# Supplementary material for: Powder Diffraction Crystal Structure Determination Using Generative Models
Source: Research Square preprint supplement (doi:10.21203/rs.3.rs-5278807/v1), 2024-10-28
Supplement: Supplementary file 2 [file PXRDGen_Refinement_output.pdf › PXRDGen_Refinement_output.pdf]

Ag1

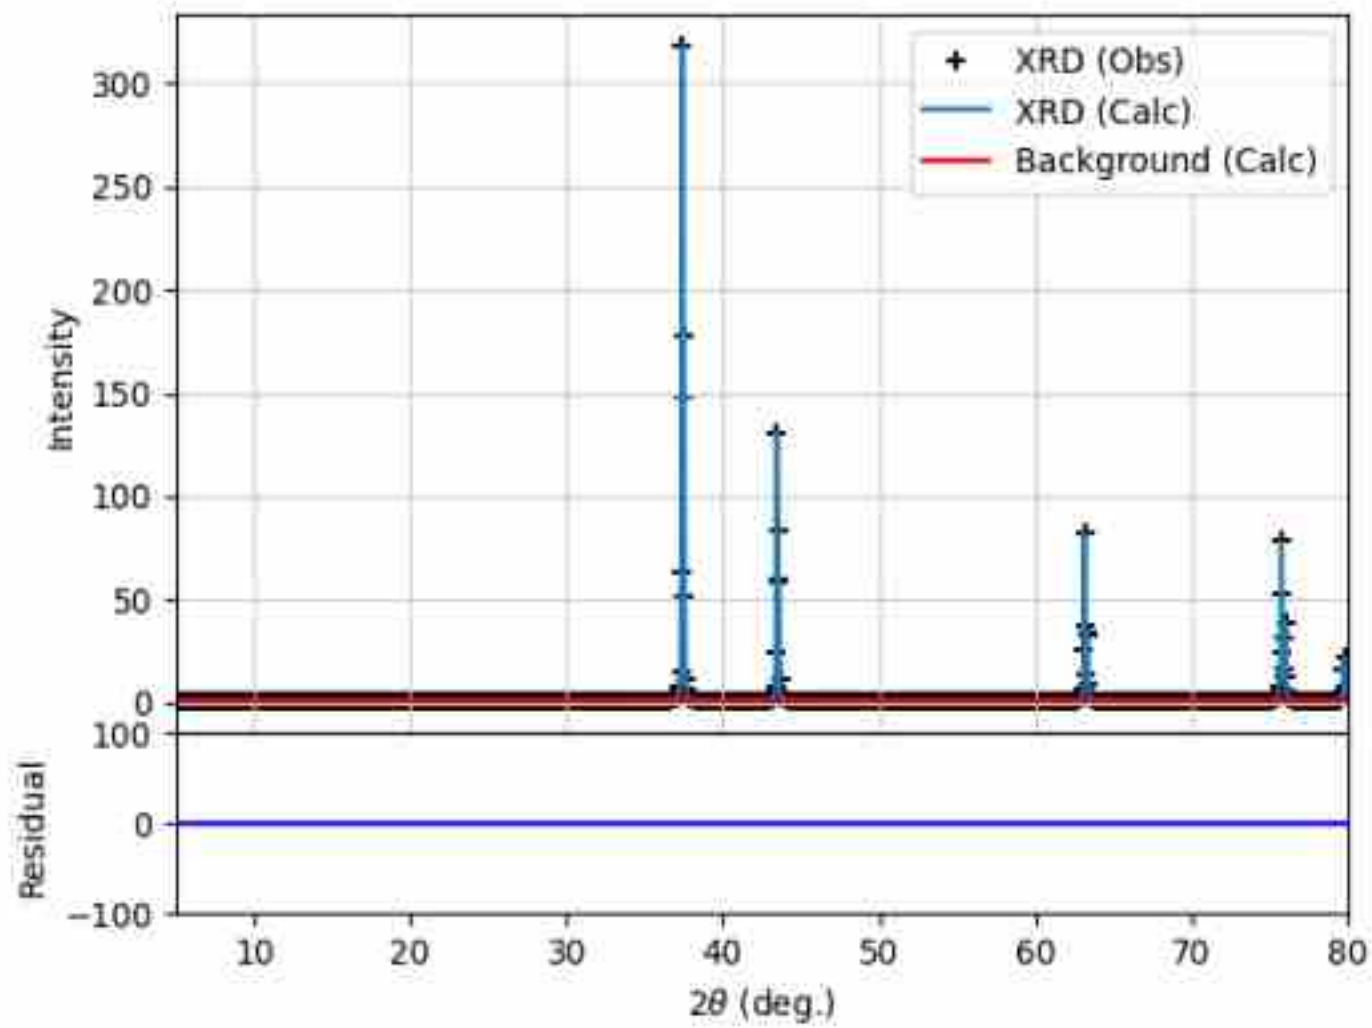

| RMSE before RR | Rwp     | RMSE after RR |
|----------------|---------|---------------|
| 0.0            | 0.00401 | 0.0           |

Ar1

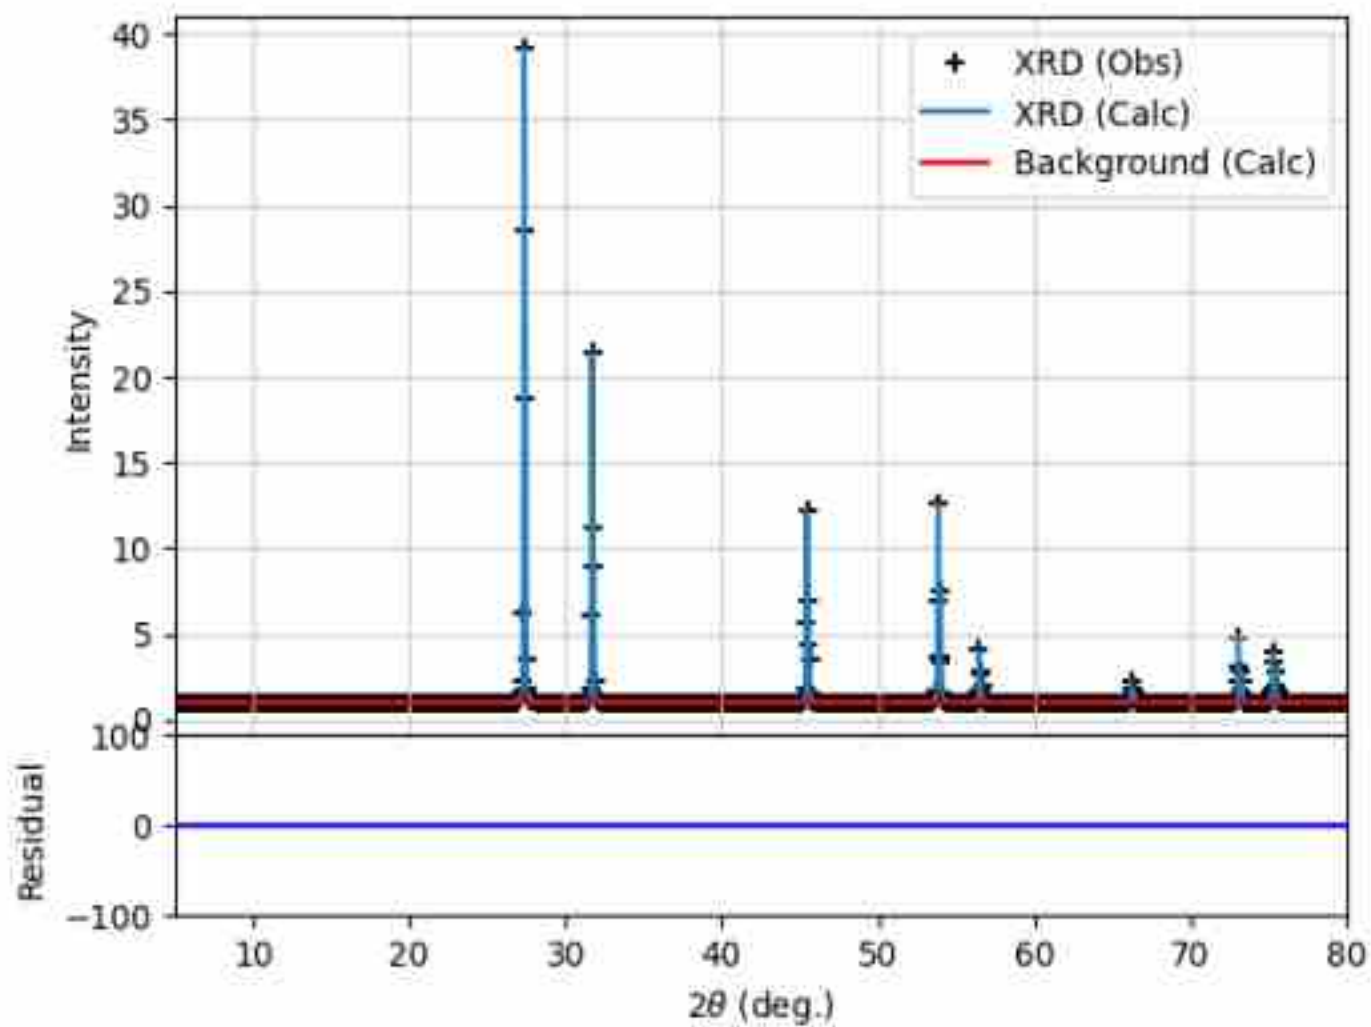

| RMSE before RR | Rwp     | RMSE after RR |
|----------------|---------|---------------|
| 0.0            | 0.00072 | 0.0           |



# Ca1

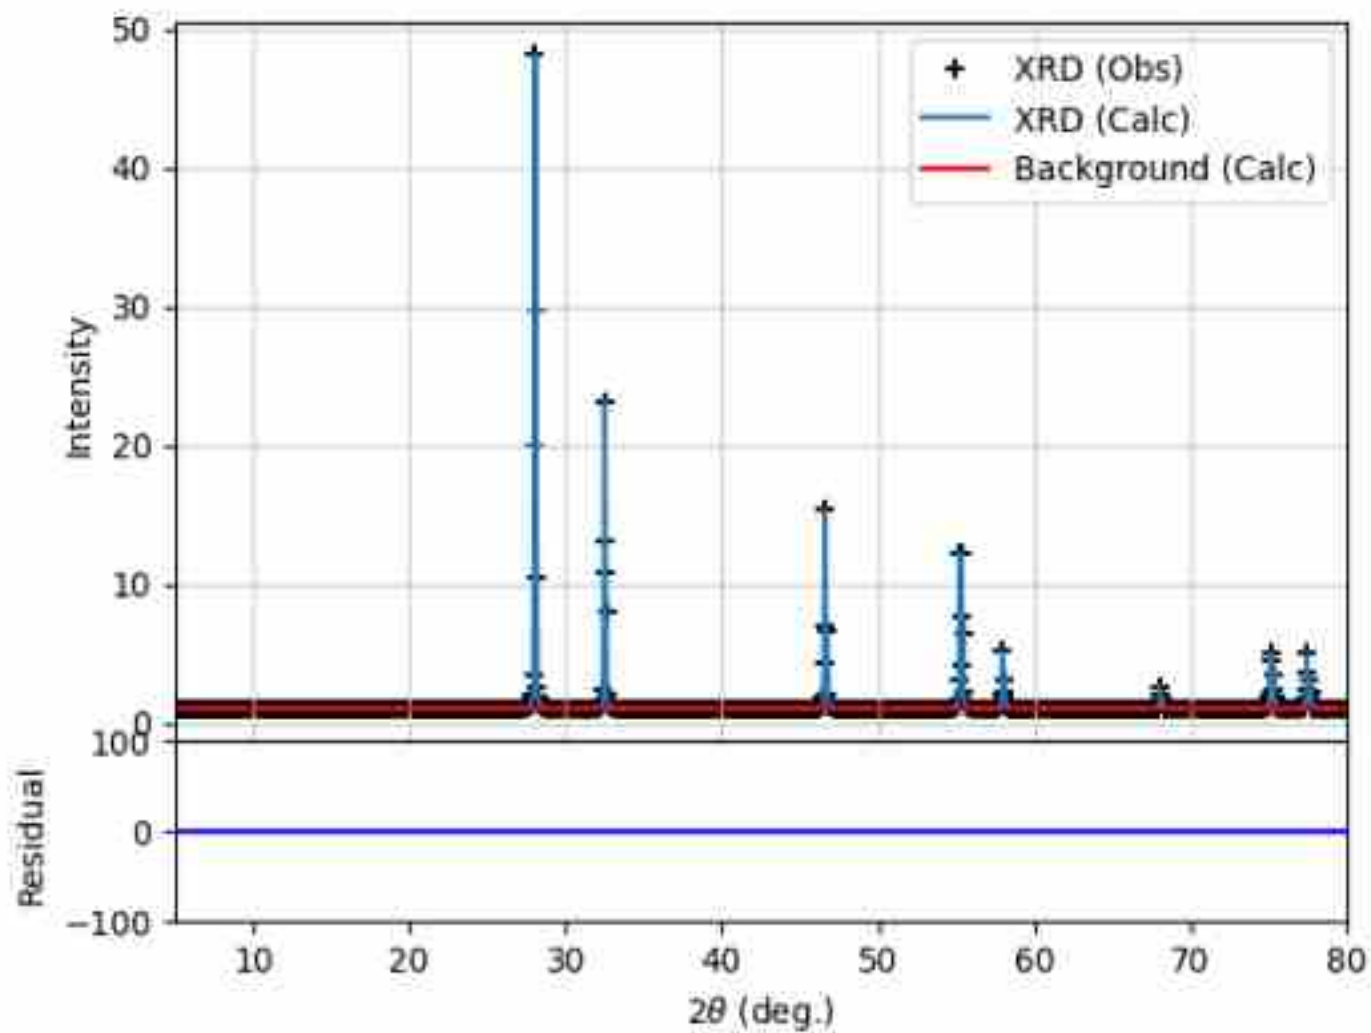

| RMSE before RR | Rwp     | RMSE after RR |
|----------------|---------|---------------|
| 0.0            | 0.00139 | 0.0           |

# Co1

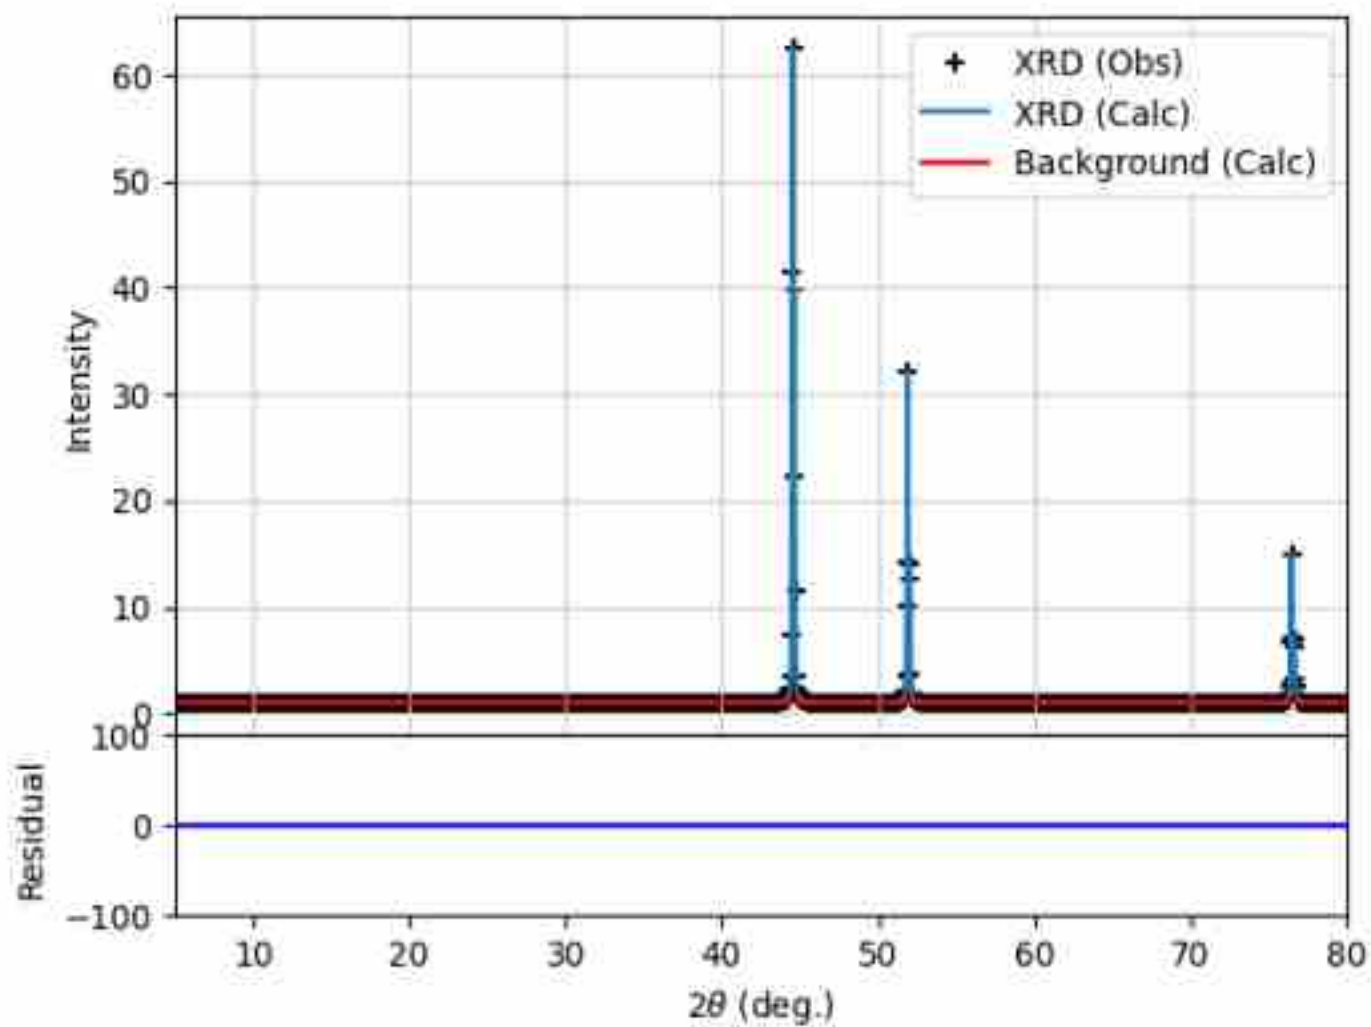

| RMSE before RR | Rwp     | RMSE after RR |
|----------------|---------|---------------|
| 0.0            | 0.00189 | 0.0           |

Er1

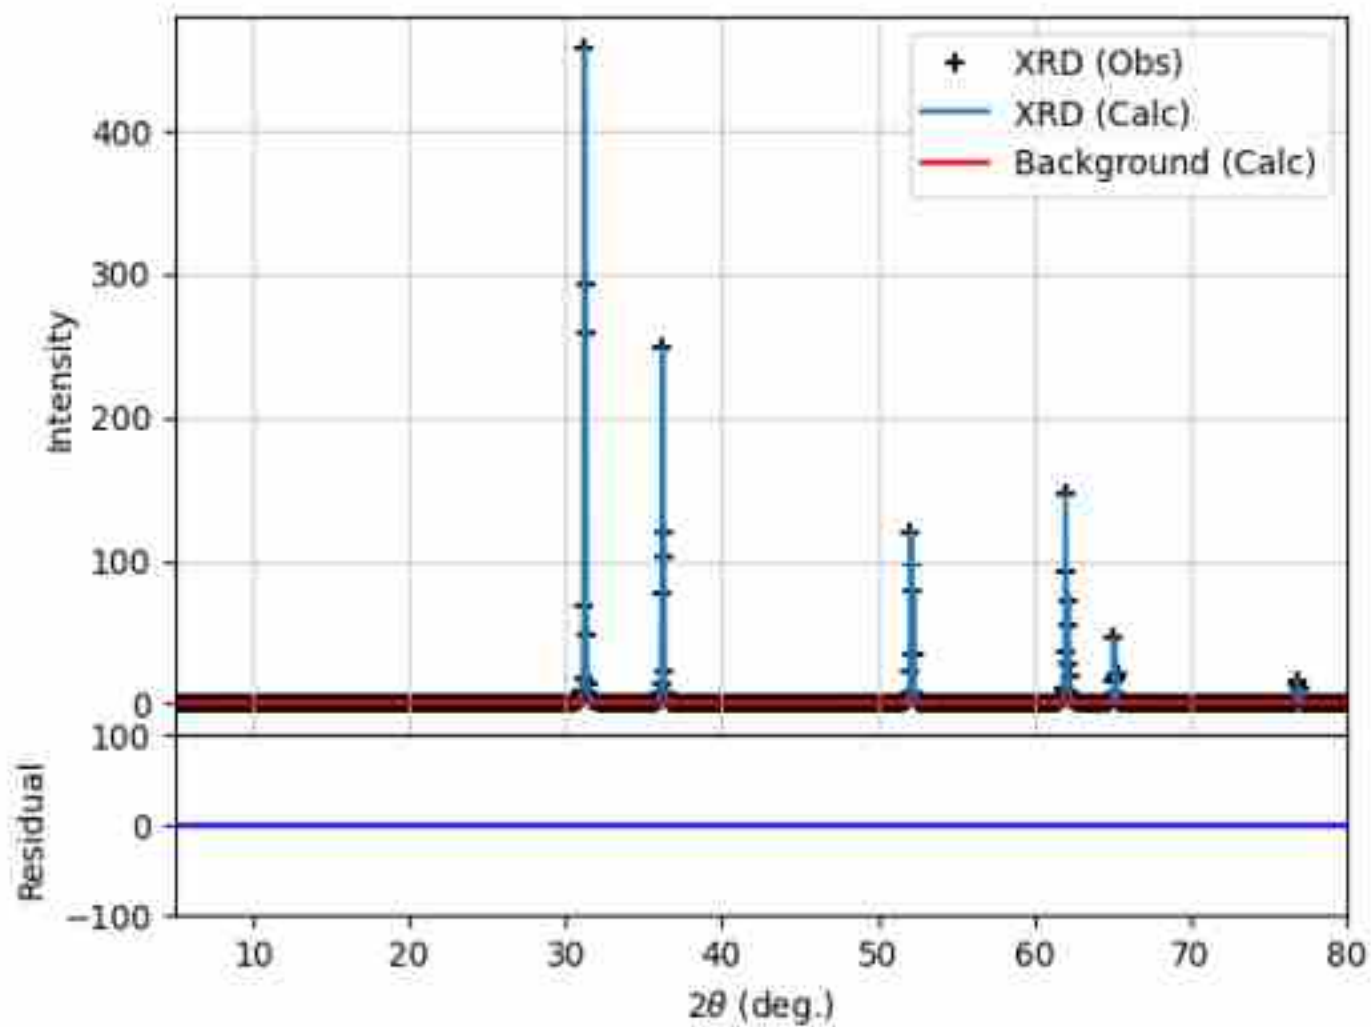

| RMSE before RR | Rwp     | RMSE after RR |
|----------------|---------|---------------|
| 0.0            | 0.00358 | 0.0           |

# Eu1Hg1

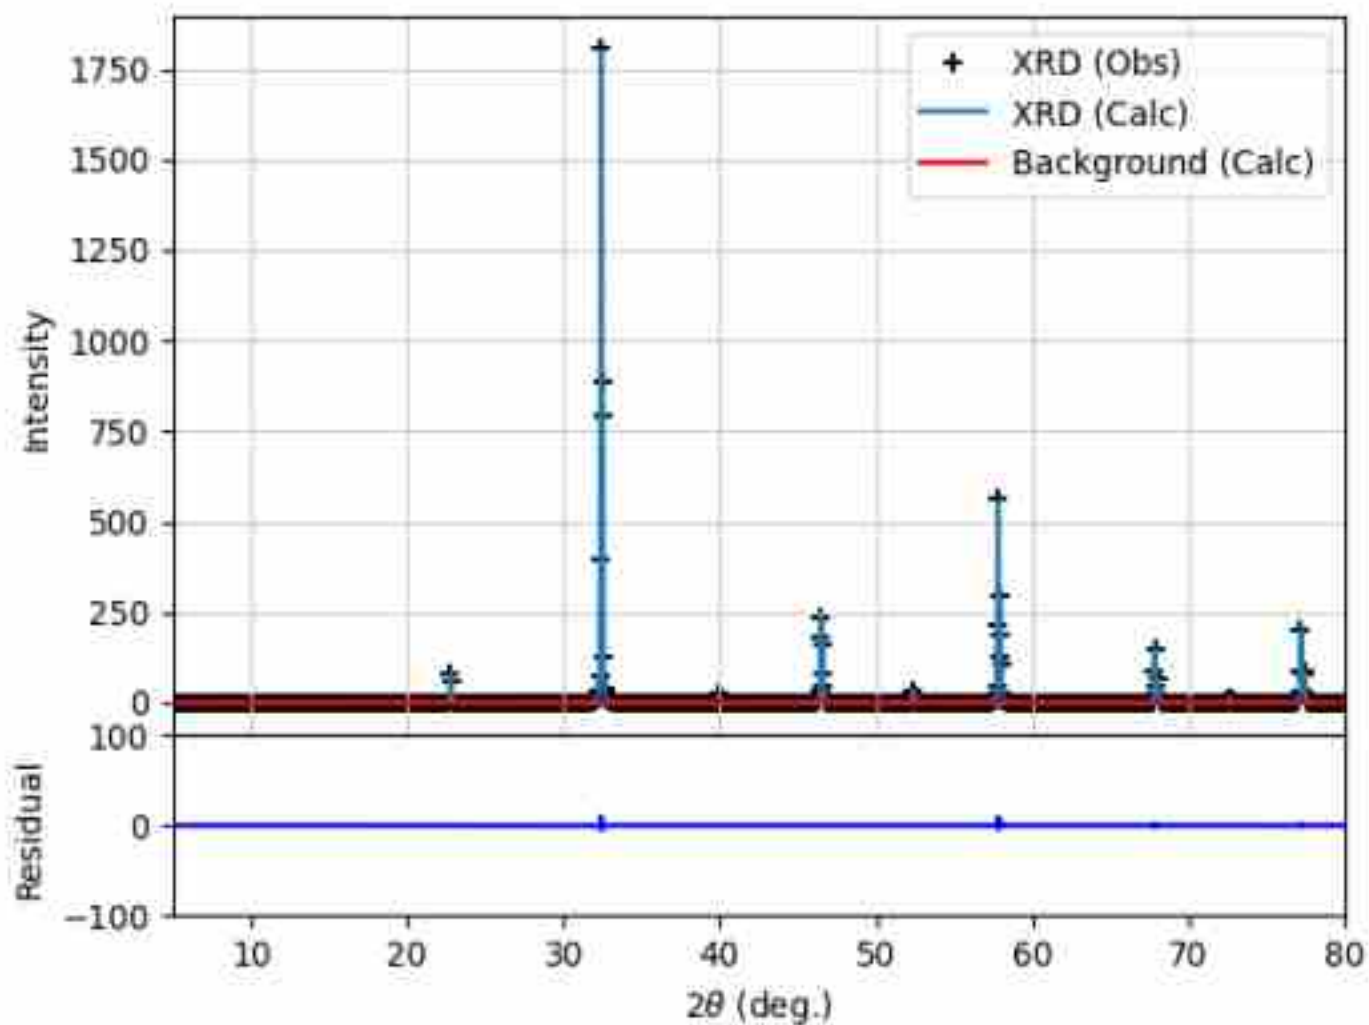

| RMSE before RR | Rwp     | RMSE after RR |
|----------------|---------|---------------|
| 0.0            | 0.68641 | 0.00035       |

# Fe1

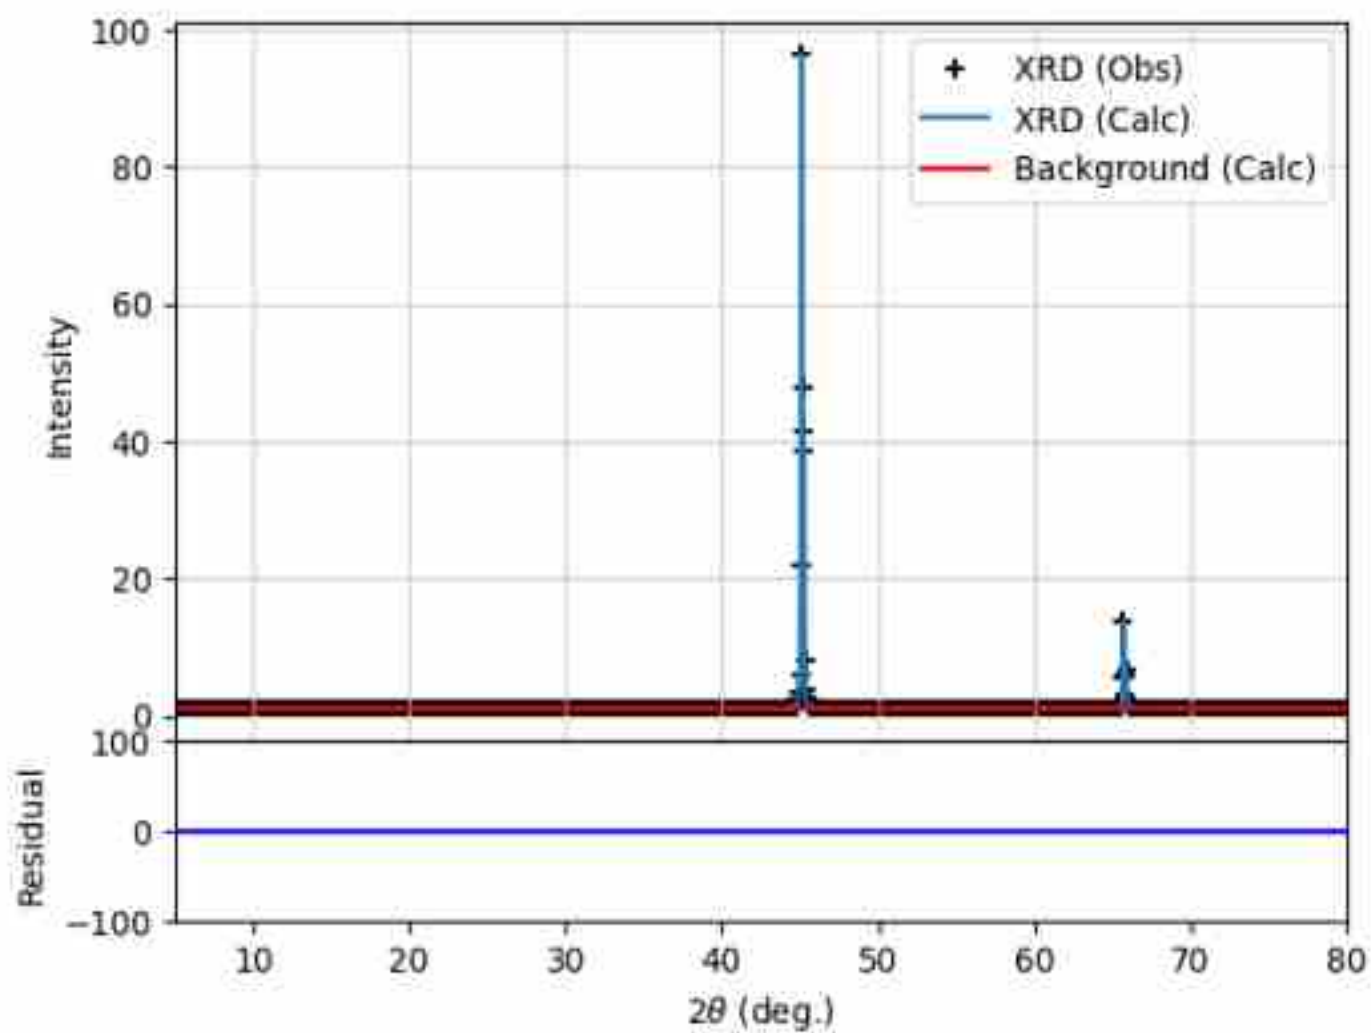

| RMSE before RR | Rwp     | RMSE after RR |
|----------------|---------|---------------|
| 0.0            | 0.00075 | 0.0           |

# Ga1Ni1

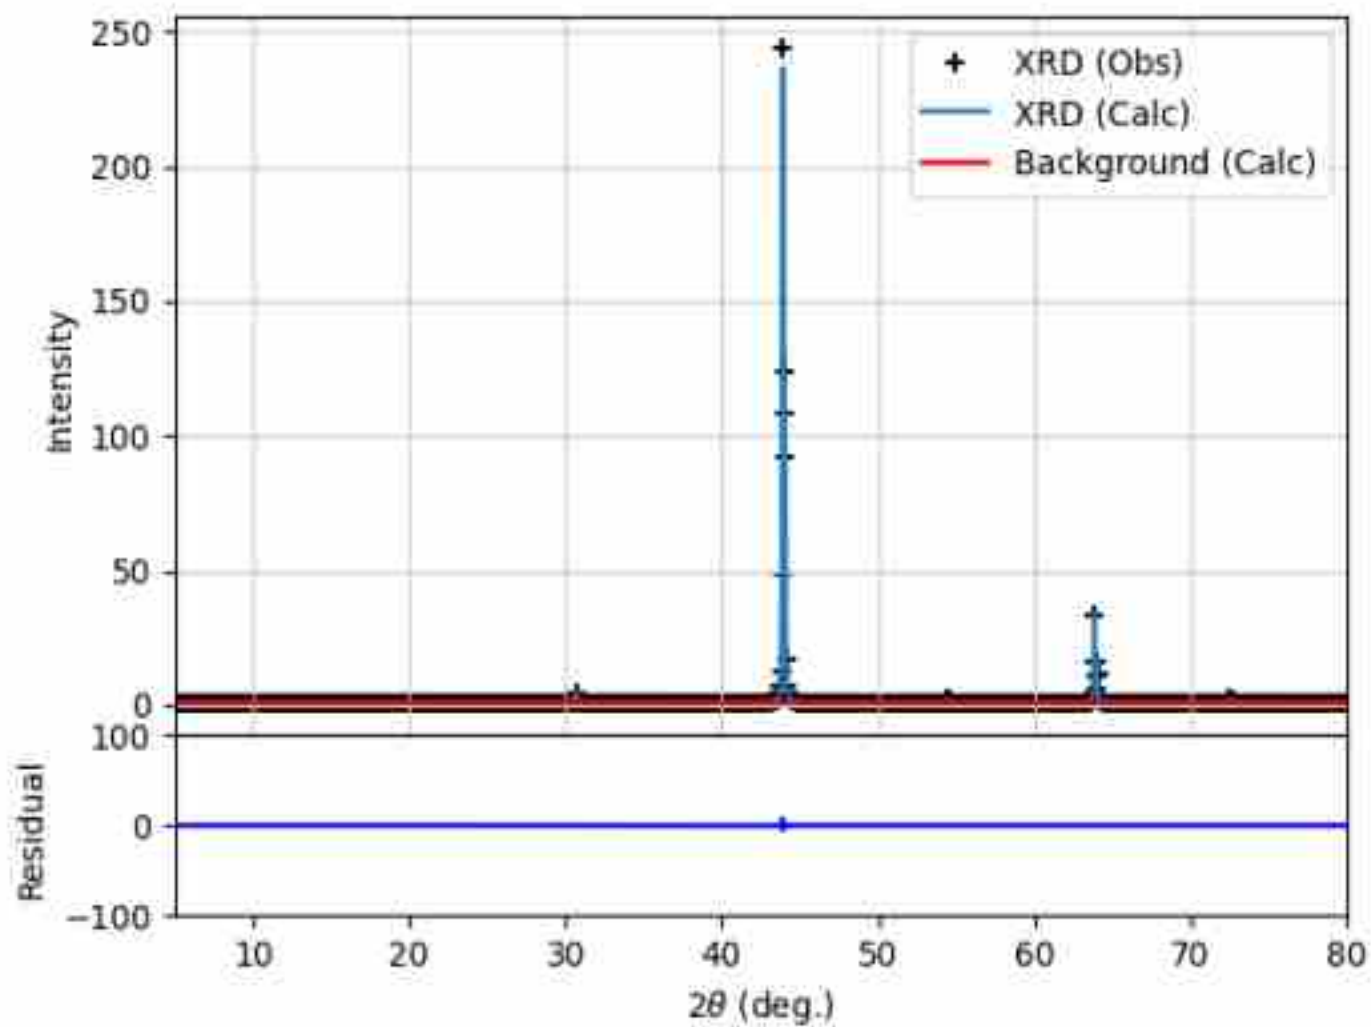

| RMSE before RR | Rwp     | RMSE after RR |
|----------------|---------|---------------|
| 0.0            | 1.66512 | 0.00039       |

# Ga4

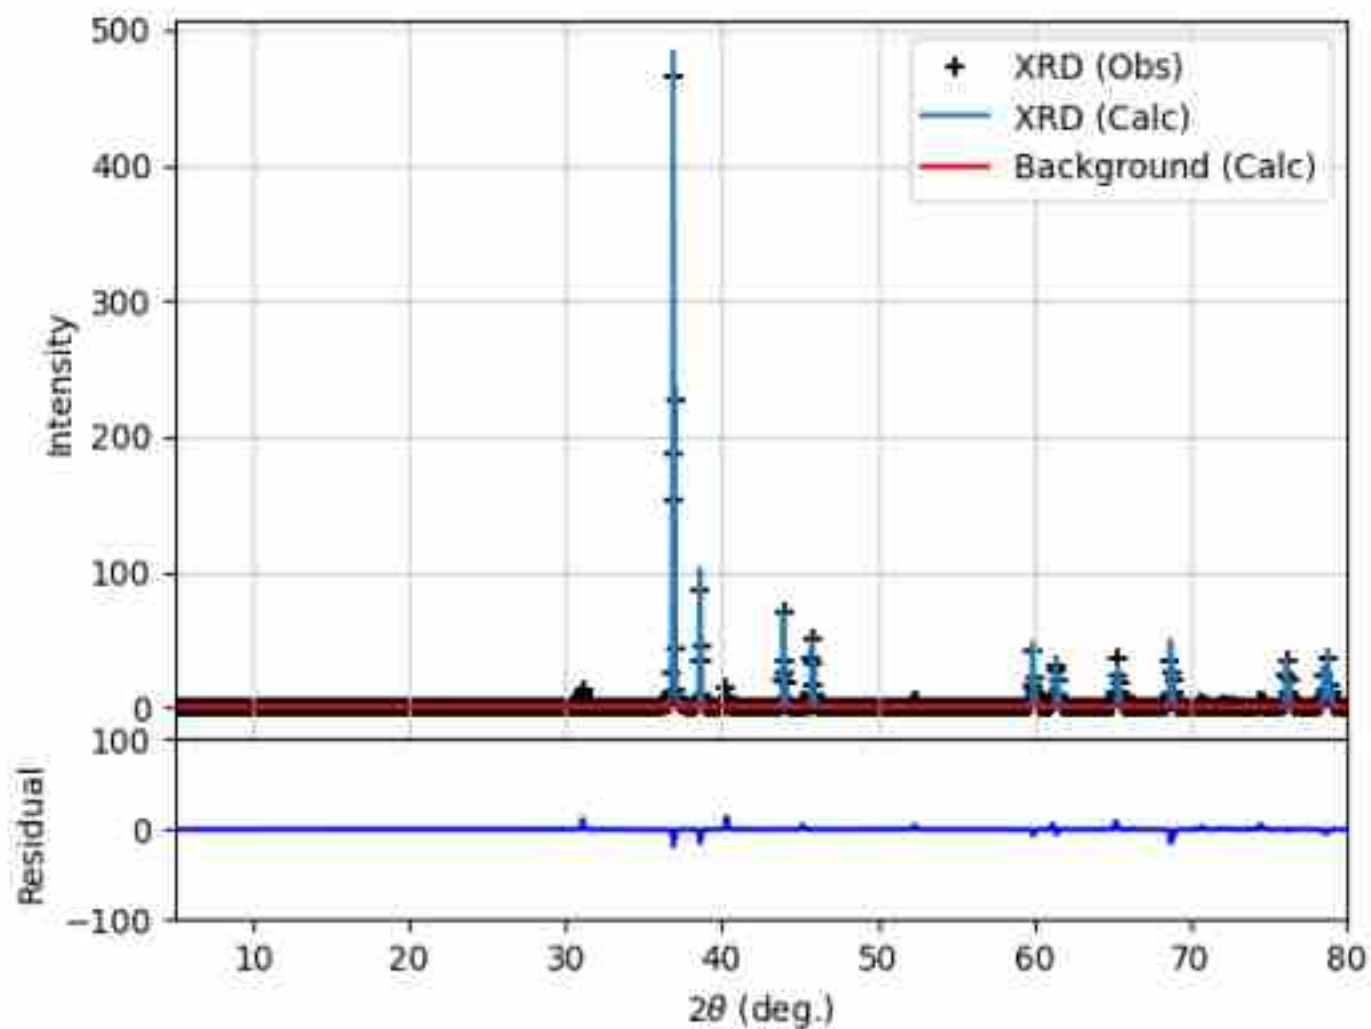

| RMSE before RR | Rwp      | RMSE after RR |
|----------------|----------|---------------|
| 0.0            | 19.77668 | 0.0           |

# Gd1

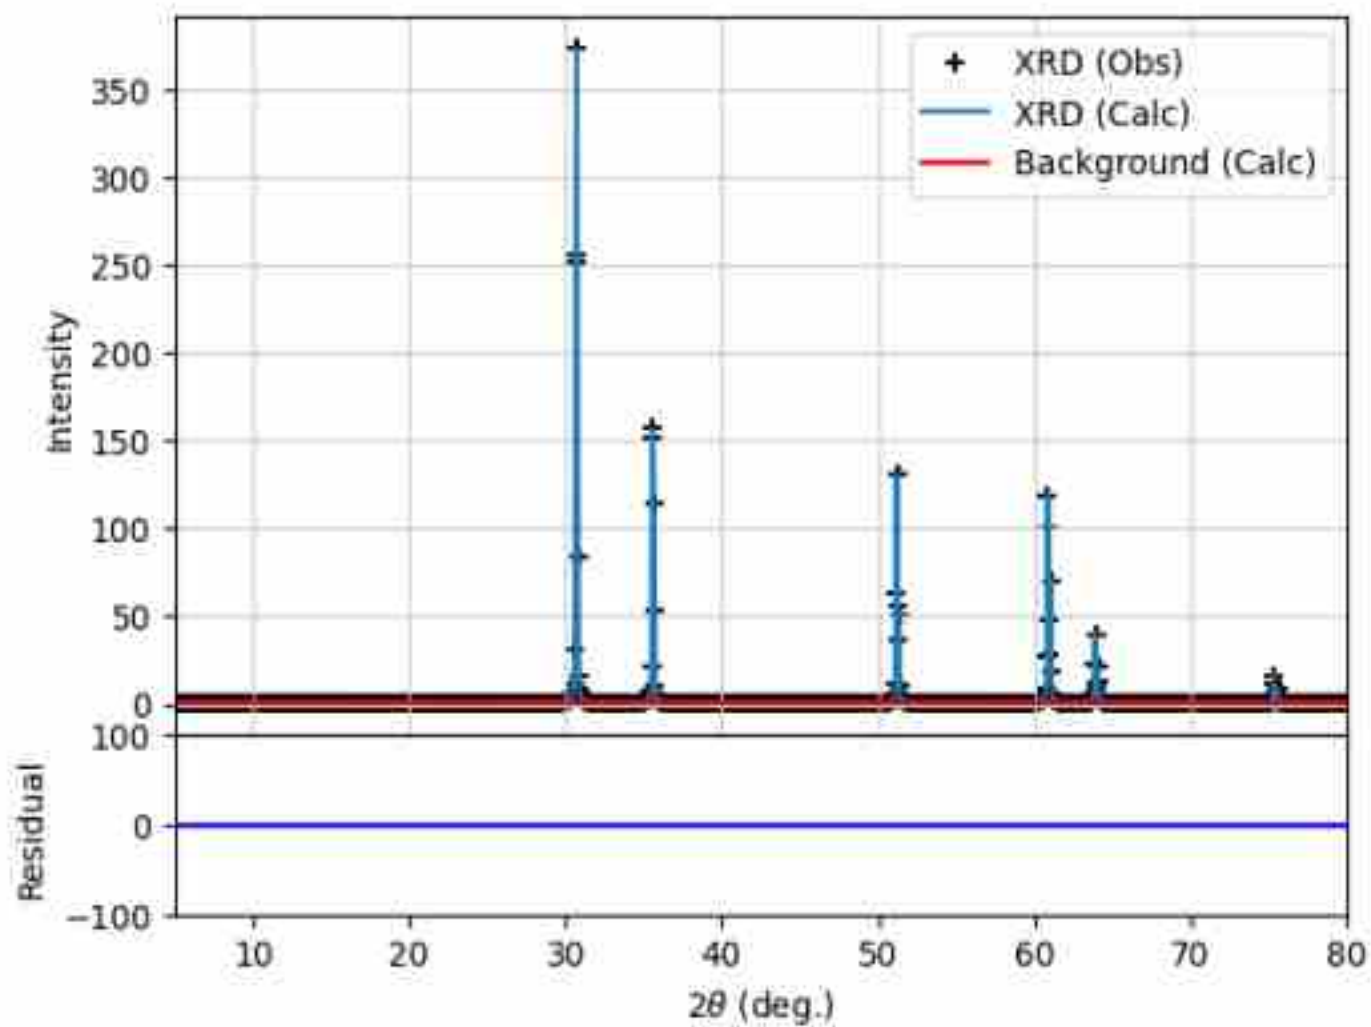

| RMSE before RR | Rwp     | RMSE after RR |
|----------------|---------|---------------|
| 0.0            | 0.00376 | 0.0           |



# Hf1N1

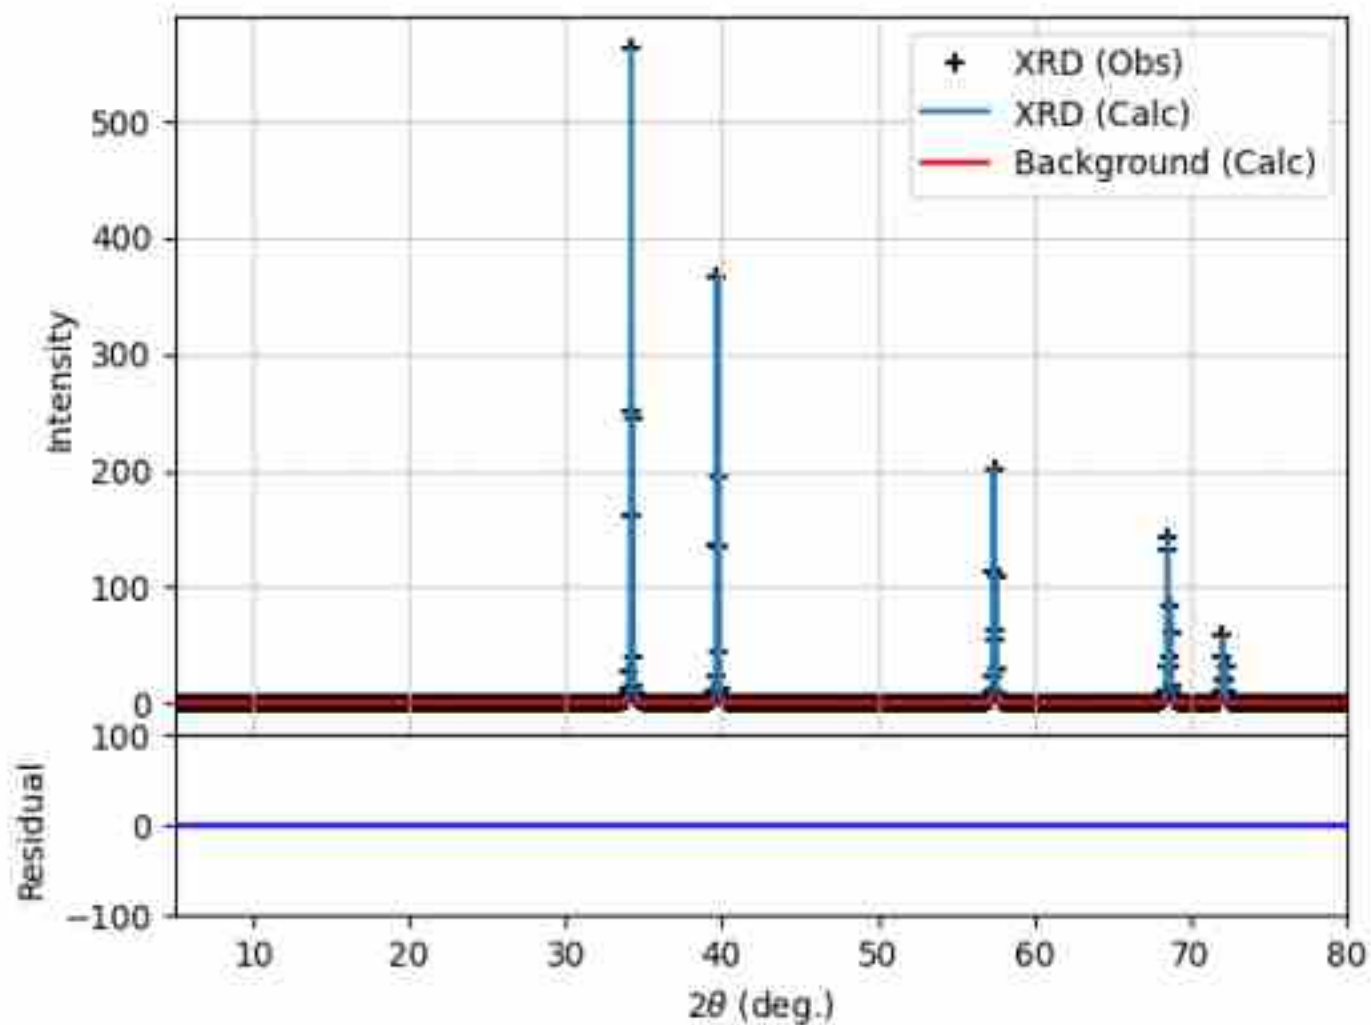

| RMSE before RR | Rwp     | RMSE after RR |
|----------------|---------|---------------|
| 0.0            | 0.00323 | 0.00034       |

# Hf1

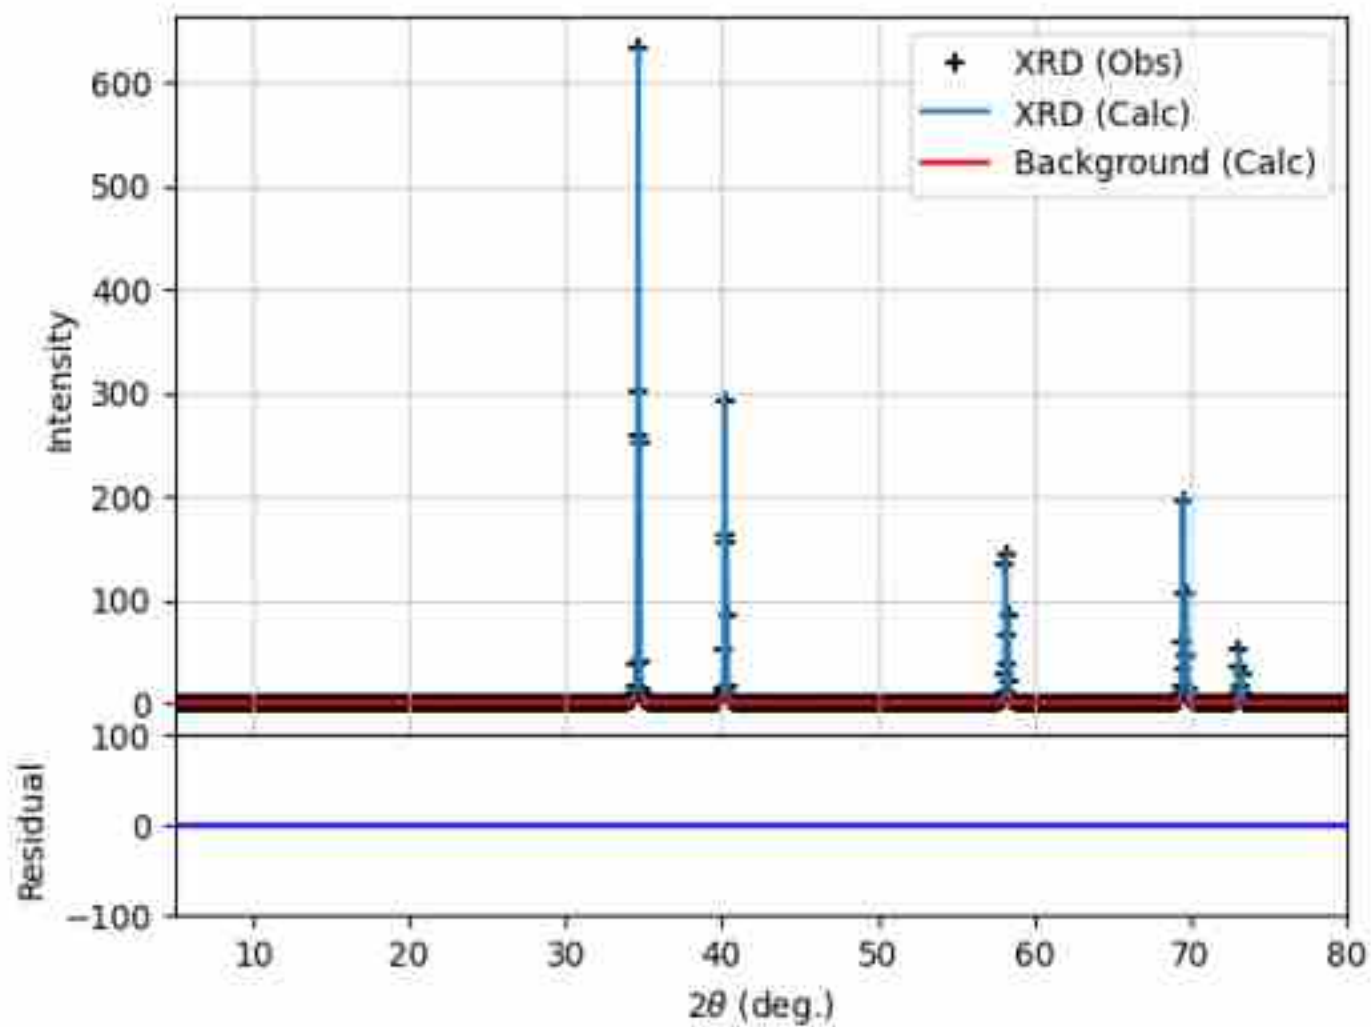

| RMSE before RR | Rwp | RMSE after RR |
|----------------|-----|---------------|
| 0.0            | 0.0 | 0.0           |

# Hg1

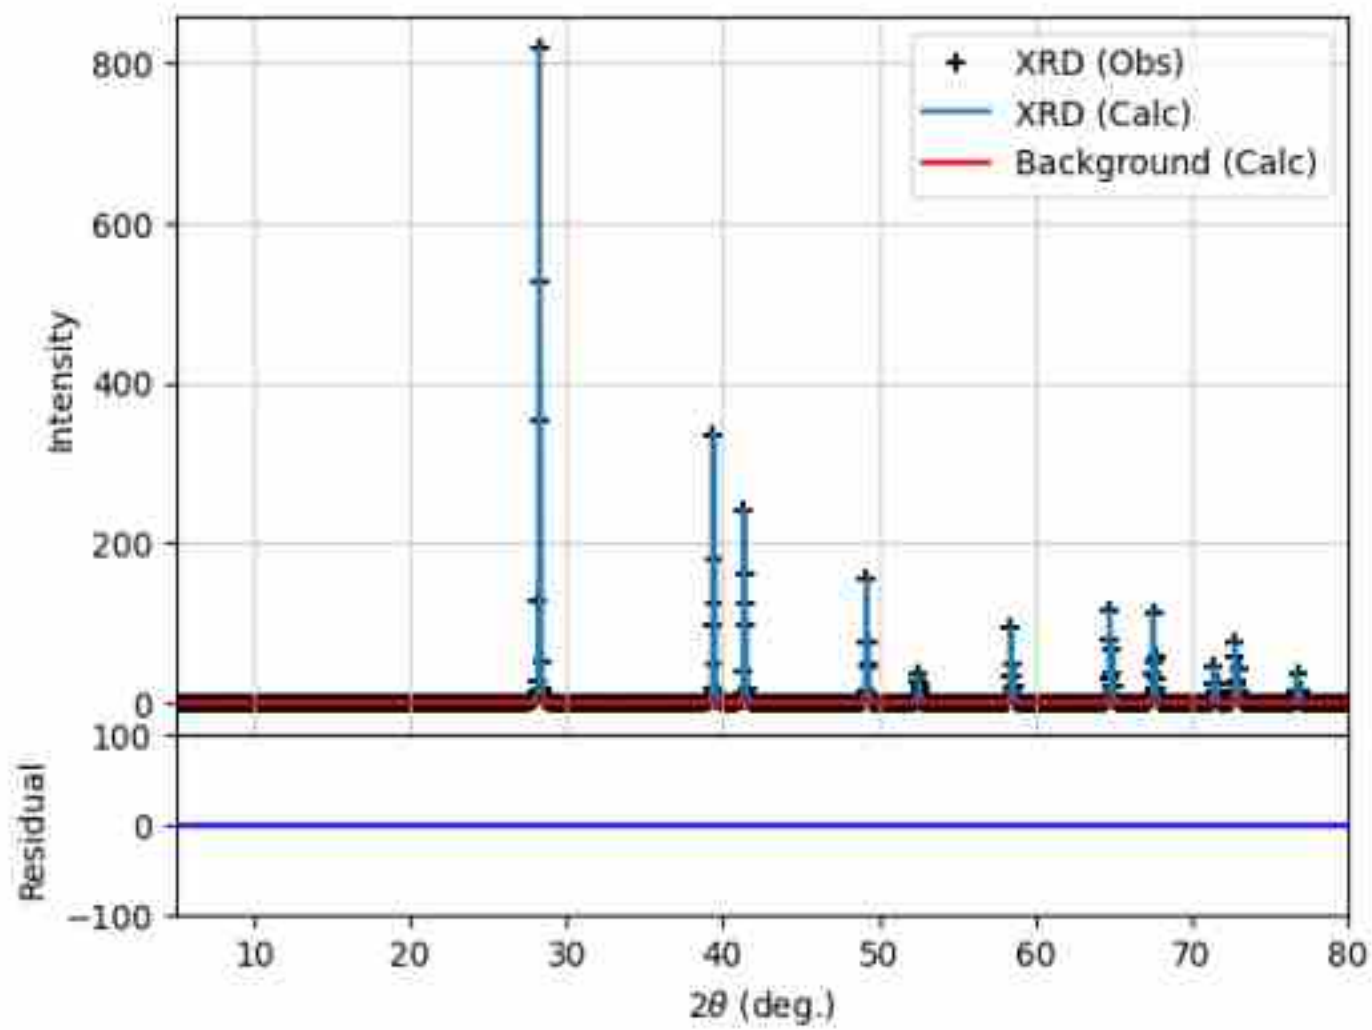

| RMSE before RR | Rwp | RMSE after RR |
|----------------|-----|---------------|
| 0.0            | 0.0 | 0.0           |

# I1

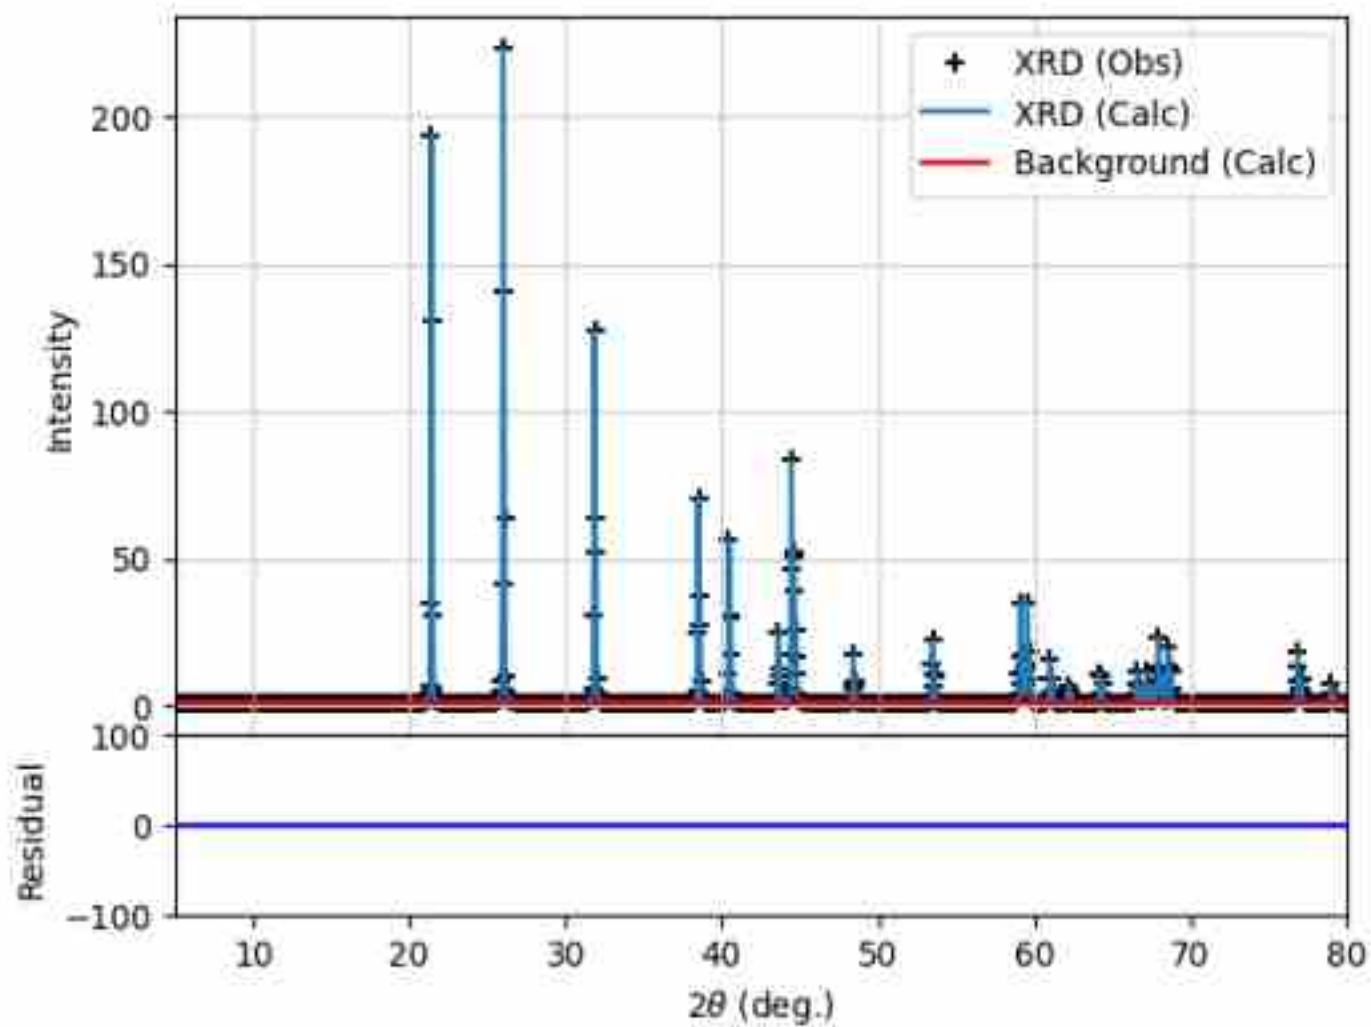

| RMSE before RR | Rwp     | RMSE after RR |
|----------------|---------|---------------|
| 0.0            | 0.00216 | 0.0           |

# Ir1

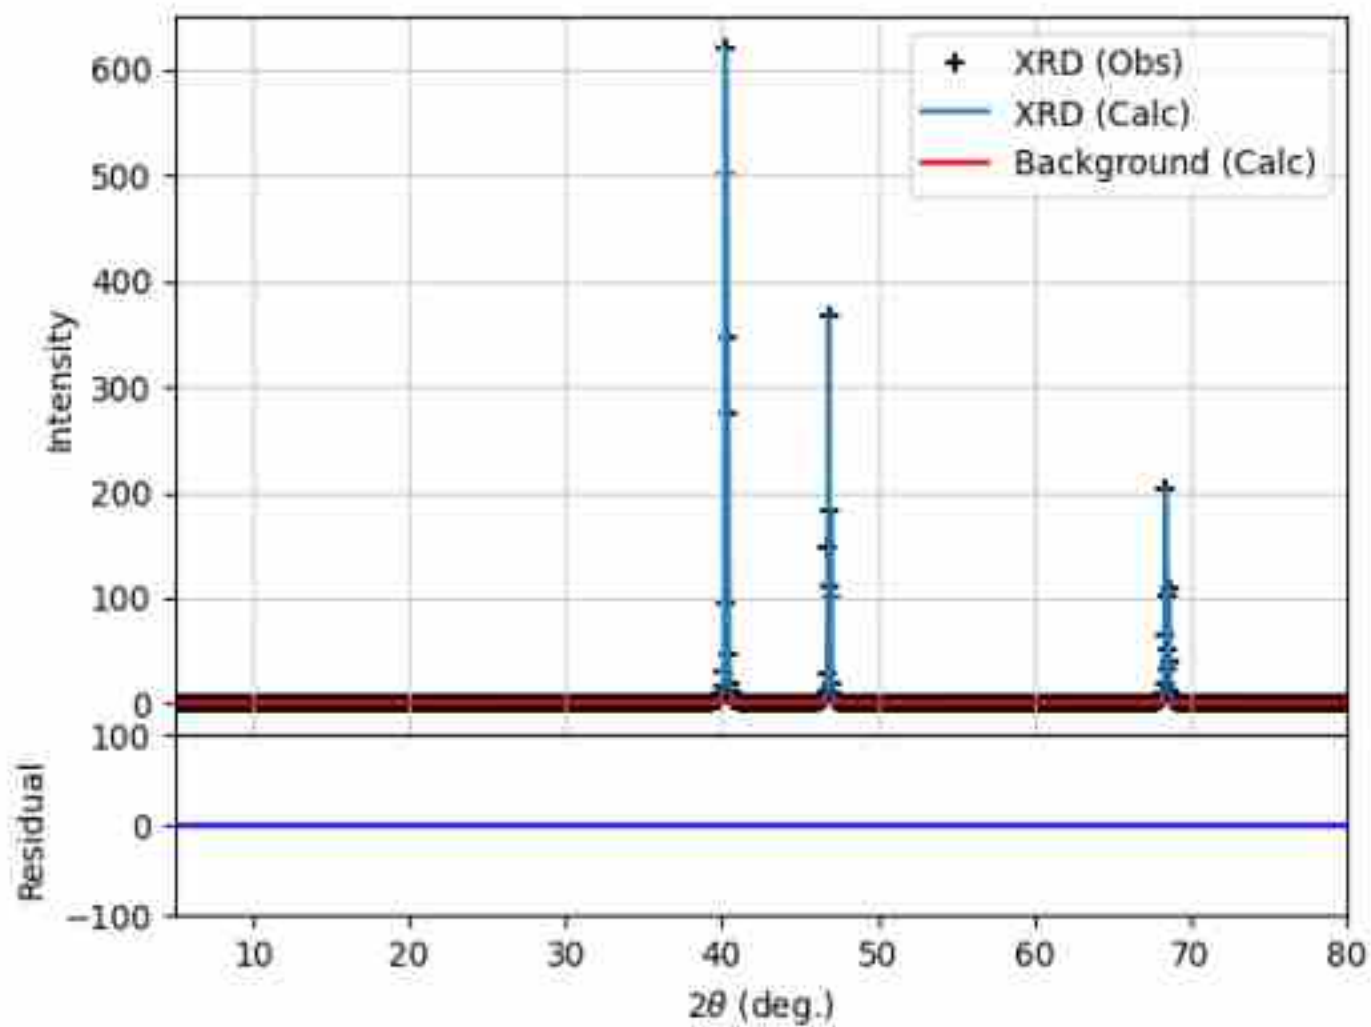

| RMSE before RR | Rwp     | RMSE after RR |
|----------------|---------|---------------|
| 0.0            | 0.00491 | 0.0           |

K1

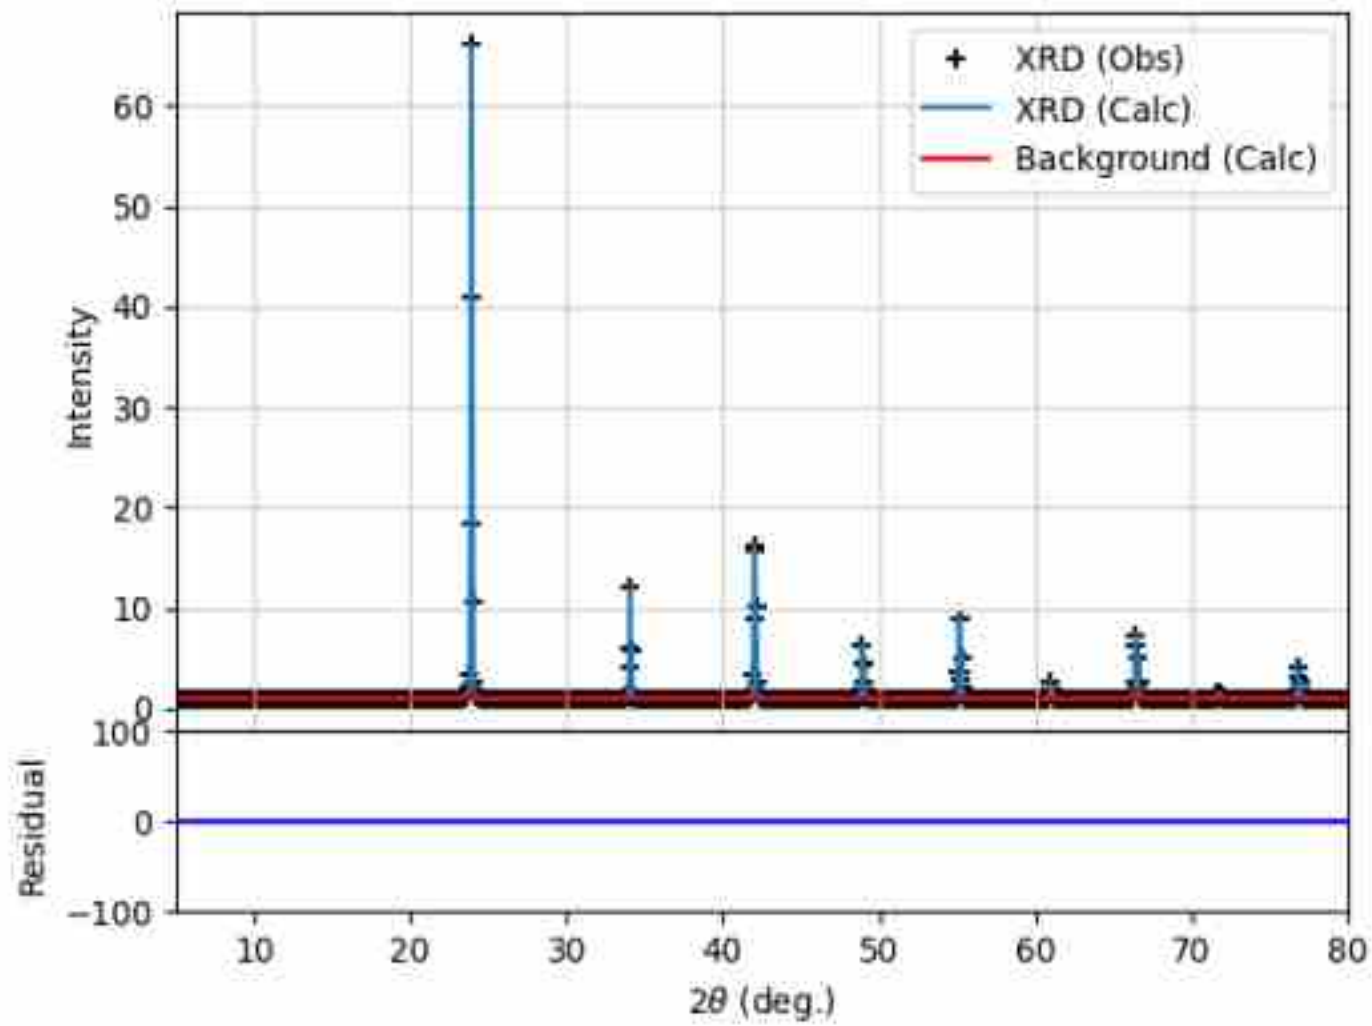

| RMSE before RR | Rwp     | RMSE after RR |
|----------------|---------|---------------|
| 0.0            | 0.00083 | 0.0           |

# La1

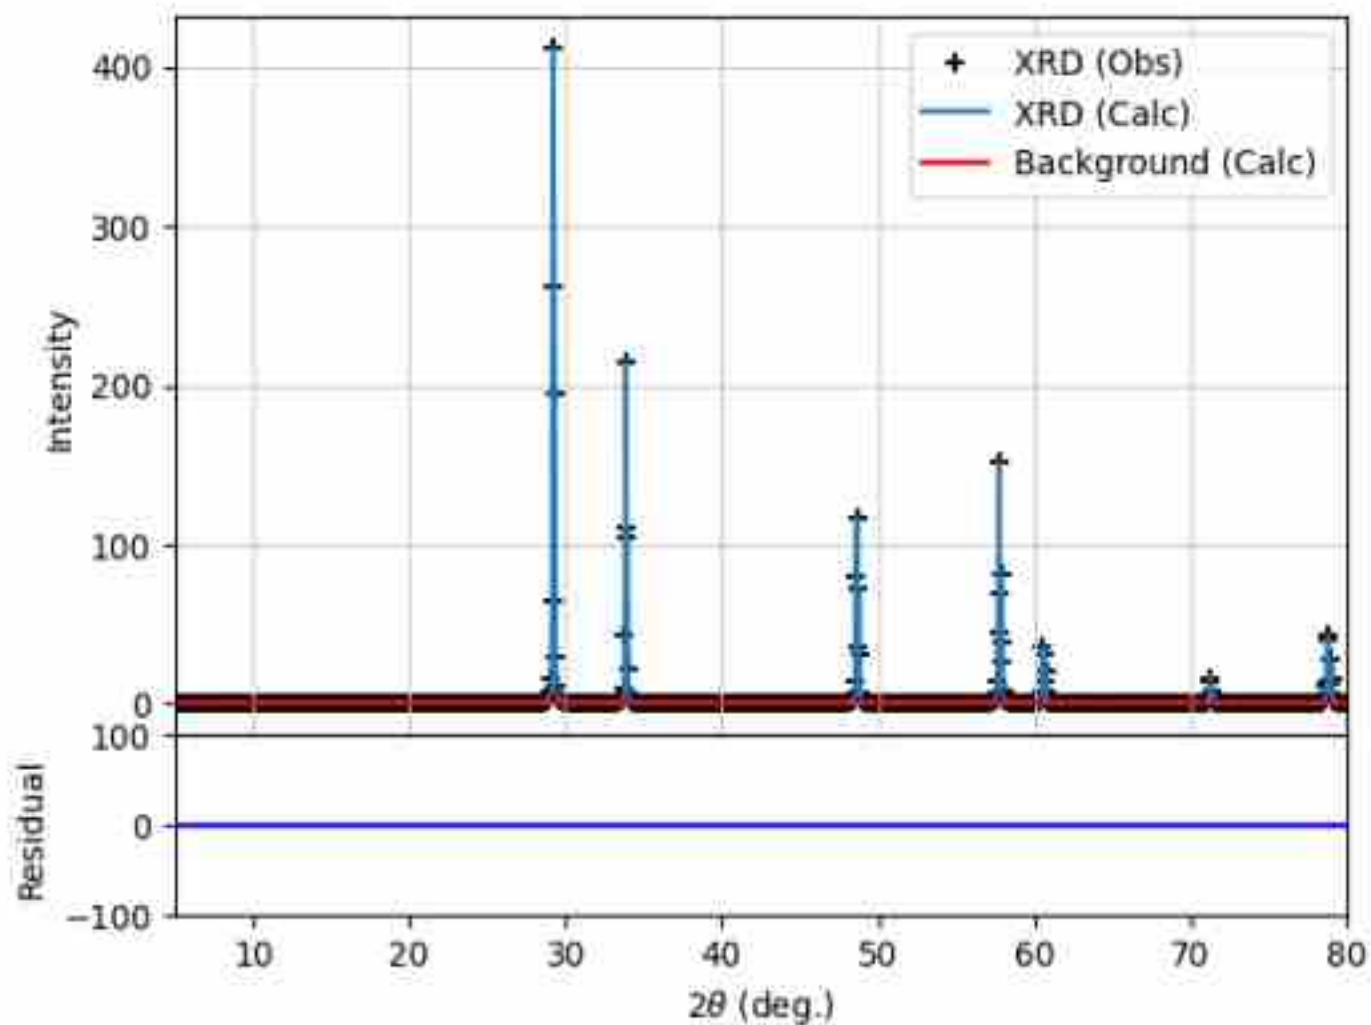

| RMSE before RR | Rwp    | RMSE after RR |
|----------------|--------|---------------|
| 0.0            | 0.0023 | 0.0           |

# Li1

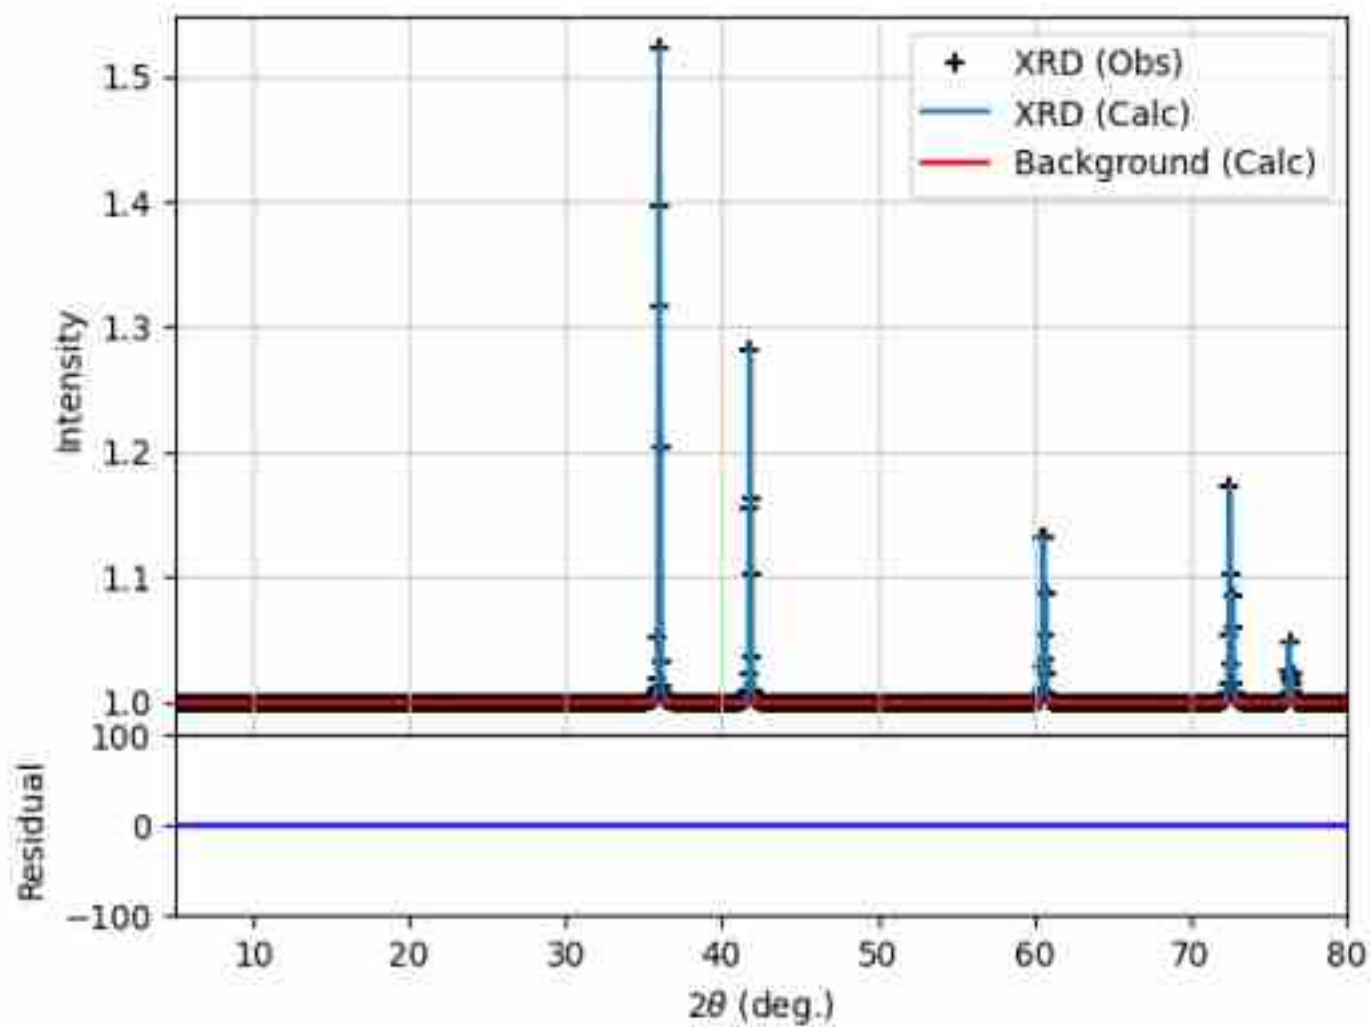

| RMSE before RR | Rwp | RMSE after RR |
|----------------|-----|---------------|
| 0.0            | 0.0 | 0.0           |



# Li2Pd1Pb1

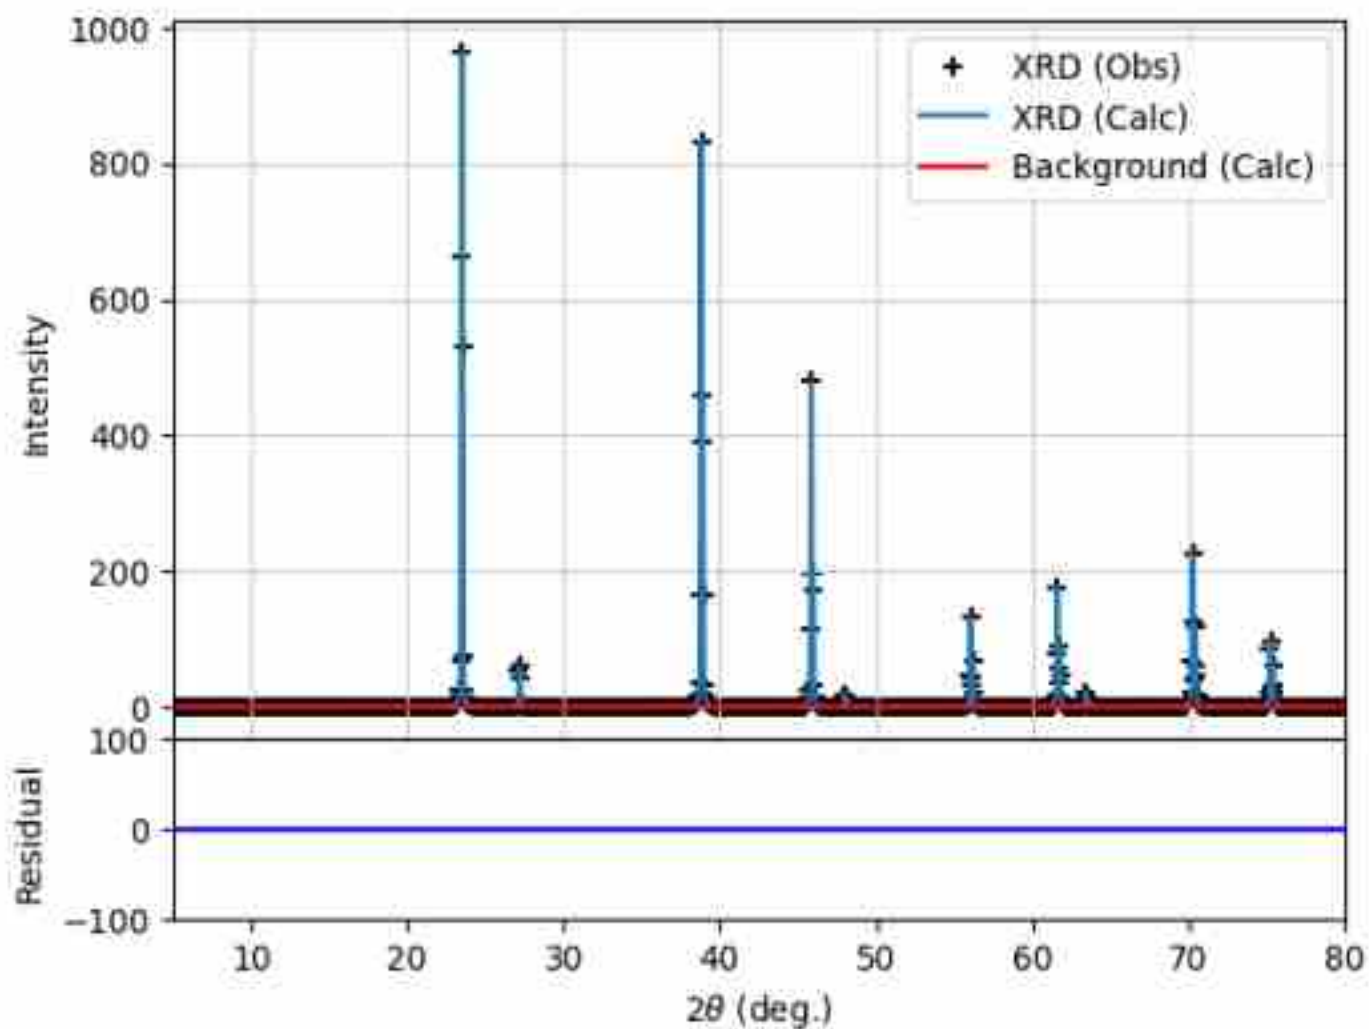

| RMSE before RR | Rwp     | RMSE after RR |
|----------------|---------|---------------|
| 0.0            | 0.00462 | 0.00675       |

# Lu1Mg1

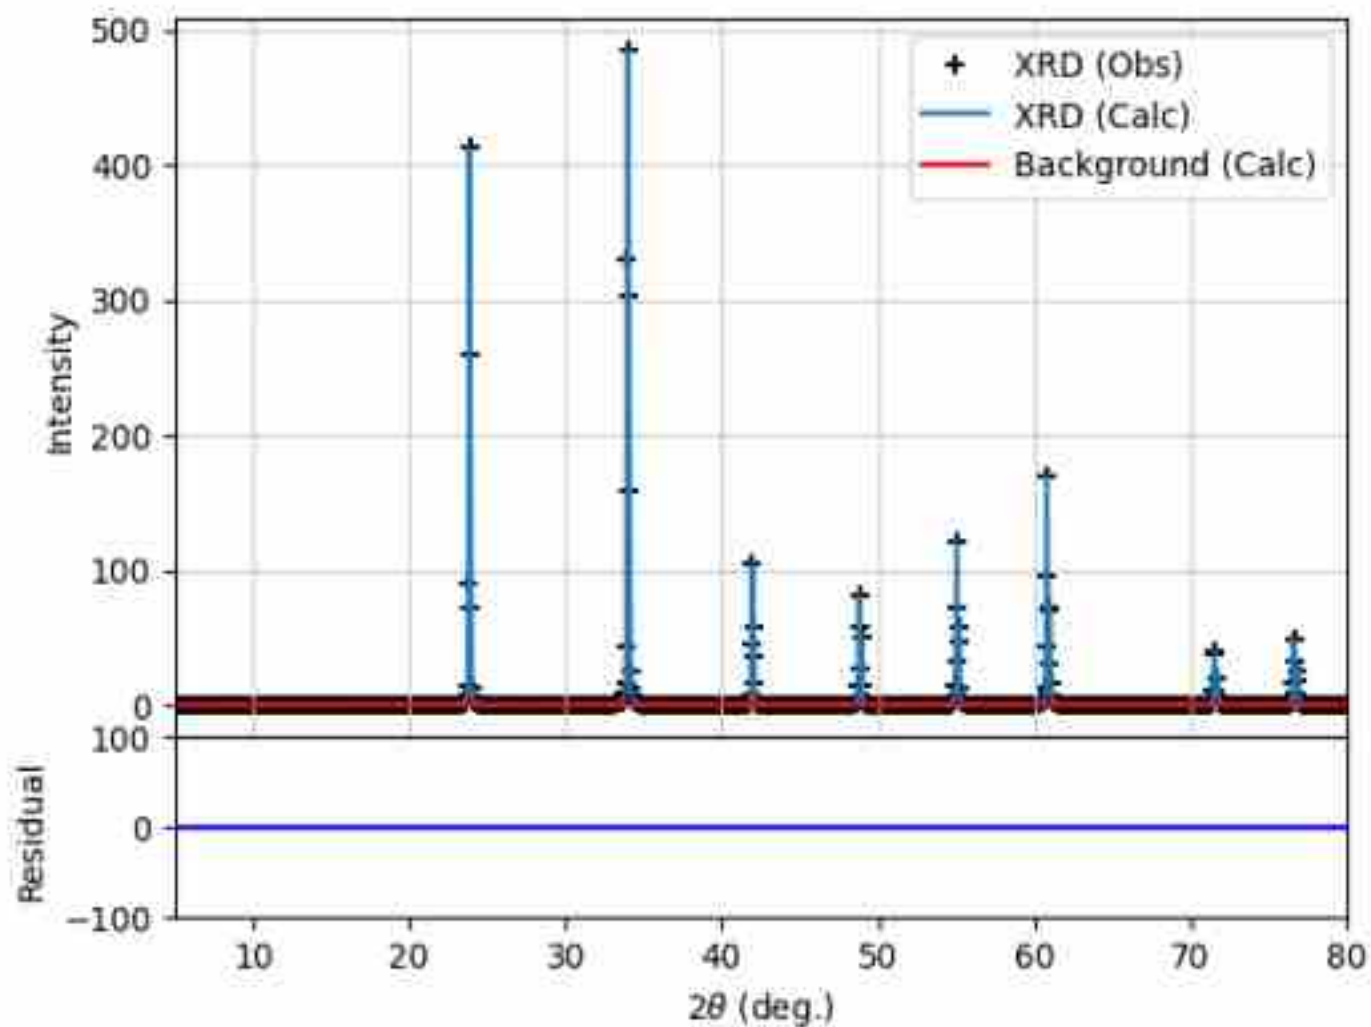

| RMSE before RR | Rwp     | RMSE after RR |
|----------------|---------|---------------|
| 0.0            | 0.00202 | 0.00044       |

# Mg1Cd1

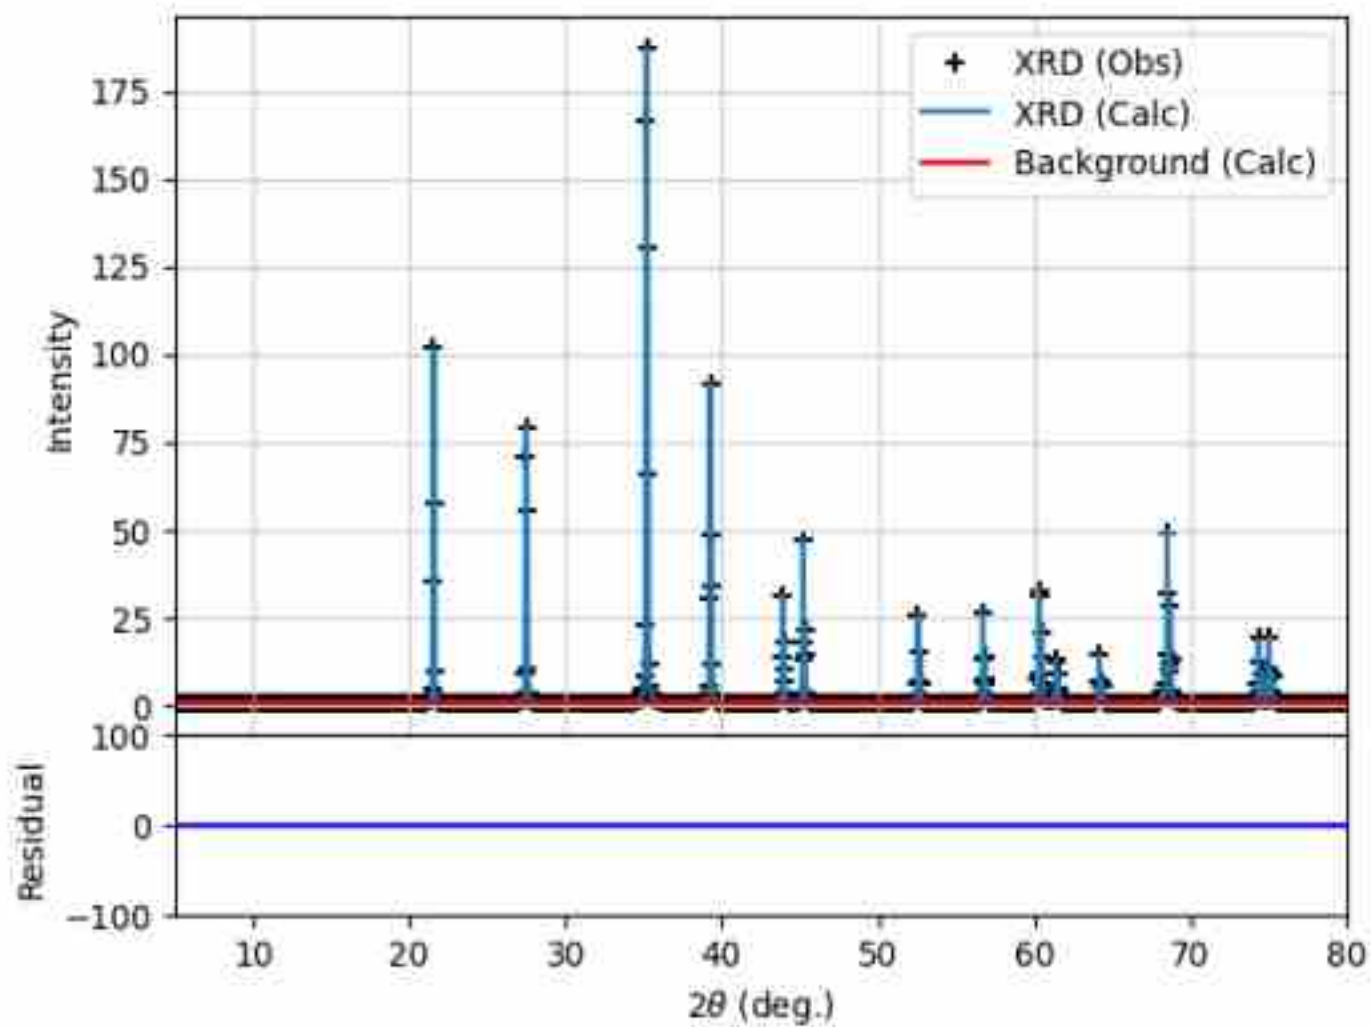

| RMSE before RR | Rwp     | RMSE after RR |
|----------------|---------|---------------|
| 0.0            | 0.10271 | 0.00046       |

# Mg1

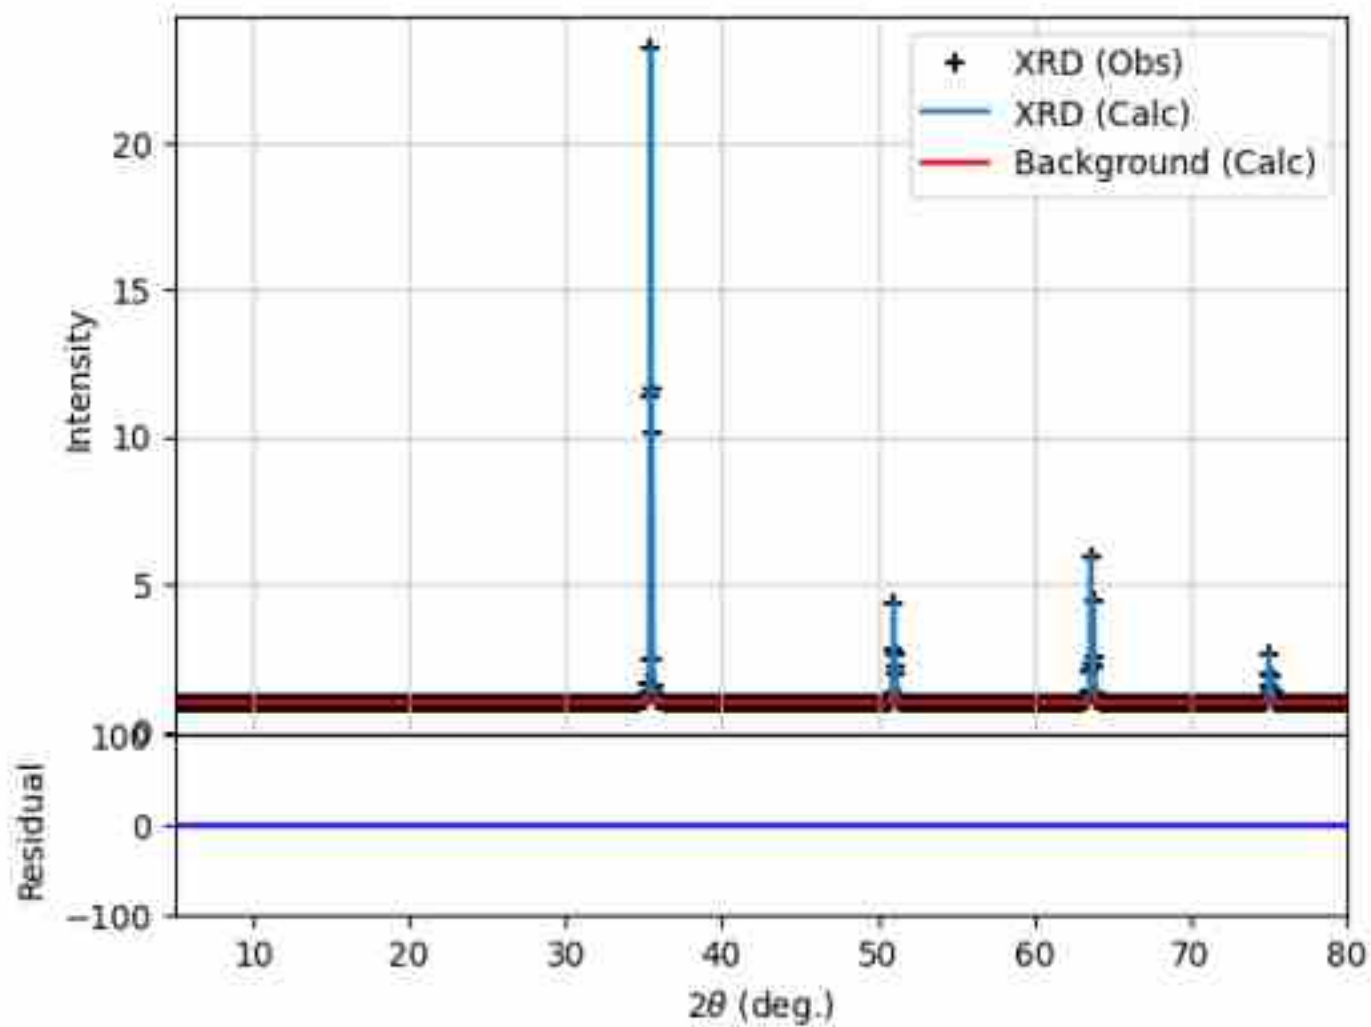

| RMSE before RR | Rwp     | RMSE after RR |
|----------------|---------|---------------|
| 0.0            | 0.00099 | 0.0           |

# Mn1Au1

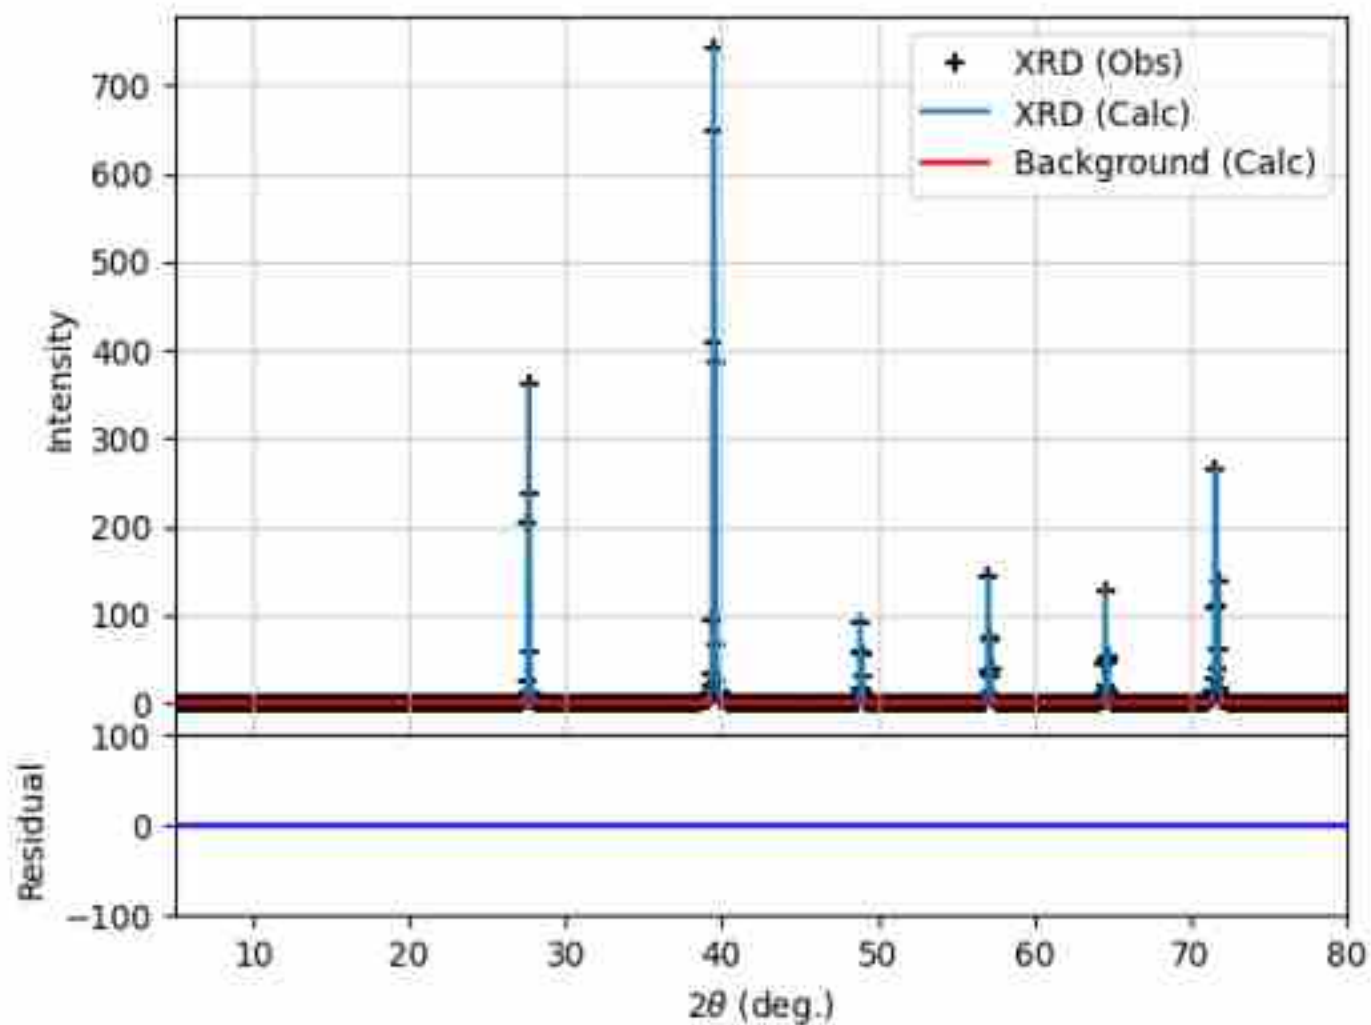

| RMSE before RR | Rwp     | RMSE after RR |
|----------------|---------|---------------|
| 0.0            | 0.00469 | 0.0004        |

# Na1

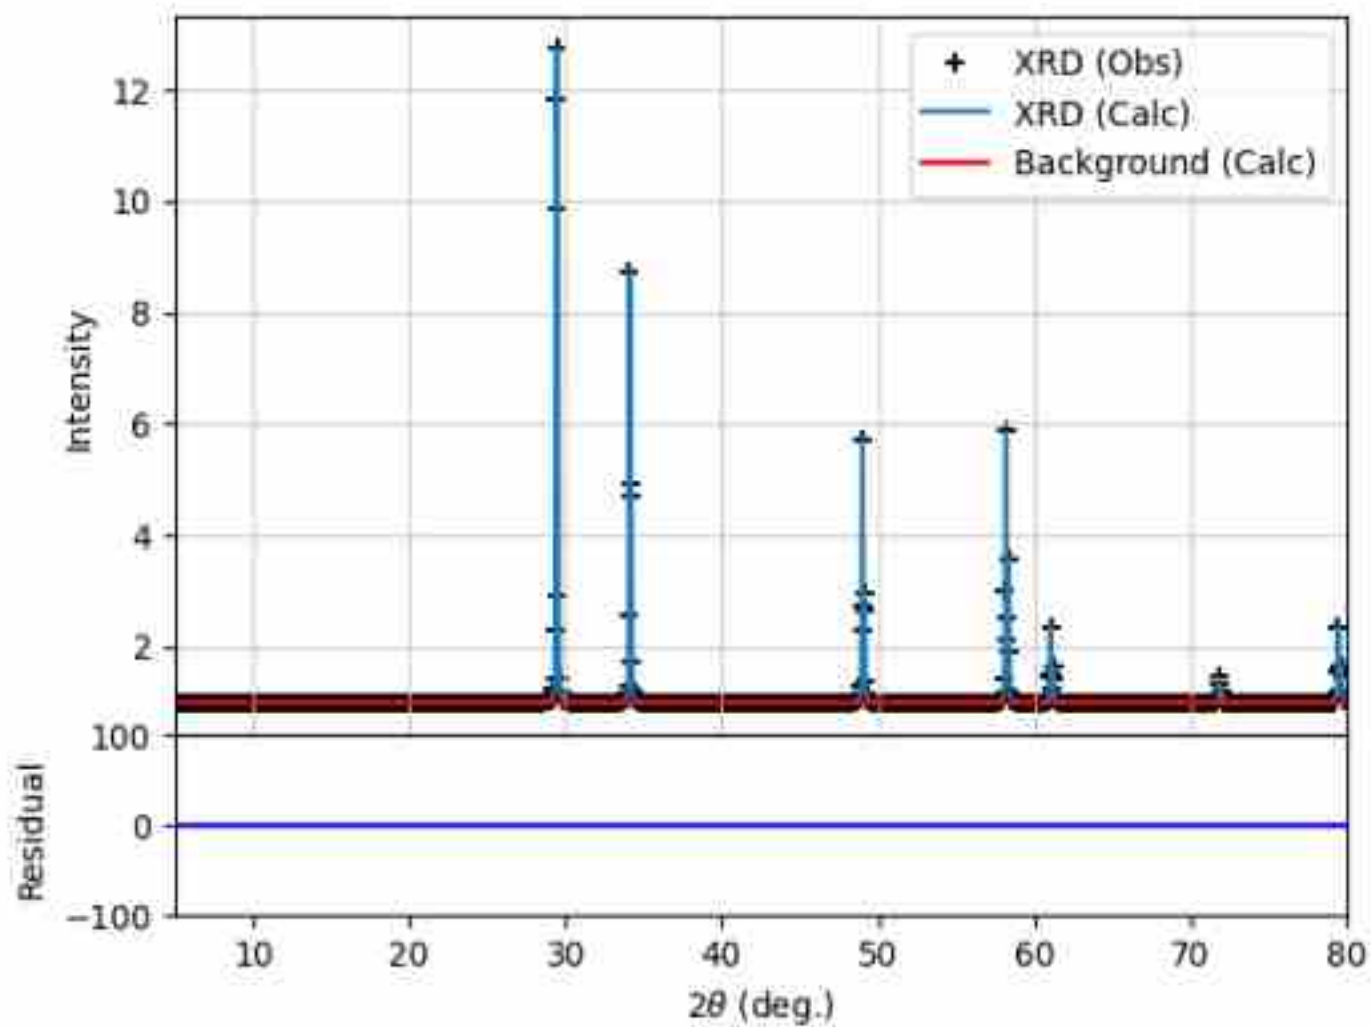

| RMSE before RR | Rwp     | RMSE after RR |
|----------------|---------|---------------|
| 0.0            | 0.00051 | 0.0           |

# Nb1

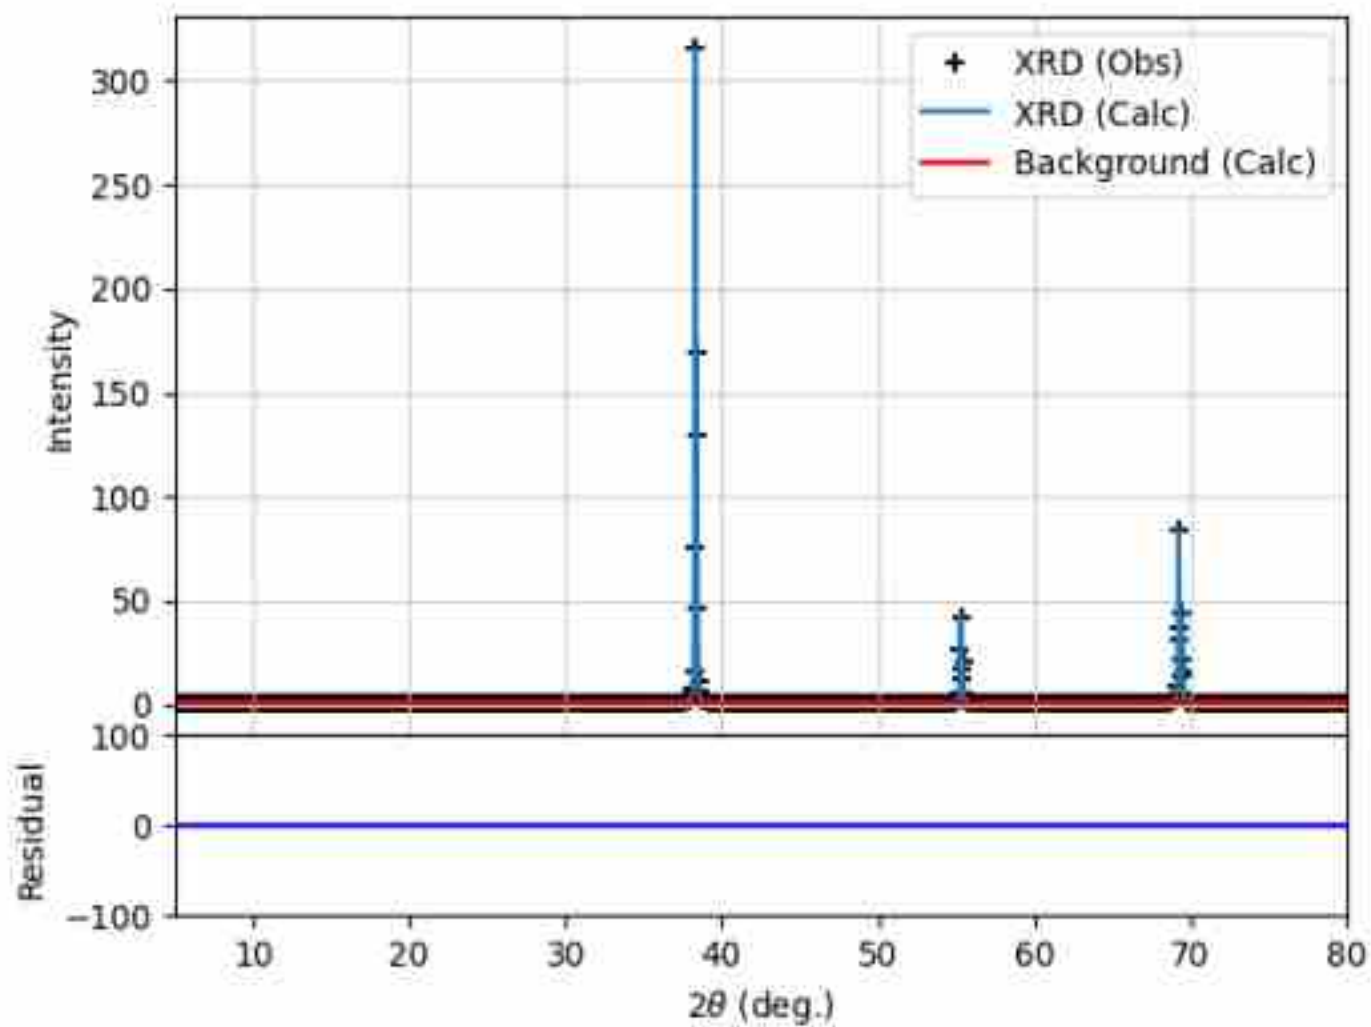

| RMSE before RR | Rwp     | RMSE after RR |
|----------------|---------|---------------|
| 0.0            | 0.00271 | 0.0           |

# Nd1Sm1Mg2

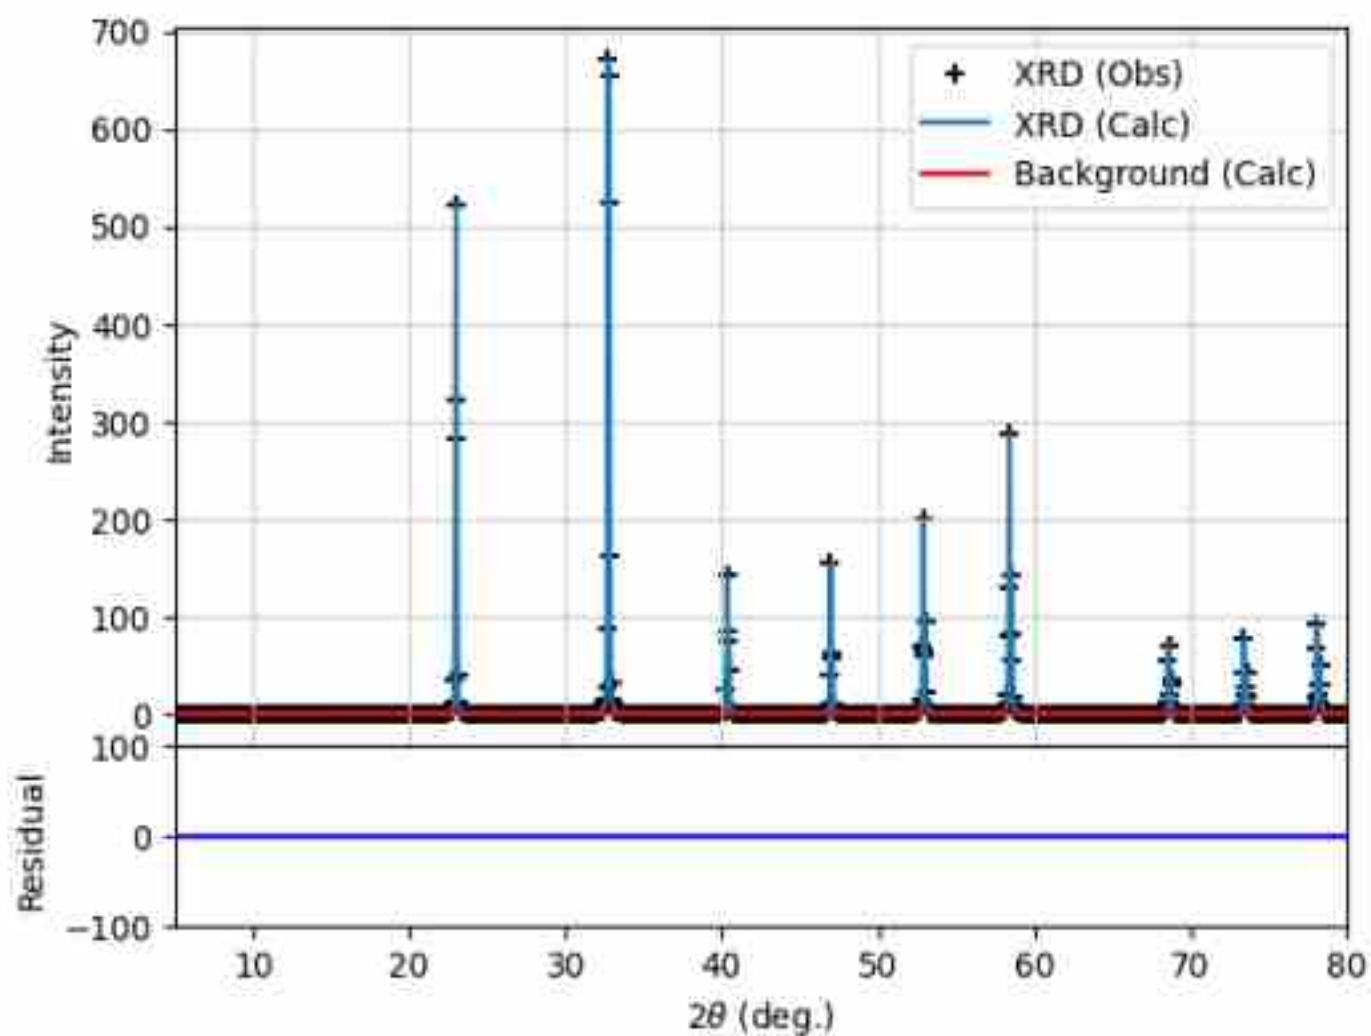

| RMSE before RR | Rwp     | RMSE after RR |
|----------------|---------|---------------|
| 0.0            | 0.00088 | 0.00043       |



# Nd<sub>2</sub>MgIn<sub>1</sub>

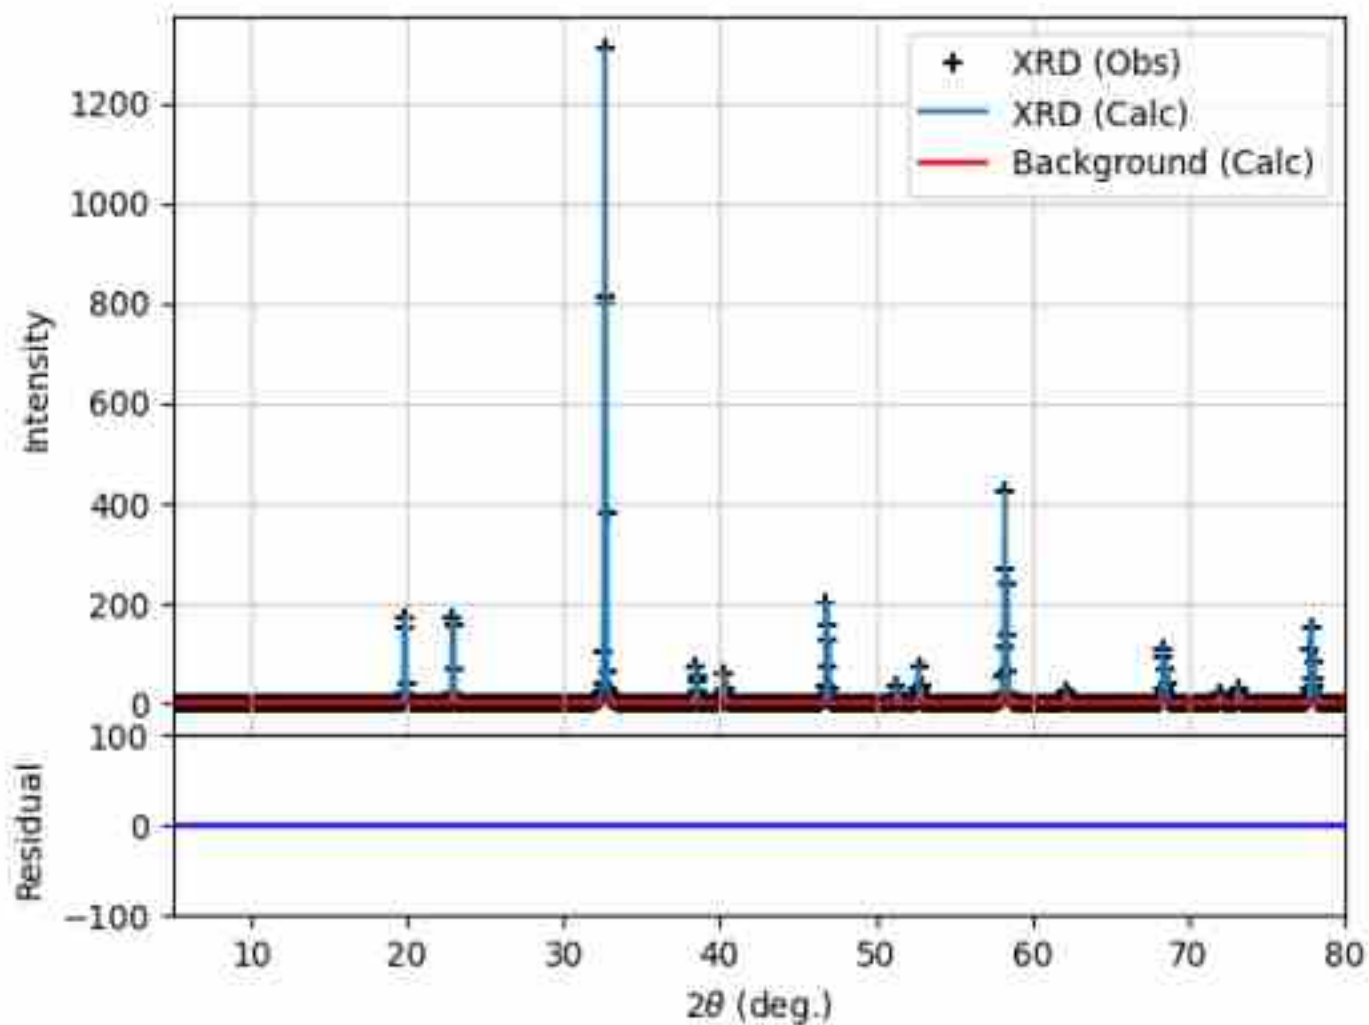

| RMSE before RR | Rwp     | RMSE after RR |
|----------------|---------|---------------|
| 0.0            | 0.00332 | 0.00311       |

# Pb1Se1

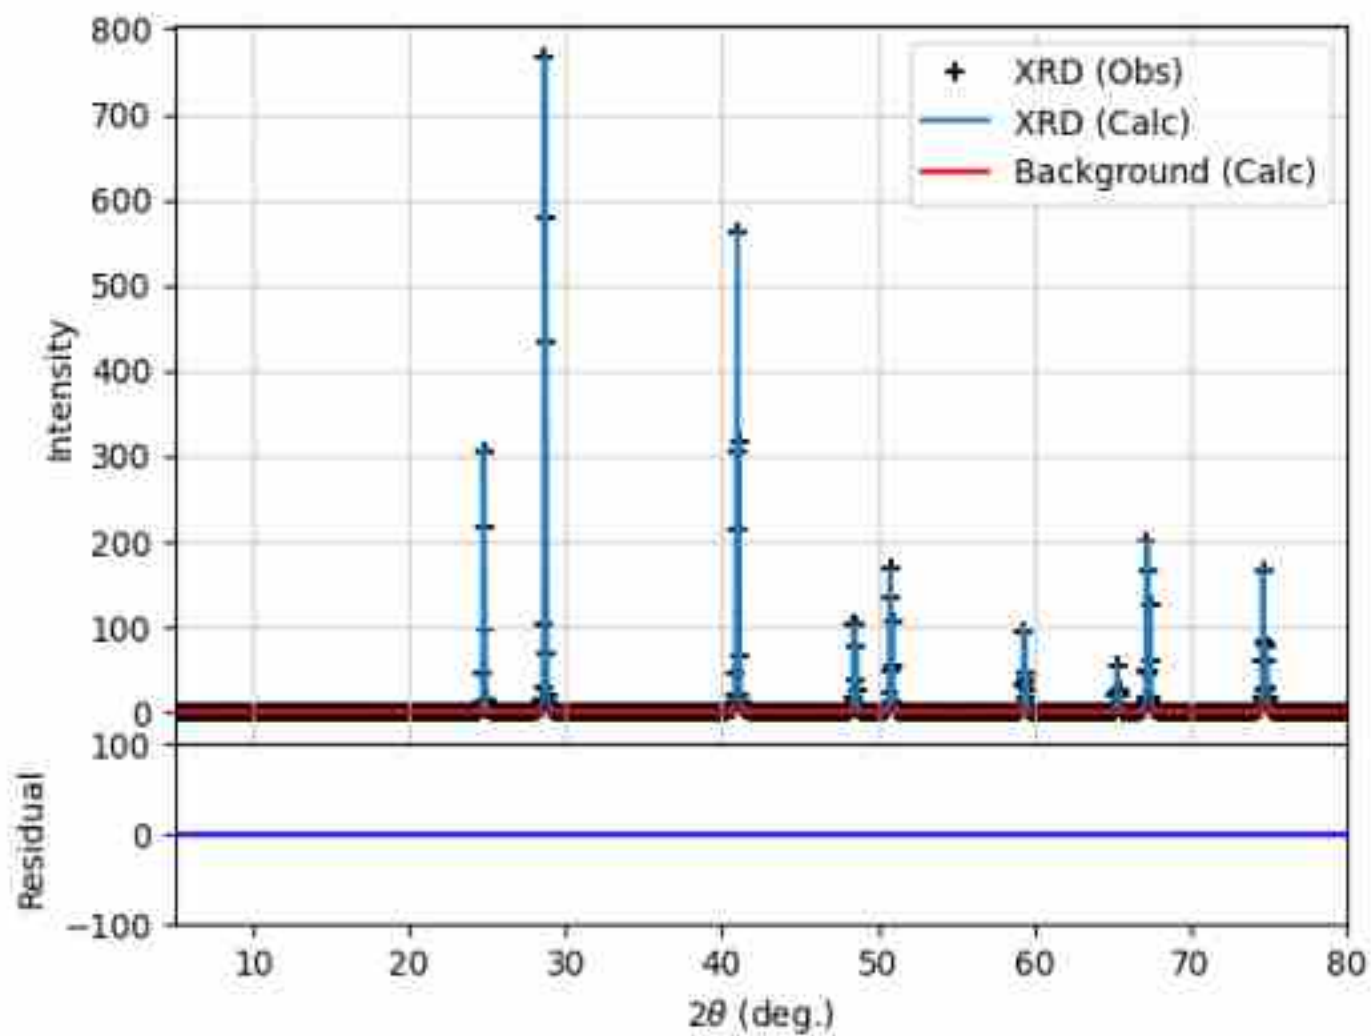

| RMSE before RR | Rwp     | RMSE after RR |
|----------------|---------|---------------|
| 0.0            | 0.00039 | 0.00022       |

Pr2

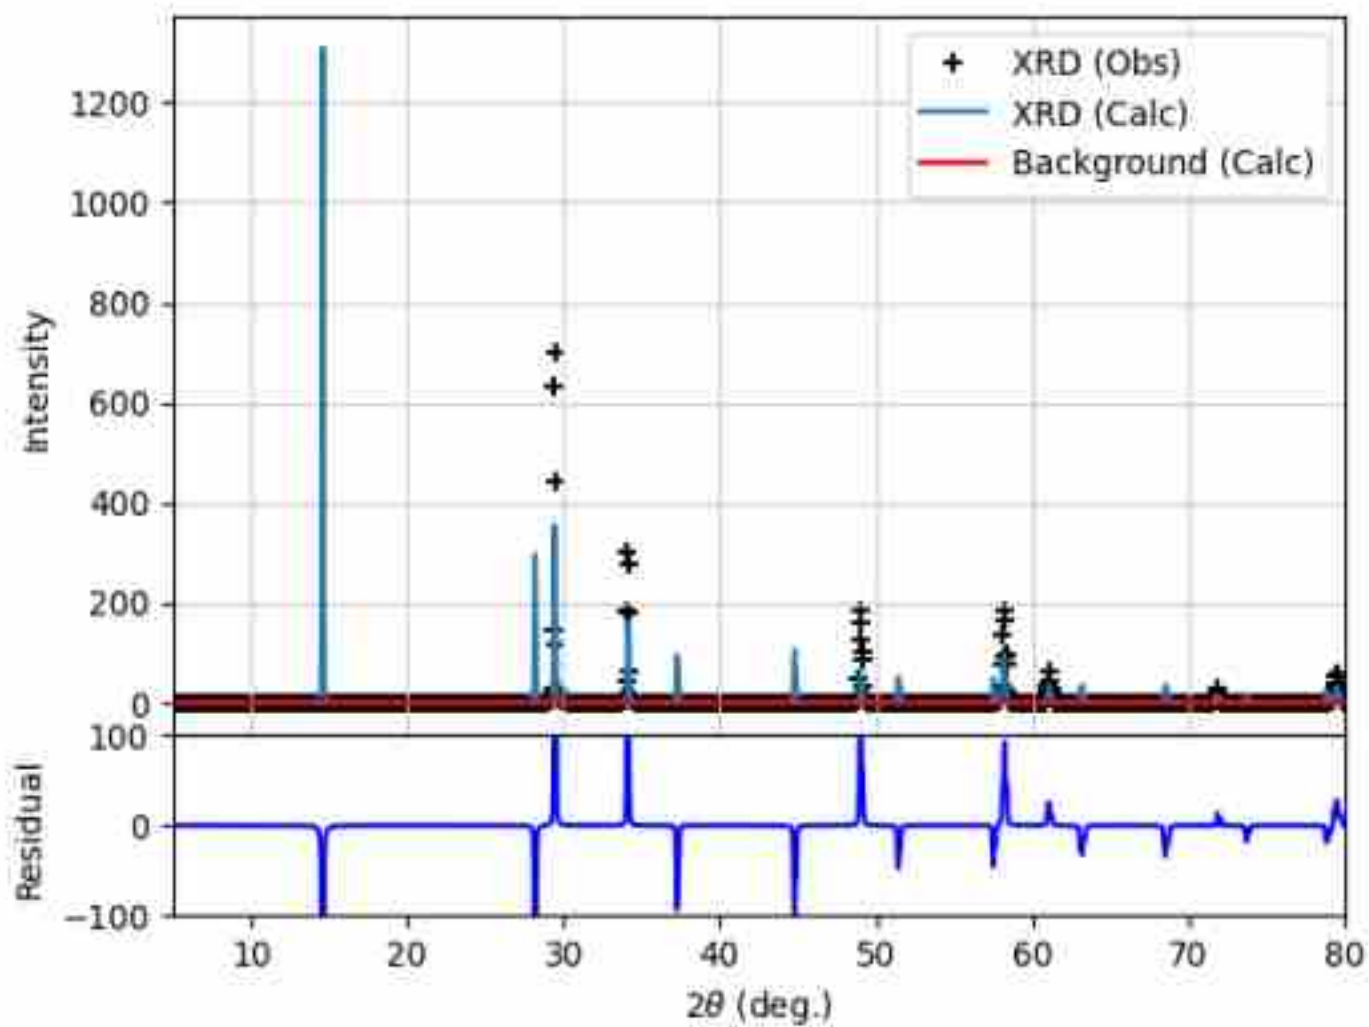

| RMSE before RR | Rwp   | RMSE after RR |
|----------------|-------|---------------|
| 0.0            | 100.0 | 0.0           |

# Pt1Rh1

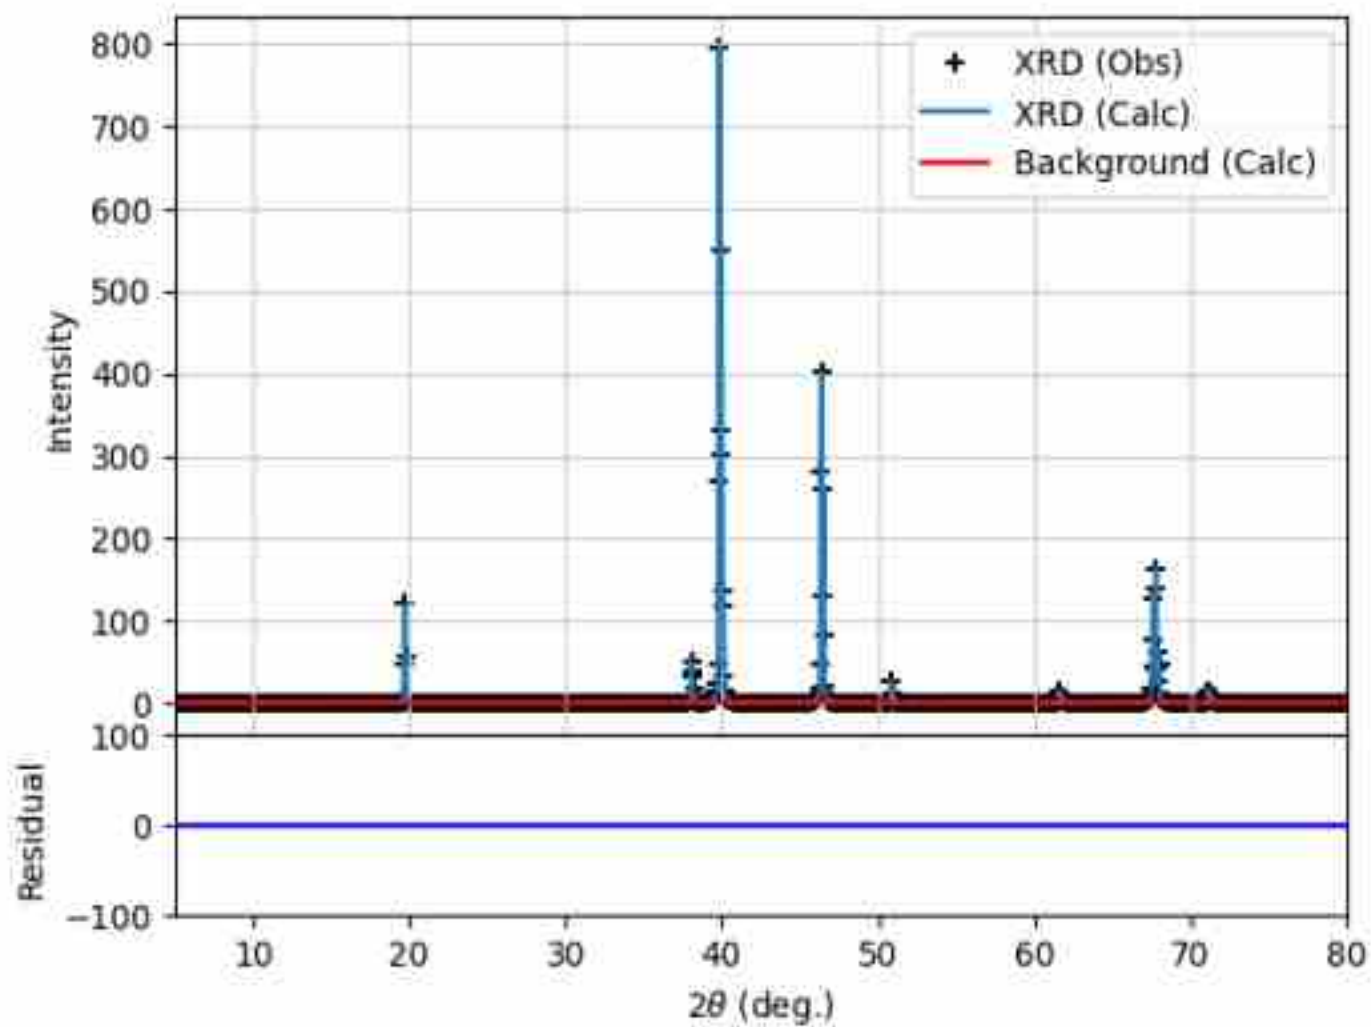

| RMSE before RR | Rwp     | RMSE after RR |
|----------------|---------|---------------|
| 0.0            | 0.00292 | 0.00014       |

Re1

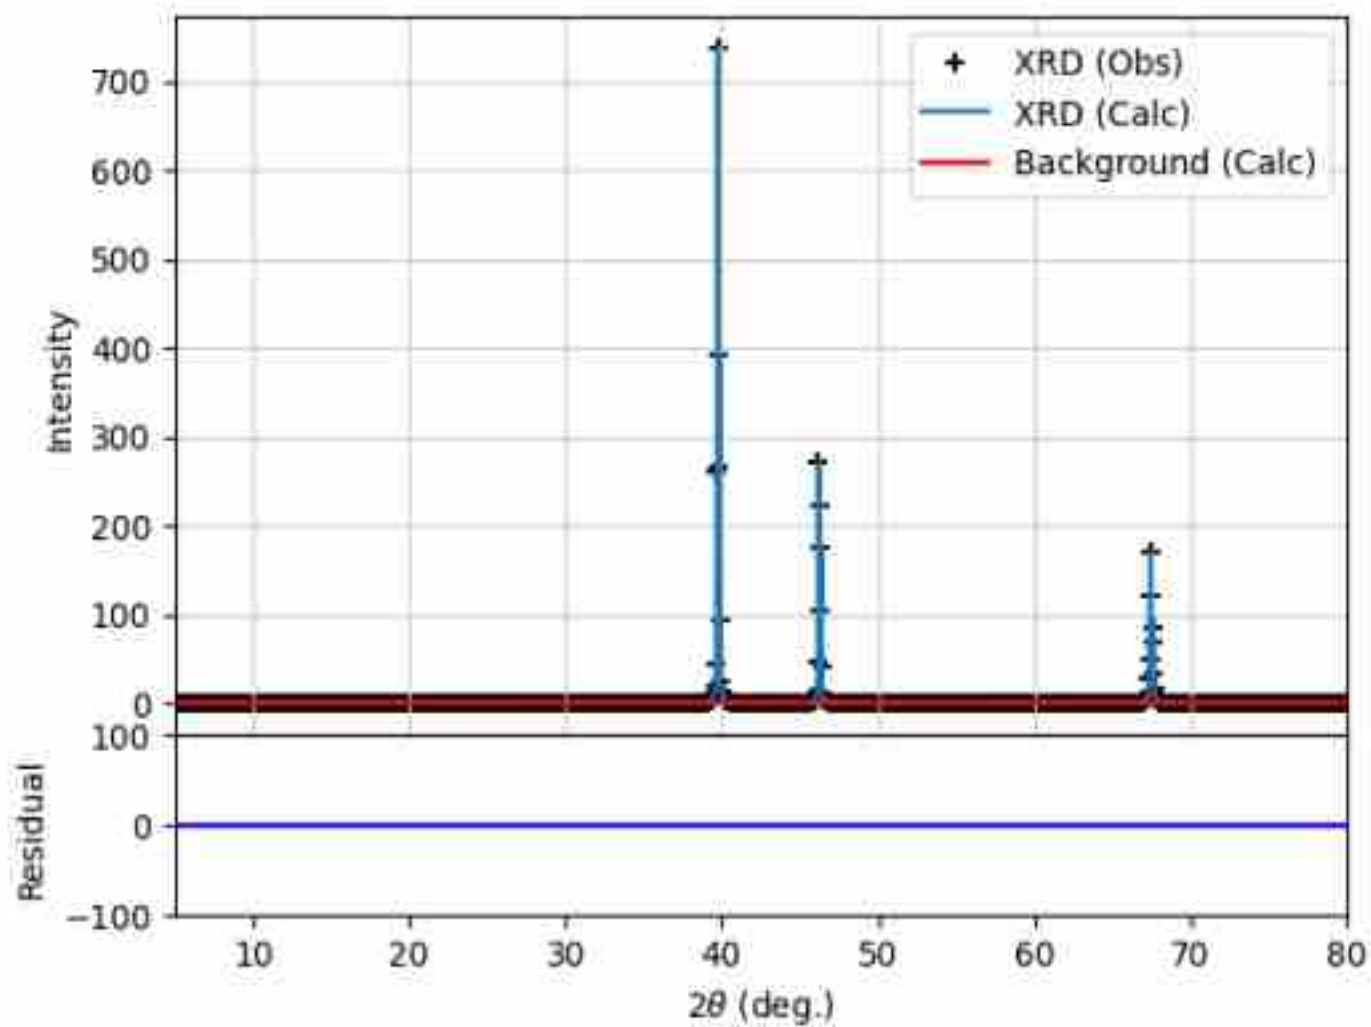

| RMSE before RR | Rwp     | RMSE after RR |
|----------------|---------|---------------|
| 0.0            | 0.00262 | 0.0           |

# Rh1

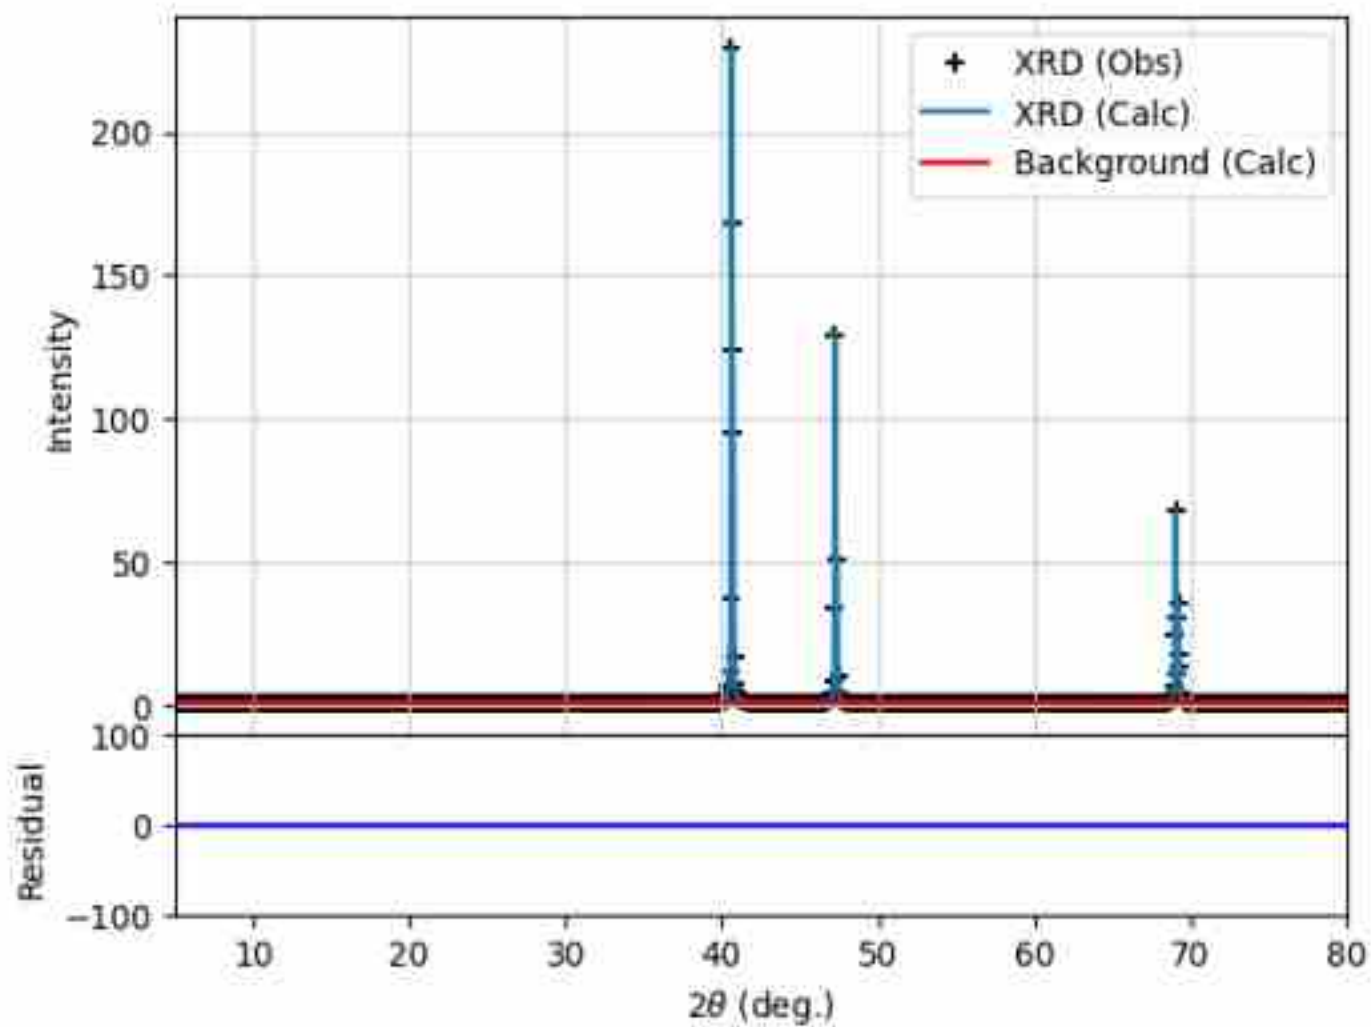

| RMSE before RR | Rwp     | RMSE after RR |
|----------------|---------|---------------|
| 0.0            | 0.00369 | 0.0           |

Sc1

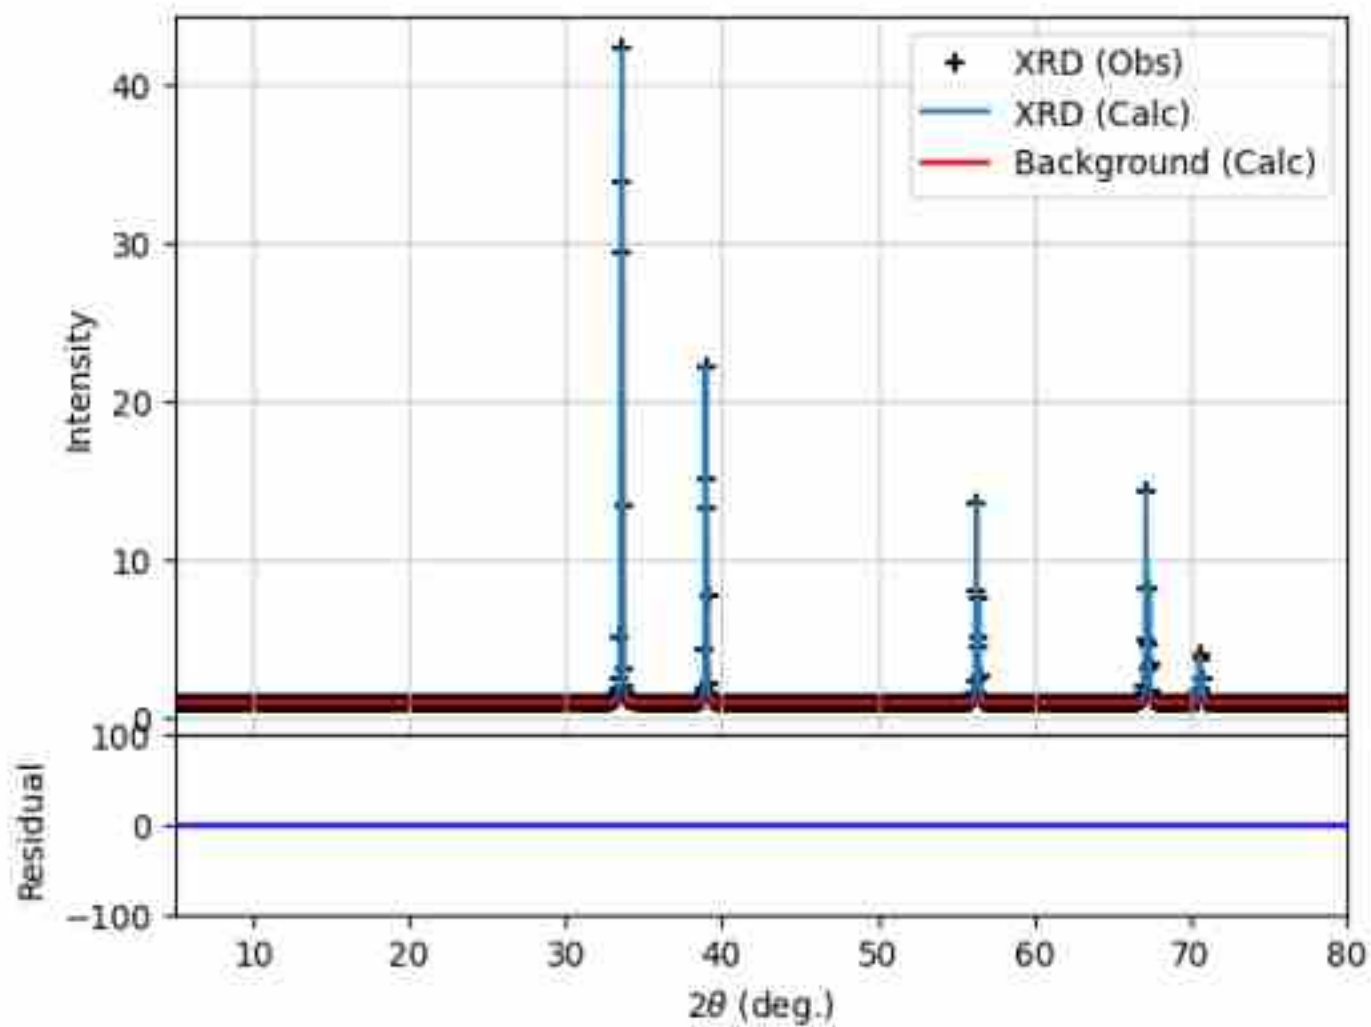

| RMSE before RR | Rwp     | RMSE after RR |
|----------------|---------|---------------|
| 0.0            | 0.00153 | 0.0           |

# Ta1

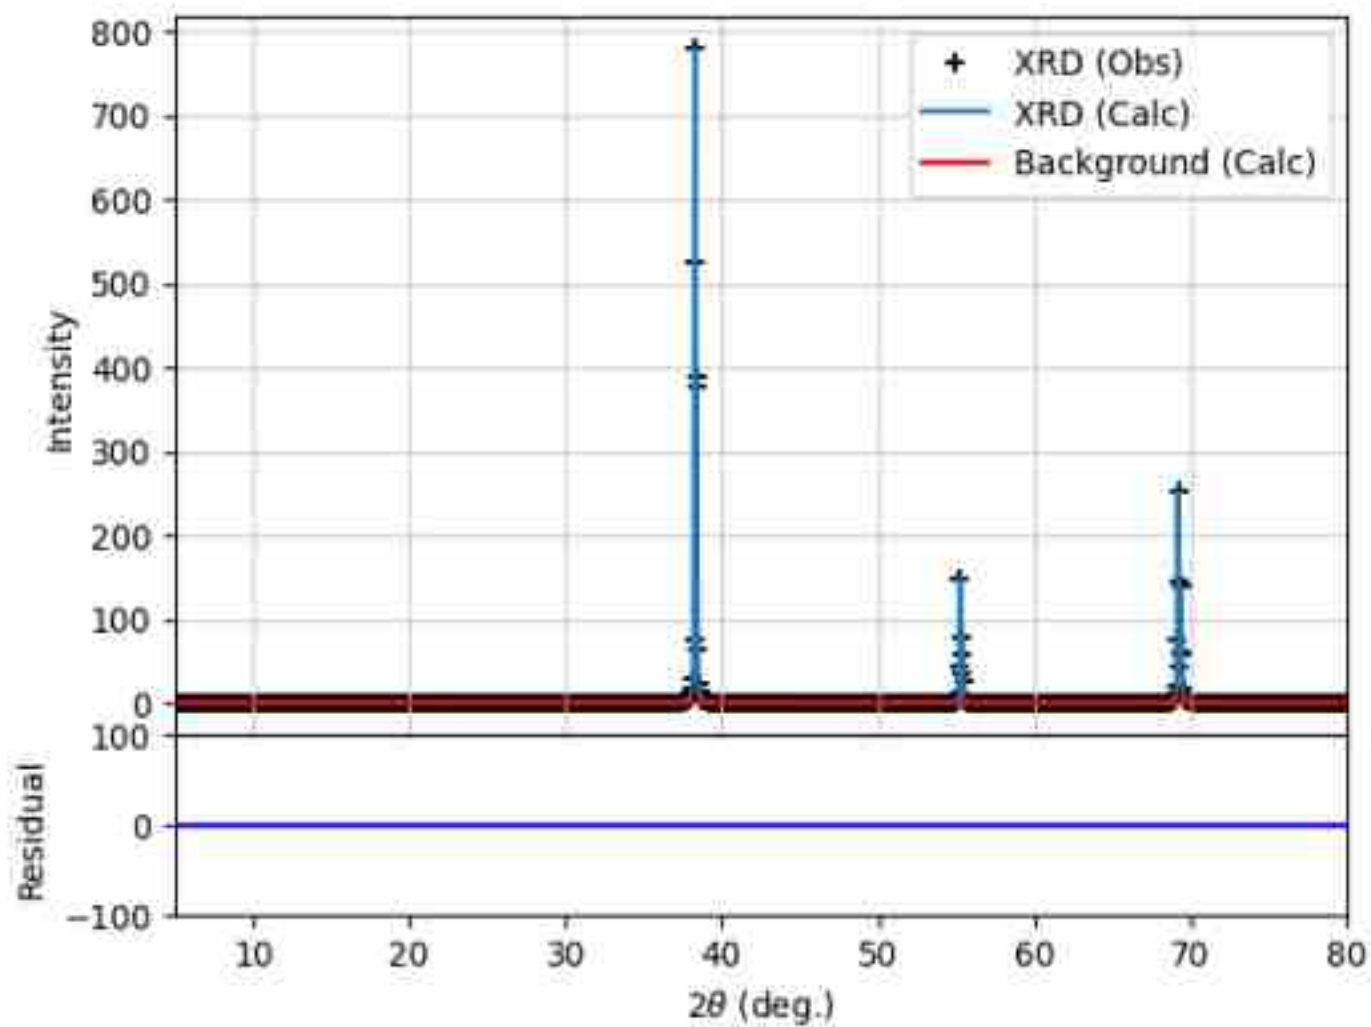

| RMSE before RR | Rwp     | RMSE after RR |
|----------------|---------|---------------|
| 0.0            | 0.00539 | 0.0           |



# Tc1

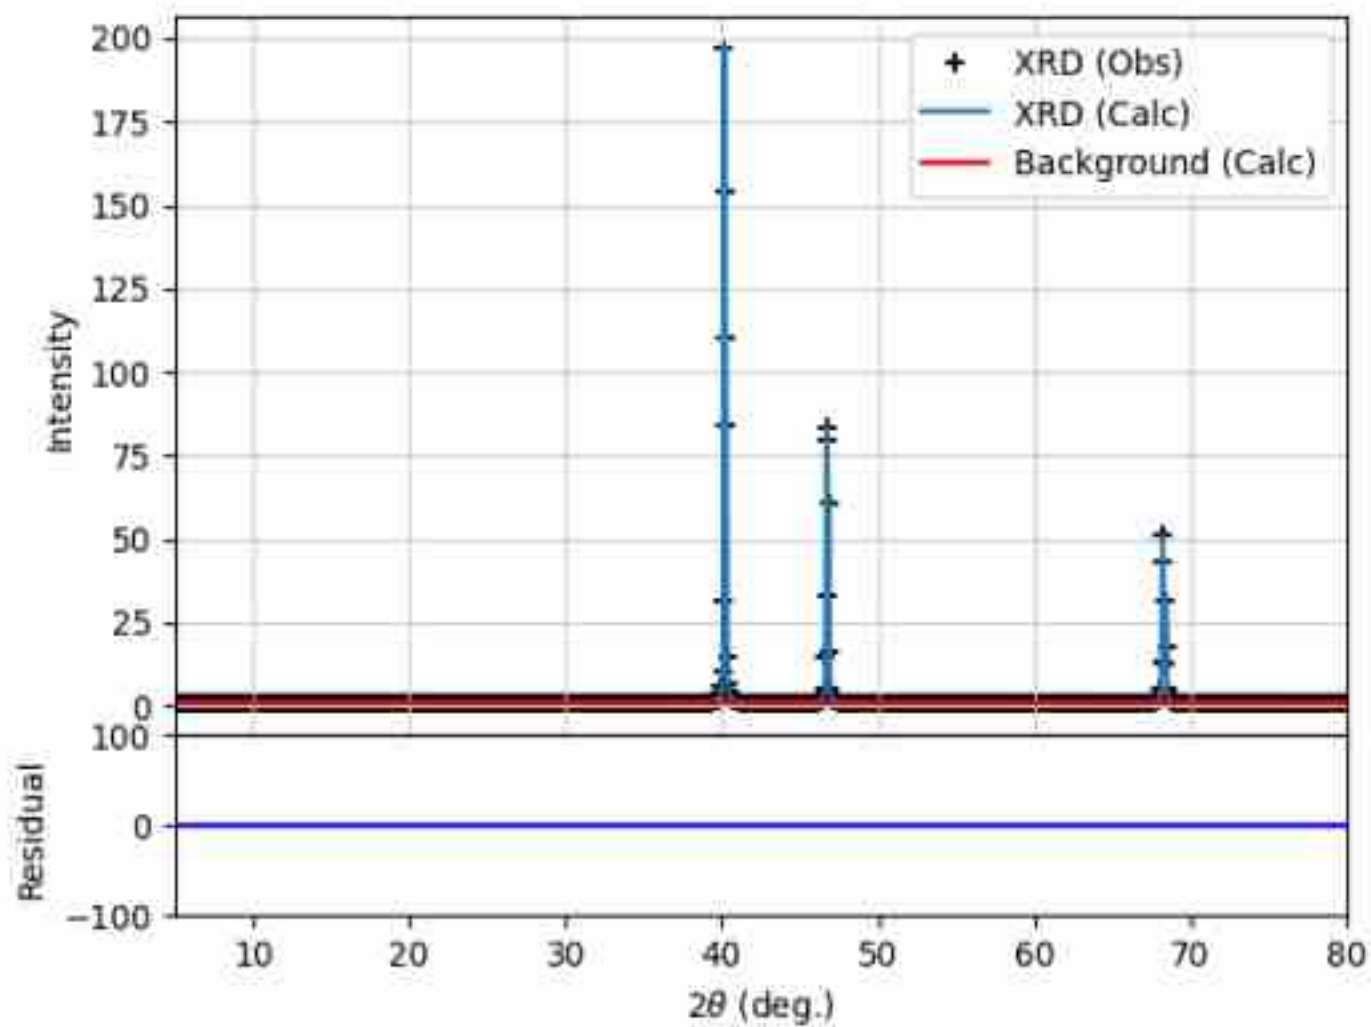

| RMSE before RR | Rwp     | RMSE after RR |
|----------------|---------|---------------|
| 0.0            | 0.00257 | 0.0           |

Te1

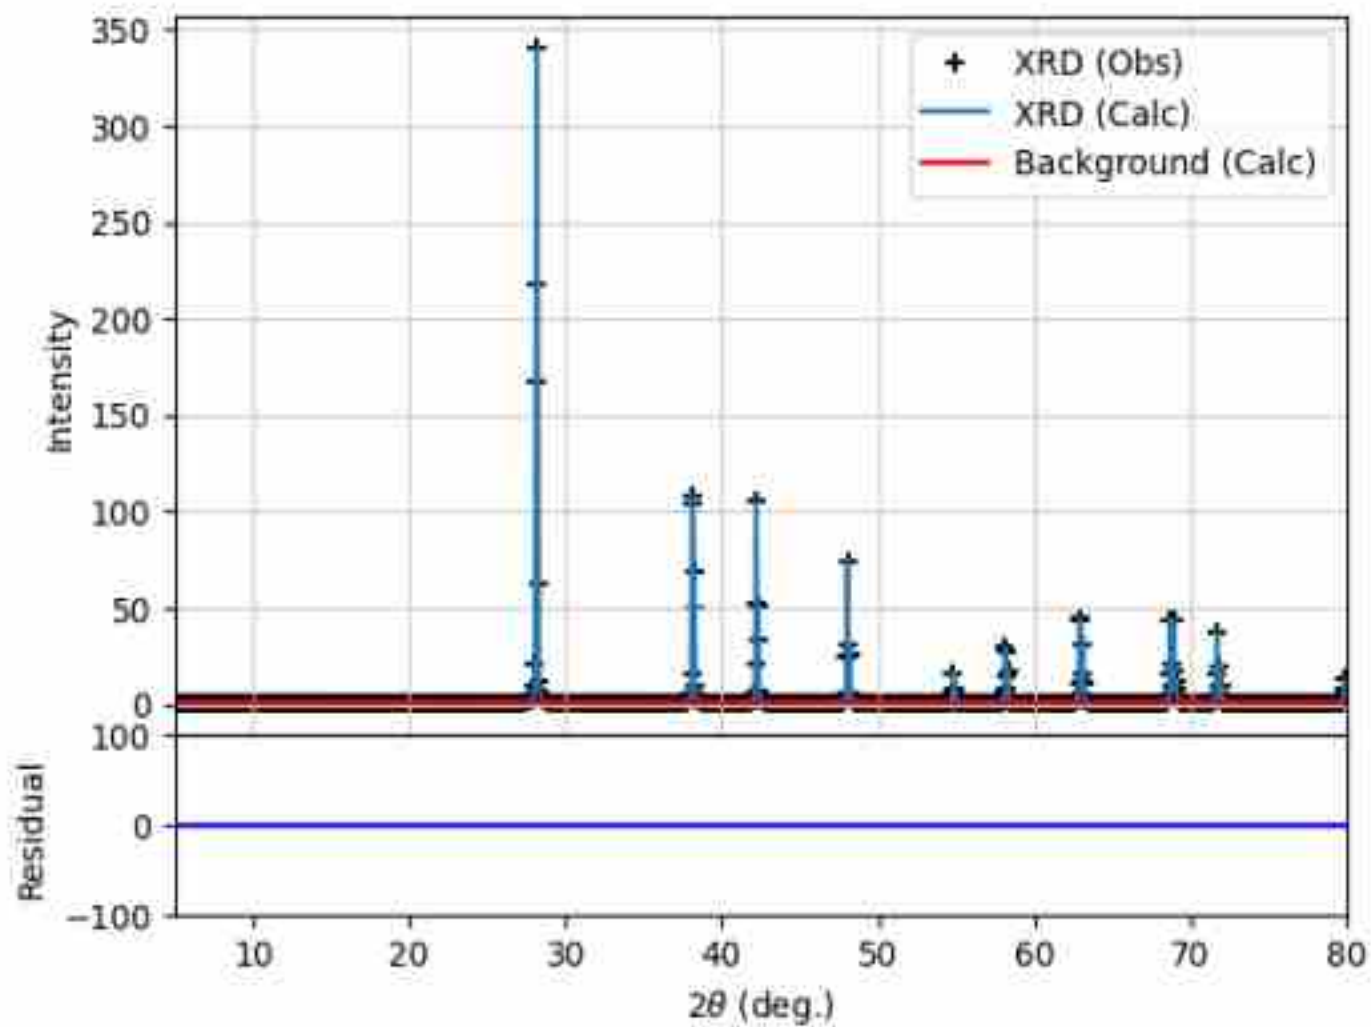

| RMSE before RR | Rwp     | RMSE after RR |
|----------------|---------|---------------|
| 0.0            | 0.00211 | 0.0           |

# Tl1

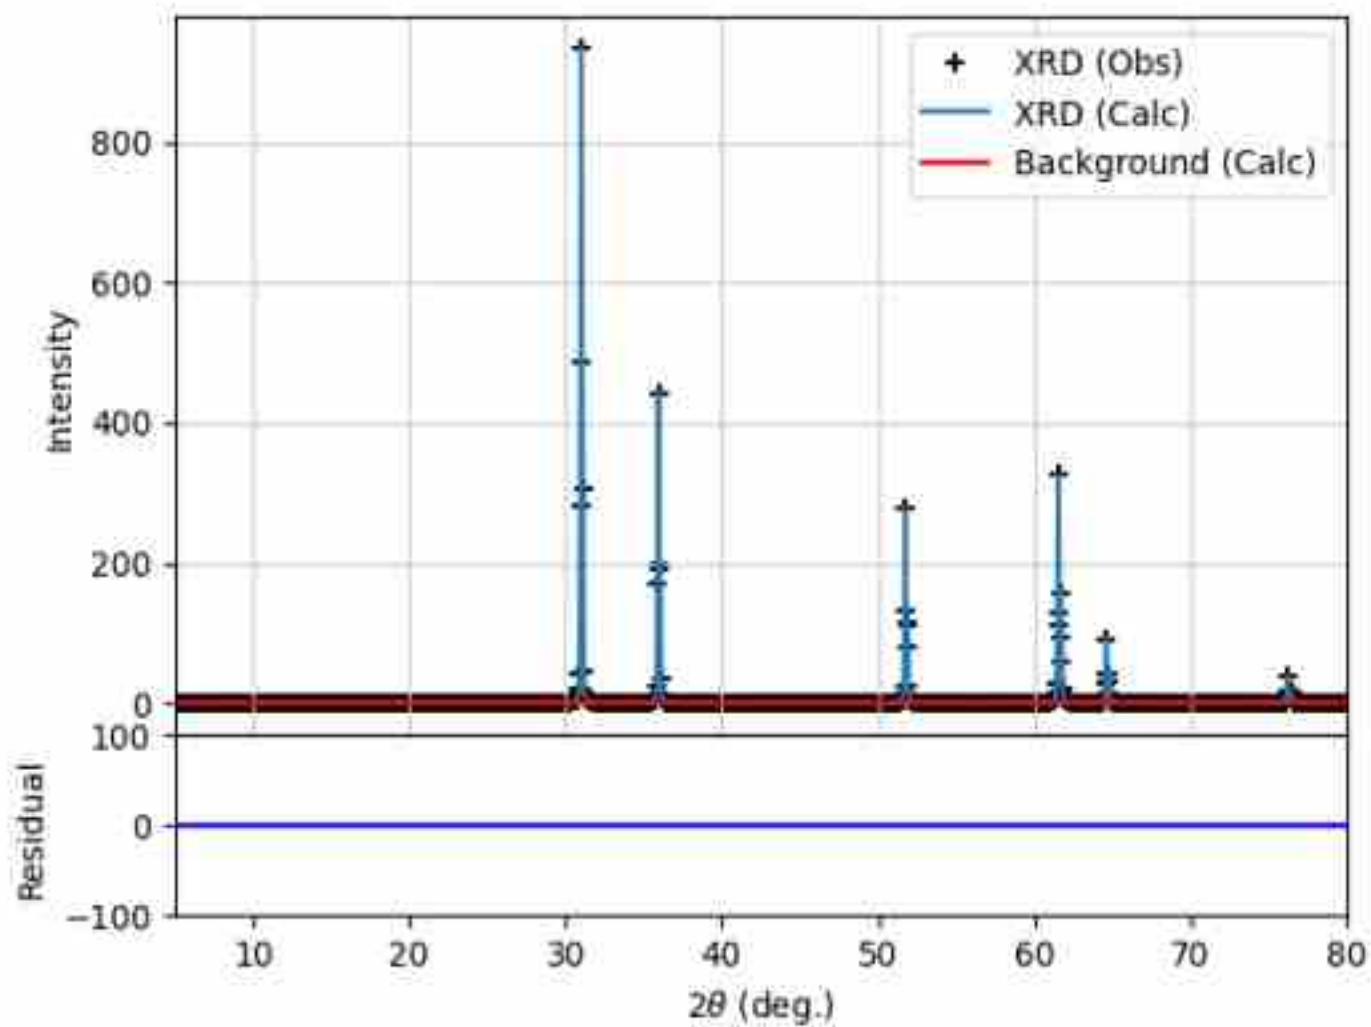

| RMSE before RR | Rwp | RMSE after RR |
|----------------|-----|---------------|
| 0.0            | 0.0 | 0.0           |

# Tm1Lu1In2

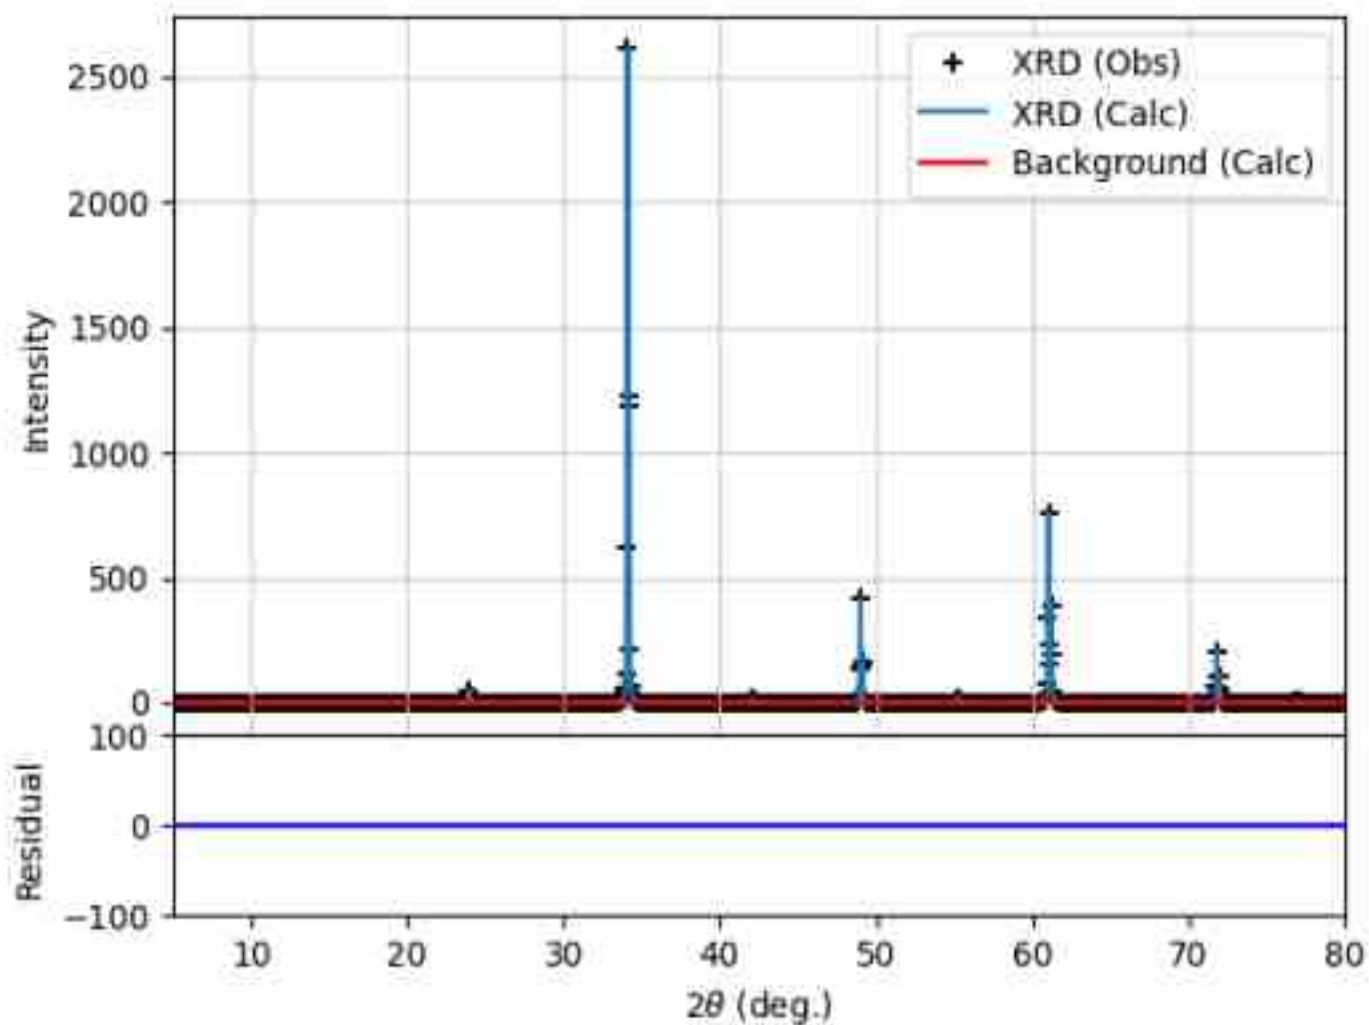

| RMSE before RR | Rwp     | RMSE after RR |
|----------------|---------|---------------|
| 0.0            | 0.00937 | 0.00054       |

# Tm1Mg1

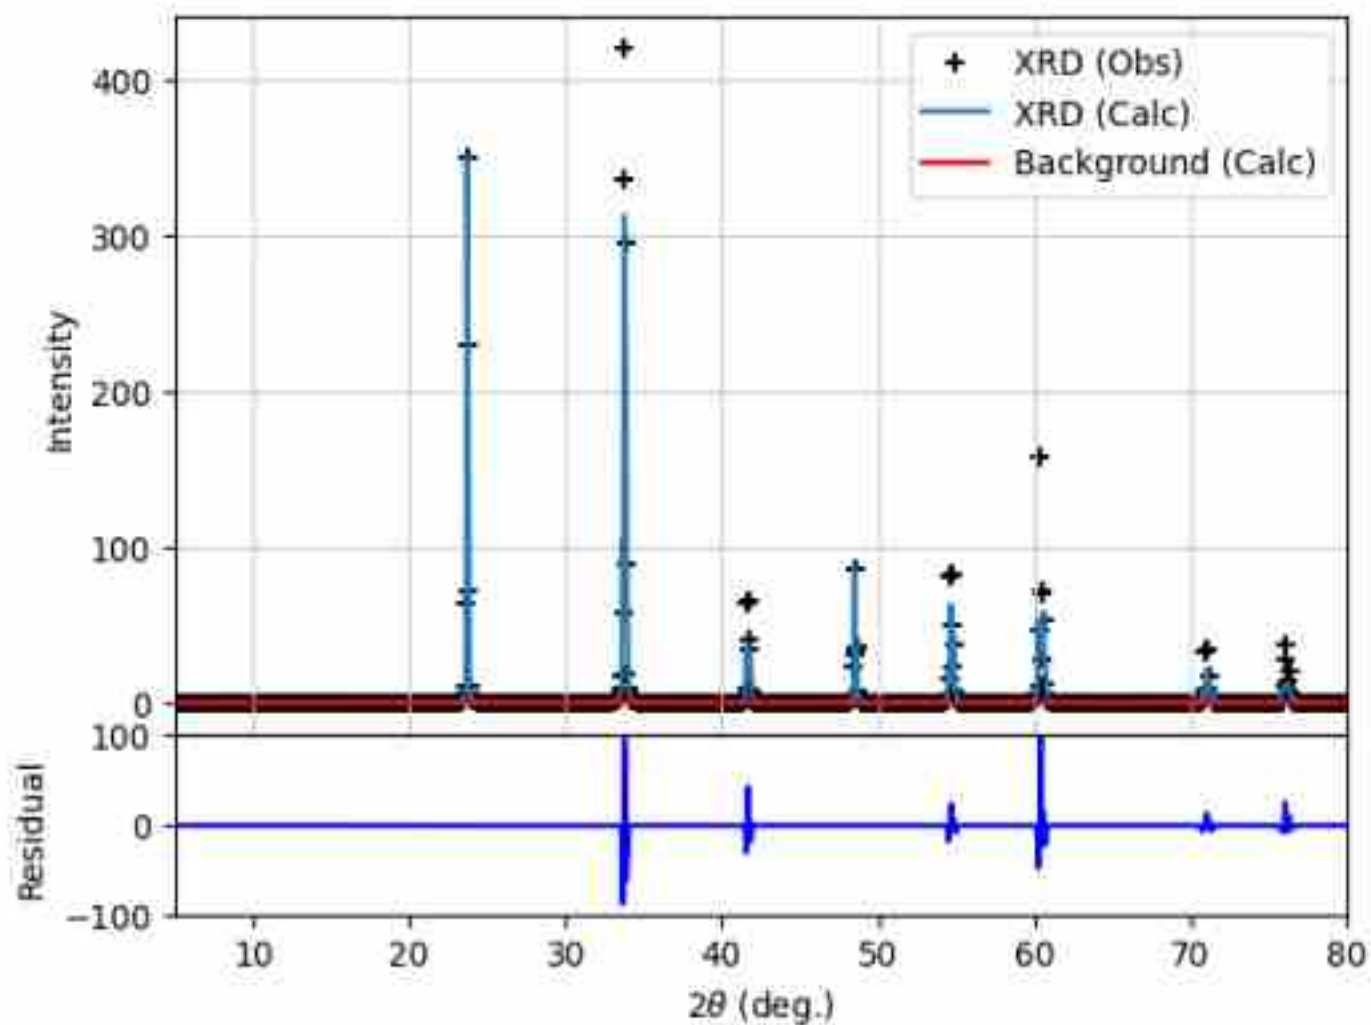

| RMSE before RR | Rwp      | RMSE after RR |
|----------------|----------|---------------|
| 0.0            | 67.13451 | 0.00029       |

# V1H1

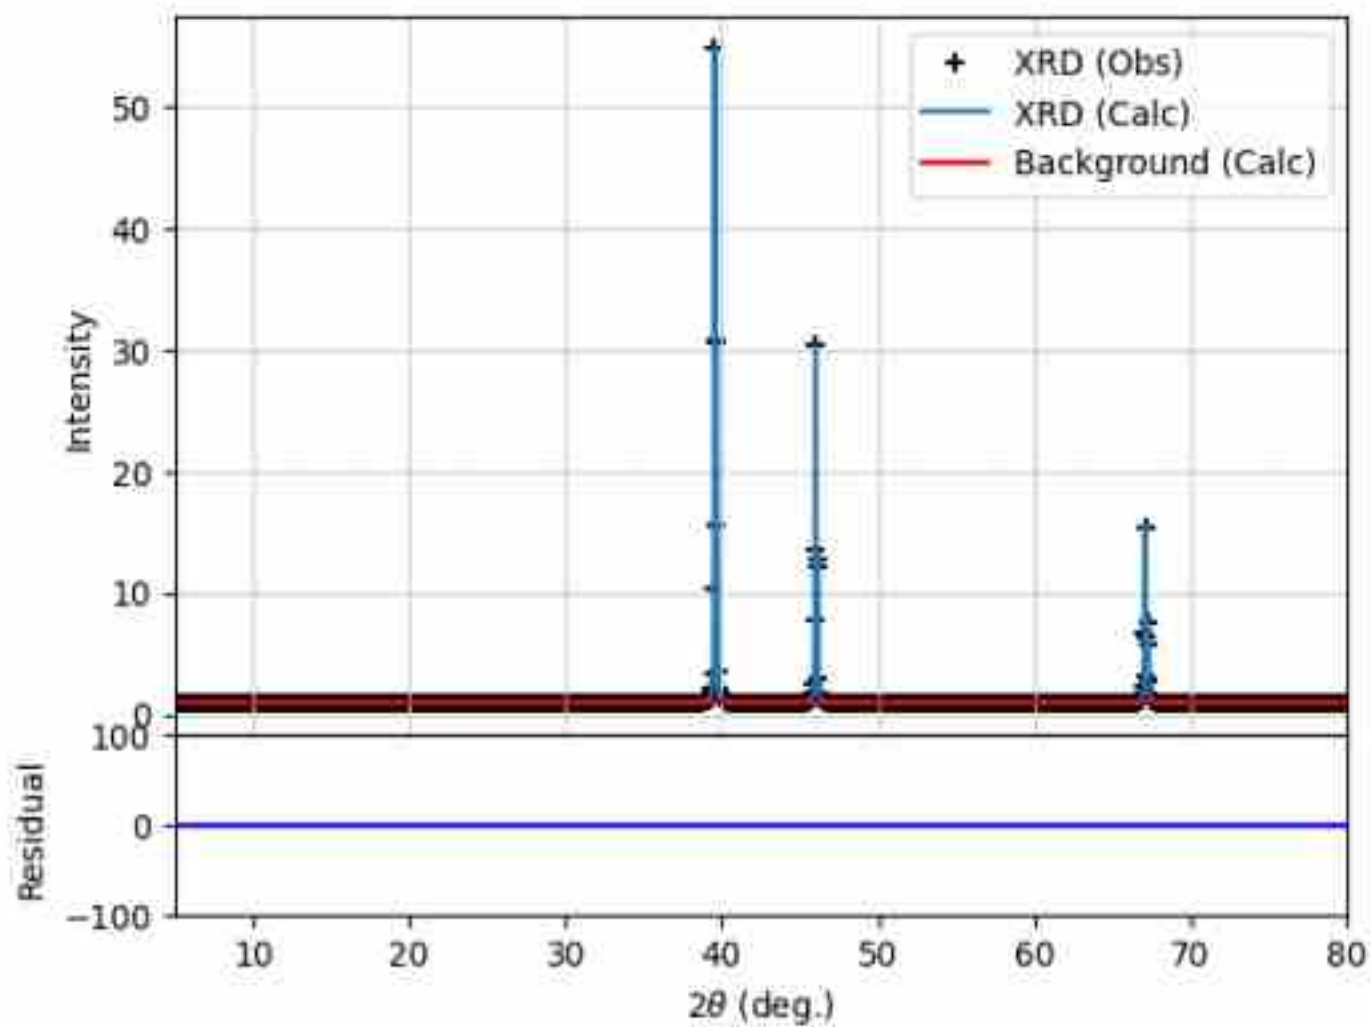

| RMSE before RR | Rwp     | RMSE after RR |
|----------------|---------|---------------|
| 0.0            | 0.00128 | 0.00123       |

# V1Ir1

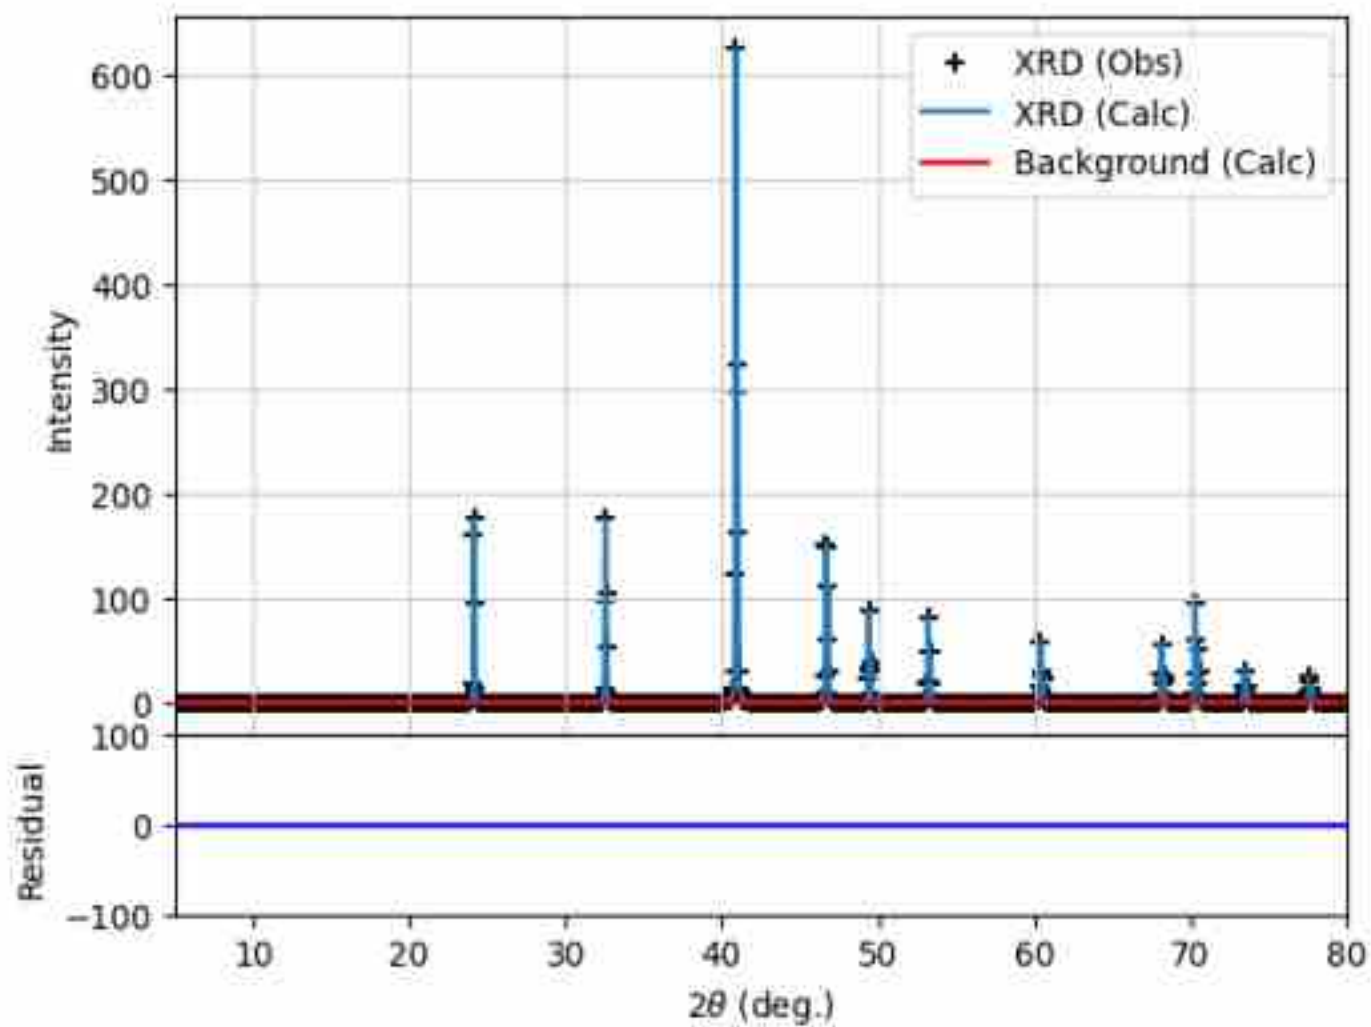

| RMSE before RR | Rwp     | RMSE after RR |
|----------------|---------|---------------|
| 0.0            | 0.00323 | 0.00049       |

# V3Re1

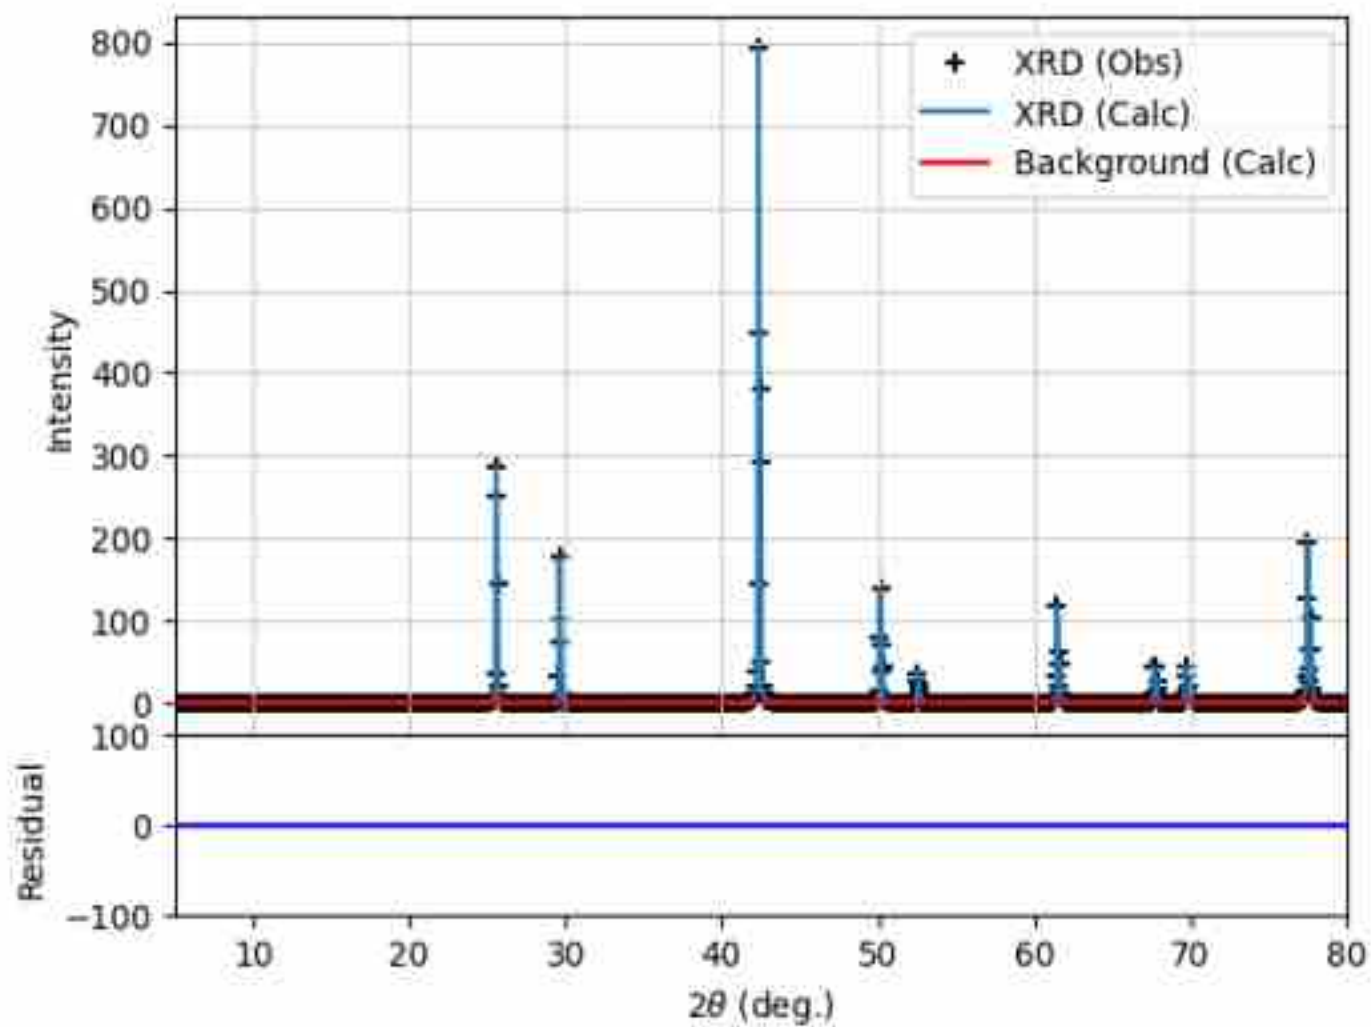

| RMSE before RR | Rwp | RMSE after RR |
|----------------|-----|---------------|
| 0.0            | 0.0 | 3e-05         |



Y1

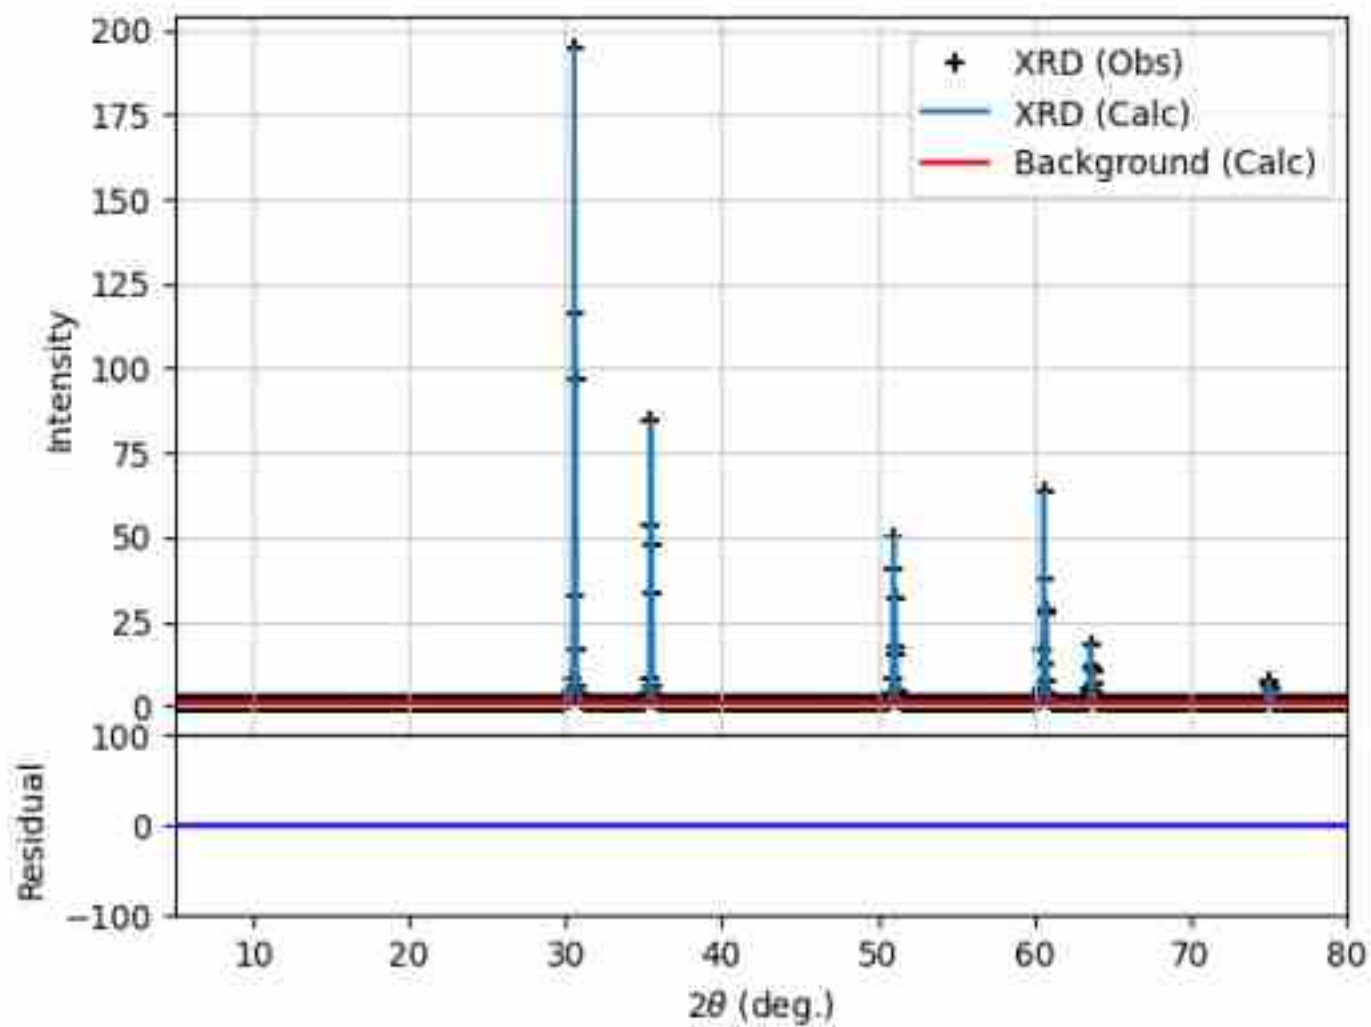

| RMSE before RR | Rwp | RMSE after RR |
|----------------|-----|---------------|
| 0.0            | 0.0 | 0.0           |

# Yb1

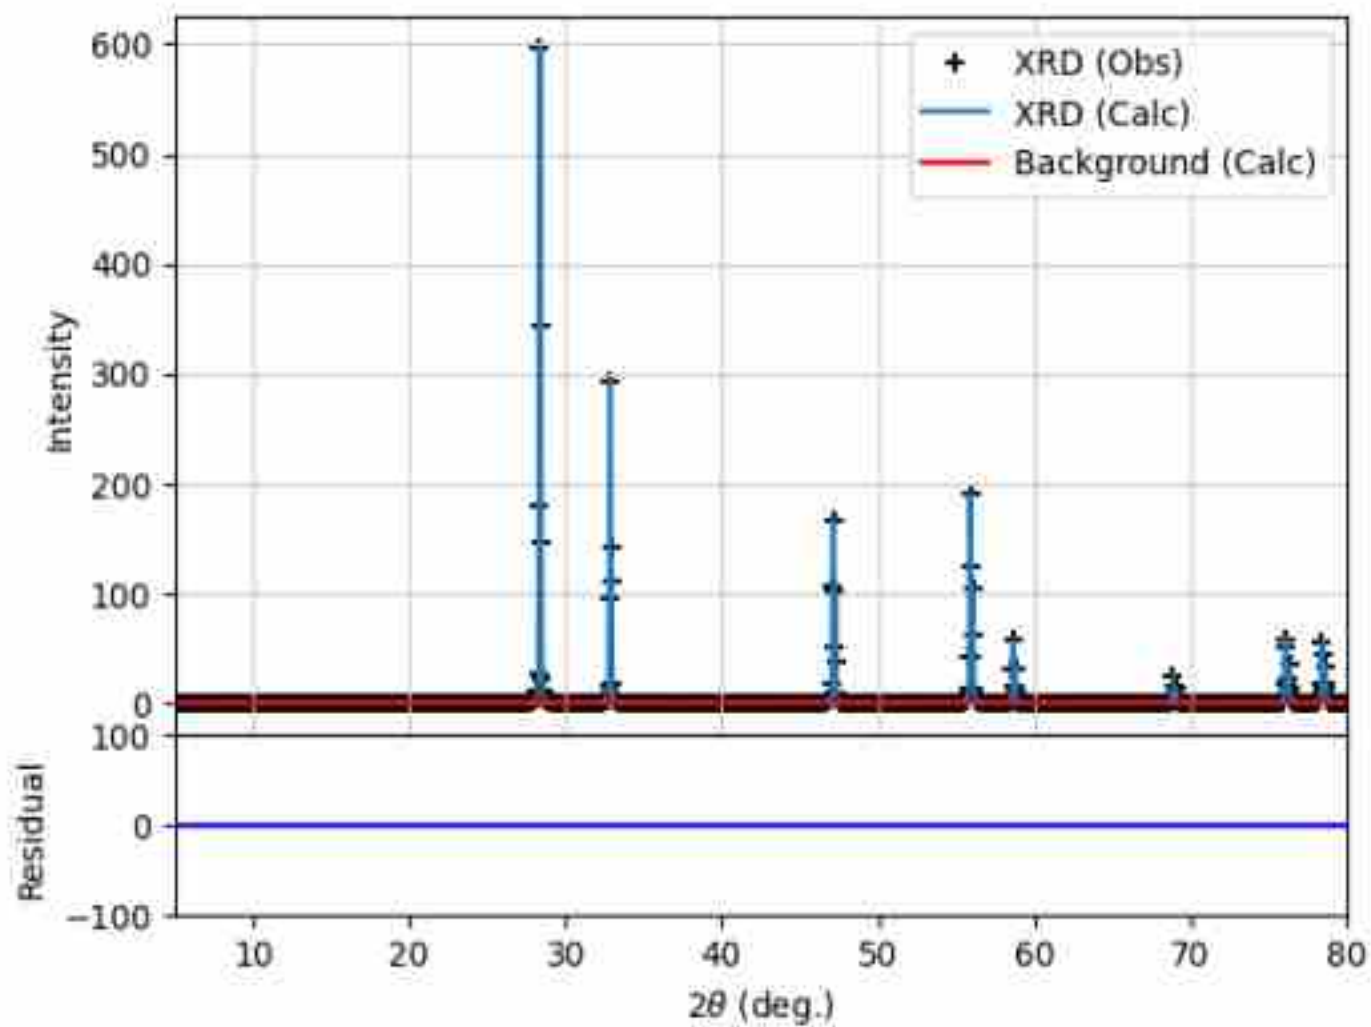

| RMSE before RR | Rwp     | RMSE after RR |
|----------------|---------|---------------|
| 0.0            | 0.00311 | 0.0           |

# Zr1N1

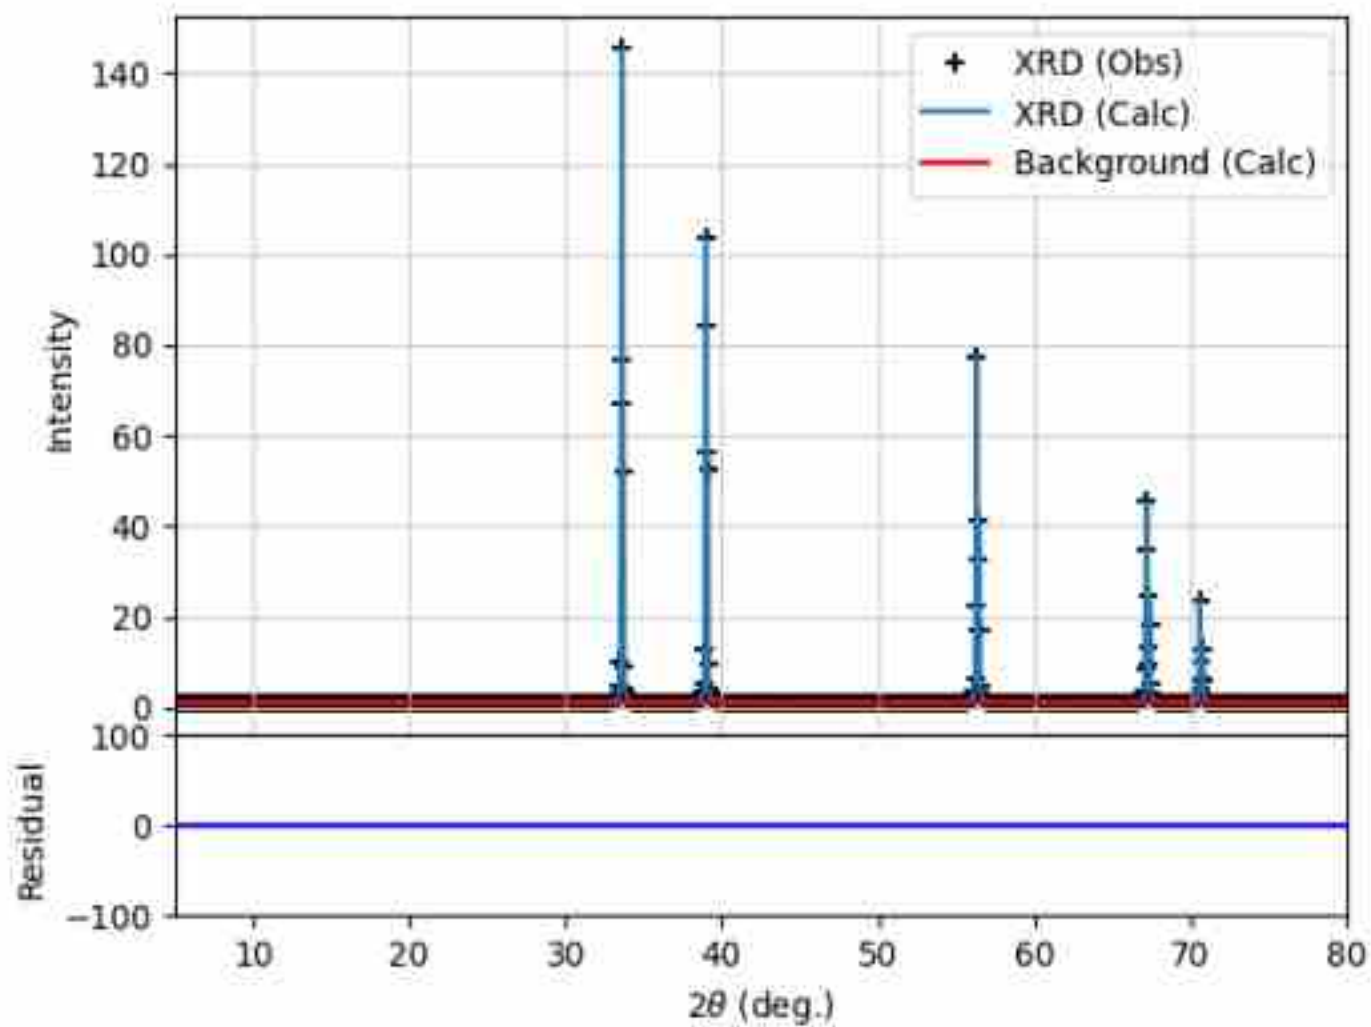

| RMSE before RR | Rwp   | RMSE after RR |
|----------------|-------|---------------|
| 0.0            | 2e-05 | 0.00017       |

# Zr1Ni2Sn1

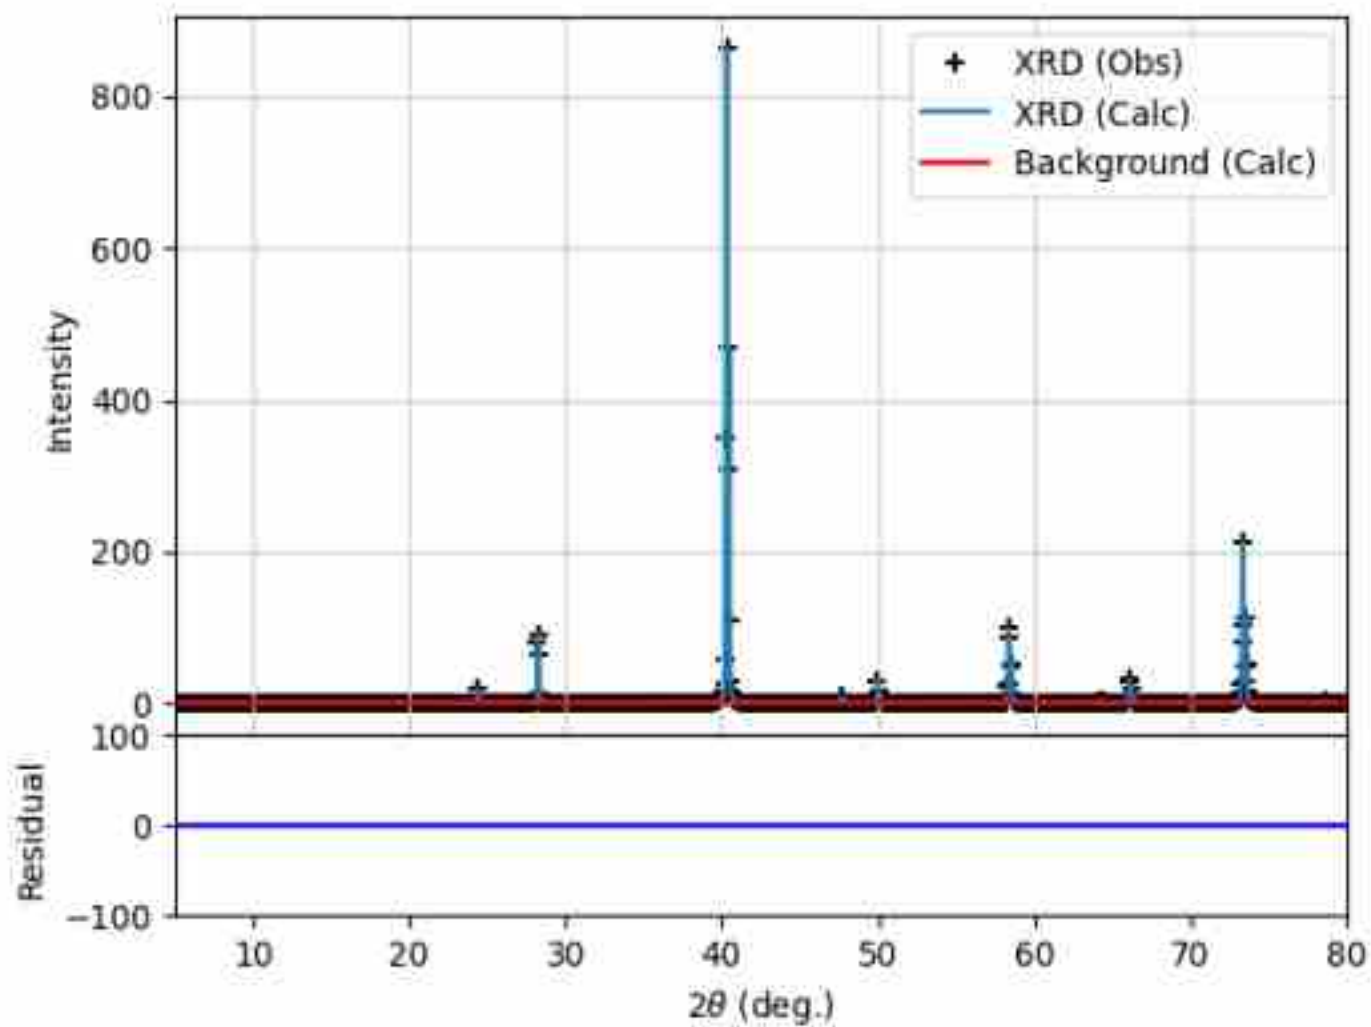

| RMSE before RR | Rwp     | RMSE after RR |
|----------------|---------|---------------|
| 0.0            | 0.00363 | 0.00051       |

Zr1

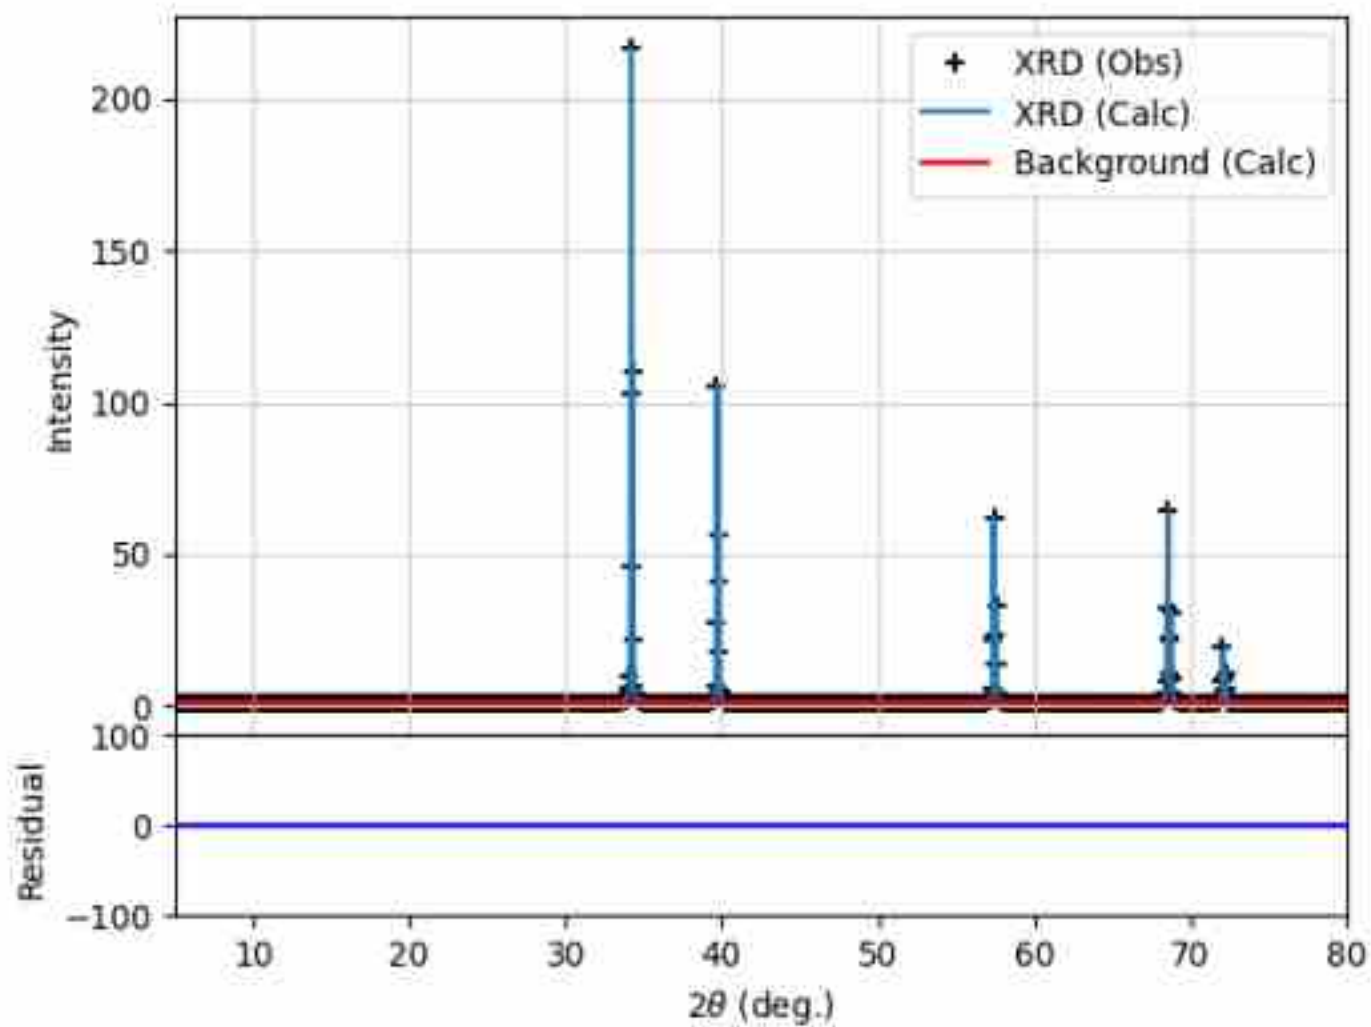

| RMSE before RR | Rwp    | RMSE after RR |
|----------------|--------|---------------|
| 0.0            | 0.0024 | 0.0           |

# Ac1La1Mg2

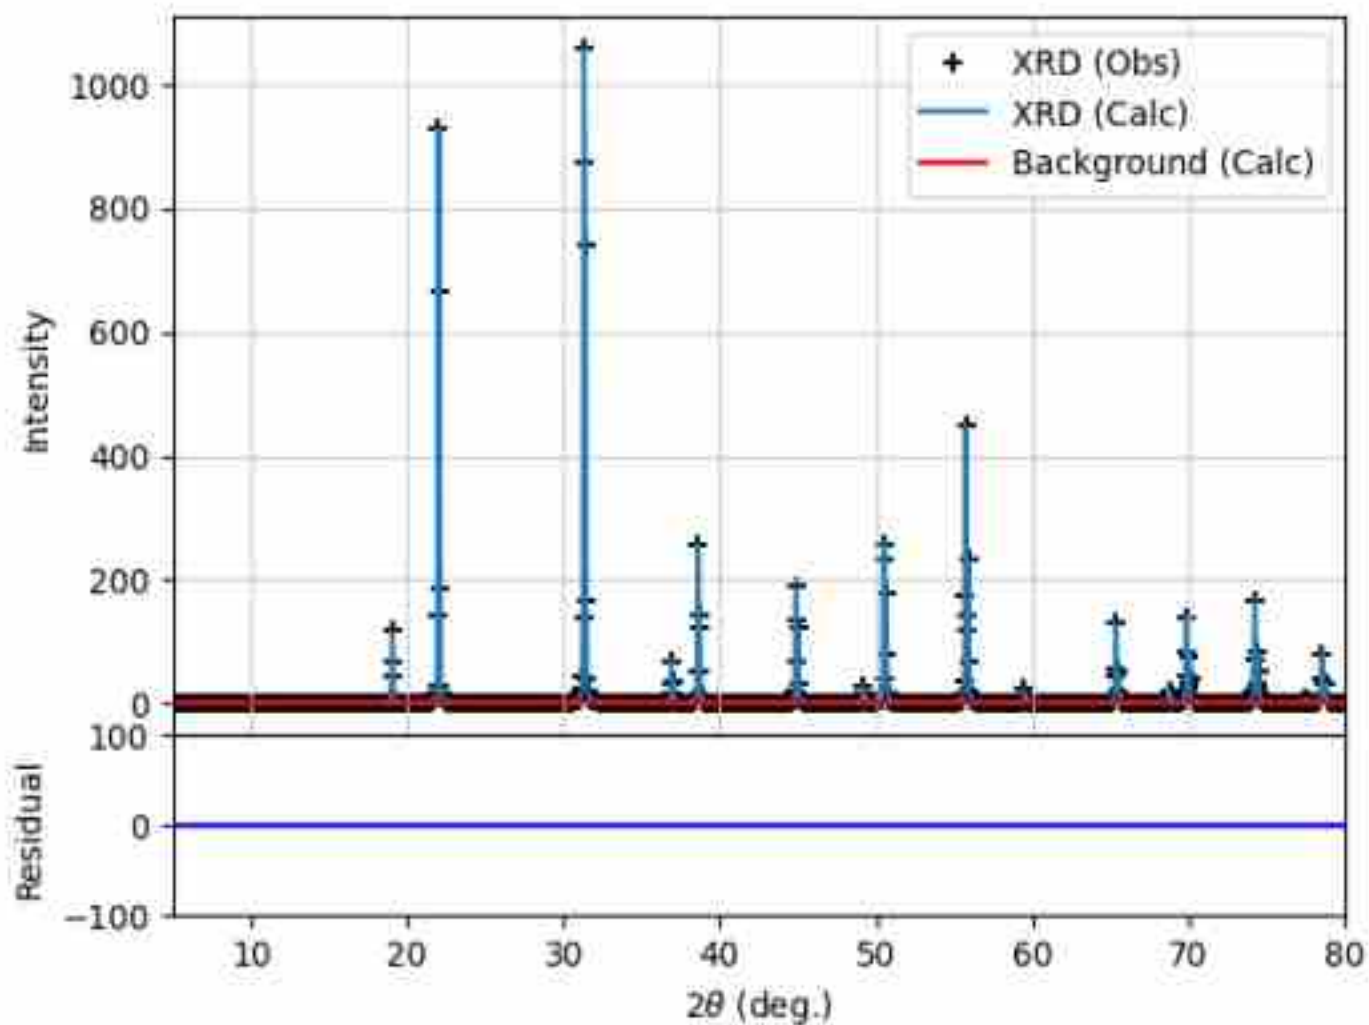

| RMSE before RR | Rwp     | RMSE after RR |
|----------------|---------|---------------|
| 0.001          | 0.01278 | 0.00072       |

# Ac1Sn1Hg2

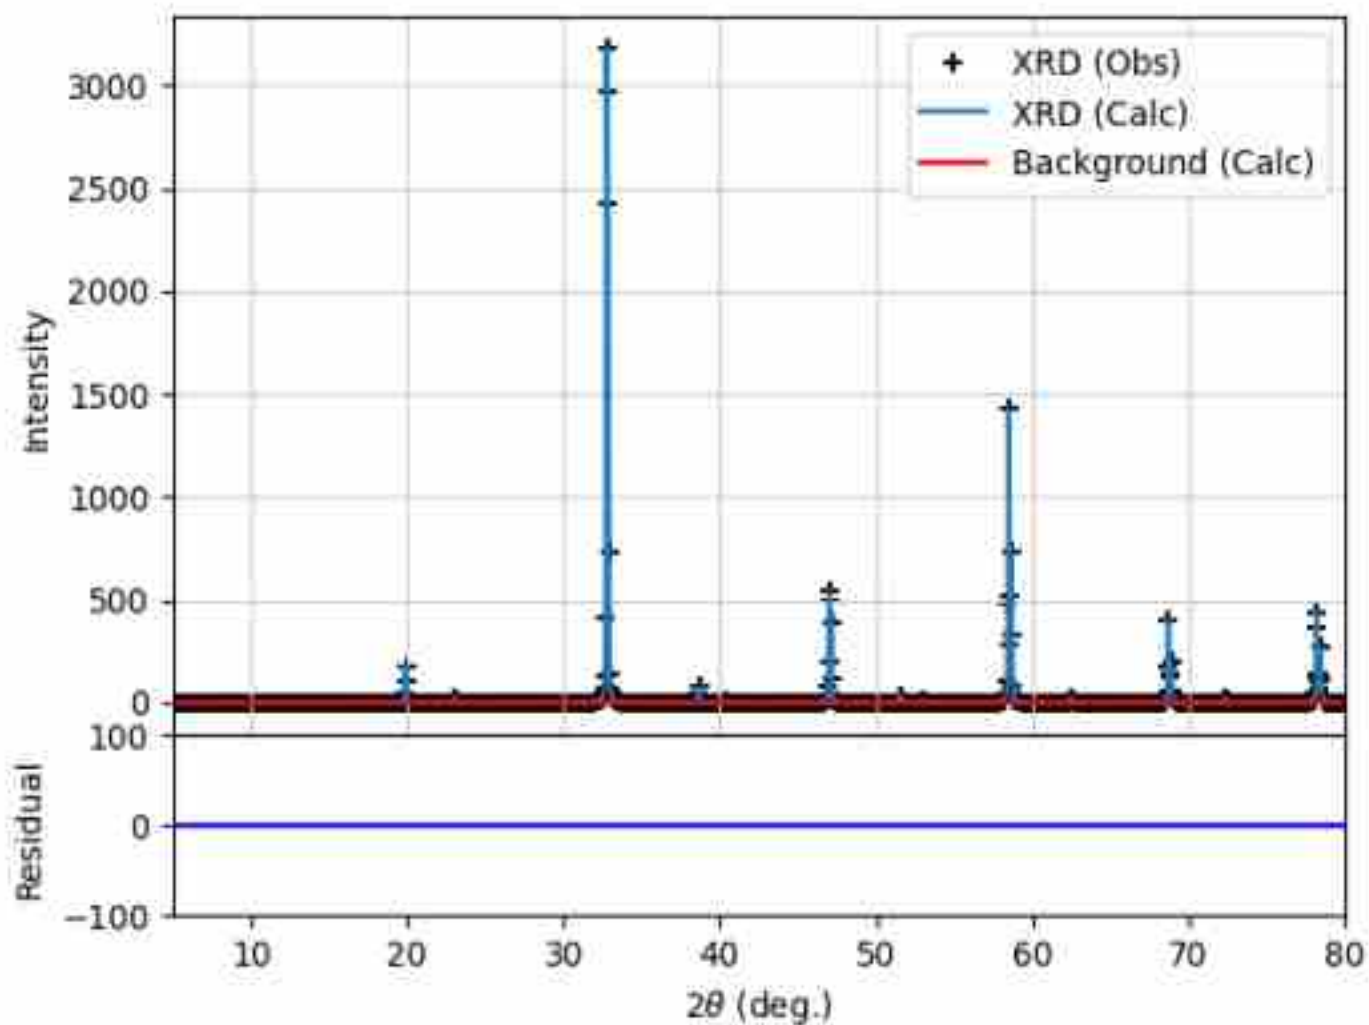

| RMSE before RR | Rwp     | RMSE after RR |
|----------------|---------|---------------|
| 0.001          | 0.00487 | 0.00045       |

# Ac1Yb1Au2

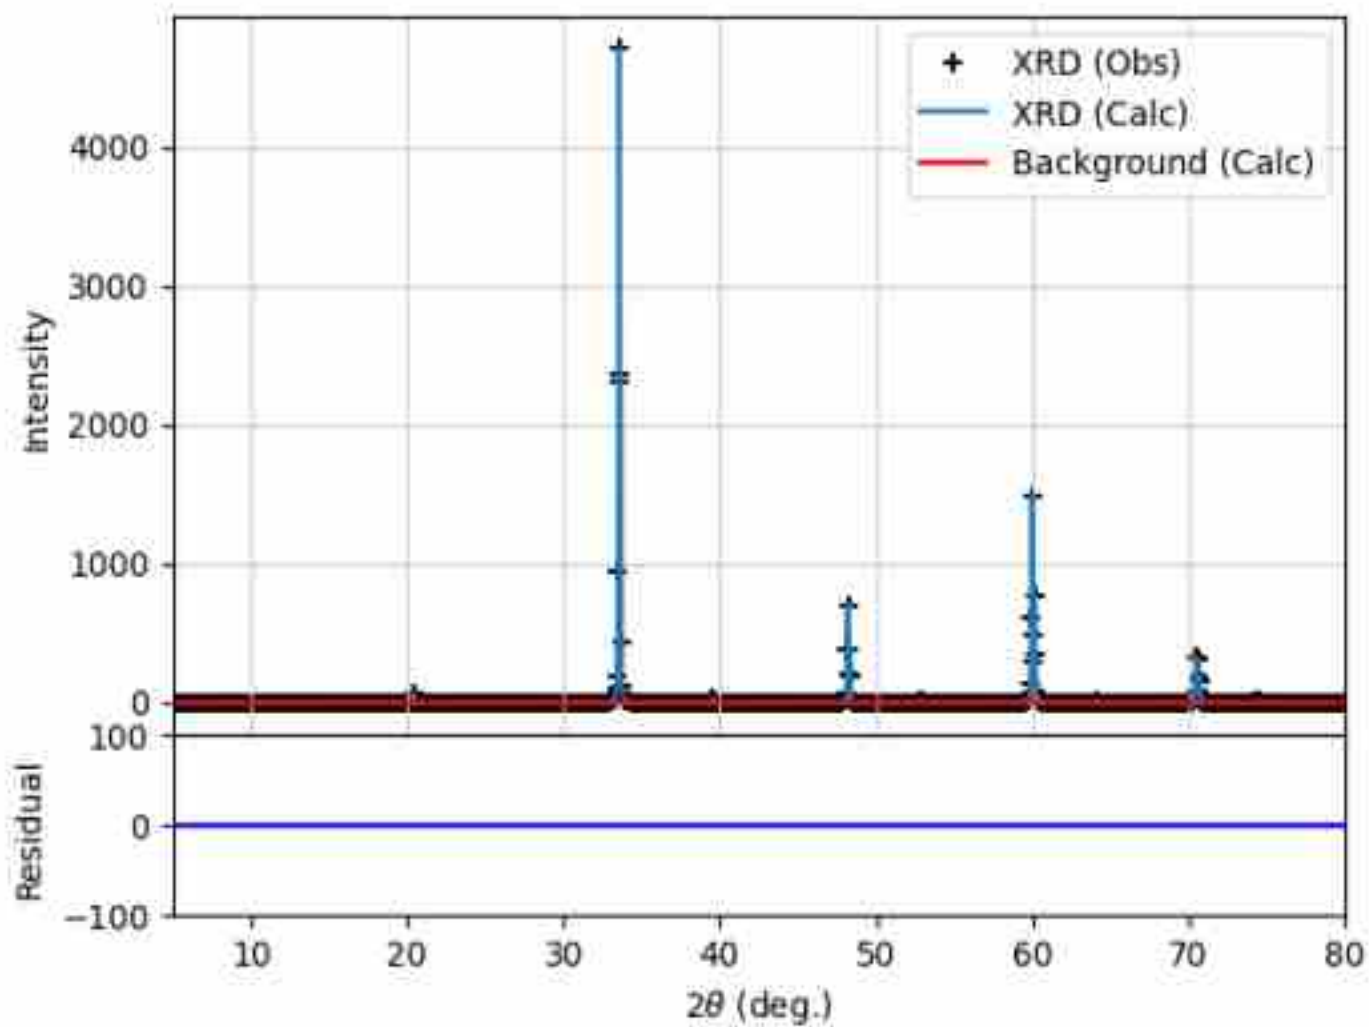

| RMSE before RR | Rwp     | RMSE after RR |
|----------------|---------|---------------|
| 0.001          | 0.00451 | 0.00012       |



# Ac1Yb1Ti2

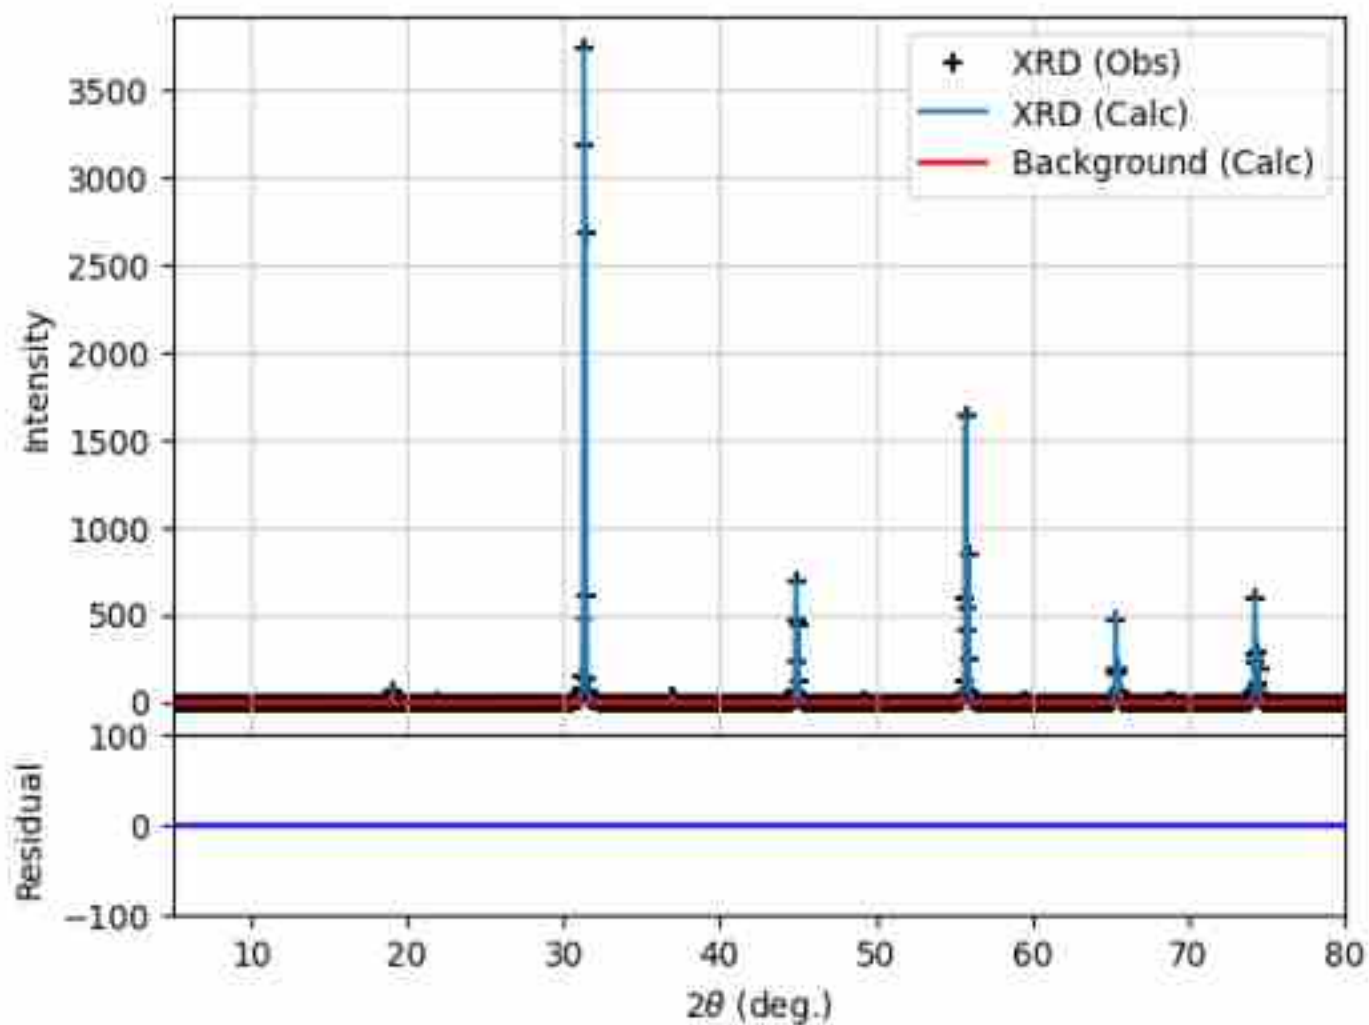

| RMSE before RR | Rwp     | RMSE after RR |
|----------------|---------|---------------|
| 0.001          | 0.15365 | 0.00142       |

# Ag1Cl1

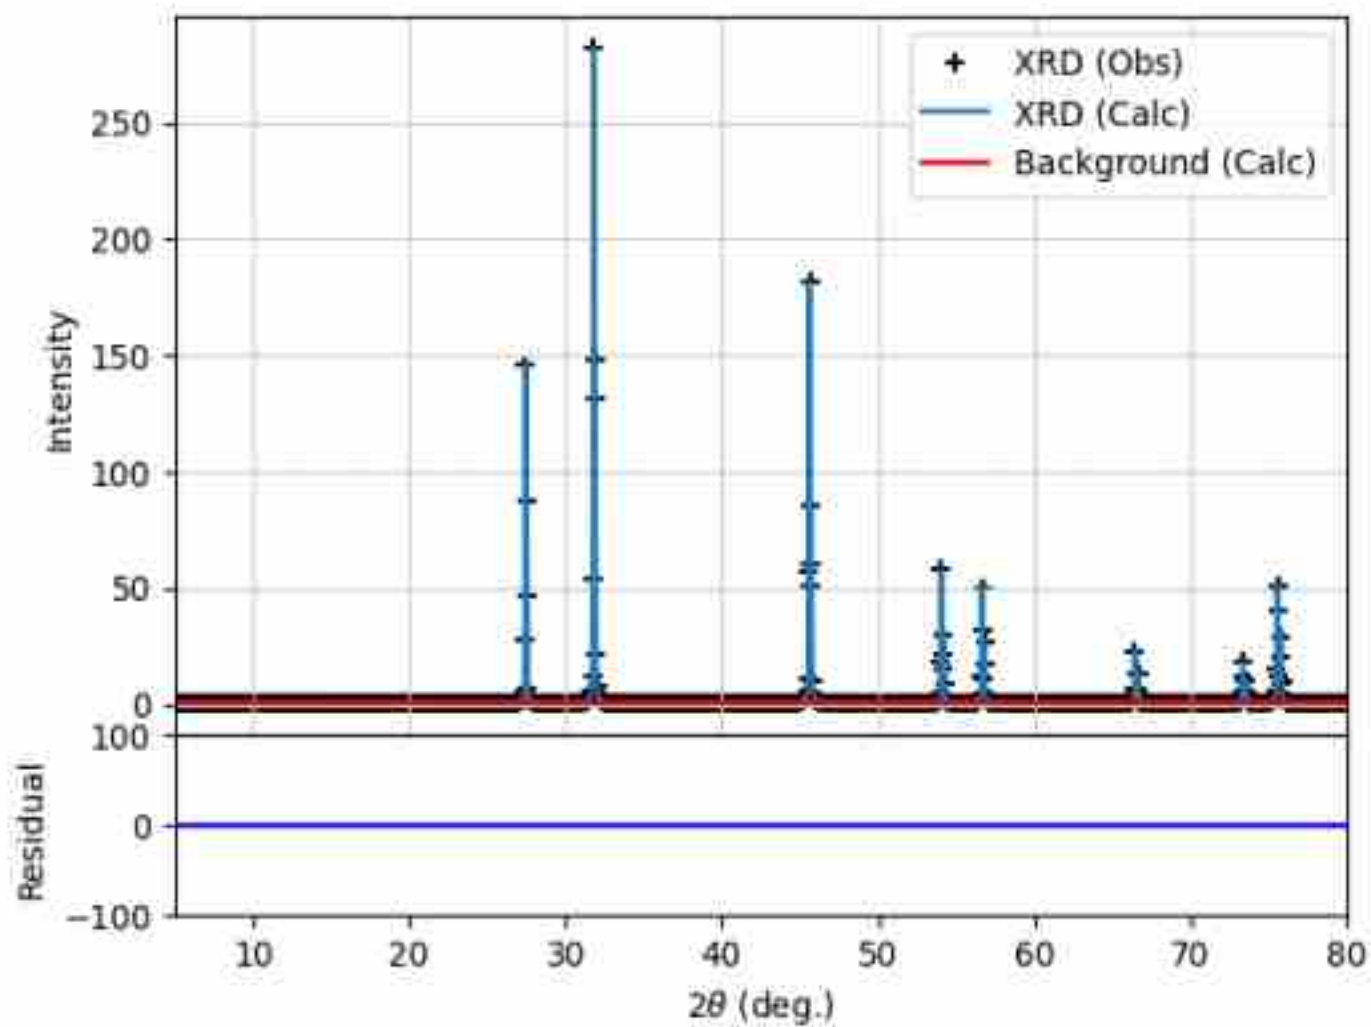

| RMSE before RR | Rwp     | RMSE after RR |
|----------------|---------|---------------|
| 0.001          | 0.00372 | 0.00096       |

# Ag1Pt1

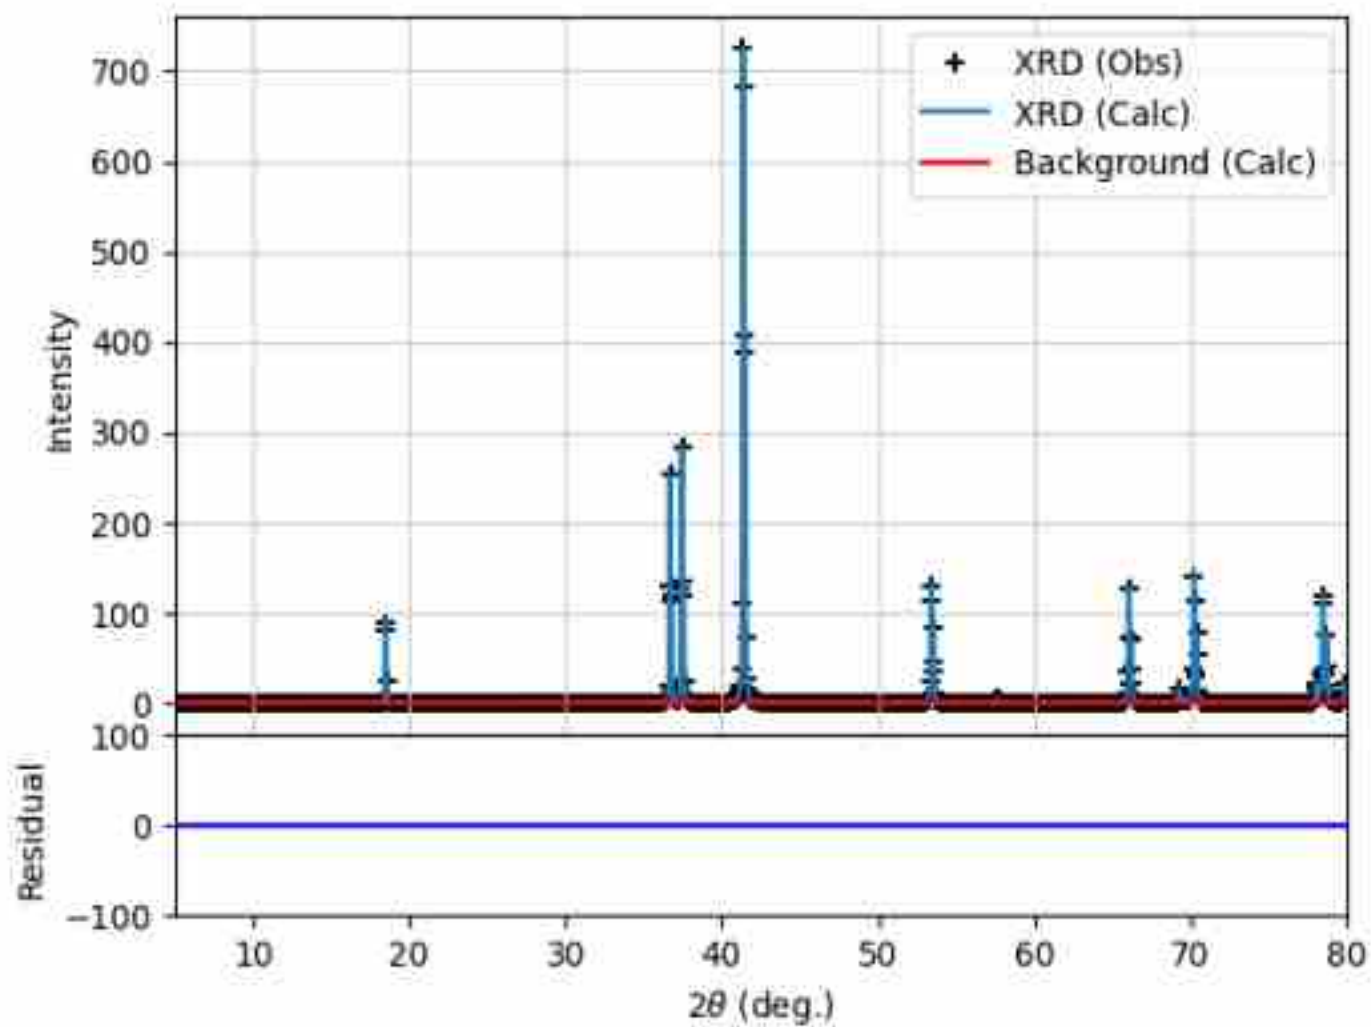

| RMSE before RR | Rwp     | RMSE after RR |
|----------------|---------|---------------|
| 0.001          | 0.00857 | 0.00042       |

# Ag<sub>3</sub>Hg<sub>1</sub>

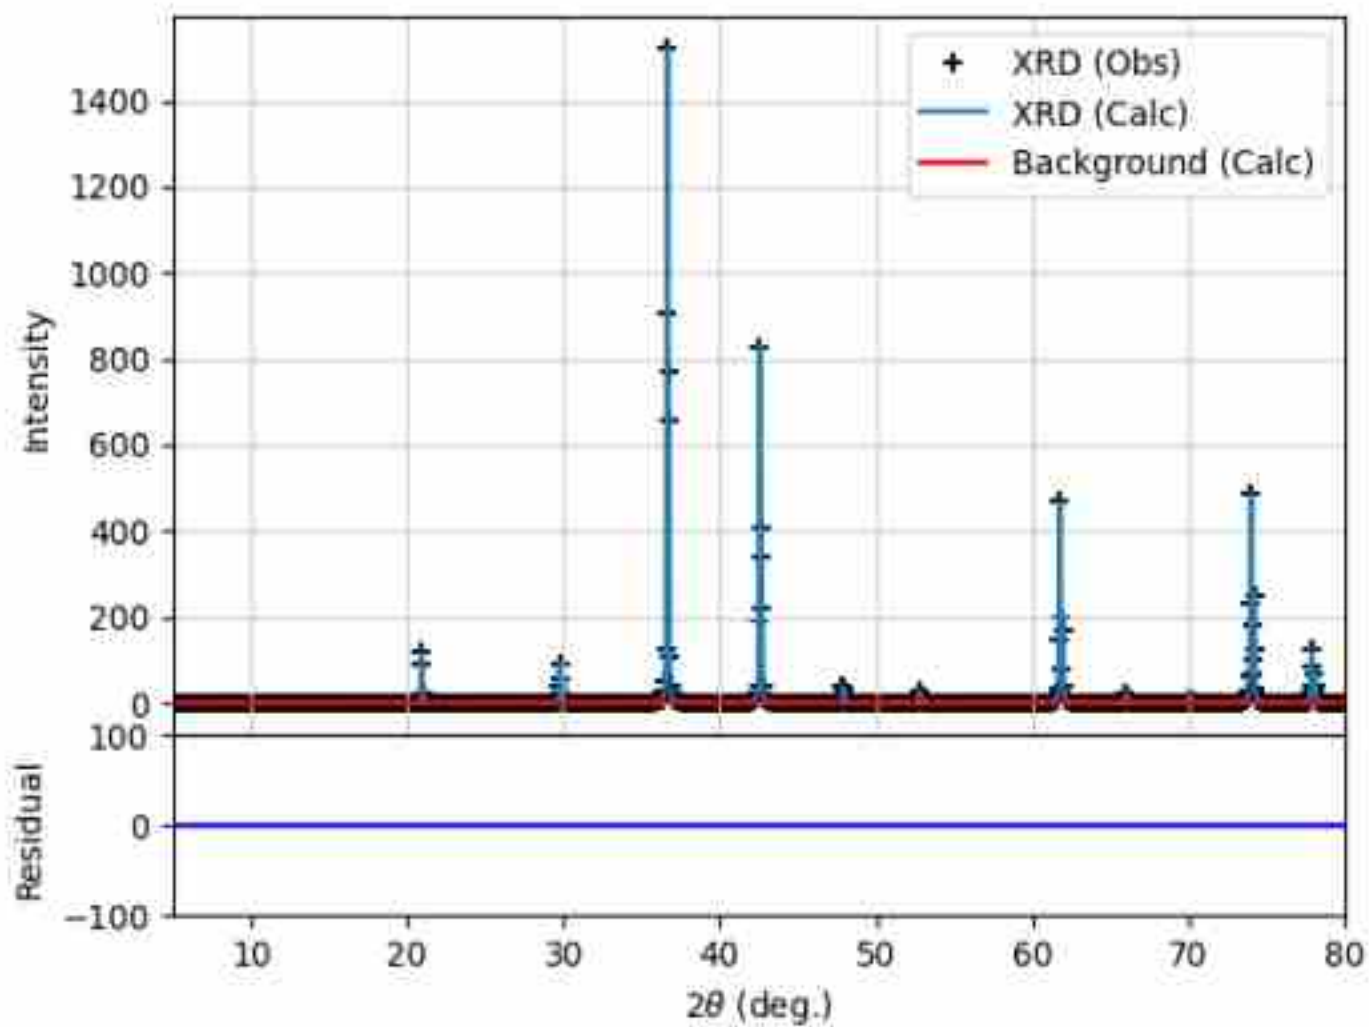

| RMSE before RR | Rwp     | RMSE after RR |
|----------------|---------|---------------|
| 0.001          | 0.00383 | 0.00038       |

# Al1Cr1Co2

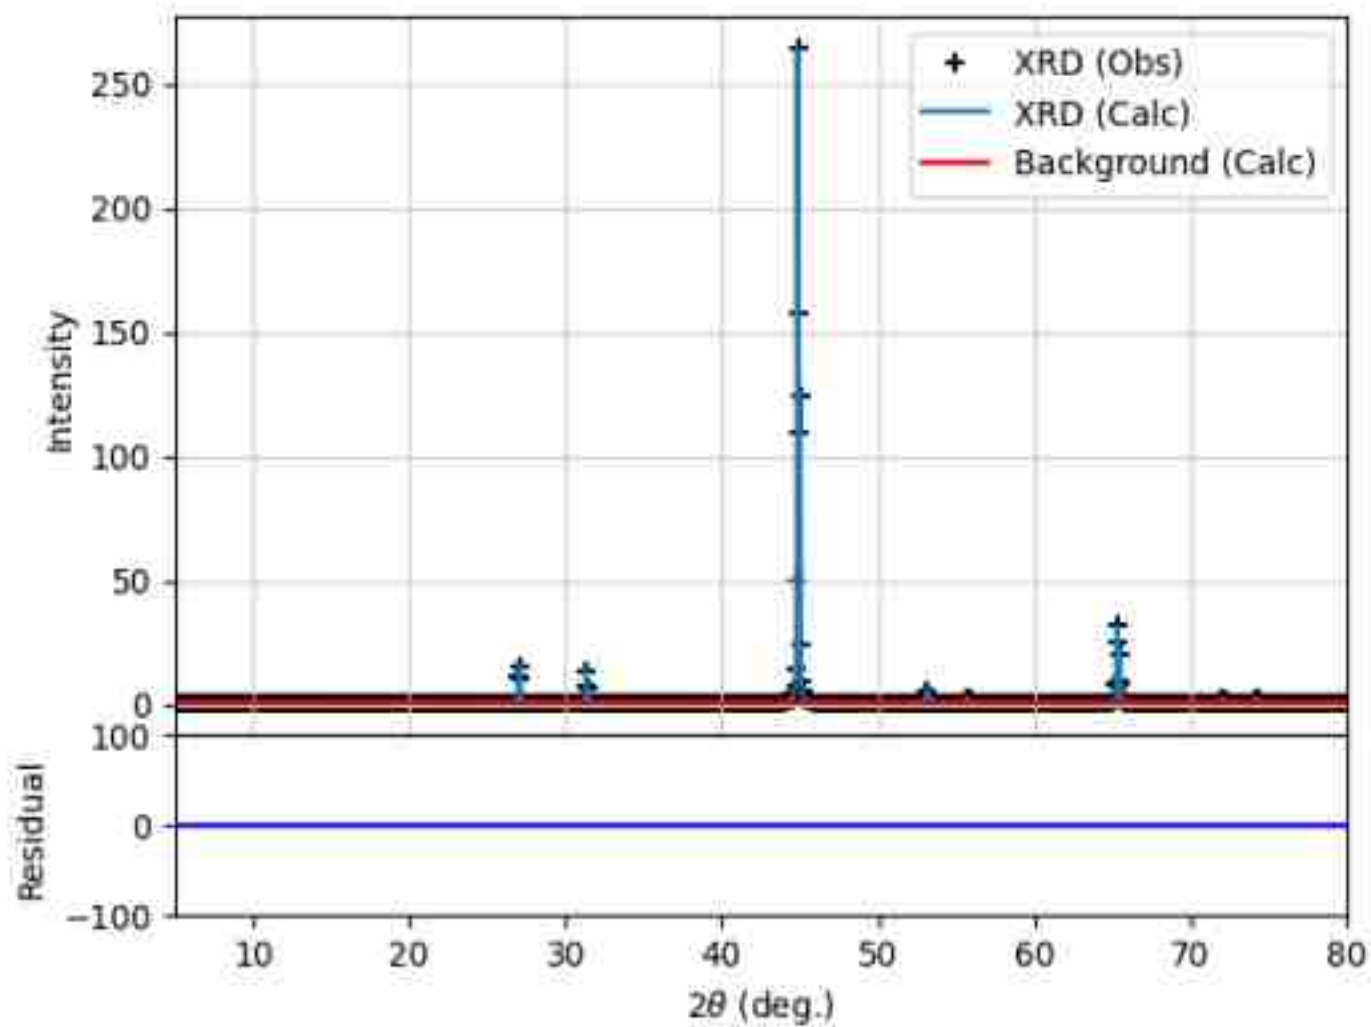

| RMSE before RR | Rwp    | RMSE after RR |
|----------------|--------|---------------|
| 0.001          | 0.0021 | 0.00075       |

# Al1Cu1Au2

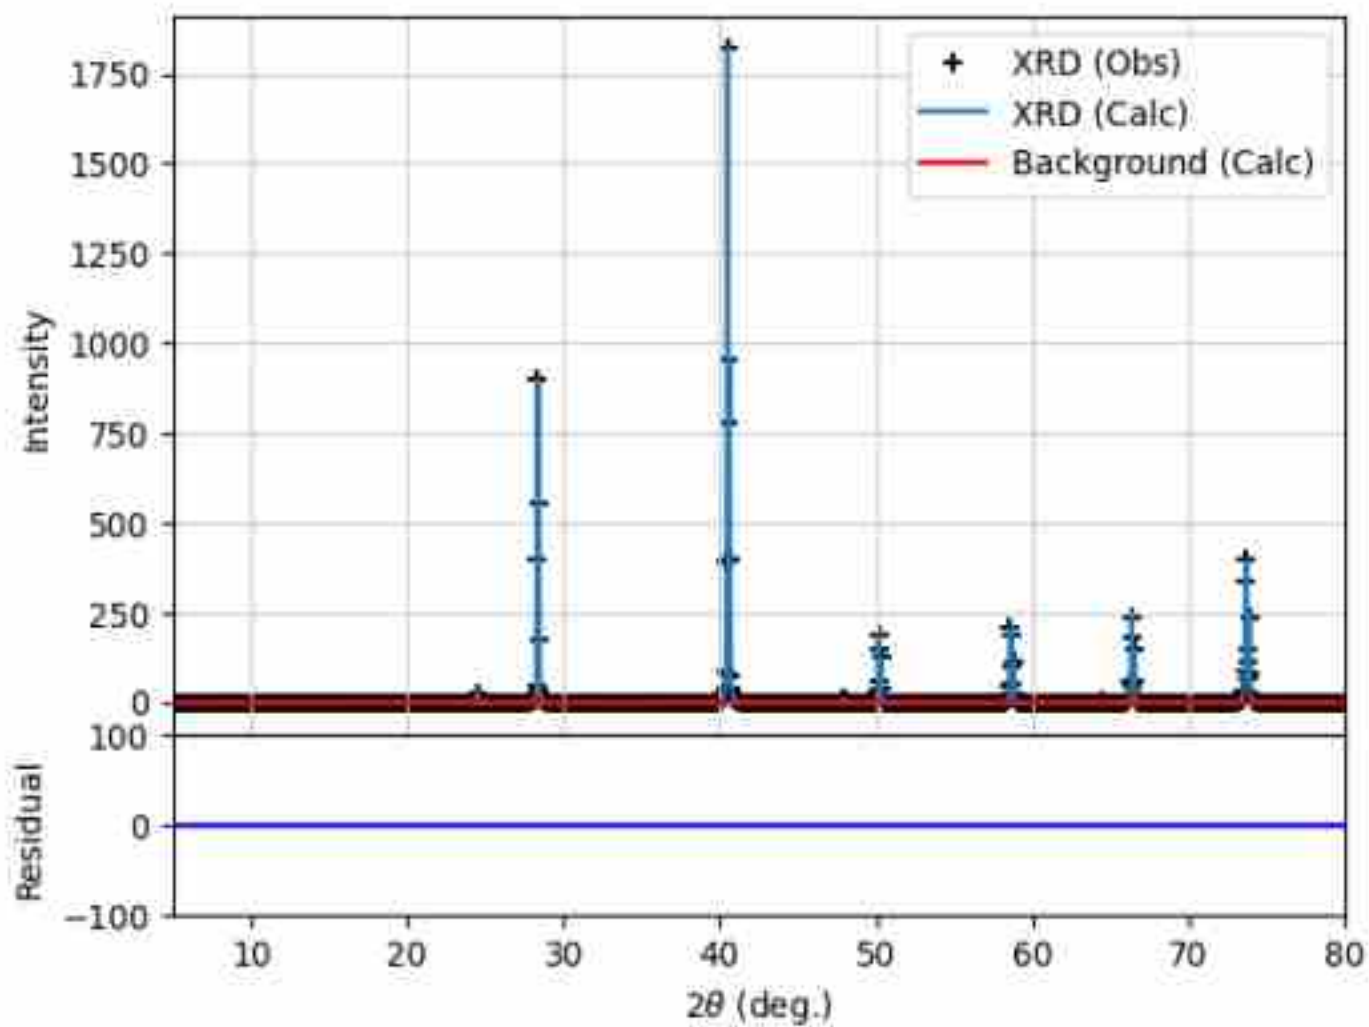

| RMSE before RR | Rwp     | RMSE after RR |
|----------------|---------|---------------|
| 0.001          | 0.00317 | 0.00072       |

# Al1Fe1

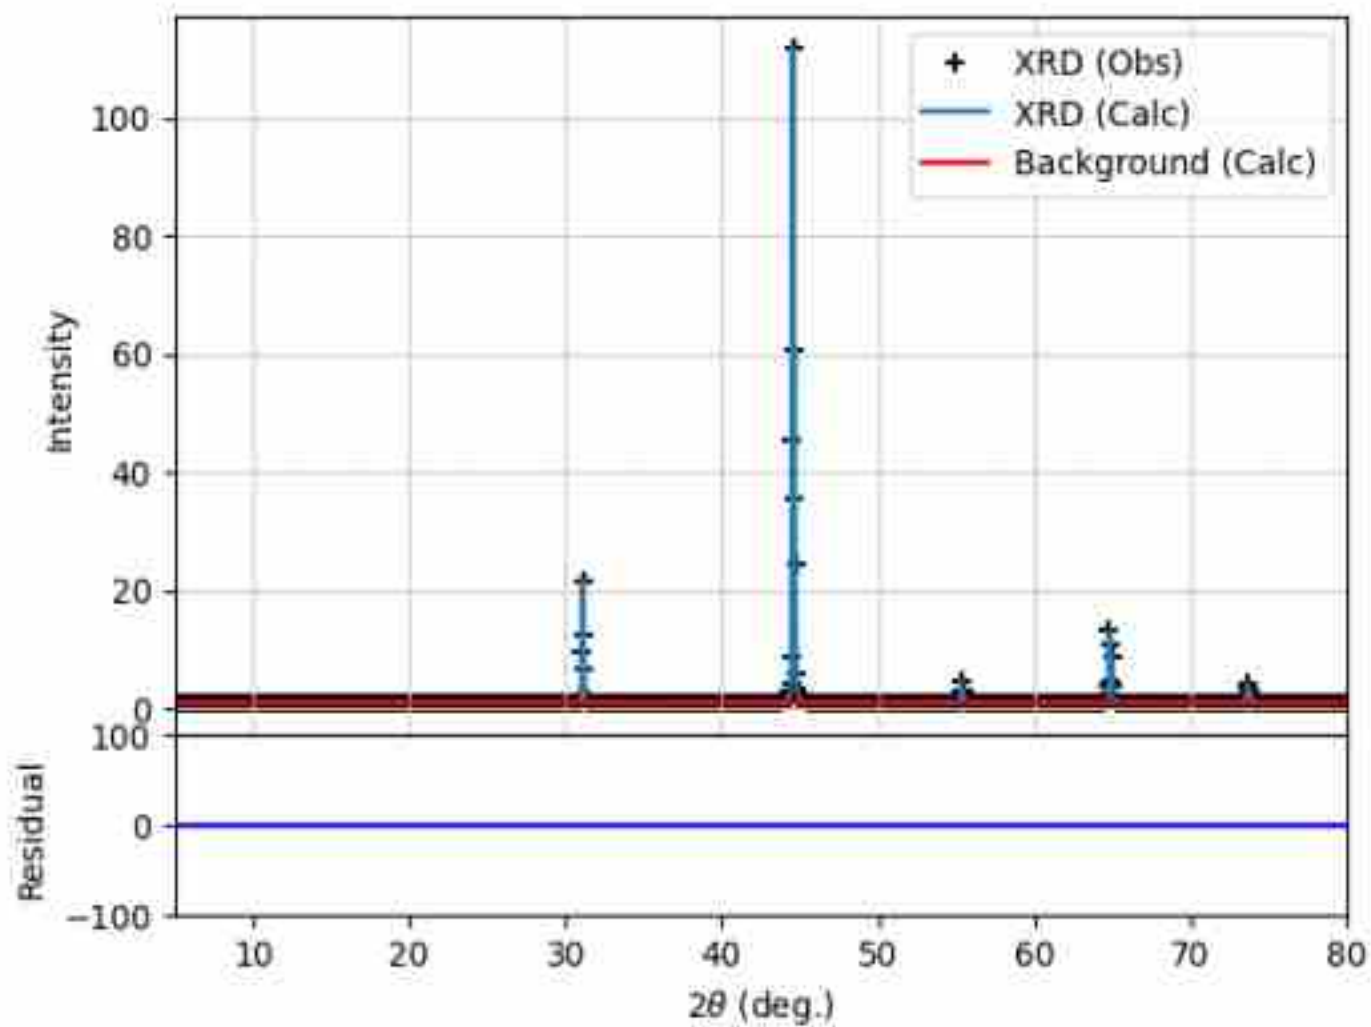

| RMSE before RR | Rwp     | RMSE after RR |
|----------------|---------|---------------|
| 0.001          | 0.00238 | 0.00076       |

# Al<sub>1</sub>Fe<sub>3</sub>

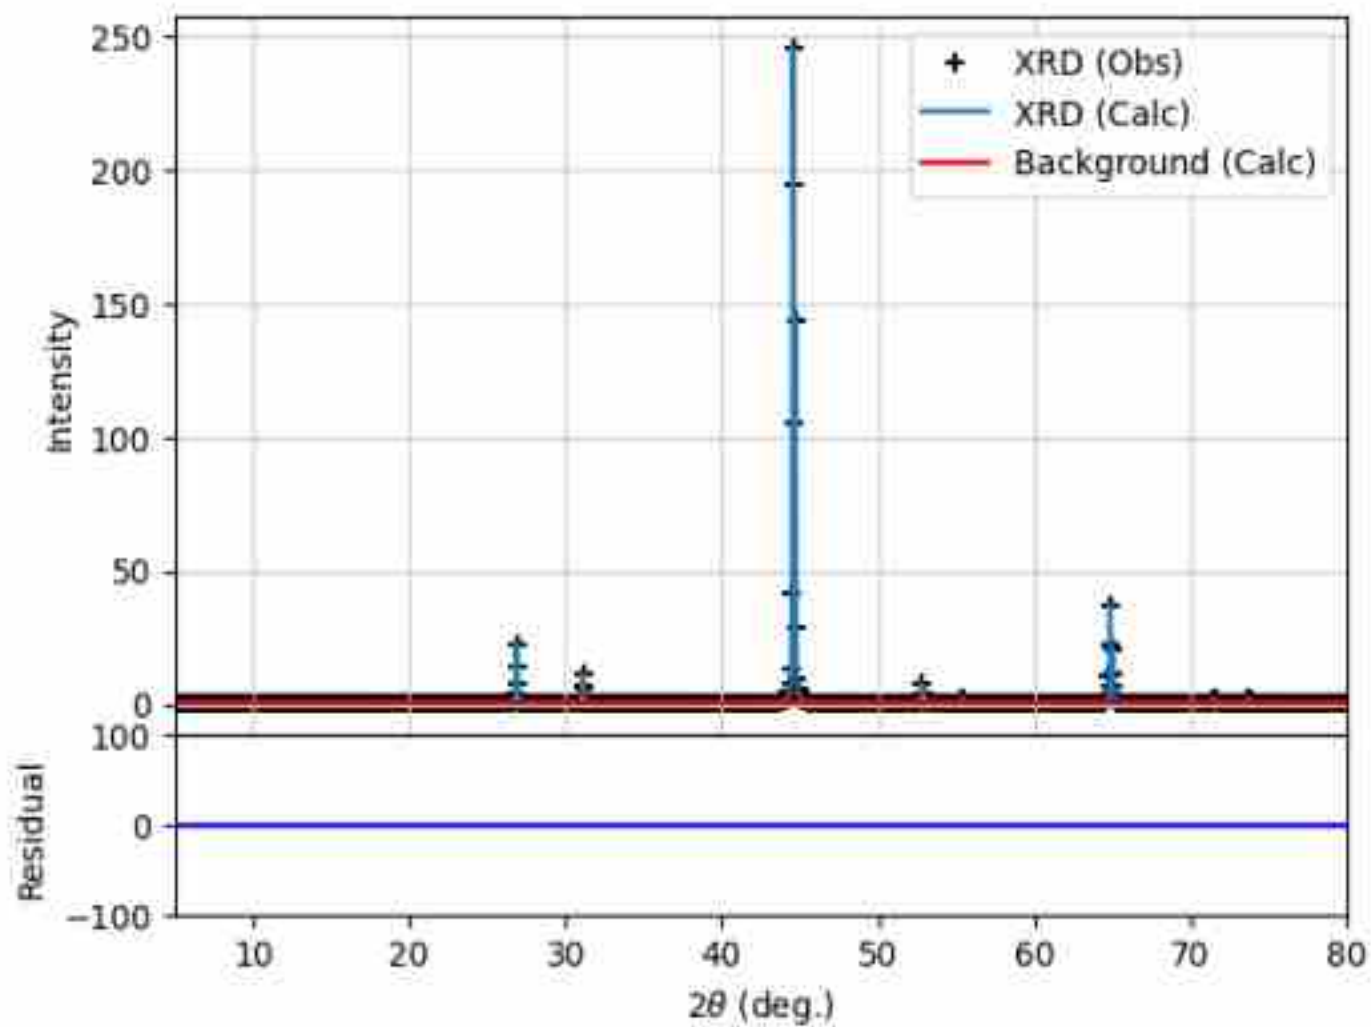

| RMSE before RR | Rwp     | RMSE after RR |
|----------------|---------|---------------|
| 0.001          | 0.00196 | 0.00026       |



# Al1Ga1Ni2

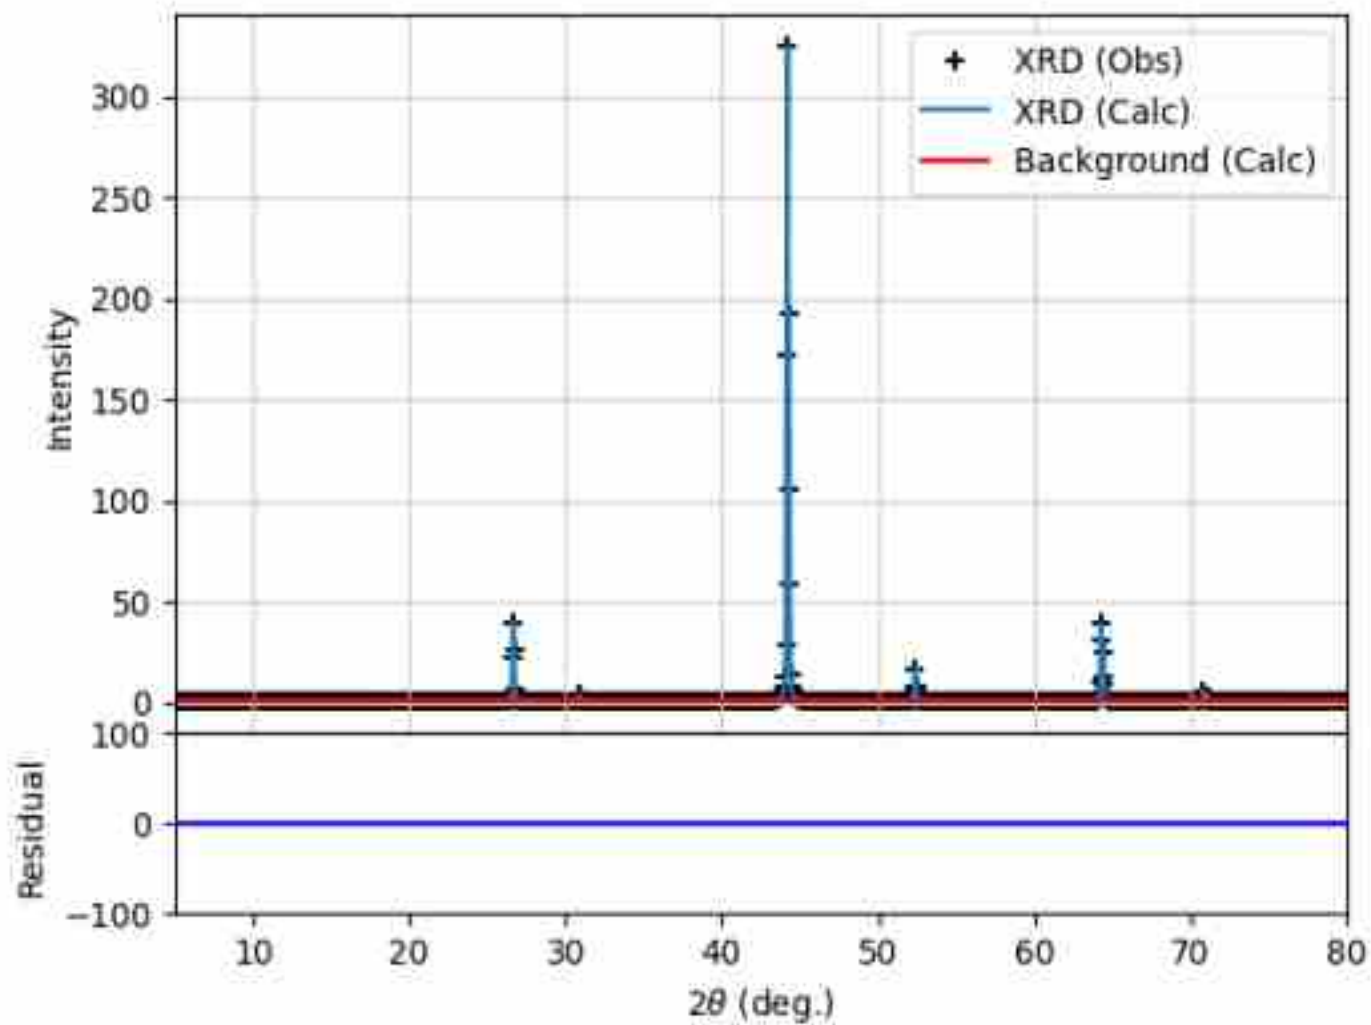

| RMSE before RR | Rwp     | RMSE after RR |
|----------------|---------|---------------|
| 0.001          | 0.00883 | 0.00076       |

# AlIr1

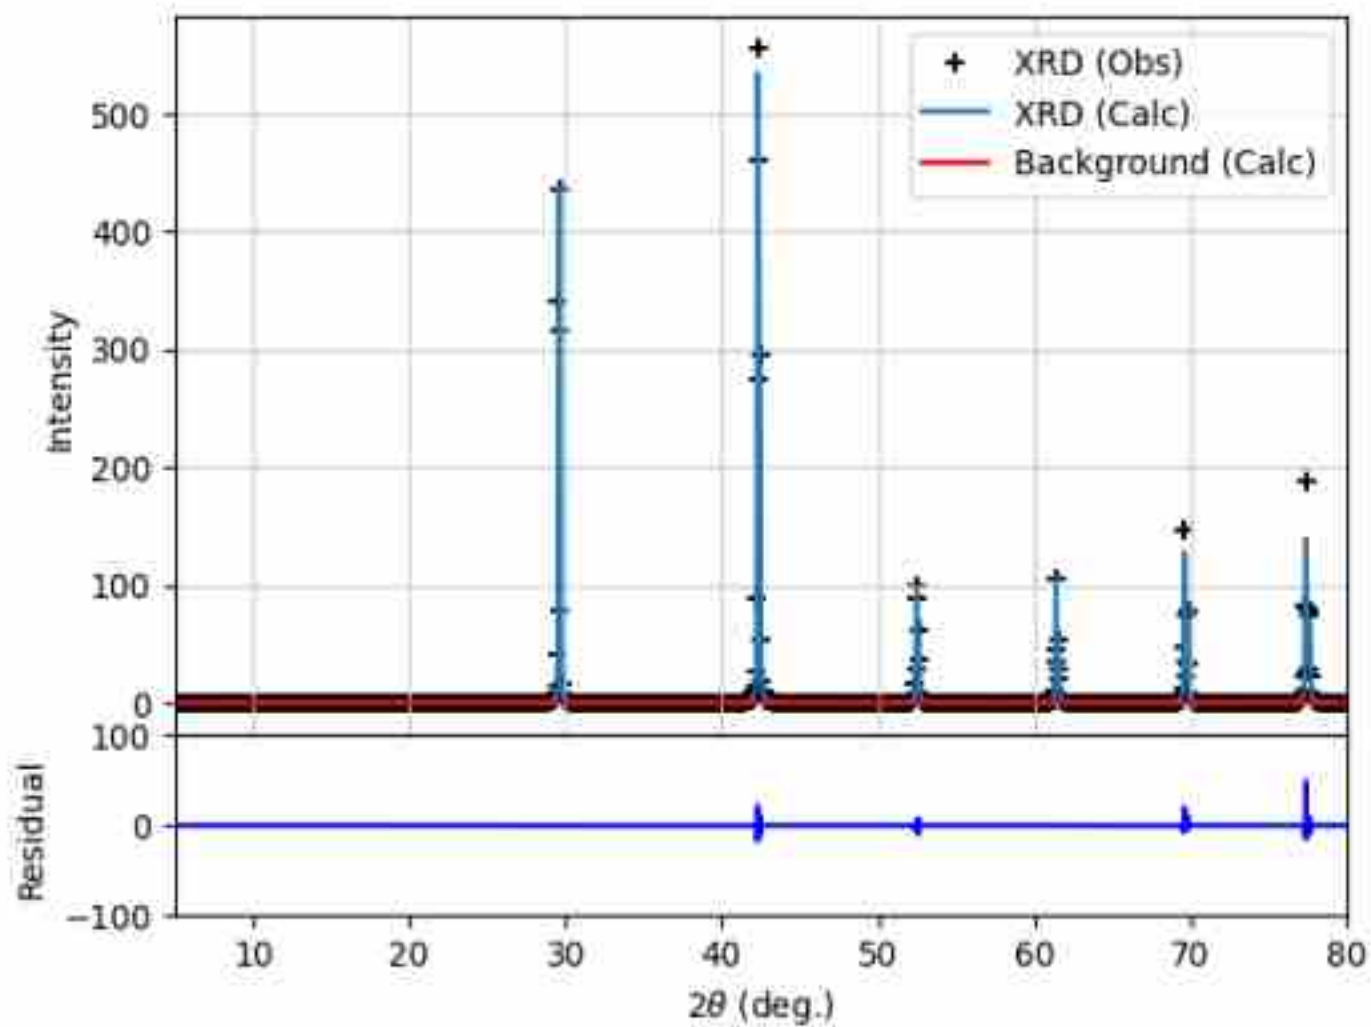

| RMSE before RR | Rwp    | RMSE after RR |
|----------------|--------|---------------|
| 0.001          | 9.3576 | 0.00125       |

# Al1Pd3

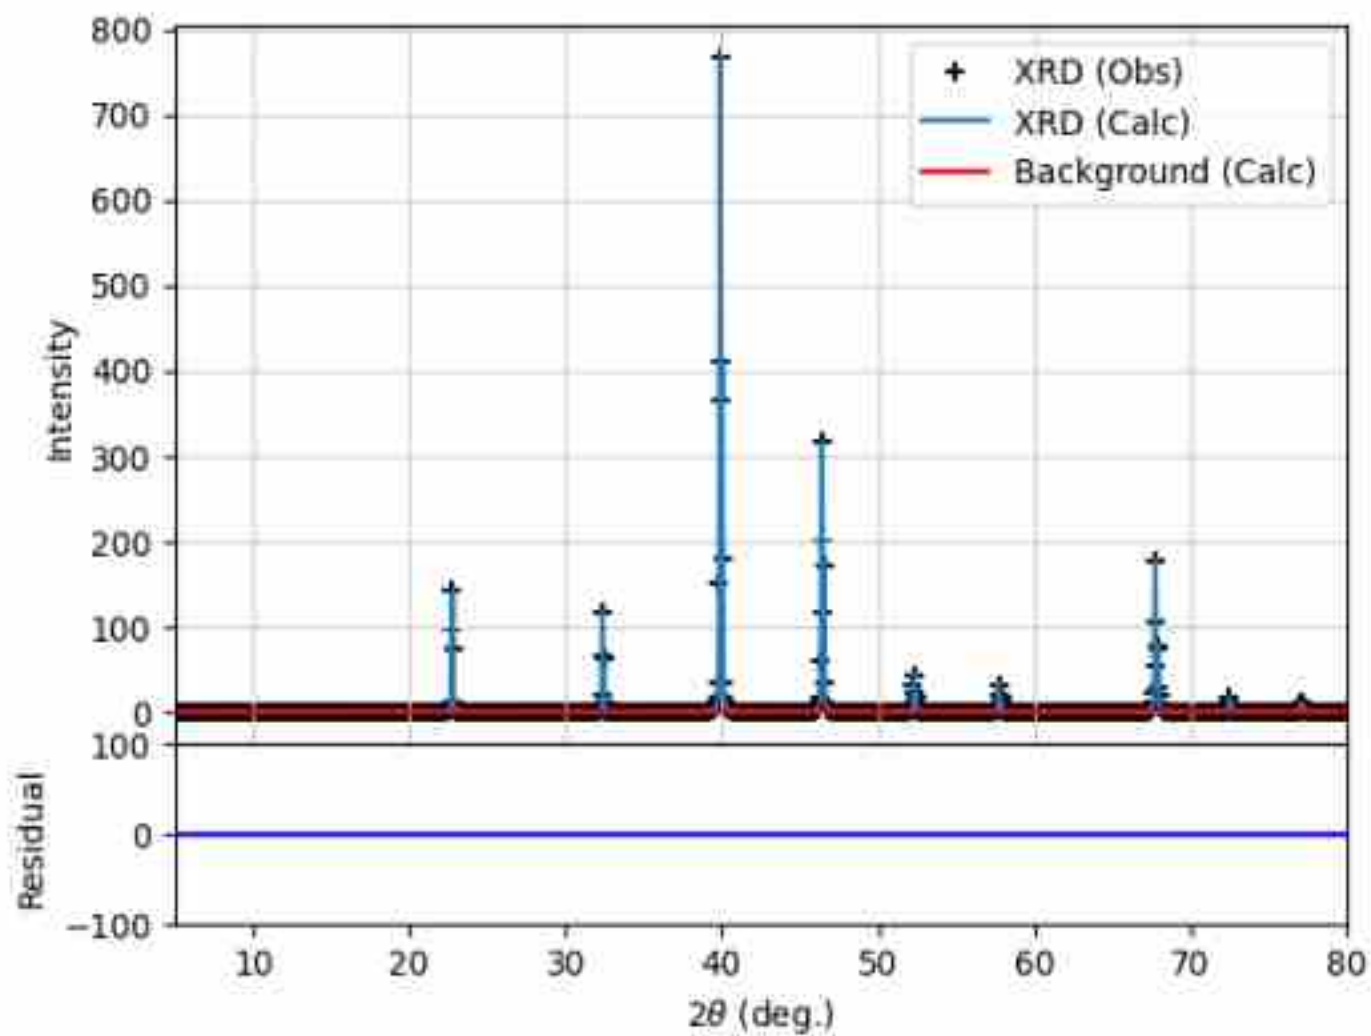

| RMSE before RR | Rwp     | RMSE after RR |
|----------------|---------|---------------|
| 0.001          | 0.01177 | 0.00185       |

# Al1Rh1

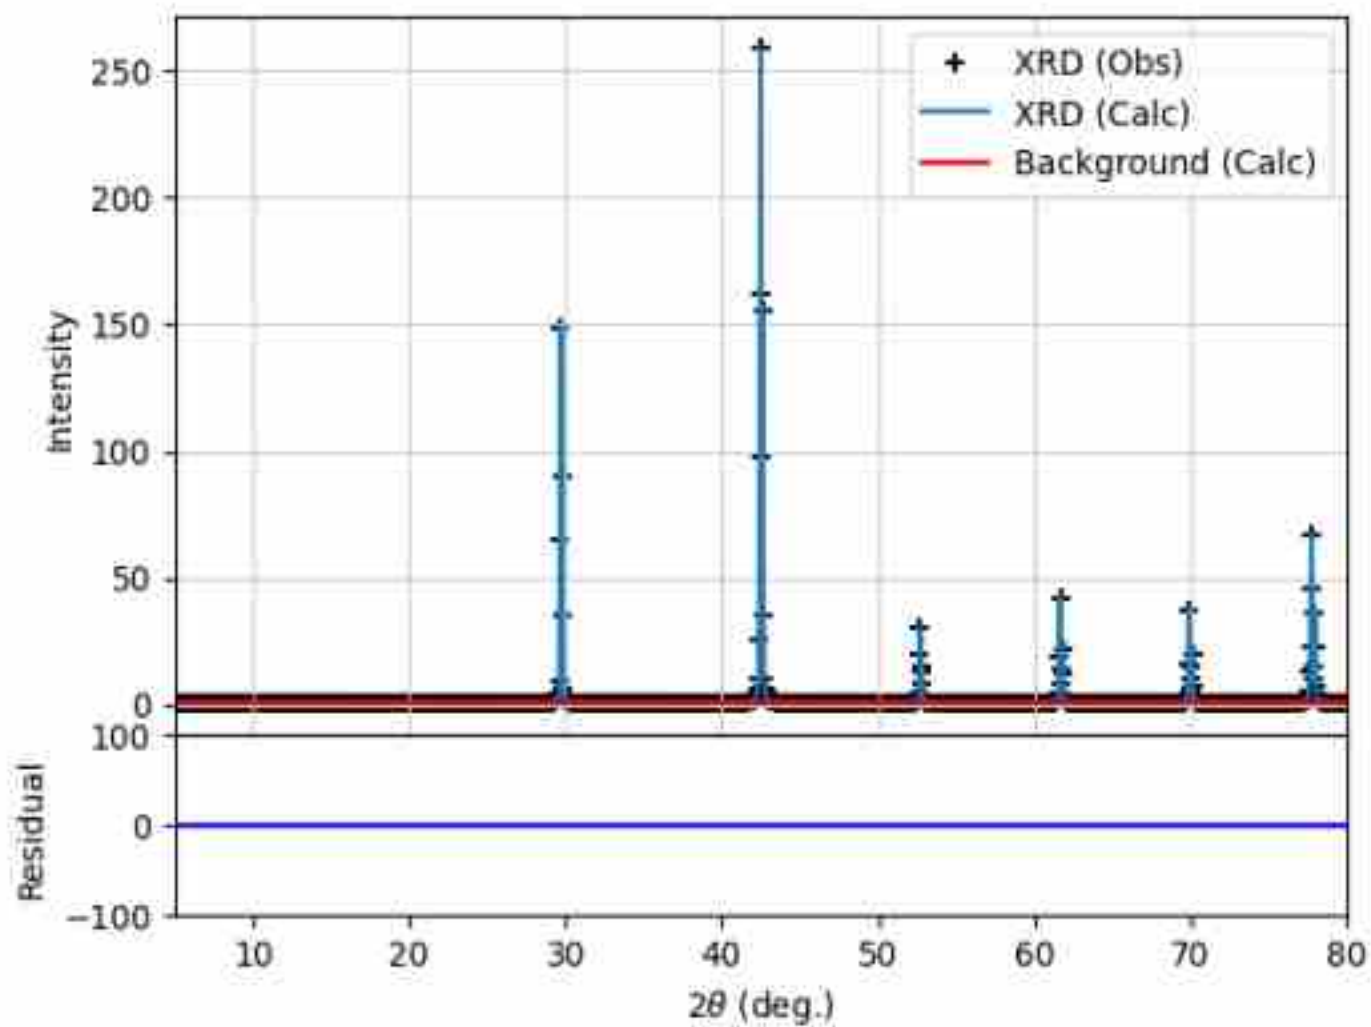

| RMSE before RR | Rwp     | RMSE after RR |
|----------------|---------|---------------|
| 0.001          | 0.02312 | 0.00134       |

# Al1Si1Ru2

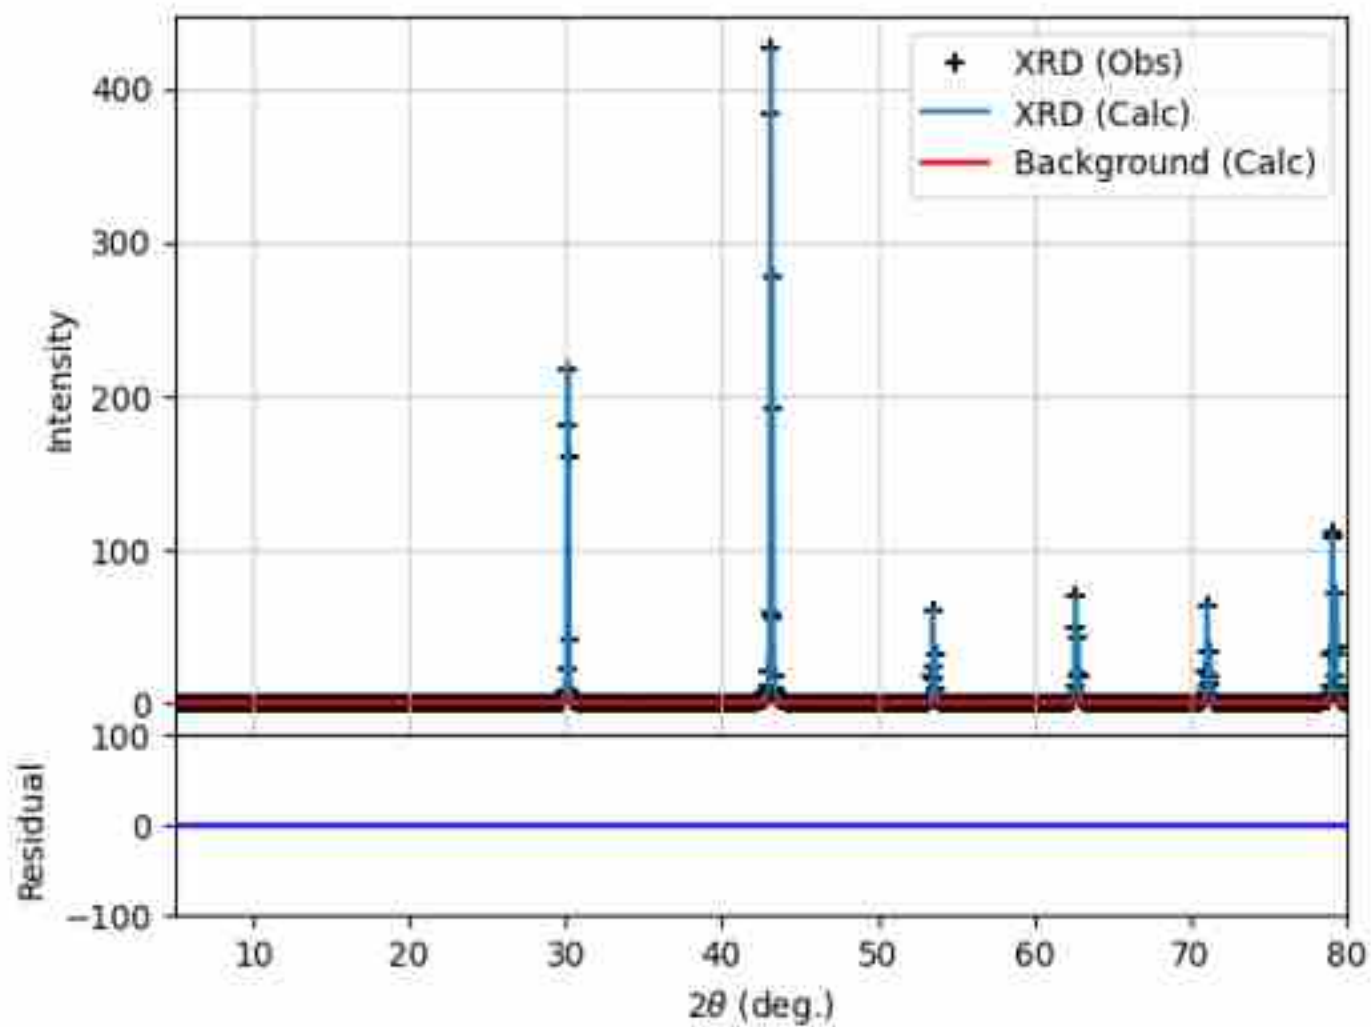

| RMSE before RR | Rwp     | RMSE after RR |
|----------------|---------|---------------|
| 0.001          | 0.00759 | 0.00109       |

# A11V1Co2

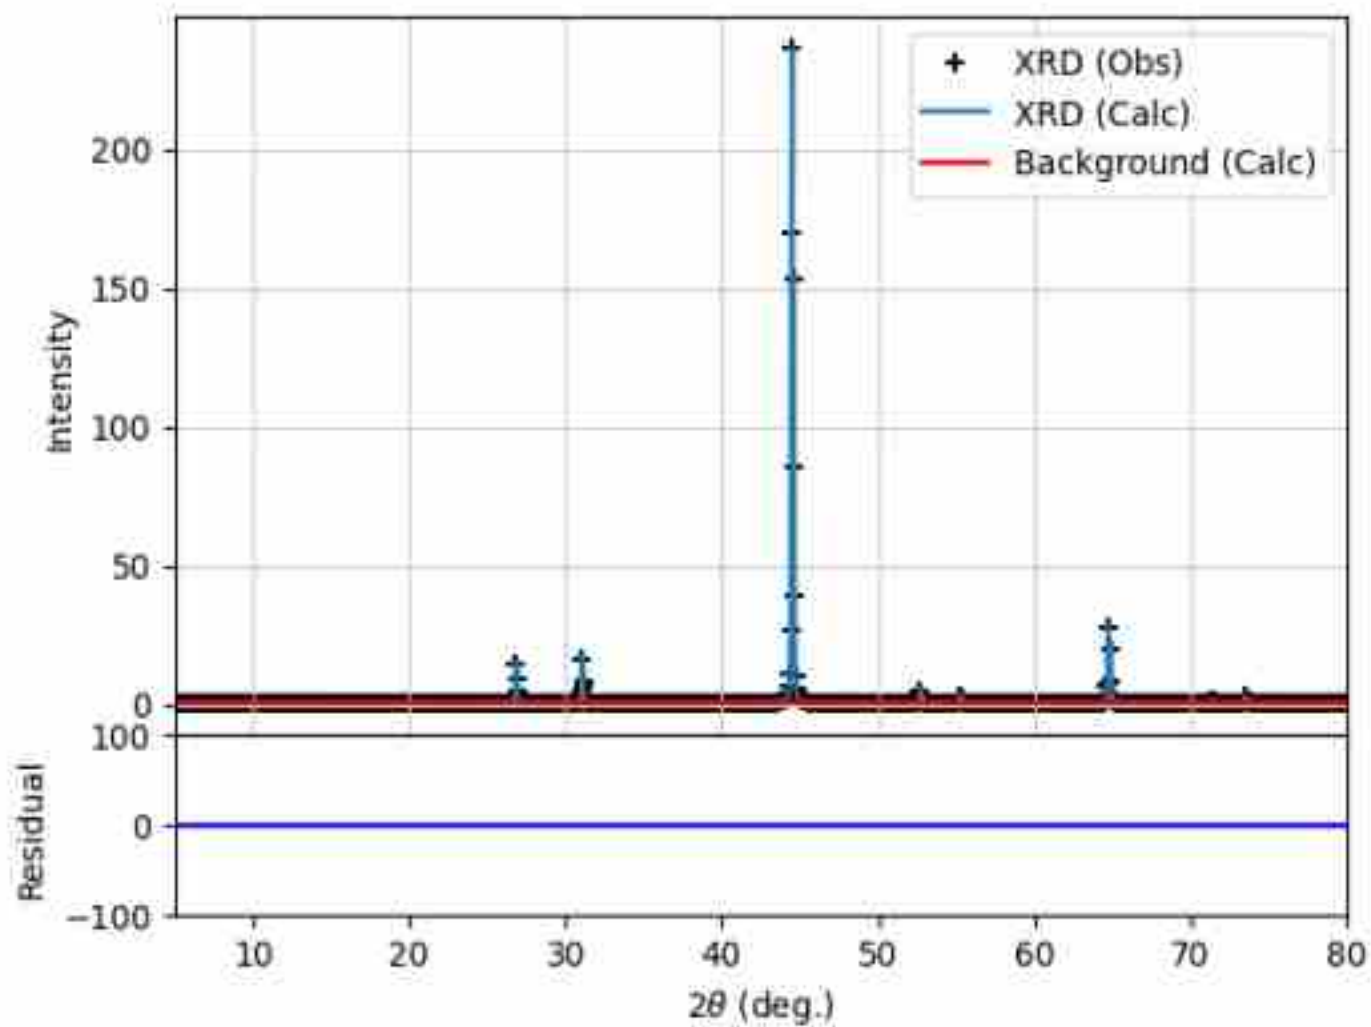

| RMSE before RR | Rwp    | RMSE after RR |
|----------------|--------|---------------|
| 0.001          | 0.0006 | 0.0001        |

# Al1V1Fe1Co1

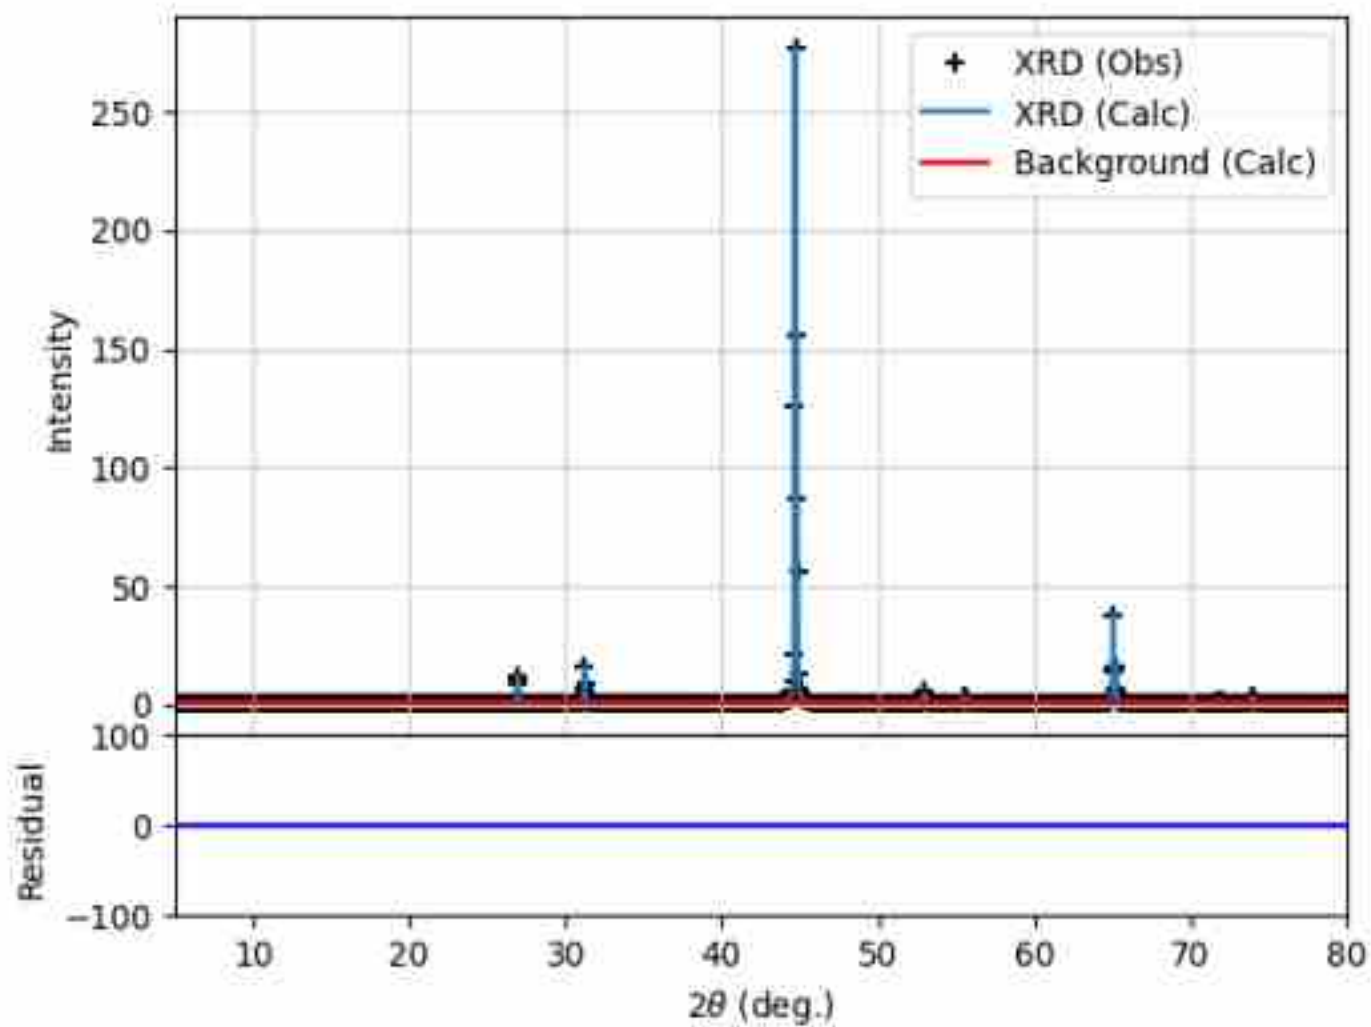

| RMSE before RR | Rwp   | RMSE after RR |
|----------------|-------|---------------|
| 0.001          | 1e-05 | 3e-05         |

# Al<sub>2</sub>FeNi

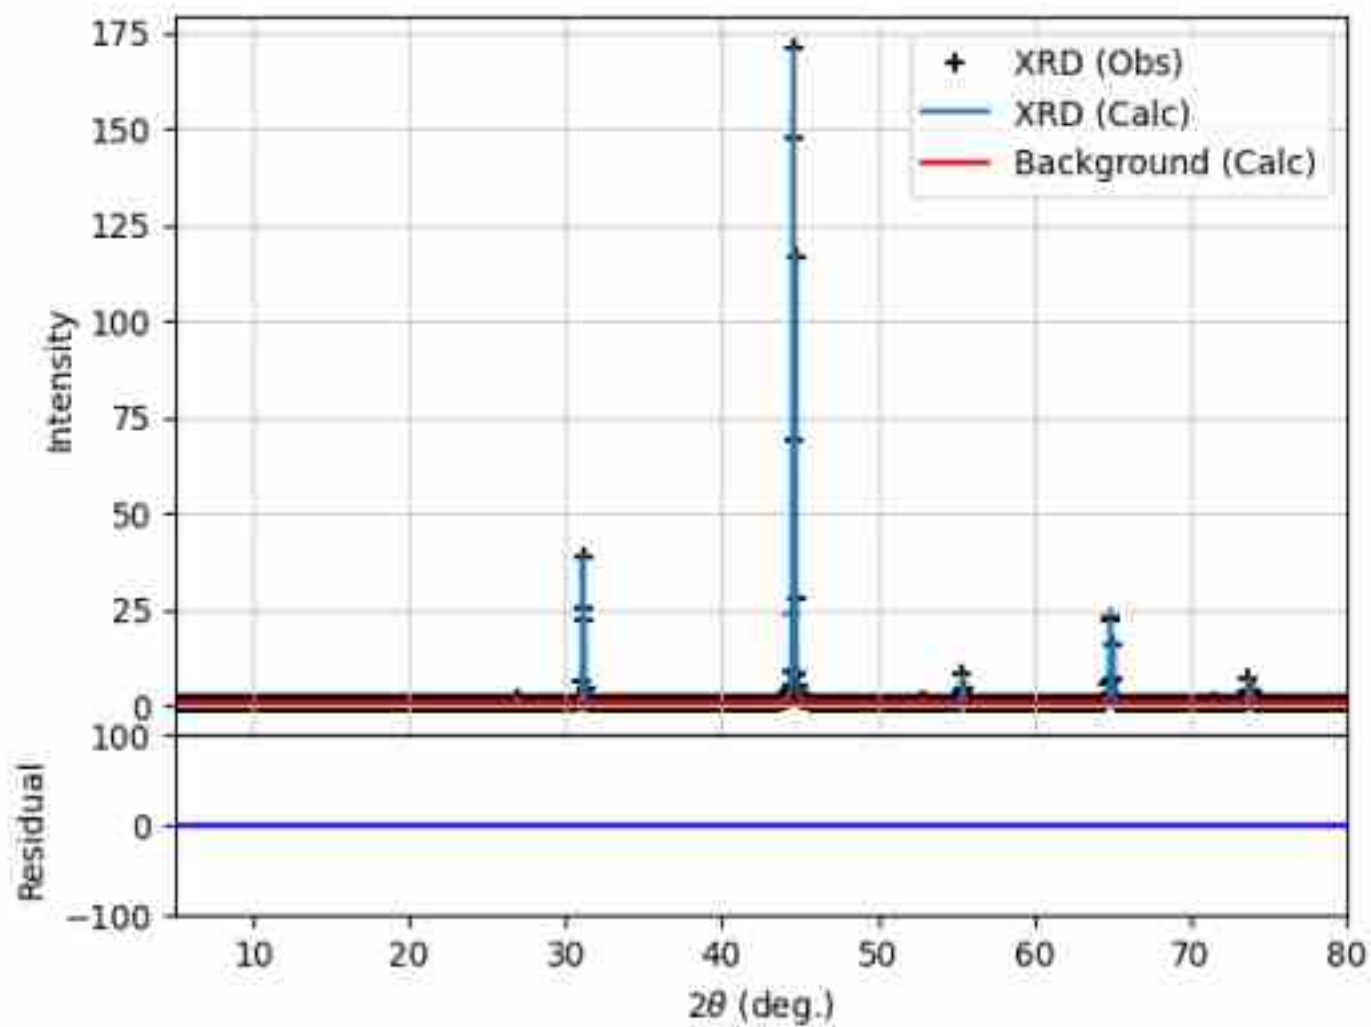

| RMSE before RR | Rwp     | RMSE after RR |
|----------------|---------|---------------|
| 0.001          | 0.00227 | 0.00037       |



# Al<sub>2</sub>Fe<sub>1</sub>Rh<sub>1</sub>

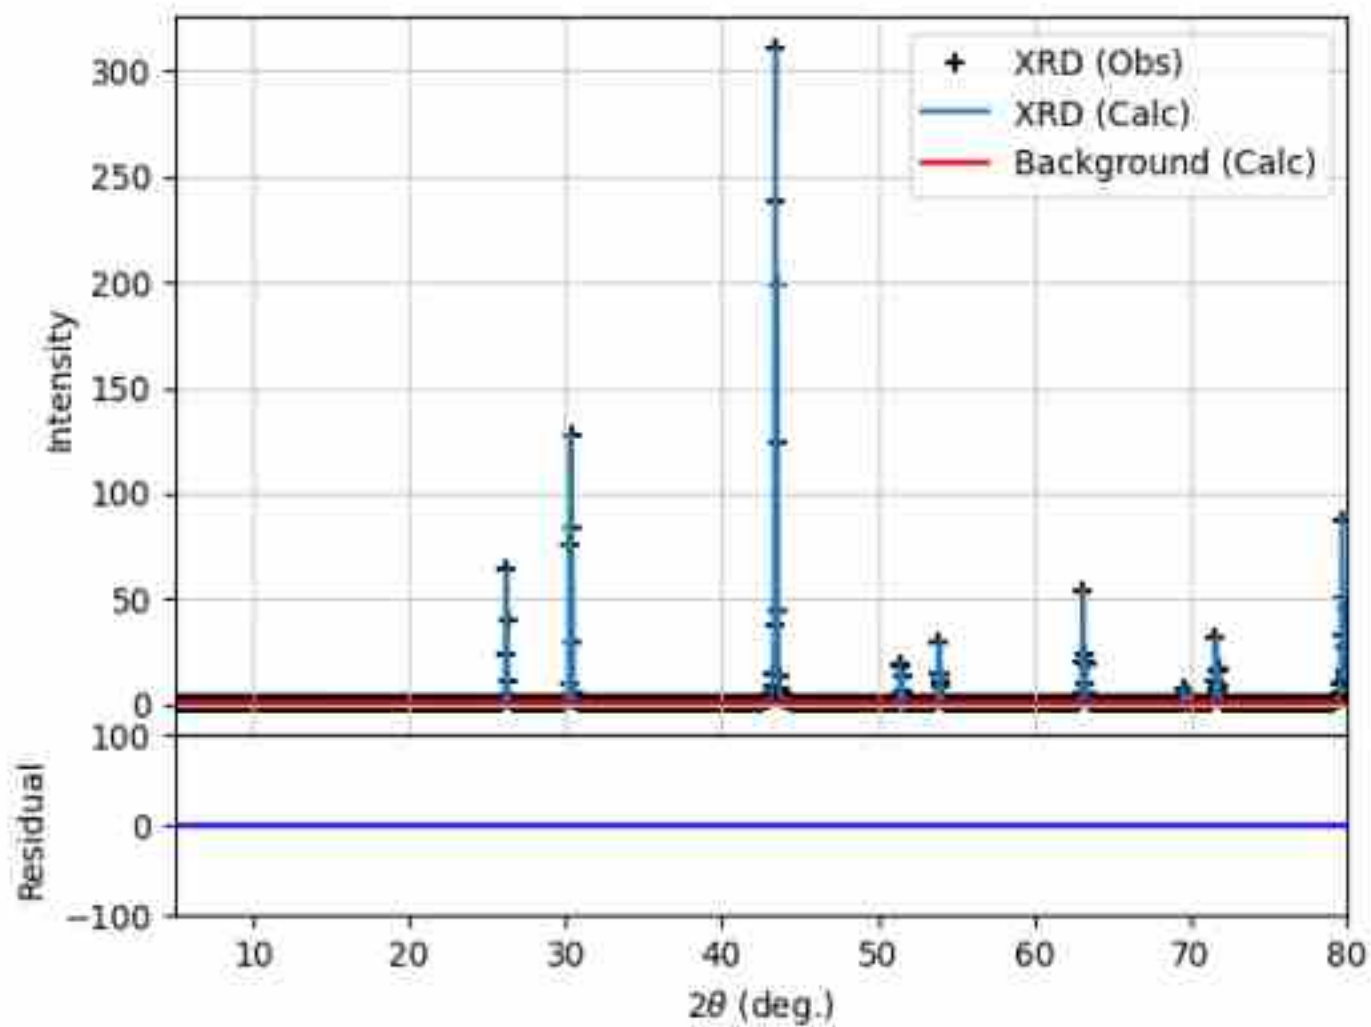

| RMSE before RR | Rwp   | RMSE after RR |
|----------------|-------|---------------|
| 0.001          | 5e-05 | 0.00013       |

# Al<sub>2</sub>Ir<sub>1</sub>Rh<sub>1</sub>

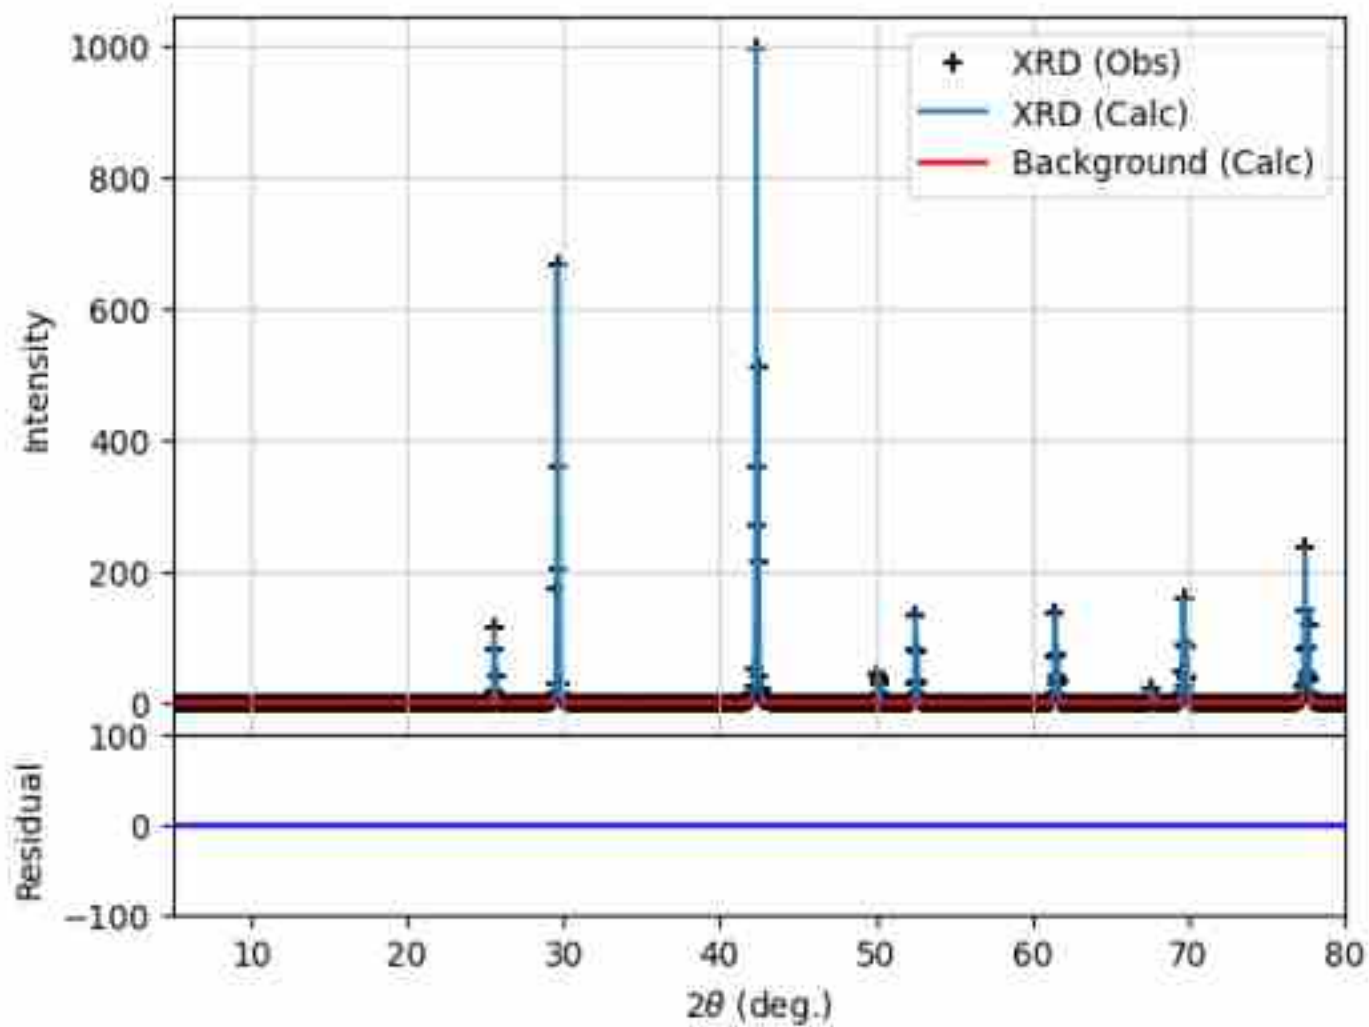

| RMSE before RR | Rwp     | RMSE after RR |
|----------------|---------|---------------|
| 0.001          | 0.00075 | 0.00032       |

# Al<sub>2</sub>Pd<sub>1</sub>Ru<sub>1</sub>

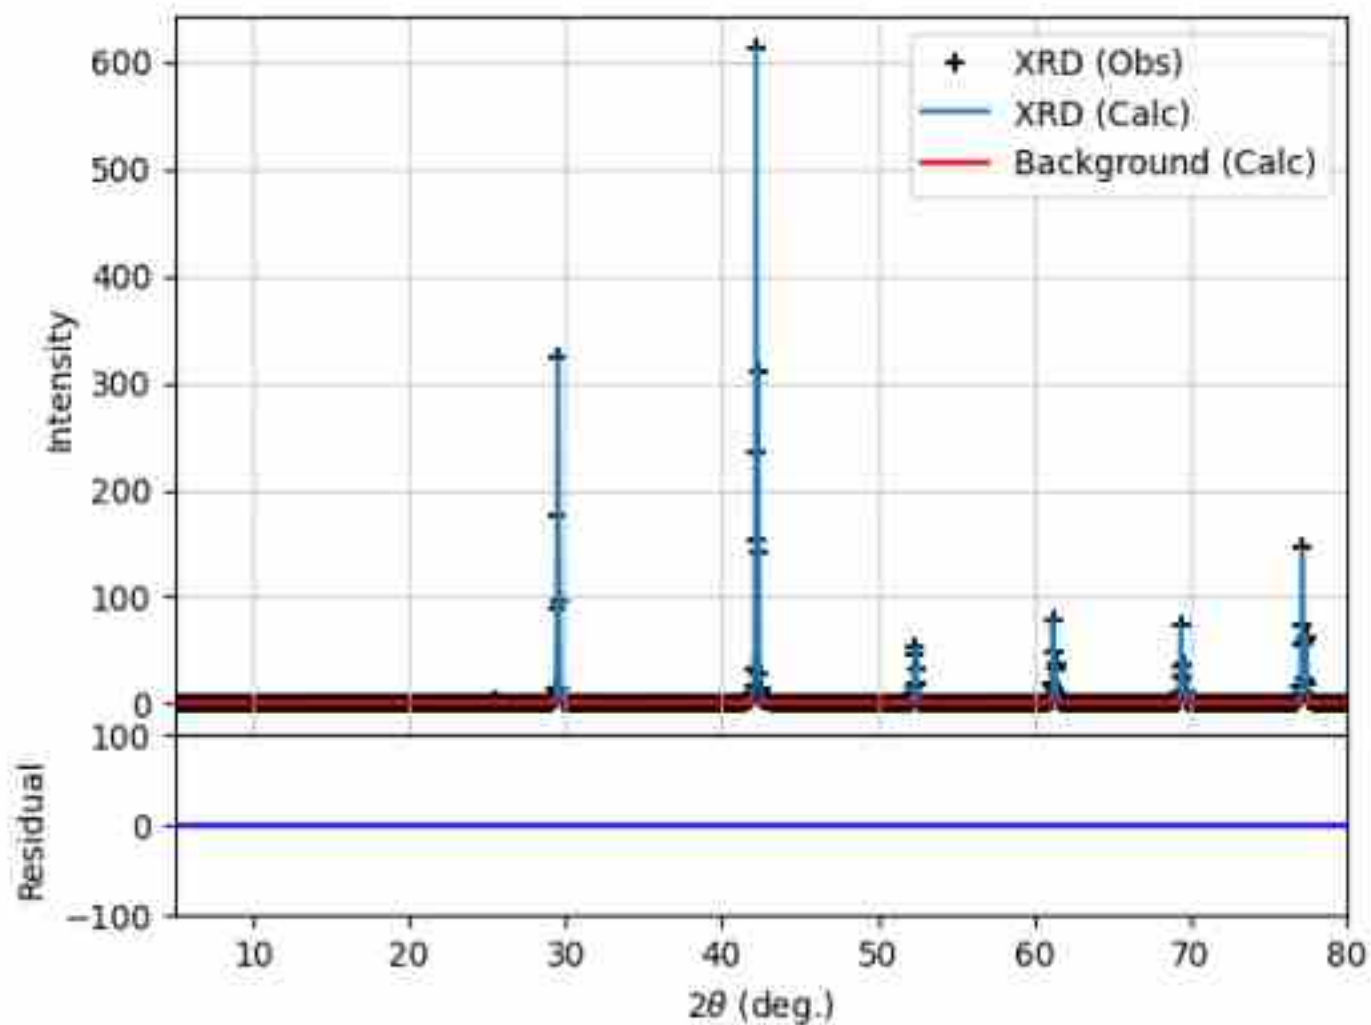

| RMSE before RR | Rwp     | RMSE after RR |
|----------------|---------|---------------|
| 0.001          | 0.00084 | 0.0004        |

# Ba1Al4

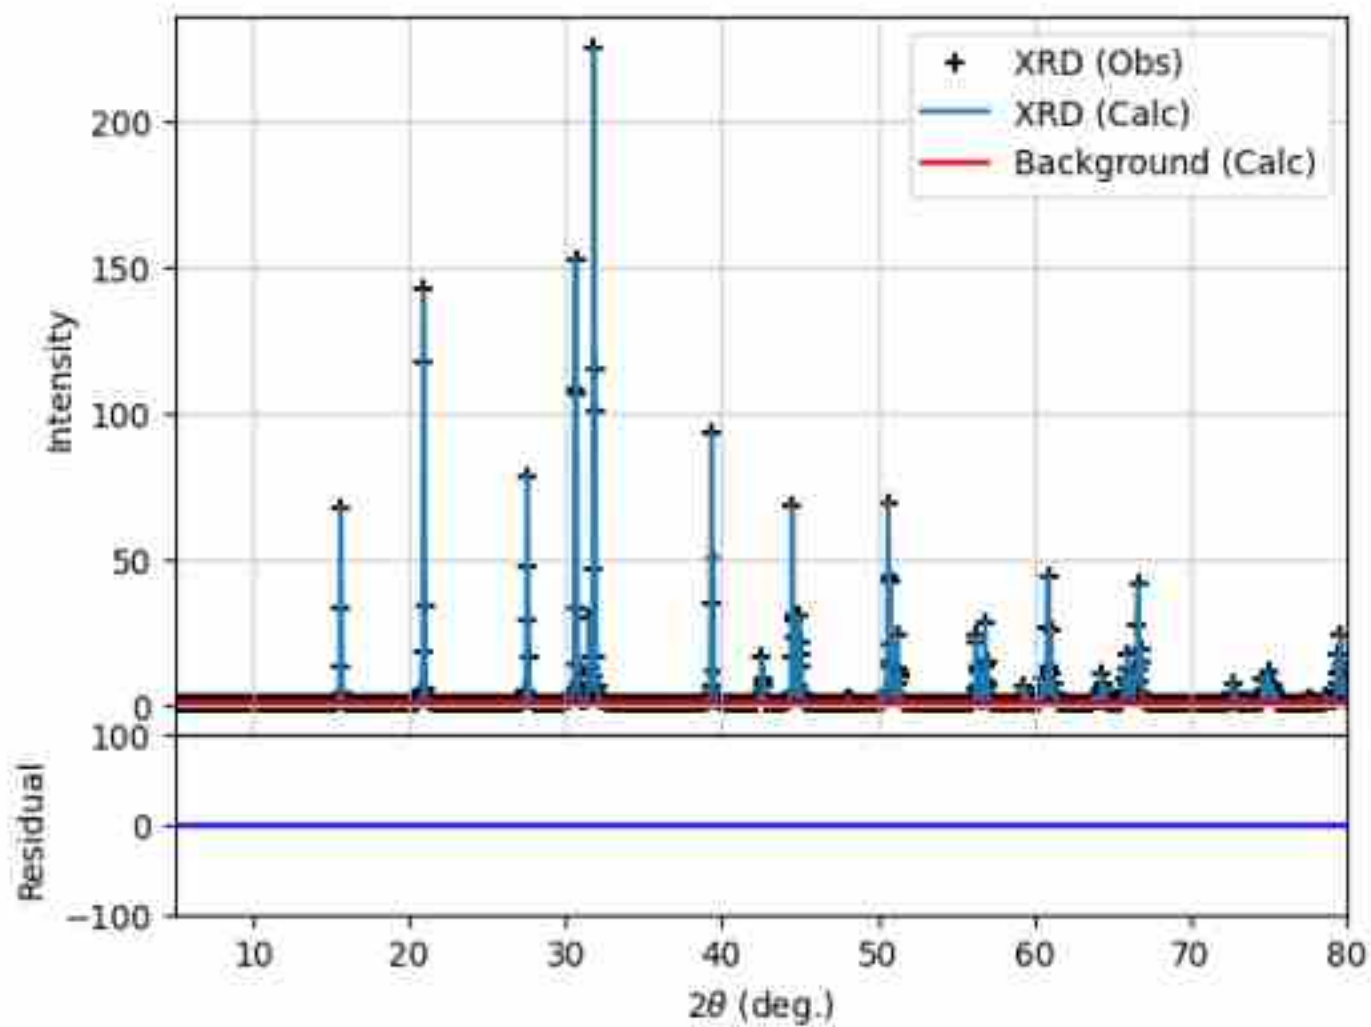

| RMSE before RR | Rwp     | RMSE after RR |
|----------------|---------|---------------|
| 0.01           | 0.00309 | 0.00042       |

# Ba1O1

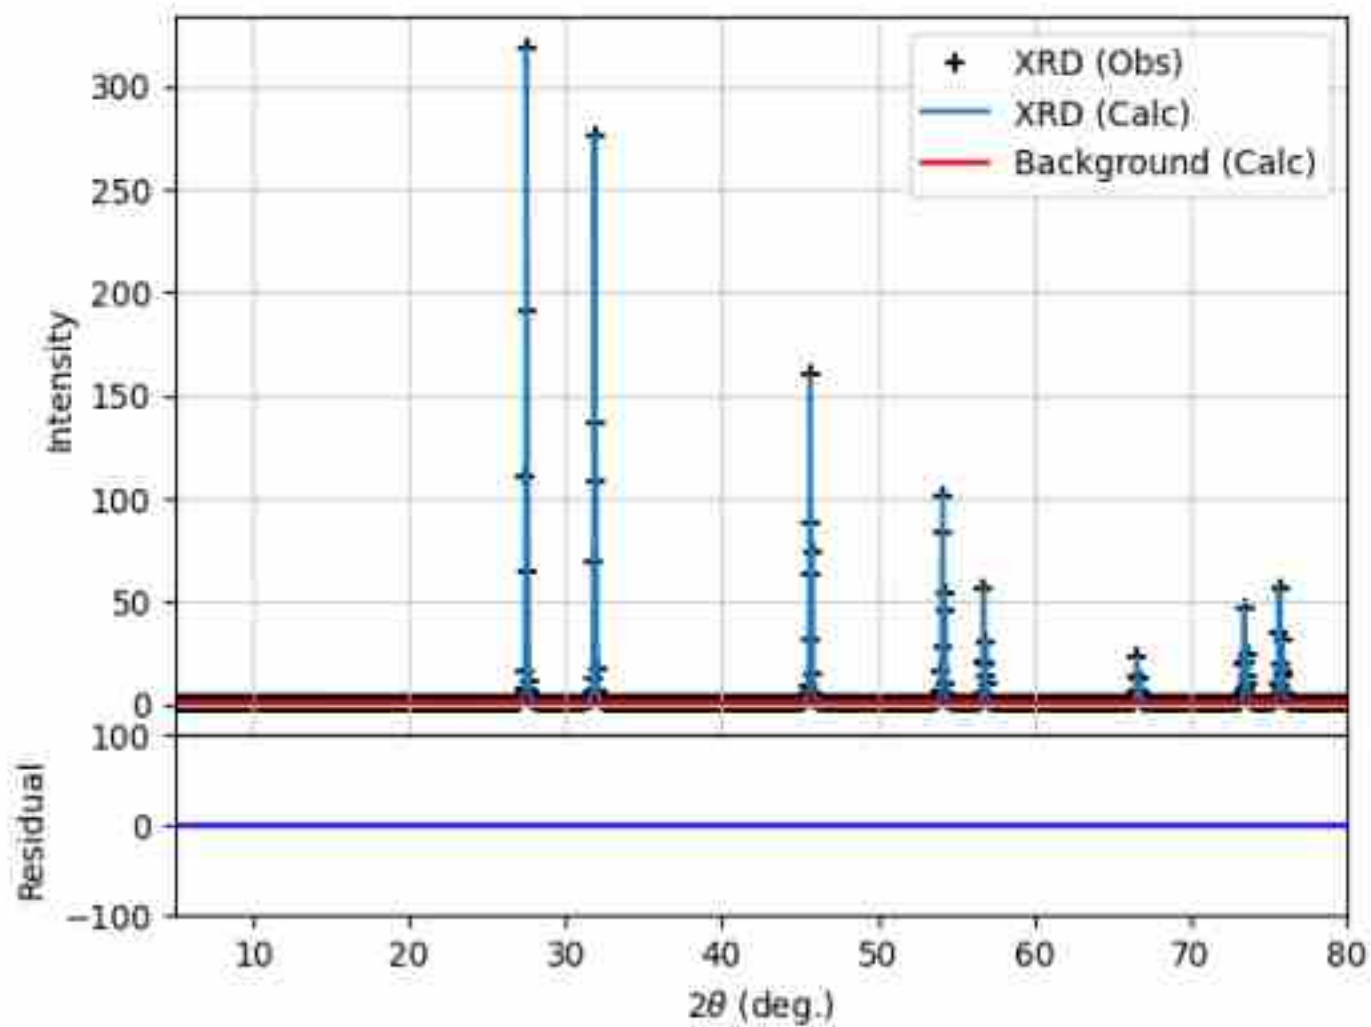

| RMSE before RR | Rwp     | RMSE after RR |
|----------------|---------|---------------|
| 0.001          | 0.00272 | 0.00089       |

# Ba1Sn5

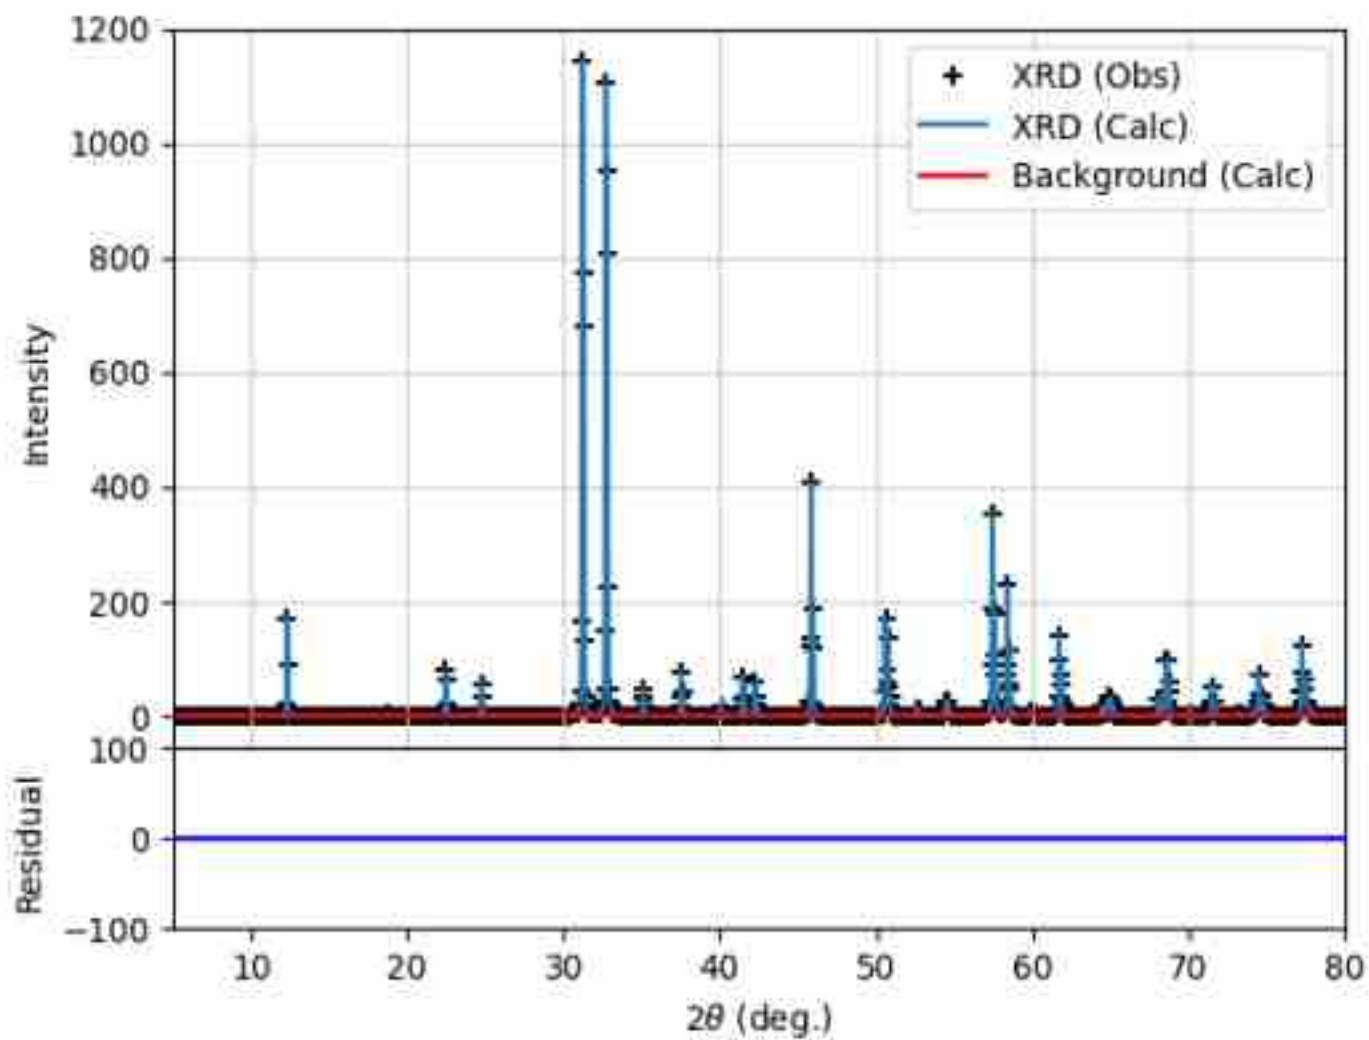

| RMSE before RR | Rwp     | RMSE after RR |
|----------------|---------|---------------|
| 0.01           | 0.00354 | 0.00056       |

# Ba1Sr1Eu1W1O6

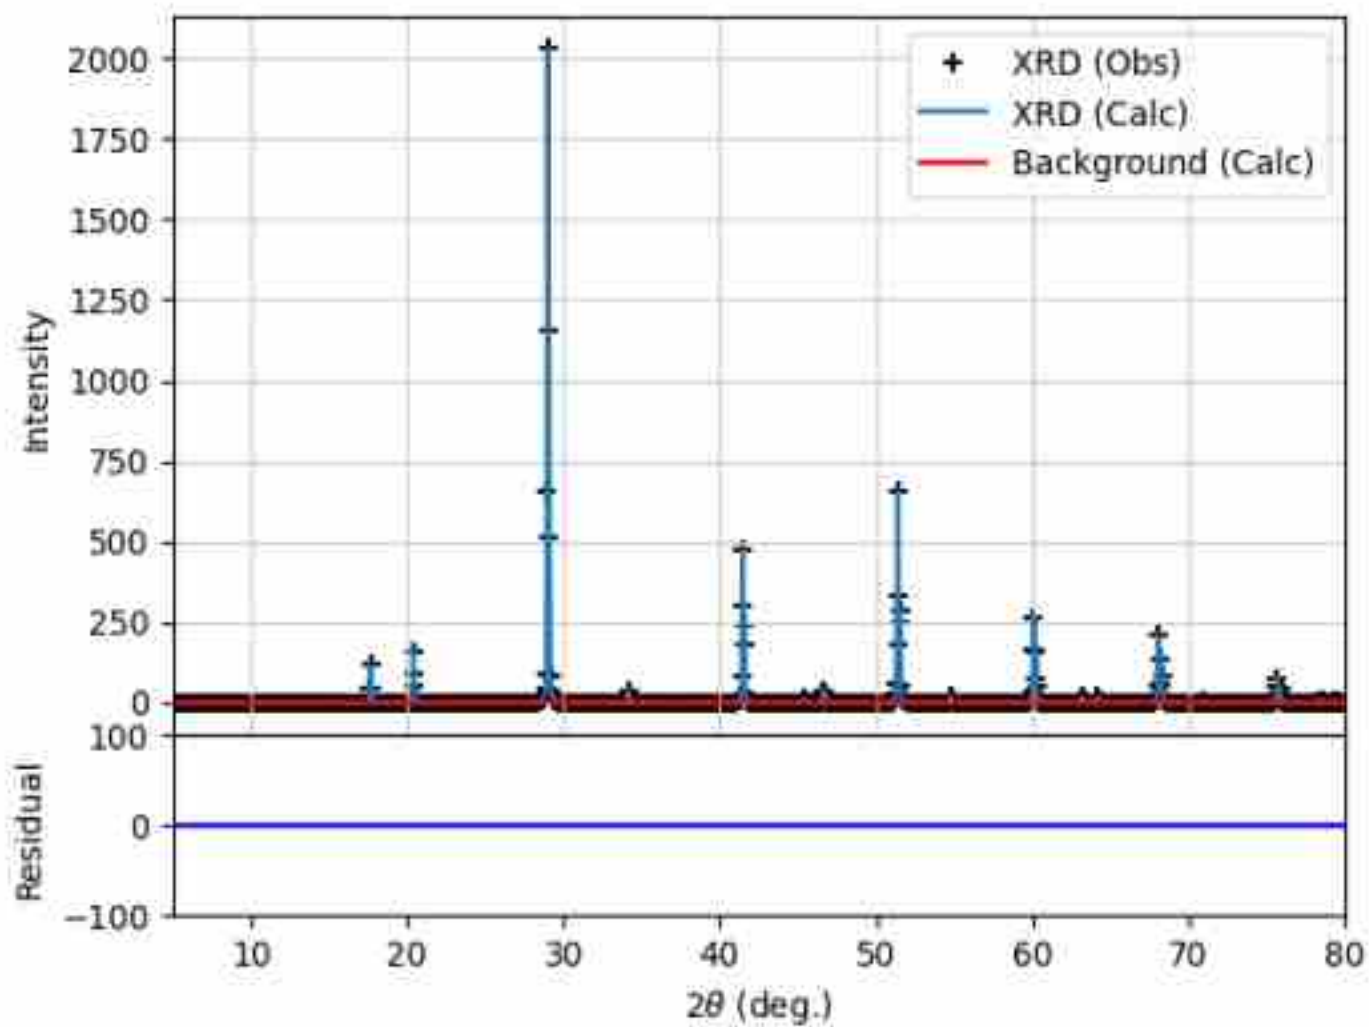

| RMSE before RR | Rwp     | RMSE after RR |
|----------------|---------|---------------|
| 0.01           | 0.00925 | 0.00423       |

# Ba1Sr1Eu2

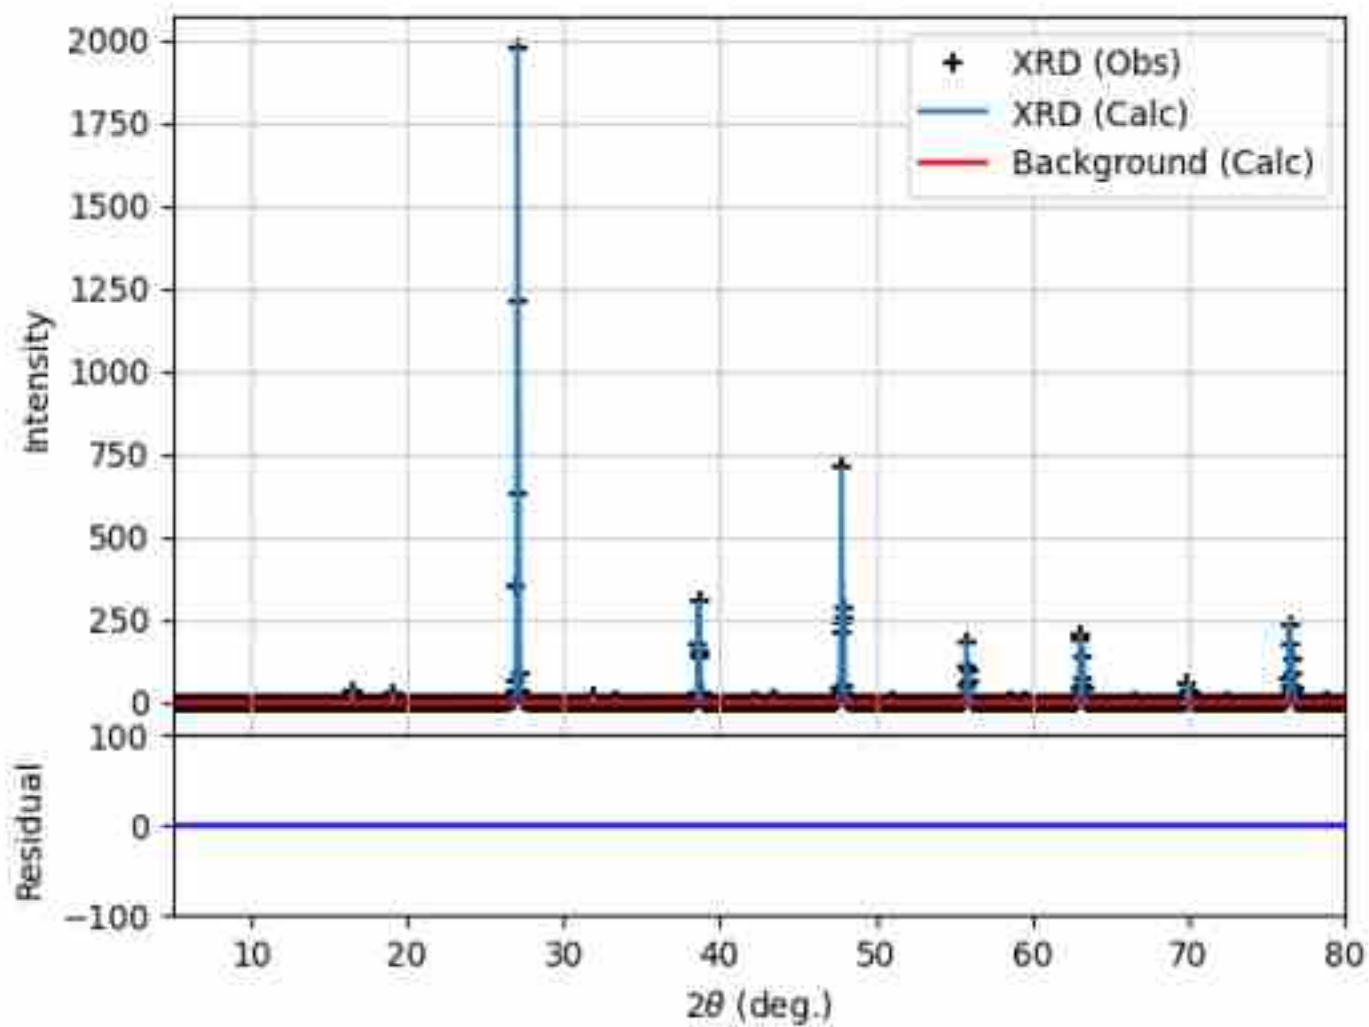

| RMSE before RR | Rwp     | RMSE after RR |
|----------------|---------|---------------|
| 0.001          | 0.00343 | 0.00032       |



# Ba1Sr2Eu1

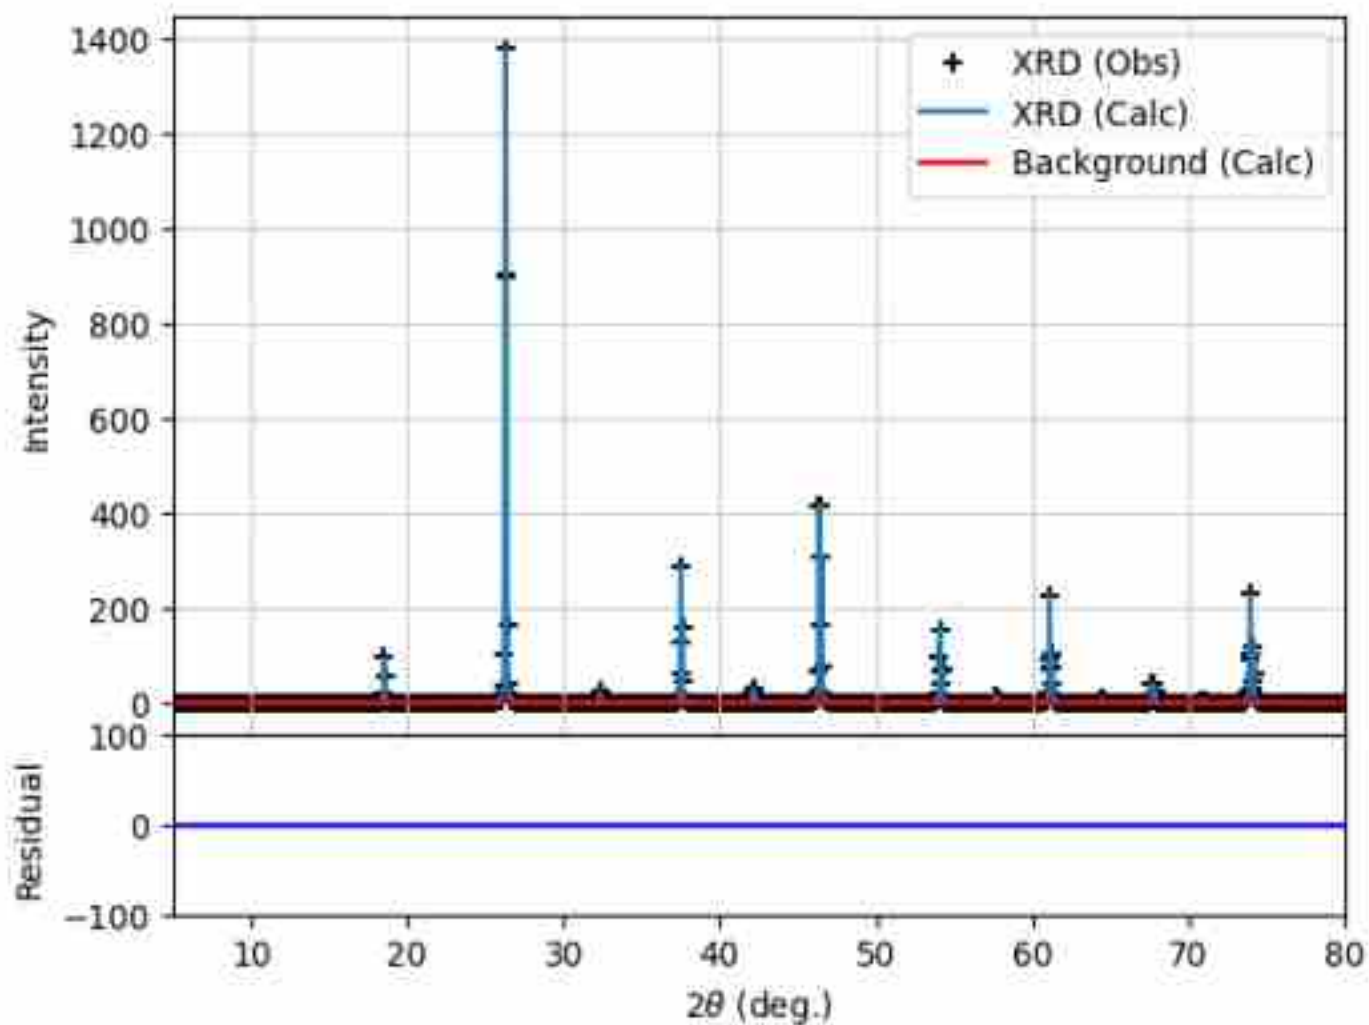

| RMSE before RR | Rwp     | RMSE after RR |
|----------------|---------|---------------|
| 0.001          | 0.00294 | 0.0003        |

# Ba<sub>2</sub>AgSb

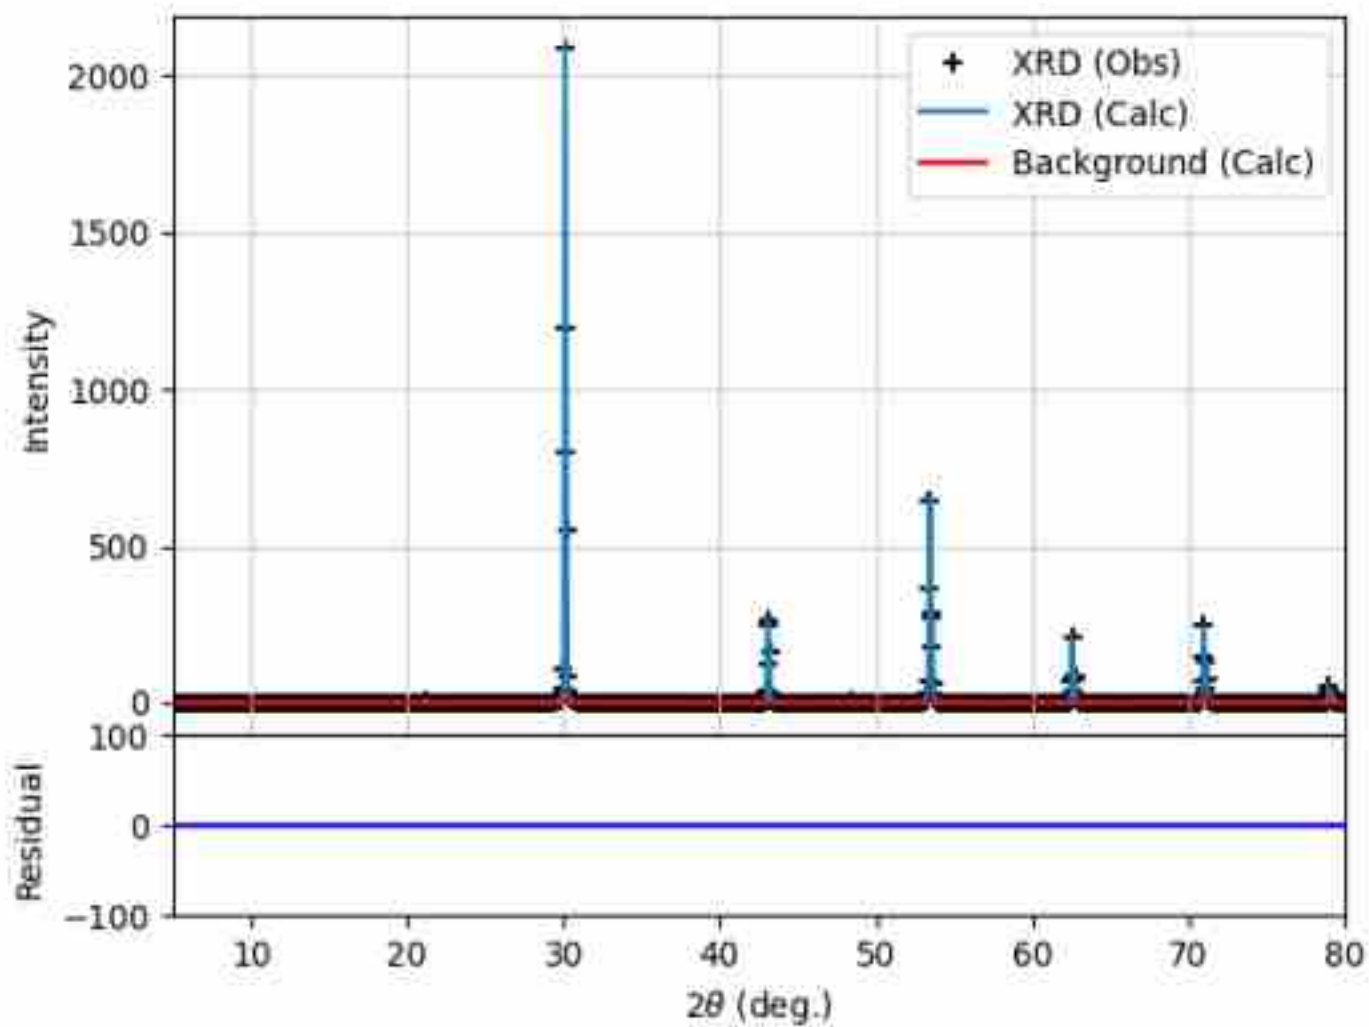

| RMSE before RR | Rwp     | RMSE after RR |
|----------------|---------|---------------|
| 0.001          | 0.00422 | 0.00058       |

# Ba2Ag2P2

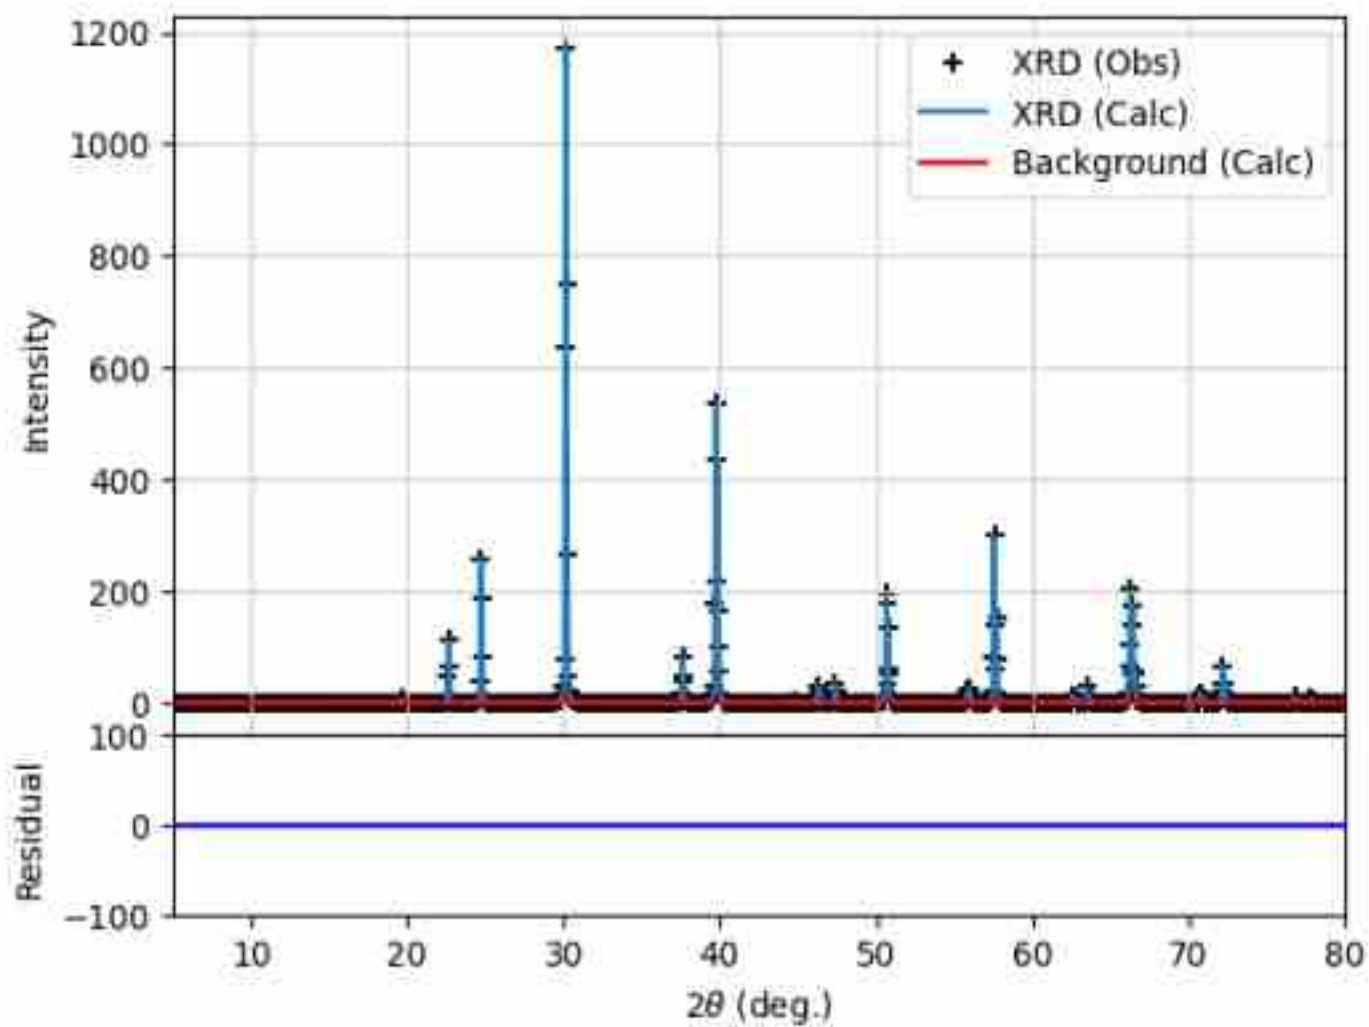

| RMSE before RR | Rwp     | RMSE after RR |
|----------------|---------|---------------|
| 0.01           | 0.00502 | 0.00058       |

# Ba2Cd6

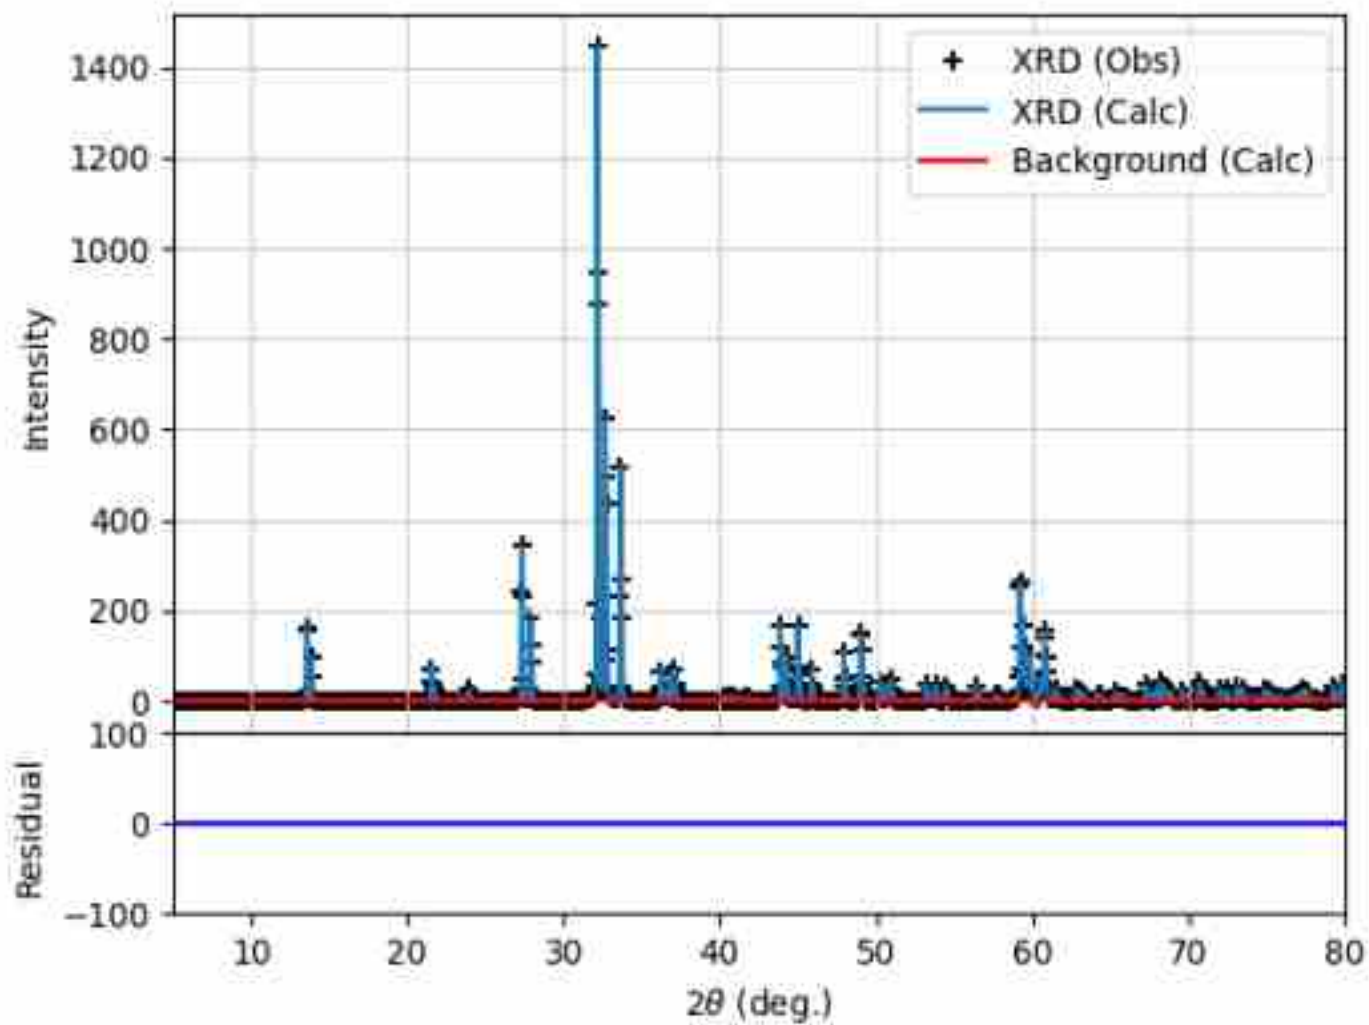

| RMSE before RR | Rwp     | RMSE after RR |
|----------------|---------|---------------|
| 0.01           | 0.00498 | 0.00032       |

# Ba<sub>2</sub>ErReO<sub>6</sub>

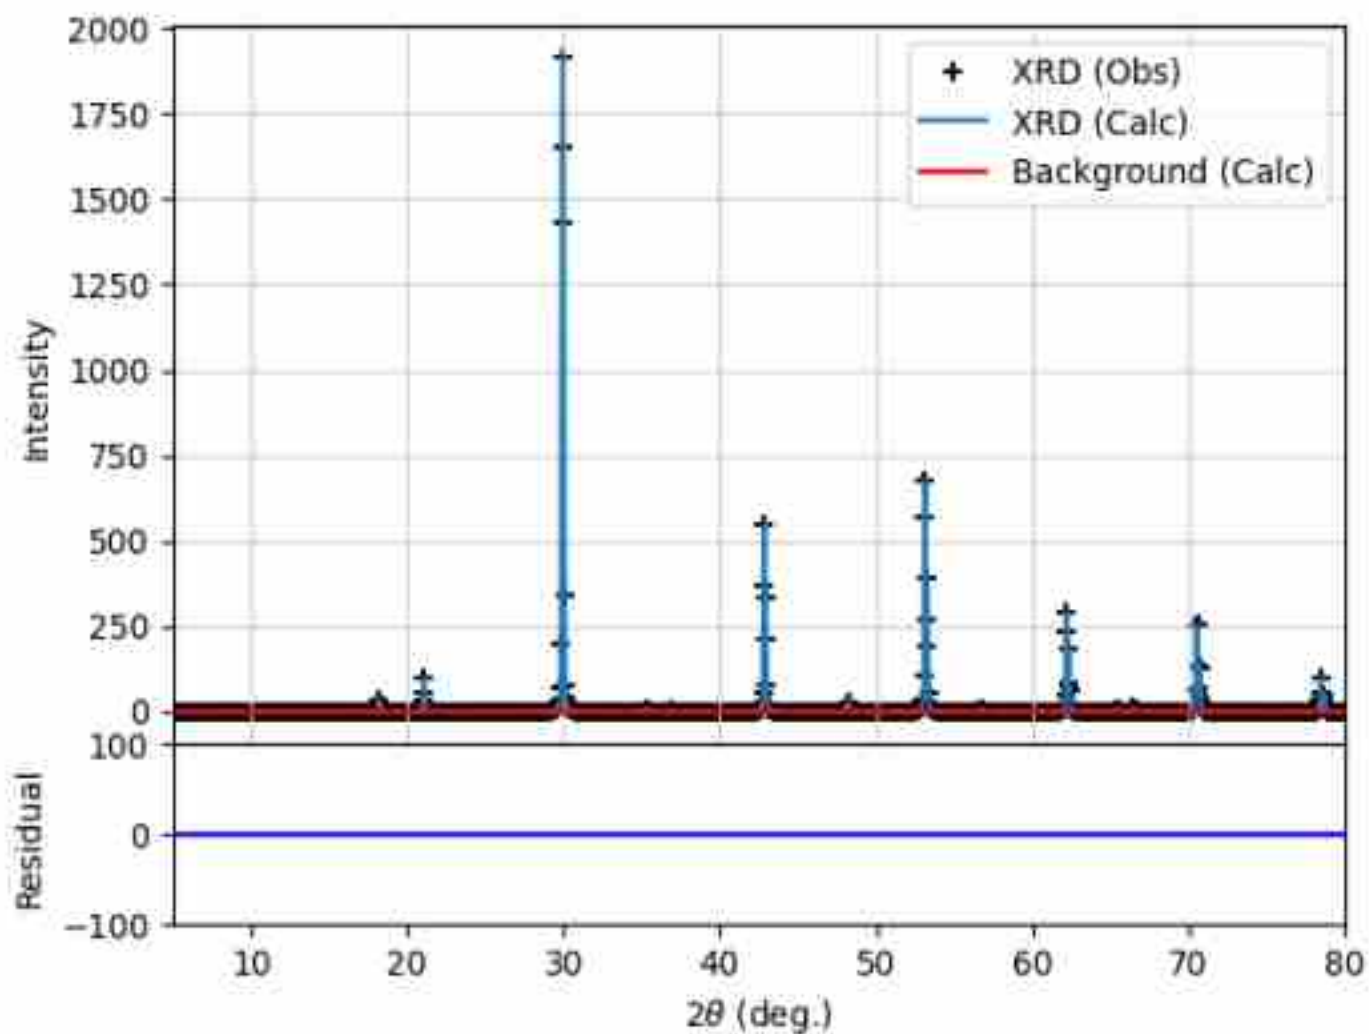

| RMSE before RR | Rwp     | RMSE after RR |
|----------------|---------|---------------|
| 0.01           | 0.00452 | 0.00208       |

# Ba<sub>2</sub>Er<sub>1</sub>Ru<sub>1</sub>O<sub>6</sub>

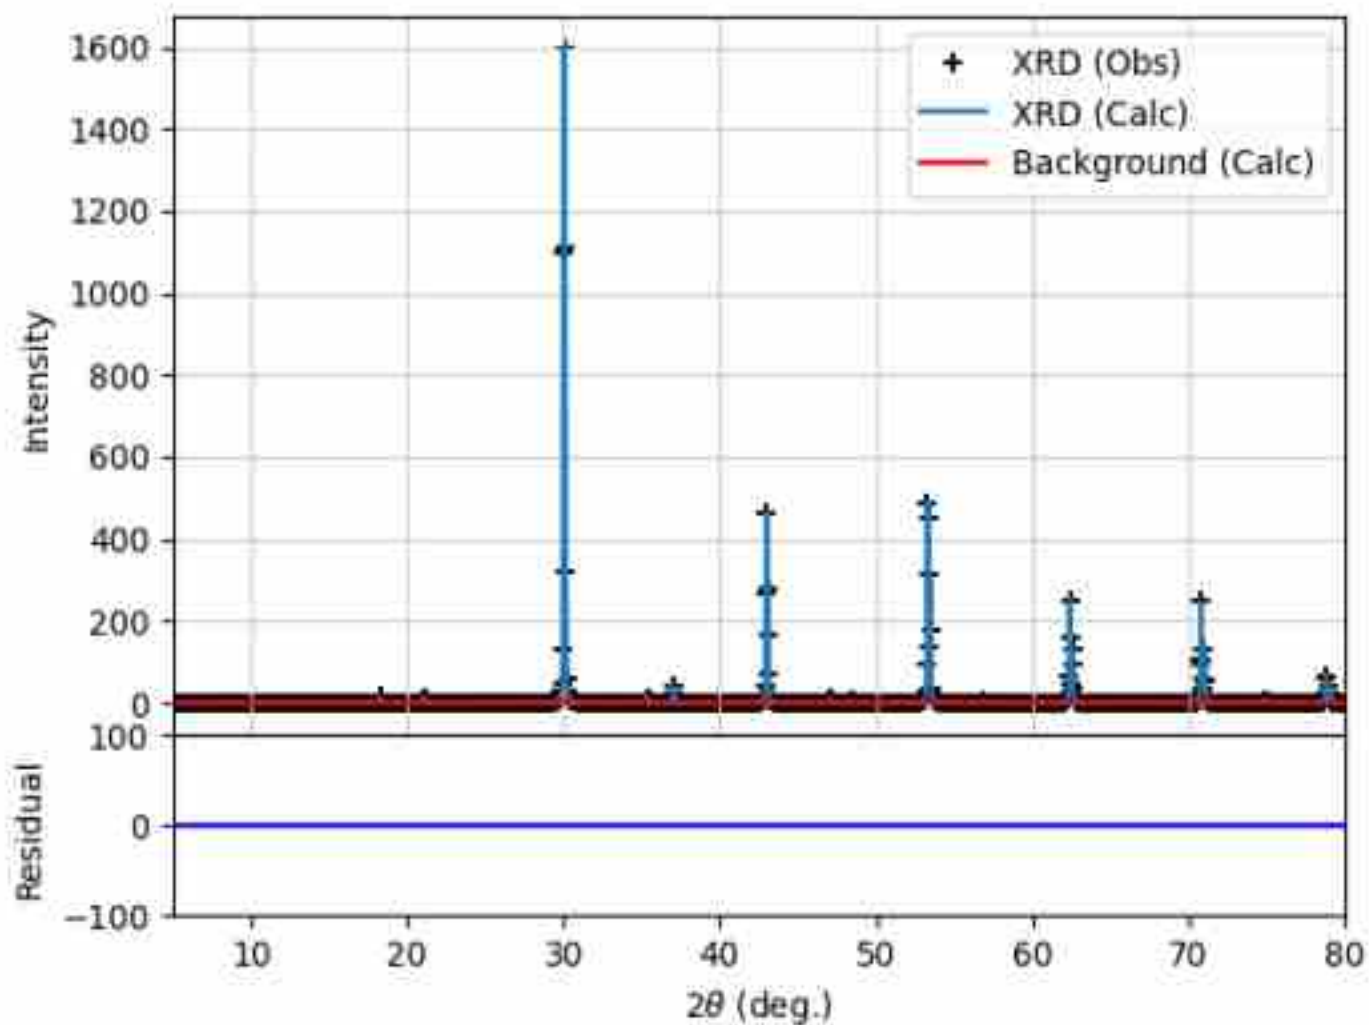

| RMSE before RR | Rwp     | RMSE after RR |
|----------------|---------|---------------|
| 0.01           | 0.00851 | 0.00284       |

# Ba<sub>2</sub>Er<sub>1</sub>Sb<sub>1</sub>O<sub>6</sub>

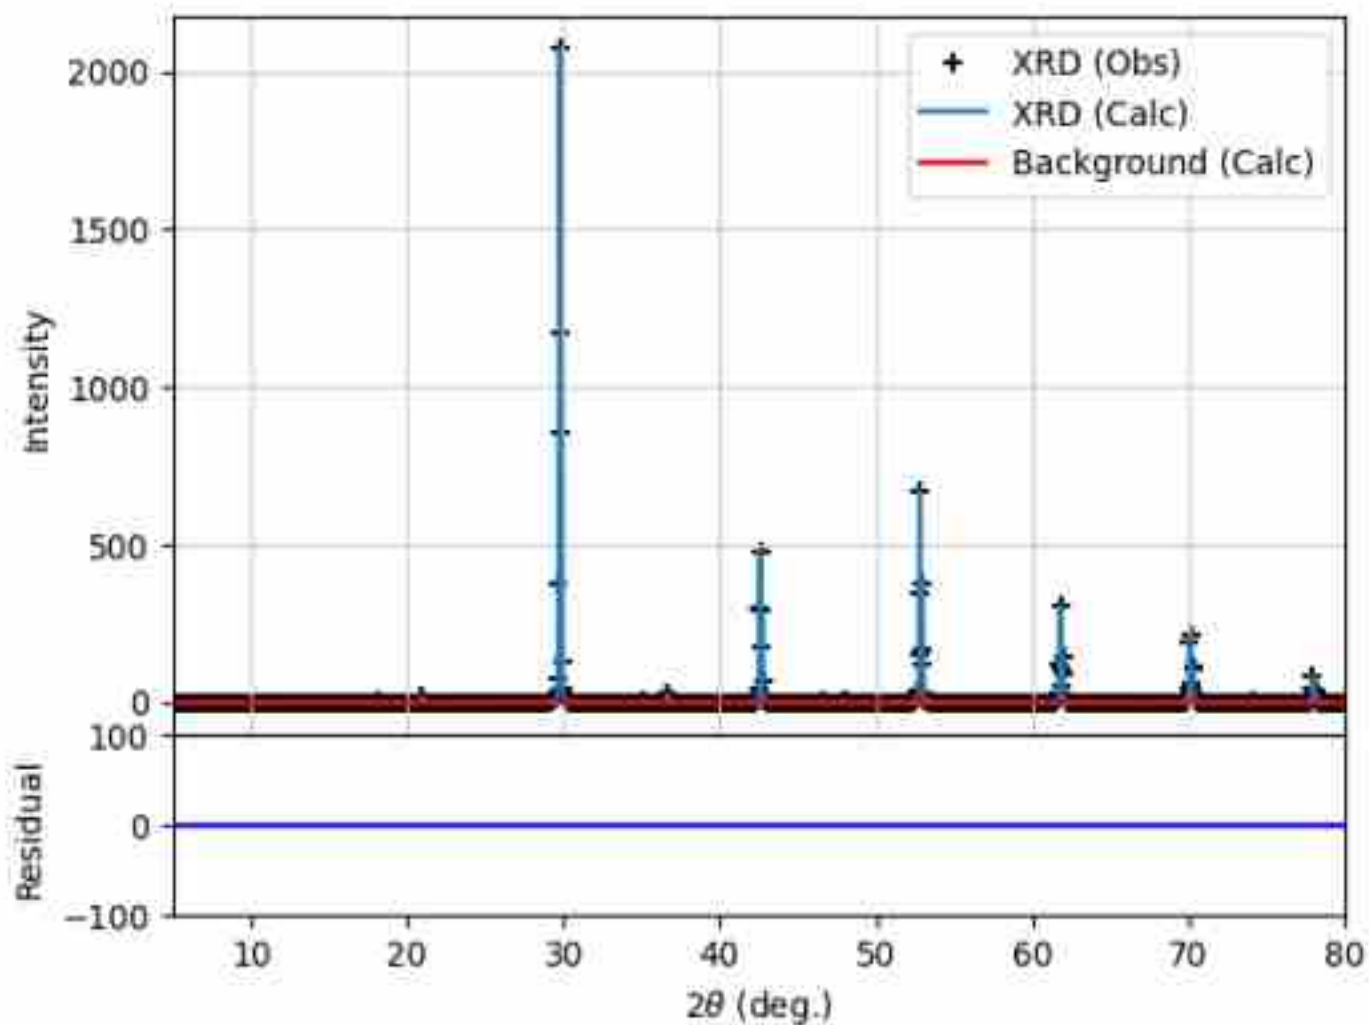

| RMSE before RR | Rwp     | RMSE after RR |
|----------------|---------|---------------|
| 0.01           | 0.02644 | 0.00627       |

# Ba<sub>2</sub>GdNb<sub>10</sub>O<sub>6</sub>

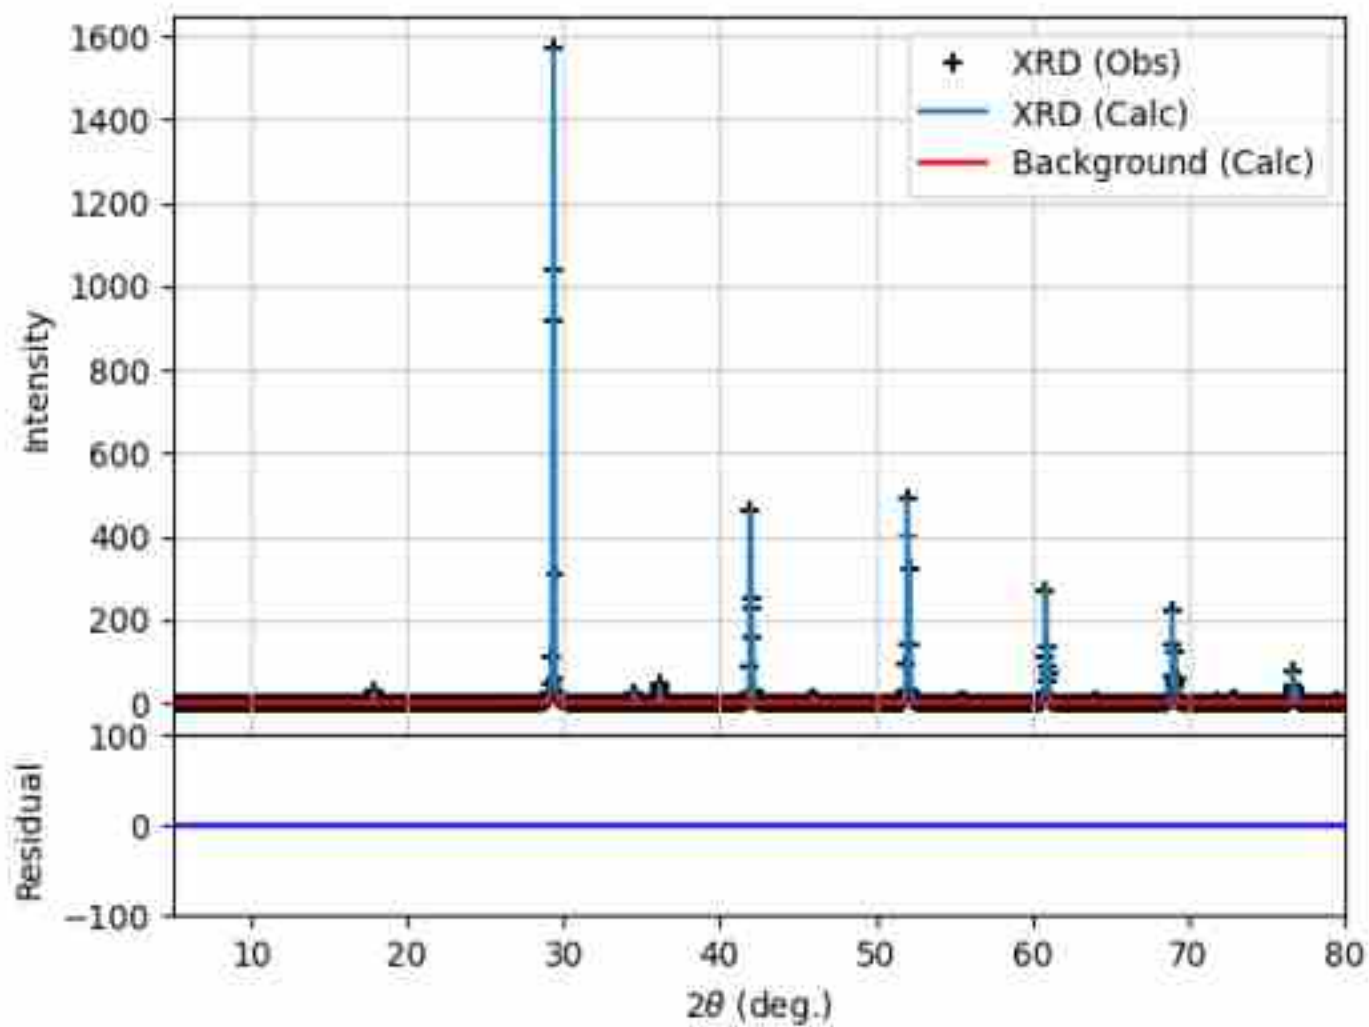

| RMSE before RR | Rwp     | RMSE after RR |
|----------------|---------|---------------|
| 0.01           | 0.02389 | 0.0054        |



# Ba<sub>2</sub>In<sub>1</sub>Os<sub>1</sub>O<sub>6</sub>

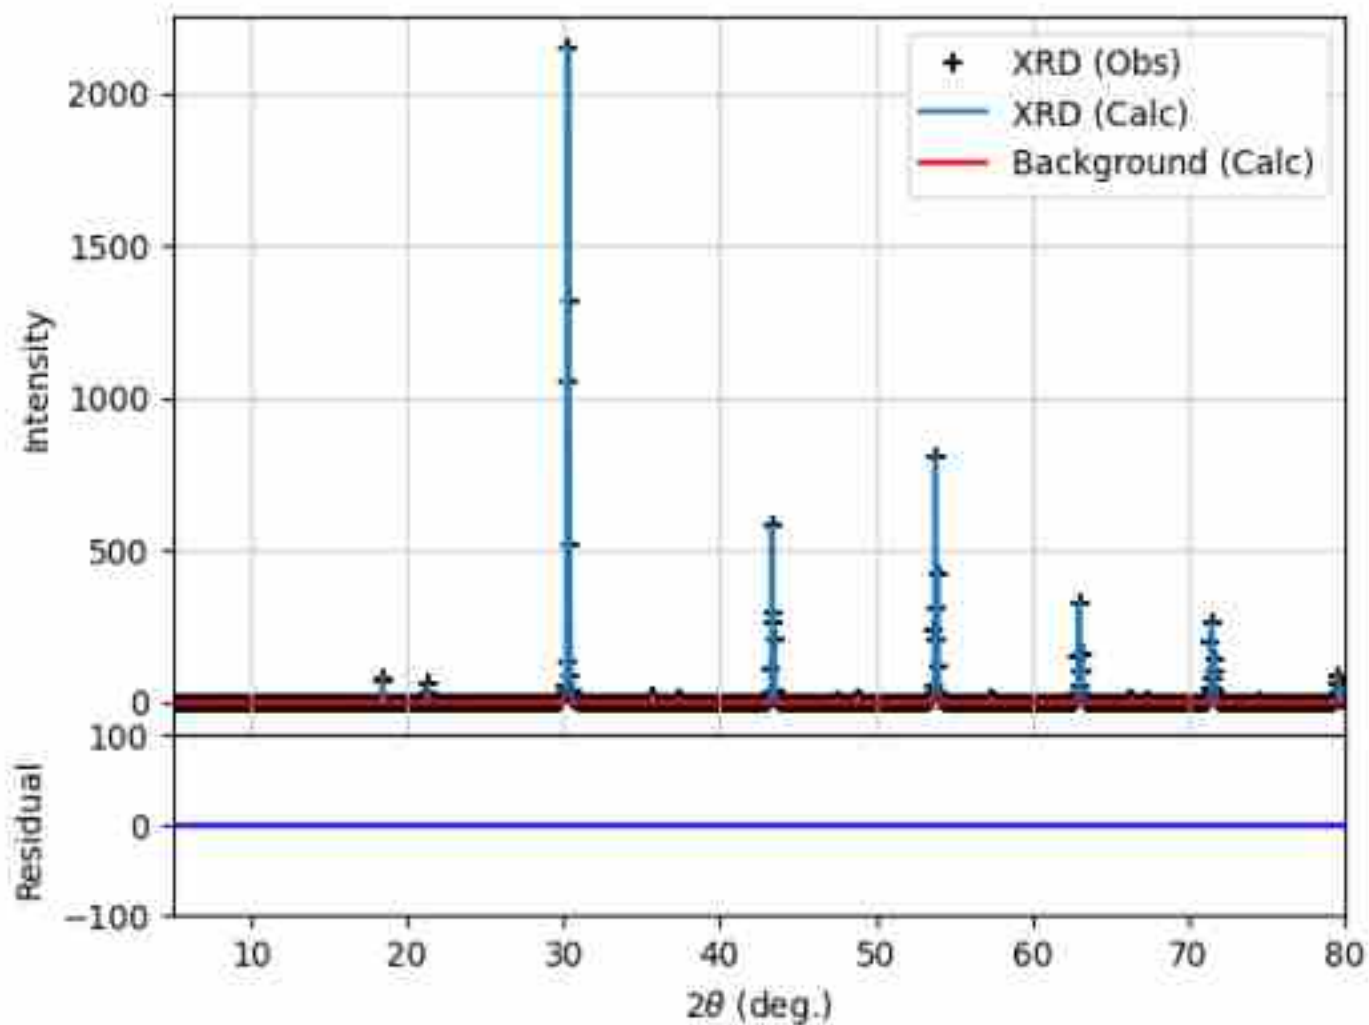

| RMSE before RR | Rwp     | RMSE after RR |
|----------------|---------|---------------|
| 0.01           | 0.00543 | 0.00279       |

# Ba<sub>2</sub>LaCoCu<sub>2</sub>O<sub>7</sub>

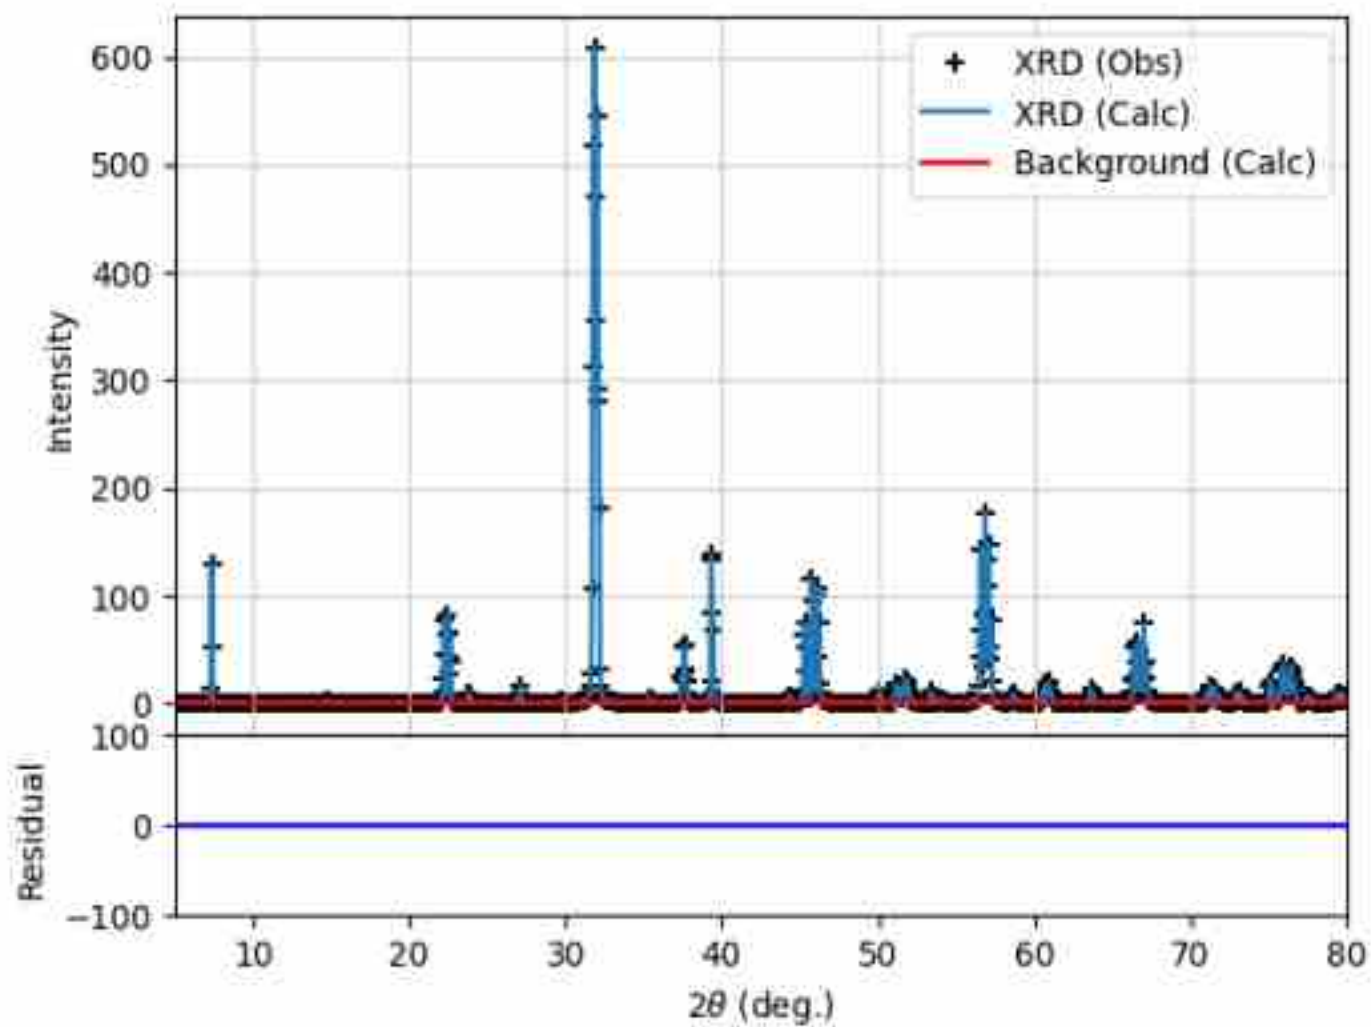

| RMSE before RR | Rwp     | RMSE after RR |
|----------------|---------|---------------|
| 0.01           | 0.00377 | 0.00084       |

# Ba<sub>2</sub>LuRuO<sub>6</sub>

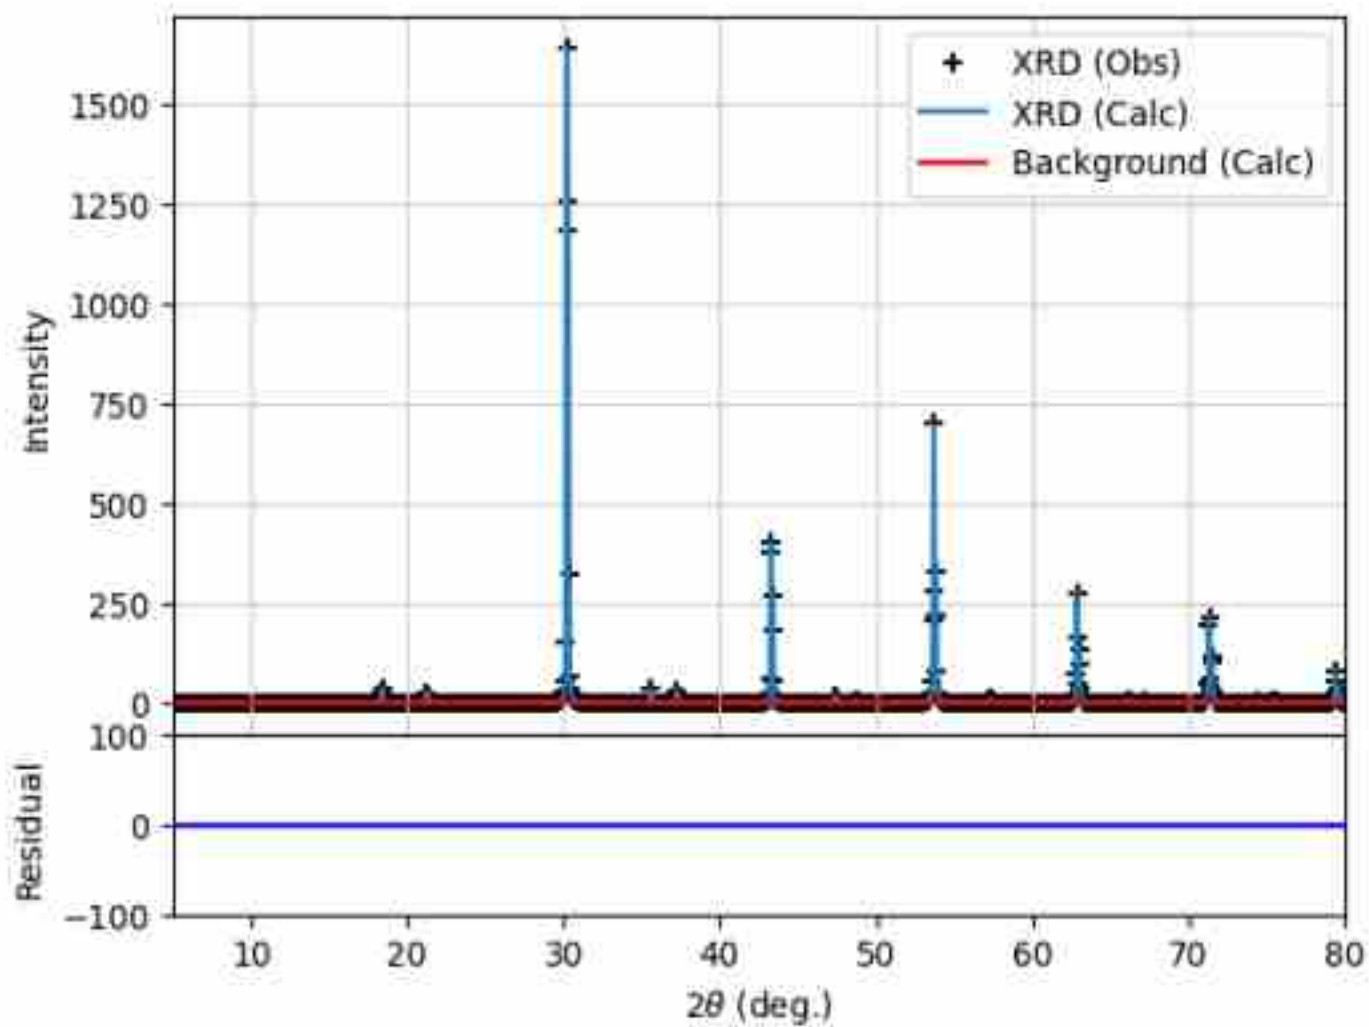

| RMSE before RR | Rwp     | RMSE after RR |
|----------------|---------|---------------|
| 0.01           | 0.00414 | 0.0022        |

Ba2Mg1Os1O6

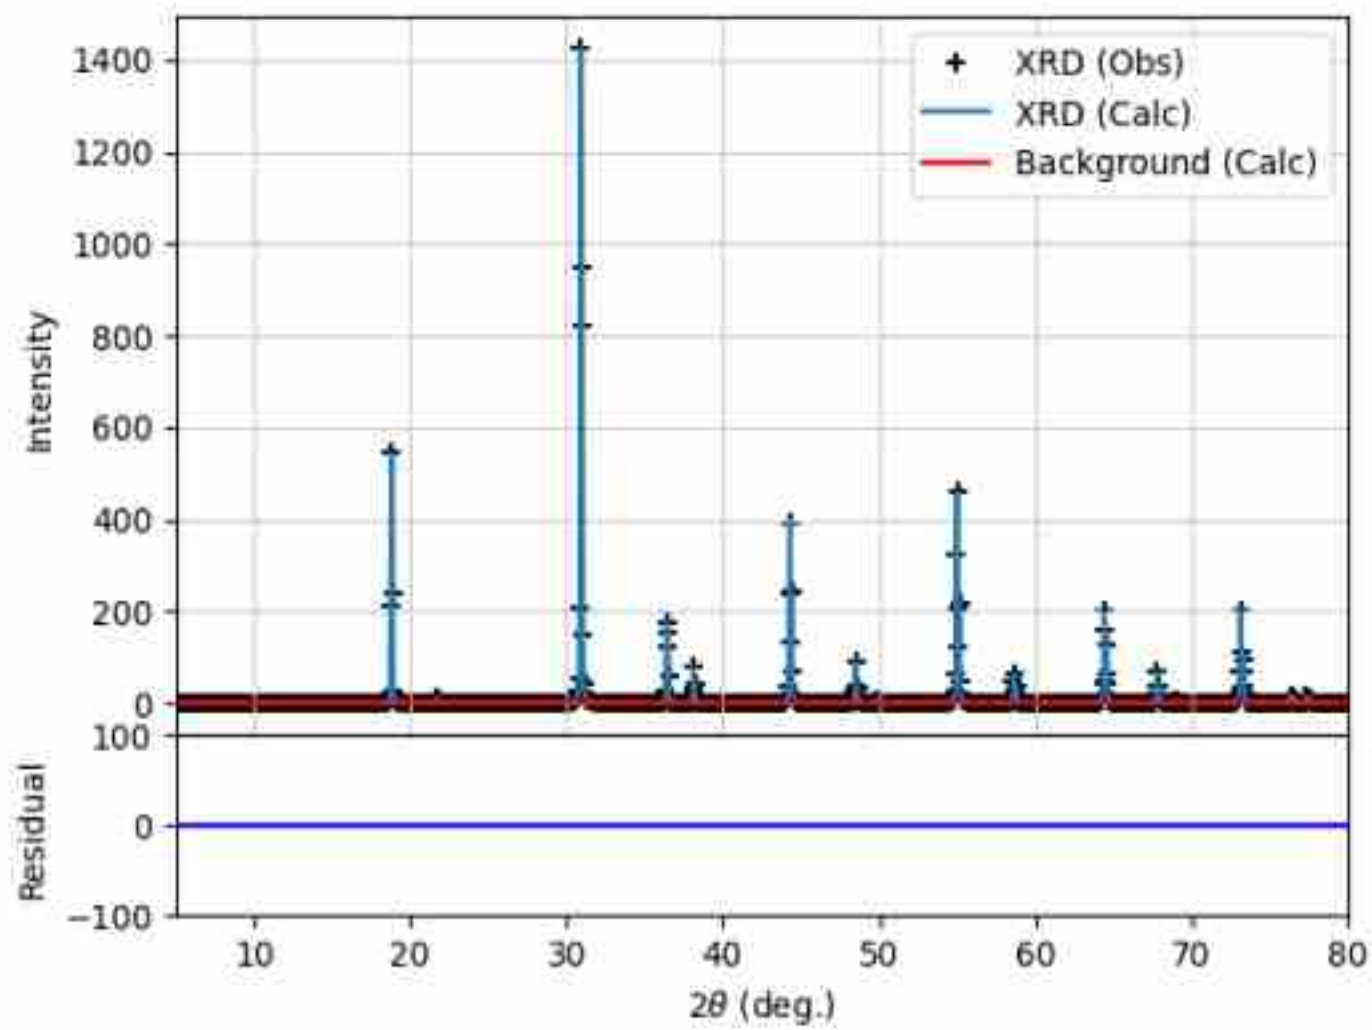

| RMSE before RR | Rwp     | RMSE after RR |
|----------------|---------|---------------|
| 0.01           | 0.05613 | 0.01096       |

# Ba2N1C11

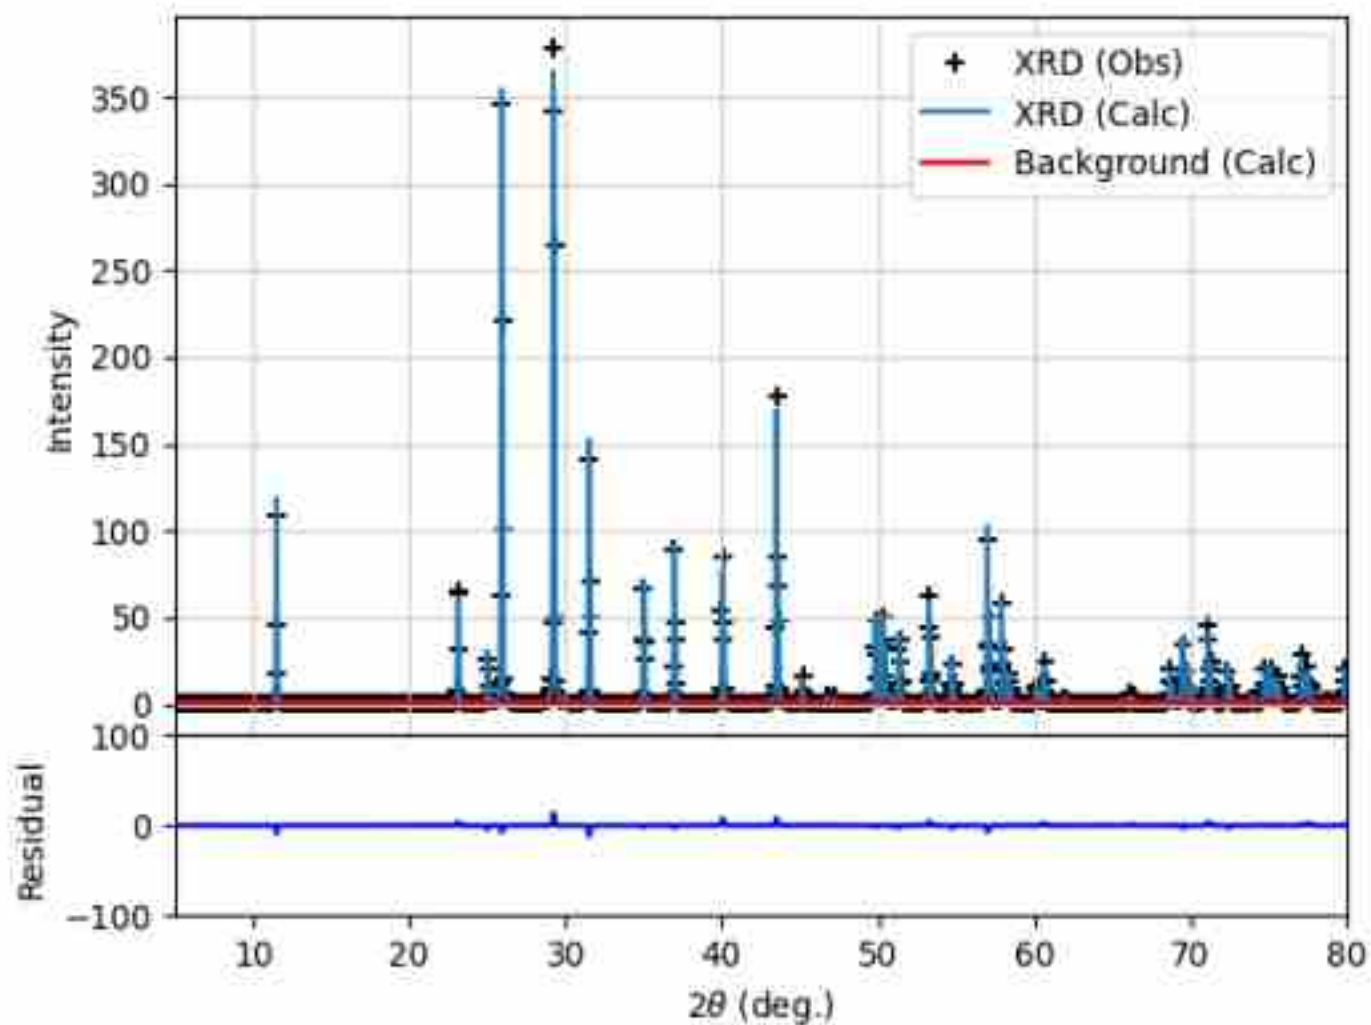

| RMSE before RR | Rwp     | RMSE after RR |
|----------------|---------|---------------|
| 0.01           | 6.04587 | 0.00955       |

# Ba2Ni2S4

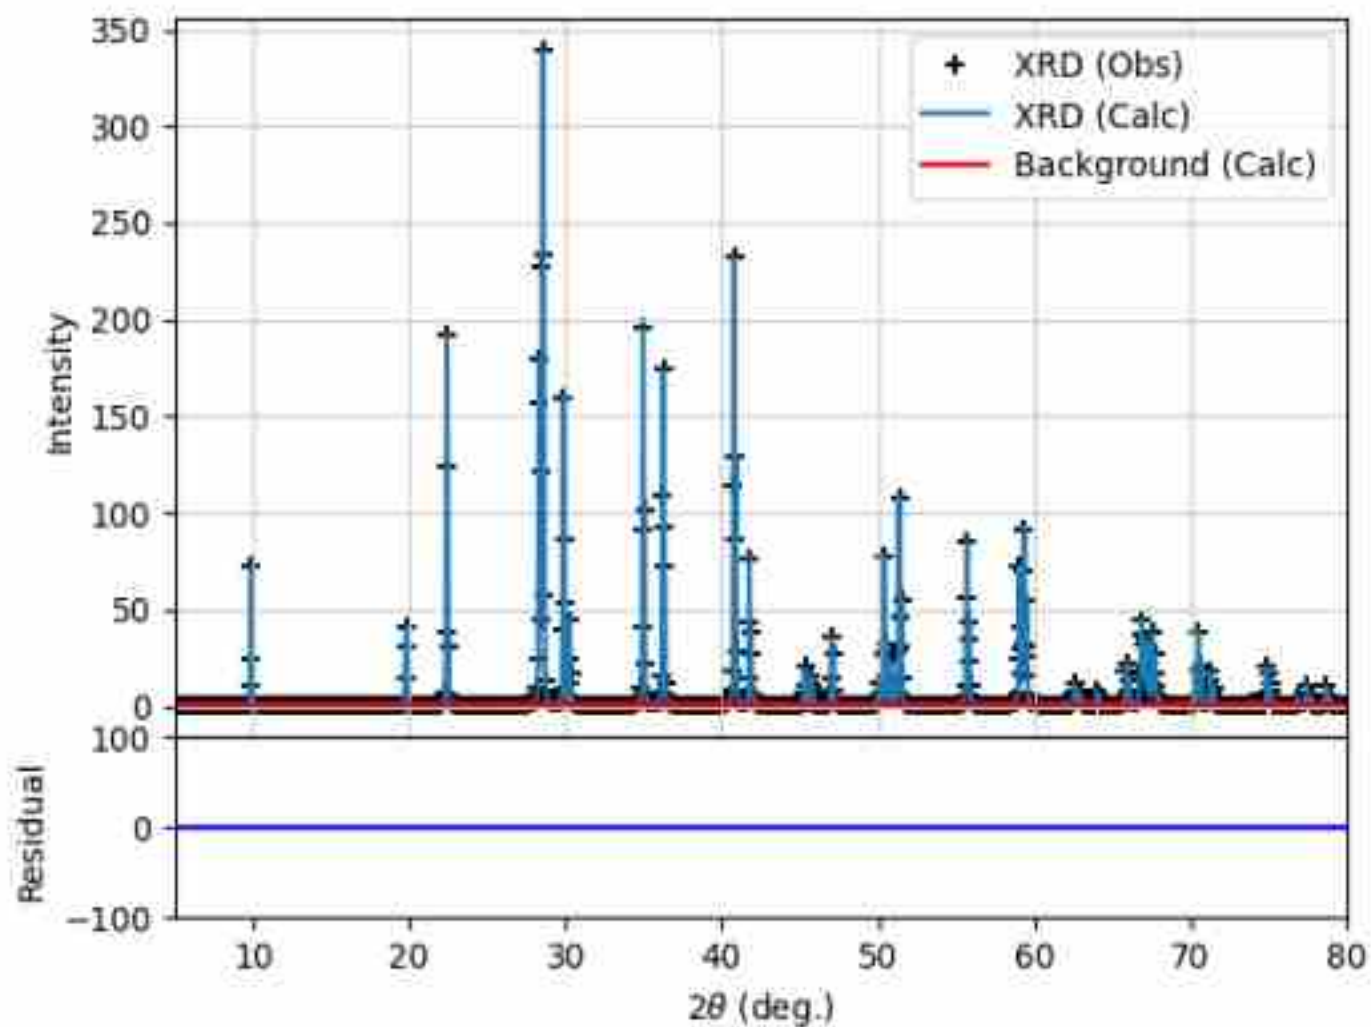

| RMSE before RR | Rwp     | RMSE after RR |
|----------------|---------|---------------|
| 0.01           | 0.00341 | 0.00063       |

# Ba<sub>2</sub>Pr<sub>1</sub>W<sub>1</sub>O<sub>6</sub>

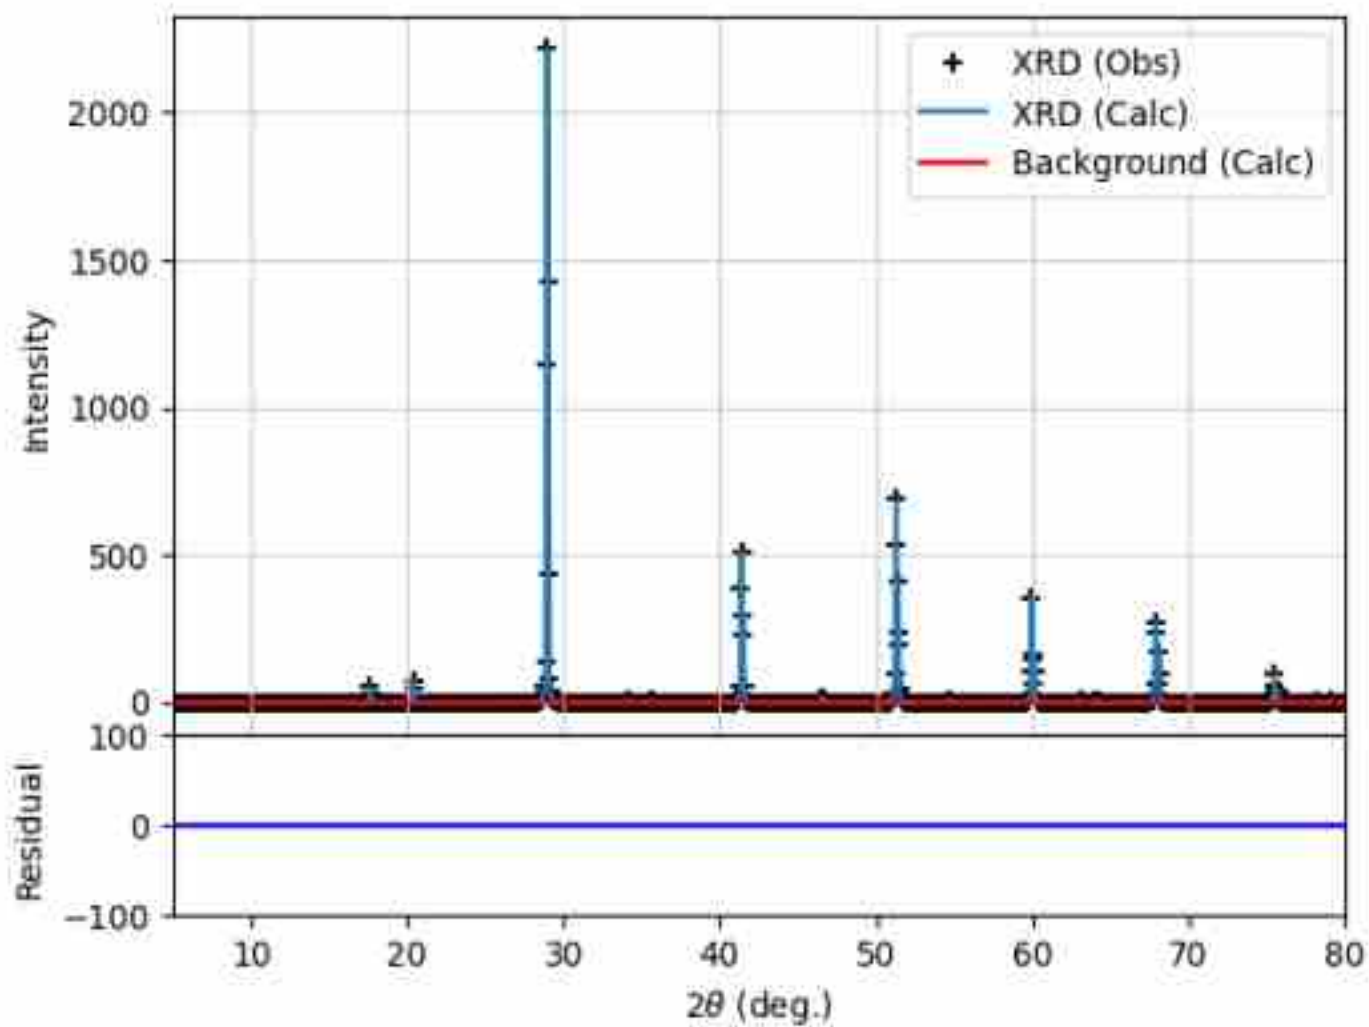

| RMSE before RR | Rwp     | RMSE after RR |
|----------------|---------|---------------|
| 0.01           | 0.00411 | 0.00191       |

# Ba<sub>2</sub>Yb<sub>1</sub>U<sub>1</sub>O<sub>6</sub>

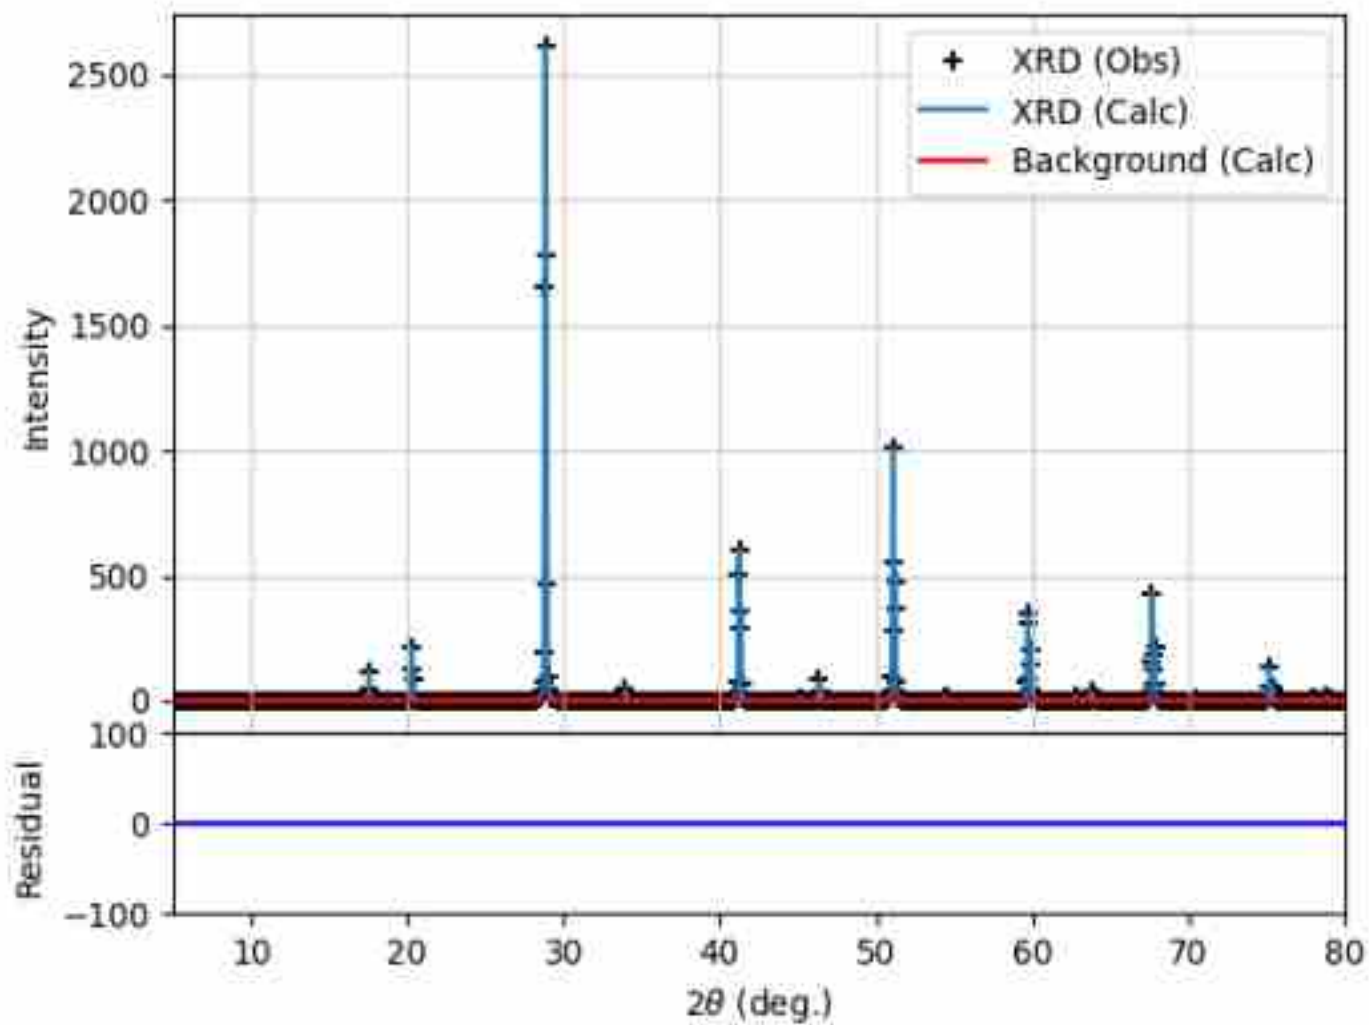

| RMSE before RR | Rwp     | RMSE after RR |
|----------------|---------|---------------|
| 0.01           | 0.00482 | 0.00491       |



# Ba<sub>3</sub>Si<sub>1</sub>O<sub>1</sub>

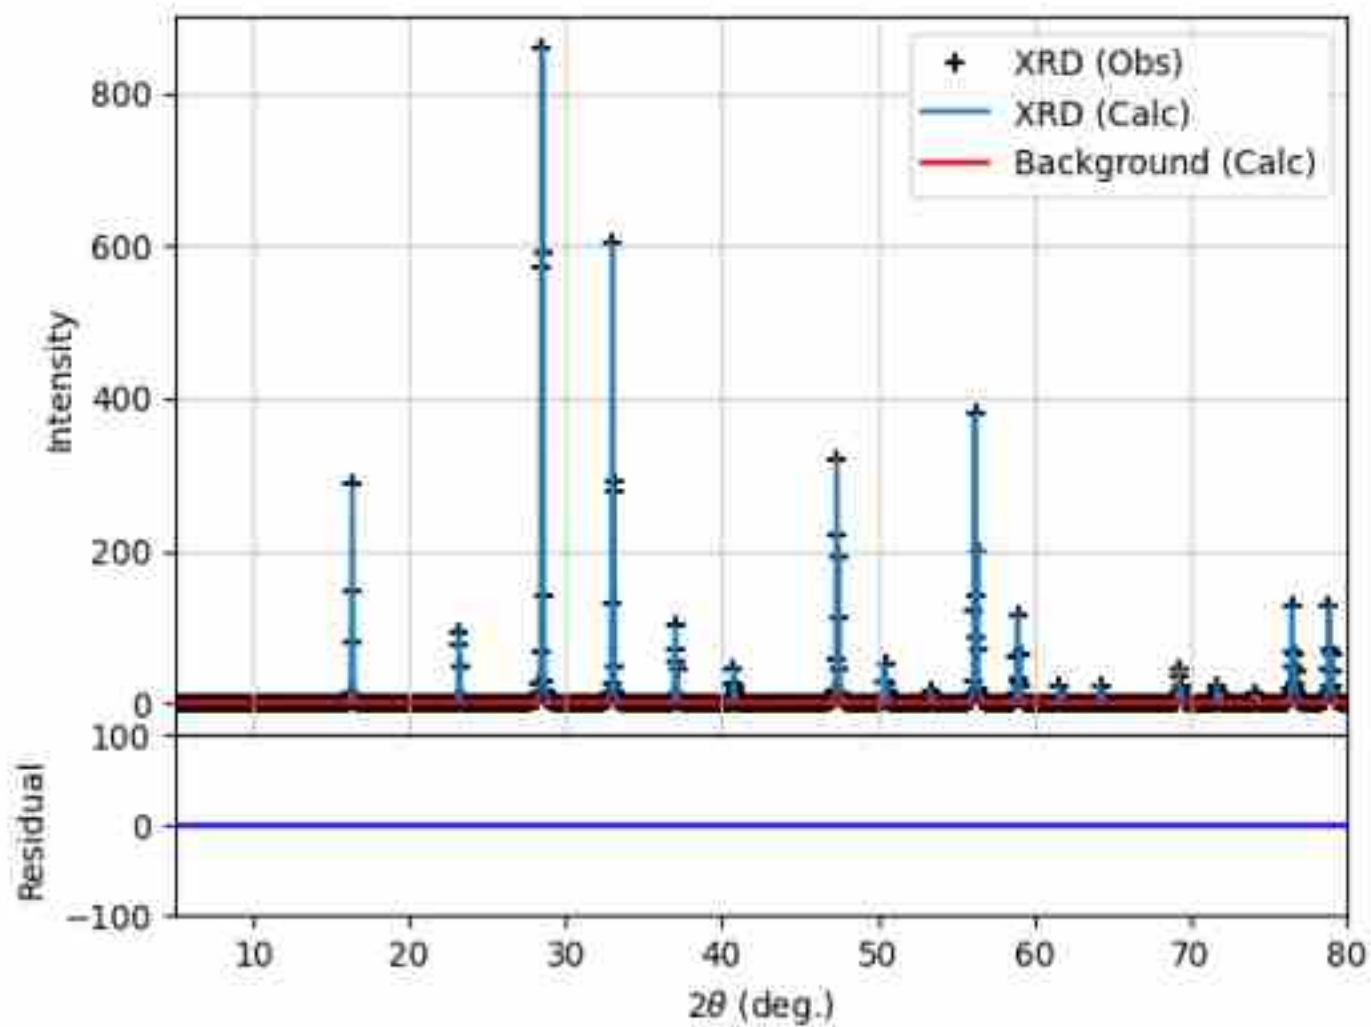

| RMSE before RR | Rwp     | RMSE after RR |
|----------------|---------|---------------|
| 0.01           | 0.00494 | 0.00217       |

# Be1Co2Si1

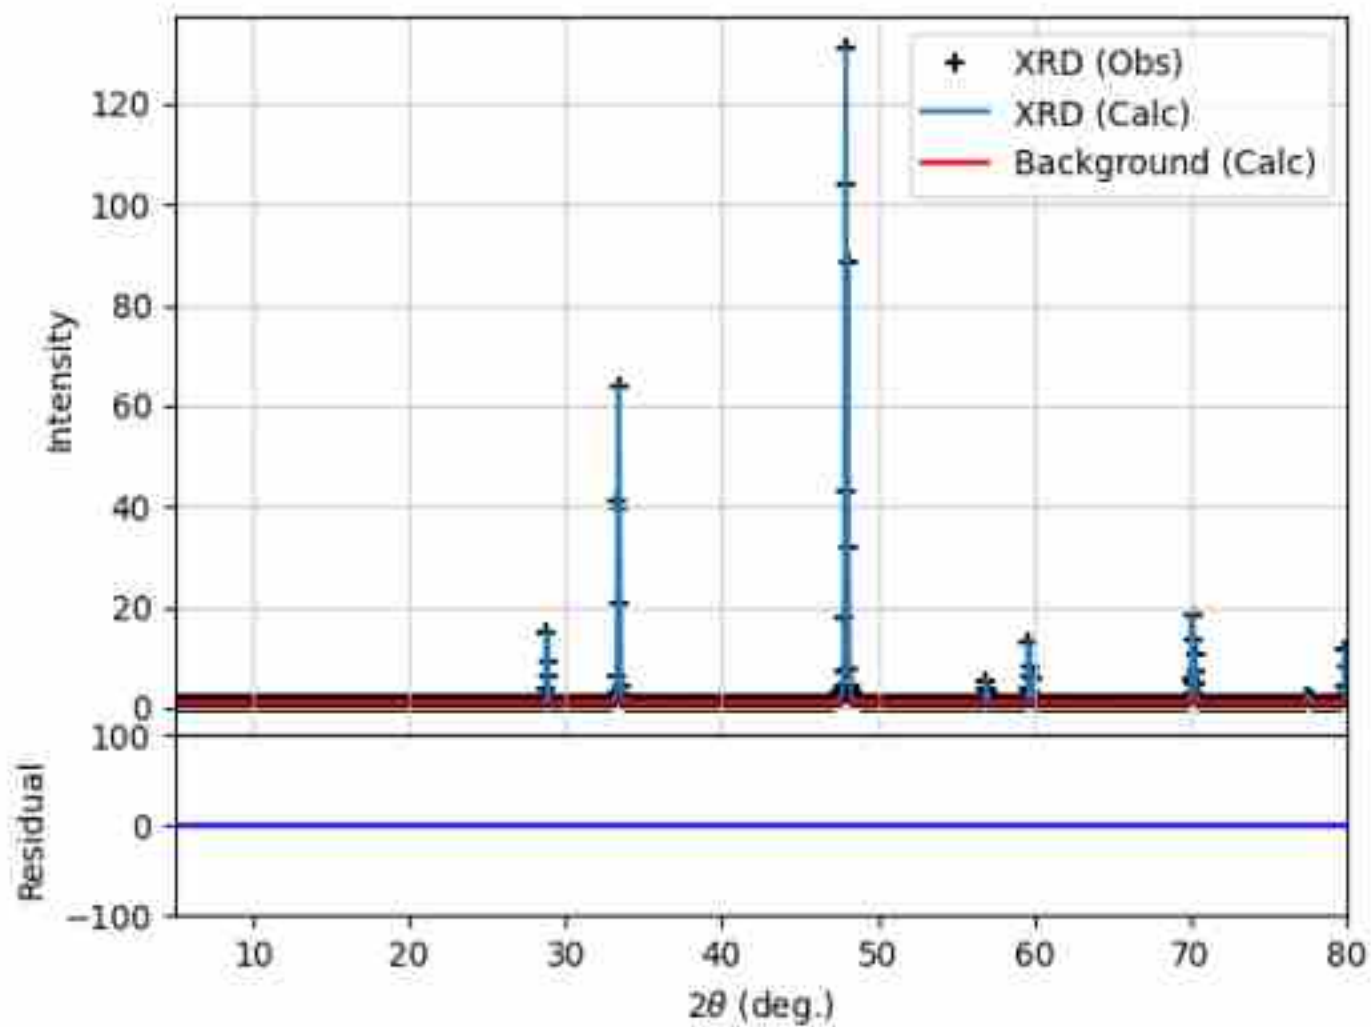

| RMSE before RR | Rwp     | RMSE after RR |
|----------------|---------|---------------|
| 0.001          | 0.03685 | 0.00194       |

# Be1Ga1Rh2

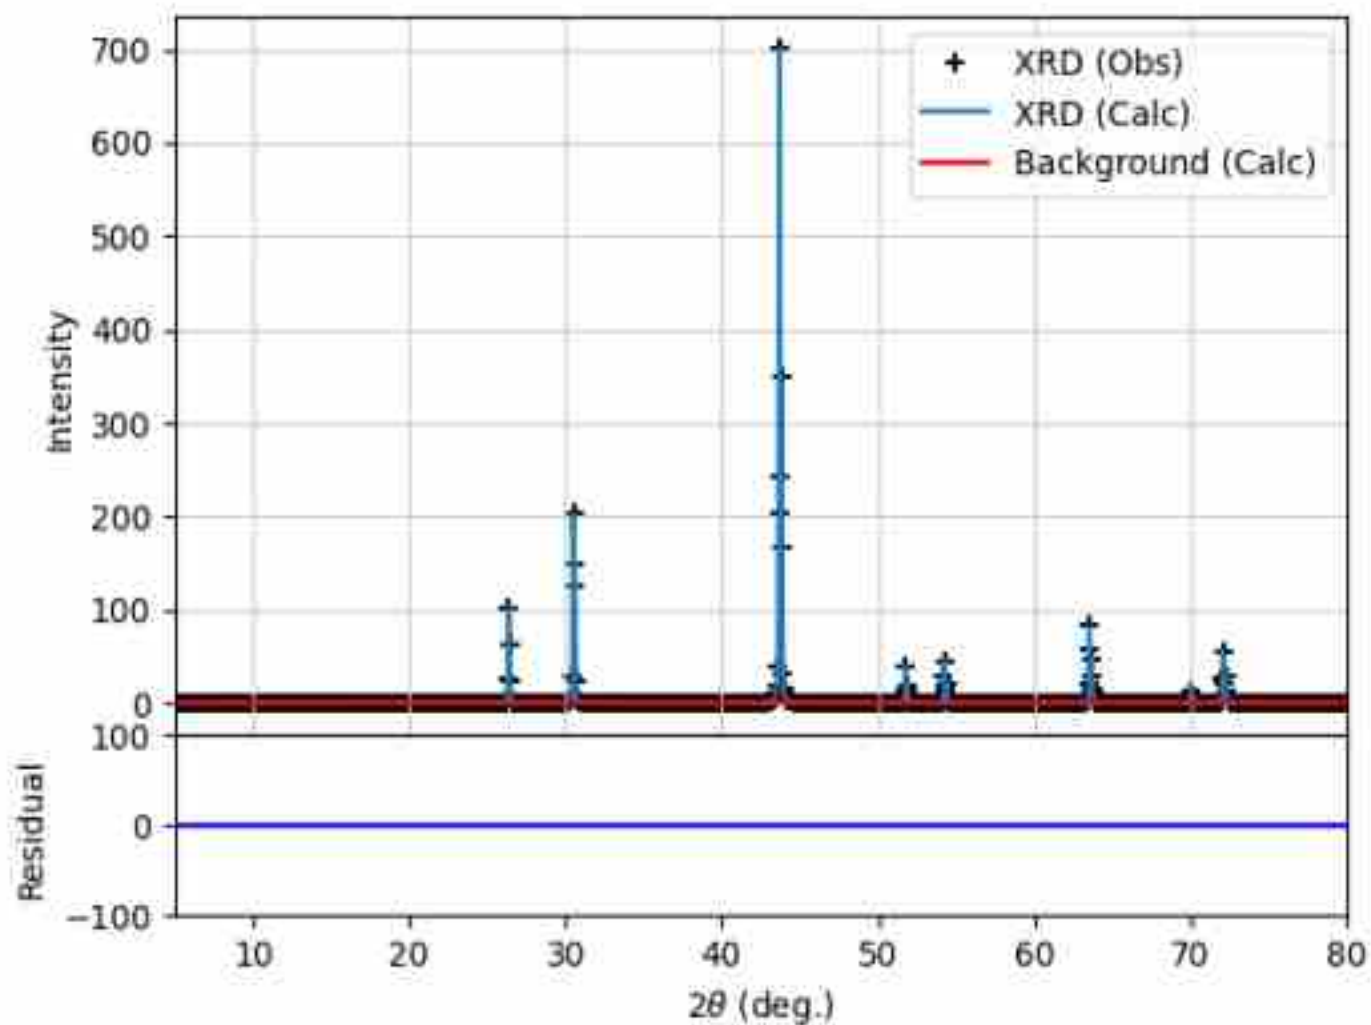

| RMSE before RR | Rwp     | RMSE after RR |
|----------------|---------|---------------|
| 0.001          | 0.00274 | 0.00115       |

# Be1Pd1

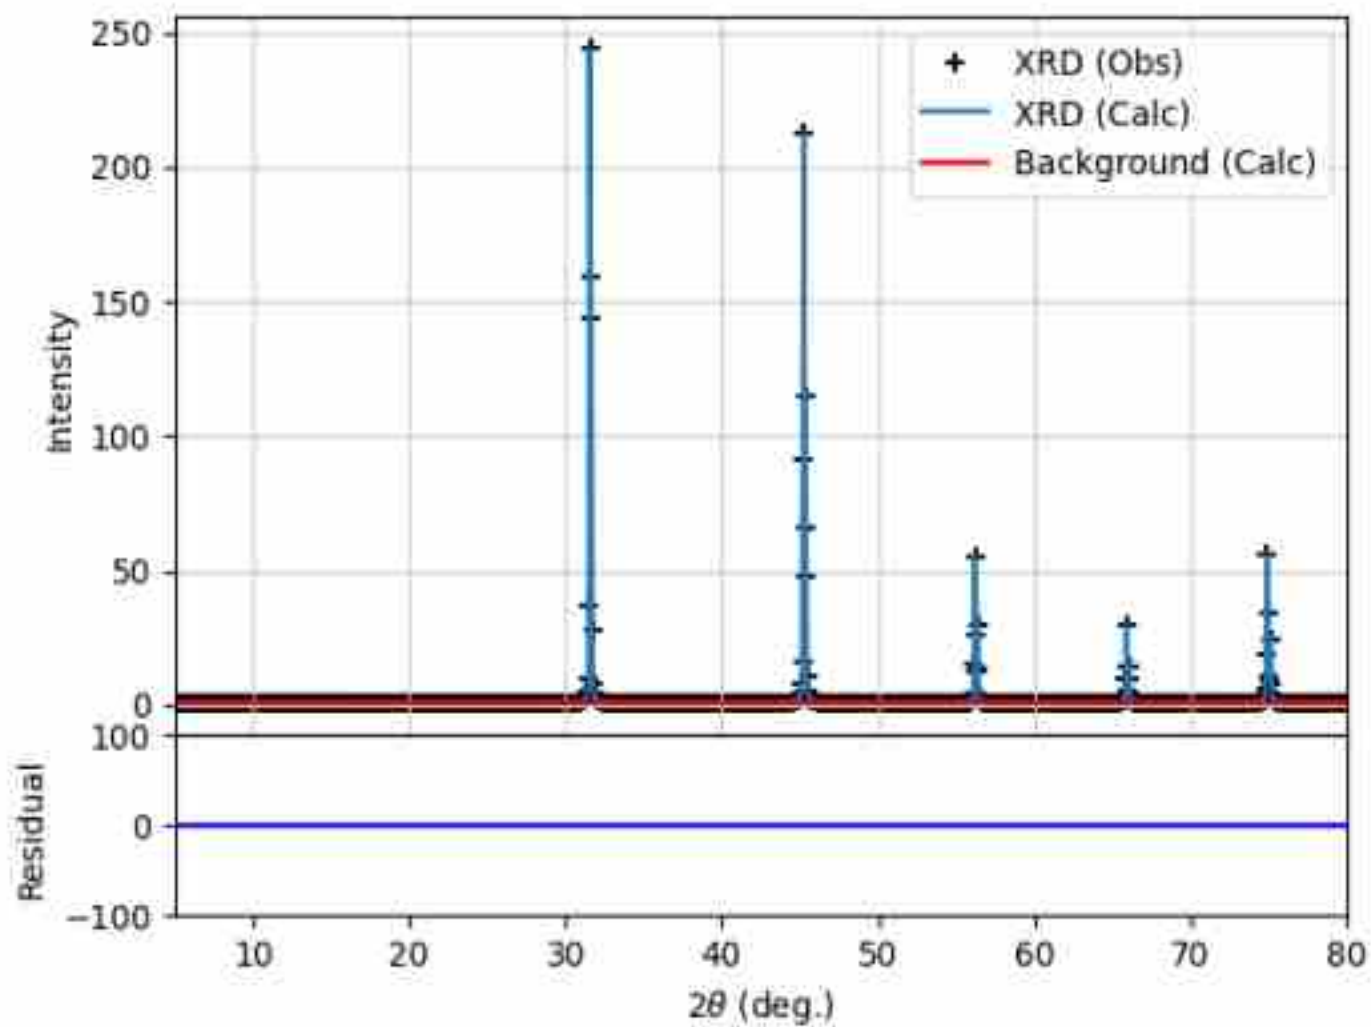

| RMSE before RR | Rwp     | RMSE after RR |
|----------------|---------|---------------|
| 0.001          | 0.00169 | 0.0013        |

# Be1Rh1

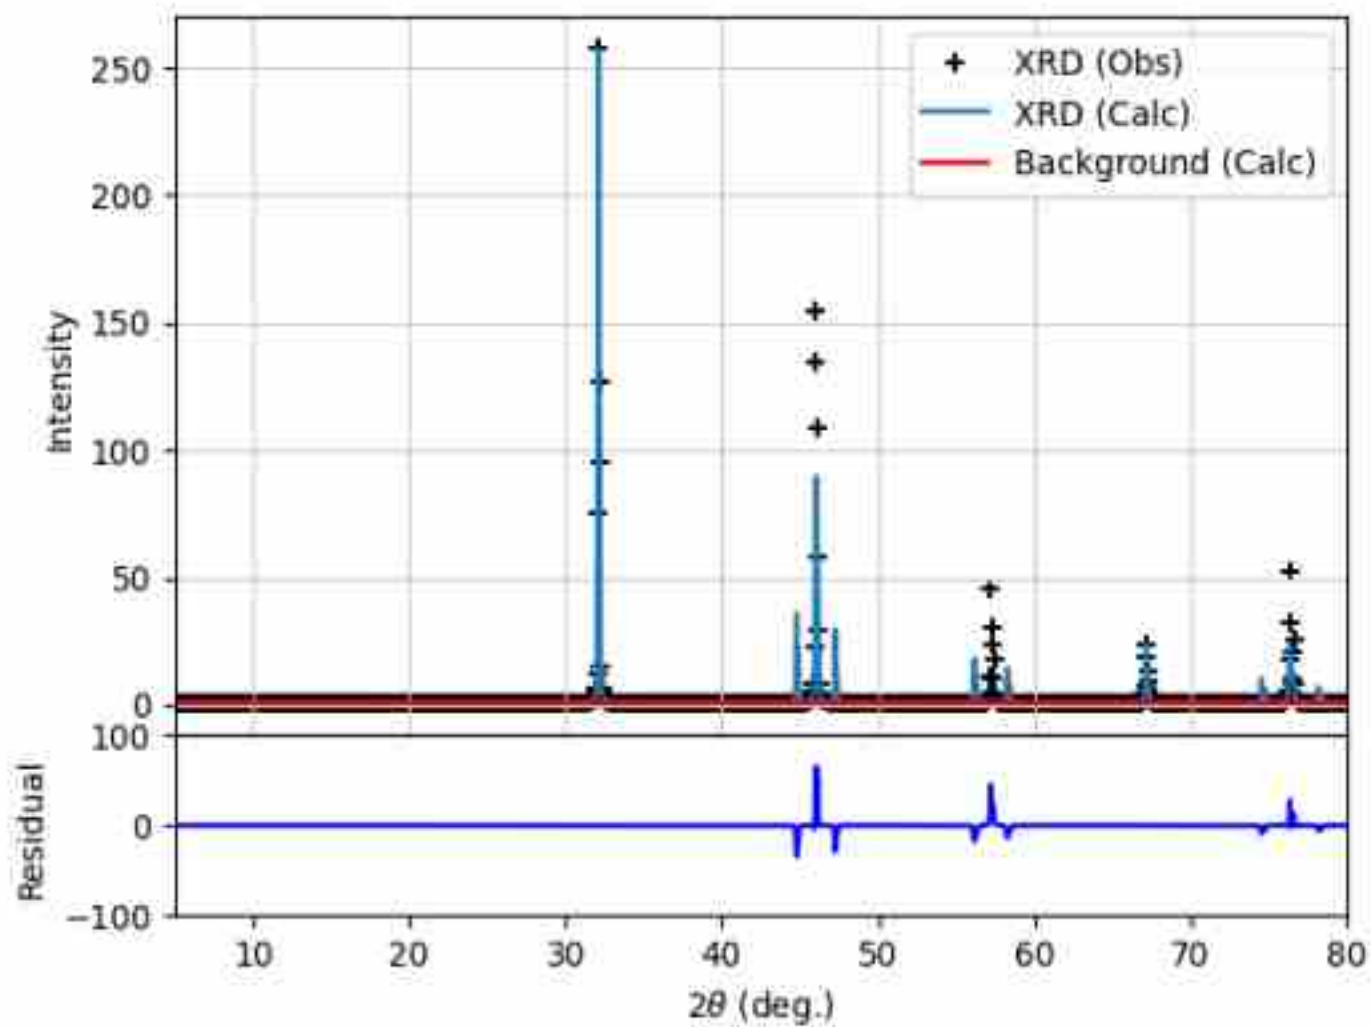

| RMSE before RR | Rwp   | RMSE after RR |
|----------------|-------|---------------|
| 0.001          | 100.0 | 0.00144       |

# Be1Si1Ni2

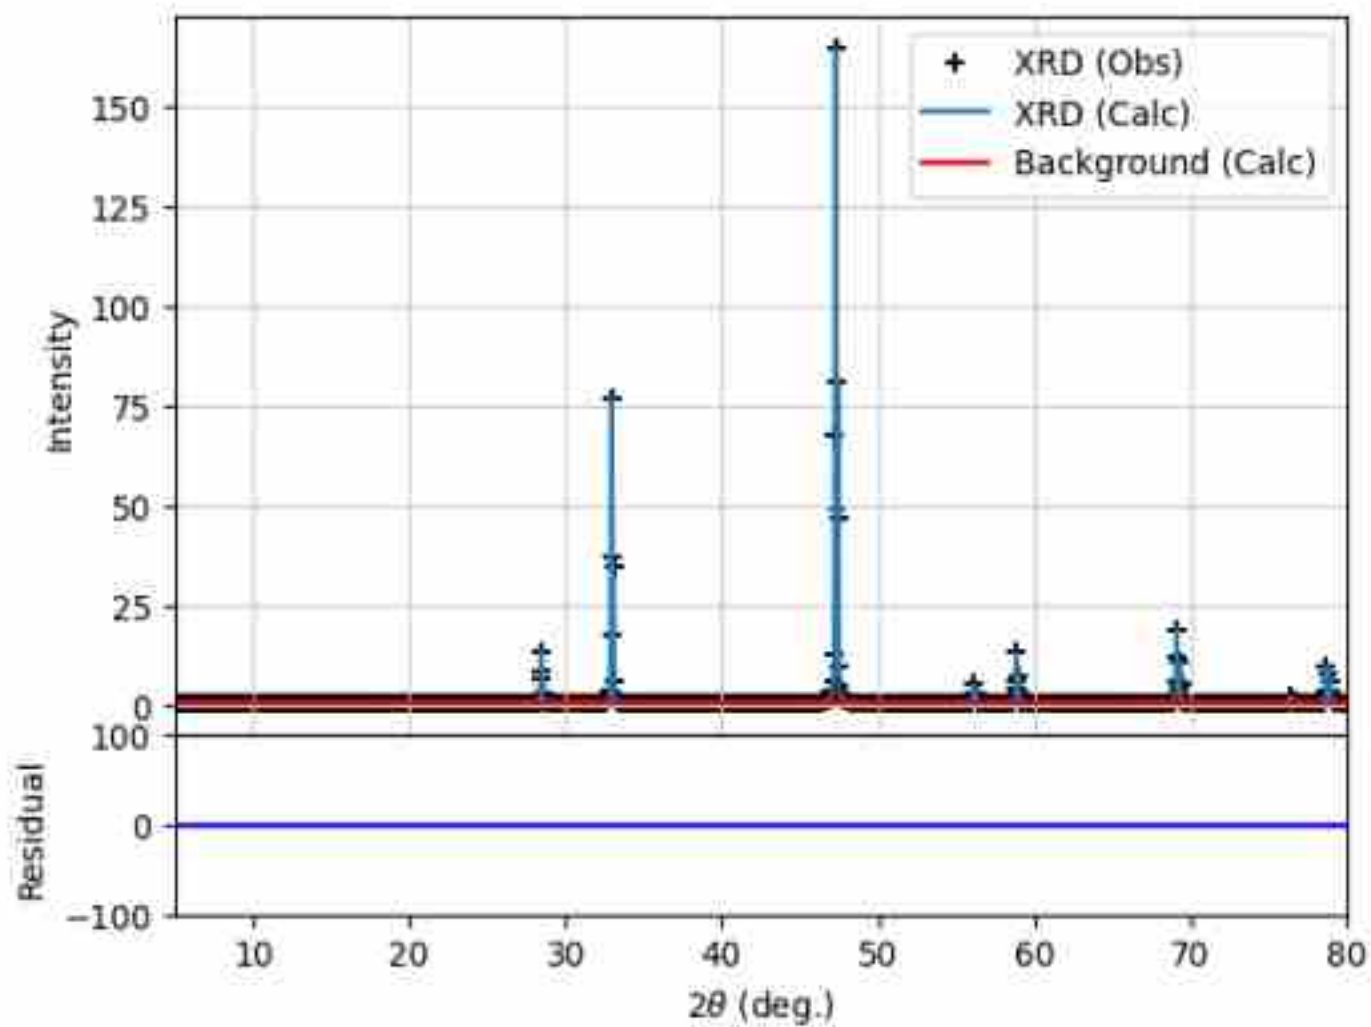

| RMSE before RR | Rwp     | RMSE after RR |
|----------------|---------|---------------|
| 0.001          | 0.00166 | 0.00068       |

# Be1Si1Rh2

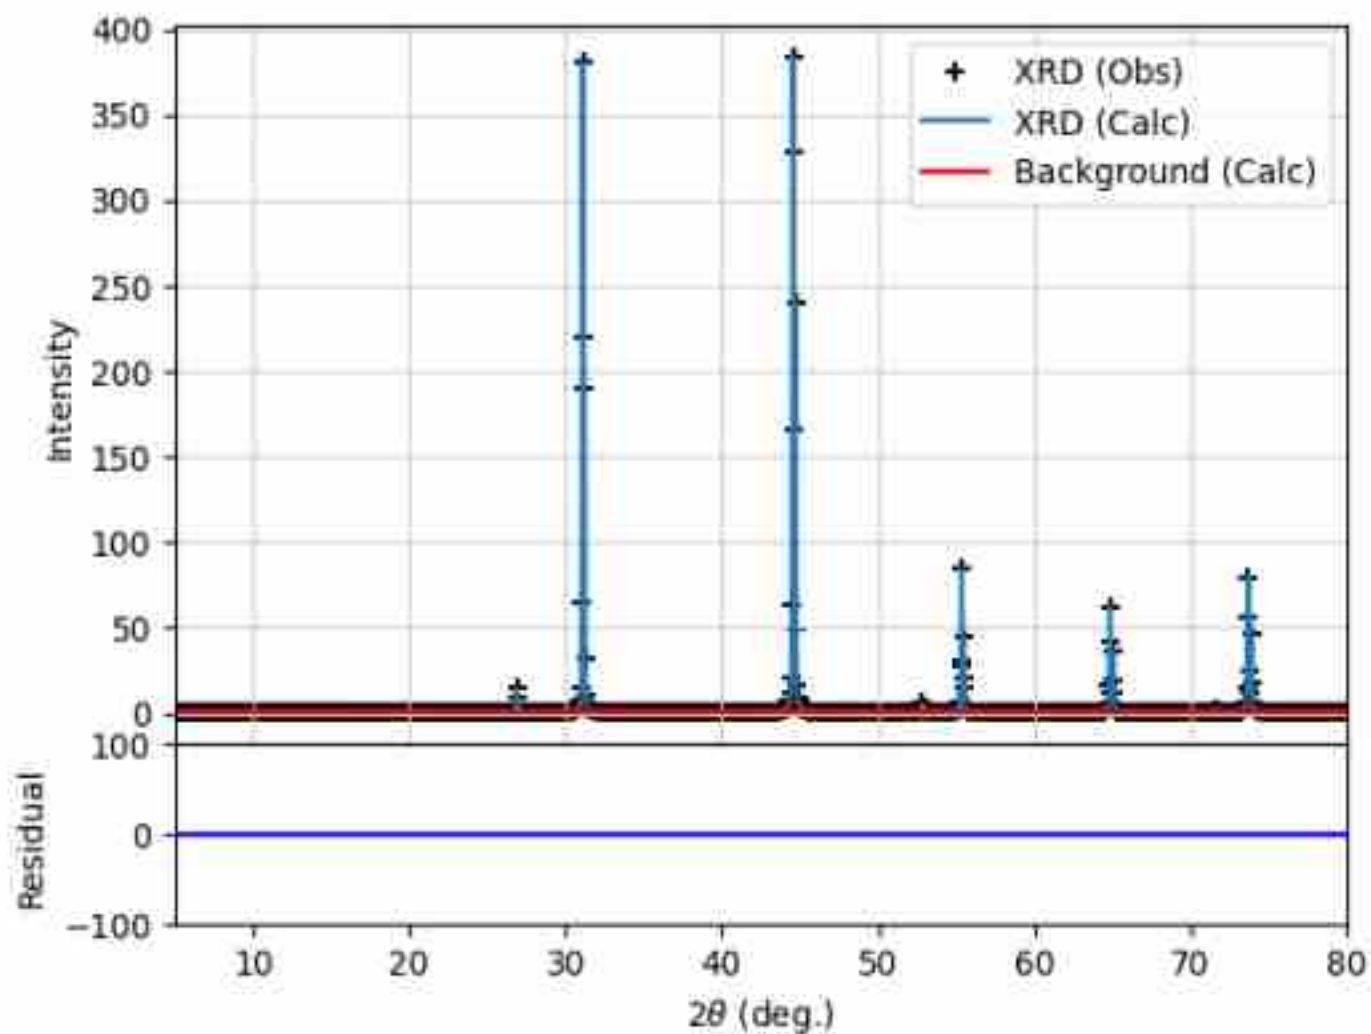

| RMSE before RR | Rwp     | RMSE after RR |
|----------------|---------|---------------|
| 0.001          | 0.00249 | 0.00133       |

# Be<sub>2</sub>Br<sub>4</sub>

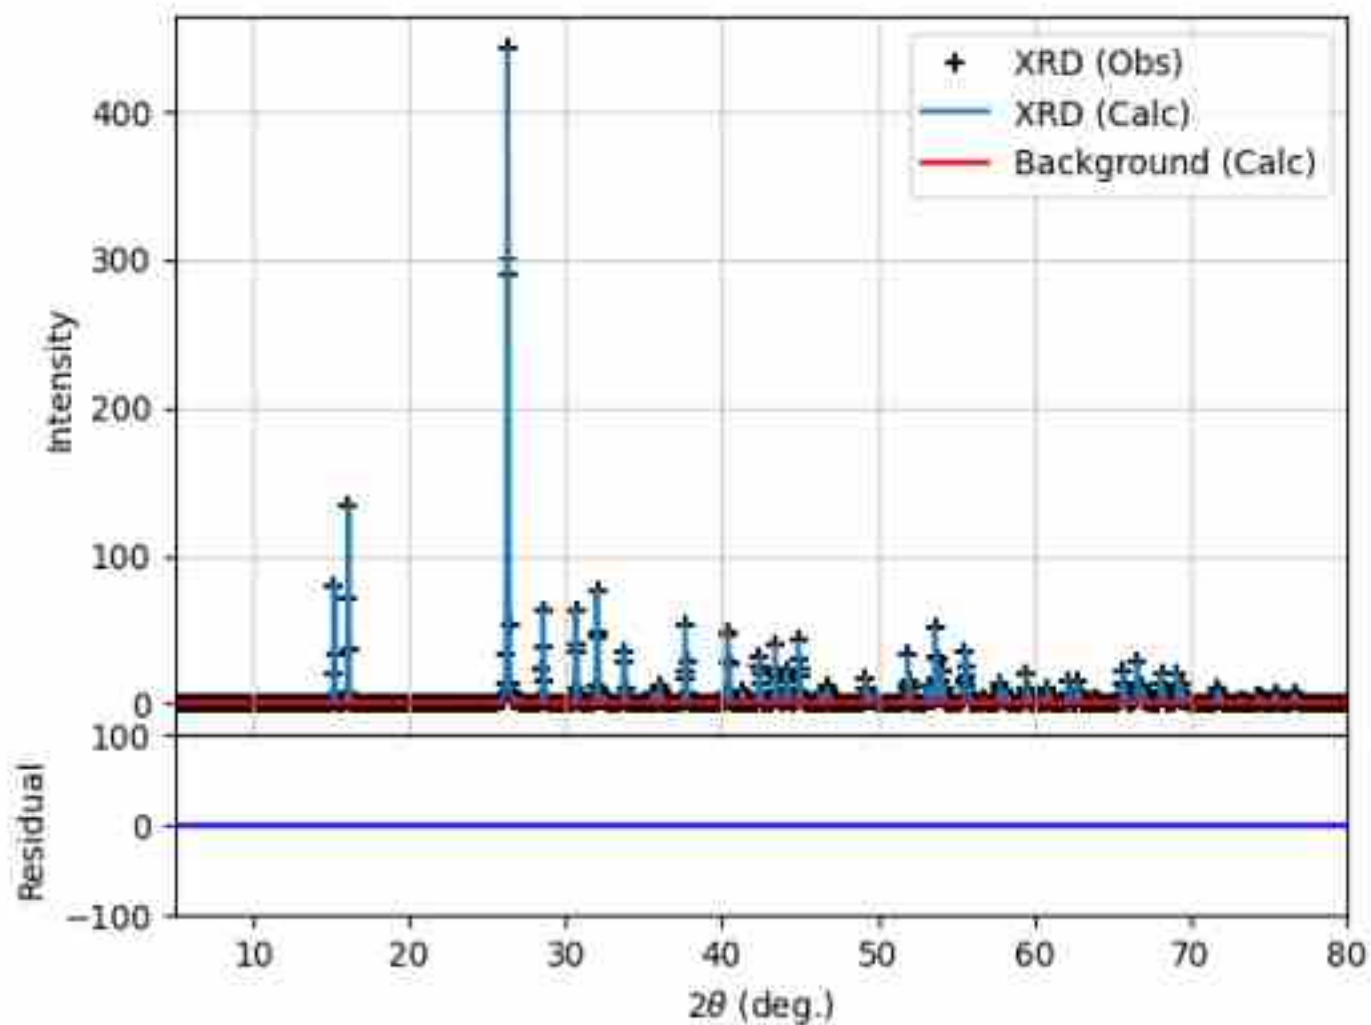

| RMSE before RR | Rwp     | RMSE after RR |
|----------------|---------|---------------|
| 0.01           | 0.00264 | 0.00077       |



# Be<sub>2</sub>CoIr<sub>1</sub>

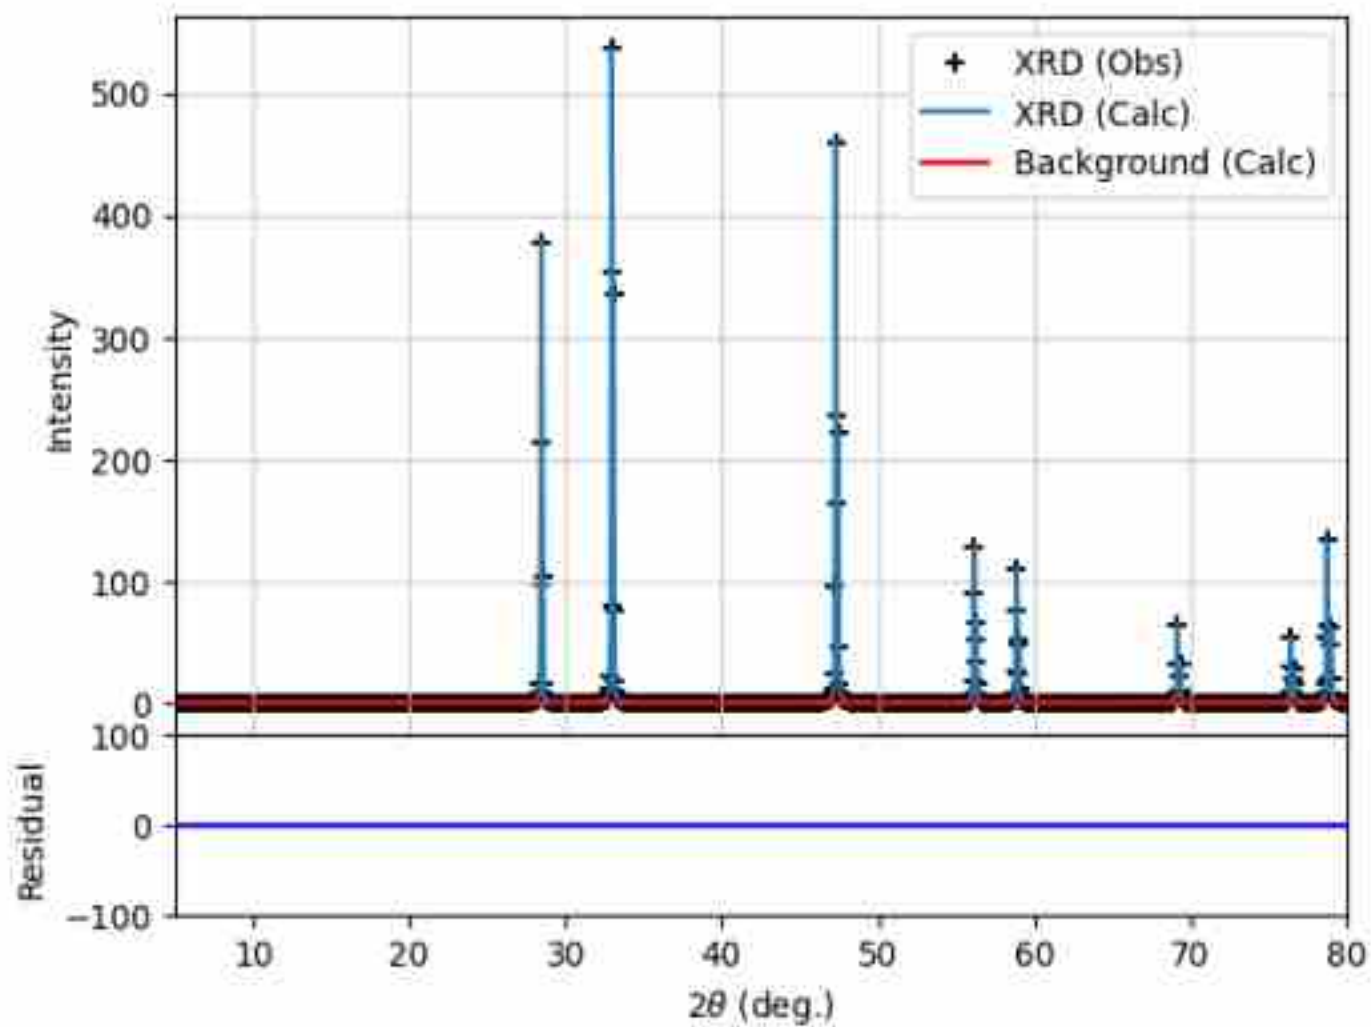

| RMSE before RR | Rwp     | RMSE after RR |
|----------------|---------|---------------|
| 0.001          | 0.00273 | 0.00163       |

# Be<sub>2</sub>Cu<sub>1</sub>Pt<sub>1</sub>

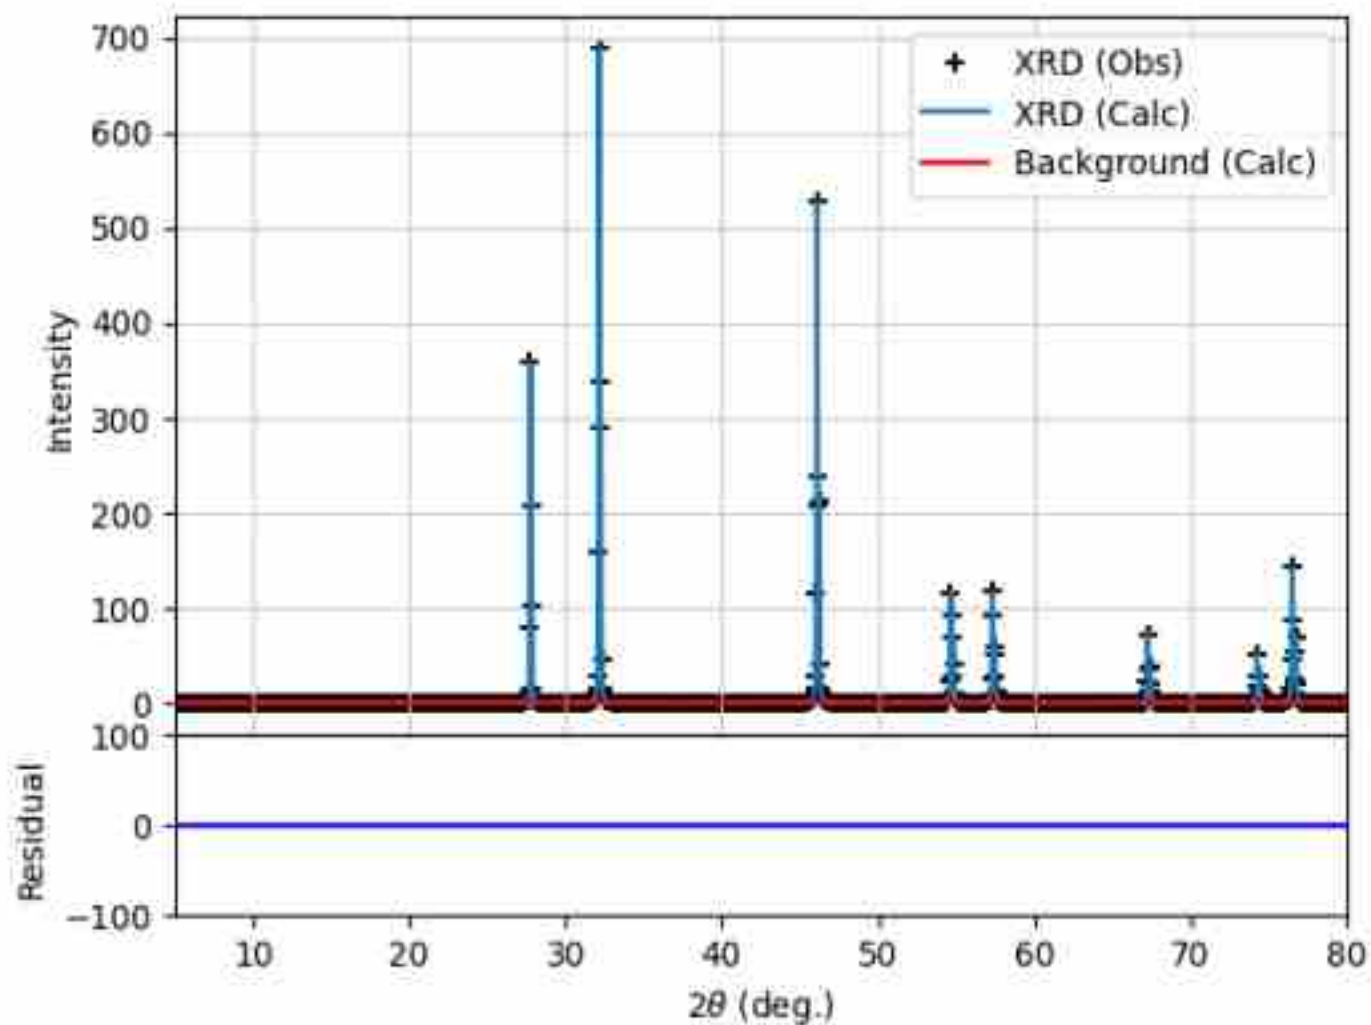

| RMSE before RR | Rwp     | RMSE after RR |
|----------------|---------|---------------|
| 0.001          | 0.00368 | 0.00146       |

# Be<sub>2</sub>NiIr

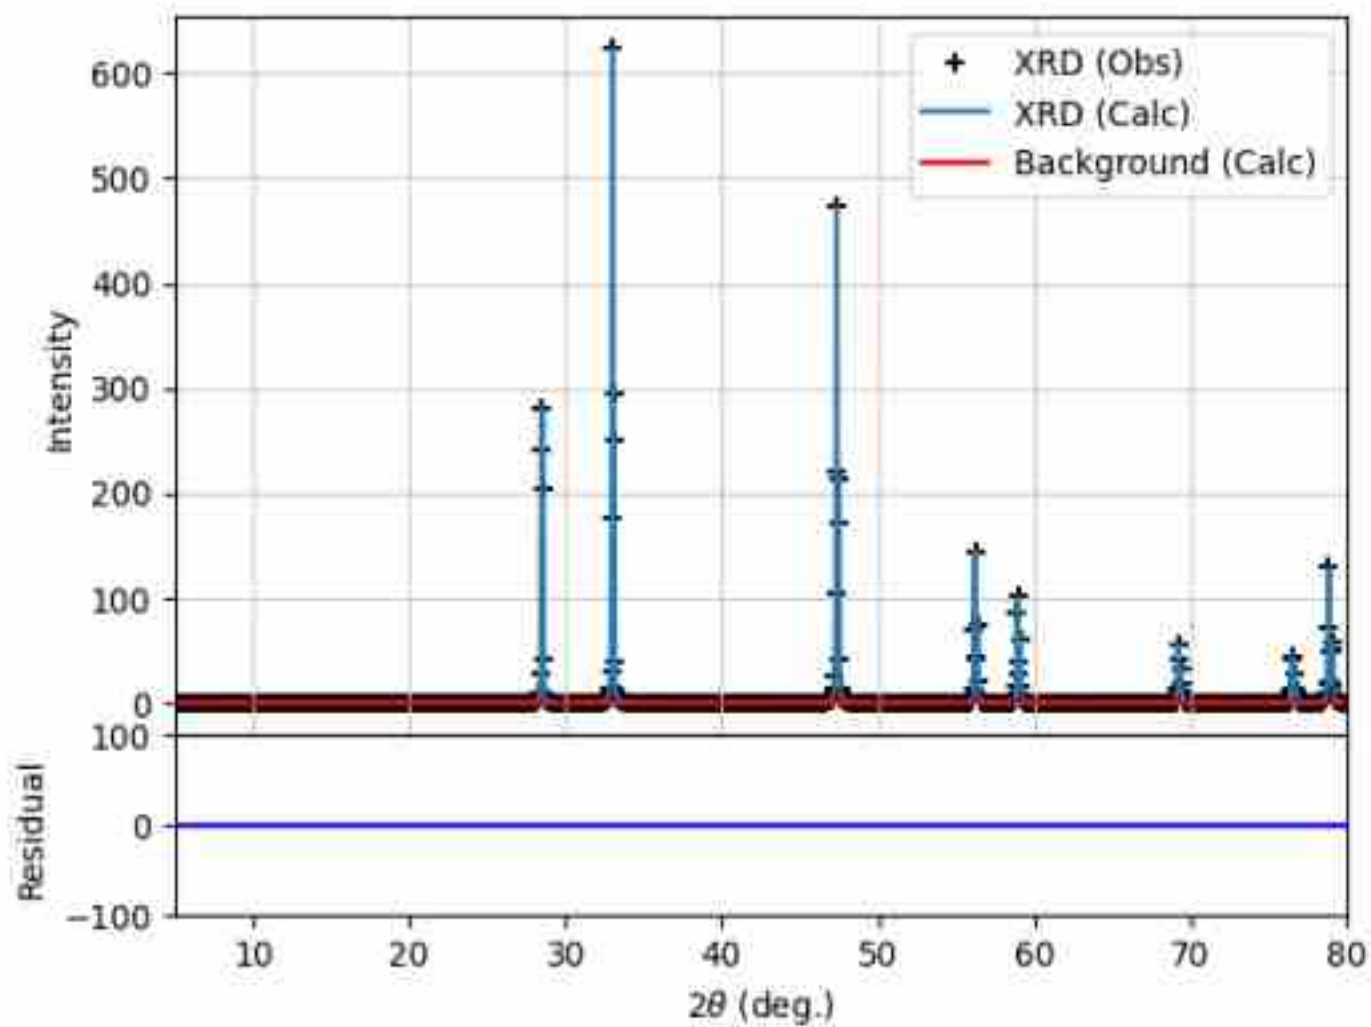

| RMSE before RR | Rwp     | RMSE after RR |
|----------------|---------|---------------|
| 0.001          | 0.00237 | 0.00396       |

# Be<sub>2</sub>NiPt<sub>1</sub>

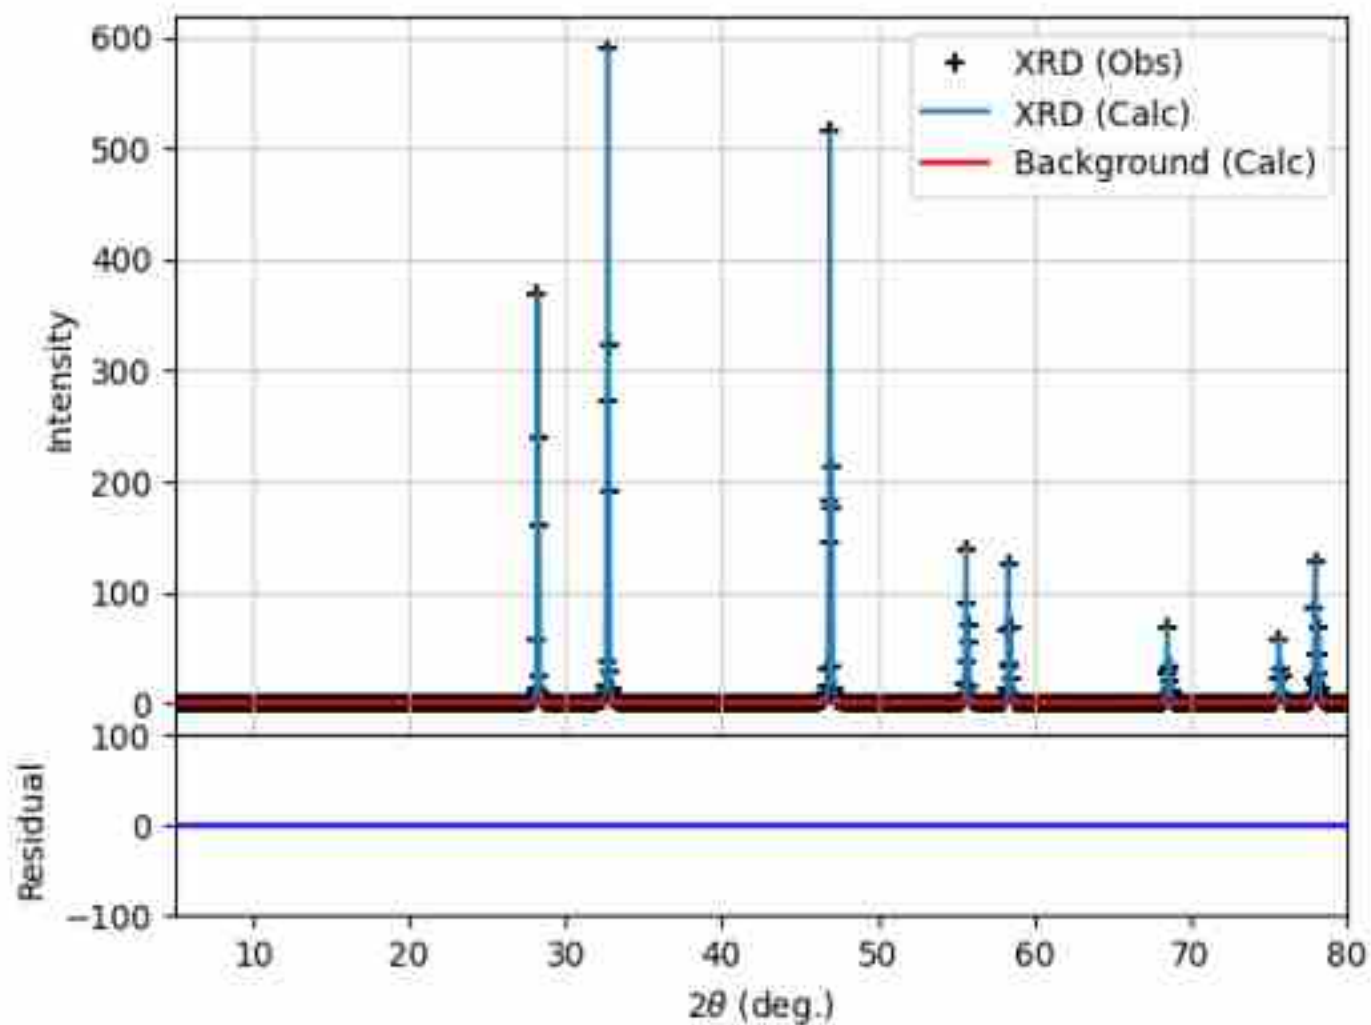

| RMSE before RR | Rwp     | RMSE after RR |
|----------------|---------|---------------|
| 0.001          | 0.00338 | 0.00361       |

# Bi1Pd2Au1

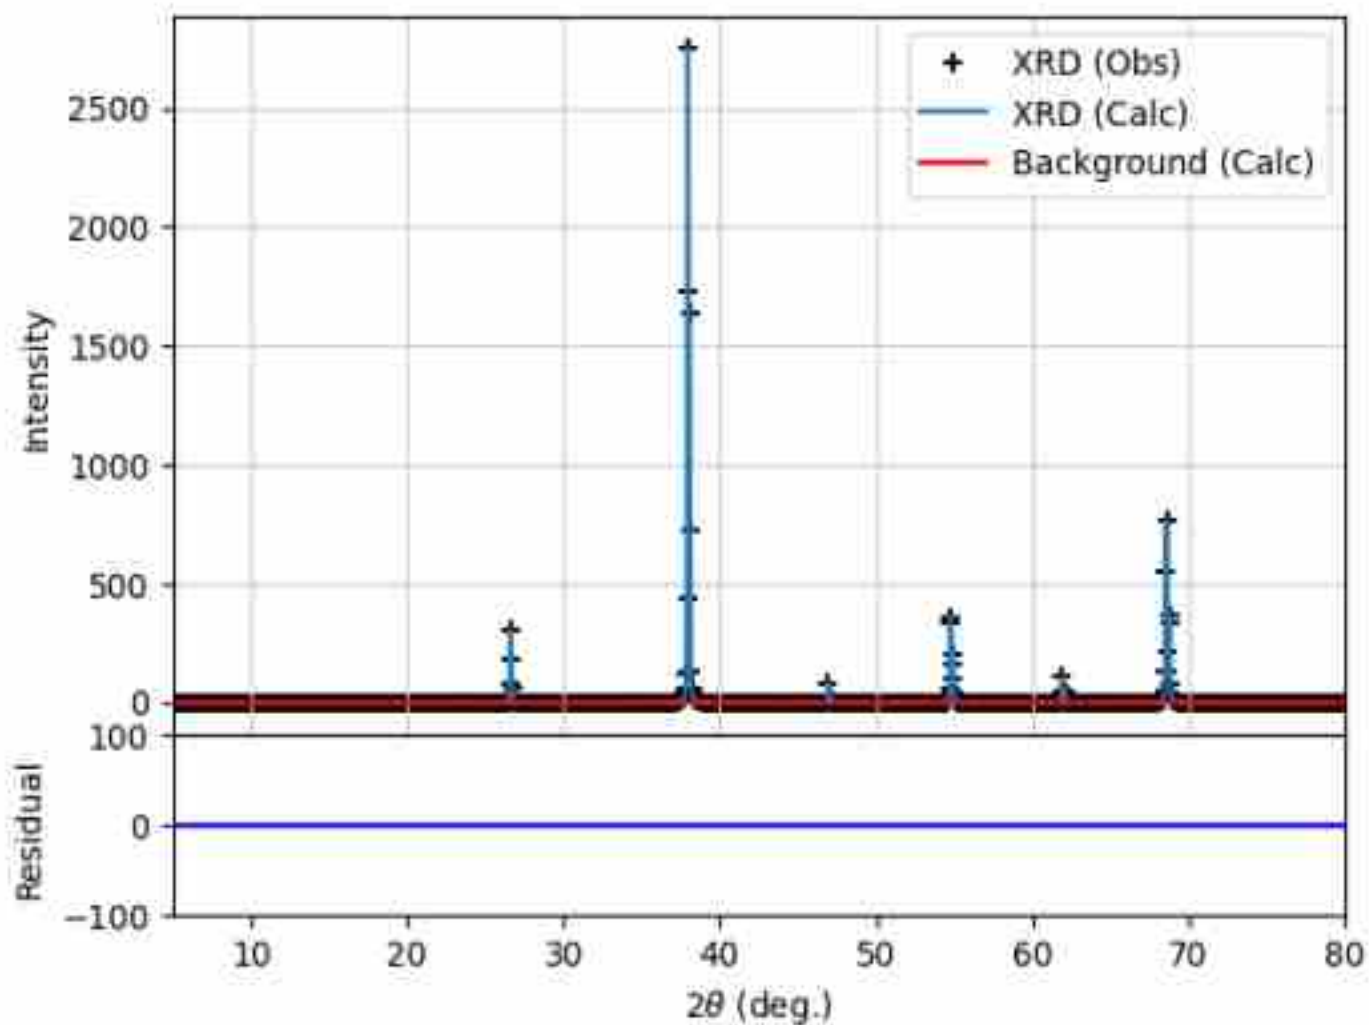

| RMSE before RR | Rwp     | RMSE after RR |
|----------------|---------|---------------|
| 0.001          | 0.01161 | 0.00065       |

# Bi1Pd3

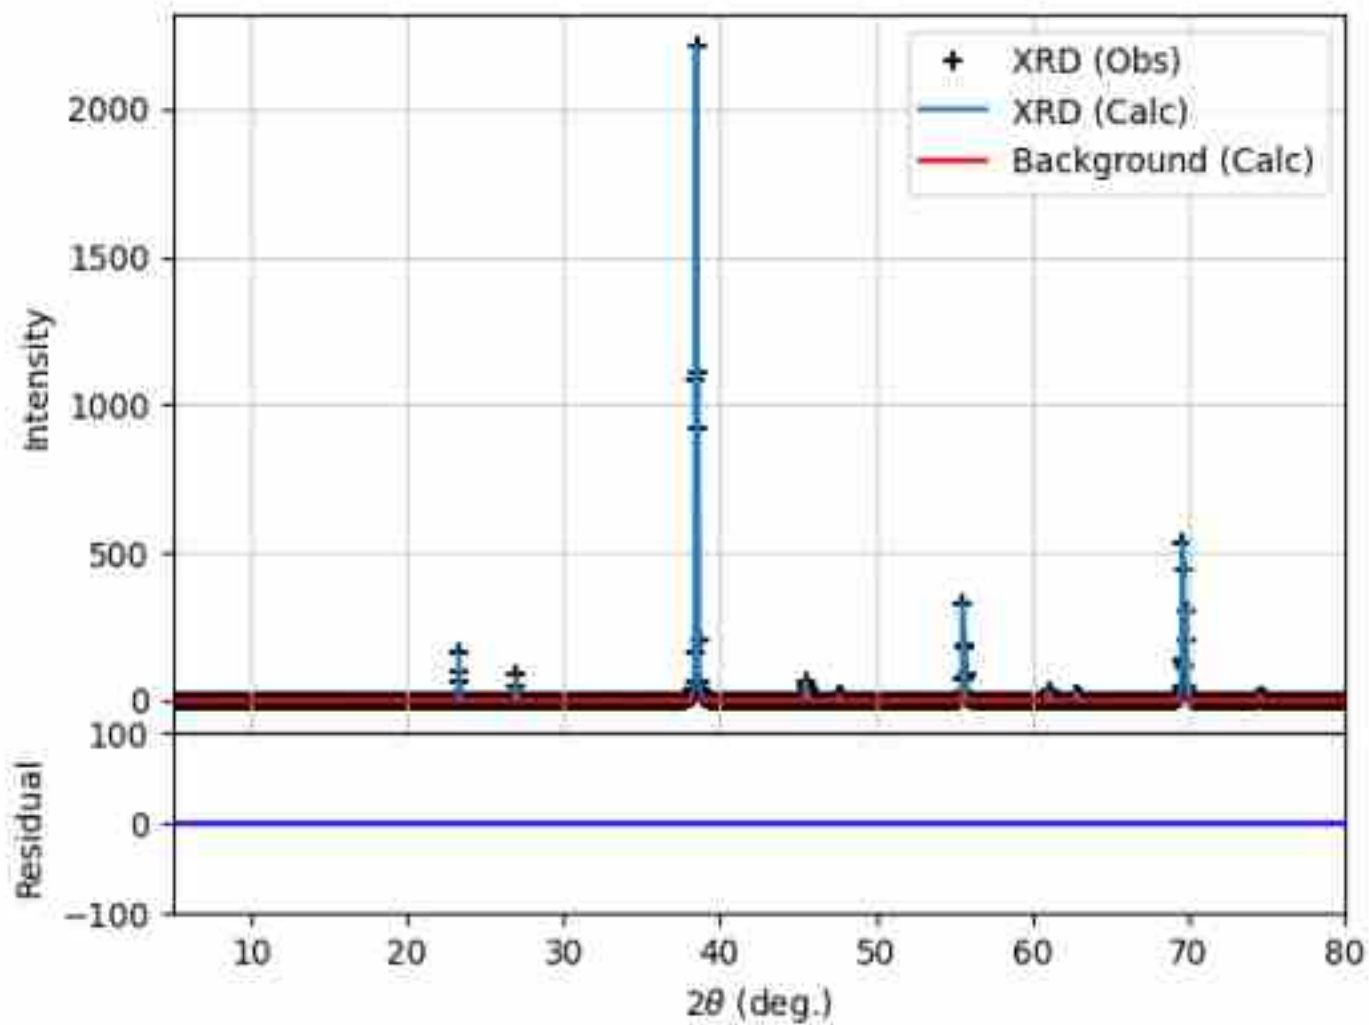

| RMSE before RR | Rwp     | RMSE after RR |
|----------------|---------|---------------|
| 0.001          | 0.00497 | 0.00066       |

# Bi<sub>2</sub>I<sub>6</sub>

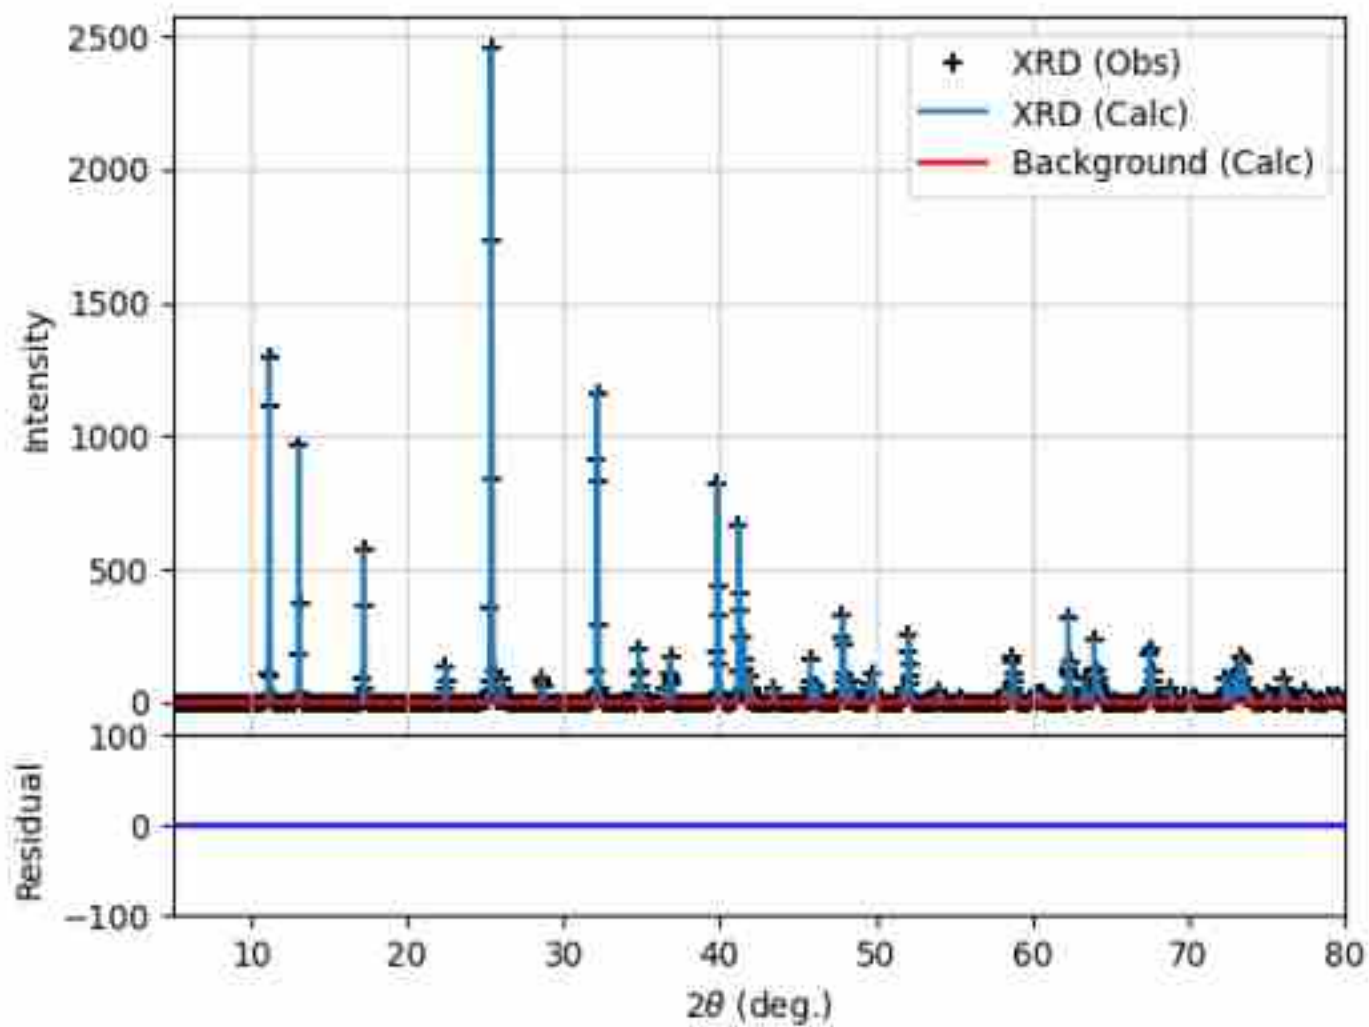

| RMSE before RR | Rwp    | RMSE after RR |
|----------------|--------|---------------|
| 0.01           | 0.0025 | 0.00026       |

# Ca1Ac1Au2

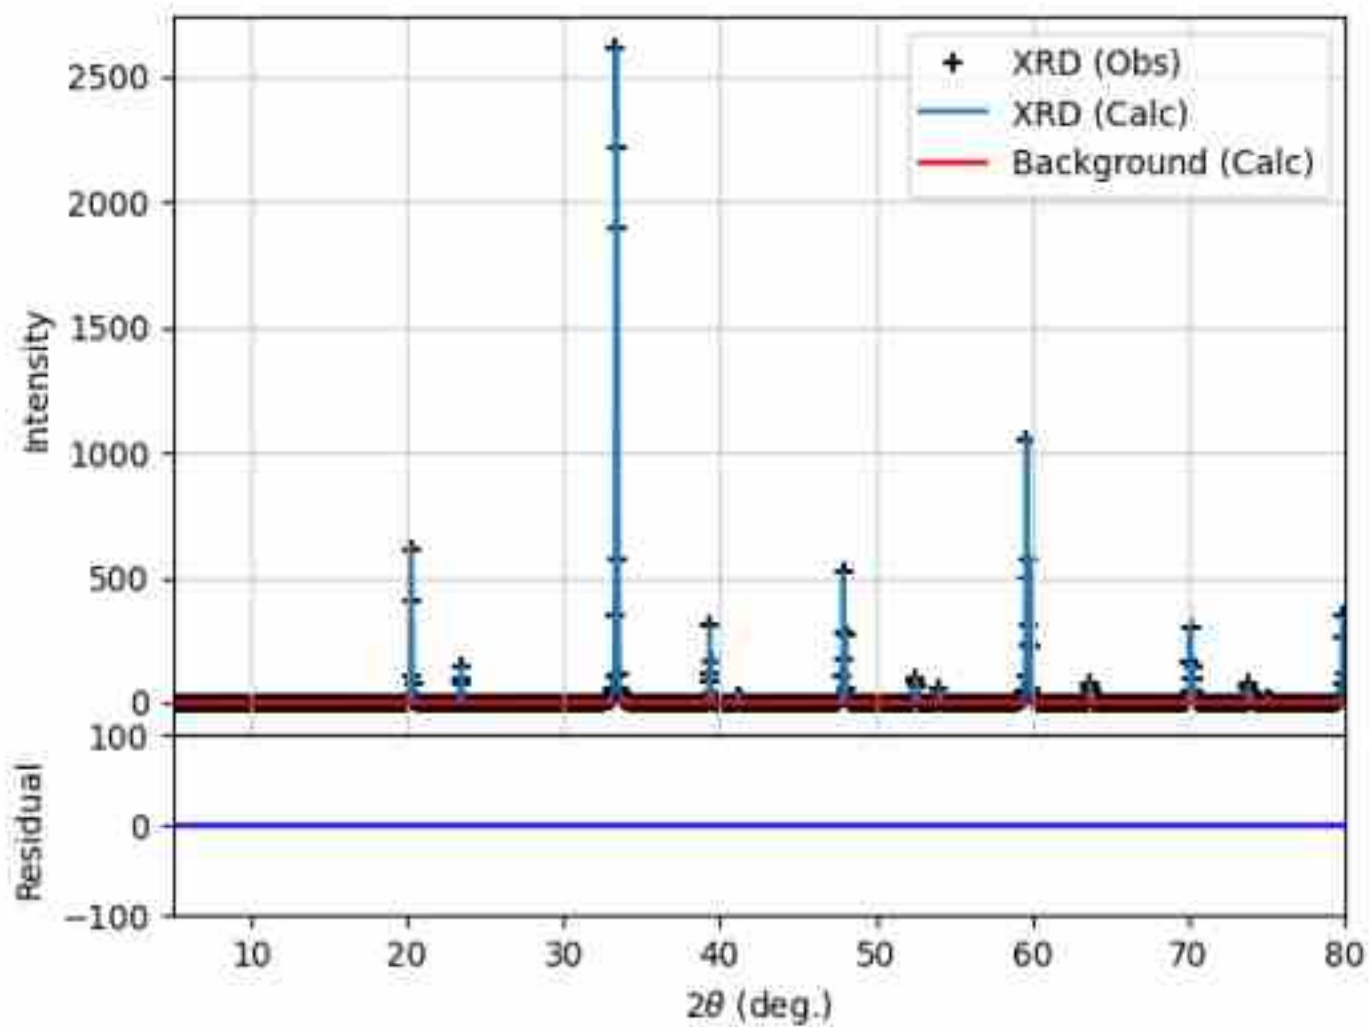

| RMSE before RR | Rwp     | RMSE after RR |
|----------------|---------|---------------|
| 0.001          | 0.00388 | 0.0003        |



# Ca<sub>1</sub>As<sub>2</sub>Ru<sub>2</sub>

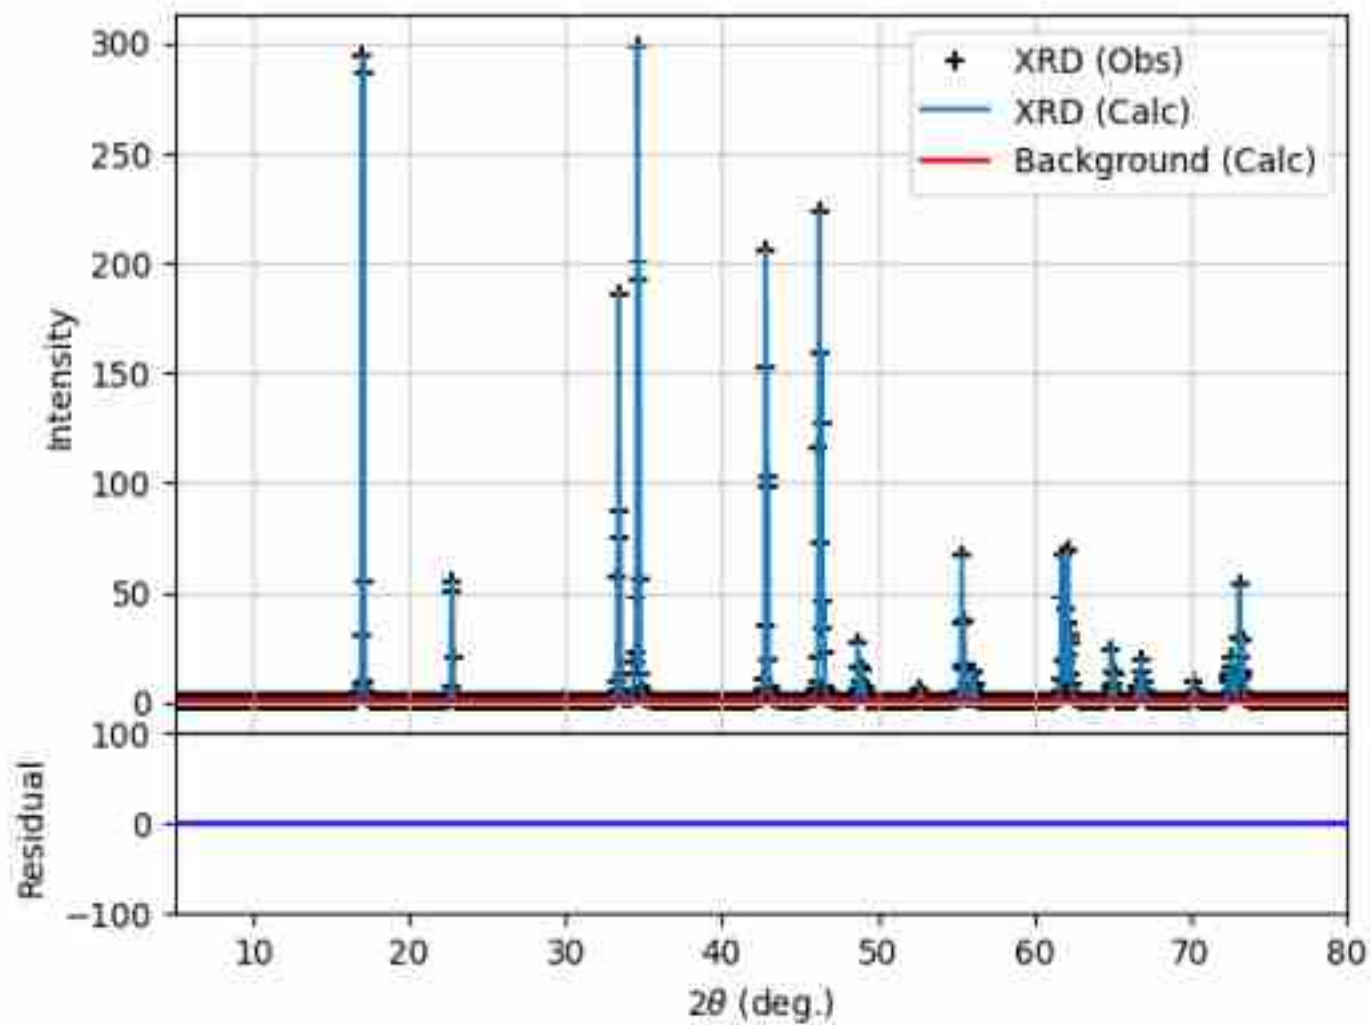

| RMSE before RR | Rwp     | RMSE after RR |
|----------------|---------|---------------|
| 0.01           | 0.00402 | 0.00042       |

# Ca1Ce1Cd2

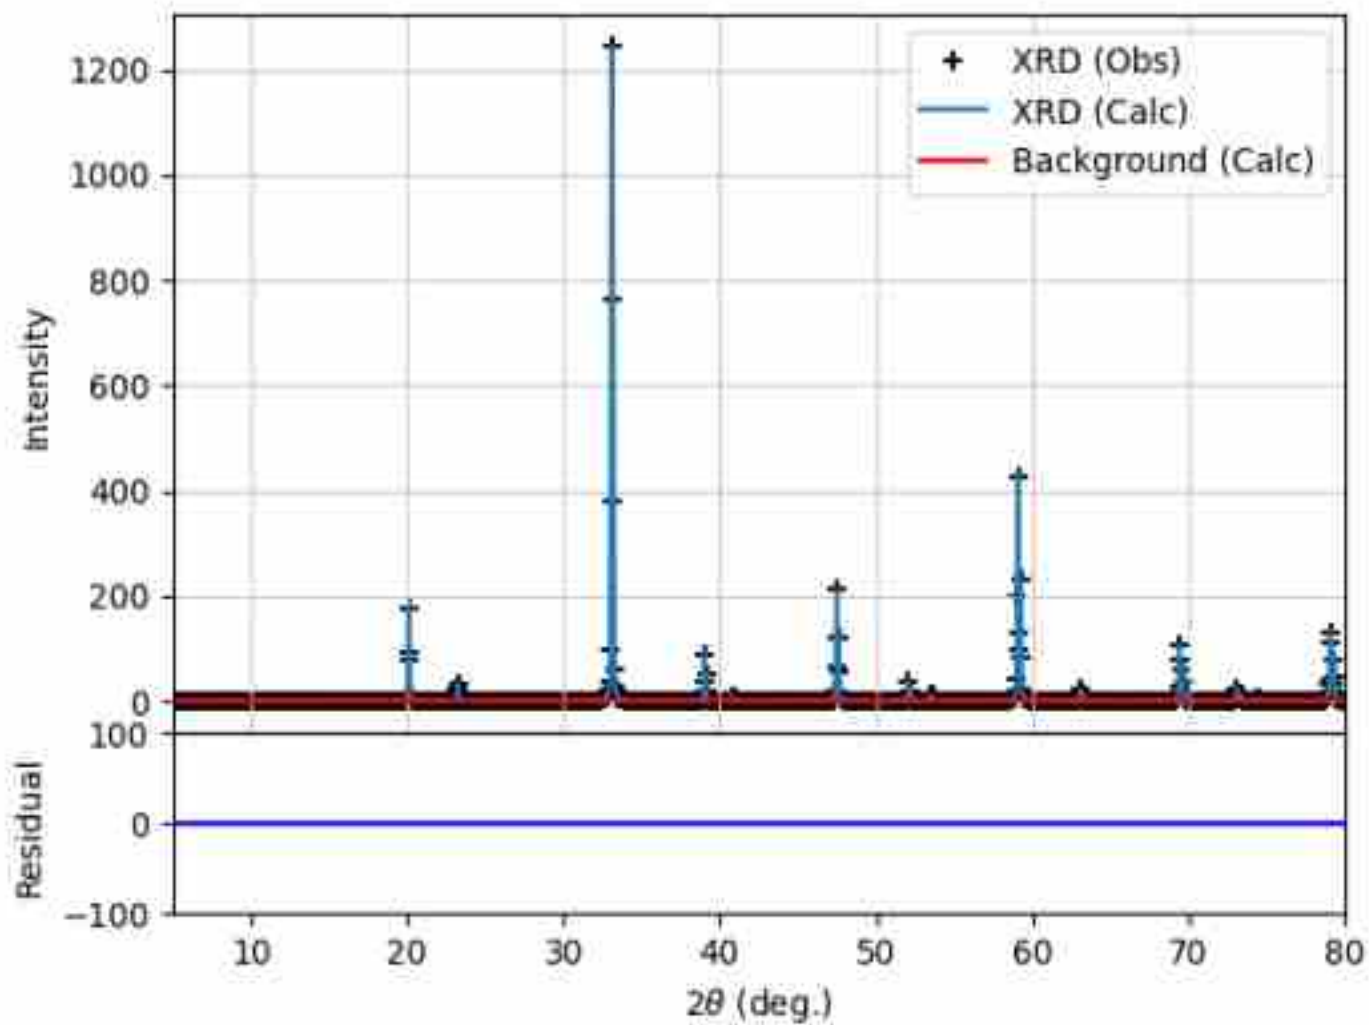

| RMSE before RR | Rwp     | RMSE after RR |
|----------------|---------|---------------|
| 0.001          | 0.00392 | 0.0007        |

# Ca1Er1Rh2

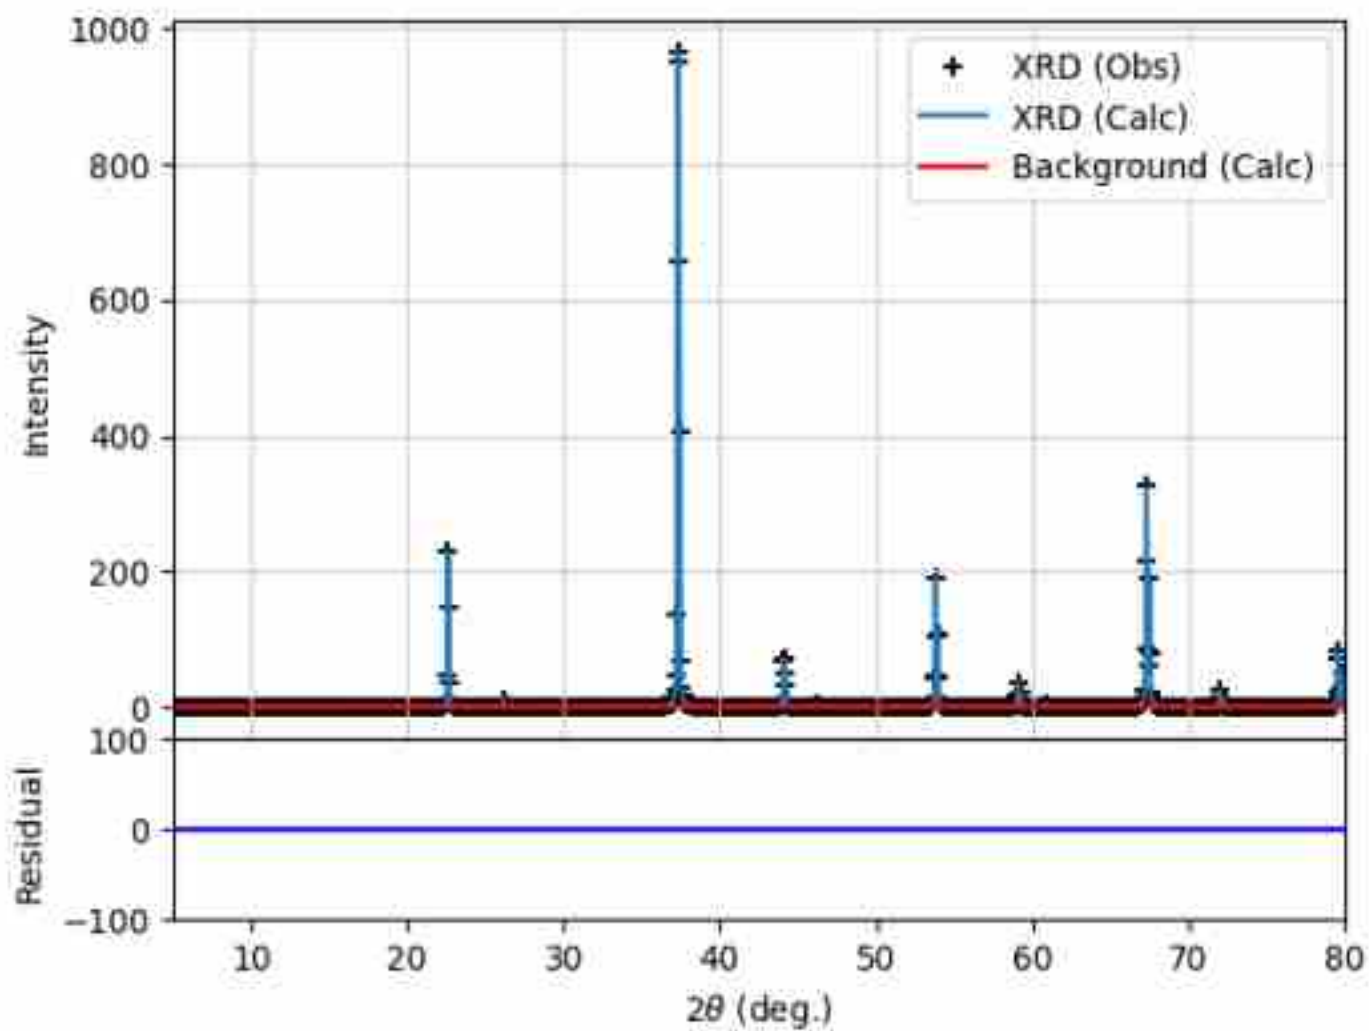

| RMSE before RR | Rwp     | RMSE after RR |
|----------------|---------|---------------|
| 0.001          | 0.00333 | 0.00044       |

# Ca1Eu1Zn1W1O6

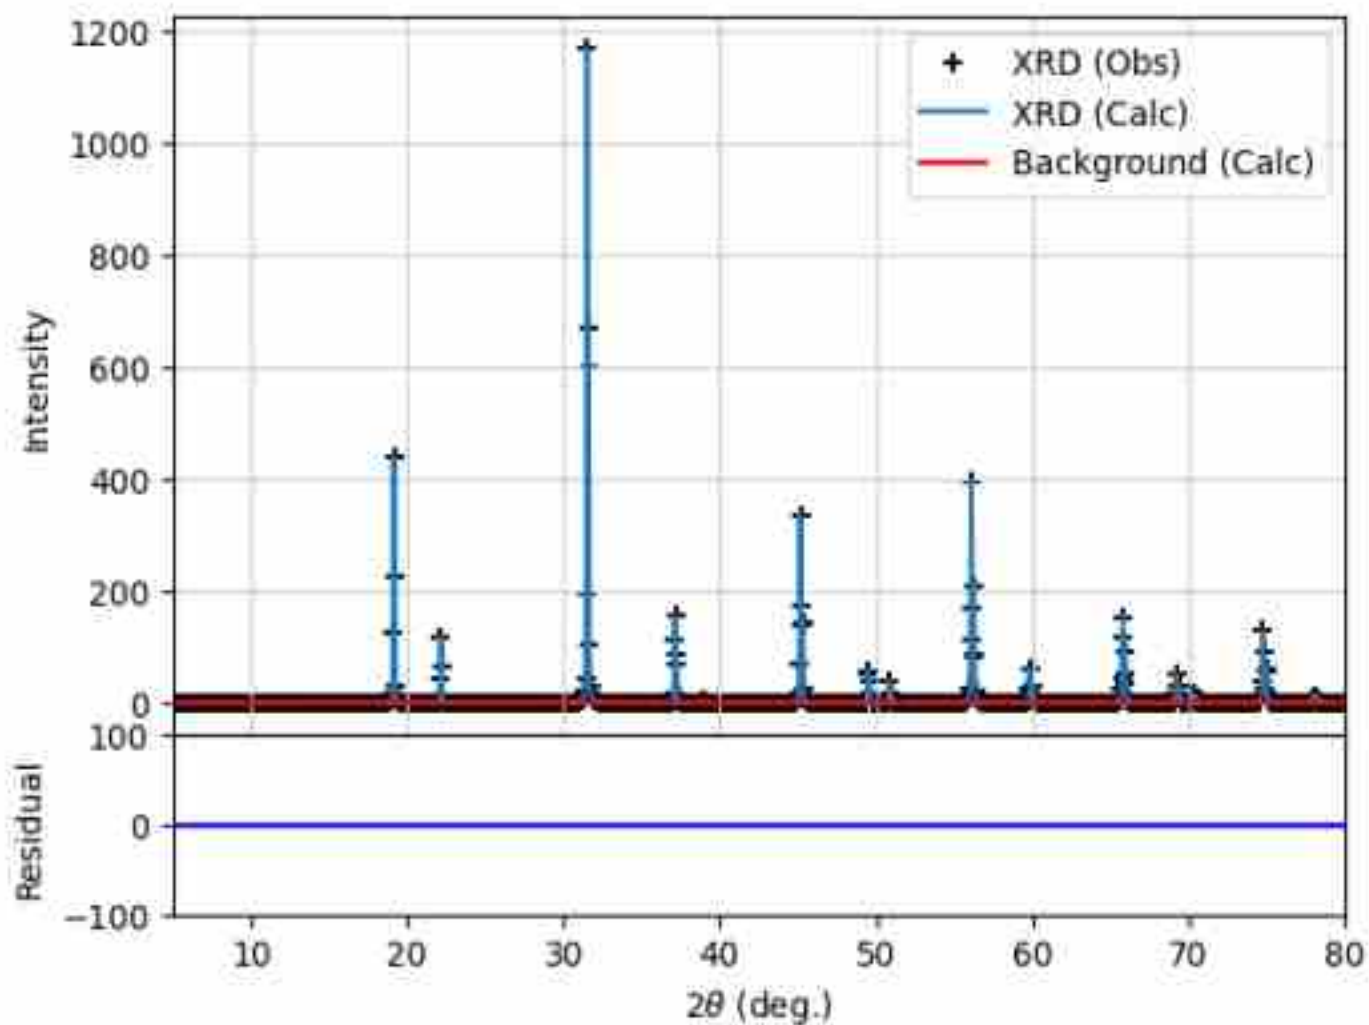

| RMSE before RR | Rwp     | RMSE after RR |
|----------------|---------|---------------|
| 0.01           | 0.00527 | 0.0028        |

# Ca1Eu3

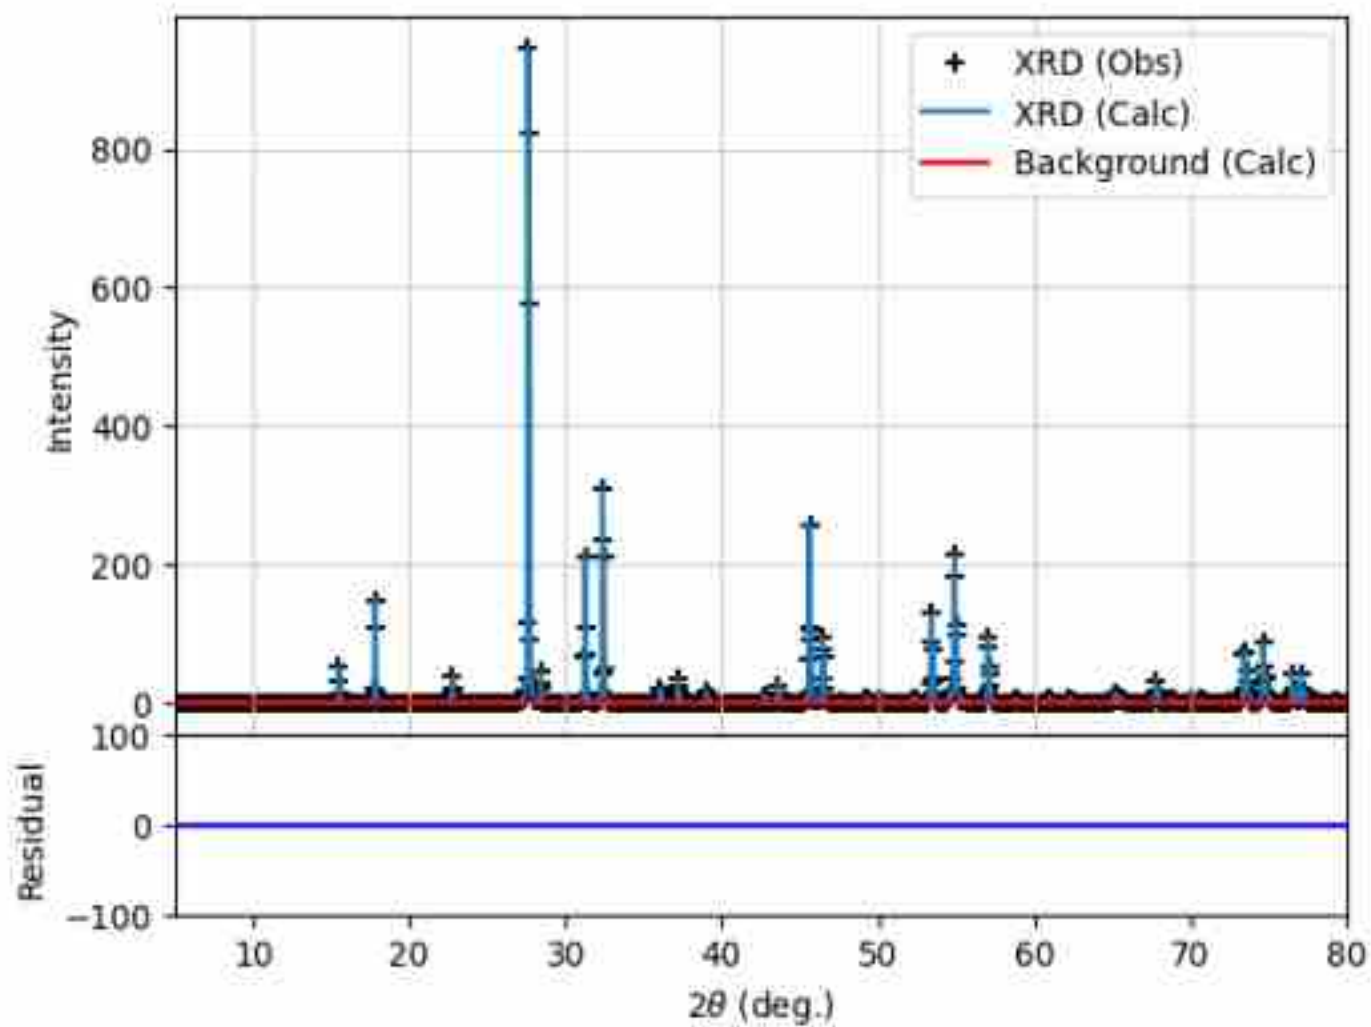

| RMSE before RR | Rwp    | RMSE after RR |
|----------------|--------|---------------|
| 0.001          | 0.0043 | 0.00032       |

# Ca1Gd1Rh2

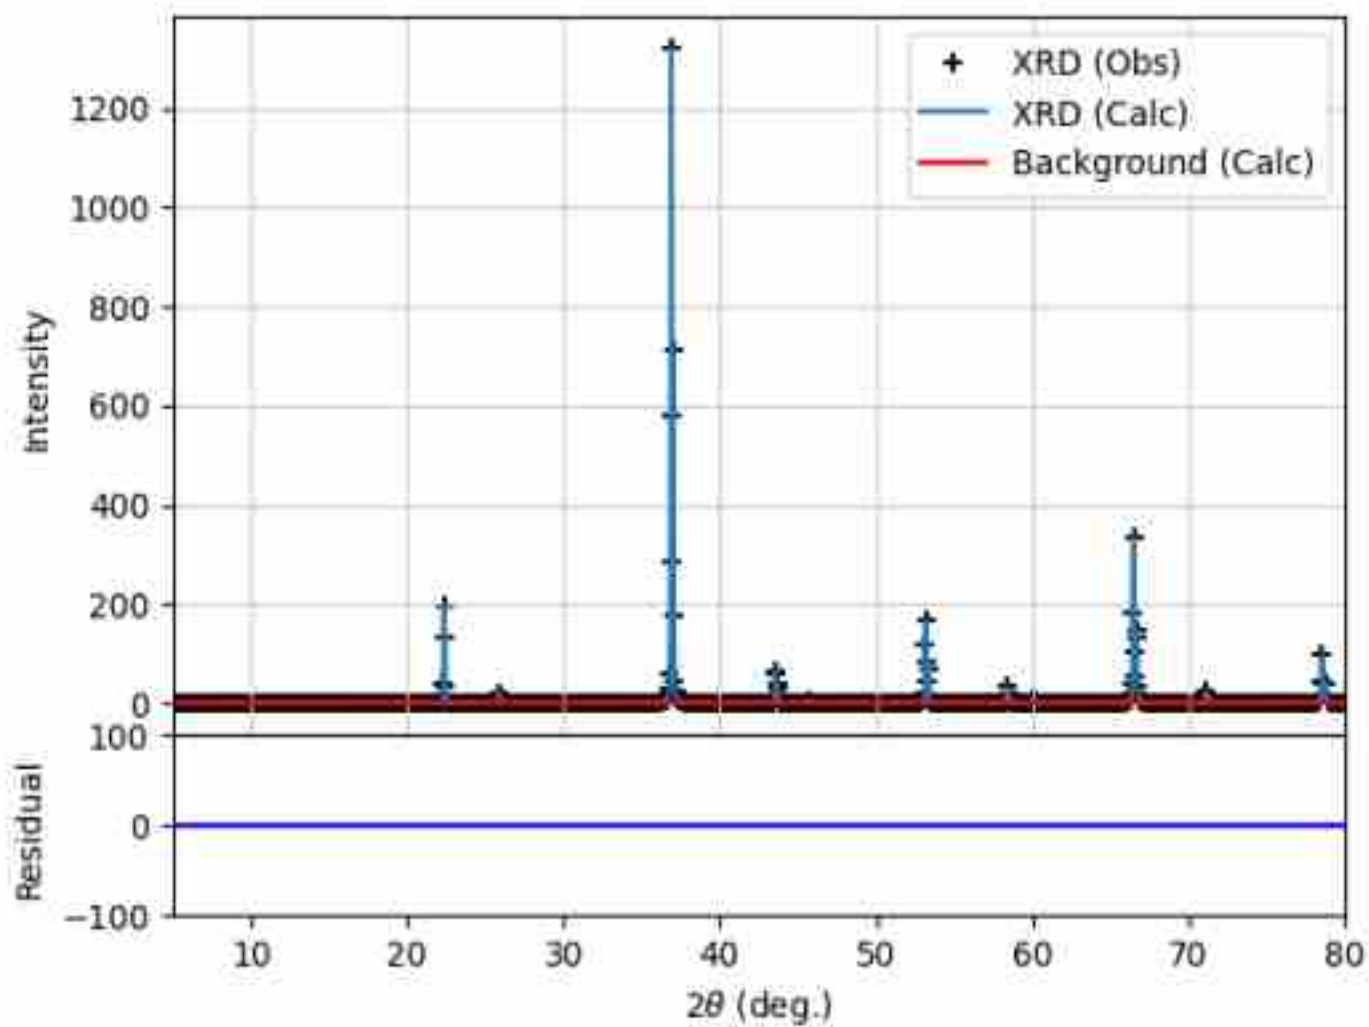

| RMSE before RR | Rwp     | RMSE after RR |
|----------------|---------|---------------|
| 0.001          | 0.00412 | 0.00054       |

# Ca1Ho1Rh2

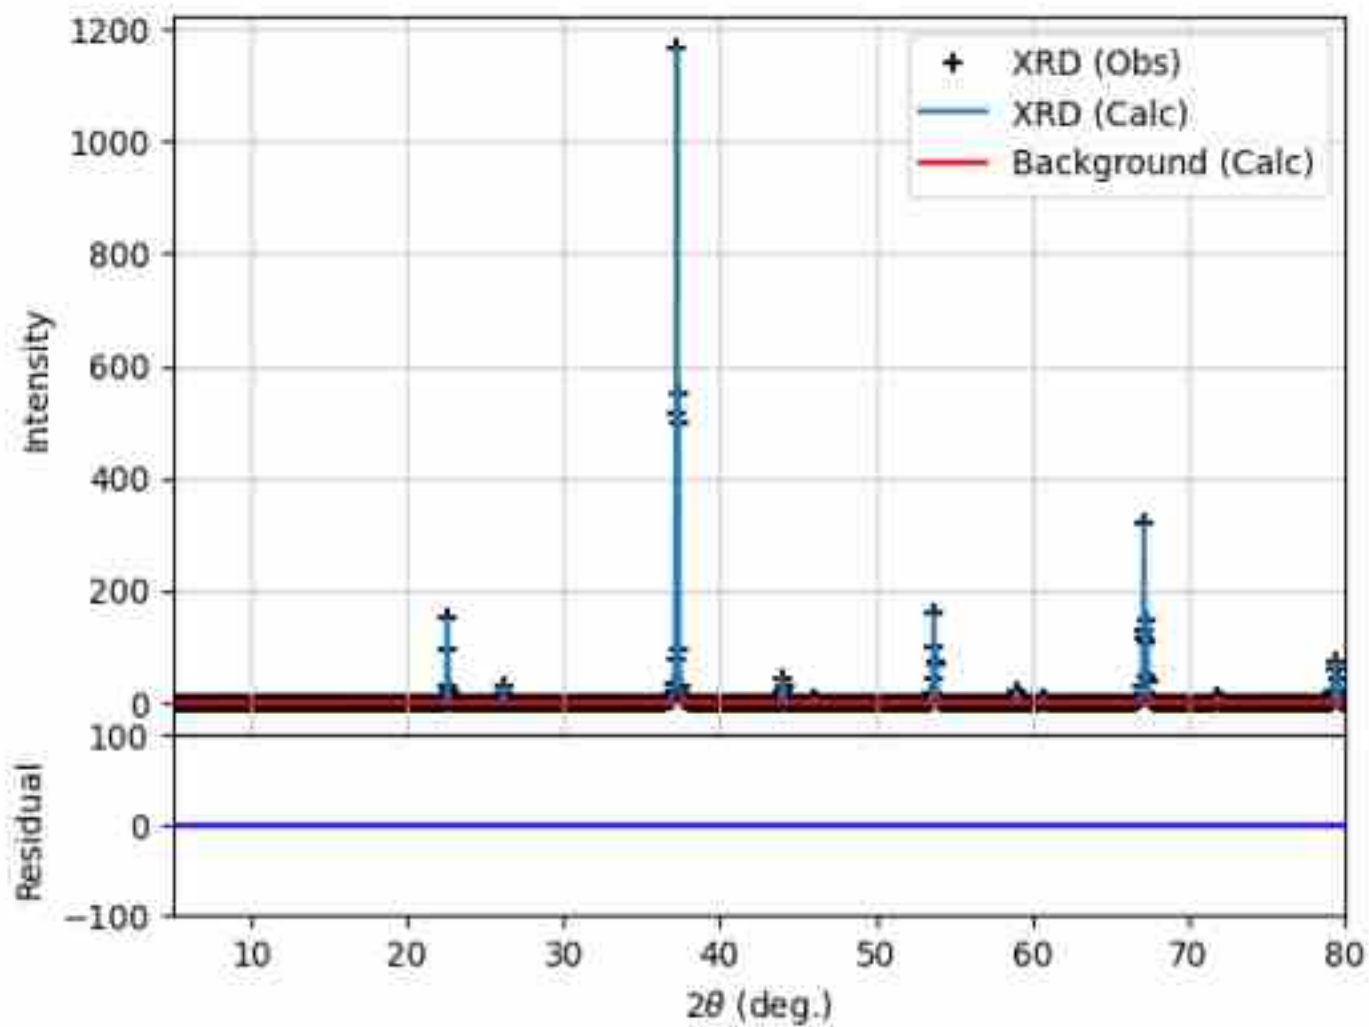

| RMSE before RR | Rwp     | RMSE after RR |
|----------------|---------|---------------|
| 0.001          | 0.00017 | 0.0002        |

# CaIn1Au2

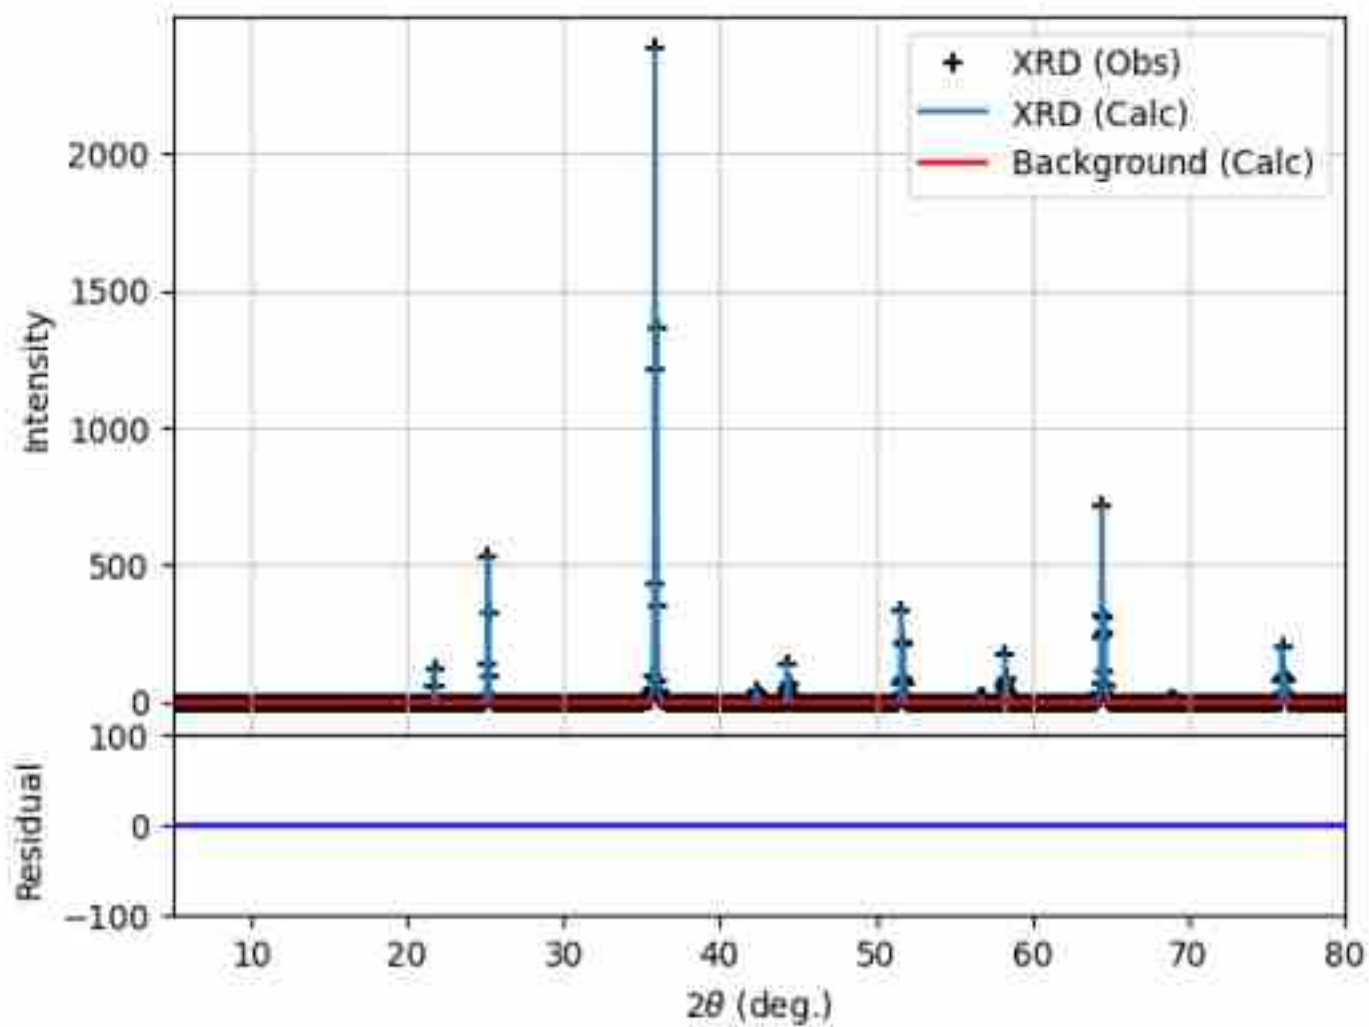

| RMSE before RR | Rwp     | RMSE after RR |
|----------------|---------|---------------|
| 0.001          | 0.00126 | 0.0002        |



Ca1La1Zn2

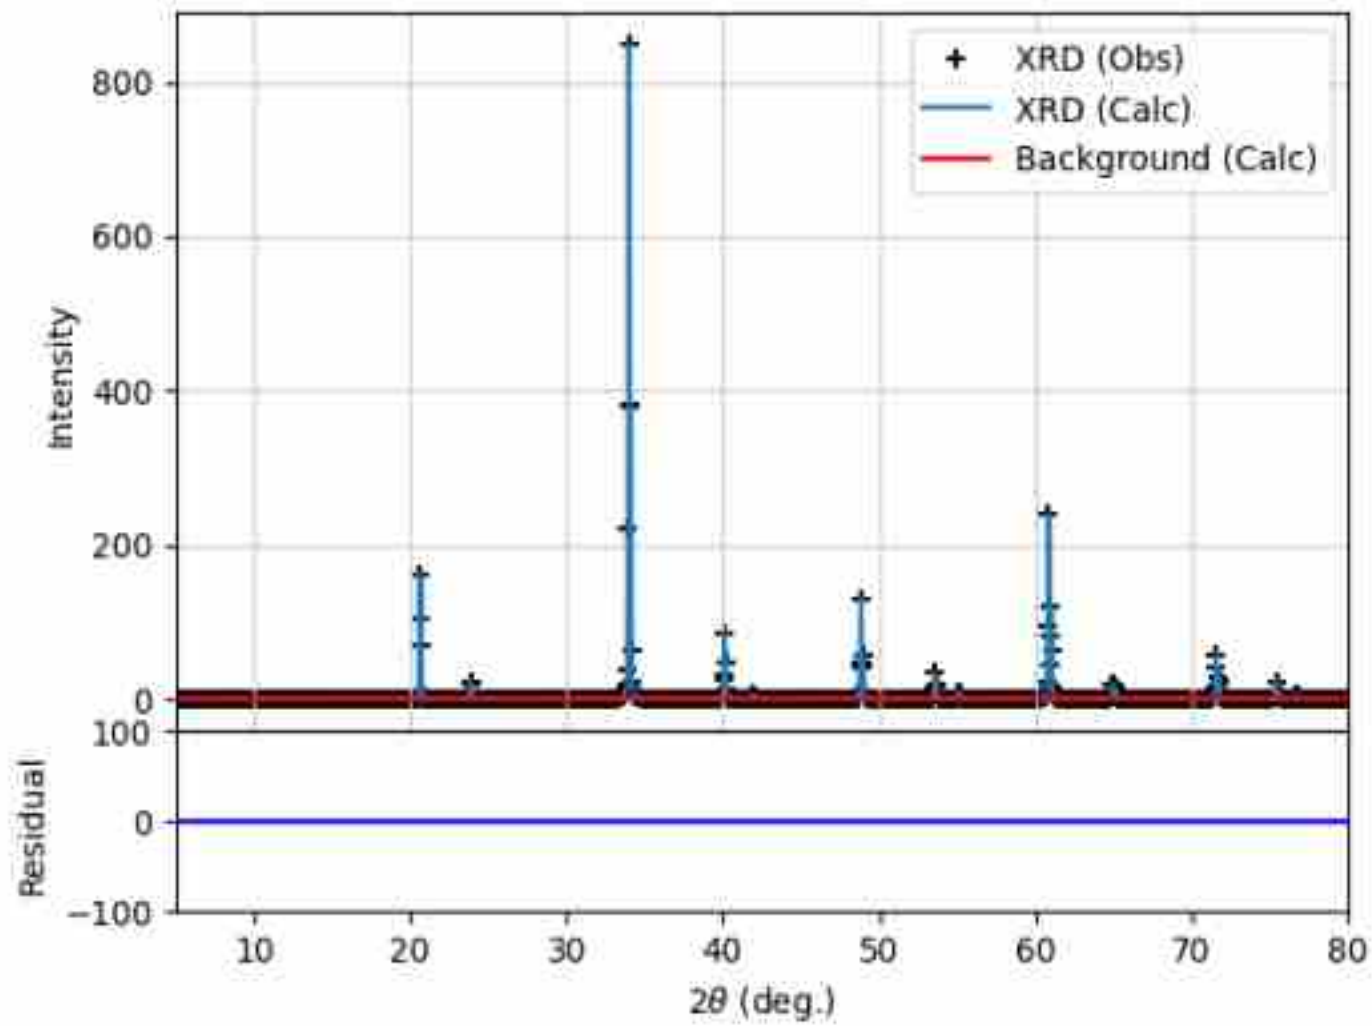

| RMSE before RR | Rwp     | RMSE after RR |
|----------------|---------|---------------|
| 0.001          | 0.00927 | 0.00065       |

# Ca1Mg3

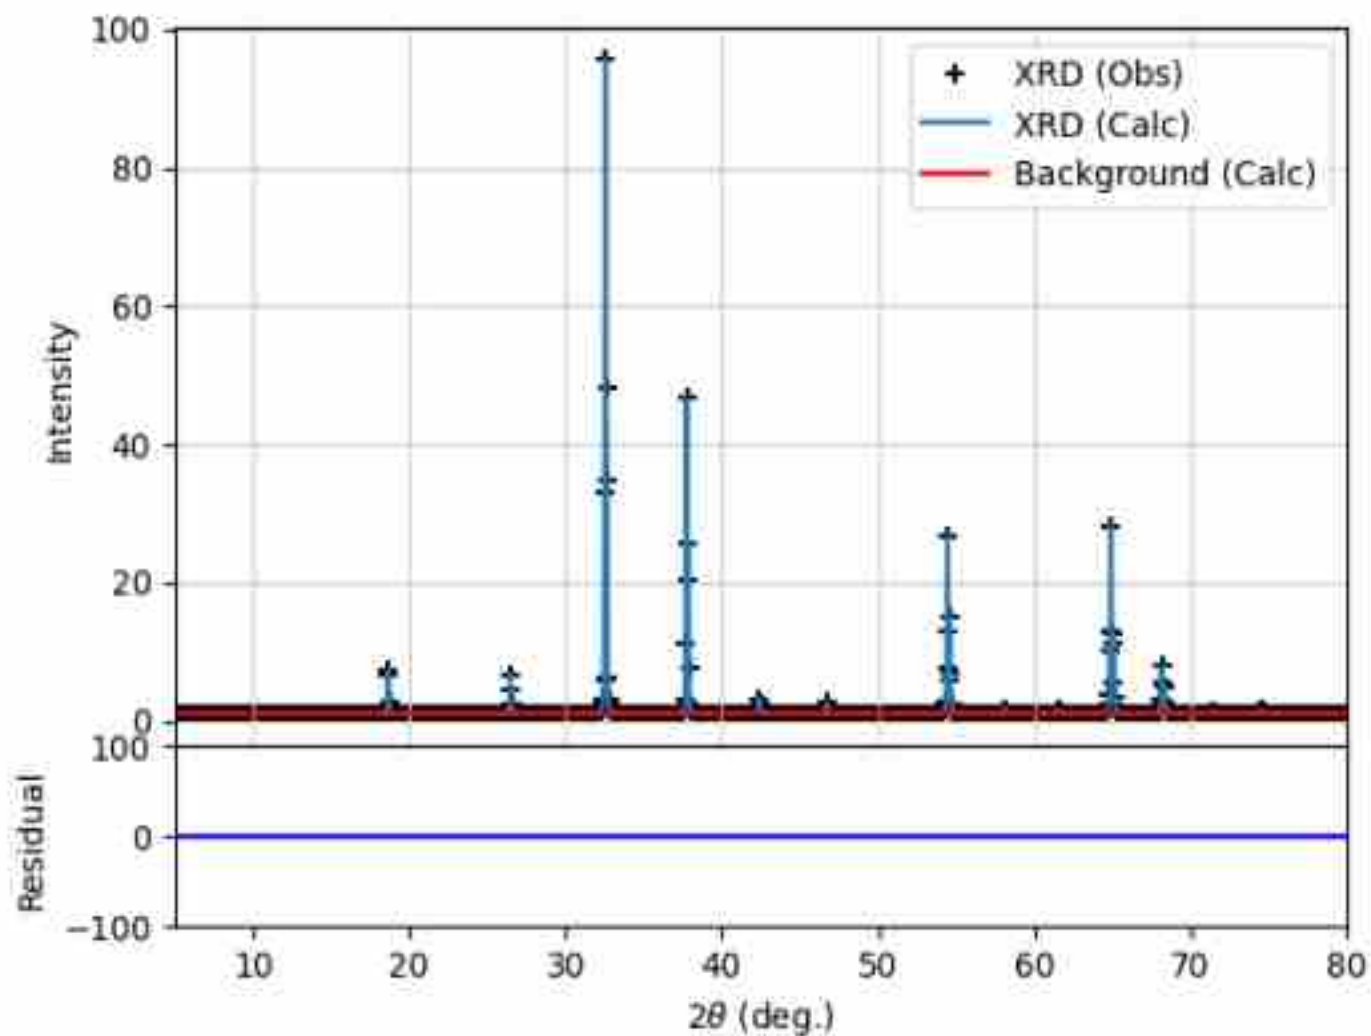

| RMSE before RR | Rwp     | RMSE after RR |
|----------------|---------|---------------|
| 0.001          | 0.00551 | 0.00099       |

# Ca1Sm1Cd2

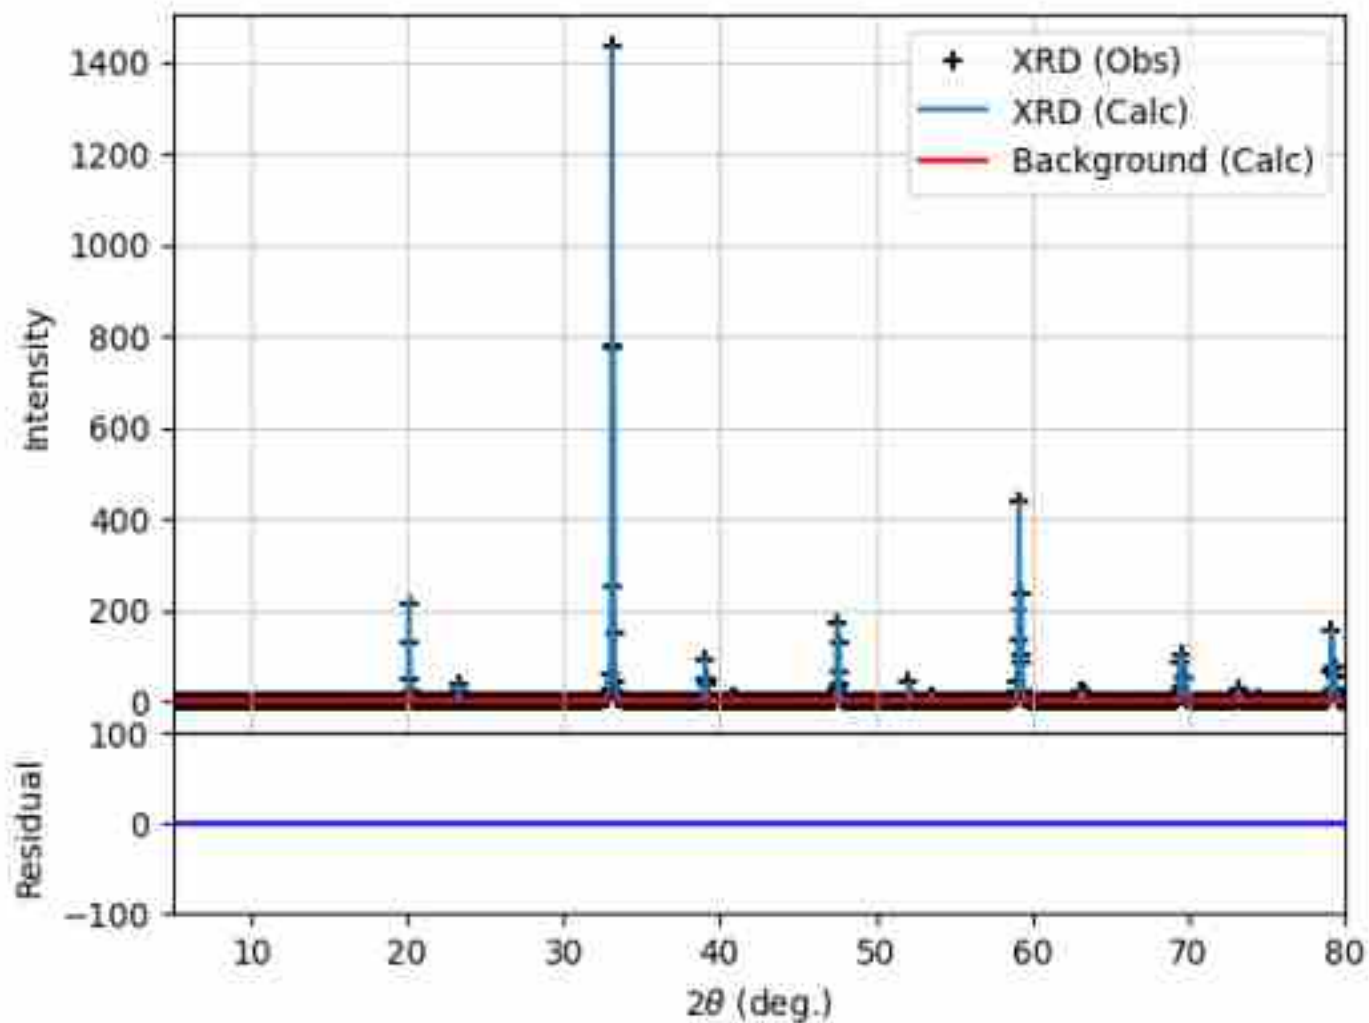

| RMSE before RR | Rwp     | RMSE after RR |
|----------------|---------|---------------|
| 0.001          | 0.02168 | 0.00129       |

# Ca1Sm1Hg2

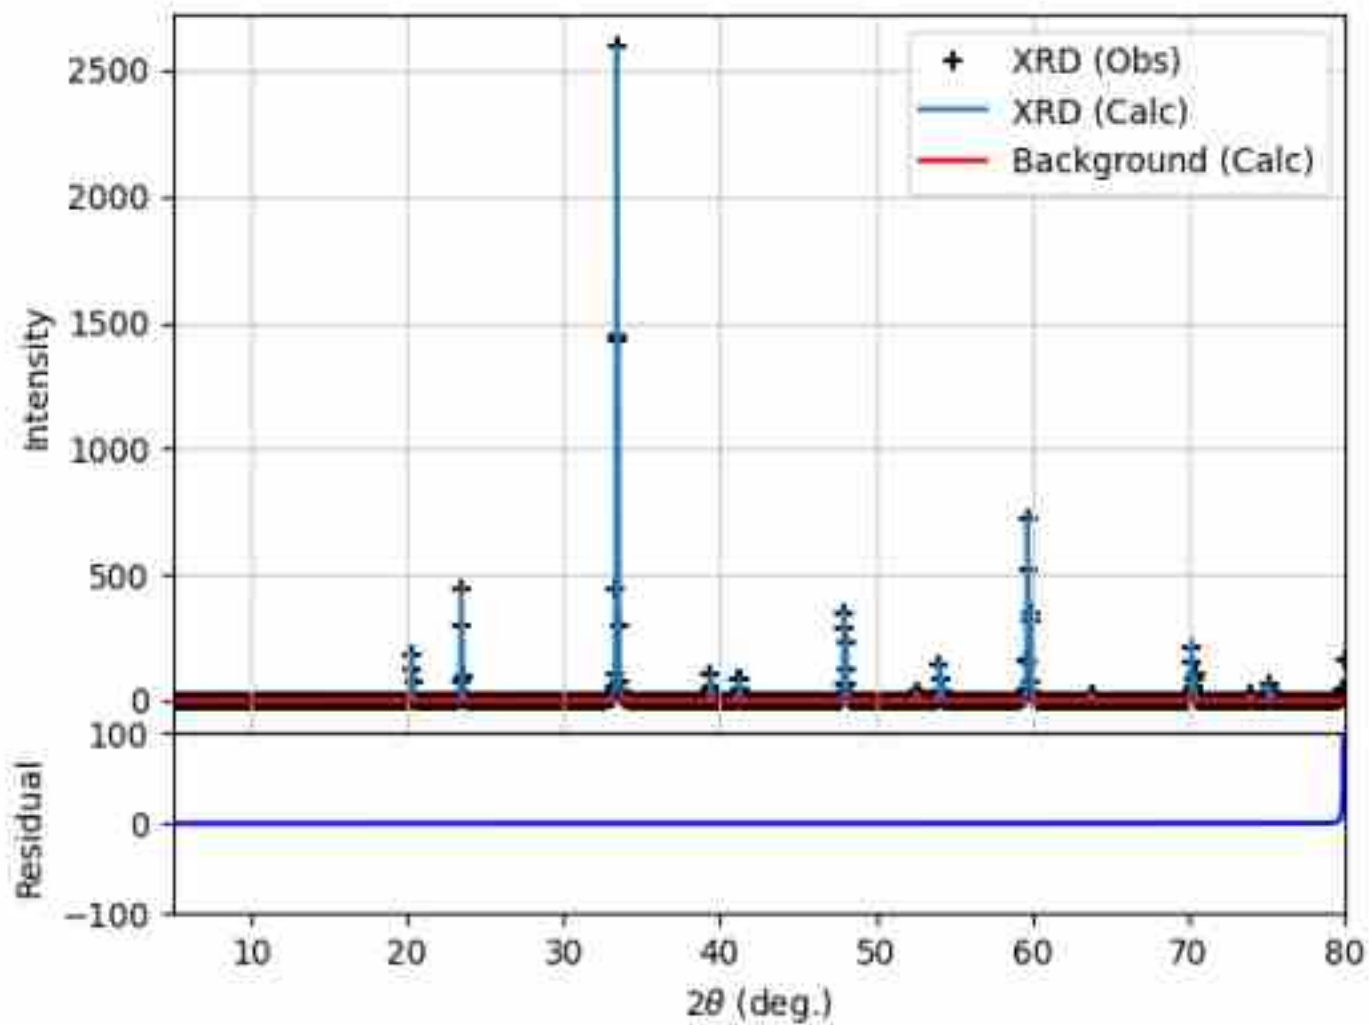

| RMSE before RR | Rwp      | RMSE after RR |
|----------------|----------|---------------|
| 0.001          | 15.34855 | None          |

# Ca1Y1Pt2

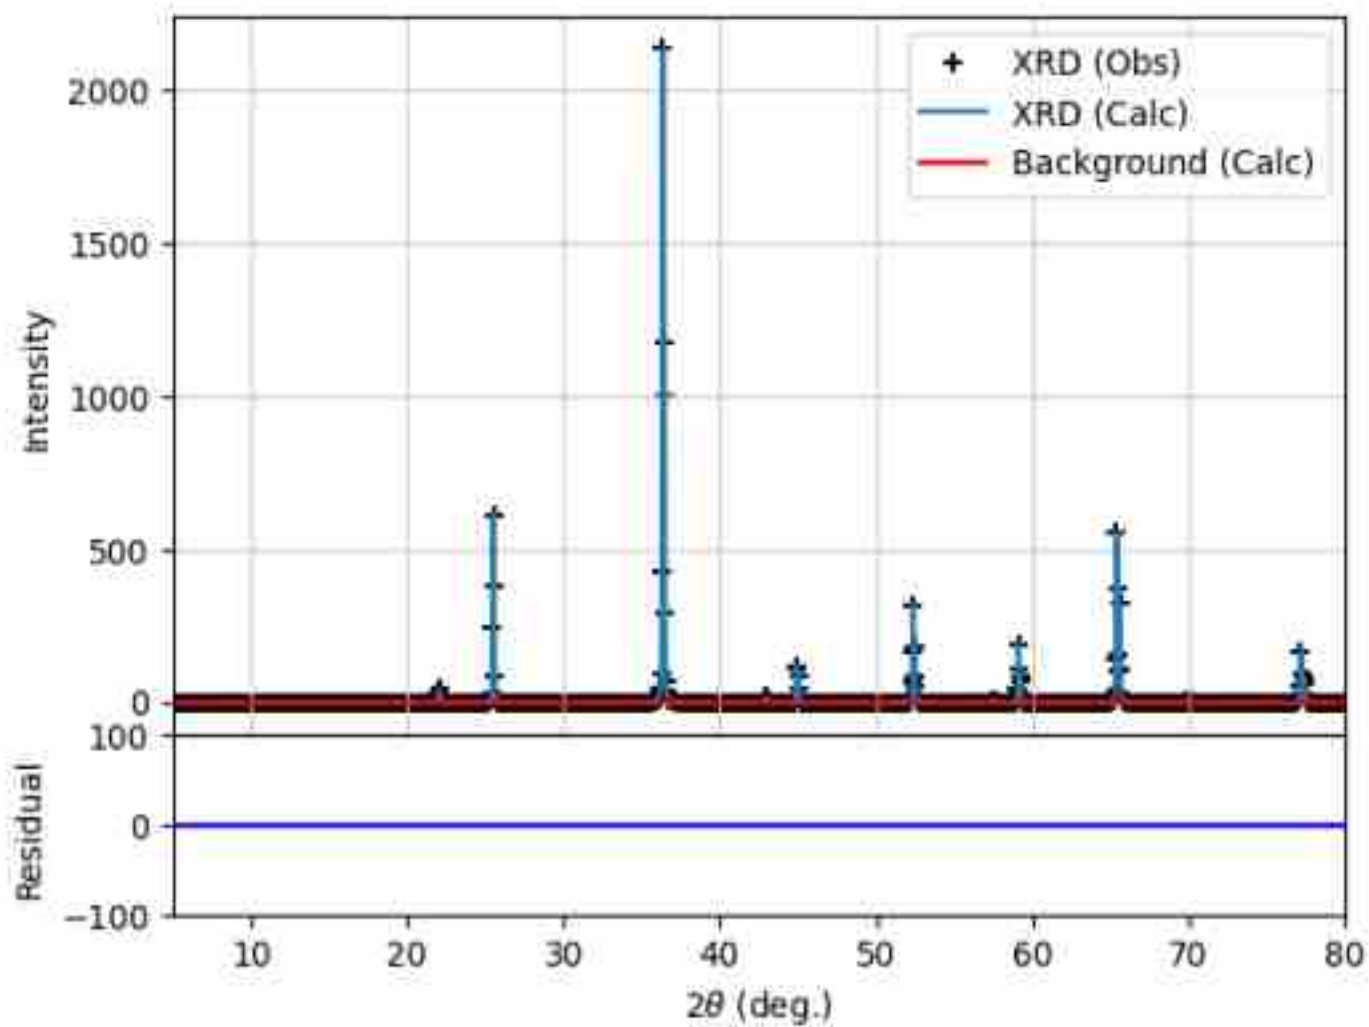

| RMSE before RR | Rwp     | RMSE after RR |
|----------------|---------|---------------|
| 0.001          | 0.00223 | 0.0005        |

# Ca1Yb3

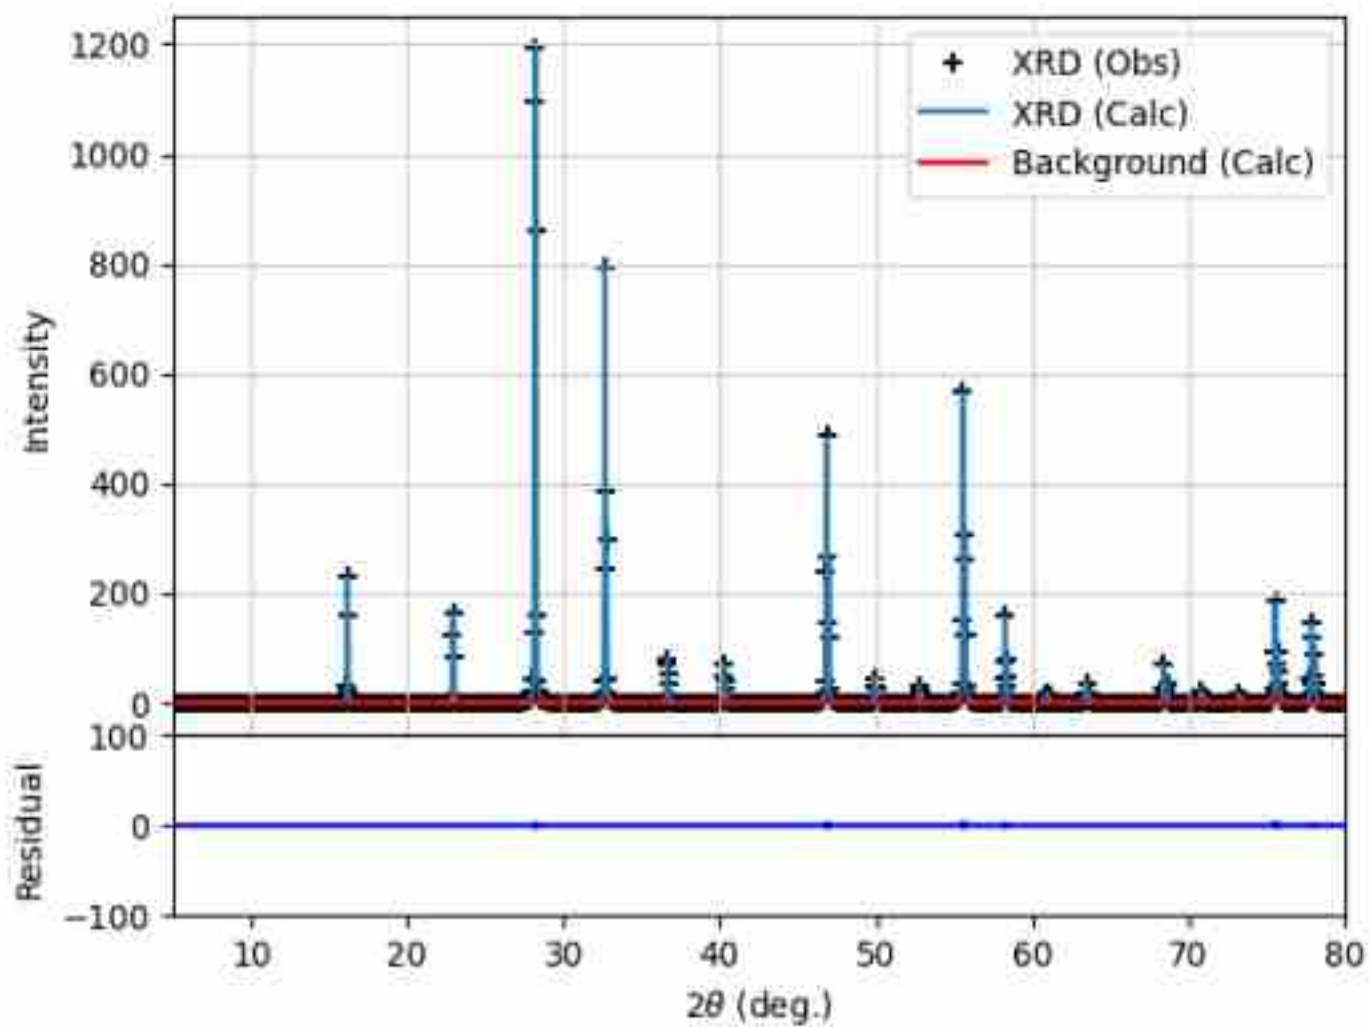

| RMSE before RR | Rwp     | RMSE after RR |
|----------------|---------|---------------|
| 0.001          | 0.53464 | 0.00087       |

Ca1Zr1N2

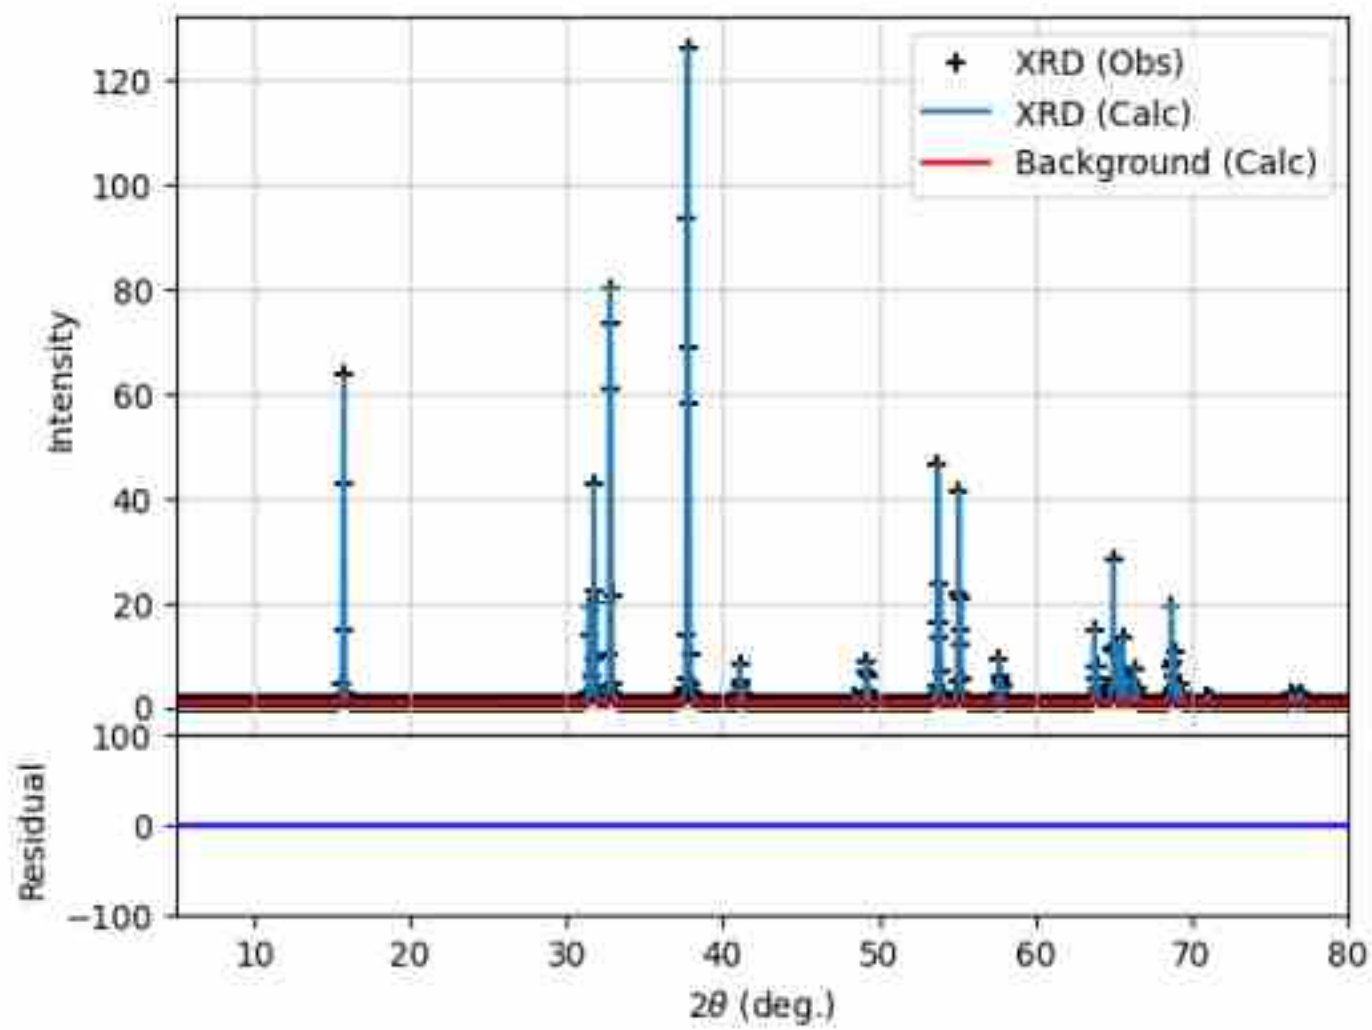

| RMSE before RR | Rwp     | RMSE after RR |
|----------------|---------|---------------|
| 0.01           | 0.00345 | 0.00049       |

# Ca<sub>2</sub>CdHg<sub>1</sub>

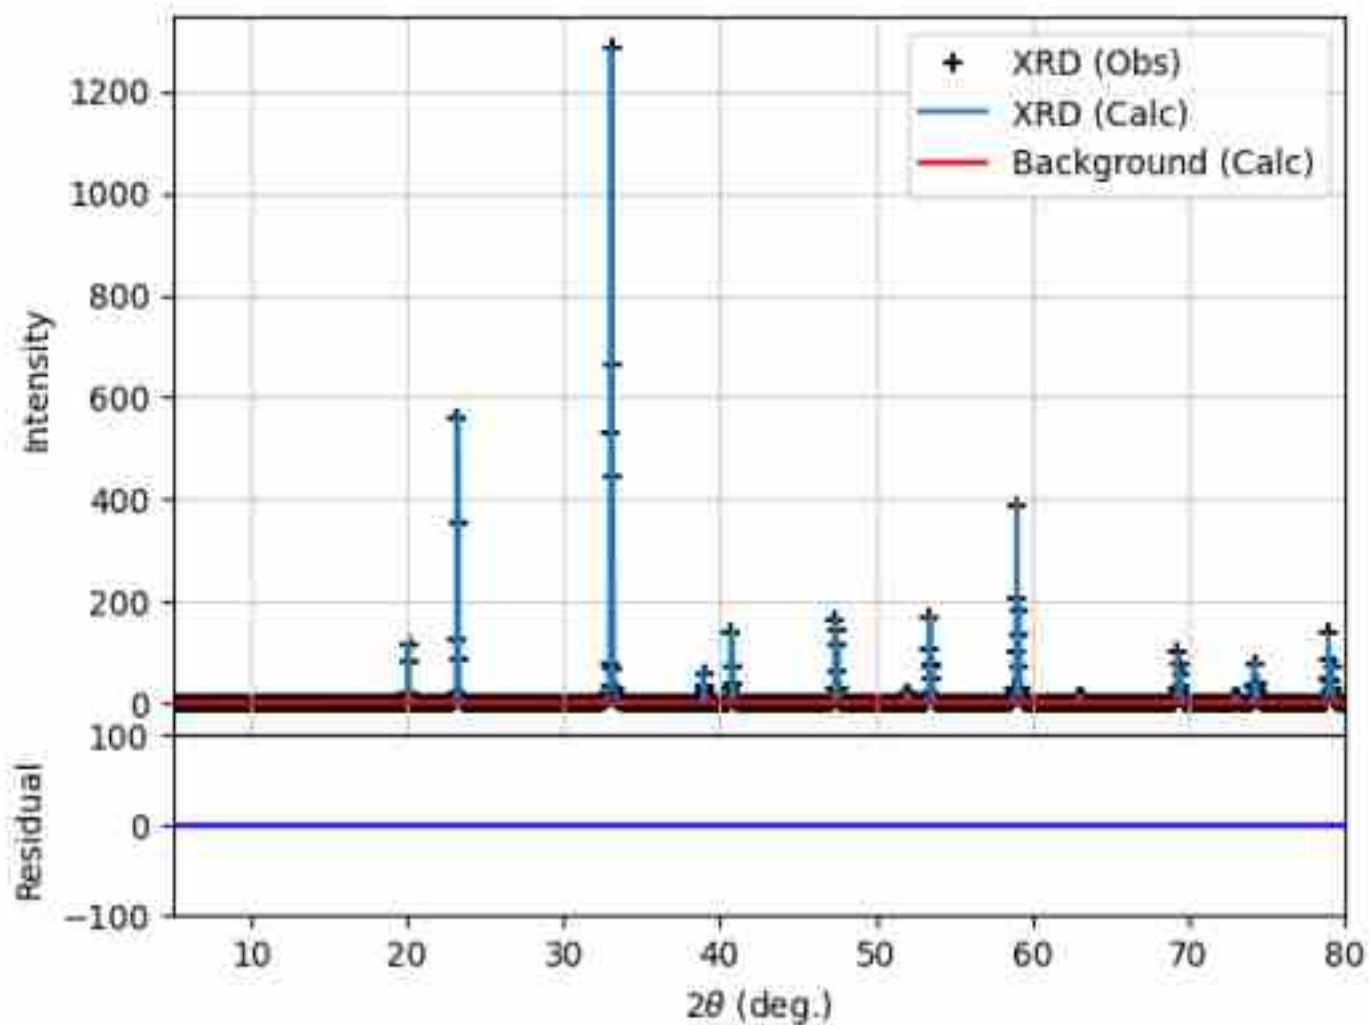

| RMSE before RR | Rwp     | RMSE after RR |
|----------------|---------|---------------|
| 0.001          | 0.00878 | 0.00089       |



Ca<sub>2</sub>Hg<sub>1</sub>Bi<sub>1</sub>

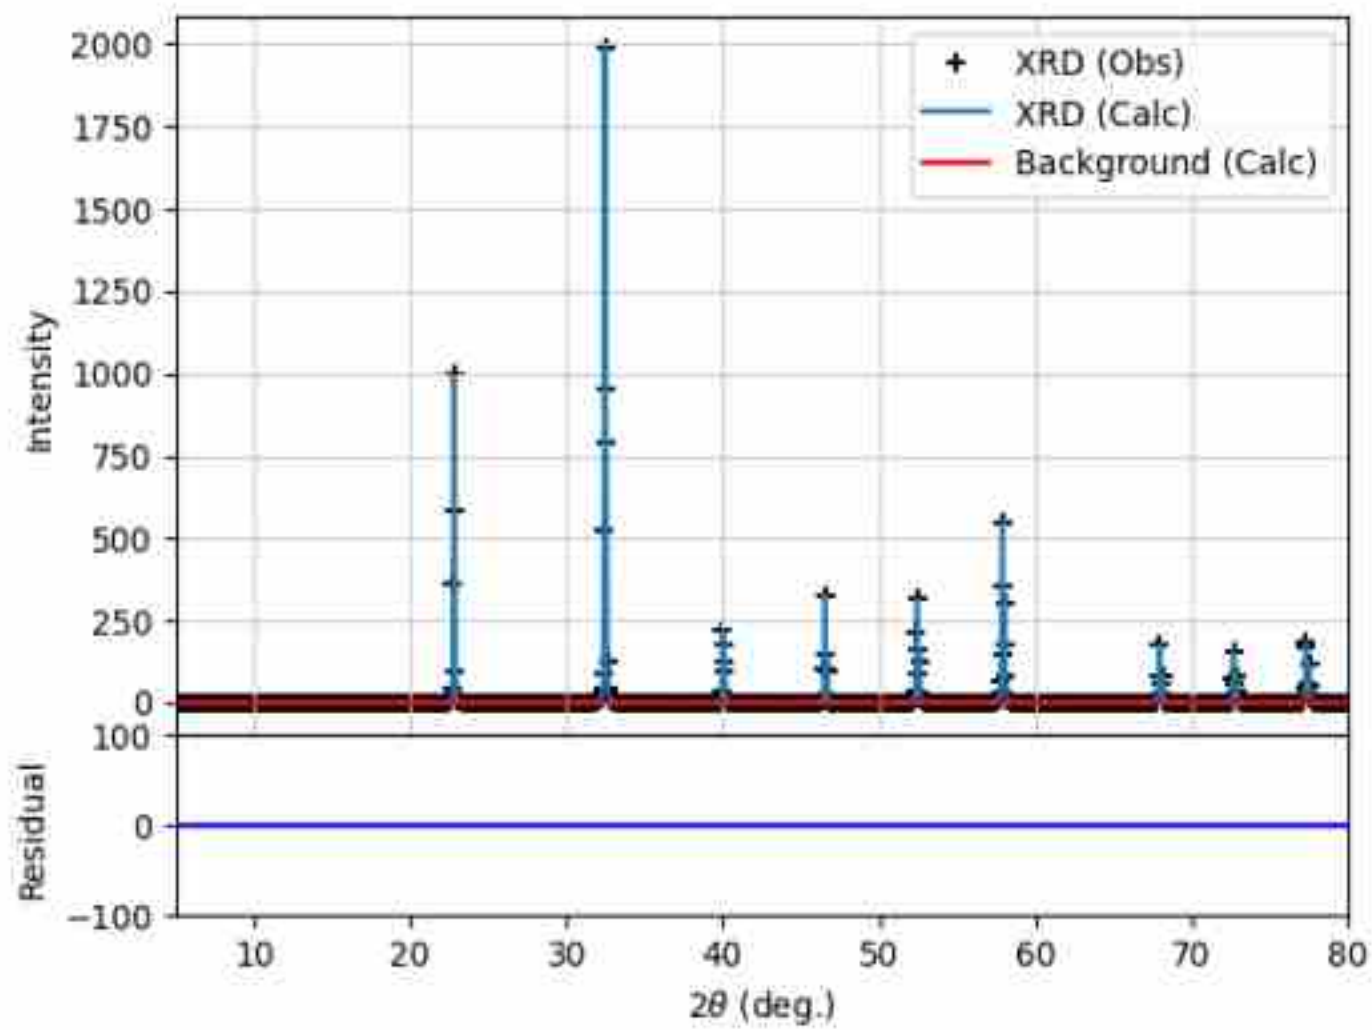

| RMSE before RR | Rwp     | RMSE after RR |
|----------------|---------|---------------|
| 0.001          | 0.00514 | 0.00072       |

# Ca<sub>2</sub>MgIn

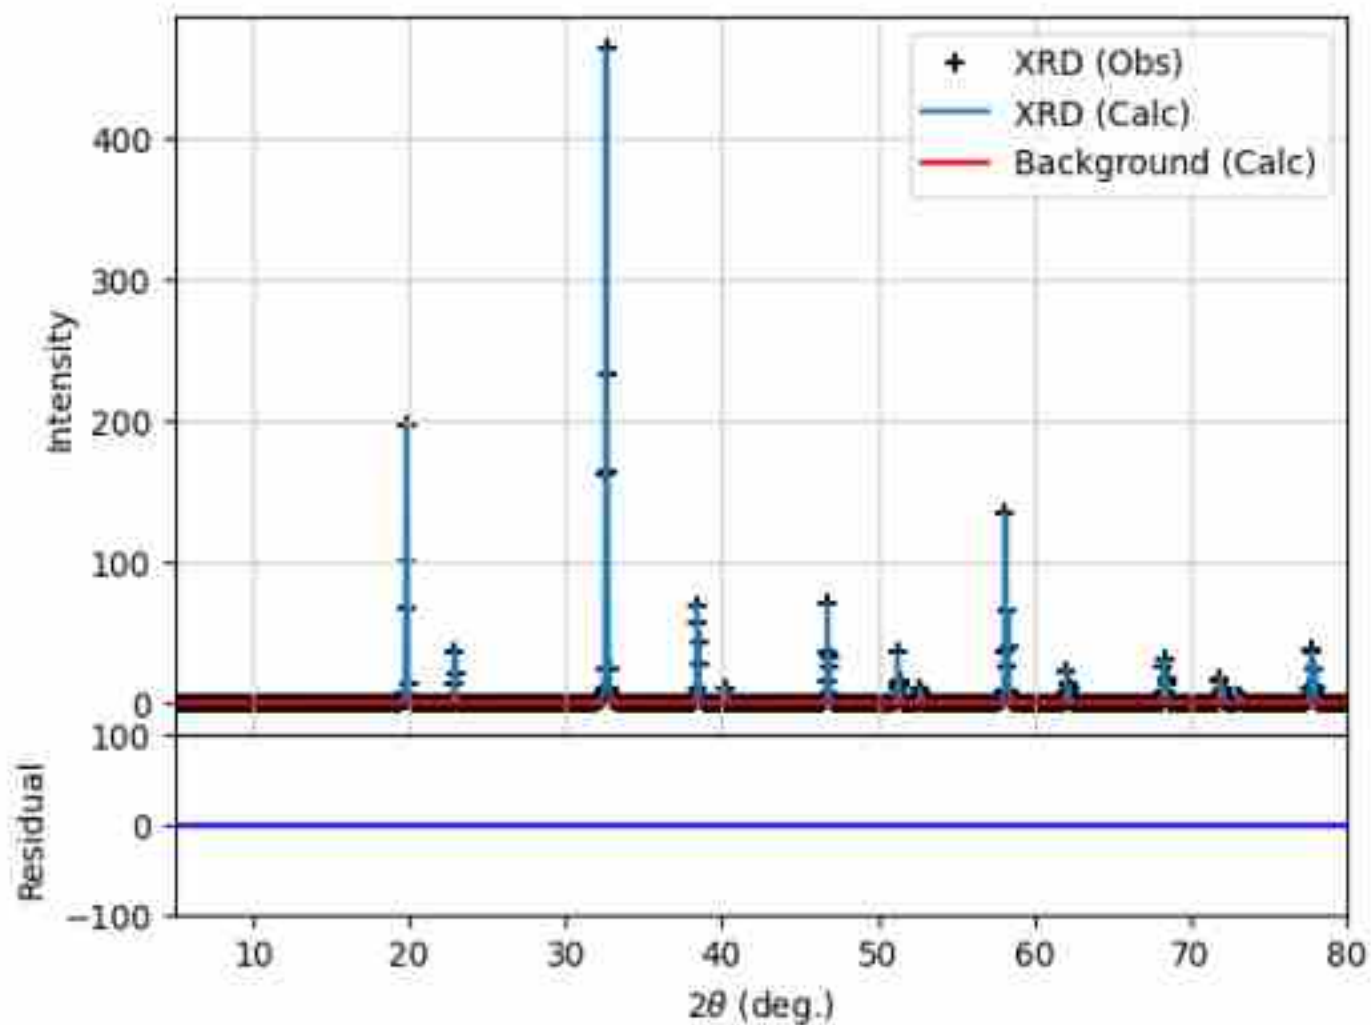

| RMSE before RR | Rwp     | RMSE after RR |
|----------------|---------|---------------|
| 0.001          | 0.00253 | 0.00052       |

# Ca<sub>2</sub>Pd<sub>1</sub>Pt<sub>1</sub>

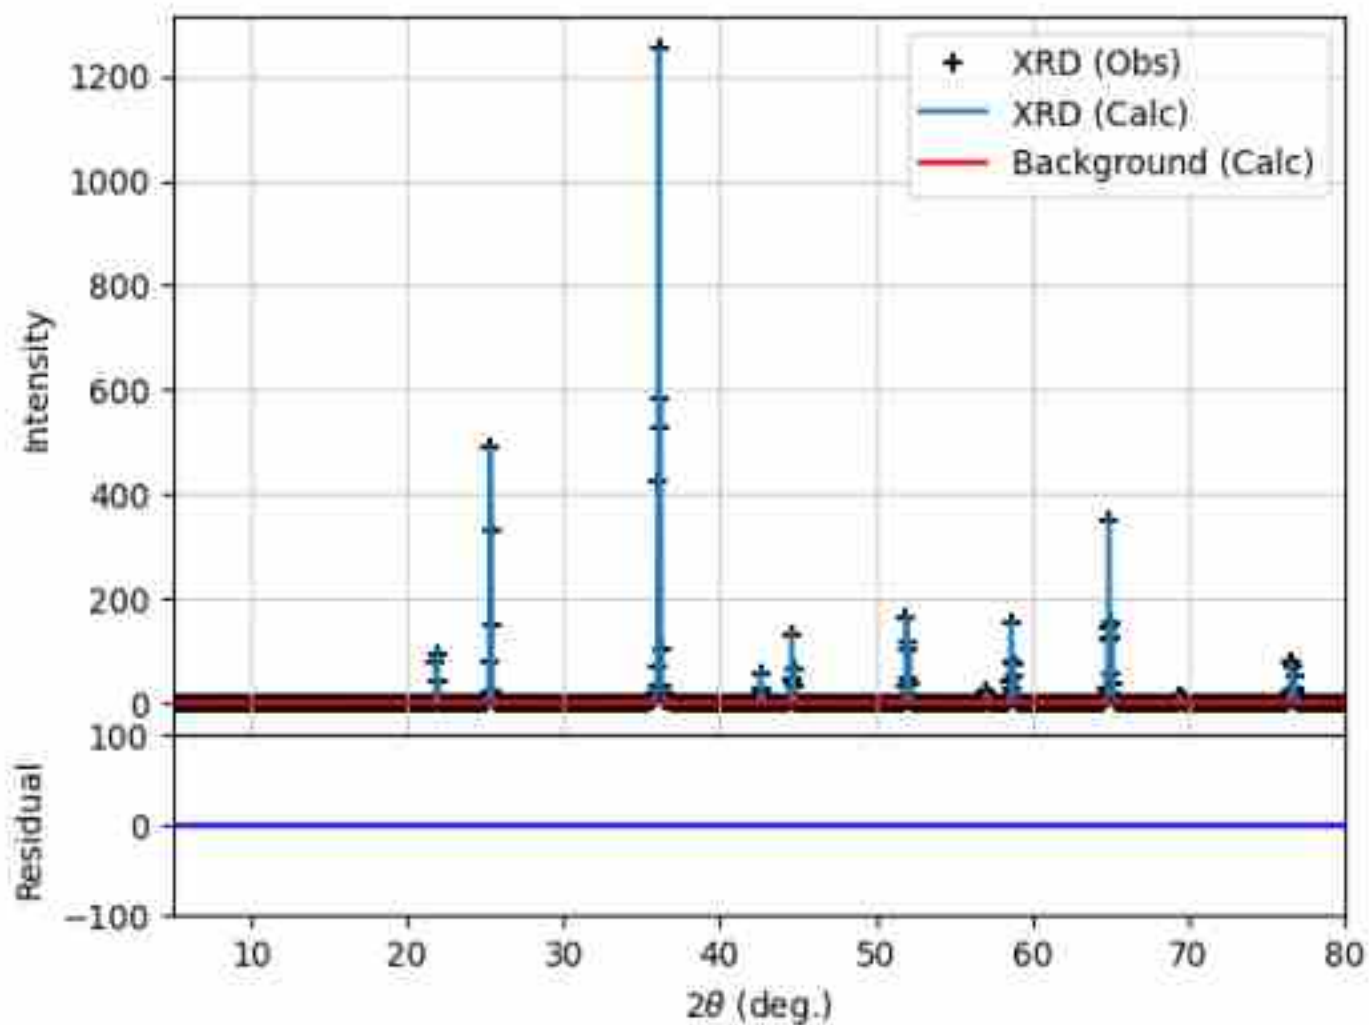

| RMSE before RR | Rwp     | RMSE after RR |
|----------------|---------|---------------|
| 0.001          | 0.00309 | 0.00039       |

# Ca<sub>2</sub>TlCd<sub>1</sub>

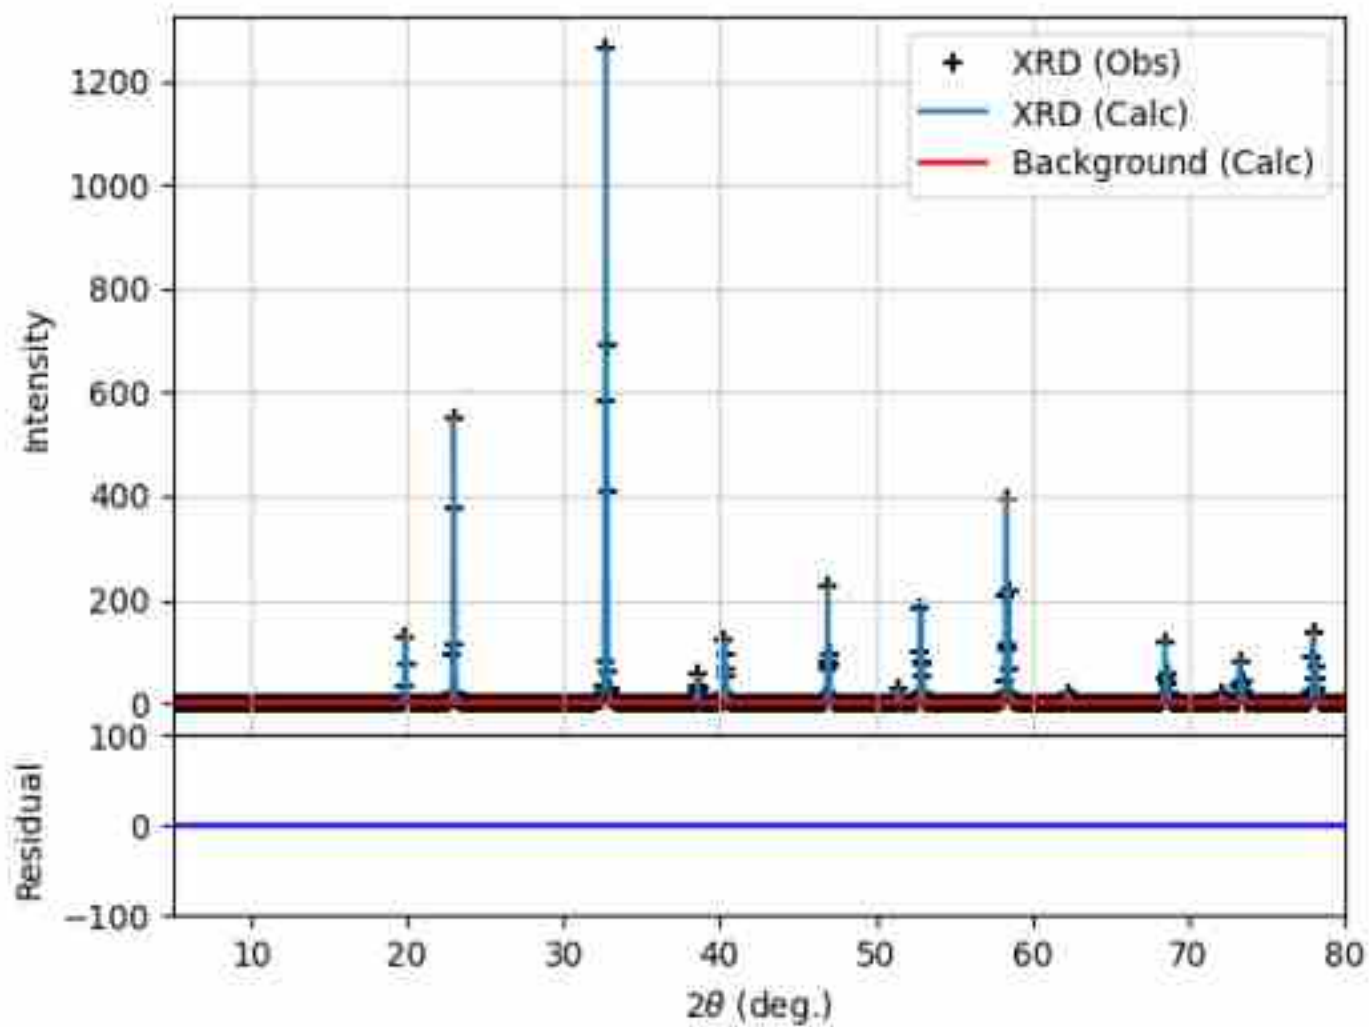

| RMSE before RR | Rwp     | RMSE after RR |
|----------------|---------|---------------|
| 0.001          | 0.00615 | 0.00085       |

# Ca3Tl1

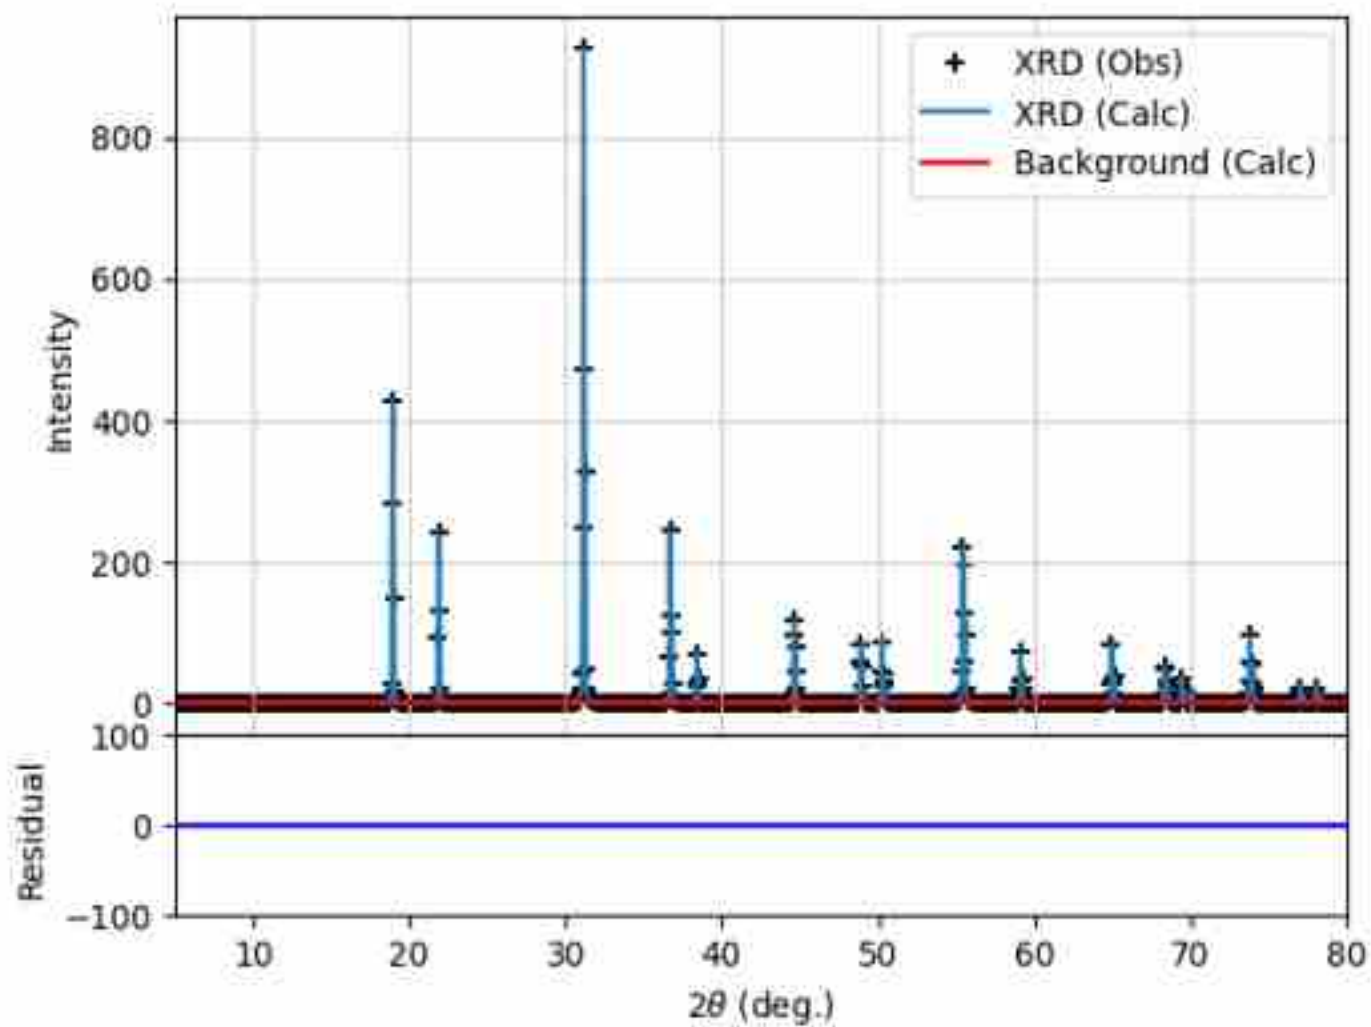

| RMSE before RR | Rwp     | RMSE after RR |
|----------------|---------|---------------|
| 0.001          | 0.00352 | 0.00096       |

# Ca<sub>4</sub>Cd<sub>4</sub>Pd<sub>4</sub>

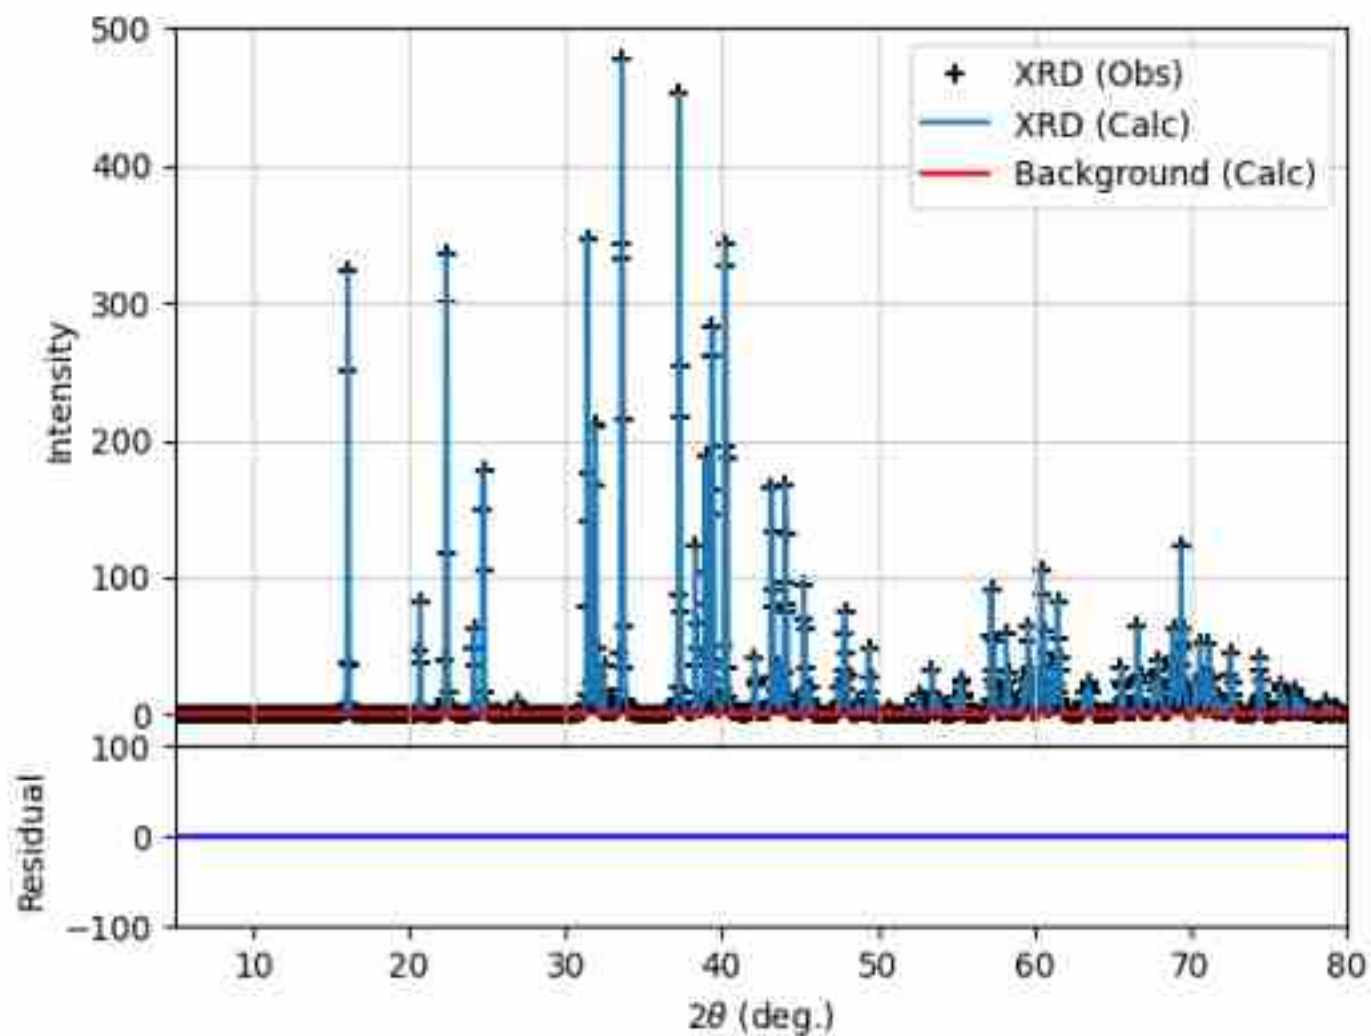

| RMSE before RR | Rwp     | RMSE after RR |
|----------------|---------|---------------|
| 0.01           | 0.00502 | 0.00047       |

# Ca<sub>4</sub>In<sub>4</sub>Pd<sub>4</sub>

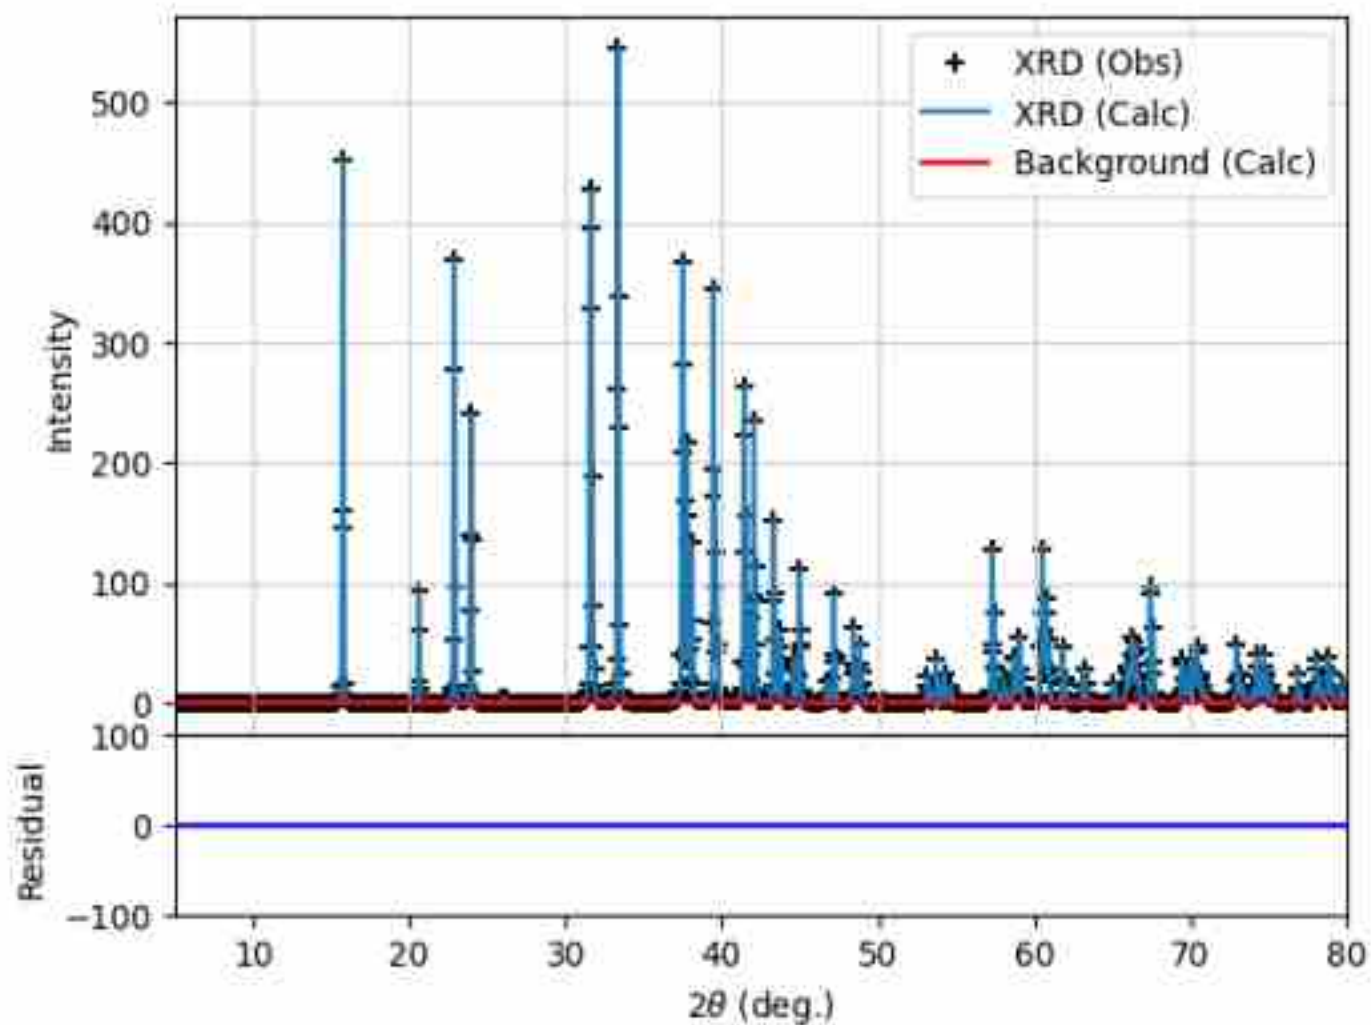

| RMSE before RR | Rwp     | RMSE after RR |
|----------------|---------|---------------|
| 0.01           | 0.00397 | 0.00035       |

# Cd1Ag1

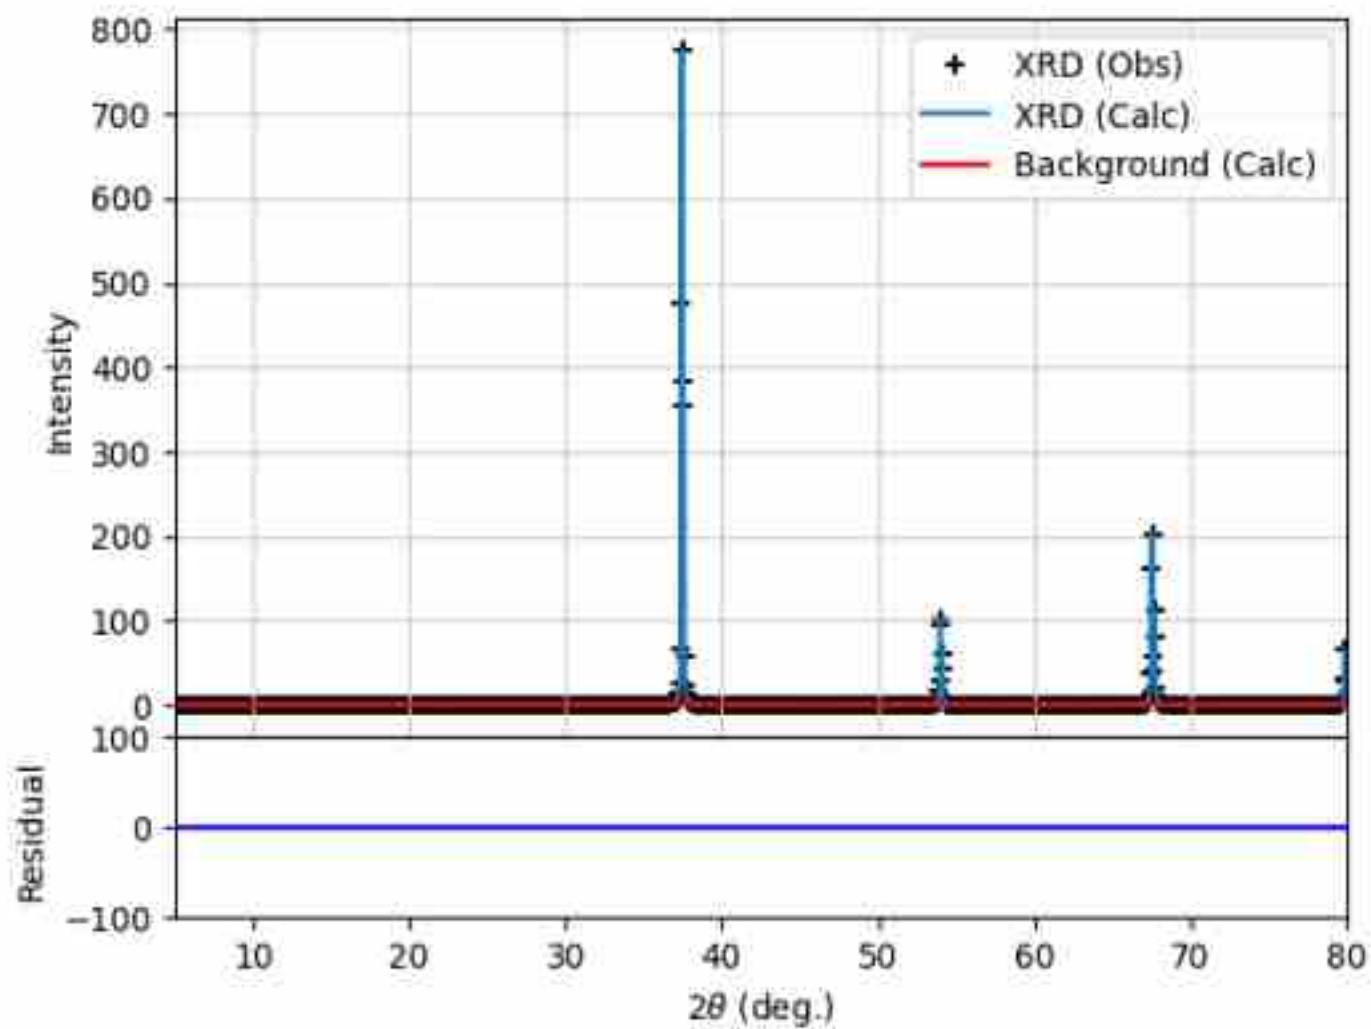

| RMSE before RR | Rwp   | RMSE after RR |
|----------------|-------|---------------|
| 0.001          | 0.007 | 0.00024       |



# Cd1Au3

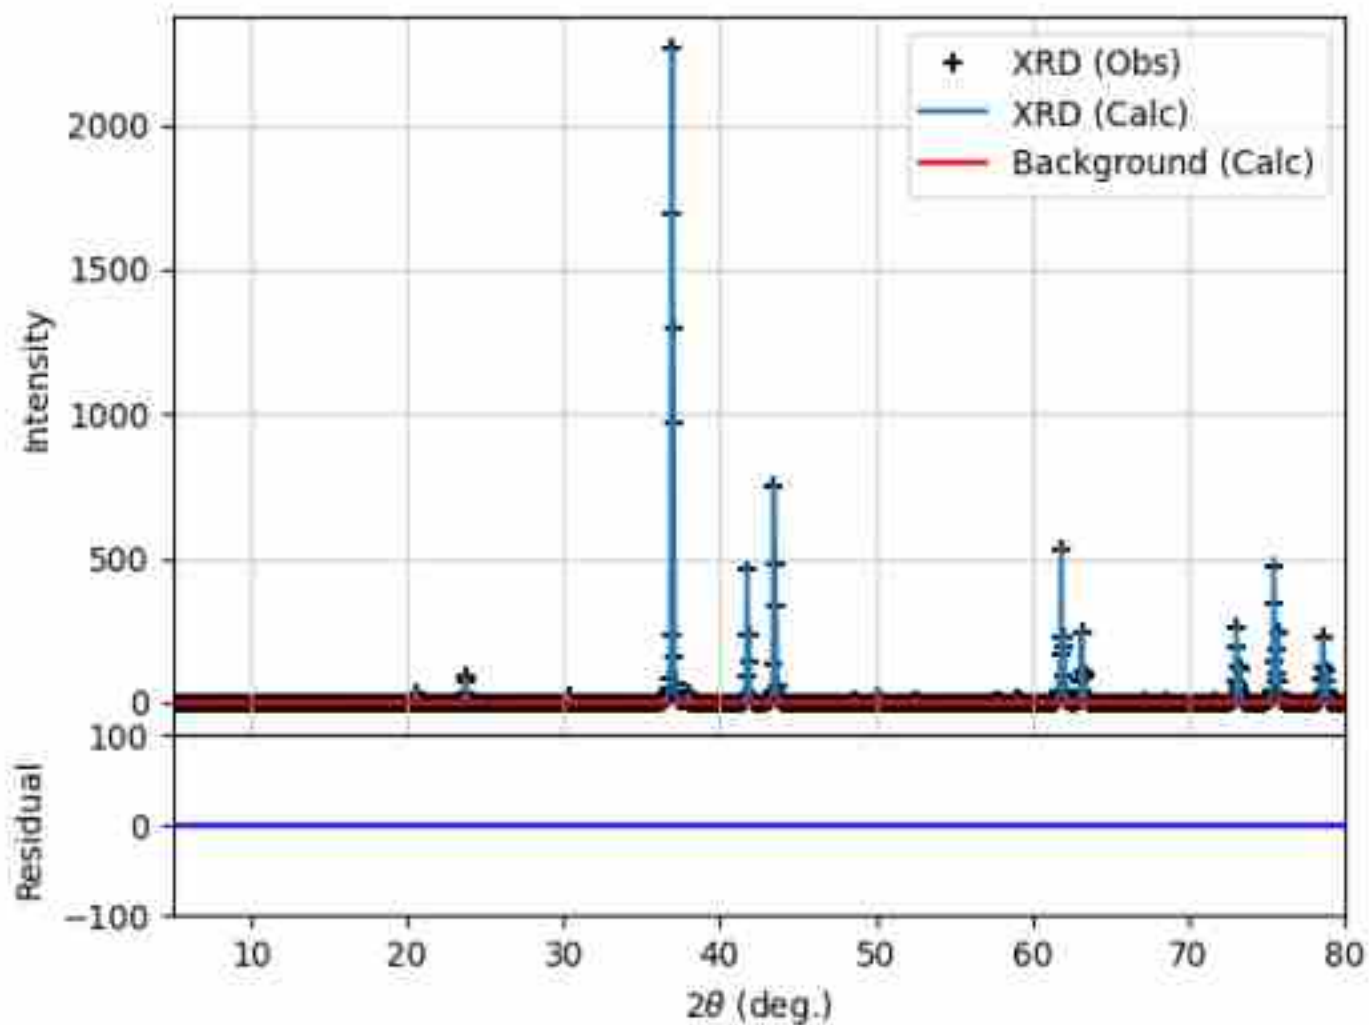

| RMSE before RR | Rwp     | RMSE after RR |
|----------------|---------|---------------|
| 0.001          | 0.00452 | 0.00039       |

# Cd1Pd2Au1

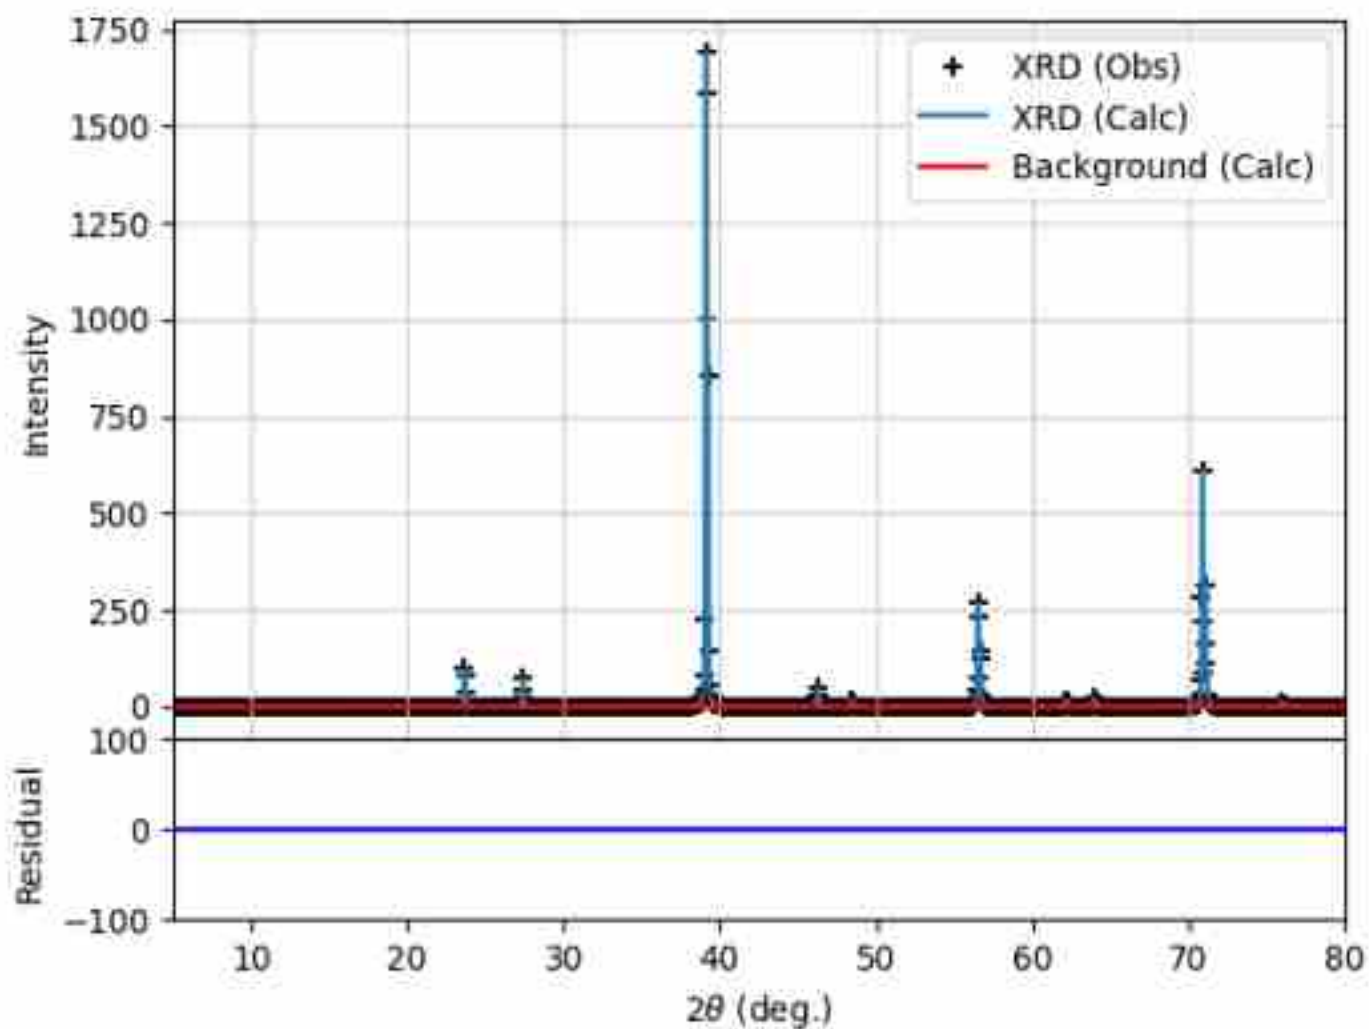

| RMSE before RR | Rwp    | RMSE after RR |
|----------------|--------|---------------|
| 0.001          | 0.0024 | 0.00046       |

# Cd1Te1

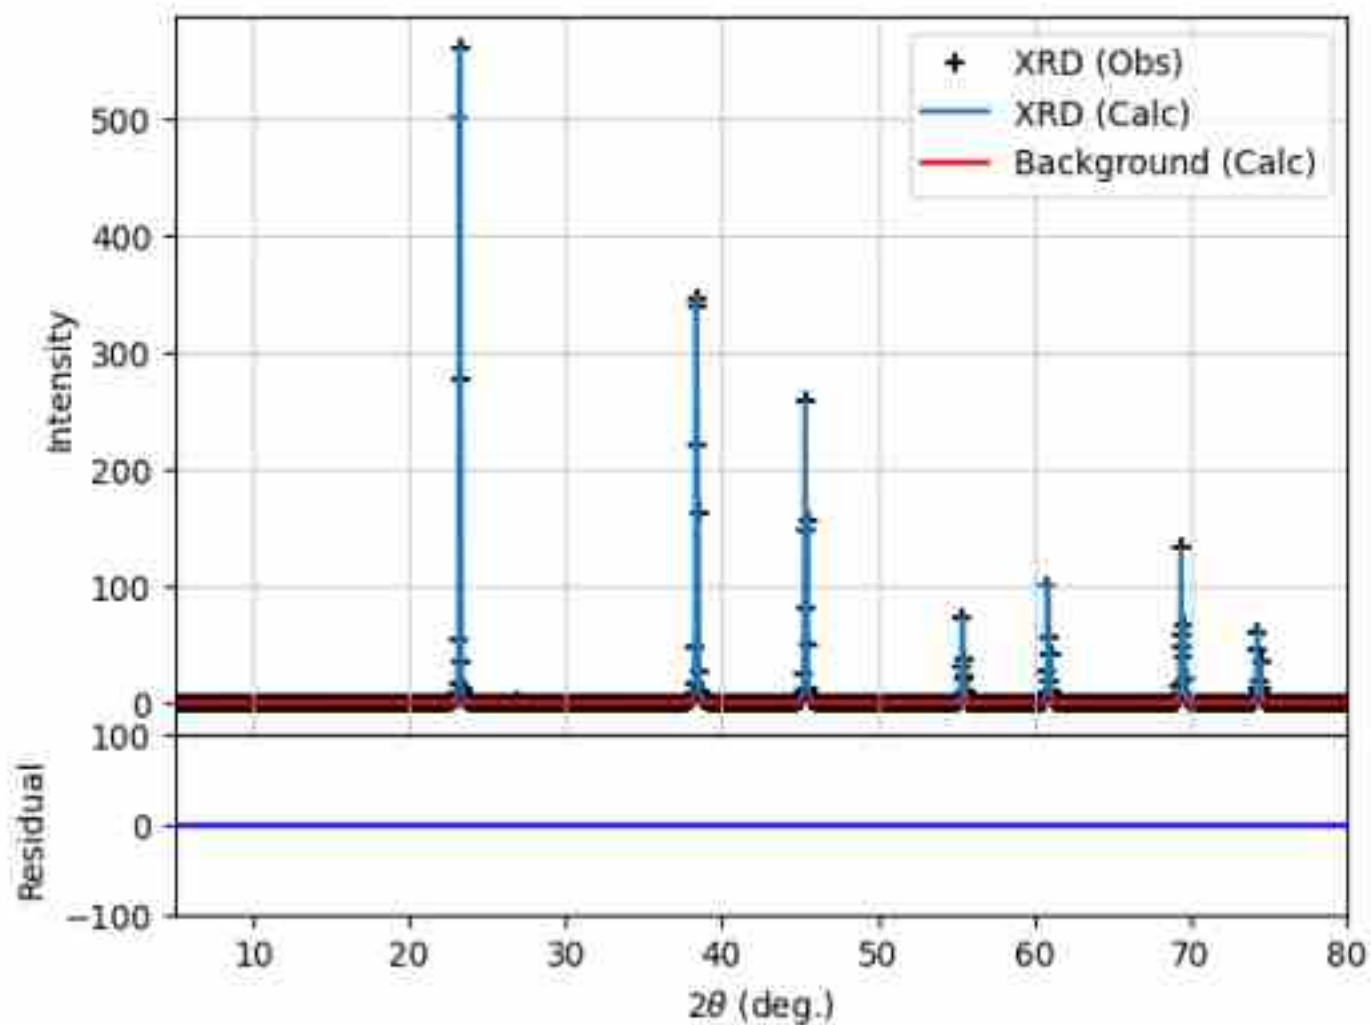

| RMSE before RR | Rwp     | RMSE after RR |
|----------------|---------|---------------|
| 0.001          | 0.00175 | 0.00027       |

# Cd<sub>2</sub>Ag<sub>1</sub>Au<sub>1</sub>

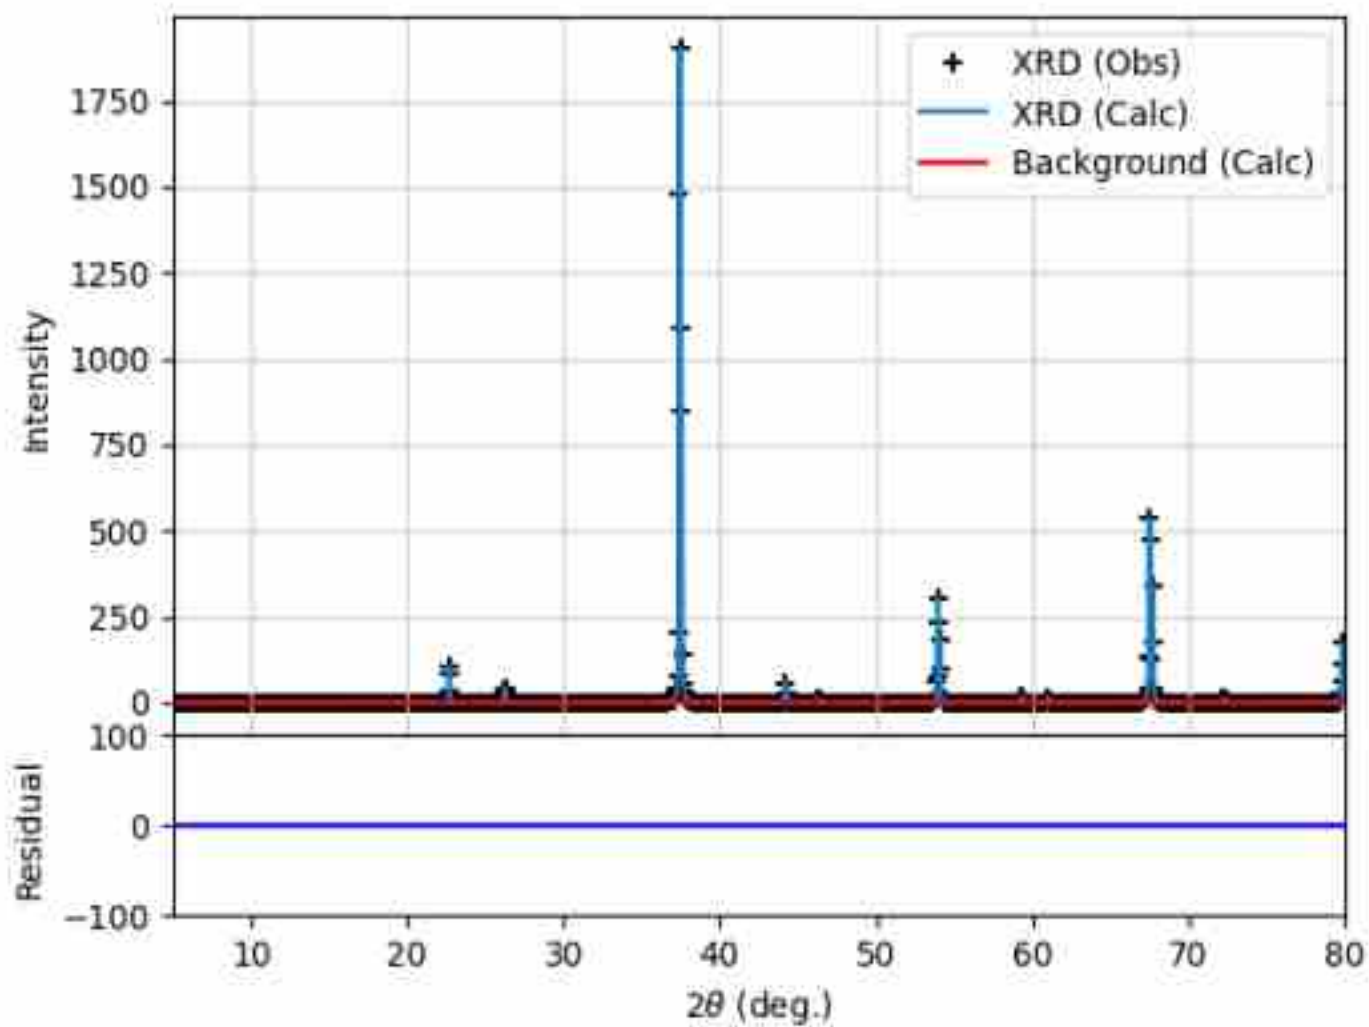

| RMSE before RR | Rwp     | RMSE after RR |
|----------------|---------|---------------|
| 0.001          | 0.00441 | 0.00056       |

# Cd2Pd1Rh1

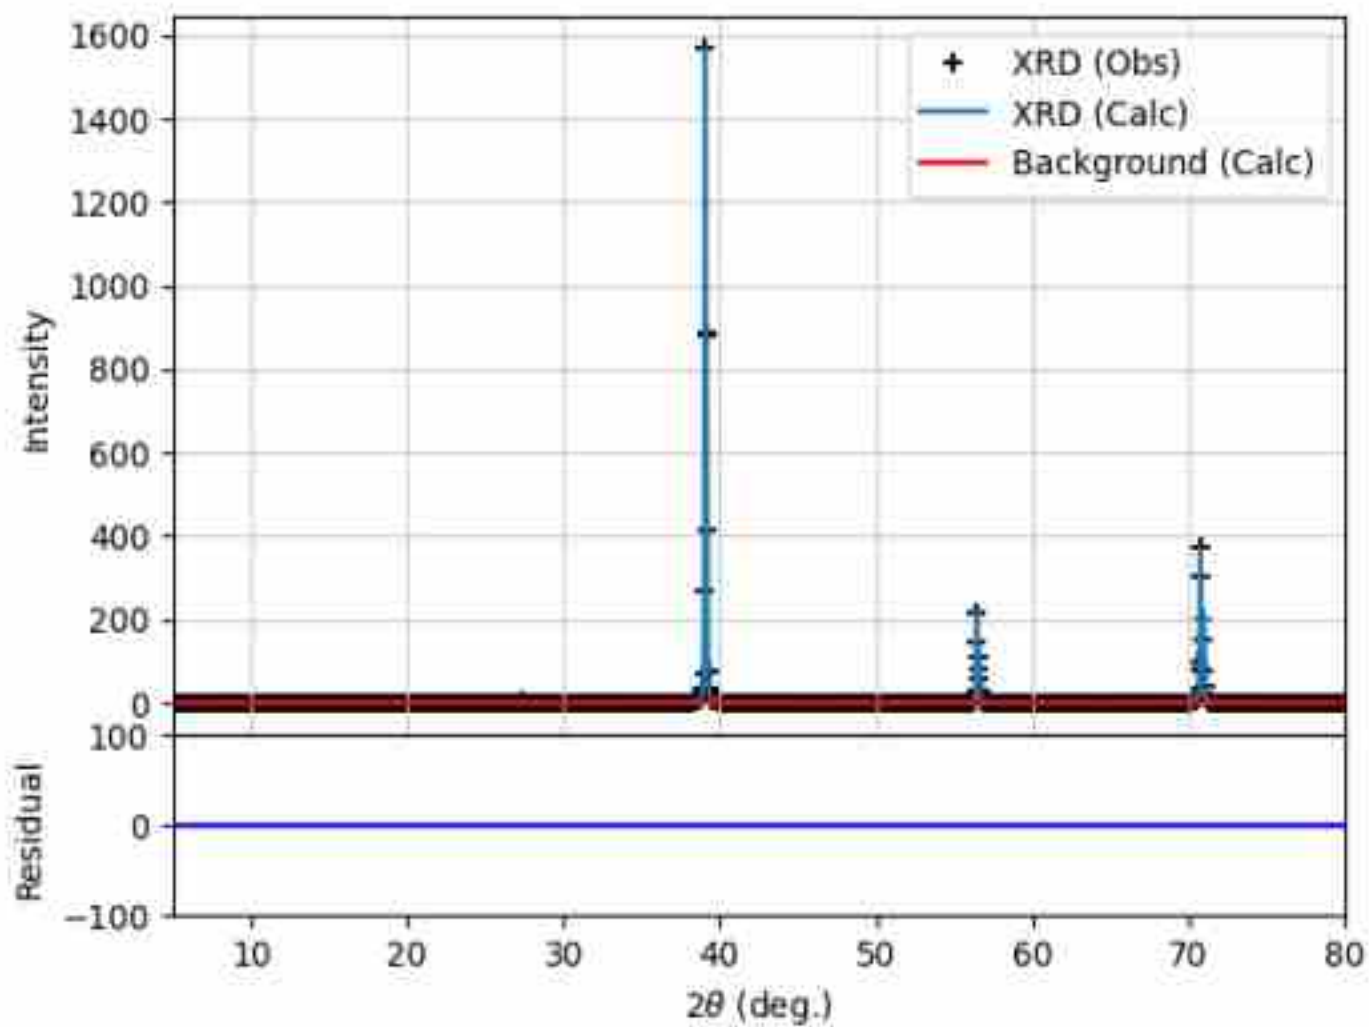

| RMSE before RR | Rwp     | RMSE after RR |
|----------------|---------|---------------|
| 0.001          | 0.09183 | 0.0013        |

# Cd3In1

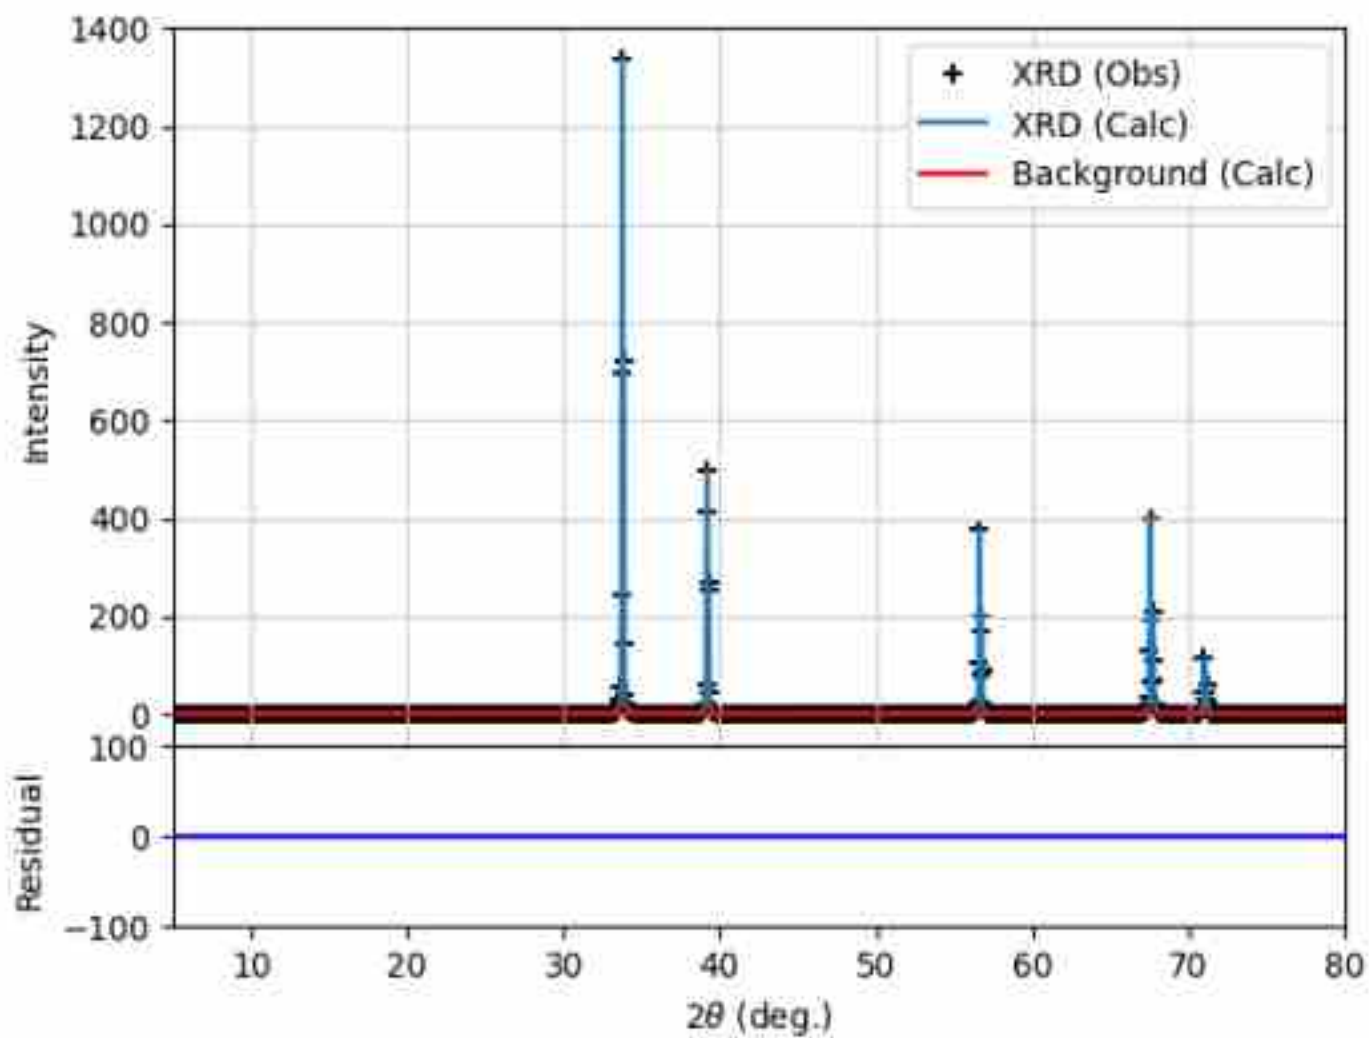

| RMSE before RR | Rwp     | RMSE after RR |
|----------------|---------|---------------|
| 0.001          | 0.01127 | 0.00045       |

# Ce1Al1Cu2Ni2

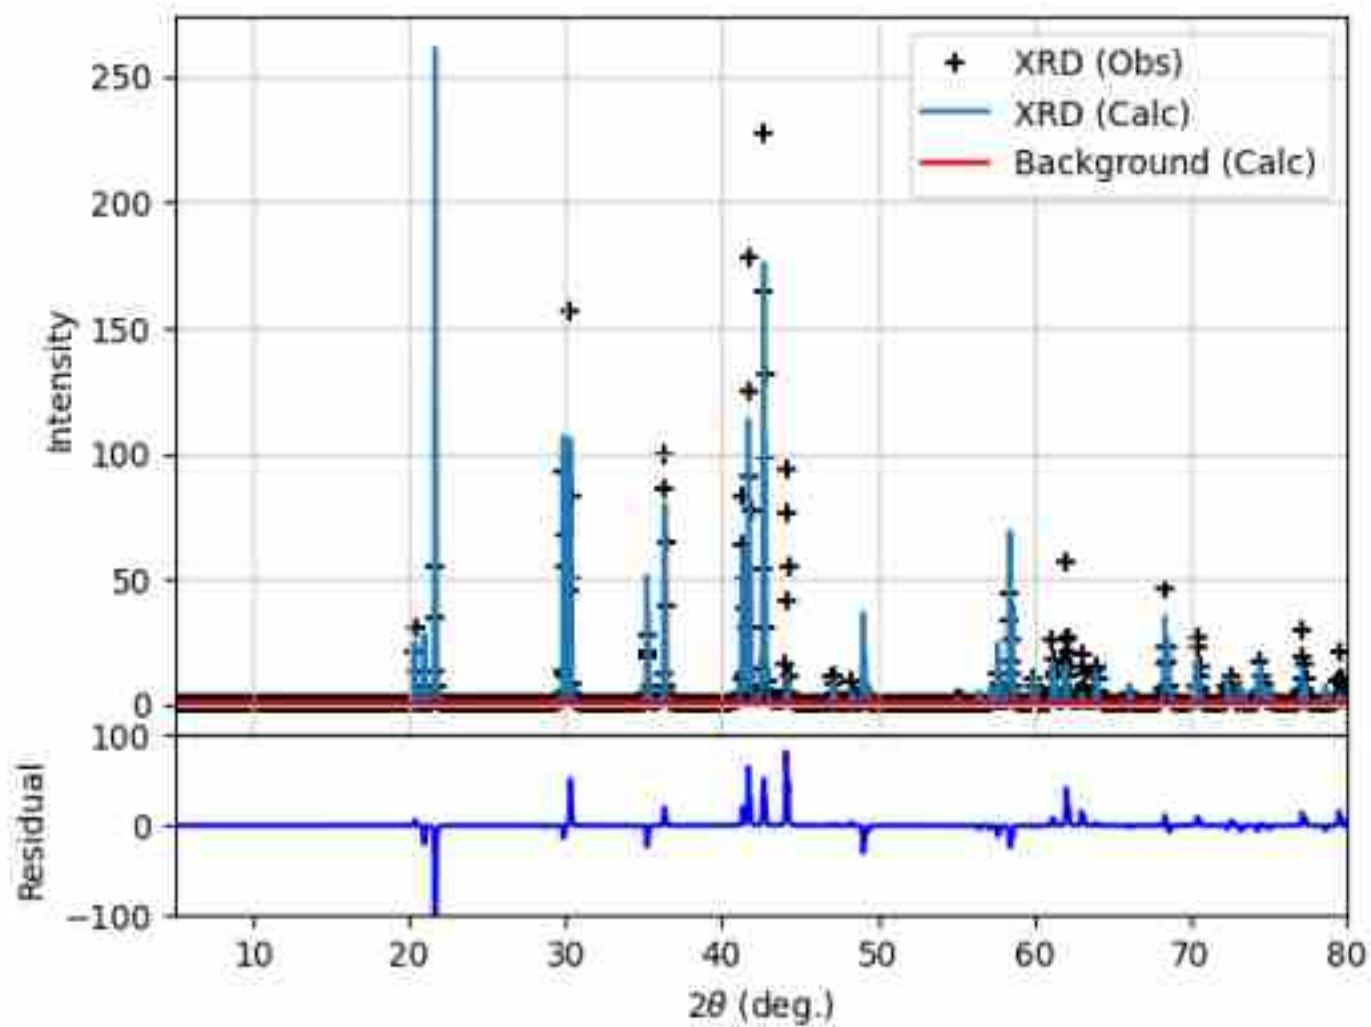

| RMSE before RR | Rwp      | RMSE after RR |
|----------------|----------|---------------|
| 0.01           | 69.83913 | 0.01448       |

# Ce1Al2Ag3

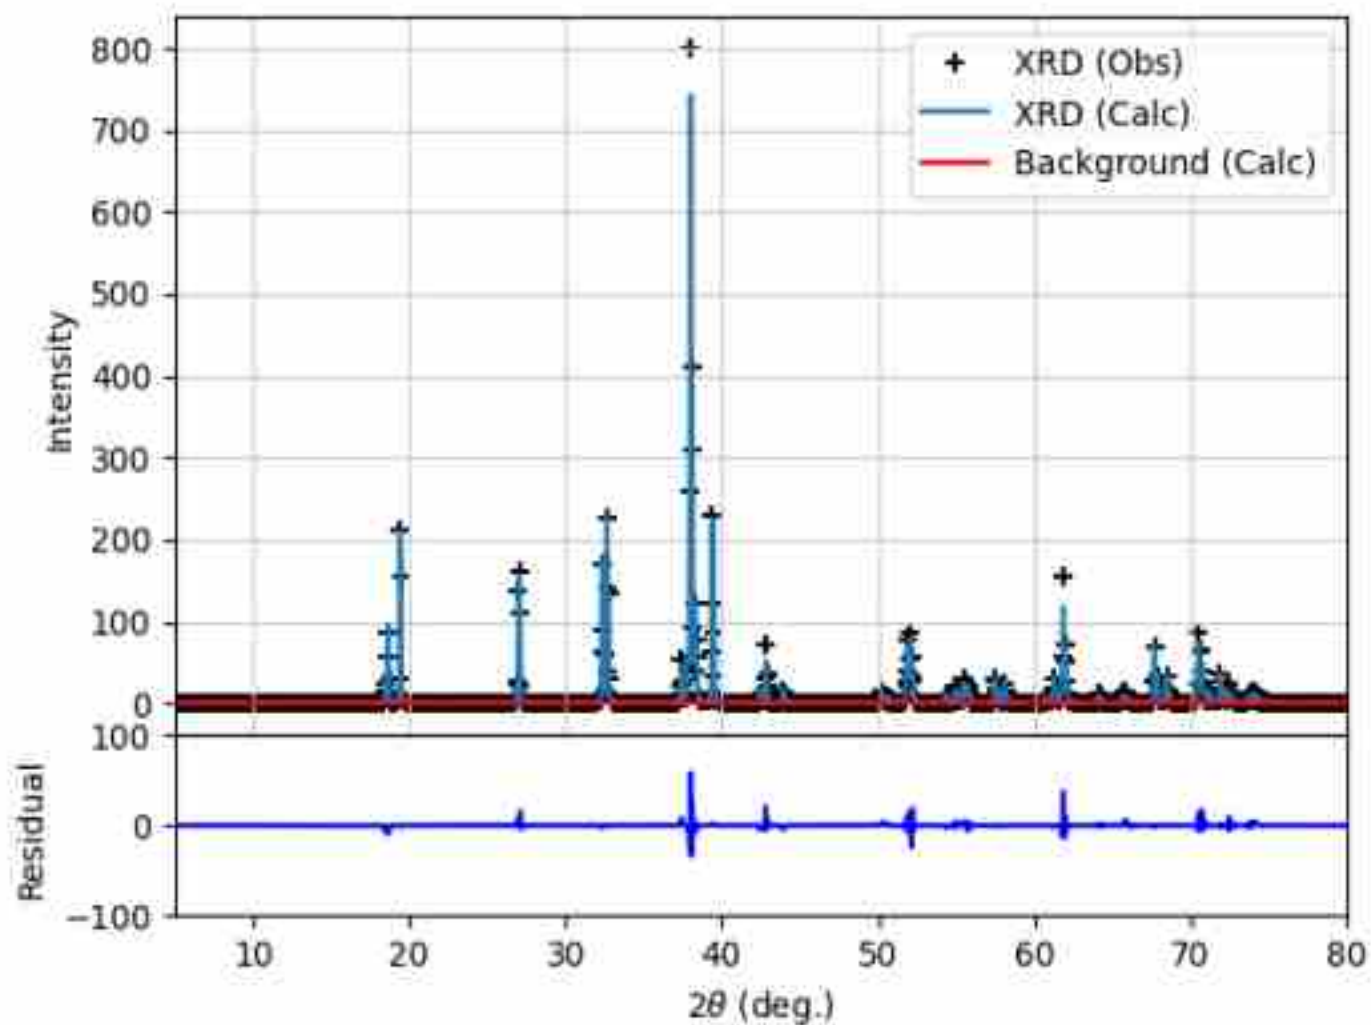

| RMSE before RR | Rwp      | RMSE after RR |
|----------------|----------|---------------|
| 0.01           | 13.80539 | 0.01013       |



# Ce1Cd1Au2

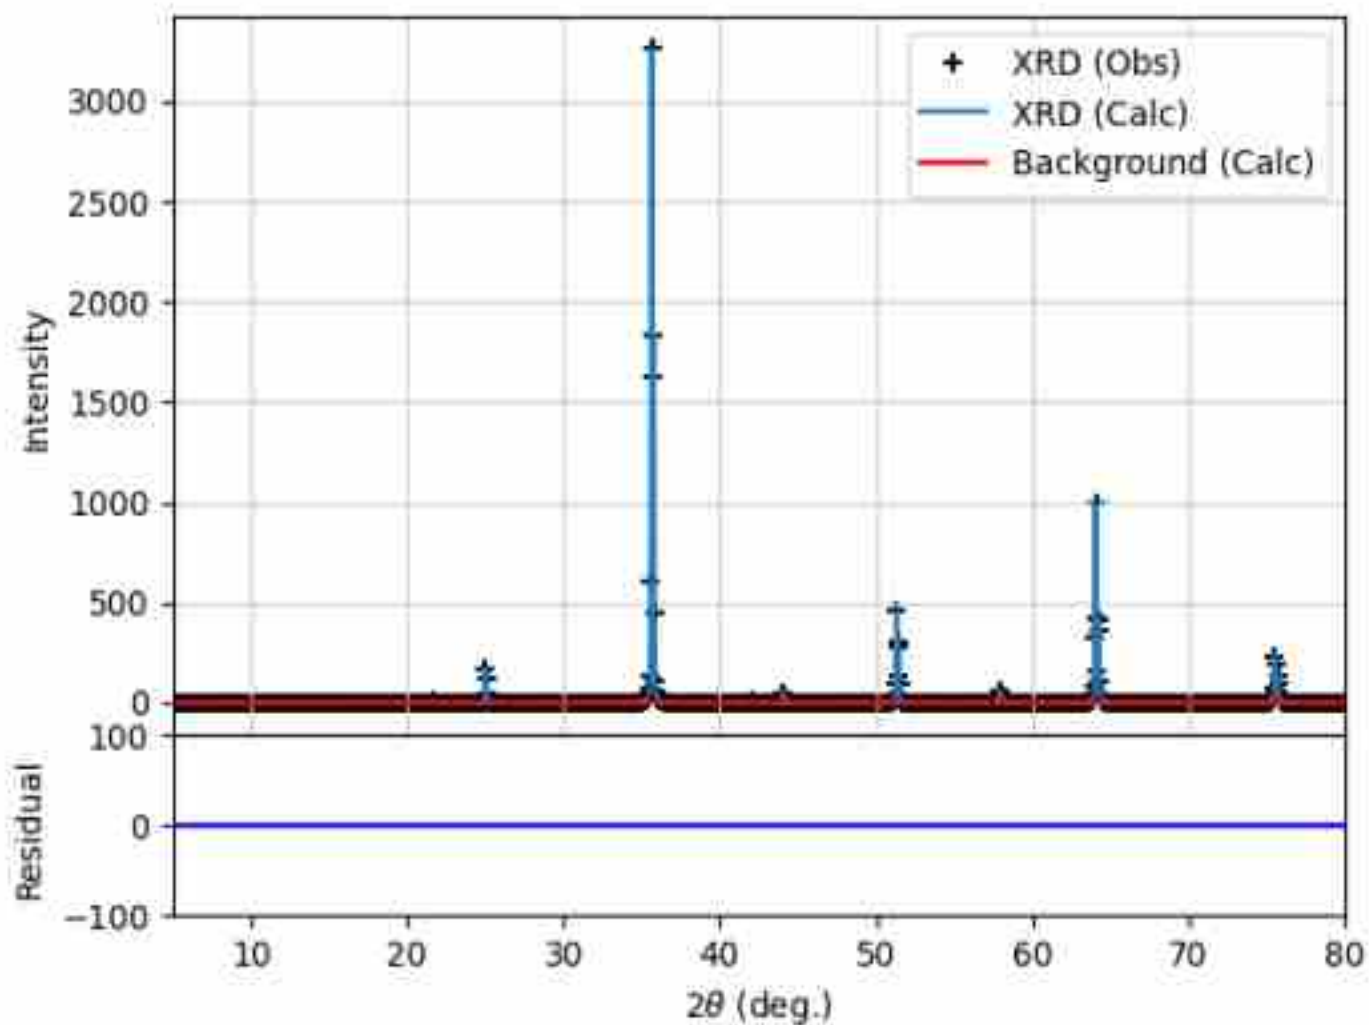

| RMSE before RR | Rwp     | RMSE after RR |
|----------------|---------|---------------|
| 0.001          | 0.00799 | 0.00054       |

# Ce1Mg1Hg2

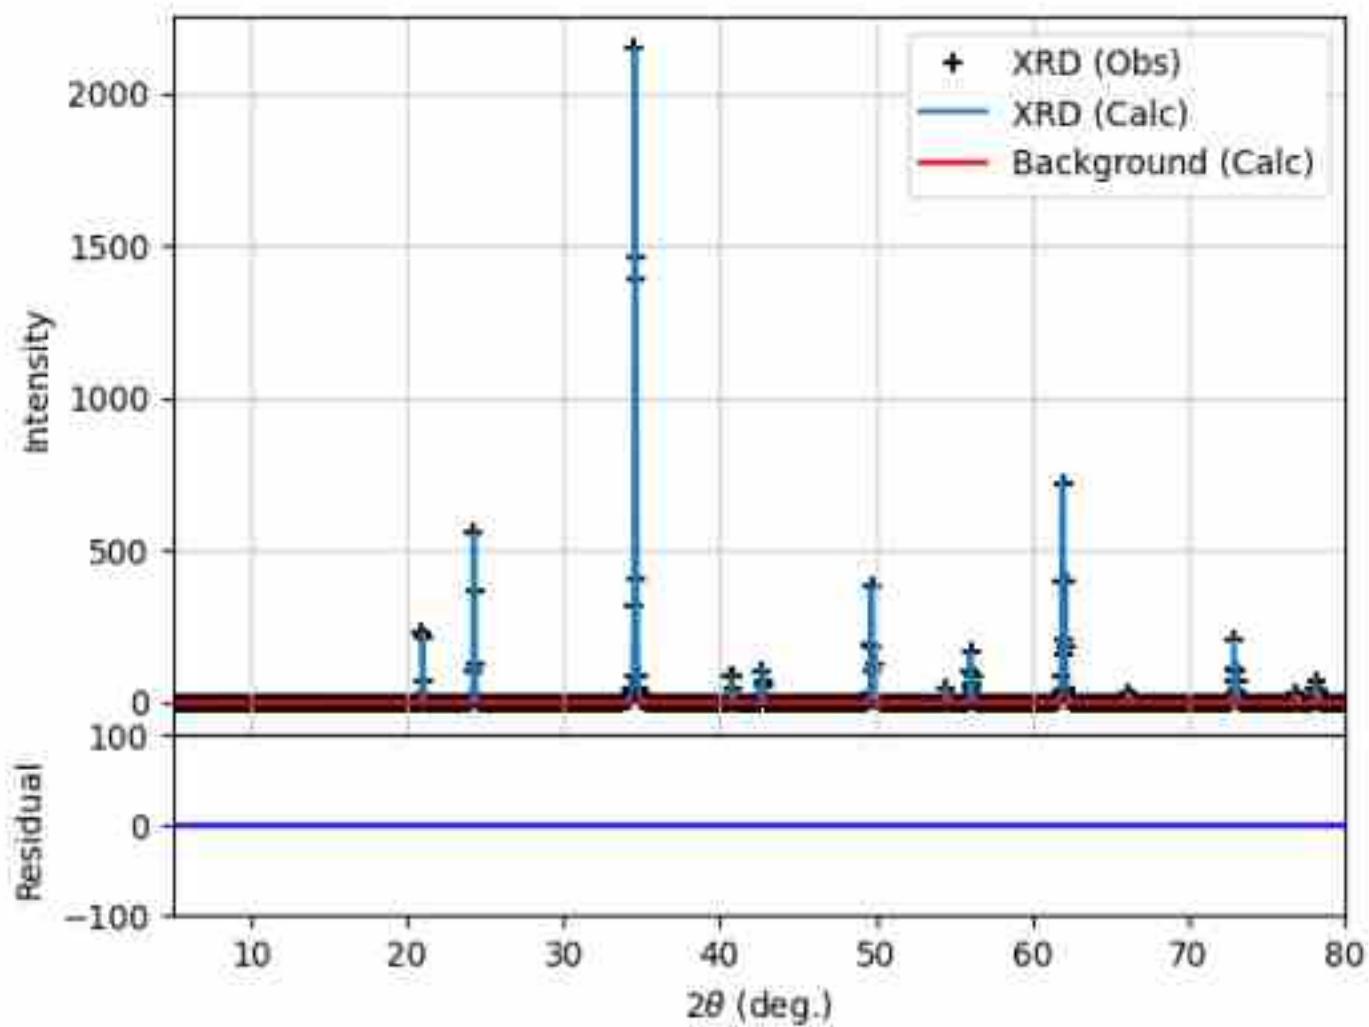

| RMSE before RR | Rwp     | RMSE after RR |
|----------------|---------|---------------|
| 0.001          | 0.01148 | 0.00093       |

# Ce1Sc1Pd6

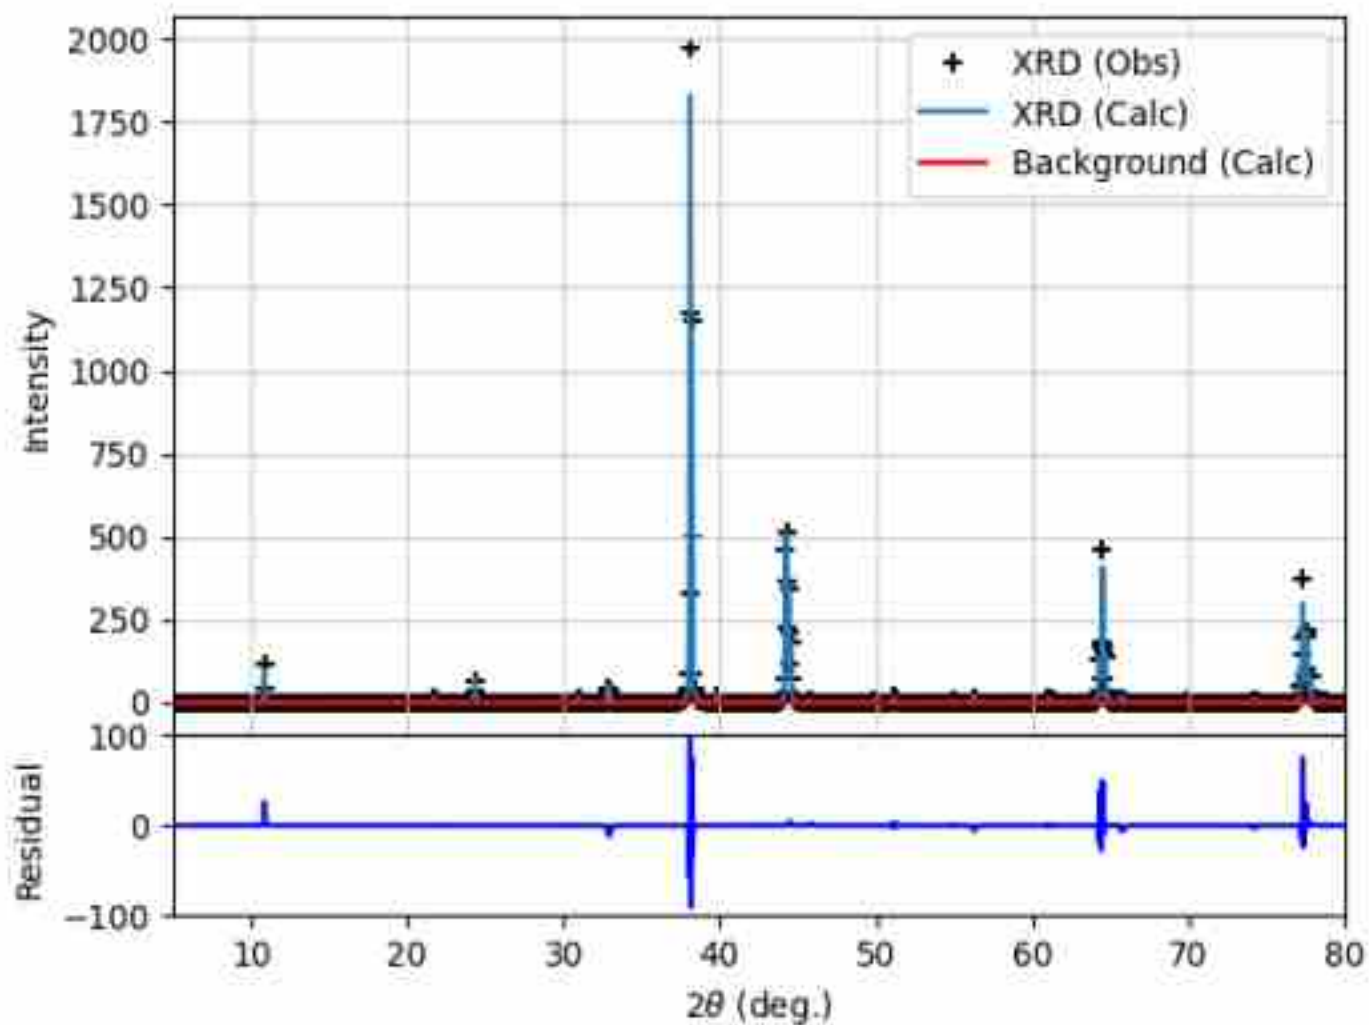

| RMSE before RR | Rwp     | RMSE after RR |
|----------------|---------|---------------|
| 0.01           | 10.3376 | 0.02392       |

# Ce1Si2Ru2

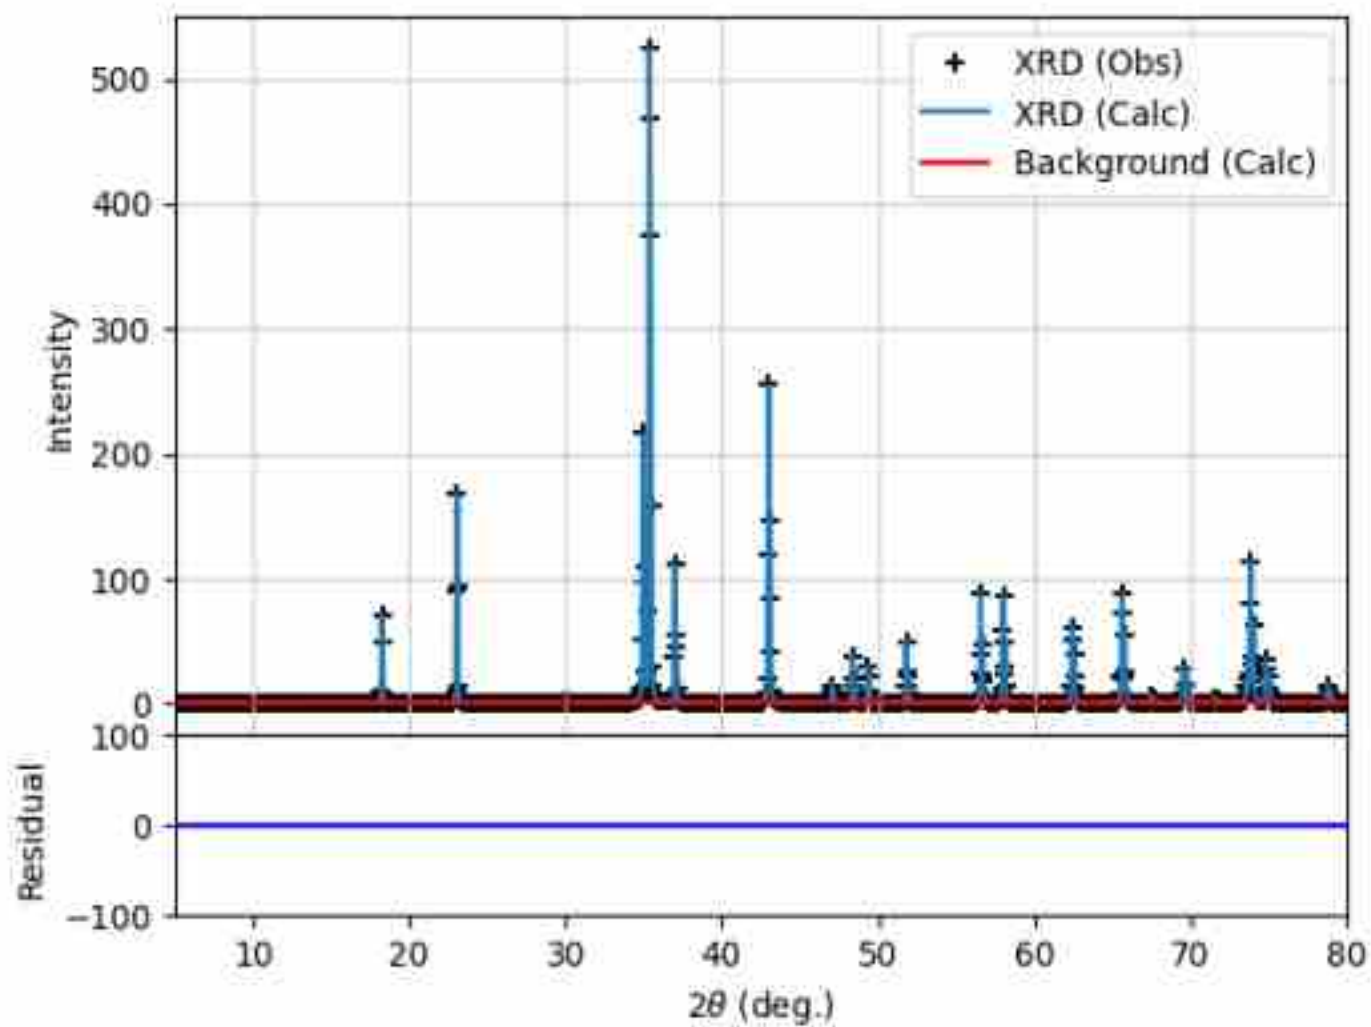

| RMSE before RR | Rwp     | RMSE after RR |
|----------------|---------|---------------|
| 0.01           | 0.00333 | 0.00057       |

# Ce1Sm1Ti2

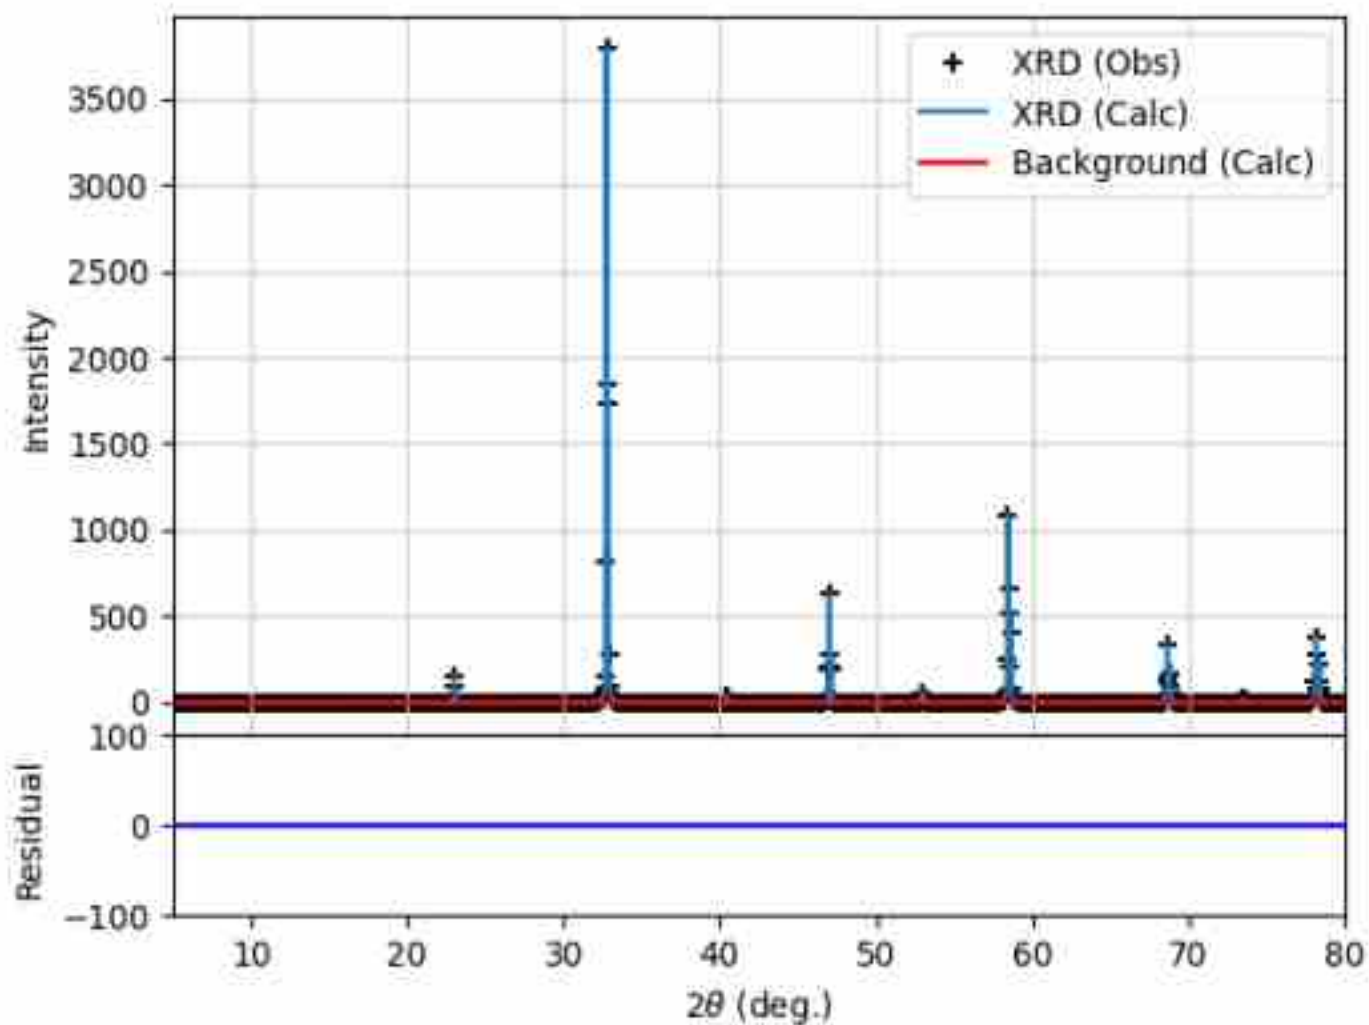

| RMSE before RR | Rwp     | RMSE after RR |
|----------------|---------|---------------|
| 0.001          | 0.12549 | 0.00155       |

# Ce<sub>1</sub>Y<sub>4</sub>Mg<sub>5</sub>

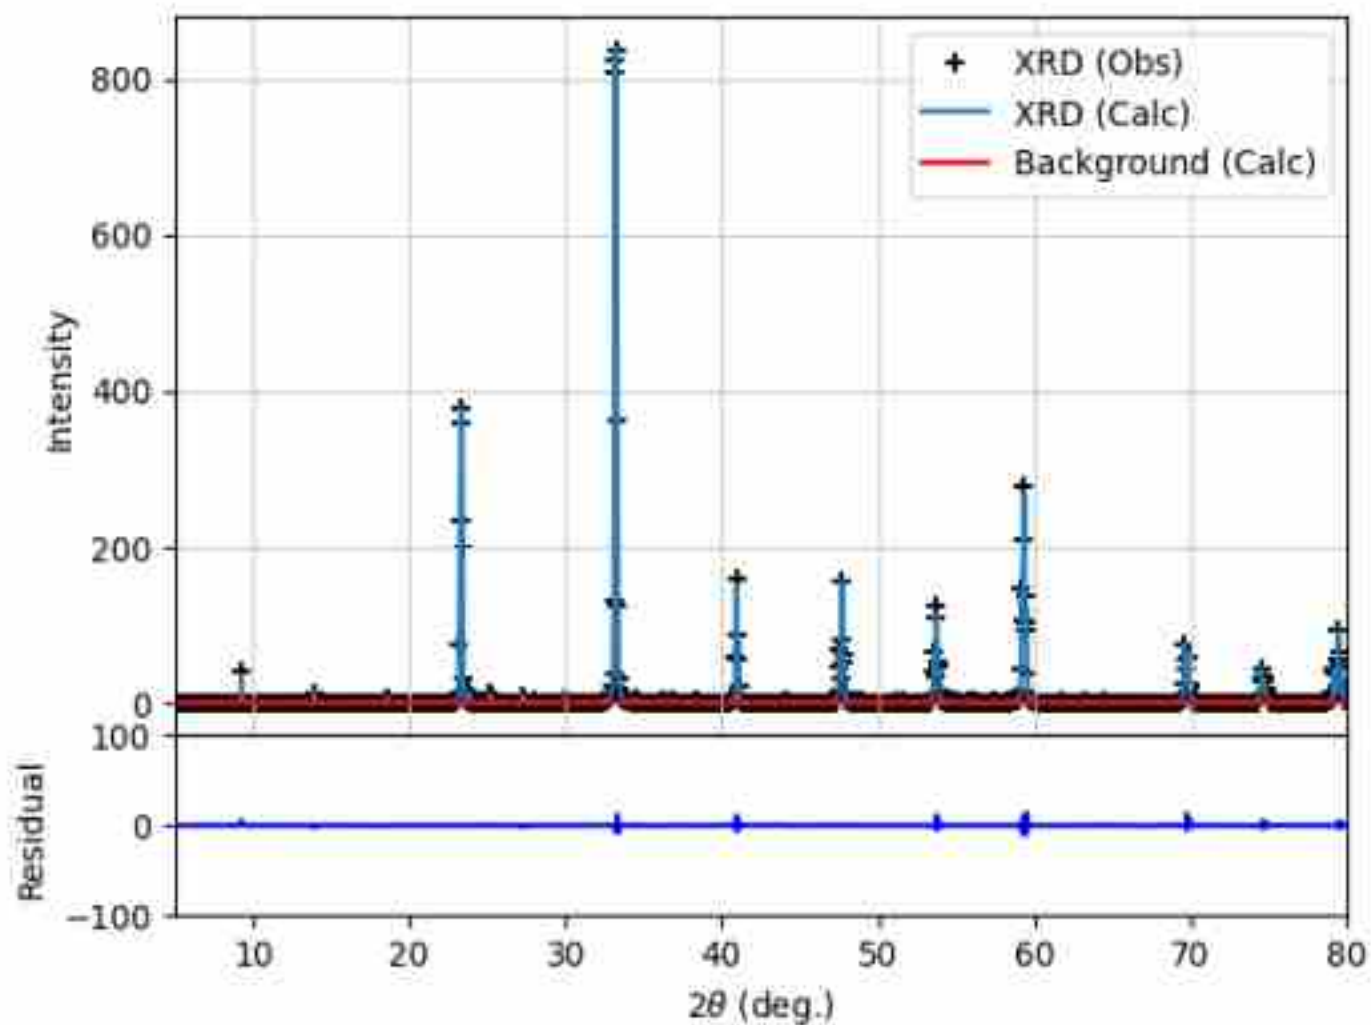

| RMSE before RR | Rwp     | RMSE after RR |
|----------------|---------|---------------|
| 0.01           | 5.39018 | 0.0542        |

Ce1Zr1O4

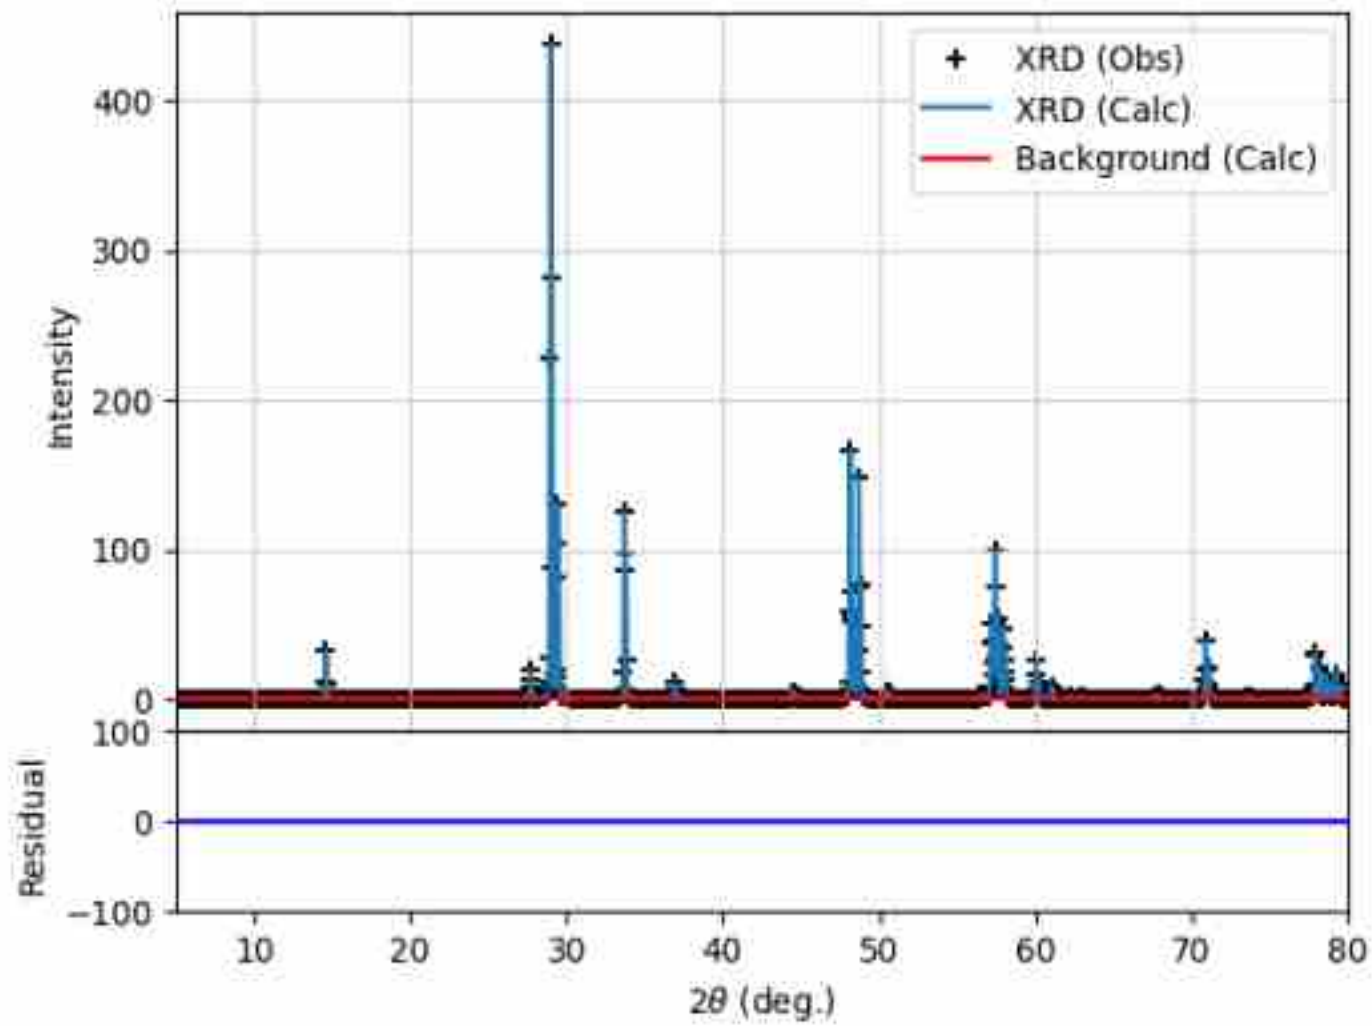

| RMSE before RR | Rwp     | RMSE after RR |
|----------------|---------|---------------|
| 0.01           | 0.00314 | 0.00051       |

# Ce<sub>2</sub>Ag<sub>1</sub>Hg<sub>1</sub>

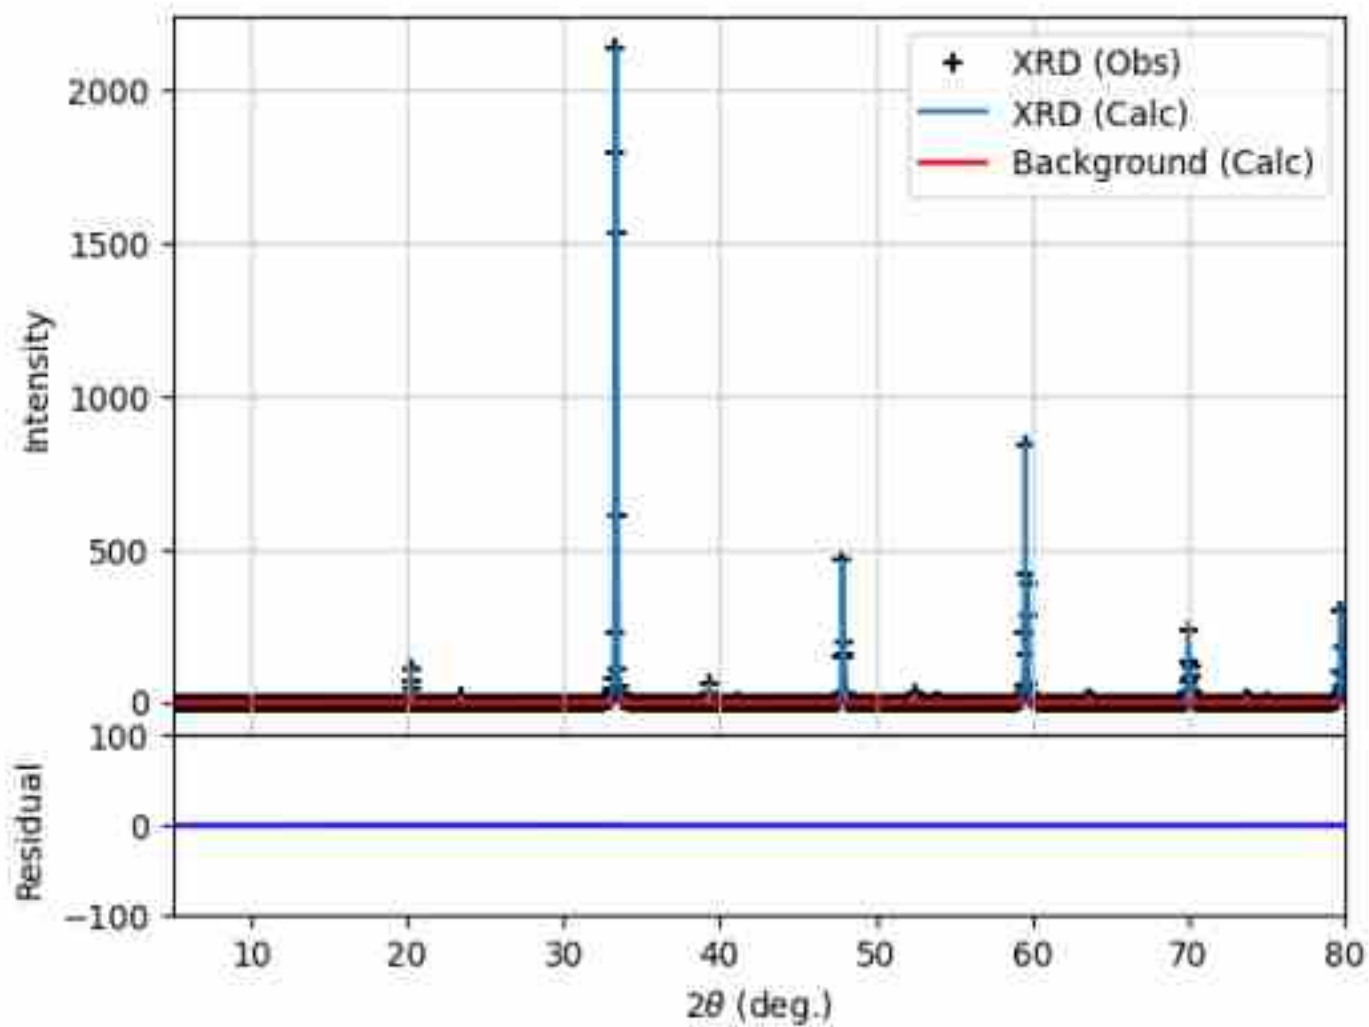

| RMSE before RR | Rwp     | RMSE after RR |
|----------------|---------|---------------|
| 0.001          | 0.13947 | 0.00095       |



Ce2Ga6

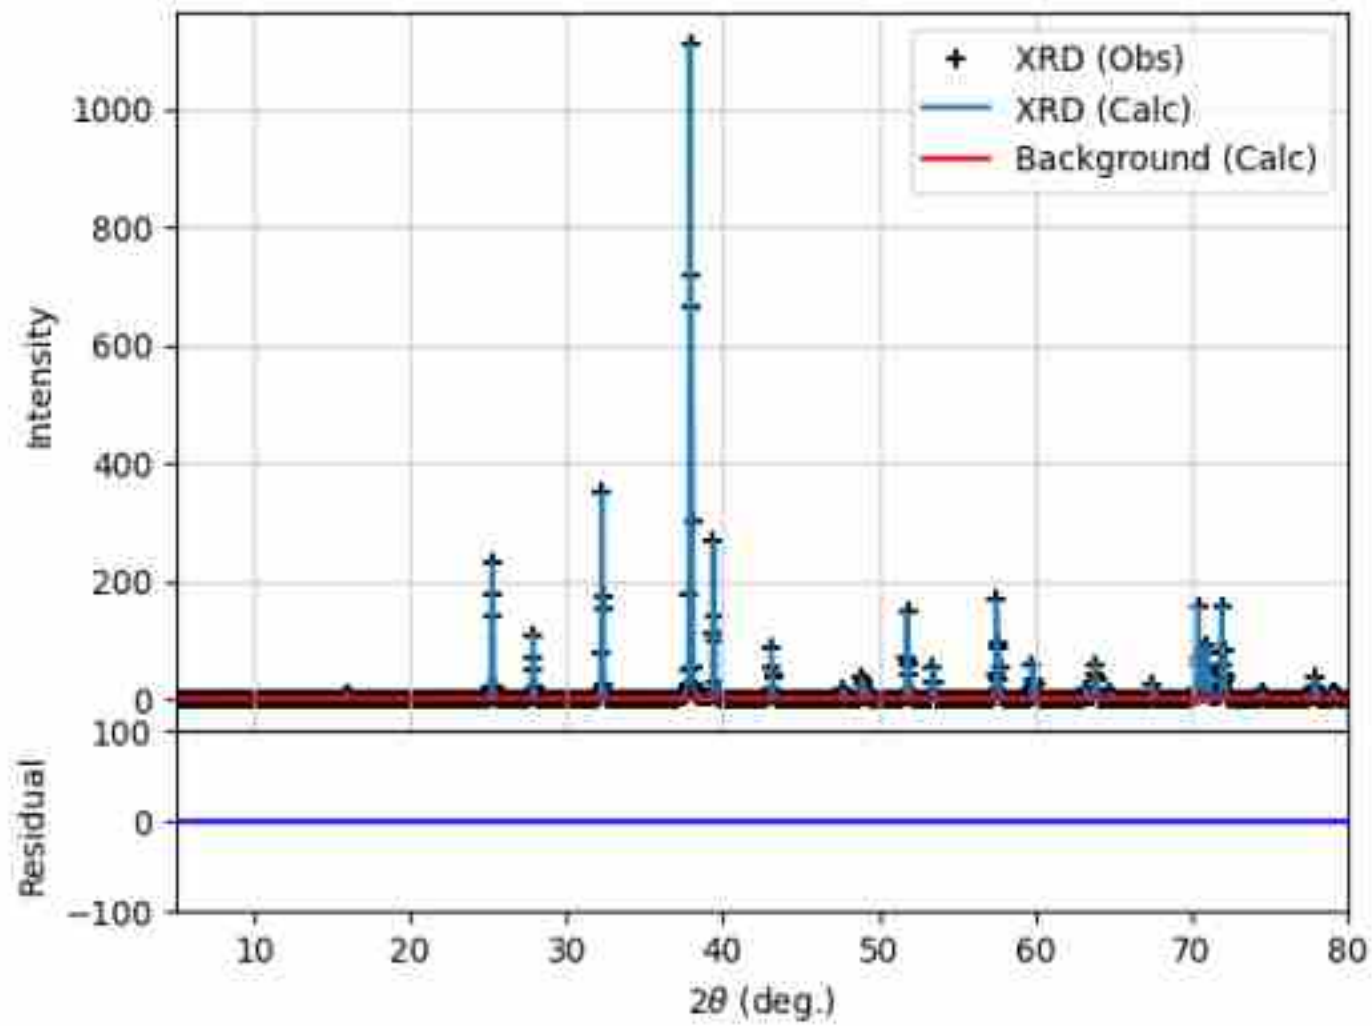

| RMSE before RR | Rwp     | RMSE after RR |
|----------------|---------|---------------|
| 0.01           | 0.00483 | 0.00056       |

# Ce<sub>2</sub>Mg<sub>4</sub>

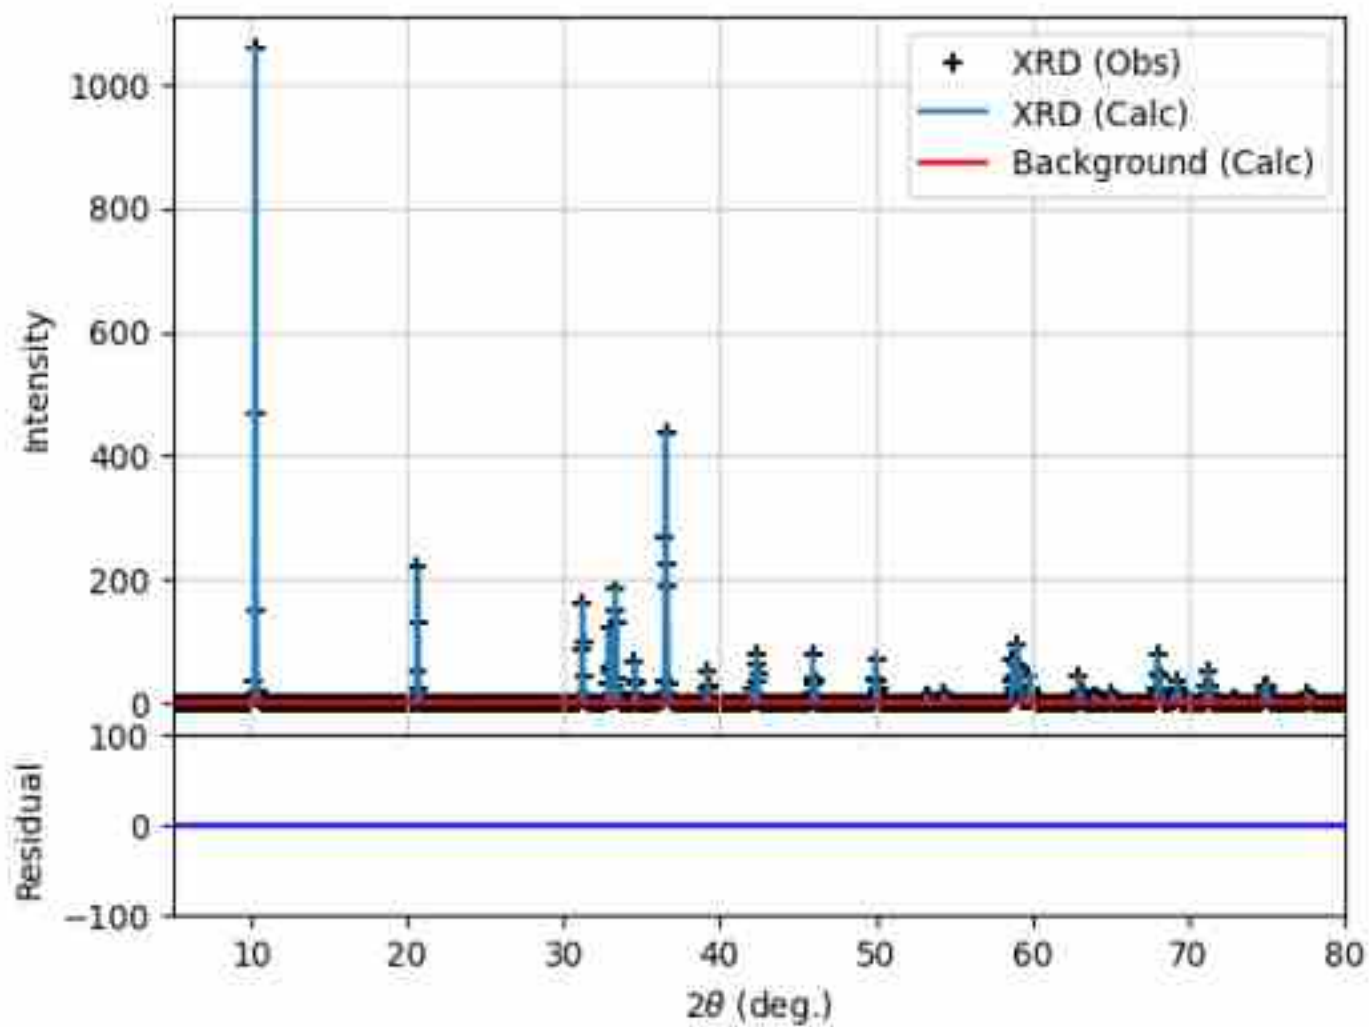

| RMSE before RR | Rwp     | RMSE after RR |
|----------------|---------|---------------|
| 0.01           | 0.00437 | 0.00103       |

# Ce2O2F2

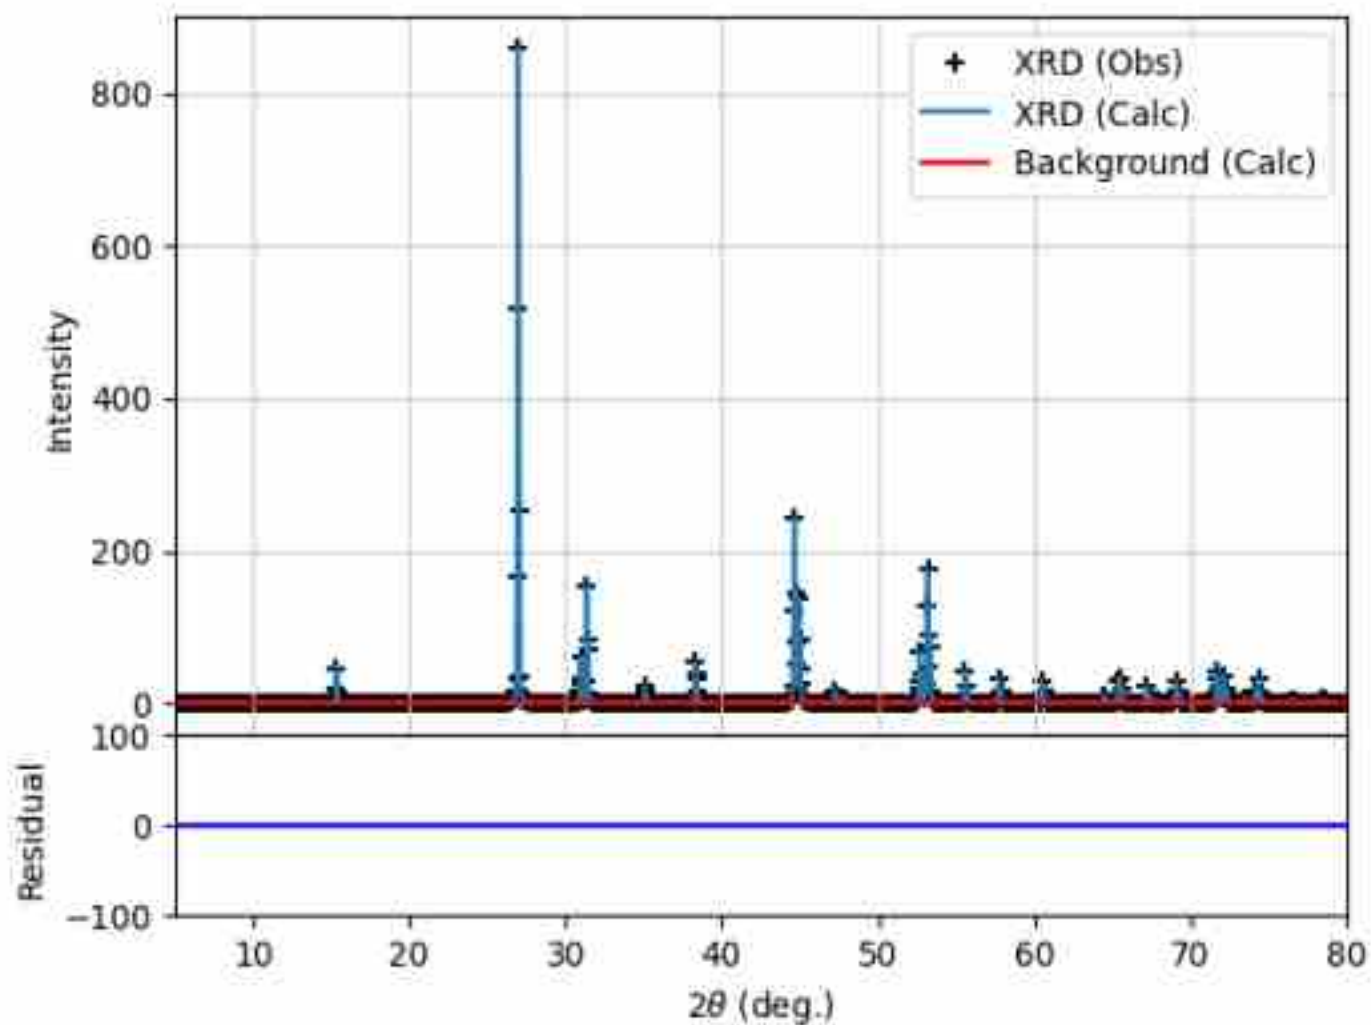

| RMSE before RR | Rwp     | RMSE after RR |
|----------------|---------|---------------|
| 0.01           | 0.00346 | 0.00092       |

# Ce<sub>2</sub>Si<sub>2</sub>Pt<sub>2</sub>

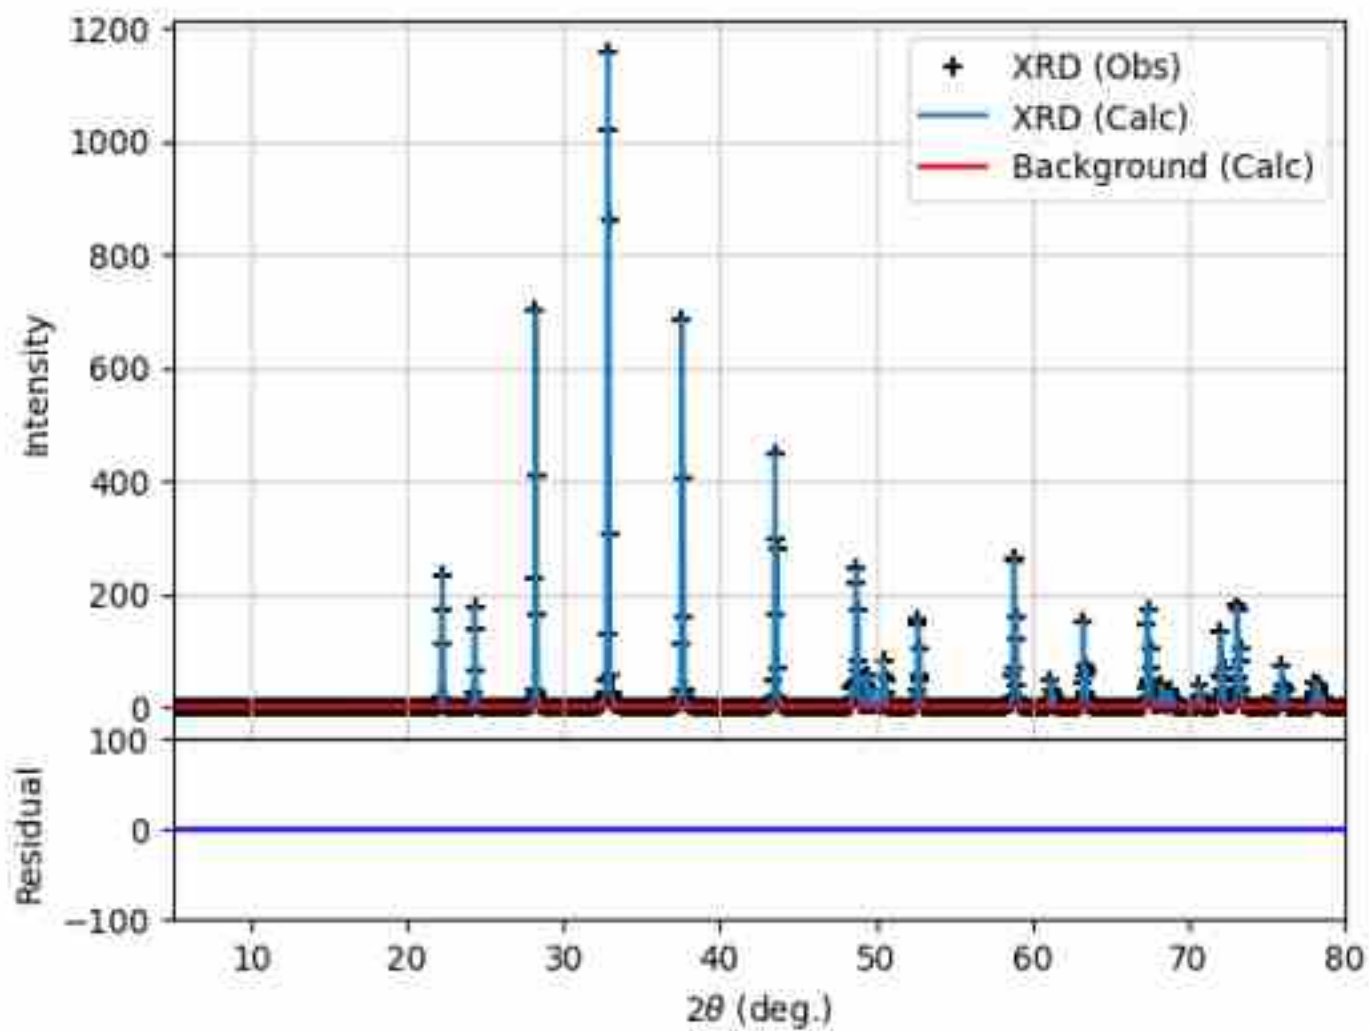

| RMSE before RR | Rwp     | RMSE after RR |
|----------------|---------|---------------|
| 0.01           | 0.00423 | 0.00056       |

# Ce<sub>2</sub>Ti<sub>2</sub>Ge<sub>2</sub>

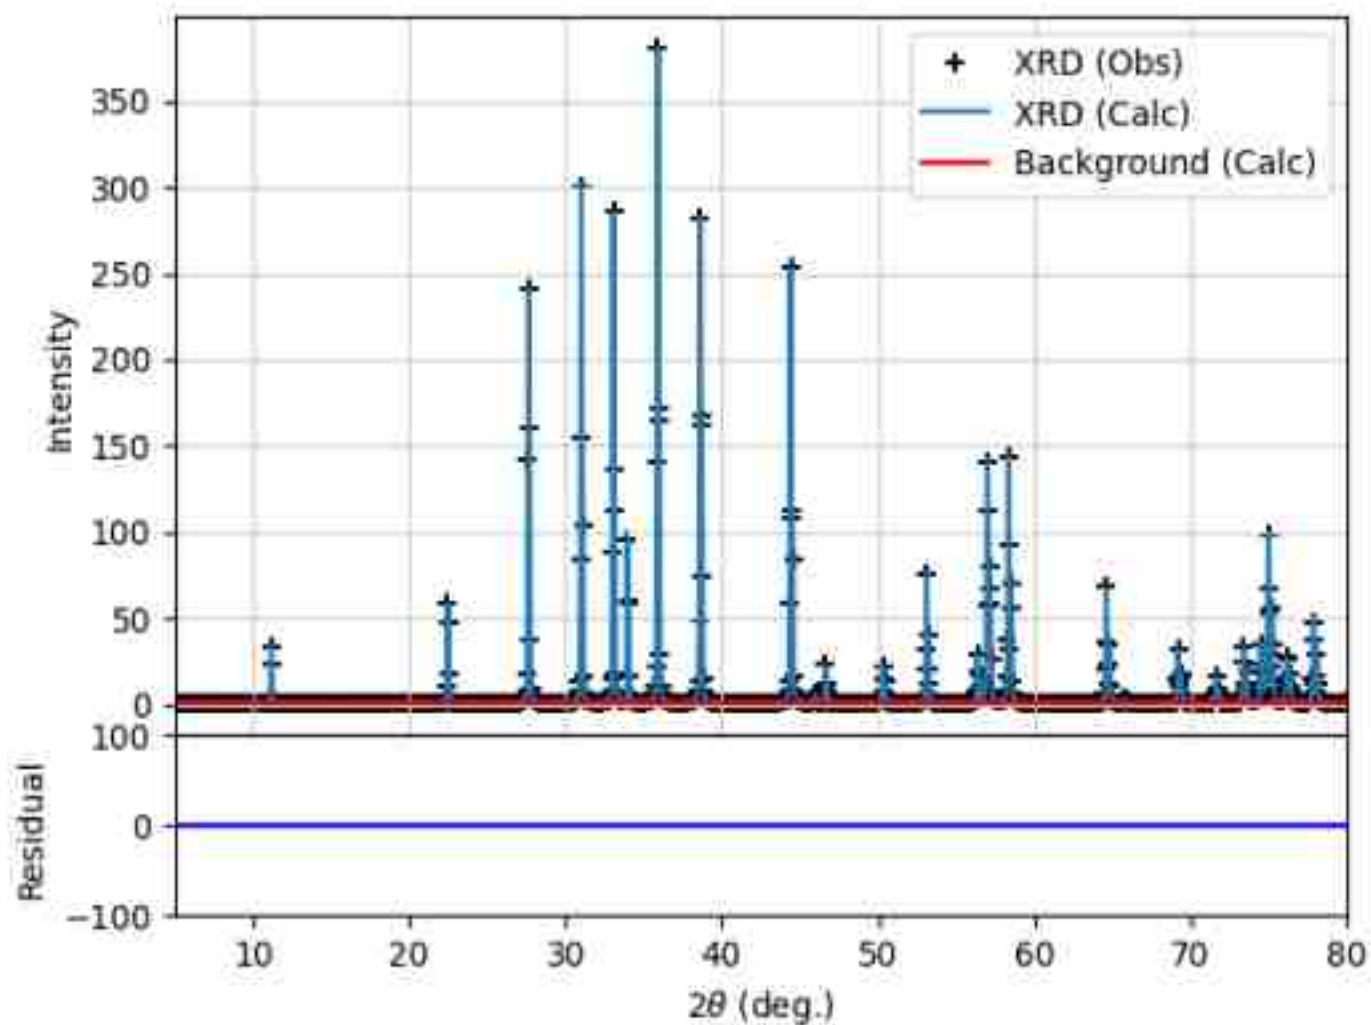

| RMSE before RR | Rwp     | RMSE after RR |
|----------------|---------|---------------|
| 0.01           | 0.00419 | 0.00046       |

# Ce<sub>2</sub>ZnHg

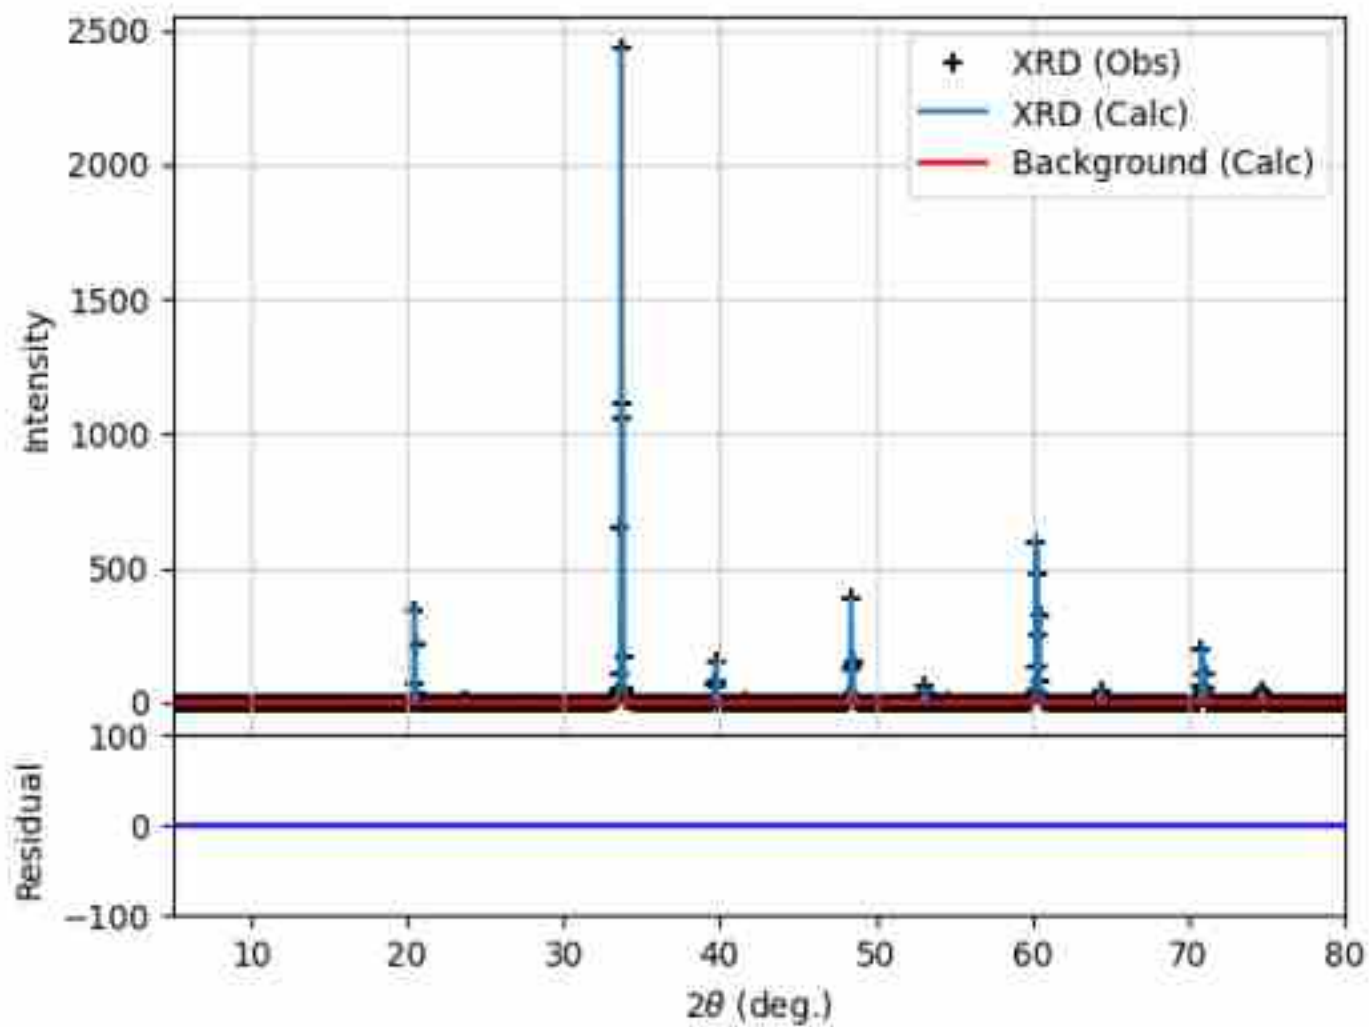

| RMSE before RR | Rwp     | RMSE after RR |
|----------------|---------|---------------|
| 0.001          | 0.00668 | 0.0008        |

# Co1Ni1Pt2

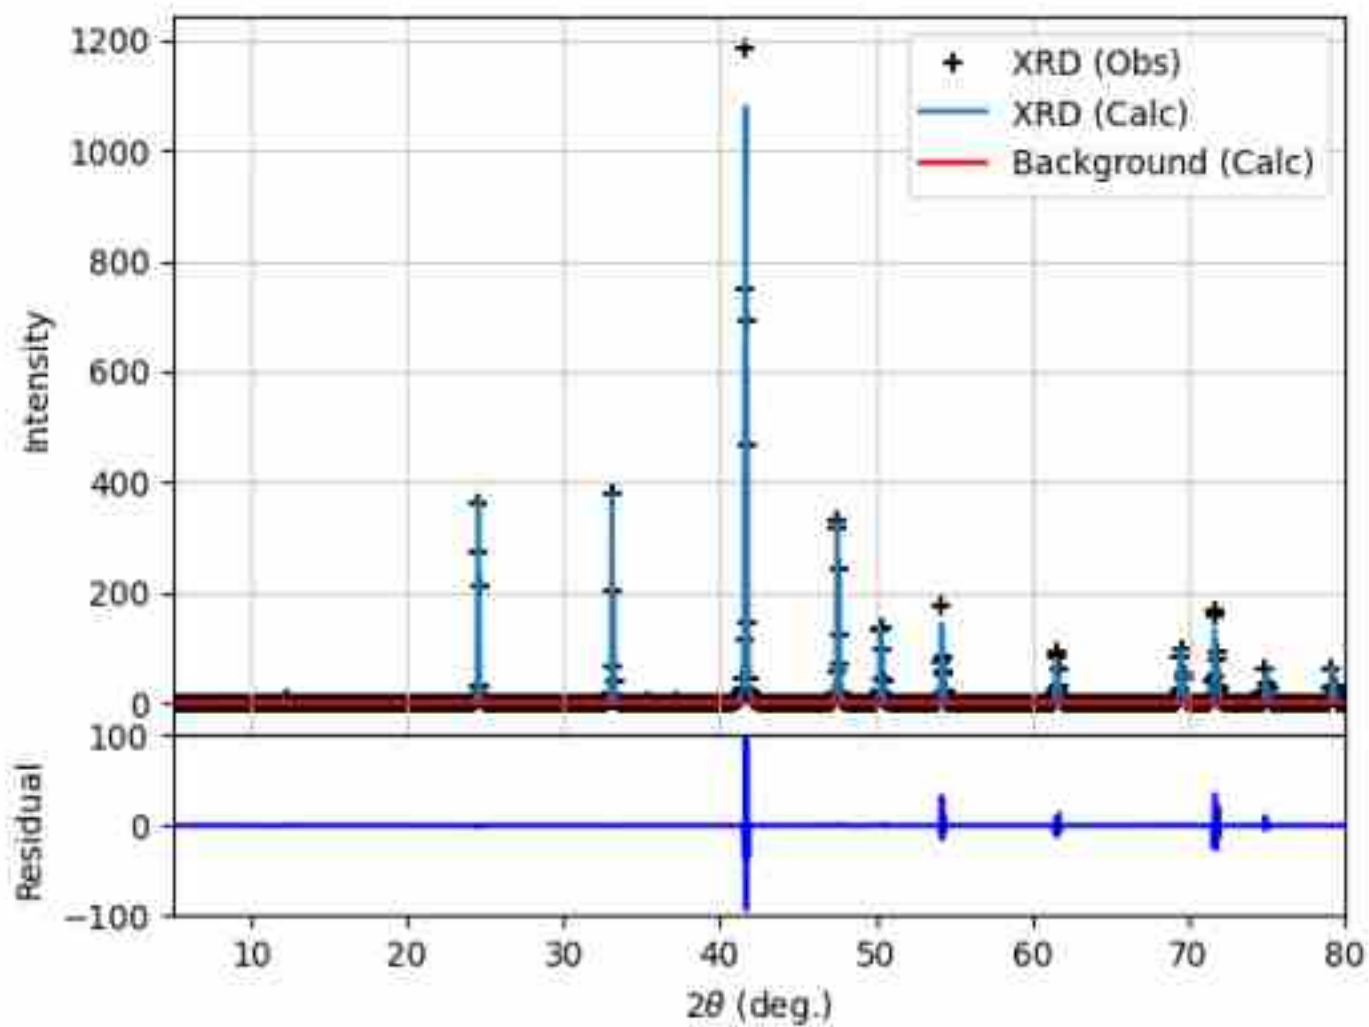

| RMSE before RR | Rwp      | RMSE after RR |
|----------------|----------|---------------|
| 0.01           | 12.72224 | 0.0097        |

# Cr1Co3

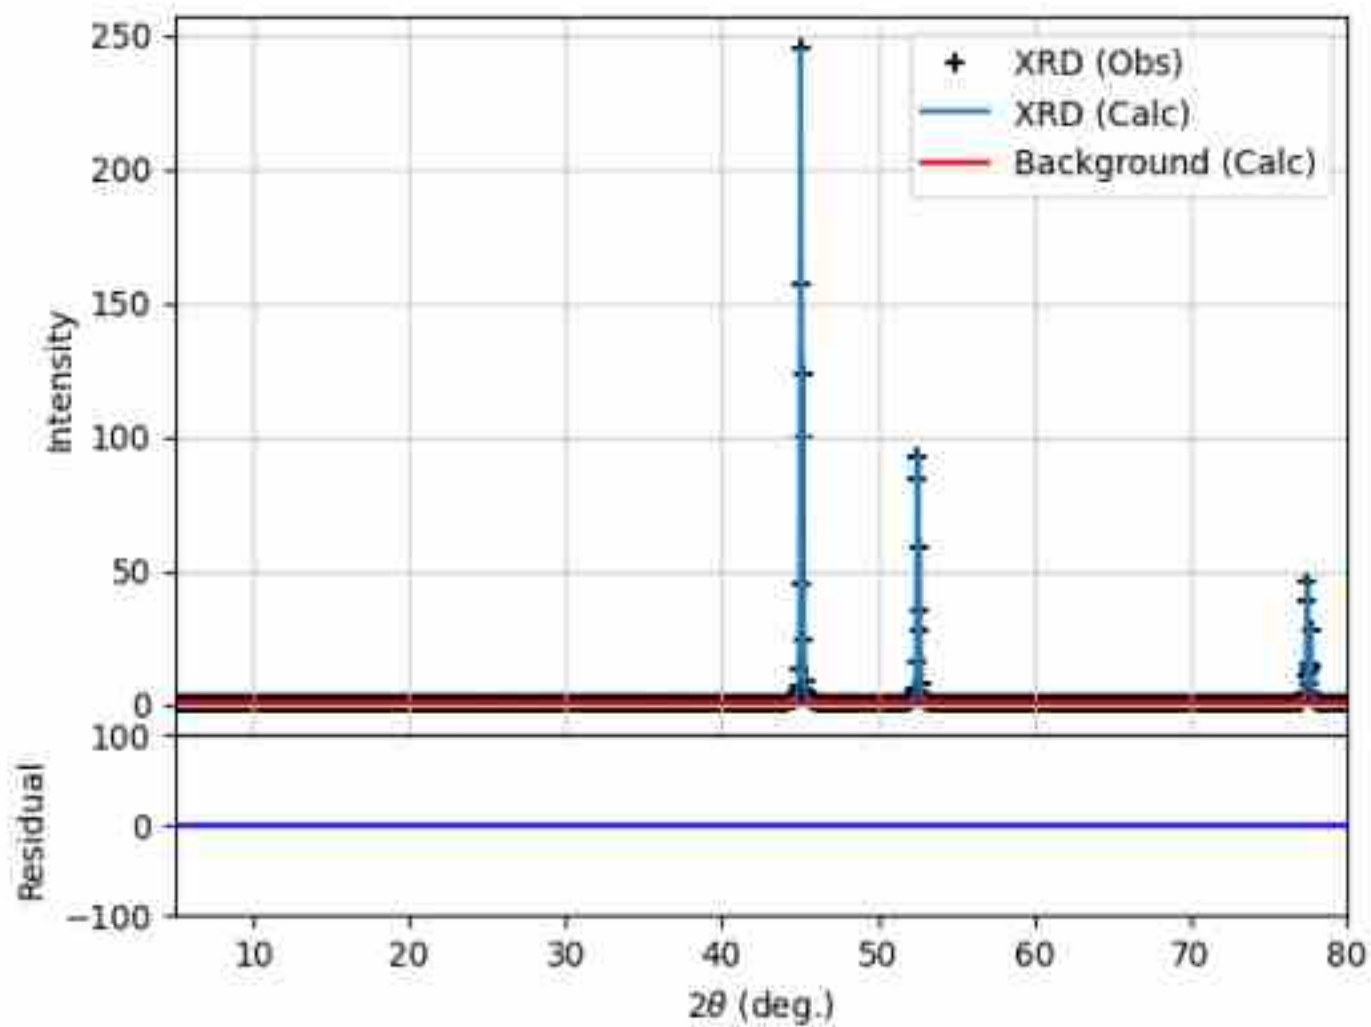

| RMSE before RR | Rwp     | RMSE after RR |
|----------------|---------|---------------|
| 0.001          | 0.00408 | 0.00035       |



# Cr1Ga1Co2

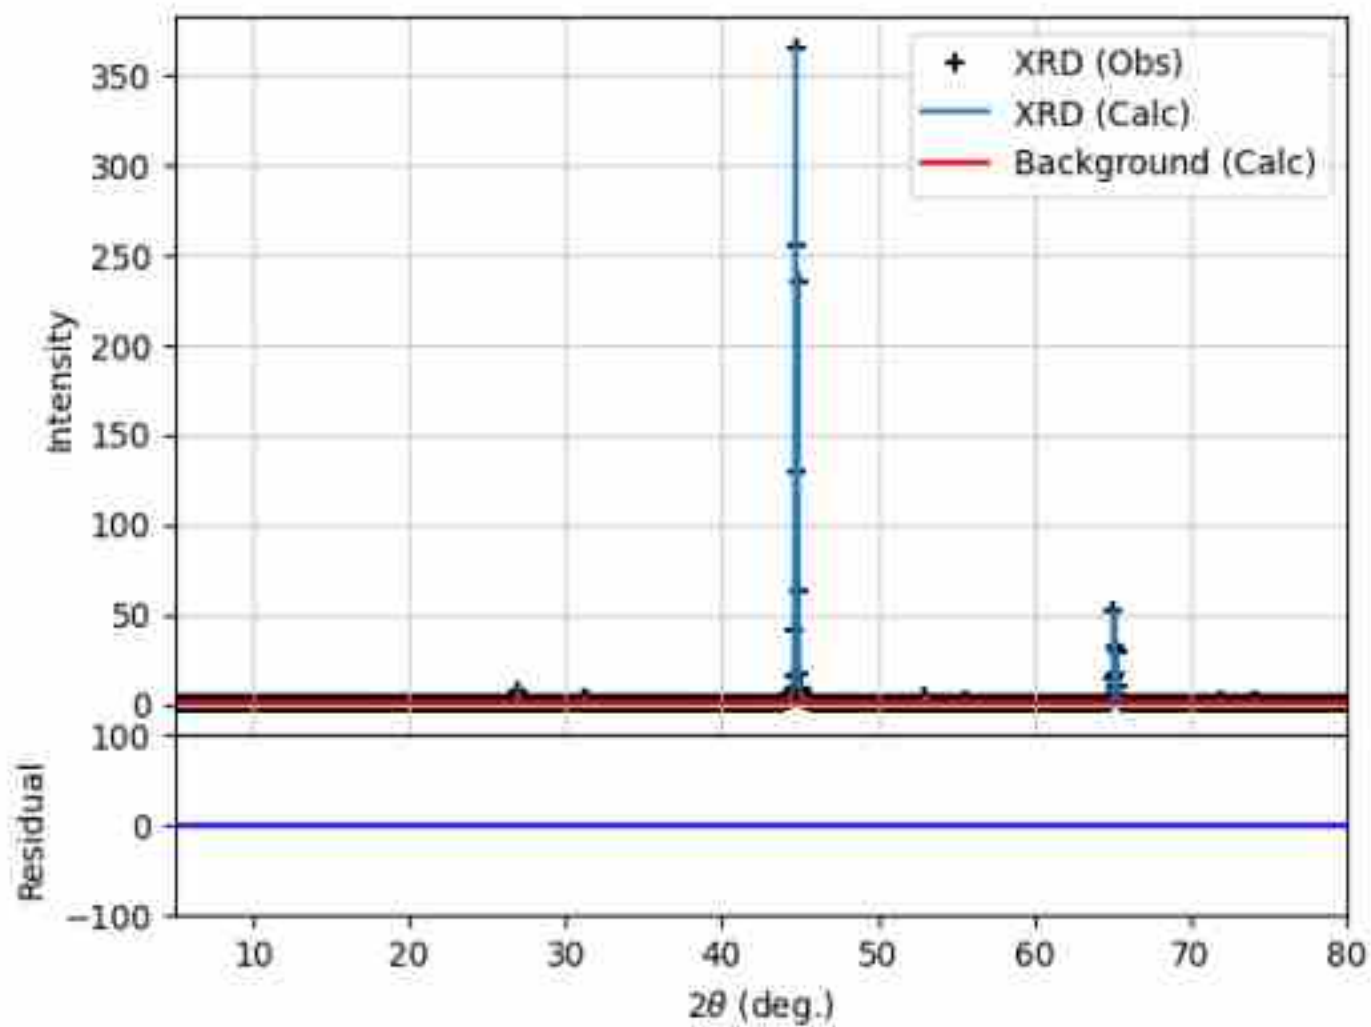

| RMSE before RR | Rwp   | RMSE after RR |
|----------------|-------|---------------|
| 0.001          | 9e-05 | 3e-05         |

# Cr1Ni3

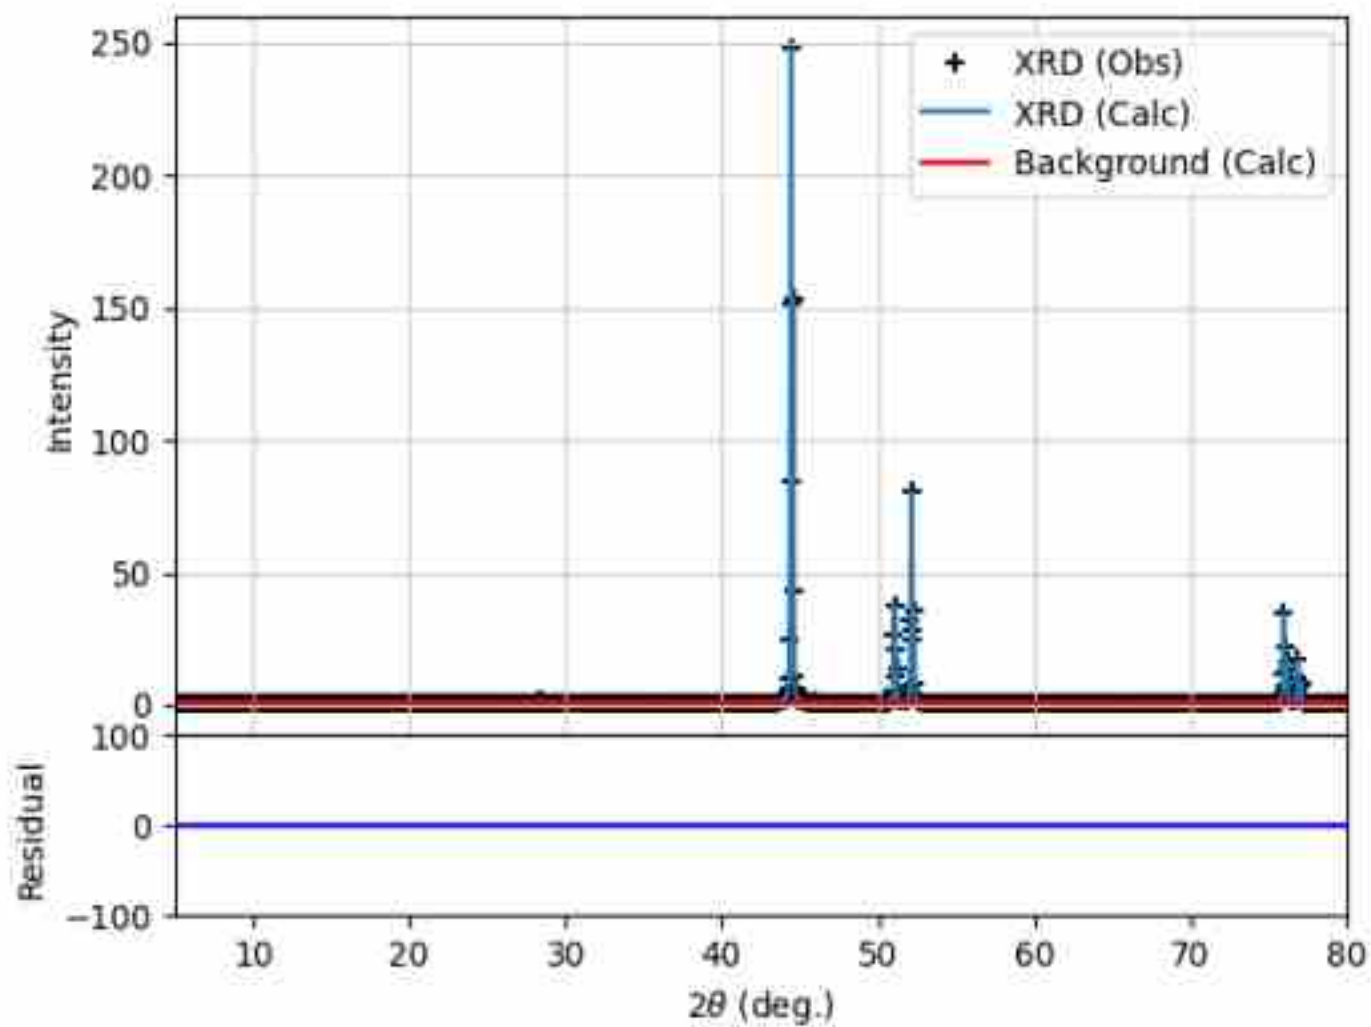

| RMSE before RR | Rwp     | RMSE after RR |
|----------------|---------|---------------|
| 0.001          | 0.00499 | 0.00043       |

# Cr<sub>3</sub>Fe<sub>3</sub>As<sub>3</sub>

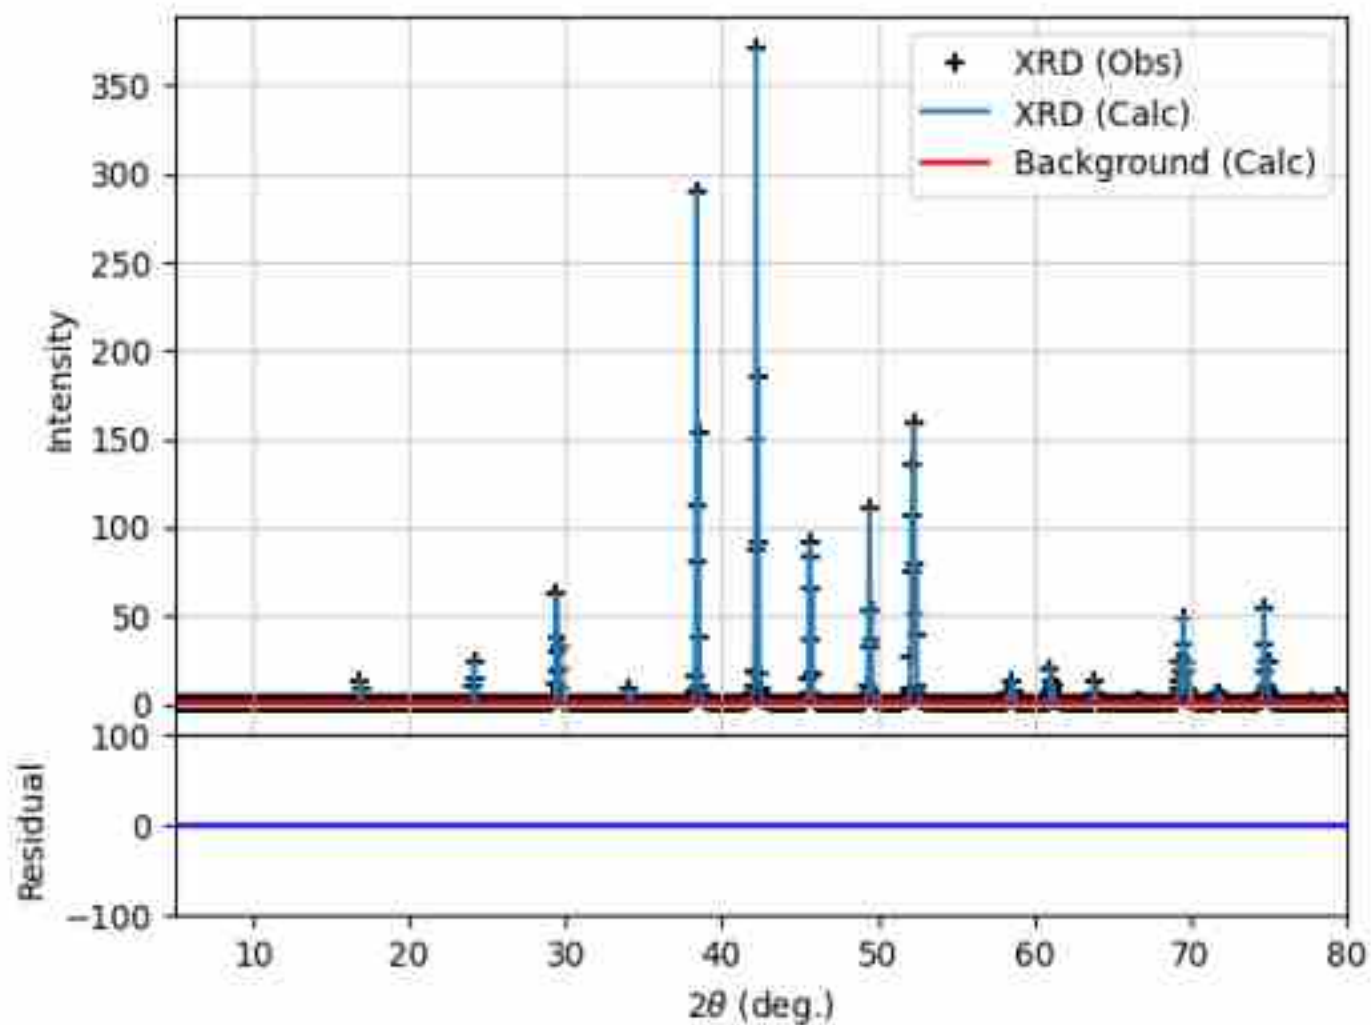

| RMSE before RR | Rwp     | RMSE after RR |
|----------------|---------|---------------|
| 0.01           | 0.00247 | 0.00065       |

# Cs1K2As1

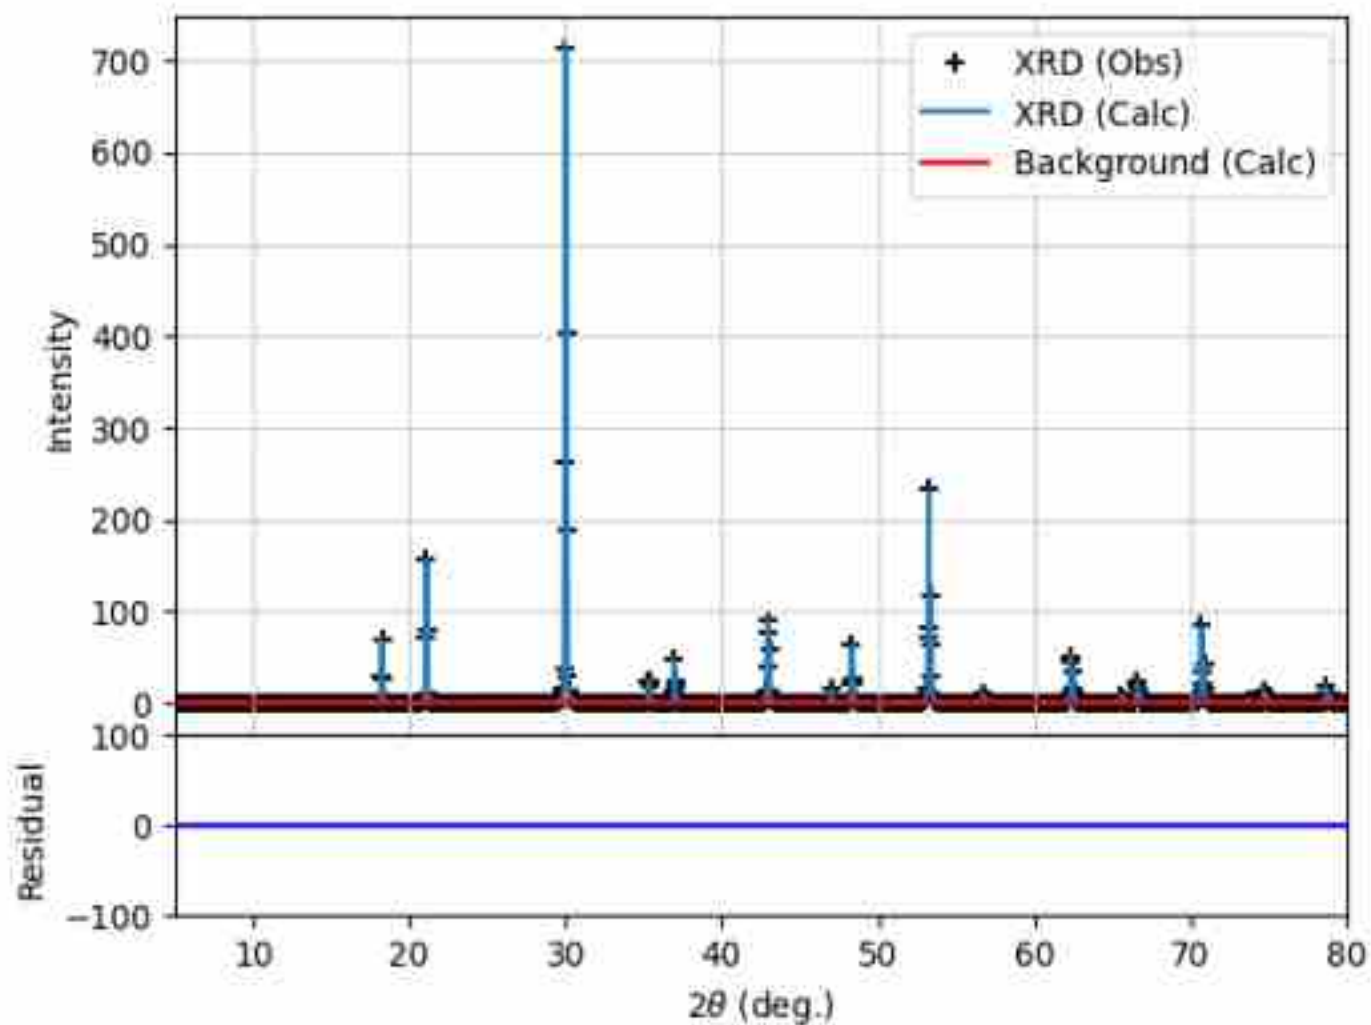

| RMSE before RR | Rwp     | RMSE after RR |
|----------------|---------|---------------|
| 0.001          | 0.00813 | 0.00108       |

# Cs1La1S2

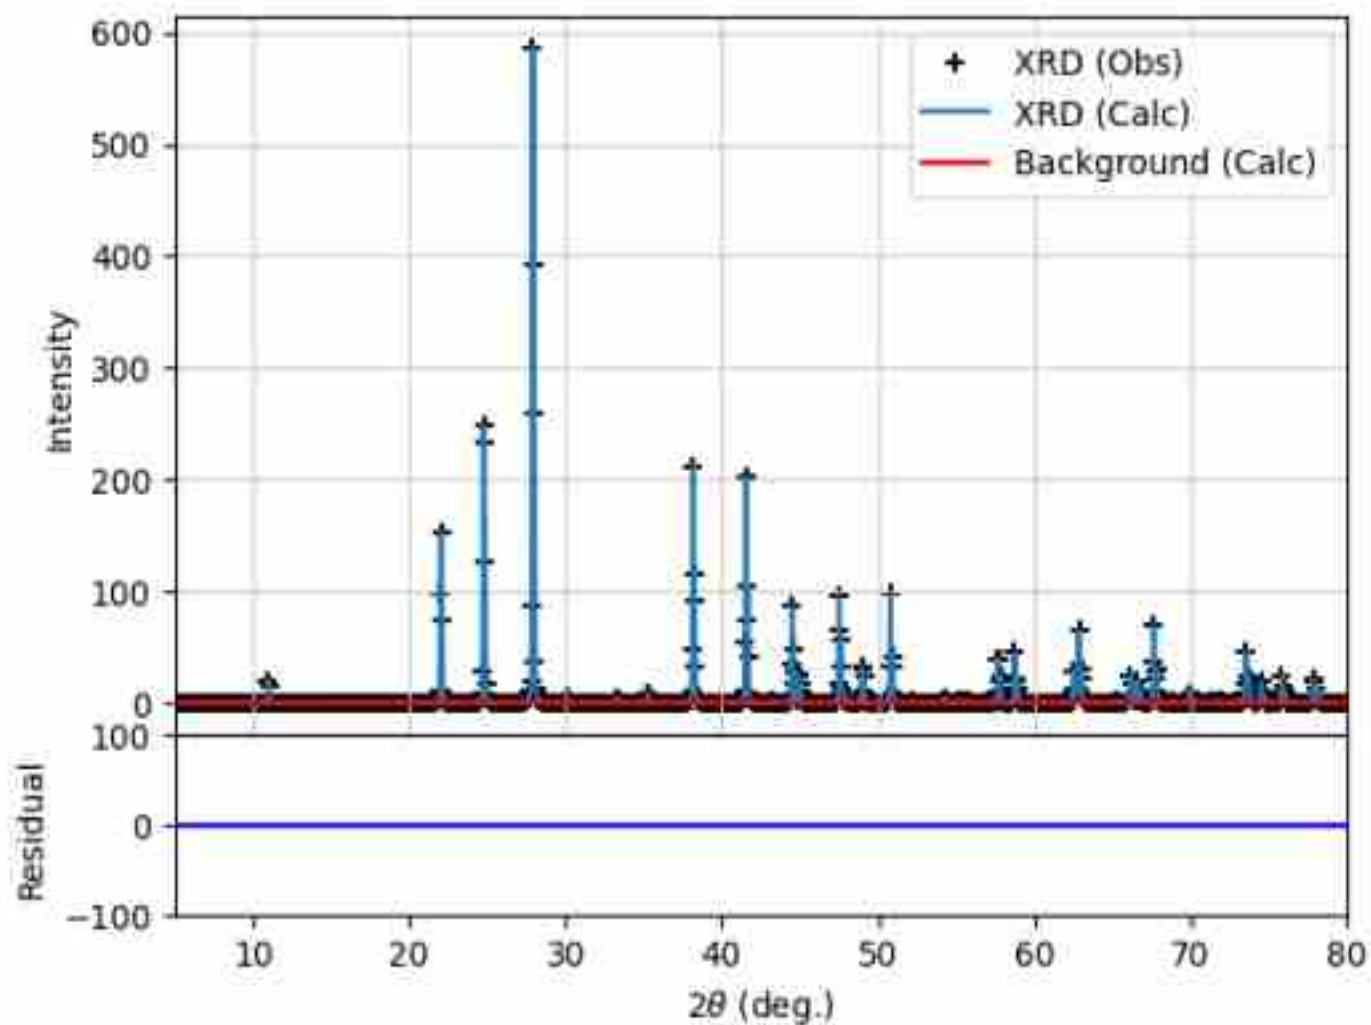

| RMSE before RR | Rwp     | RMSE after RR |
|----------------|---------|---------------|
| 0.01           | 0.00244 | 0.00028       |

# Cs1Rb1

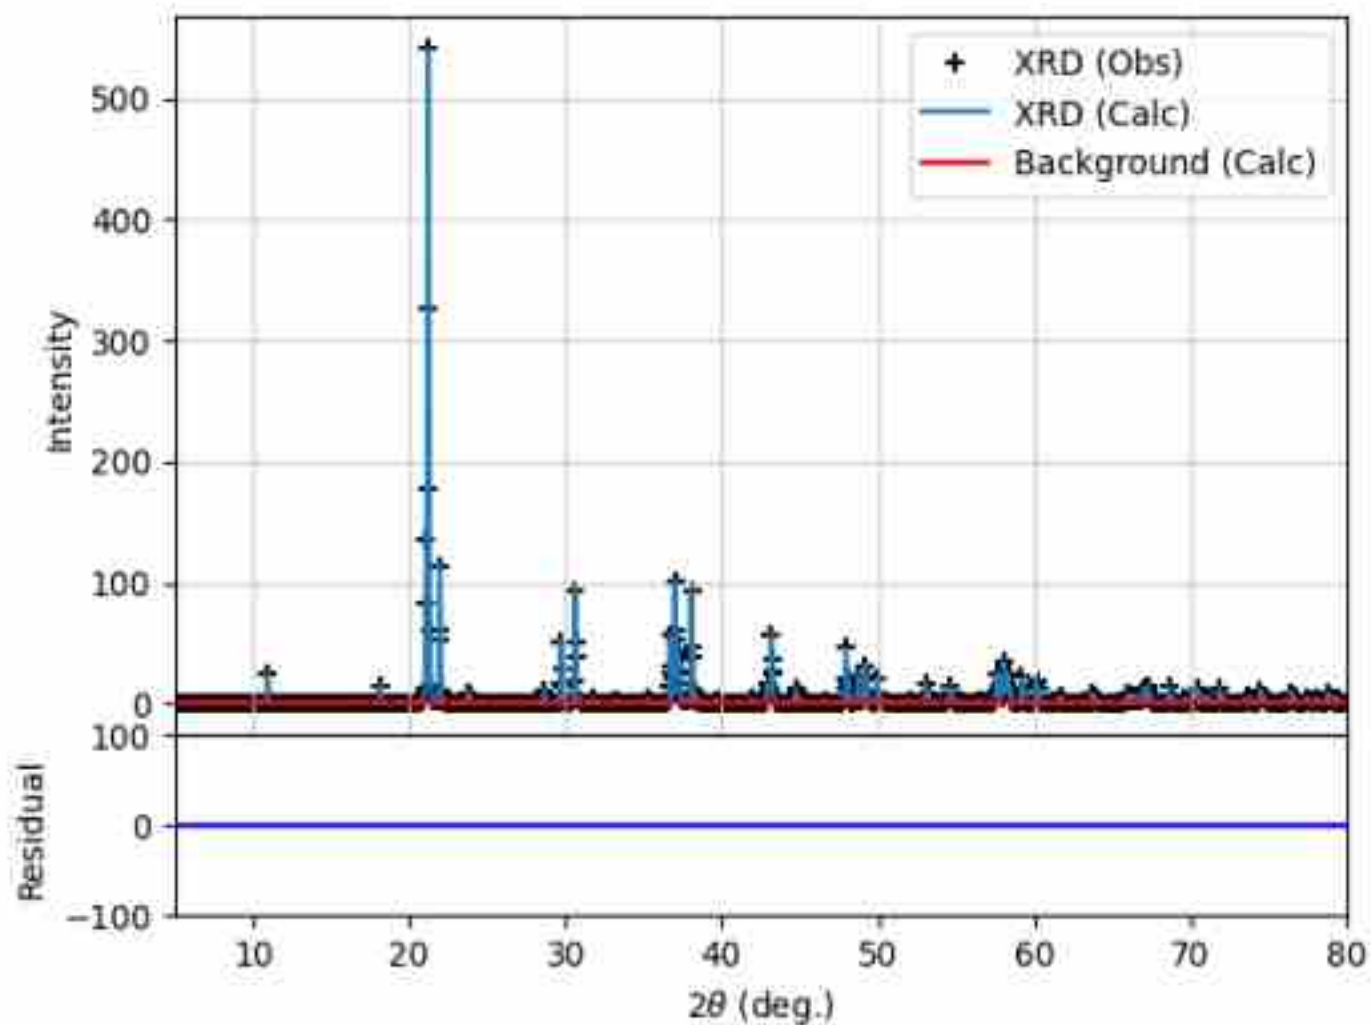

| RMSE before RR | Rwp     | RMSE after RR |
|----------------|---------|---------------|
| 0.001          | 0.00265 | 6e-05         |

Cs1Rb2As1Br6

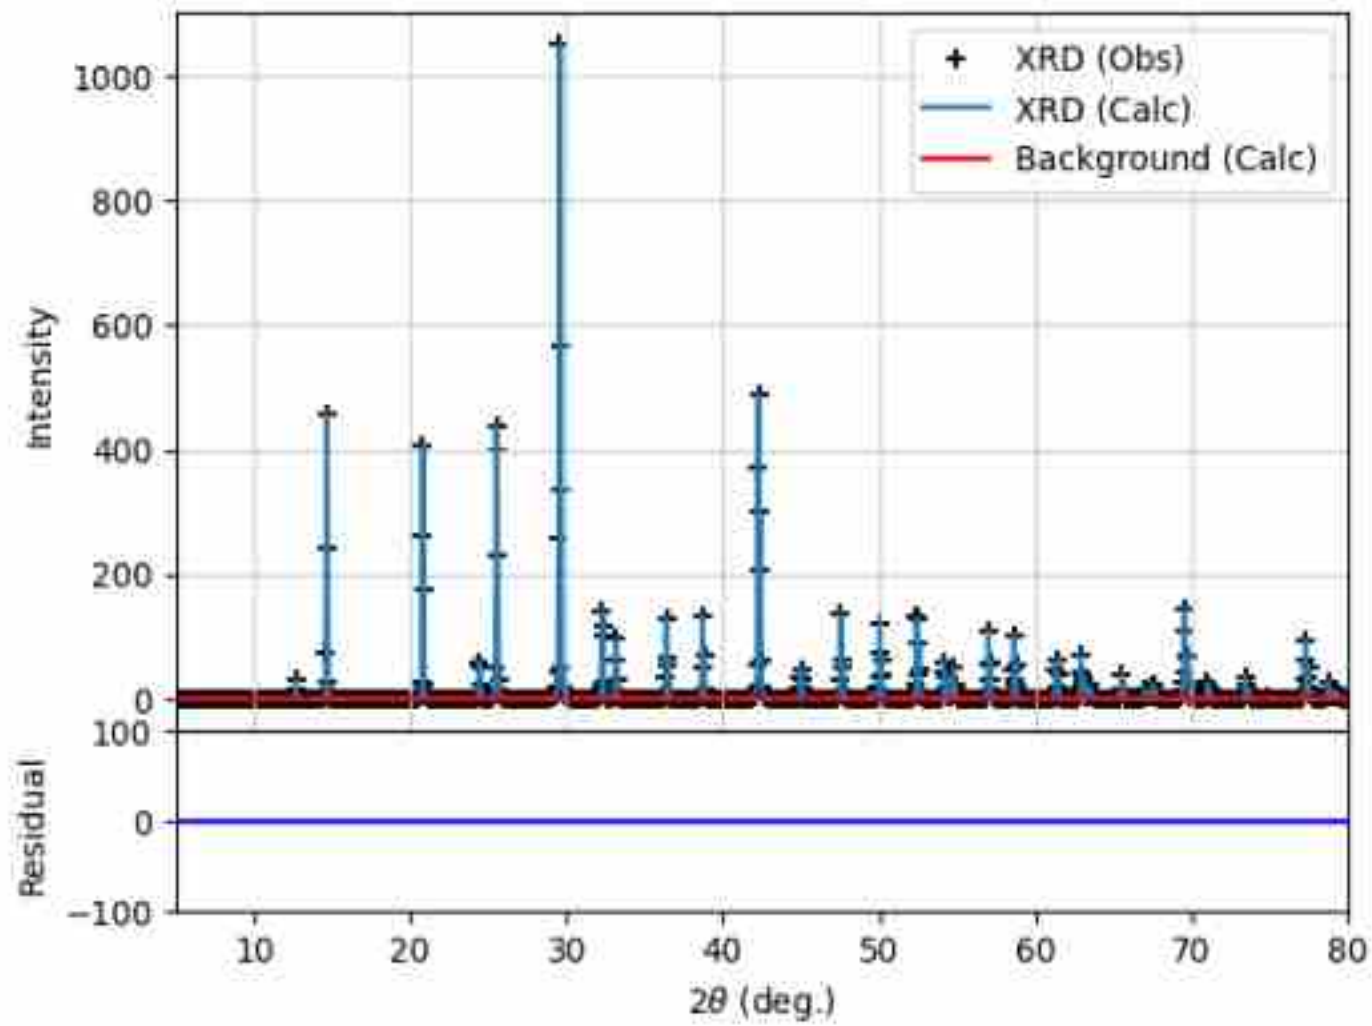

| RMSE before RR | Rwp     | RMSE after RR |
|----------------|---------|---------------|
| 0.01           | 0.04207 | 0.00273       |

# Cs1Tm1S2

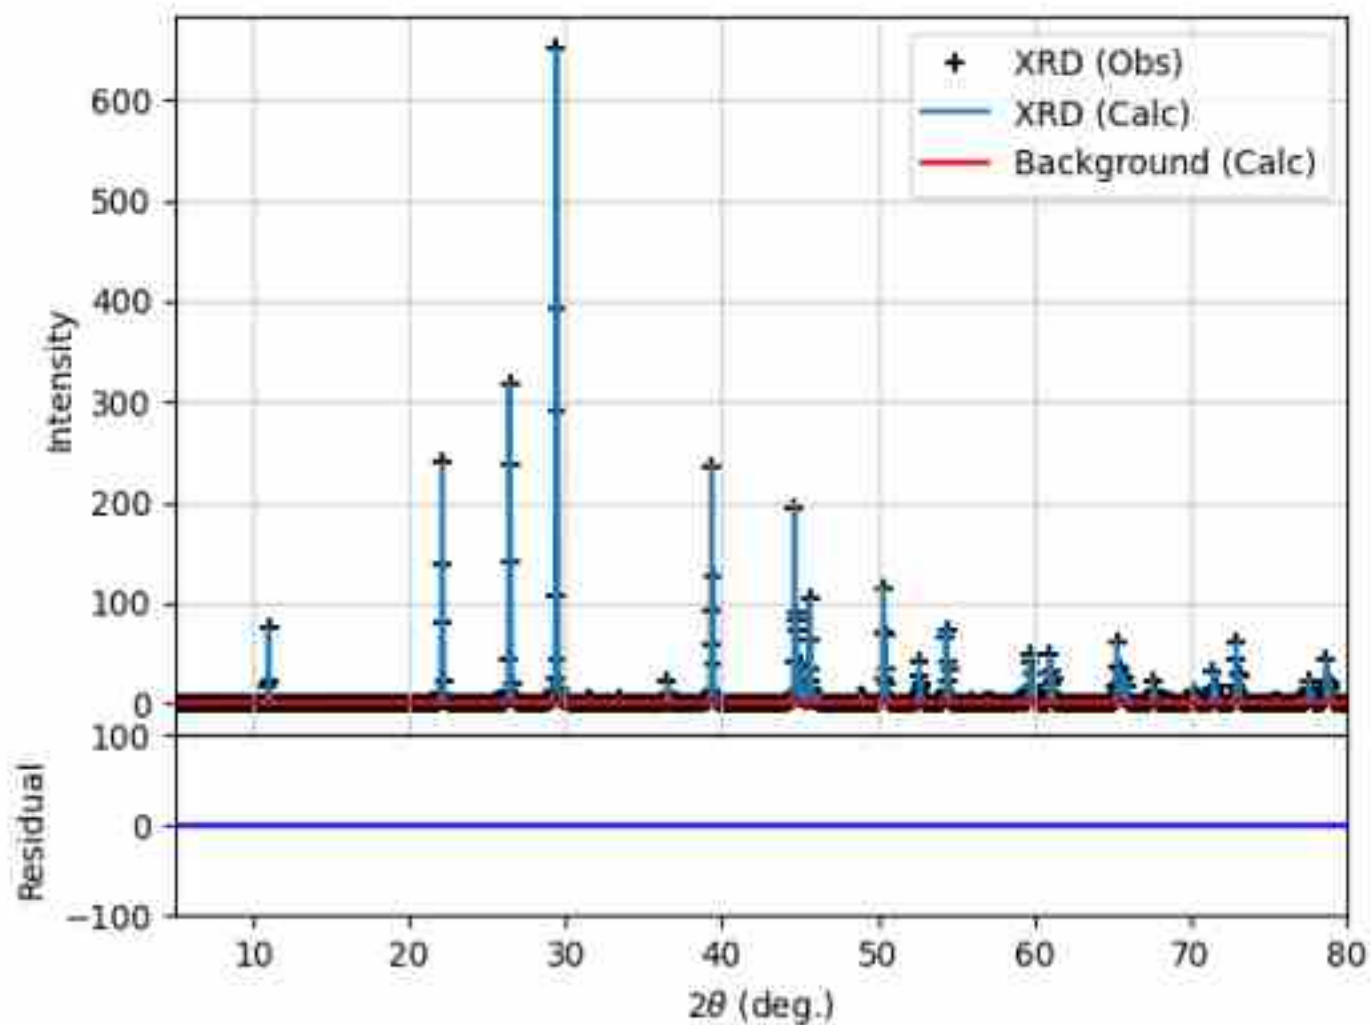

| RMSE before RR | Rwp     | RMSE after RR |
|----------------|---------|---------------|
| 0.01           | 0.00308 | 0.00024       |



# Cs<sub>2</sub>AgMoBr<sub>6</sub>

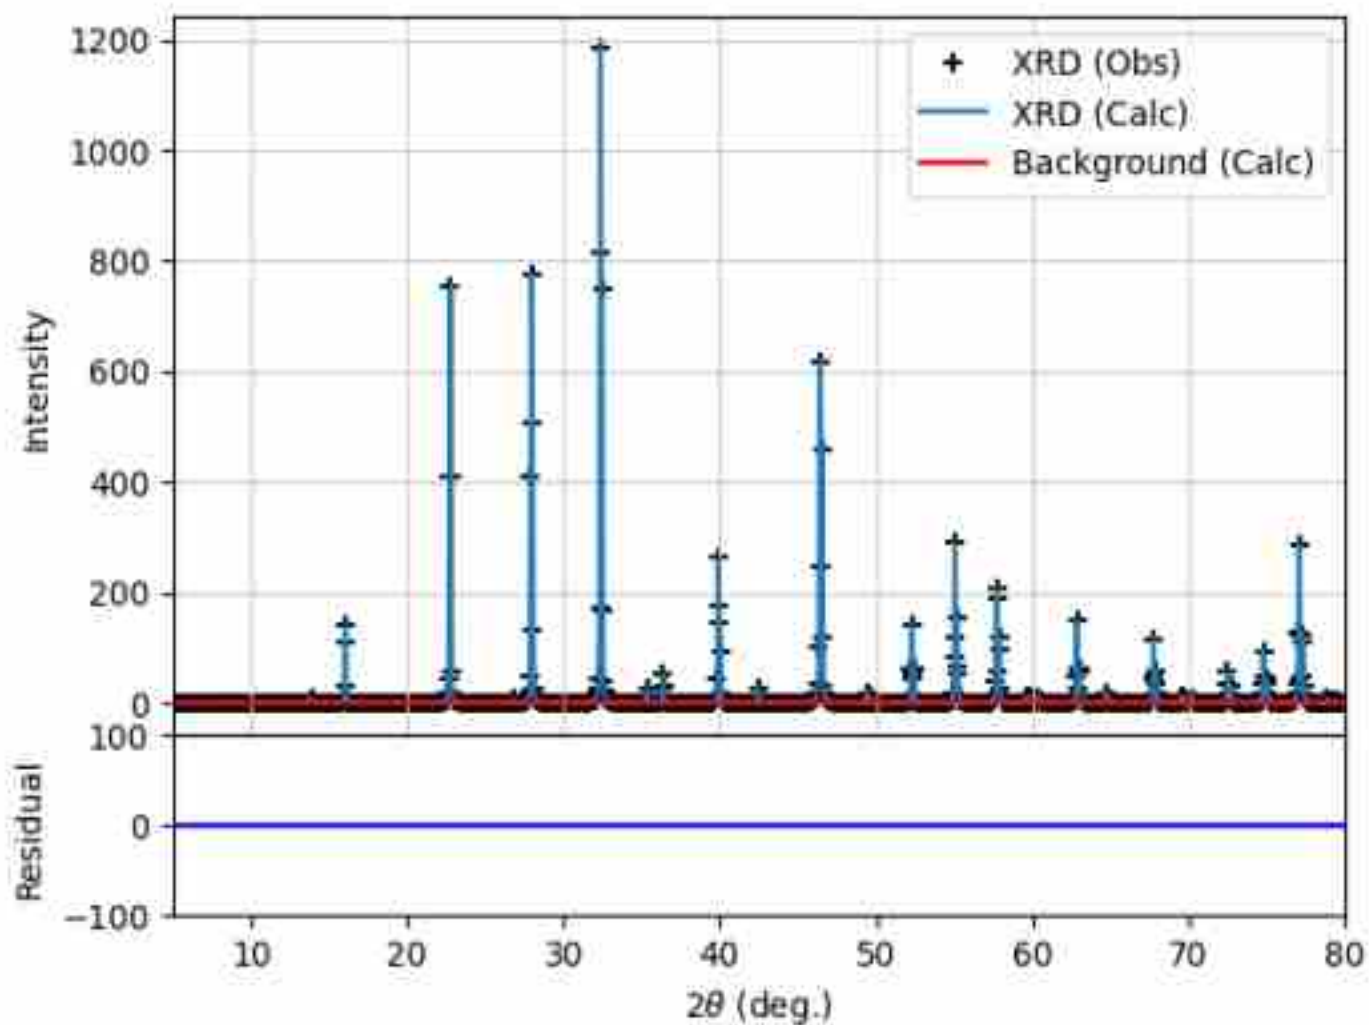

| RMSE before RR | Rwp     | RMSE after RR |
|----------------|---------|---------------|
| 0.01           | 0.01757 | 0.00131       |

# Cs<sub>2</sub>Al<sub>11</sub>Tl<sub>1</sub>Br<sub>6</sub>

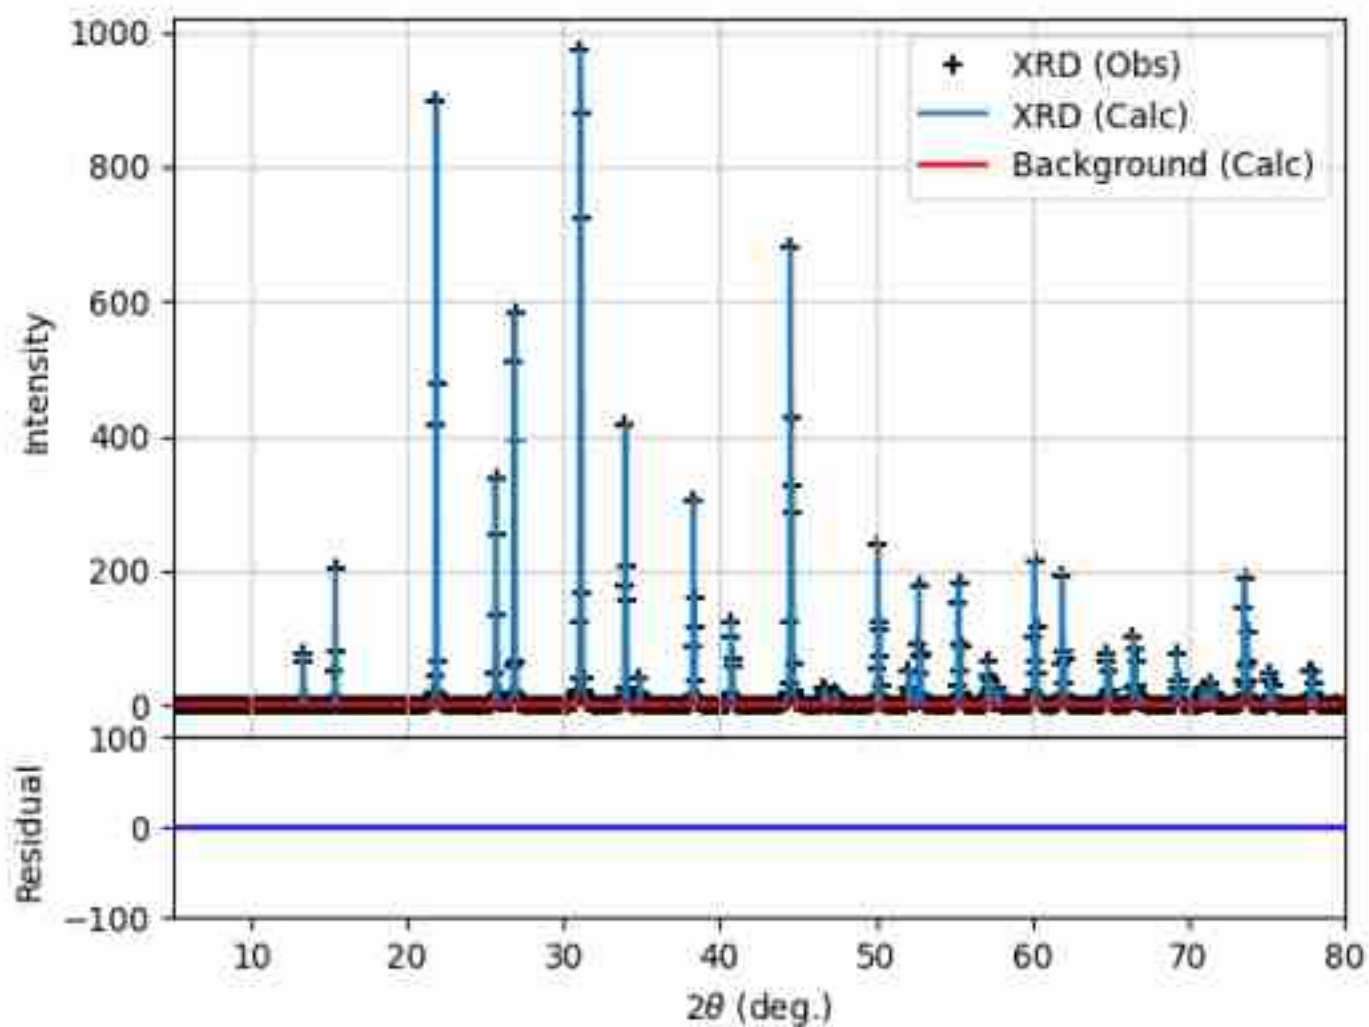

| RMSE before RR | Rwp     | RMSE after RR |
|----------------|---------|---------------|
| 0.01           | 0.02748 | 0.00256       |

# Cs<sub>2</sub>Dy<sub>2</sub>S<sub>4</sub>

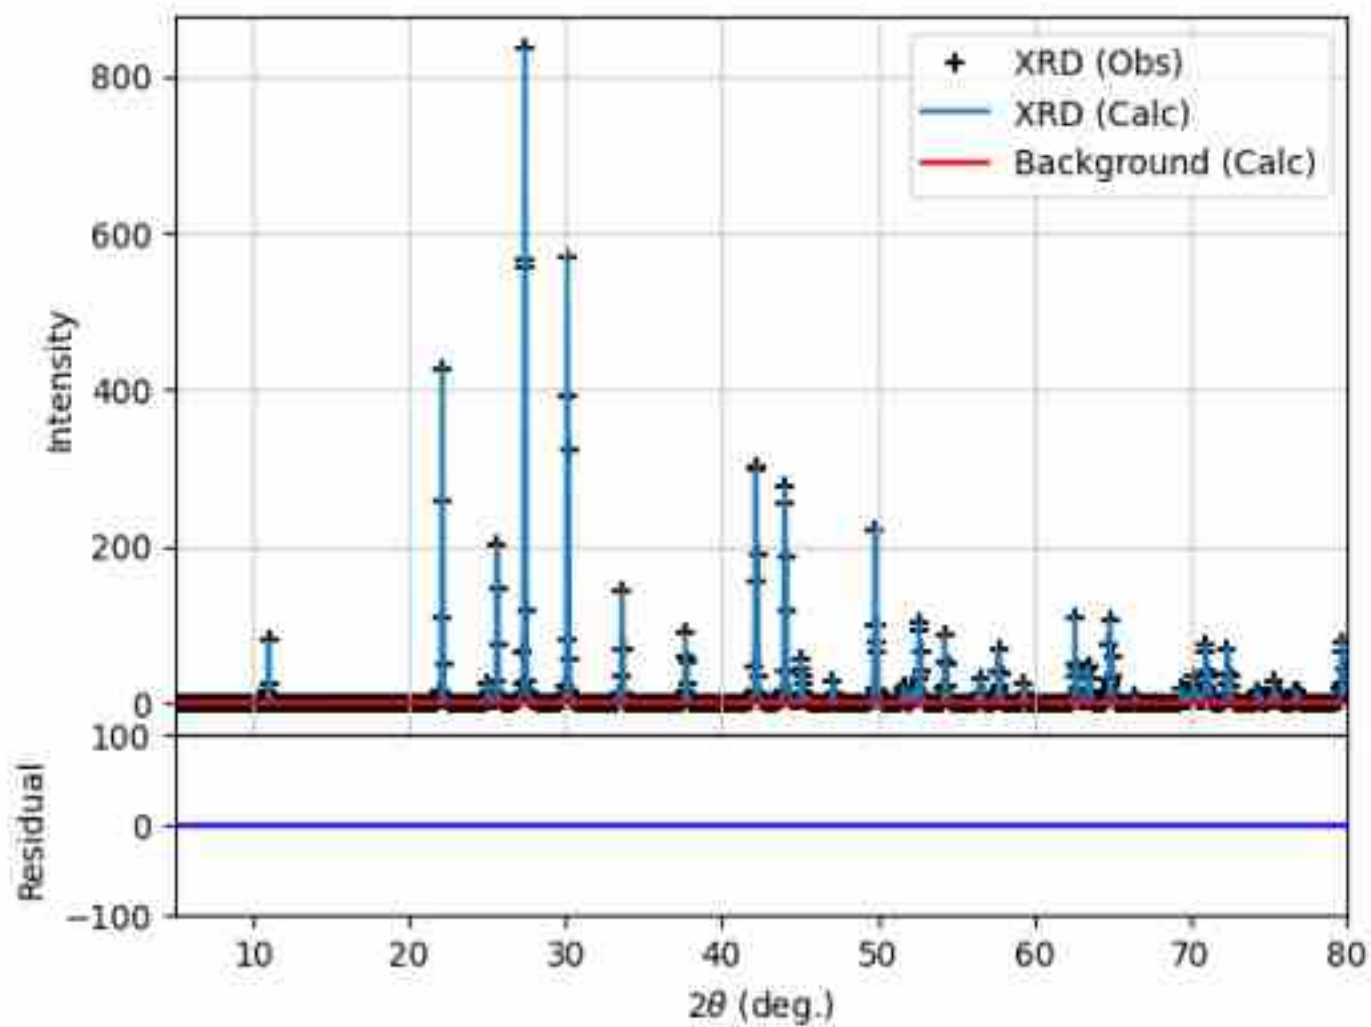

| RMSE before RR | Rwp     | RMSE after RR |
|----------------|---------|---------------|
| 0.01           | 0.00255 | 0.00061       |

Cs<sub>2</sub>GaAgCl<sub>6</sub>

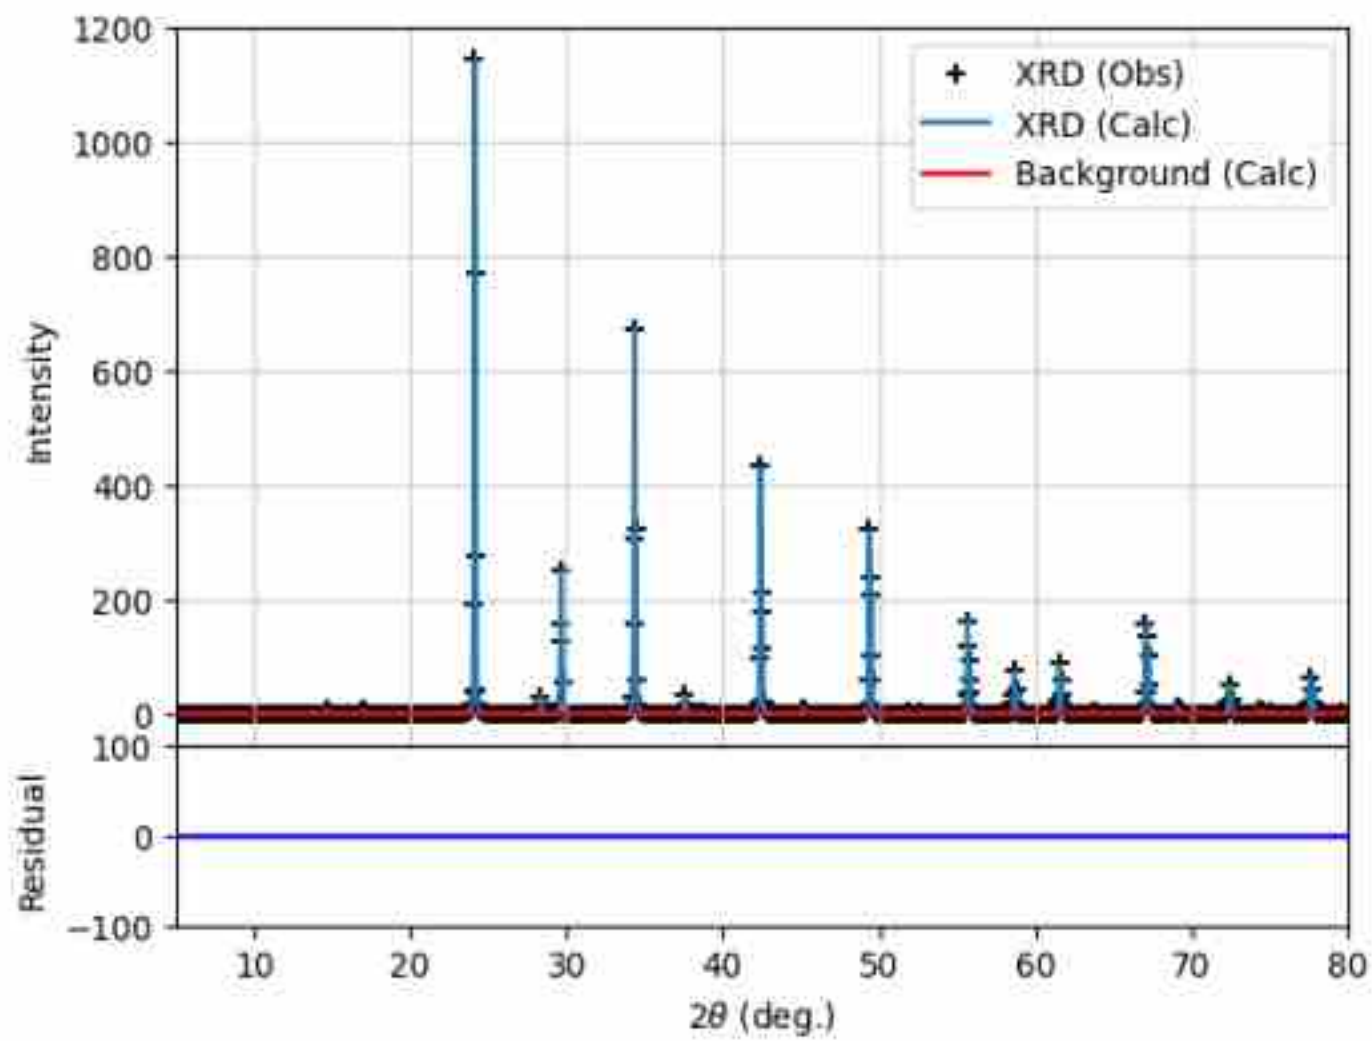

| RMSE before RR | Rwp    | RMSE after RR |
|----------------|--------|---------------|
| 0.01           | 0.1104 | 0.00537       |

# Cs<sub>2</sub>In<sub>1</sub>Bi<sub>1</sub>Br<sub>6</sub>

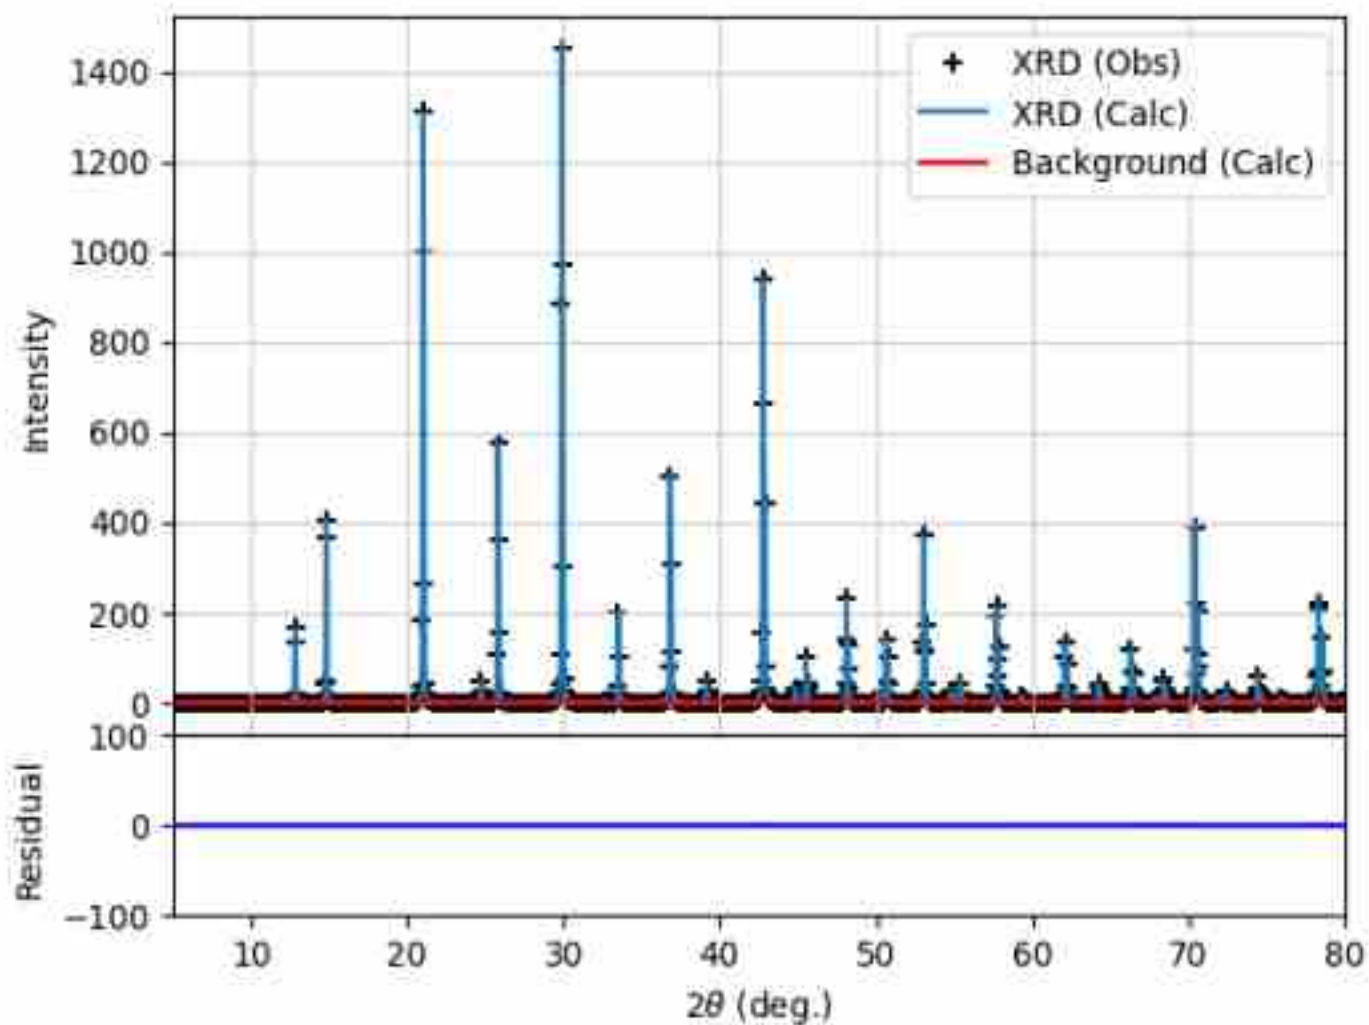

| RMSE before RR | Rwp     | RMSE after RR |
|----------------|---------|---------------|
| 0.01           | 0.11583 | 0.00379       |

# Cs<sub>2</sub>K<sub>1</sub>Lu<sub>1</sub>Cl<sub>6</sub>

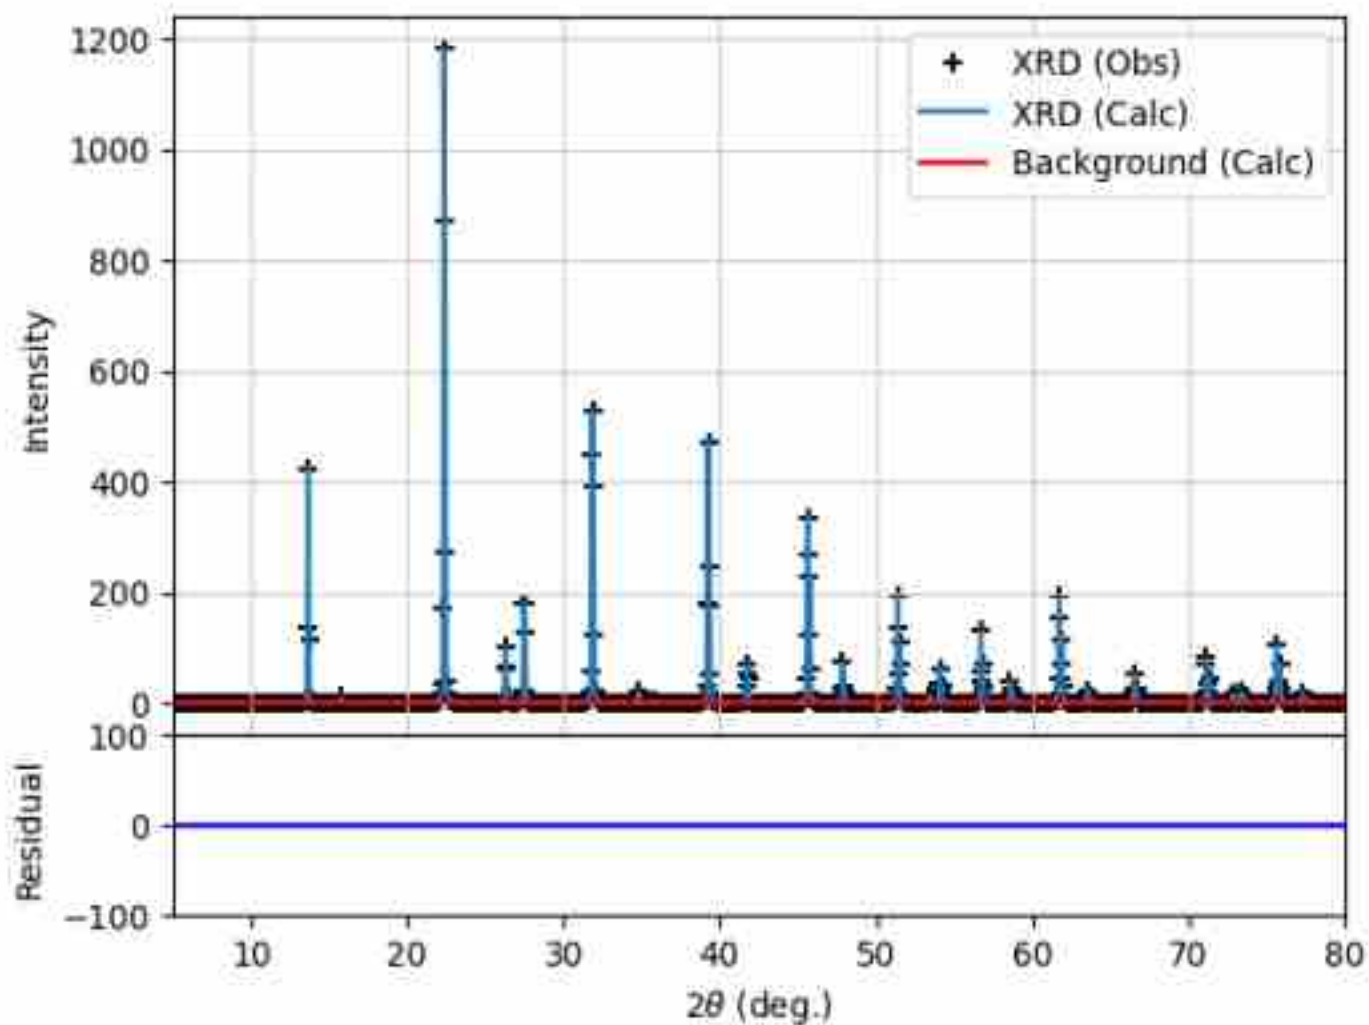

| RMSE before RR | Rwp     | RMSE after RR |
|----------------|---------|---------------|
| 0.01           | 0.01336 | 0.00199       |

# Cs<sub>2</sub>K<sub>1</sub>Ti<sub>1</sub>F<sub>6</sub>

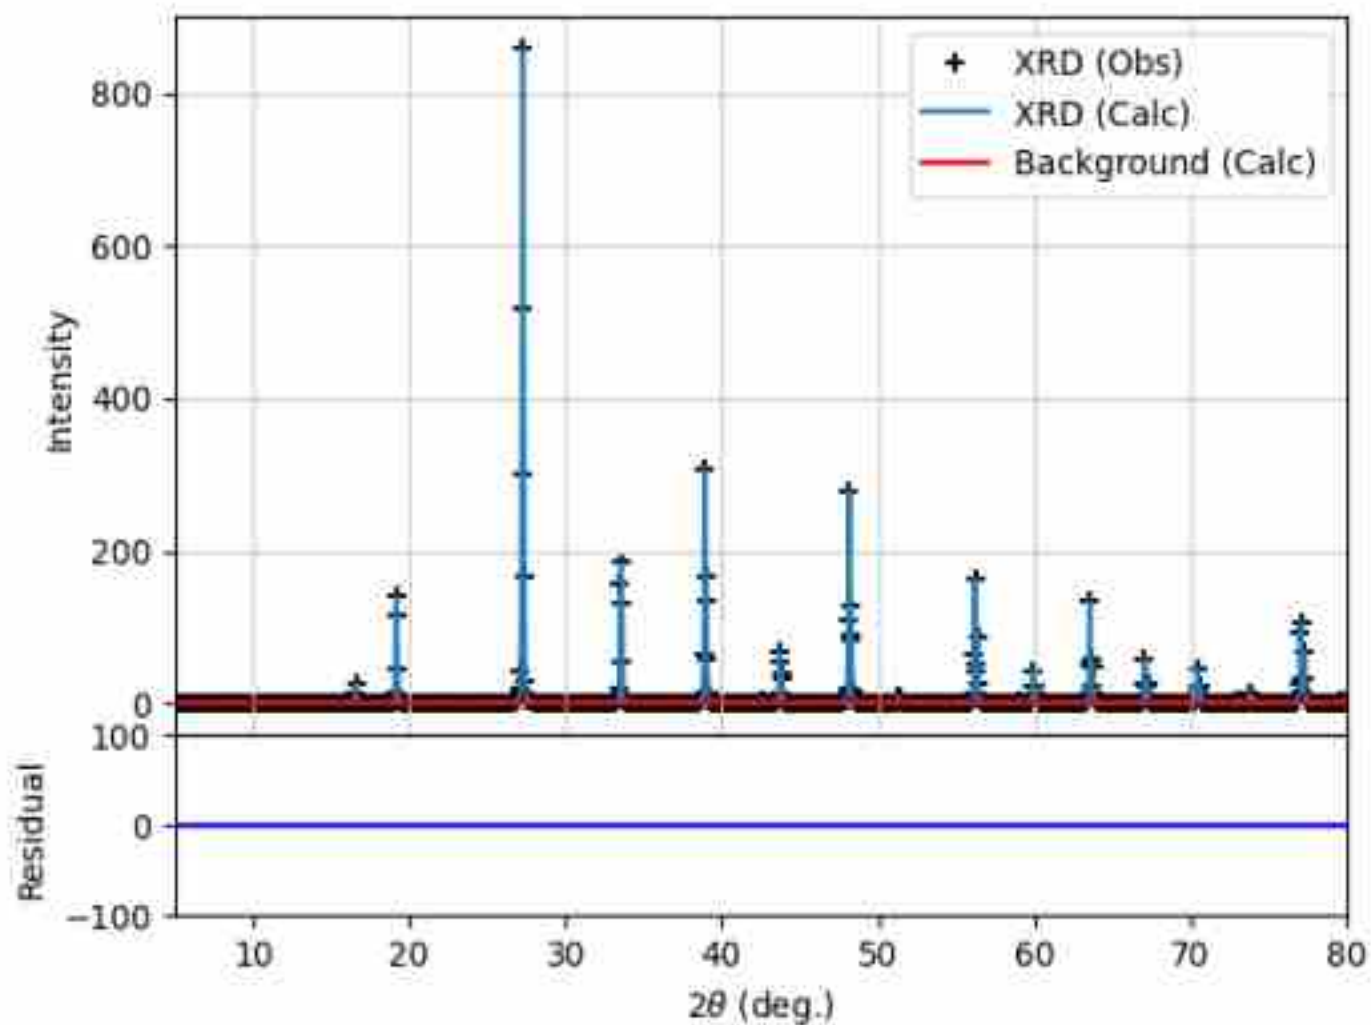

| RMSE before RR | Rwp     | RMSE after RR |
|----------------|---------|---------------|
| 0.01           | 0.01196 | 0.00245       |

# Cs<sub>2</sub>Li<sub>1</sub>Nd<sub>1</sub>Cl<sub>6</sub>

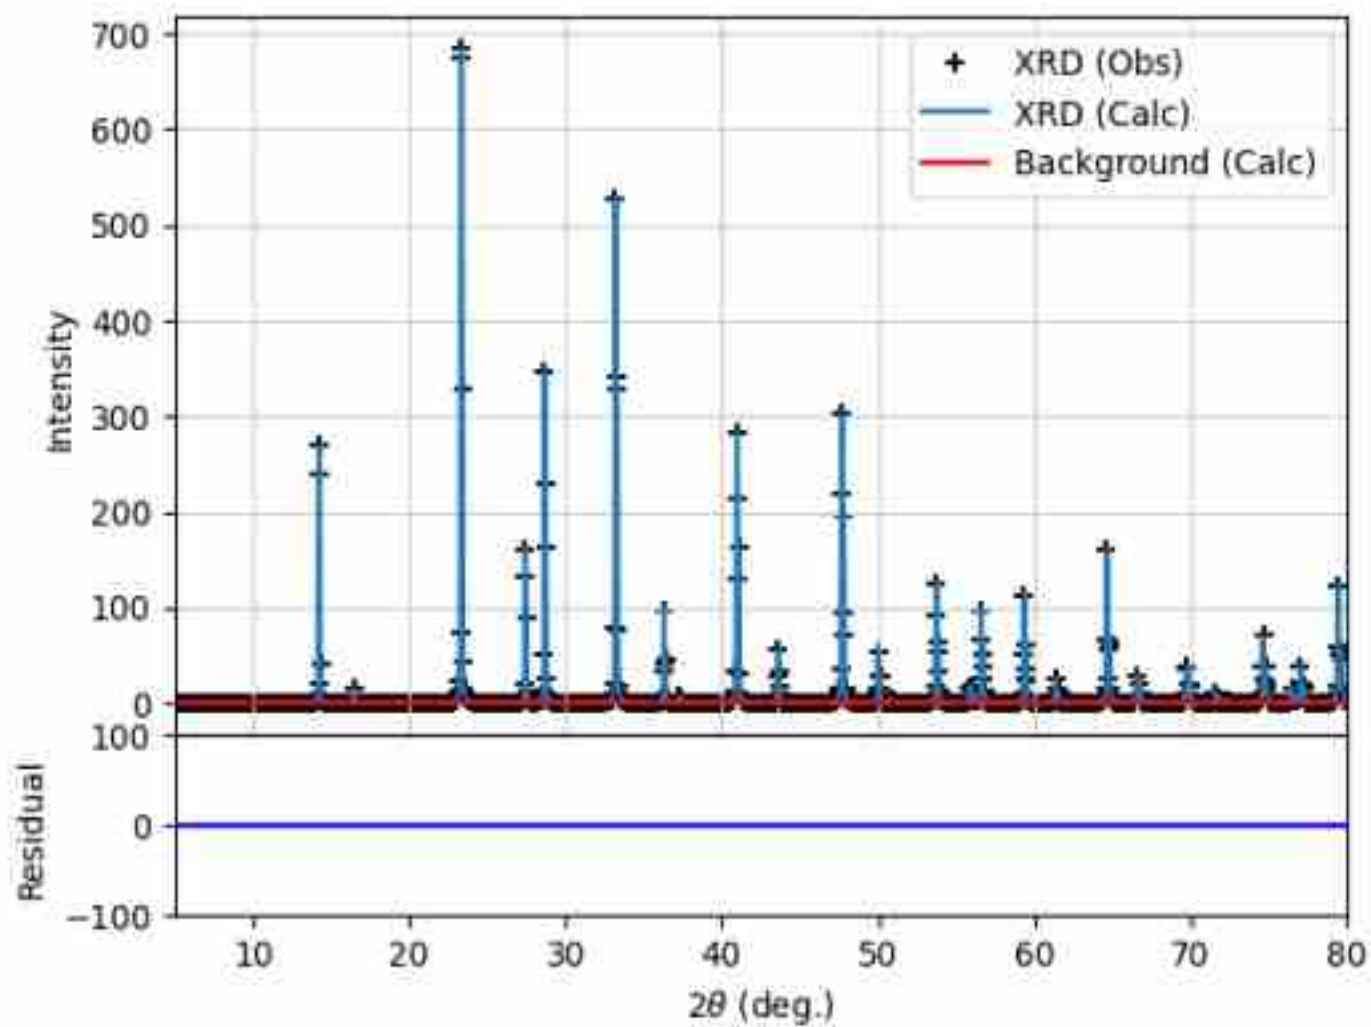

| RMSE before RR | Rwp     | RMSE after RR |
|----------------|---------|---------------|
| 0.01           | 0.06125 | 0.00816       |



# Cs<sub>2</sub>Li<sub>1</sub>Pr<sub>1</sub>Cl<sub>6</sub>

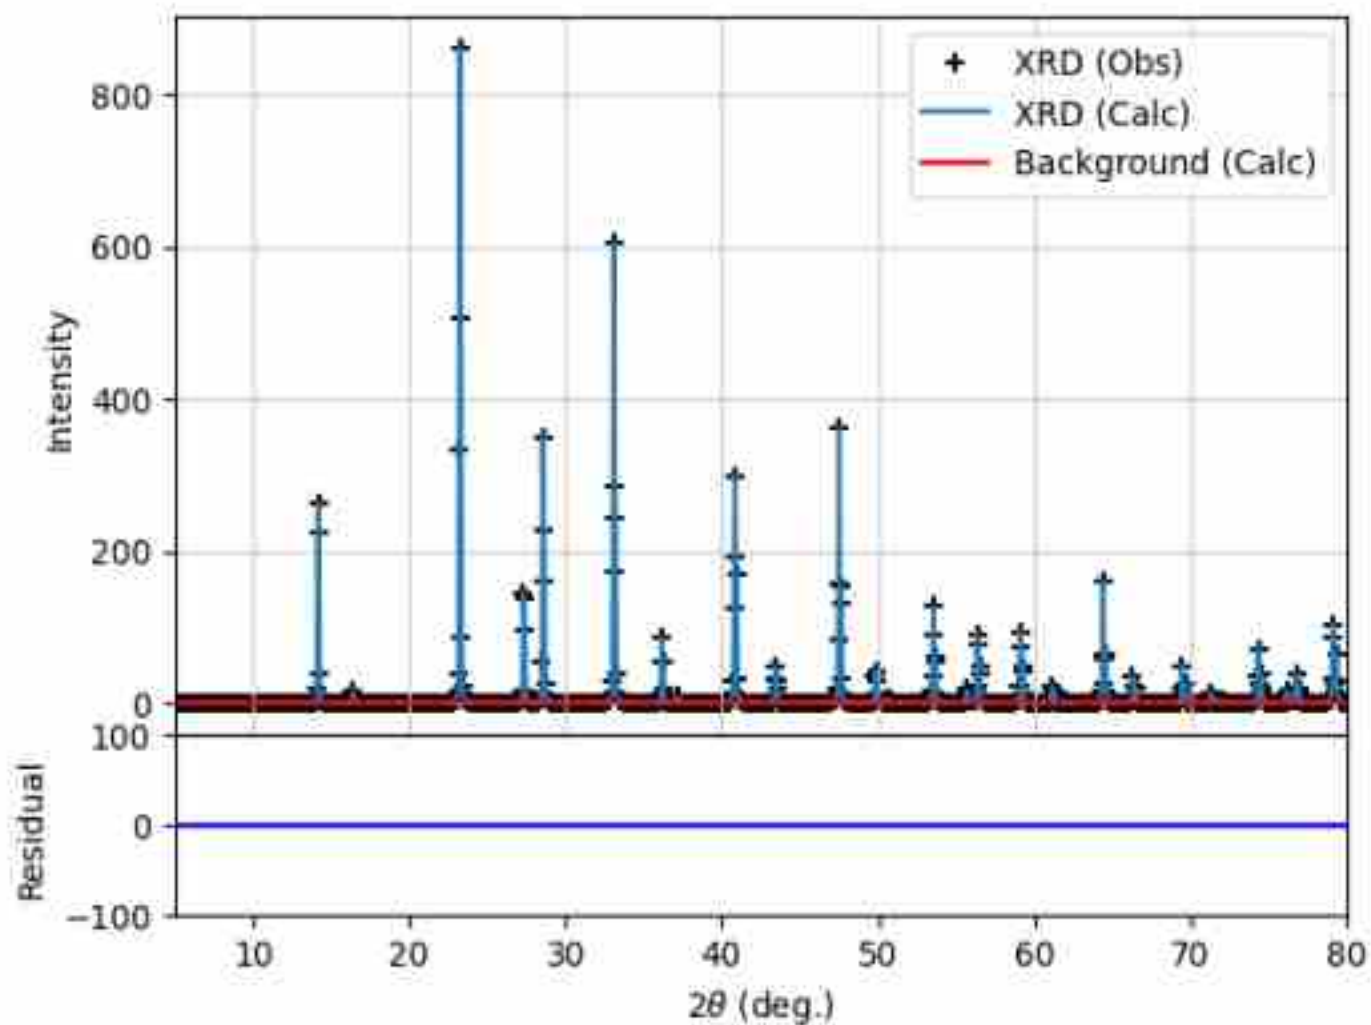

| RMSE before RR | Rwp     | RMSE after RR |
|----------------|---------|---------------|
| 0.01           | 0.04314 | 0.00522       |

# Cs<sub>2</sub>LiSbCl<sub>6</sub>

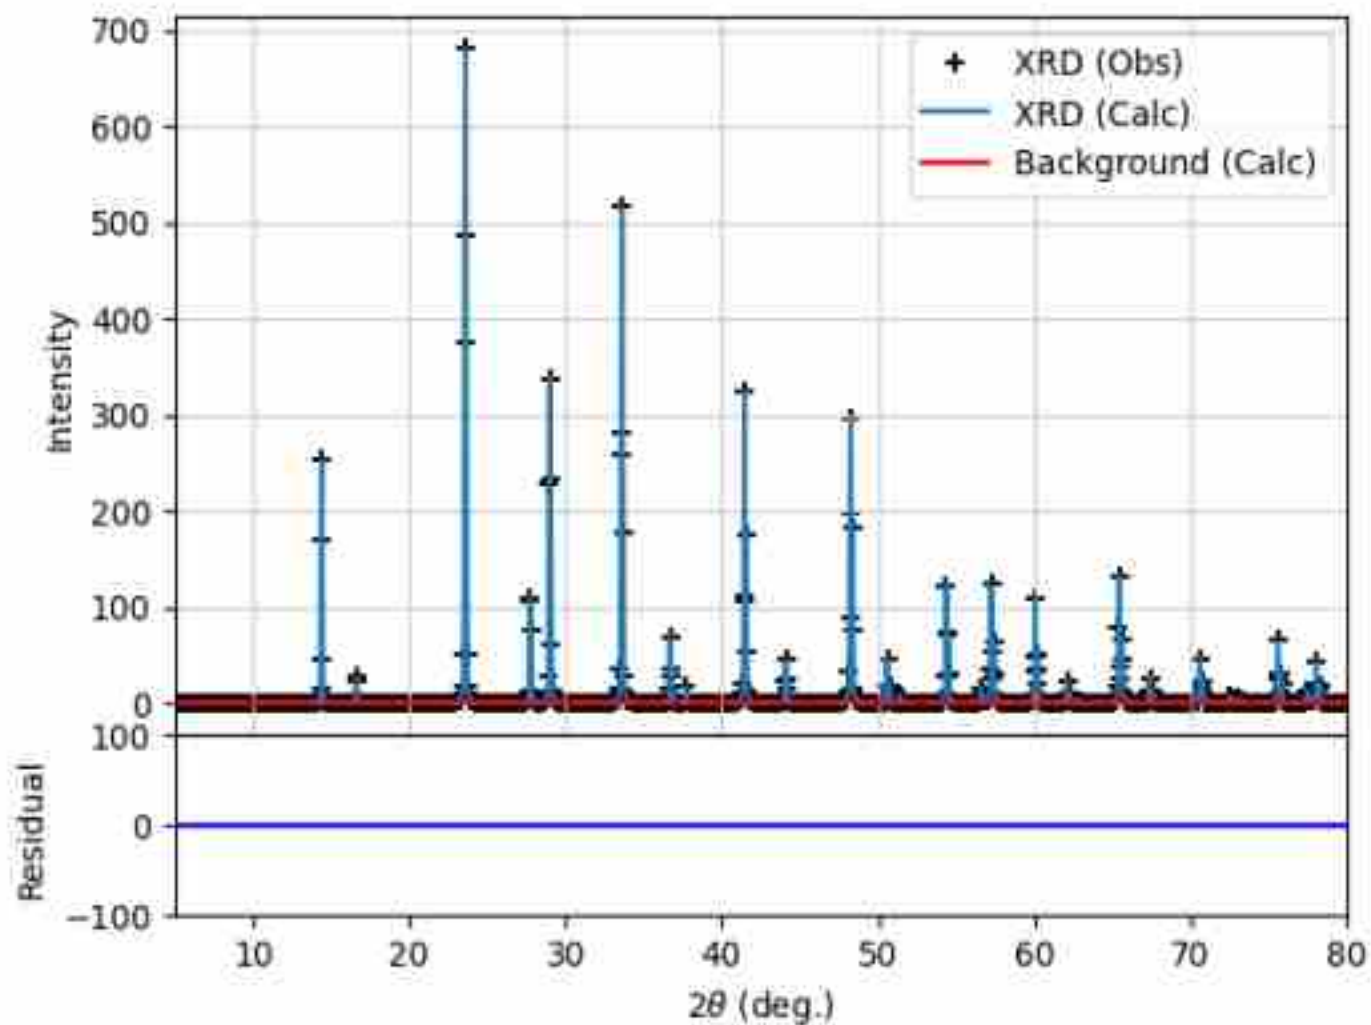

| RMSE before RR | Rwp     | RMSE after RR |
|----------------|---------|---------------|
| 0.01           | 0.04109 | 0.0074        |

# Cs<sub>2</sub>NaGaF<sub>6</sub>

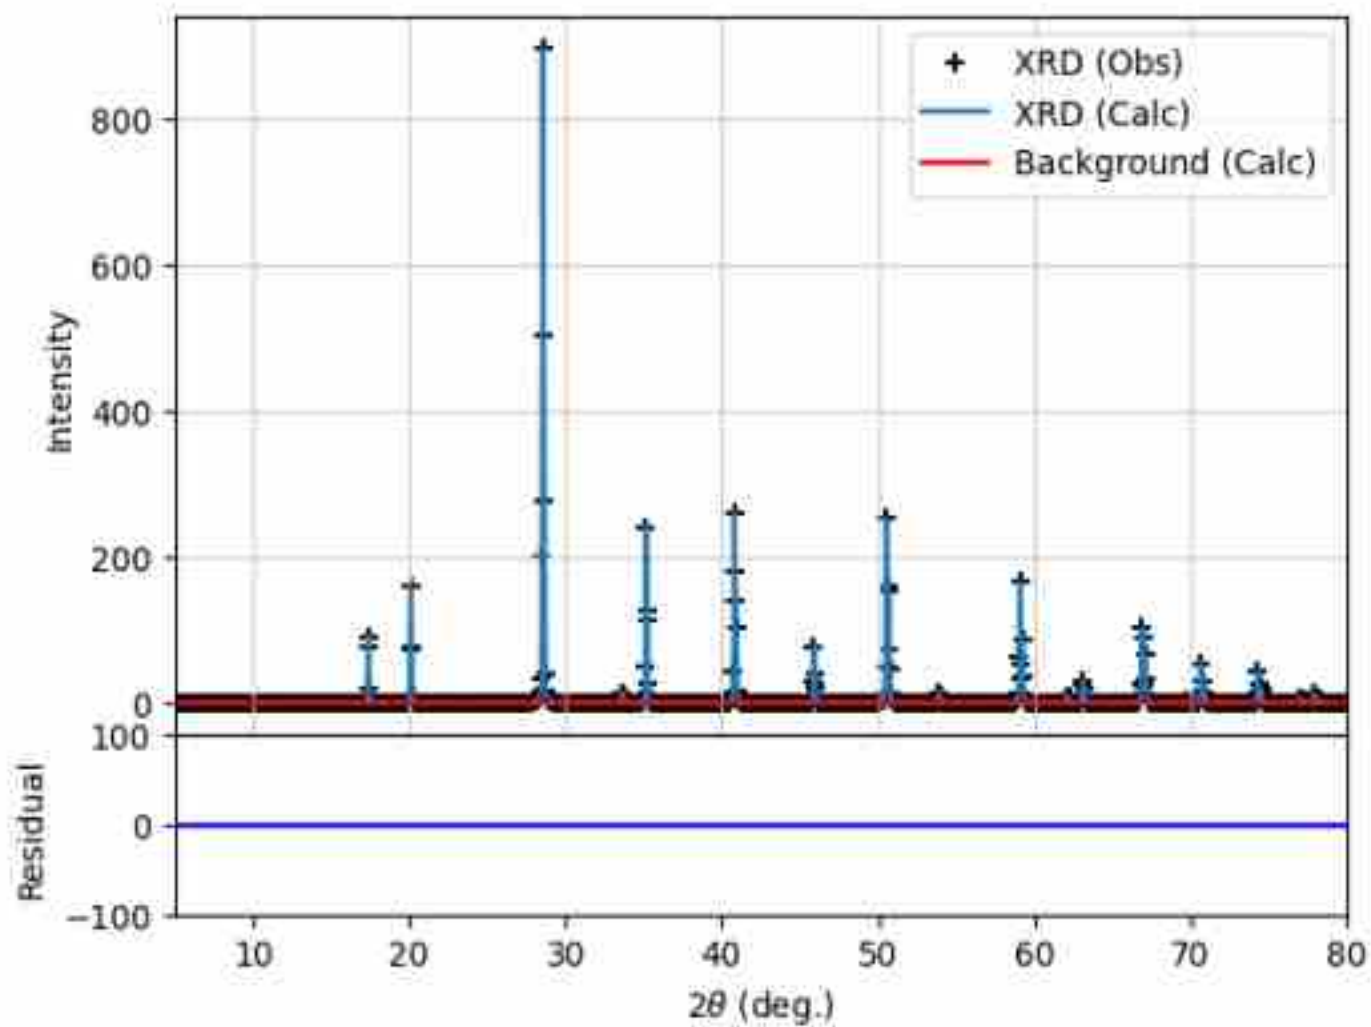

| RMSE before RR | Rwp     | RMSE after RR |
|----------------|---------|---------------|
| 0.01           | 0.01204 | 0.00354       |

# Cs<sub>2</sub>NaInCl<sub>6</sub>

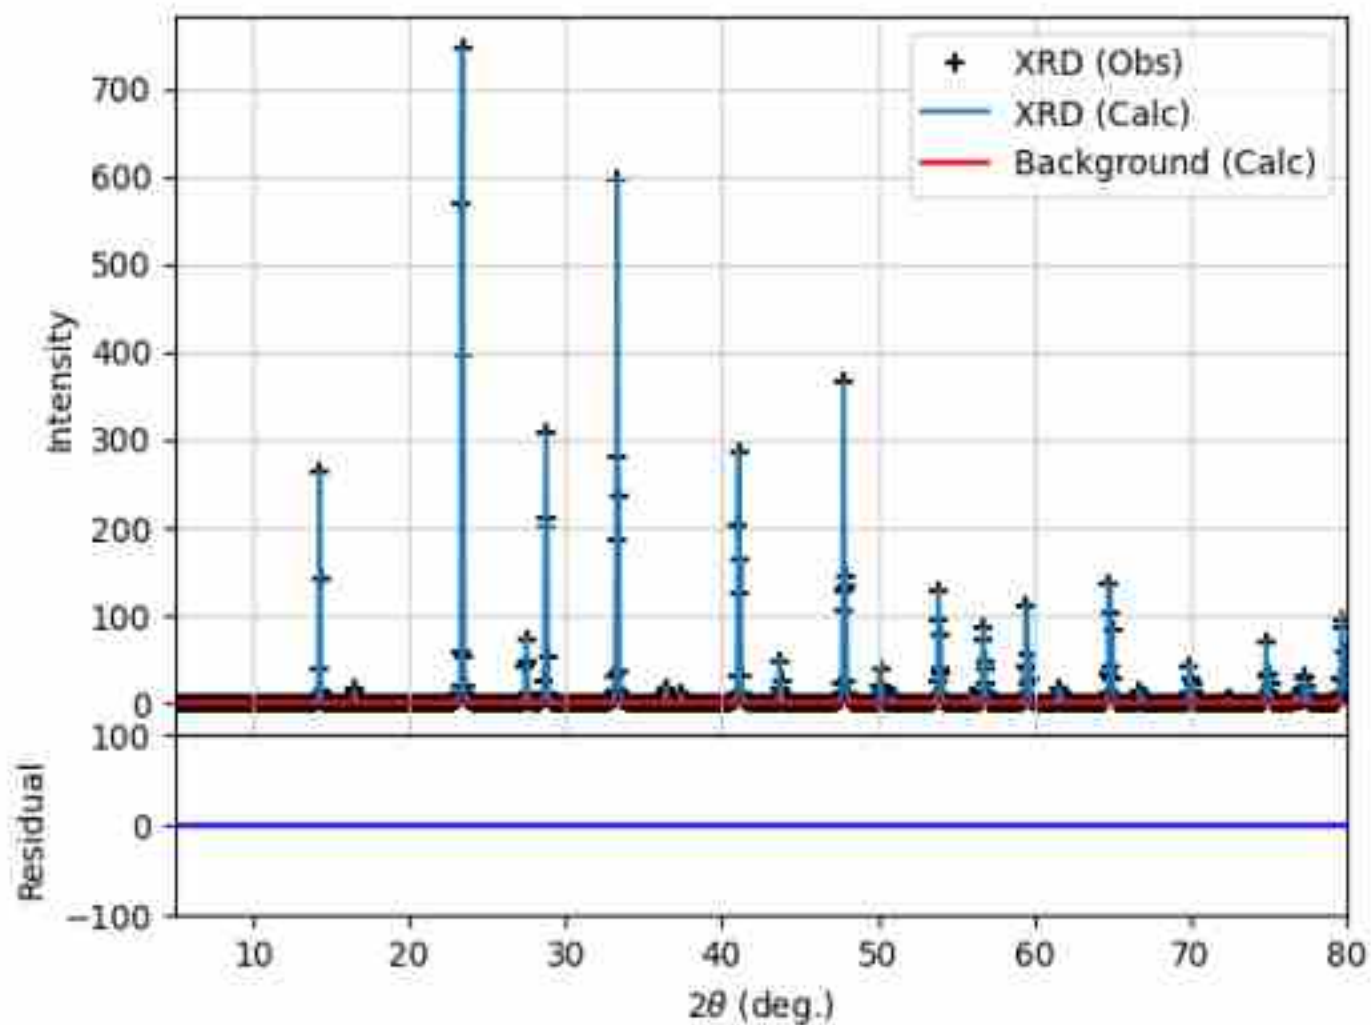

| RMSE before RR | Rwp     | RMSE after RR |
|----------------|---------|---------------|
| 0.01           | 0.02252 | 0.00282       |

# Cs<sub>2</sub>Na<sub>1</sub>Nd<sub>1</sub>Br<sub>6</sub>

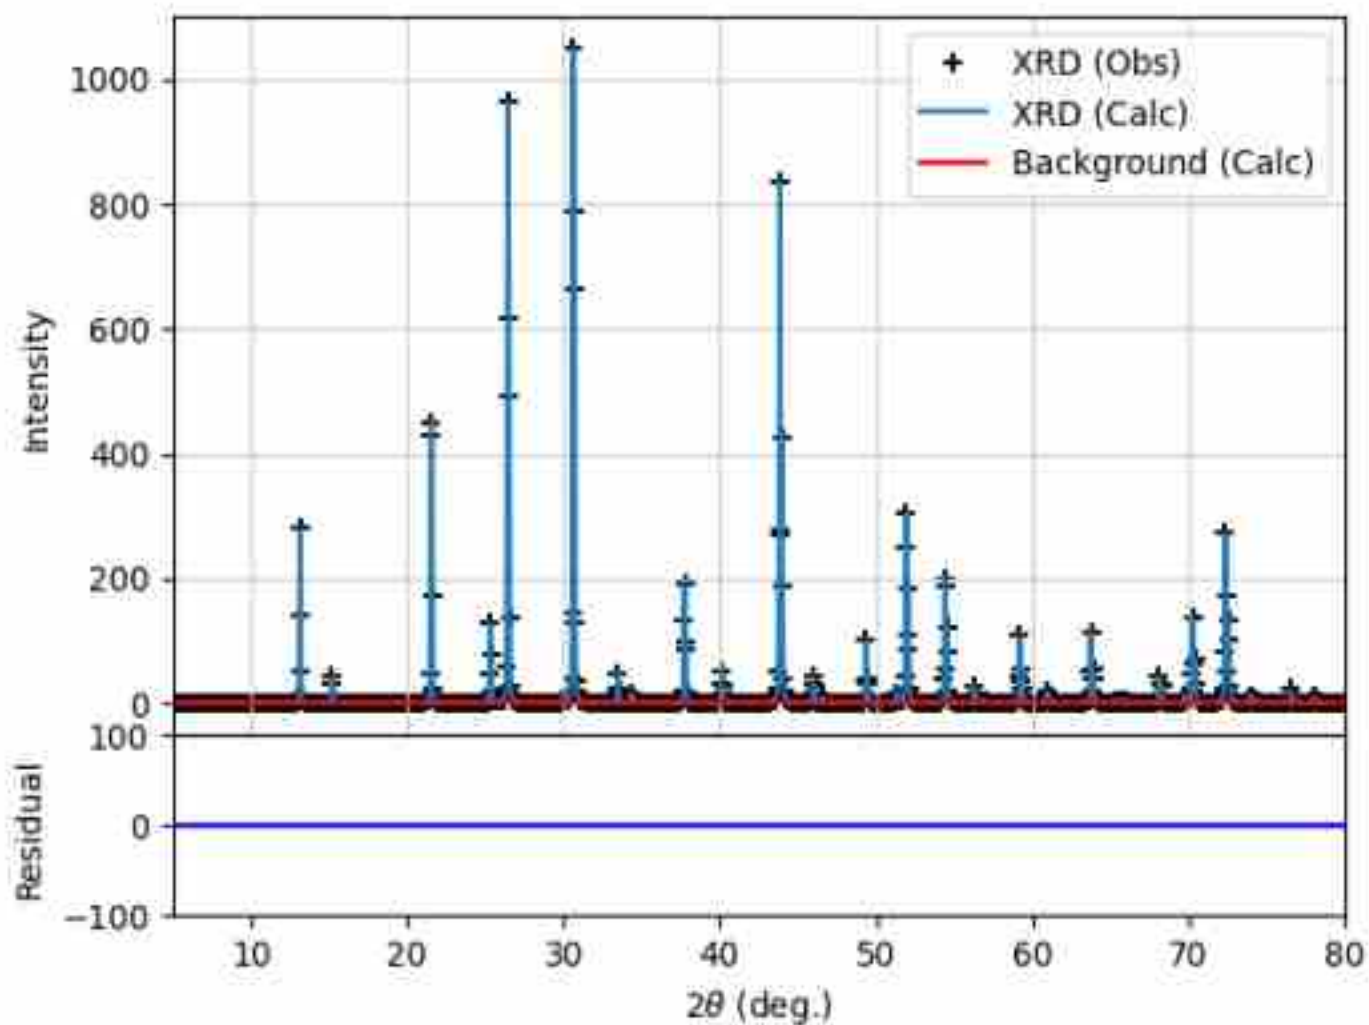

| RMSE before RR | Rwp     | RMSE after RR |
|----------------|---------|---------------|
| 0.01           | 0.02732 | 0.00219       |

# Cs<sub>2</sub>Na<sub>1</sub>Nd<sub>1</sub>Cl<sub>6</sub>

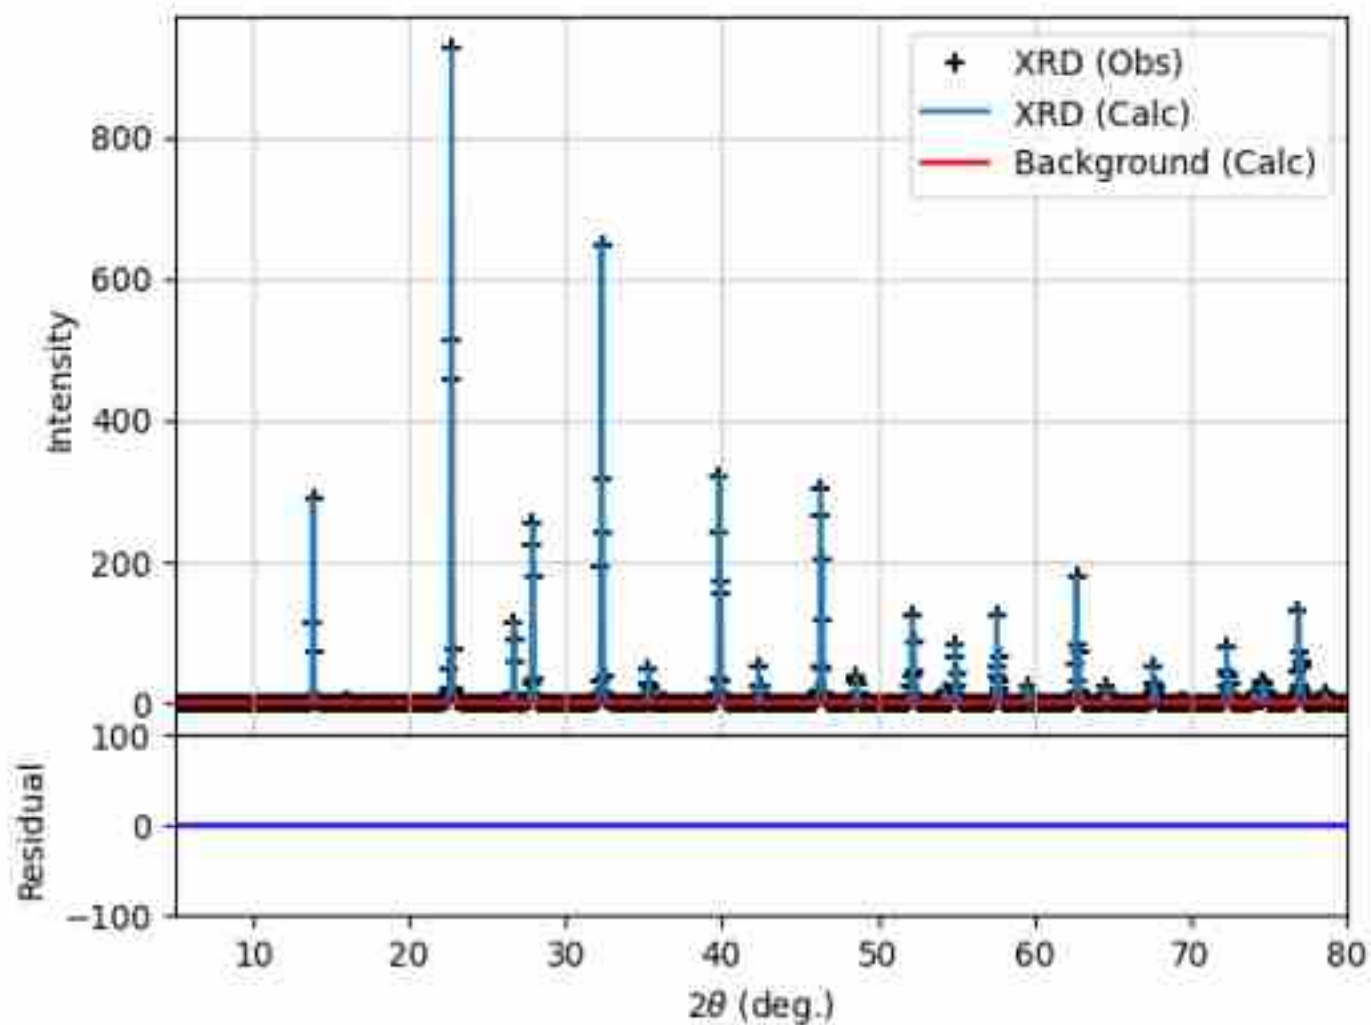

| RMSE before RR | Rwp     | RMSE after RR |
|----------------|---------|---------------|
| 0.01           | 0.02013 | 0.00233       |

# Cs<sub>2</sub>Na<sub>1</sub>Sm<sub>1</sub>F<sub>6</sub>

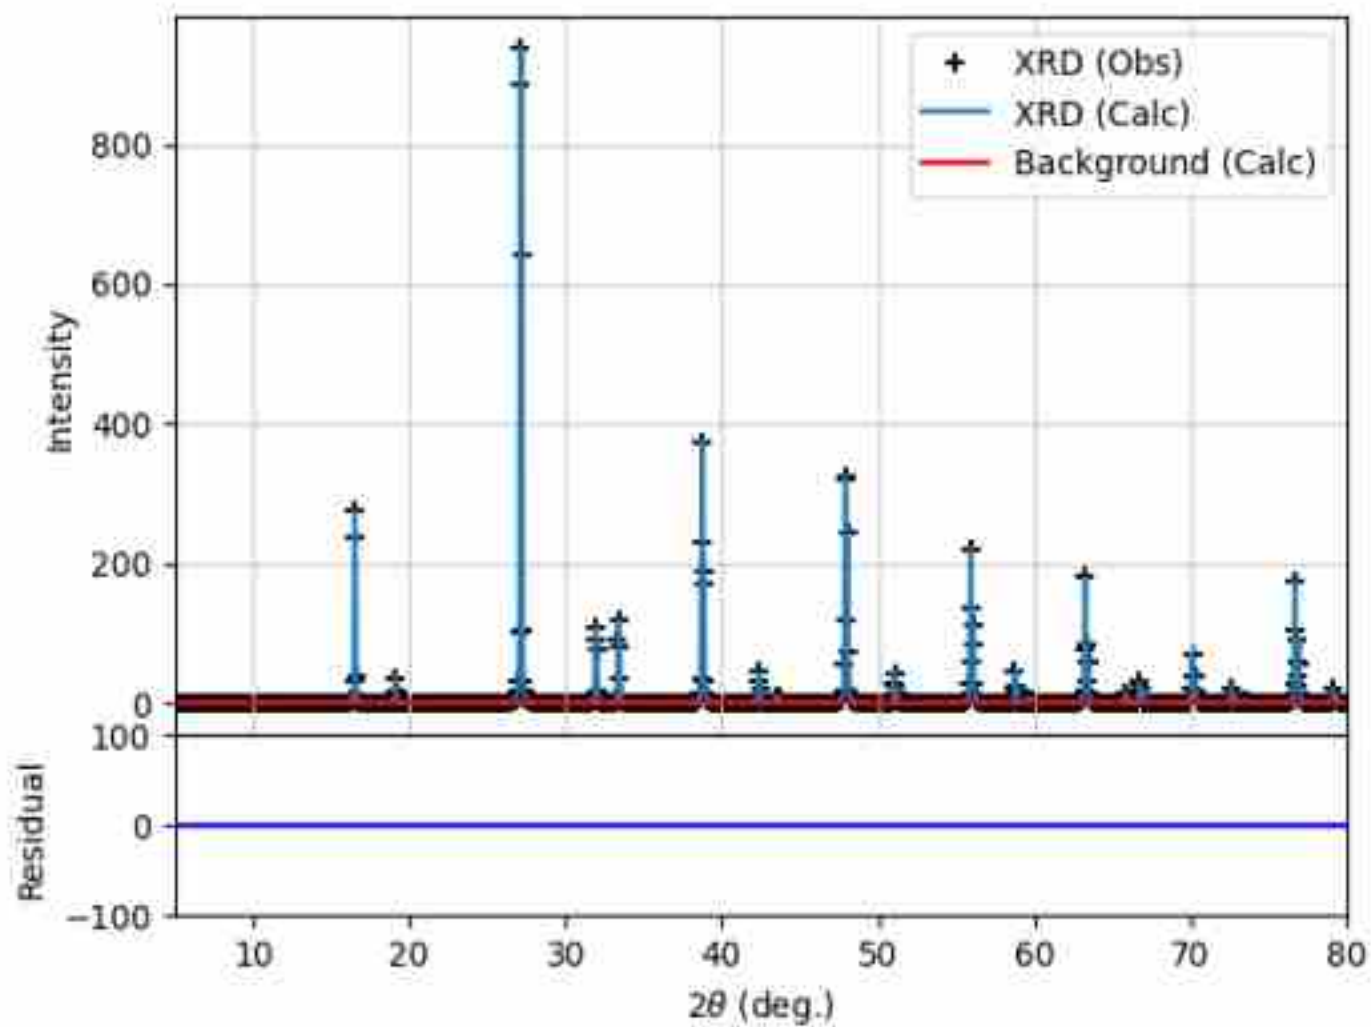

| RMSE before RR | Rwp     | RMSE after RR |
|----------------|---------|---------------|
| 0.01           | 0.00892 | 0.00287       |

# Cs<sub>2</sub>RbRuF<sub>6</sub>

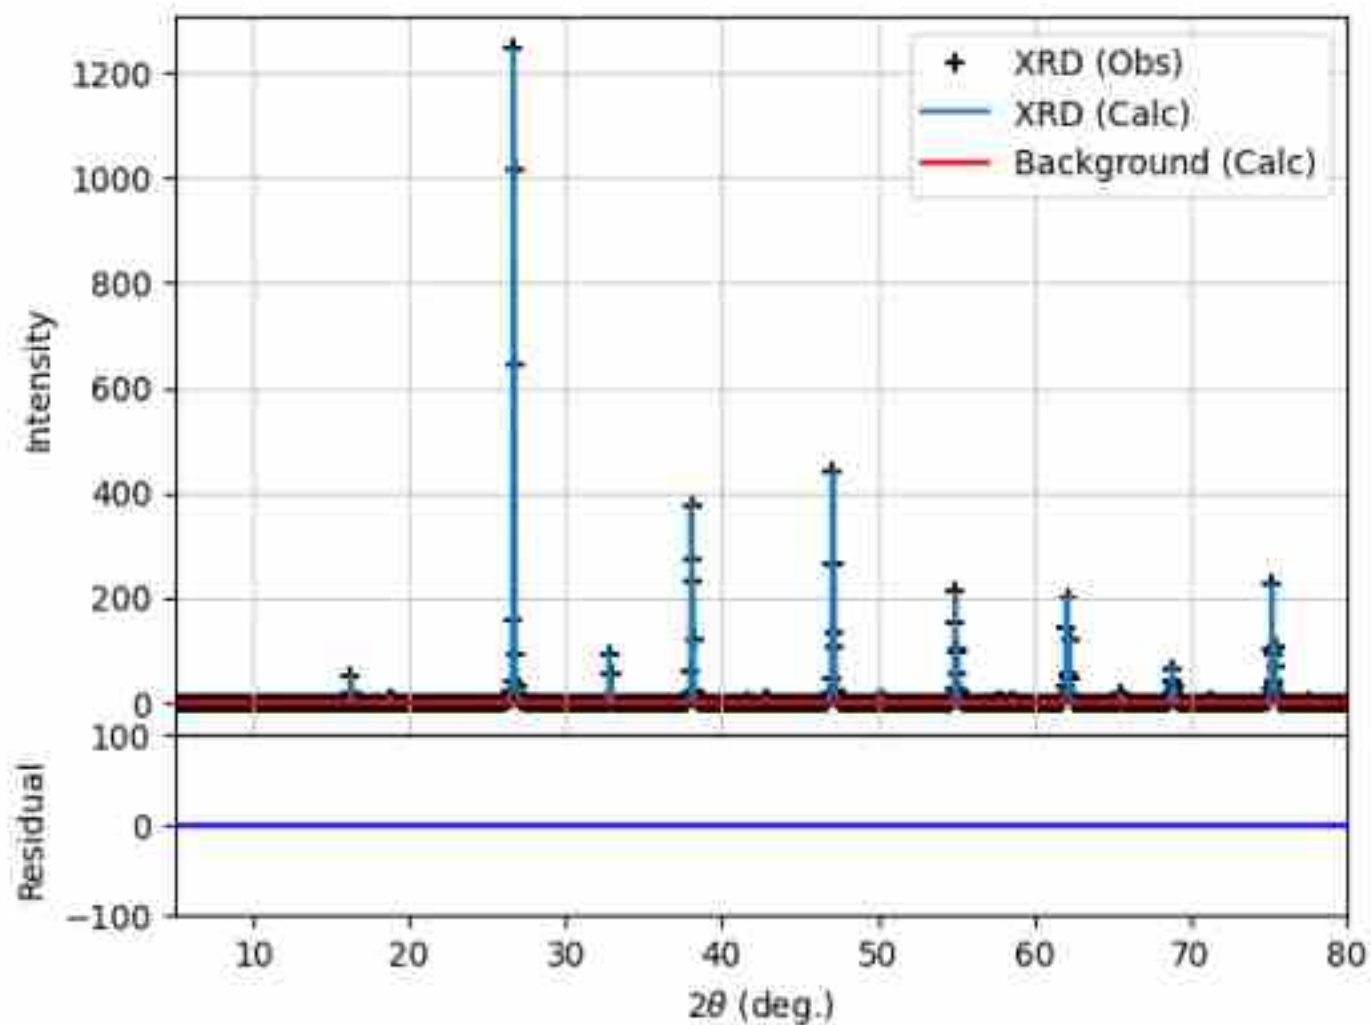

| RMSE before RR | Rwp     | RMSE after RR |
|----------------|---------|---------------|
| 0.01           | 0.00932 | 0.00274       |



# Cs<sub>2</sub>SmAgCl<sub>6</sub>

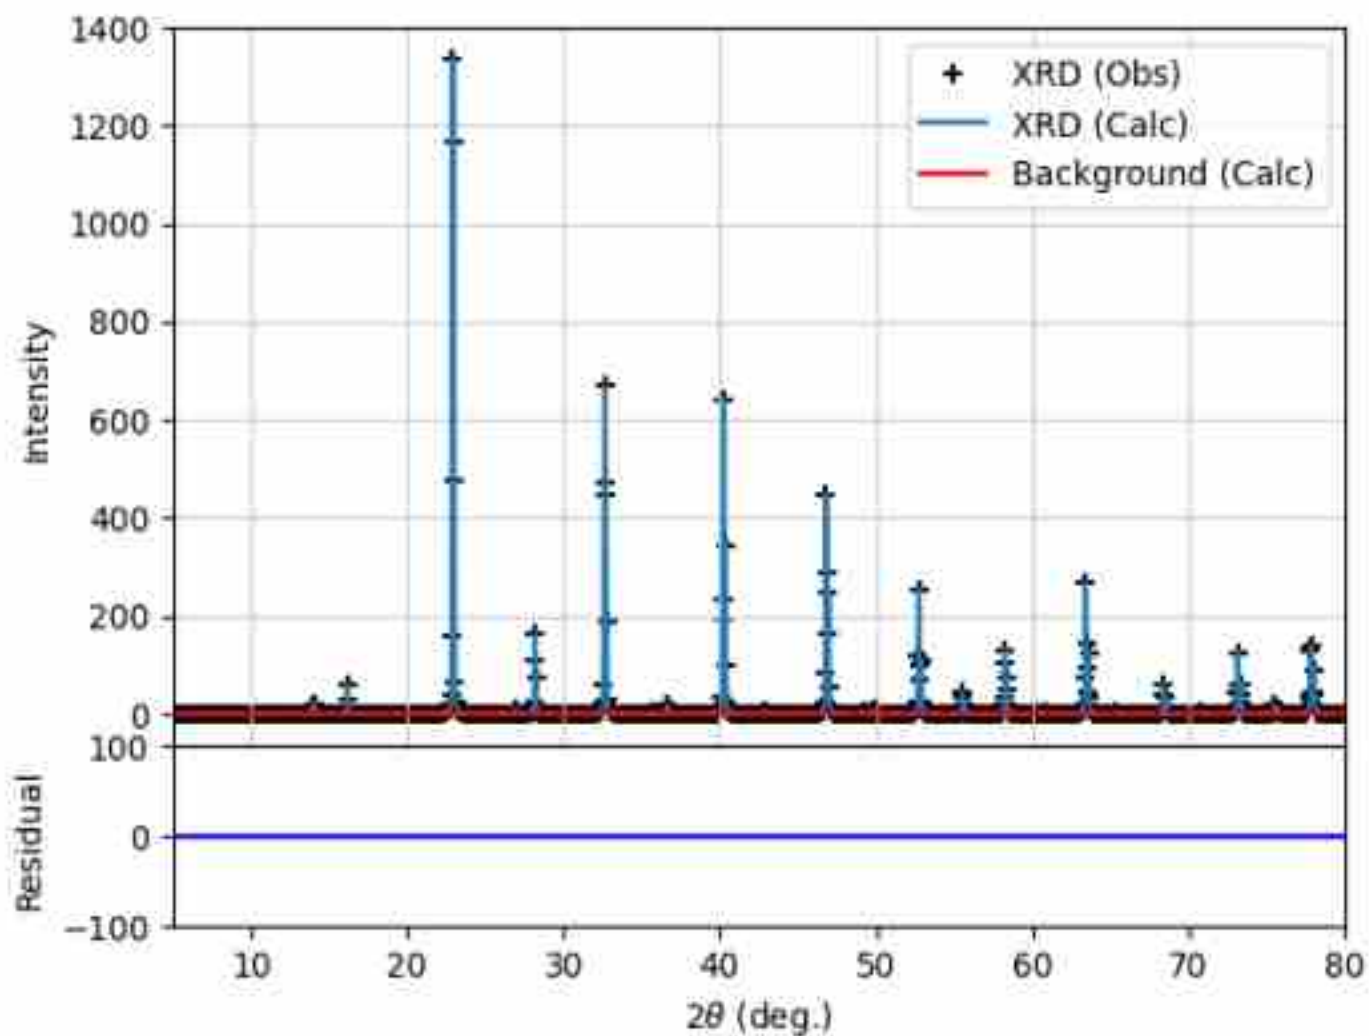

| RMSE before RR | Rwp    | RMSE after RR |
|----------------|--------|---------------|
| 0.01           | 0.0093 | 0.00161       |

# Cs<sub>2</sub>TlInCl<sub>6</sub>

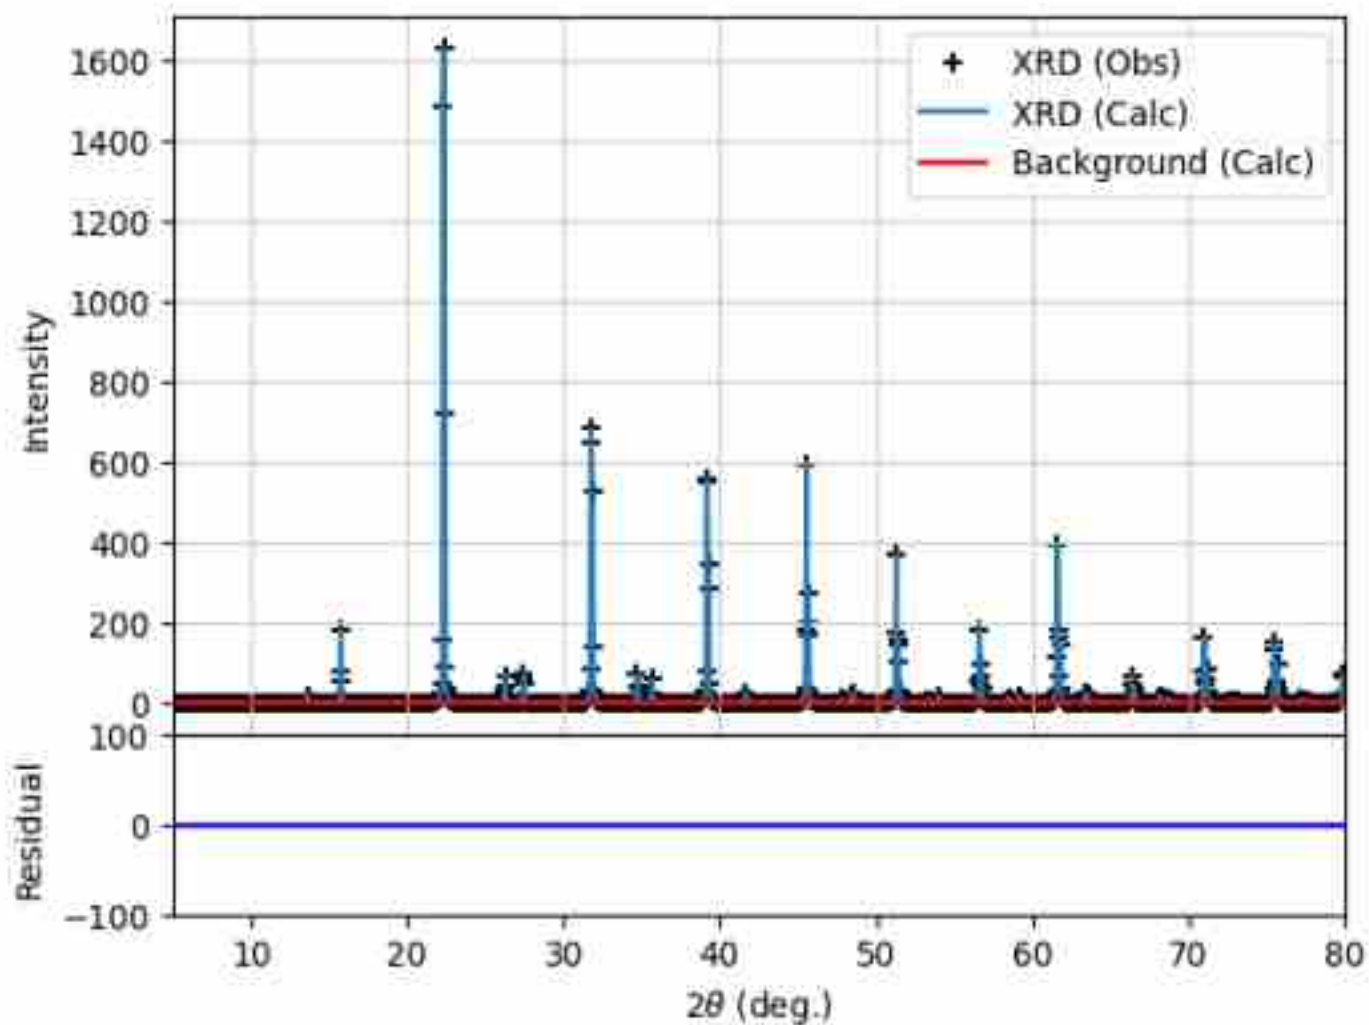

| RMSE before RR | Rwp     | RMSE after RR |
|----------------|---------|---------------|
| 0.01           | 0.00814 | 0.00199       |

# Cs<sub>2</sub>Tl<sub>11</sub>In<sub>1</sub>F<sub>6</sub>

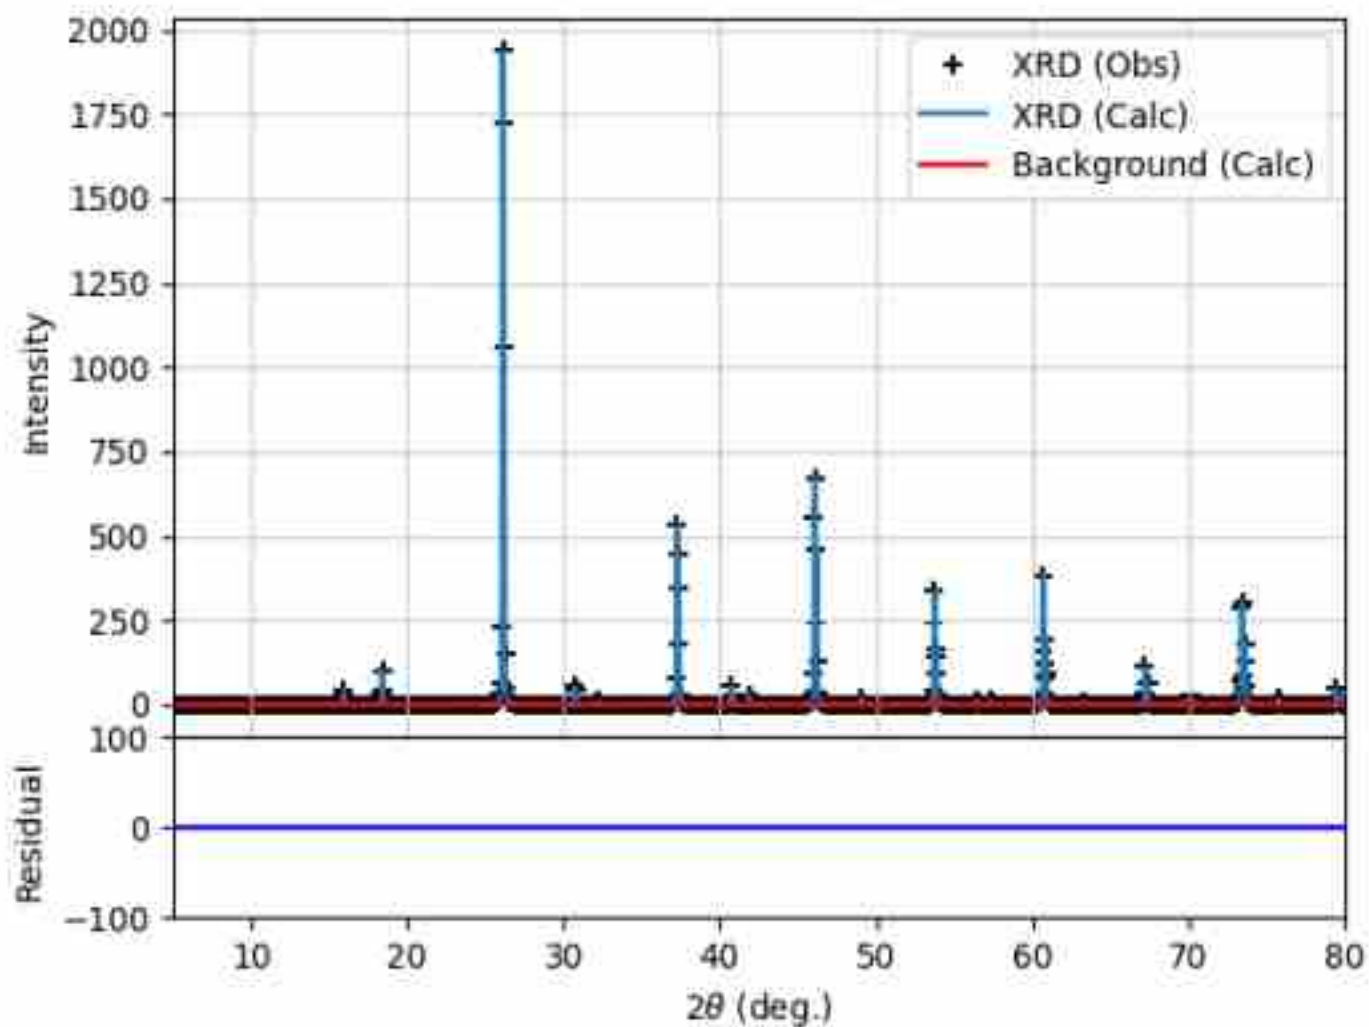

| RMSE before RR | Rwp    | RMSE after RR |
|----------------|--------|---------------|
| 0.01           | 0.0053 | 0.00246       |

# Cs<sub>3</sub>ScI<sub>6</sub>

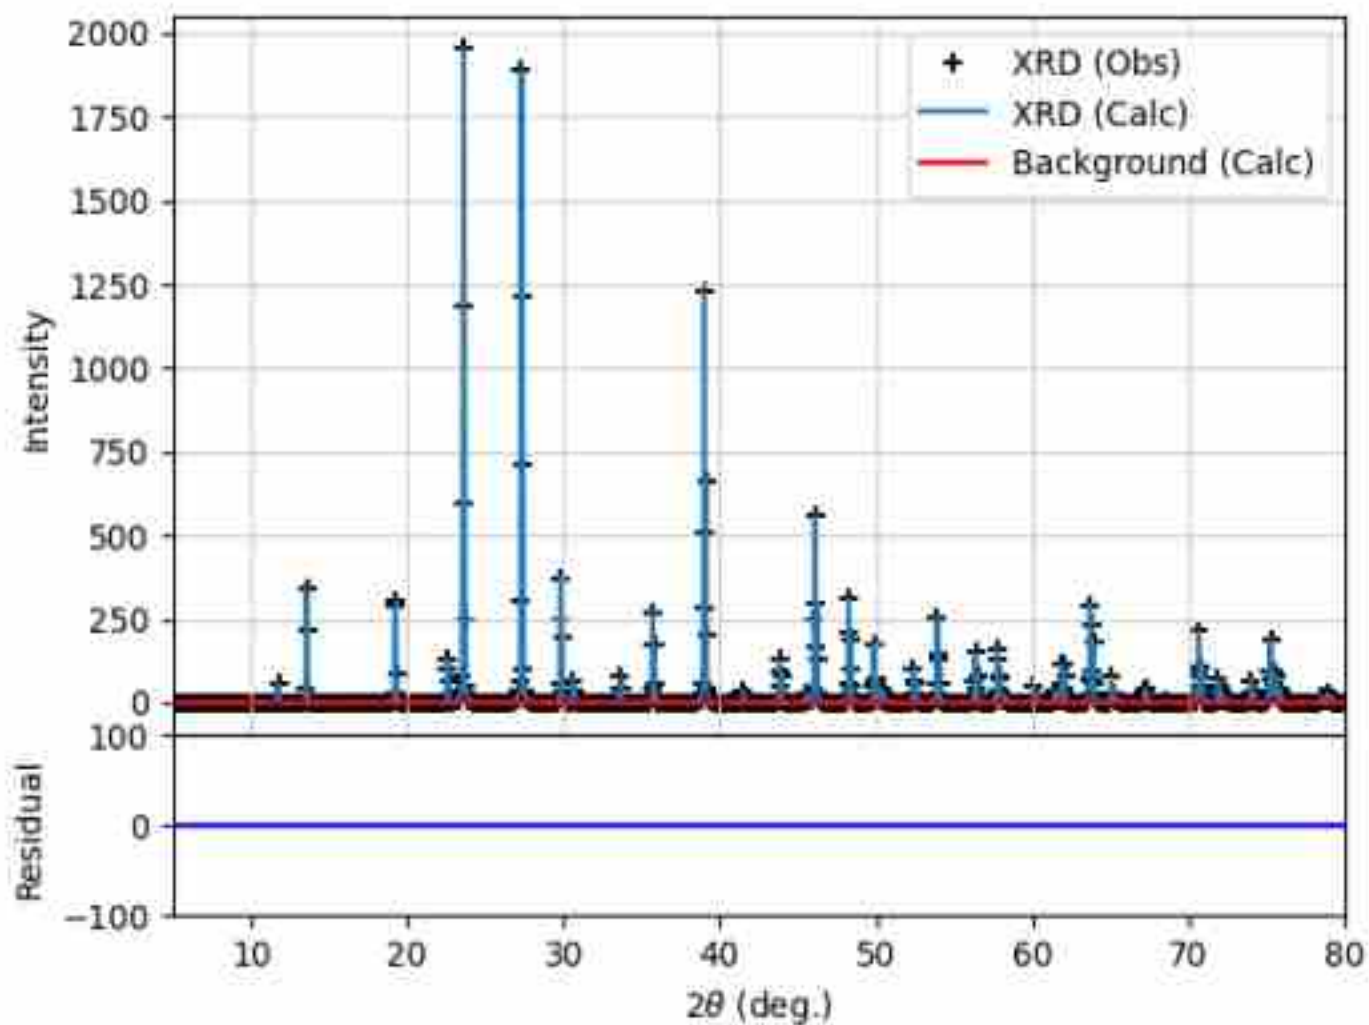

| RMSE before RR | Rwp     | RMSE after RR |
|----------------|---------|---------------|
| 0.01           | 0.04508 | 0.00269       |

# Cu<sub>1</sub>Ni<sub>2</sub>Sn<sub>1</sub>

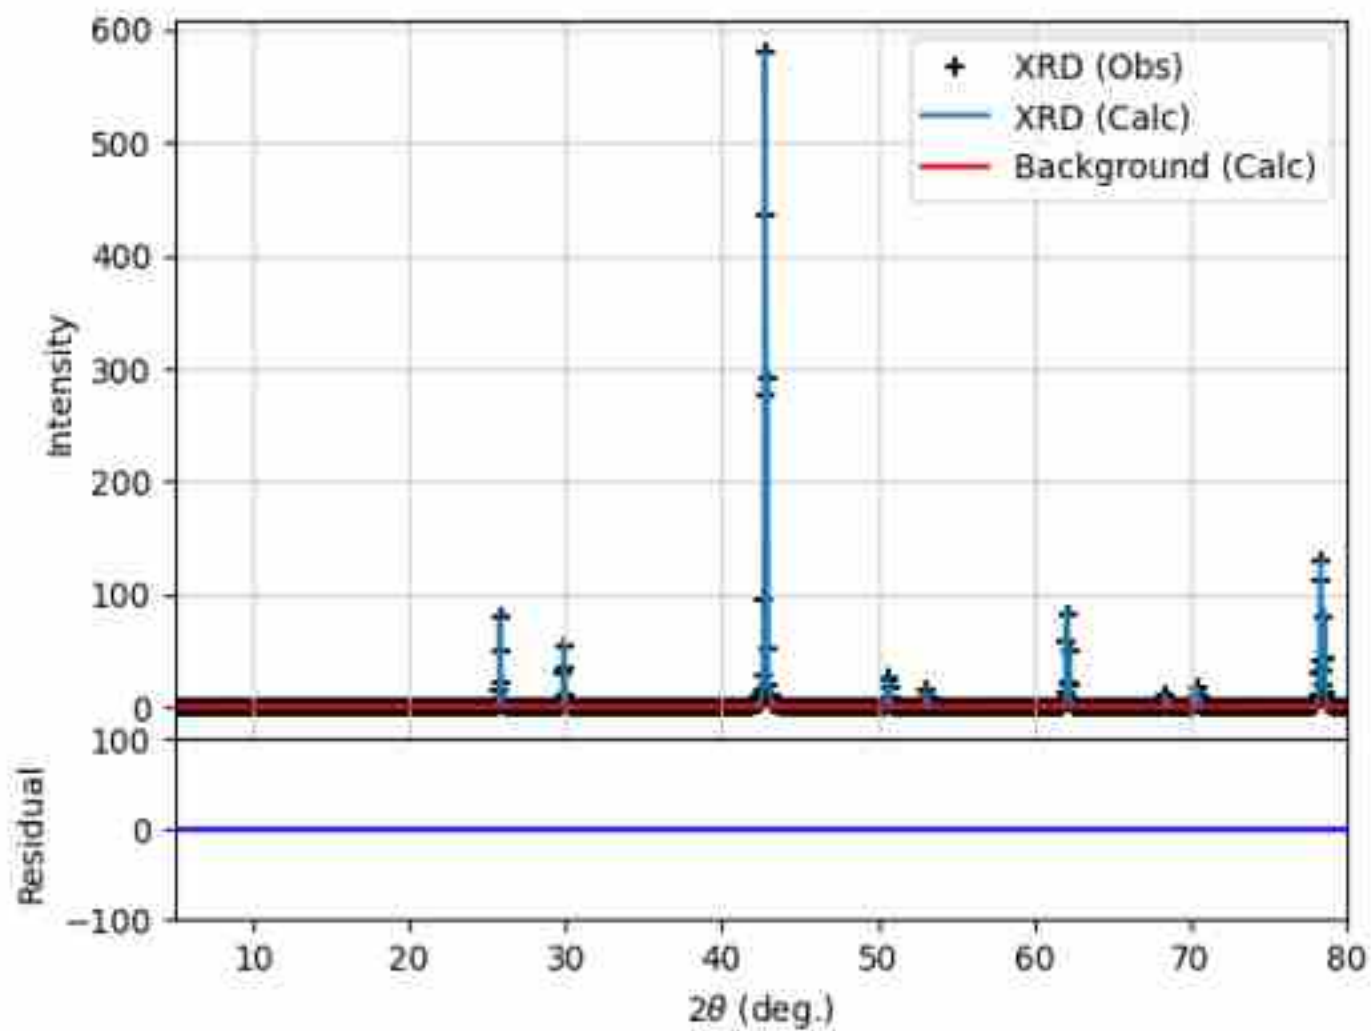

| RMSE before RR | Rwp     | RMSE after RR |
|----------------|---------|---------------|
| 0.001          | 0.00357 | 0.00101       |

# Cu1Rh2Pb1

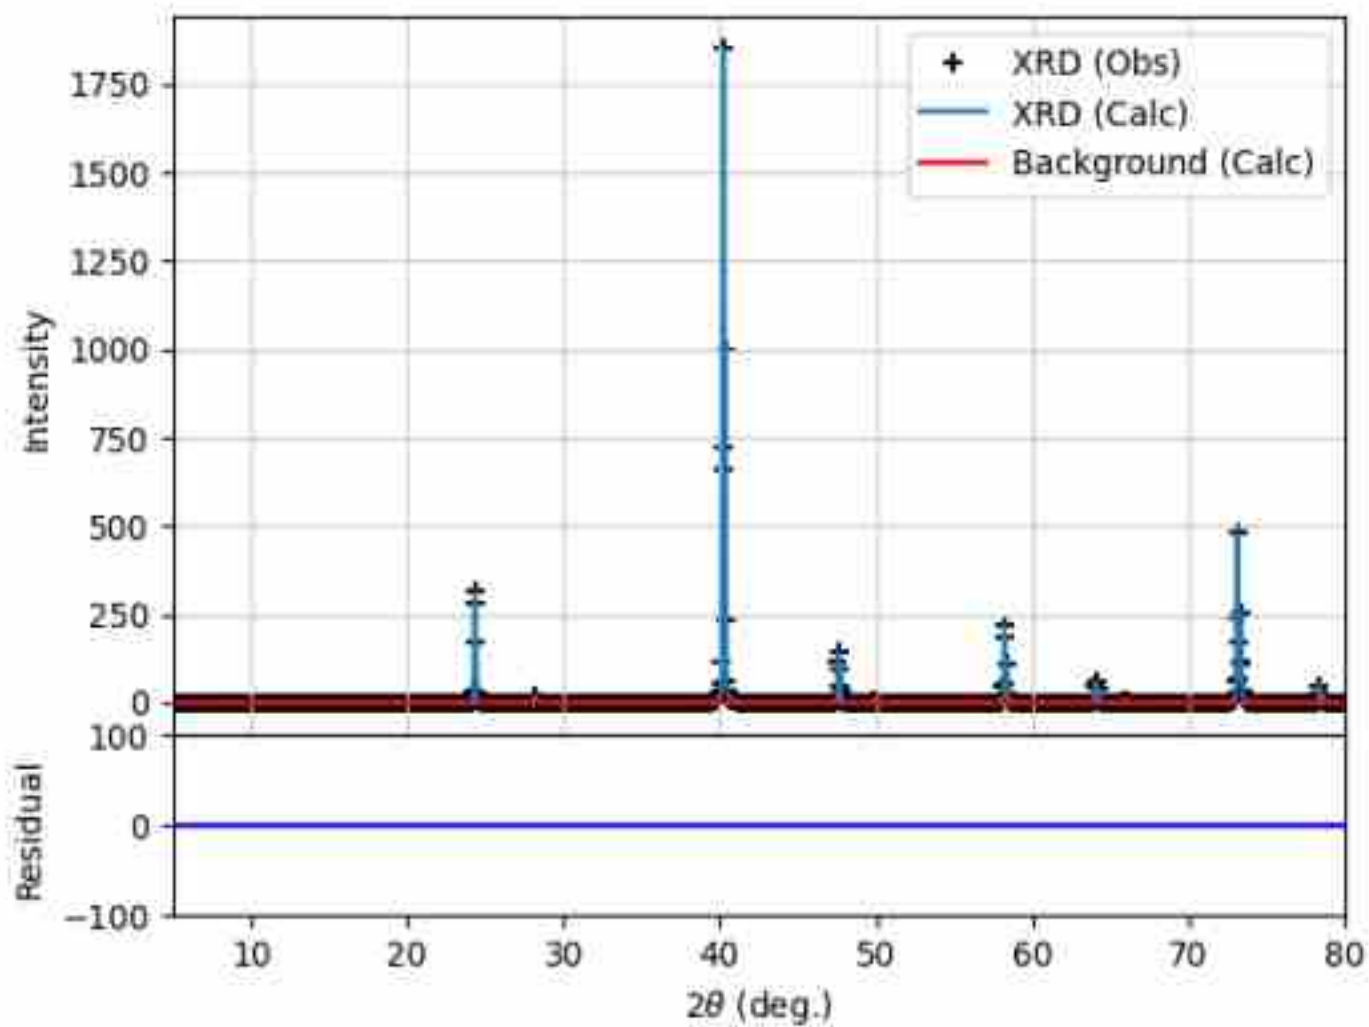

| RMSE before RR | Rwp     | RMSE after RR |
|----------------|---------|---------------|
| 0.001          | 0.00292 | 0.00154       |

# Cu<sub>6</sub>Sn<sub>2</sub>

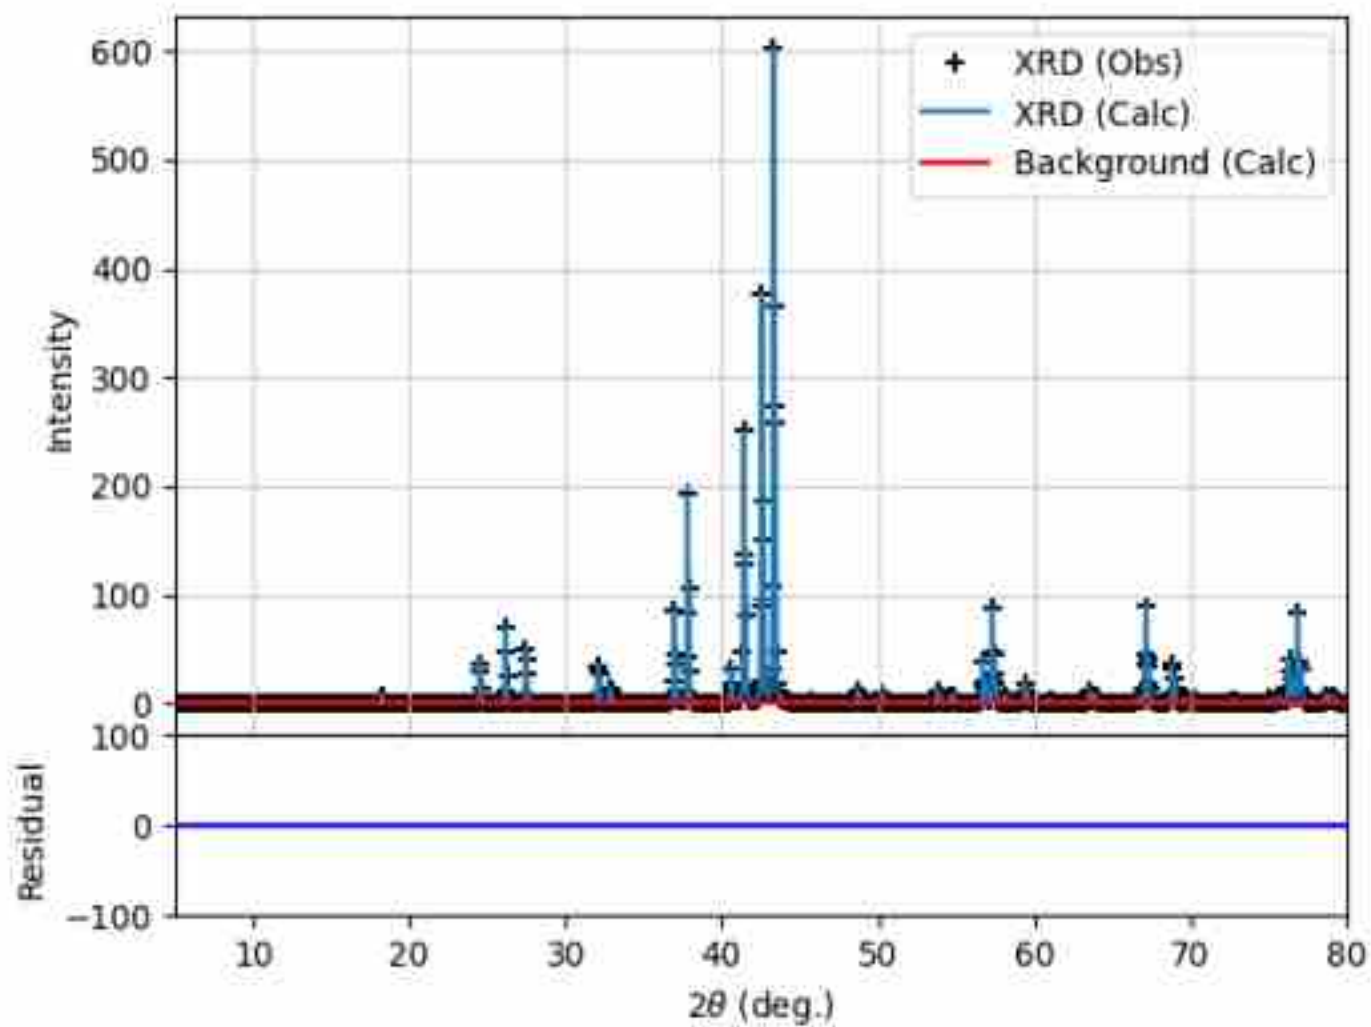

| RMSE before RR | Rwp     | RMSE after RR |
|----------------|---------|---------------|
| 0.01           | 0.00404 | 0.00036       |

# Dy1Cu1Se2

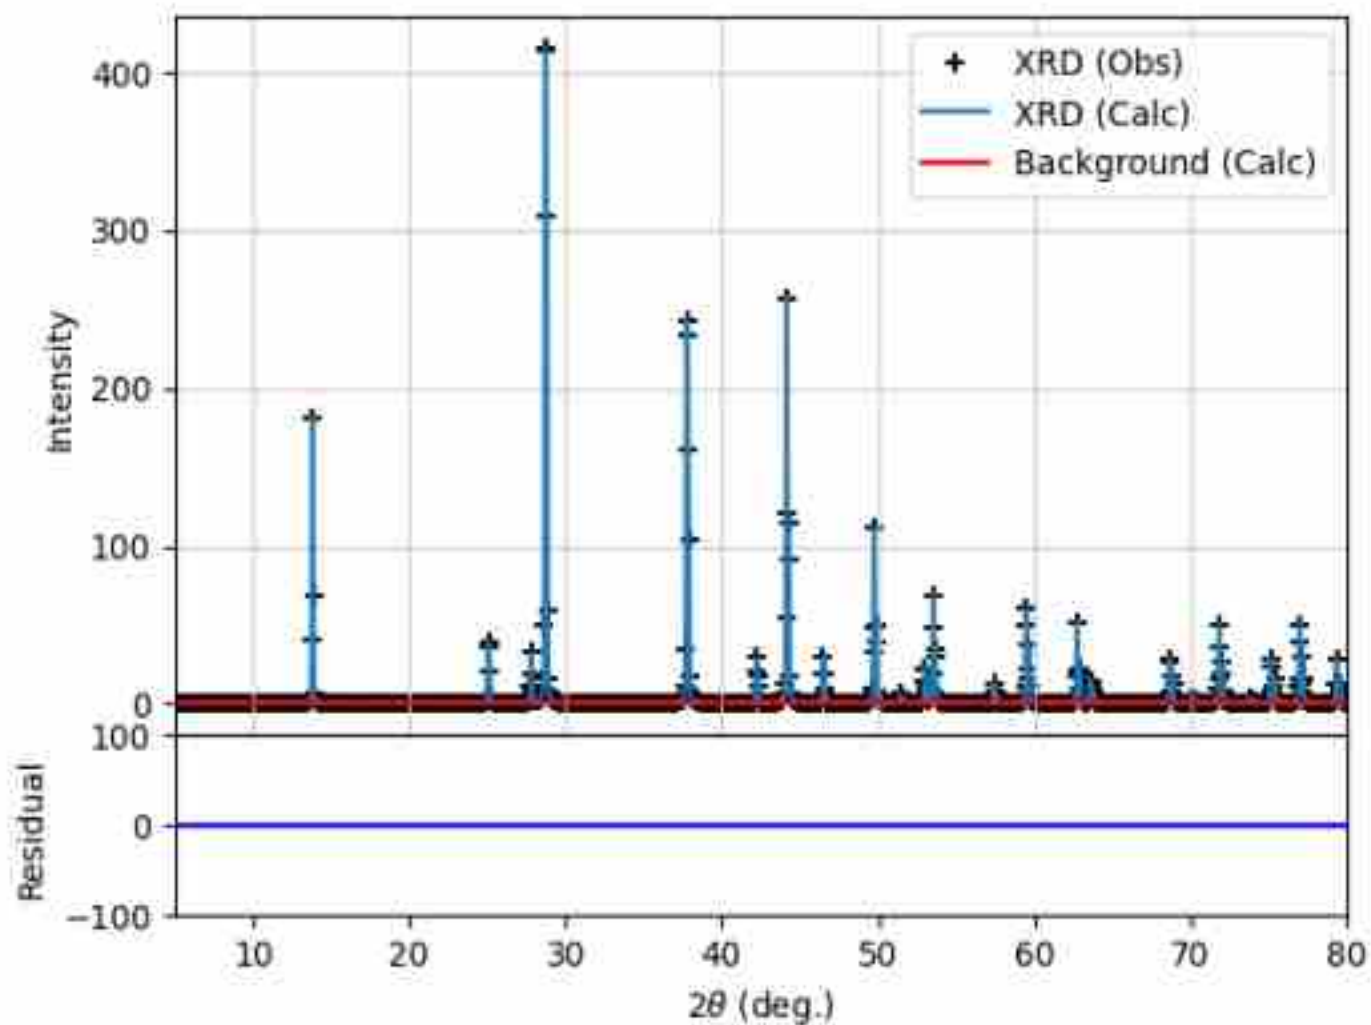

| RMSE before RR | Rwp     | RMSE after RR |
|----------------|---------|---------------|
| 0.01           | 0.00335 | 0.00049       |



# Dy1Er1C4

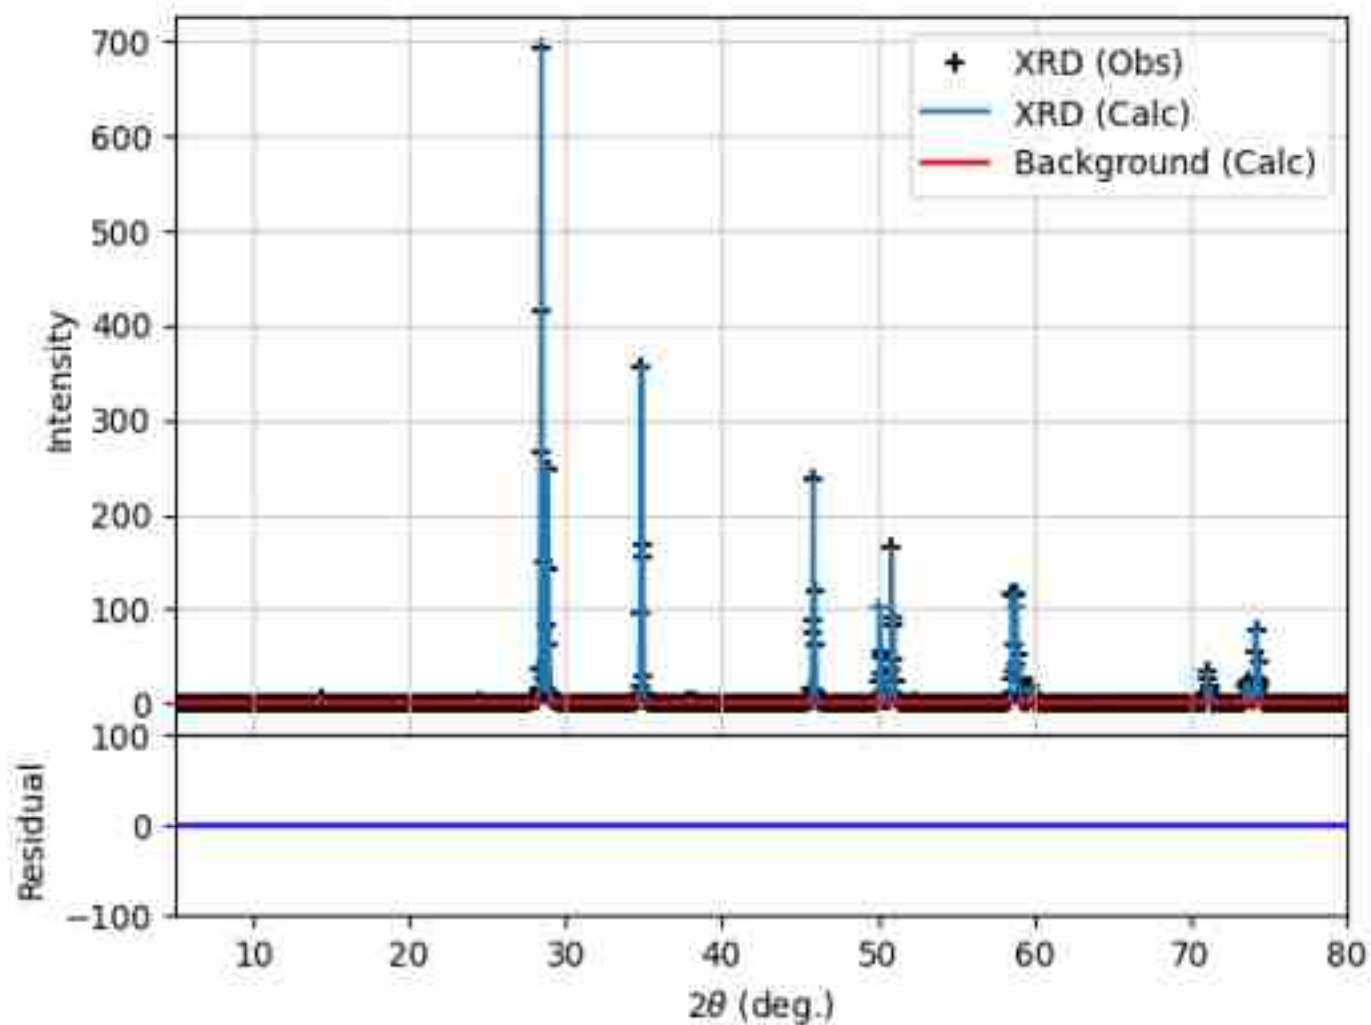

| RMSE before RR | Rwp     | RMSE after RR |
|----------------|---------|---------------|
| 0.01           | 0.00417 | 0.00184       |

# Dy1Er1Cd2

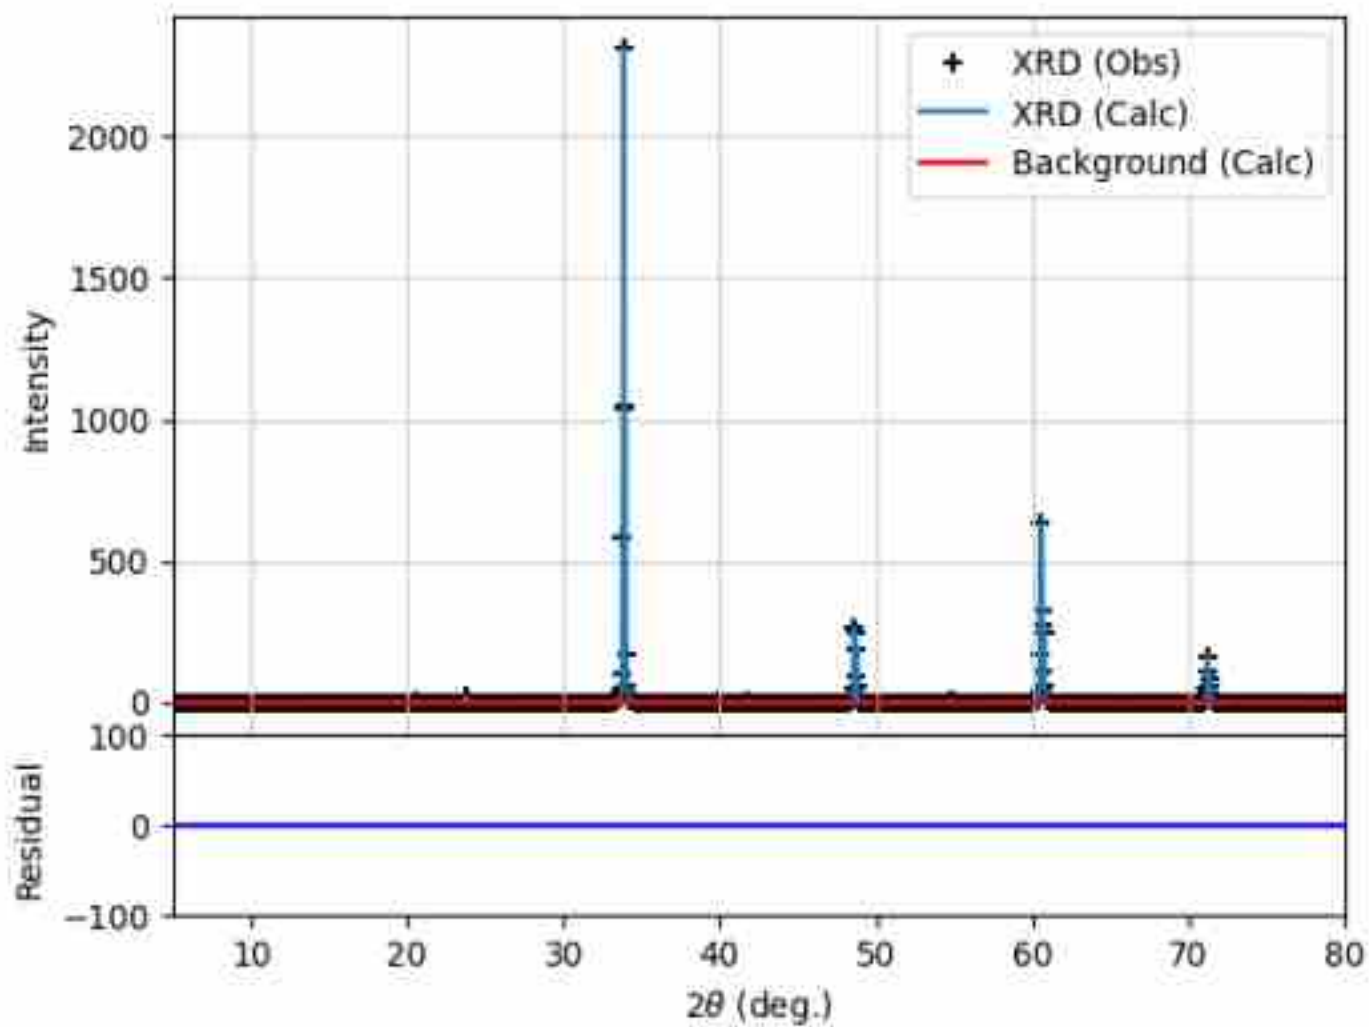

| RMSE before RR | Rwp     | RMSE after RR |
|----------------|---------|---------------|
| 0.001          | 0.03677 | 0.00122       |

# Dy1Er1Rh2

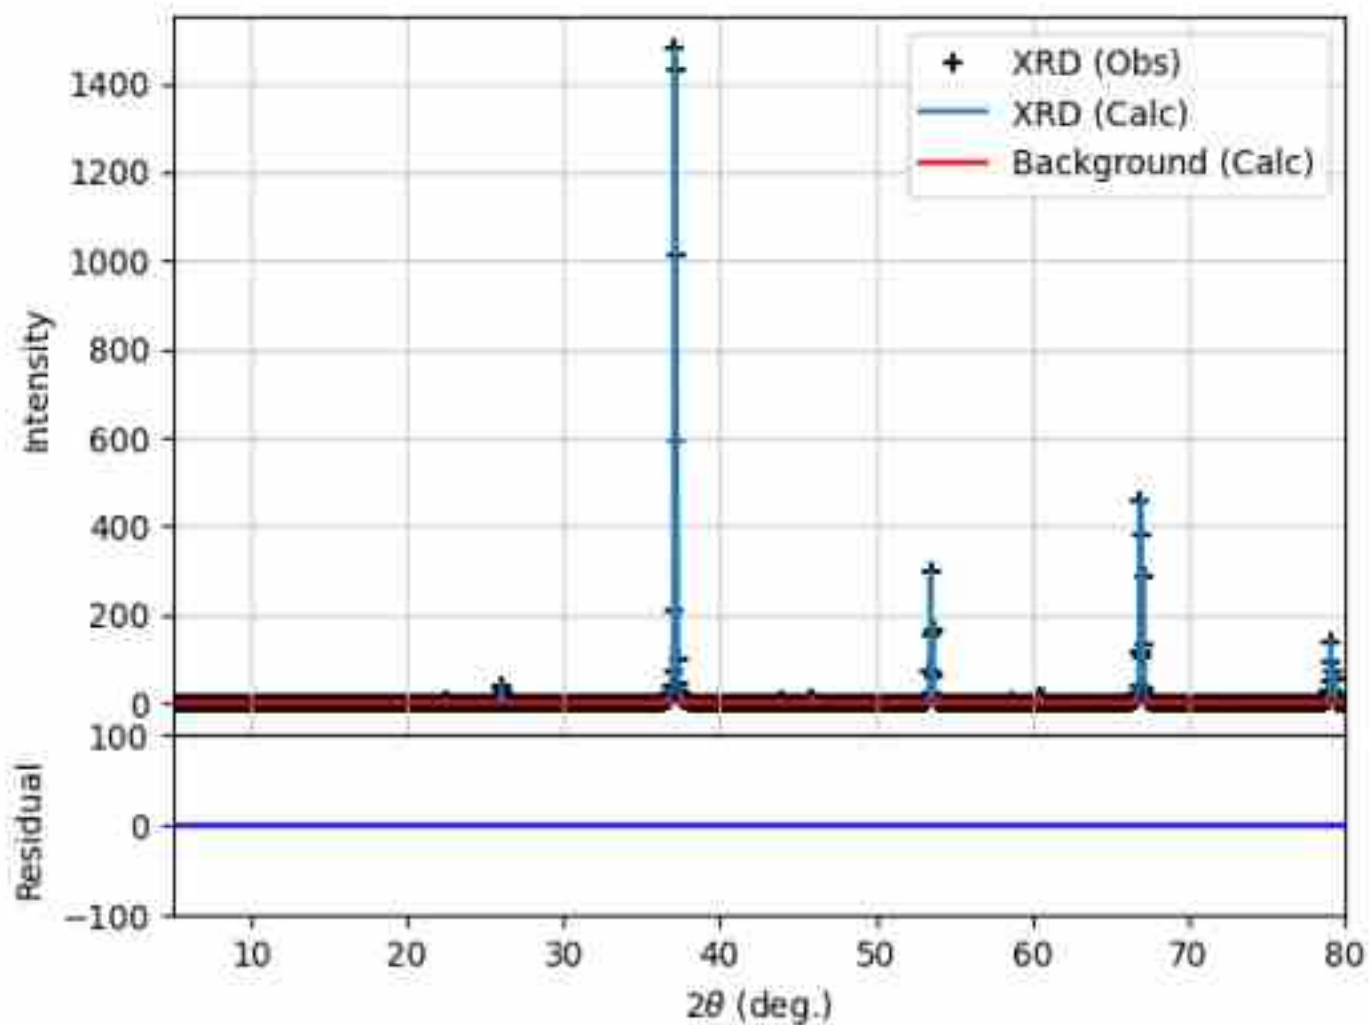

| RMSE before RR | Rwp     | RMSE after RR |
|----------------|---------|---------------|
| 0.001          | 0.00404 | 0.00043       |

# Dy1Hg1

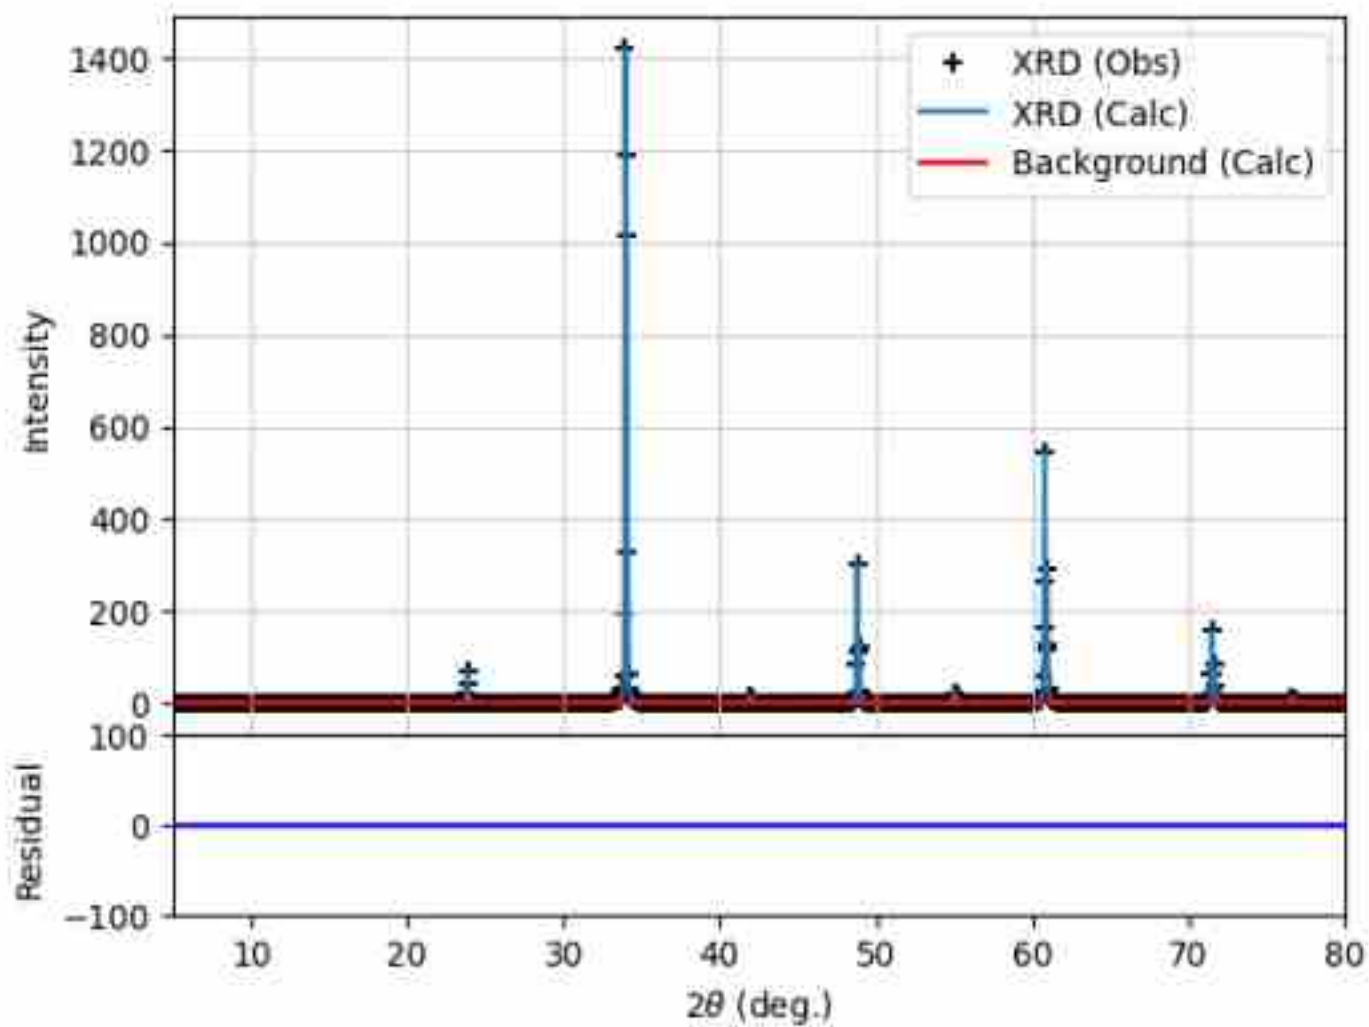

| RMSE before RR | Rwp     | RMSE after RR |
|----------------|---------|---------------|
| 0.001          | 0.02316 | 0.00101       |

# Dy1Ho1In2

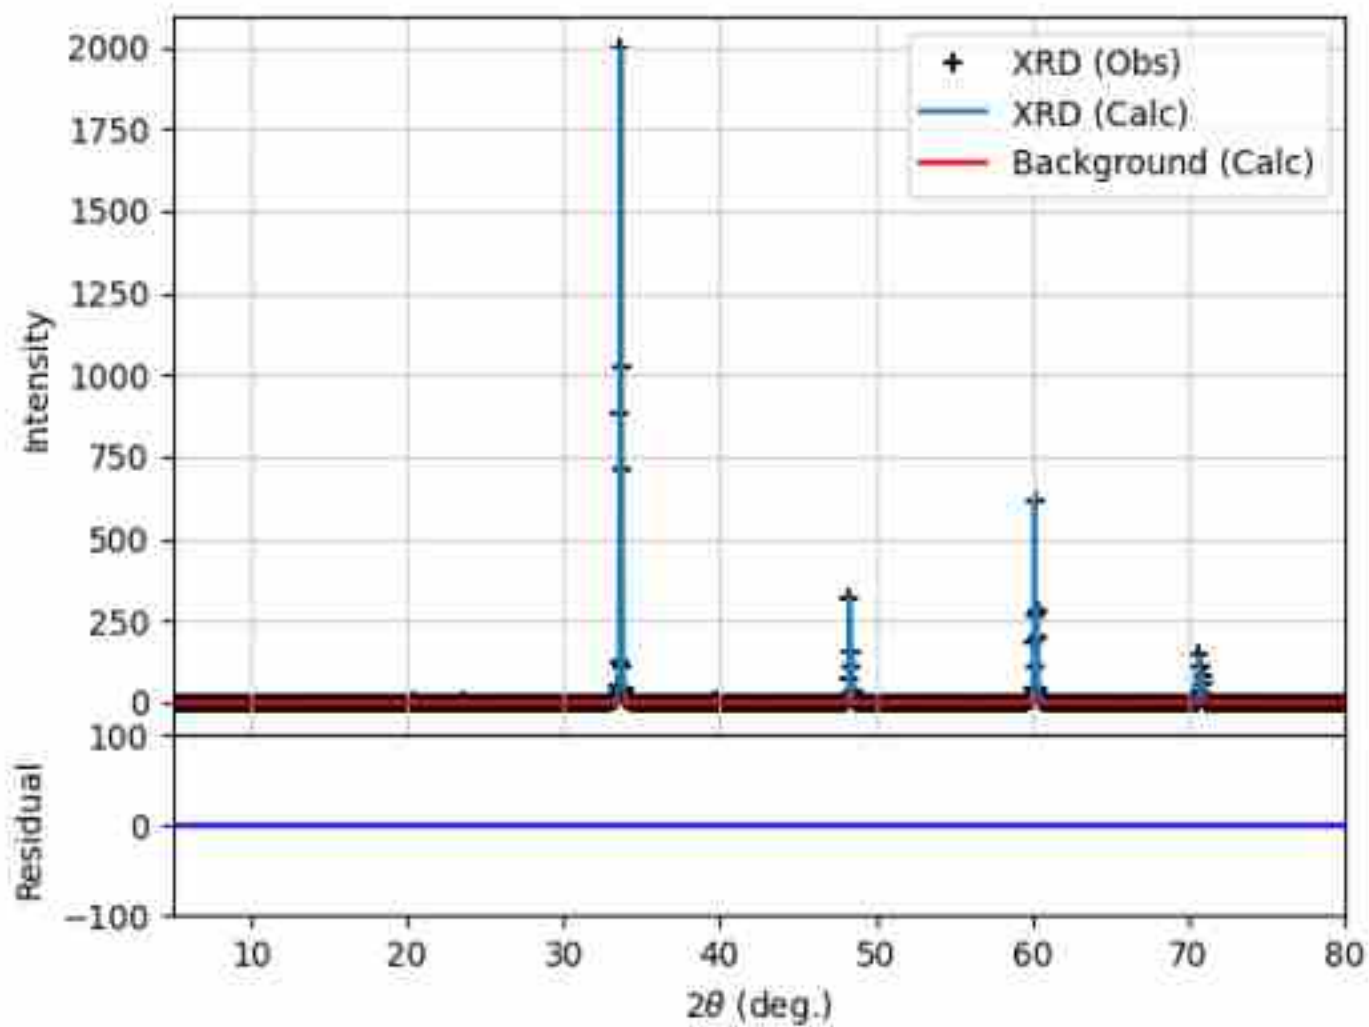

| RMSE before RR | Rwp     | RMSE after RR |
|----------------|---------|---------------|
| 0.001          | 0.00245 | 0.00016       |

# Dy1Ho3

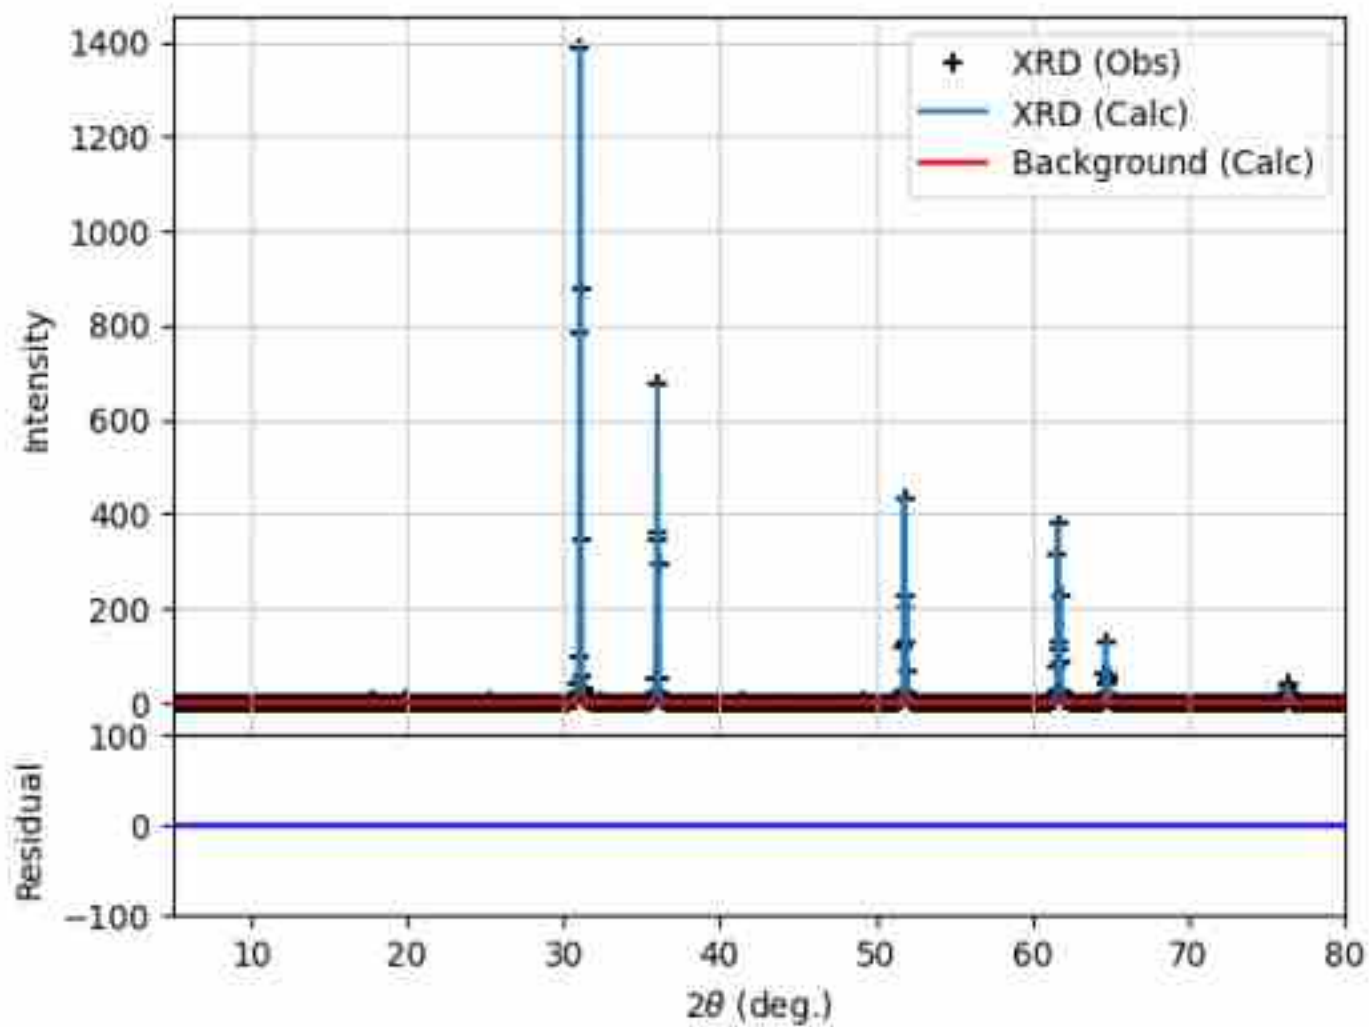

| RMSE before RR | Rwp     | RMSE after RR |
|----------------|---------|---------------|
| 0.001          | 0.01434 | 0.00054       |

# Dy1Lu1Mg2

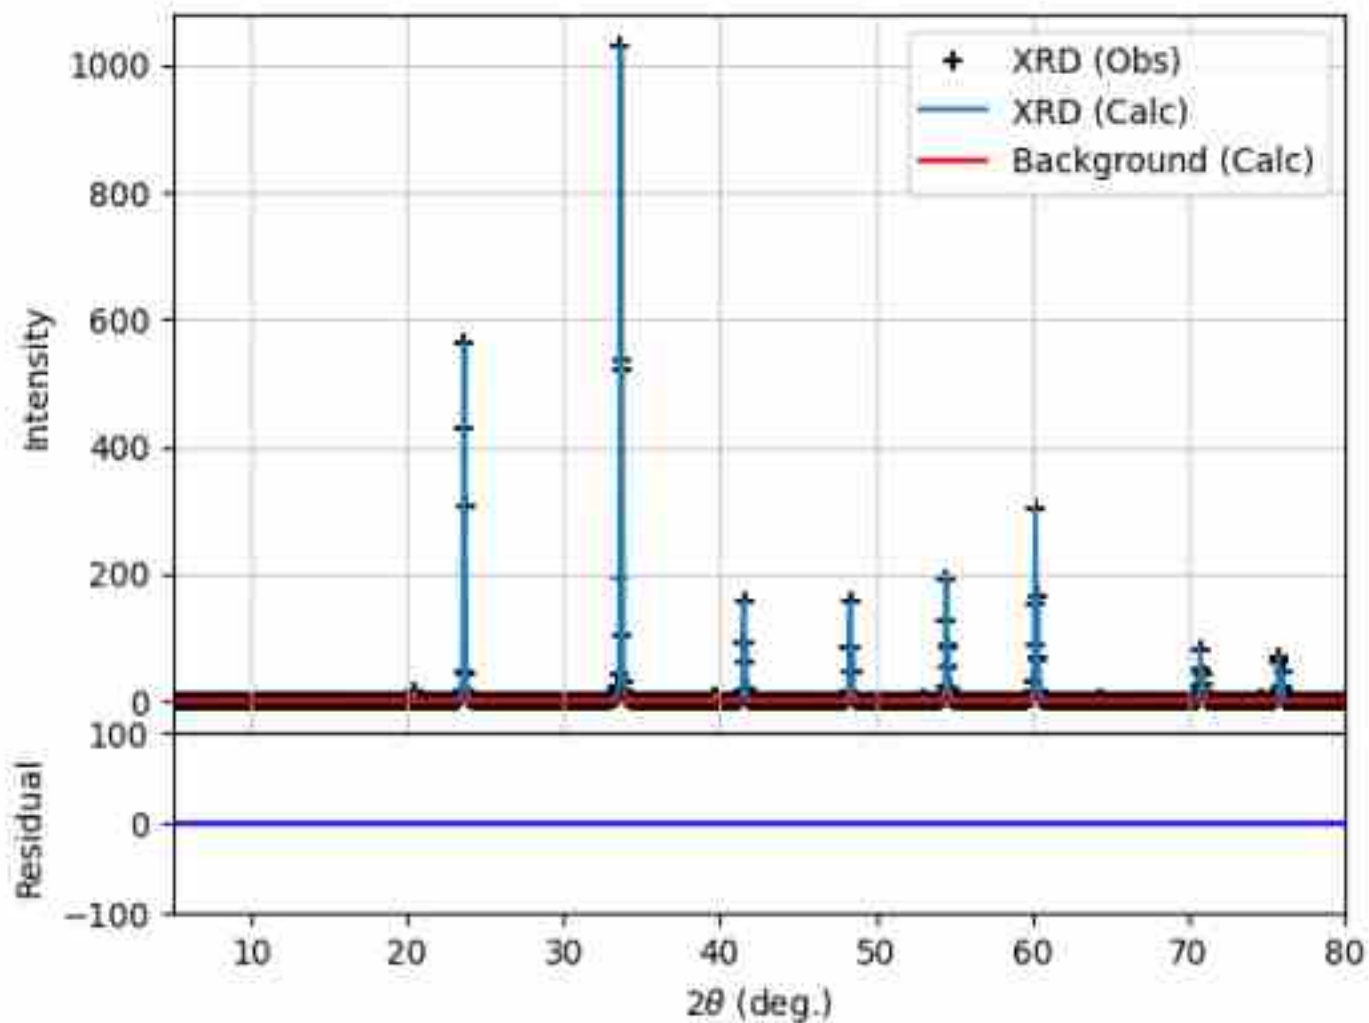

| RMSE before RR | Rwp     | RMSE after RR |
|----------------|---------|---------------|
| 0.001          | 0.00279 | 0.00046       |

# Dy1Mg1Tl2

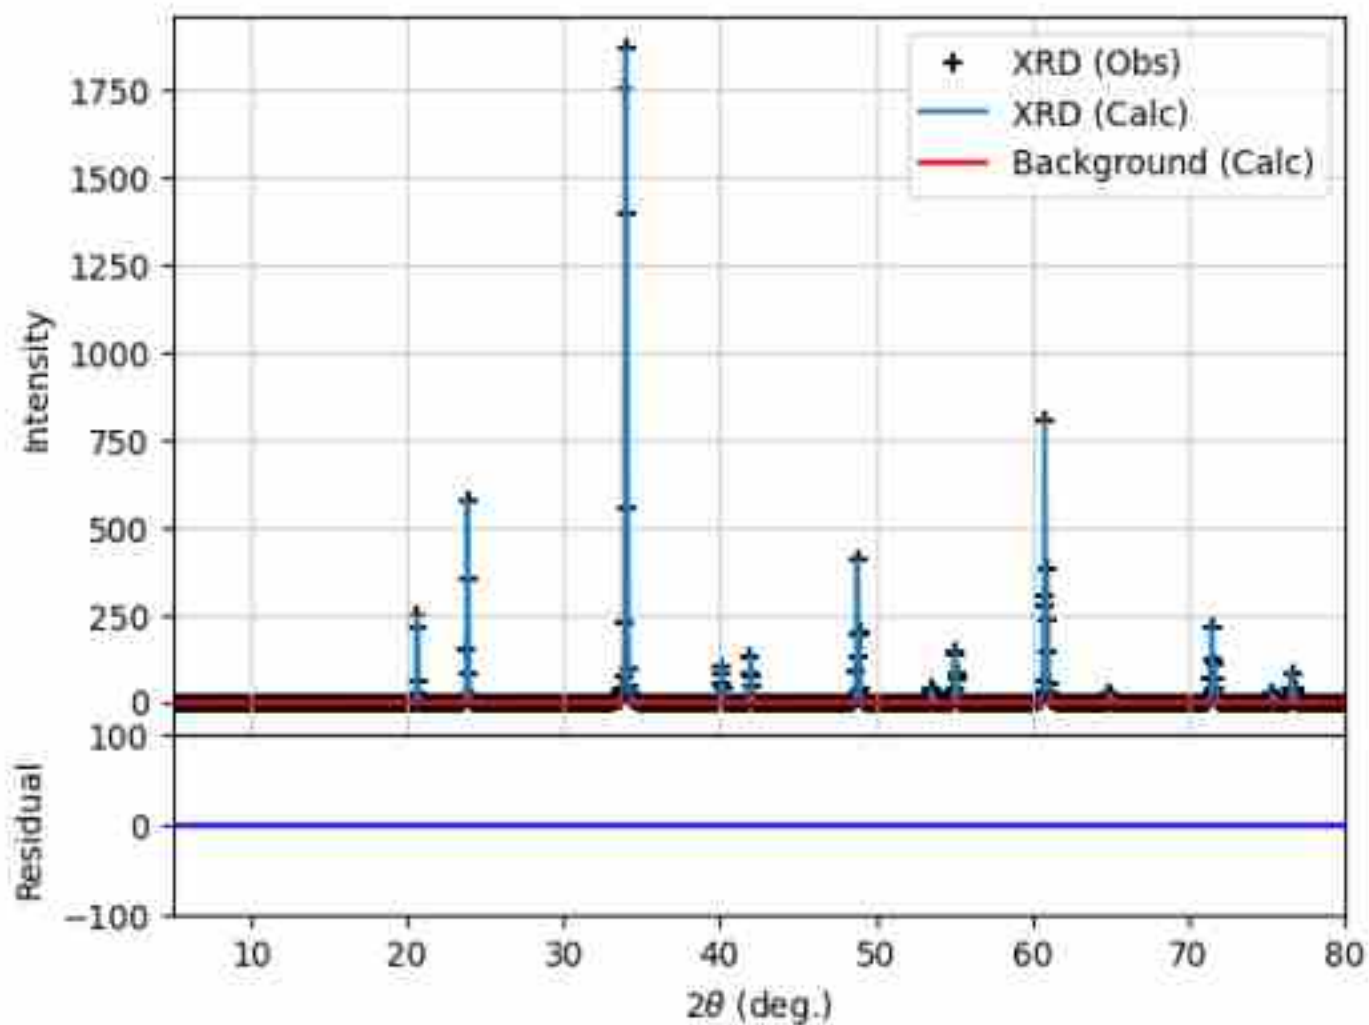

| RMSE before RR | Rwp     | RMSE after RR |
|----------------|---------|---------------|
| 0.001          | 0.00323 | 0.00032       |



# Dy1Mg1Zn2

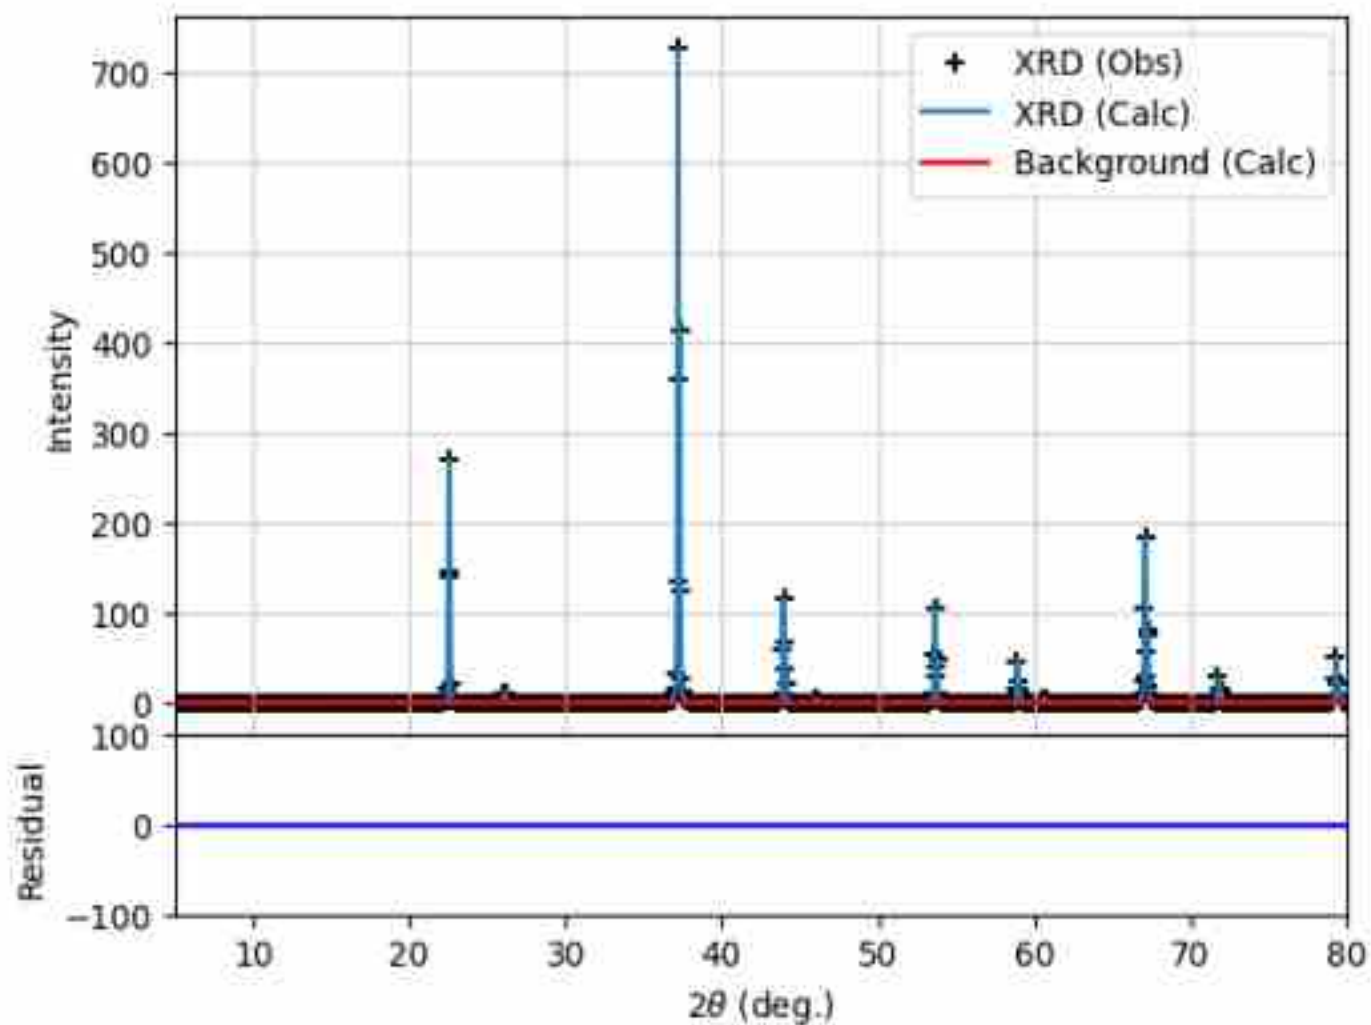

| RMSE before RR | Rwp     | RMSE after RR |
|----------------|---------|---------------|
| 0.001          | 0.00309 | 0.00026       |

# Dy1Mg1

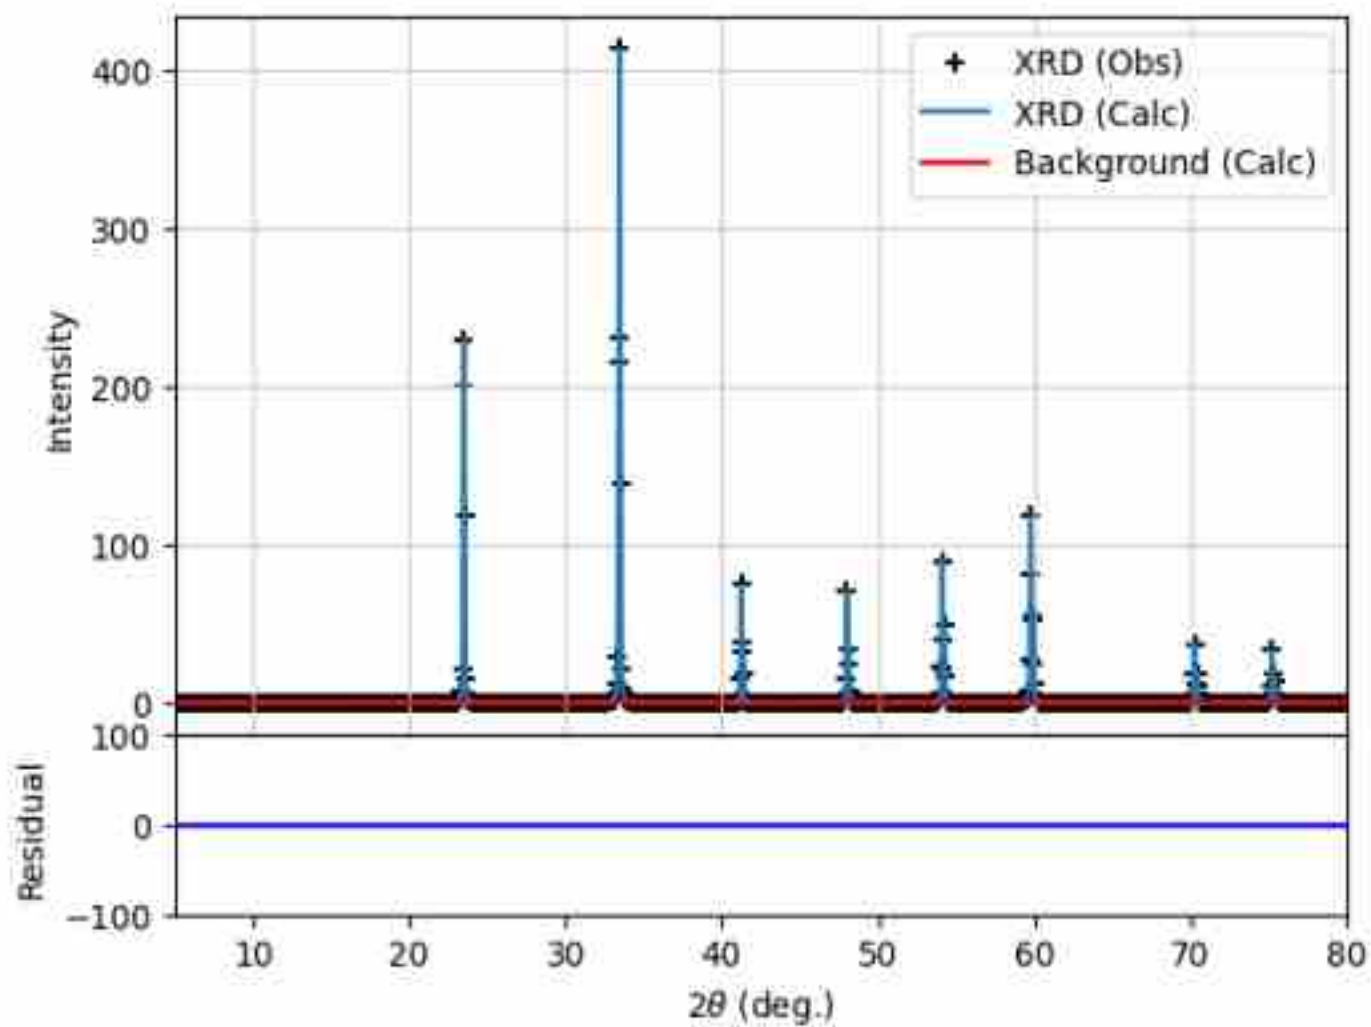

| RMSE before RR | Rwp     | RMSE after RR |
|----------------|---------|---------------|
| 0.001          | 0.07706 | 0.00137       |

# Dy1Mg3

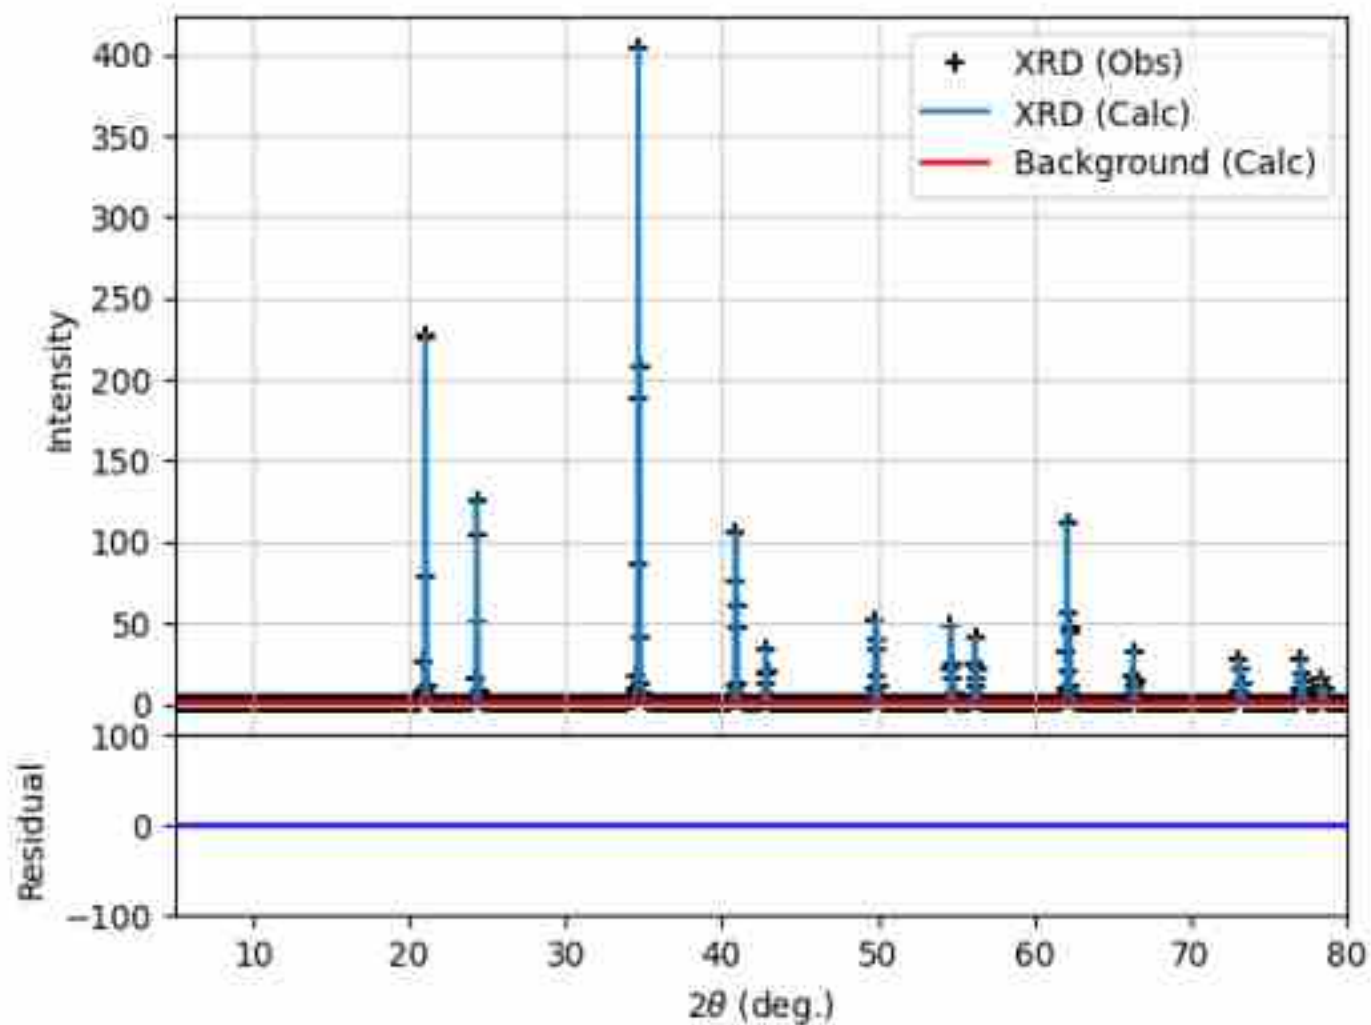

| RMSE before RR | Rwp     | RMSE after RR |
|----------------|---------|---------------|
| 0.001          | 0.00245 | 0.00082       |

# Dy1Mo6S8

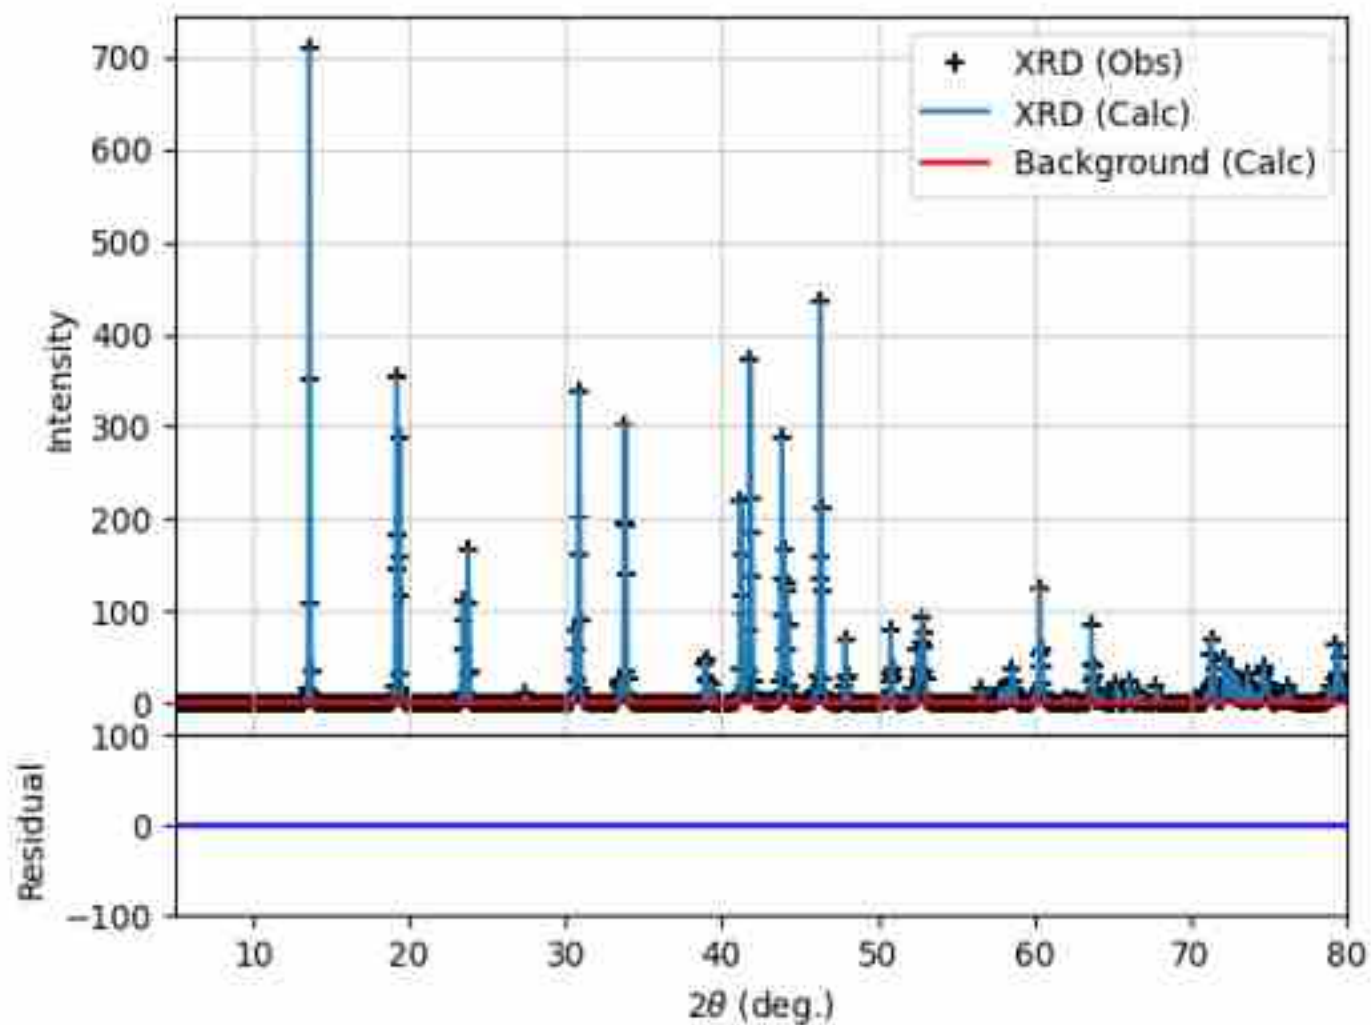

| RMSE before RR | Rwp     | RMSE after RR |
|----------------|---------|---------------|
| 0.01           | 0.00364 | 0.00058       |

# Dy1Pa1Ru2

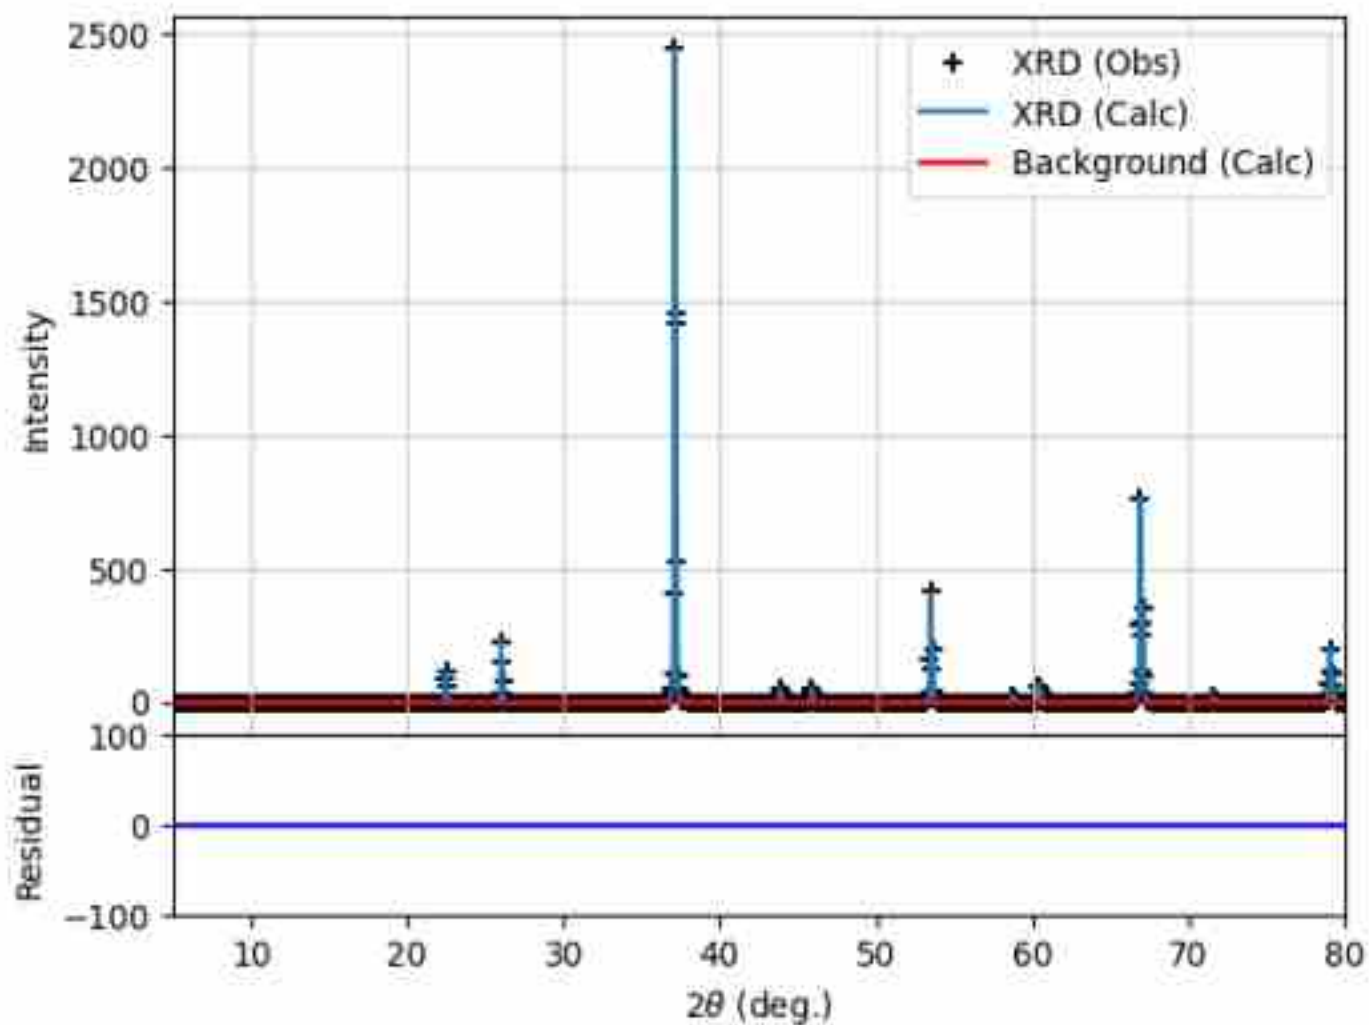

| RMSE before RR | Rwp     | RMSE after RR |
|----------------|---------|---------------|
| 0.001          | 0.00954 | 0.00101       |

# Dy1Pa1Tc2

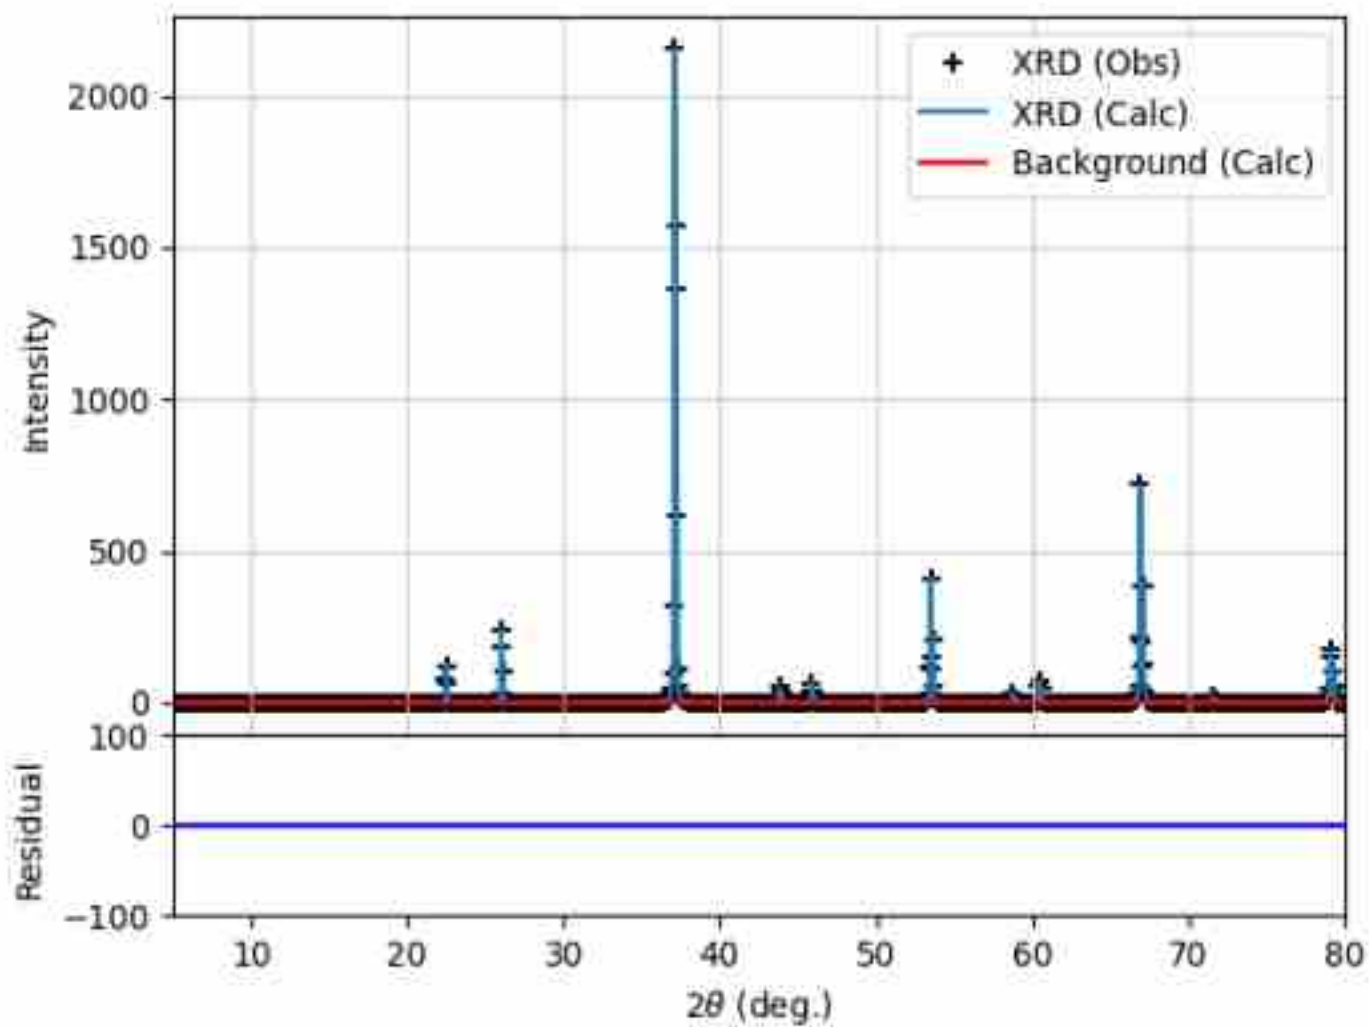

| RMSE before RR | Rwp     | RMSE after RR |
|----------------|---------|---------------|
| 0.001          | 0.00347 | 0.00035       |

# Dy1Sc1Zn2

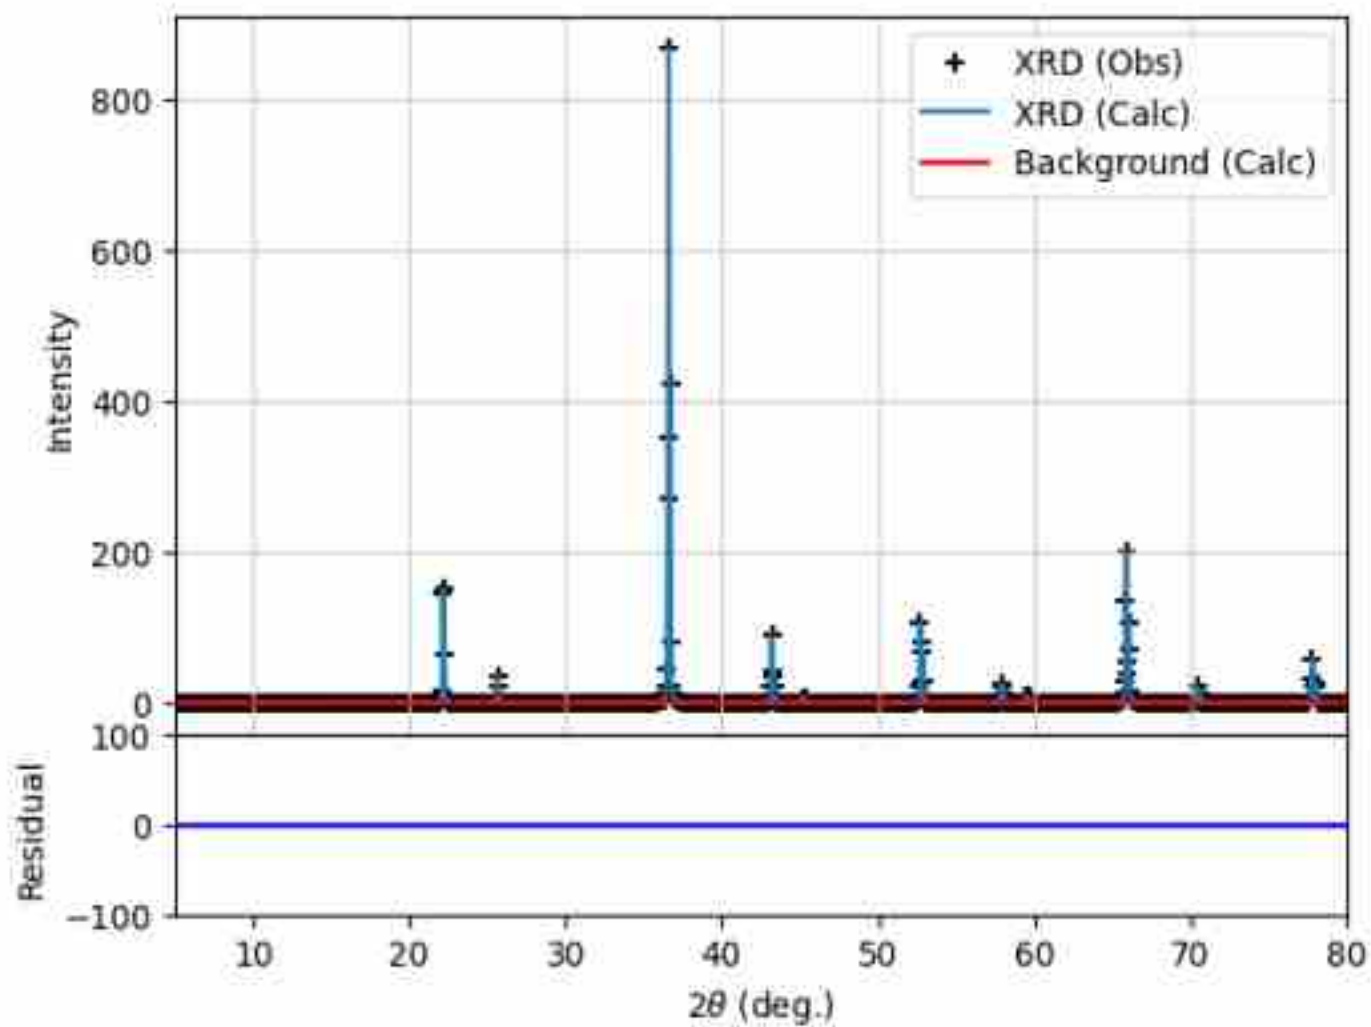

| RMSE before RR | Rwp     | RMSE after RR |
|----------------|---------|---------------|
| 0.001          | 0.14551 | 0.00328       |

Dy1Tm1Cd2

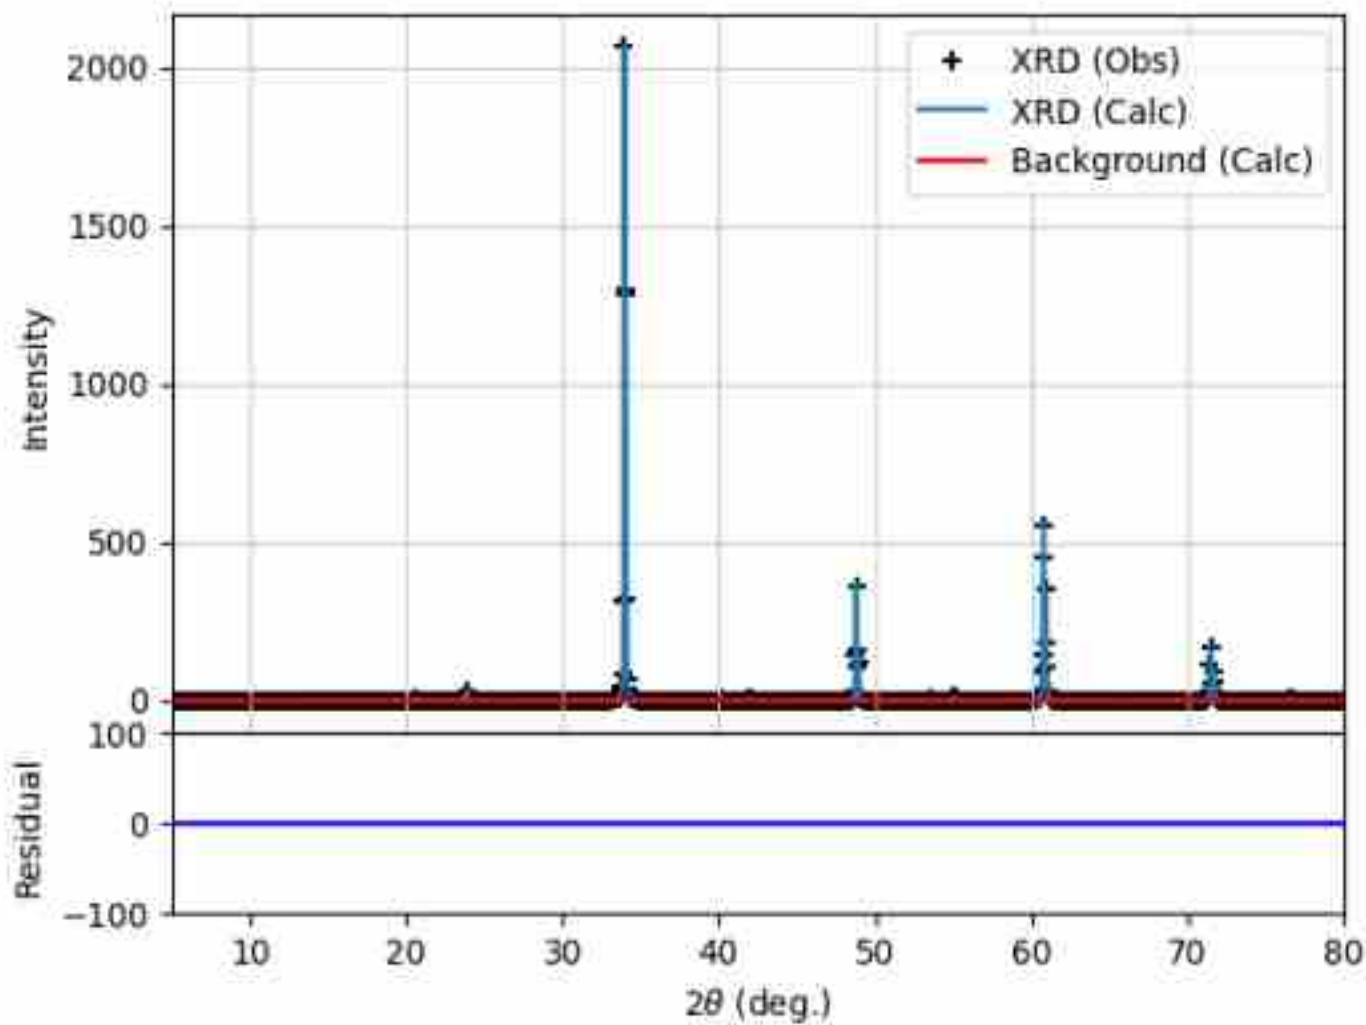

| RMSE before RR | Rwp     | RMSE after RR |
|----------------|---------|---------------|
| 0.001          | 0.05539 | 0.00126       |



# Dy1Tm1In2

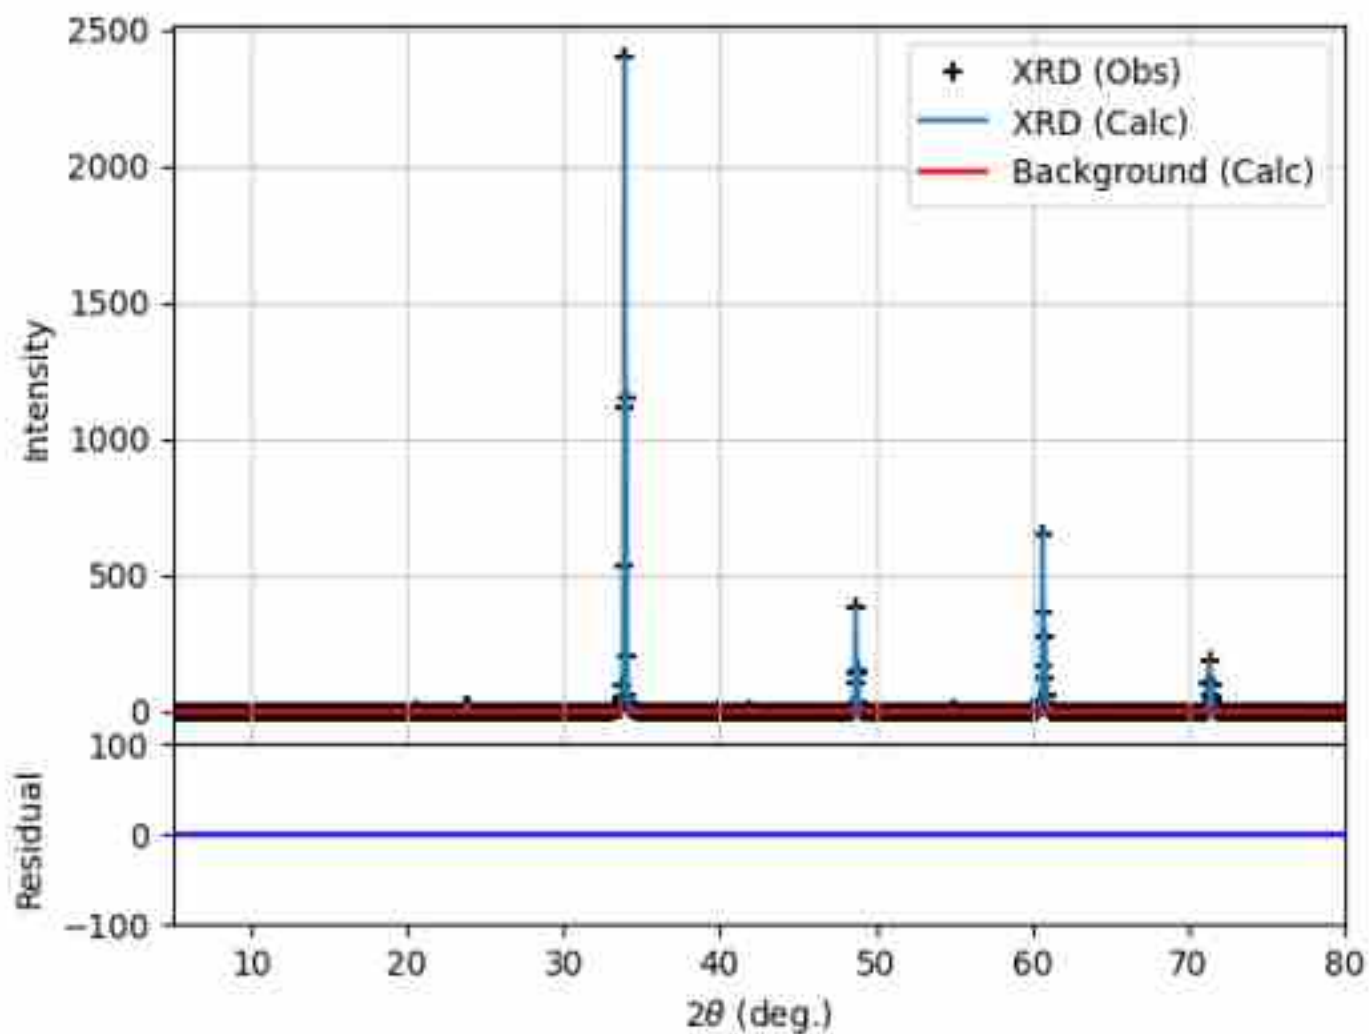

| RMSE before RR | Rwp     | RMSE after RR |
|----------------|---------|---------------|
| 0.001          | 0.00778 | 0.00036       |

# Dy<sub>2</sub>MgIn<sub>1</sub>

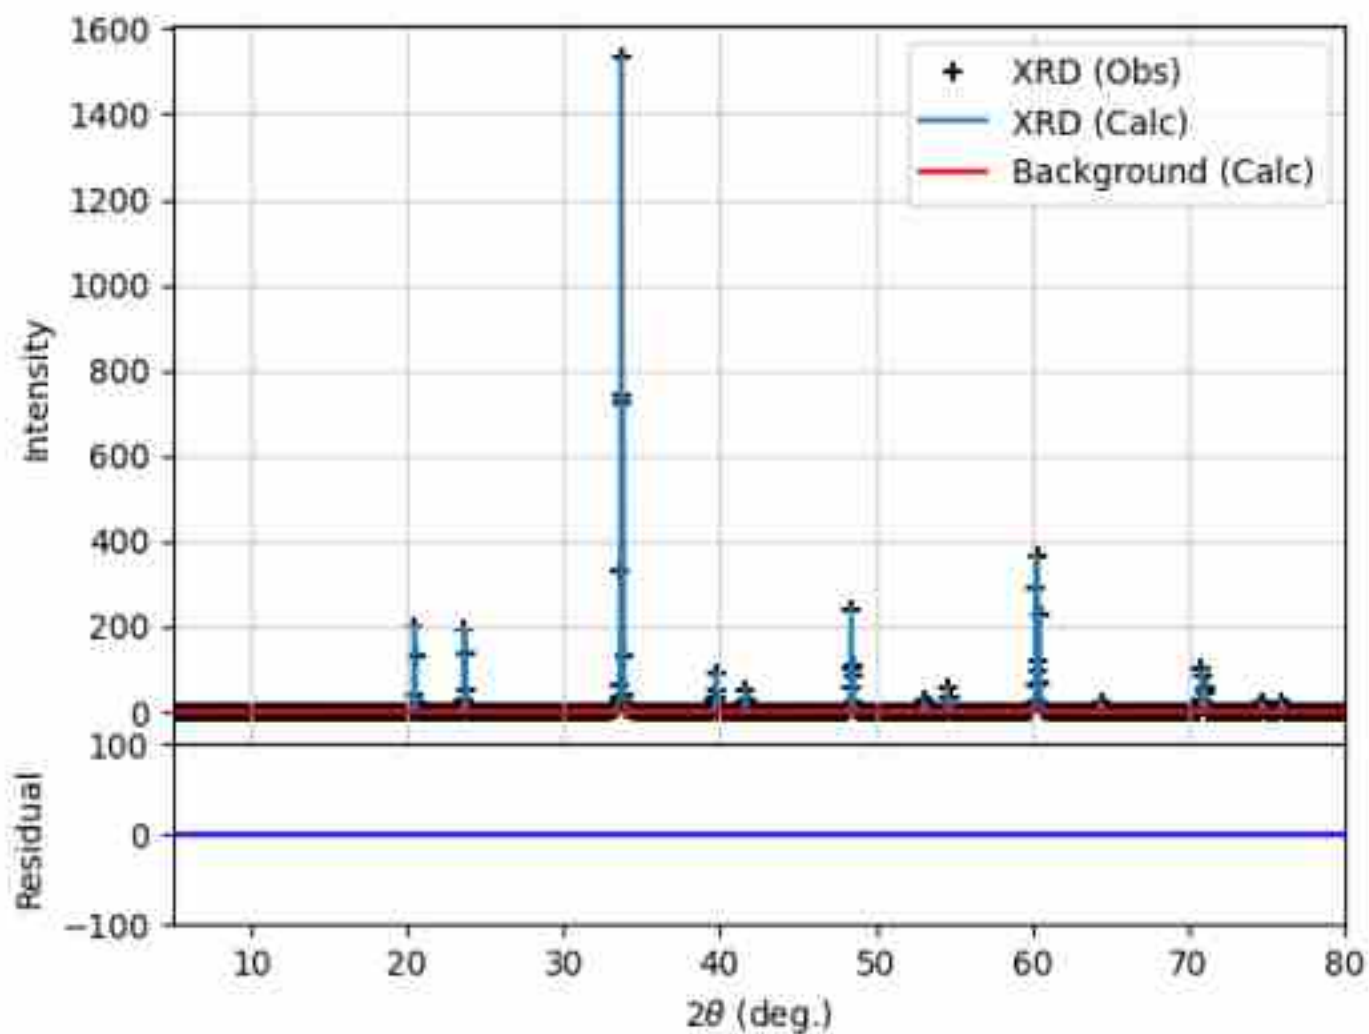

| RMSE before RR | Rwp | RMSE after RR |
|----------------|-----|---------------|
| 0.001          | 0.0 | 4e-05         |

# Dy3Al1

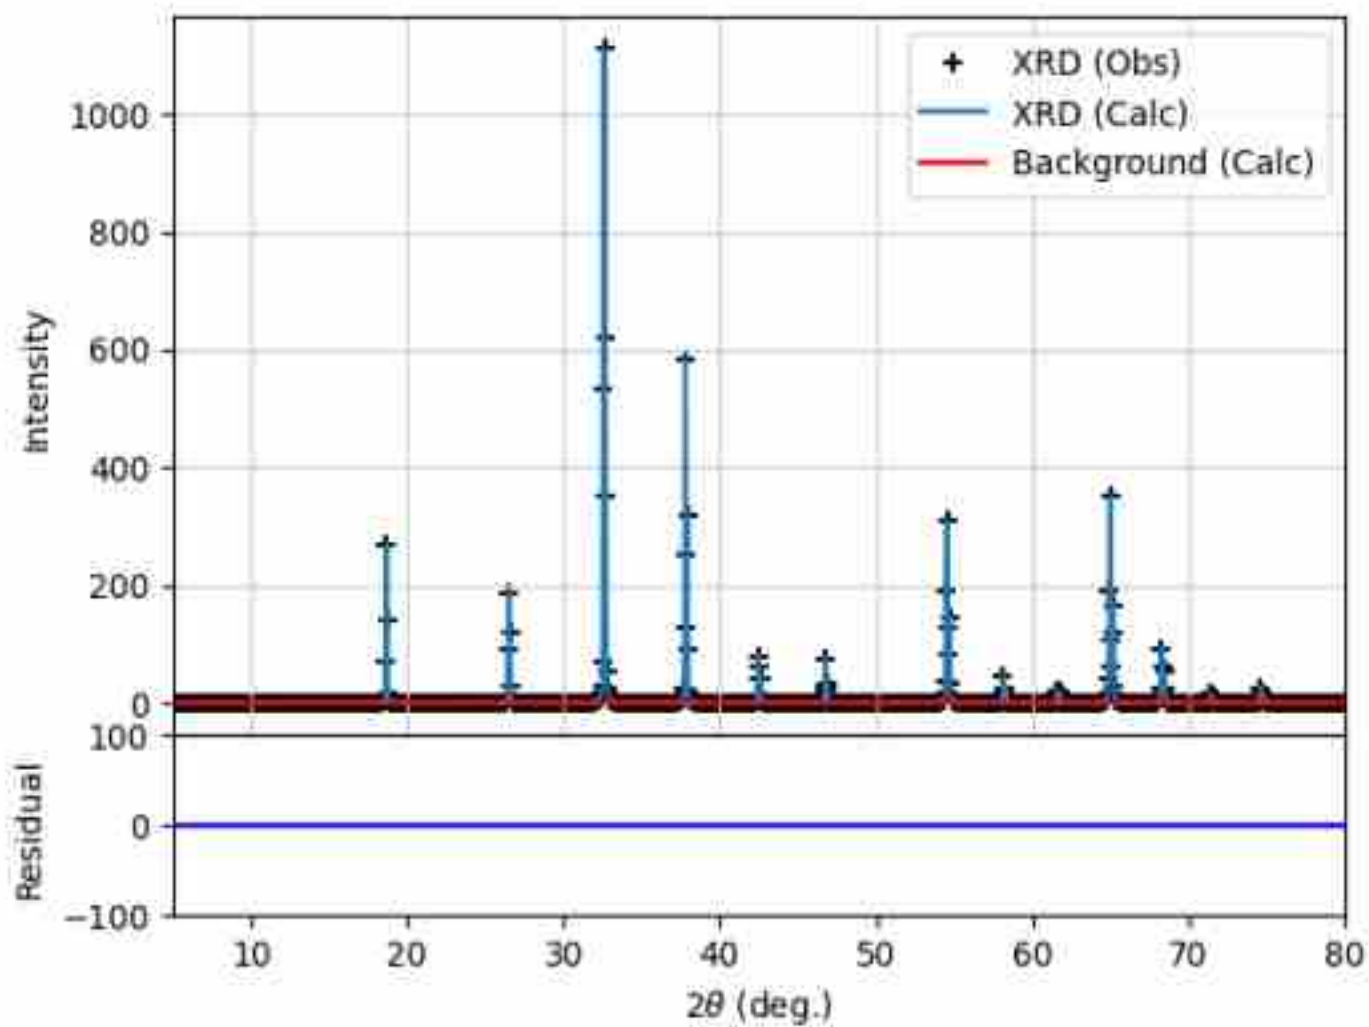

| RMSE before RR | Rwp     | RMSE after RR |
|----------------|---------|---------------|
| 0.001          | 0.00537 | 0.00092       |

# Dy<sub>3</sub>Er<sub>1</sub>

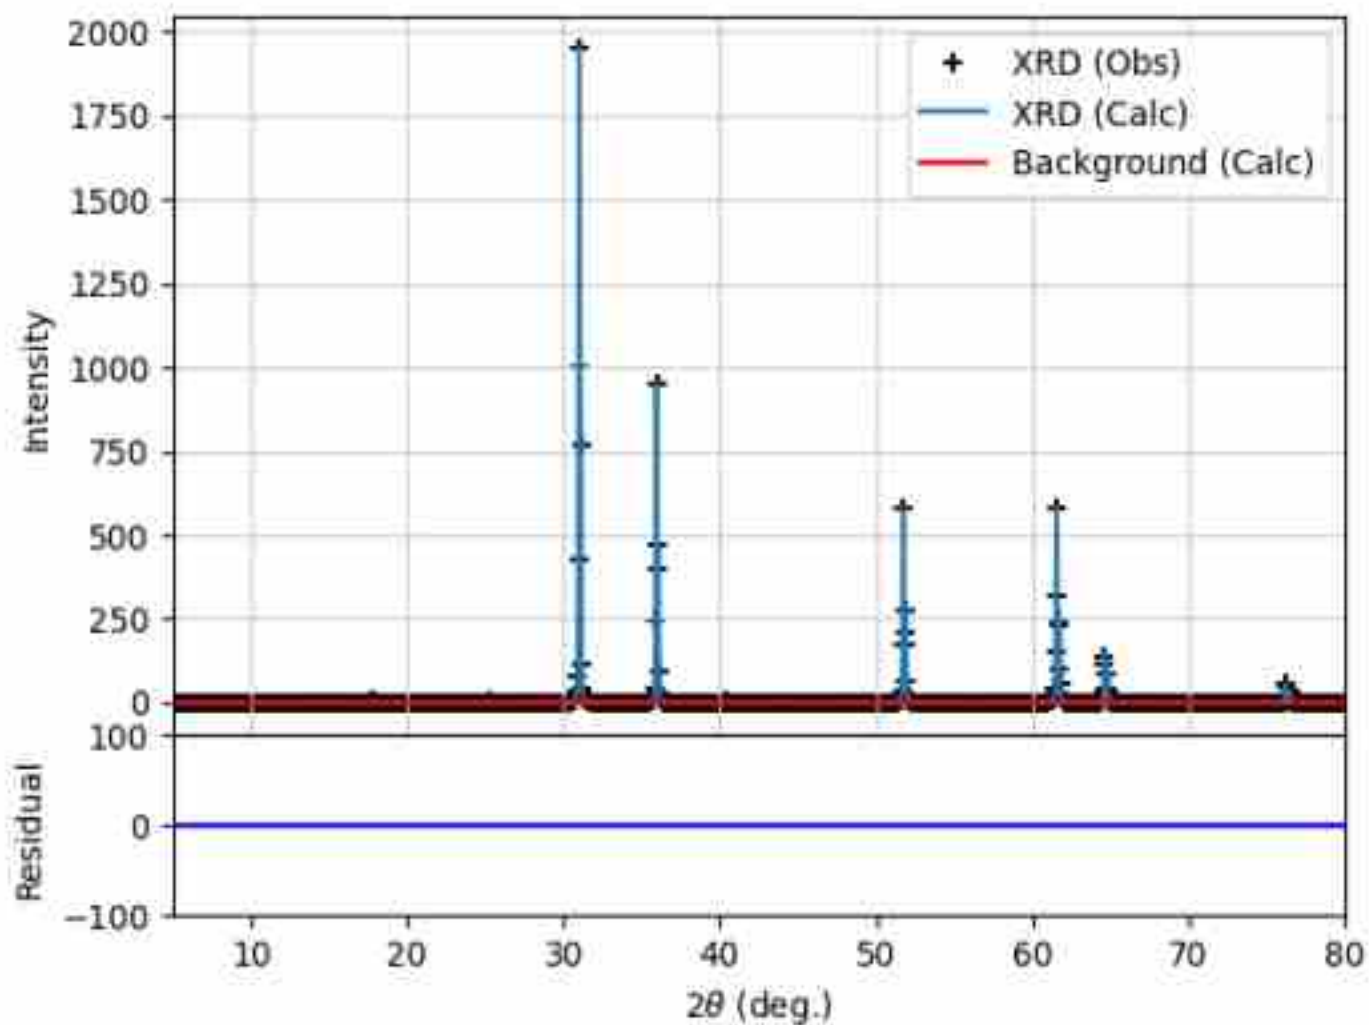

| RMSE before RR | Rwp   | RMSE after RR |
|----------------|-------|---------------|
| 0.001          | 0.035 | 0.00058       |

# Dy<sub>3</sub>In<sub>3</sub>Au<sub>3</sub>

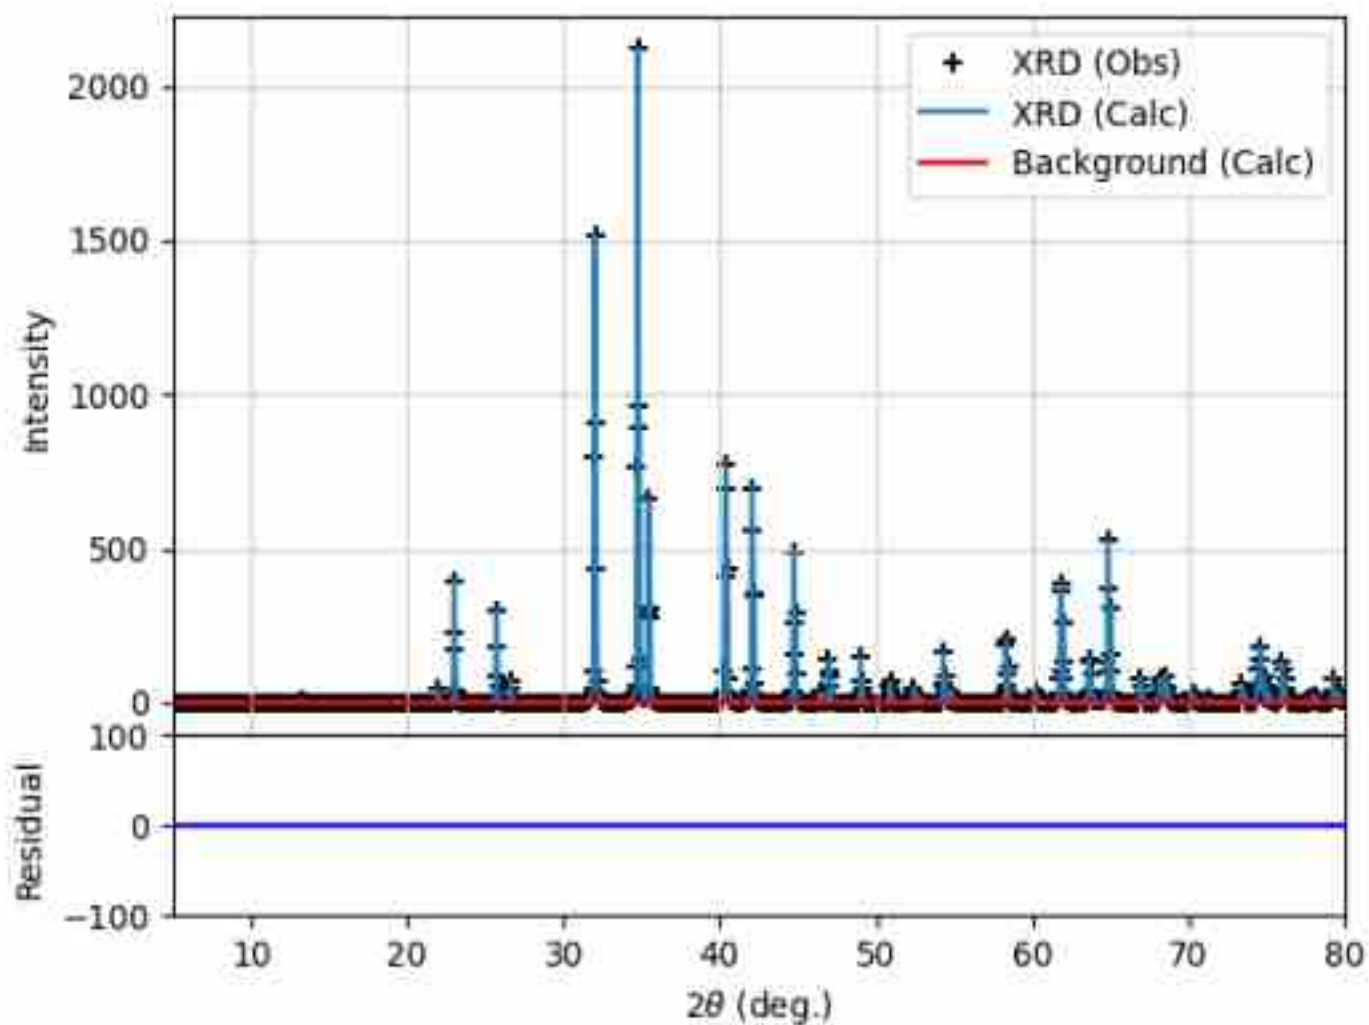

| RMSE before RR | Rwp     | RMSE after RR |
|----------------|---------|---------------|
| 0.01           | 0.00499 | 0.00081       |

# Dy3Tm1

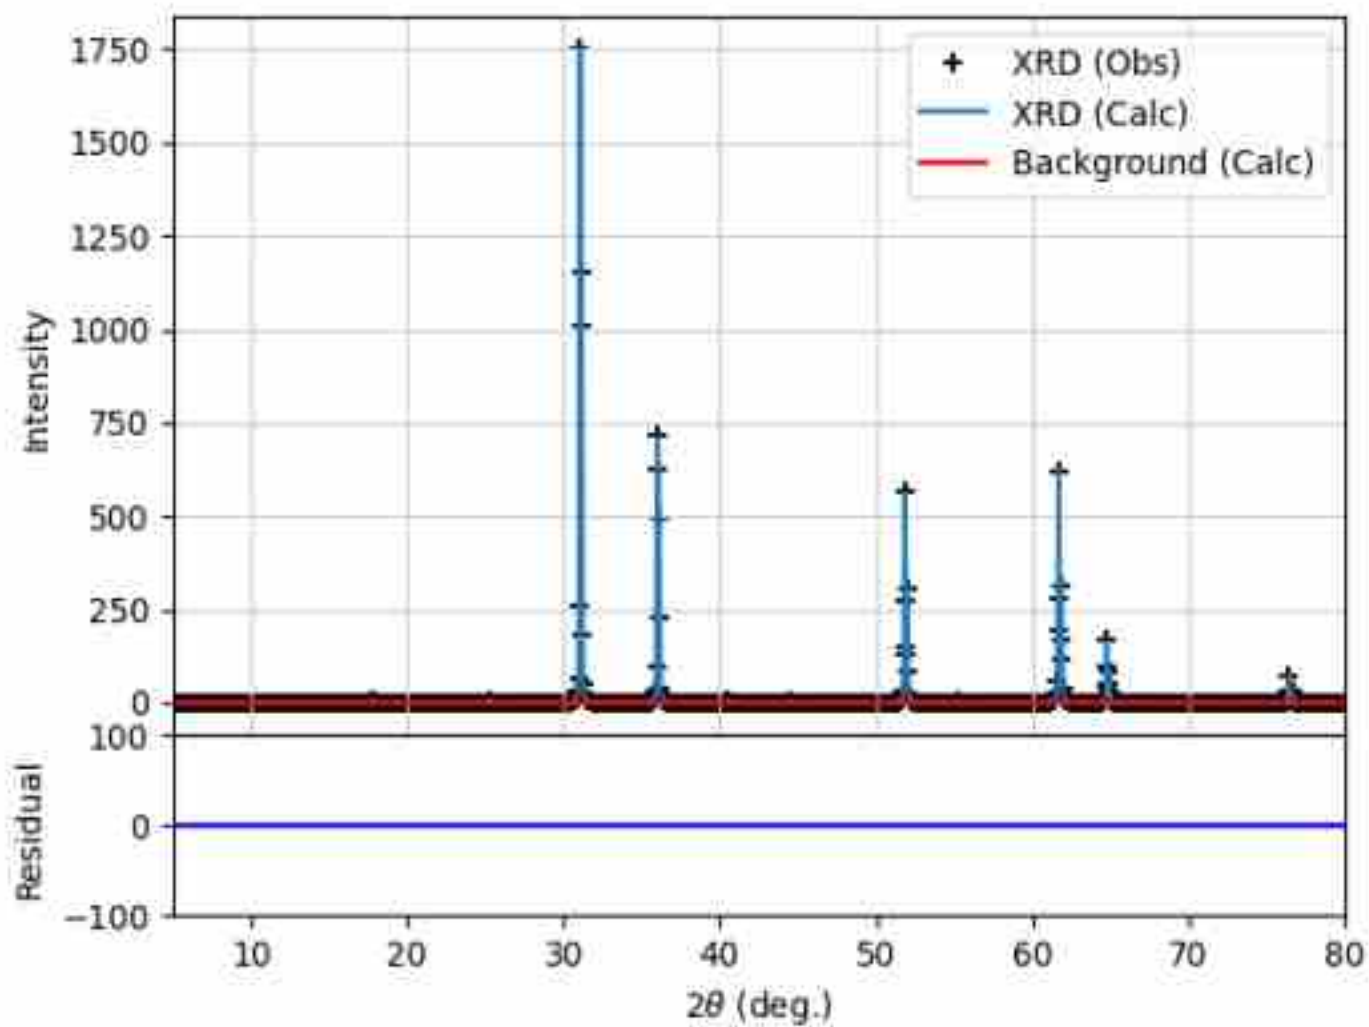

| RMSE before RR | Rwp     | RMSE after RR |
|----------------|---------|---------------|
| 0.001          | 0.02097 | 0.00077       |

# Dy<sub>4</sub>Mg<sub>2</sub>Ge<sub>4</sub>

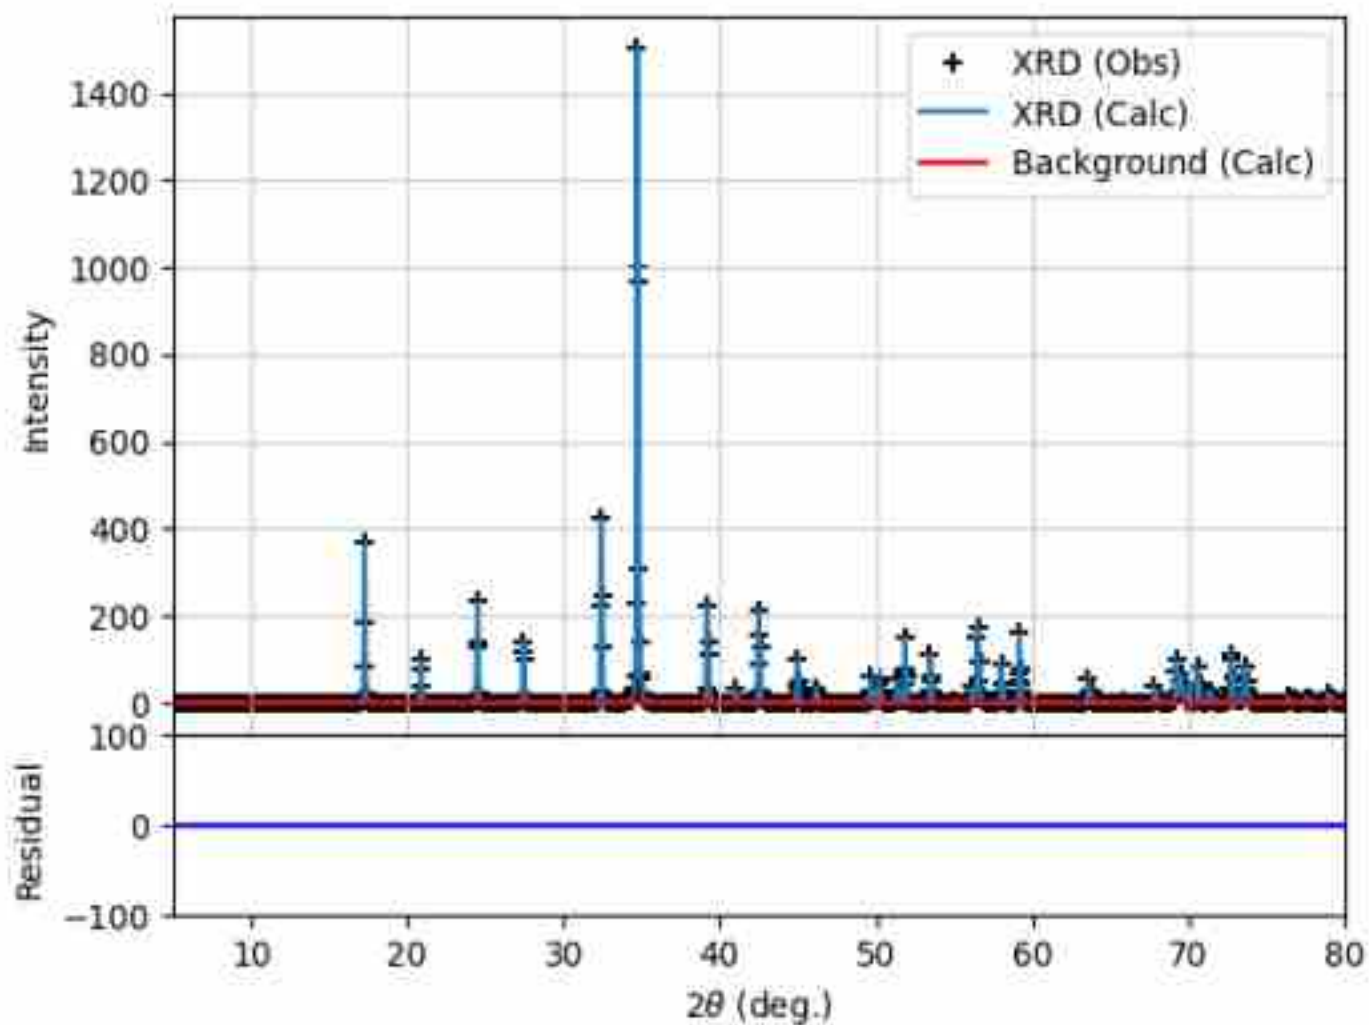

| RMSE before RR | Rwp     | RMSE after RR |
|----------------|---------|---------------|
| 0.01           | 0.00438 | 0.00041       |

# Er1Al2Ge2

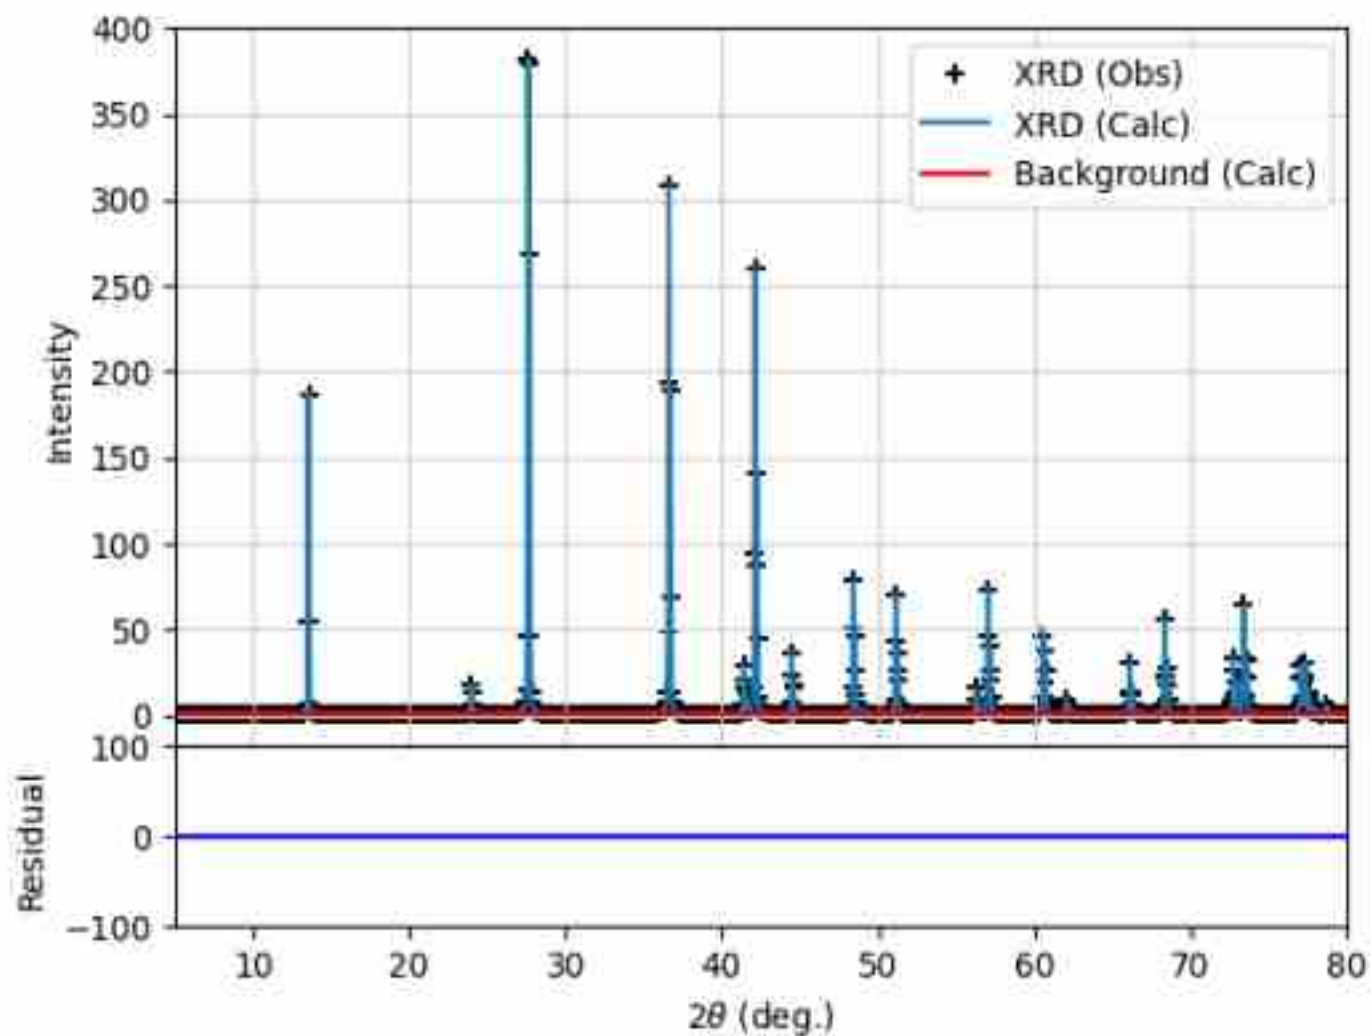

| RMSE before RR | Rwp     | RMSE after RR |
|----------------|---------|---------------|
| 0.01           | 0.00324 | 0.00071       |



# Er1Au1

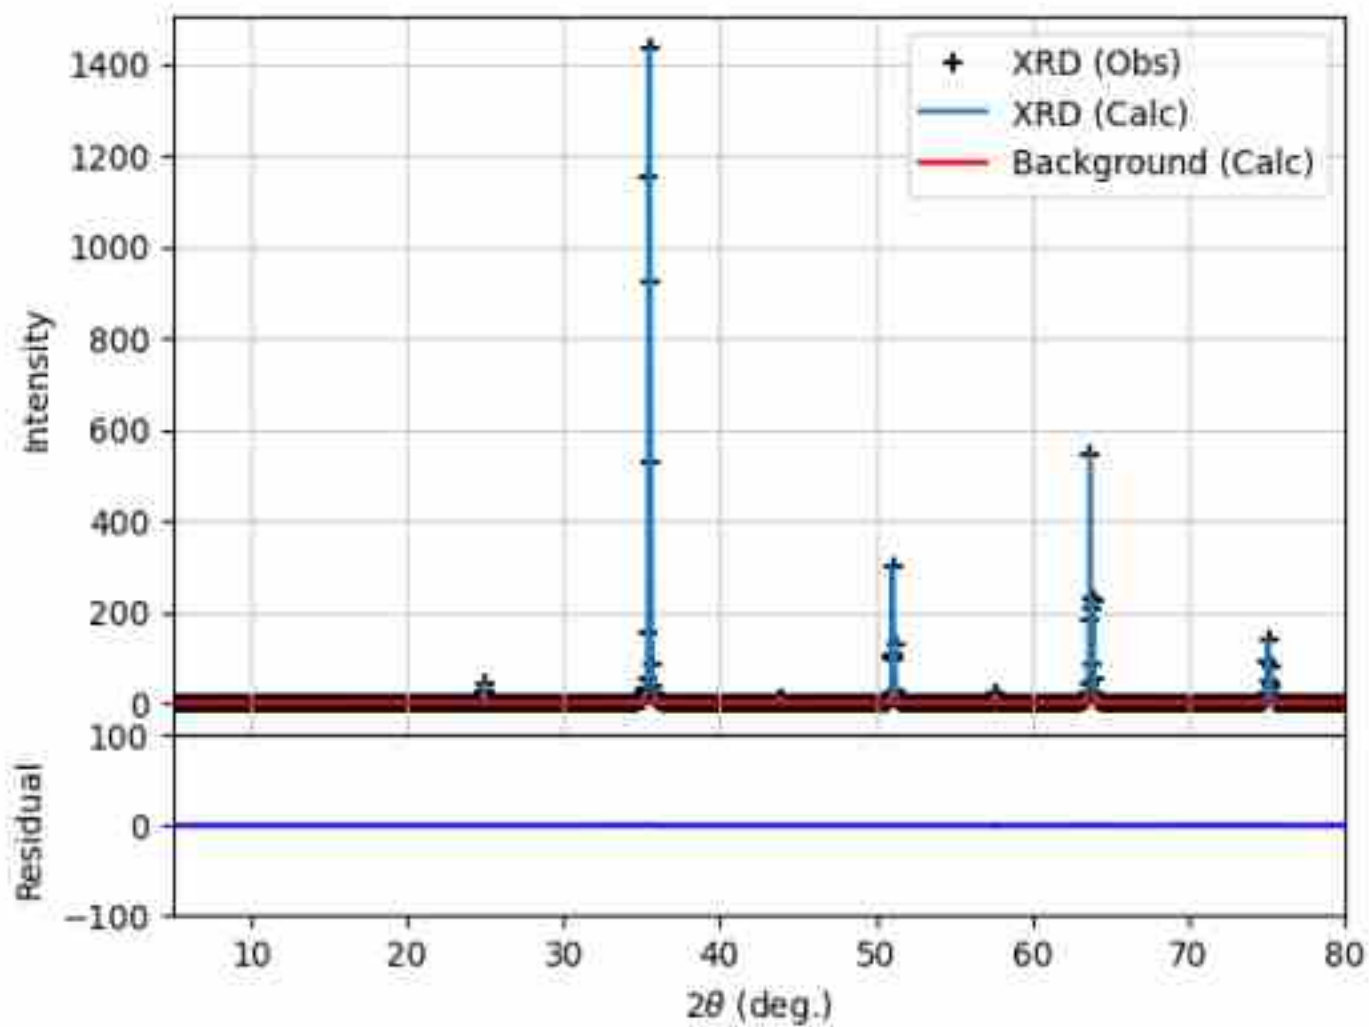

| RMSE before RR | Rwp     | RMSE after RR |
|----------------|---------|---------------|
| 0.001          | 0.57843 | 0.00078       |

# Er<sub>1</sub>Co<sub>6</sub>Ge<sub>6</sub>

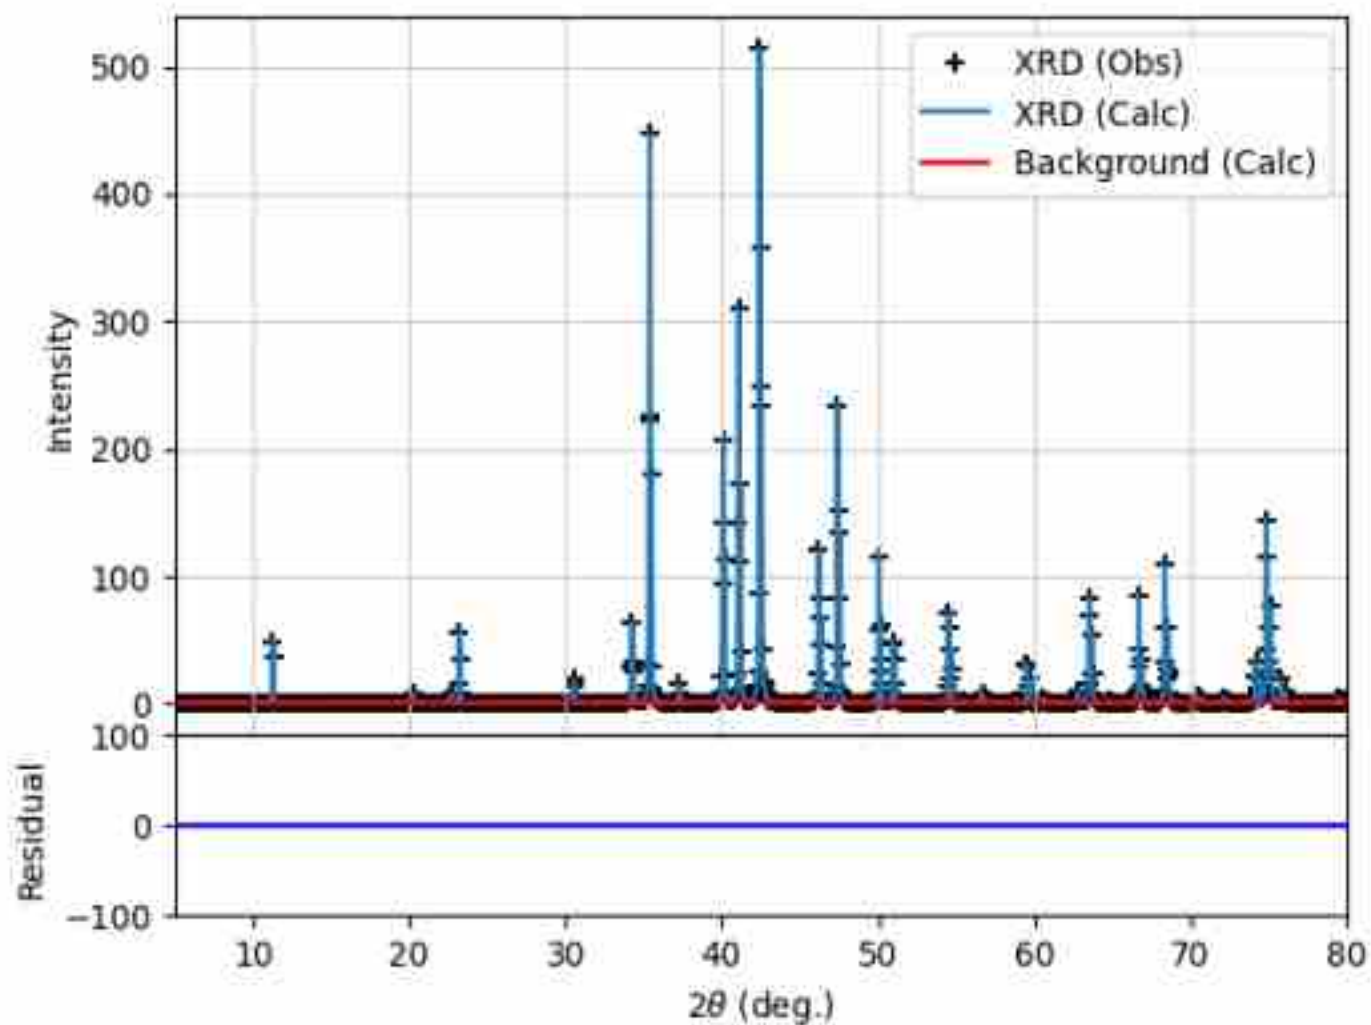

| RMSE before RR | Rwp     | RMSE after RR |
|----------------|---------|---------------|
| 0.01           | 0.00302 | 0.00097       |

# Er1Mg1Rh2

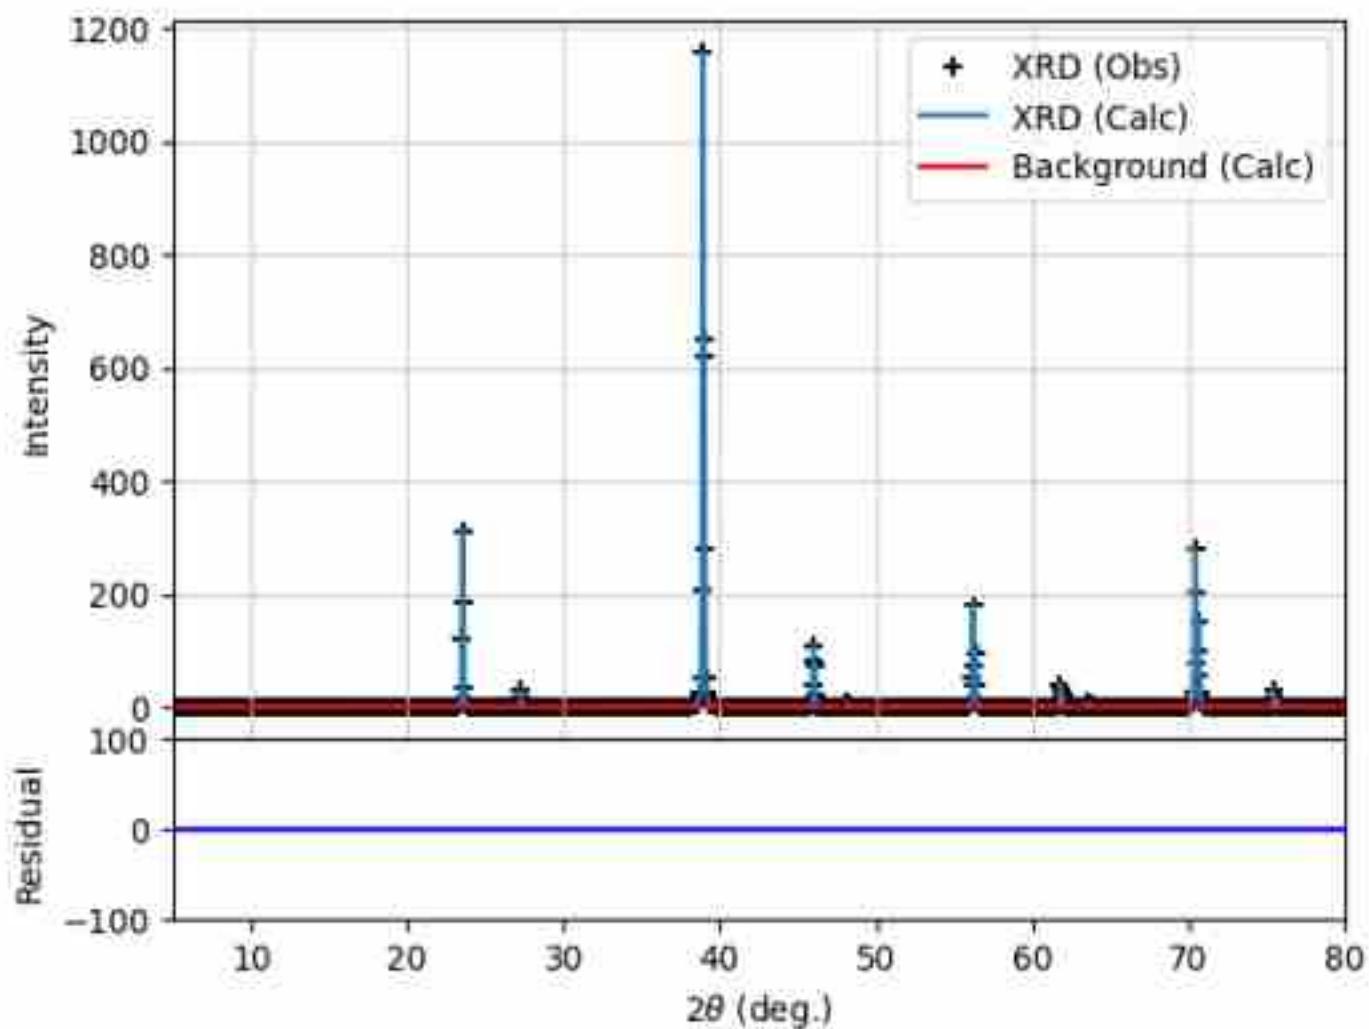

| RMSE before RR | Rwp     | RMSE after RR |
|----------------|---------|---------------|
| 0.001          | 0.01182 | 0.00214       |

# Er1Sc1Ru2

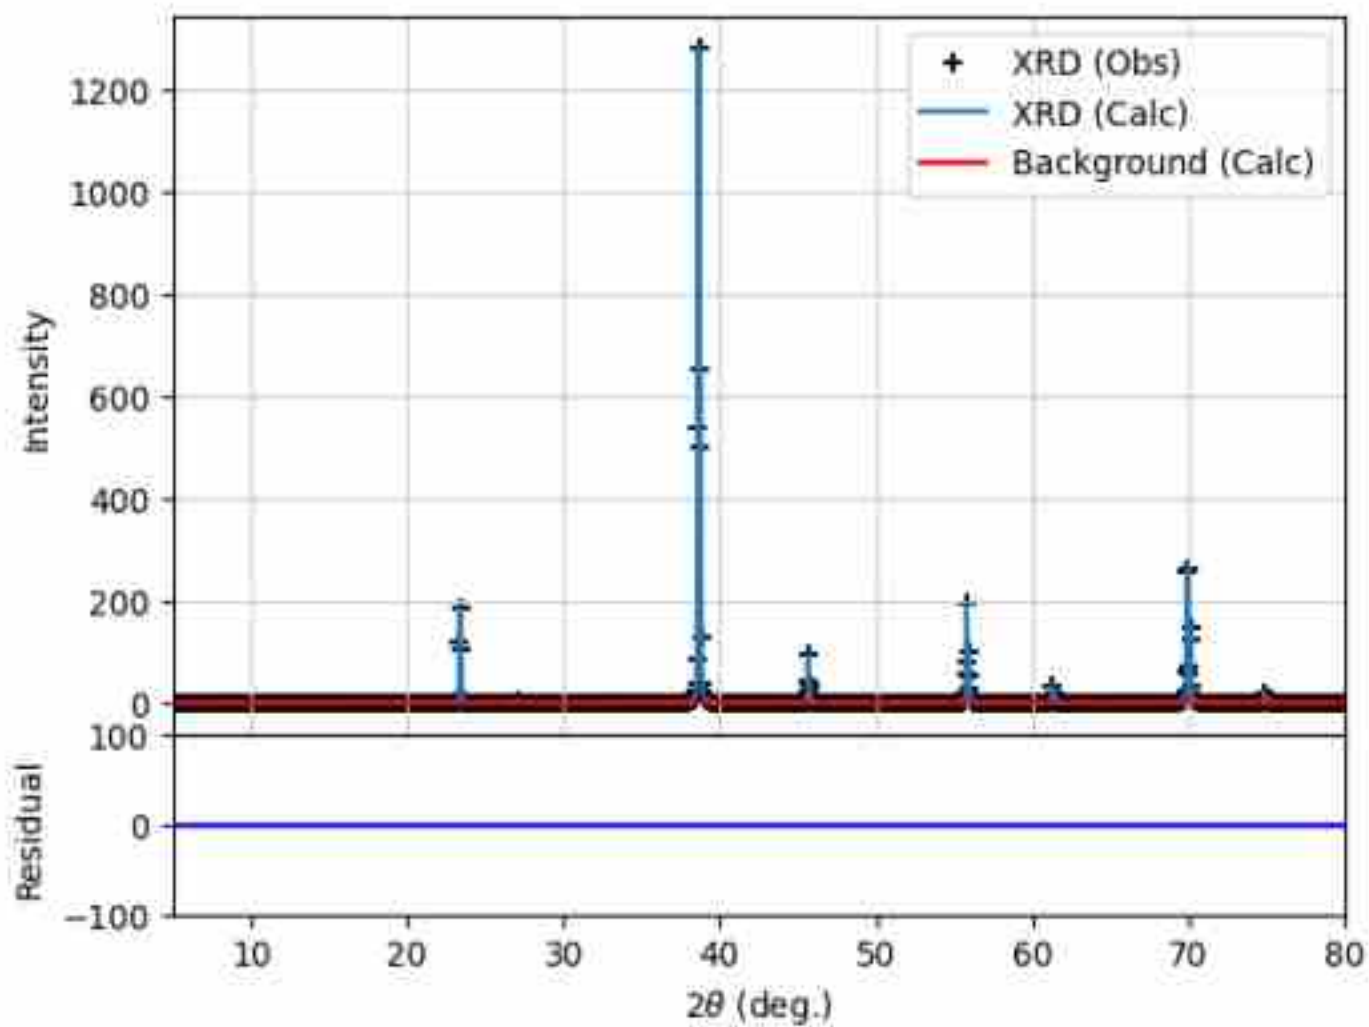

| RMSE before RR | Rwp     | RMSE after RR |
|----------------|---------|---------------|
| 0.001          | 0.00245 | 0.00032       |

# Er1Ta1Ru2

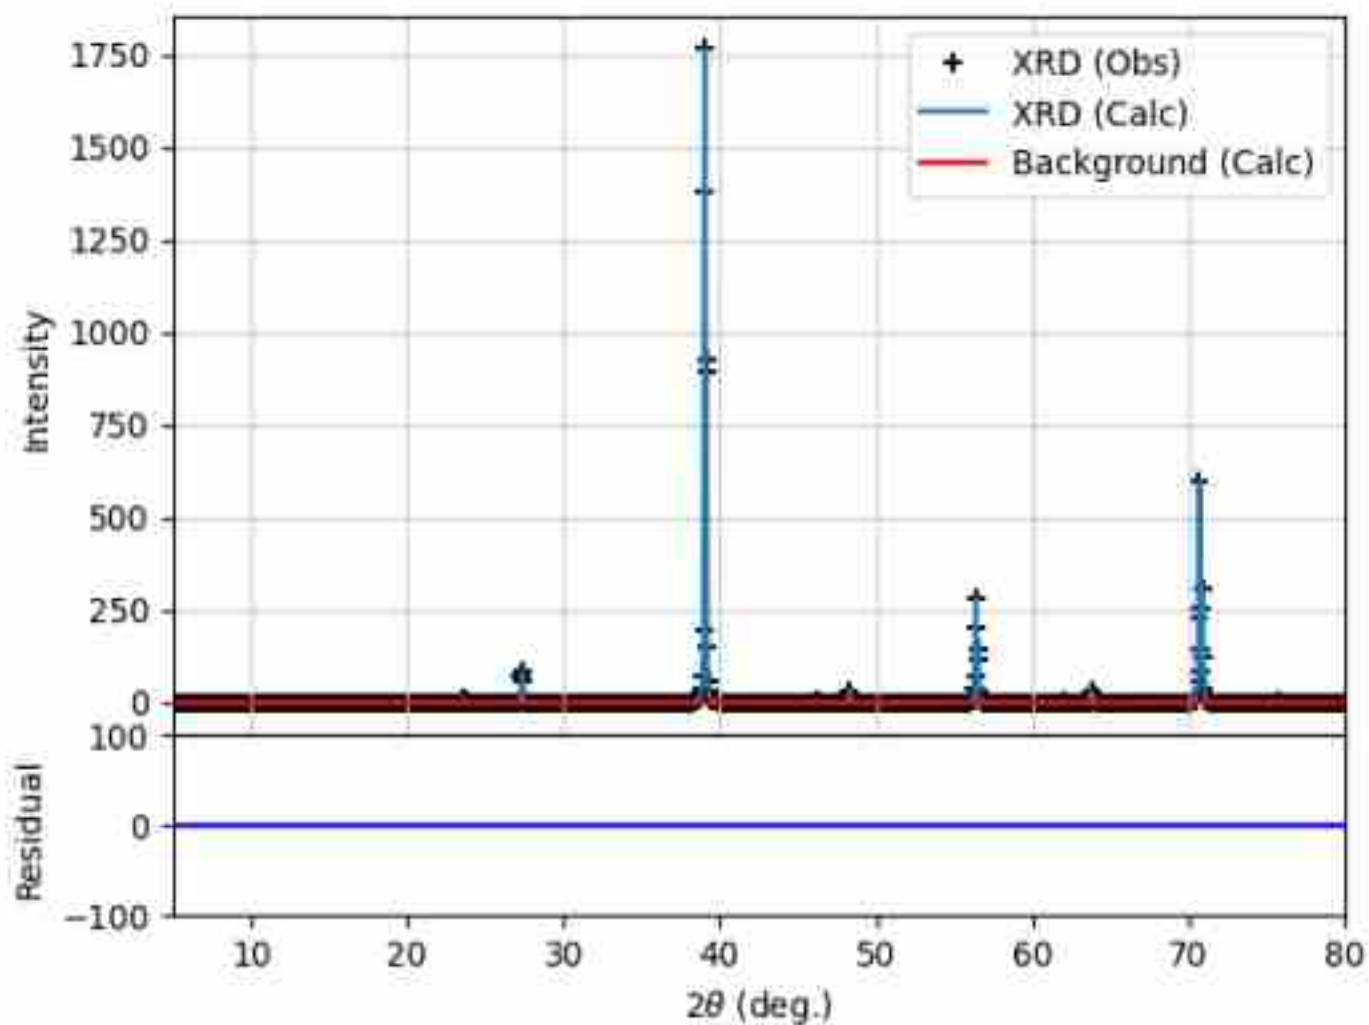

| RMSE before RR | Rwp    | RMSE after RR |
|----------------|--------|---------------|
| 0.001          | 0.0036 | 0.00059       |

# Er1Th1

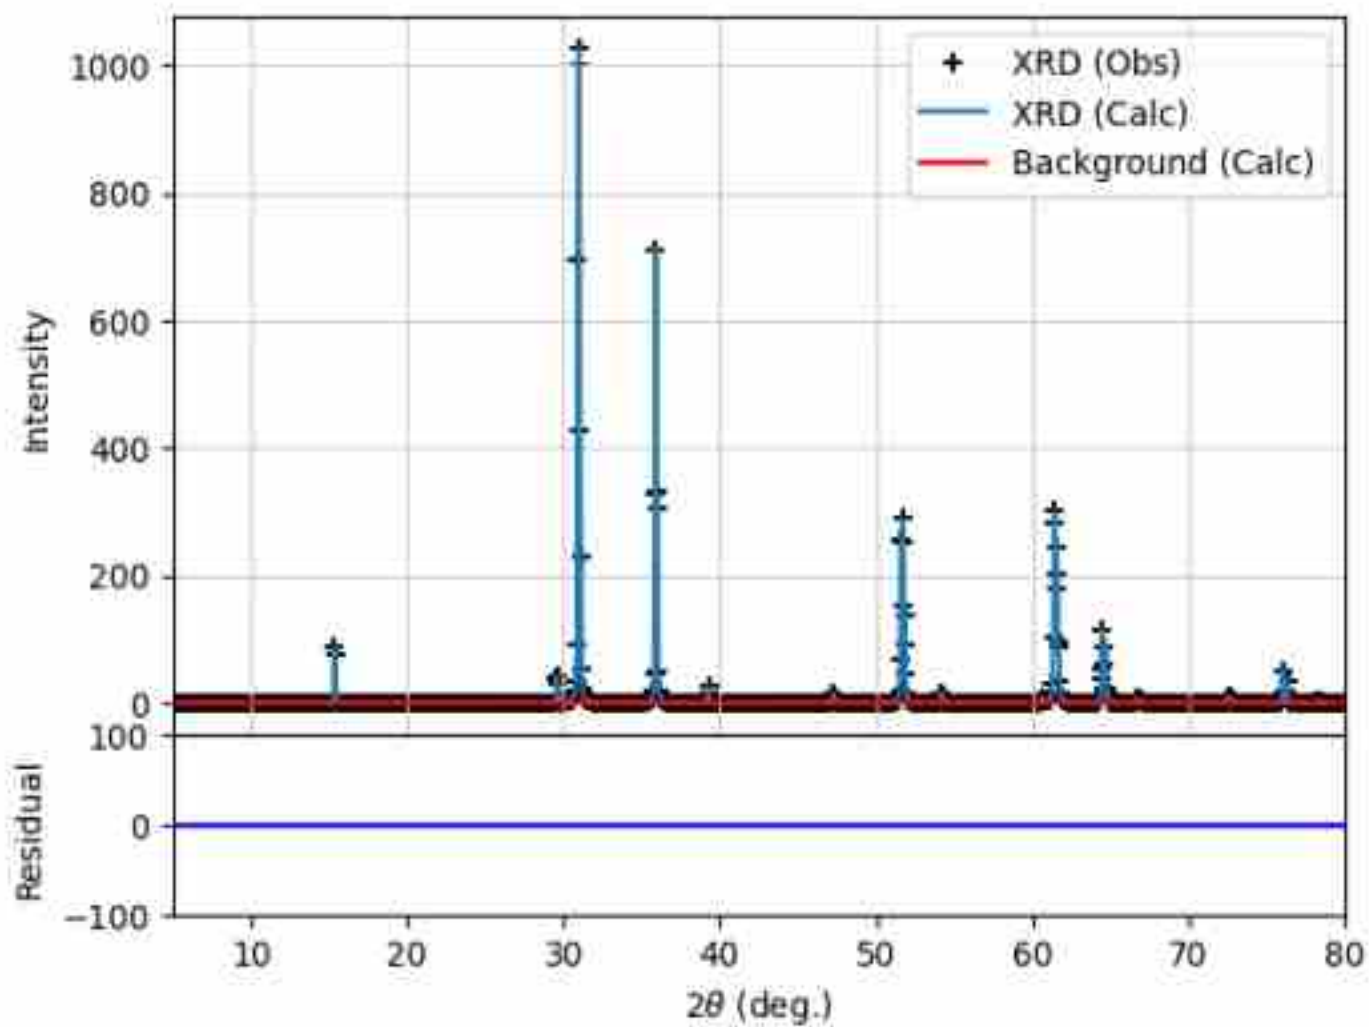

| RMSE before RR | Rwp     | RMSE after RR |
|----------------|---------|---------------|
| 0.001          | 0.02328 | 0.00119       |

# Er1Tm1Cd2

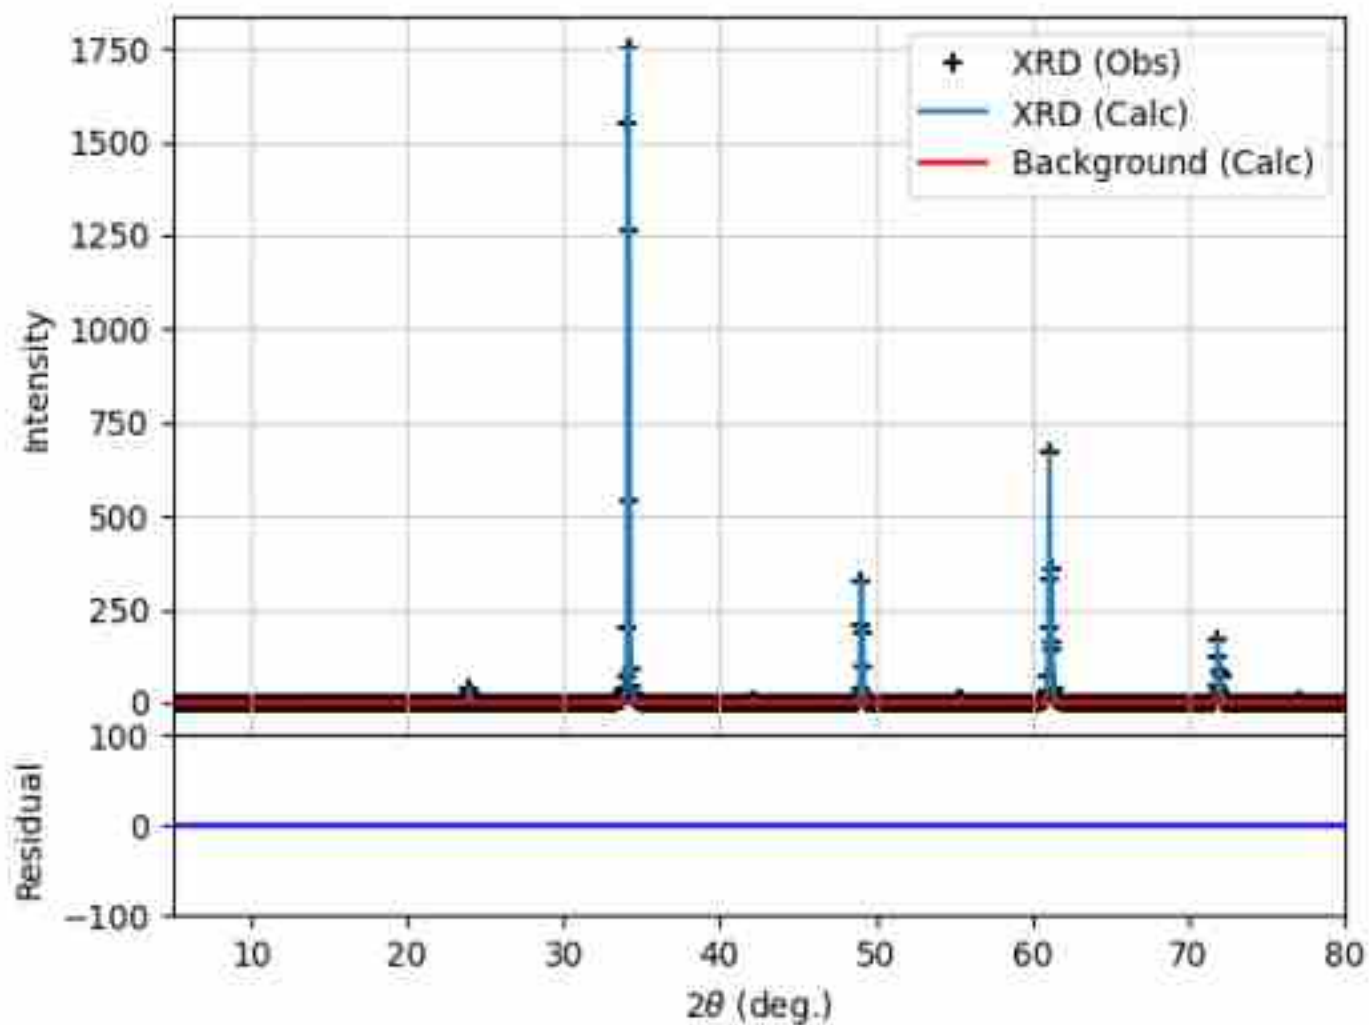

| RMSE before RR | Rwp | RMSE after RR |
|----------------|-----|---------------|
| 0.001          | 0.0 | 1e-05         |

# Er<sub>2</sub>Al<sub>2</sub>Si<sub>2</sub>

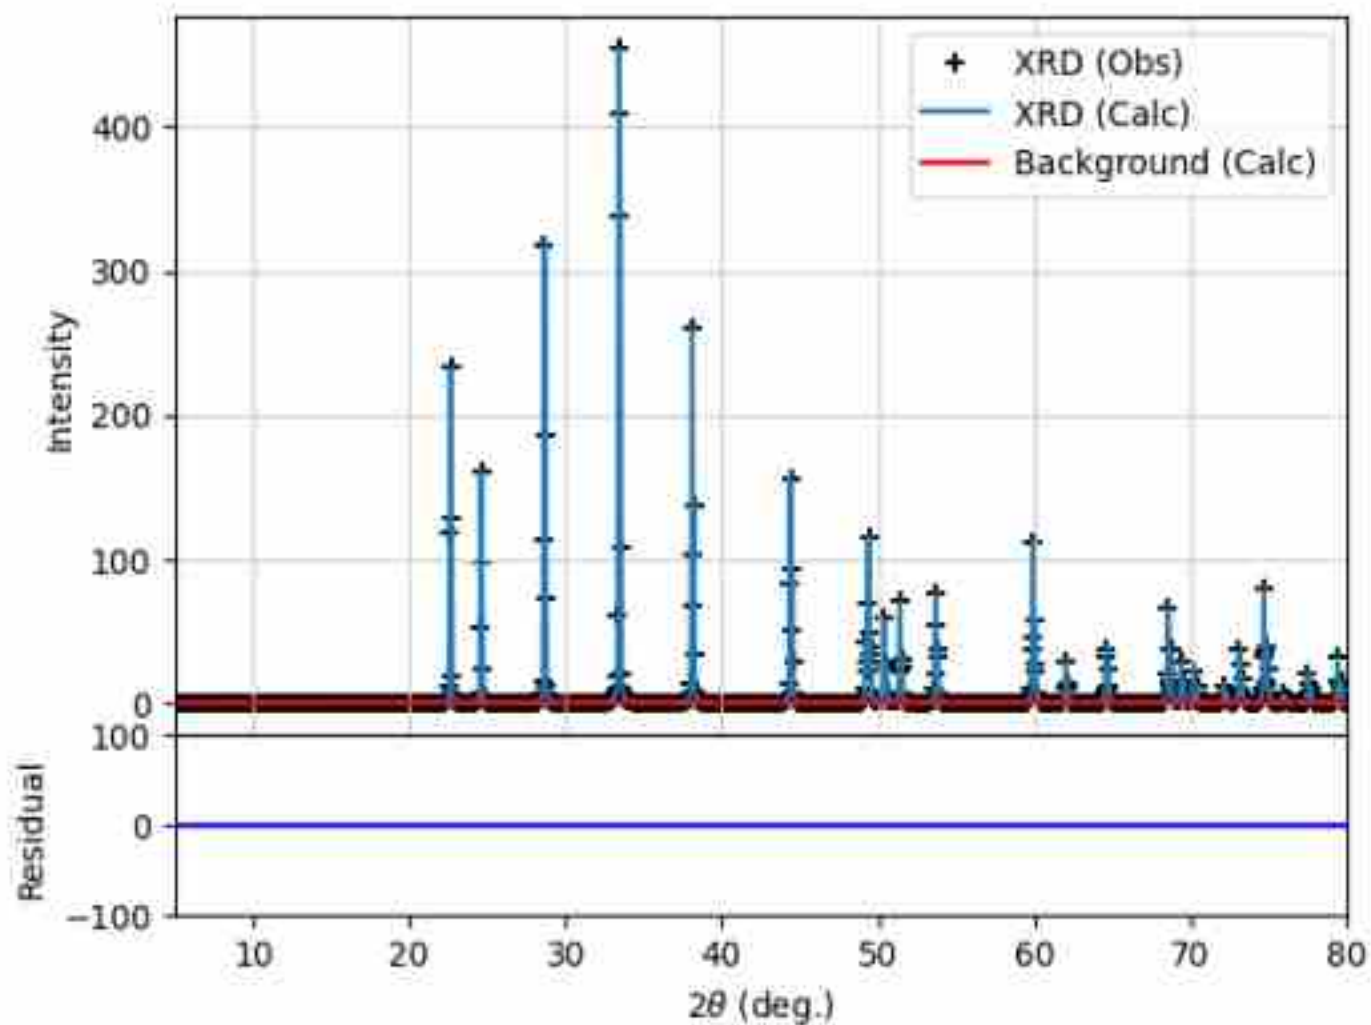

| RMSE before RR | Rwp     | RMSE after RR |
|----------------|---------|---------------|
| 0.01           | 0.00259 | 0.00063       |



# Er<sub>2</sub>Cl<sub>2</sub>O<sub>2</sub>

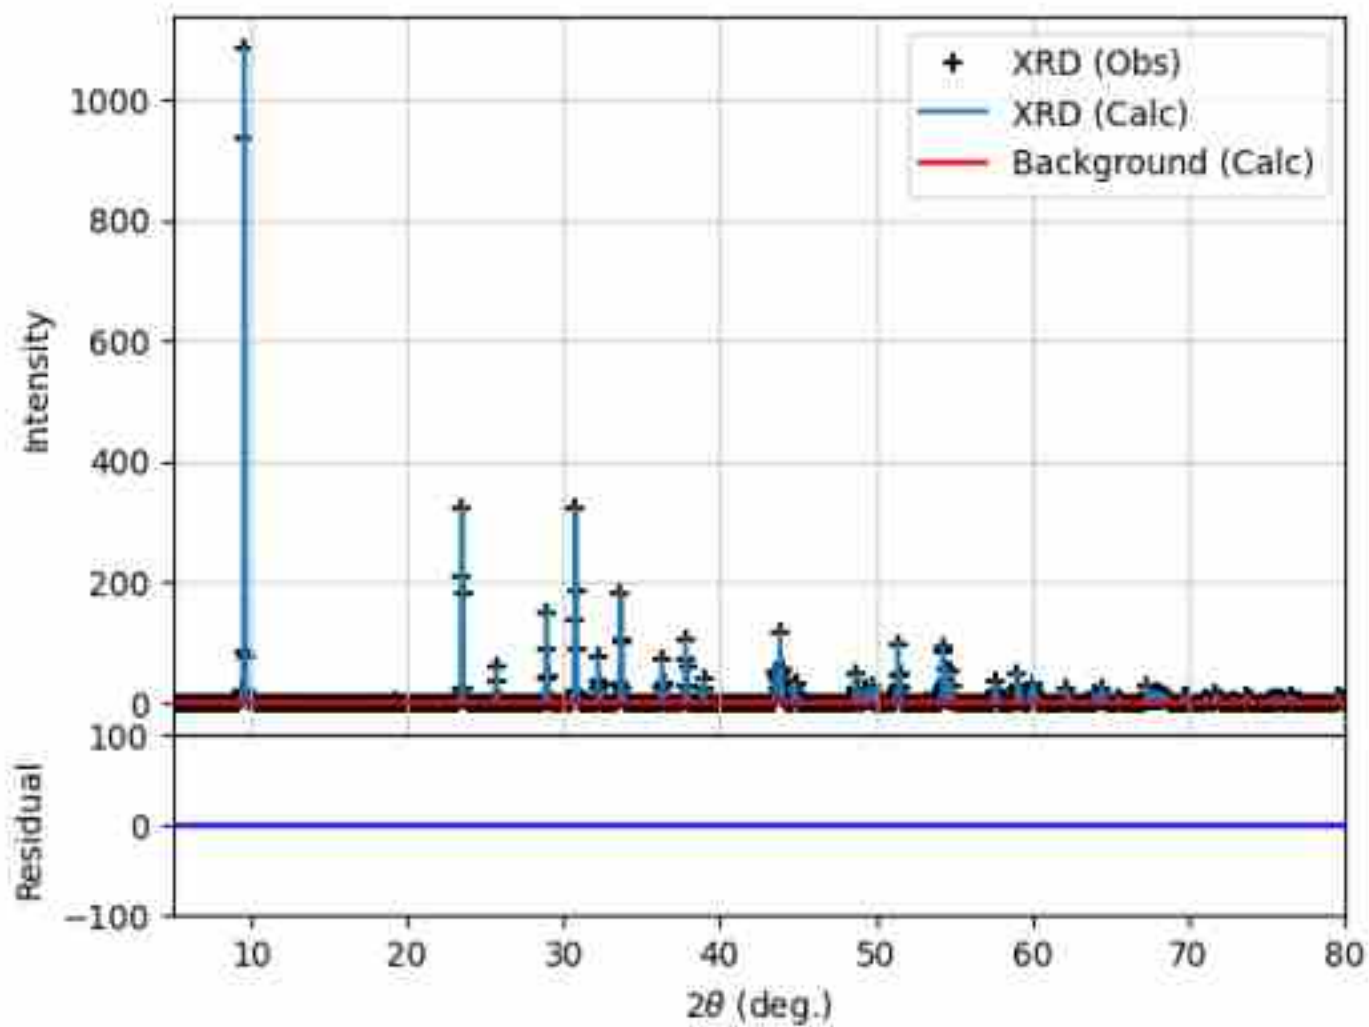

| RMSE before RR | Rwp     | RMSE after RR |
|----------------|---------|---------------|
| 0.01           | 0.00422 | 0.00132       |

# Er<sub>2</sub>CoIr<sub>1</sub>

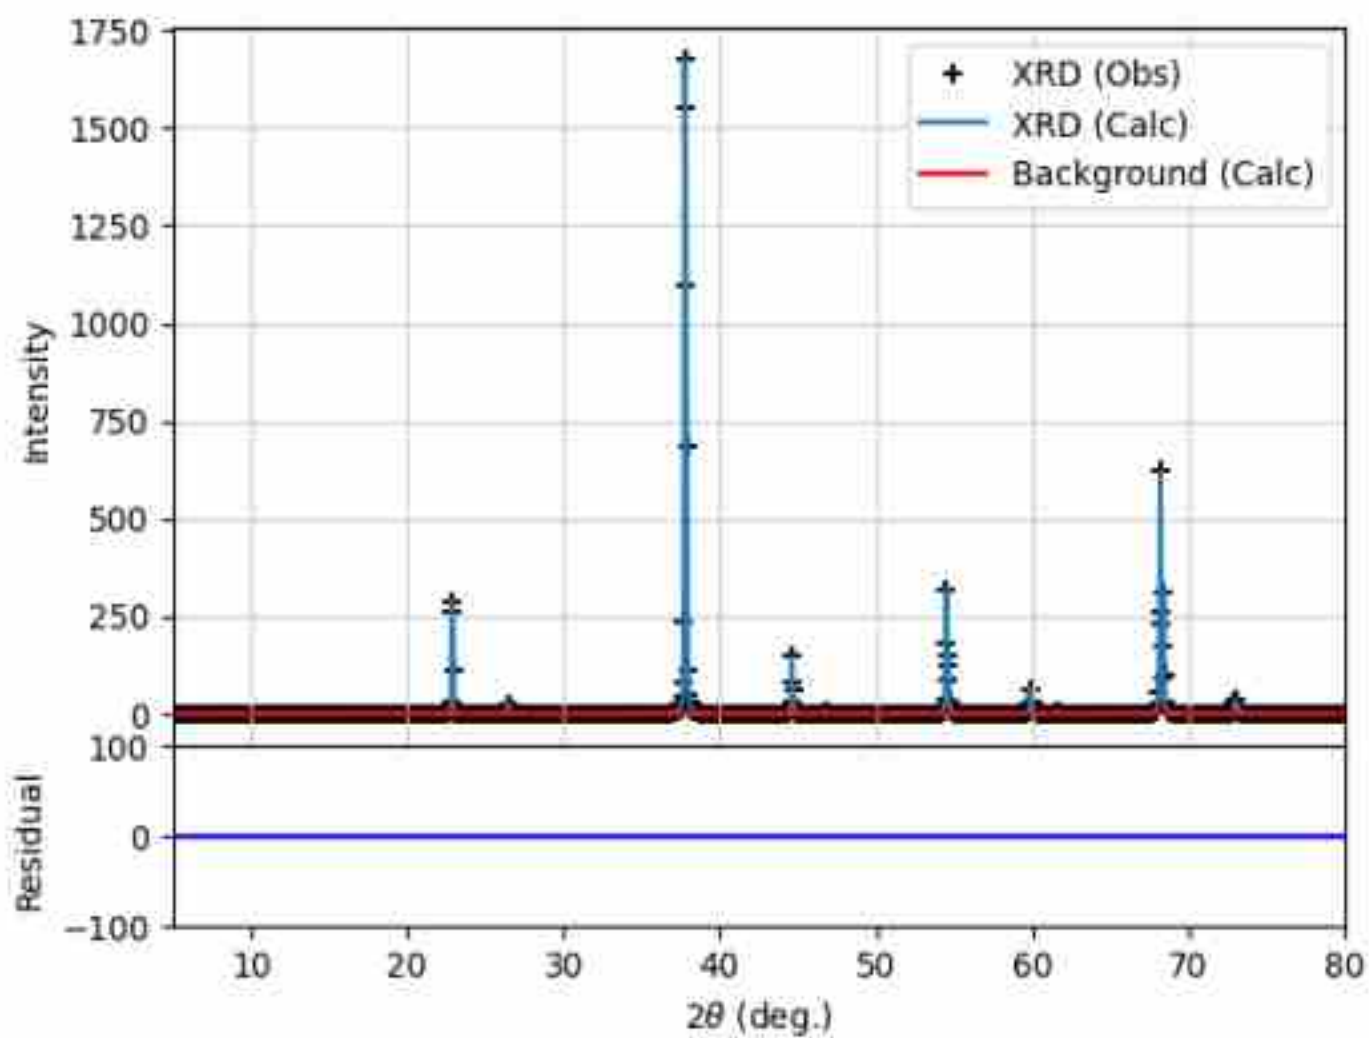

| RMSE before RR | Rwp     | RMSE after RR |
|----------------|---------|---------------|
| 0.001          | 0.00449 | 0.00047       |

Er<sub>2</sub>Cu<sub>1</sub>Ru<sub>1</sub>

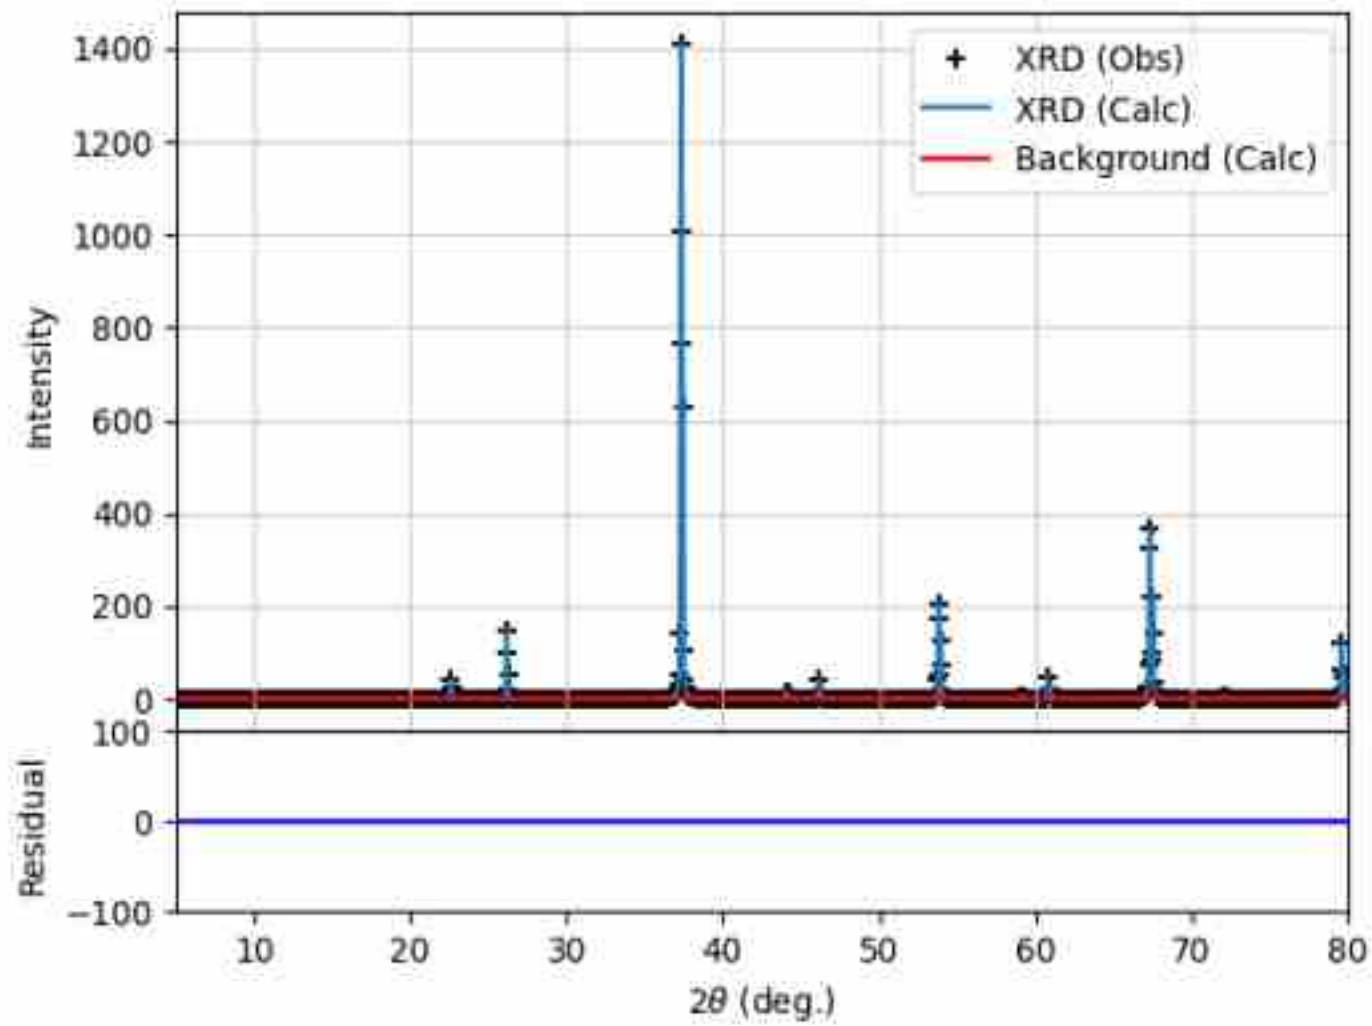

| RMSE before RR | Rwp     | RMSE after RR |
|----------------|---------|---------------|
| 0.001          | 0.00402 | 0.00197       |

# Er<sub>2</sub>IrPd<sub>1</sub>

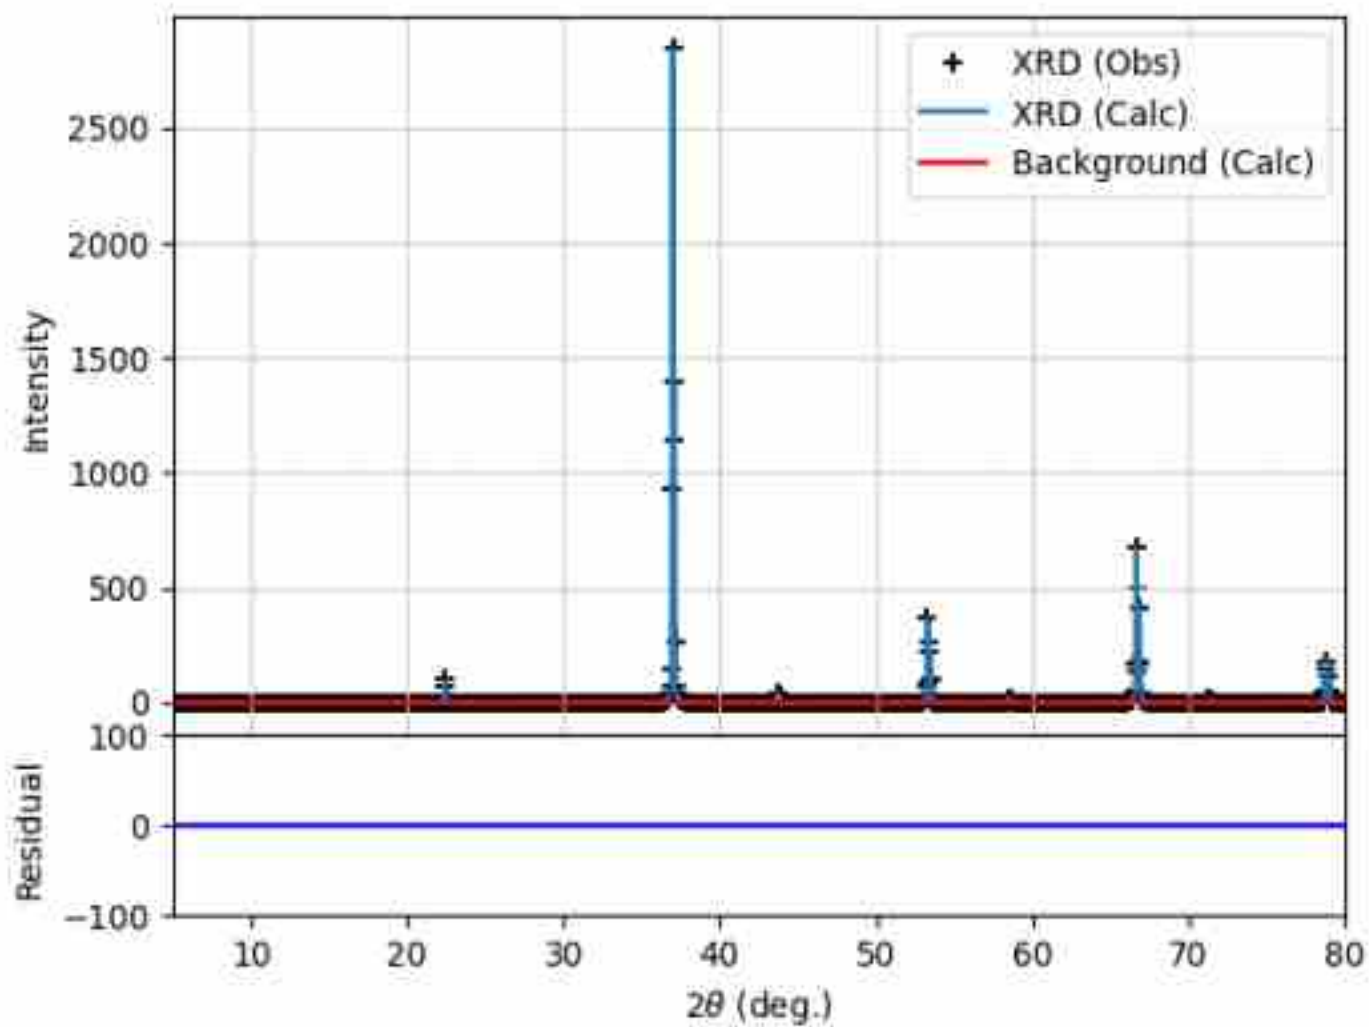

| RMSE before RR | Rwp     | RMSE after RR |
|----------------|---------|---------------|
| 0.001          | 0.08368 | 0.0007        |

# Er<sub>2</sub>Ni<sub>1</sub>O<sub>s</sub>1

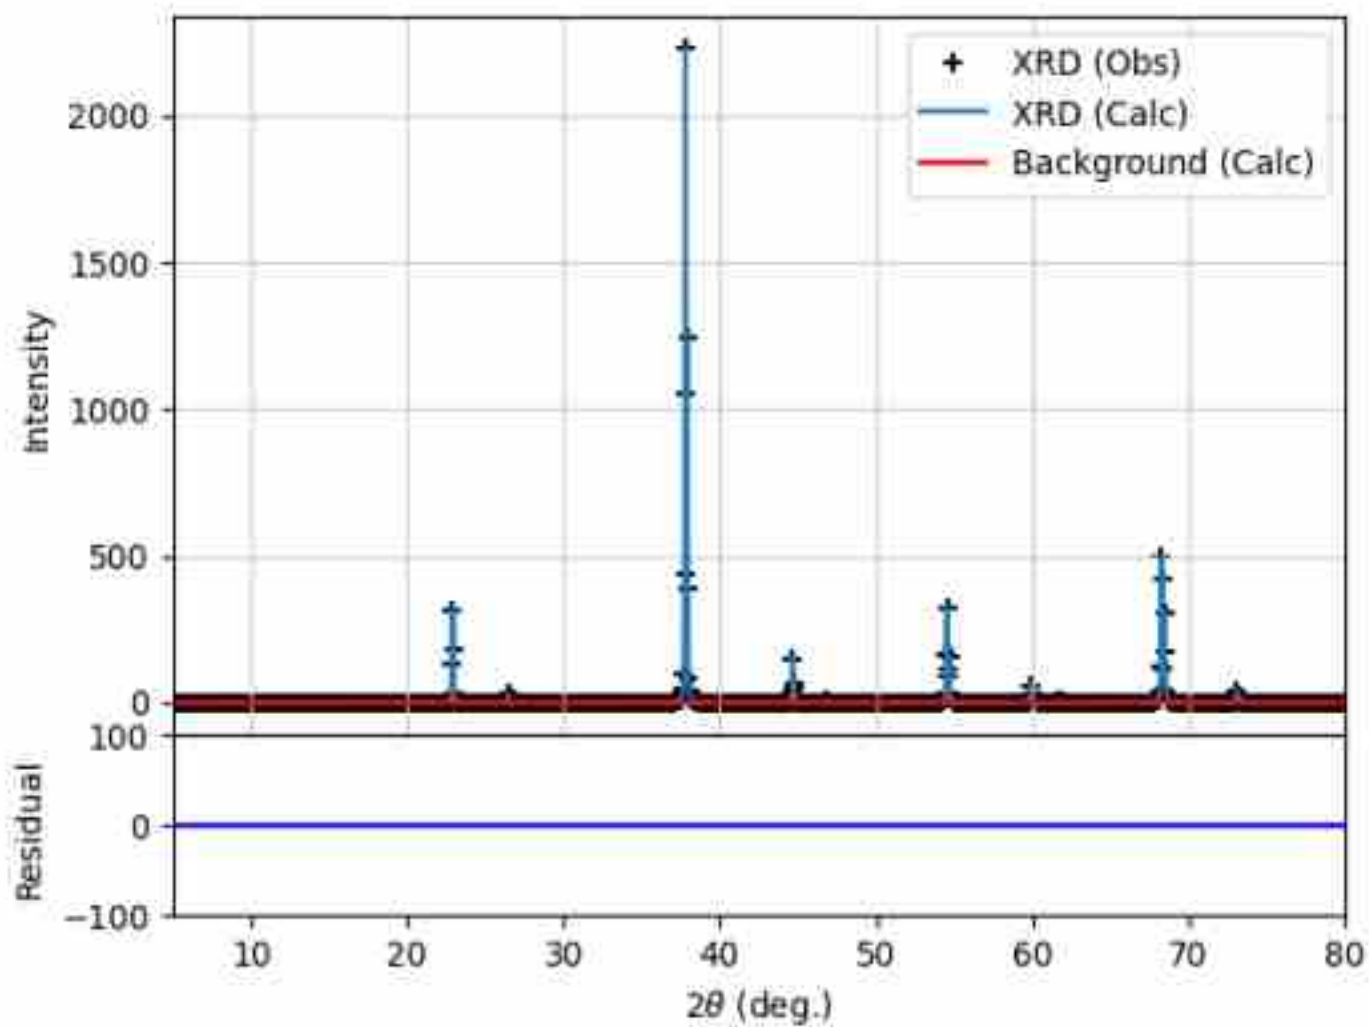

| RMSE before RR | Rwp     | RMSE after RR |
|----------------|---------|---------------|
| 0.001          | 0.00244 | 0.00065       |

# Er<sub>2</sub>S<sub>4</sub>

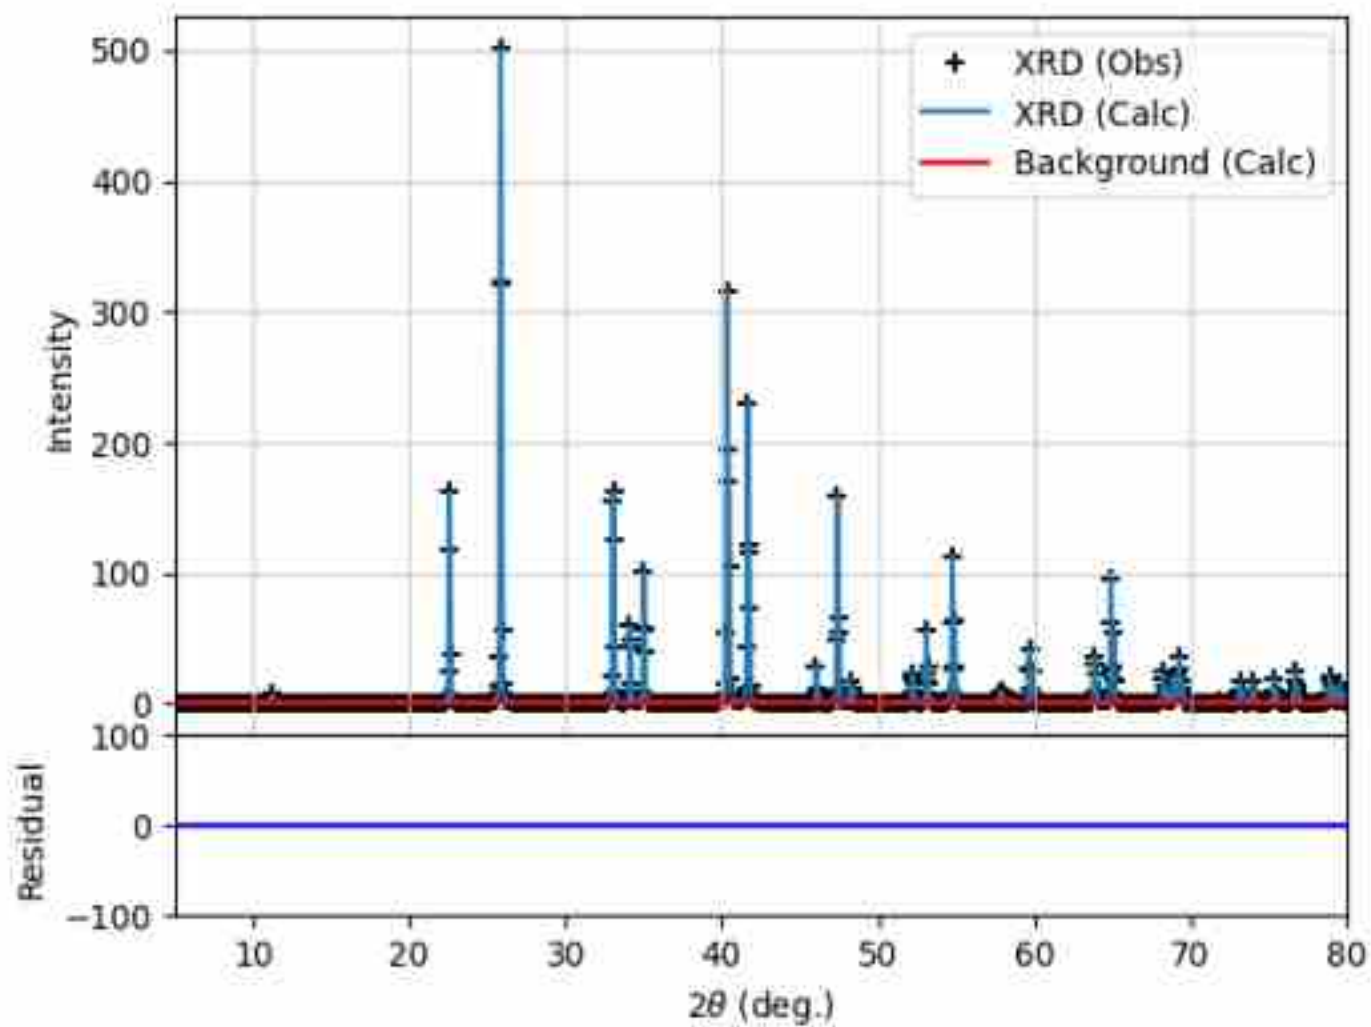

| RMSE before RR | Rwp     | RMSE after RR |
|----------------|---------|---------------|
| 0.01           | 0.00374 | 0.00087       |

# Er4Pt4

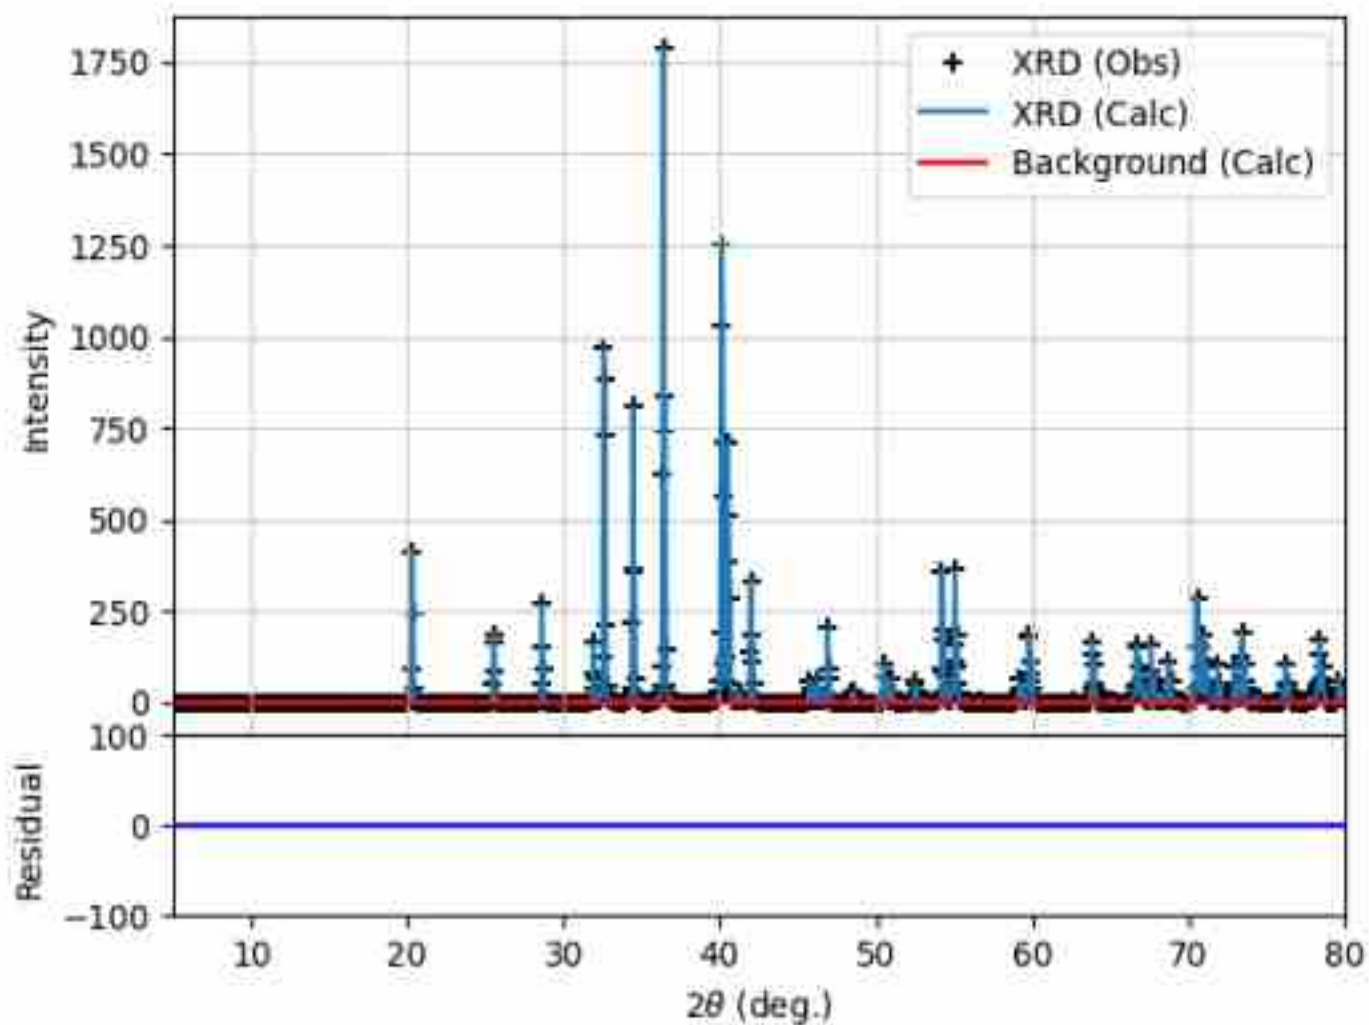

| RMSE before RR | Rwp     | RMSE after RR |
|----------------|---------|---------------|
| 0.01           | 0.00518 | 0.00026       |

# Er<sub>4</sub>Th<sub>1</sub>C<sub>1</sub>N<sub>4</sub>

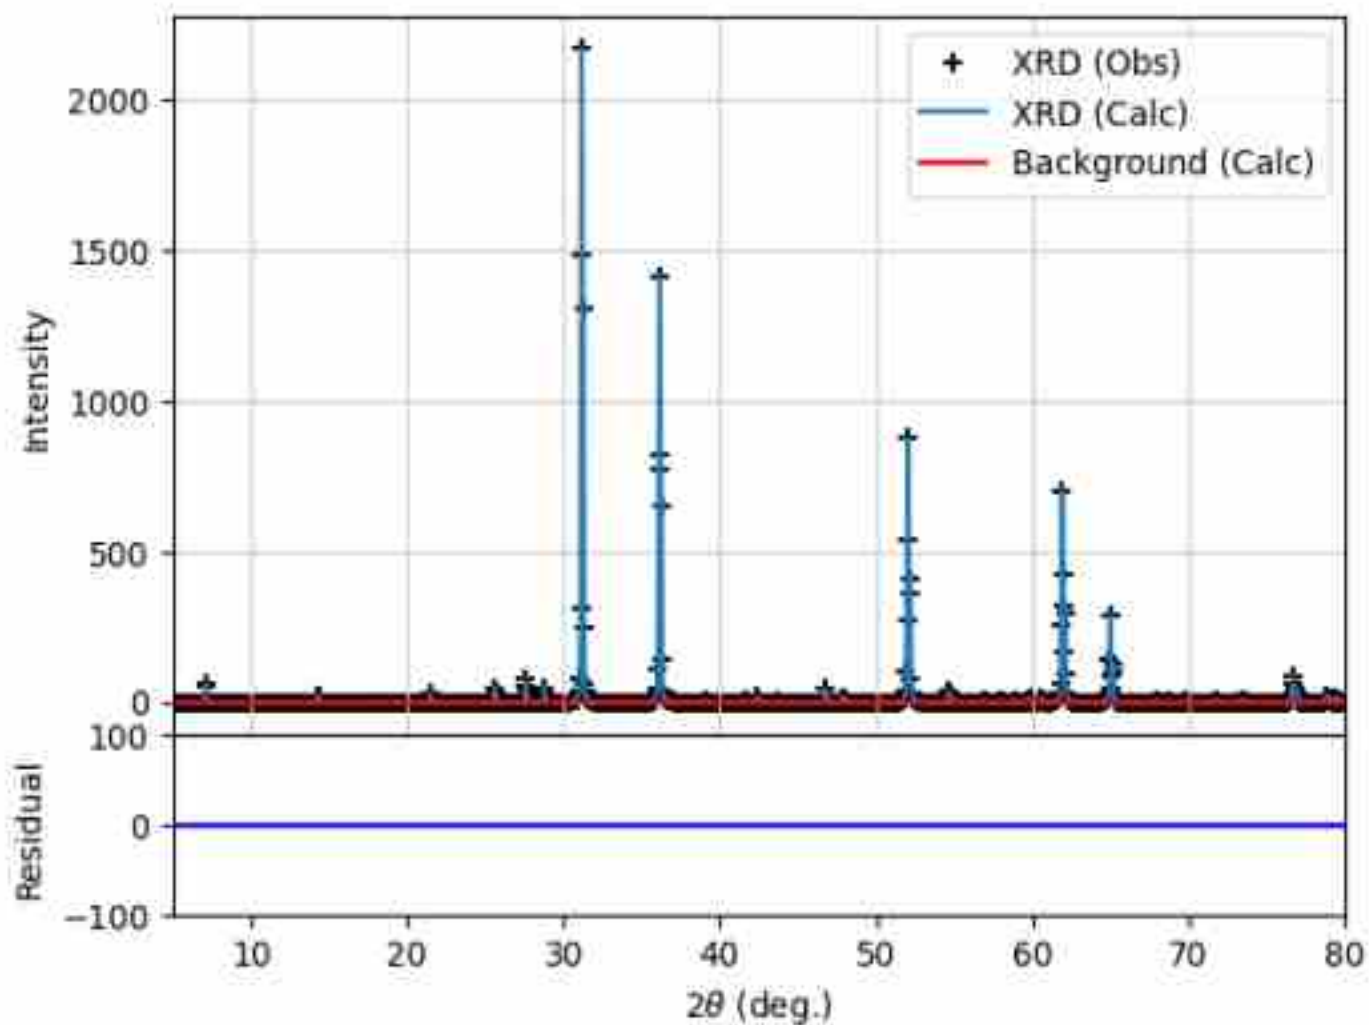

| RMSE before RR | Rwp     | RMSE after RR |
|----------------|---------|---------------|
| 0.01           | 0.00326 | 0.00192       |



# Eu1Cd3

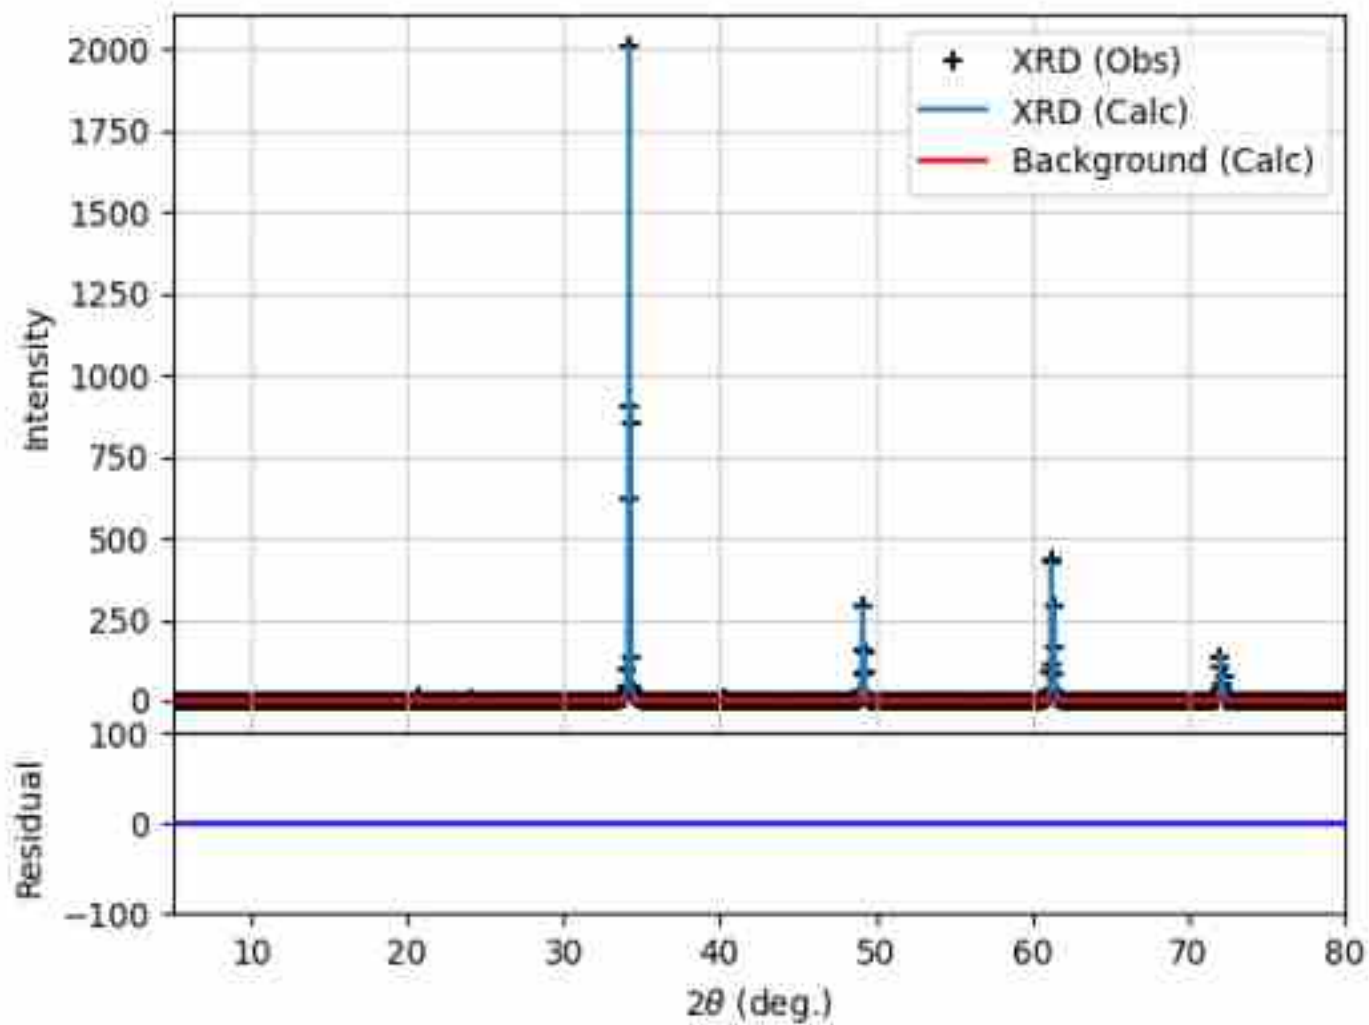

| RMSE before RR | Rwp     | RMSE after RR |
|----------------|---------|---------------|
| 0.001          | 0.01049 | 0.00021       |

# Eu1Cu1O3

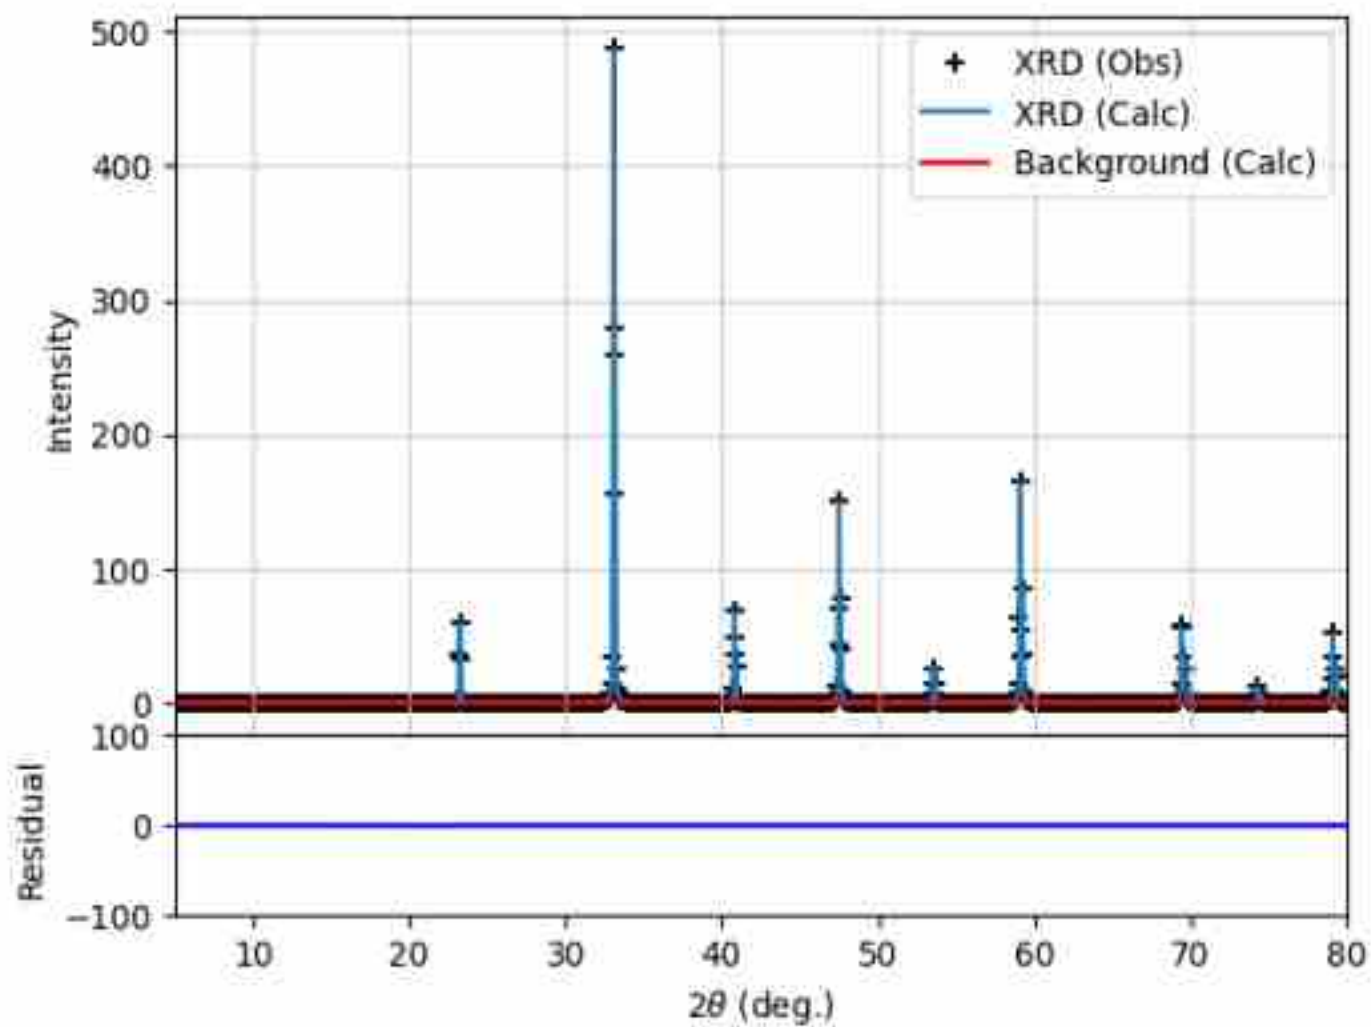

| RMSE before RR | Rwp     | RMSE after RR |
|----------------|---------|---------------|
| 0.01           | 0.26625 | 0.0147        |

# Eu1Fe2As2

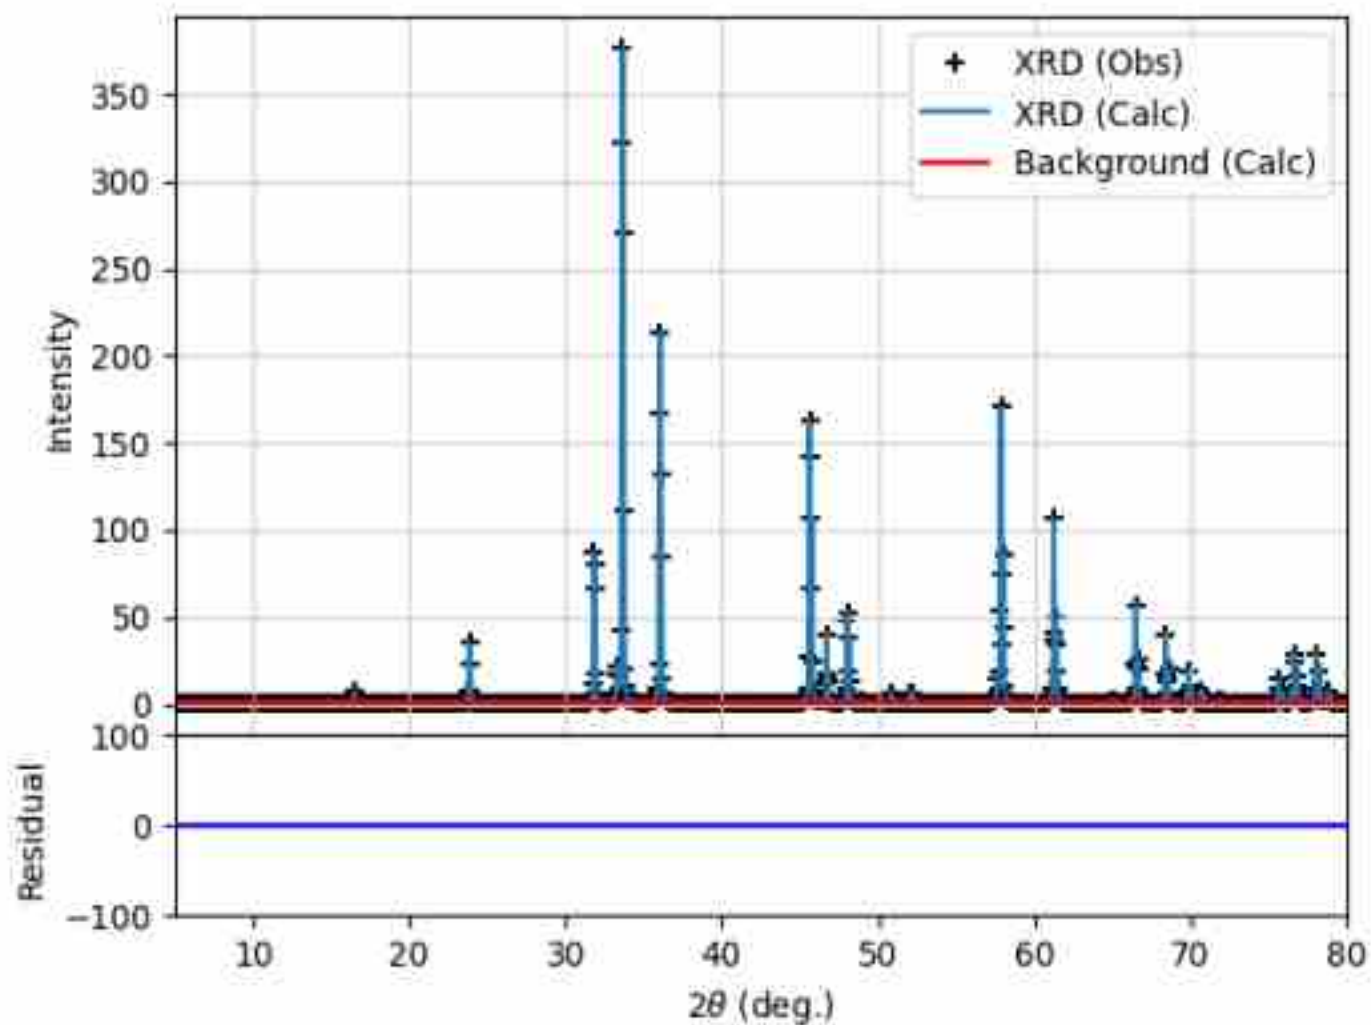

| RMSE before RR | Rwp     | RMSE after RR |
|----------------|---------|---------------|
| 0.01           | 0.00357 | 0.00039       |

# Eu1In1Au2

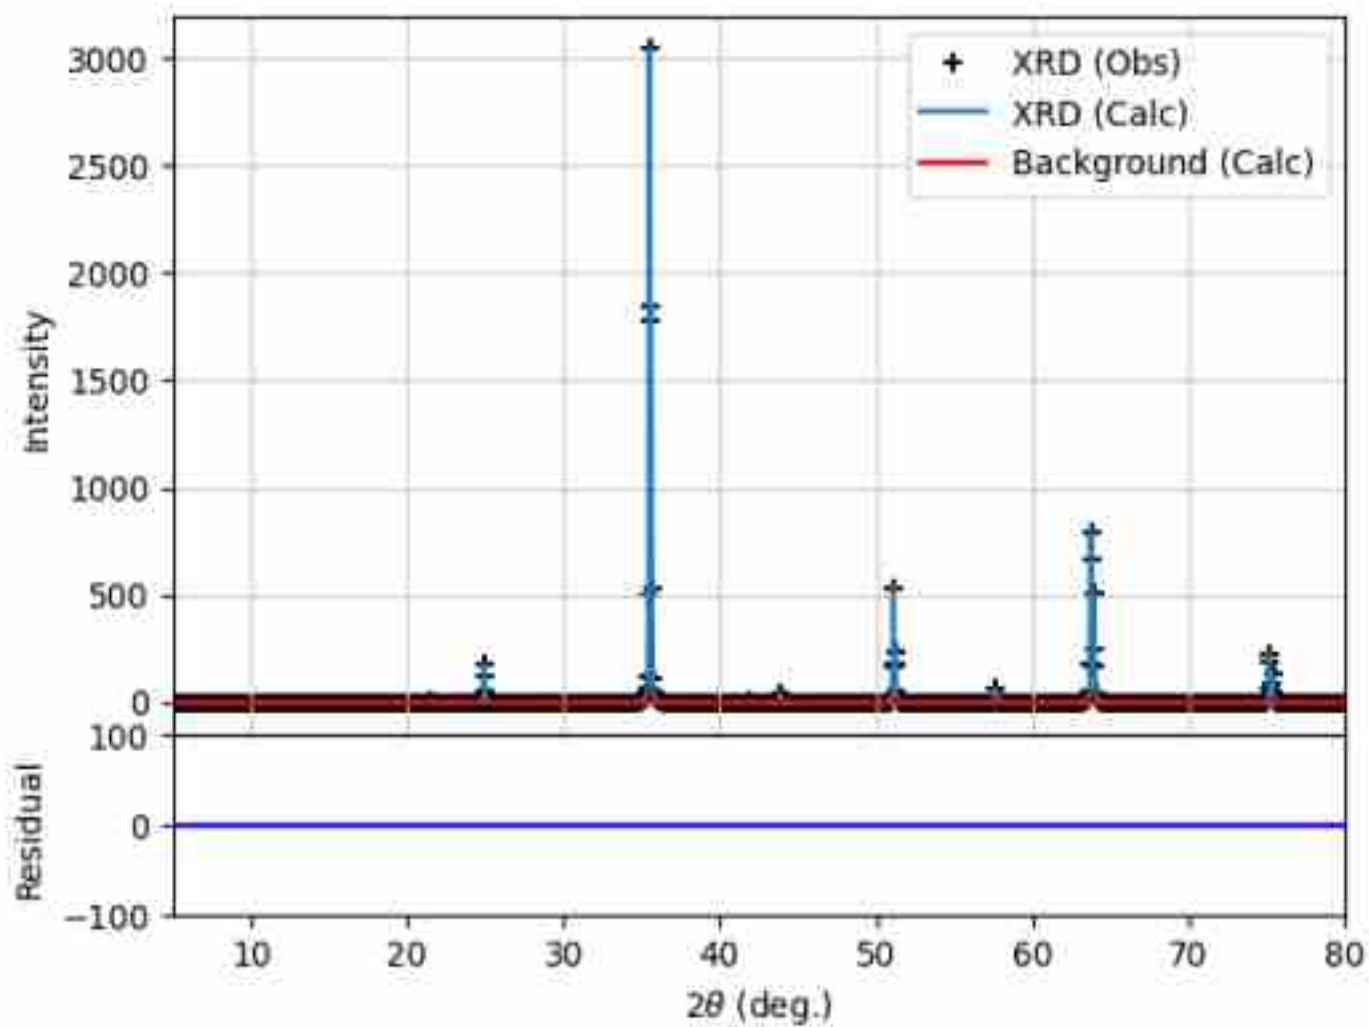

| RMSE before RR | Rwp     | RMSE after RR |
|----------------|---------|---------------|
| 0.001          | 0.00285 | 0.00014       |

# Eu1P2Ru2

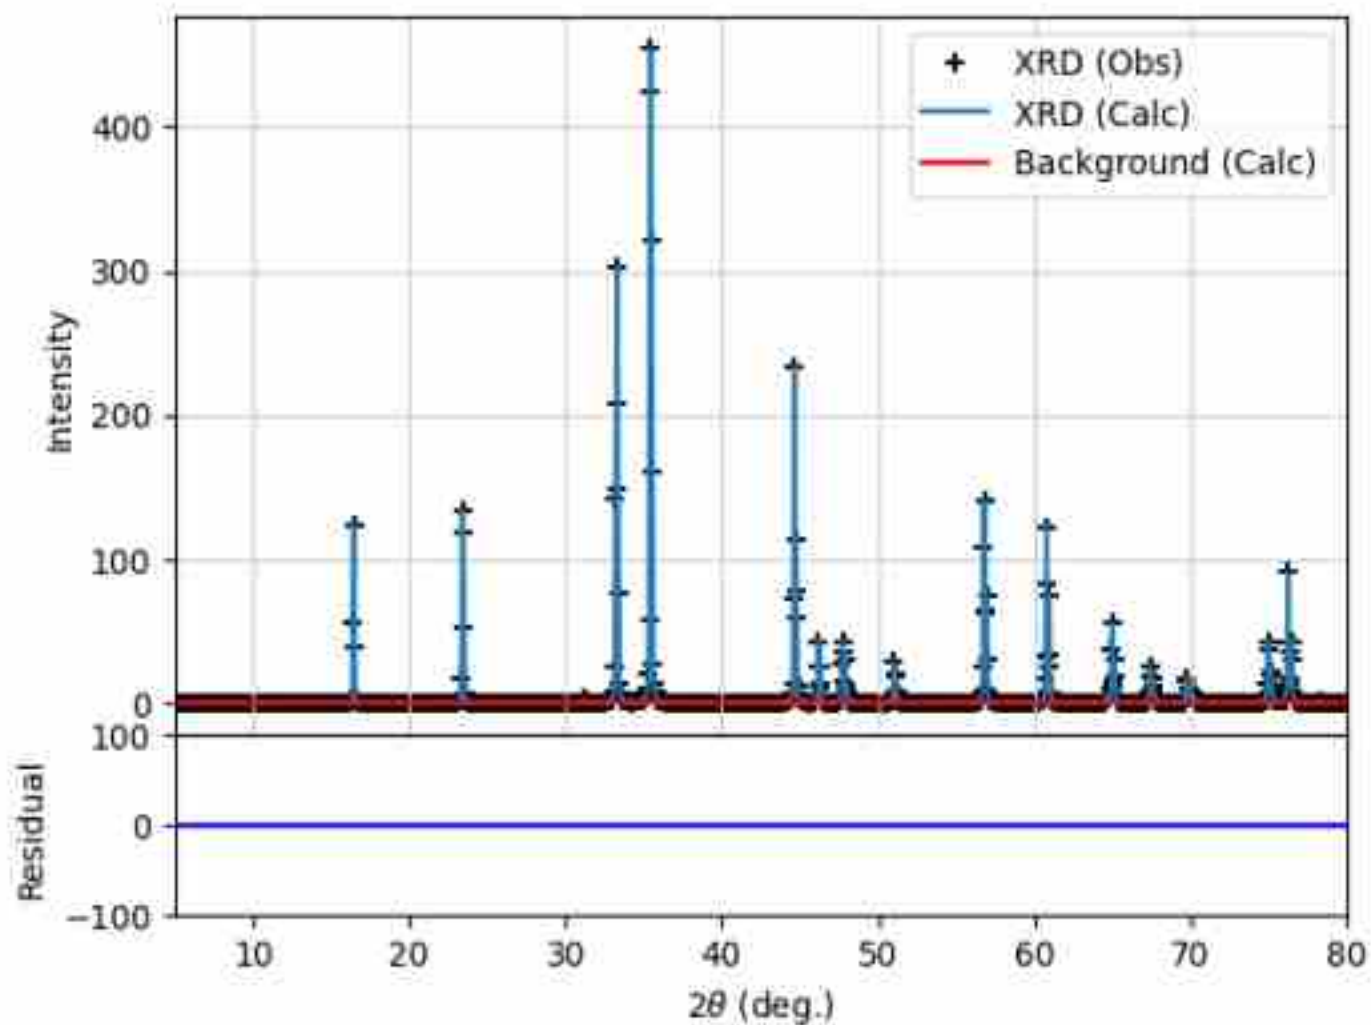

| RMSE before RR | Rwp     | RMSE after RR |
|----------------|---------|---------------|
| 0.01           | 0.00303 | 0.00113       |

# Eu1S1

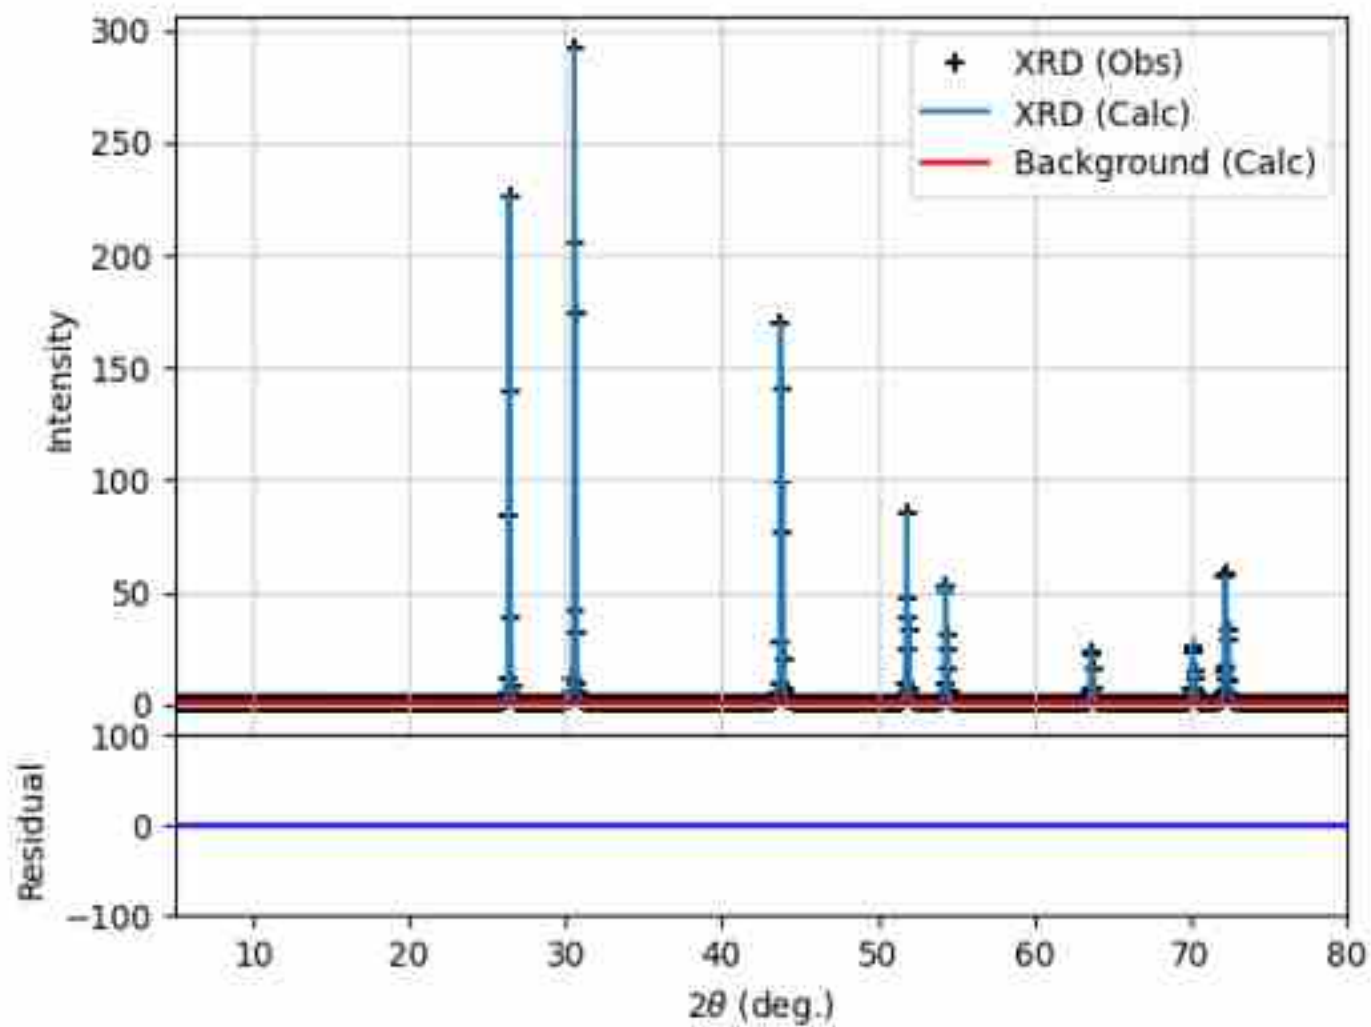

| RMSE before RR | Rwp     | RMSE after RR |
|----------------|---------|---------------|
| 0.001          | 0.00464 | 0.00107       |

# Eu1Se1

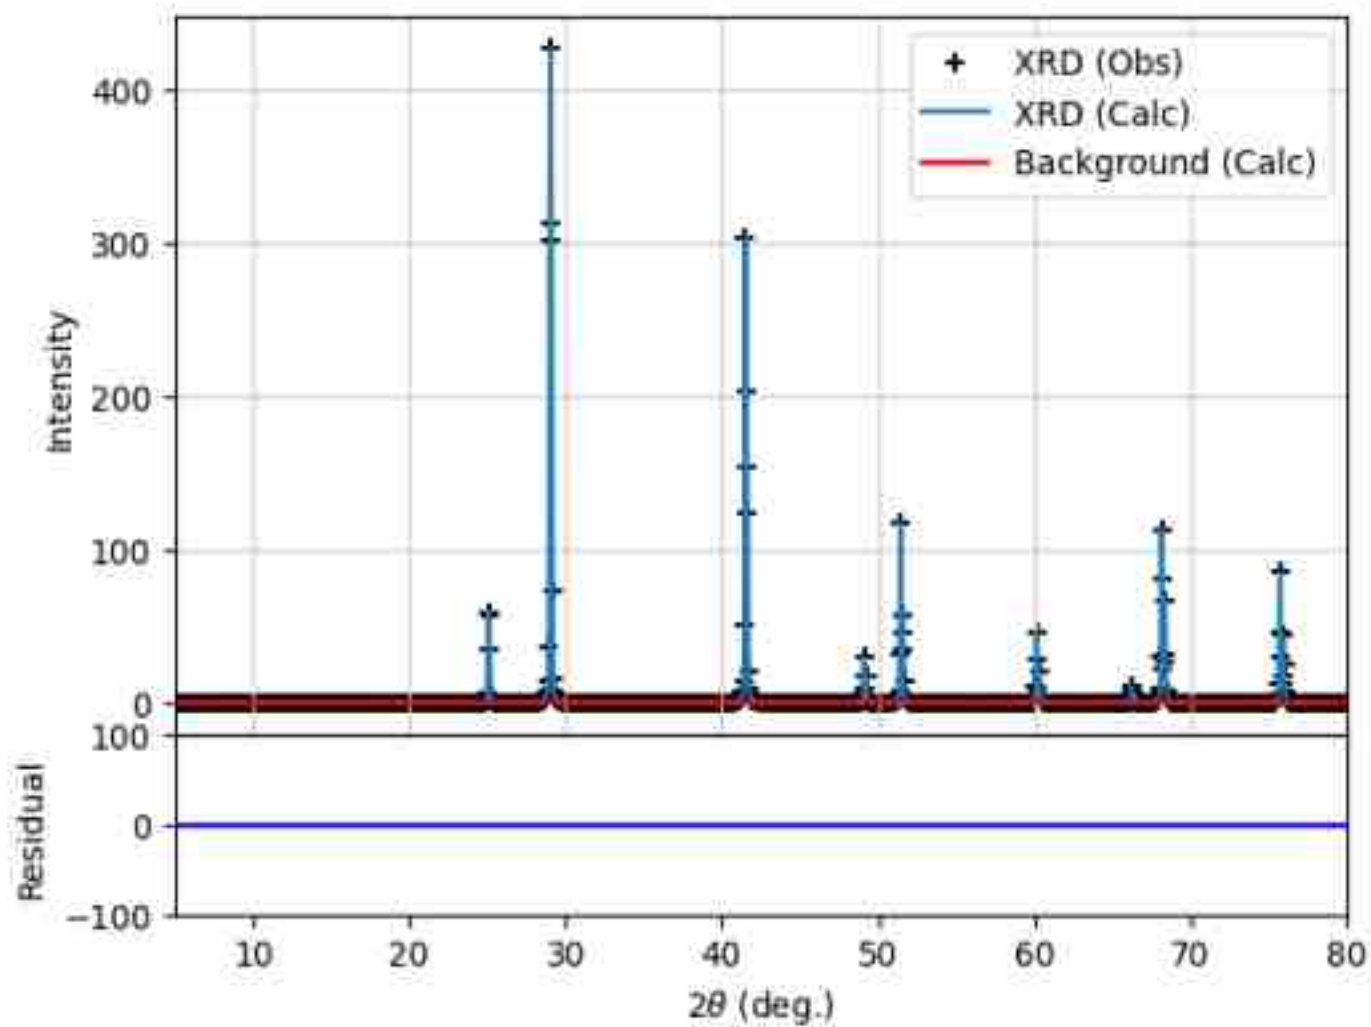

| RMSE before RR | Rwp     | RMSE after RR |
|----------------|---------|---------------|
| 0.001          | 0.01159 | 0.00109       |

# Eu<sub>2</sub>CdHg<sub>1</sub>

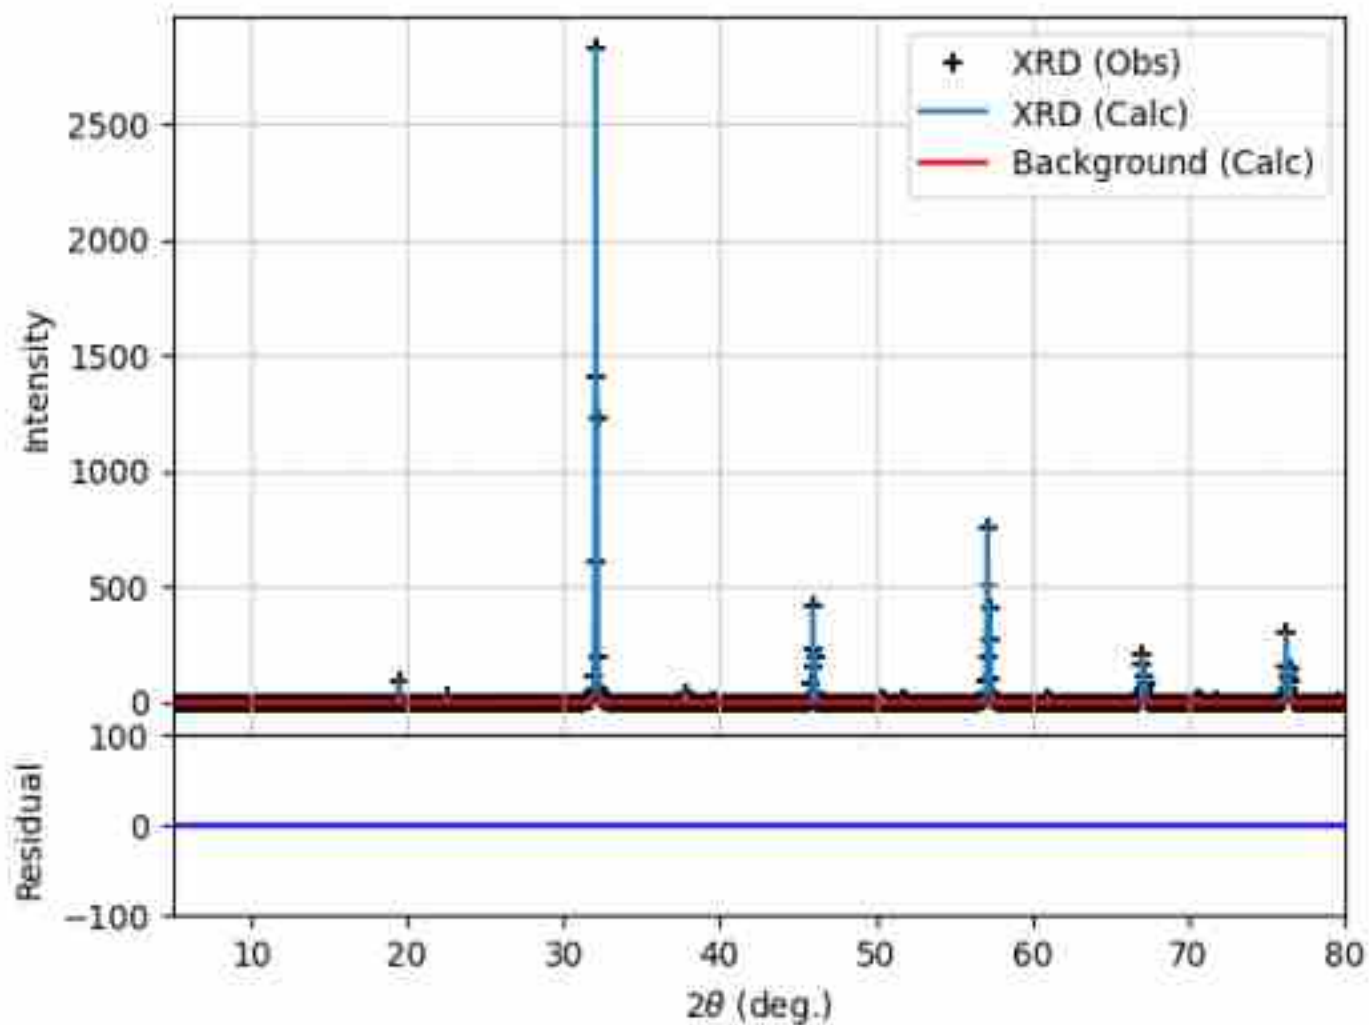

| RMSE before RR | Rwp     | RMSE after RR |
|----------------|---------|---------------|
| 0.001          | 0.00726 | 0.0005        |



# Eu<sub>2</sub>Cr<sub>1</sub>Sb<sub>1</sub>O<sub>6</sub>

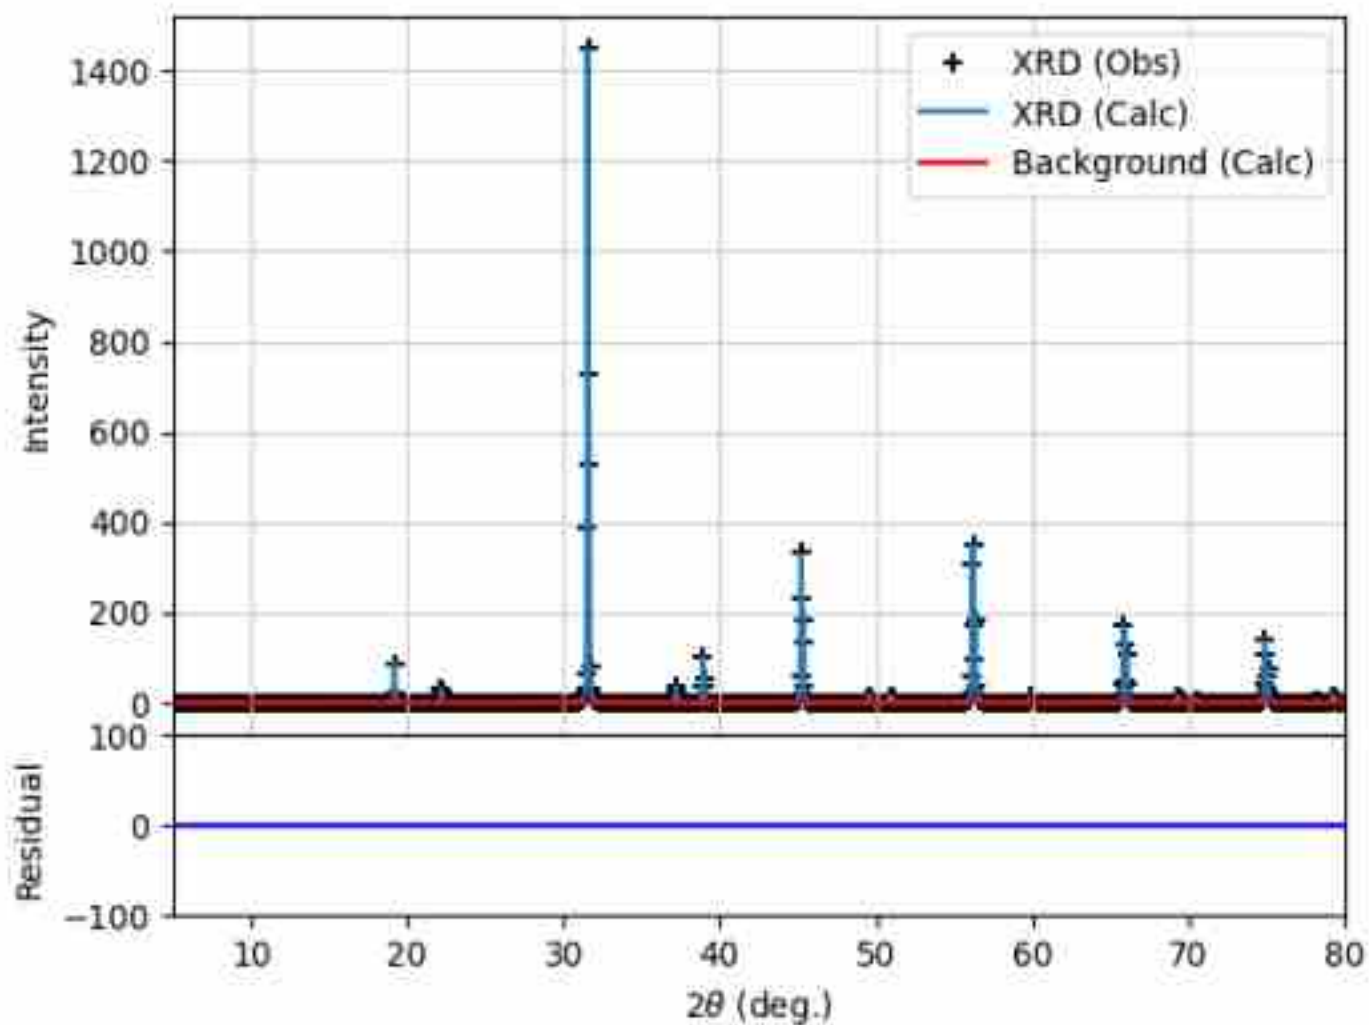

| RMSE before RR | Rwp     | RMSE after RR |
|----------------|---------|---------------|
| 0.01           | 0.00524 | 0.0026        |

# Eu<sub>2</sub>Hf<sub>1</sub>Fe<sub>1</sub>O<sub>6</sub>

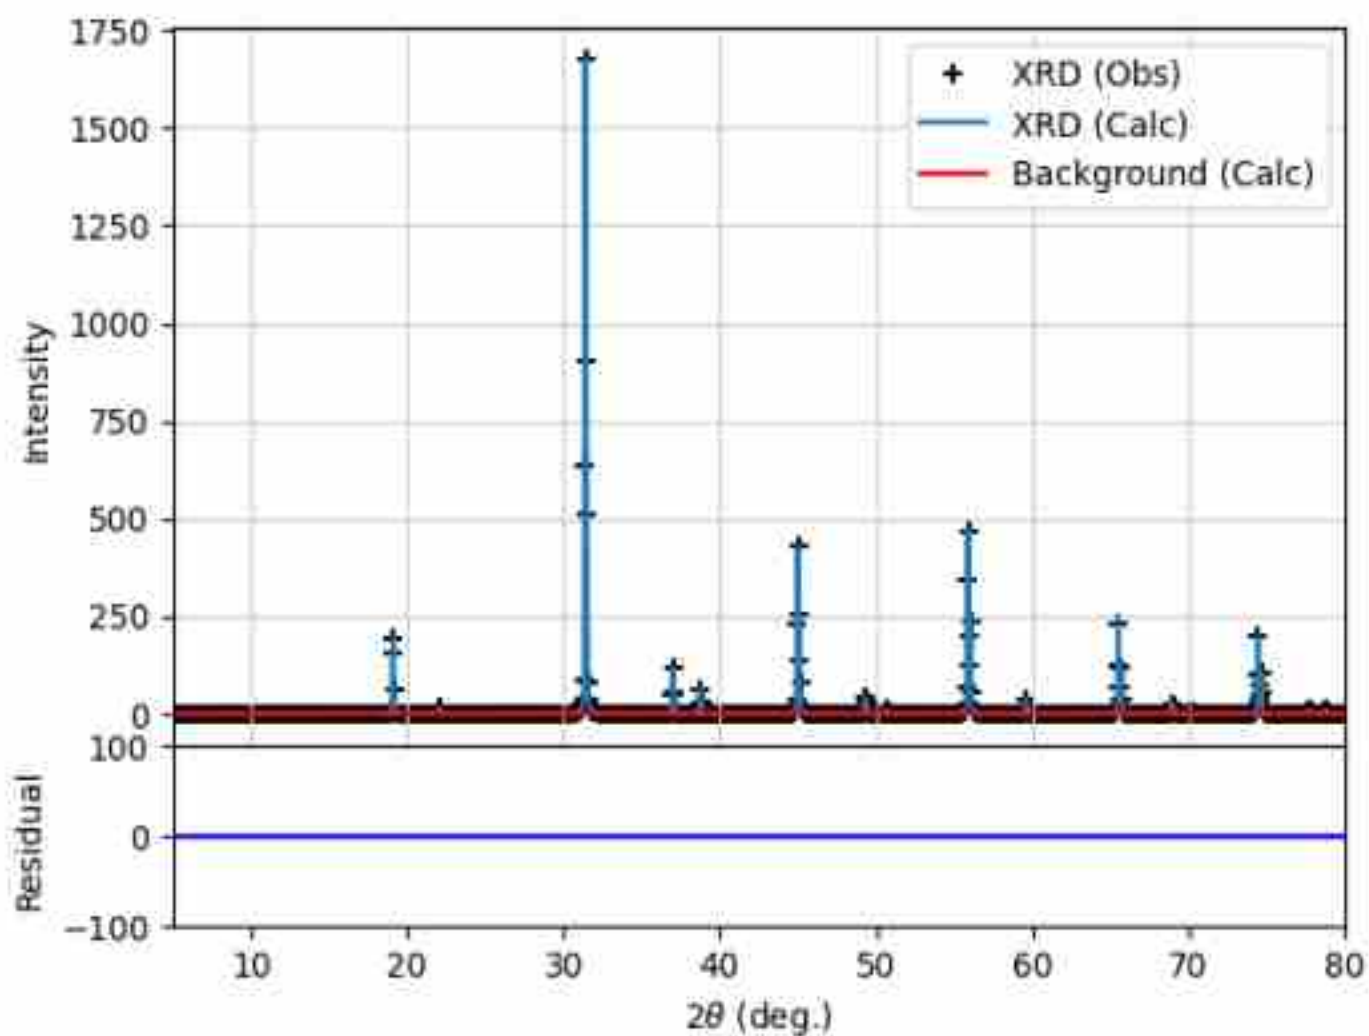

| RMSE before RR | Rwp     | RMSE after RR |
|----------------|---------|---------------|
| 0.01           | 0.01284 | 0.00468       |

# Eu<sub>2</sub>Ni<sub>1</sub>W<sub>1</sub>O<sub>6</sub>

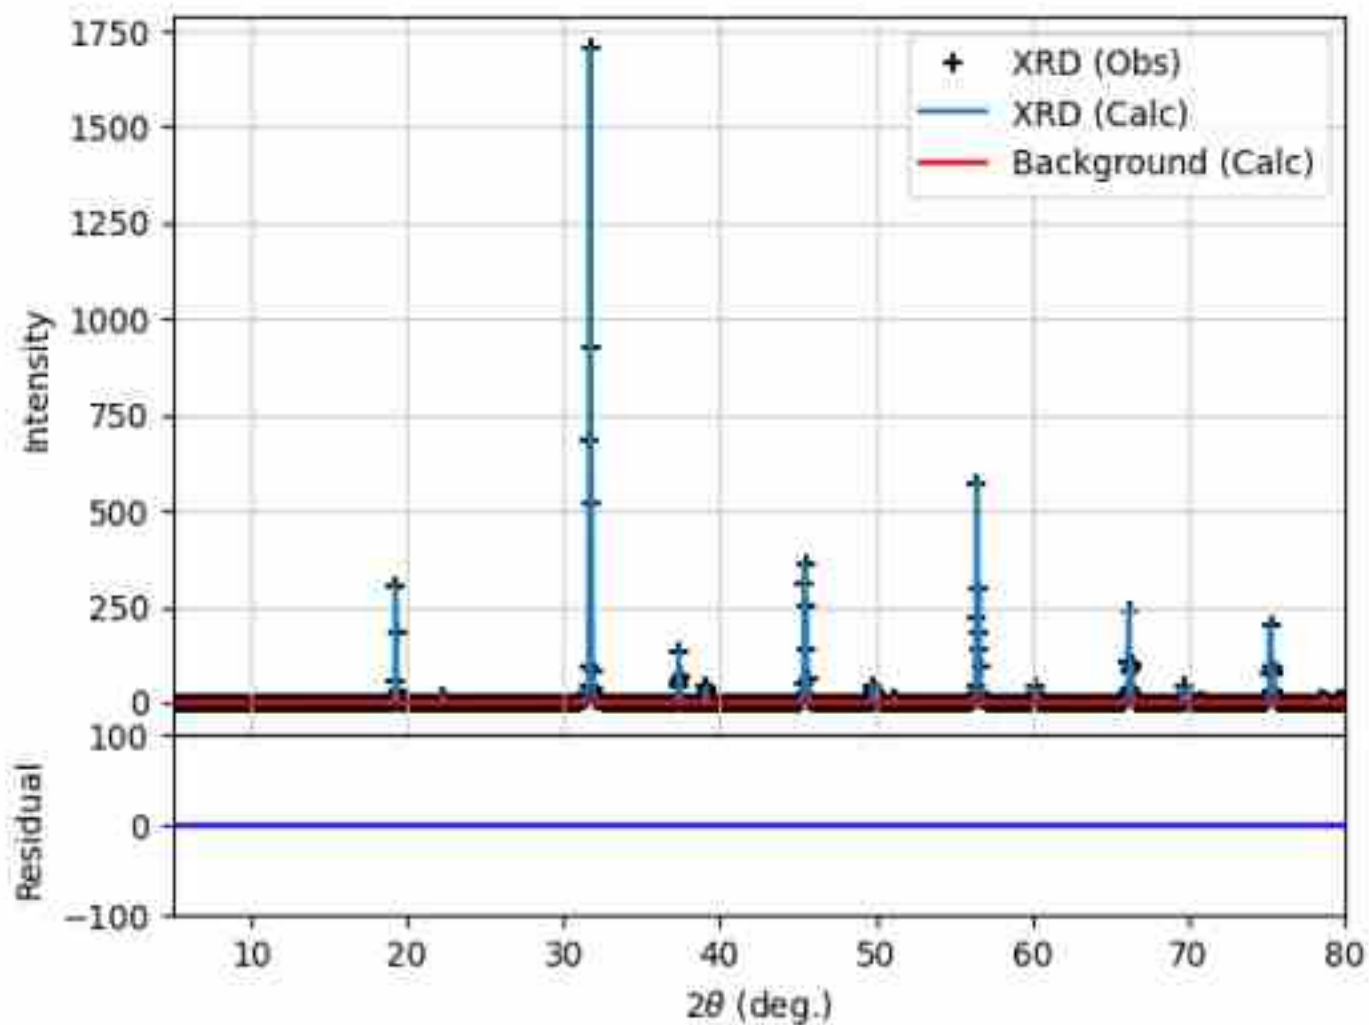

| RMSE before RR | Rwp     | RMSE after RR |
|----------------|---------|---------------|
| 0.01           | 0.00615 | 0.00303       |

# Eu<sub>2</sub>Sb<sub>1</sub>Au<sub>1</sub>

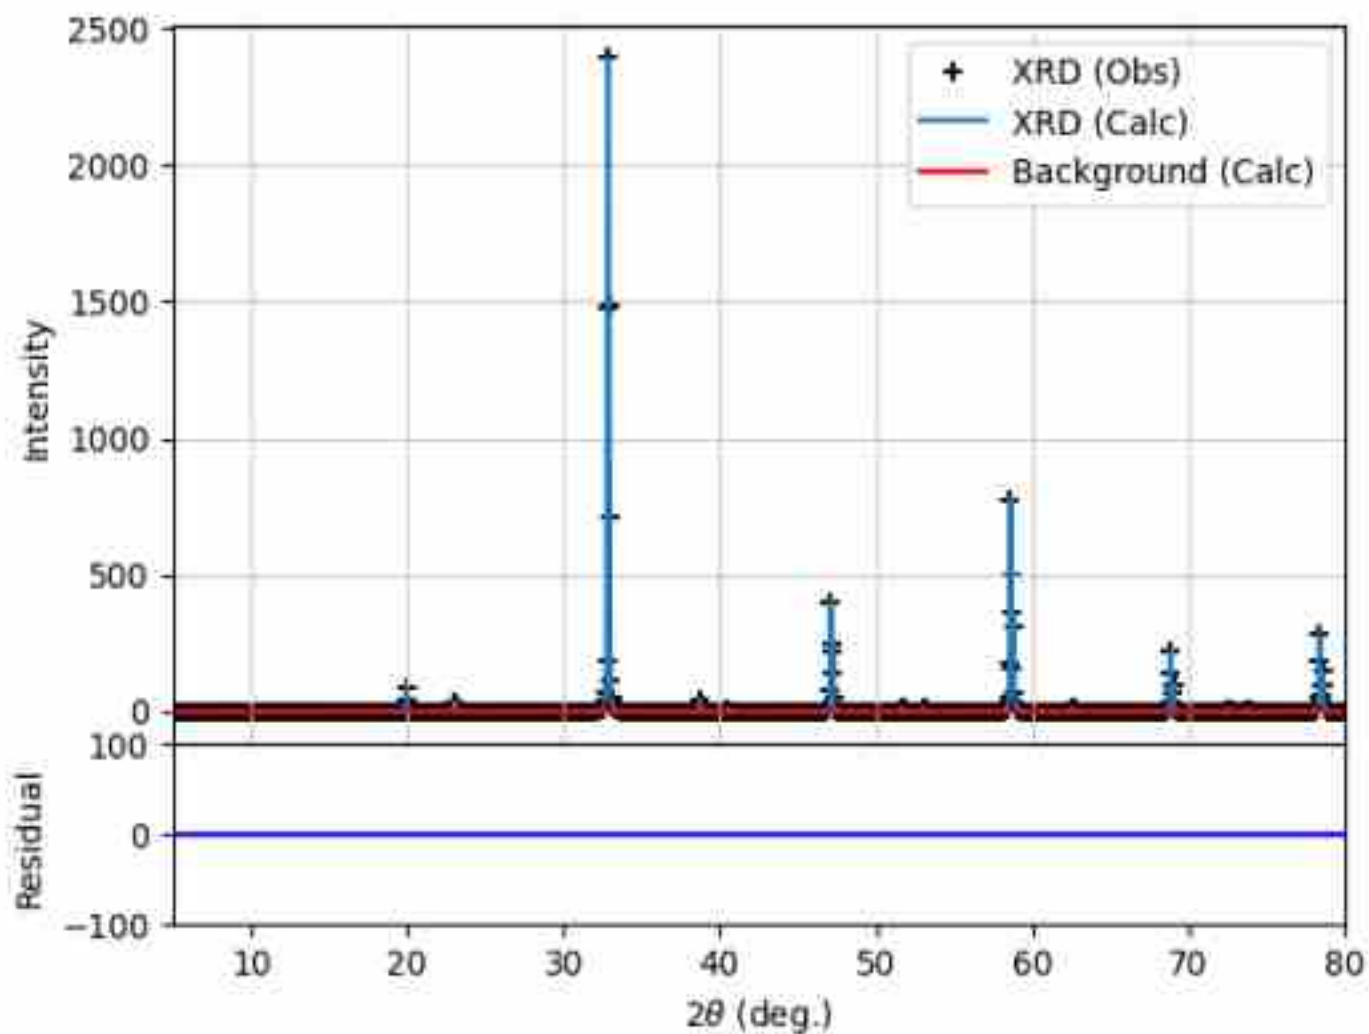

| RMSE before RR | Rwp     | RMSE after RR |
|----------------|---------|---------------|
| 0.001          | 0.00334 | 0.00024       |

# Fe1Co3

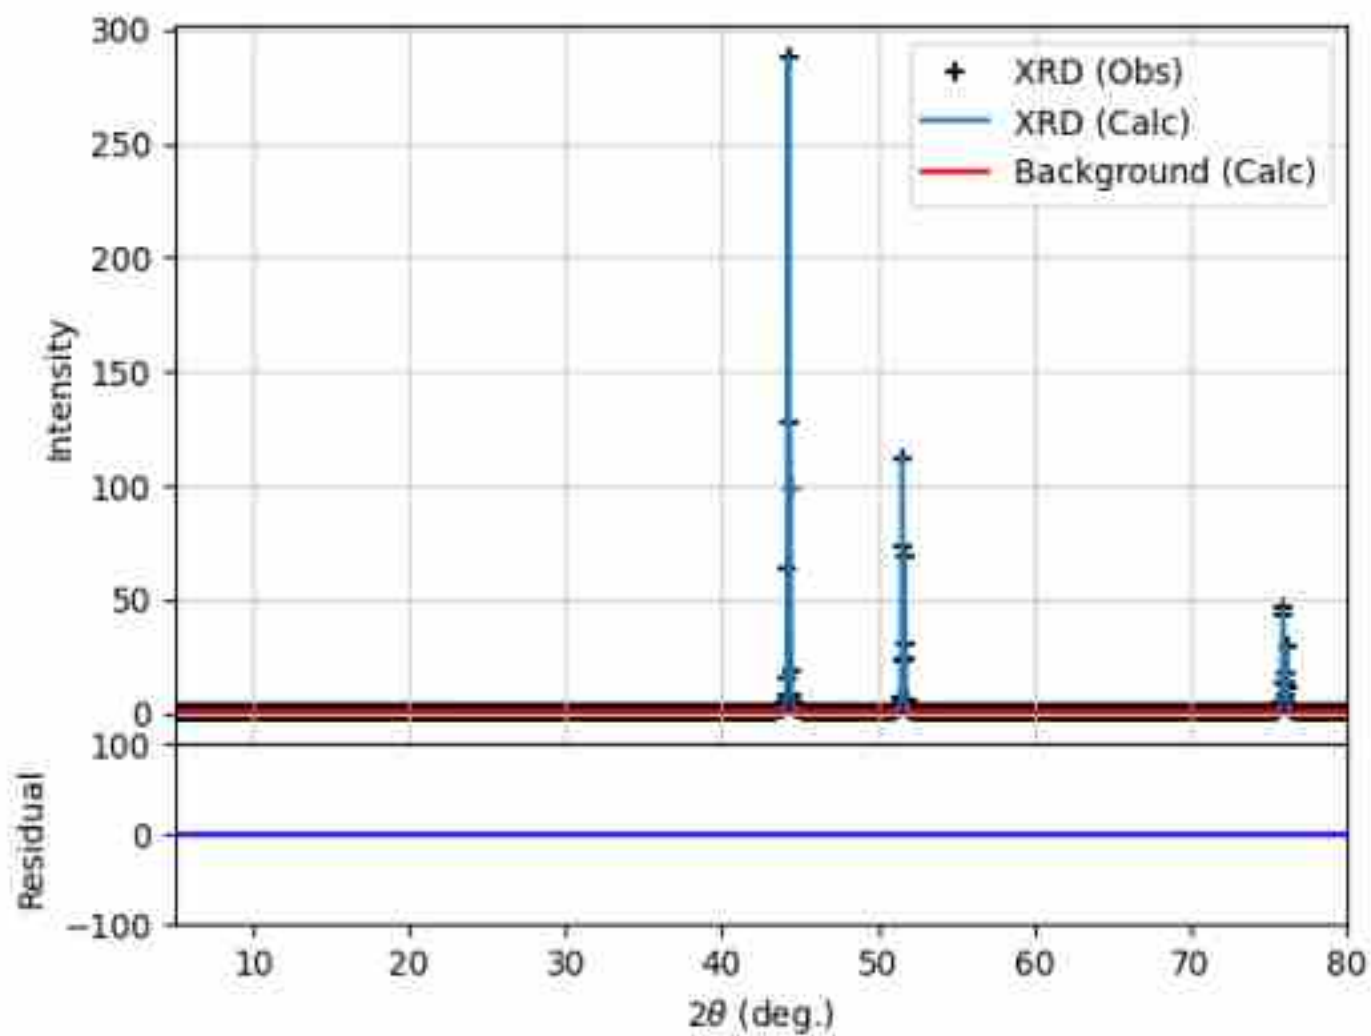

| RMSE before RR | Rwp    | RMSE after RR |
|----------------|--------|---------------|
| 0.001          | 0.0061 | 0.00031       |

# Fe1Ni1

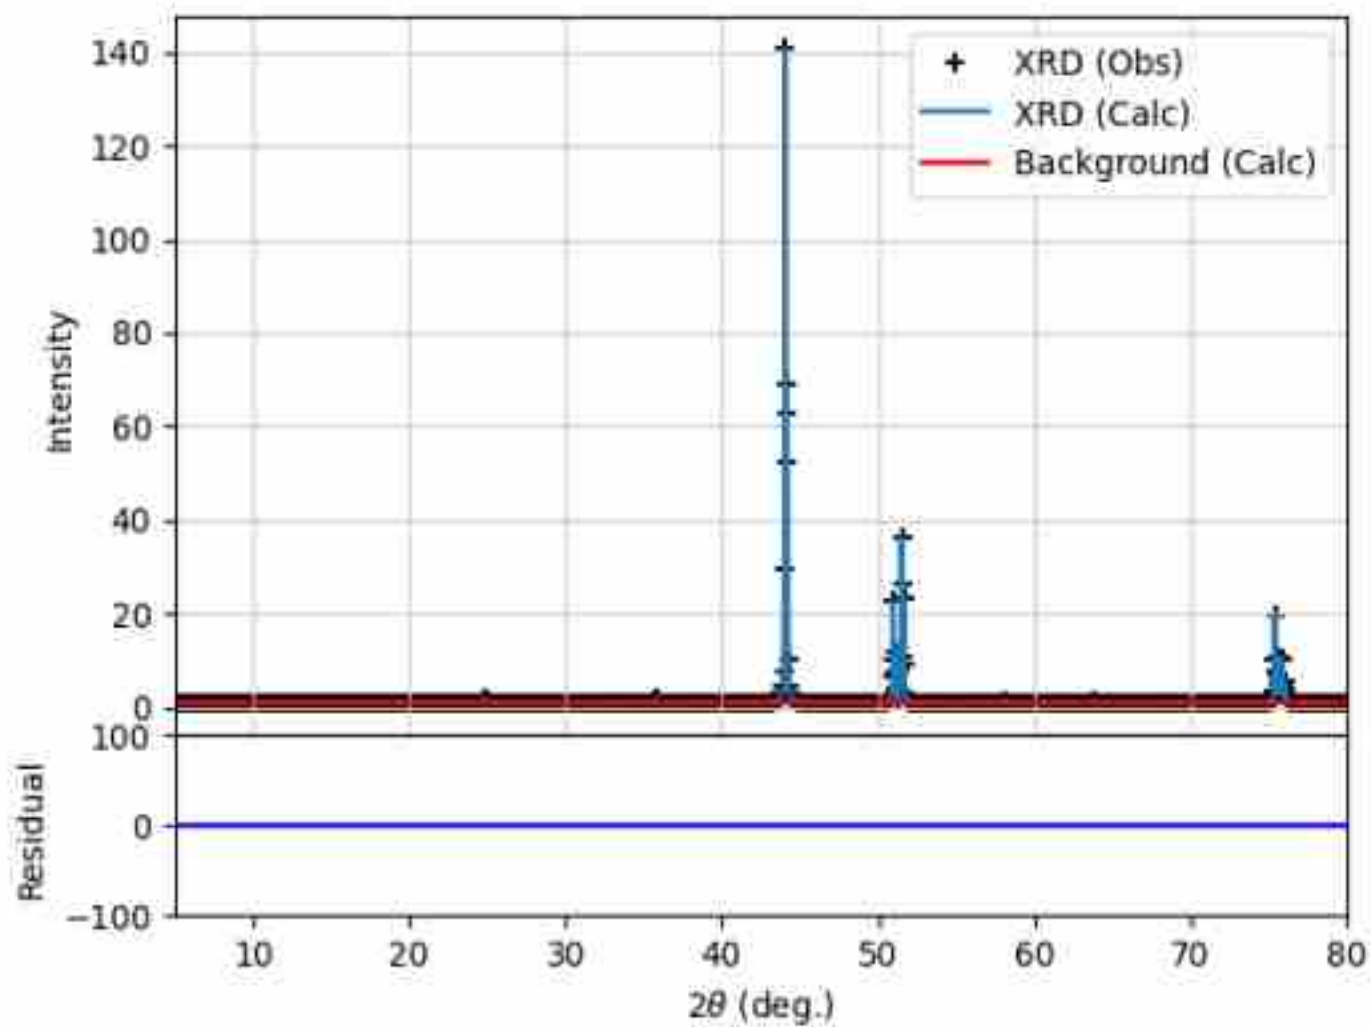

| RMSE before RR | Rwp     | RMSE after RR |
|----------------|---------|---------------|
| 0.001          | 0.00821 | 0.00116       |

# Fe<sub>3</sub>Si<sub>1</sub>

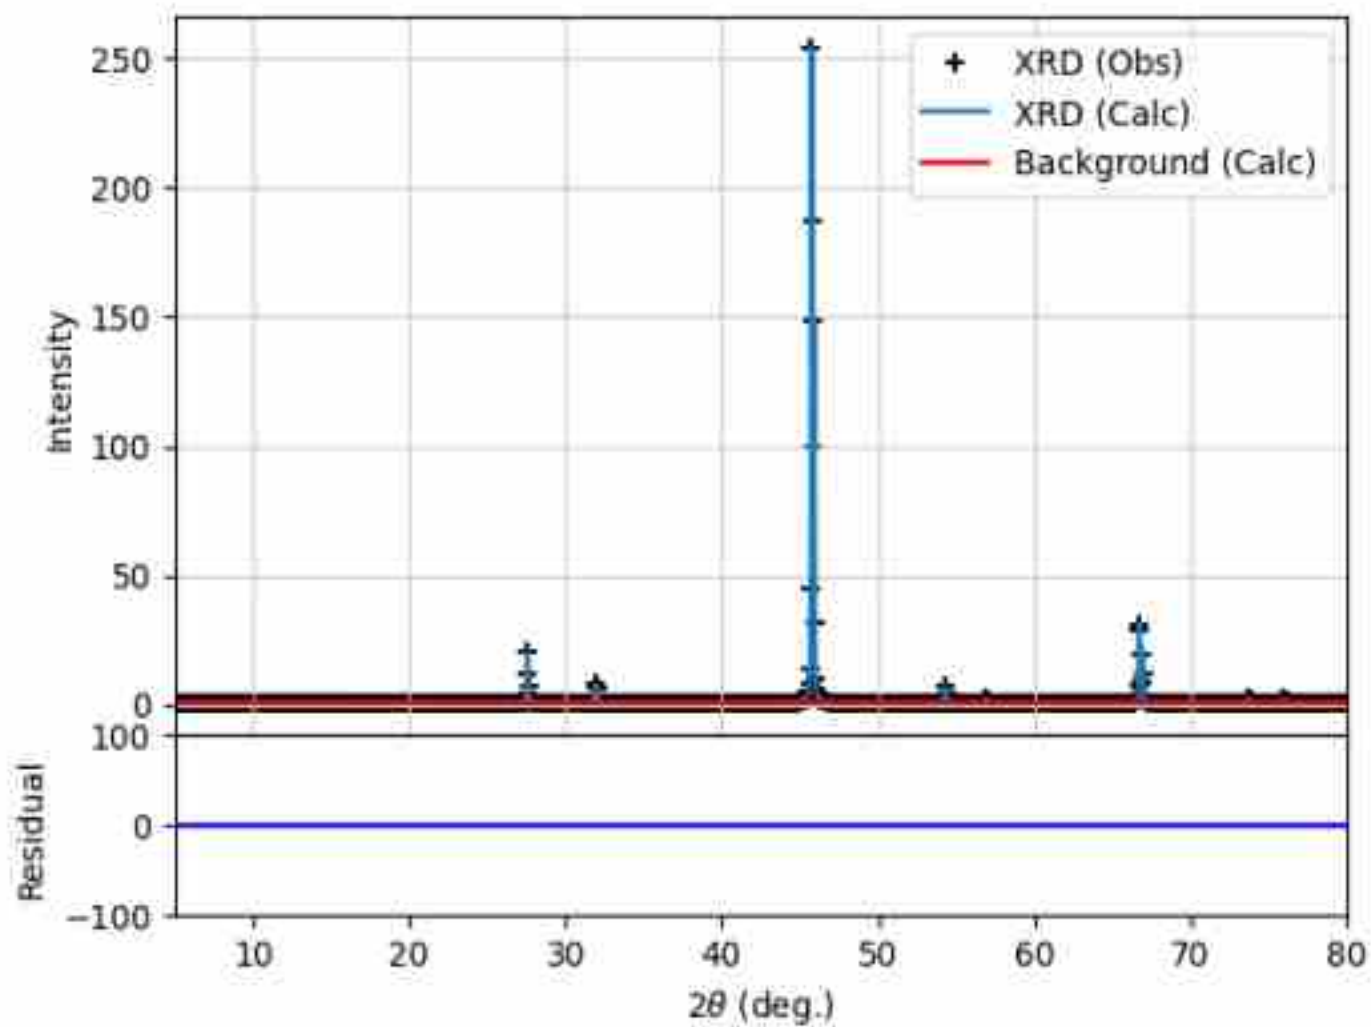

| RMSE before RR | Rwp     | RMSE after RR |
|----------------|---------|---------------|
| 0.001          | 0.00502 | 0.00109       |

# Ga1Cu1Pd2

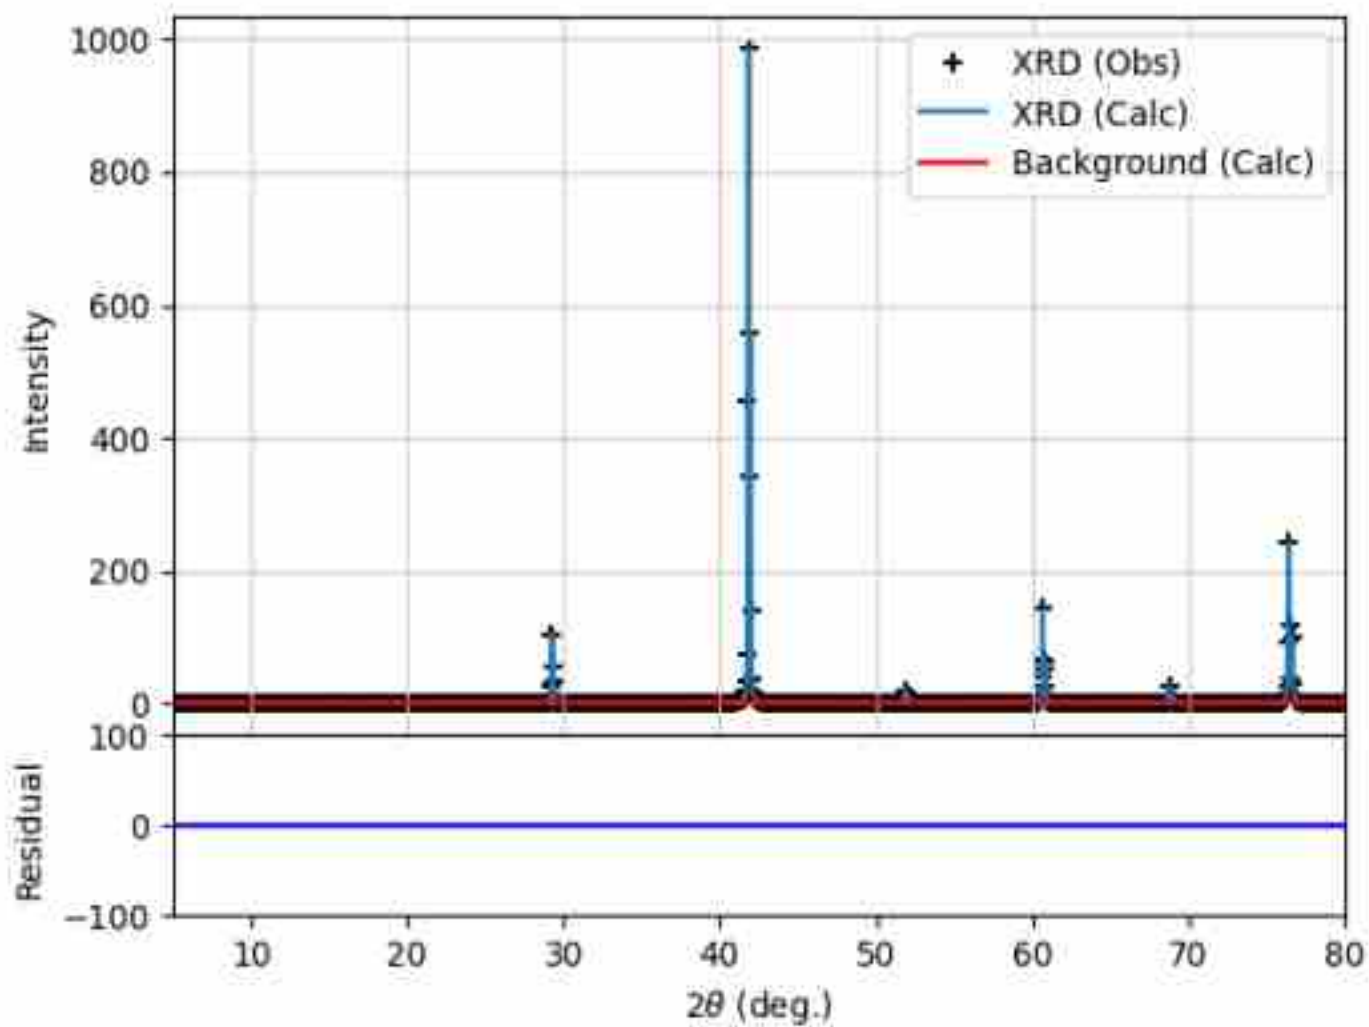

| RMSE before RR | Rwp     | RMSE after RR |
|----------------|---------|---------------|
| 0.001          | 0.00284 | 0.00025       |



# Ga1Ni1Rh2

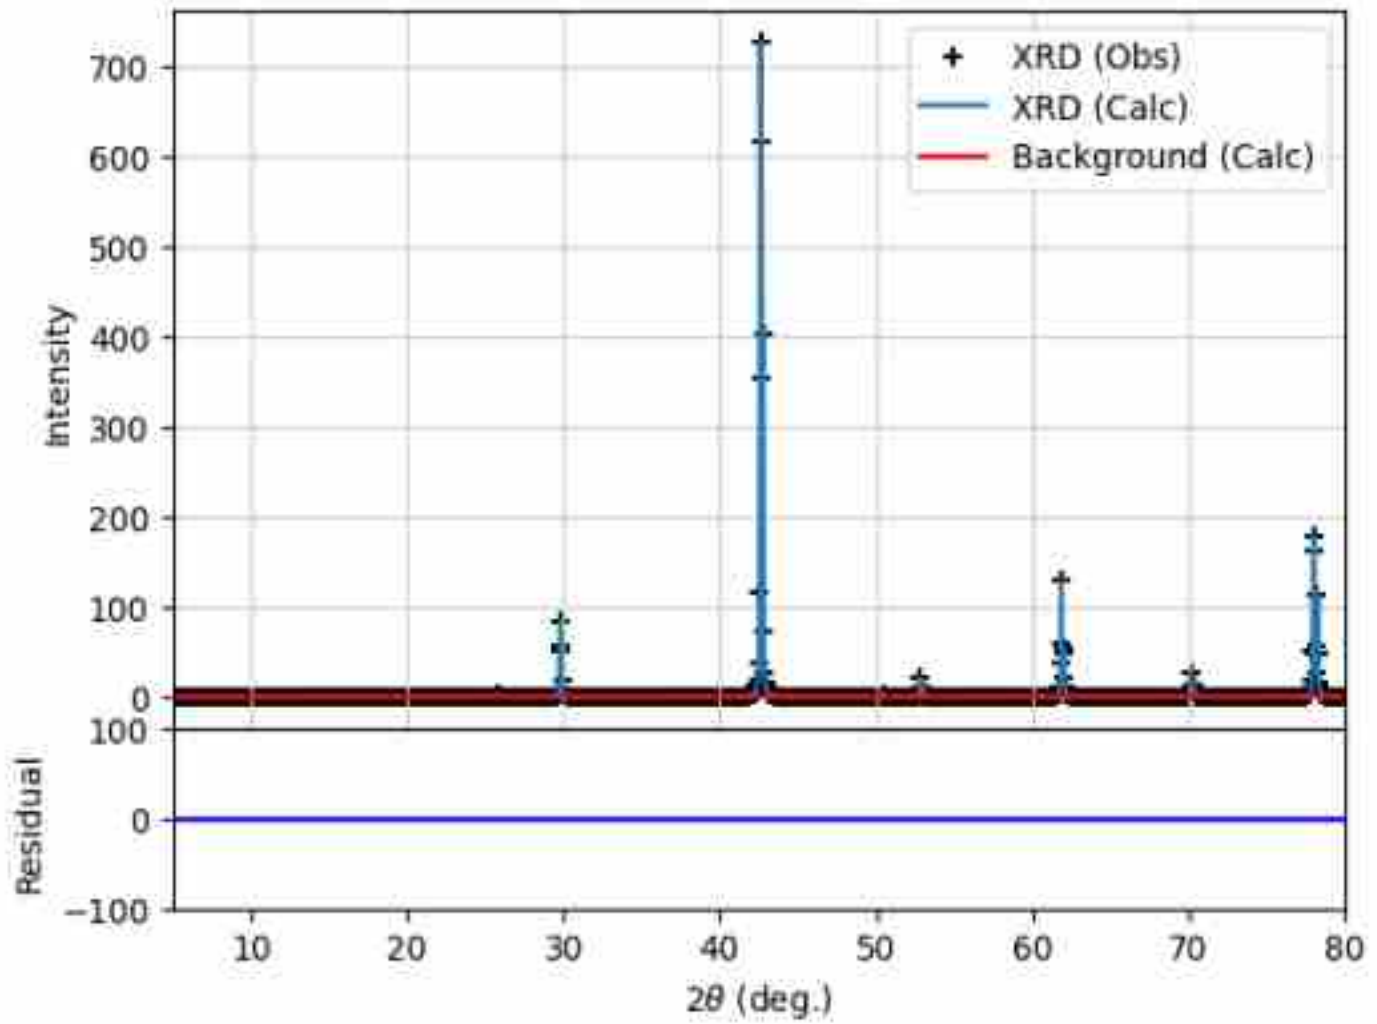

| RMSE before RR | Rwp     | RMSE after RR |
|----------------|---------|---------------|
| 0.001          | 0.00304 | 0.00033       |

# Ga1Ni2Pt1

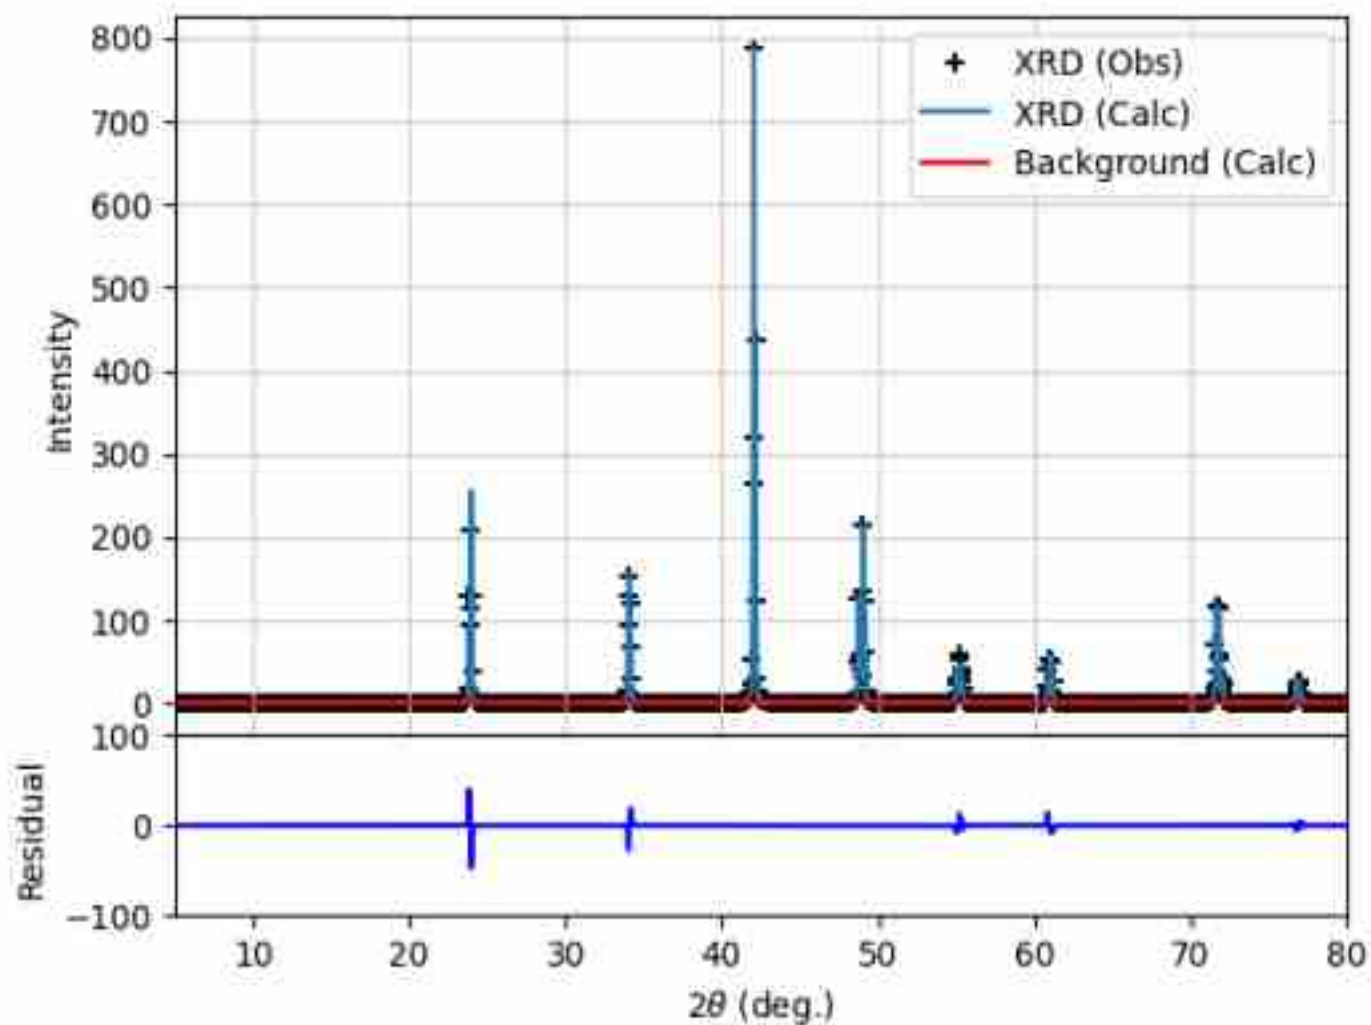

| RMSE before RR | Rwp      | RMSE after RR |
|----------------|----------|---------------|
| 0.001          | 11.33207 | 0.00129       |

# Ga<sub>2</sub>Ag<sub>2</sub>Se<sub>2</sub>S<sub>2</sub>

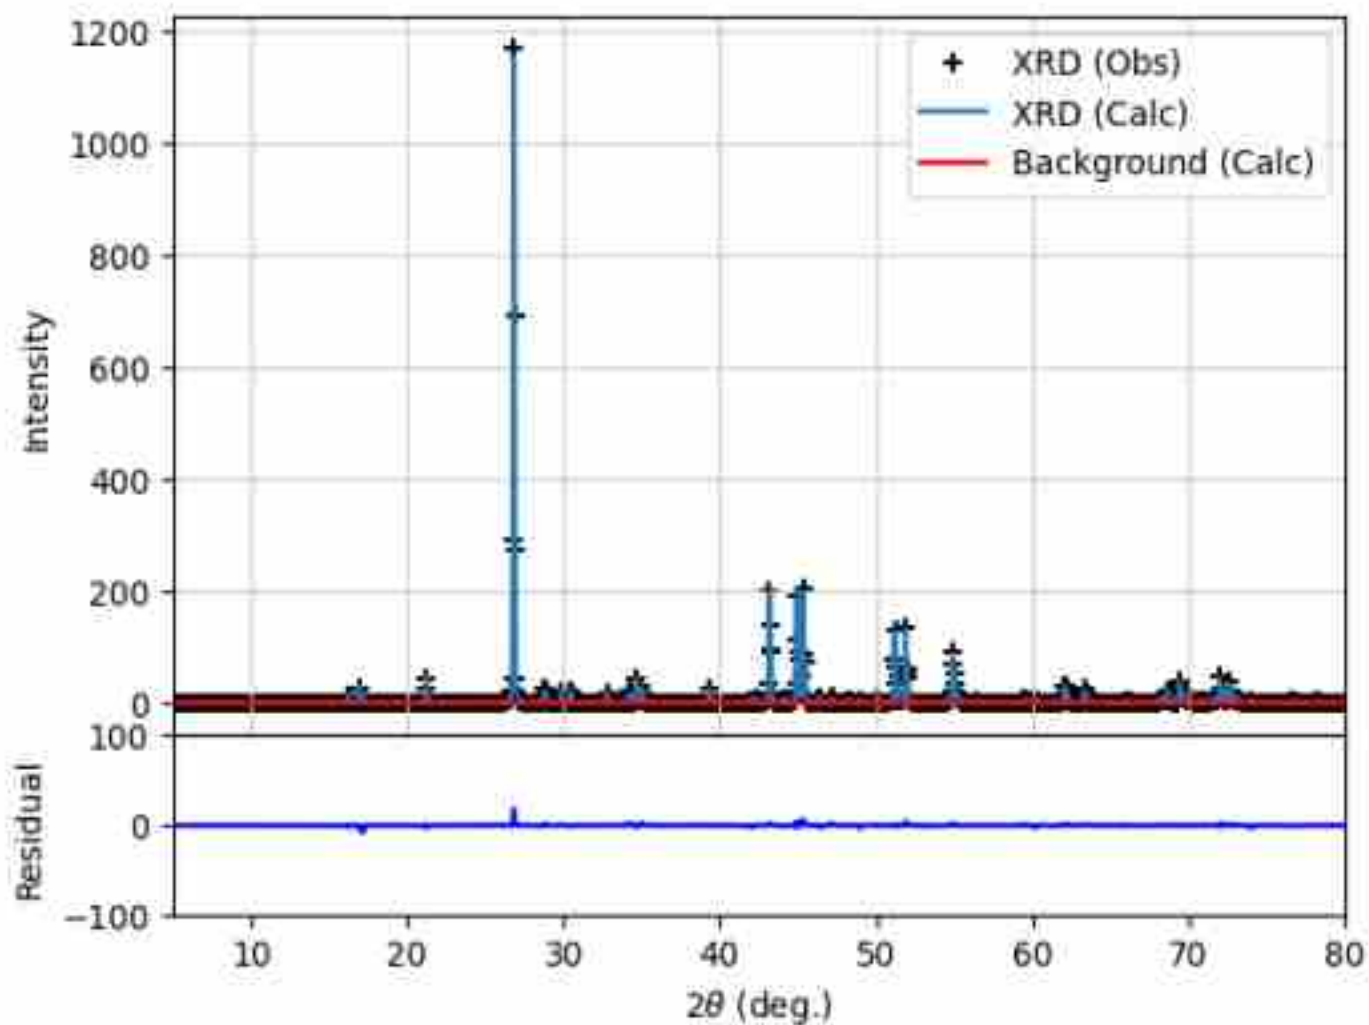

| RMSE before RR | Rwp     | RMSE after RR |
|----------------|---------|---------------|
| 0.01           | 7.55827 | 0.03719       |

# Ga<sub>2</sub>Ag<sub>6</sub>

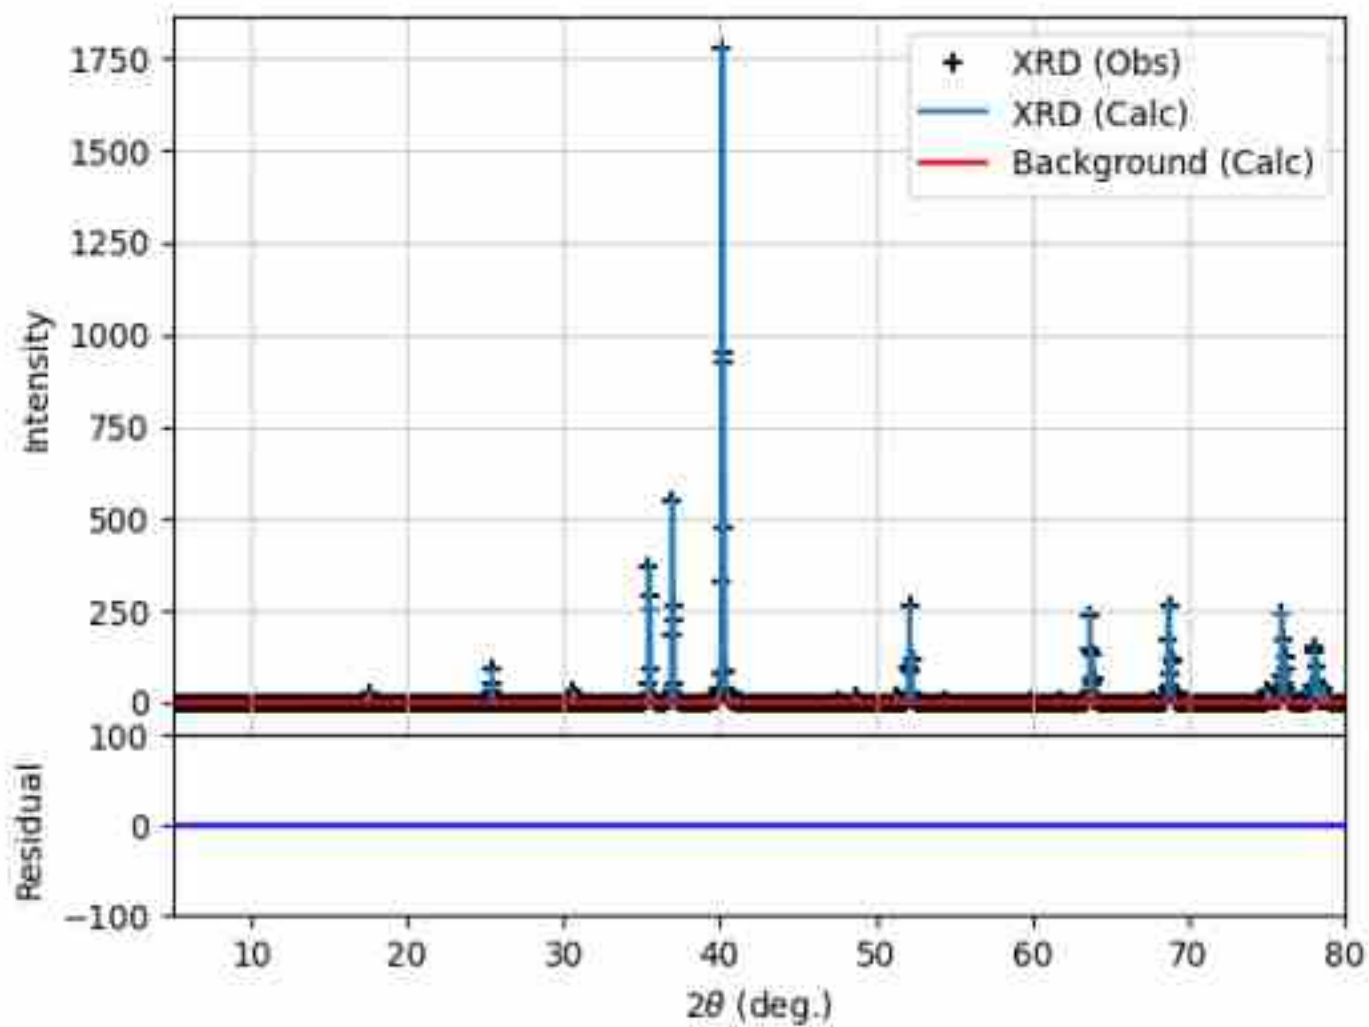

| RMSE before RR | Rwp     | RMSE after RR |
|----------------|---------|---------------|
| 0.01           | 0.01581 | 0.00112       |

# Ga<sub>2</sub>CoIr<sub>1</sub>

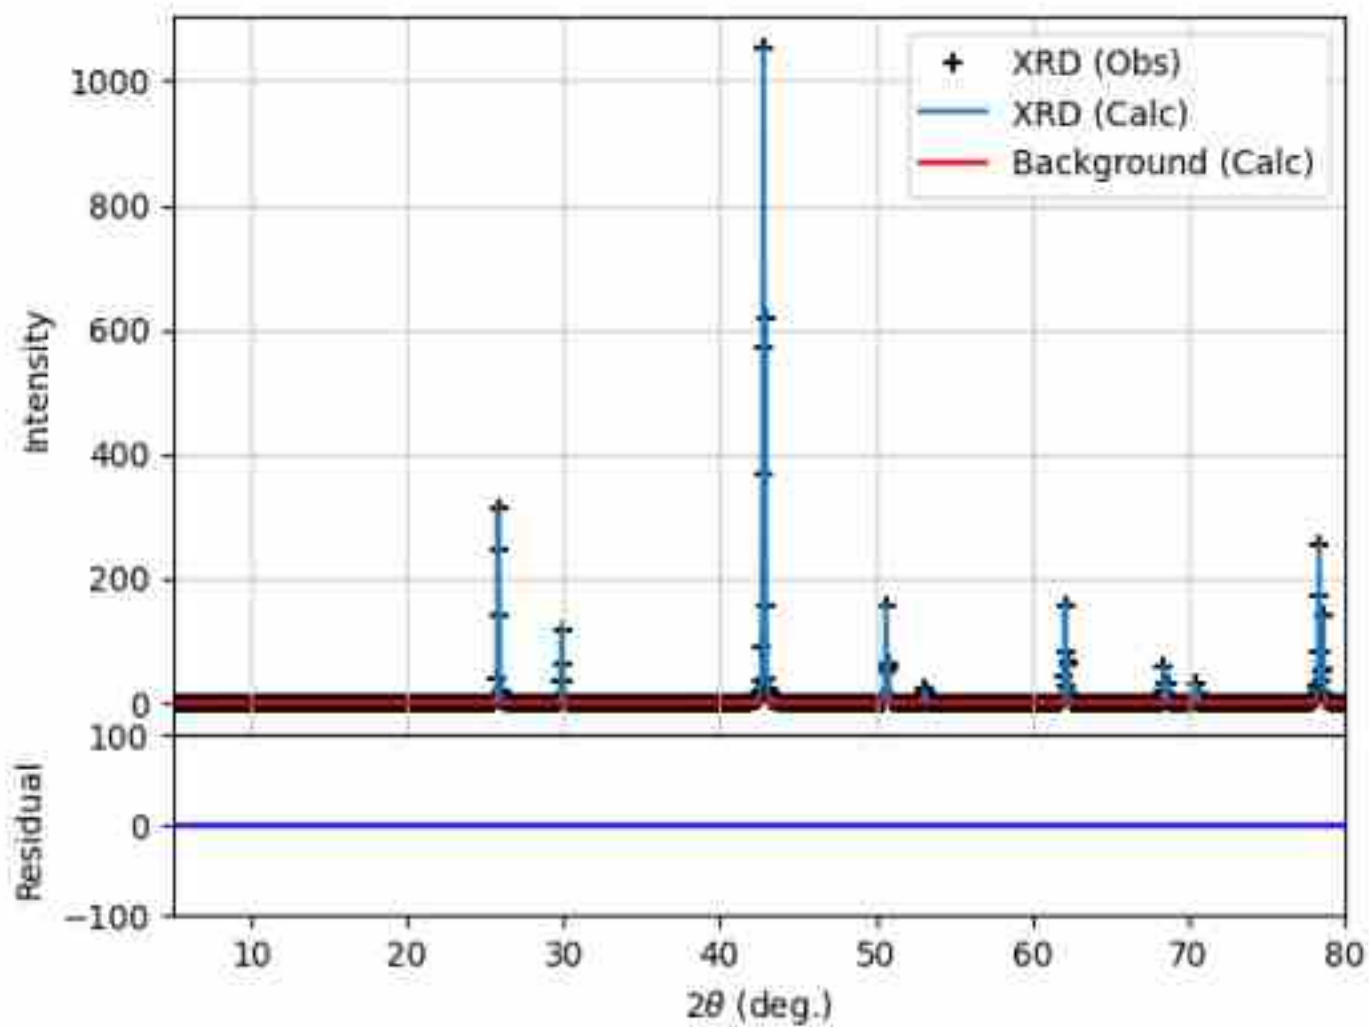

| RMSE before RR | Rwp     | RMSE after RR |
|----------------|---------|---------------|
| 0.001          | 0.00122 | 0.00032       |

# Ga<sub>2</sub>Cu<sub>6</sub>

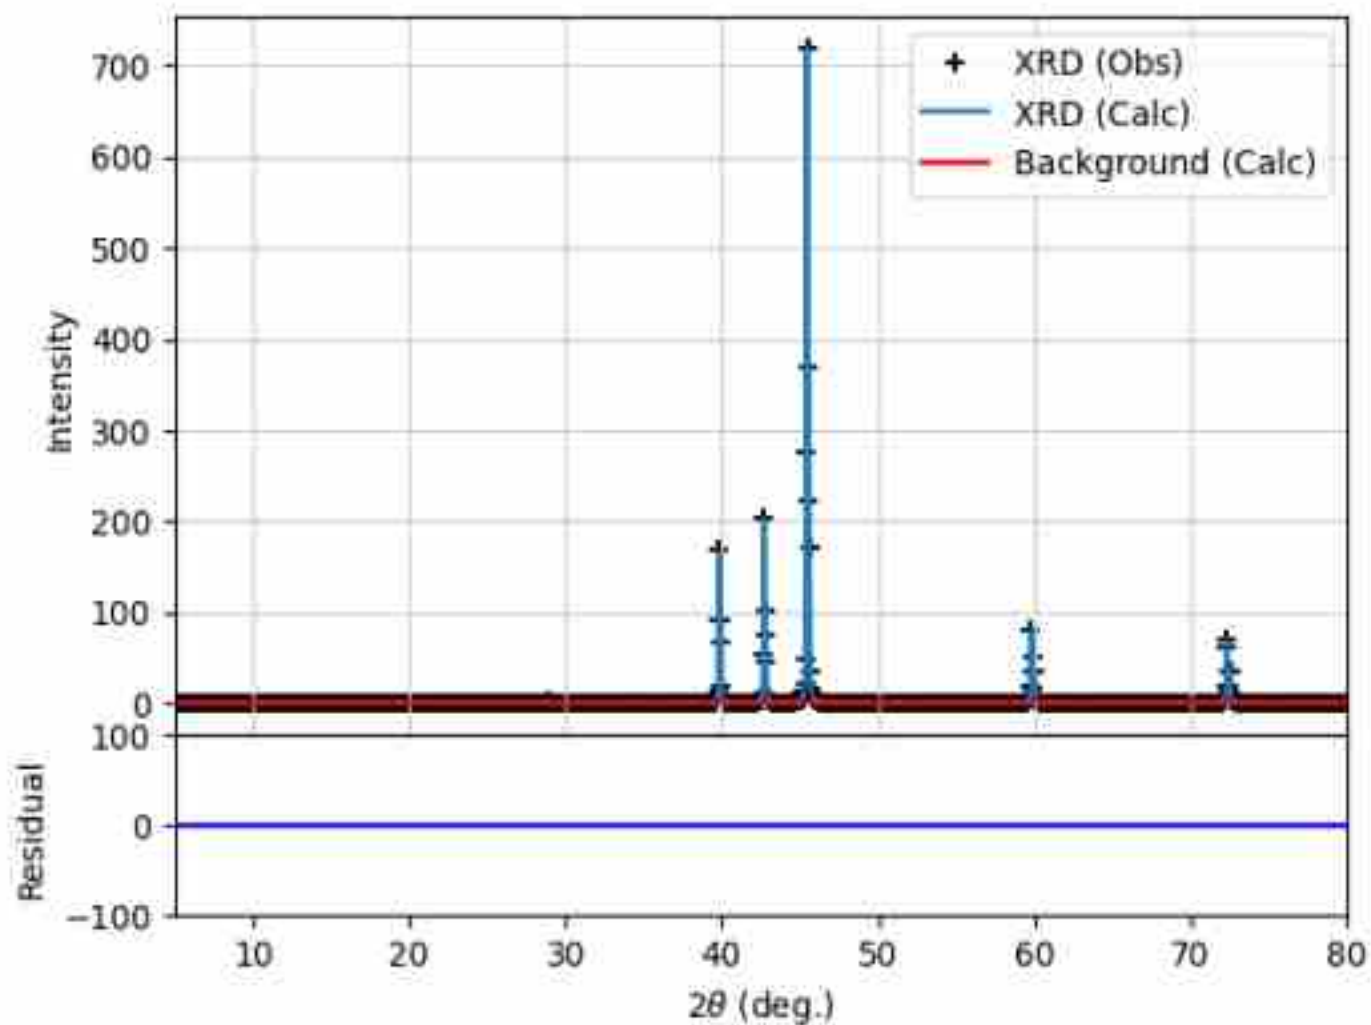

| RMSE before RR | Rwp     | RMSE after RR |
|----------------|---------|---------------|
| 0.01           | 0.01636 | 0.00119       |

# Ga2Ir1Rh1

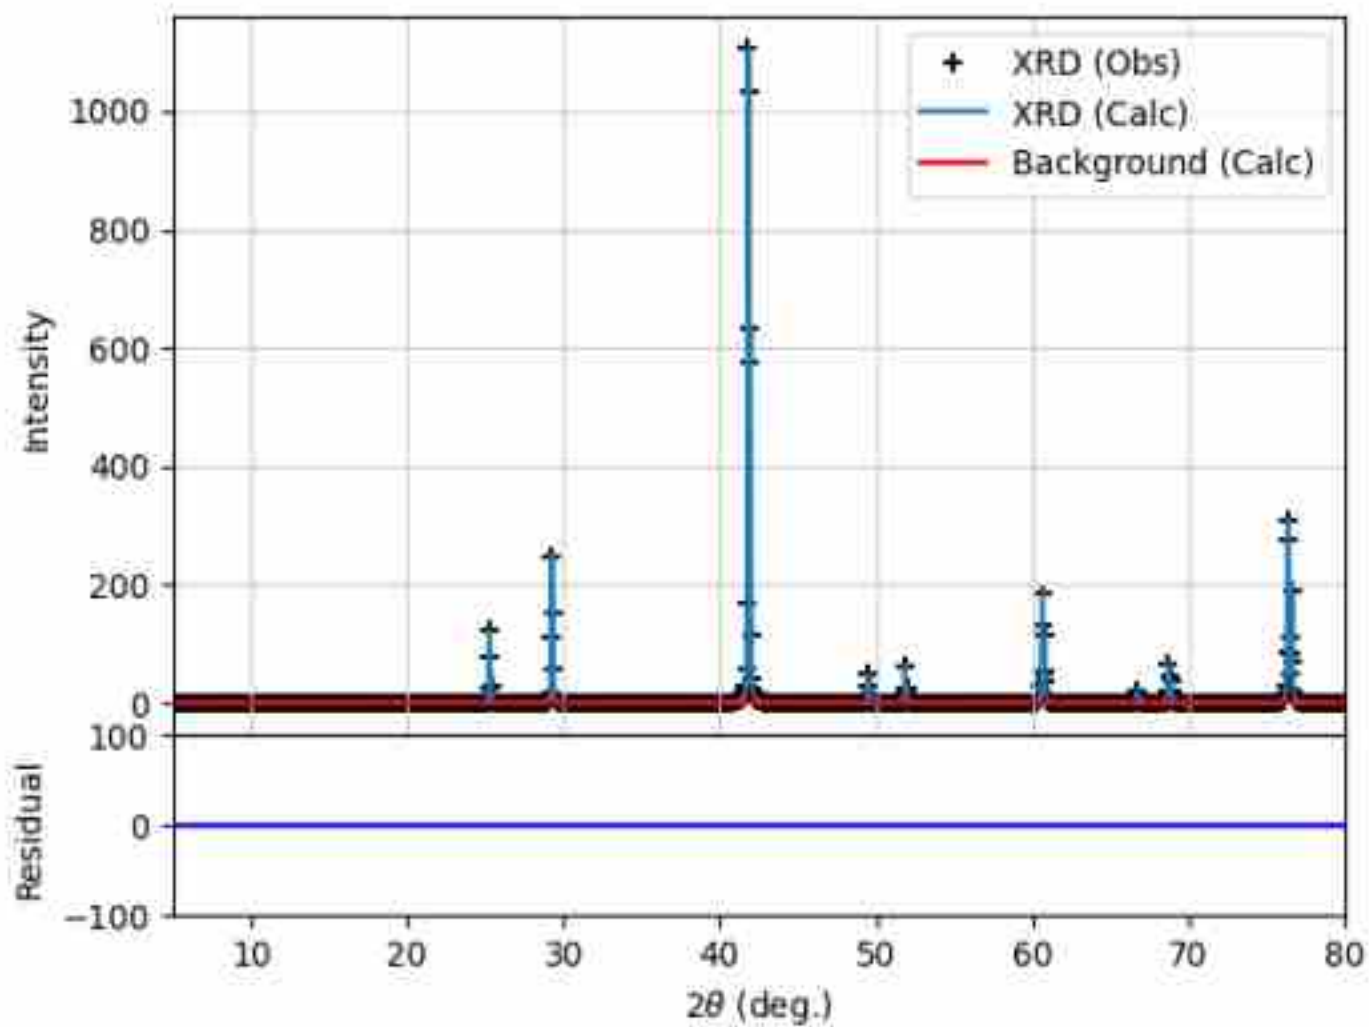

| RMSE before RR | Rwp     | RMSE after RR |
|----------------|---------|---------------|
| 0.001          | 0.00333 | 0.00279       |

# Ga<sub>2</sub>Ir<sub>1</sub>Ru<sub>1</sub>

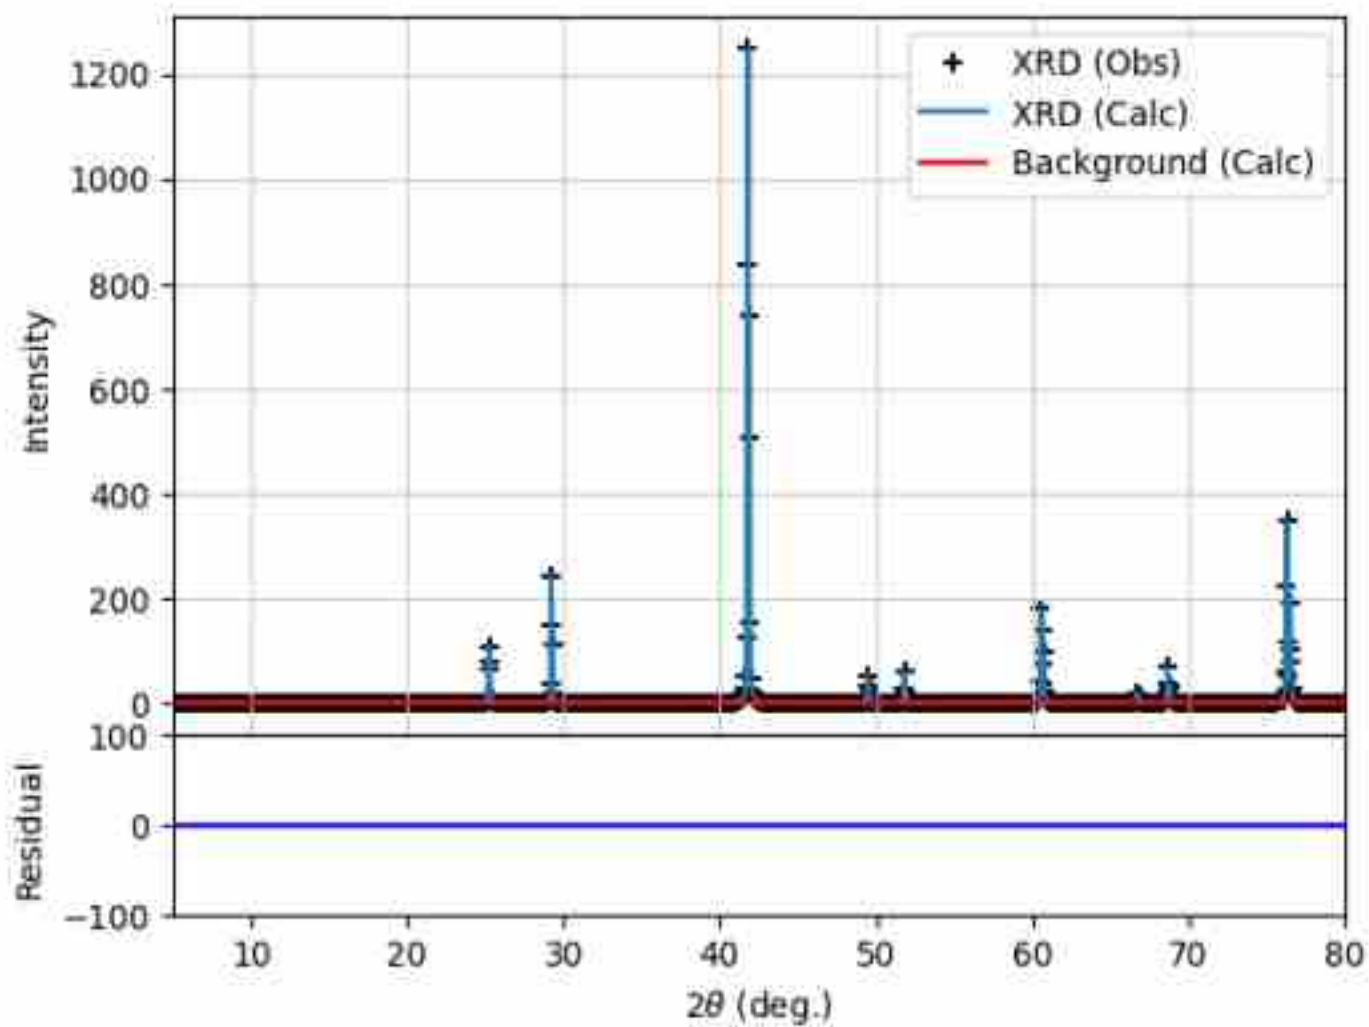

| RMSE before RR | Rwp     | RMSE after RR |
|----------------|---------|---------------|
| 0.001          | 0.00324 | 0.0008        |



# Ga<sub>3</sub>Ag<sub>1</sub>

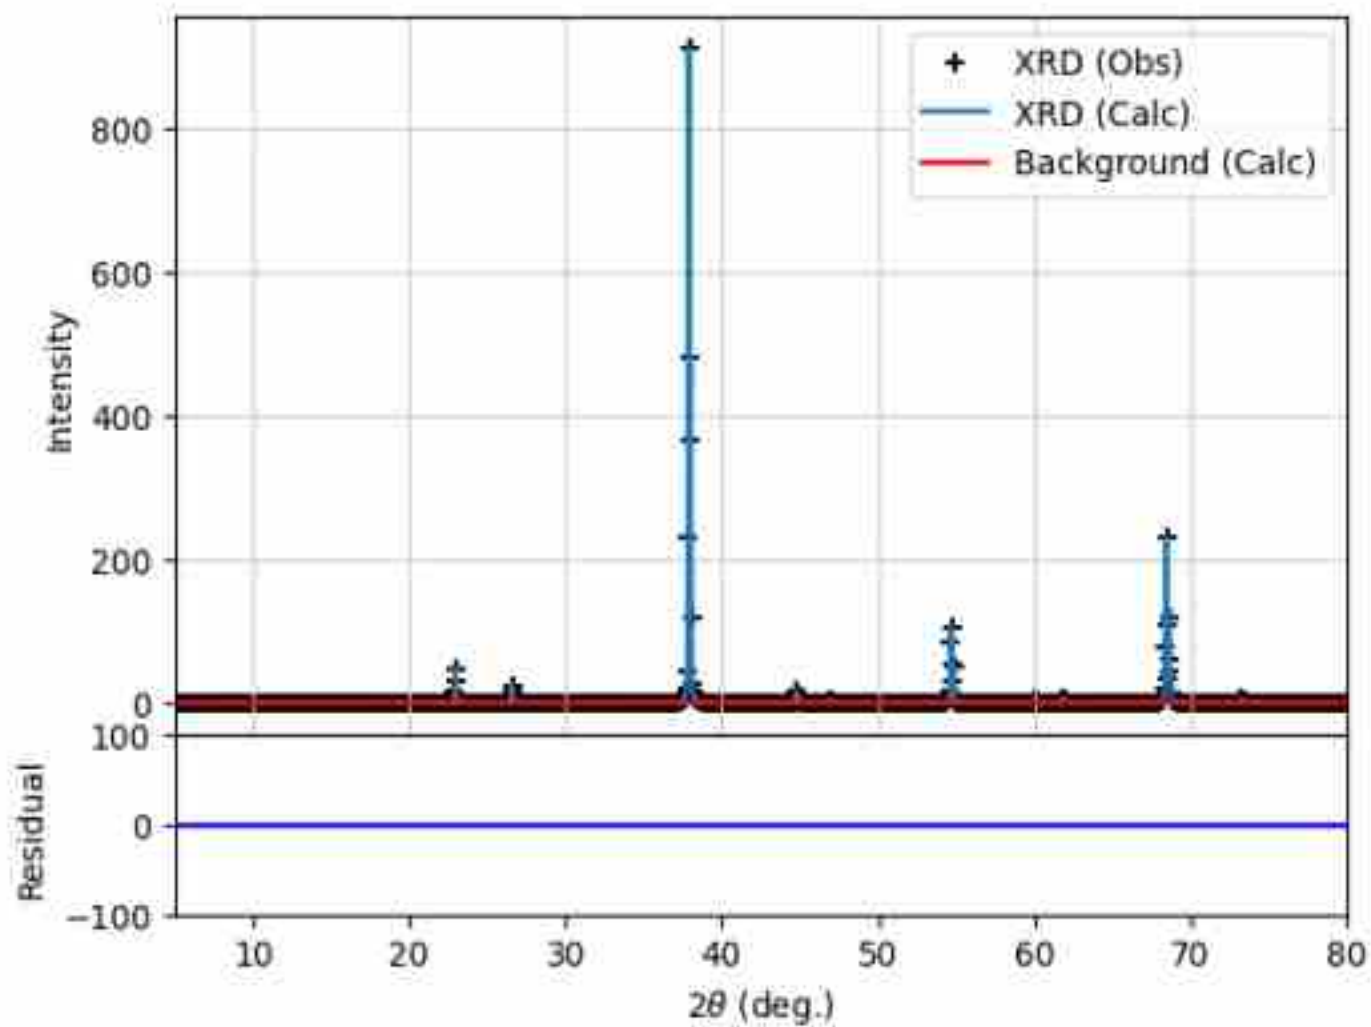

| RMSE before RR | Rwp     | RMSE after RR |
|----------------|---------|---------------|
| 0.001          | 0.00279 | 0.00032       |

# Ga<sub>3</sub>Si<sub>1</sub>Ni<sub>4</sub>

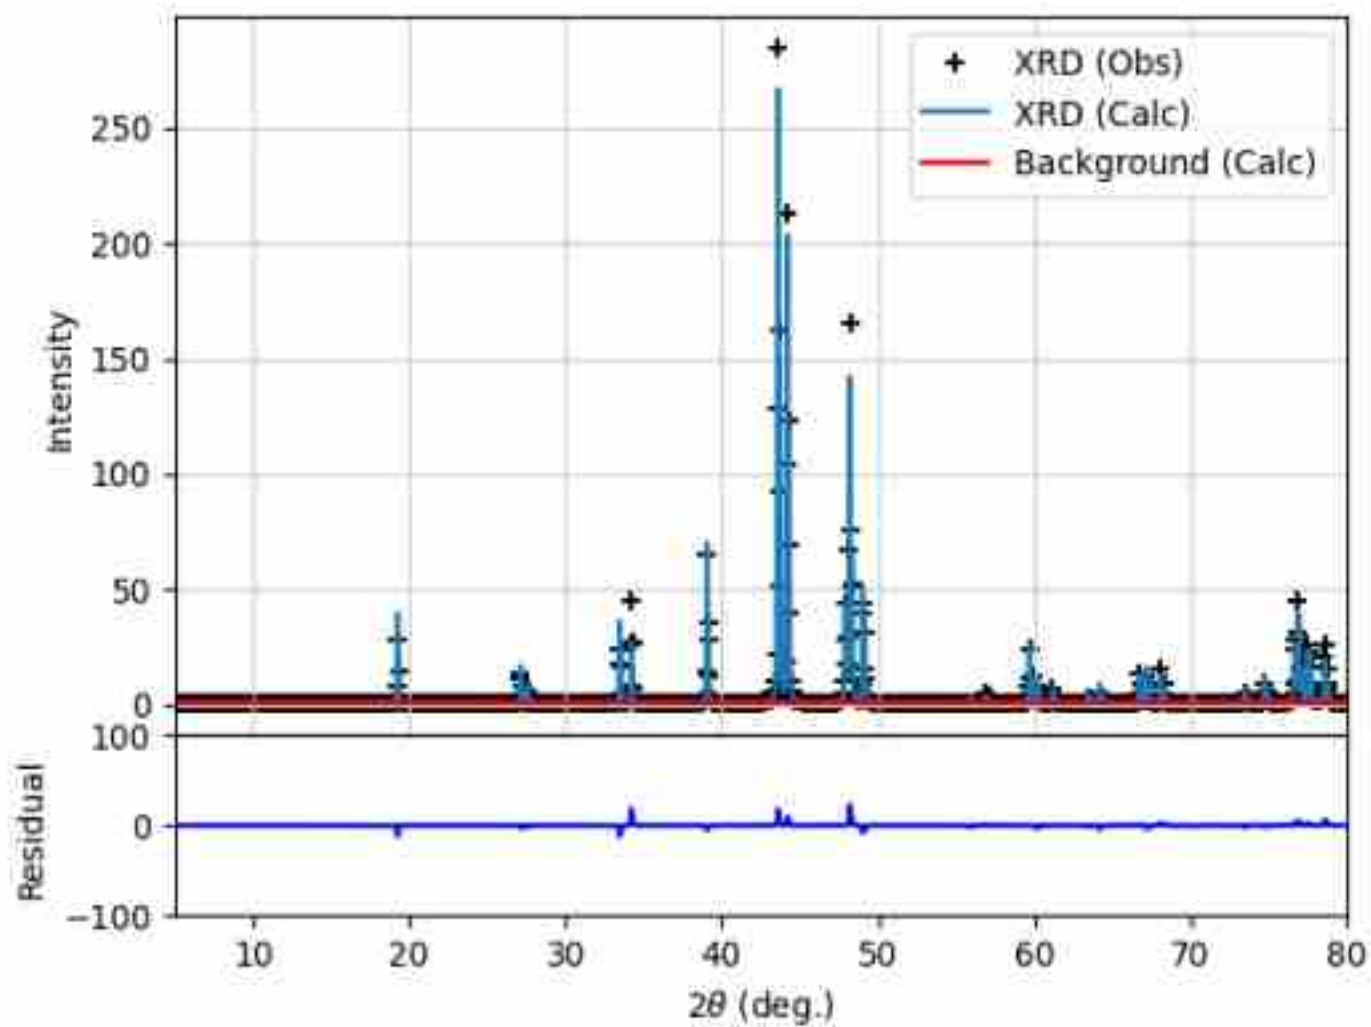

| RMSE before RR | Rwp      | RMSE after RR |
|----------------|----------|---------------|
| 0.01           | 15.04187 | 0.07264       |

# Gd1Bi1

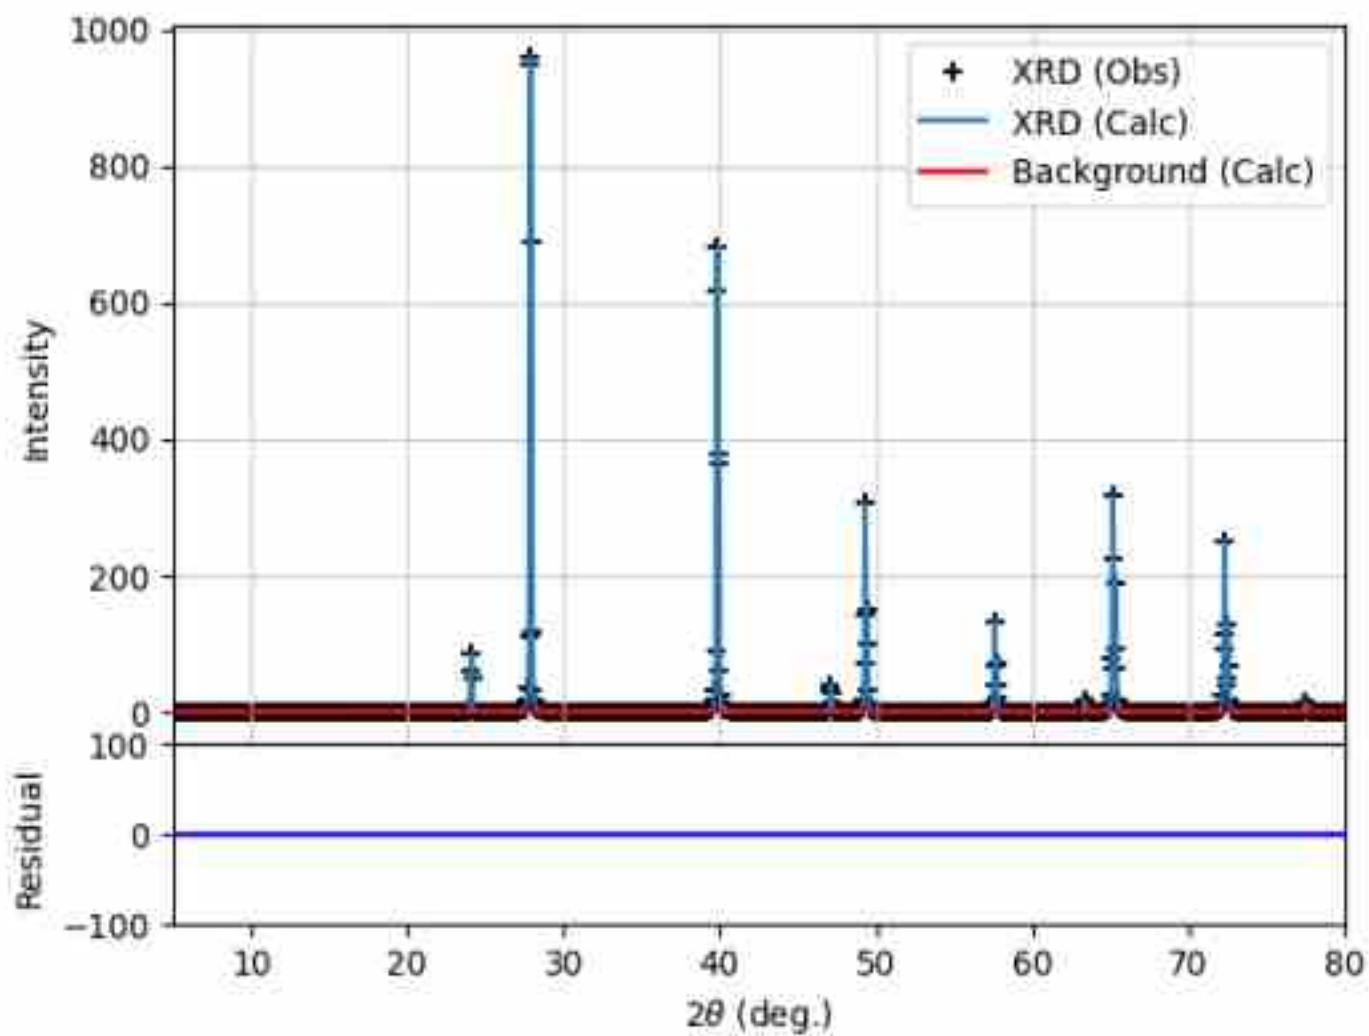

| RMSE before RR | Rwp  | RMSE after RR |
|----------------|------|---------------|
| 0.001          | 0.04 | 0.00131       |

# Gd1Cu1

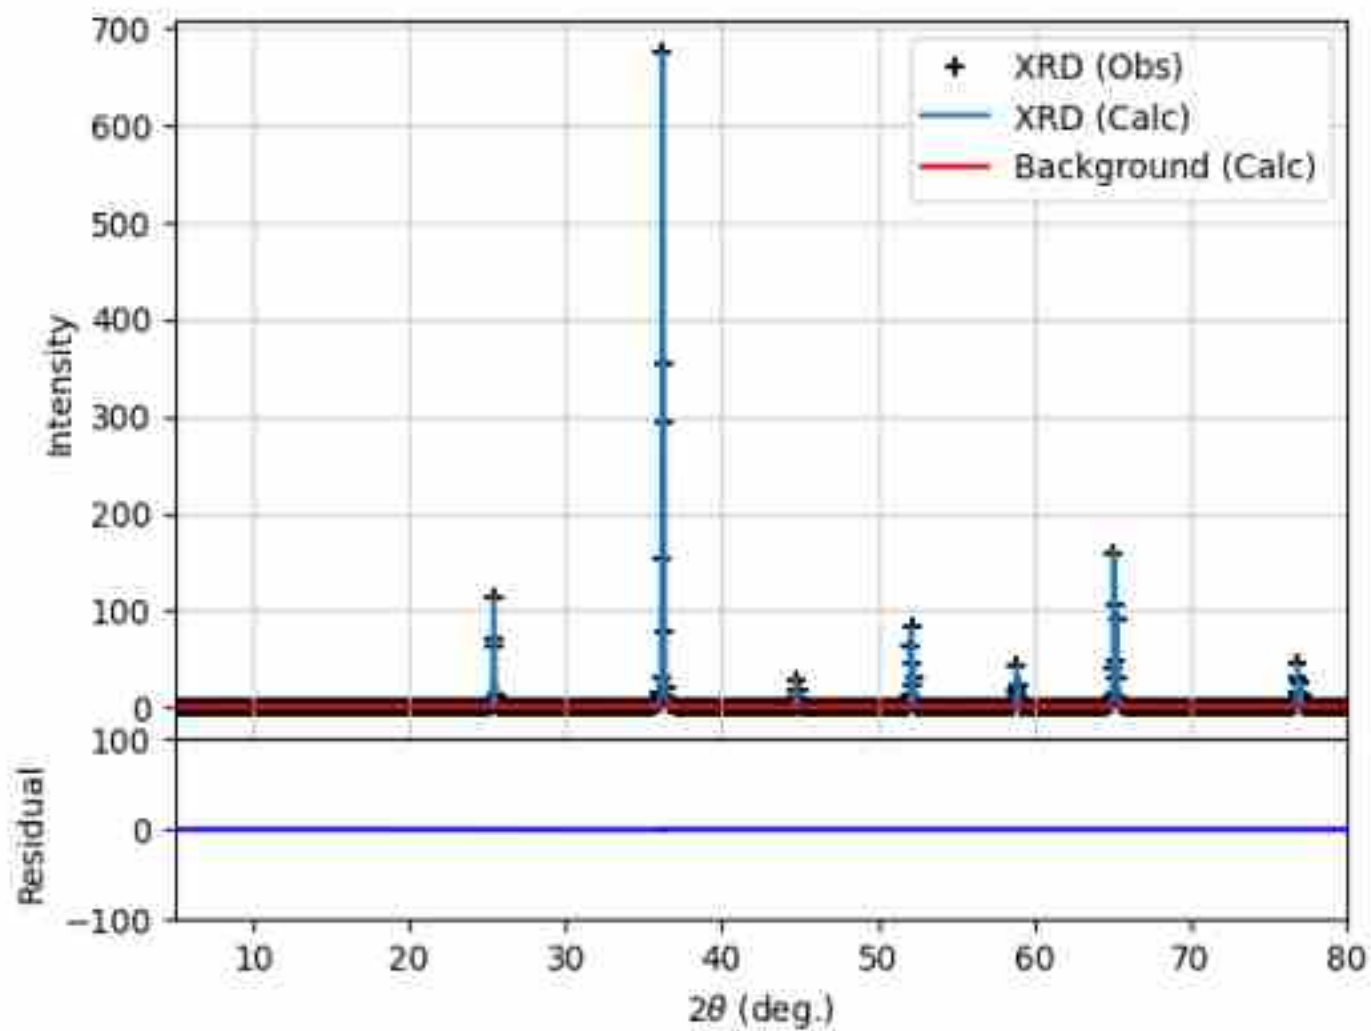

| RMSE before RR | Rwp     | RMSE after RR |
|----------------|---------|---------------|
| 0.001          | 0.09826 | 0.00146       |

Gd1Dy1In2

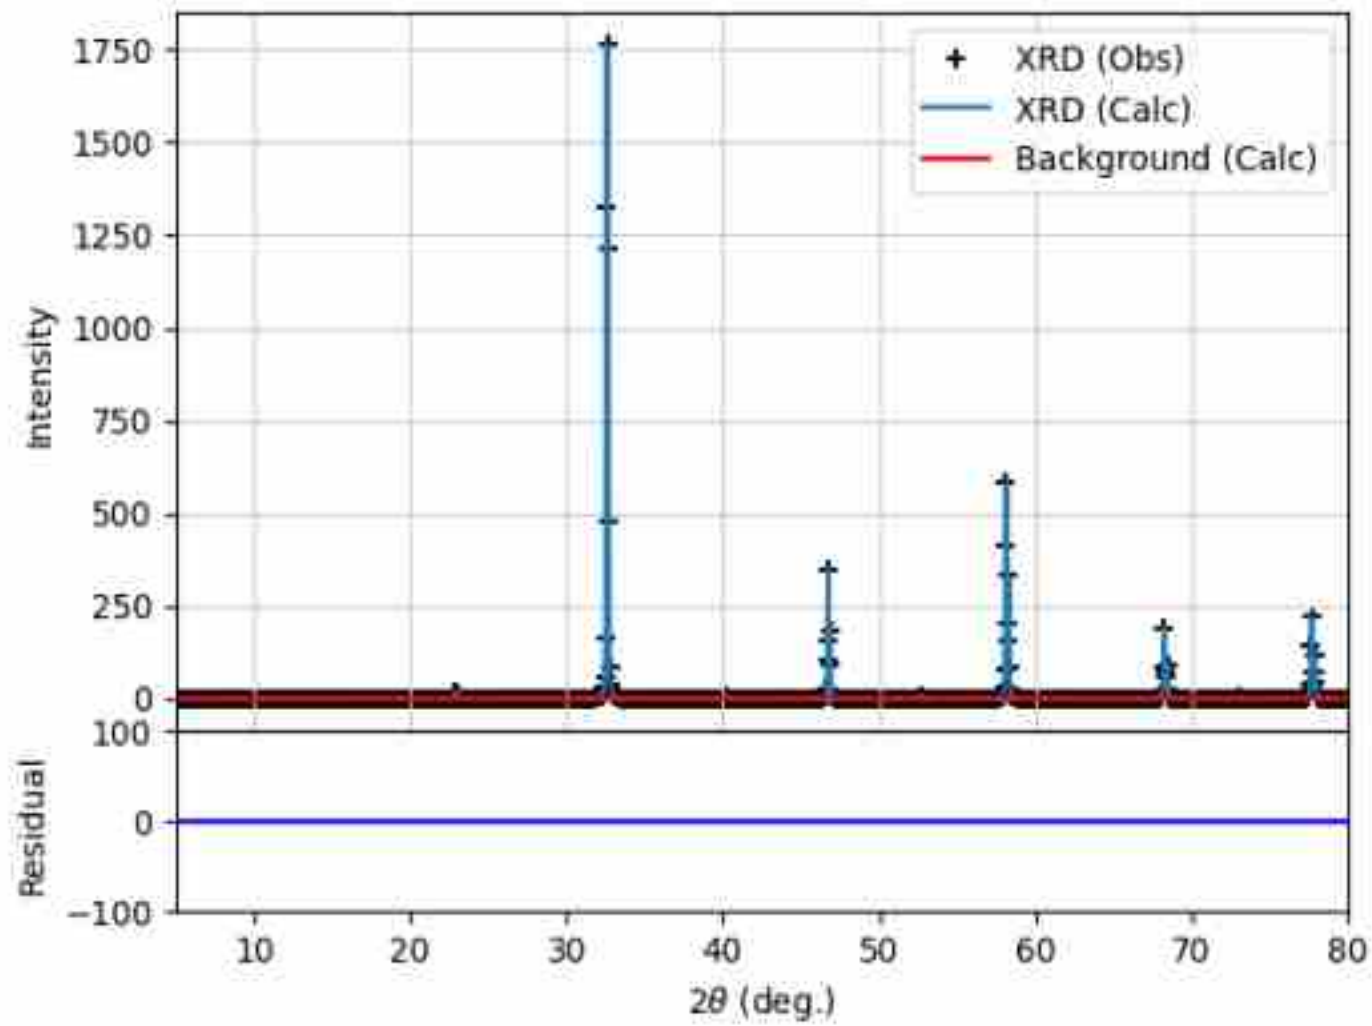

| RMSE before RR | Rwp     | RMSE after RR |
|----------------|---------|---------------|
| 0.001          | 0.00338 | 0.00033       |

# Gd1Dy1Ti2

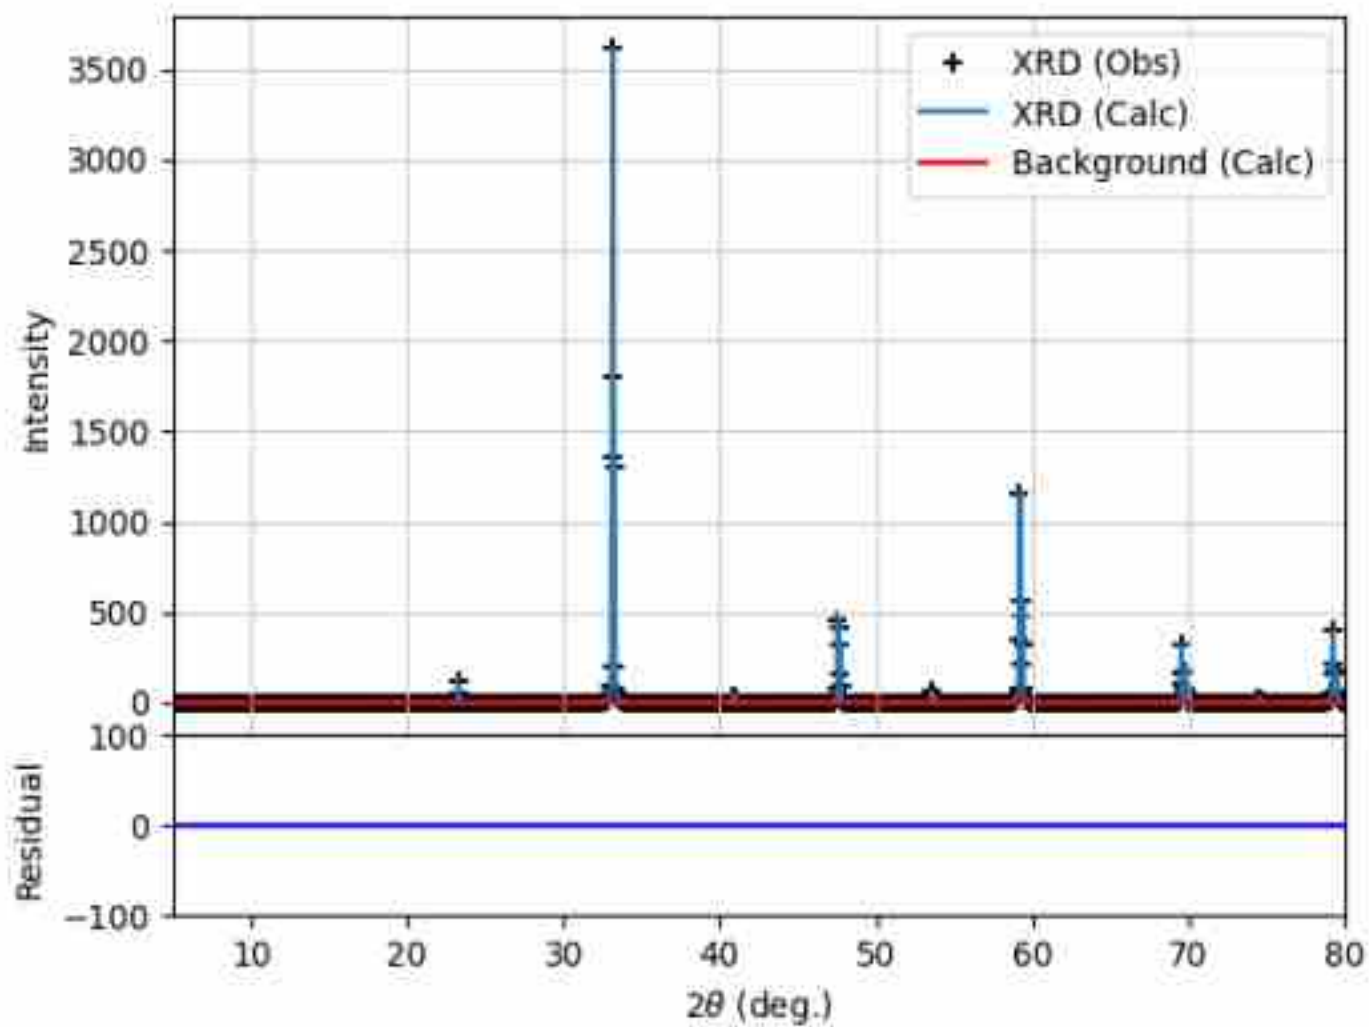

| RMSE before RR | Rwp    | RMSE after RR |
|----------------|--------|---------------|
| 0.001          | 0.0208 | 0.00076       |

# Gd1Mg1Hg2

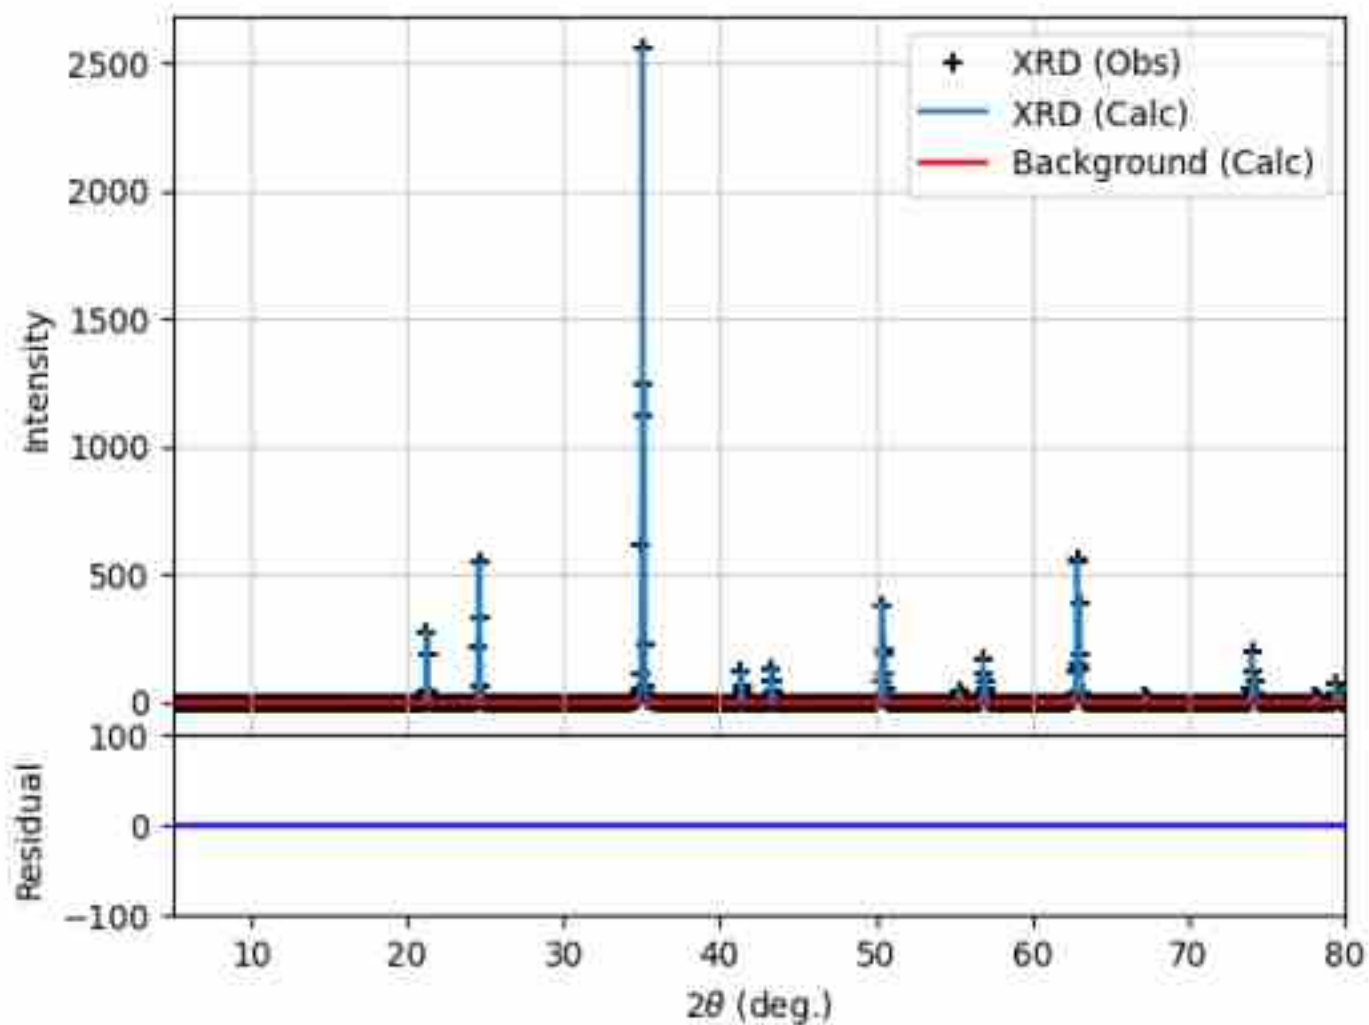

| RMSE before RR | Rwp     | RMSE after RR |
|----------------|---------|---------------|
| 0.001          | 0.00188 | 0.00042       |

# Gd1Mg3

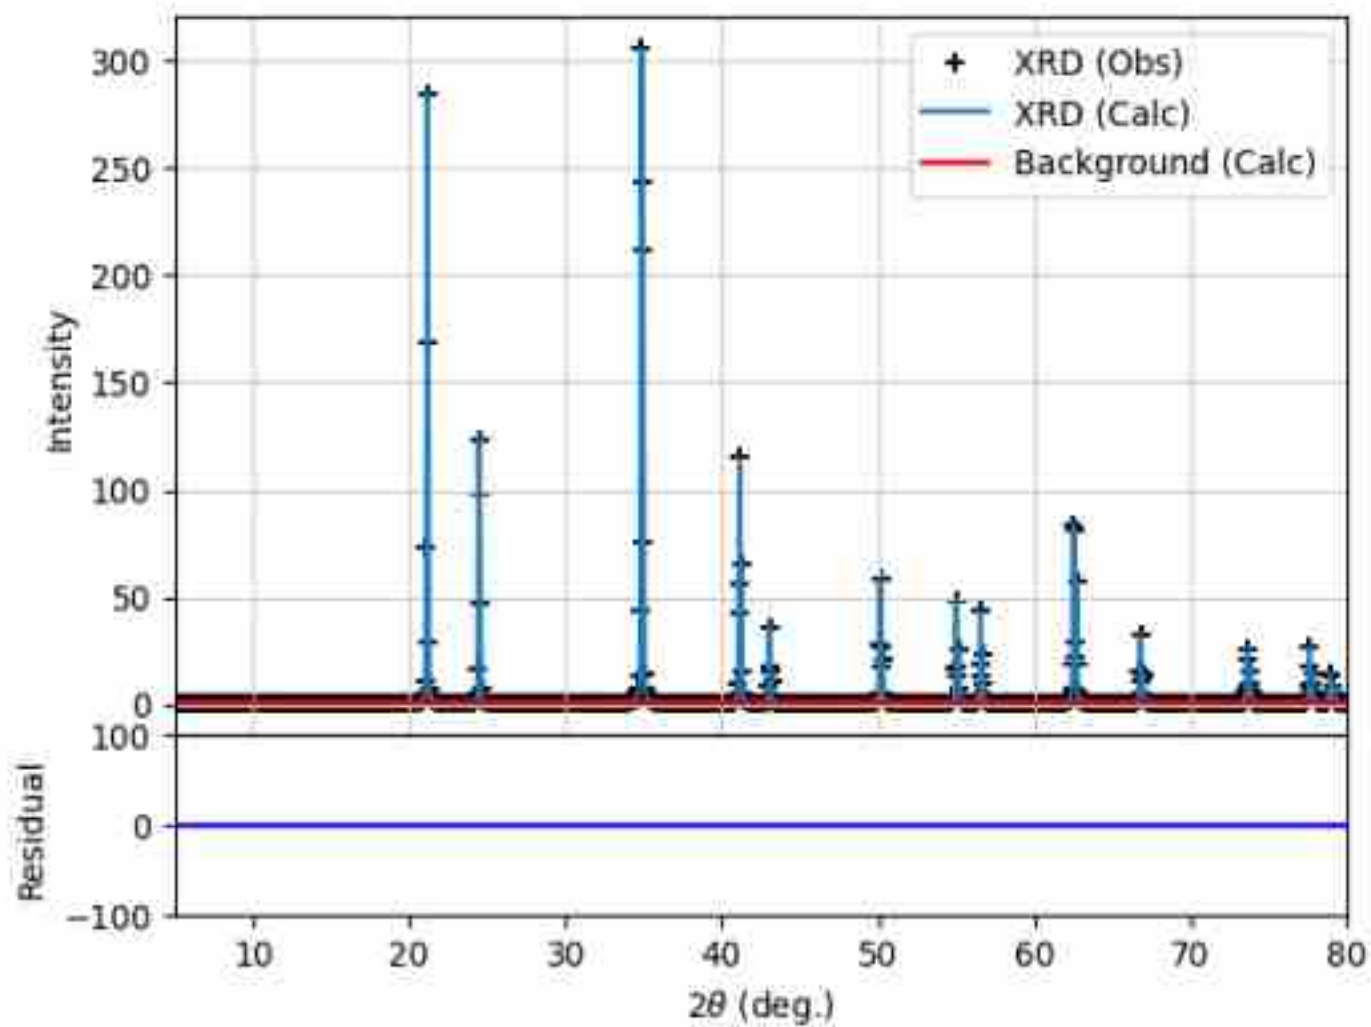

| RMSE before RR | Rwp     | RMSE after RR |
|----------------|---------|---------------|
| 0.001          | 0.00295 | 0.00107       |



# Gd1Rh5

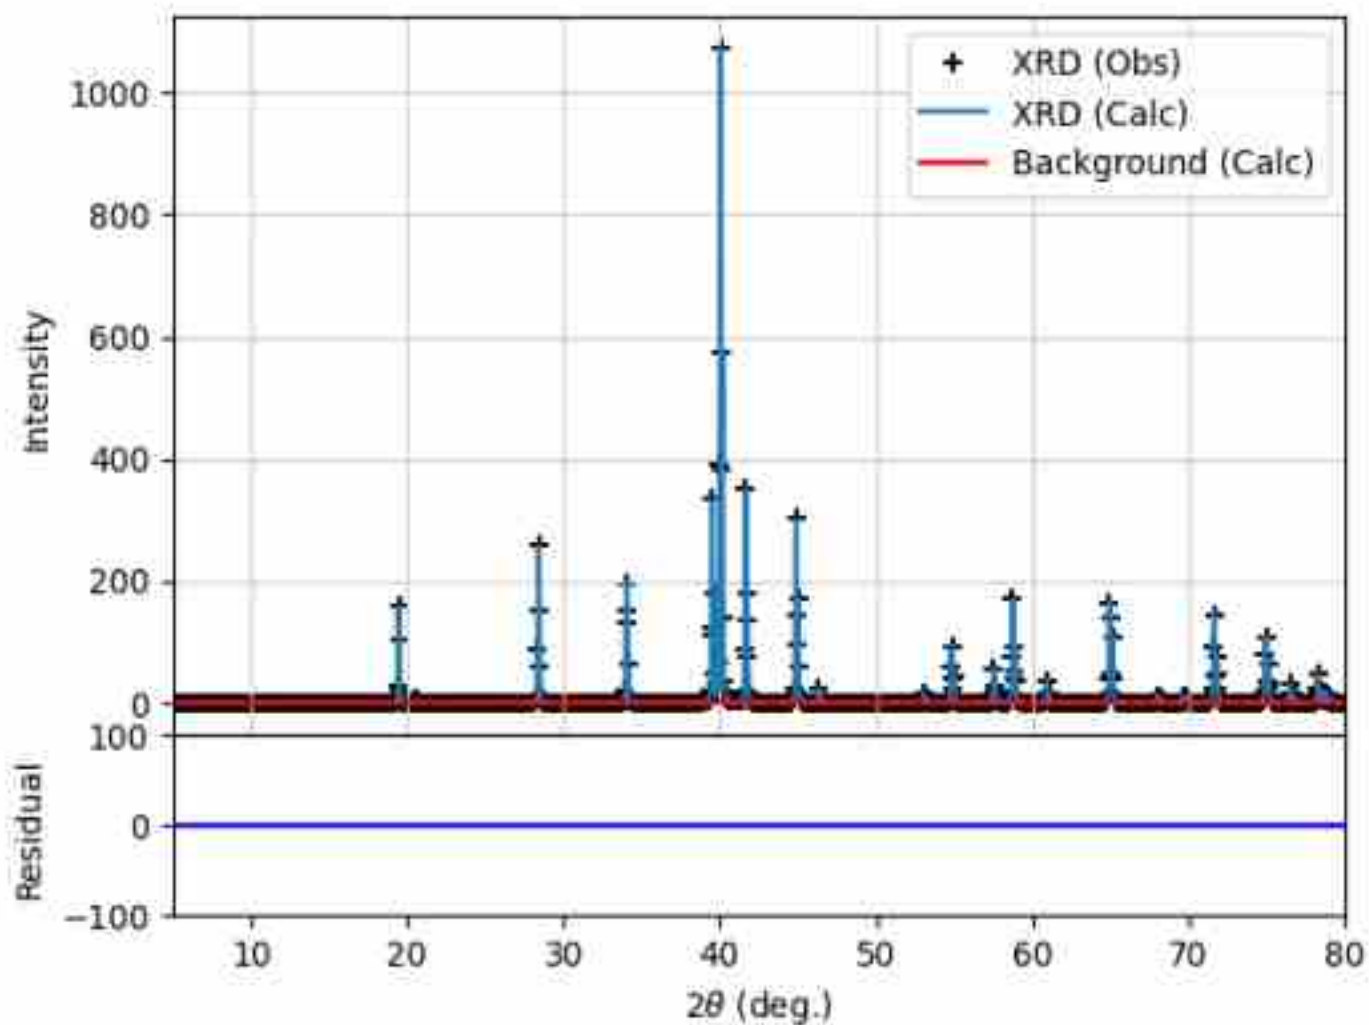

| RMSE before RR | Rwp     | RMSE after RR |
|----------------|---------|---------------|
| 0.01           | 0.00922 | 0.0009        |

# Gd1Se1

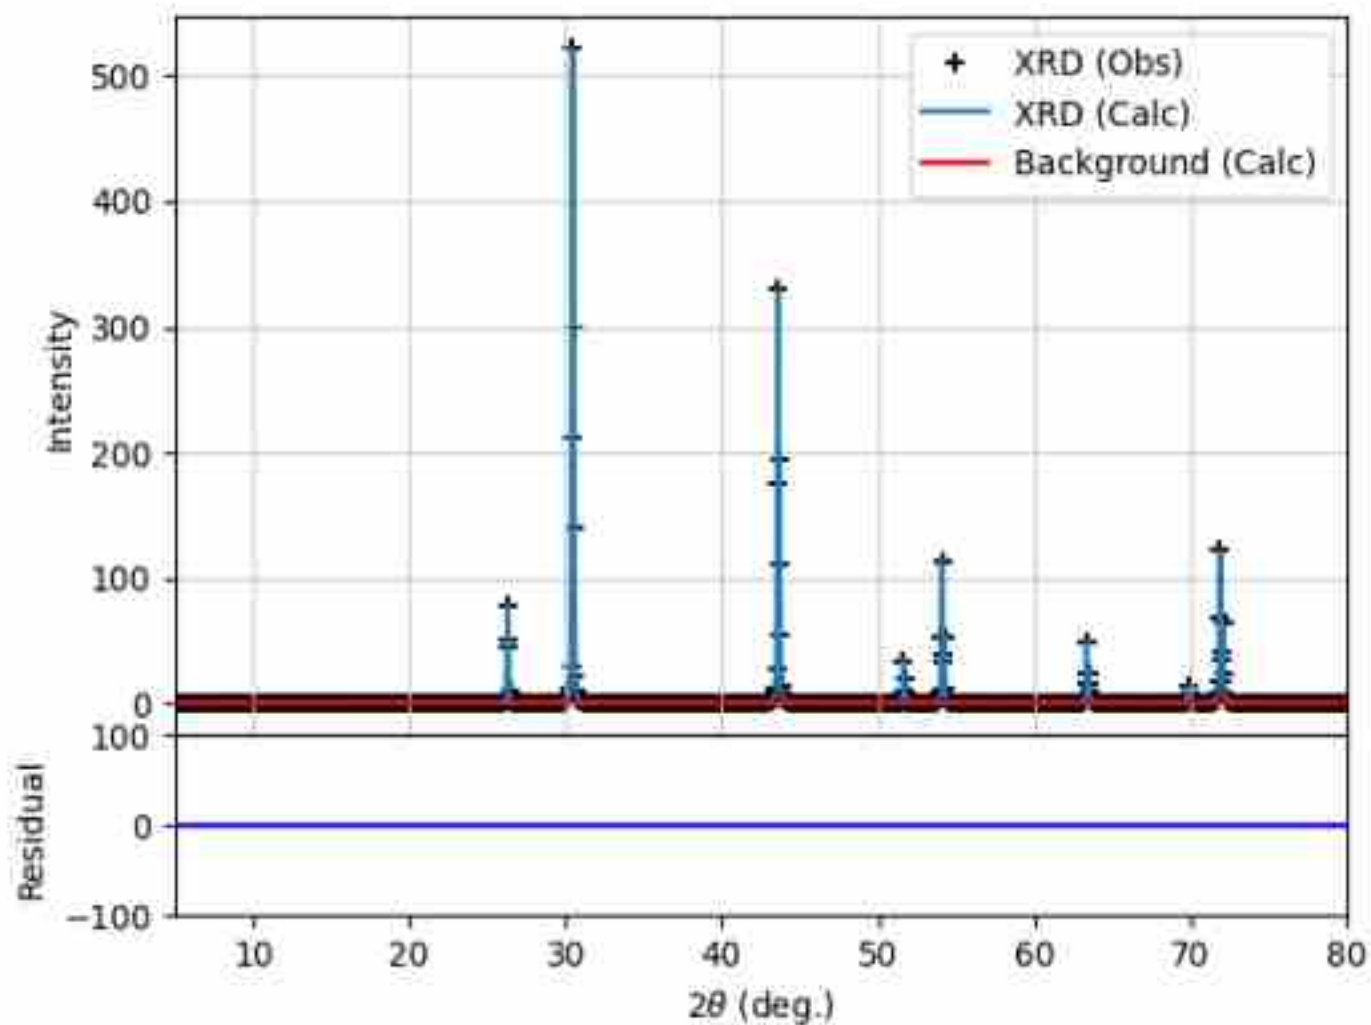

| RMSE before RR | Rwp     | RMSE after RR |
|----------------|---------|---------------|
| 0.001          | 0.05481 | 0.00057       |

Gd1Tm1Ir2

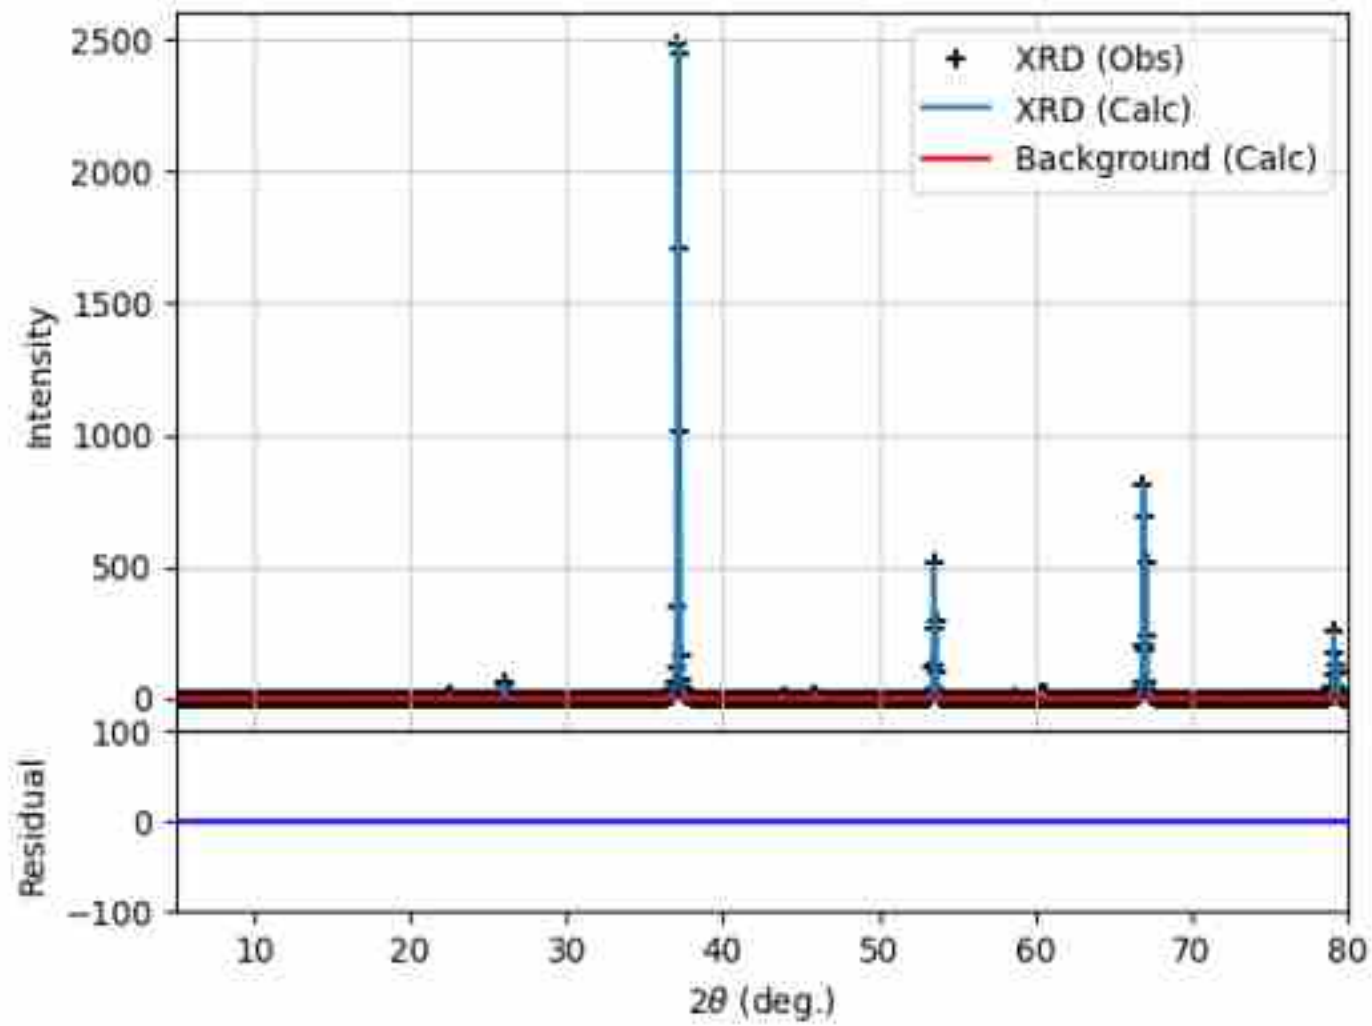

| RMSE before RR | Rwp   | RMSE after RR |
|----------------|-------|---------------|
| 0.001          | 2e-05 | 2e-05         |

# Gd<sub>2</sub>Ir<sub>1</sub>Pd<sub>1</sub>

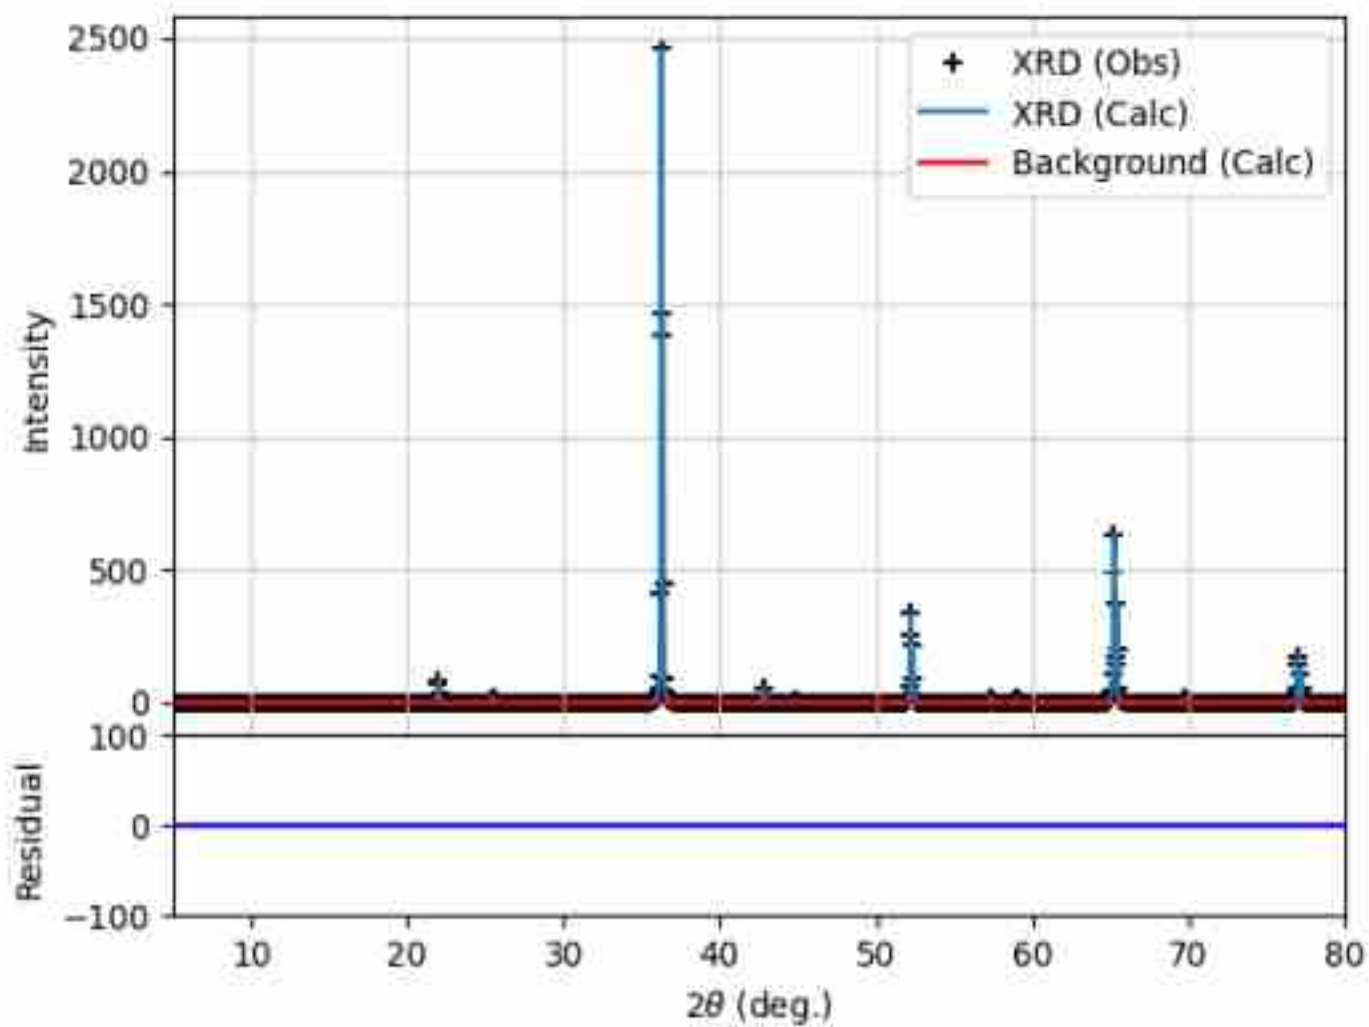

| RMSE before RR | Rwp     | RMSE after RR |
|----------------|---------|---------------|
| 0.001          | 0.00372 | 0.00023       |

# Gd<sub>2</sub>Ni<sub>2</sub>

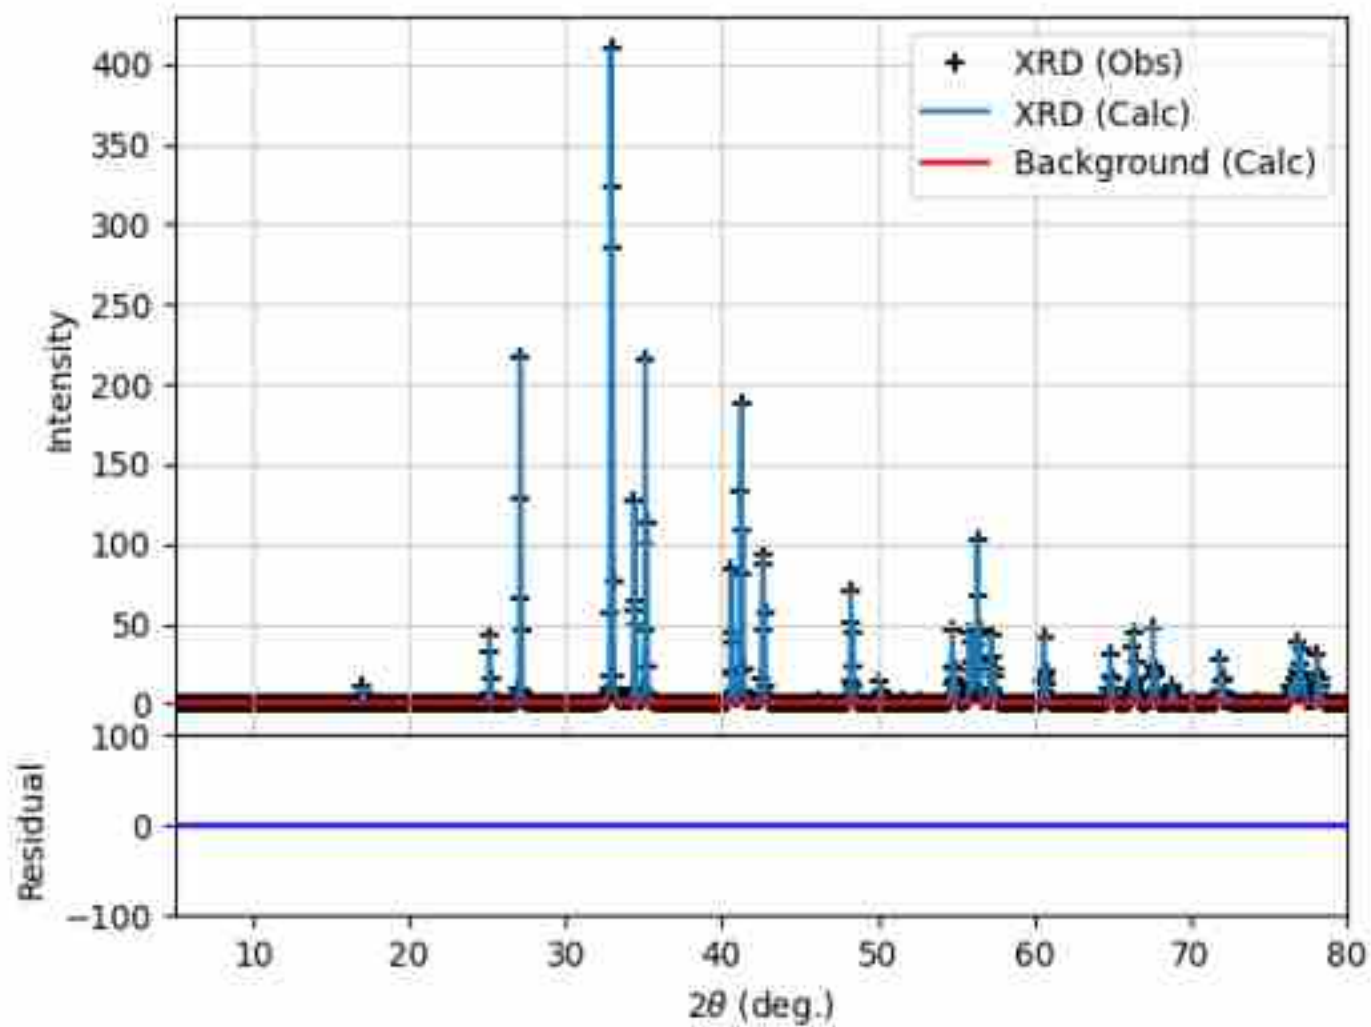

| RMSE before RR | Rwp     | RMSE after RR |
|----------------|---------|---------------|
| 0.01           | 0.00435 | 0.0003        |

# Gd<sub>3</sub>Er<sub>1</sub>

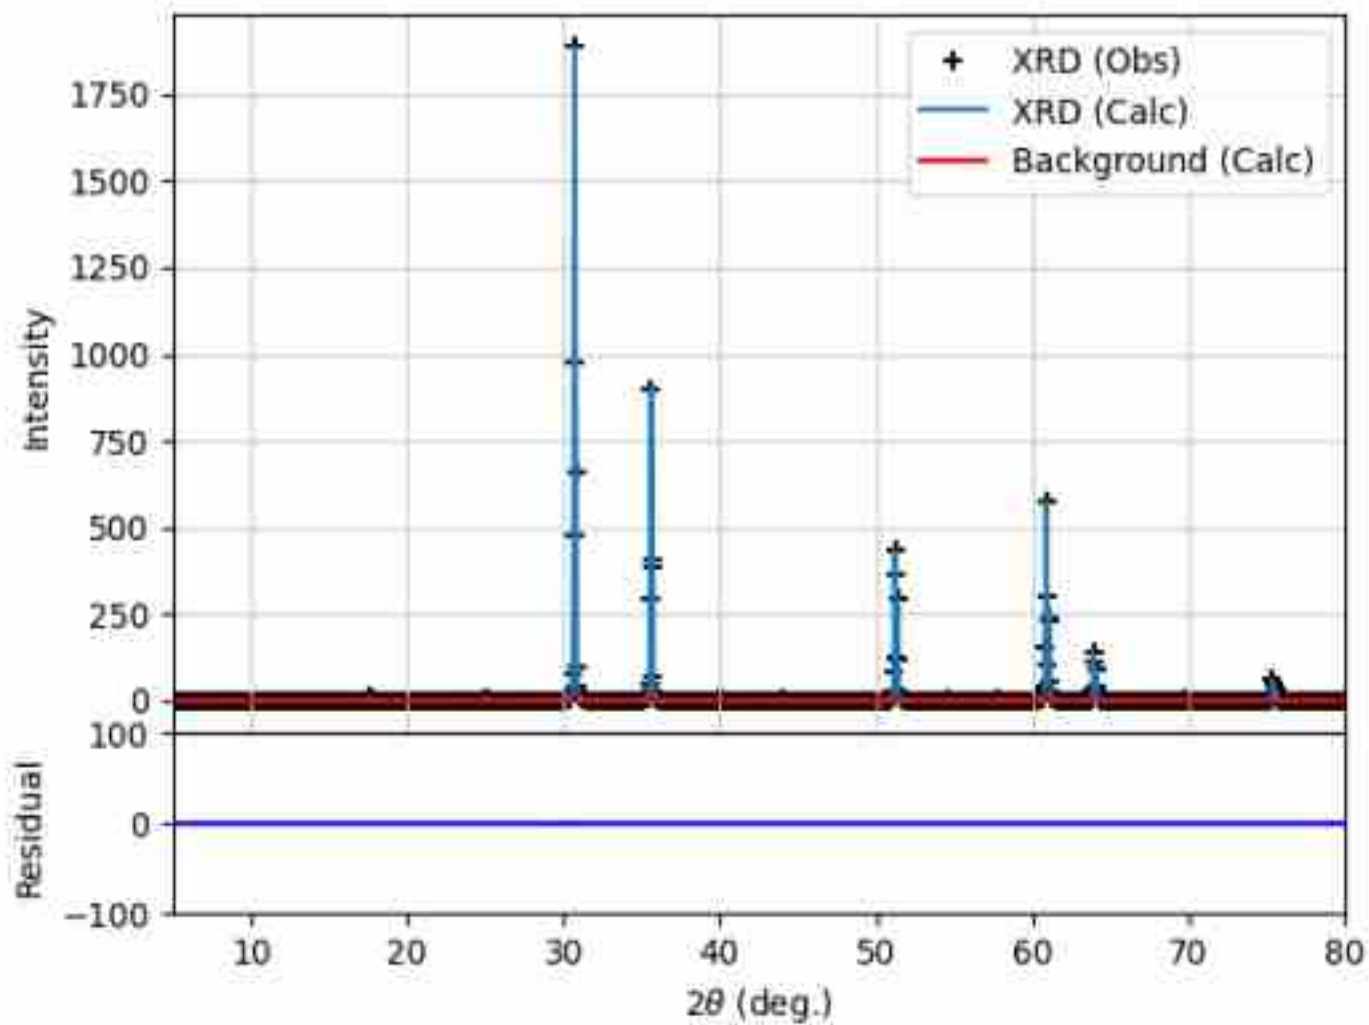

| RMSE before RR | Rwp     | RMSE after RR |
|----------------|---------|---------------|
| 0.001          | 0.02371 | 0.00078       |

# H1Rh1

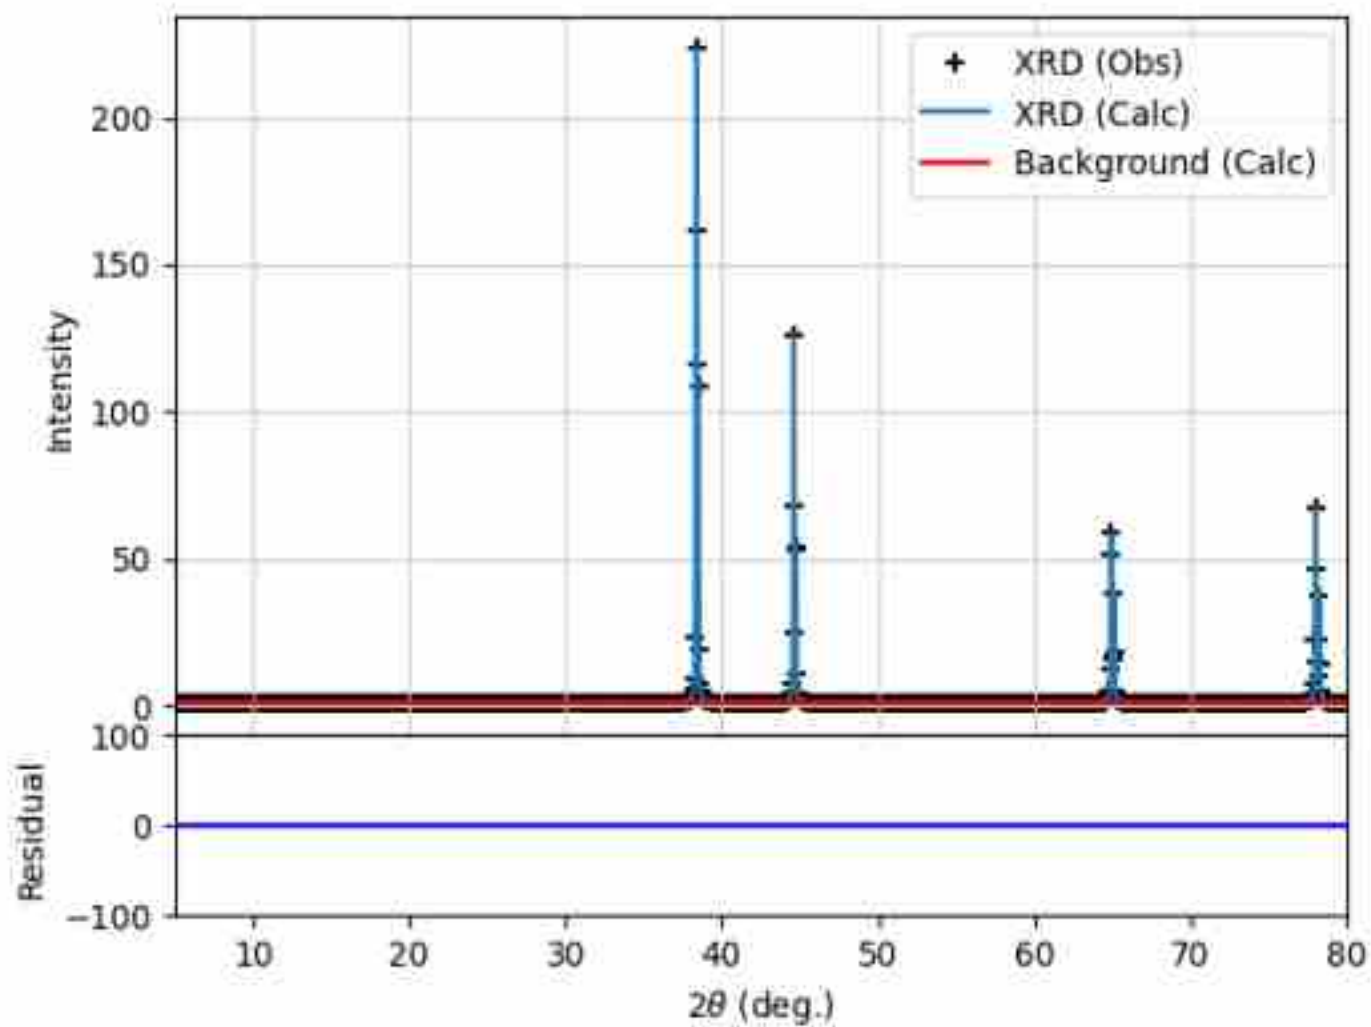

| RMSE before RR | Rwp     | RMSE after RR |
|----------------|---------|---------------|
| 0.001          | 0.00289 | 0.00086       |

Hf1Al1Au2

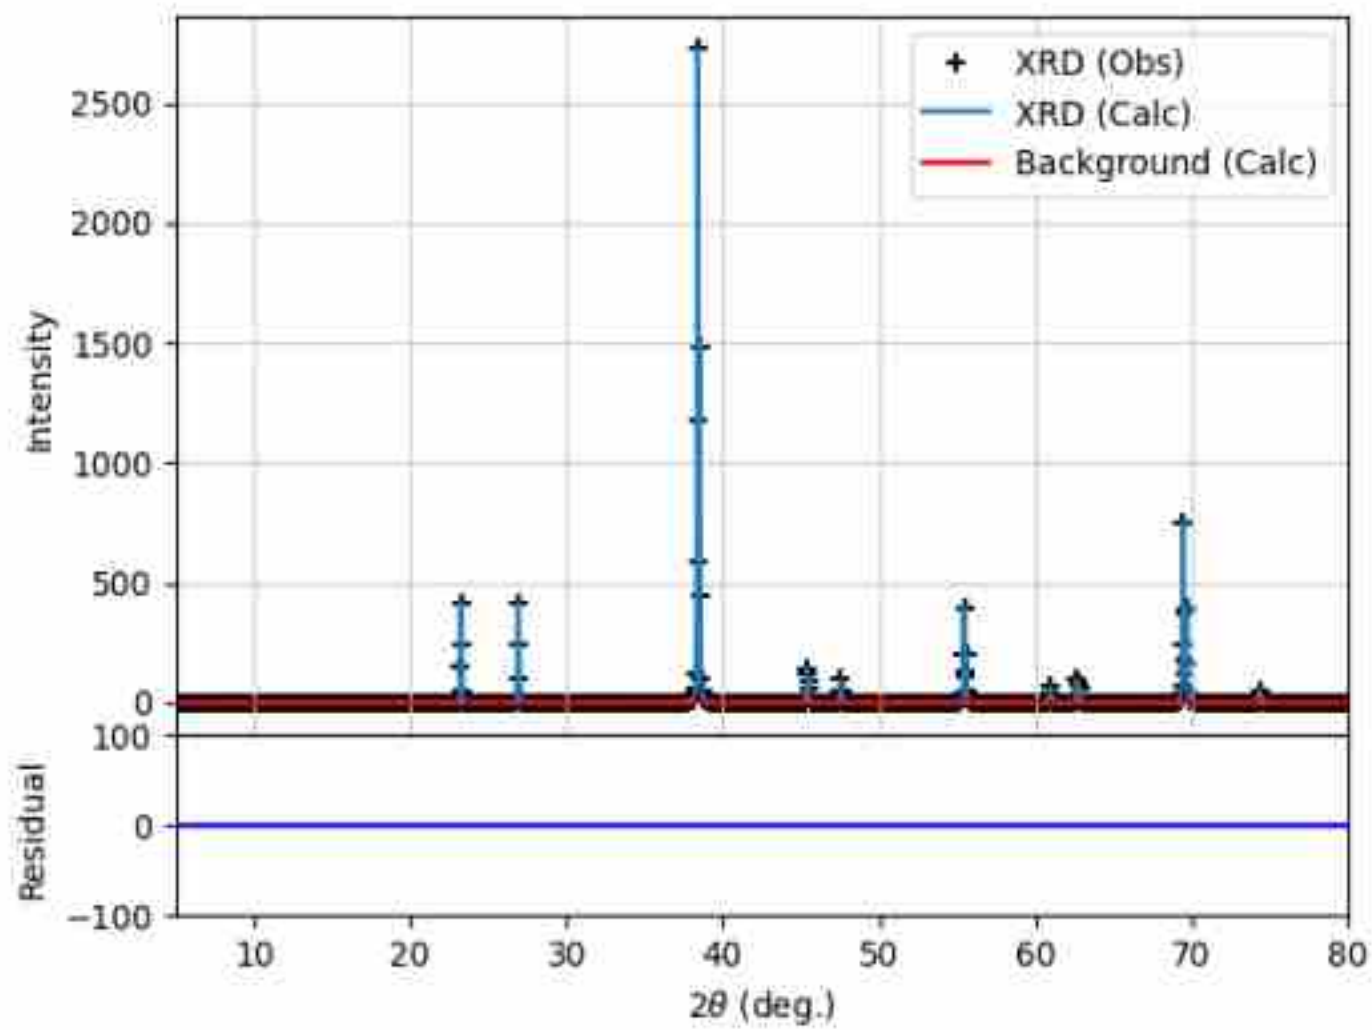

| RMSE before RR | Rwp     | RMSE after RR |
|----------------|---------|---------------|
| 0.001          | 0.00054 | 0.00051       |



# Hf1Be1Ir2

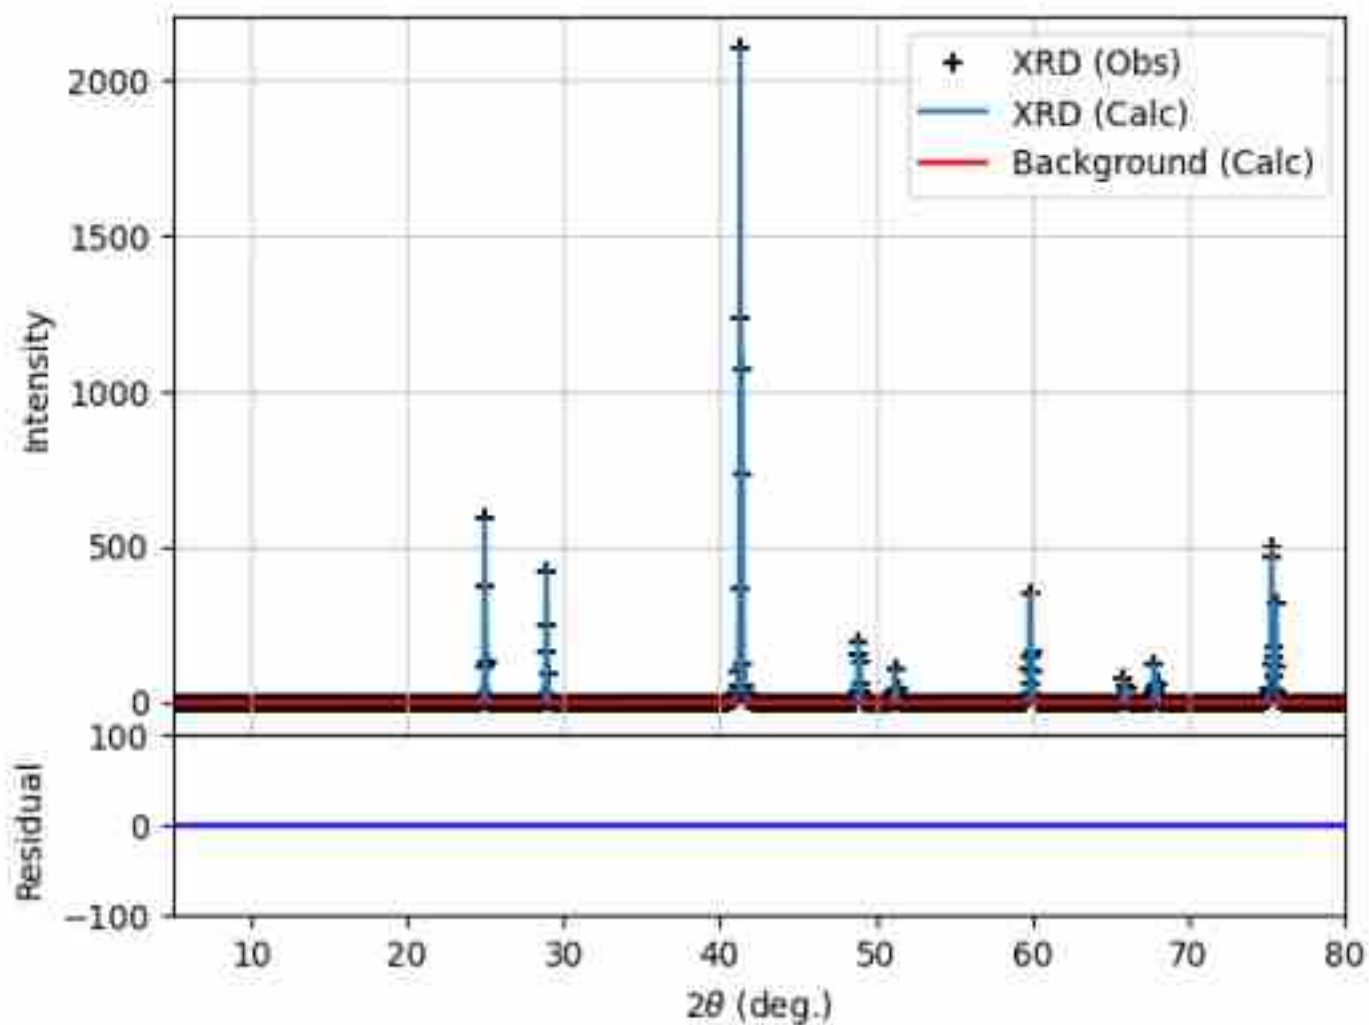

| RMSE before RR | Rwp     | RMSE after RR |
|----------------|---------|---------------|
| 0.001          | 0.00426 | 0.00213       |

# Hf1Mg1Au2

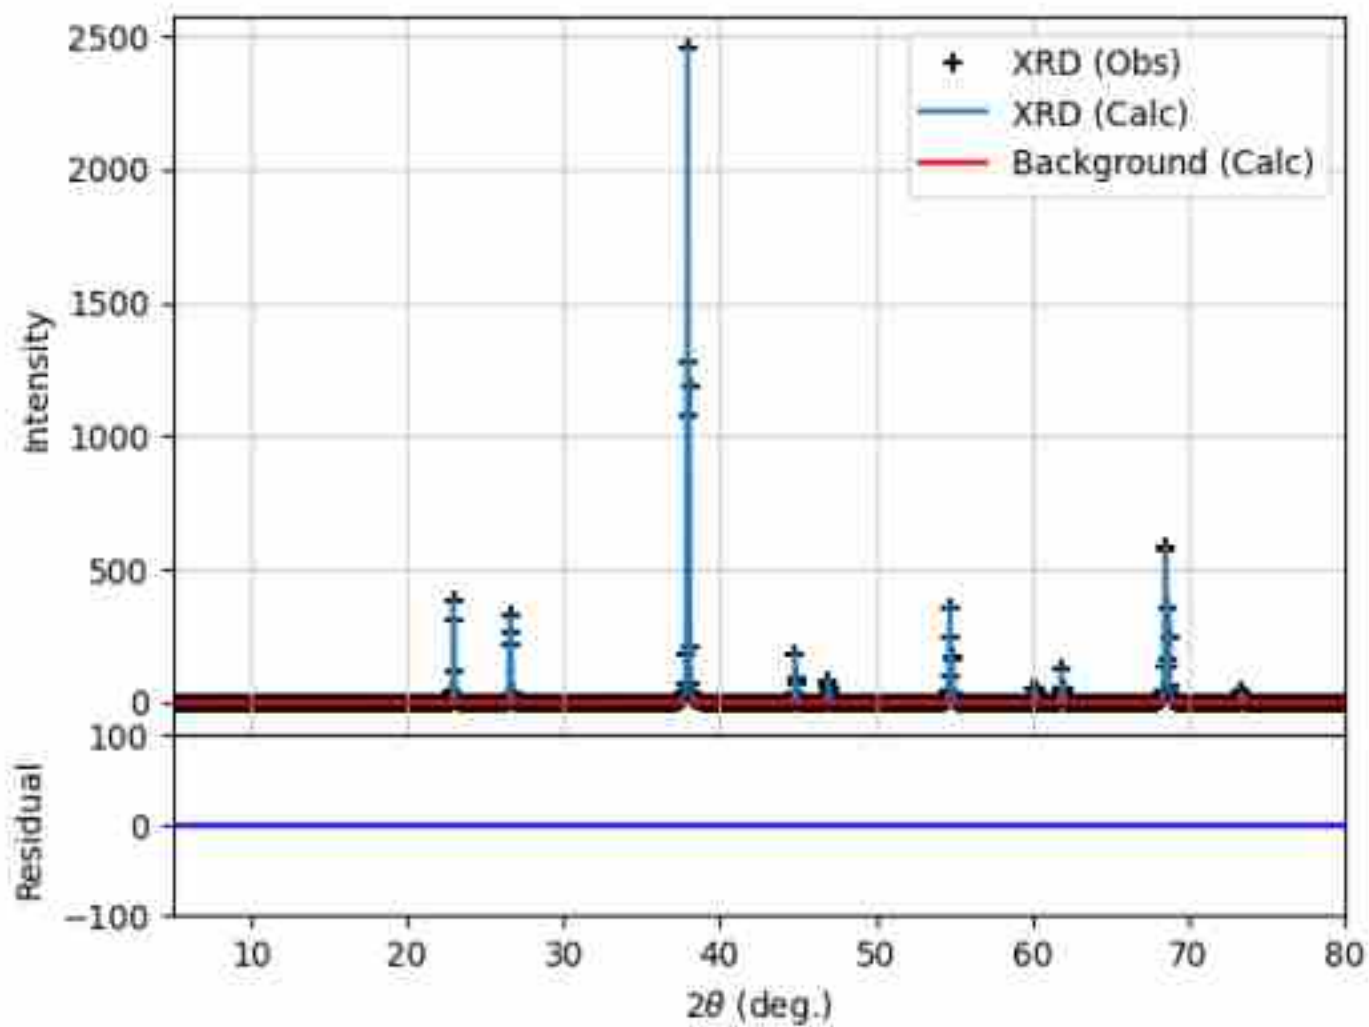

| RMSE before RR | Rwp     | RMSE after RR |
|----------------|---------|---------------|
| 0.001          | 0.00504 | 0.00107       |

# Hf1Mg1Ir2

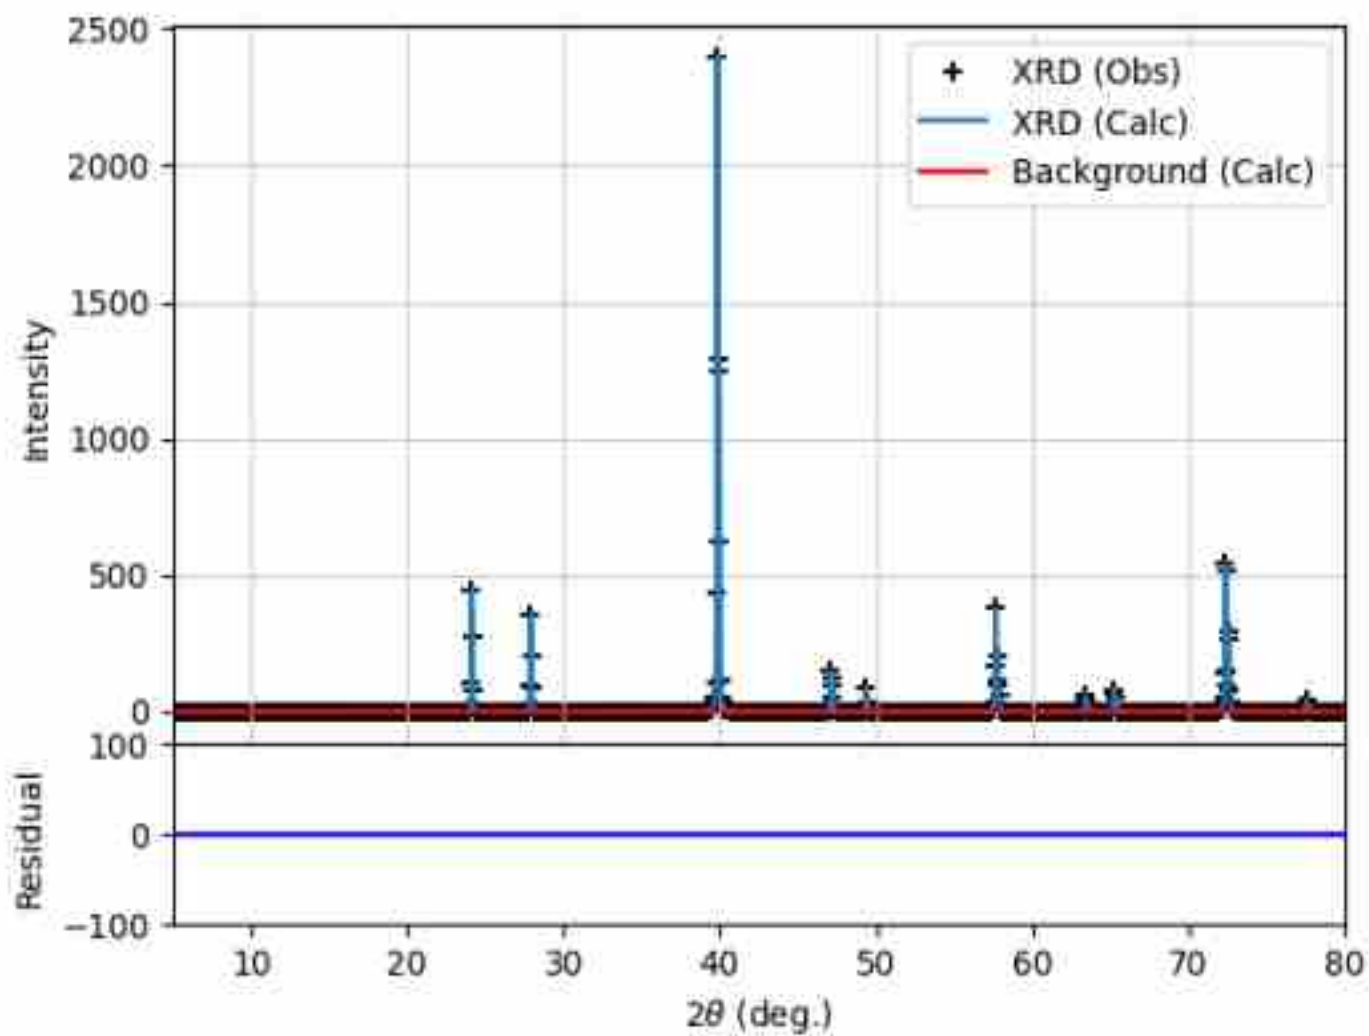

| RMSE before RR | Rwp   | RMSE after RR |
|----------------|-------|---------------|
| 0.001          | 8e-05 | 7e-05         |

# Hf1Si1Ru2

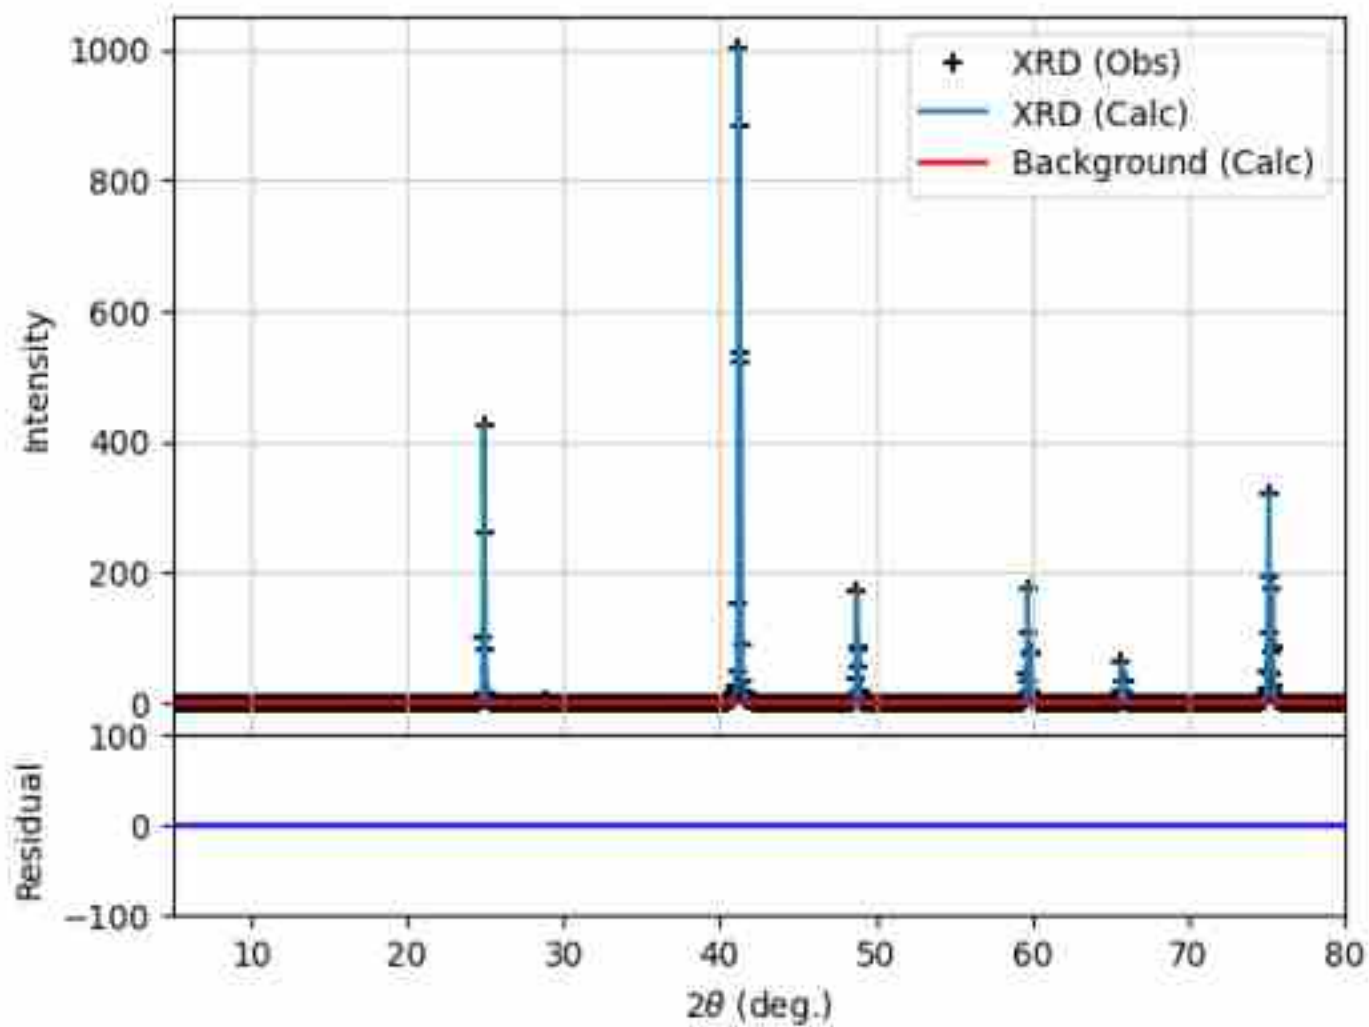

| RMSE before RR | Rwp   | RMSE after RR |
|----------------|-------|---------------|
| 0.001          | 1e-05 | 3e-05         |

Hf1Ta1Ru2

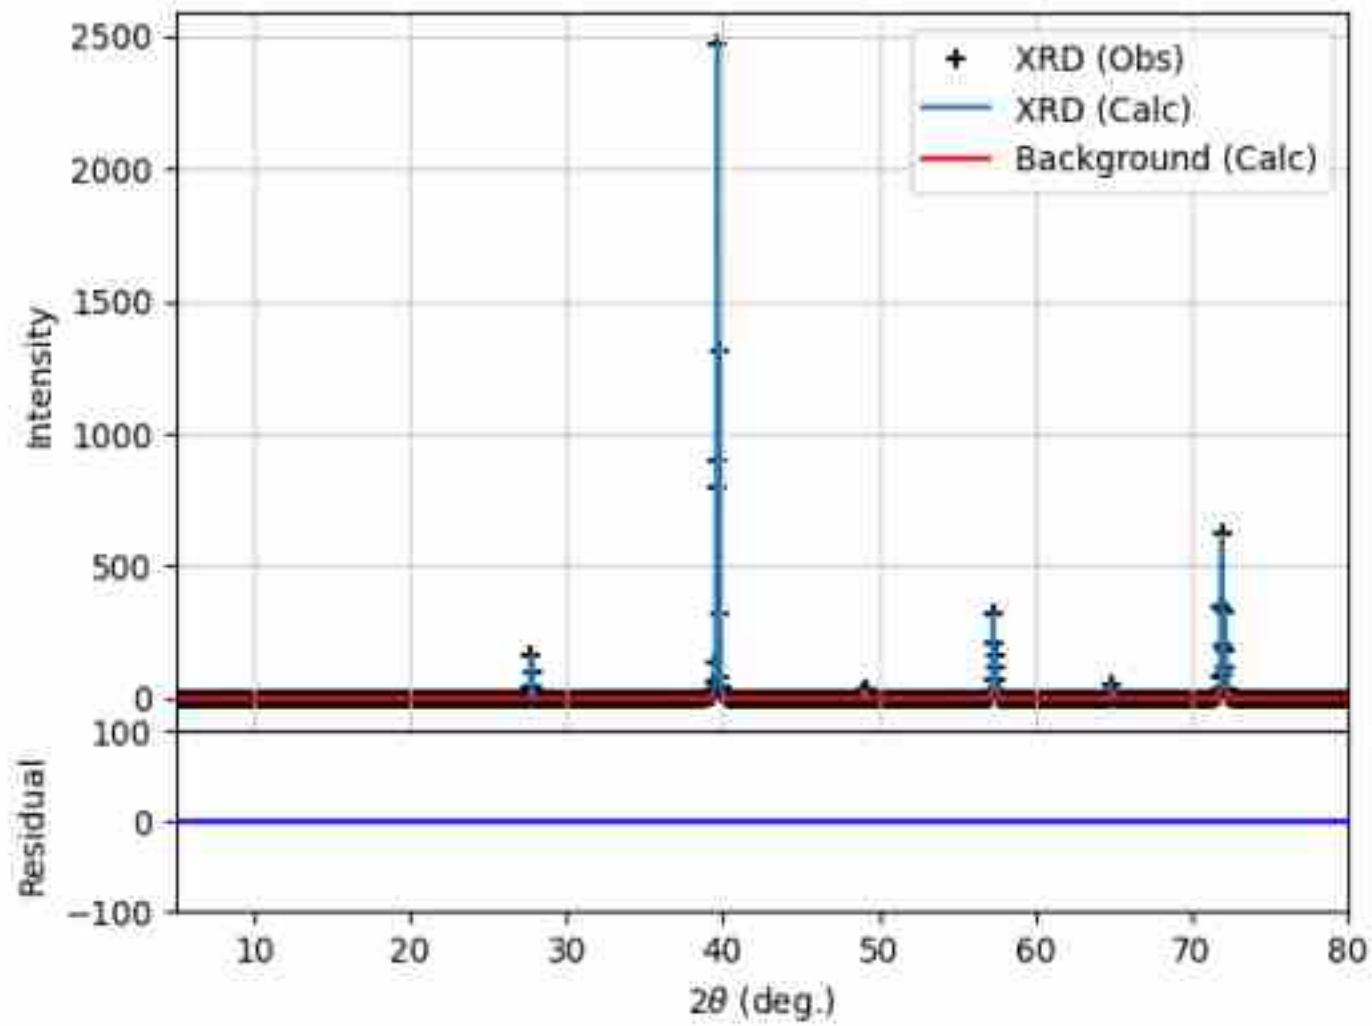

| RMSE before RR | Rwp     | RMSE after RR |
|----------------|---------|---------------|
| 0.001          | 0.00568 | 0.00035       |

# Hf1Tc1

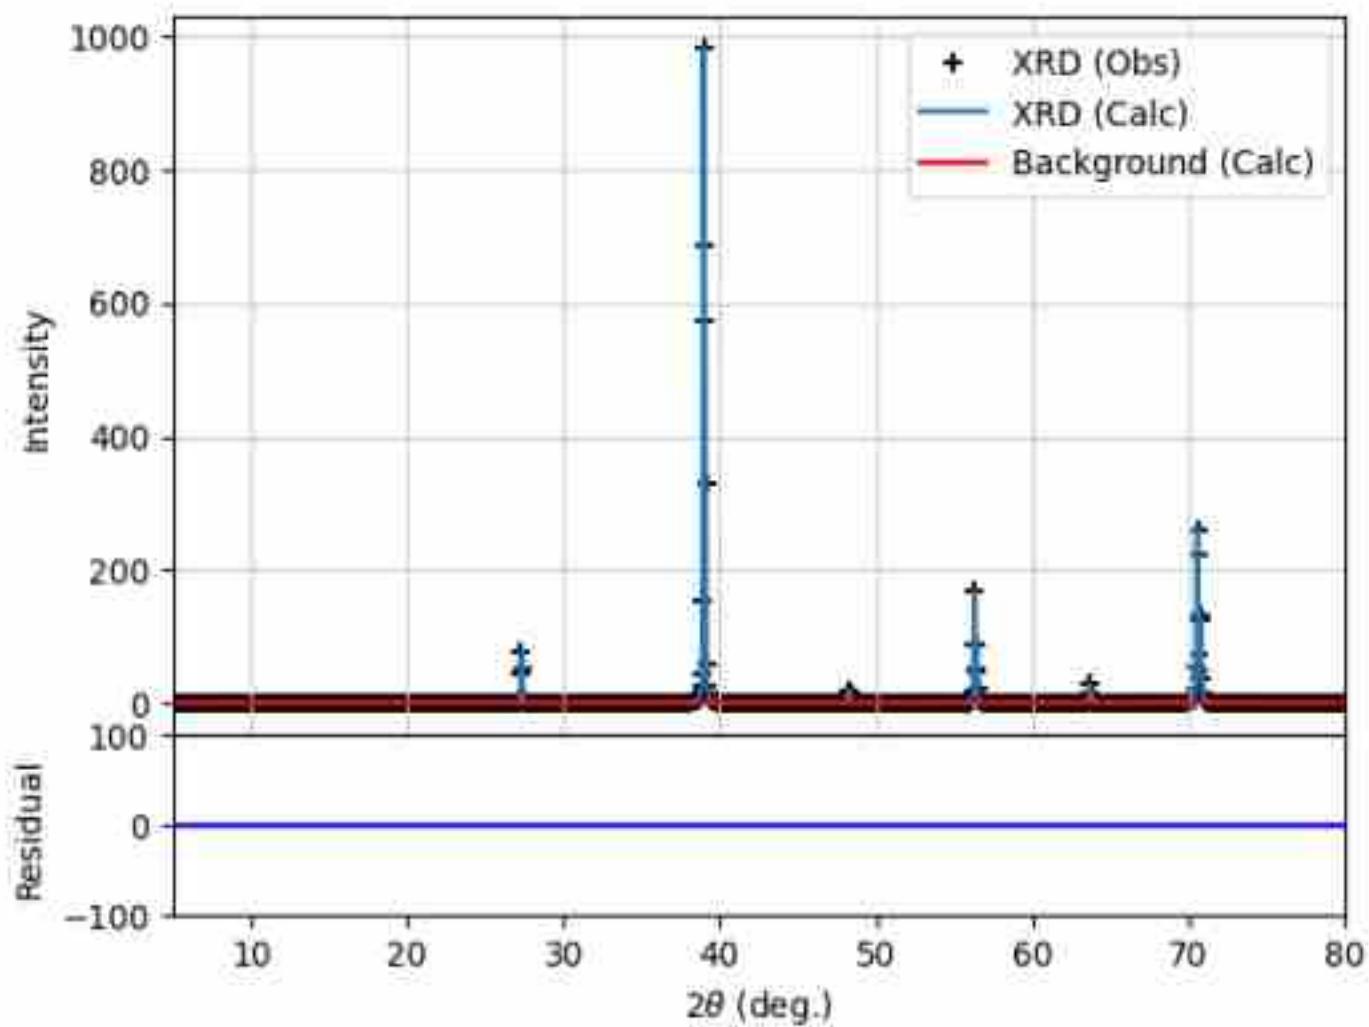

| RMSE before RR | Rwp     | RMSE after RR |
|----------------|---------|---------------|
| 0.001          | 0.00462 | 0.00058       |

# Hf1Zr1Mo4

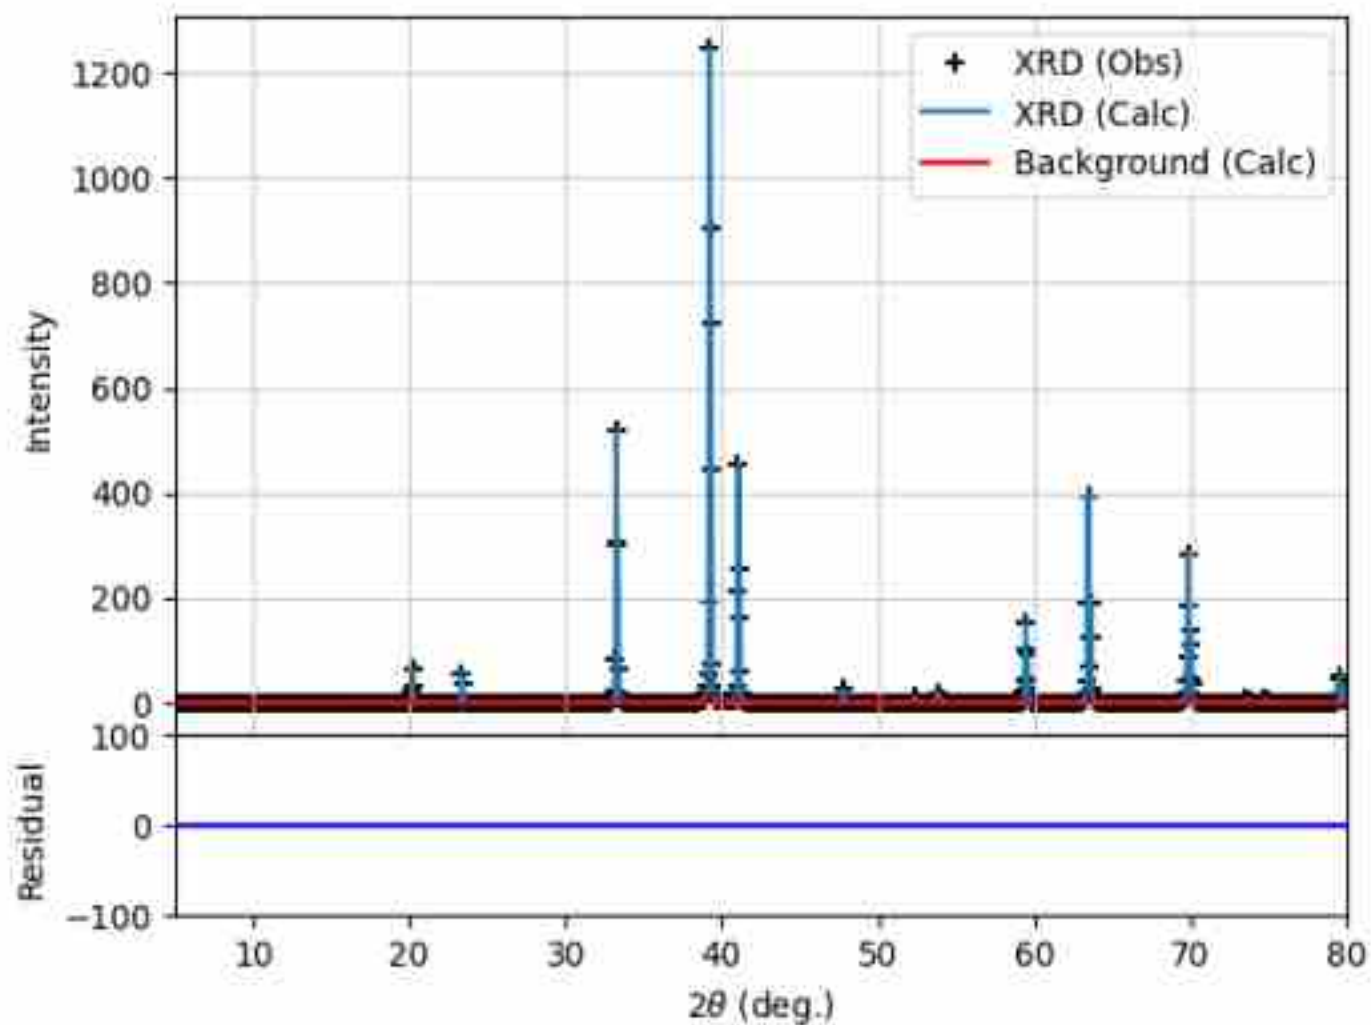

| RMSE before RR | Rwp     | RMSE after RR |
|----------------|---------|---------------|
| 0.01           | 0.00794 | 0.00107       |

# Hf1Zr1Os2

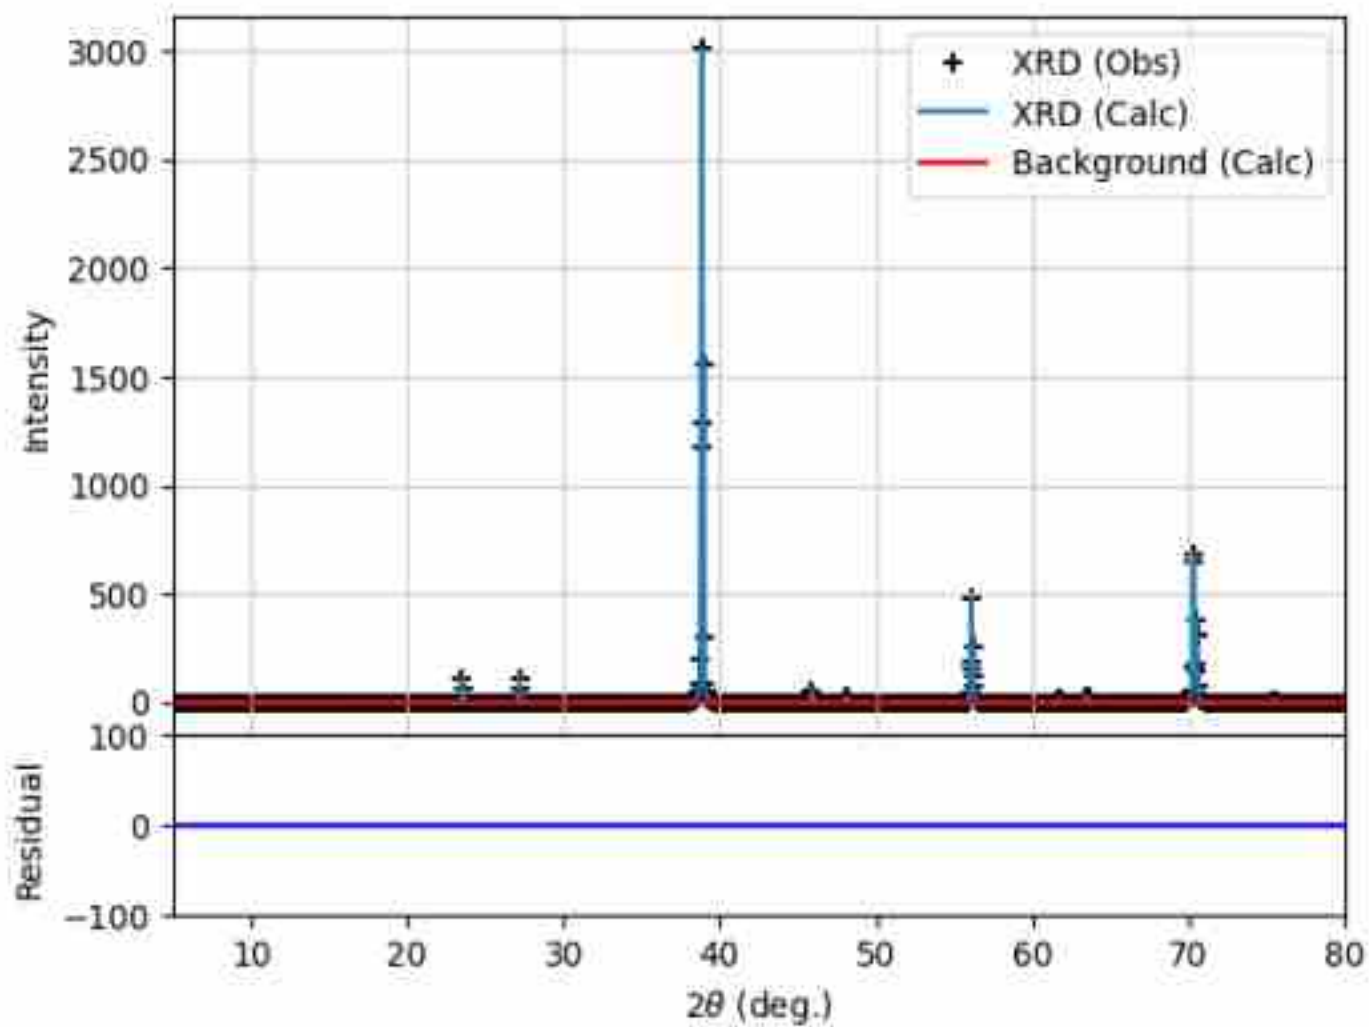

| RMSE before RR | Rwp     | RMSE after RR |
|----------------|---------|---------------|
| 0.001          | 0.00151 | 0.0003        |



# Hf<sub>2</sub>Cu<sub>1</sub>Sb<sub>3</sub>

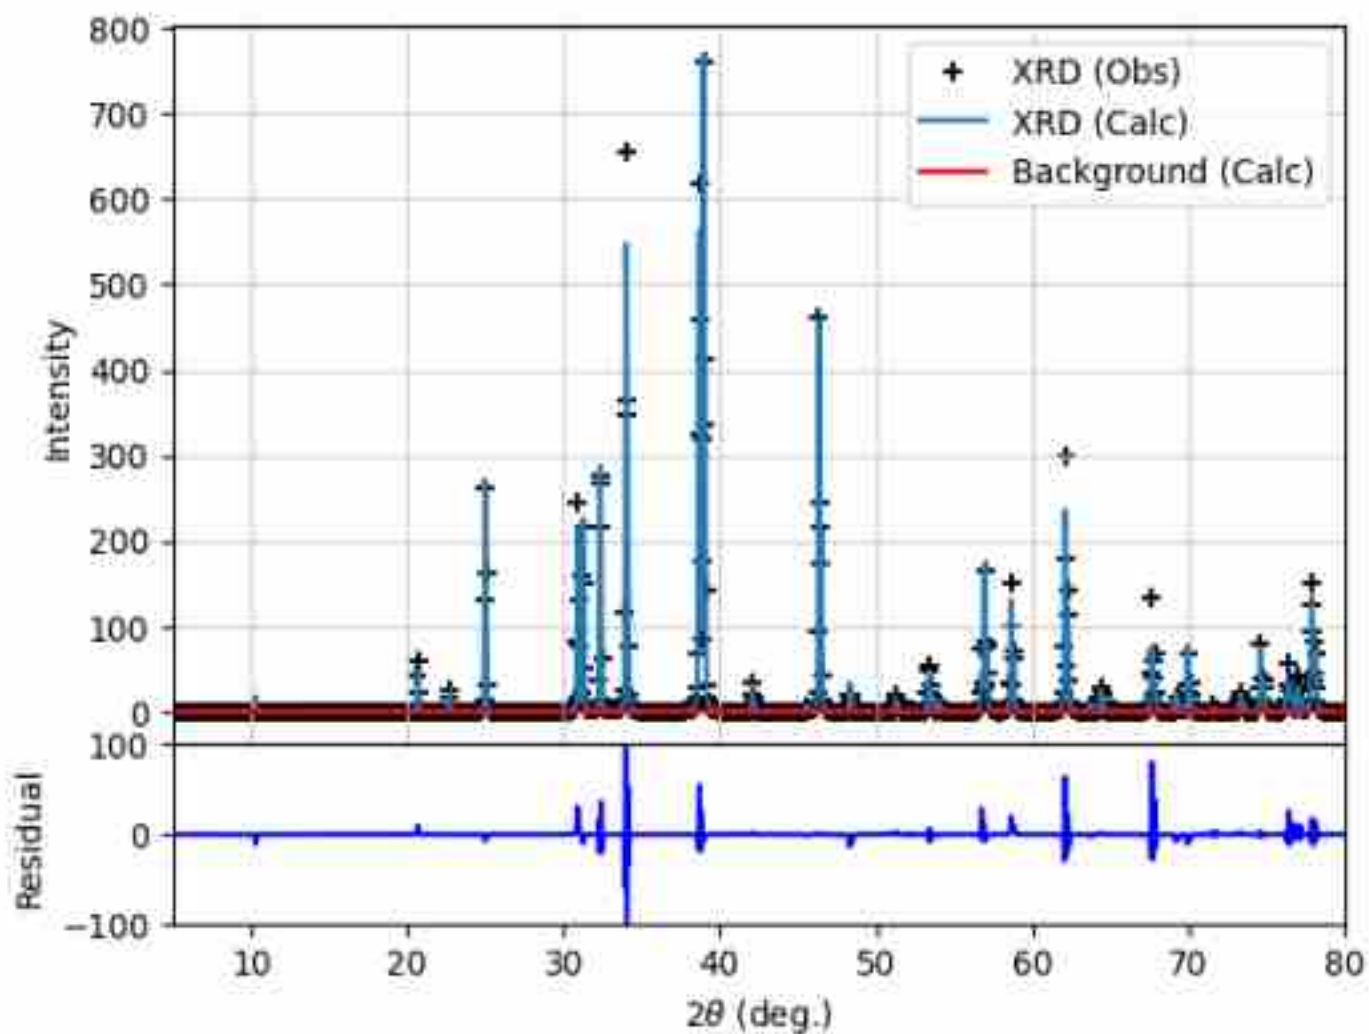

| RMSE before RR | Rwp     | RMSE after RR |
|----------------|---------|---------------|
| 0.01           | 18.2388 | 0.01365       |

# Hf2Ir1Rh1

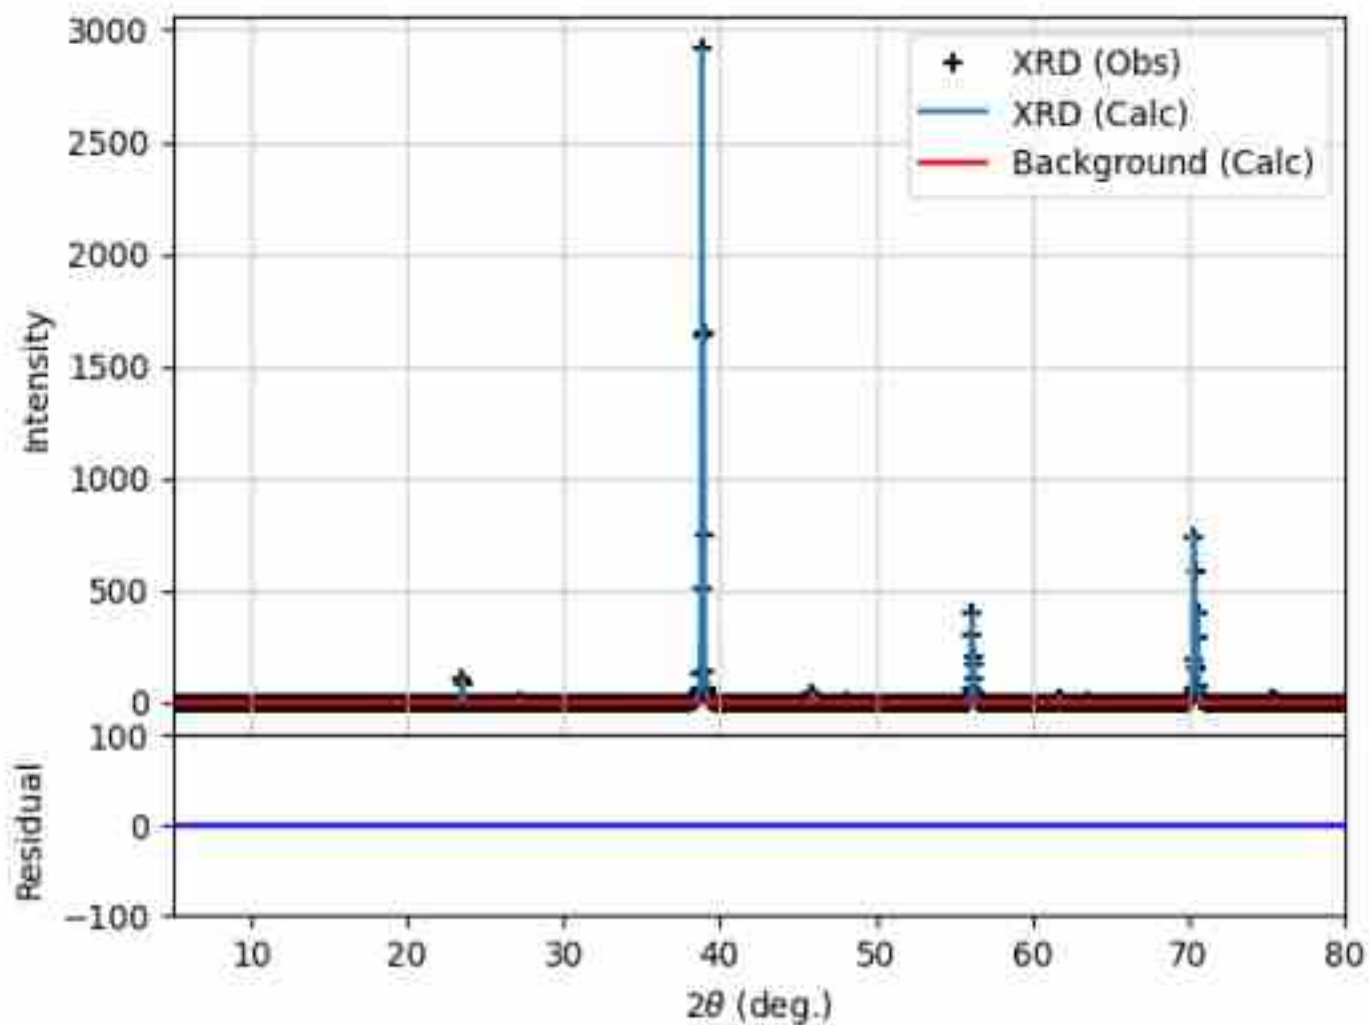

| RMSE before RR | Rwp     | RMSE after RR |
|----------------|---------|---------------|
| 0.001          | 0.00394 | 0.00031       |

# Hf2Ir2

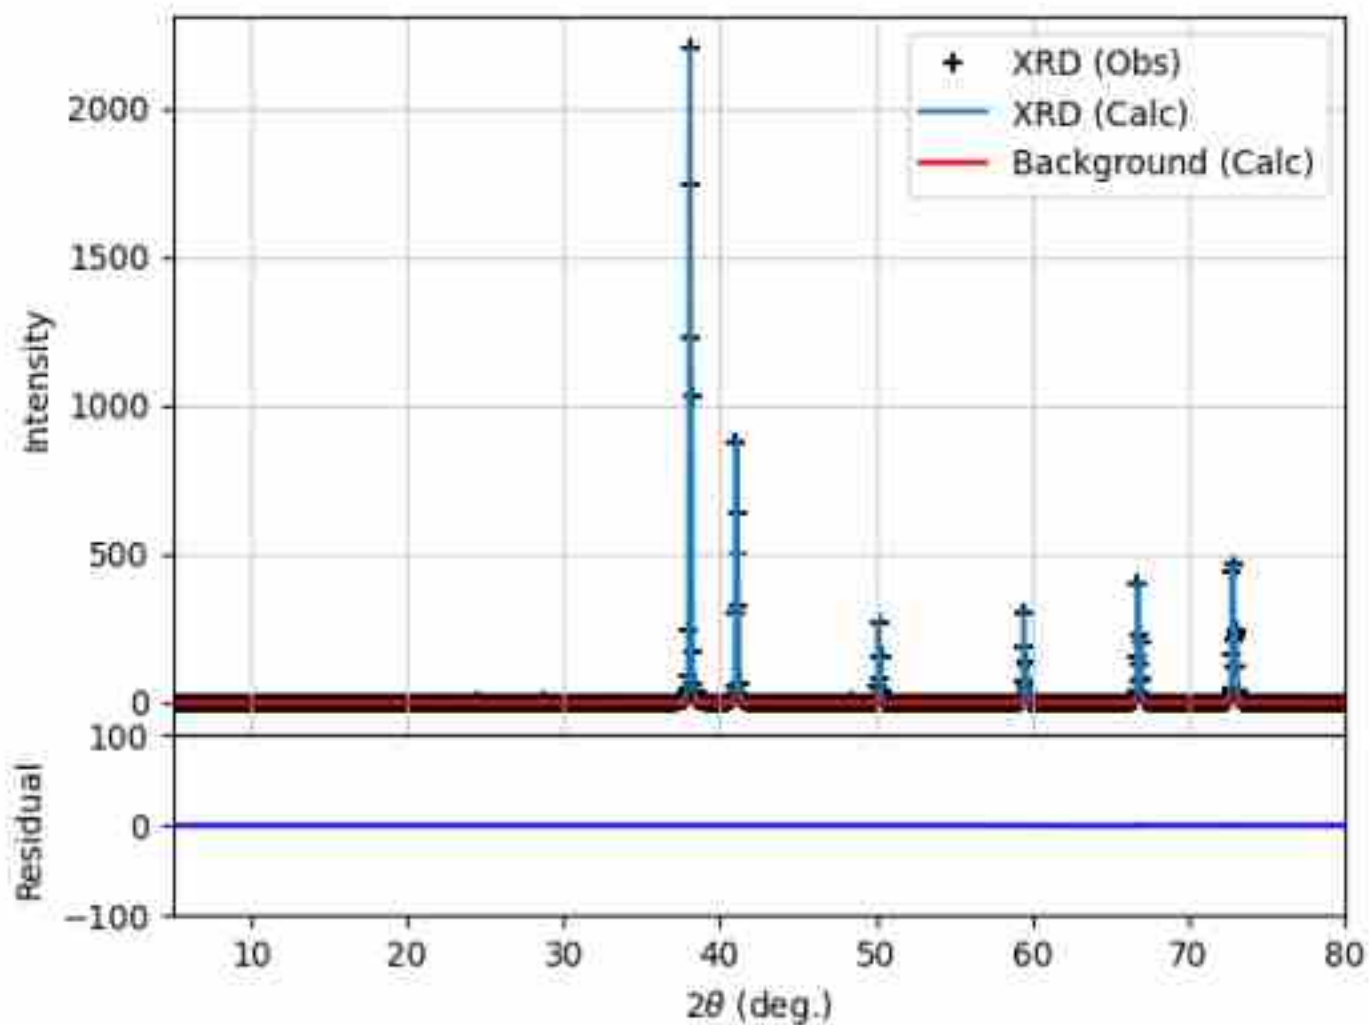

| RMSE before RR | Rwp     | RMSE after RR |
|----------------|---------|---------------|
| 0.001          | 0.08128 | 0.00135       |

# Hf2Mo1Ir1

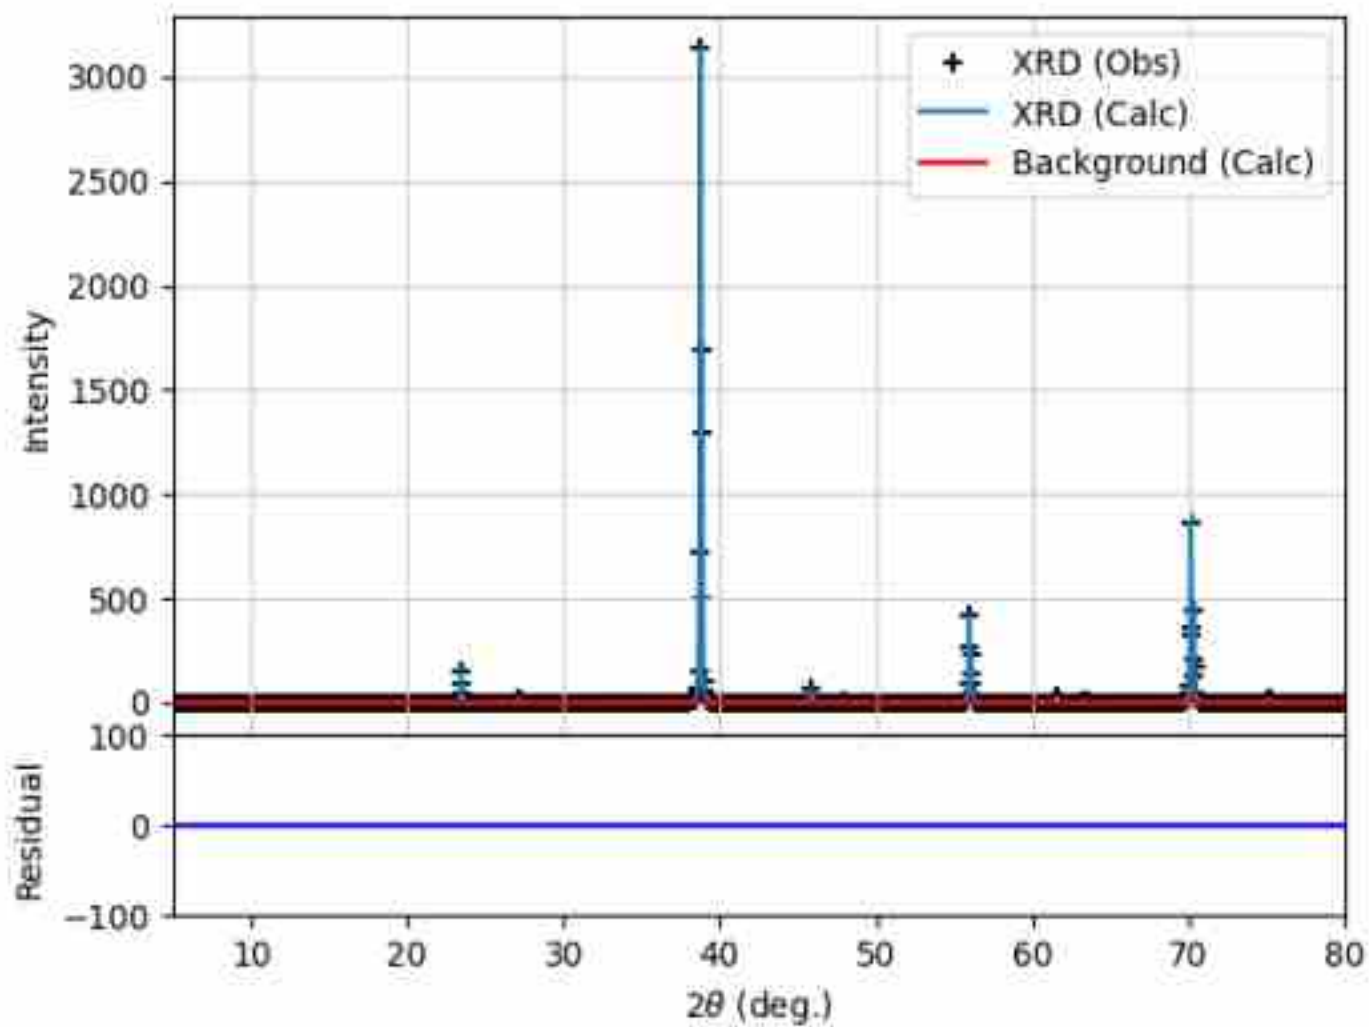

| RMSE before RR | Rwp     | RMSE after RR |
|----------------|---------|---------------|
| 0.001          | 0.01442 | 0.0009        |

# Hf2Os1Ru1

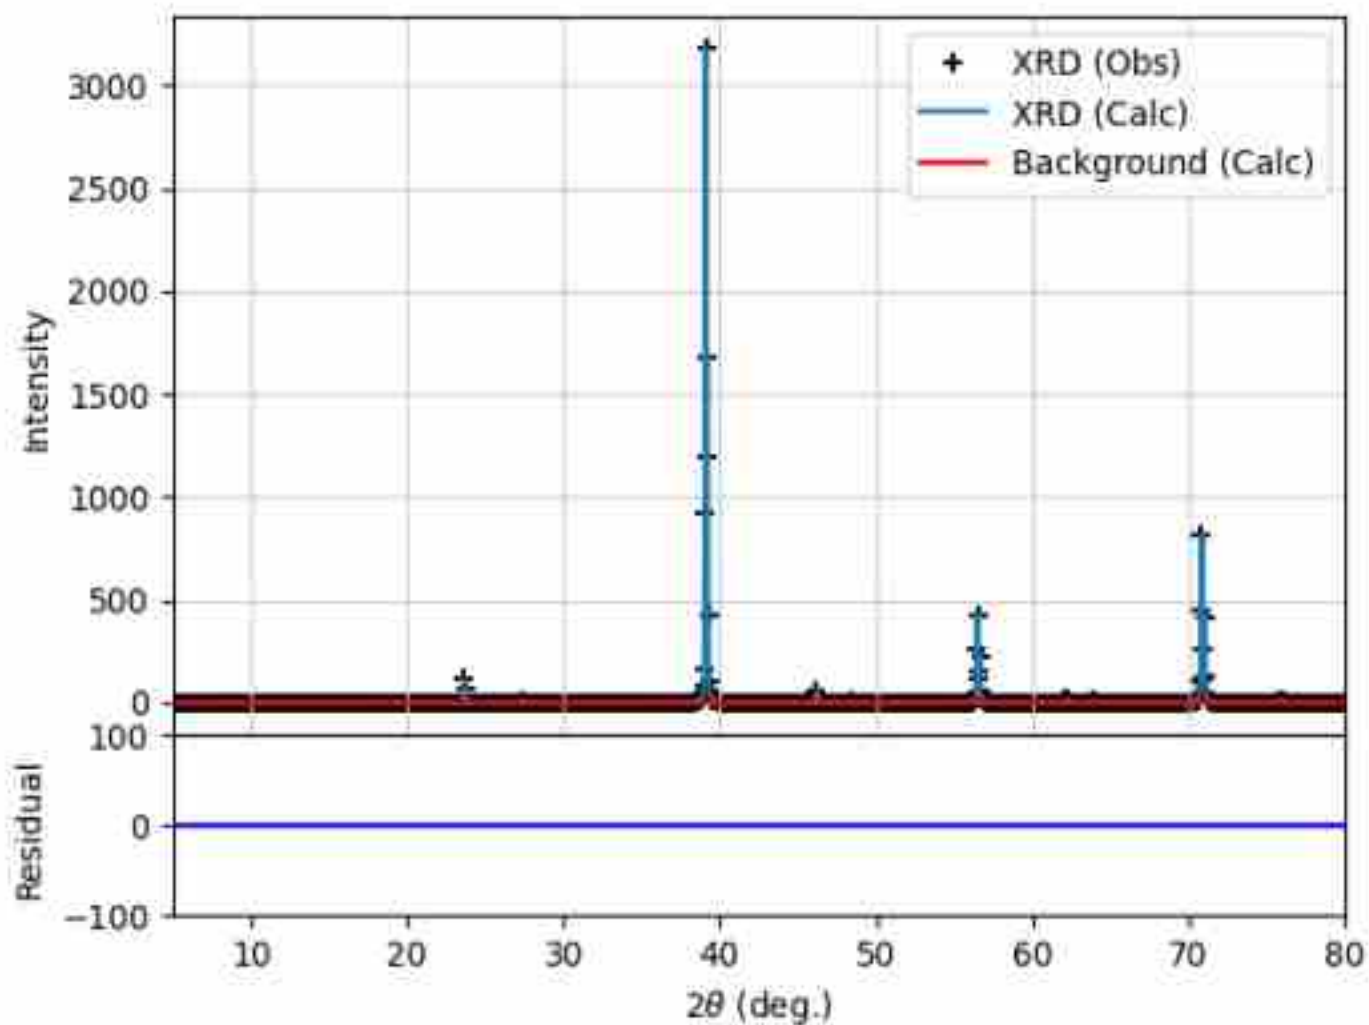

| RMSE before RR | Rwp     | RMSE after RR |
|----------------|---------|---------------|
| 0.001          | 0.00347 | 0.00018       |

# Hf<sub>2</sub>Tc<sub>1</sub>Ni<sub>1</sub>

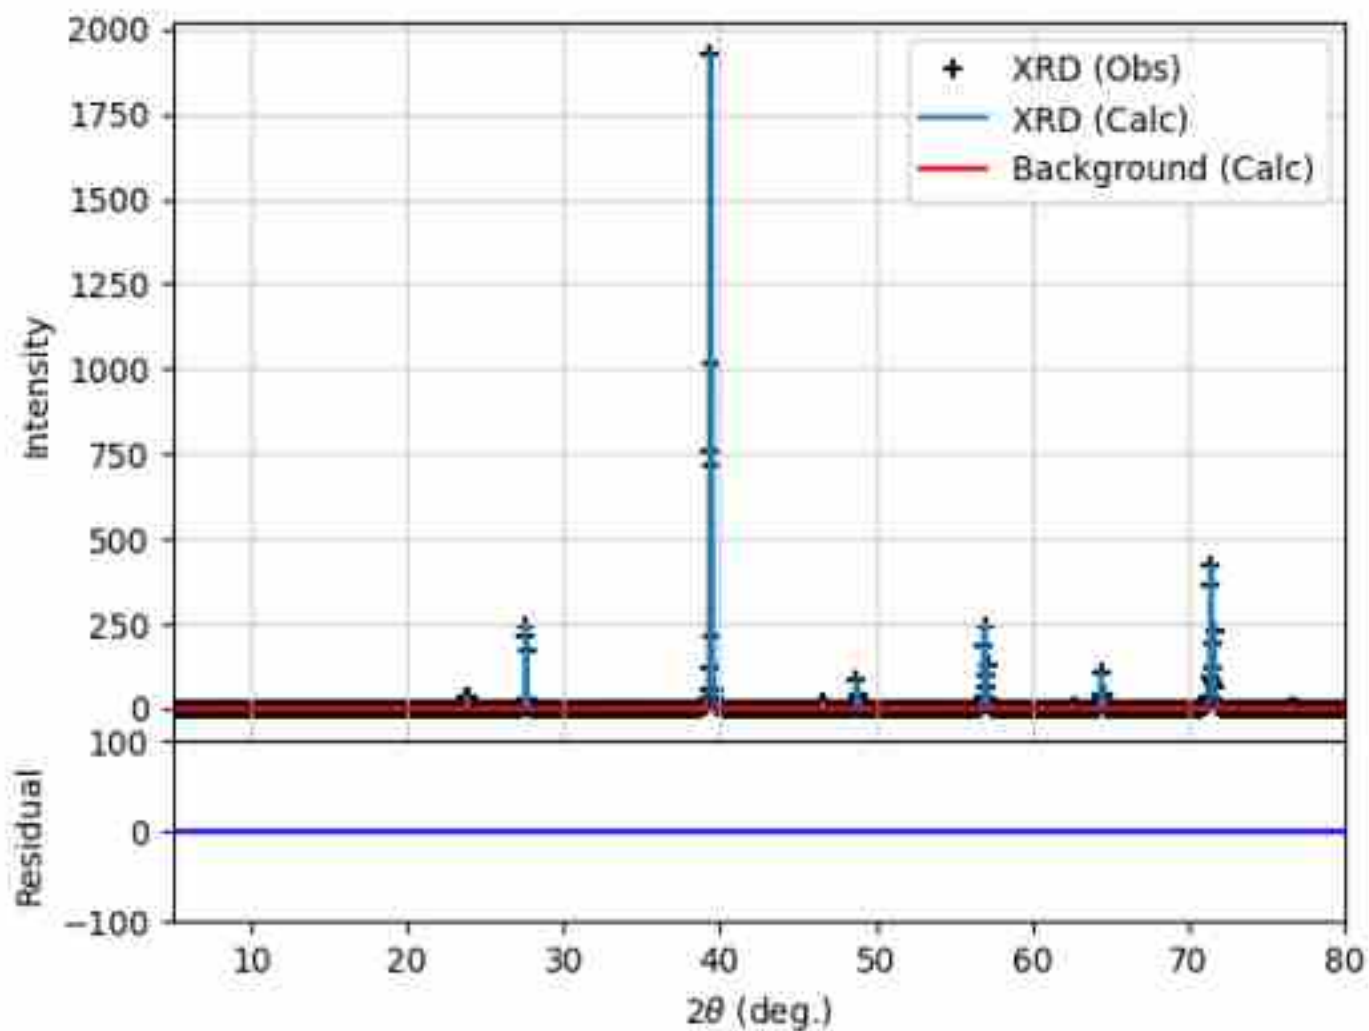

| RMSE before RR | Rwp     | RMSE after RR |
|----------------|---------|---------------|
| 0.001          | 0.01092 | 0.00072       |

# Hf<sub>4</sub>Si<sub>2</sub>Mo<sub>6</sub>

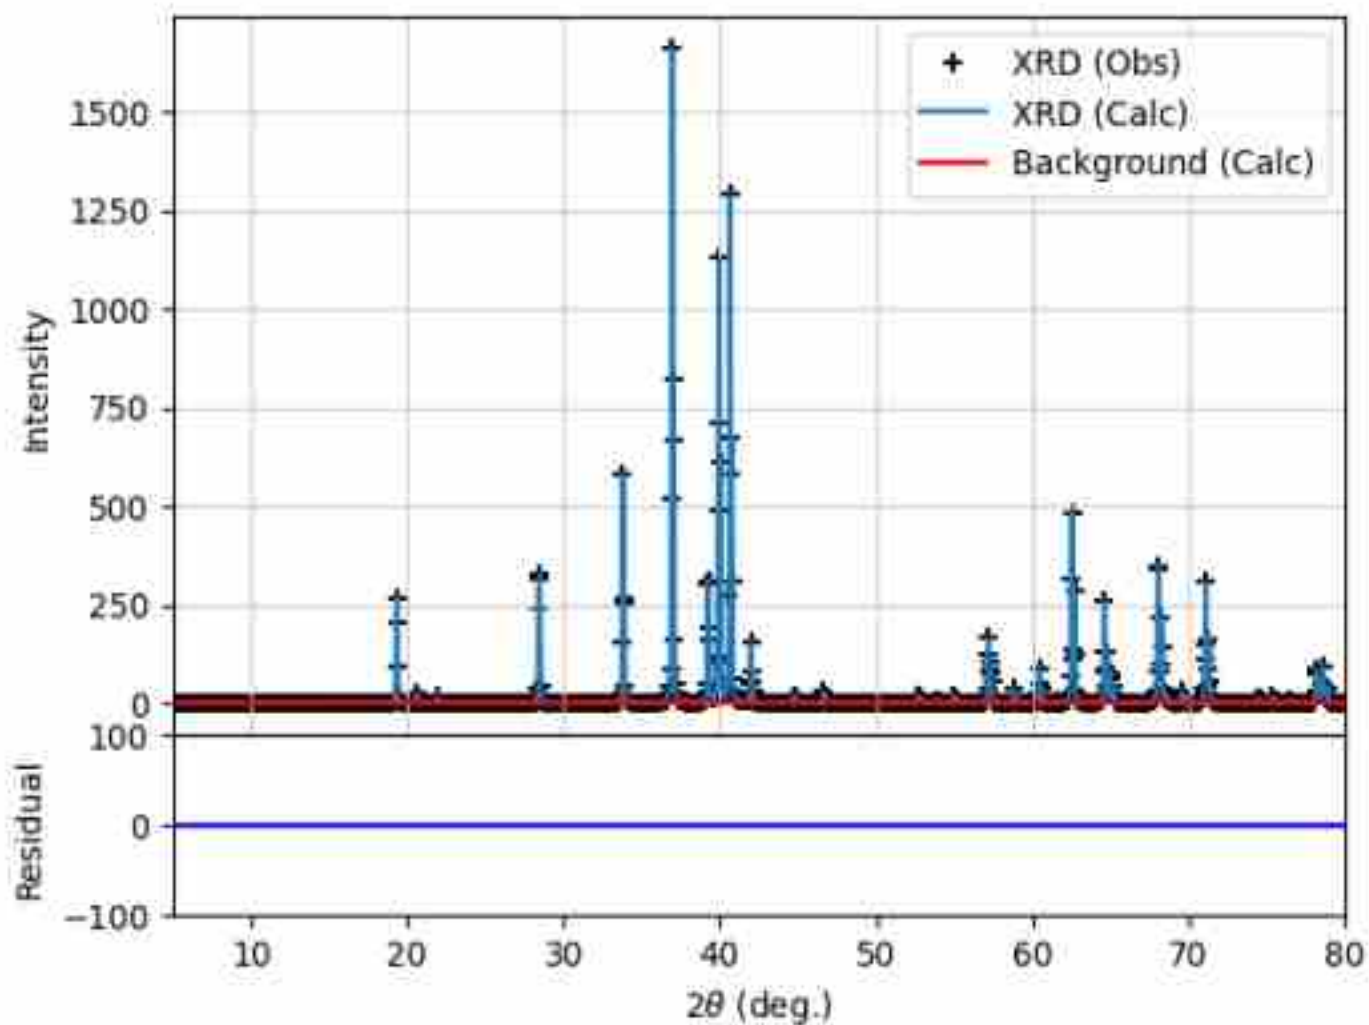

| RMSE before RR | Rwp    | RMSE after RR |
|----------------|--------|---------------|
| 0.01           | 0.0052 | 0.00075       |

# Hg1Pd2Au1

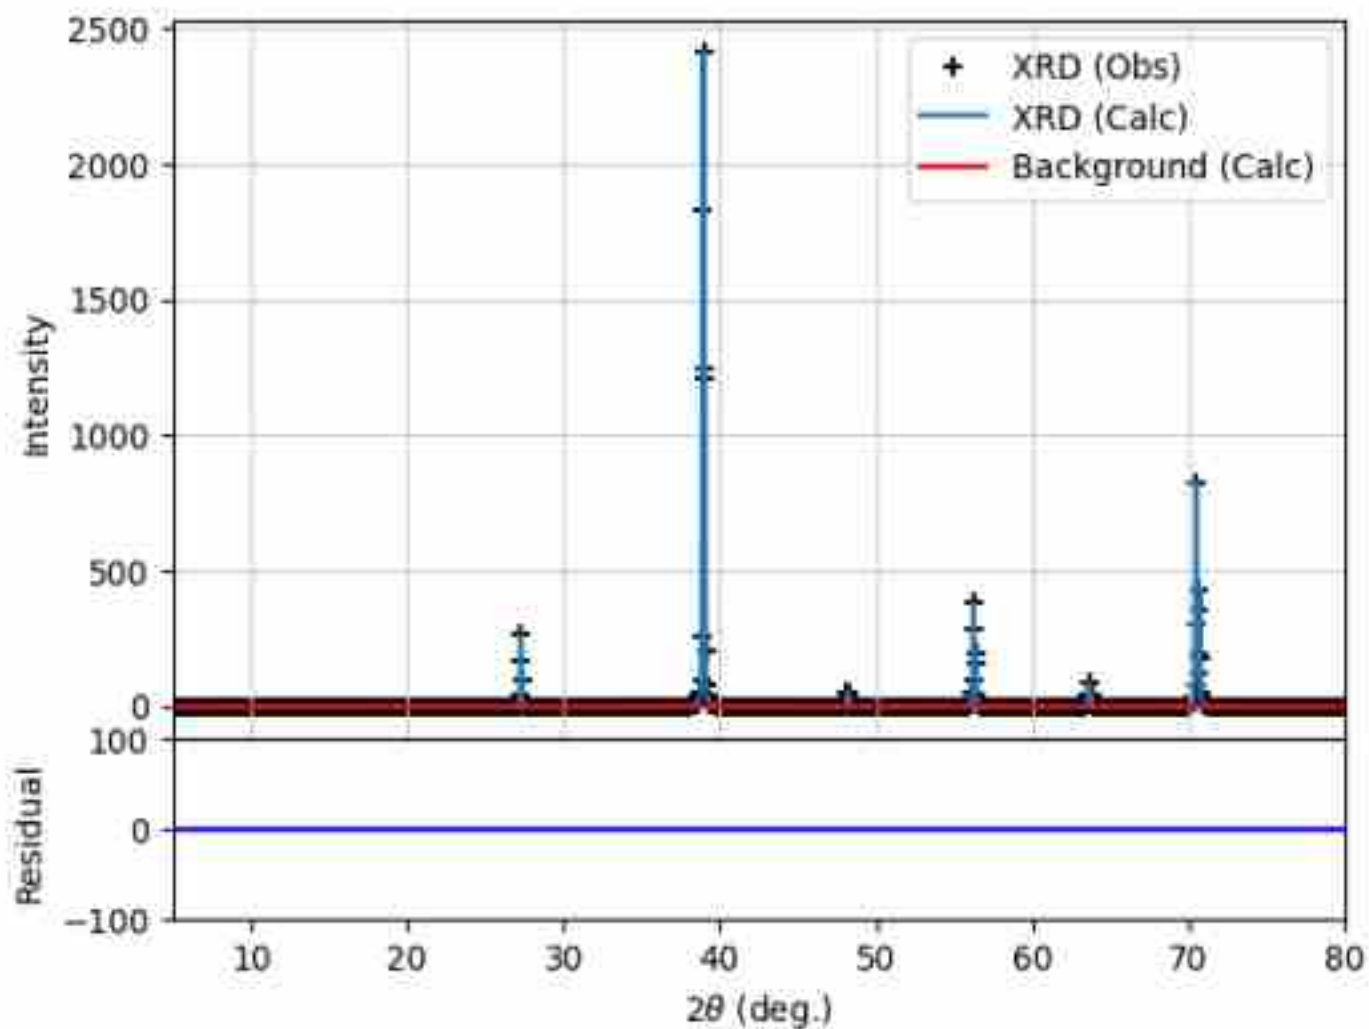

| RMSE before RR | Rwp     | RMSE after RR |
|----------------|---------|---------------|
| 0.001          | 0.03529 | 0.00107       |



# Hg1Pd3

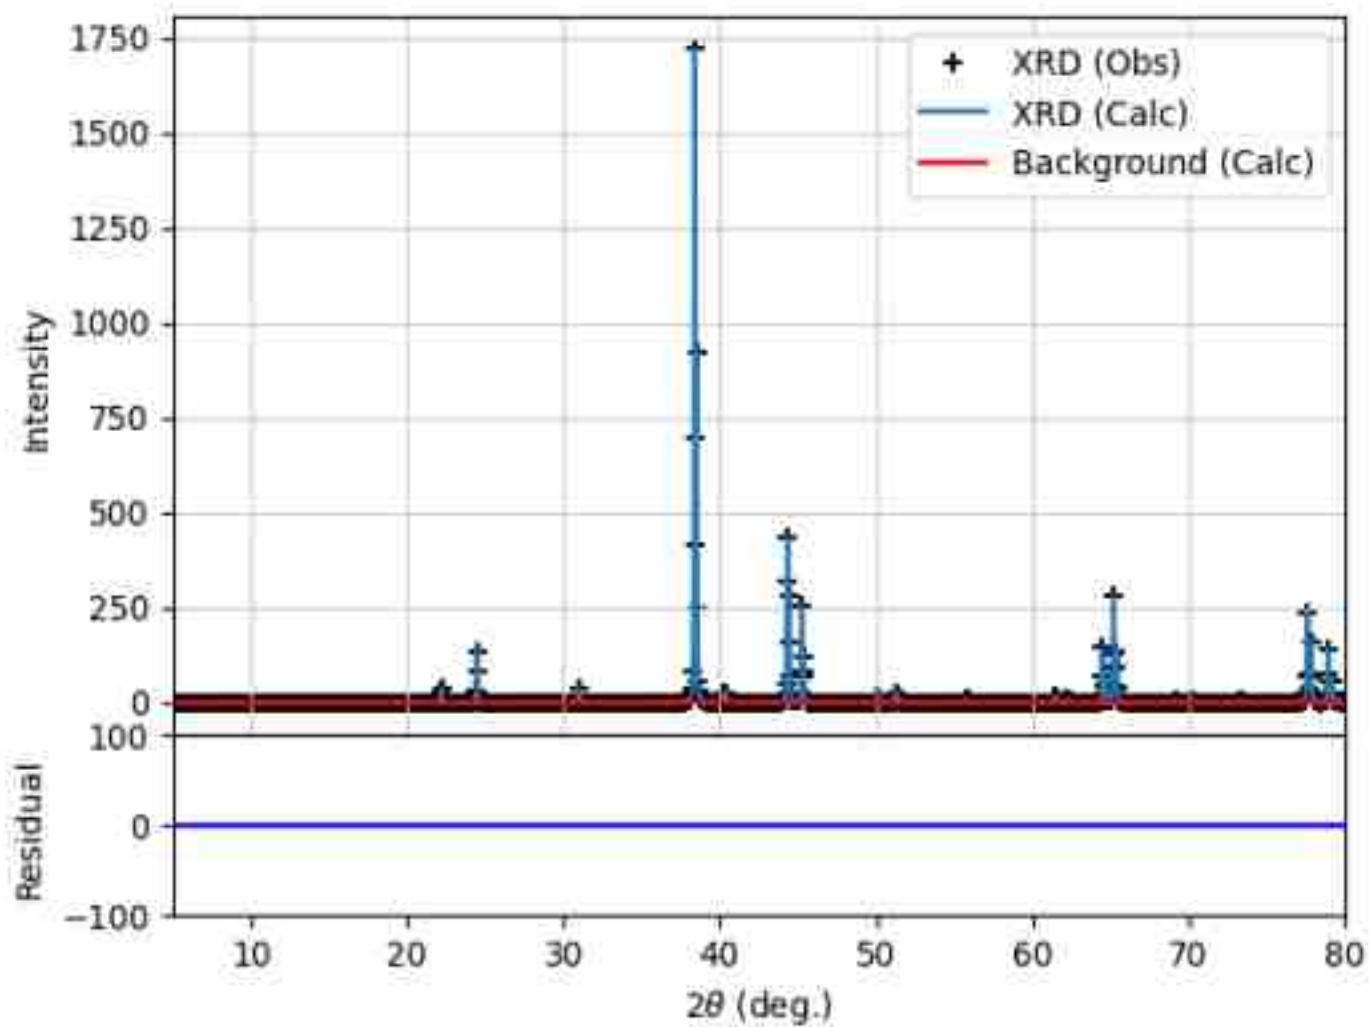

| RMSE before RR | Rwp    | RMSE after RR |
|----------------|--------|---------------|
| 0.001          | 0.0041 | 0.00032       |

# Ho1Au1

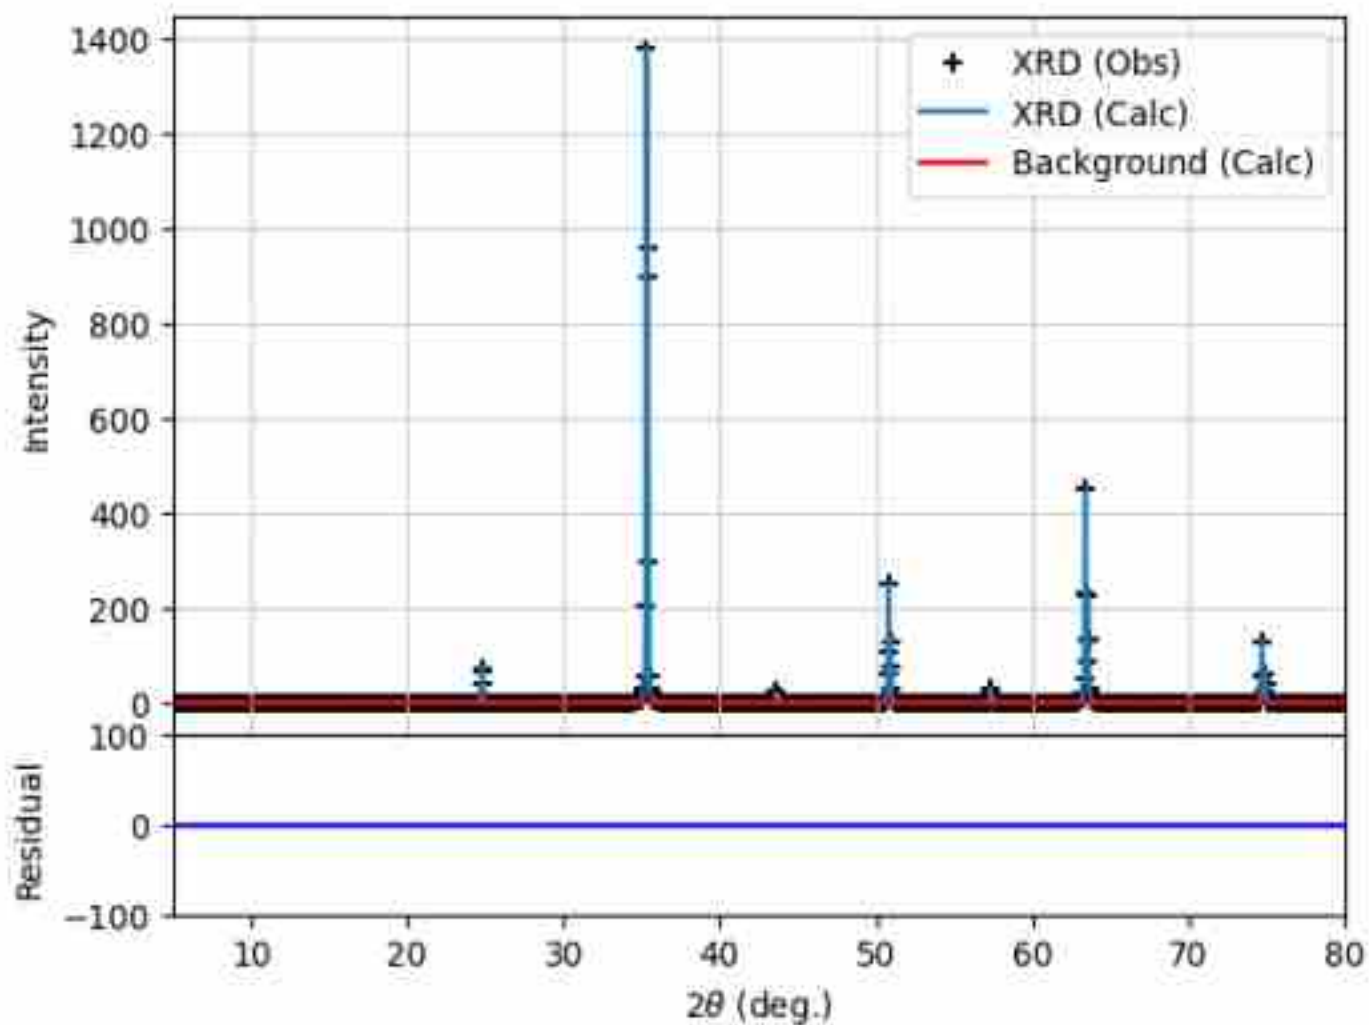

| RMSE before RR | Rwp     | RMSE after RR |
|----------------|---------|---------------|
| 0.001          | 0.01886 | 0.00129       |

# Ho1Cd2

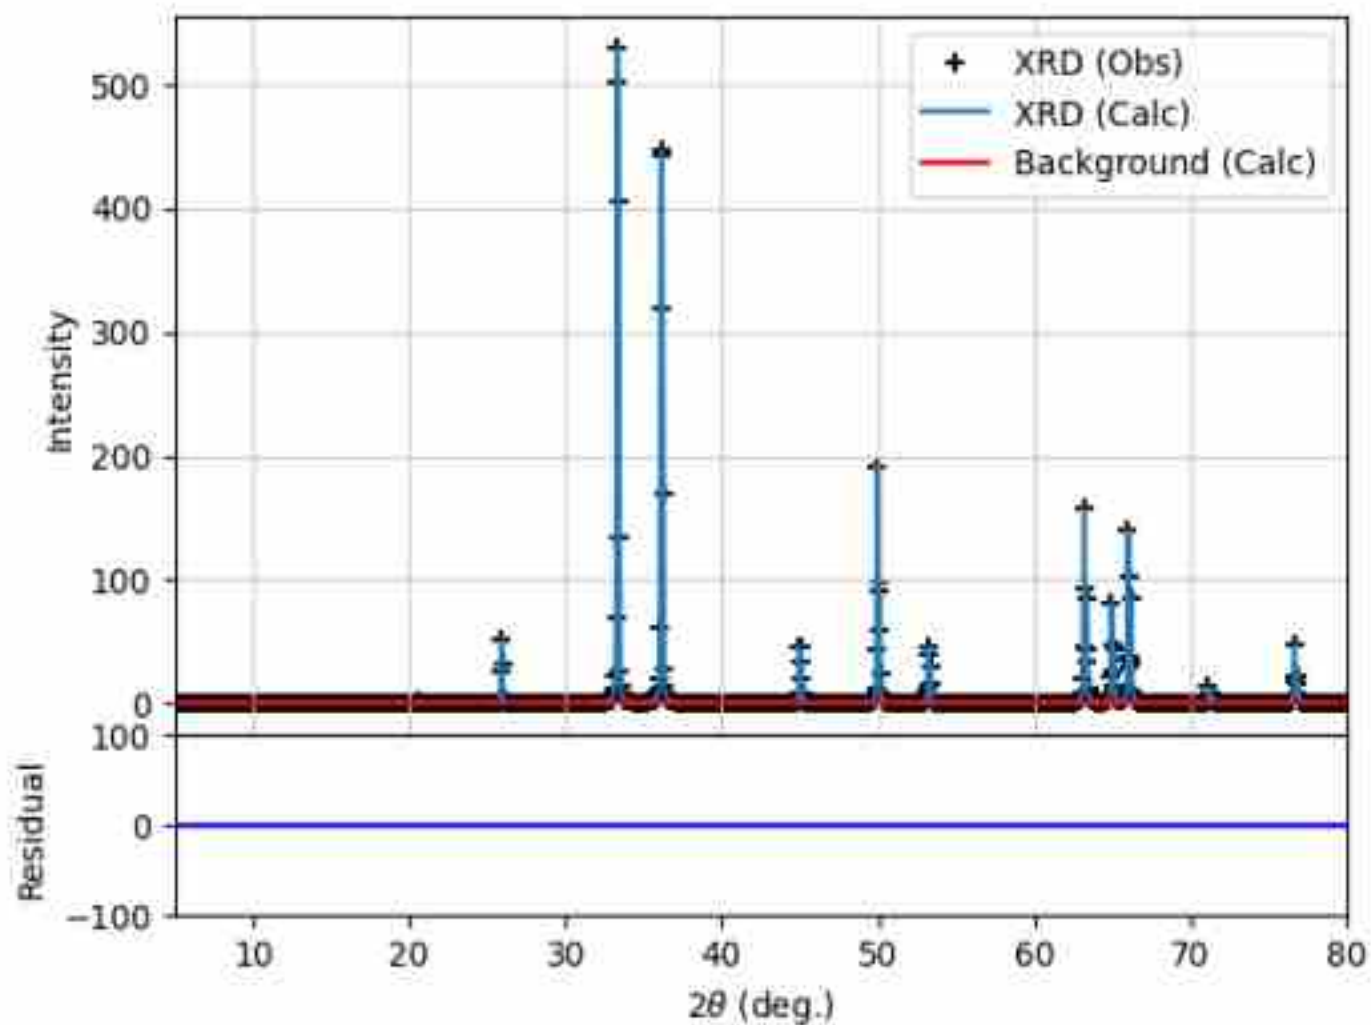

| RMSE before RR | Rwp     | RMSE after RR |
|----------------|---------|---------------|
| 0.001          | 0.00646 | 0.00064       |

# Ho1Er1Cd2

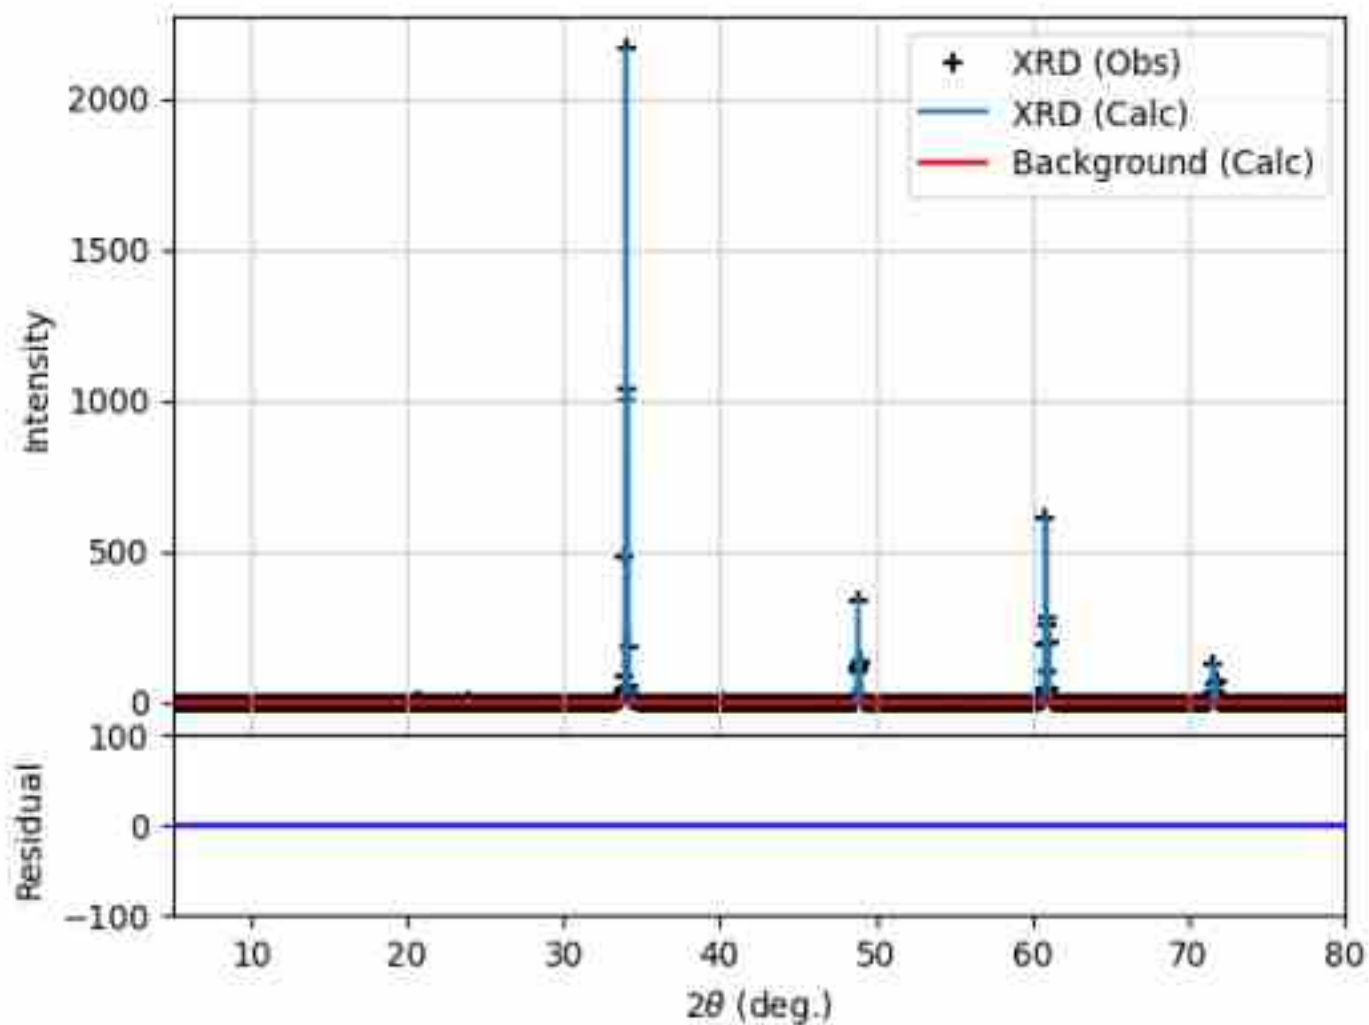

| RMSE before RR | Rwp     | RMSE after RR |
|----------------|---------|---------------|
| 0.001          | 0.00684 | 0.0006        |

# Ho1Er1Mg2

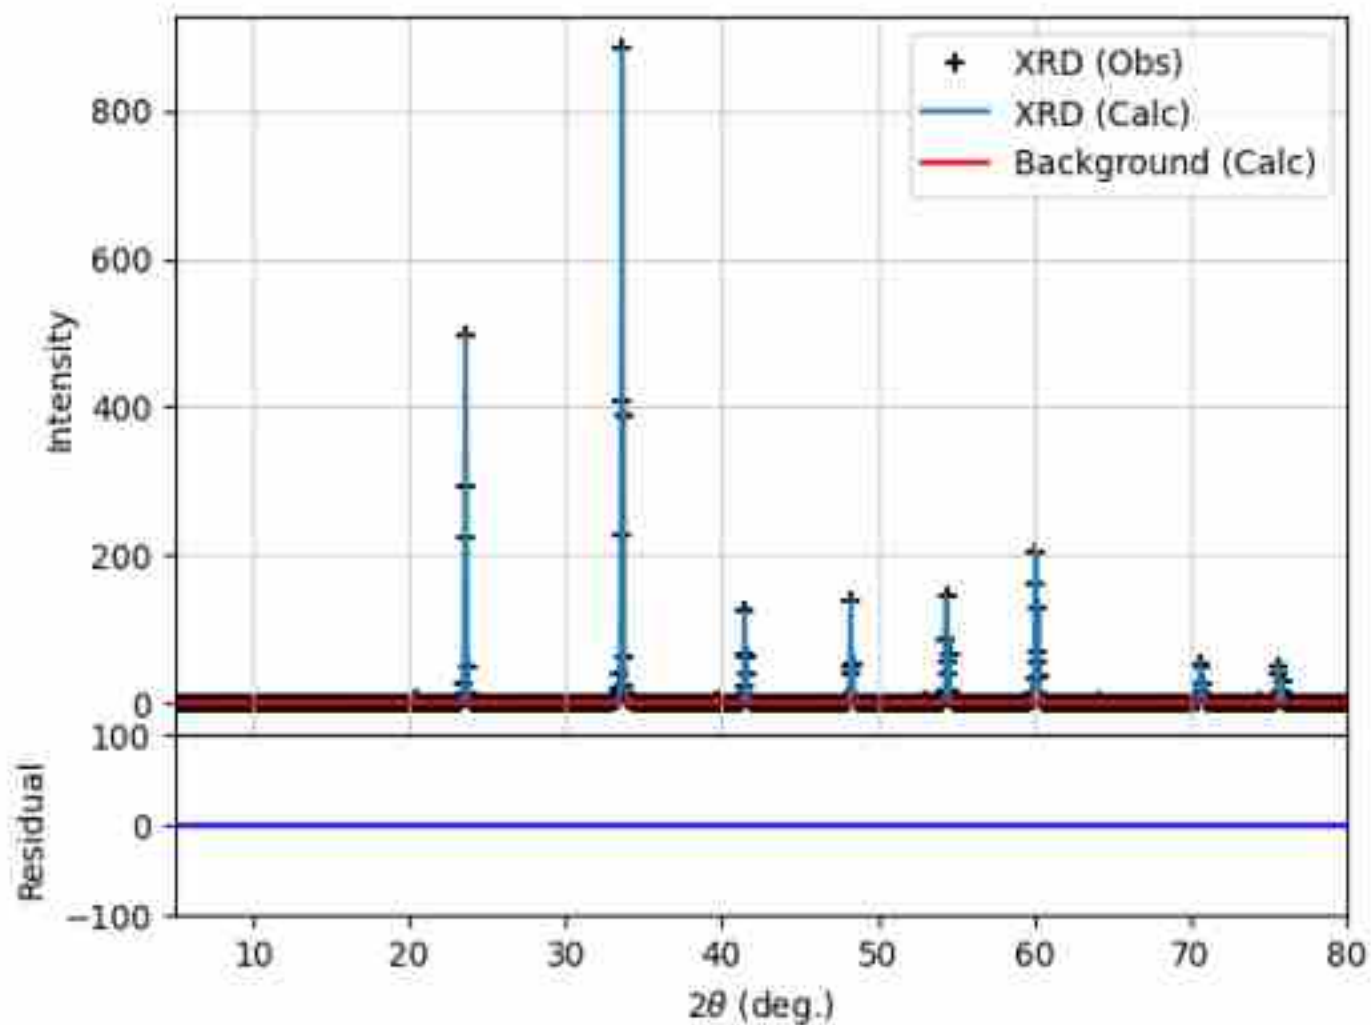

| RMSE before RR | Rwp     | RMSE after RR |
|----------------|---------|---------------|
| 0.001          | 0.00346 | 0.00065       |

Ho1In1Au2

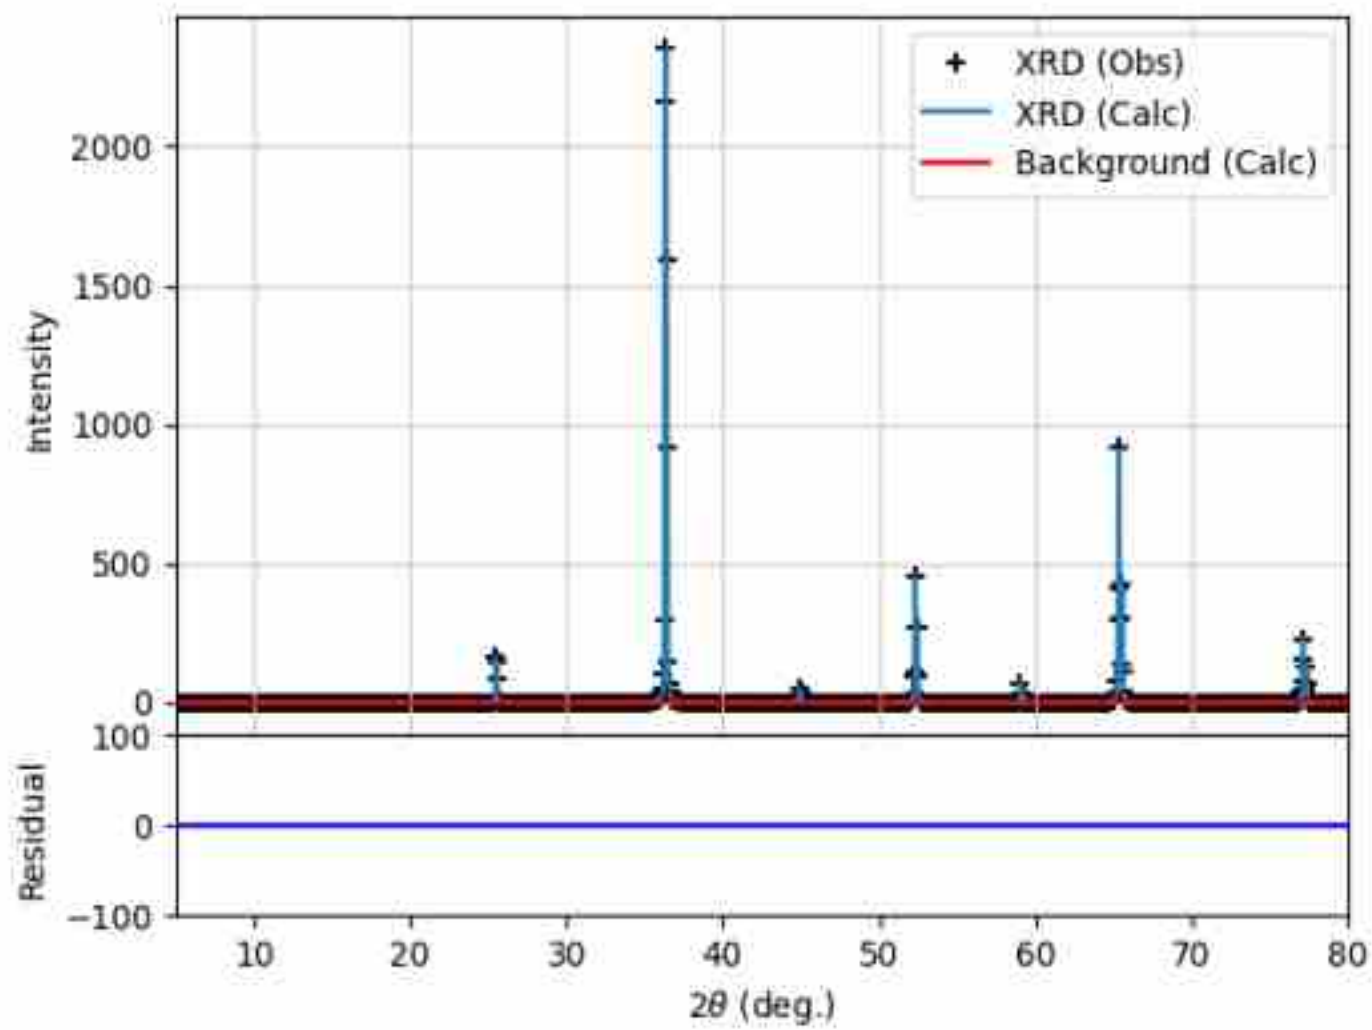

| RMSE before RR | Rwp     | RMSE after RR |
|----------------|---------|---------------|
| 0.001          | 0.00516 | 0.00034       |

# Ho1Mg1Tl2

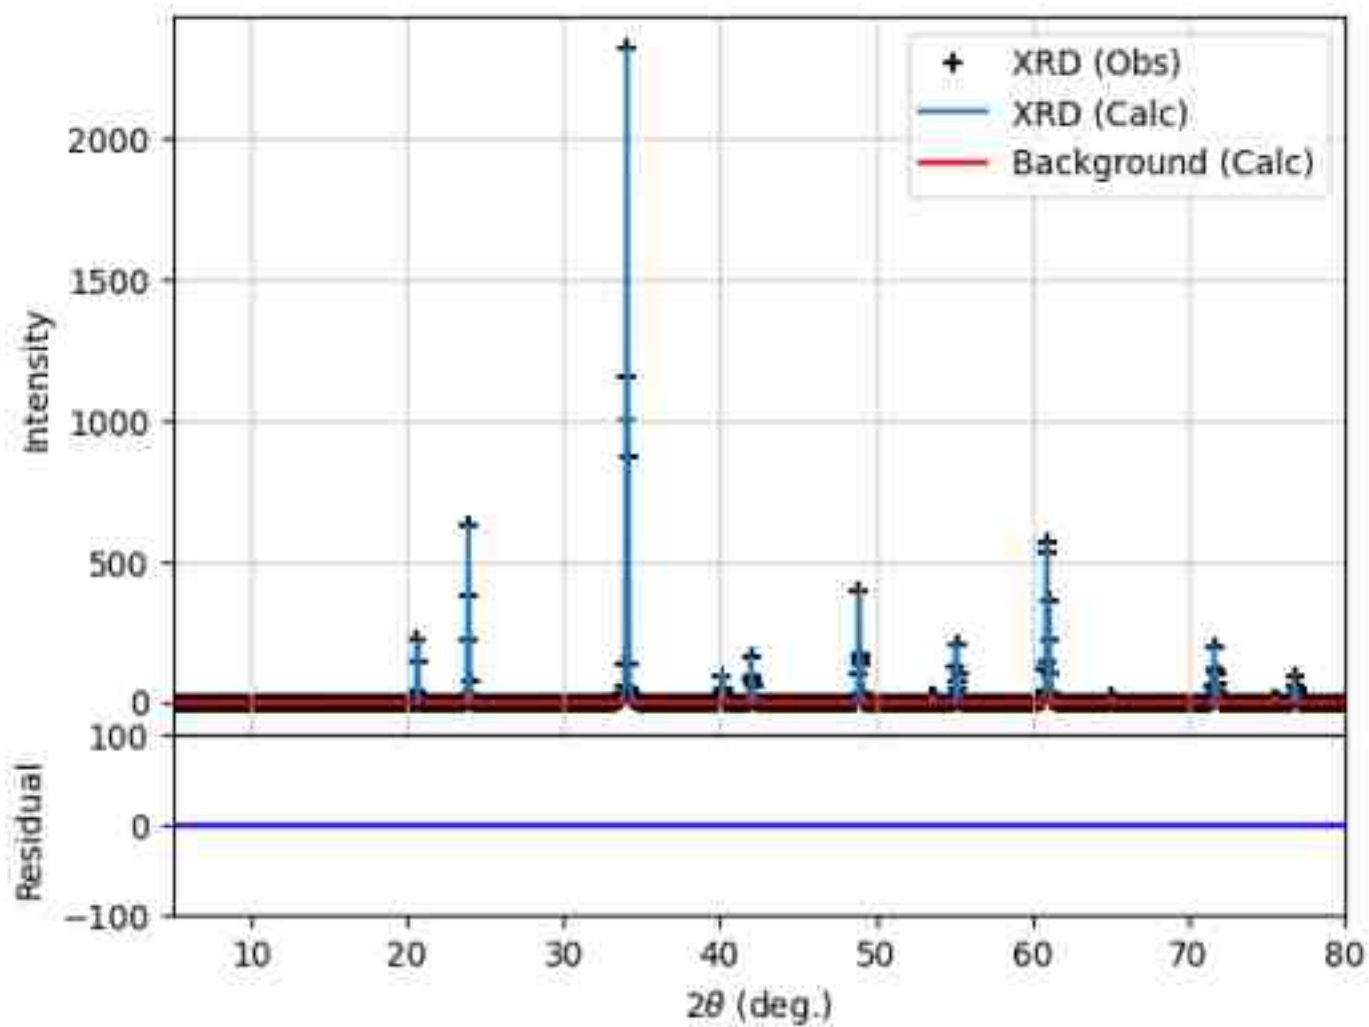

| RMSE before RR | Rwp     | RMSE after RR |
|----------------|---------|---------------|
| 0.001          | 0.00374 | 0.00046       |

# Ho1S1

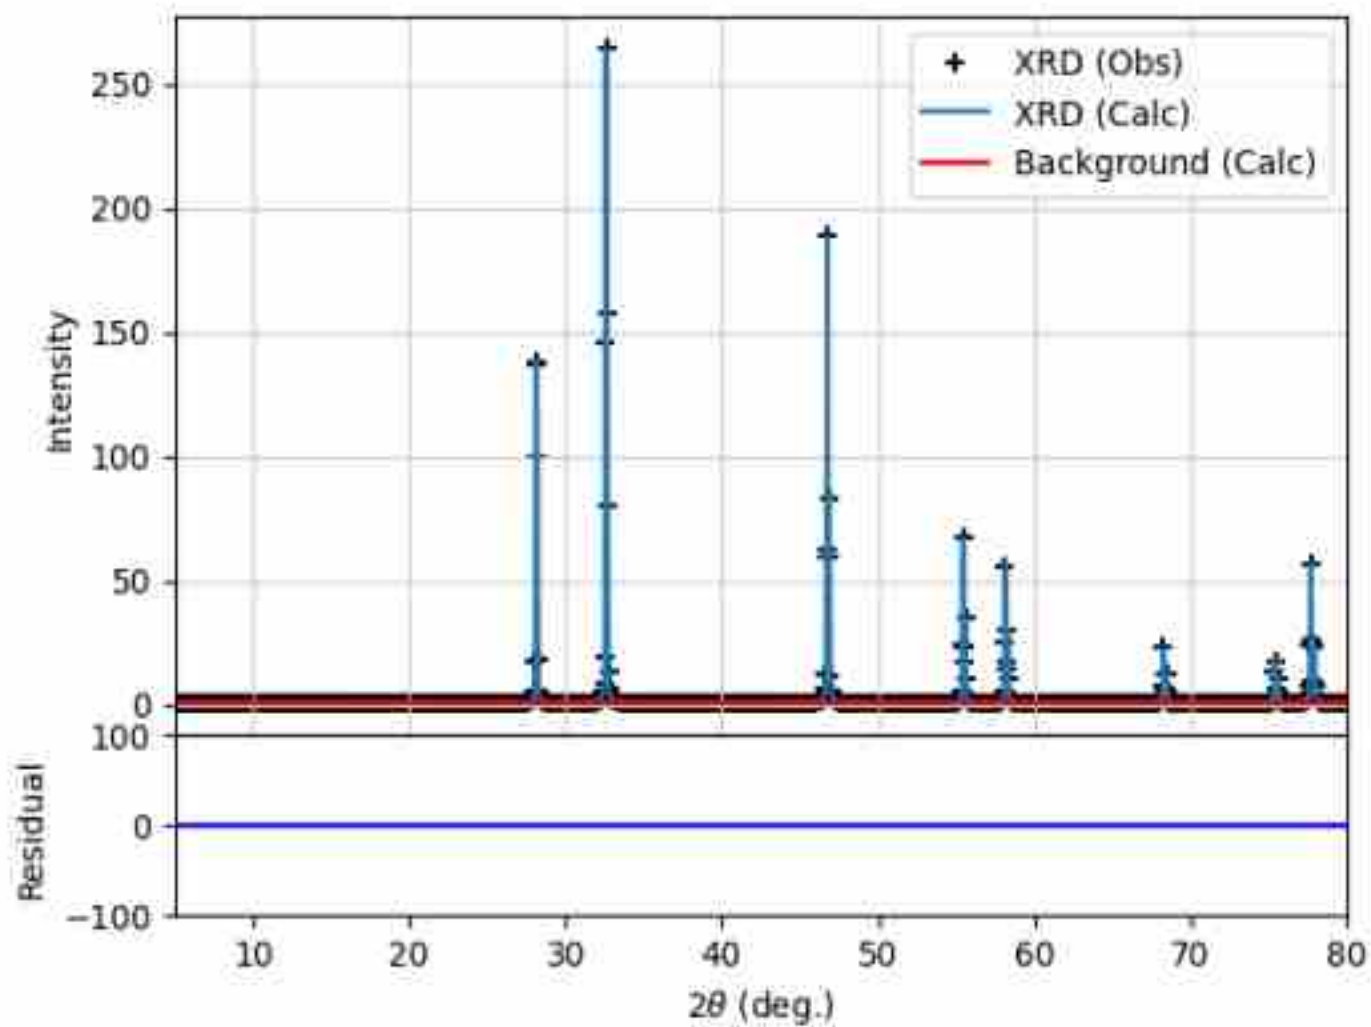

| RMSE before RR | Rwp     | RMSE after RR |
|----------------|---------|---------------|
| 0.001          | 0.00648 | 0.00116       |



# Ho1Sn1Au2

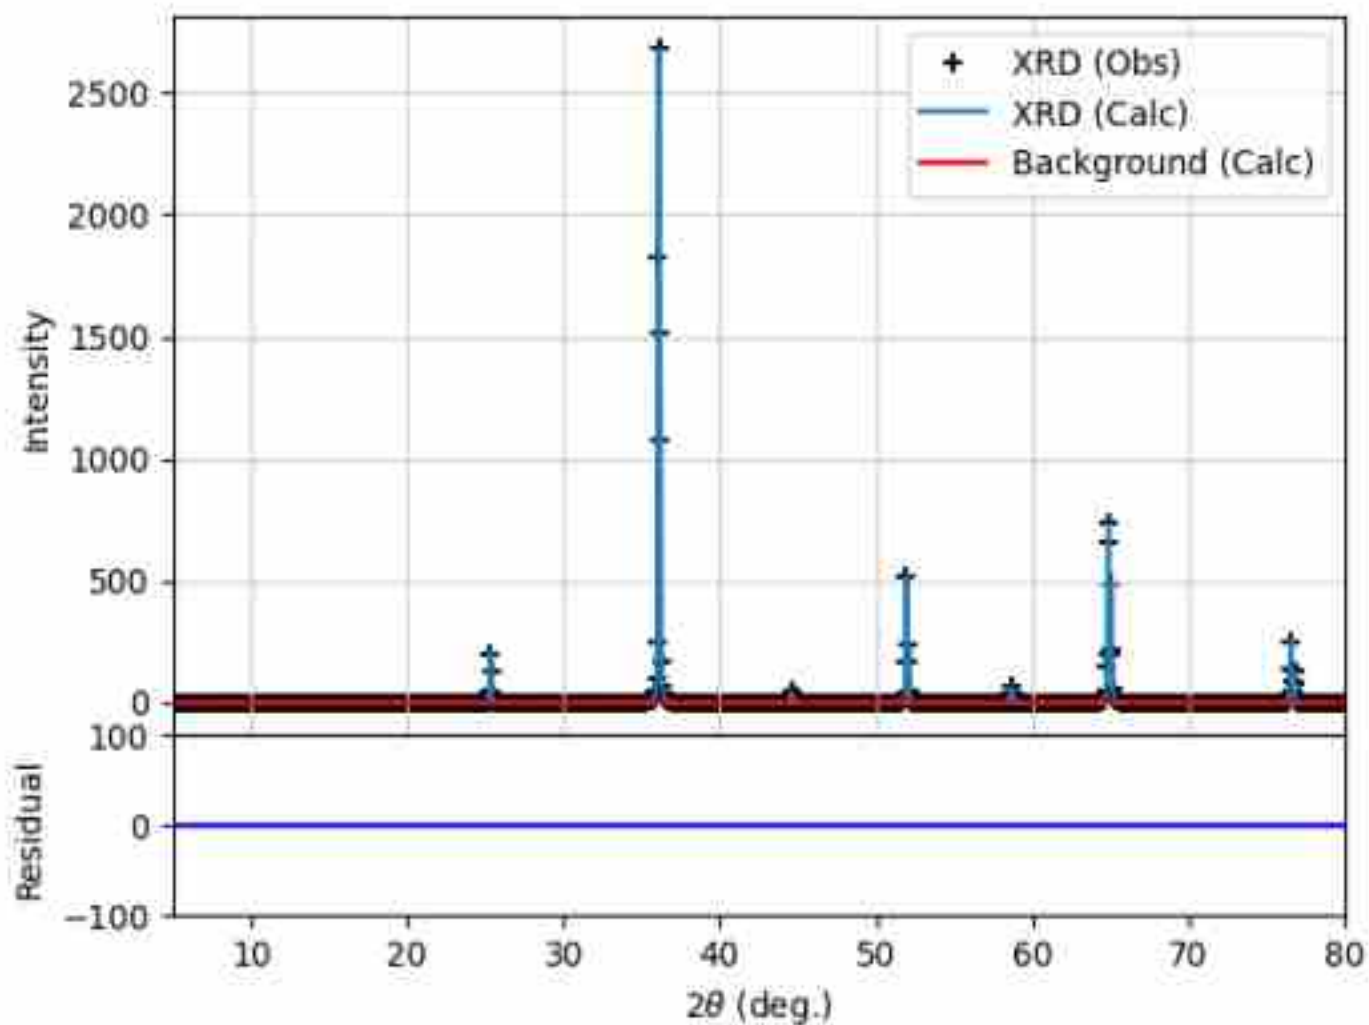

| RMSE before RR | Rwp     | RMSE after RR |
|----------------|---------|---------------|
| 0.001          | 0.00638 | 0.00054       |

# Ho1Th1Ru2

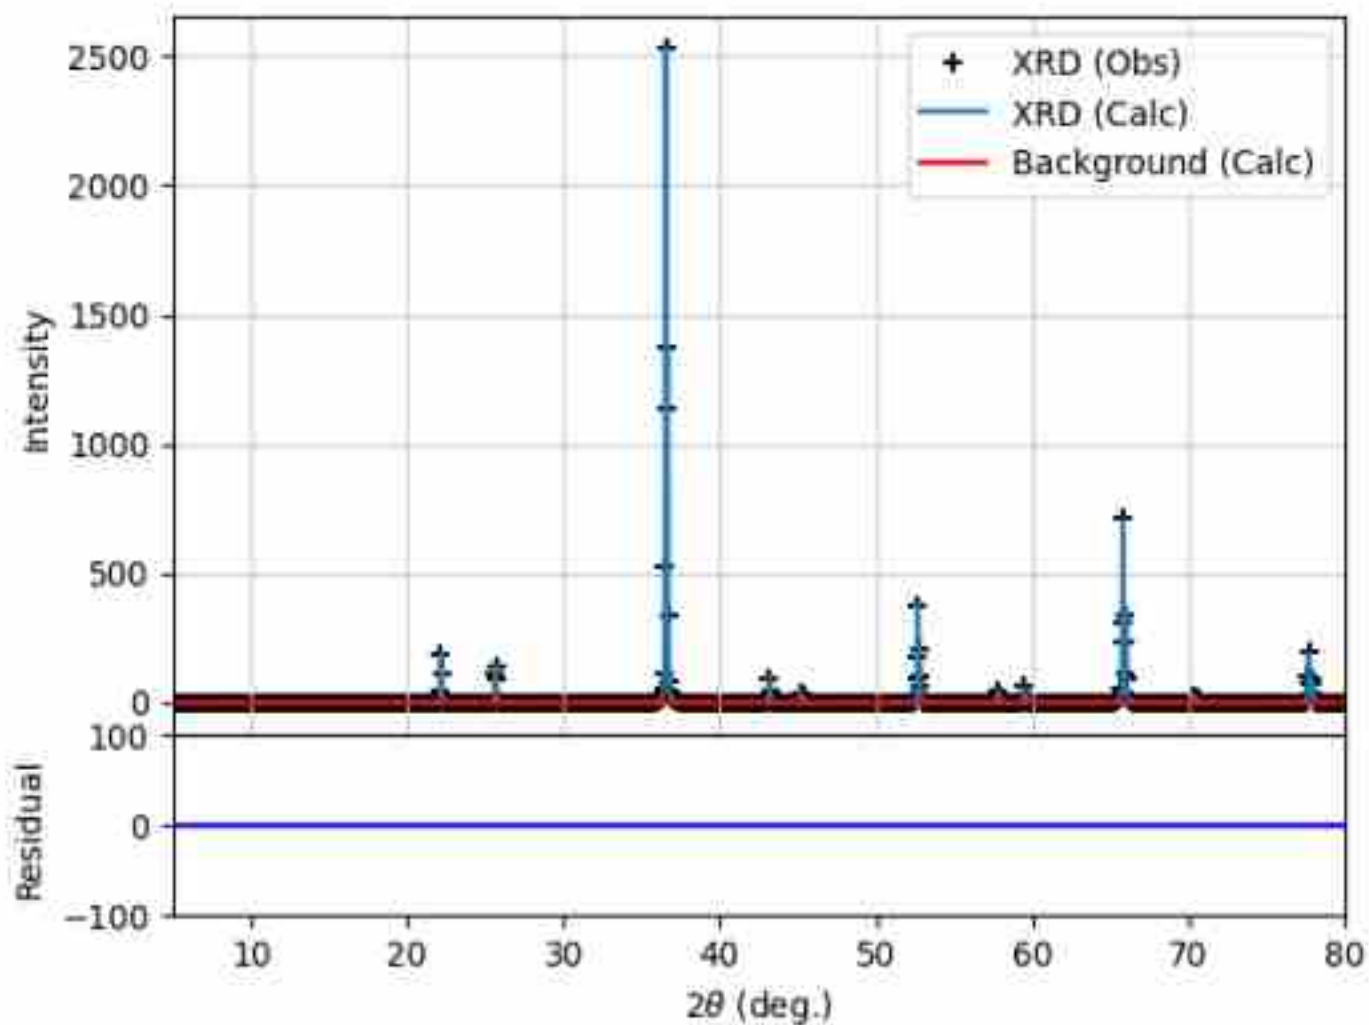

| RMSE before RR | Rwp     | RMSE after RR |
|----------------|---------|---------------|
| 0.001          | 0.01538 | 0.0005        |

# Ho1Tm1Cd2

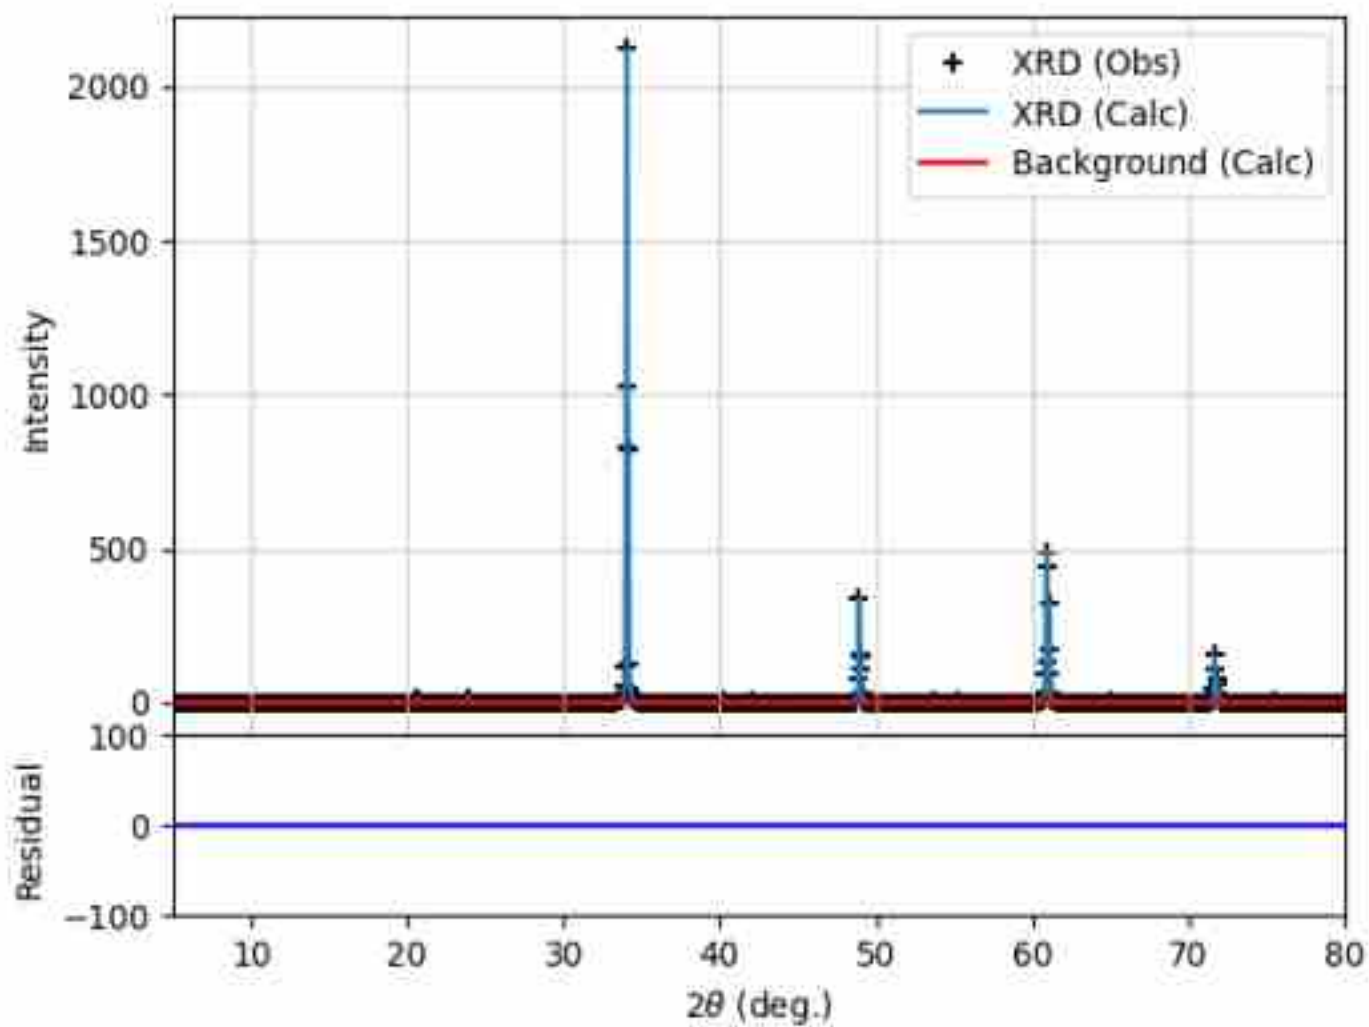

| RMSE before RR | Rwp     | RMSE after RR |
|----------------|---------|---------------|
| 0.001          | 0.06156 | 0.00142       |

# Ho1Tm1Mg2

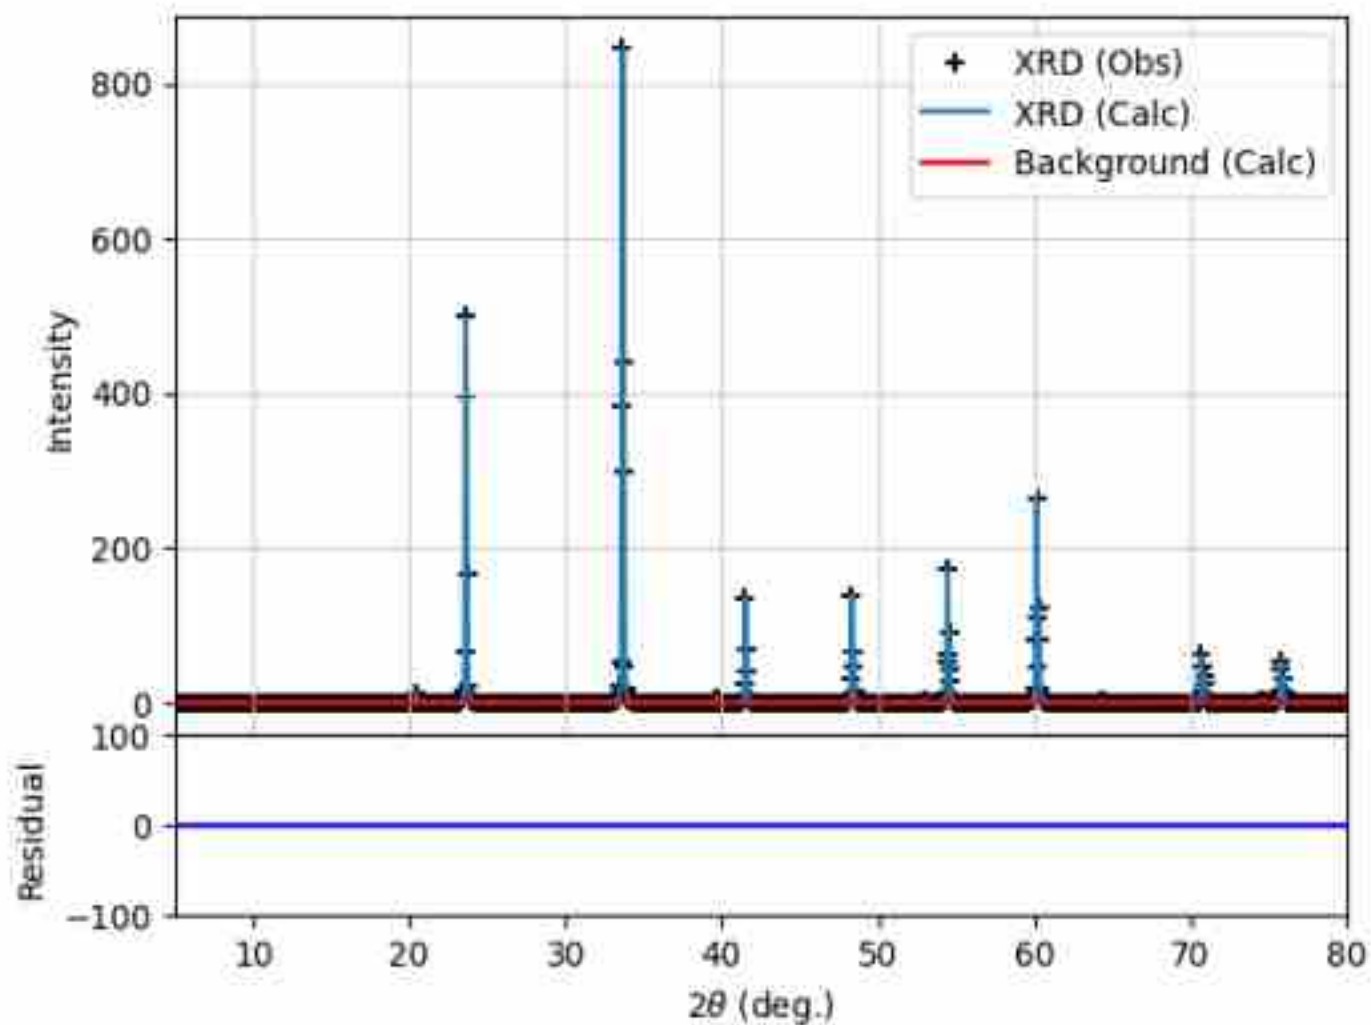

| RMSE before RR | Rwp     | RMSE after RR |
|----------------|---------|---------------|
| 0.001          | 0.00515 | 0.00122       |

# Ho1Tm1Rh2

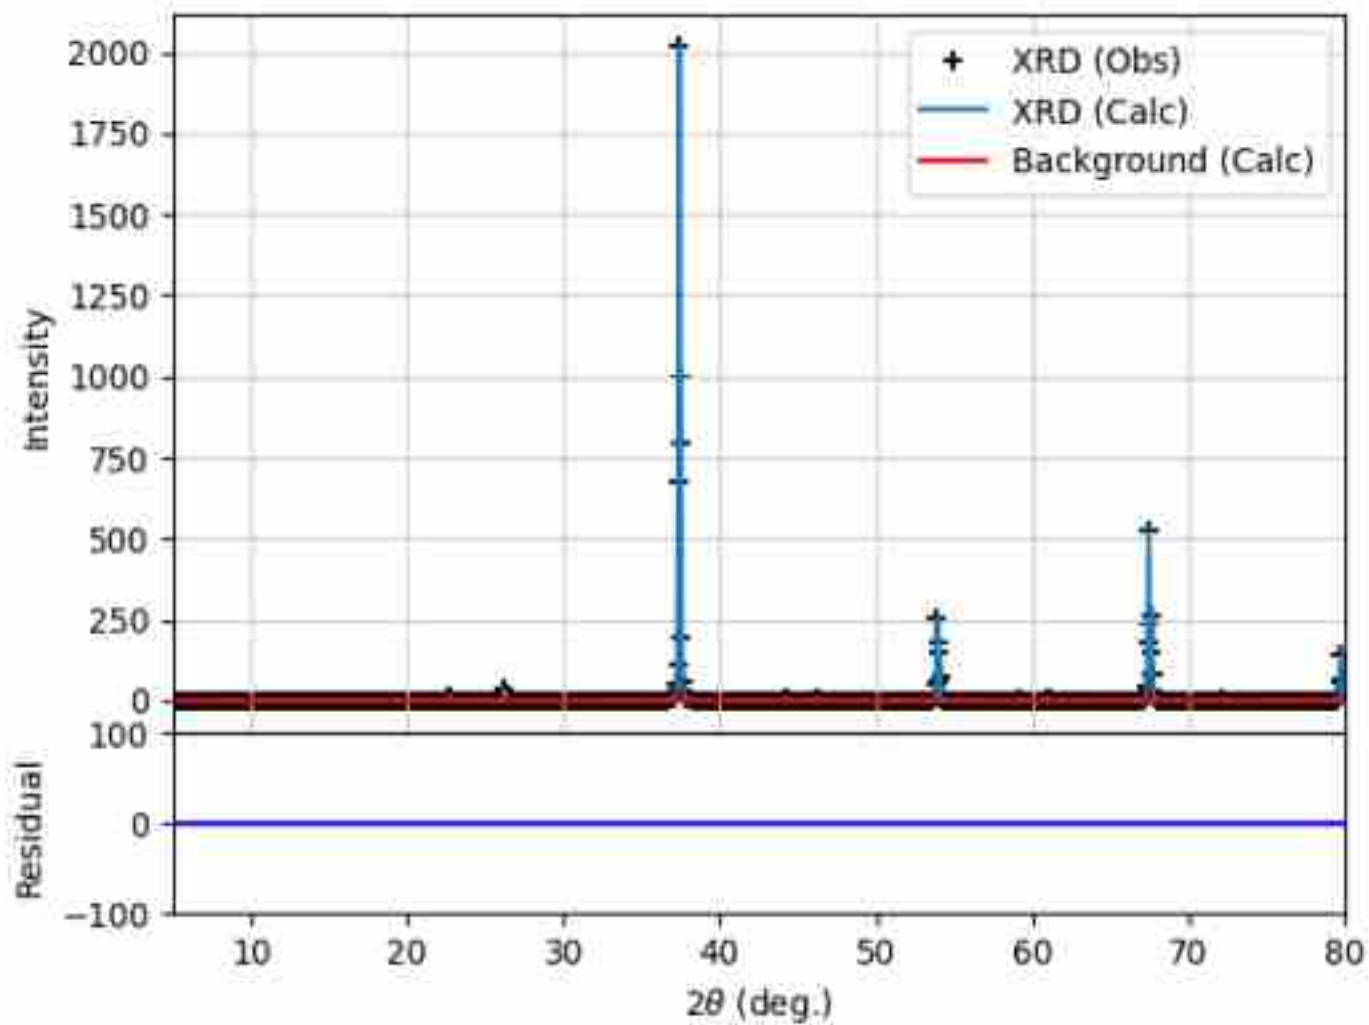

| RMSE before RR | Rwp     | RMSE after RR |
|----------------|---------|---------------|
| 0.001          | 0.00333 | 0.00028       |

# Ho1Tm1Ru2

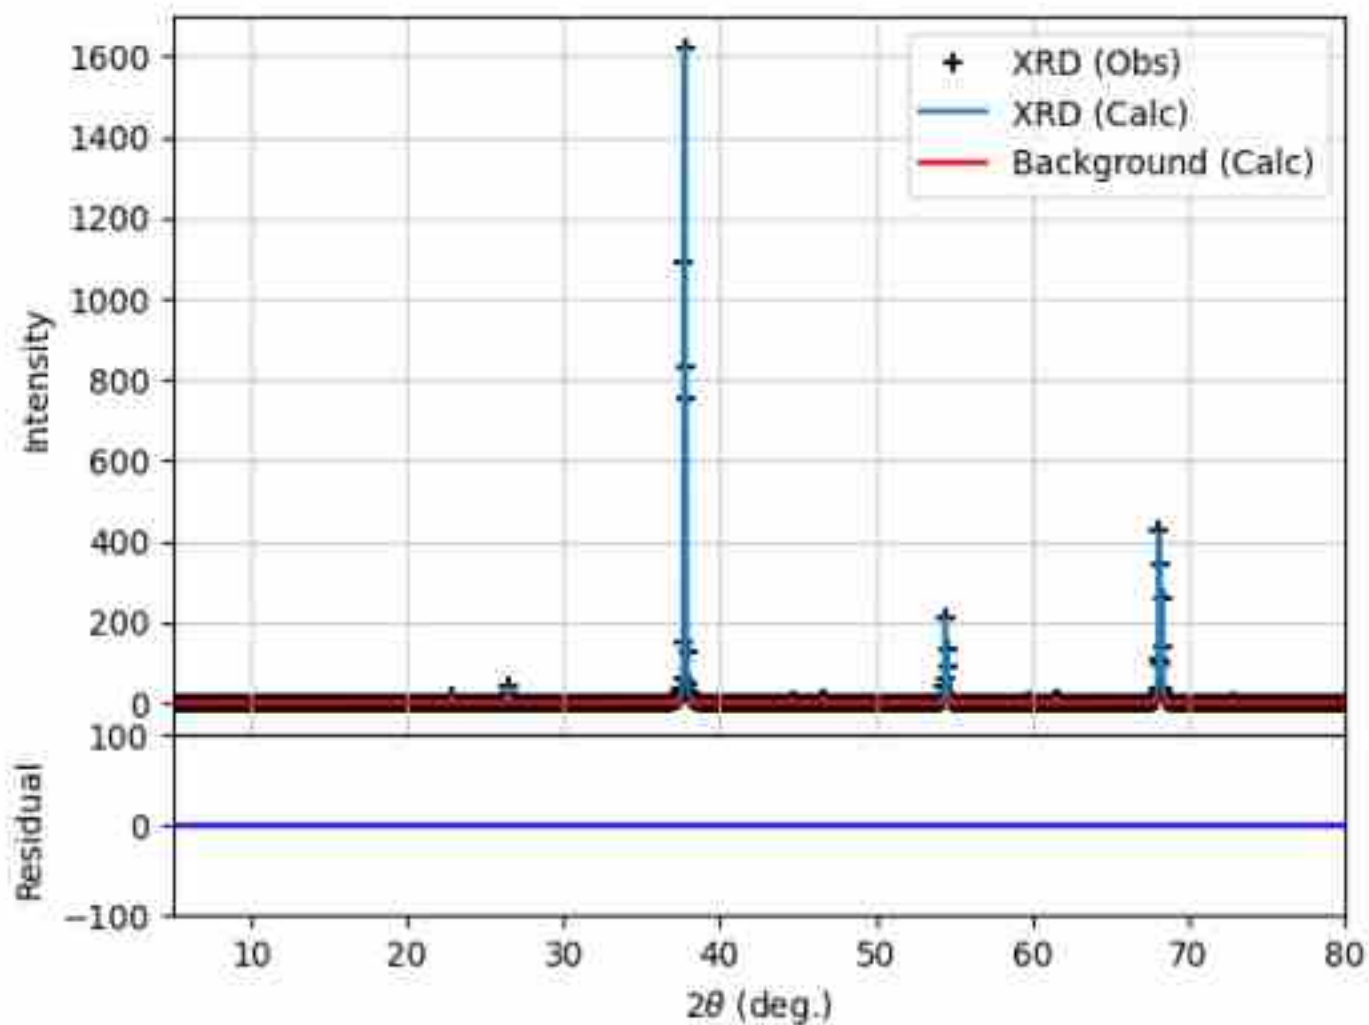

| RMSE before RR | Rwp     | RMSE after RR |
|----------------|---------|---------------|
| 0.001          | 0.02911 | 0.00128       |

# Ho<sub>2</sub>CuPt

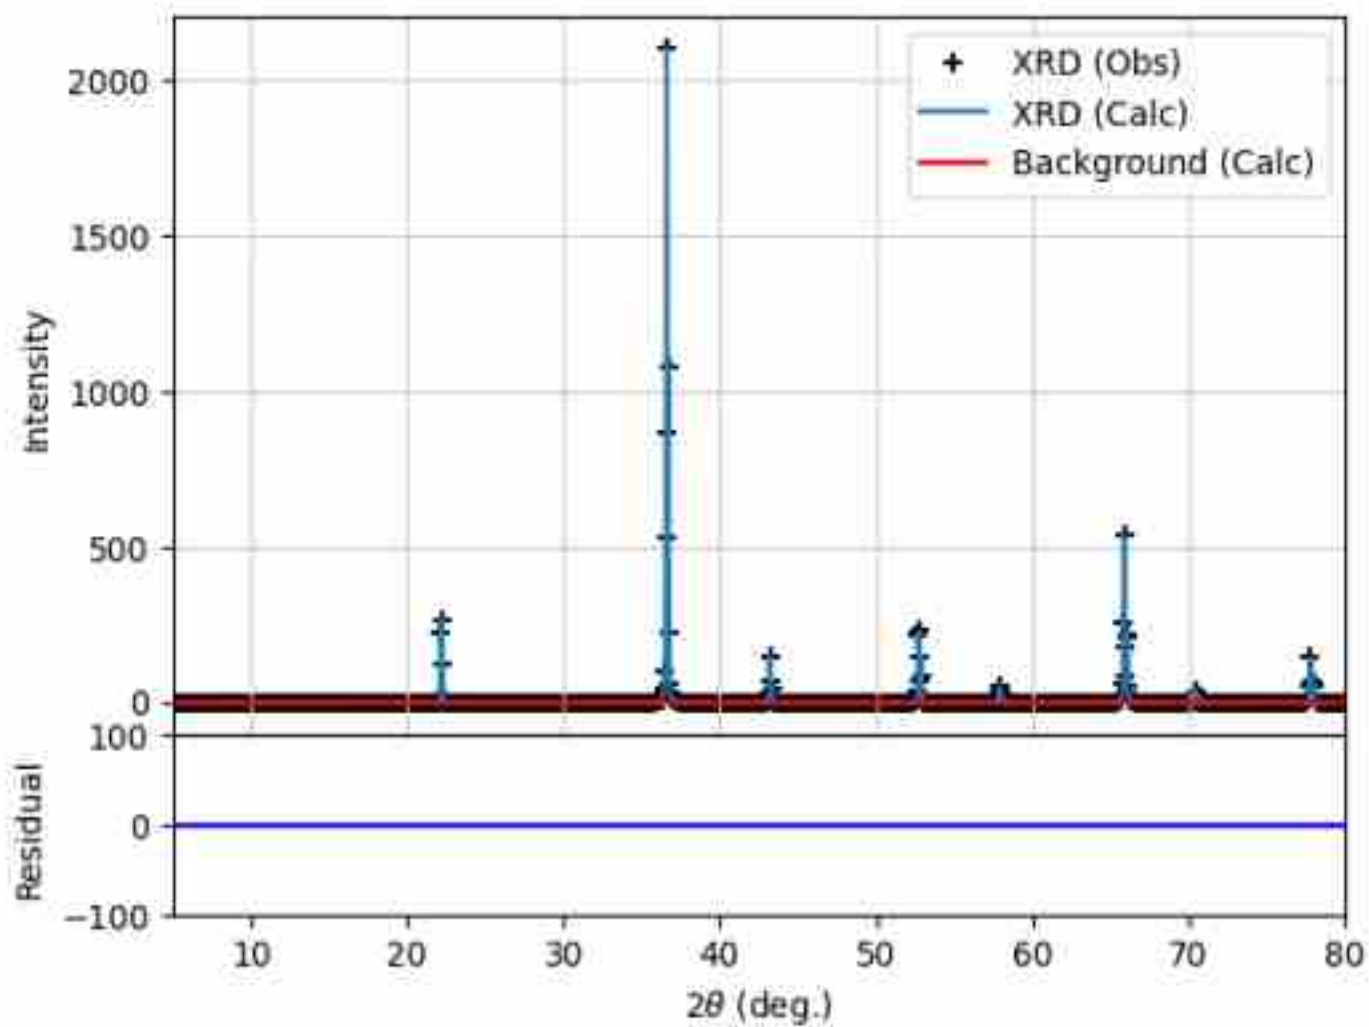

| RMSE before RR | Rwp     | RMSE after RR |
|----------------|---------|---------------|
| 0.001          | 0.29377 | 0.0019        |

# Ho2Cu1Ru1

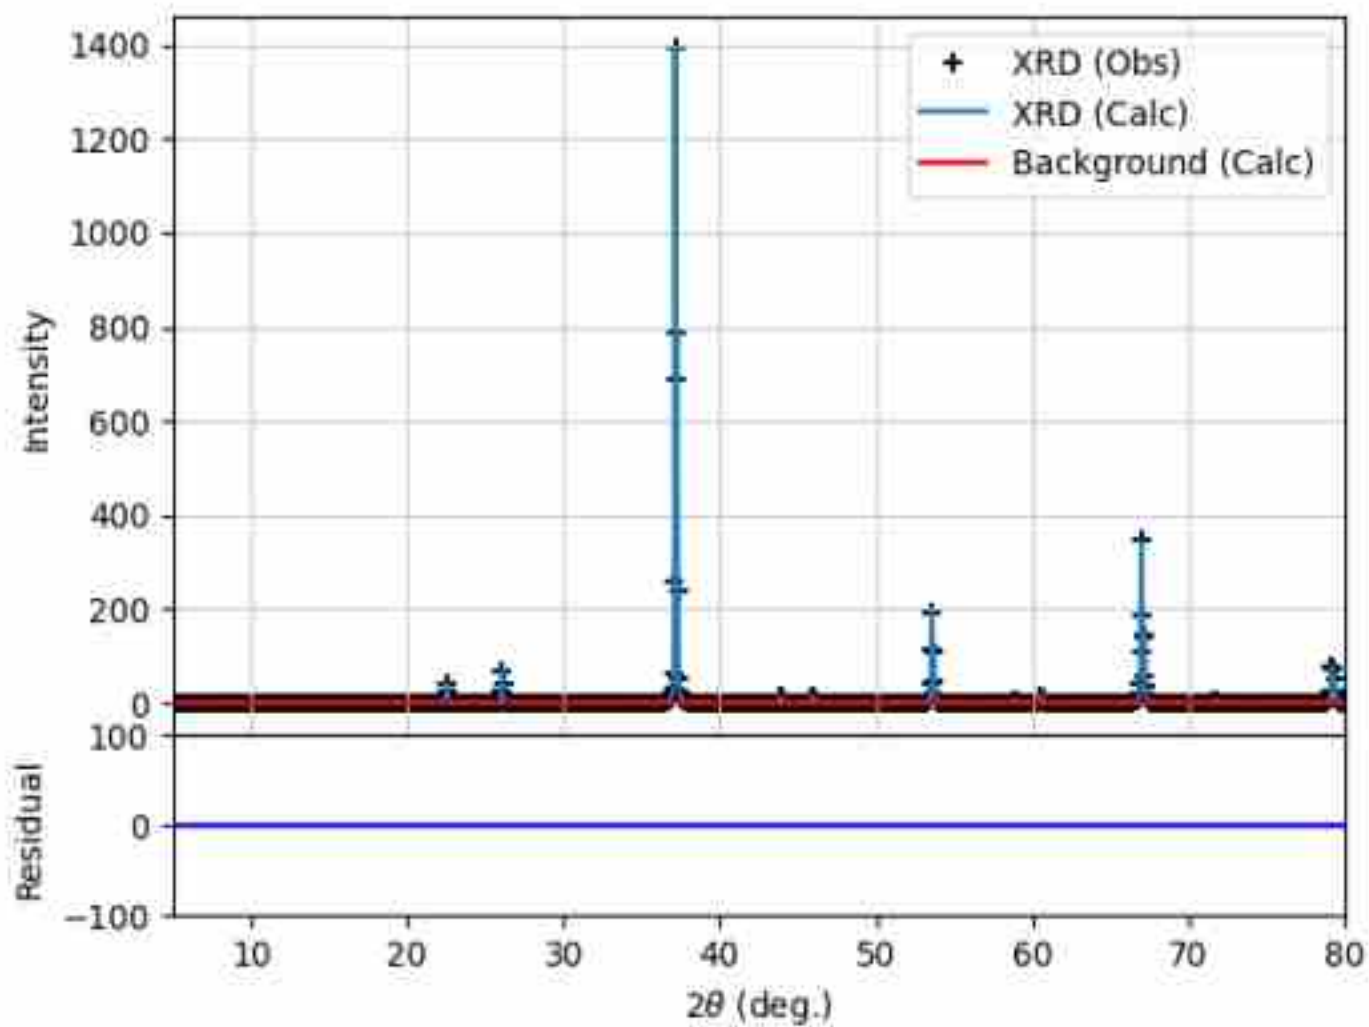

| RMSE before RR | Rwp     | RMSE after RR |
|----------------|---------|---------------|
| 0.001          | 0.00231 | 0.0004        |



# Ho<sub>2</sub>Ga<sub>8</sub>Co<sub>1</sub>

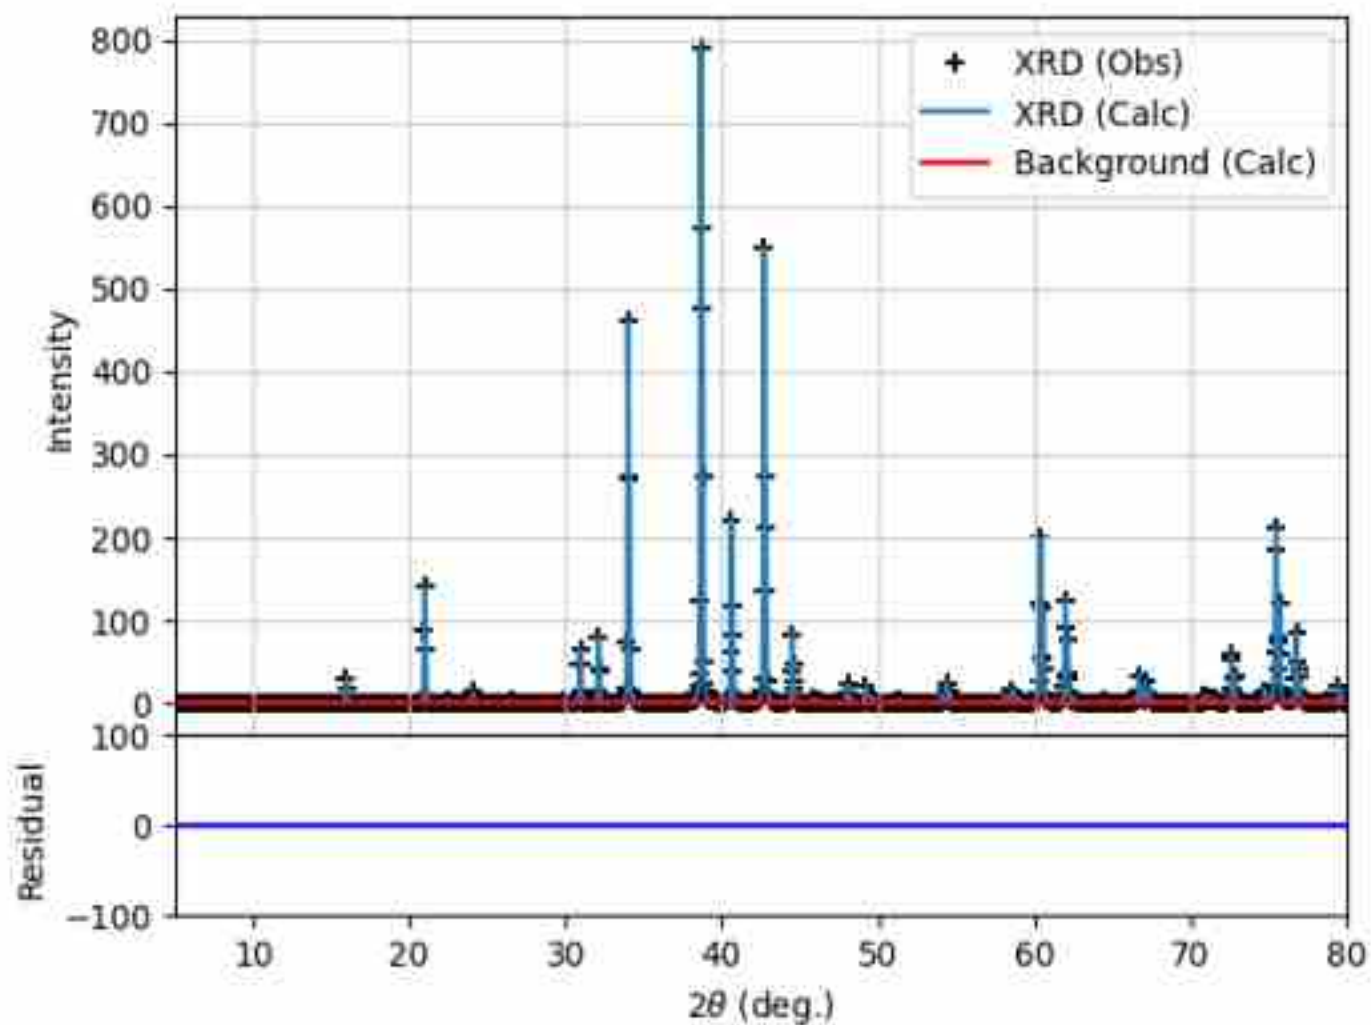

| RMSE before RR | Rwp     | RMSE after RR |
|----------------|---------|---------------|
| 0.01           | 0.00606 | 0.00062       |

# Ho<sub>2</sub>Mg<sub>1</sub>In<sub>1</sub>

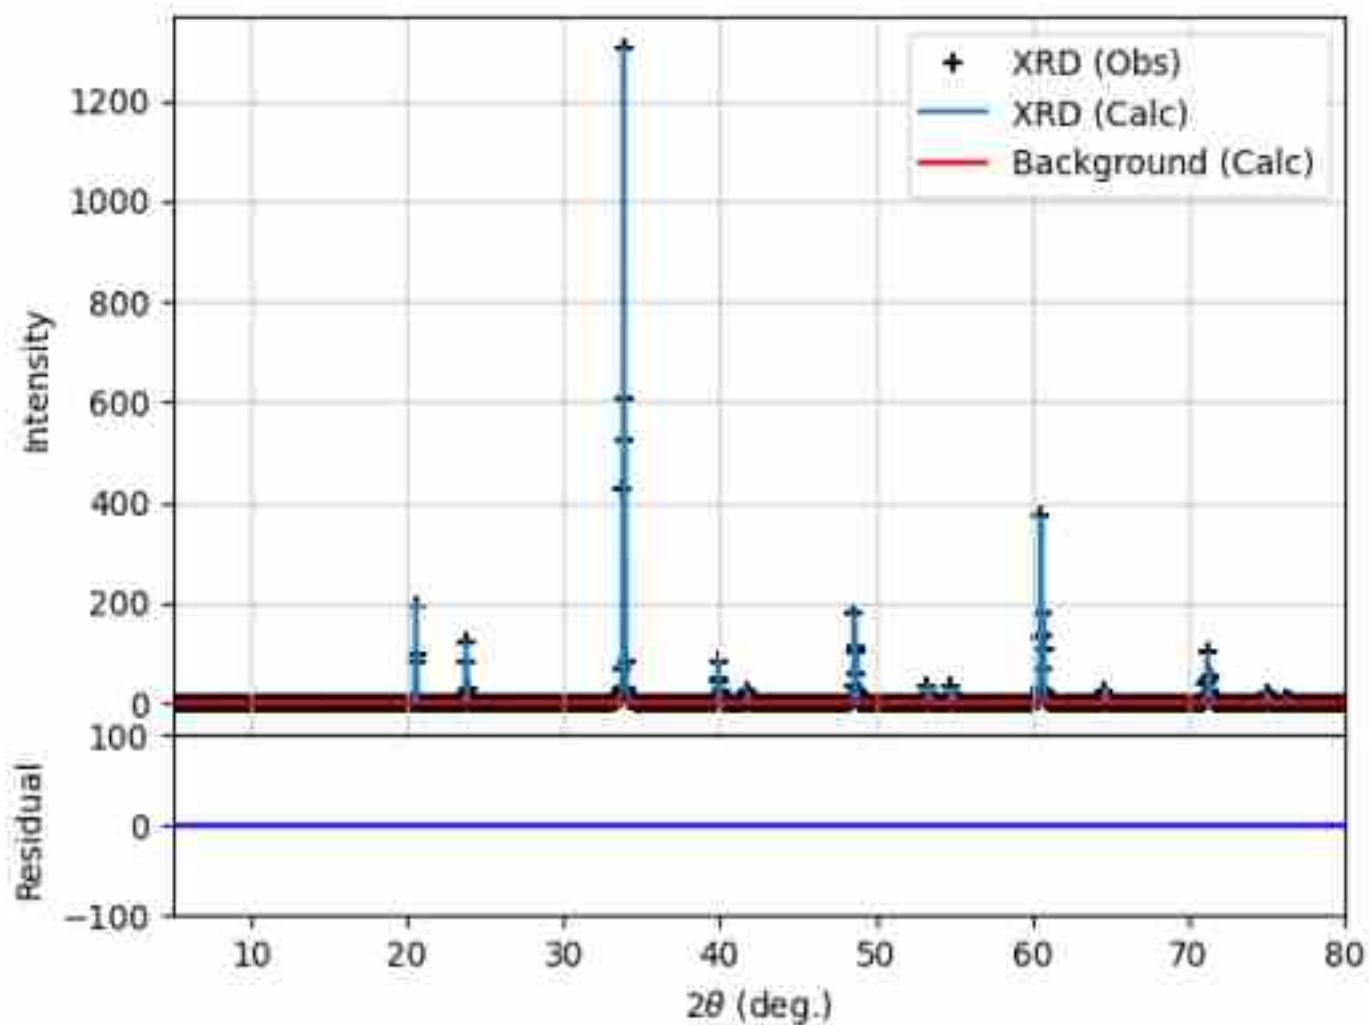

| RMSE before RR | Rwp     | RMSE after RR |
|----------------|---------|---------------|
| 0.001          | 0.00472 | 0.00072       |

# Ho2Pd1Ru1

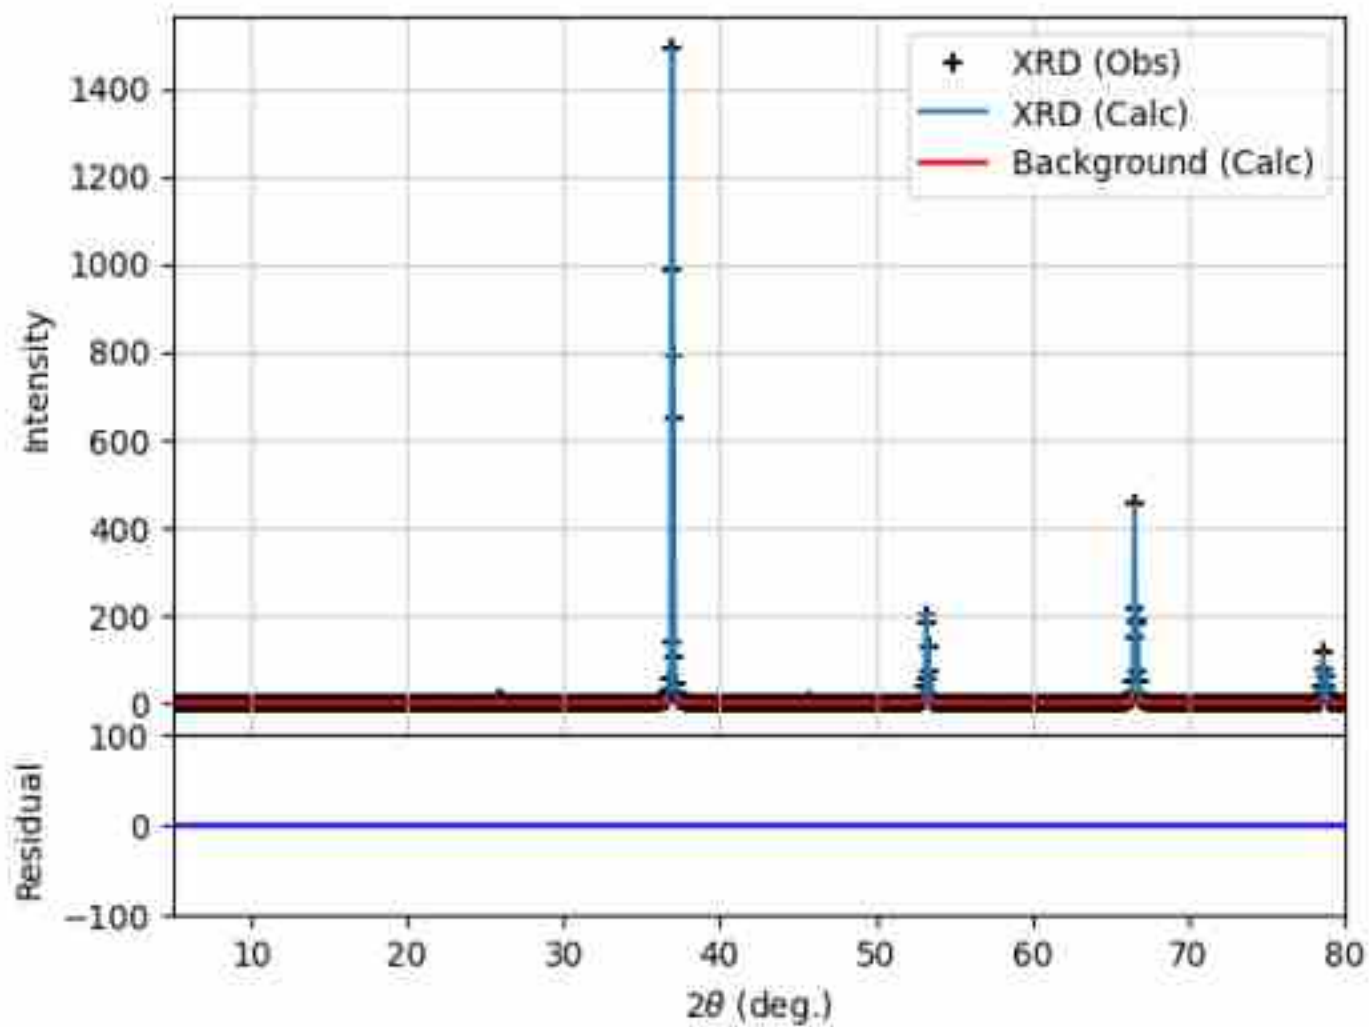

| RMSE before RR | Rwp     | RMSE after RR |
|----------------|---------|---------------|
| 0.001          | 0.00705 | 0.00045       |

# Ho<sub>2</sub>Zn<sub>1</sub>Pd<sub>1</sub>

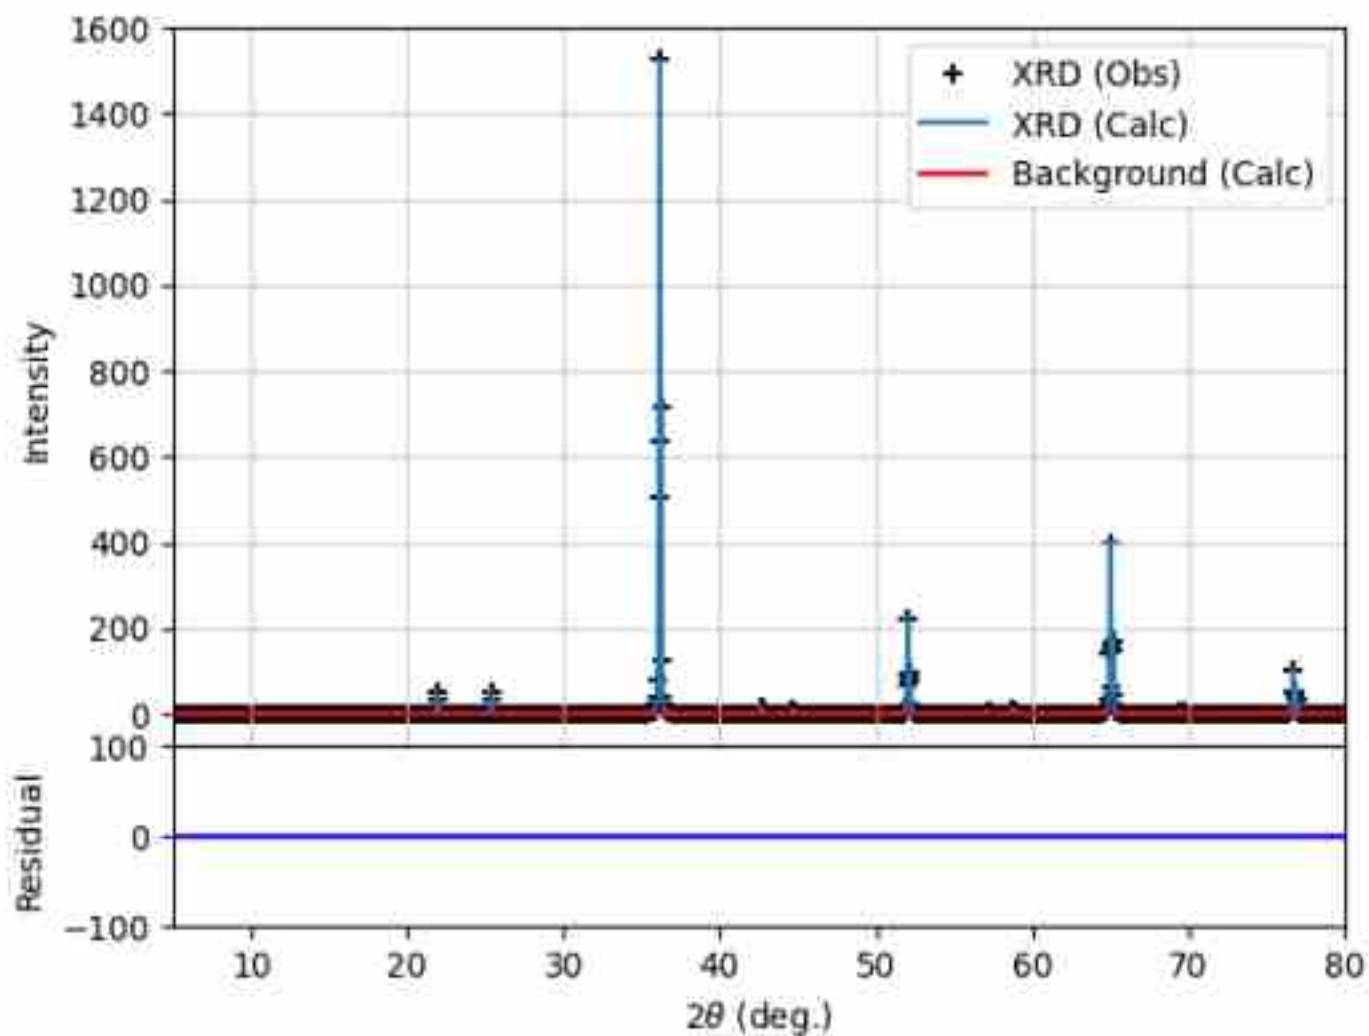

| RMSE before RR | Rwp | RMSE after RR |
|----------------|-----|---------------|
| 0.001          | 0.0 | 0.0           |

# Ho<sub>3</sub>In<sub>3</sub>Rh<sub>3</sub>

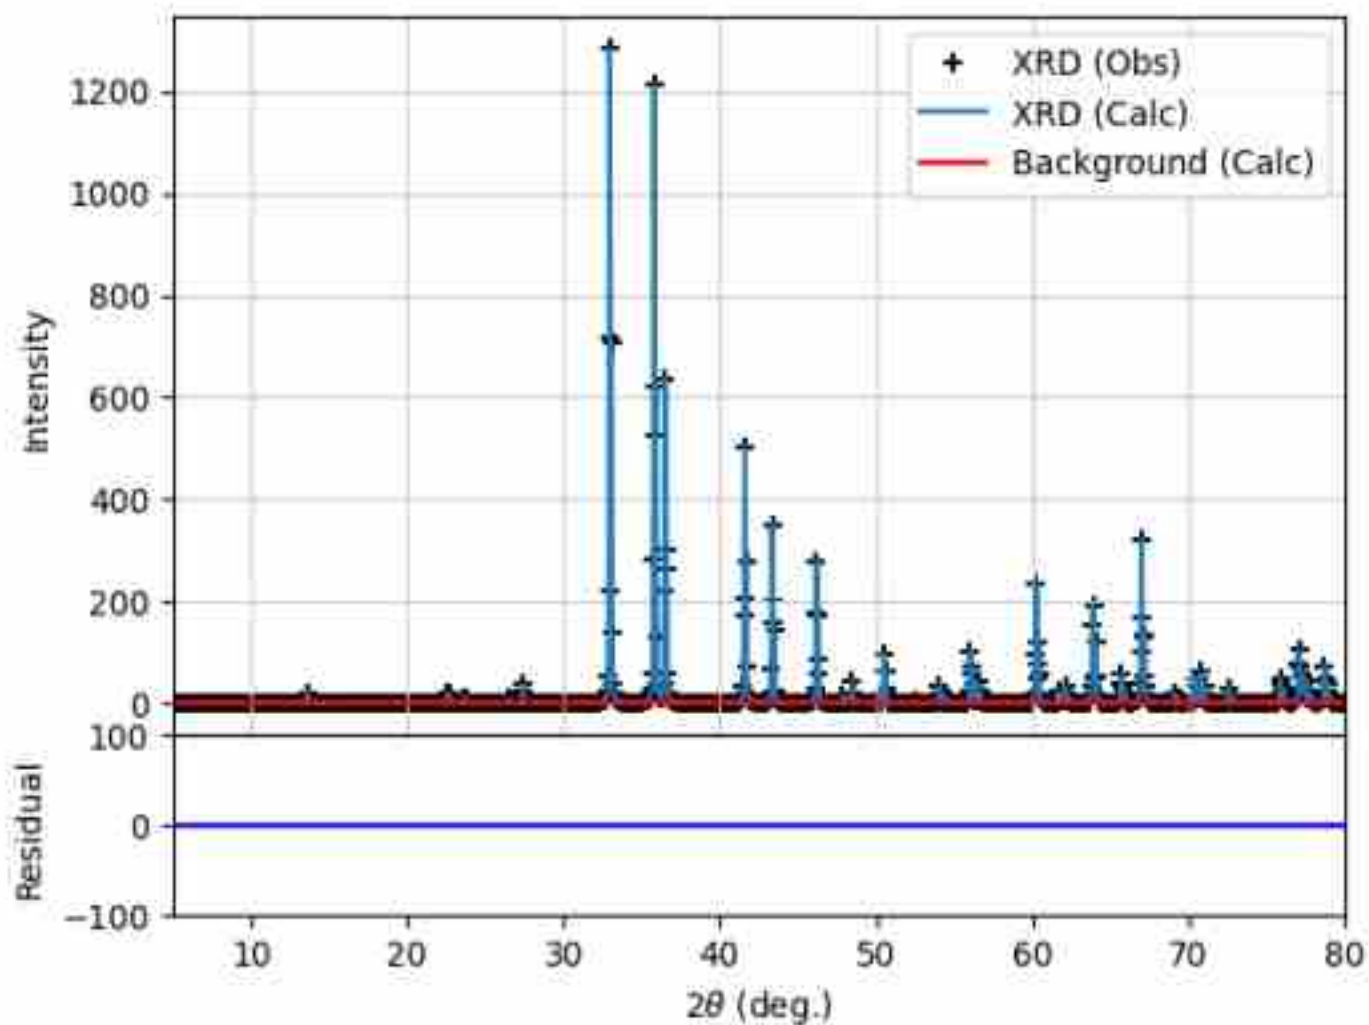

| RMSE before RR | Rwp     | RMSE after RR |
|----------------|---------|---------------|
| 0.01           | 0.00813 | 0.00101       |

# Ho<sub>4</sub>In<sub>2</sub>Ni<sub>4</sub>

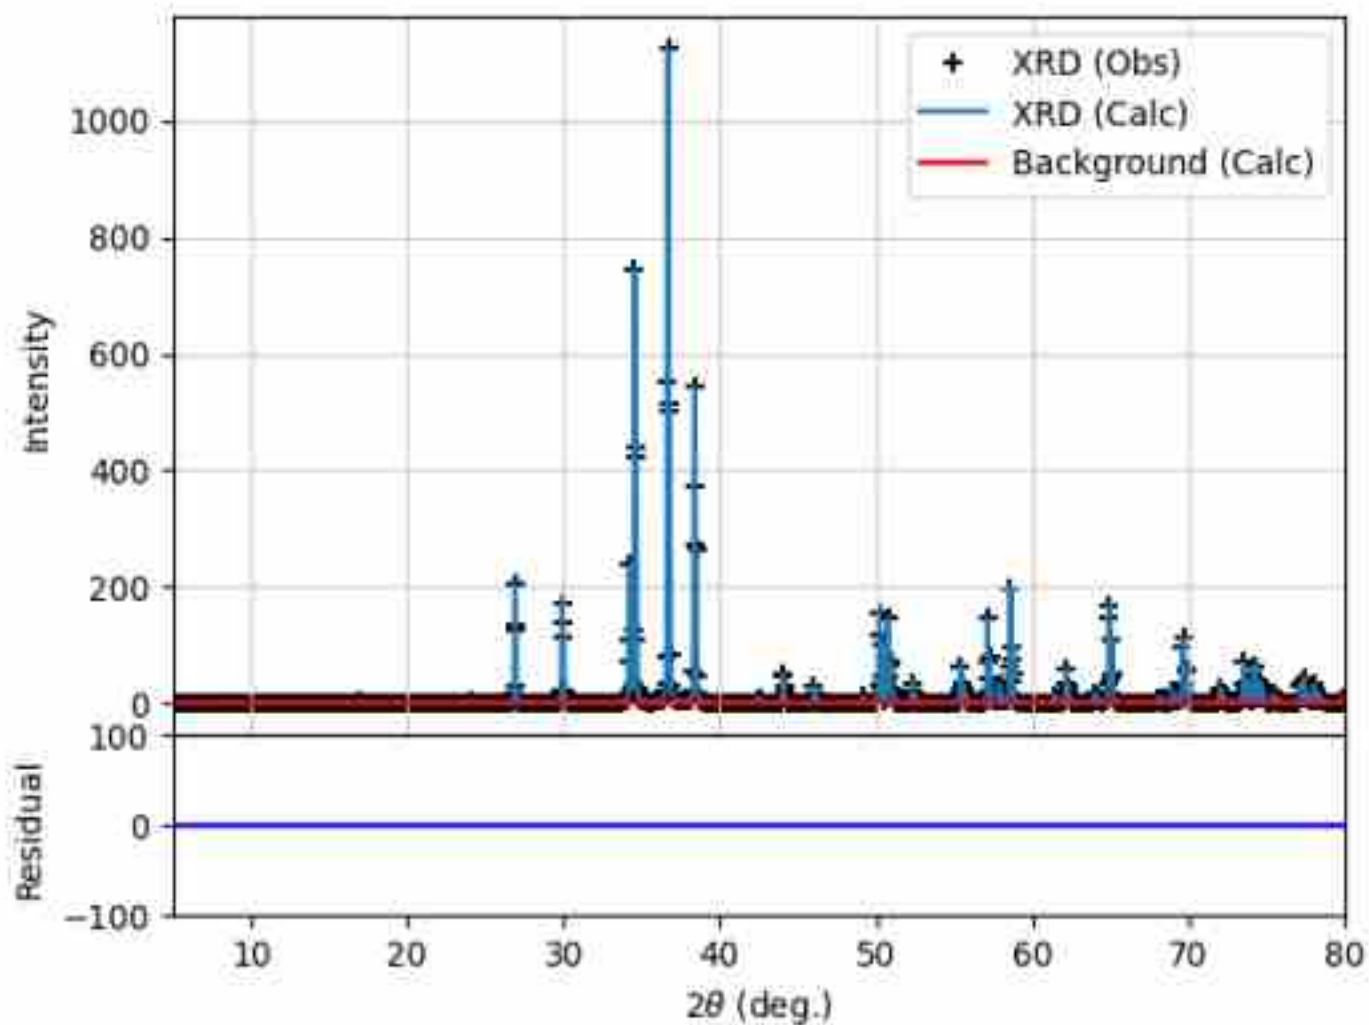

| RMSE before RR | Rwp     | RMSE after RR |
|----------------|---------|---------------|
| 0.01           | 0.00519 | 0.00058       |

# Ho4Pt4

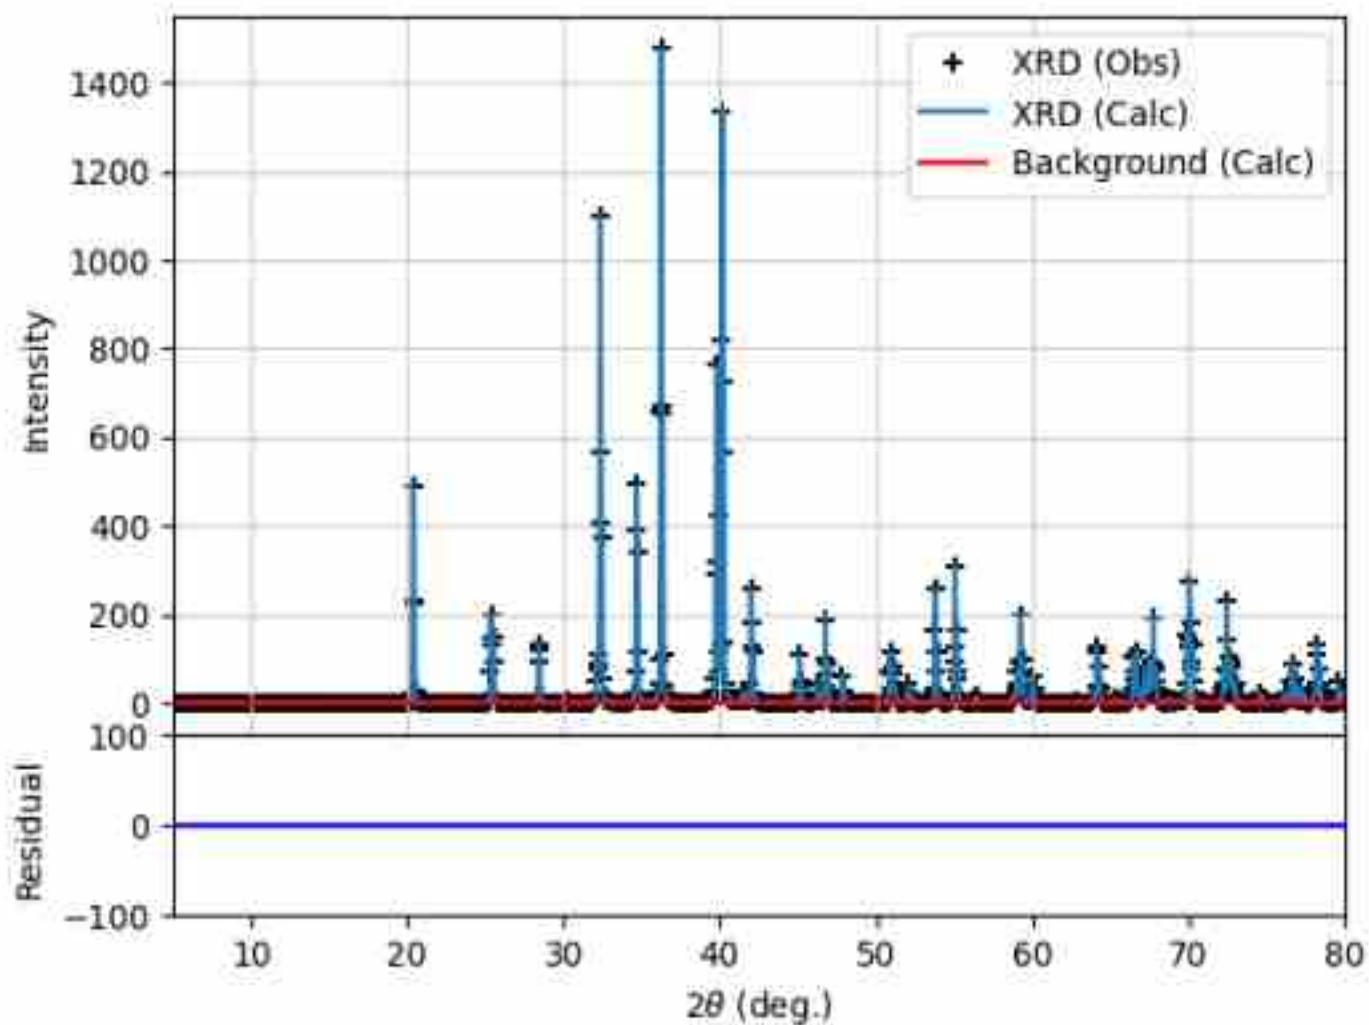

| RMSE before RR | Rwp     | RMSE after RR |
|----------------|---------|---------------|
| 0.01           | 0.00581 | 0.00041       |

# In1Ga3

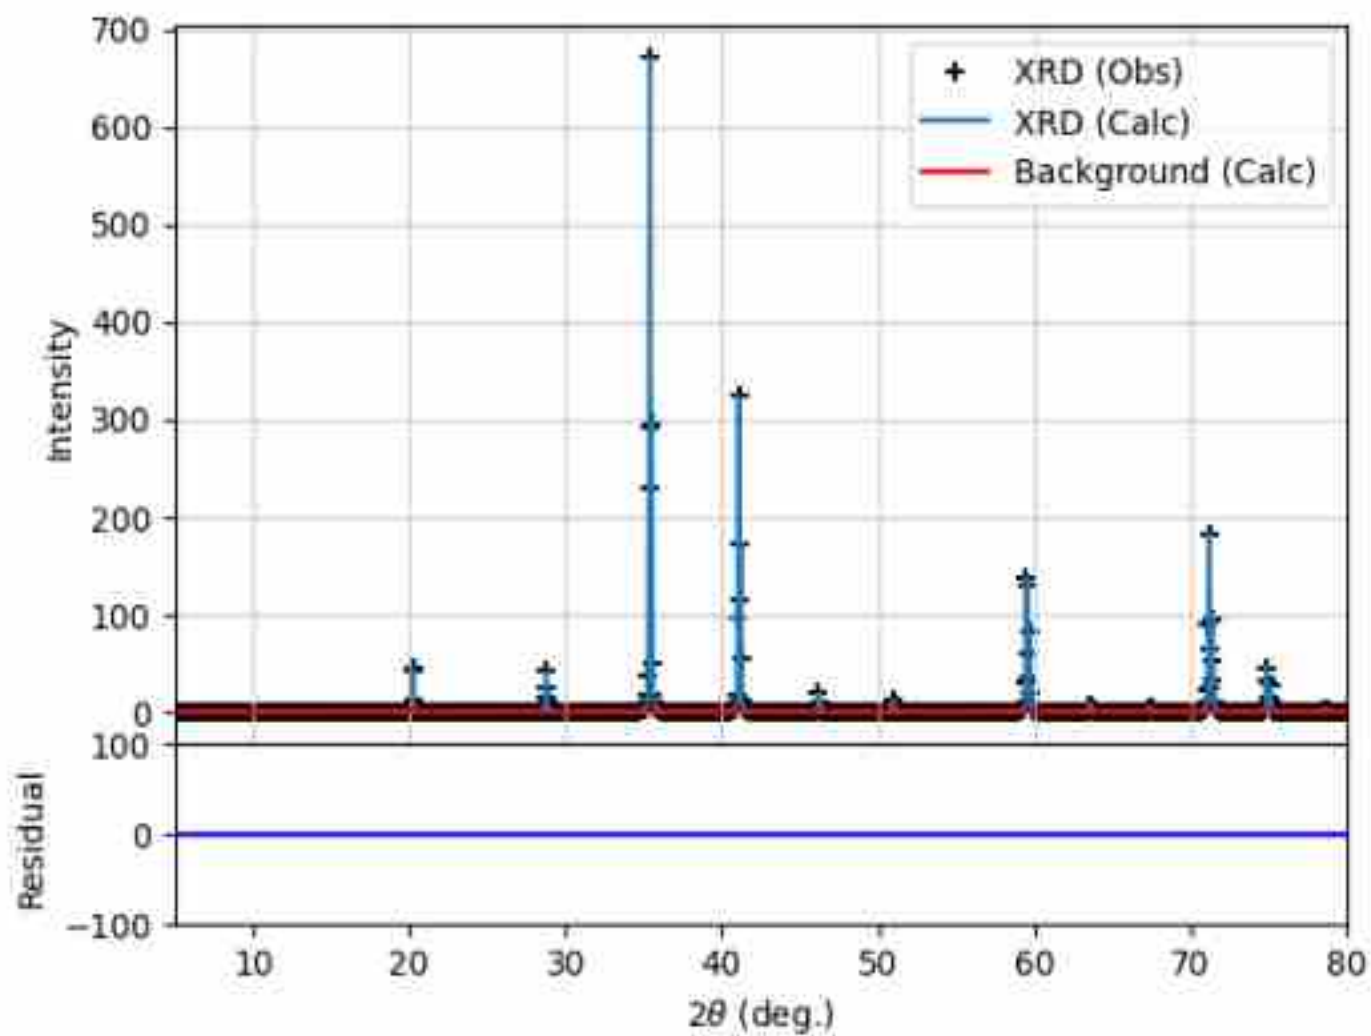

| RMSE before RR | Rwp     | RMSE after RR |
|----------------|---------|---------------|
| 0.001          | 0.02745 | 0.00094       |



# In1Pb1

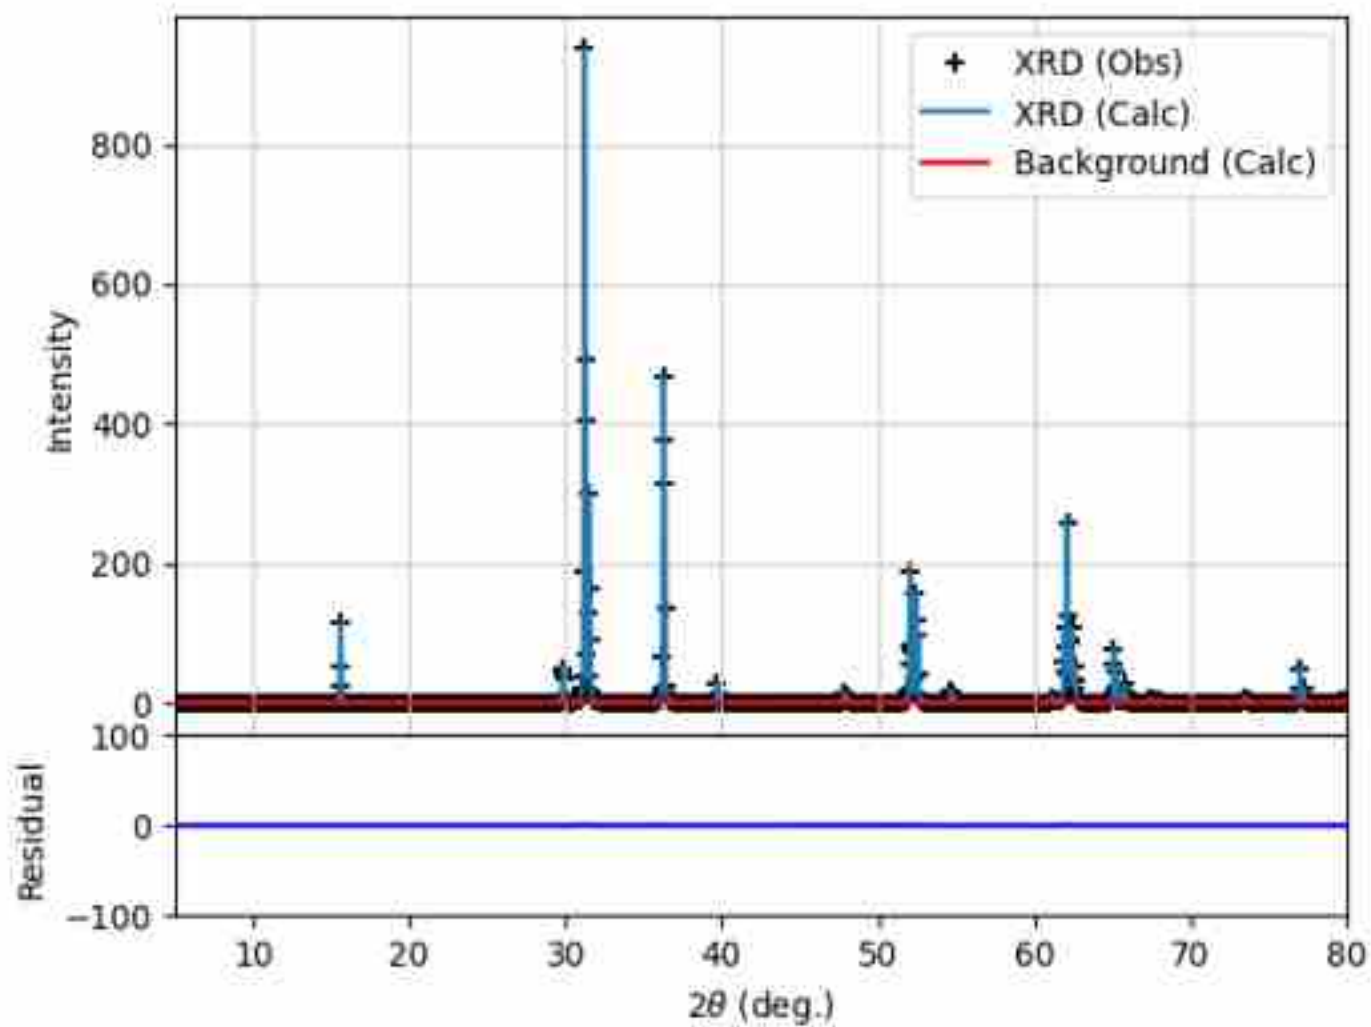

| RMSE before RR | Rwp     | RMSE after RR |
|----------------|---------|---------------|
| 0.001          | 0.54332 | 0.00126       |

# In1Te1

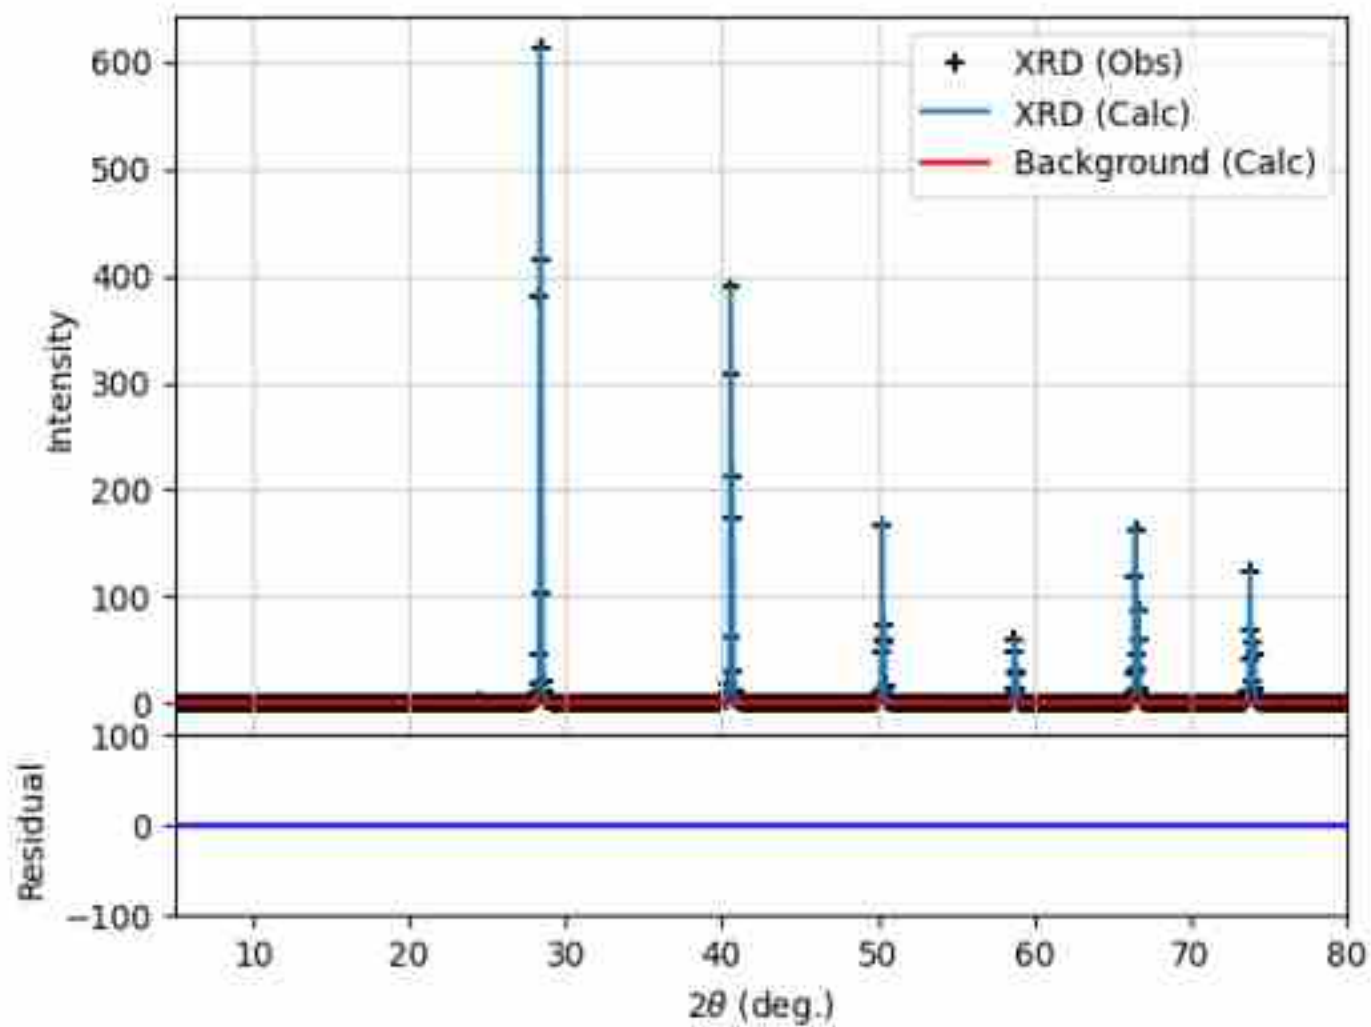

| RMSE before RR | Rwp     | RMSE after RR |
|----------------|---------|---------------|
| 0.001          | 0.25297 | 0.00057       |

# In<sub>2</sub>Ag<sub>1</sub>Se<sub>4</sub>

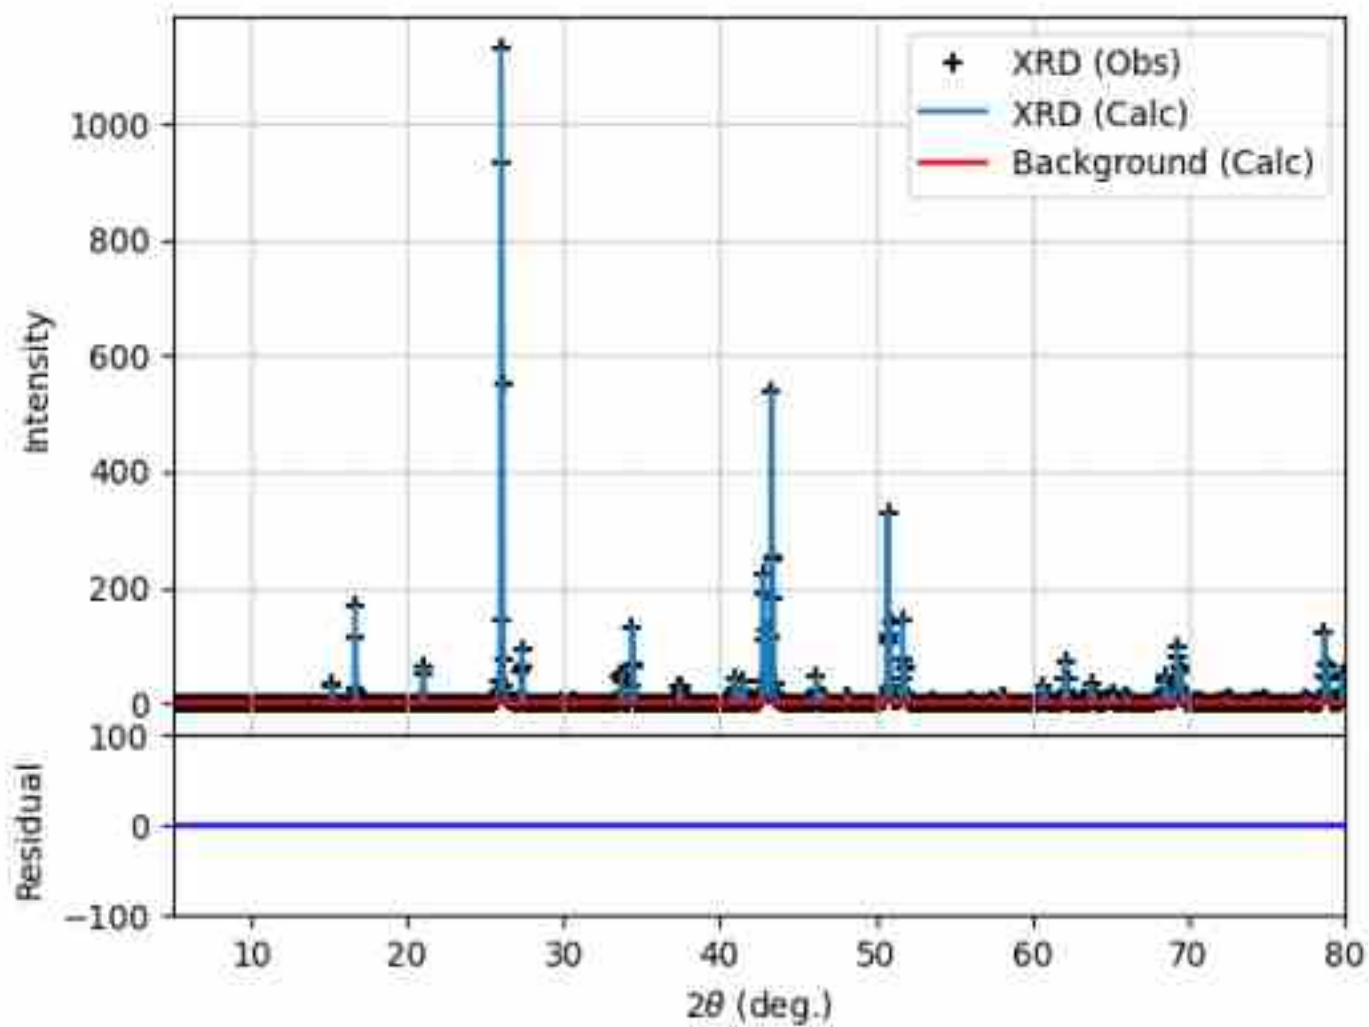

| RMSE before RR | Rwp     | RMSE after RR |
|----------------|---------|---------------|
| 0.01           | 0.00294 | 0.00045       |

# In2Cl2

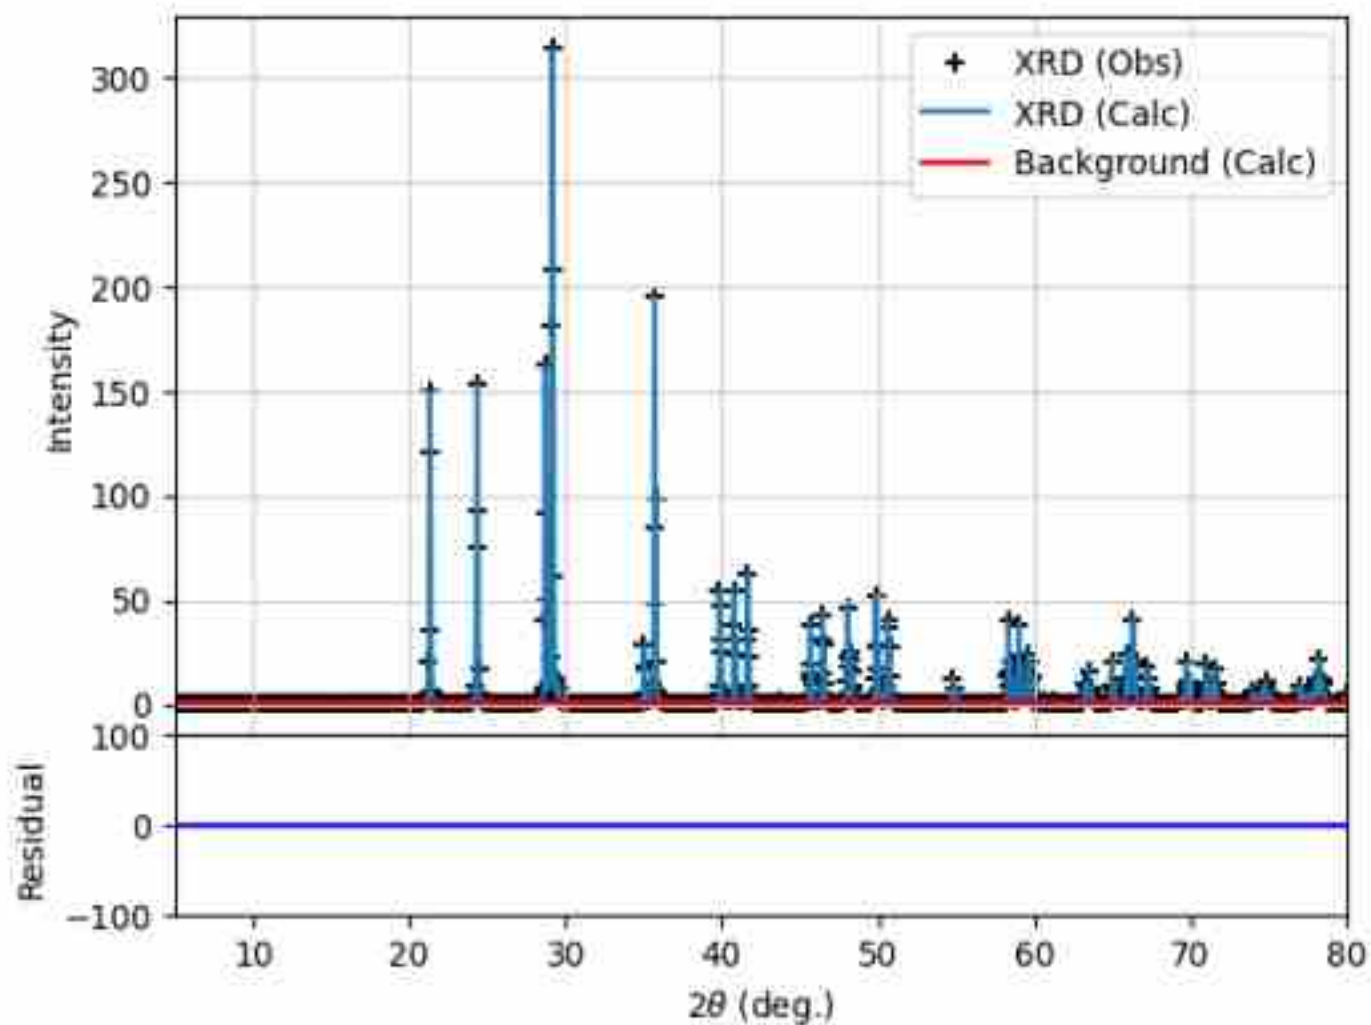

| RMSE before RR | Rwp    | RMSE after RR |
|----------------|--------|---------------|
| 0.01           | 0.0034 | 0.00061       |

# In3Sn1

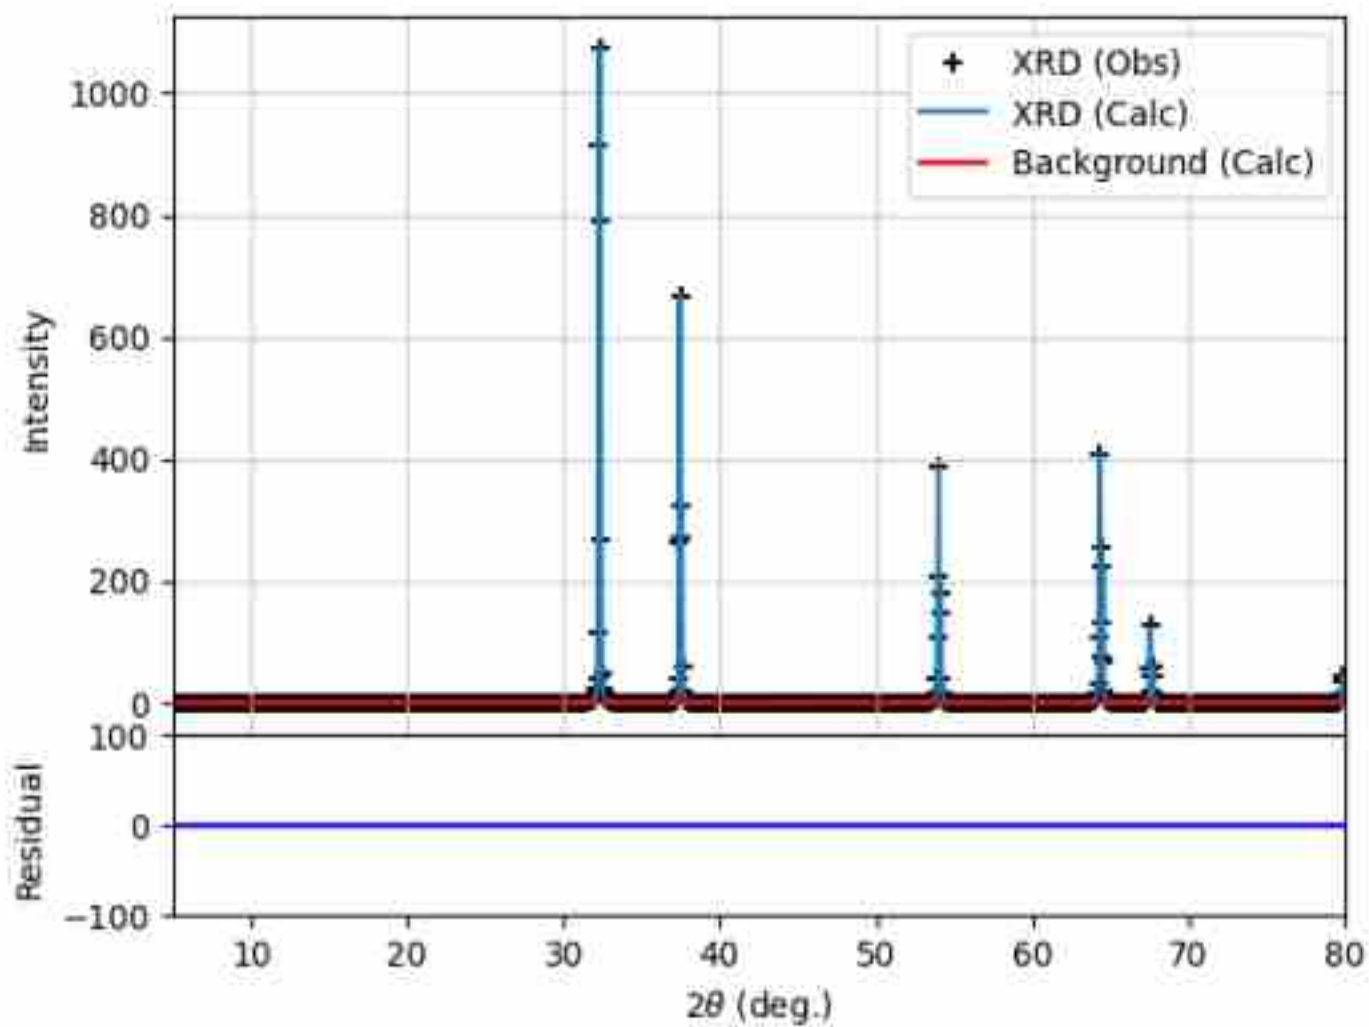

| RMSE before RR | Rwp     | RMSE after RR |
|----------------|---------|---------------|
| 0.001          | 0.00416 | 0.00098       |

# Ir1Rh1

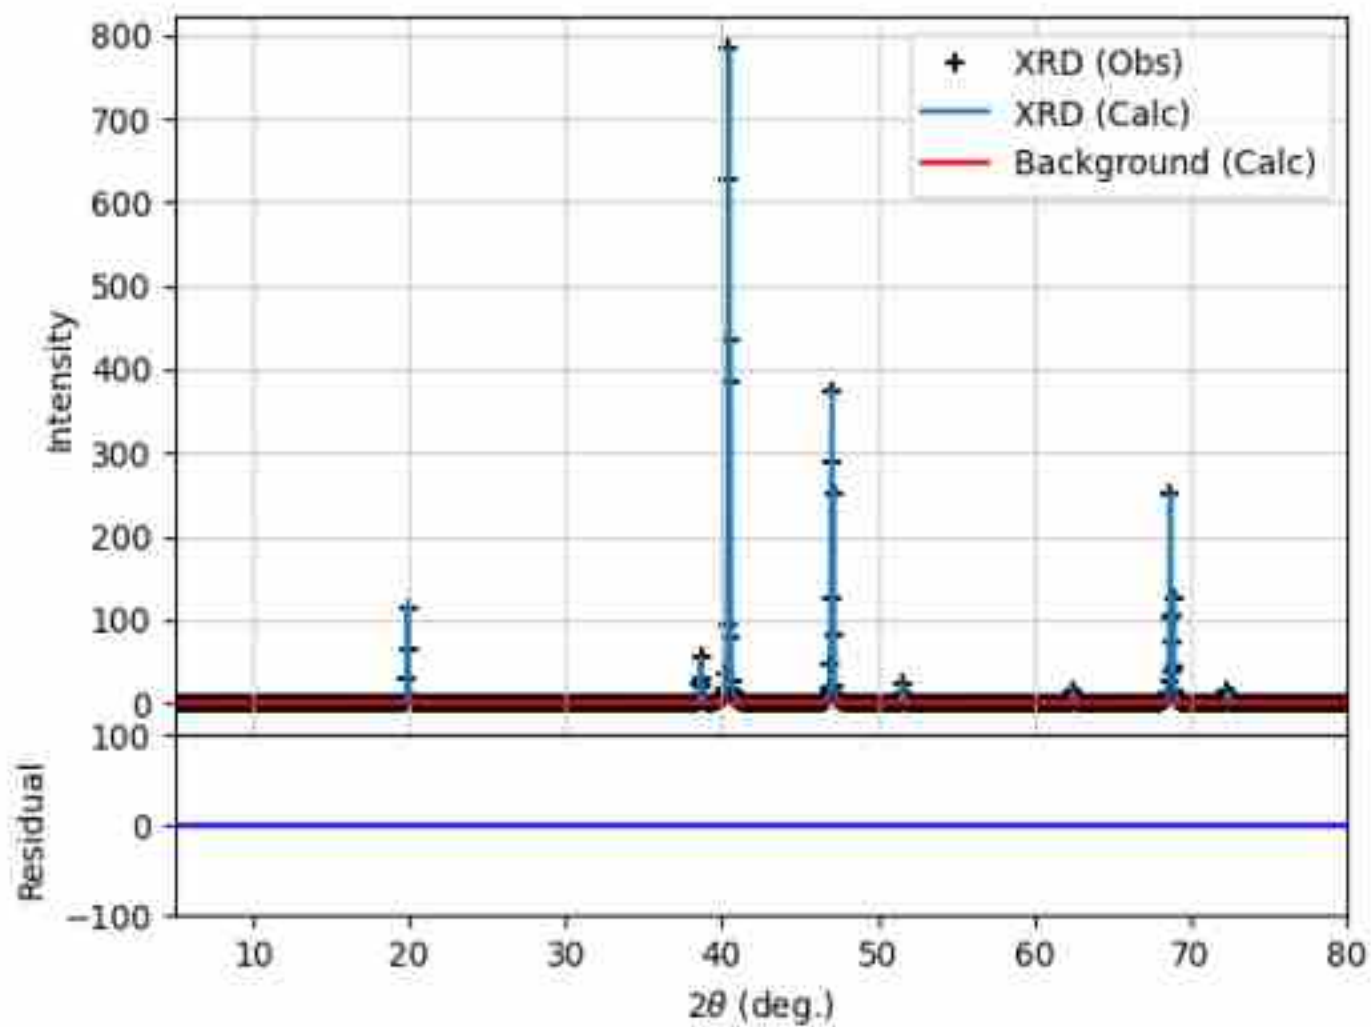

| RMSE before RR | Rwp     | RMSE after RR |
|----------------|---------|---------------|
| 0.001          | 0.00782 | 0.00032       |

# Ir1Ru1

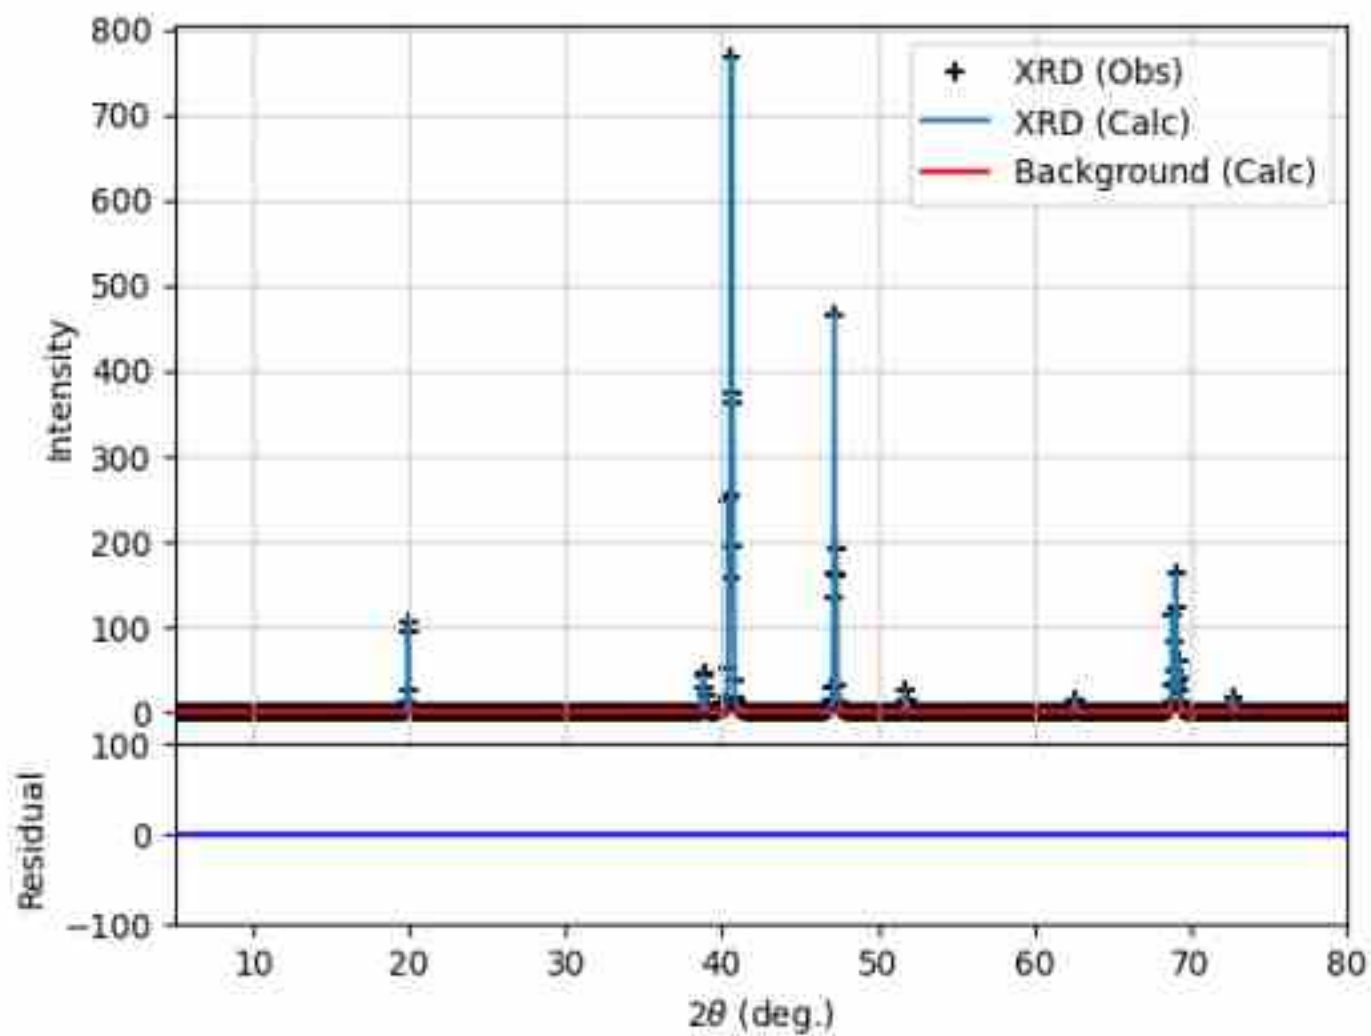

| RMSE before RR | Rwp   | RMSE after RR |
|----------------|-------|---------------|
| 0.001          | 7e-05 | 2e-05         |

# Ir3Rh1

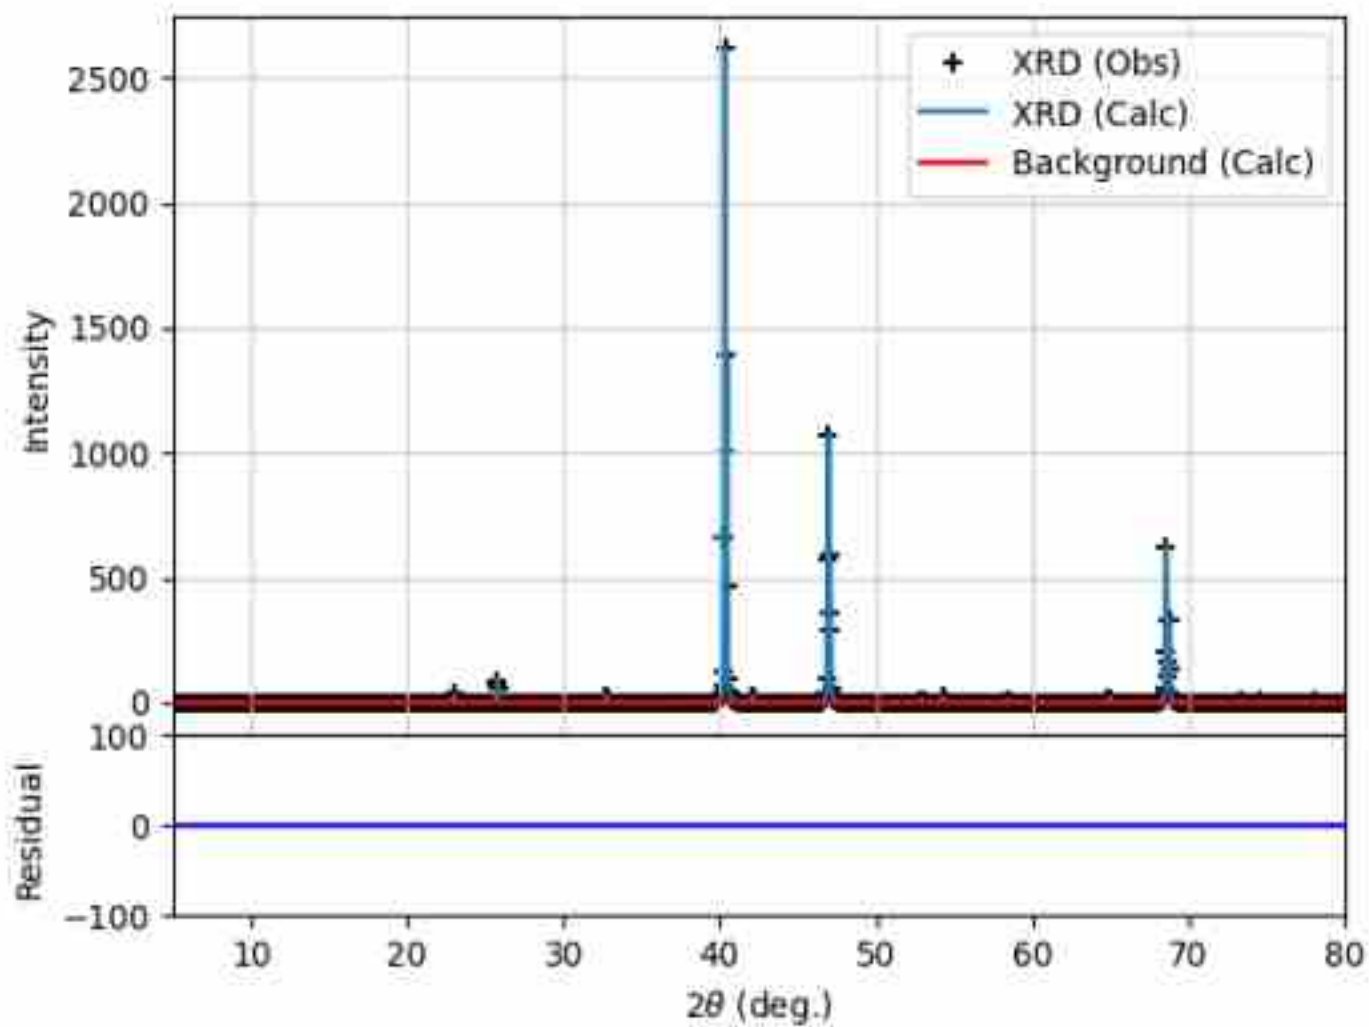

| RMSE before RR | Rwp     | RMSE after RR |
|----------------|---------|---------------|
| 0.001          | 0.00318 | 0.0003        |



# K1H1

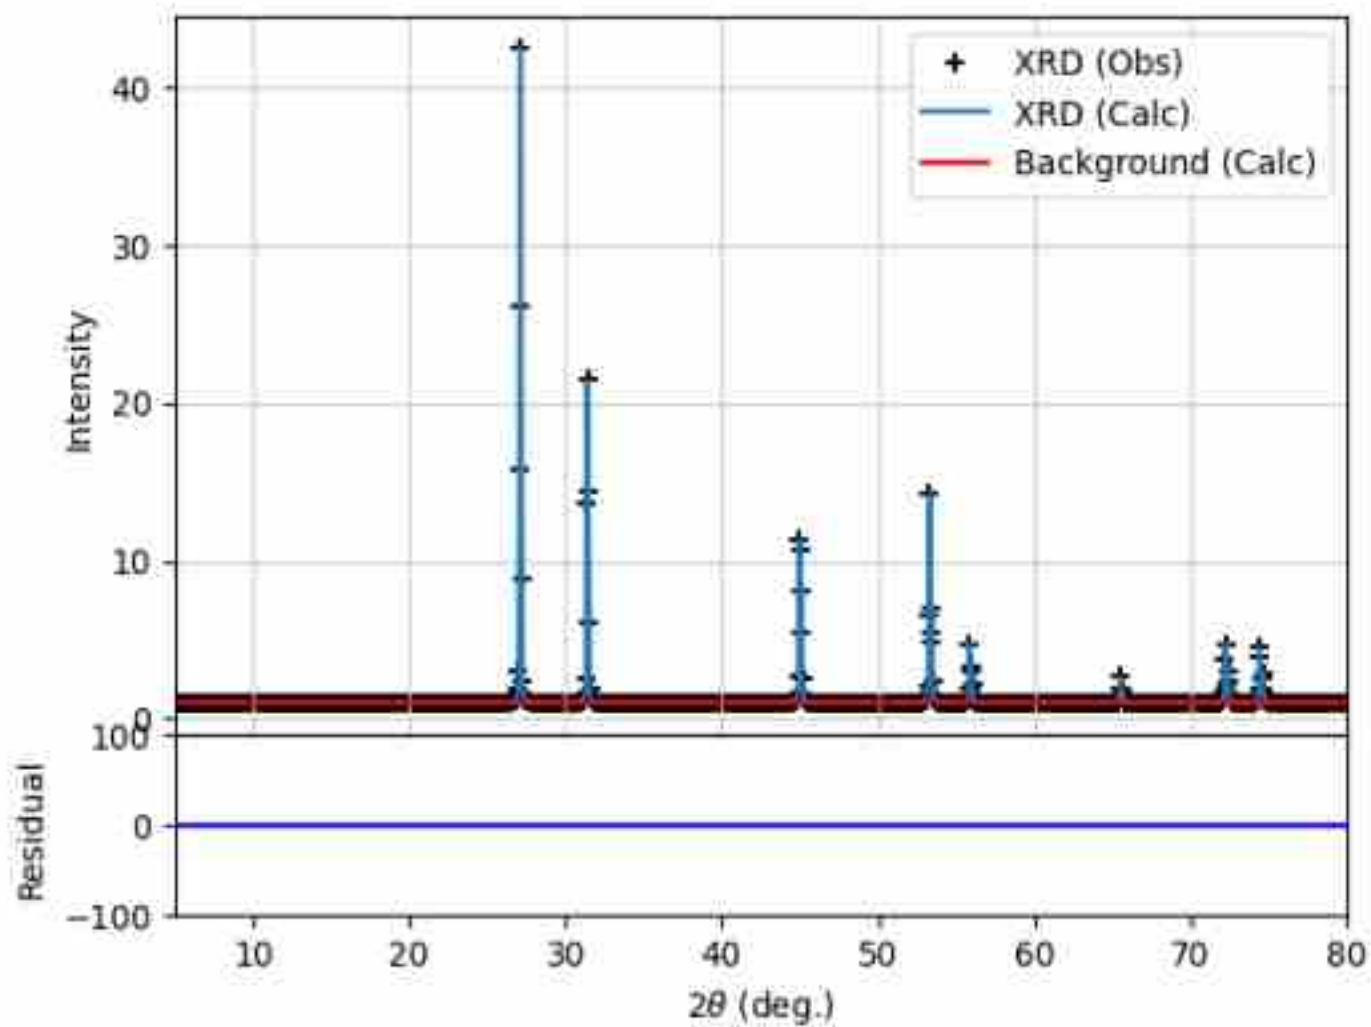

| RMSE before RR | Rwp     | RMSE after RR |
|----------------|---------|---------------|
| 0.001          | 0.00121 | 0.00085       |

# K1Hg3

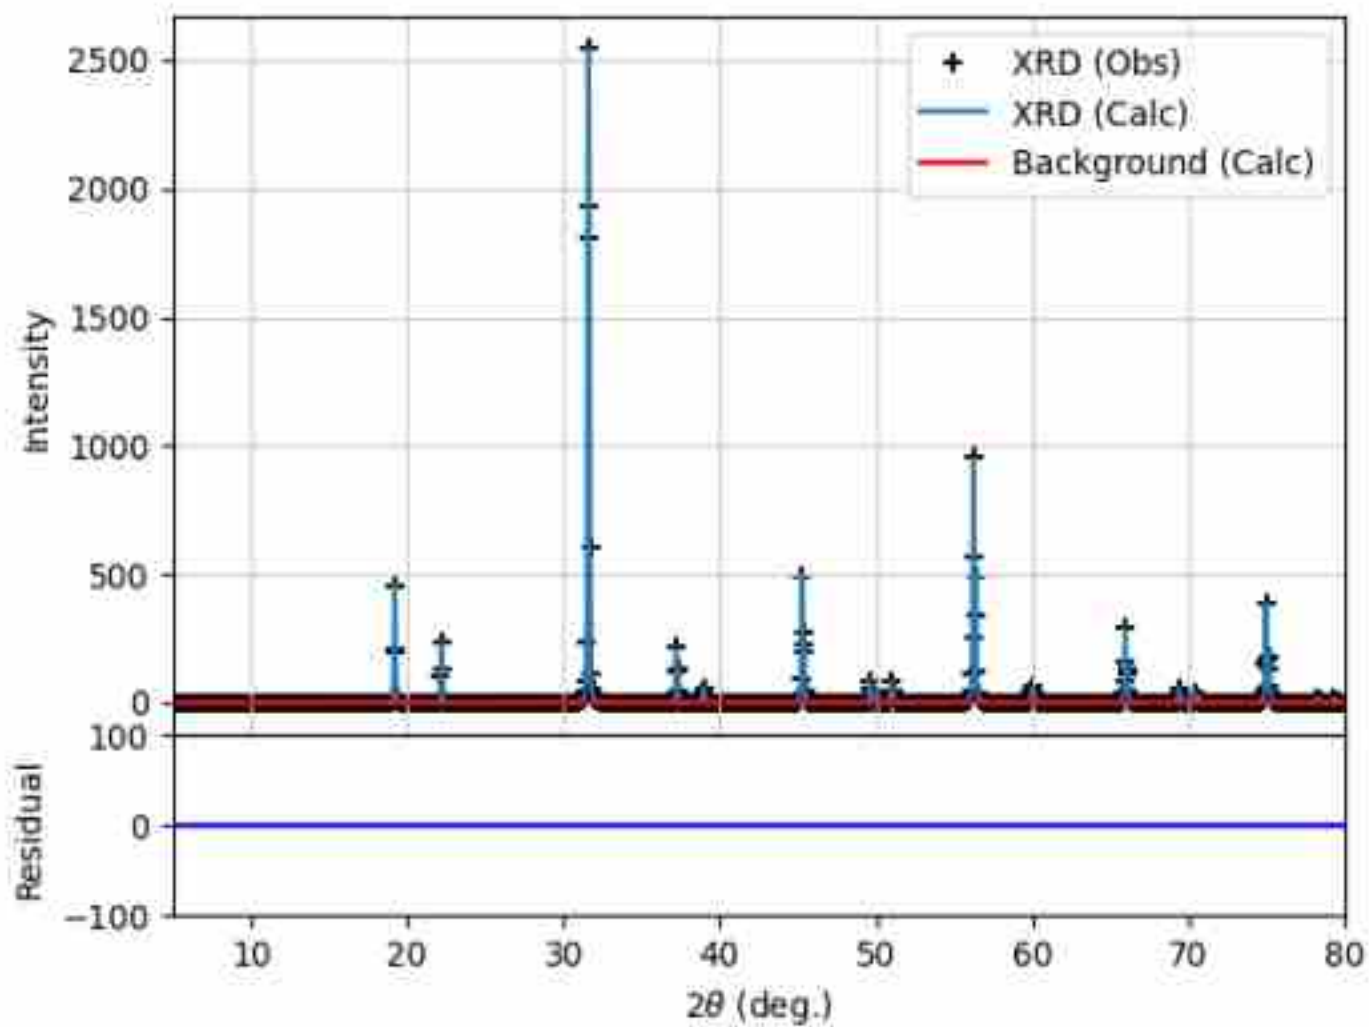

| RMSE before RR | Rwp     | RMSE after RR |
|----------------|---------|---------------|
| 0.001          | 0.00329 | 0.00076       |

# K1Pd1F3

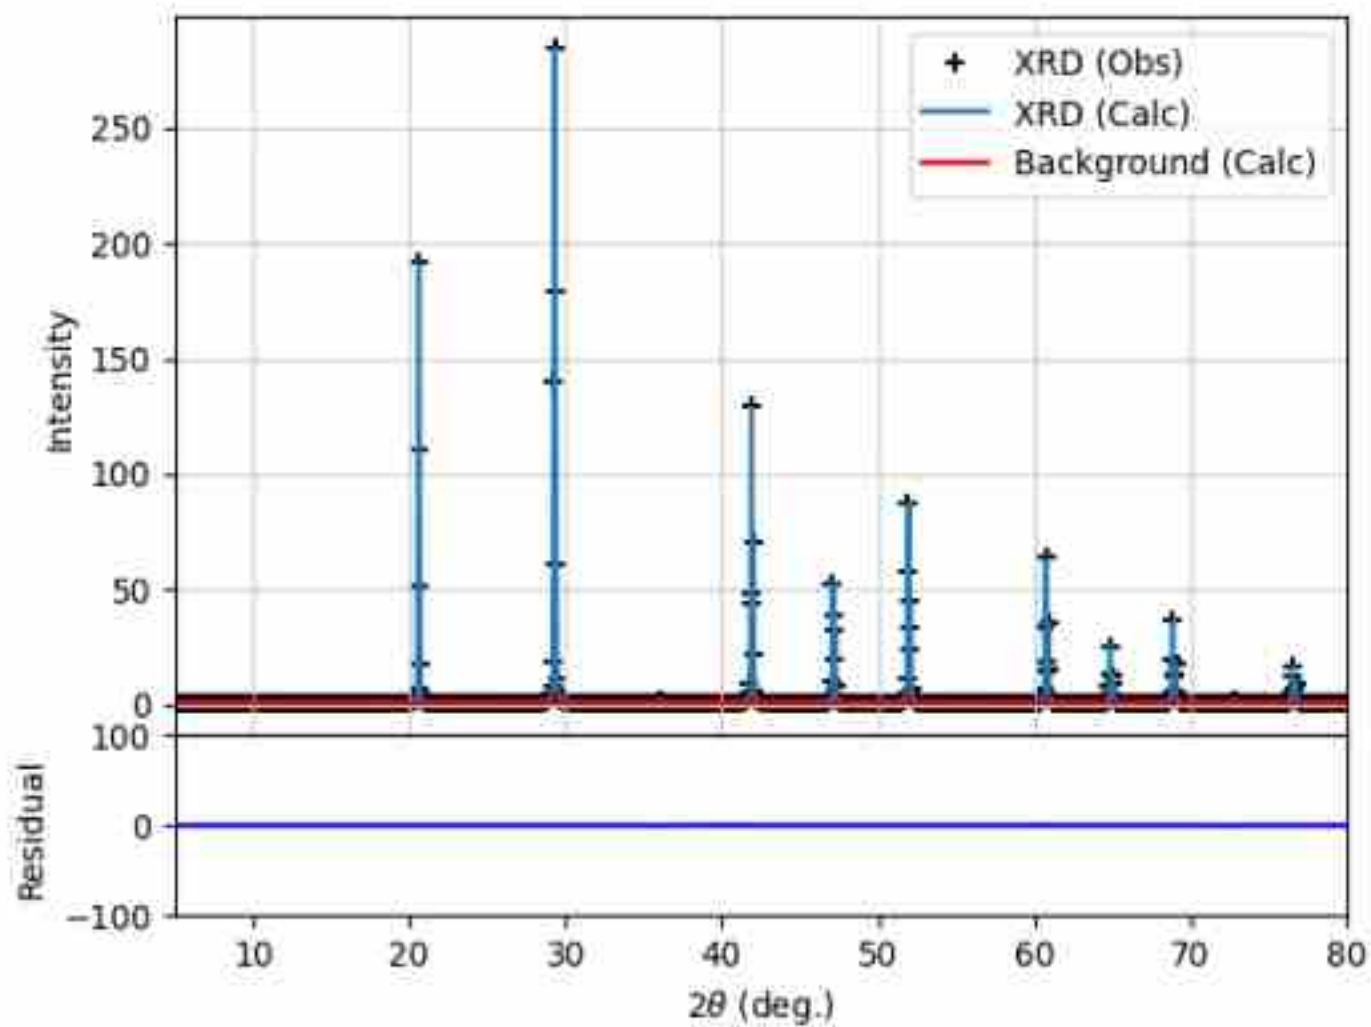

| RMSE before RR | Rwp     | RMSE after RR |
|----------------|---------|---------------|
| 0.01           | 1.27357 | 0.01139       |

# K1Rb2Au1F6

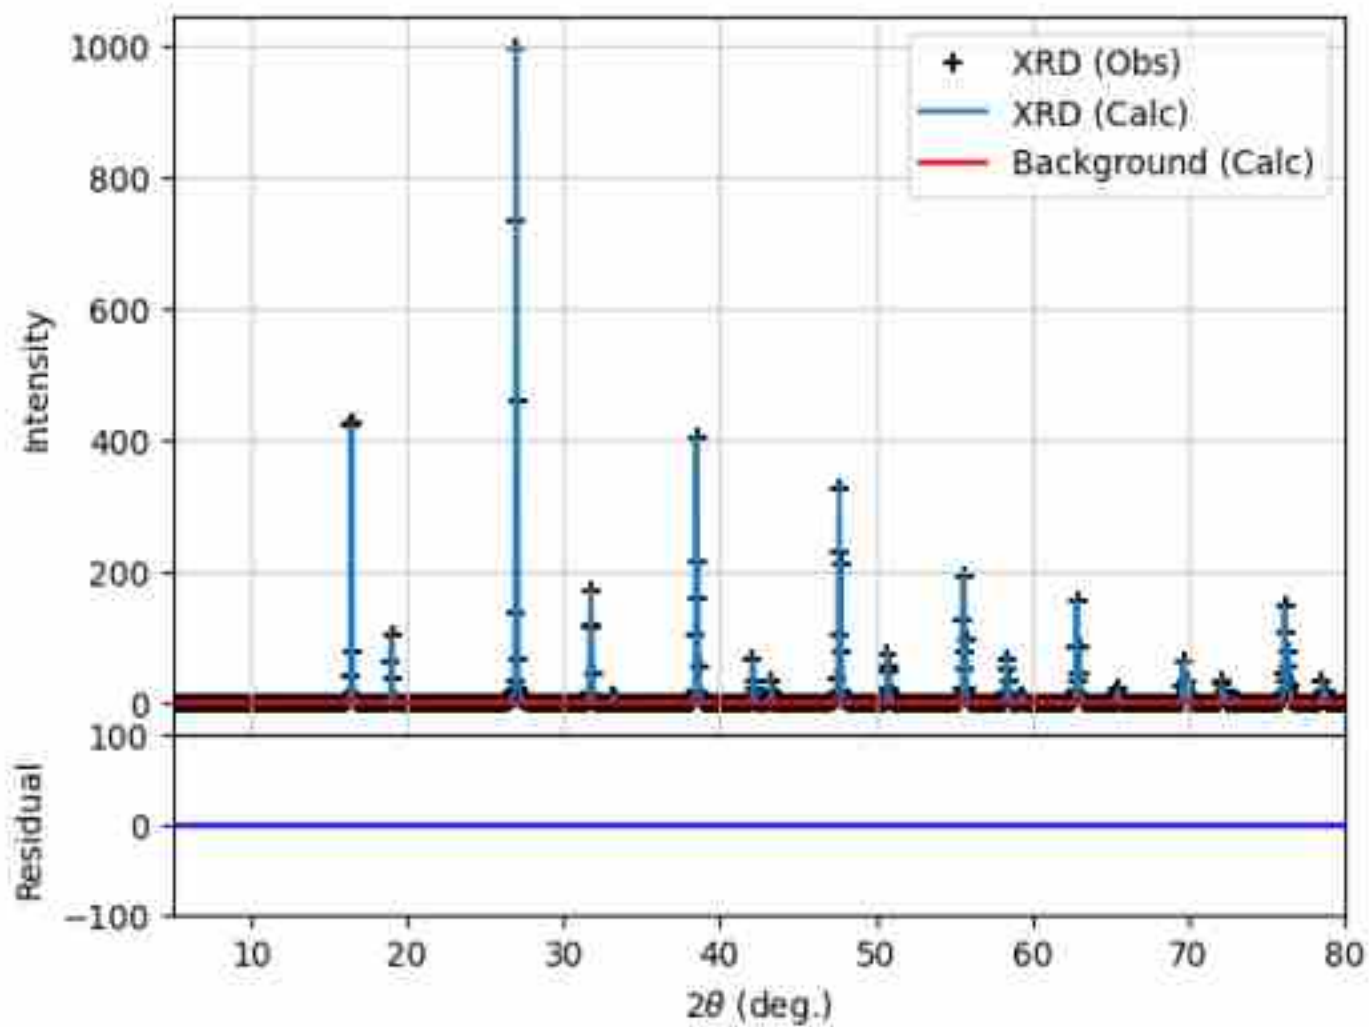

| RMSE before RR | Rwp     | RMSE after RR |
|----------------|---------|---------------|
| 0.01           | 0.01246 | 0.00428       |

# K1Rb2Nb1F6

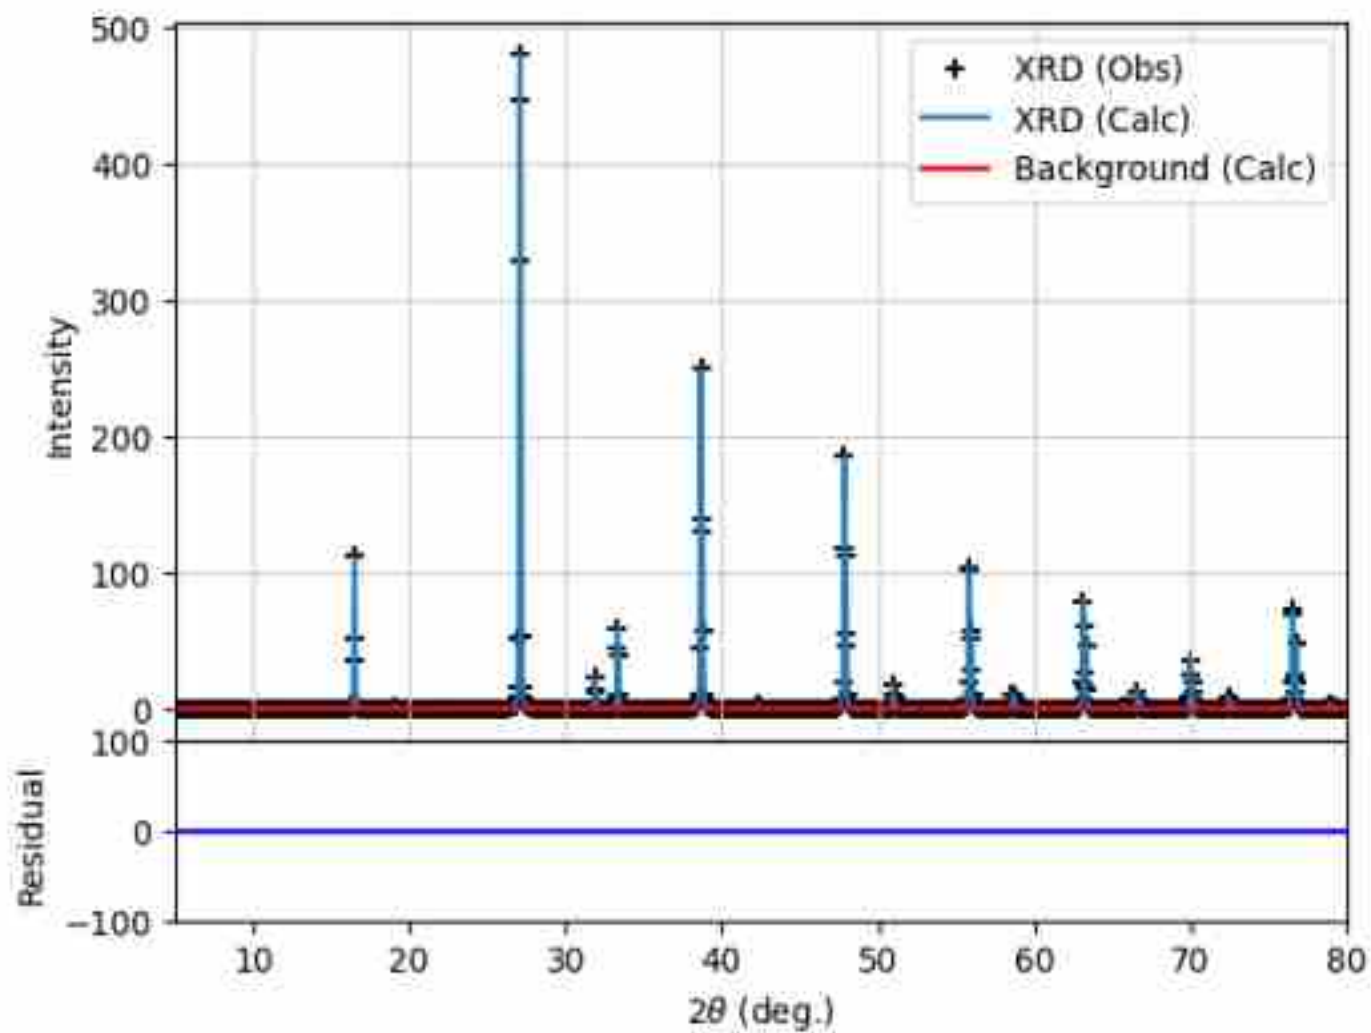

| RMSE before RR | Rwp     | RMSE after RR |
|----------------|---------|---------------|
| 0.01           | 0.02405 | 0.00432       |

K1Sm1Eu1W1O6

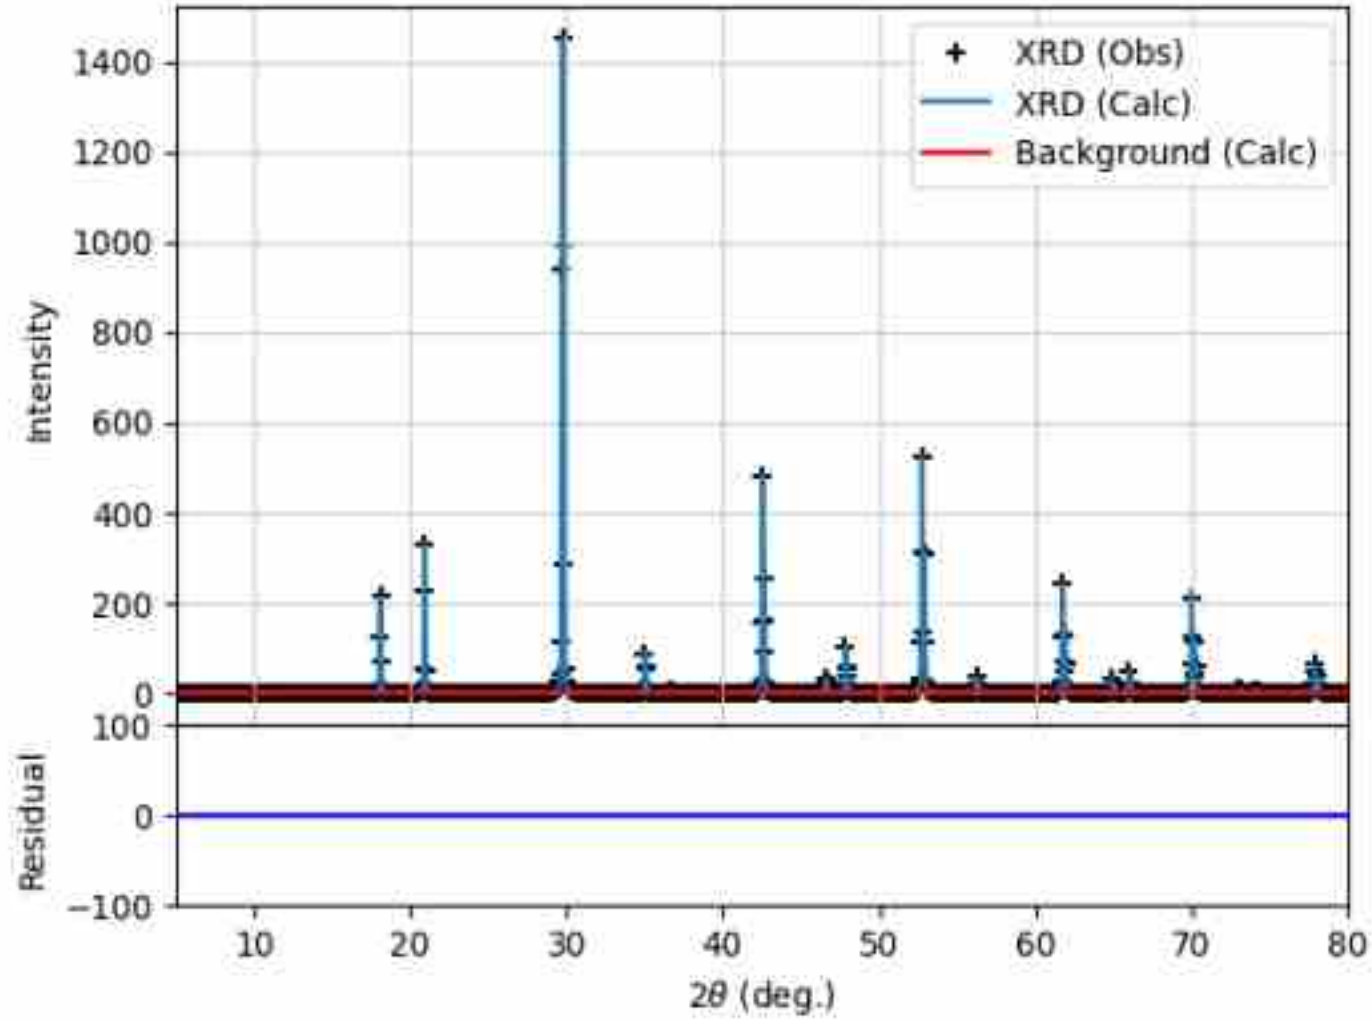

| RMSE before RR | Rwp     | RMSE after RR |
|----------------|---------|---------------|
| 0.01           | 0.00876 | 0.0033        |

# K1Sr1Nd1W1O6

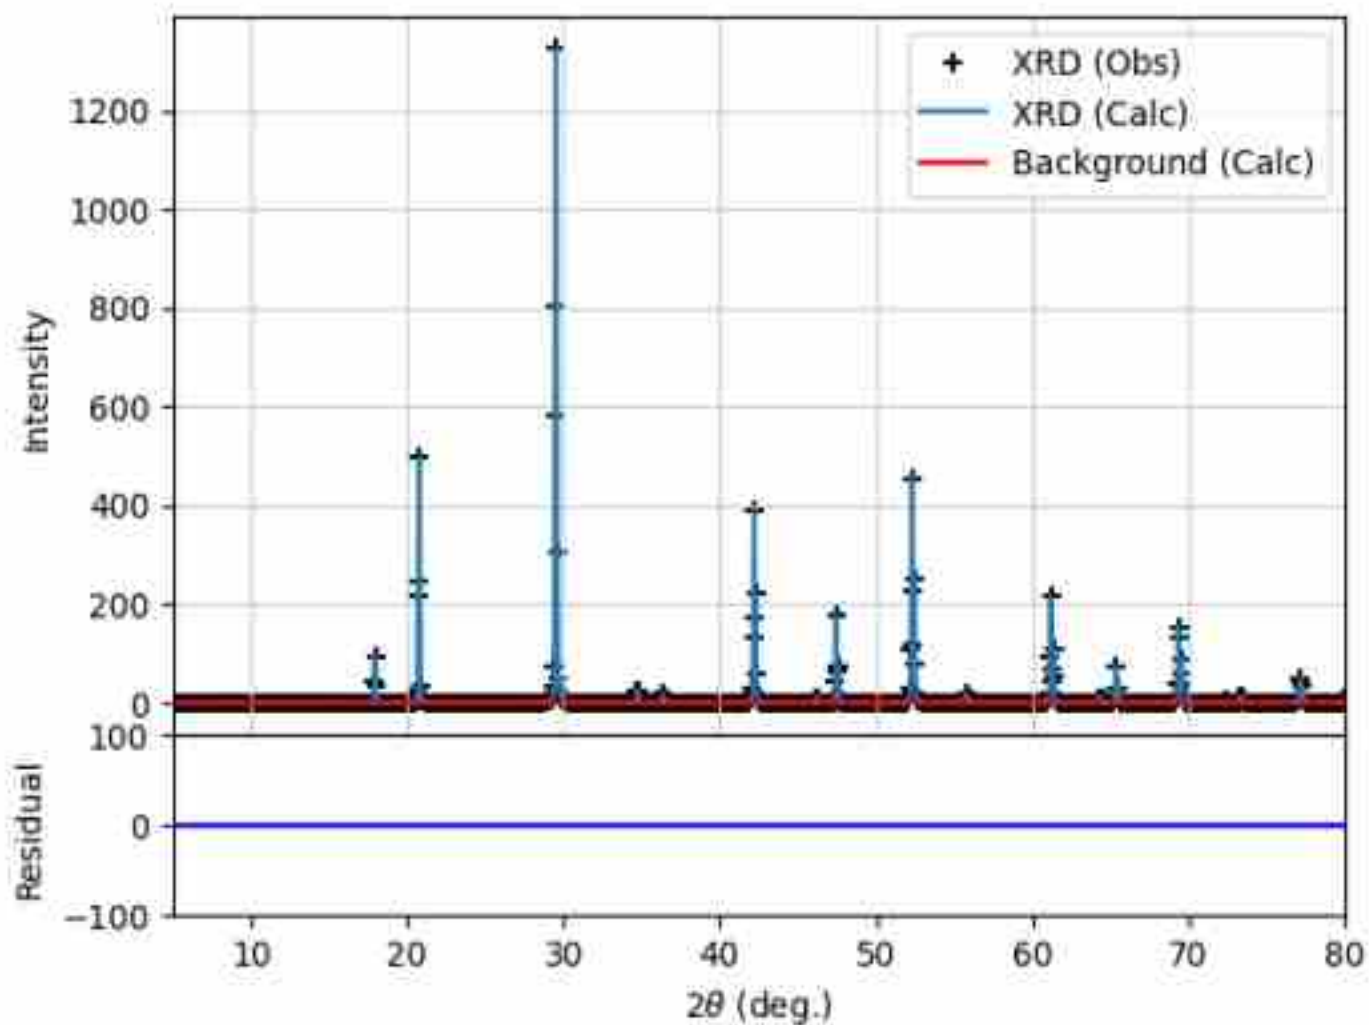

| RMSE before RR | Rwp     | RMSE after RR |
|----------------|---------|---------------|
| 0.01           | 0.01269 | 0.00468       |

# K1Sr1Zr1Bi1O6

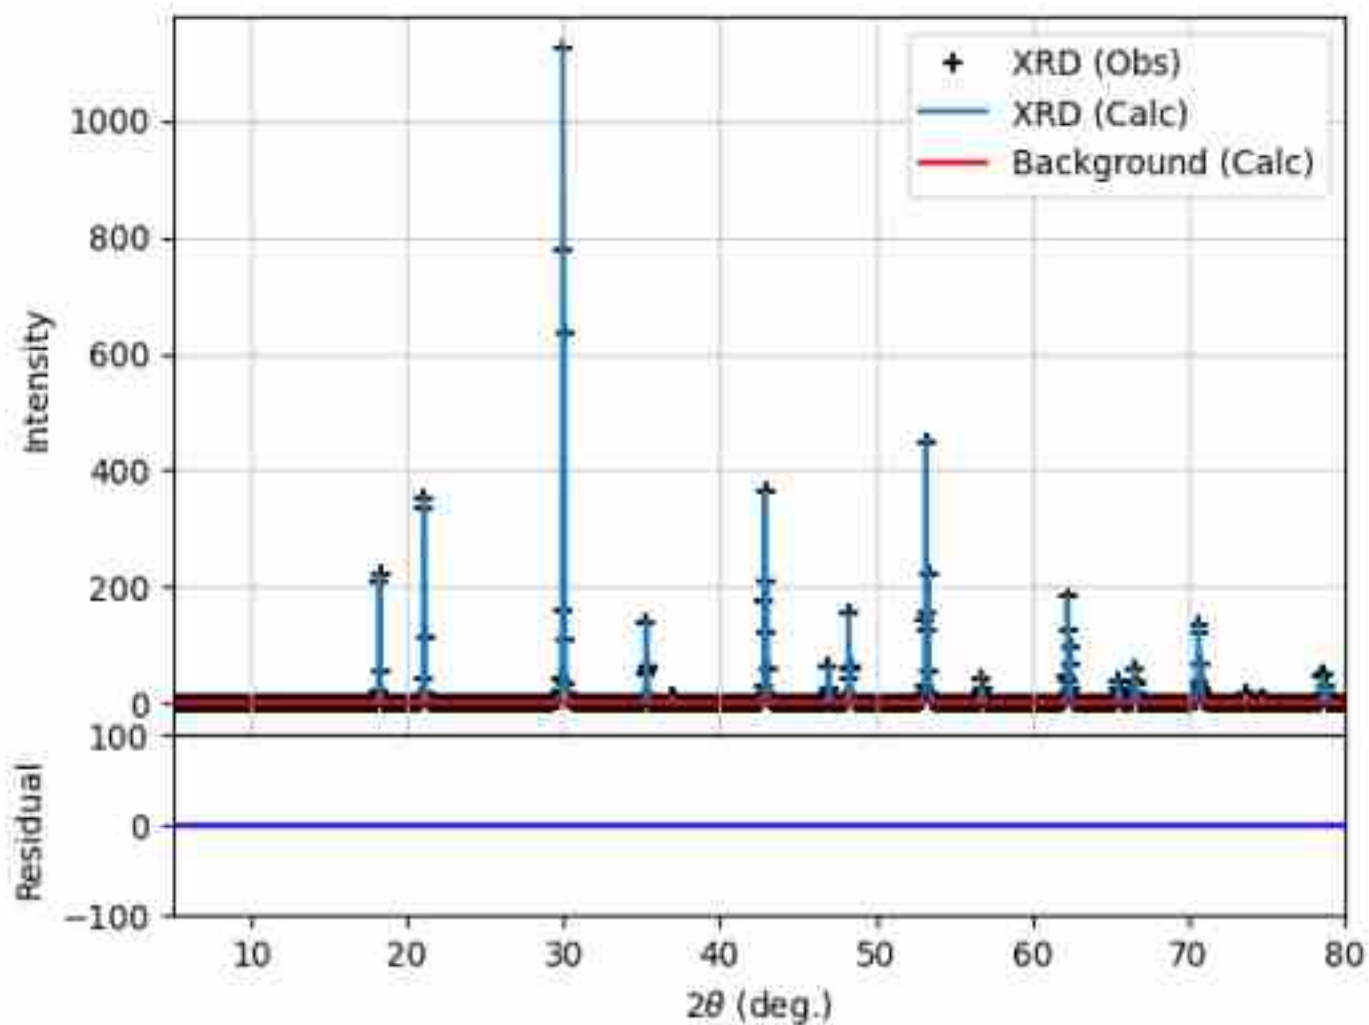

| RMSE before RR | Rwp     | RMSE after RR |
|----------------|---------|---------------|
| 0.01           | 0.01512 | 0.00393       |



# K<sub>2</sub>Li<sub>1</sub>Ce<sub>1</sub>Br<sub>6</sub>

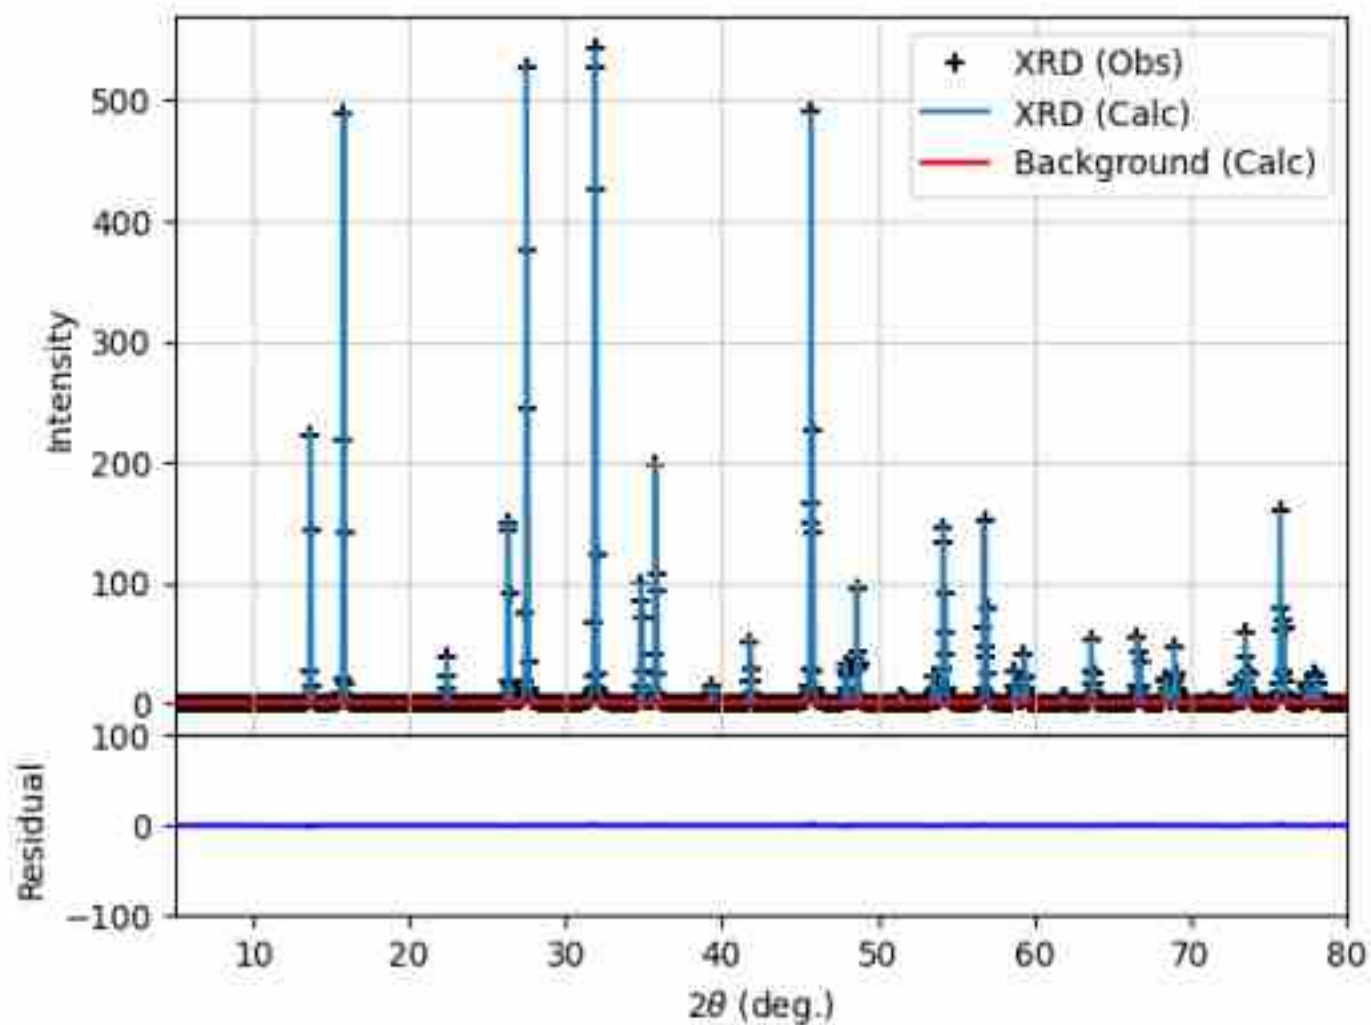

| RMSE before RR | Rwp     | RMSE after RR |
|----------------|---------|---------------|
| 0.01           | 0.71771 | 0.0308        |

# K<sub>2</sub>LiDyCl<sub>6</sub>

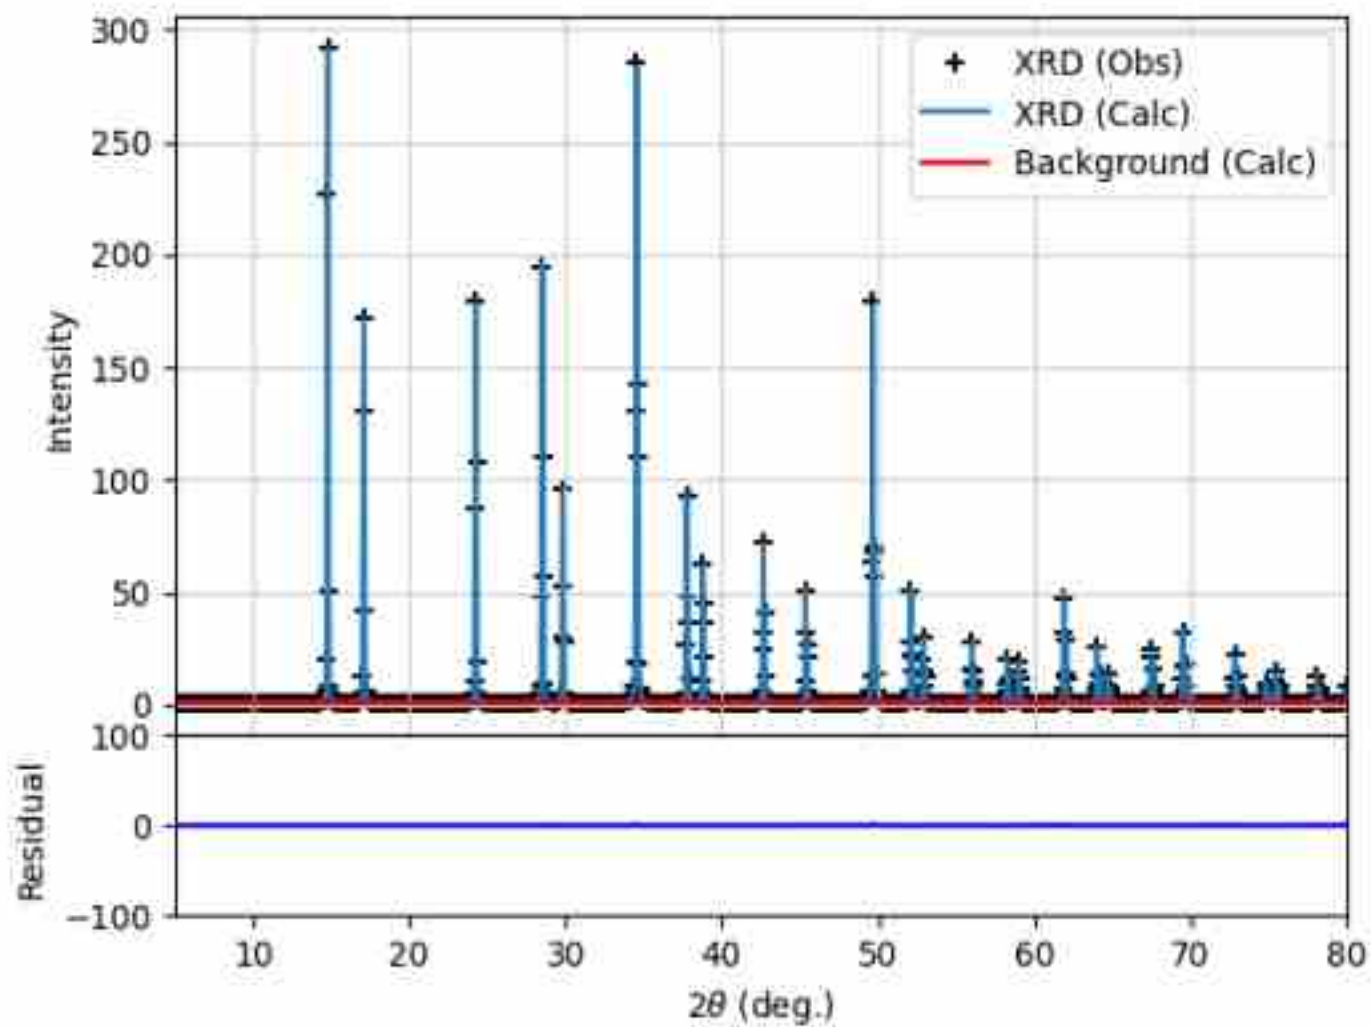

| RMSE before RR | Rwp     | RMSE after RR |
|----------------|---------|---------------|
| 0.01           | 1.45644 | 0.05924       |

# K<sub>2</sub>LuCl<sub>6</sub>

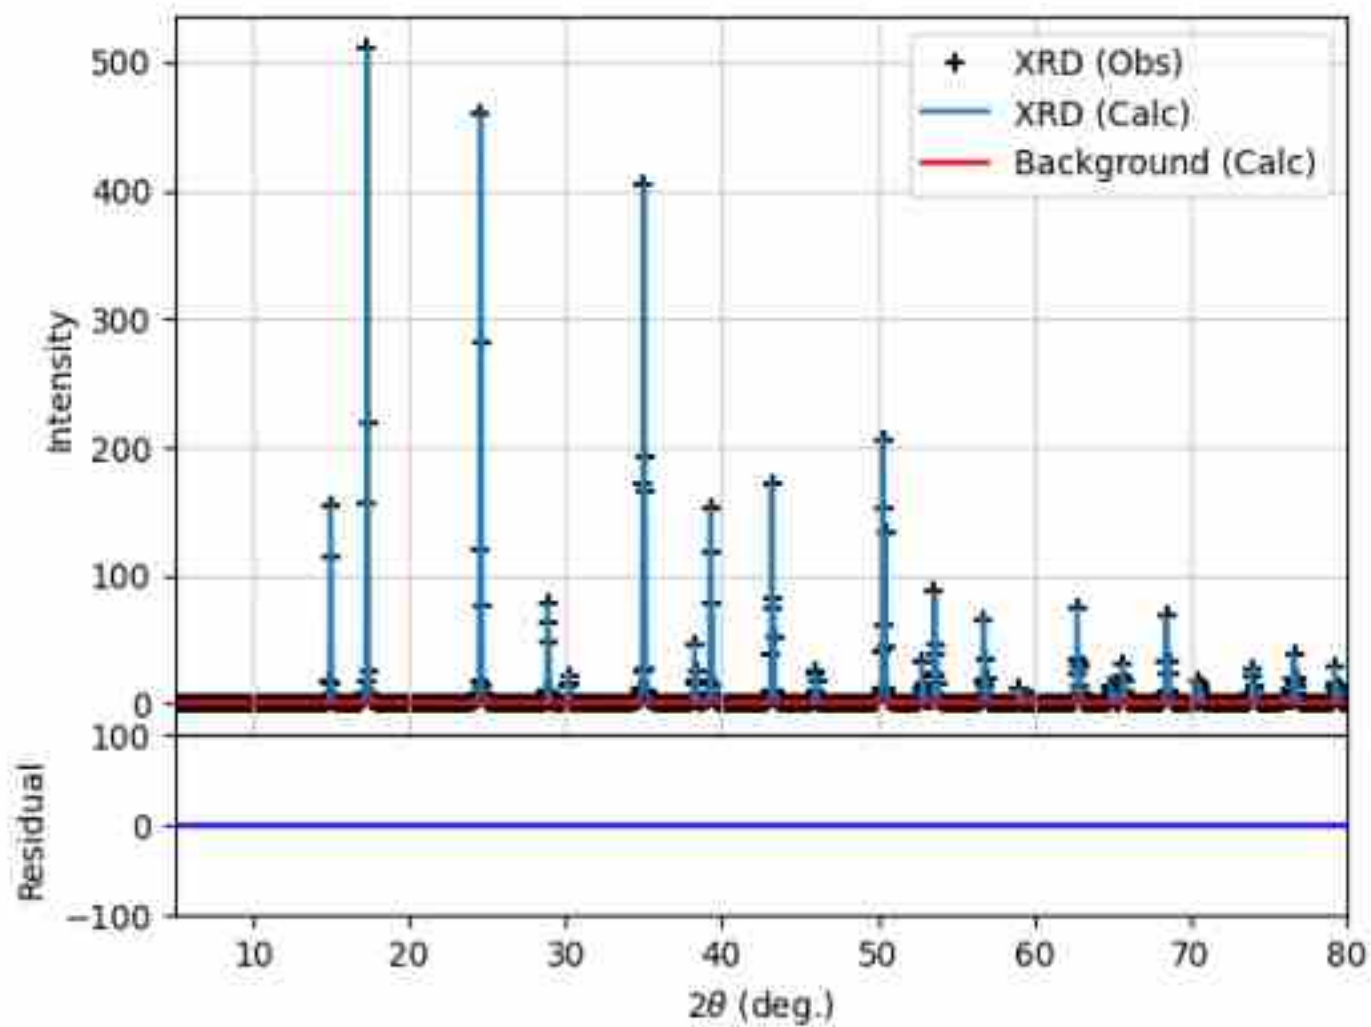

| RMSE before RR | Rwp     | RMSE after RR |
|----------------|---------|---------------|
| 0.01           | 0.01574 | 0.00292       |

# K<sub>2</sub>Mg<sub>2</sub>Bi<sub>2</sub>

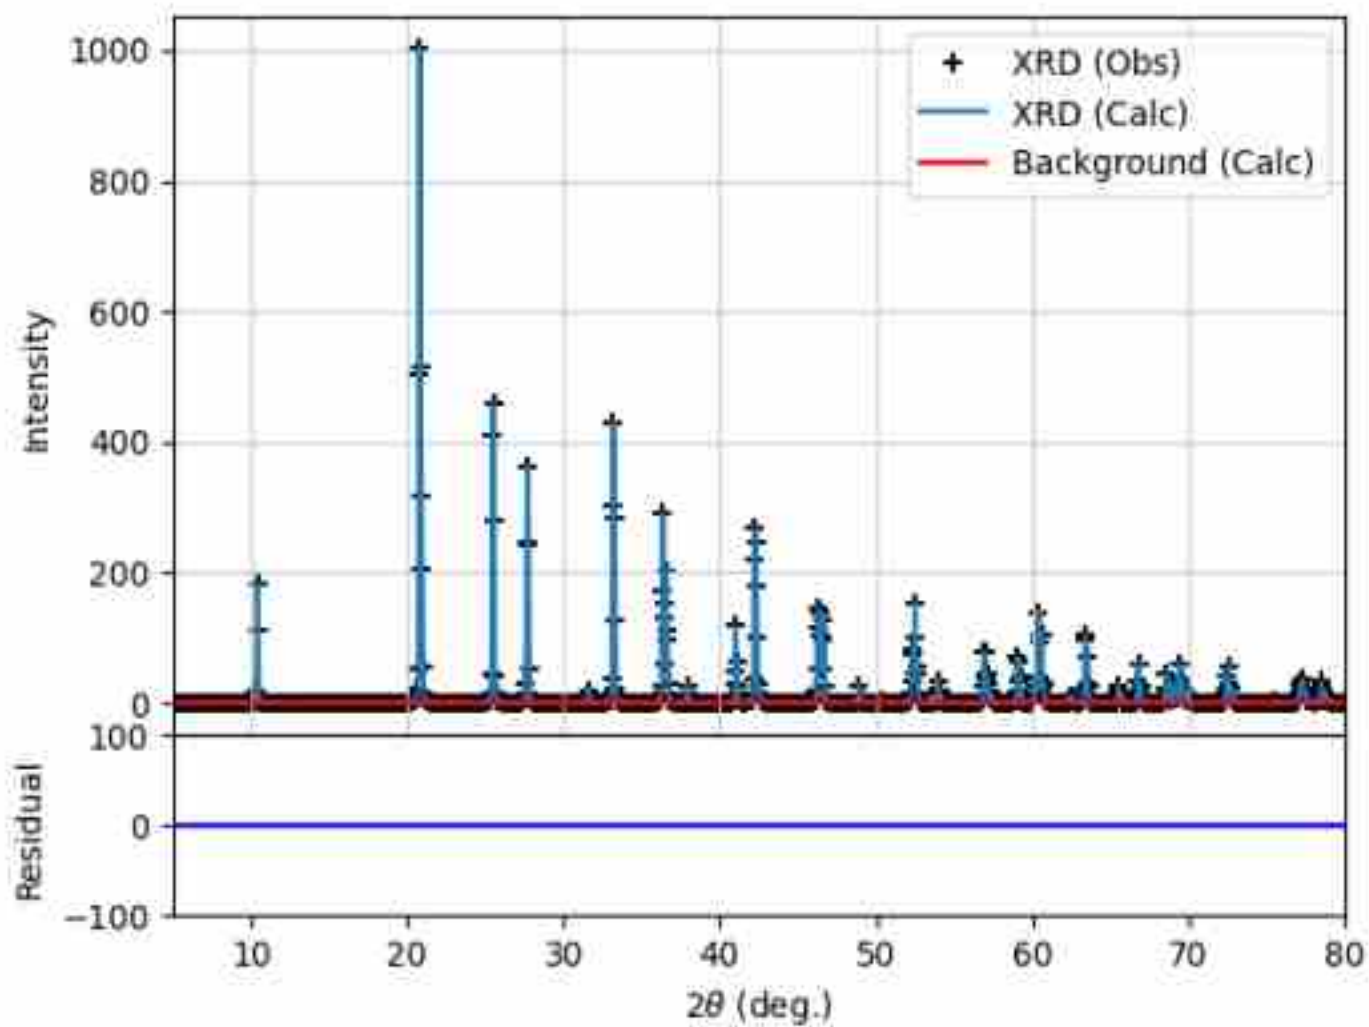

| RMSE before RR | Rwp     | RMSE after RR |
|----------------|---------|---------------|
| 0.01           | 0.00428 | 0.00081       |

# K<sub>2</sub>Na<sub>1</sub>Dy<sub>1</sub>Cl<sub>6</sub>

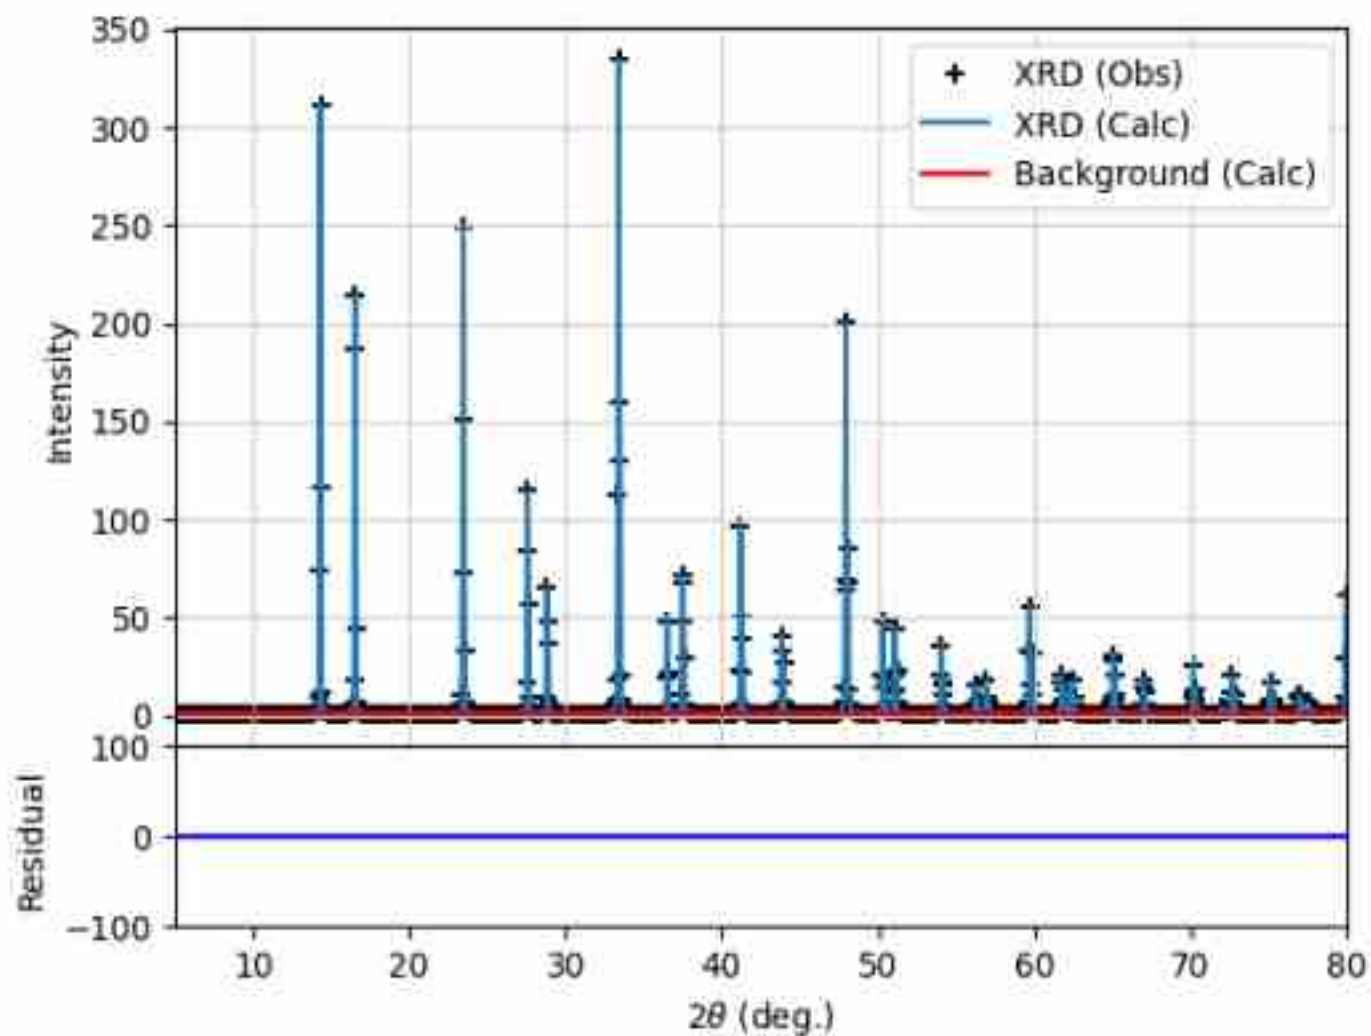

| RMSE before RR | Rwp     | RMSE after RR |
|----------------|---------|---------------|
| 0.01           | 0.00721 | 0.00157       |

# K<sub>2</sub>Na<sub>1</sub>Sc<sub>1</sub>Br<sub>6</sub>

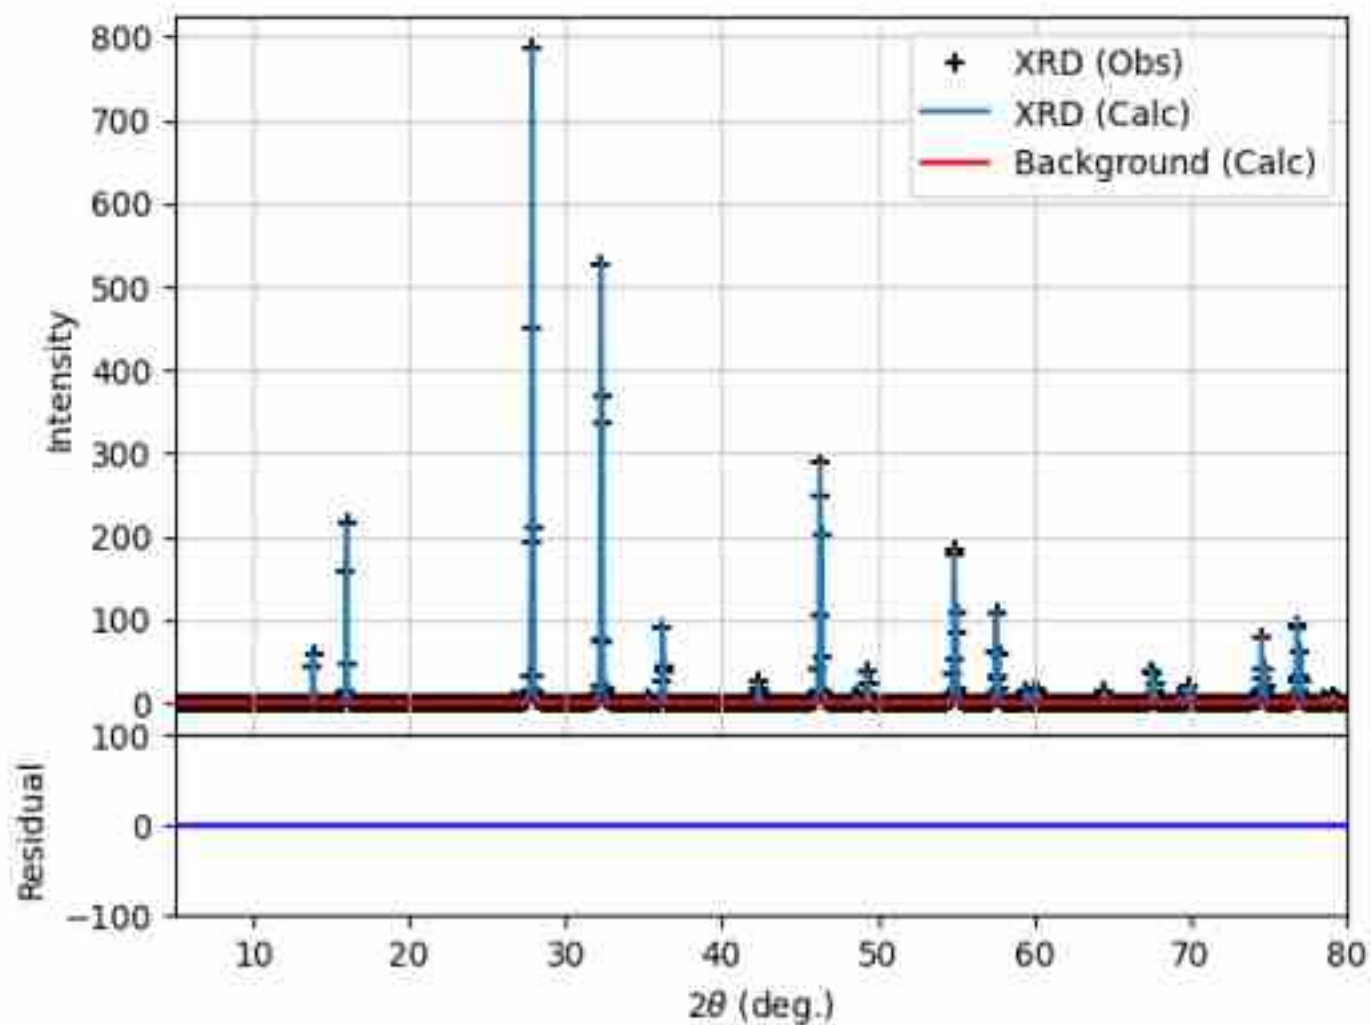

| RMSE before RR | Rwp     | RMSE after RR |
|----------------|---------|---------------|
| 0.01           | 0.06492 | 0.00199       |

# K<sub>2</sub>Na<sub>1</sub>Tl<sub>1</sub>Cl<sub>6</sub>

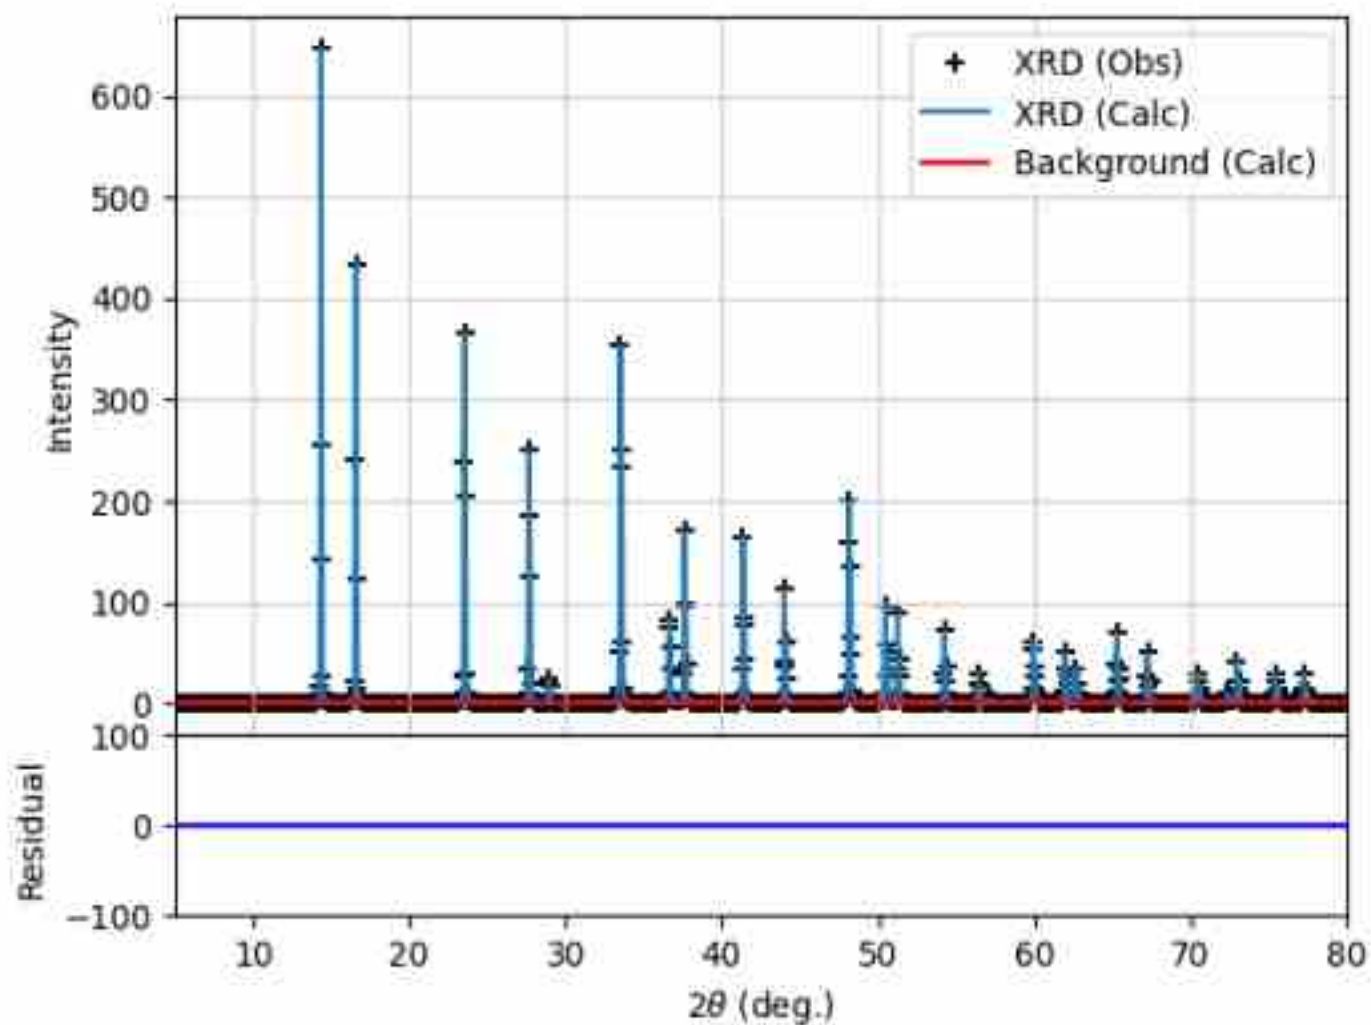

| RMSE before RR | Rwp     | RMSE after RR |
|----------------|---------|---------------|
| 0.01           | 0.01791 | 0.00333       |

# K2Rb1Tl1F6

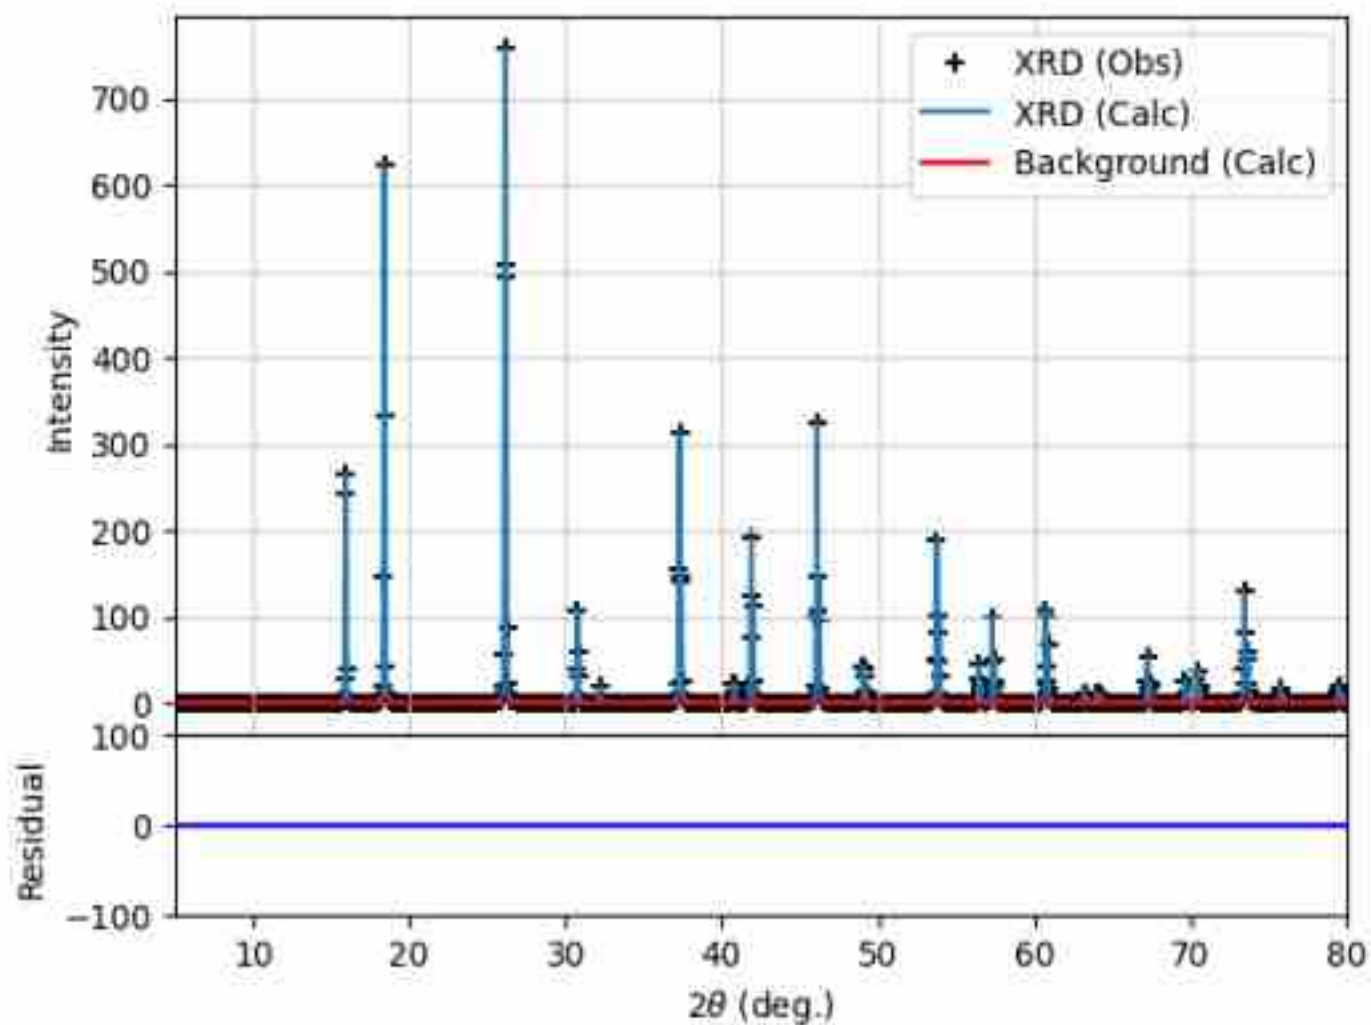

| RMSE before RR | Rwp     | RMSE after RR |
|----------------|---------|---------------|
| 0.01           | 0.01452 | 0.00395       |



# K<sub>2</sub>Re1Br<sub>6</sub>

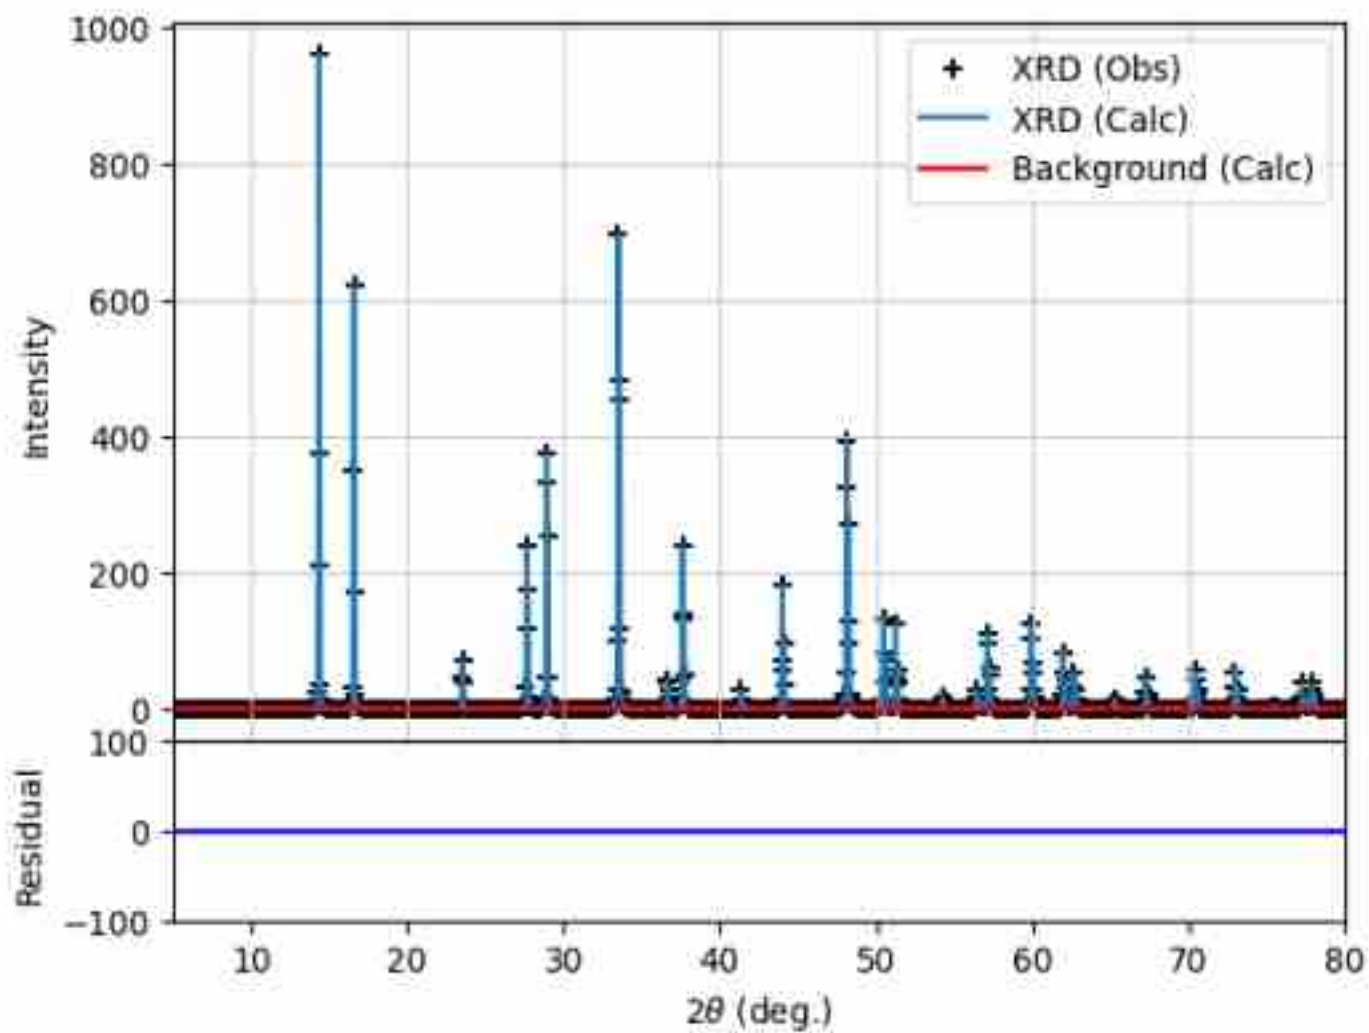

| RMSE before RR | Rwp     | RMSE after RR |
|----------------|---------|---------------|
| 0.01           | 0.03835 | 0.00319       |

# K2Sc1Ag1Cl6

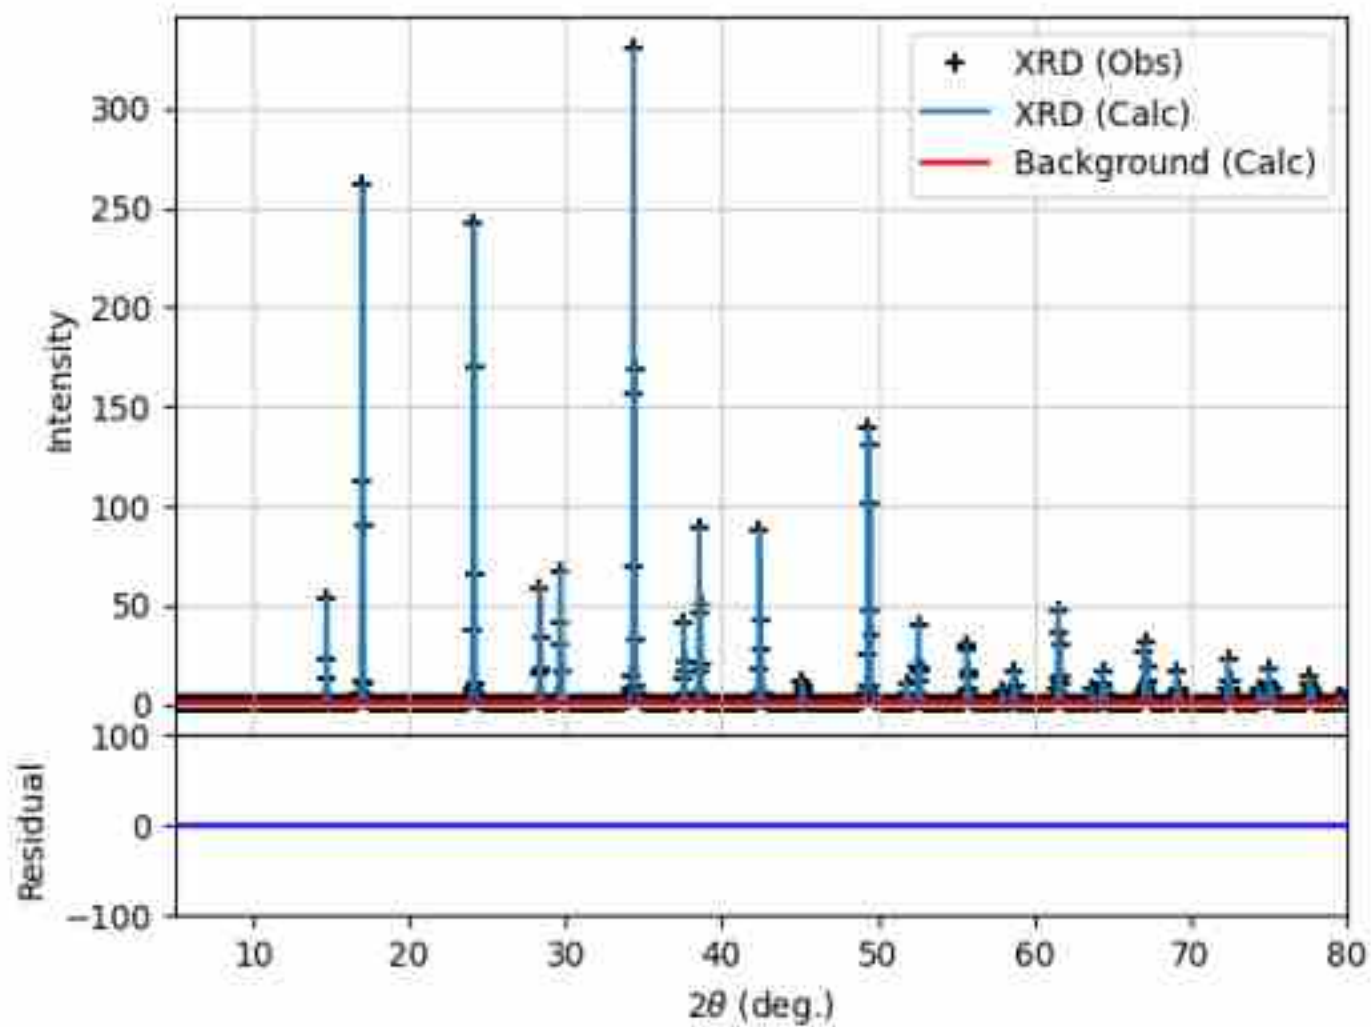

| RMSE before RR | Rwp     | RMSE after RR |
|----------------|---------|---------------|
| 0.01           | 0.02326 | 0.00305       |

# K<sub>2</sub>Se1

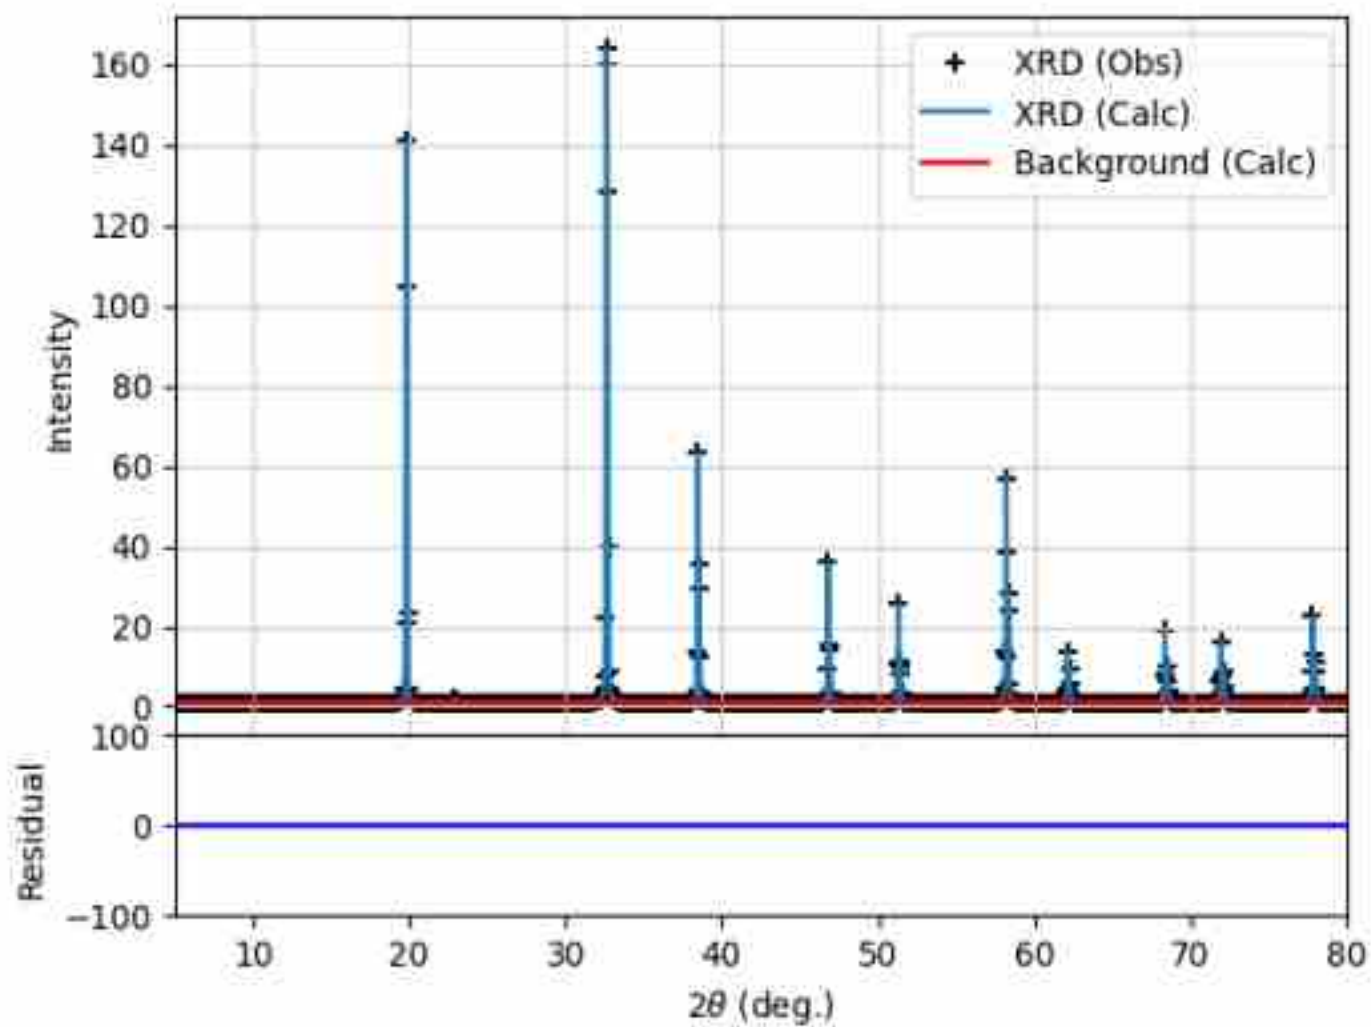

| RMSE before RR | Rwp     | RMSE after RR |
|----------------|---------|---------------|
| 0.001          | 0.21736 | 0.00257       |

# K<sub>2</sub>TlCrF<sub>6</sub>

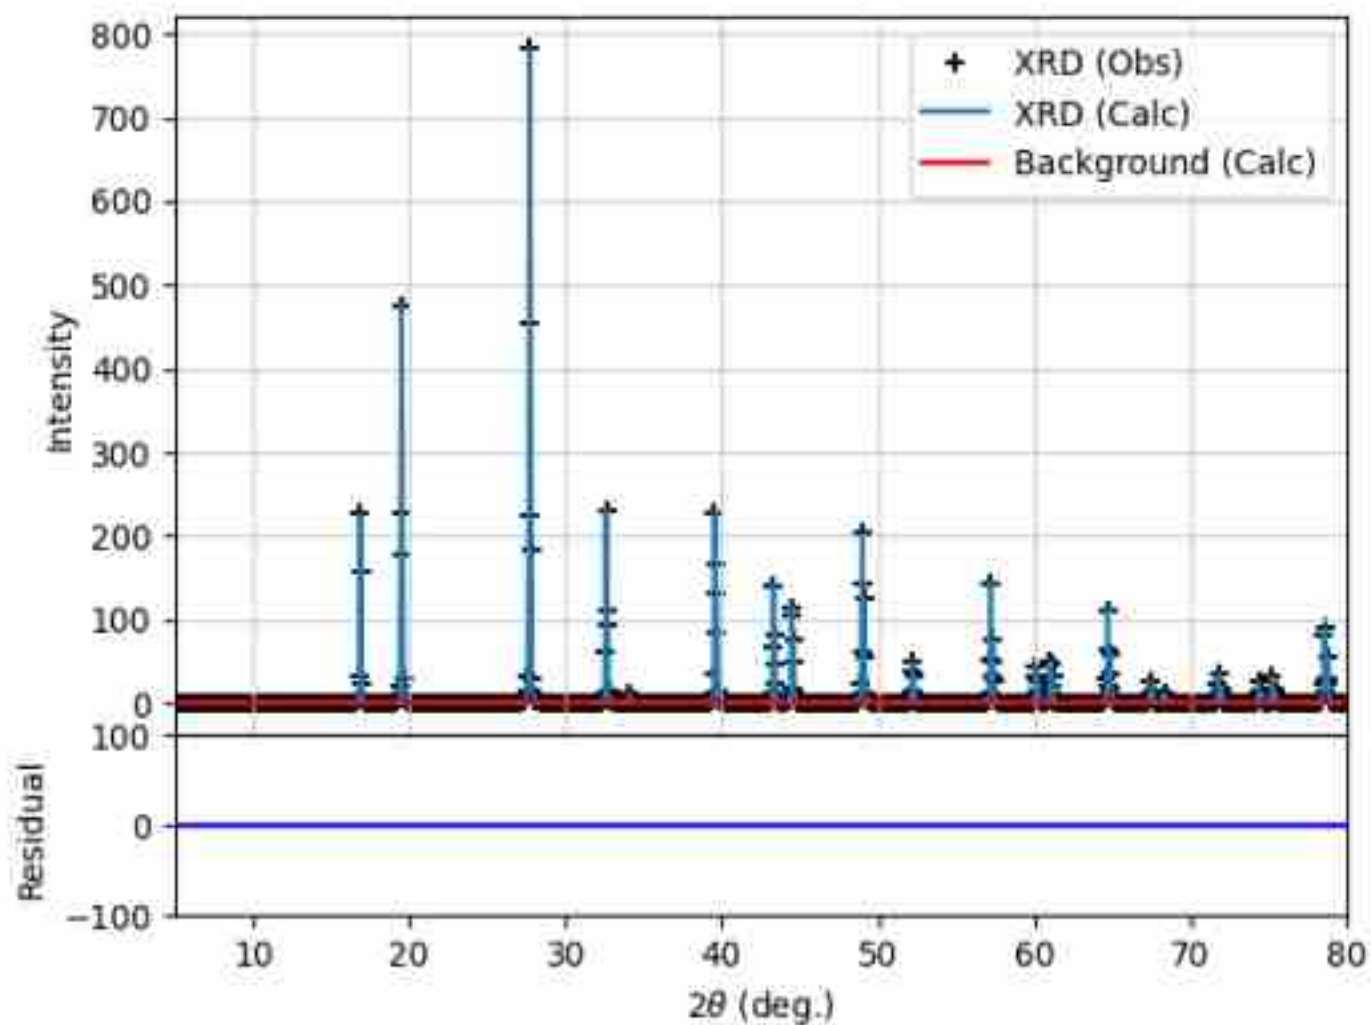

| RMSE before RR | Rwp     | RMSE after RR |
|----------------|---------|---------------|
| 0.01           | 0.00901 | 0.00313       |

# K<sub>2</sub>Tl<sub>1</sub>In<sub>1</sub>Br<sub>6</sub>

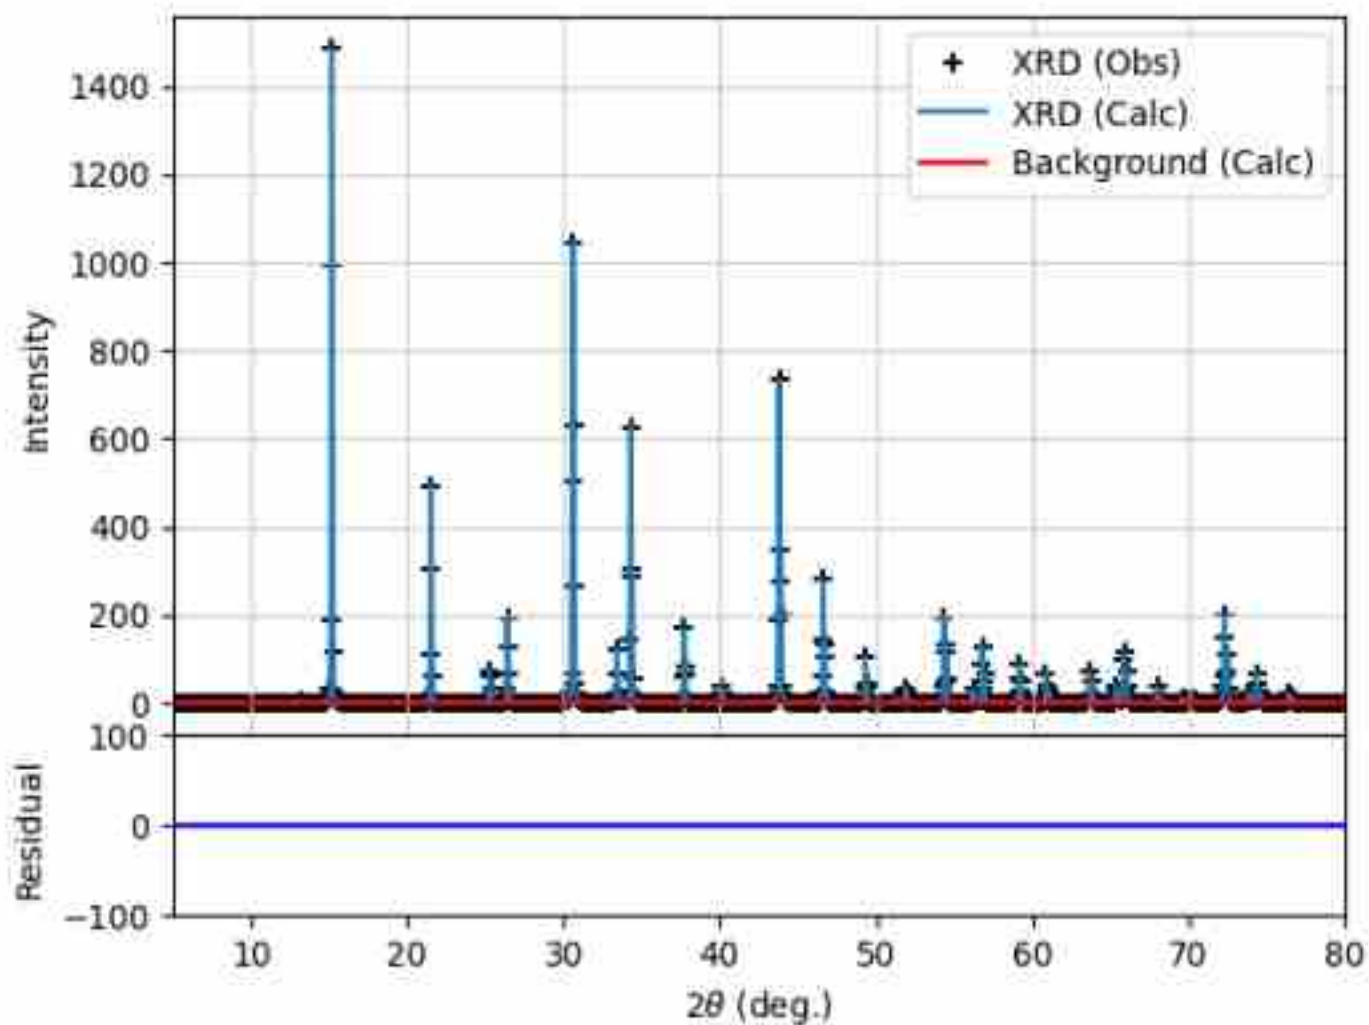

| RMSE before RR | Rwp     | RMSE after RR |
|----------------|---------|---------------|
| 0.01           | 0.03096 | 0.00257       |

# K3As1F6

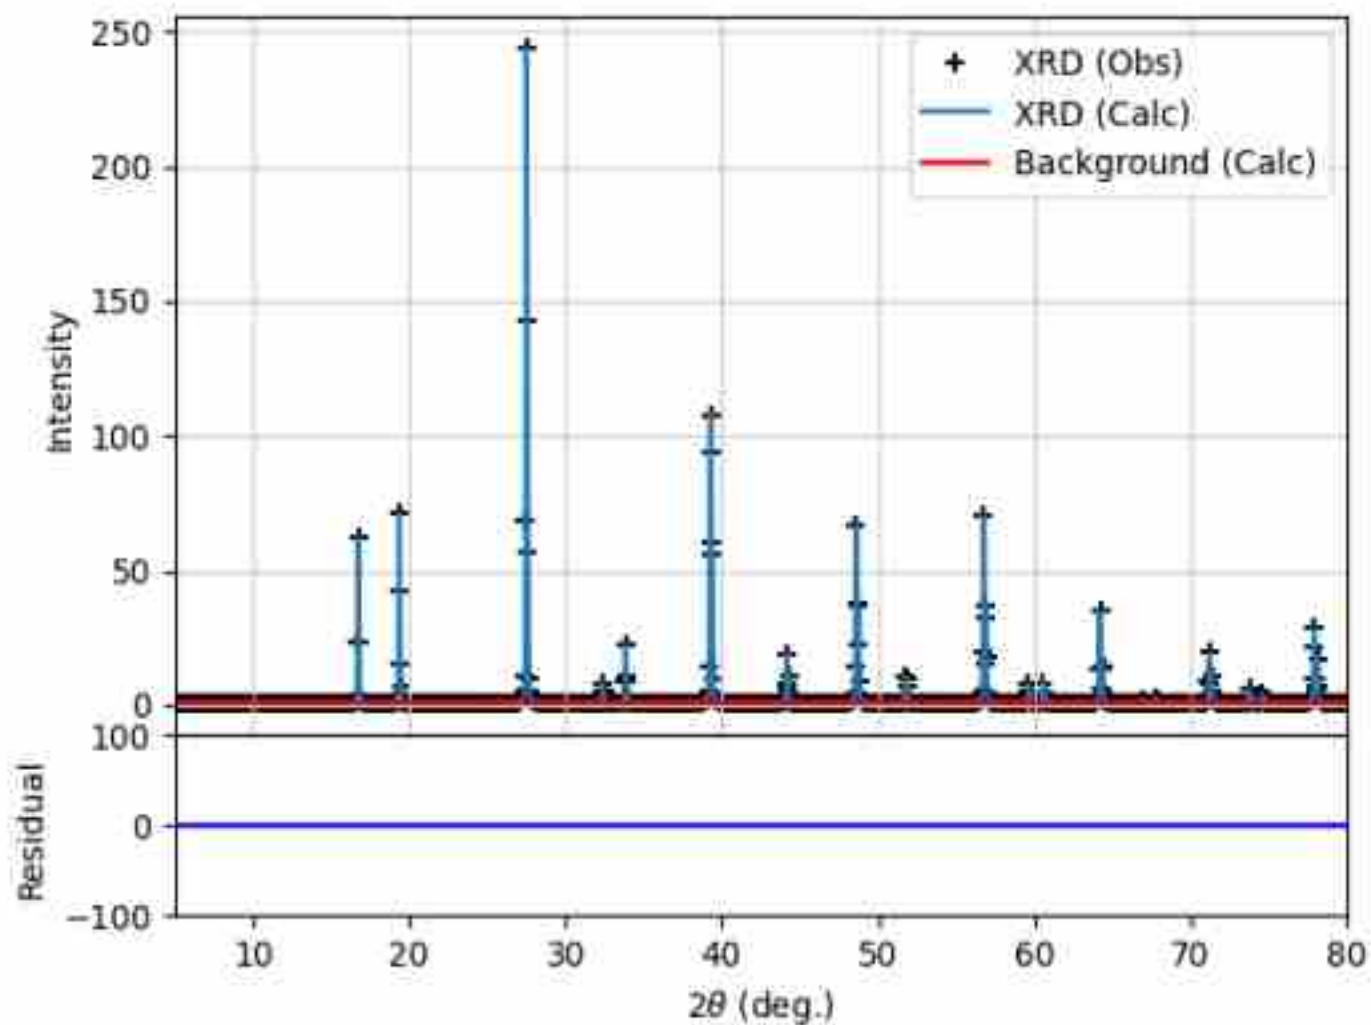

| RMSE before RR | Rwp     | RMSE after RR |
|----------------|---------|---------------|
| 0.01           | 0.00947 | 0.00266       |

# K3Cd1

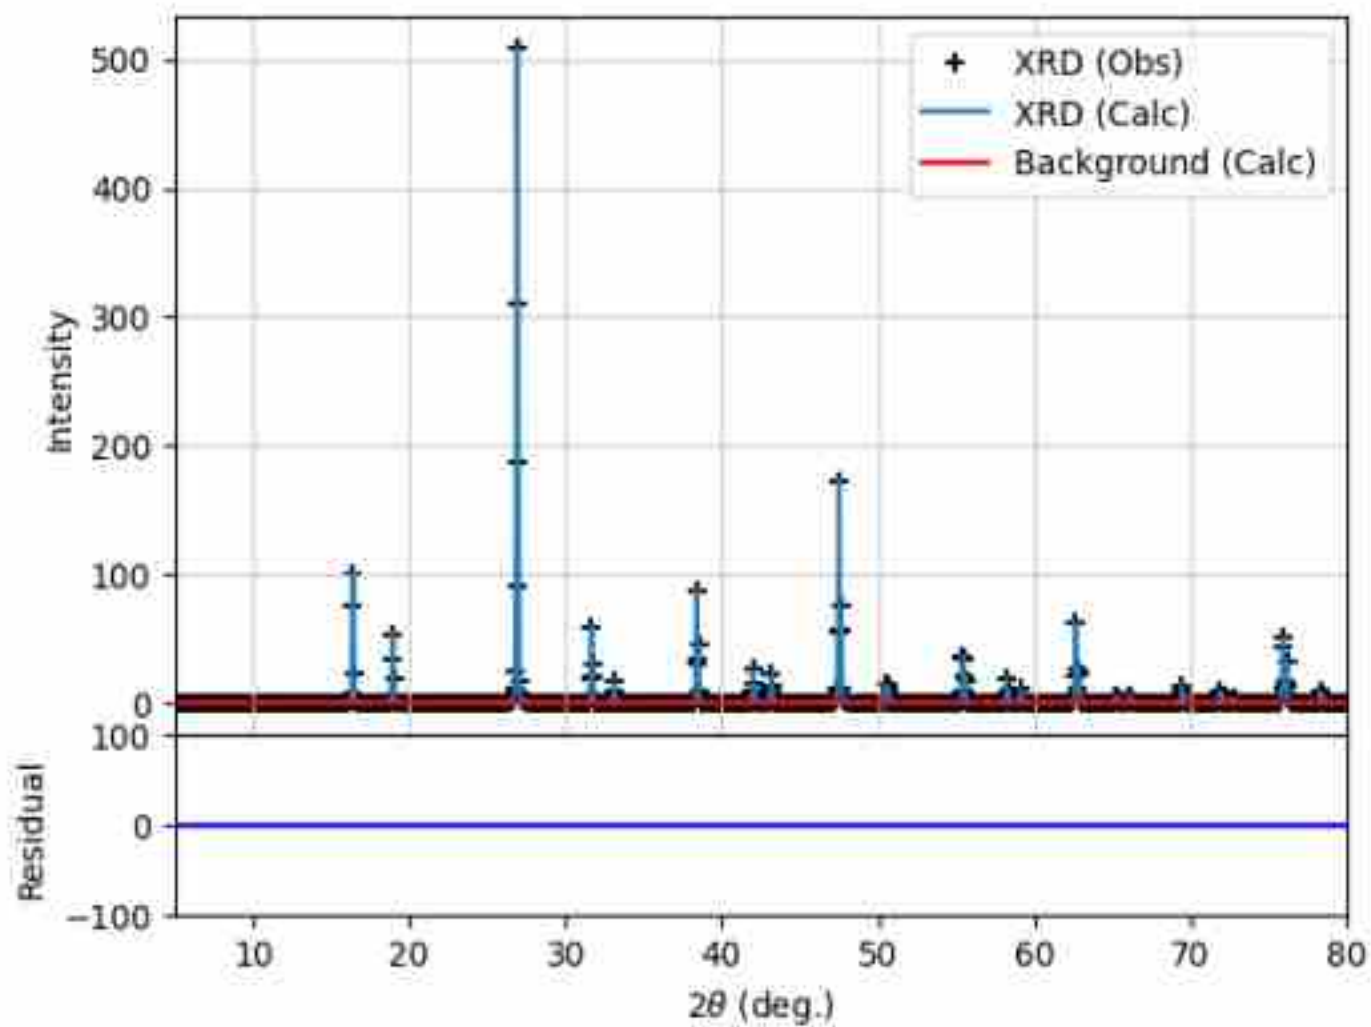

| RMSE before RR | Rwp     | RMSE after RR |
|----------------|---------|---------------|
| 0.001          | 0.00255 | 0.0004        |

# K3Sb1Br6

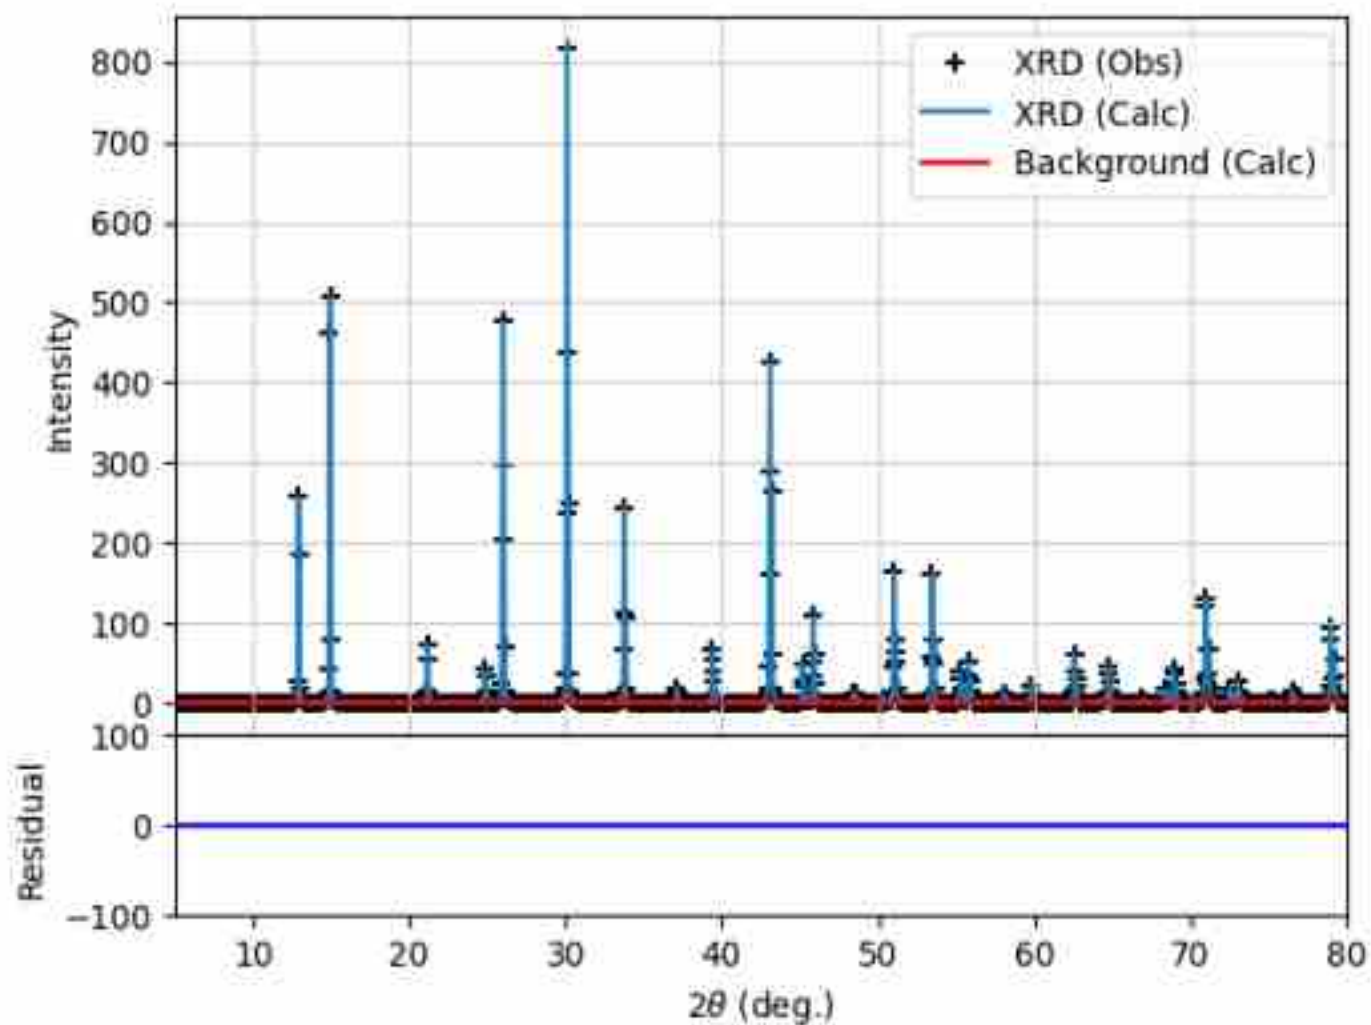

| RMSE before RR | Rwp     | RMSE after RR |
|----------------|---------|---------------|
| 0.01           | 0.01632 | 0.00174       |



# La1Al1Ni4

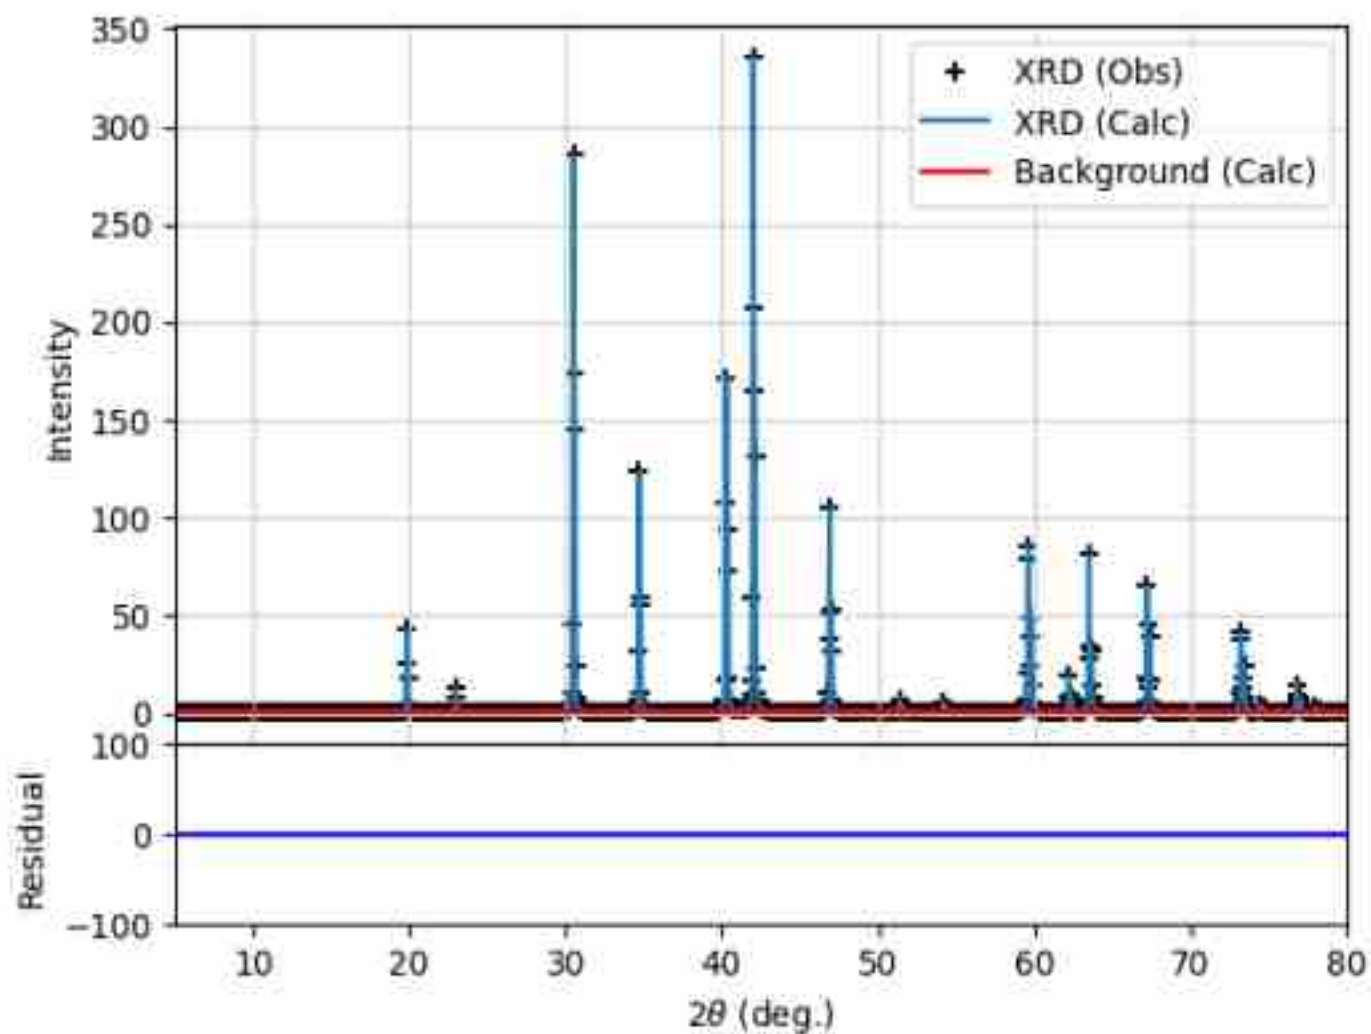

| RMSE before RR | Rwp     | RMSE after RR |
|----------------|---------|---------------|
| 0.01           | 0.00361 | 0.00071       |

# La1Al4

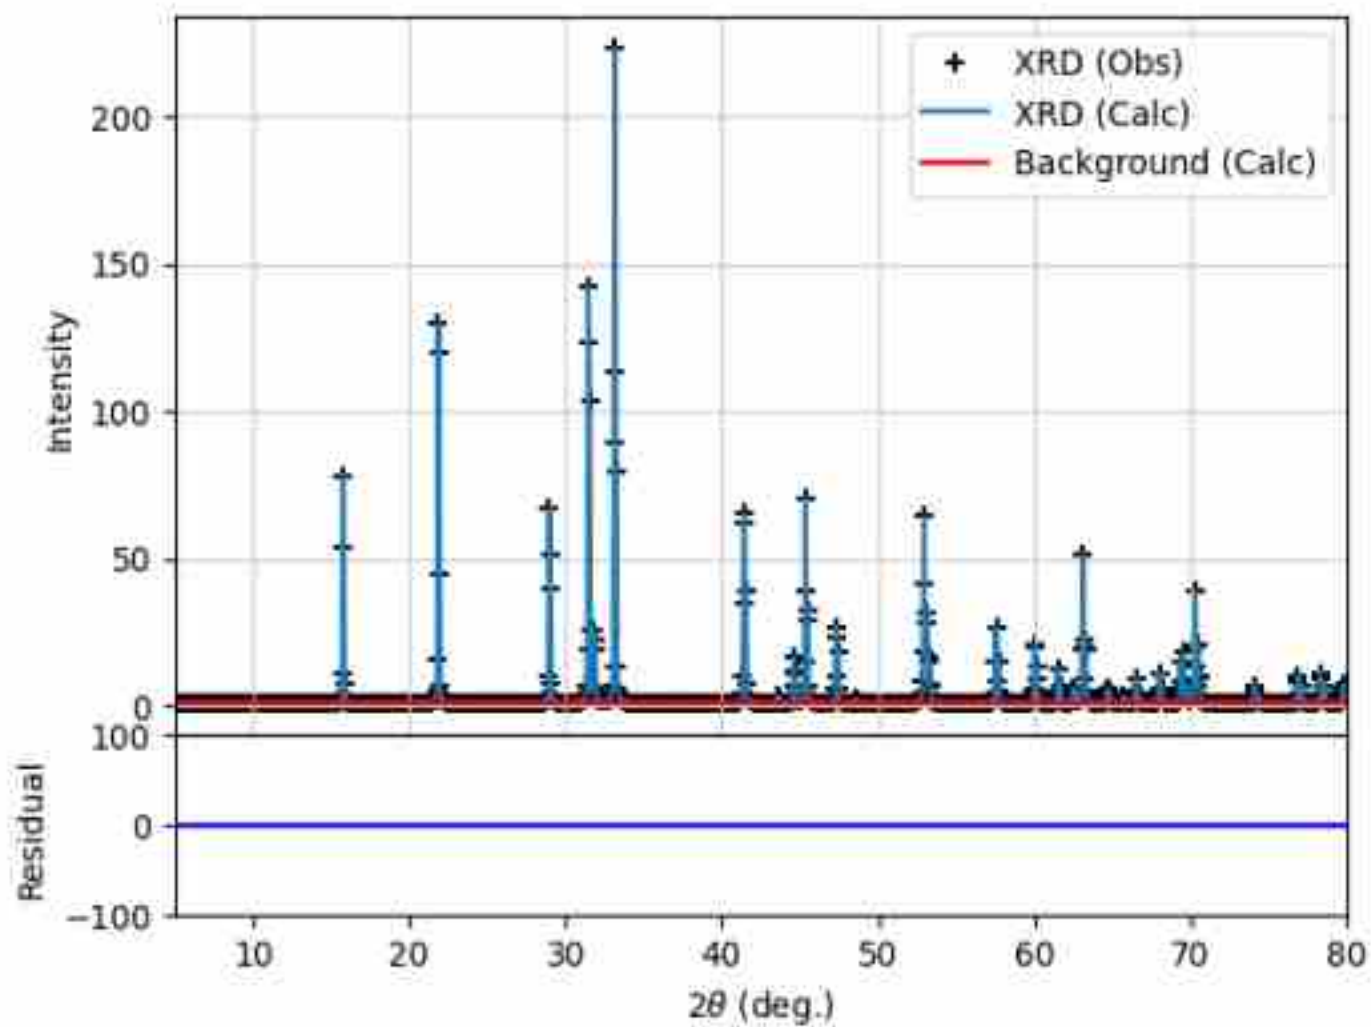

| RMSE before RR | Rwp     | RMSE after RR |
|----------------|---------|---------------|
| 0.01           | 0.00306 | 0.00045       |

# La1Bi3

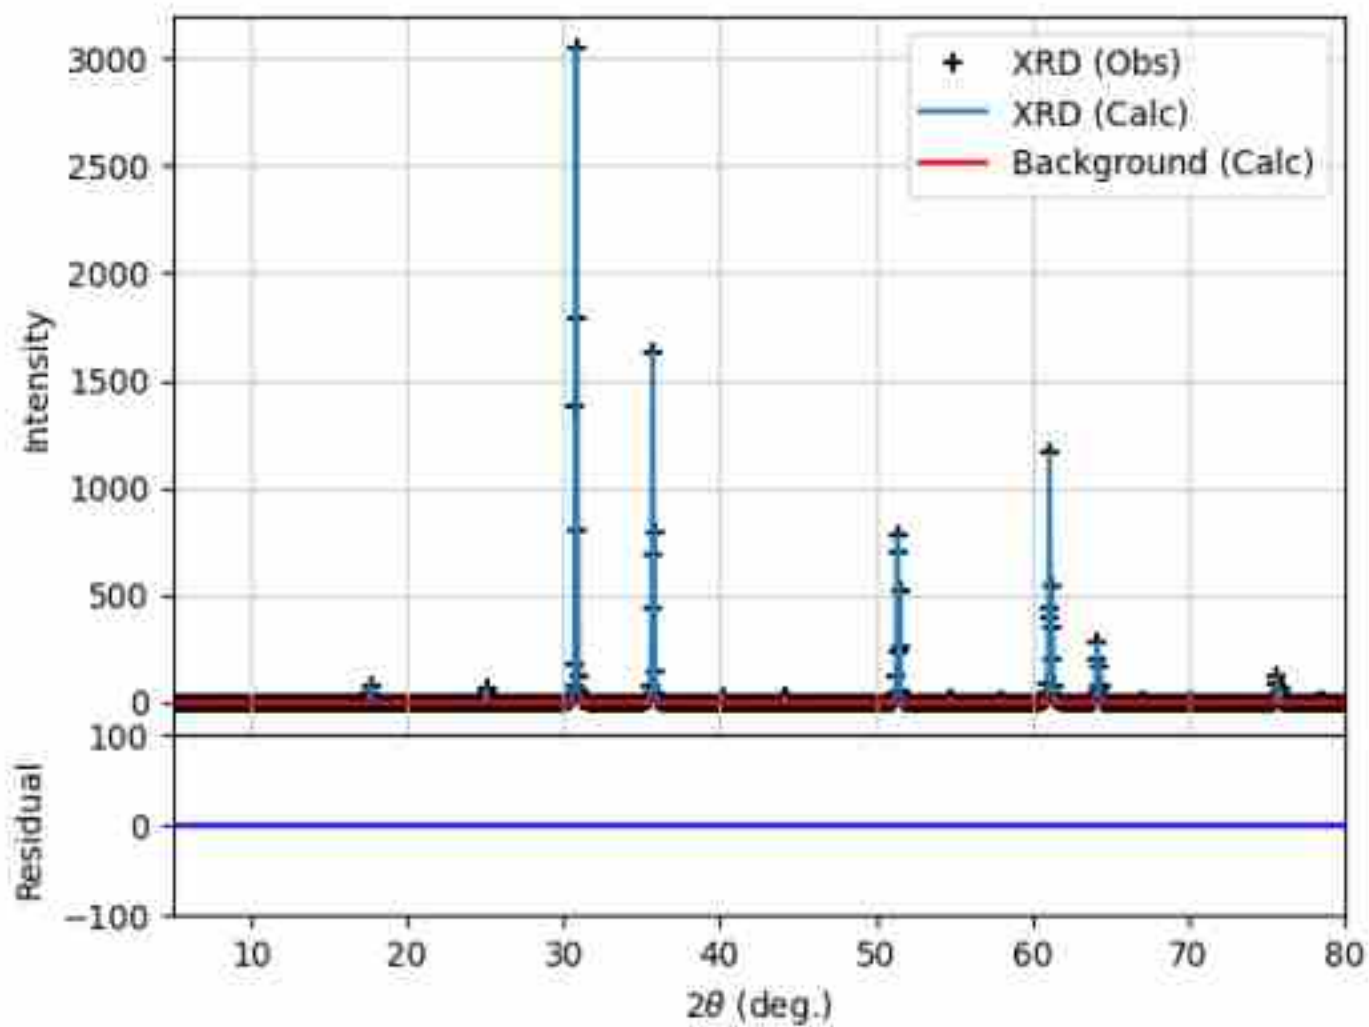

| RMSE before RR | Rwp     | RMSE after RR |
|----------------|---------|---------------|
| 0.001          | 0.00348 | 0.00026       |

# La1Co1Ni4

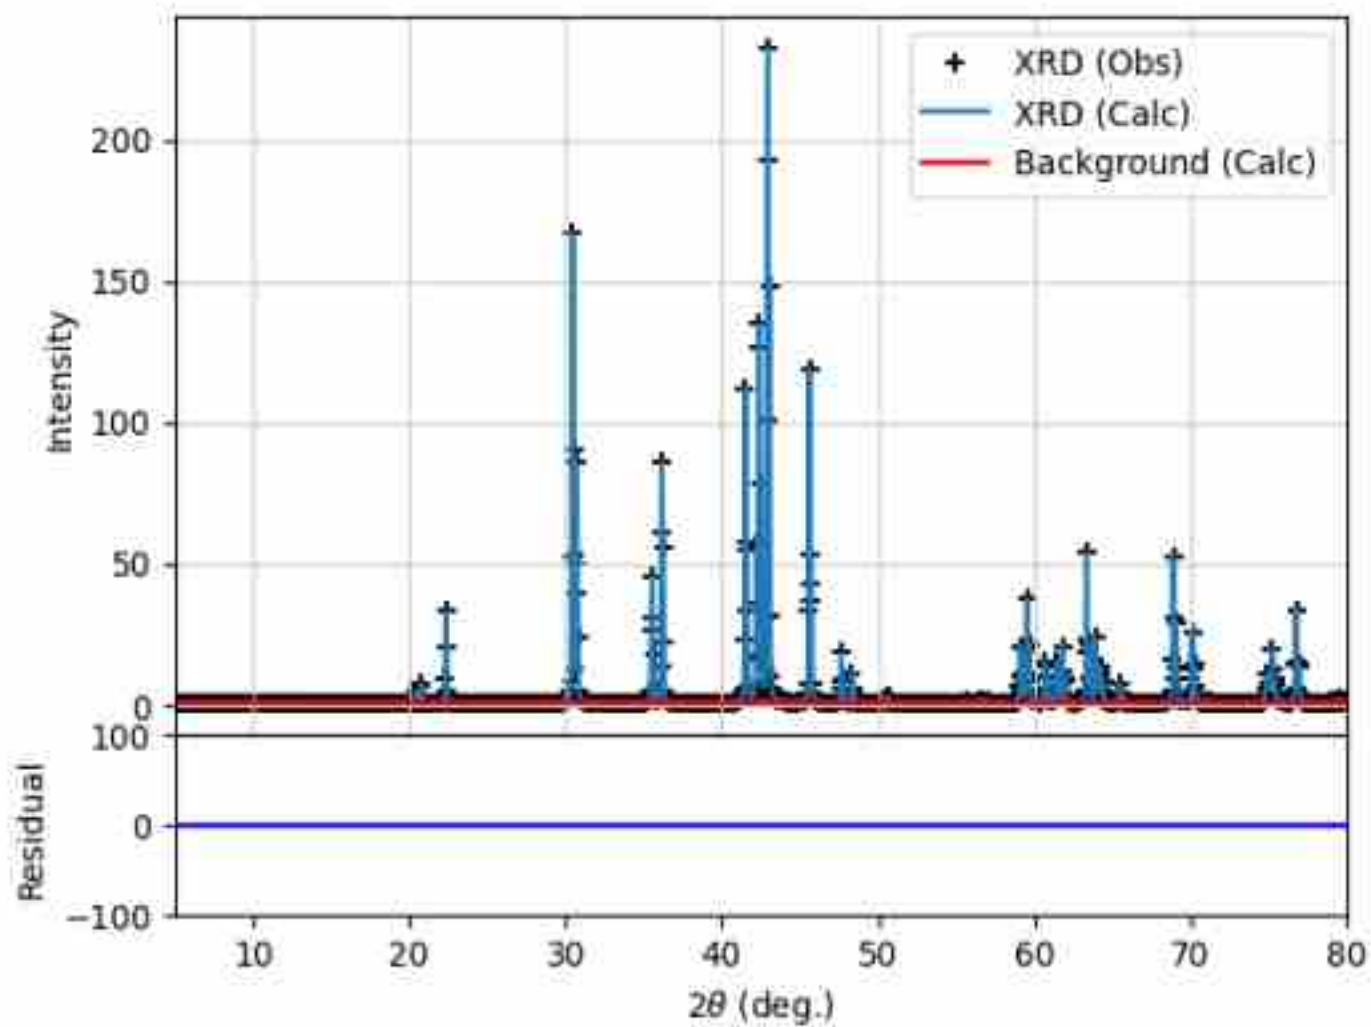

| RMSE before RR | Rwp     | RMSE after RR |
|----------------|---------|---------------|
| 0.01           | 0.00423 | 0.00041       |

# LaInHg<sub>2</sub>

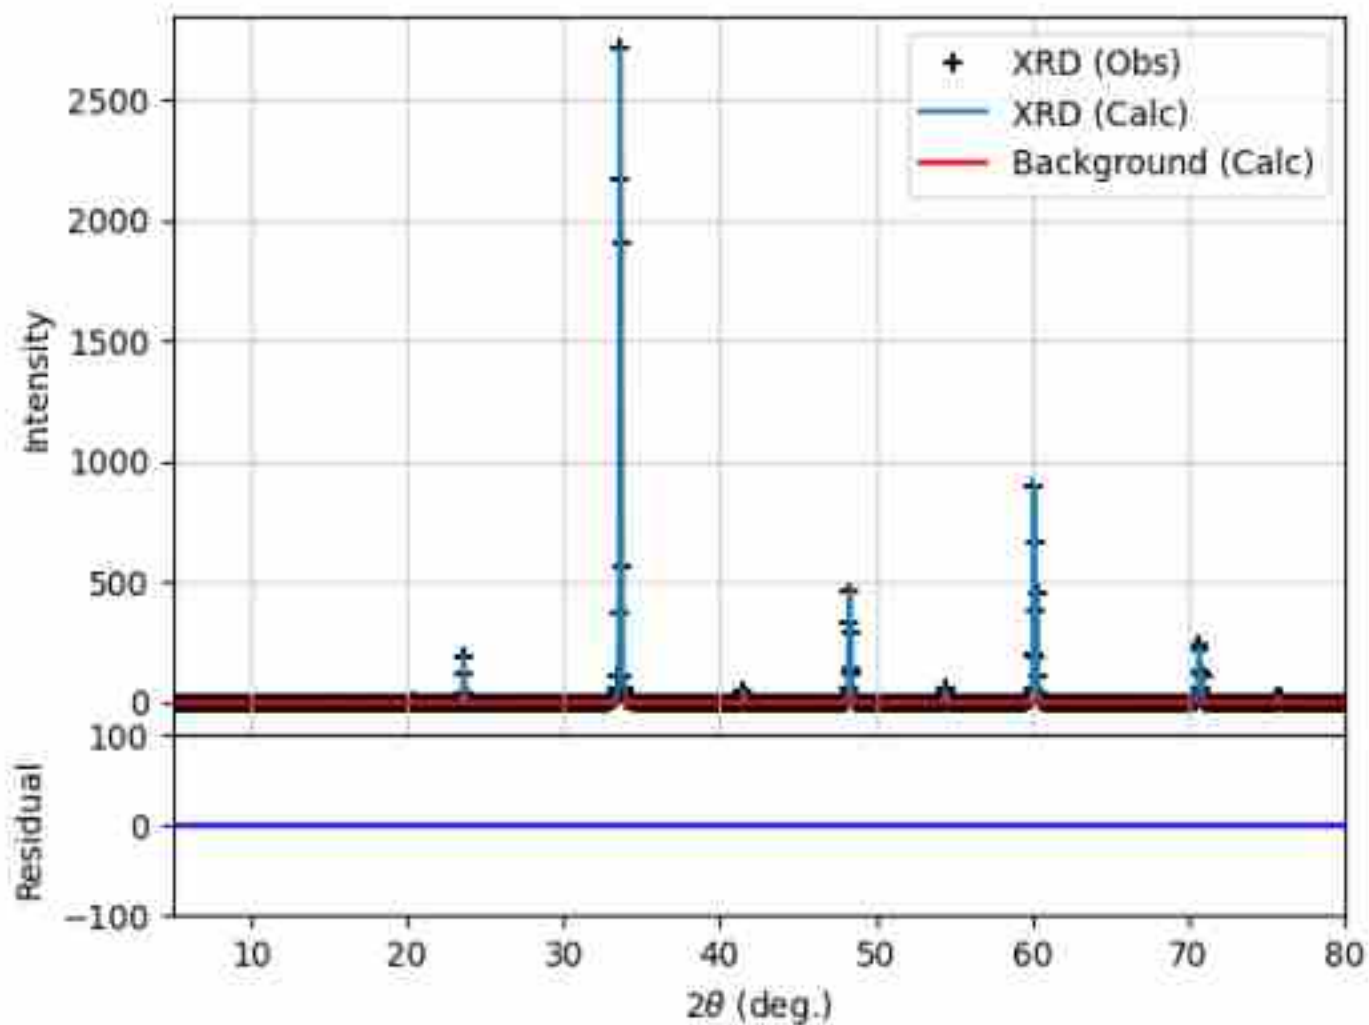

| RMSE before RR | Rwp   | RMSE after RR |
|----------------|-------|---------------|
| 0.001          | 0.004 | 0.00039       |

# La1Mn2Ni3

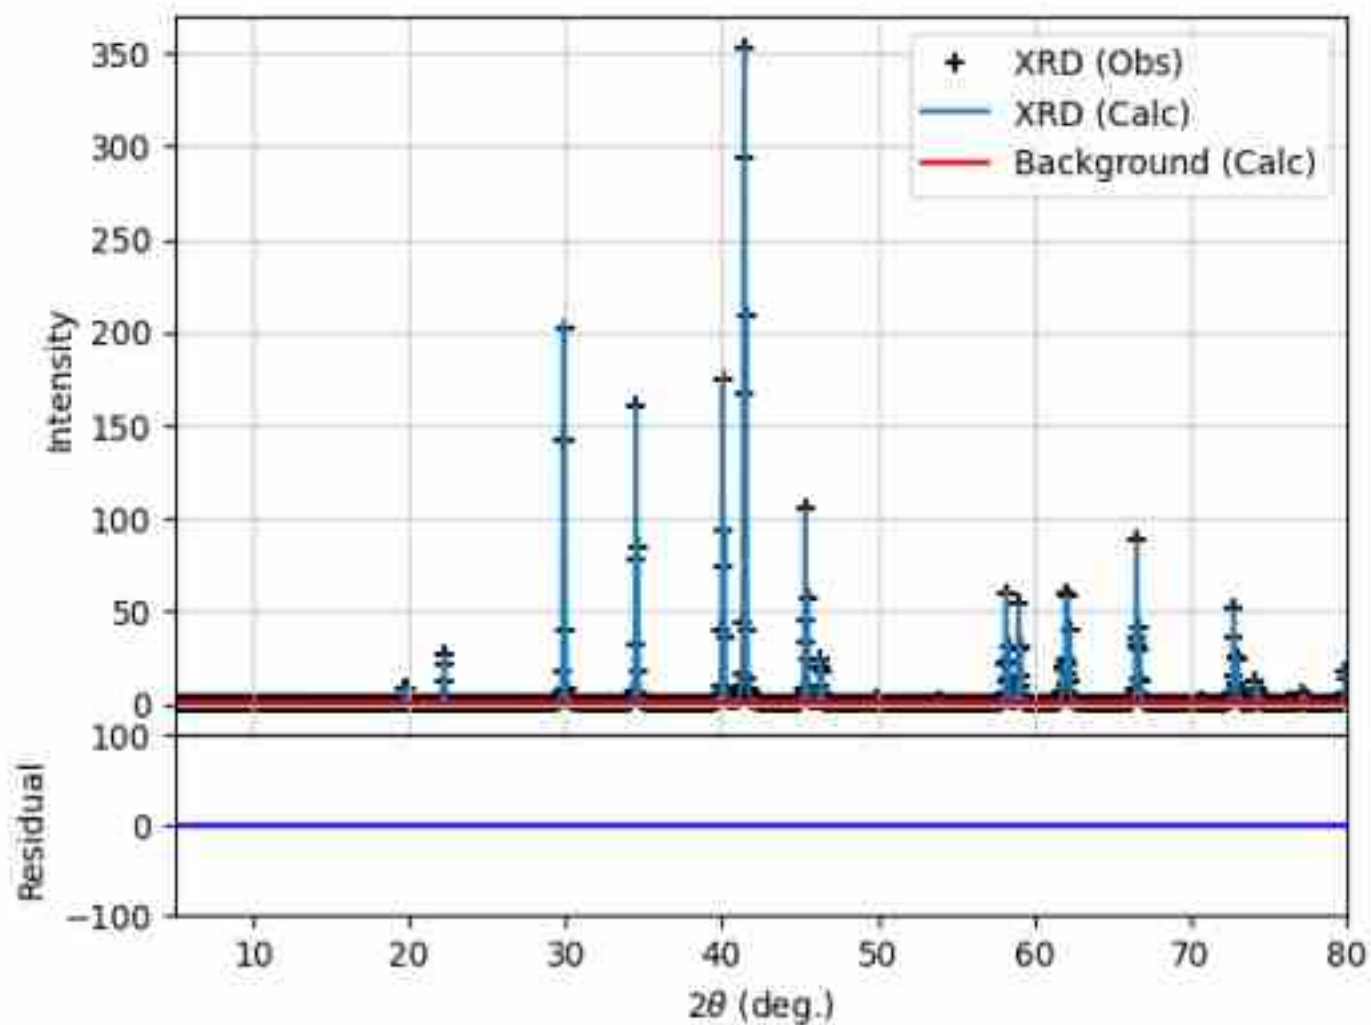

| RMSE before RR | Rwp     | RMSE after RR |
|----------------|---------|---------------|
| 0.01           | 0.00303 | 0.00055       |

# La1Mo1N3

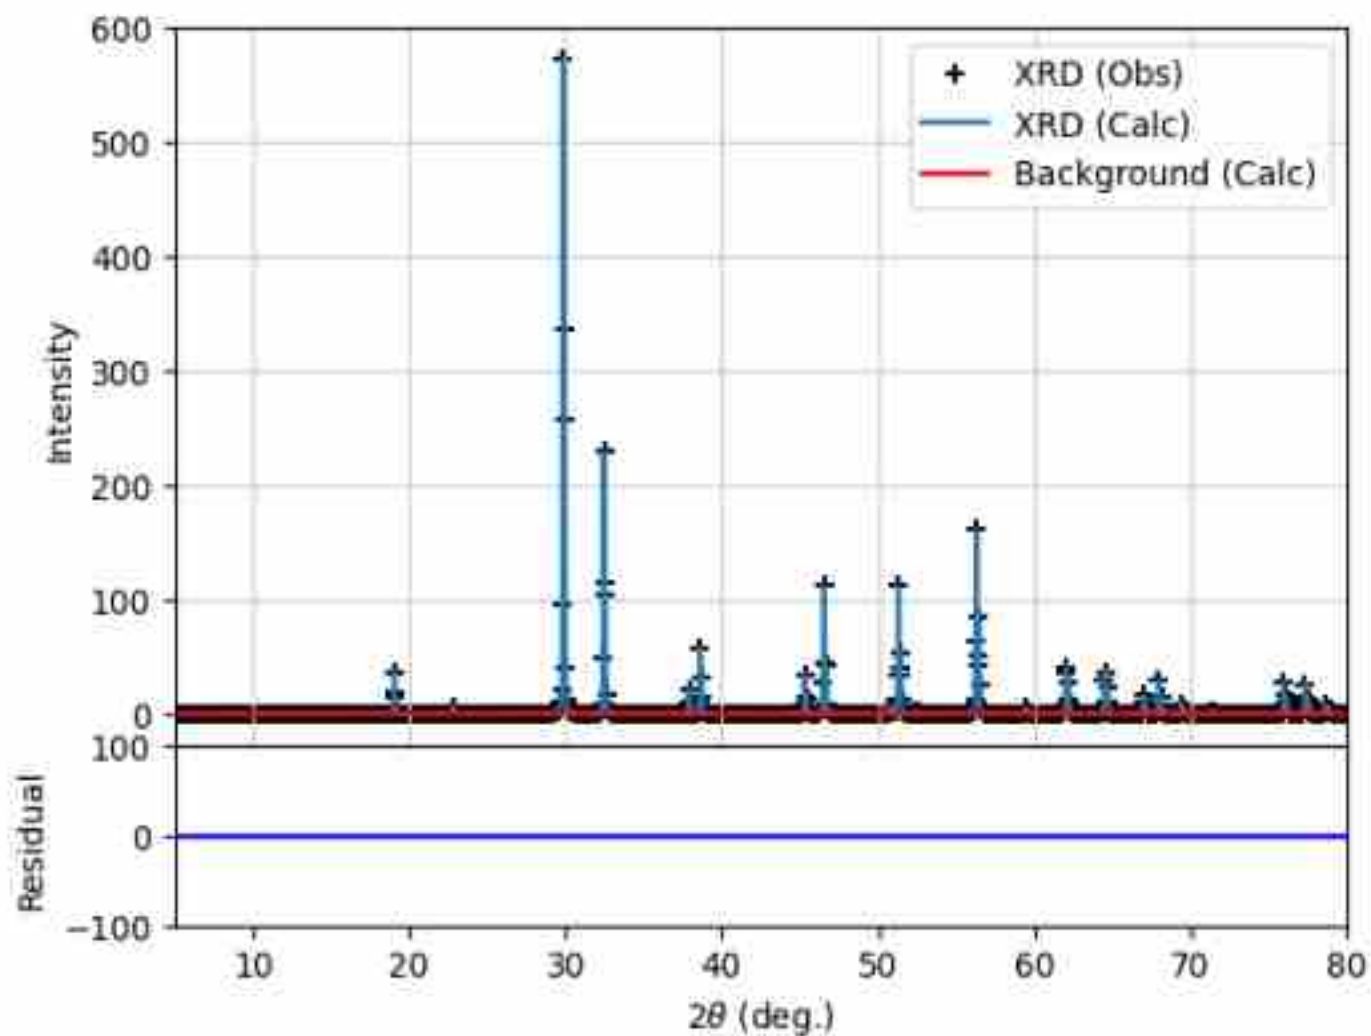

| RMSE before RR | Rwp     | RMSE after RR |
|----------------|---------|---------------|
| 0.01           | 0.00908 | 0.00288       |

# La1Nd3

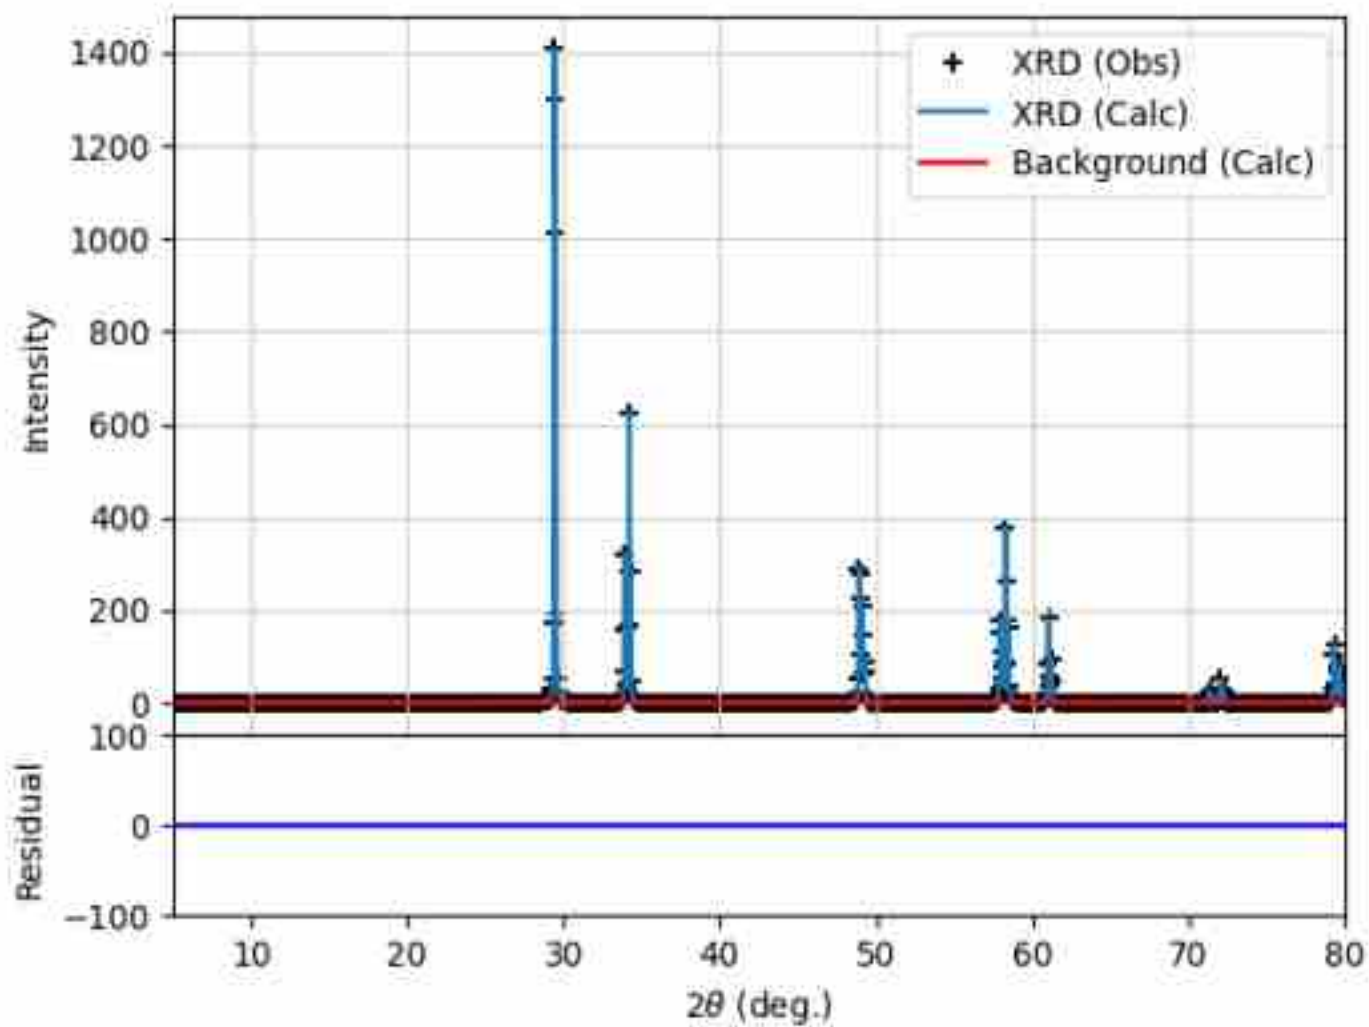

| RMSE before RR | Rwp     | RMSE after RR |
|----------------|---------|---------------|
| 0.001          | 0.00197 | 0.00012       |



# La1Pb1Au2

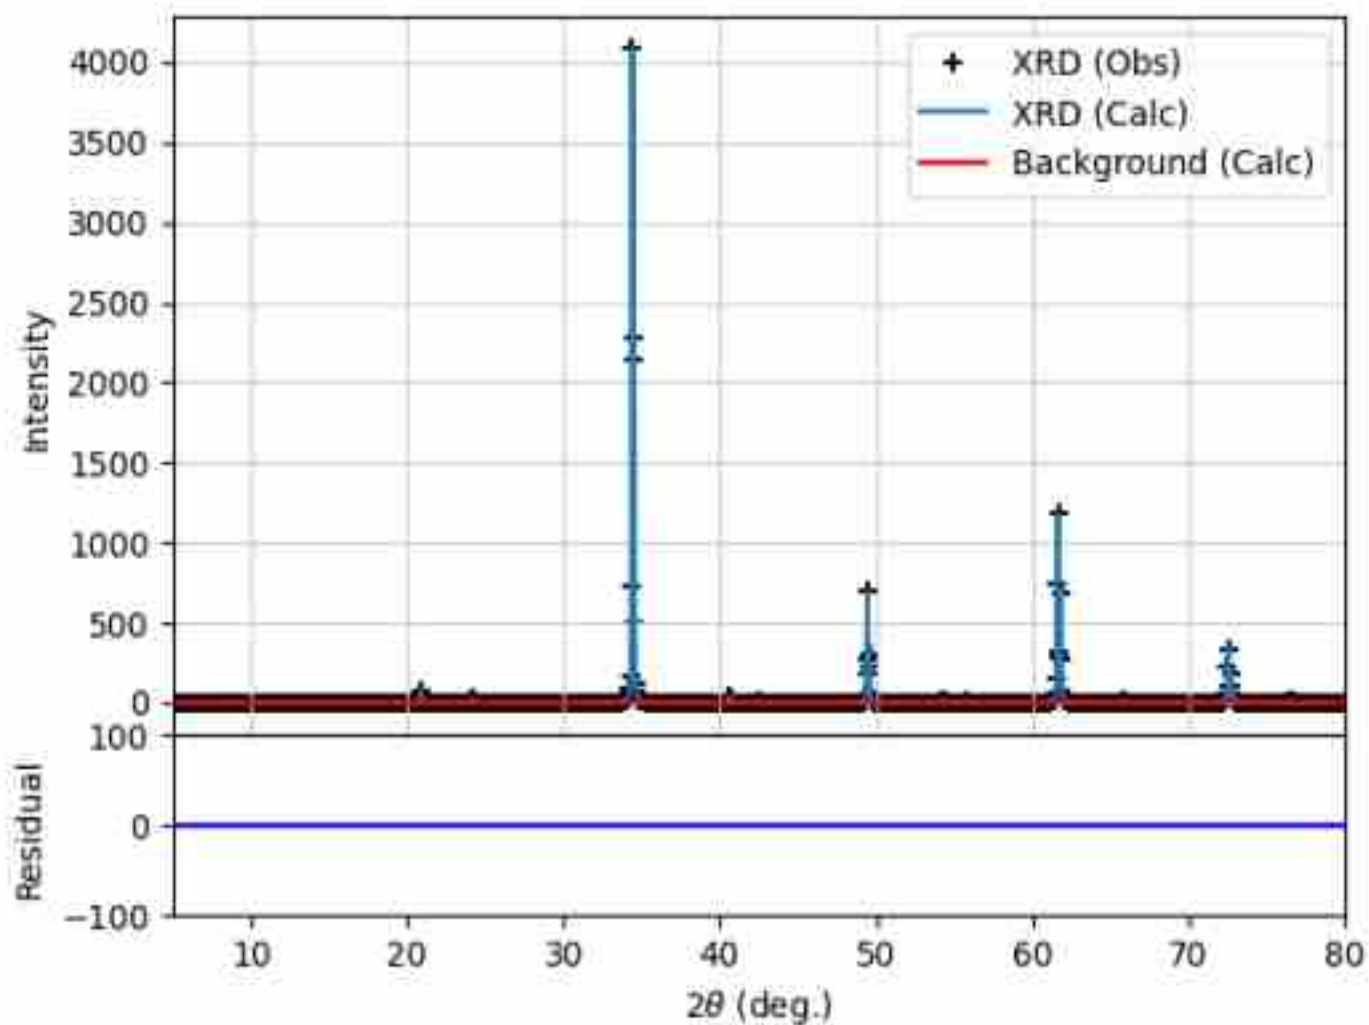

| RMSE before RR | Rwp     | RMSE after RR |
|----------------|---------|---------------|
| 0.001          | 0.00519 | 0.00049       |

# La1Pr3

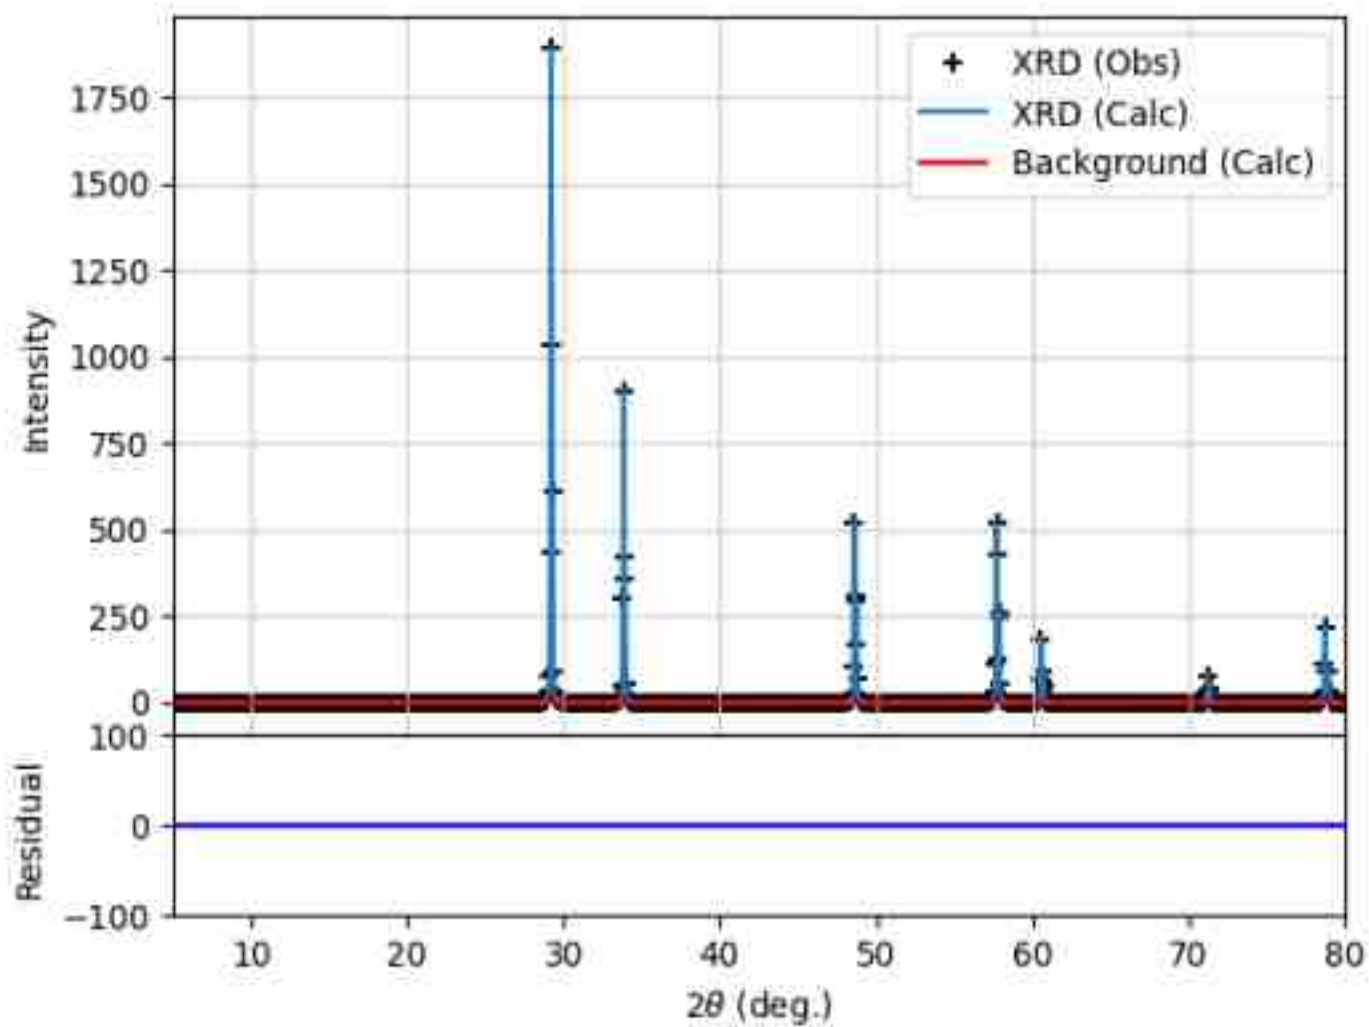

| RMSE before RR | Rwp     | RMSE after RR |
|----------------|---------|---------------|
| 0.001          | 0.03356 | 0.00037       |

# La1Se1

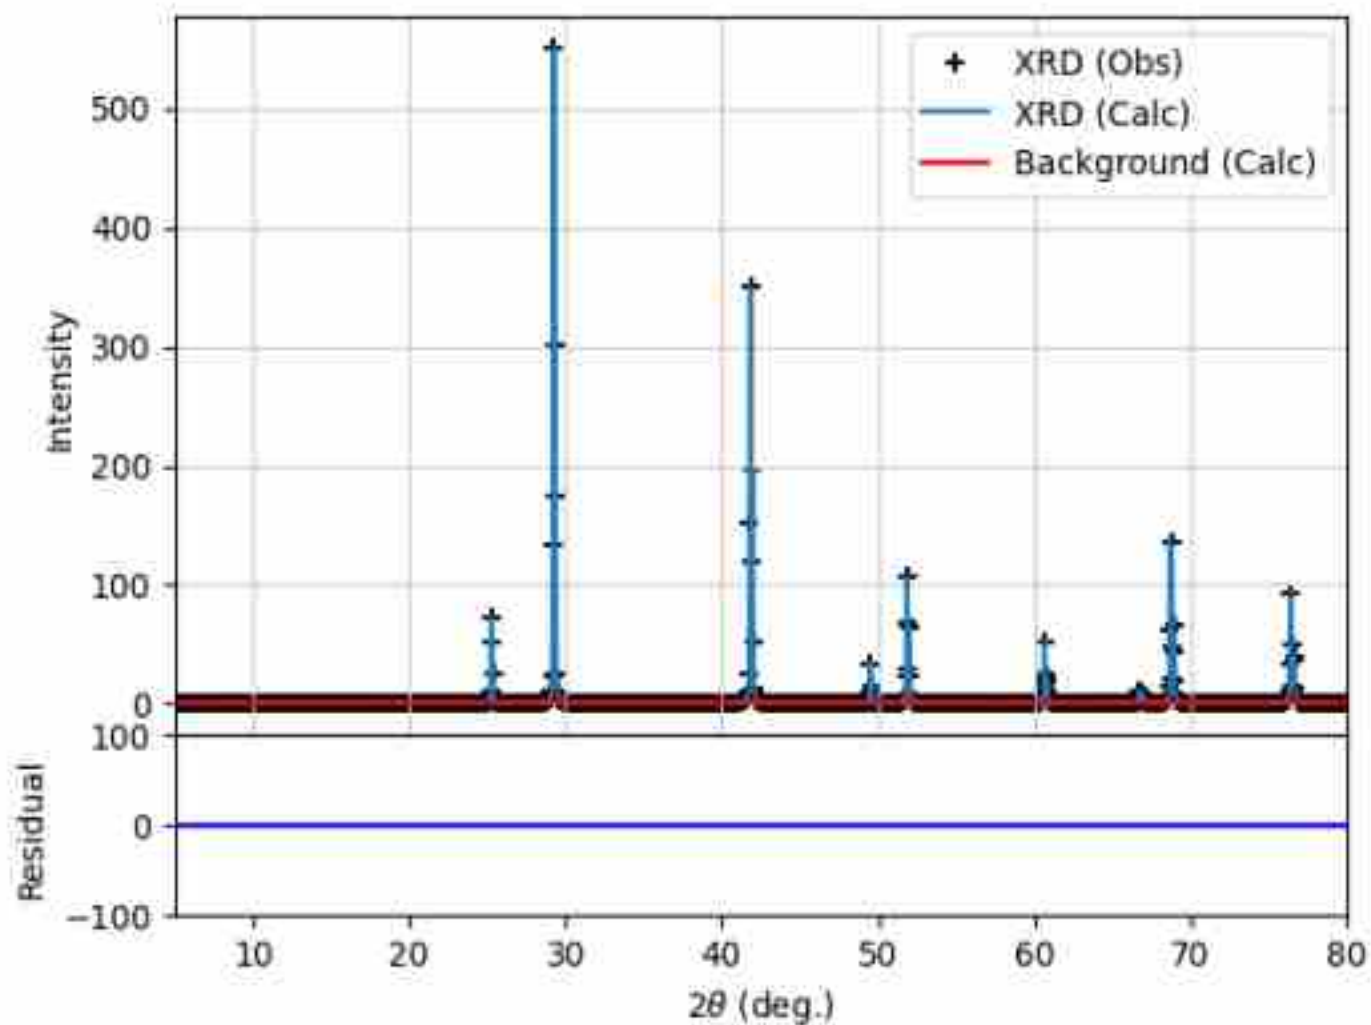

| RMSE before RR | Rwp     | RMSE after RR |
|----------------|---------|---------------|
| 0.001          | 0.04028 | 0.00049       |

# La1Tl1Hg2

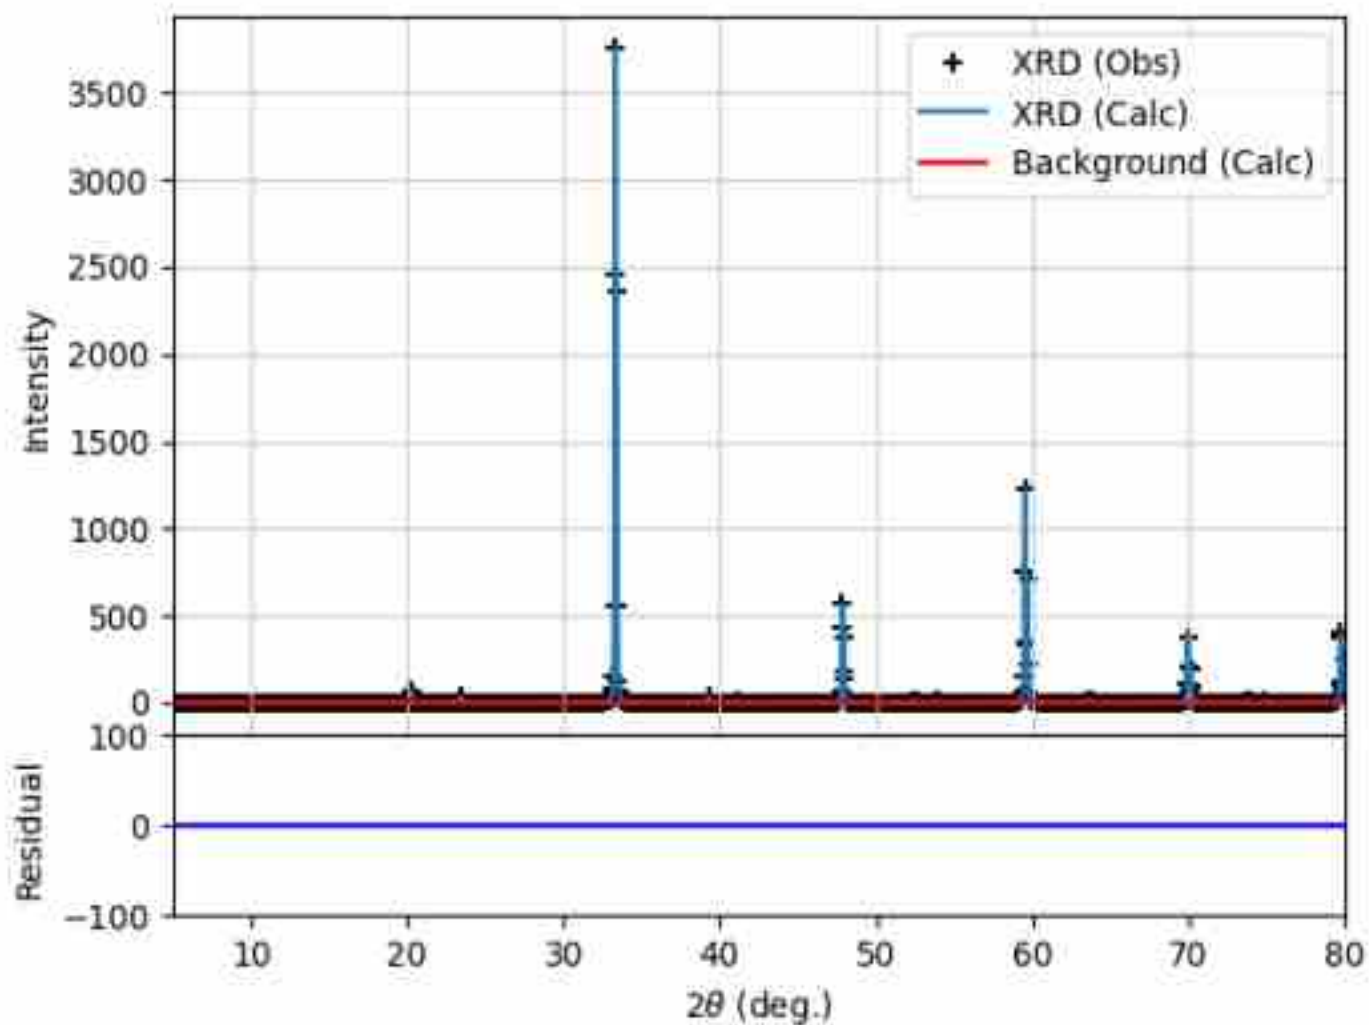

| RMSE before RR | Rwp     | RMSE after RR |
|----------------|---------|---------------|
| 0.001          | 0.00517 | 0.00114       |

# La1Tm1Ti2

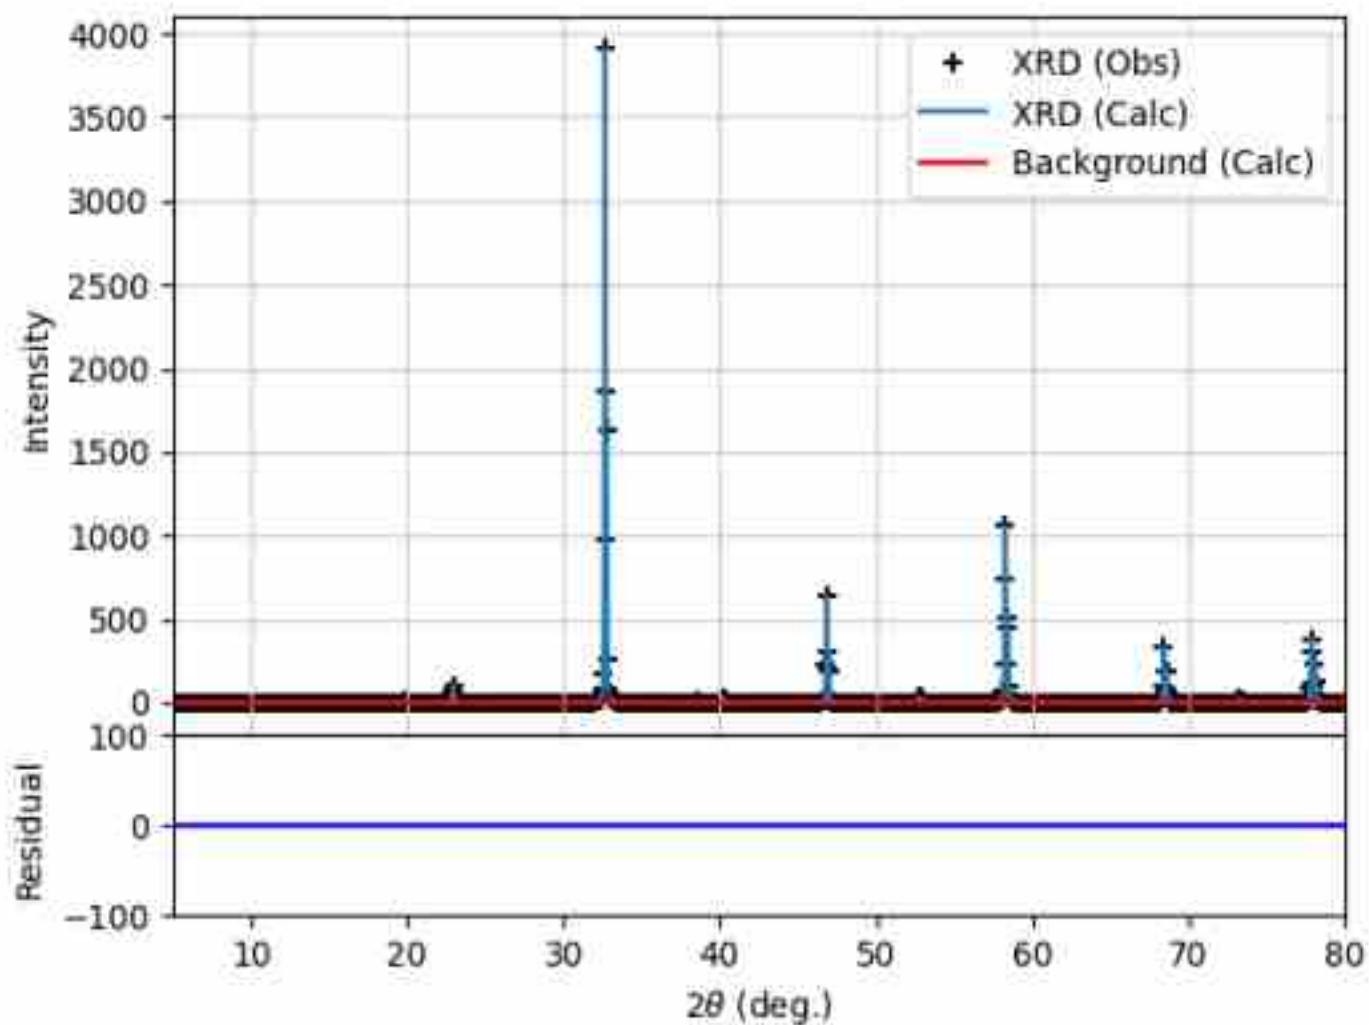

| RMSE before RR | Rwp     | RMSE after RR |
|----------------|---------|---------------|
| 0.001          | 0.02275 | 0.00039       |

# La<sub>1</sub>Y<sub>1</sub>Mg<sub>6</sub>

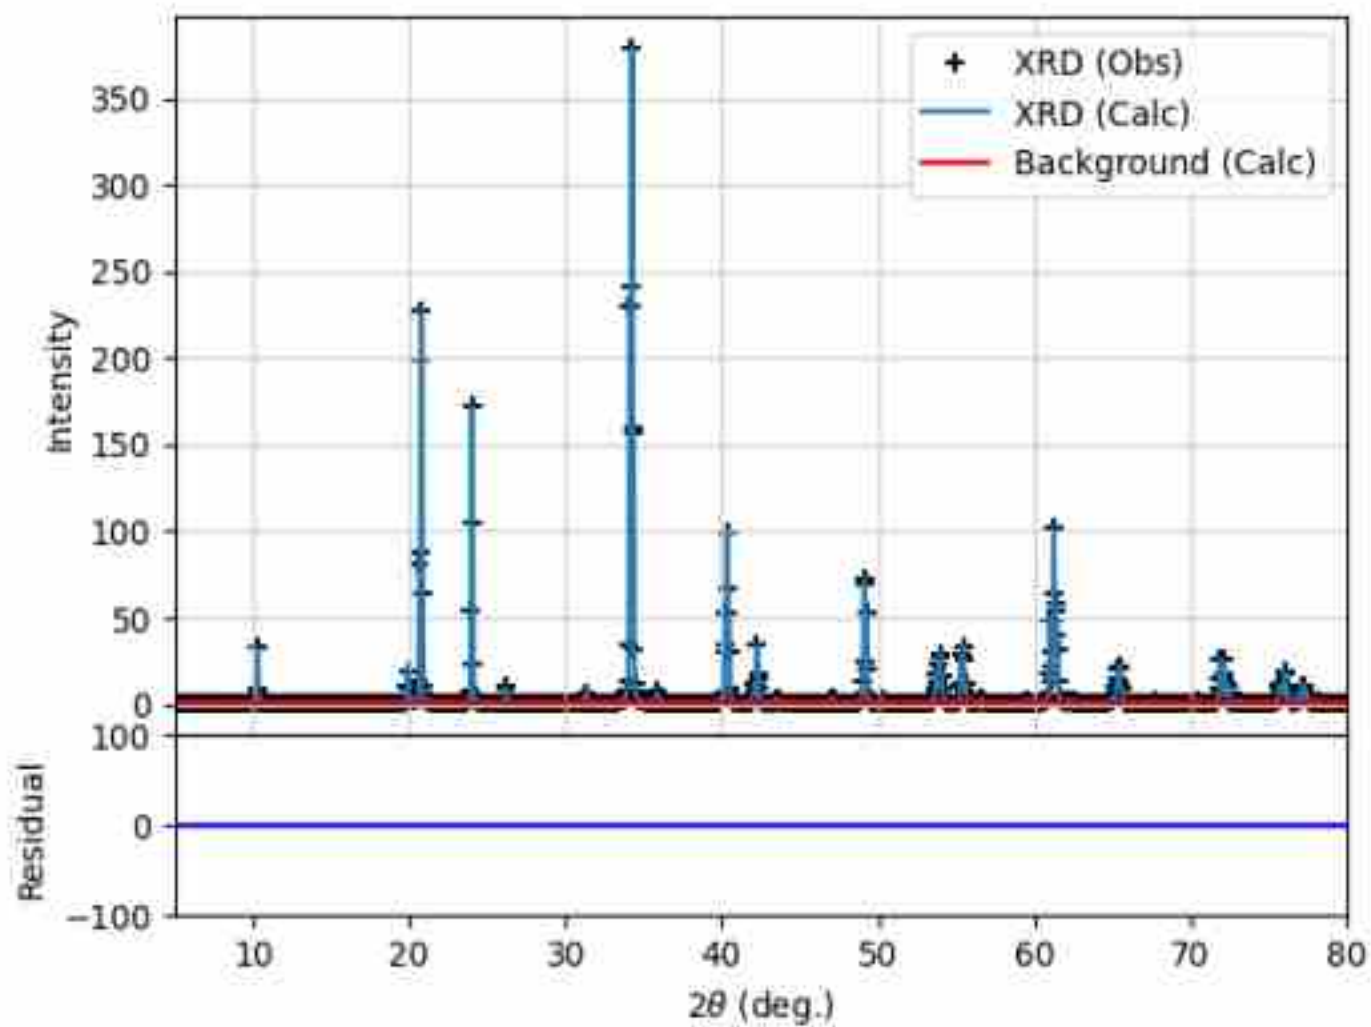

| RMSE before RR | Rwp     | RMSE after RR |
|----------------|---------|---------------|
| 0.01           | 0.00278 | 0.00059       |

# La1Zn1Au2

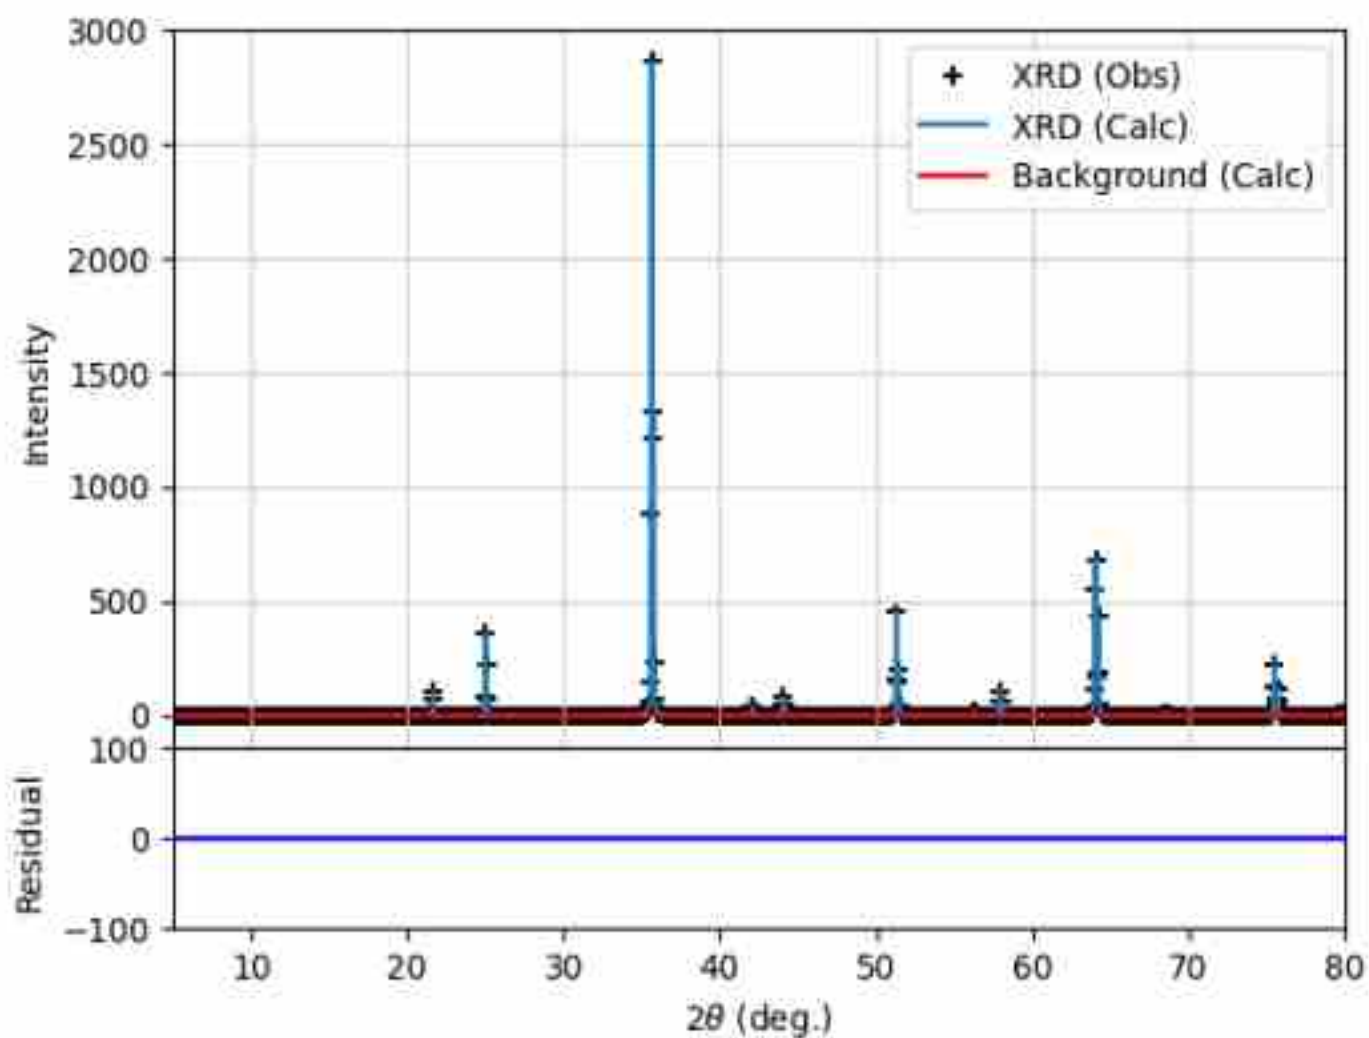

| RMSE before RR | Rwp     | RMSE after RR |
|----------------|---------|---------------|
| 0.001          | 0.00469 | 0.00074       |

# La<sub>2</sub>Br<sub>1</sub>Cl<sub>1</sub>O<sub>2</sub>

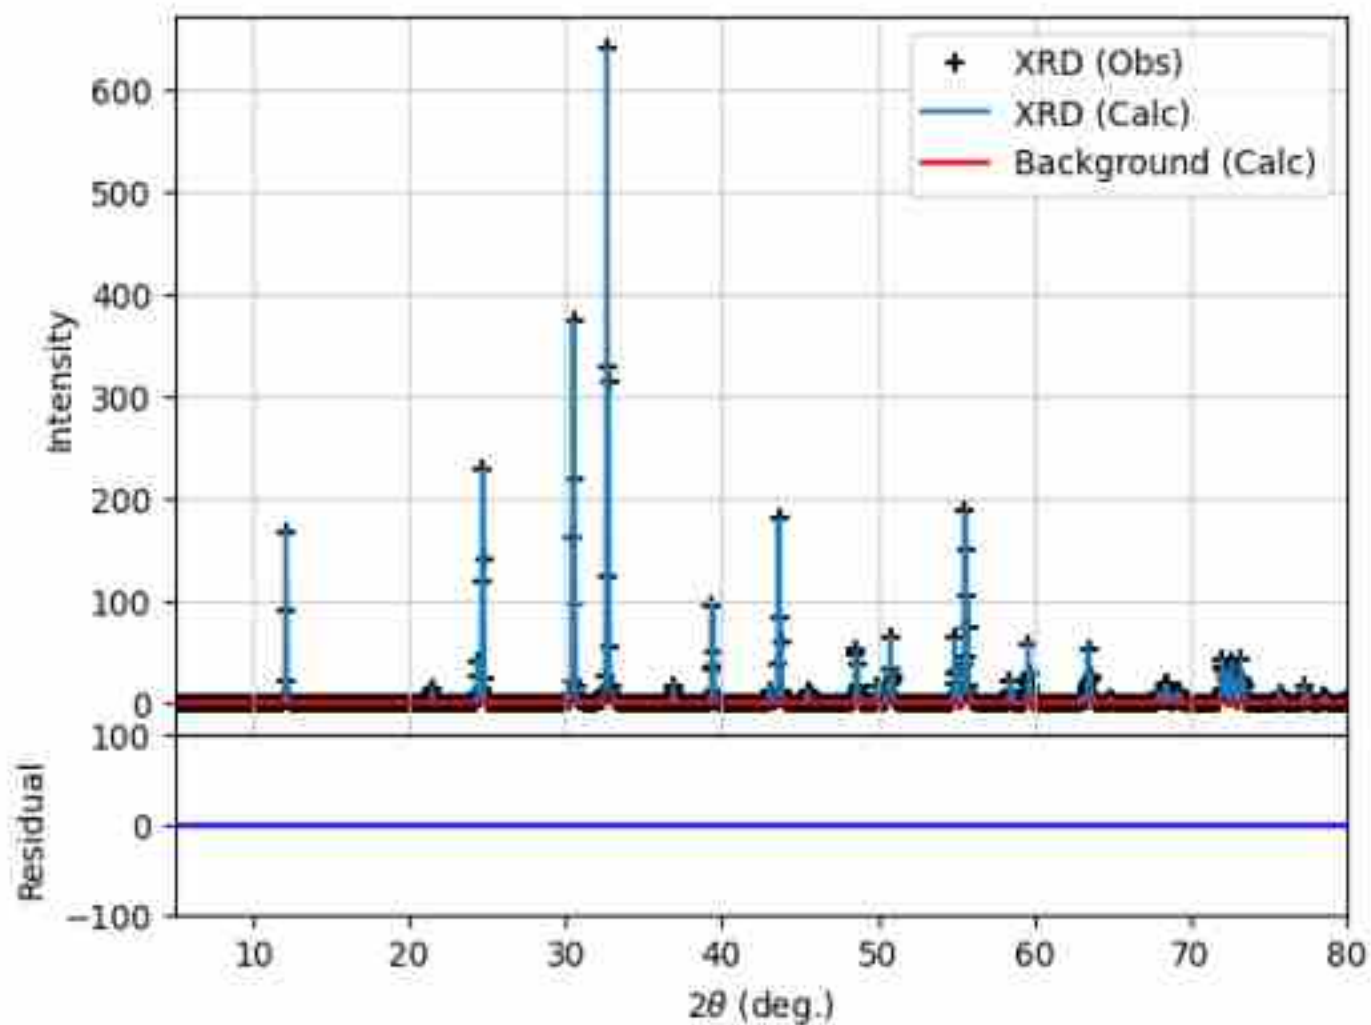

| RMSE before RR | Rwp     | RMSE after RR |
|----------------|---------|---------------|
| 0.01           | 0.04974 | 0.0063        |



# La<sub>2</sub>Ge<sub>4</sub>Pt<sub>4</sub>

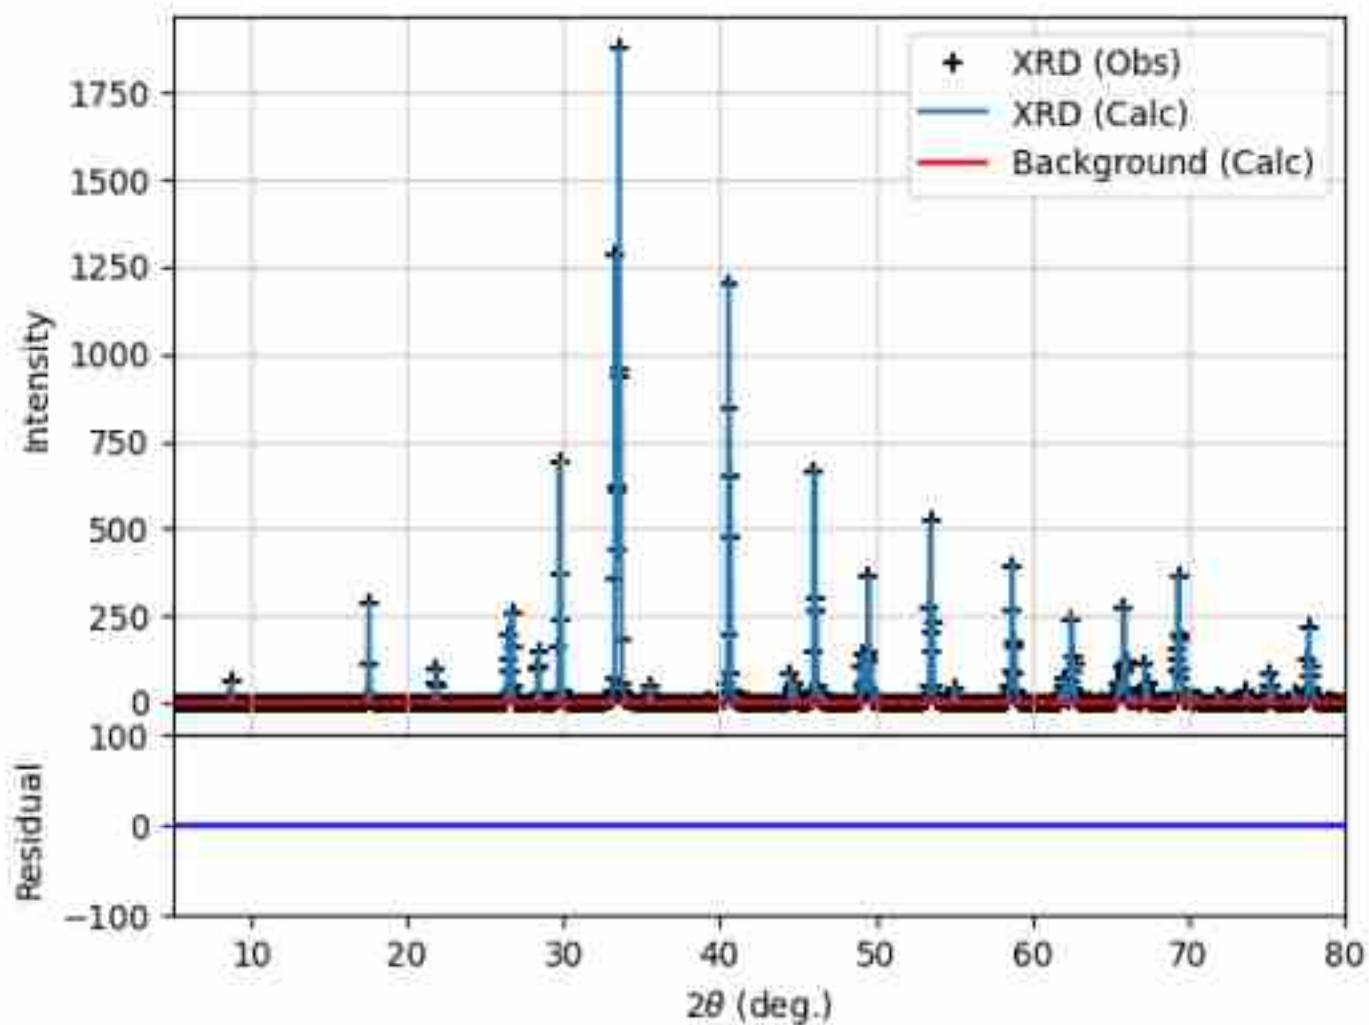

| RMSE before RR | Rwp     | RMSE after RR |
|----------------|---------|---------------|
| 0.01           | 0.00505 | 0.00027       |

# La<sub>2</sub>Mg<sub>1</sub>Cd<sub>1</sub>

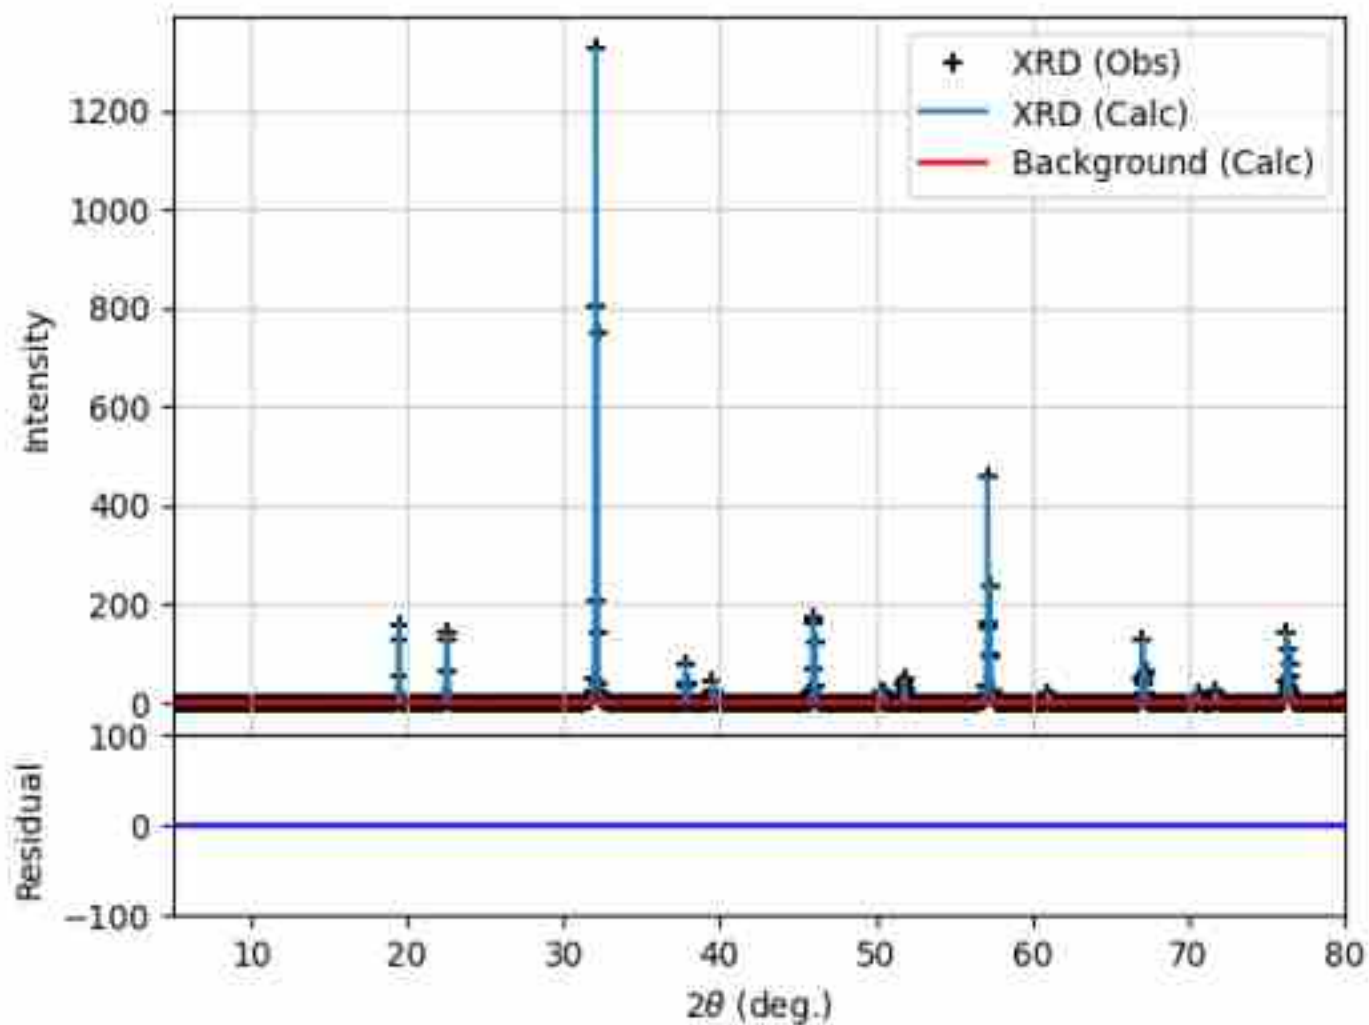

| RMSE before RR | Rwp     | RMSE after RR |
|----------------|---------|---------------|
| 0.001          | 0.00564 | 0.00393       |

# La<sub>2</sub>Pd<sub>1</sub>Ru<sub>1</sub>

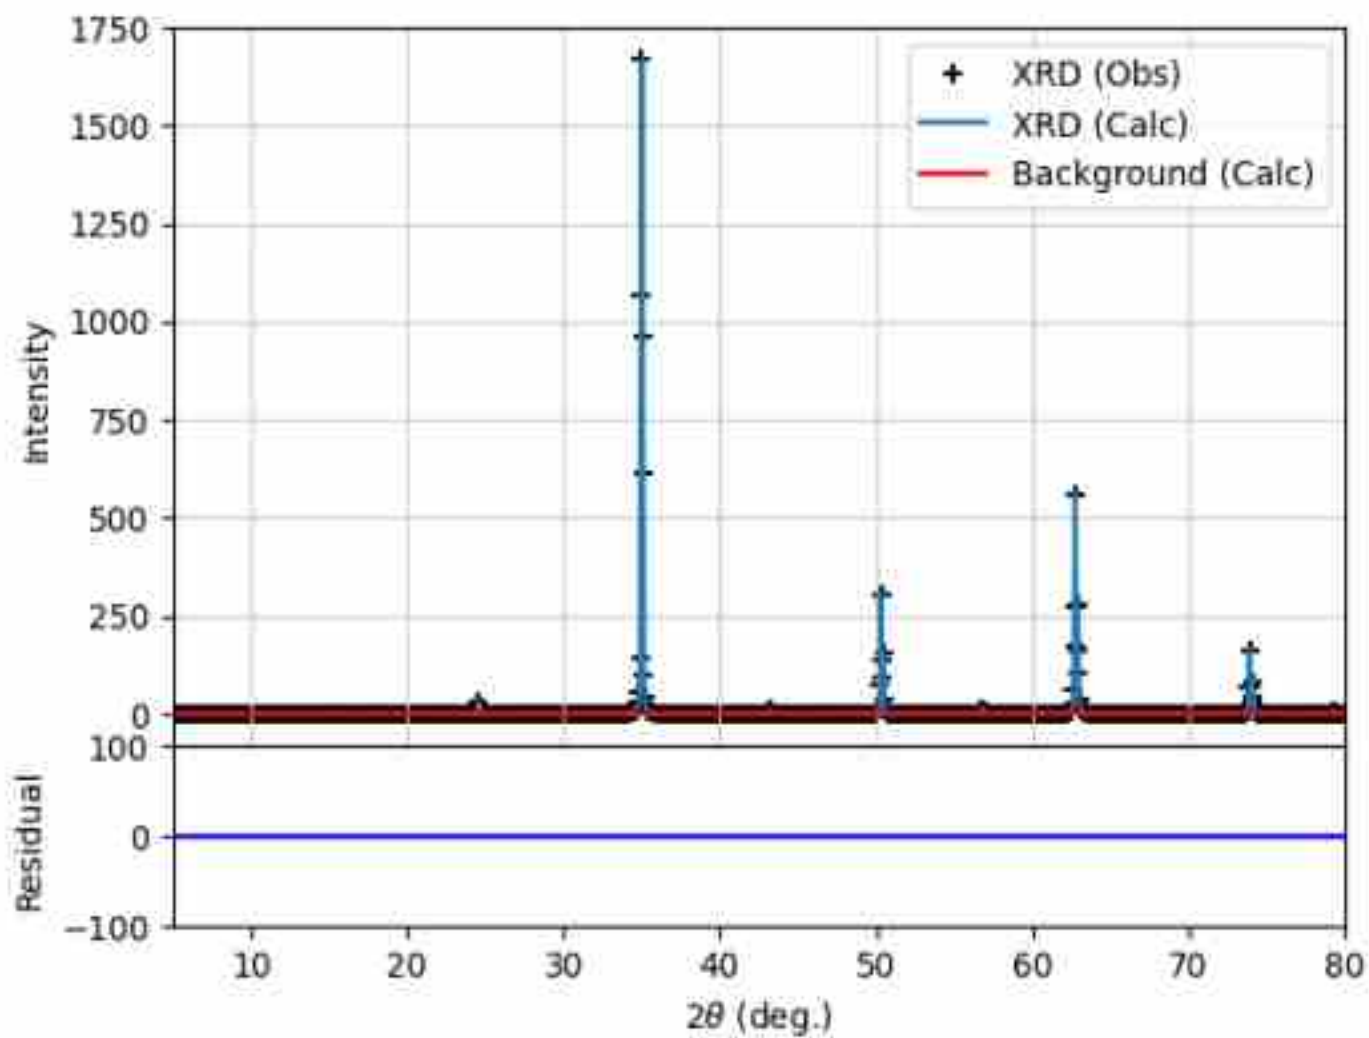

| RMSE before RR | Rwp     | RMSE after RR |
|----------------|---------|---------------|
| 0.001          | 0.00616 | 0.00062       |

# La<sub>2</sub>Sc<sub>2</sub>Sb<sub>2</sub>

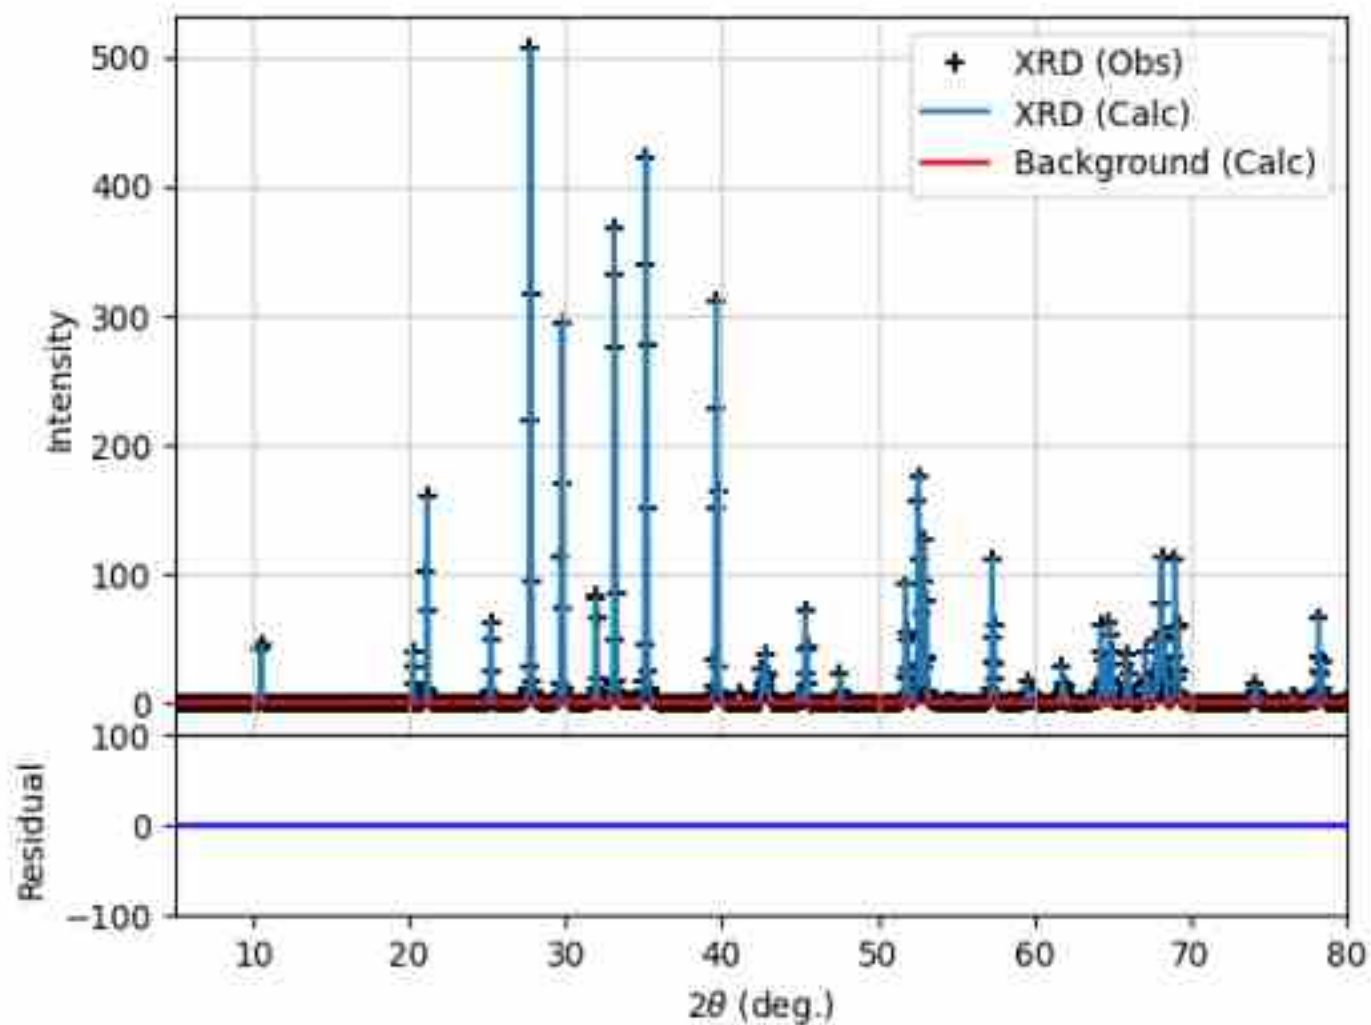

| RMSE before RR | Rwp    | RMSE after RR |
|----------------|--------|---------------|
| 0.01           | 0.0043 | 0.0005        |

# La2Y2

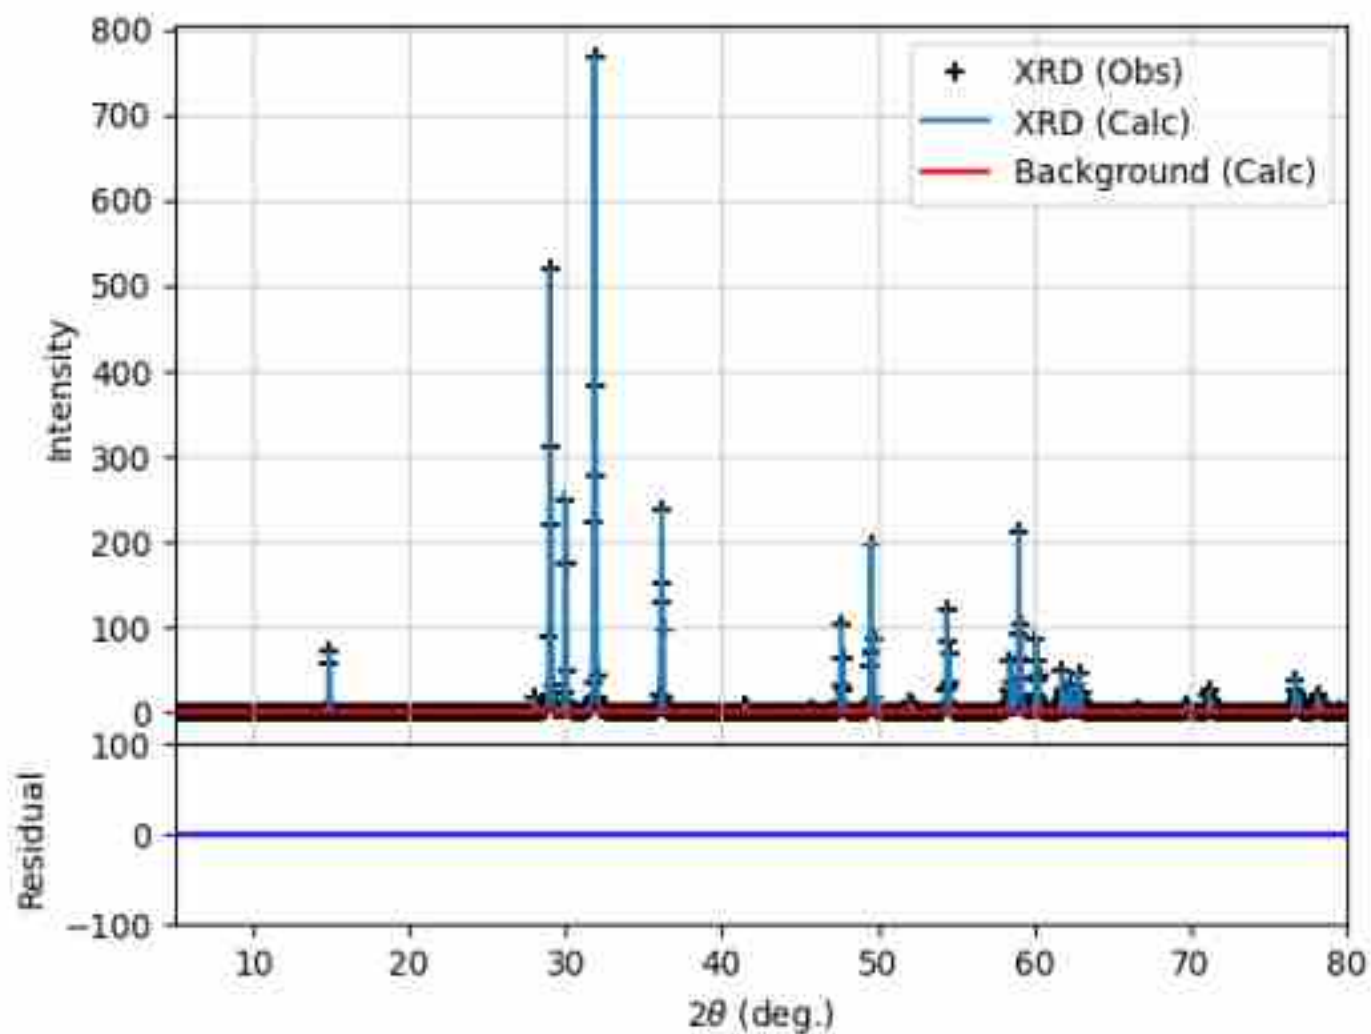

| RMSE before RR | Rwp     | RMSE after RR |
|----------------|---------|---------------|
| 0.001          | 0.01464 | 0.00061       |

# La<sub>2</sub>ZnSb<sub>4</sub>

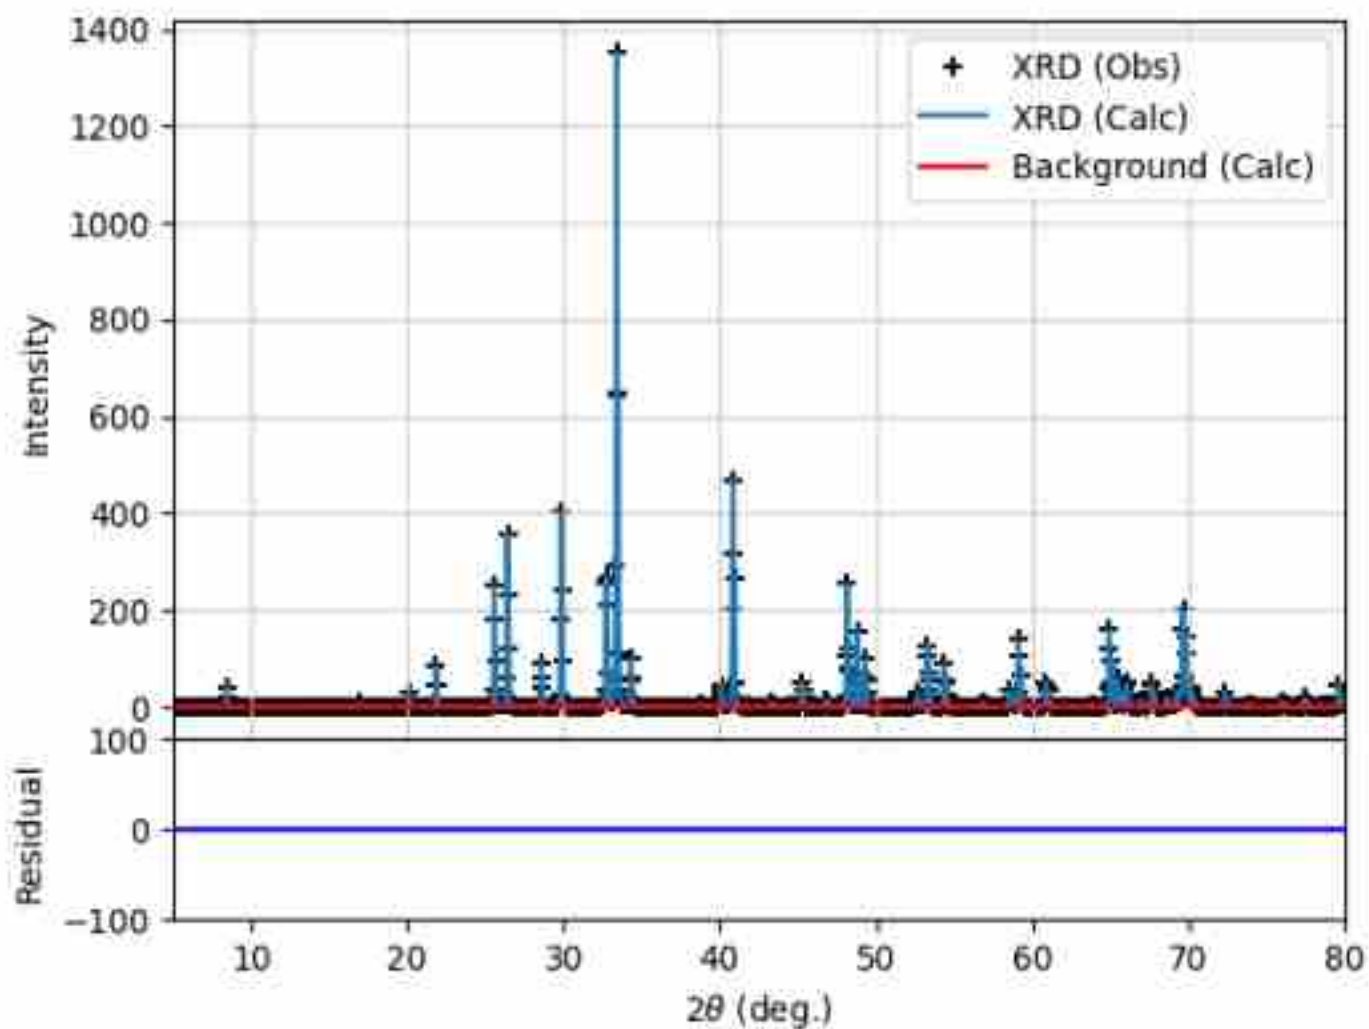

| RMSE before RR | Rwp     | RMSE after RR |
|----------------|---------|---------------|
| 0.01           | 0.00616 | 0.00066       |

# La<sub>2</sub>Zn<sub>4</sub>

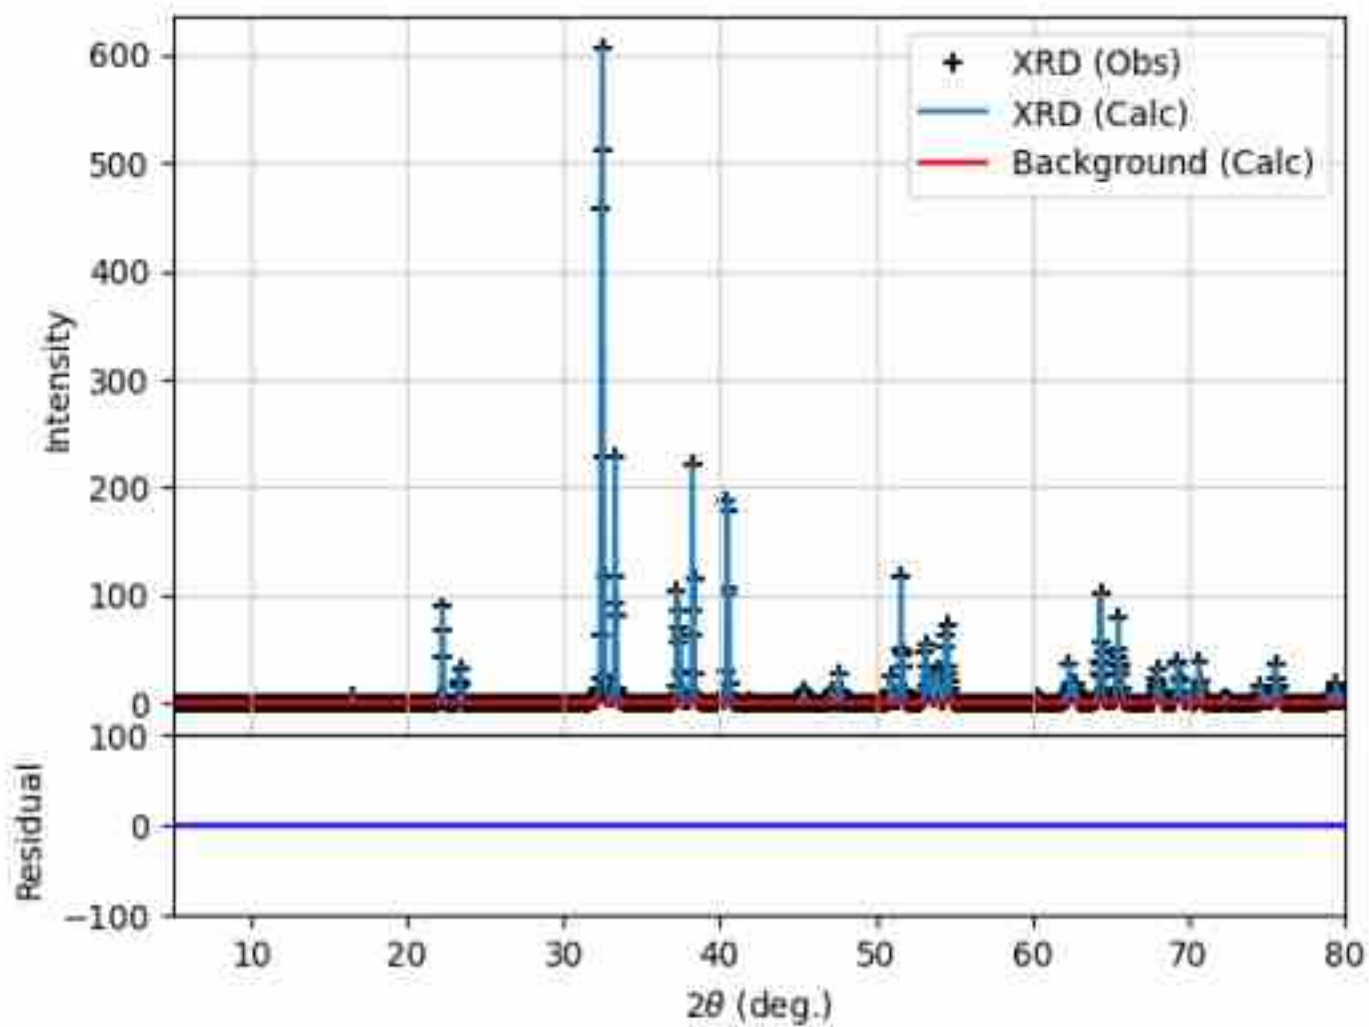

| RMSE before RR | Rwp     | RMSE after RR |
|----------------|---------|---------------|
| 0.01           | 0.01802 | 0.00184       |

# La3Sm1

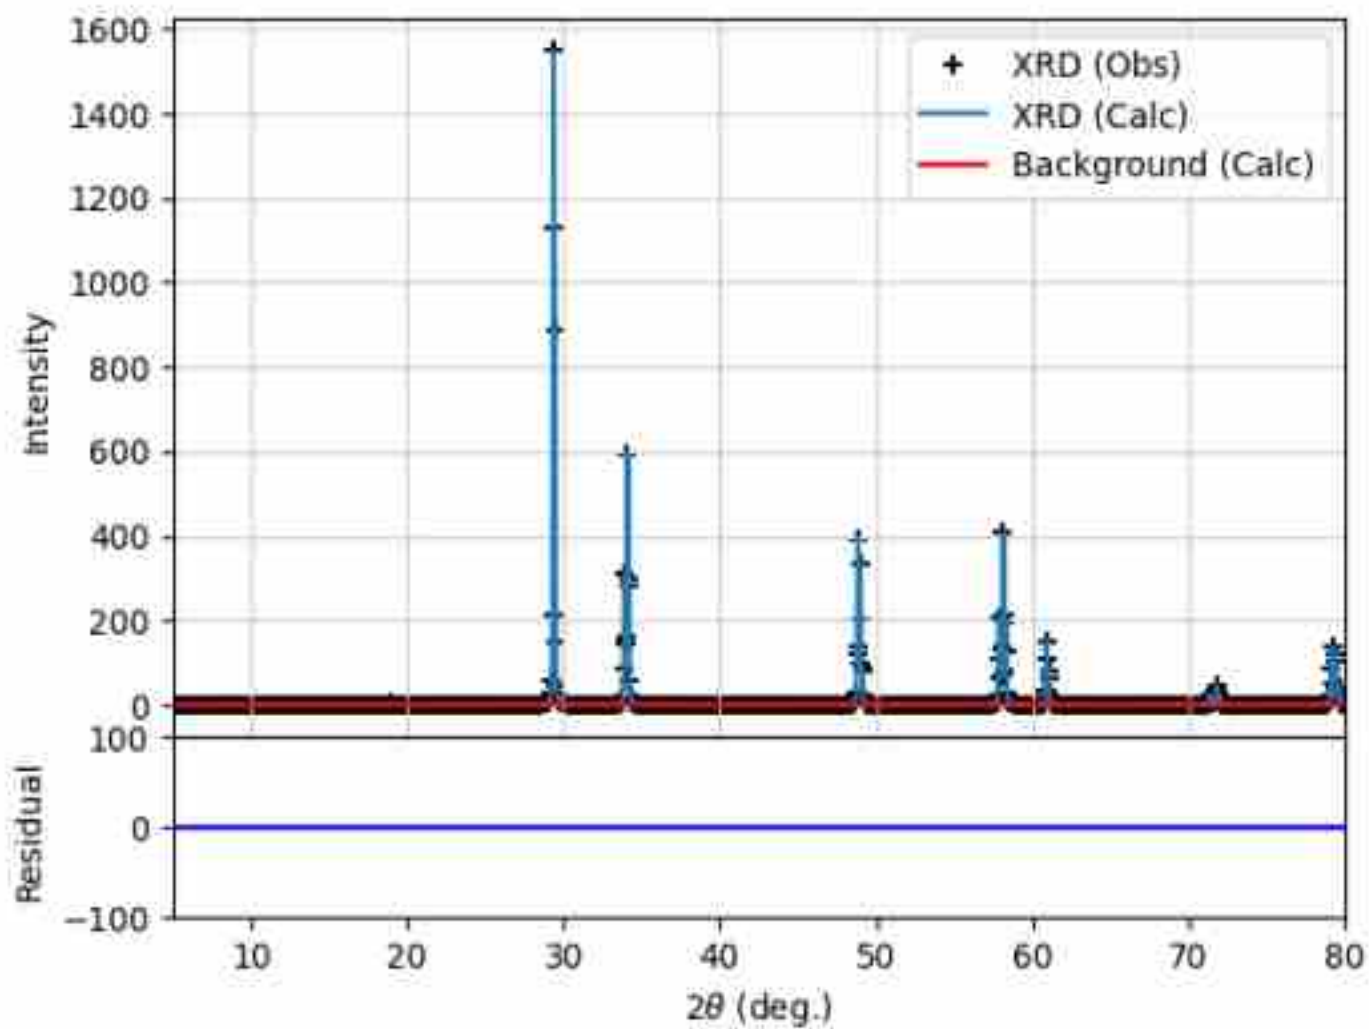

| RMSE before RR | Rwp     | RMSE after RR |
|----------------|---------|---------------|
| 0.001          | 0.01781 | 0.00067       |



# La<sub>3</sub>Yb1

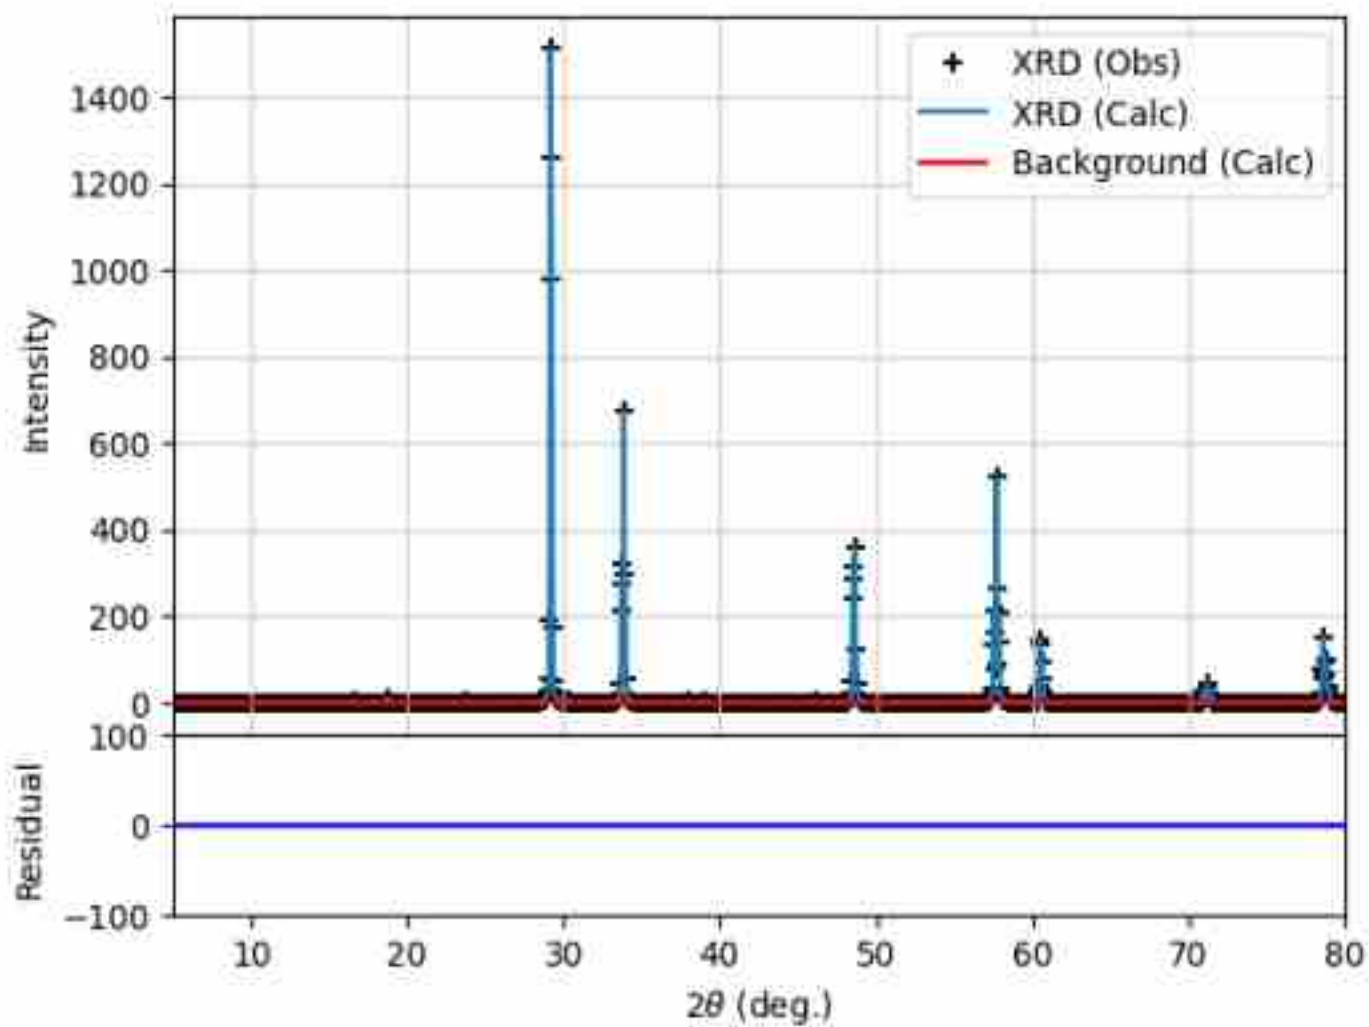

| RMSE before RR | Rwp     | RMSE after RR |
|----------------|---------|---------------|
| 0.001          | 0.00394 | 0.00031       |

# Li1Ag2Pd1

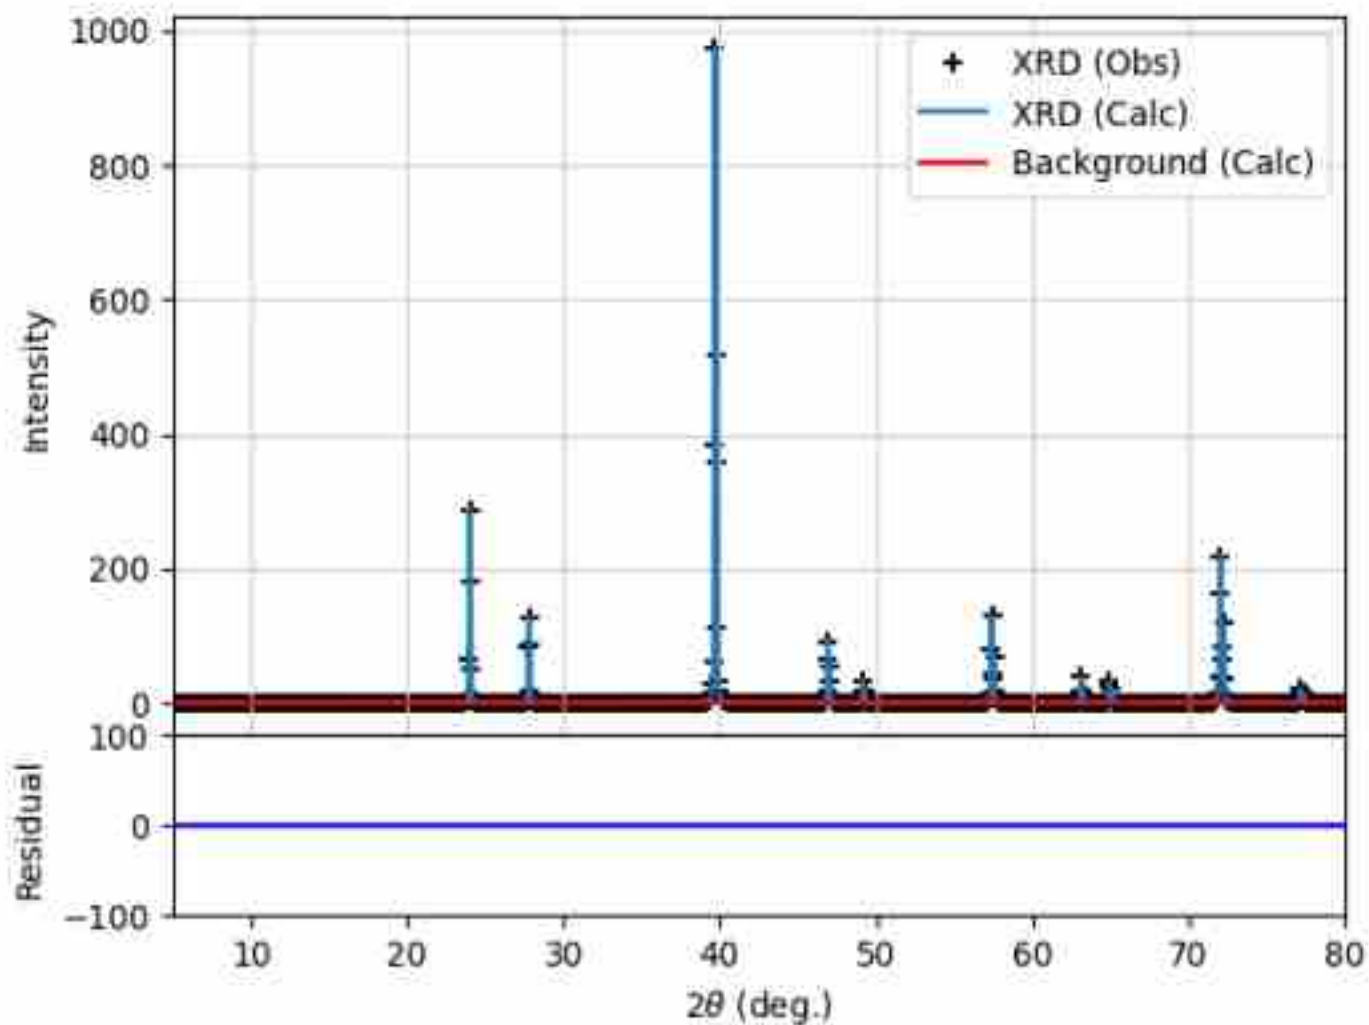

| RMSE before RR | Rwp    | RMSE after RR |
|----------------|--------|---------------|
| 0.001          | 0.0011 | 0.00079       |

# Li1Al1Ni2

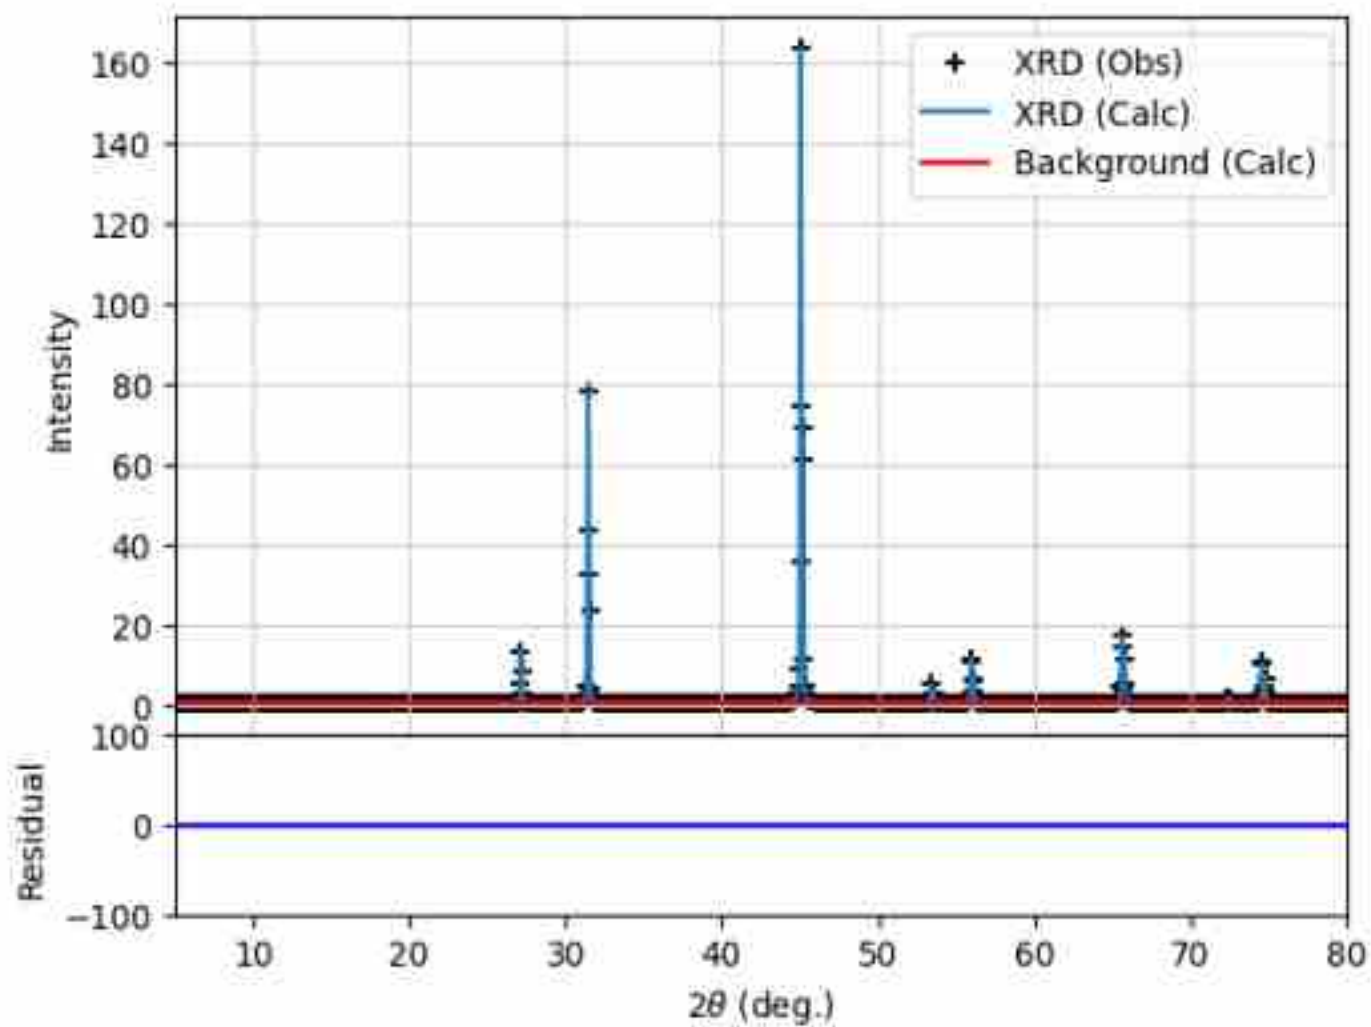

| RMSE before RR | Rwp     | RMSE after RR |
|----------------|---------|---------------|
| 0.001          | 0.00019 | 0.00027       |

# Li1Al2Os1

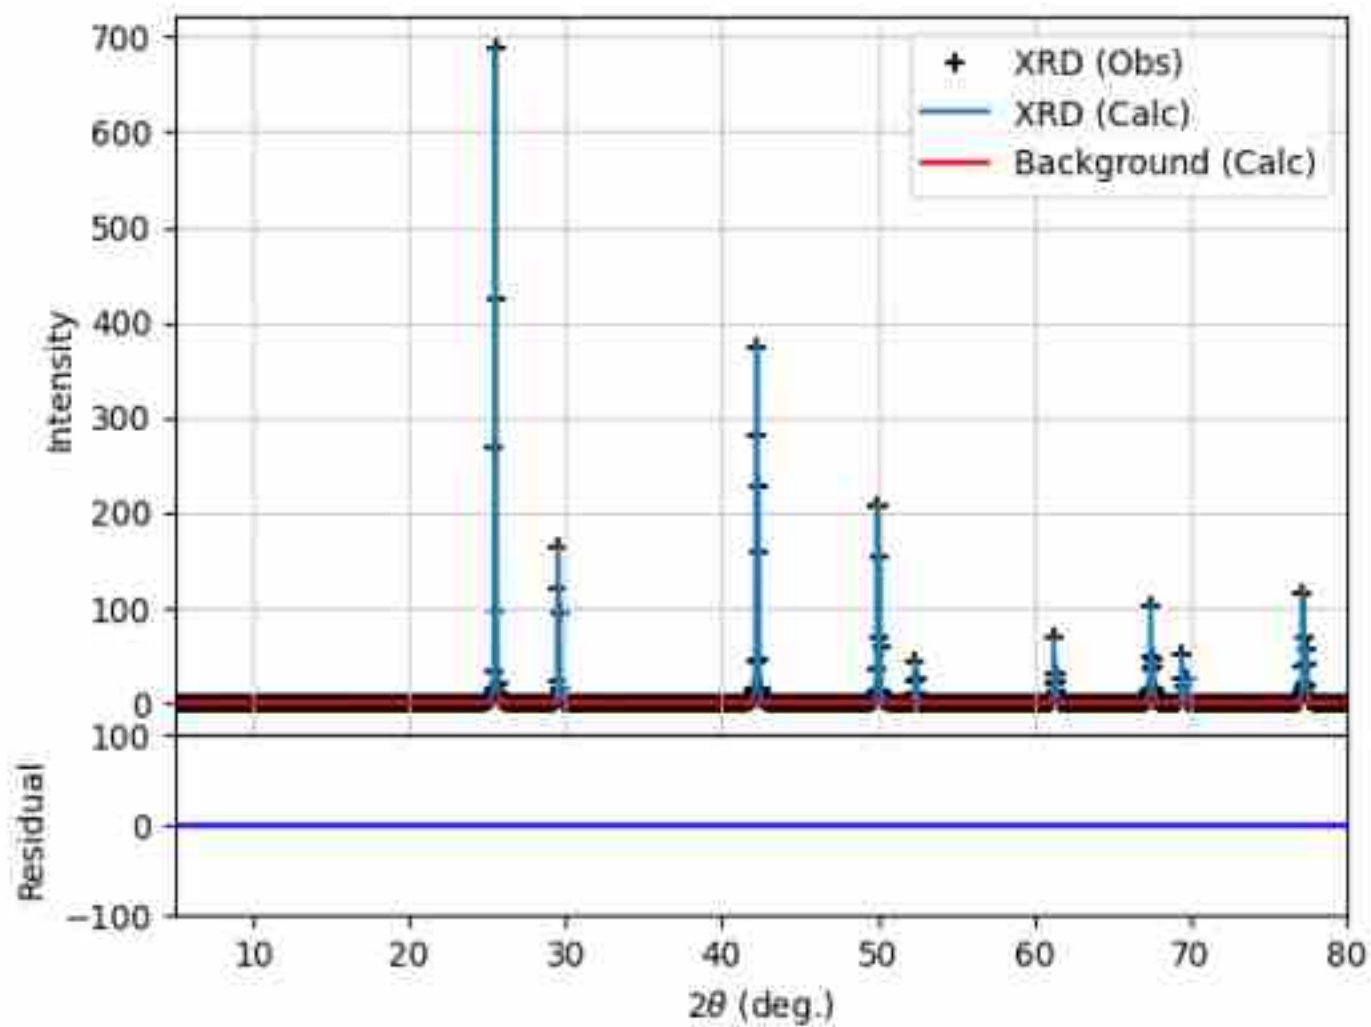

| RMSE before RR | Rwp     | RMSE after RR |
|----------------|---------|---------------|
| 0.001          | 0.00696 | 0.00135       |

# Li1Au1

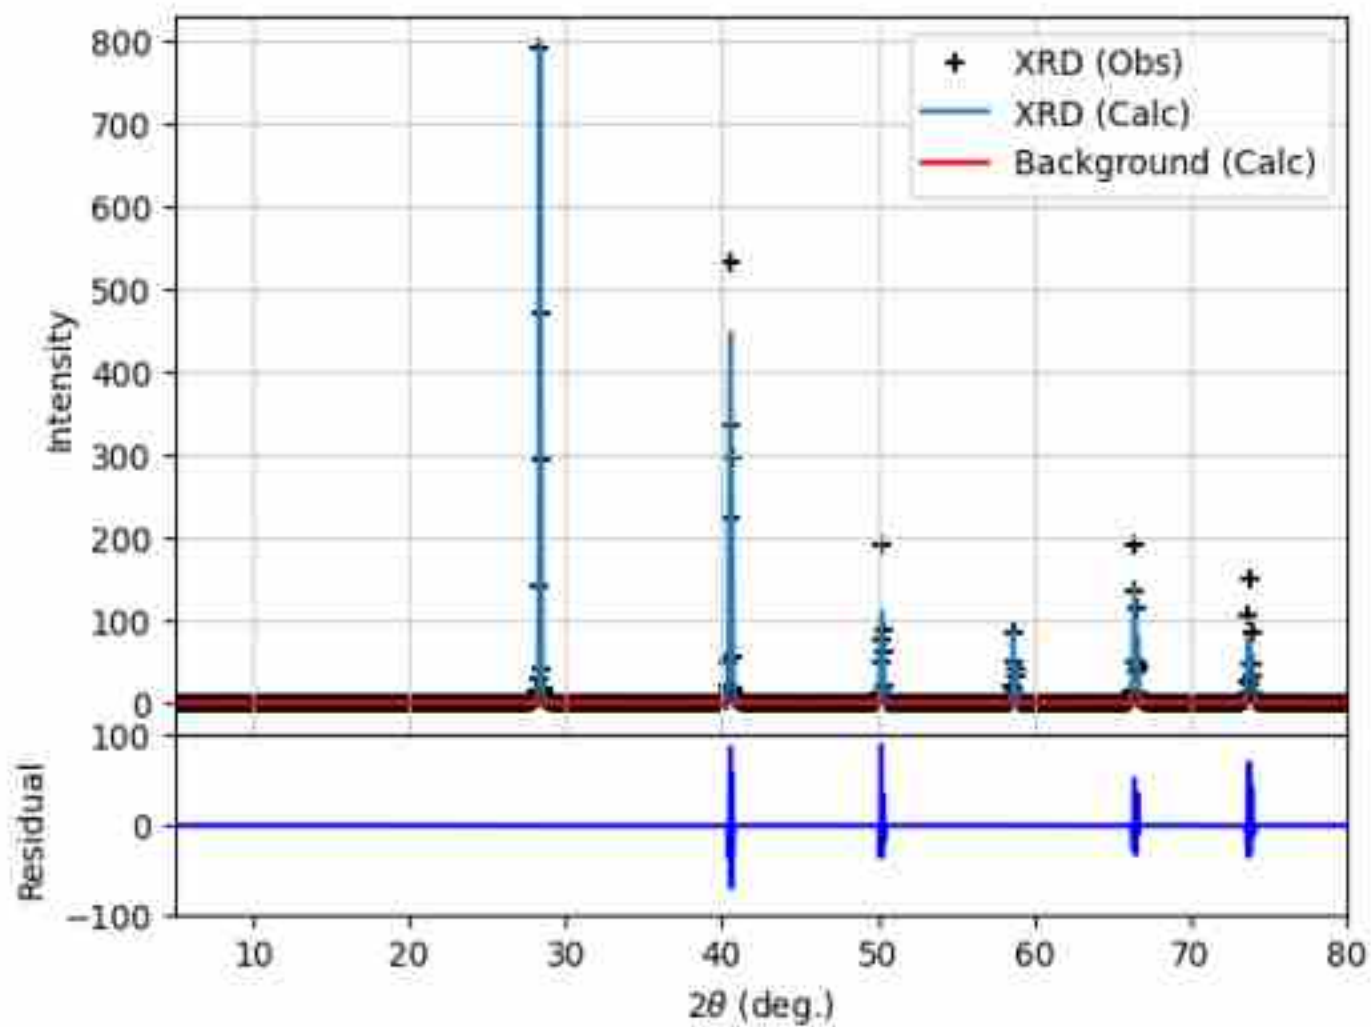

| RMSE before RR | Rwp      | RMSE after RR |
|----------------|----------|---------------|
| 0.001          | 26.63397 | 0.00078       |

# Li1Be1Au2

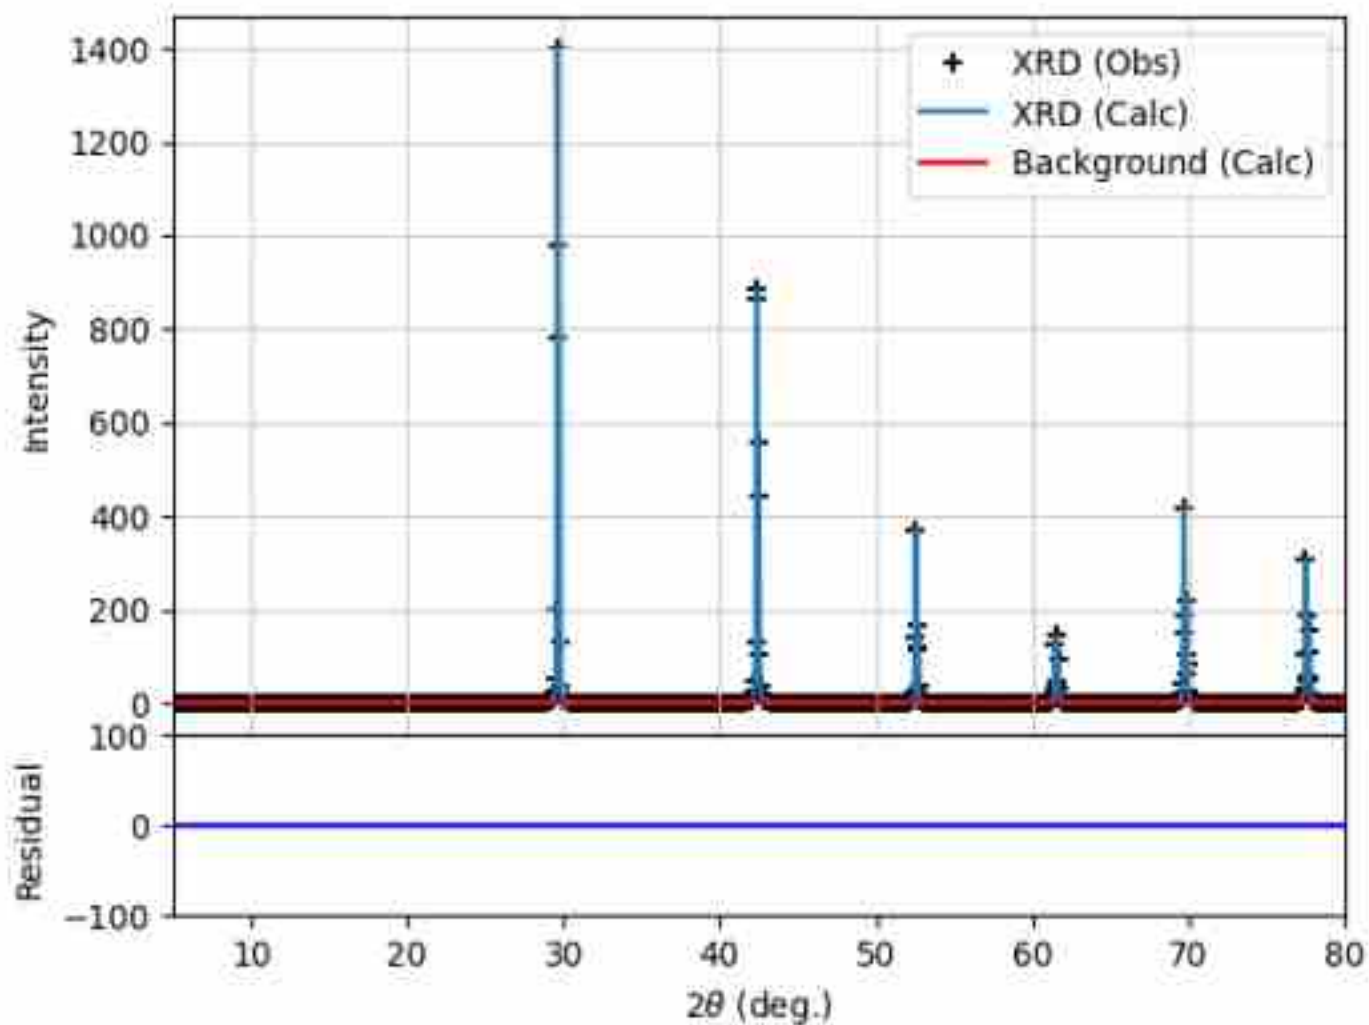

| RMSE before RR | Rwp     | RMSE after RR |
|----------------|---------|---------------|
| 0.001          | 0.00584 | 0.00415       |

# Li1Ca2Ga1

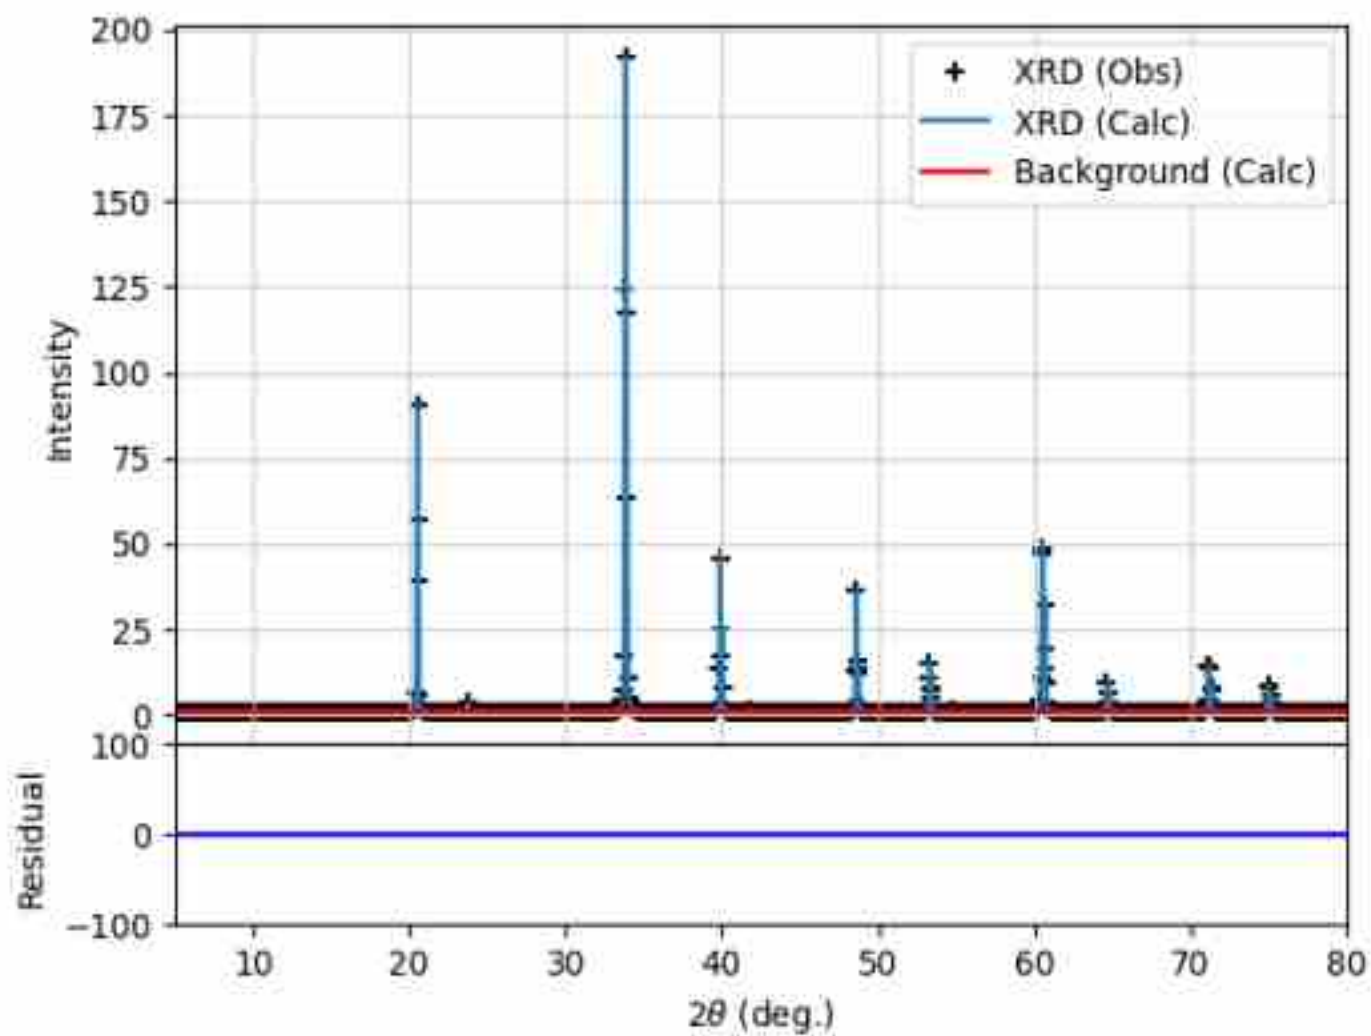

| RMSE before RR | Rwp     | RMSE after RR |
|----------------|---------|---------------|
| 0.001          | 0.00226 | 0.00084       |

# Li1Ca2Ge1

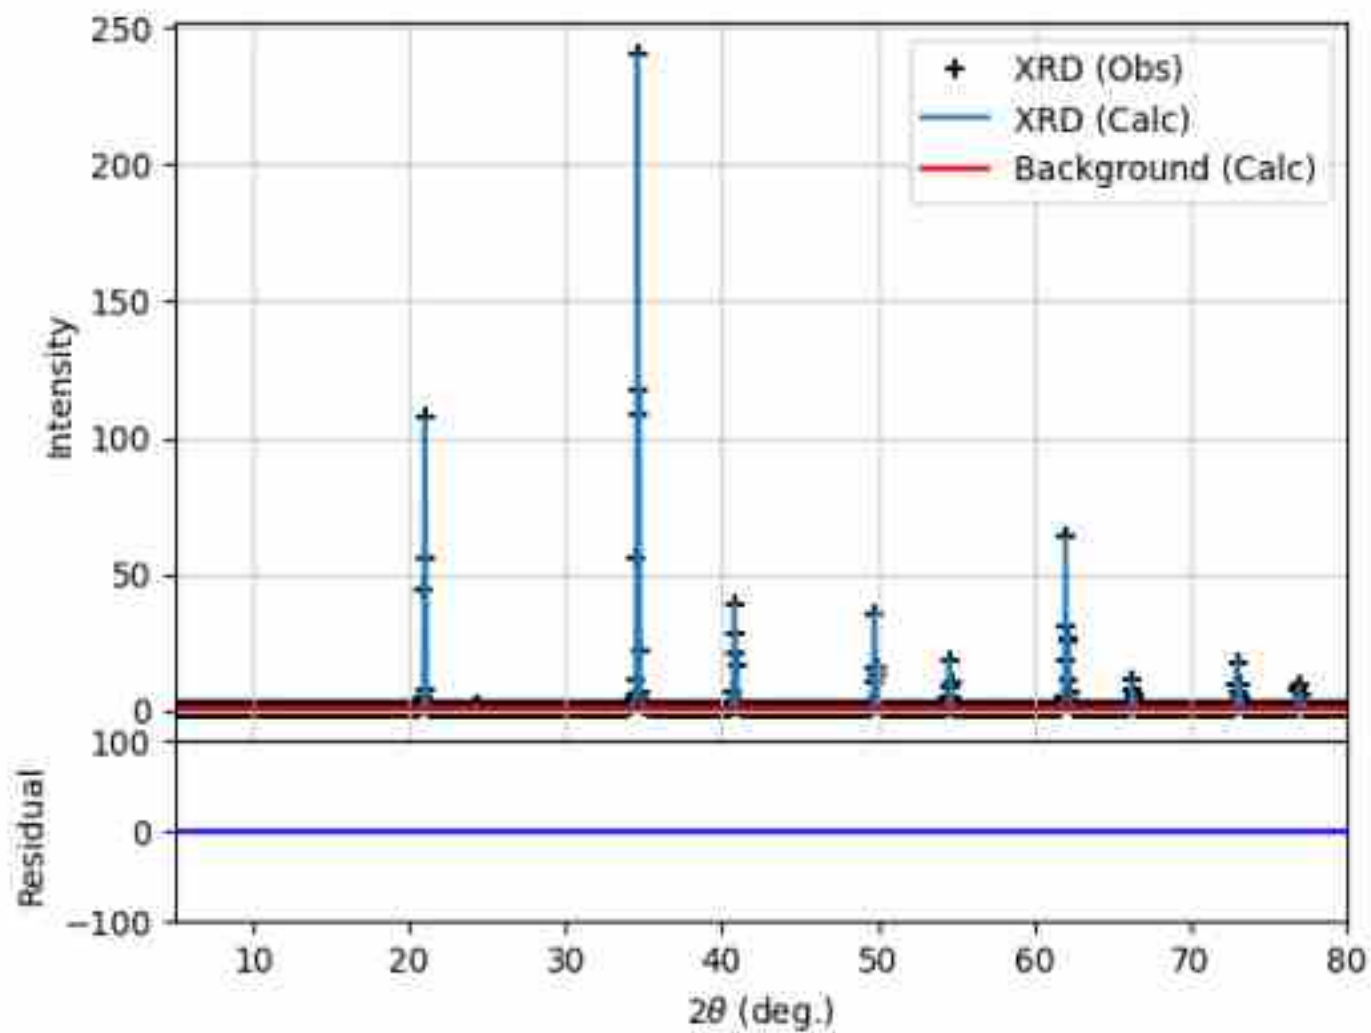

| RMSE before RR | Rwp     | RMSE after RR |
|----------------|---------|---------------|
| 0.001          | 0.00662 | 0.00121       |



# Li1Cd1Ag2

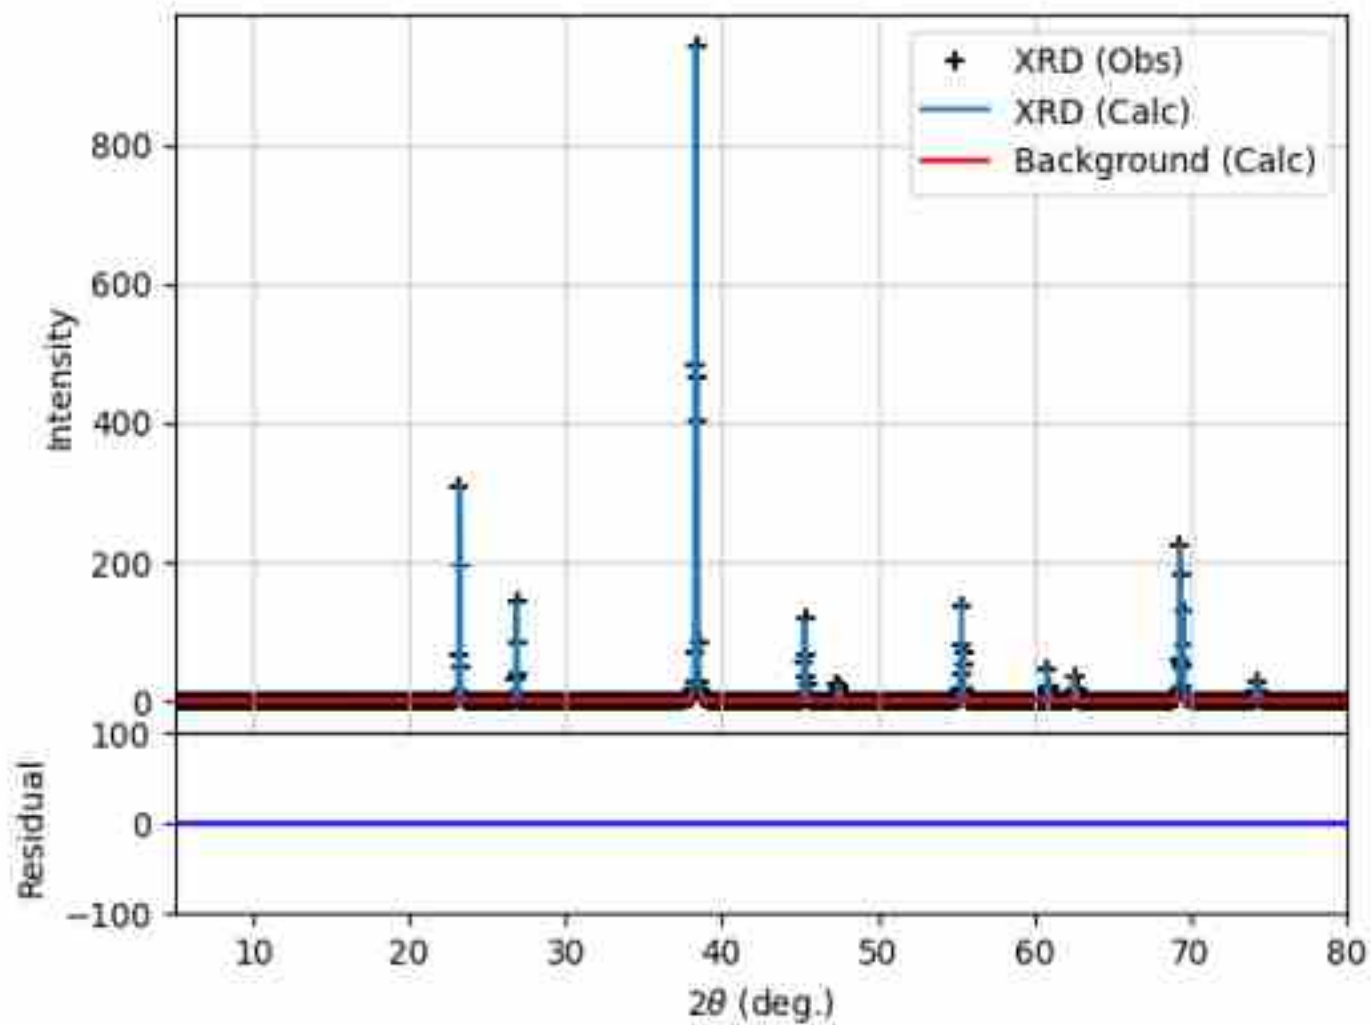

| RMSE before RR | Rwp     | RMSE after RR |
|----------------|---------|---------------|
| 0.001          | 0.00354 | 0.002         |

# Li1Cd2Pt1

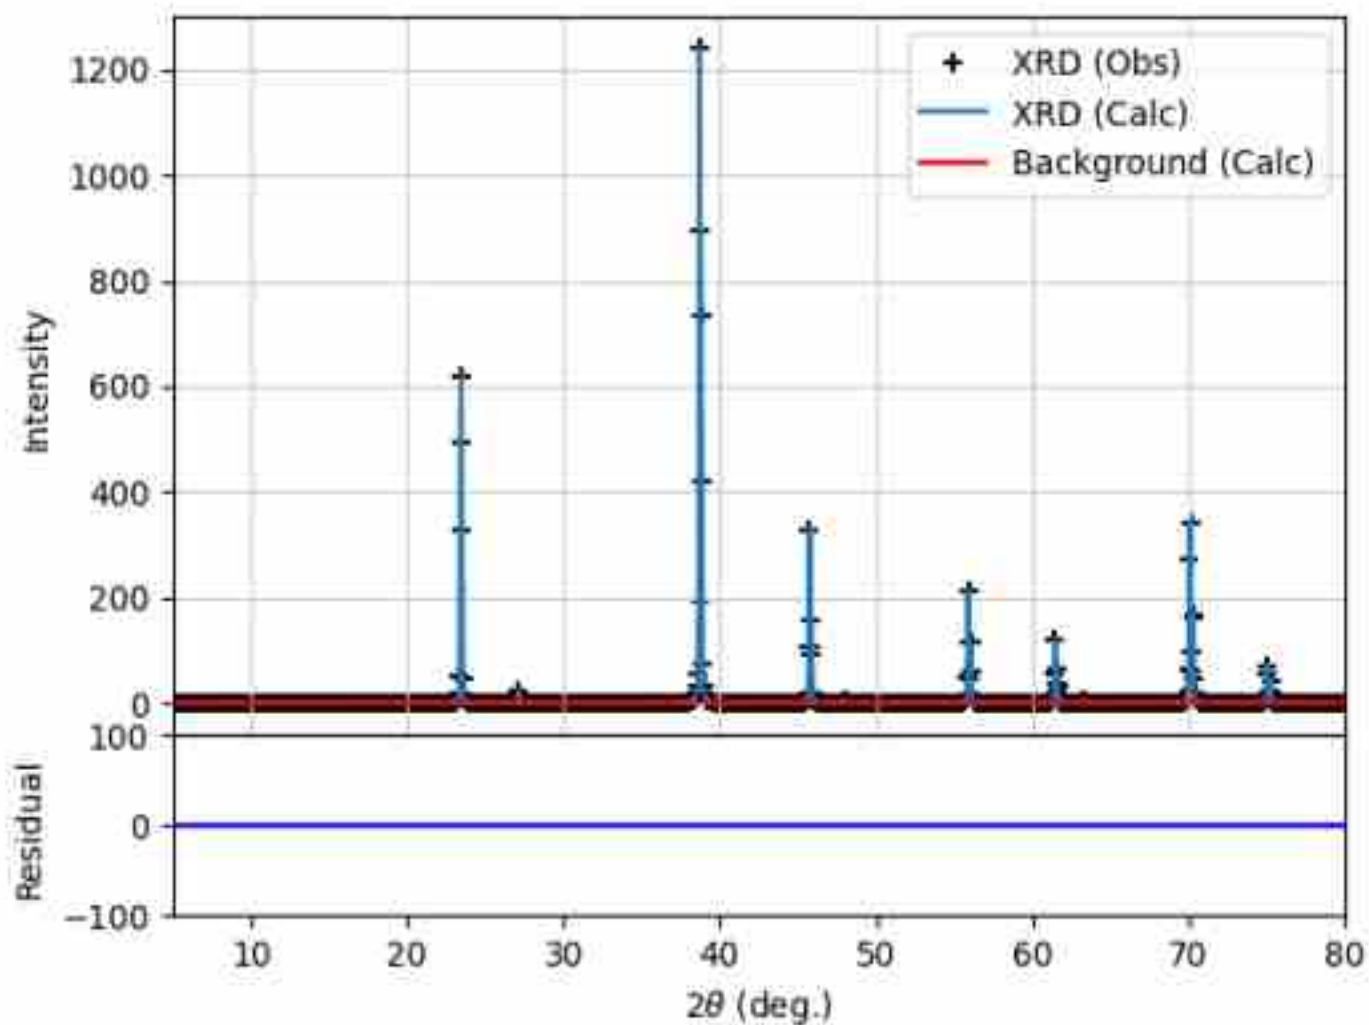

| RMSE before RR | Rwp     | RMSE after RR |
|----------------|---------|---------------|
| 0.001          | 0.01973 | 0.00305       |

# Li1C11

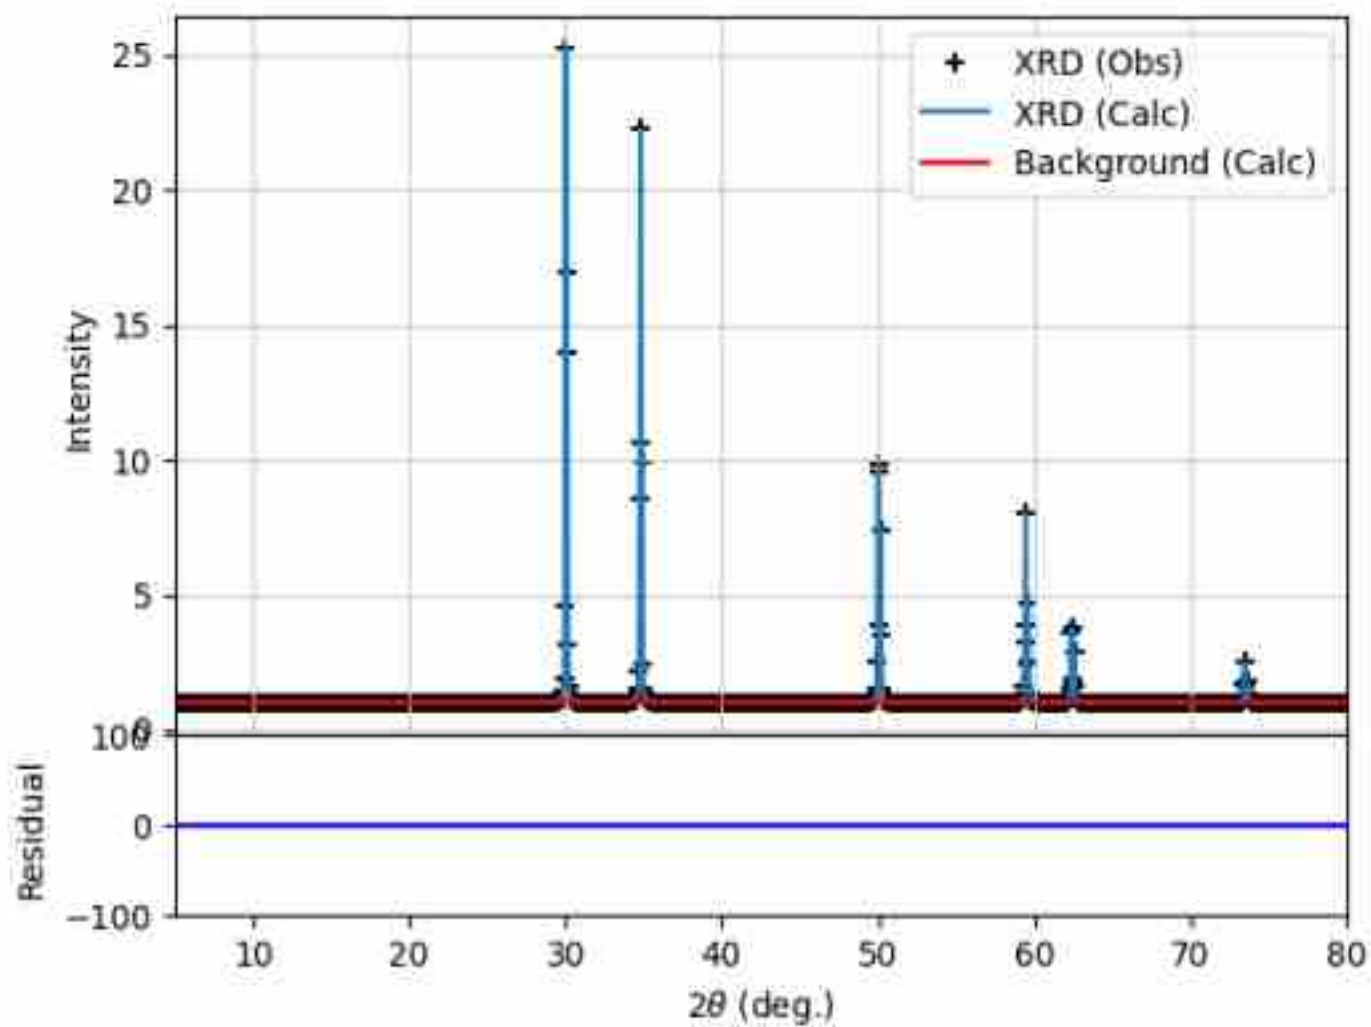

| RMSE before RR | Rwp     | RMSE after RR |
|----------------|---------|---------------|
| 0.001          | 0.00098 | 0.0013        |

# Li1Co1O2

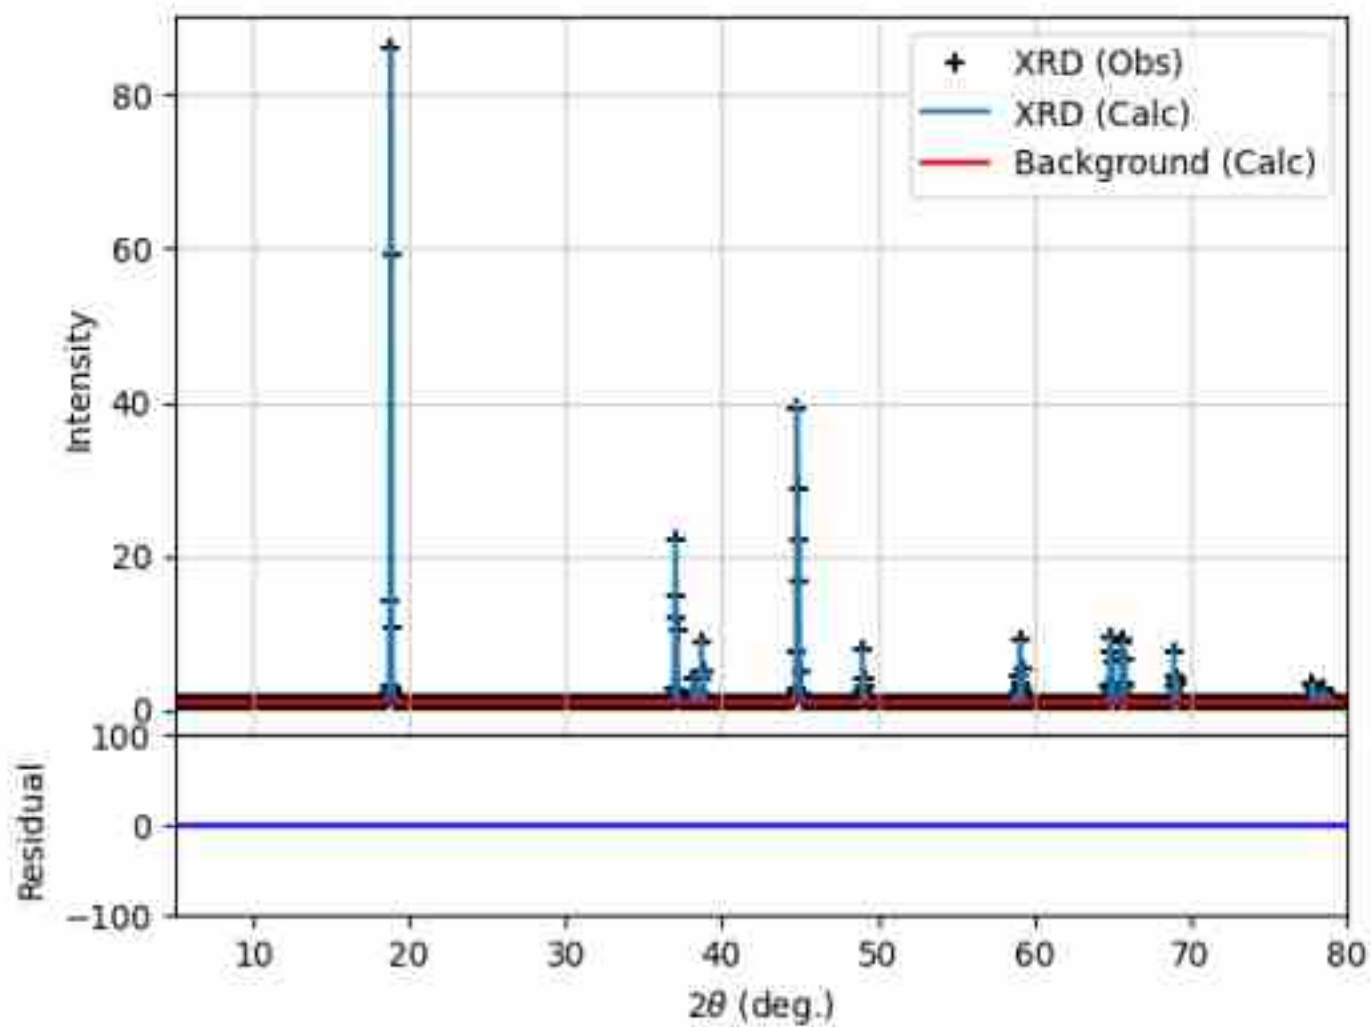

| RMSE before RR | Rwp     | RMSE after RR |
|----------------|---------|---------------|
| 0.01           | 0.00339 | 0.00257       |

# Li1Co2Si1

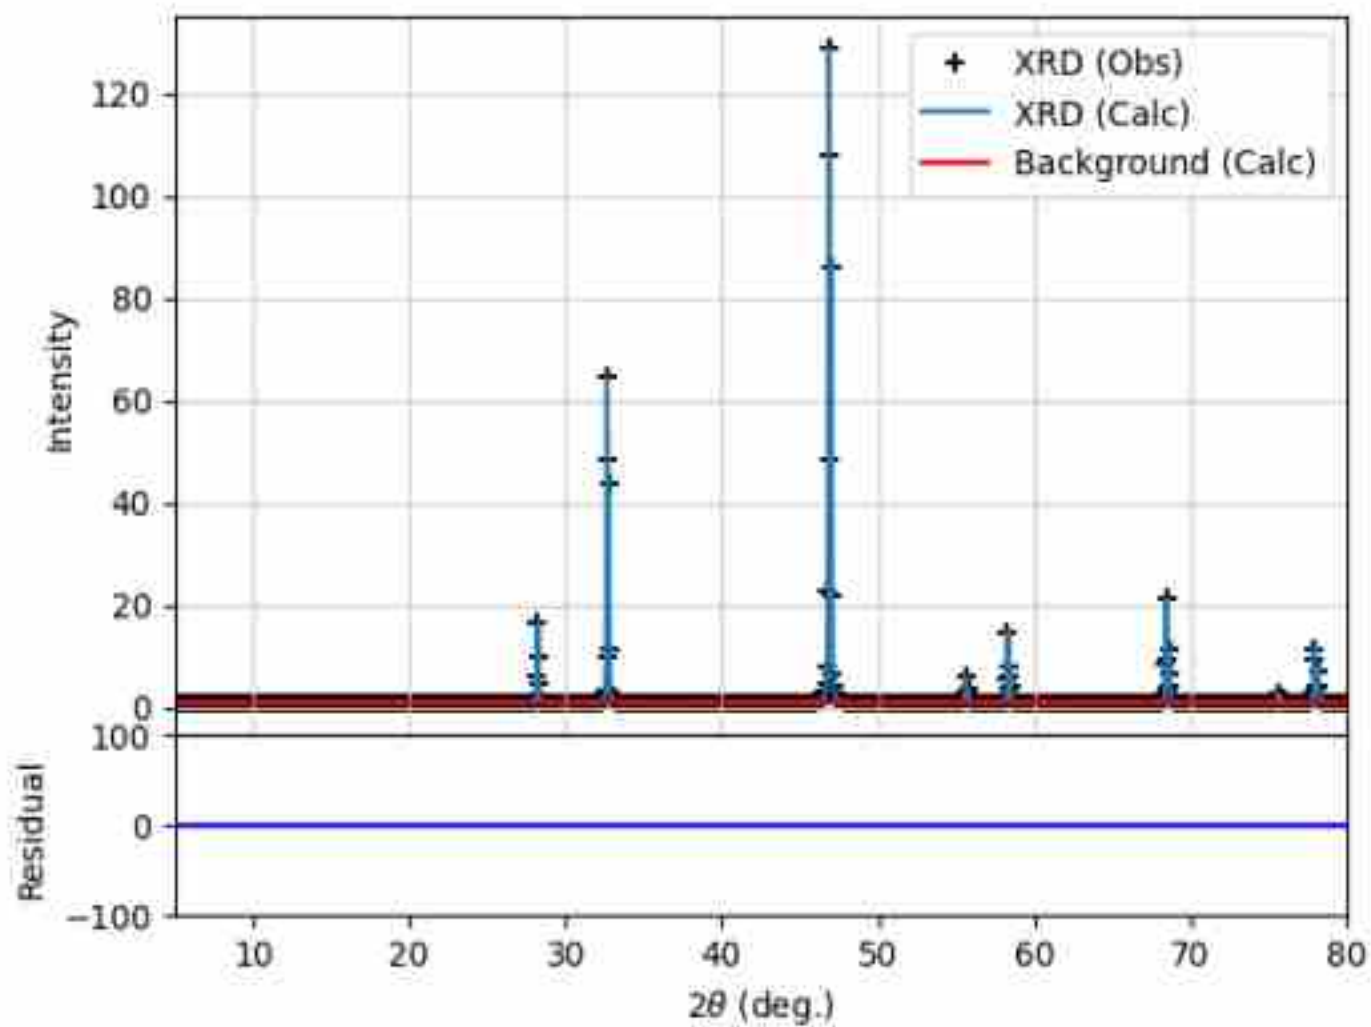

| RMSE before RR | Rwp   | RMSE after RR |
|----------------|-------|---------------|
| 0.001          | 0.002 | 0.00085       |

# Li1Cu1Au2

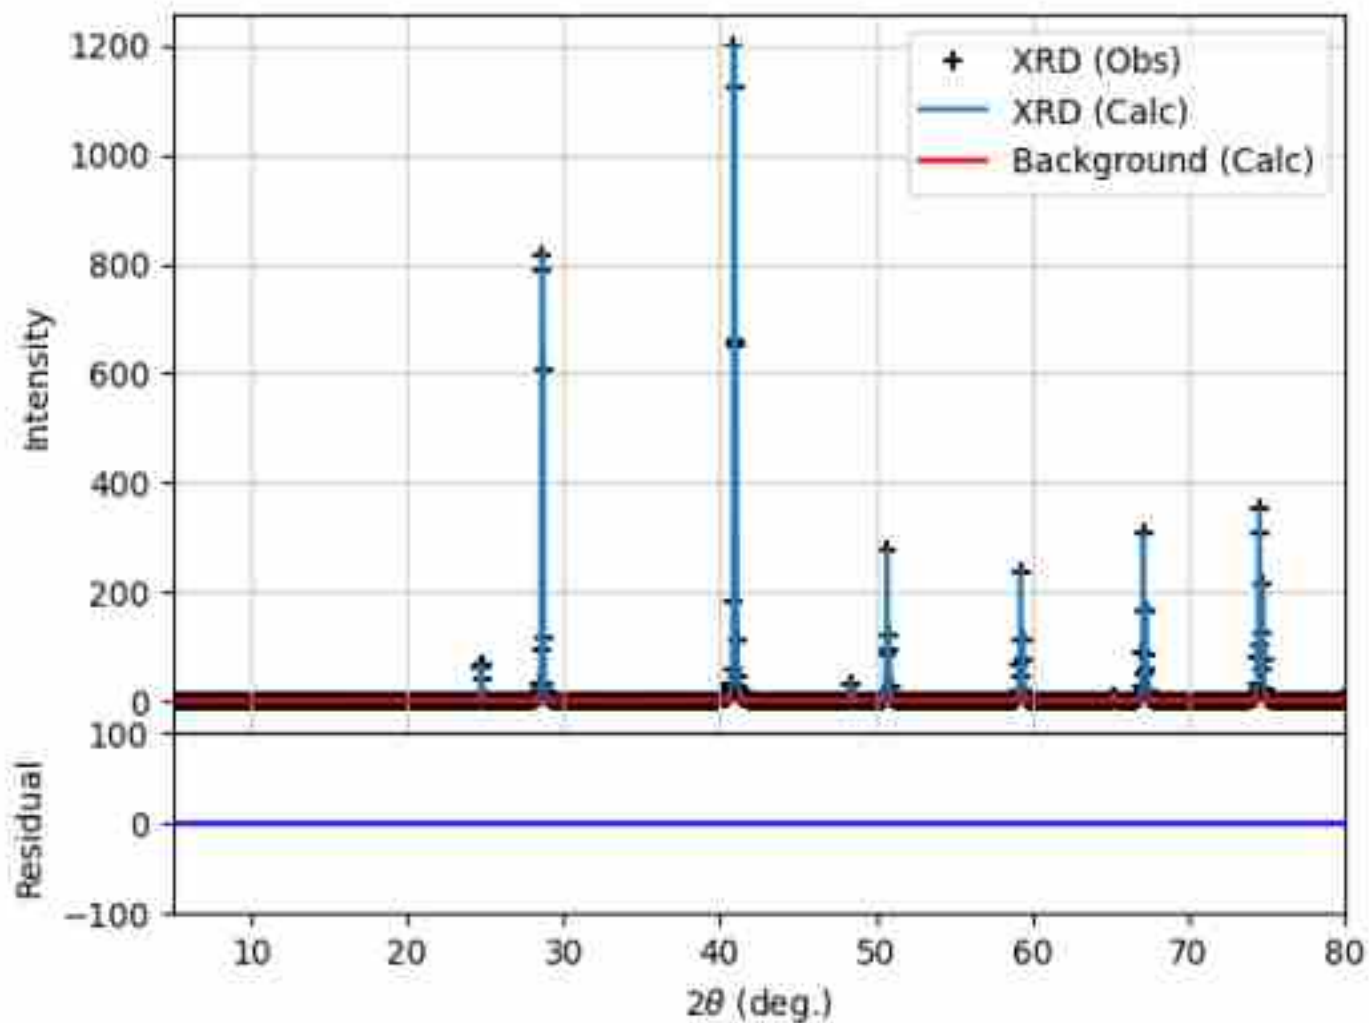

| RMSE before RR | Rwp     | RMSE after RR |
|----------------|---------|---------------|
| 0.001          | 0.00376 | 0.00348       |

# Li1Dy2Tc1

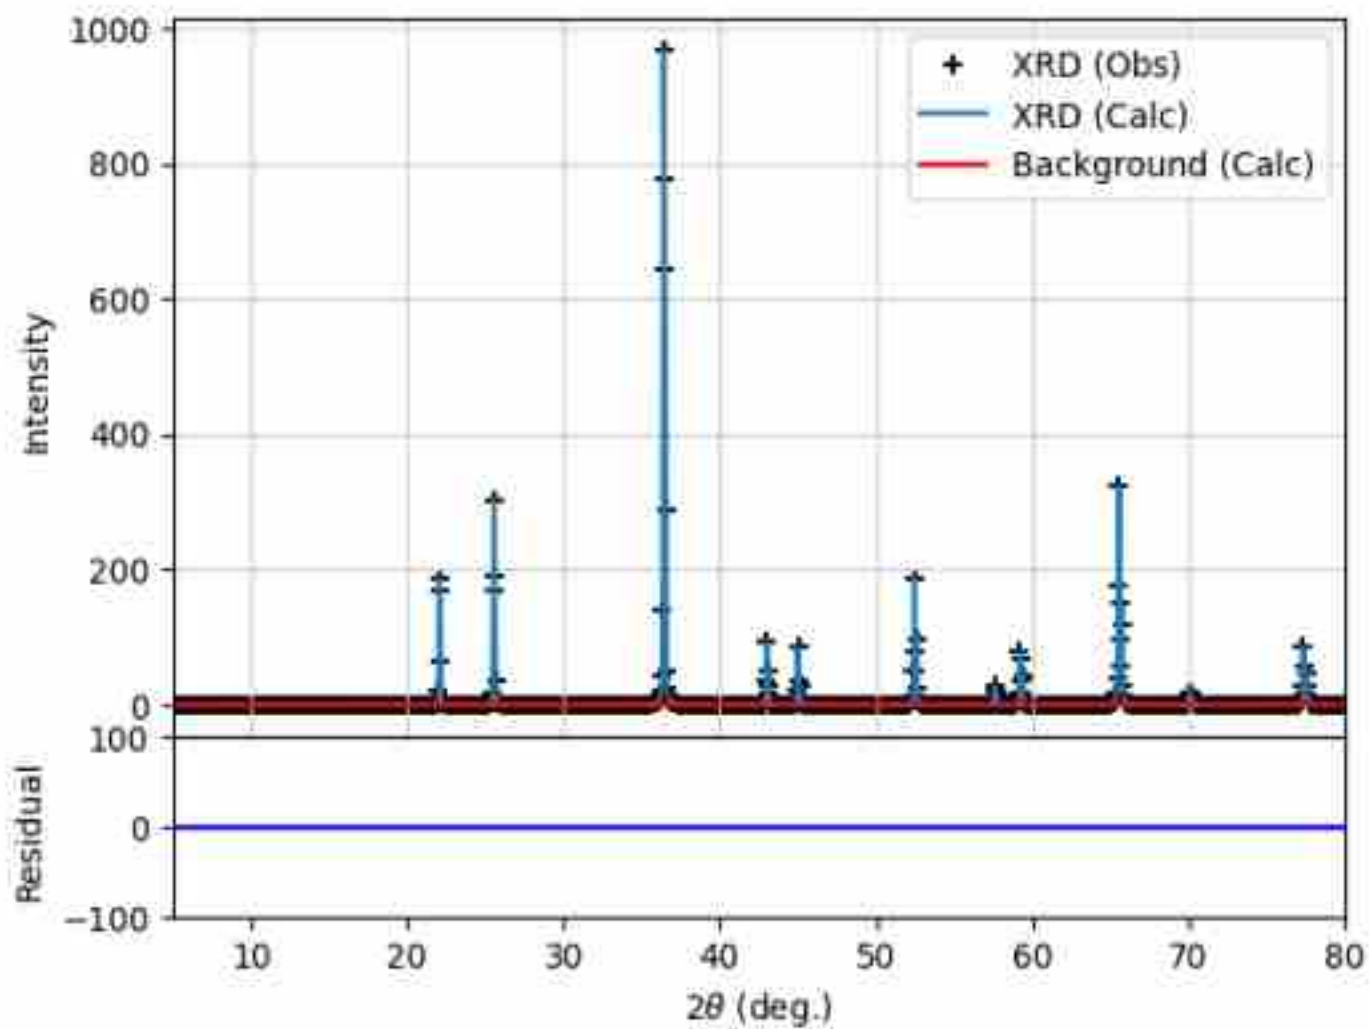

| RMSE before RR | Rwp     | RMSE after RR |
|----------------|---------|---------------|
| 0.001          | 0.00324 | 0.0035        |

# Li1Ga1Rh2

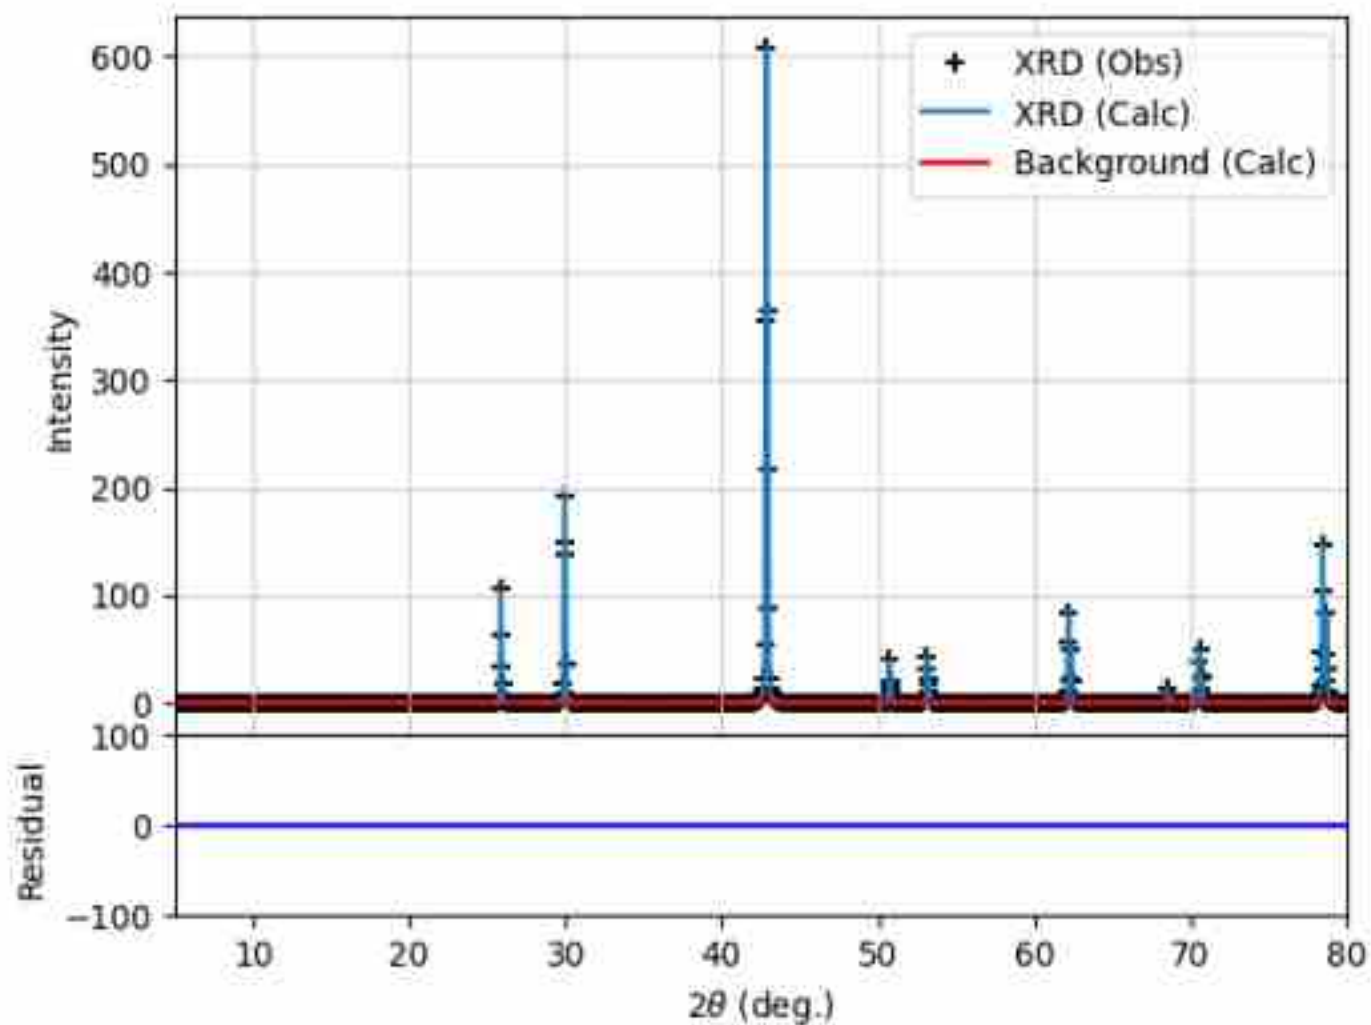

| RMSE before RR | Rwp     | RMSE after RR |
|----------------|---------|---------------|
| 0.001          | 0.00293 | 0.00091       |



# Li1Ga2Ir1

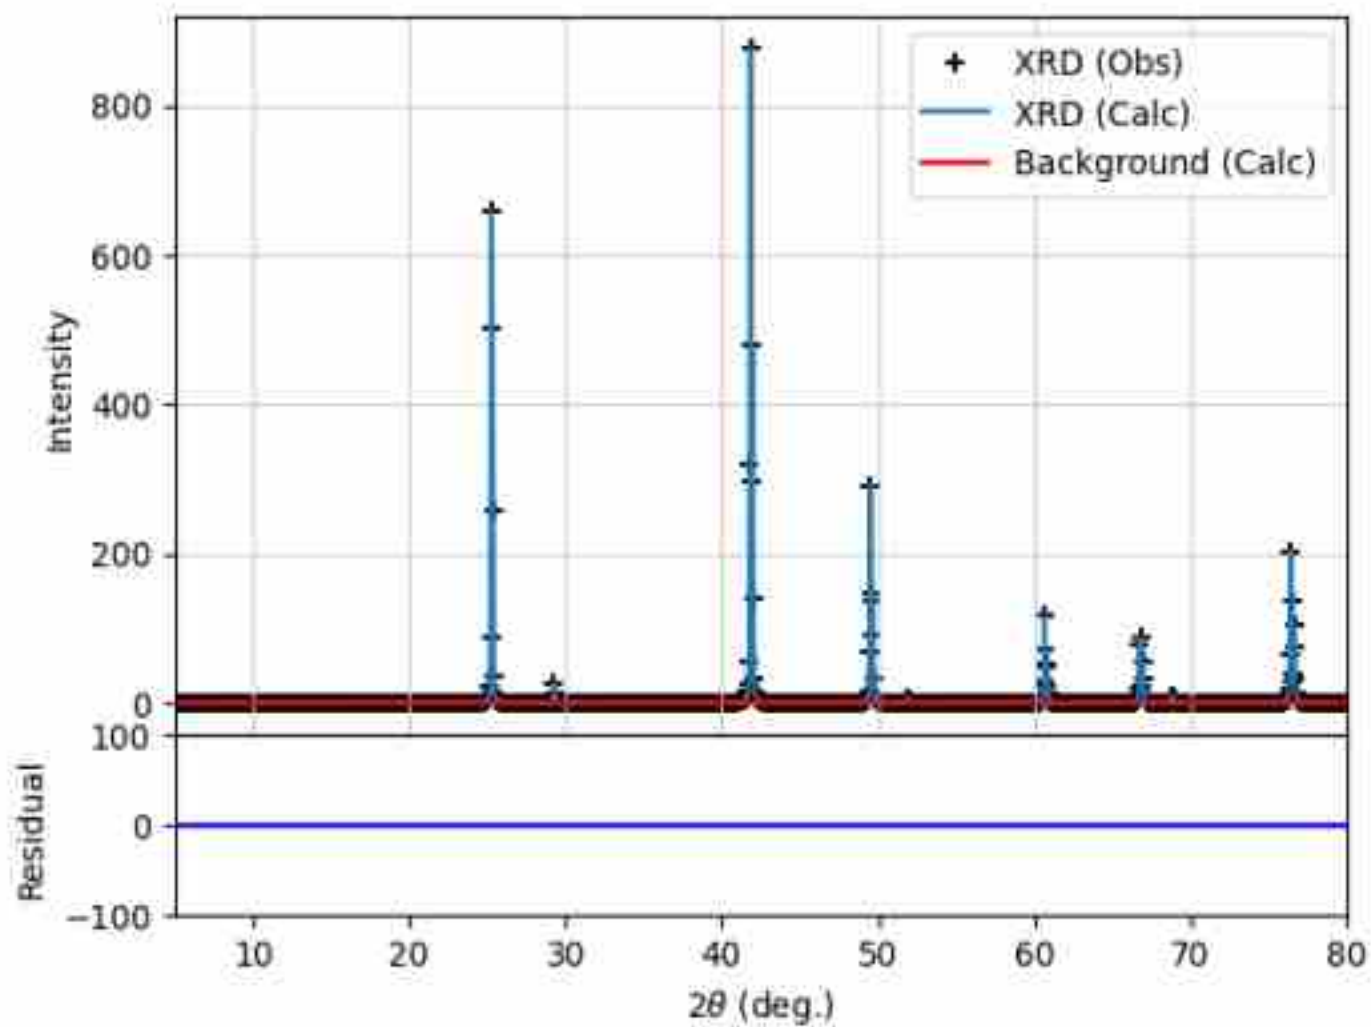

| RMSE before RR | Rwp     | RMSE after RR |
|----------------|---------|---------------|
| 0.001          | 0.00238 | 0.00073       |

# Li1Ga3

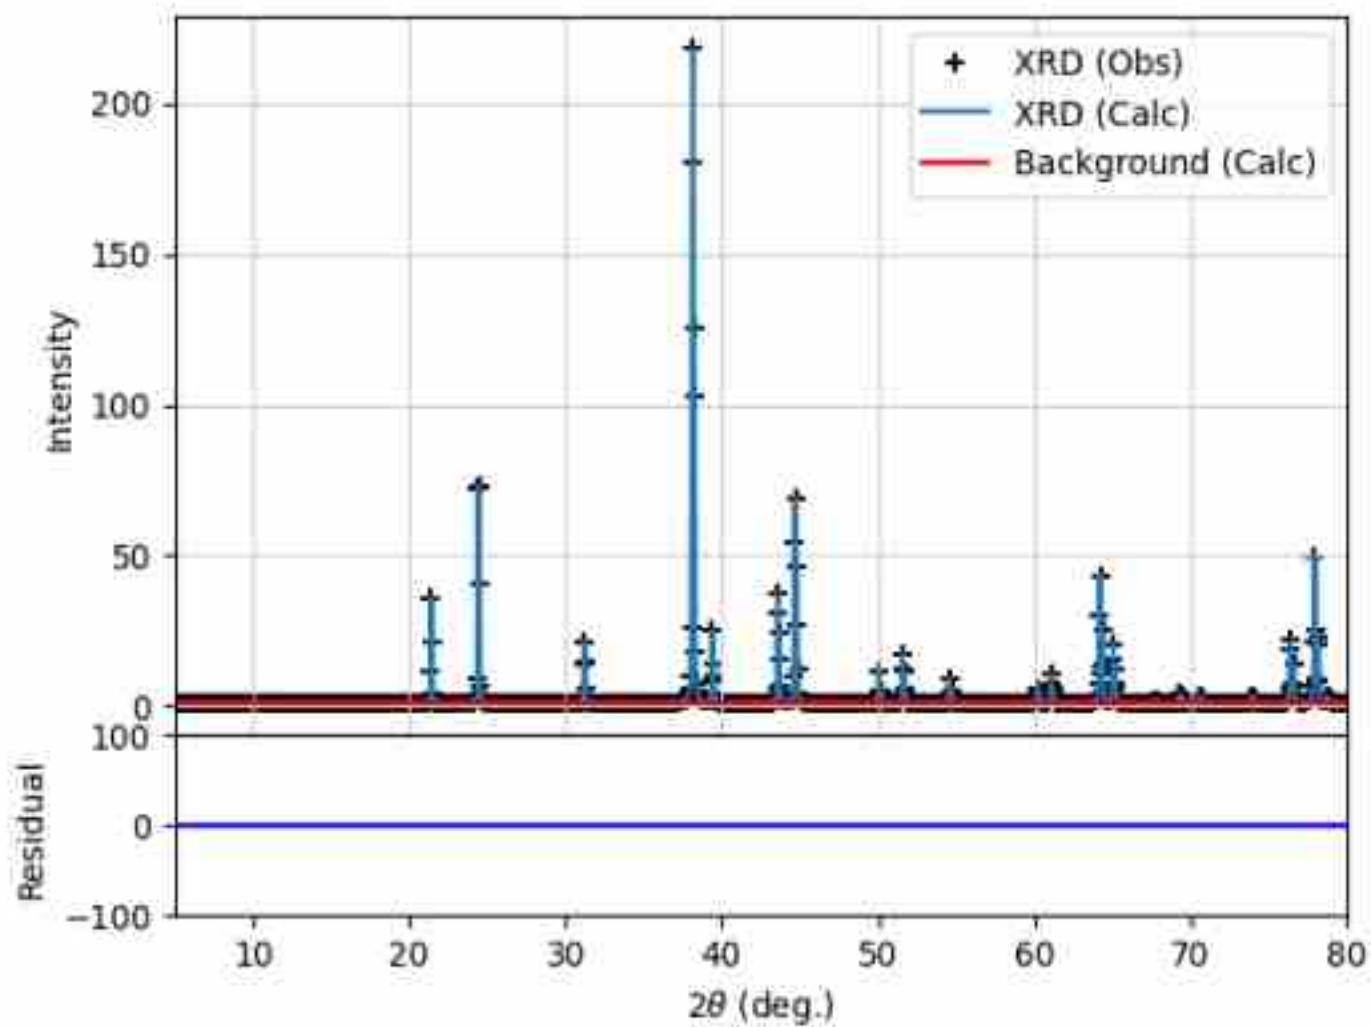

| RMSE before RR | Rwp     | RMSE after RR |
|----------------|---------|---------------|
| 0.001          | 0.00308 | 0.00092       |

# Li1Gd2Tl1

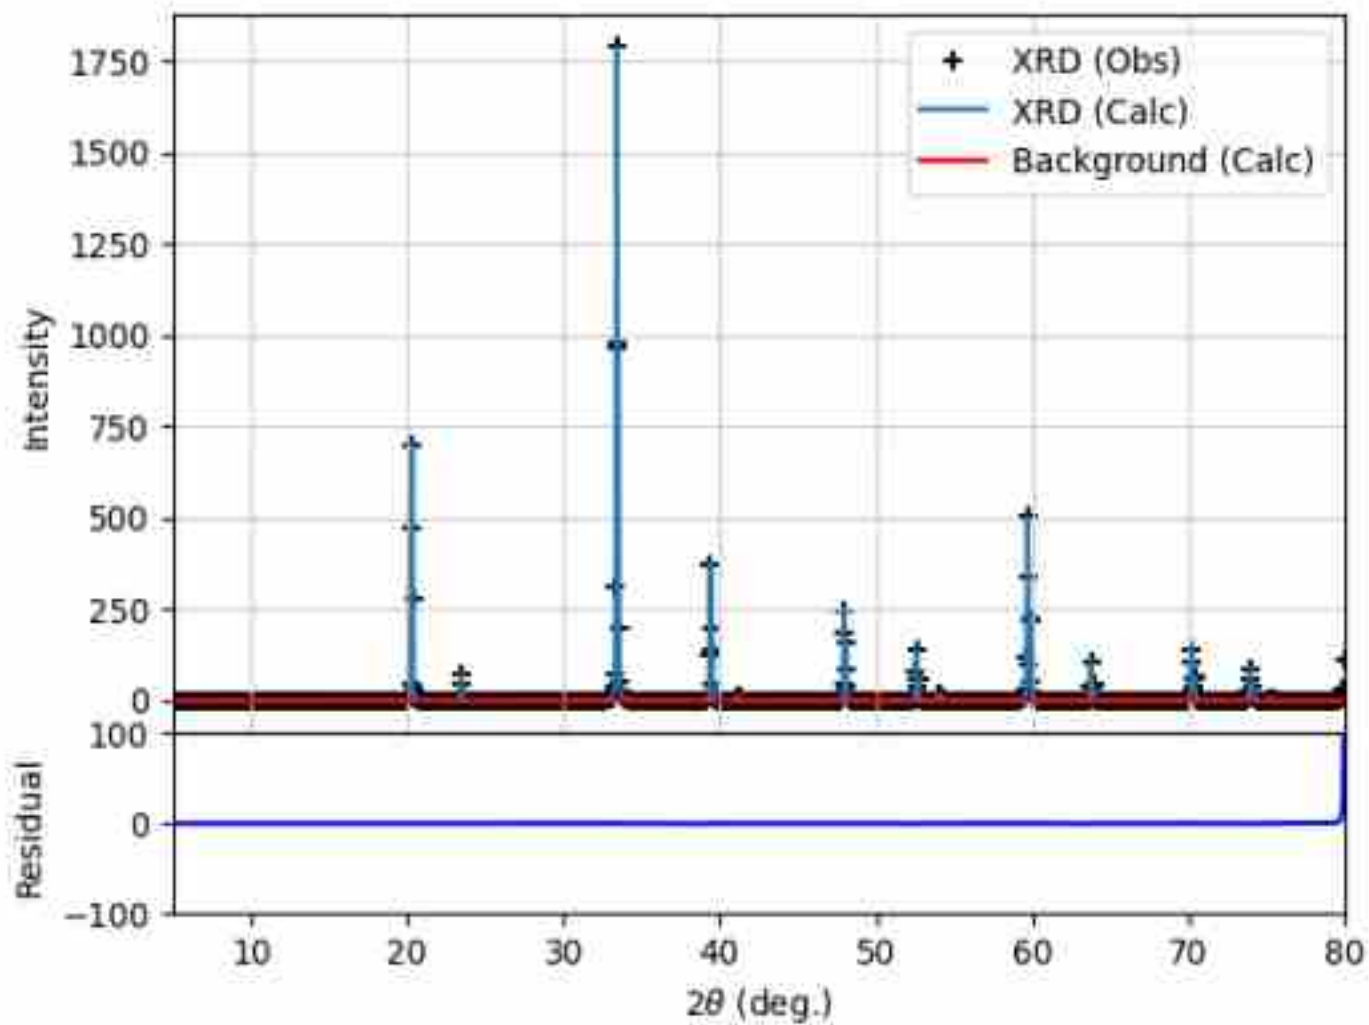

| RMSE before RR | Rwp      | RMSE after RR |
|----------------|----------|---------------|
| 0.001          | 13.87975 | None          |

# Li1Ge1Au2

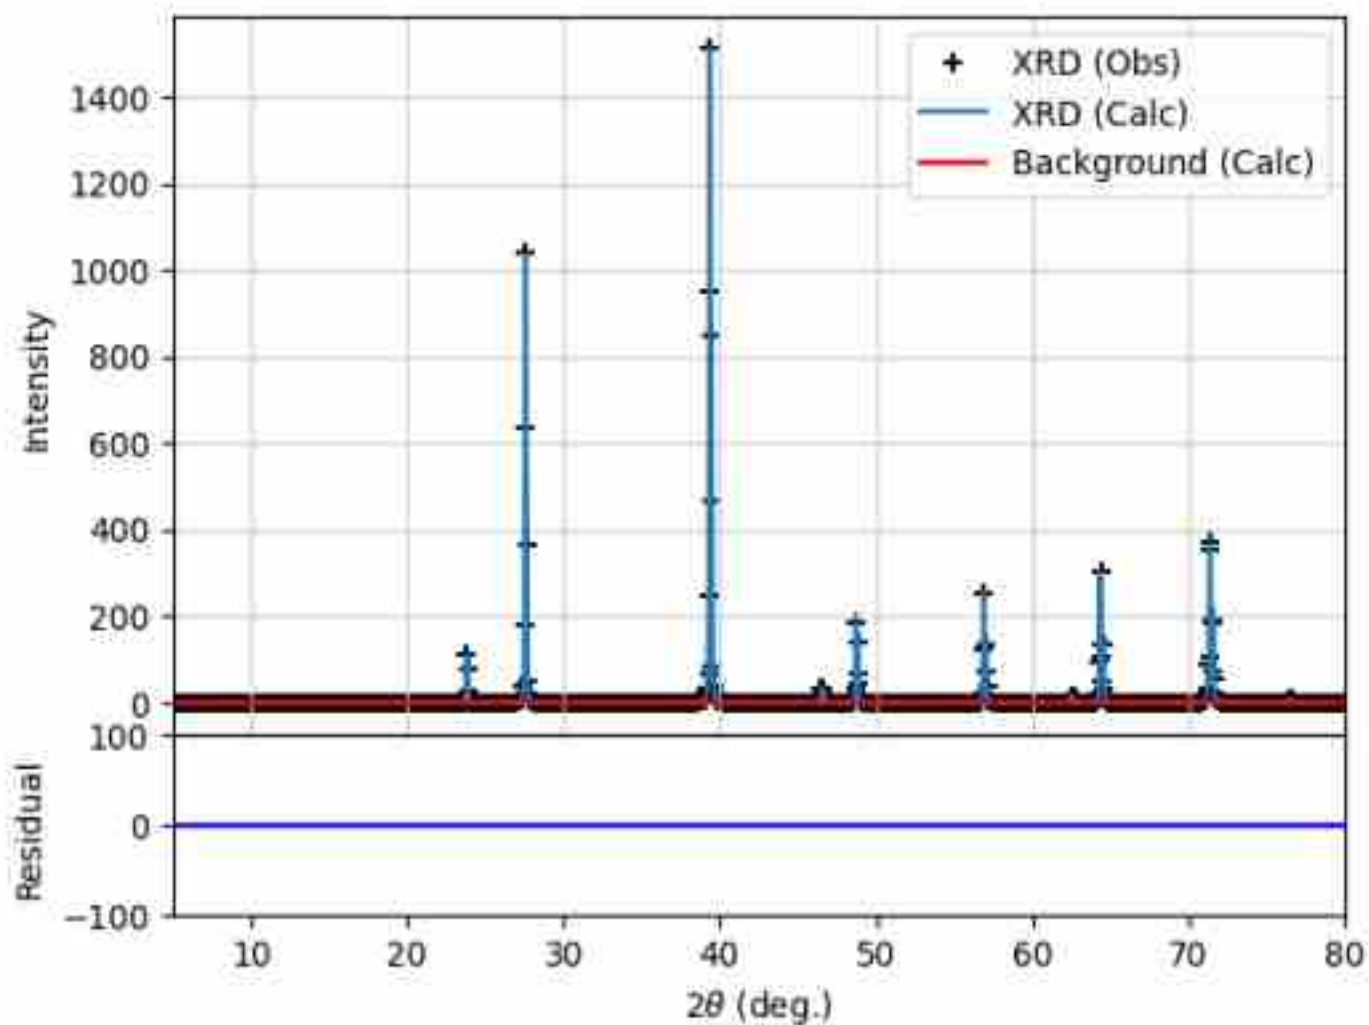

| RMSE before RR | Rwp     | RMSE after RR |
|----------------|---------|---------------|
| 0.001          | 0.00492 | 0.00291       |

# Li1H1

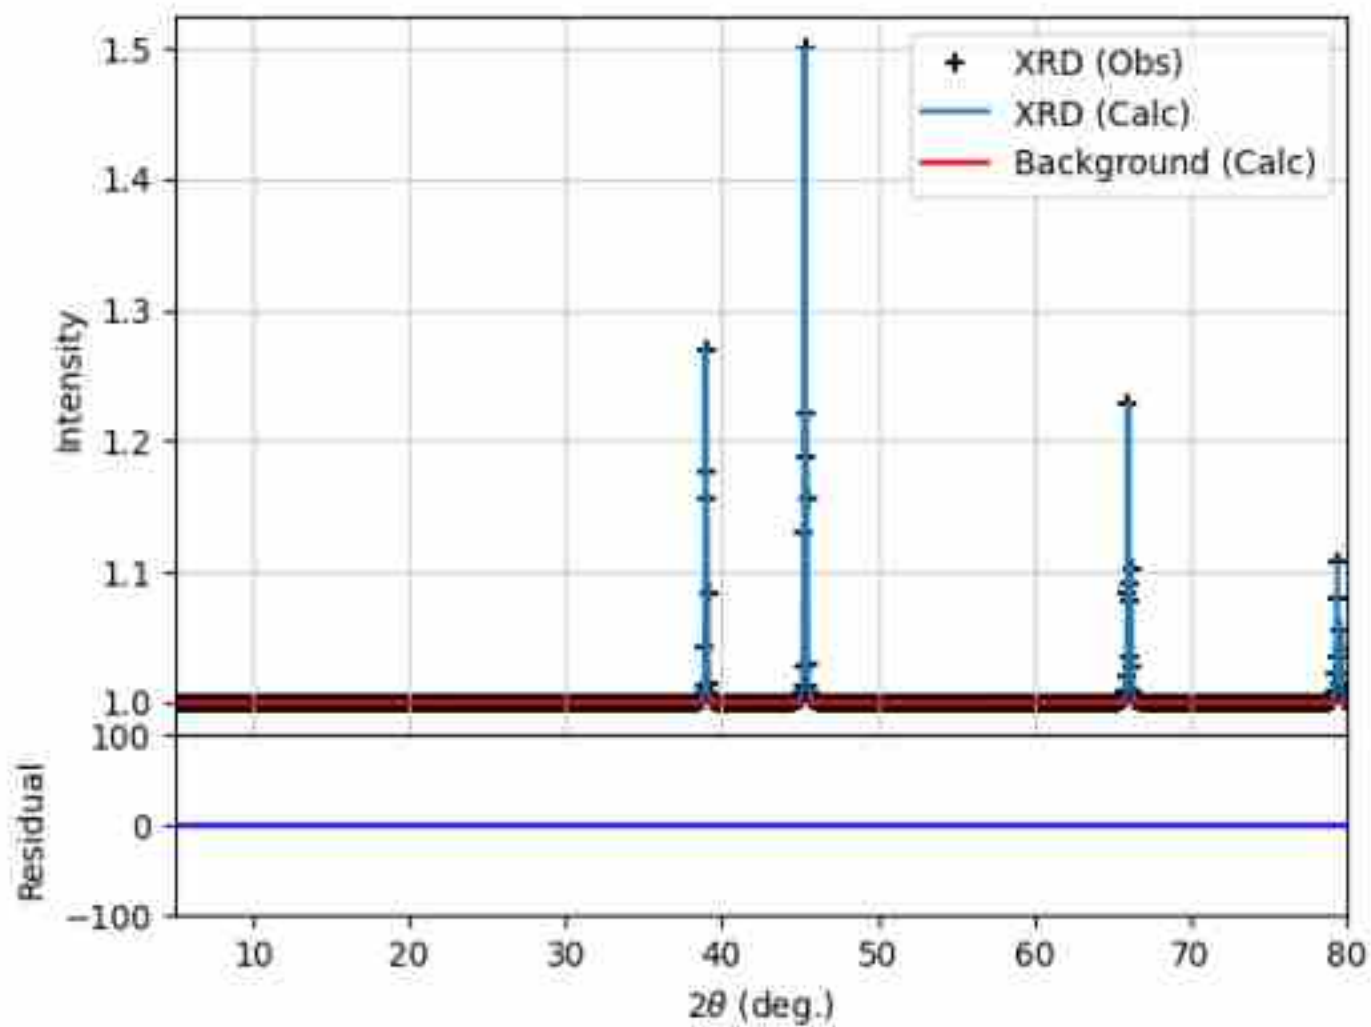

| RMSE before RR | Rwp   | RMSE after RR |
|----------------|-------|---------------|
| 0.001          | 8e-05 | 0.00074       |

# Li1Hg1

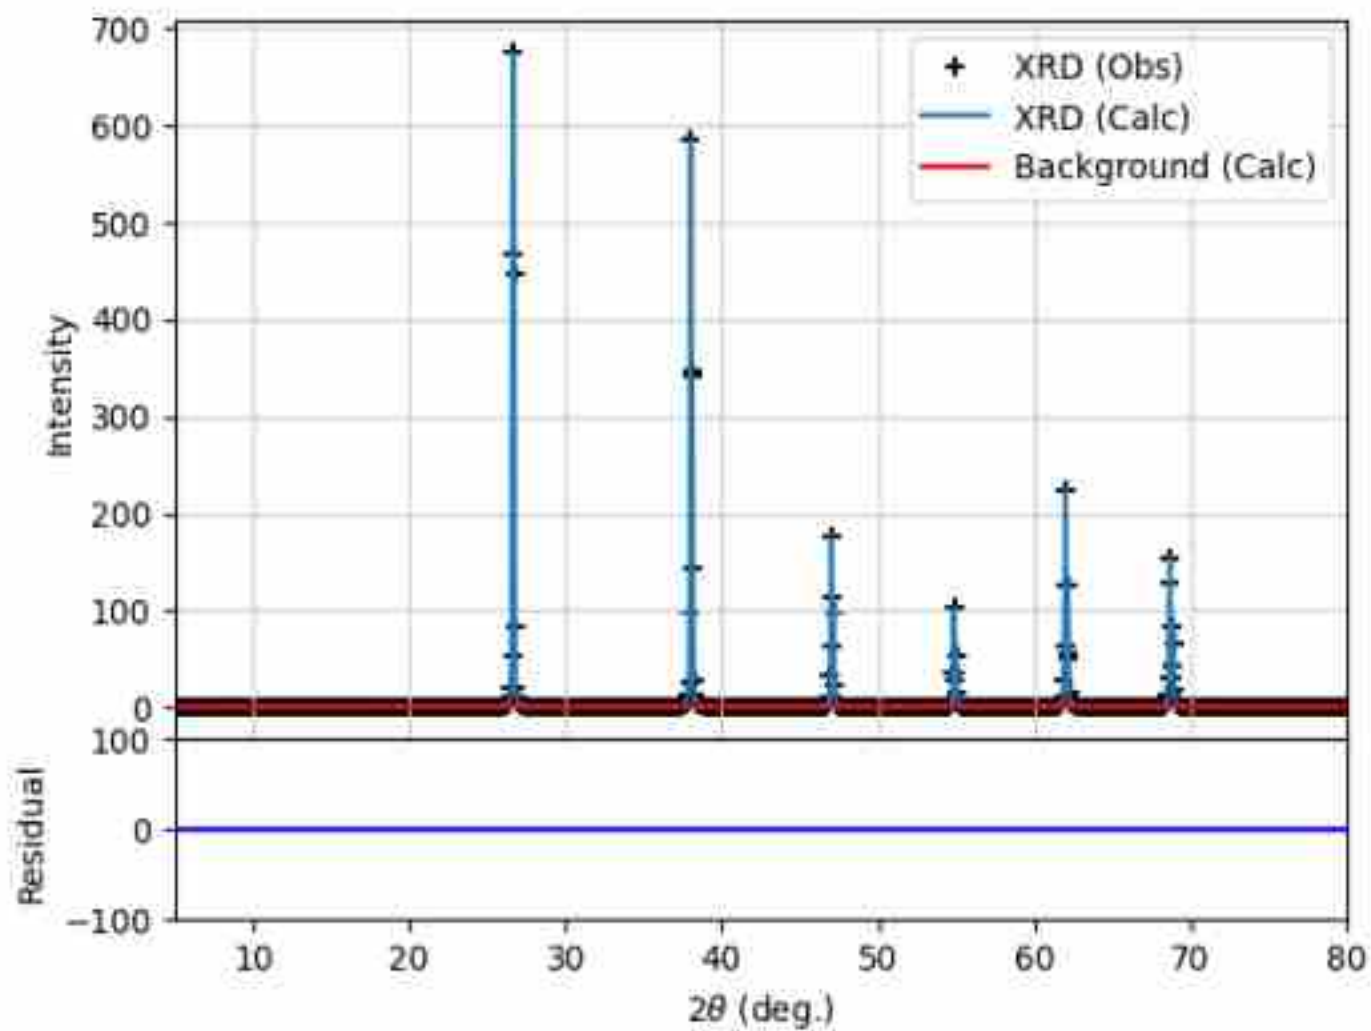

| RMSE before RR | Rwp     | RMSE after RR |
|----------------|---------|---------------|
| 0.001          | 0.00257 | 0.0015        |

# Li1Ho2Ga1

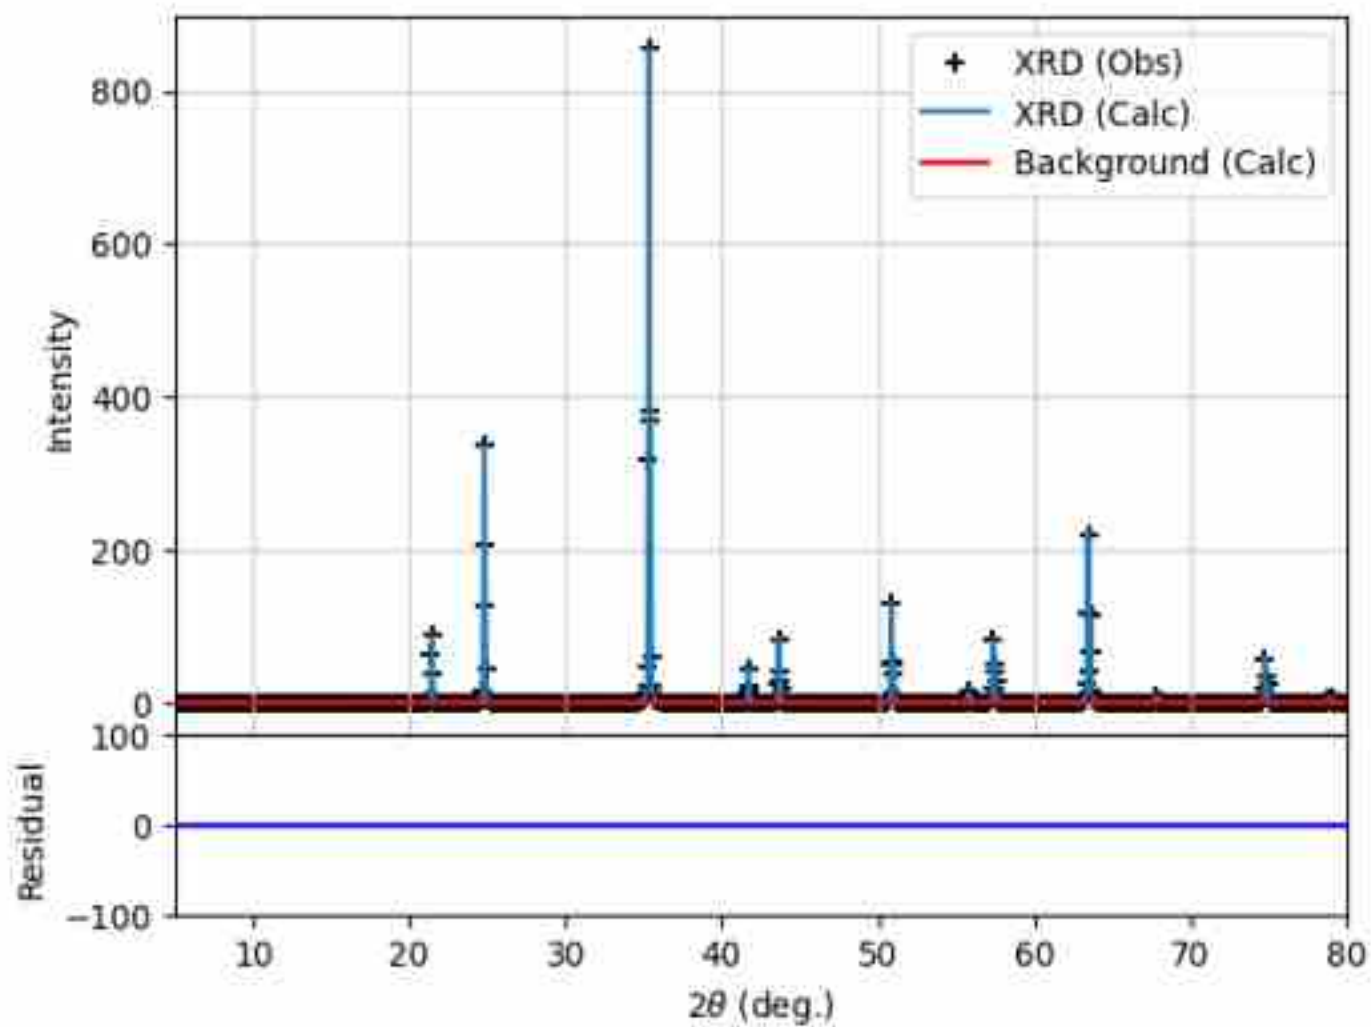

| RMSE before RR | Rwp     | RMSE after RR |
|----------------|---------|---------------|
| 0.001          | 0.01154 | 0.00162       |

# Li1Ho2Tc1

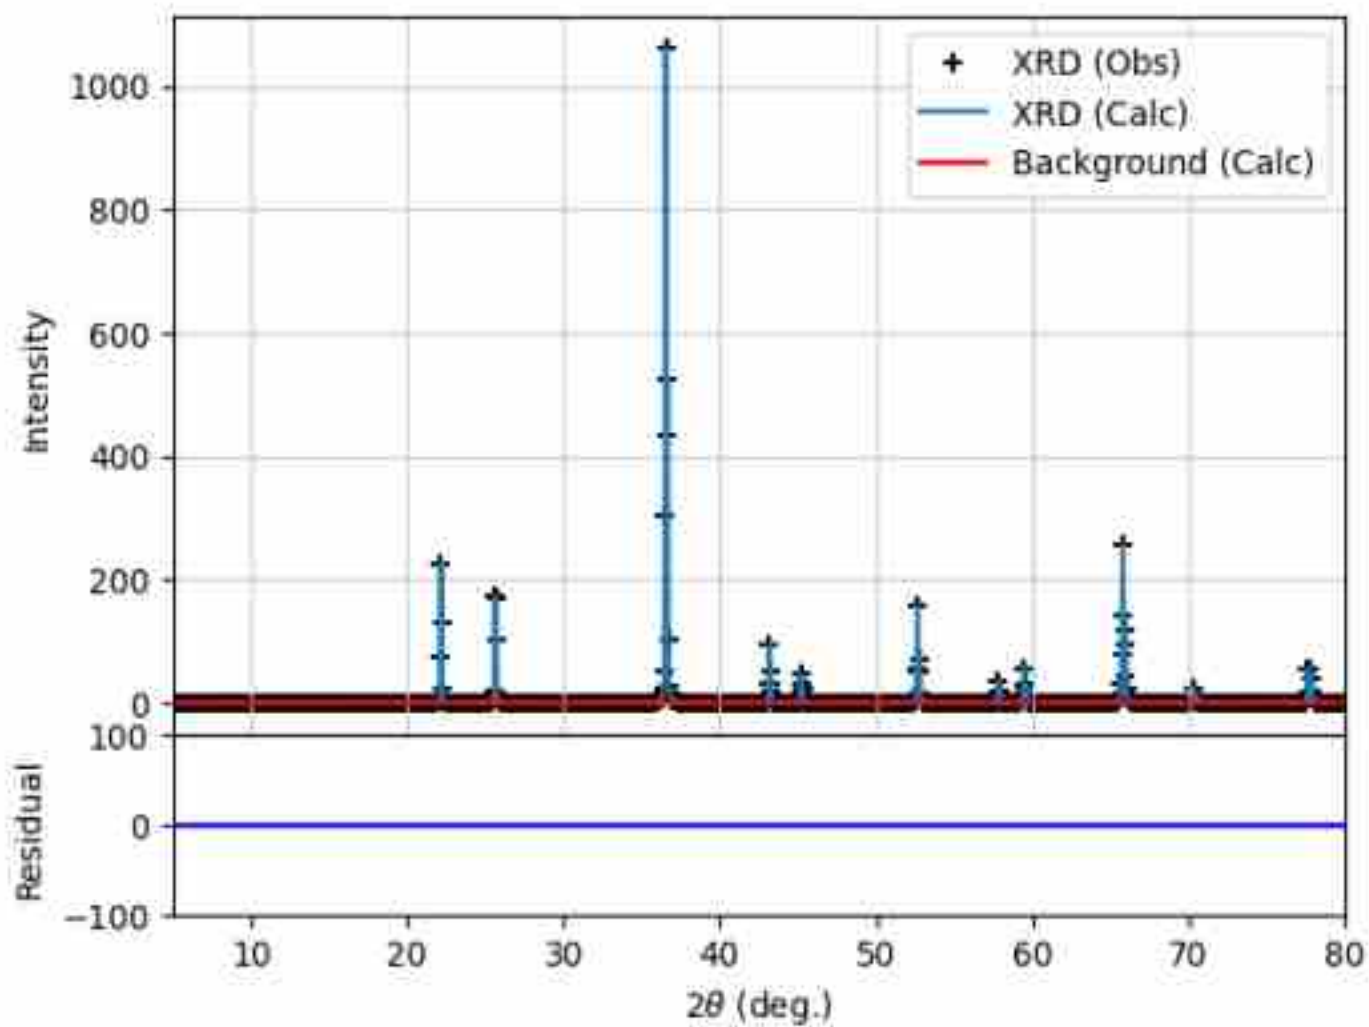

| RMSE before RR | Rwp     | RMSE after RR |
|----------------|---------|---------------|
| 0.001          | 0.00448 | 0.00192       |



# Li1In1Rh2

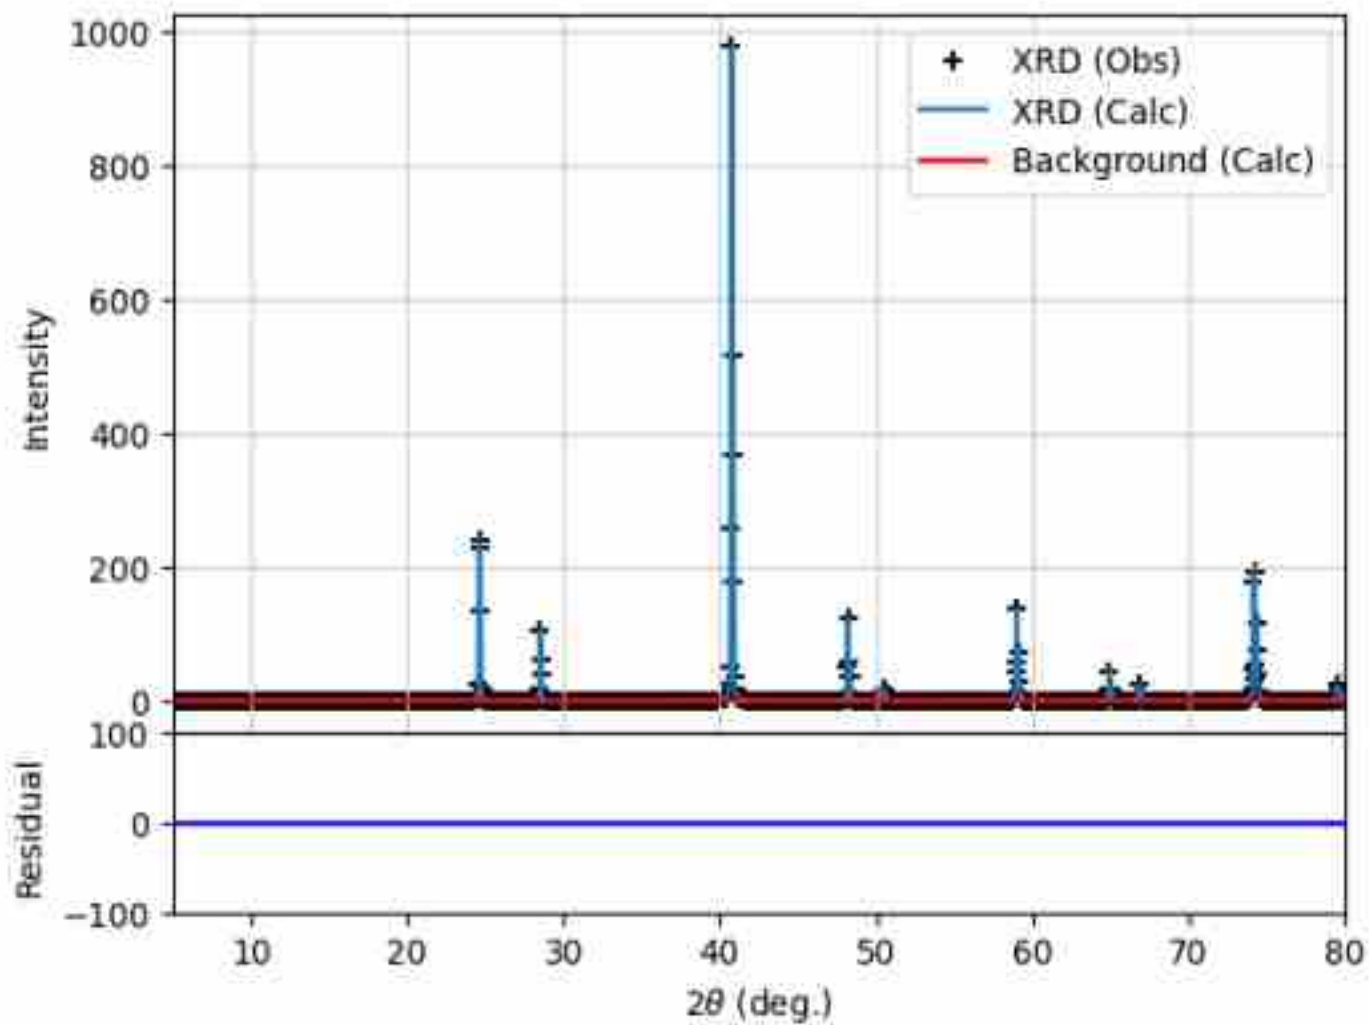

| RMSE before RR | Rwp     | RMSE after RR |
|----------------|---------|---------------|
| 0.001          | 0.00332 | 0.00299       |

# Li1In2Ru1

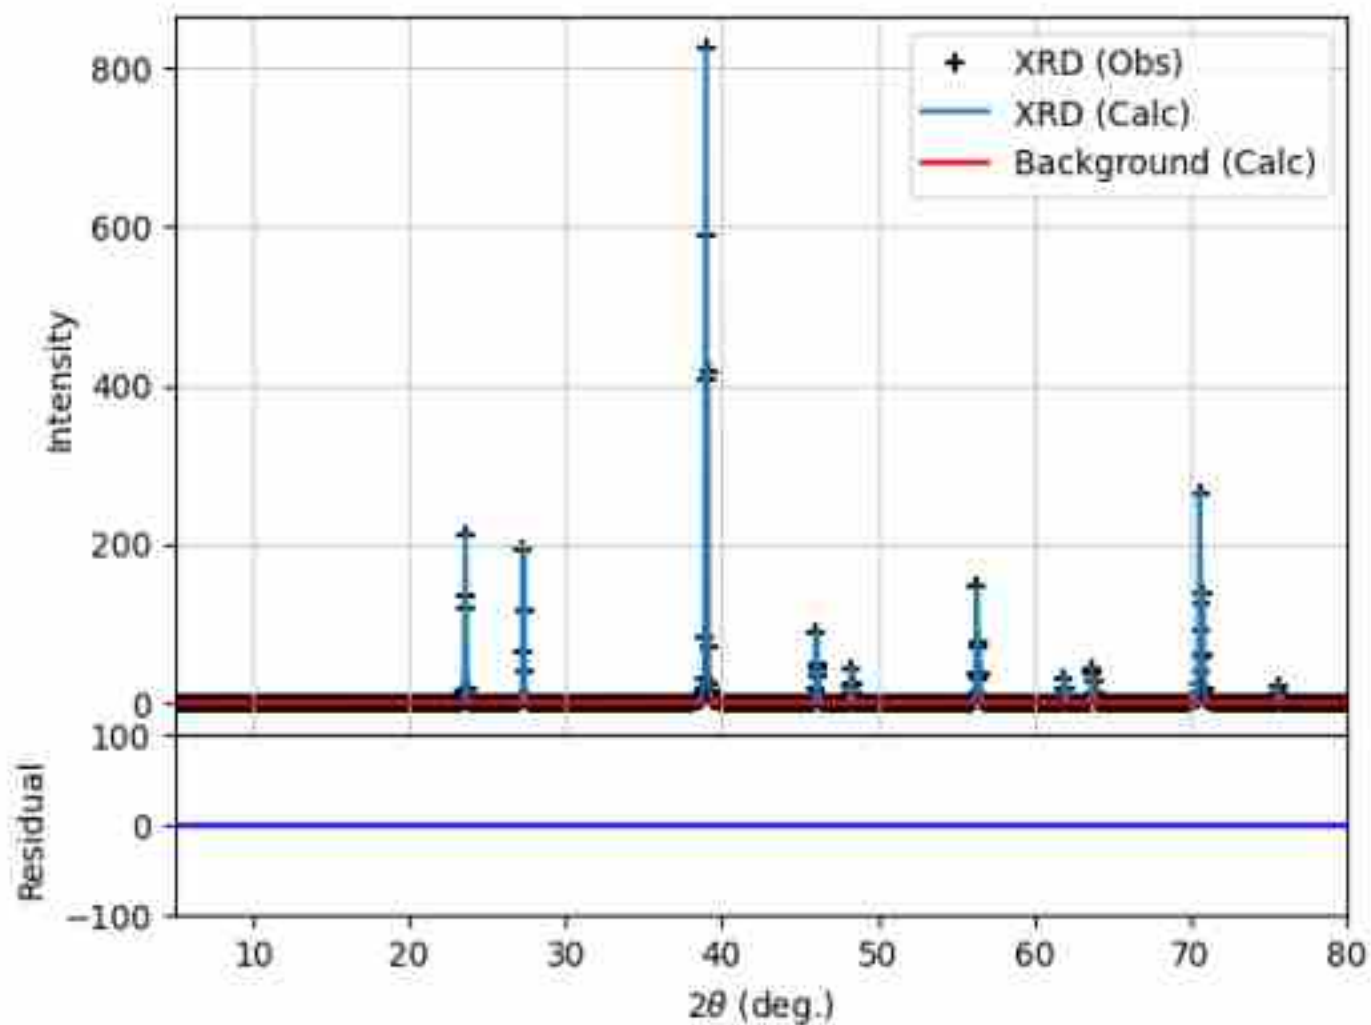

| RMSE before RR | Rwp     | RMSE after RR |
|----------------|---------|---------------|
| 0.001          | 0.00584 | 0.00326       |

# Li1La1Ti2

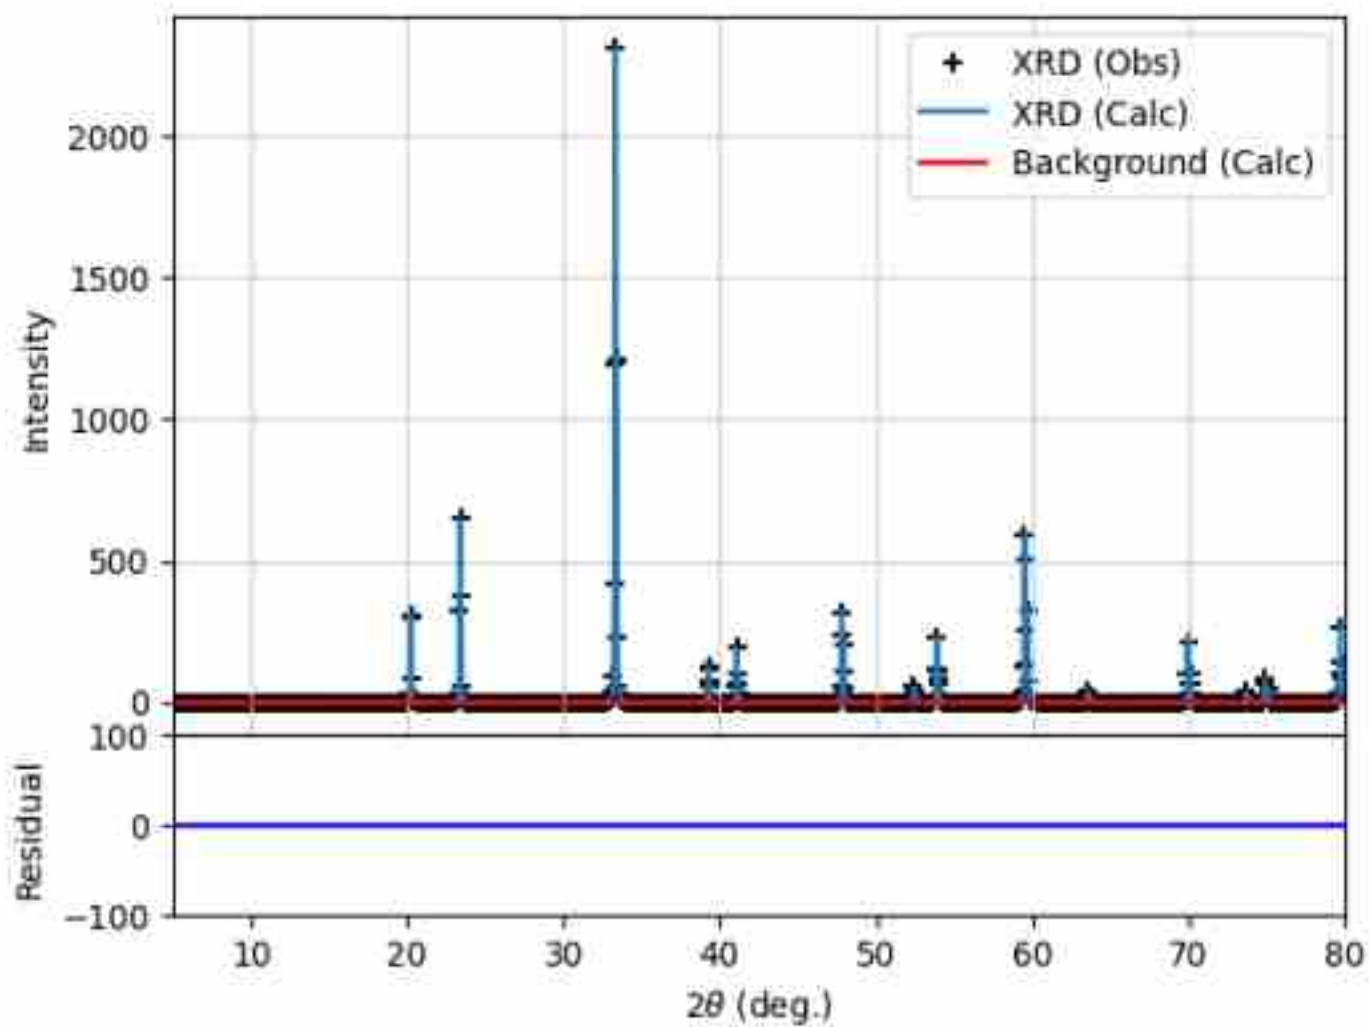

| RMSE before RR | Rwp     | RMSE after RR |
|----------------|---------|---------------|
| 0.001          | 0.00884 | 0.00127       |

# Li1Lu2Au1

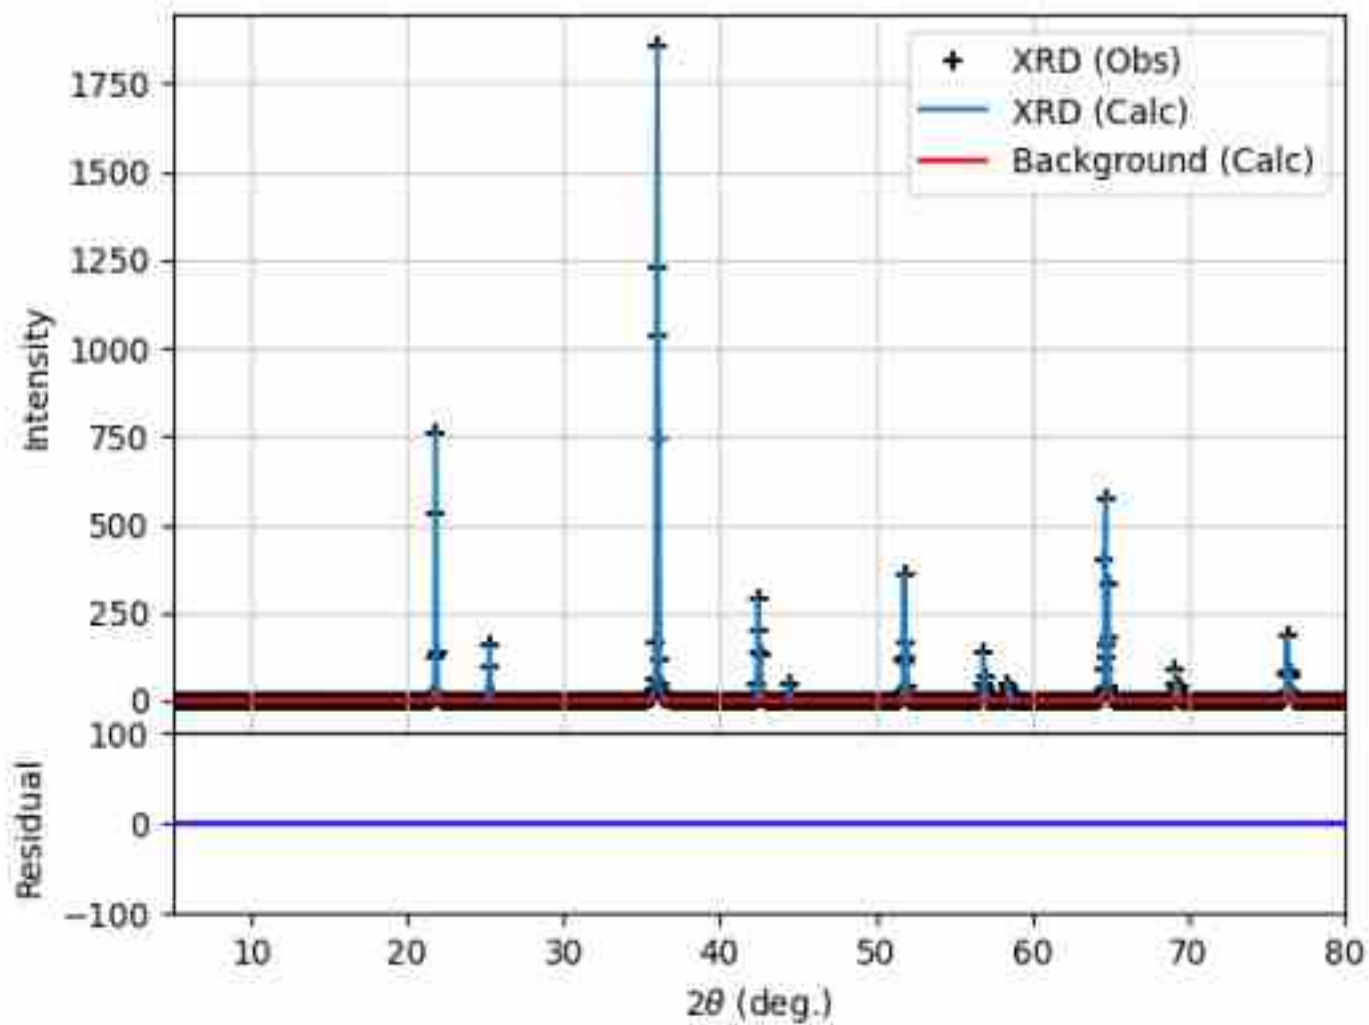

| RMSE before RR | Rwp     | RMSE after RR |
|----------------|---------|---------------|
| 0.001          | 0.01728 | 0.00179       |

# Li1Lu2Ga1

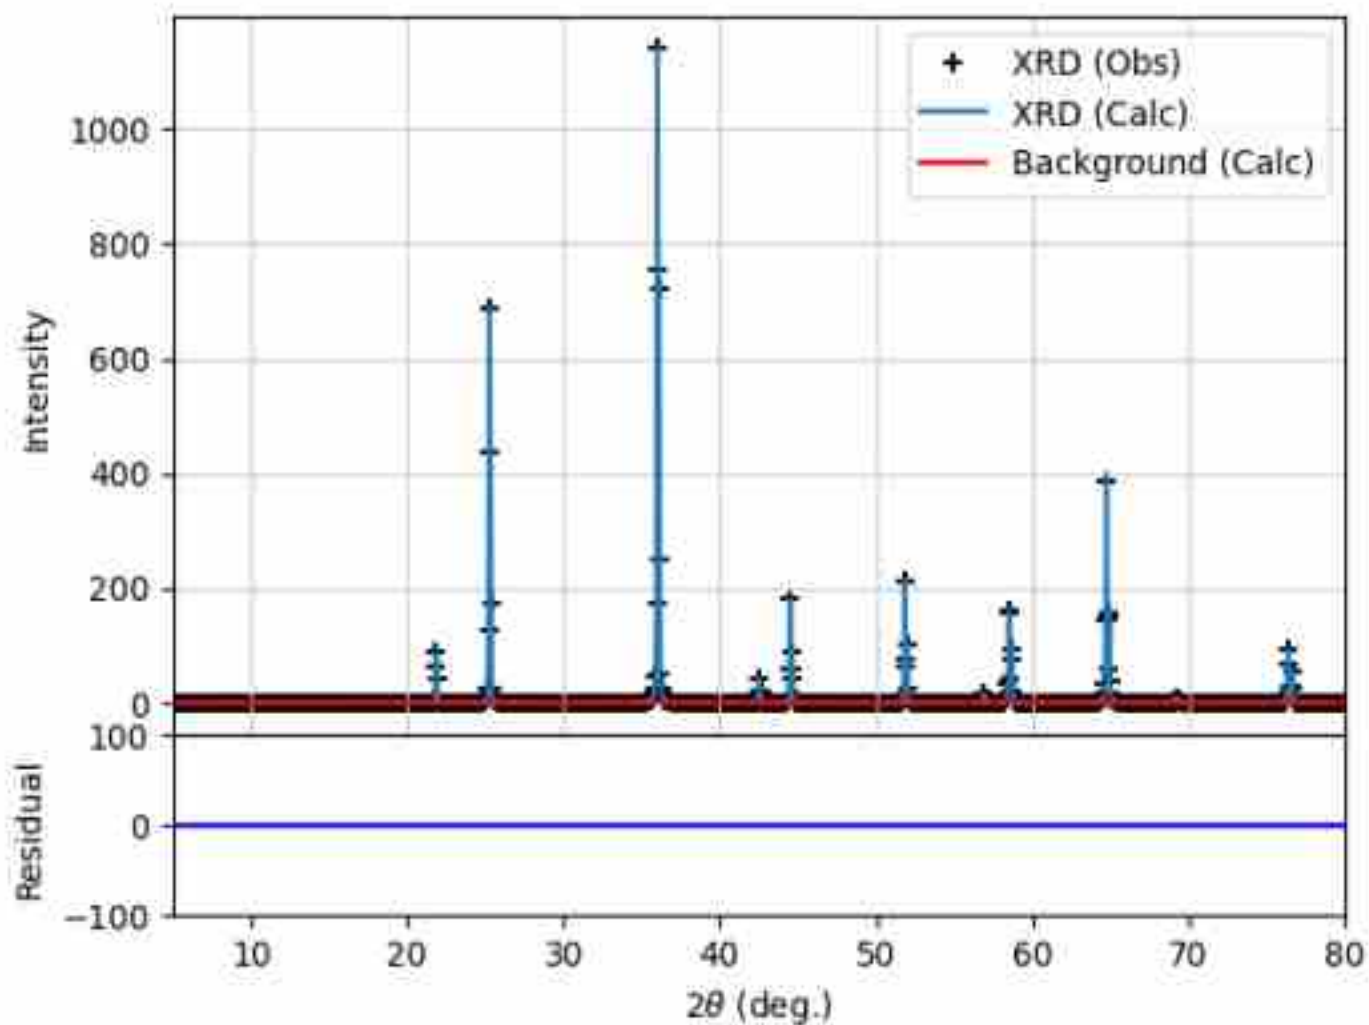

| RMSE before RR | Rwp   | RMSE after RR |
|----------------|-------|---------------|
| 0.001          | 2e-05 | 0.00019       |

# Li1Mg1Pd2

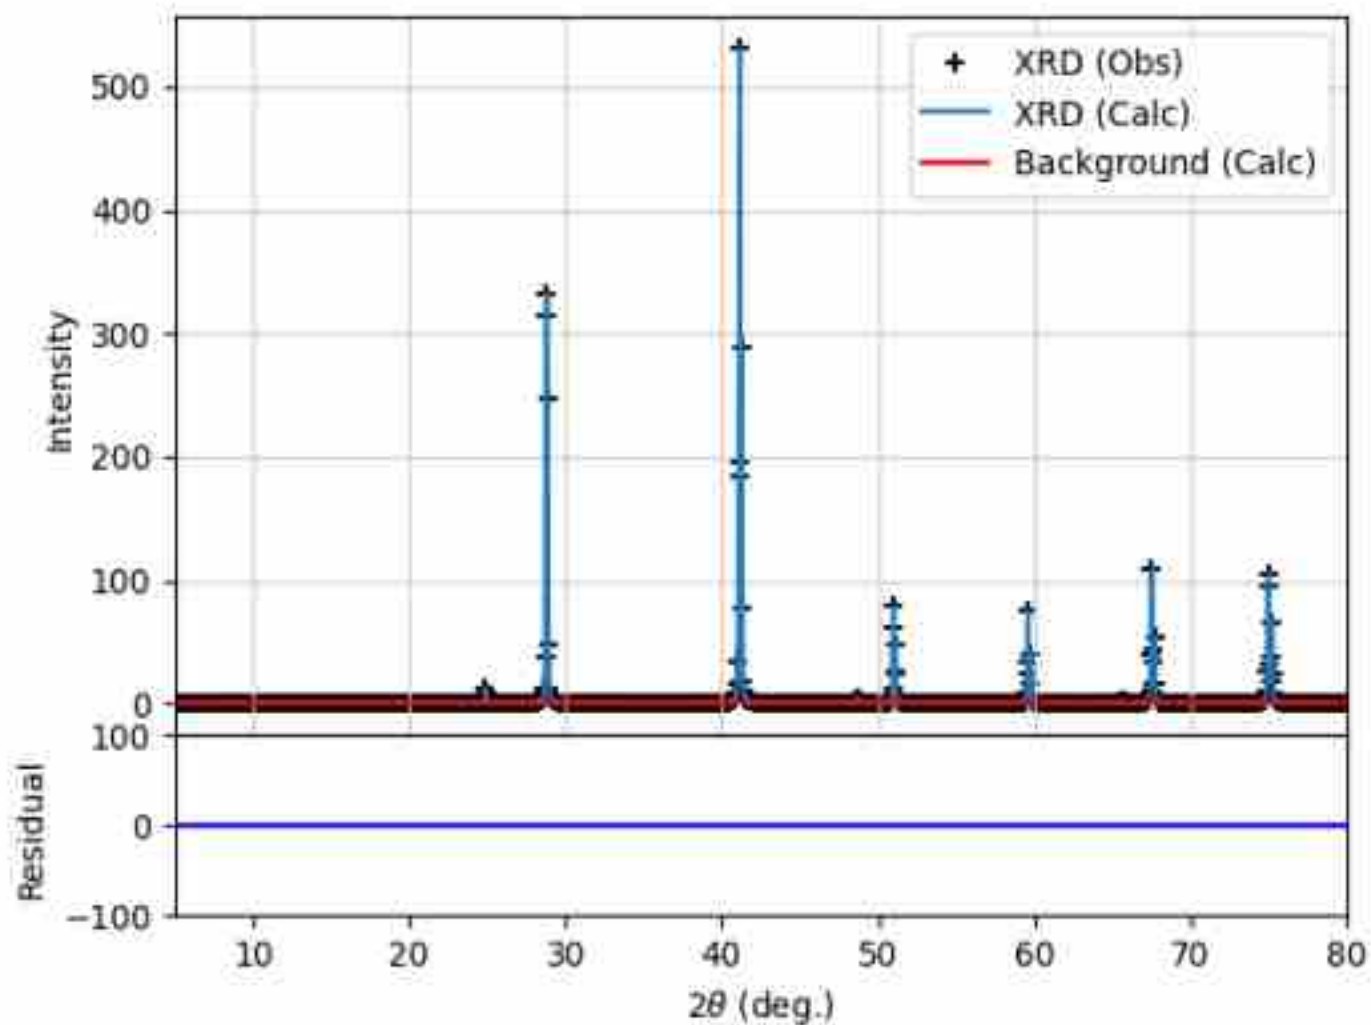

| RMSE before RR | Rwp   | RMSE after RR |
|----------------|-------|---------------|
| 0.001          | 3e-05 | 0.00065       |

# Li1Mg1Sb1Pt1

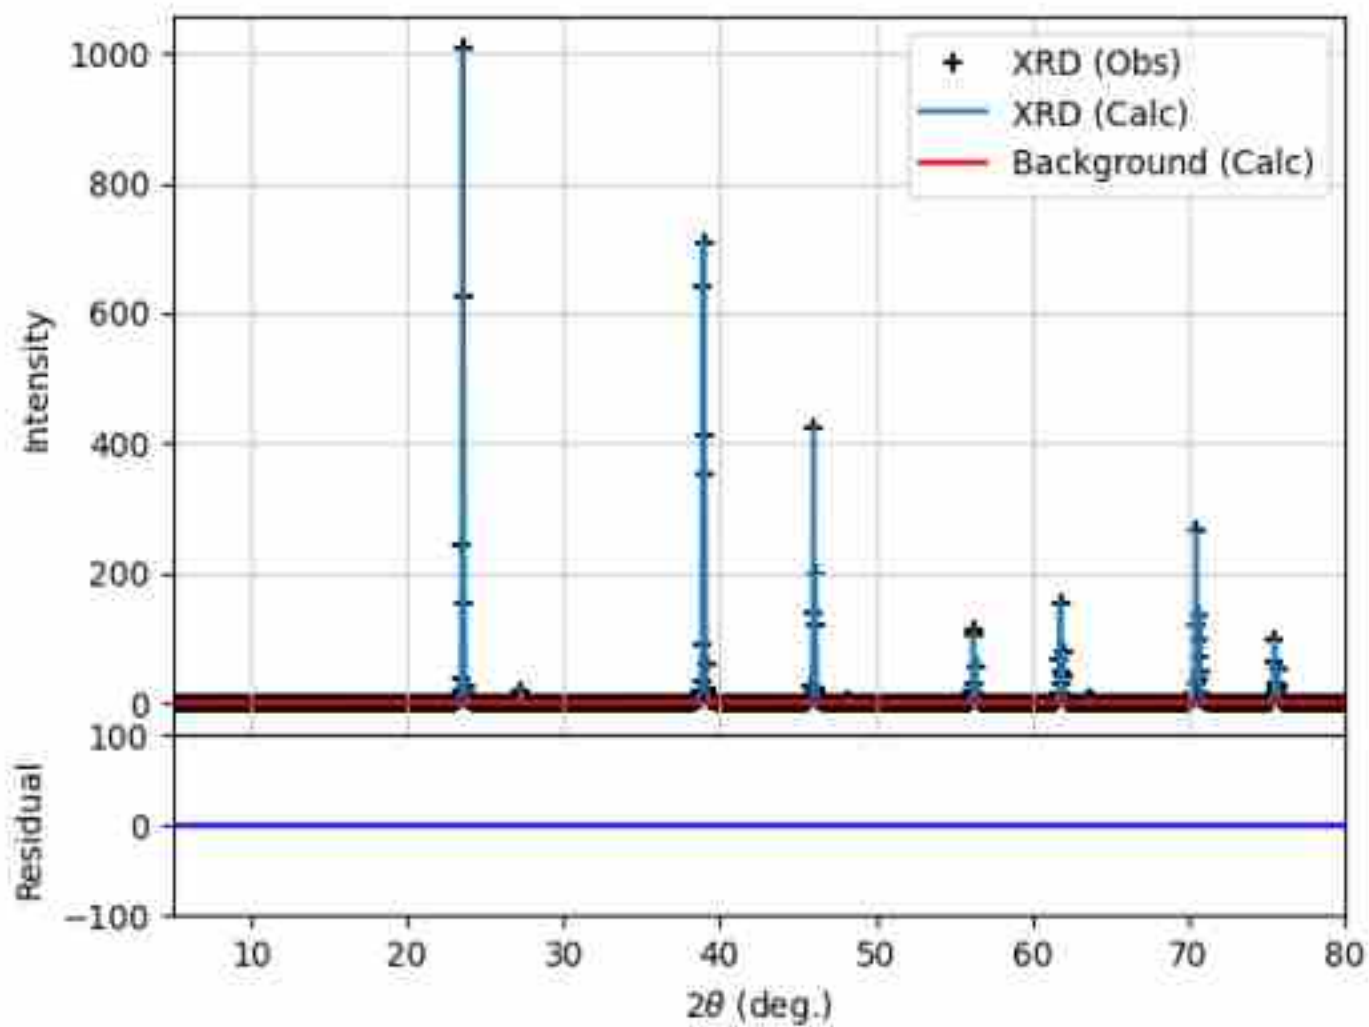

| RMSE before RR | Rwp     | RMSE after RR |
|----------------|---------|---------------|
| 0.001          | 0.00514 | 0.00391       |

# Li1Mg2Au1

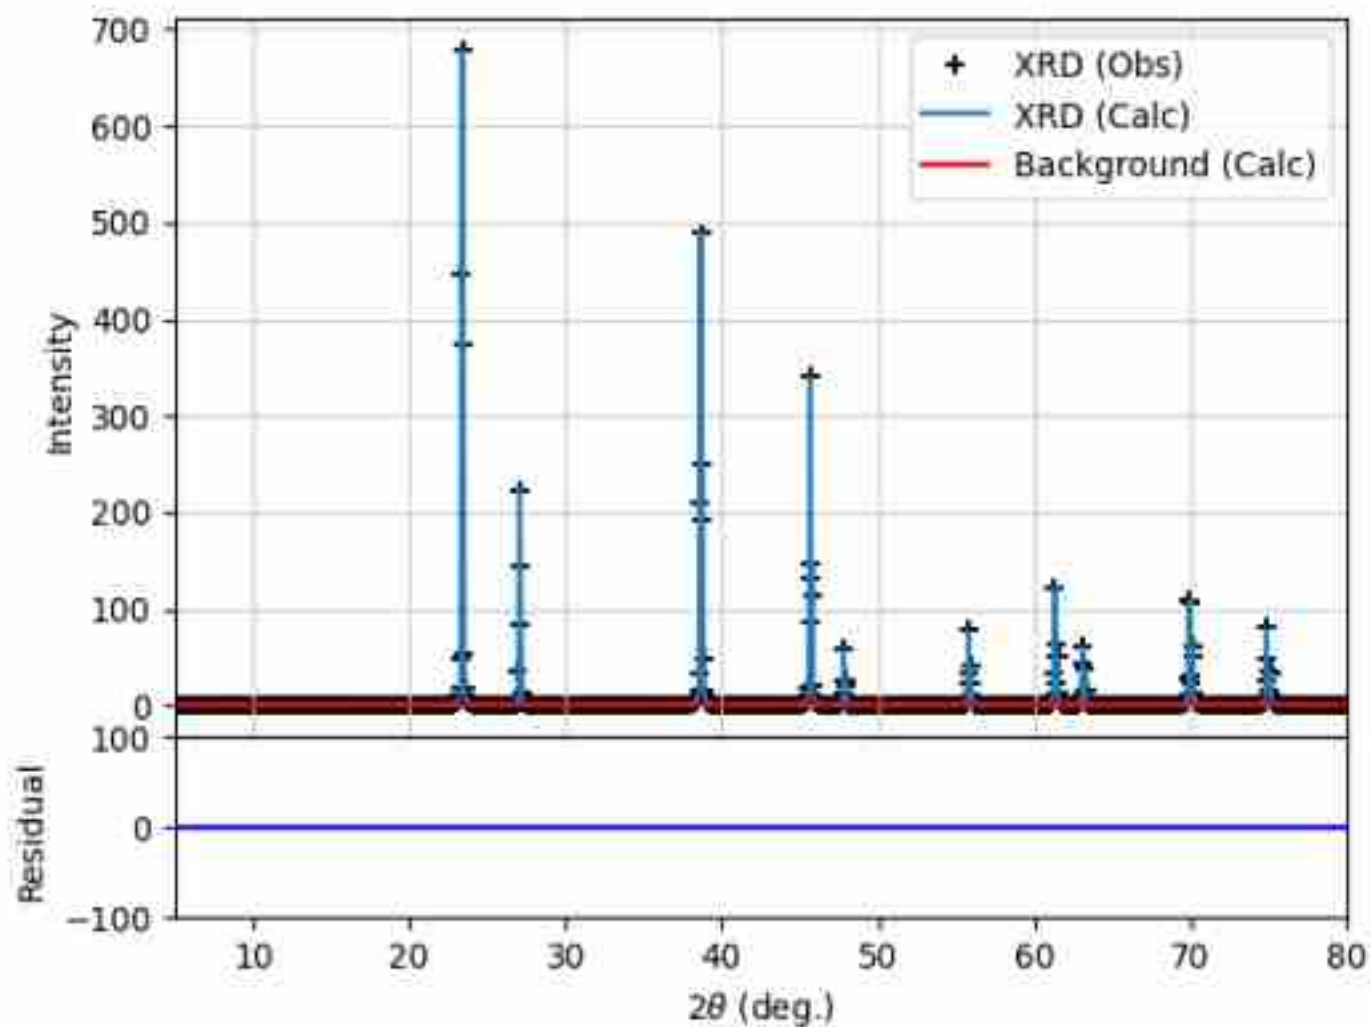

| RMSE before RR | Rwp     | RMSE after RR |
|----------------|---------|---------------|
| 0.001          | 0.00013 | 0.00019       |



# Li1Mg2Hg1

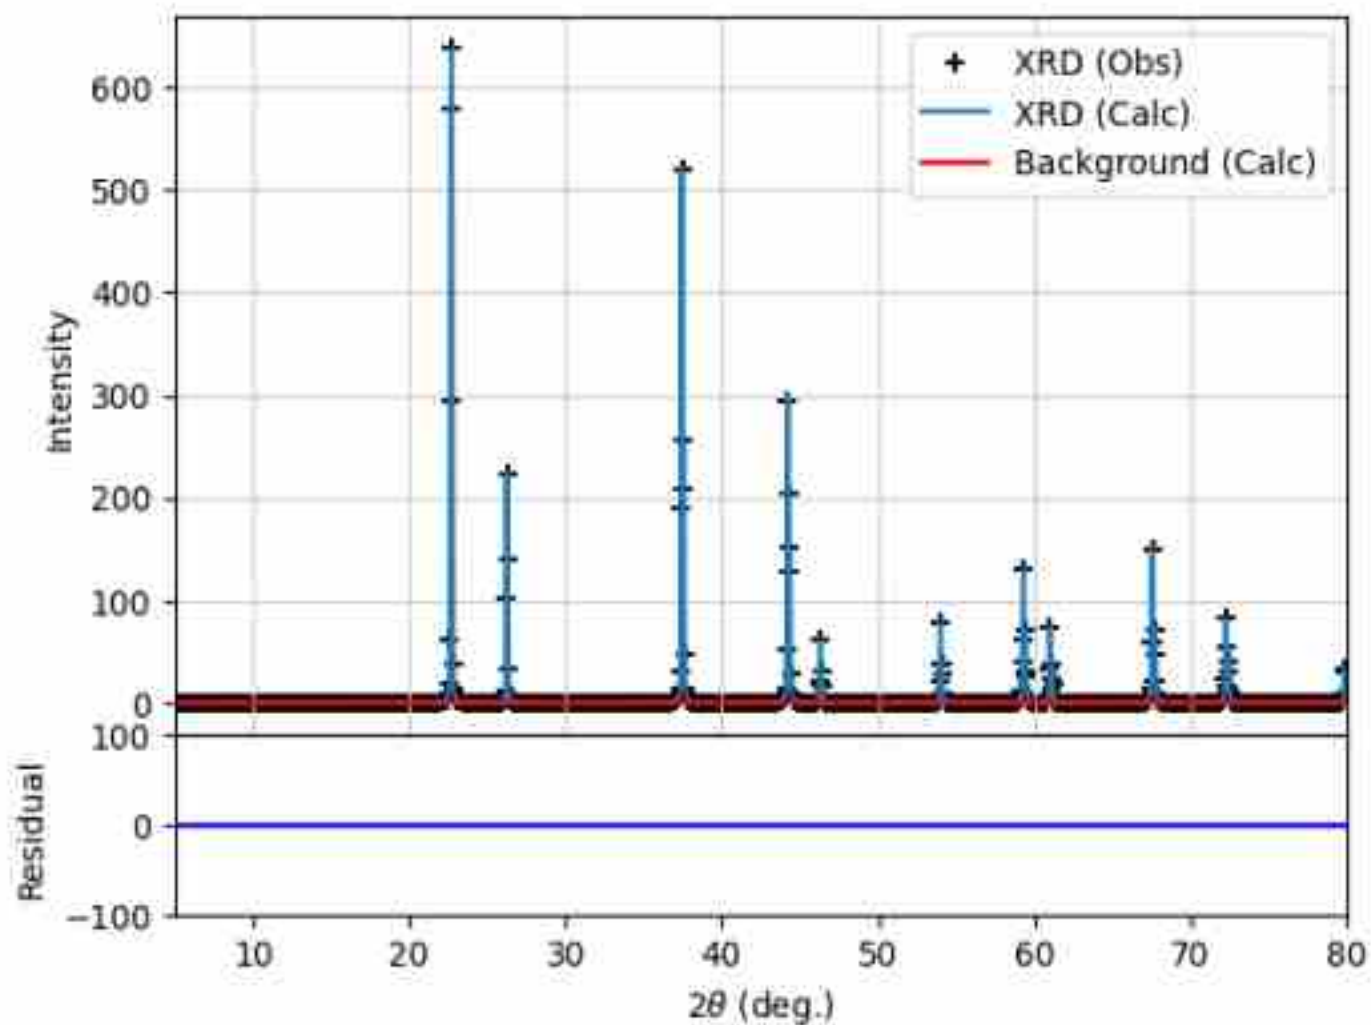

| RMSE before RR | Rwp     | RMSE after RR |
|----------------|---------|---------------|
| 0.001          | 0.00369 | 0.00193       |

# Li1Mg2Pt1

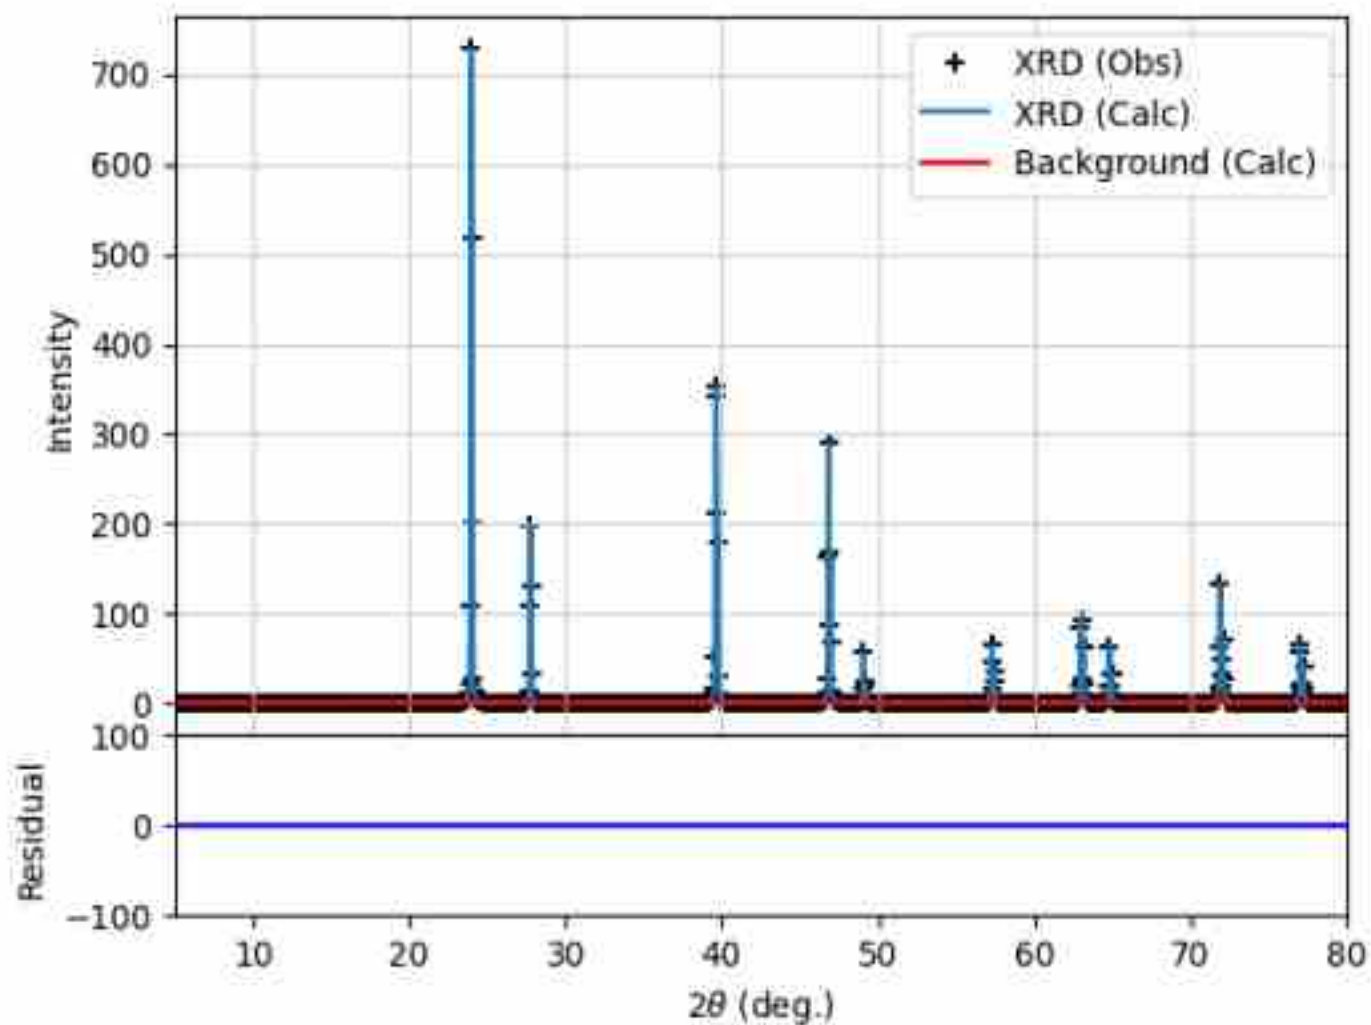

| RMSE before RR | Rwp     | RMSE after RR |
|----------------|---------|---------------|
| 0.001          | 0.00025 | 0.00083       |

# Li1Mg2Tl1

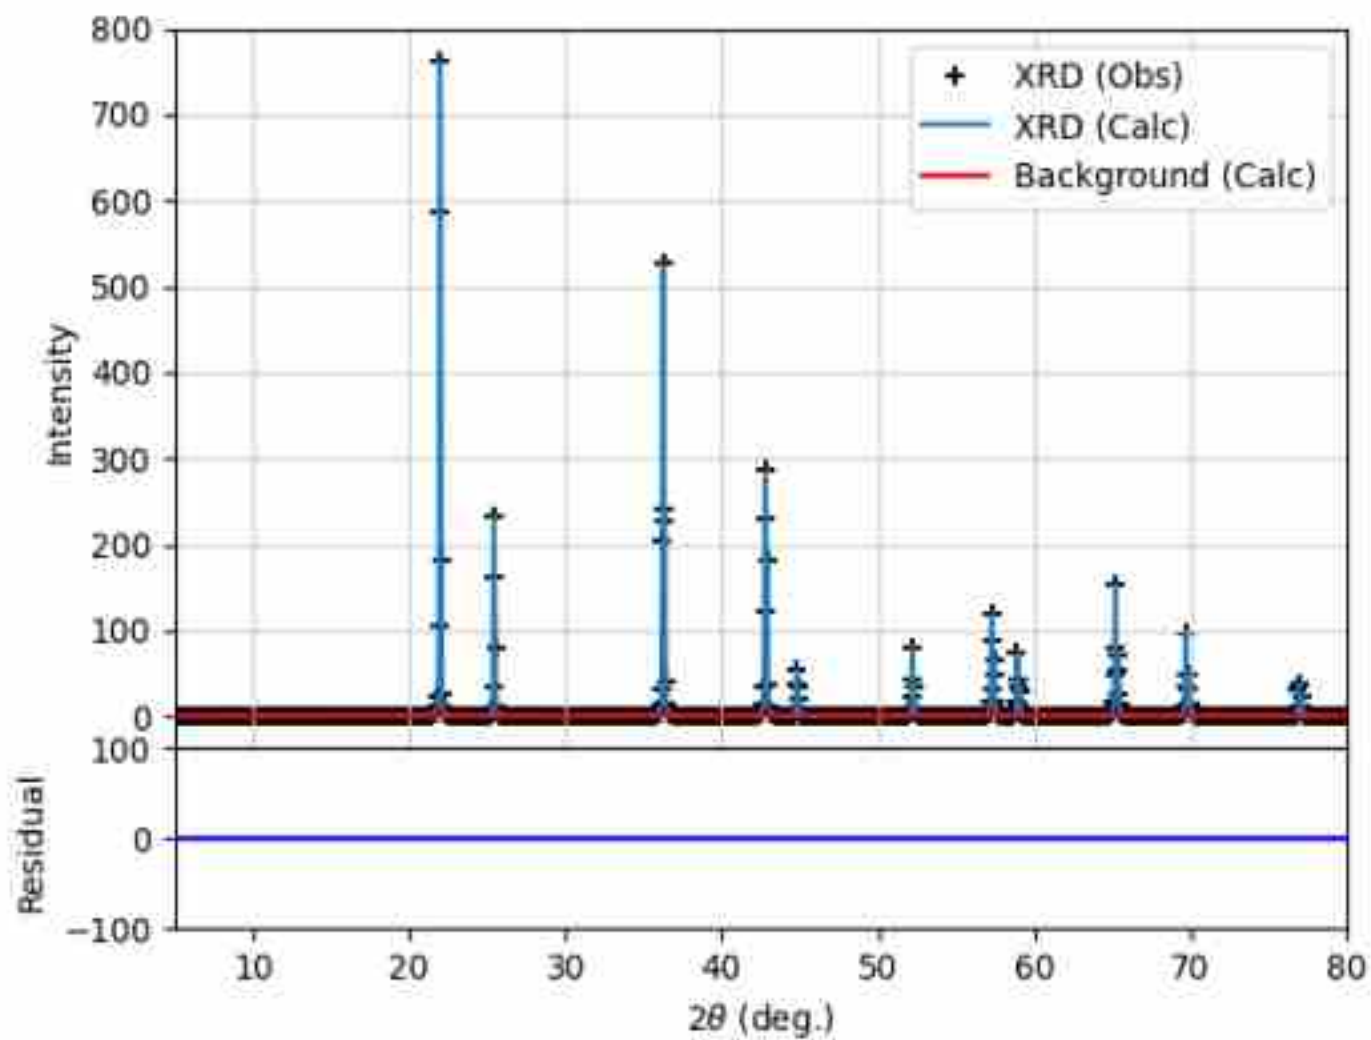

| RMSE before RR | Rwp   | RMSE after RR |
|----------------|-------|---------------|
| 0.001          | 0.003 | 0.00327       |

# Li1Nd1In2

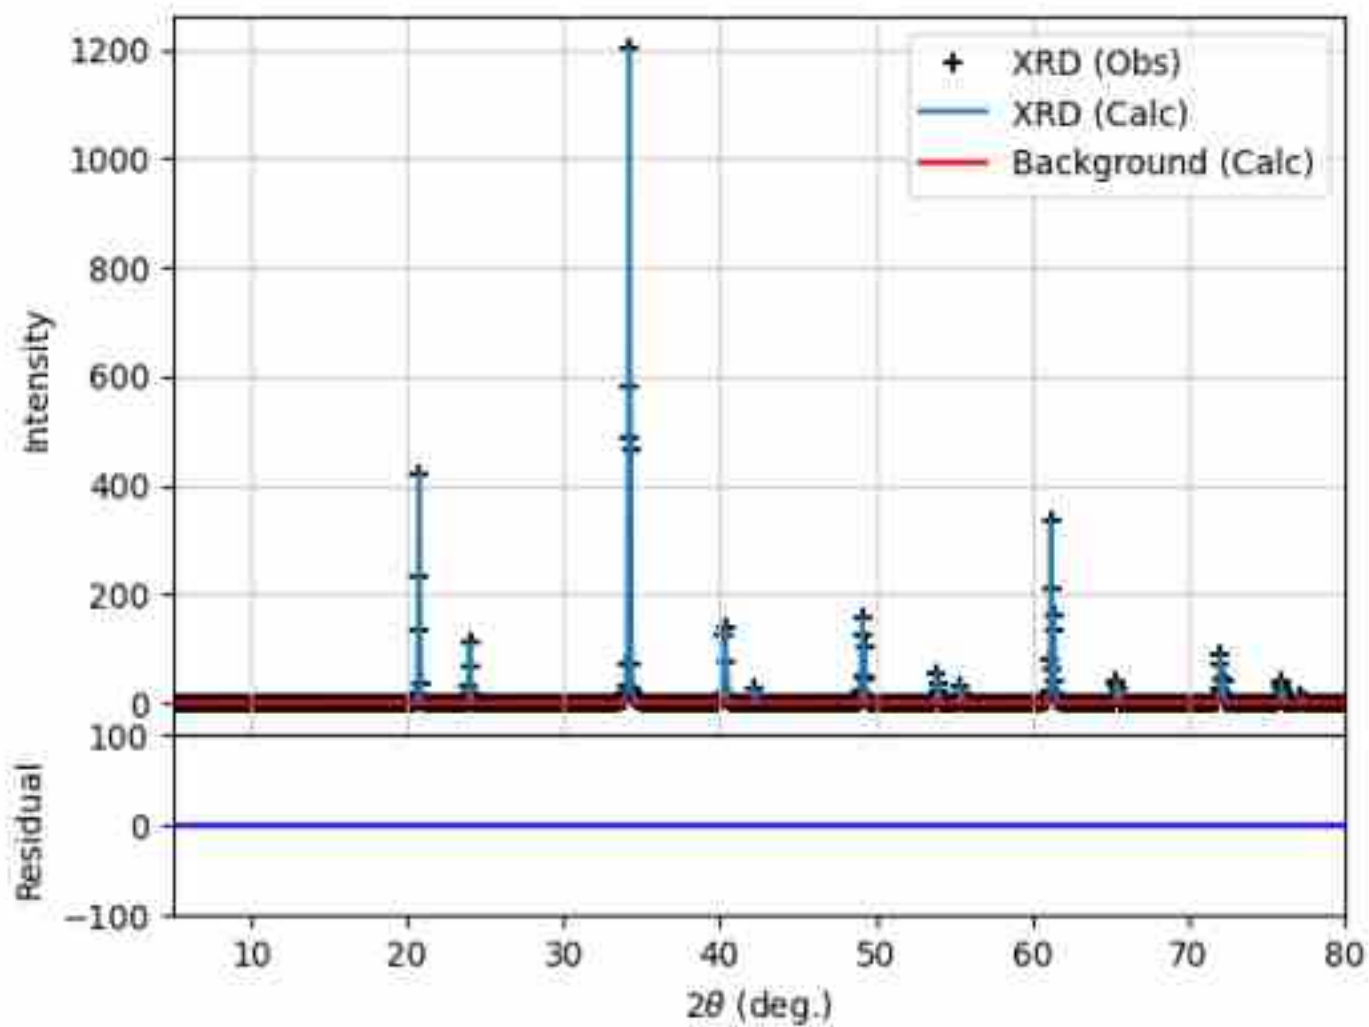

| RMSE before RR | Rwp     | RMSE after RR |
|----------------|---------|---------------|
| 0.001          | 0.00388 | 0.00322       |

# Li1Nd1Ti2

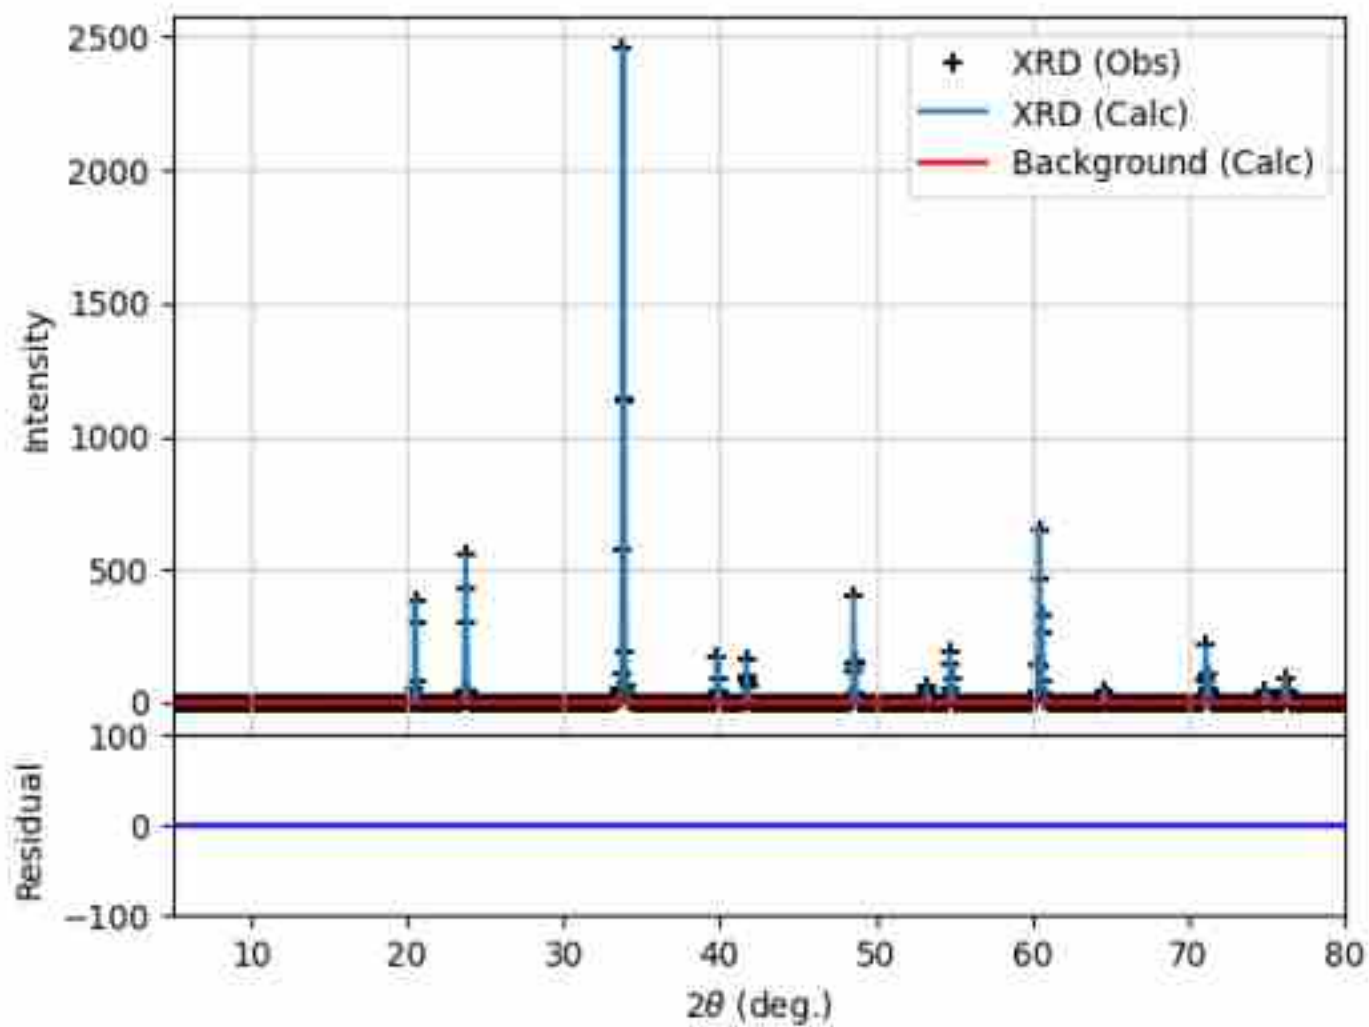

| RMSE before RR | Rwp    | RMSE after RR |
|----------------|--------|---------------|
| 0.001          | 0.0006 | 0.00033       |

# Li1Nd2Ir1

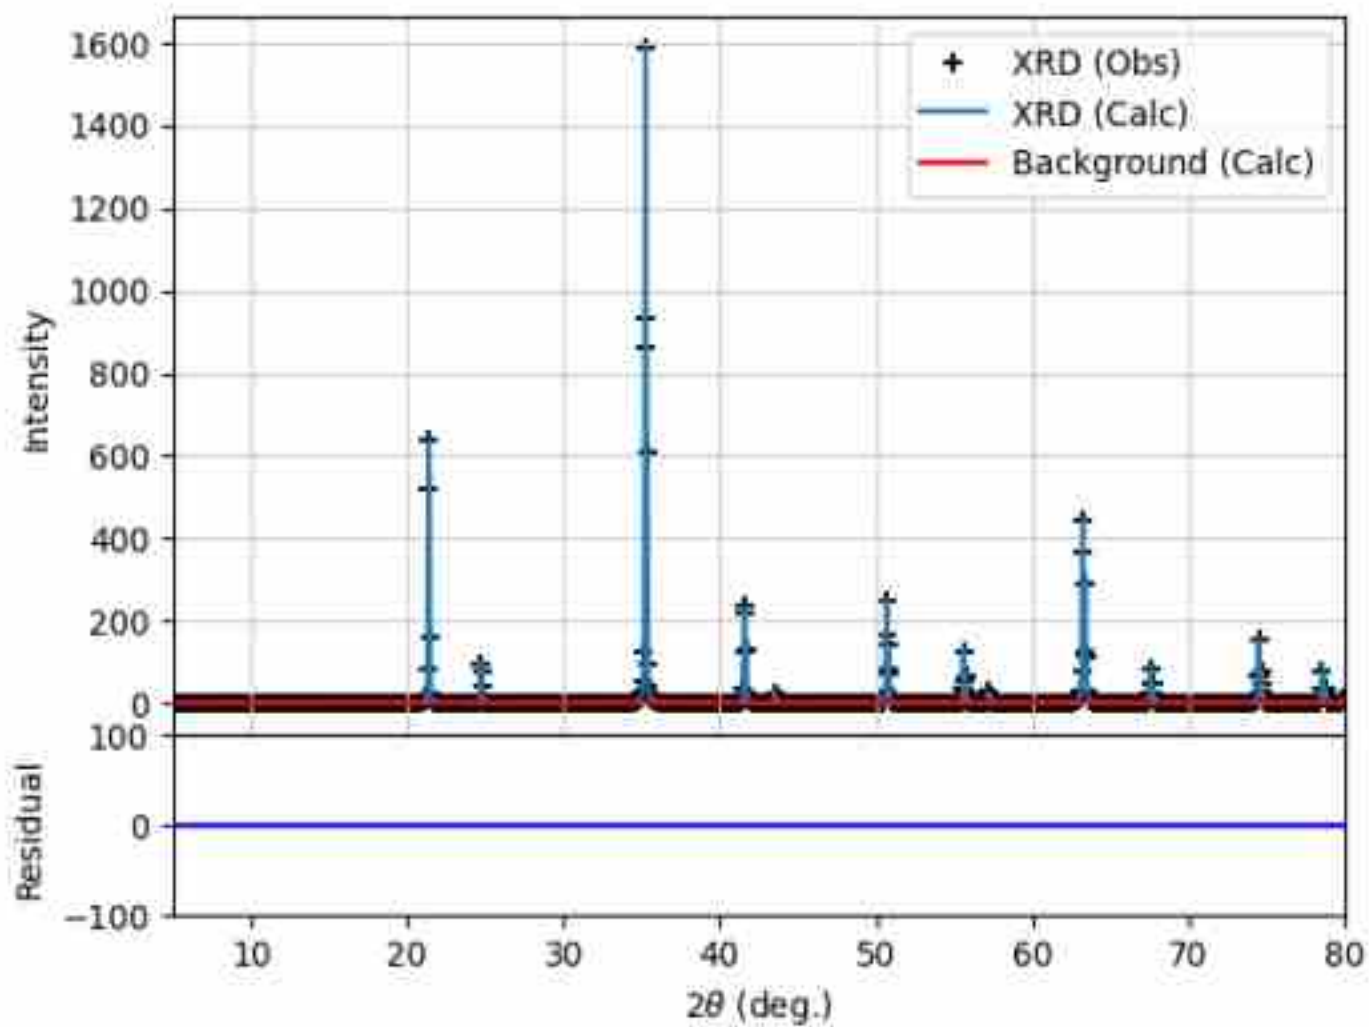

| RMSE before RR | Rwp     | RMSE after RR |
|----------------|---------|---------------|
| 0.001          | 0.00212 | 0.00045       |

# Li1Pa1Ru2

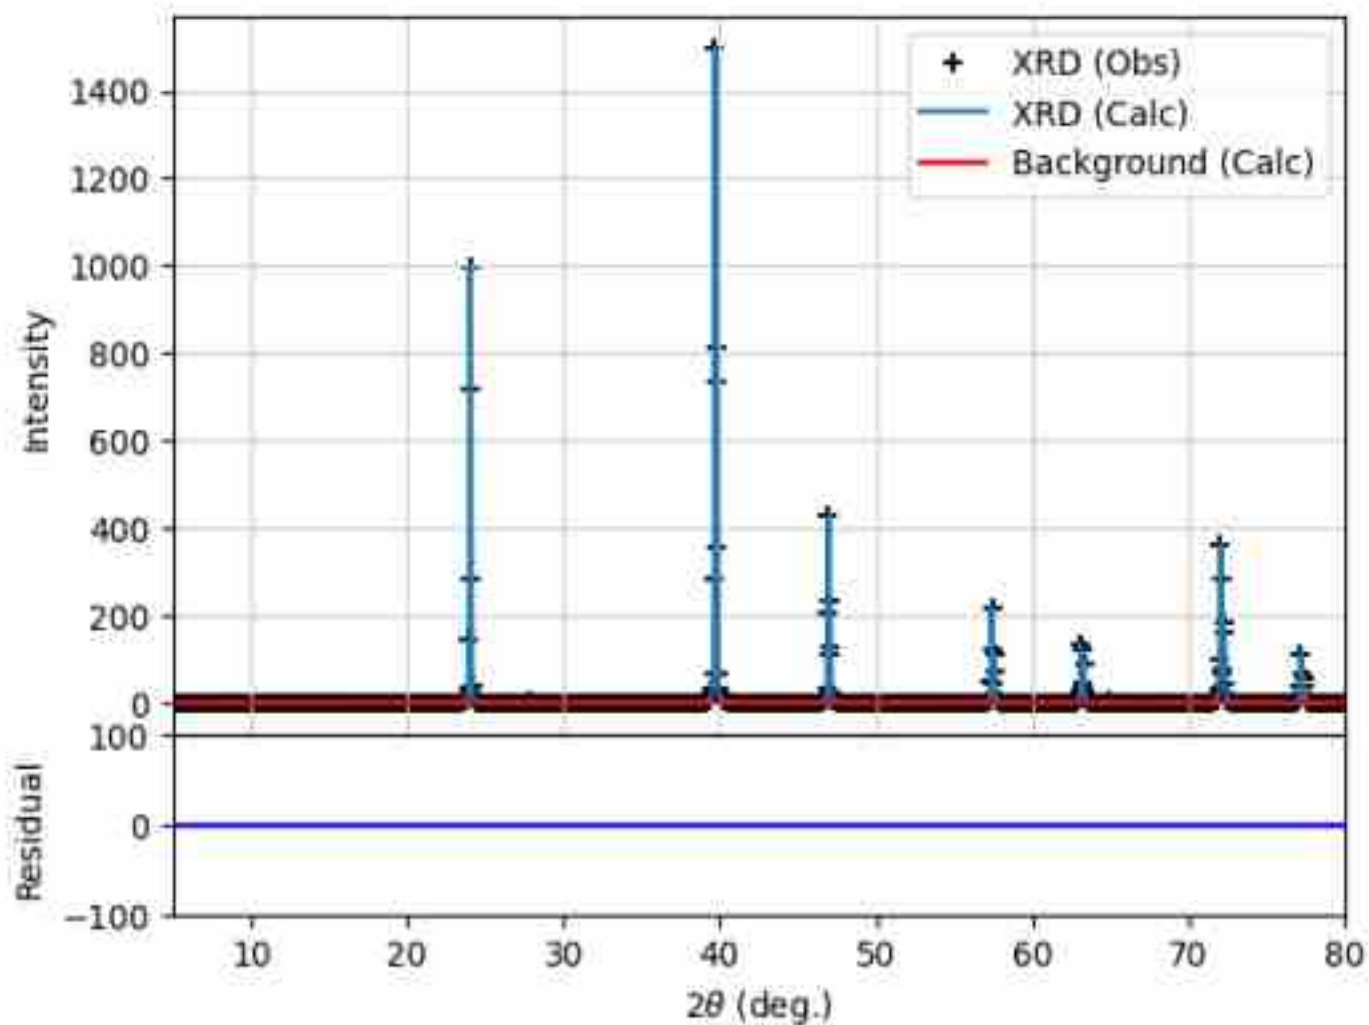

| RMSE before RR | Rwp     | RMSE after RR |
|----------------|---------|---------------|
| 0.001          | 0.00436 | 0.00395       |

# Li1Pr2Al1

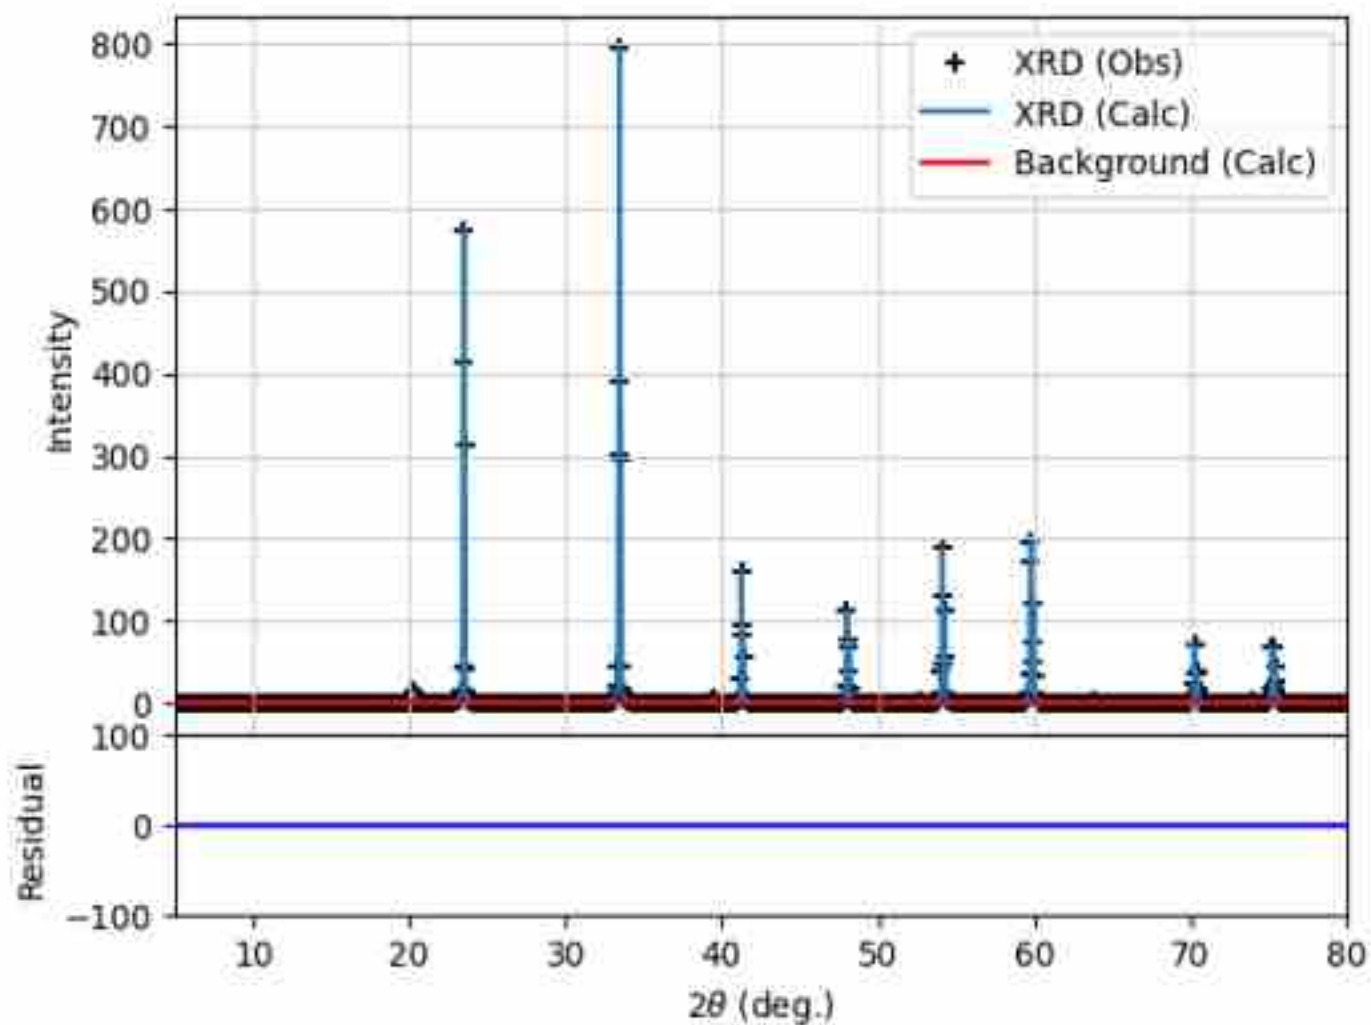

| RMSE before RR | Rwp     | RMSE after RR |
|----------------|---------|---------------|
| 0.001          | 0.02267 | 0.00205       |



# Li1Sc2Rh1

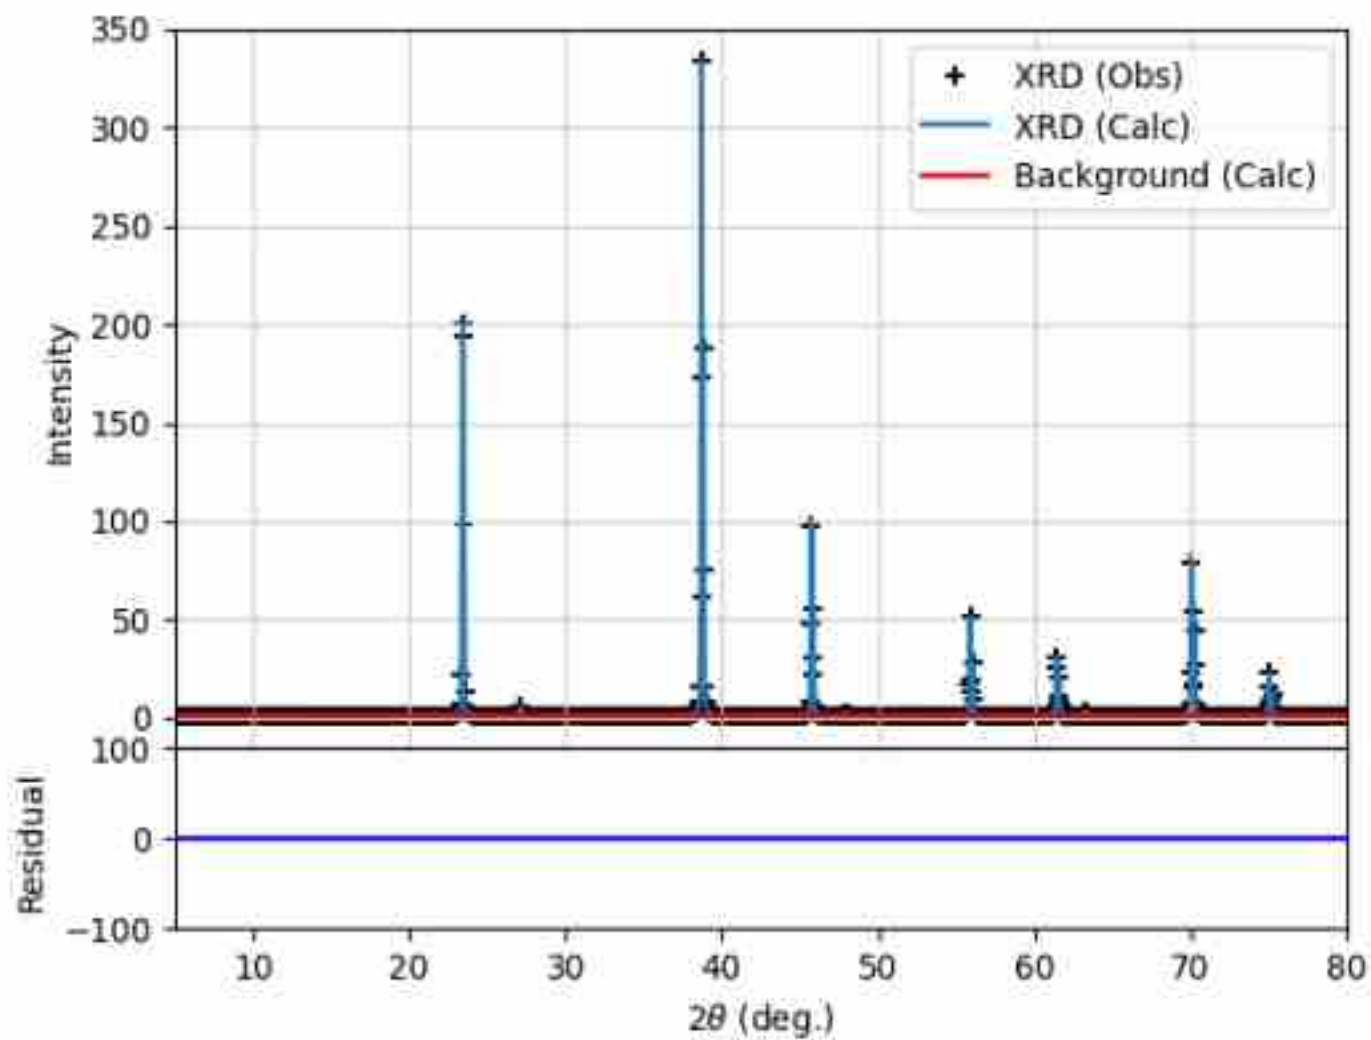

| RMSE before RR | Rwp     | RMSE after RR |
|----------------|---------|---------------|
| 0.001          | 0.00278 | 0.00032       |

# Li1Si1Pt2

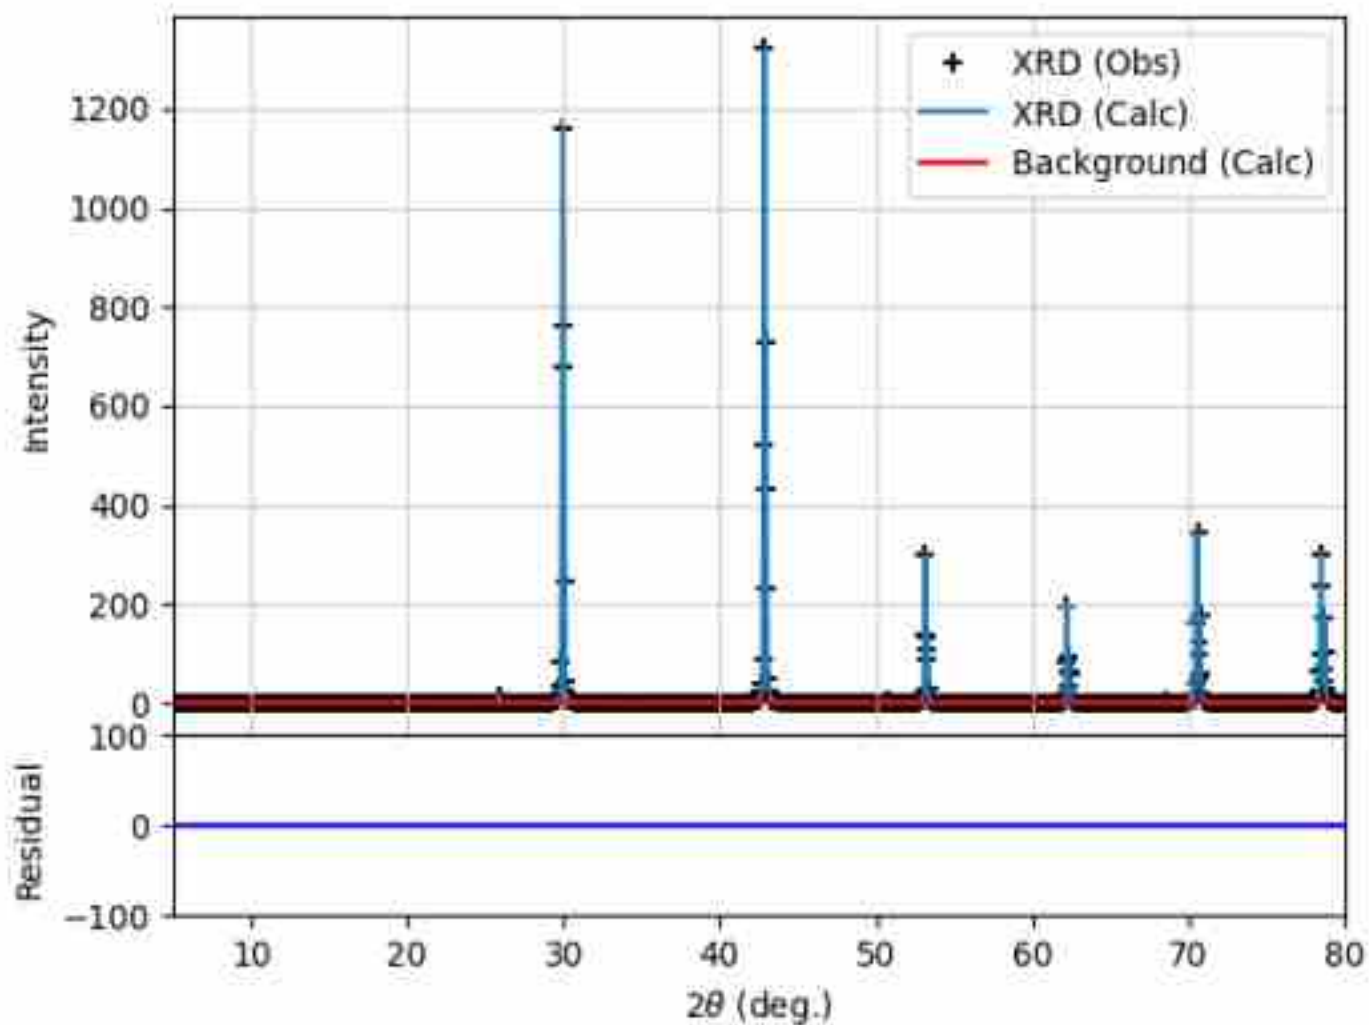

| RMSE before RR | Rwp    | RMSE after RR |
|----------------|--------|---------------|
| 0.001          | 0.0083 | 0.00122       |

# Li1Sm1Ti2

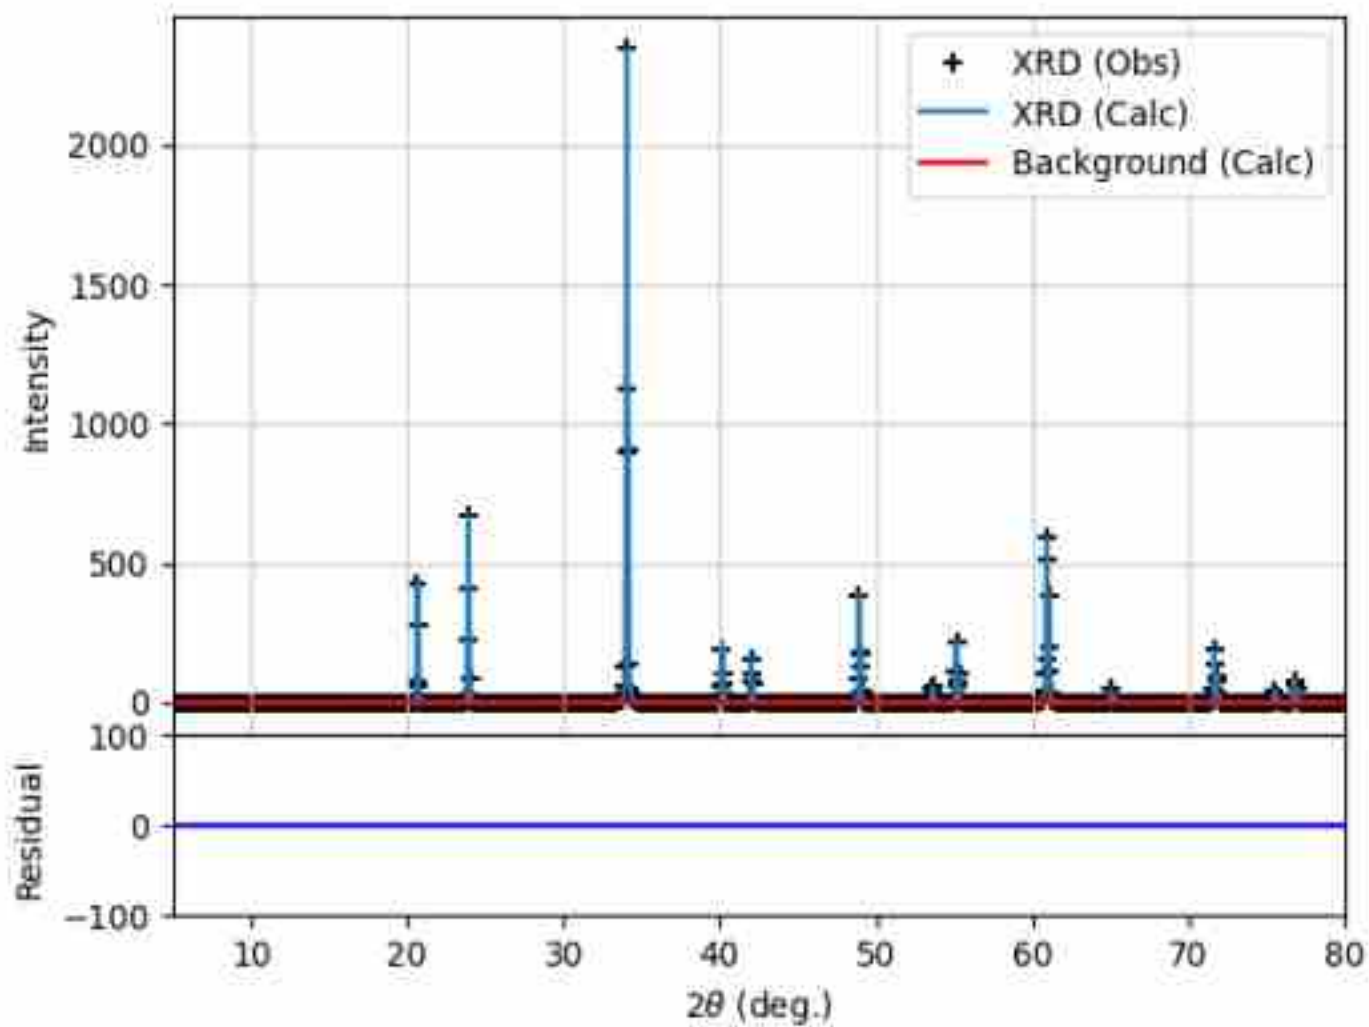

| RMSE before RR | Rwp     | RMSE after RR |
|----------------|---------|---------------|
| 0.001          | 0.00372 | 0.00159       |

# Li1Sm2Ga1

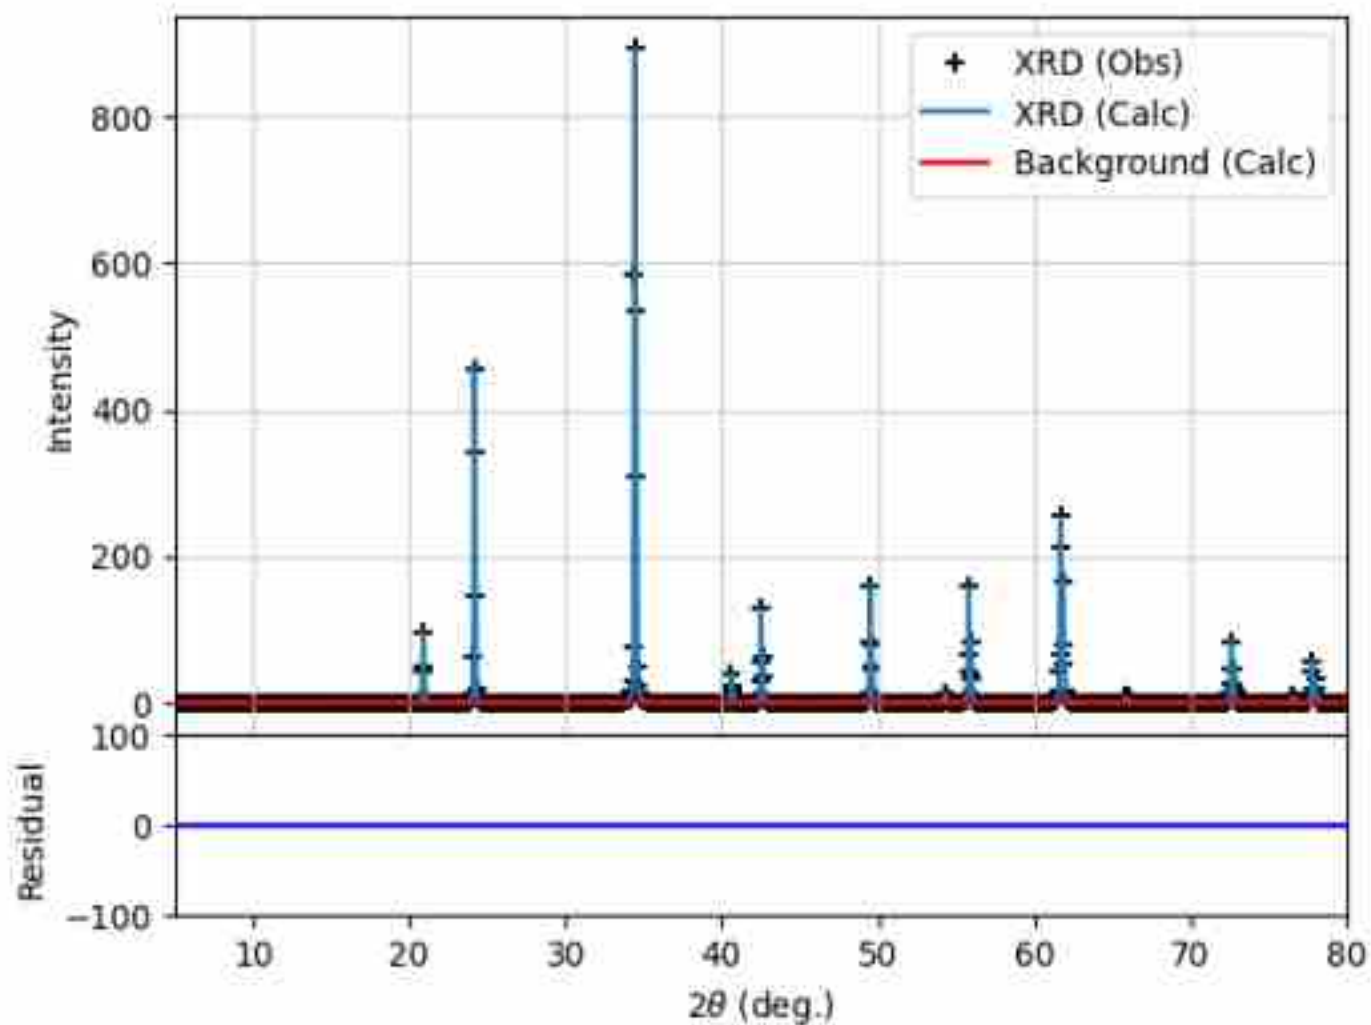

| RMSE before RR | Rwp     | RMSE after RR |
|----------------|---------|---------------|
| 0.001          | 0.01096 | 0.00204       |

# Li1Sm2Ir1

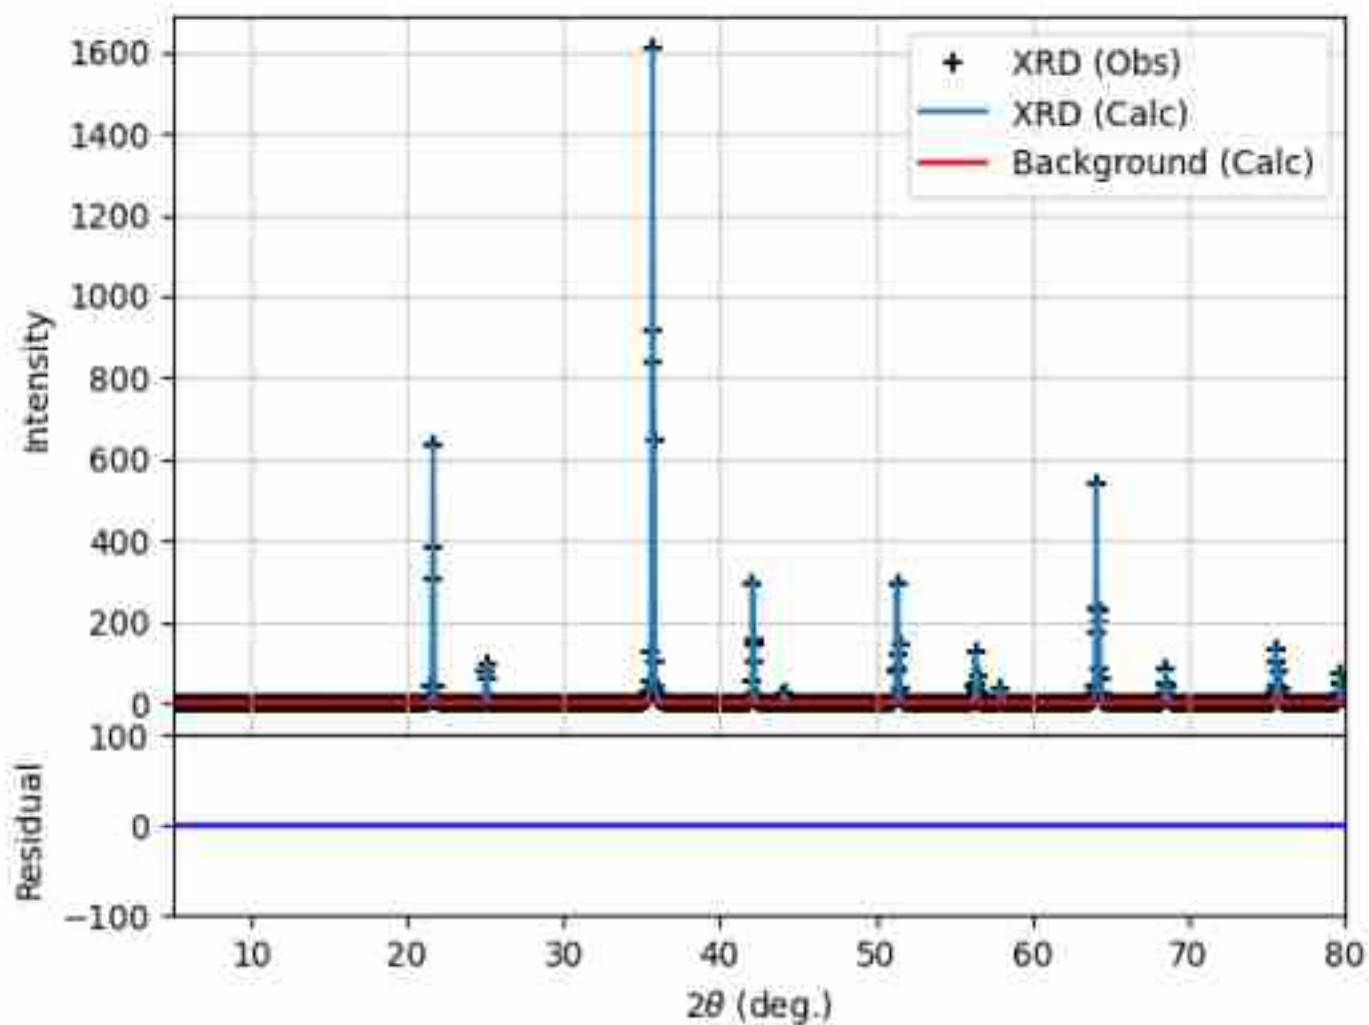

| RMSE before RR | Rwp     | RMSE after RR |
|----------------|---------|---------------|
| 0.001          | 0.00735 | 0.00199       |

# Li1Tb1In2

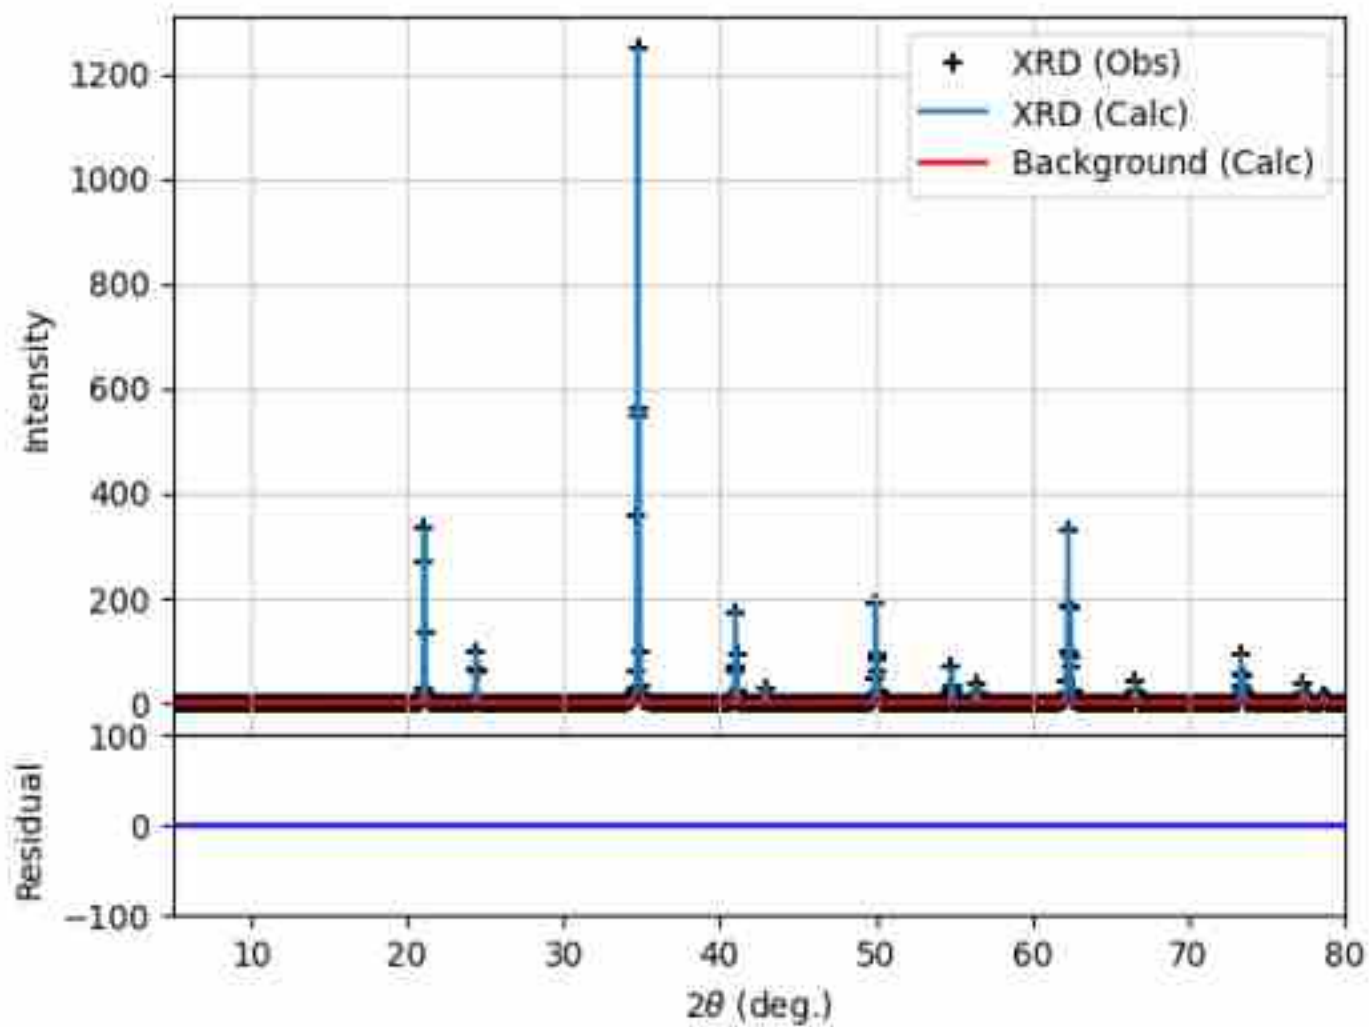

| RMSE before RR | Rwp     | RMSE after RR |
|----------------|---------|---------------|
| 0.001          | 0.00474 | 0.00353       |

# Li1Tb2Ir1

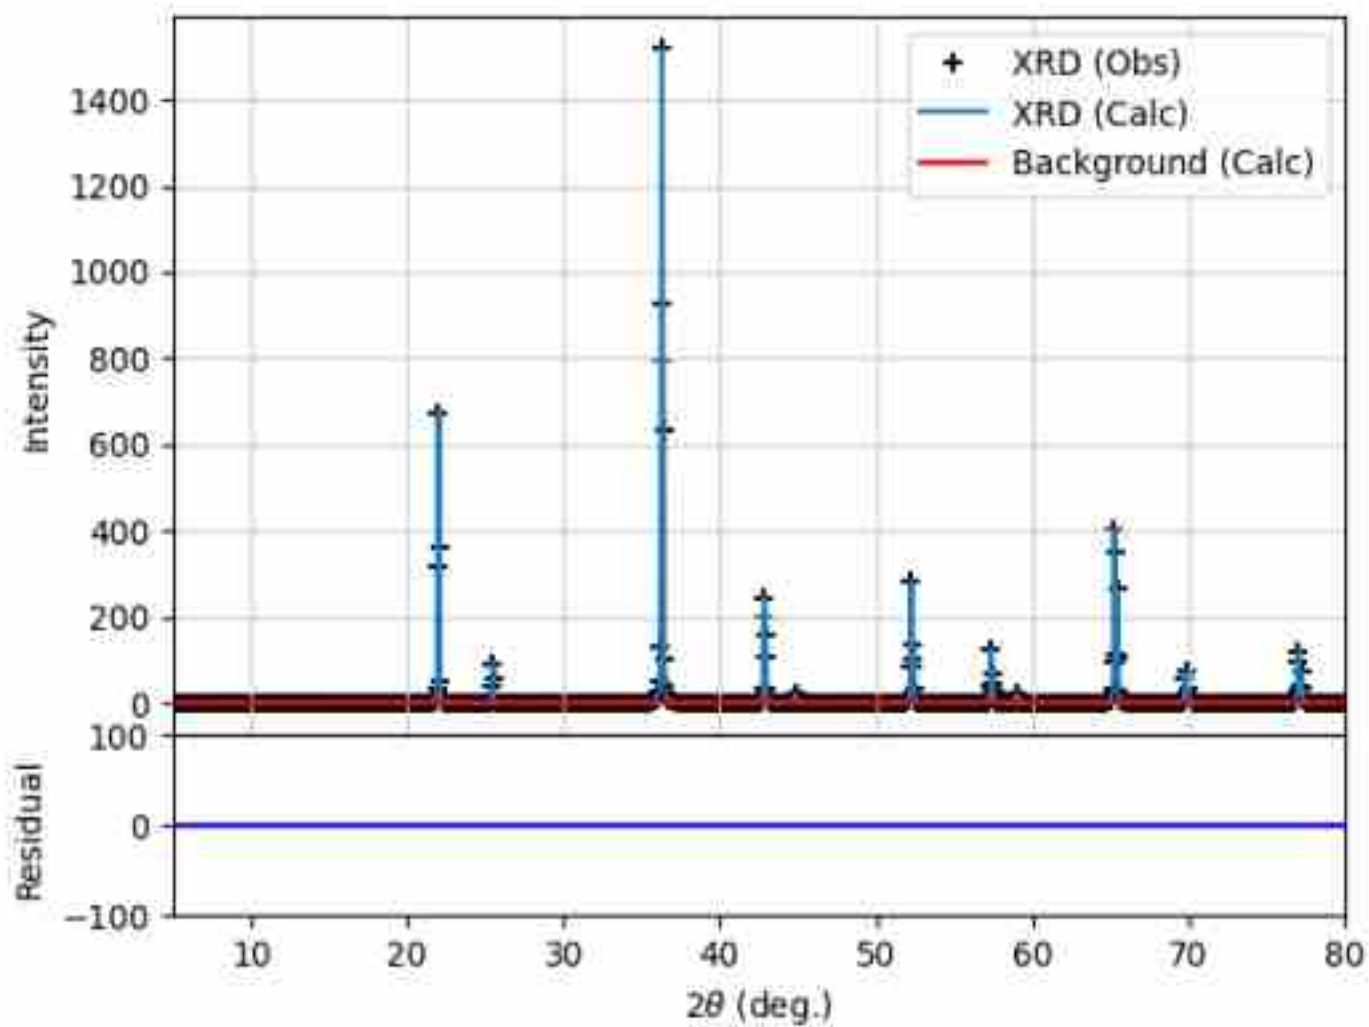

| RMSE before RR | Rwp     | RMSE after RR |
|----------------|---------|---------------|
| 0.001          | 0.00017 | 0.00061       |

# Li1Ti1Pd2

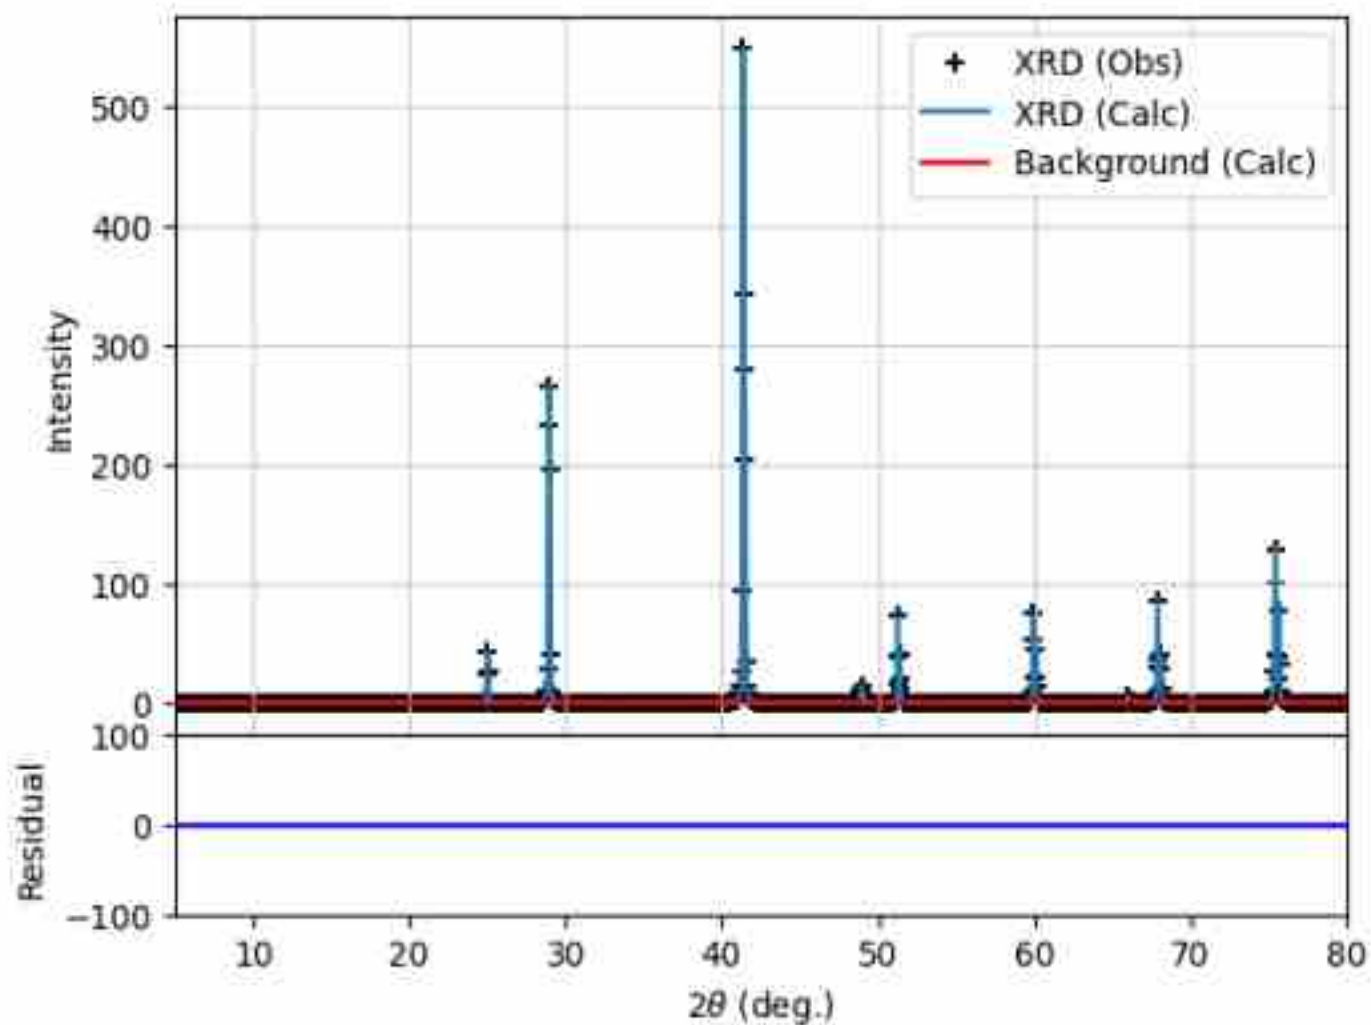

| RMSE before RR | Rwp    | RMSE after RR |
|----------------|--------|---------------|
| 0.001          | 0.0002 | 0.00023       |



# Li1Ti2Ir1

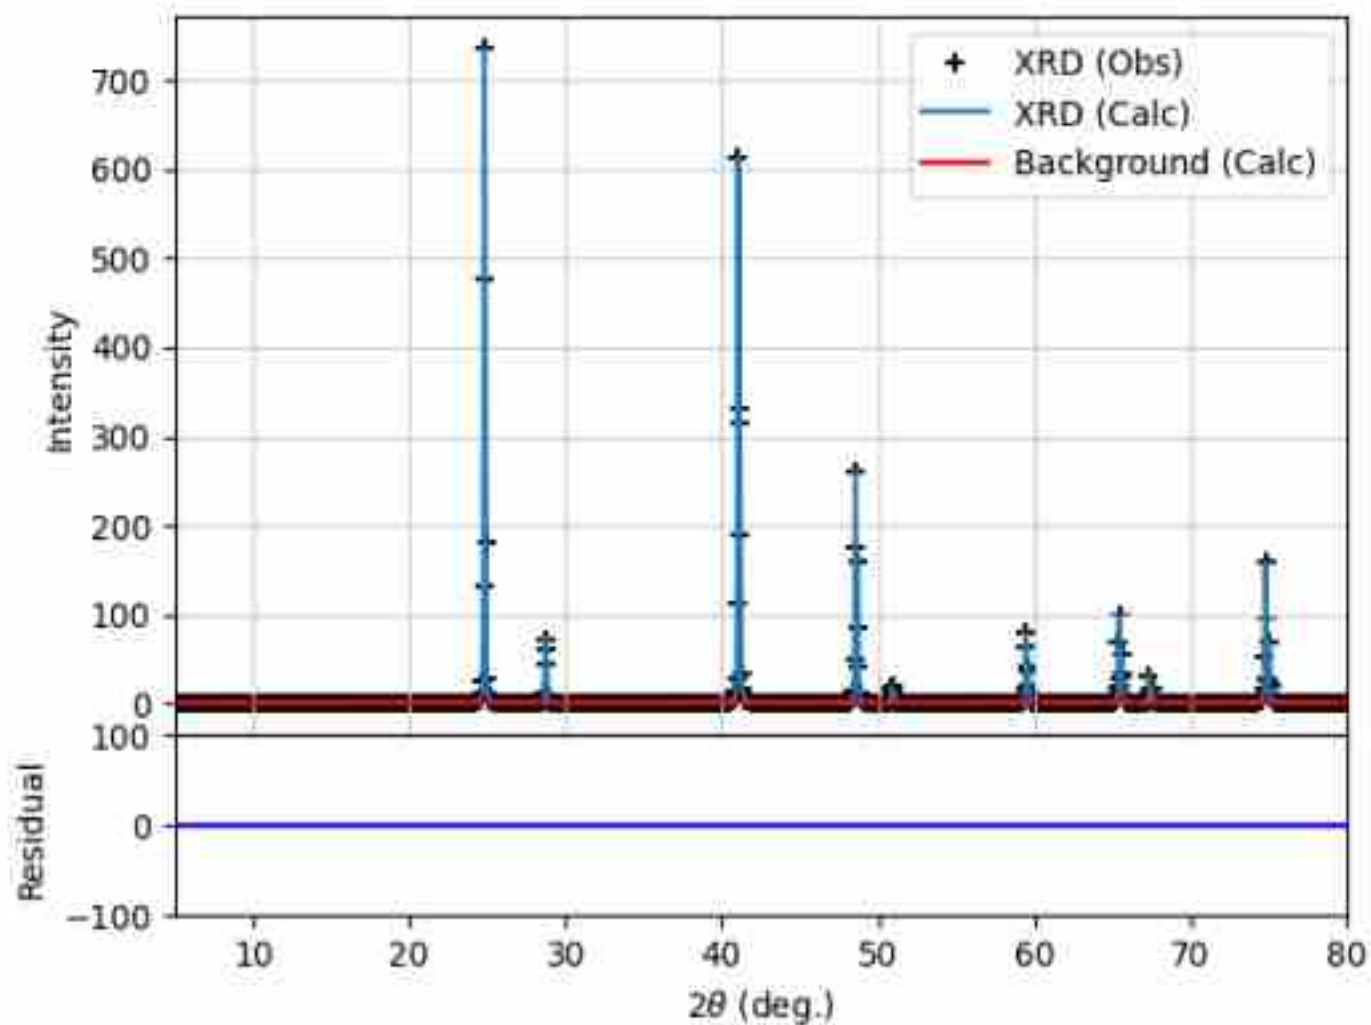

| RMSE before RR | Rwp     | RMSE after RR |
|----------------|---------|---------------|
| 0.001          | 0.00171 | 0.00187       |

# Li1Tl3

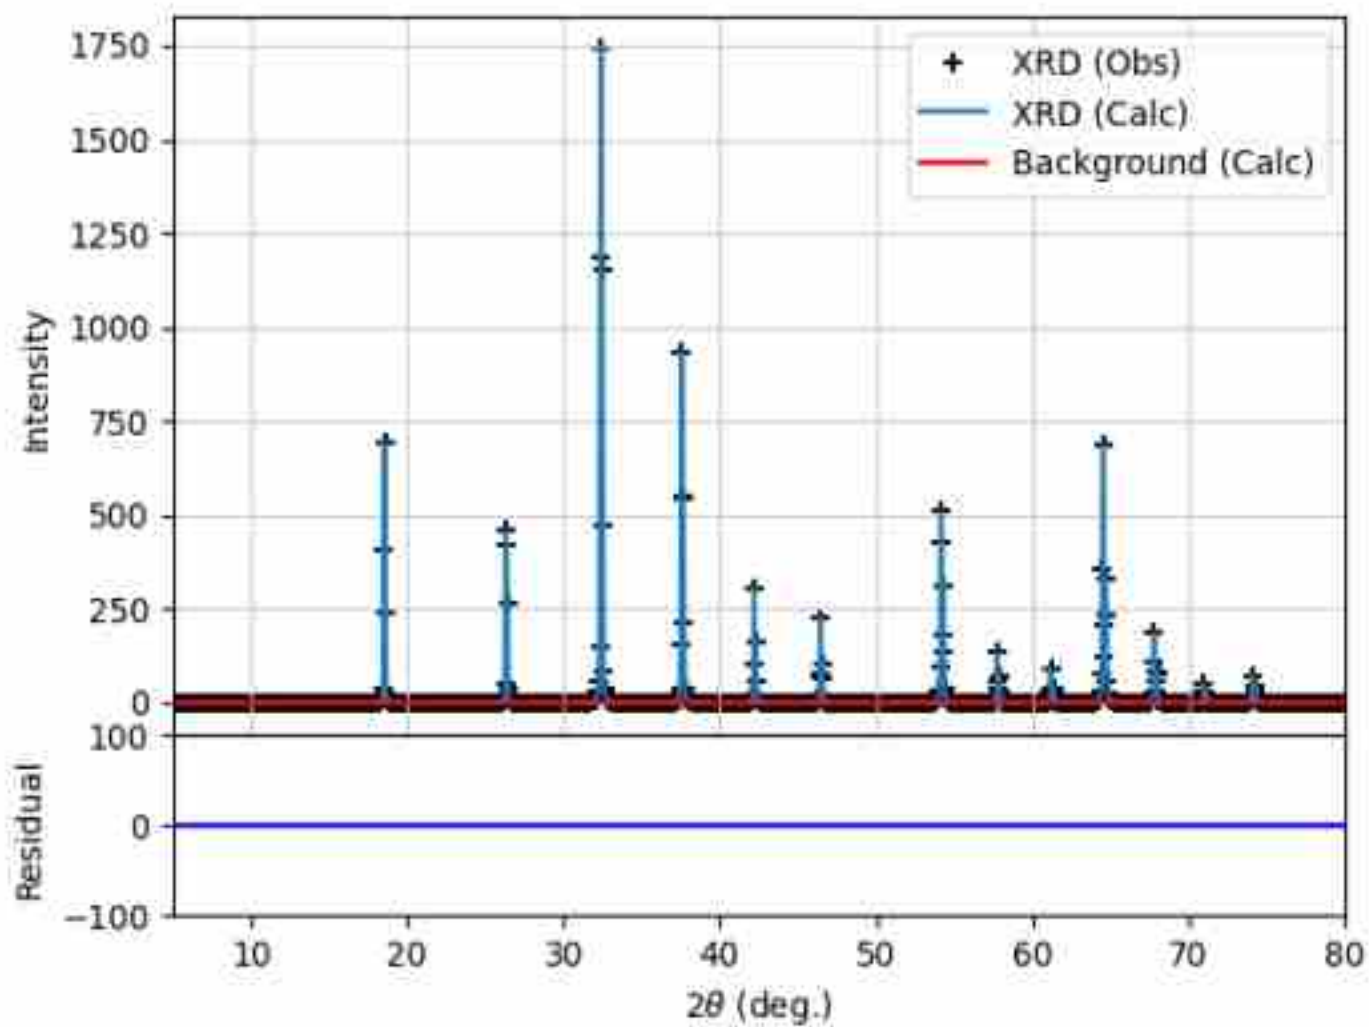

| RMSE before RR | Rwp    | RMSE after RR |
|----------------|--------|---------------|
| 0.001          | 0.0241 | 0.00374       |

# Li1Tm1Pd2

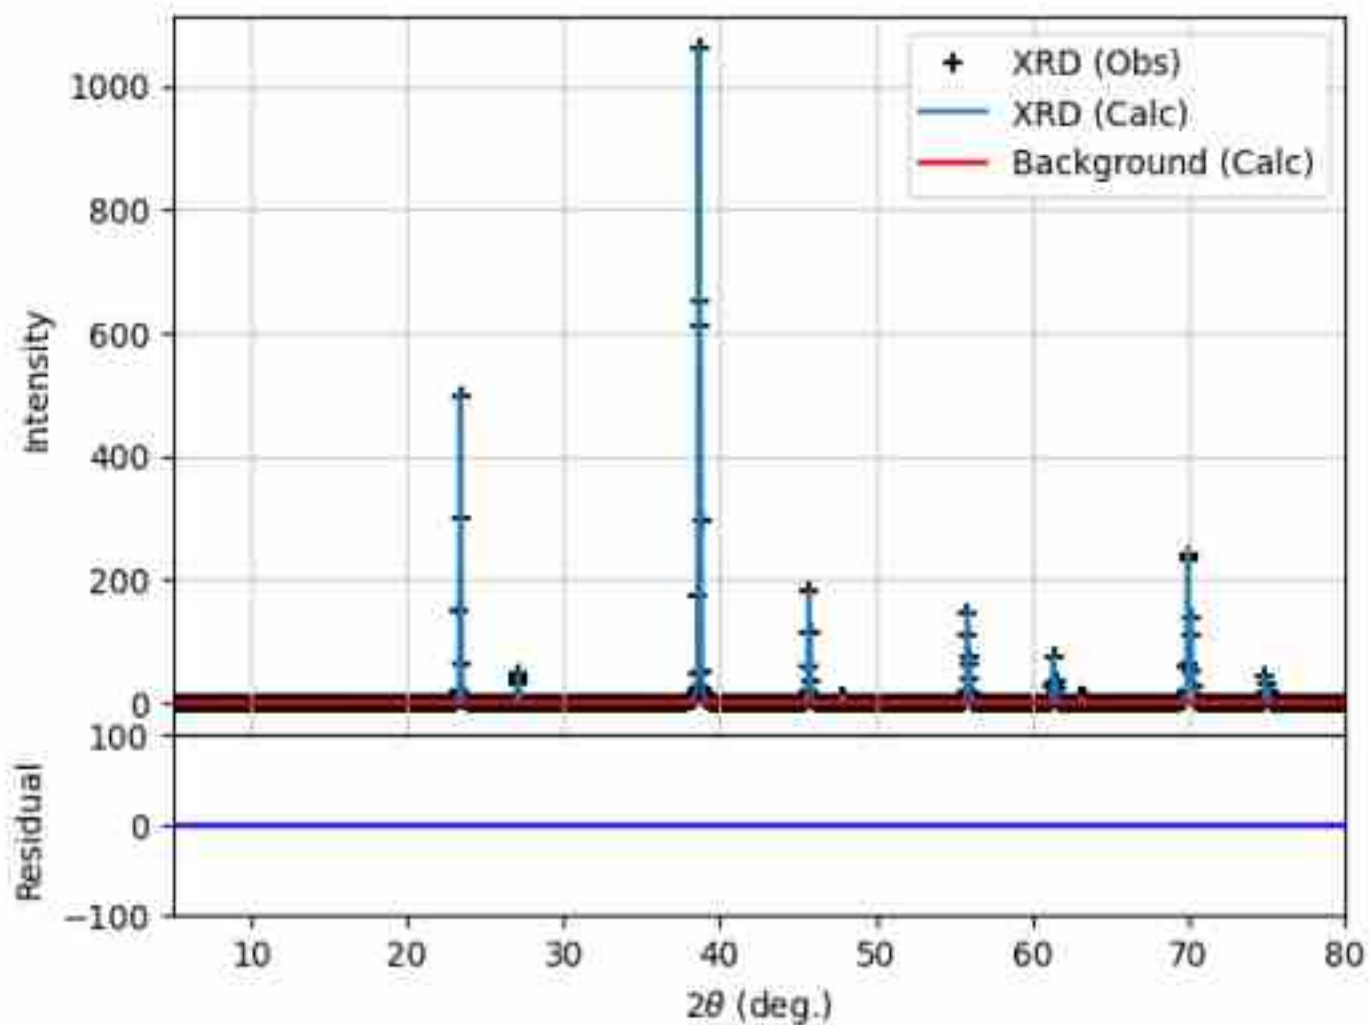

| RMSE before RR | Rwp     | RMSE after RR |
|----------------|---------|---------------|
| 0.001          | 0.00824 | 0.00119       |

# Li1Tm2Ga1

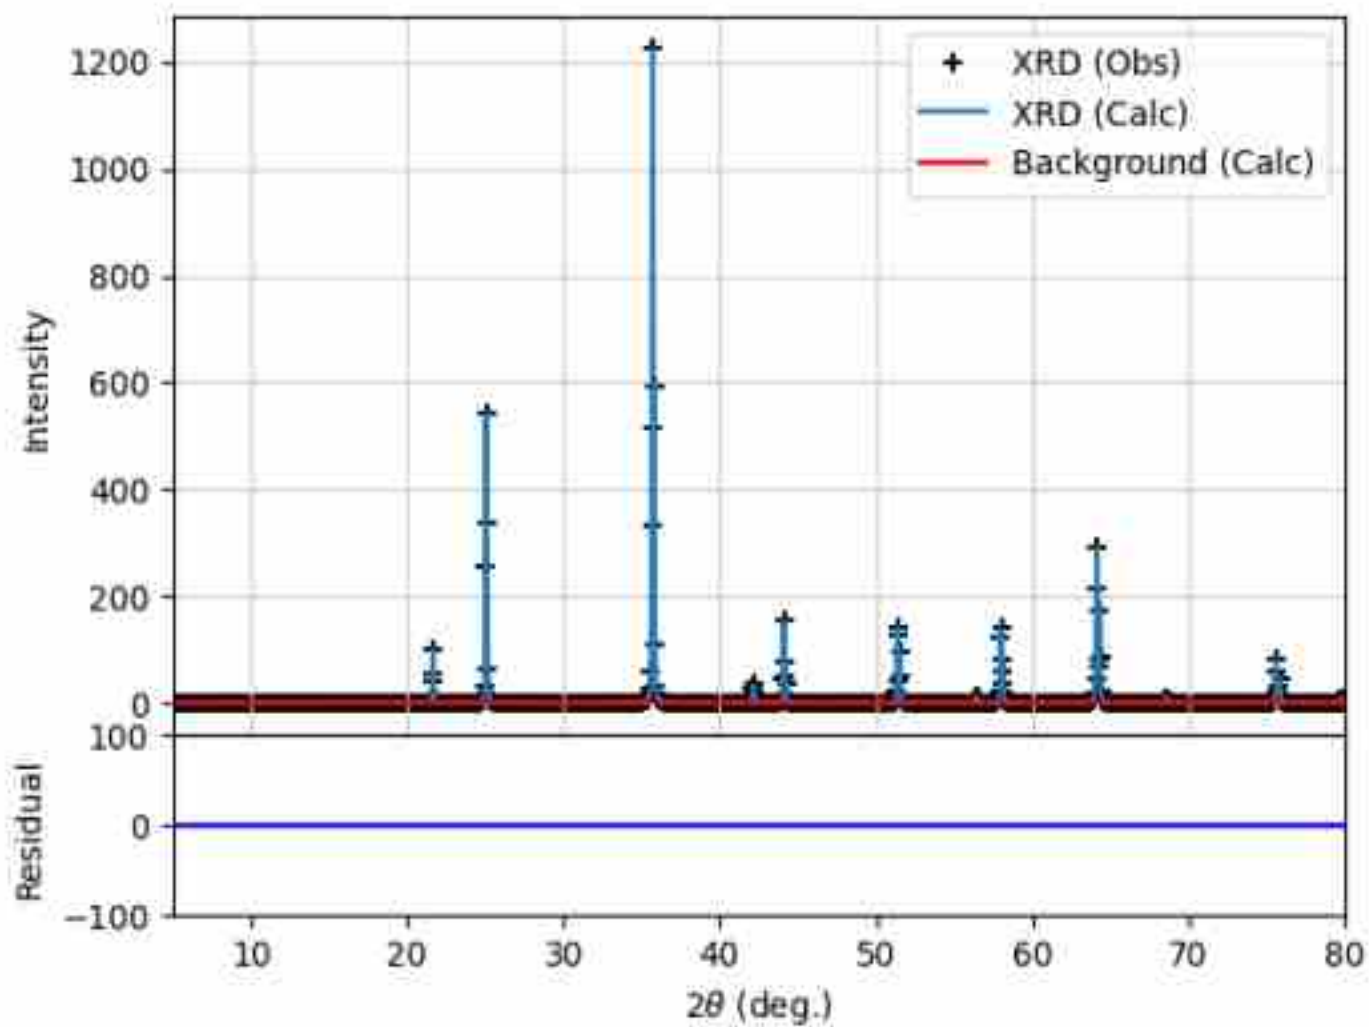

| RMSE before RR | Rwp     | RMSE after RR |
|----------------|---------|---------------|
| 0.001          | 0.00507 | 0.00247       |

# Li1V1Ir2

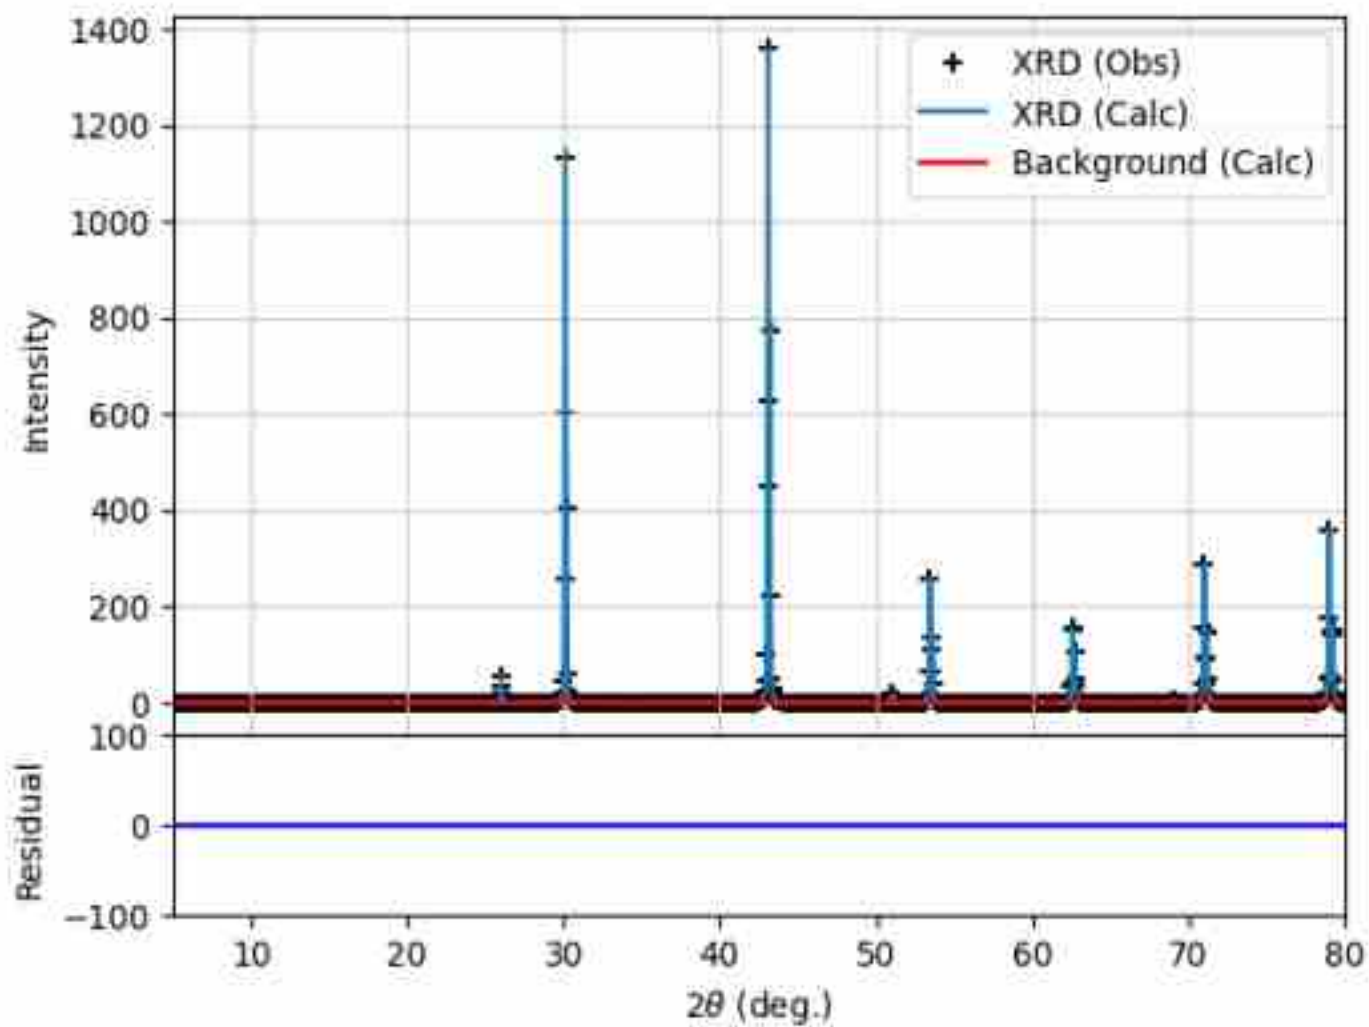

| RMSE before RR | Rwp     | RMSE after RR |
|----------------|---------|---------------|
| 0.001          | 0.00415 | 0.00261       |

# Li1Y2Hg1

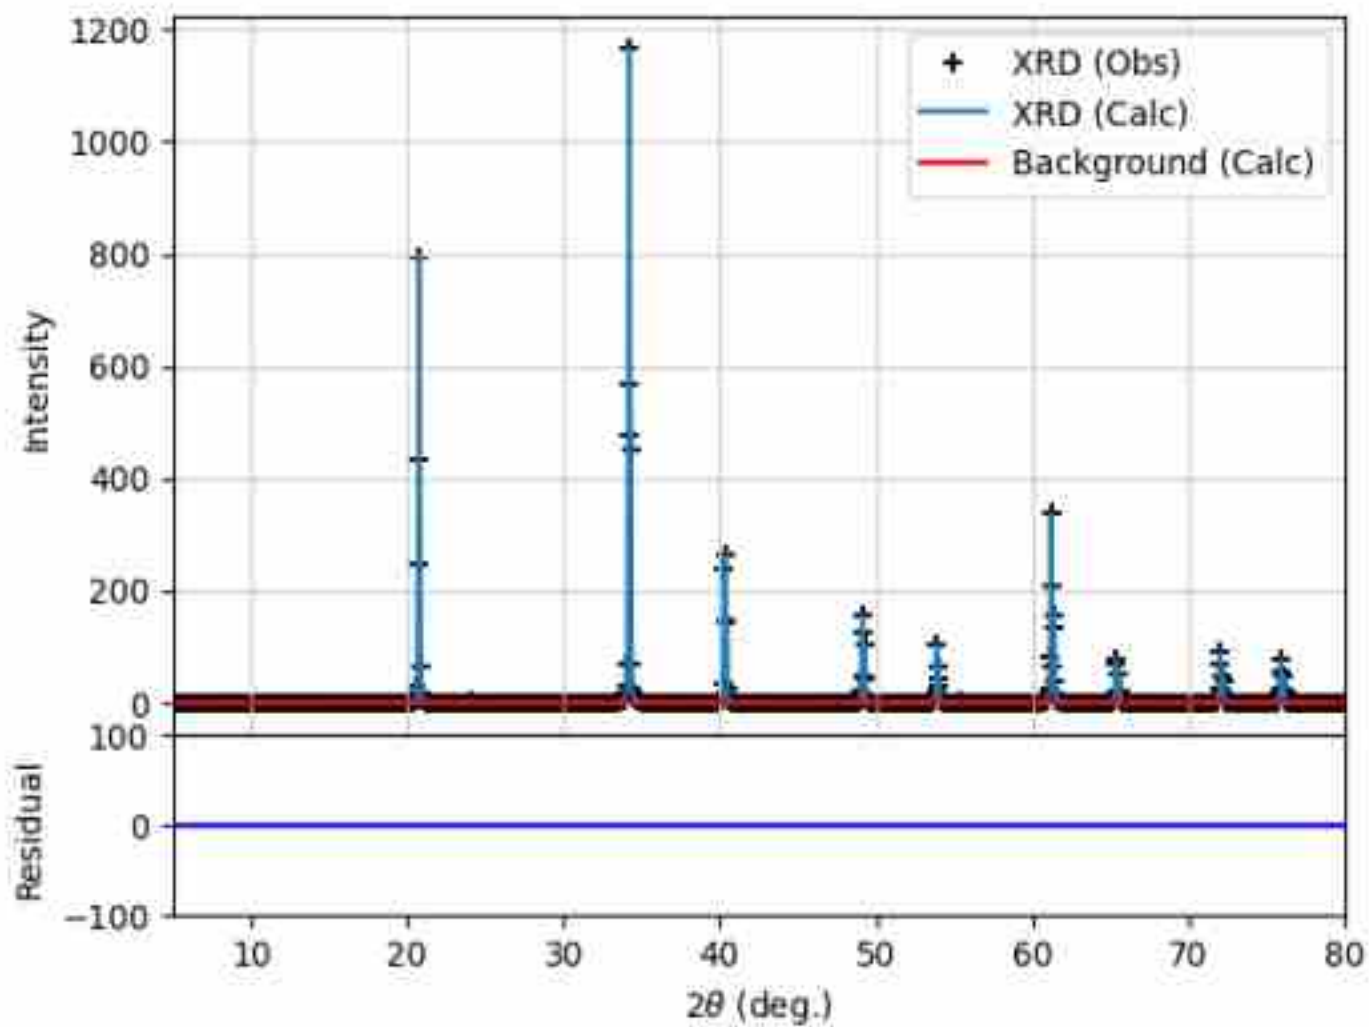

| RMSE before RR | Rwp     | RMSE after RR |
|----------------|---------|---------------|
| 0.001          | 0.00714 | 0.00235       |

# Li1Y2Ir1

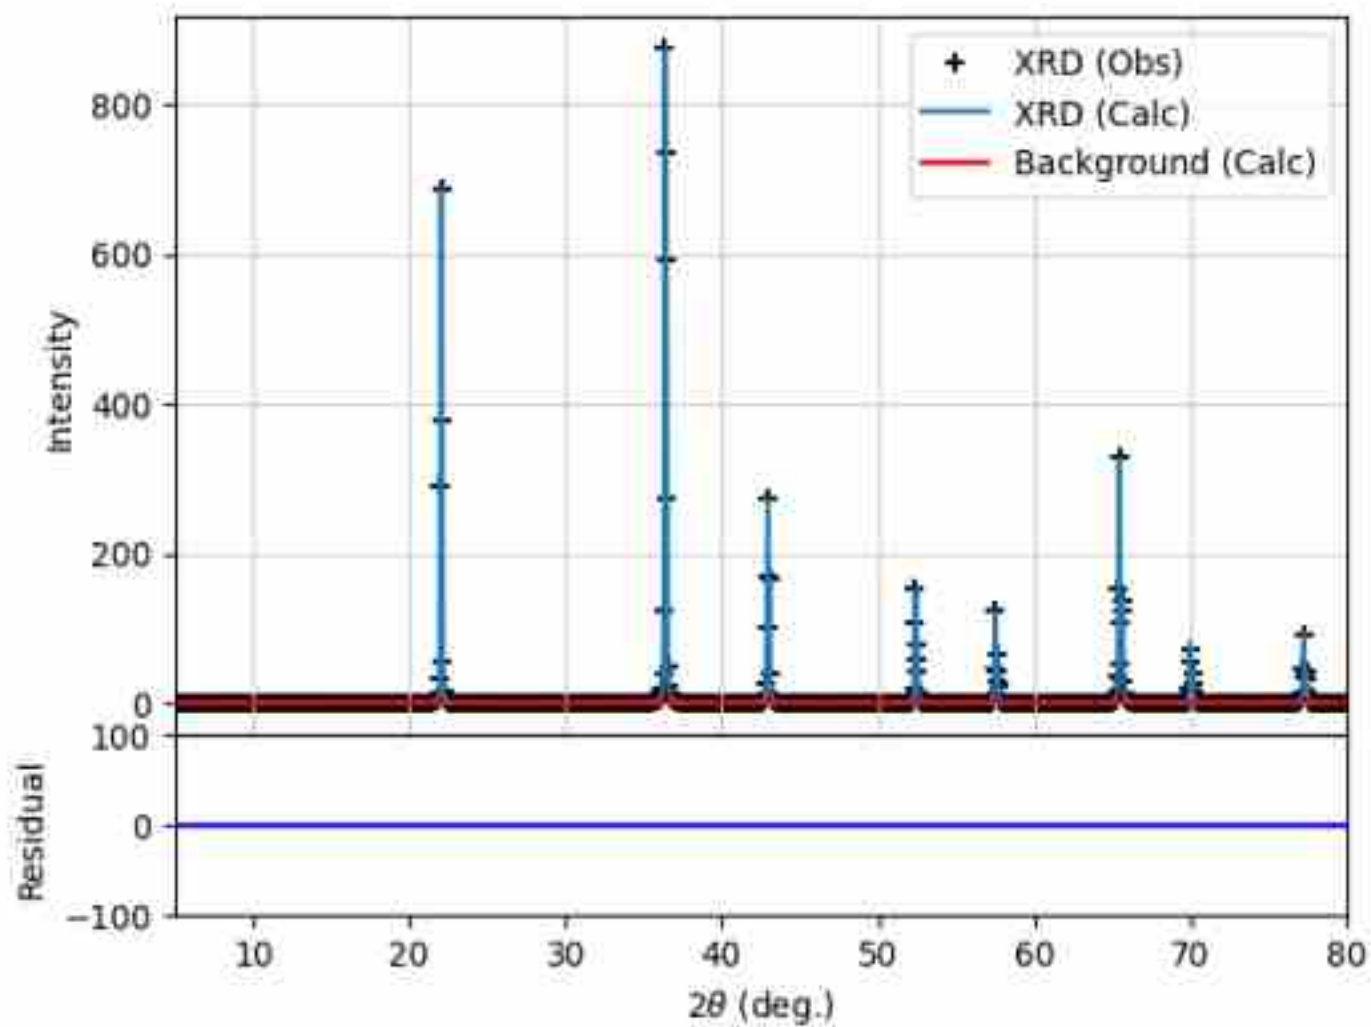

| RMSE before RR | Rwp   | RMSE after RR |
|----------------|-------|---------------|
| 0.001          | 0.003 | 0.00073       |

# Li1Zn1Cu2

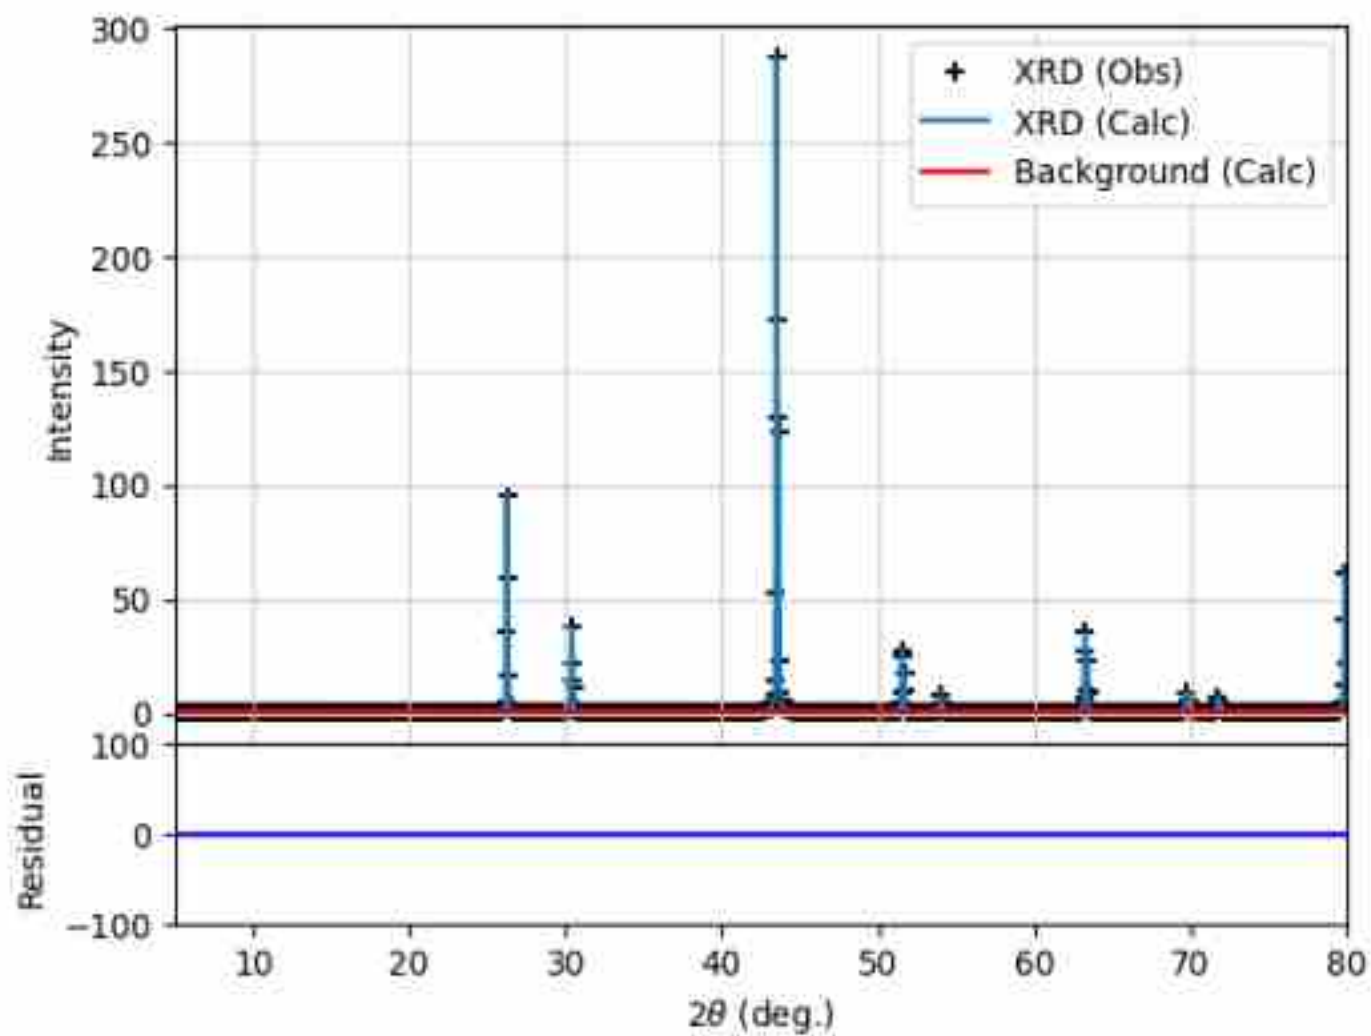

| RMSE before RR | Rwp     | RMSE after RR |
|----------------|---------|---------------|
| 0.001          | 0.00754 | 0.00086       |



# Li1Zn1Pd2

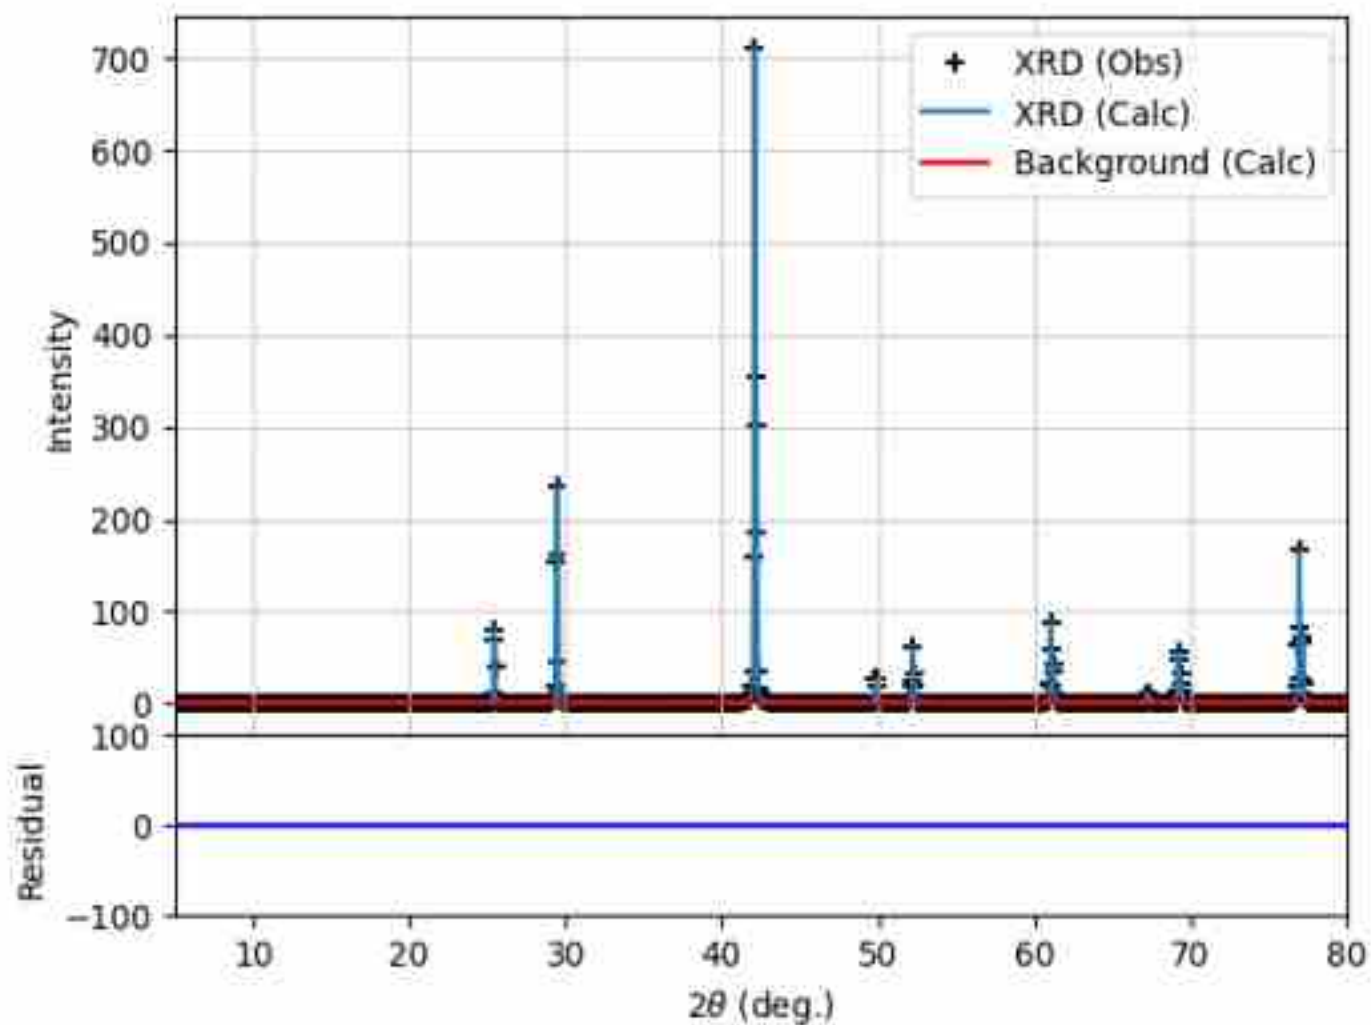

| RMSE before RR | Rwp   | RMSE after RR |
|----------------|-------|---------------|
| 0.001          | 4e-05 | 0.0003        |

# Li1Zn2Pd1

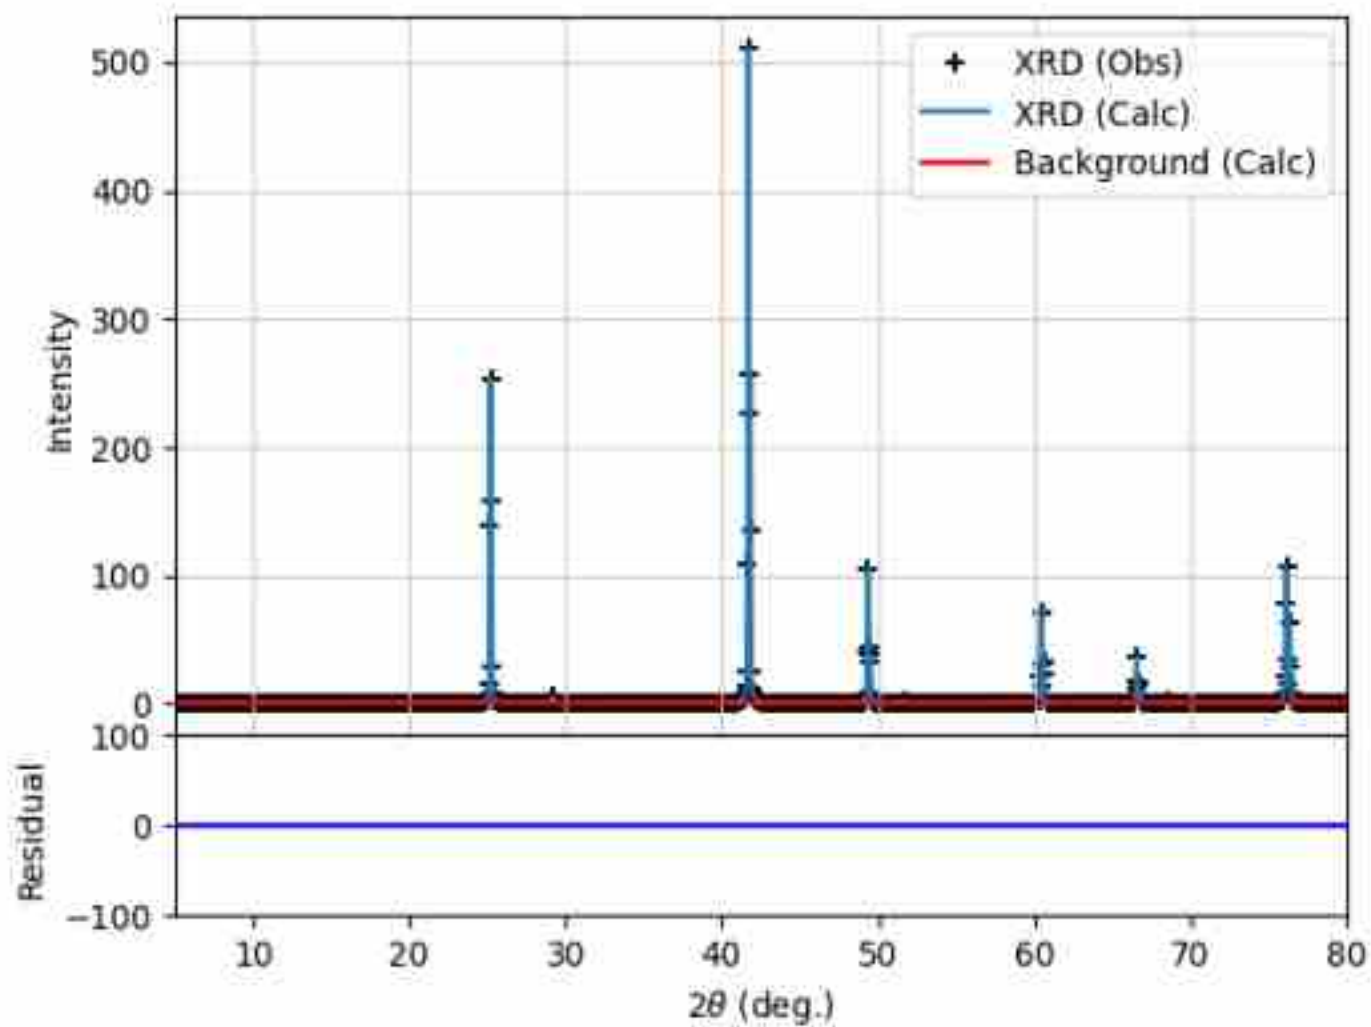

| RMSE before RR | Rwp     | RMSE after RR |
|----------------|---------|---------------|
| 0.001          | 0.00277 | 0.0007        |

# Li1Zn2Rh1

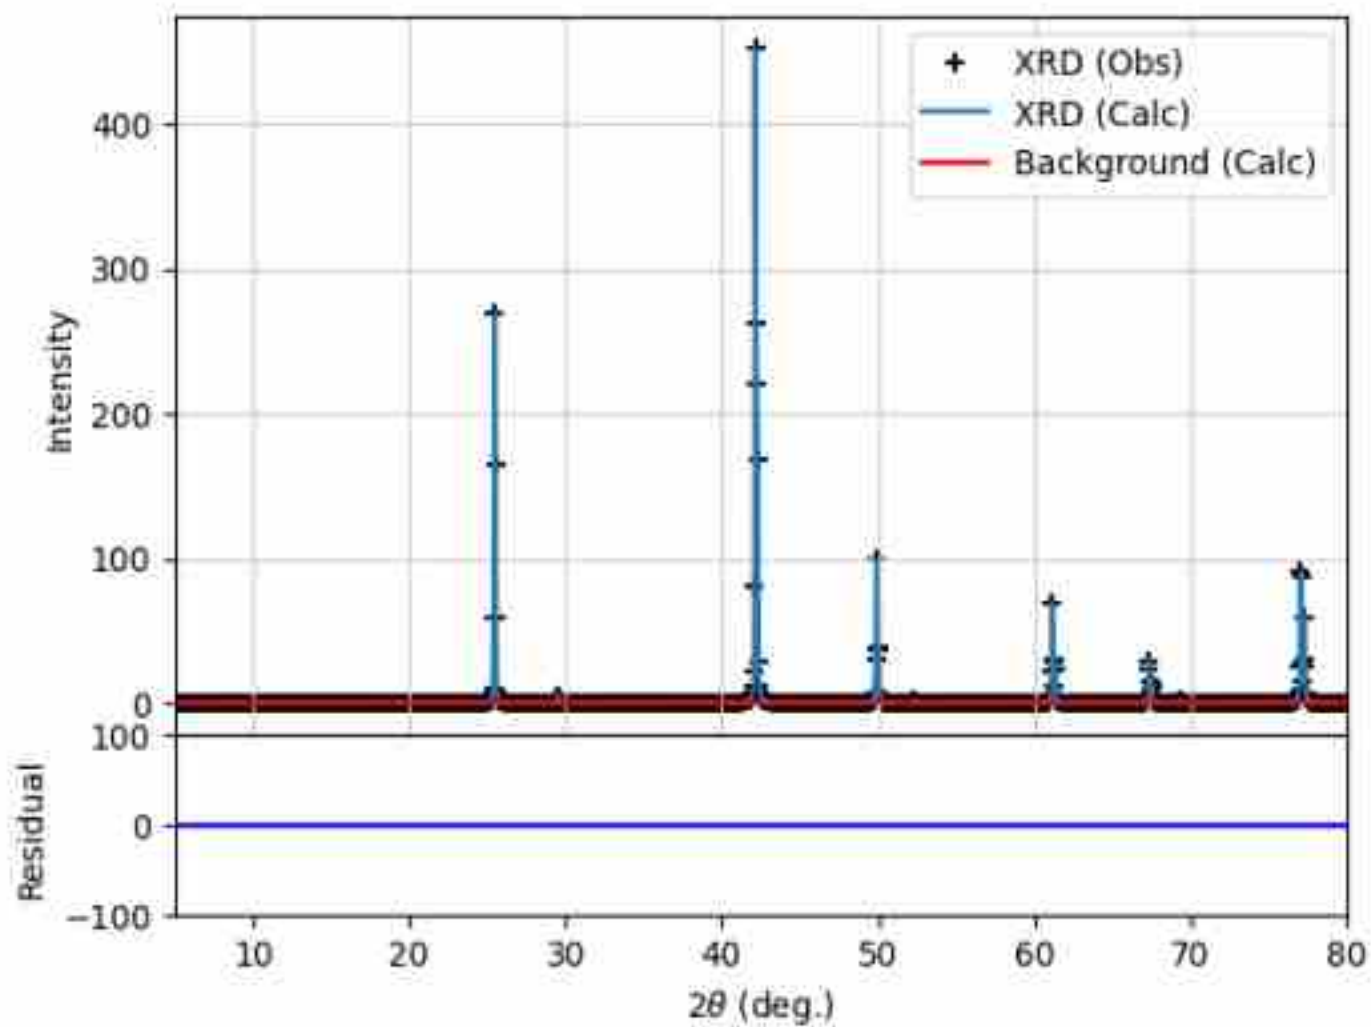

| RMSE before RR | Rwp     | RMSE after RR |
|----------------|---------|---------------|
| 0.001          | 0.00299 | 0.00122       |

# Li1Zr1Rh2

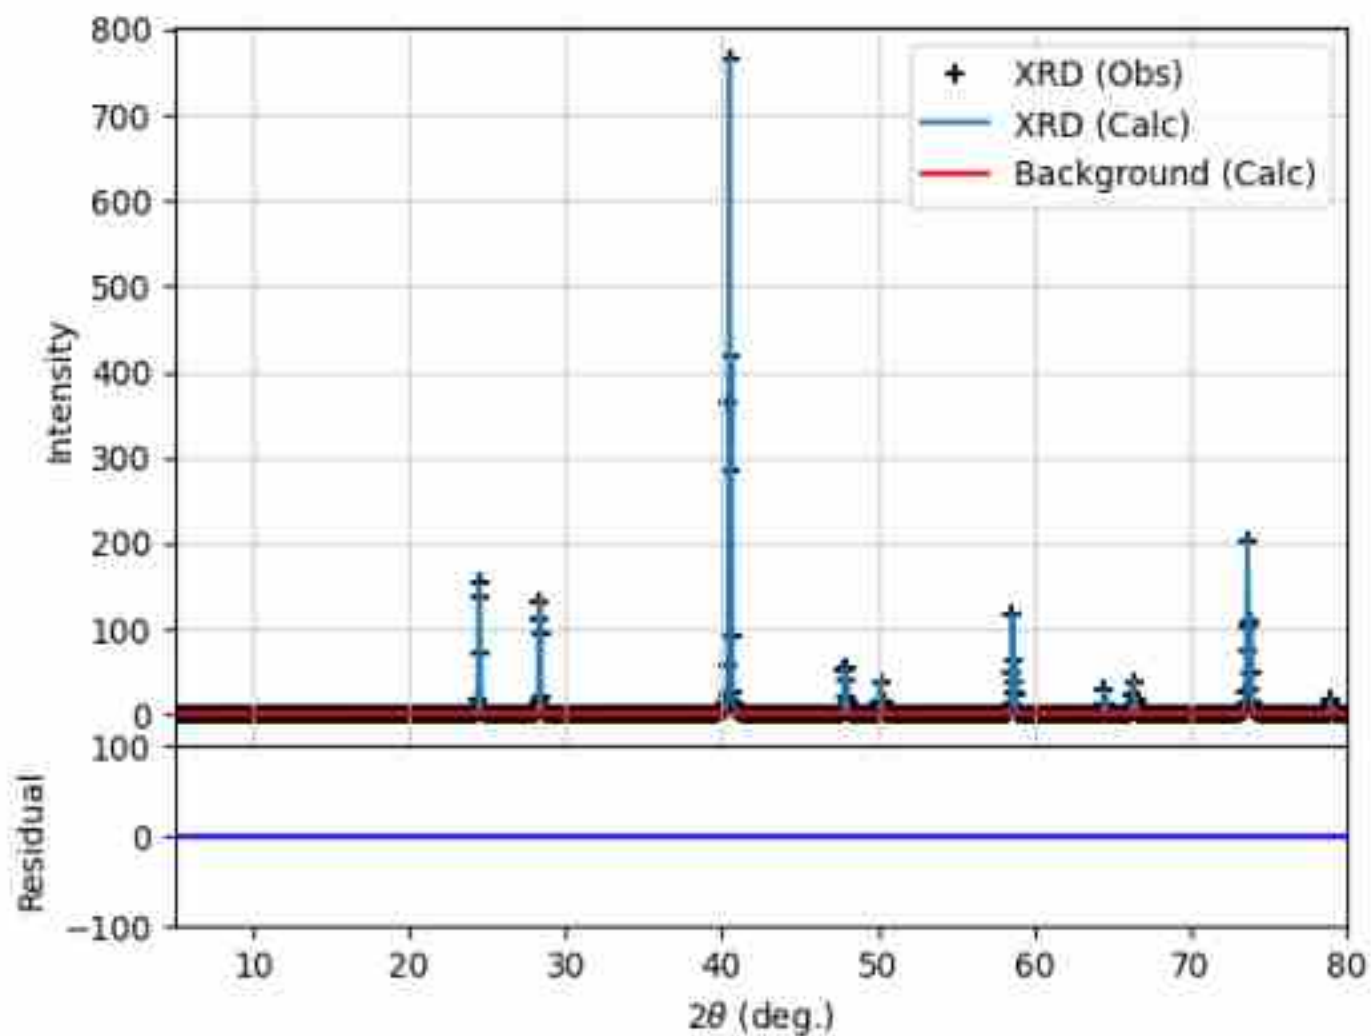

| RMSE before RR | Rwp     | RMSE after RR |
|----------------|---------|---------------|
| 0.001          | 0.00393 | 0.00143       |

# Li1Zr2Tc1

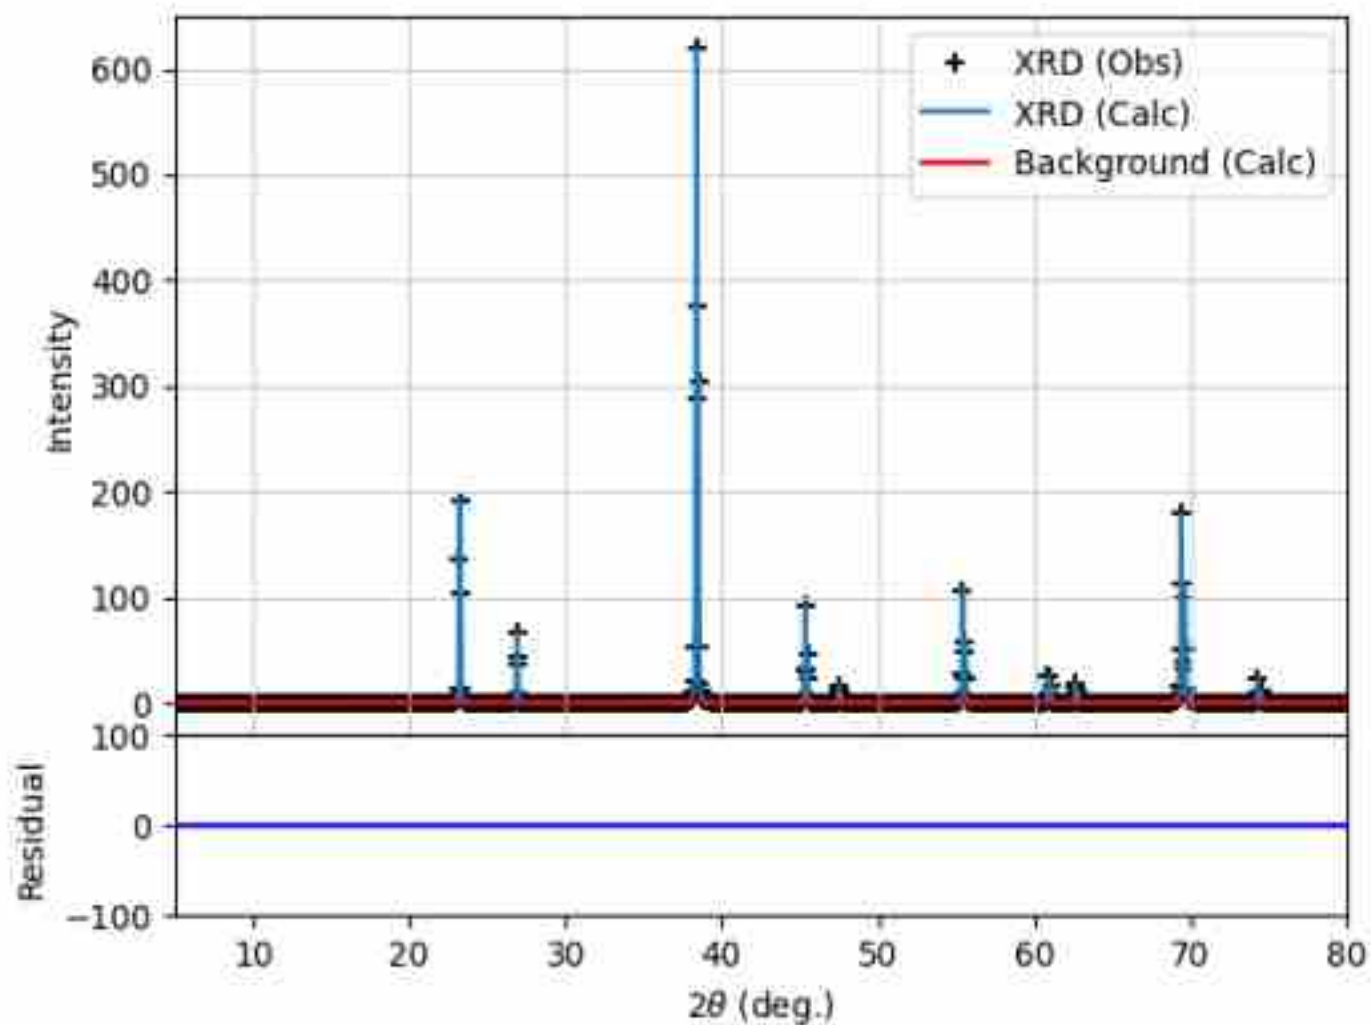

| RMSE before RR | Rwp     | RMSE after RR |
|----------------|---------|---------------|
| 0.001          | 0.00553 | 0.00078       |

# Li2Ac1In1

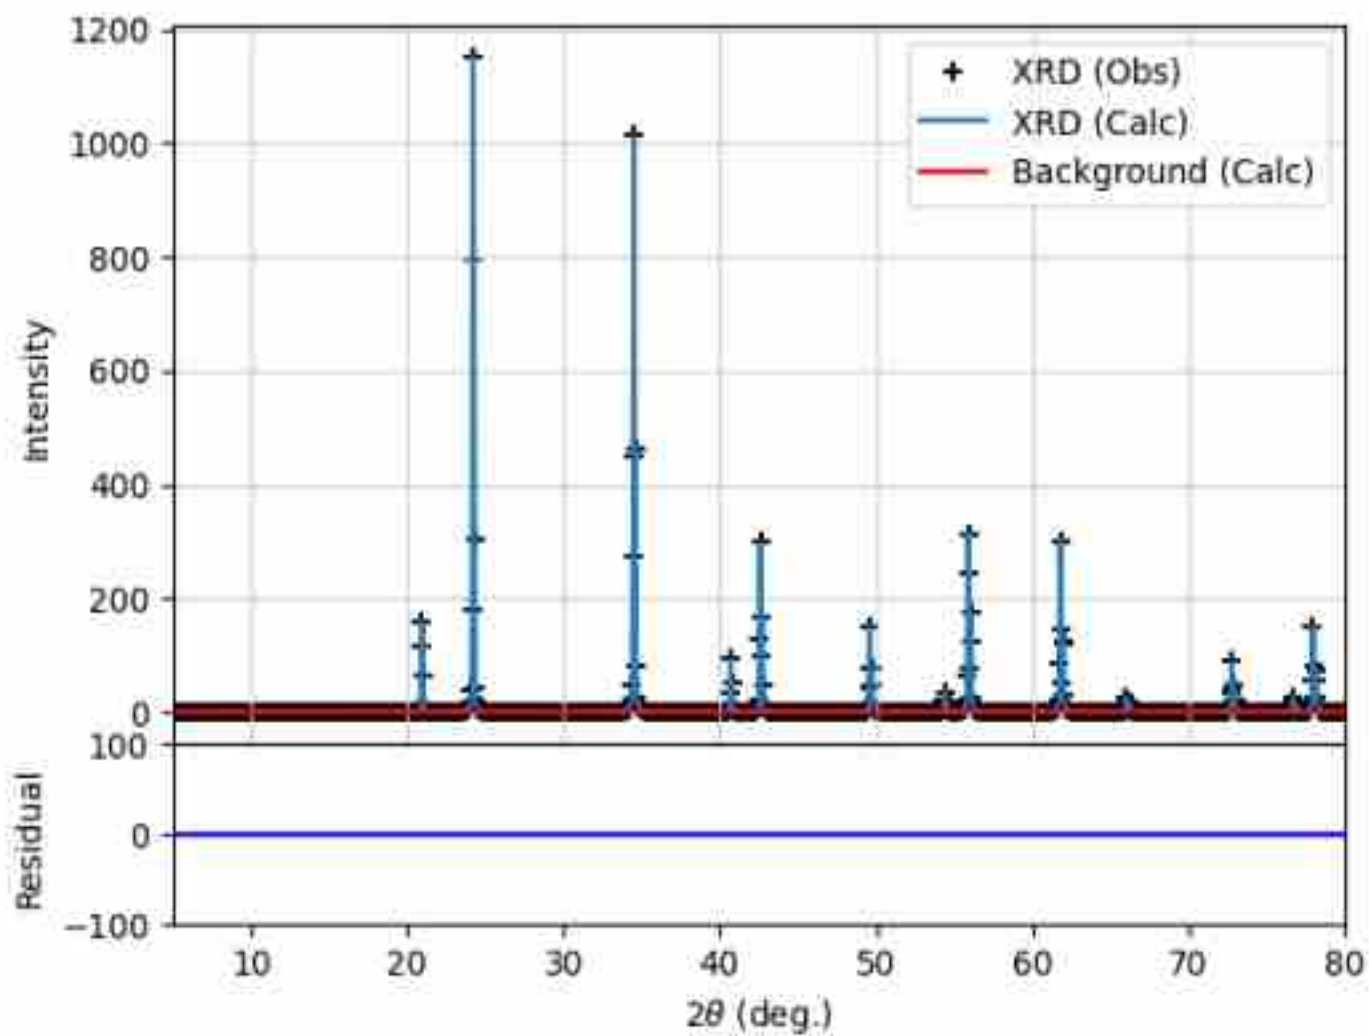

| RMSE before RR | Rwp     | RMSE after RR |
|----------------|---------|---------------|
| 0.001          | 0.00302 | 0.00128       |

# Li<sub>2</sub>Ag<sub>1</sub>Au<sub>1</sub>

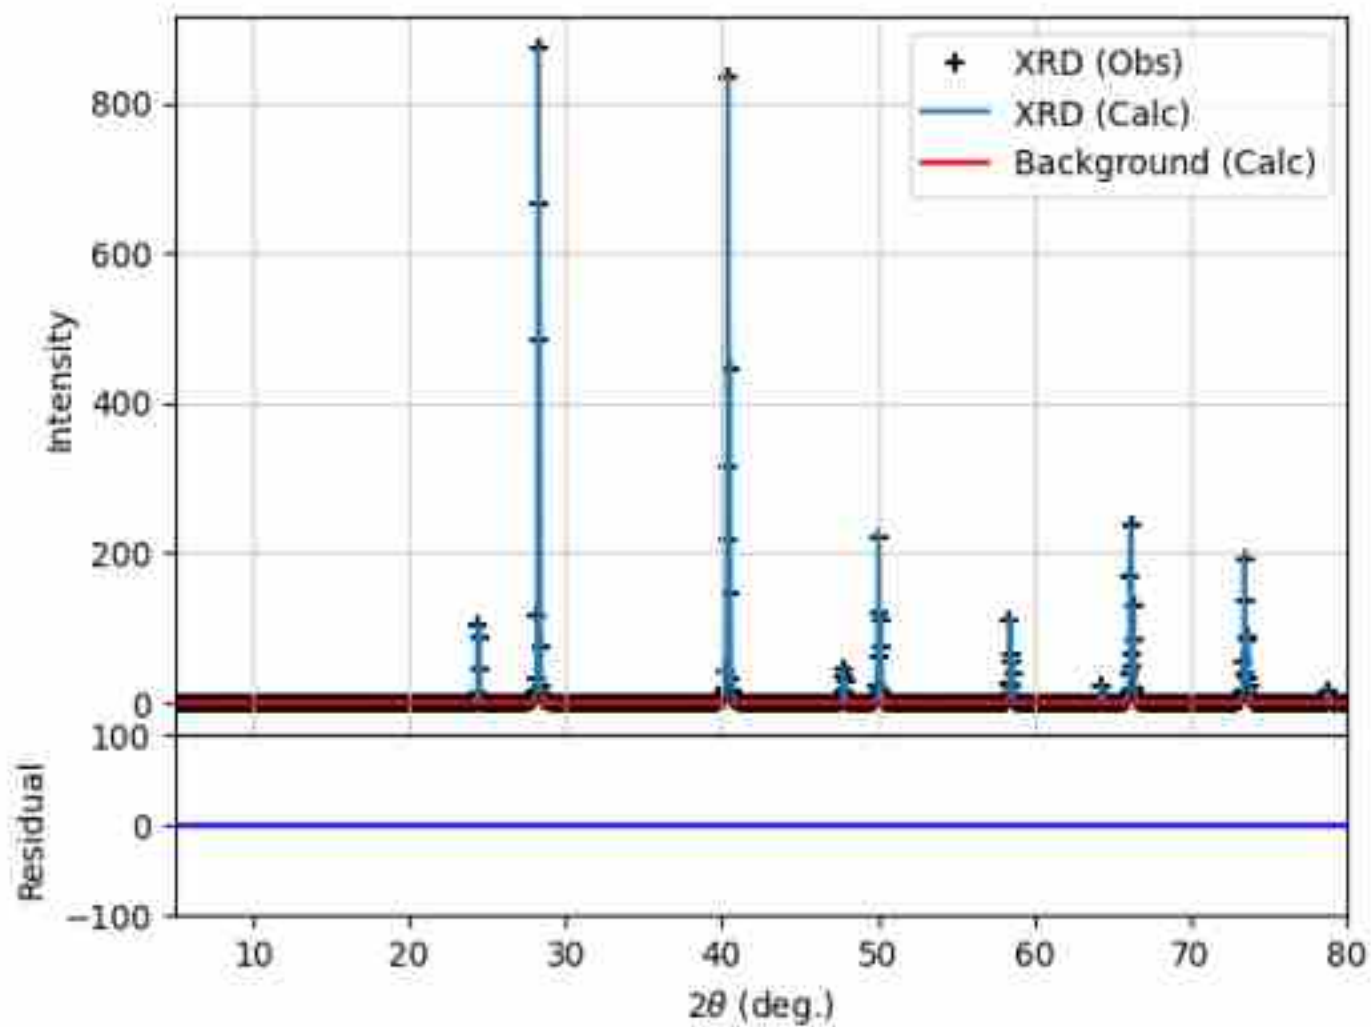

| RMSE before RR | Rwp     | RMSE after RR |
|----------------|---------|---------------|
| 0.001          | 0.02867 | 0.00628       |

# Li<sub>2</sub>AlAg<sub>1</sub>

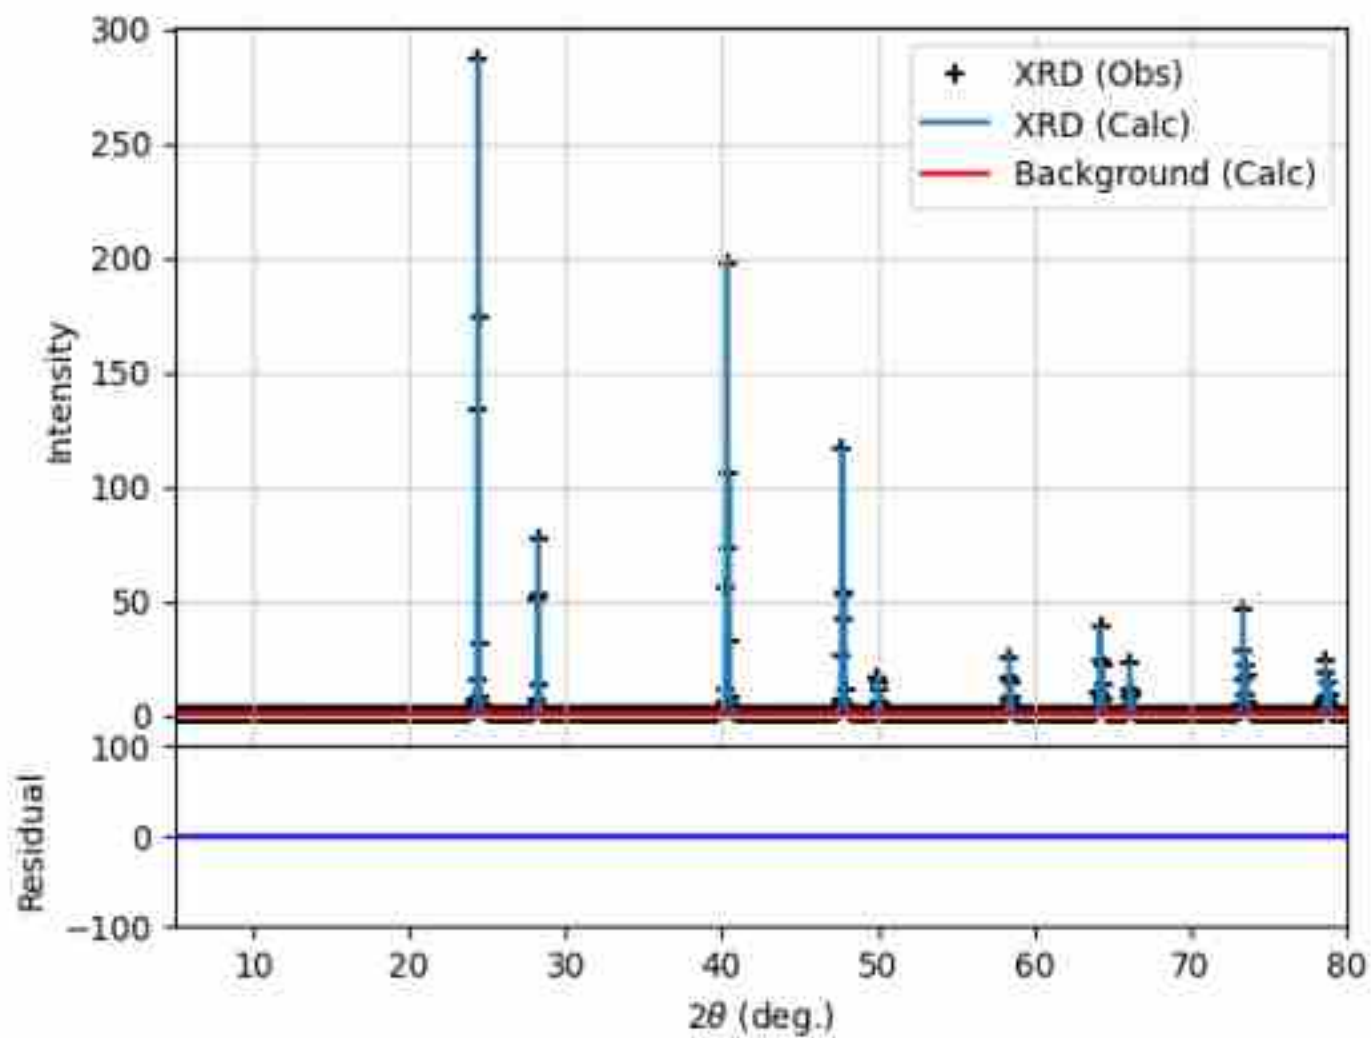

| RMSE before RR | Rwp     | RMSE after RR |
|----------------|---------|---------------|
| 0.001          | 0.01309 | 0.00136       |



# Li<sub>2</sub>Ca<sub>1</sub>Sn<sub>1</sub>

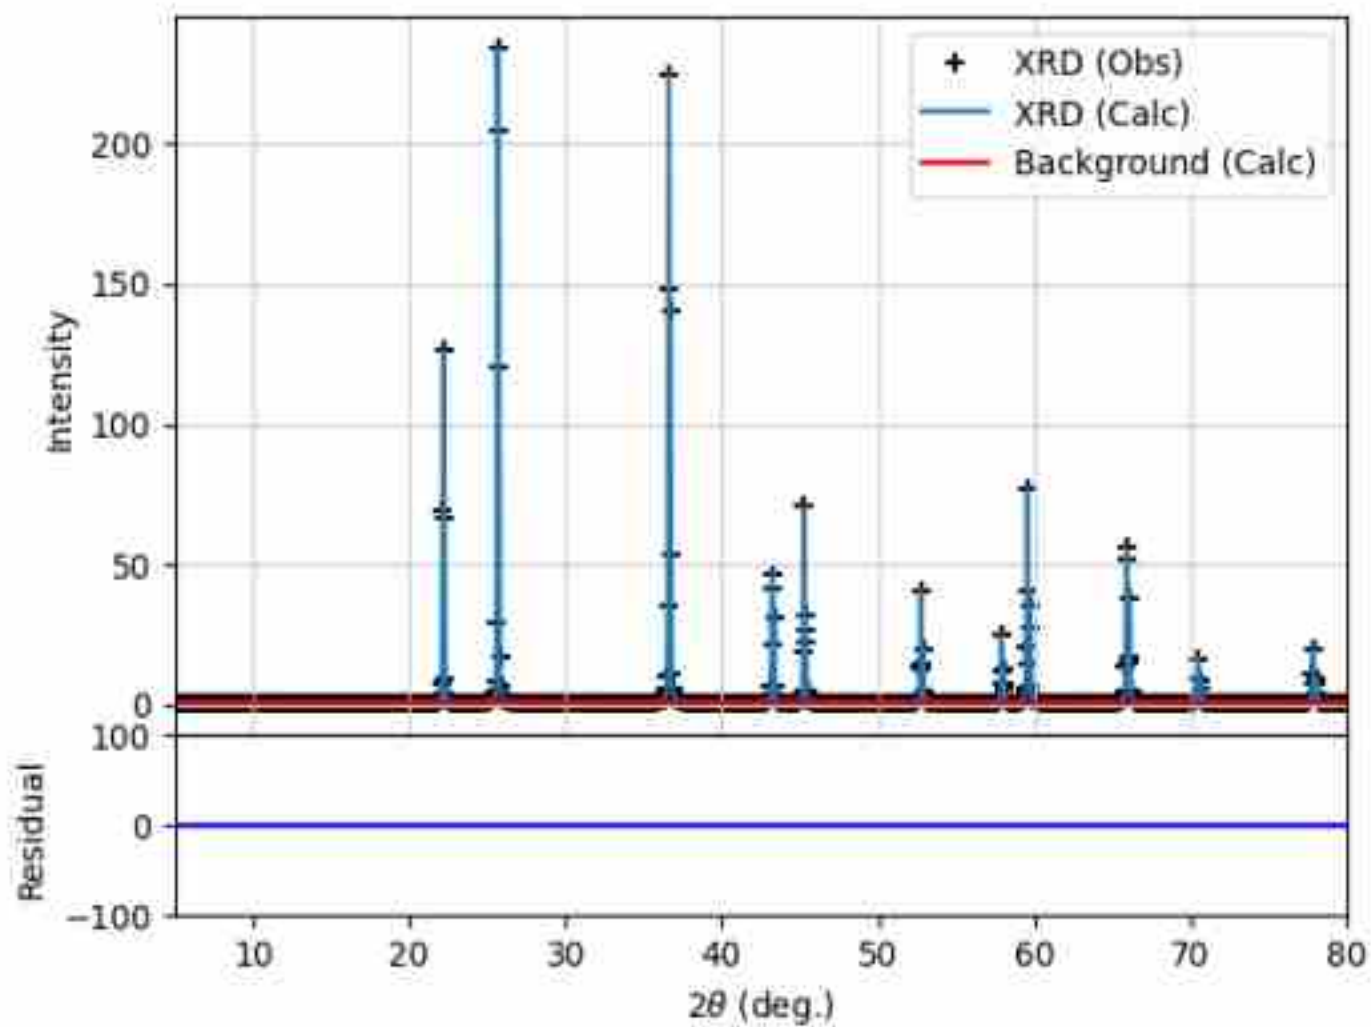

| RMSE before RR | Rwp     | RMSE after RR |
|----------------|---------|---------------|
| 0.001          | 0.00253 | 0.00516       |

# Li2Ca1Tl1

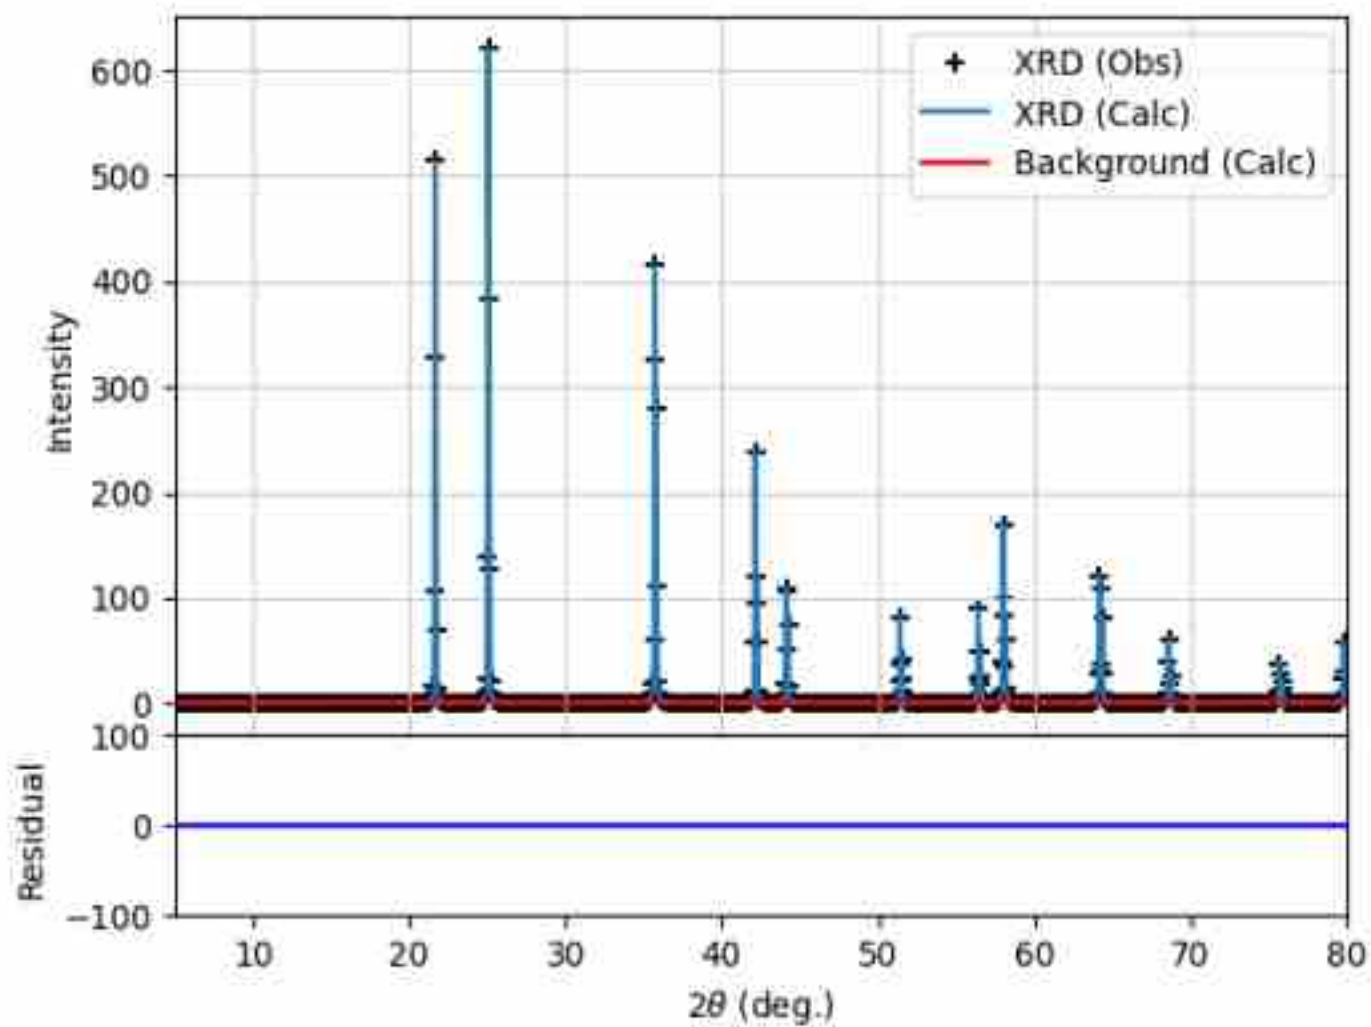

| RMSE before RR | Rwp     | RMSE after RR |
|----------------|---------|---------------|
| 0.001          | 0.02406 | 0.00723       |

# Li<sub>2</sub>Cu<sub>1</sub>Ge<sub>1</sub>

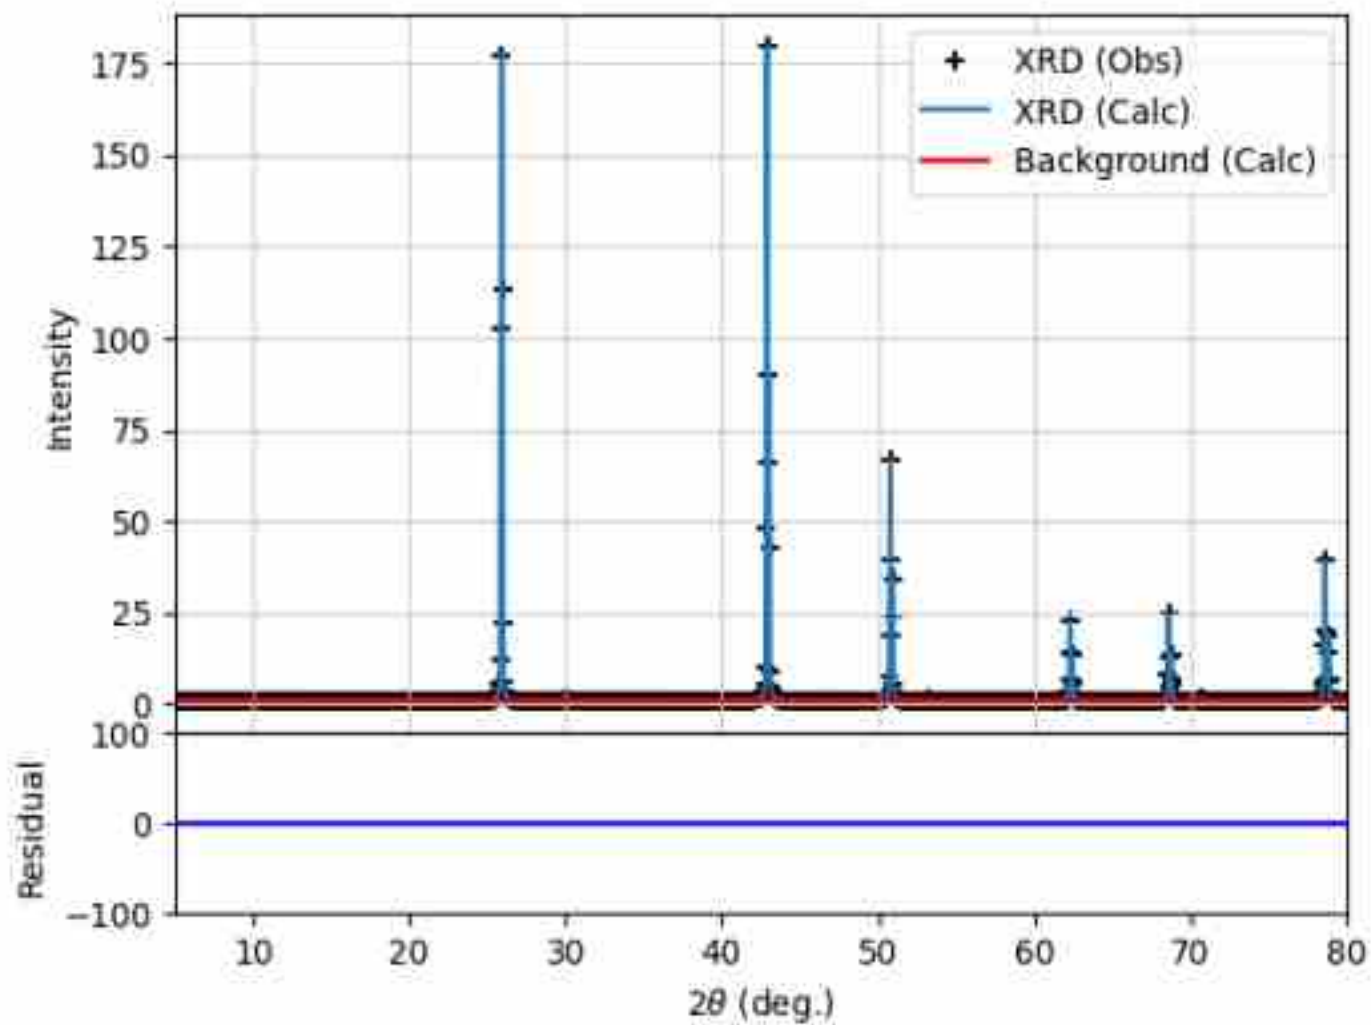

| RMSE before RR | Rwp     | RMSE after RR |
|----------------|---------|---------------|
| 0.001          | 0.01717 | 0.00325       |

# Li<sub>2</sub>Er<sub>2</sub>S<sub>4</sub>

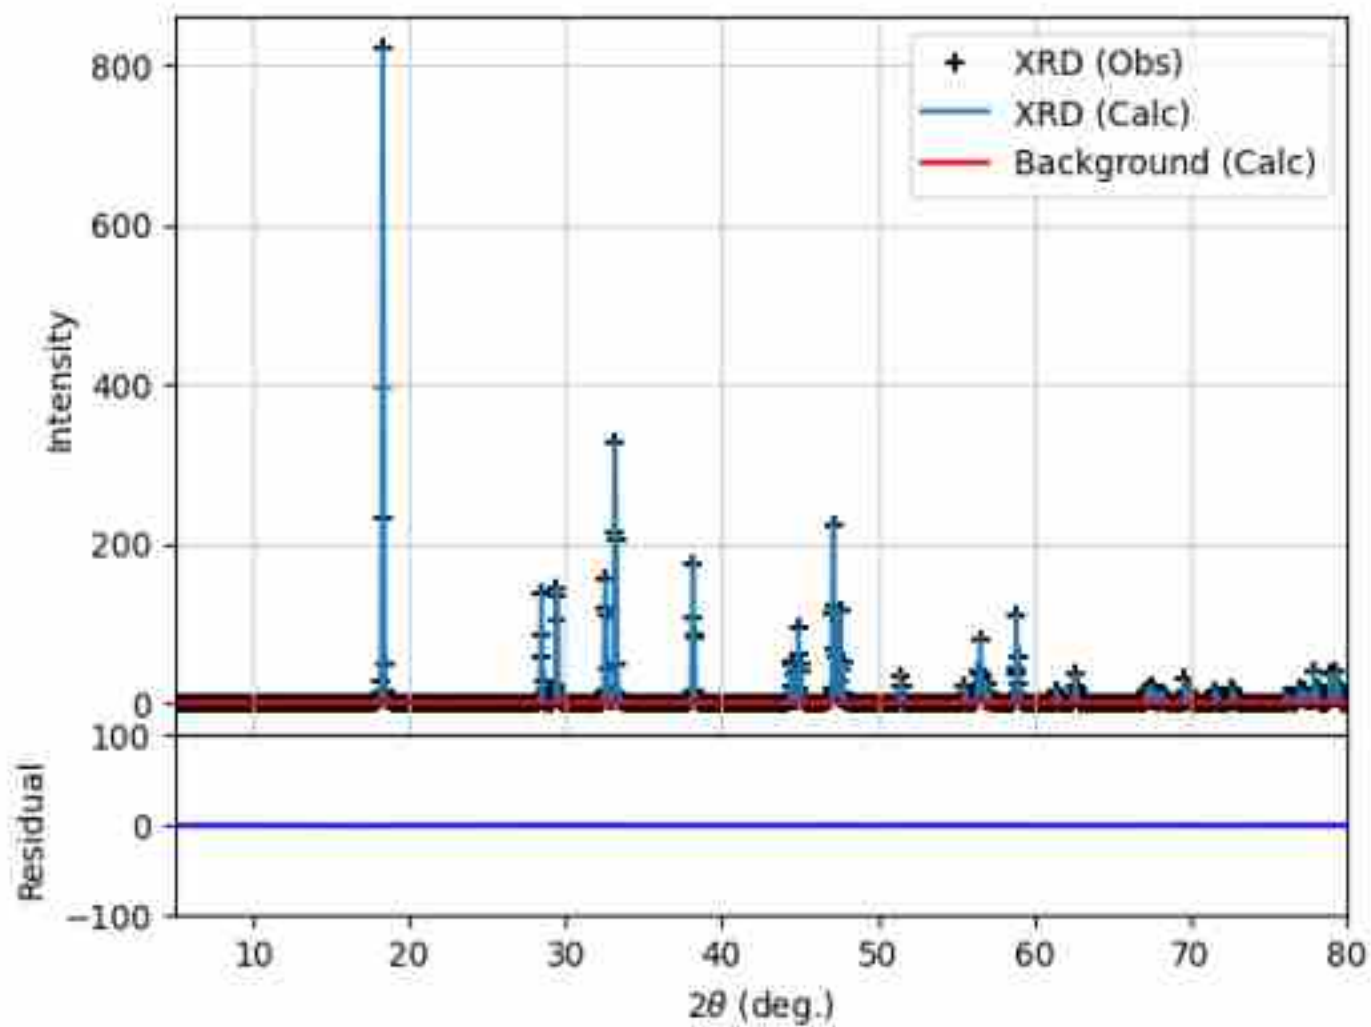

| RMSE before RR | Rwp     | RMSE after RR |
|----------------|---------|---------------|
| 0.01           | 0.56431 | 0.03413       |

# Li<sub>2</sub>Ga<sub>1</sub>Au<sub>1</sub>

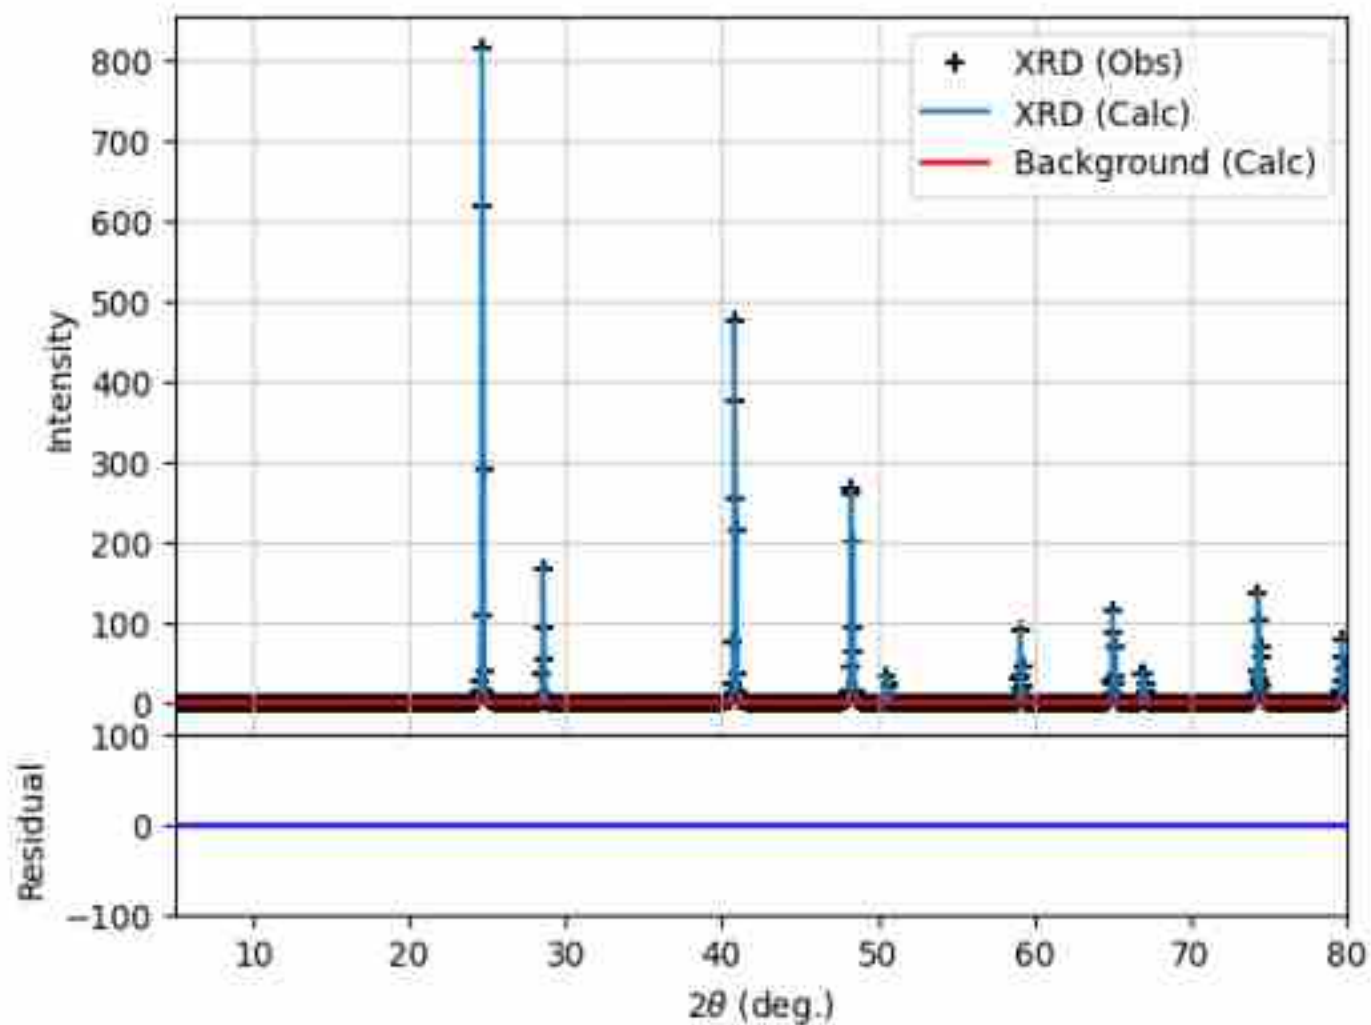

| RMSE before RR | Rwp     | RMSE after RR |
|----------------|---------|---------------|
| 0.001          | 0.00287 | 0.00412       |

# Li<sub>2</sub>GaPt<sub>1</sub>

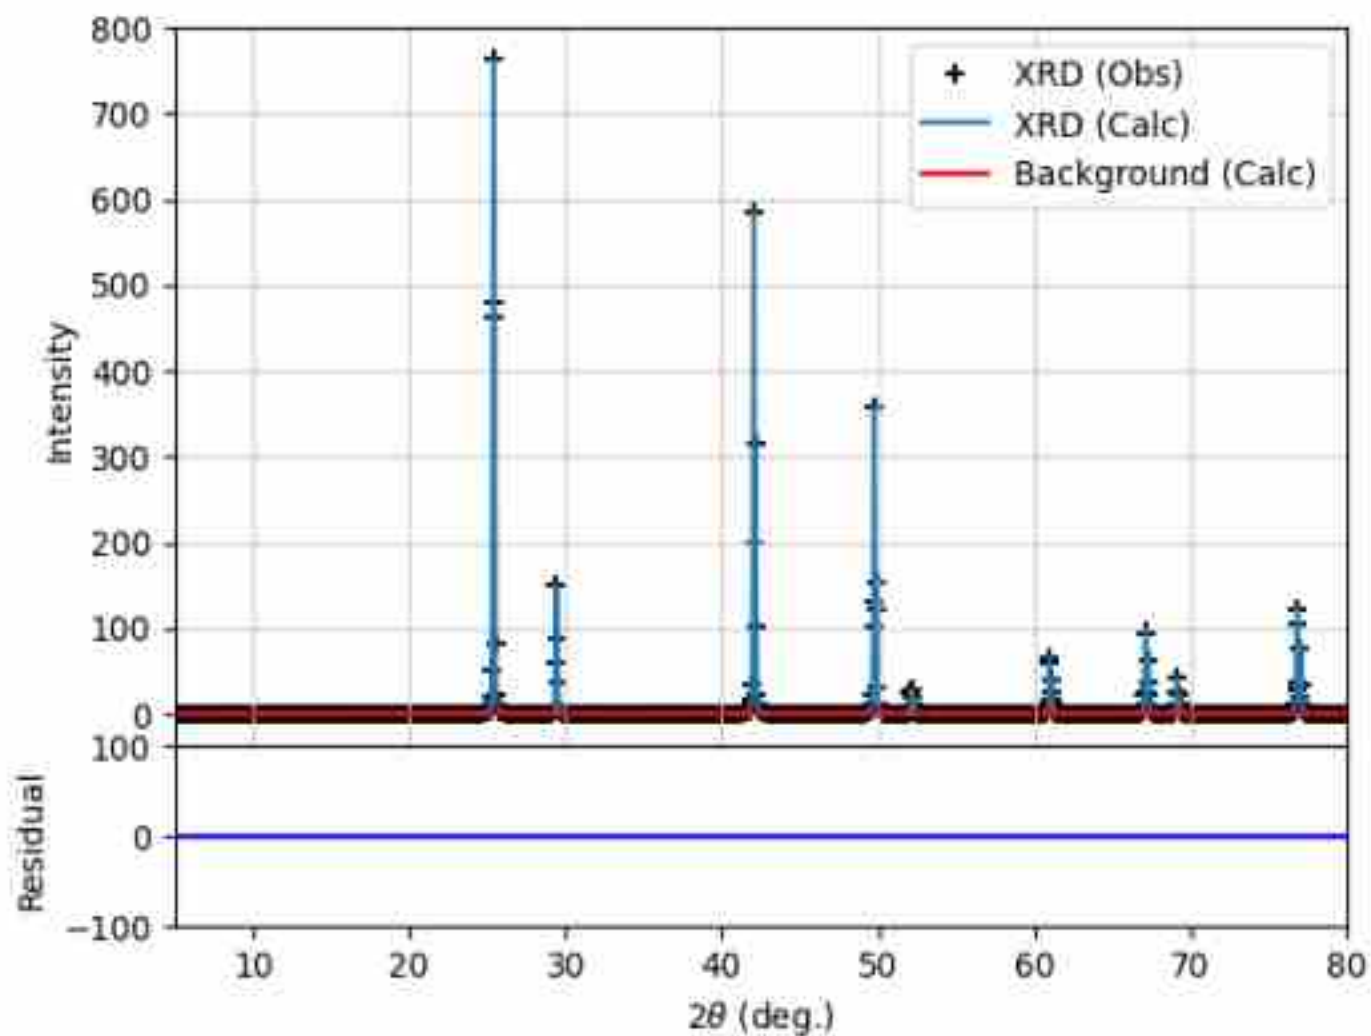

| RMSE before RR | Rwp     | RMSE after RR |
|----------------|---------|---------------|
| 0.001          | 0.00331 | 0.0013        |

# Li<sub>2</sub>Ge<sub>1</sub>Pt<sub>1</sub>

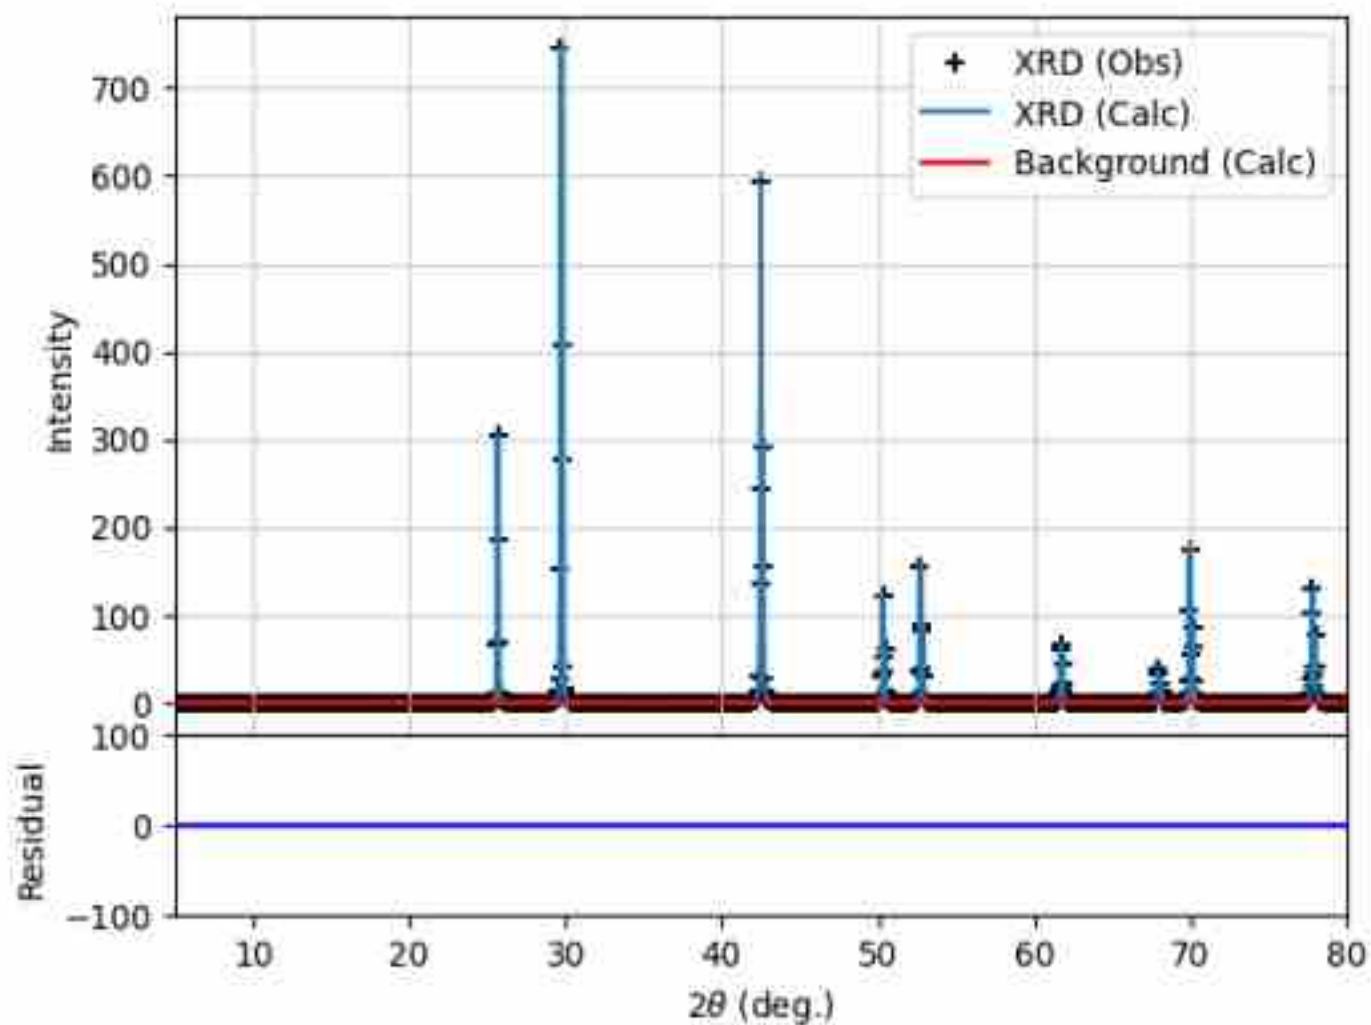

| RMSE before RR | Rwp  | RMSE after RR |
|----------------|------|---------------|
| 0.001          | 0.04 | 0.00341       |

# Li<sub>2</sub>HoIn<sub>1</sub>

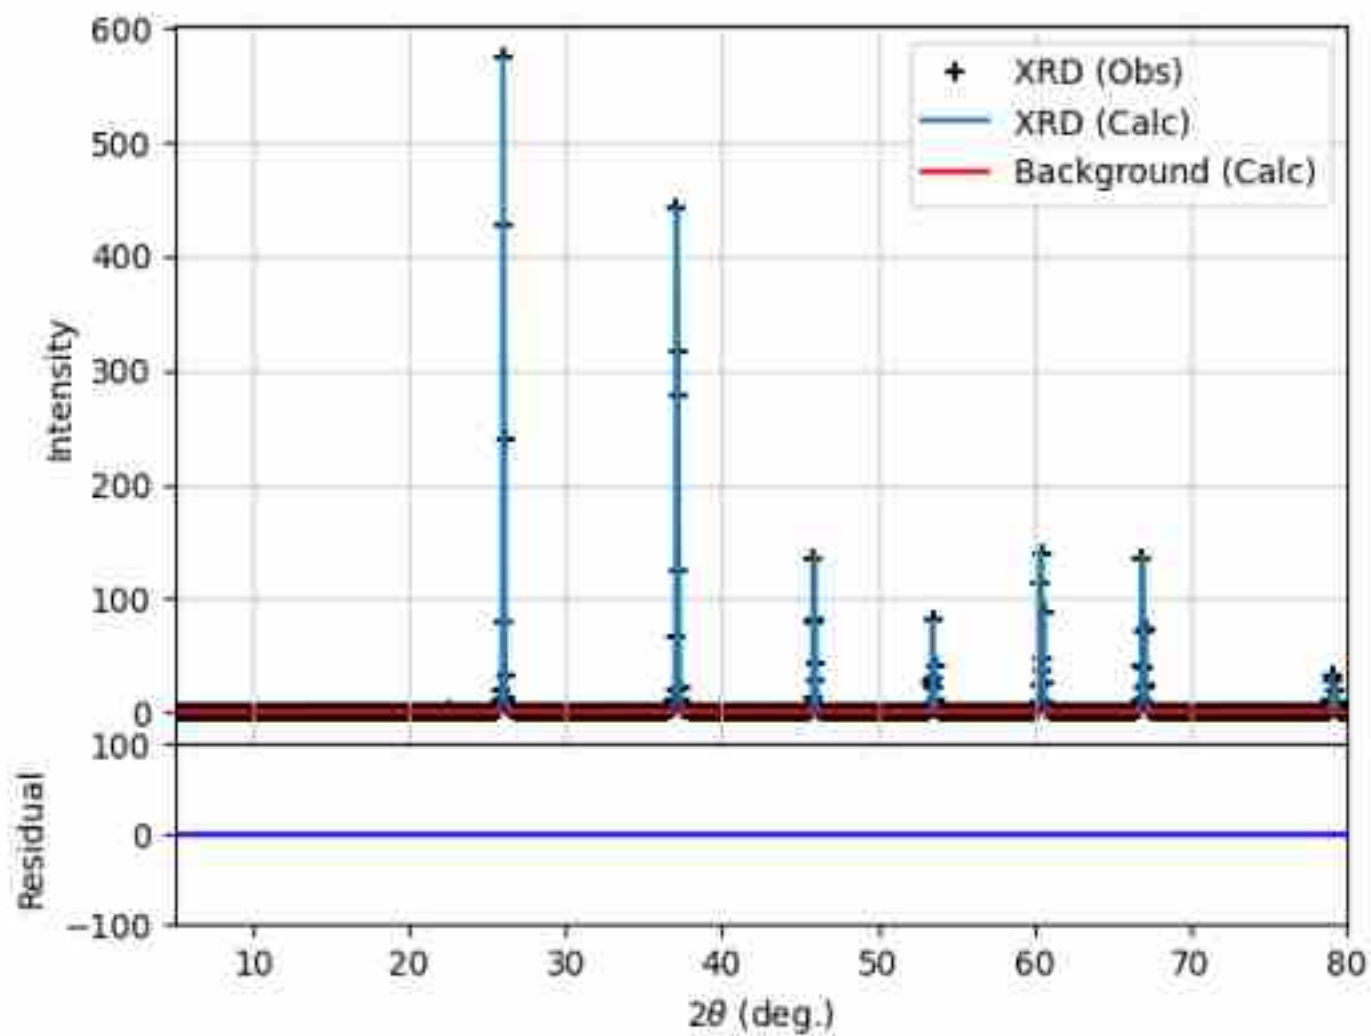

| RMSE before RR | Rwp     | RMSE after RR |
|----------------|---------|---------------|
| 0.001          | 0.00723 | 0.00378       |



# Li<sub>2</sub>LaIn<sub>1</sub>

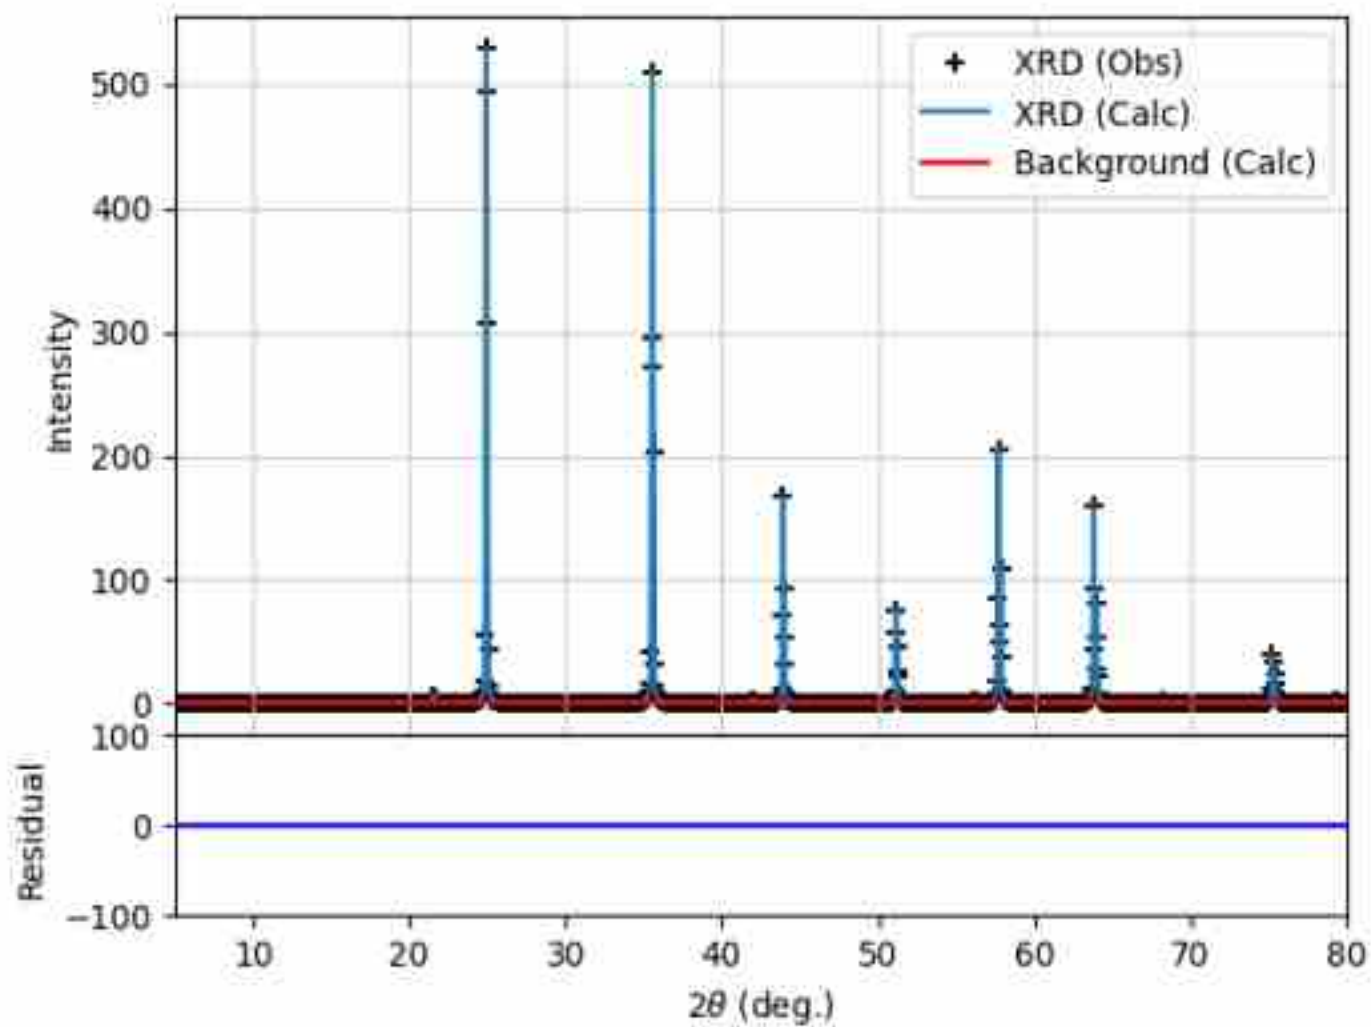

| RMSE before RR | Rwp     | RMSE after RR |
|----------------|---------|---------------|
| 0.001          | 0.04079 | 0.00226       |

# Li<sub>2</sub>LuIn<sub>1</sub>

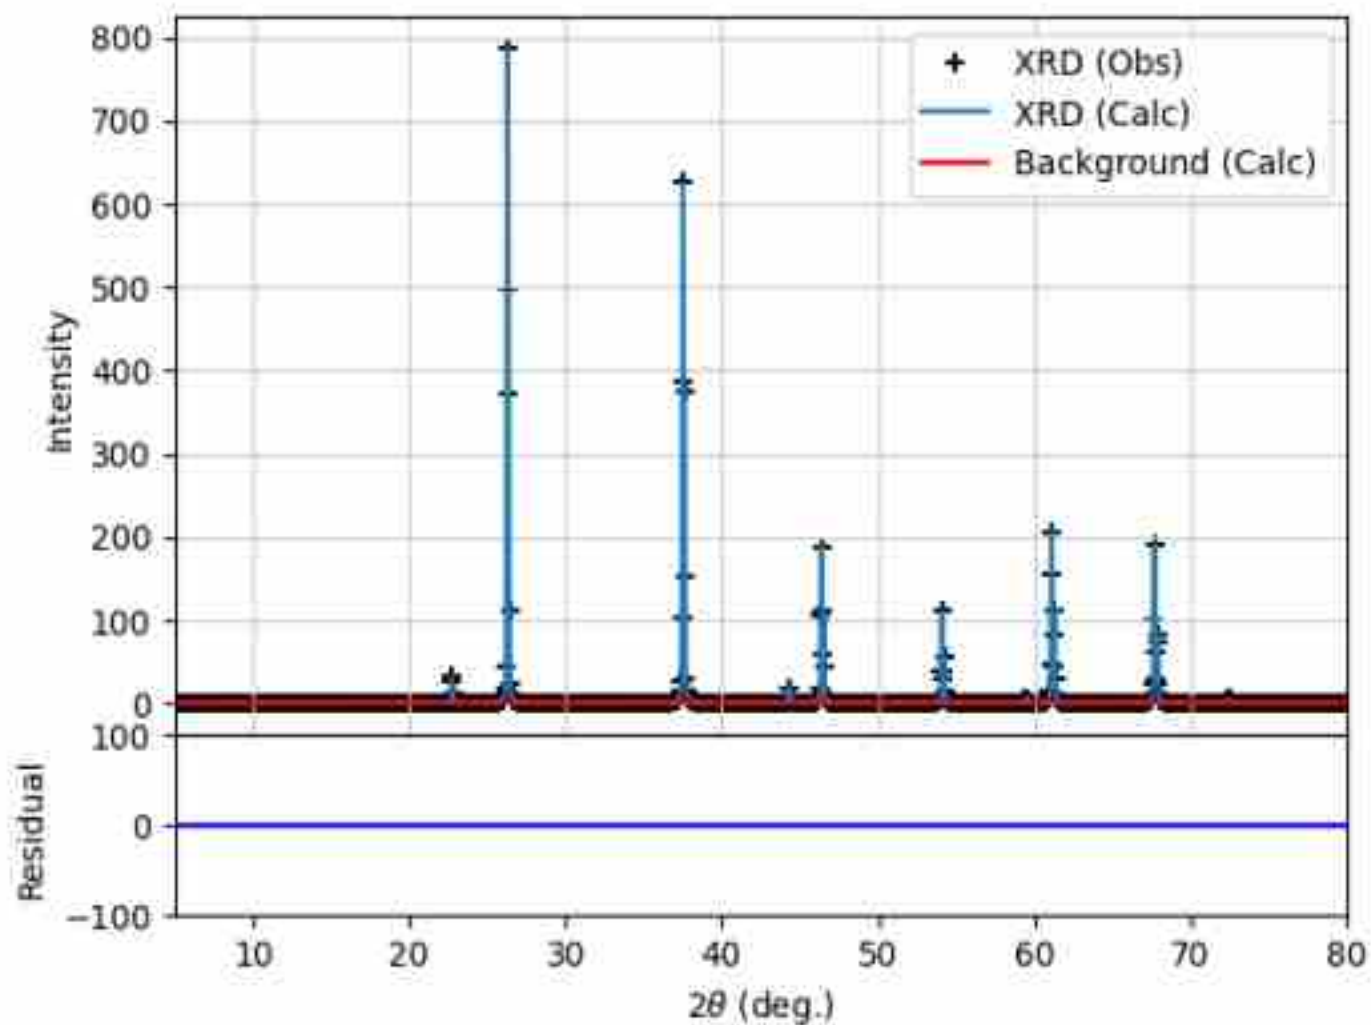

| RMSE before RR | Rwp     | RMSE after RR |
|----------------|---------|---------------|
| 0.001          | 0.00315 | 0.00287       |

# Li2Mg1Au1

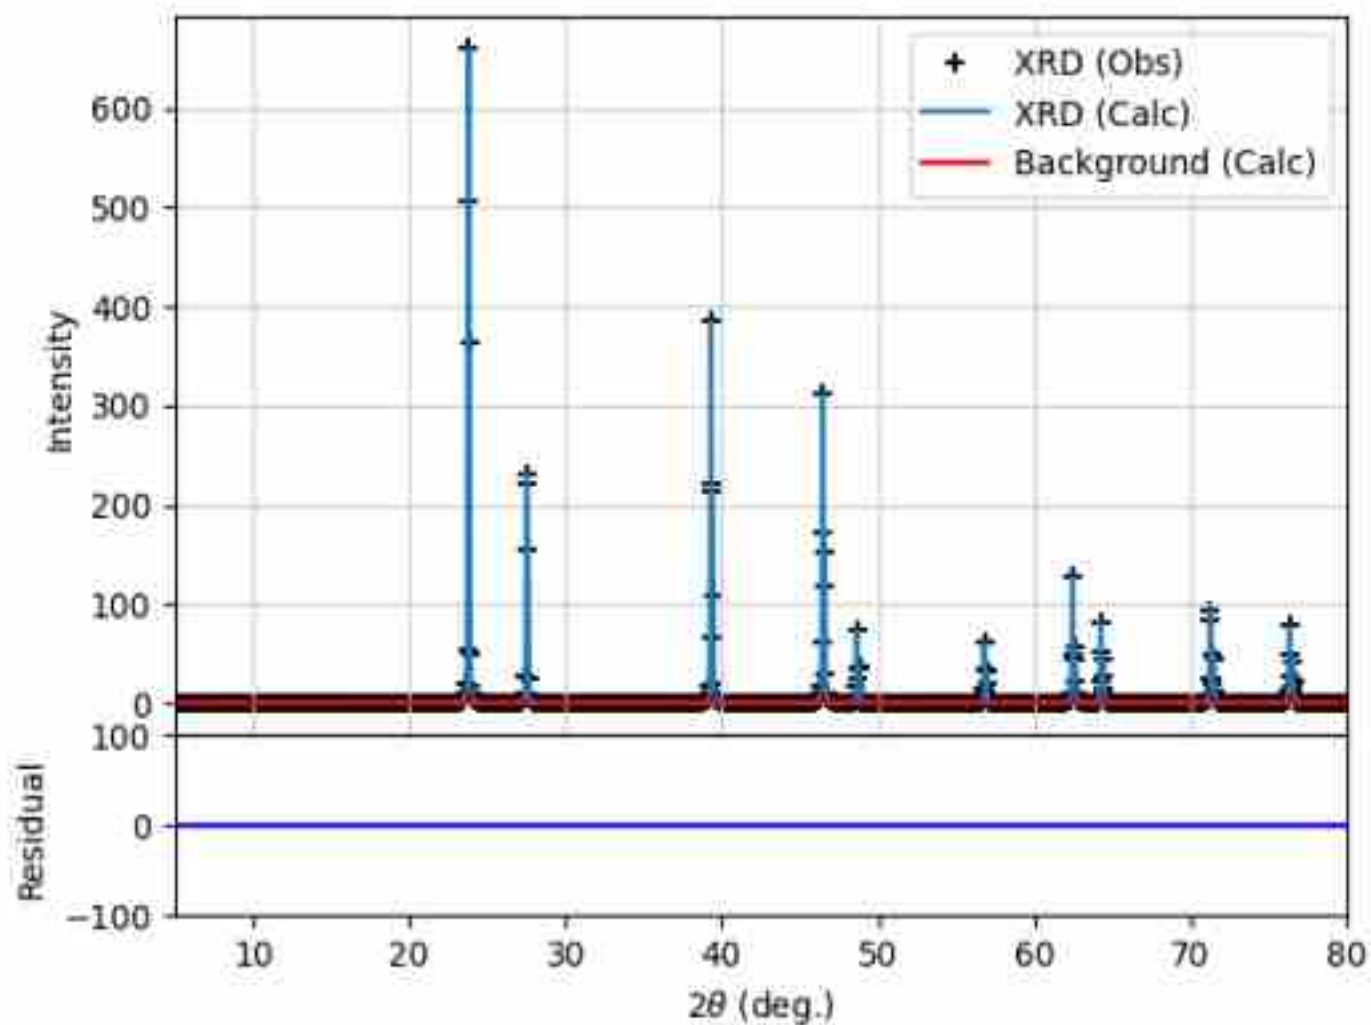

| RMSE before RR | Rwp     | RMSE after RR |
|----------------|---------|---------------|
| 0.001          | 0.00356 | 0.00207       |

# Li<sub>2</sub>Mg<sub>1</sub>Ge<sub>1</sub>

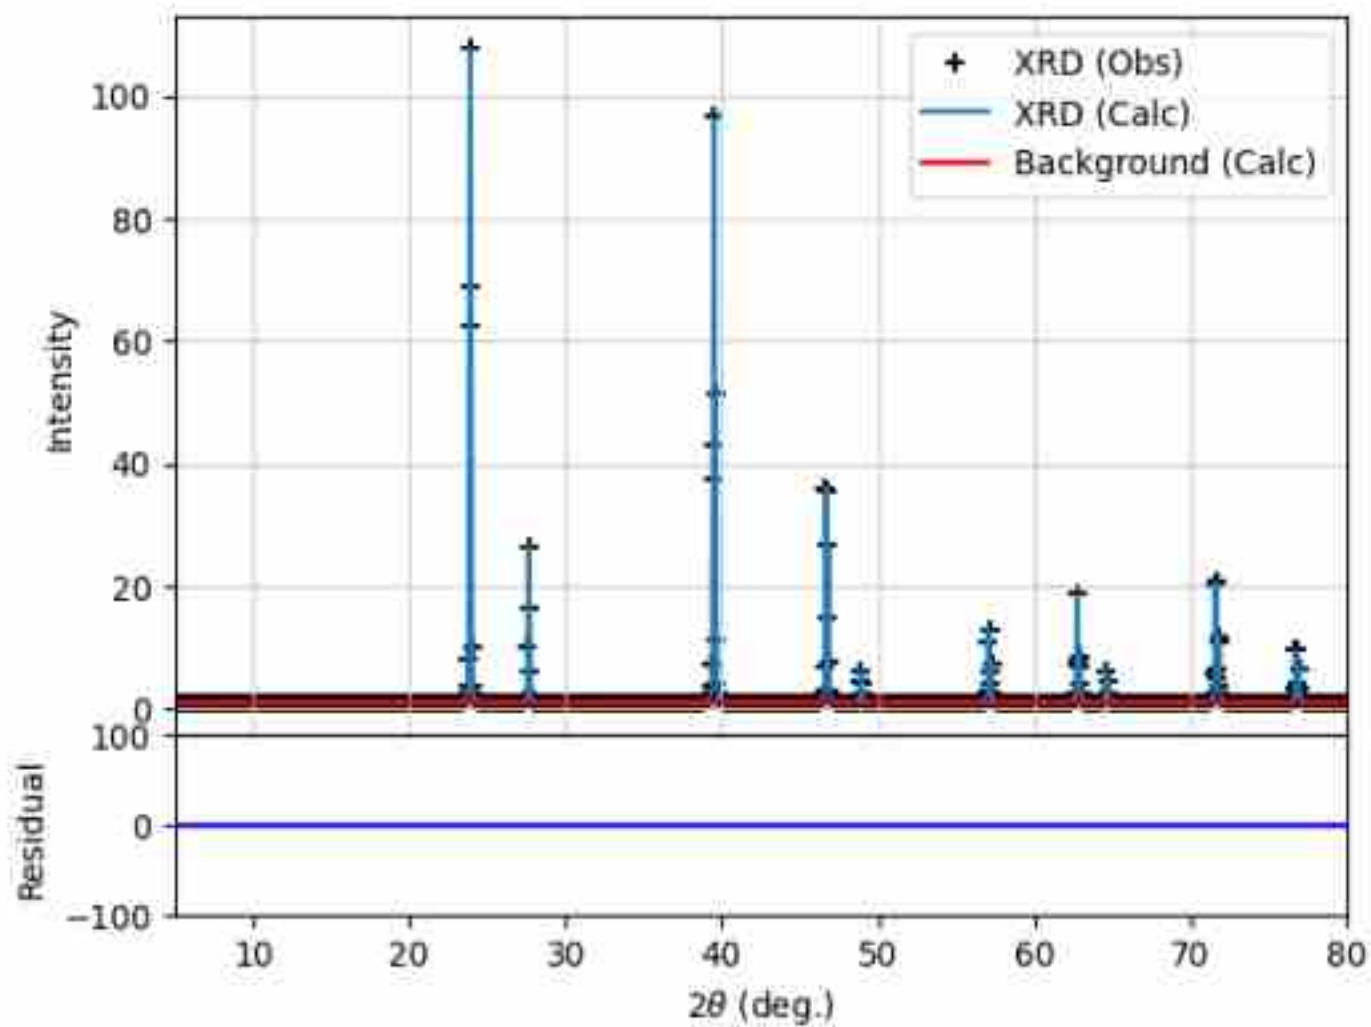

| RMSE before RR | Rwp     | RMSE after RR |
|----------------|---------|---------------|
| 0.001          | 0.00011 | 0.00053       |

# Li<sub>2</sub>Nd1Ga1

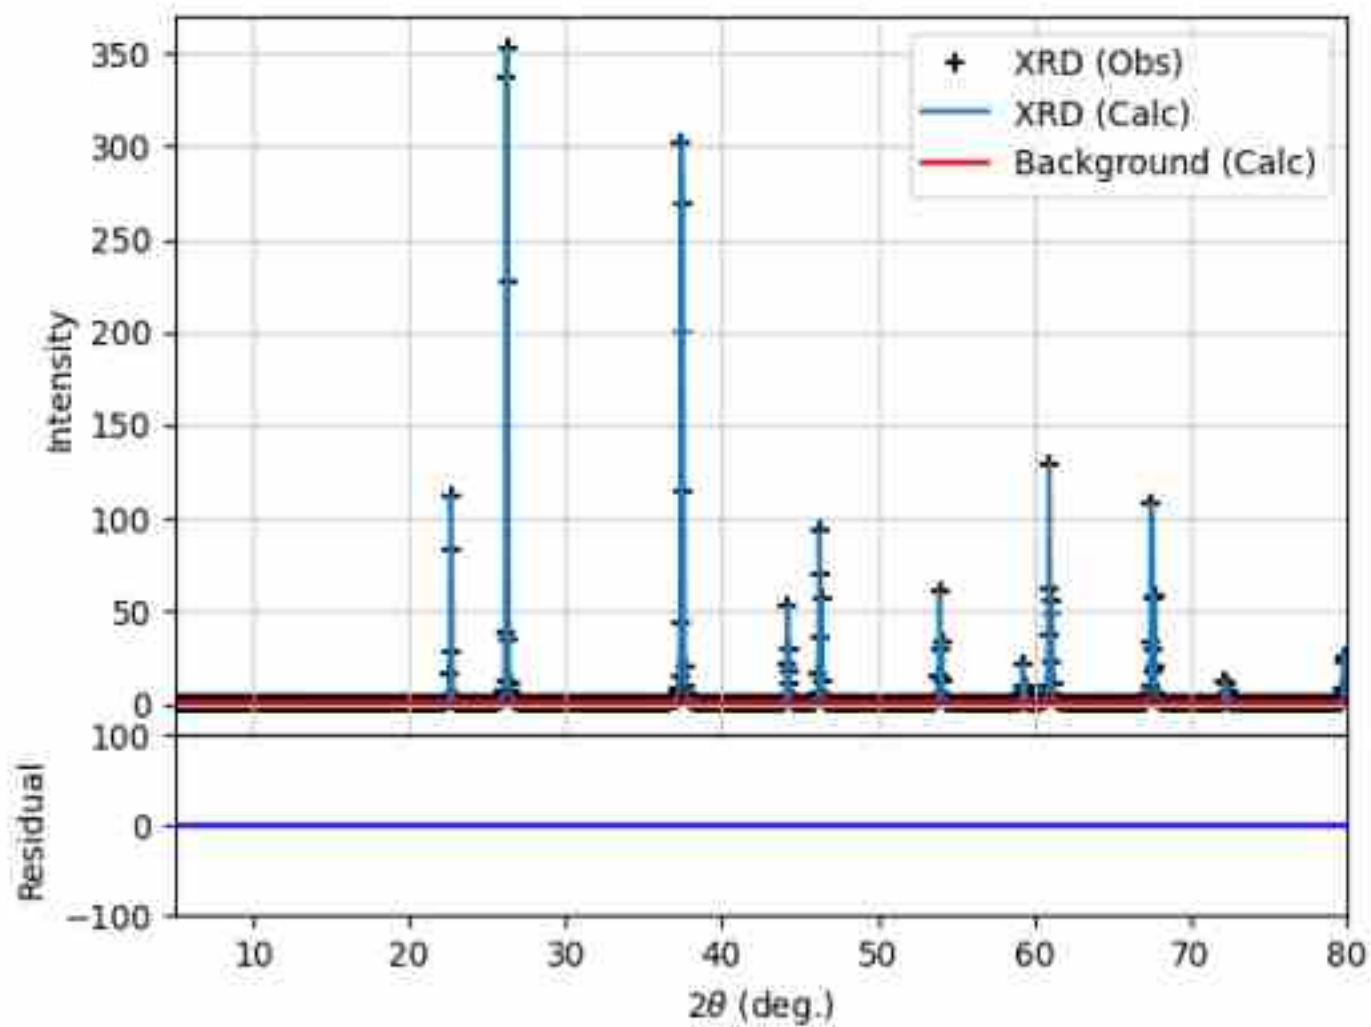

| RMSE before RR | Rwp     | RMSE after RR |
|----------------|---------|---------------|
| 0.001          | 0.02983 | 0.00168       |

# Li<sub>2</sub>Te1

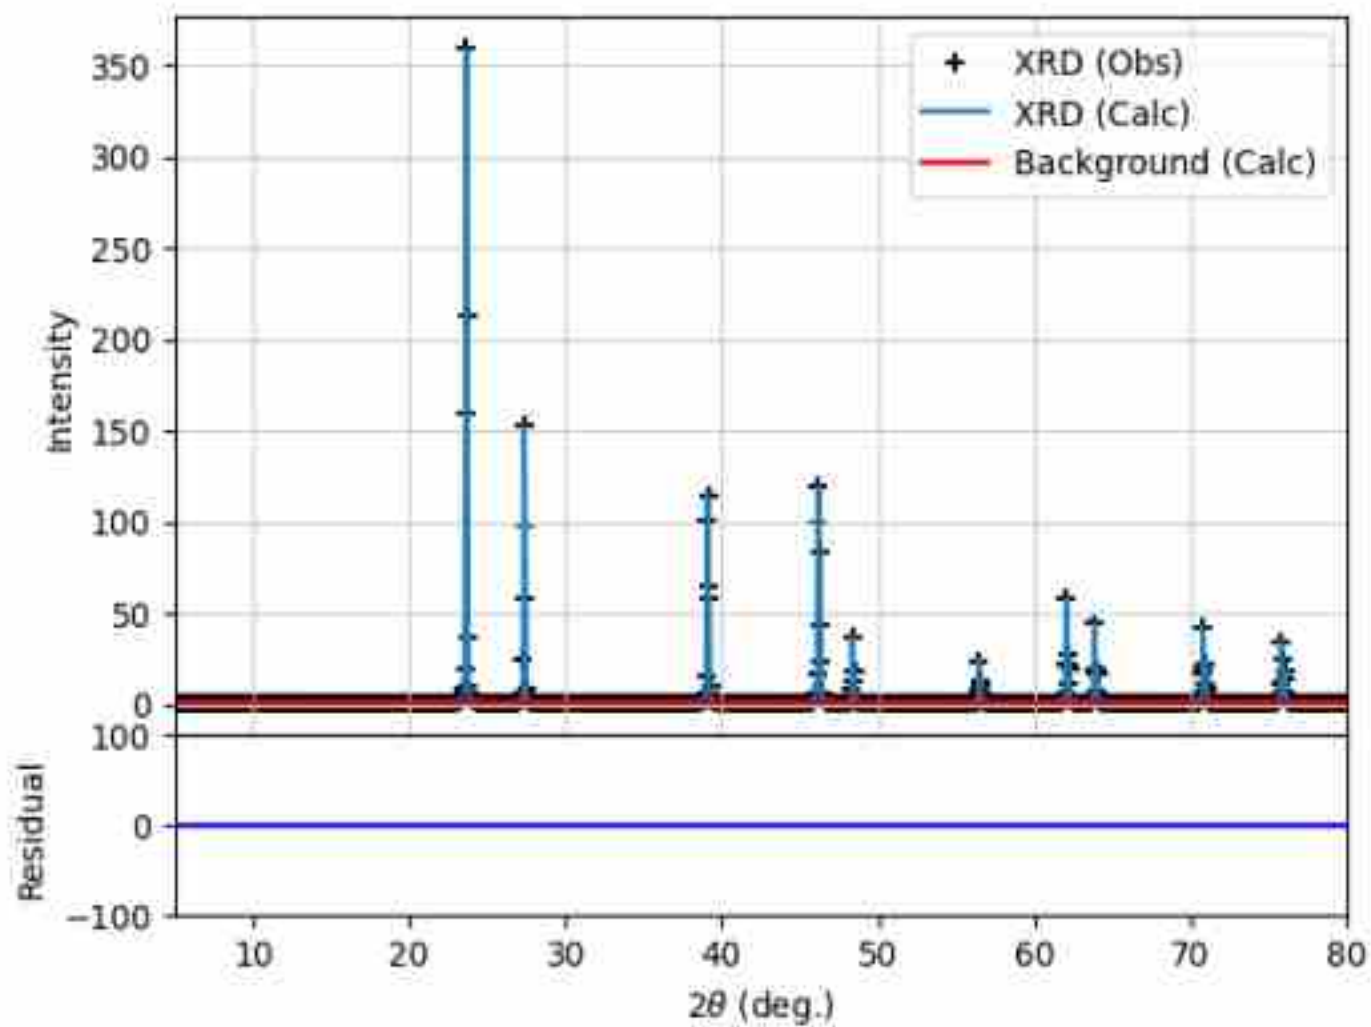

| RMSE before RR | Rwp     | RMSE after RR |
|----------------|---------|---------------|
| 0.001          | 0.00265 | 0.00194       |

# Li<sub>2</sub>Zn<sub>1</sub>Sn<sub>1</sub>

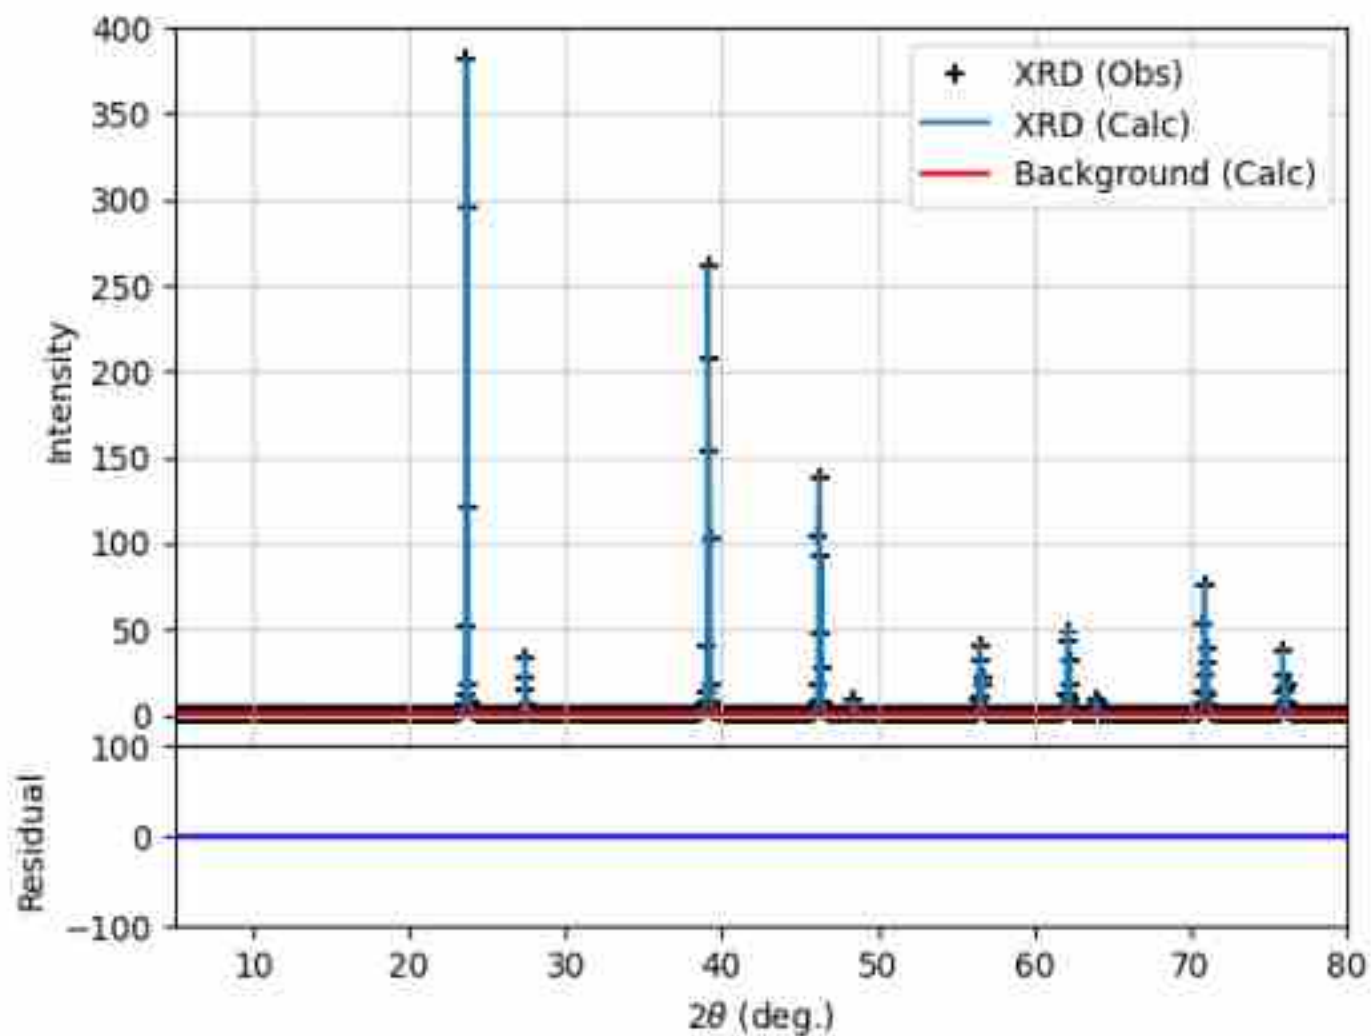

| RMSE before RR | Rwp    | RMSE after RR |
|----------------|--------|---------------|
| 0.001          | 0.0069 | 0.00498       |

# Li3Ag1

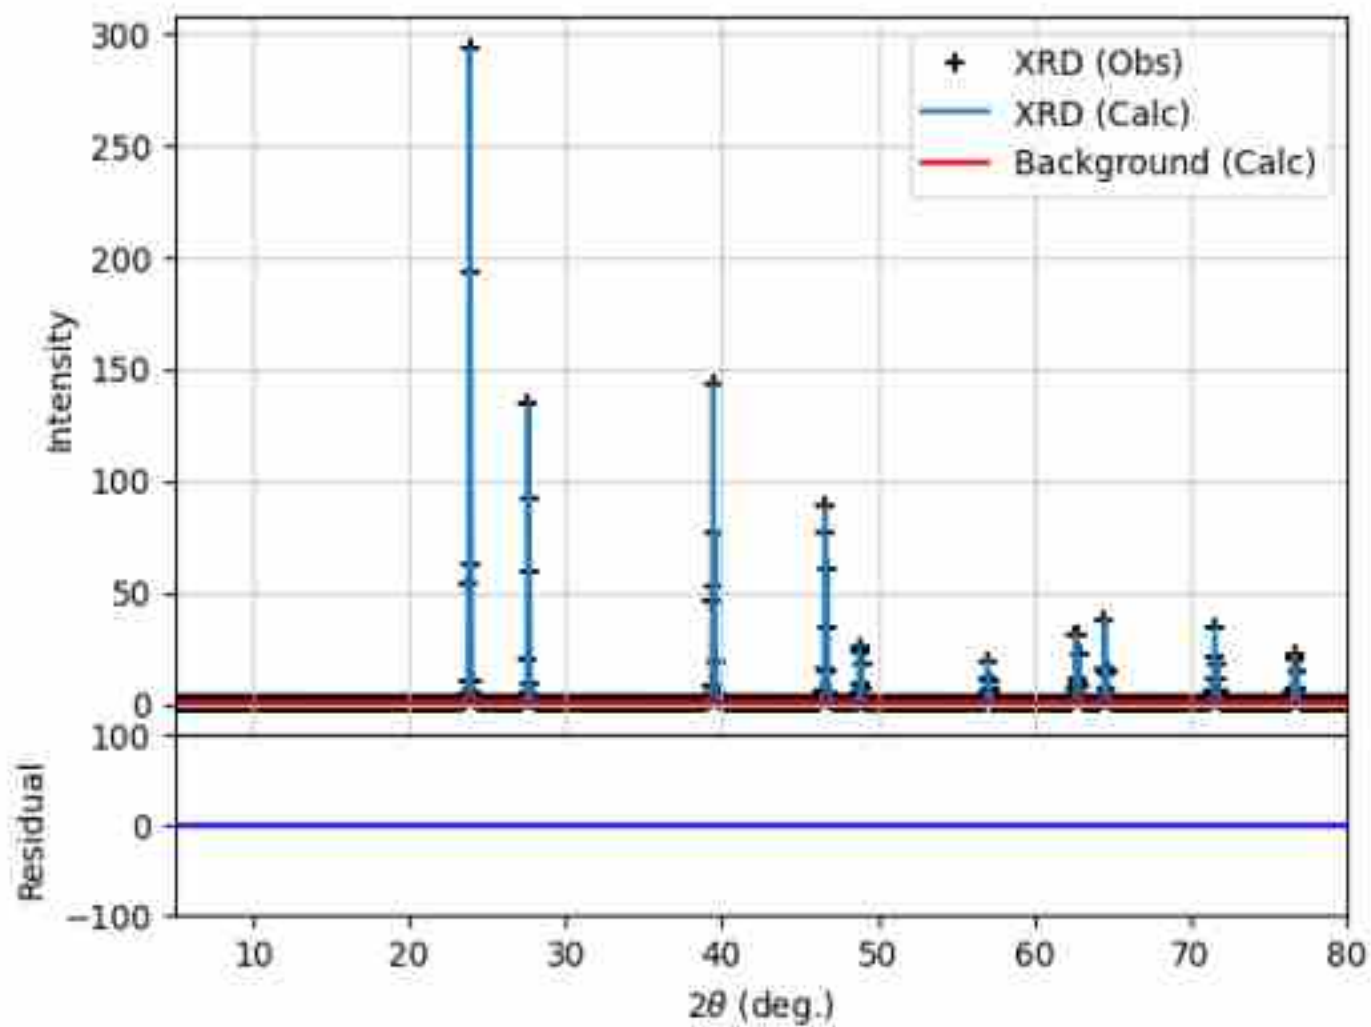

| RMSE before RR | Rwp     | RMSE after RR |
|----------------|---------|---------------|
| 0.001          | 0.00198 | 0.00285       |



# Li<sub>3</sub>Cd1

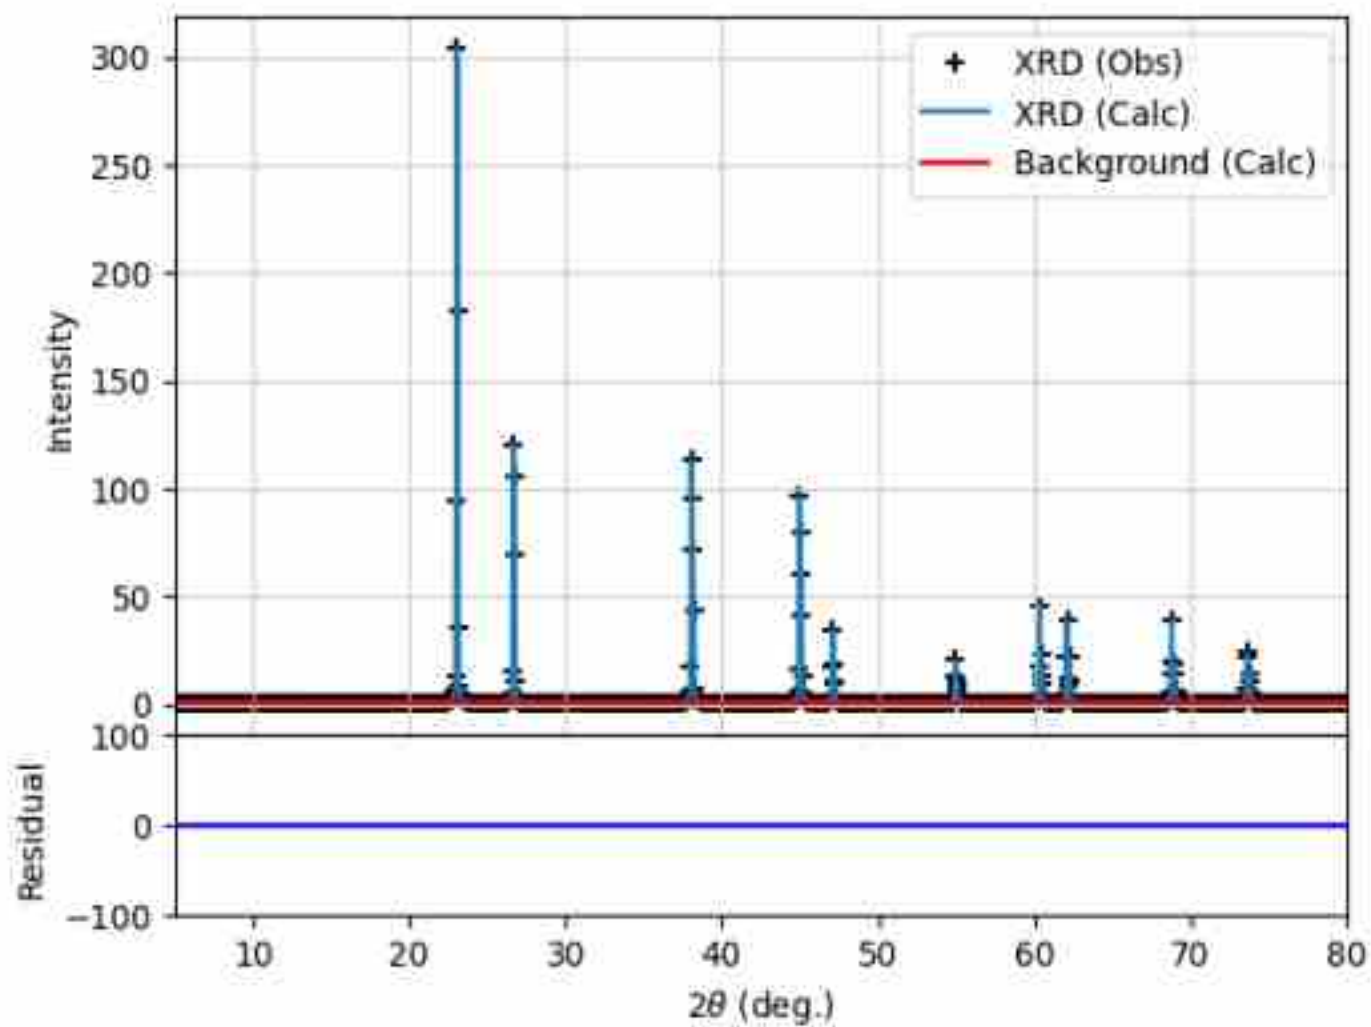

| RMSE before RR | Rwp    | RMSE after RR |
|----------------|--------|---------------|
| 0.001          | 0.0032 | 0.00456       |

# Li<sub>3</sub>La<sub>1</sub>Bi<sub>2</sub>

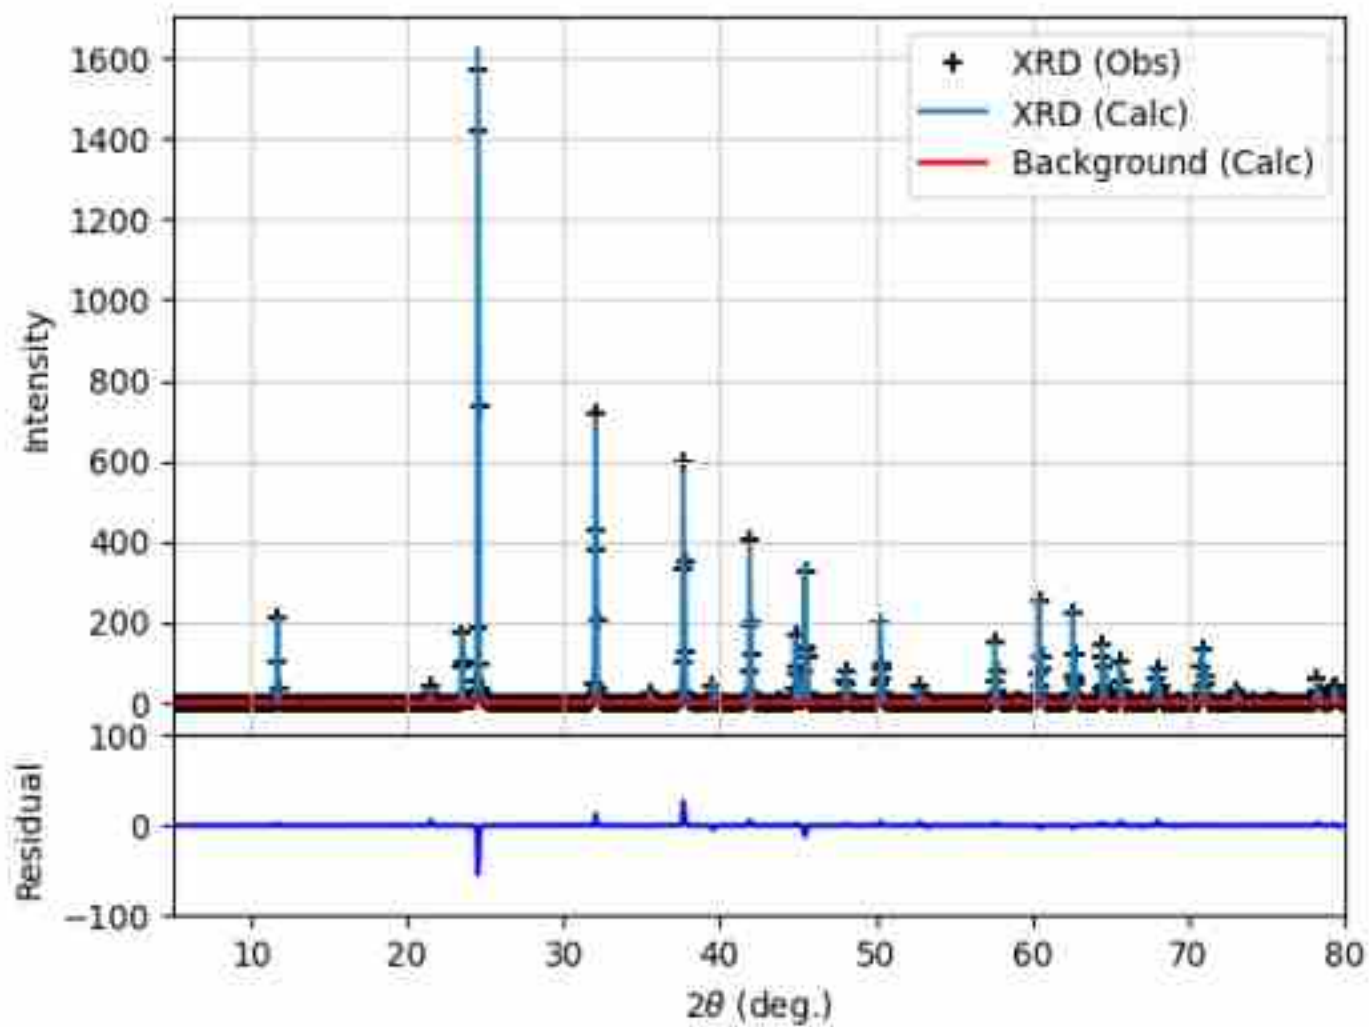

| RMSE before RR | Rwp     | RMSE after RR |
|----------------|---------|---------------|
| 0.01           | 3.32122 | 0.30622       |

# Li<sub>3</sub>Pt1

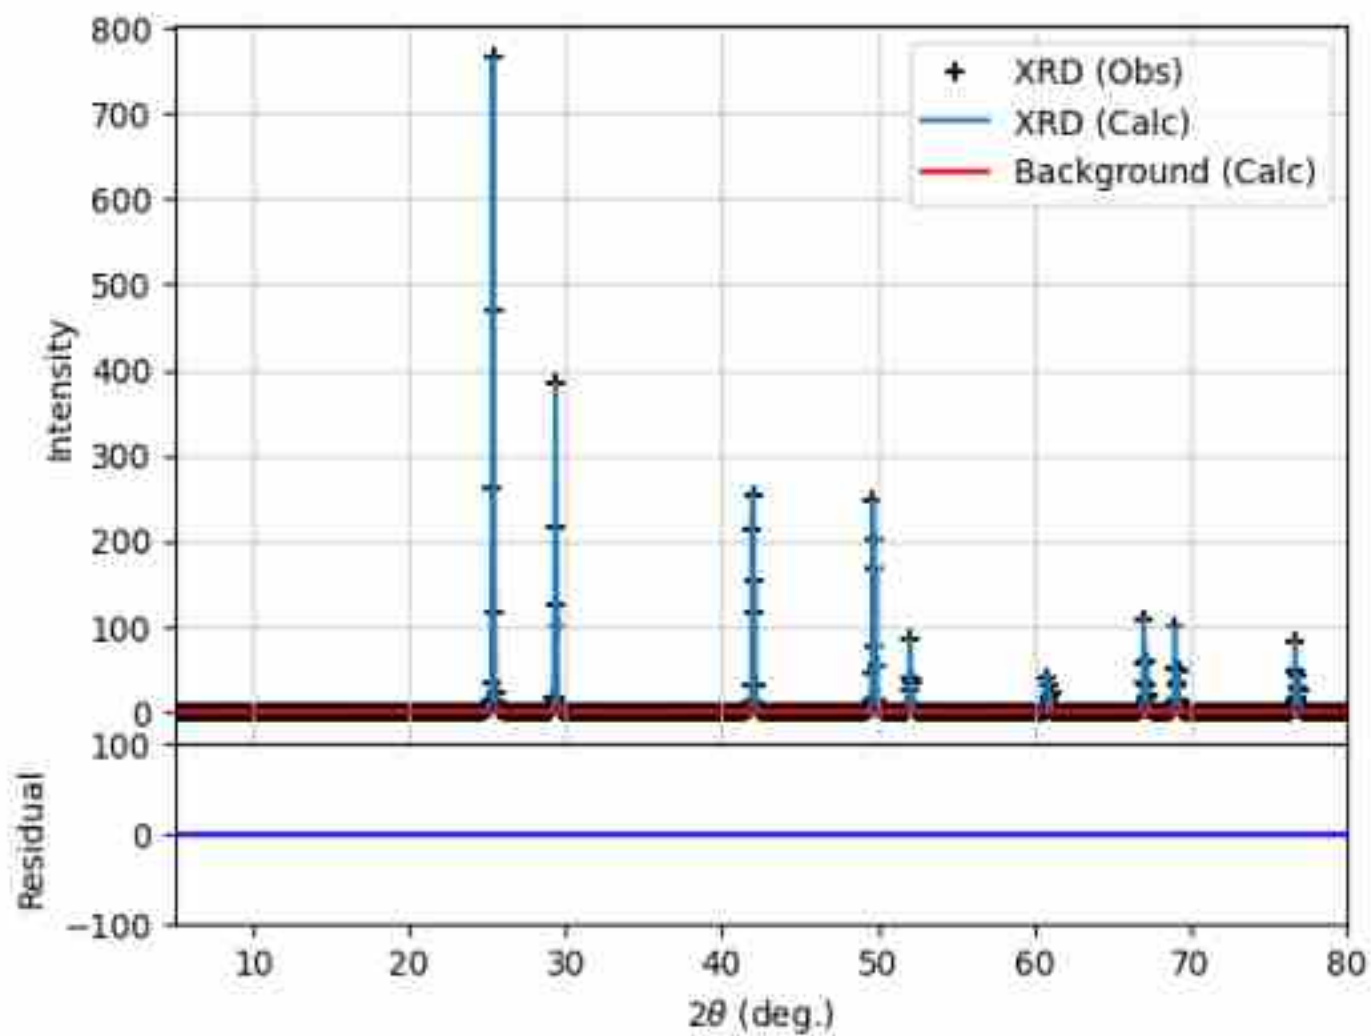

| RMSE before RR | Rwp     | RMSE after RR |
|----------------|---------|---------------|
| 0.001          | 0.00287 | 0.00617       |

# Li<sub>3</sub>Y<sub>3</sub>Ge<sub>3</sub>

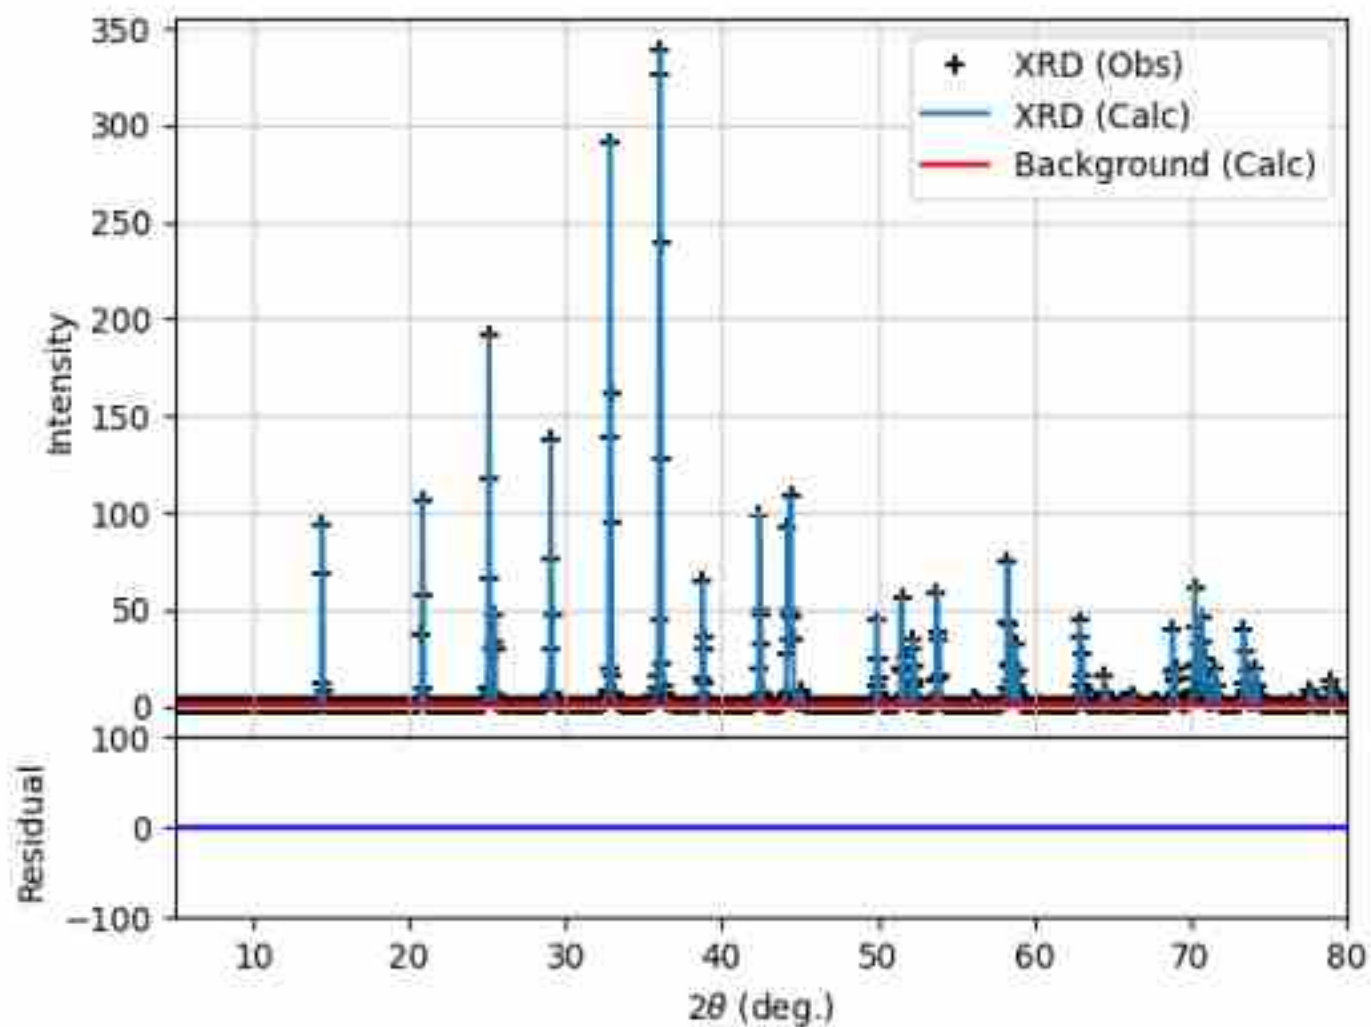

| RMSE before RR | Rwp     | RMSE after RR |
|----------------|---------|---------------|
| 0.01           | 0.00451 | 0.00241       |

# Li<sub>4</sub>Ti<sub>4</sub>S<sub>8</sub>

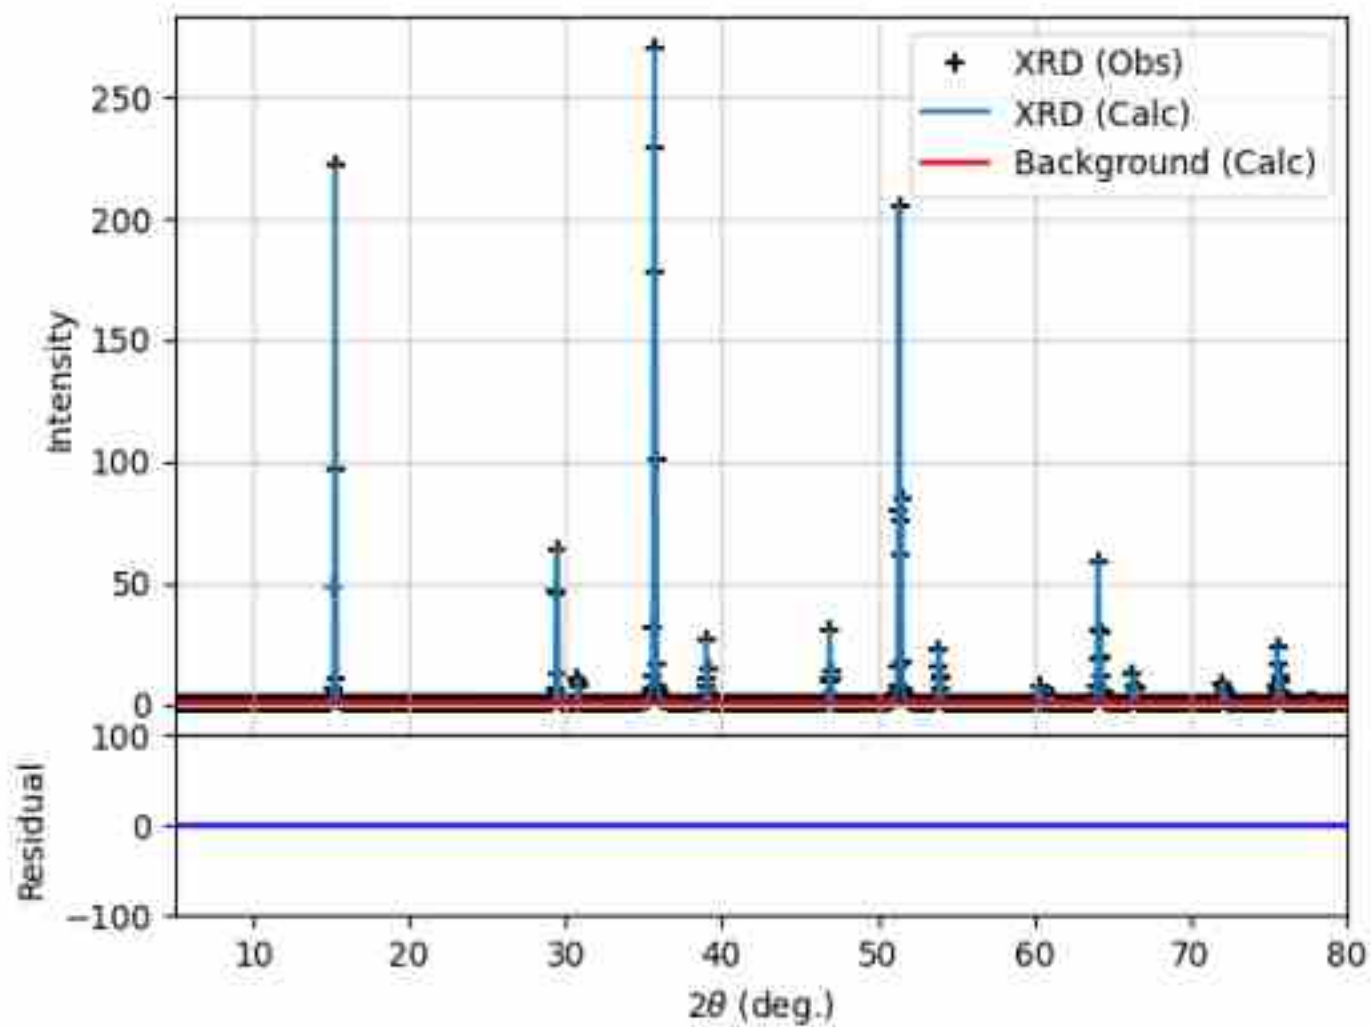

| RMSE before RR | Rwp     | RMSE after RR |
|----------------|---------|---------------|
| 0.01           | 0.10631 | 0.00995       |

# Li6Rh2

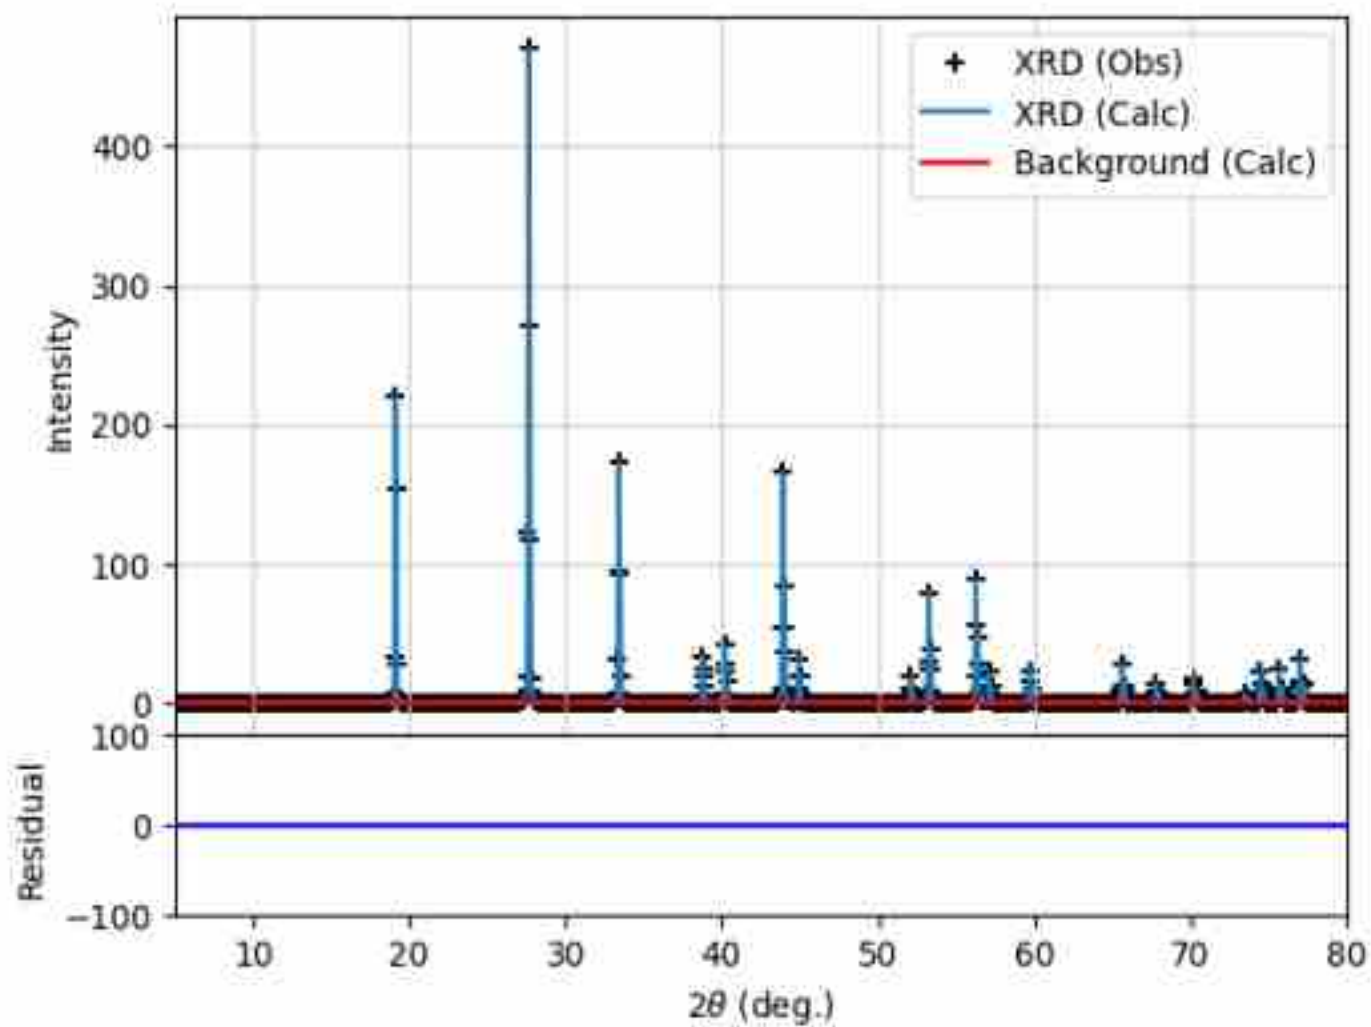

| RMSE before RR | Rwp    | RMSE after RR |
|----------------|--------|---------------|
| 0.01           | 0.1123 | 0.02127       |

# Lu1Mg1Zn2

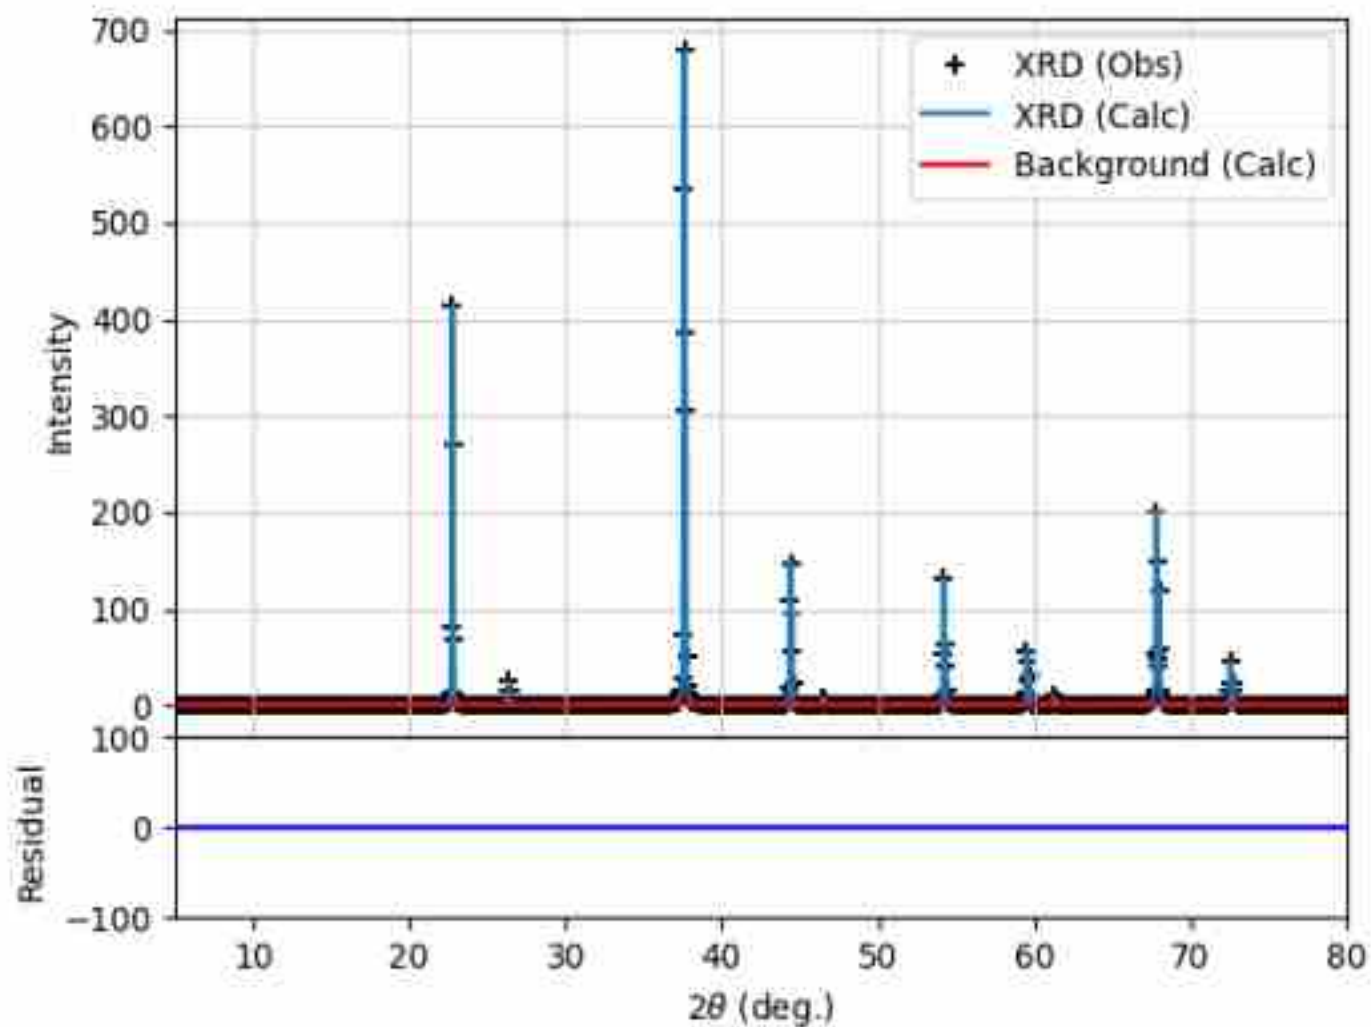

| RMSE before RR | Rwp     | RMSE after RR |
|----------------|---------|---------------|
| 0.001          | 0.00096 | 0.00056       |

# Lu<sub>1</sub>Mn<sub>6</sub>Ga<sub>1</sub>Ge<sub>5</sub>

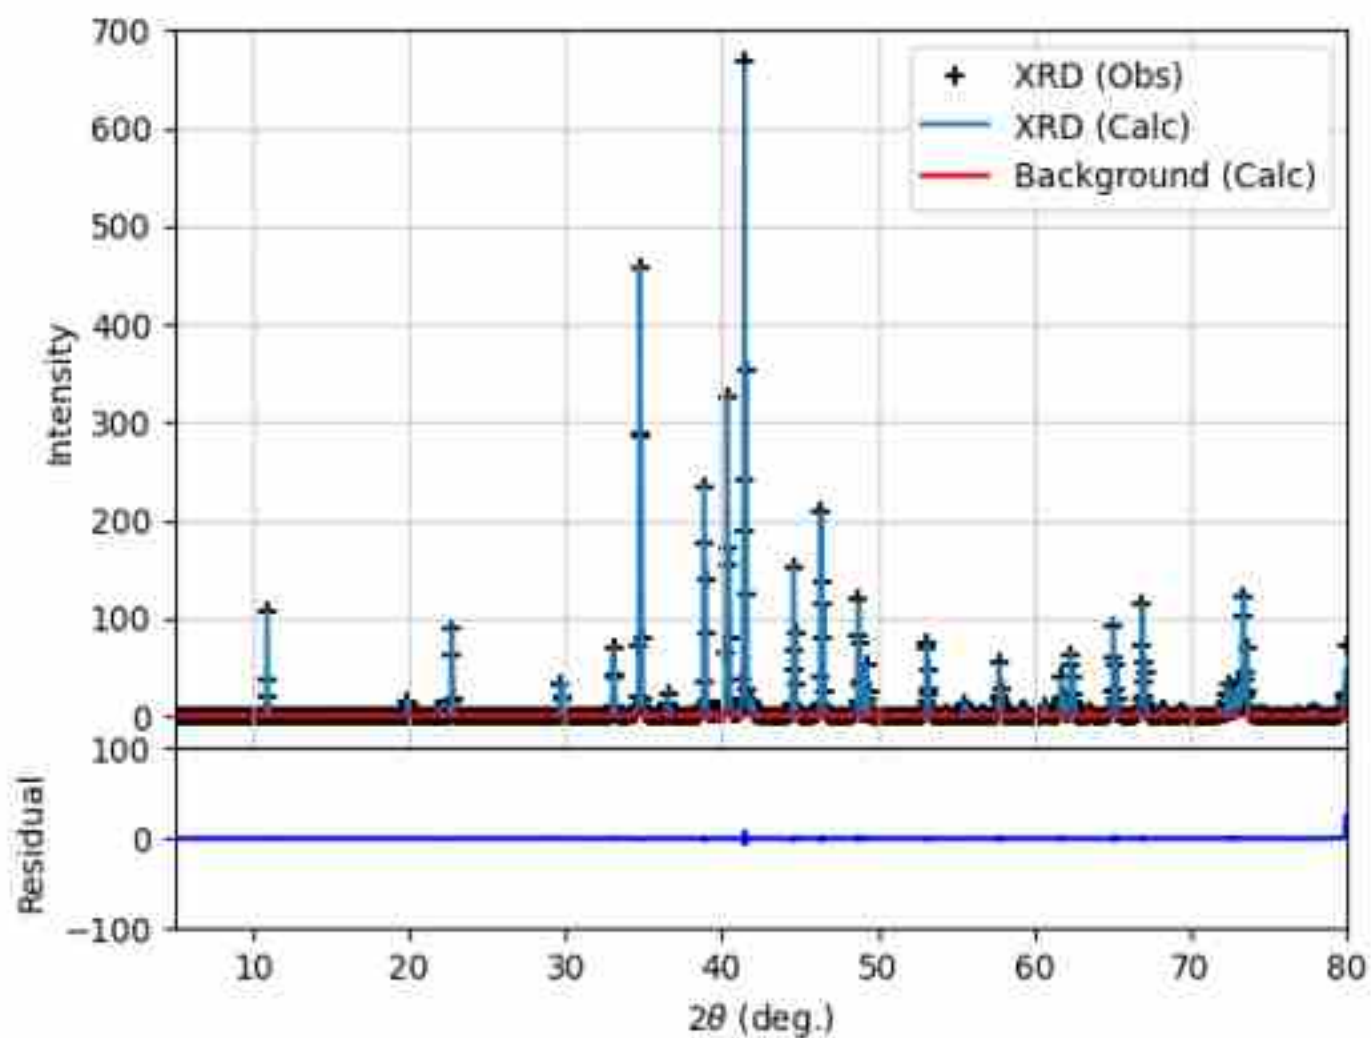

| RMSE before RR | Rwp     | RMSE after RR |
|----------------|---------|---------------|
| 0.01           | 4.84034 | 0.01121       |



# Lu1Np1Ru2

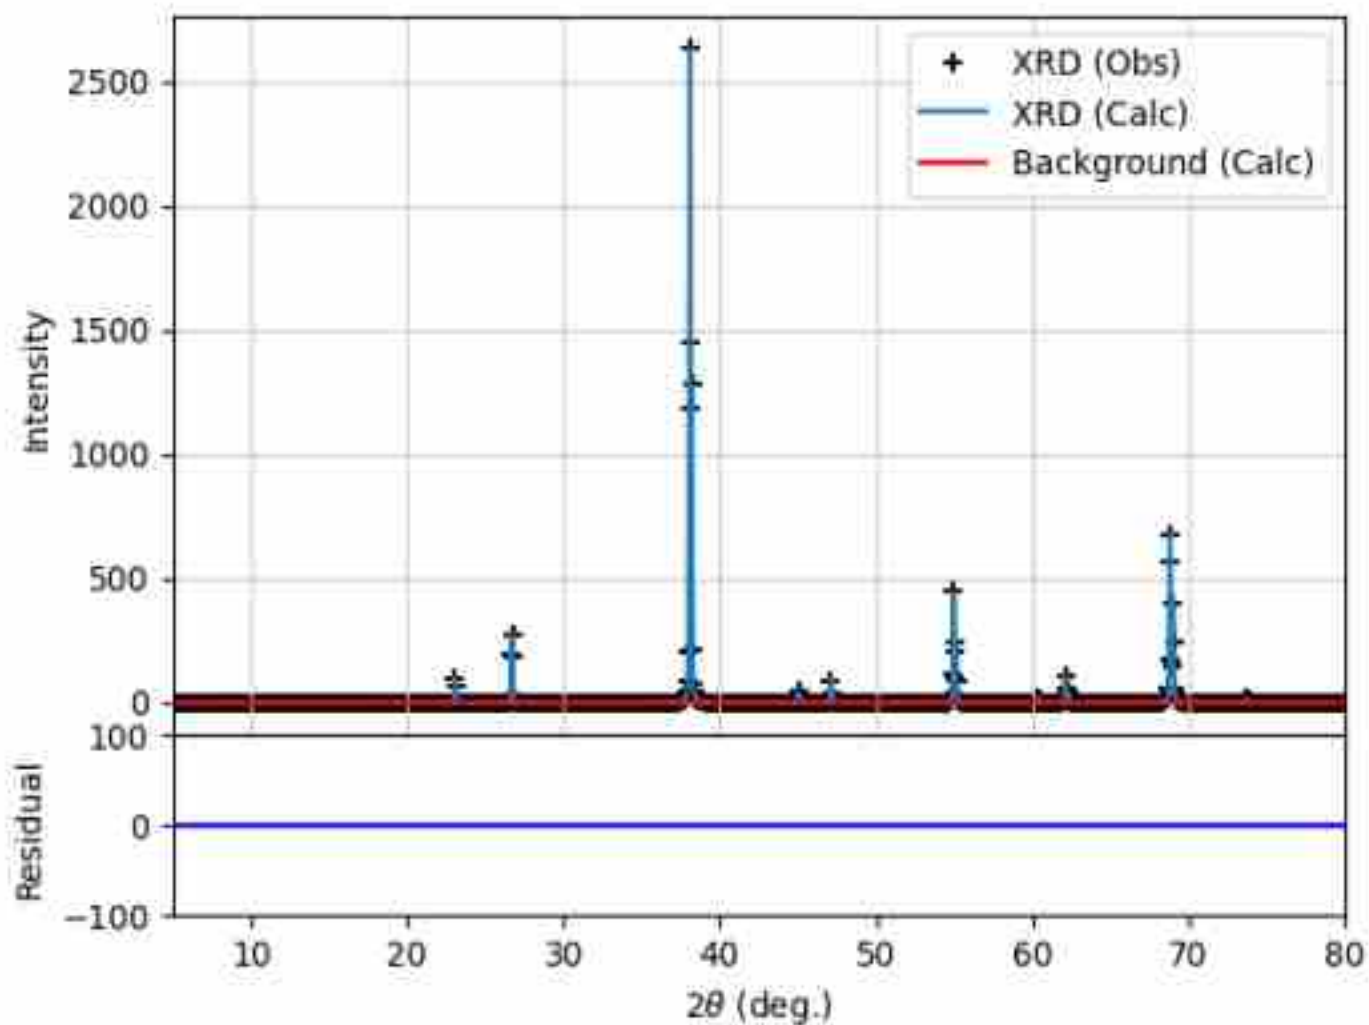

| RMSE before RR | Rwp     | RMSE after RR |
|----------------|---------|---------------|
| 0.001          | 0.00358 | 0.00083       |

# Lu1Pa1O4

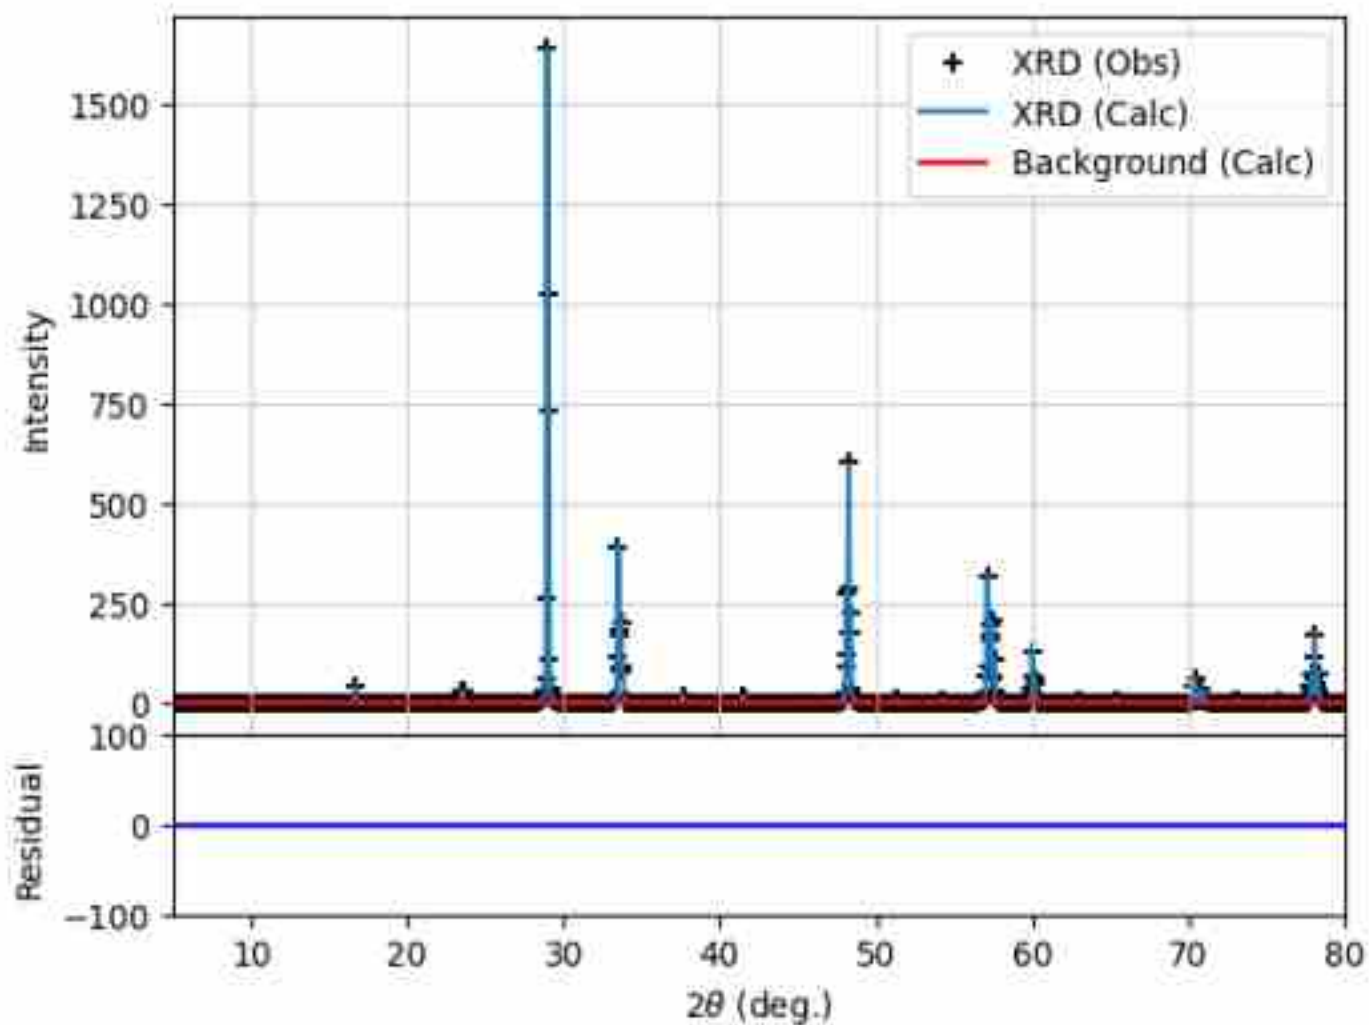

| RMSE before RR | Rwp     | RMSE after RR |
|----------------|---------|---------------|
| 0.01           | 0.00501 | 0.00184       |

# Lu1Pa1Tc2

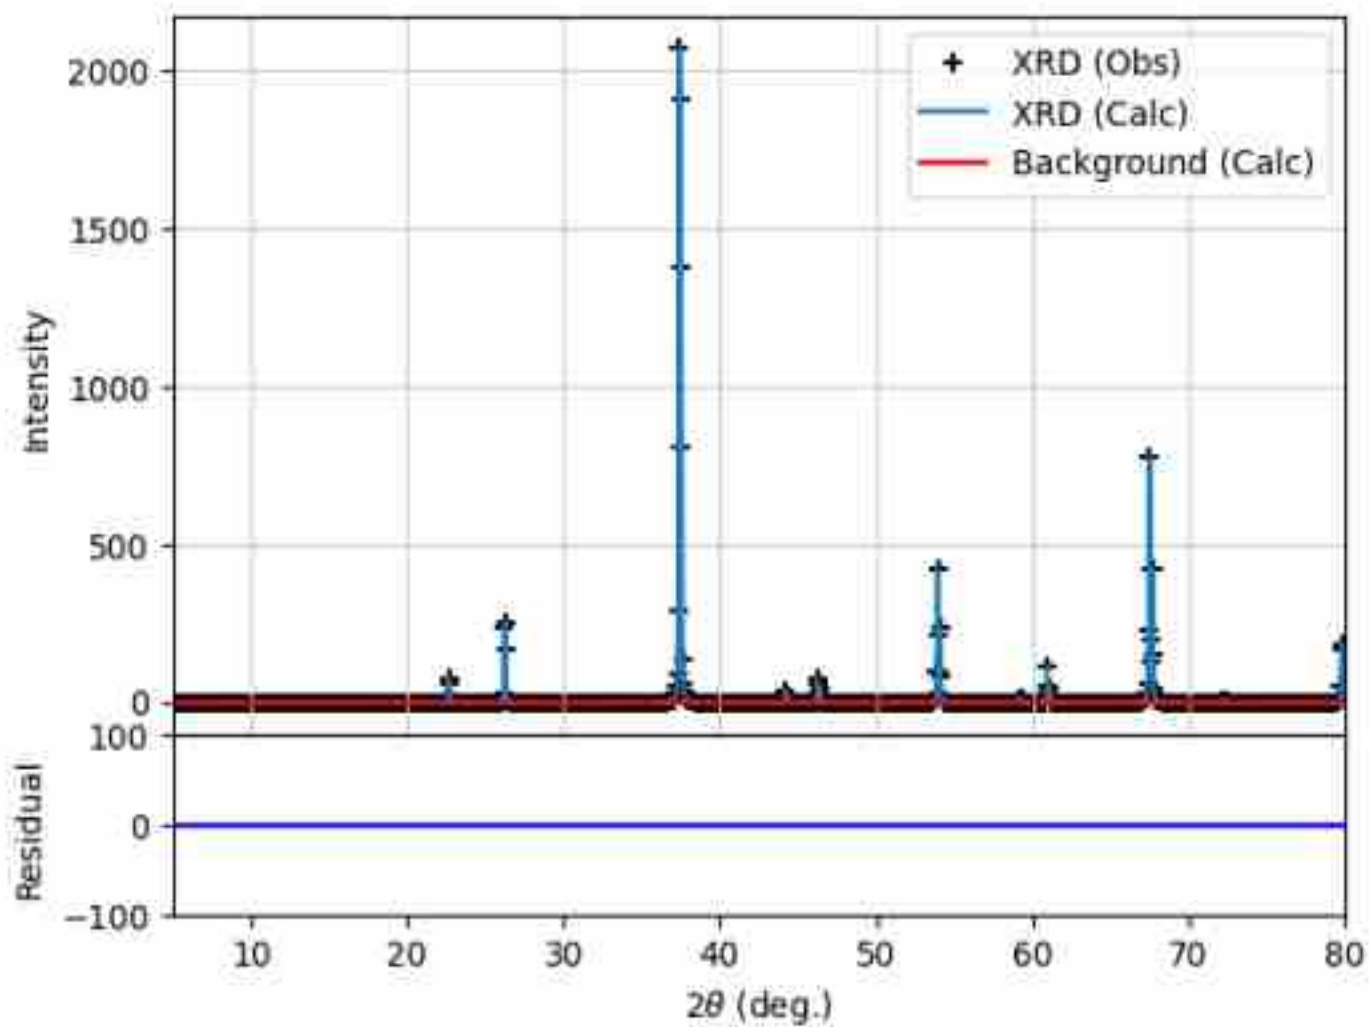

| RMSE before RR | Rwp     | RMSE after RR |
|----------------|---------|---------------|
| 0.001          | 0.00393 | 0.00332       |

# Lu1Ru1

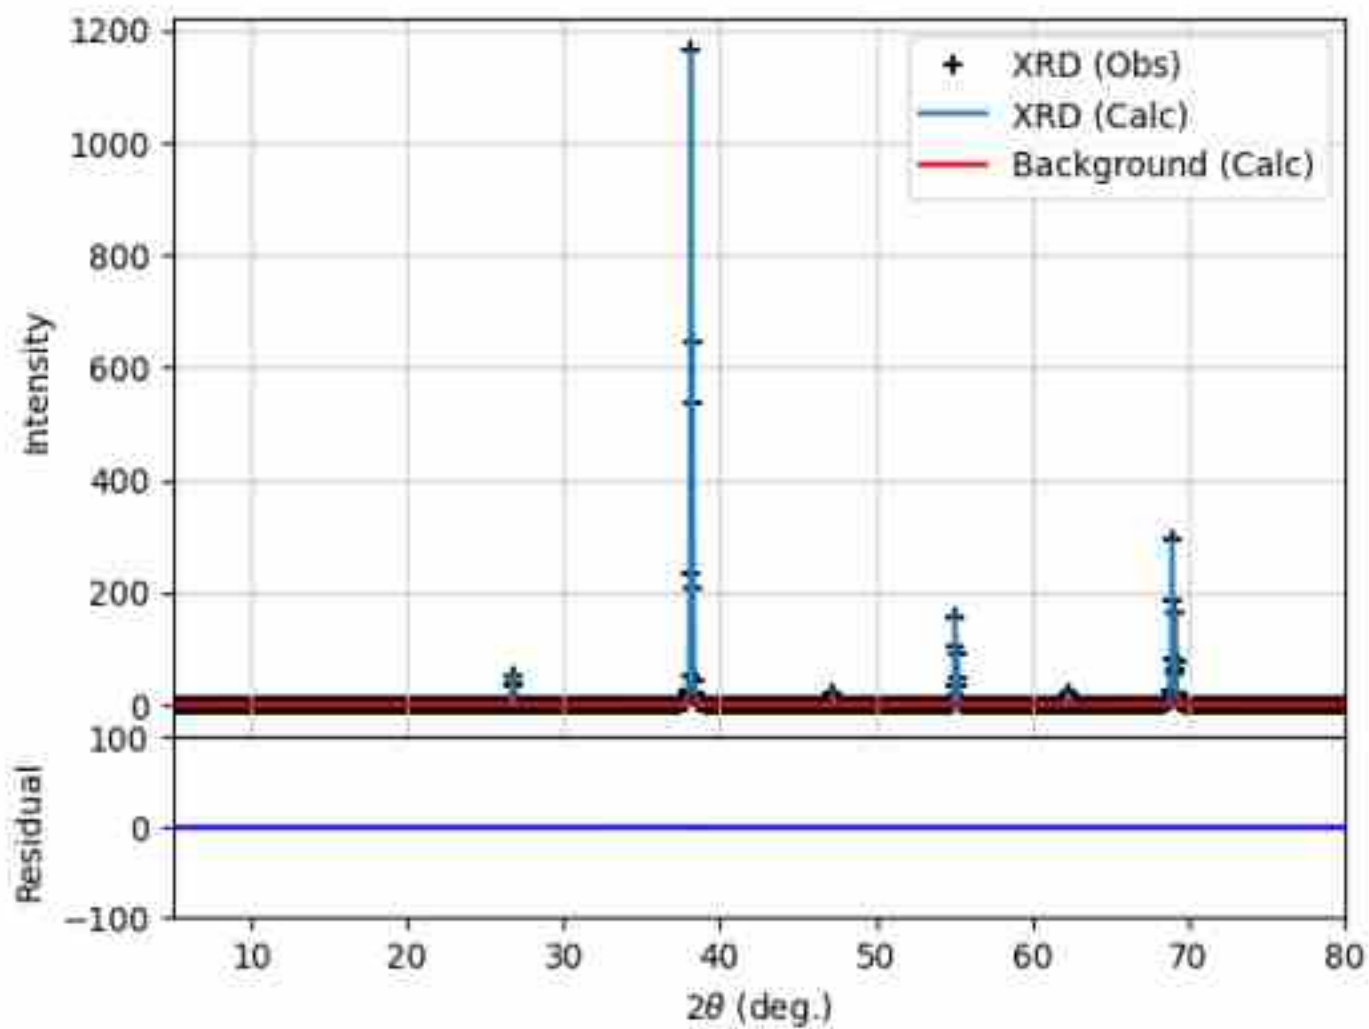

| RMSE before RR | Rwp     | RMSE after RR |
|----------------|---------|---------------|
| 0.001          | 0.10823 | 0.00113       |

# Lu1Zn1Rh2

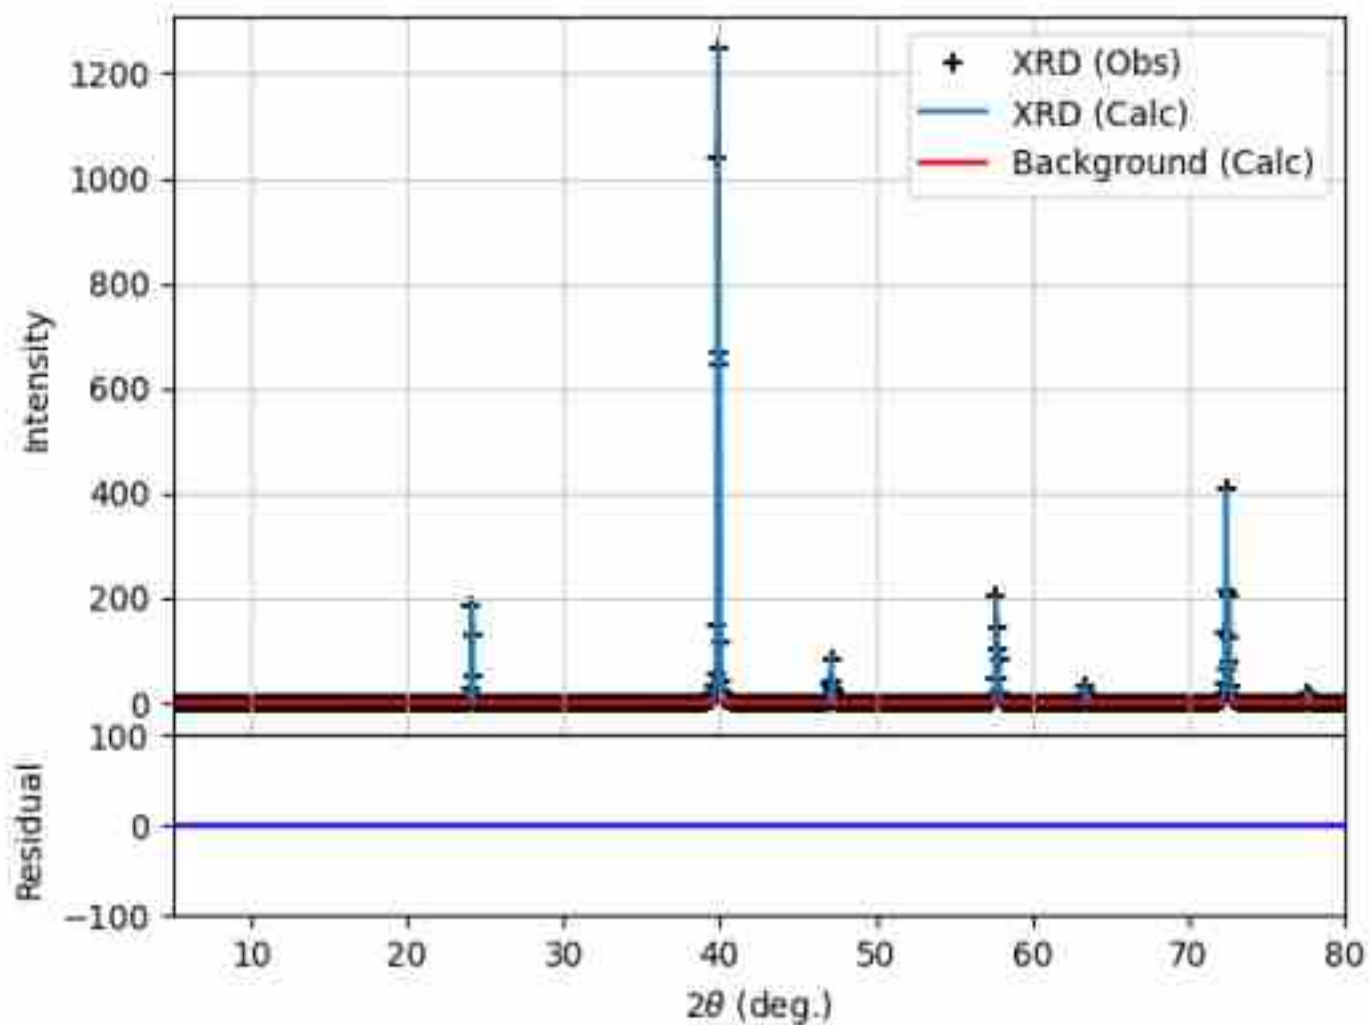

| RMSE before RR | Rwp     | RMSE after RR |
|----------------|---------|---------------|
| 0.001          | 0.00329 | 0.00055       |

# Lu2Co1Rh1

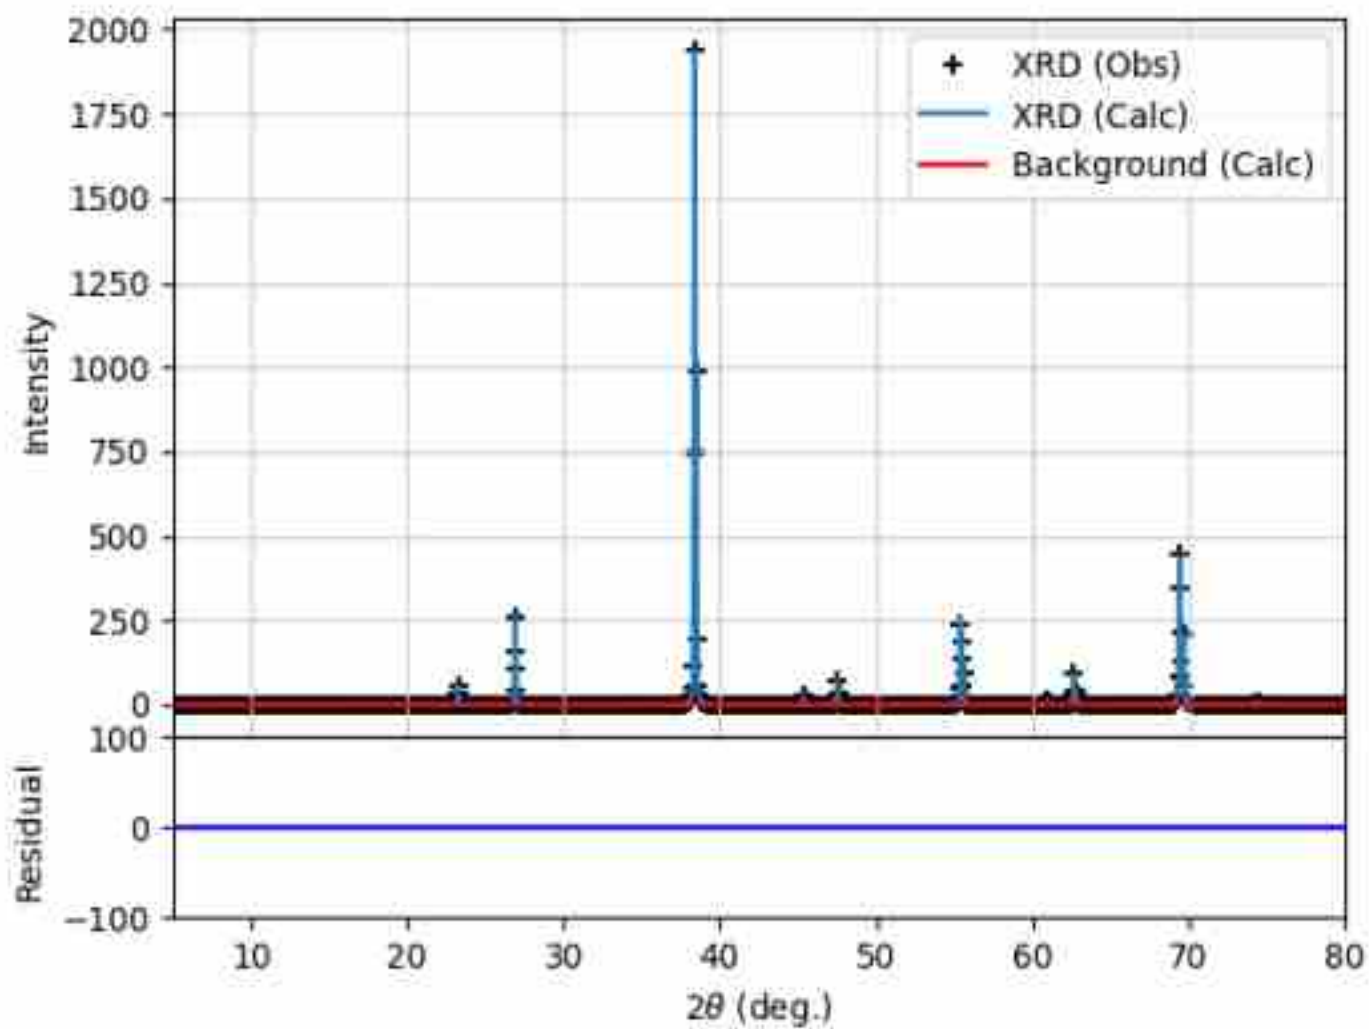

| RMSE before RR | Rwp     | RMSE after RR |
|----------------|---------|---------------|
| 0.001          | 0.00397 | 0.00021       |

# Lu<sub>2</sub>Cu<sub>1</sub>Pt<sub>1</sub>

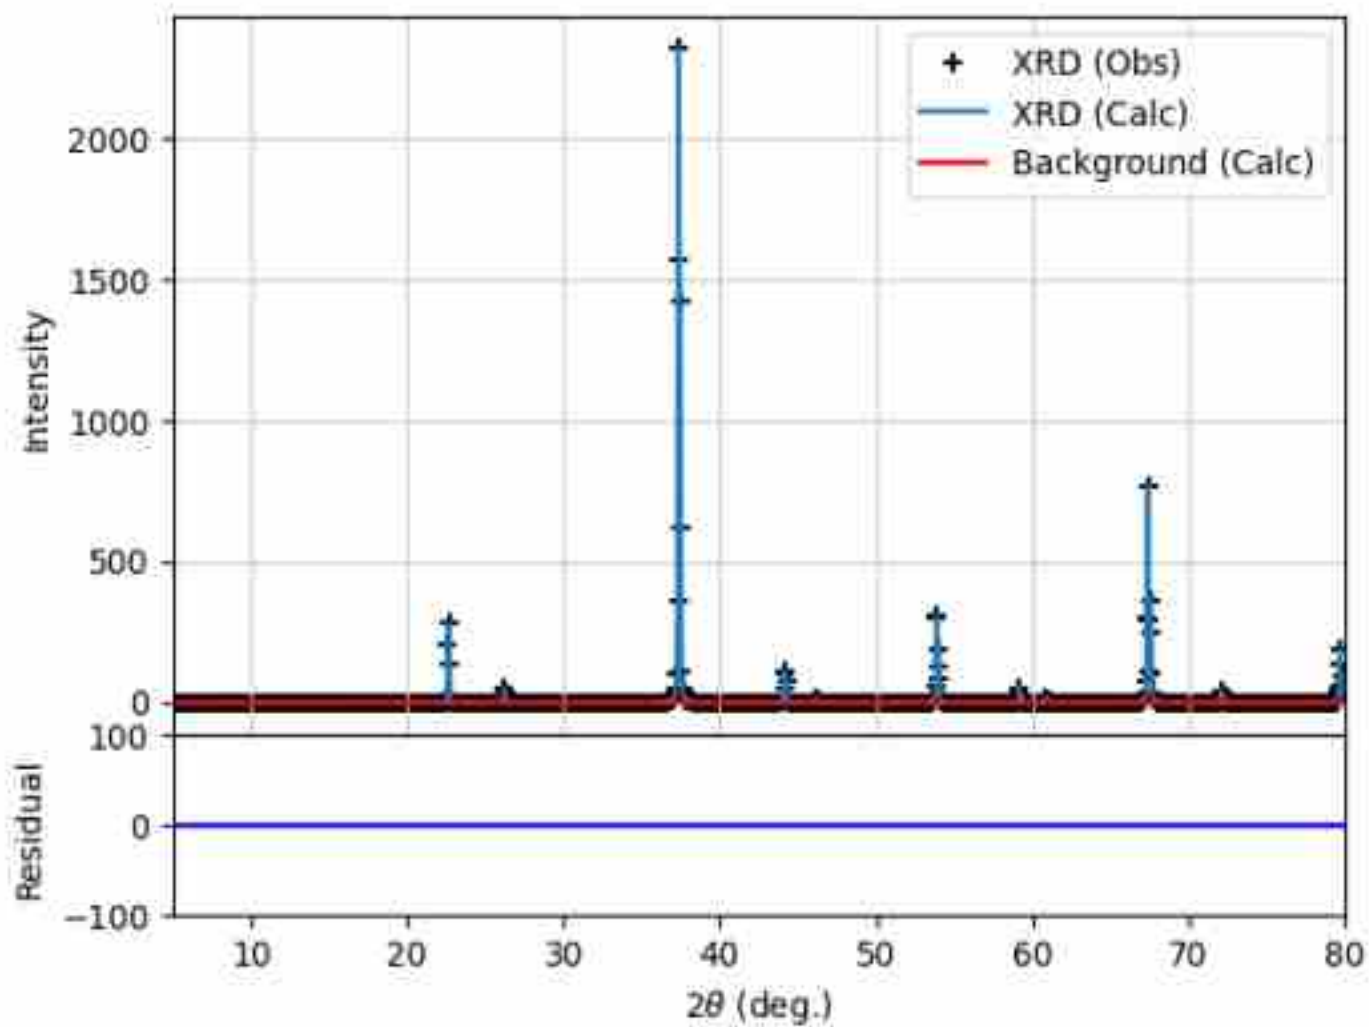

| RMSE before RR | Rwp     | RMSE after RR |
|----------------|---------|---------------|
| 0.001          | 0.00056 | 0.00024       |

# Lu<sub>2</sub>Ir<sub>1</sub>Rh<sub>1</sub>

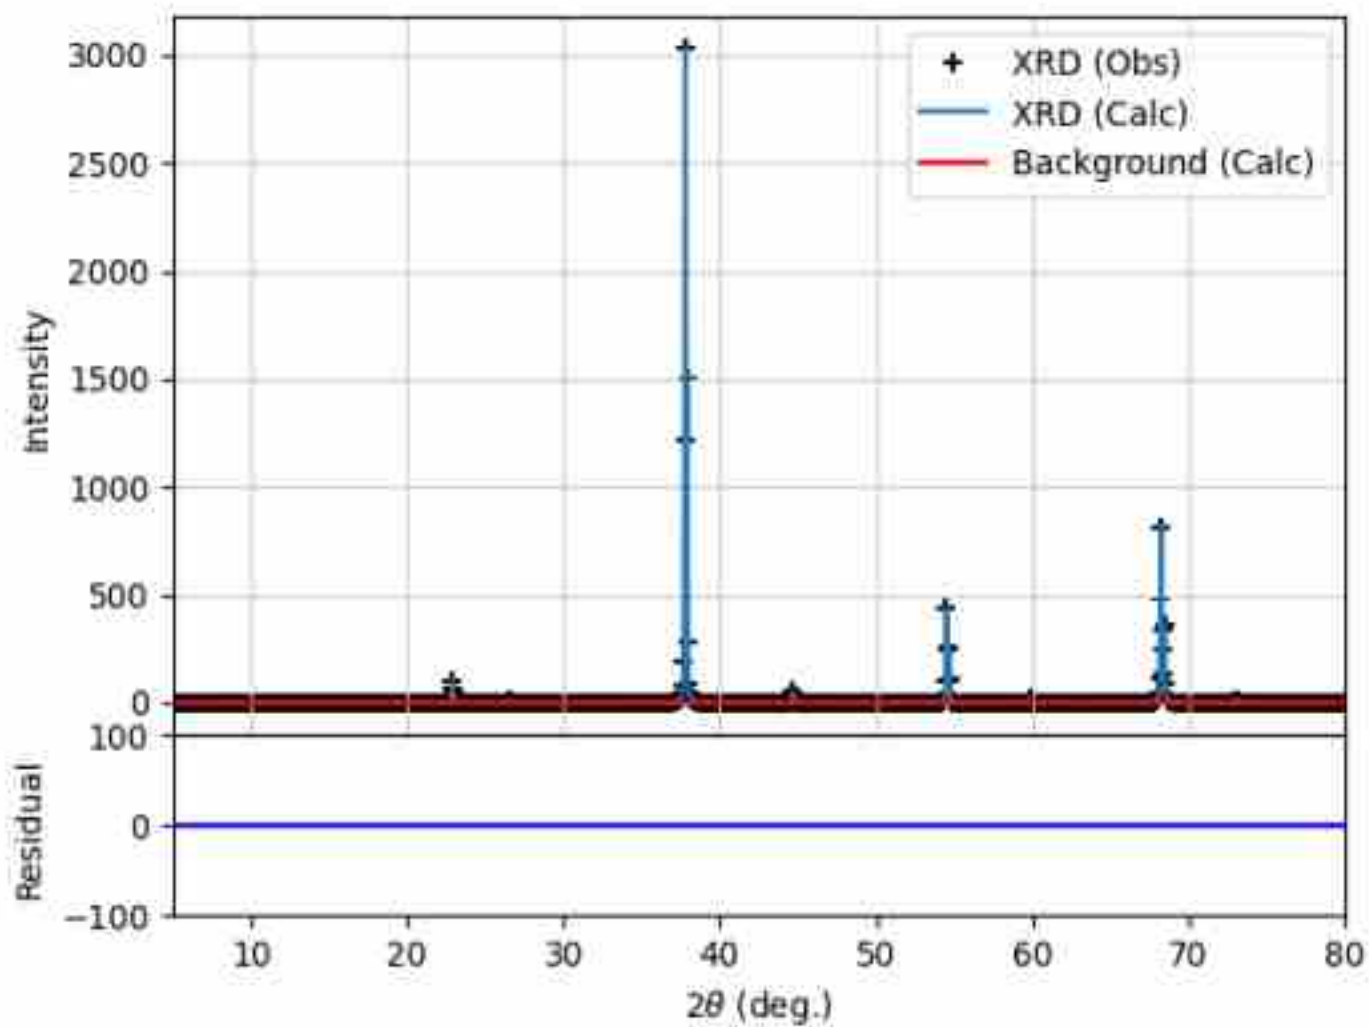

| RMSE before RR | Rwp     | RMSE after RR |
|----------------|---------|---------------|
| 0.001          | 0.01088 | 0.00047       |



# Lu<sub>2</sub>Ir<sub>1</sub>Ru<sub>1</sub>

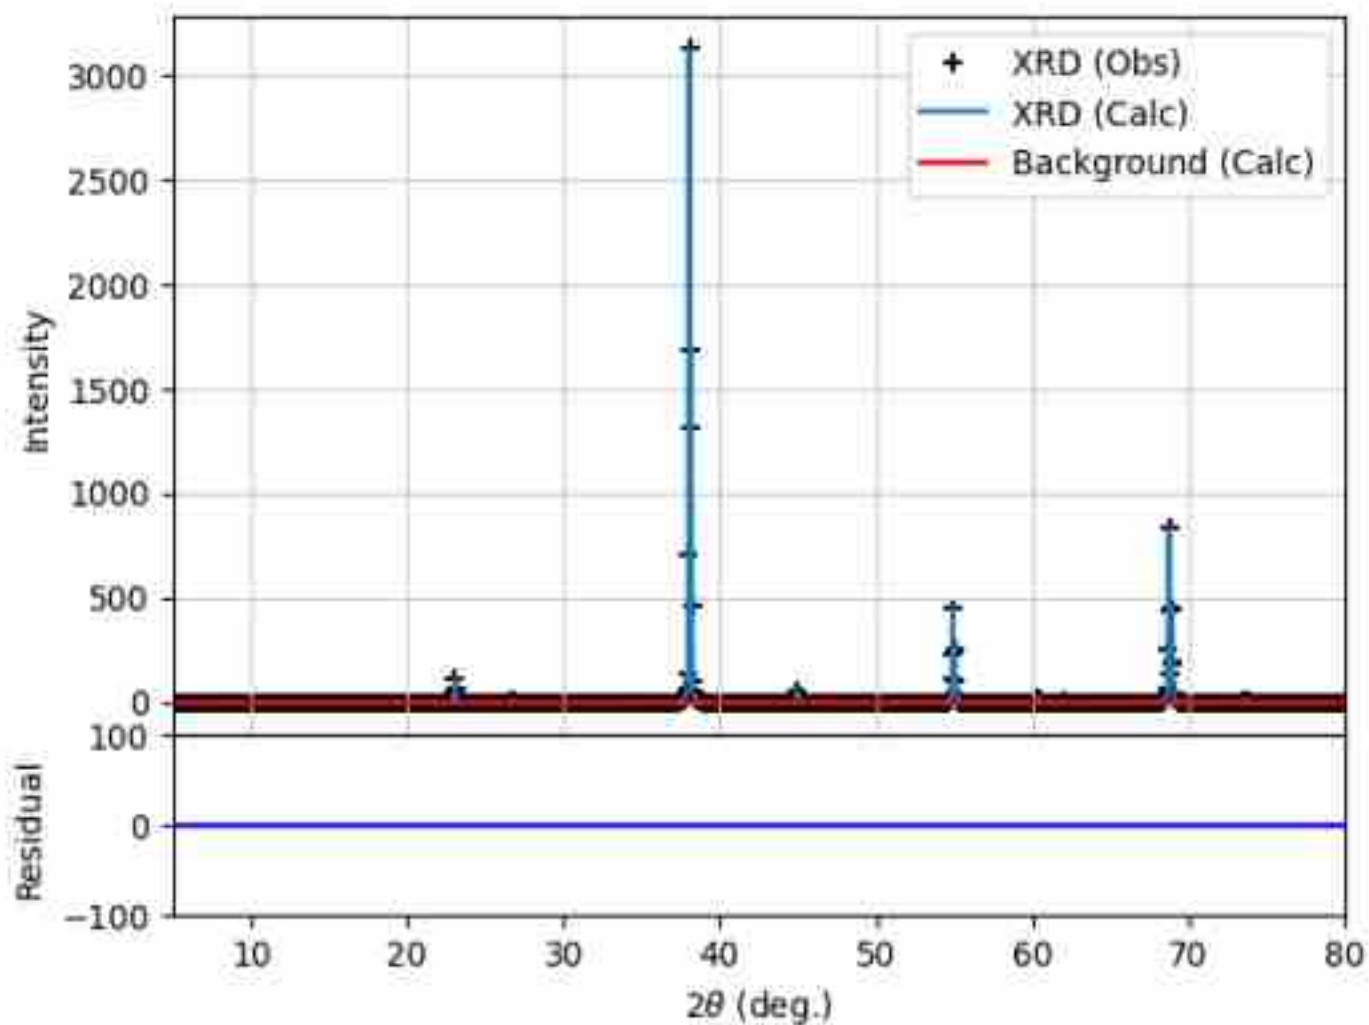

| RMSE before RR | Rwp     | RMSE after RR |
|----------------|---------|---------------|
| 0.001          | 0.01684 | 0.00036       |

# Lu<sub>2</sub>Ni<sub>1</sub>Ru<sub>1</sub>

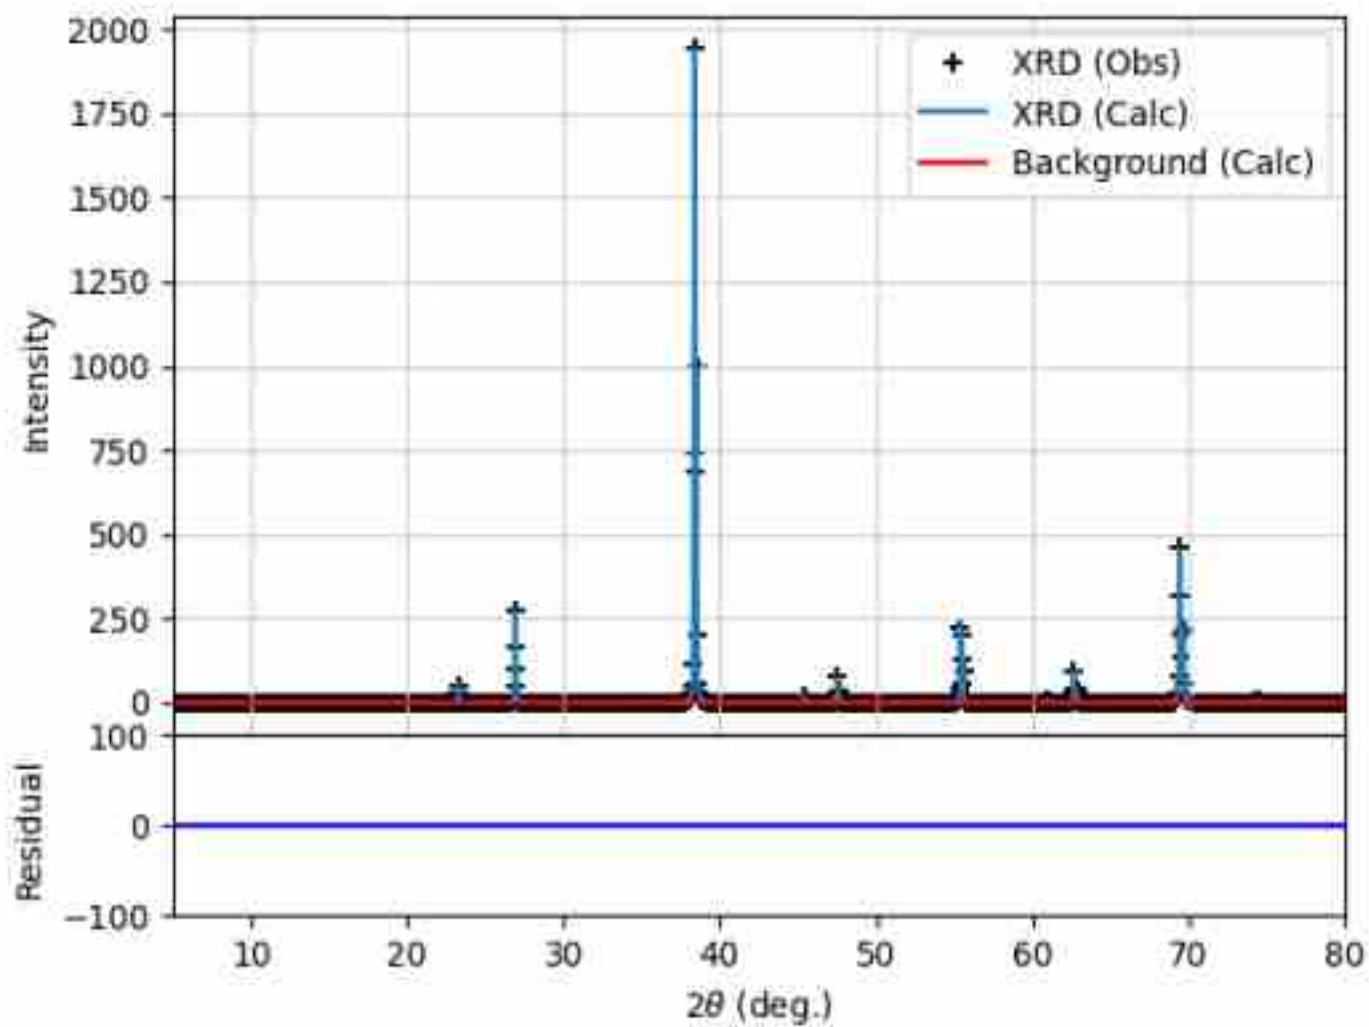

| RMSE before RR | Rwp    | RMSE after RR |
|----------------|--------|---------------|
| 0.001          | 0.0008 | 0.00025       |

# Lu<sub>2</sub>O<sub>3</sub>1Pd1

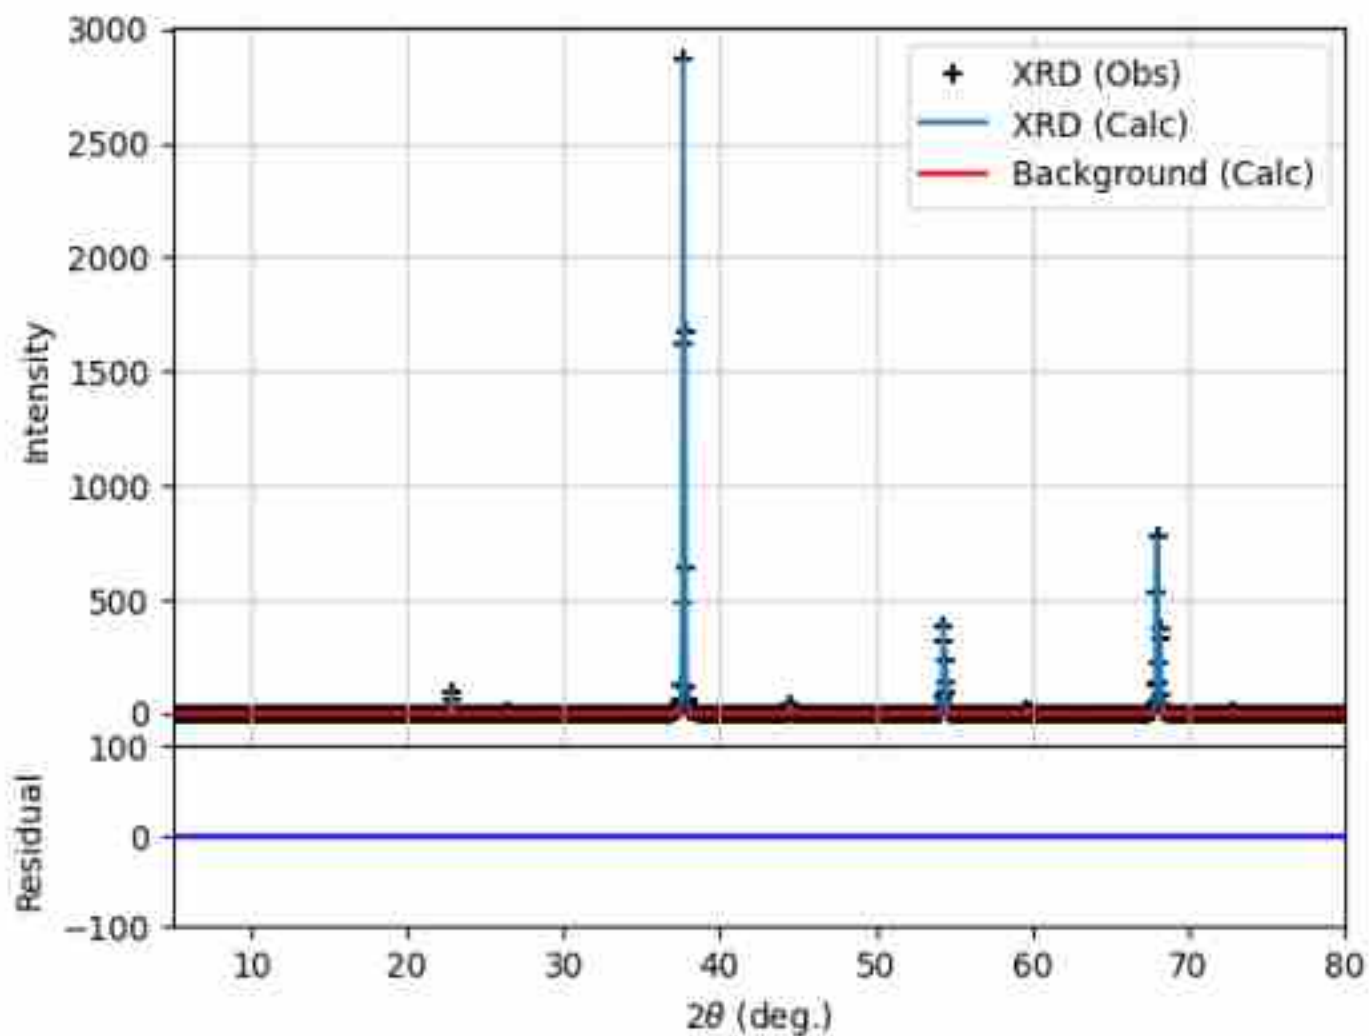

| RMSE before RR | Rwp     | RMSE after RR |
|----------------|---------|---------------|
| 0.001          | 0.00515 | 0.00029       |

# Lu<sub>2</sub>Pd<sub>1</sub>Ru<sub>1</sub>

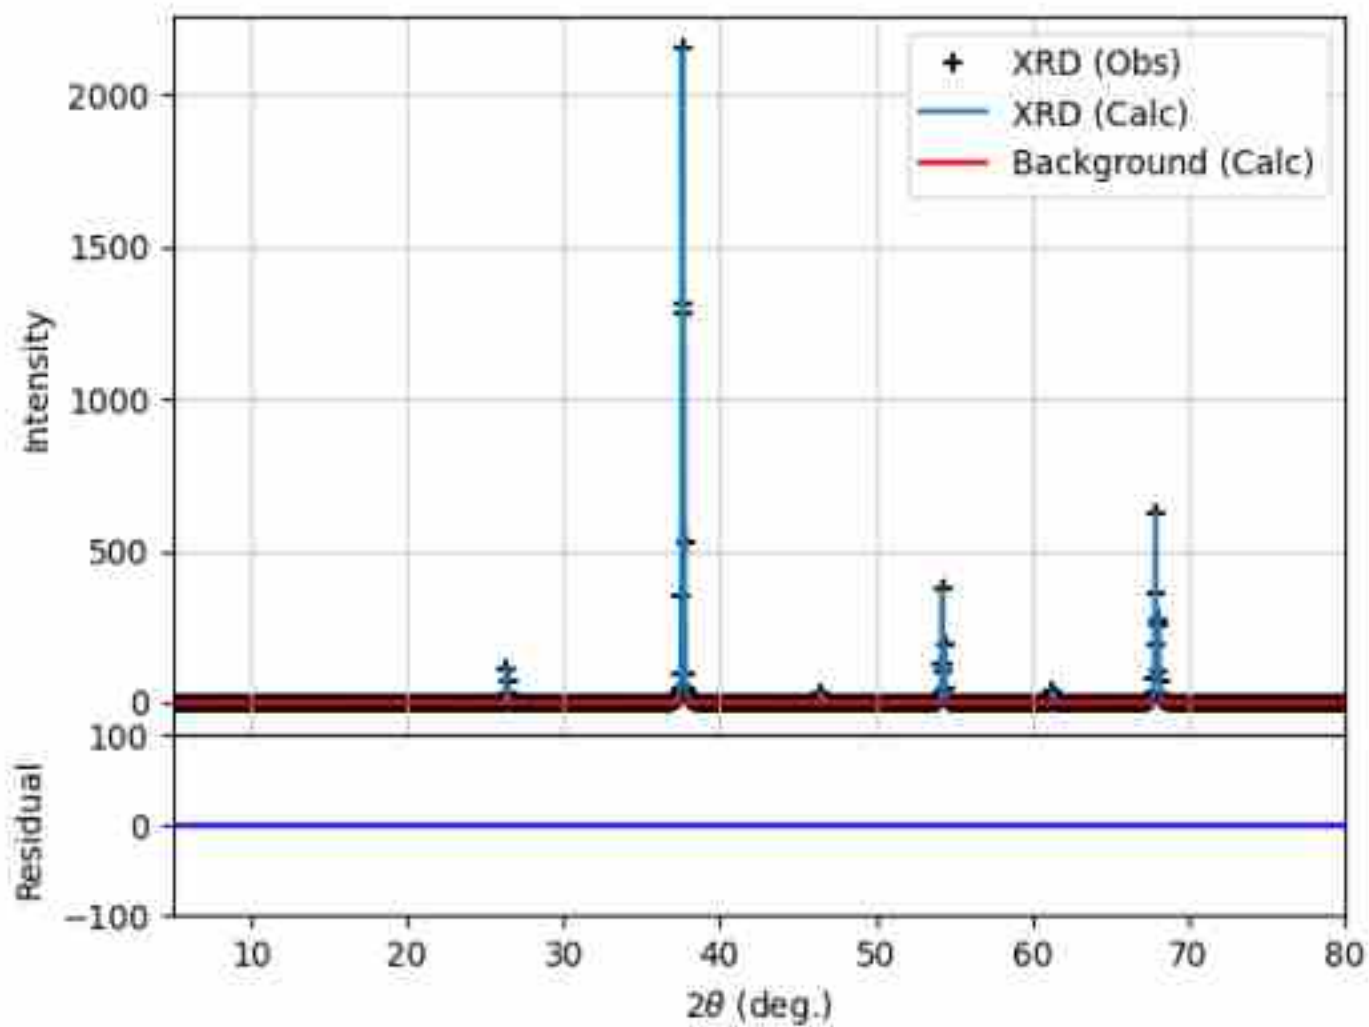

| RMSE before RR | Rwp     | RMSE after RR |
|----------------|---------|---------------|
| 0.001          | 0.01159 | 0.00038       |

# Lu<sub>2</sub>RuAu<sub>1</sub>

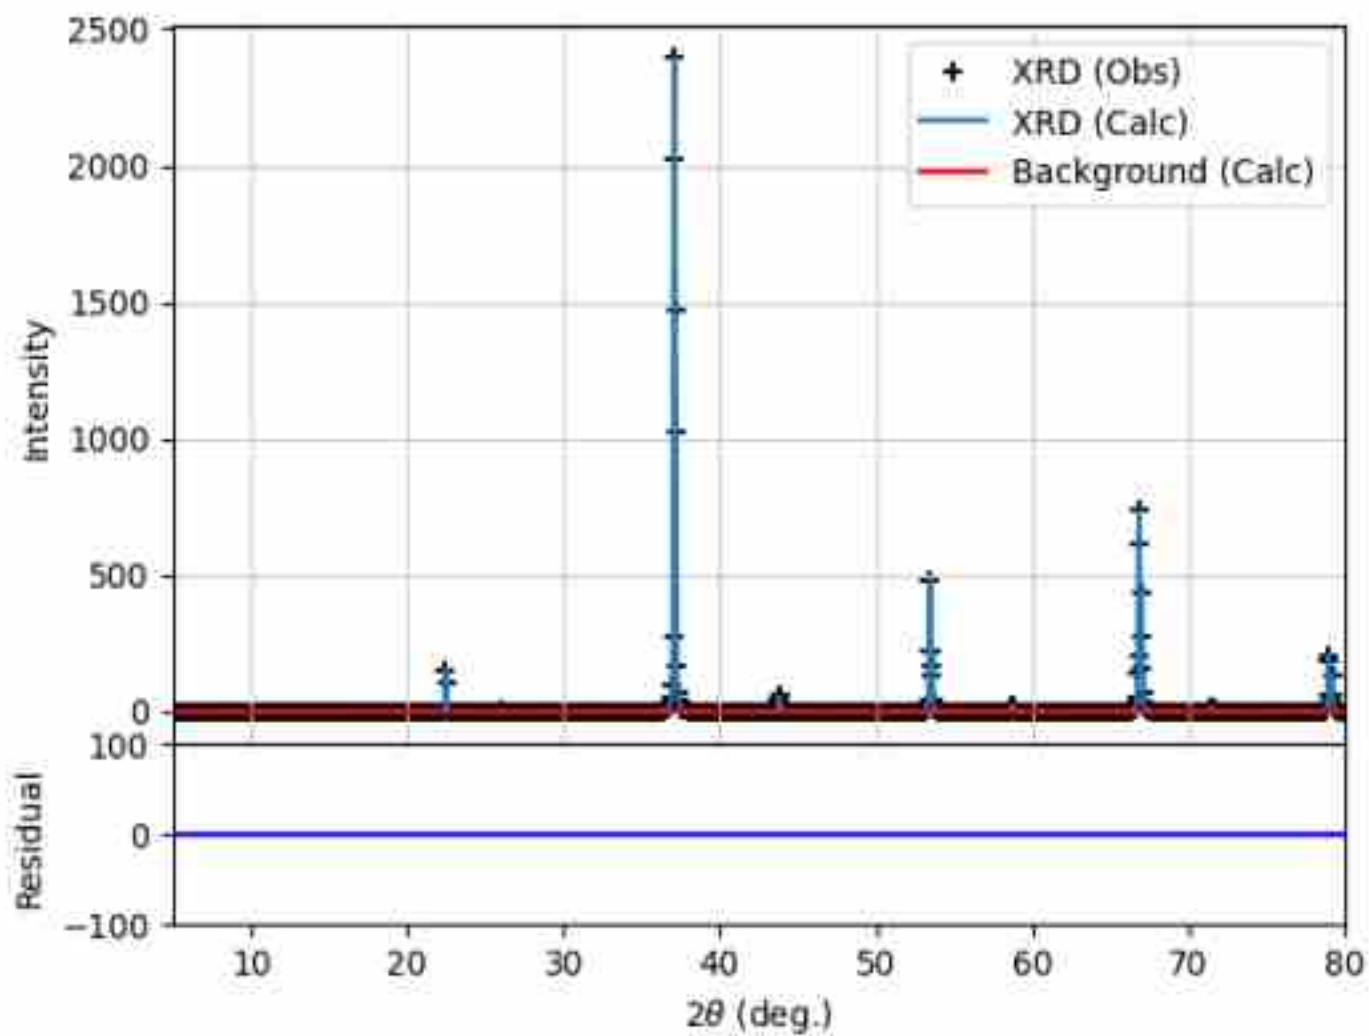

| RMSE before RR | Rwp     | RMSE after RR |
|----------------|---------|---------------|
| 0.001          | 0.00623 | 0.00046       |

# Lu<sub>2</sub>Ru<sub>1</sub>Rh<sub>1</sub>

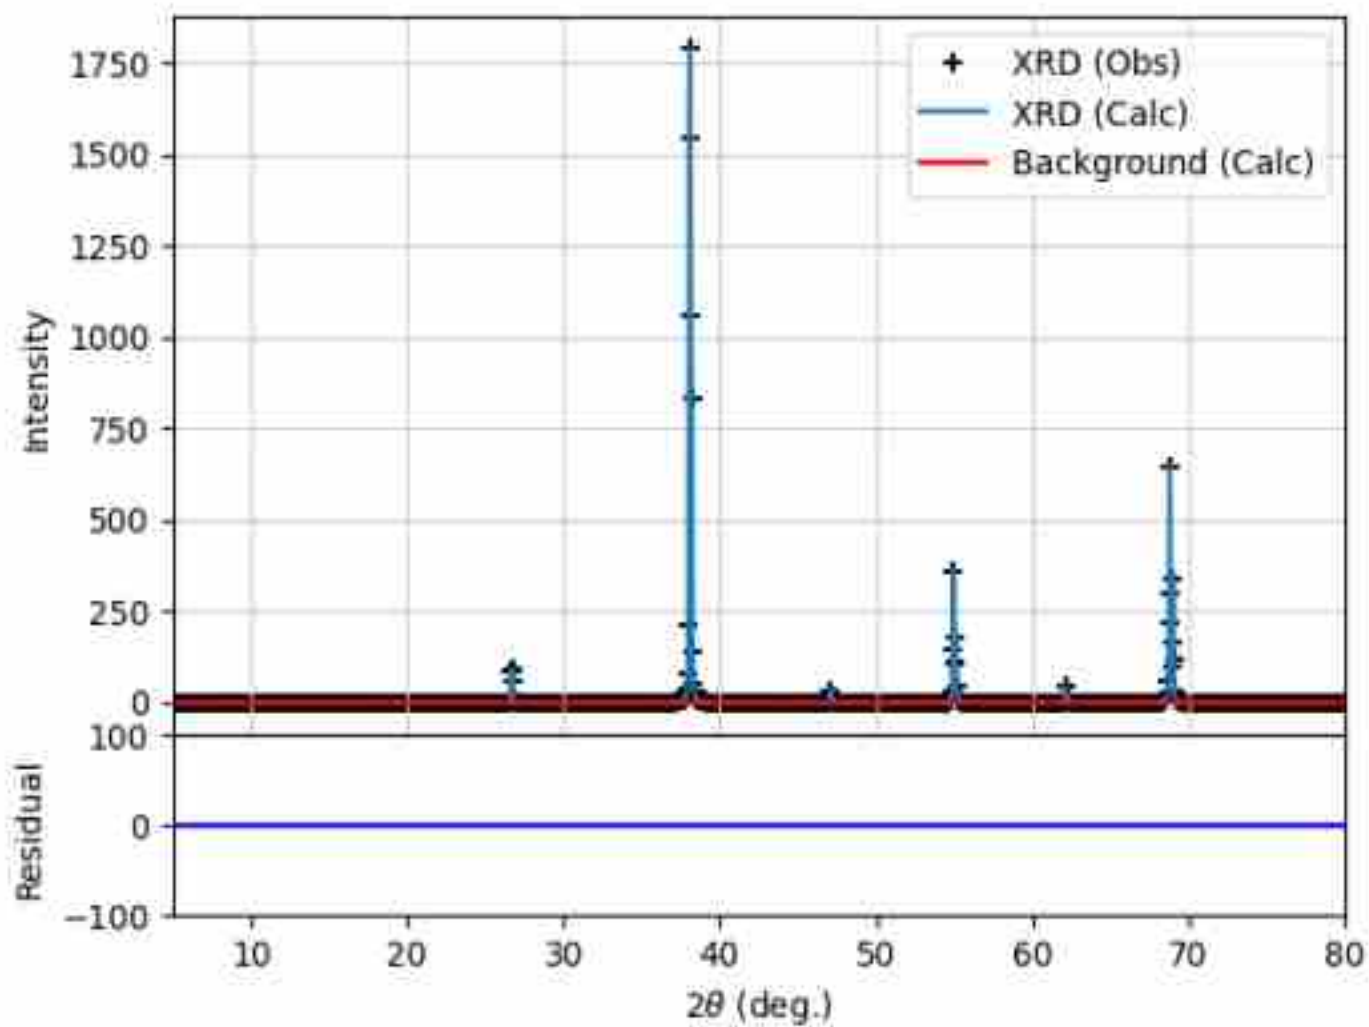

| RMSE before RR | Rwp    | RMSE after RR |
|----------------|--------|---------------|
| 0.001          | 0.0086 | 0.00056       |

# Lu<sub>2</sub>TlHg

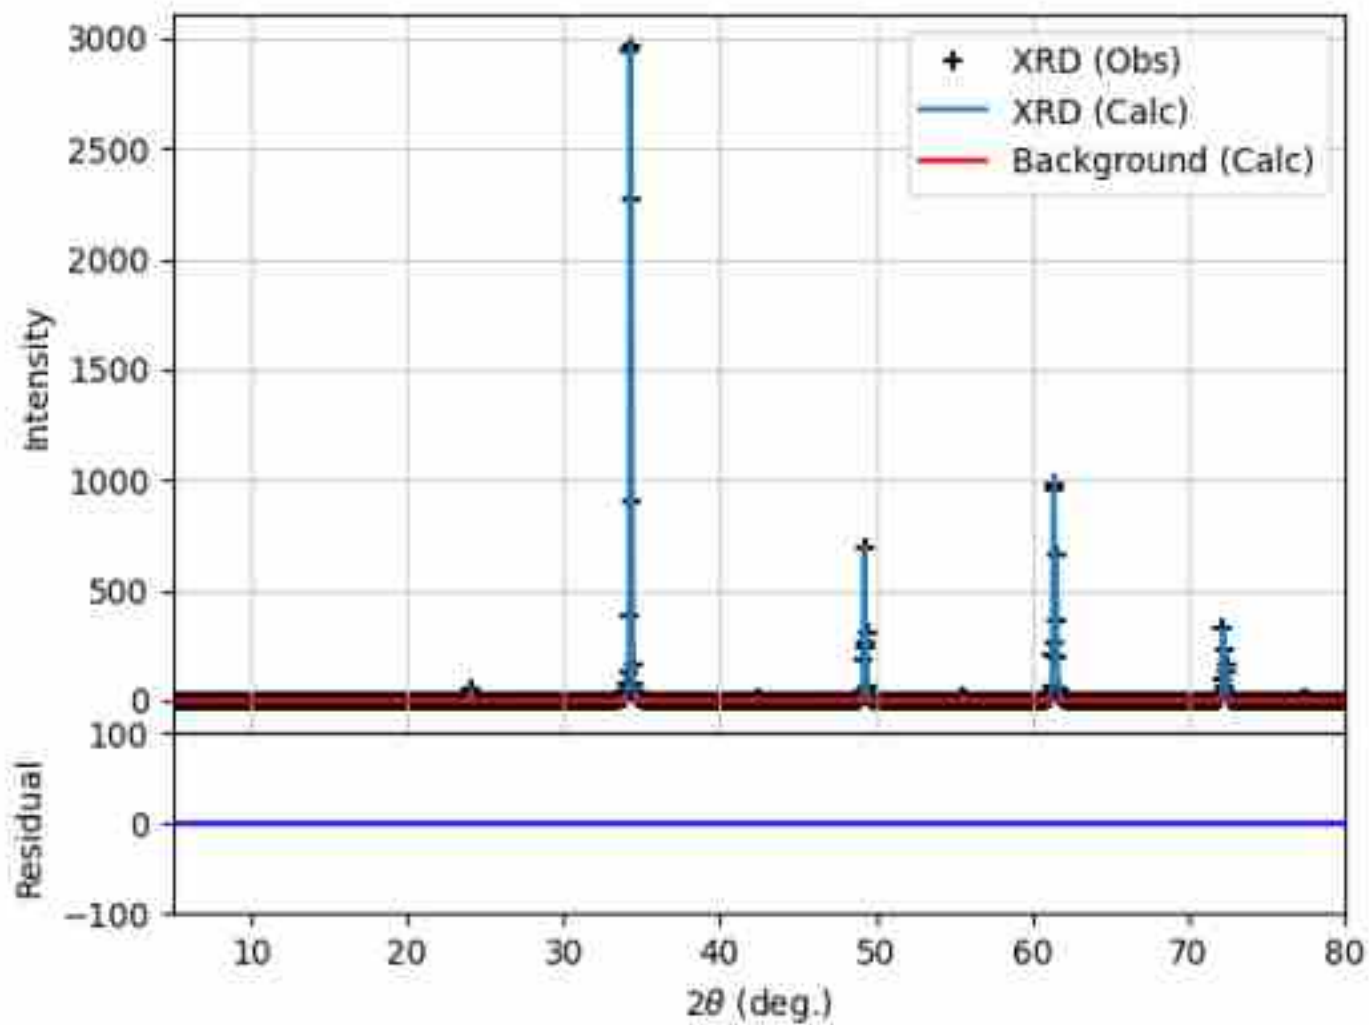

| RMSE before RR | Rwp     | RMSE after RR |
|----------------|---------|---------------|
| 0.001          | 0.02662 | 0.00093       |

# Lu<sub>3</sub>In<sub>1</sub>

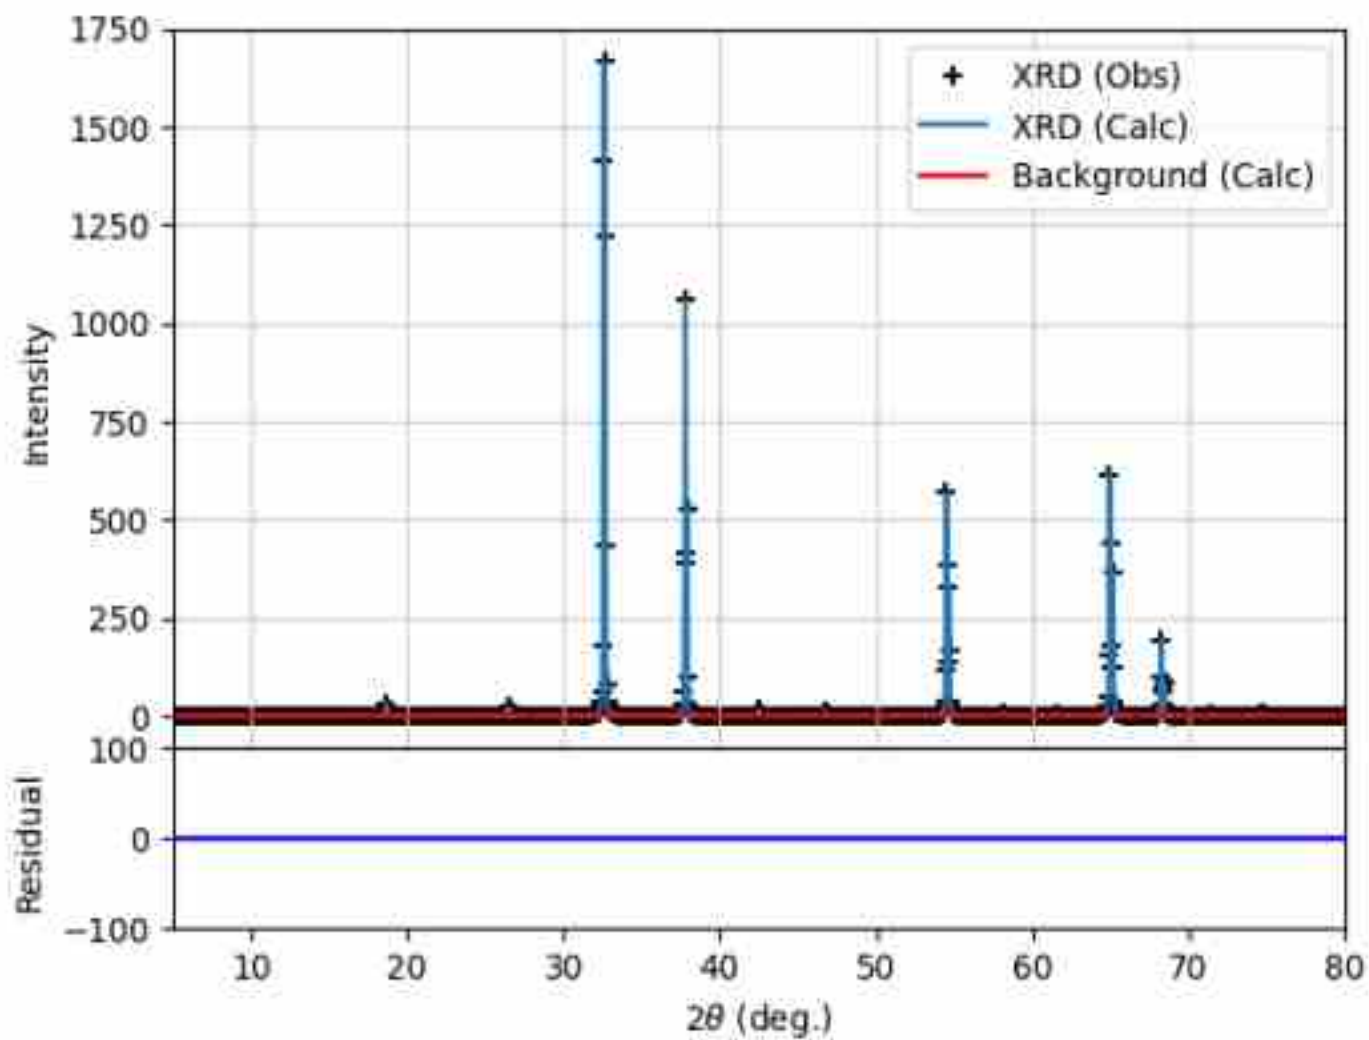

| RMSE before RR | Rwp     | RMSE after RR |
|----------------|---------|---------------|
| 0.001          | 0.04844 | 0.00072       |



# Lu<sub>4</sub>In<sub>2</sub>Pd<sub>4</sub>

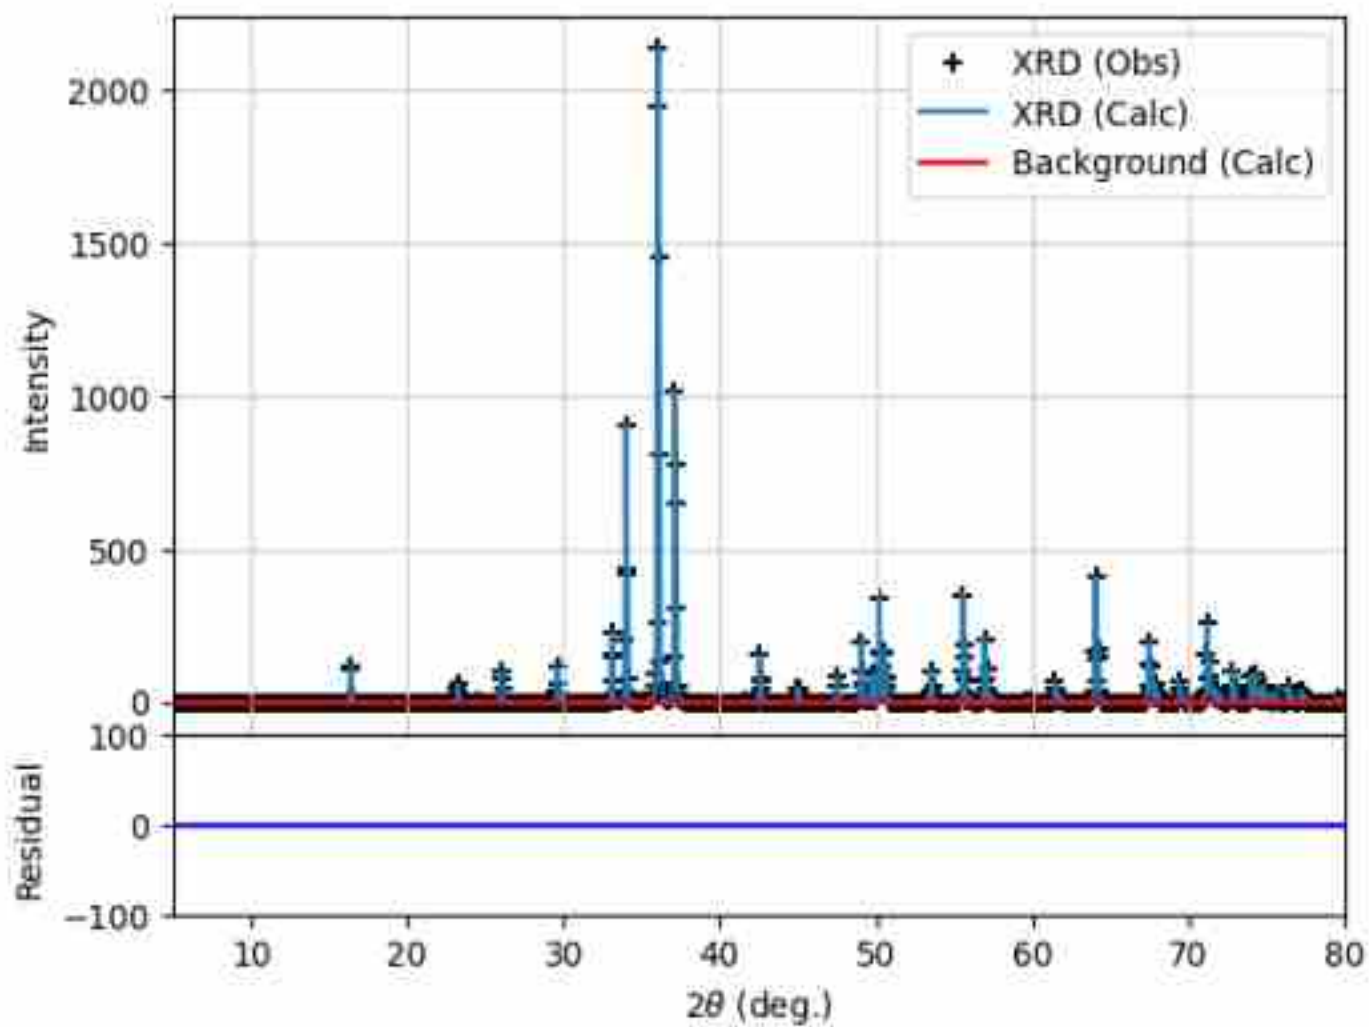

| RMSE before RR | Rwp     | RMSE after RR |
|----------------|---------|---------------|
| 0.01           | 0.00447 | 0.00019       |

# Mg<sub>1</sub>AlIr<sub>2</sub>

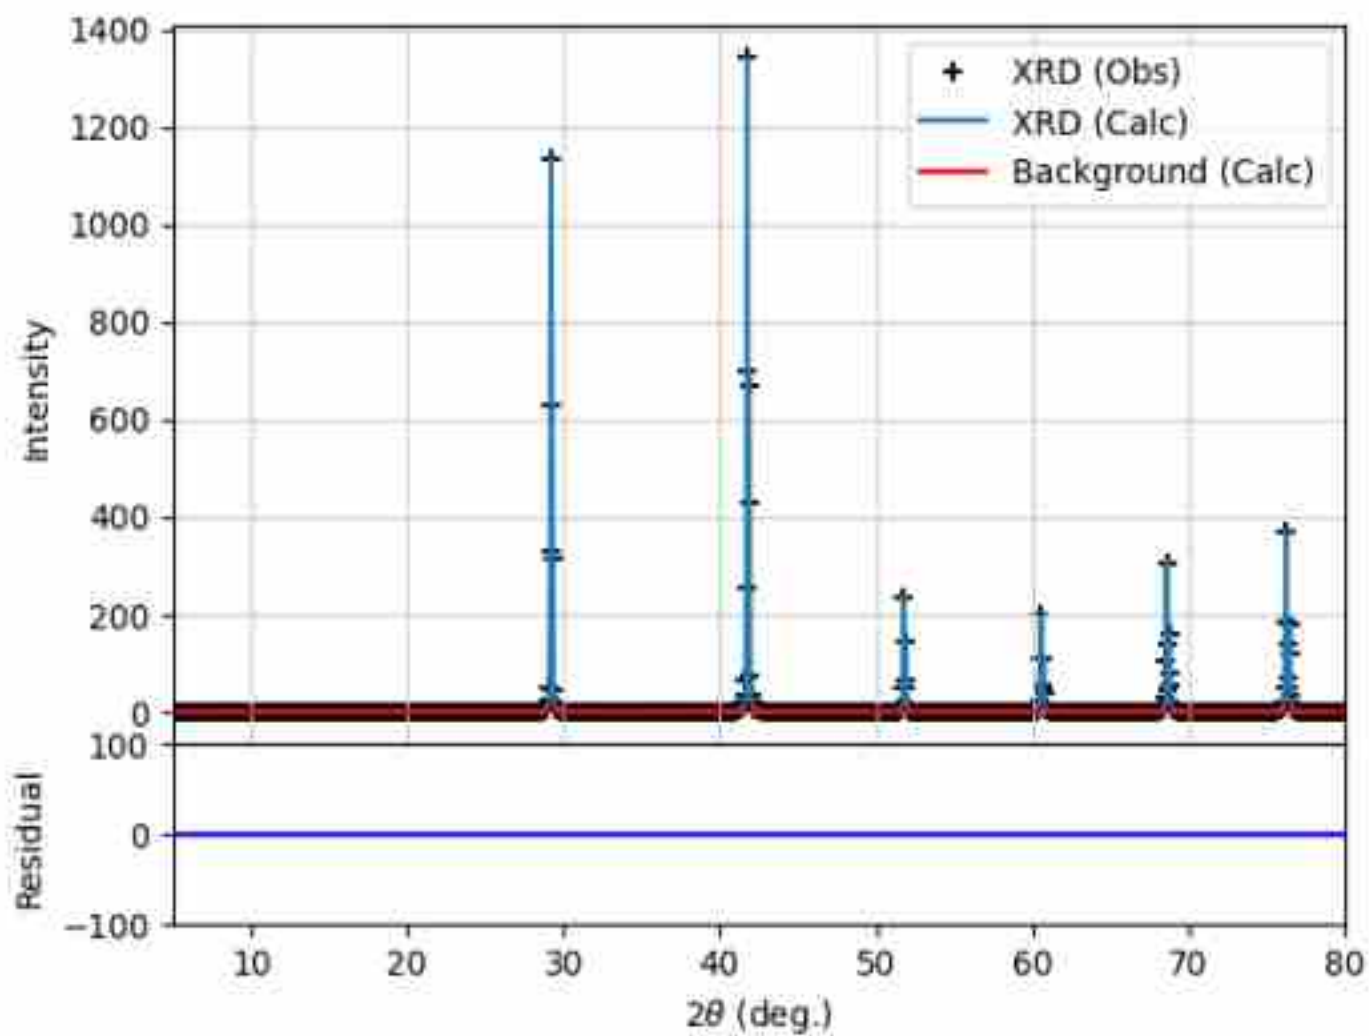

| RMSE before RR | Rwp     | RMSE after RR |
|----------------|---------|---------------|
| 0.001          | 0.08199 | 0.00372       |

# Mg1C1N2

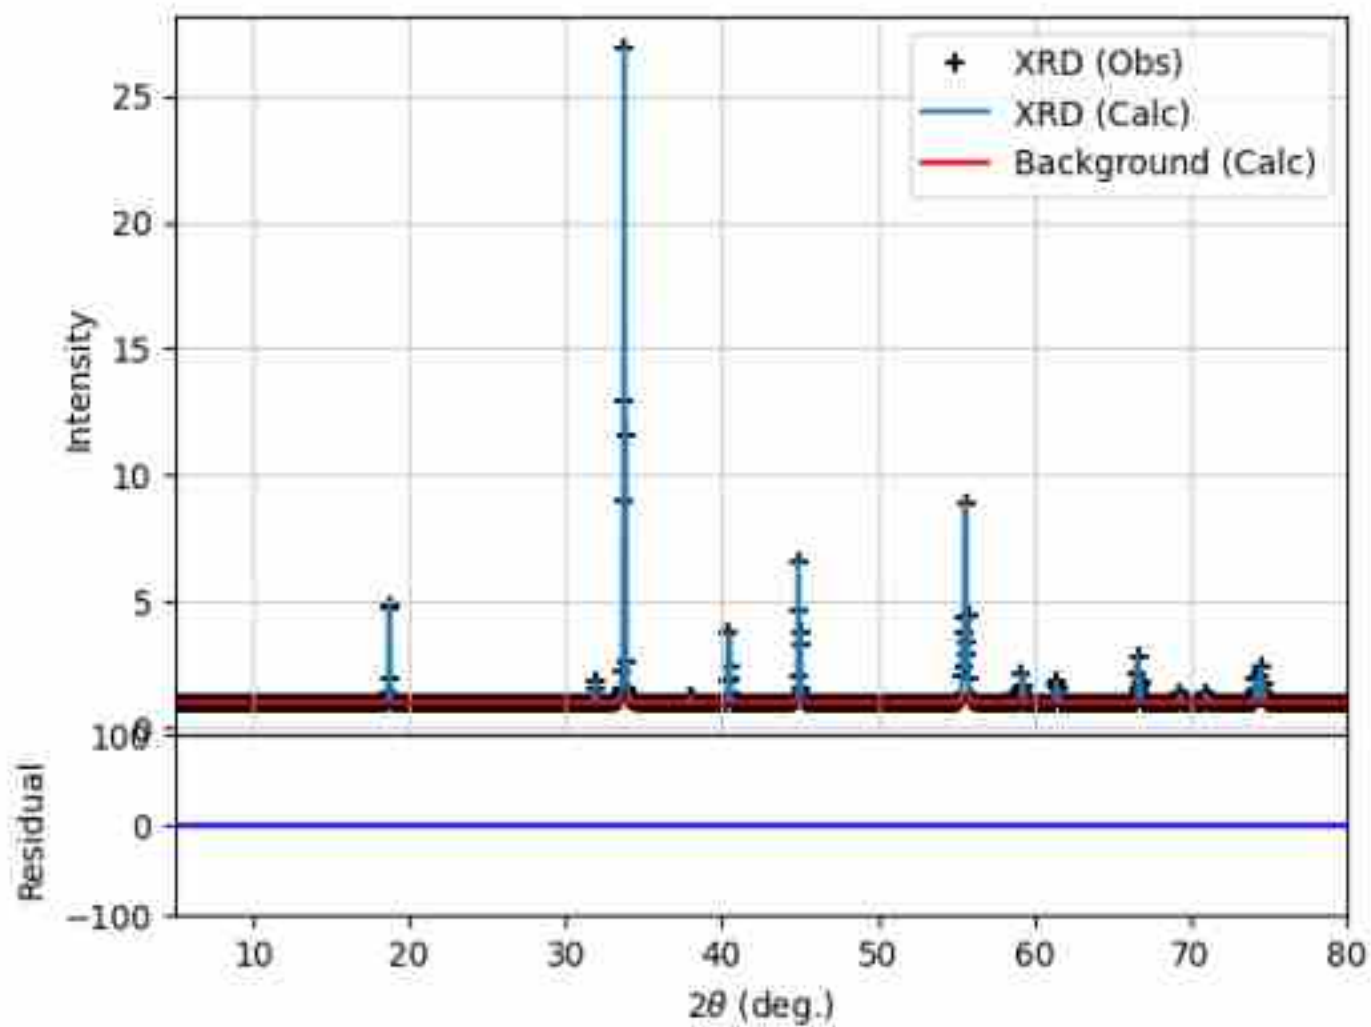

| RMSE before RR | Rwp     | RMSE after RR |
|----------------|---------|---------------|
| 0.01           | 0.00063 | 0.00068       |

# Mg<sub>1</sub>Cd<sub>1</sub>Au<sub>2</sub>

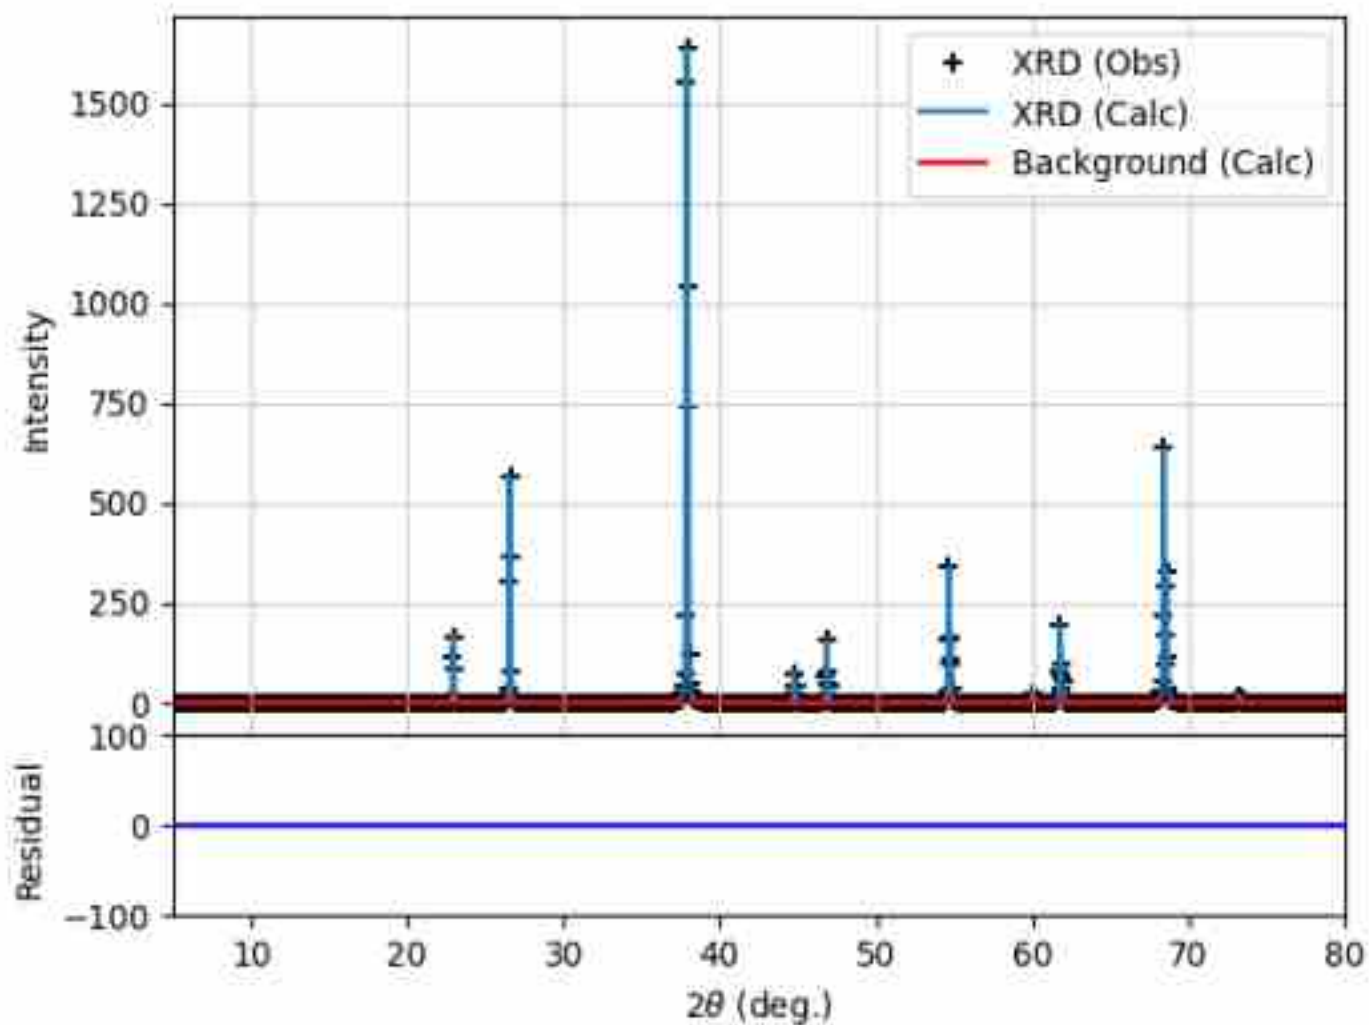

| RMSE before RR | Rwp     | RMSE after RR |
|----------------|---------|---------------|
| 0.001          | 0.00318 | 0.00063       |

# Mg<sub>1</sub>Cd<sub>1</sub>Pd<sub>2</sub>

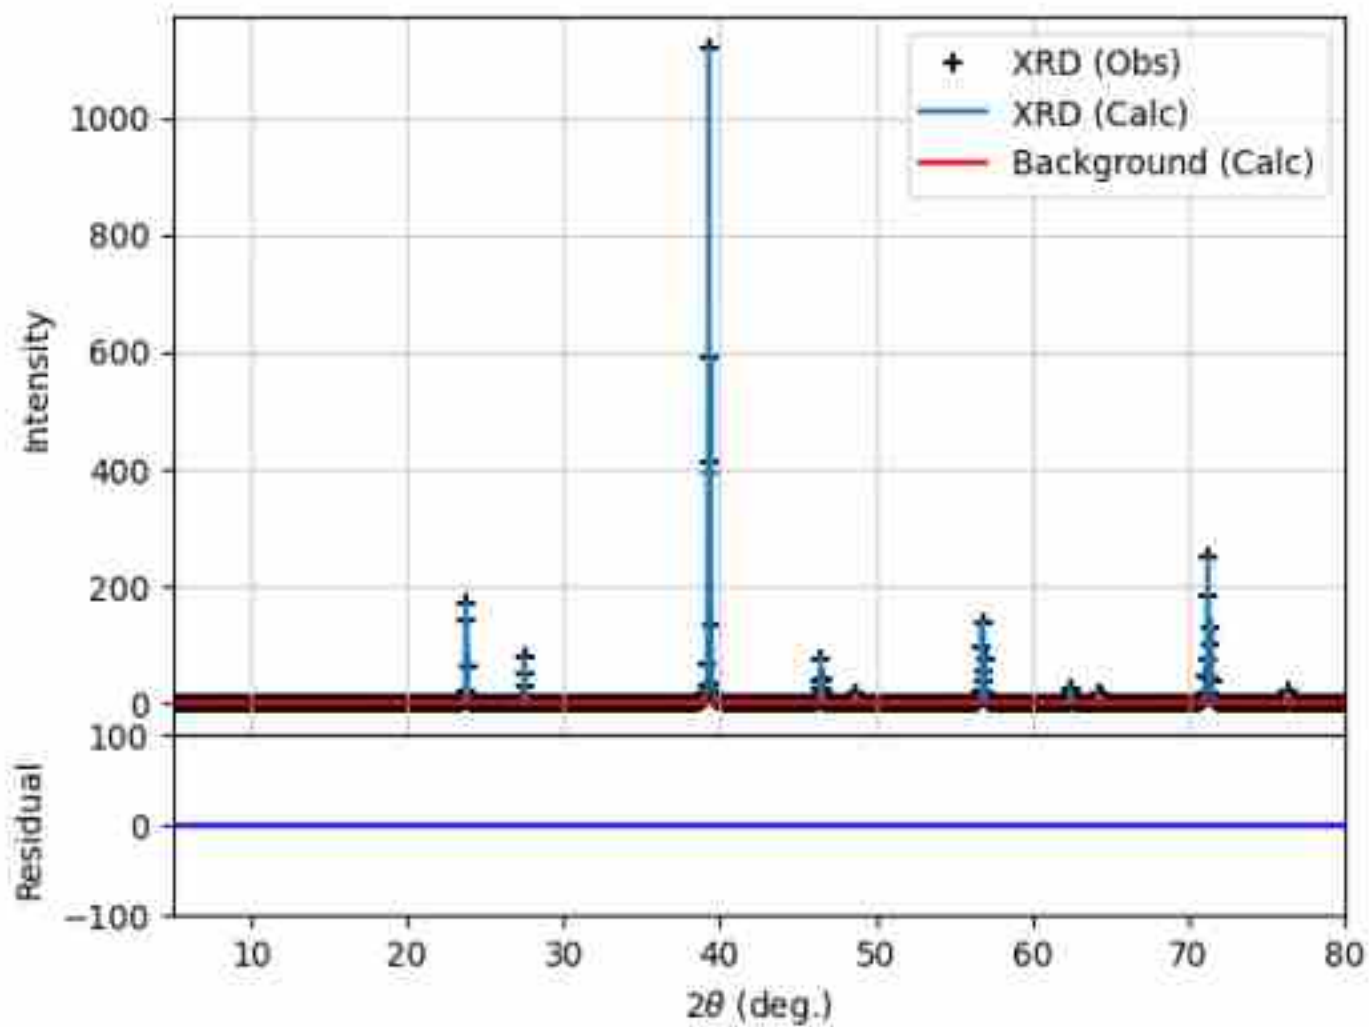

| RMSE before RR | Rwp   | RMSE after RR |
|----------------|-------|---------------|
| 0.001          | 9e-05 | 0.00013       |

# Mg1Ga1

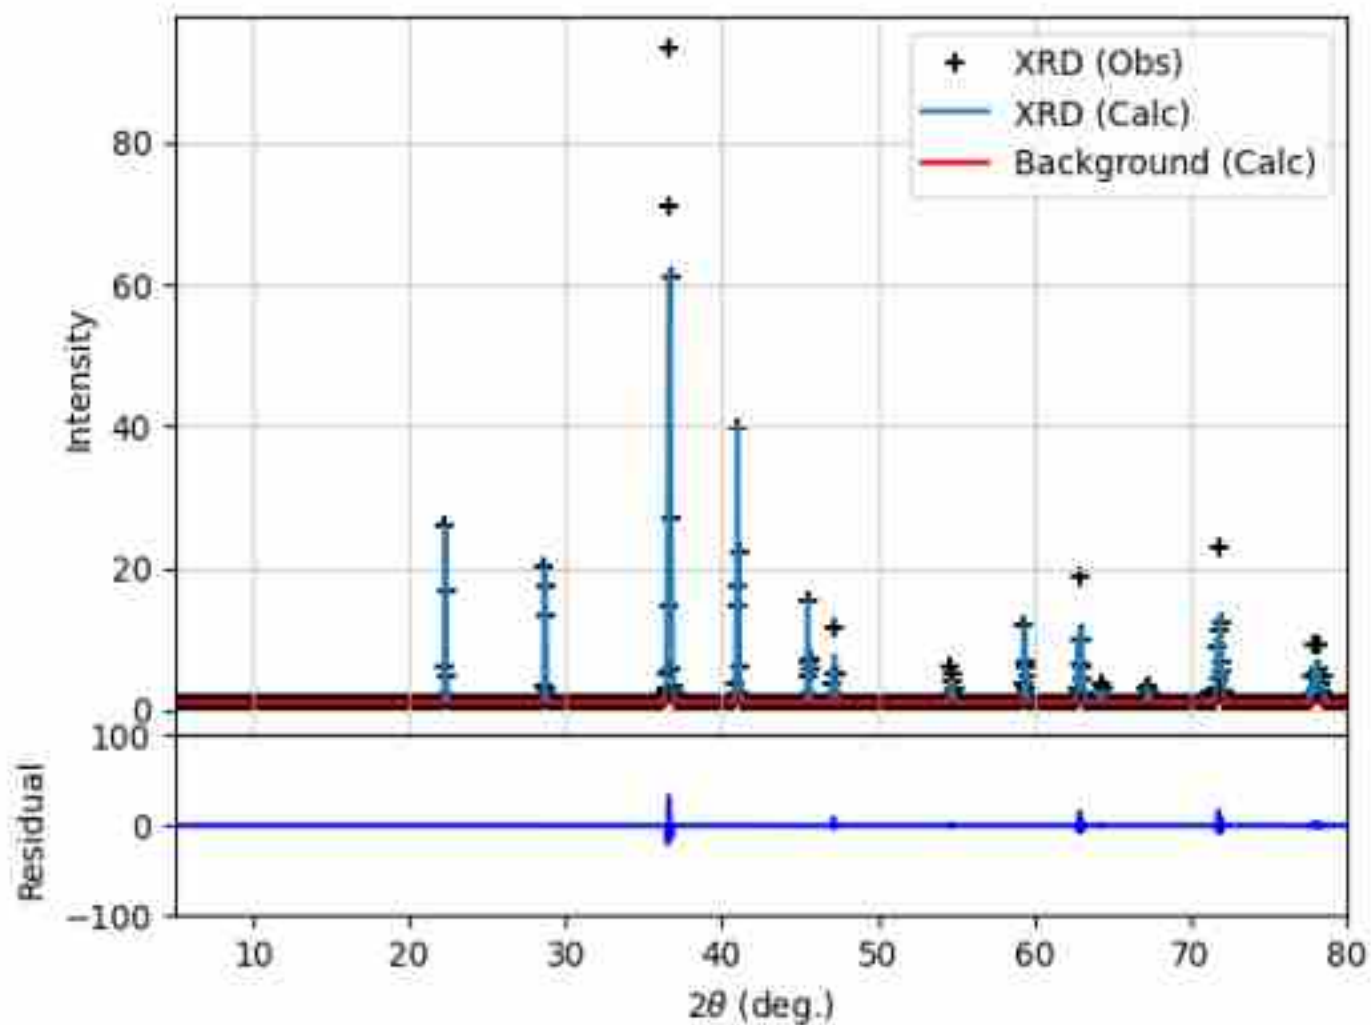

| RMSE before RR | Rwp      | RMSE after RR |
|----------------|----------|---------------|
| 0.001          | 34.25169 | 0.00056       |

# Mg1Pa1Tc2

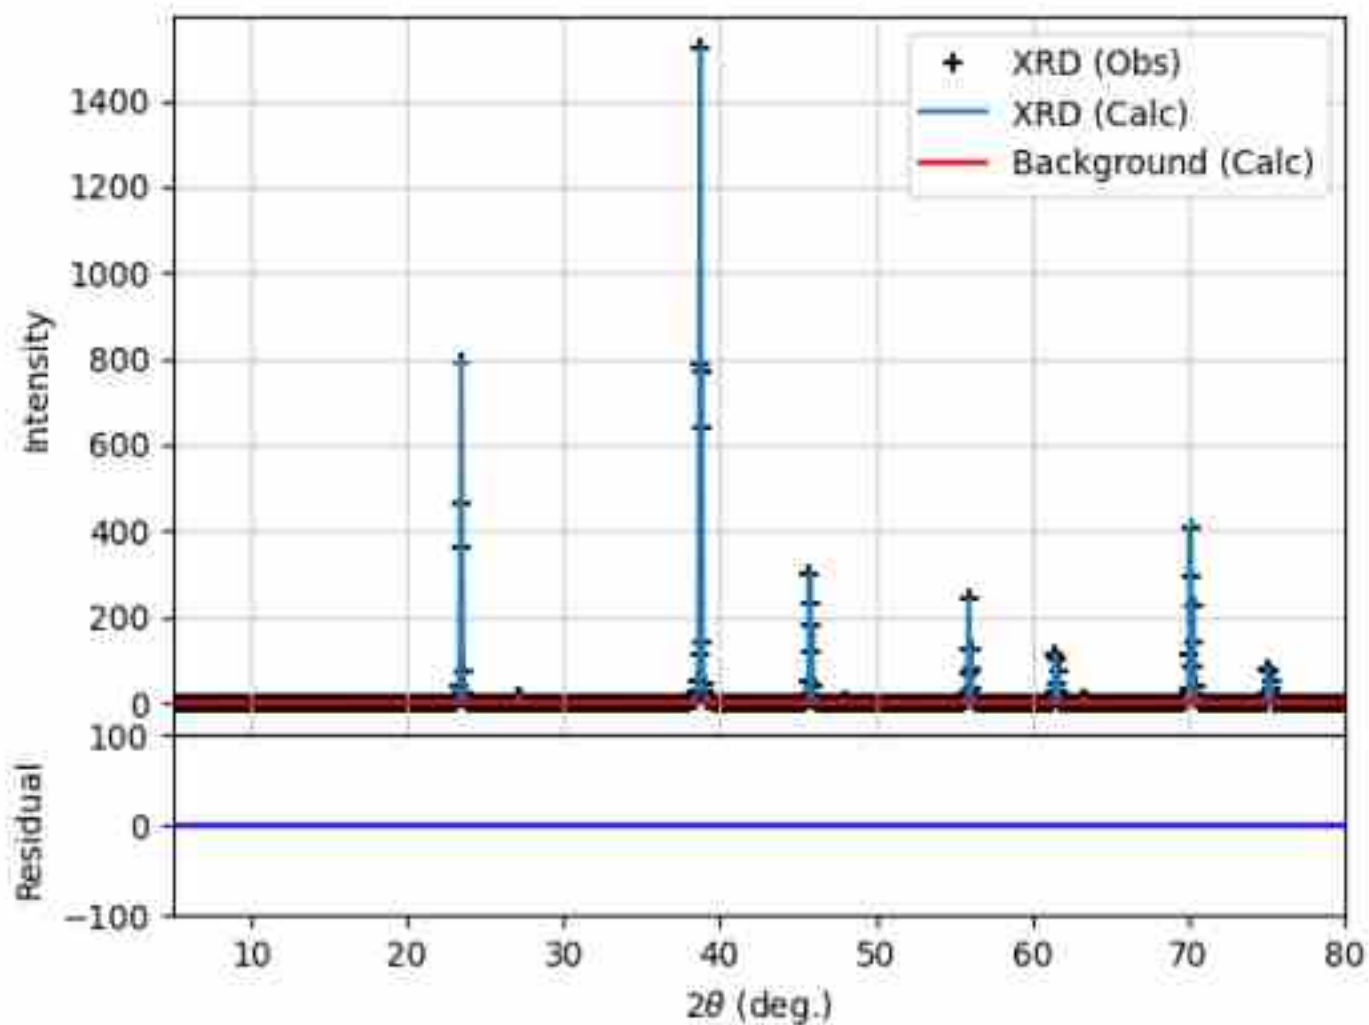

| RMSE before RR | Rwp     | RMSE after RR |
|----------------|---------|---------------|
| 0.001          | 0.00284 | 0.00033       |

# Mg1Pd1

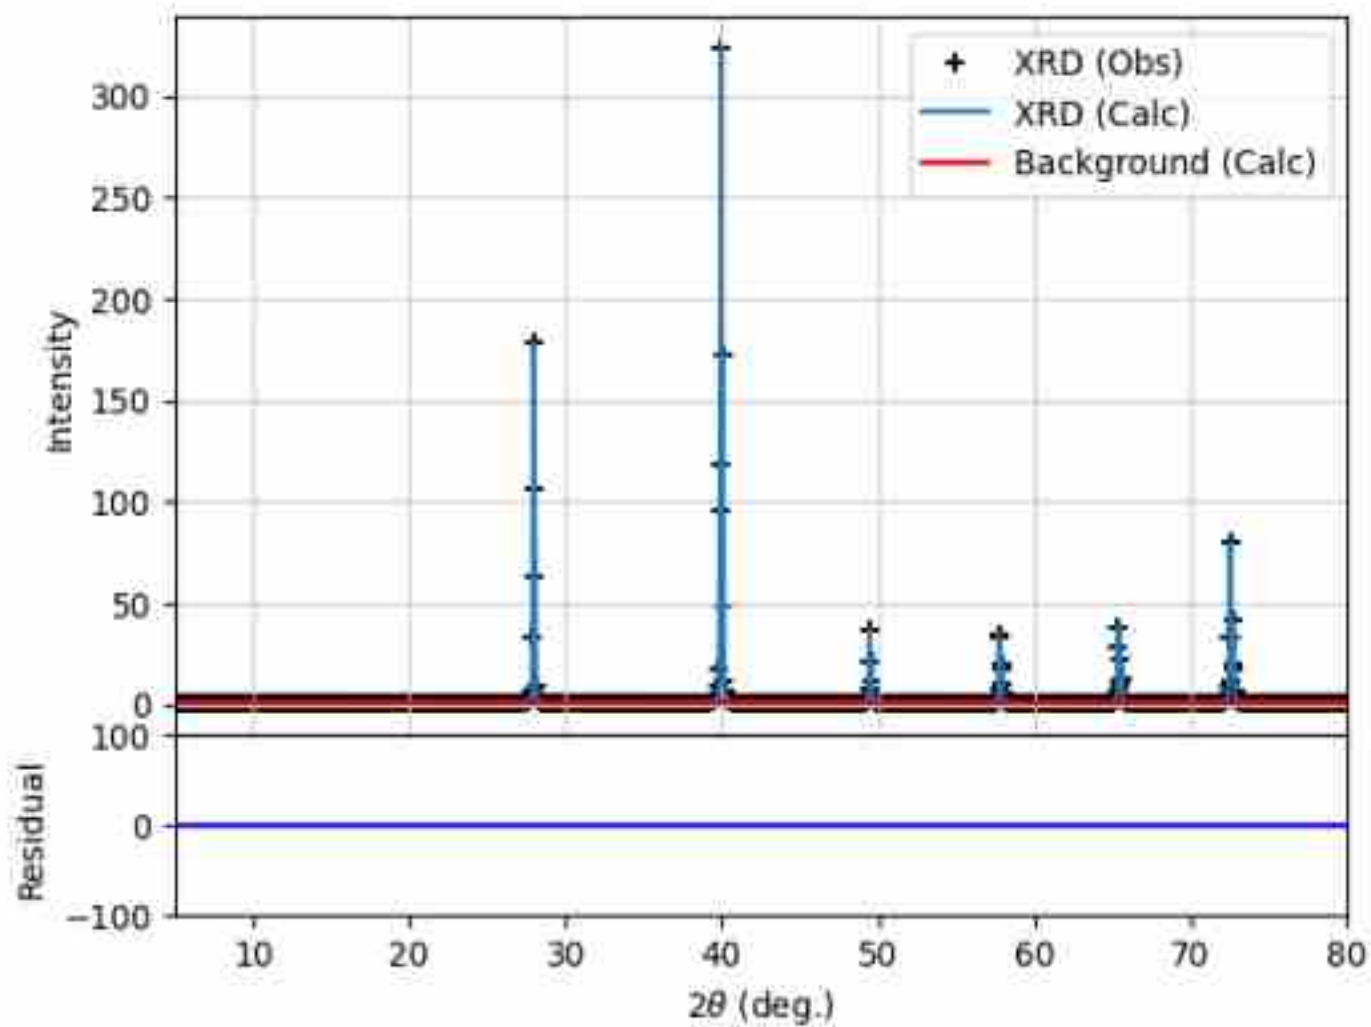

| RMSE before RR | Rwp     | RMSE after RR |
|----------------|---------|---------------|
| 0.001          | 0.00364 | 0.00104       |



# Mg1Ru2W1

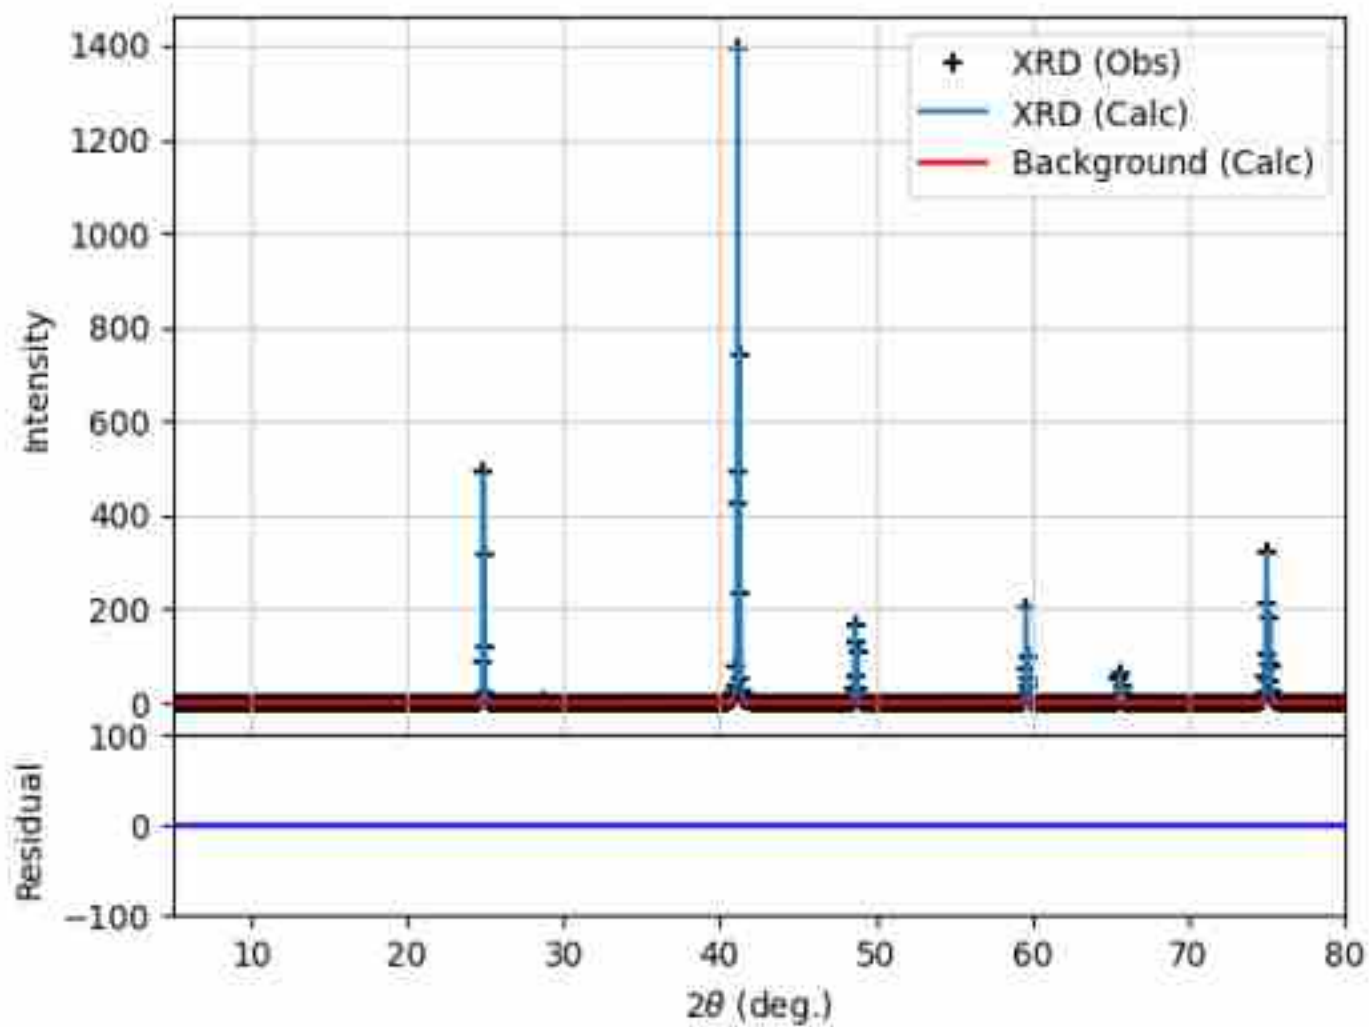

| RMSE before RR | Rwp     | RMSE after RR |
|----------------|---------|---------------|
| 0.001          | 0.00232 | 0.00052       |

# Mg1Sc1Au2

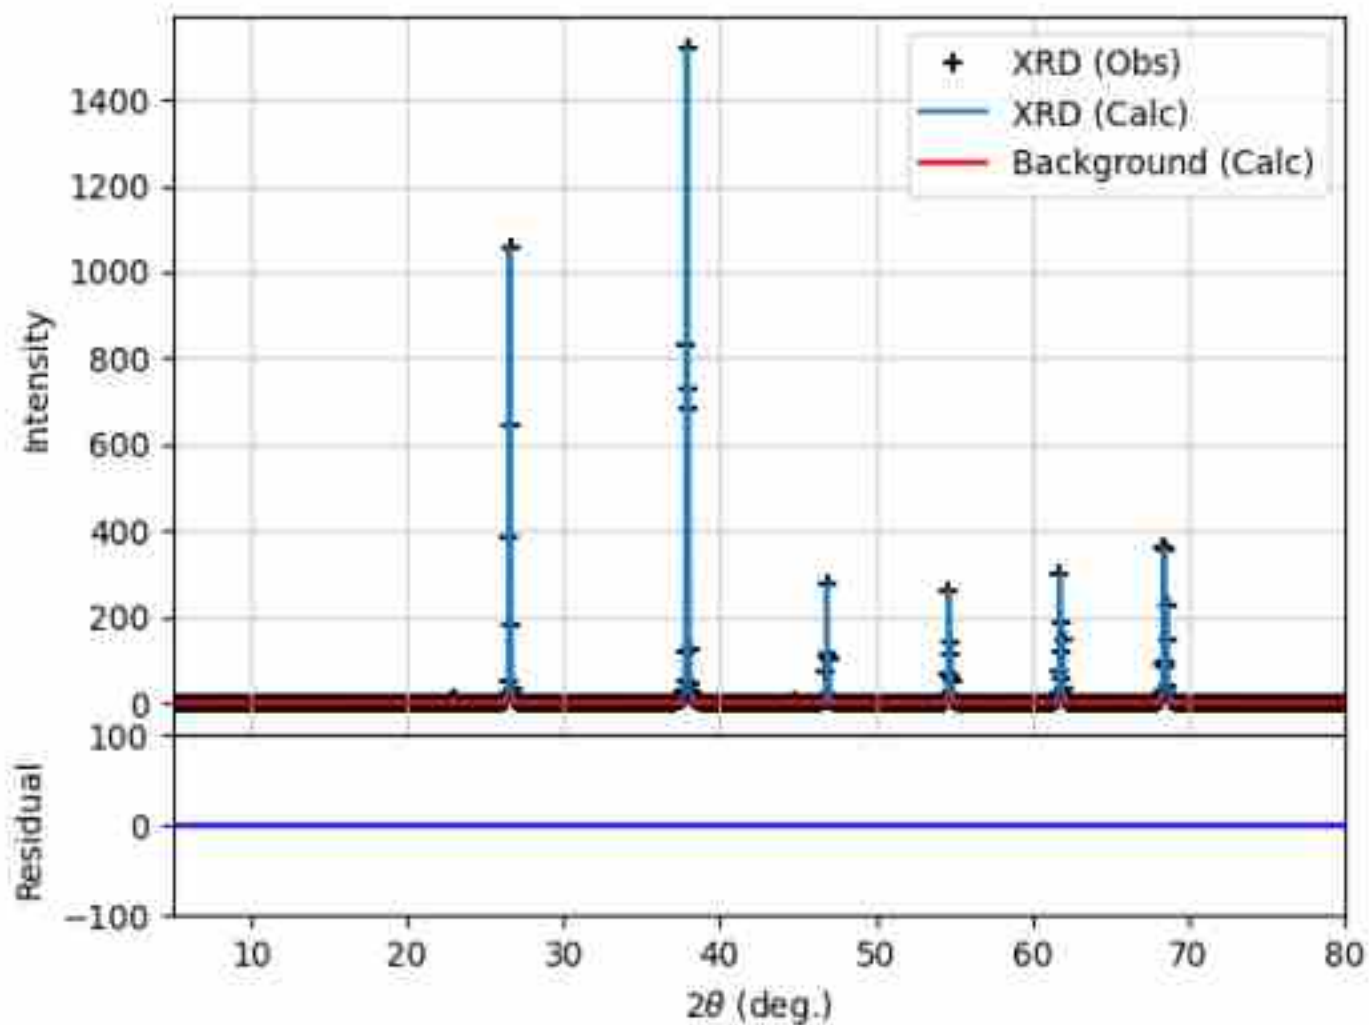

| RMSE before RR | Rwp     | RMSE after RR |
|----------------|---------|---------------|
| 0.001          | 0.00131 | 0.00071       |

# Mg1Sc1Rh2

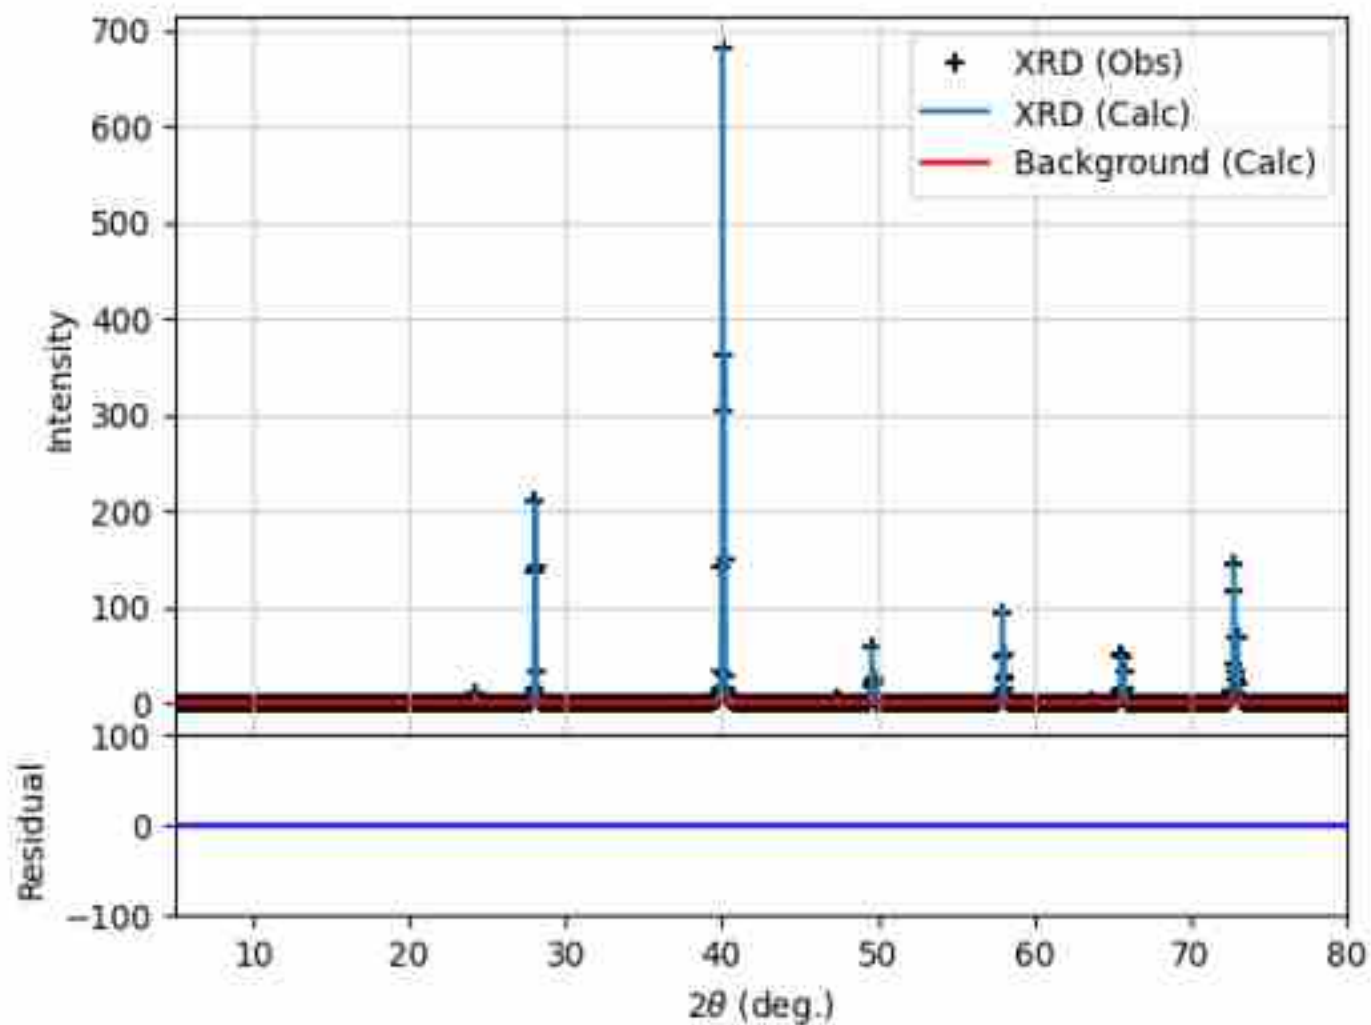

| RMSE before RR | Rwp     | RMSE after RR |
|----------------|---------|---------------|
| 0.001          | 0.00357 | 0.00093       |

# Mg1Si1Rh2

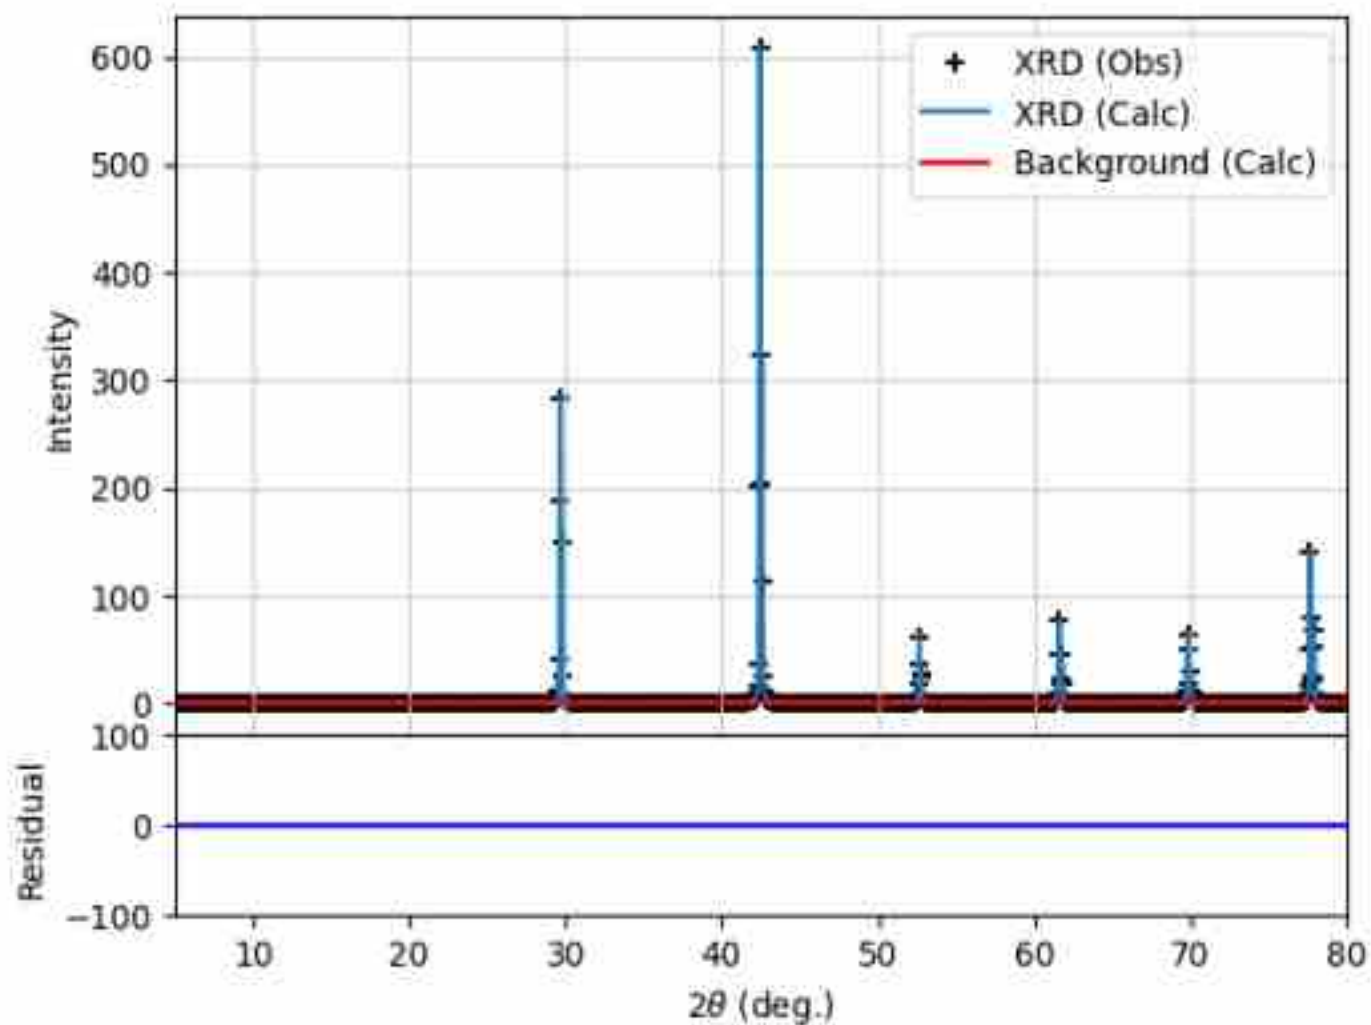

| RMSE before RR | Rwp     | RMSE after RR |
|----------------|---------|---------------|
| 0.001          | 0.02417 | 0.00147       |

# Mg1Sn1Ru2

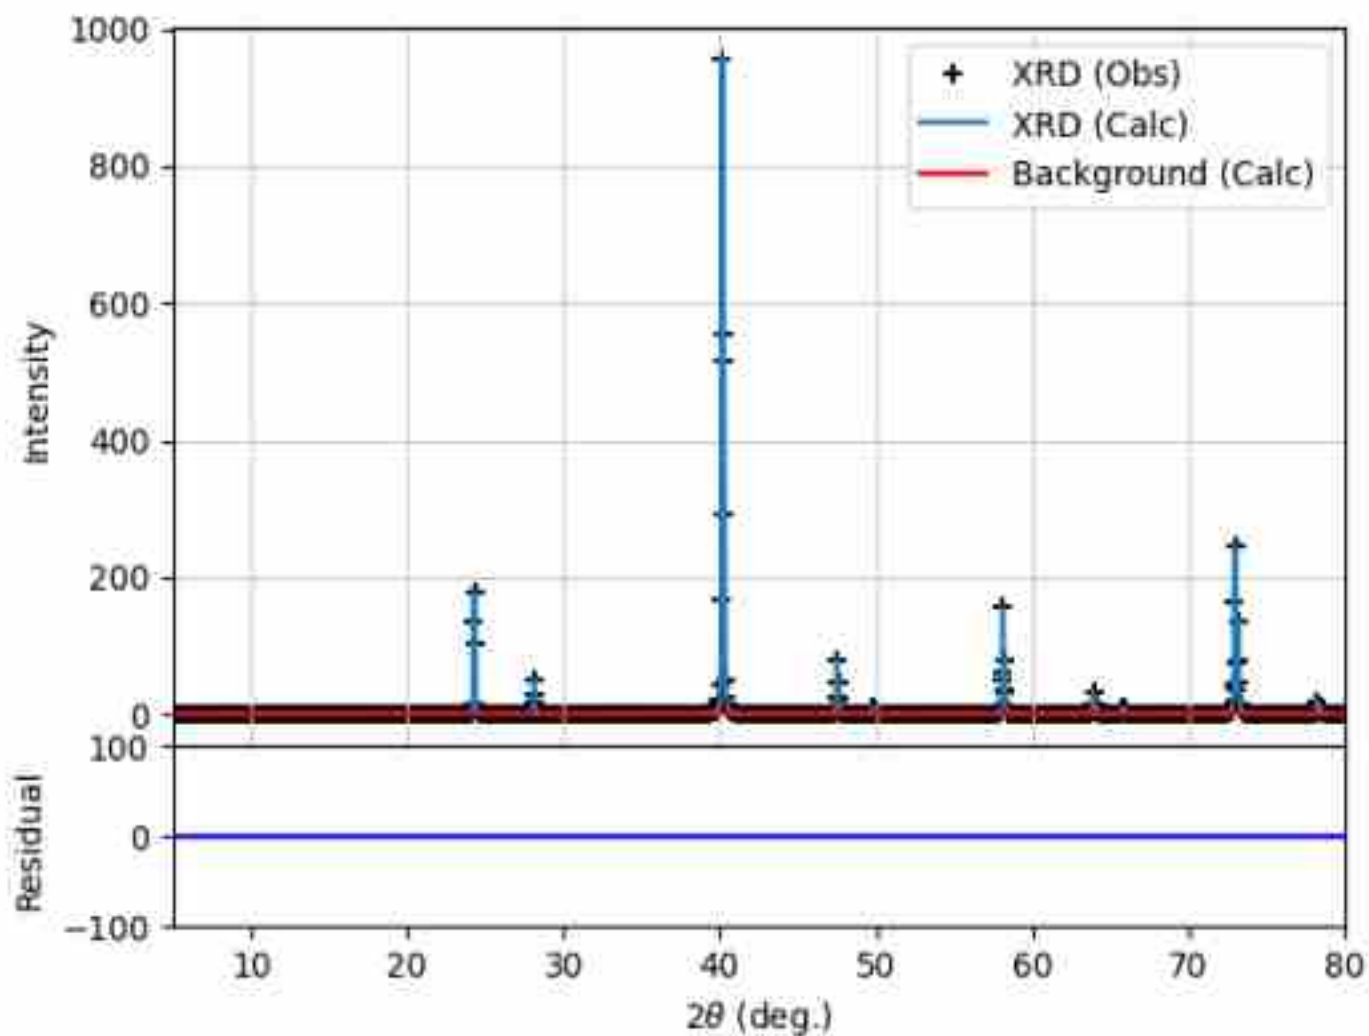

| RMSE before RR | Rwp     | RMSE after RR |
|----------------|---------|---------------|
| 0.001          | 0.00308 | 0.00105       |

# Mg1Sn1

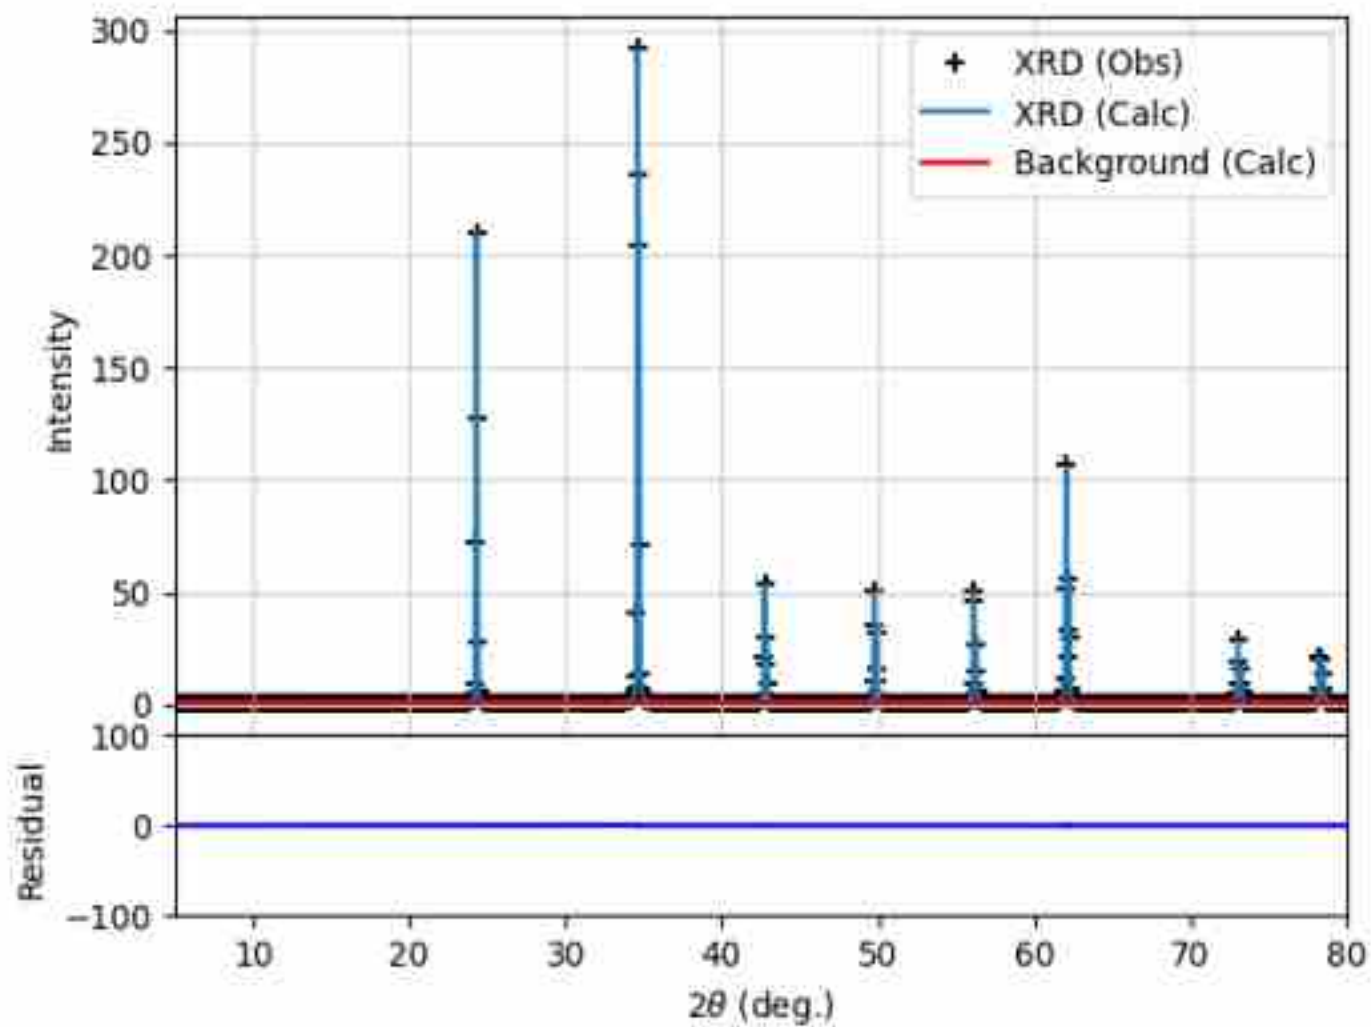

| RMSE before RR | Rwp     | RMSE after RR |
|----------------|---------|---------------|
| 0.001          | 0.35109 | 0.00117       |

# Mg1Ta1Os2

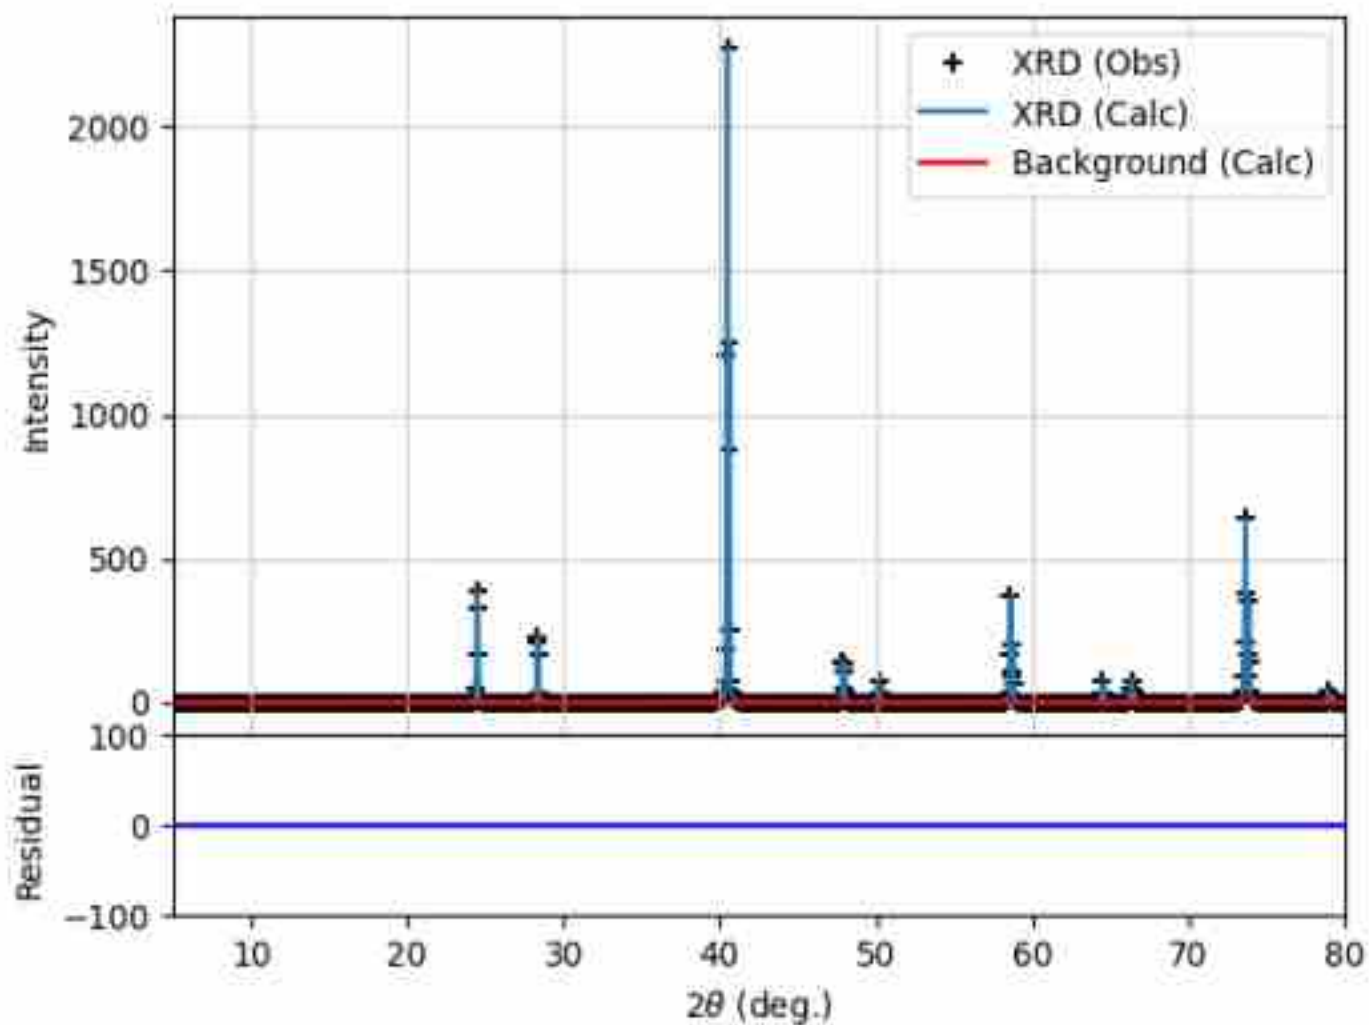

| RMSE before RR | Rwp     | RMSE after RR |
|----------------|---------|---------------|
| 0.001          | 0.00272 | 0.00438       |

# Mg1Tl1F3

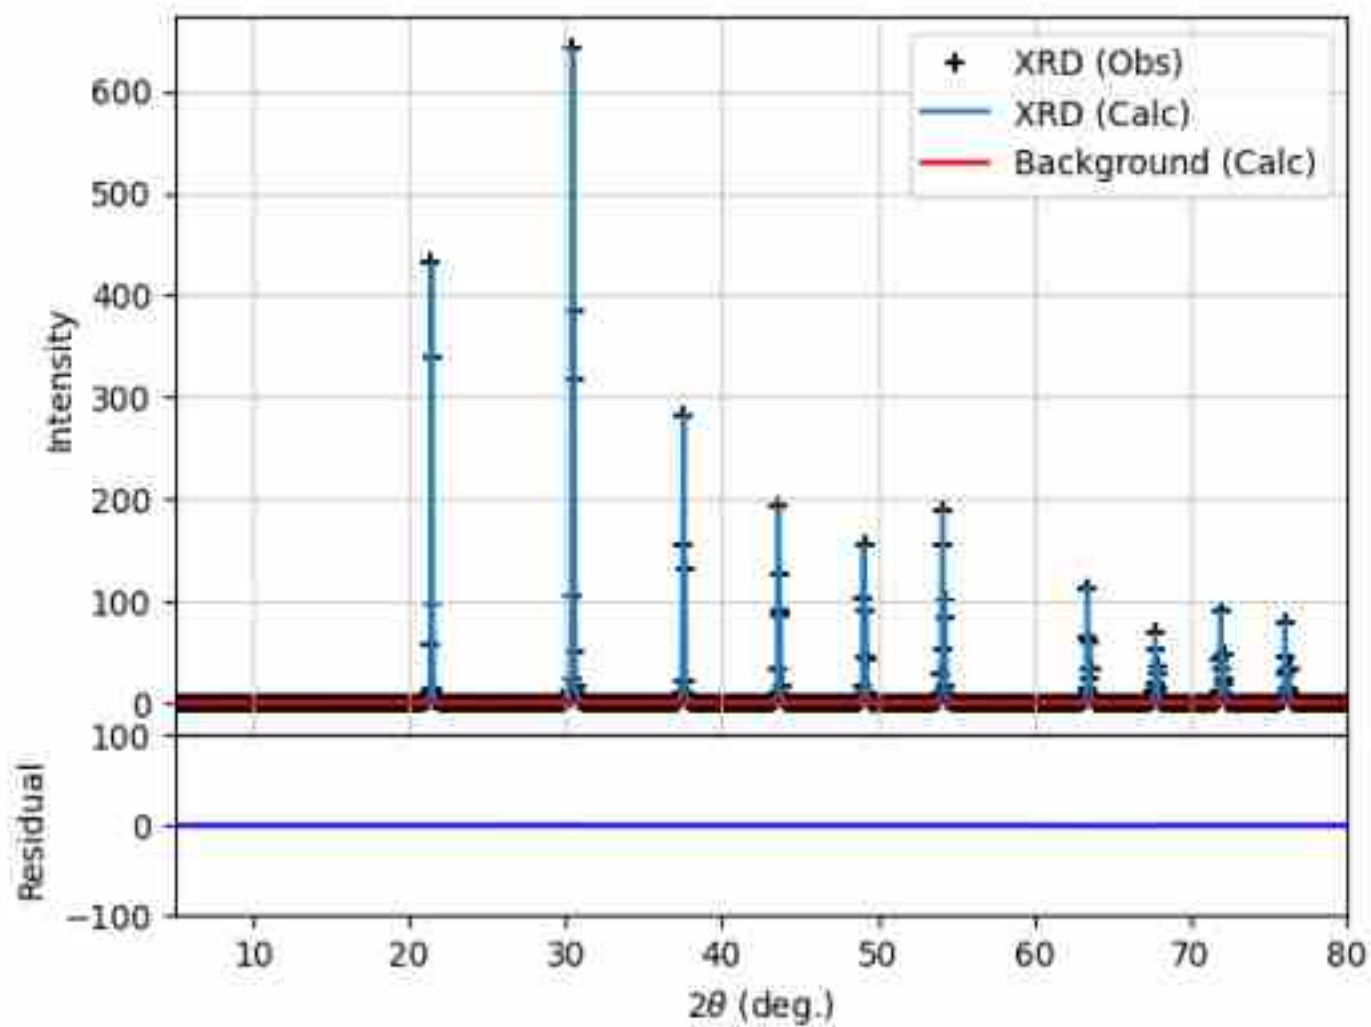

| RMSE before RR | Rwp     | RMSE after RR |
|----------------|---------|---------------|
| 0.01           | 0.17341 | 0.0095        |



# Mg1Zn1Au2

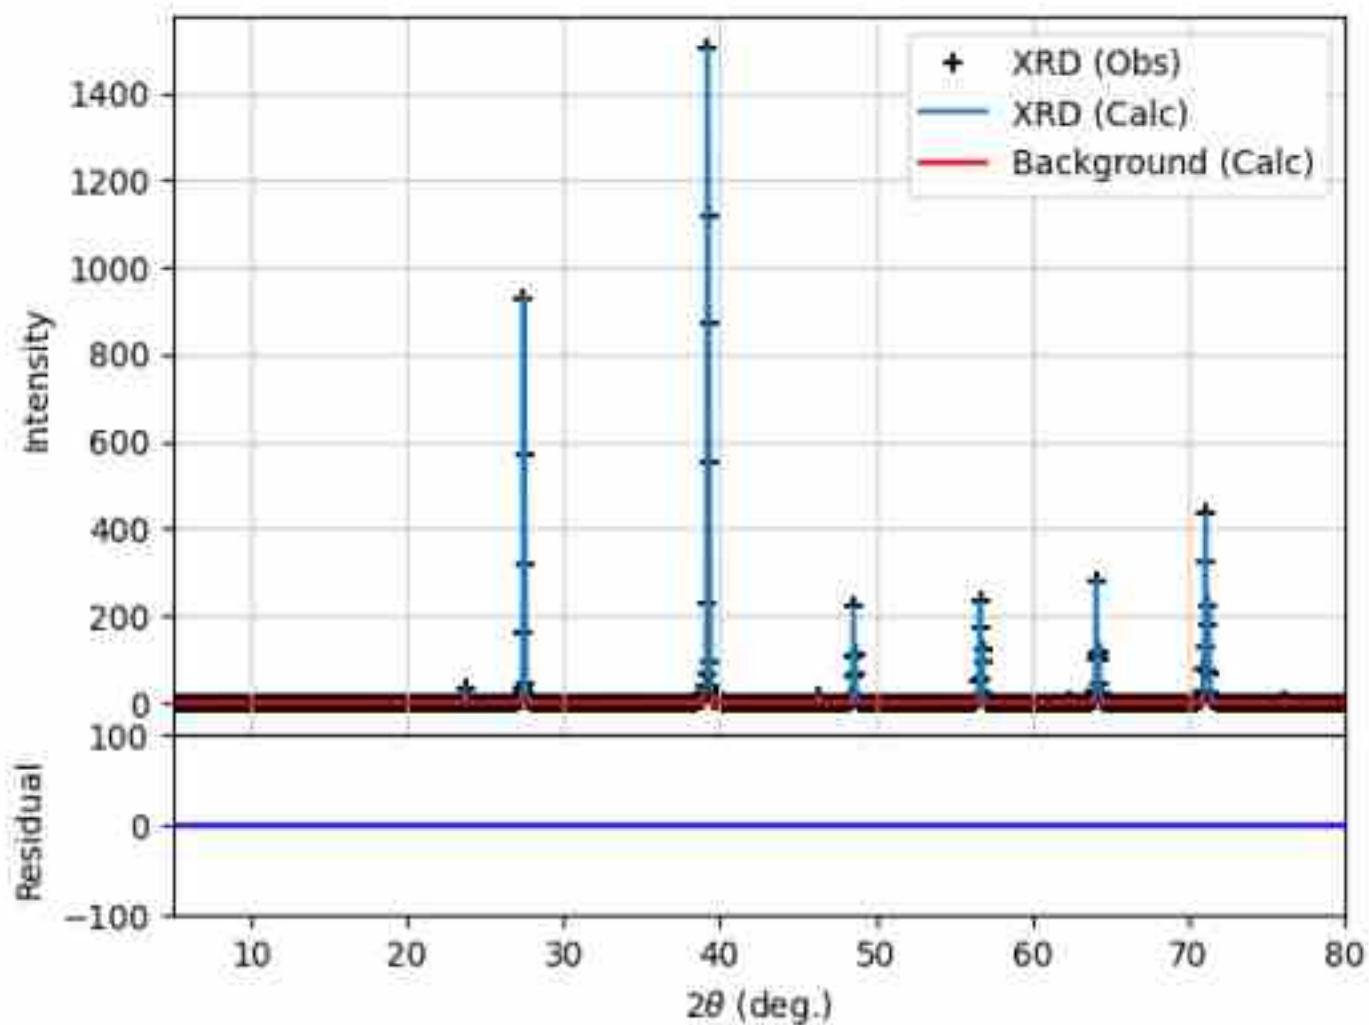

| RMSE before RR | Rwp     | RMSE after RR |
|----------------|---------|---------------|
| 0.001          | 0.00363 | 0.00028       |

# Mg<sub>1</sub>Zn<sub>1</sub>Ni<sub>2</sub>

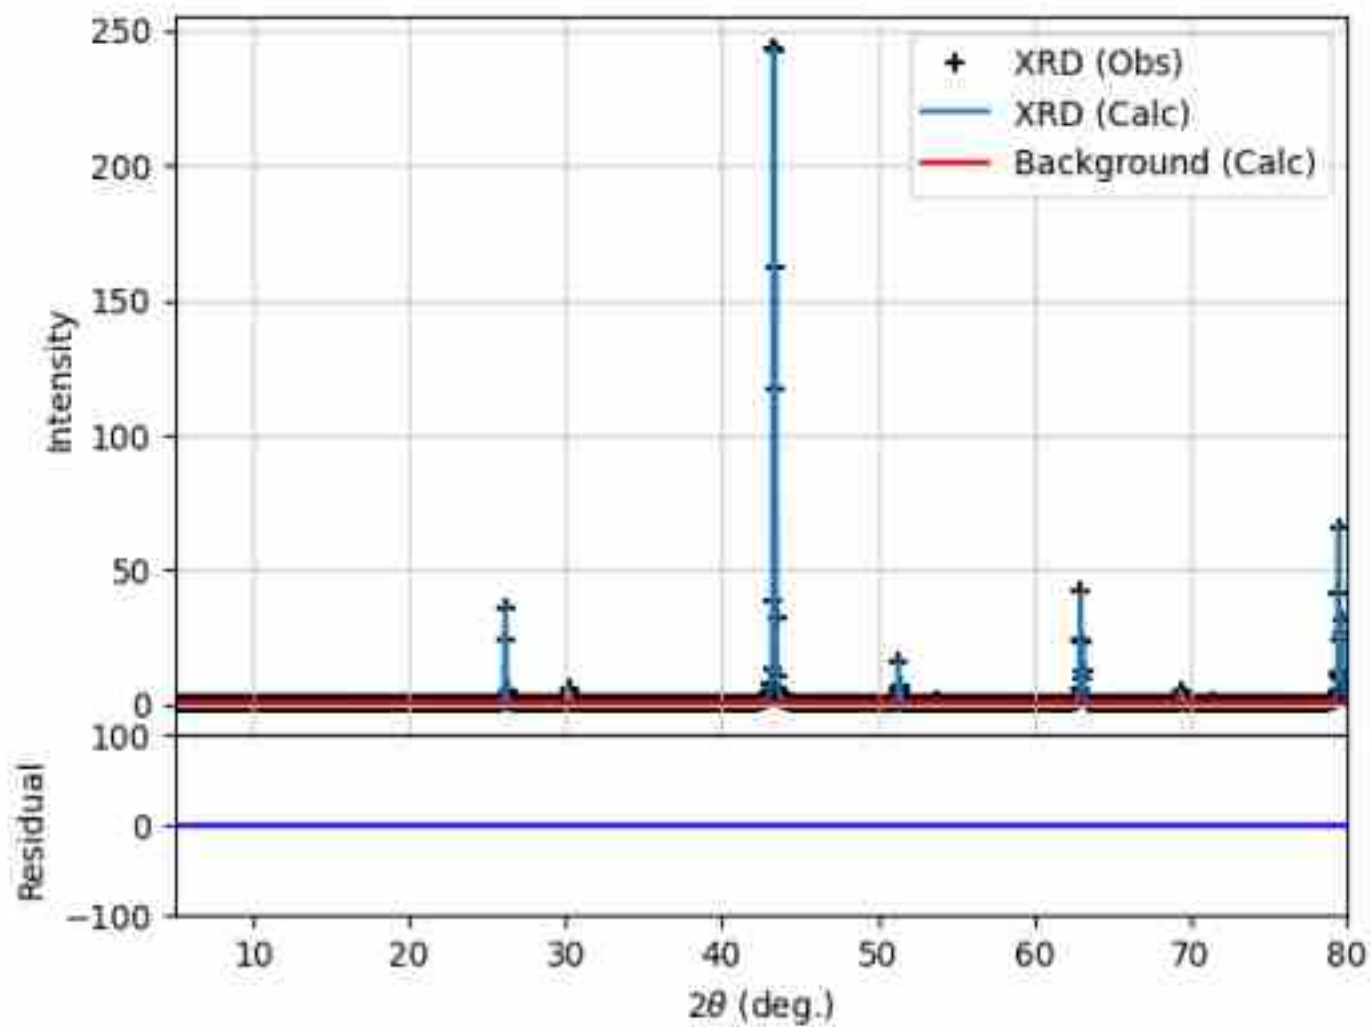

| RMSE before RR | Rwp   | RMSE after RR |
|----------------|-------|---------------|
| 0.001          | 2e-05 | 4e-05         |

# Mg1Zn1O2

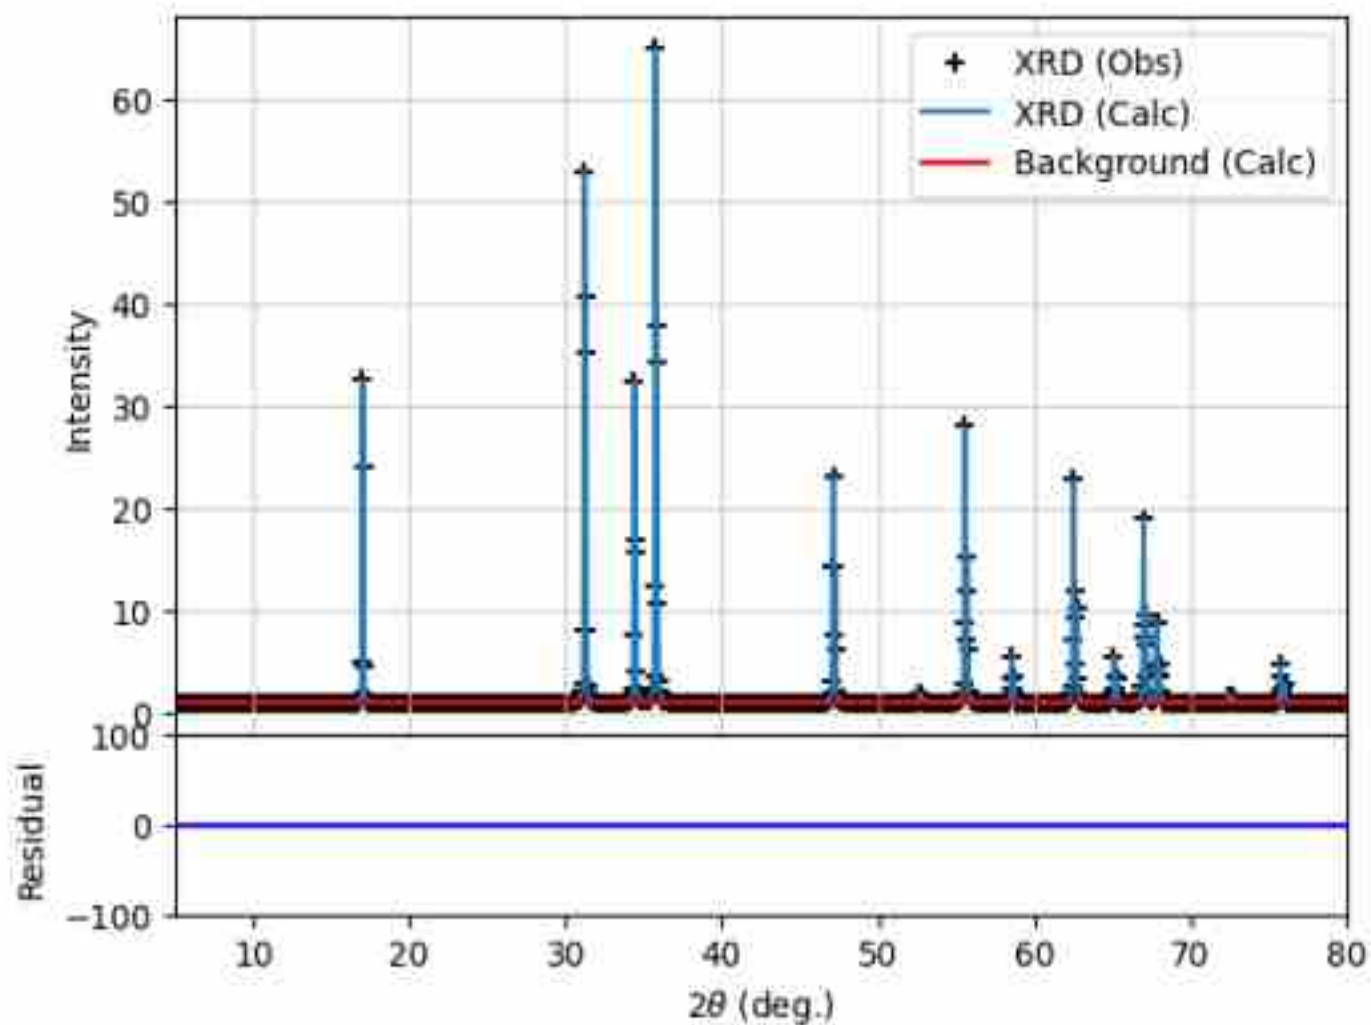

| RMSE before RR | Rwp     | RMSE after RR |
|----------------|---------|---------------|
| 0.01           | 0.00183 | 0.00051       |

# Mg<sub>1</sub>Zn<sub>1</sub>Pd<sub>2</sub>

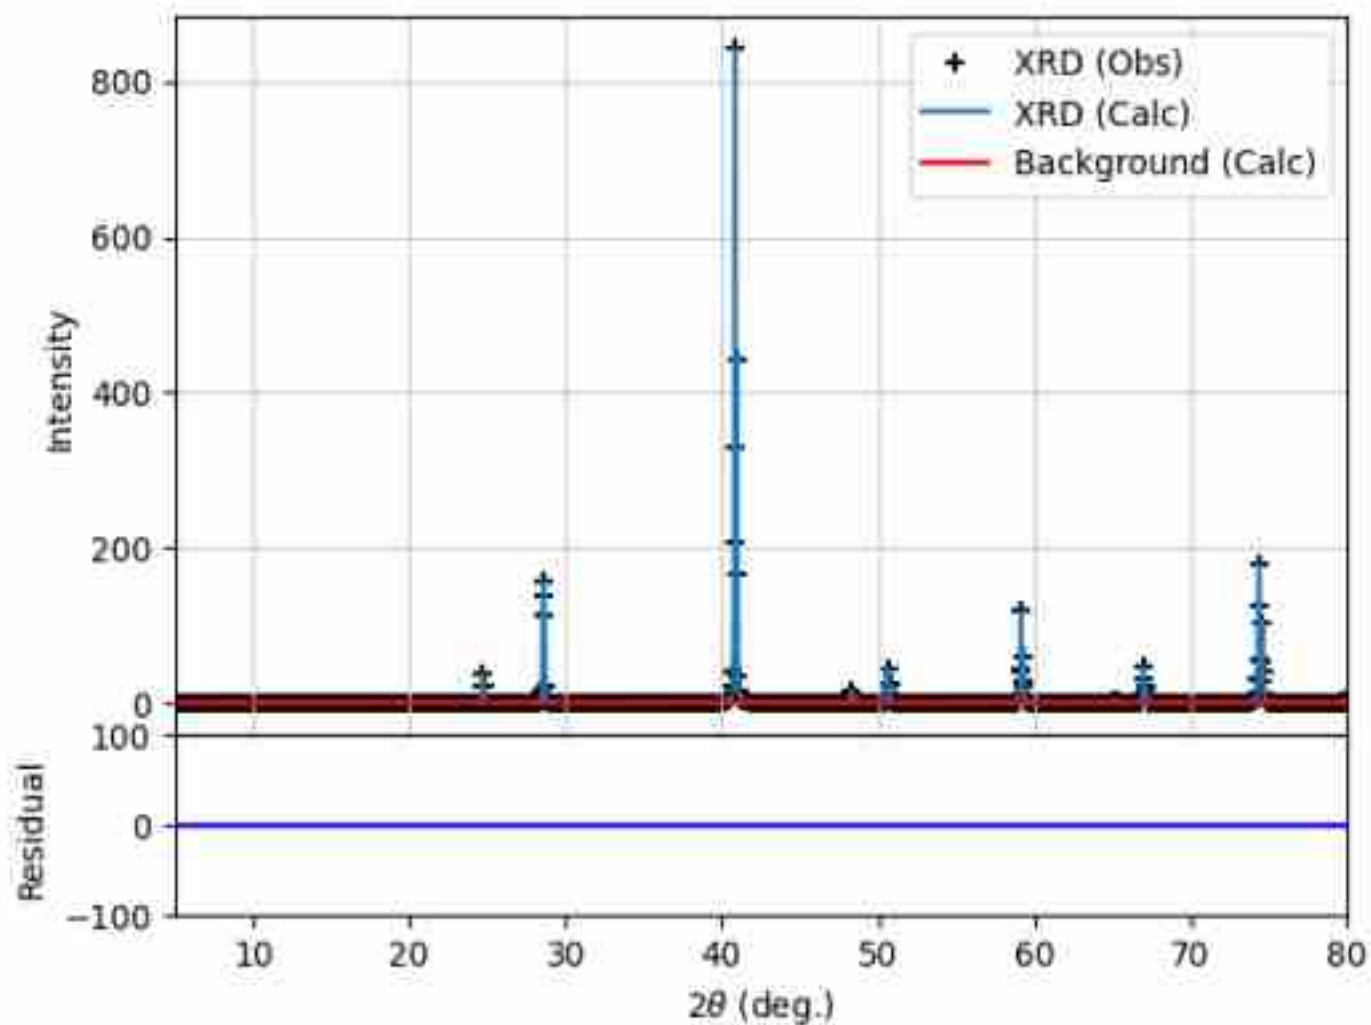

| RMSE before RR | Rwp     | RMSE after RR |
|----------------|---------|---------------|
| 0.001          | 0.00334 | 0.00045       |

# Mg1Zn1Rh2

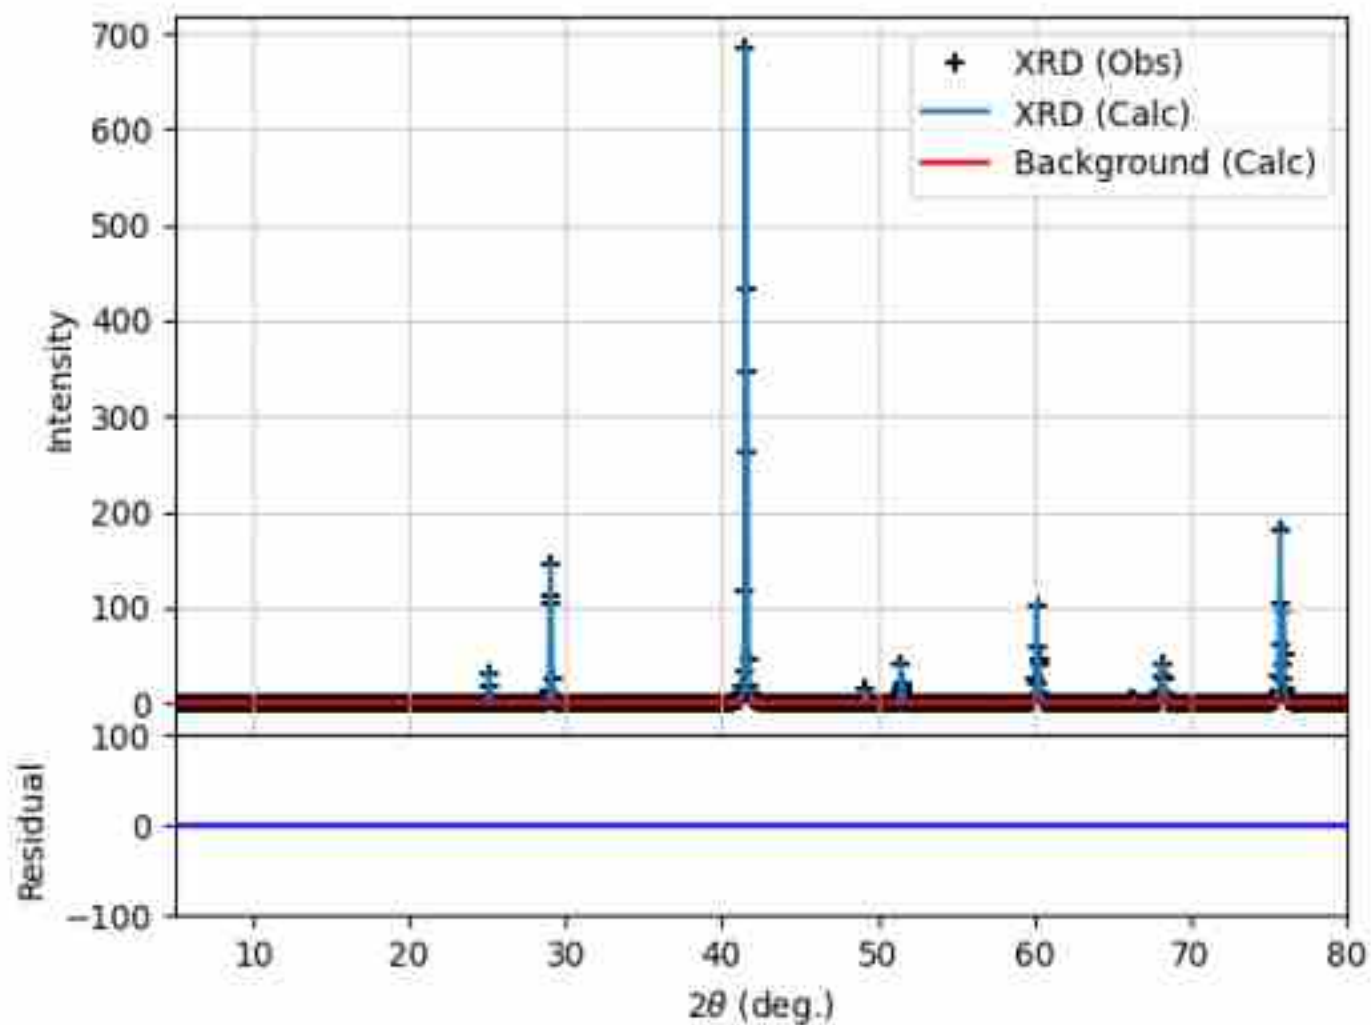

| RMSE before RR | Rwp     | RMSE after RR |
|----------------|---------|---------------|
| 0.001          | 0.00311 | 0.00081       |

# Mg1Zr1Au2

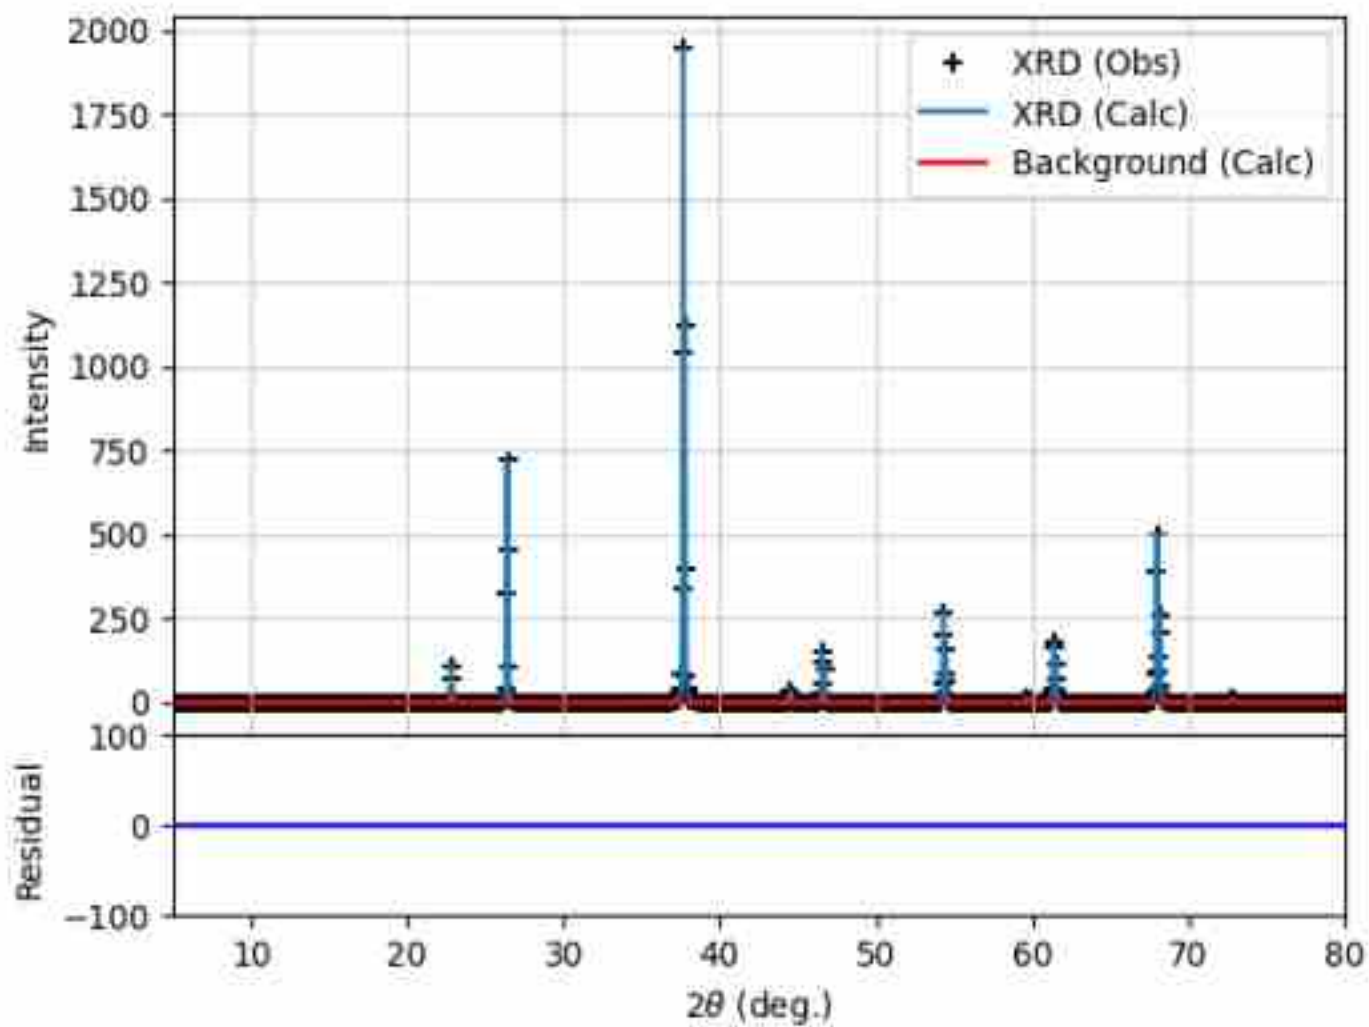

| RMSE before RR | Rwp    | RMSE after RR |
|----------------|--------|---------------|
| 0.001          | 0.0162 | 0.00404       |

# Mg1Zr1Ni2

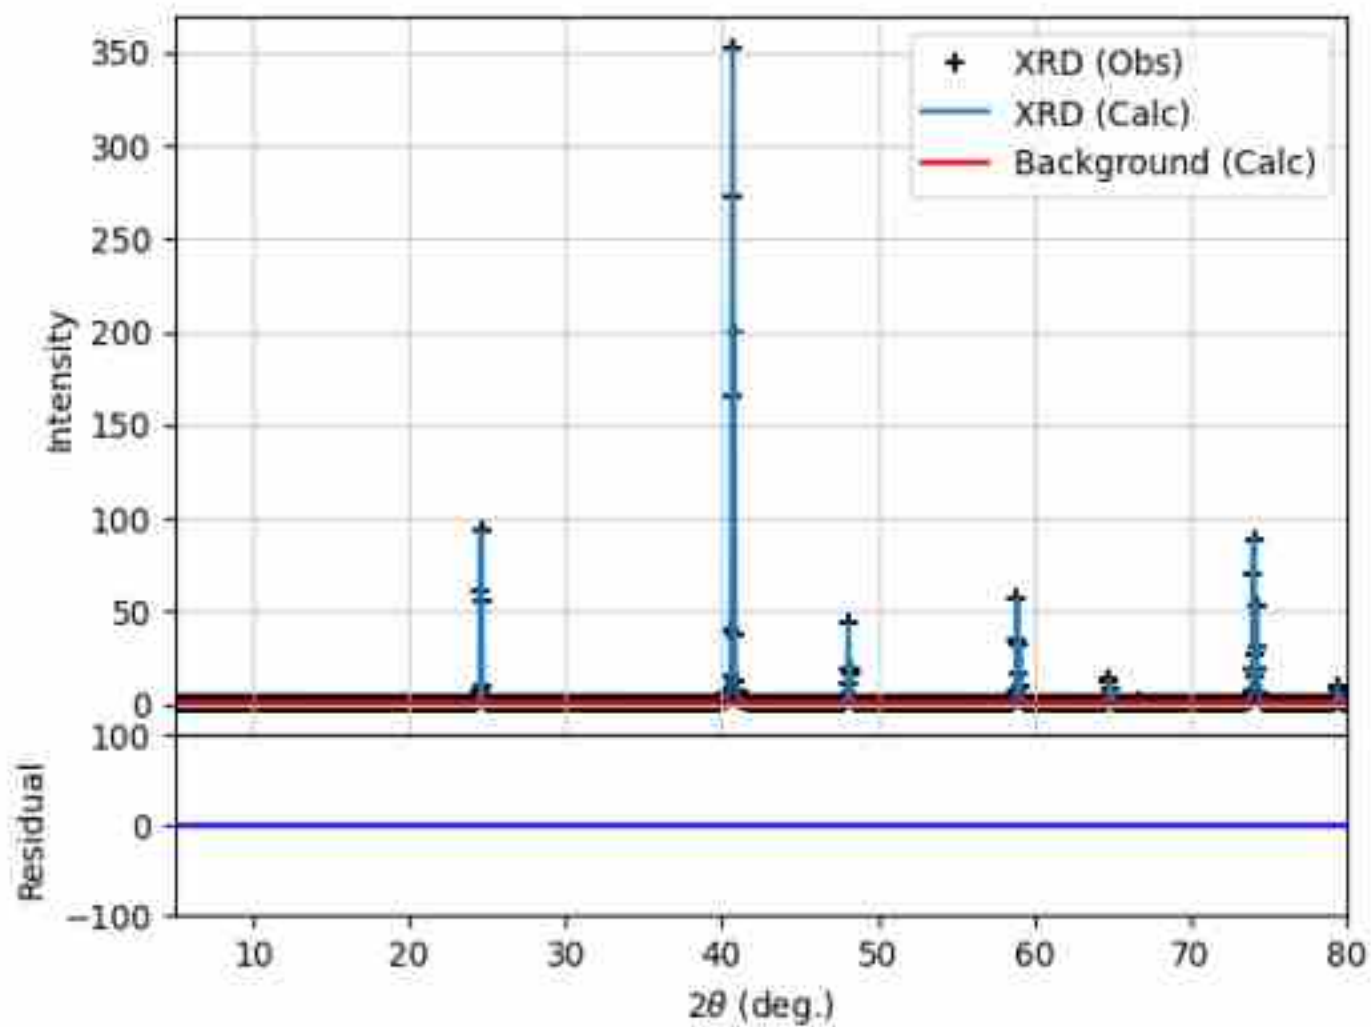

| RMSE before RR | Rwp | RMSE after RR |
|----------------|-----|---------------|
| 0.001          | 0.0 | 1e-05         |

# Mg1Zr1Rh2

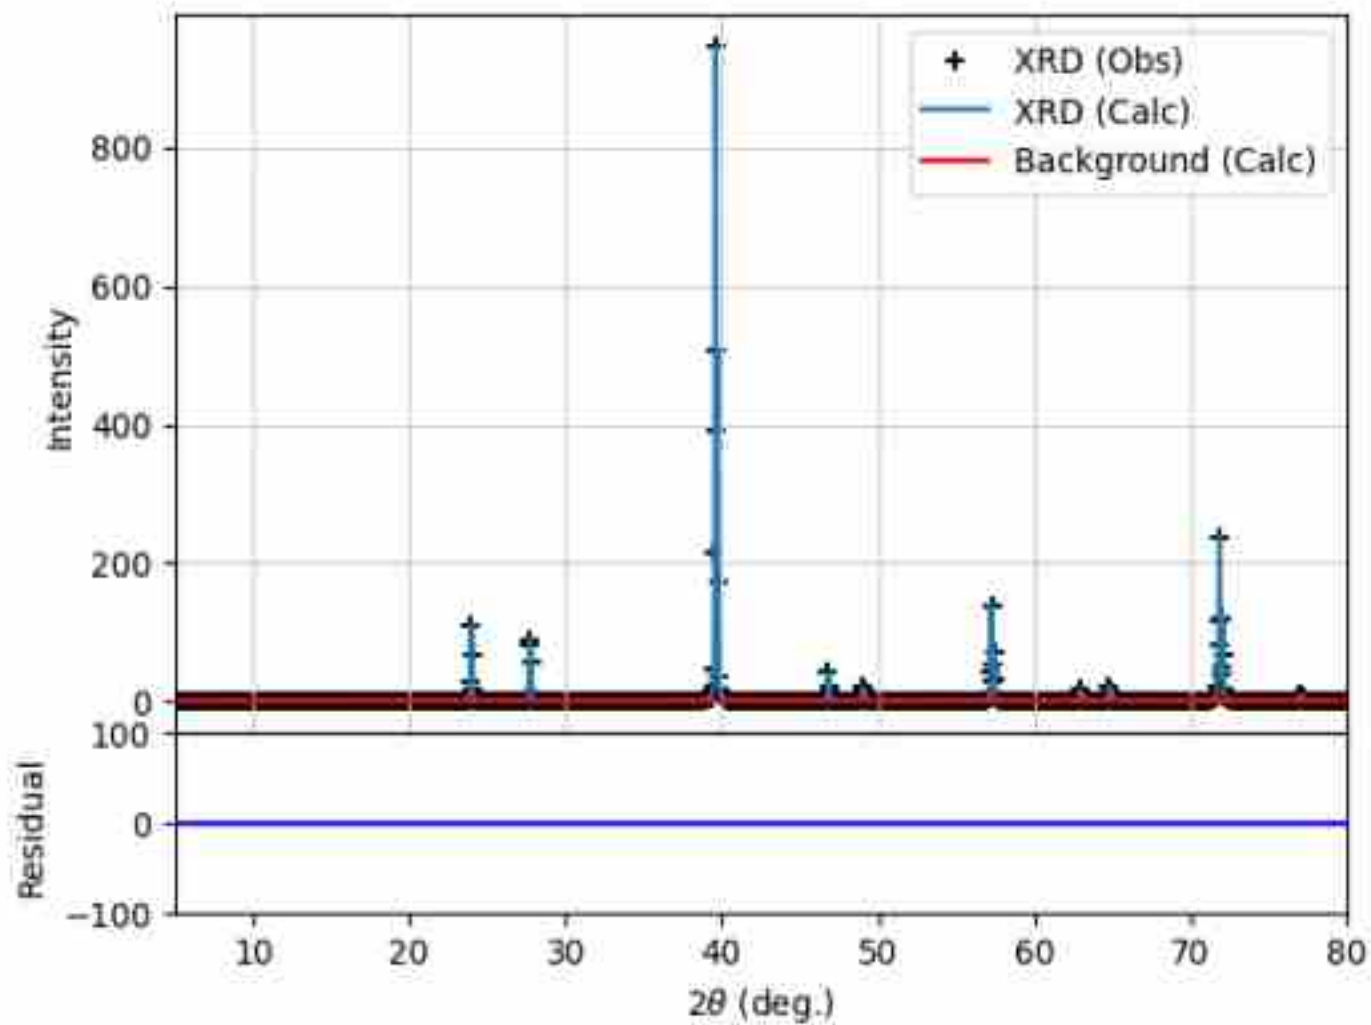

| RMSE before RR | Rwp     | RMSE after RR |
|----------------|---------|---------------|
| 0.001          | 0.01854 | 0.0014        |



# Mg2Ag1Rh1

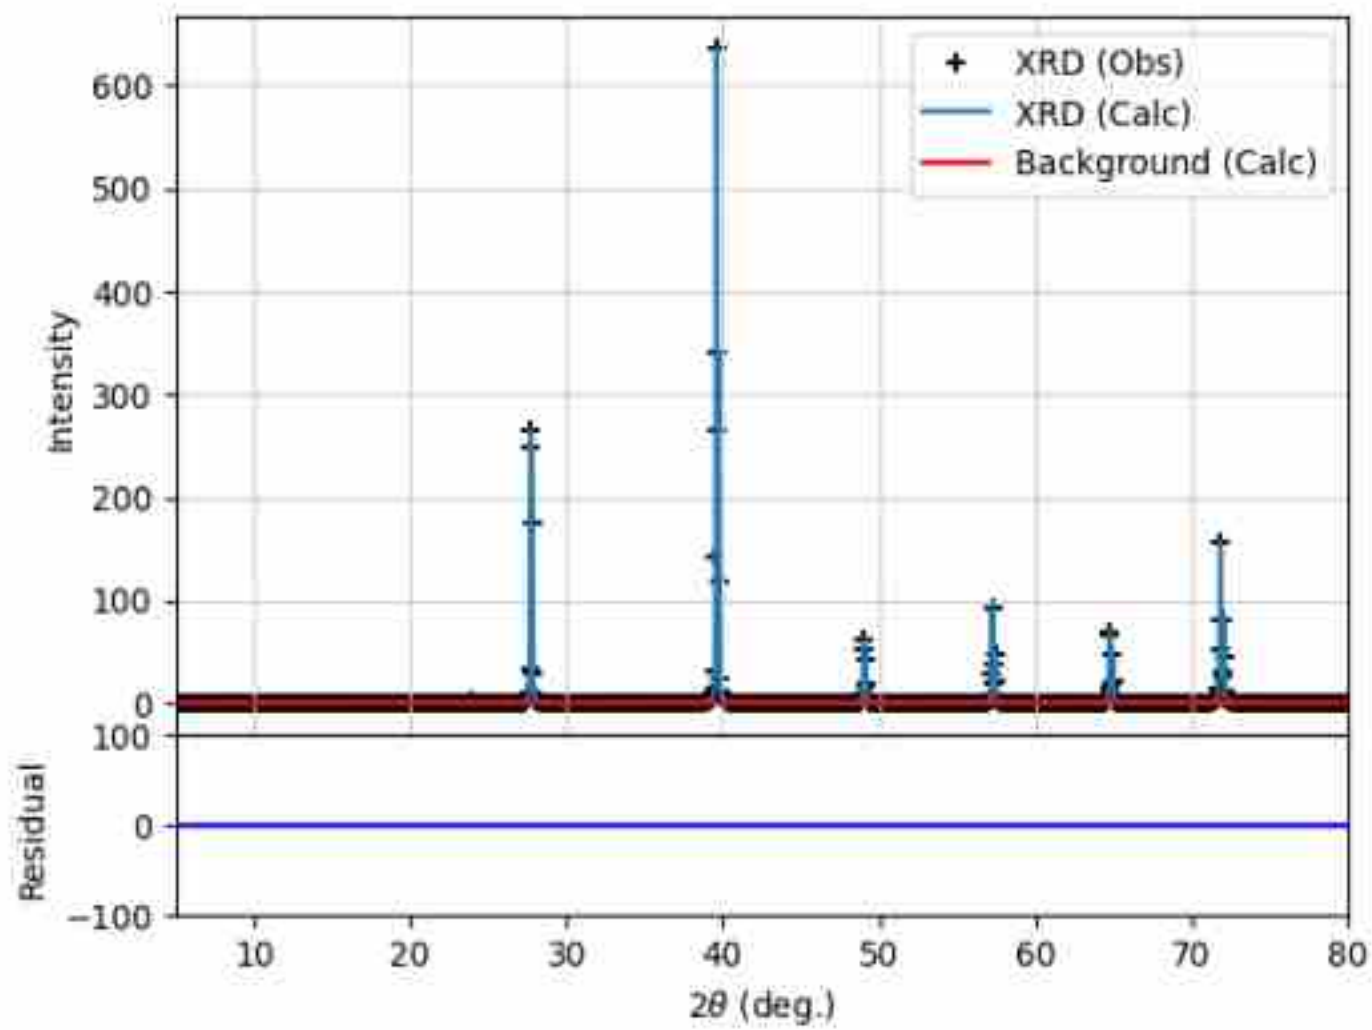

| RMSE before RR | Rwp     | RMSE after RR |
|----------------|---------|---------------|
| 0.001          | 0.00141 | 0.00056       |

# Mg<sub>2</sub>H<sub>4</sub>

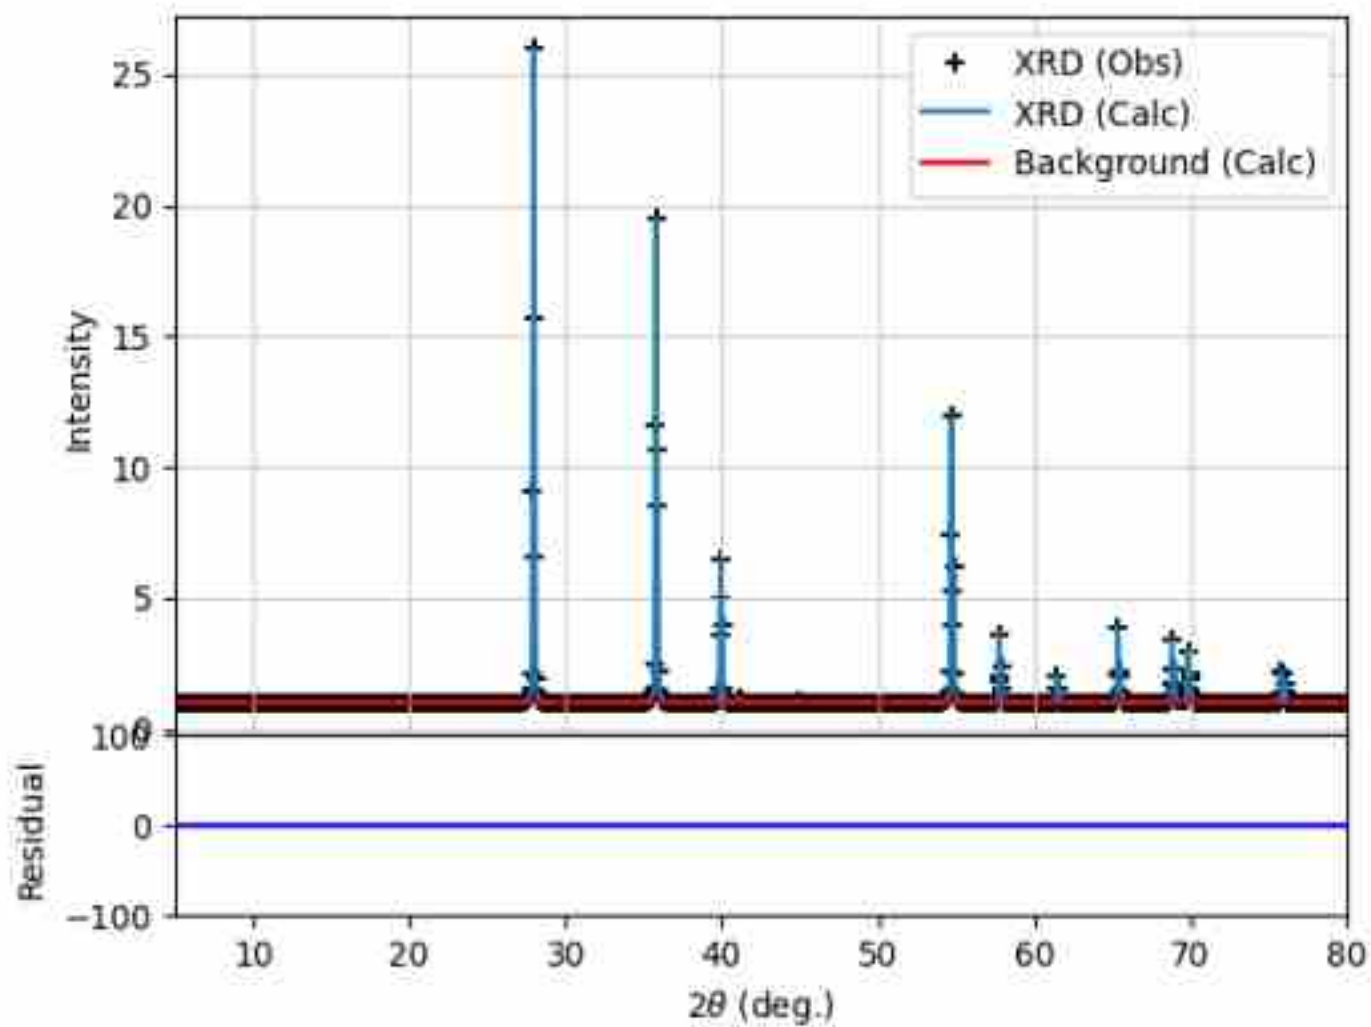

| RMSE before RR | Rwp     | RMSE after RR |
|----------------|---------|---------------|
| 0.01           | 0.00149 | 0.00487       |

# Mg<sub>2</sub>Ir<sub>1</sub>Pt<sub>1</sub>

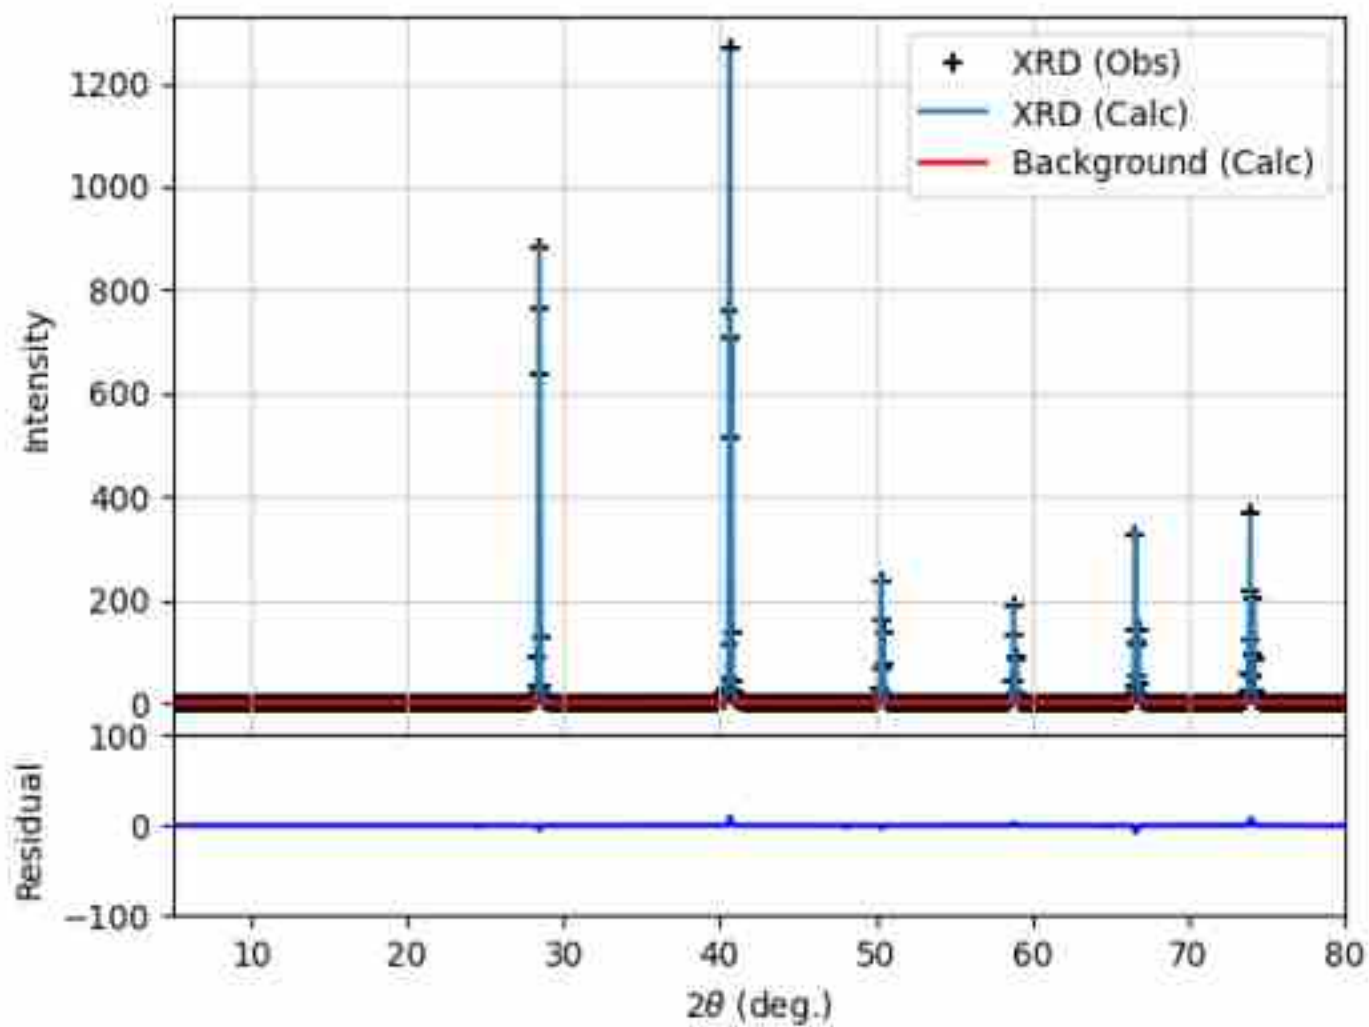

| RMSE before RR | Rwp     | RMSE after RR |
|----------------|---------|---------------|
| 0.001          | 3.56483 | 0.03662       |

# Mg<sub>2</sub>Ir<sub>1</sub>Rh<sub>1</sub>

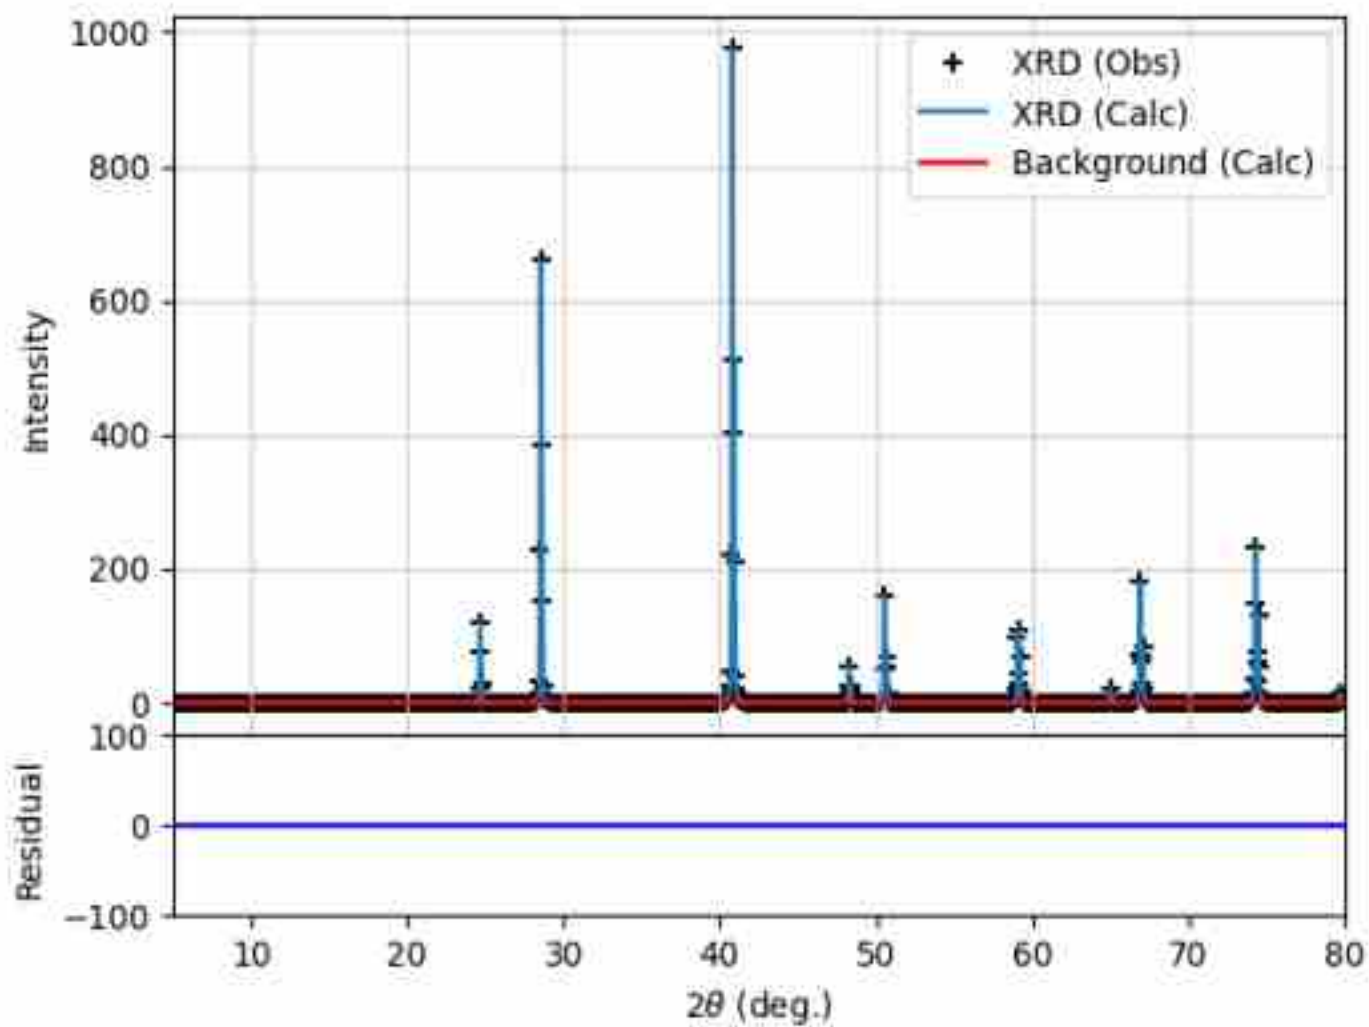

| RMSE before RR | Rwp     | RMSE after RR |
|----------------|---------|---------------|
| 0.001          | 0.00687 | 0.00118       |

# Mg<sub>2</sub>NiIr

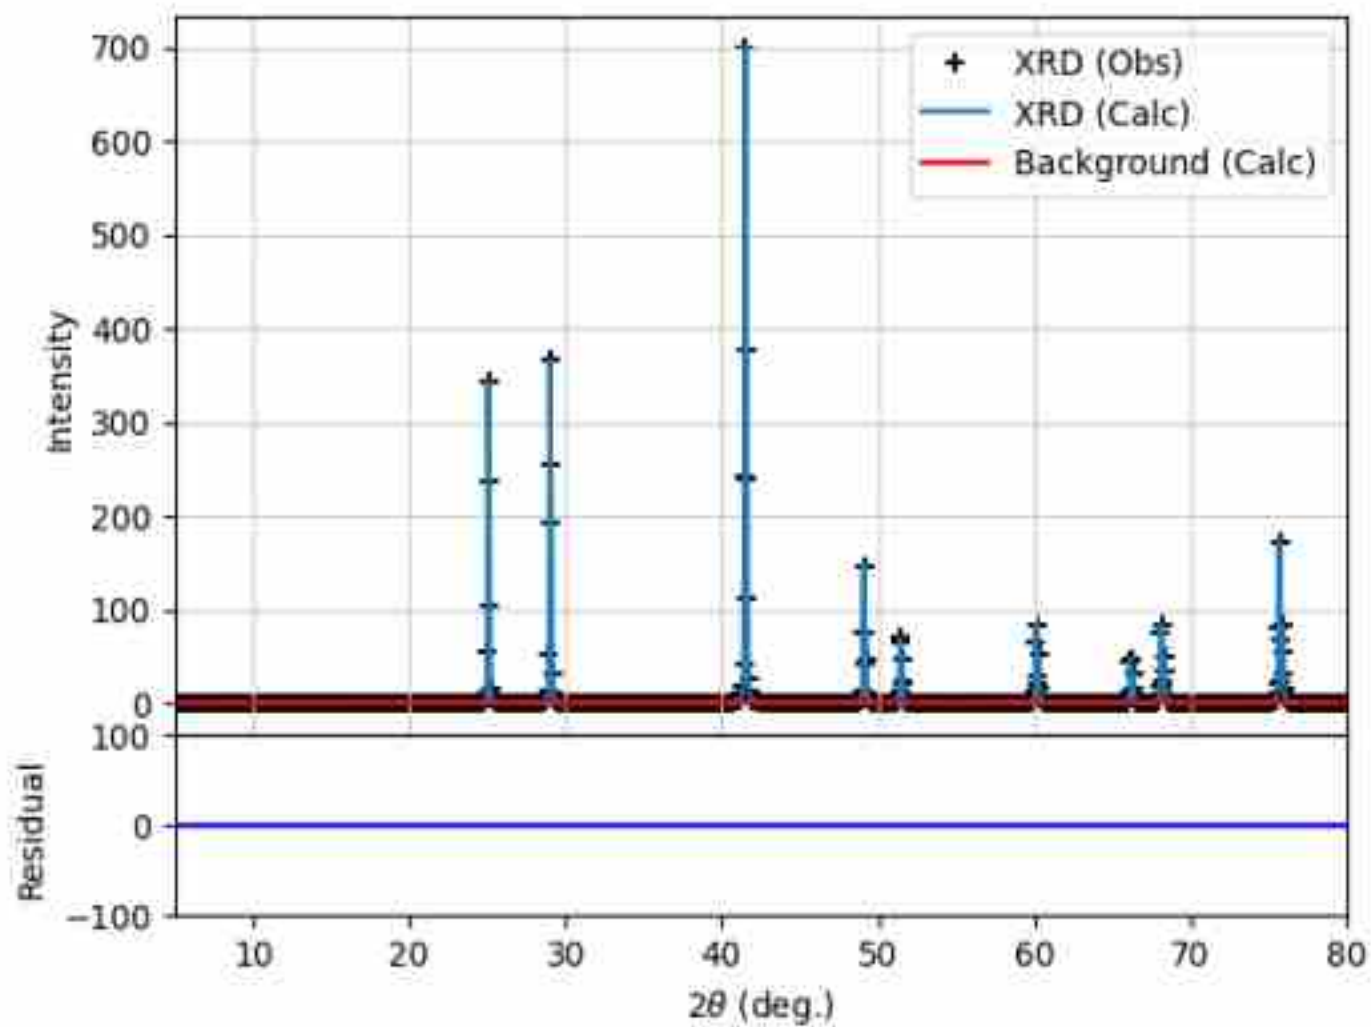

| RMSE before RR | Rwp     | RMSE after RR |
|----------------|---------|---------------|
| 0.001          | 0.00252 | 0.00085       |

# Mg<sub>2</sub>Ni<sub>2</sub>

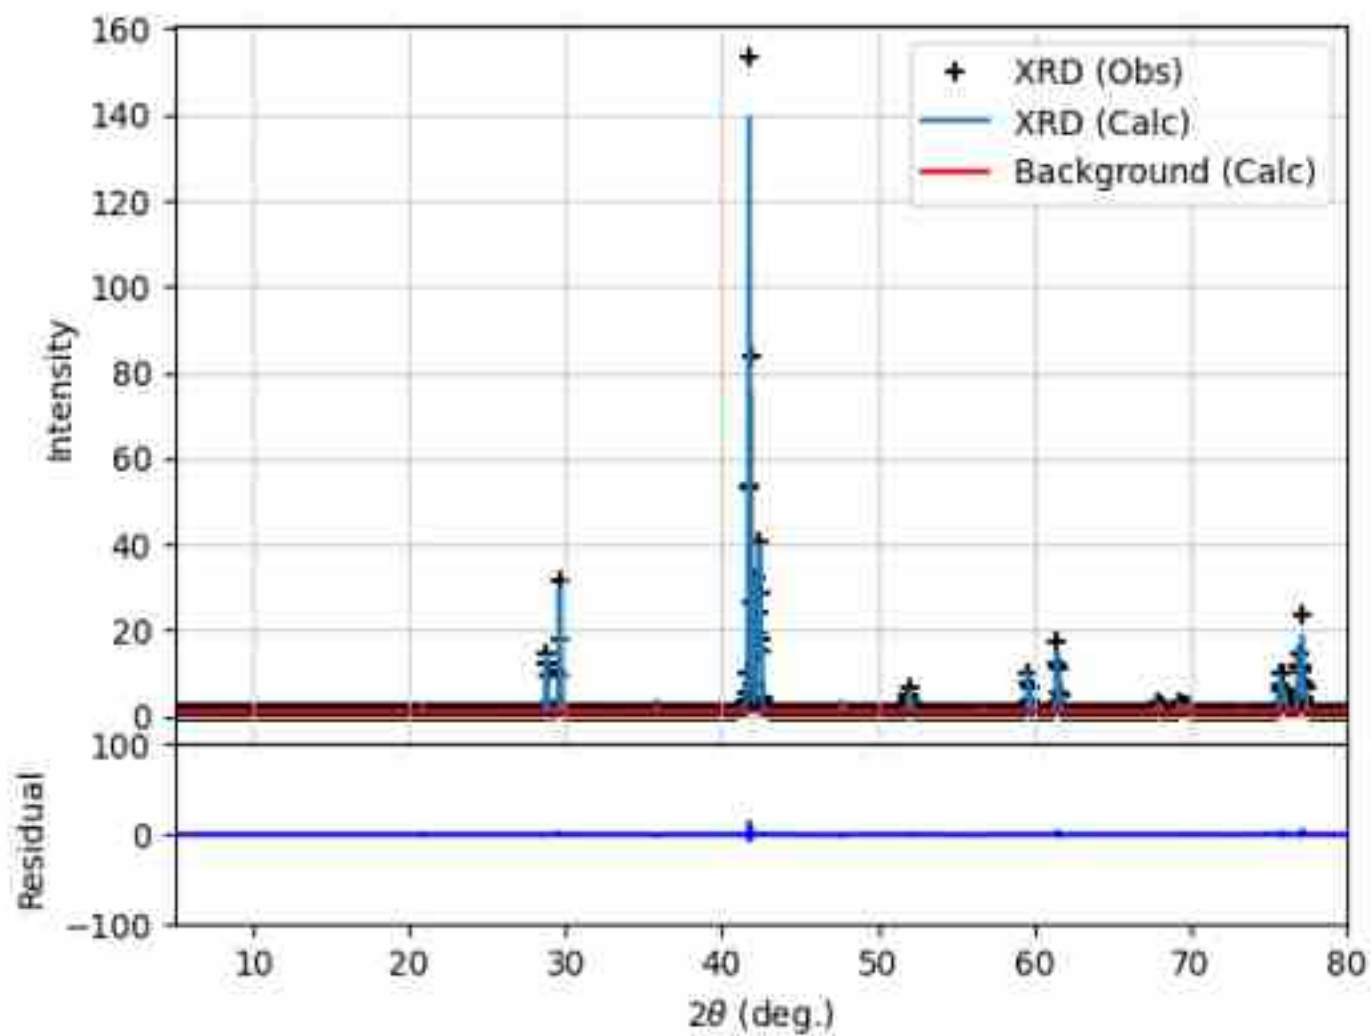

| RMSE before RR | Rwp     | RMSE after RR |
|----------------|---------|---------------|
| 0.001          | 8.78885 | 0.06329       |

# Mg<sub>2</sub>Pd<sub>1</sub>Rh<sub>1</sub>

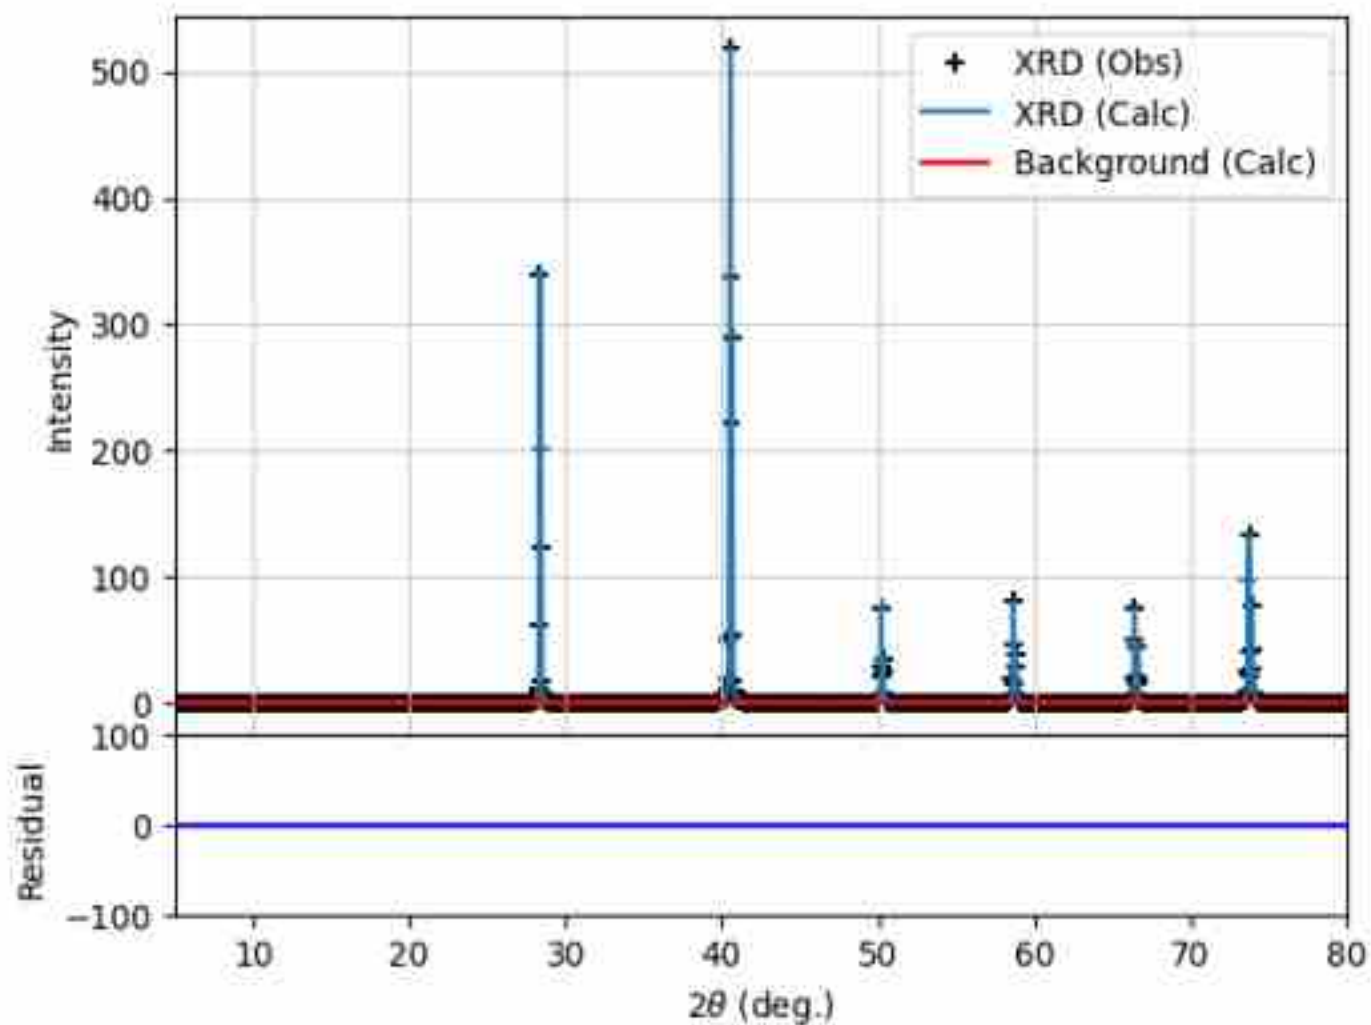

| RMSE before RR | Rwp     | RMSE after RR |
|----------------|---------|---------------|
| 0.001          | 0.00294 | 0.00031       |

# Mg<sub>2</sub>TlPb<sub>1</sub>

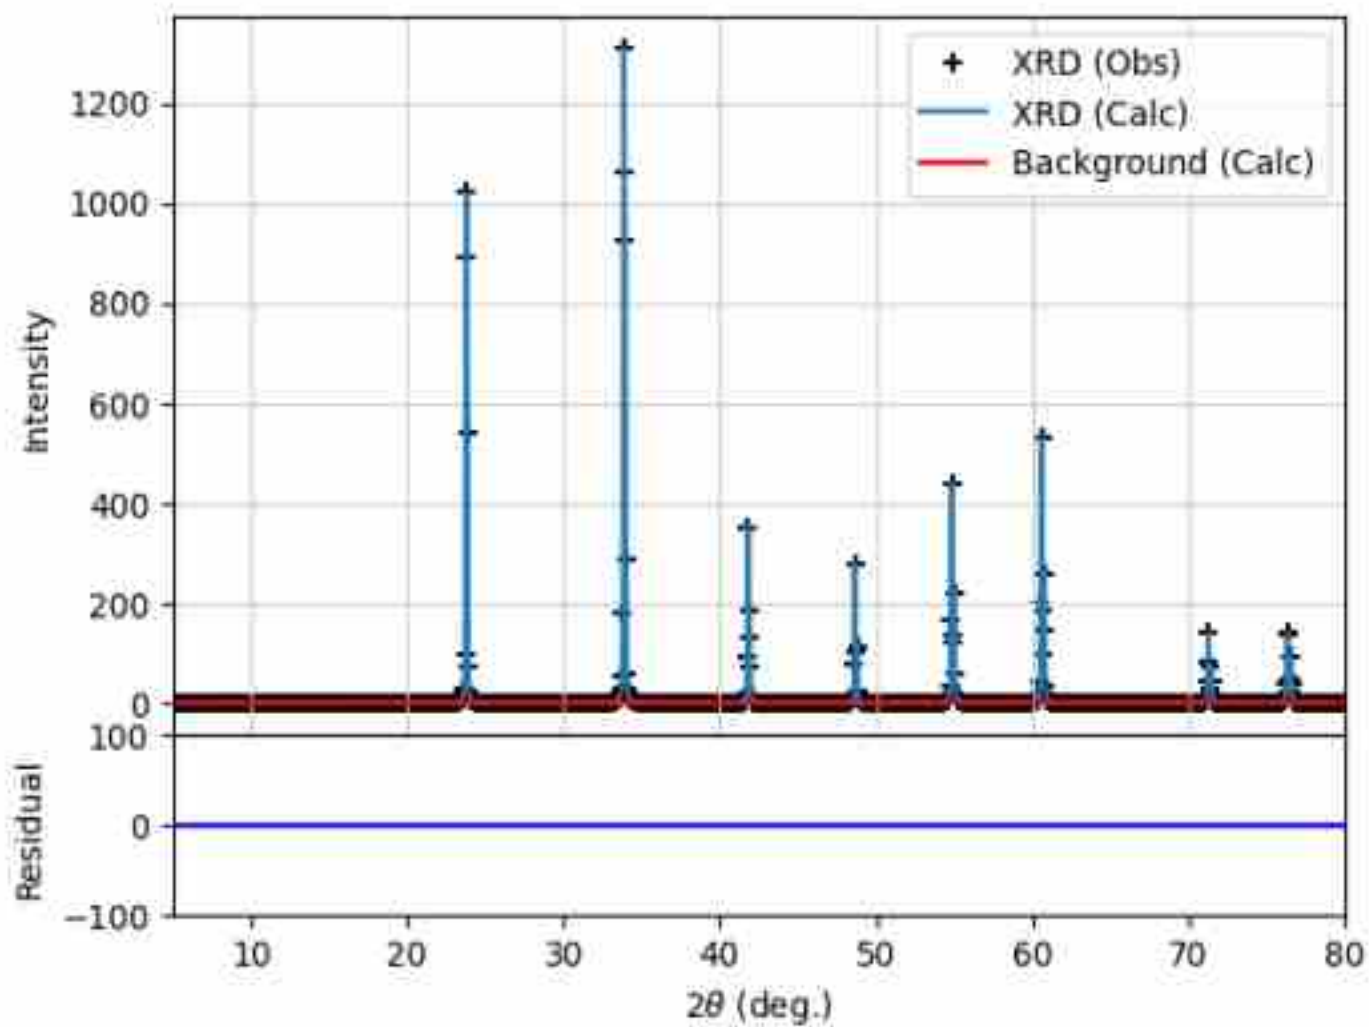

| RMSE before RR | Rwp     | RMSE after RR |
|----------------|---------|---------------|
| 0.001          | 0.03196 | 0.00131       |



# Mg<sub>2</sub>ZnPt

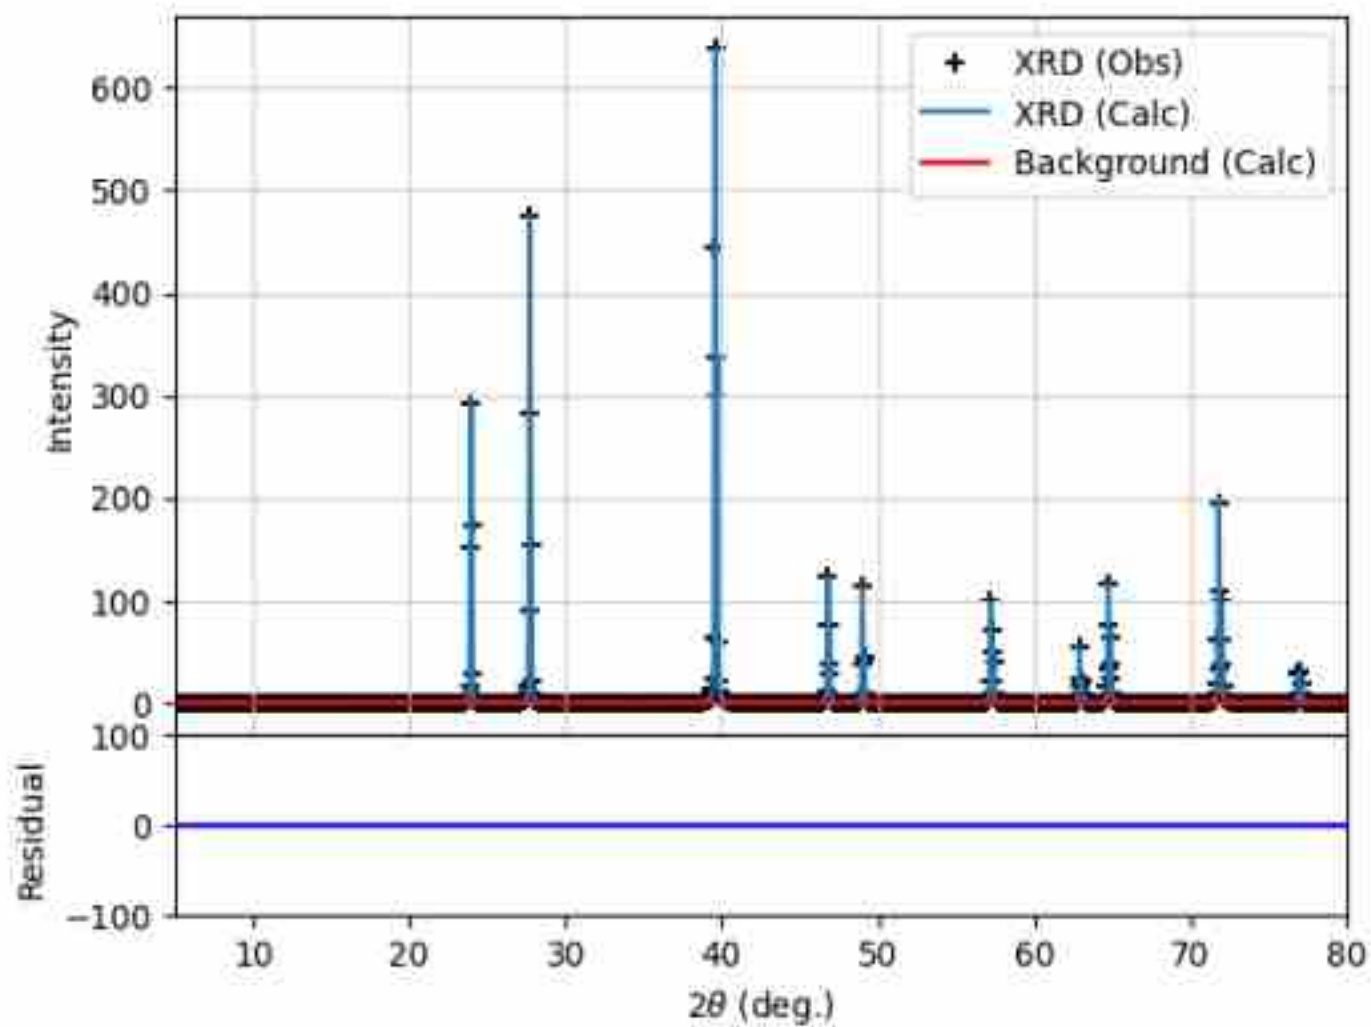

| RMSE before RR | Rwp     | RMSE after RR |
|----------------|---------|---------------|
| 0.001          | 0.00671 | 0.00228       |

# Mg3Sc1

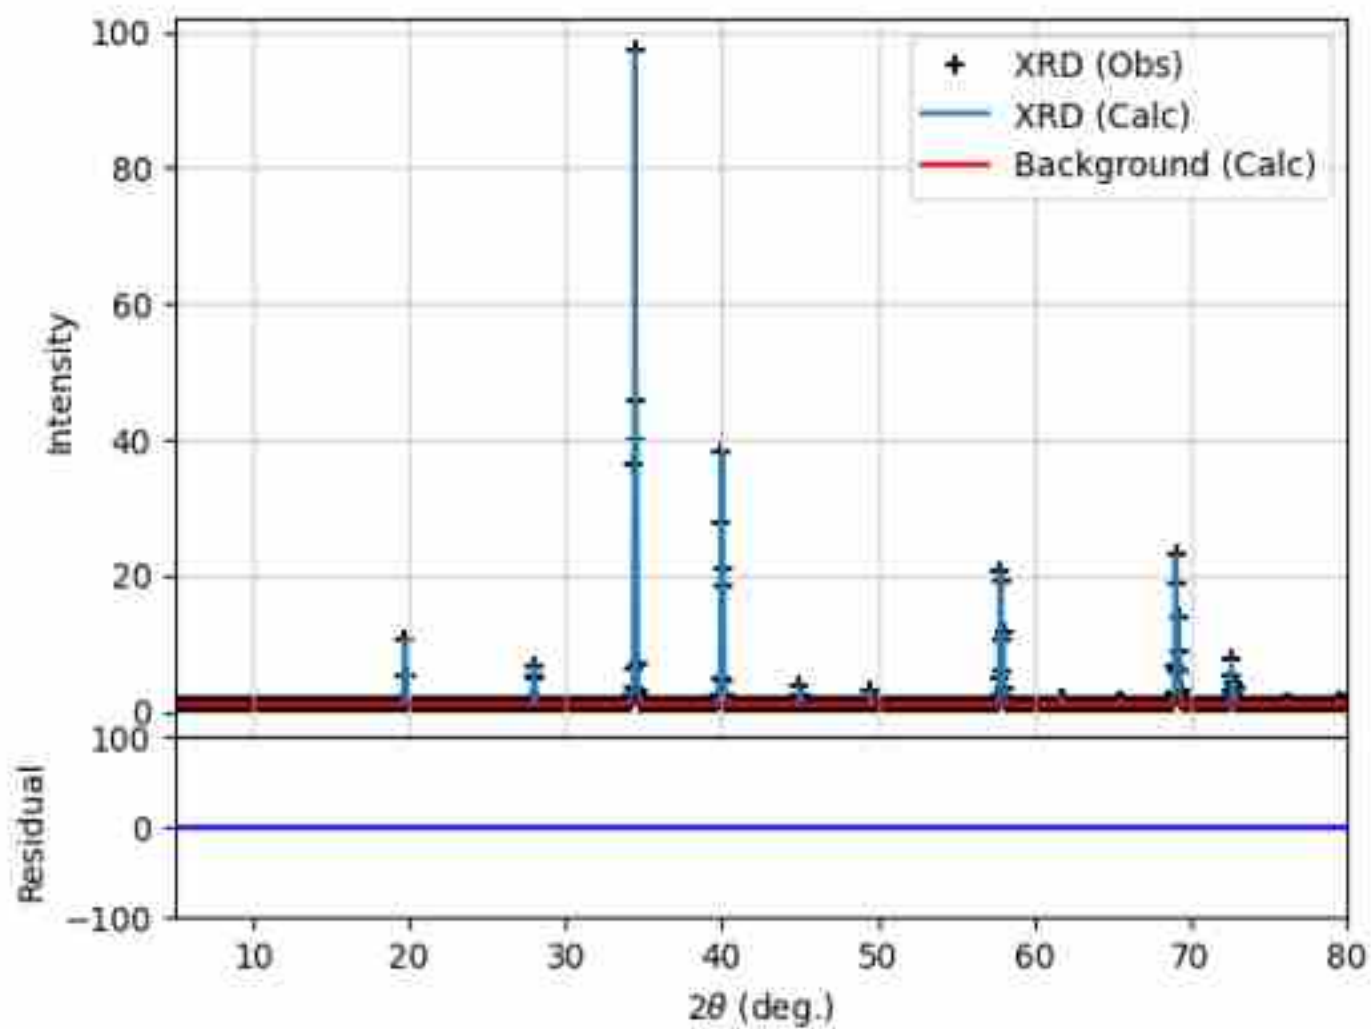

| RMSE before RR | Rwp     | RMSE after RR |
|----------------|---------|---------------|
| 0.001          | 0.00434 | 0.00079       |

# Mg<sub>3</sub>Zn<sub>1</sub>

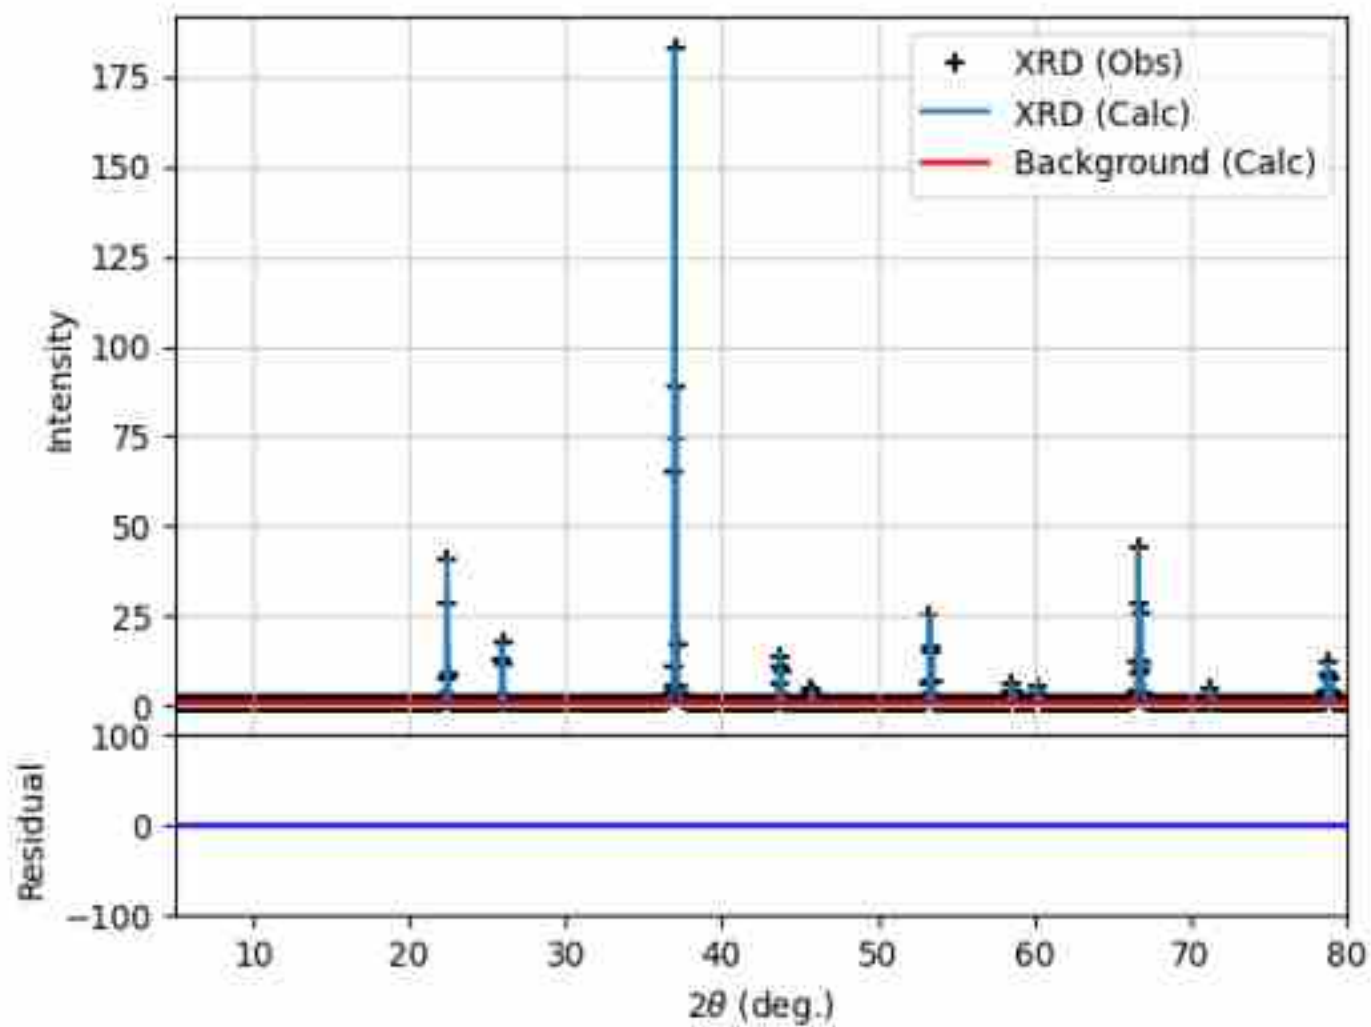

| RMSE before RR | Rwp     | RMSE after RR |
|----------------|---------|---------------|
| 0.001          | 0.00303 | 0.00076       |

# Mg<sub>5</sub>Hg<sub>1</sub>

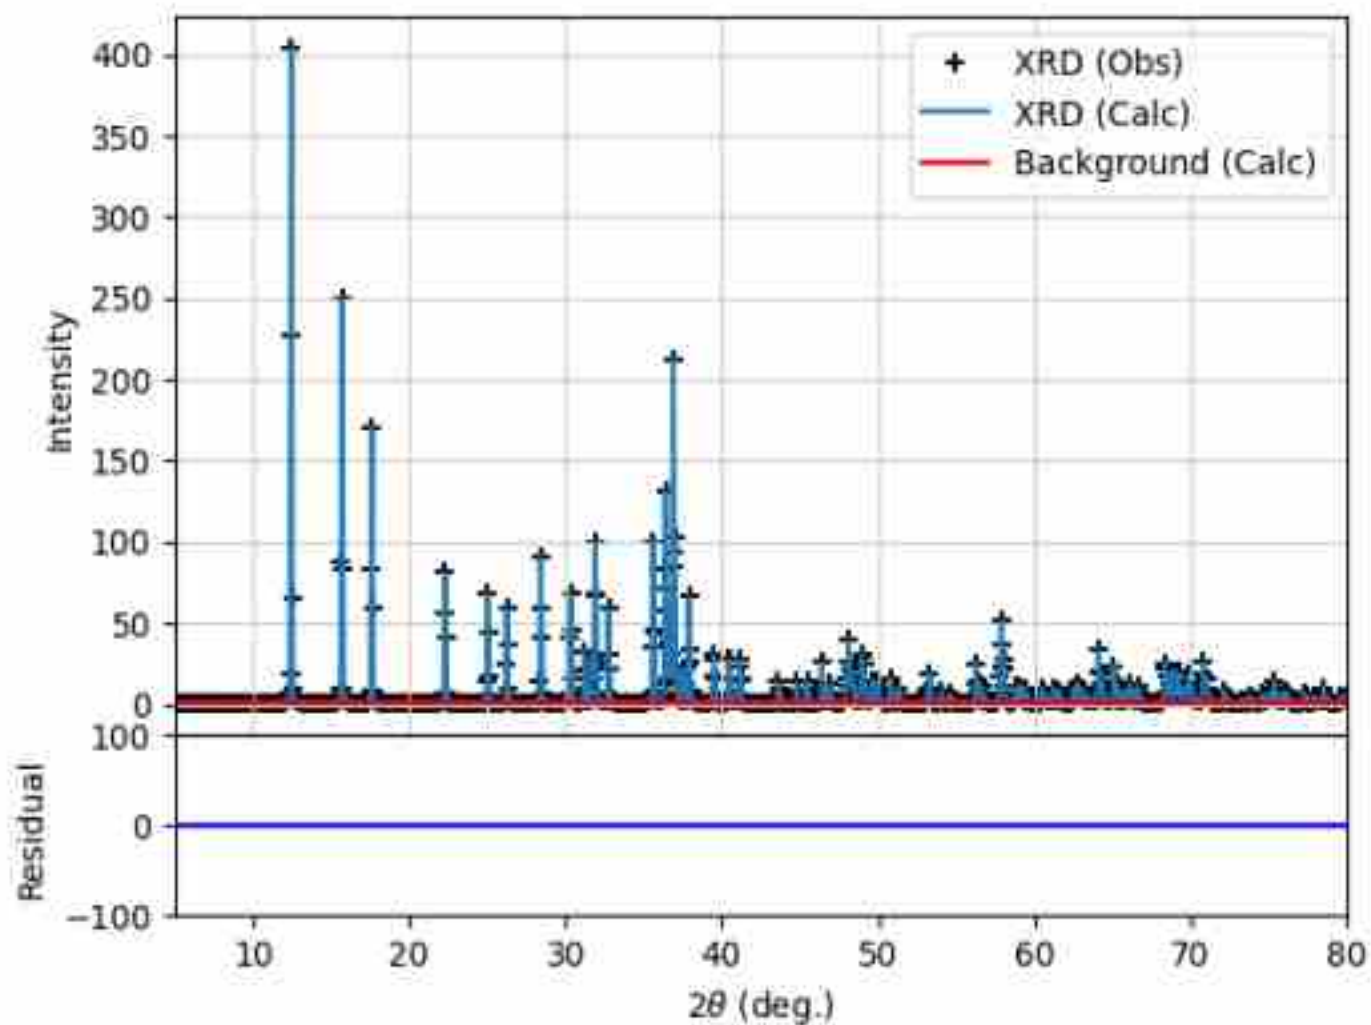

| RMSE before RR | Rwp     | RMSE after RR |
|----------------|---------|---------------|
| 0.01           | 0.00276 | 0.00062       |

# Mg<sub>6</sub>Cd<sub>1</sub>In<sub>1</sub>

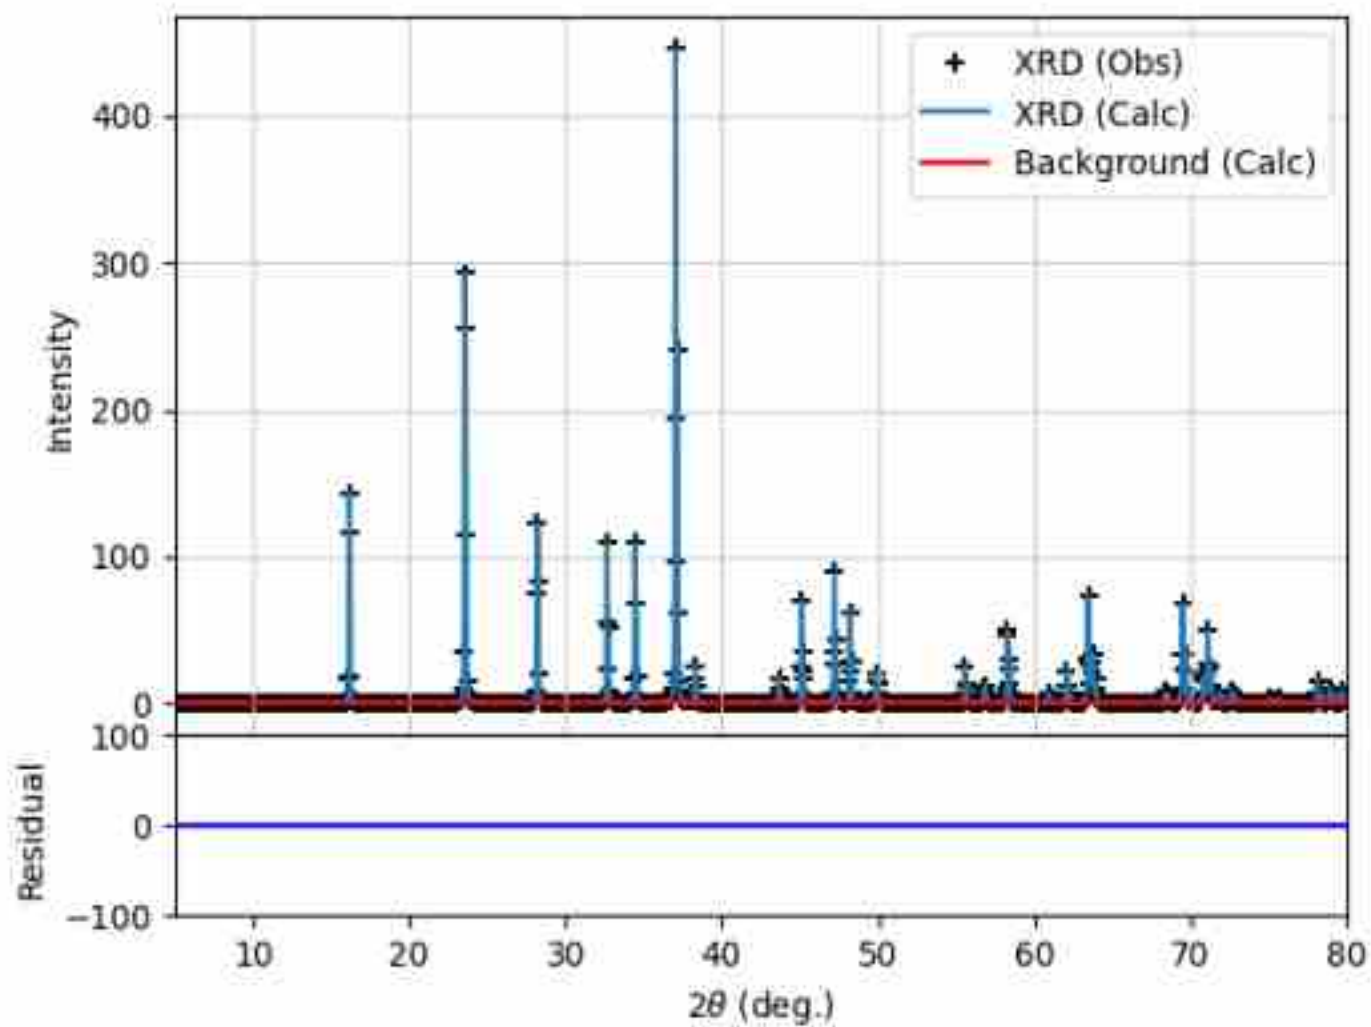

| RMSE before RR | Rwp     | RMSE after RR |
|----------------|---------|---------------|
| 0.01           | 0.01885 | 0.00298       |

# Mn1Al1Pt2

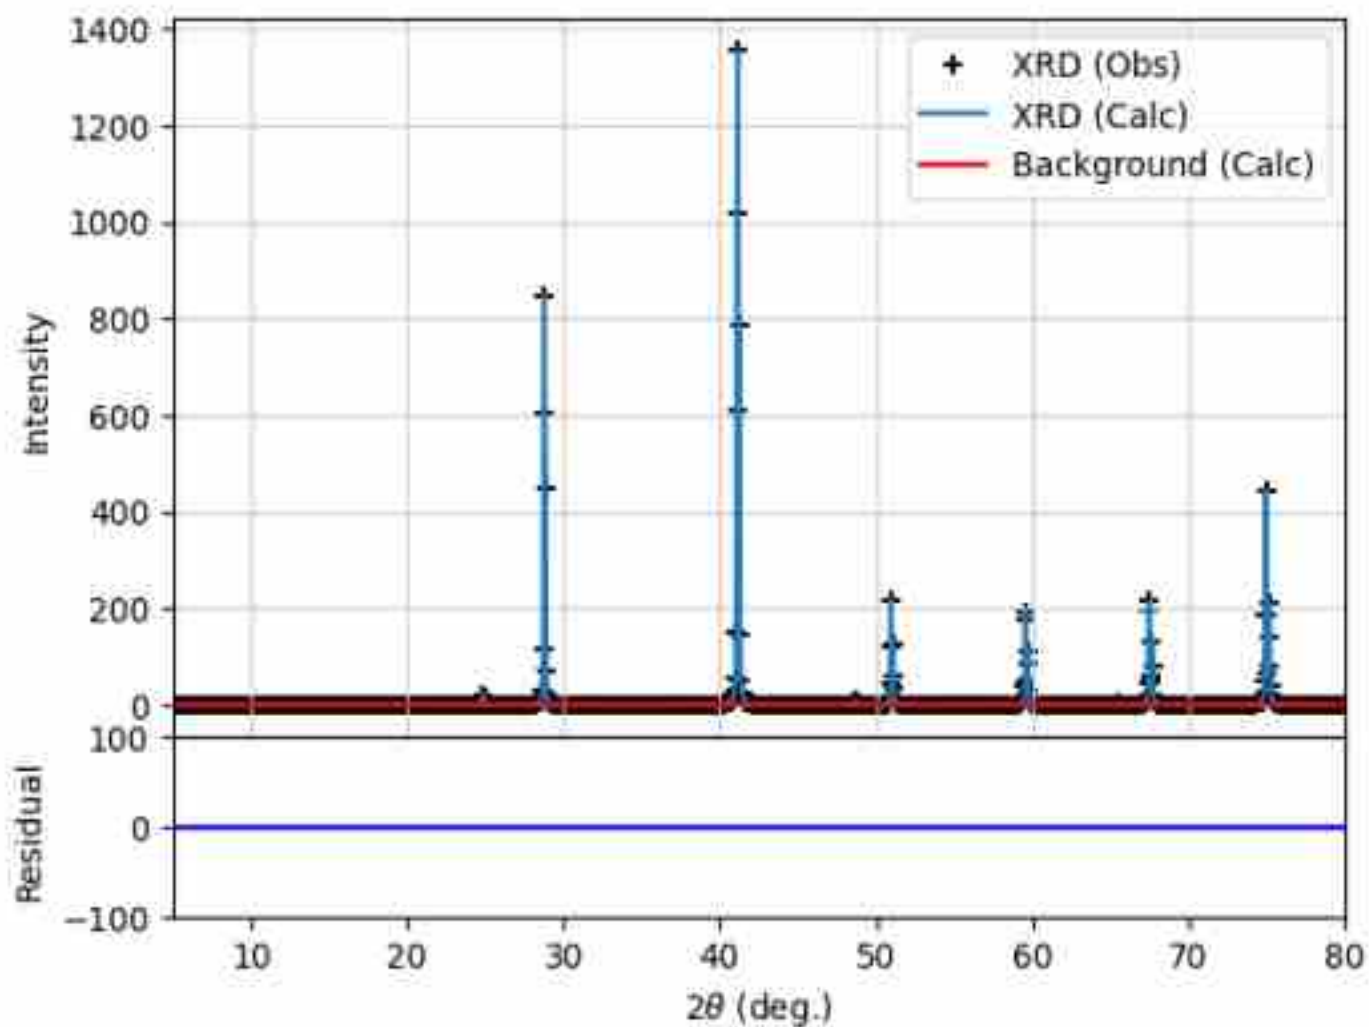

| RMSE before RR | Rwp     | RMSE after RR |
|----------------|---------|---------------|
| 0.001          | 0.02625 | 0.00156       |

# Mn1Al2Tc1

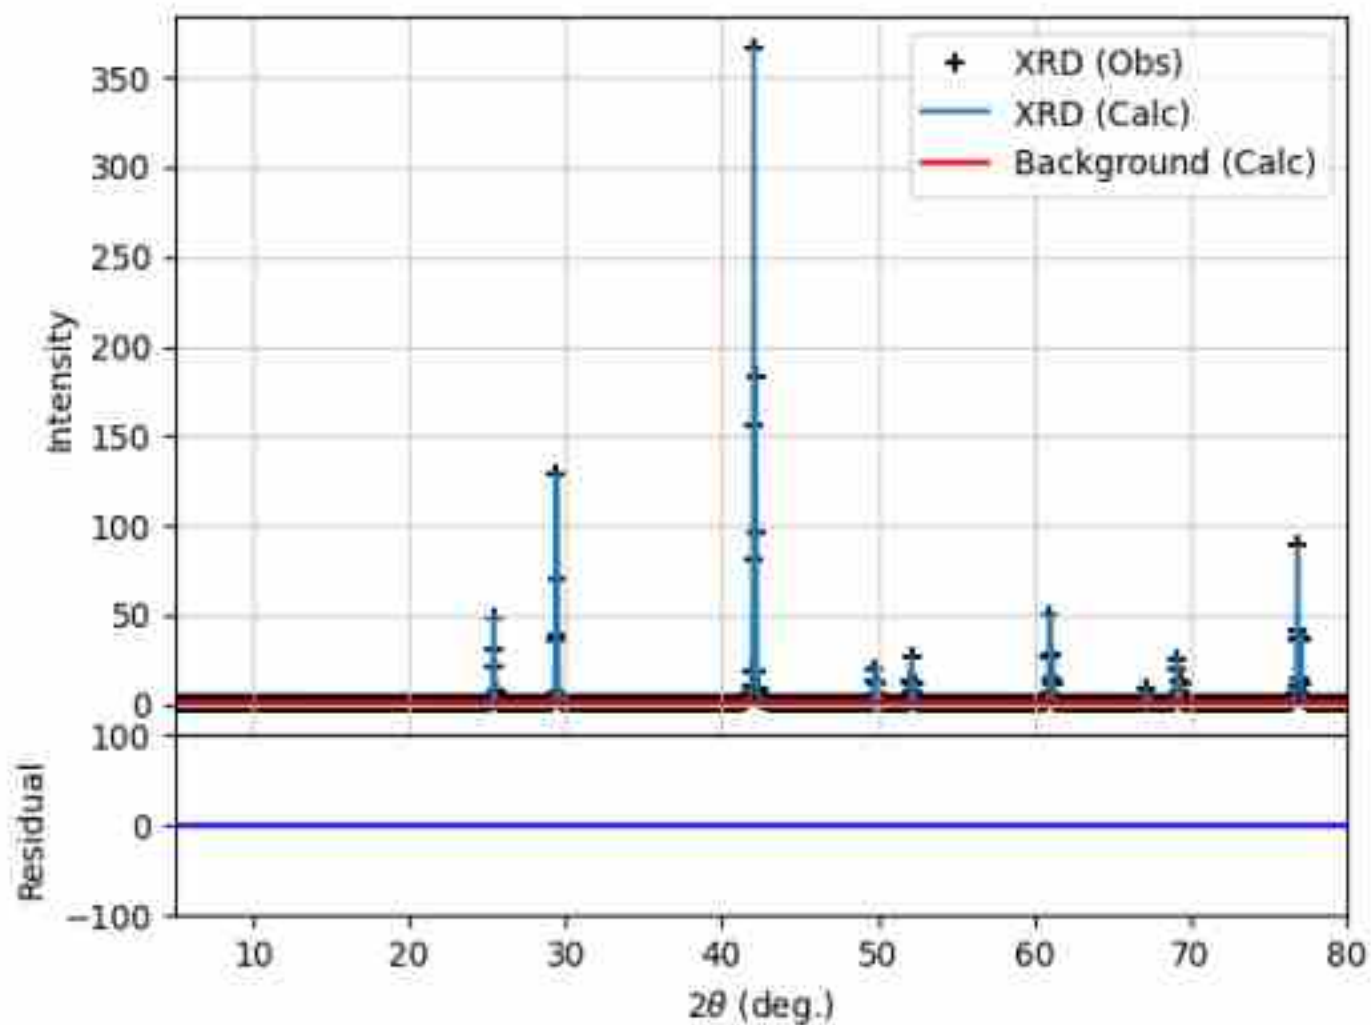

| RMSE before RR | Rwp   | RMSE after RR |
|----------------|-------|---------------|
| 0.001          | 4e-05 | 0.00011       |

# Mn1Cd1S2

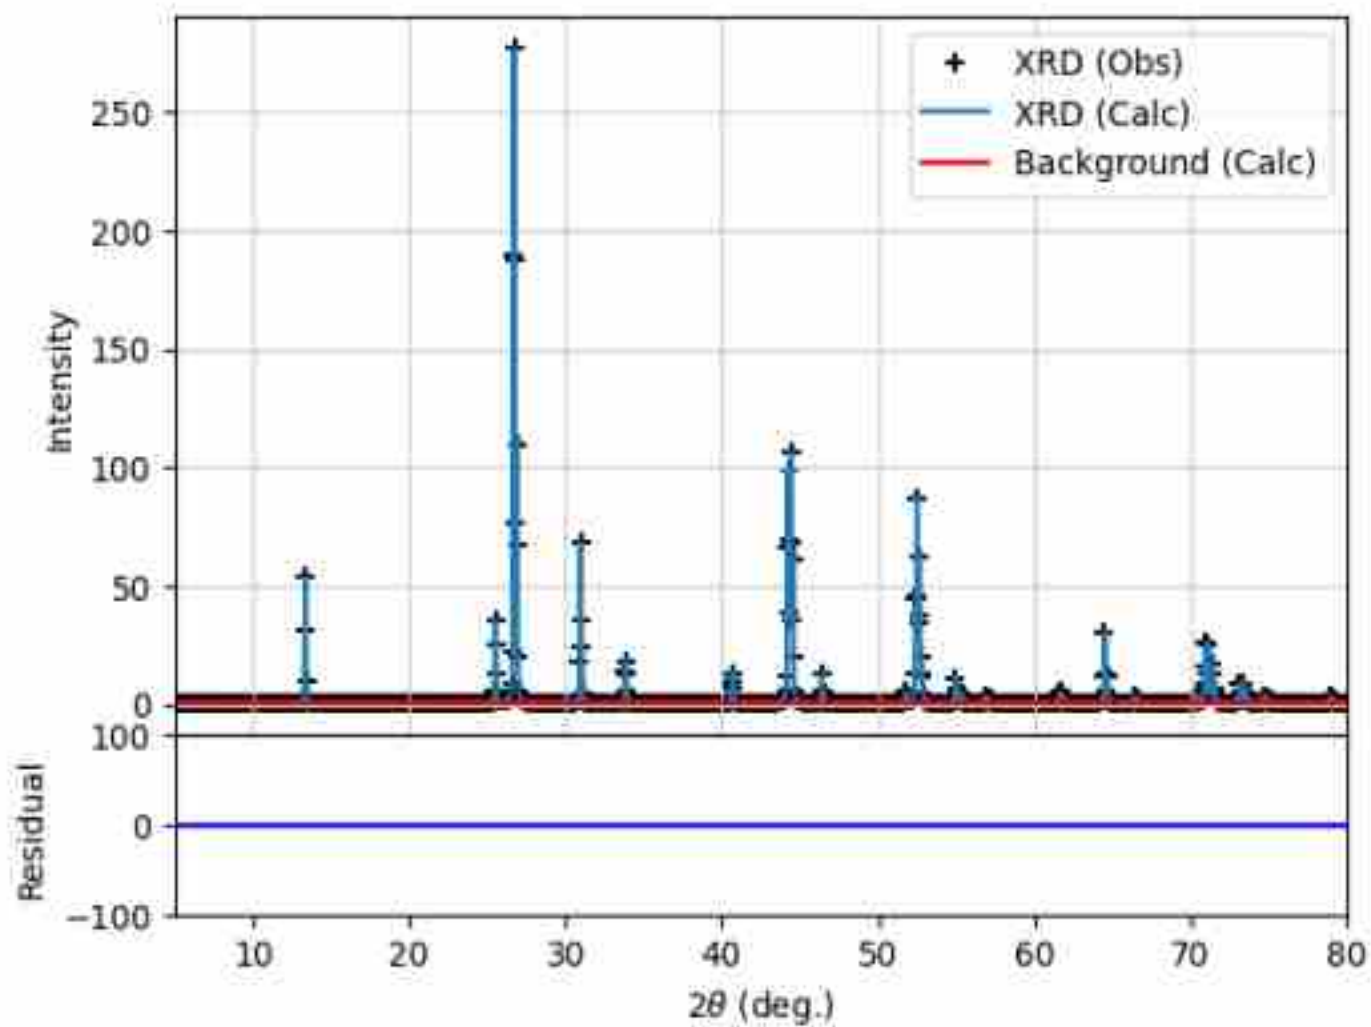

| RMSE before RR | Rwp     | RMSE after RR |
|----------------|---------|---------------|
| 0.01           | 0.00191 | 0.0002        |



# Mn1Co1

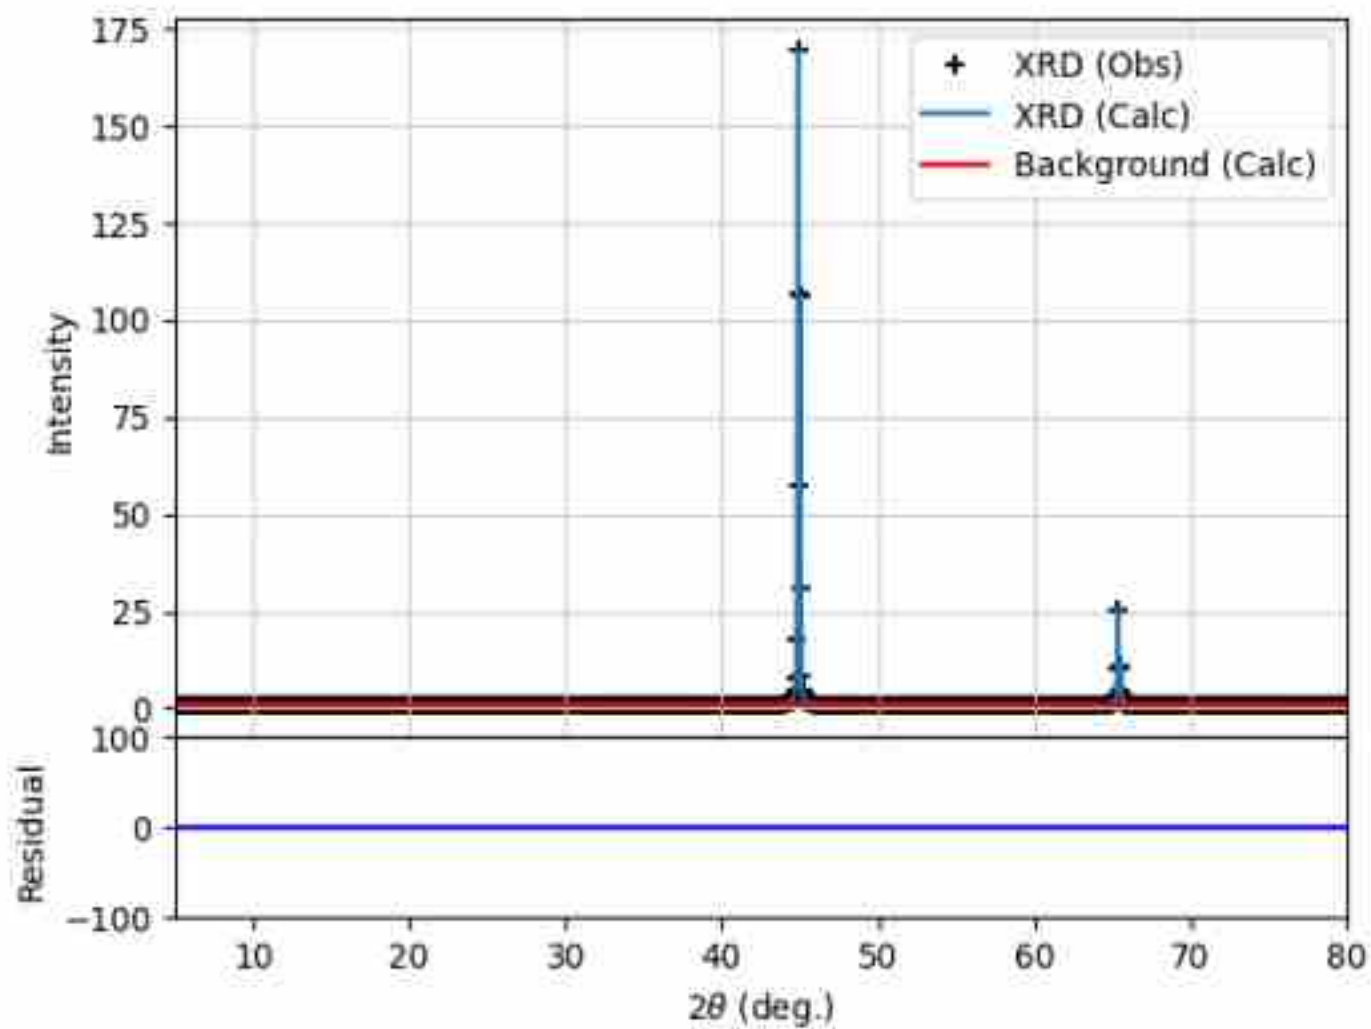

| RMSE before RR | Rwp     | RMSE after RR |
|----------------|---------|---------------|
| 0.001          | 0.00149 | 0.00028       |

# Mn1Co2Si1

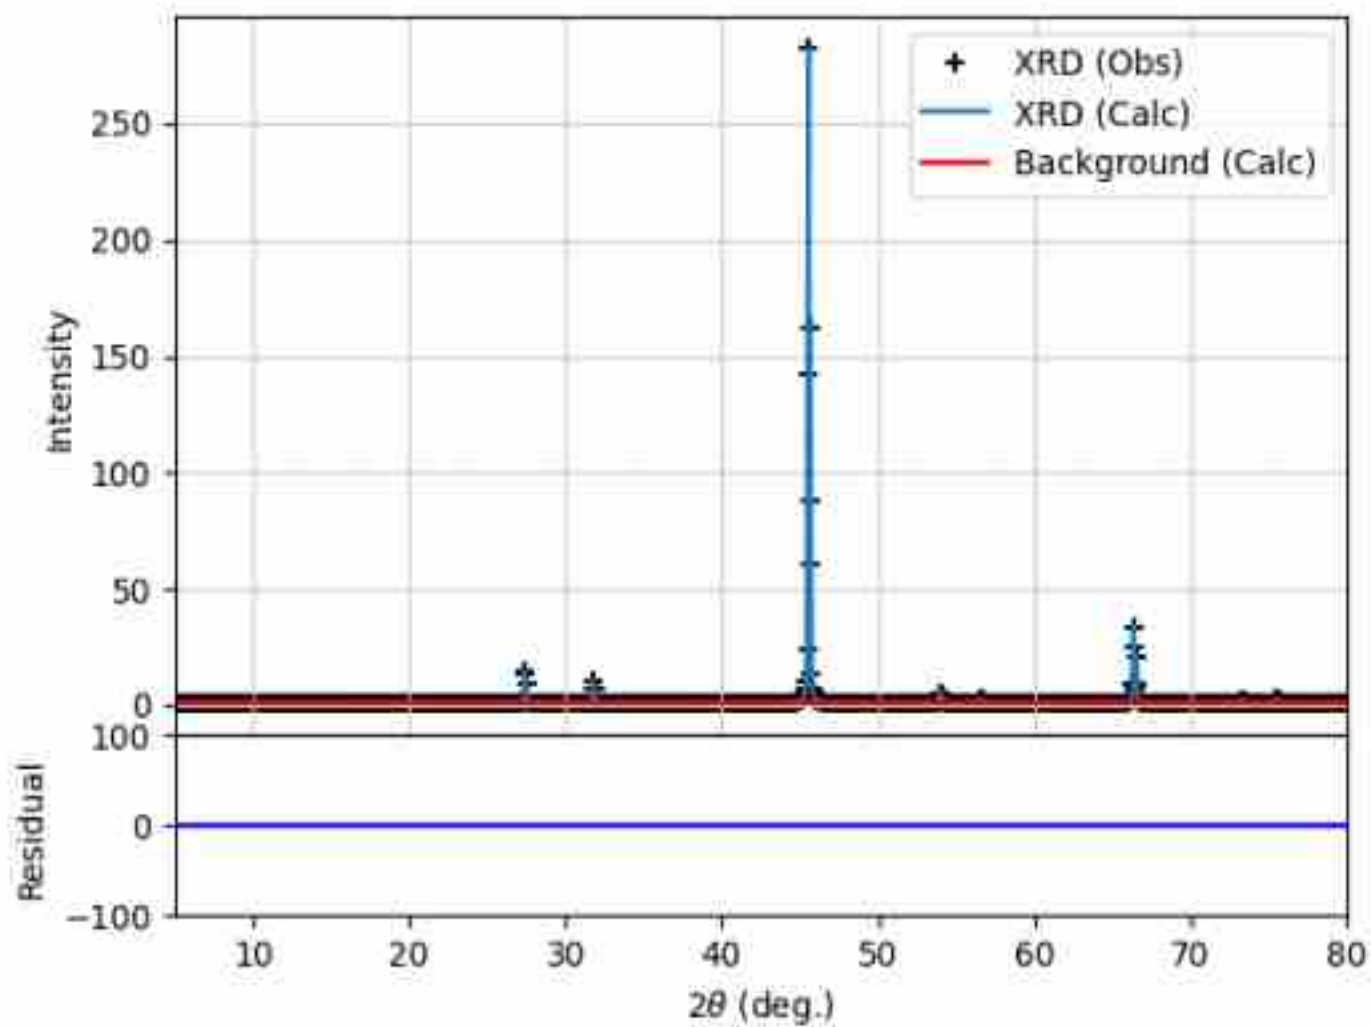

| RMSE before RR | Rwp     | RMSE after RR |
|----------------|---------|---------------|
| 0.001          | 0.00398 | 0.00093       |

# Mn1Ge1Pd2

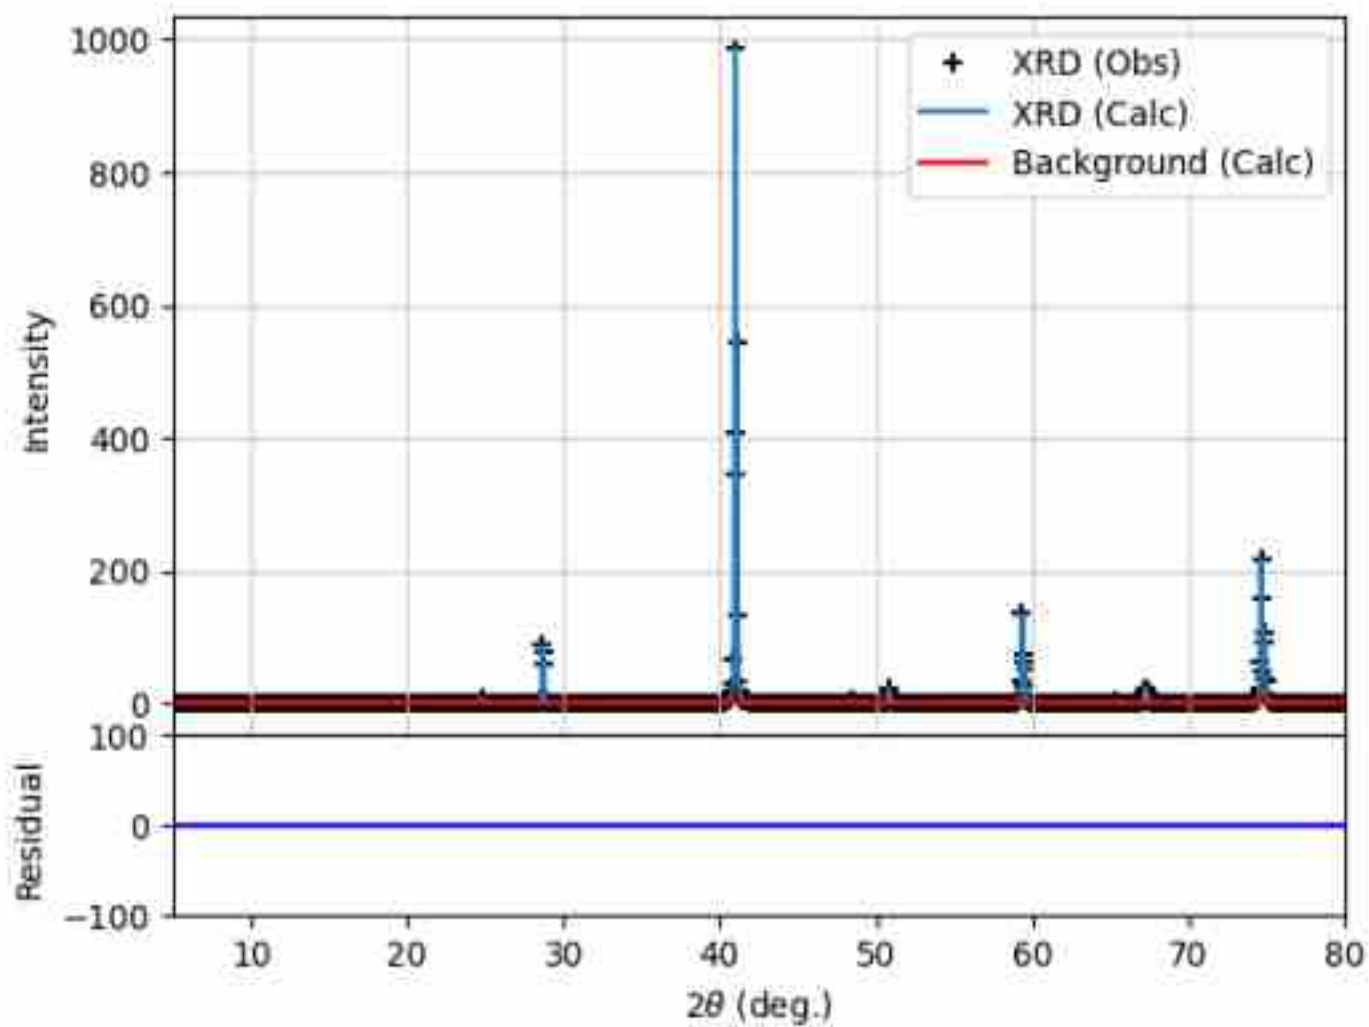

| RMSE before RR | Rwp     | RMSE after RR |
|----------------|---------|---------------|
| 0.001          | 0.00338 | 0.00046       |

# Mn1Ge1Rh2

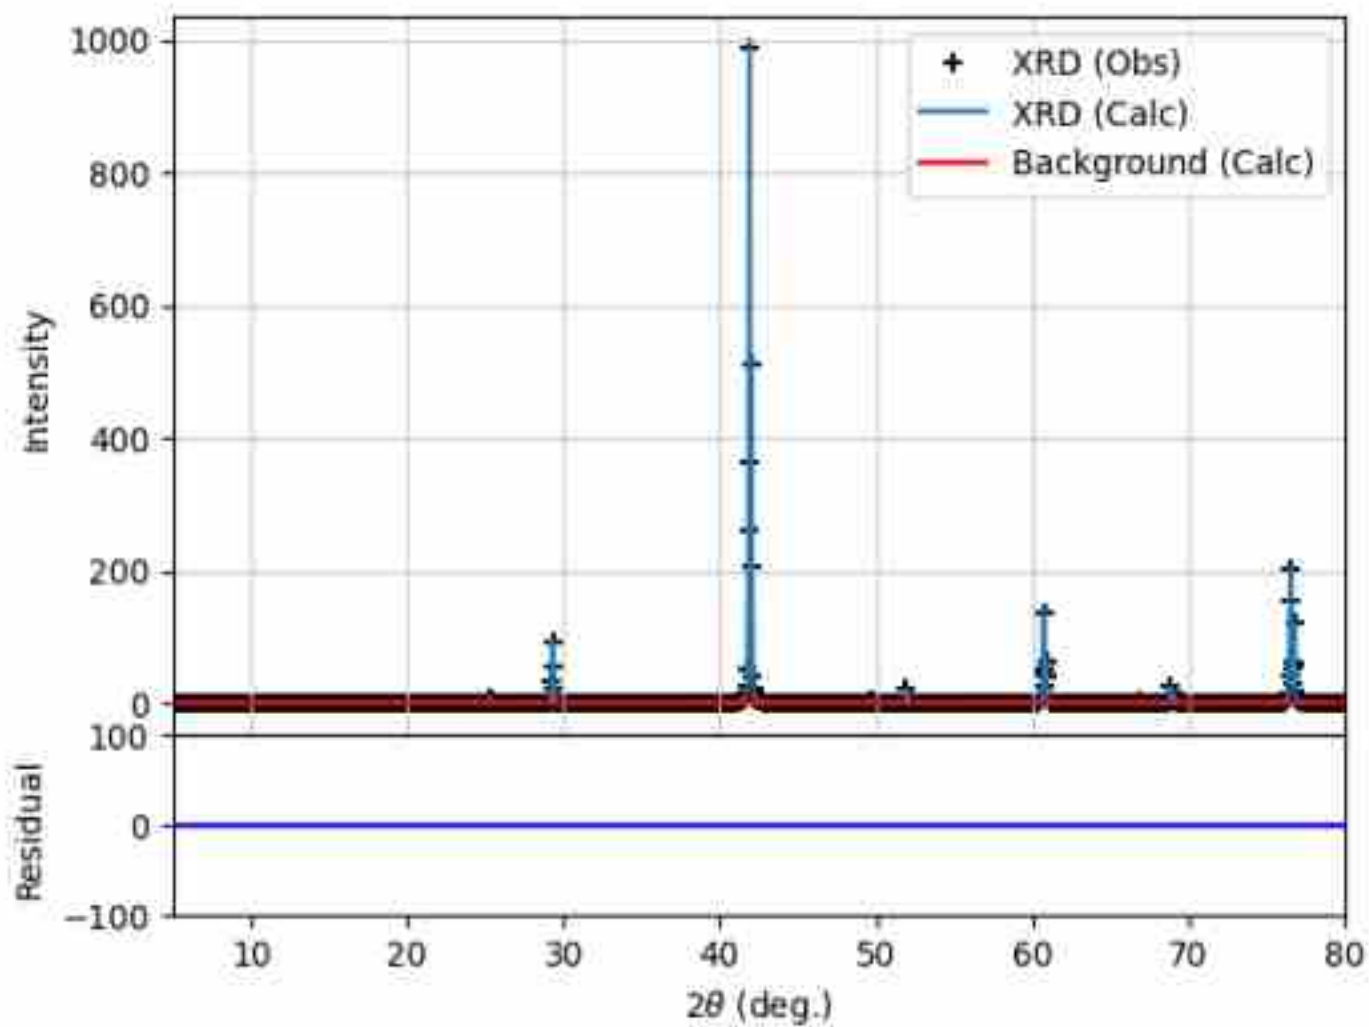

| RMSE before RR | Rwp     | RMSE after RR |
|----------------|---------|---------------|
| 0.001          | 0.00292 | 0.00062       |

# Mn1In1Rh2

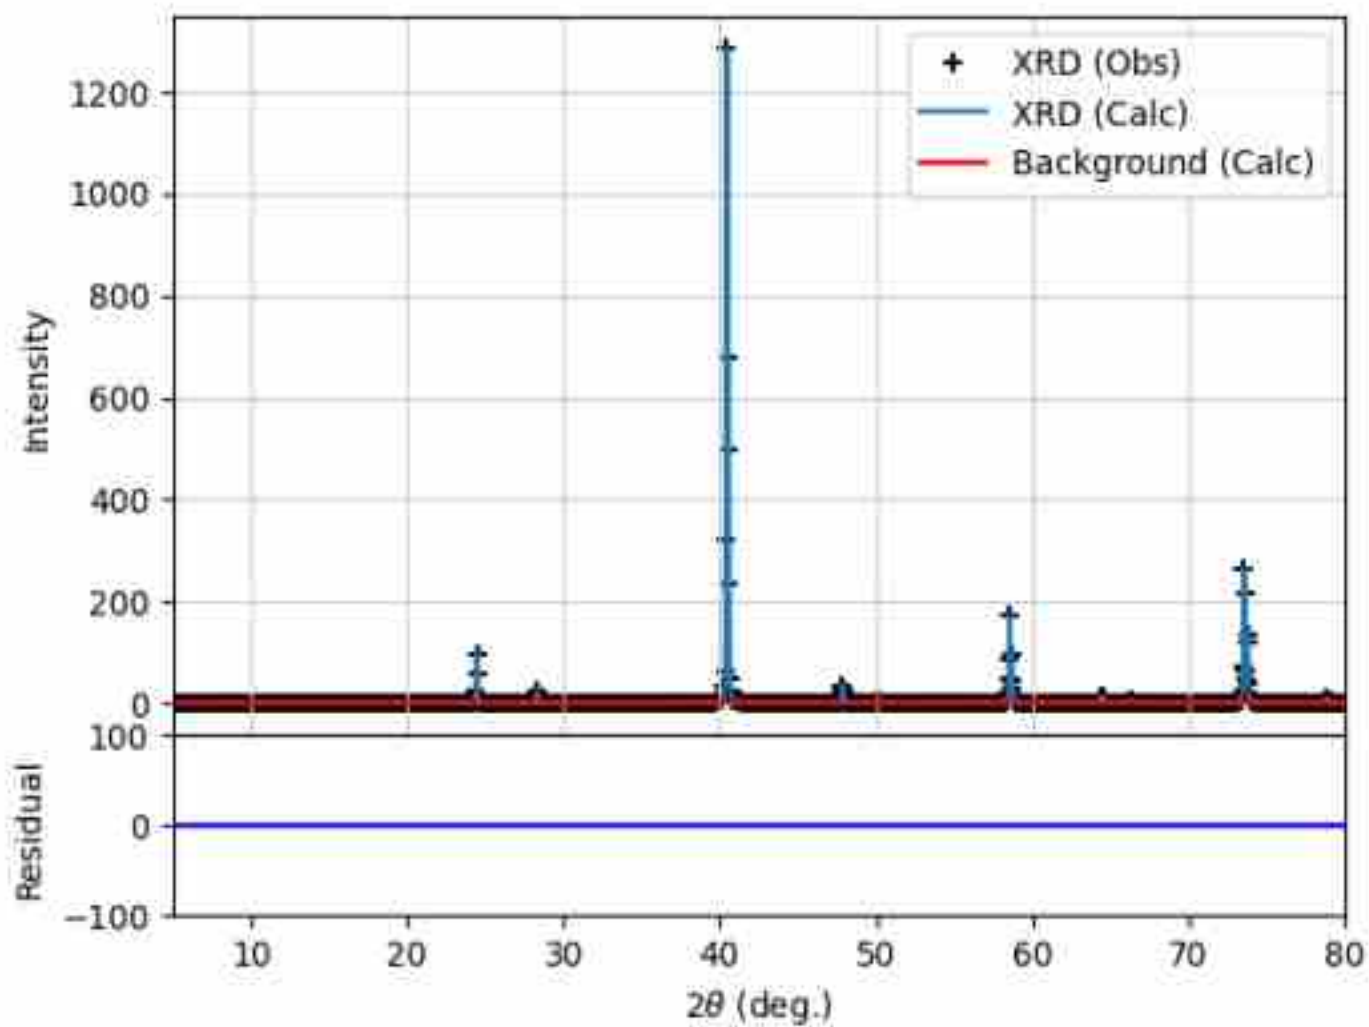

| RMSE before RR | Rwp    | RMSE after RR |
|----------------|--------|---------------|
| 0.001          | 0.0016 | 0.0003        |

# Mn1Ni1Sb2

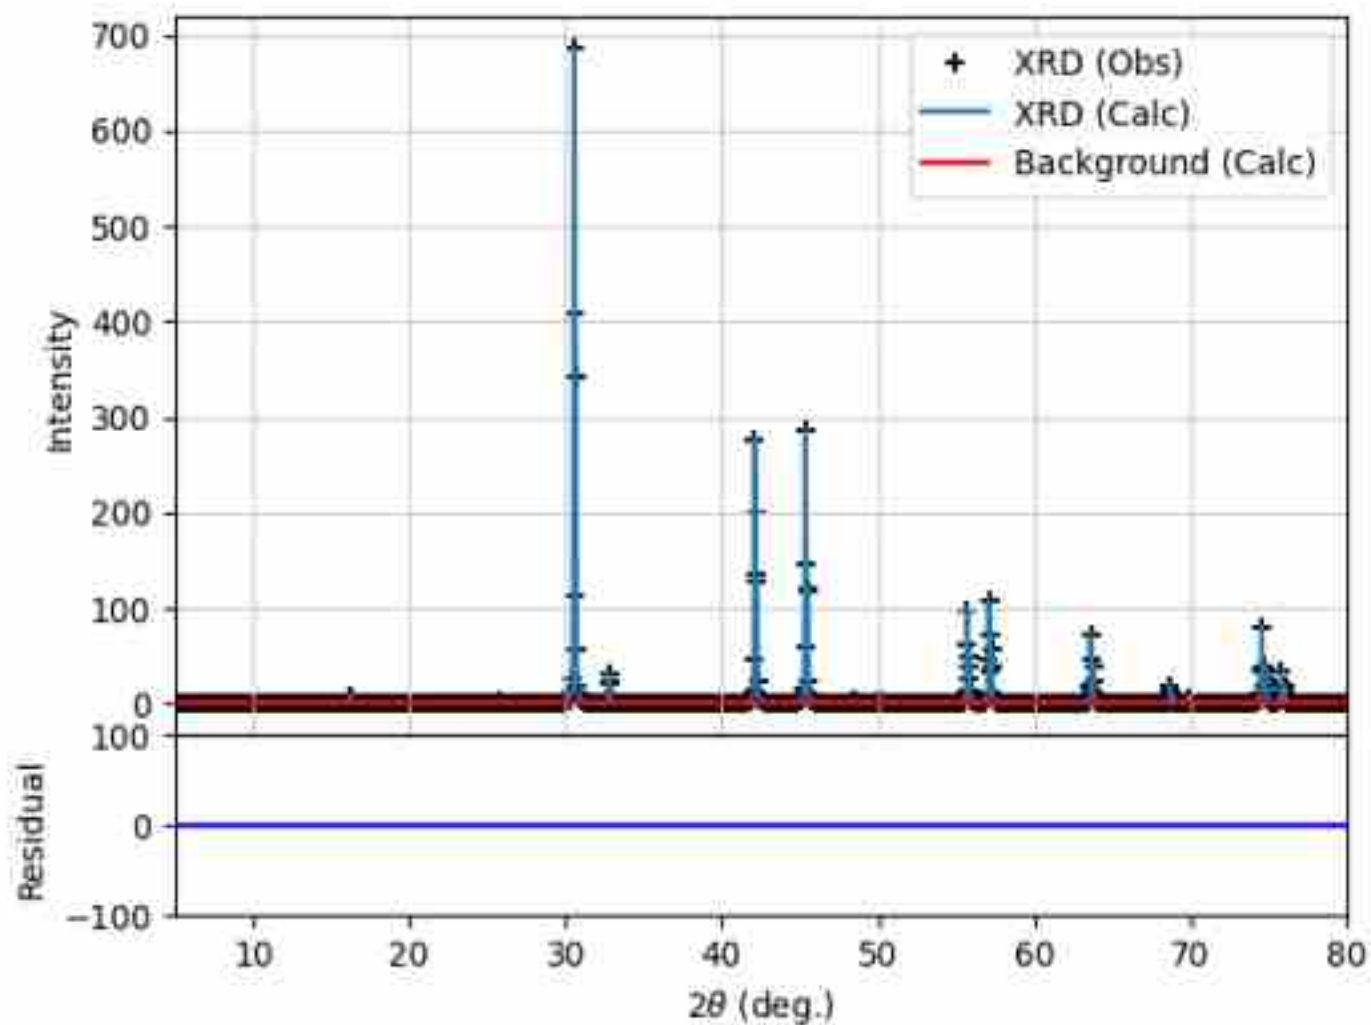

| RMSE before RR | Rwp    | RMSE after RR |
|----------------|--------|---------------|
| 0.01           | 0.0045 | 0.00039       |

# Mn1Ni1Sn1Pd1

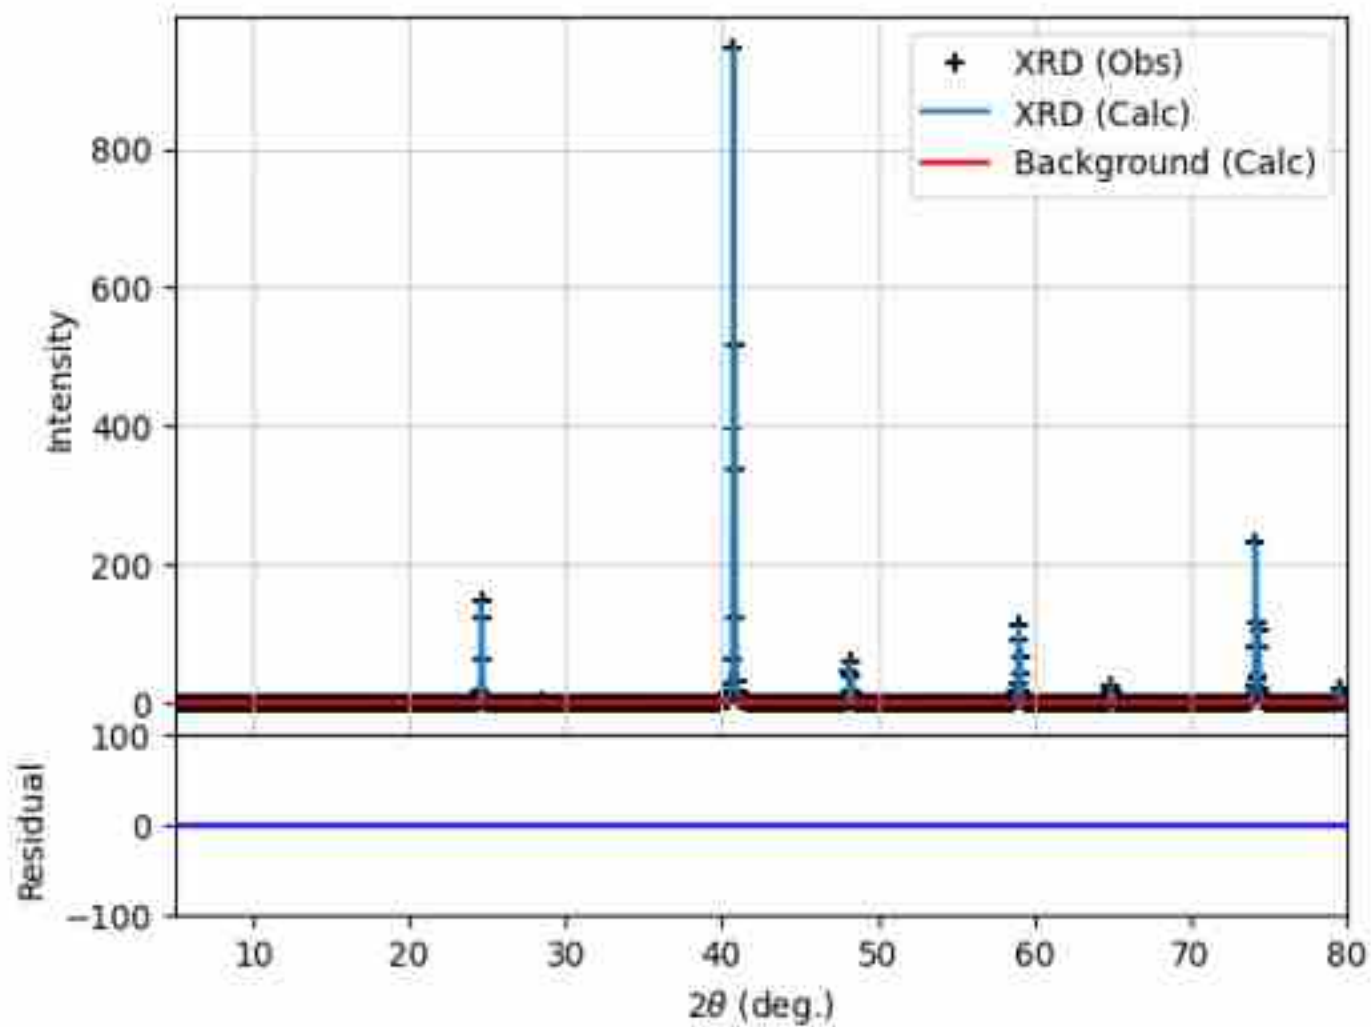

| RMSE before RR | Rwp    | RMSE after RR |
|----------------|--------|---------------|
| 0.001          | 0.0001 | 0.00013       |

# Mn1Pd1

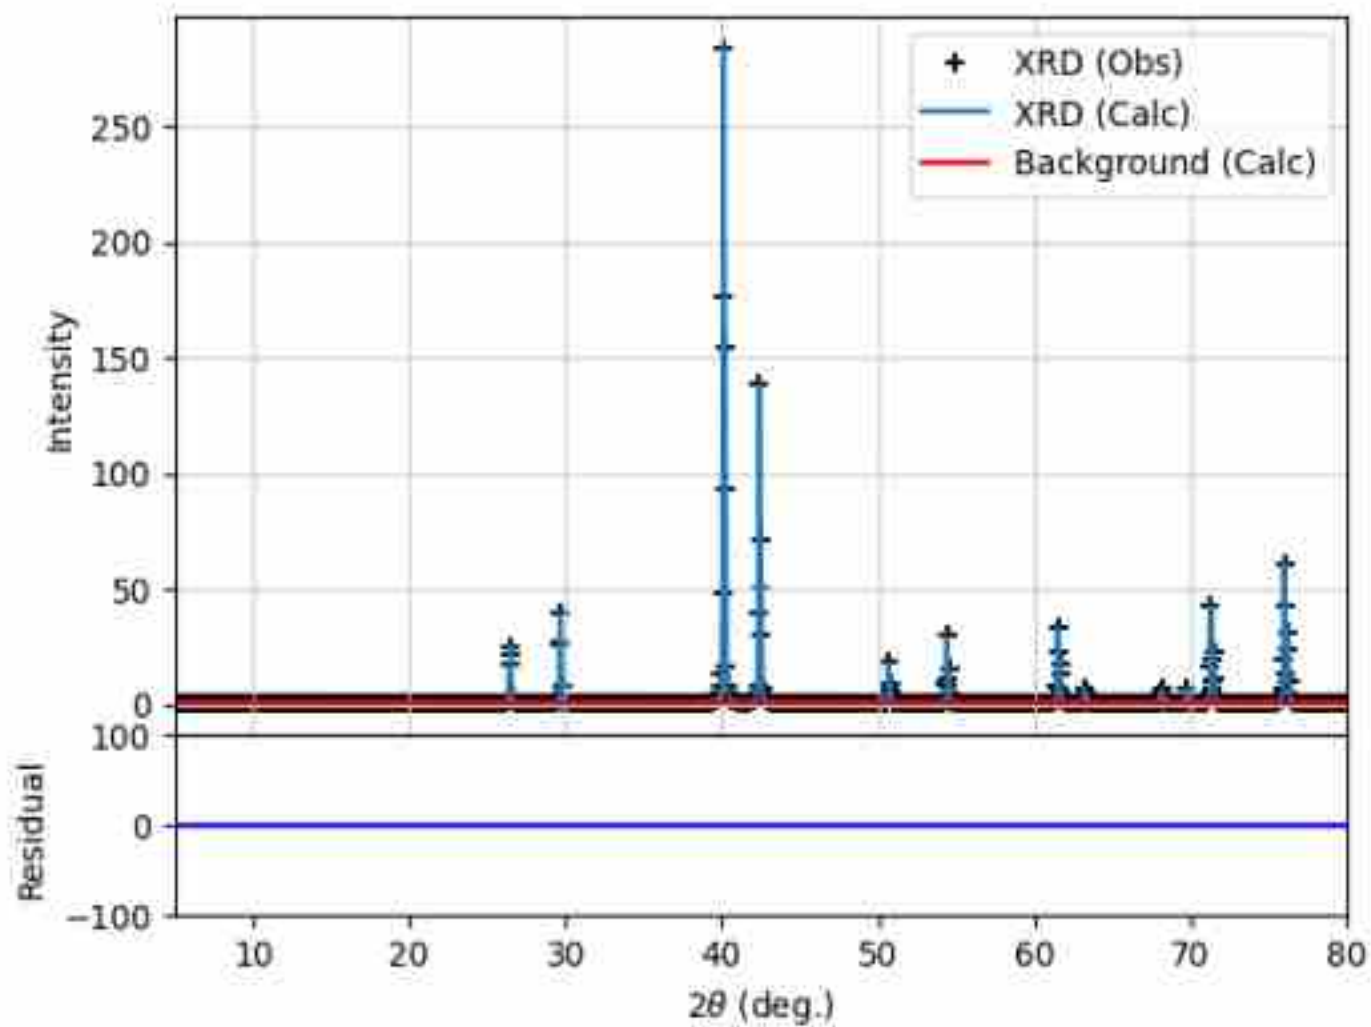

| RMSE before RR | Rwp     | RMSE after RR |
|----------------|---------|---------------|
| 0.001          | 0.00555 | 0.00098       |



# Mn1V2Ru1

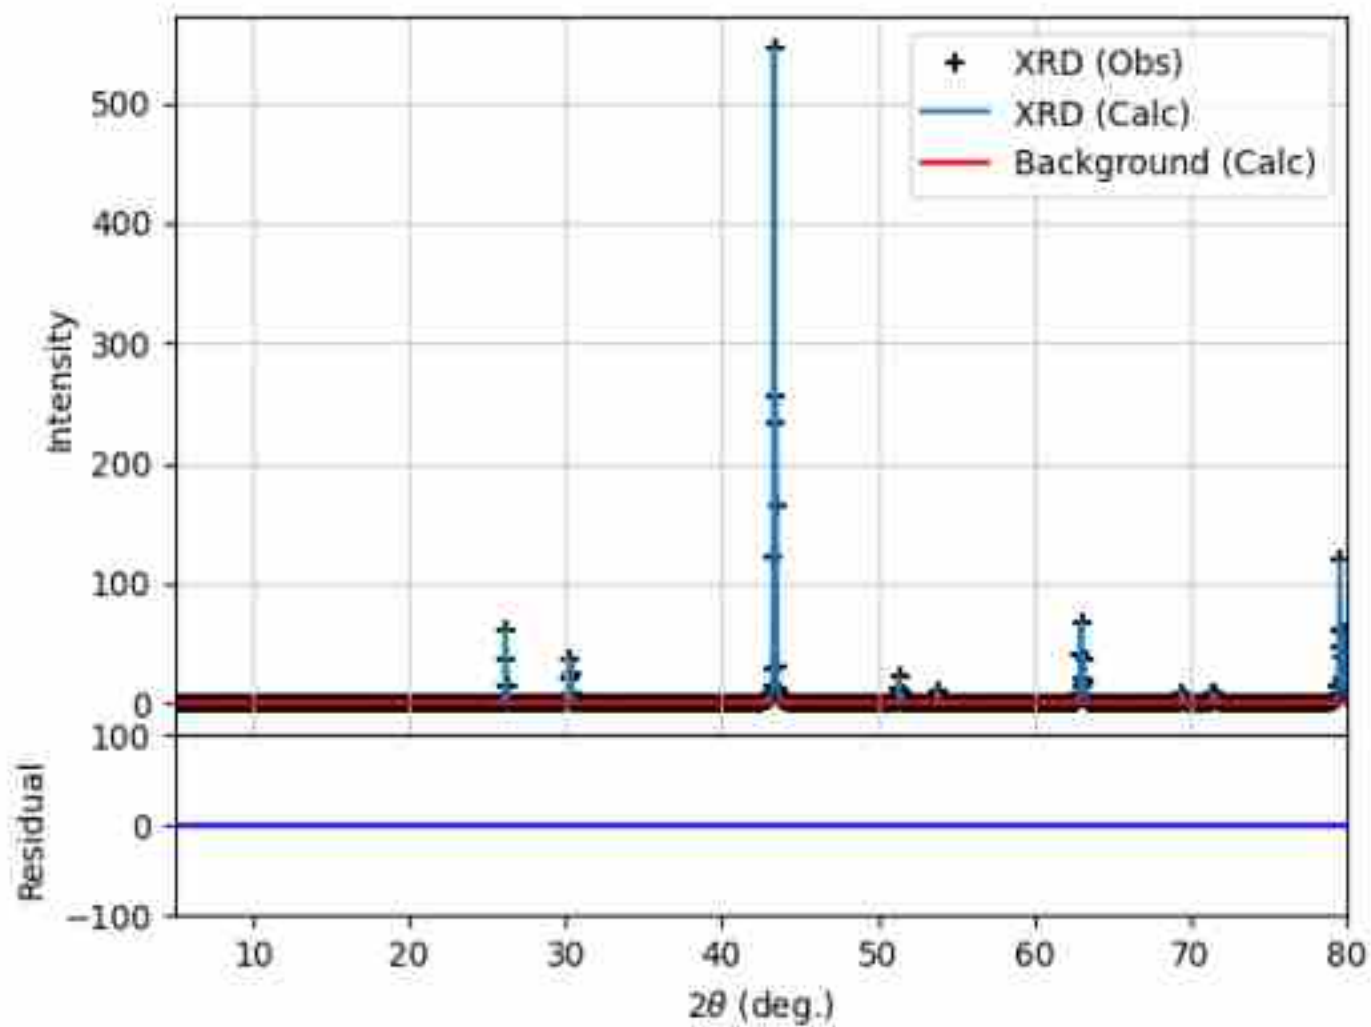

| RMSE before RR | Rwp    | RMSE after RR |
|----------------|--------|---------------|
| 0.001          | 0.0001 | 9e-05         |

# Mn<sub>2</sub>VSi

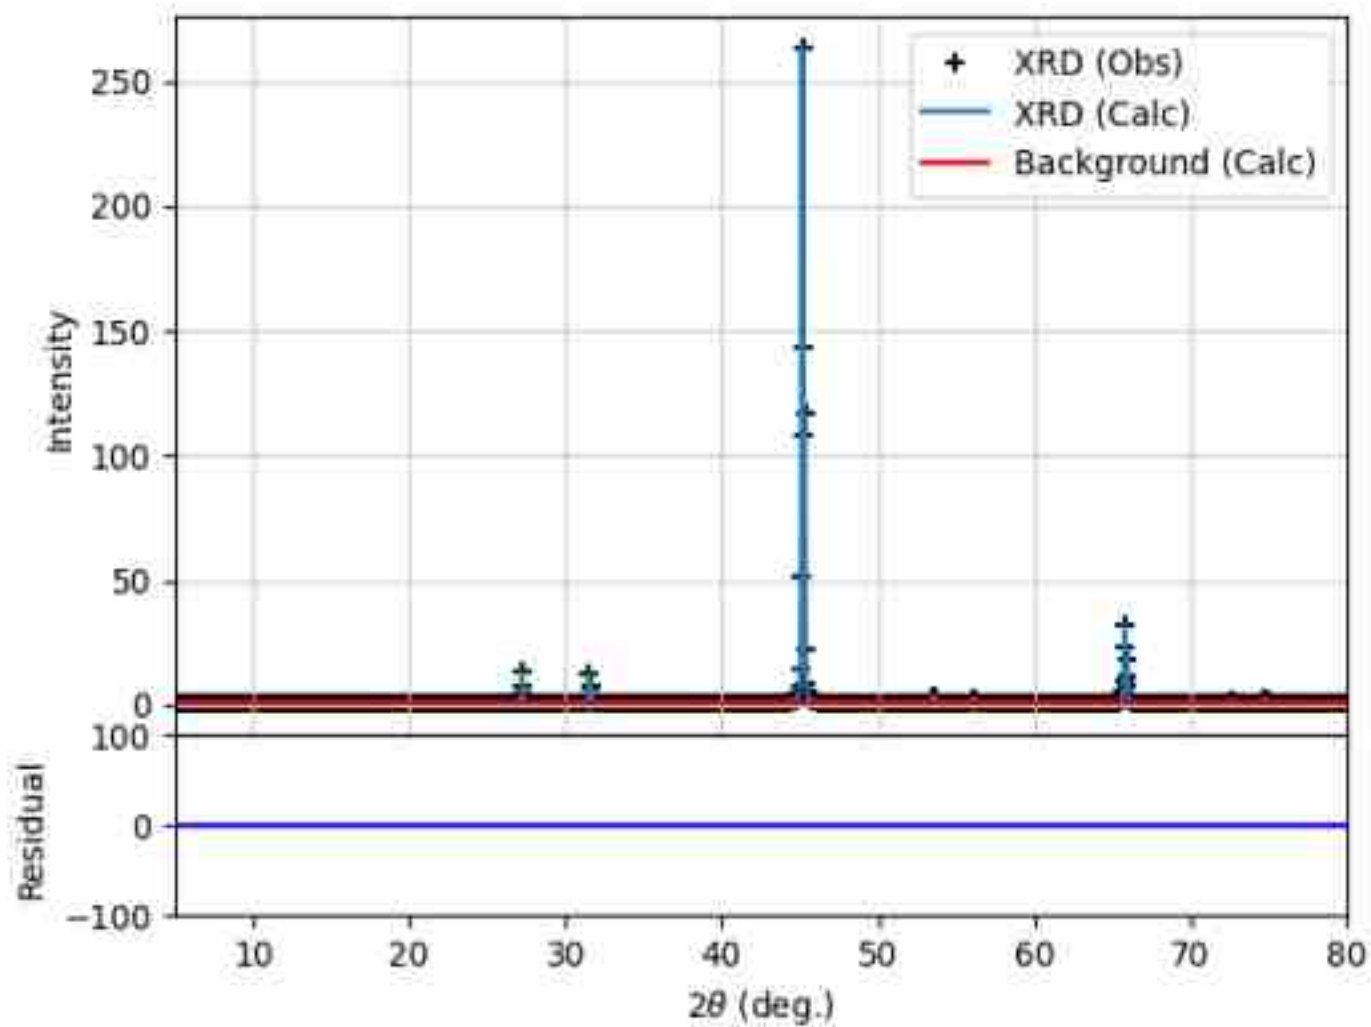

| RMSE before RR | Rwp     | RMSE after RR |
|----------------|---------|---------------|
| 0.001          | 0.00015 | 0.00013       |

# Mn<sub>3</sub>Si

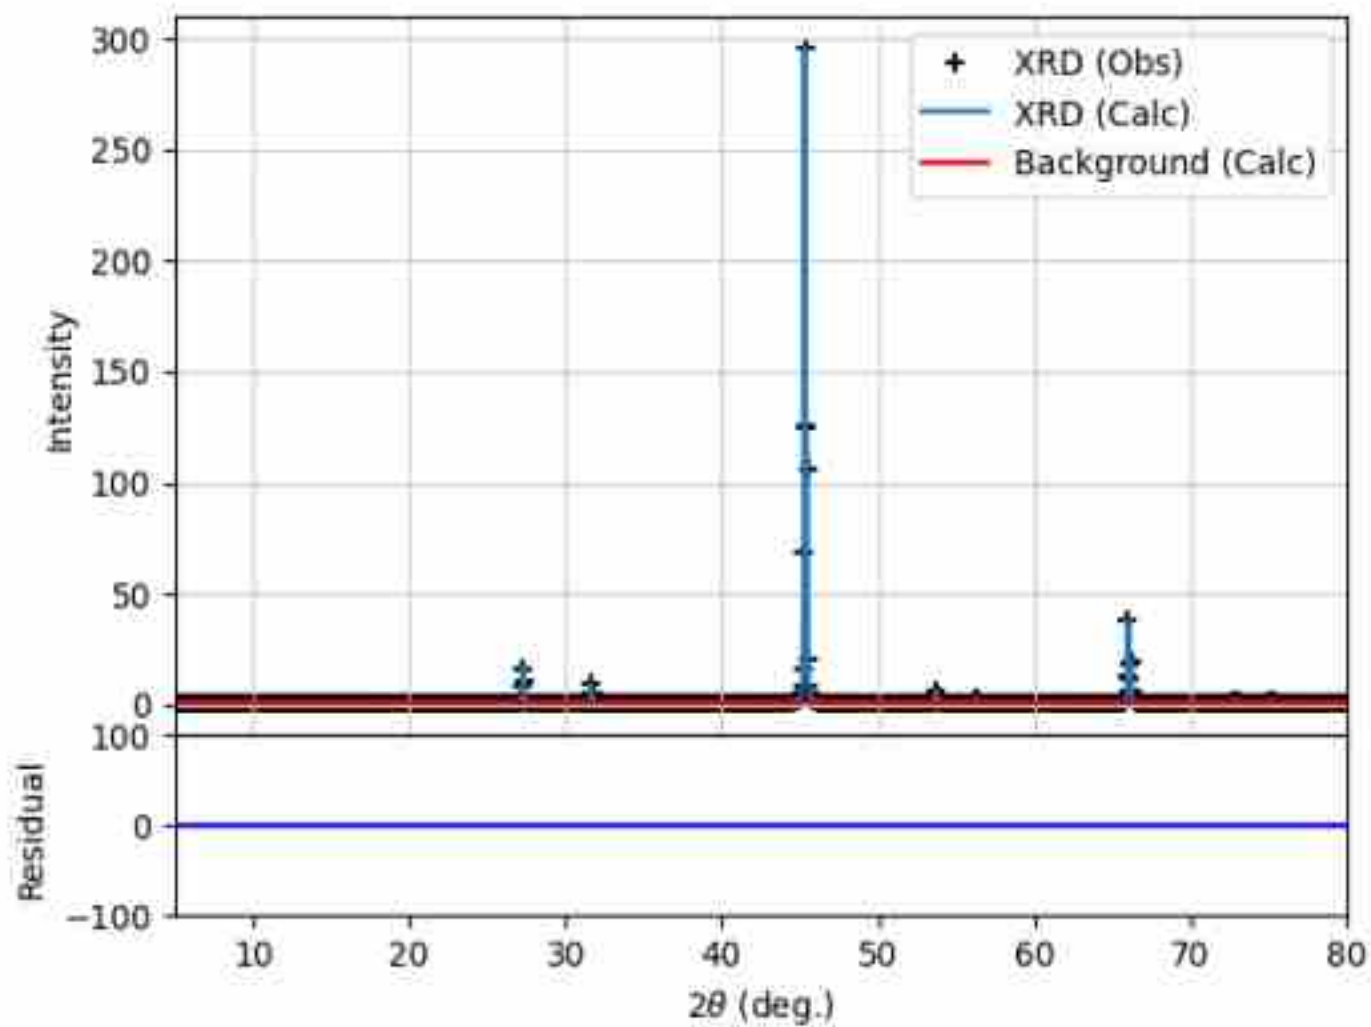

| RMSE before RR | Rwp     | RMSE after RR |
|----------------|---------|---------------|
| 0.001          | 0.00444 | 0.00079       |

# Mn6P3

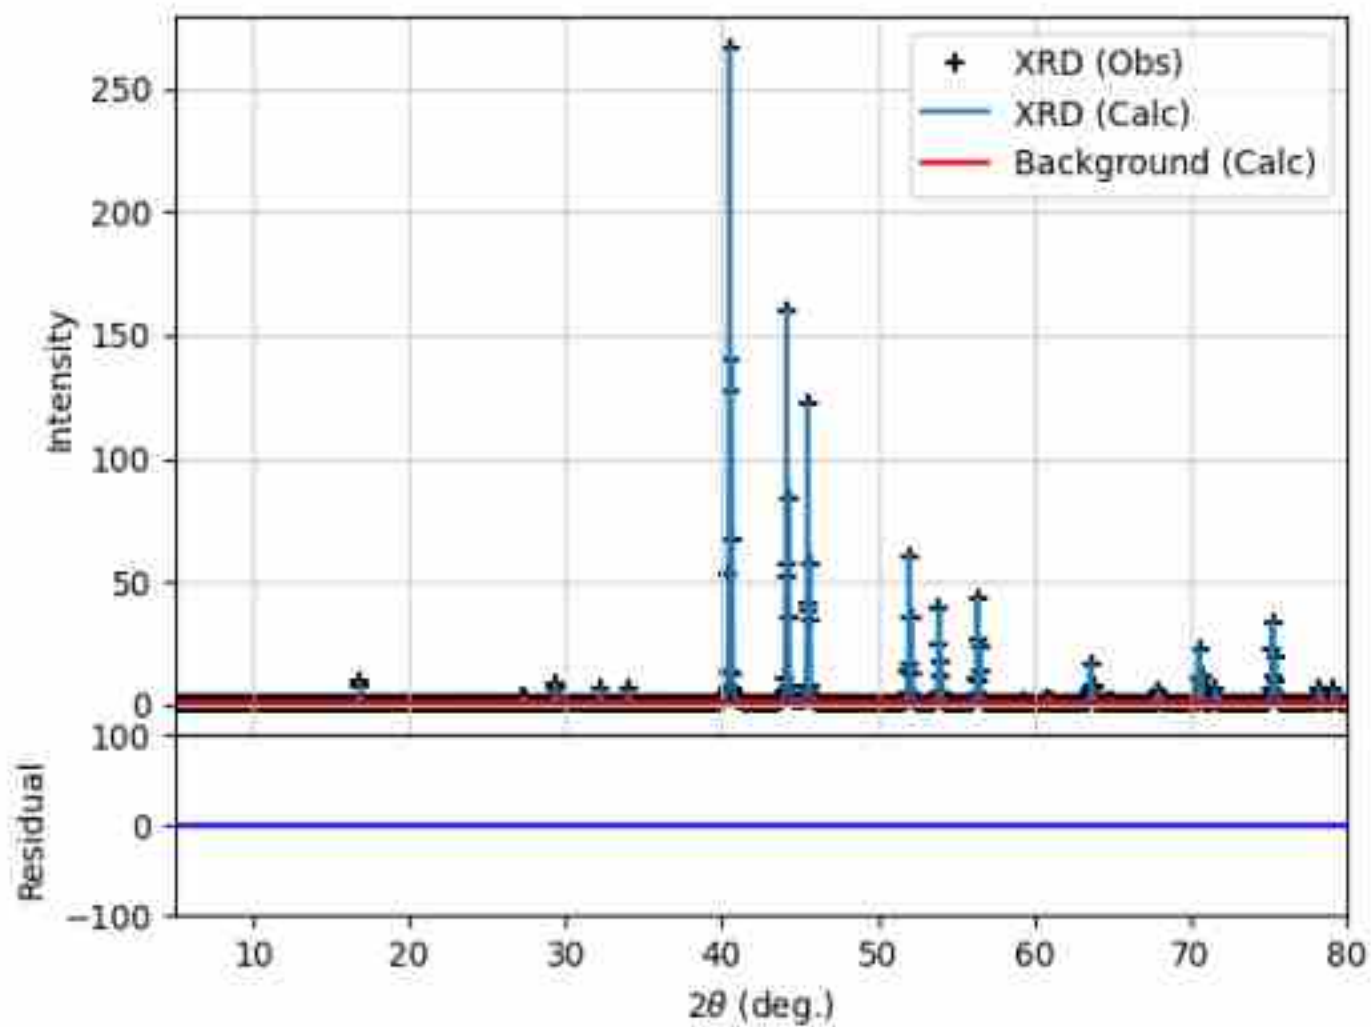

| RMSE before RR | Rwp     | RMSE after RR |
|----------------|---------|---------------|
| 0.01           | 0.00444 | 0.00148       |

# Na1Ca2Tl1

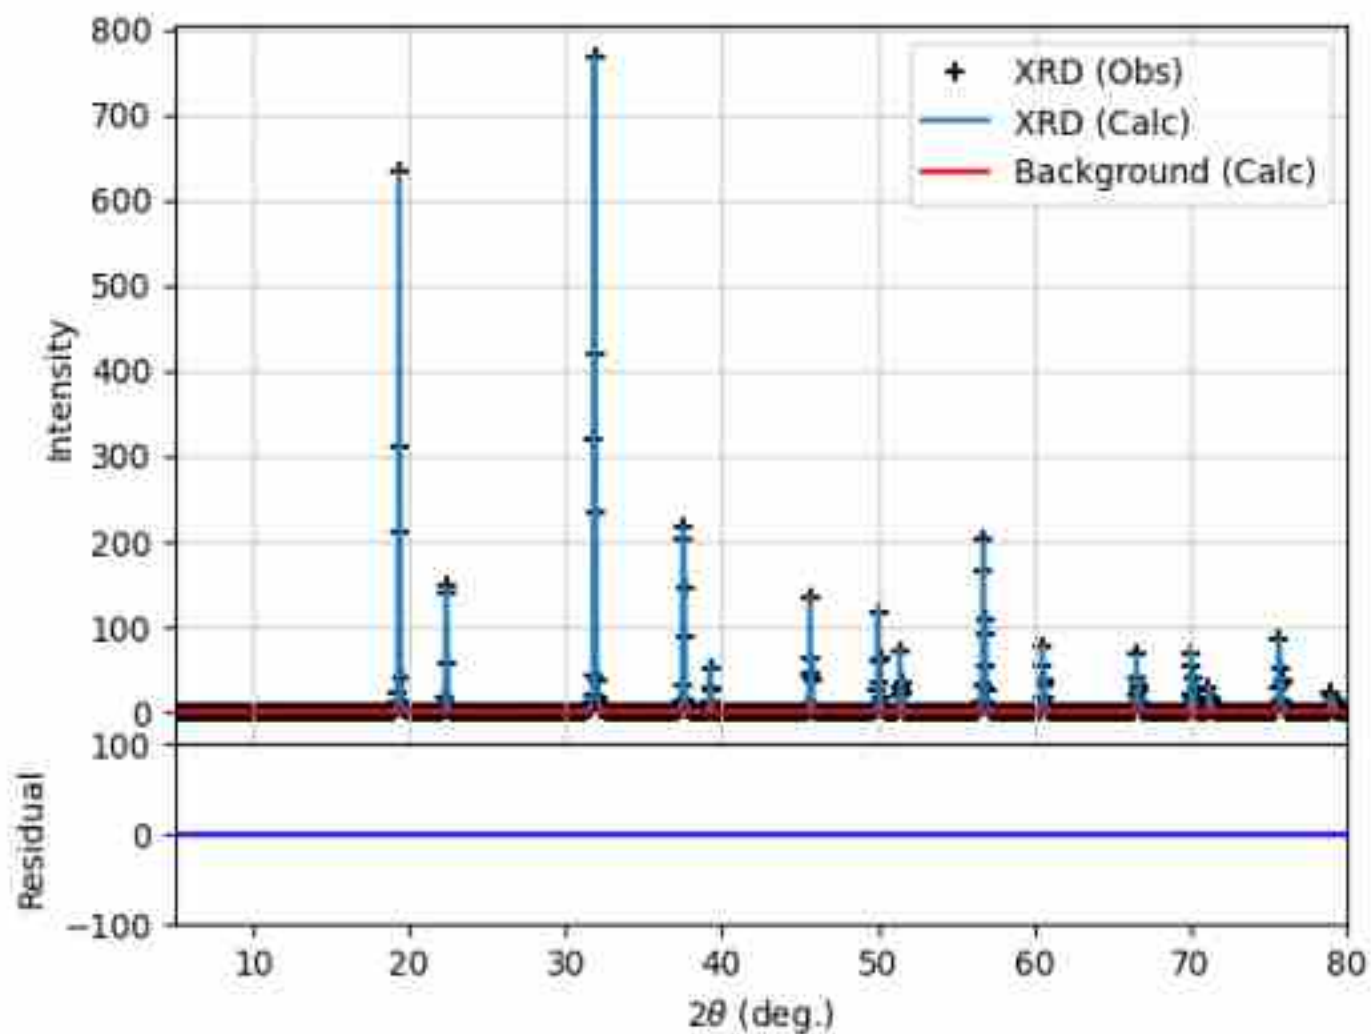

| RMSE before RR | Rwp     | RMSE after RR |
|----------------|---------|---------------|
| 0.001          | 0.02505 | 0.00139       |

# Na1La1Ti2

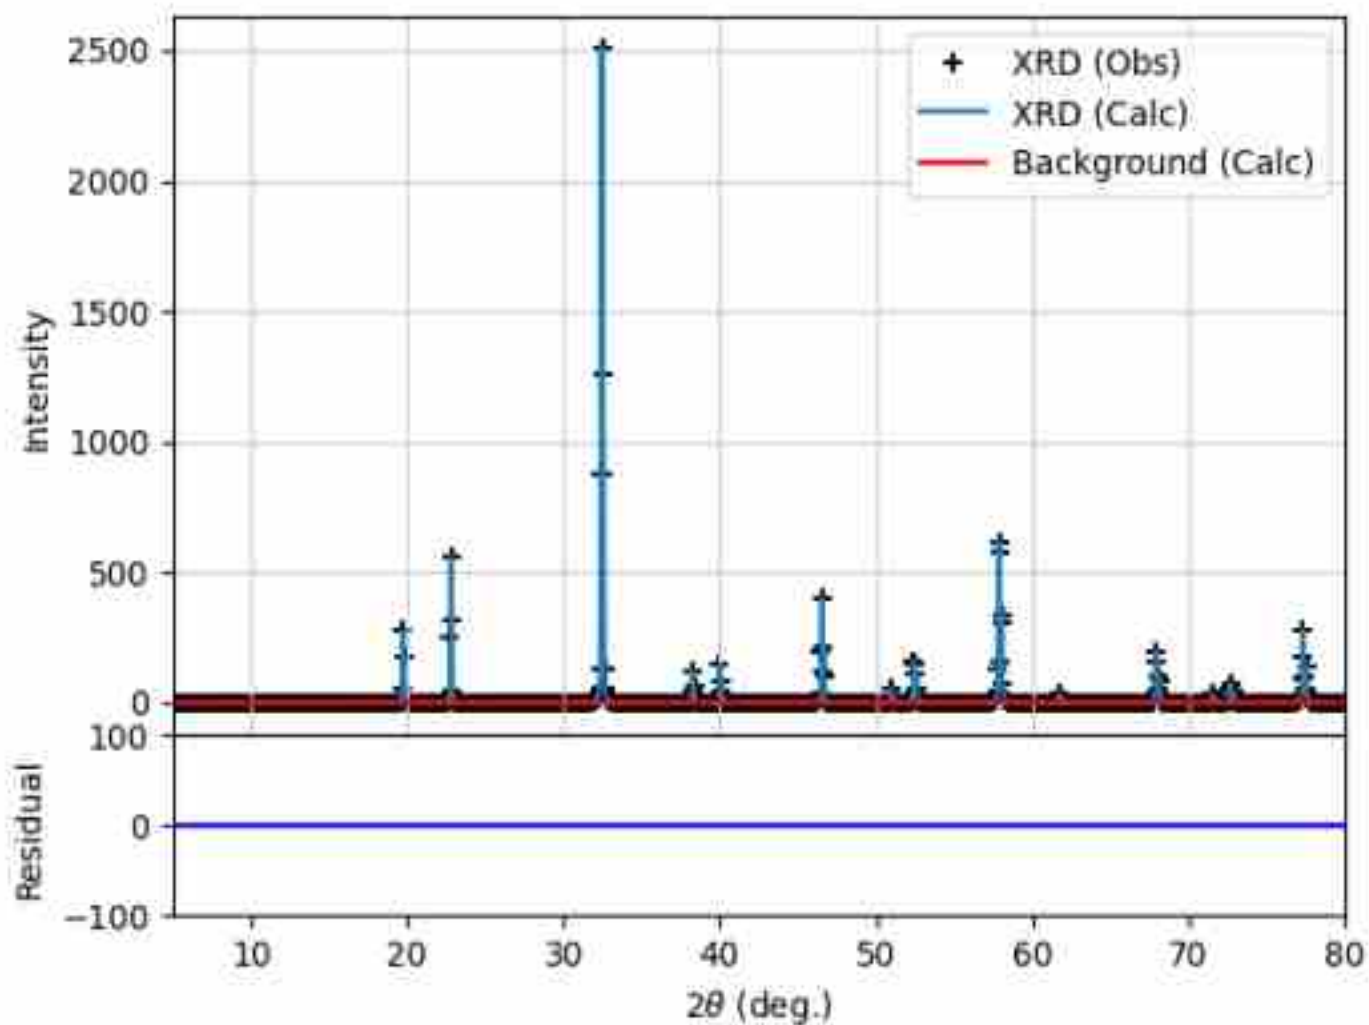

| RMSE before RR | Rwp     | RMSE after RR |
|----------------|---------|---------------|
| 0.001          | 0.00417 | 0.00081       |

# Na1Nd1Ti2

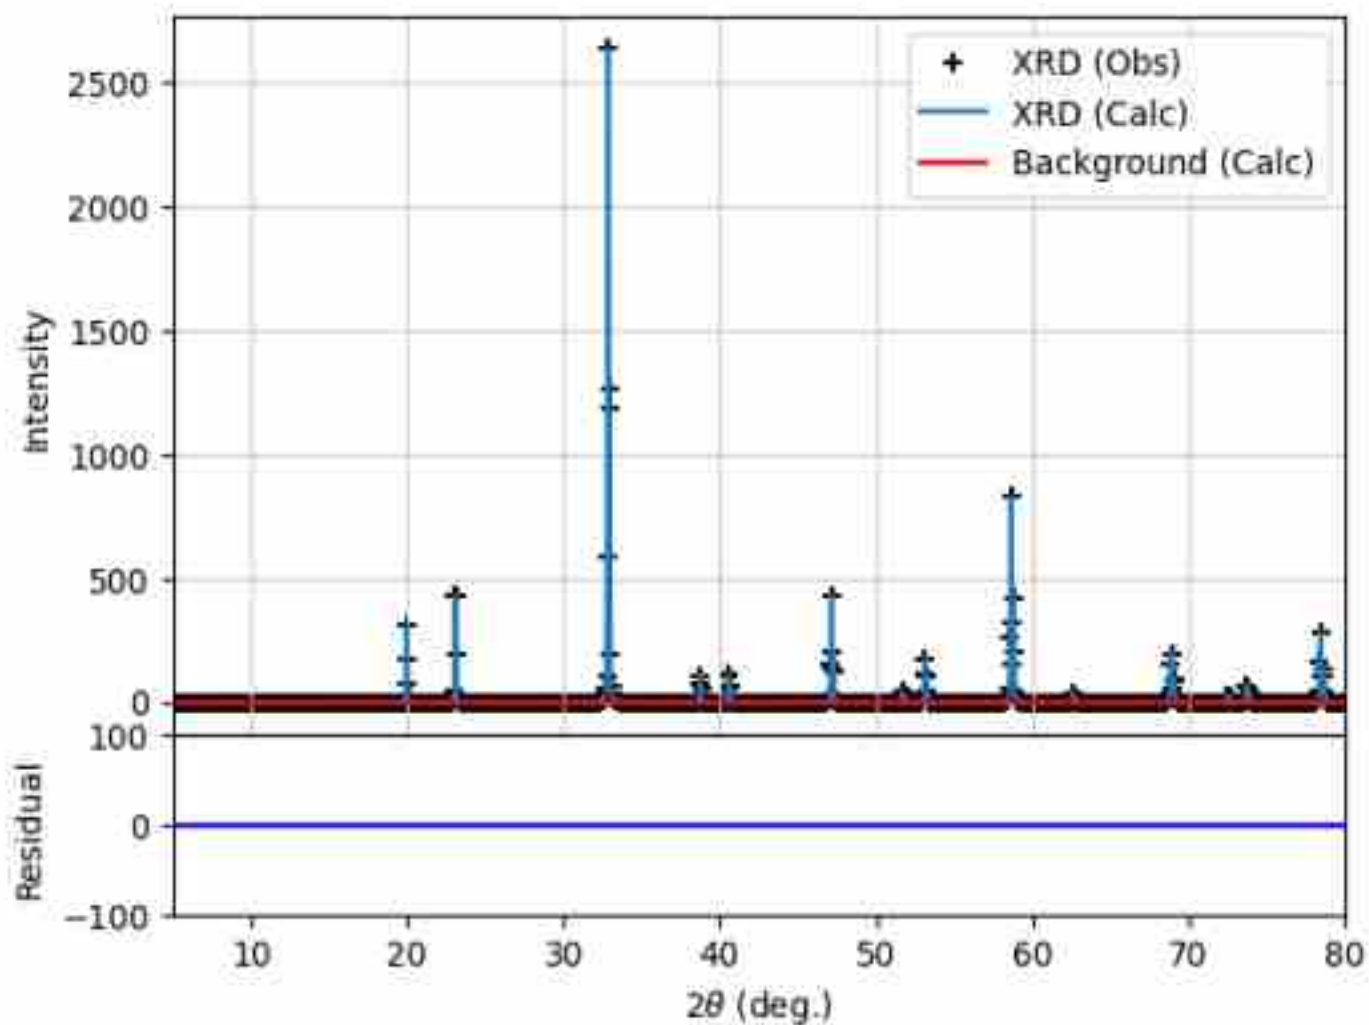

| RMSE before RR | Rwp     | RMSE after RR |
|----------------|---------|---------------|
| 0.001          | 0.00478 | 0.00033       |

# Na1Pa1O3

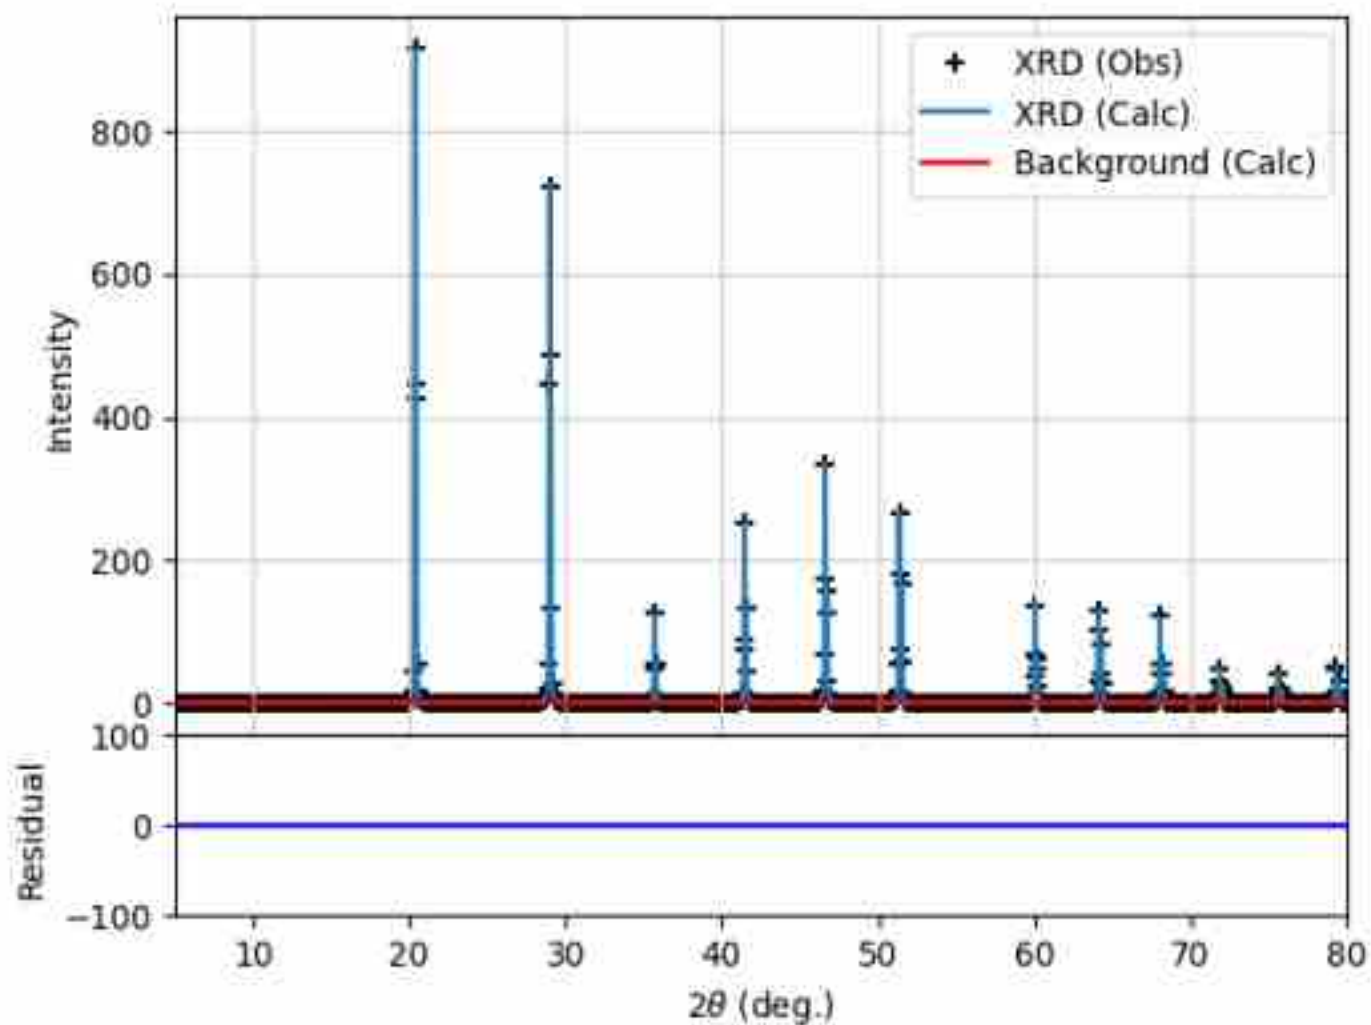

| RMSE before RR | Rwp     | RMSE after RR |
|----------------|---------|---------------|
| 0.01           | 0.00325 | 0.00195       |



# Na1Sm1Tl2

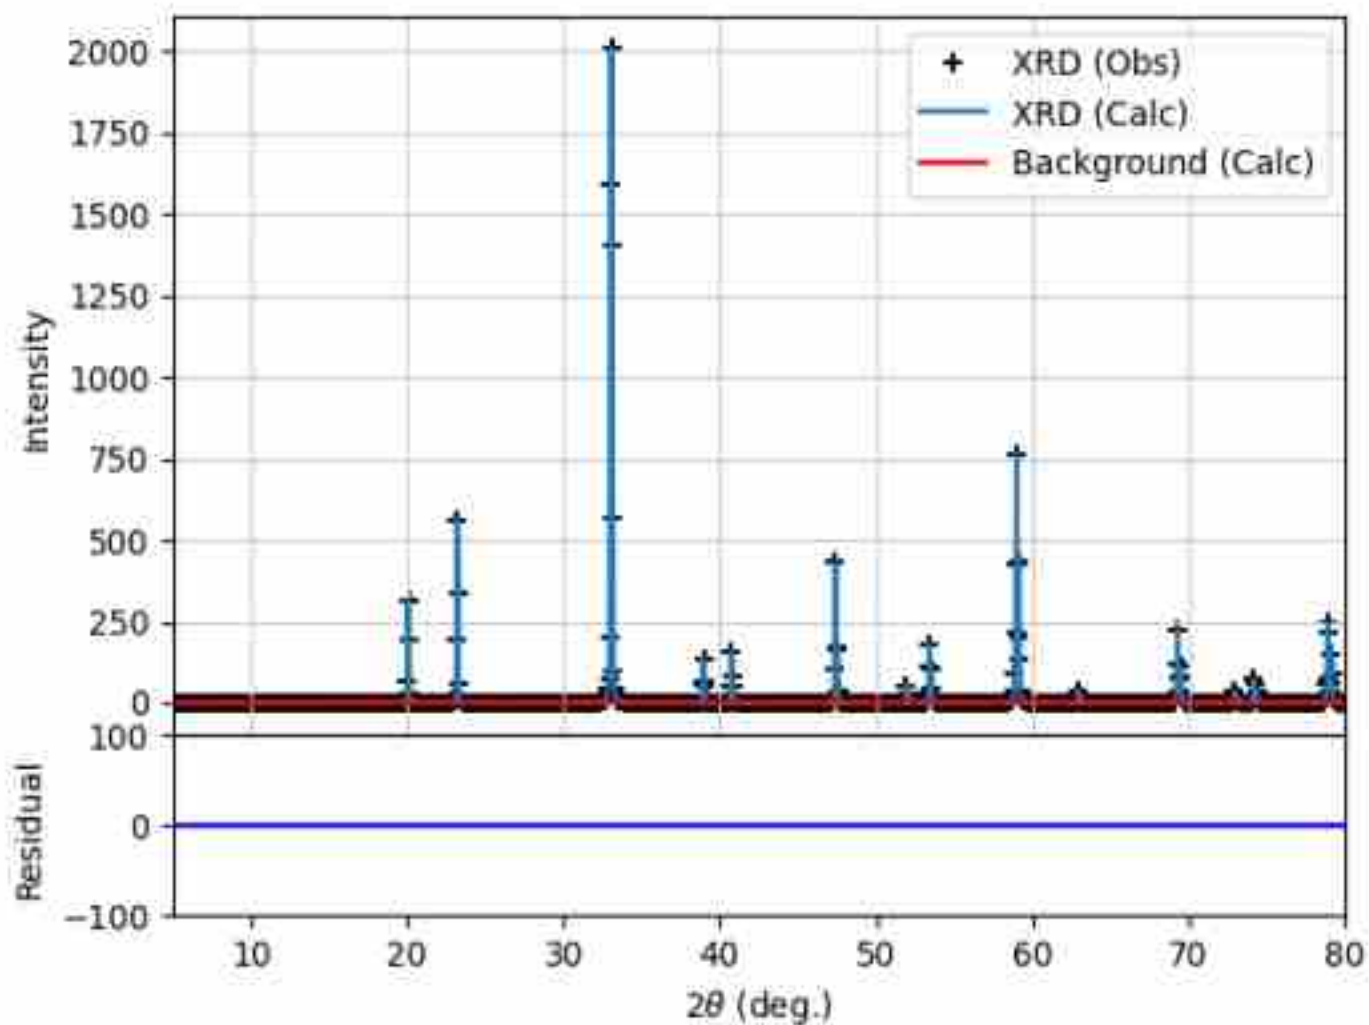

| RMSE before RR | Rwp    | RMSE after RR |
|----------------|--------|---------------|
| 0.001          | 0.0036 | 0.00057       |

# Na1Sr1Hg2

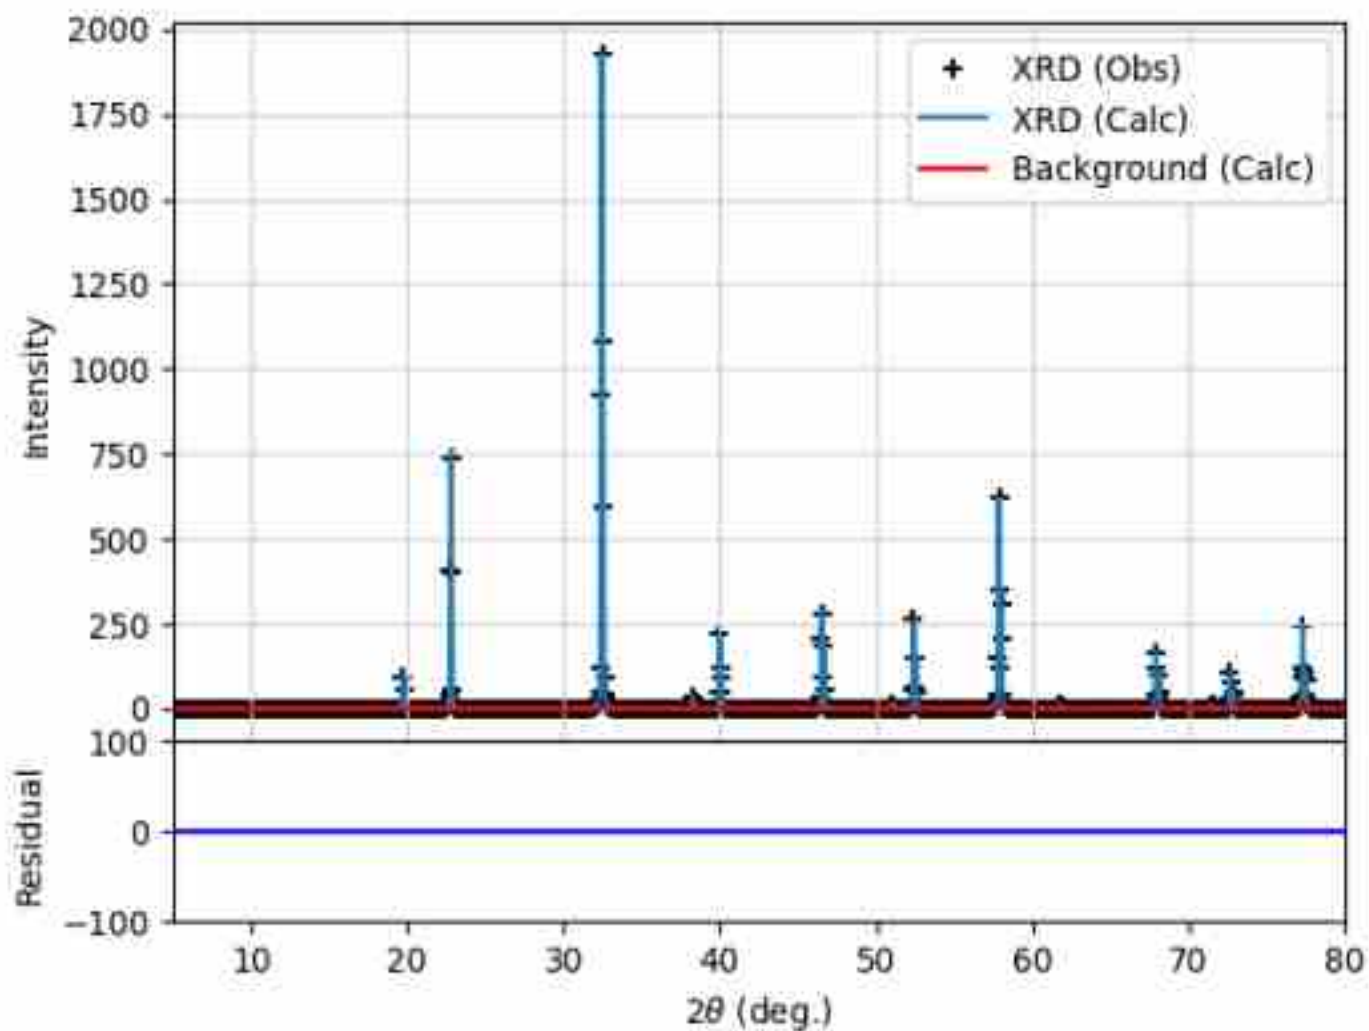

| RMSE before RR | Rwp     | RMSE after RR |
|----------------|---------|---------------|
| 0.001          | 0.00311 | 0.00074       |

# Na1Sr1Sm1W1O6

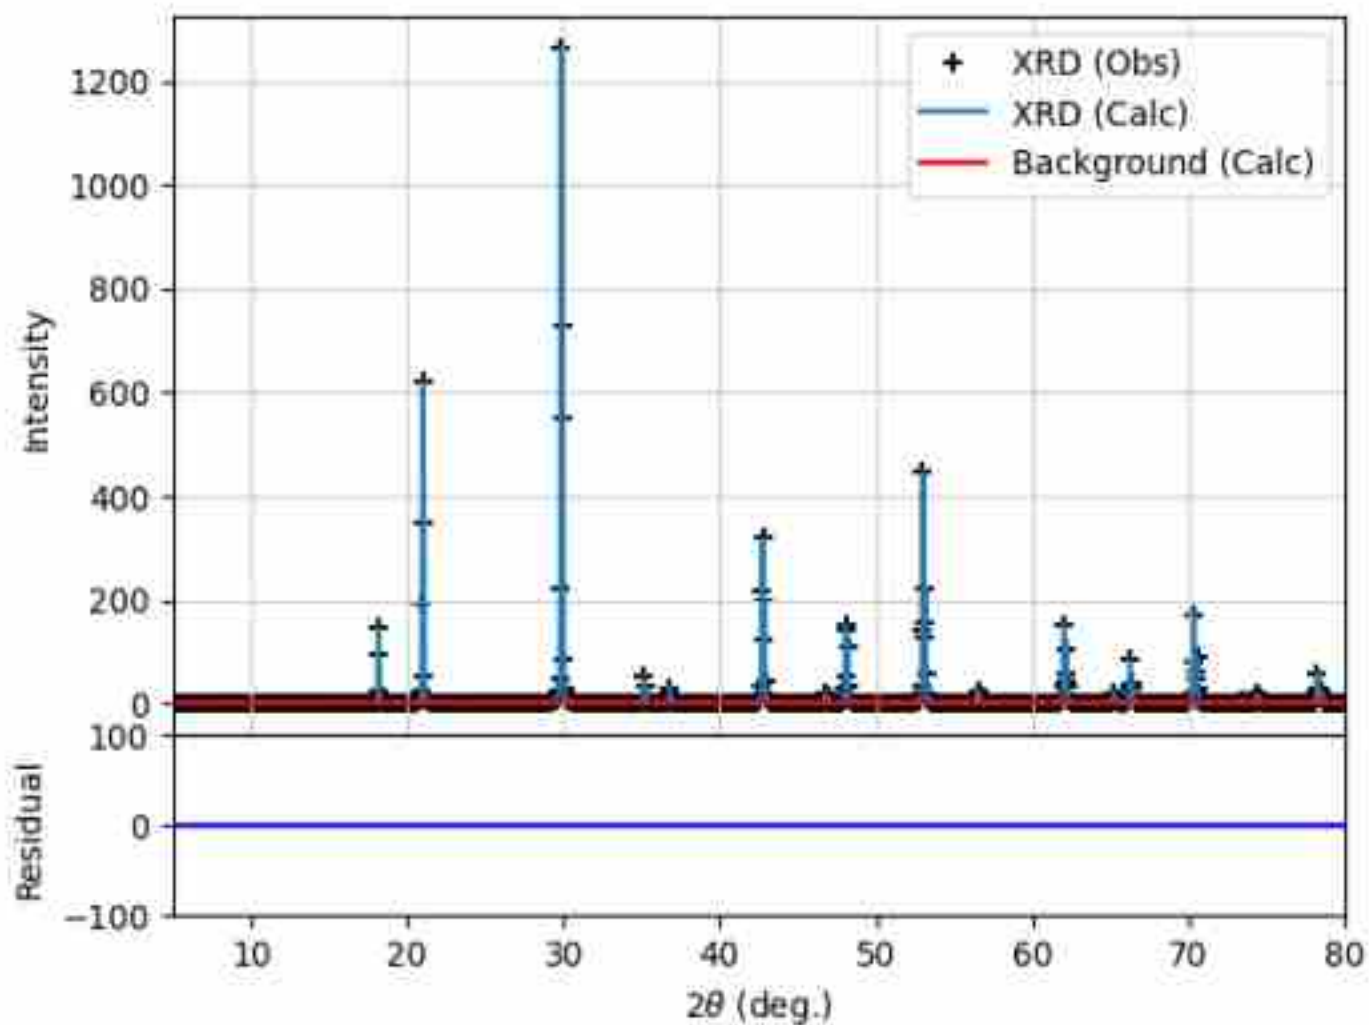

| RMSE before RR | Rwp     | RMSE after RR |
|----------------|---------|---------------|
| 0.01           | 0.01207 | 0.00476       |

# Na1Sr1Ti2

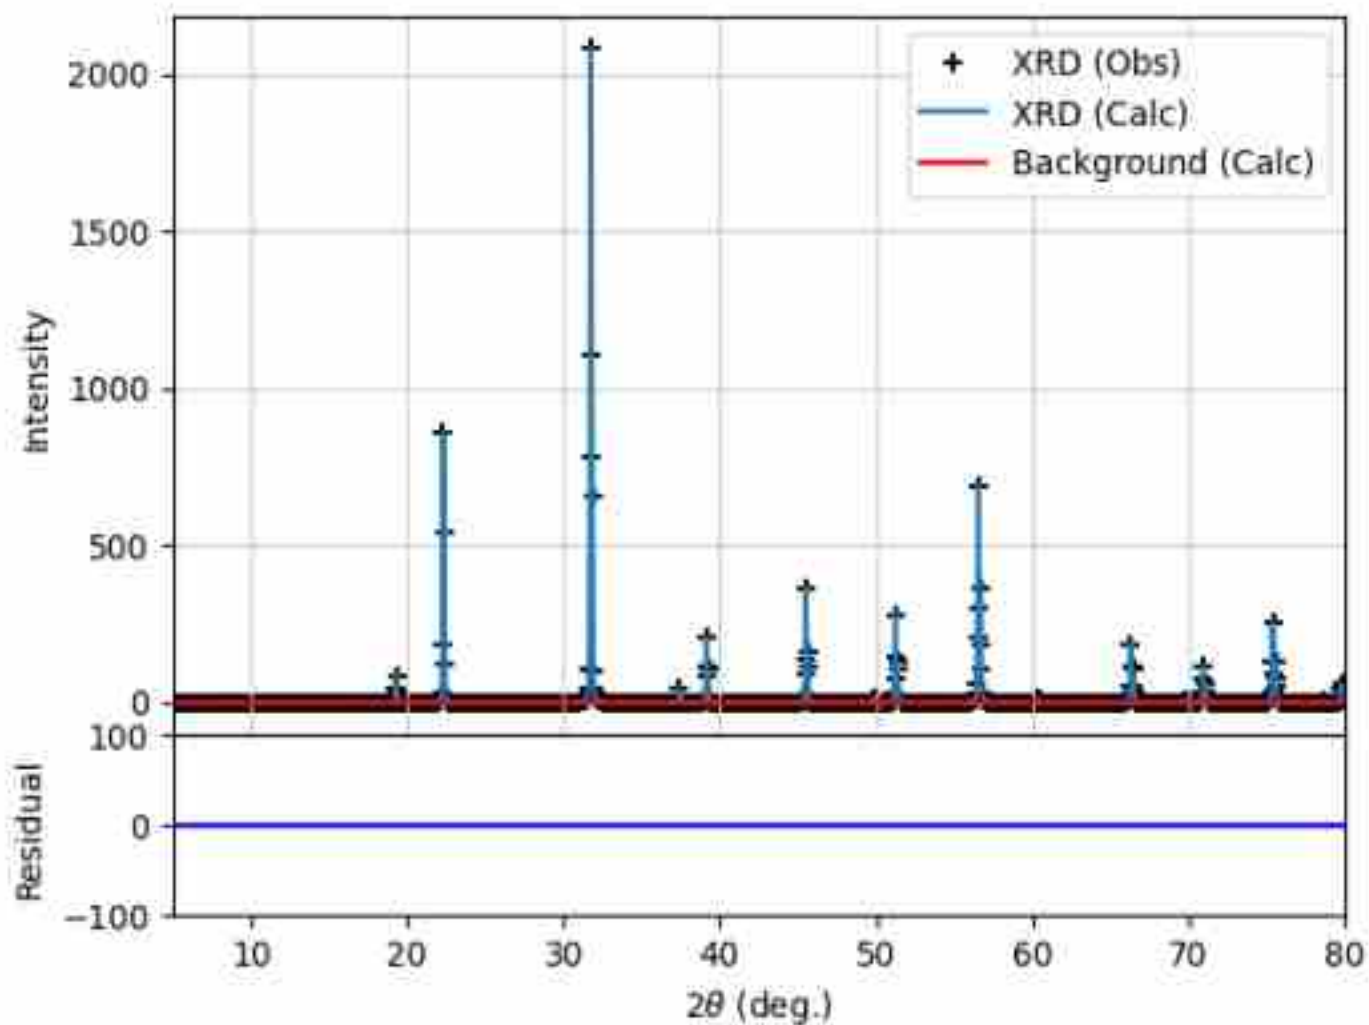

| RMSE before RR | Rwp     | RMSE after RR |
|----------------|---------|---------------|
| 0.001          | 0.00395 | 0.00024       |

# Na1Tl2In1

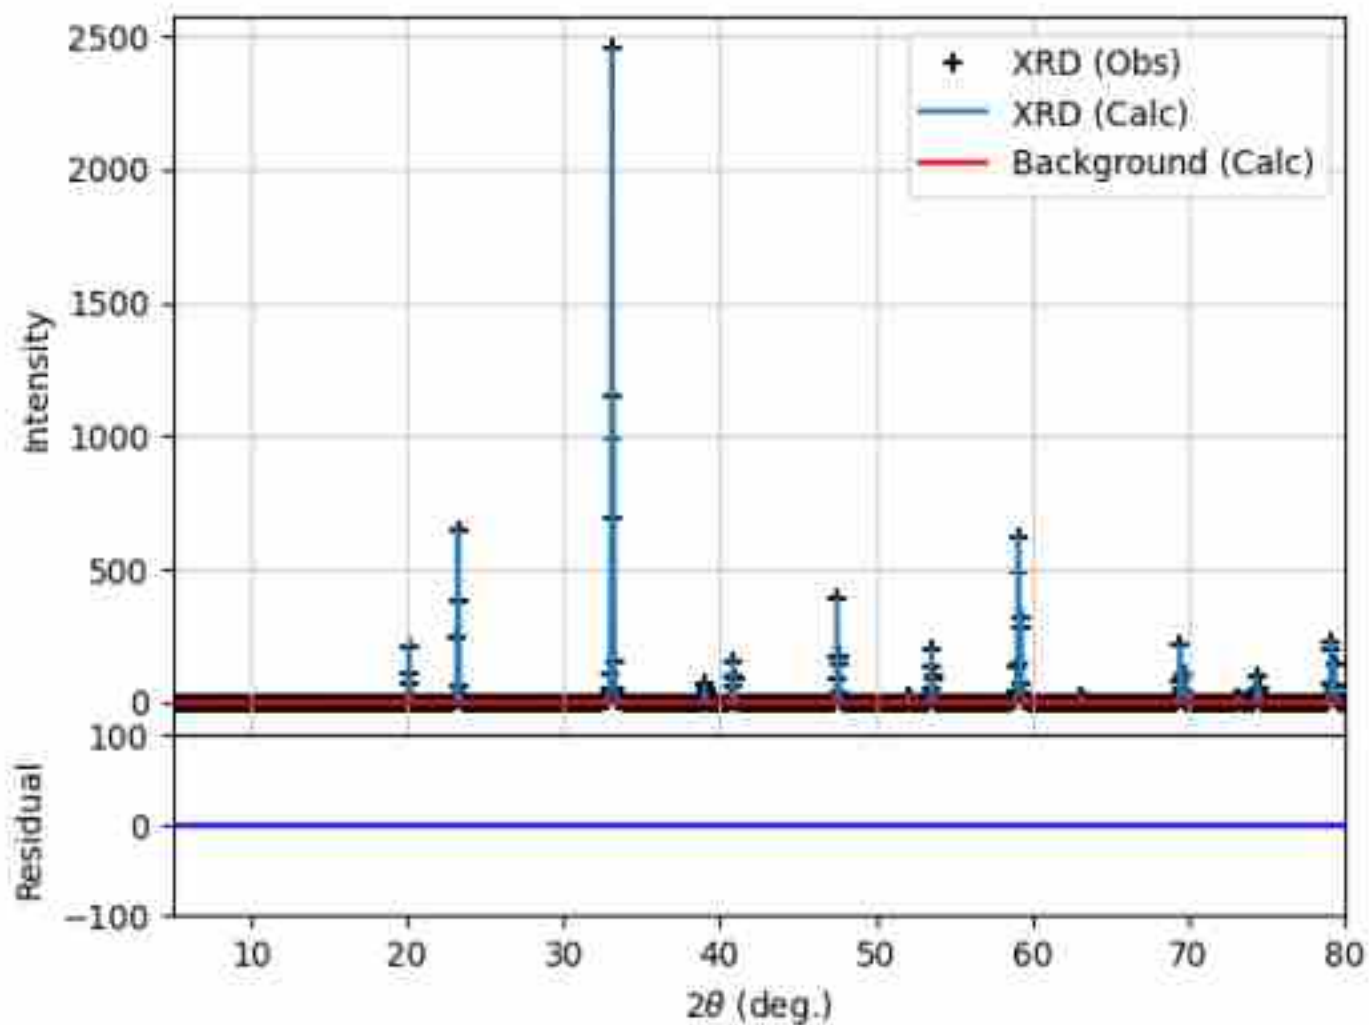

| RMSE before RR | Rwp     | RMSE after RR |
|----------------|---------|---------------|
| 0.001          | 0.00377 | 0.00101       |

# Na<sub>2</sub>Sn<sub>1</sub>Hg<sub>1</sub>

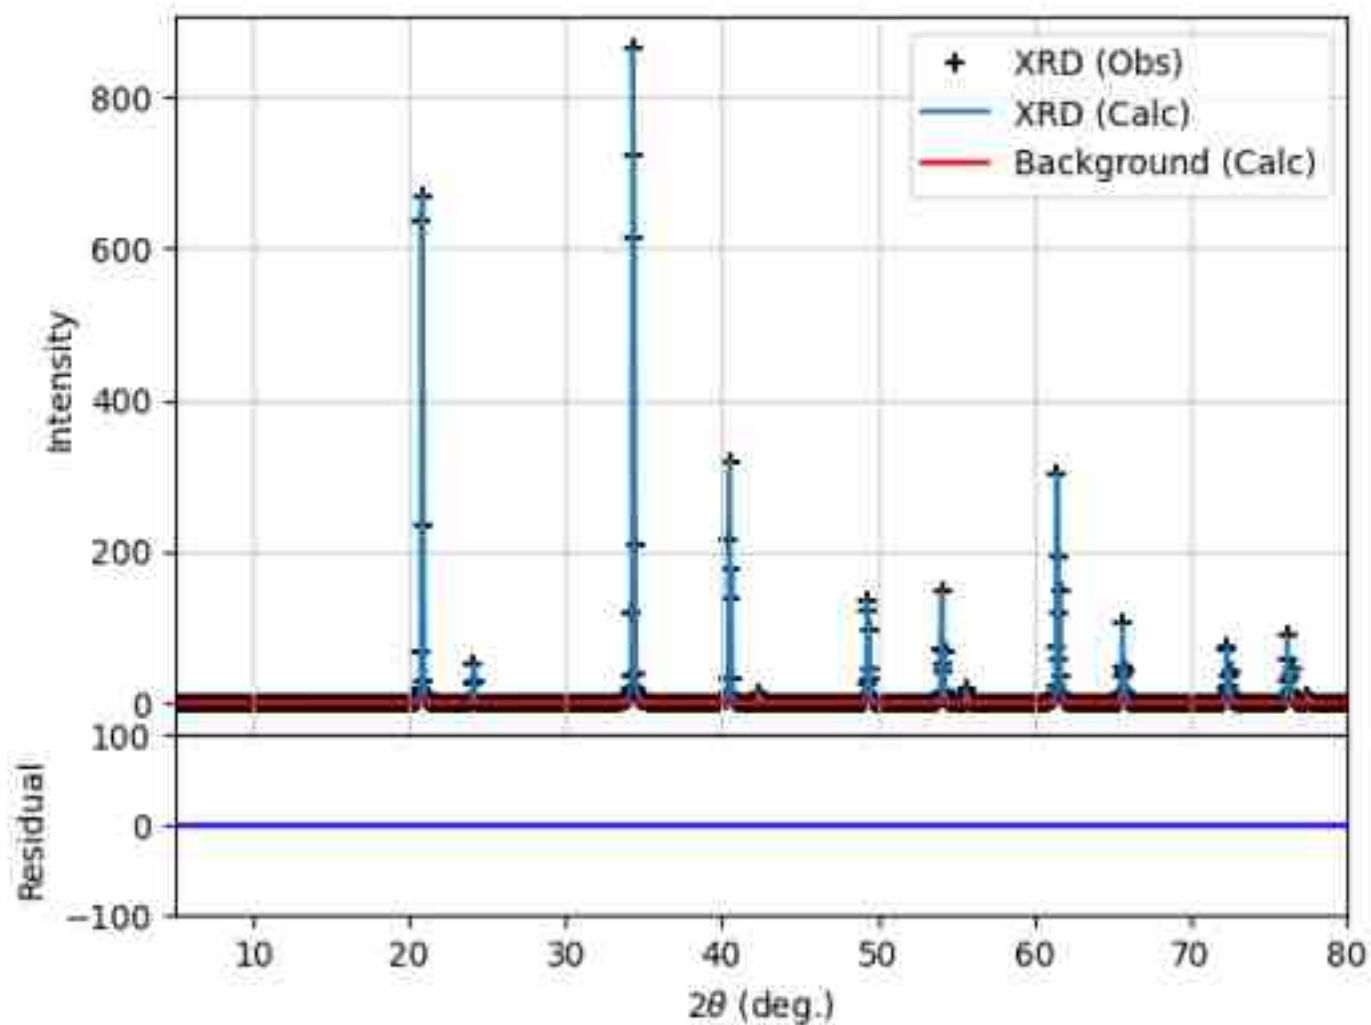

| RMSE before RR | Rwp     | RMSE after RR |
|----------------|---------|---------------|
| 0.001          | 0.01042 | 0.00148       |

# Na<sub>3</sub>CdI

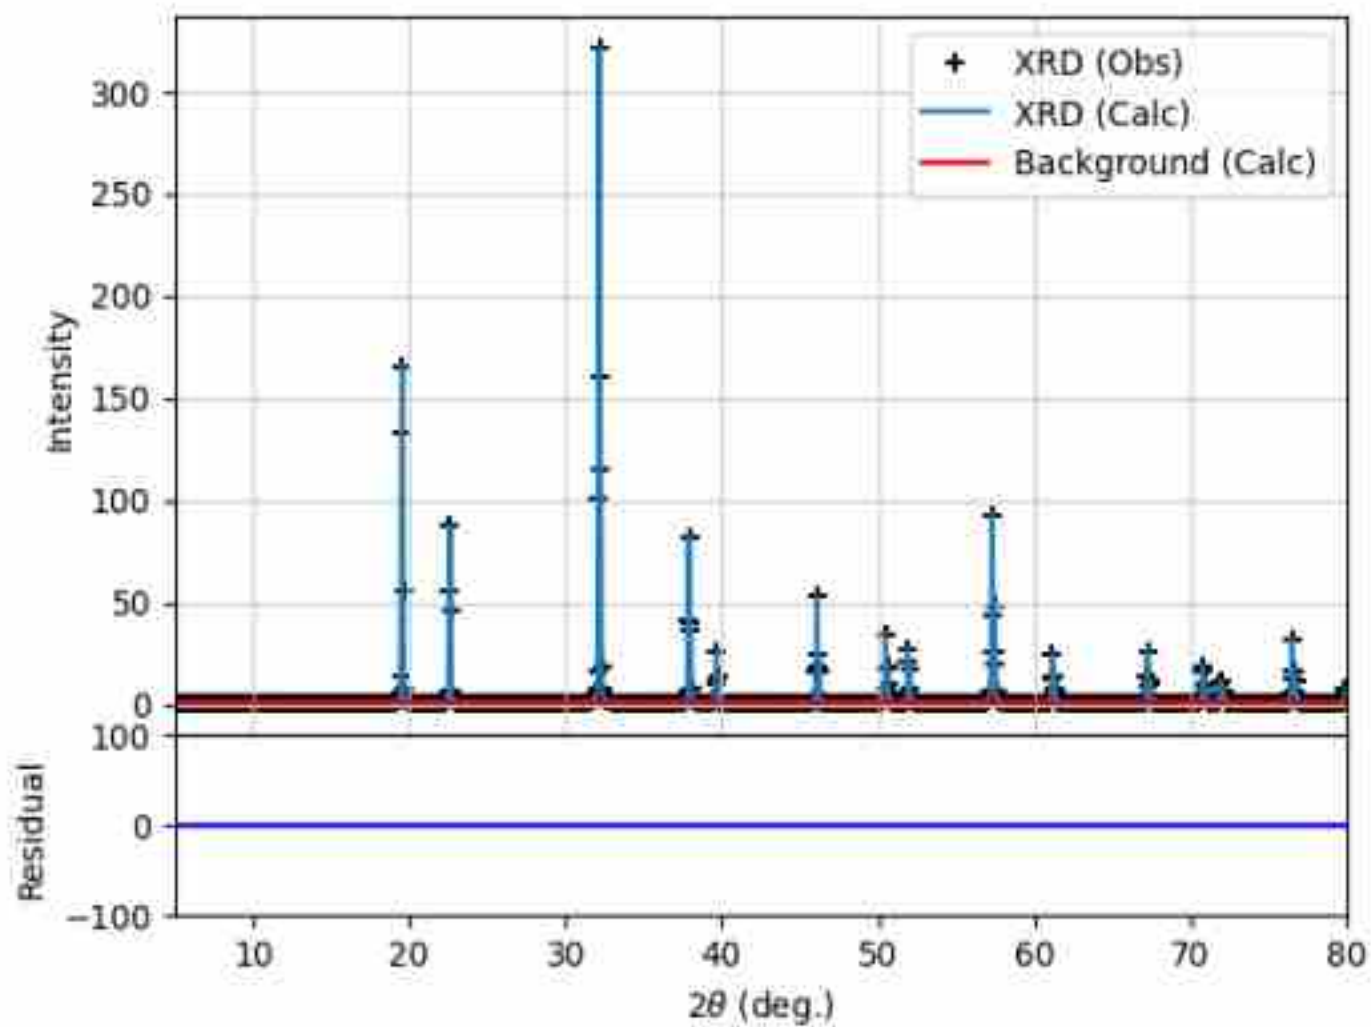

| RMSE before RR | Rwp   | RMSE after RR |
|----------------|-------|---------------|
| 0.001          | 6e-05 | 0.00012       |

# Na<sub>4</sub>Zn<sub>2</sub>Ge<sub>2</sub>

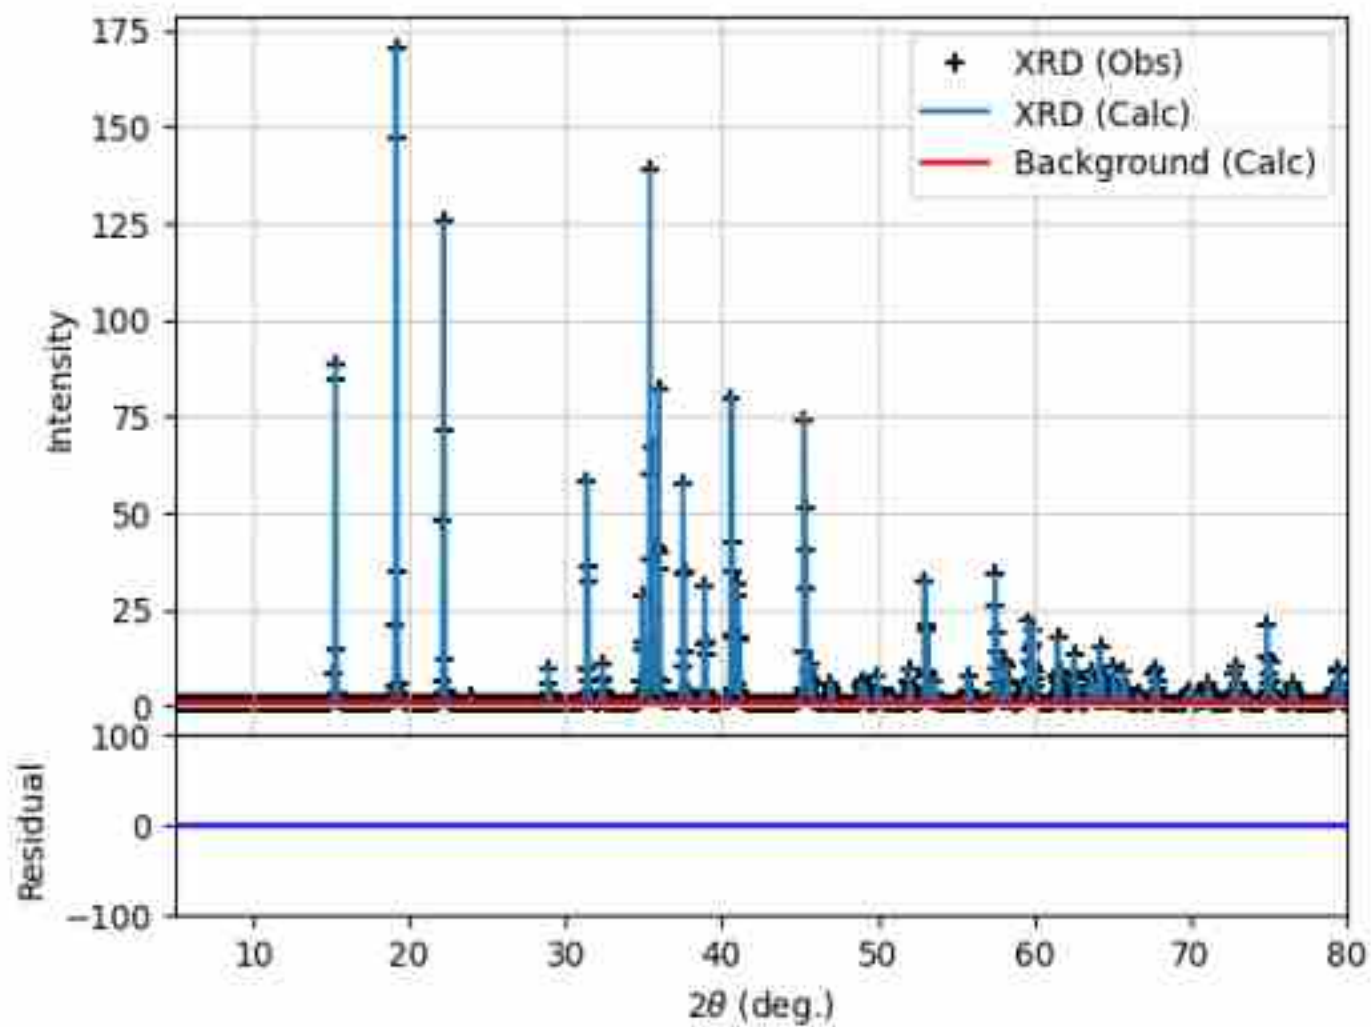

| RMSE before RR | Rwp    | RMSE after RR |
|----------------|--------|---------------|
| 0.01           | 0.0034 | 0.0005        |



# Nb1Ga1Os2

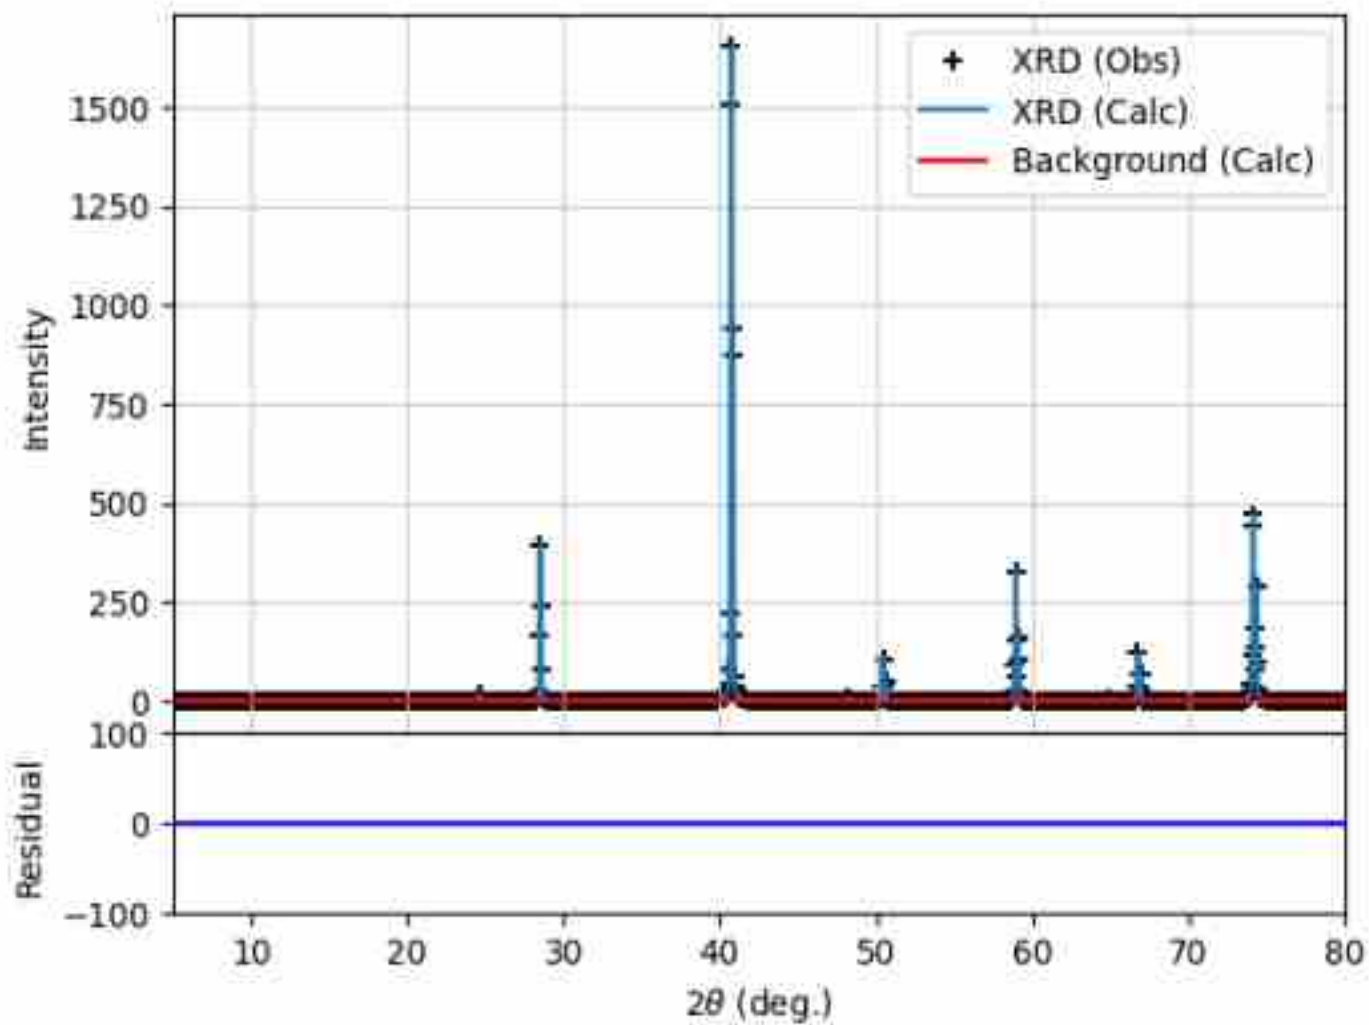

| RMSE before RR | Rwp     | RMSE after RR |
|----------------|---------|---------------|
| 0.001          | 0.01785 | 0.00078       |

# Nb1Ir1

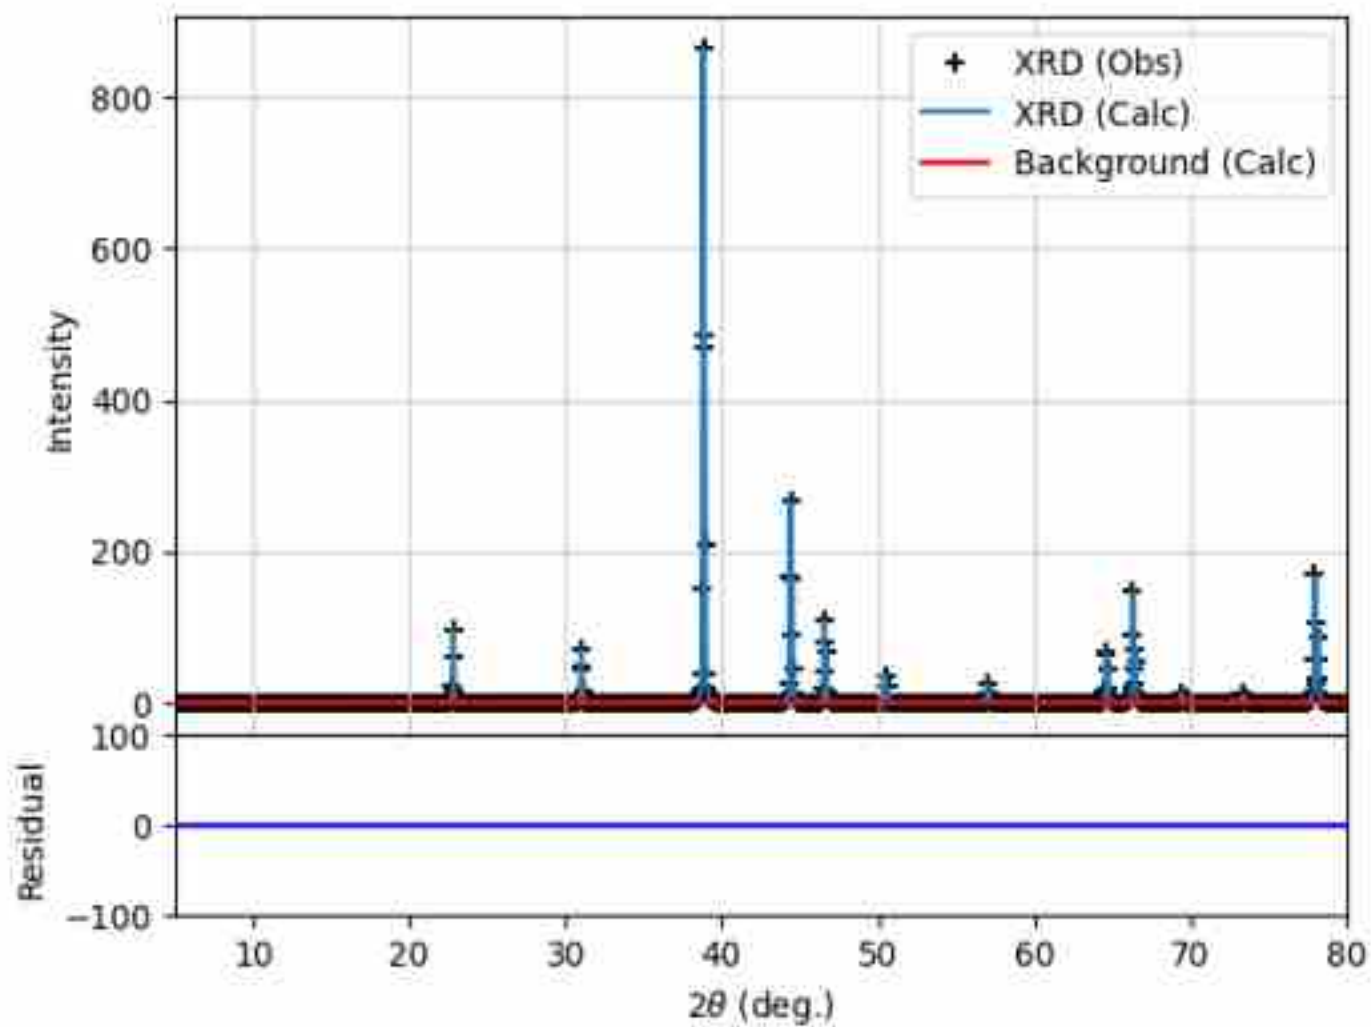

| RMSE before RR | Rwp   | RMSE after RR |
|----------------|-------|---------------|
| 0.001          | 0.015 | 0.0013        |

# Nb1Mo1S4

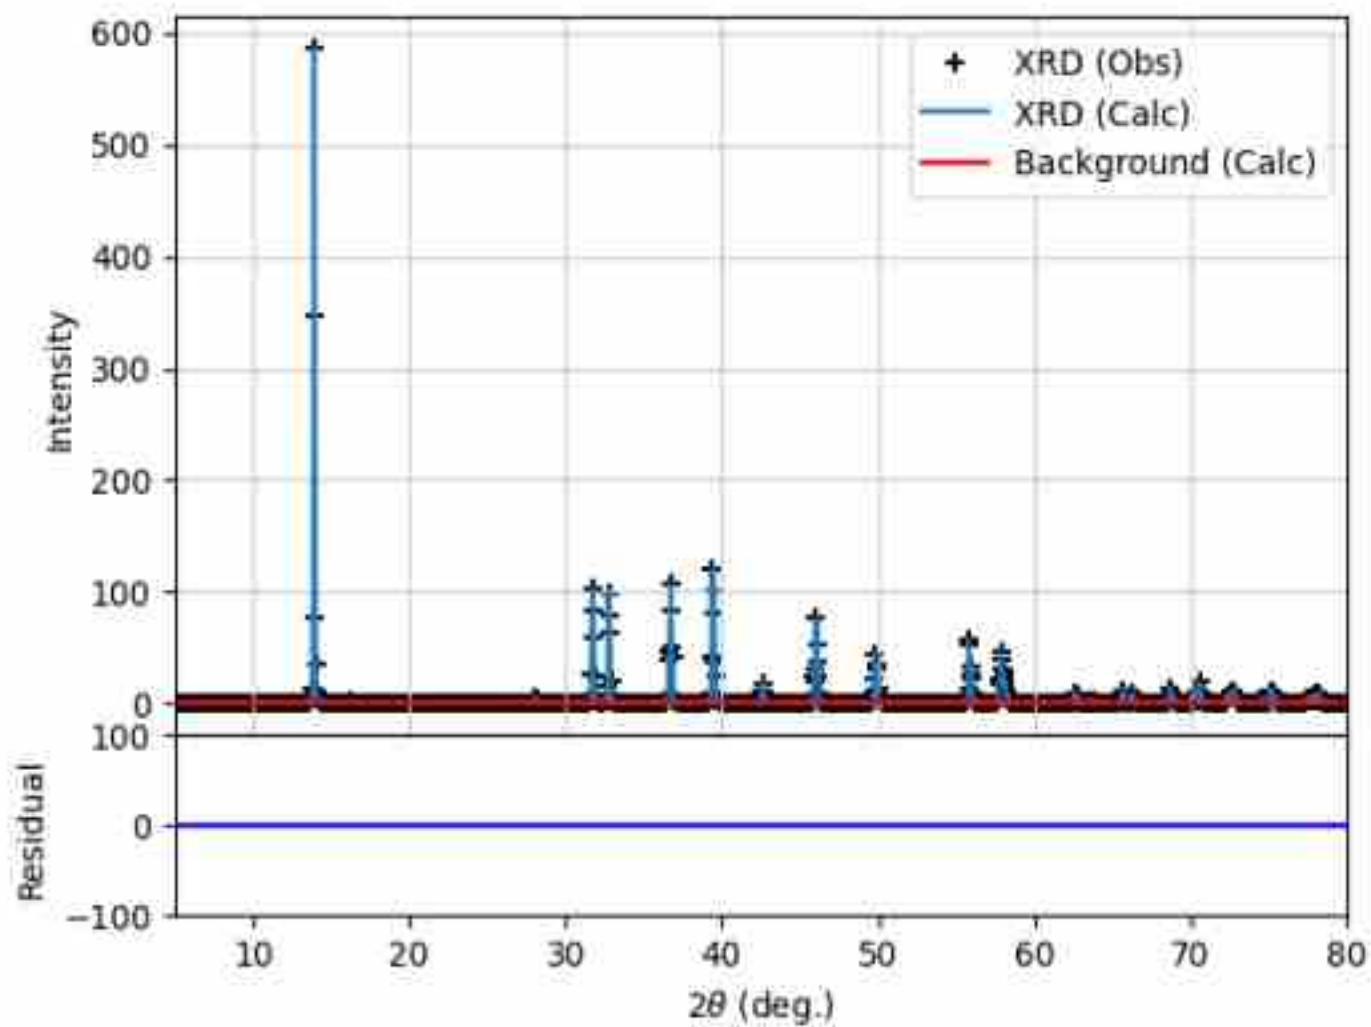

| RMSE before RR | Rwp     | RMSE after RR |
|----------------|---------|---------------|
| 0.01           | 0.00308 | 0.00029       |

# Nb1Rh1

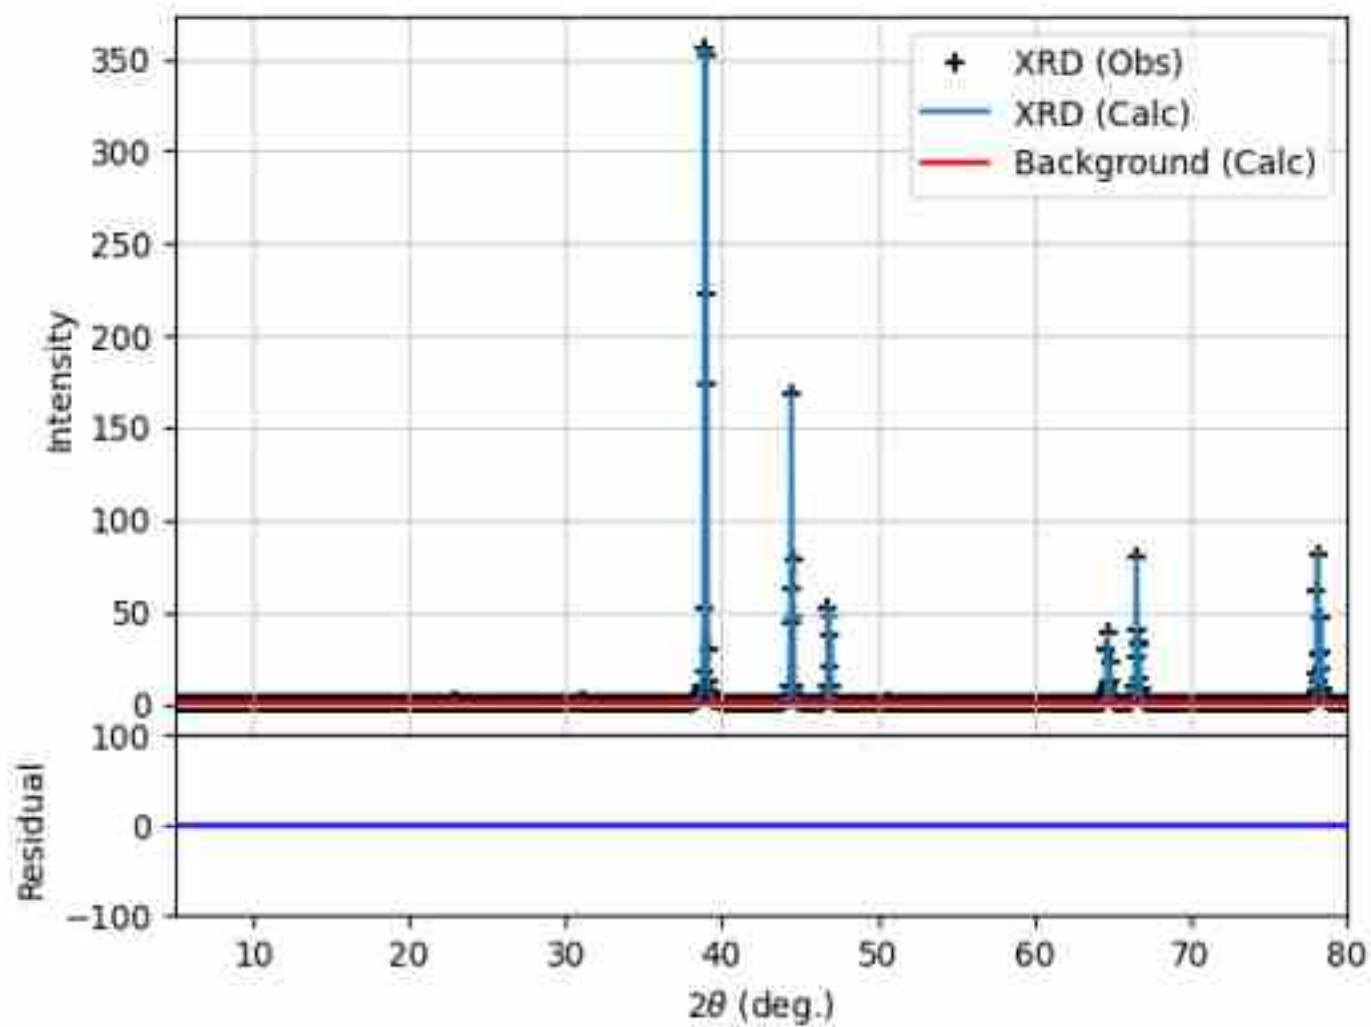

| RMSE before RR | Rwp     | RMSE after RR |
|----------------|---------|---------------|
| 0.001          | 0.00371 | 0.0           |

# Nb1Sb1Rh1

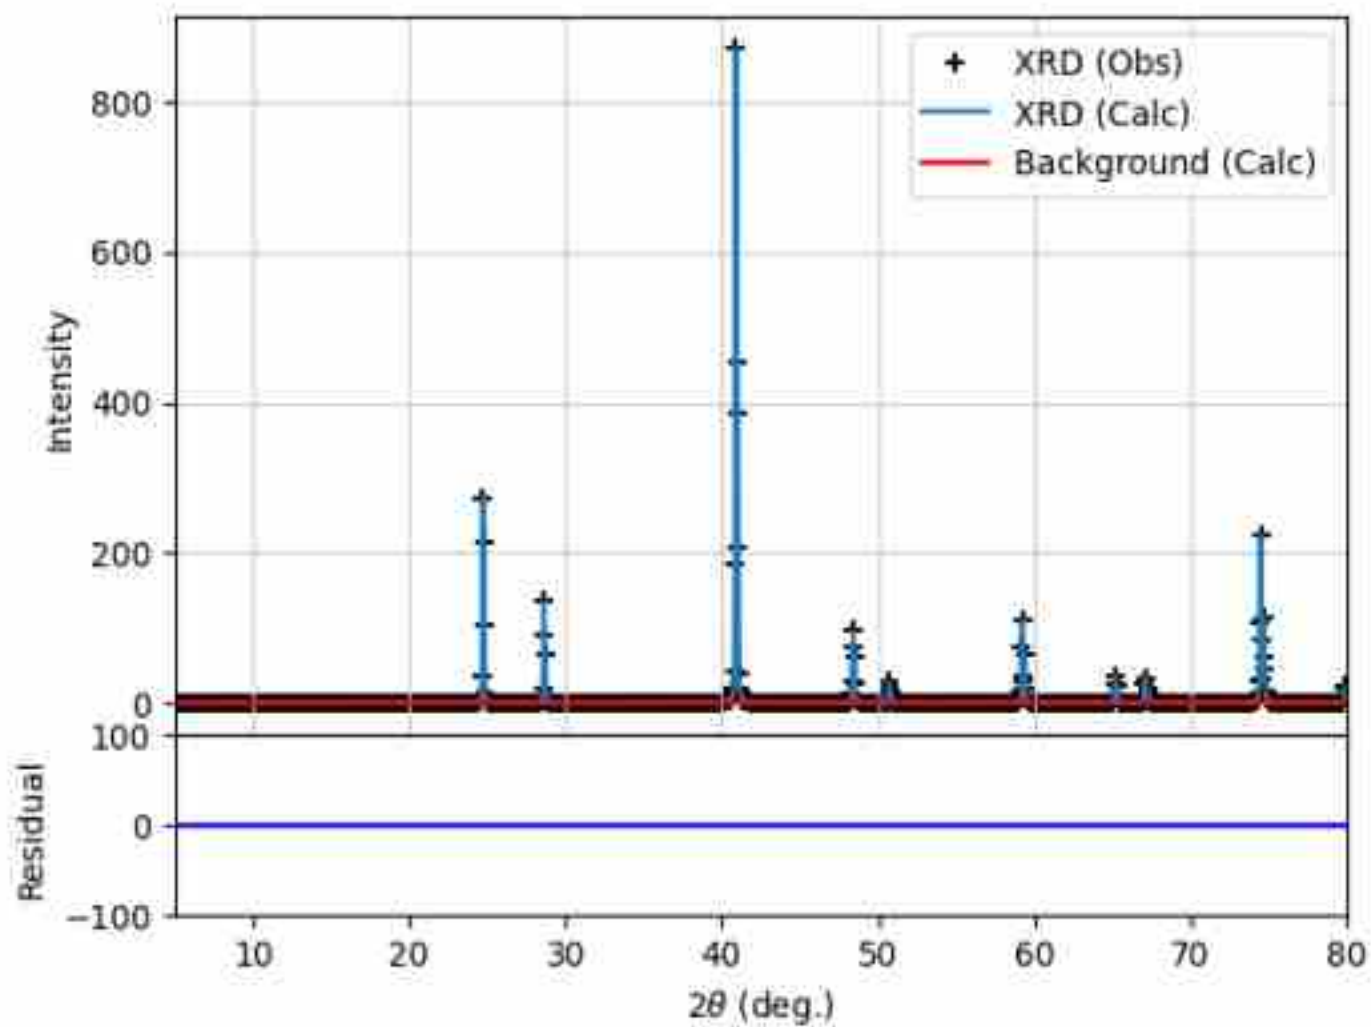

| RMSE before RR | Rwp     | RMSE after RR |
|----------------|---------|---------------|
| 0.001          | 0.00164 | 0.00023       |

# Nb<sub>2</sub>MoOs<sub>1</sub>

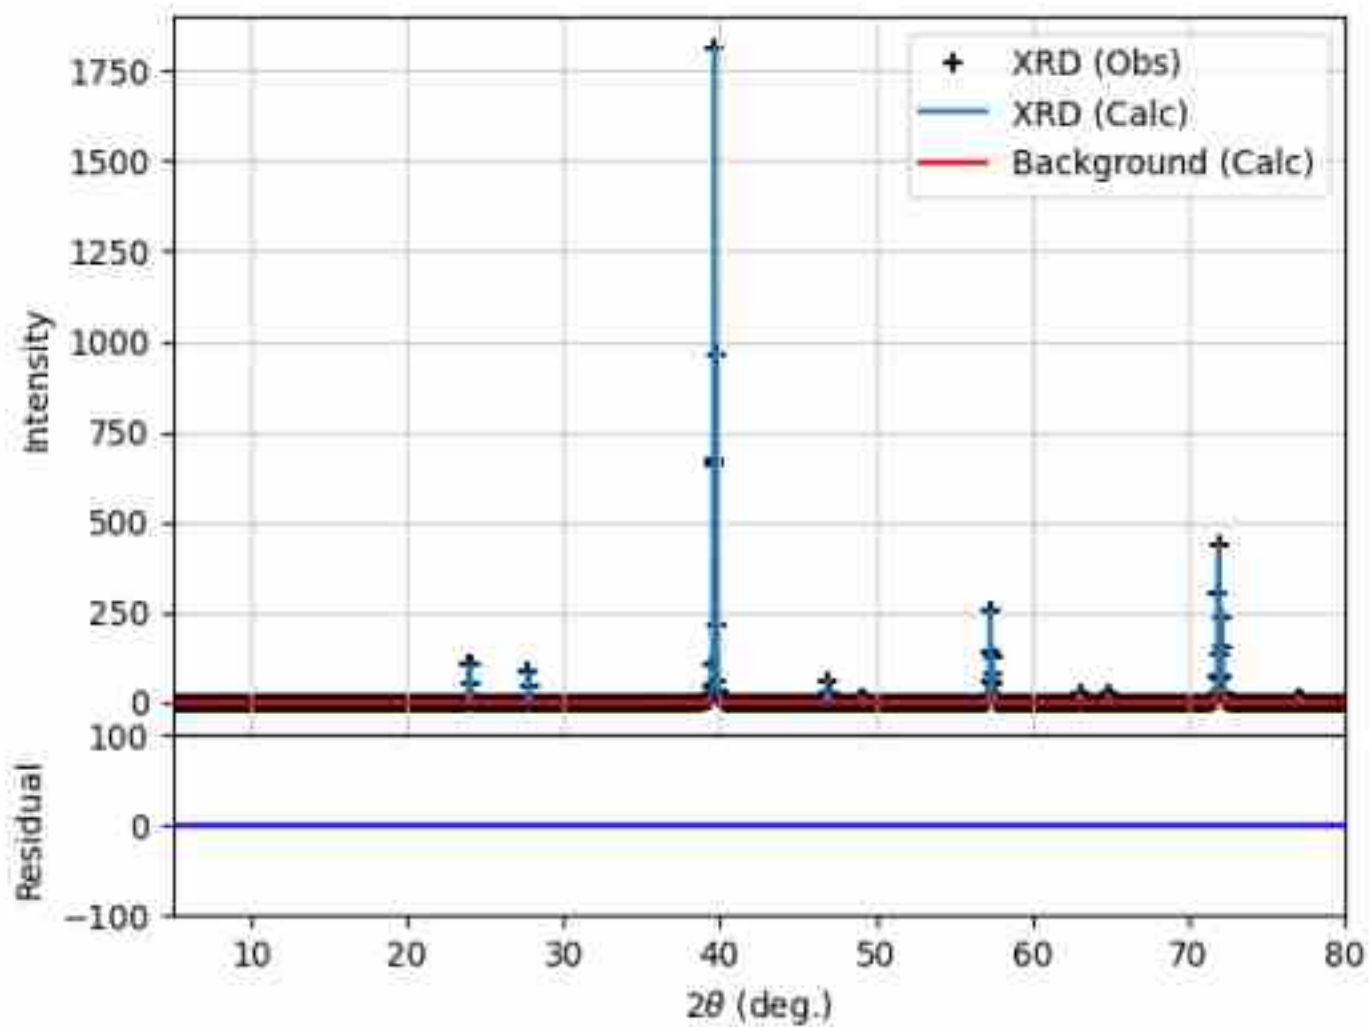

| RMSE before RR | Rwp     | RMSE after RR |
|----------------|---------|---------------|
| 0.001          | 0.00069 | 0.0003        |

# Nb2Re1Ru1

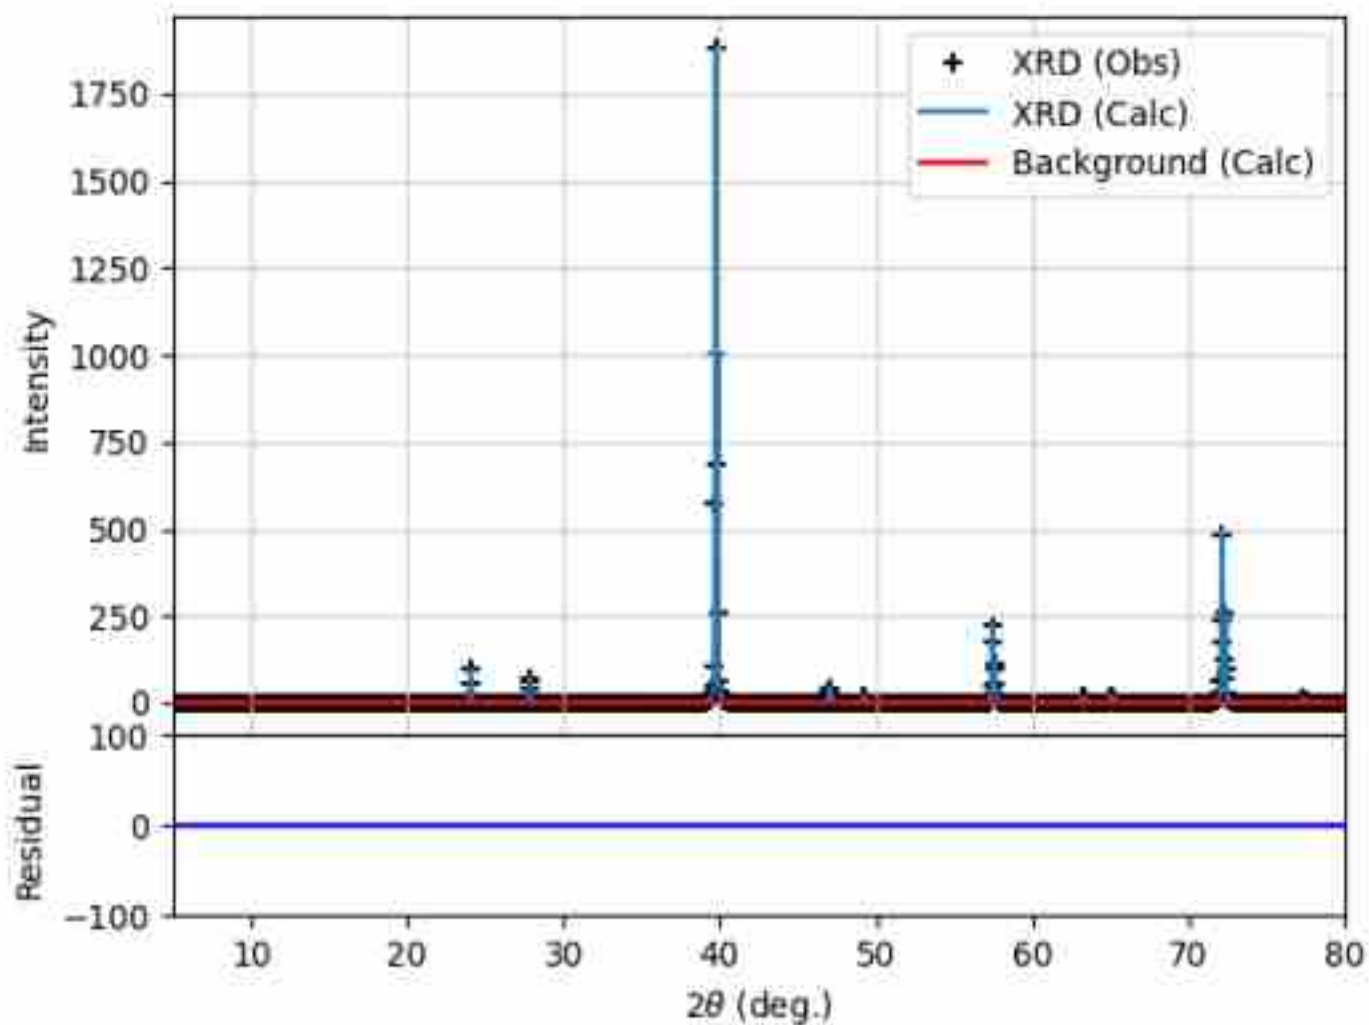

| RMSE before RR | Rwp     | RMSE after RR |
|----------------|---------|---------------|
| 0.001          | 0.00211 | 0.00053       |

# Nb4V4P4

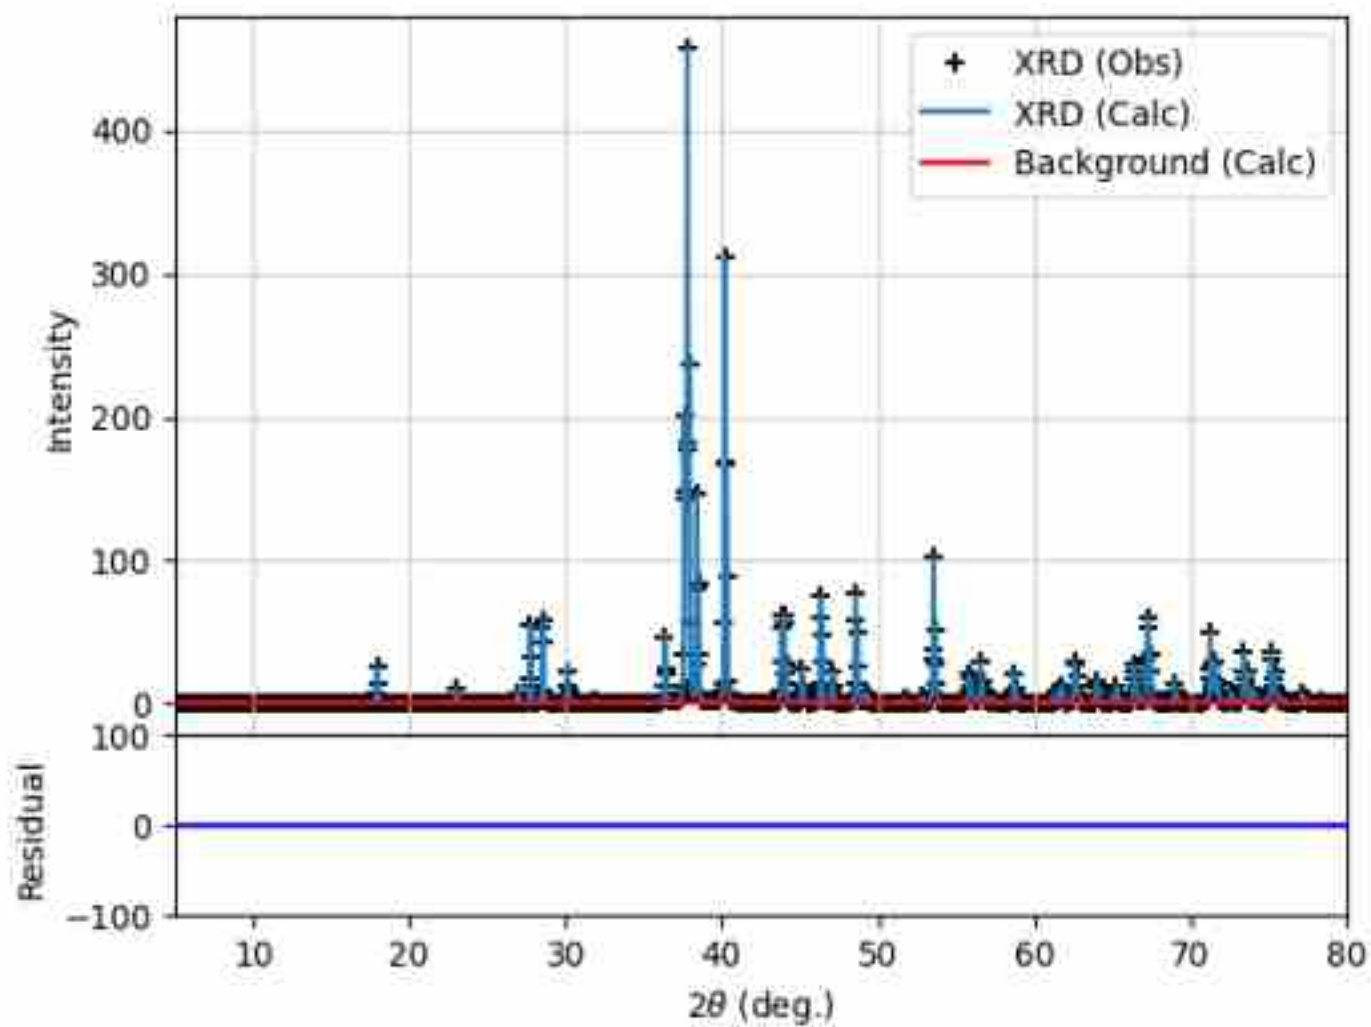

| RMSE before RR | Rwp     | RMSE after RR |
|----------------|---------|---------------|
| 0.01           | 0.00421 | 0.00041       |



# Nd1Cd1Au2

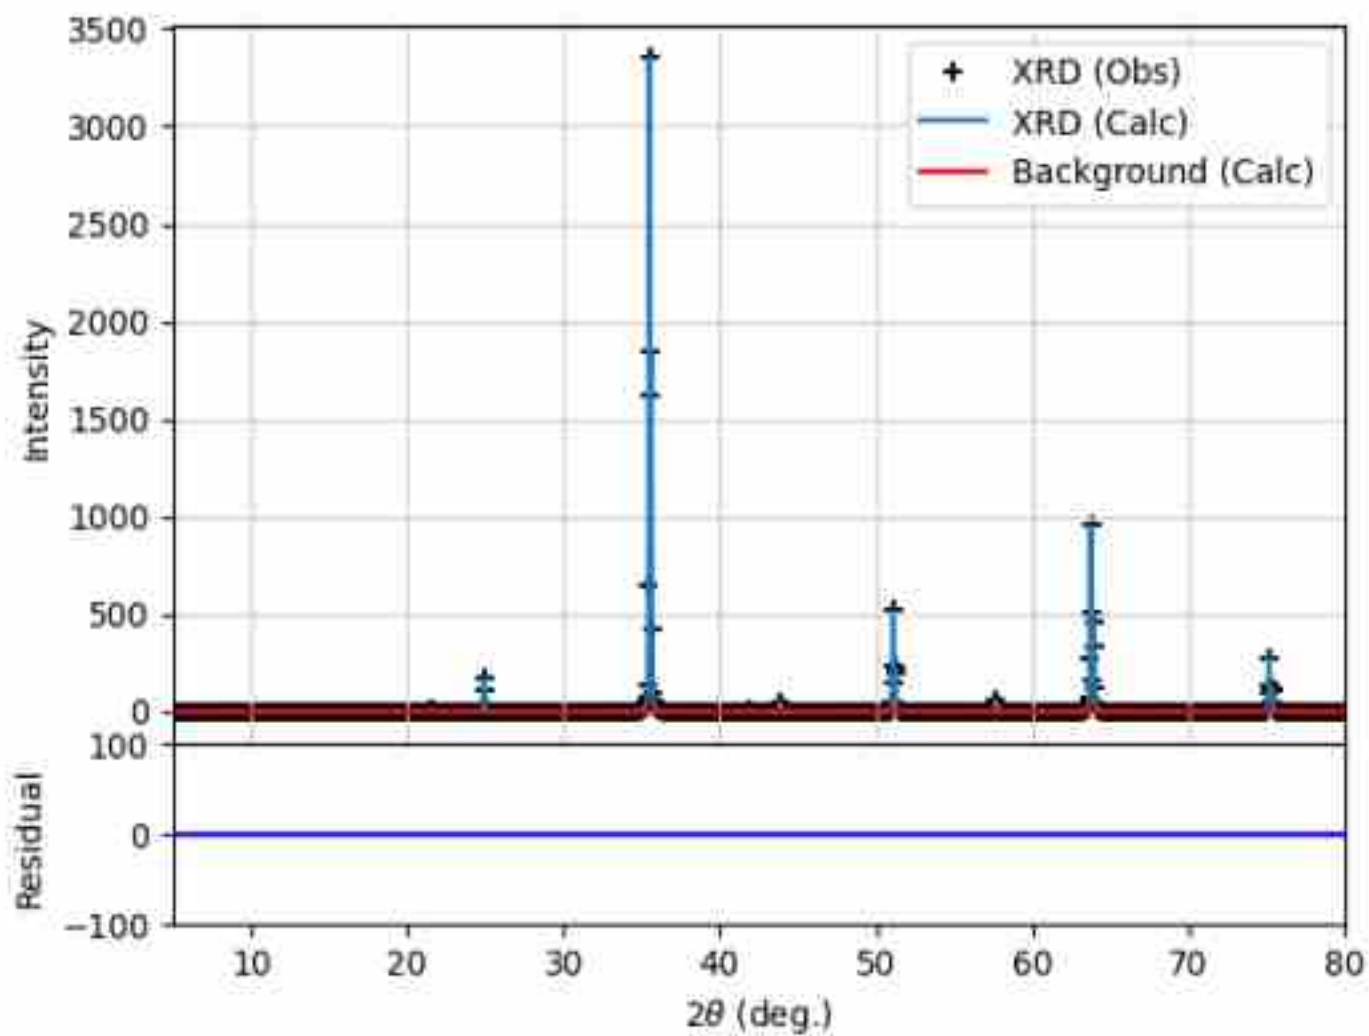

| RMSE before RR | Rwp    | RMSE after RR |
|----------------|--------|---------------|
| 0.001          | 0.0029 | 0.00037       |

# Nd1Gd1Hg2

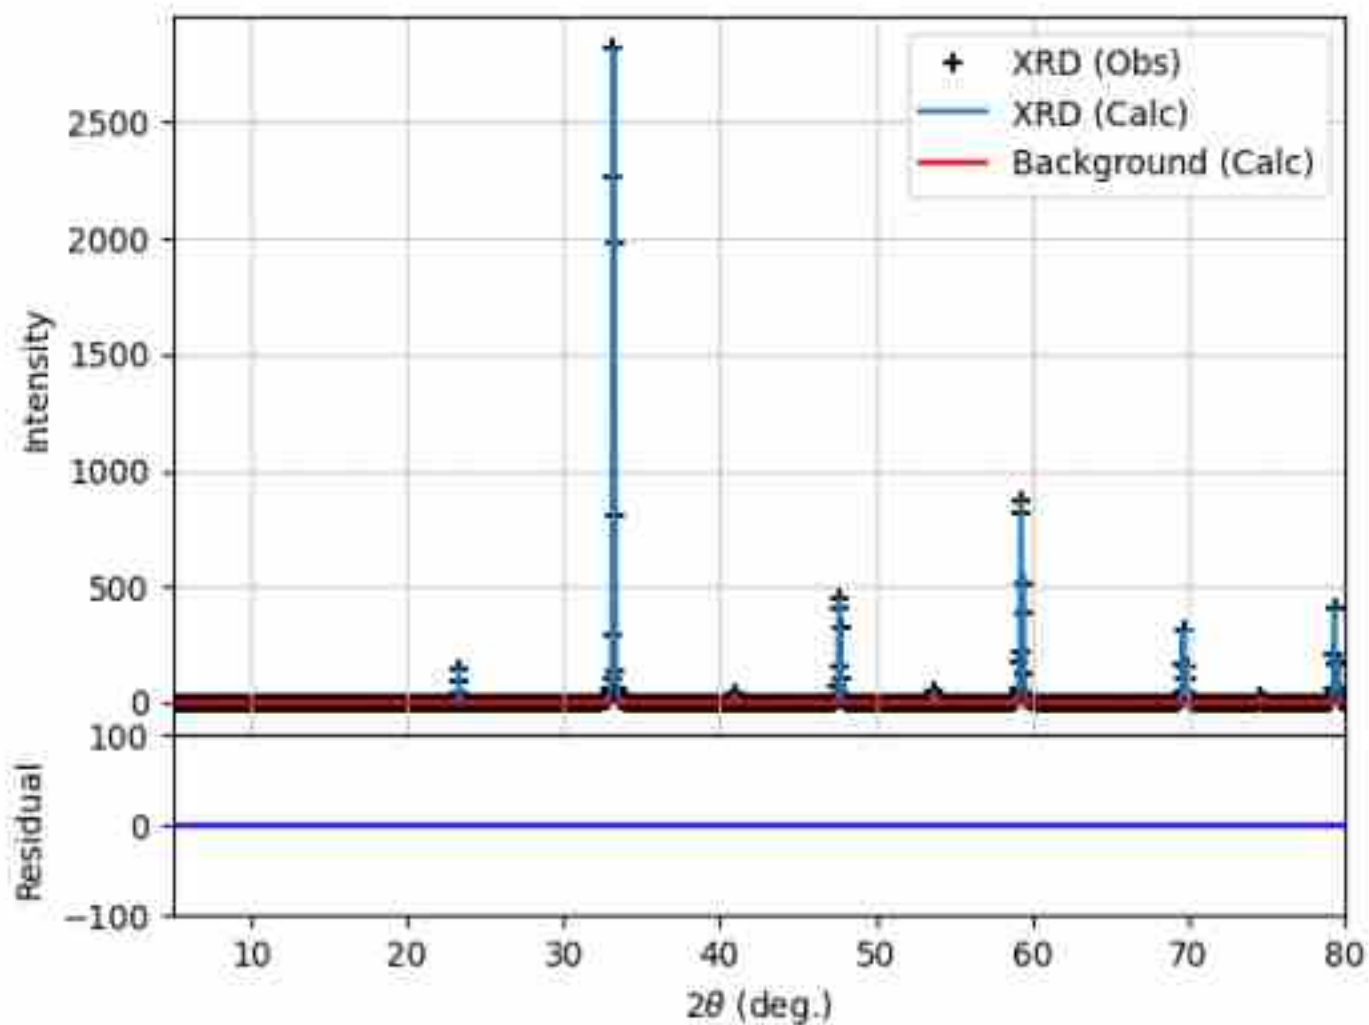

| RMSE before RR | Rwp     | RMSE after RR |
|----------------|---------|---------------|
| 0.001          | 0.00345 | 0.00018       |

# Nd1Ge2Au2

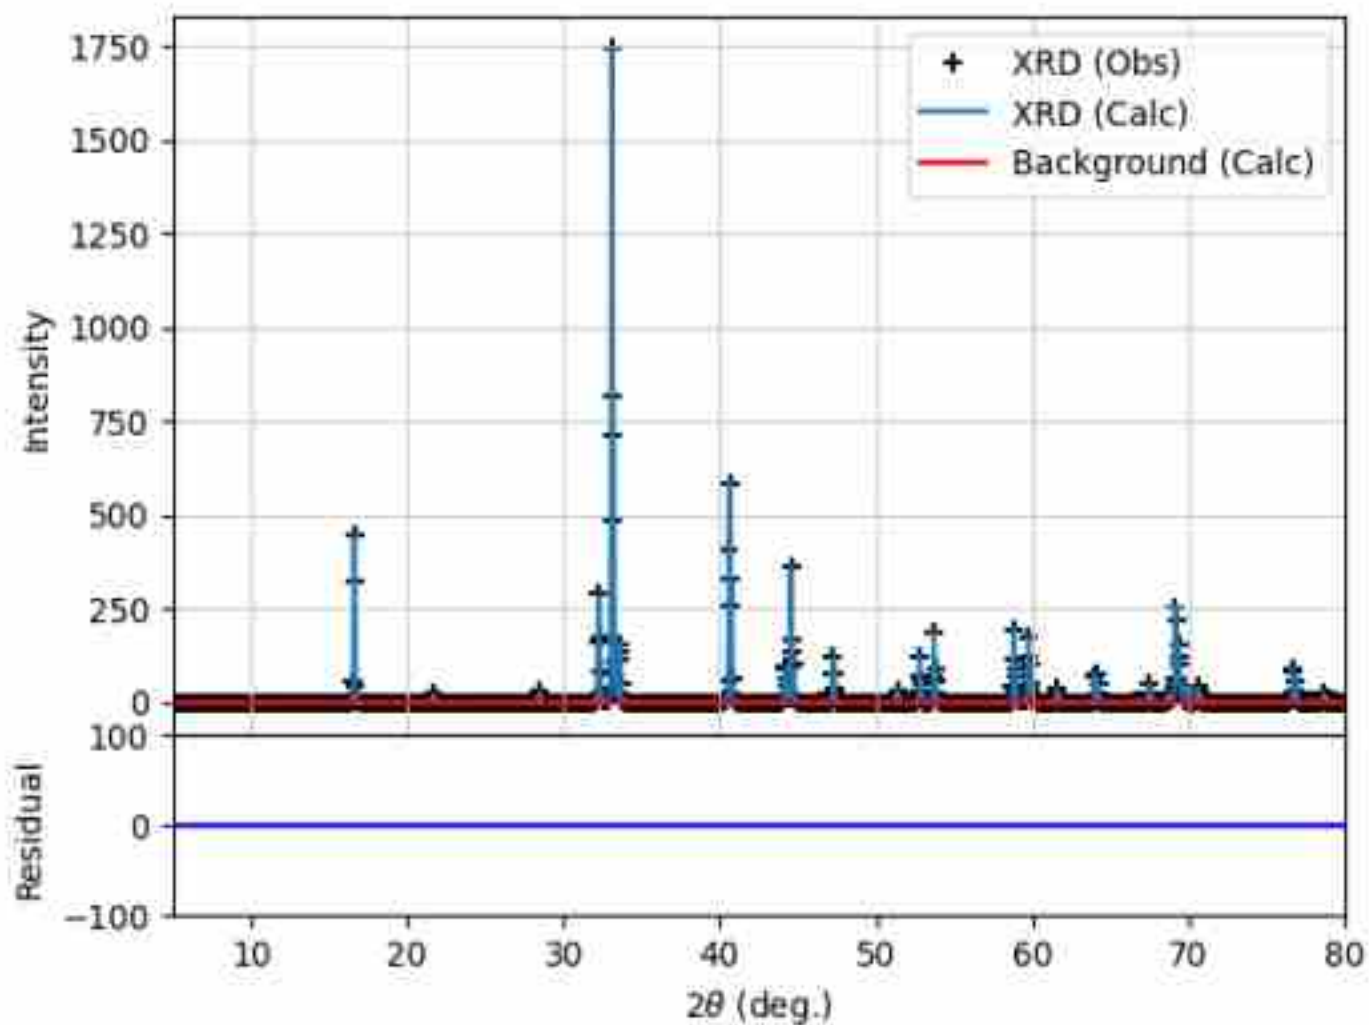

| RMSE before RR | Rwp     | RMSE after RR |
|----------------|---------|---------------|
| 0.01           | 0.00458 | 0.00042       |

# Nd1Mg1Hg2

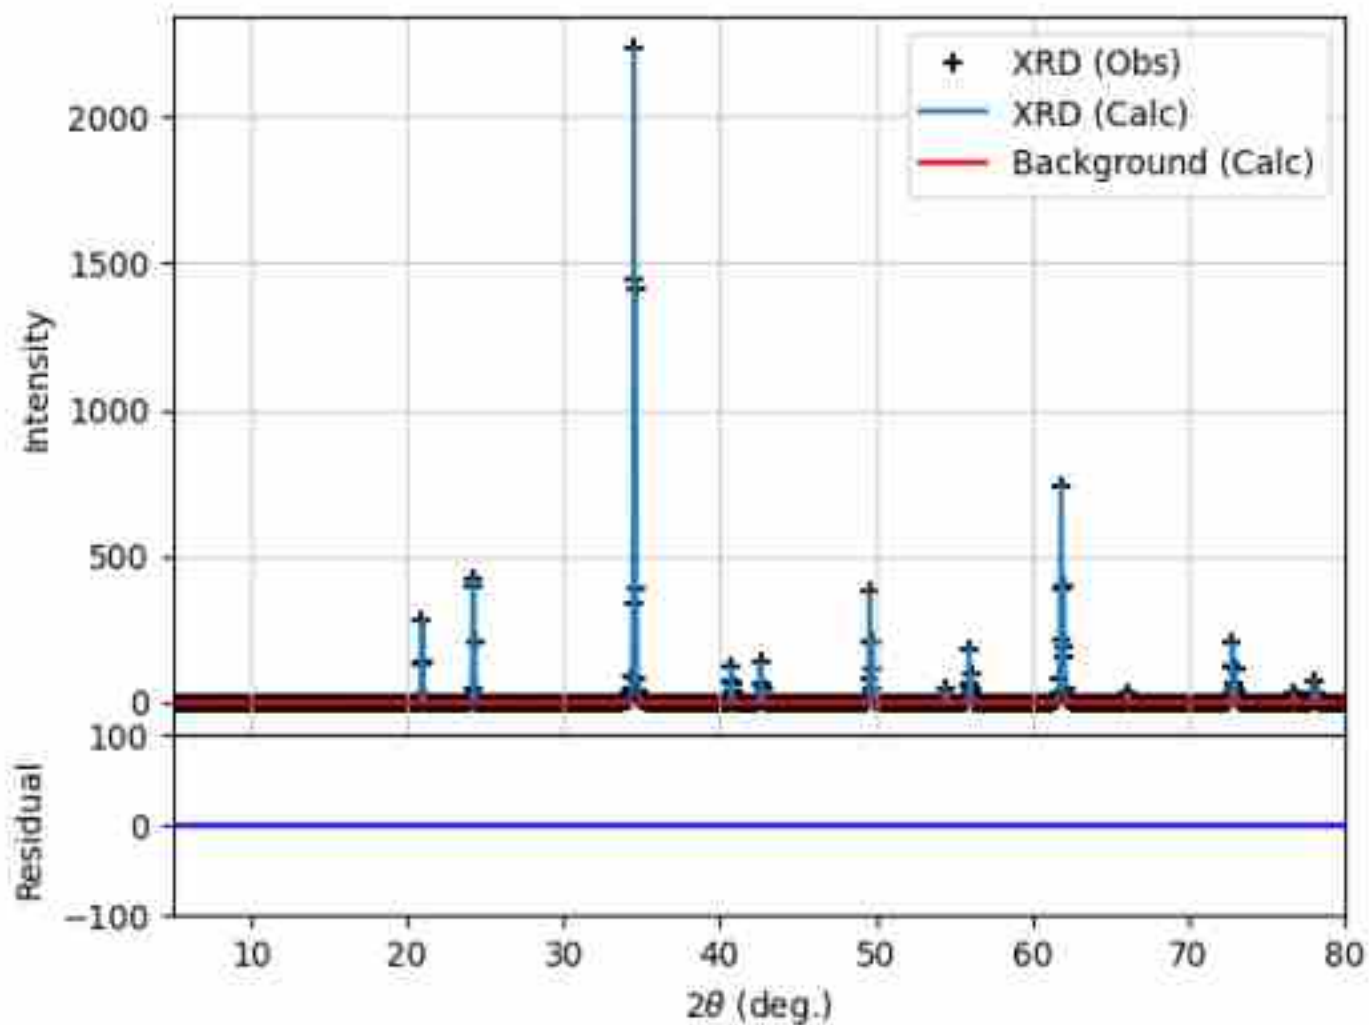

| RMSE before RR | Rwp    | RMSE after RR |
|----------------|--------|---------------|
| 0.001          | 0.0033 | 0.00059       |

# Nd1Mn2Si2

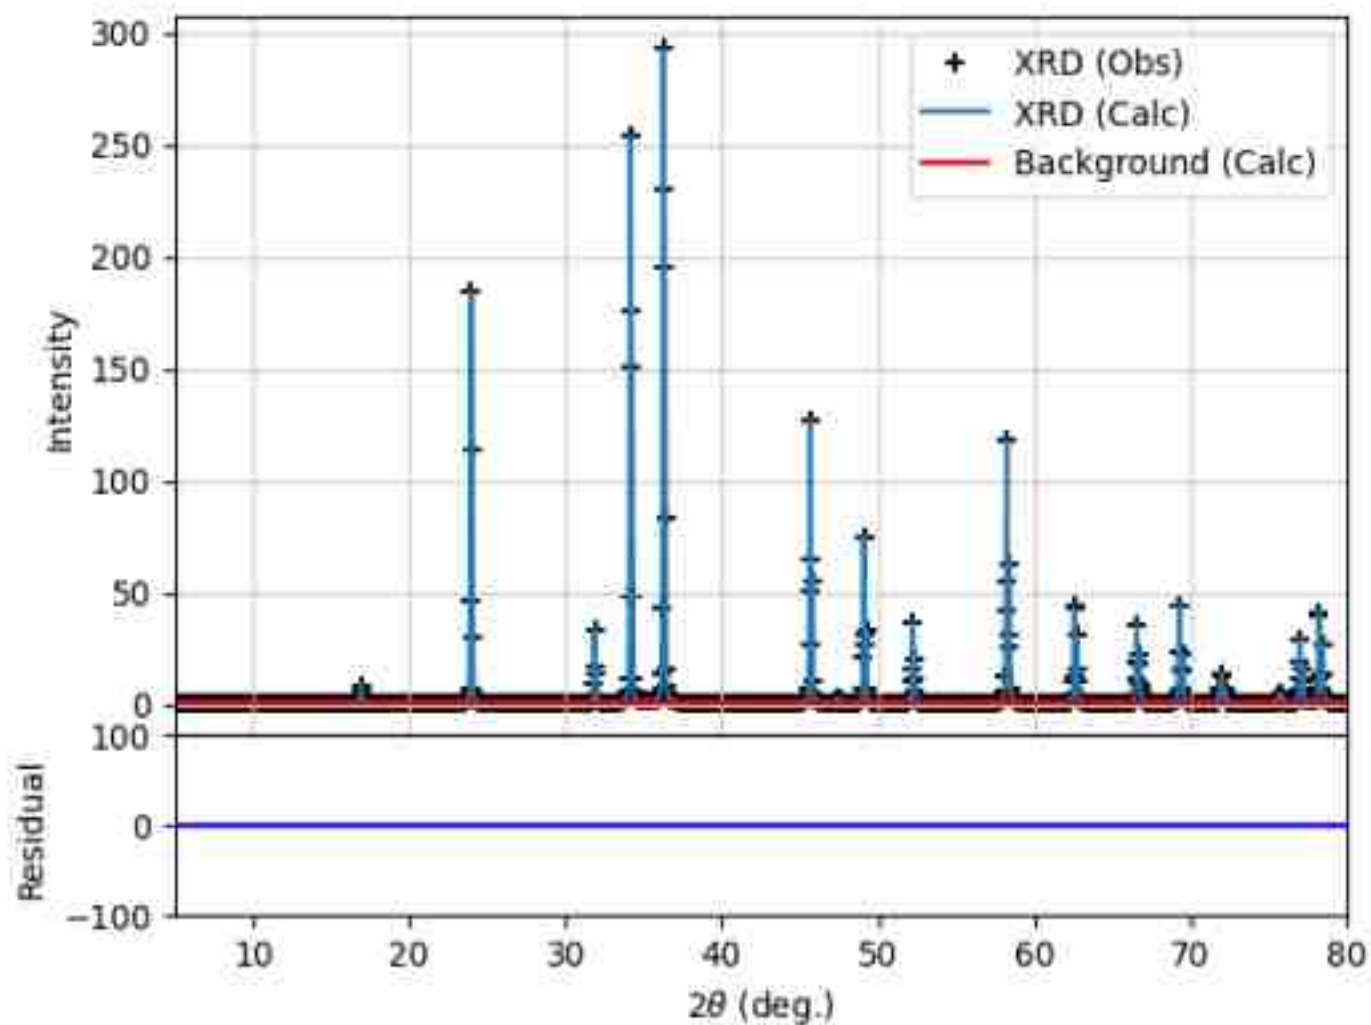

| RMSE before RR | Rwp     | RMSE after RR |
|----------------|---------|---------------|
| 0.01           | 0.00421 | 0.00111       |

# Nd1Ni2Sb2

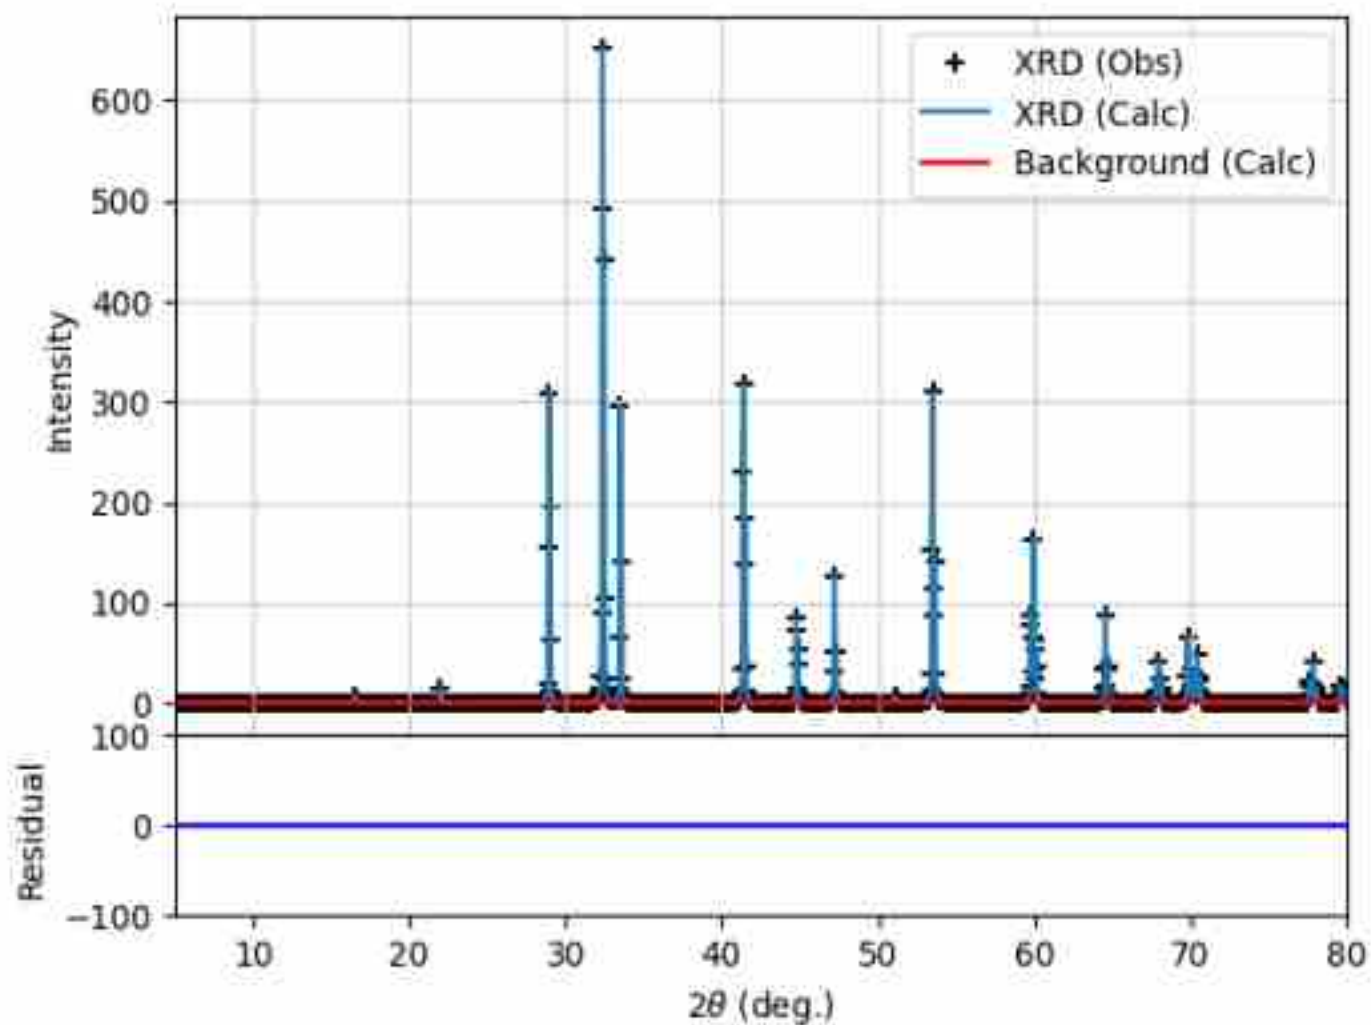

| RMSE before RR | Rwp     | RMSE after RR |
|----------------|---------|---------------|
| 0.01           | 0.00425 | 0.00042       |

# Nd1Pd2Pb1

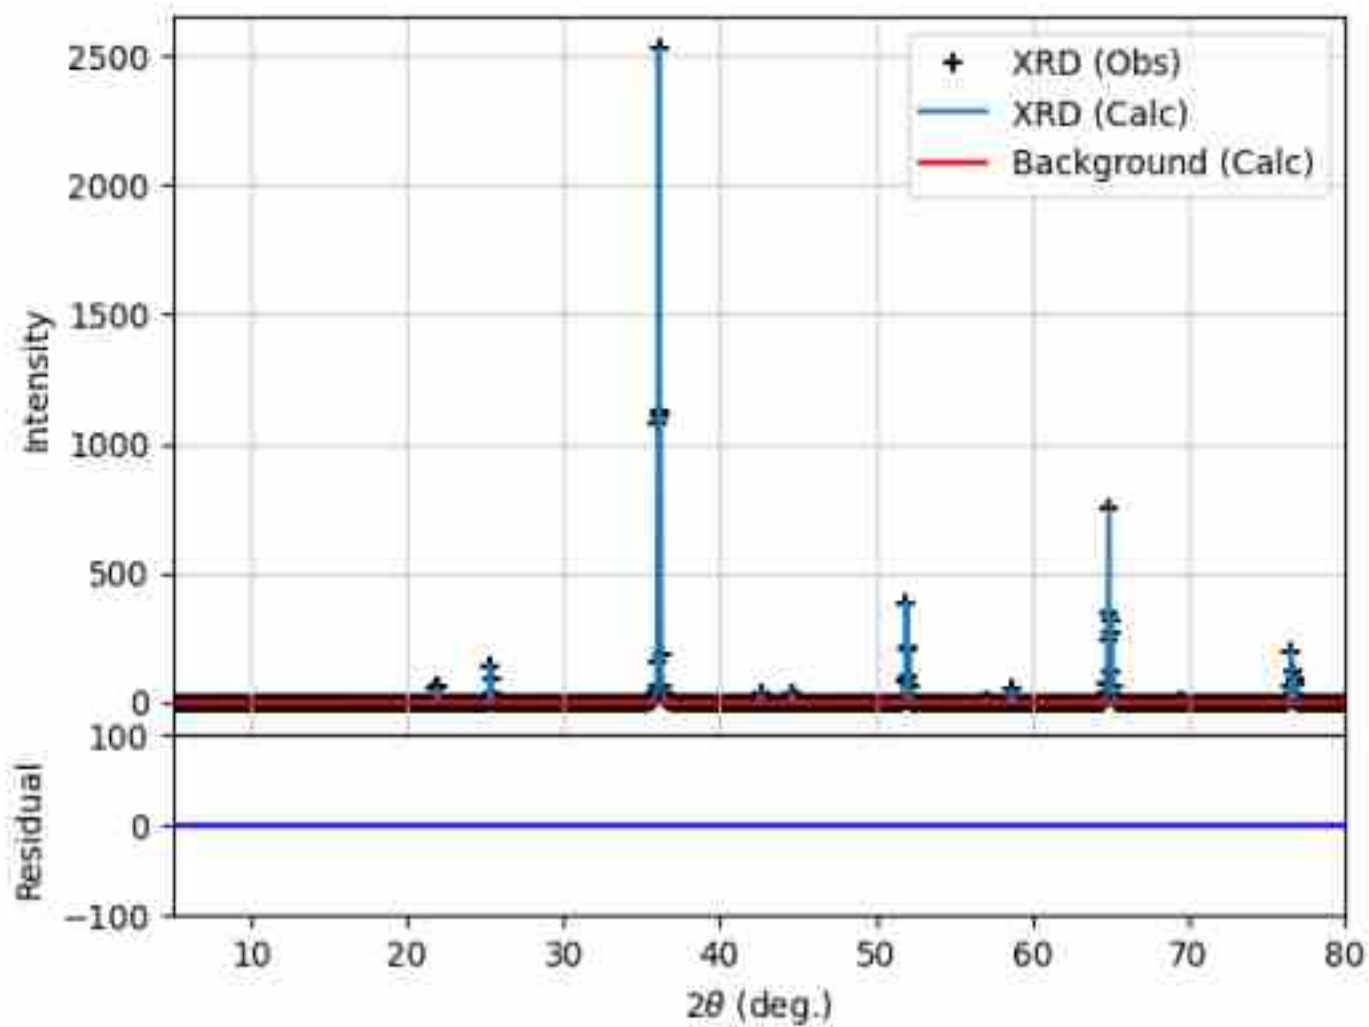

| RMSE before RR | Rwp     | RMSE after RR |
|----------------|---------|---------------|
| 0.001          | 0.00437 | 0.00155       |

# Nd1Sm1Zn2

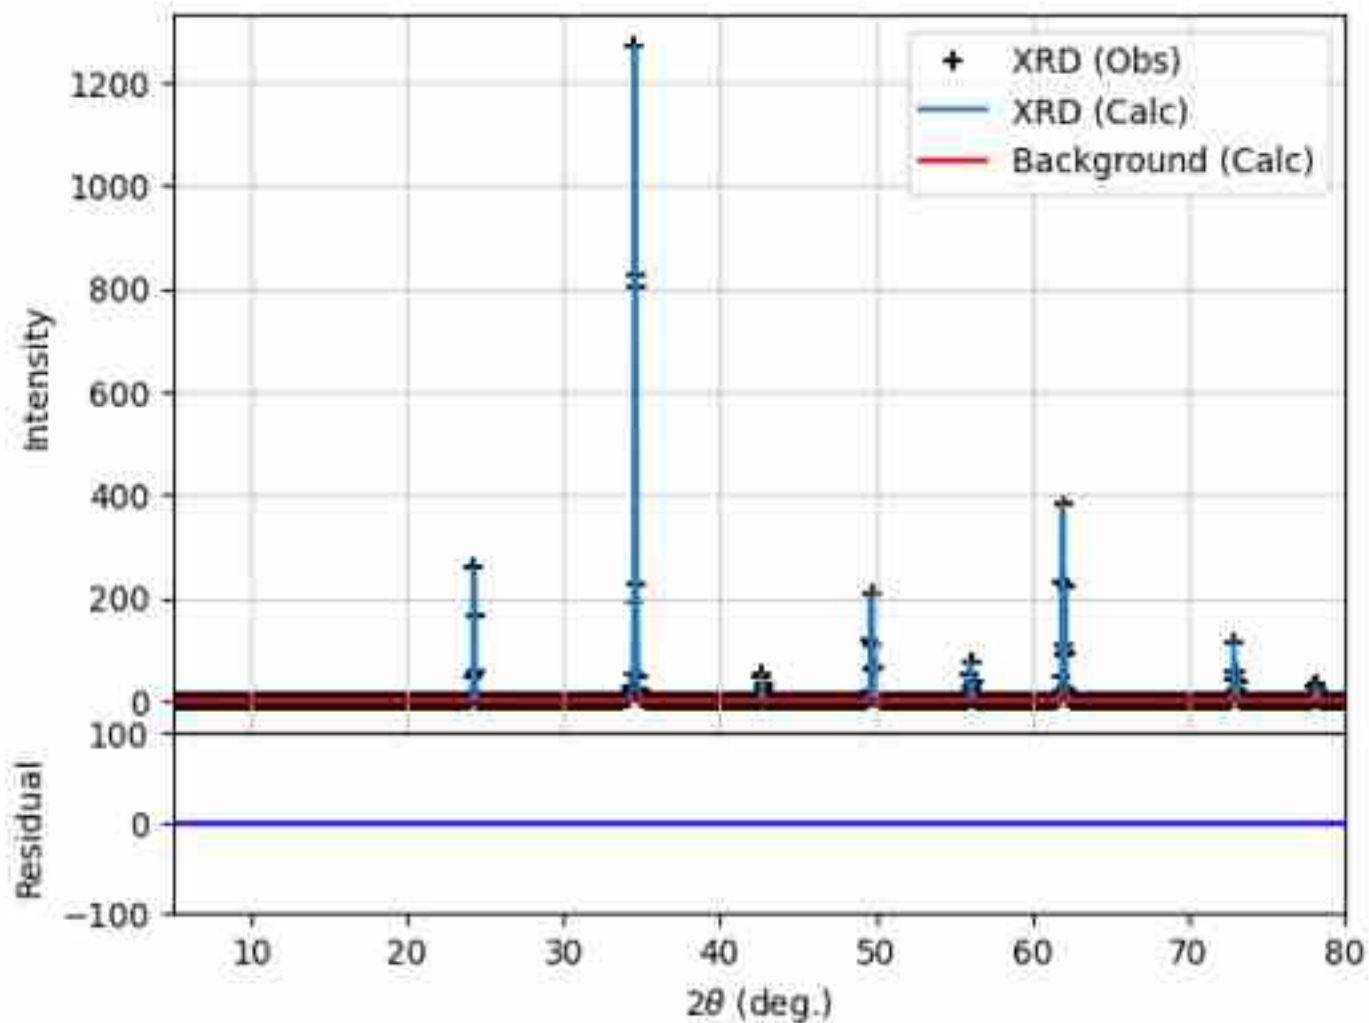

| RMSE before RR | Rwp     | RMSE after RR |
|----------------|---------|---------------|
| 0.001          | 0.00024 | 9e-05         |



# Nd1Th3

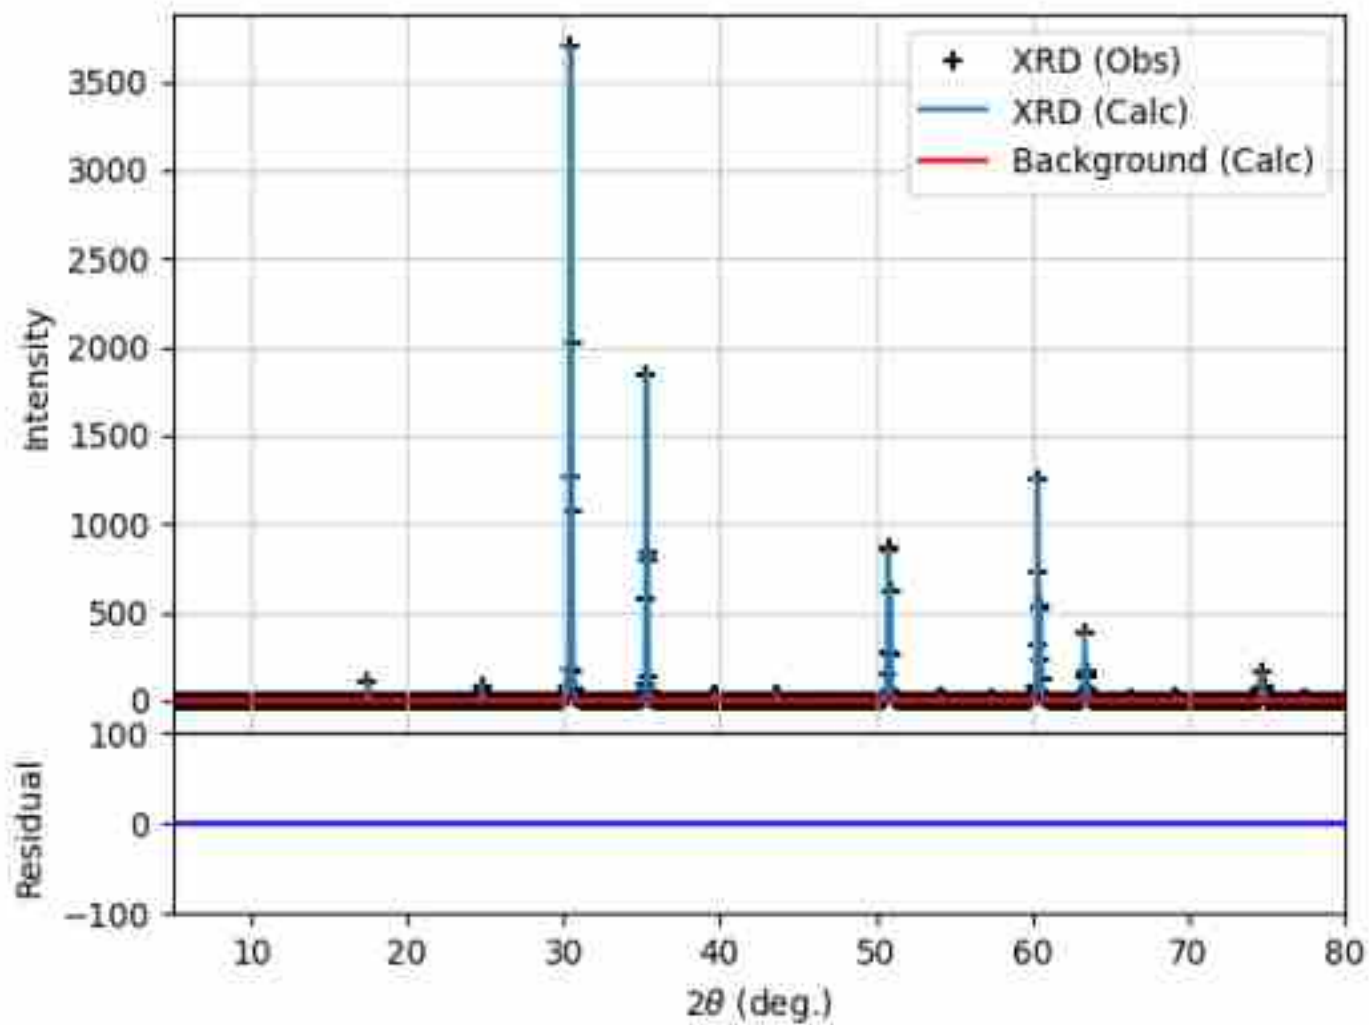

| RMSE before RR | Rwp     | RMSE after RR |
|----------------|---------|---------------|
| 0.001          | 0.01439 | 0.00087       |

# Nd1Zn1Au2

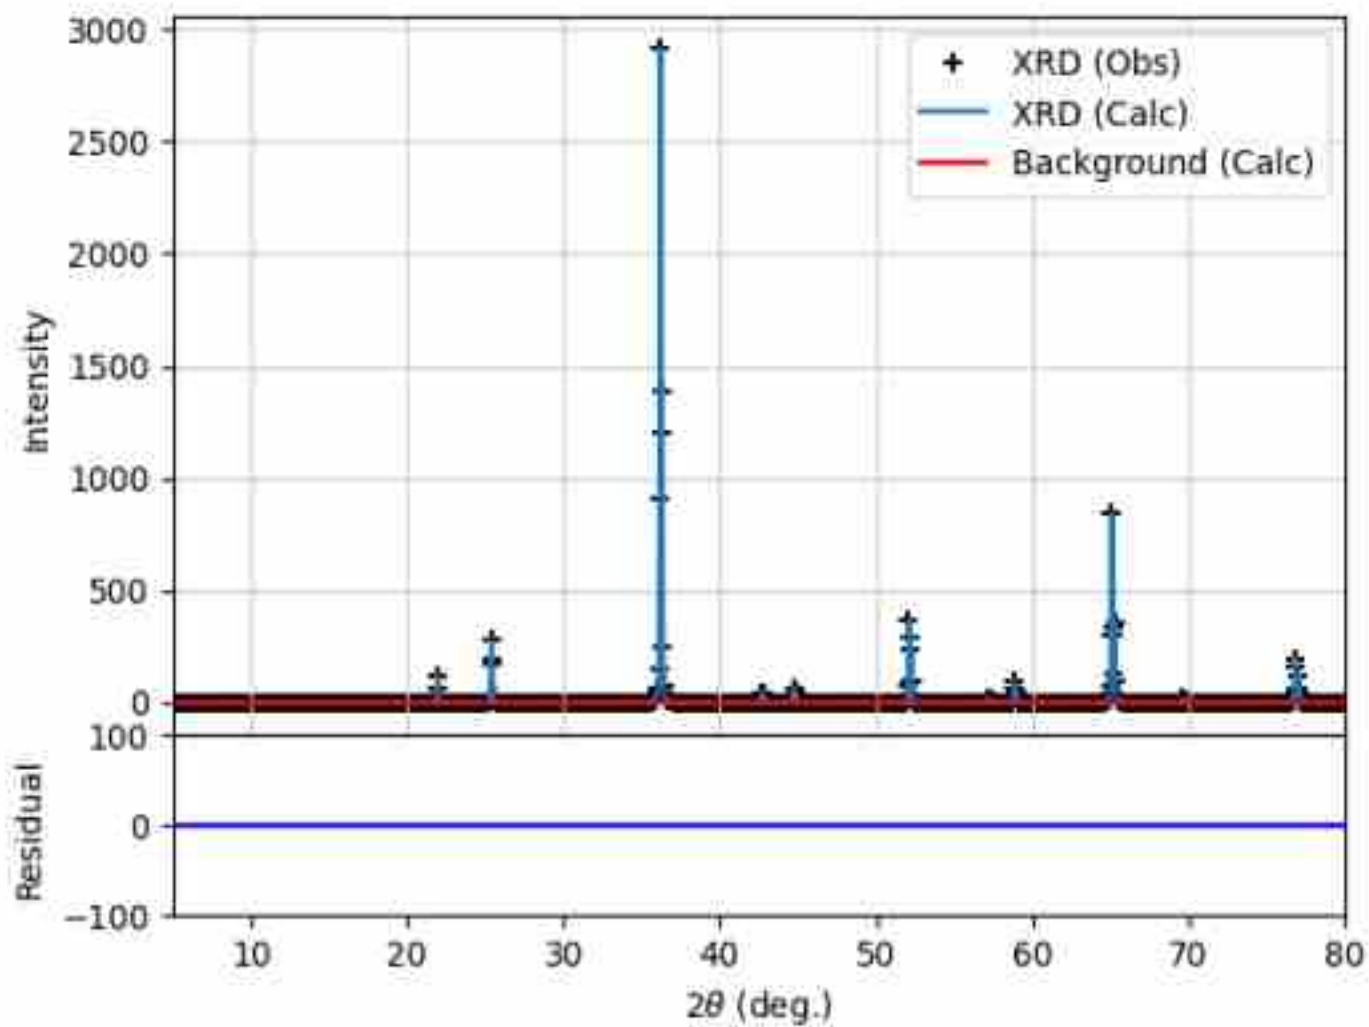

| RMSE before RR | Rwp     | RMSE after RR |
|----------------|---------|---------------|
| 0.001          | 0.00545 | 0.00215       |

# Nd<sub>2</sub>Al<sub>4</sub>

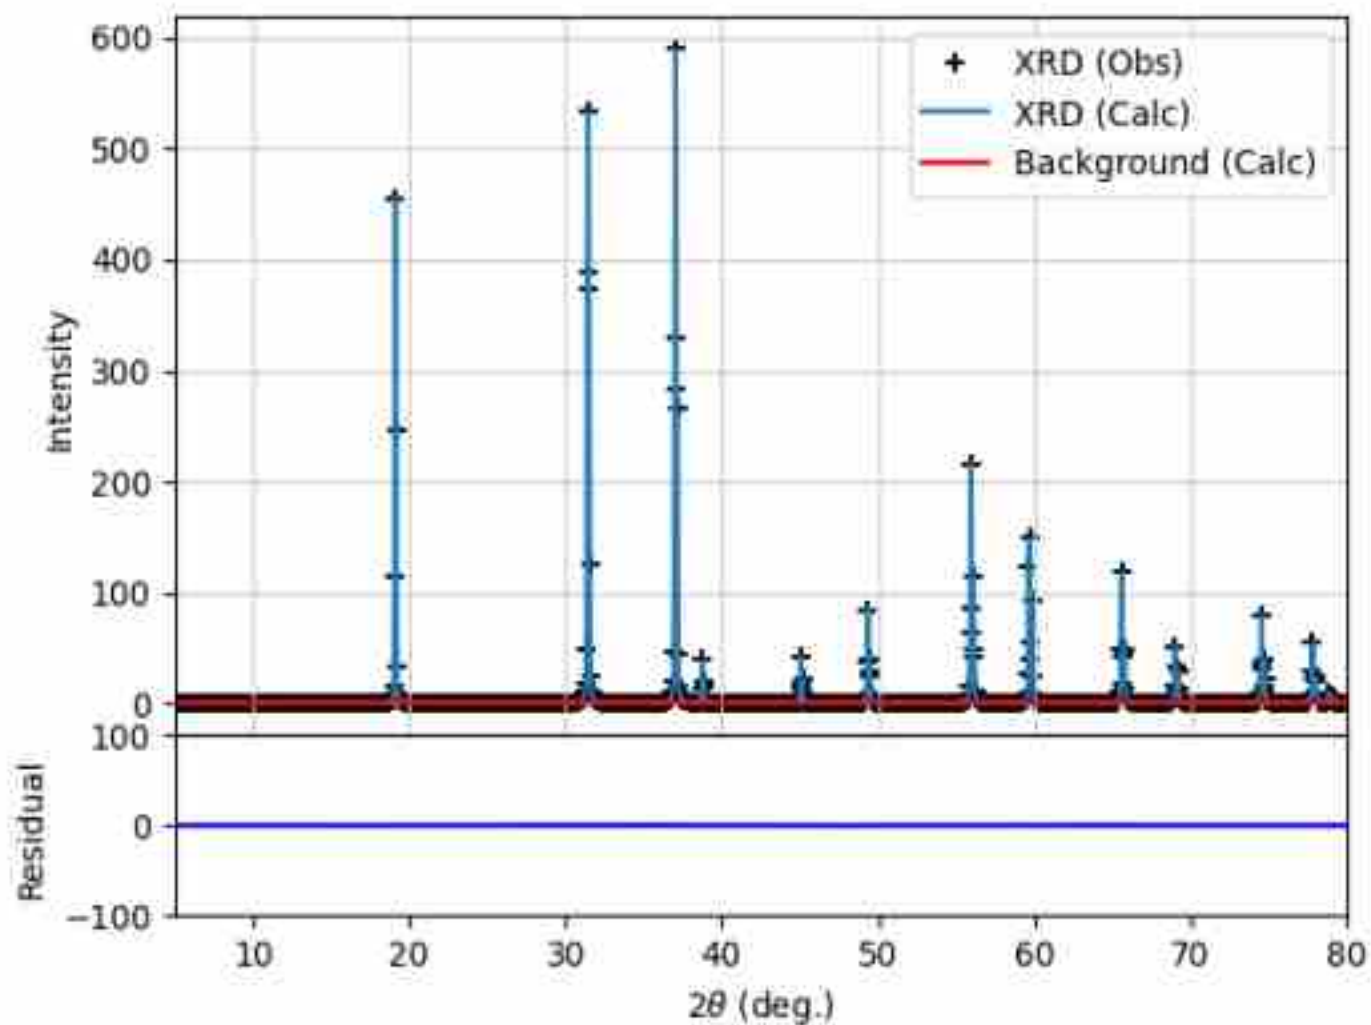

| RMSE before RR | Rwp    | RMSE after RR |
|----------------|--------|---------------|
| 0.01           | 0.3483 | 0.01081       |

# Nd<sub>2</sub>Fe<sub>2</sub>Si<sub>4</sub>

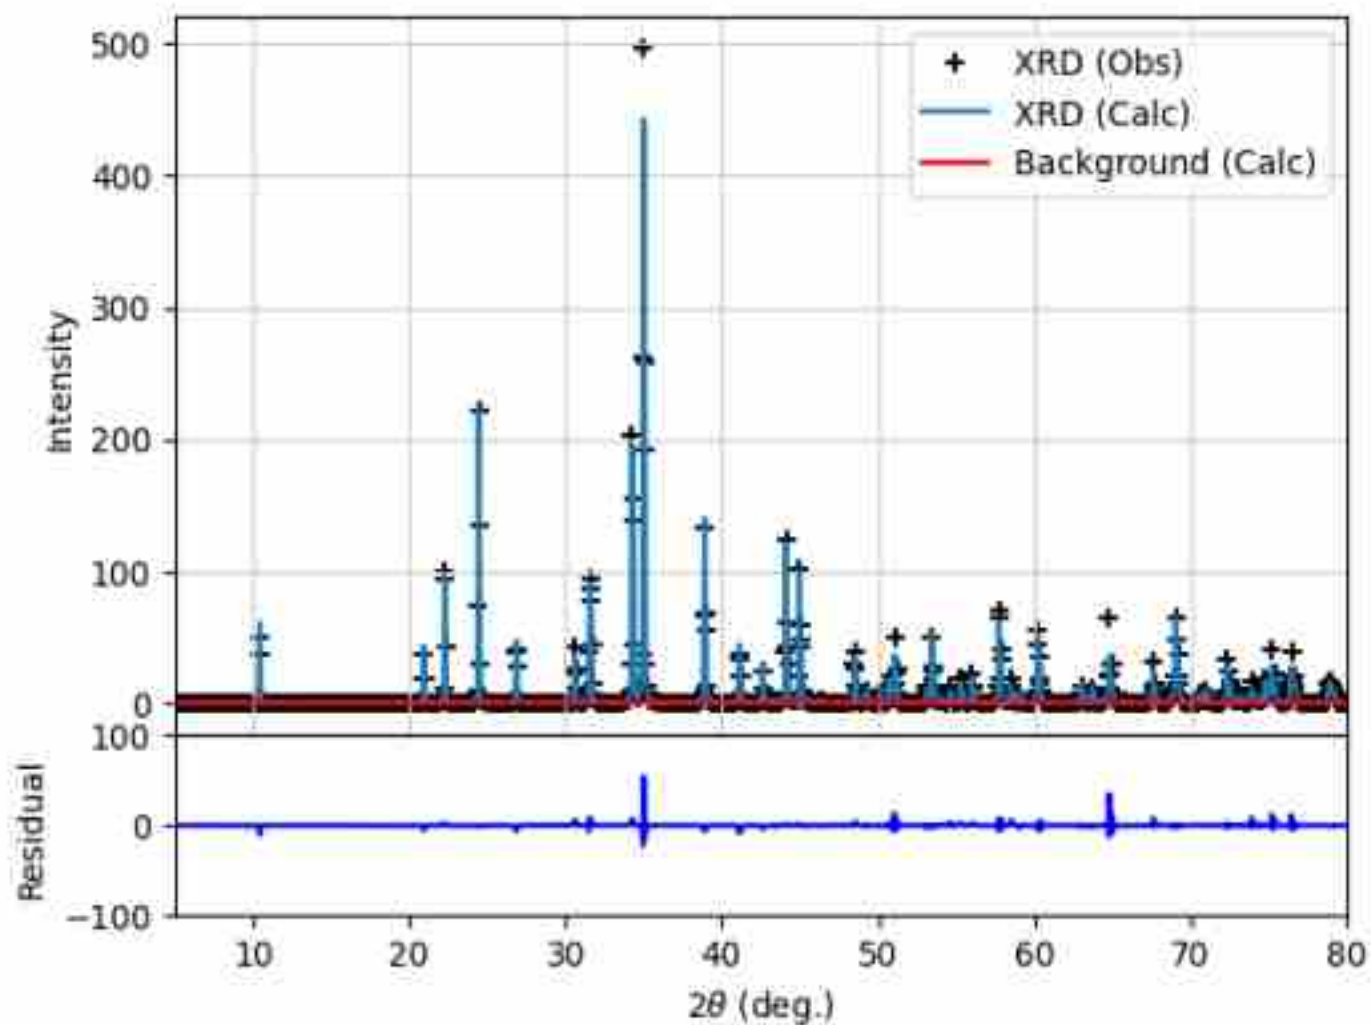

| RMSE before RR | Rwp      | RMSE after RR |
|----------------|----------|---------------|
| 0.01           | 14.51886 | 0.01142       |

# Nd<sub>2</sub>Ge<sub>2</sub>

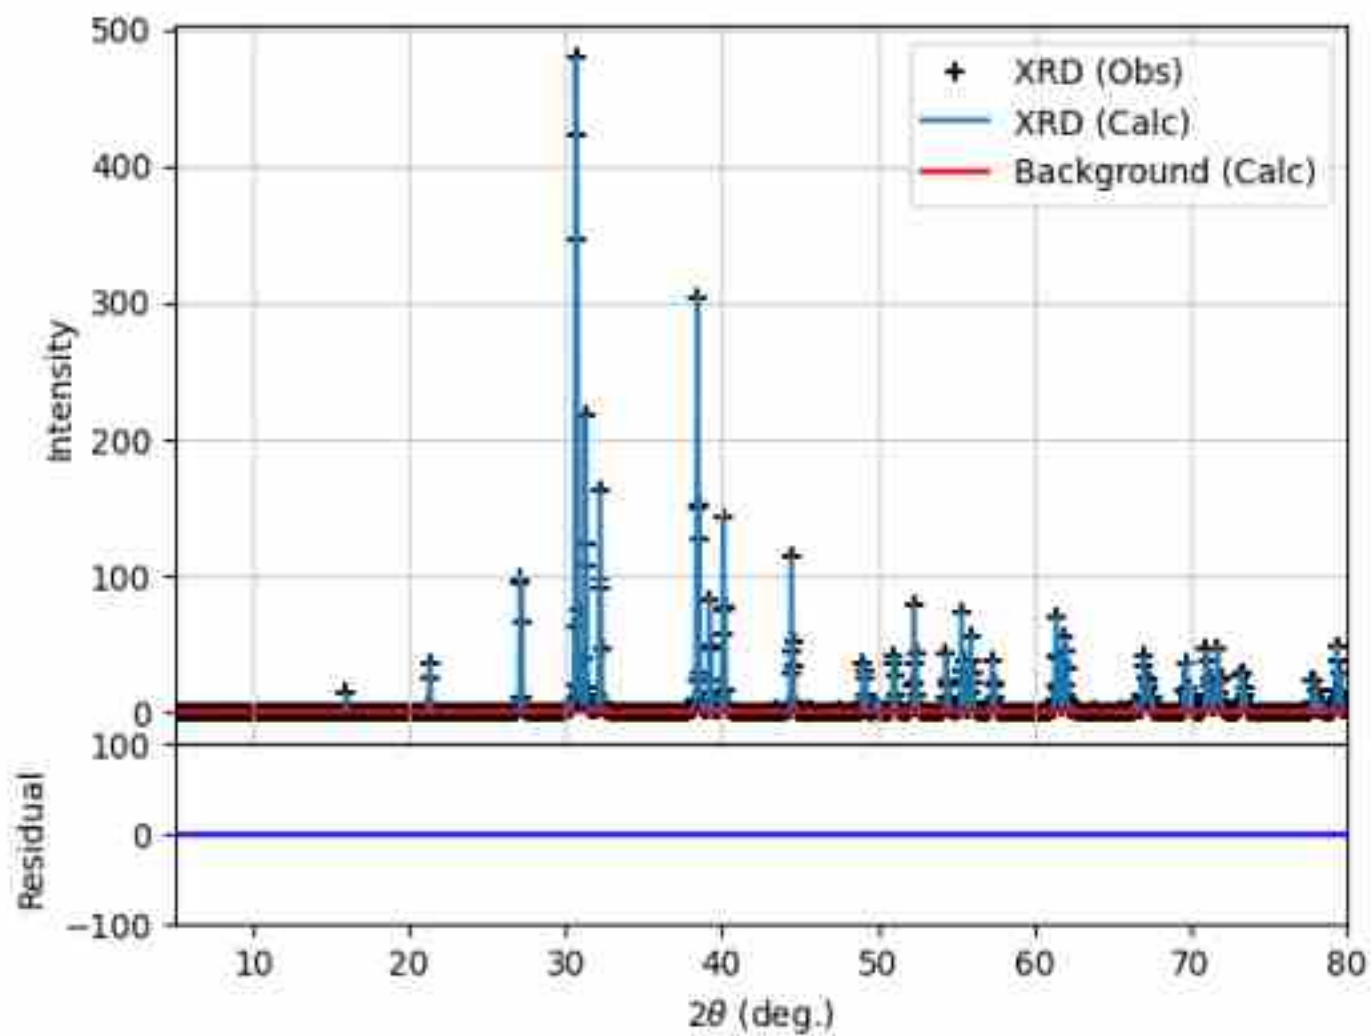

| RMSE before RR | Rwp     | RMSE after RR |
|----------------|---------|---------------|
| 0.01           | 0.00434 | 0.00055       |

# Nd<sub>2</sub>Si<sub>2</sub>Ni<sub>2</sub>

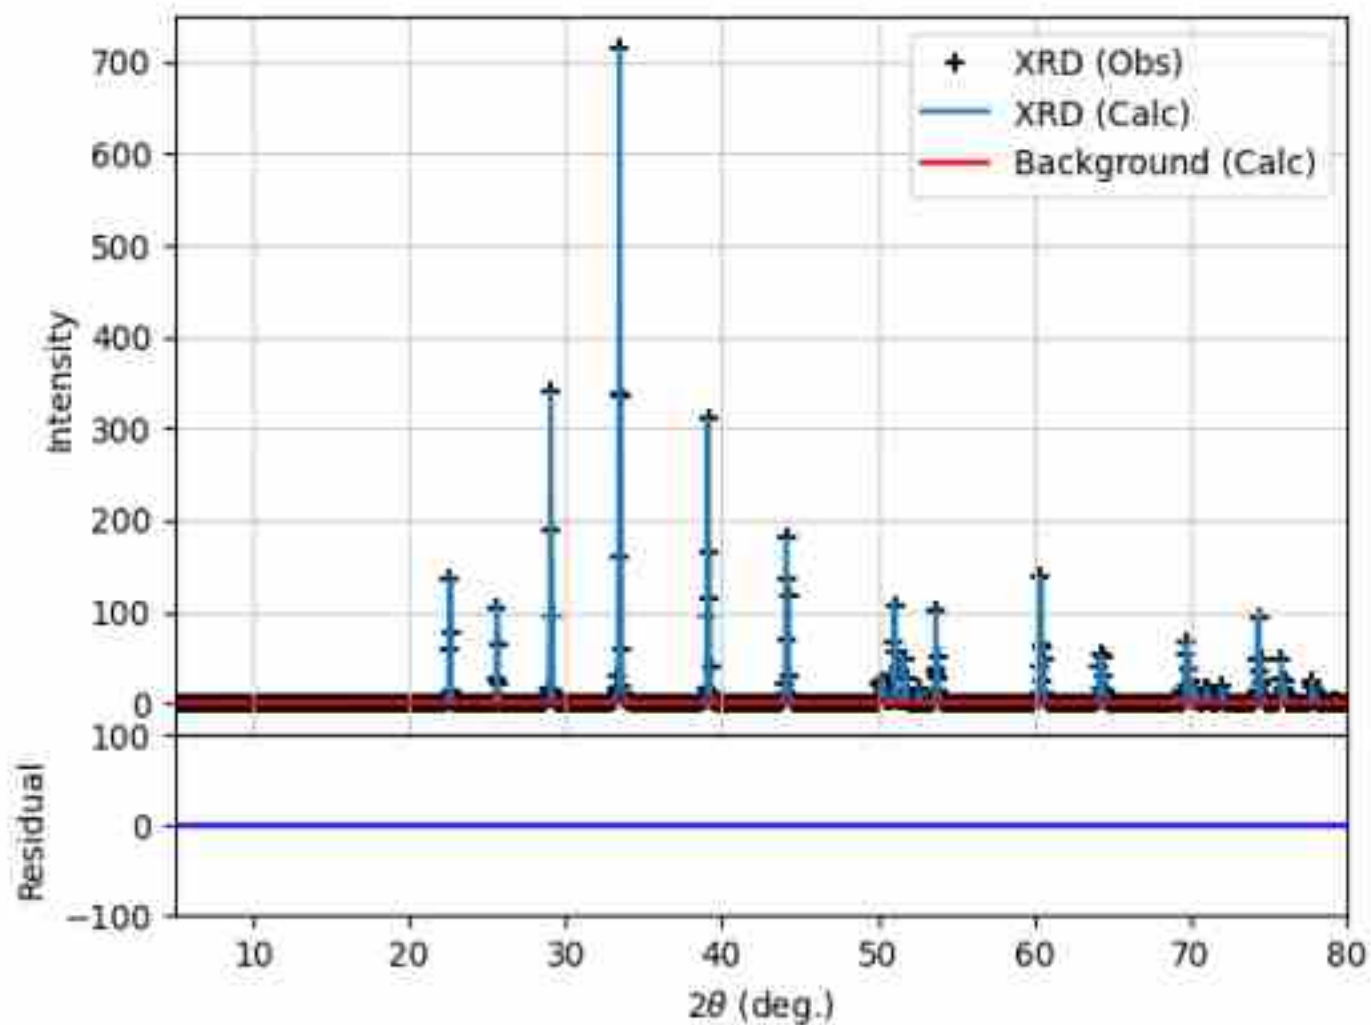

| RMSE before RR | Rwp    | RMSE after RR |
|----------------|--------|---------------|
| 0.01           | 0.0046 | 0.00062       |

# Nd<sub>2</sub>TlHg

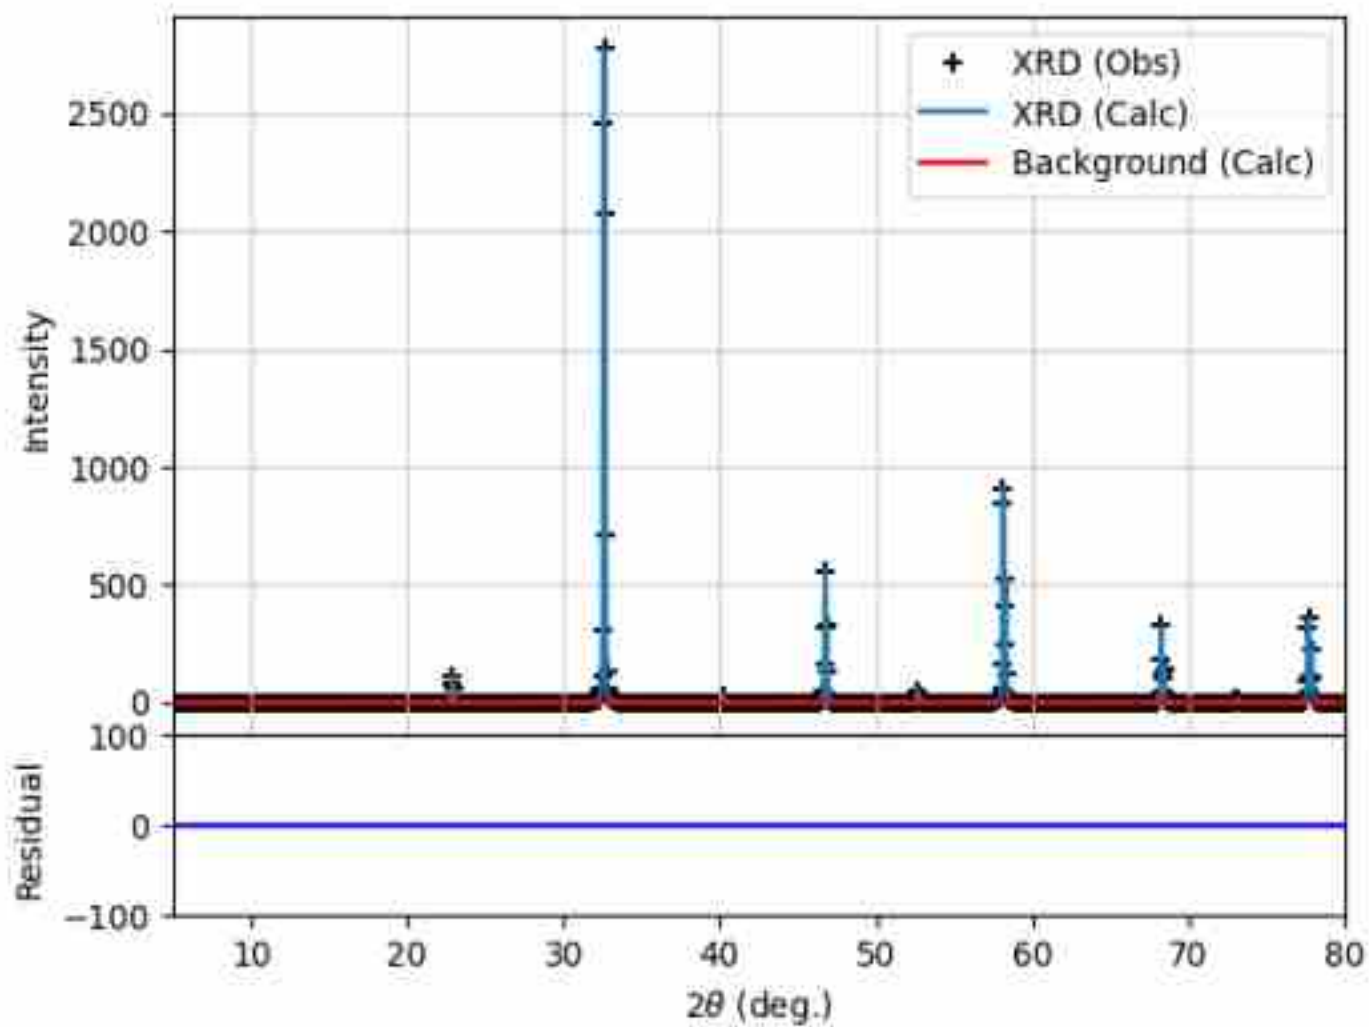

| RMSE before RR | Rwp     | RMSE after RR |
|----------------|---------|---------------|
| 0.001          | 0.00523 | 0.0004        |

# Nd<sub>2</sub>TlIn

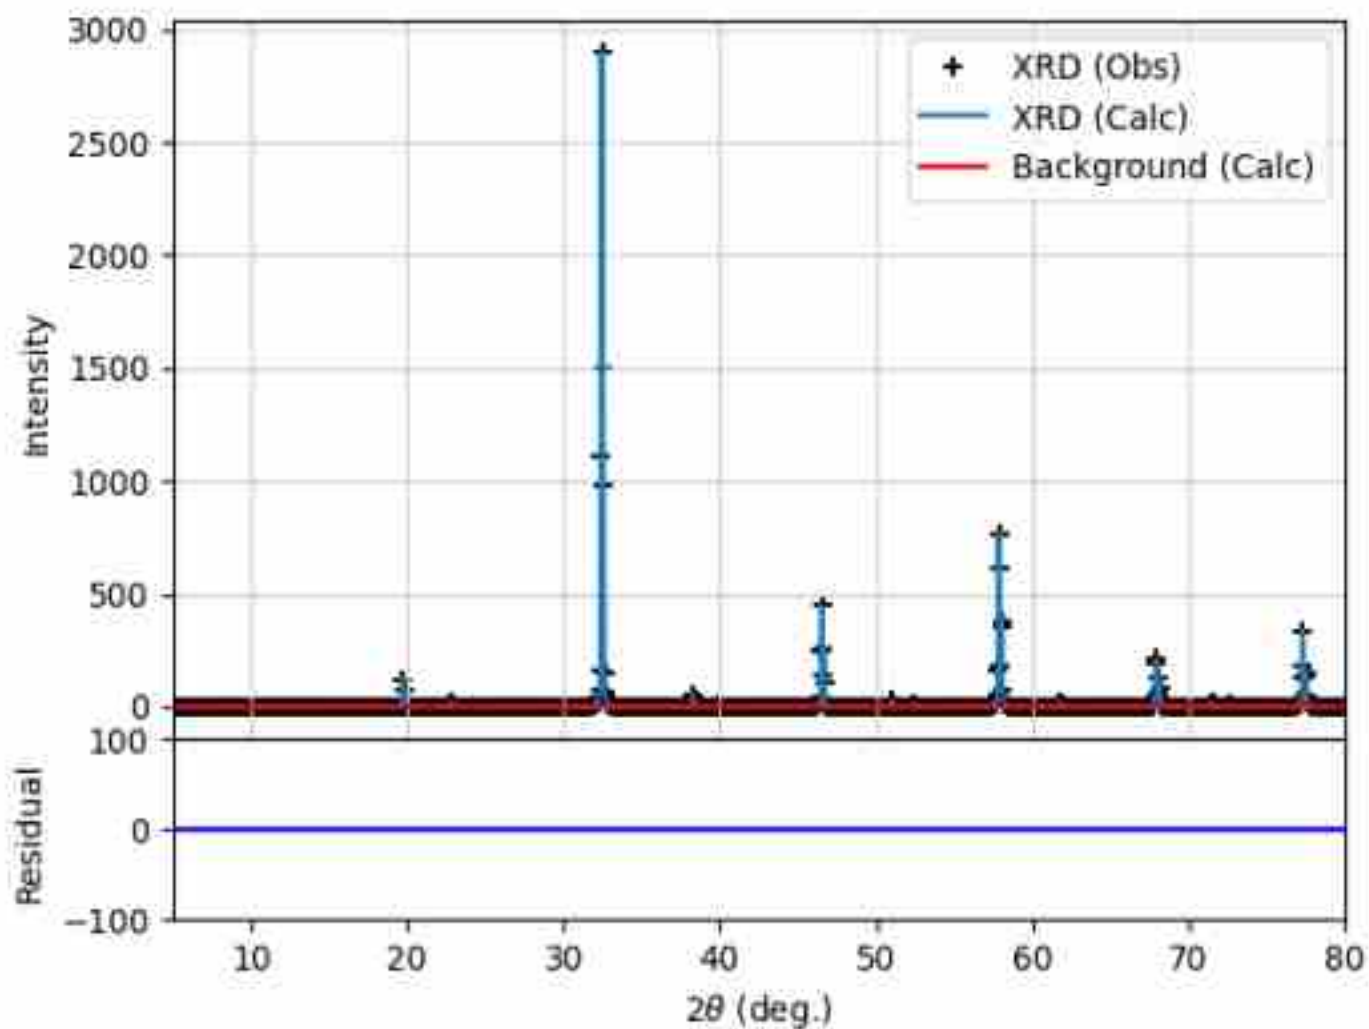

| RMSE before RR | Rwp    | RMSE after RR |
|----------------|--------|---------------|
| 0.001          | 0.0036 | 0.00027       |



# Nd<sub>2</sub>ZnGa

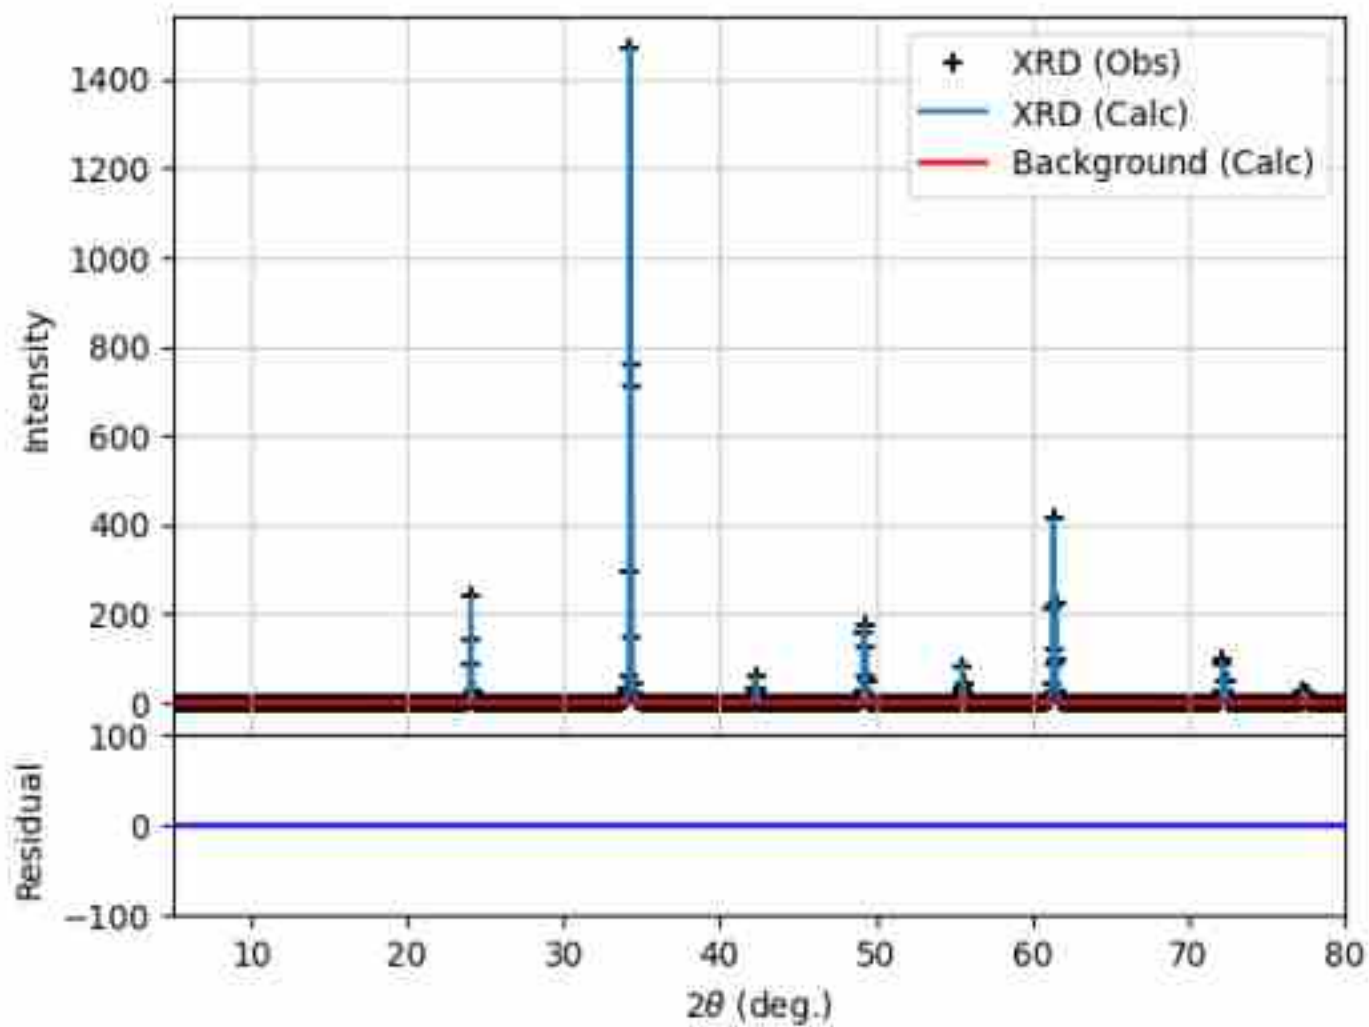

| RMSE before RR | Rwp     | RMSE after RR |
|----------------|---------|---------------|
| 0.001          | 0.00397 | 0.0004        |

# Nd3Dy1

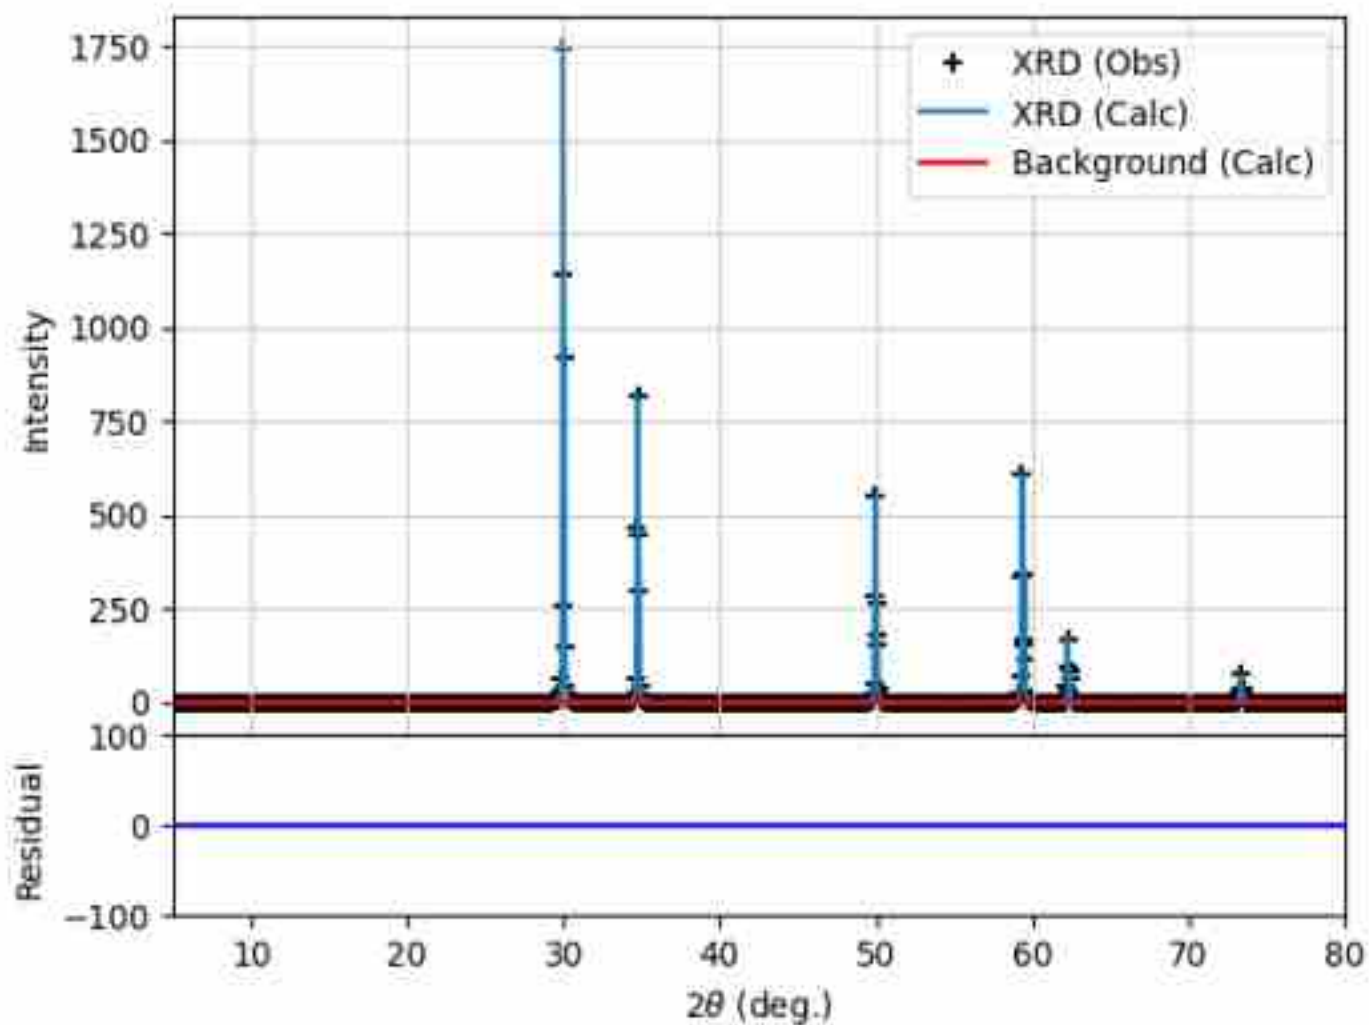

| RMSE before RR | Rwp     | RMSE after RR |
|----------------|---------|---------------|
| 0.001          | 0.12564 | 0.00141       |

# Nd<sub>3</sub>In<sub>3</sub>Pt<sub>3</sub>

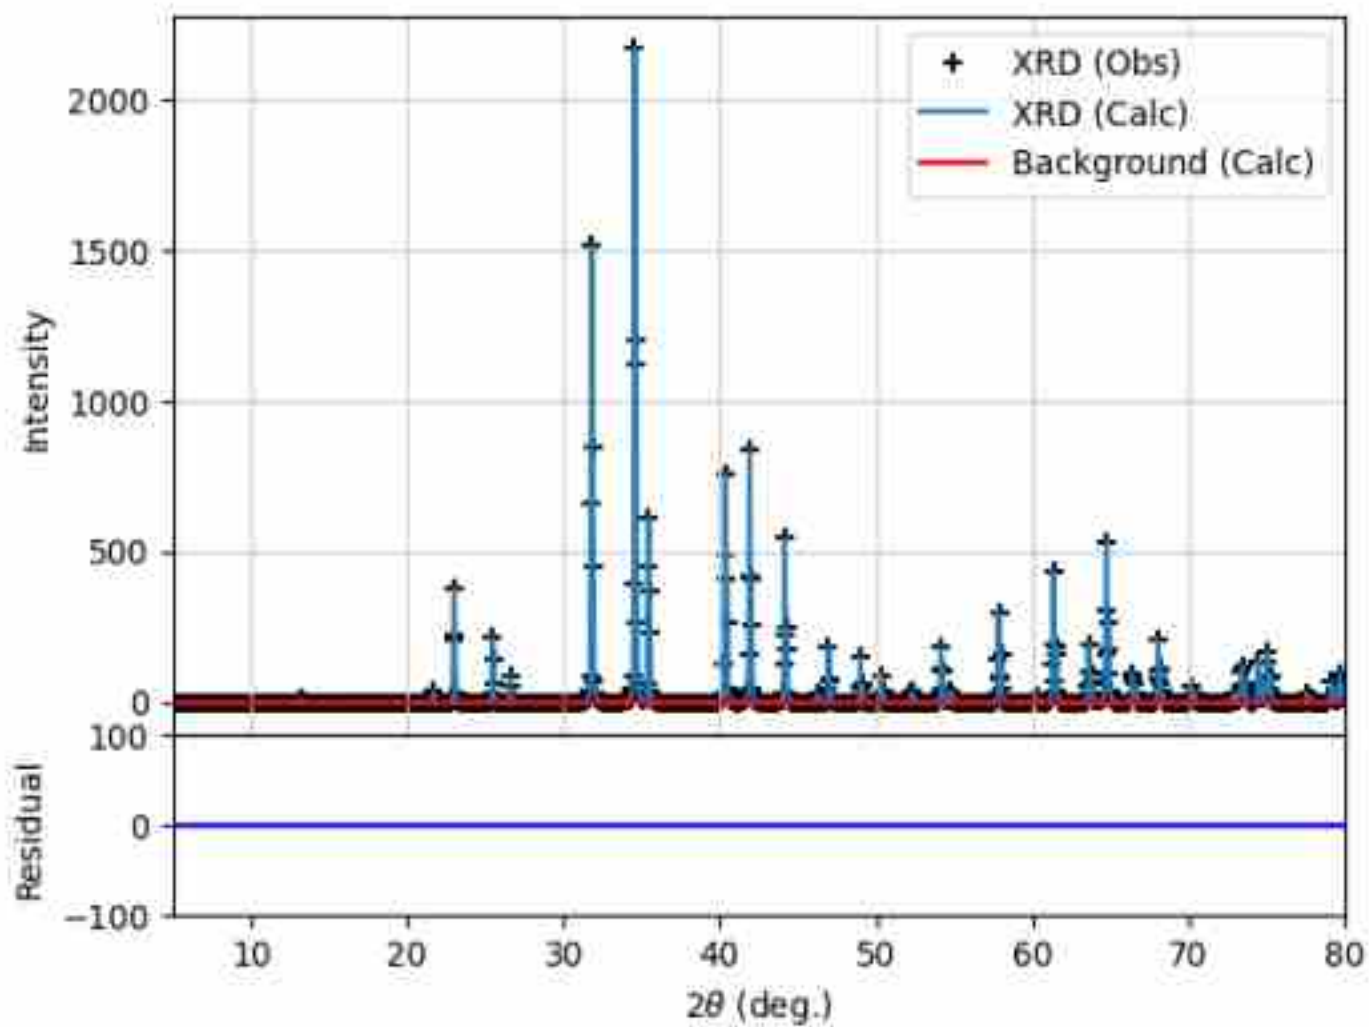

| RMSE before RR | Rwp     | RMSE after RR |
|----------------|---------|---------------|
| 0.01           | 0.00358 | 0.00064       |

# Nd<sub>3</sub>Sn<sub>3</sub>Pd<sub>3</sub>

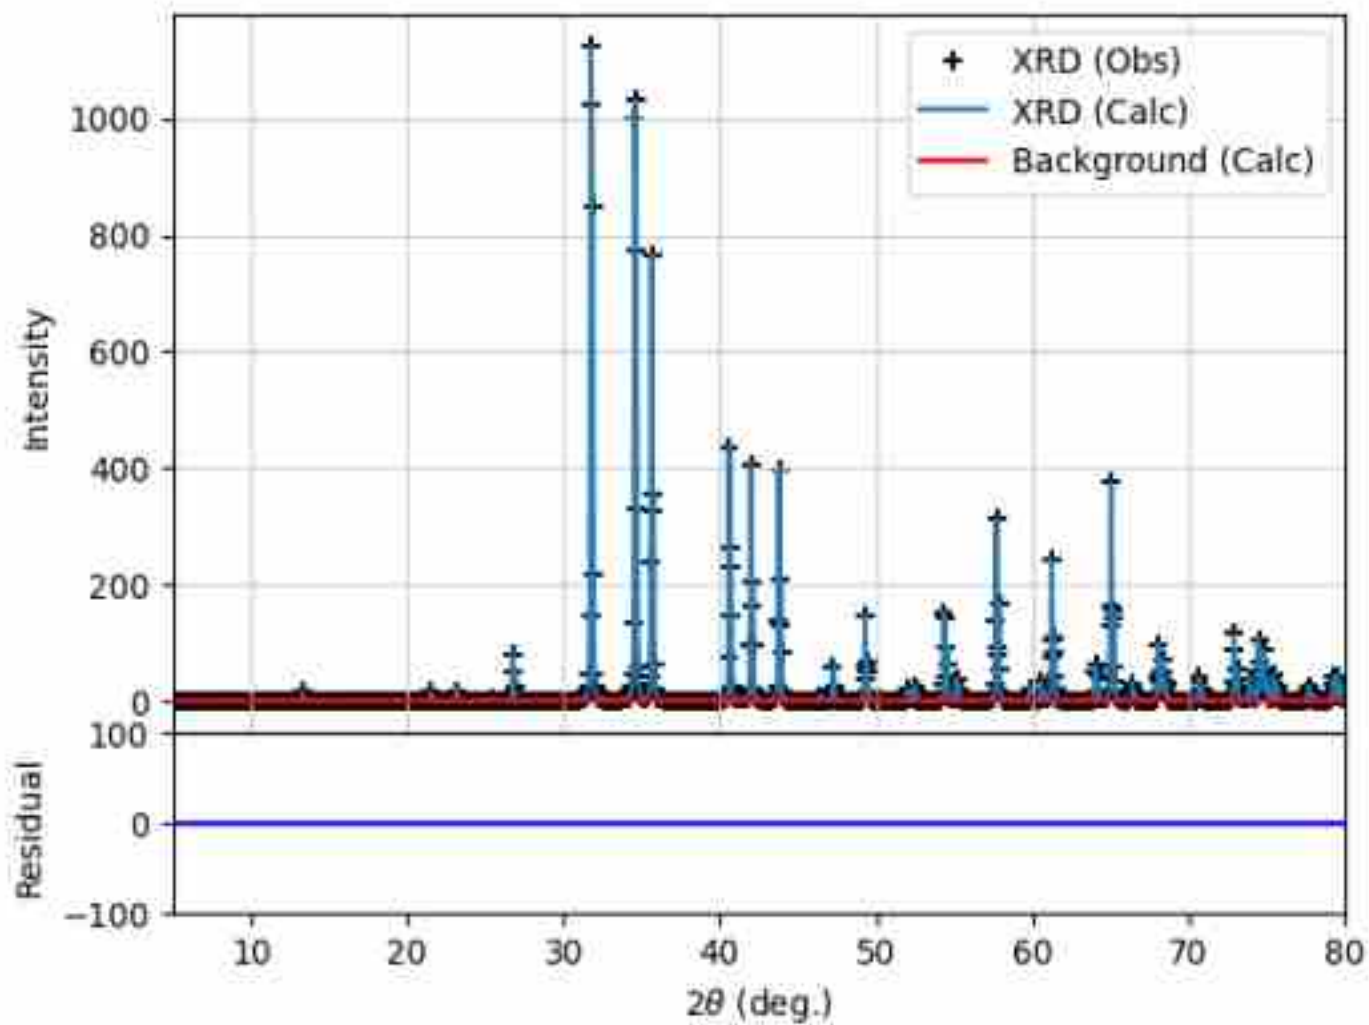

| RMSE before RR | Rwp     | RMSE after RR |
|----------------|---------|---------------|
| 0.01           | 0.00356 | 0.00065       |

# Nd3Tl1

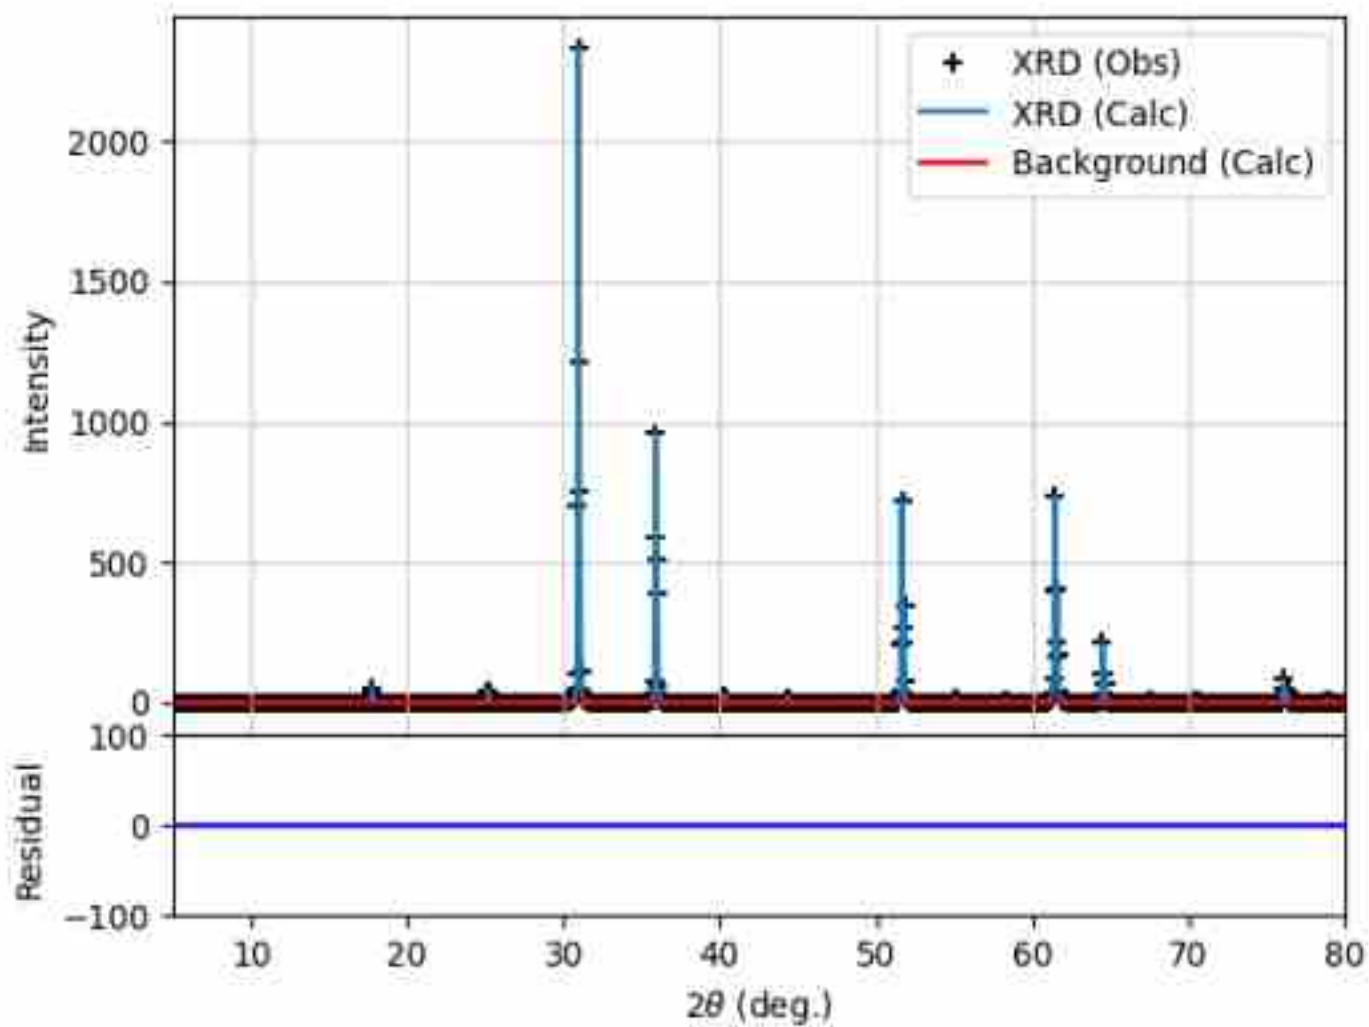

| RMSE before RR | Rwp     | RMSE after RR |
|----------------|---------|---------------|
| 0.001          | 0.00272 | 0.00027       |

# Nd<sub>4</sub>Al<sub>4</sub>Pt<sub>4</sub>

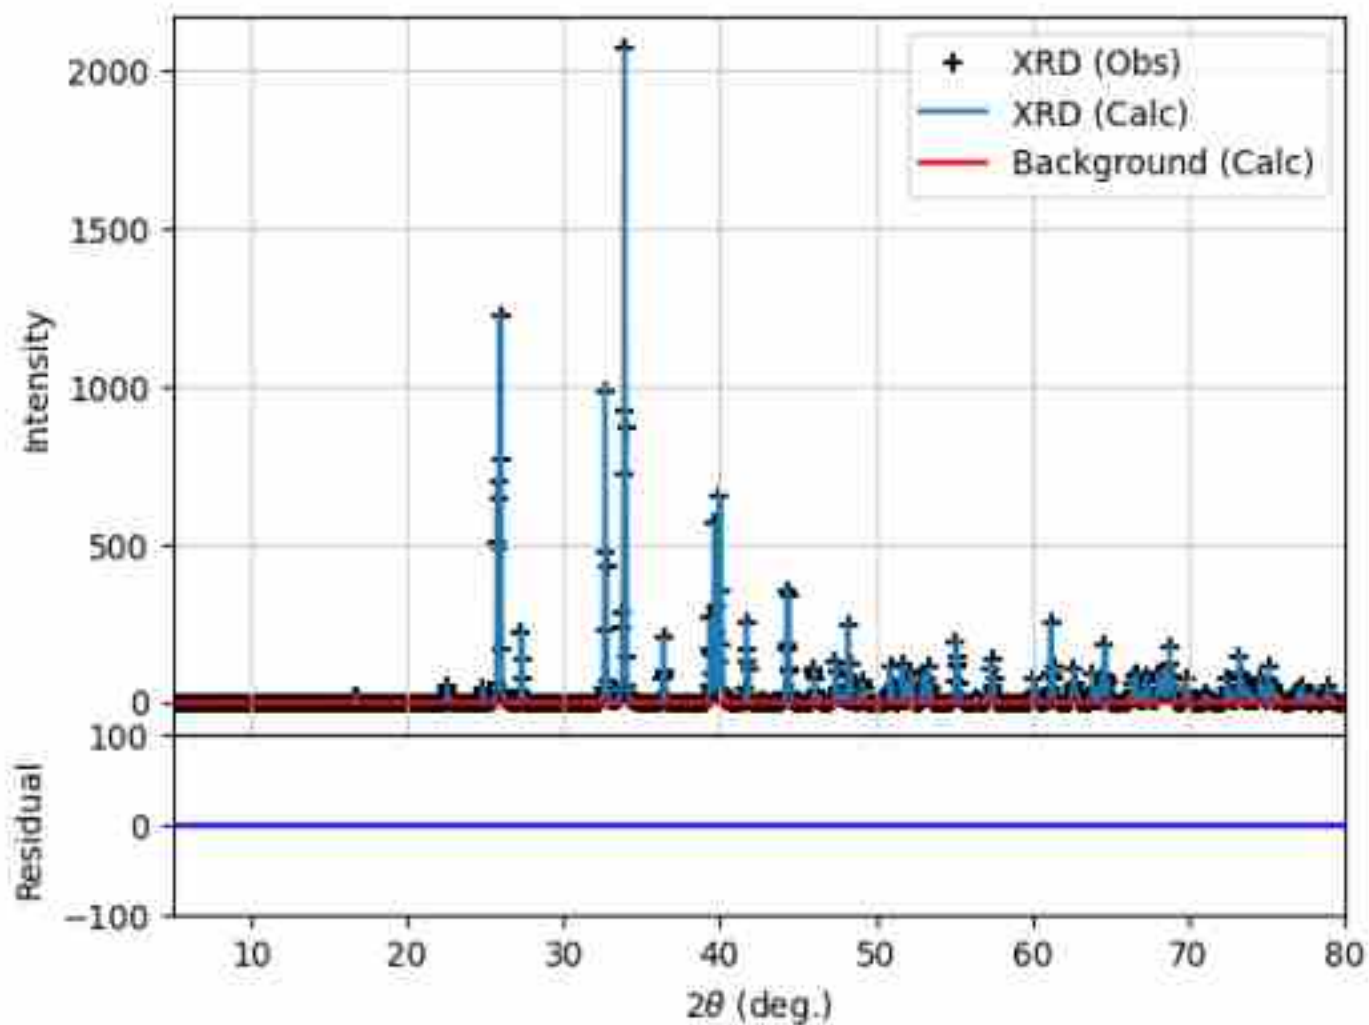

| RMSE before RR | Rwp     | RMSE after RR |
|----------------|---------|---------------|
| 0.01           | 0.00402 | 0.00073       |

# Nd<sub>4</sub>Mg<sub>2</sub>Si<sub>4</sub>

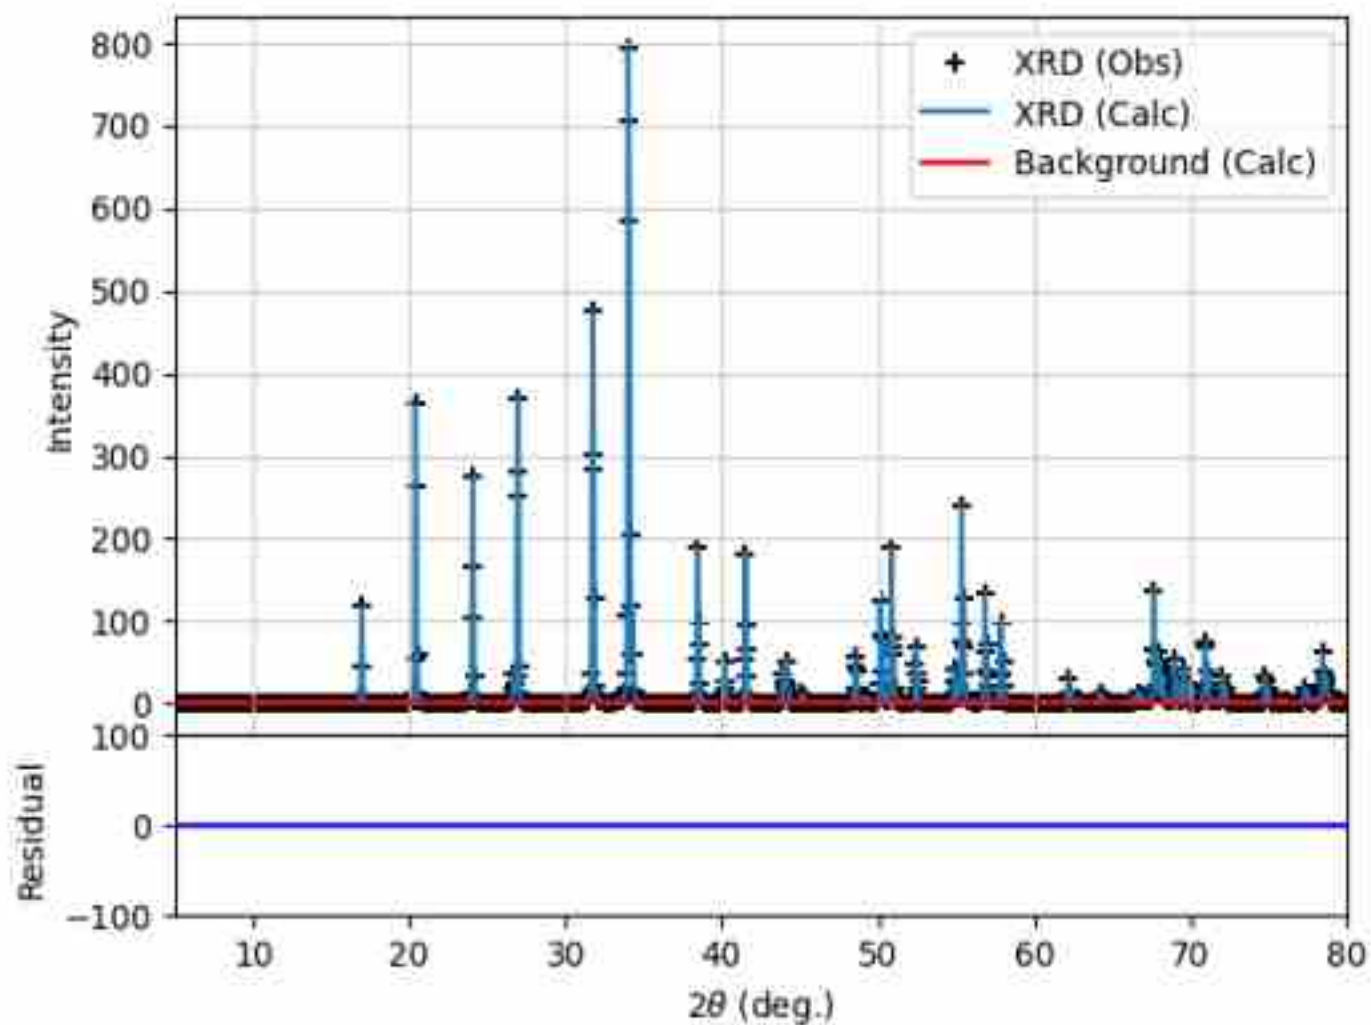

| RMSE before RR | Rwp    | RMSE after RR |
|----------------|--------|---------------|
| 0.01           | 0.0047 | 0.00064       |

# Ni<sub>4</sub>Ag<sub>4</sub>O<sub>8</sub>

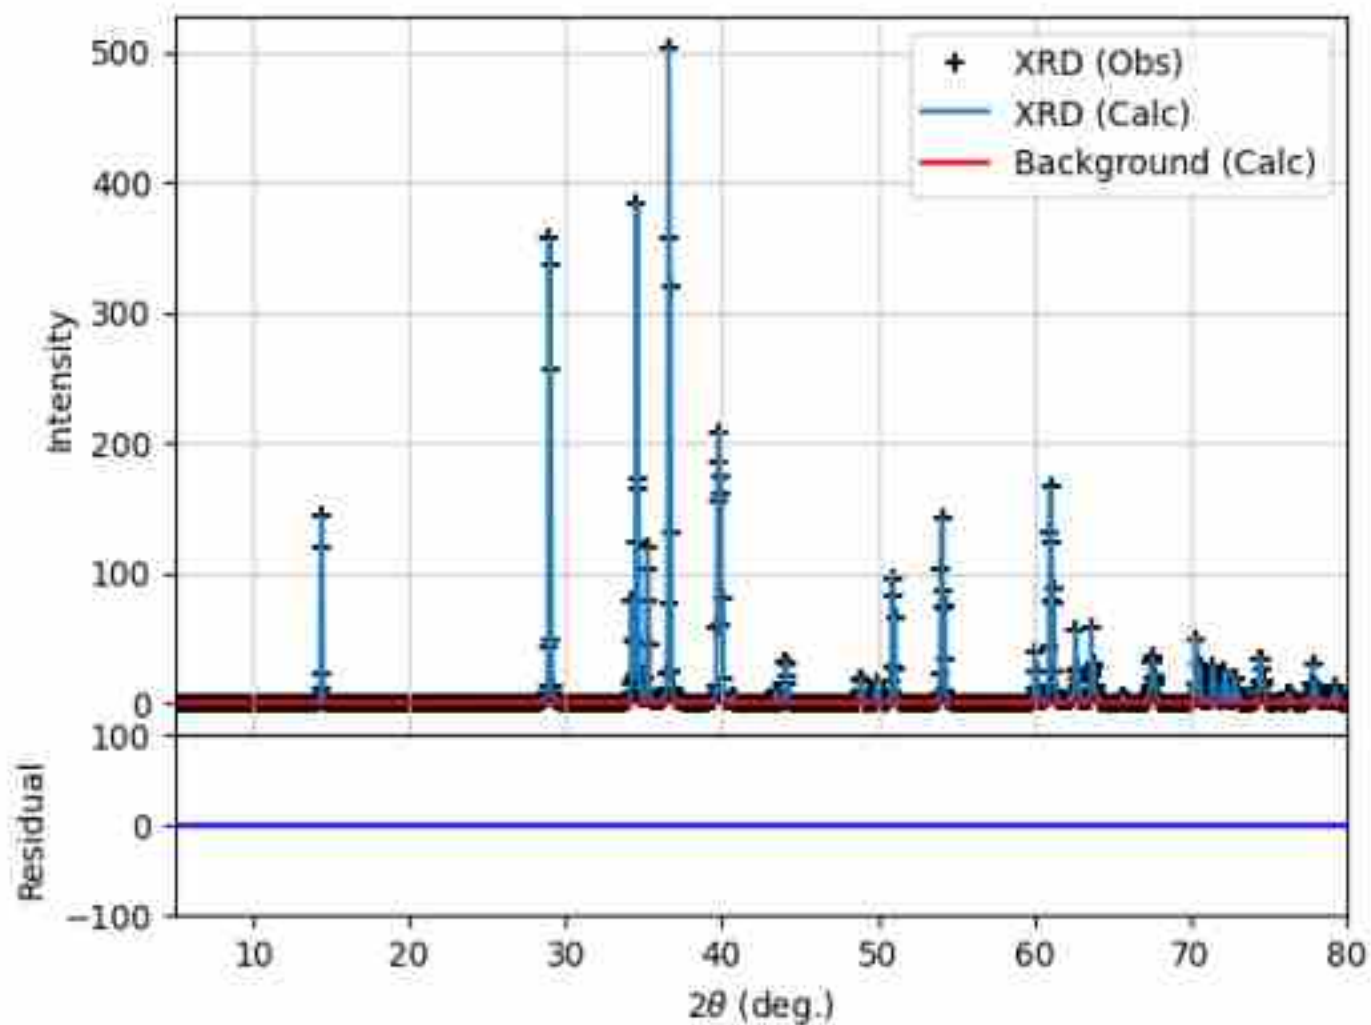

| RMSE before RR | Rwp     | RMSE after RR |
|----------------|---------|---------------|
| 0.01           | 0.00151 | 0.00026       |



# Np1Sb1

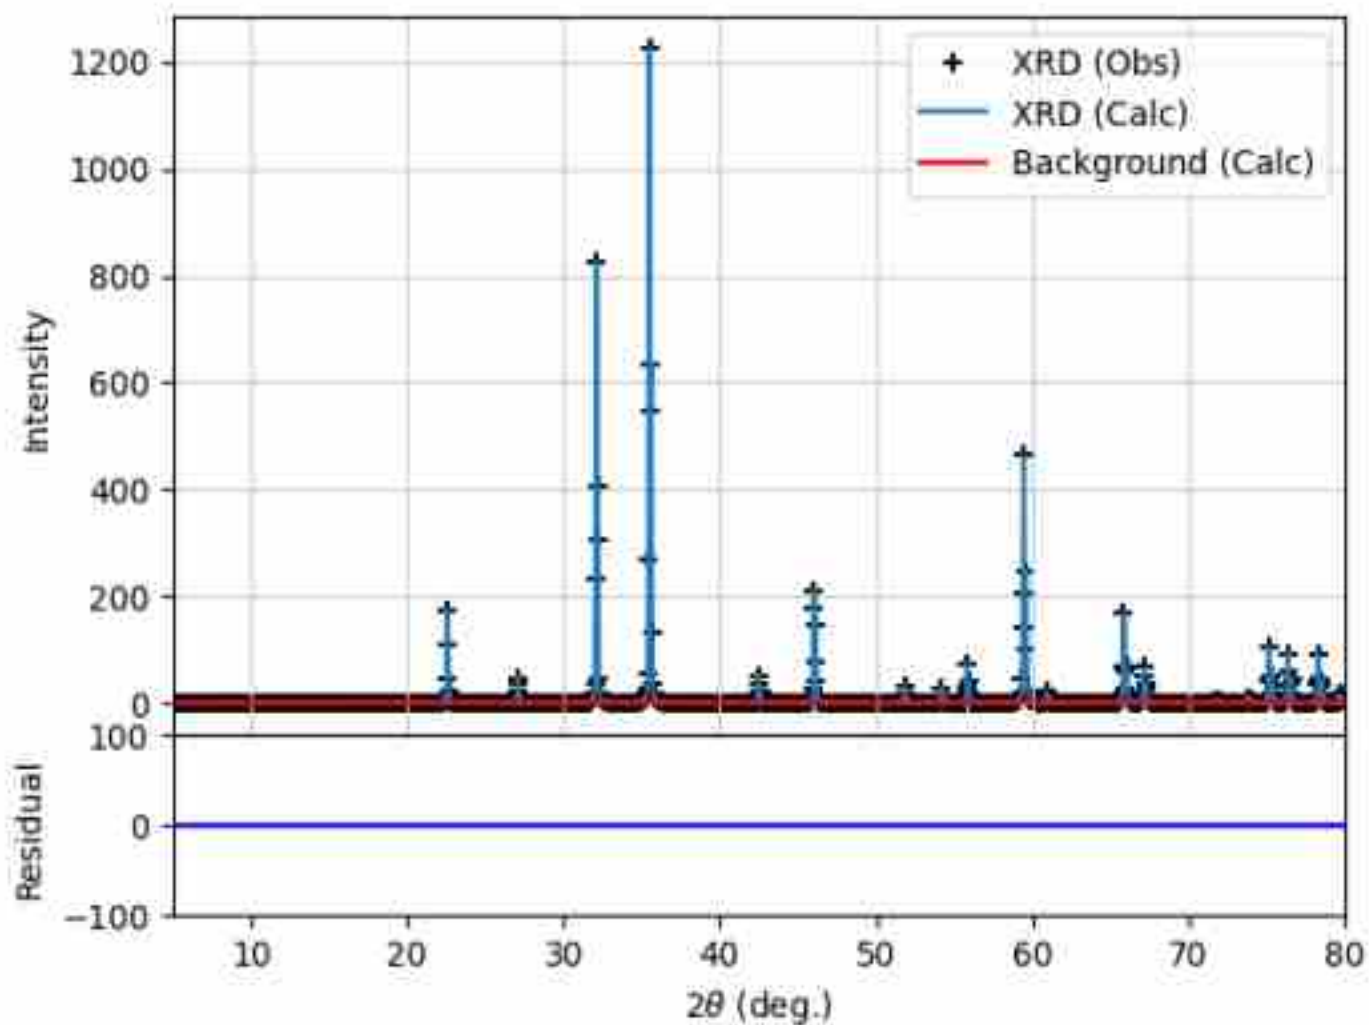

| RMSE before RR | Rwp     | RMSE after RR |
|----------------|---------|---------------|
| 0.001          | 0.04264 | 0.0008        |

# Pa1Ag1Te2

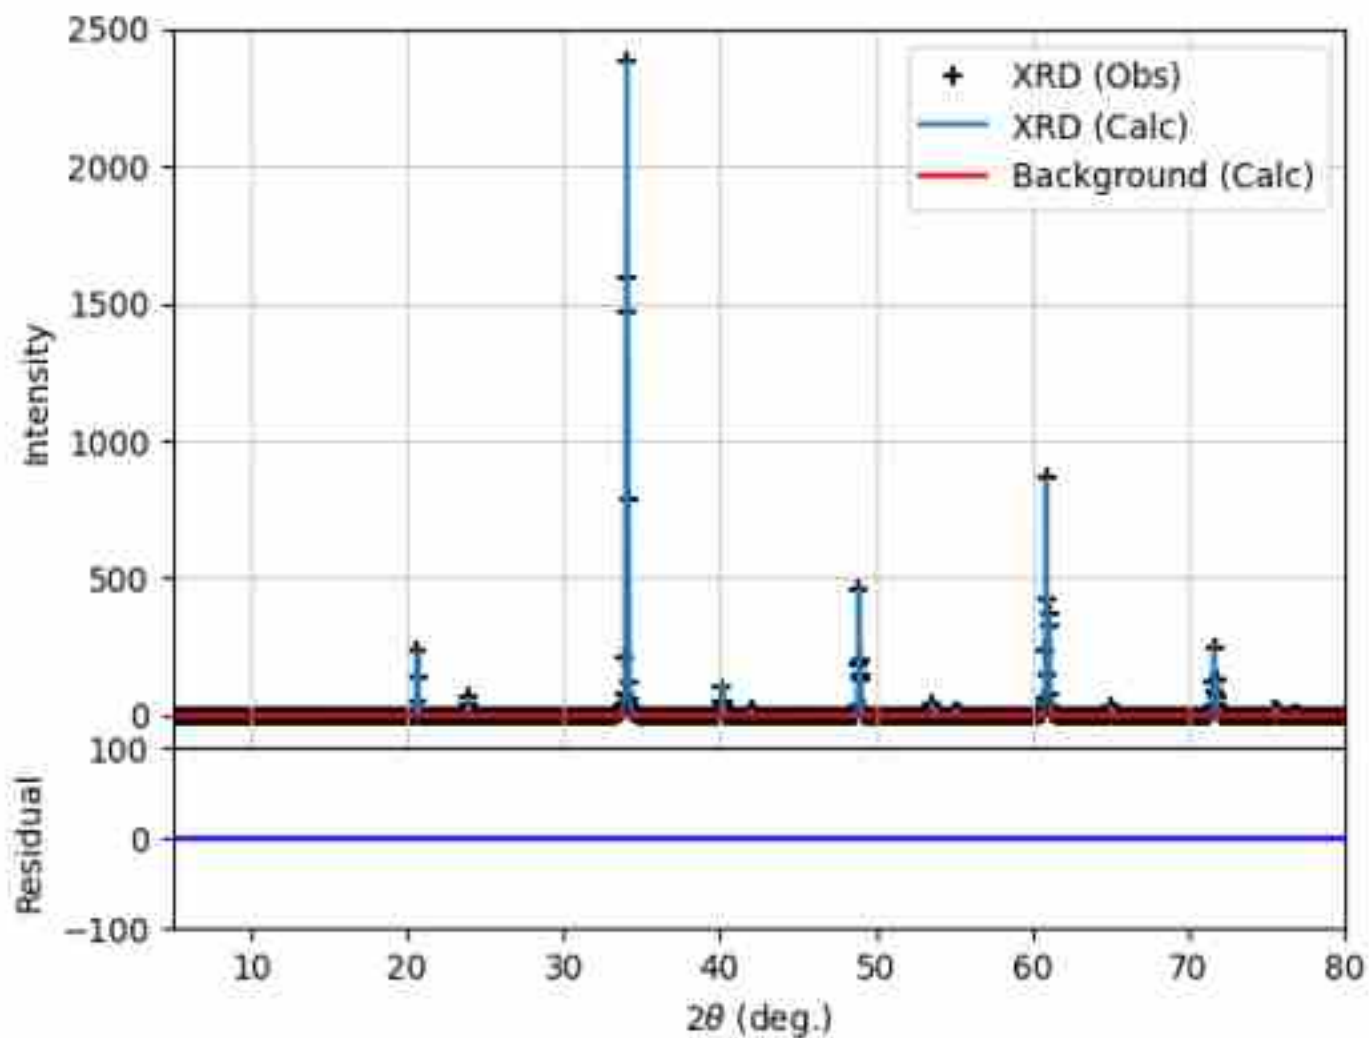

| RMSE before RR | Rwp     | RMSE after RR |
|----------------|---------|---------------|
| 0.001          | 0.00327 | 0.00042       |

# Pa1Al1Ru2

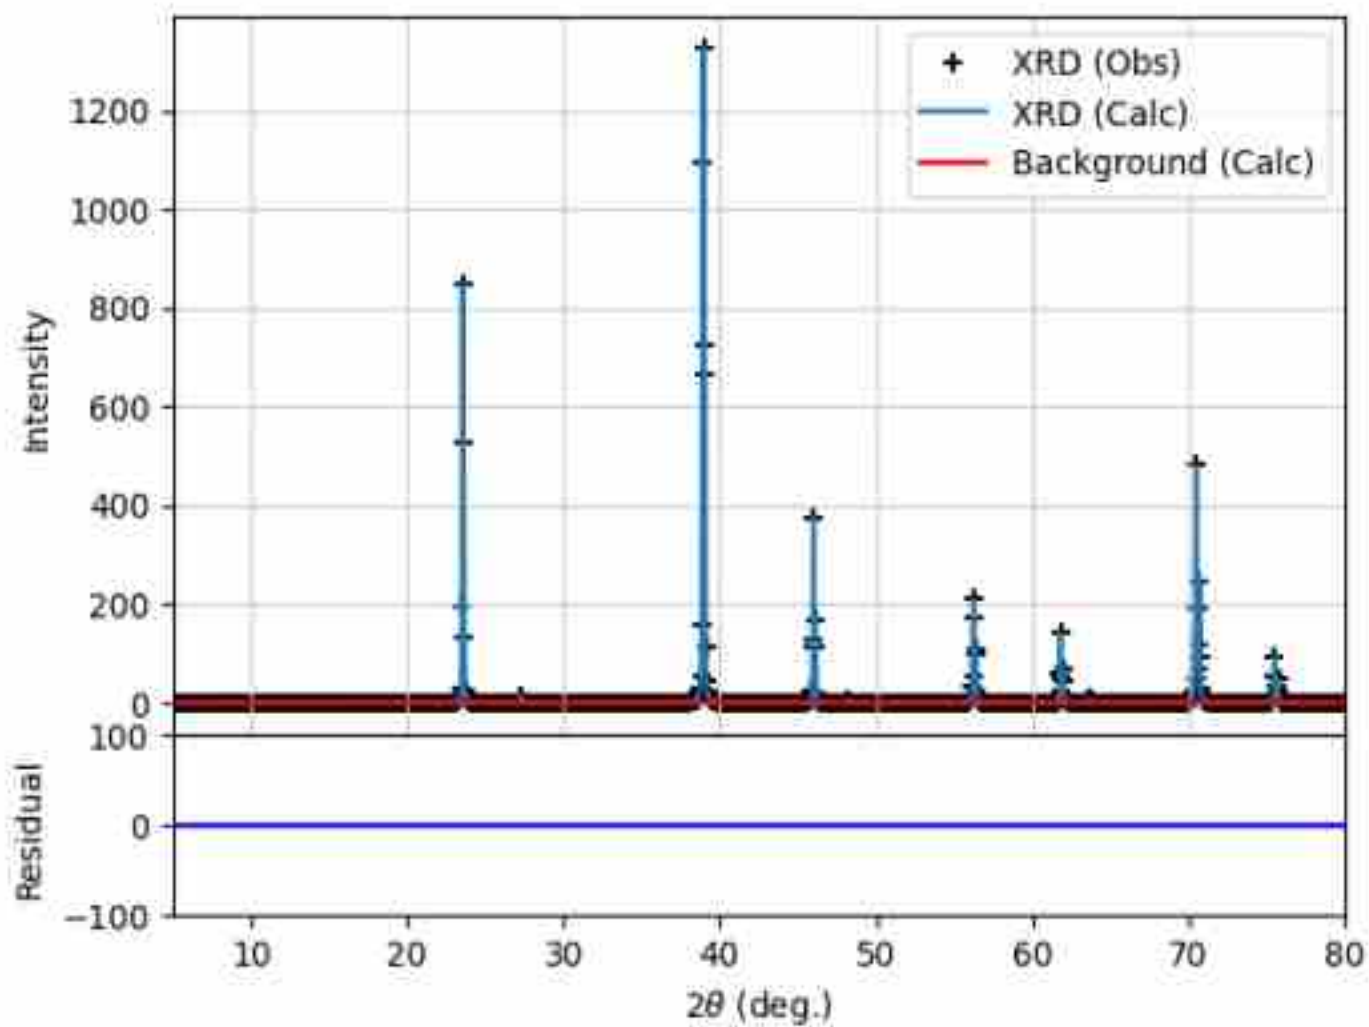

| RMSE before RR | Rwp     | RMSE after RR |
|----------------|---------|---------------|
| 0.001          | 0.02251 | 0.00125       |

# Pa1Al1Tc2

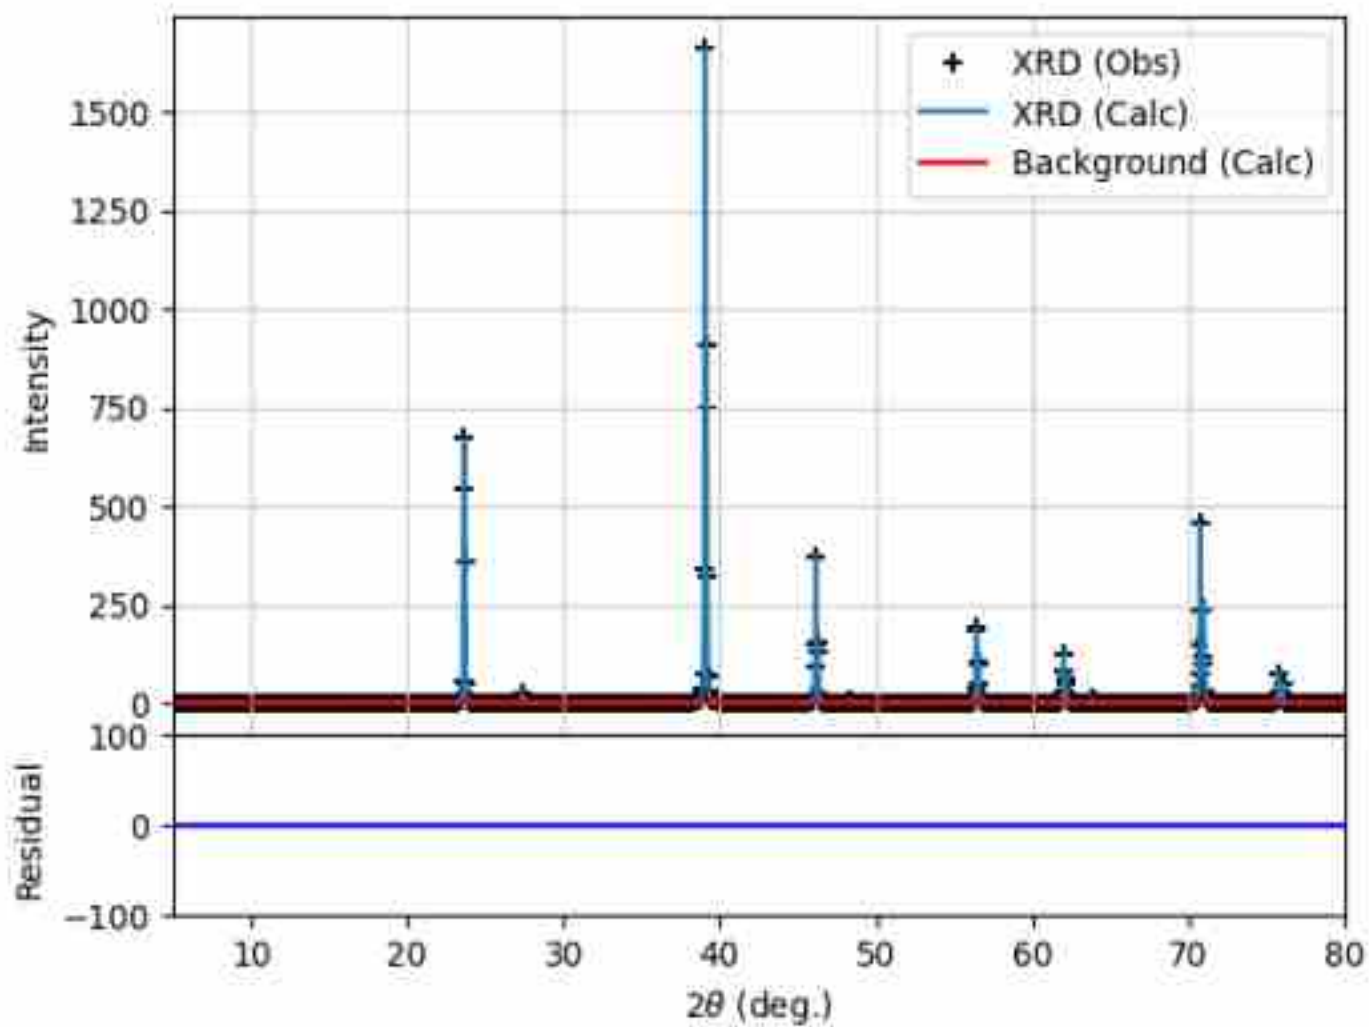

| RMSE before RR | Rwp   | RMSE after RR |
|----------------|-------|---------------|
| 0.001          | 9e-05 | 0.0001        |

# Pa1Al1V2

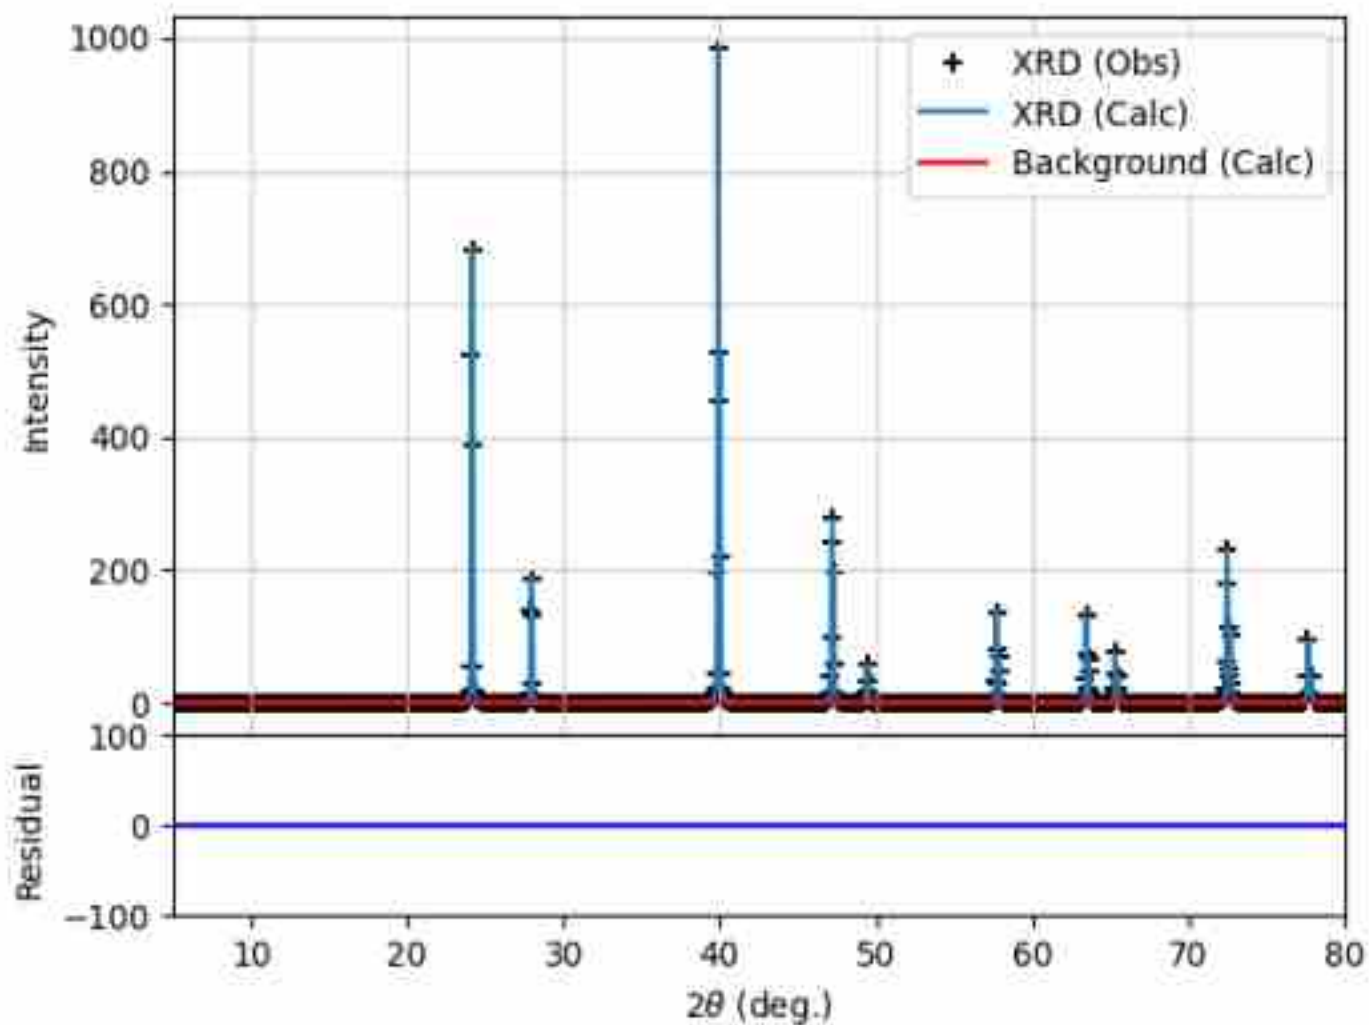

| RMSE before RR | Rwp    | RMSE after RR |
|----------------|--------|---------------|
| 0.001          | 0.0005 | 0.00071       |

Pa1Ga1Tc2

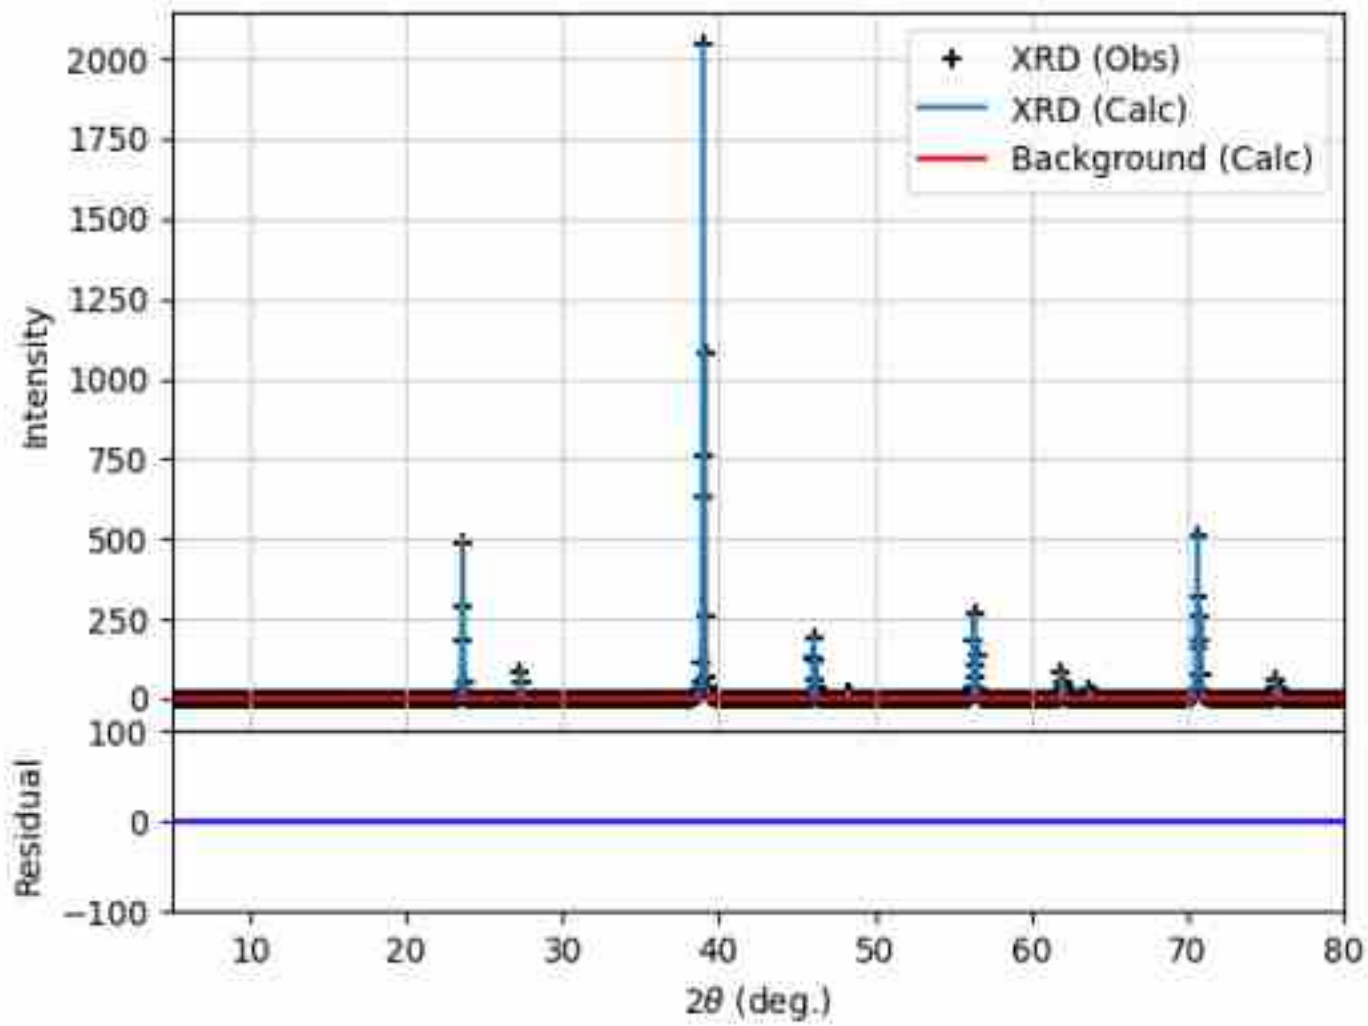

| RMSE before RR | Rwp     | RMSE after RR |
|----------------|---------|---------------|
| 0.001          | 0.01584 | 0.00111       |

# Pa1Mn2Al1

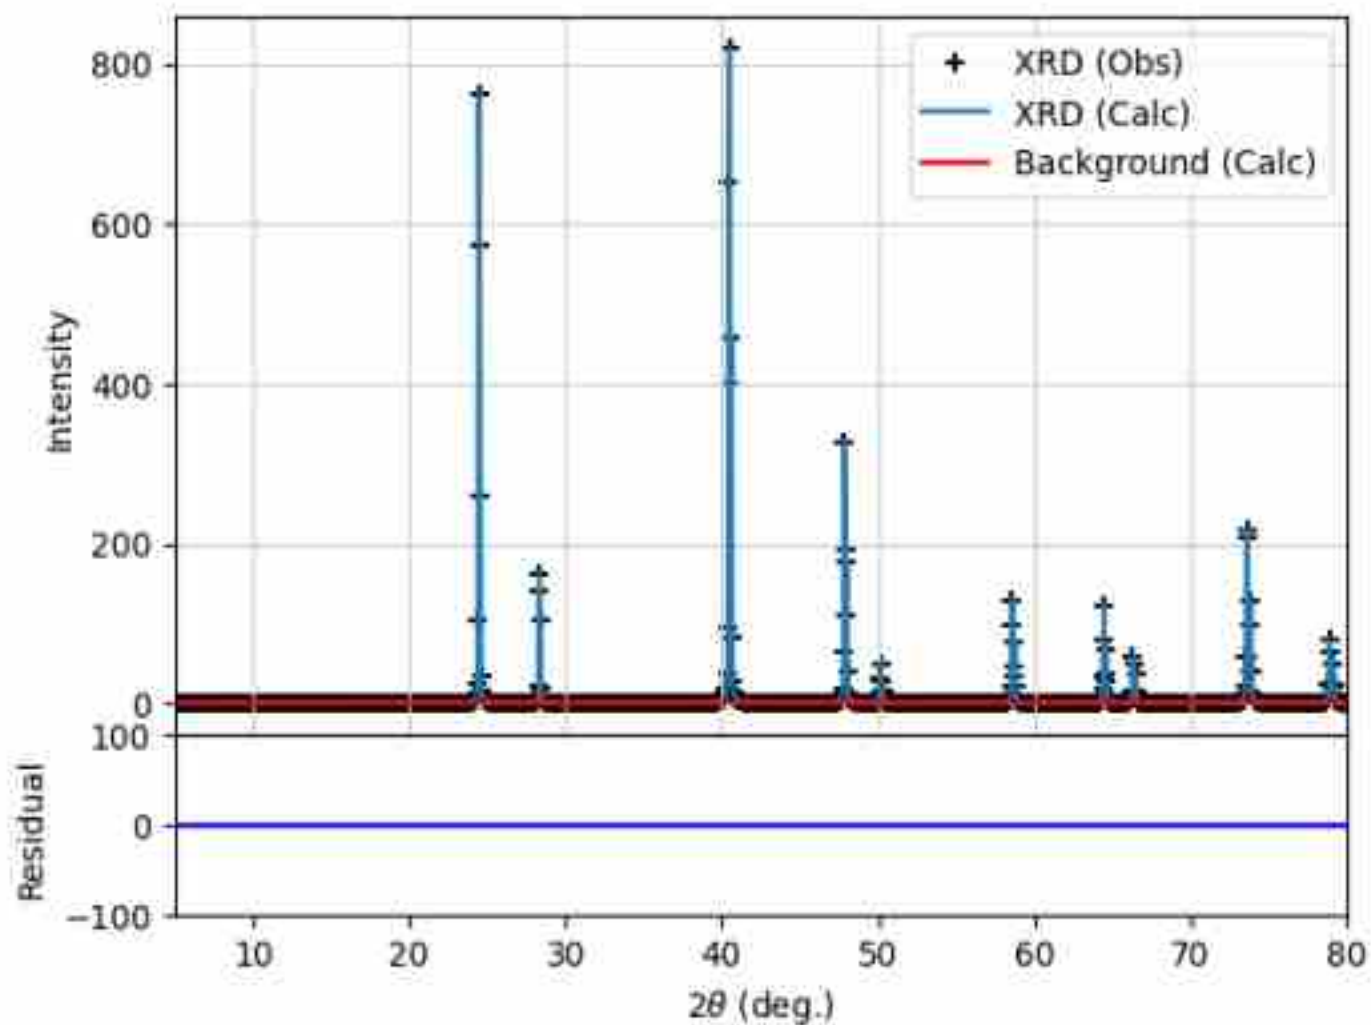

| RMSE before RR | Rwp     | RMSE after RR |
|----------------|---------|---------------|
| 0.001          | 0.00363 | 0.00393       |

Pa1Sn1Ru2

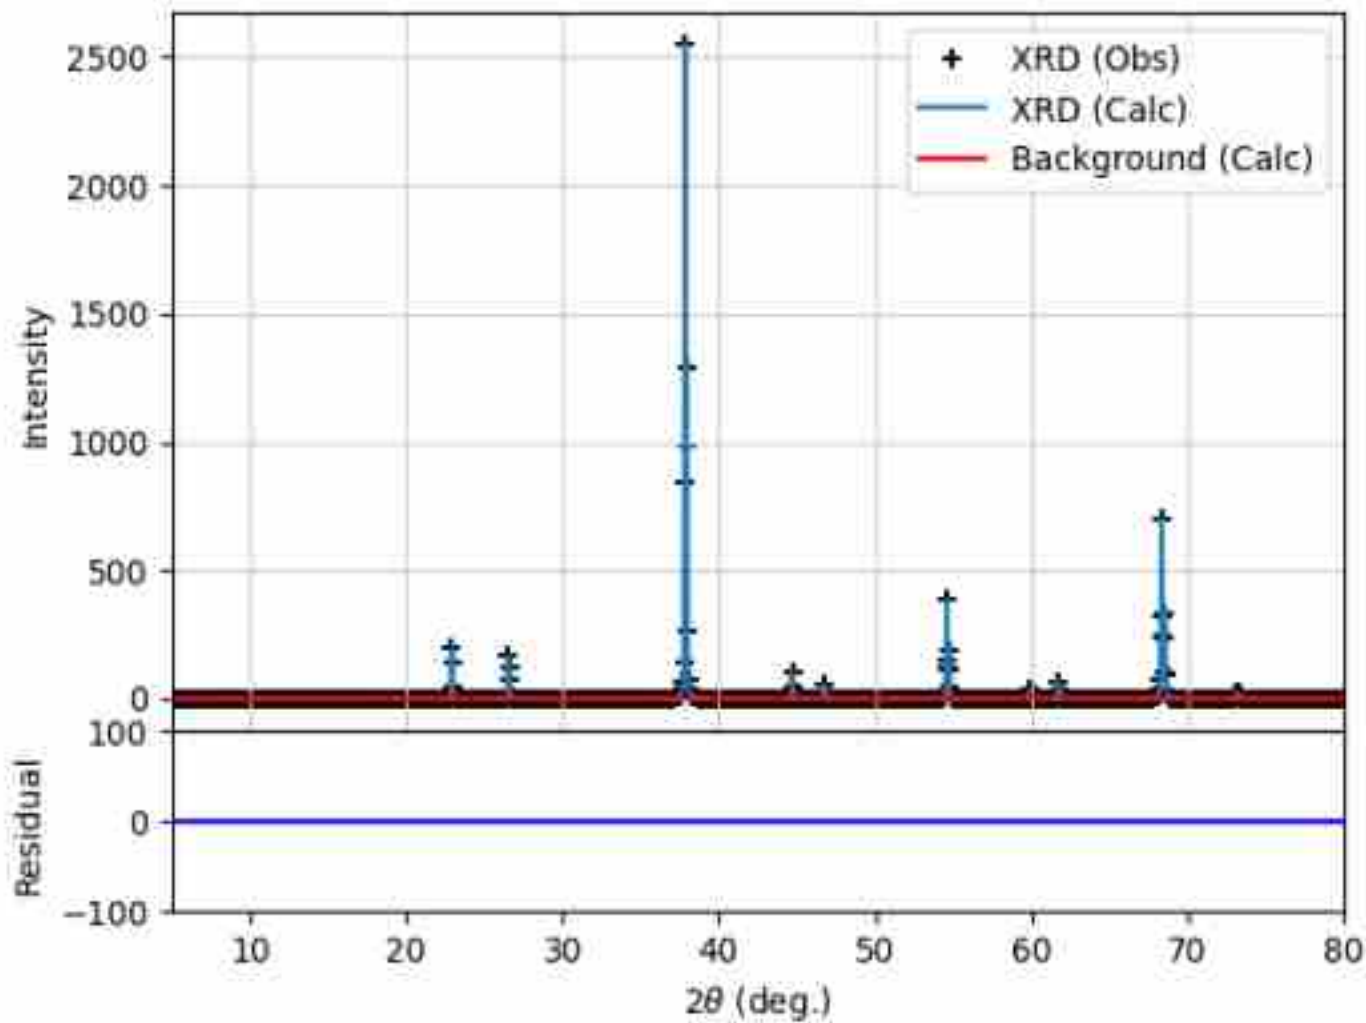

| RMSE before RR | Rwp     | RMSE after RR |
|----------------|---------|---------------|
| 0.001          | 0.01934 | 0.00148       |



# Pa1Tc2Sn1

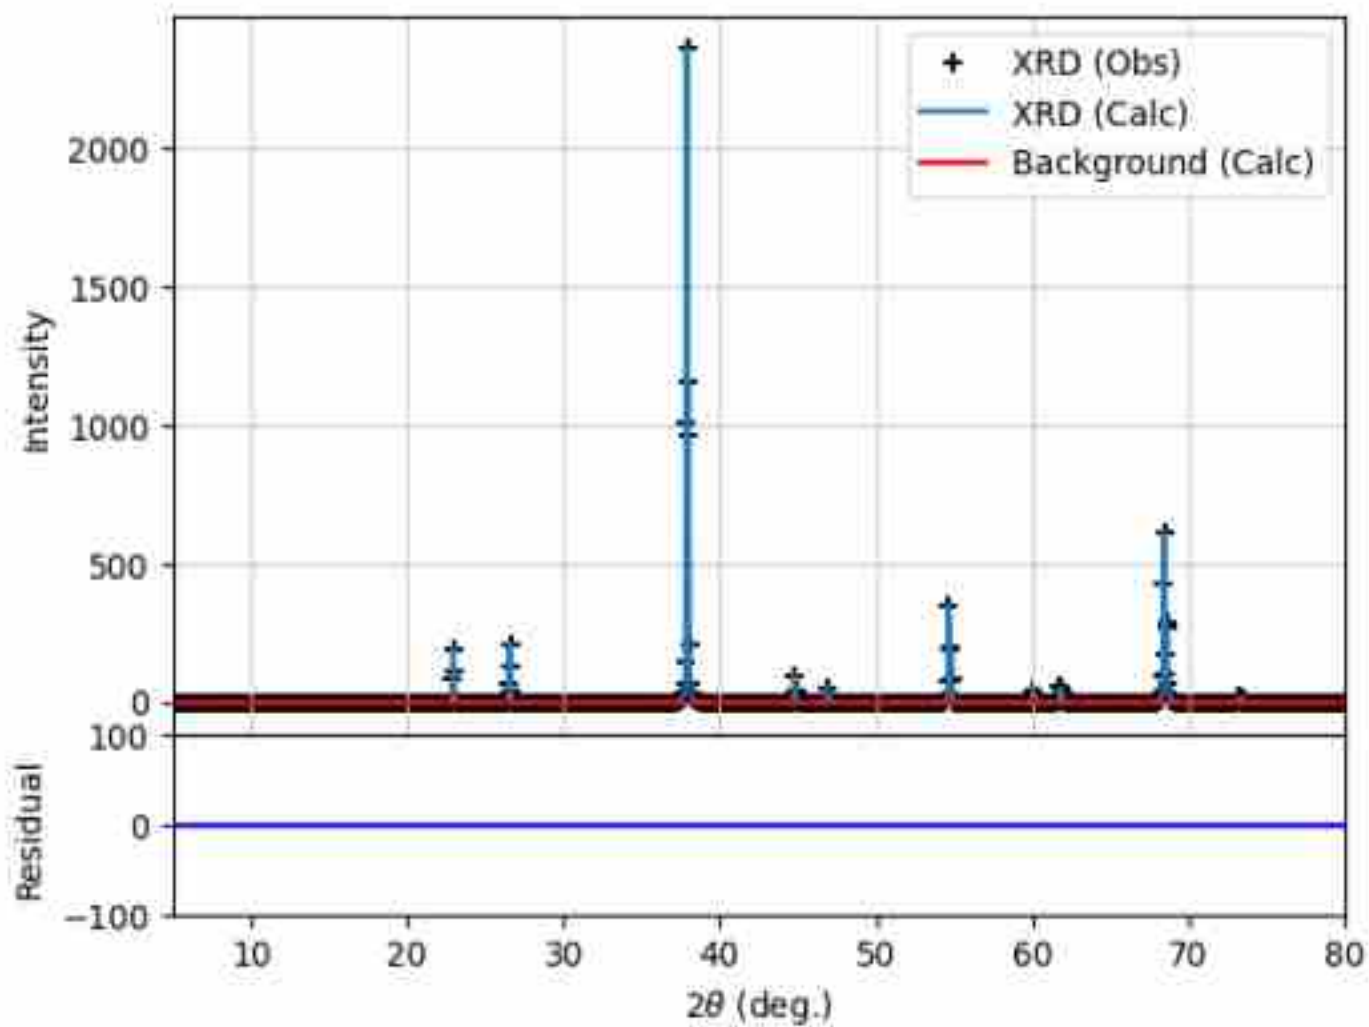

| RMSE before RR | Rwp     | RMSE after RR |
|----------------|---------|---------------|
| 0.001          | 0.00447 | 0.00074       |

# Pd1Pb4Au1

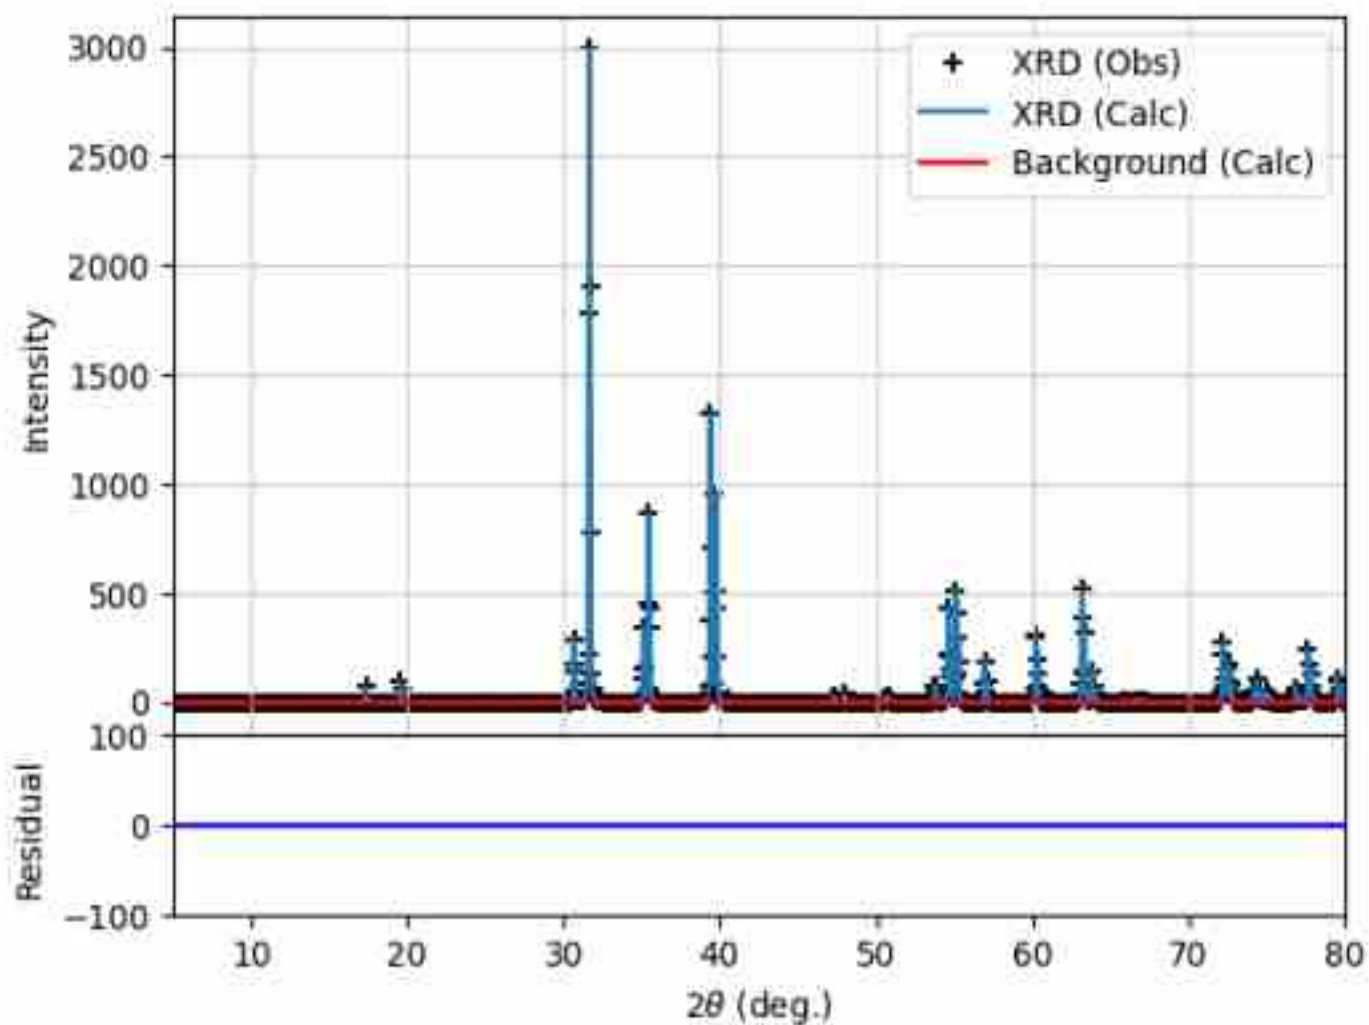

| RMSE before RR | Rwp     | RMSE after RR |
|----------------|---------|---------------|
| 0.01           | 0.00411 | 0.00049       |

# Pd2Au6

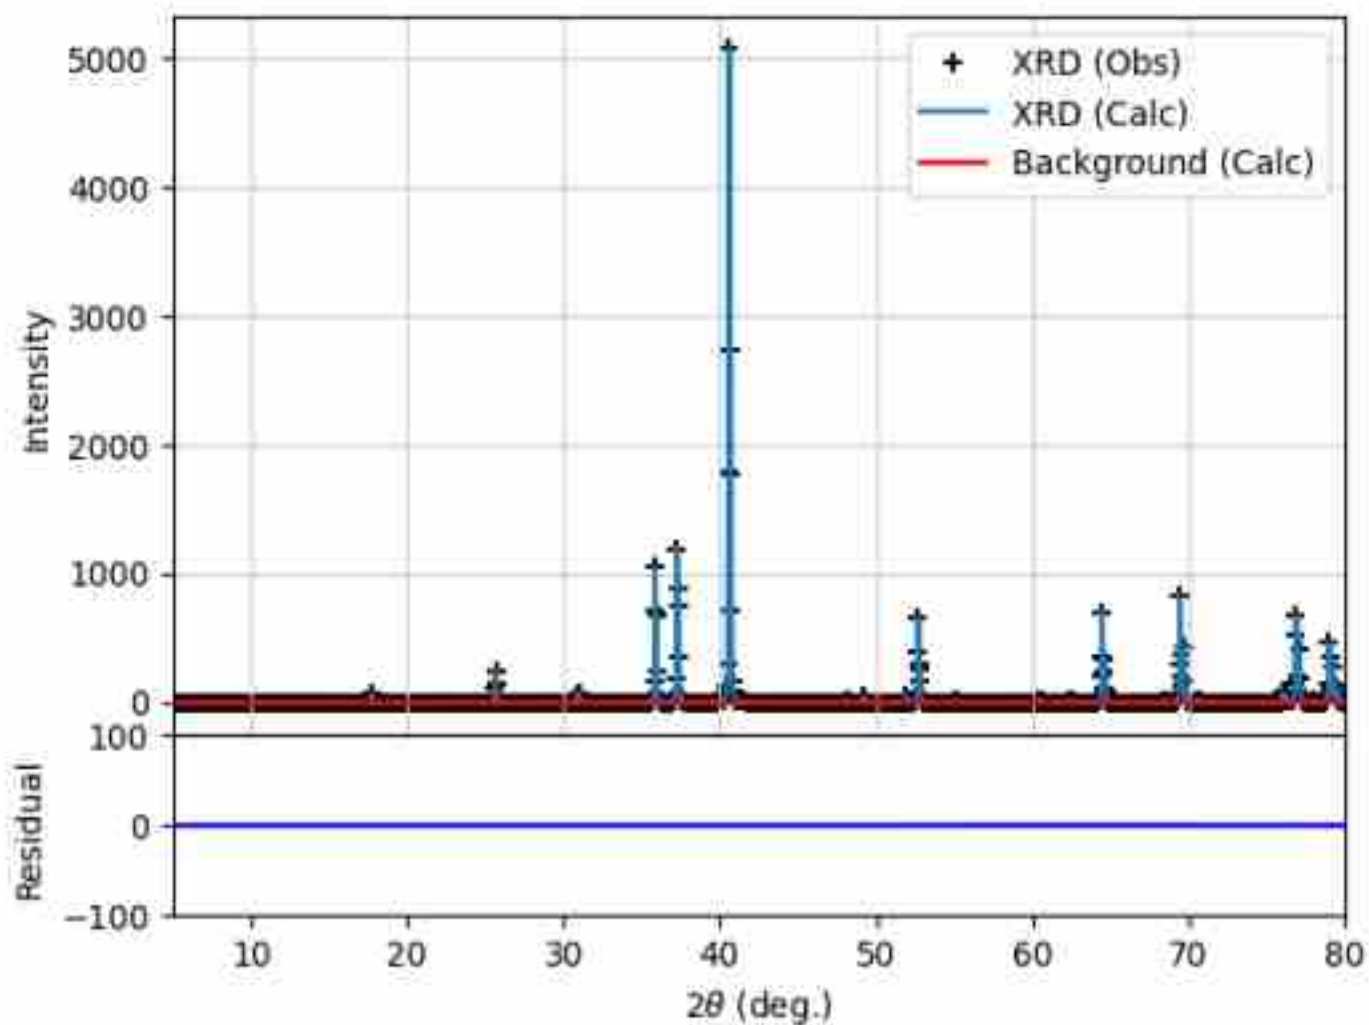

| RMSE before RR | Rwp     | RMSE after RR |
|----------------|---------|---------------|
| 0.01           | 0.11438 | 0.00233       |

# Pd3Au1

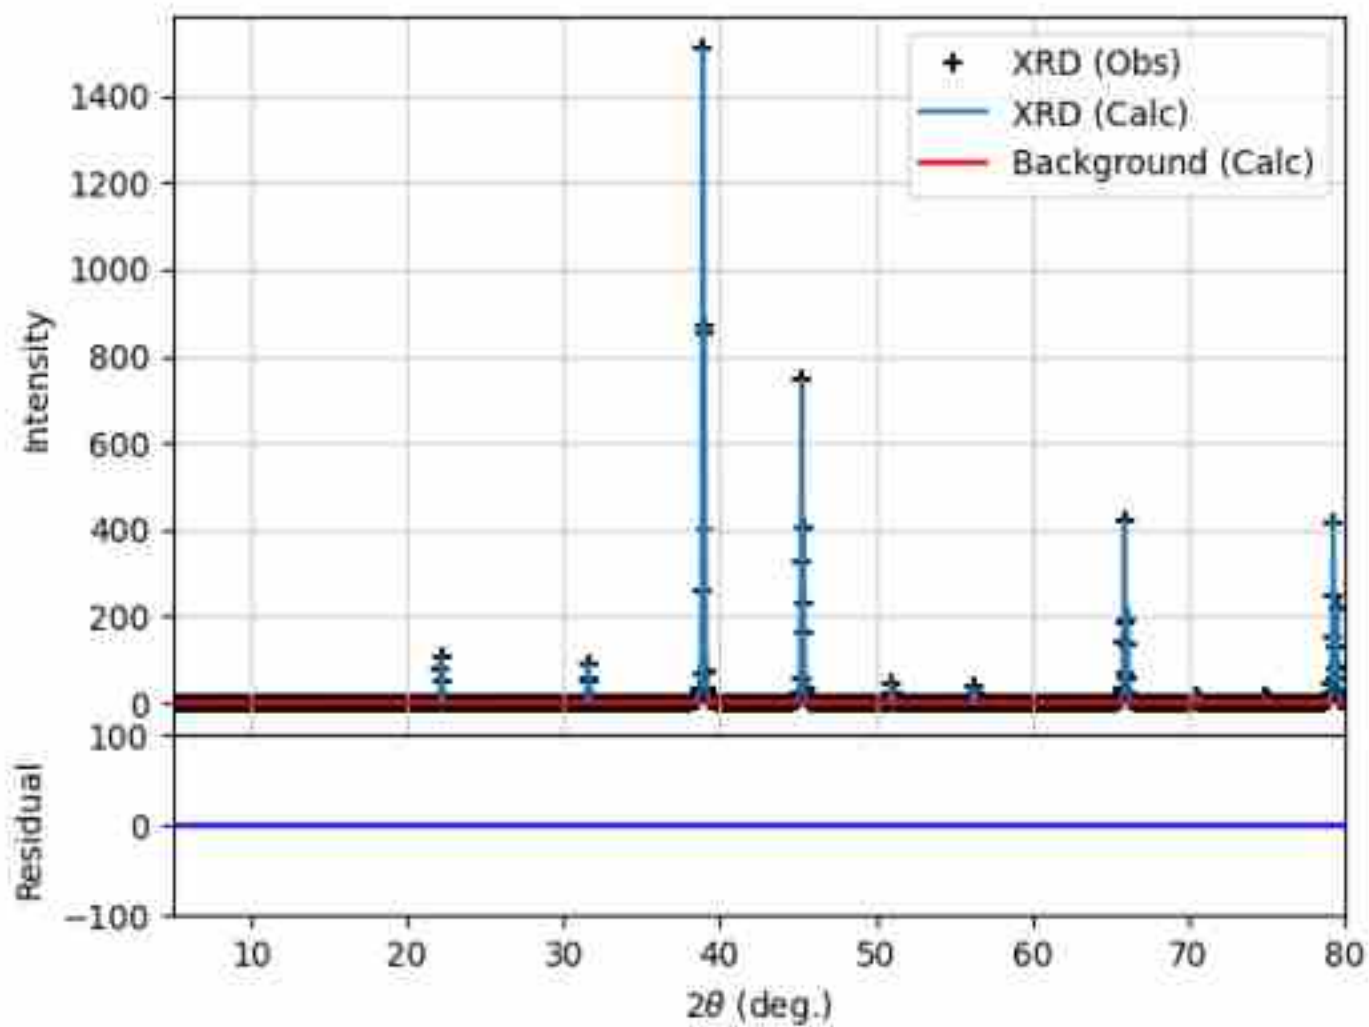

| RMSE before RR | Rwp     | RMSE after RR |
|----------------|---------|---------------|
| 0.001          | 0.01556 | 0.00094       |

# Pm1Au3

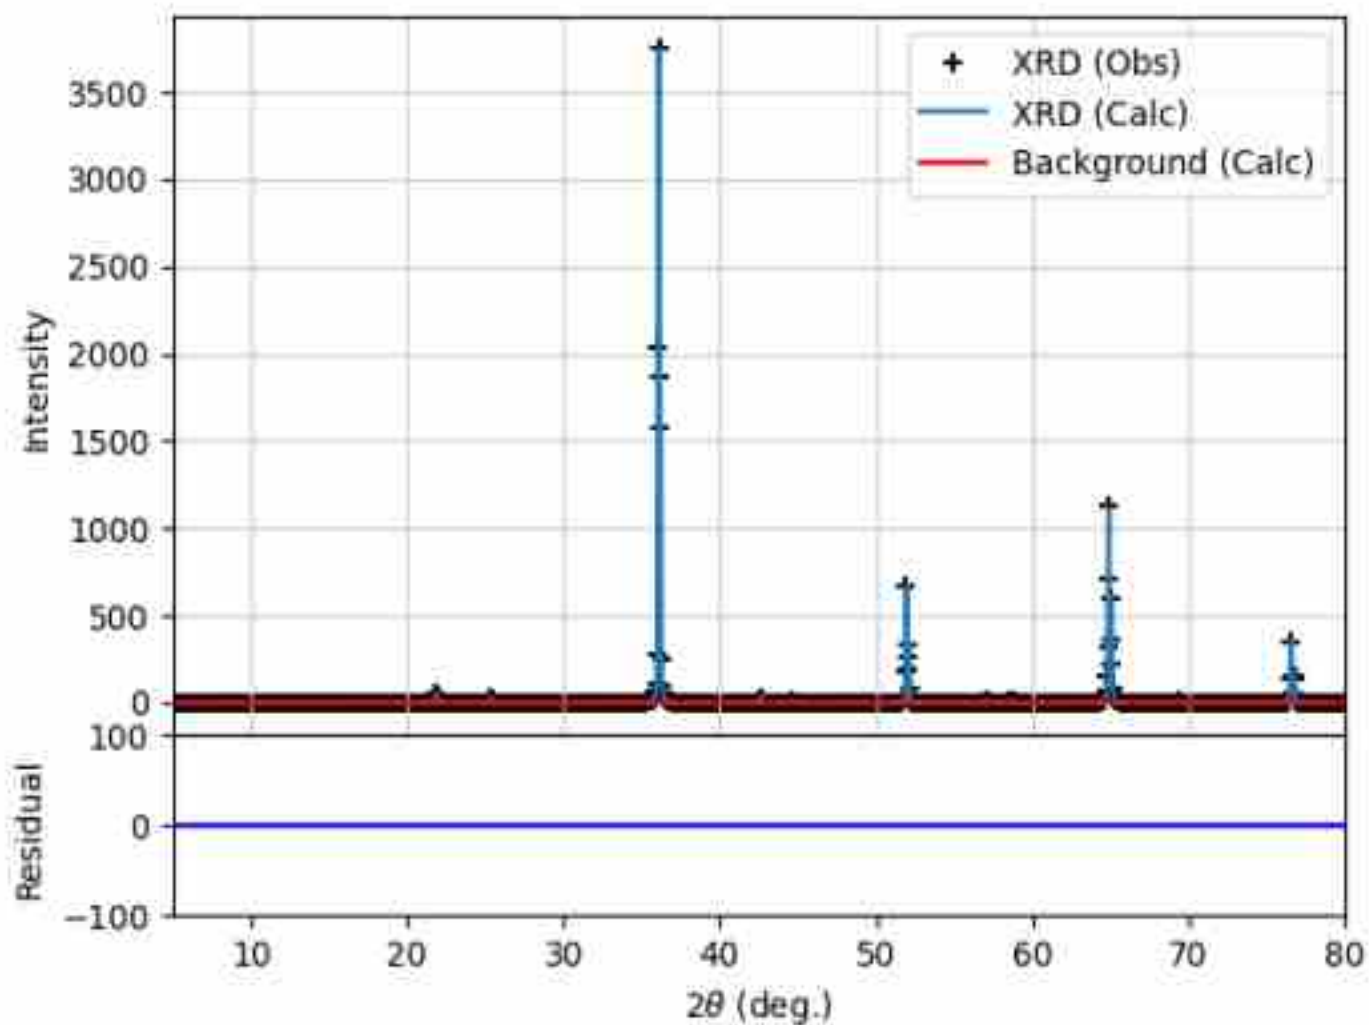

| RMSE before RR | Rwp     | RMSE after RR |
|----------------|---------|---------------|
| 0.001          | 0.00844 | 0.00056       |

# Pm2Au6

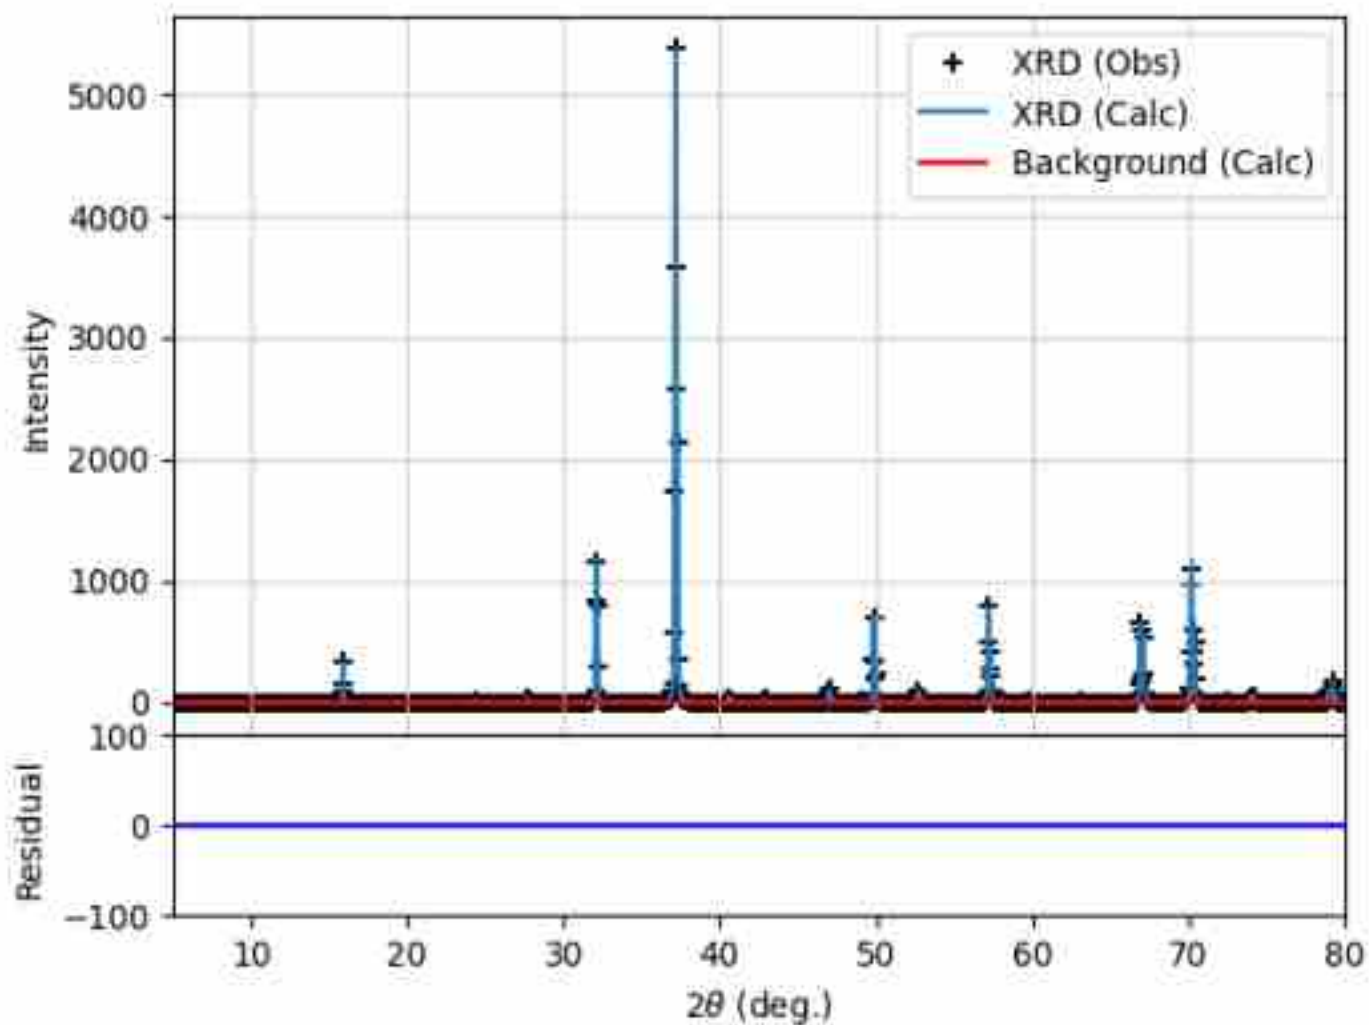

| RMSE before RR | Rwp     | RMSE after RR |
|----------------|---------|---------------|
| 0.01           | 0.01562 | 0.00081       |

# Pm2Br6

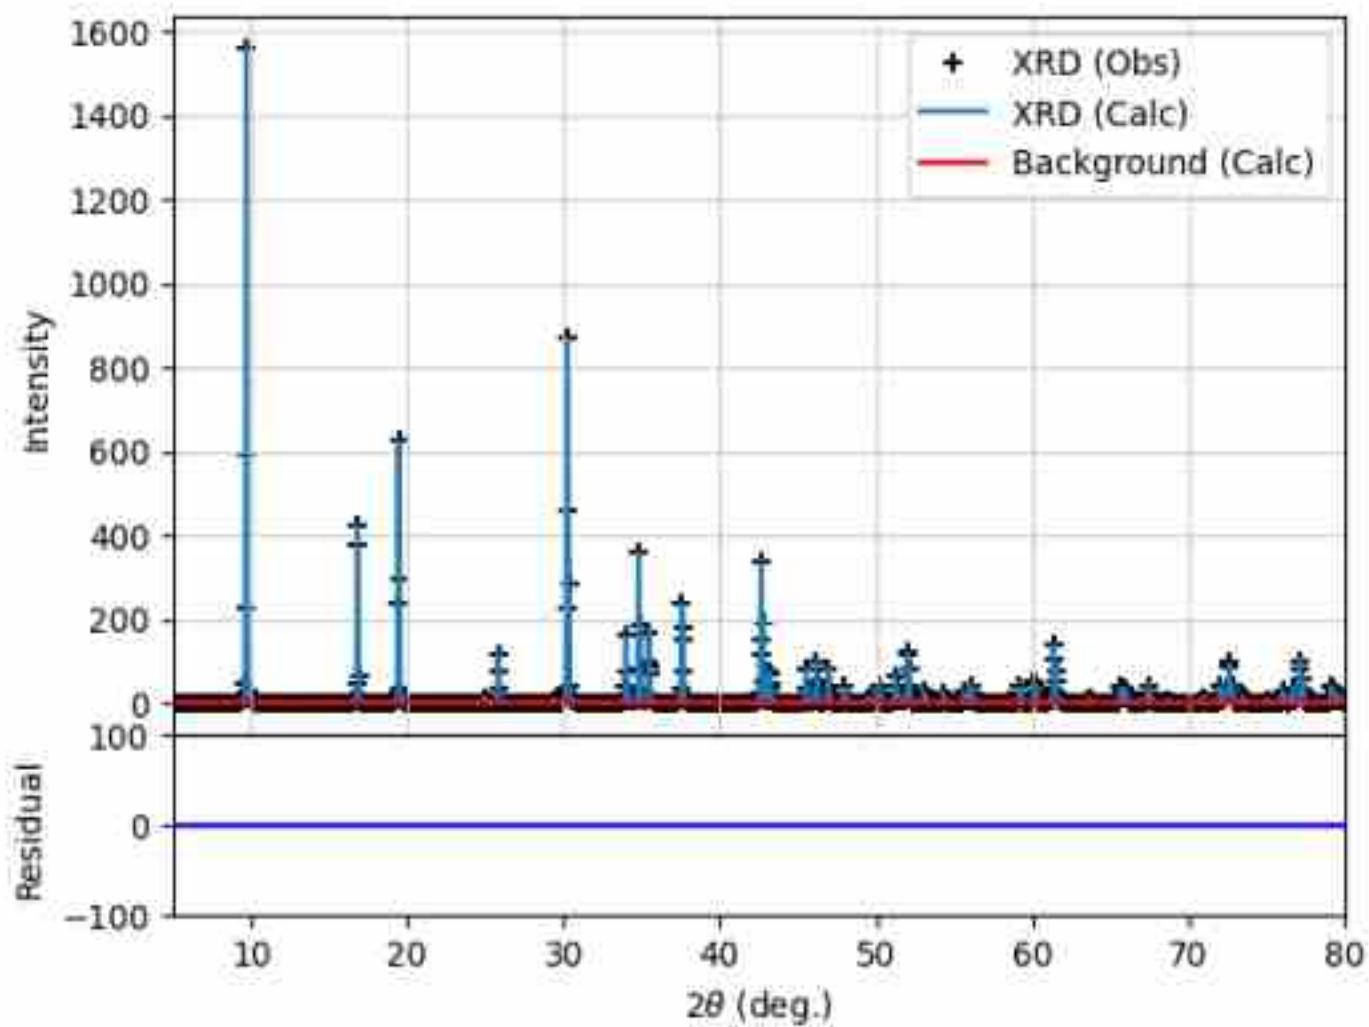

| RMSE before RR | Rwp     | RMSE after RR |
|----------------|---------|---------------|
| 0.01           | 0.00647 | 0.00055       |

# Pr1Au1

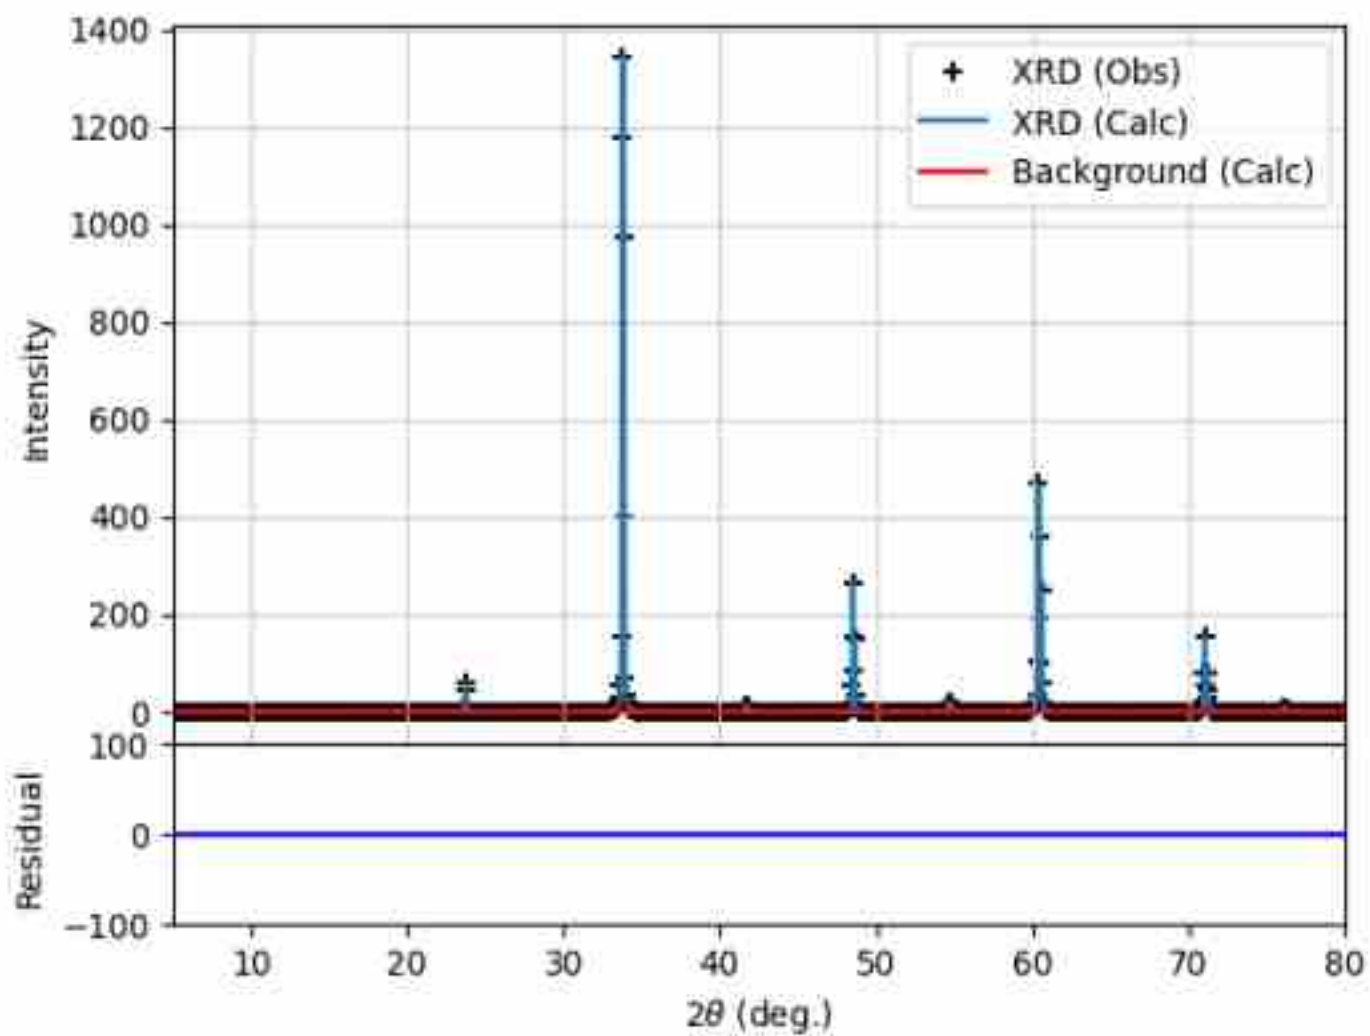

| RMSE before RR | Rwp     | RMSE after RR |
|----------------|---------|---------------|
| 0.001          | 0.00972 | 0.00052       |



# Pr1Cd2

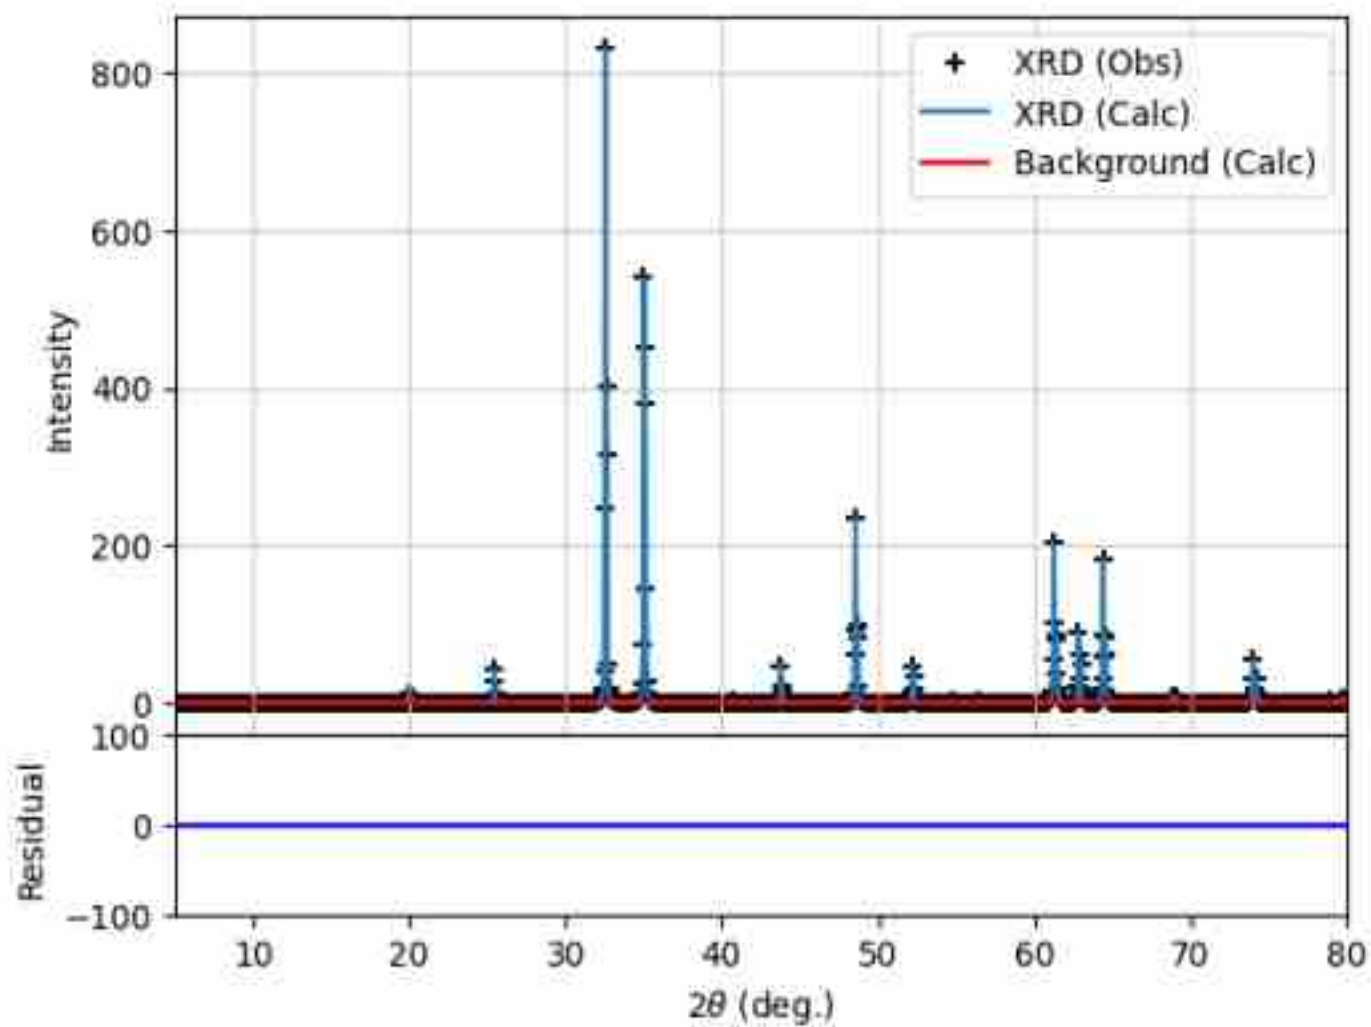

| RMSE before RR | Rwp     | RMSE after RR |
|----------------|---------|---------------|
| 0.001          | 0.01127 | 0.00077       |

# Pr1Dy1Mg2

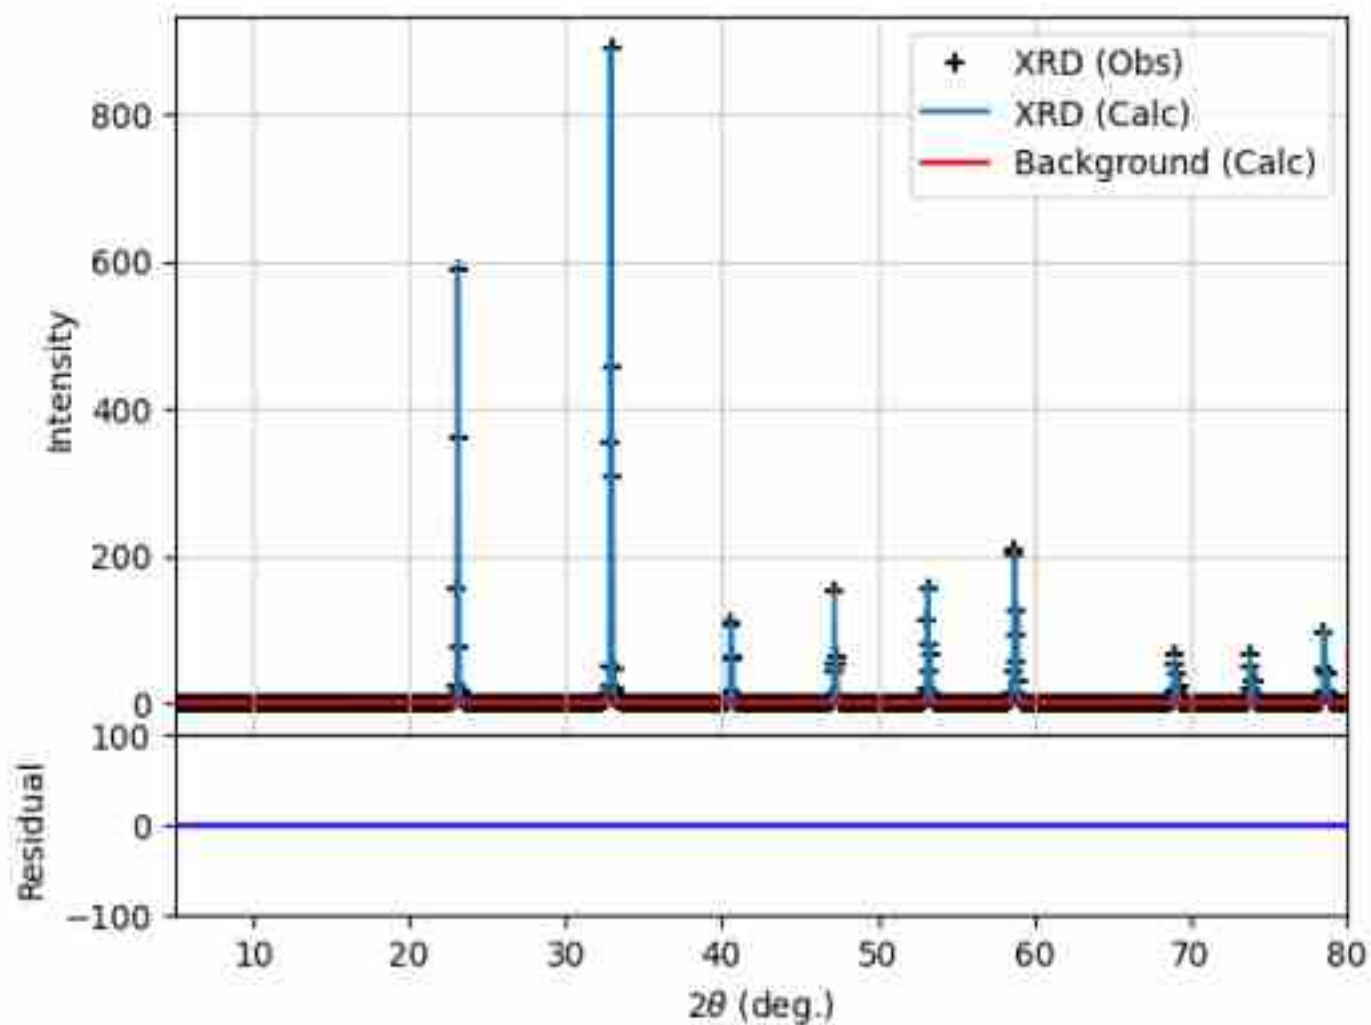

| RMSE before RR | Rwp     | RMSE after RR |
|----------------|---------|---------------|
| 0.001          | 0.17407 | 0.00257       |

# Pr<sub>1</sub>Eu<sub>1</sub>Hg<sub>2</sub>

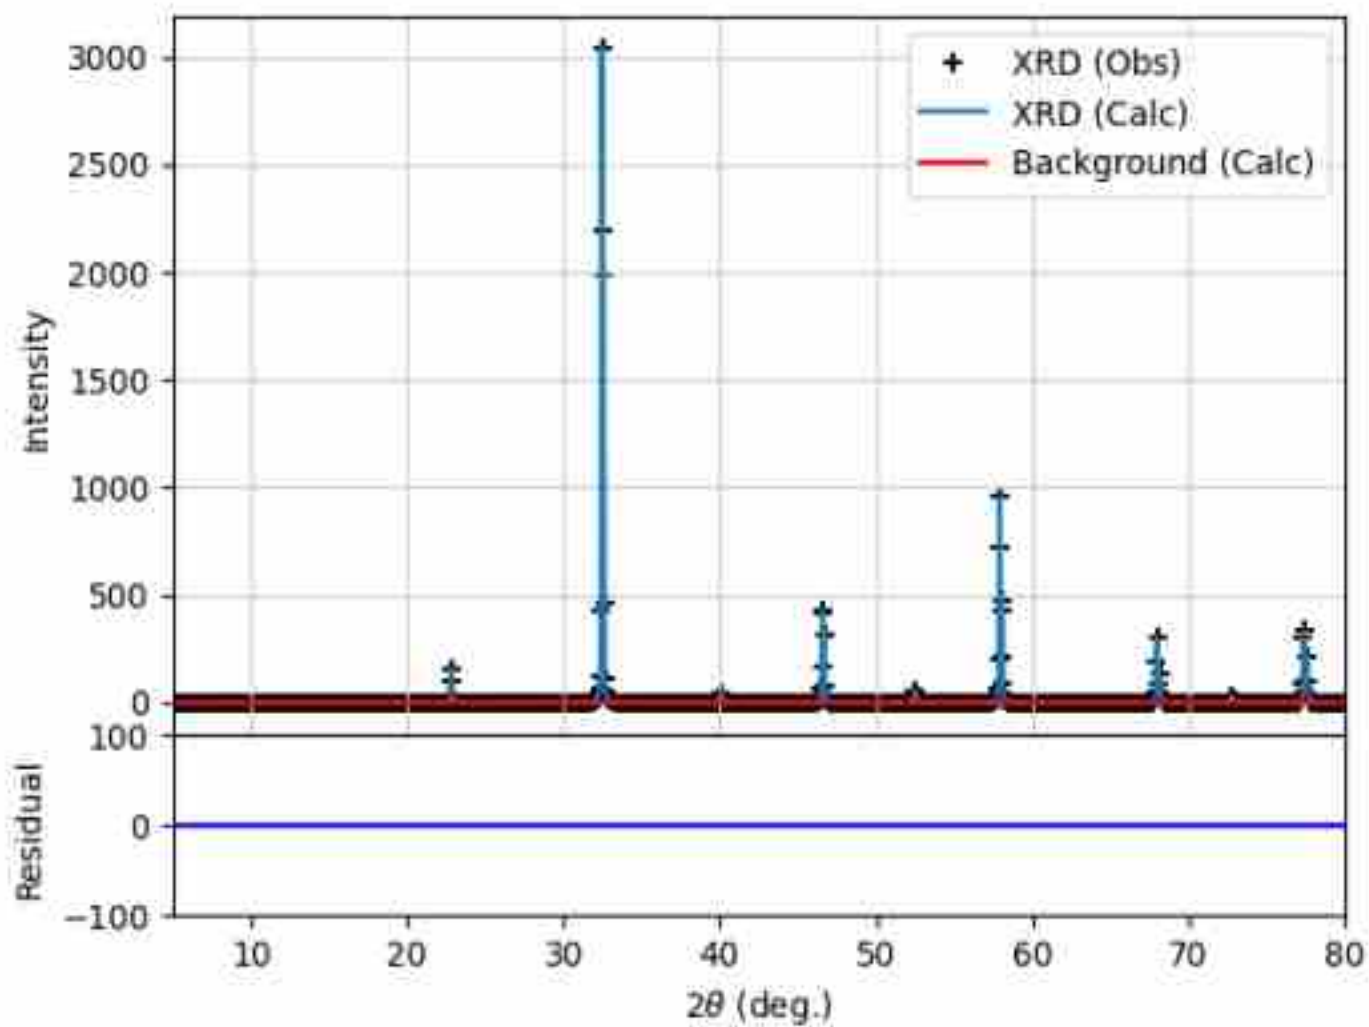

| RMSE before RR | Rwp     | RMSE after RR |
|----------------|---------|---------------|
| 0.001          | 0.00415 | 0.00027       |

# Pr1In1Au2

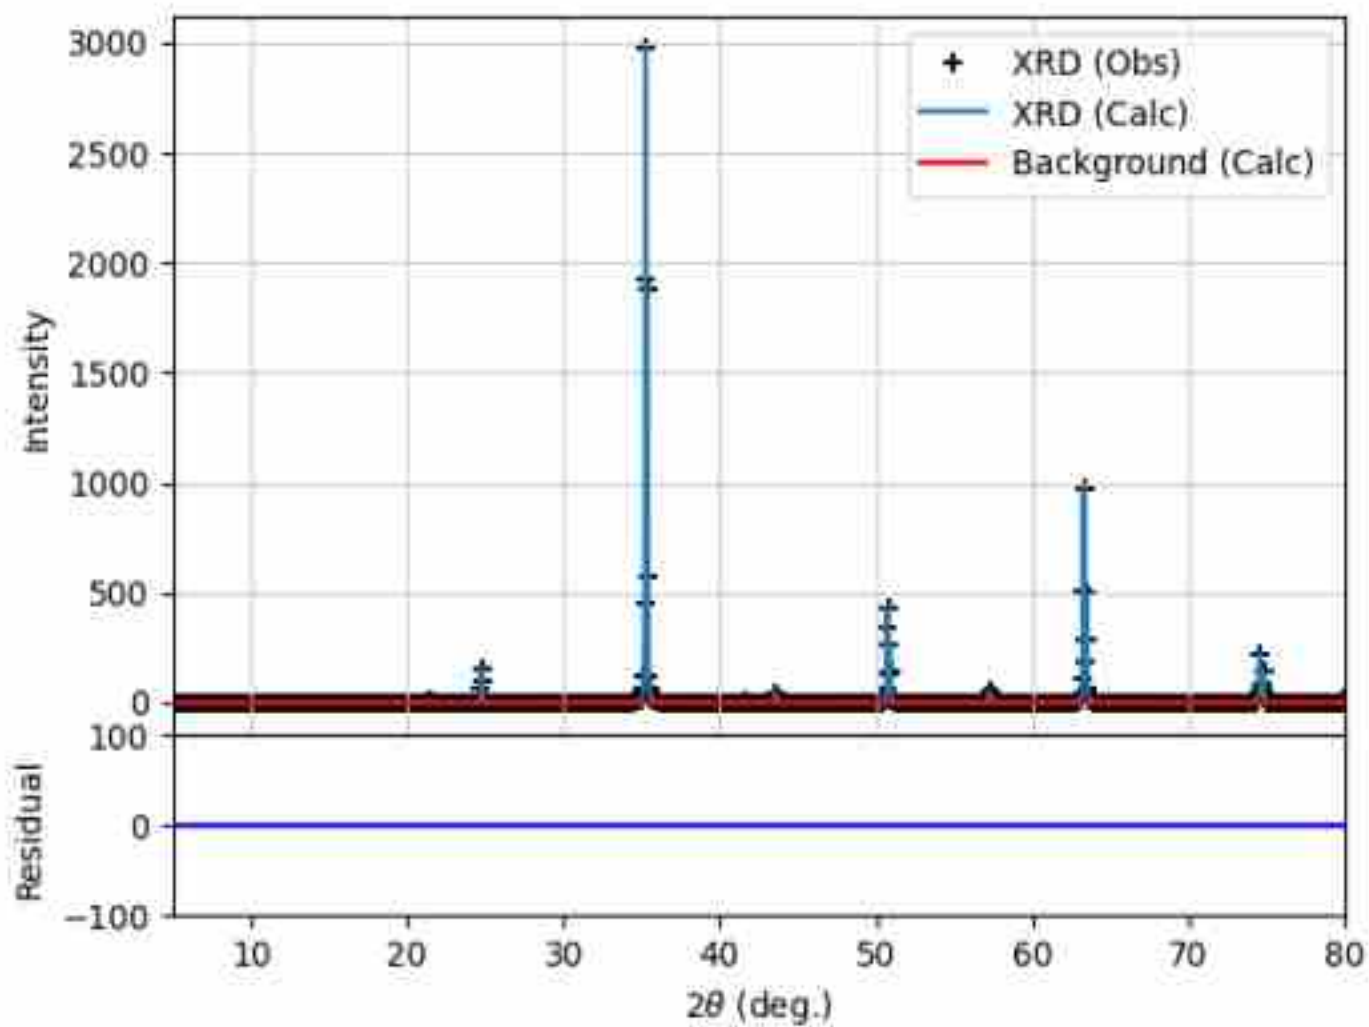

| RMSE before RR | Rwp     | RMSE after RR |
|----------------|---------|---------------|
| 0.001          | 0.00881 | 0.00046       |

# Pr1Nd3

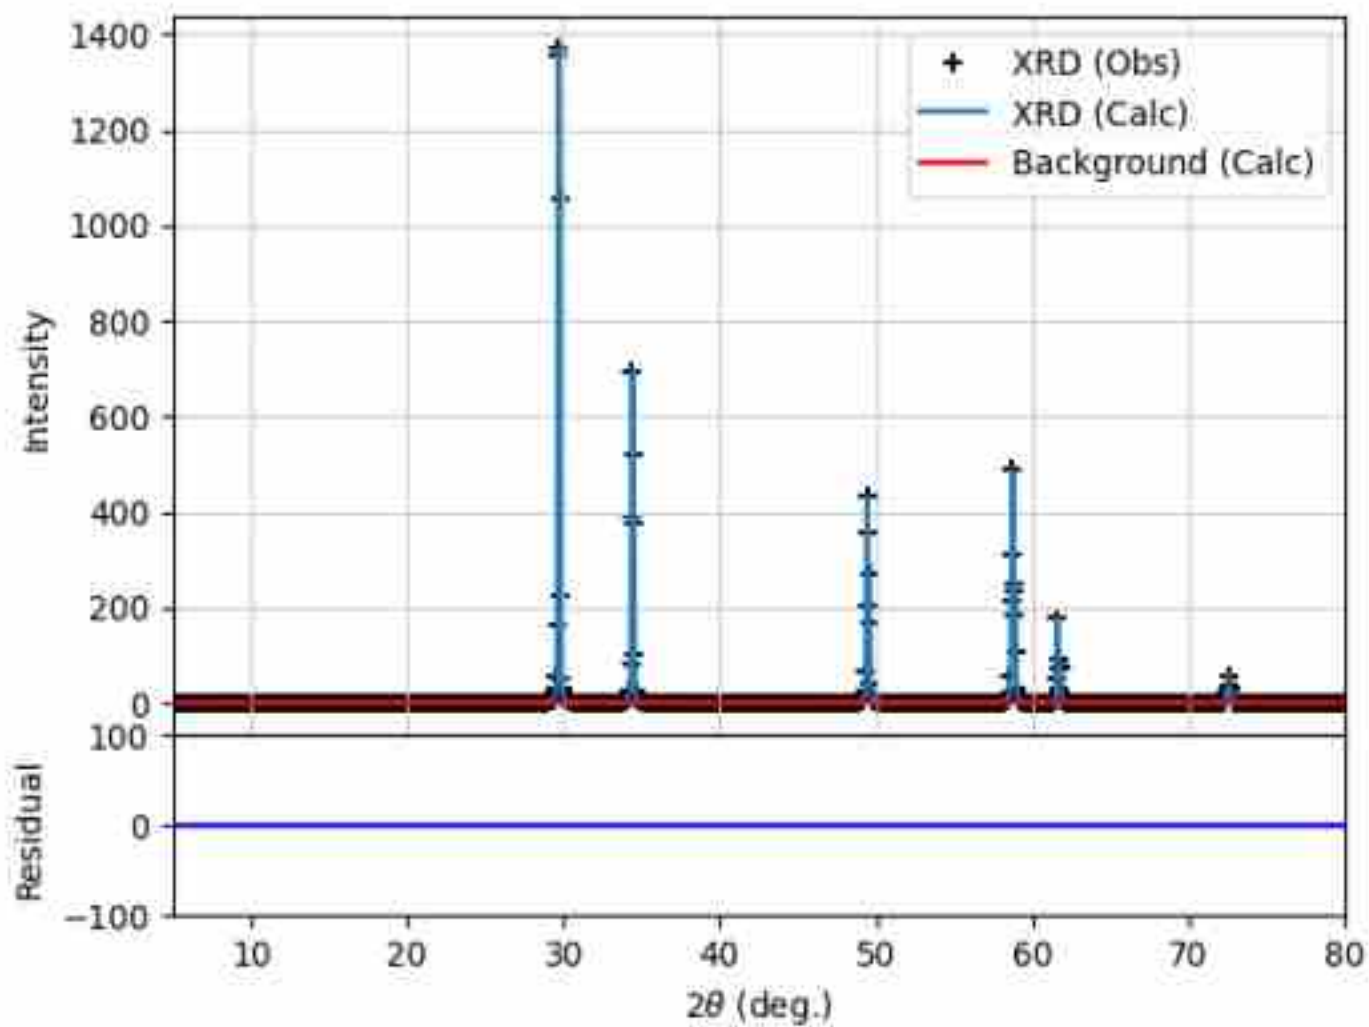

| RMSE before RR | Rwp     | RMSE after RR |
|----------------|---------|---------------|
| 0.001          | 0.00263 | 0.00021       |

# Pr1P2Ru2

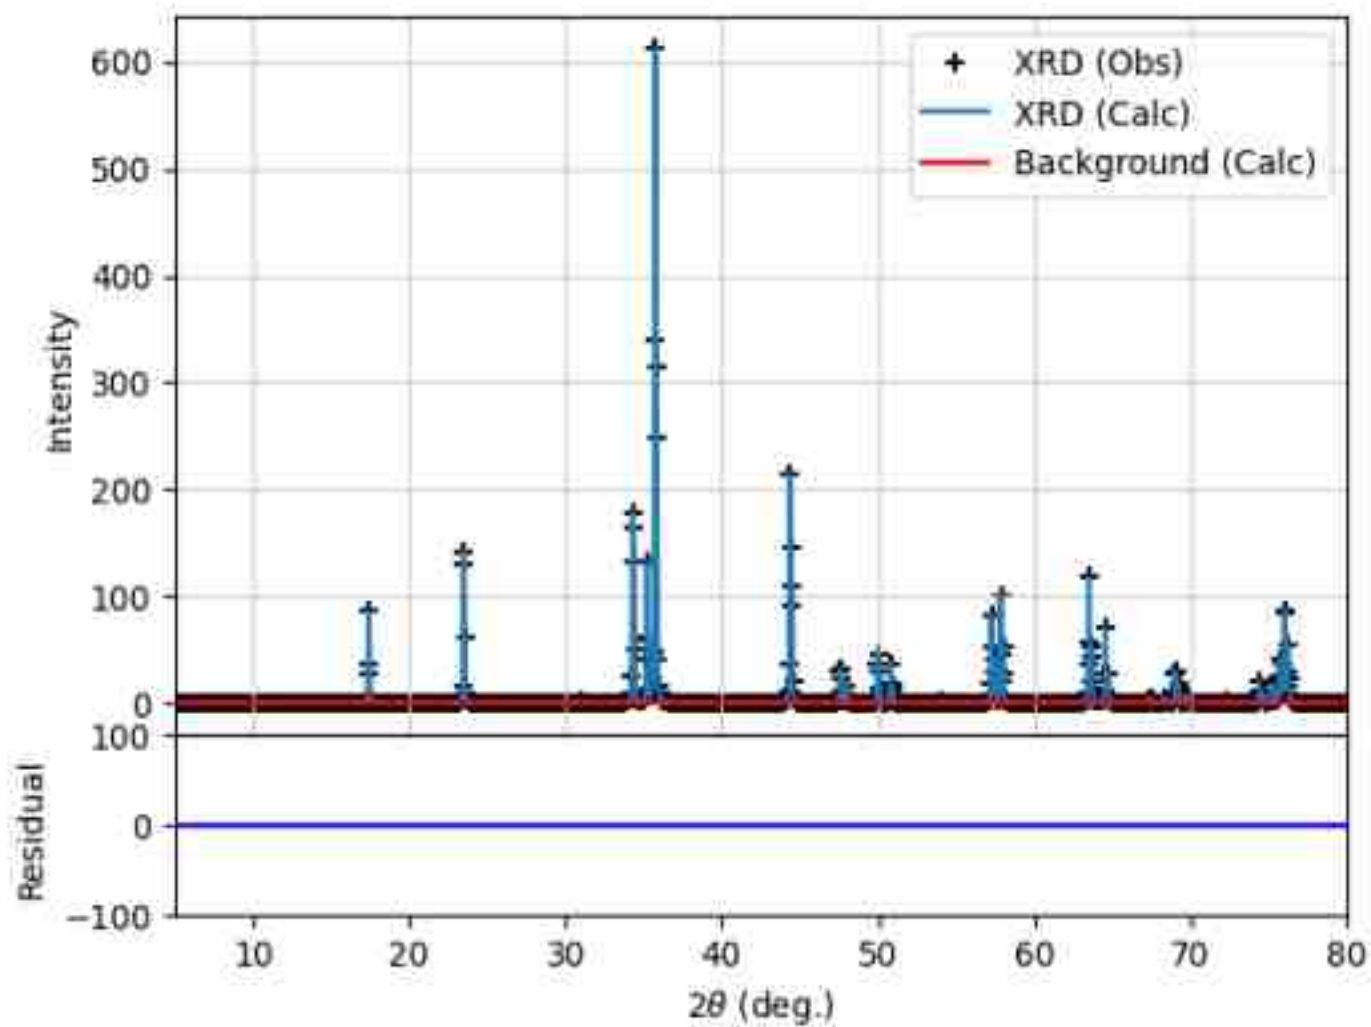

| RMSE before RR | Rwp     | RMSE after RR |
|----------------|---------|---------------|
| 0.01           | 0.00351 | 0.00048       |

# Pr1Sb1

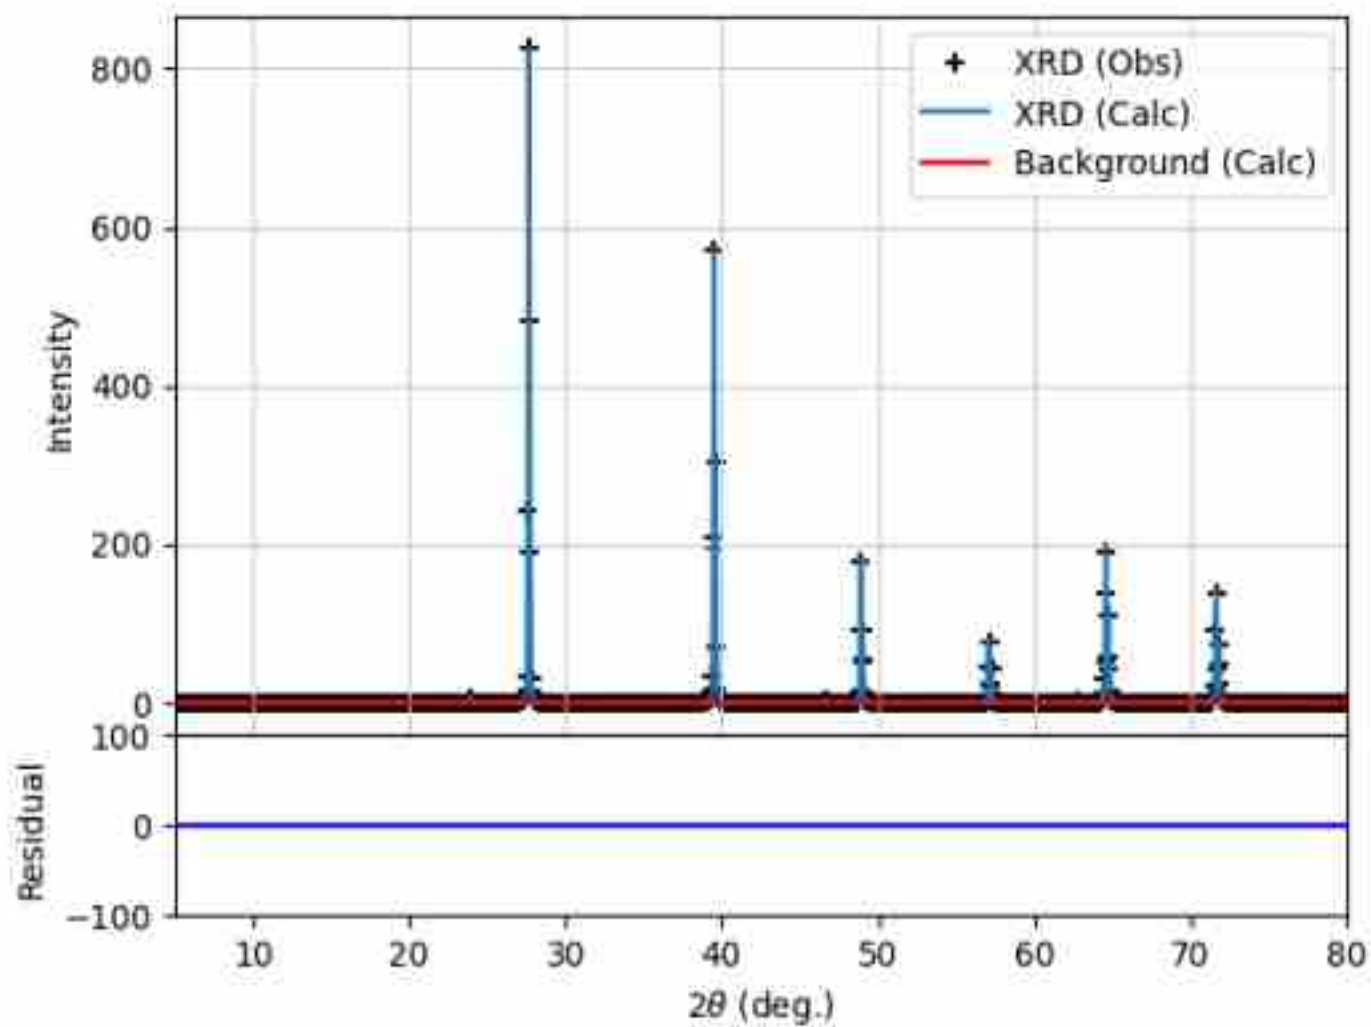

| RMSE before RR | Rwp     | RMSE after RR |
|----------------|---------|---------------|
| 0.001          | 0.07005 | 0.00144       |

# Pr1Sm1Mg2

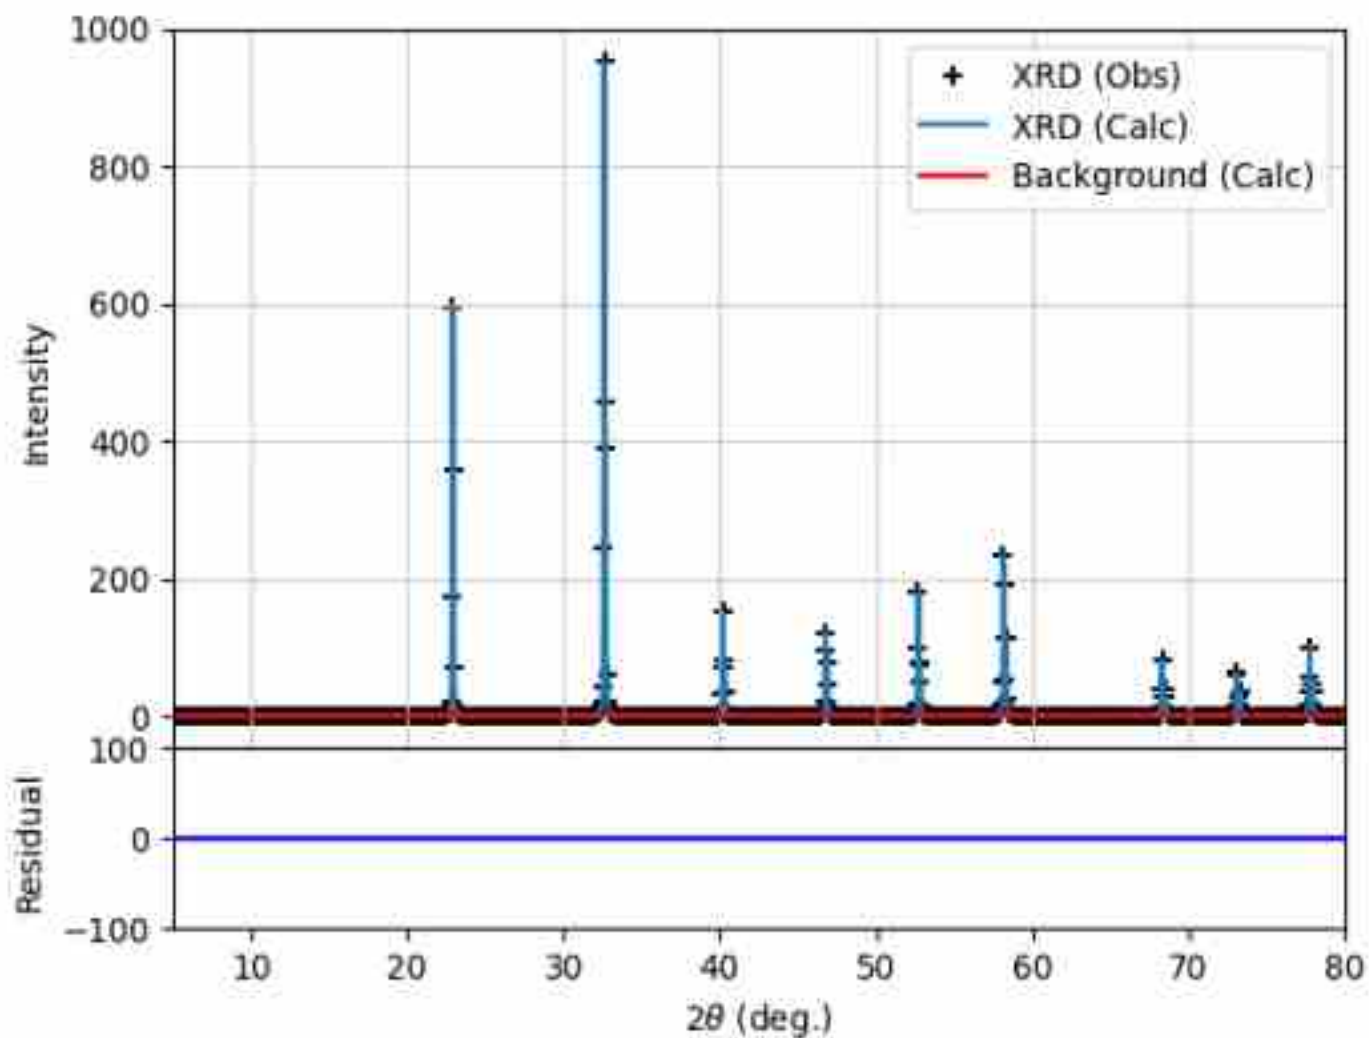

| RMSE before RR | Rwp     | RMSE after RR |
|----------------|---------|---------------|
| 0.001          | 0.00292 | 0.00026       |



# Pr1Sm1Ti2

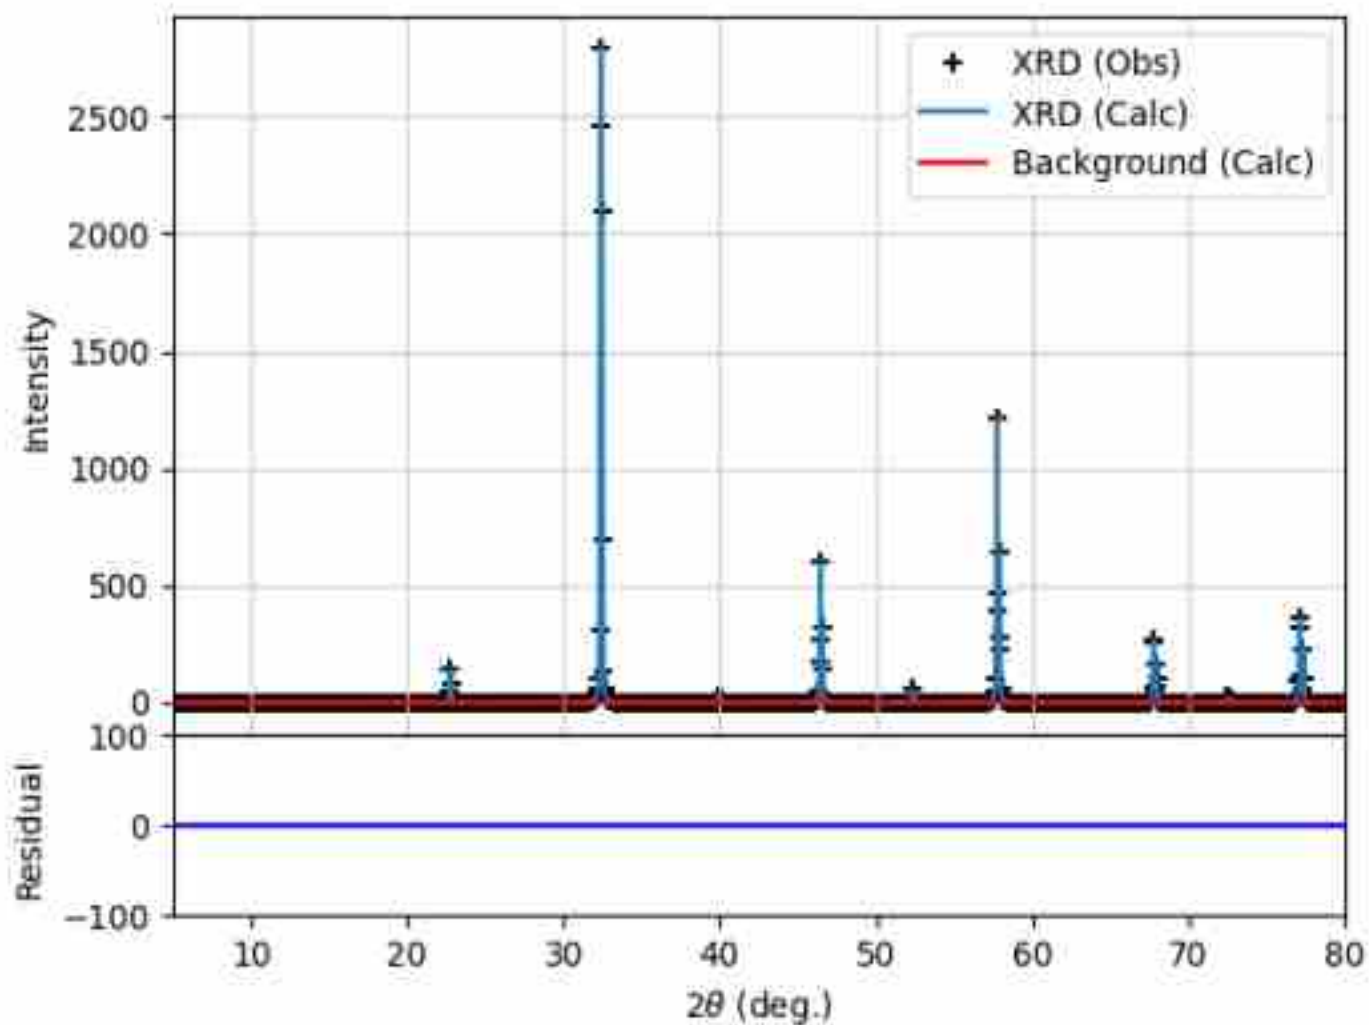

| RMSE before RR | Rwp    | RMSE after RR |
|----------------|--------|---------------|
| 0.001          | 0.0097 | 0.00048       |

# Pr<sub>2</sub>Co<sub>2</sub>Ni<sub>2</sub>

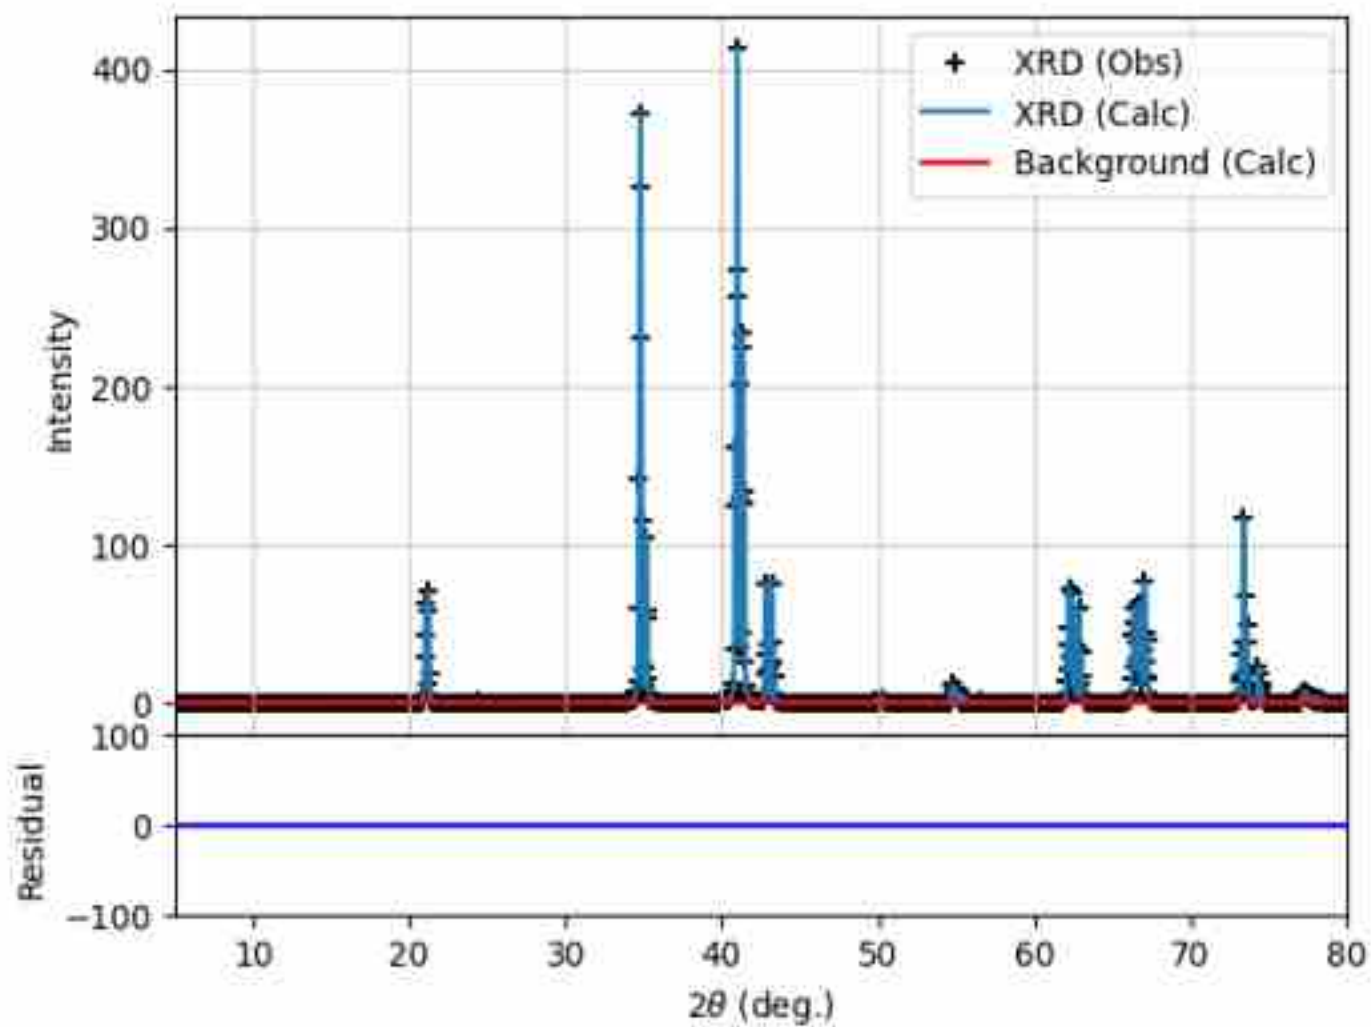

| RMSE before RR | Rwp     | RMSE after RR |
|----------------|---------|---------------|
| 0.01           | 0.00301 | 0.00028       |

# Pr<sub>2</sub>Cu<sub>1</sub>Sn<sub>4</sub>

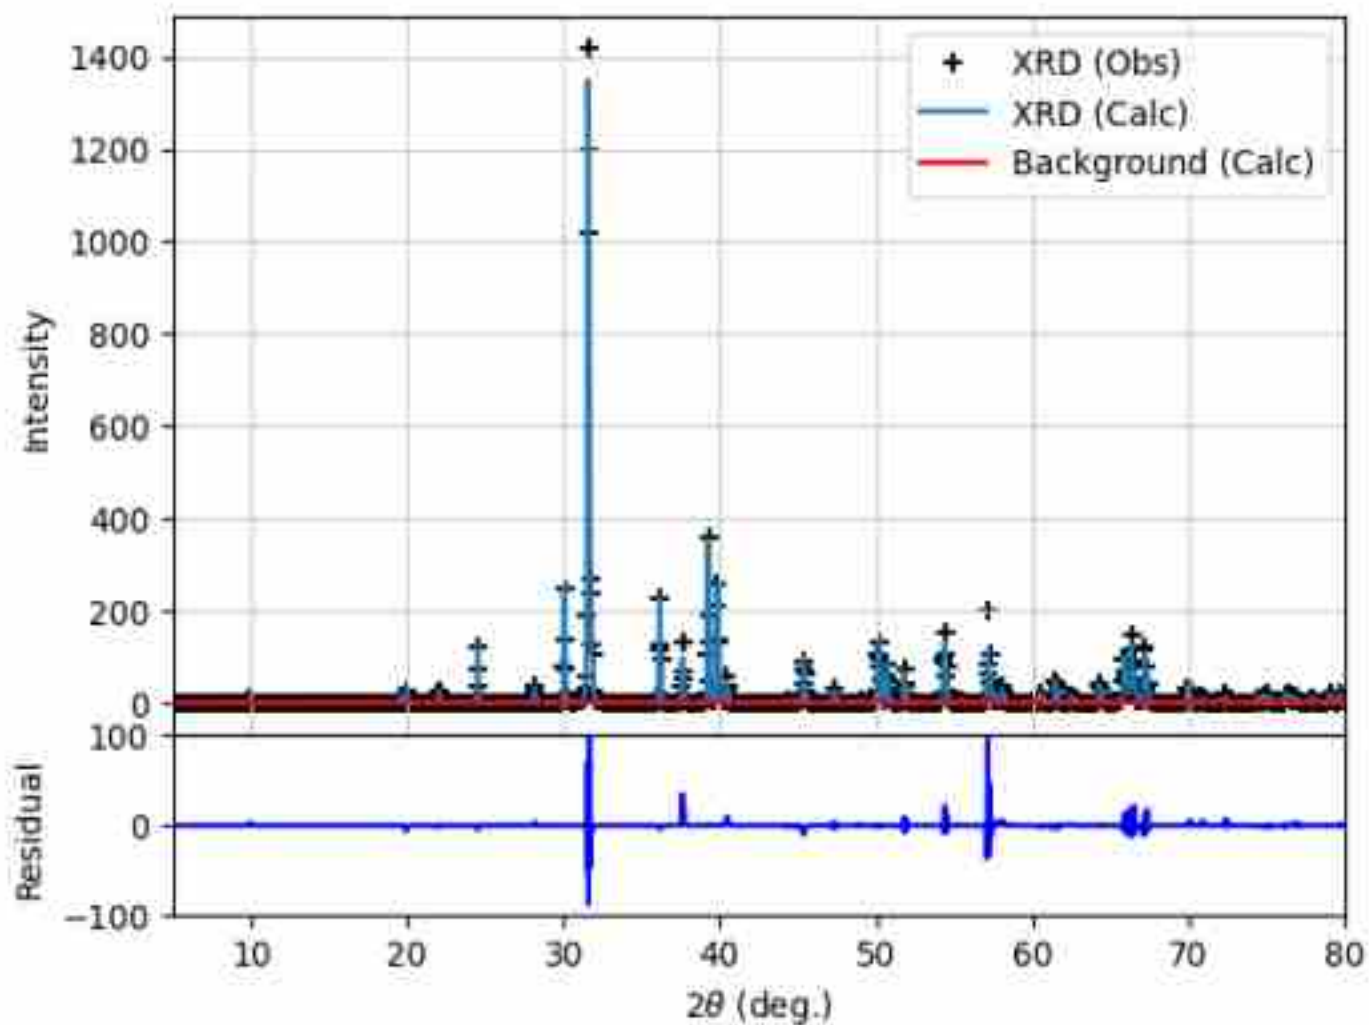

| RMSE before RR | Rwp      | RMSE after RR |
|----------------|----------|---------------|
| 0.01           | 13.35422 | 0.01024       |

# Pr<sub>2</sub>Hg<sub>6</sub>

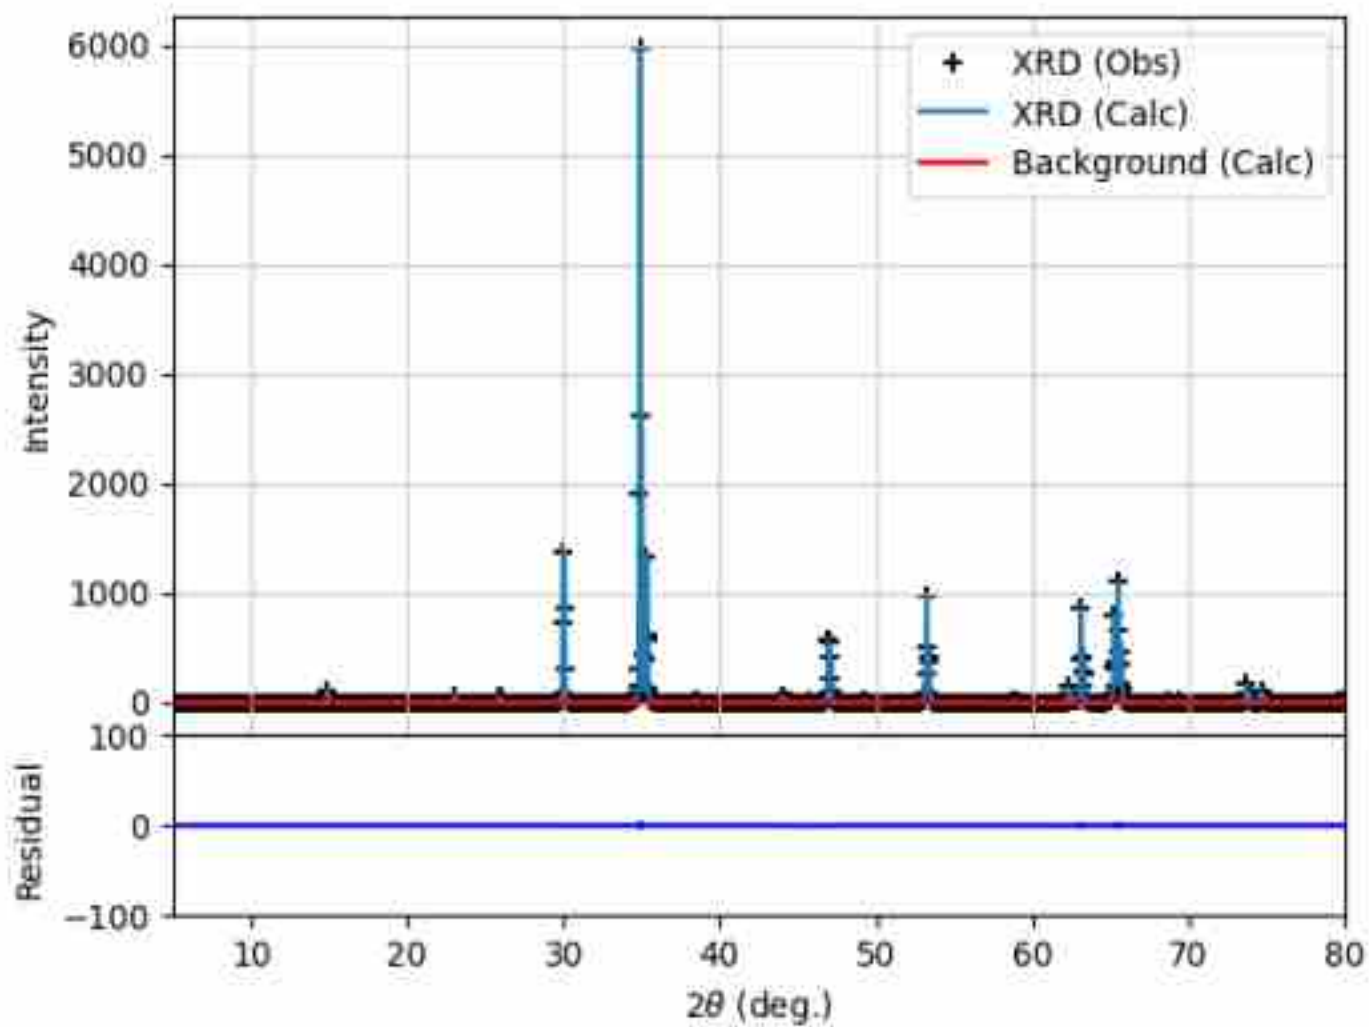

| RMSE before RR | Rwp     | RMSE after RR |
|----------------|---------|---------------|
| 0.01           | 0.06279 | 0.00088       |

# Pr<sub>2</sub>Mg<sub>1</sub>Cd<sub>1</sub>

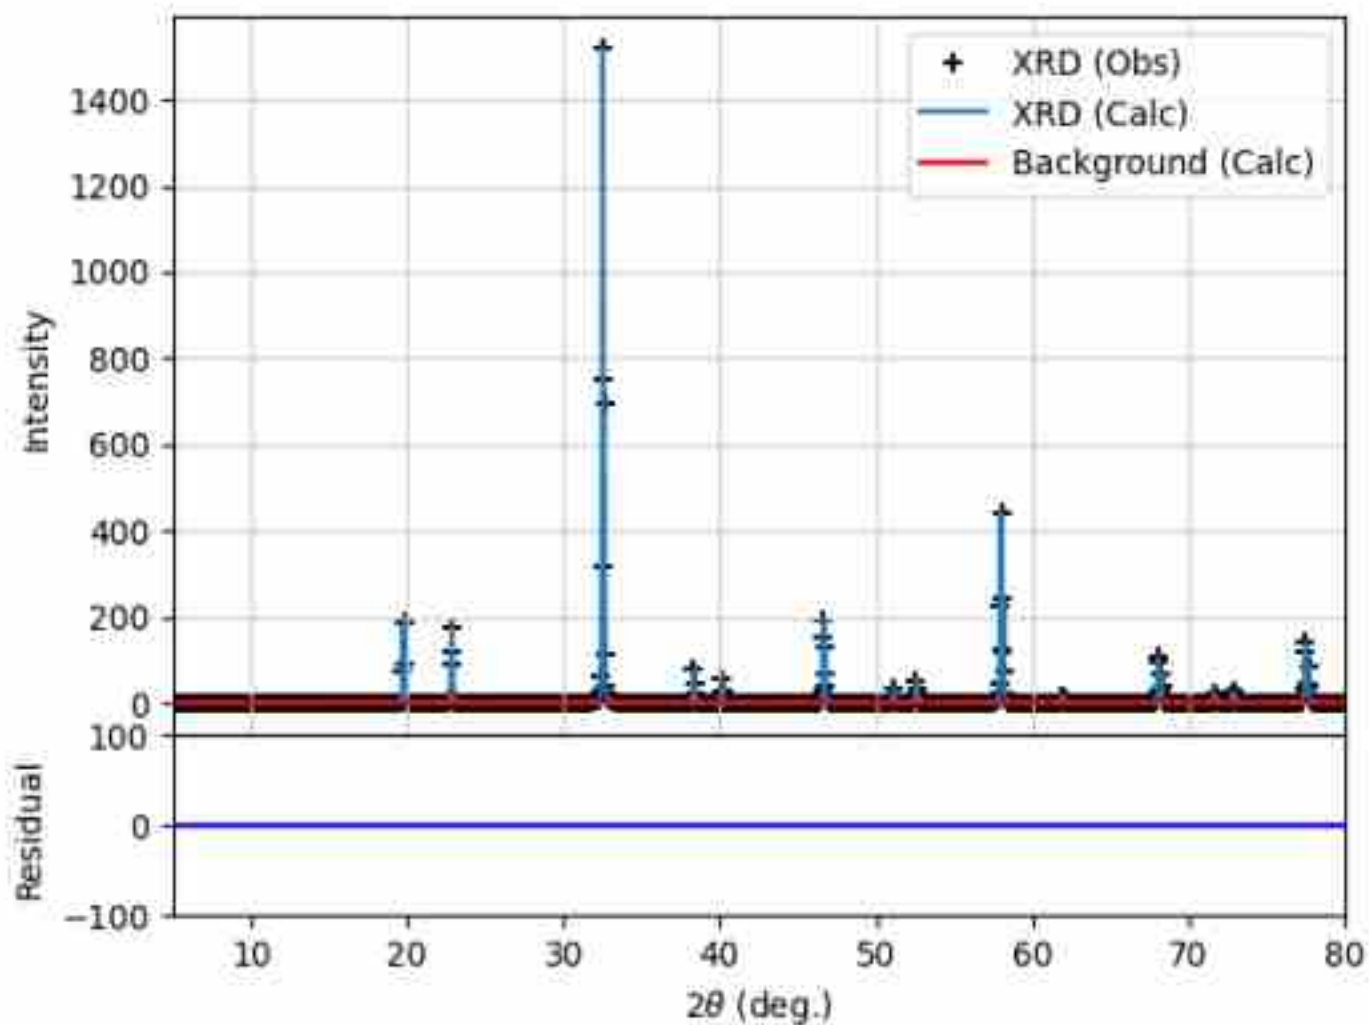

| RMSE before RR | Rwp | RMSE after RR |
|----------------|-----|---------------|
| 0.001          | 0.0 | 1e-05         |

# Pr<sub>2</sub>Mn<sub>2</sub>Si<sub>4</sub>

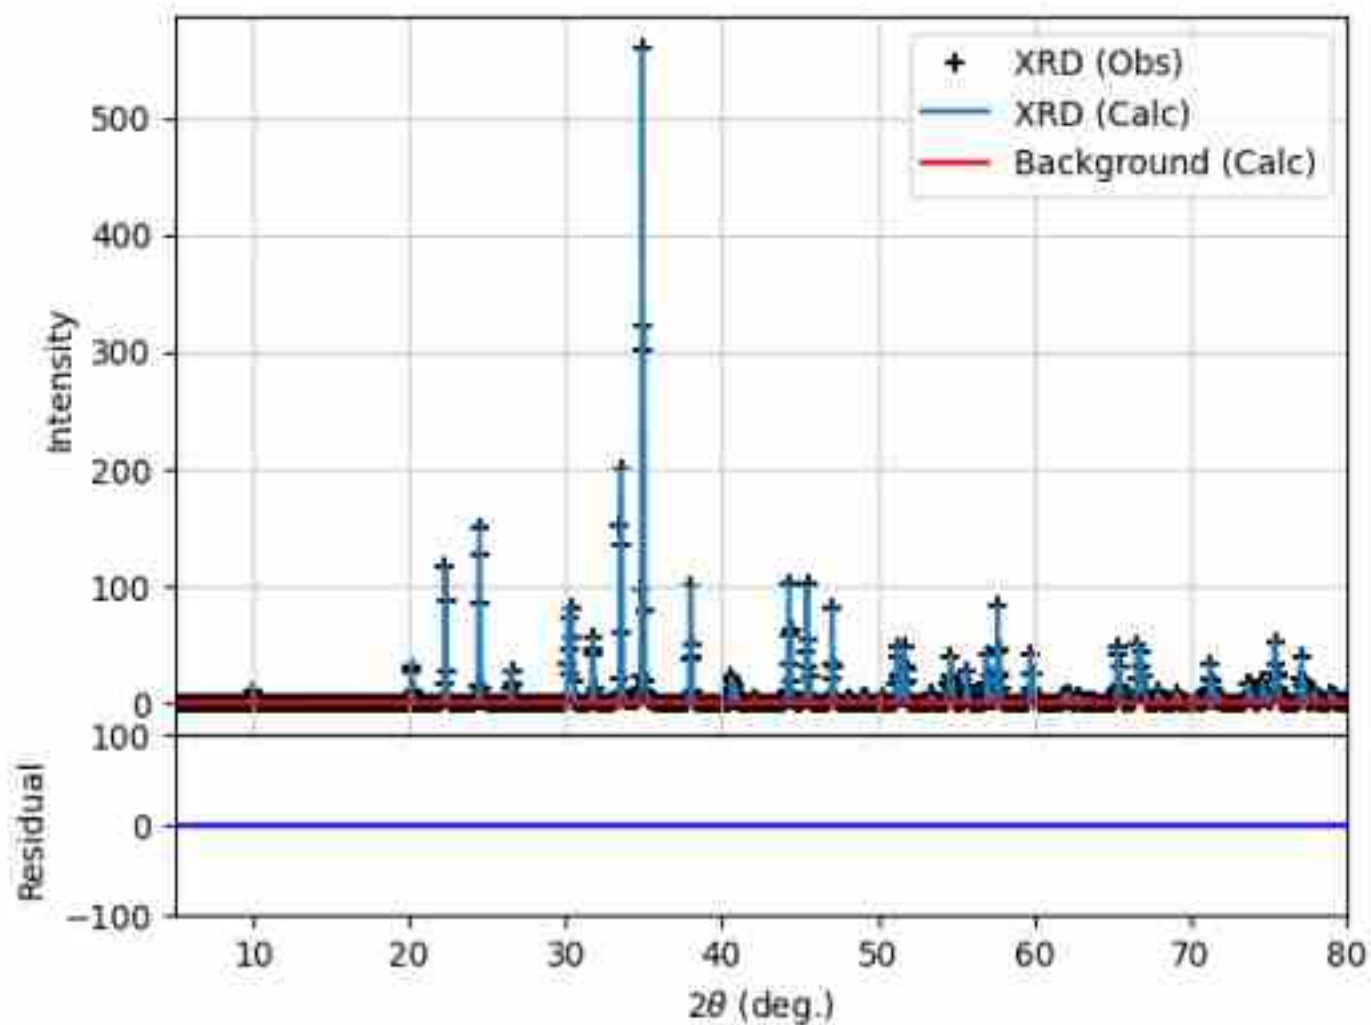

| RMSE before RR | Rwp    | RMSE after RR |
|----------------|--------|---------------|
| 0.01           | 0.0681 | 0.00456       |

# Pr<sub>2</sub>Ni<sub>4</sub>Bi<sub>4</sub>

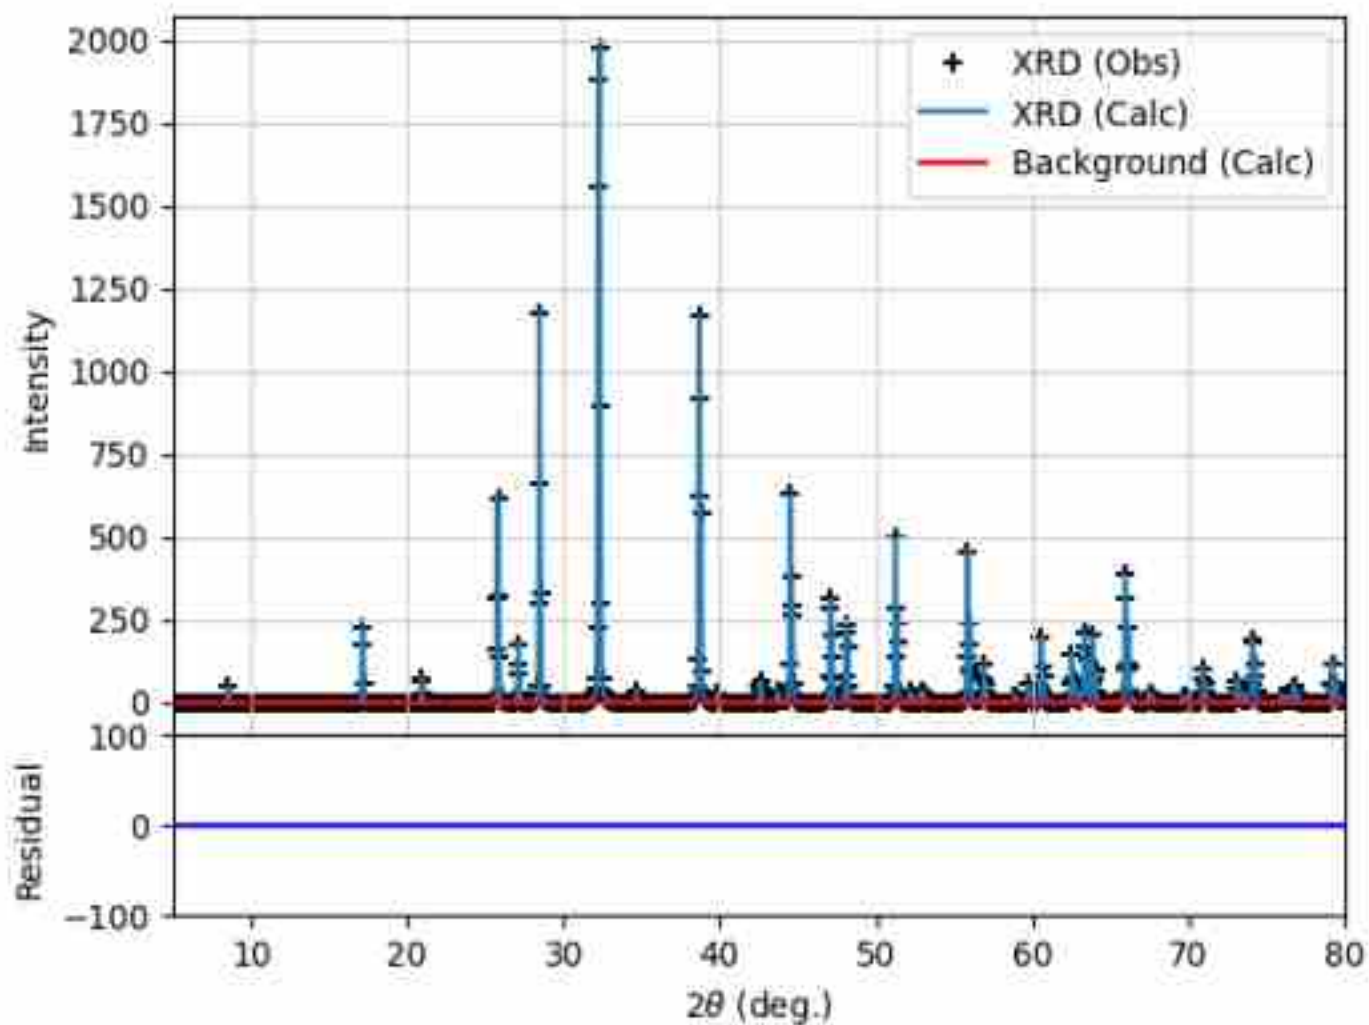

| RMSE before RR | Rwp    | RMSE after RR |
|----------------|--------|---------------|
| 0.01           | 0.0041 | 0.0006        |

# Pr<sub>3</sub>In<sub>1</sub>

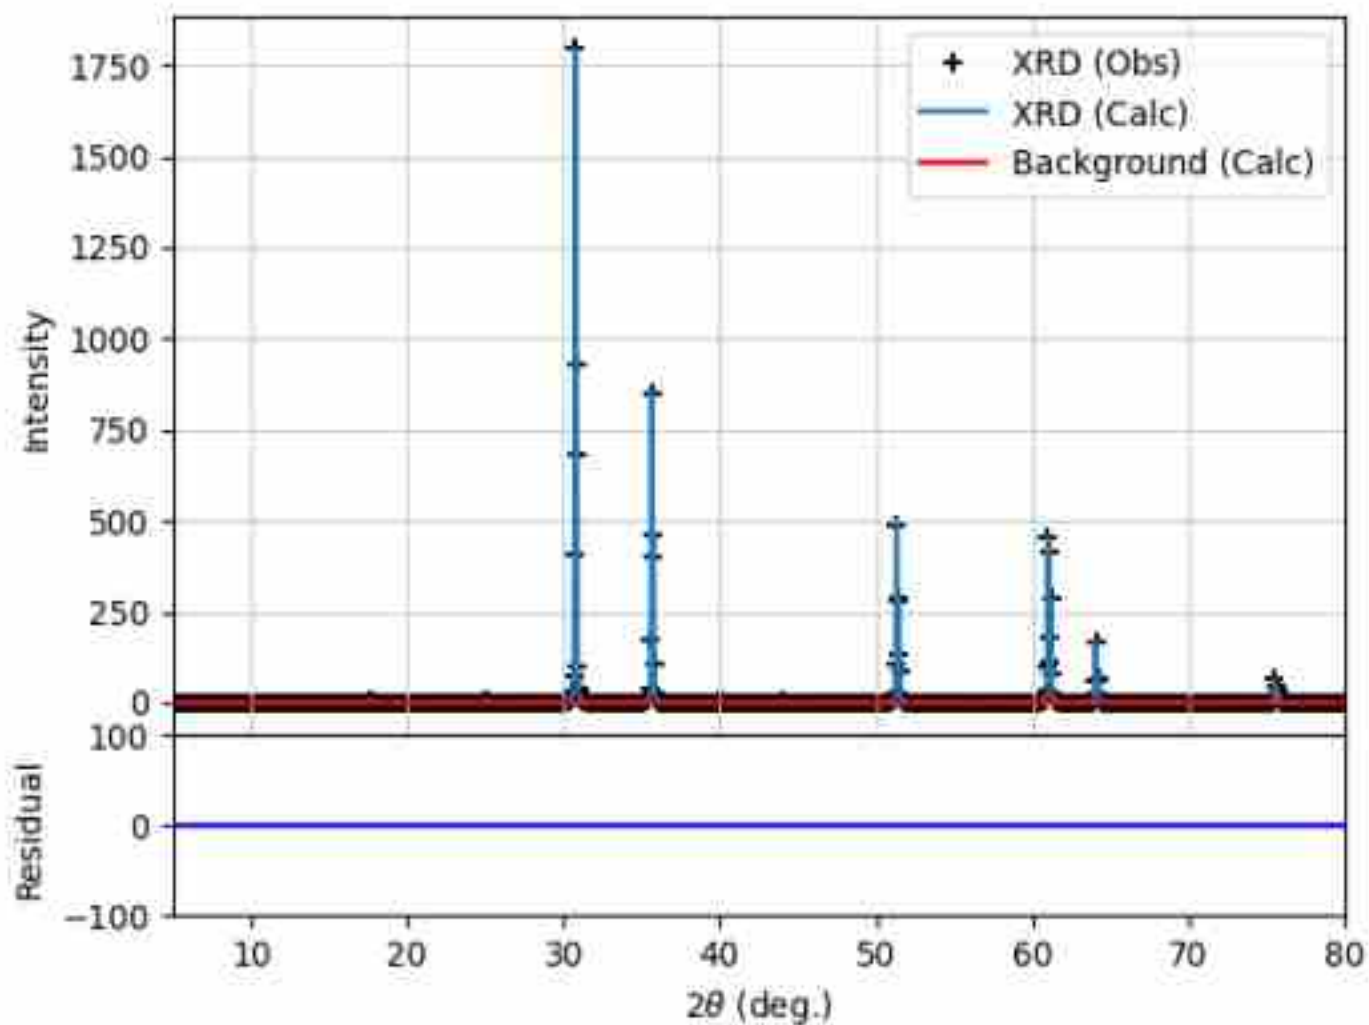

| RMSE before RR | Rwp     | RMSE after RR |
|----------------|---------|---------------|
| 0.001          | 0.00358 | 0.00025       |



# Pr3Nd1

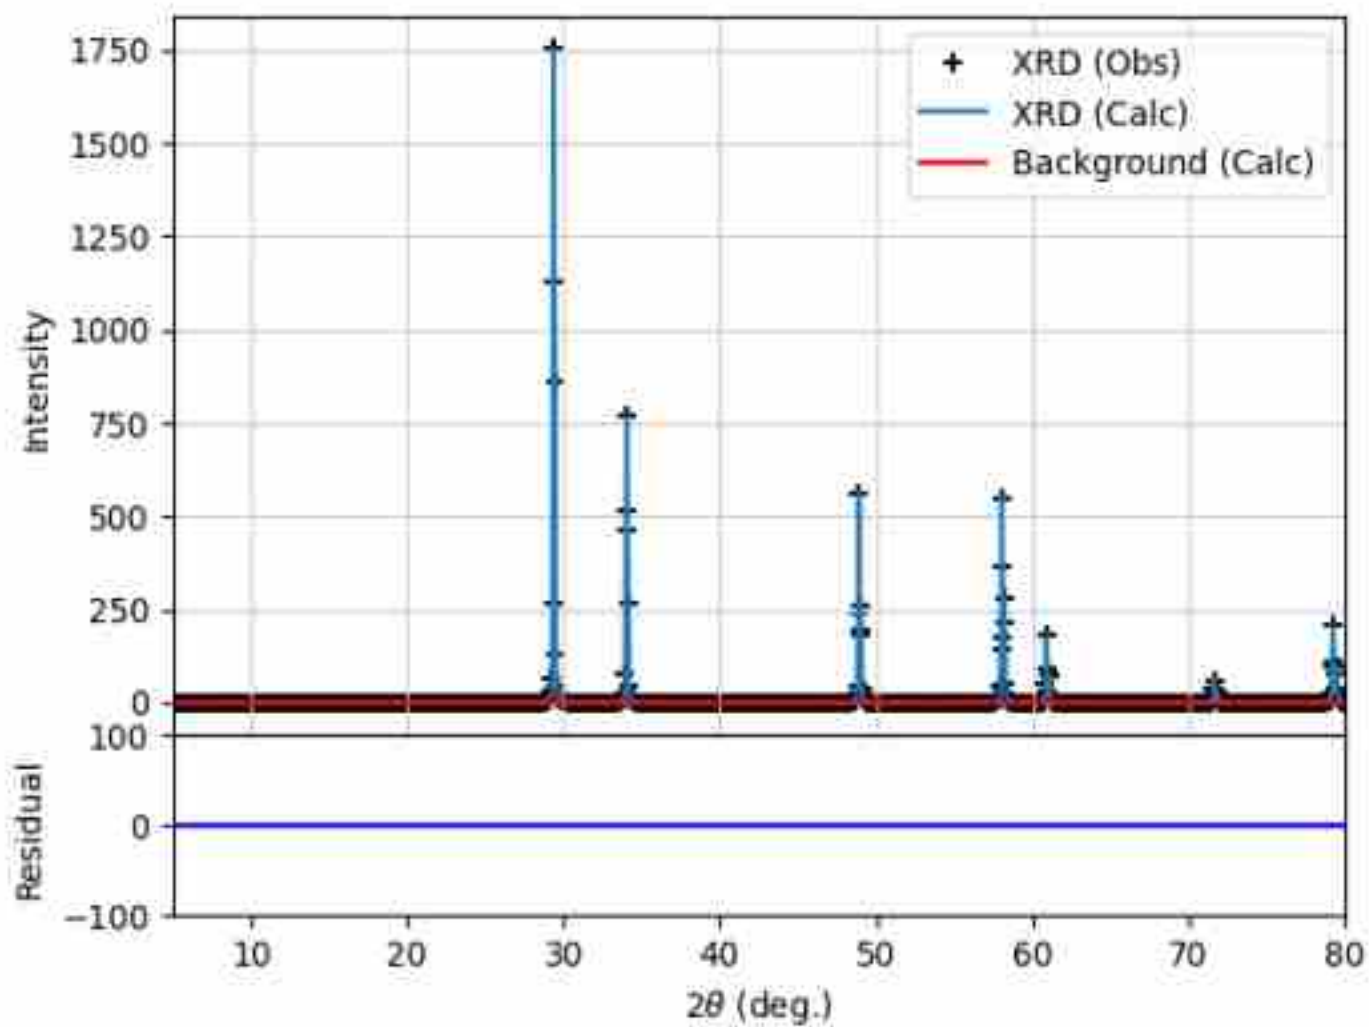

| RMSE before RR | Rwp     | RMSE after RR |
|----------------|---------|---------------|
| 0.001          | 0.00267 | 0.0001        |

# Pr3Y1

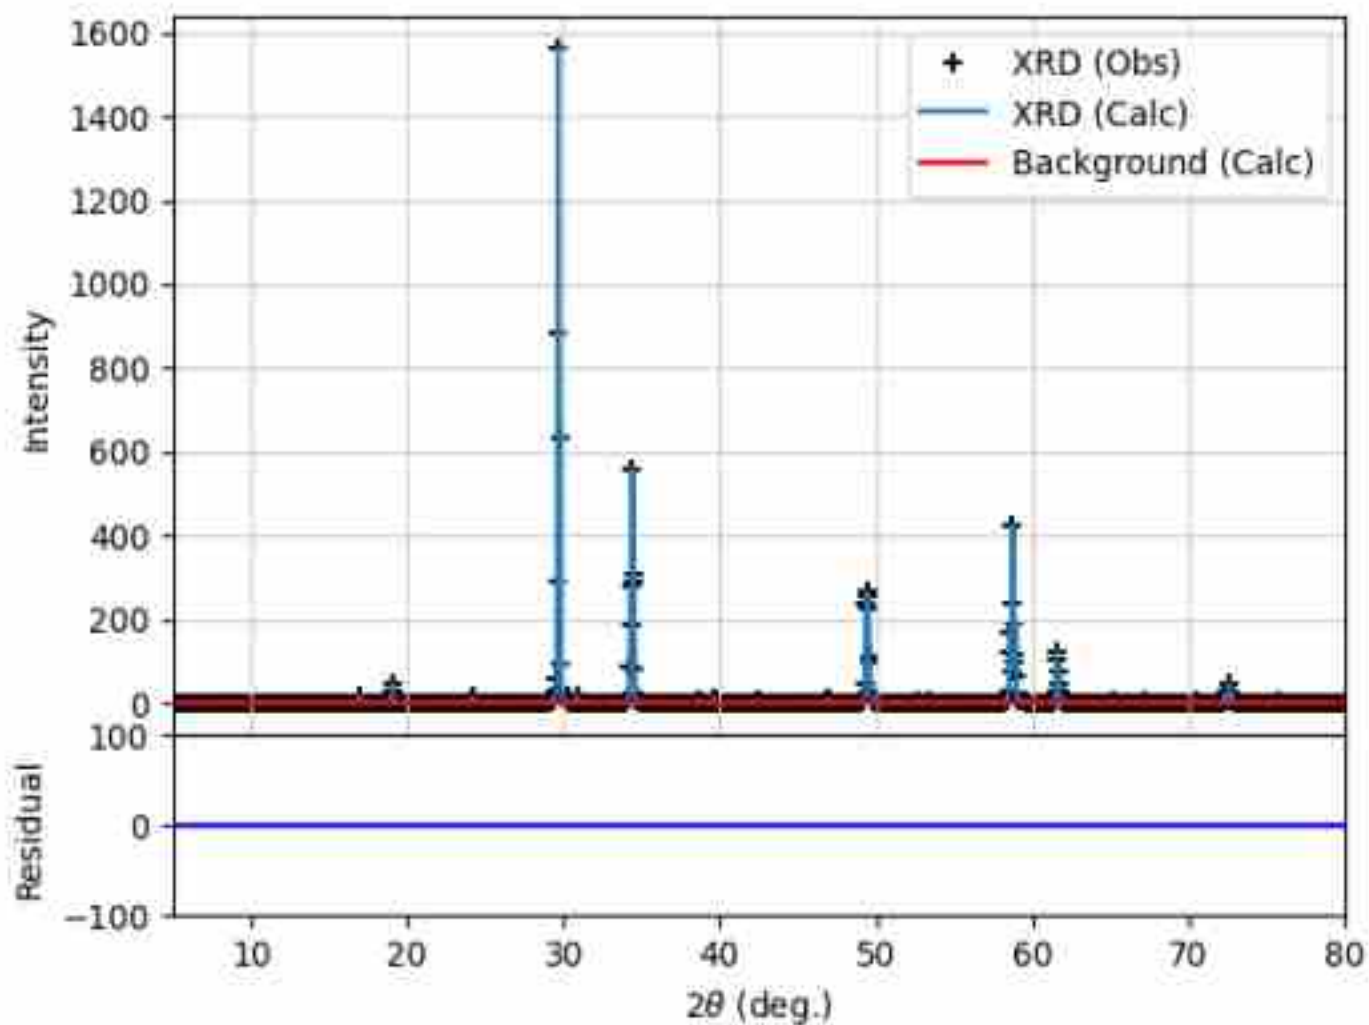

| RMSE before RR | Rwp    | RMSE after RR |
|----------------|--------|---------------|
| 0.001          | 0.0029 | 0.00015       |

# Pt1Rh3

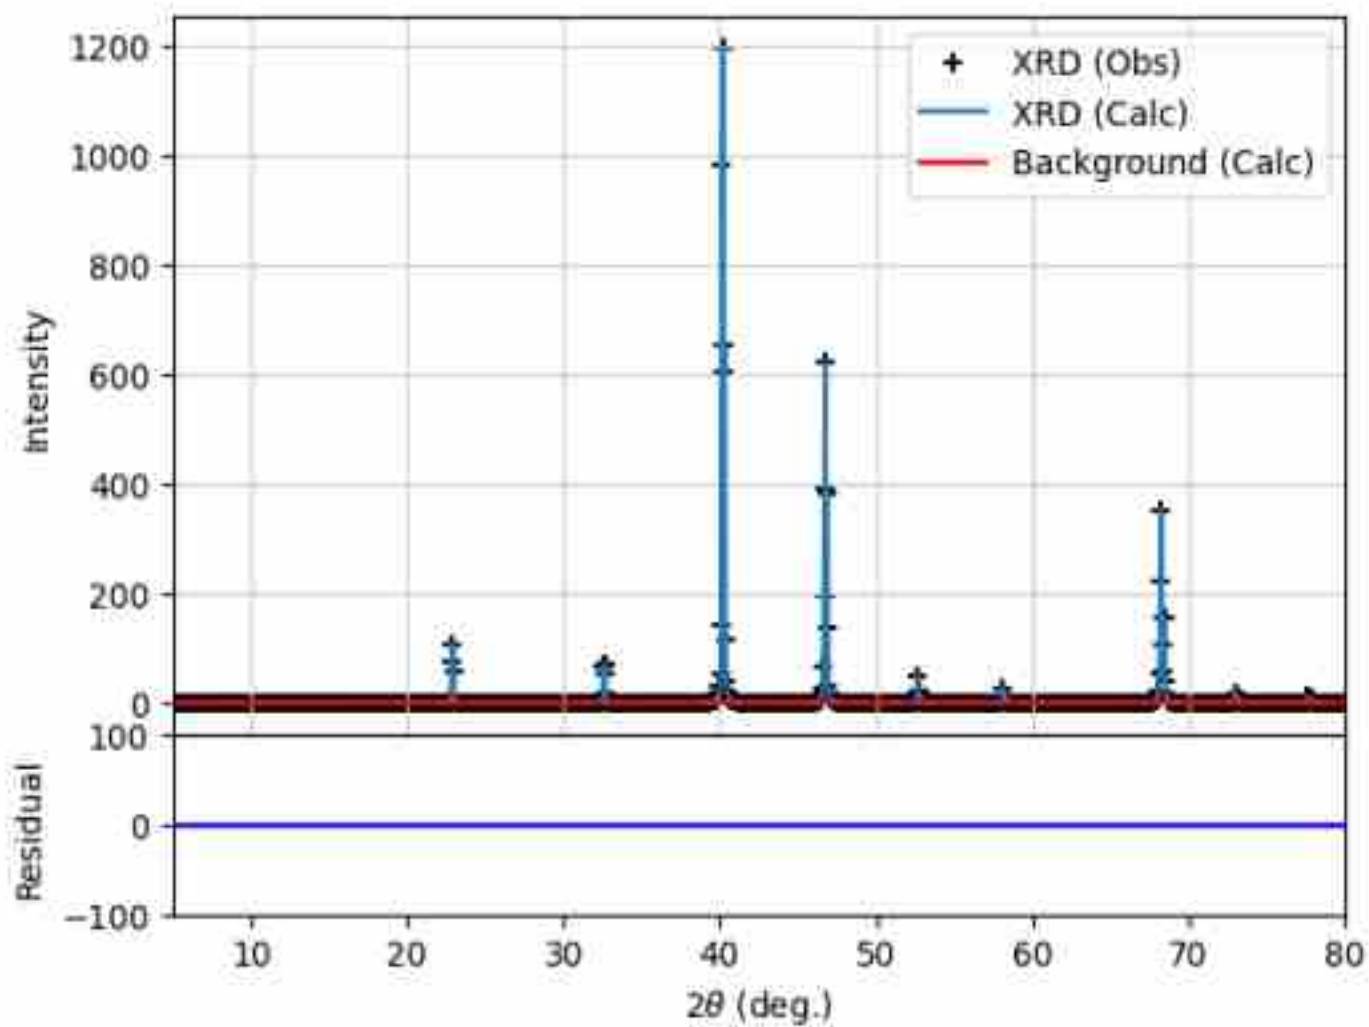

| RMSE before RR | Rwp     | RMSE after RR |
|----------------|---------|---------------|
| 0.001          | 0.00549 | 0.00055       |

# Pt3W1

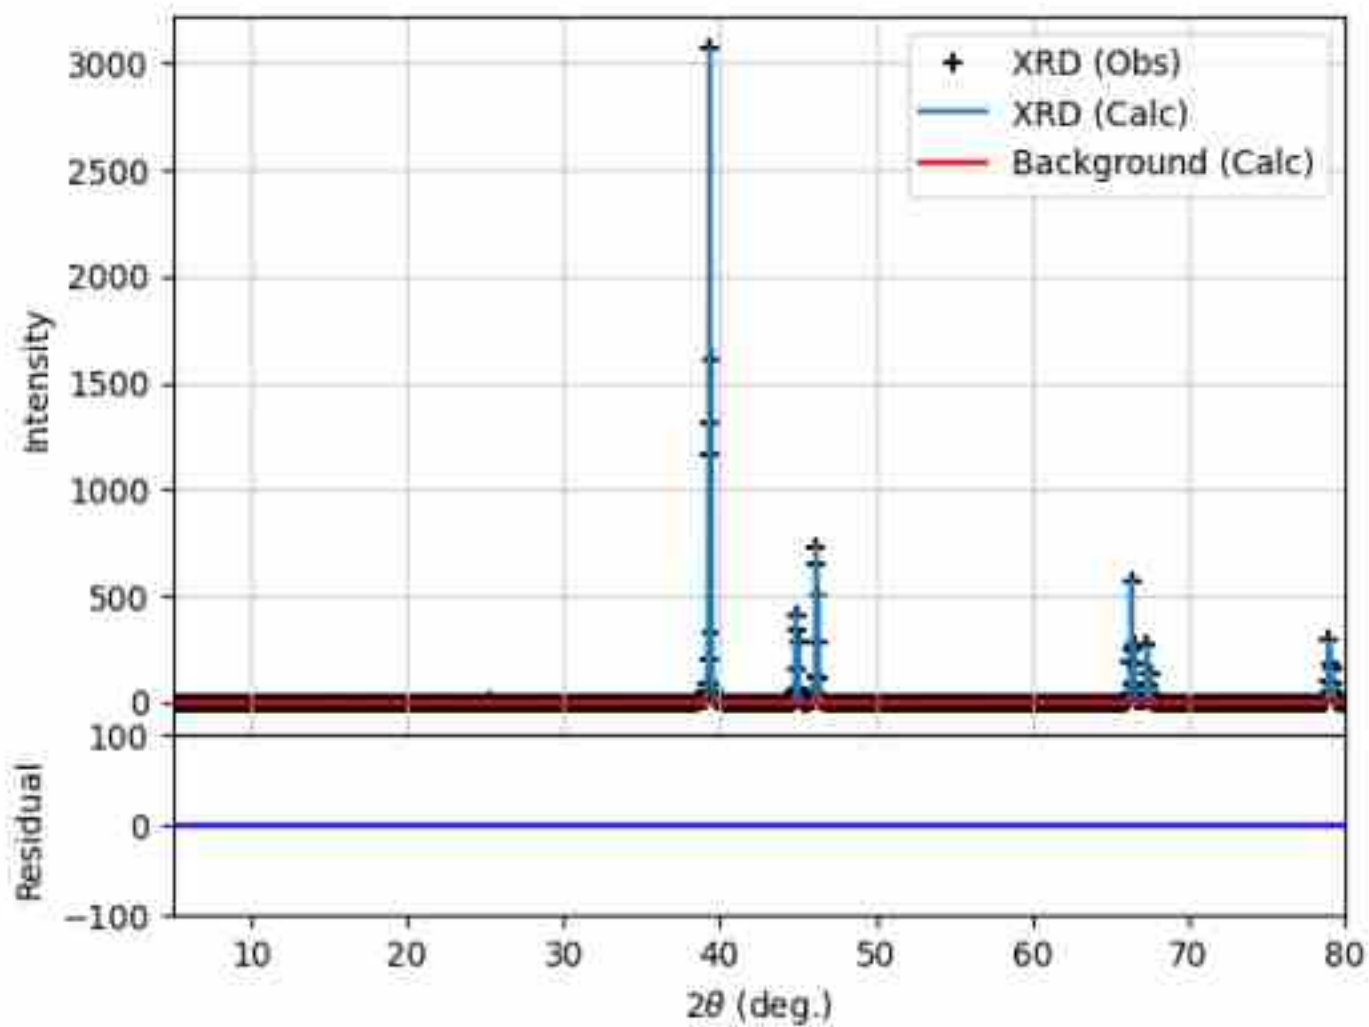

| RMSE before RR | Rwp     | RMSE after RR |
|----------------|---------|---------------|
| 0.001          | 0.00247 | 0.00013       |

# Pu1P1

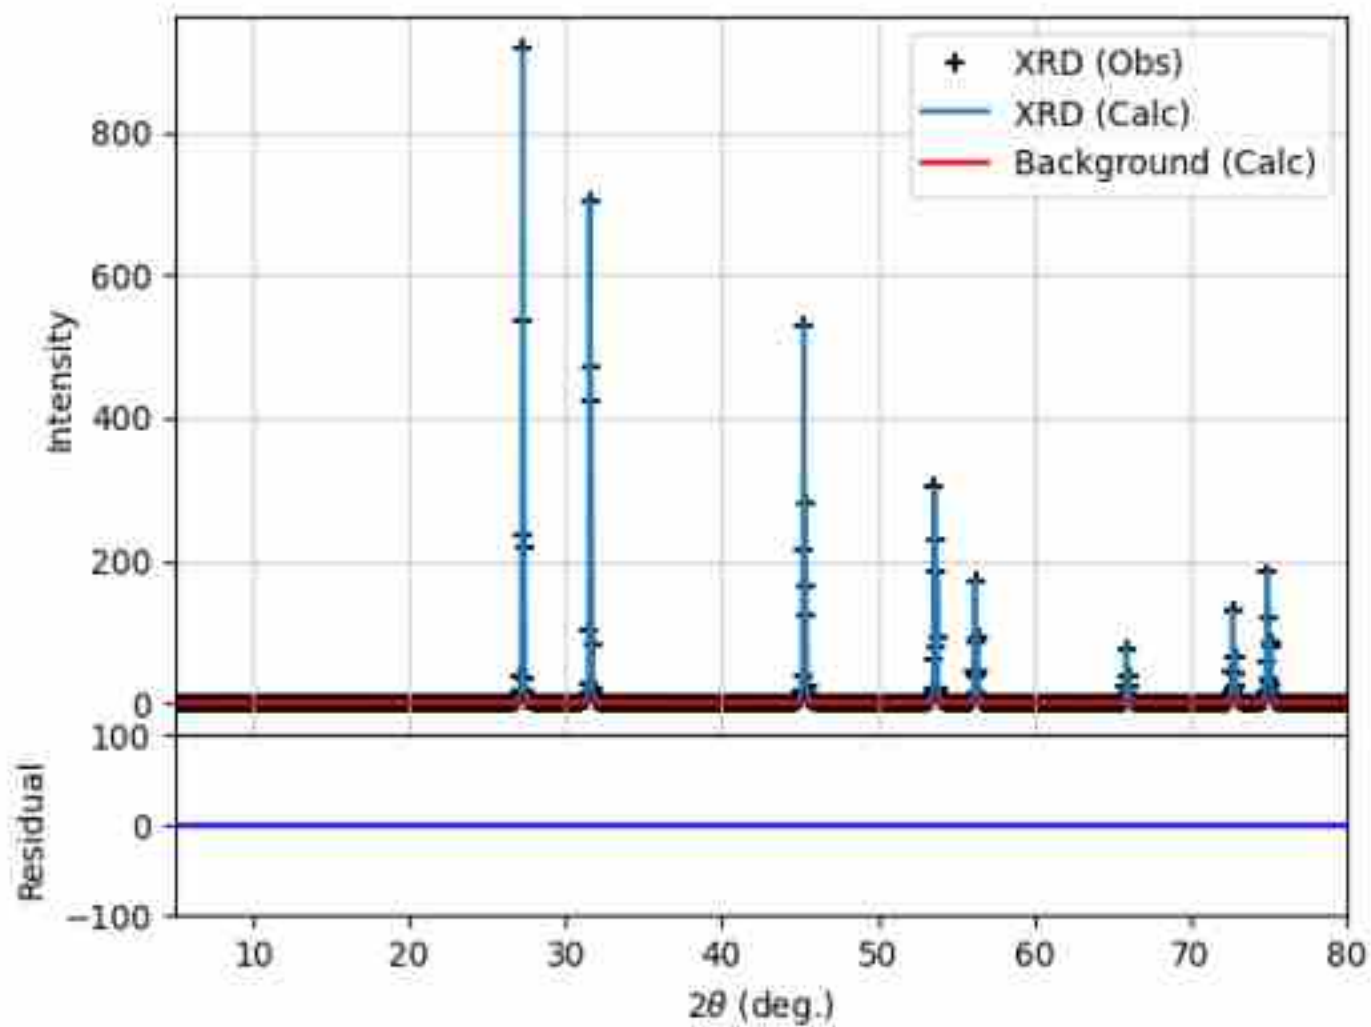

| RMSE before RR | Rwp     | RMSE after RR |
|----------------|---------|---------------|
| 0.001          | 0.00065 | 0.00062       |

# Pu1Sb1

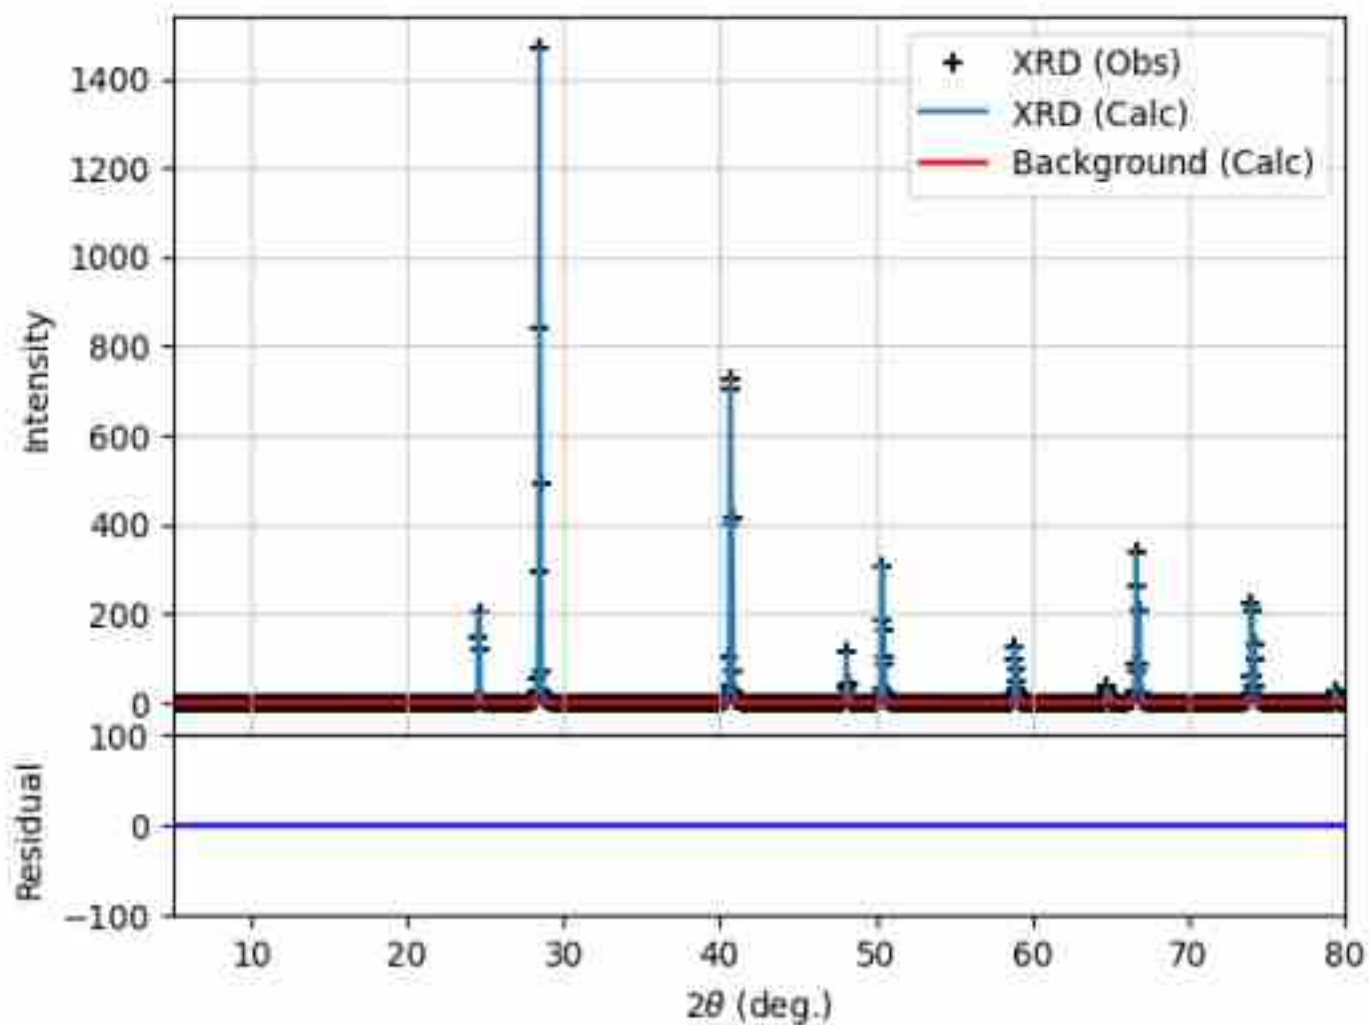

| RMSE before RR | Rwp     | RMSE after RR |
|----------------|---------|---------------|
| 0.001          | 0.01559 | 0.00088       |

# Pu<sub>2</sub>Br<sub>2</sub>O<sub>2</sub>

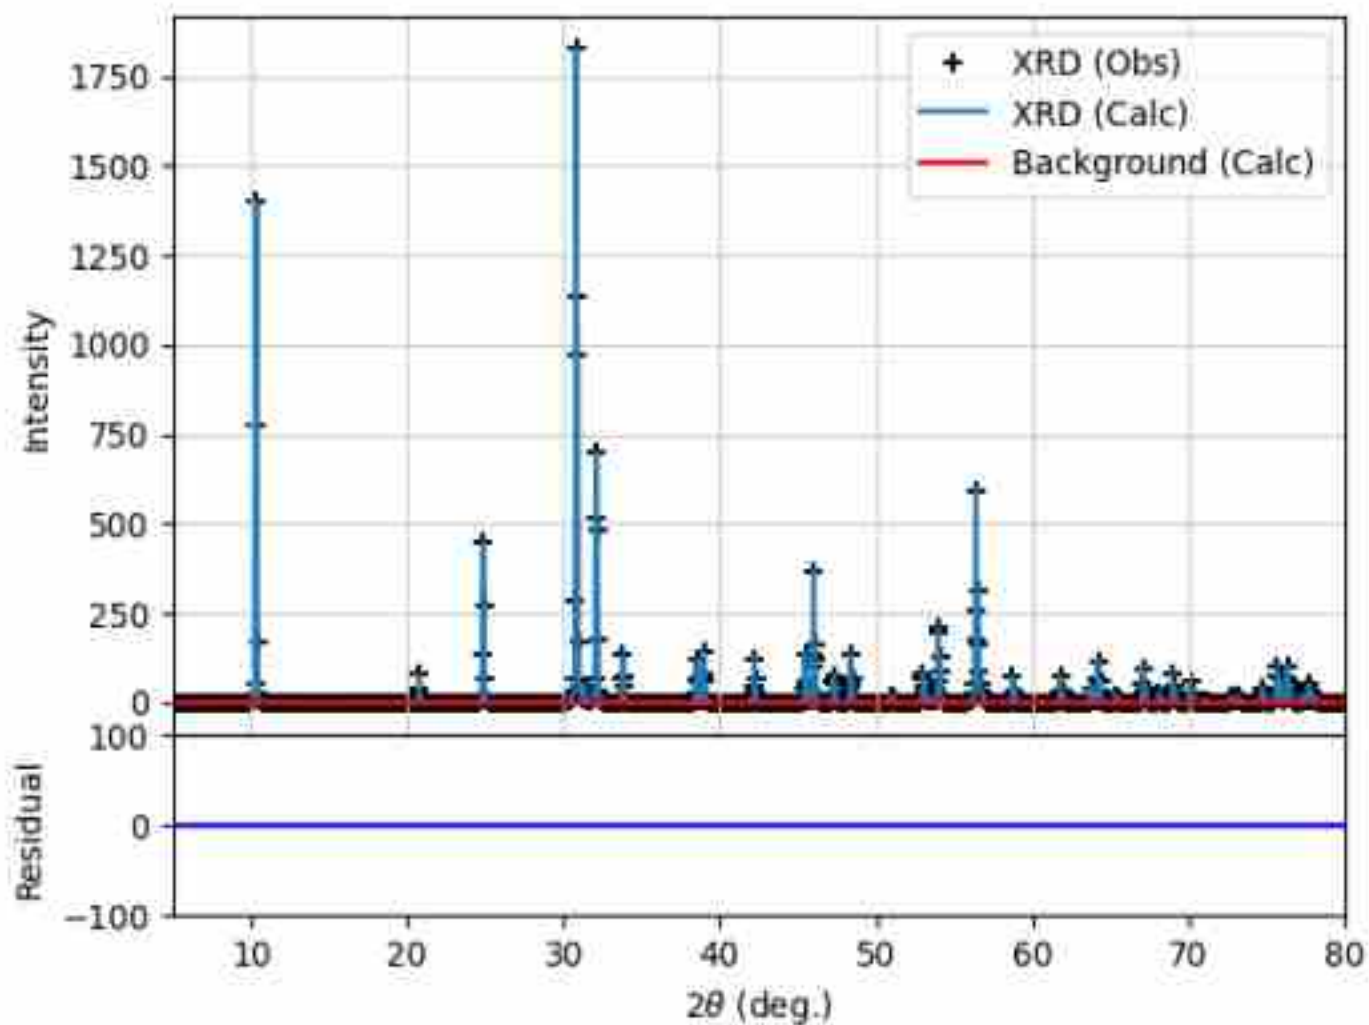

| RMSE before RR | Rwp     | RMSE after RR |
|----------------|---------|---------------|
| 0.01           | 0.00494 | 0.00158       |

# Pu<sub>2</sub>Sb<sub>1</sub>Au<sub>1</sub>

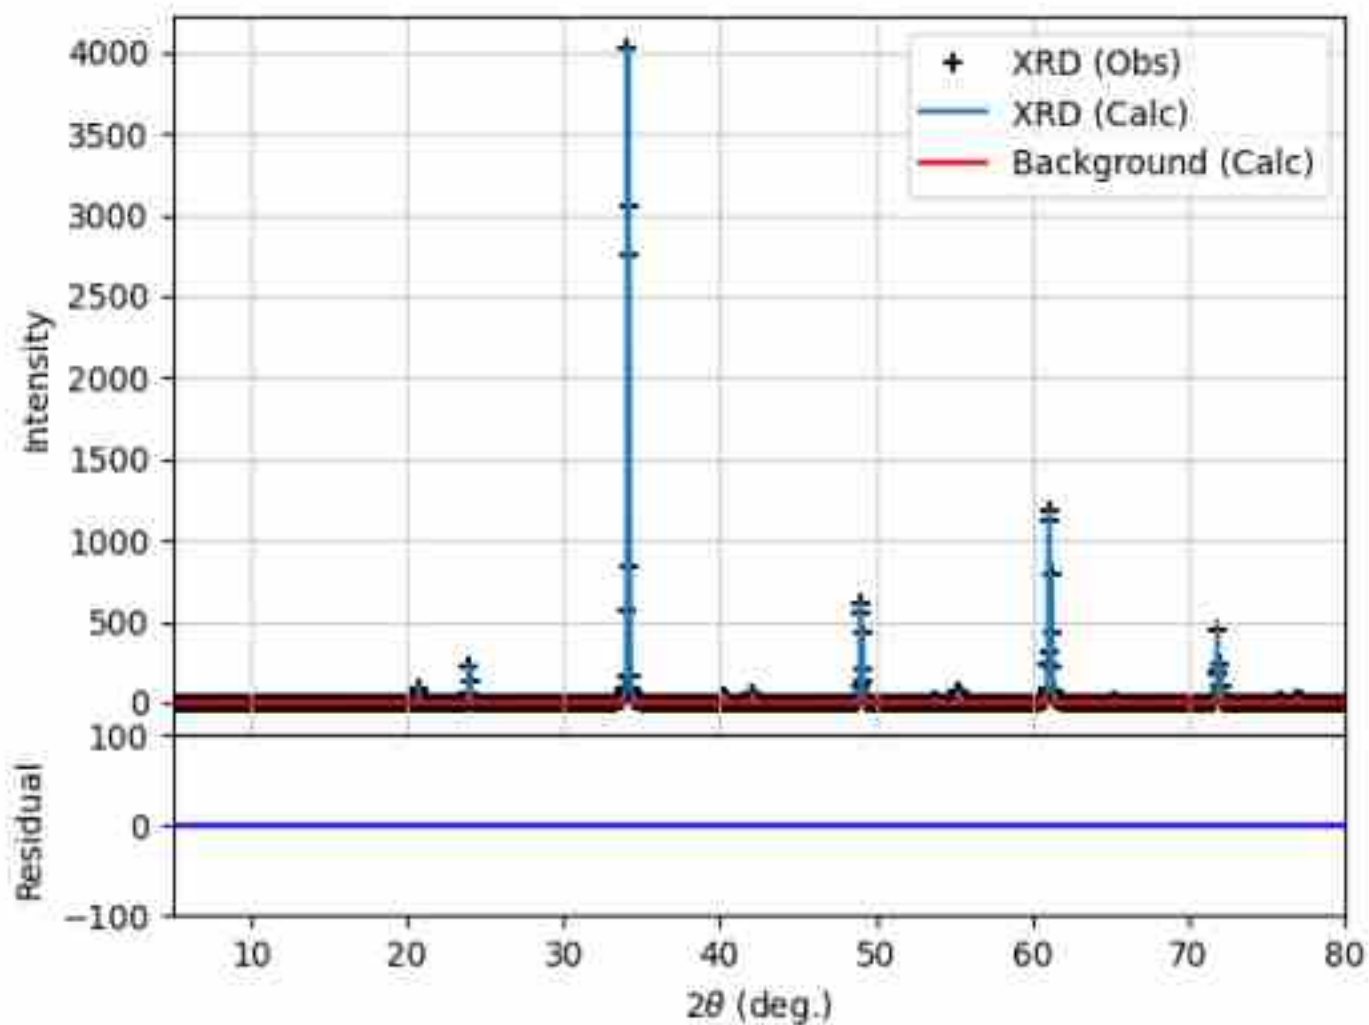

| RMSE before RR | Rwp     | RMSE after RR |
|----------------|---------|---------------|
| 0.001          | 0.00077 | 0.00014       |



# Rb1F1

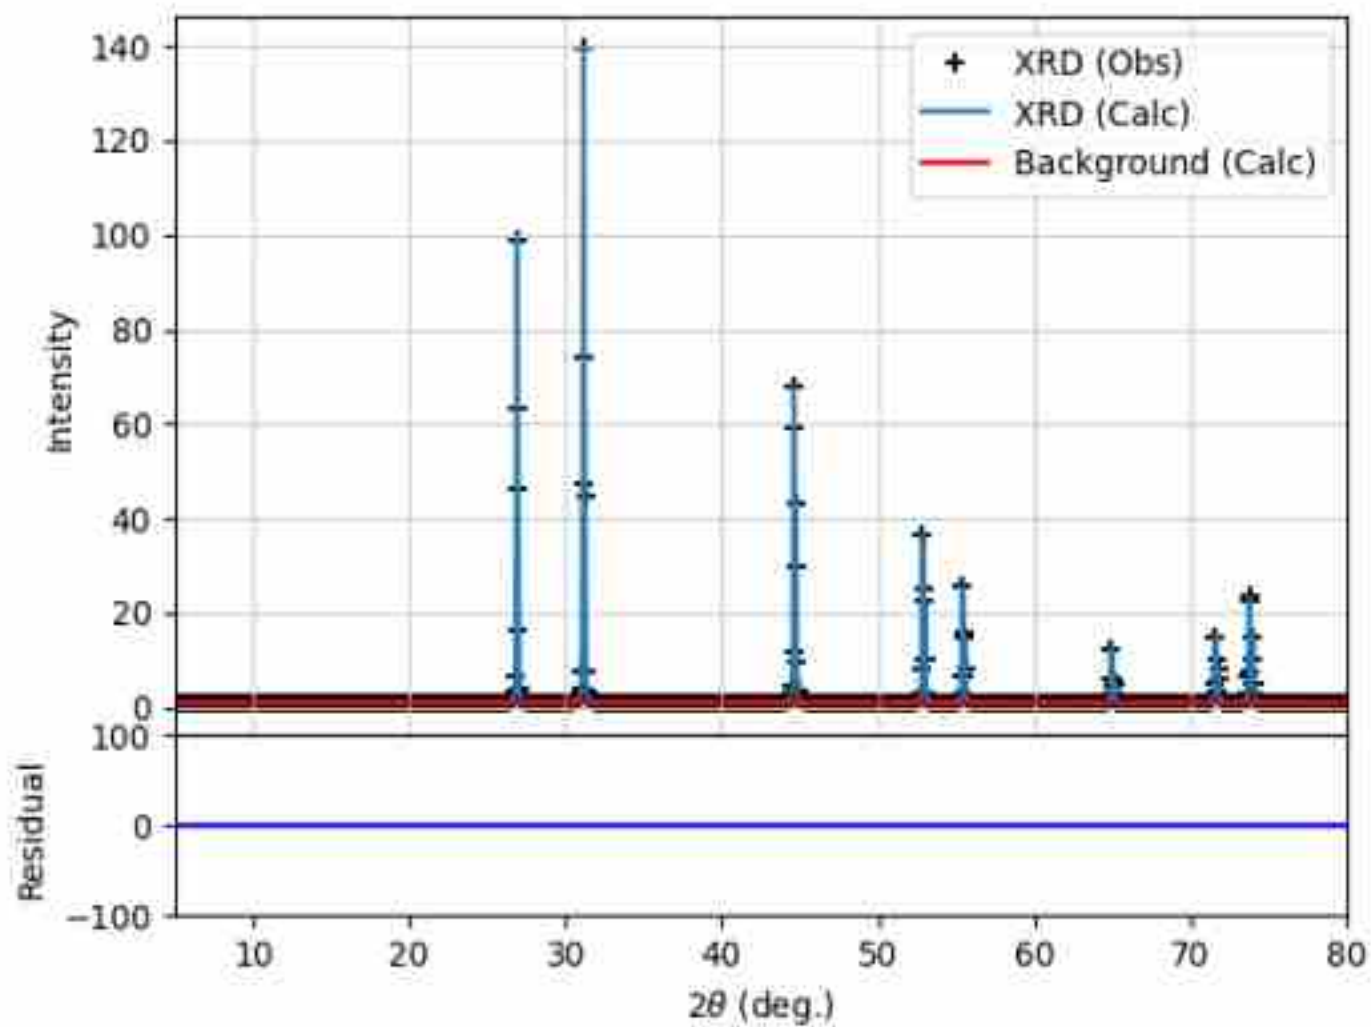

| RMSE before RR | Rwp     | RMSE after RR |
|----------------|---------|---------------|
| 0.001          | 0.00207 | 0.00043       |

# Rb1I1

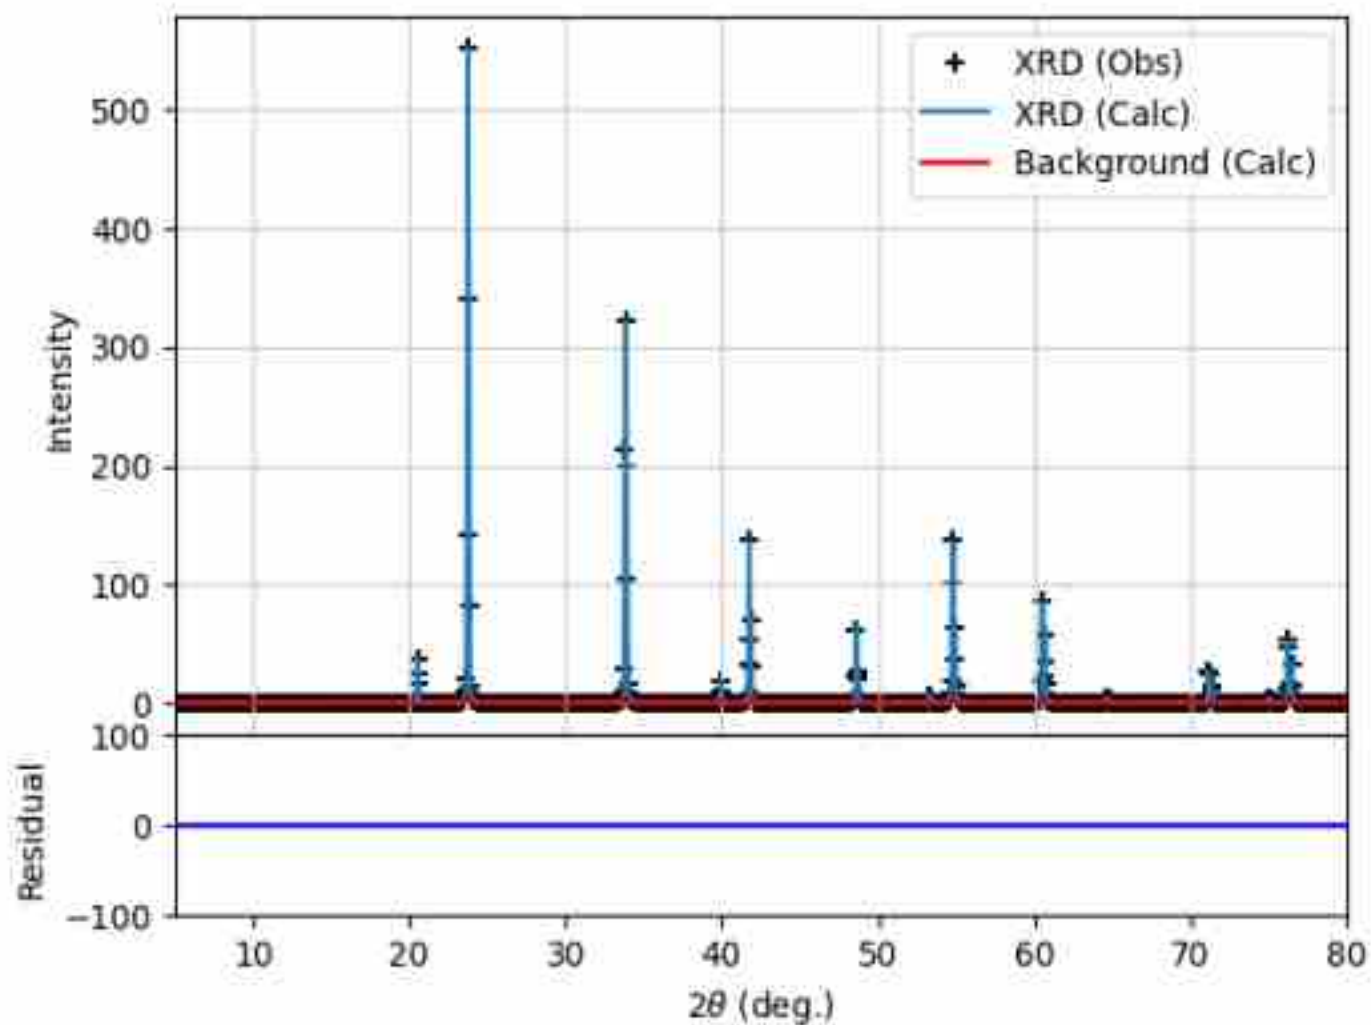

| RMSE before RR | Rwp     | RMSE after RR |
|----------------|---------|---------------|
| 0.001          | 0.02188 | 0.00101       |

# Rb1Nd1Se2

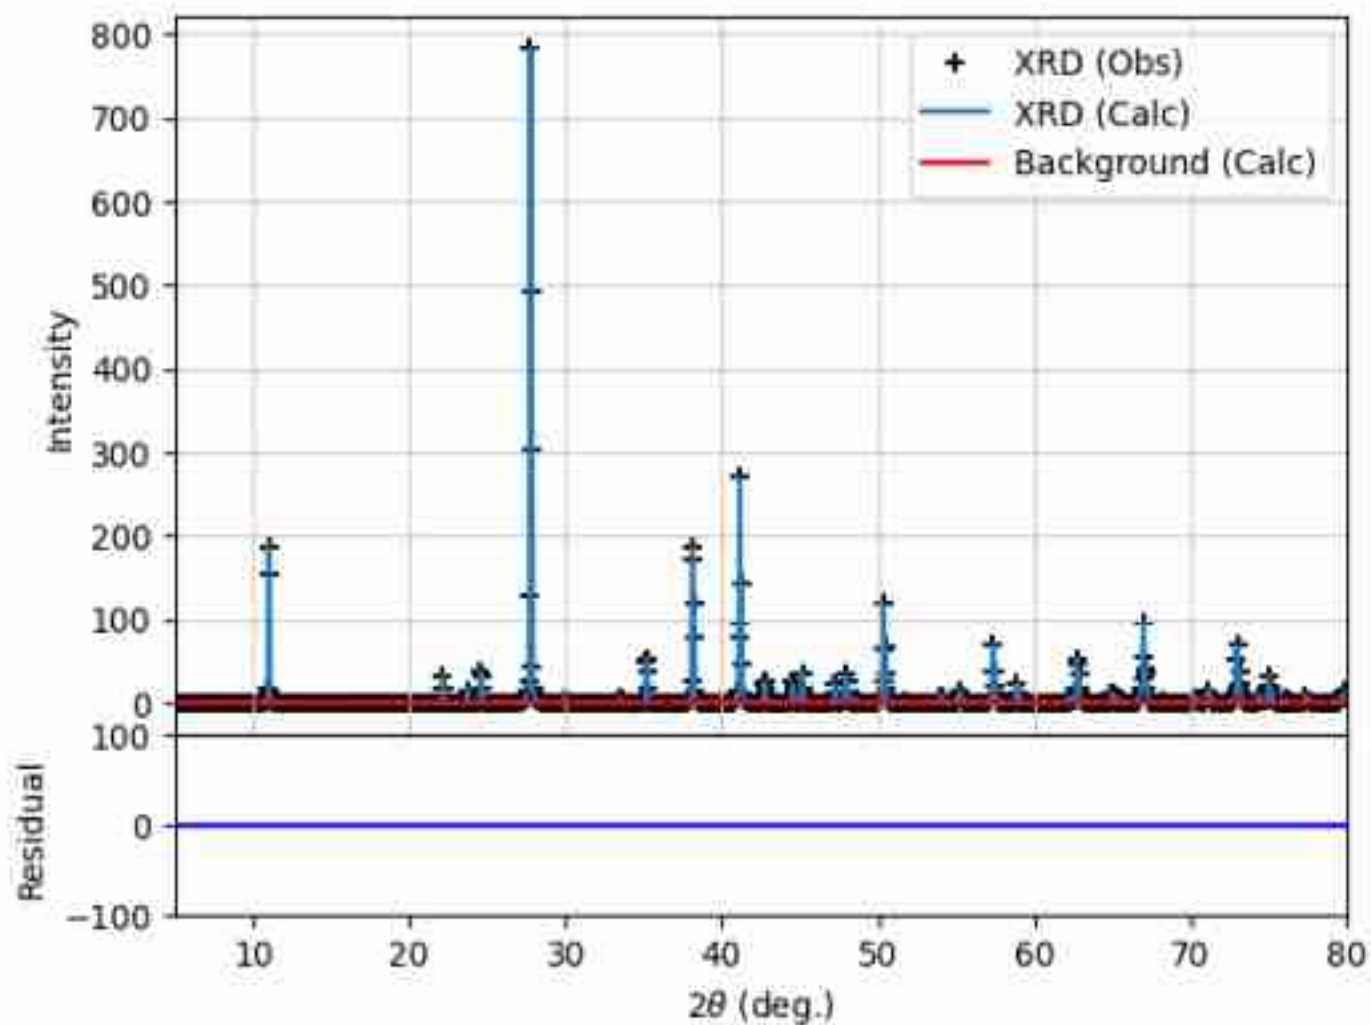

| RMSE before RR | Rwp   | RMSE after RR |
|----------------|-------|---------------|
| 0.01           | 0.003 | 0.00033       |

# Rb1Se1Br3

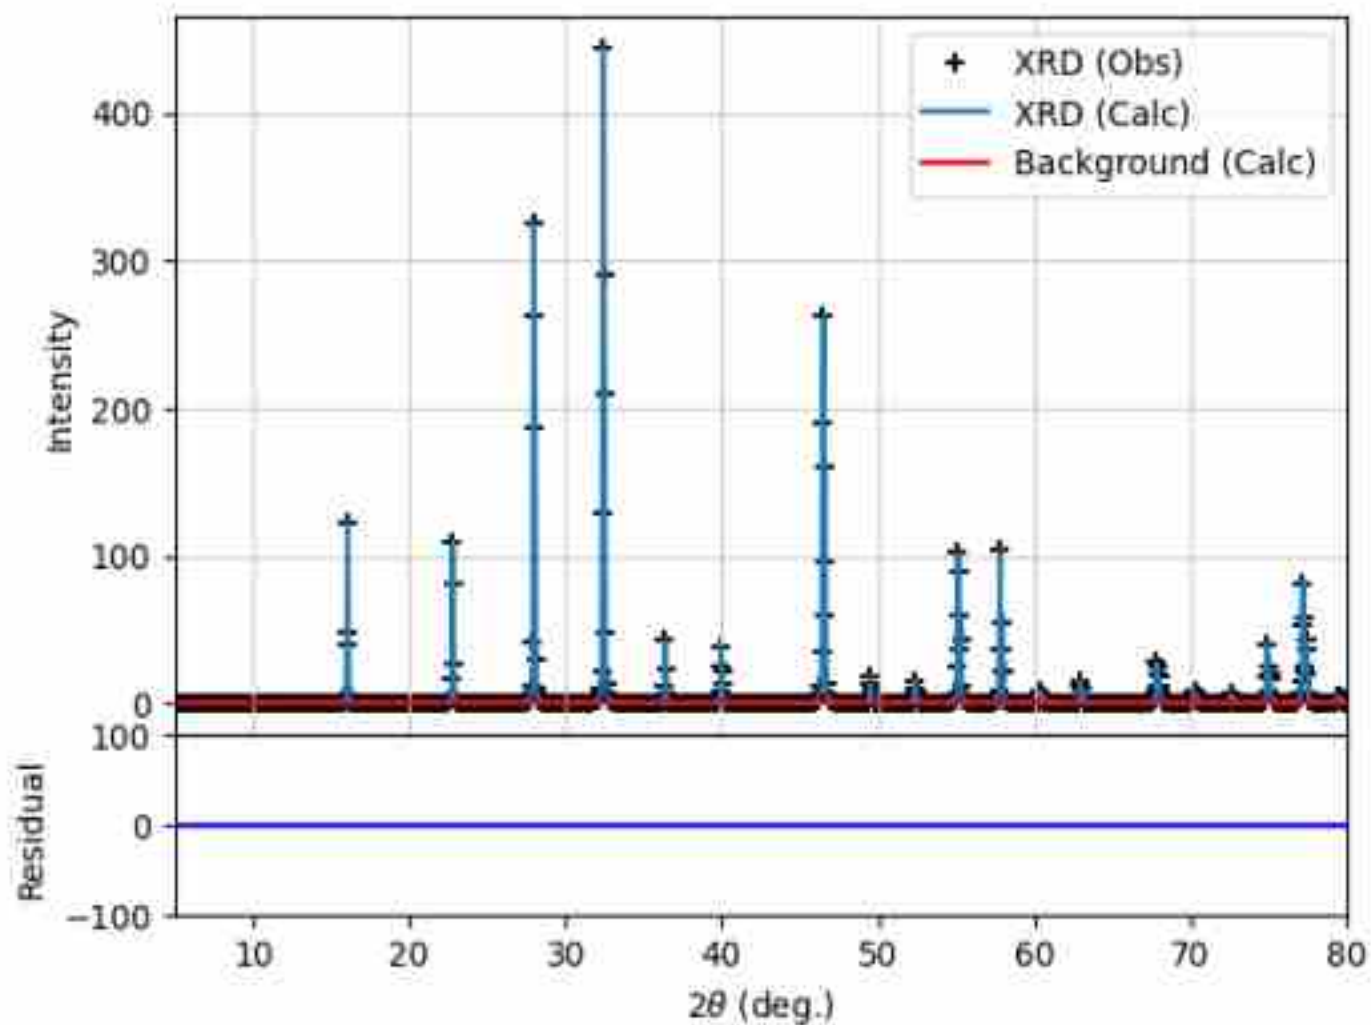

| RMSE before RR | Rwp     | RMSE after RR |
|----------------|---------|---------------|
| 0.01           | 0.00314 | 0.00067       |

# Rb<sub>2</sub>Ag<sub>1</sub>Rh<sub>1</sub>F<sub>6</sub>

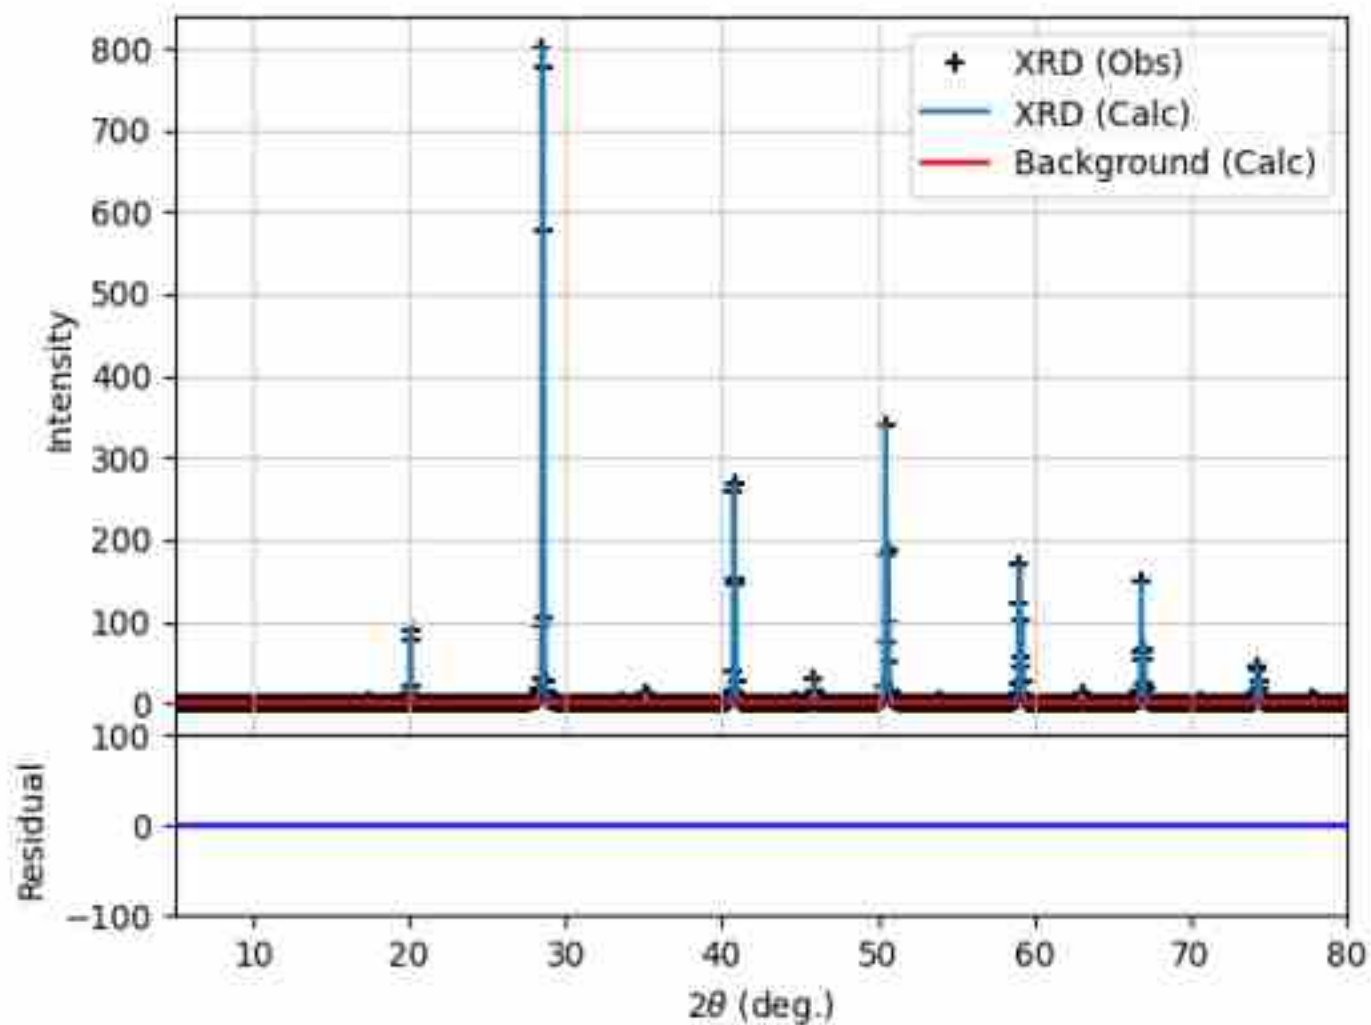

| RMSE before RR | Rwp     | RMSE after RR |
|----------------|---------|---------------|
| 0.01           | 0.04923 | 0.00446       |

# Rb<sub>2</sub>CeBr<sub>6</sub>

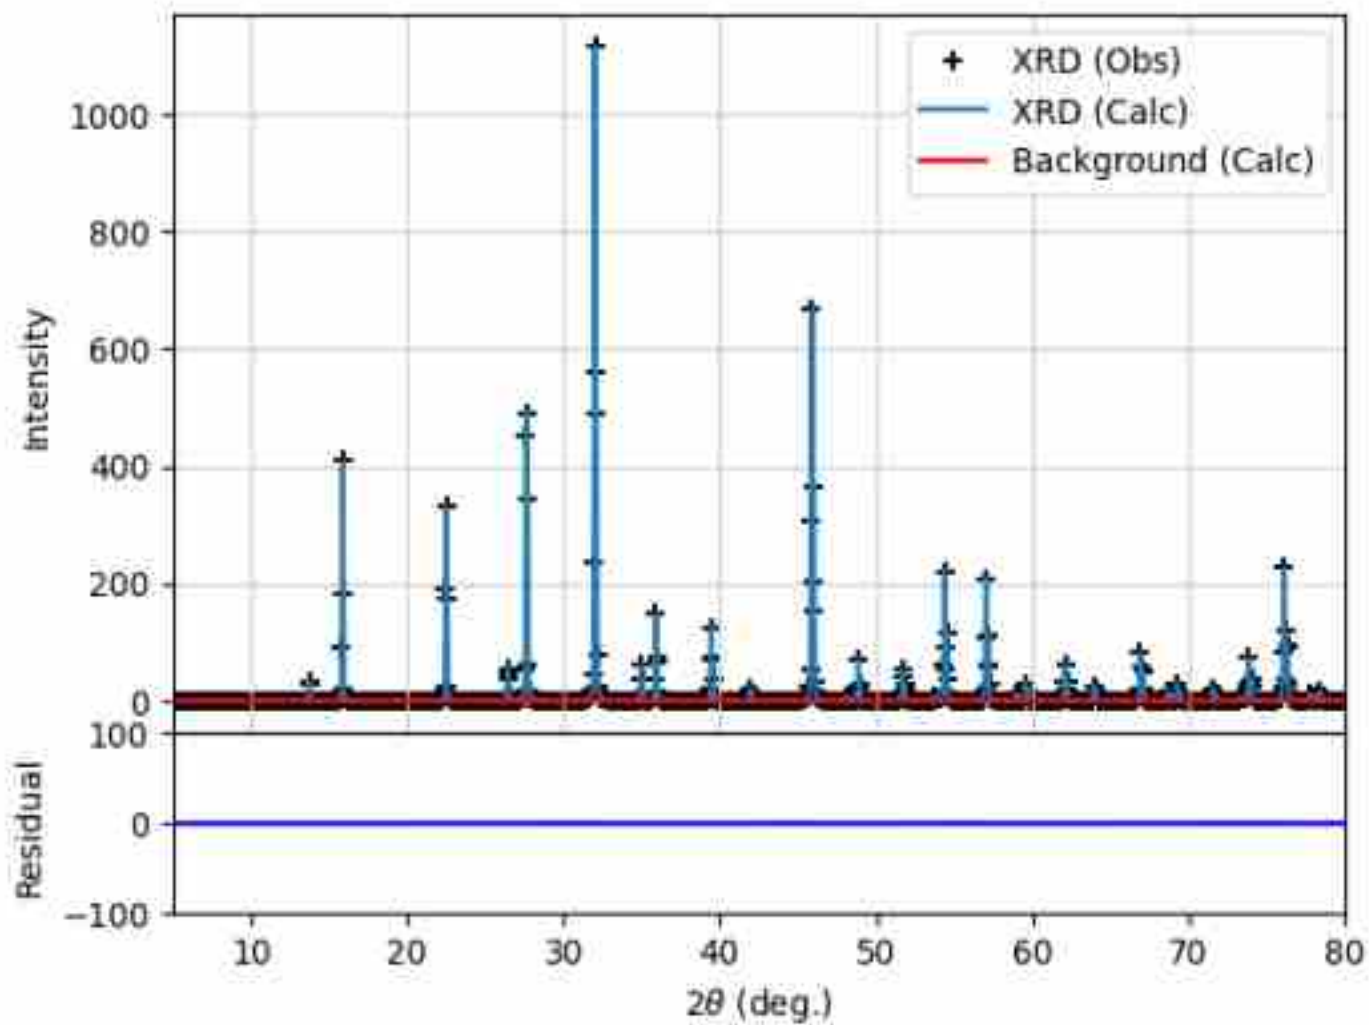

| RMSE before RR | Rwp     | RMSE after RR |
|----------------|---------|---------------|
| 0.01           | 0.20546 | 0.00477       |

# Rb<sub>2</sub>Cr<sub>1</sub>Ag<sub>1</sub>F<sub>6</sub>

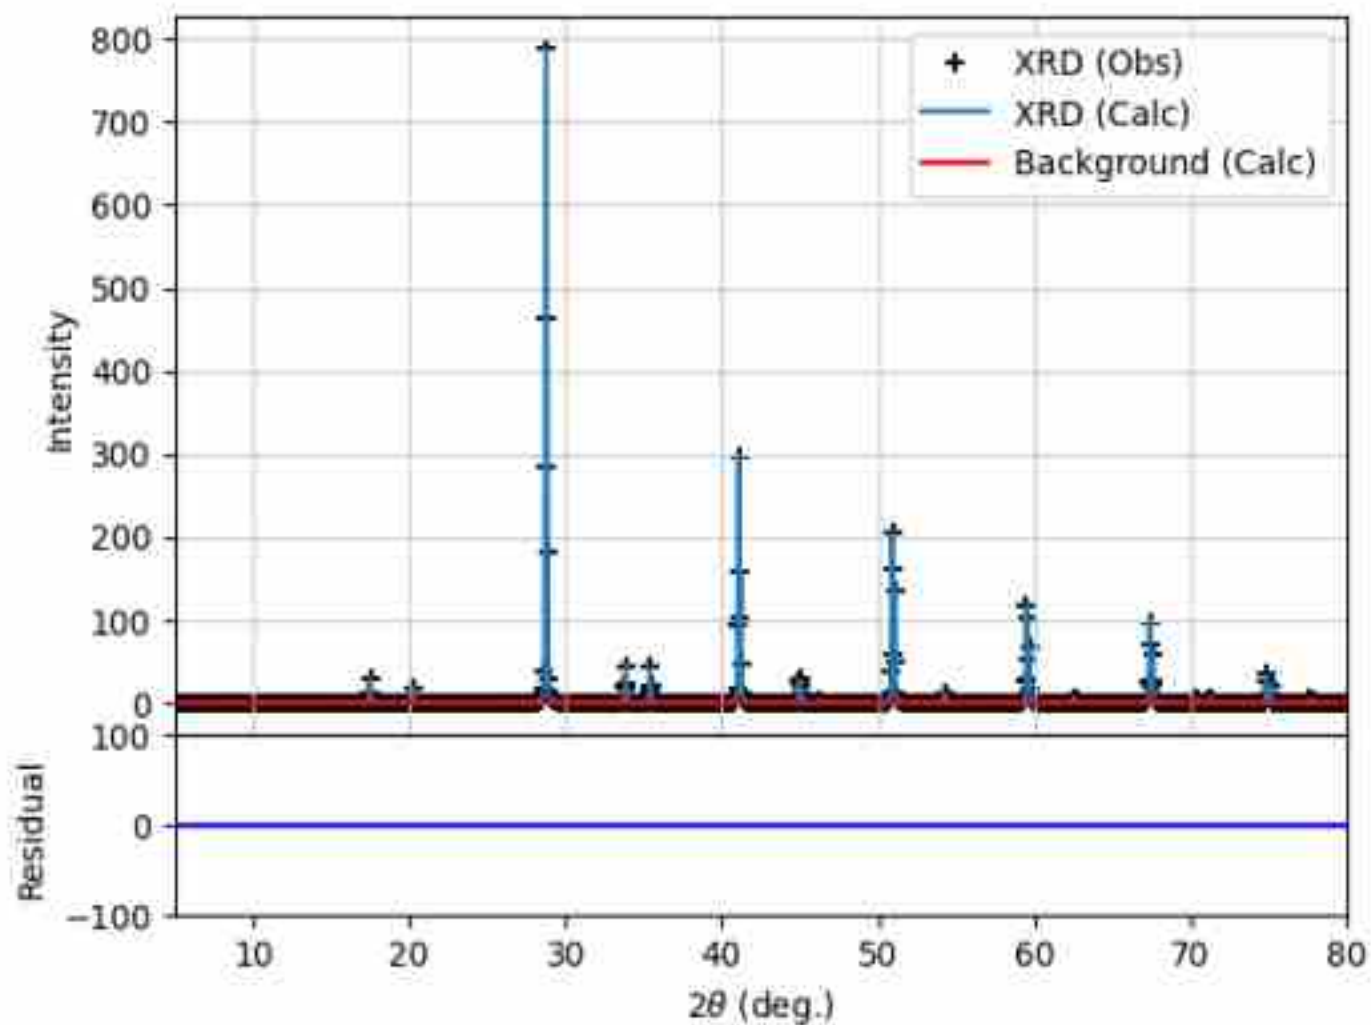

| RMSE before RR | Rwp     | RMSE after RR |
|----------------|---------|---------------|
| 0.01           | 0.01131 | 0.0034        |

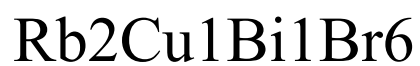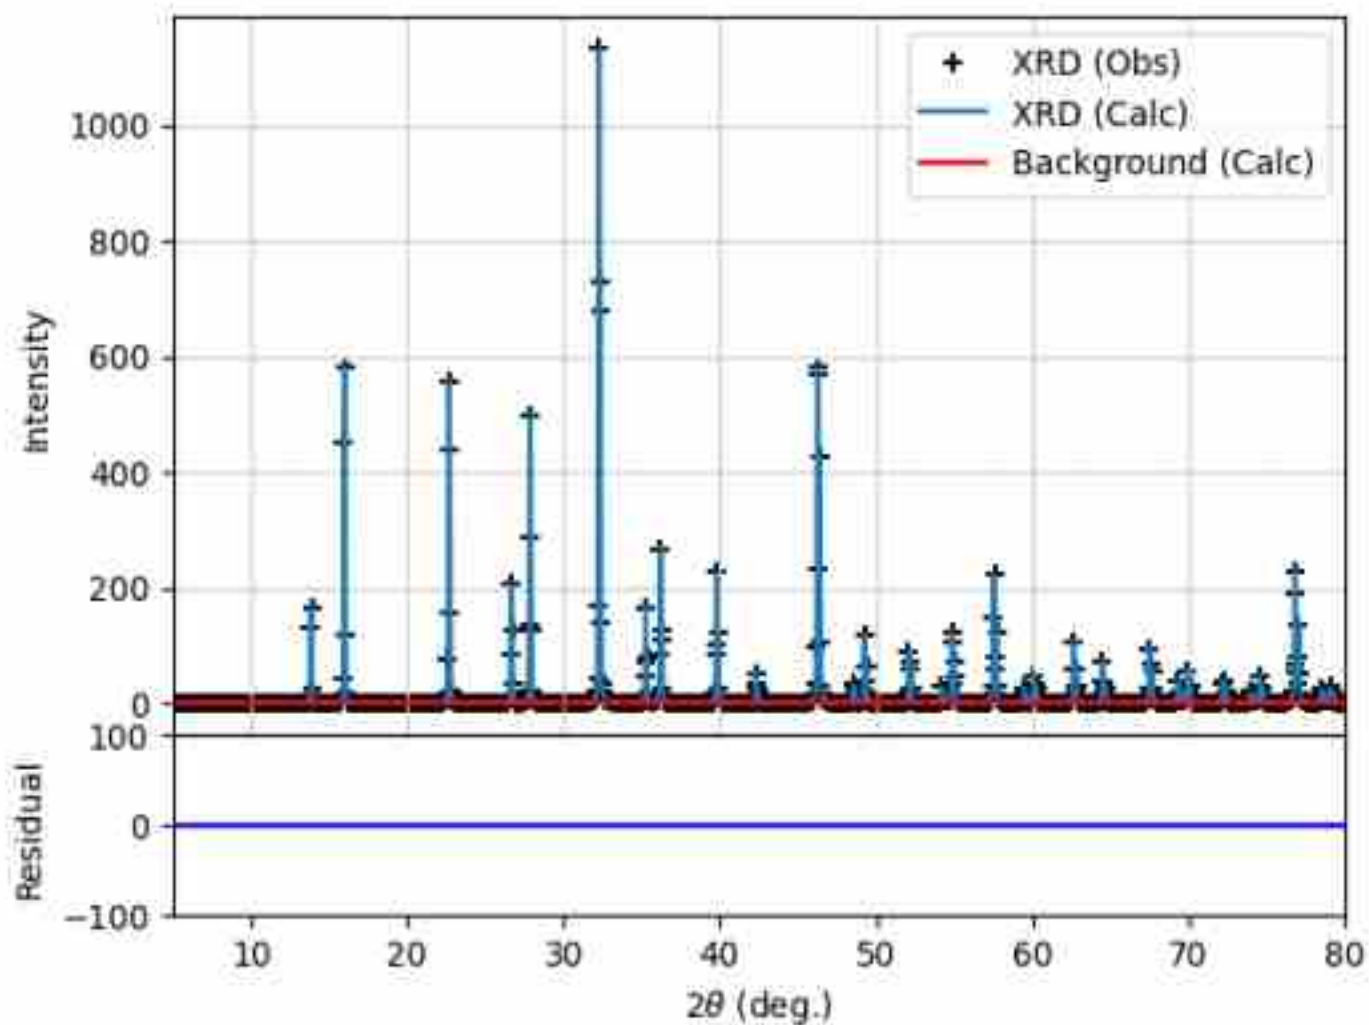

| RMSE before RR | Rwp     | RMSE after RR |
|----------------|---------|---------------|
| 0.01           | 0.03439 | 0.00281       |



# Rb<sub>2</sub>Hg<sub>1</sub>Au<sub>1</sub>

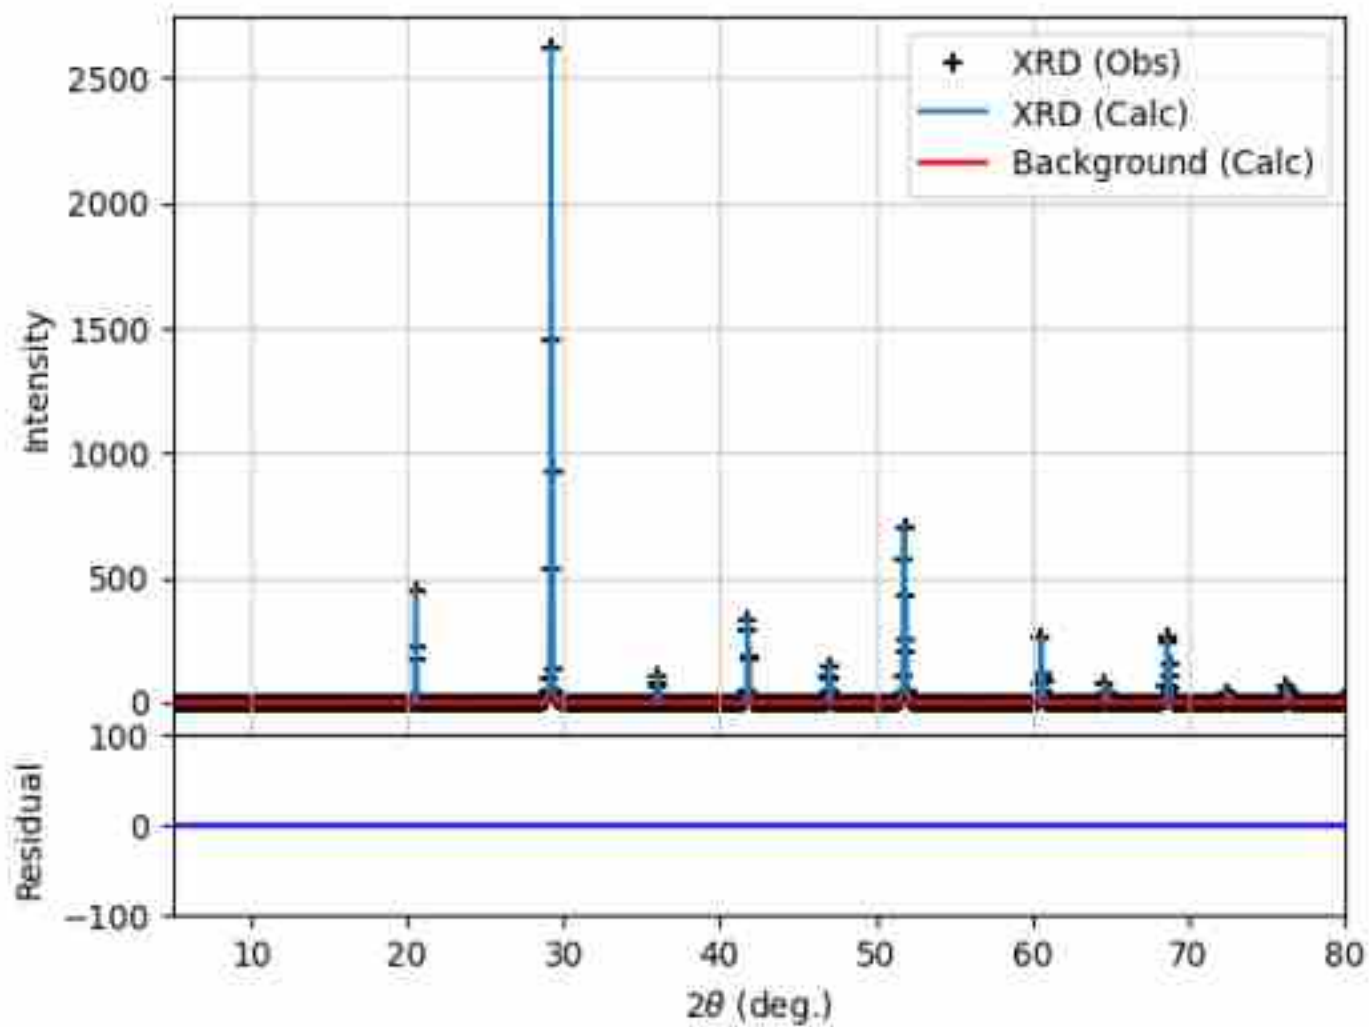

| RMSE before RR | Rwp    | RMSE after RR |
|----------------|--------|---------------|
| 0.001          | 0.0017 | 0.00016       |

# Rb<sub>2</sub>LiMnF<sub>6</sub>

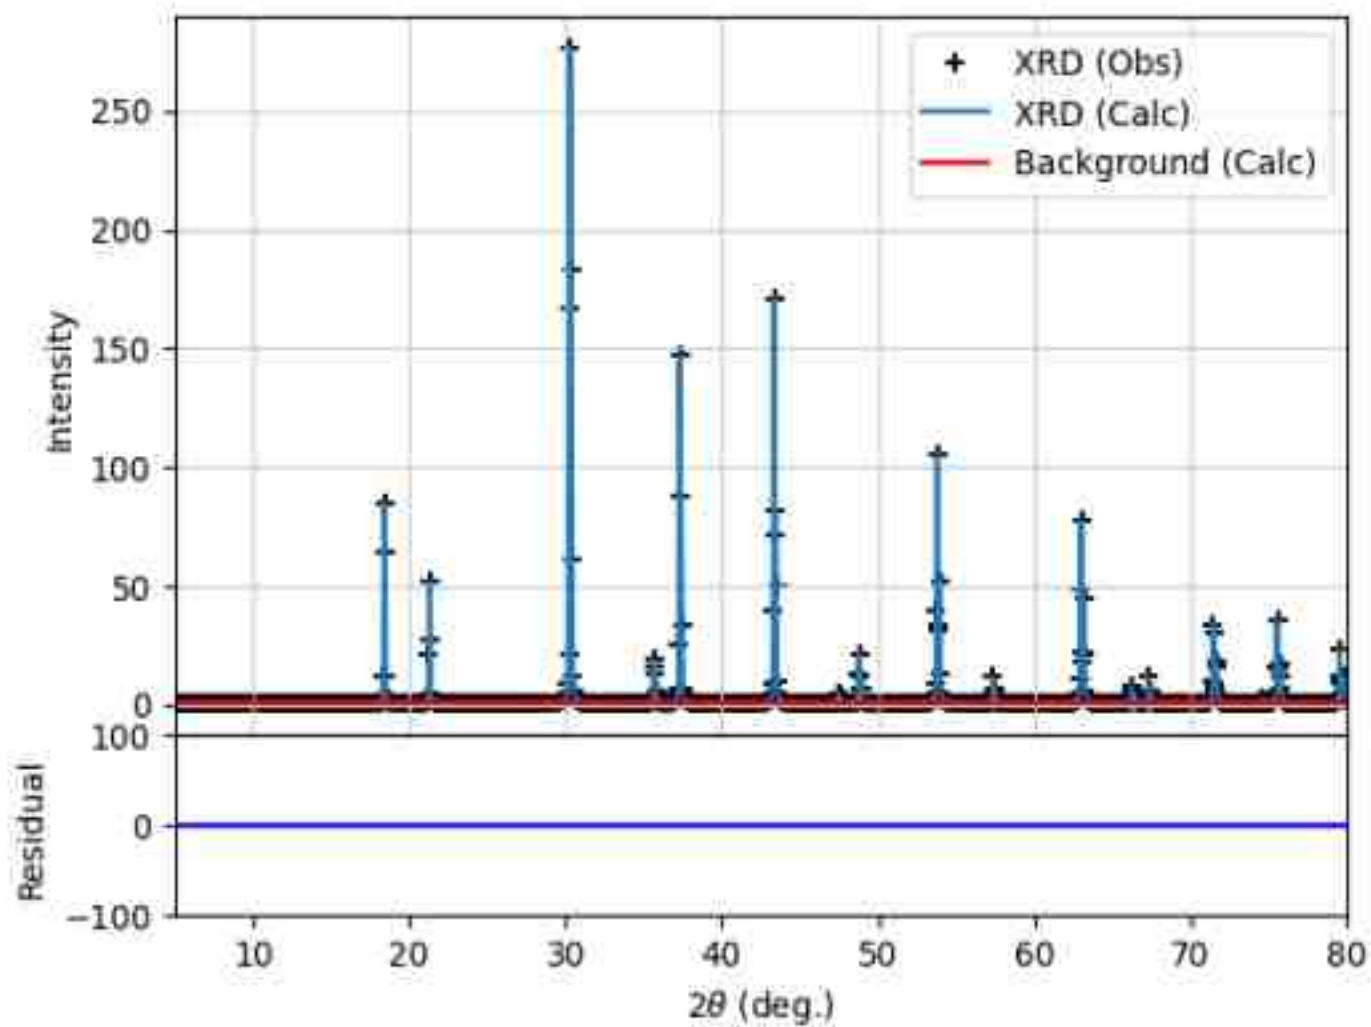

| RMSE before RR | Rwp     | RMSE after RR |
|----------------|---------|---------------|
| 0.01           | 0.01362 | 0.00404       |

Rb<sub>2</sub>Li<sub>1</sub>Sm<sub>1</sub>Cl<sub>6</sub>

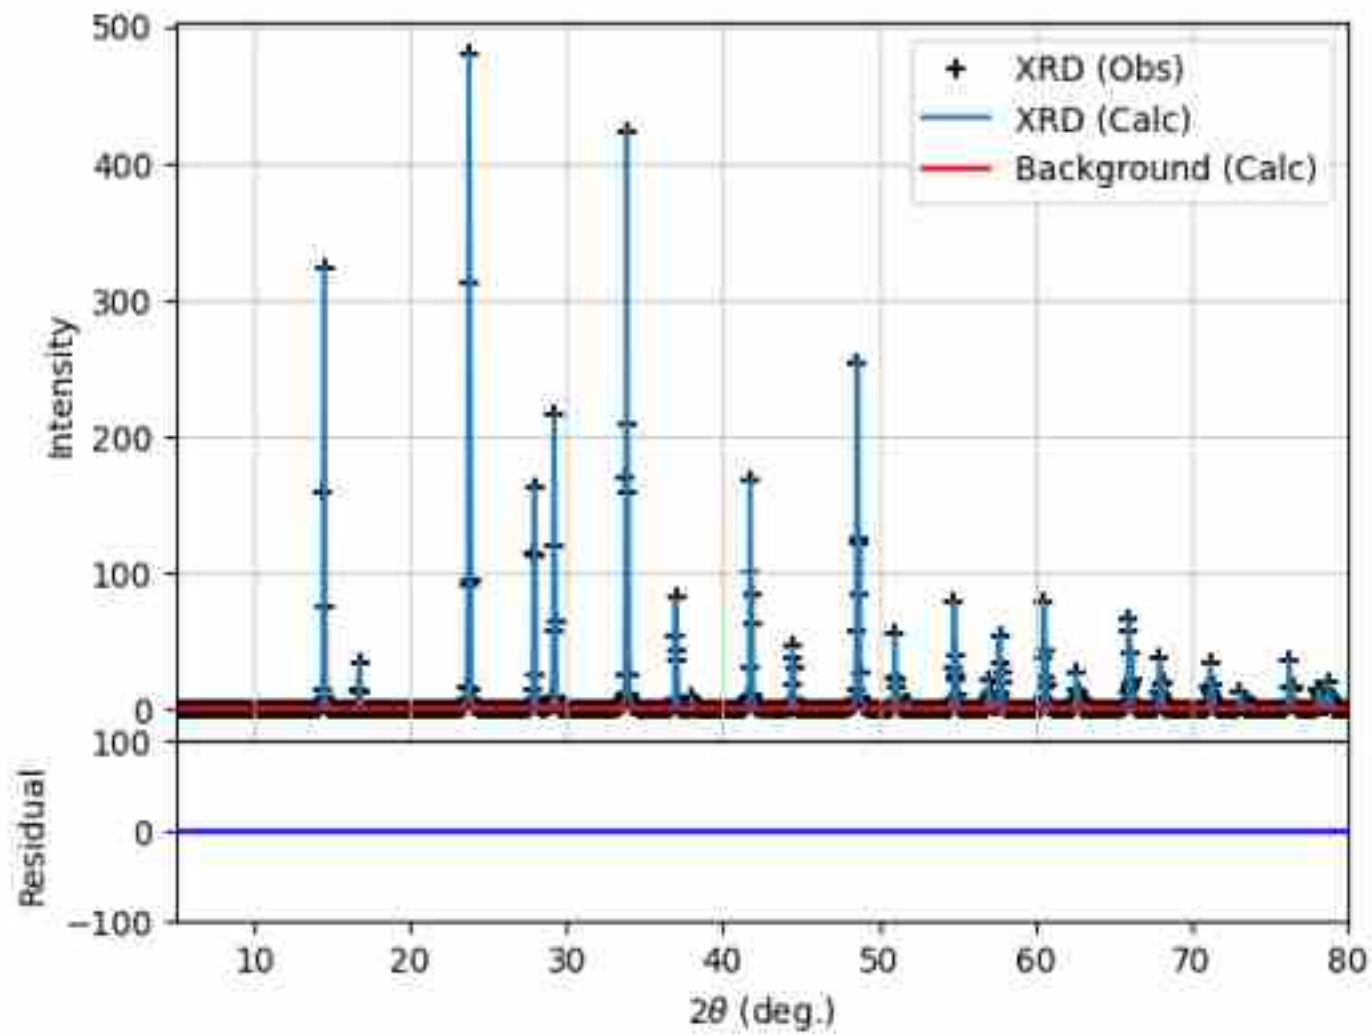

| RMSE before RR | Rwp     | RMSE after RR |
|----------------|---------|---------------|
| 0.01           | 0.00781 | 0.00269       |

# Rb<sub>2</sub>LuCl<sub>6</sub>

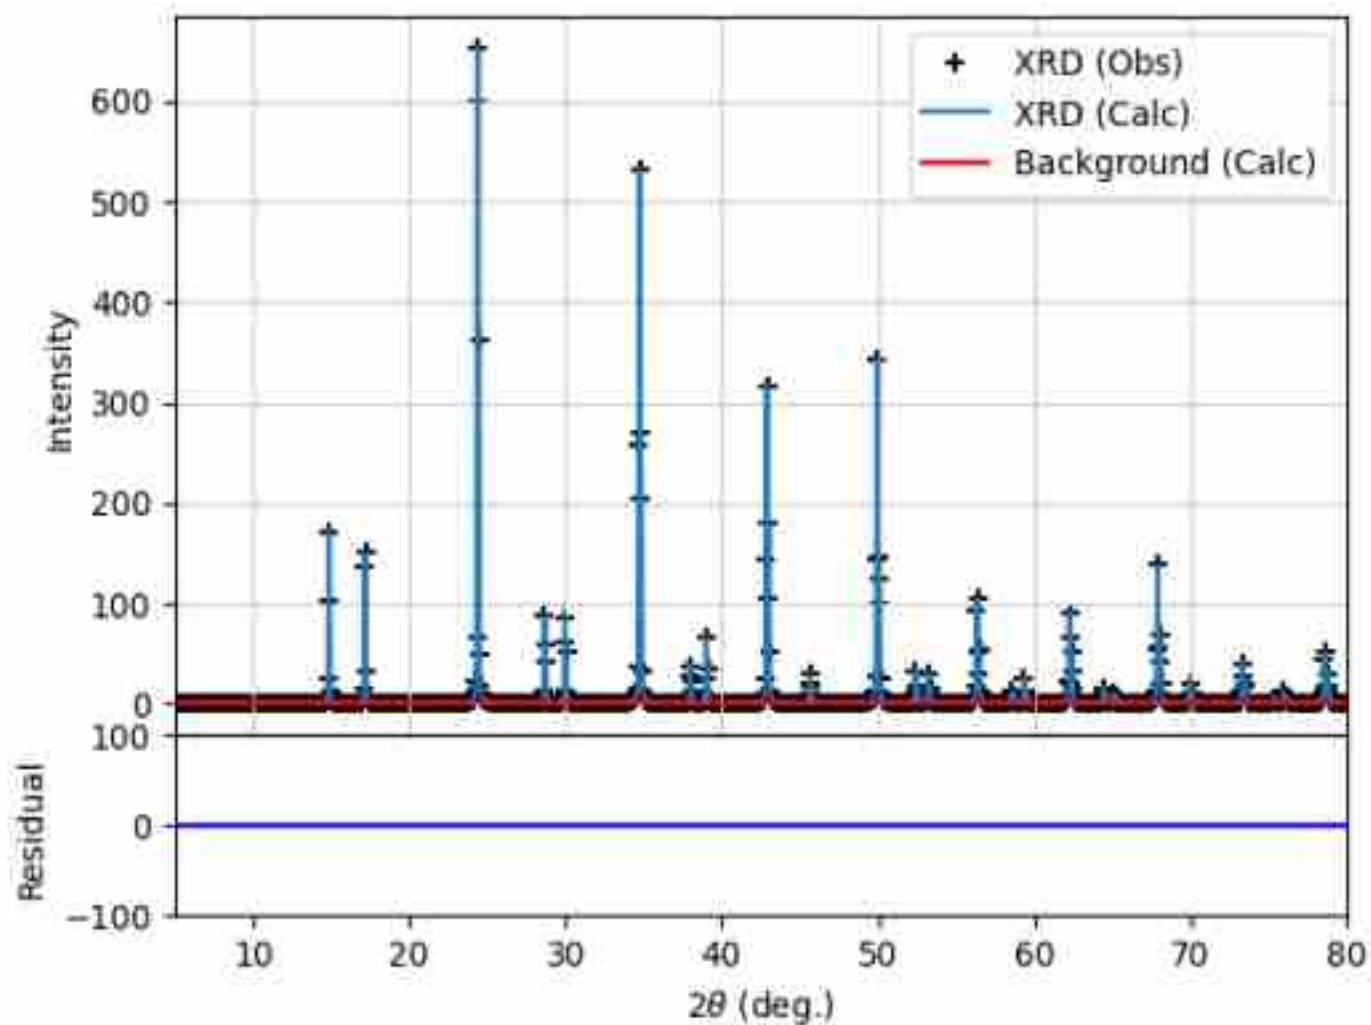

| RMSE before RR | Rwp     | RMSE after RR |
|----------------|---------|---------------|
| 0.01           | 0.02195 | 0.00315       |

# Rb<sub>2</sub>Na<sub>1</sub>Ce<sub>1</sub>F<sub>6</sub>

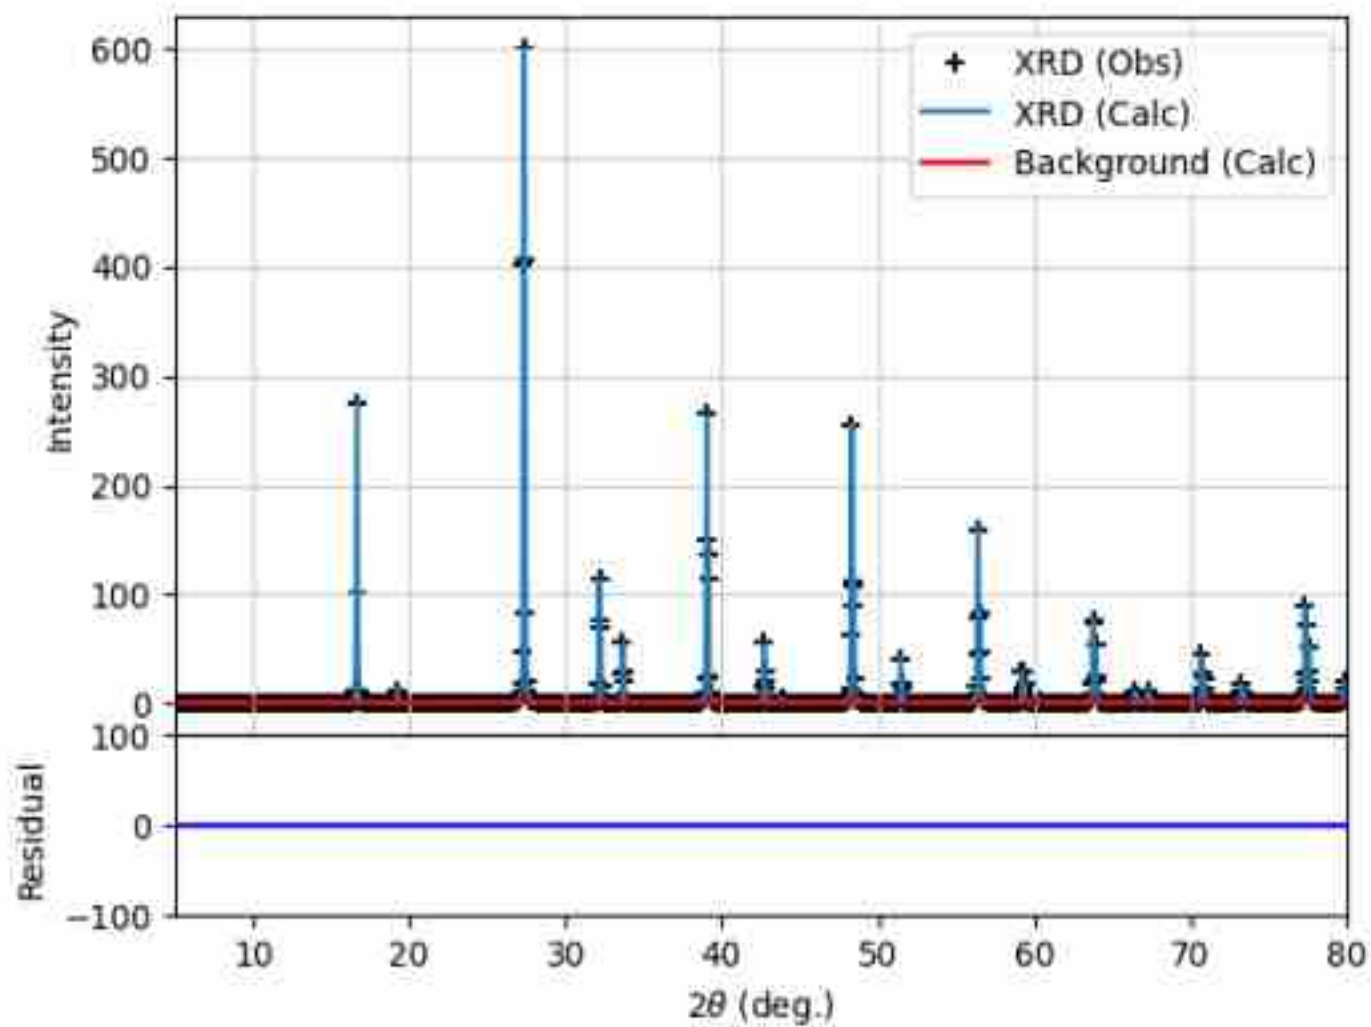

| RMSE before RR | Rwp     | RMSE after RR |
|----------------|---------|---------------|
| 0.01           | 0.01575 | 0.00433       |

# Rb<sub>2</sub>NaCeI<sub>6</sub>

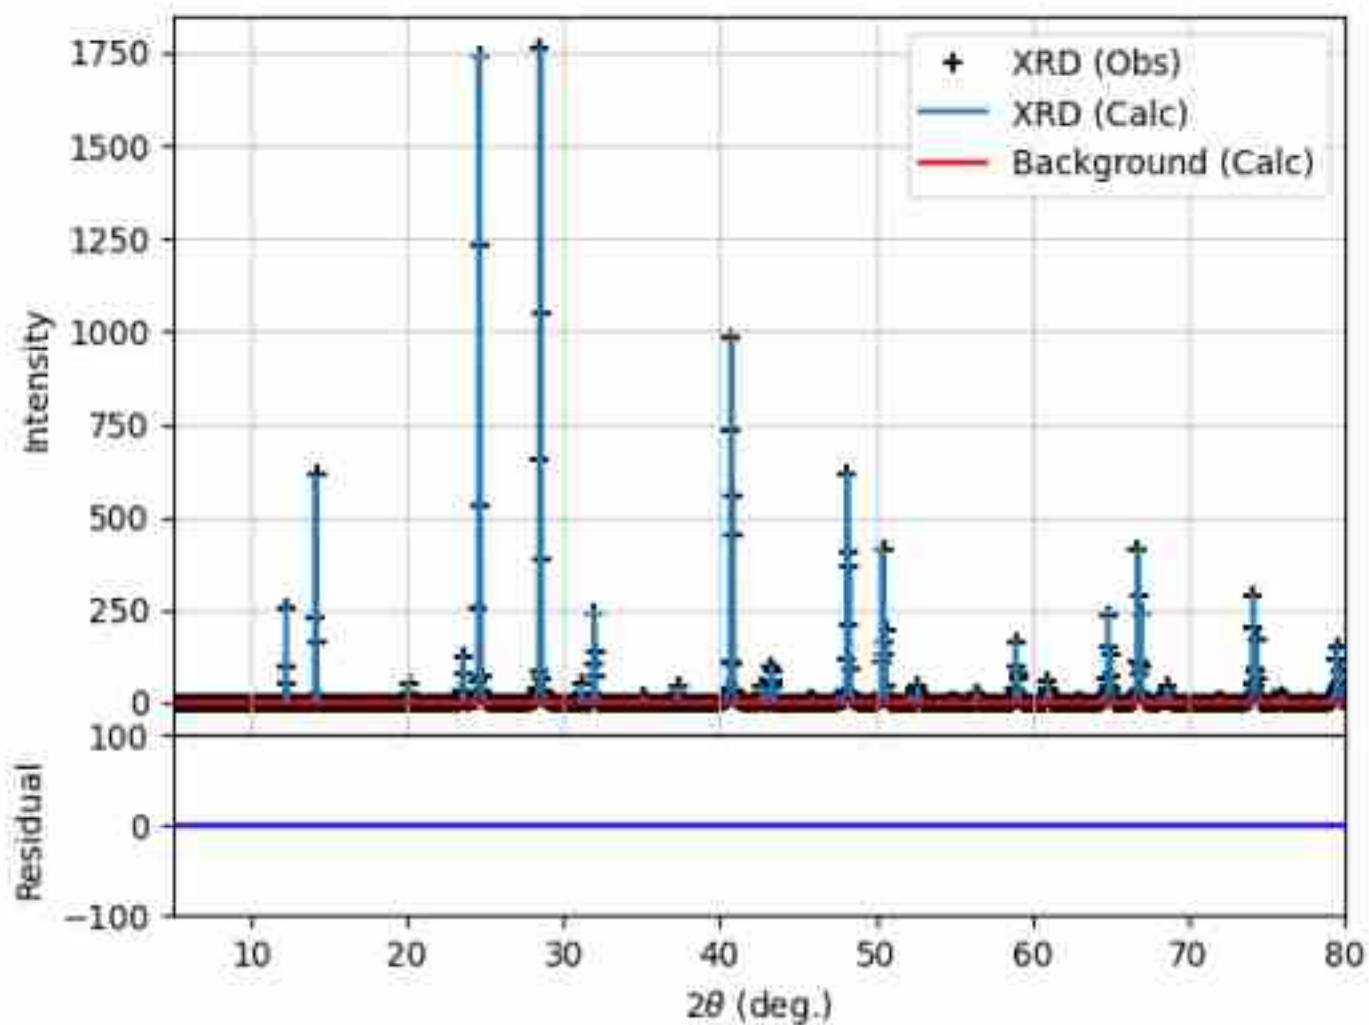

| RMSE before RR | Rwp     | RMSE after RR |
|----------------|---------|---------------|
| 0.01           | 0.06609 | 0.00232       |

# Rb<sub>2</sub>NaNbF<sub>6</sub>

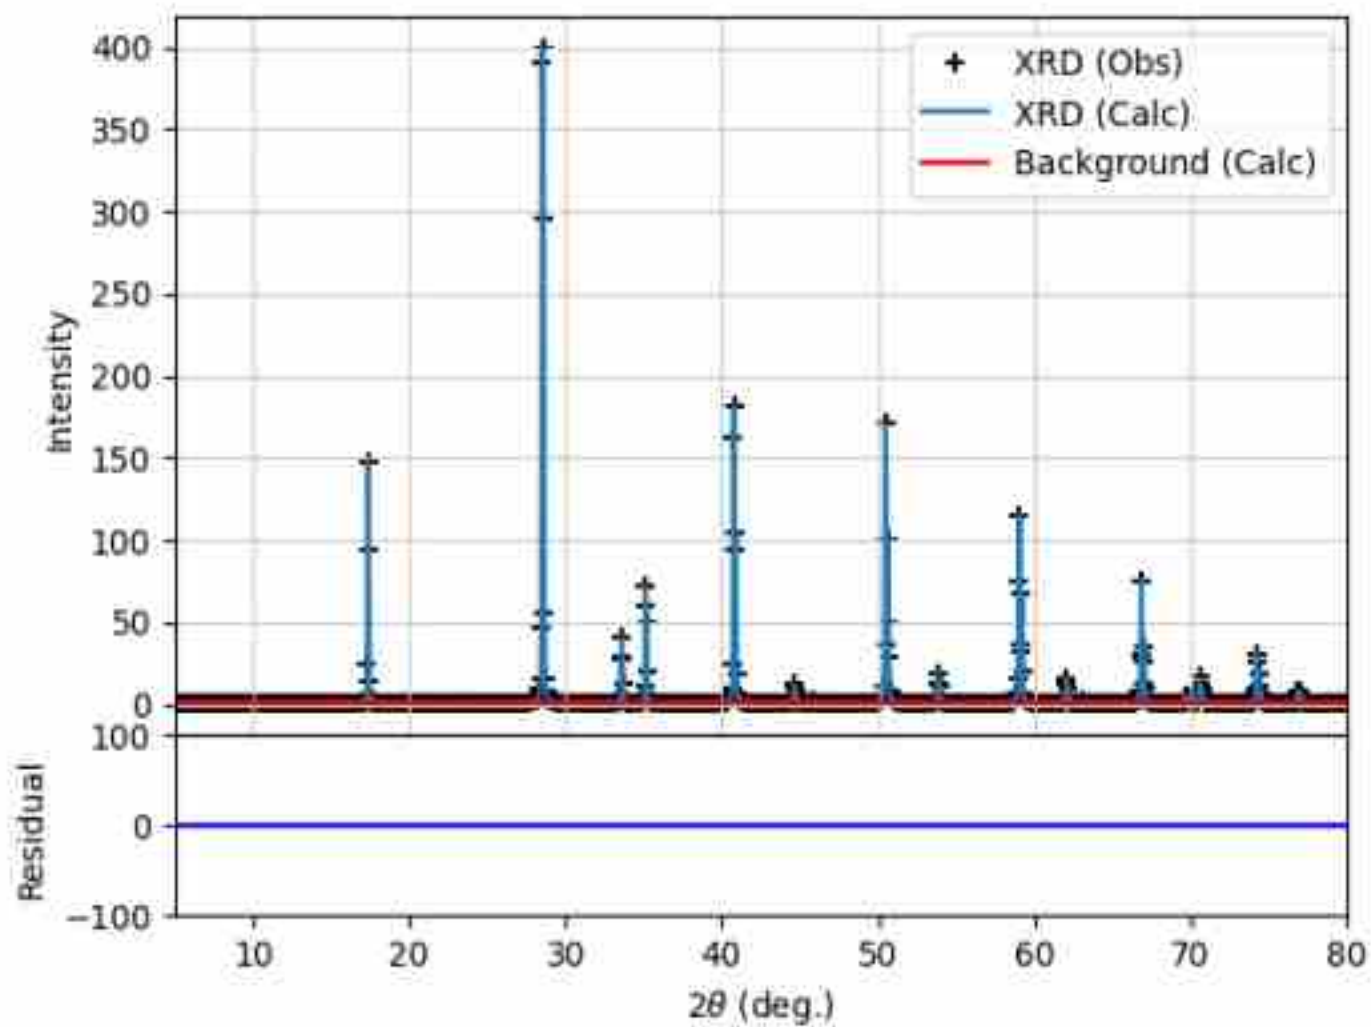

| RMSE before RR | Rwp    | RMSE after RR |
|----------------|--------|---------------|
| 0.01           | 0.0088 | 0.0023        |

# Rb2Na1Sb1F6

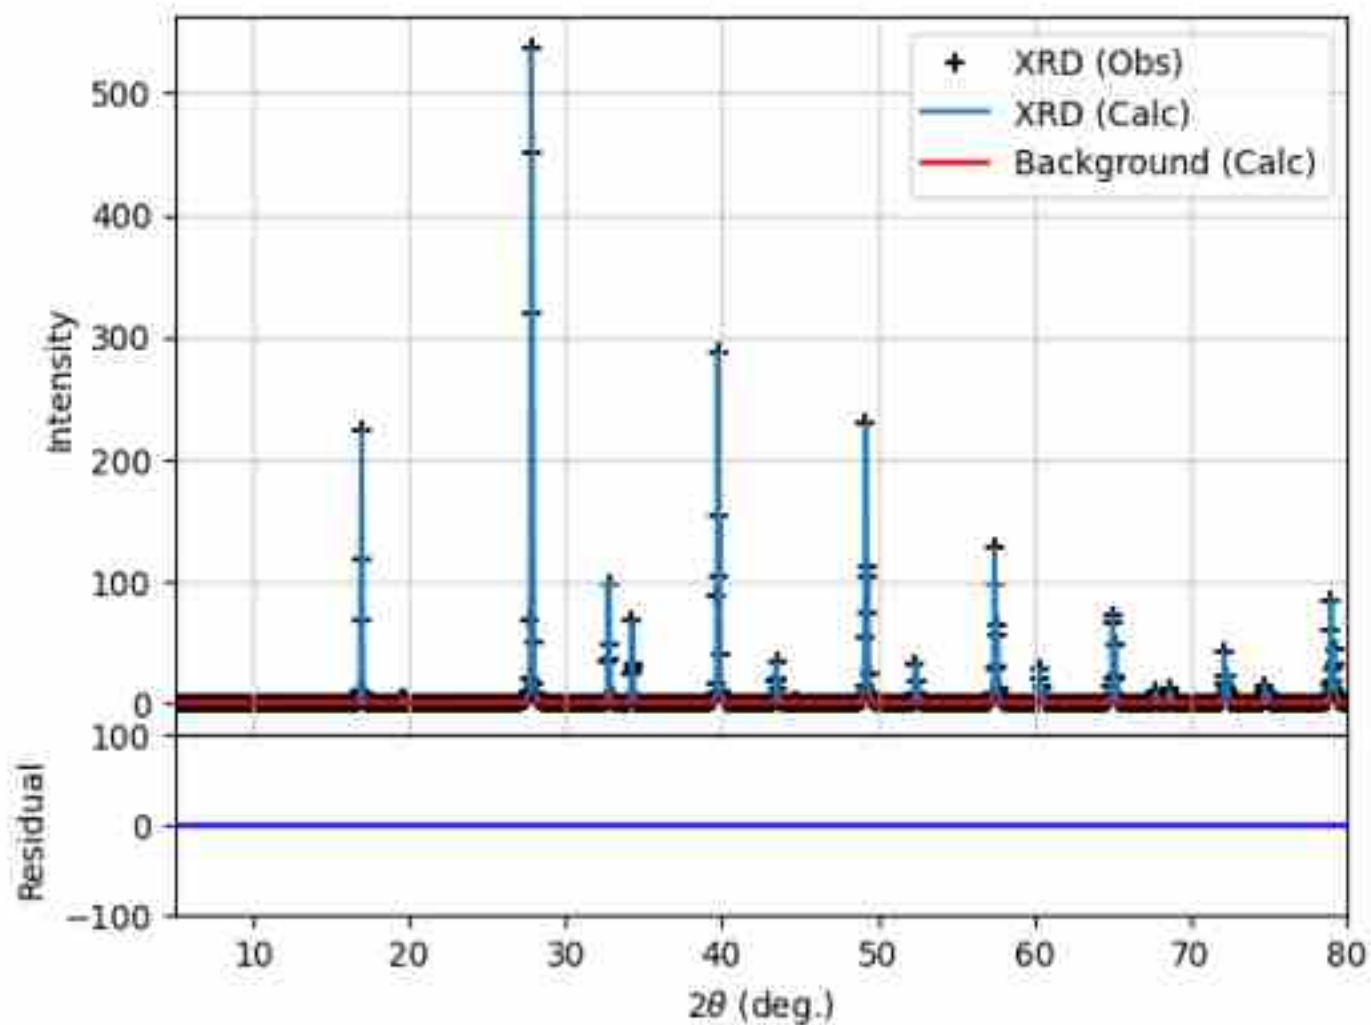

| RMSE before RR | Rwp     | RMSE after RR |
|----------------|---------|---------------|
| 0.01           | 0.01967 | 0.00346       |



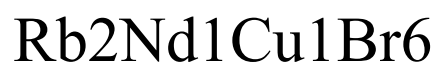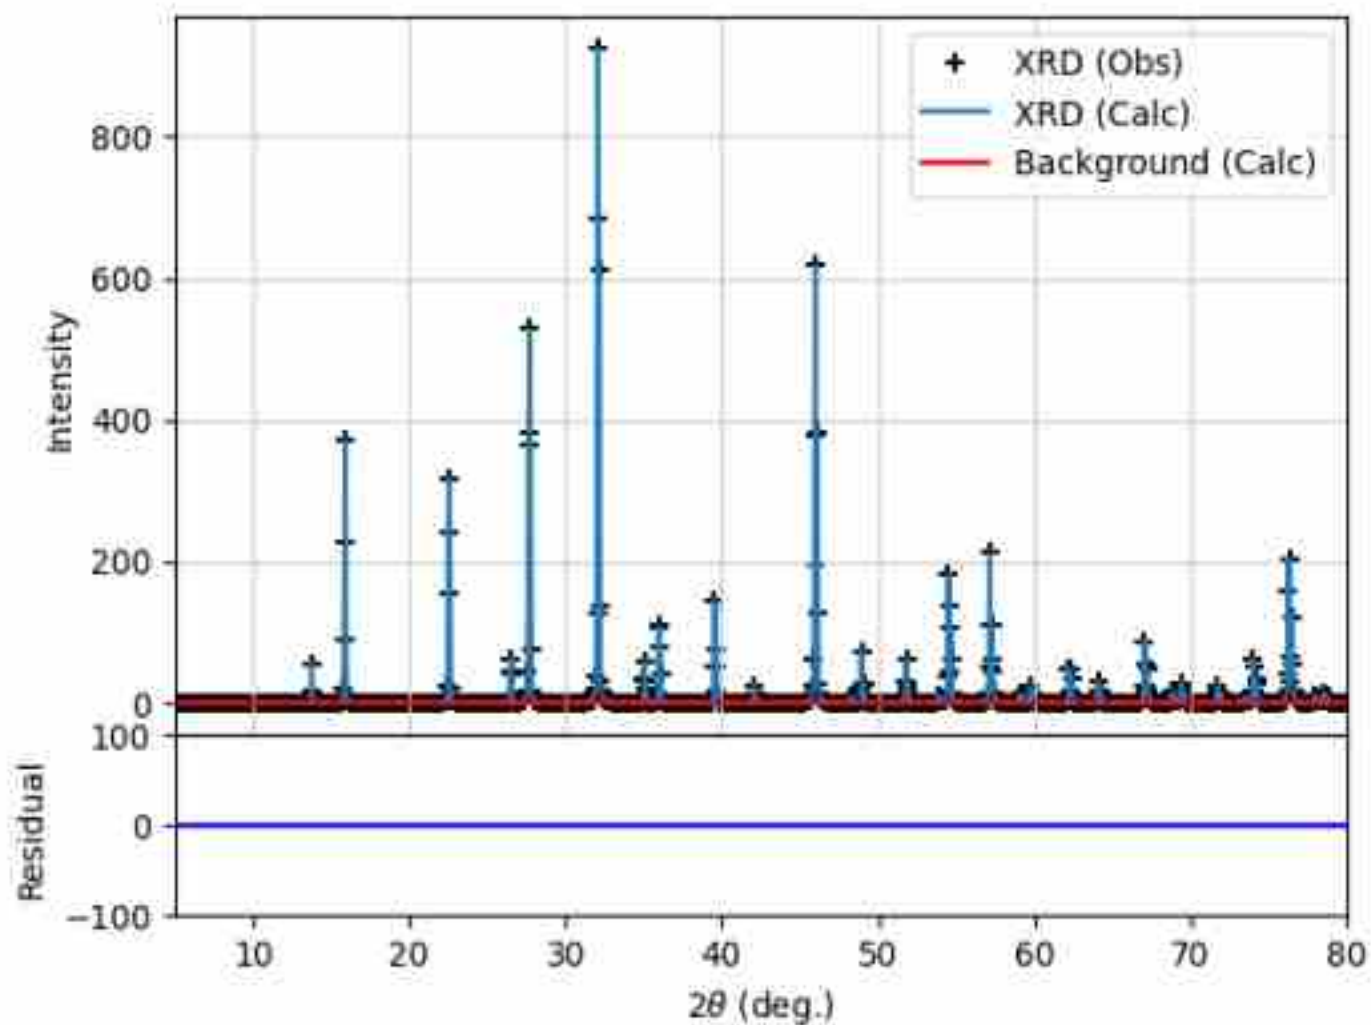

| RMSE before RR | Rwp     | RMSE after RR |
|----------------|---------|---------------|
| 0.01           | 0.08574 | 0.00349       |

# Rb<sub>2</sub>Pr<sub>1</sub>Cu<sub>1</sub>Cl<sub>6</sub>

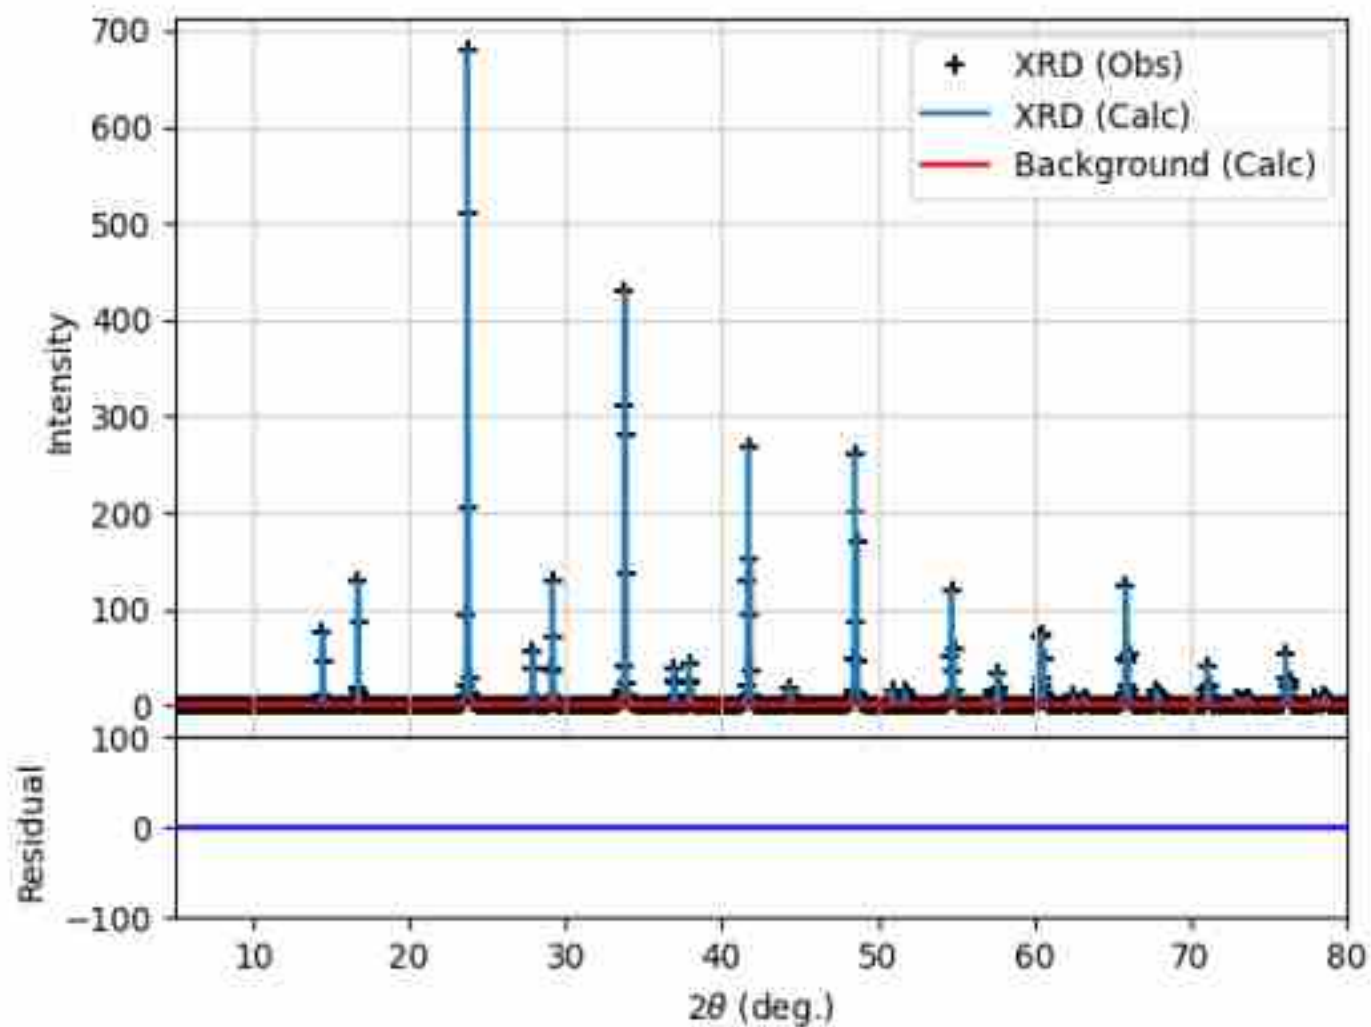

| RMSE before RR | Rwp     | RMSE after RR |
|----------------|---------|---------------|
| 0.01           | 0.02122 | 0.00251       |

# Rb2Sc1In1F6

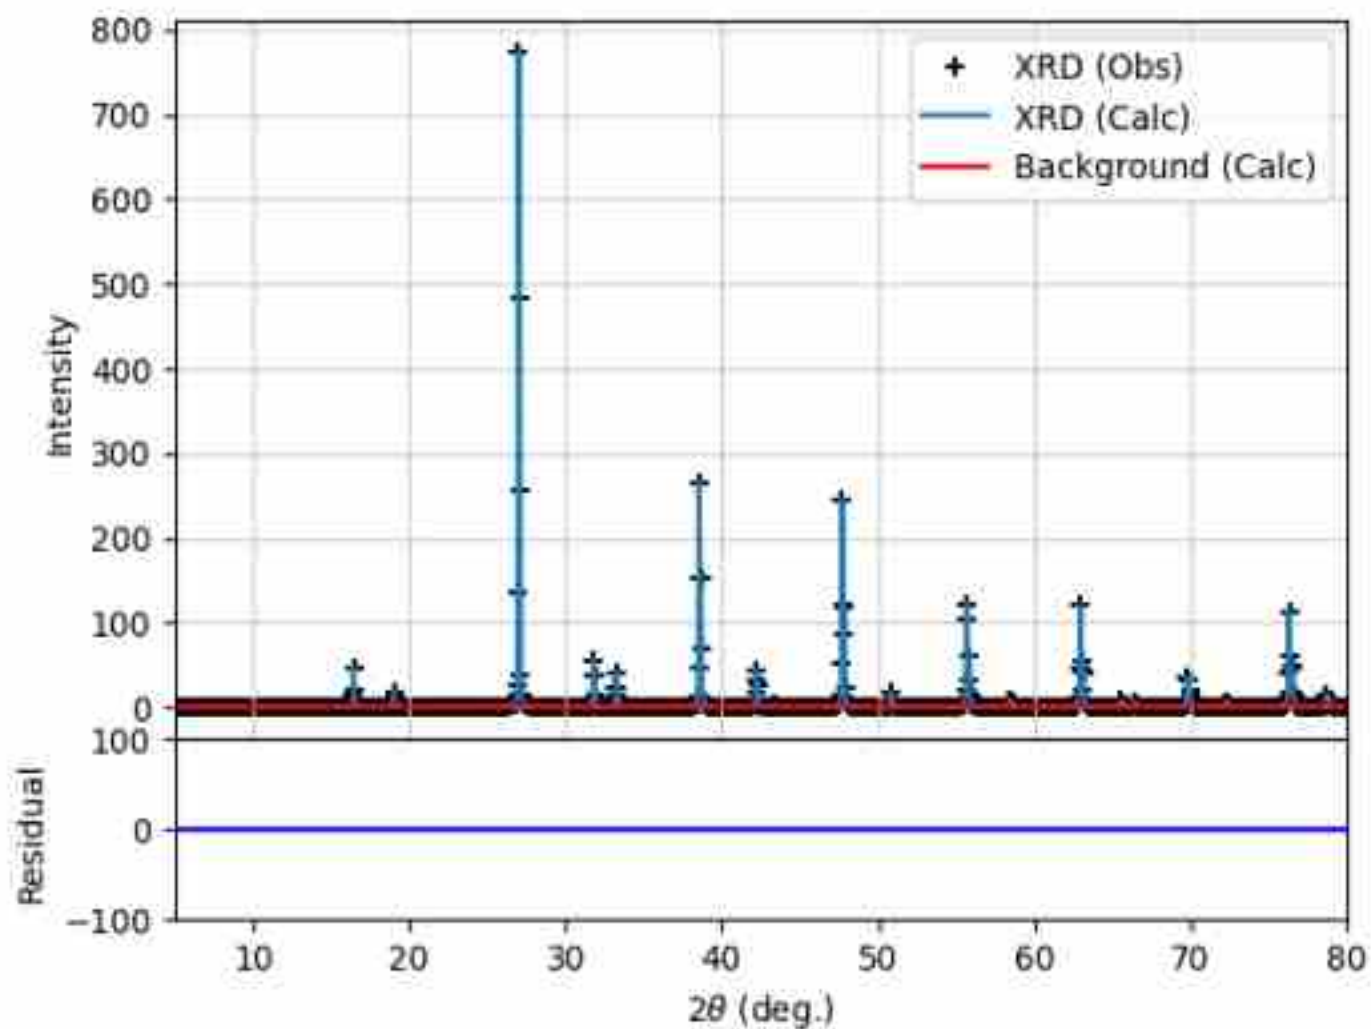

| RMSE before RR | Rwp   | RMSE after RR |
|----------------|-------|---------------|
| 0.01           | 0.027 | 0.00464       |

# Rb<sub>2</sub>Sn<sub>1</sub>Cl<sub>6</sub>

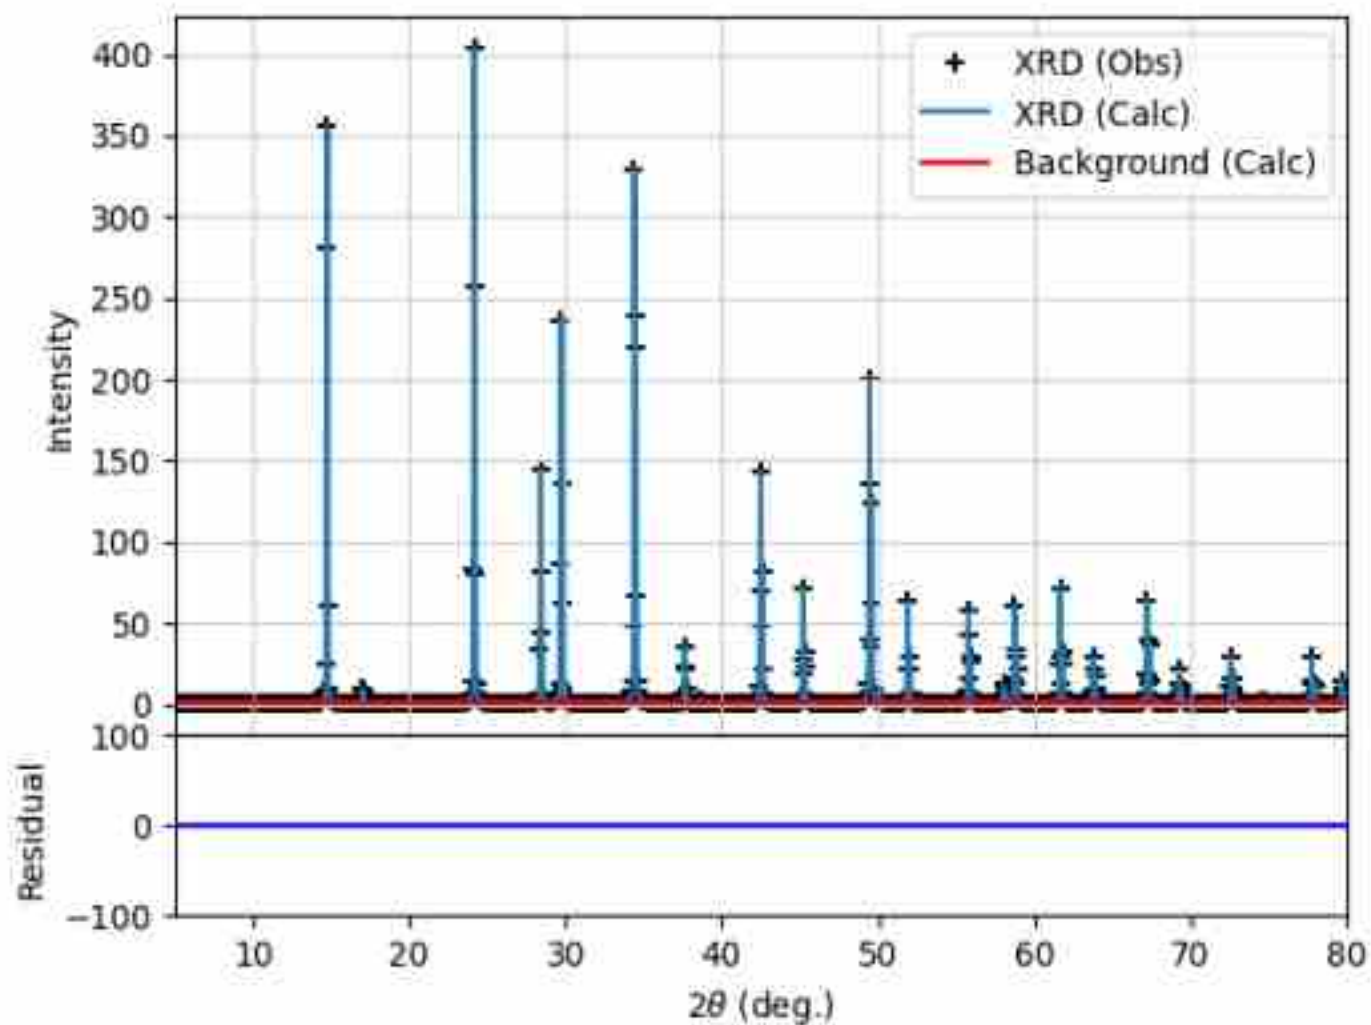

| RMSE before RR | Rwp     | RMSE after RR |
|----------------|---------|---------------|
| 0.01           | 0.01996 | 0.0025        |

# Rb<sub>2</sub>TlIAgI<sub>6</sub>

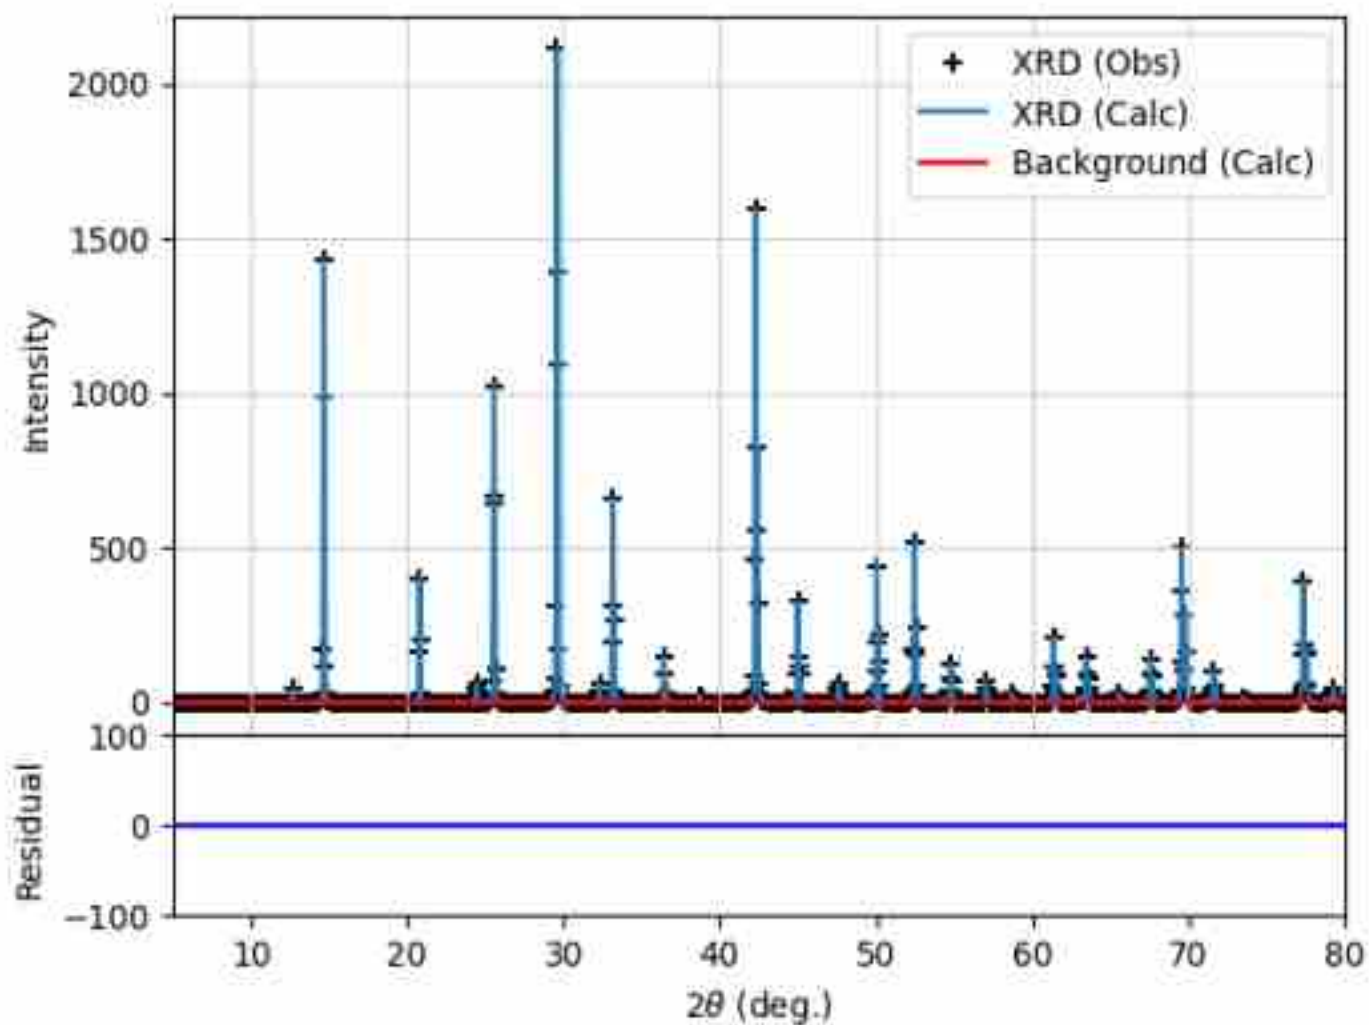

| RMSE before RR | Rwp     | RMSE after RR |
|----------------|---------|---------------|
| 0.01           | 0.05388 | 0.00202       |

# Rb<sub>2</sub>Tl<sub>1</sub>As<sub>1</sub>Cl<sub>6</sub>

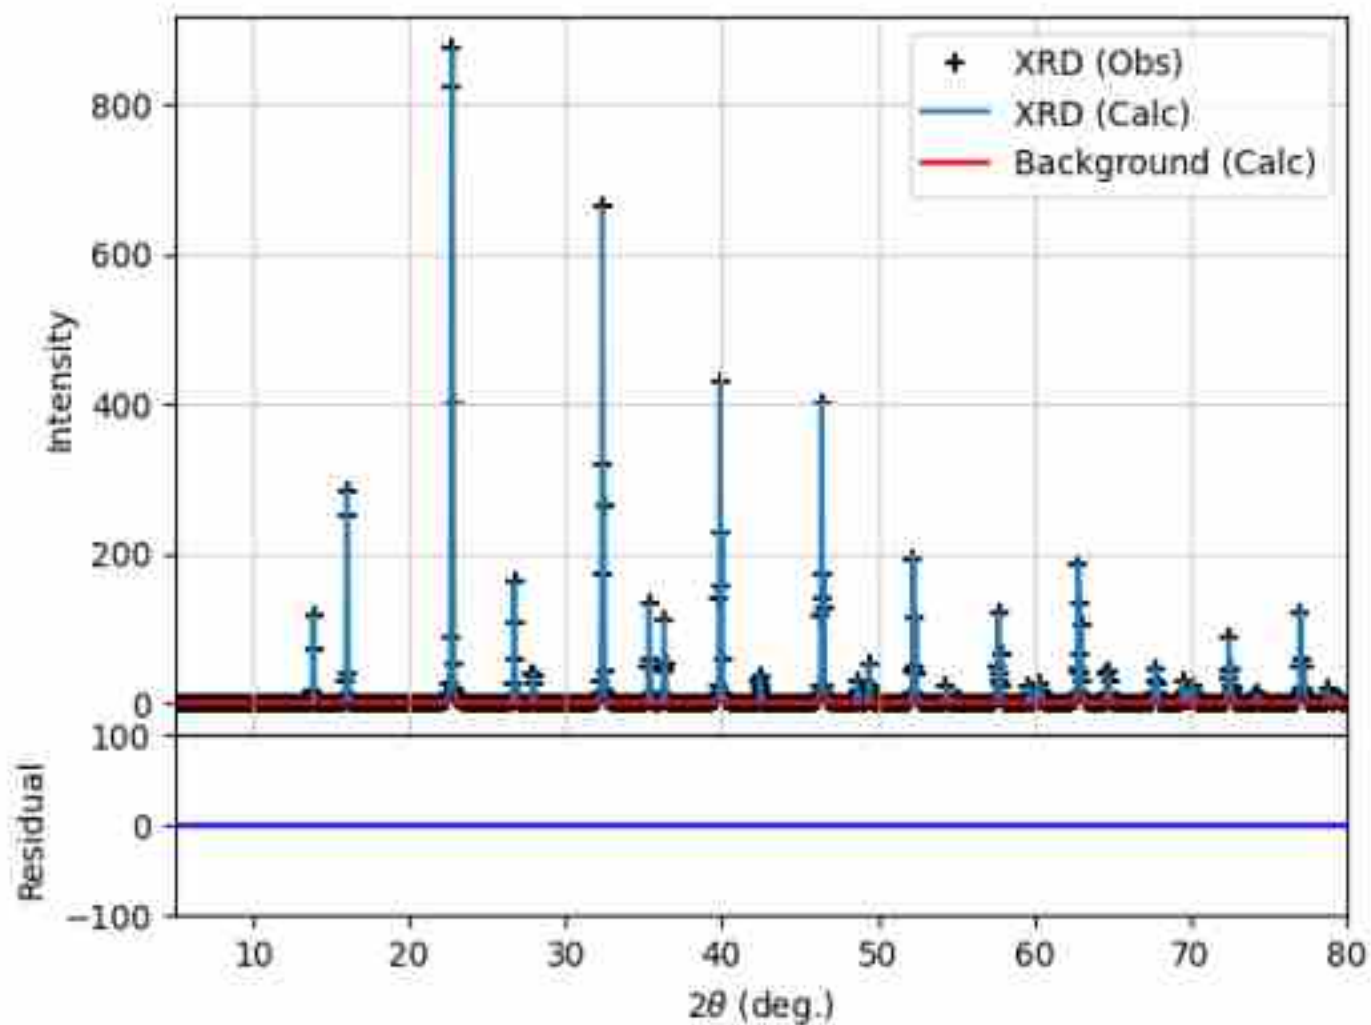

| RMSE before RR | Rwp     | RMSE after RR |
|----------------|---------|---------------|
| 0.01           | 0.00554 | 0.00119       |

# Rb<sub>2</sub>Tl<sub>1</sub>V<sub>1</sub>F<sub>6</sub>

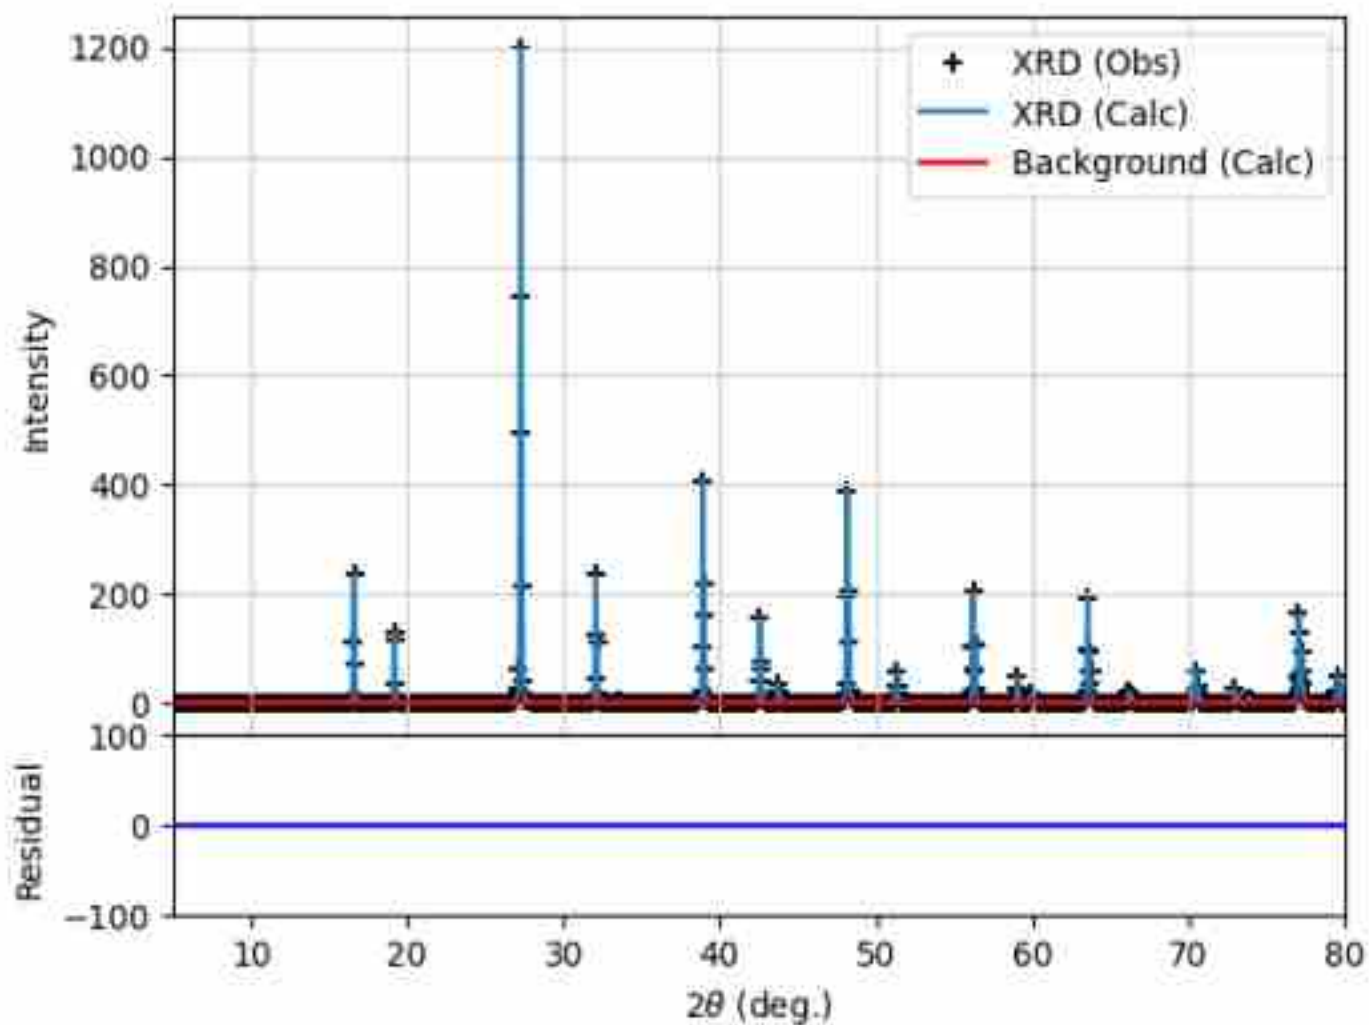

| RMSE before RR | Rwp     | RMSE after RR |
|----------------|---------|---------------|
| 0.01           | 0.01357 | 0.00415       |

# Rb<sub>2</sub>WBr<sub>6</sub>

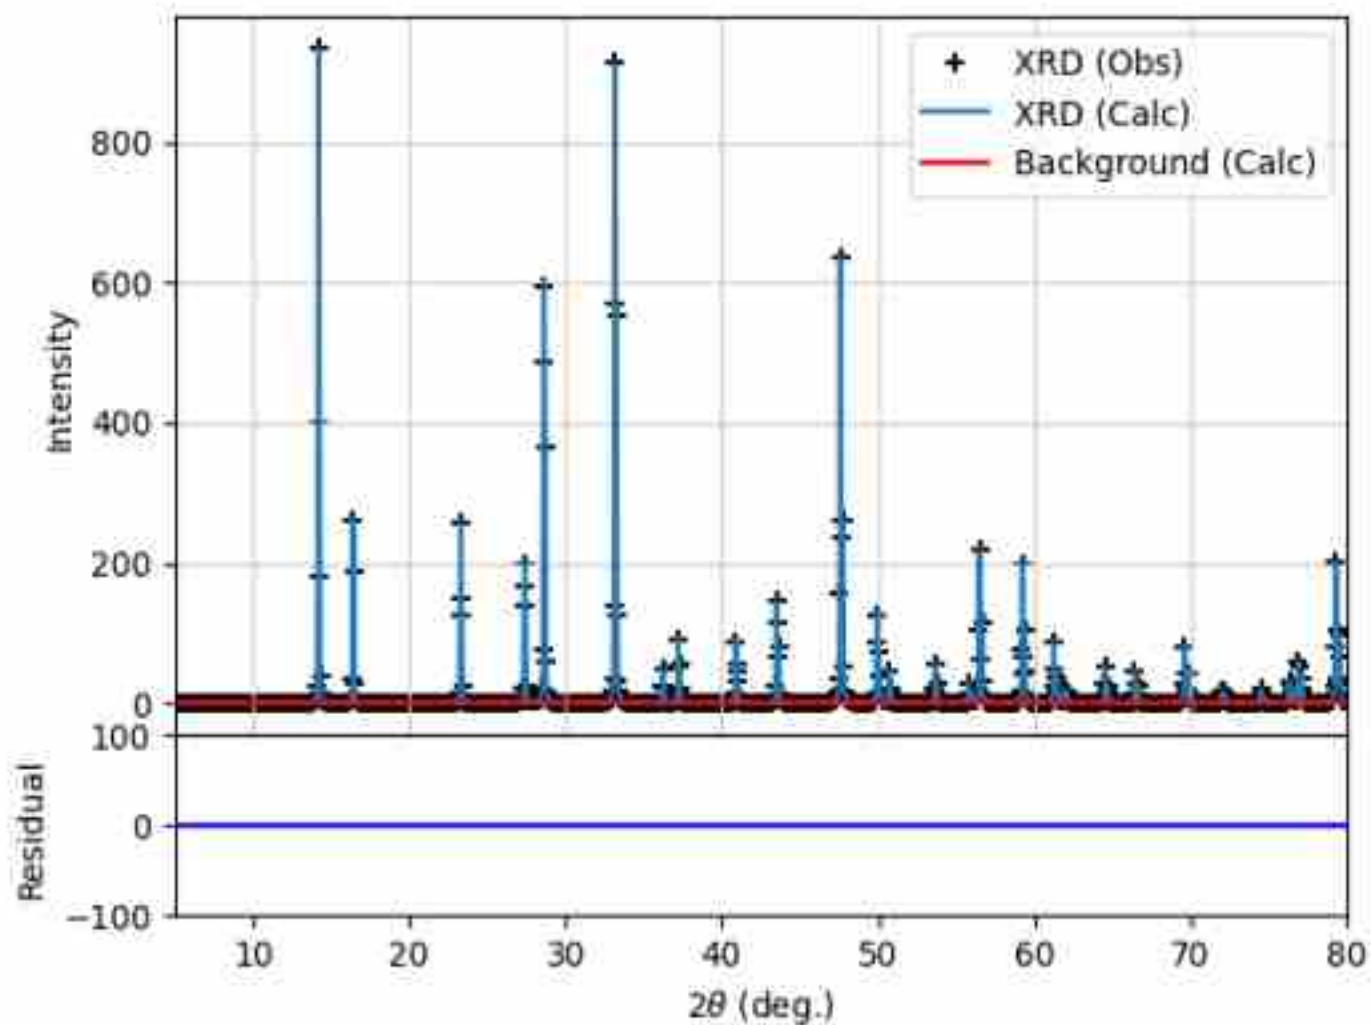

| RMSE before RR | Rwp     | RMSE after RR |
|----------------|---------|---------------|
| 0.01           | 0.01054 | 0.0014        |



# Rb3Ir1F6

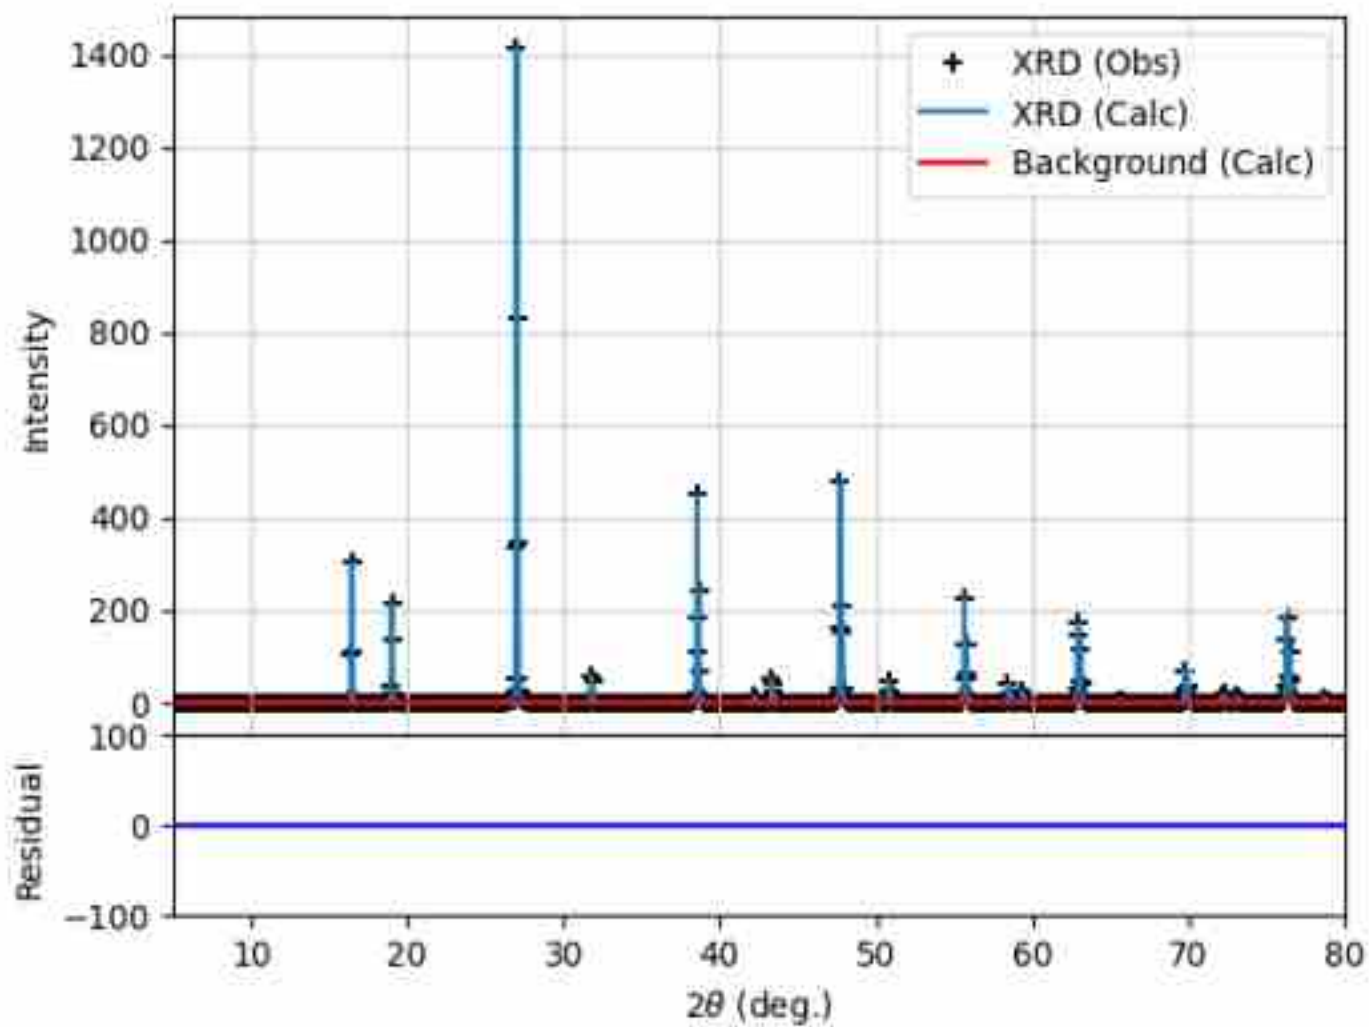

| RMSE before RR | Rwp     | RMSE after RR |
|----------------|---------|---------------|
| 0.01           | 0.00881 | 0.00312       |

# Rb3Na1

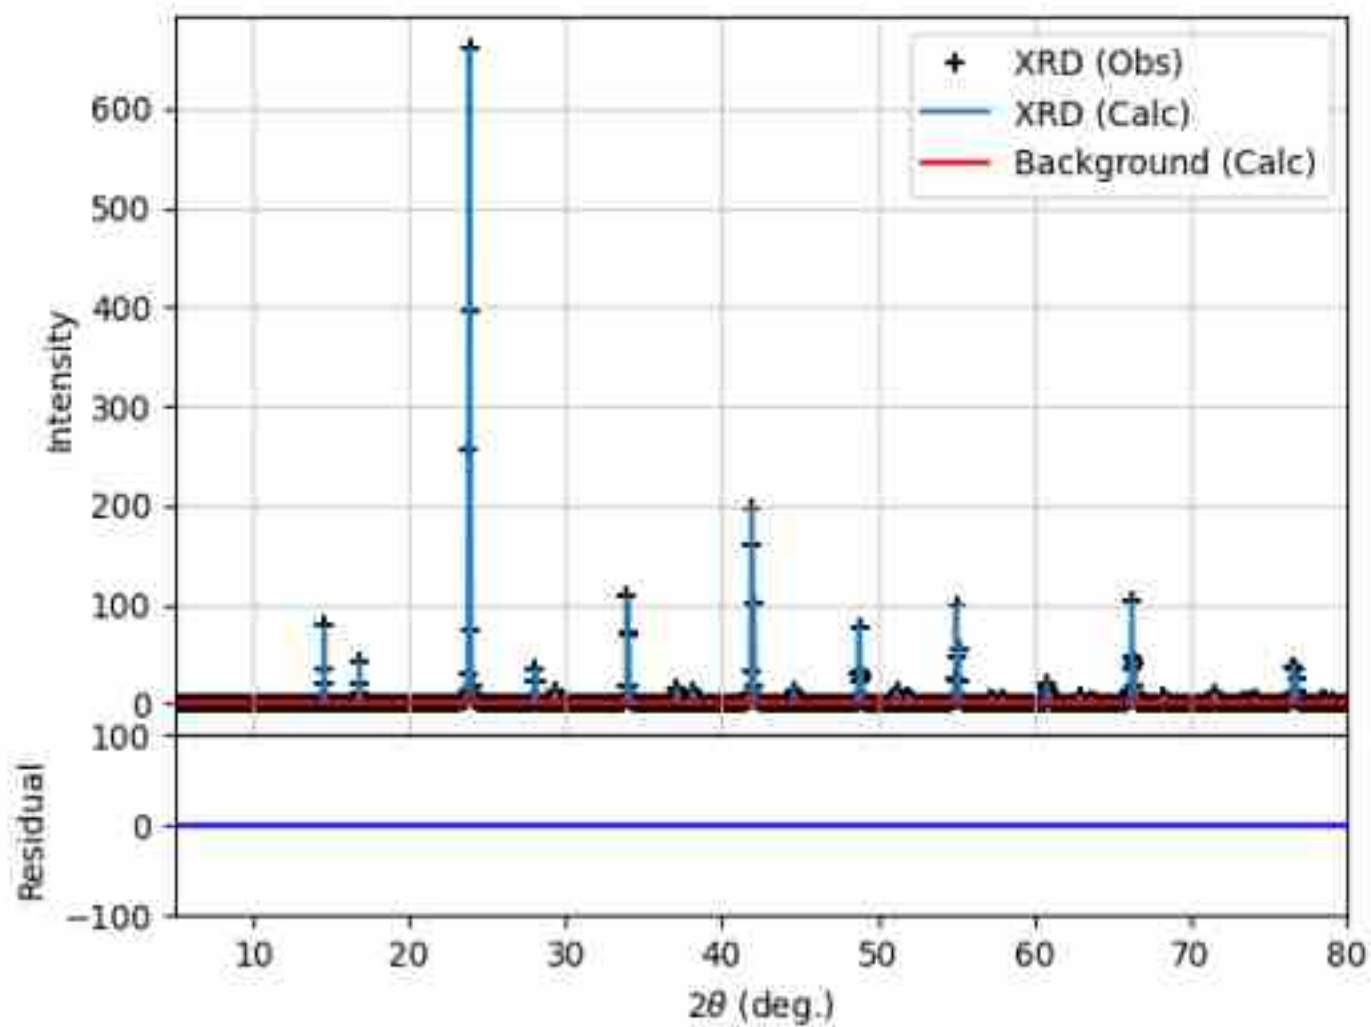

| RMSE before RR | Rwp     | RMSE after RR |
|----------------|---------|---------------|
| 0.001          | 0.00336 | 0.00032       |

# Re<sub>3</sub>Ir1

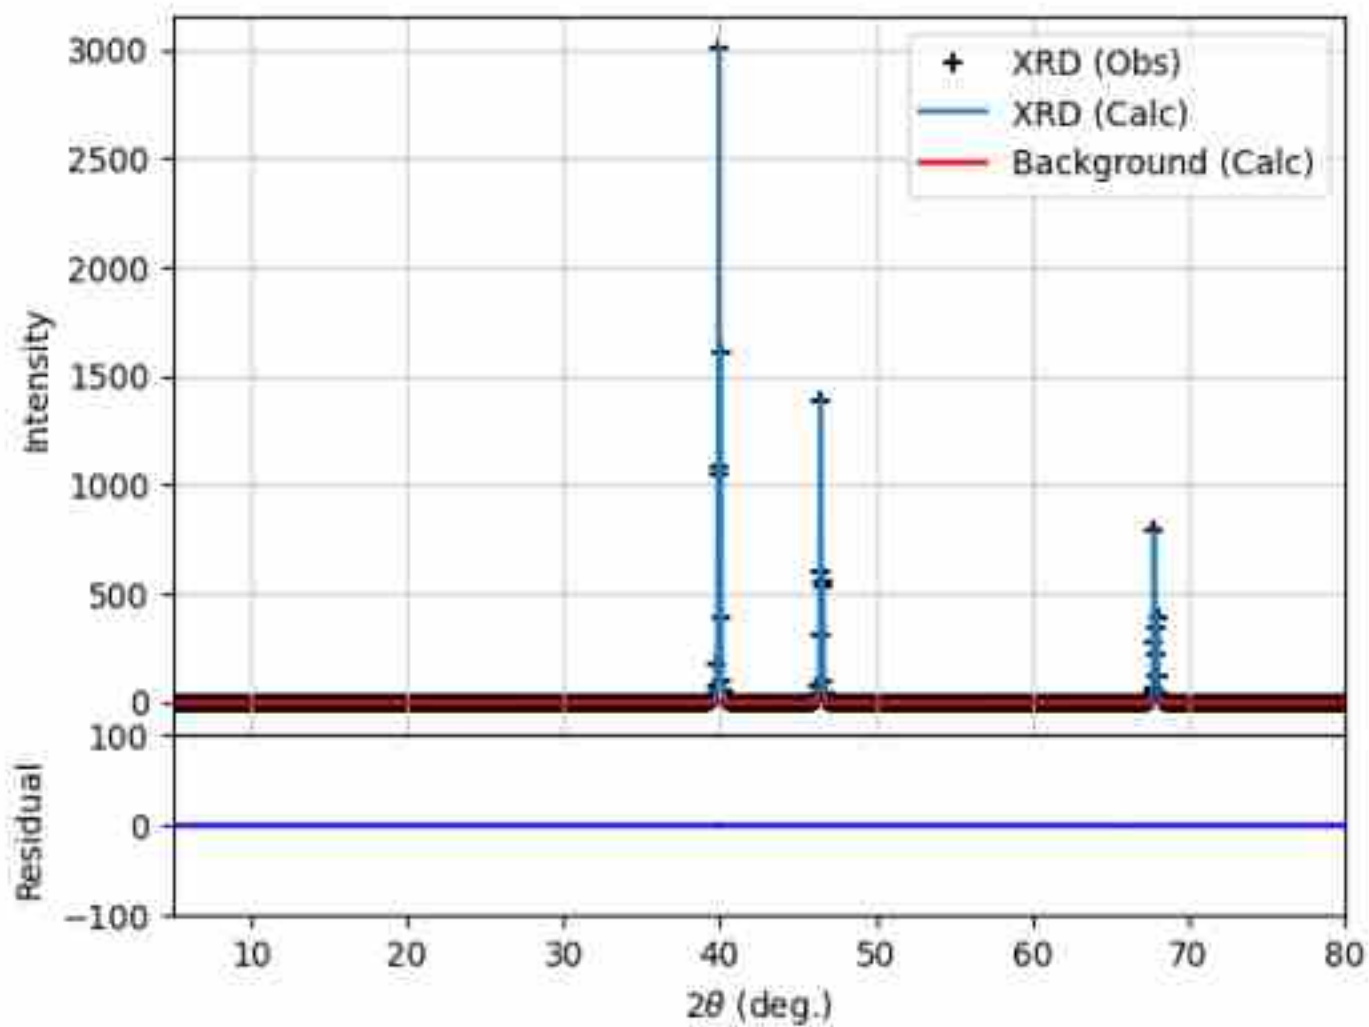

| RMSE before RR | Rwp     | RMSE after RR |
|----------------|---------|---------------|
| 0.001          | 0.02726 | 0.00068       |

# Re6Pt2

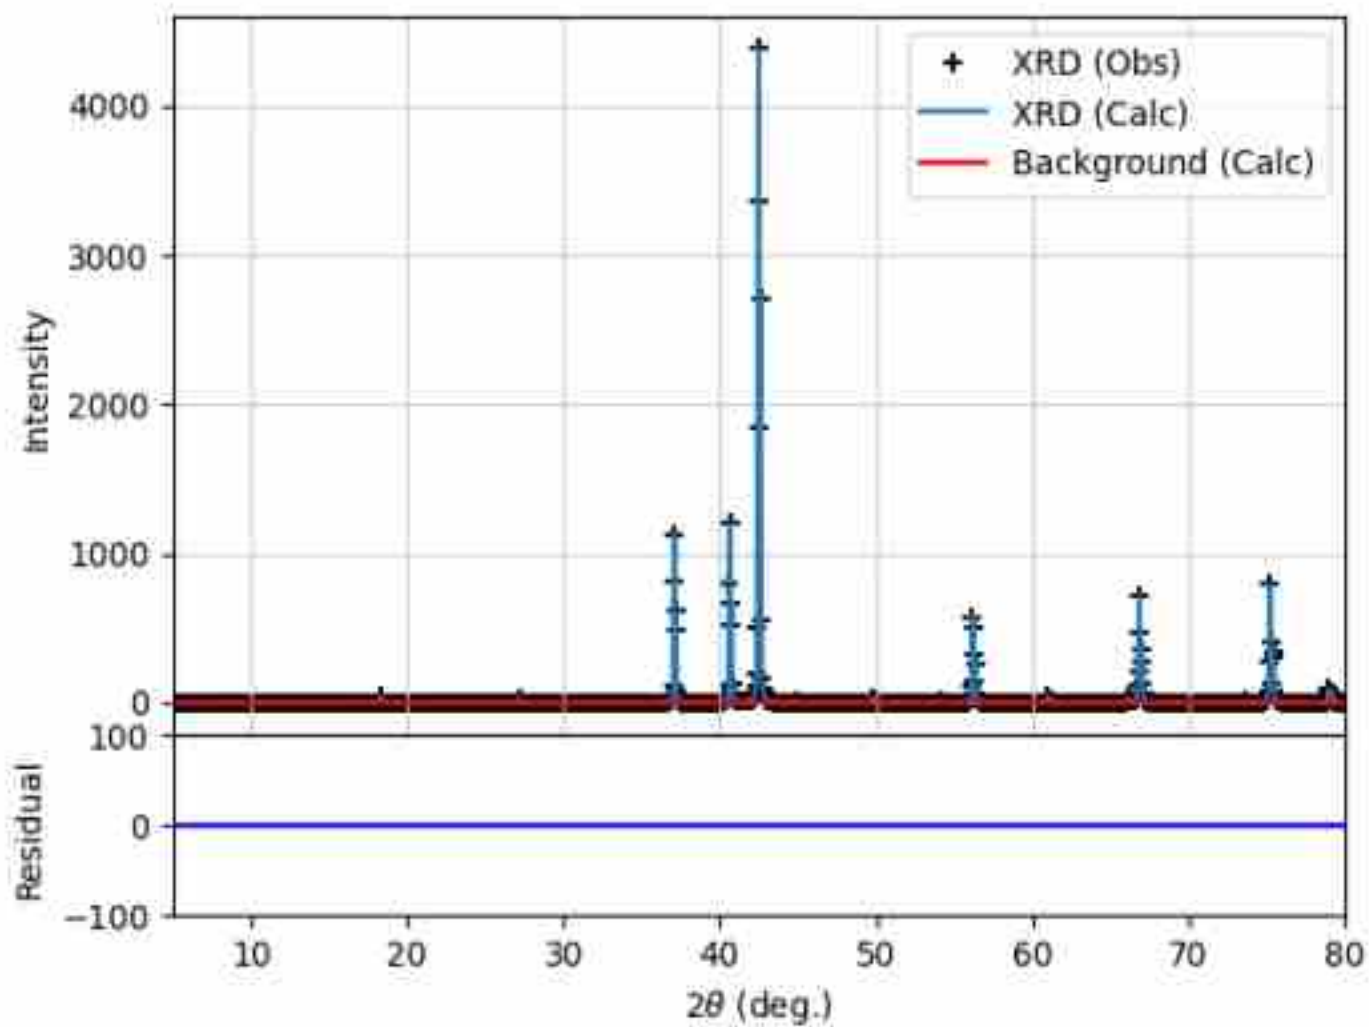

| RMSE before RR | Rwp     | RMSE after RR |
|----------------|---------|---------------|
| 0.01           | 0.00669 | 0.00043       |

# Sc1Al1Cu2

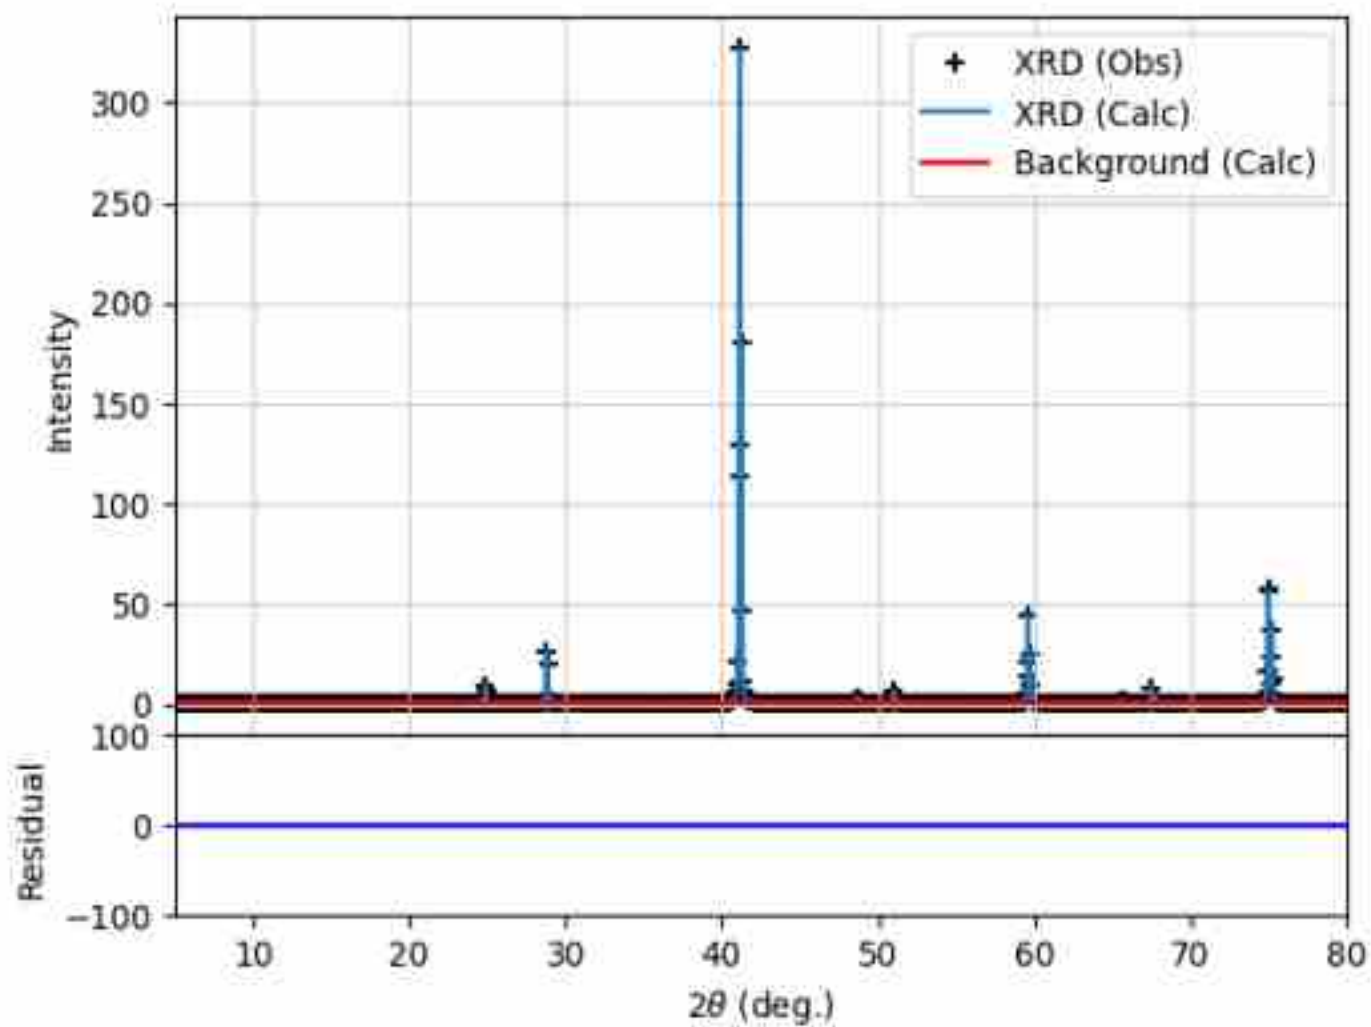

| RMSE before RR | Rwp   | RMSE after RR |
|----------------|-------|---------------|
| 0.001          | 2e-05 | 7e-05         |

# Sc1Al1Rh2

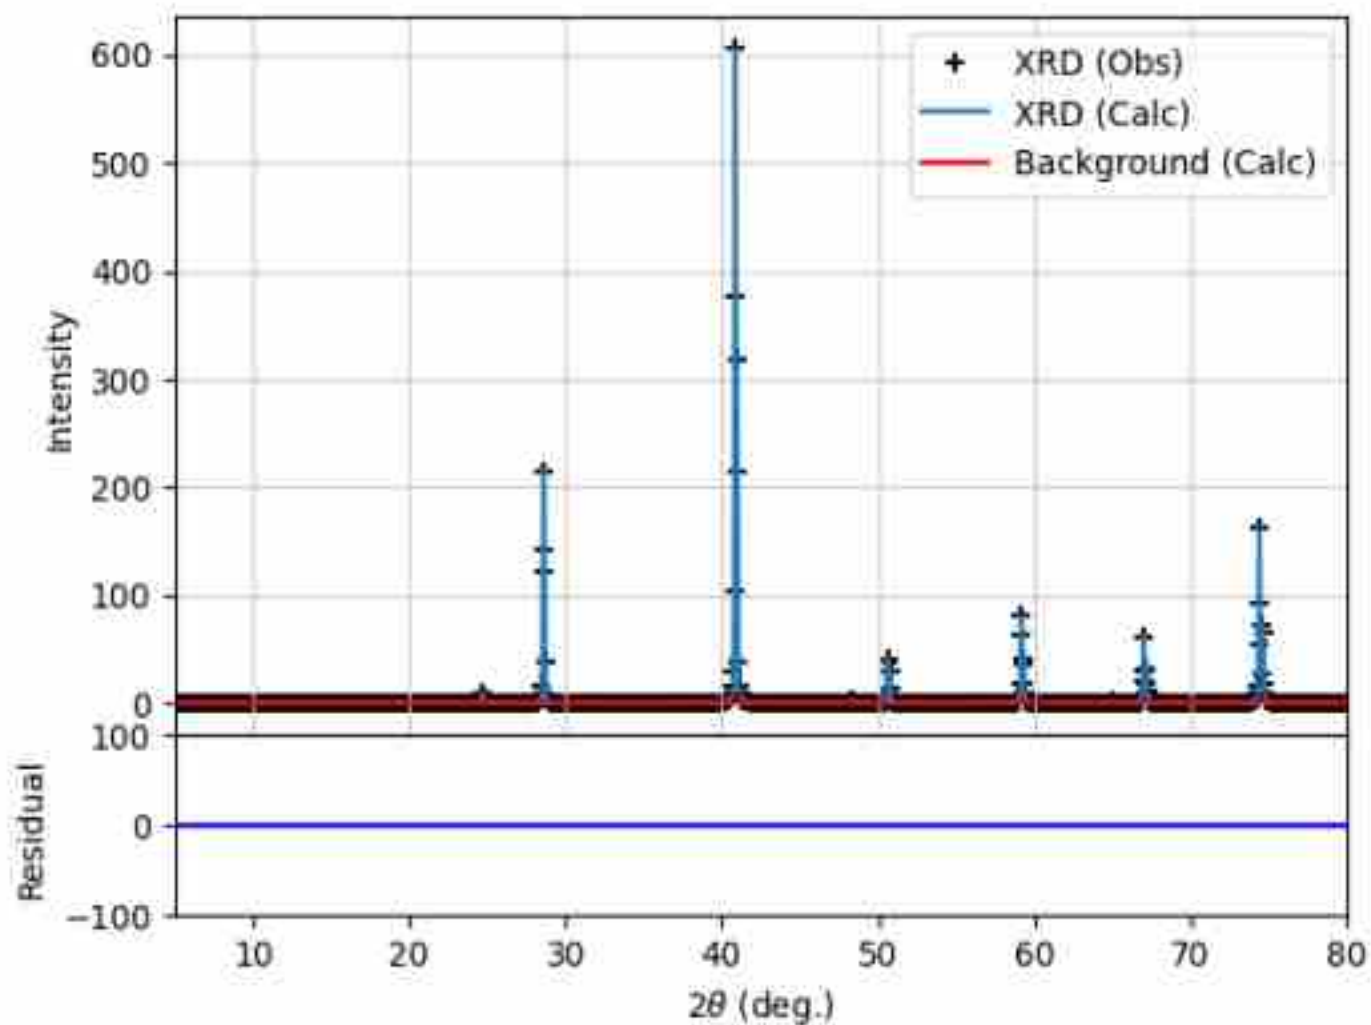

| RMSE before RR | Rwp     | RMSE after RR |
|----------------|---------|---------------|
| 0.001          | 0.01395 | 0.00142       |

# Sc1Au3

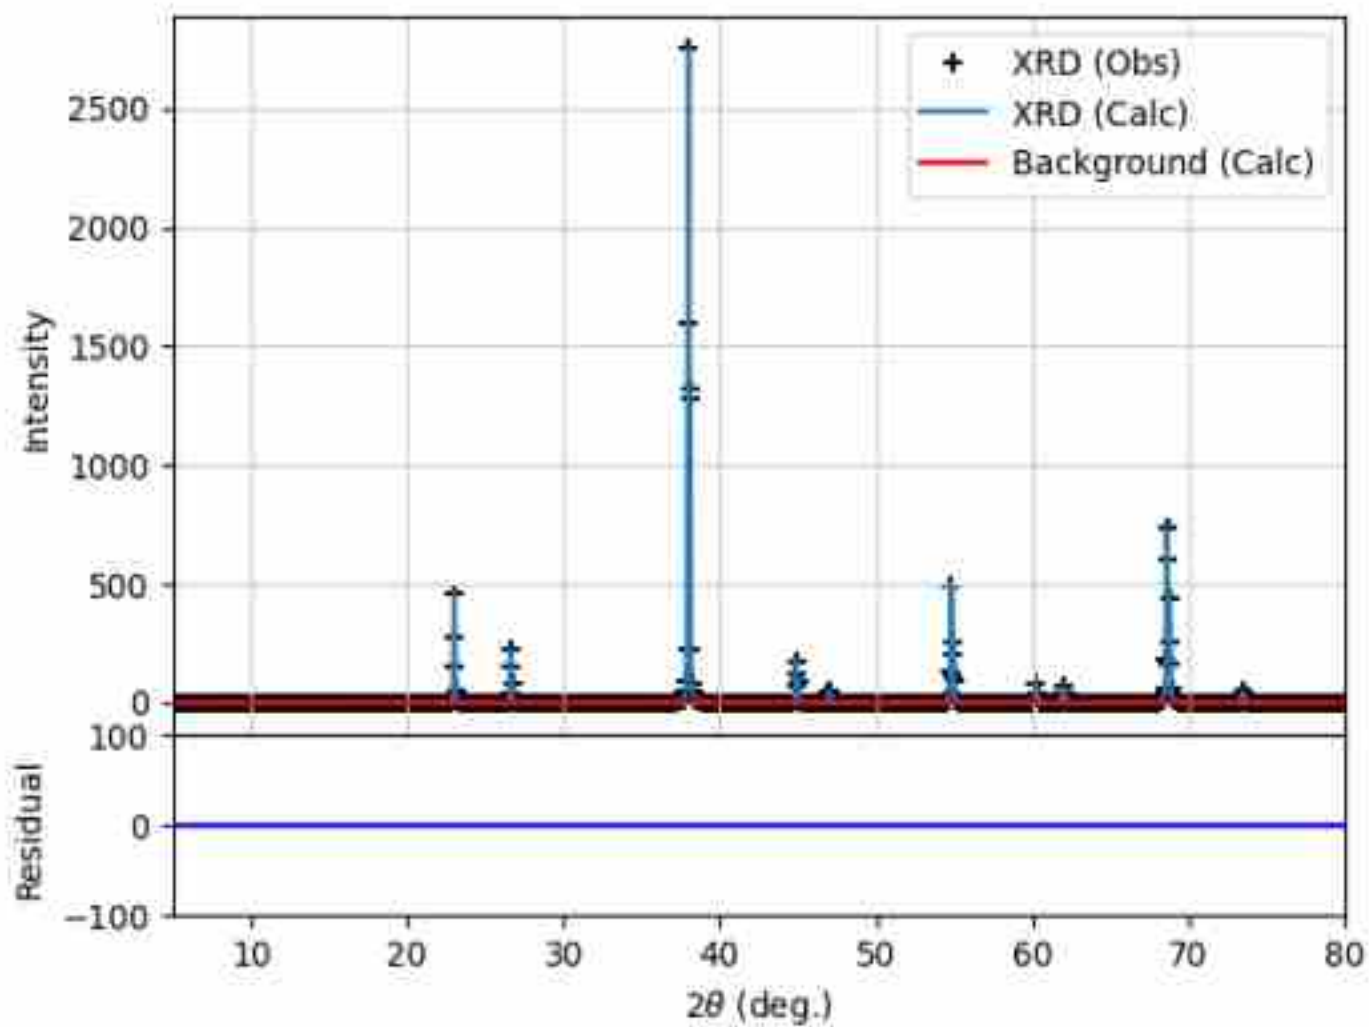

| RMSE before RR | Rwp     | RMSE after RR |
|----------------|---------|---------------|
| 0.001          | 0.00374 | 0.00029       |

# Sc1B2Ir3

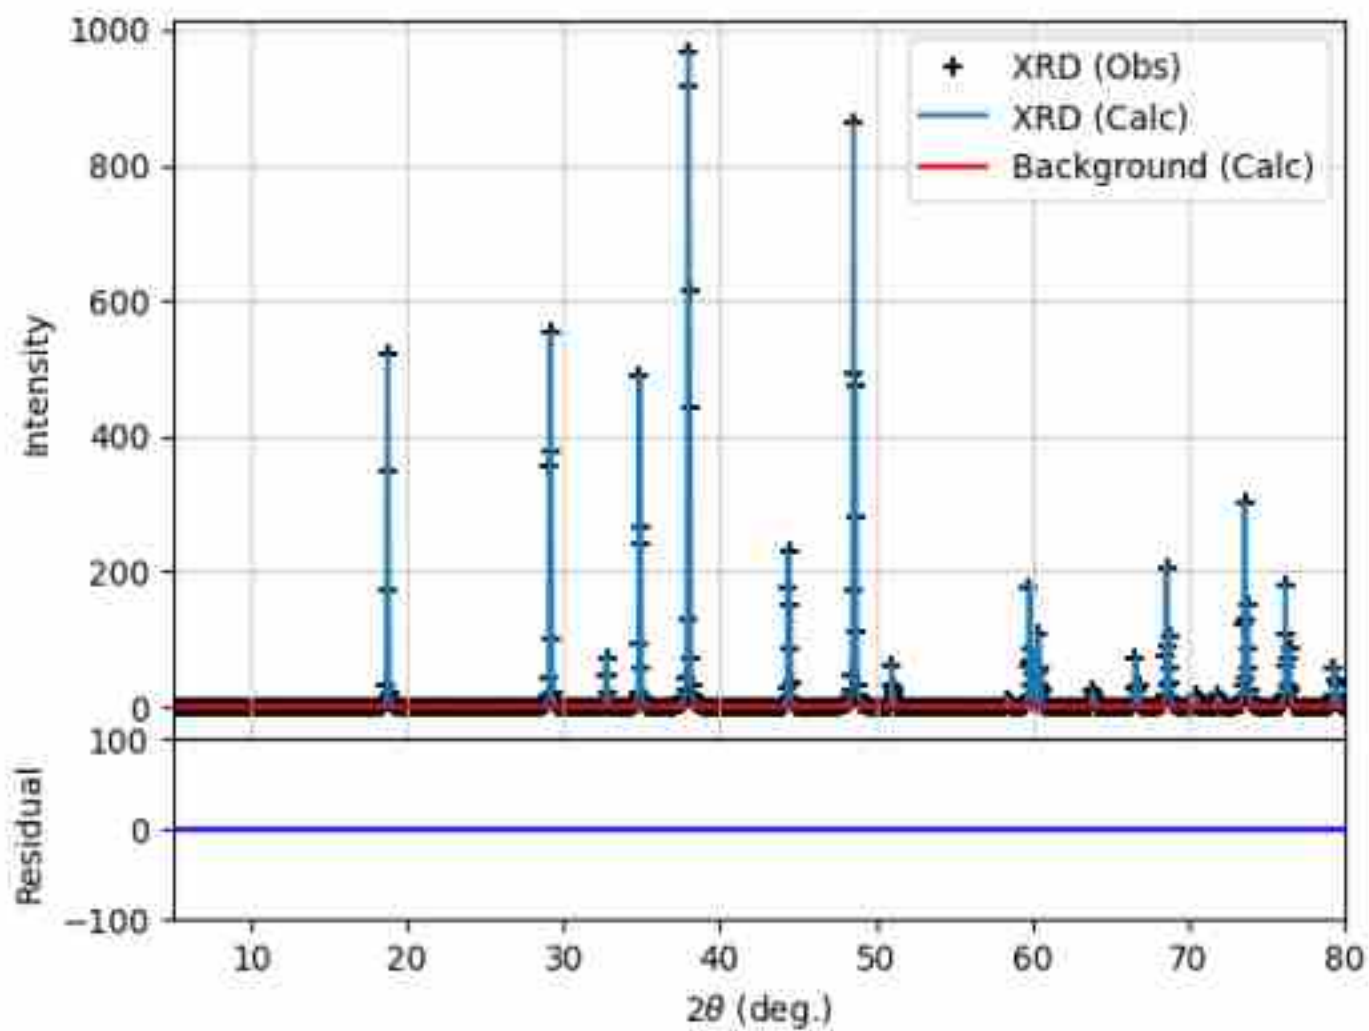

| RMSE before RR | Rwp     | RMSE after RR |
|----------------|---------|---------------|
| 0.01           | 0.01742 | 0.00417       |



# Sc1Fe6Ge6

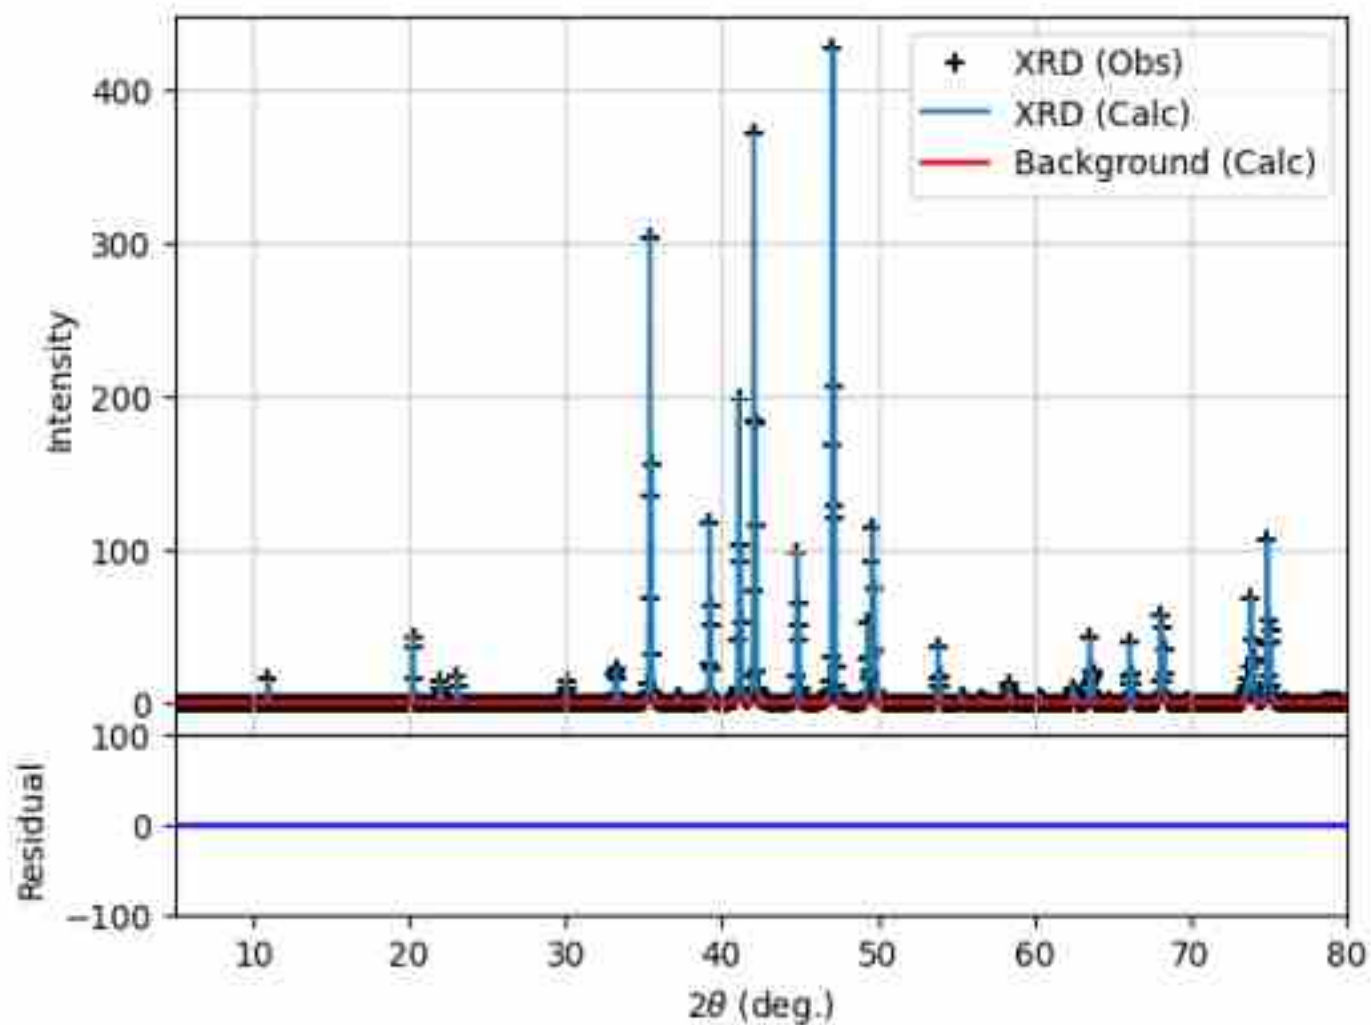

| RMSE before RR | Rwp     | RMSE after RR |
|----------------|---------|---------------|
| 0.01           | 0.00515 | 0.0006        |

# Sc1In1

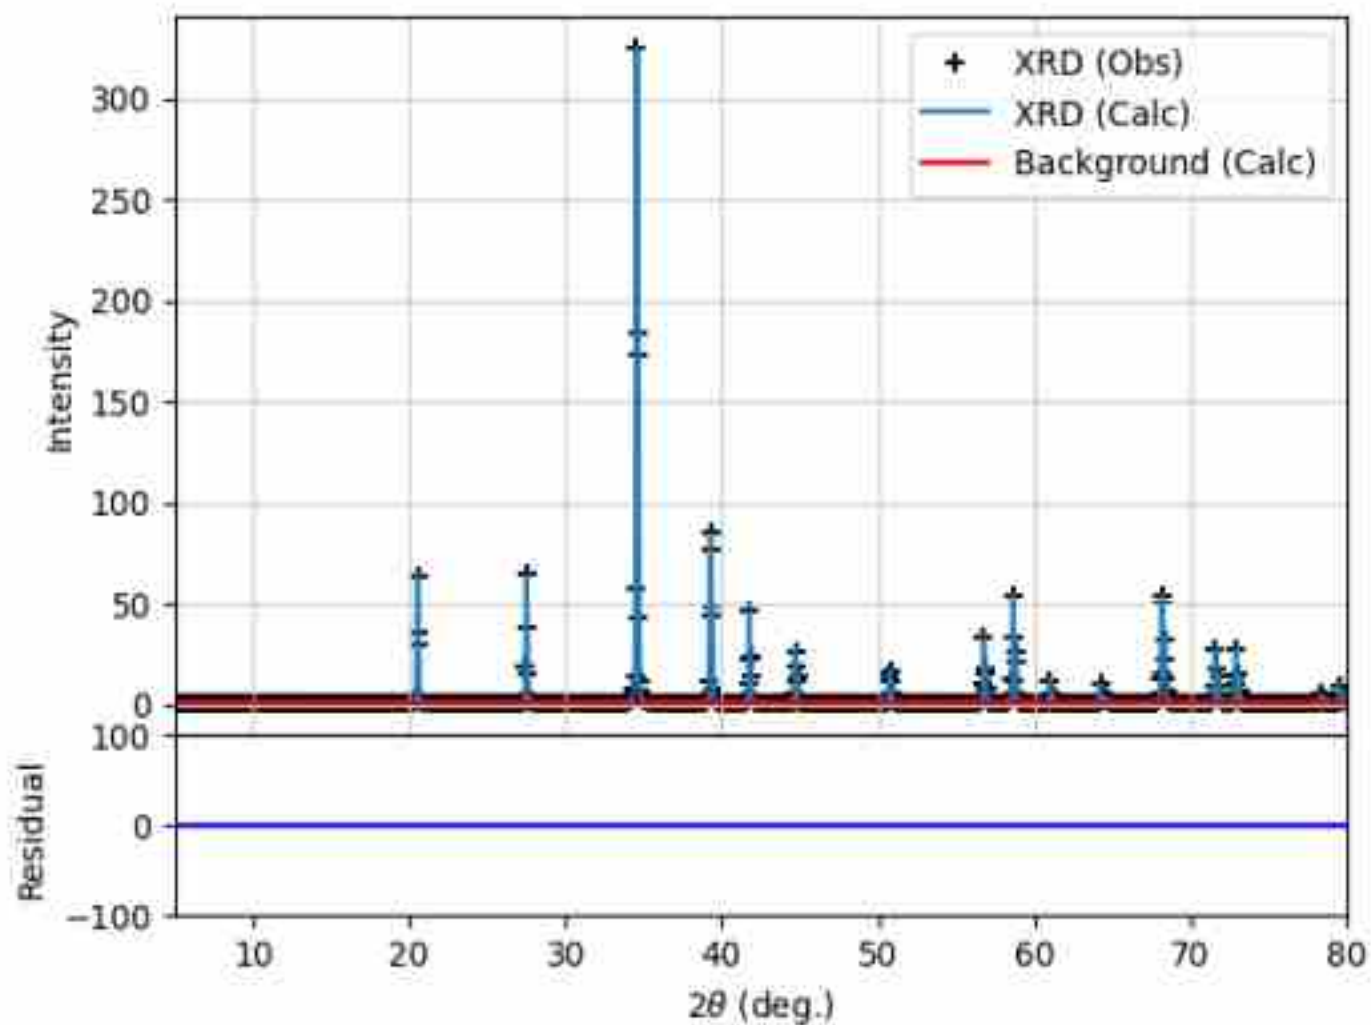

| RMSE before RR | Rwp     | RMSE after RR |
|----------------|---------|---------------|
| 0.001          | 0.00323 | 0.00024       |

# Sc1Nb1Os2

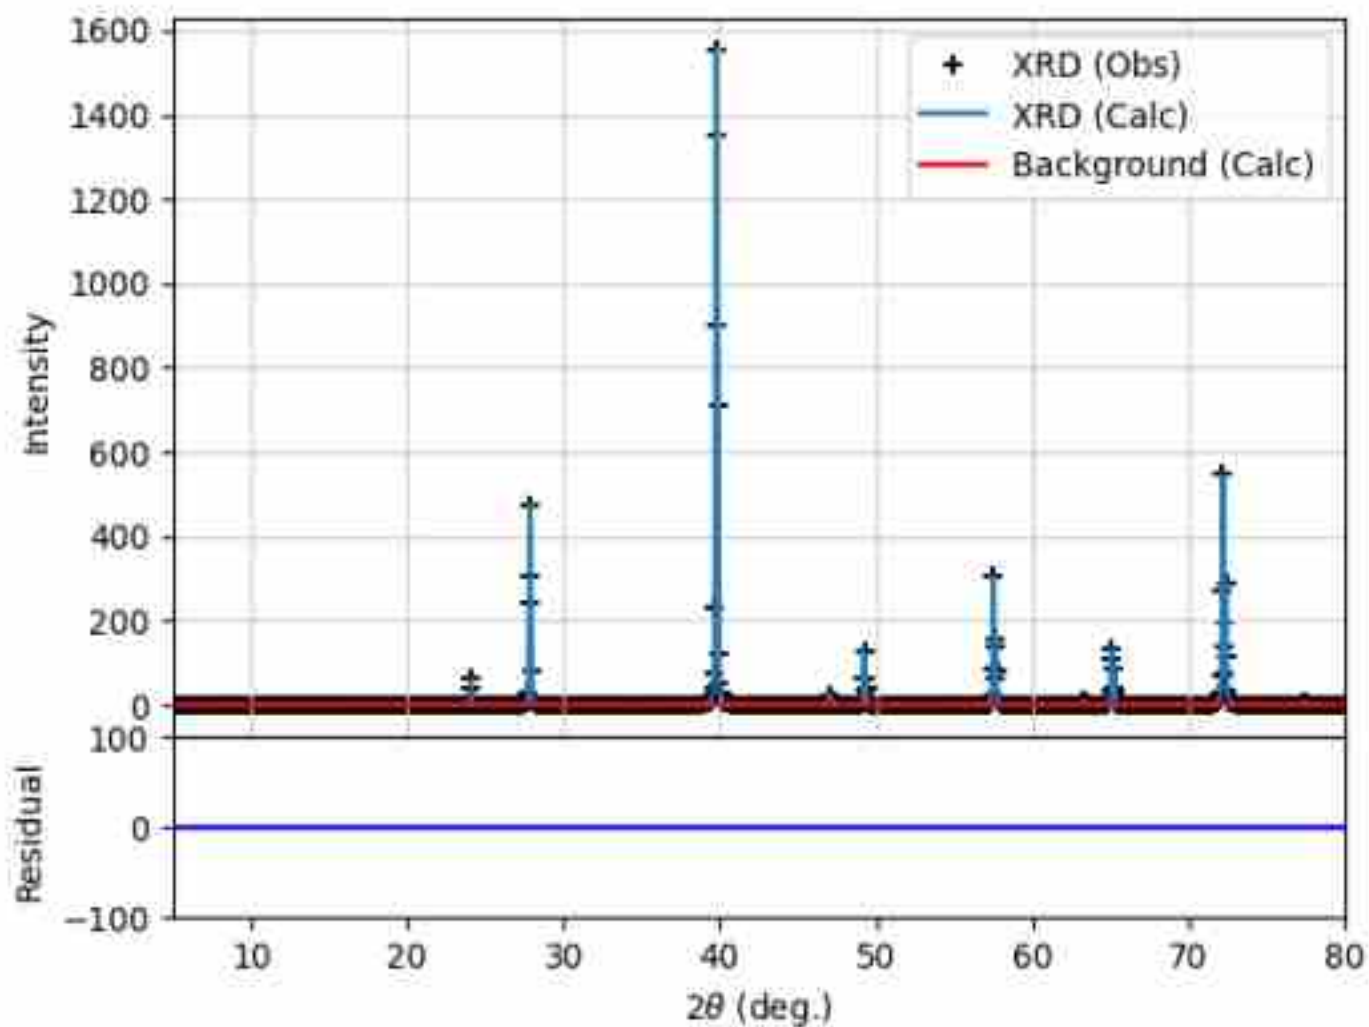

| RMSE before RR | Rwp     | RMSE after RR |
|----------------|---------|---------------|
| 0.001          | 0.01386 | 0.00083       |

# Sc1Nb1Tc2

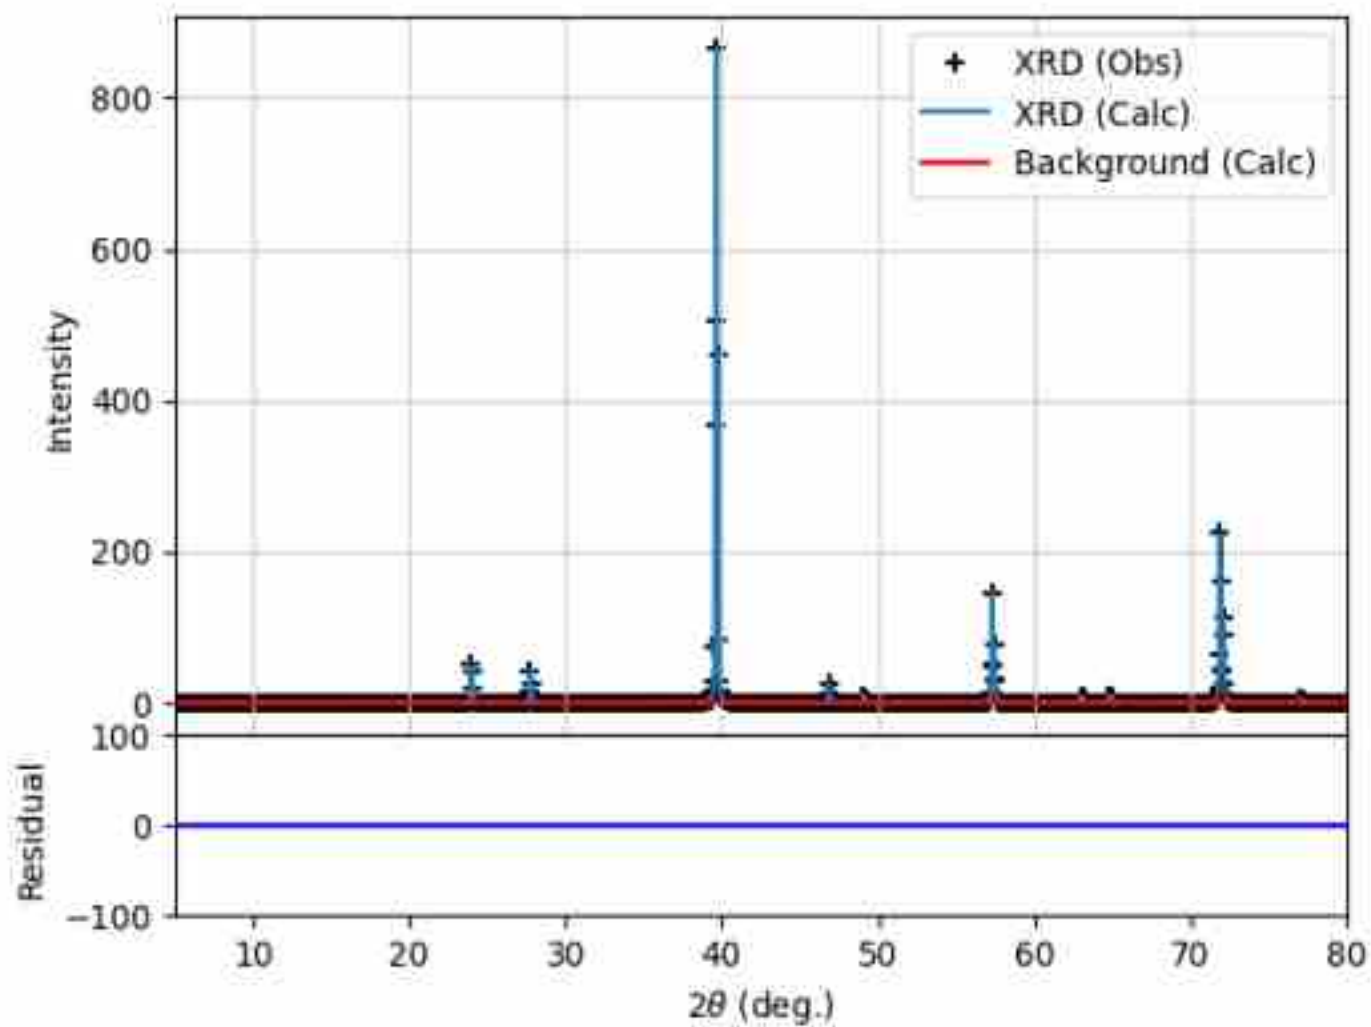

| RMSE before RR | Rwp     | RMSE after RR |
|----------------|---------|---------------|
| 0.001          | 0.00174 | 0.00063       |

# Sc1Pa1Os2

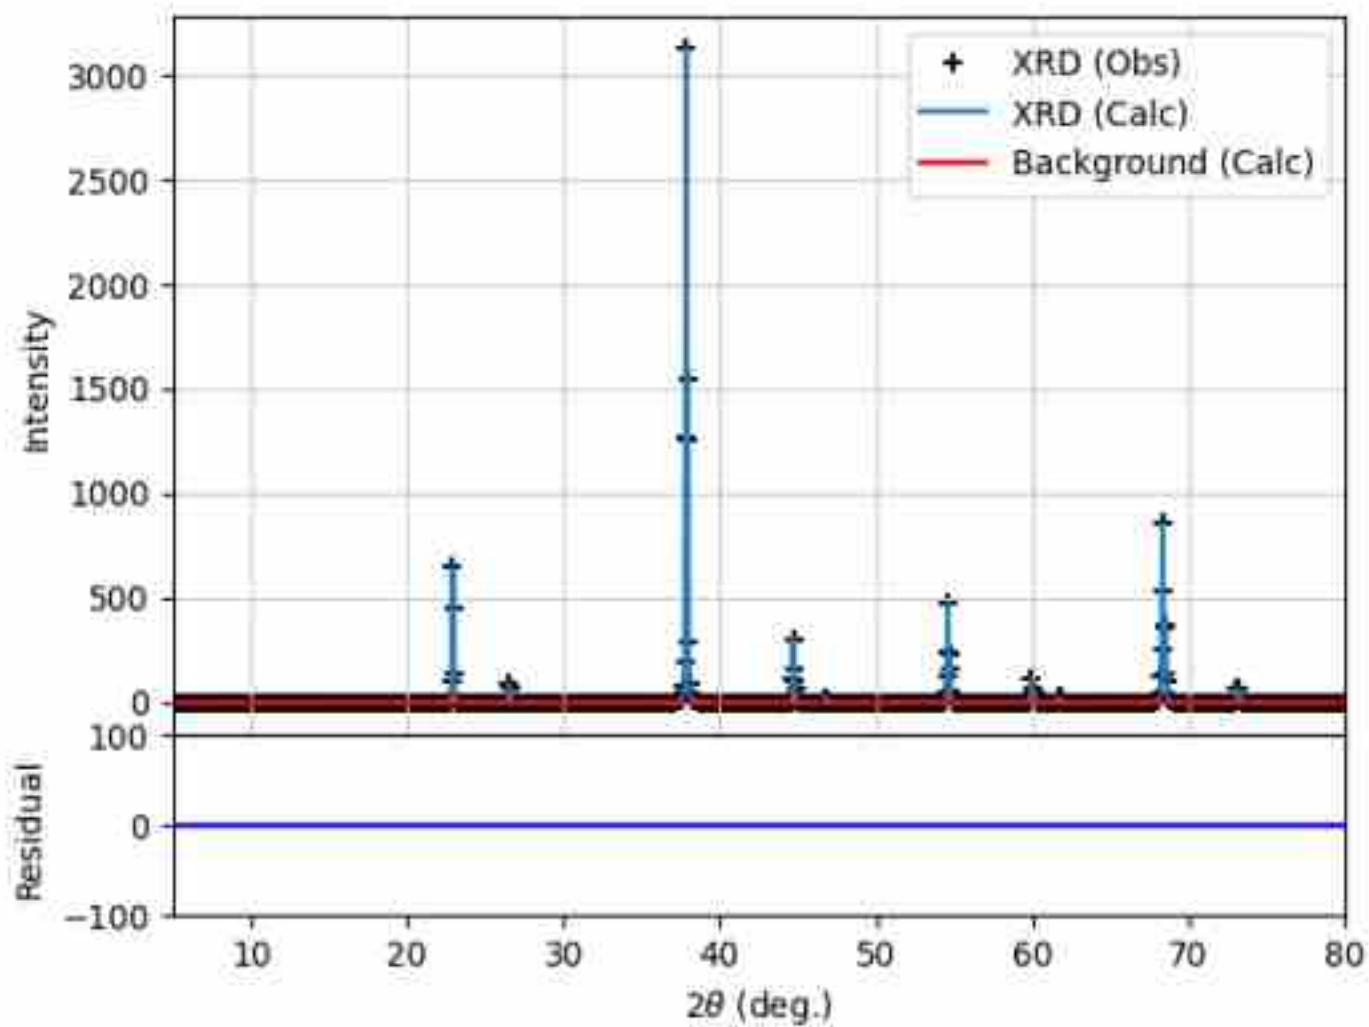

| RMSE before RR | Rwp     | RMSE after RR |
|----------------|---------|---------------|
| 0.001          | 0.00364 | 0.0002        |

# Sc1Pd1

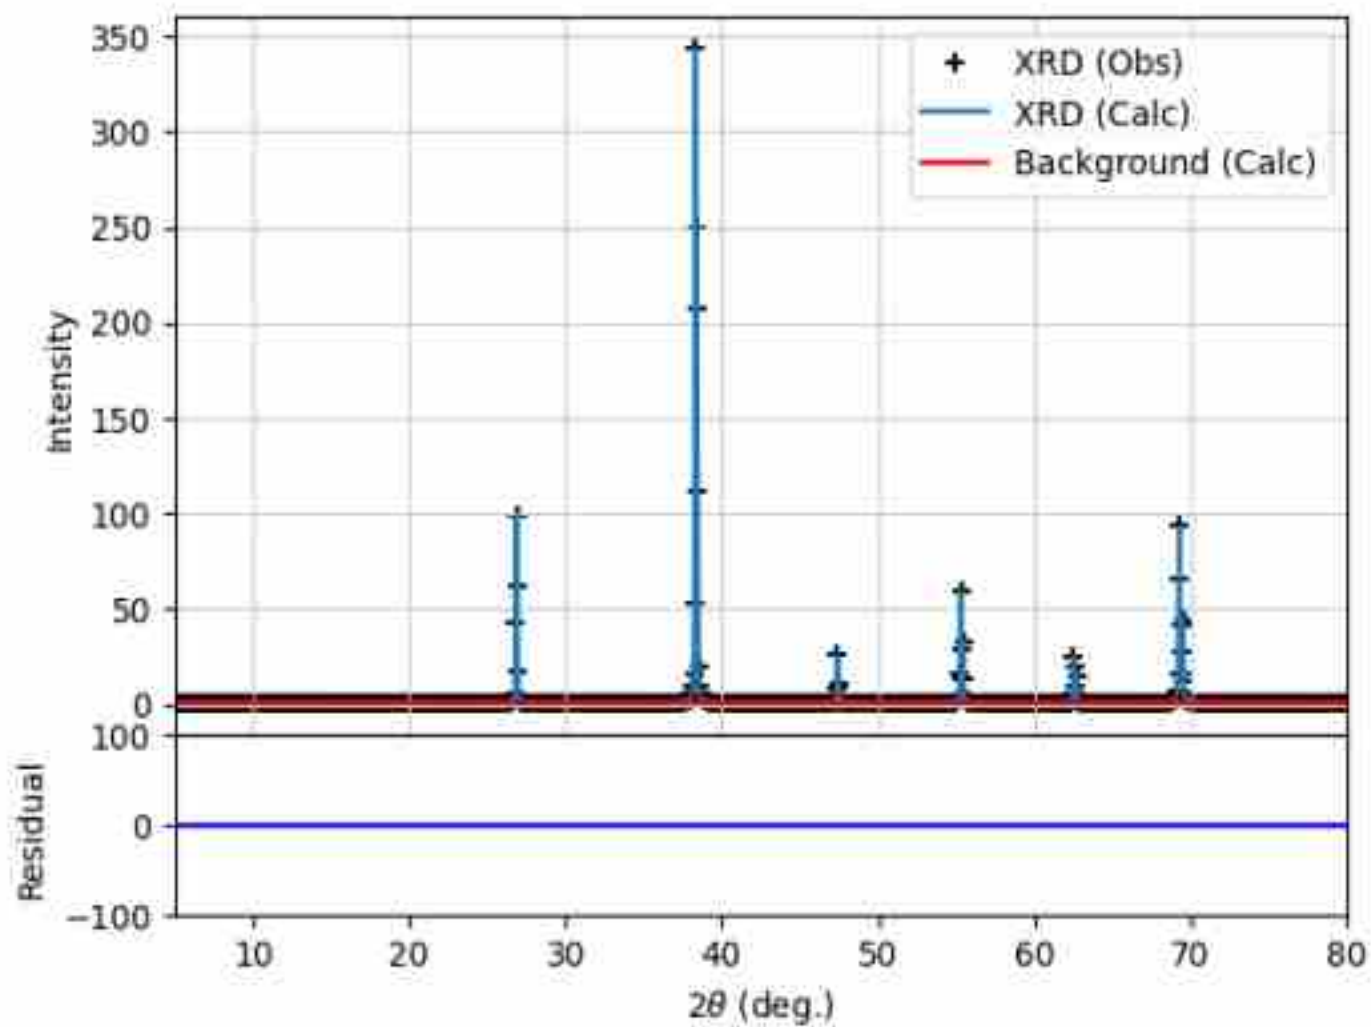

| RMSE before RR | Rwp     | RMSE after RR |
|----------------|---------|---------------|
| 0.001          | 0.12467 | 0.00124       |

# Sc1Pd3

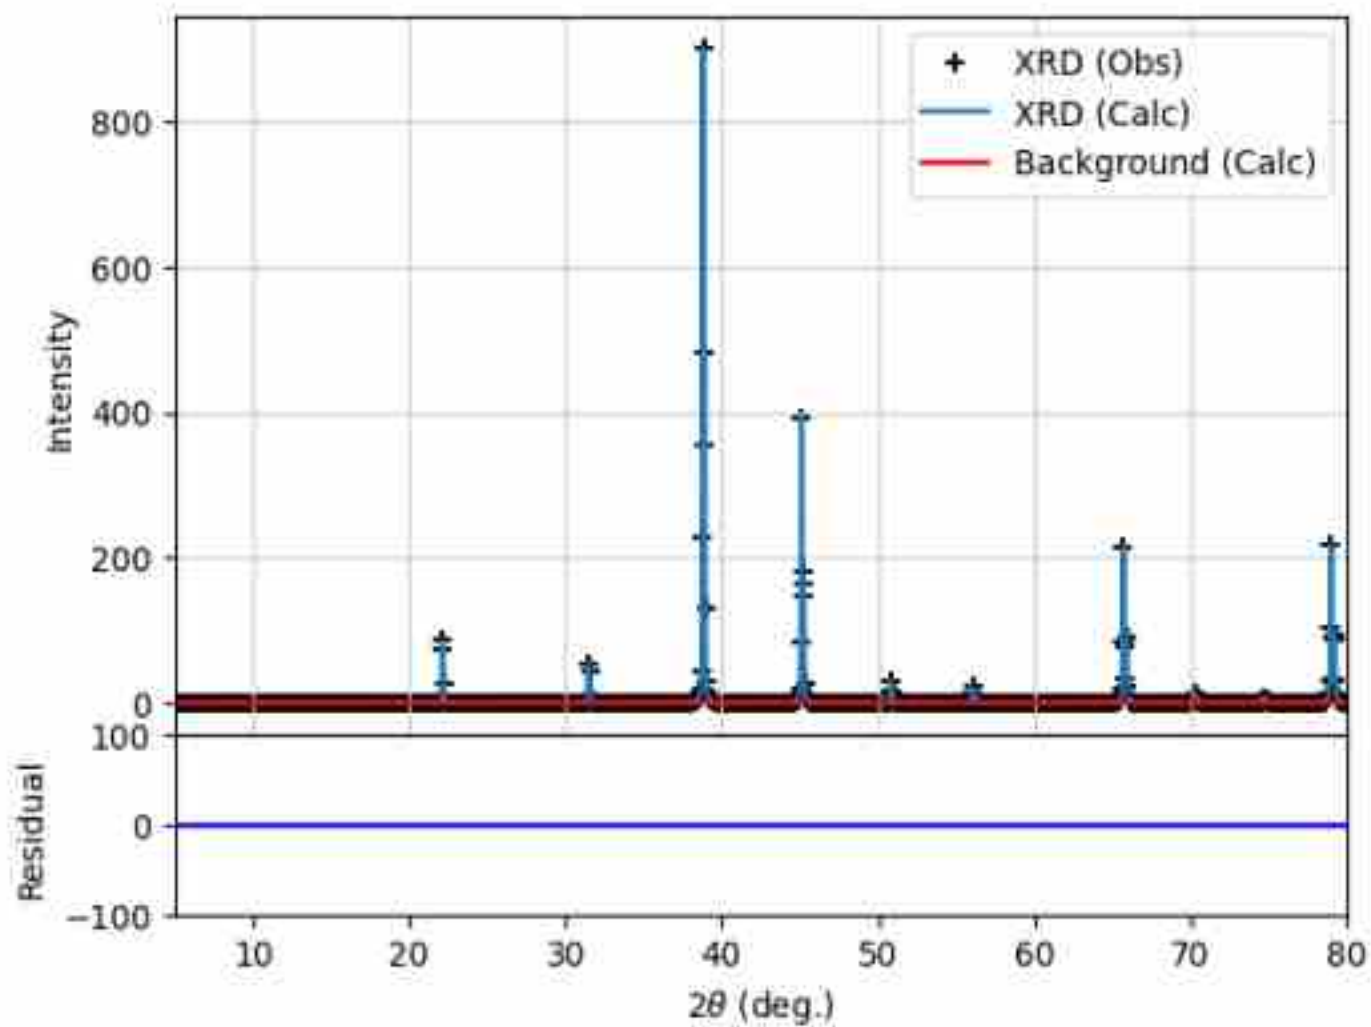

| RMSE before RR | Rwp     | RMSE after RR |
|----------------|---------|---------------|
| 0.001          | 0.01182 | 0.00105       |

# Sc1Rh3

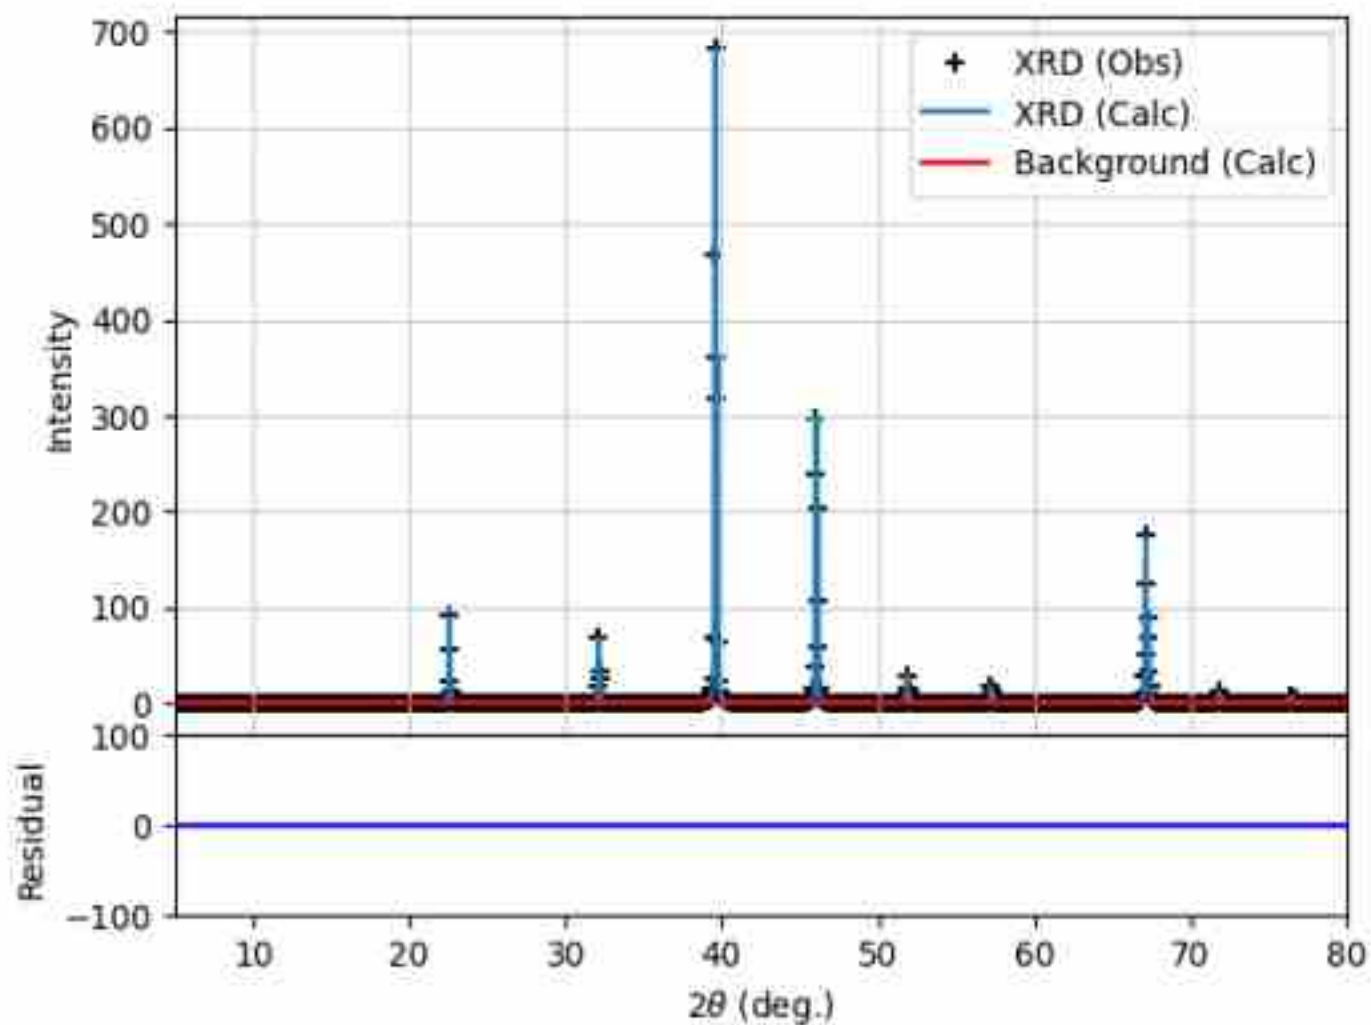

| RMSE before RR | Rwp     | RMSE after RR |
|----------------|---------|---------------|
| 0.001          | 0.02457 | 0.00108       |



# Sc1Sb1Rh2

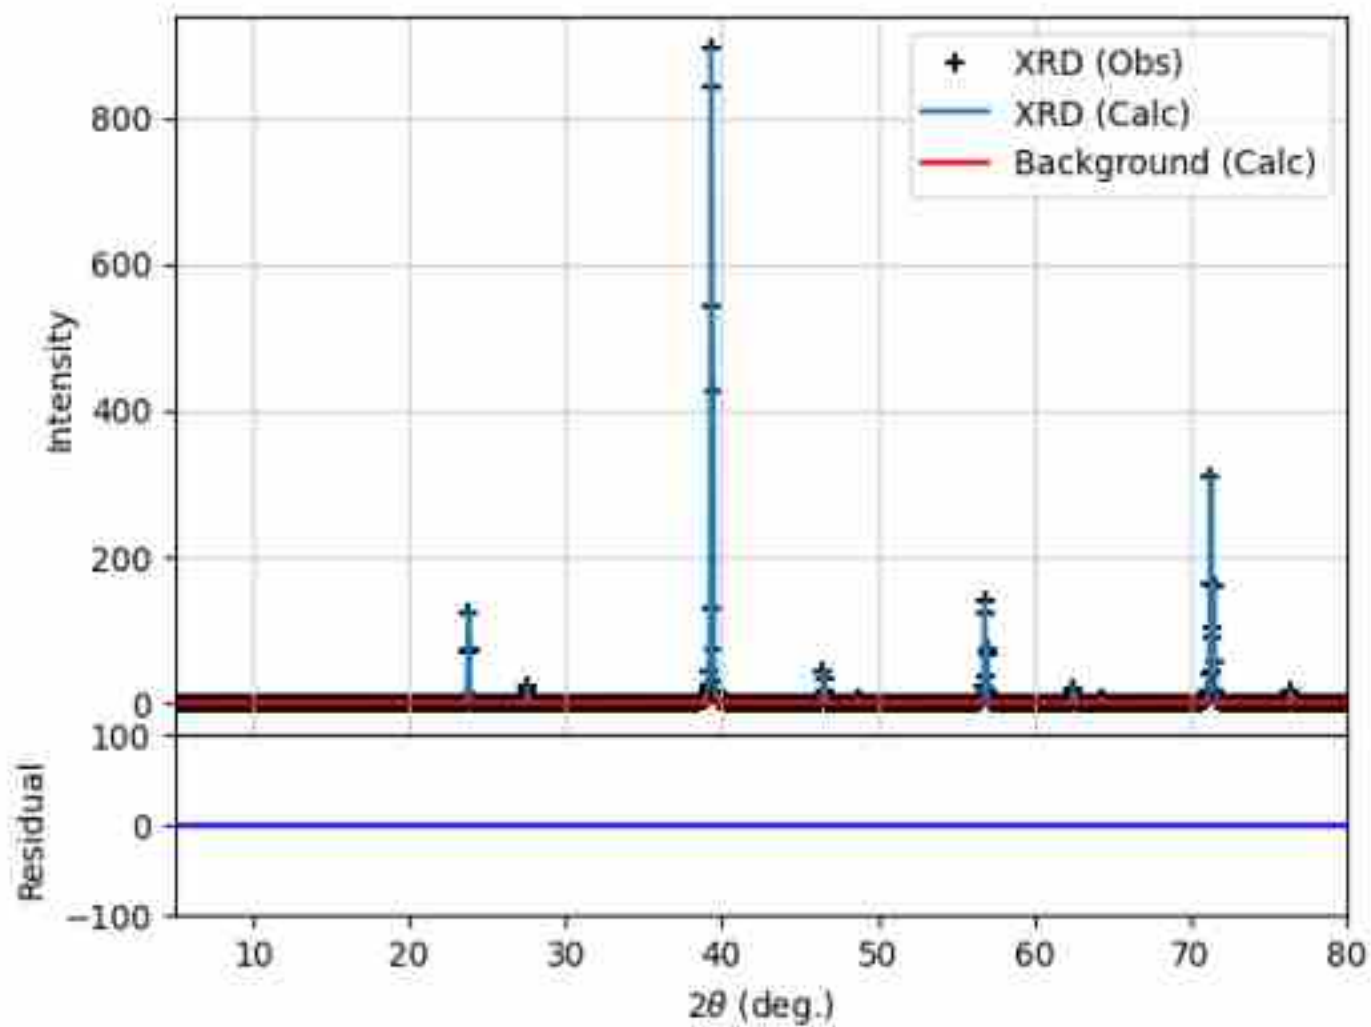

| RMSE before RR | Rwp     | RMSE after RR |
|----------------|---------|---------------|
| 0.001          | 0.00524 | 0.00078       |

# Sc1Sb1

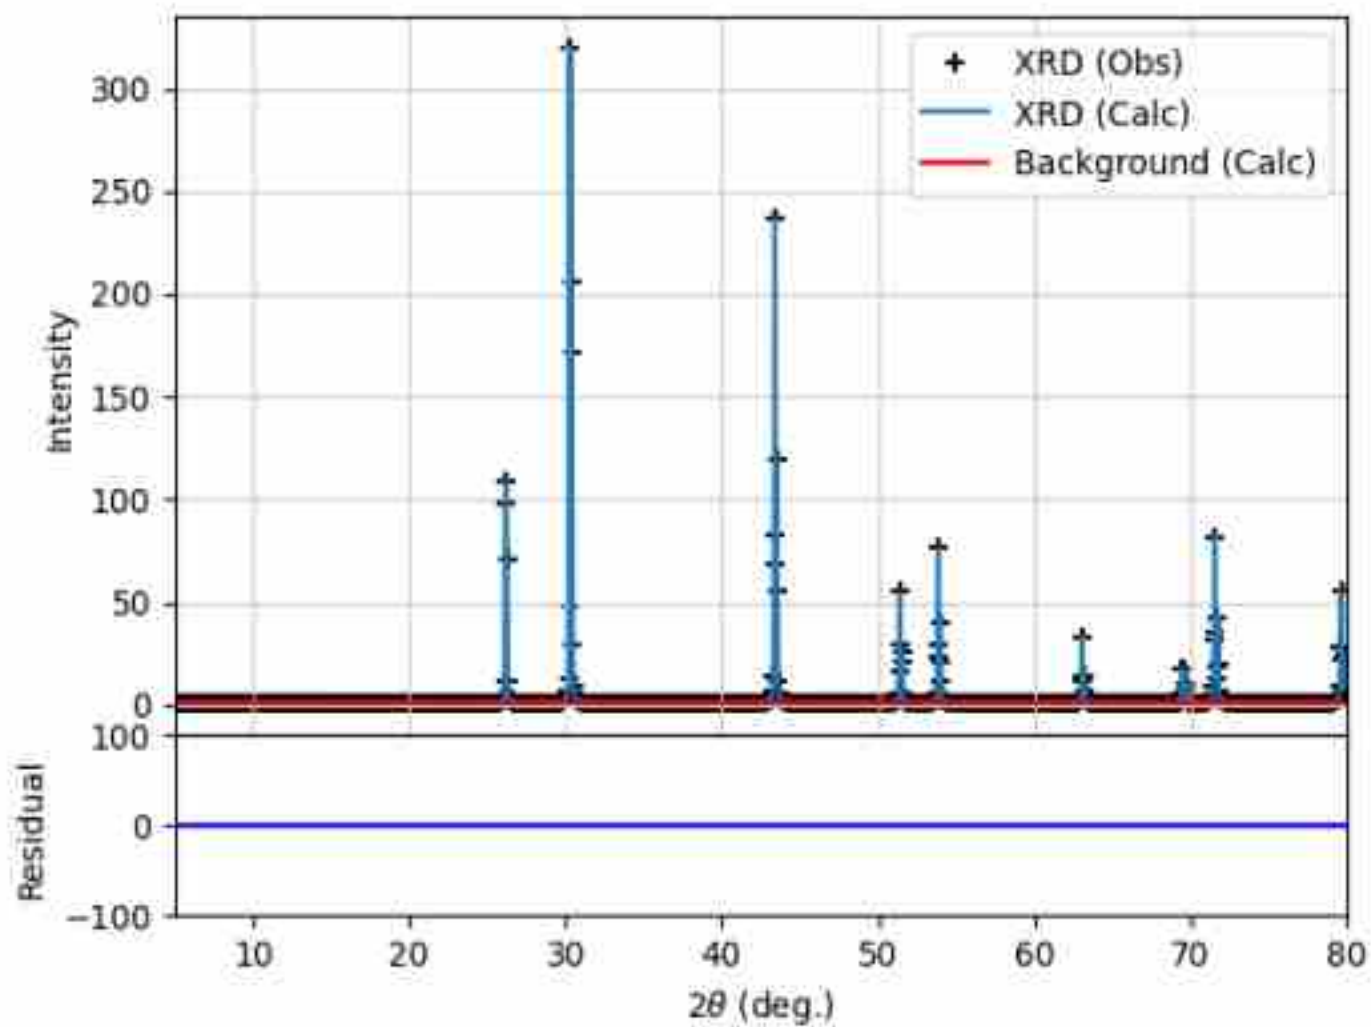

| RMSE before RR | Rwp     | RMSE after RR |
|----------------|---------|---------------|
| 0.001          | 0.00616 | 0.00092       |

# Sc1Sn1Rh2

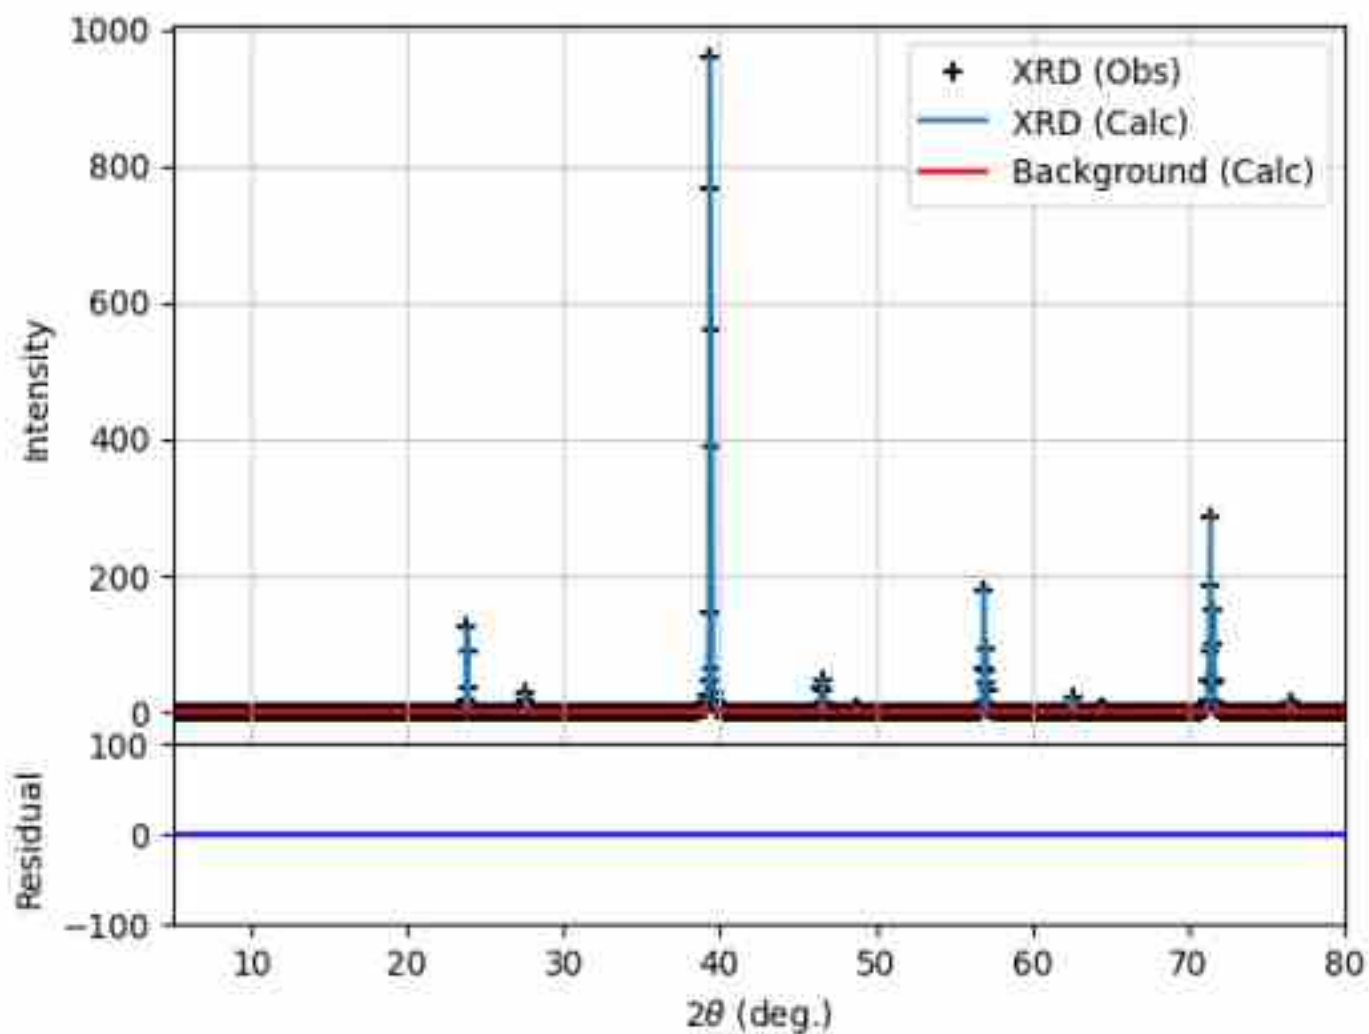

| RMSE before RR | Rwp     | RMSE after RR |
|----------------|---------|---------------|
| 0.001          | 0.00302 | 0.0005        |

# Sc1Tc2W1

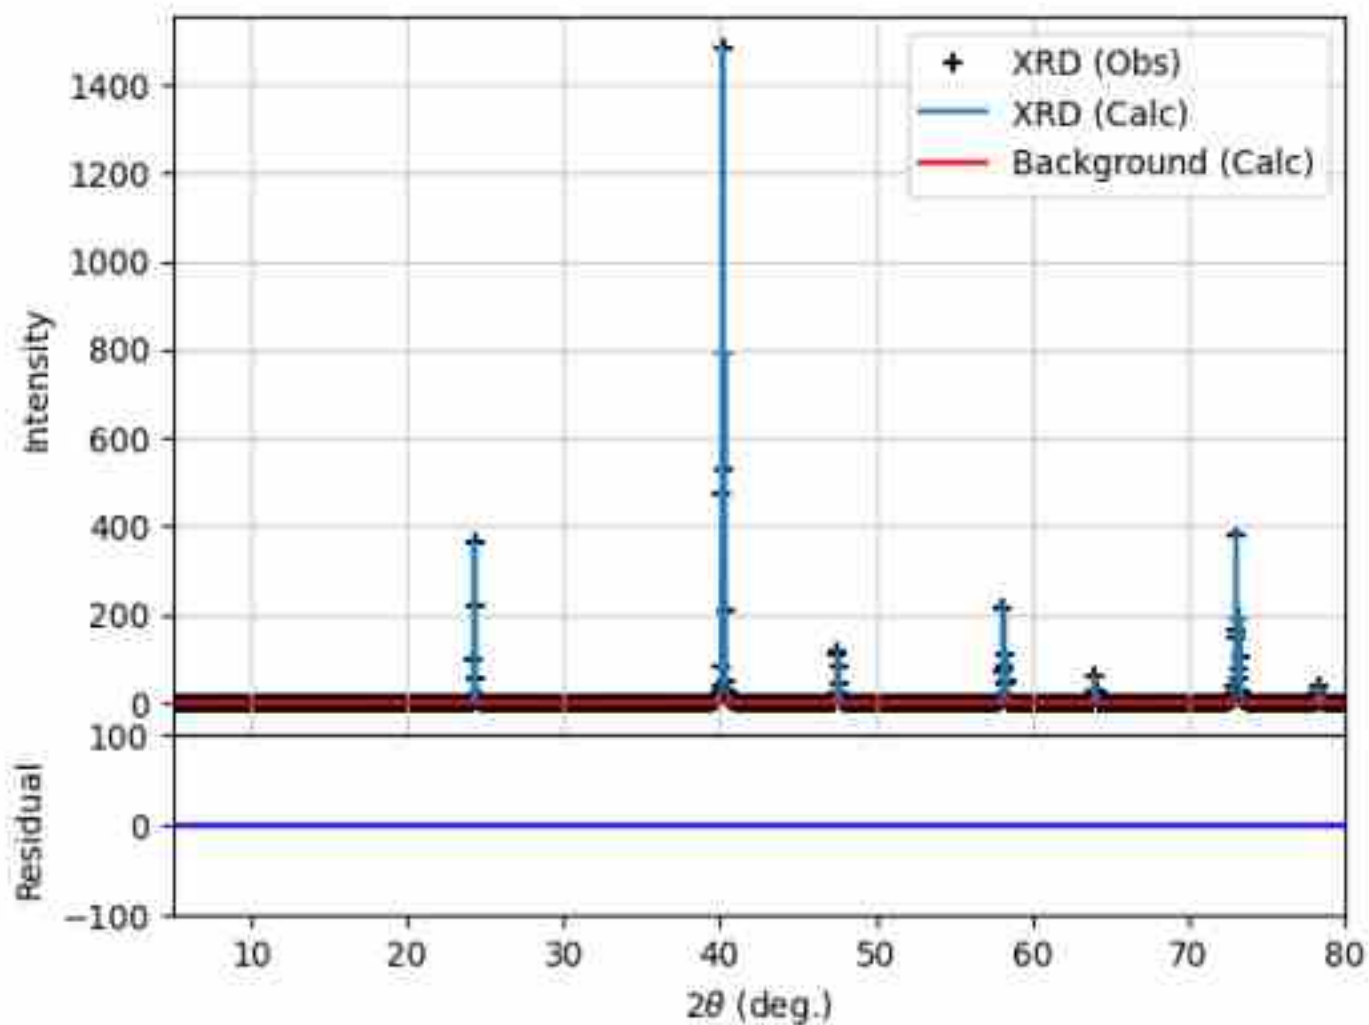

| RMSE before RR | Rwp     | RMSE after RR |
|----------------|---------|---------------|
| 0.001          | 0.01127 | 0.00071       |

# Sc2Ag1Ru1

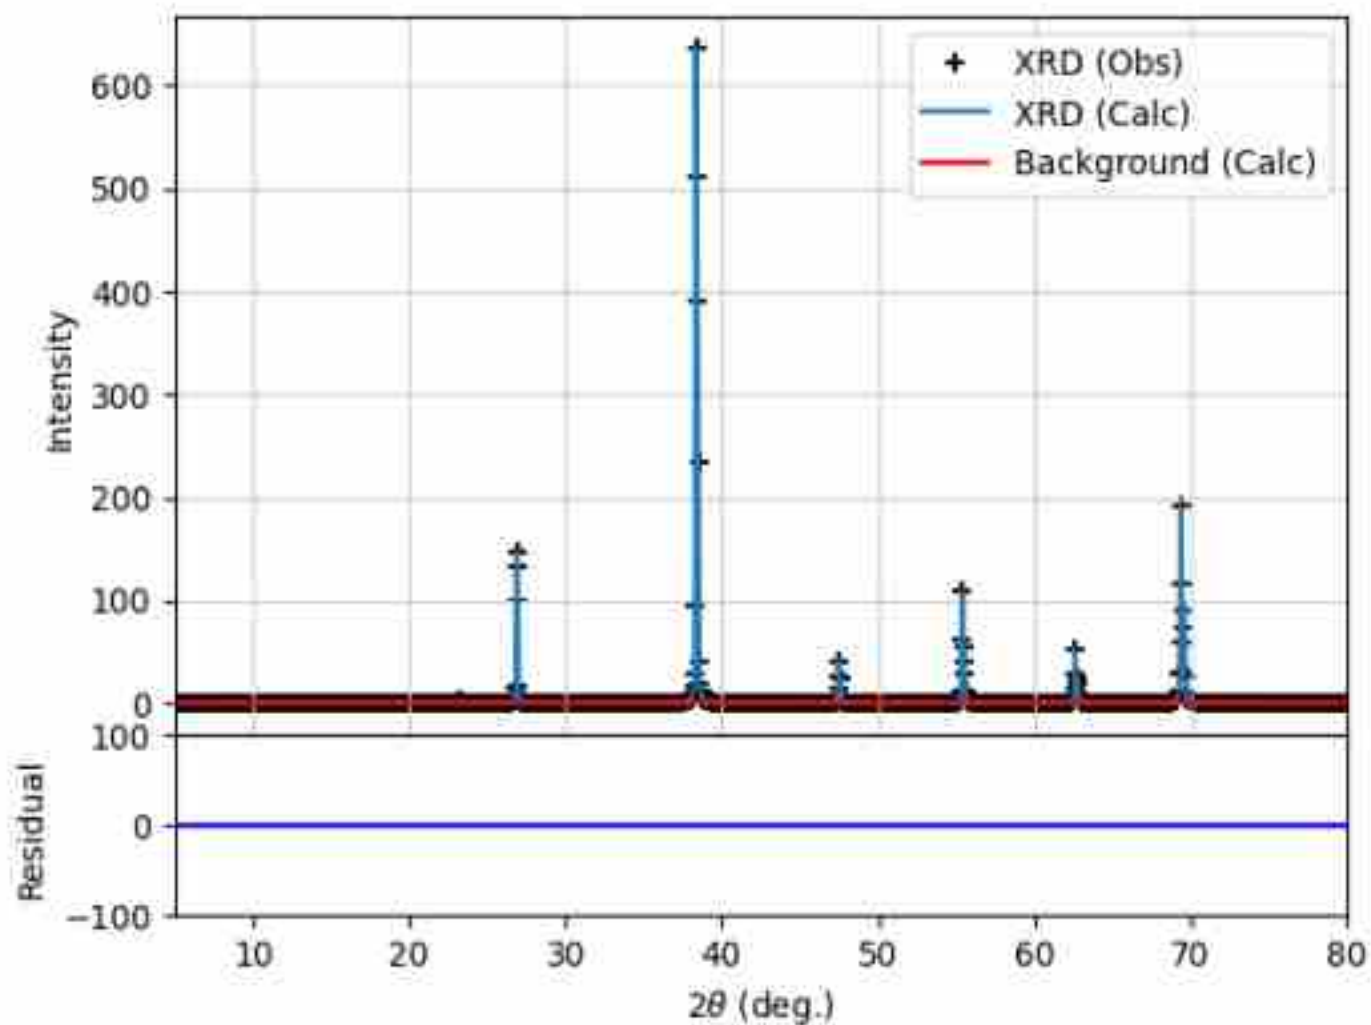

| RMSE before RR | Rwp     | RMSE after RR |
|----------------|---------|---------------|
| 0.001          | 0.01662 | 0.00104       |

# Sc<sub>2</sub>Al<sub>11</sub>Zn<sub>1</sub>

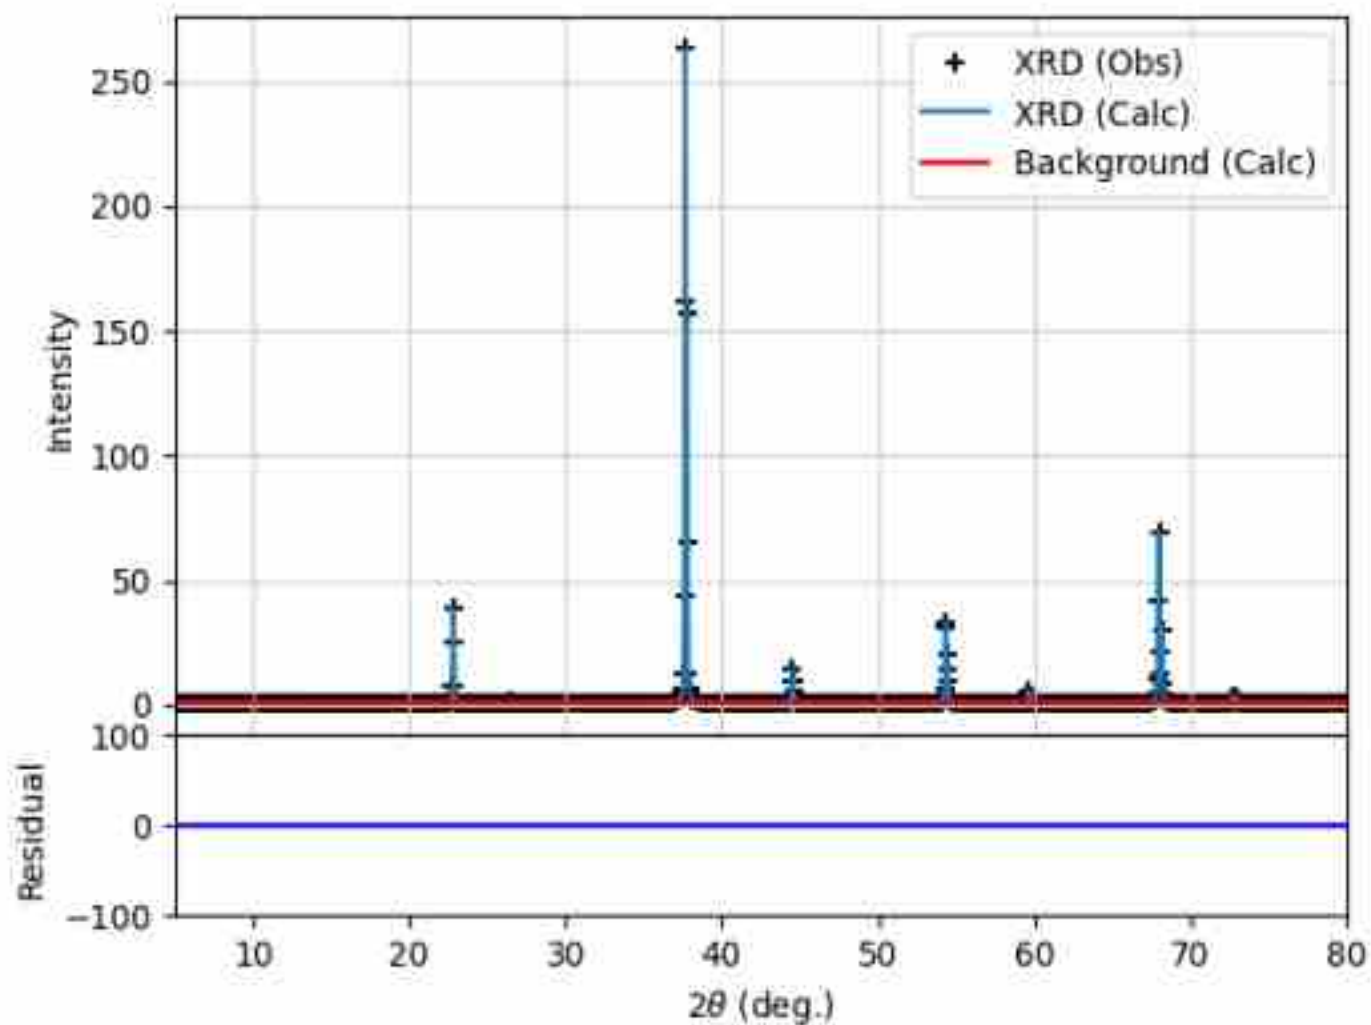

| RMSE before RR | Rwp     | RMSE after RR |
|----------------|---------|---------------|
| 0.001          | 0.00219 | 0.00032       |

# Sc2Cd1Au1

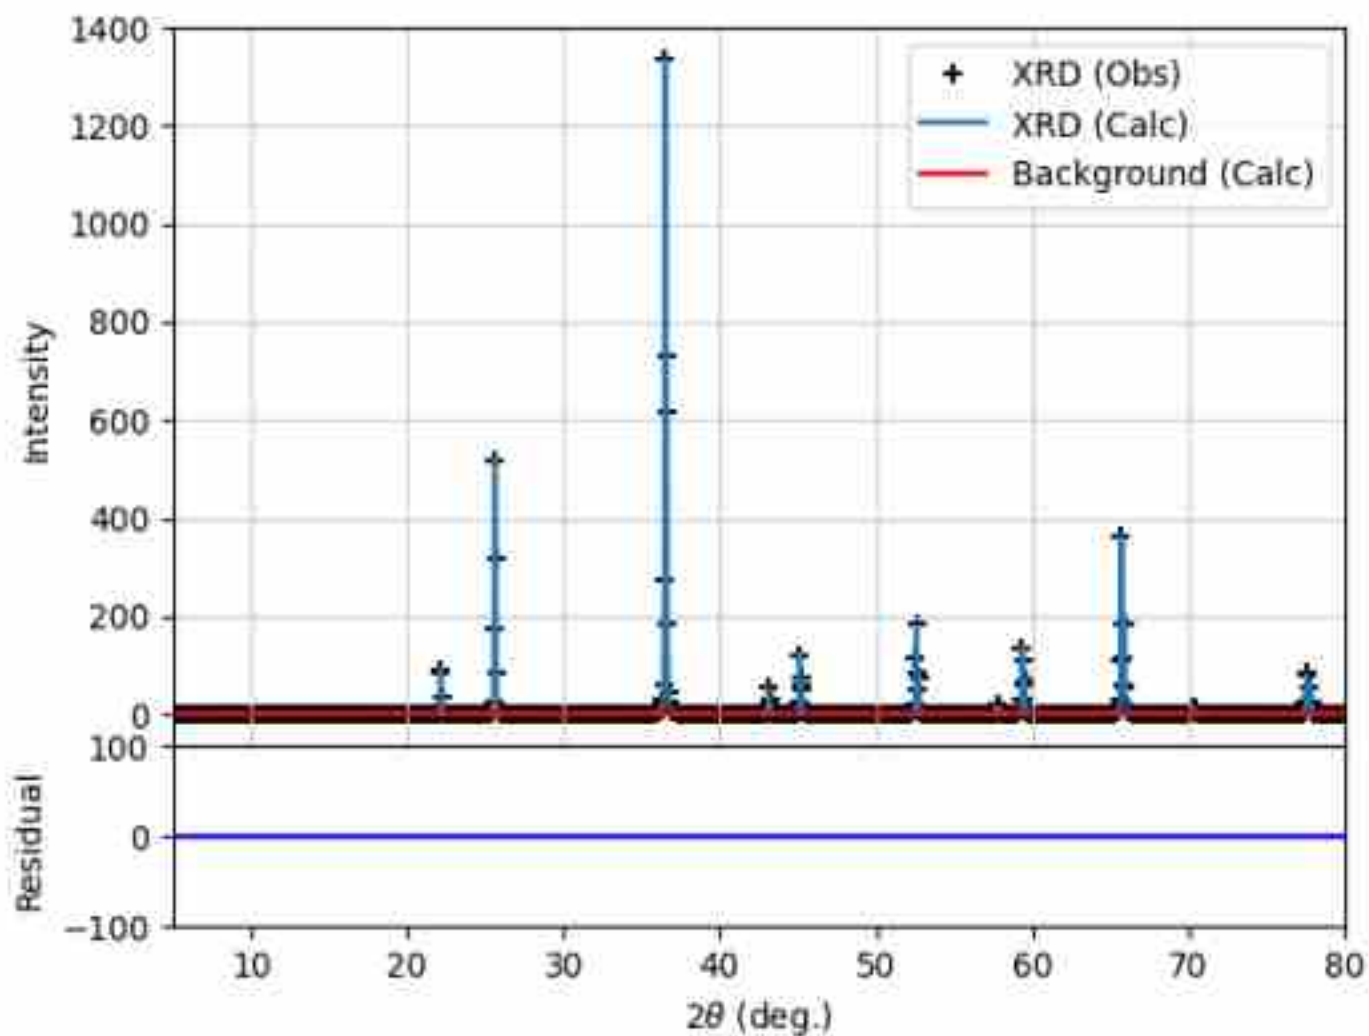

| RMSE before RR | Rwp     | RMSE after RR |
|----------------|---------|---------------|
| 0.001          | 0.00634 | 0.00131       |

# Sc2Co1Cu1

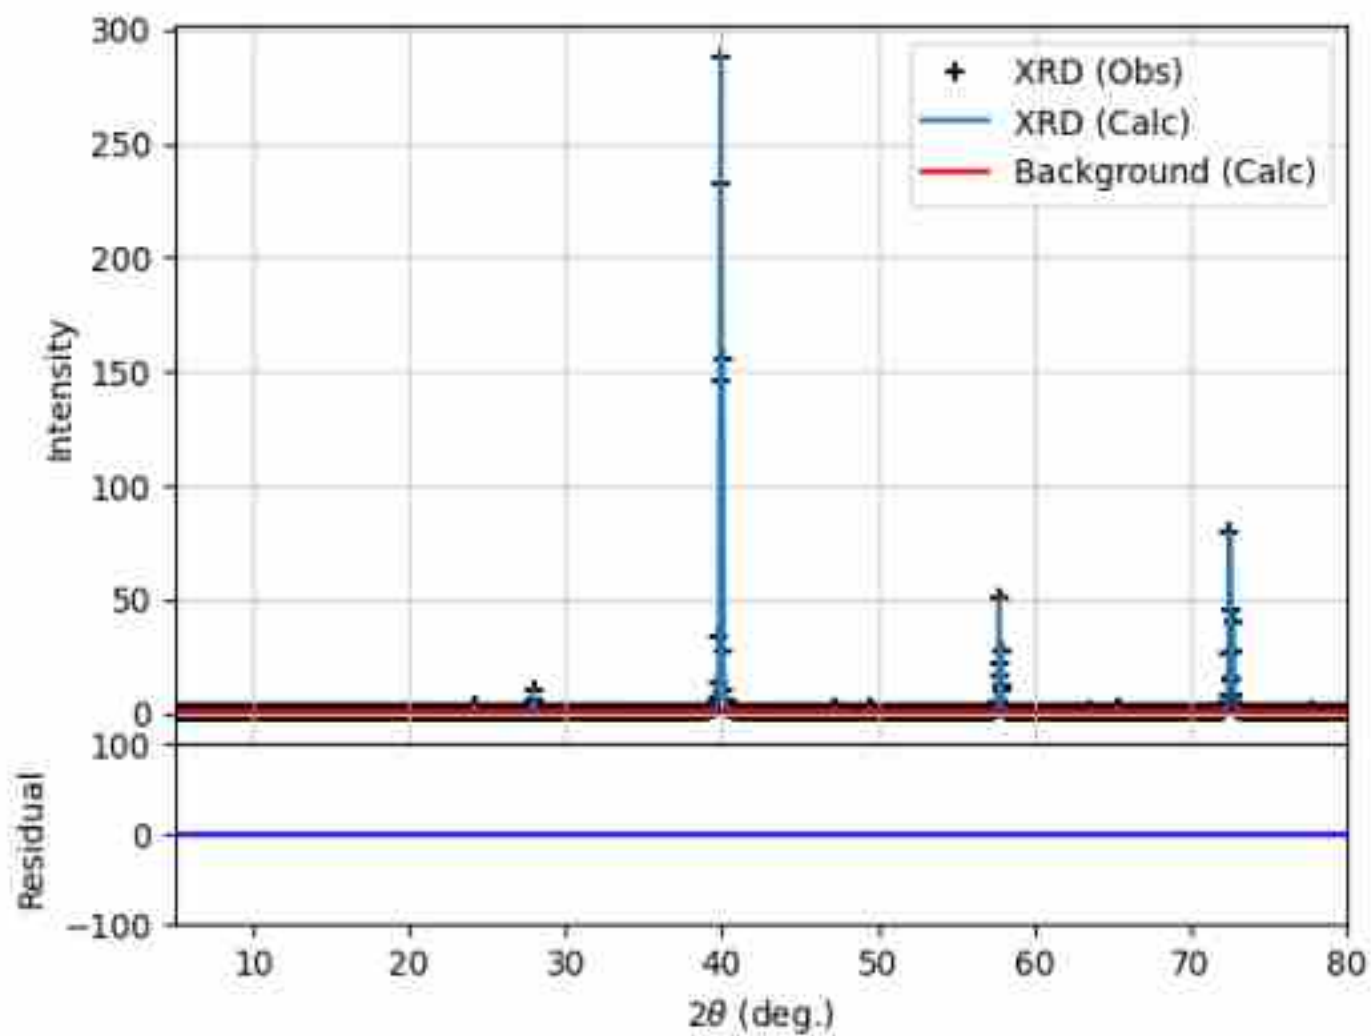

| RMSE before RR | Rwp     | RMSE after RR |
|----------------|---------|---------------|
| 0.001          | 0.00509 | 0.00048       |



# Sc2Co1Rh1

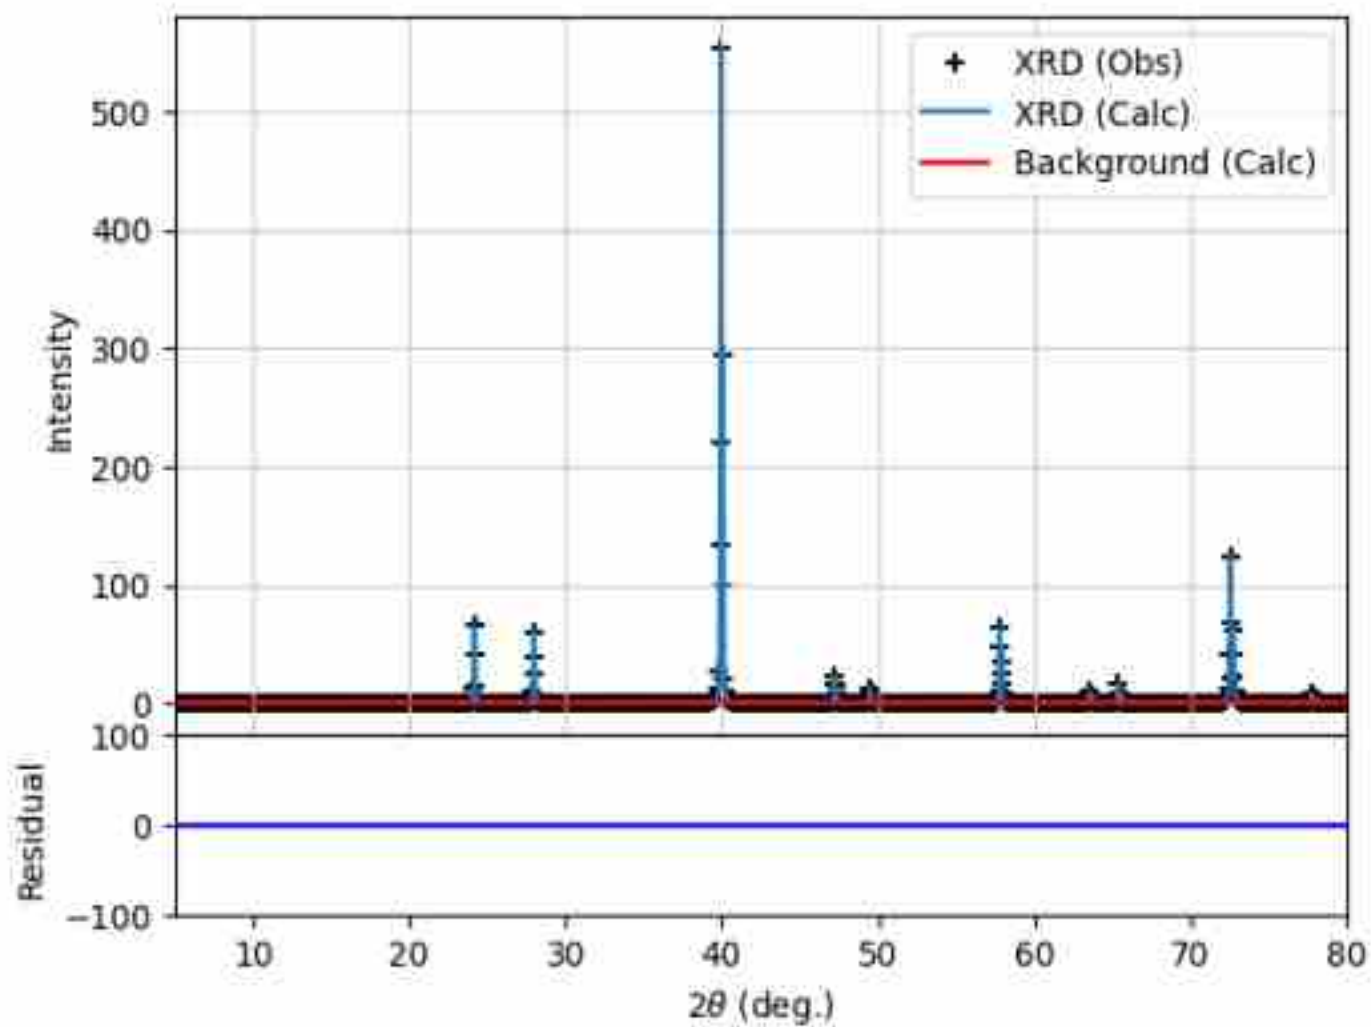

| RMSE before RR | Rwp     | RMSE after RR |
|----------------|---------|---------------|
| 0.001          | 0.00029 | 0.00022       |

# Sc<sub>2</sub>Cu<sub>1</sub>Tc<sub>1</sub>

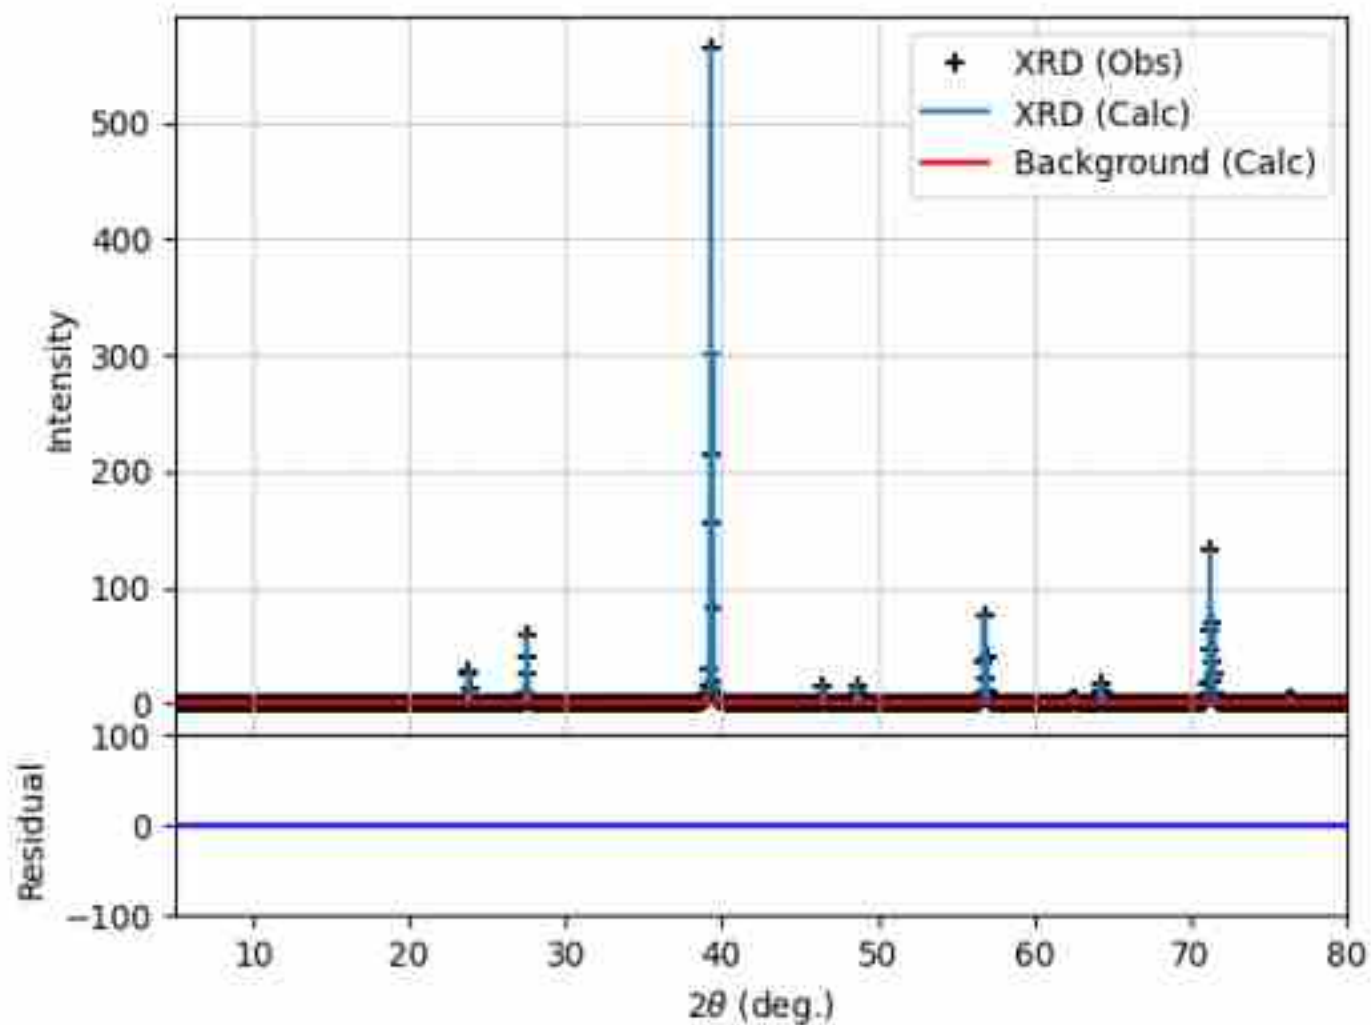

| RMSE before RR | Rwp     | RMSE after RR |
|----------------|---------|---------------|
| 0.001          | 0.00639 | 0.00082       |

Sc2Ga1Cu1

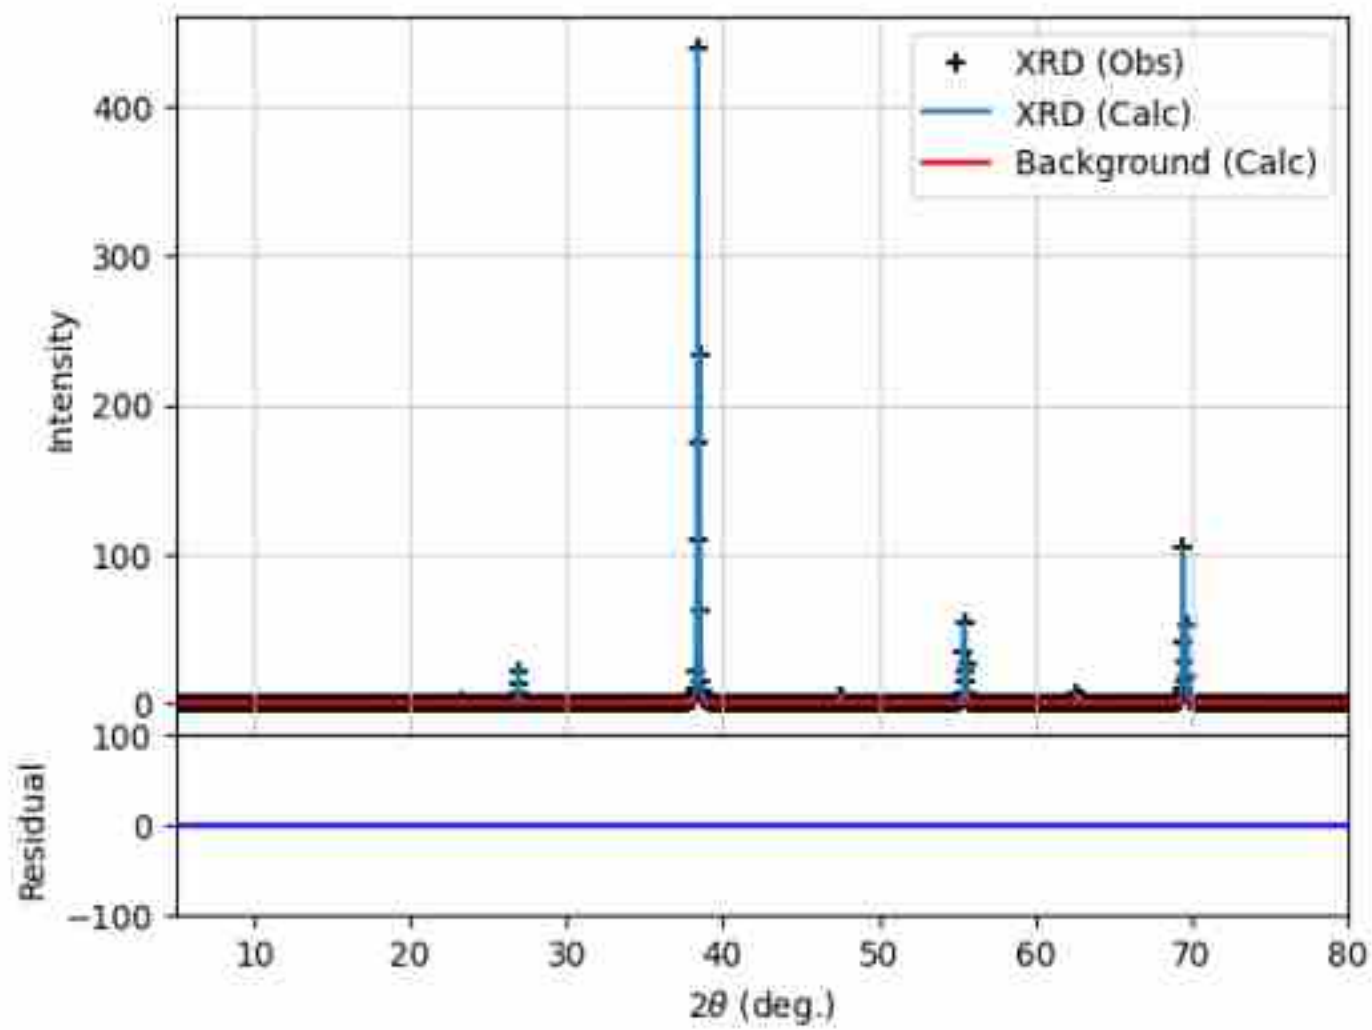

| RMSE before RR | Rwp     | RMSE after RR |
|----------------|---------|---------------|
| 0.001          | 0.00376 | 0.00038       |

# Sc2Ga1Ru1

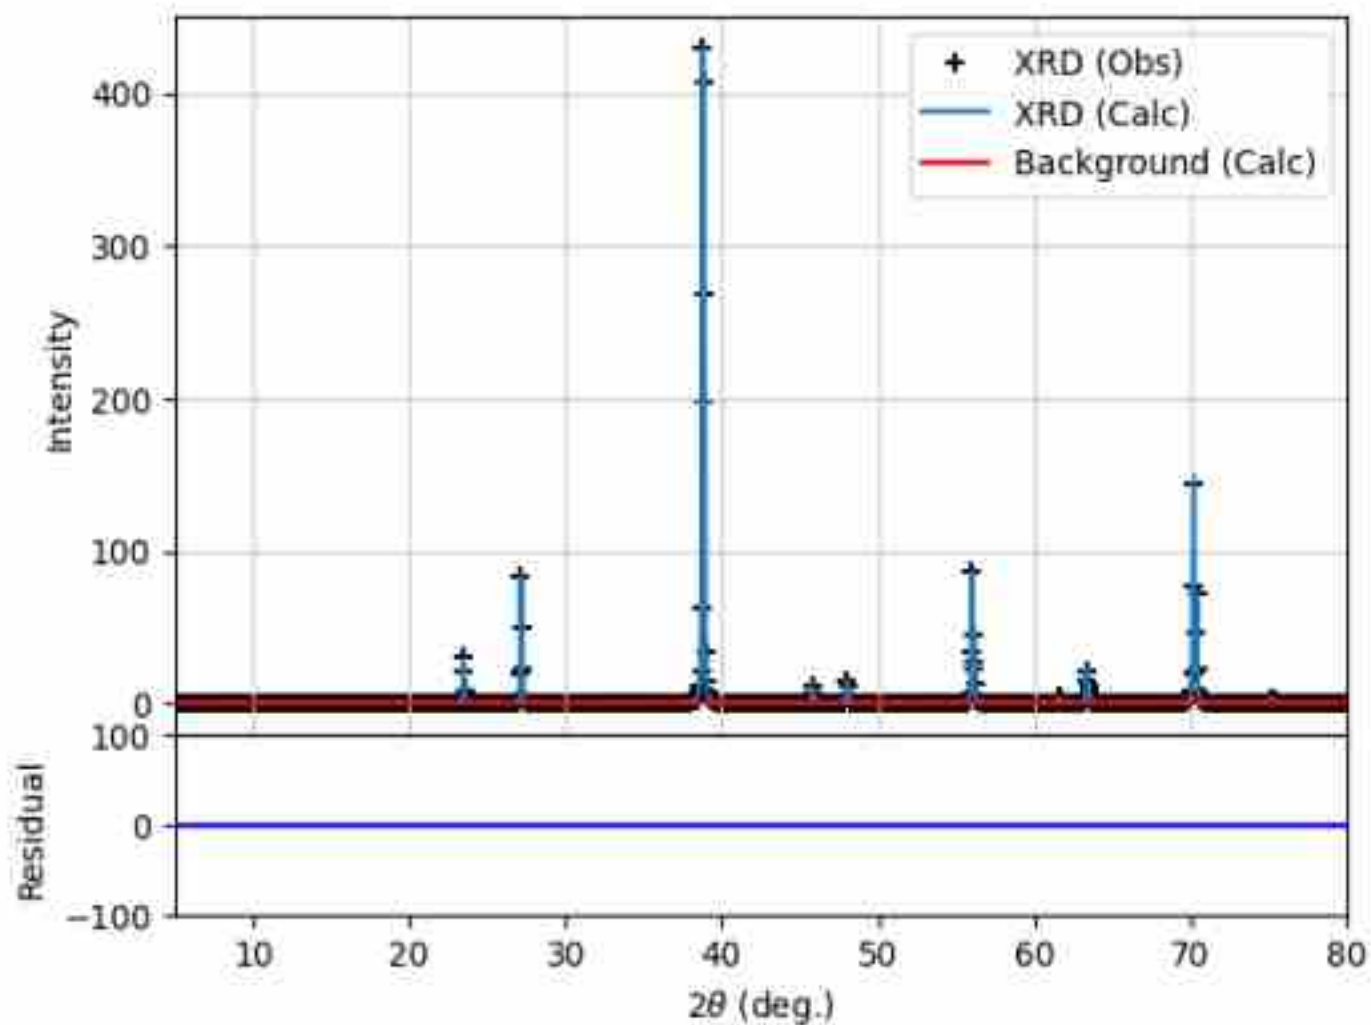

| RMSE before RR | Rwp     | RMSE after RR |
|----------------|---------|---------------|
| 0.001          | 0.00432 | 0.00121       |

# Sc2Ga2

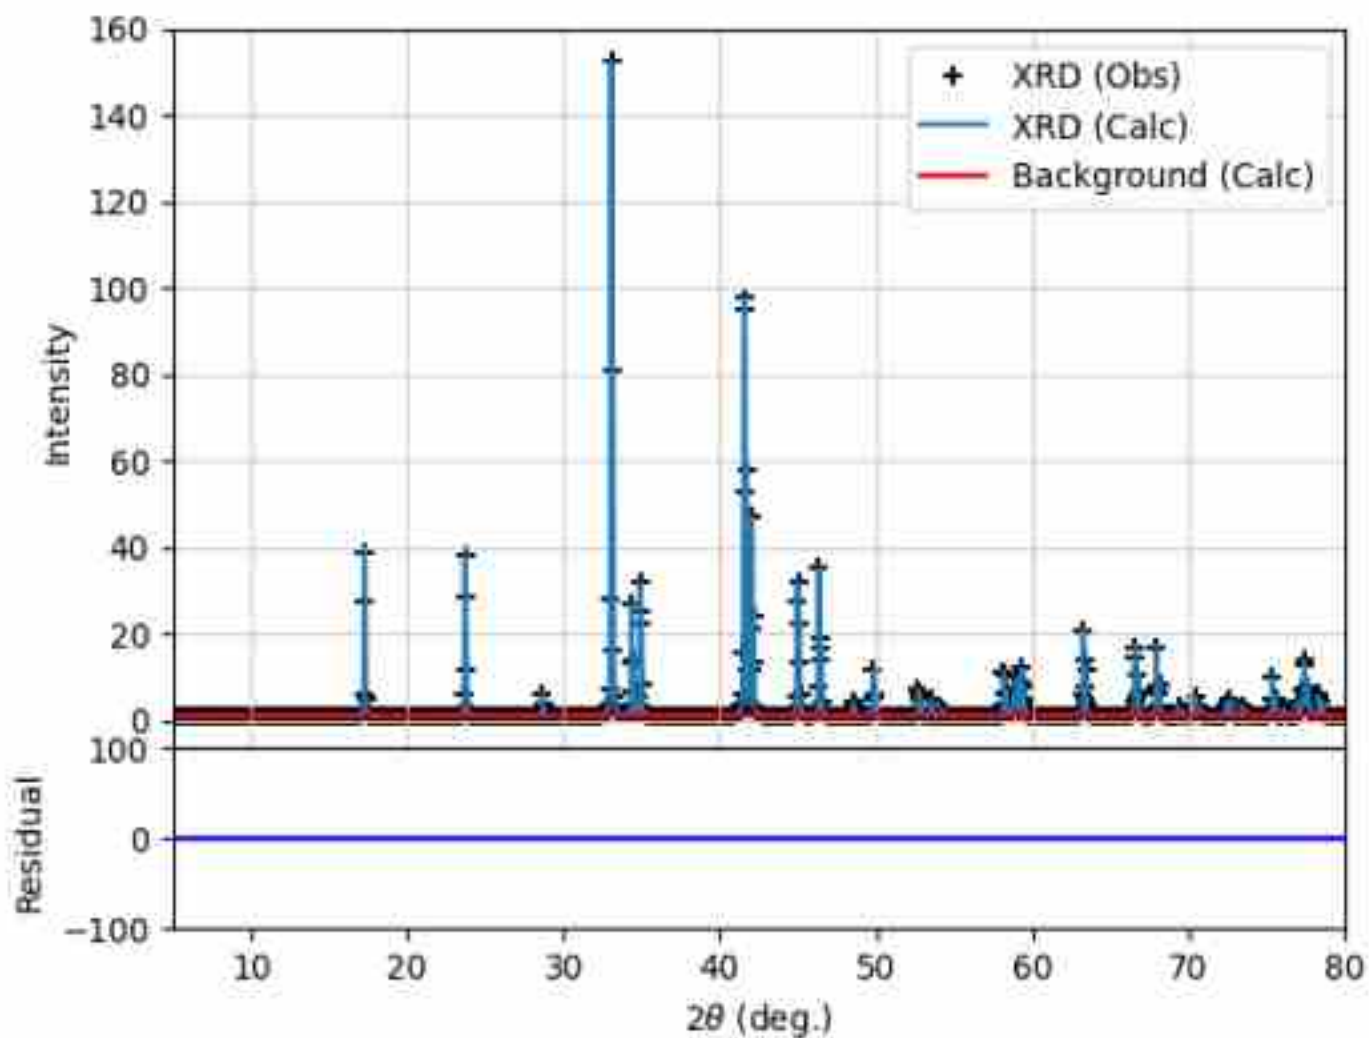

| RMSE before RR | Rwp     | RMSE after RR |
|----------------|---------|---------------|
| 0.01           | 0.00275 | 0.00018       |

# Sc2Ir1Os1

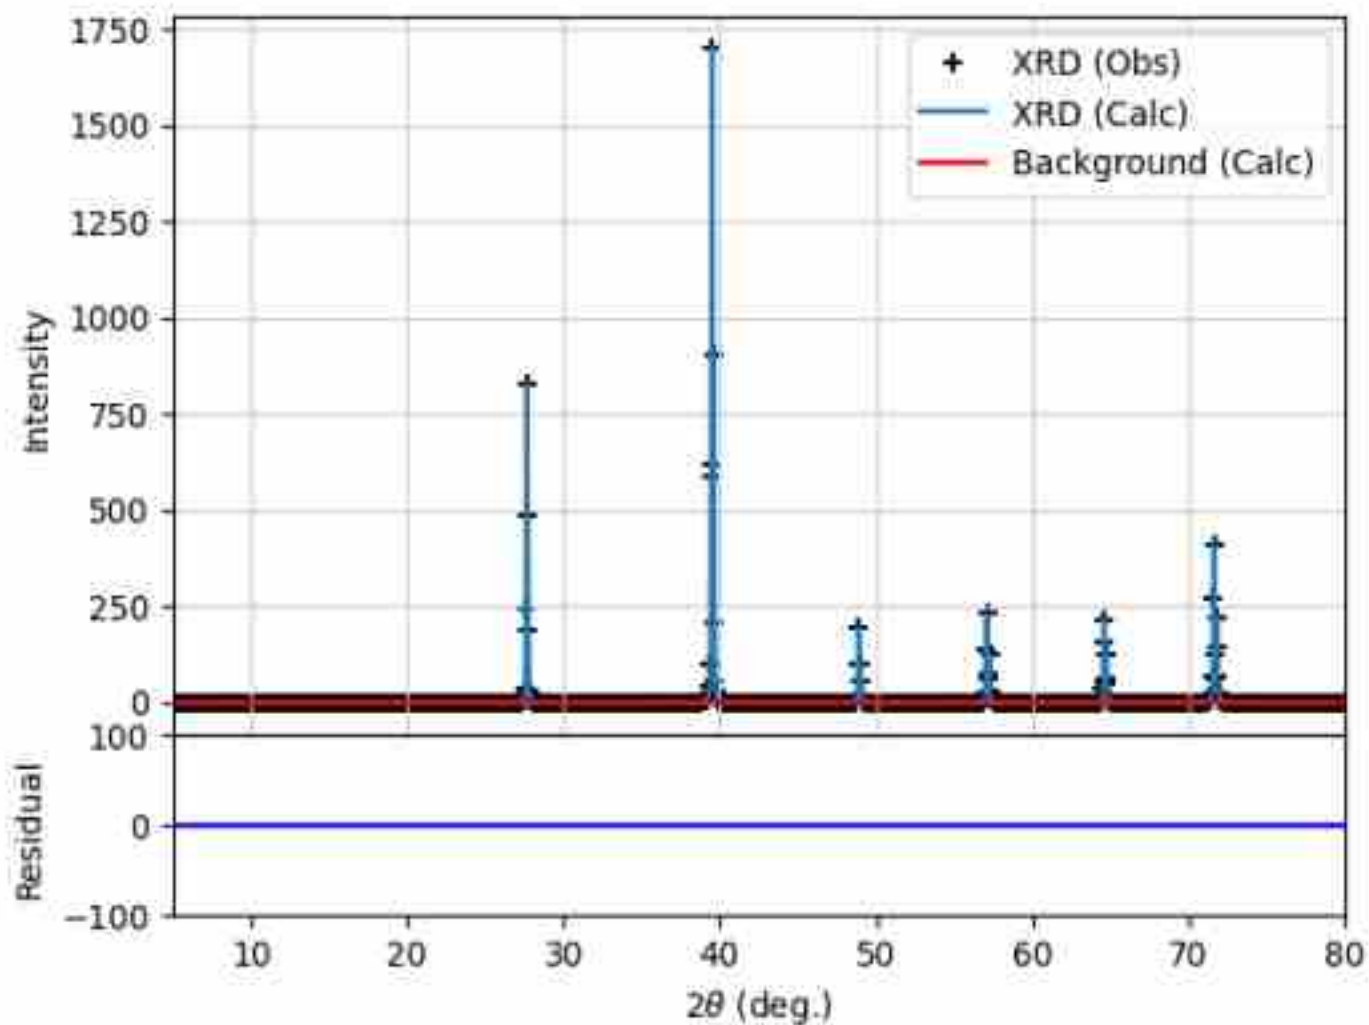

| RMSE before RR | Rwp     | RMSE after RR |
|----------------|---------|---------------|
| 0.001          | 0.00411 | 0.00389       |

# Sc2Tc1Ni1

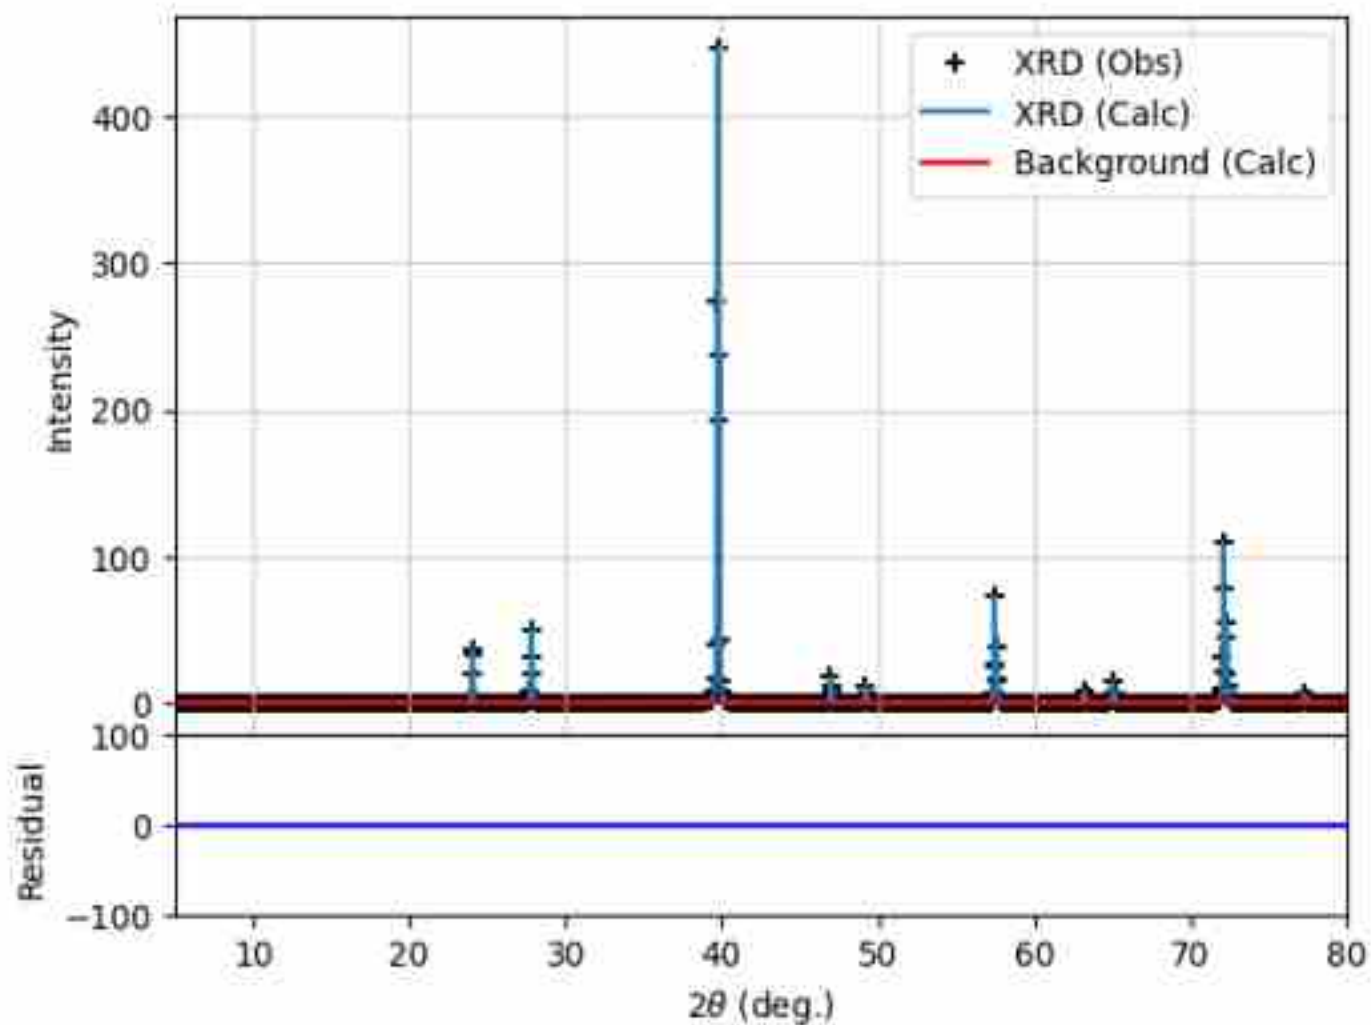

| RMSE before RR | Rwp     | RMSE after RR |
|----------------|---------|---------------|
| 0.001          | 0.00881 | 0.00089       |

# Sc2Tc1Pt1

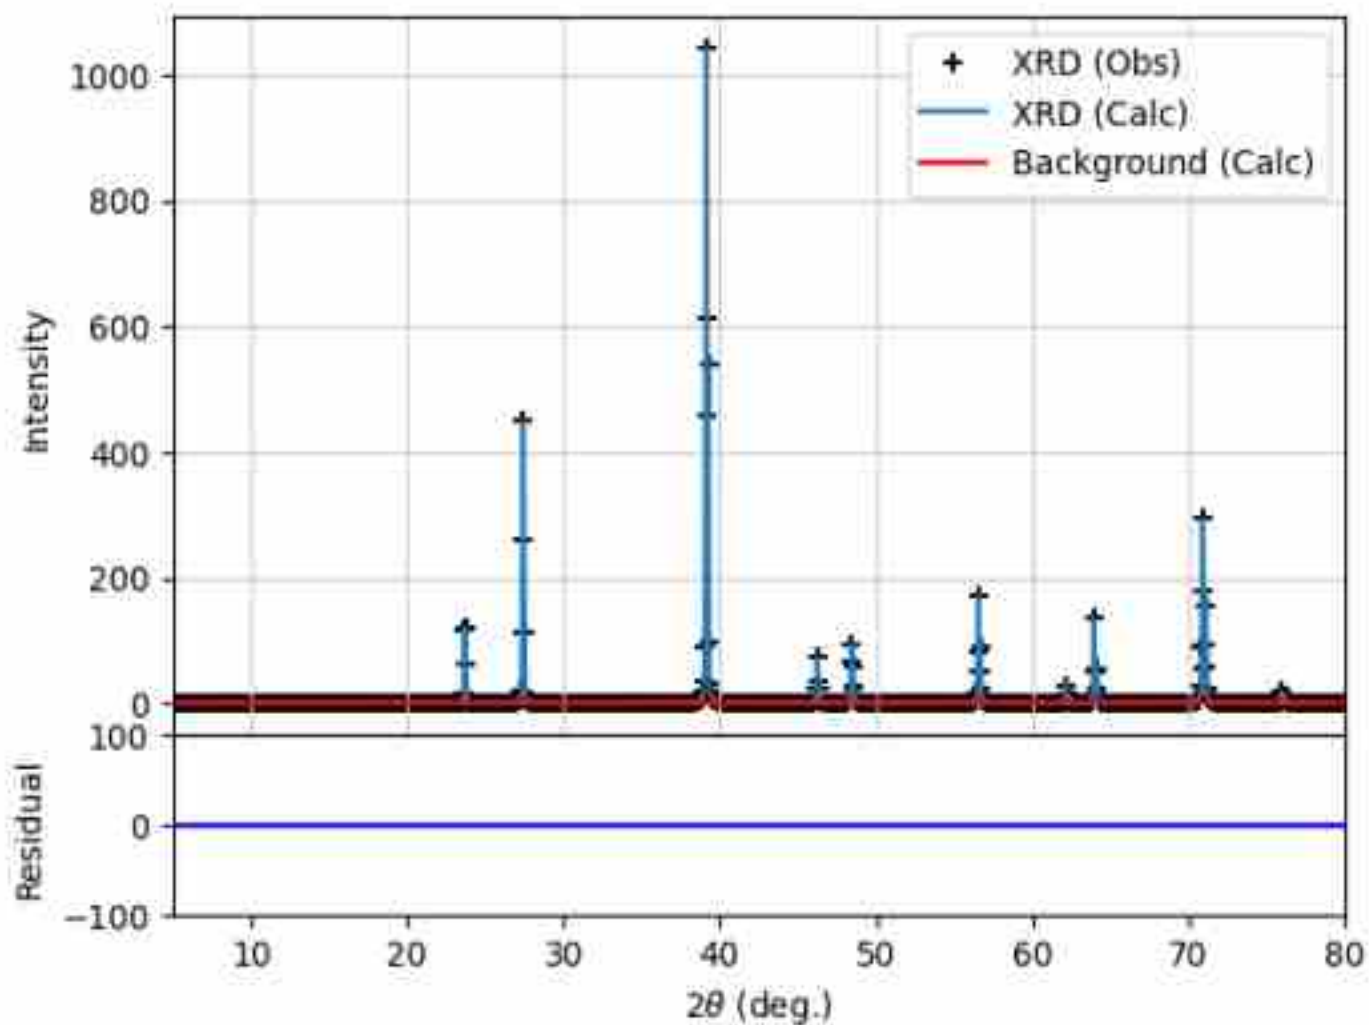

| RMSE before RR | Rwp     | RMSE after RR |
|----------------|---------|---------------|
| 0.001          | 0.00291 | 0.0005        |



# Sc2Zn1Ir1

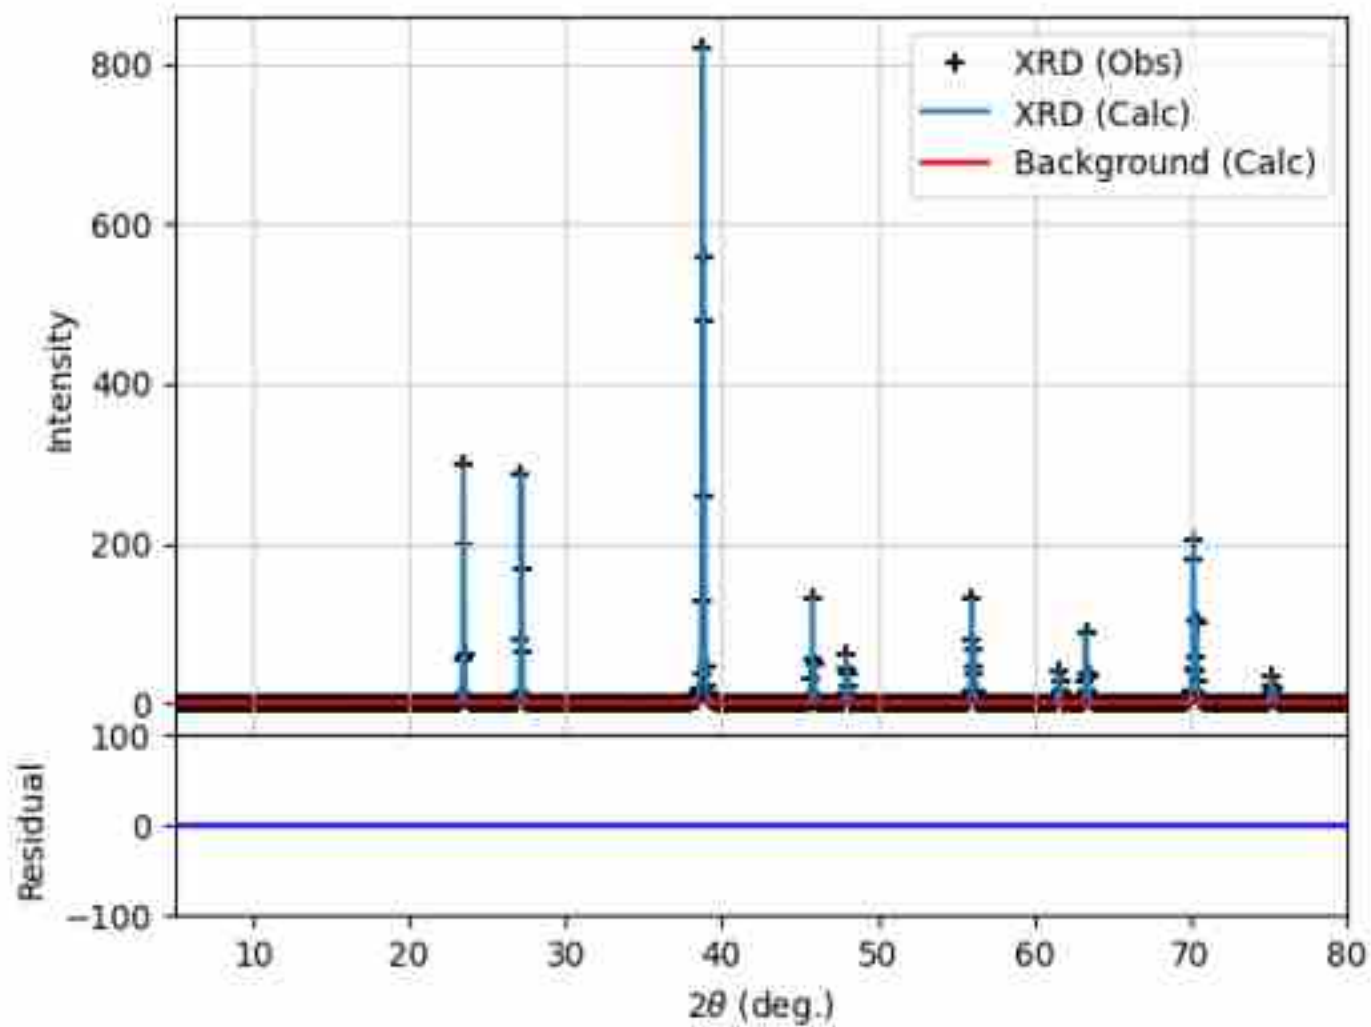

| RMSE before RR | Rwp   | RMSE after RR |
|----------------|-------|---------------|
| 0.001          | 3e-05 | 9e-05         |

# Sc<sub>2</sub>Zn<sub>1</sub>O<sub>s</sub>1

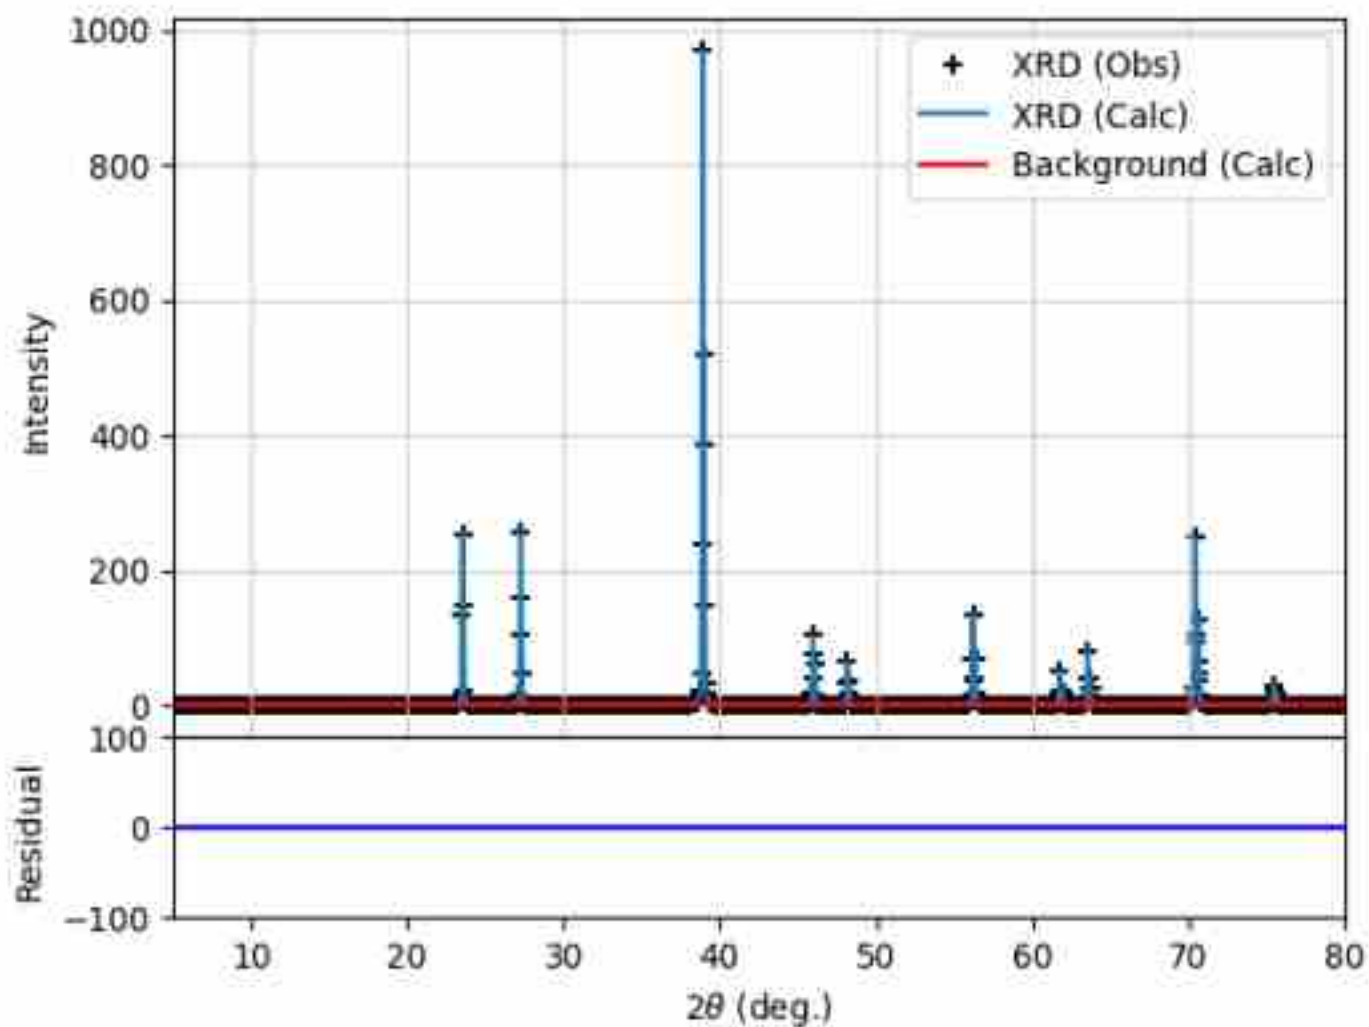

| RMSE before RR | Rwp     | RMSE after RR |
|----------------|---------|---------------|
| 0.001          | 0.00318 | 0.00403       |

Sc2Zn1Ru1

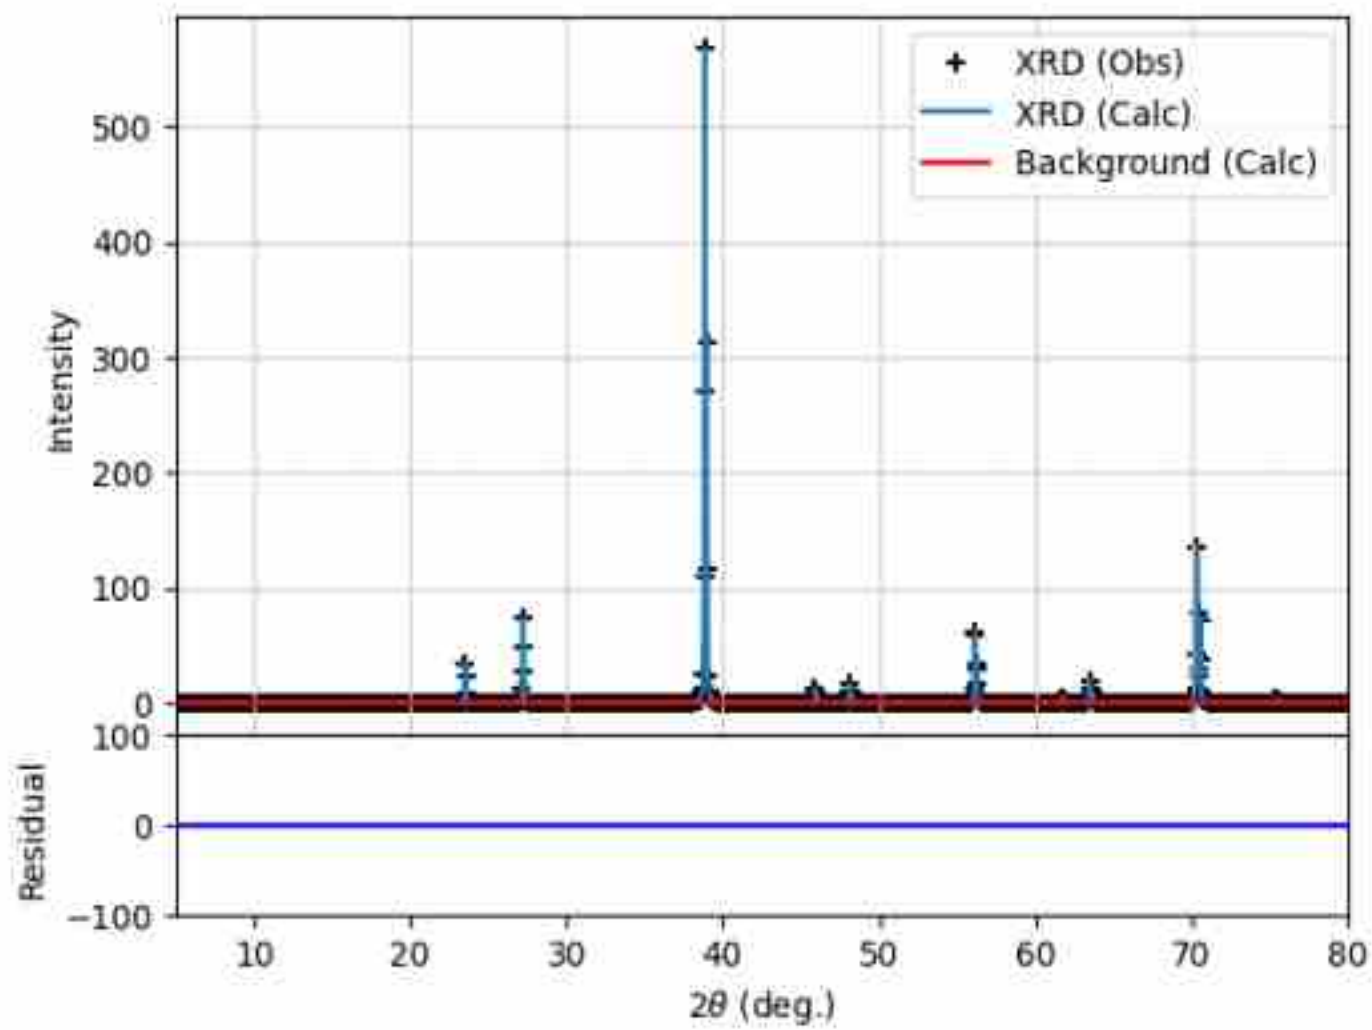

| RMSE before RR | Rwp    | RMSE after RR |
|----------------|--------|---------------|
| 0.001          | 0.0047 | 0.0008        |

# Sc<sub>4</sub>Fe<sub>2</sub>Si<sub>4</sub>

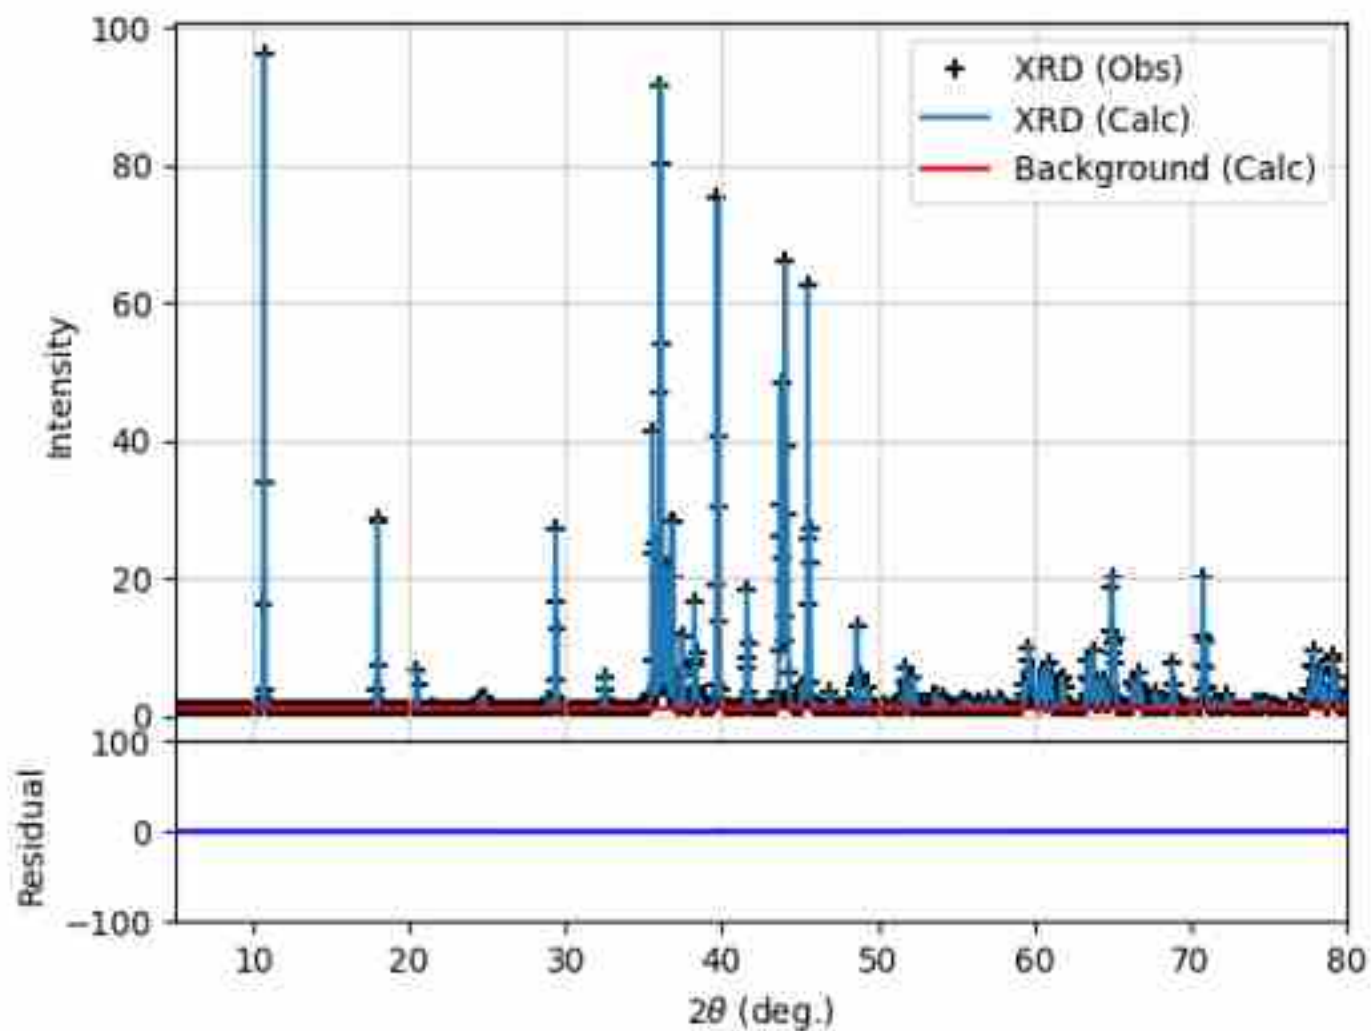

| RMSE before RR | Rwp     | RMSE after RR |
|----------------|---------|---------------|
| 0.01           | 1.09718 | 0.01113       |

Si1Ni3

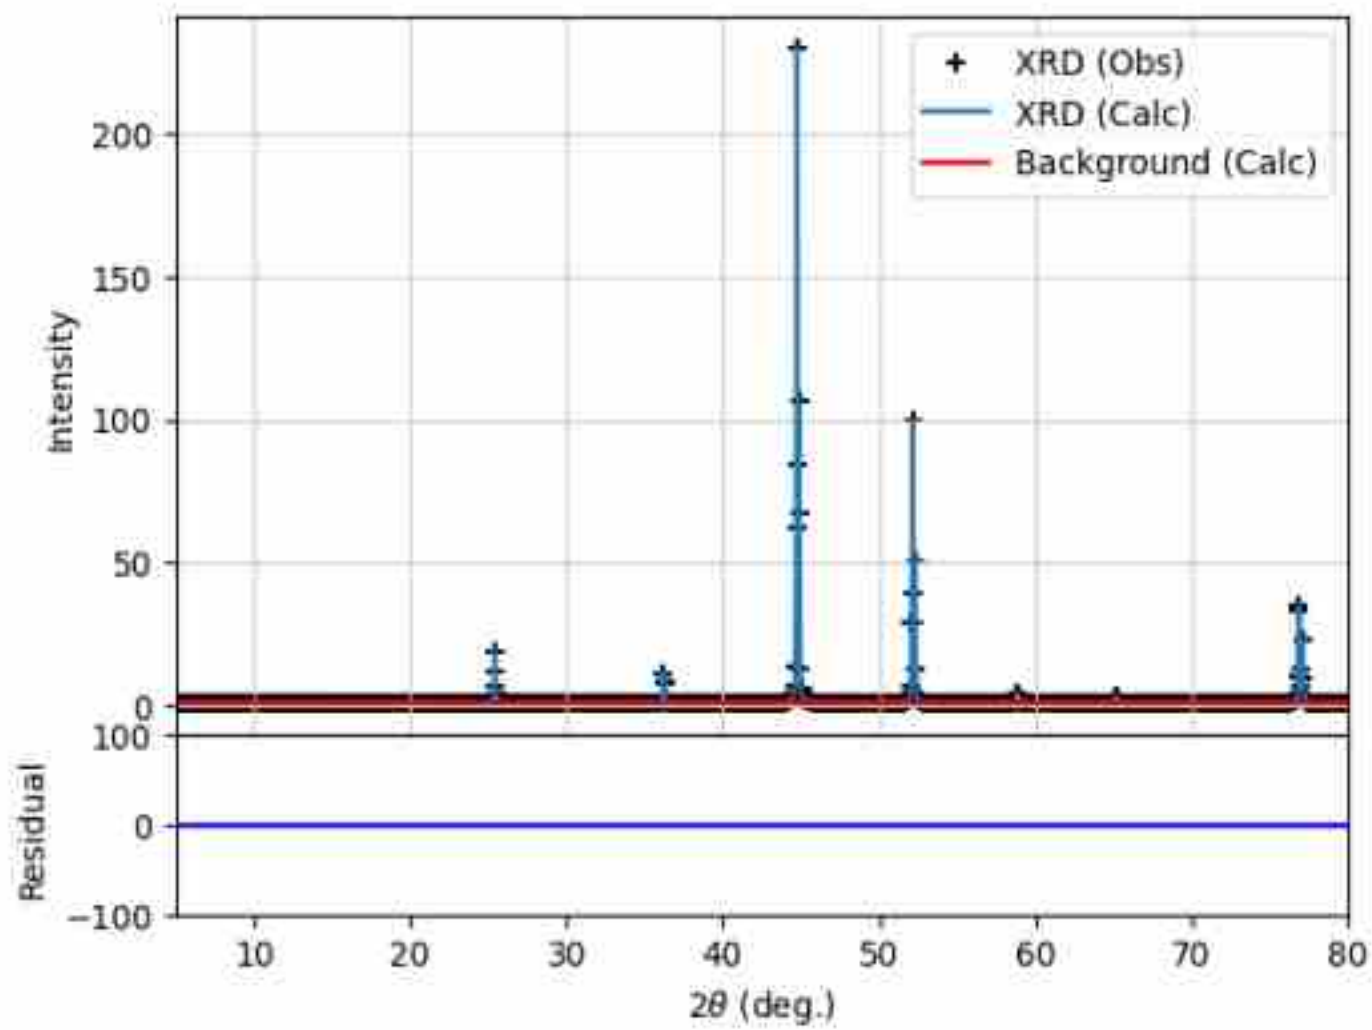

| RMSE before RR | Rwp     | RMSE after RR |
|----------------|---------|---------------|
| 0.001          | 0.01914 | 0.0013        |

# Si1Tc2W1

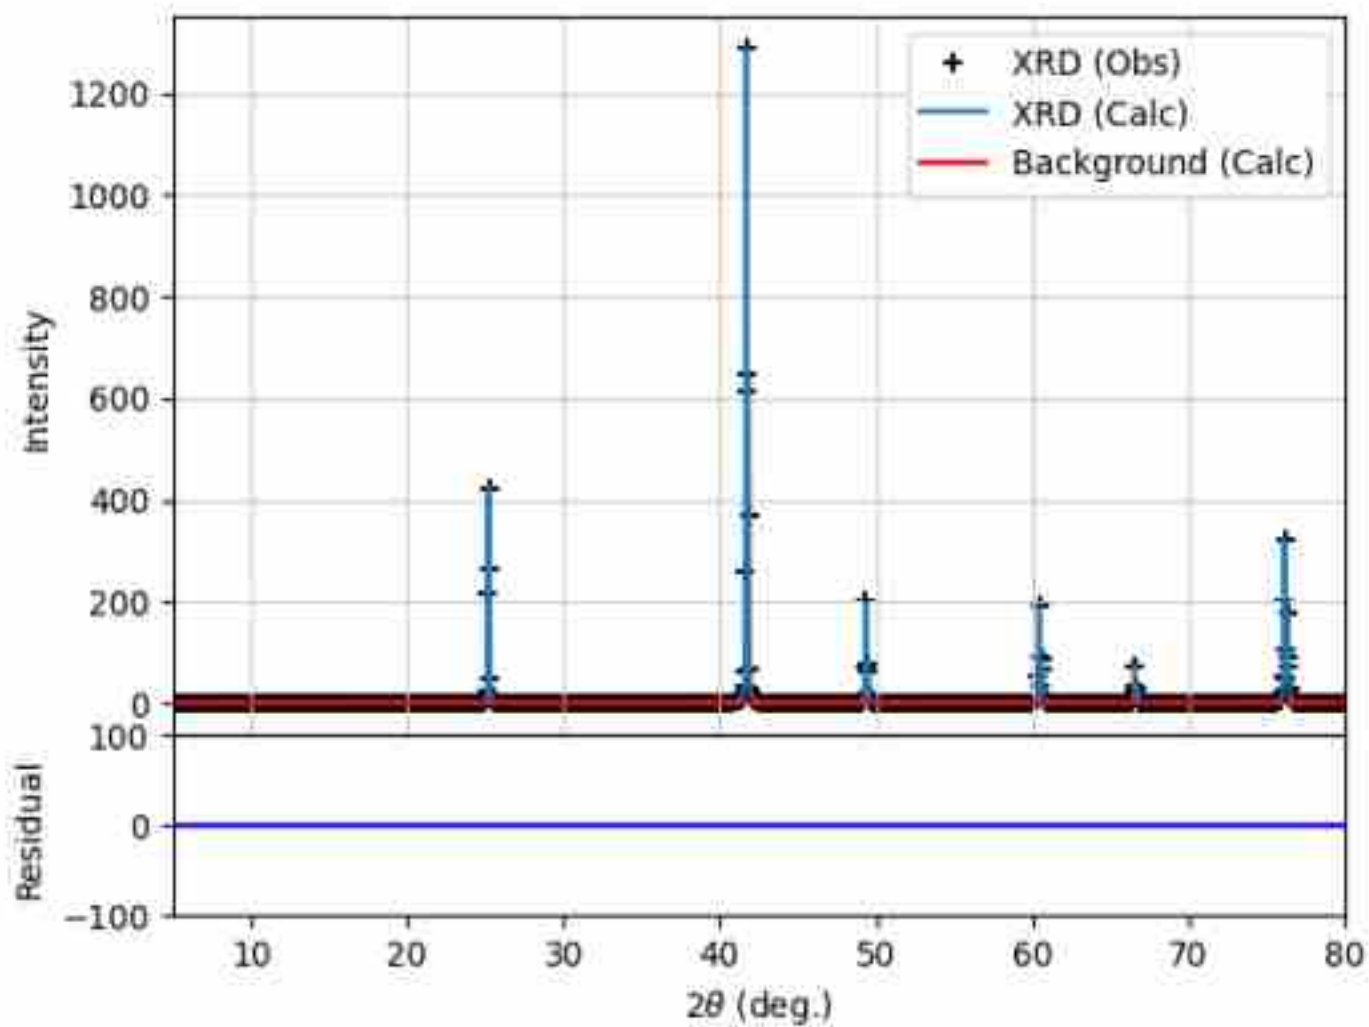

| RMSE before RR | Rwp     | RMSE after RR |
|----------------|---------|---------------|
| 0.001          | 0.00071 | 0.00026       |

# Sm1Au1

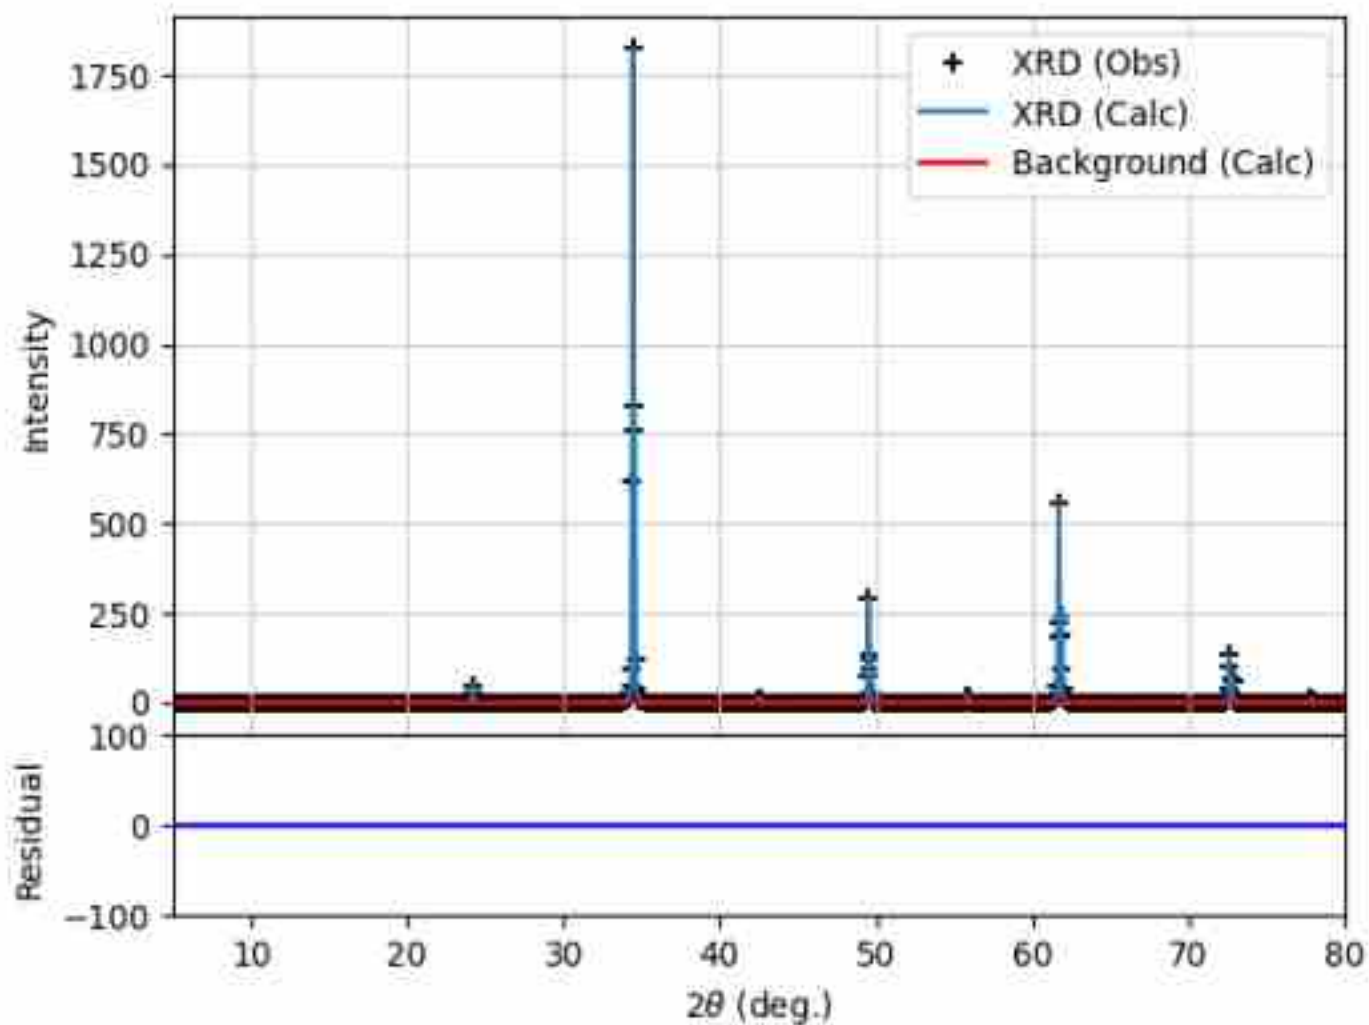

| RMSE before RR | Rwp     | RMSE after RR |
|----------------|---------|---------------|
| 0.001          | 0.00478 | 0.00045       |

# Sm1Dy1Tl2

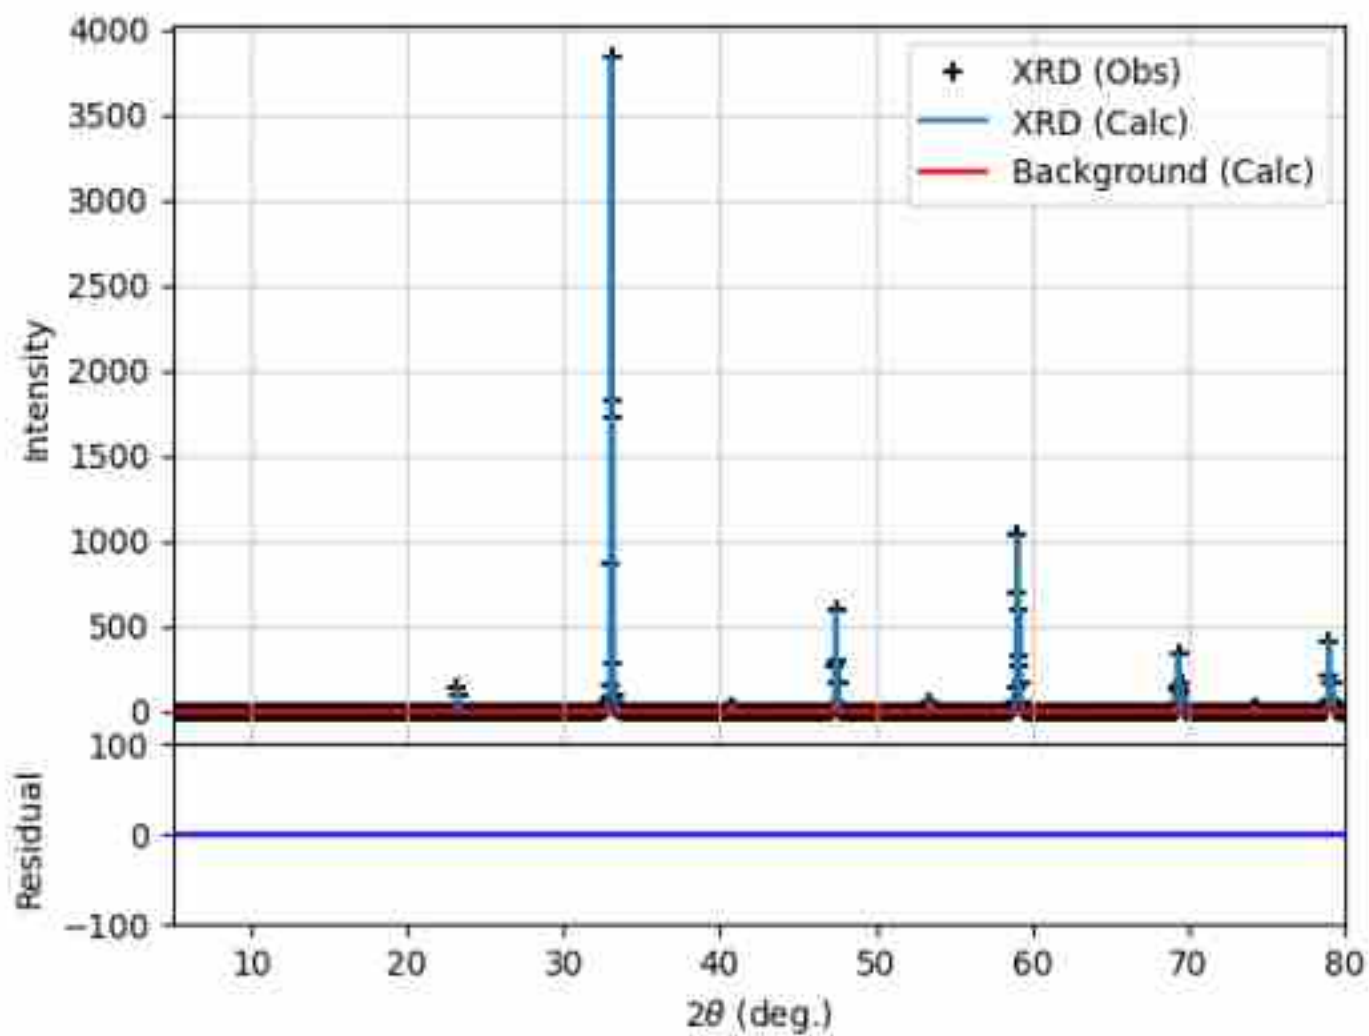

| RMSE before RR | Rwp     | RMSE after RR |
|----------------|---------|---------------|
| 0.001          | 0.01217 | 0.00021       |



# Sm1Dy1Zn2

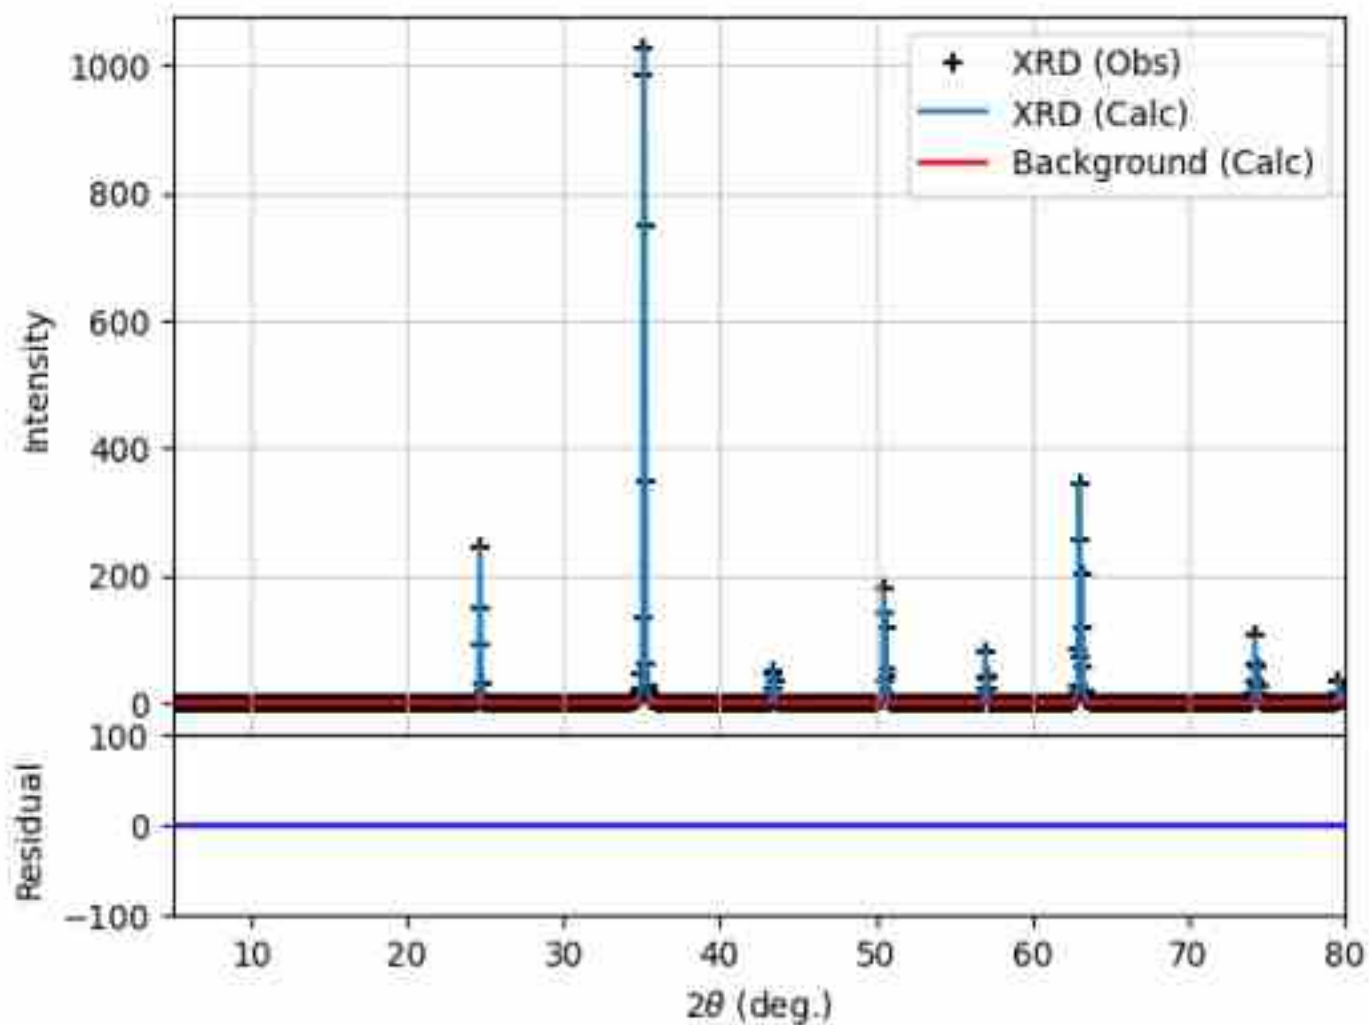

| RMSE before RR | Rwp     | RMSE after RR |
|----------------|---------|---------------|
| 0.001          | 0.01151 | 0.00092       |

# Sm1Er1Ir2

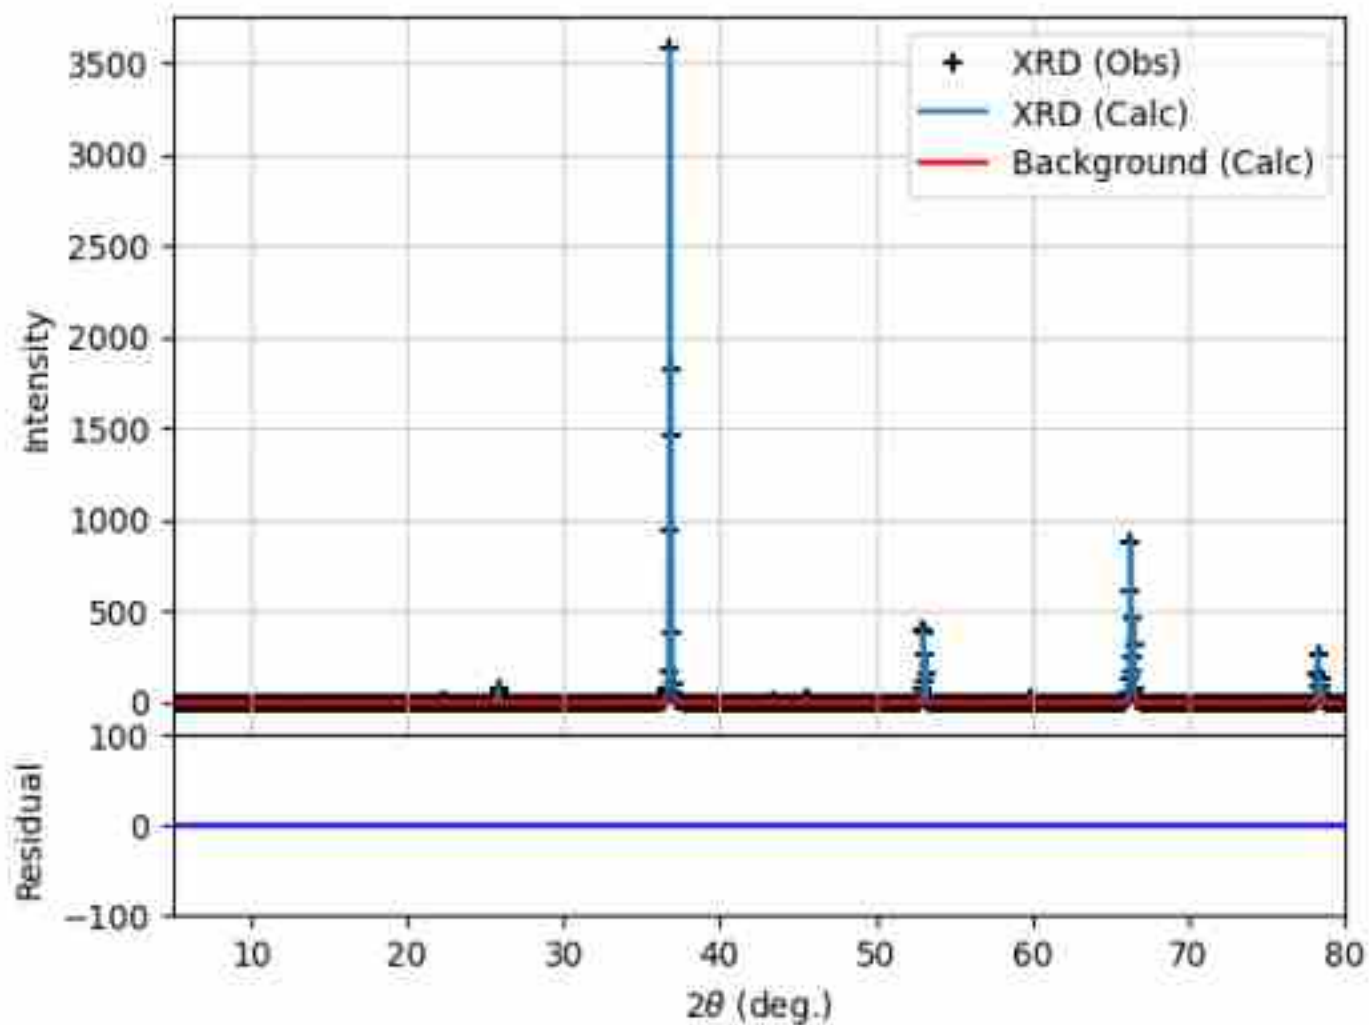

| RMSE before RR | Rwp    | RMSE after RR |
|----------------|--------|---------------|
| 0.001          | 0.0007 | 0.00021       |

# Sm1Er1Ru2

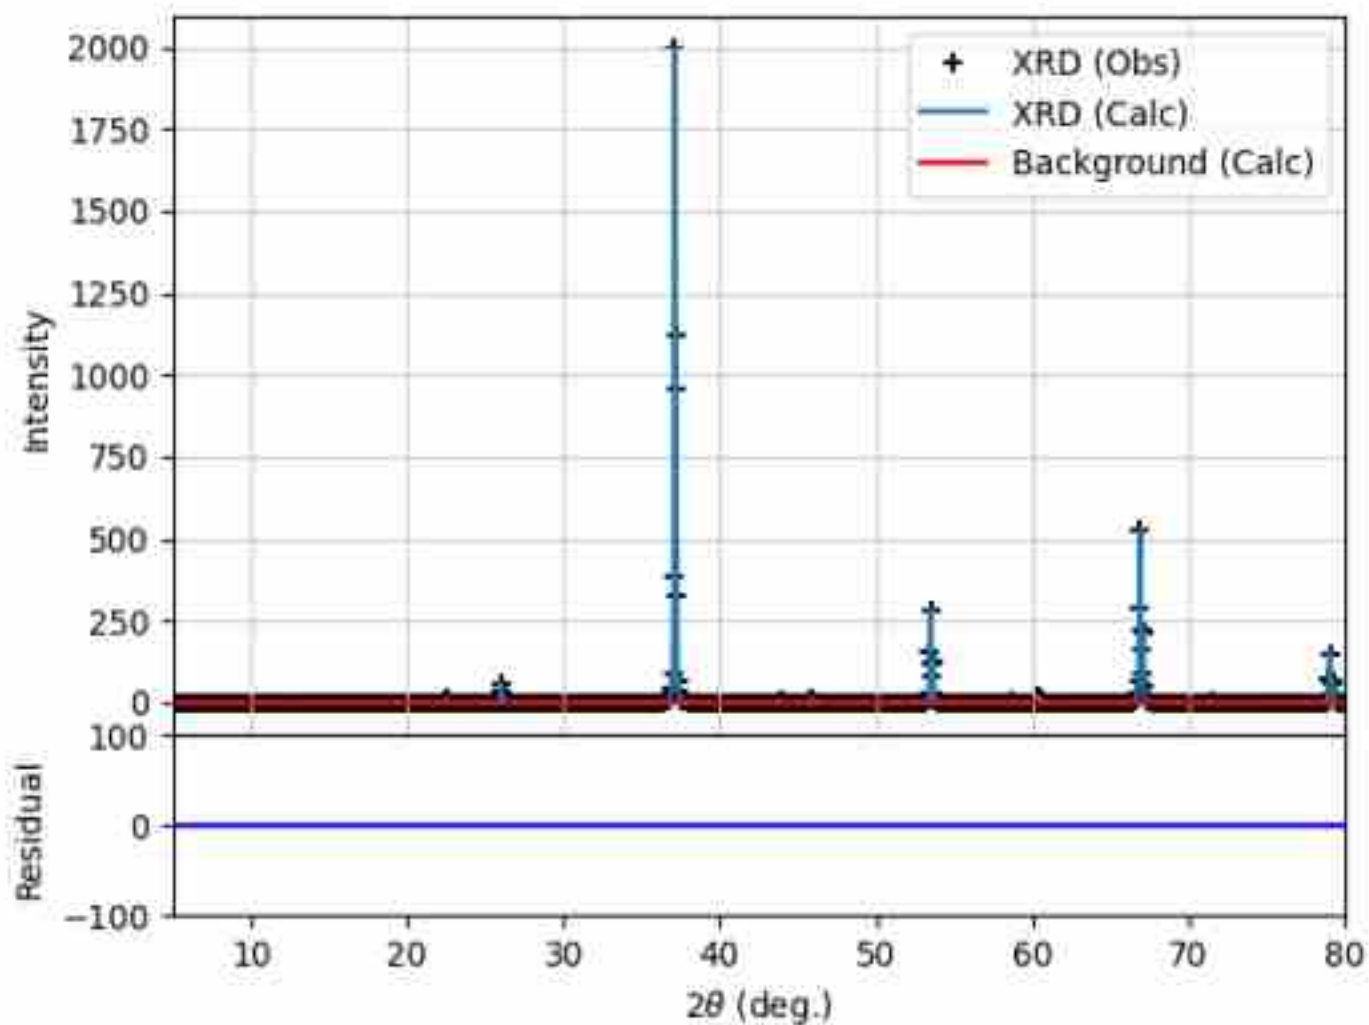

| RMSE before RR | Rwp     | RMSE after RR |
|----------------|---------|---------------|
| 0.001          | 0.00461 | 0.00056       |

# Sm1Er3

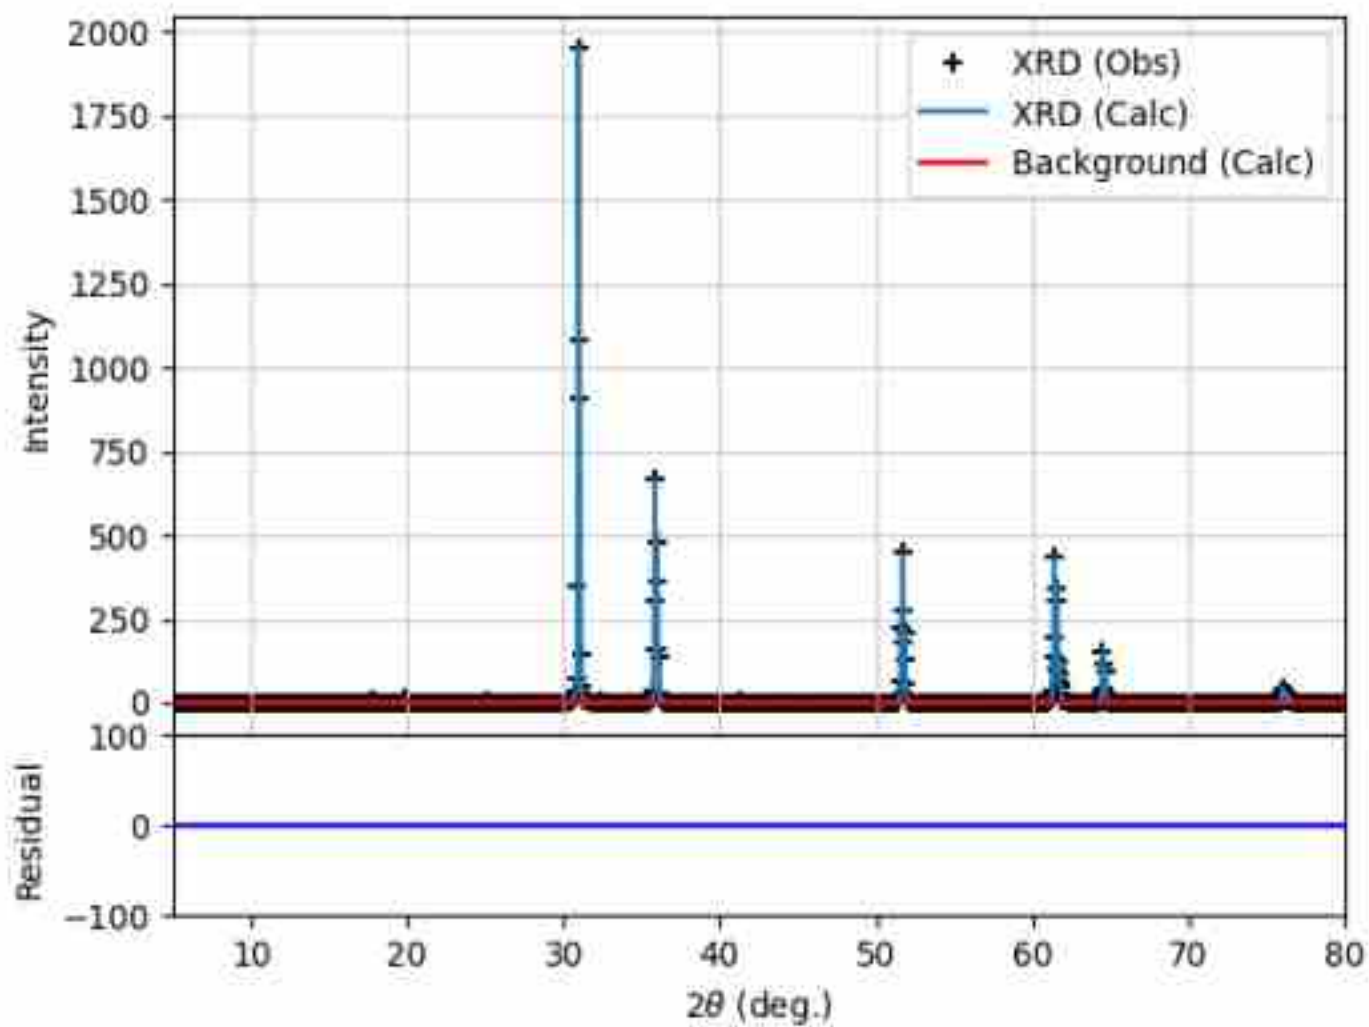

| RMSE before RR | Rwp     | RMSE after RR |
|----------------|---------|---------------|
| 0.001          | 0.00271 | 0.00021       |

# Sm1Gd3

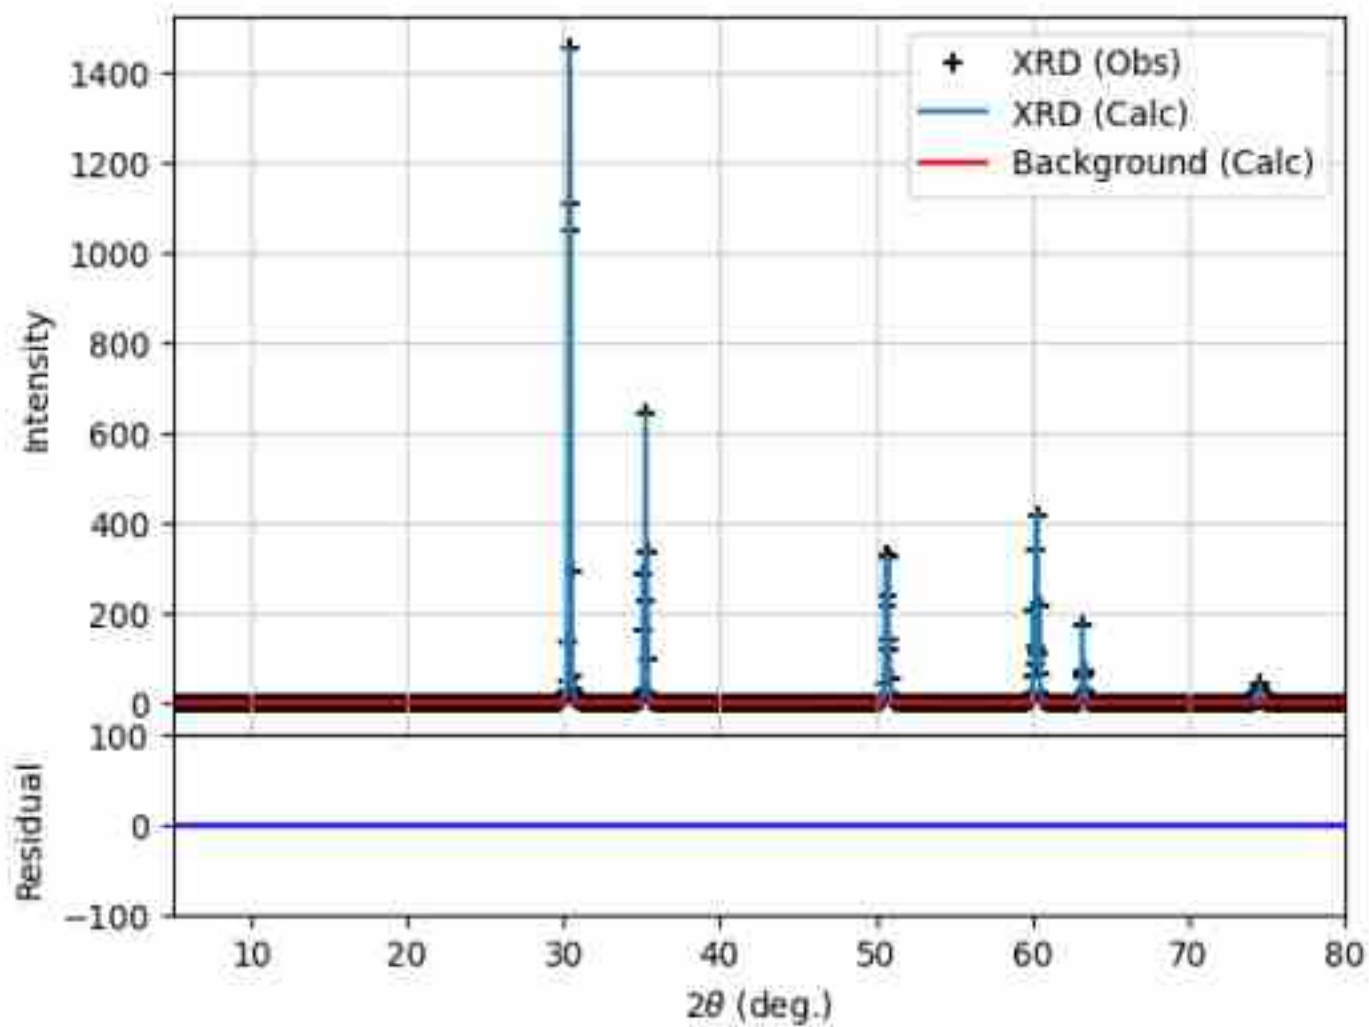

| RMSE before RR | Rwp     | RMSE after RR |
|----------------|---------|---------------|
| 0.001          | 0.00518 | 0.00019       |

# Sm1Ho1Tl2

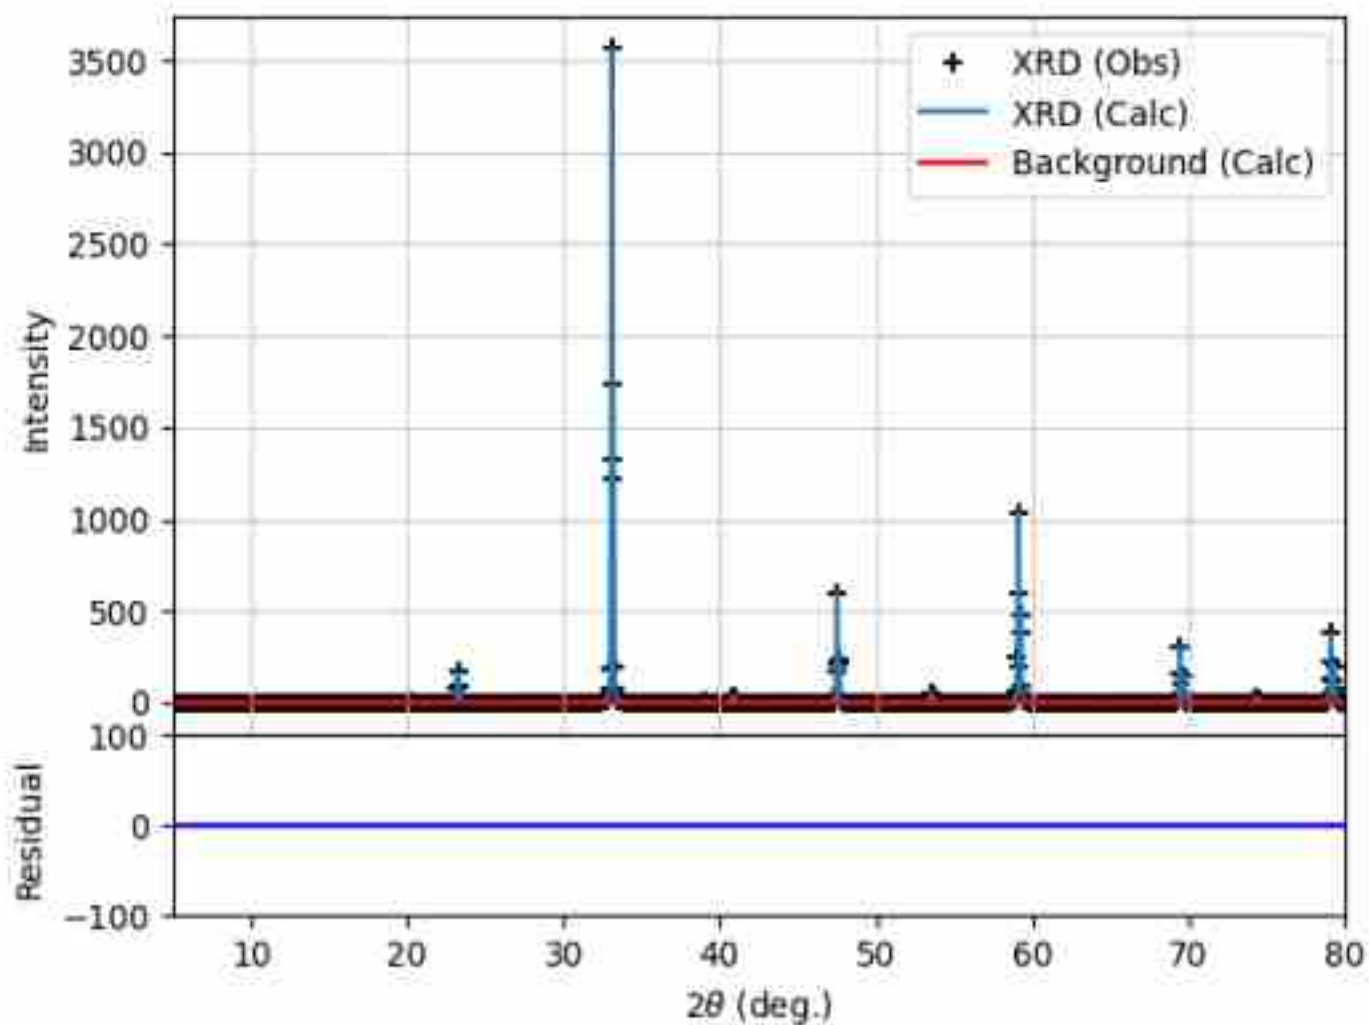

| RMSE before RR | Rwp     | RMSE after RR |
|----------------|---------|---------------|
| 0.001          | 0.03681 | 0.00102       |

# Sm1Ho1Zn2

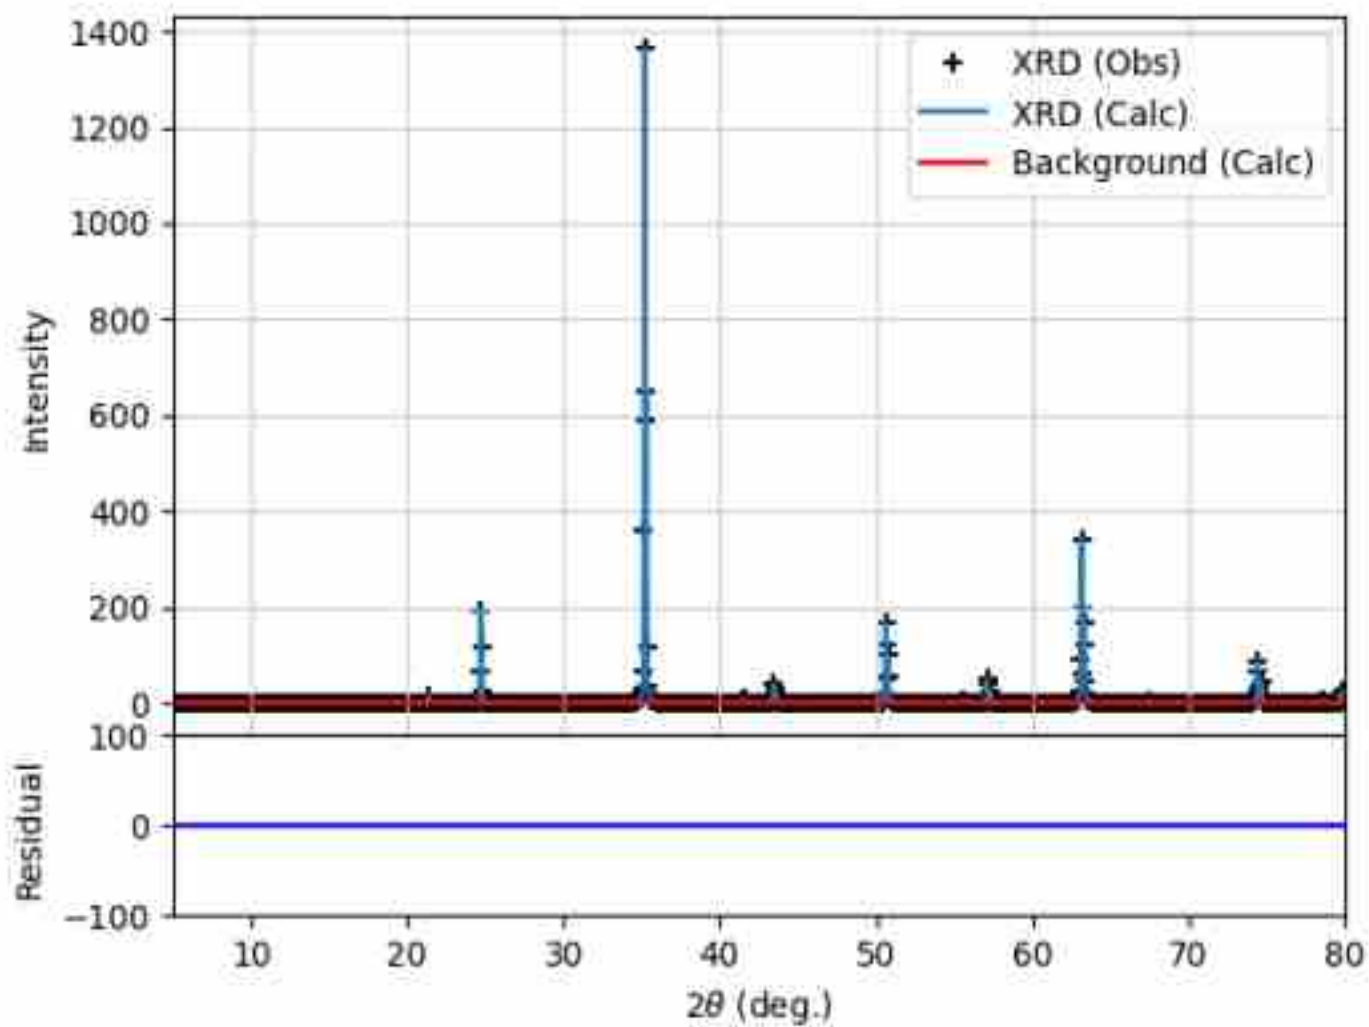

| RMSE before RR | Rwp     | RMSE after RR |
|----------------|---------|---------------|
| 0.001          | 0.00373 | 0.00066       |

# Sm1In1Au2

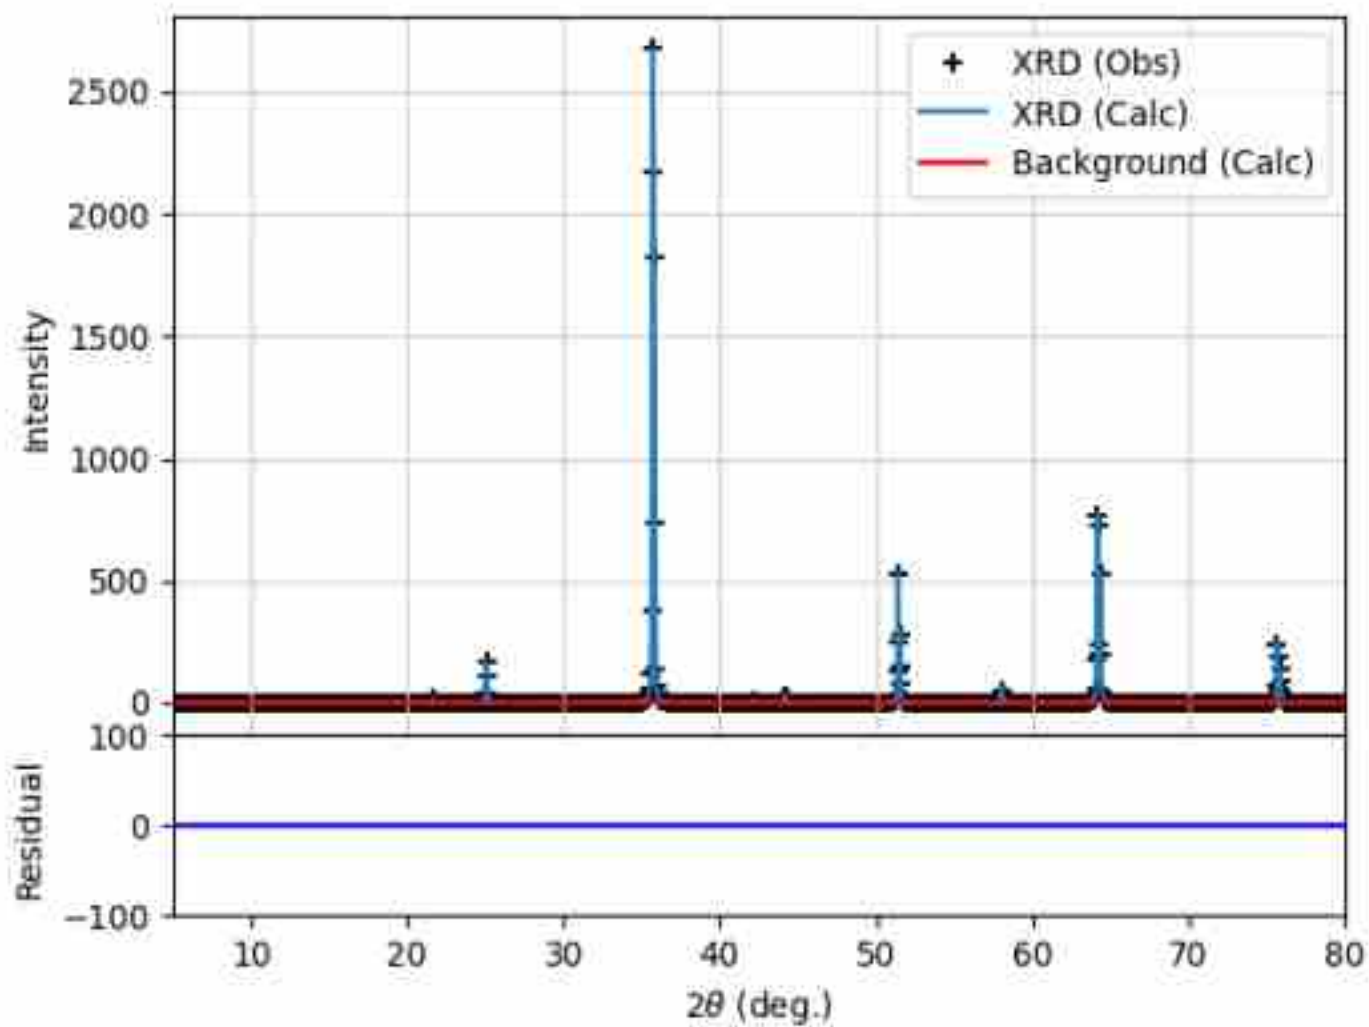

| RMSE before RR | Rwp     | RMSE after RR |
|----------------|---------|---------------|
| 0.001          | 0.00579 | 0.00026       |



# Sm1Lu1In2

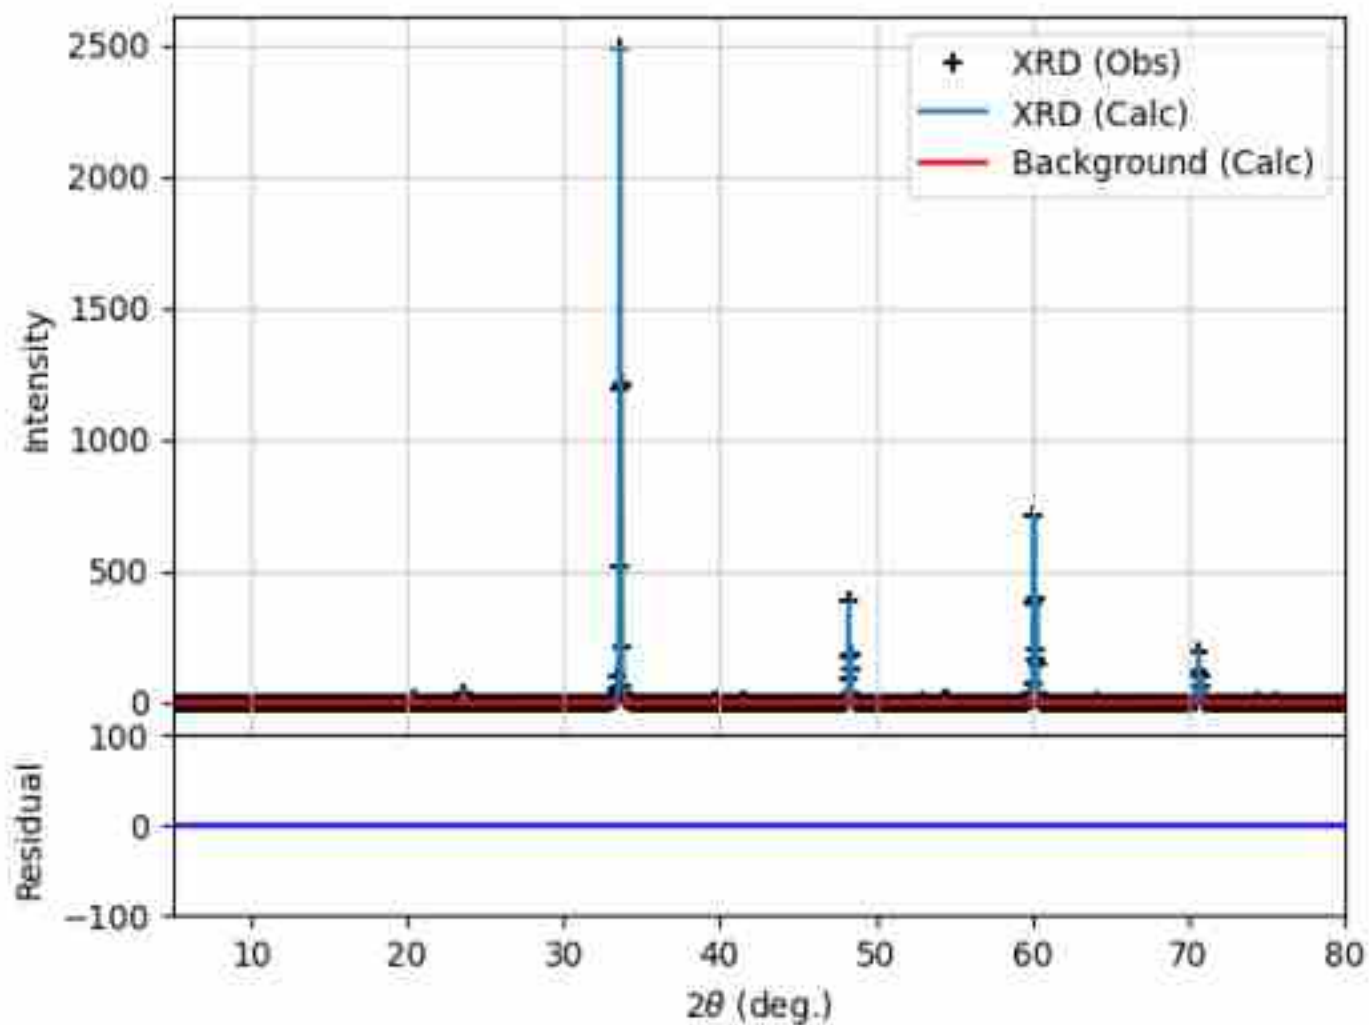

| RMSE before RR | Rwp     | RMSE after RR |
|----------------|---------|---------------|
| 0.001          | 0.00367 | 0.00025       |

# Sm1Lu1Mg2

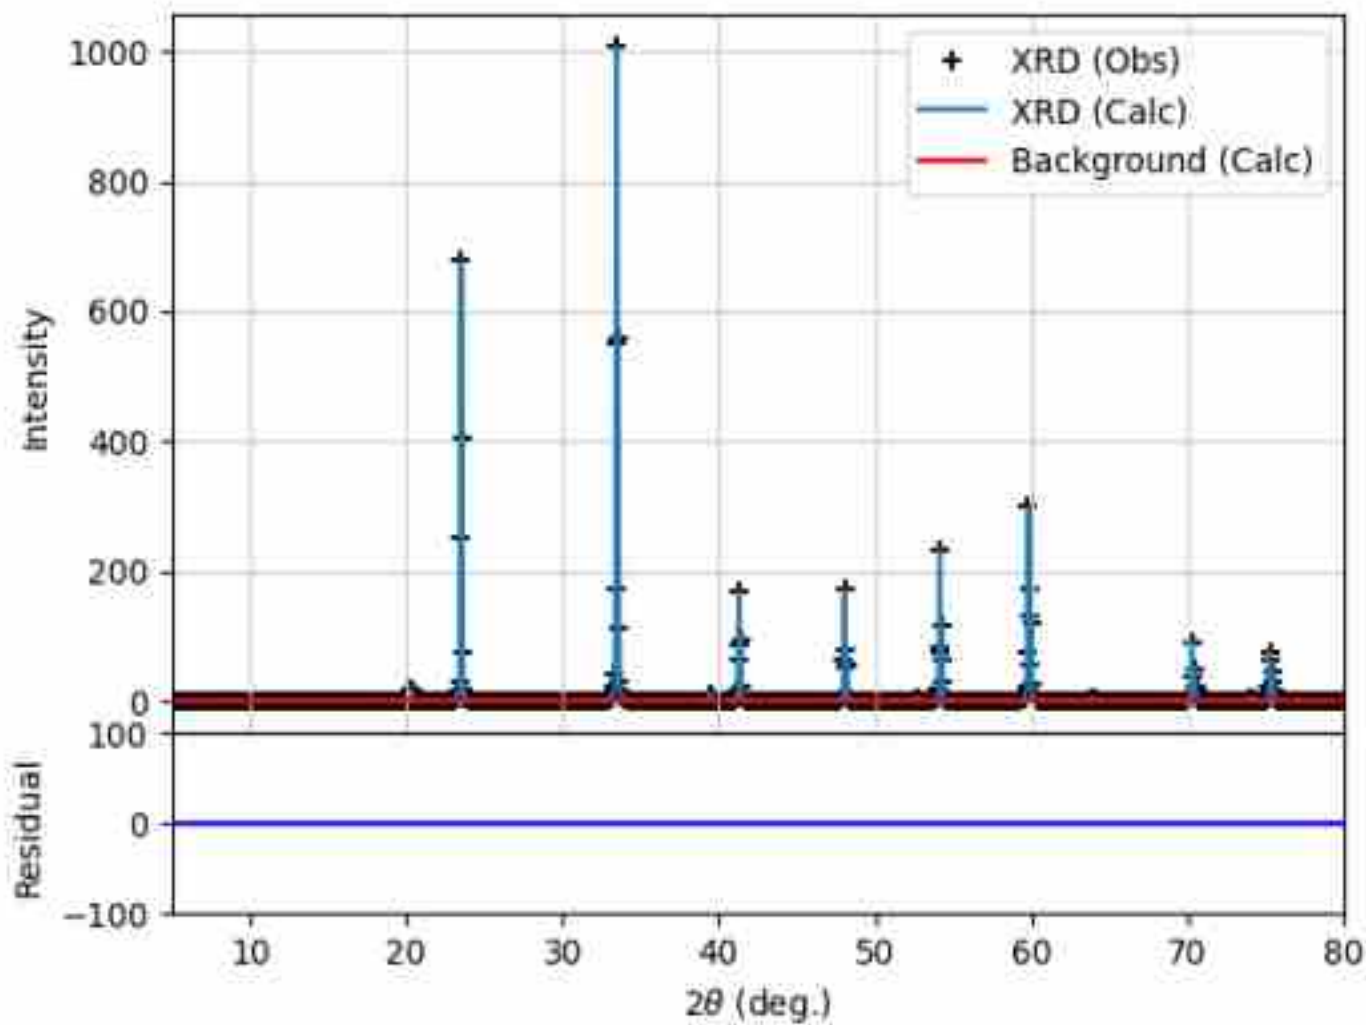

| RMSE before RR | Rwp     | RMSE after RR |
|----------------|---------|---------------|
| 0.001          | 0.00999 | 0.00081       |

# Sm1Mg1Hg2

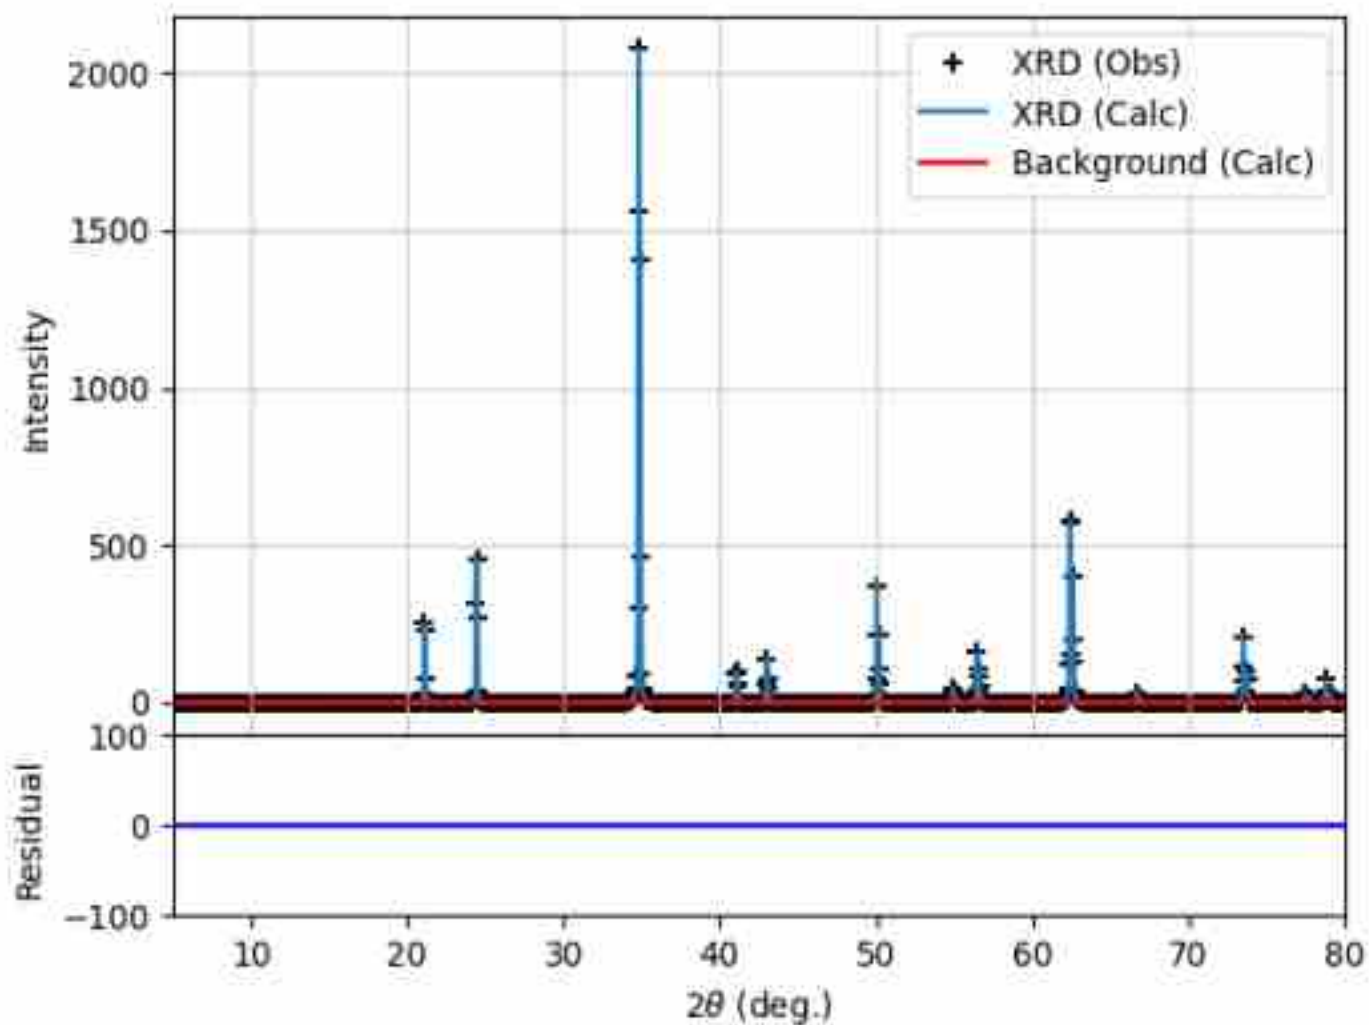

| RMSE before RR | Rwp   | RMSE after RR |
|----------------|-------|---------------|
| 0.001          | 0.004 | 0.00158       |

# Sm1Mg2Sc1

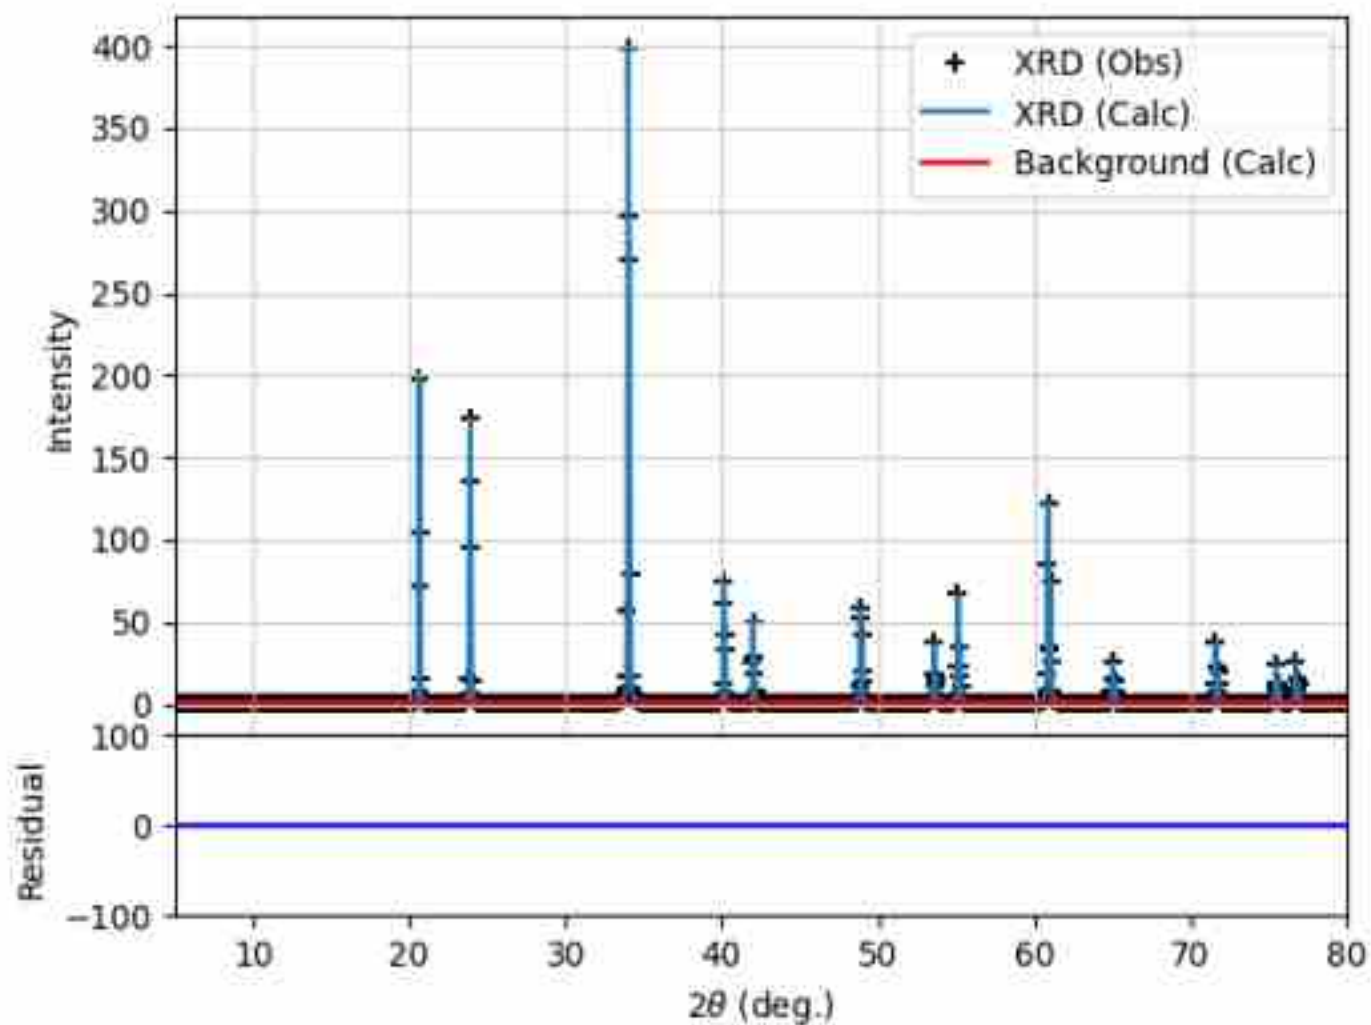

| RMSE before RR | Rwp     | RMSE after RR |
|----------------|---------|---------------|
| 0.001          | 0.00295 | 0.00097       |

# Sm1Mg3

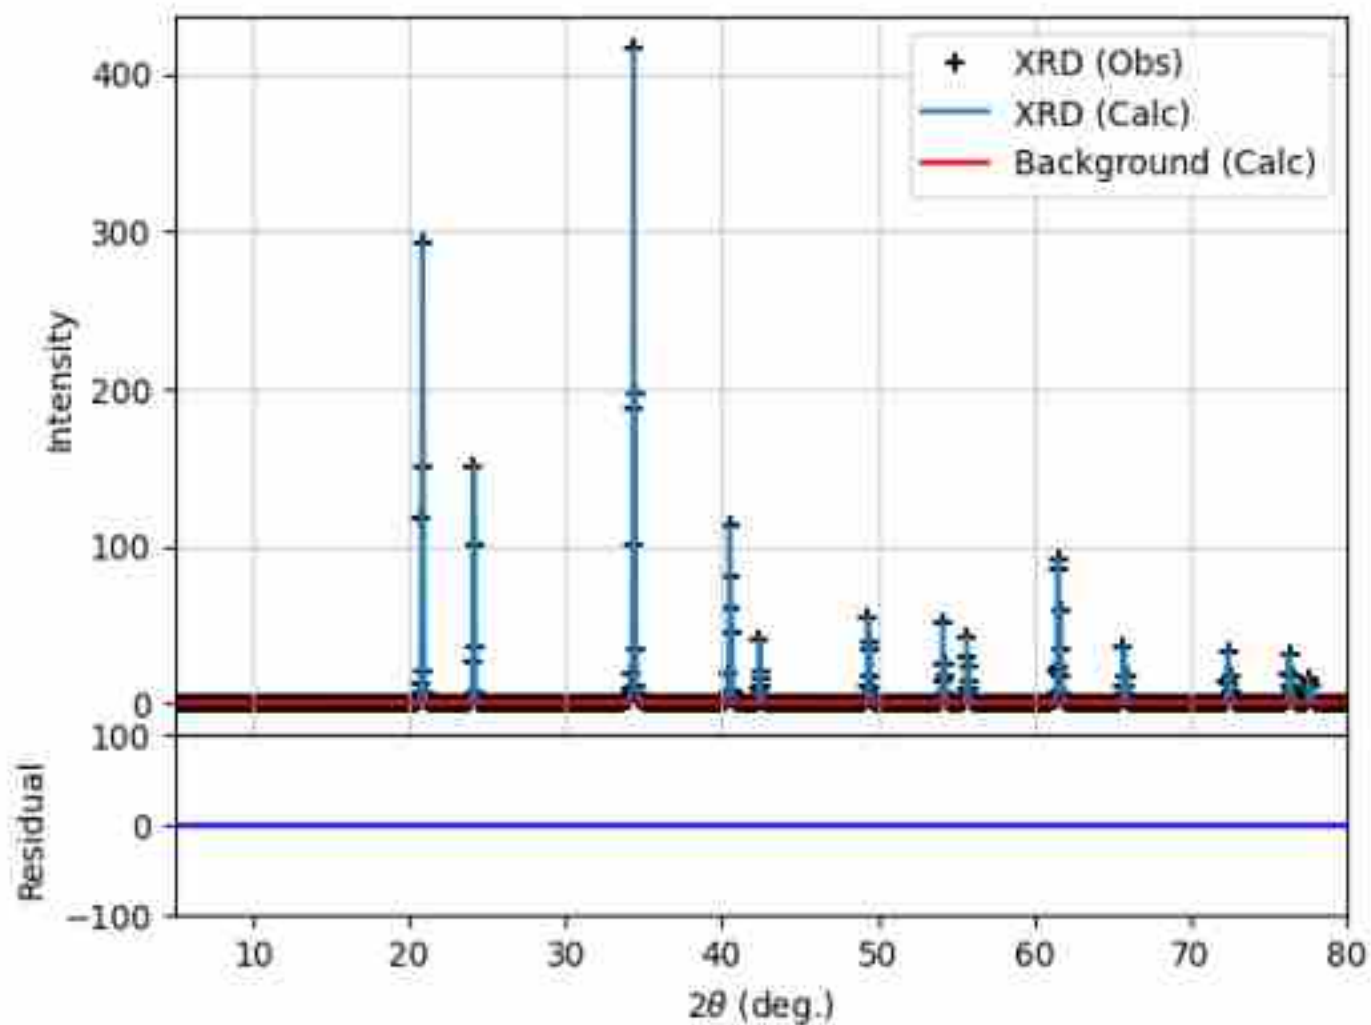

| RMSE before RR | Rwp     | RMSE after RR |
|----------------|---------|---------------|
| 0.001          | 0.00266 | 0.00294       |

# Sm1P1

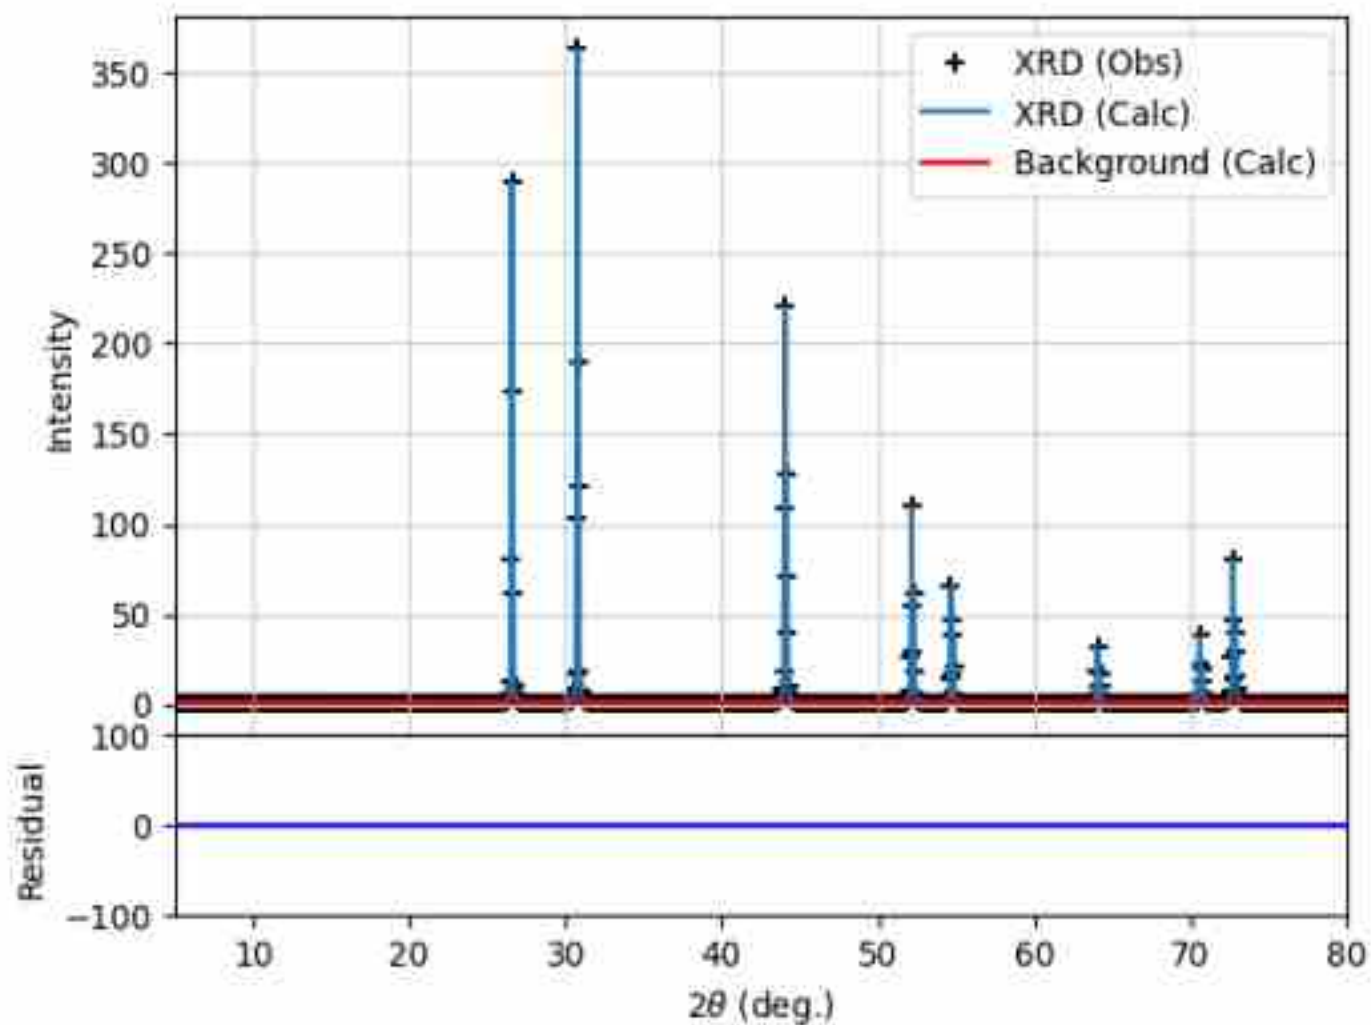

| RMSE before RR | Rwp     | RMSE after RR |
|----------------|---------|---------------|
| 0.001          | 0.03468 | 0.00116       |

# Sm1Se1

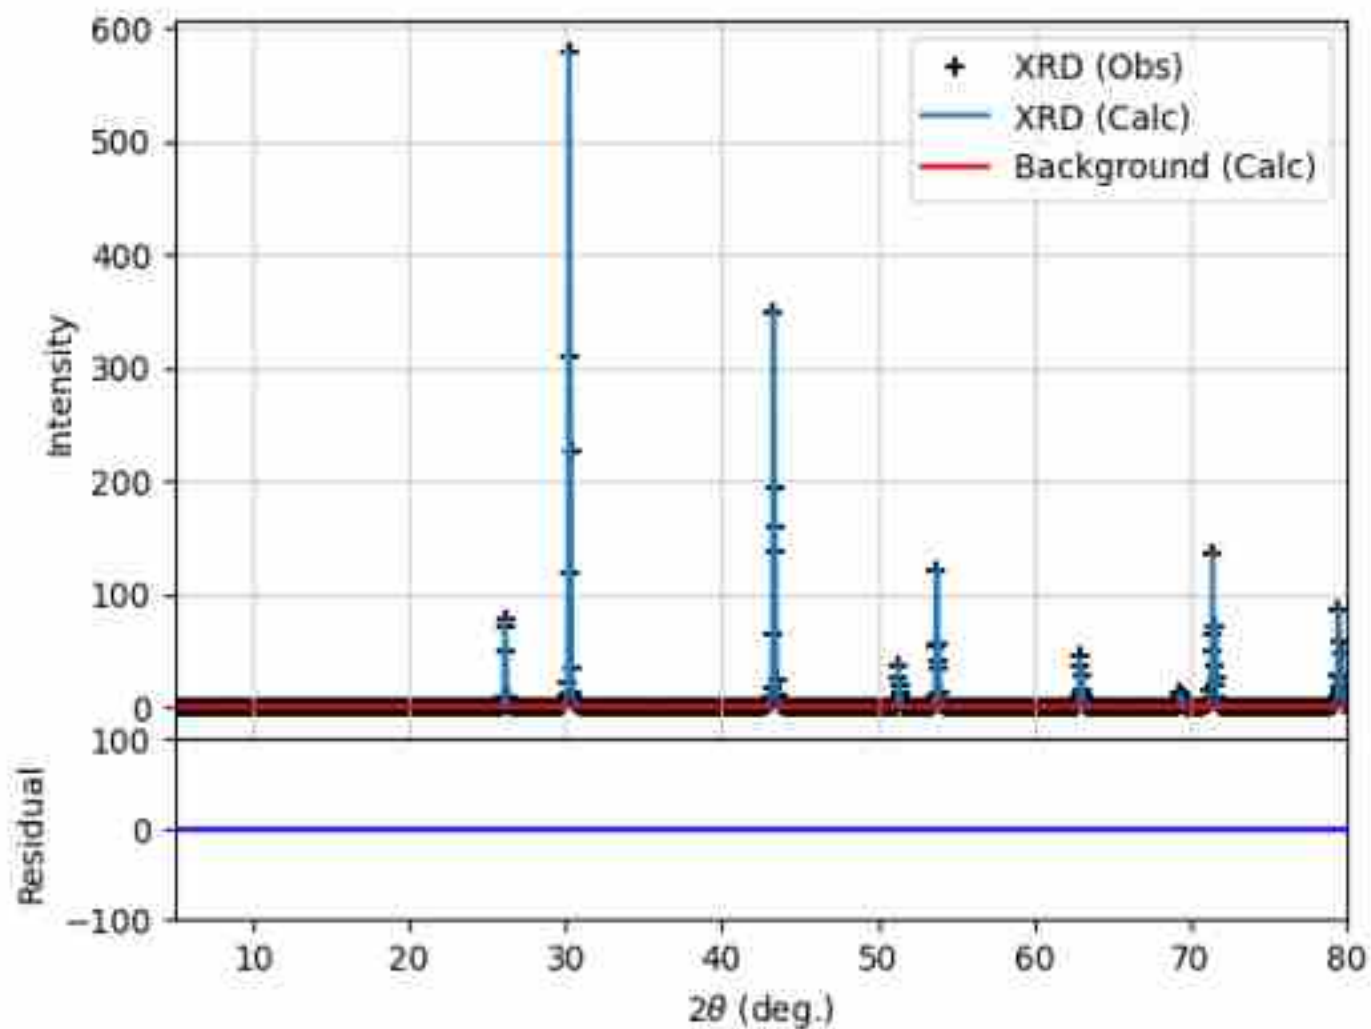

| RMSE before RR | Rwp     | RMSE after RR |
|----------------|---------|---------------|
| 0.001          | 0.00226 | 0.00048       |

# Sm1Sn1Au2

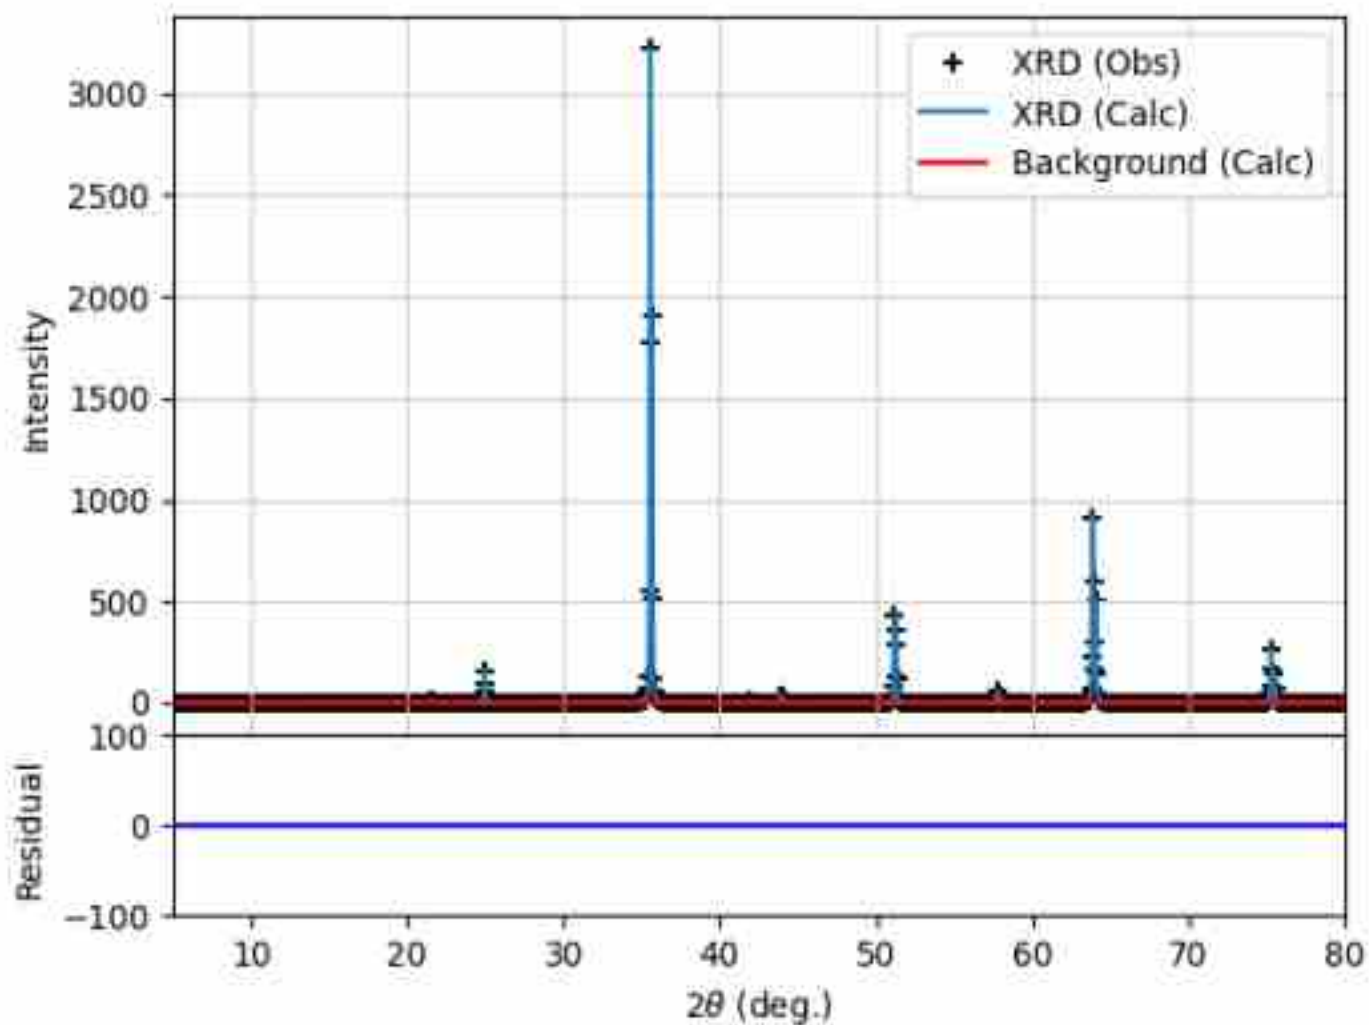

| RMSE before RR | Rwp     | RMSE after RR |
|----------------|---------|---------------|
| 0.001          | 0.00311 | 0.00028       |



# Sm1Te1

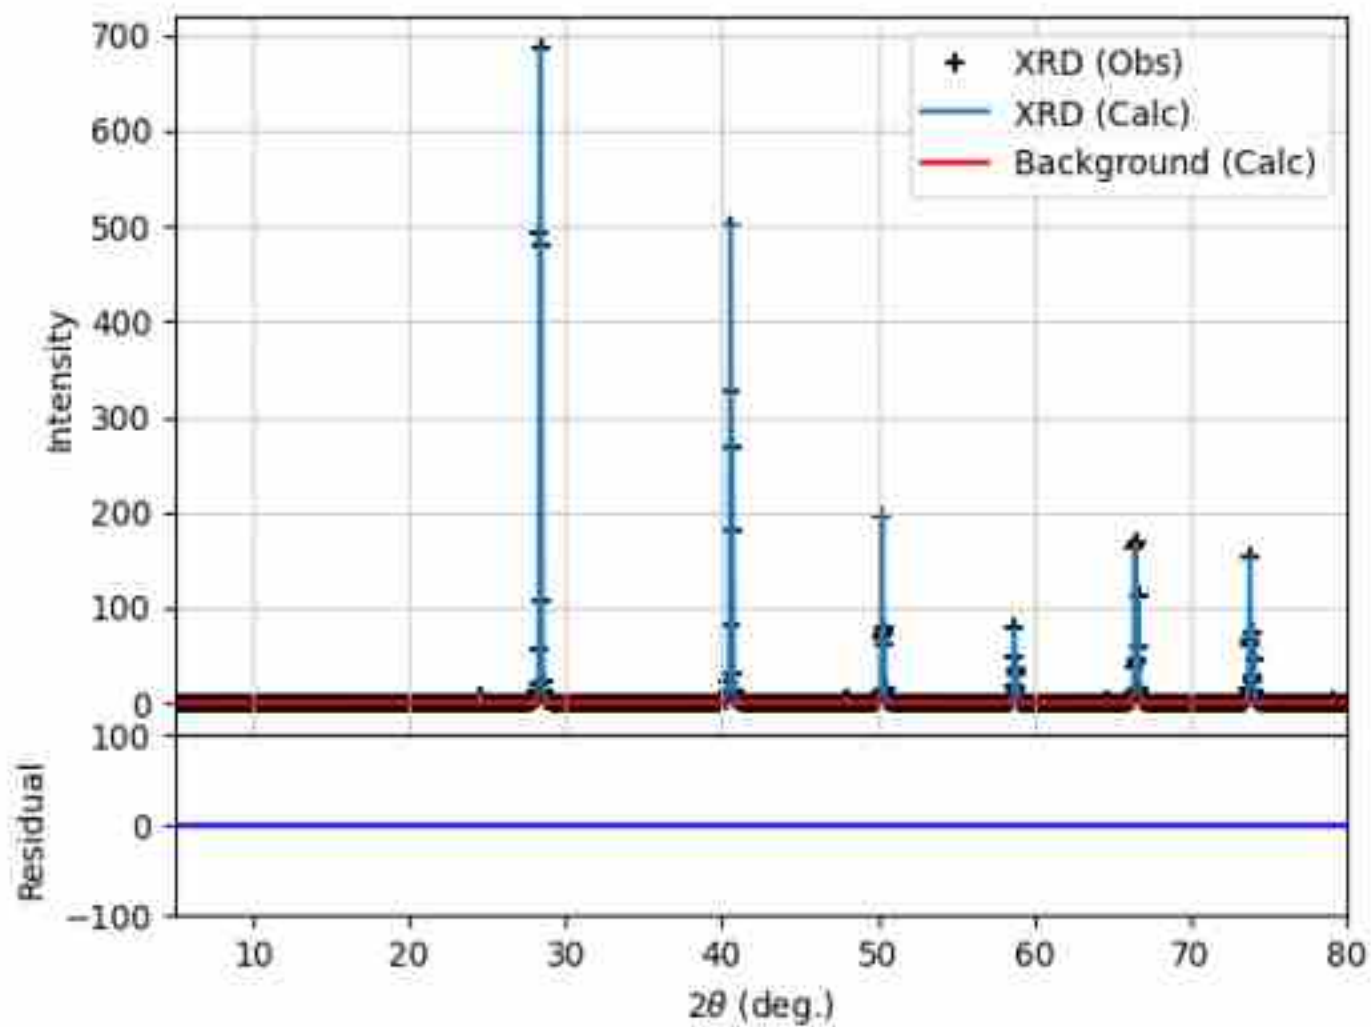

| RMSE before RR | Rwp     | RMSE after RR |
|----------------|---------|---------------|
| 0.001          | 0.00357 | 0.00021       |

# Sm1Tl1Te2

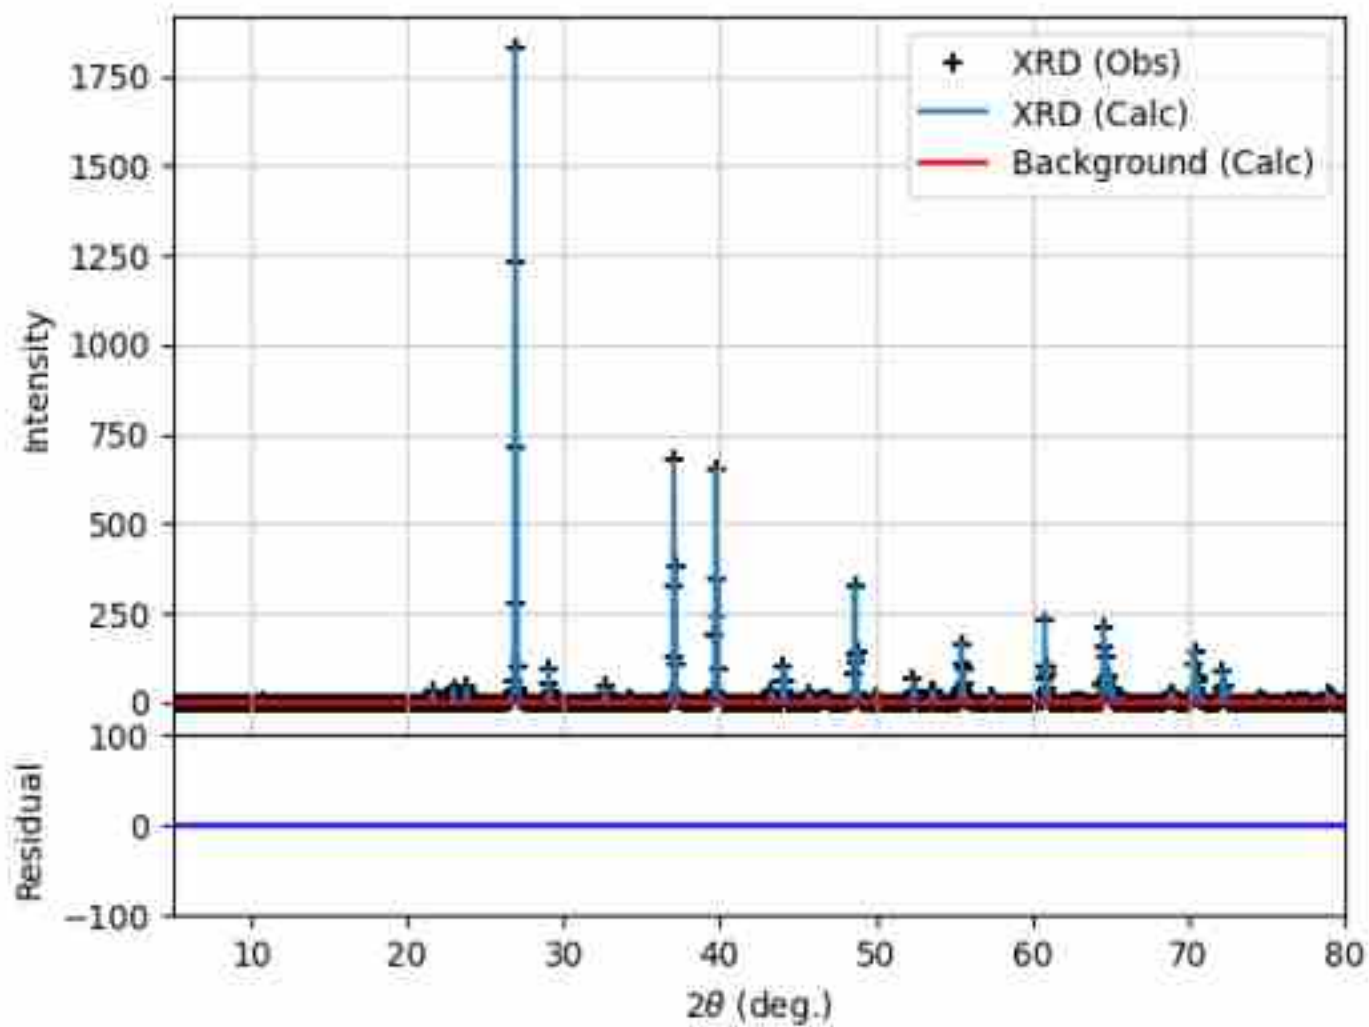

| RMSE before RR | Rwp     | RMSE after RR |
|----------------|---------|---------------|
| 0.01           | 0.00334 | 0.00035       |

# Sm1Tm1In2

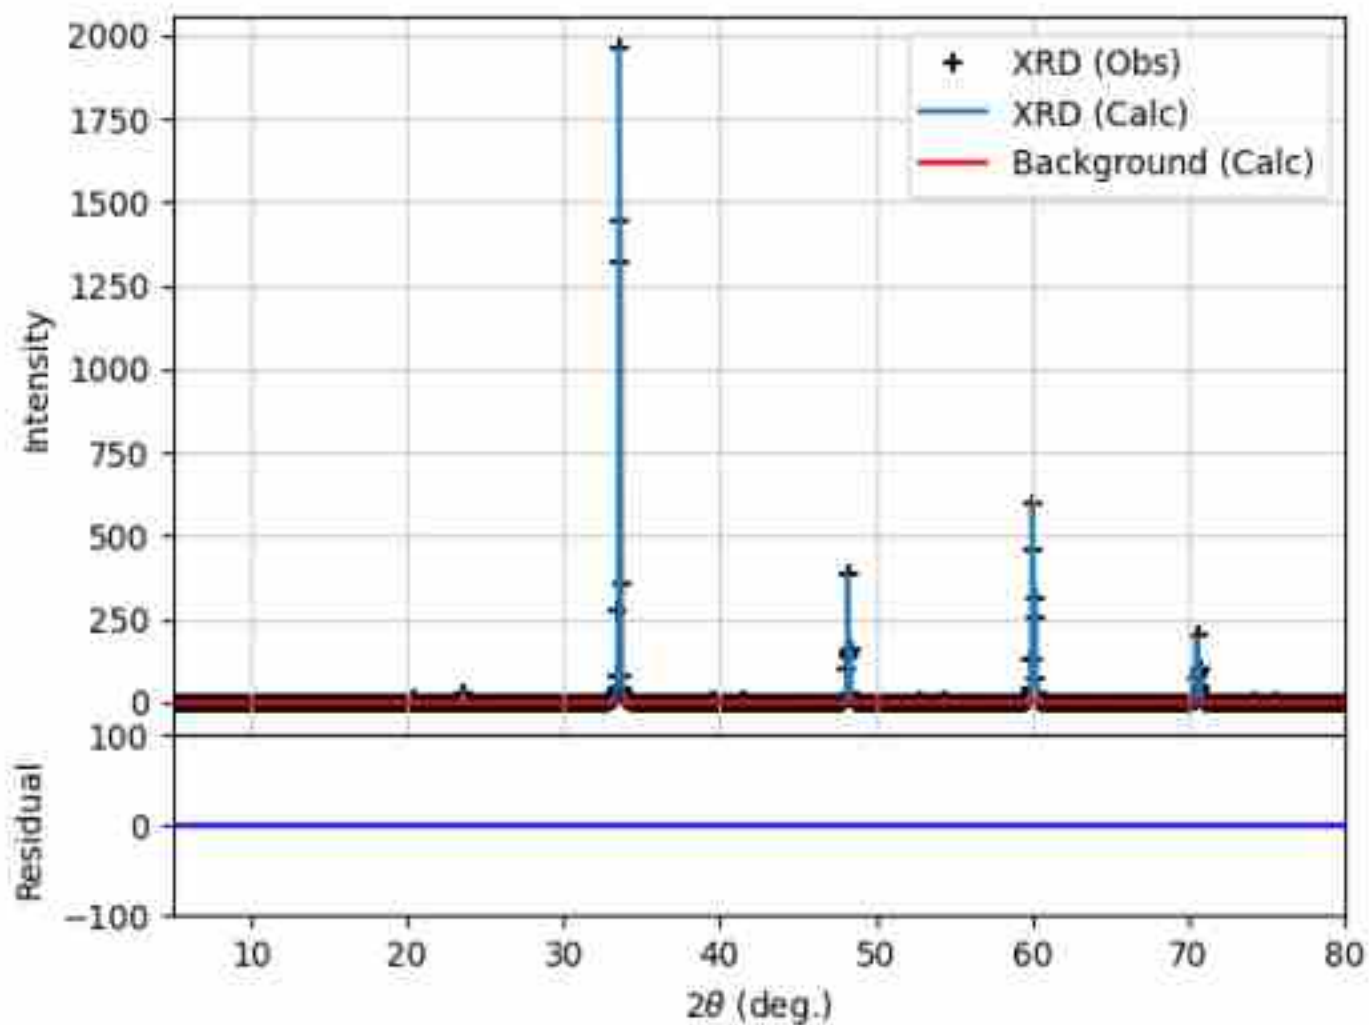

| RMSE before RR | Rwp     | RMSE after RR |
|----------------|---------|---------------|
| 0.001          | 0.01451 | 0.00079       |

Sm1Tm1Zn2

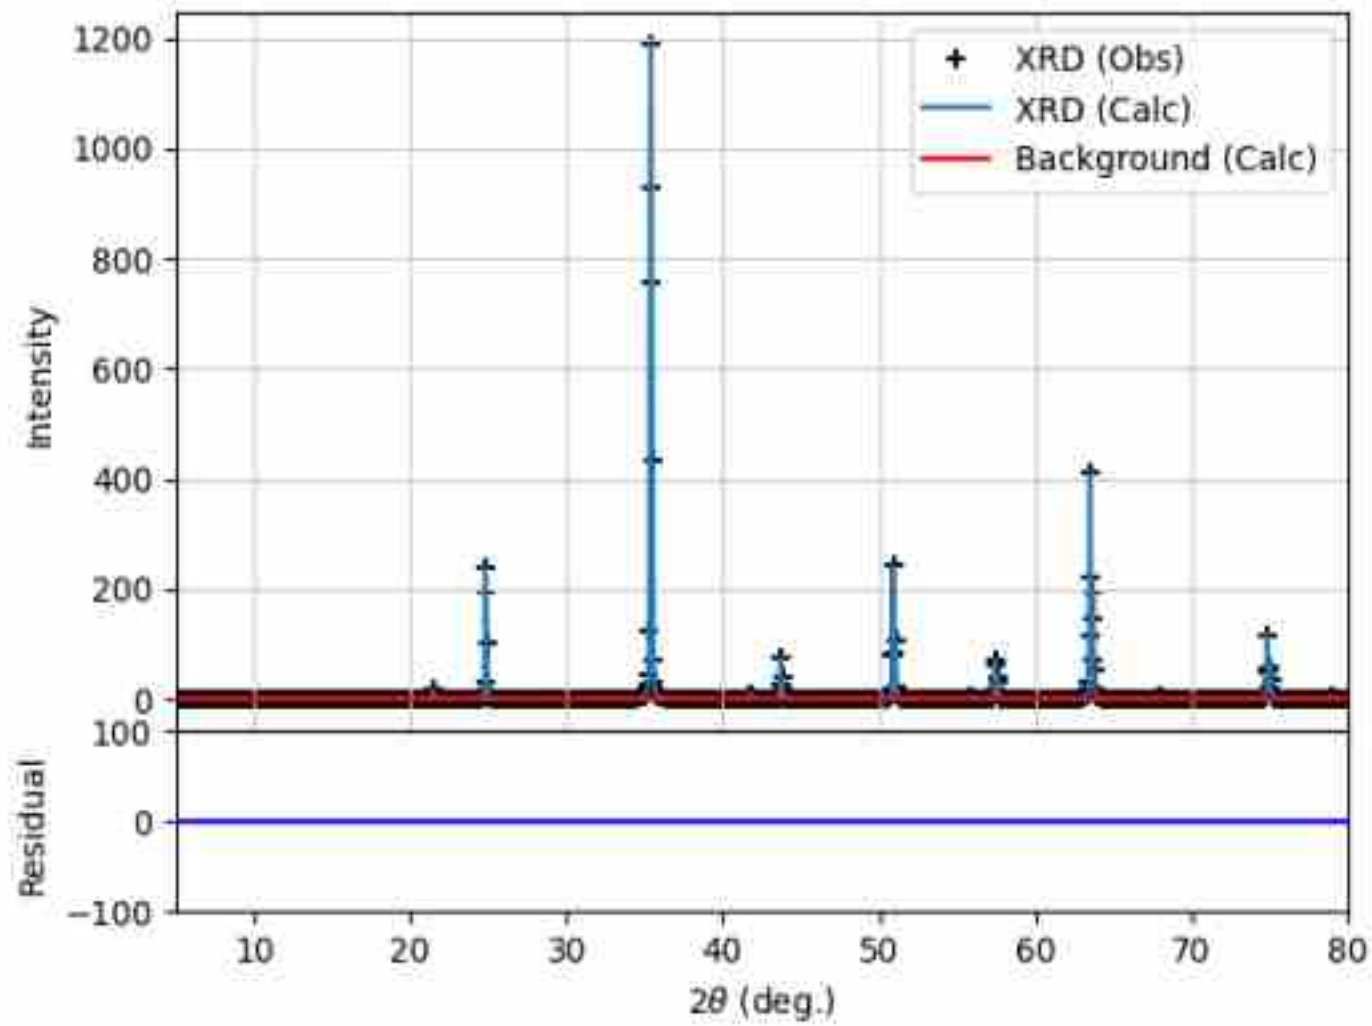

| RMSE before RR | Rwp     | RMSE after RR |
|----------------|---------|---------------|
| 0.001          | 0.00503 | 0.00048       |

# Sm1Y1In2

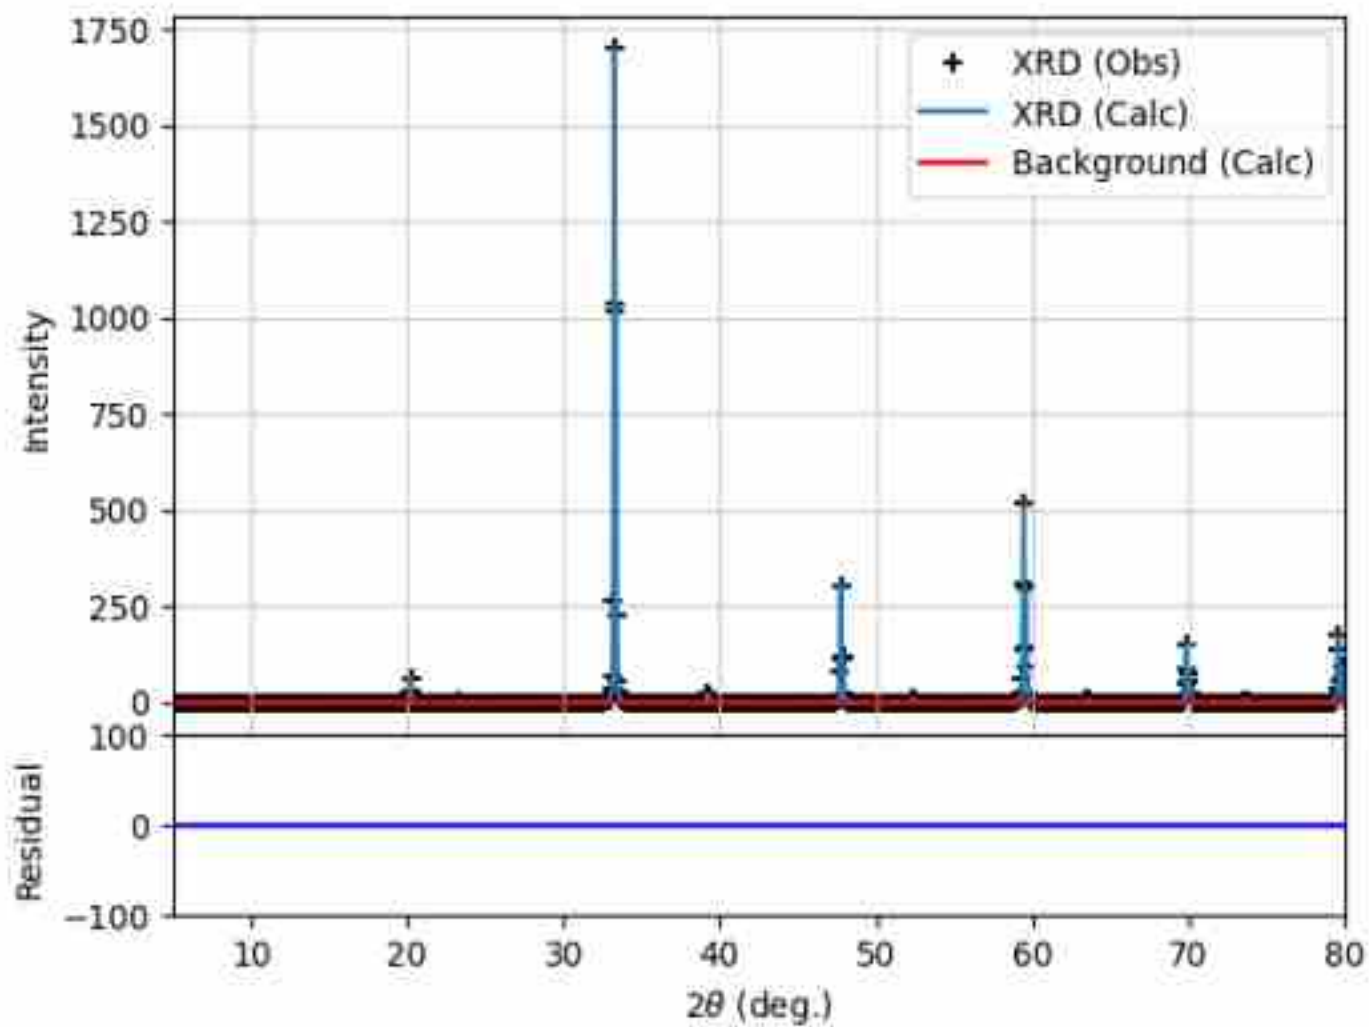

| RMSE before RR | Rwp     | RMSE after RR |
|----------------|---------|---------------|
| 0.001          | 0.00369 | 0.00031       |

# Sm2Co4

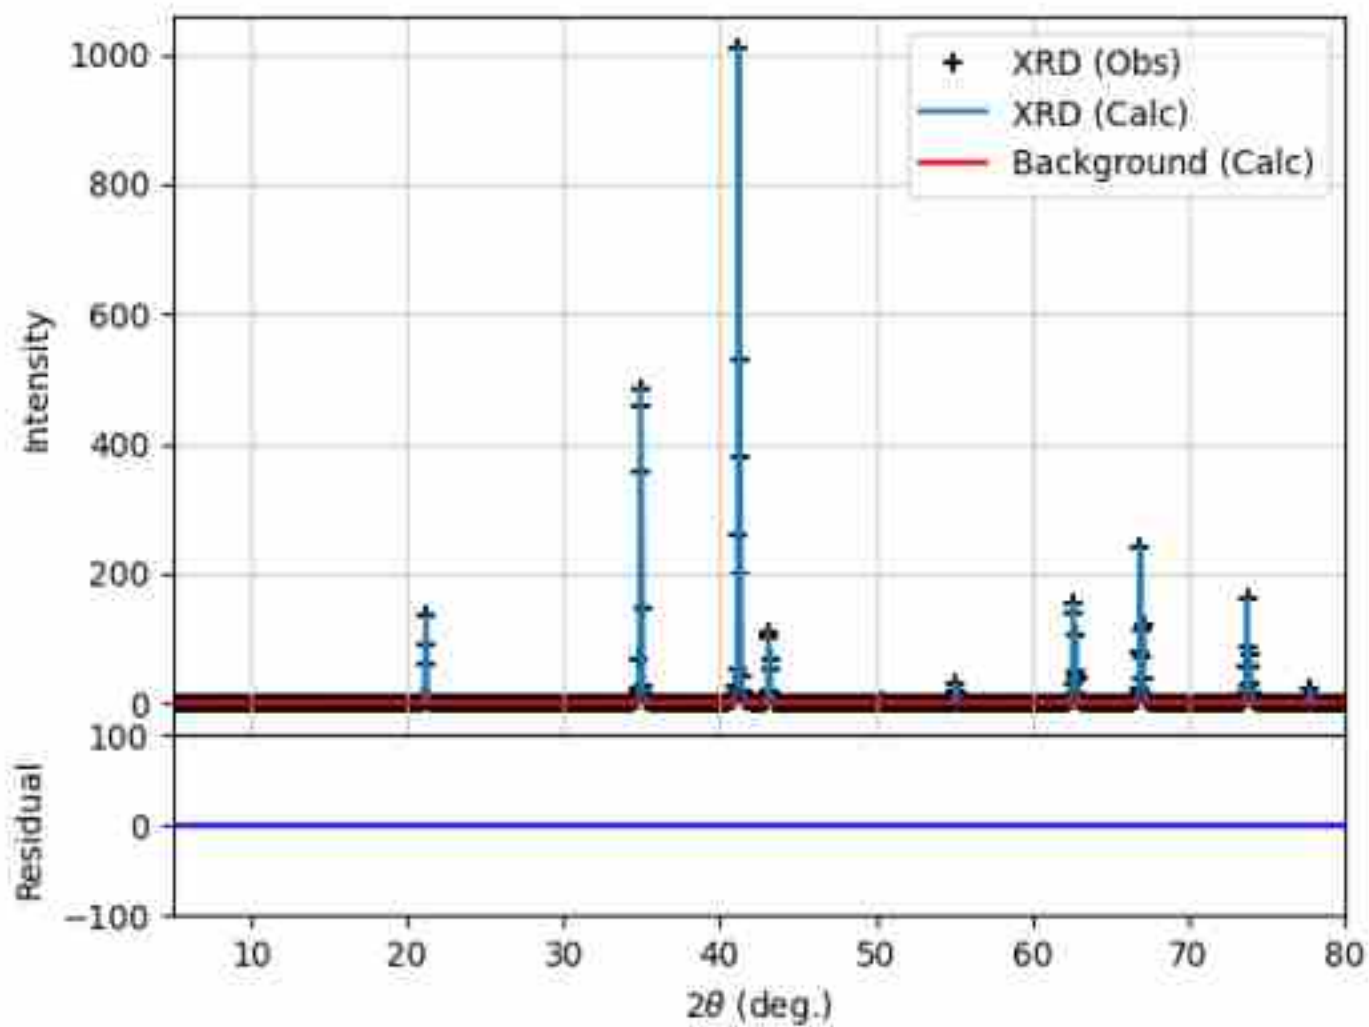

| RMSE before RR | Rwp     | RMSE after RR |
|----------------|---------|---------------|
| 0.01           | 0.00429 | 0.0007        |

# Sm2Cu1Ir1

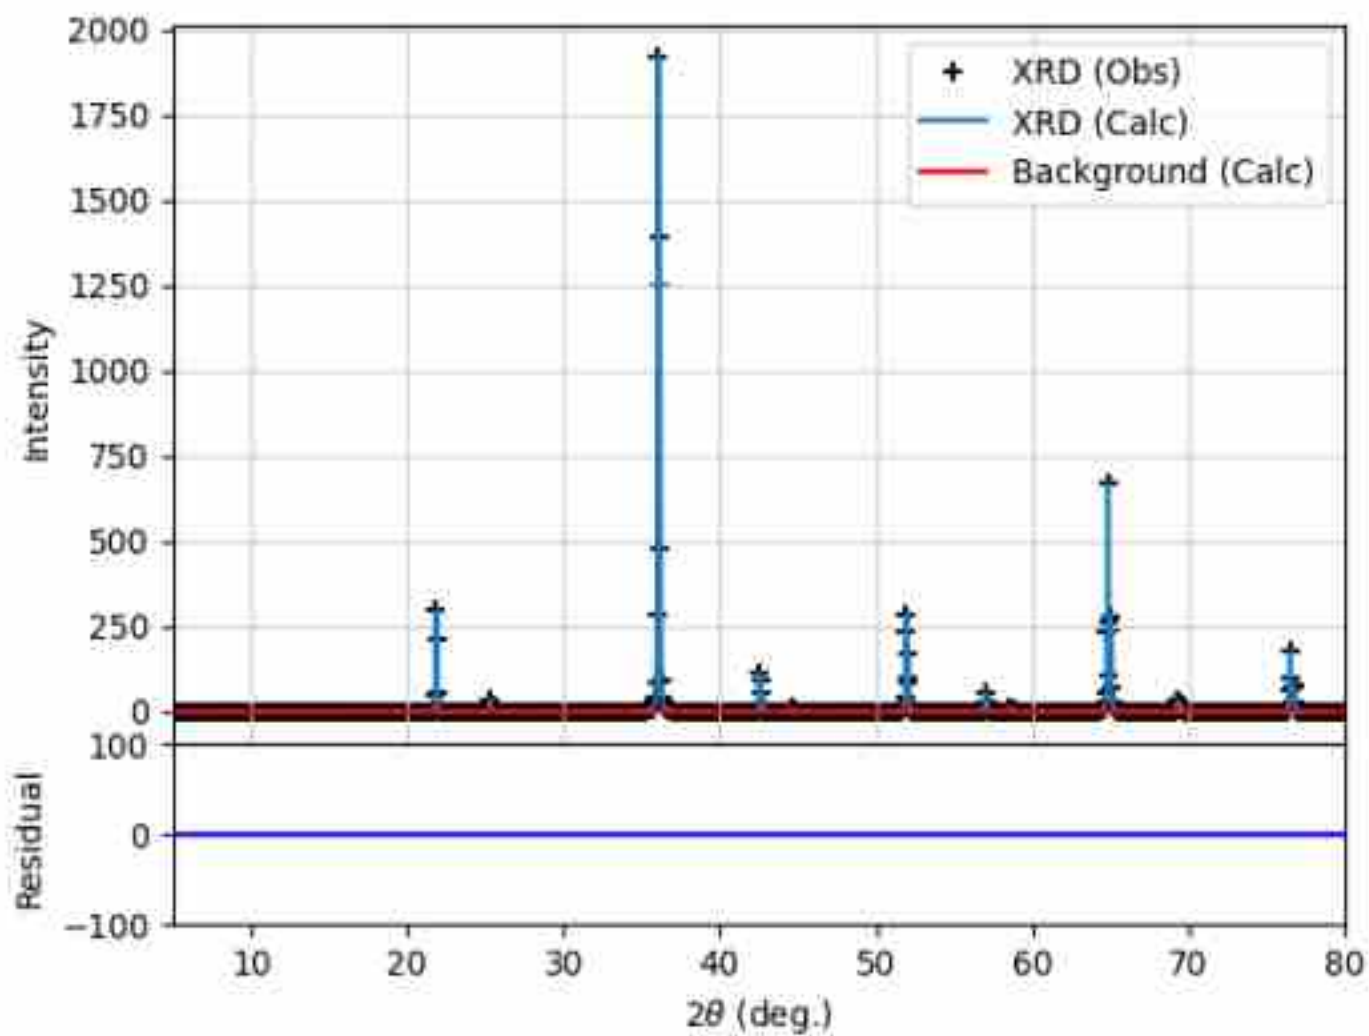

| RMSE before RR | Rwp     | RMSE after RR |
|----------------|---------|---------------|
| 0.001          | 0.00264 | 0.00037       |

# Sm<sub>2</sub>Ga<sub>3</sub>Ni<sub>1</sub>

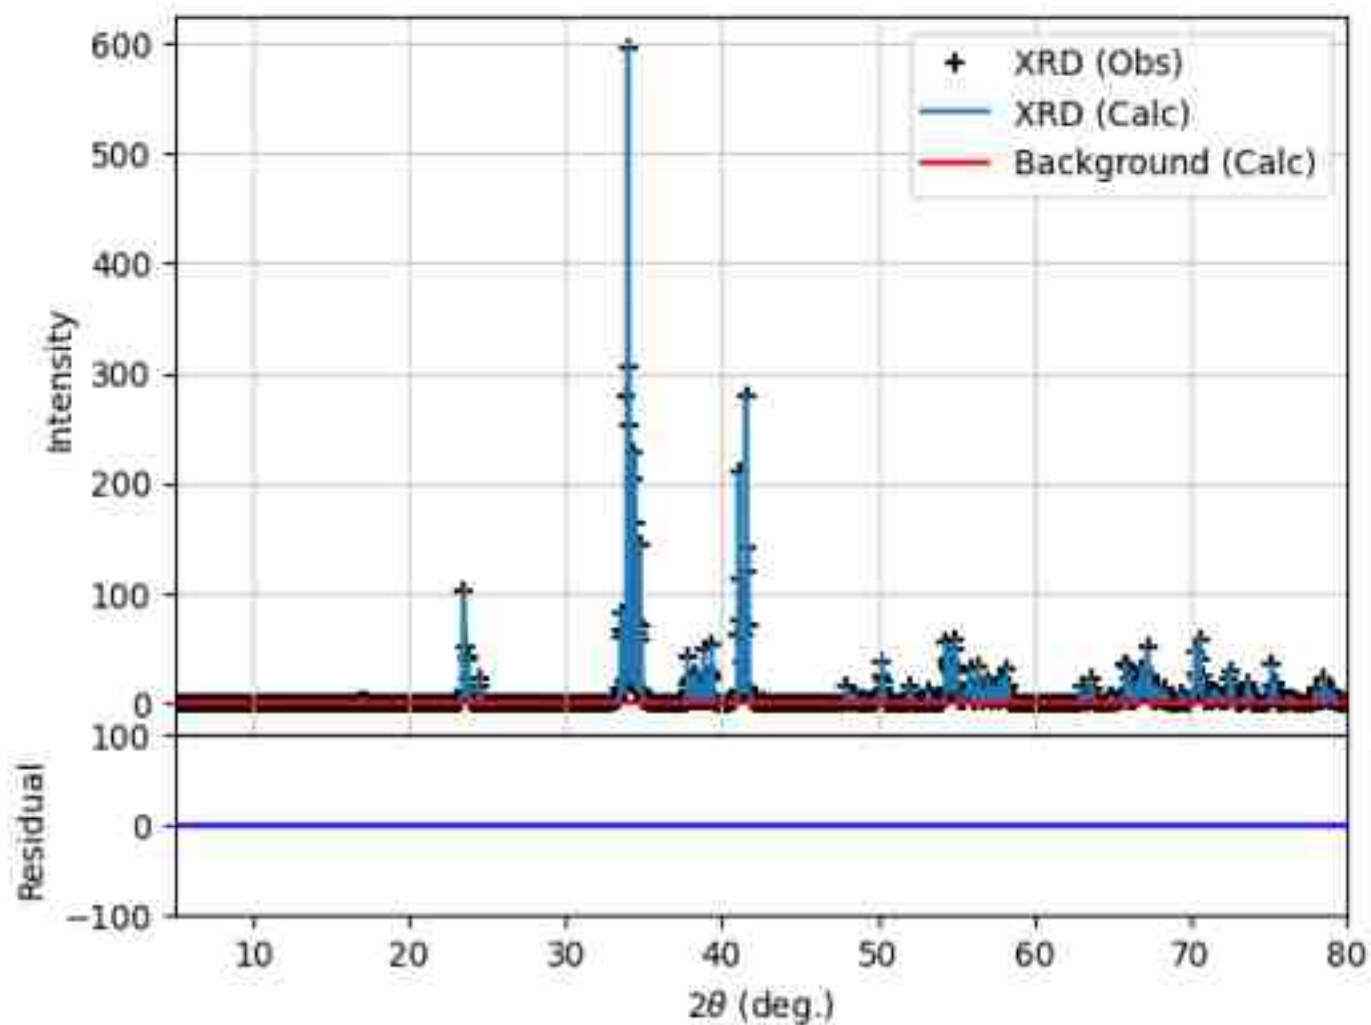

| RMSE before RR | Rwp     | RMSE after RR |
|----------------|---------|---------------|
| 0.01           | 0.00276 | 0.00018       |



# Sm<sub>2</sub>Ga<sub>4</sub>Ni<sub>2</sub>

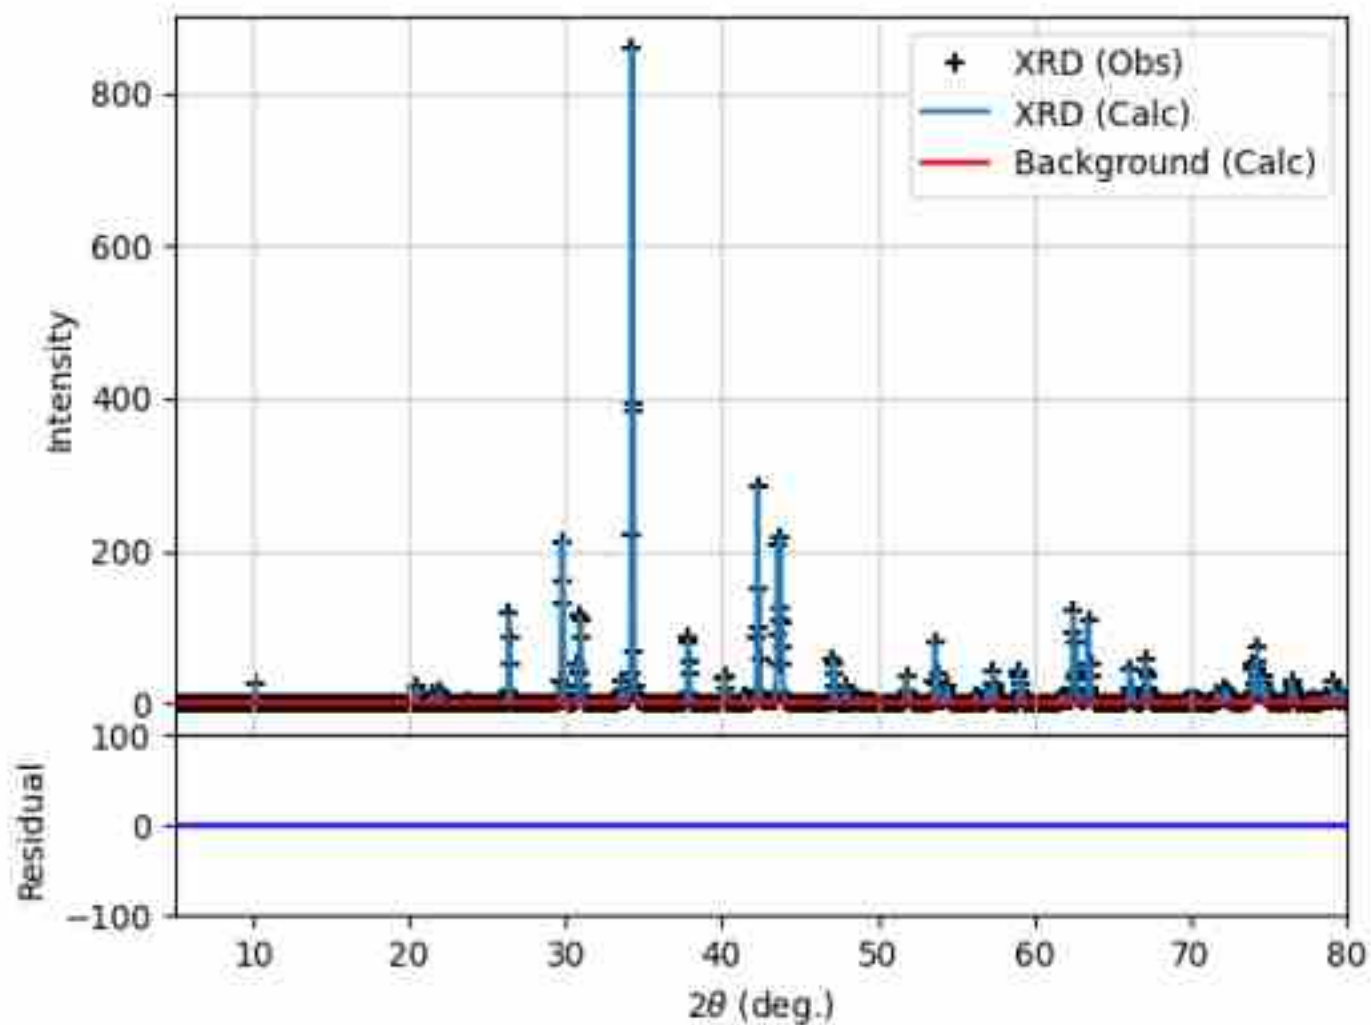

| RMSE before RR | Rwp     | RMSE after RR |
|----------------|---------|---------------|
| 0.01           | 0.00323 | 0.00035       |

# Sm<sub>2</sub>Ni<sub>4</sub>As<sub>4</sub>

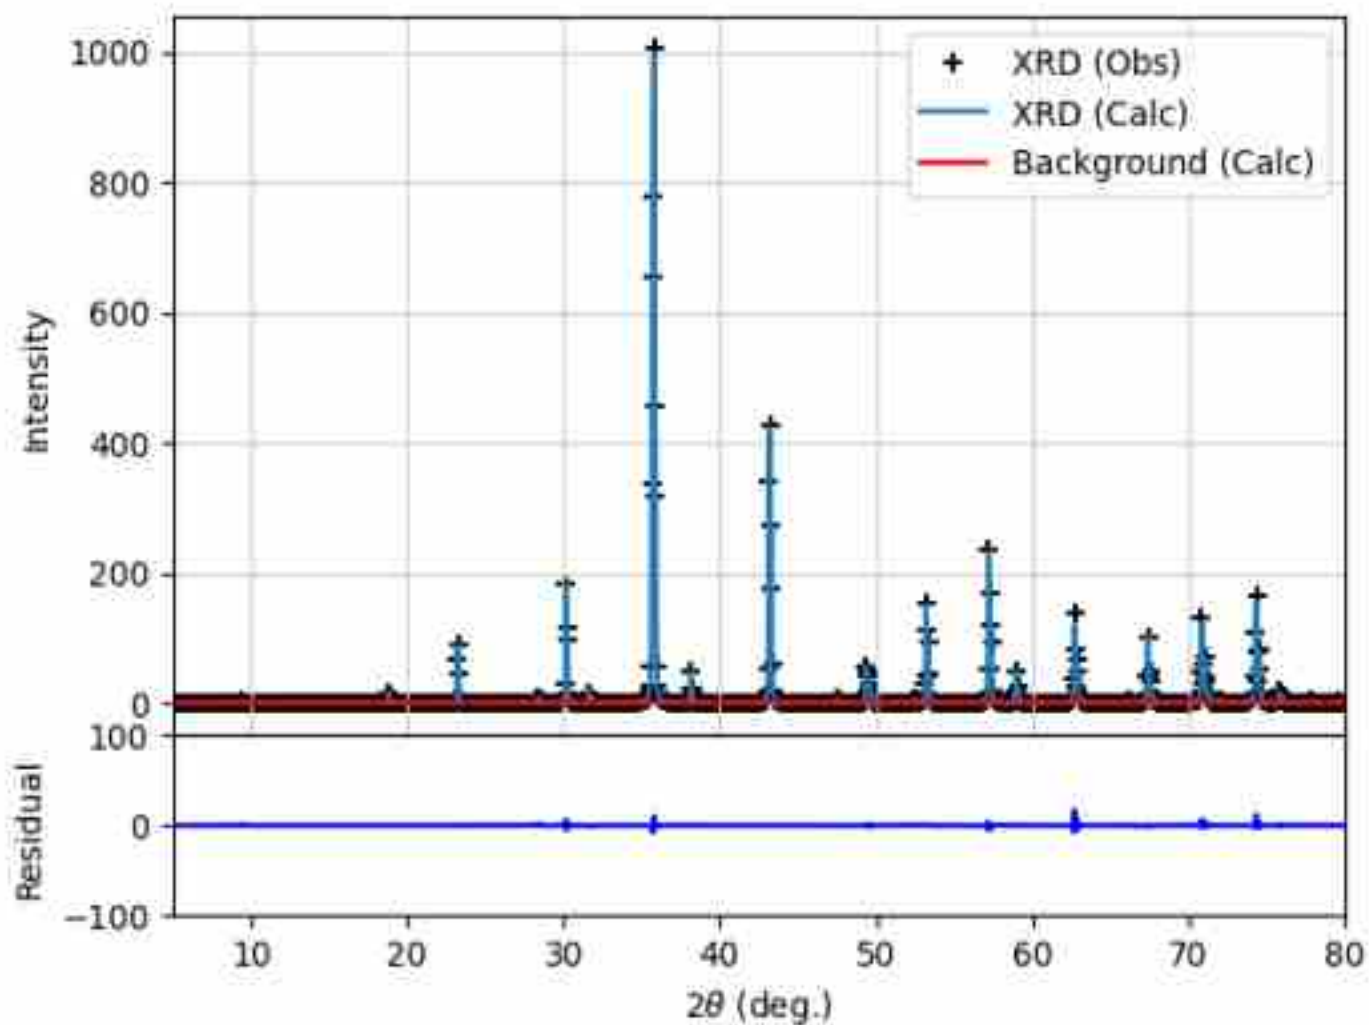

| RMSE before RR | Rwp     | RMSE after RR |
|----------------|---------|---------------|
| 0.01           | 4.01566 | 0.02559       |

# Sm<sub>2</sub>Ti<sub>2</sub>Ge<sub>2</sub>

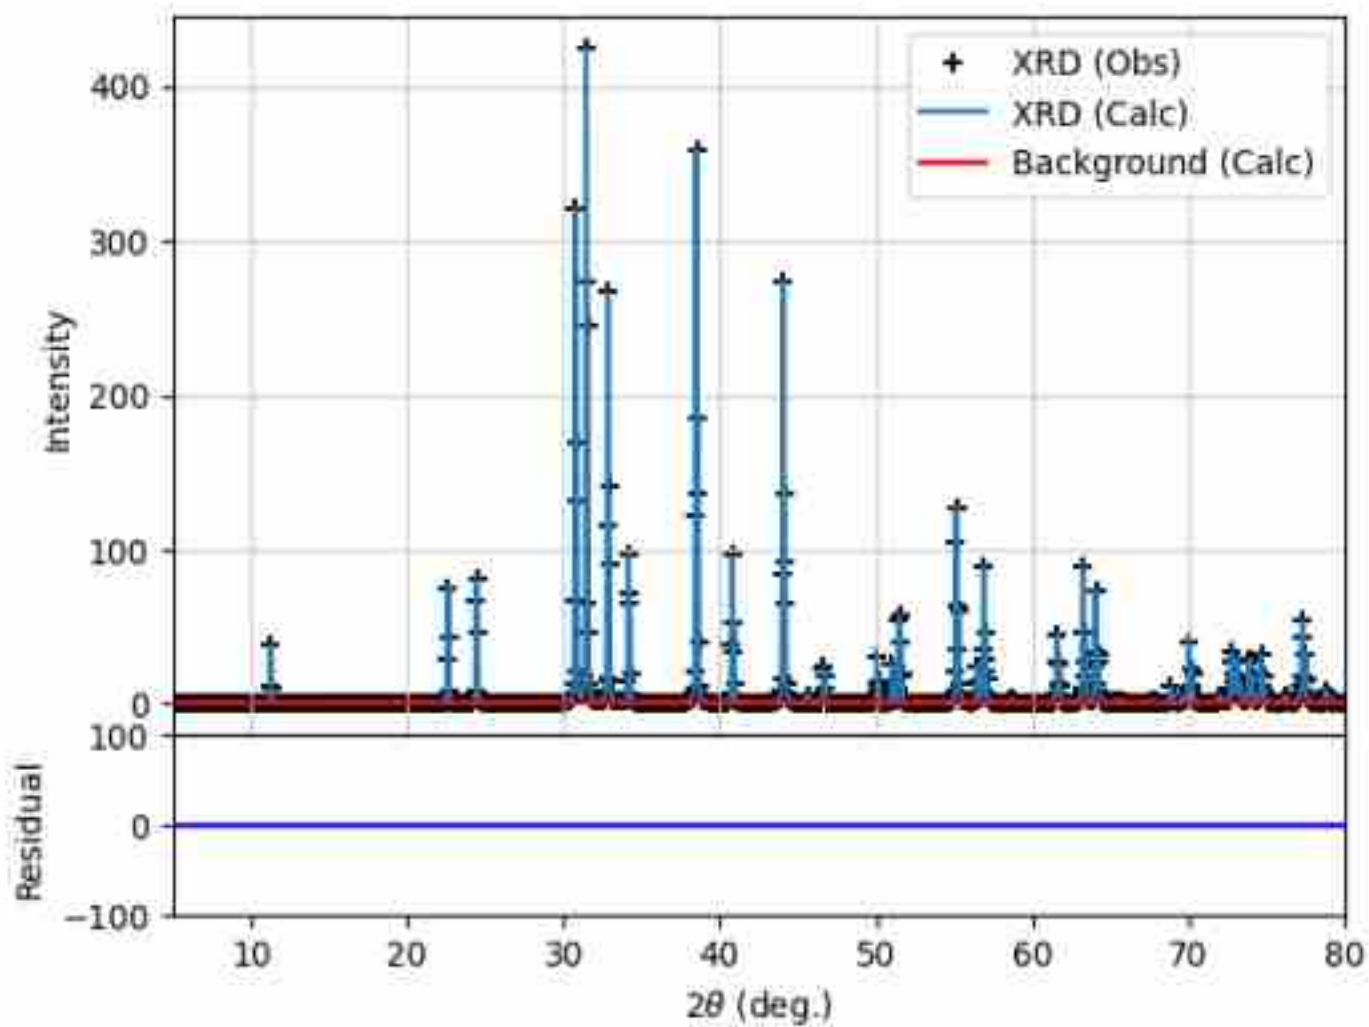

| RMSE before RR | Rwp     | RMSE after RR |
|----------------|---------|---------------|
| 0.01           | 0.00448 | 0.00066       |

# Sm2Tl1Hg1

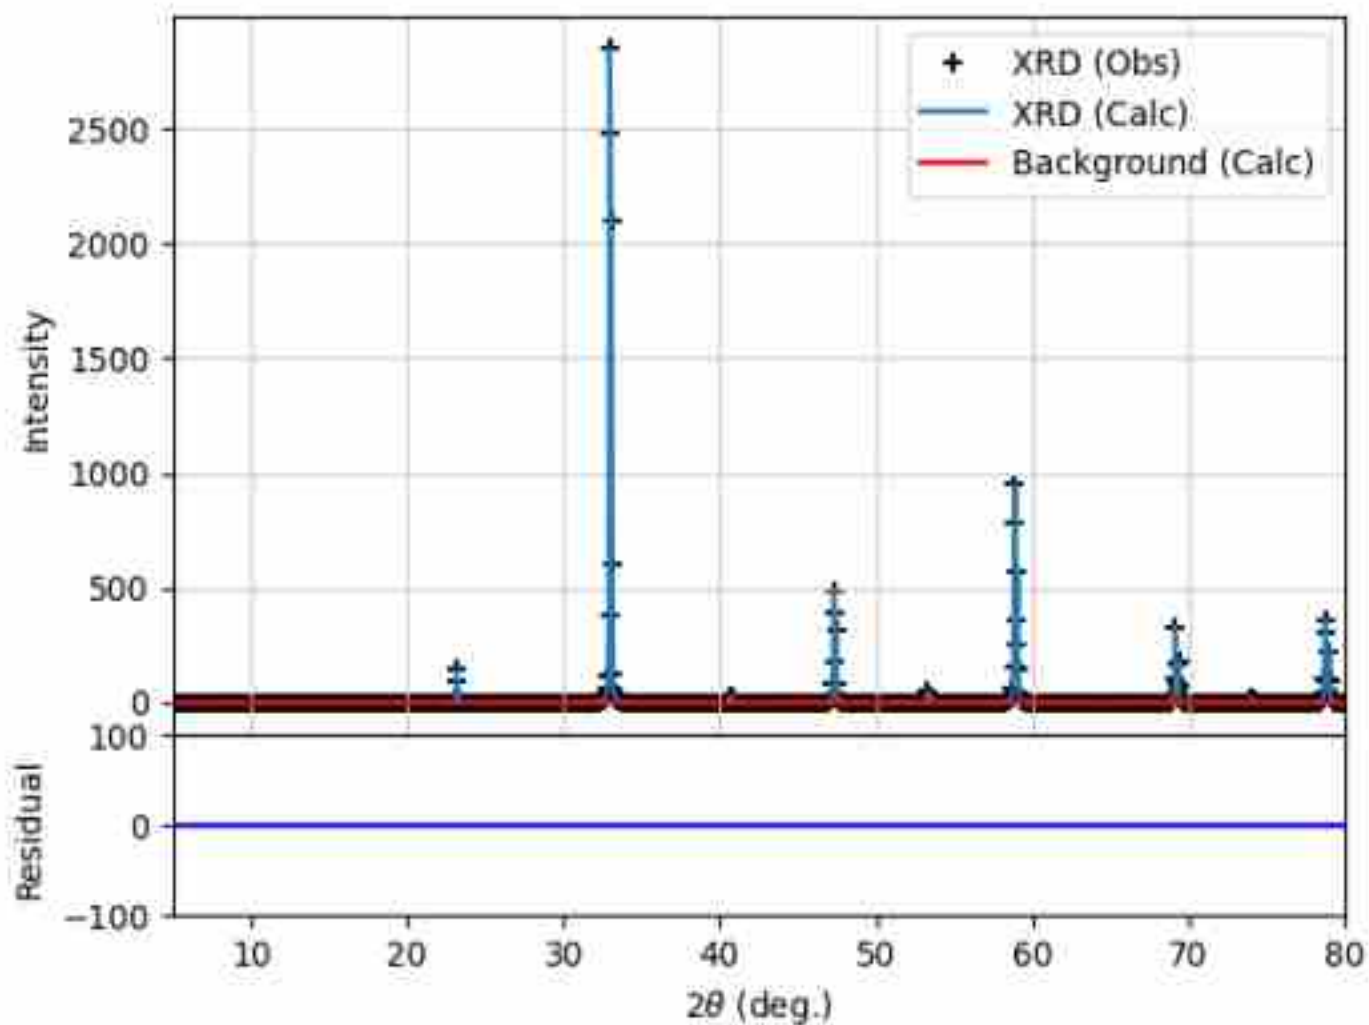

| RMSE before RR | Rwp     | RMSE after RR |
|----------------|---------|---------------|
| 0.001          | 0.00065 | 8e-05         |

# Sm<sub>2</sub>ZnSb<sub>4</sub>

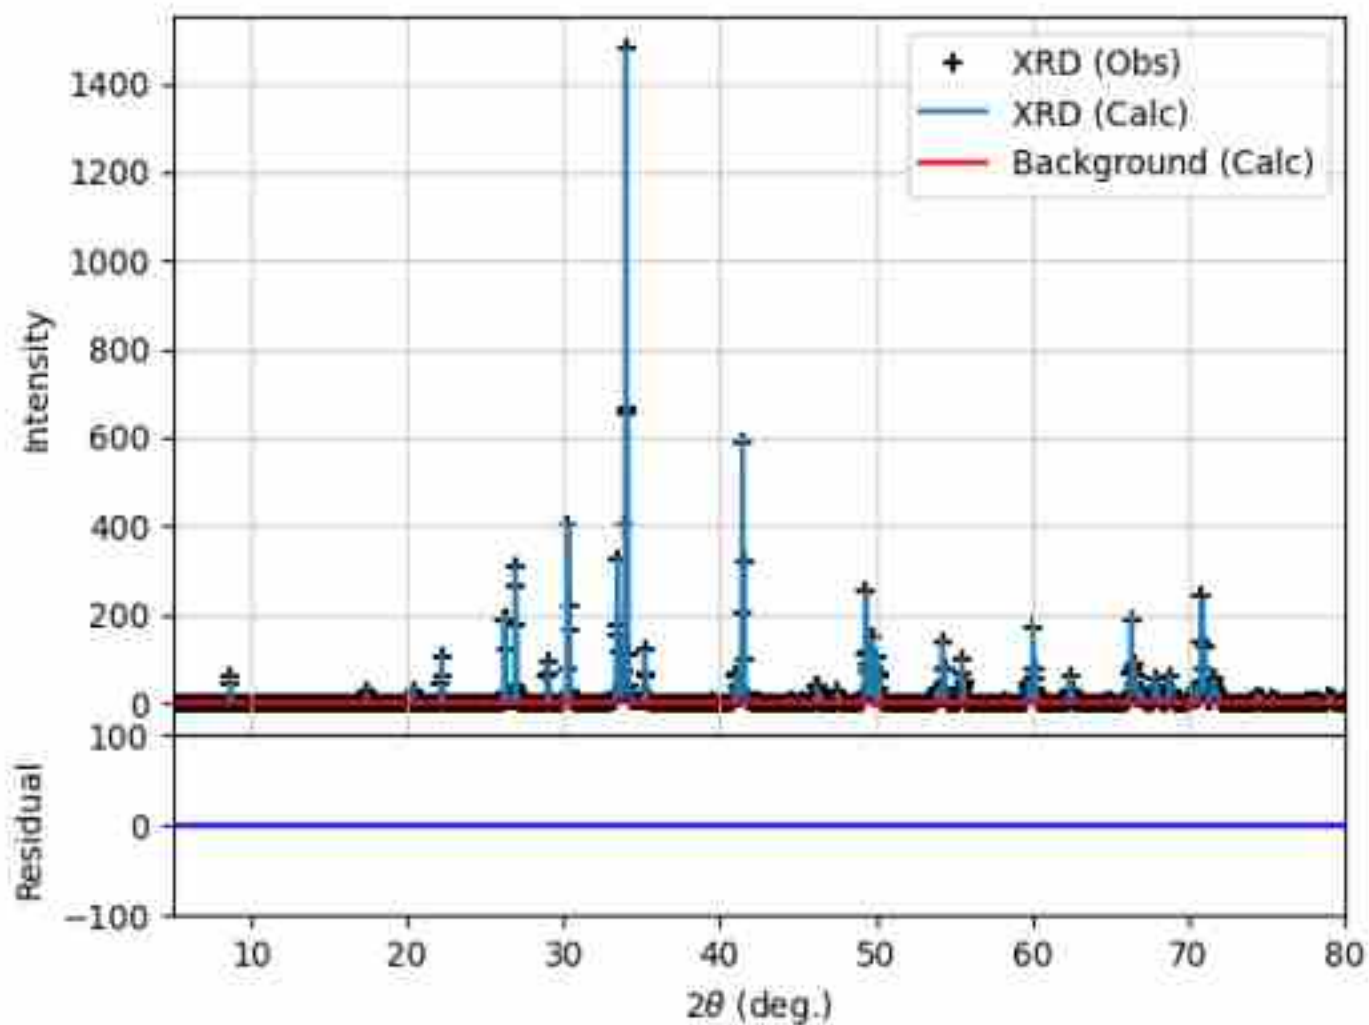

| RMSE before RR | Rwp     | RMSE after RR |
|----------------|---------|---------------|
| 0.01           | 0.00563 | 0.00051       |

# Sm3Dy1

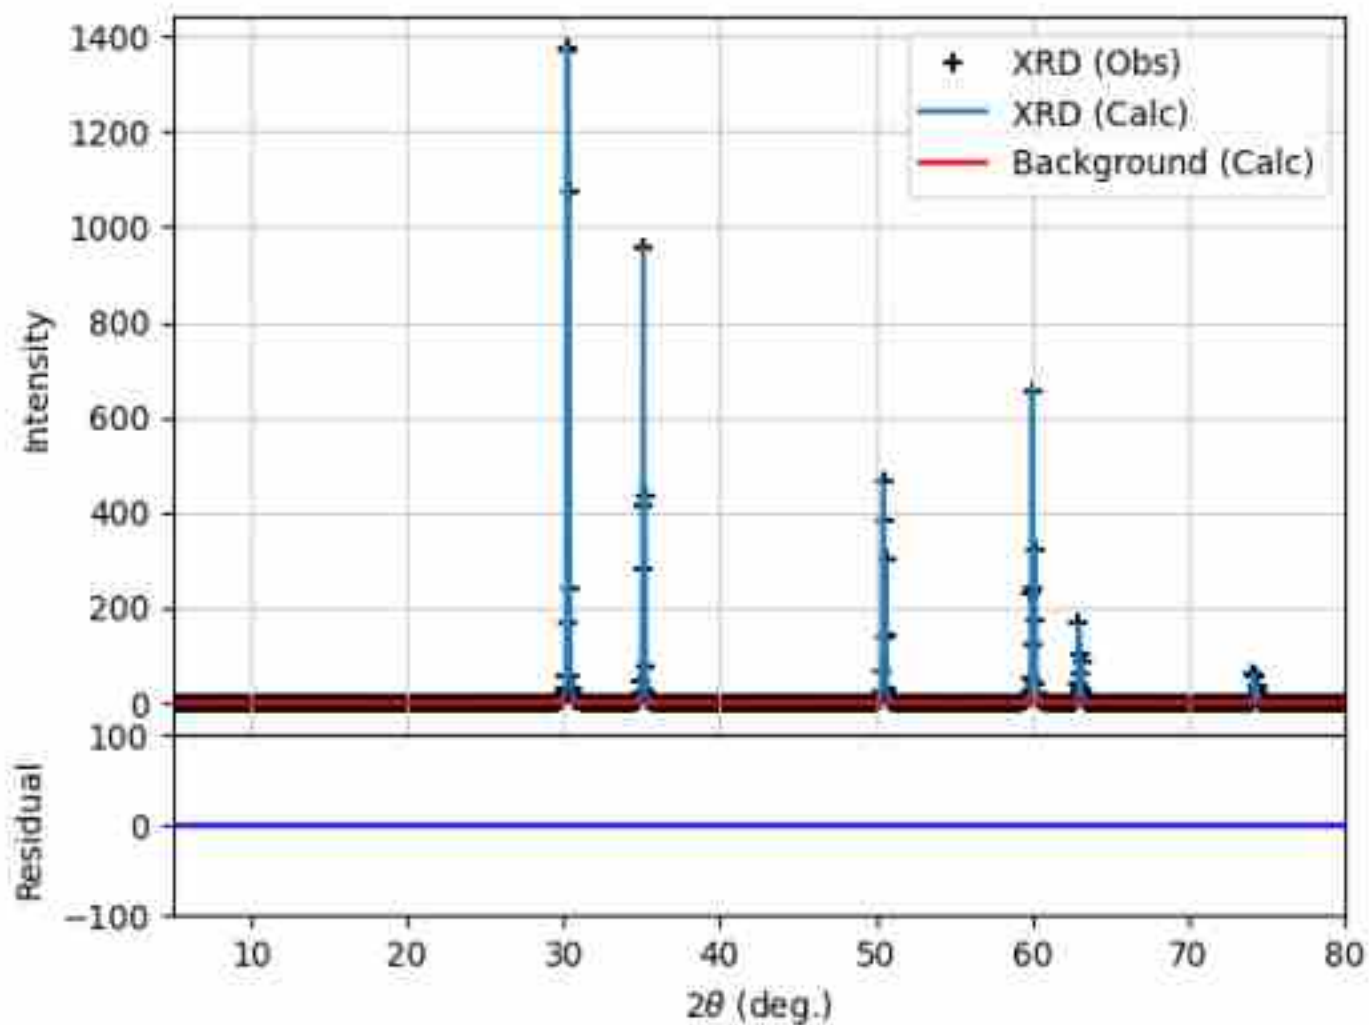

| RMSE before RR | Rwp     | RMSE after RR |
|----------------|---------|---------------|
| 0.001          | 0.03034 | 0.00054       |

# Sm3Ho1

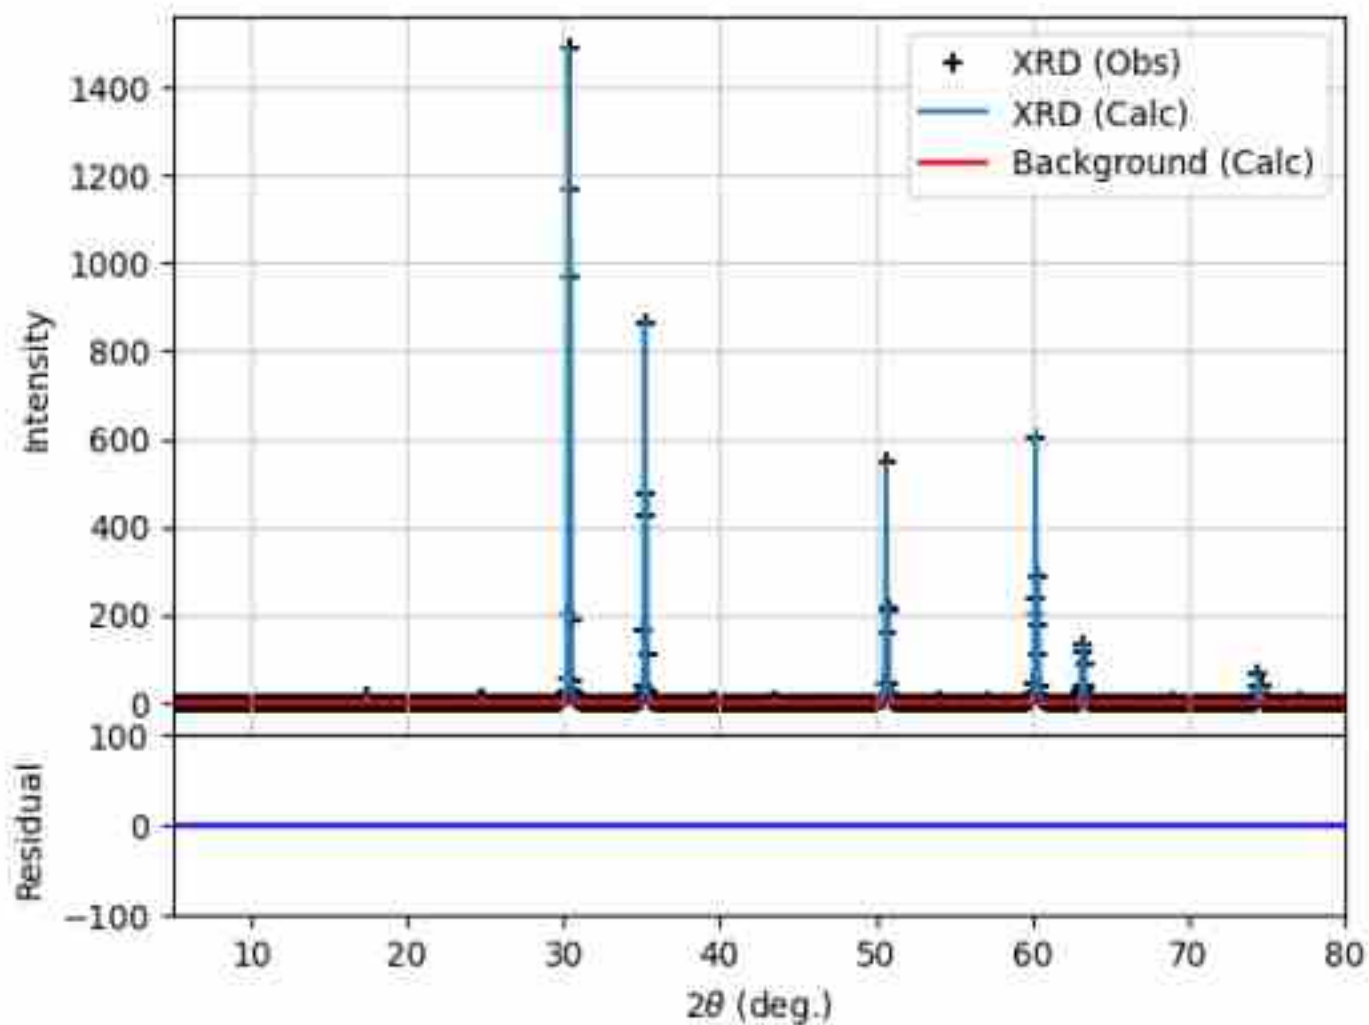

| RMSE before RR | Rwp     | RMSE after RR |
|----------------|---------|---------------|
| 0.001          | 0.02059 | 0.00082       |

# Sm3Mg1

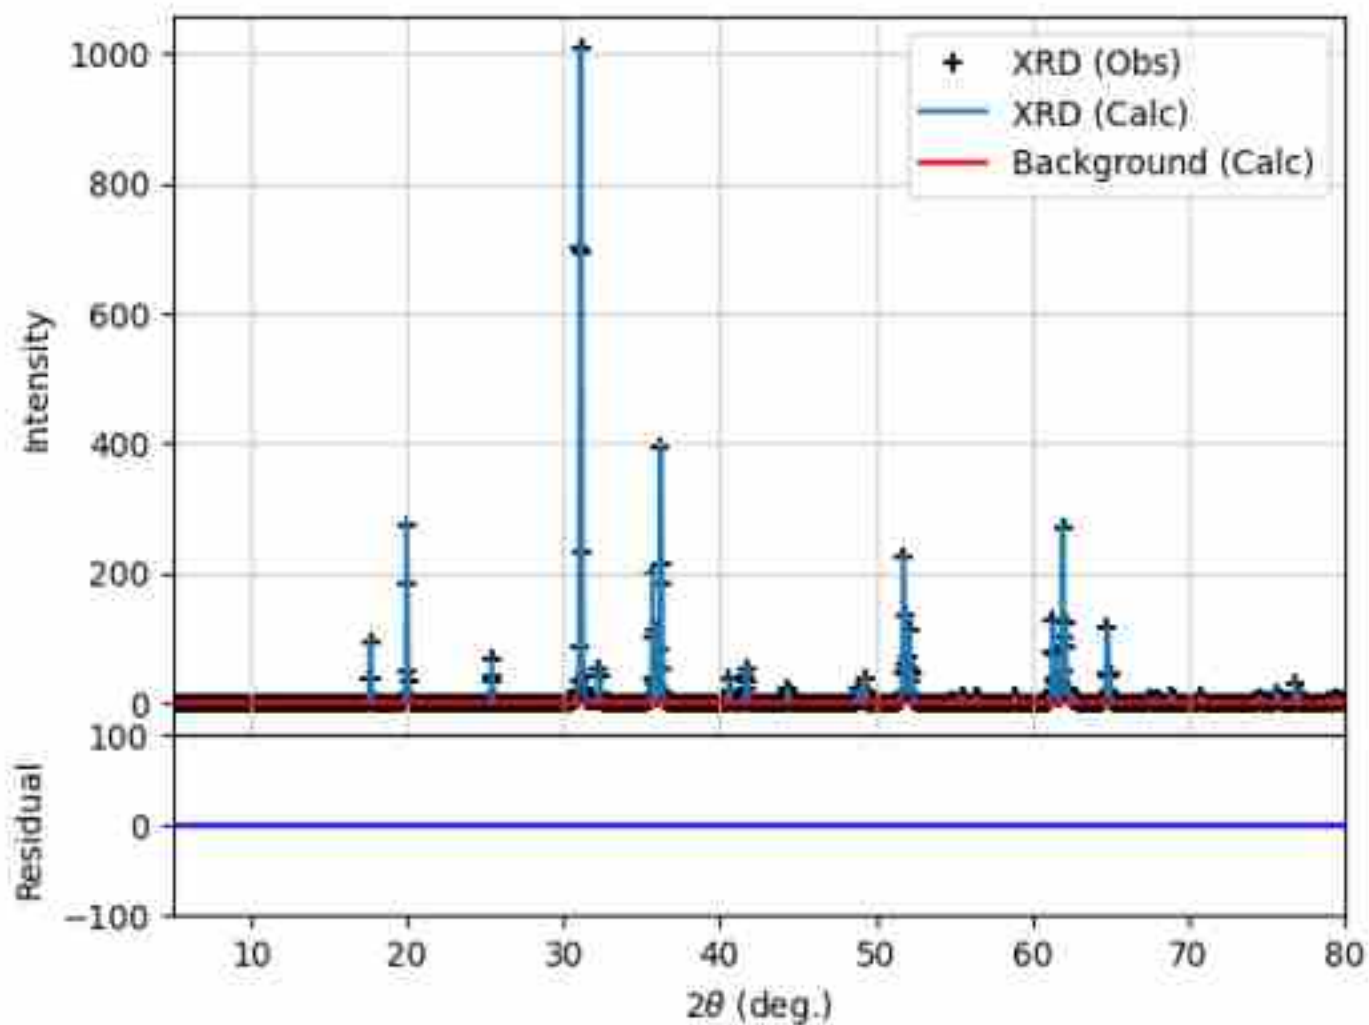

| RMSE before RR | Rwp     | RMSE after RR |
|----------------|---------|---------------|
| 0.001          | 0.00493 | 0.00134       |



# Sm4Al4Pt4

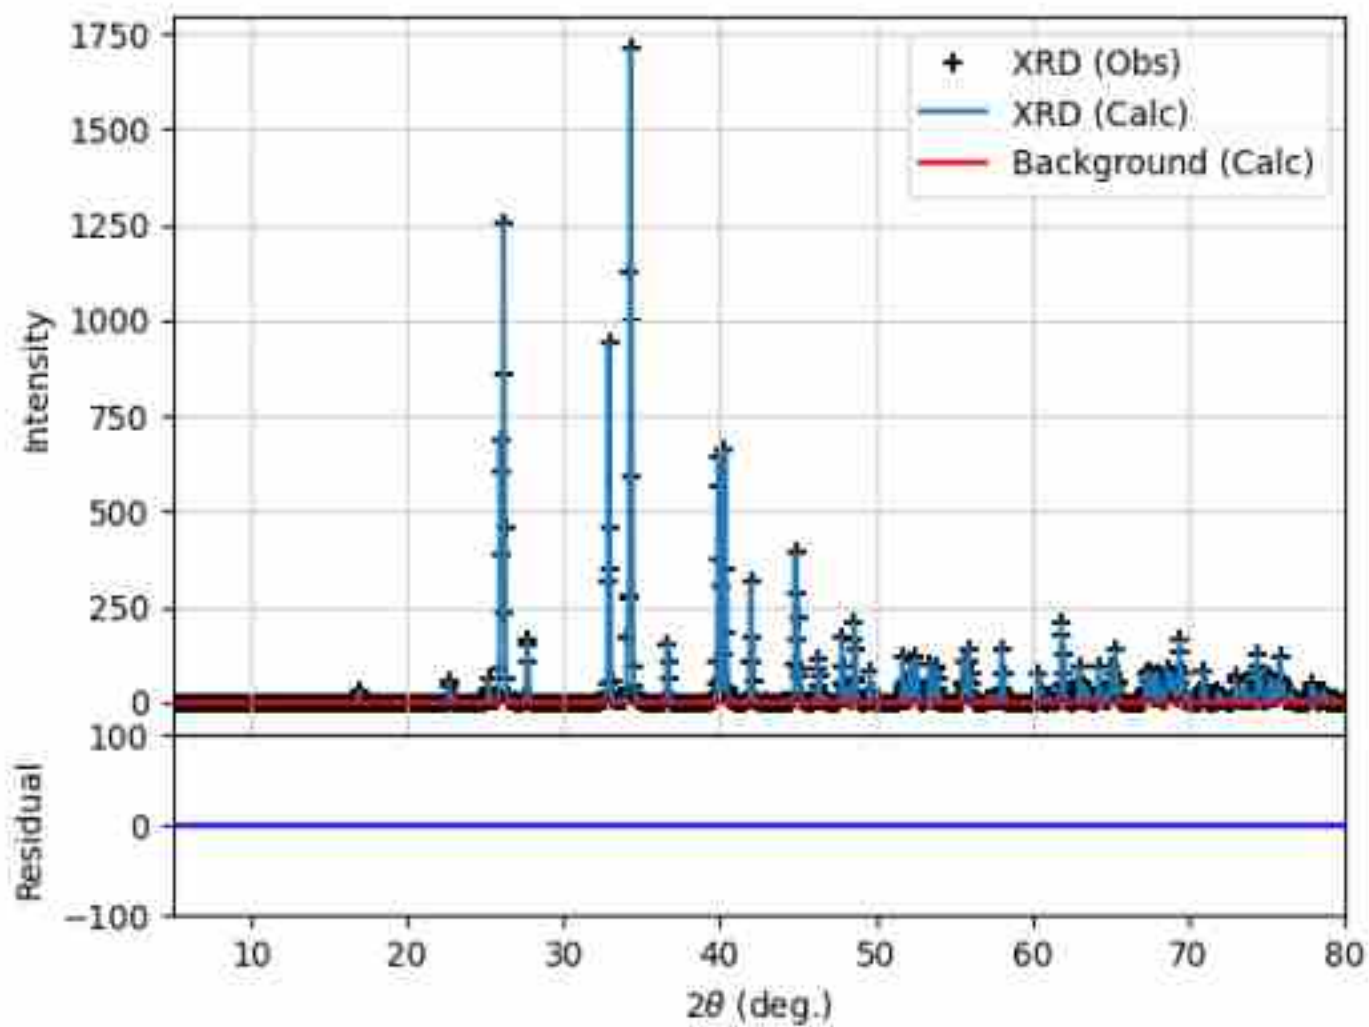

| RMSE before RR | Rwp     | RMSE after RR |
|----------------|---------|---------------|
| 0.01           | 0.00423 | 0.00098       |

# Sm6Sc2

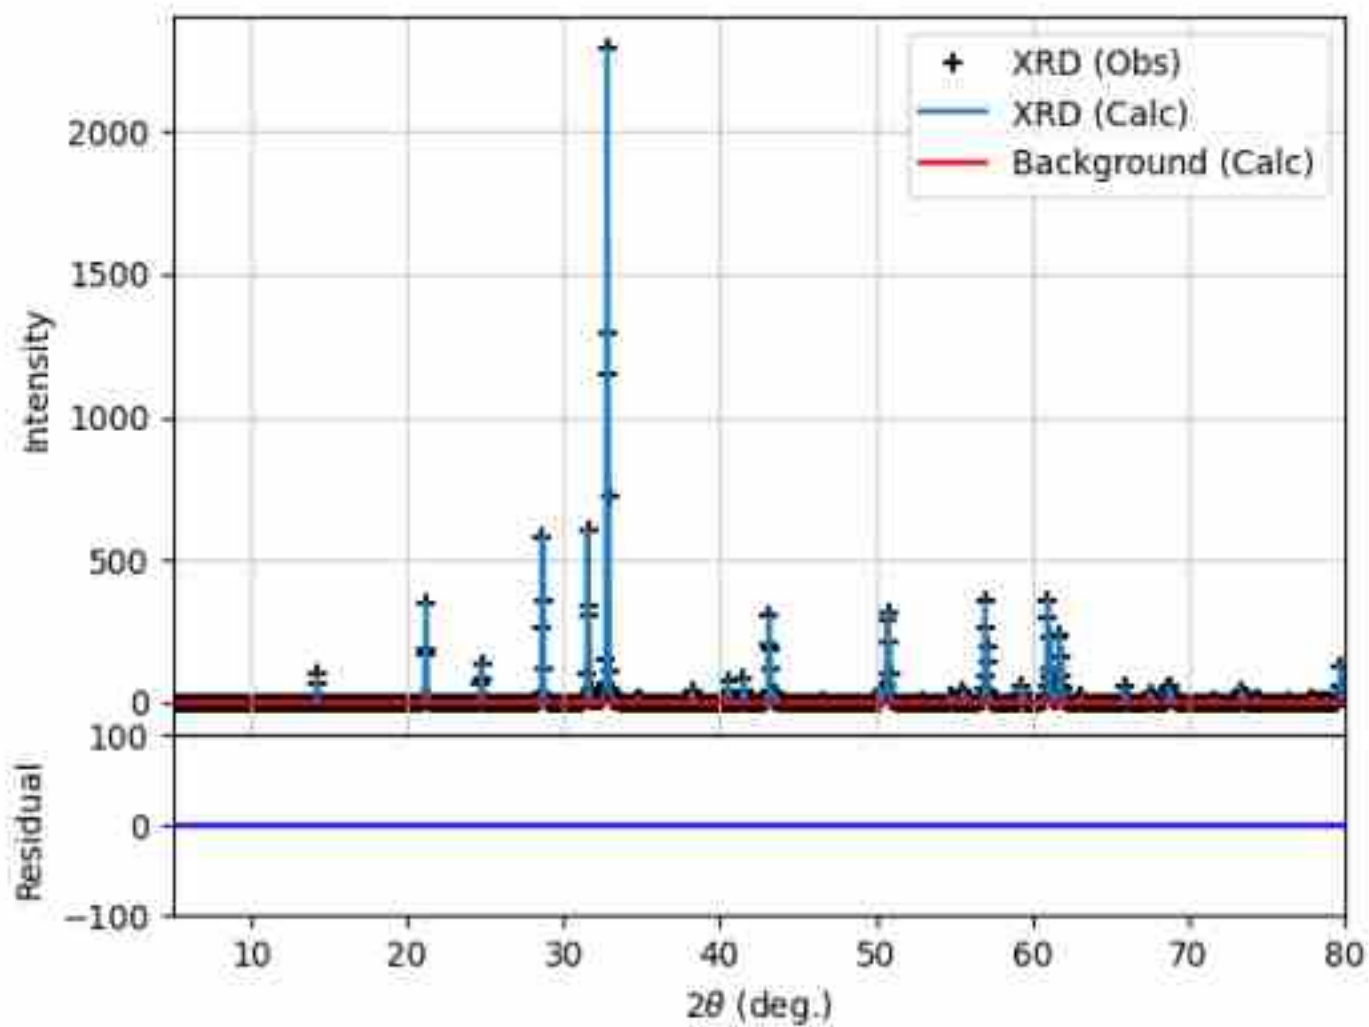

| RMSE before RR | Rwp     | RMSE after RR |
|----------------|---------|---------------|
| 0.01           | 0.00512 | 0.00064       |

# Sn1Pb1Se2

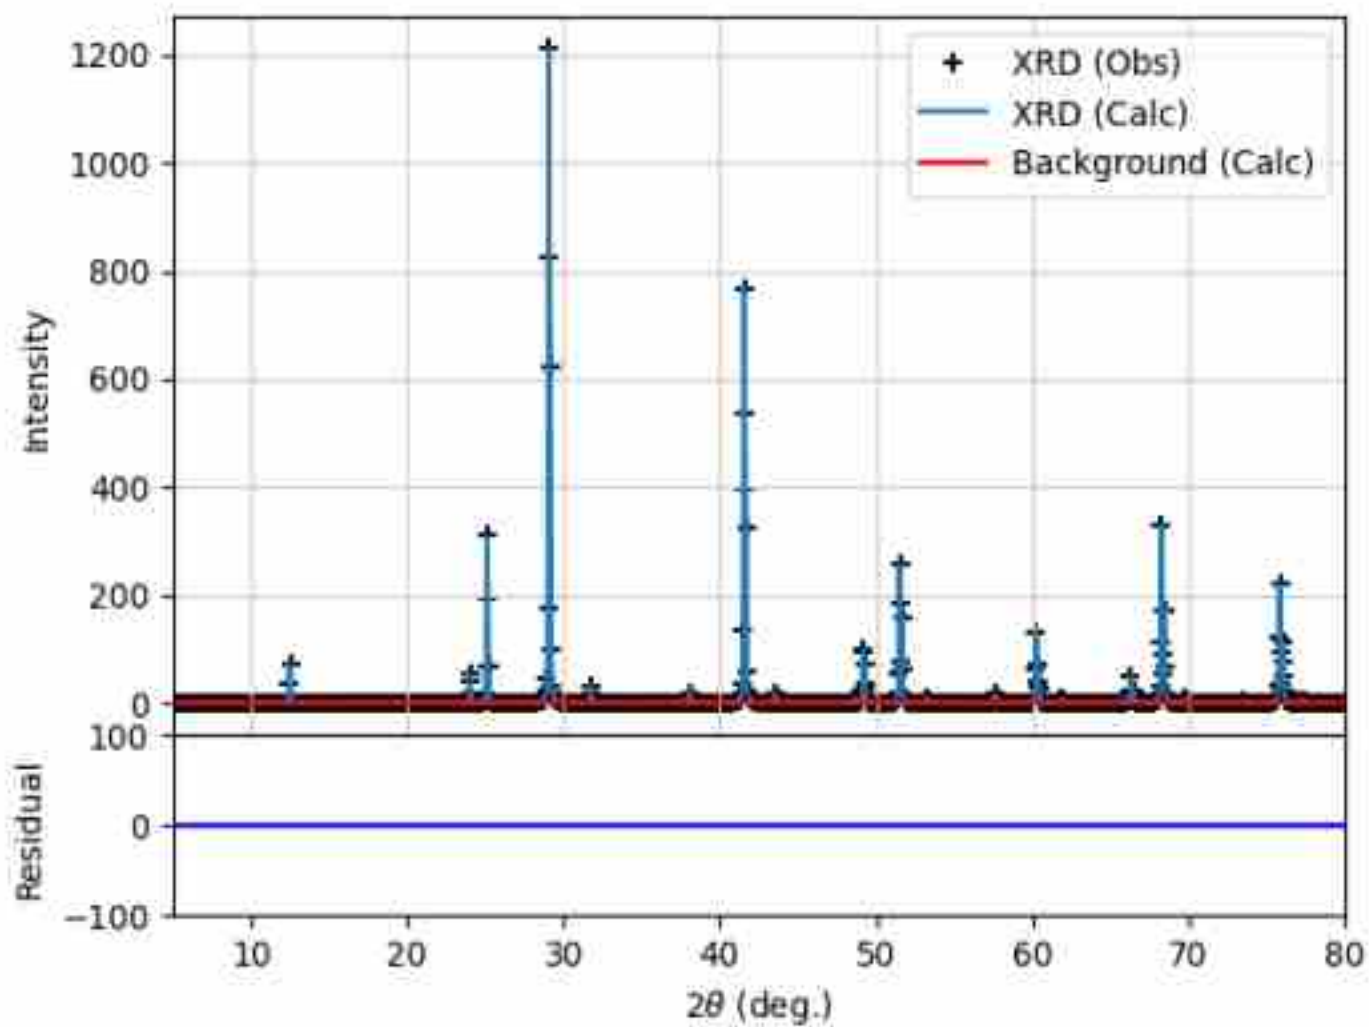

| RMSE before RR | Rwp     | RMSE after RR |
|----------------|---------|---------------|
| 0.01           | 0.00241 | 0.00035       |

# Sn4Ru2

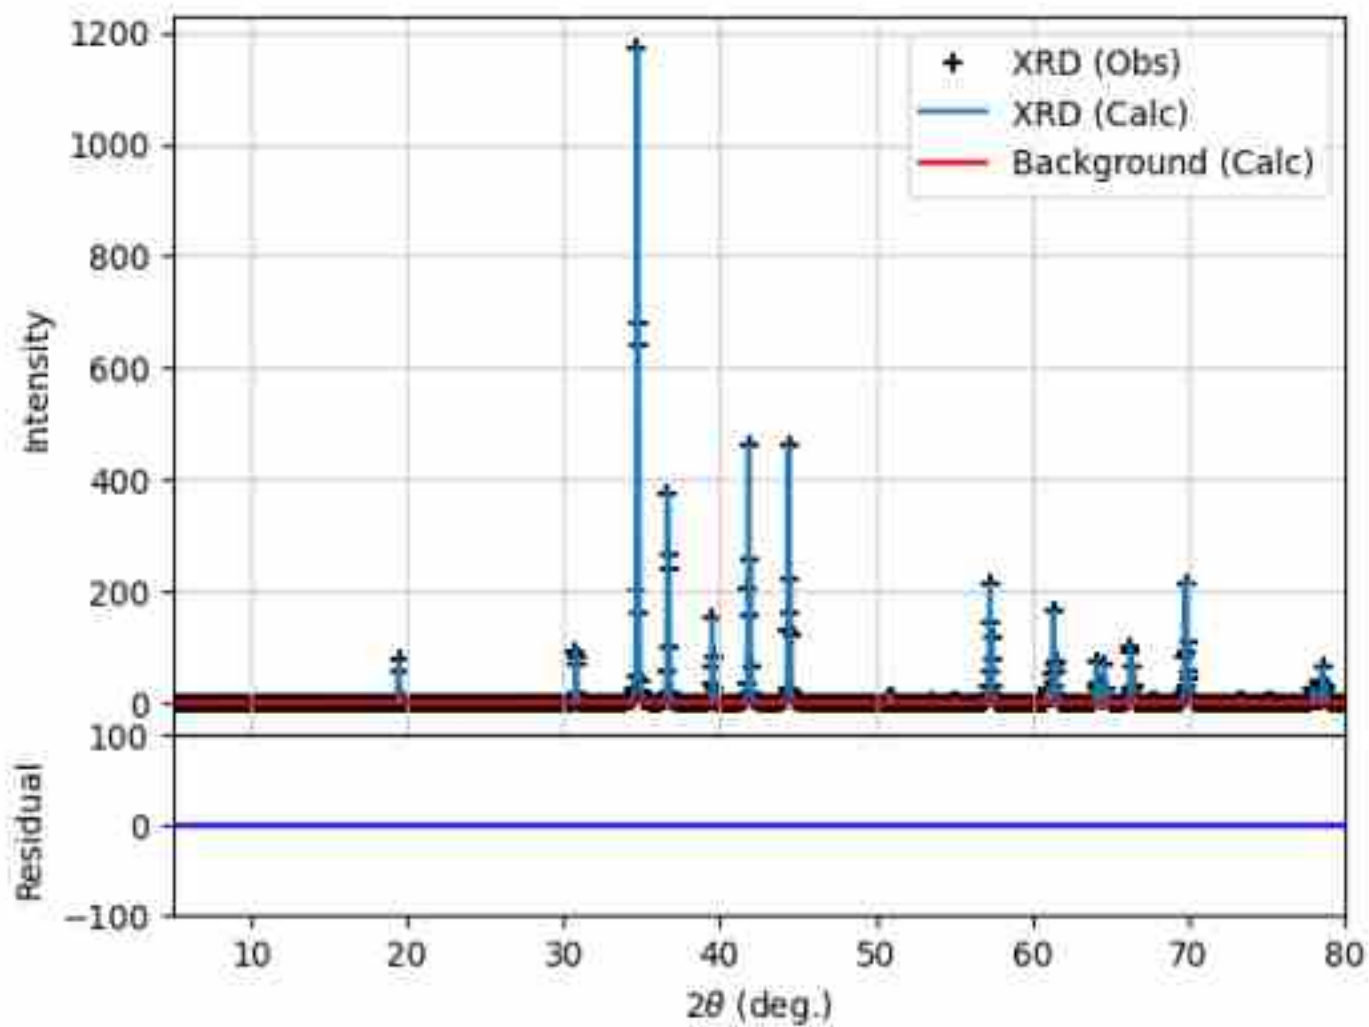

| RMSE before RR | Rwp     | RMSE after RR |
|----------------|---------|---------------|
| 0.01           | 0.00508 | 0.00041       |

# Sr1Ac1Tl2

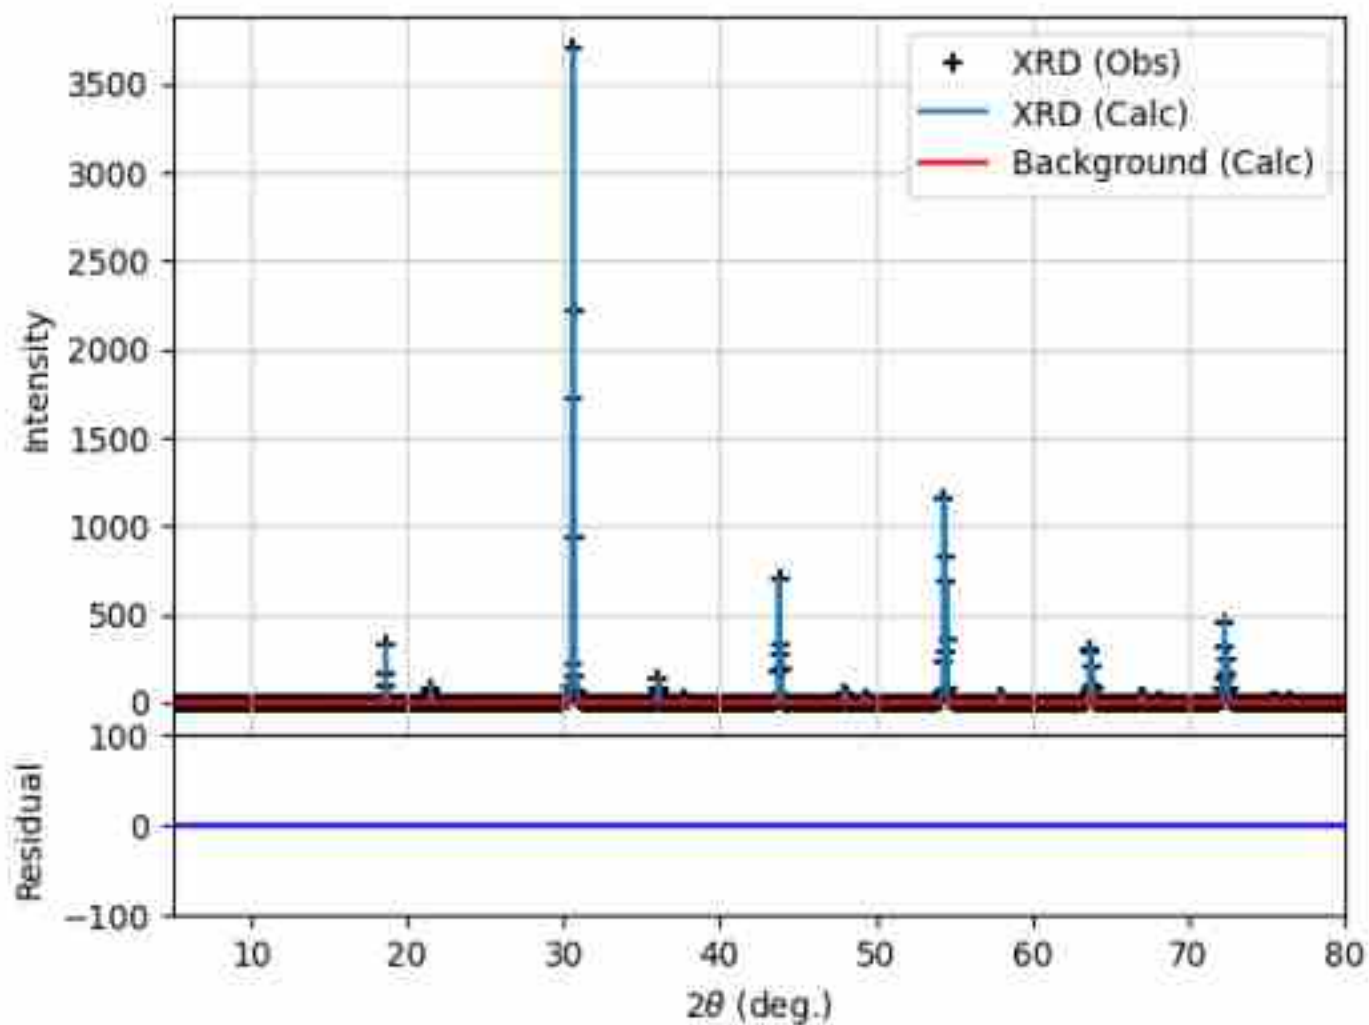

| RMSE before RR | Rwp     | RMSE after RR |
|----------------|---------|---------------|
| 0.001          | 0.00299 | 0.00039       |

# Sr1Ca1

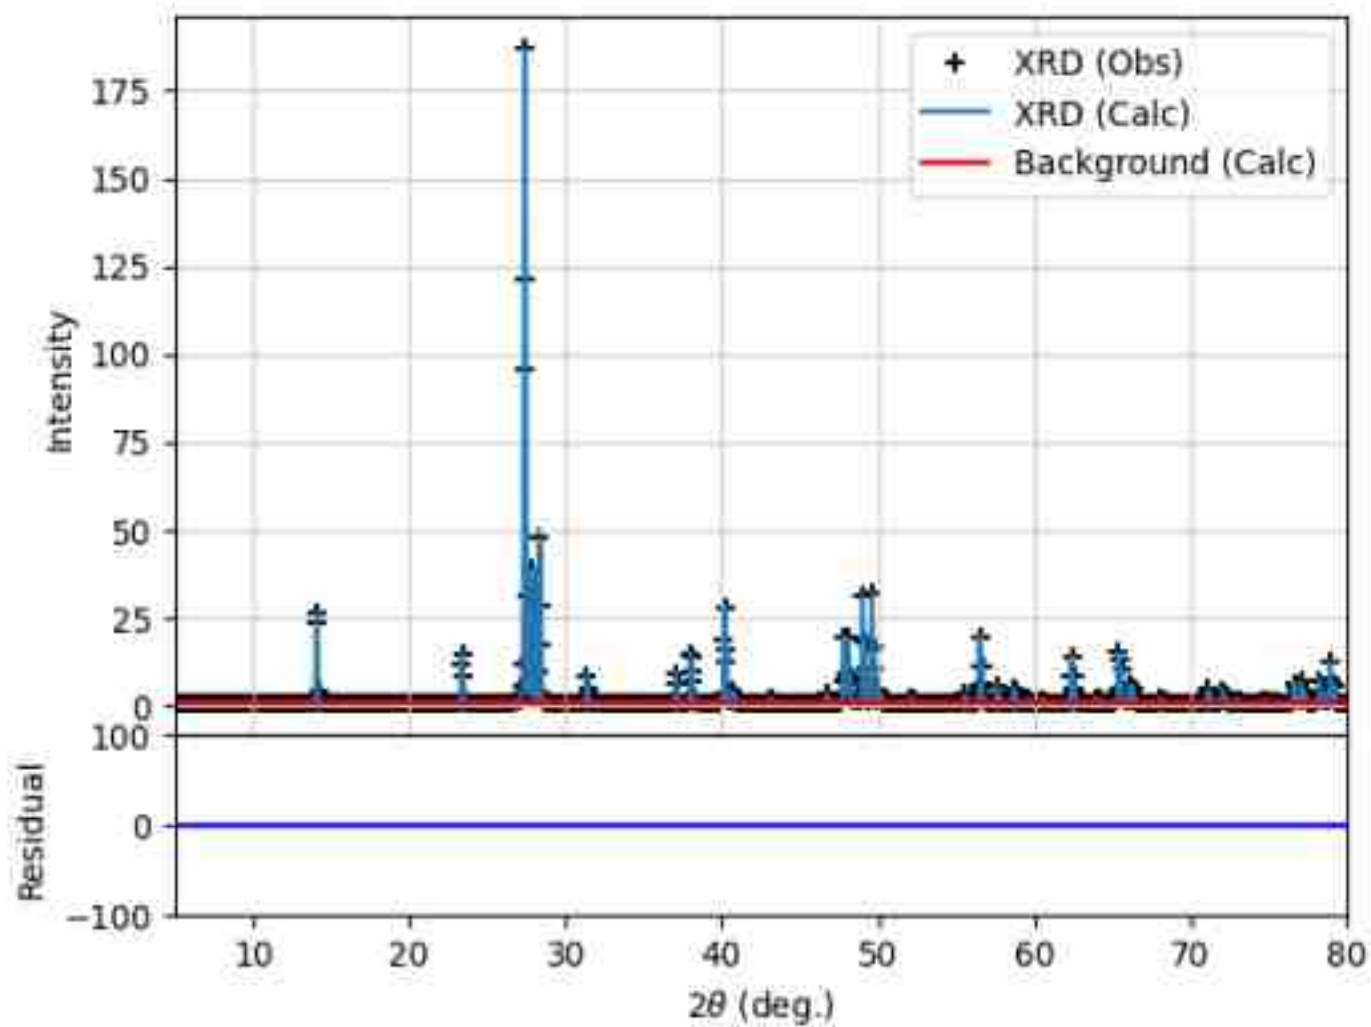

| RMSE before RR | Rwp     | RMSE after RR |
|----------------|---------|---------------|
| 0.001          | 0.04811 | 0.00141       |

# Sr1Eu1In1Sb1O6

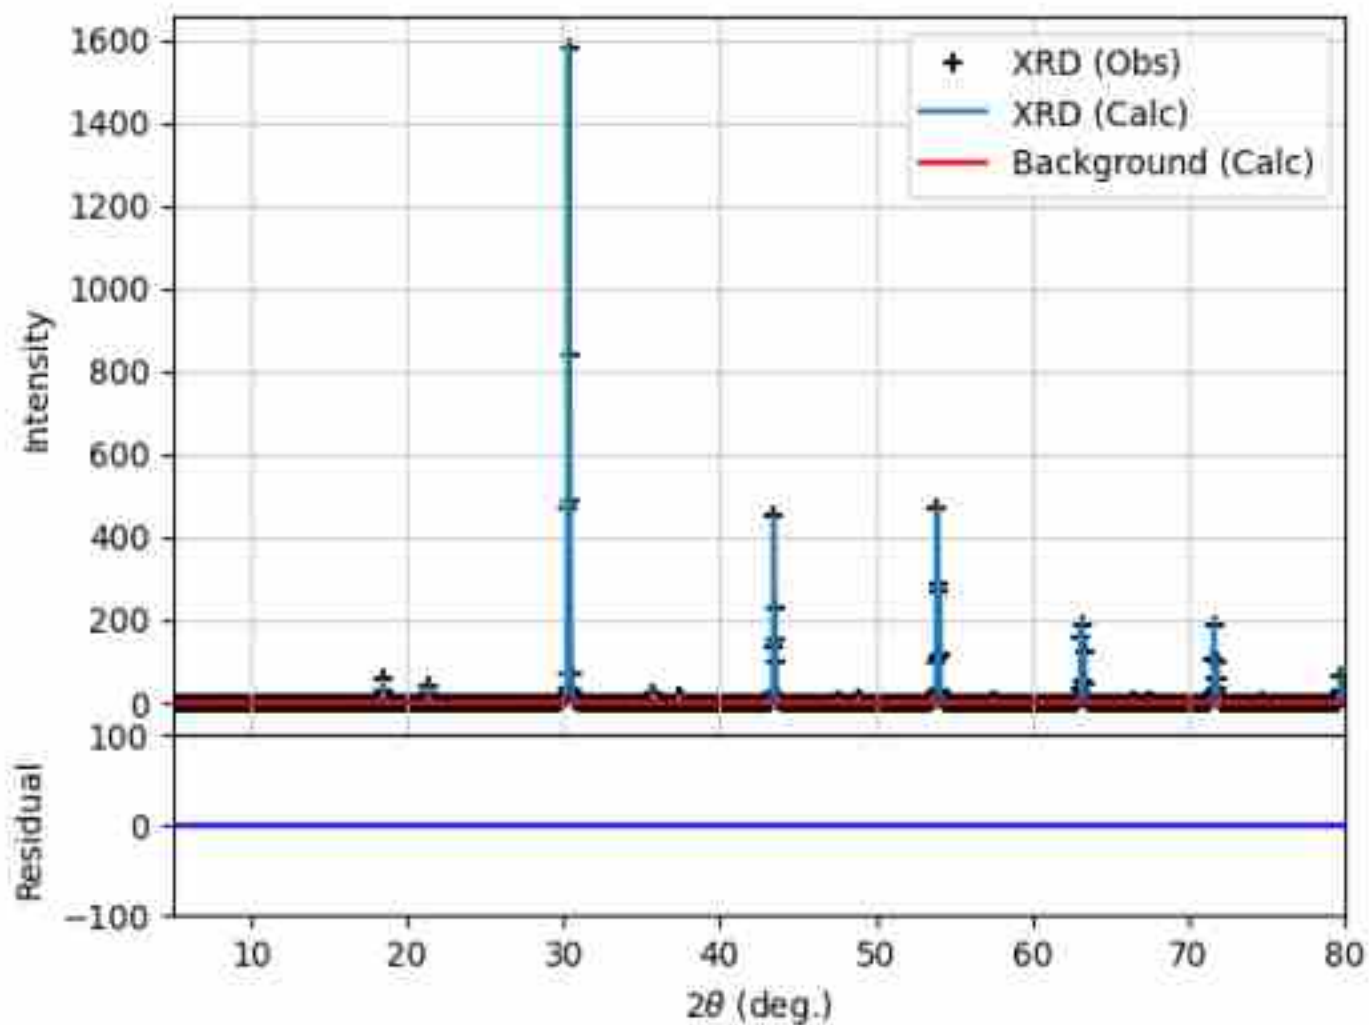

| RMSE before RR | Rwp     | RMSE after RR |
|----------------|---------|---------------|
| 0.01           | 0.00384 | 0.00217       |

# Sr1Eu1Ni1W1O6

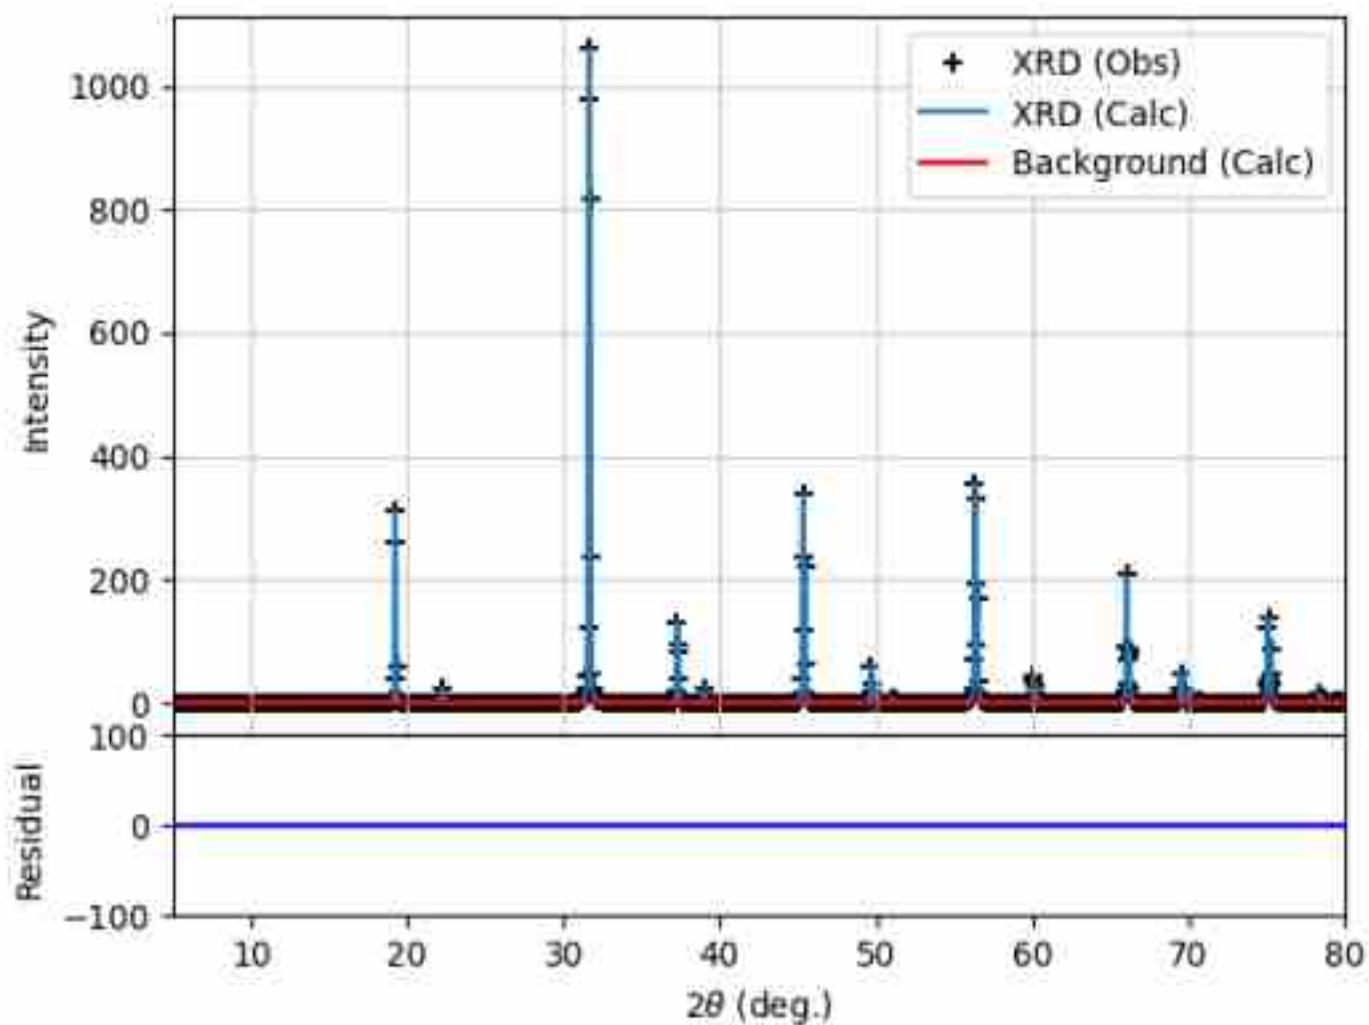

| RMSE before RR | Rwp     | RMSE after RR |
|----------------|---------|---------------|
| 0.01           | 0.01023 | 0.00466       |



# Sr1Eu3

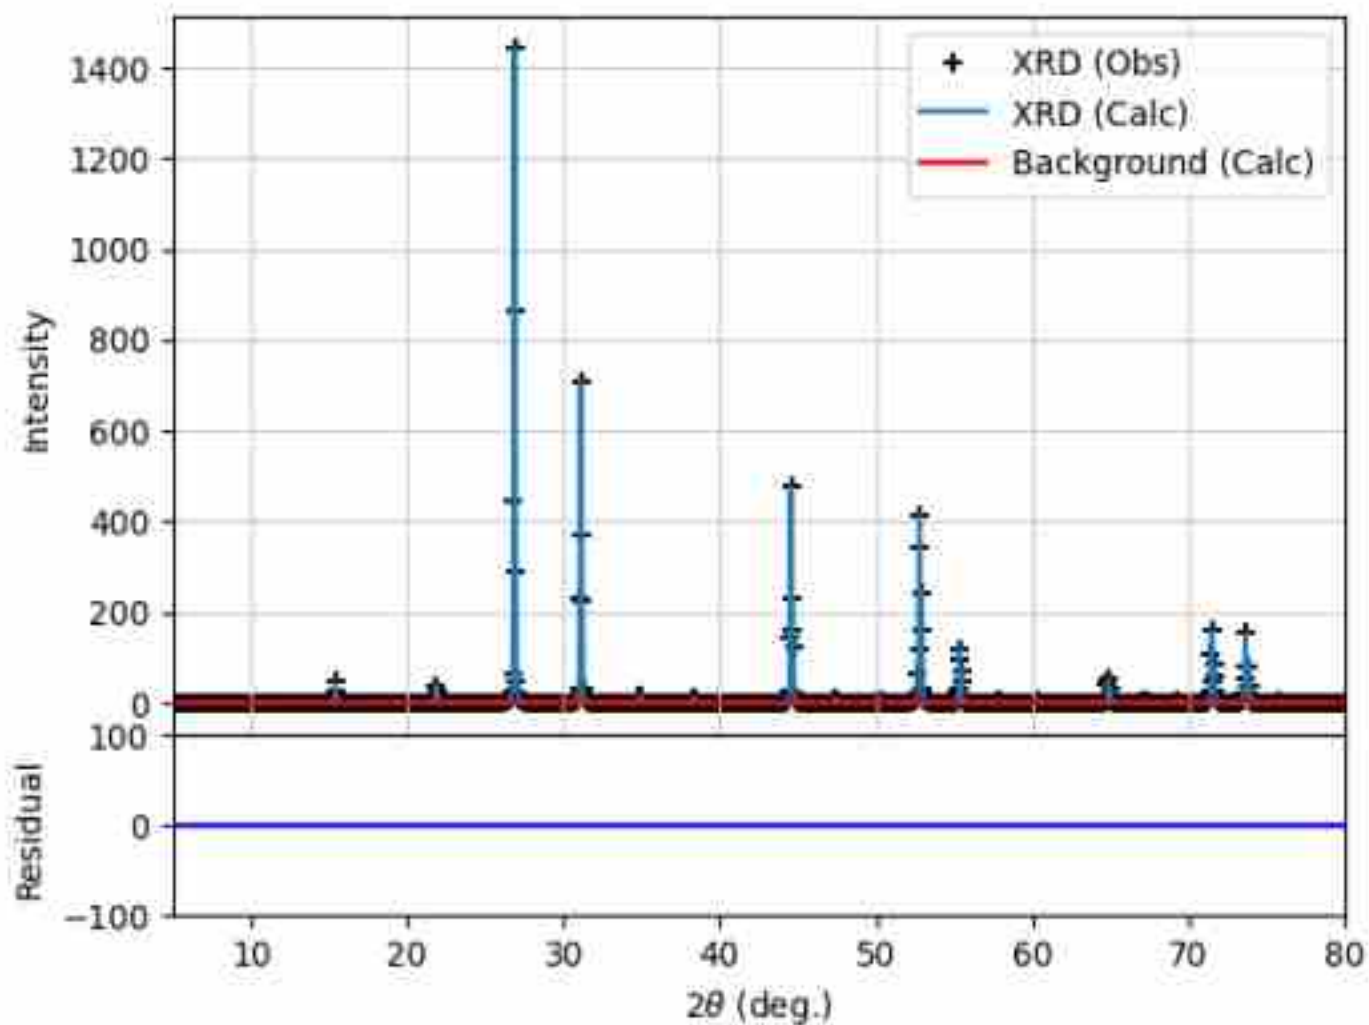

| RMSE before RR | Rwp     | RMSE after RR |
|----------------|---------|---------------|
| 0.001          | 0.02698 | 0.00078       |

# Sr1La1Pt2

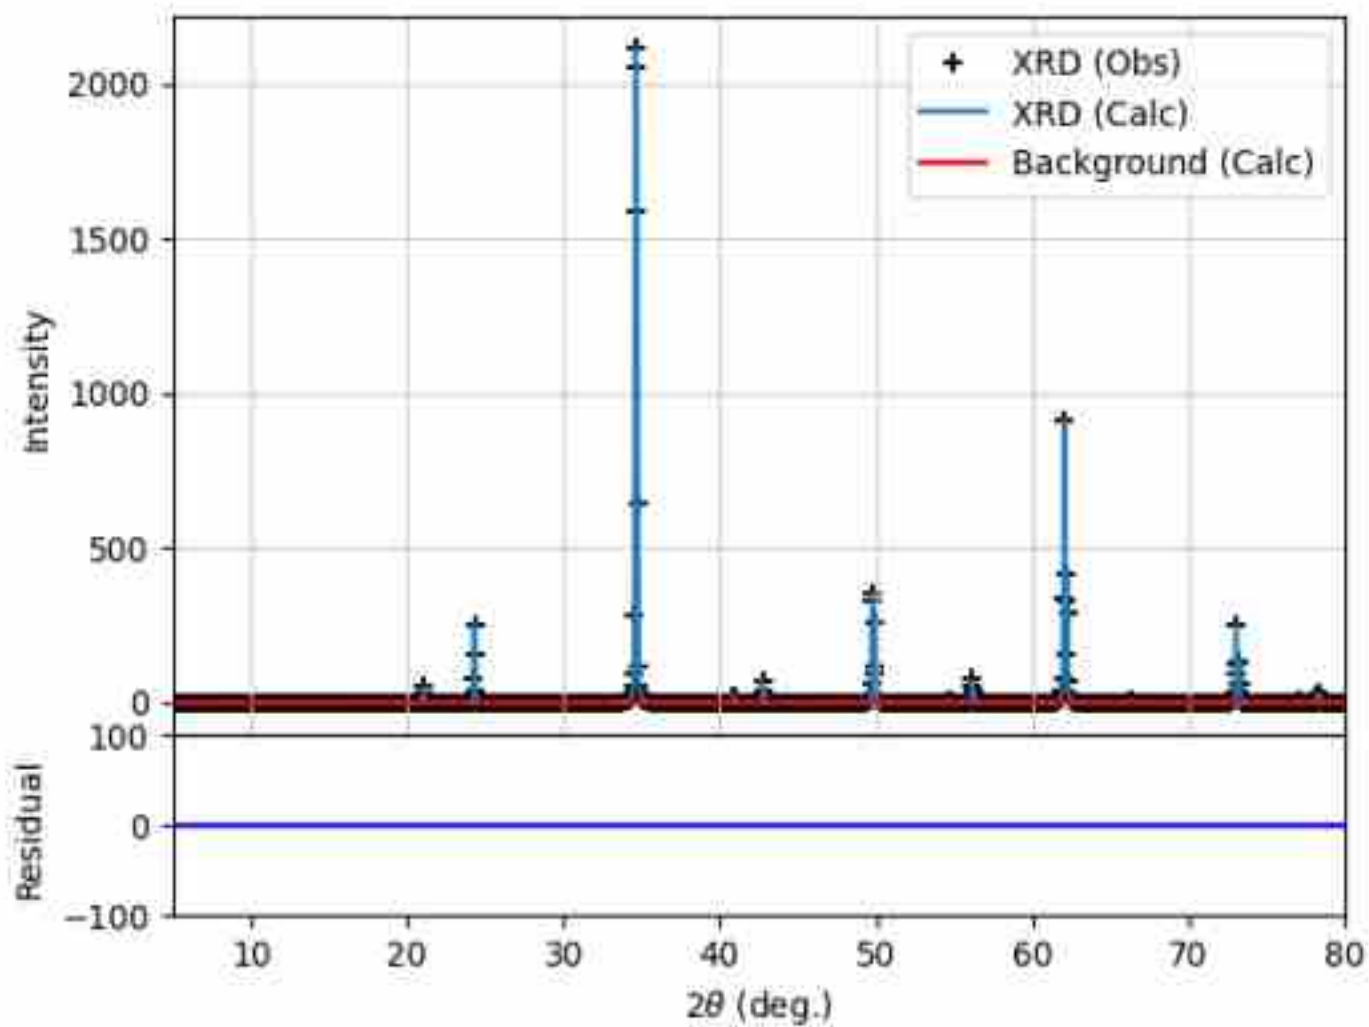

| RMSE before RR | Rwp     | RMSE after RR |
|----------------|---------|---------------|
| 0.001          | 0.00491 | 0.00034       |

# Sr1Mg1Ti2

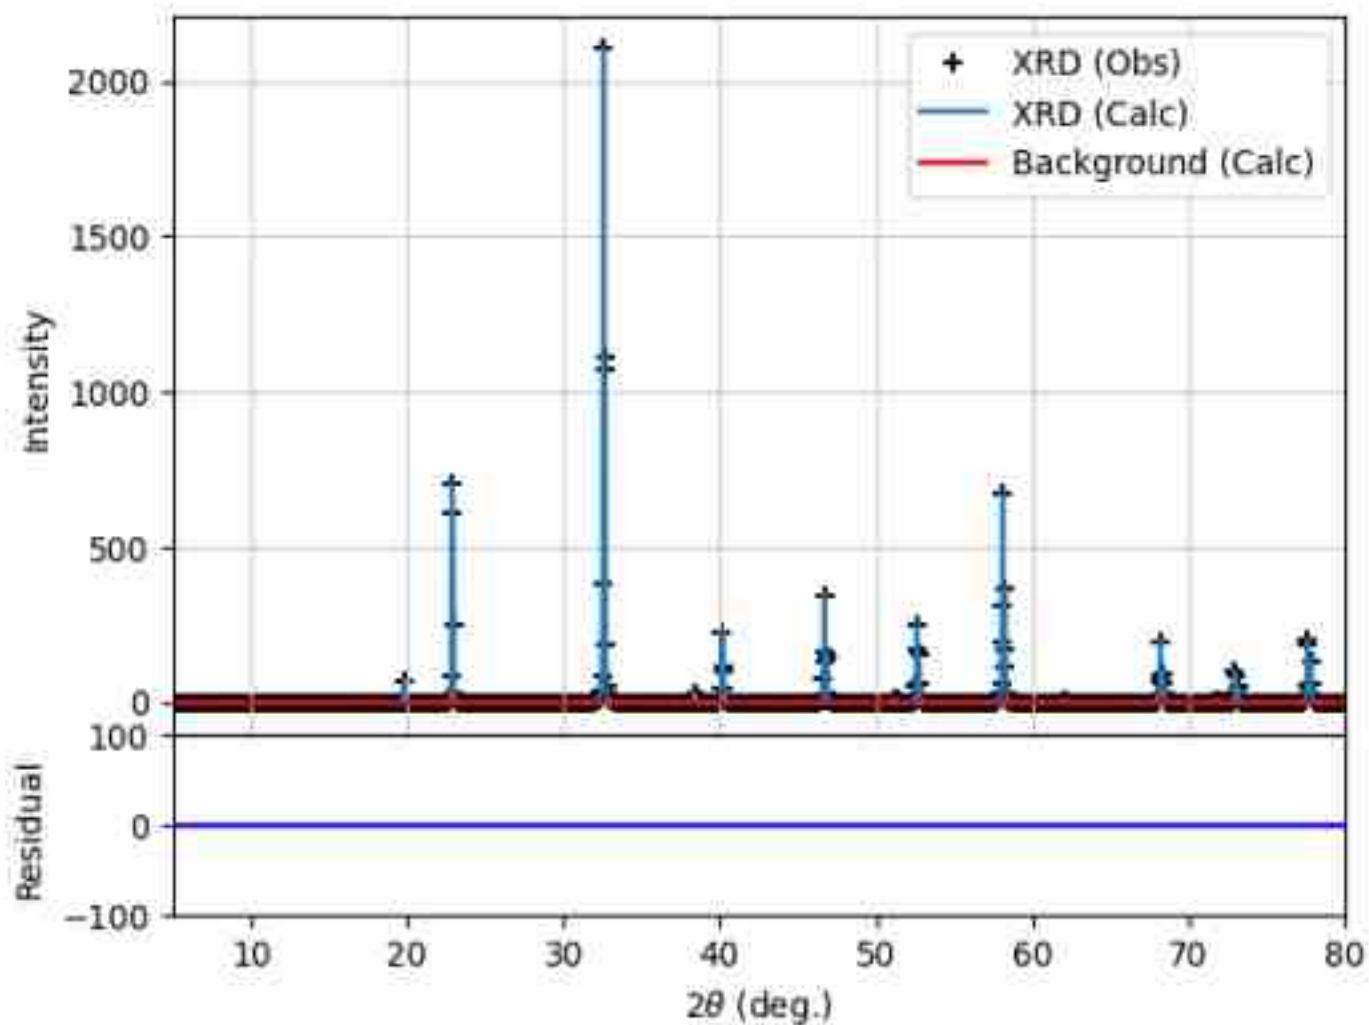

| RMSE before RR | Rwp    | RMSE after RR |
|----------------|--------|---------------|
| 0.001          | 0.0108 | 0.0017        |

# Sr<sub>2</sub>Br<sub>2</sub>F<sub>2</sub>

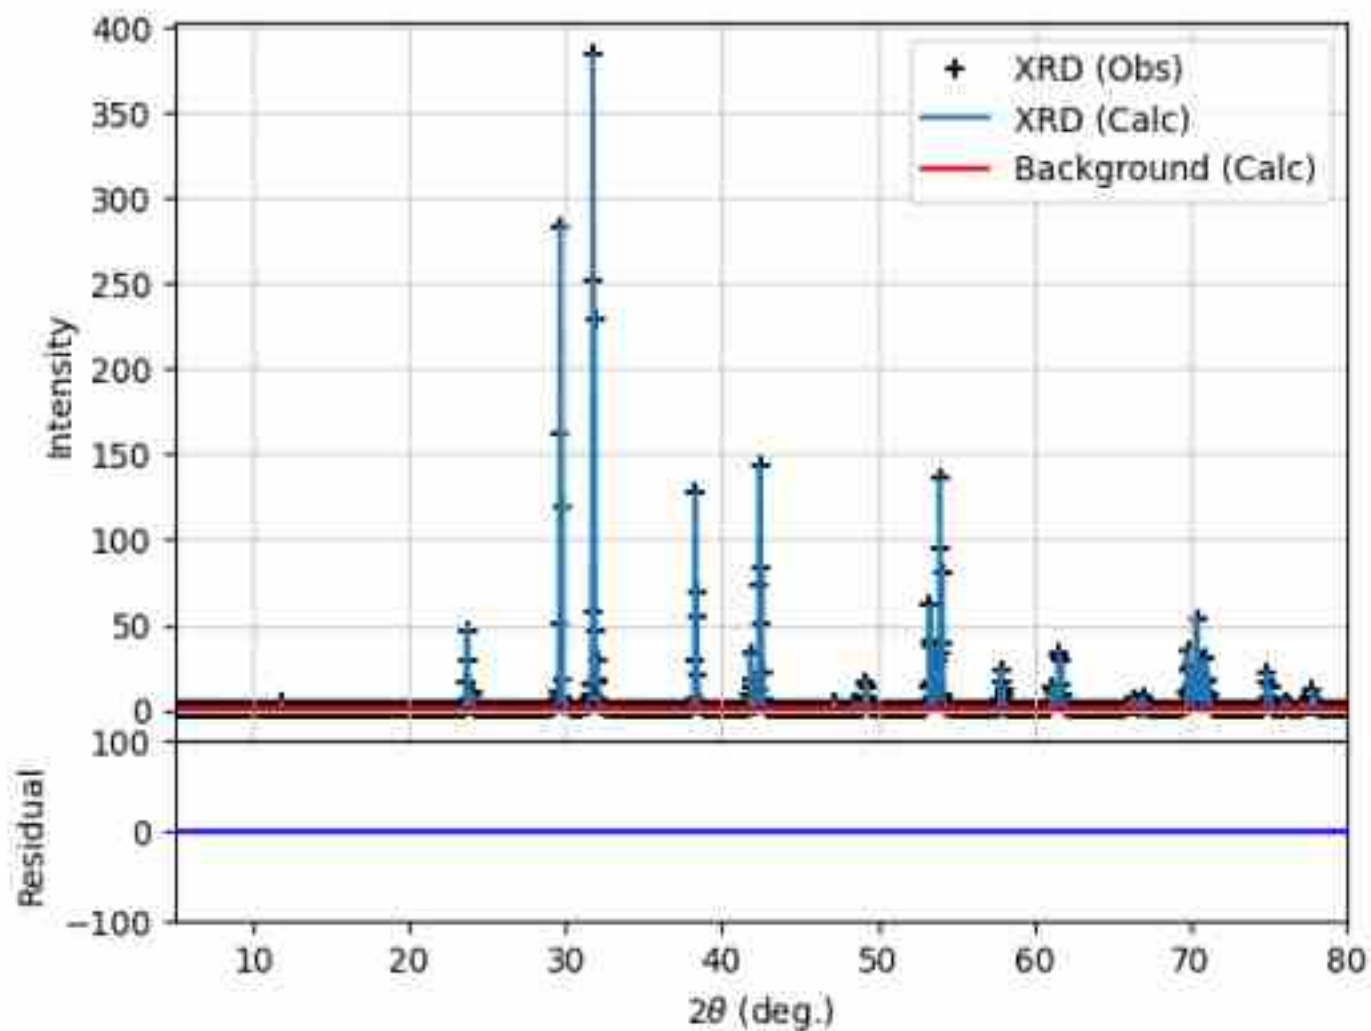

| RMSE before RR | Rwp     | RMSE after RR |
|----------------|---------|---------------|
| 0.01           | 0.00381 | 0.00083       |

# Sr<sub>2</sub>LiRh

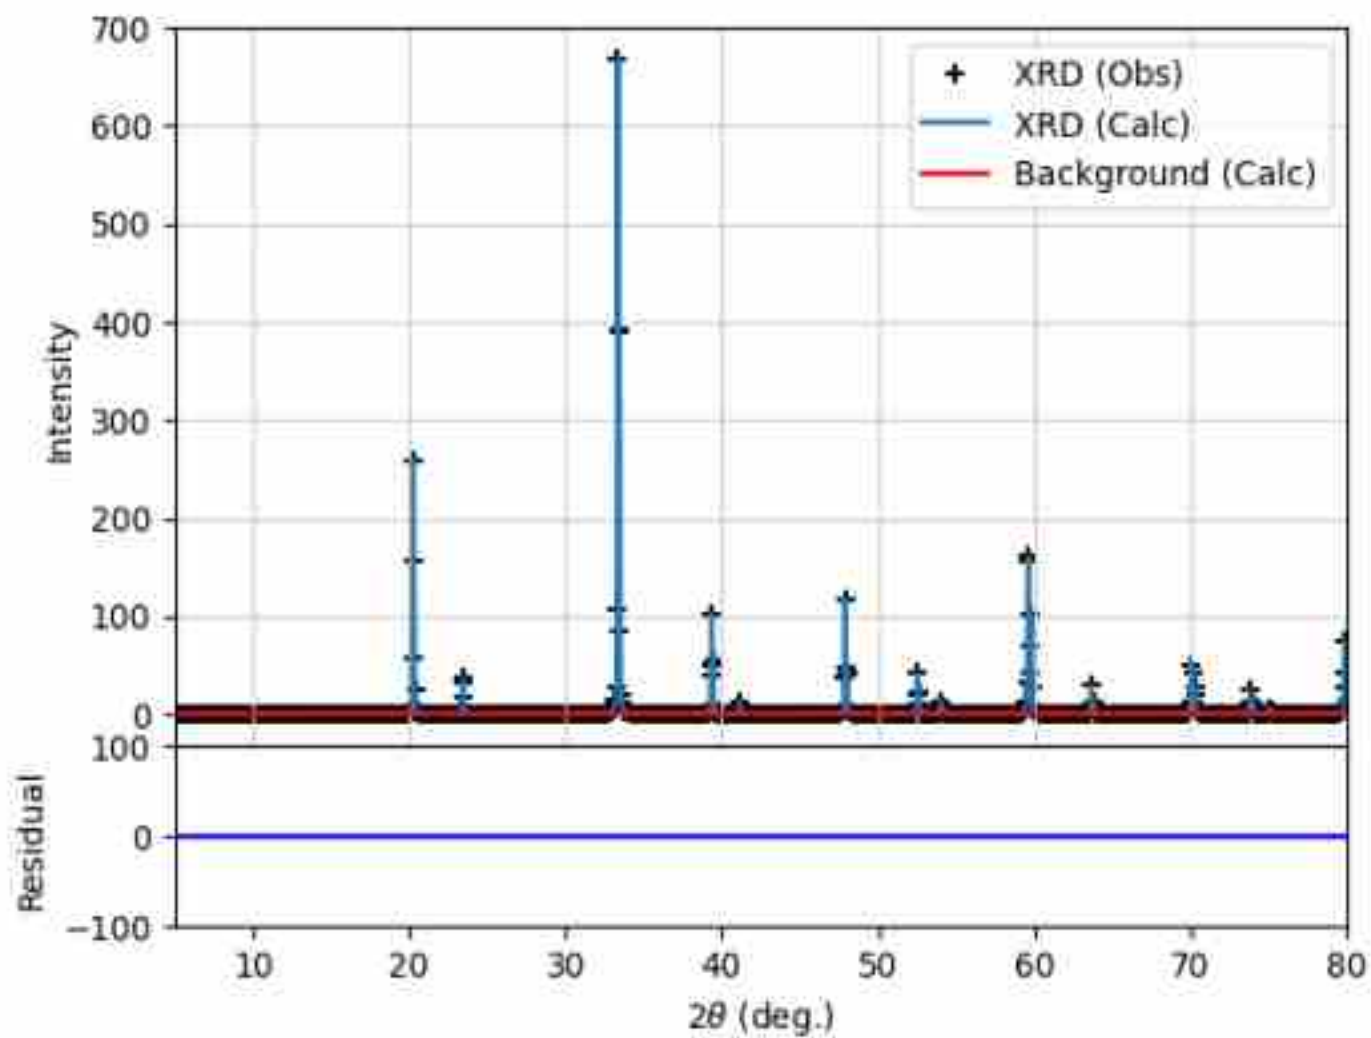

| RMSE before RR | Rwp     | RMSE after RR |
|----------------|---------|---------------|
| 0.001          | 0.00597 | 0.00134       |

# Sr<sub>2</sub>MgReO<sub>6</sub>

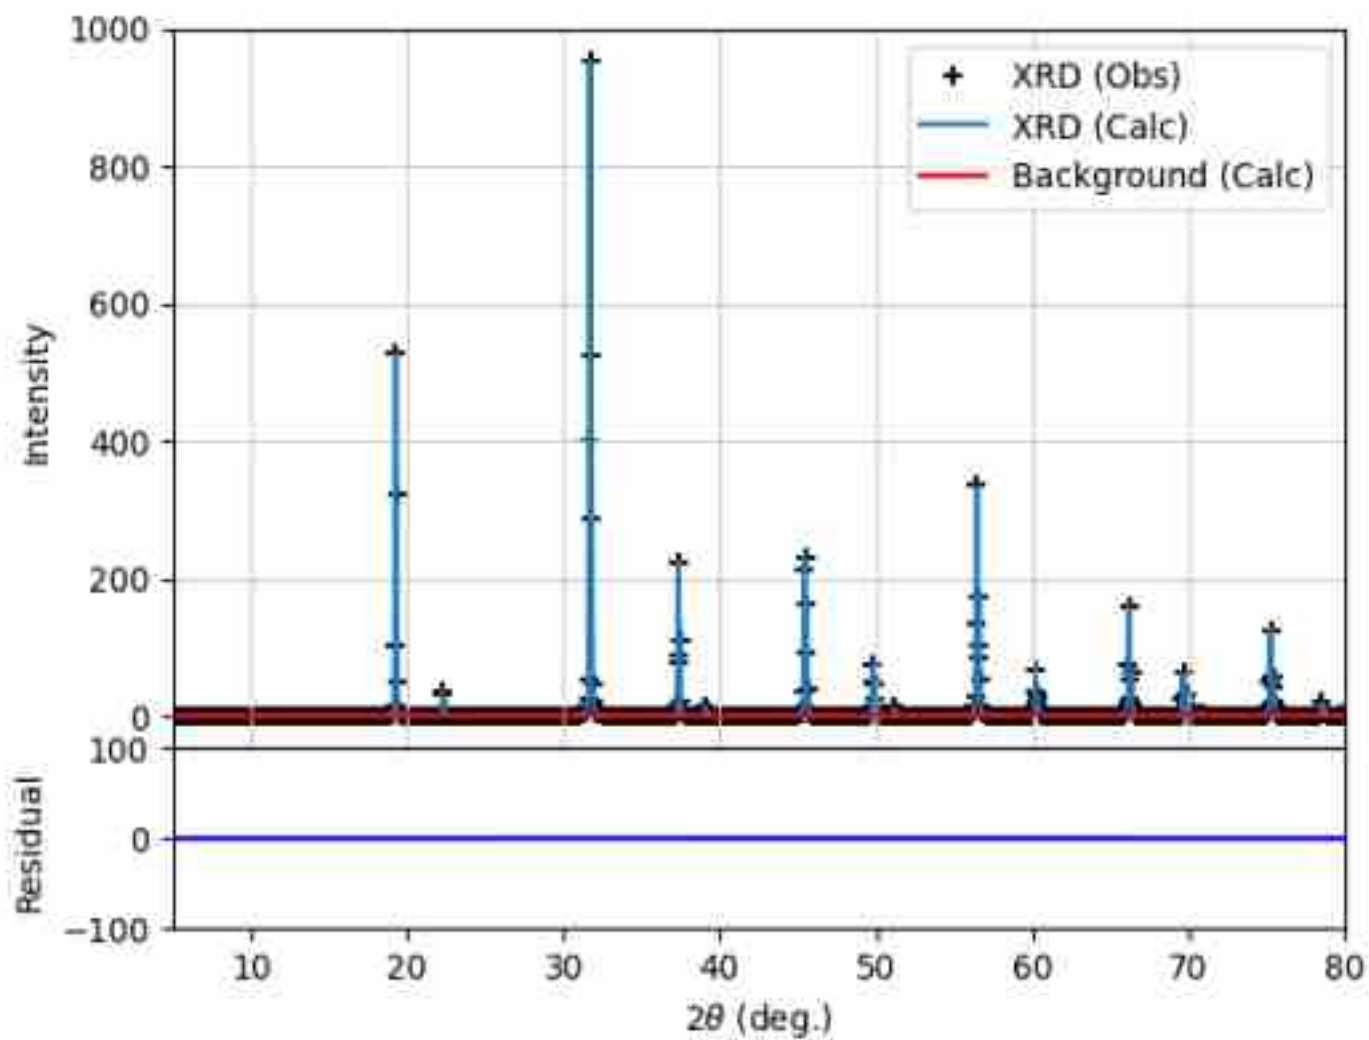

| RMSE before RR | Rwp     | RMSE after RR |
|----------------|---------|---------------|
| 0.01           | 0.13449 | 0.0139        |

# Sr3Pb1S4

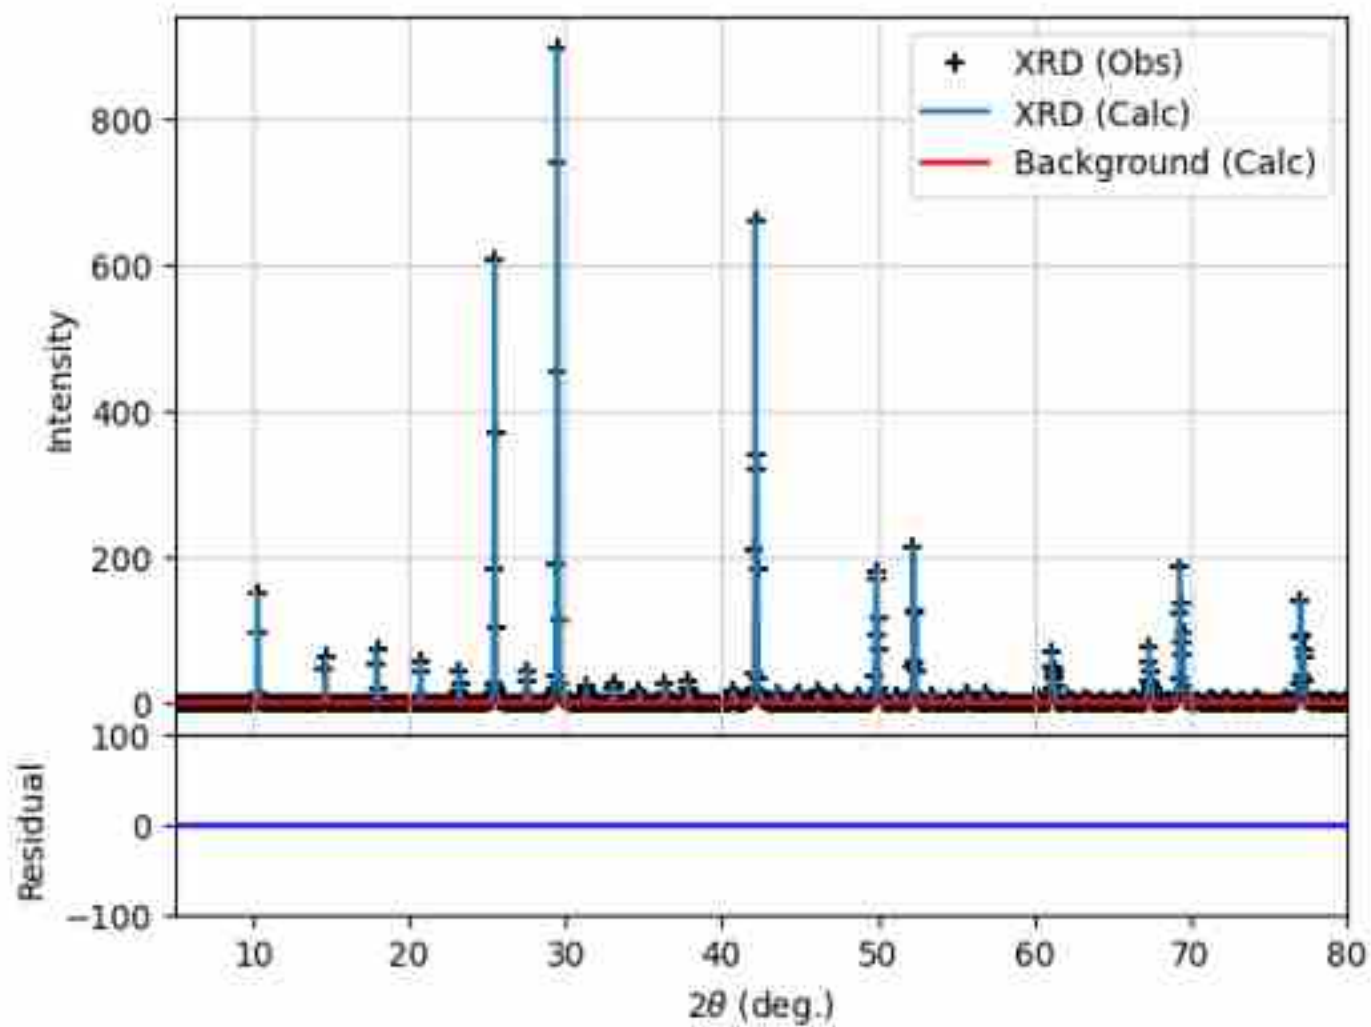

| RMSE before RR | Rwp     | RMSE after RR |
|----------------|---------|---------------|
| 0.01           | 0.00293 | 0.00059       |

# Sr5Mg1

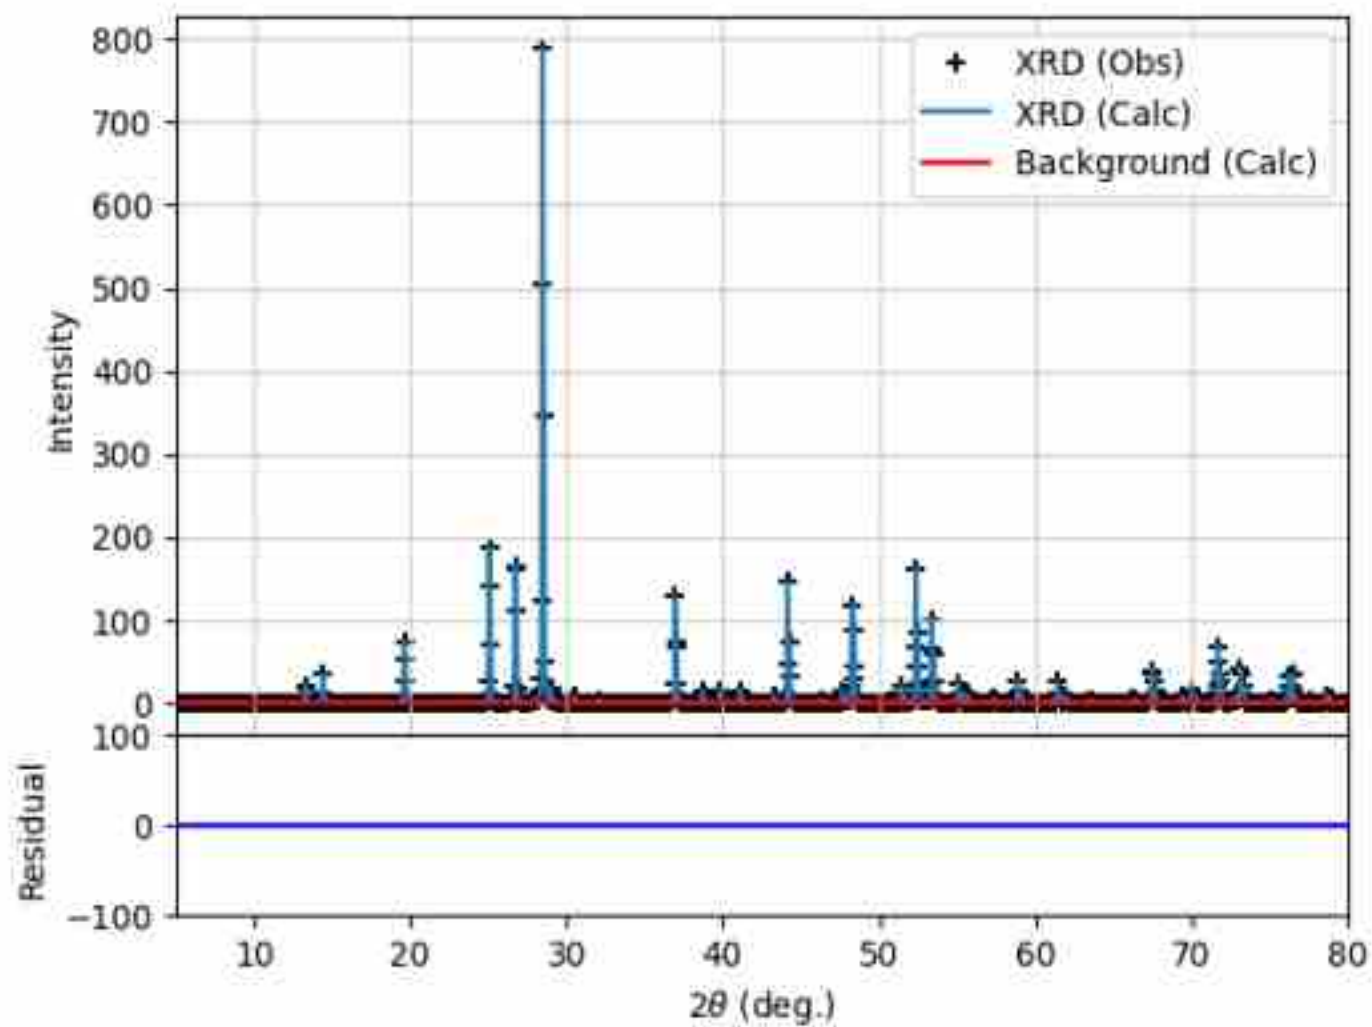

| RMSE before RR | Rwp     | RMSE after RR |
|----------------|---------|---------------|
| 0.01           | 0.01729 | 0.00155       |



# Ta1Al1Fe2

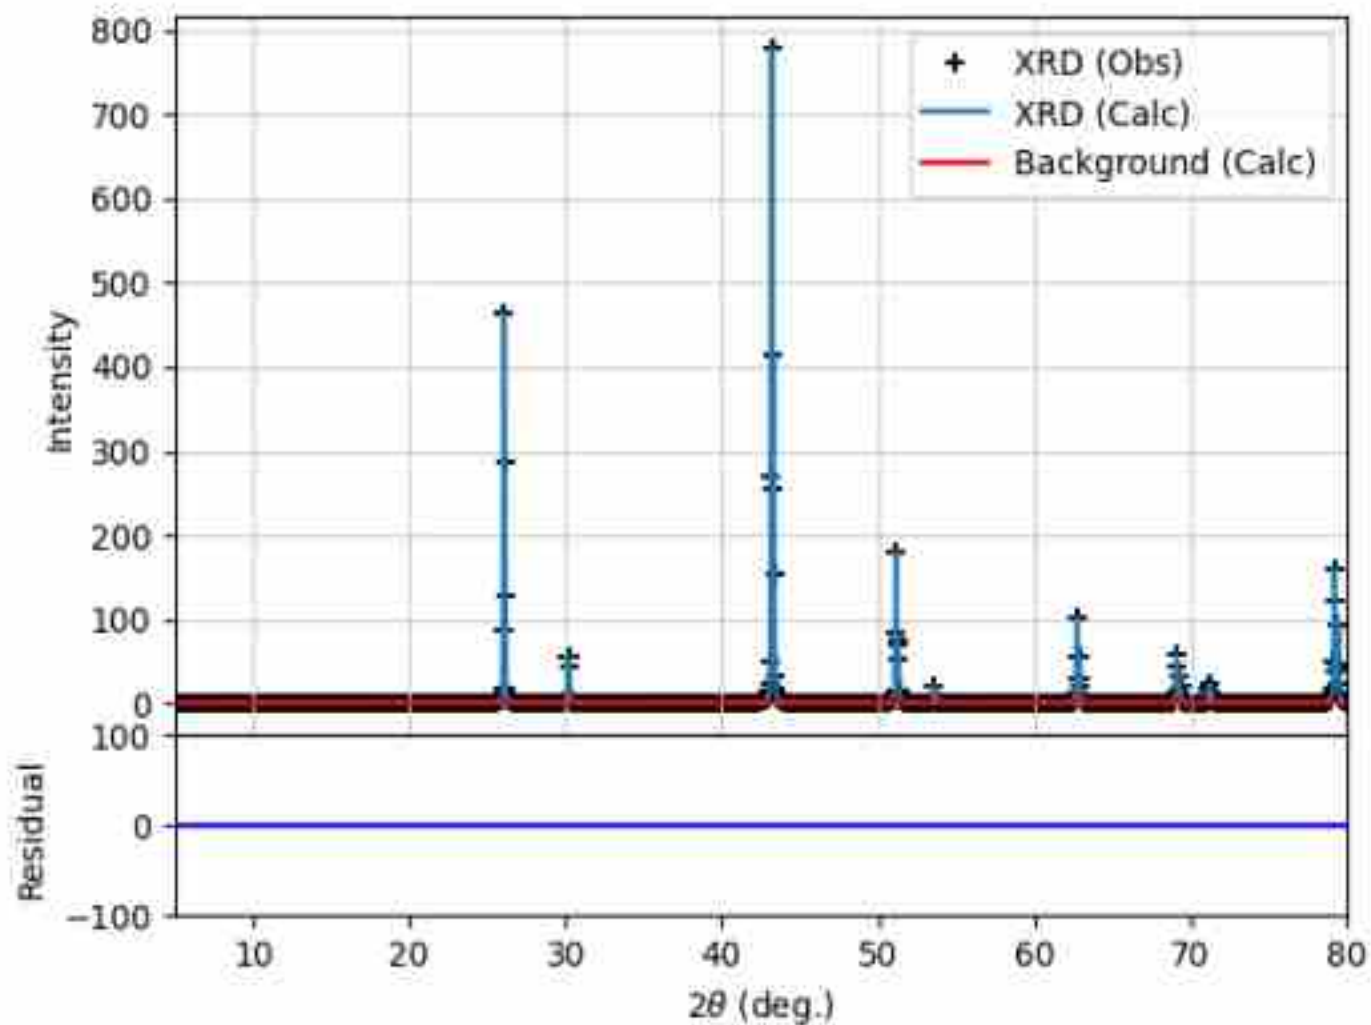

| RMSE before RR | Rwp     | RMSE after RR |
|----------------|---------|---------------|
| 0.001          | 0.00255 | 0.00104       |

# Ta1Be1Ru2

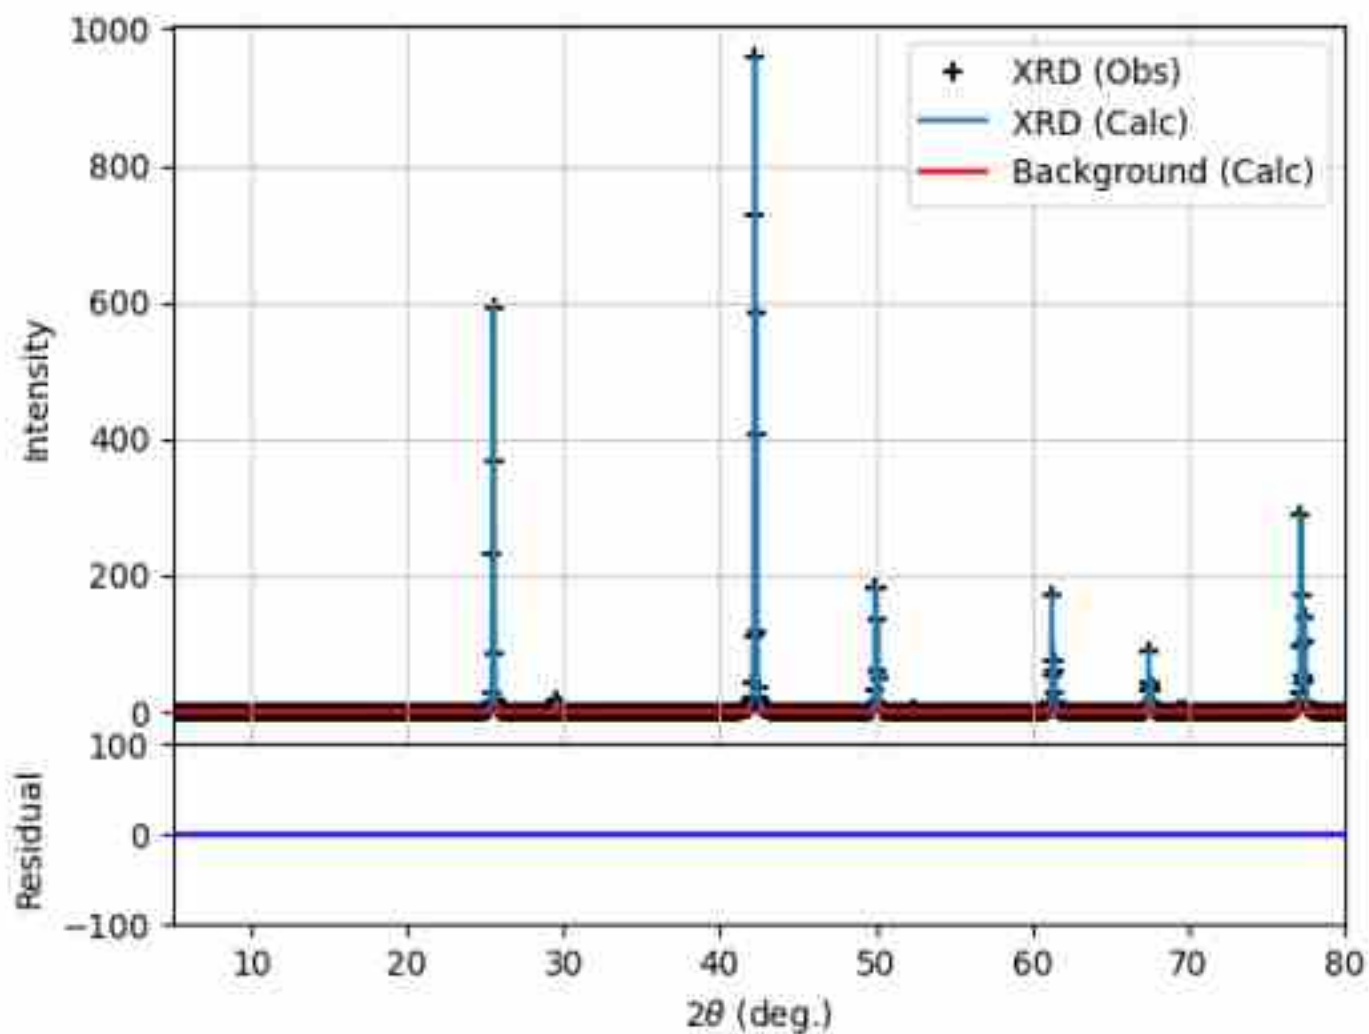

| RMSE before RR | Rwp     | RMSE after RR |
|----------------|---------|---------------|
| 0.001          | 0.00475 | 0.00124       |

# Ta1C1

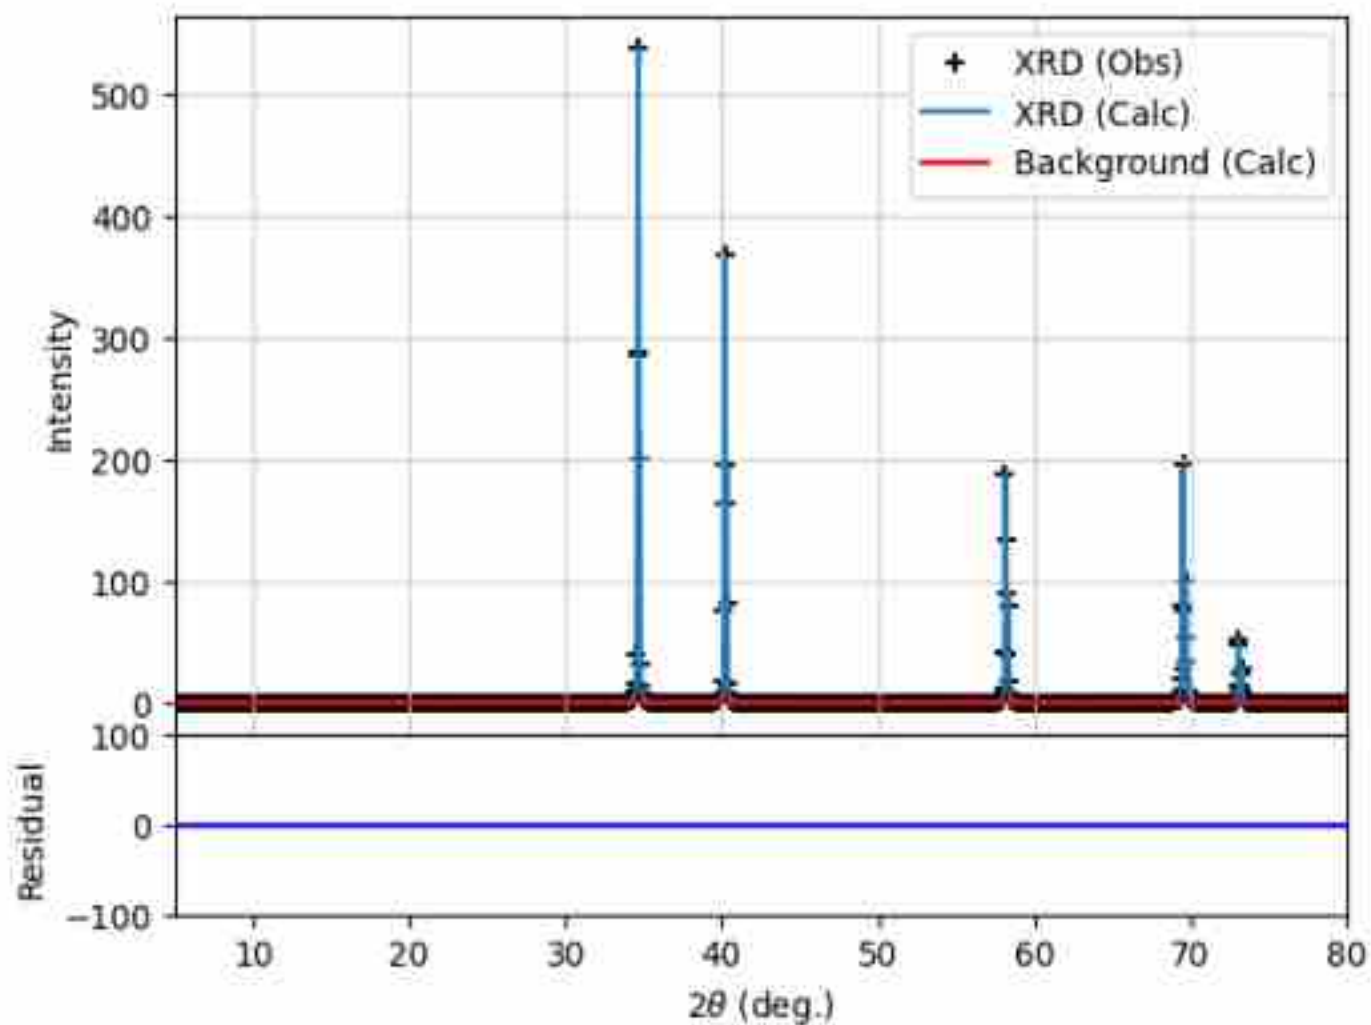

| RMSE before RR | Rwp    | RMSE after RR |
|----------------|--------|---------------|
| 0.001          | 0.0035 | 0.0013        |

# Ta1Ga1Os2

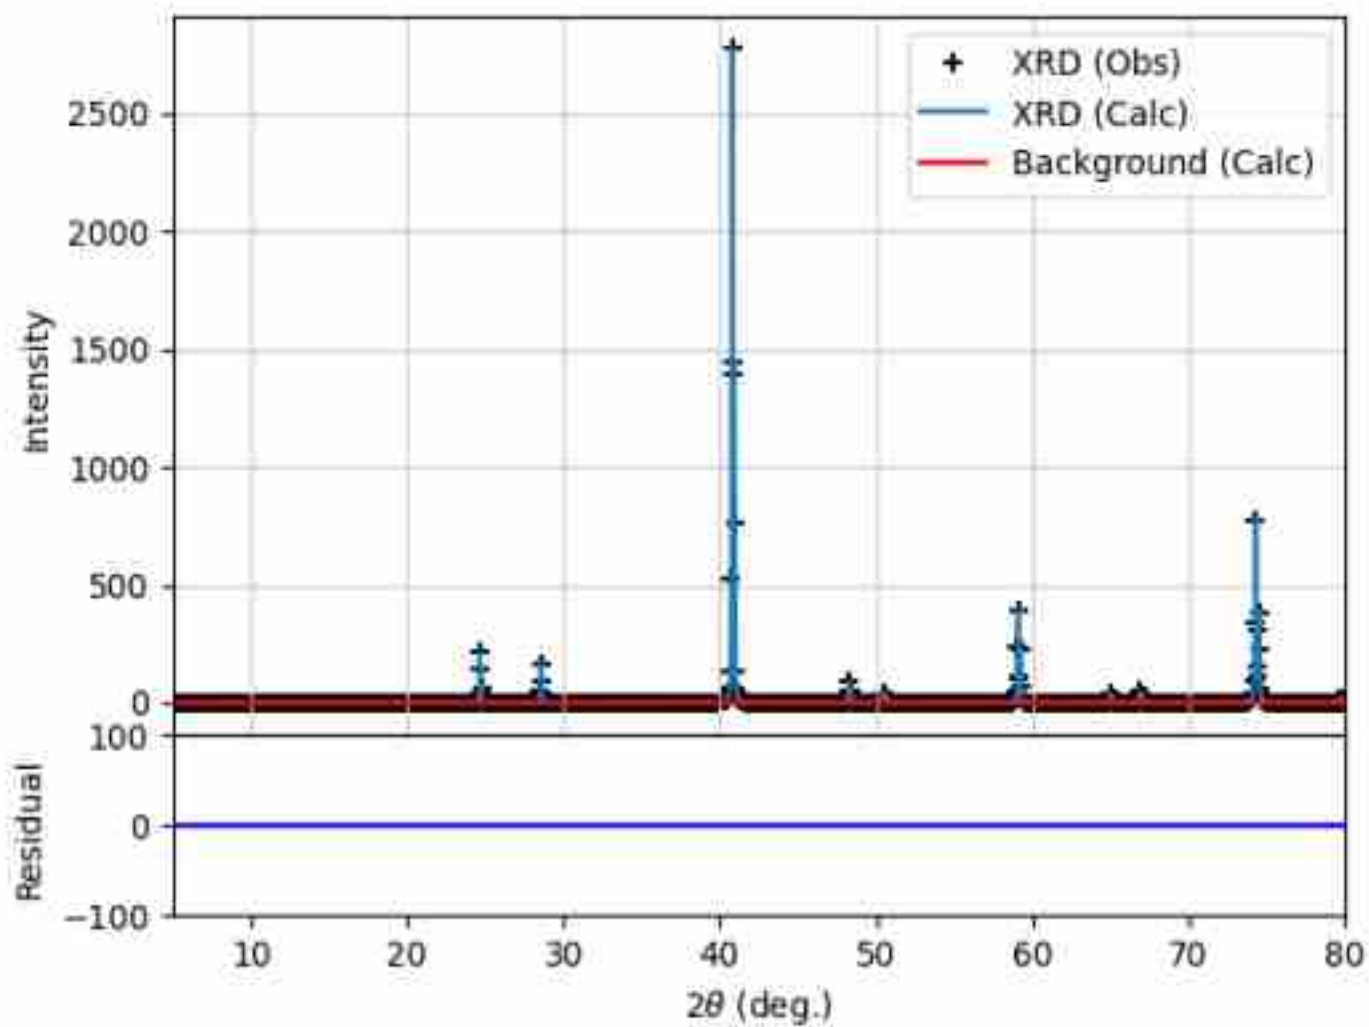

| RMSE before RR | Rwp     | RMSE after RR |
|----------------|---------|---------------|
| 0.001          | 0.00021 | 0.00015       |

Ta1Nb1

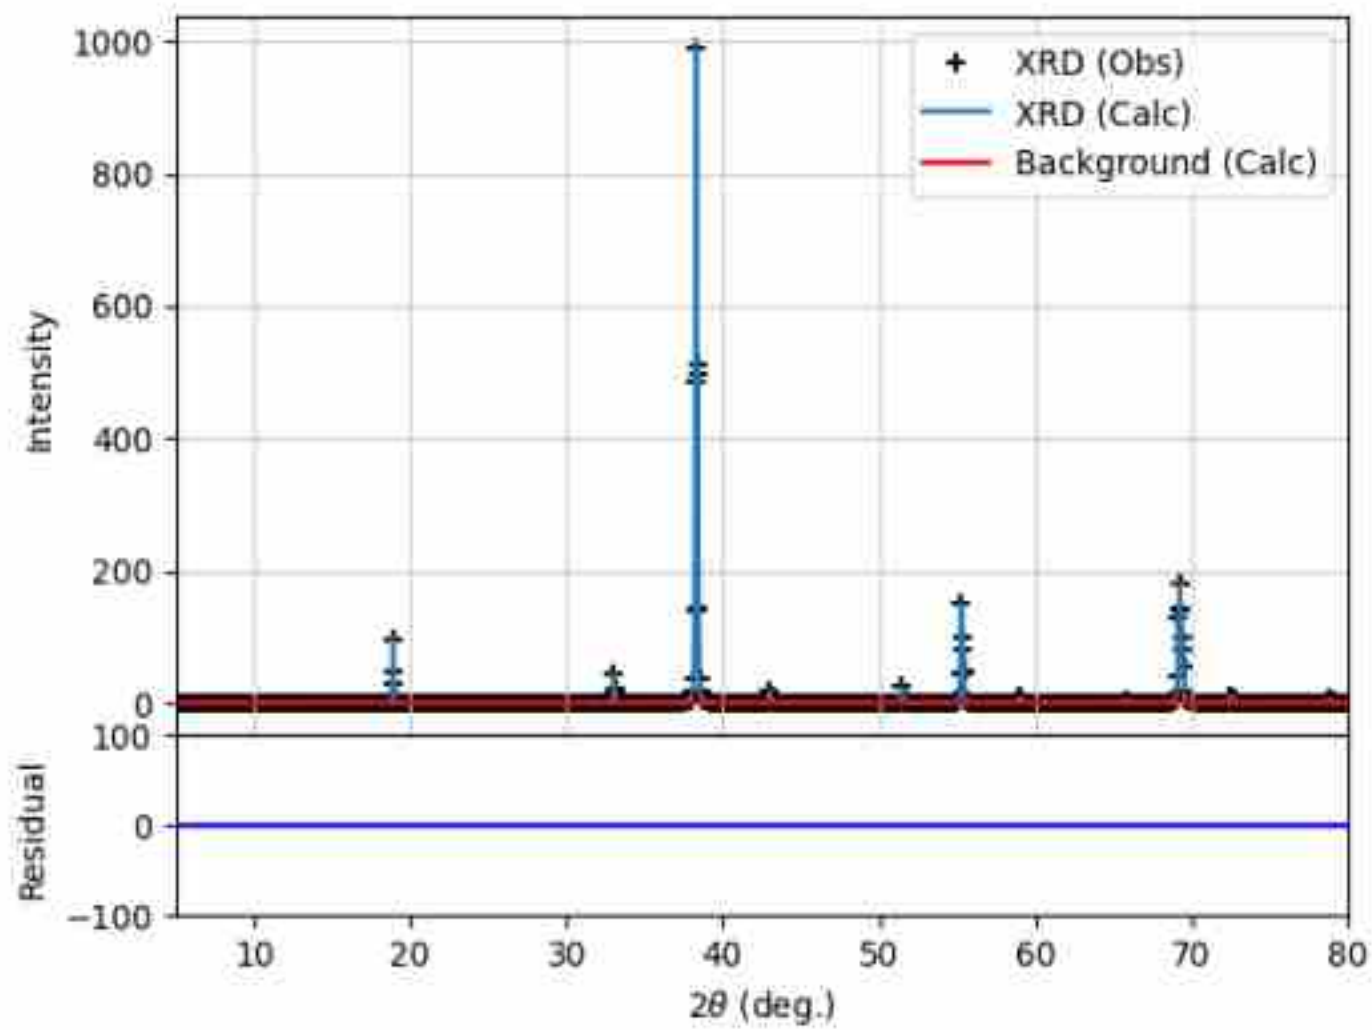

| RMSE before RR | Rwp     | RMSE after RR |
|----------------|---------|---------------|
| 0.001          | 0.00346 | 0.00014       |

# Ta1Pd3

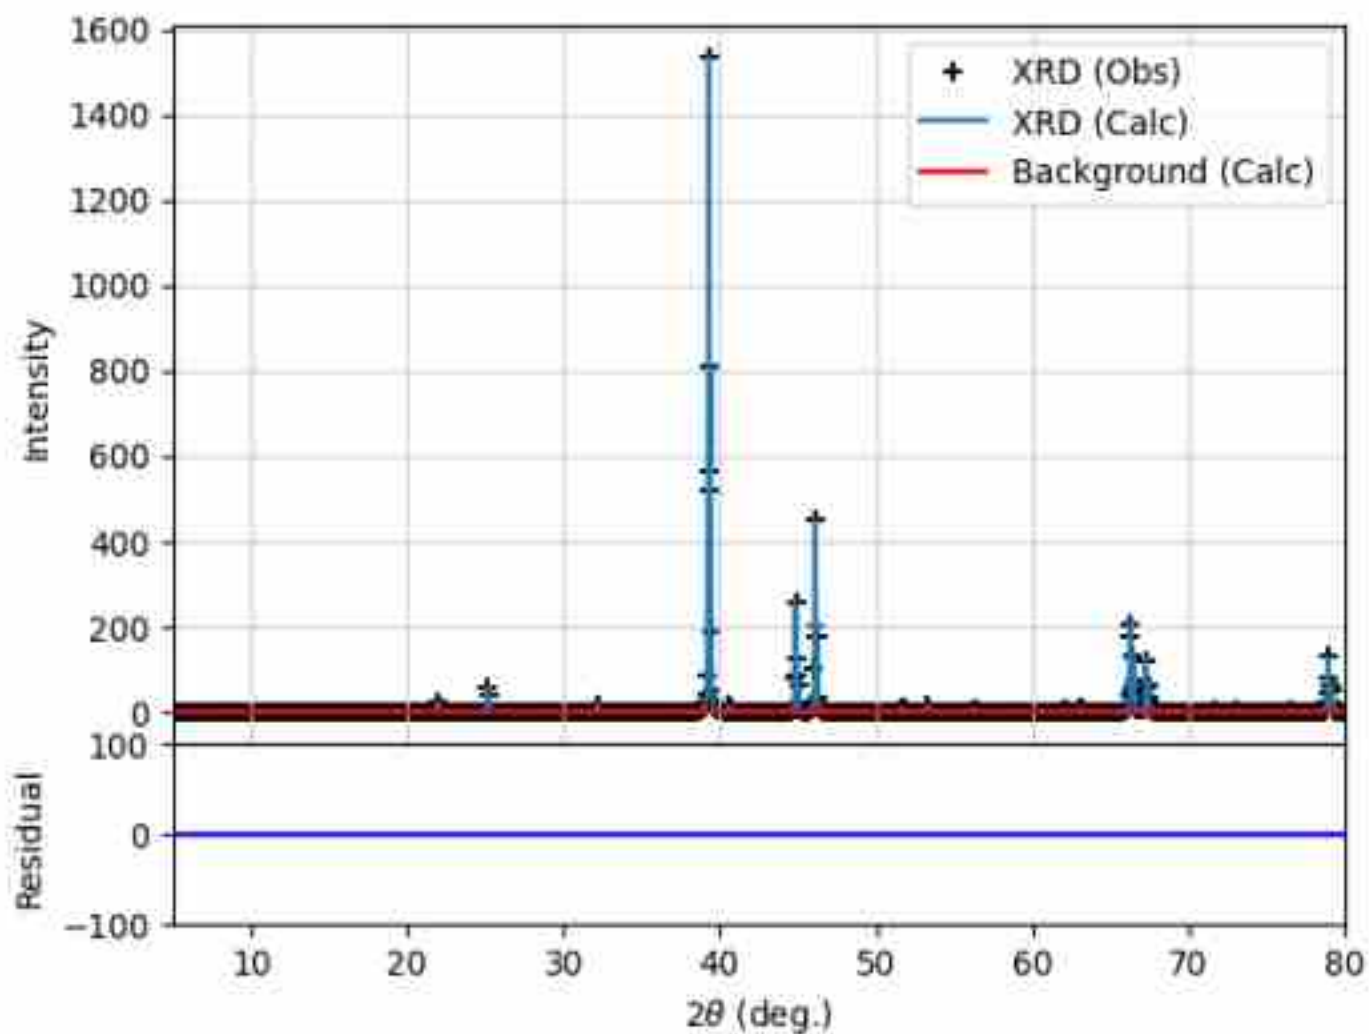

| RMSE before RR | Rwp     | RMSE after RR |
|----------------|---------|---------------|
| 0.001          | 0.00398 | 0.00039       |

# Ta1S2

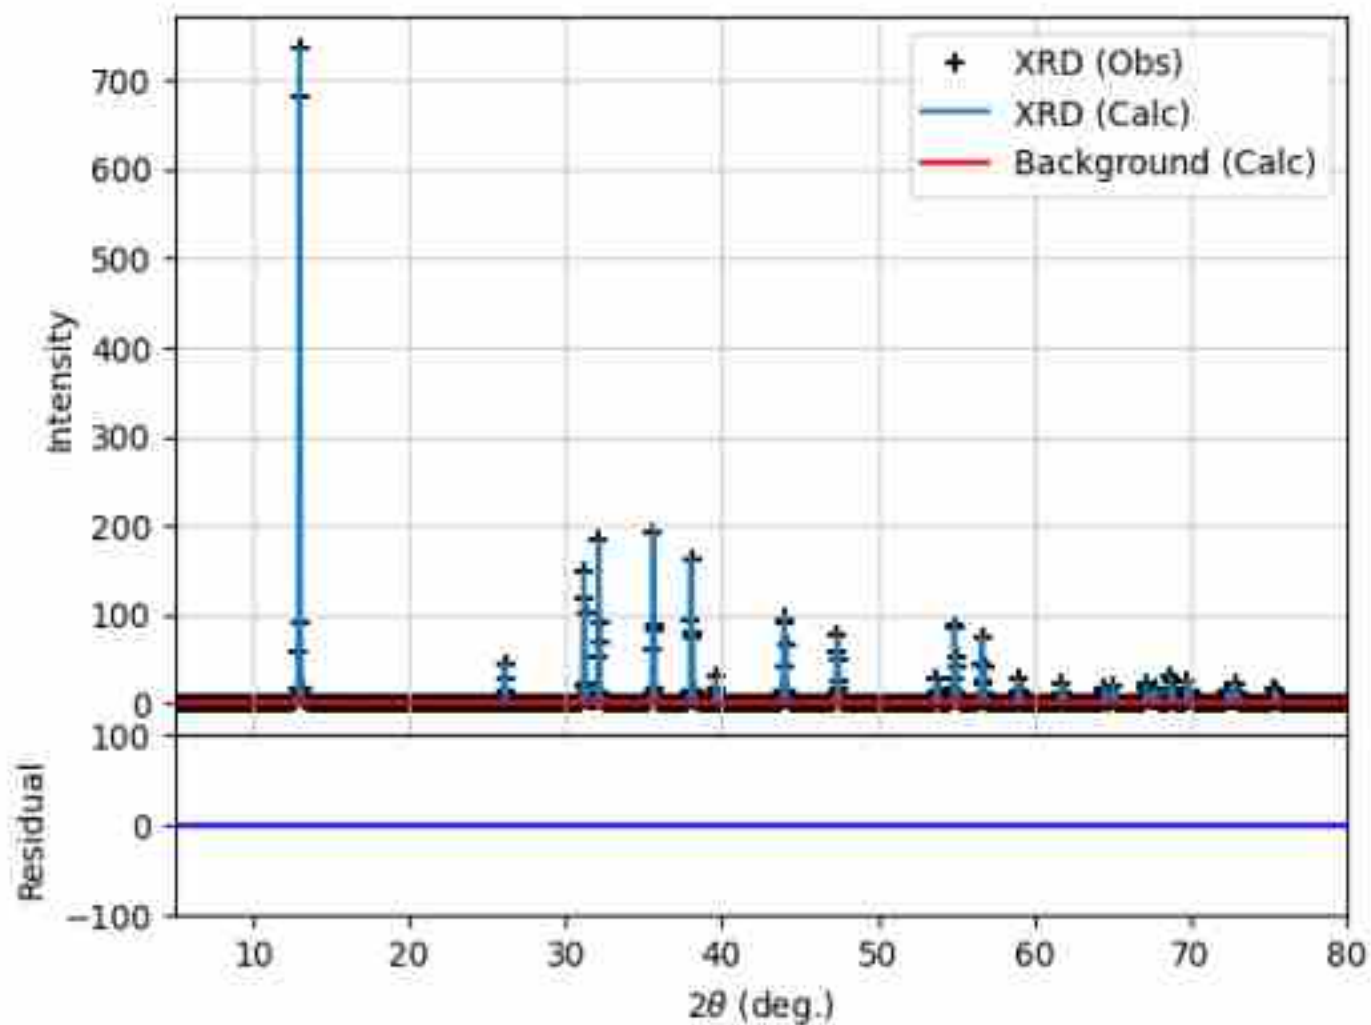

| RMSE before RR | Rwp     | RMSE after RR |
|----------------|---------|---------------|
| 0.01           | 0.00287 | 0.00057       |

# Ta<sub>1</sub>Si<sub>1</sub>Ru<sub>2</sub>

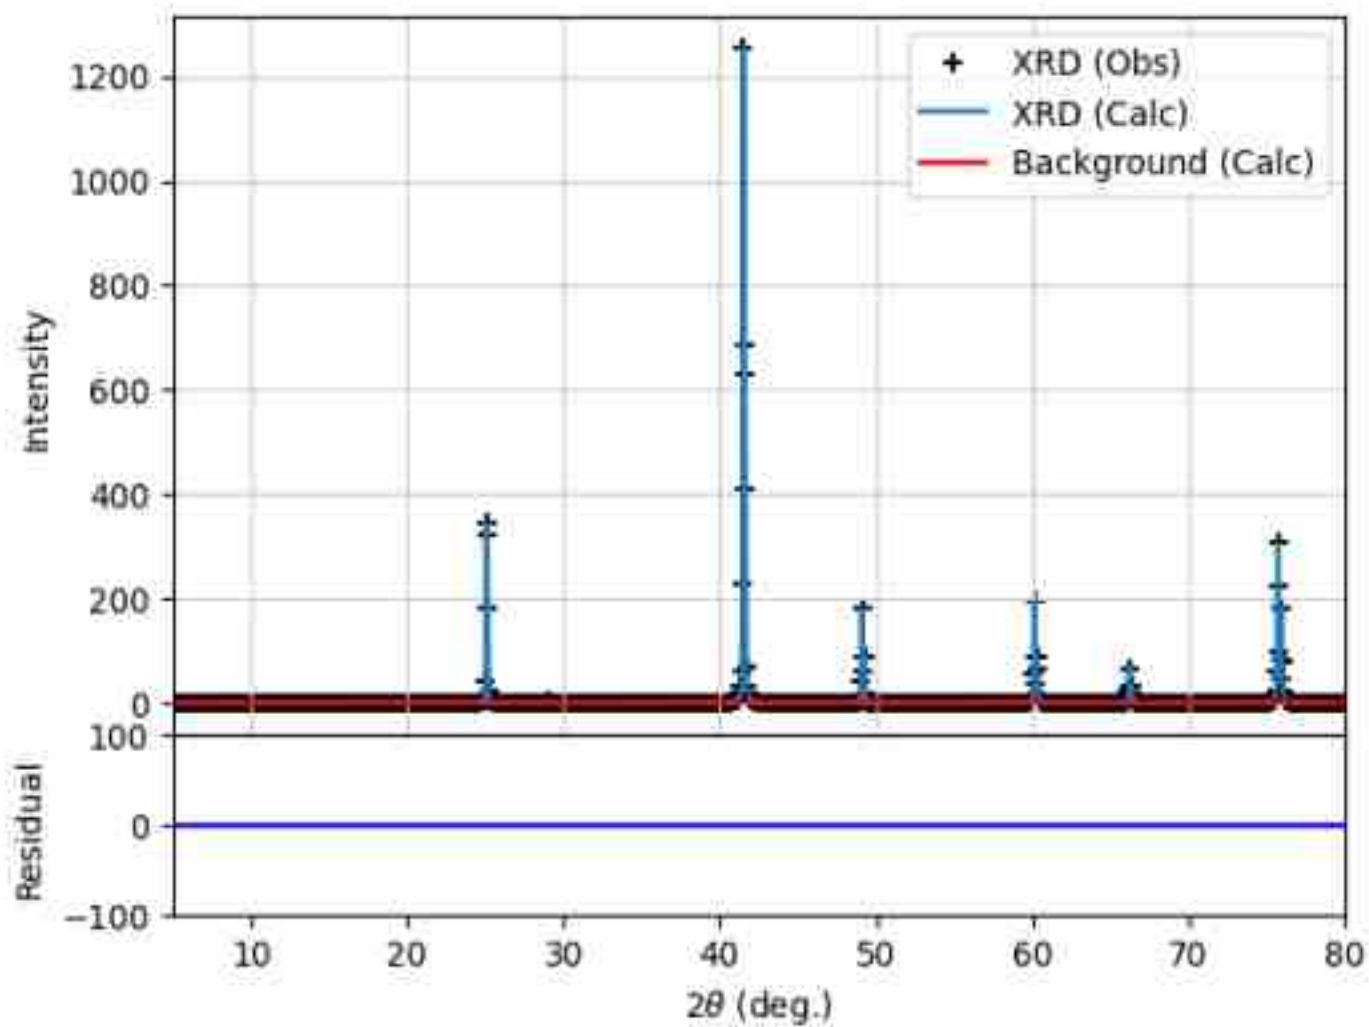

| RMSE before RR | Rwp     | RMSE after RR |
|----------------|---------|---------------|
| 0.001          | 0.00585 | 0.00057       |



# Ta1Tc1

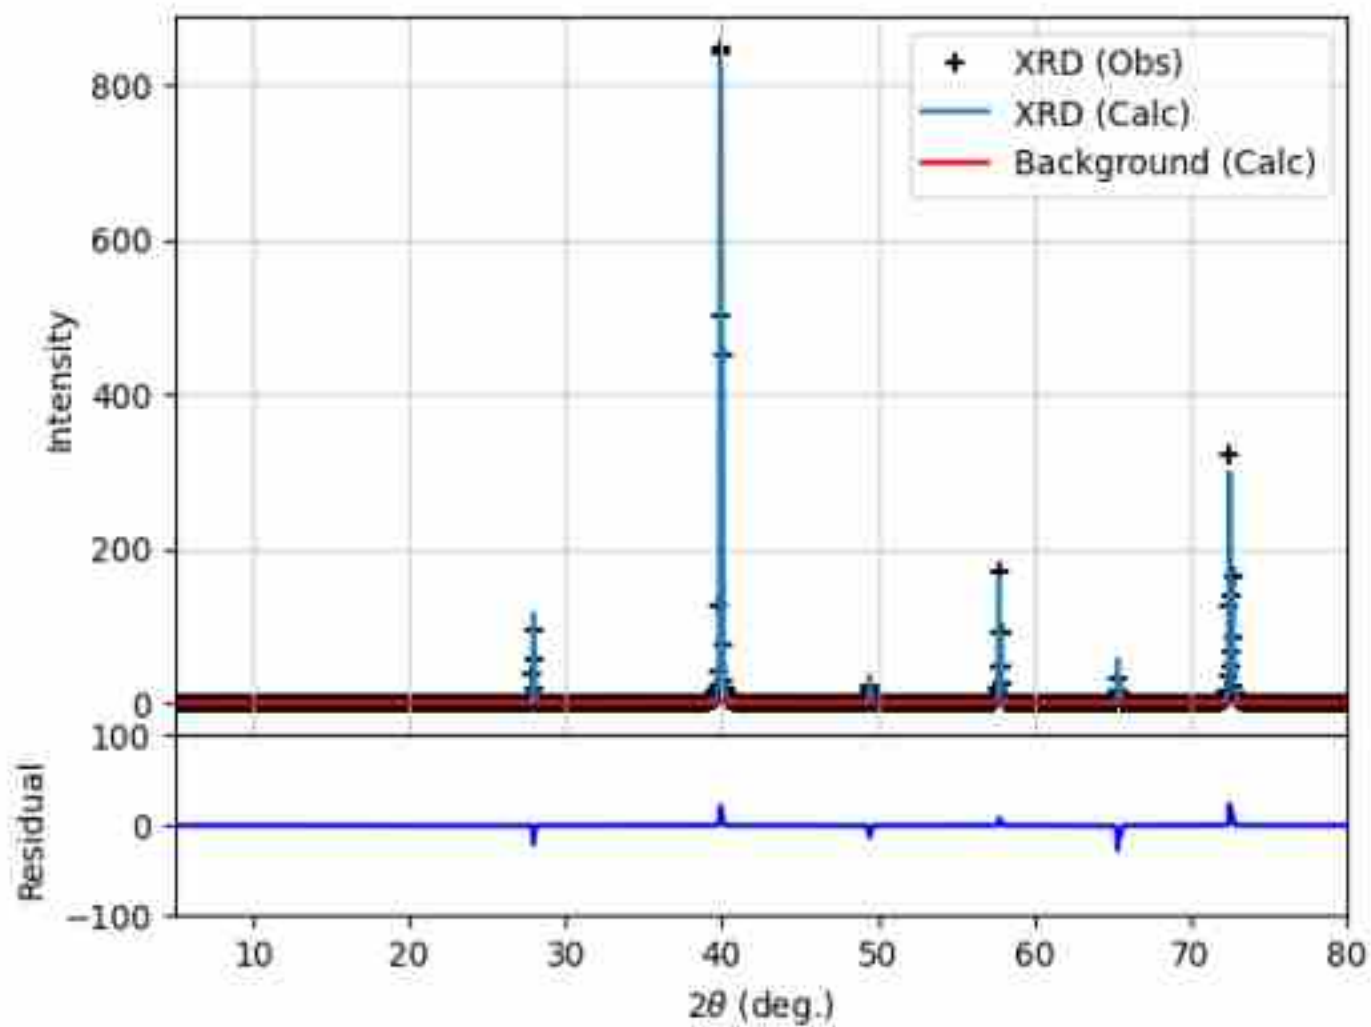

| RMSE before RR | Rwp     | RMSE after RR |
|----------------|---------|---------------|
| 0.001          | 13.0027 | 0.00064       |

# Ta1W1

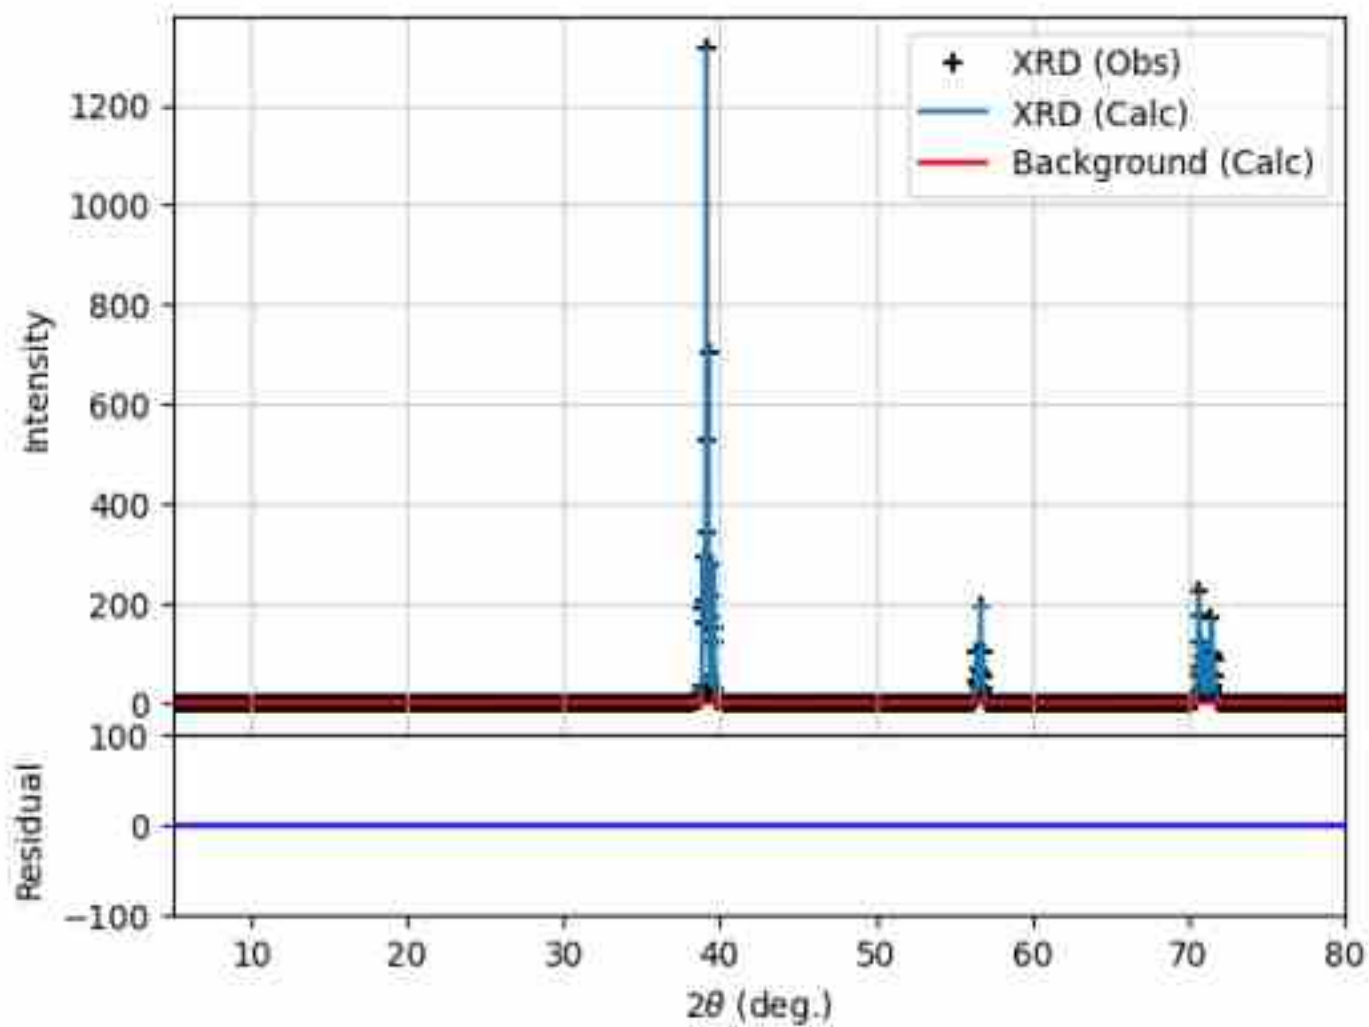

| RMSE before RR | Rwp     | RMSE after RR |
|----------------|---------|---------------|
| 0.001          | 0.00485 | 6e-05         |

# Ta<sub>1</sub>Zn<sub>1</sub>Ru<sub>2</sub>

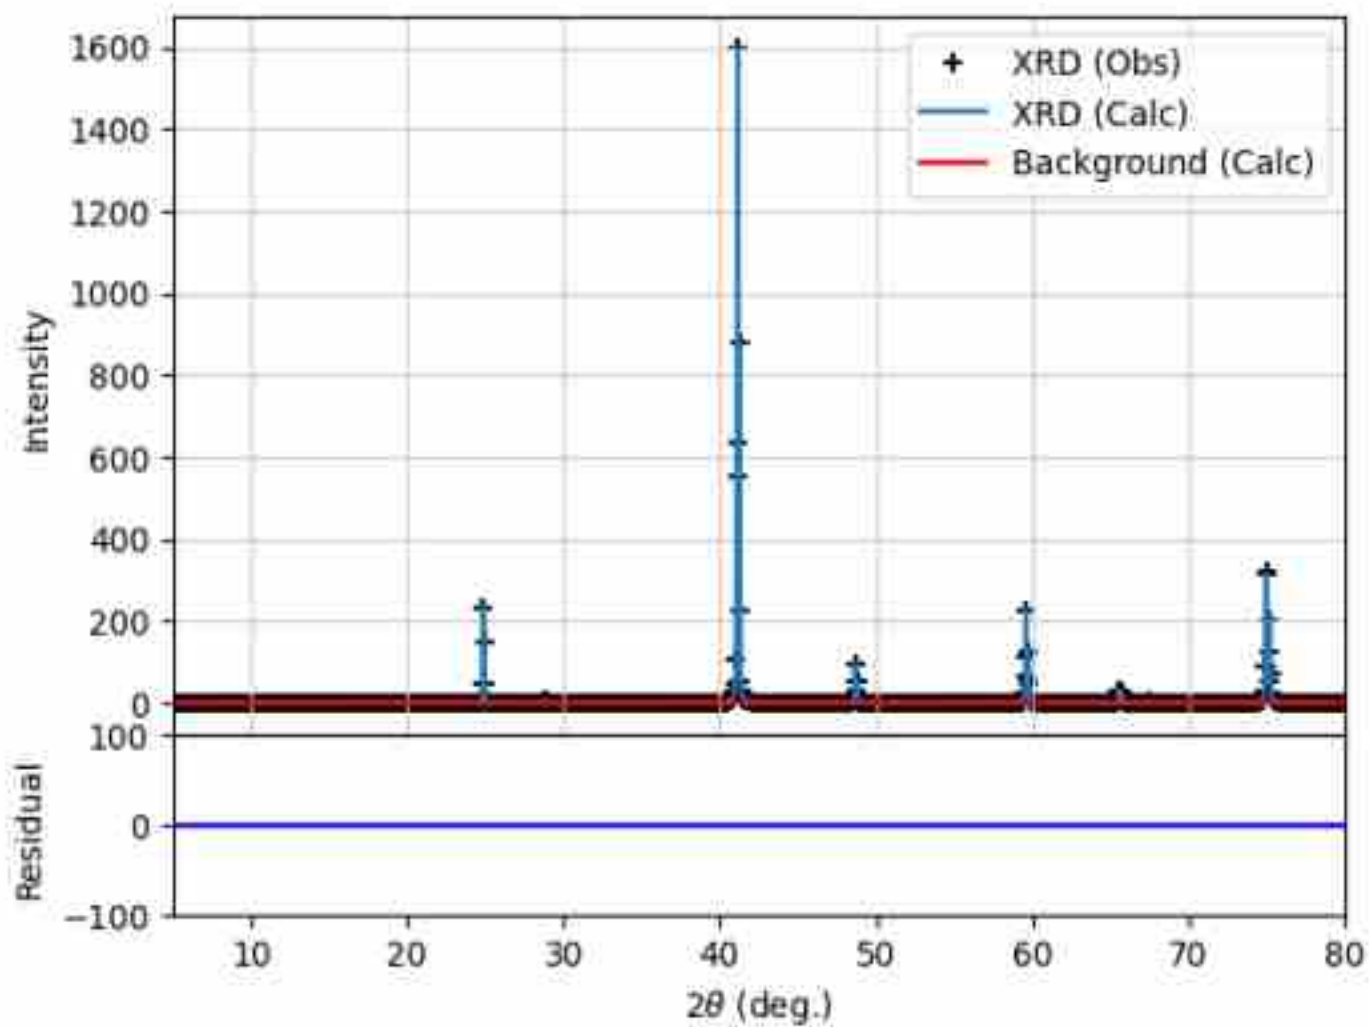

| RMSE before RR | Rwp     | RMSE after RR |
|----------------|---------|---------------|
| 0.001          | 0.00392 | 0.00038       |

# Ta2Cr1Ru1

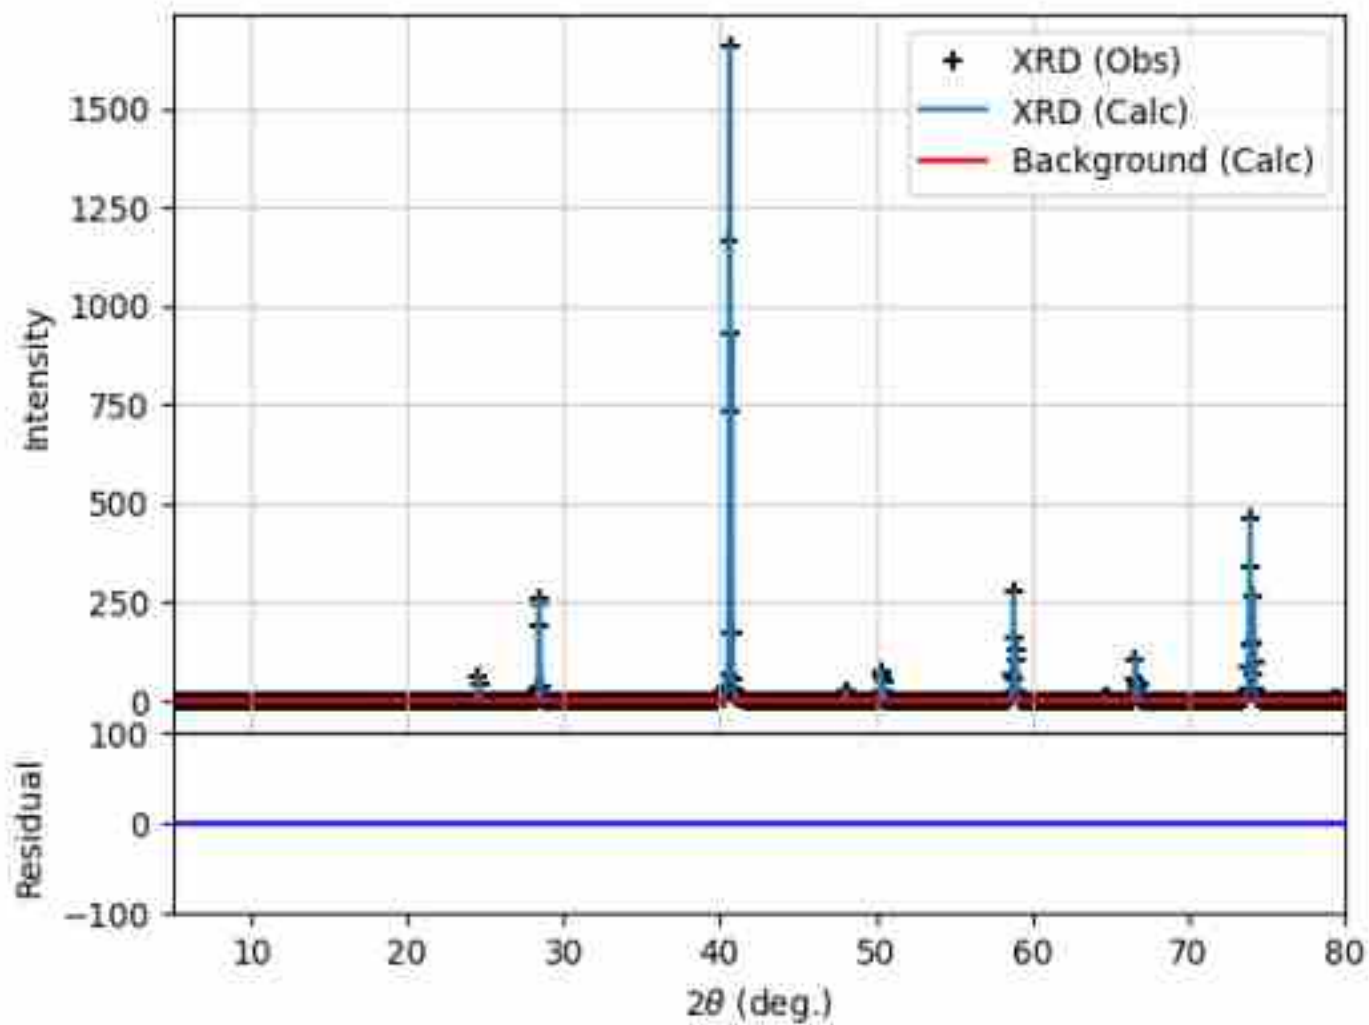

| RMSE before RR | Rwp     | RMSE after RR |
|----------------|---------|---------------|
| 0.001          | 0.00075 | 0.00049       |

# Ta<sub>2</sub>Os<sub>1</sub>Ru<sub>1</sub>

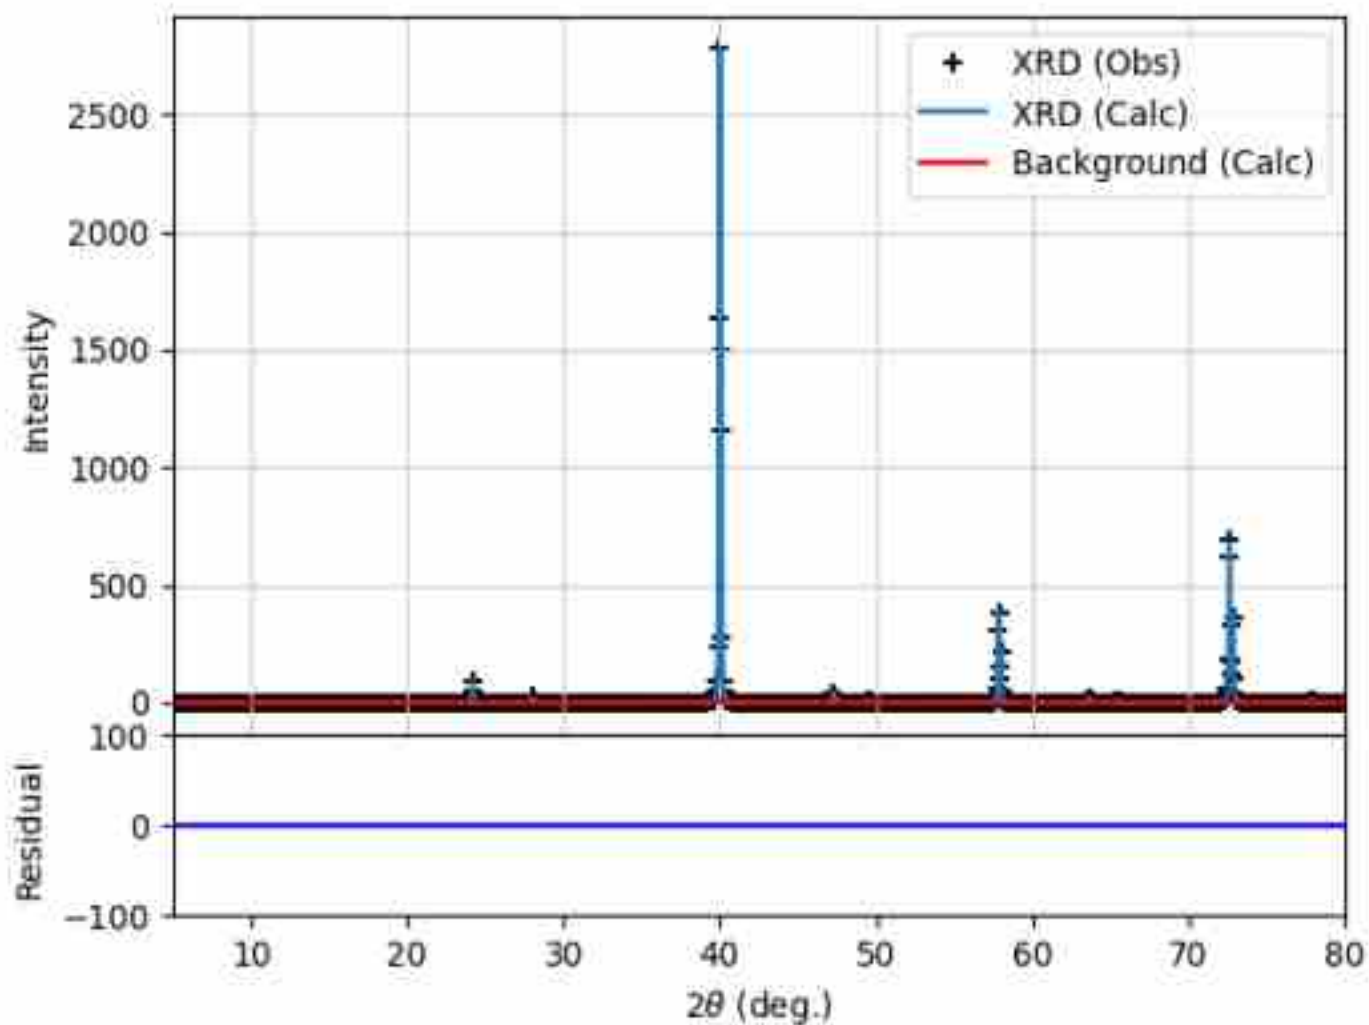

| RMSE before RR | Rwp     | RMSE after RR |
|----------------|---------|---------------|
| 0.001          | 0.00646 | 0.0005        |

# Ta<sub>2</sub>ReMo<sub>1</sub>

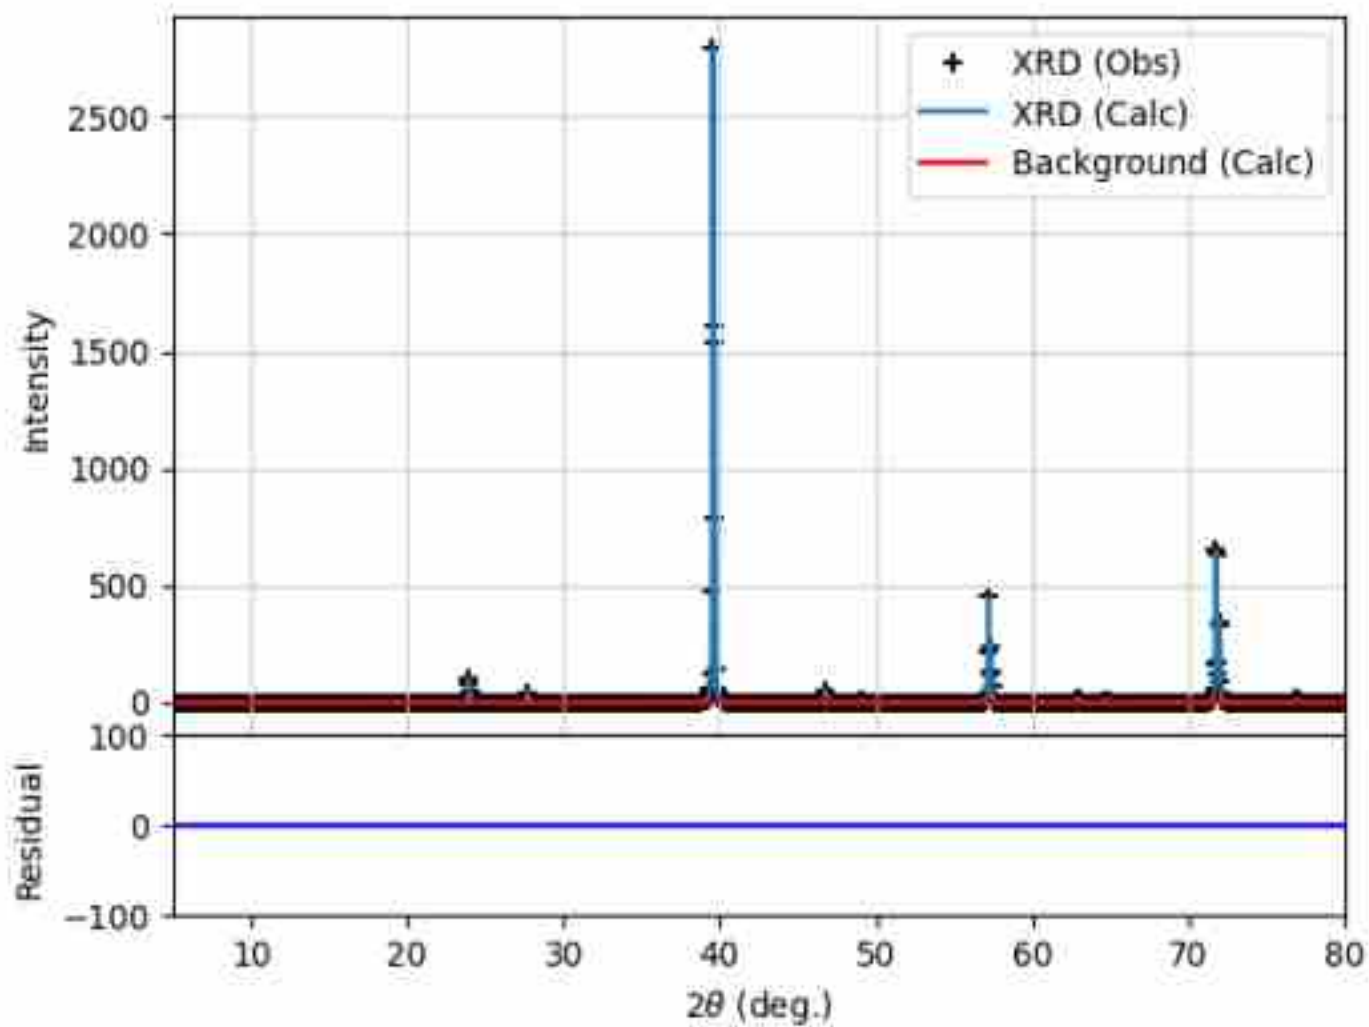

| RMSE before RR | Rwp     | RMSE after RR |
|----------------|---------|---------------|
| 0.001          | 0.00421 | 0.00016       |

# Ta<sub>2</sub>RuW<sub>1</sub>

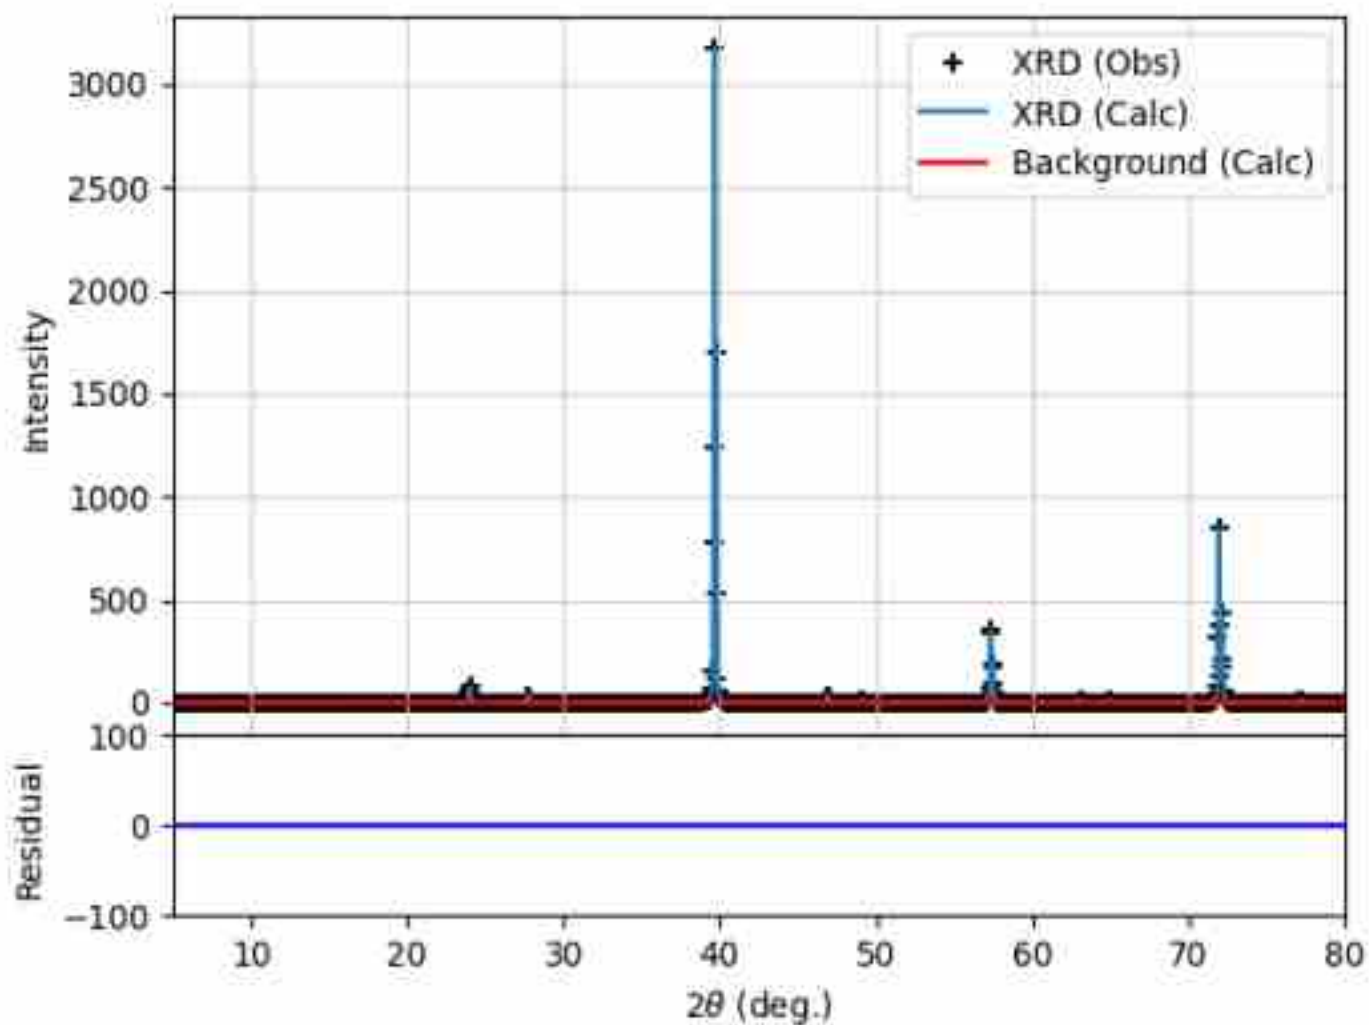

| RMSE before RR | Rwp     | RMSE after RR |
|----------------|---------|---------------|
| 0.001          | 0.00395 | 0.00026       |

# Ta<sub>2</sub>V<sub>10</sub>S<sub>1</sub>

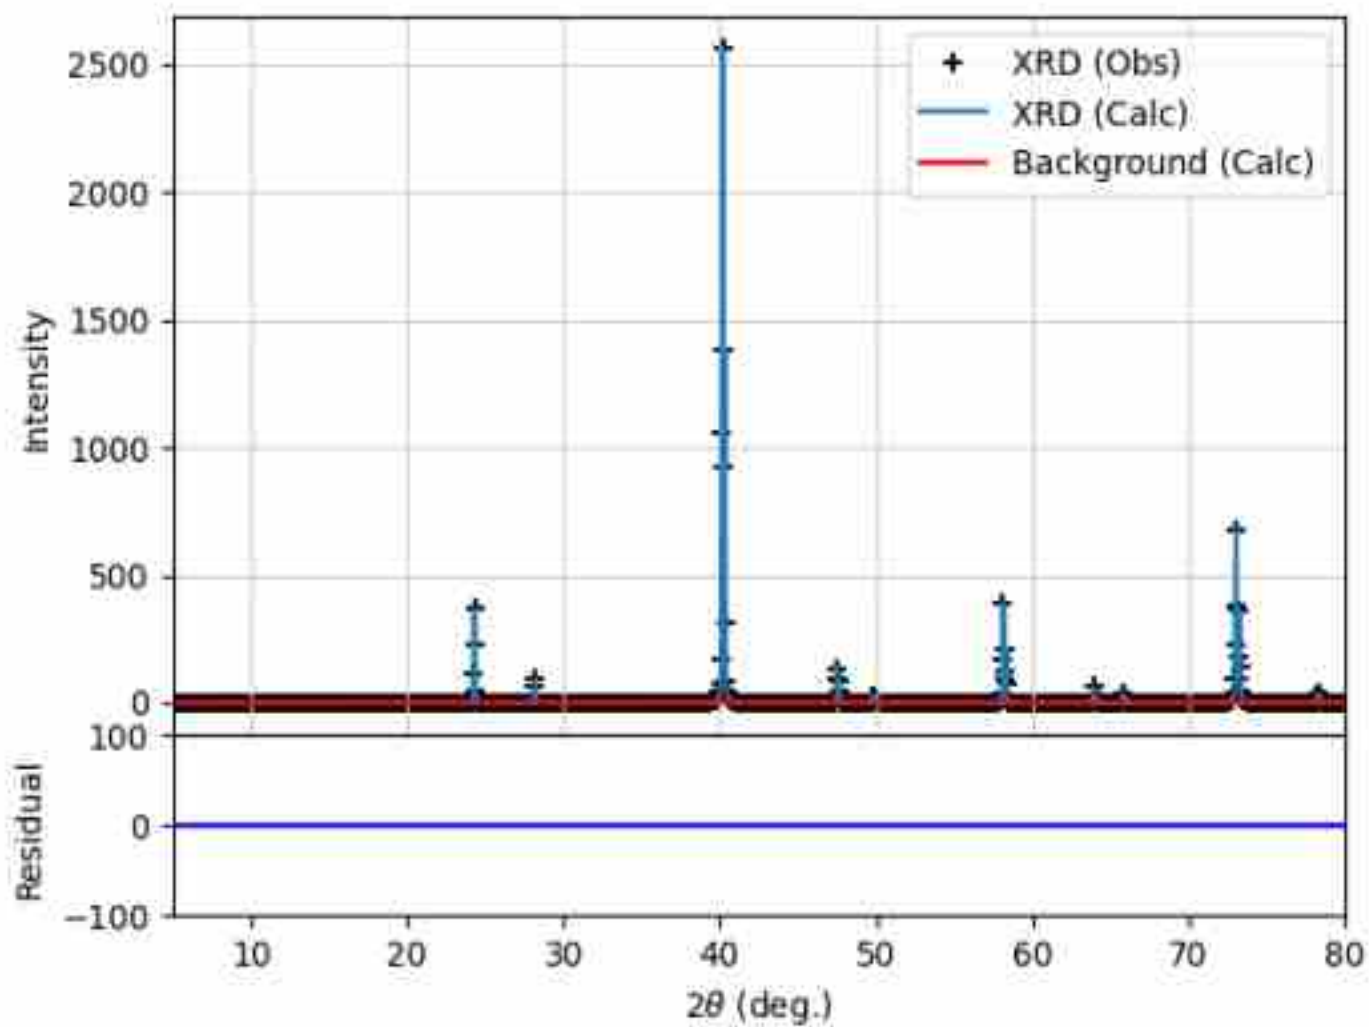

| RMSE before RR | Rwp     | RMSE after RR |
|----------------|---------|---------------|
| 0.001          | 0.01093 | 0.00275       |



# Ta2V1Re1

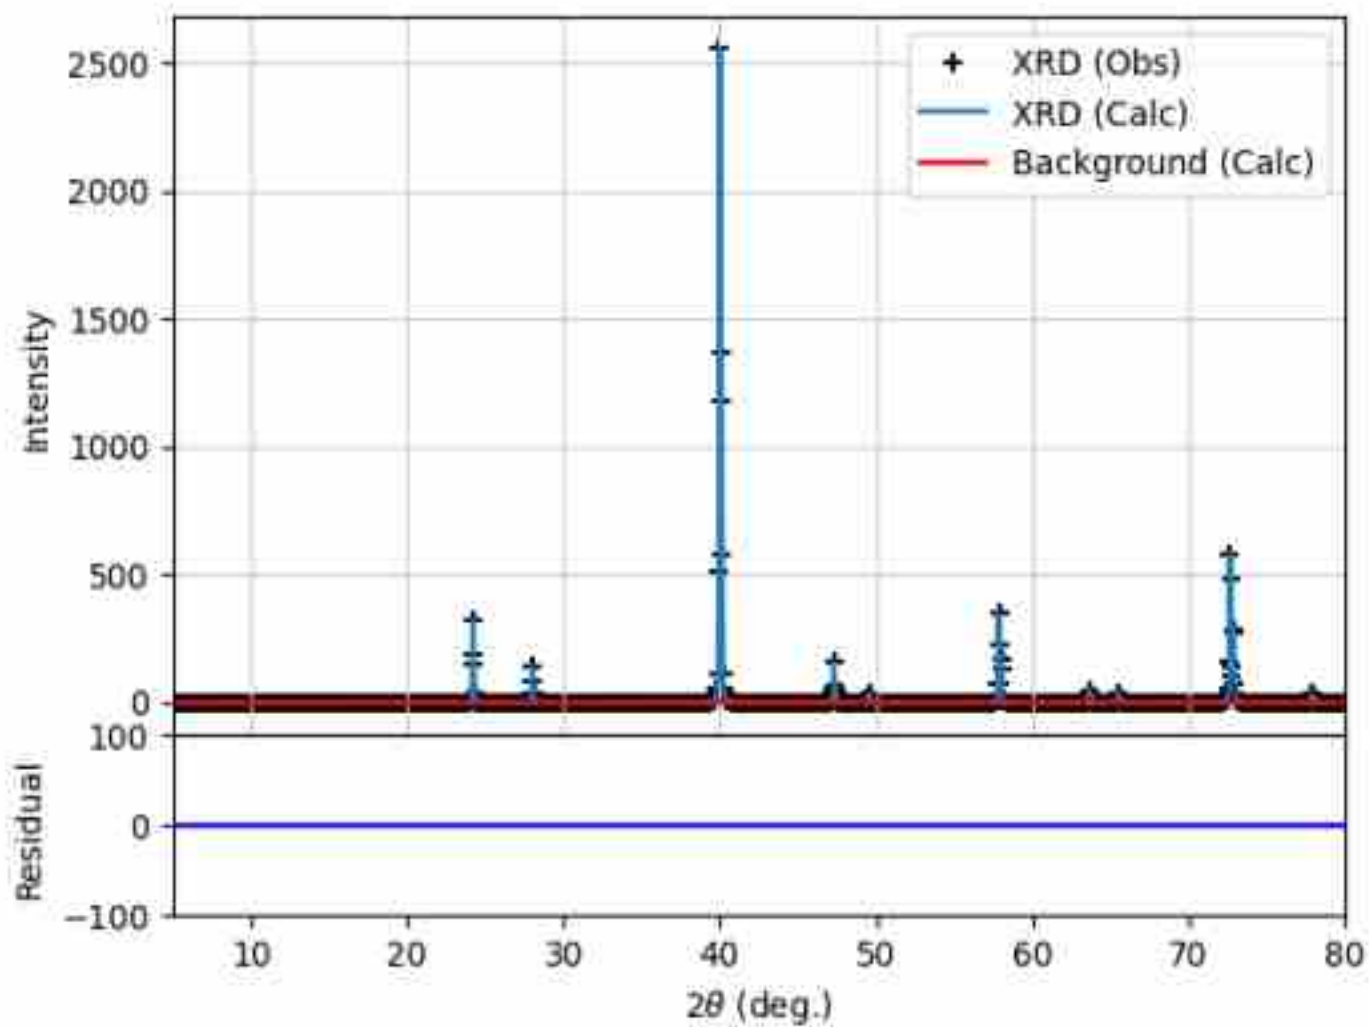

| RMSE before RR | Rwp     | RMSE after RR |
|----------------|---------|---------------|
| 0.001          | 0.00381 | 0.00243       |

# Ta3Os1

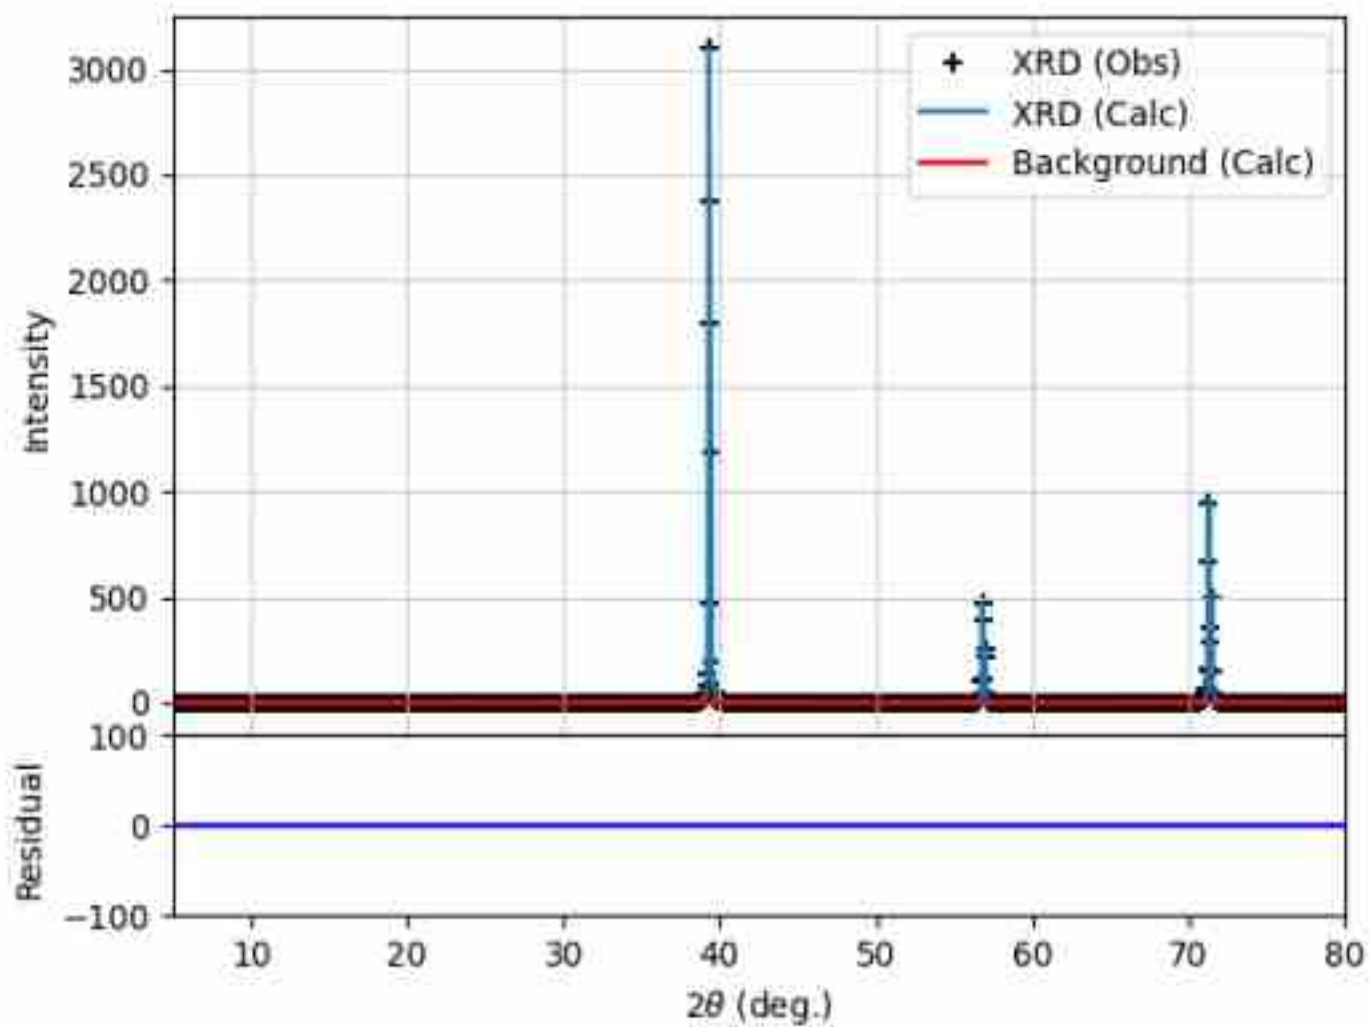

| RMSE before RR | Rwp     | RMSE after RR |
|----------------|---------|---------------|
| 0.001          | 0.00414 | 0.00033       |

# Ta3Re1

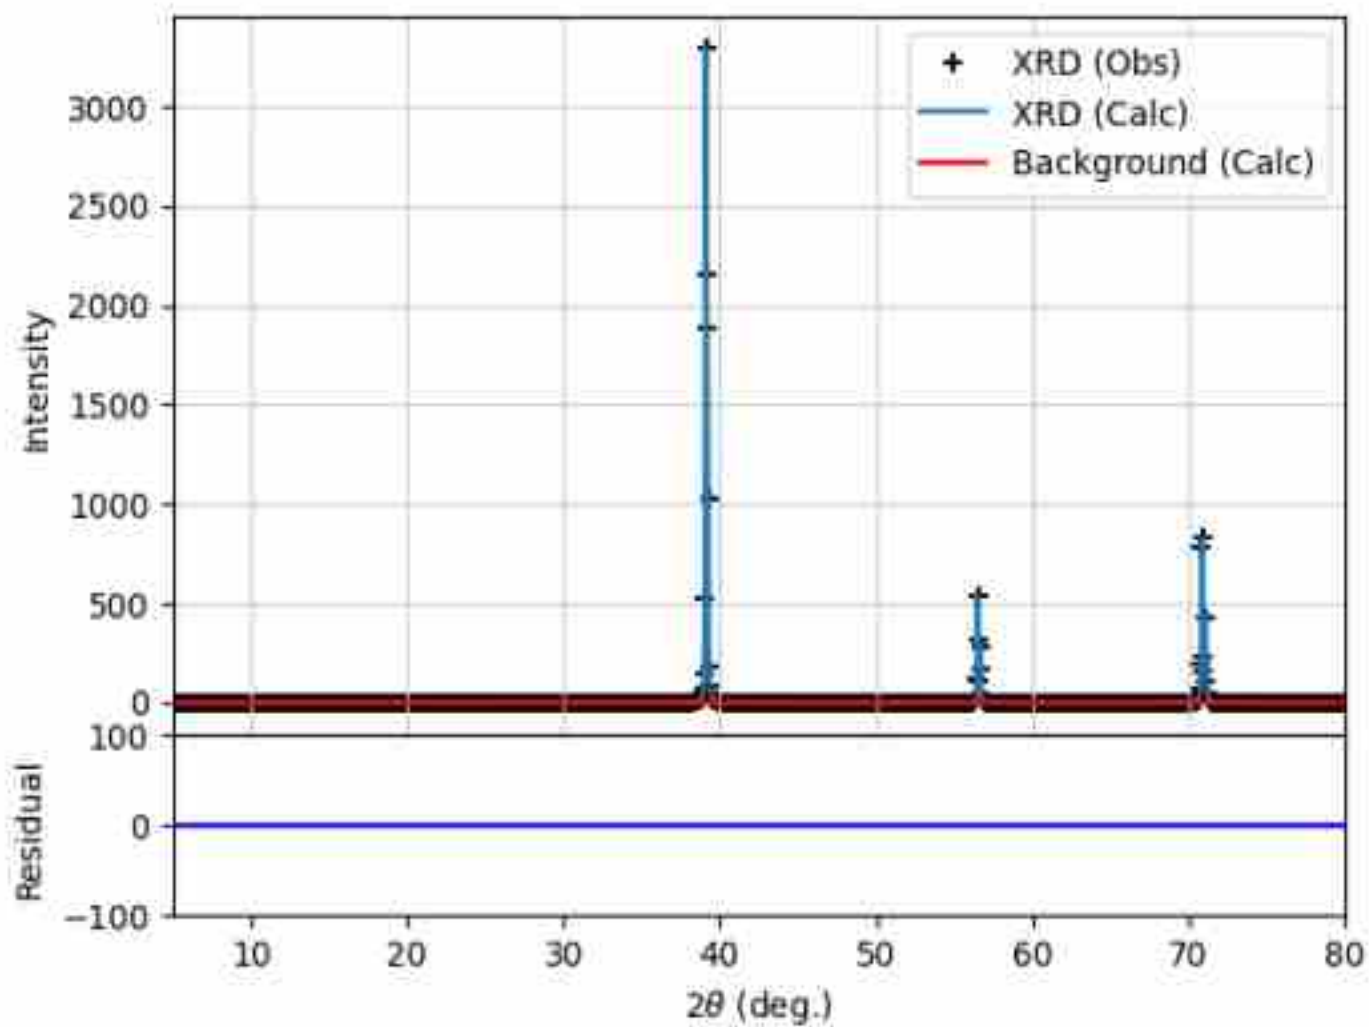

| RMSE before RR | Rwp     | RMSE after RR |
|----------------|---------|---------------|
| 0.001          | 0.00416 | 0.00016       |

# Ta4P4Rh4

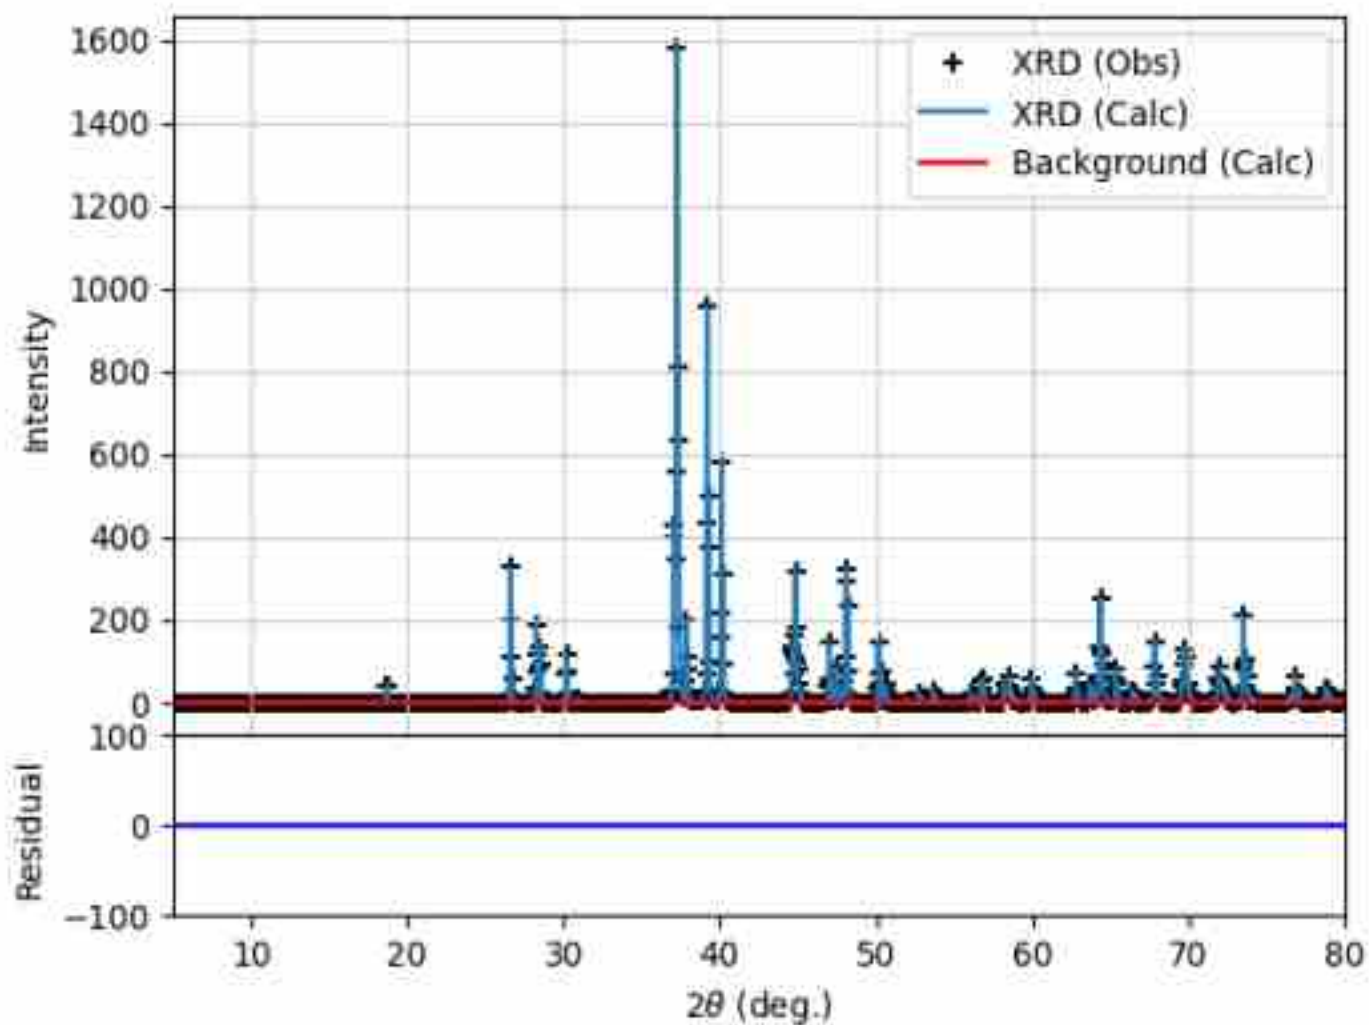

| RMSE before RR | Rwp     | RMSE after RR |
|----------------|---------|---------------|
| 0.01           | 0.00554 | 0.00068       |

# Tb1Er1Rh2

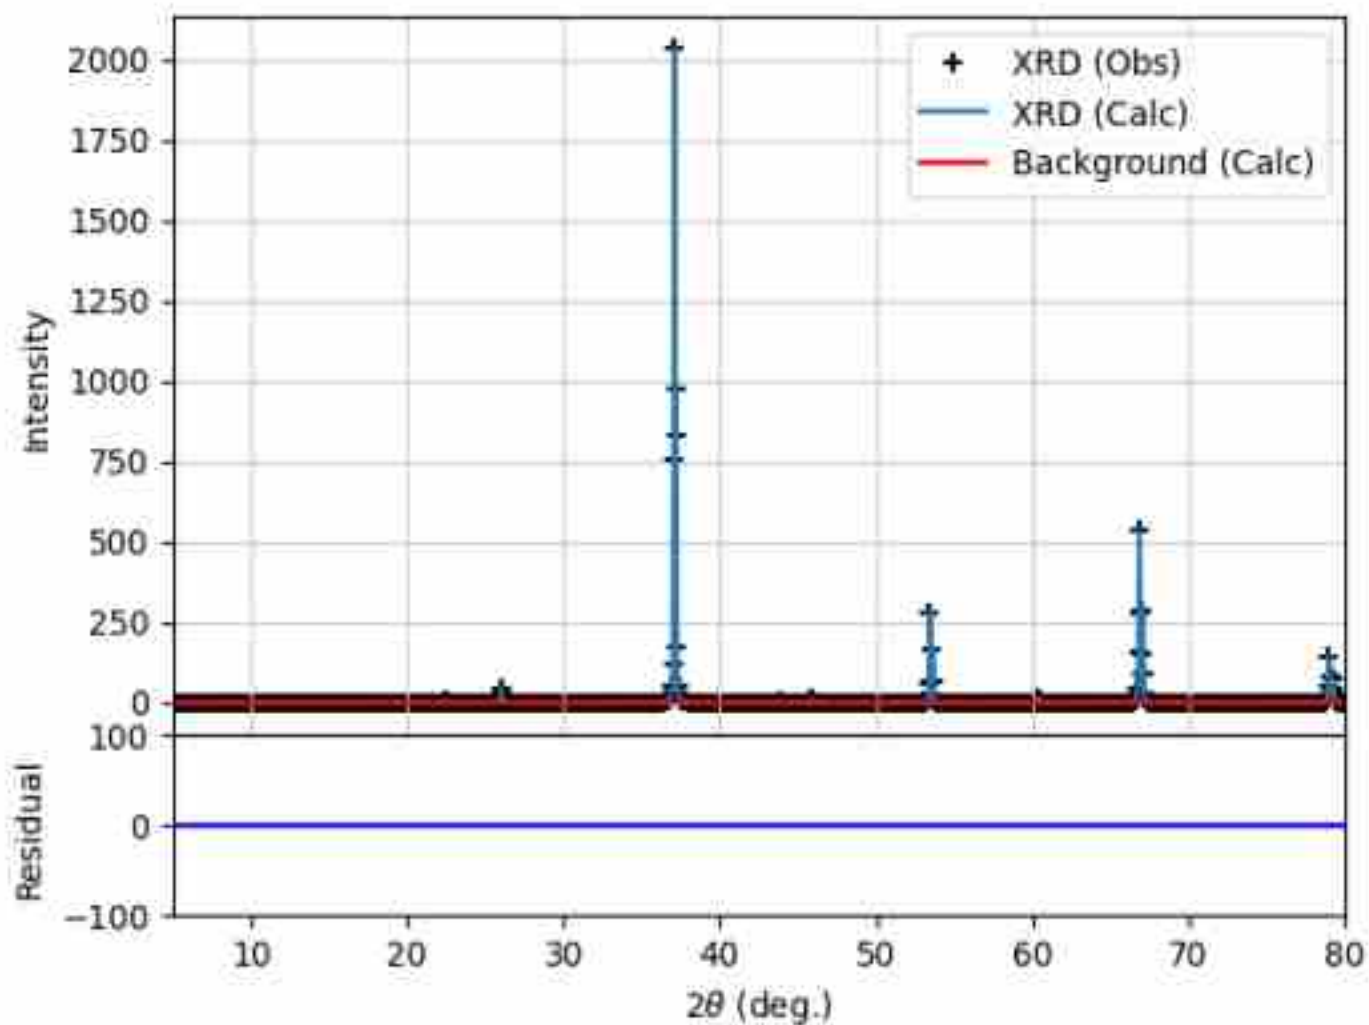

| RMSE before RR | Rwp    | RMSE after RR |
|----------------|--------|---------------|
| 0.001          | 0.0036 | 0.00013       |

# Tb1Mg1Au2

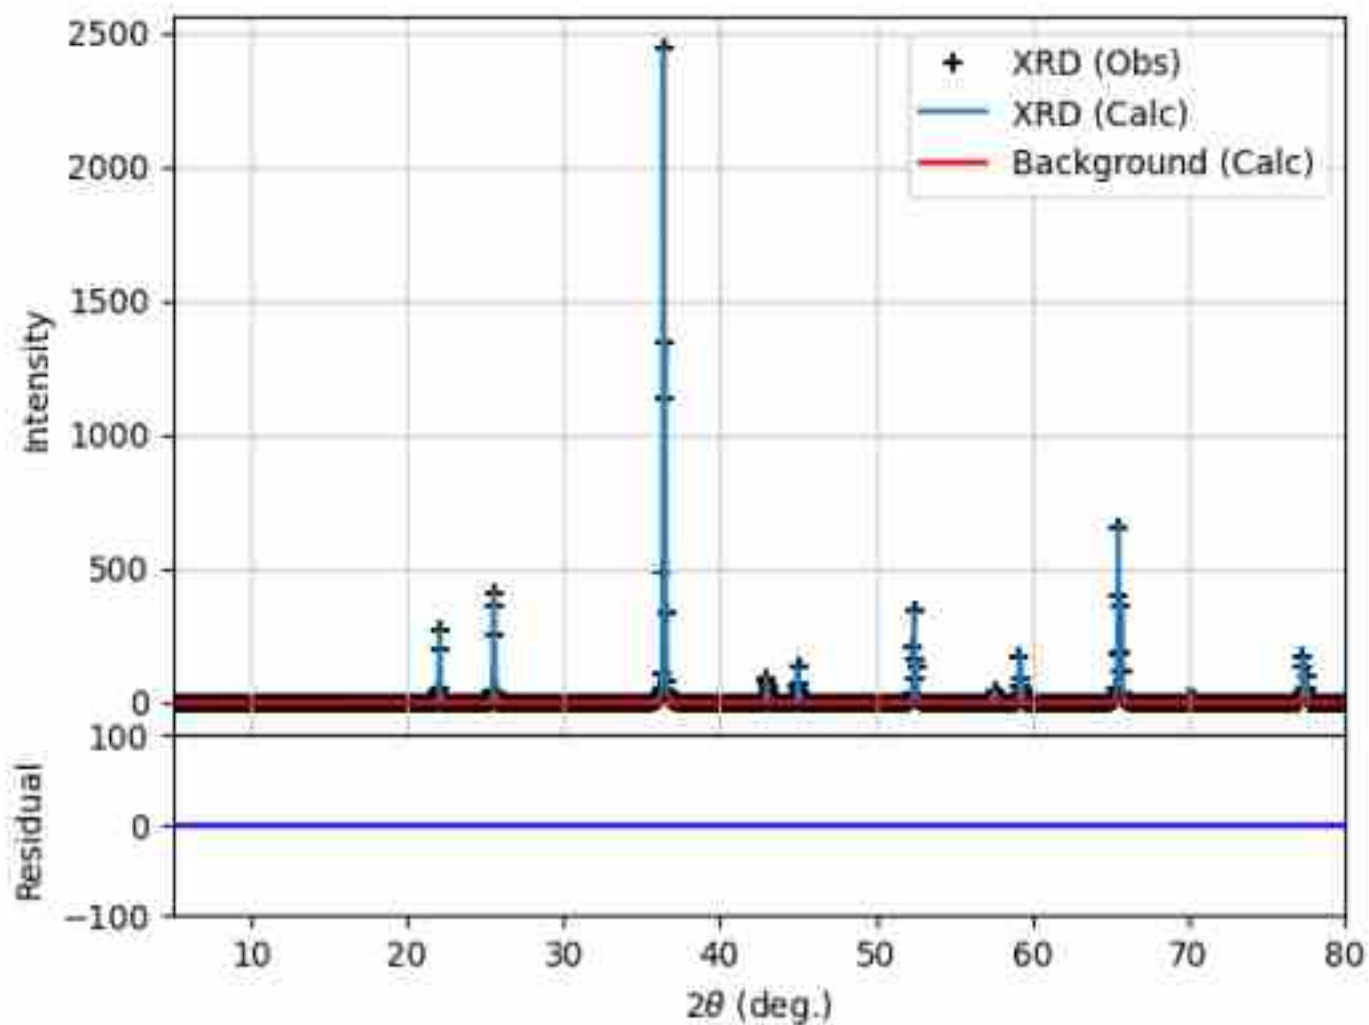

| RMSE before RR | Rwp     | RMSE after RR |
|----------------|---------|---------------|
| 0.001          | 0.00318 | 0.00074       |

# Tb1Mg1Rh2

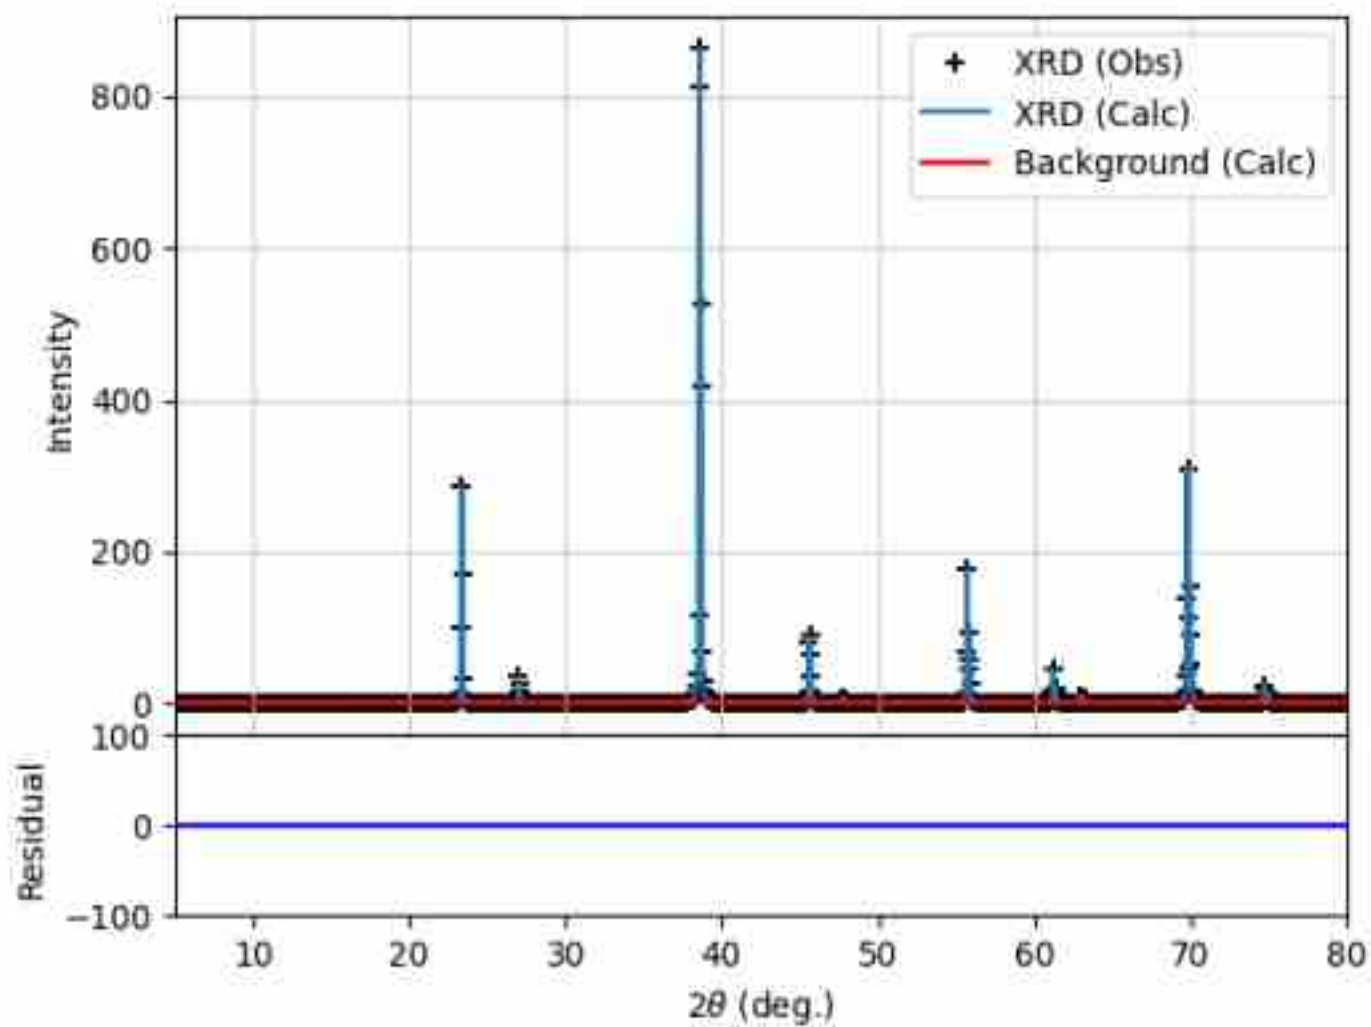

| RMSE before RR | Rwp     | RMSE after RR |
|----------------|---------|---------------|
| 0.001          | 0.00035 | 0.00032       |

# Tb1Sm1Rh2

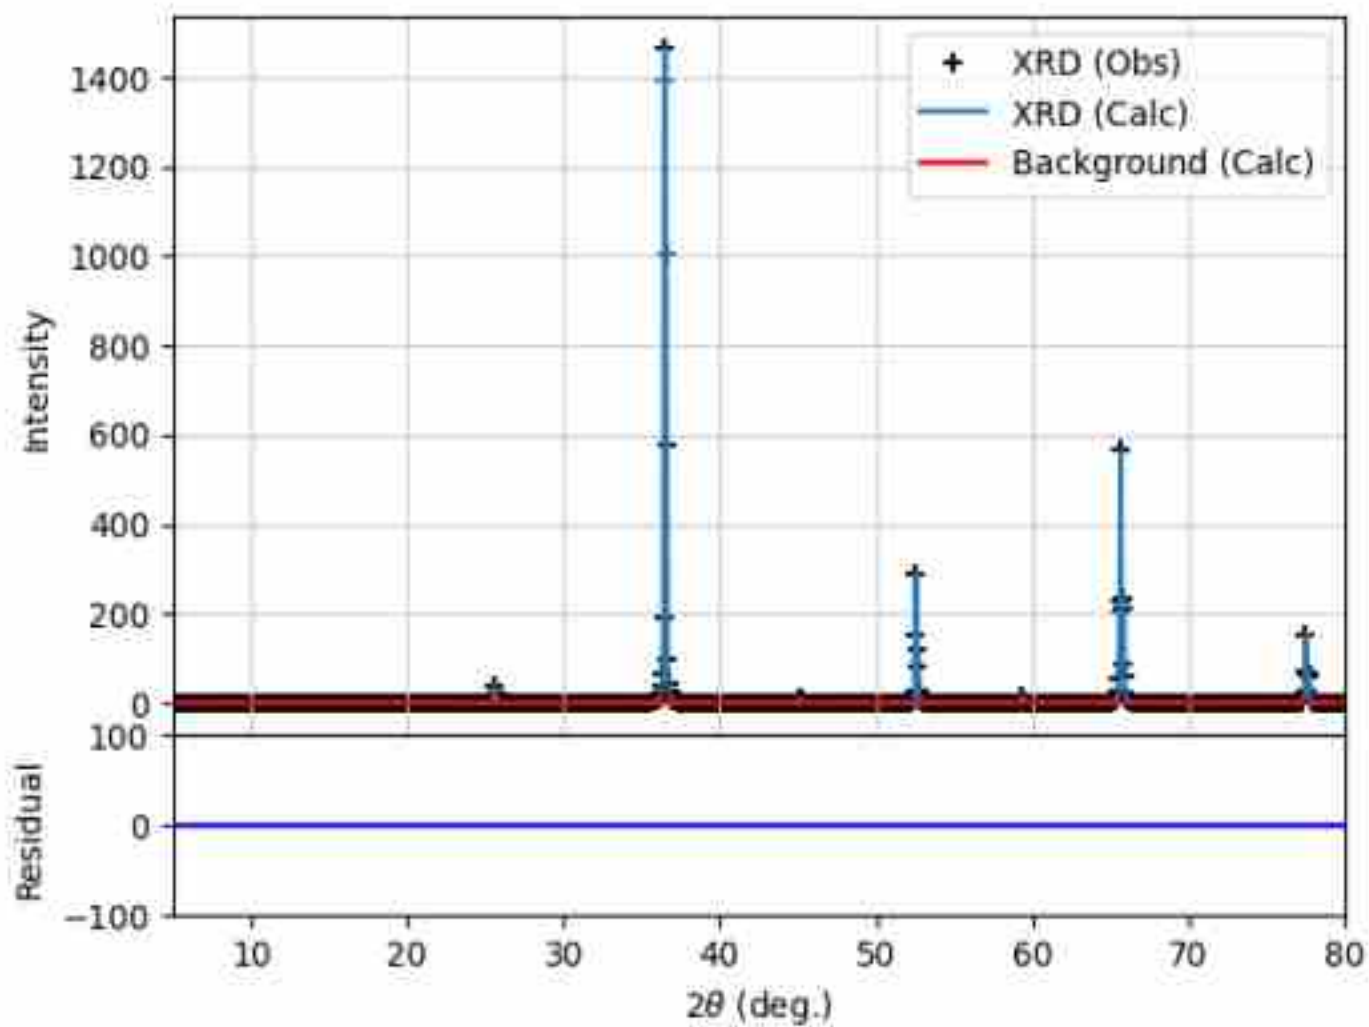

| RMSE before RR | Rwp    | RMSE after RR |
|----------------|--------|---------------|
| 0.001          | 0.0258 | 0.00142       |



# Tb1Tm1In2

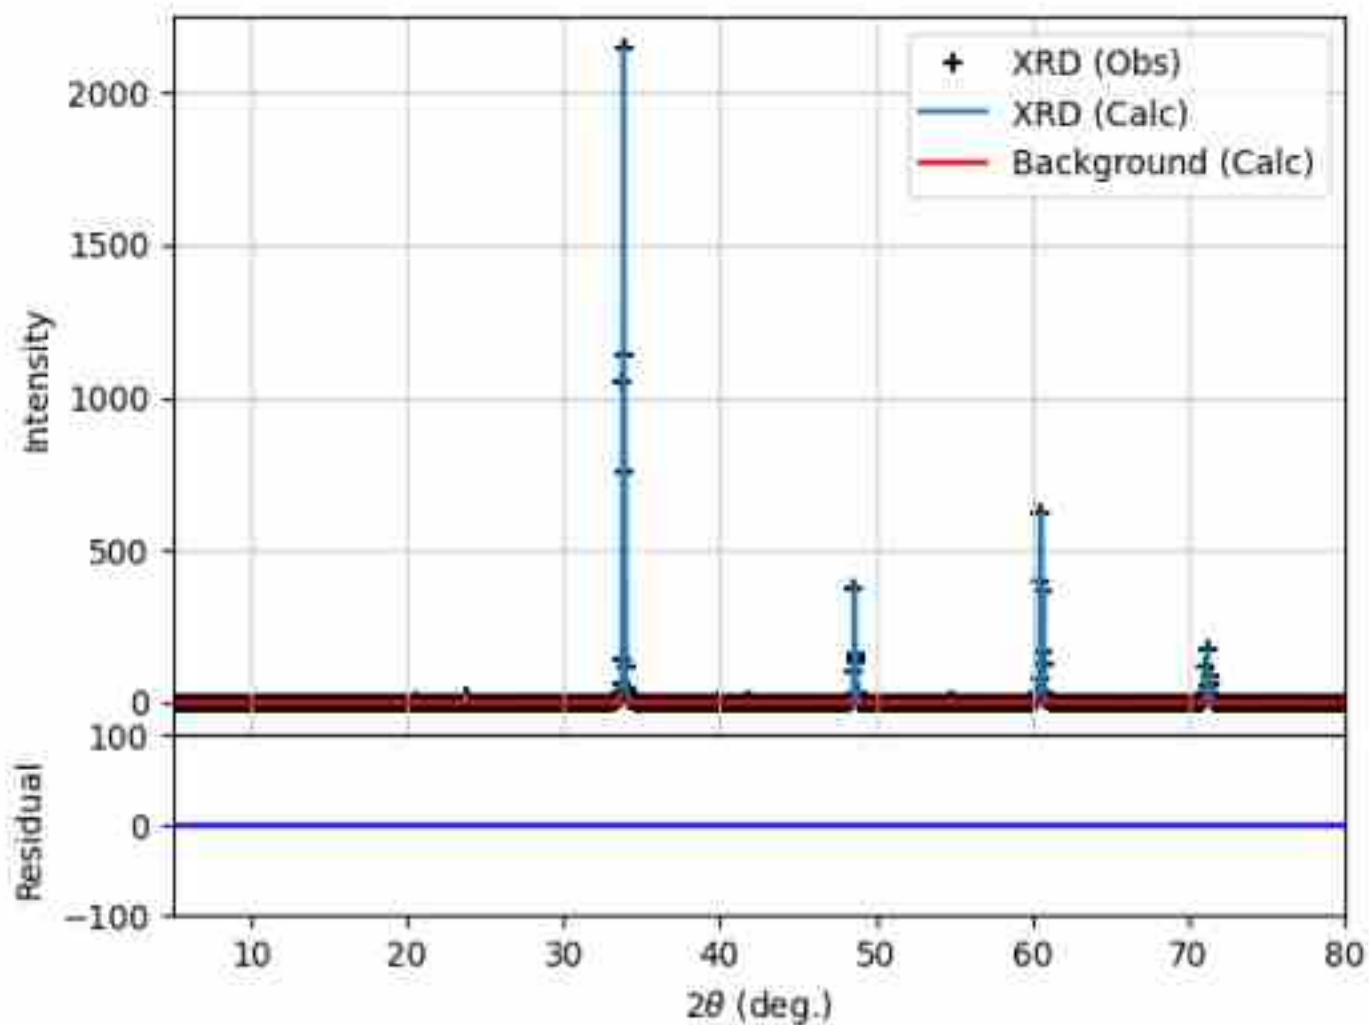

| RMSE before RR | Rwp     | RMSE after RR |
|----------------|---------|---------------|
| 0.001          | 0.00471 | 0.00045       |

# Tb1Tm1Ir2

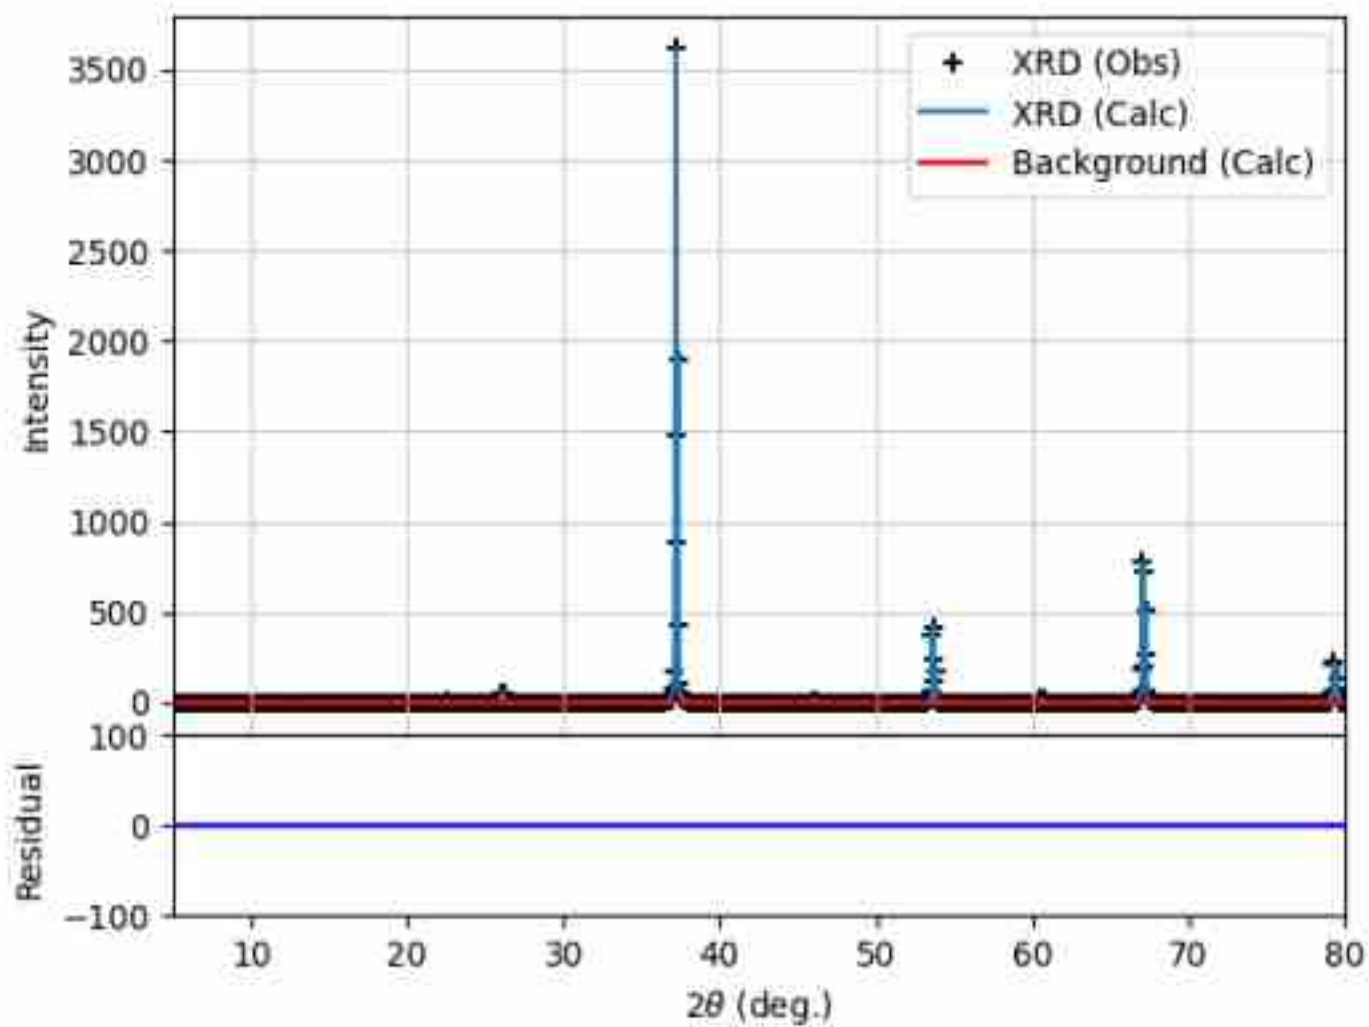

| RMSE before RR | Rwp     | RMSE after RR |
|----------------|---------|---------------|
| 0.001          | 0.00734 | 0.00044       |

# Tb1Y1Ti2

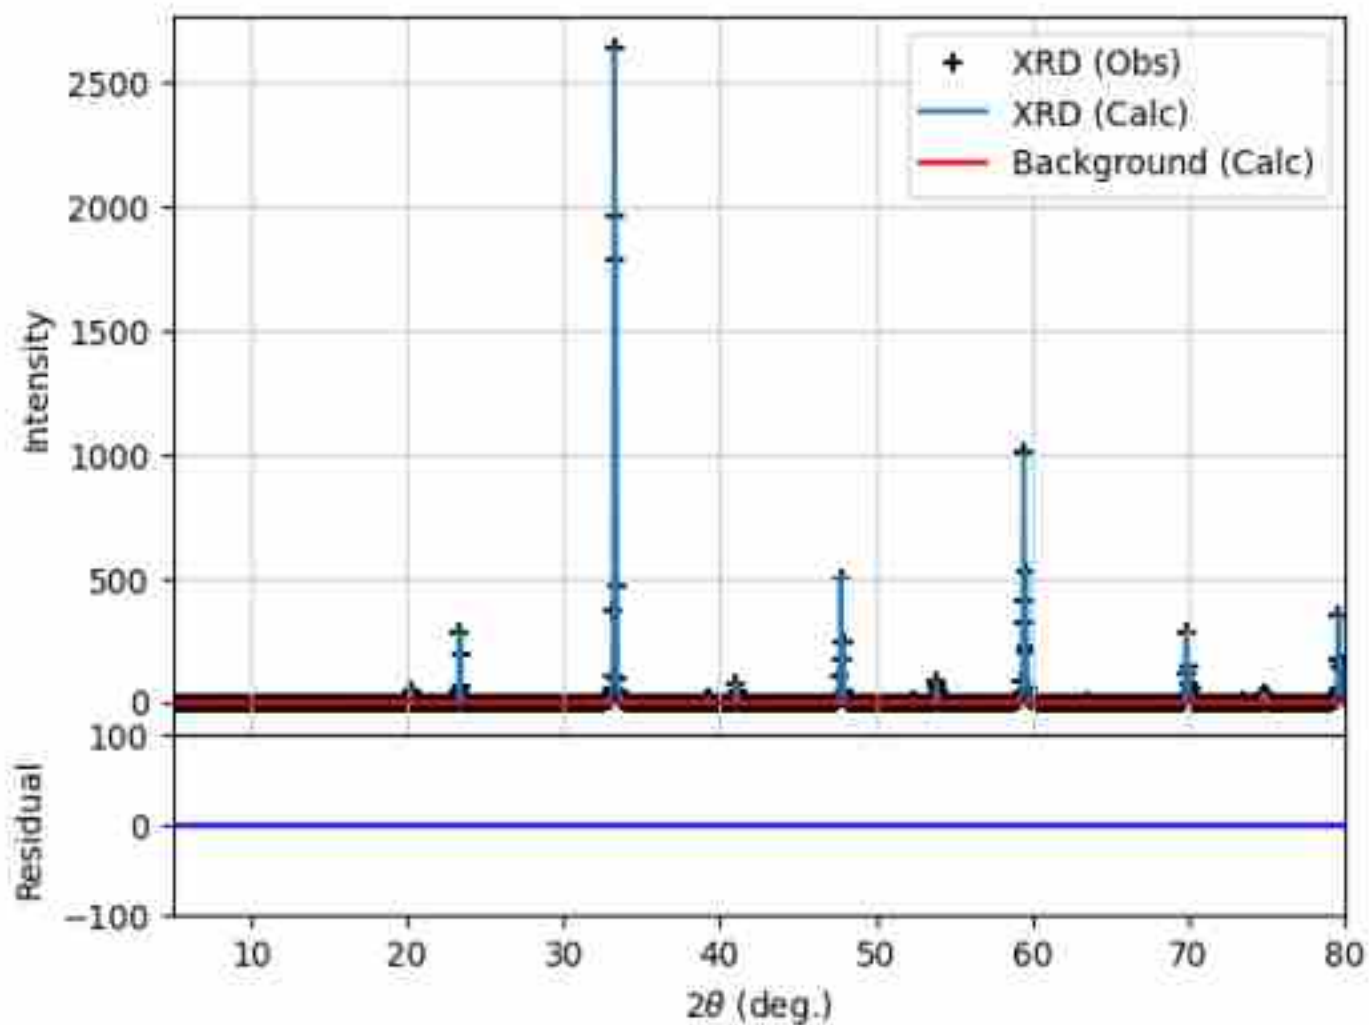

| RMSE before RR | Rwp     | RMSE after RR |
|----------------|---------|---------------|
| 0.001          | 0.00314 | 0.00025       |

# Tb1Yb1Pd2

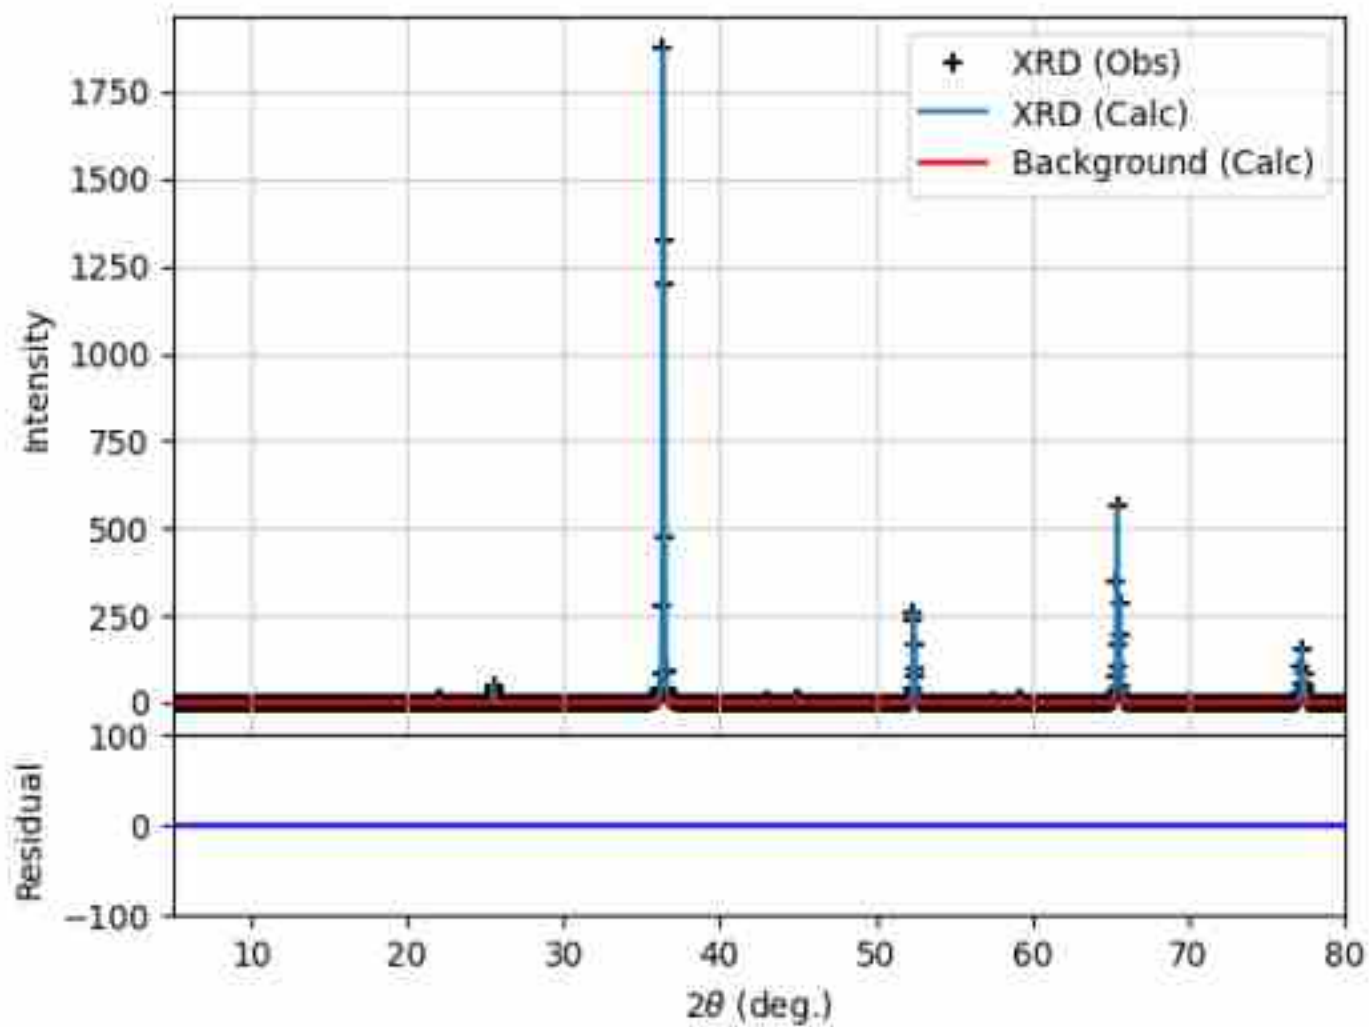

| RMSE before RR | Rwp     | RMSE after RR |
|----------------|---------|---------------|
| 0.001          | 0.00953 | 0.00061       |

# Tb<sub>2</sub>Cu<sub>1</sub>Ir<sub>1</sub>

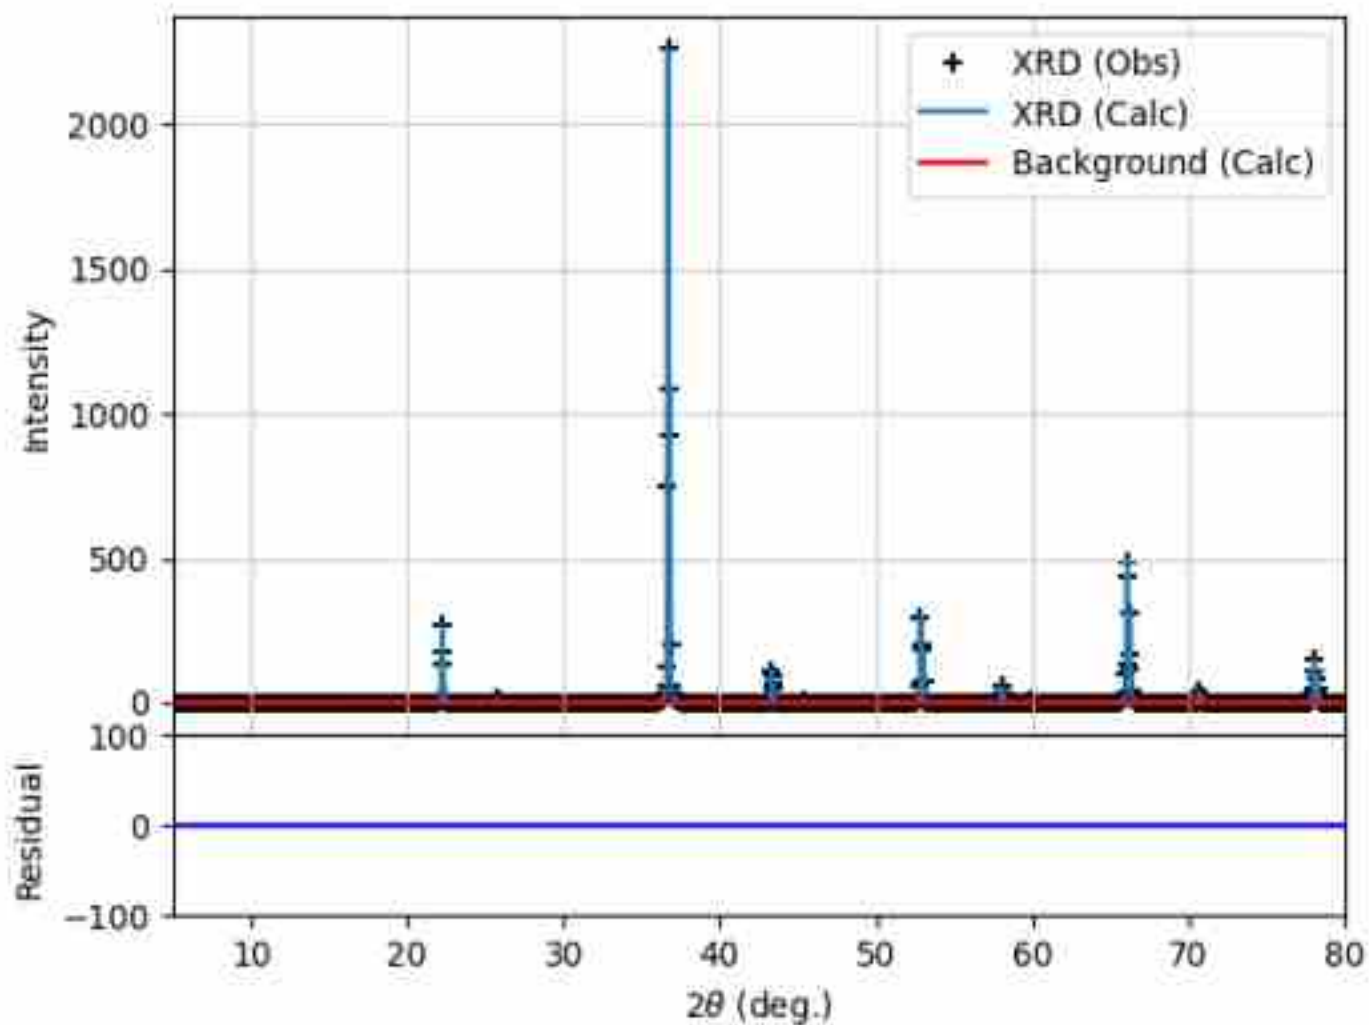

| RMSE before RR | Rwp     | RMSE after RR |
|----------------|---------|---------------|
| 0.001          | 0.00387 | 0.00229       |

# Tb<sub>2</sub>Ga<sub>1</sub>Ni<sub>2</sub>

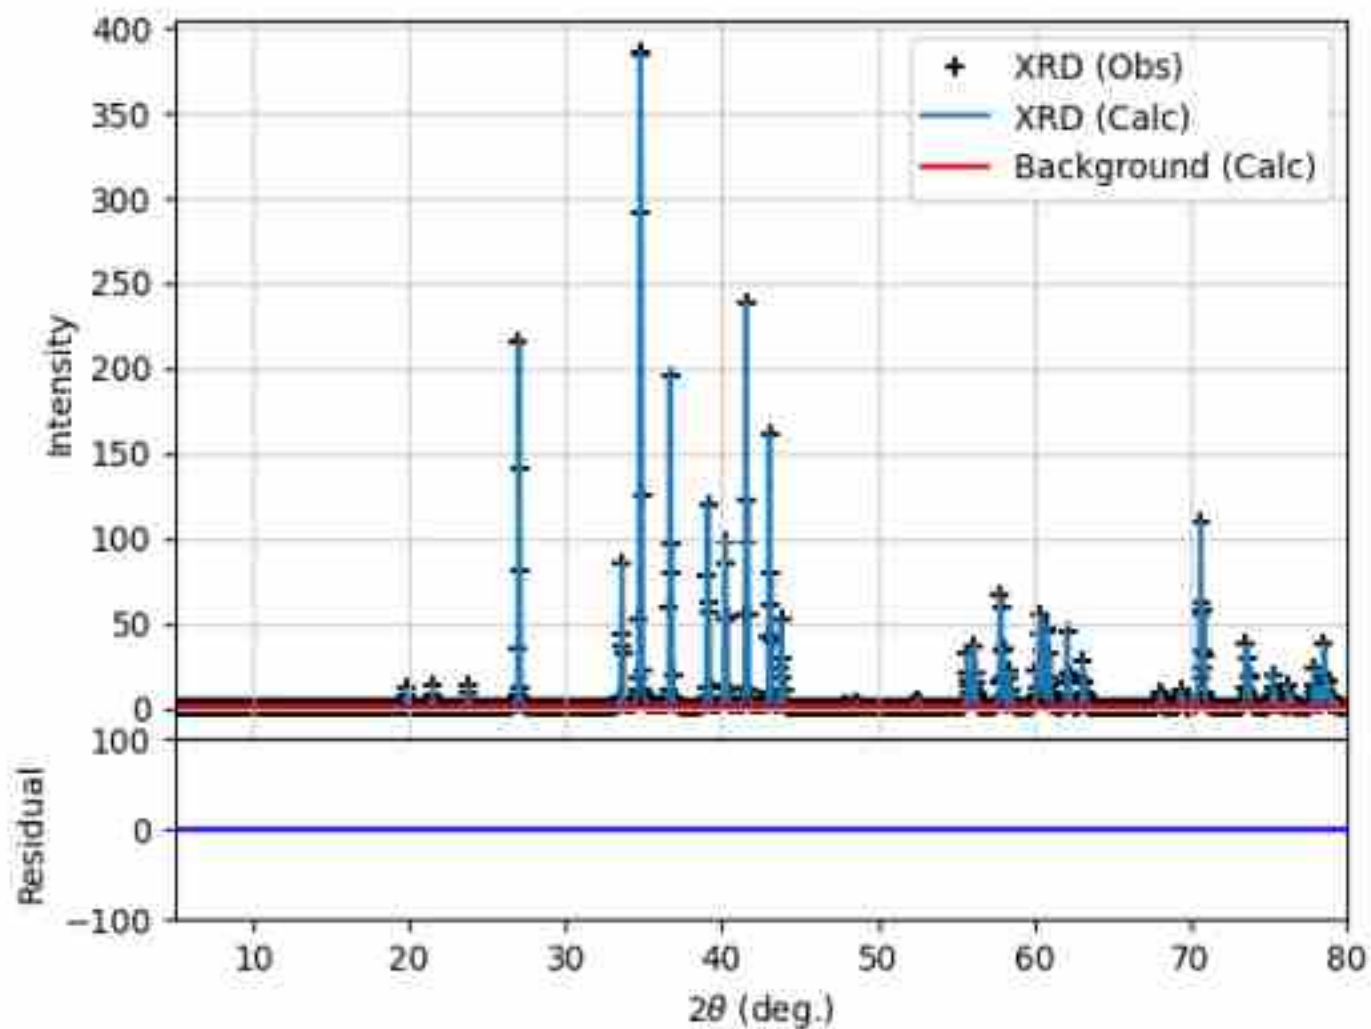

| RMSE before RR | Rwp     | RMSE after RR |
|----------------|---------|---------------|
| 0.01           | 0.00376 | 0.00038       |

# Tb2Ir1Rh1

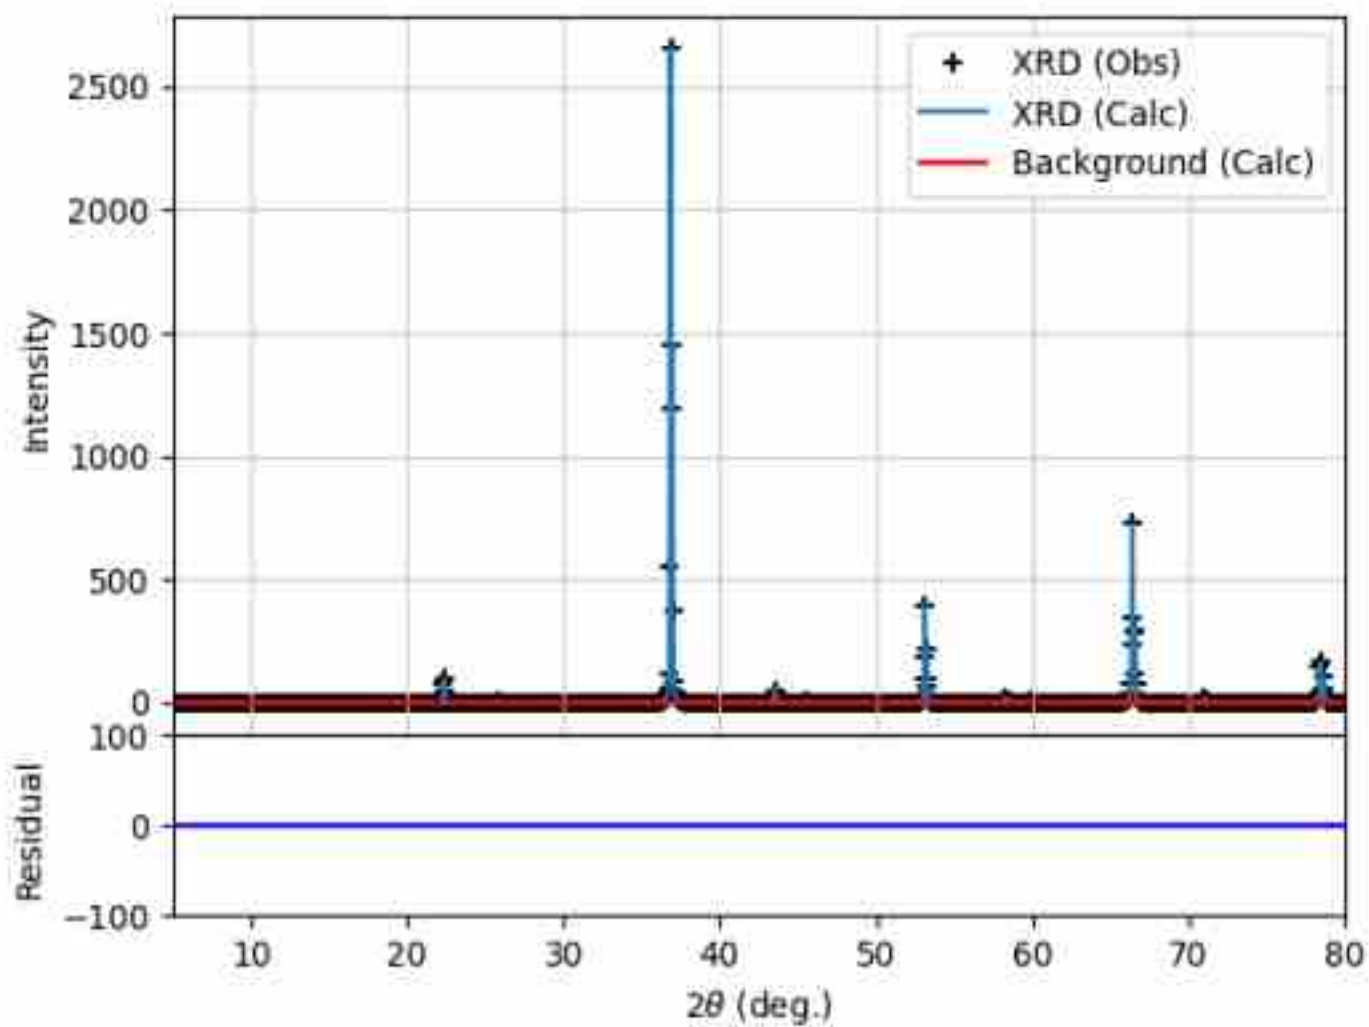

| RMSE before RR | Rwp     | RMSE after RR |
|----------------|---------|---------------|
| 0.001          | 0.04171 | 0.00125       |

# Tb<sub>2</sub>O<sub>2</sub>F<sub>2</sub>

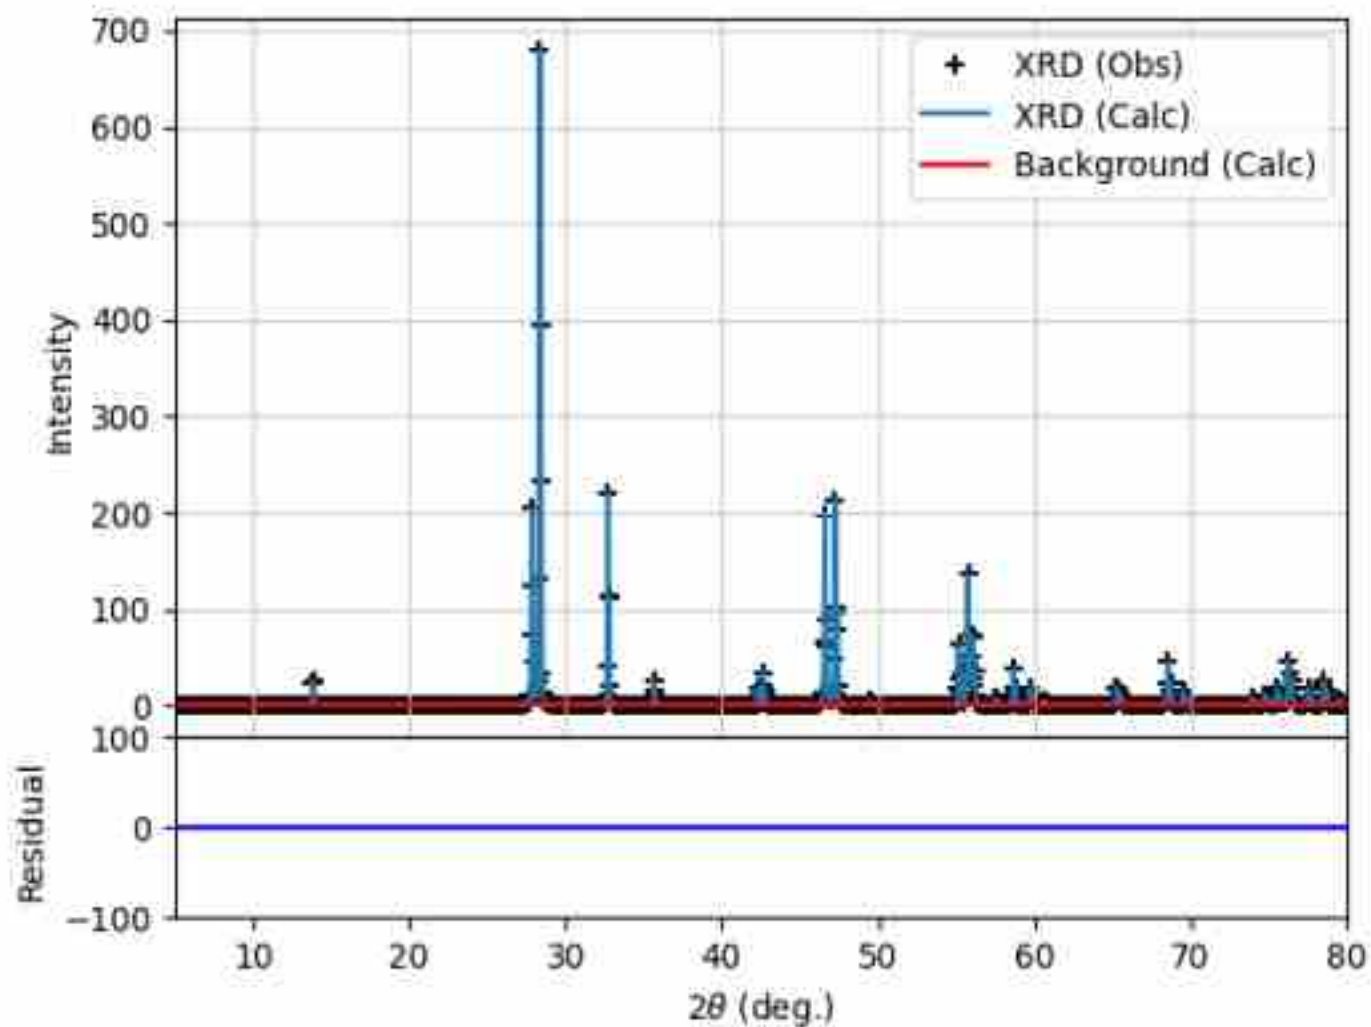

| RMSE before RR | Rwp    | RMSE after RR |
|----------------|--------|---------------|
| 0.01           | 0.0046 | 0.00192       |



# Tb<sub>2</sub>Ru<sub>1</sub>Rh<sub>1</sub>

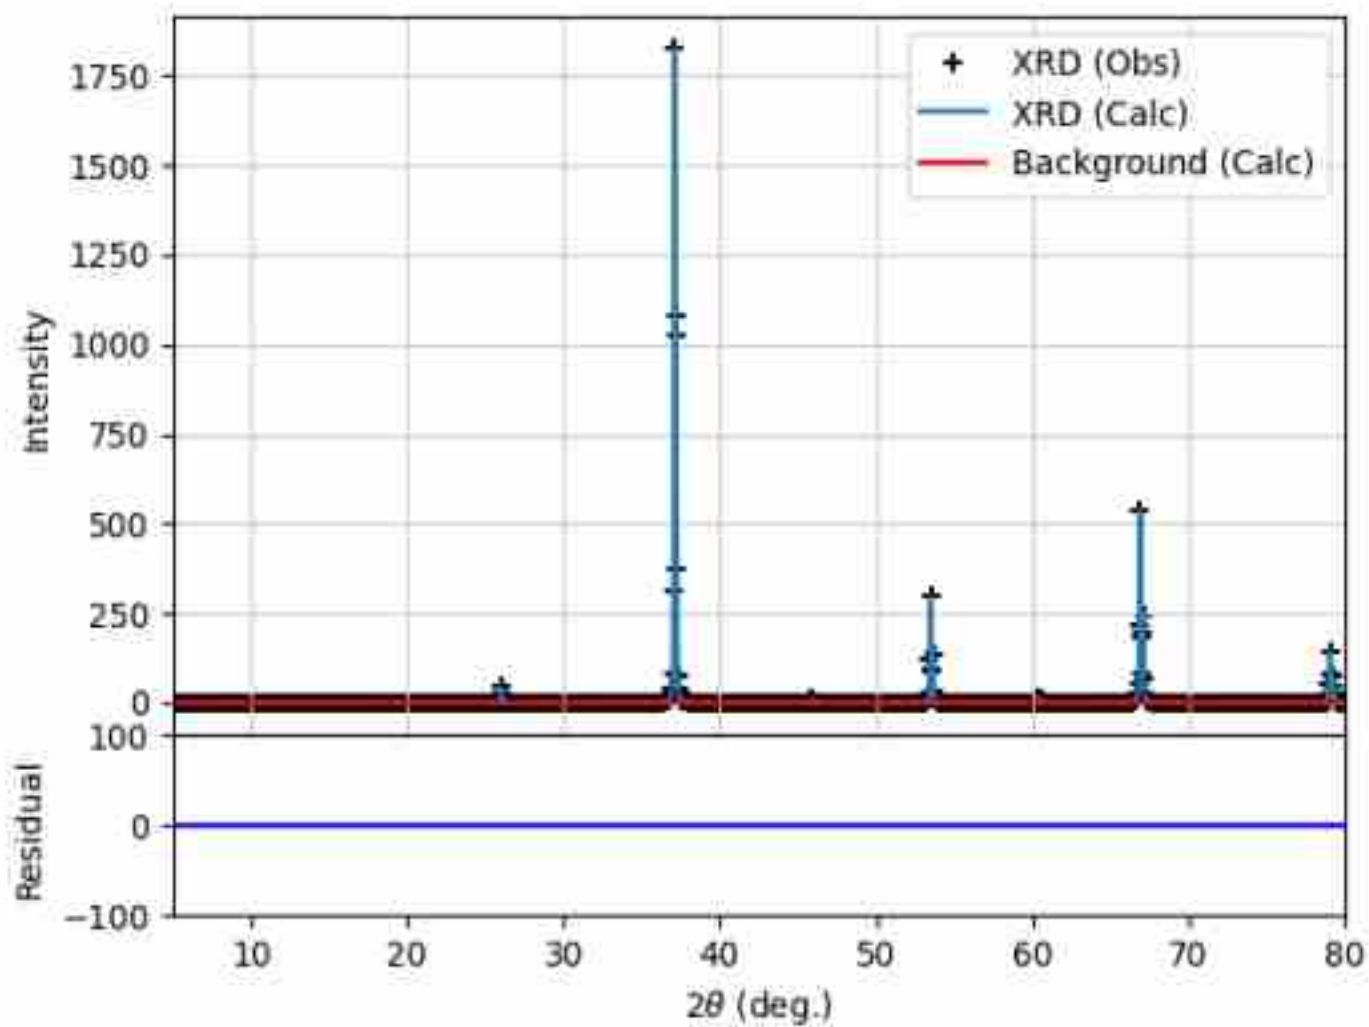

| RMSE before RR | Rwp     | RMSE after RR |
|----------------|---------|---------------|
| 0.001          | 0.00837 | 0.00073       |

# Tb<sub>2</sub>Se<sub>10</sub>O<sub>2</sub>

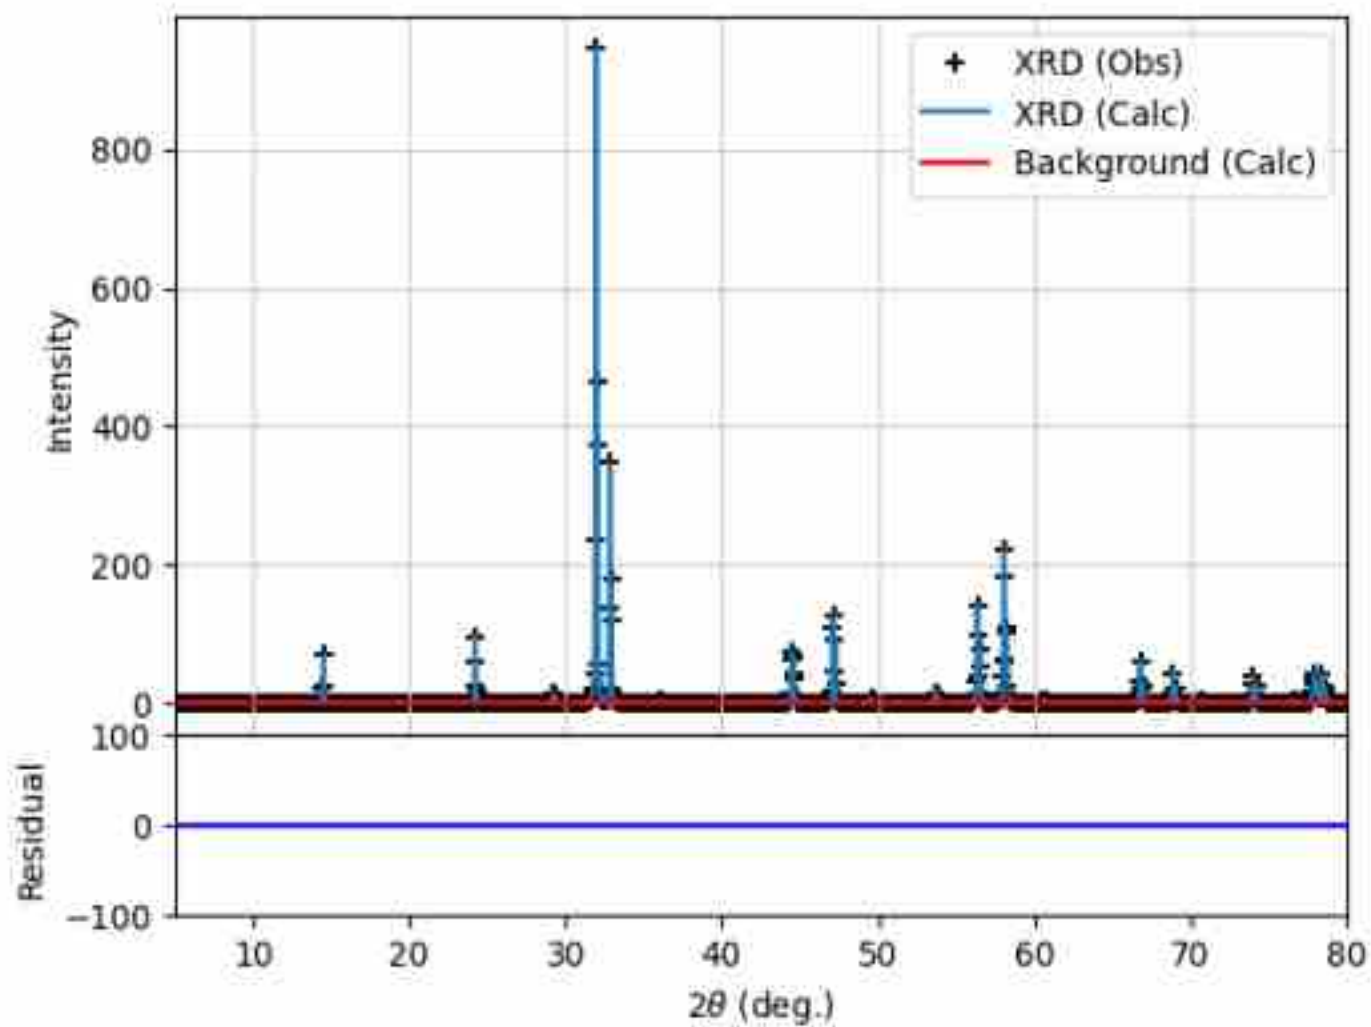

| RMSE before RR | Rwp     | RMSE after RR |
|----------------|---------|---------------|
| 0.01           | 0.00368 | 0.00095       |

# Tb<sub>2</sub>TlHg

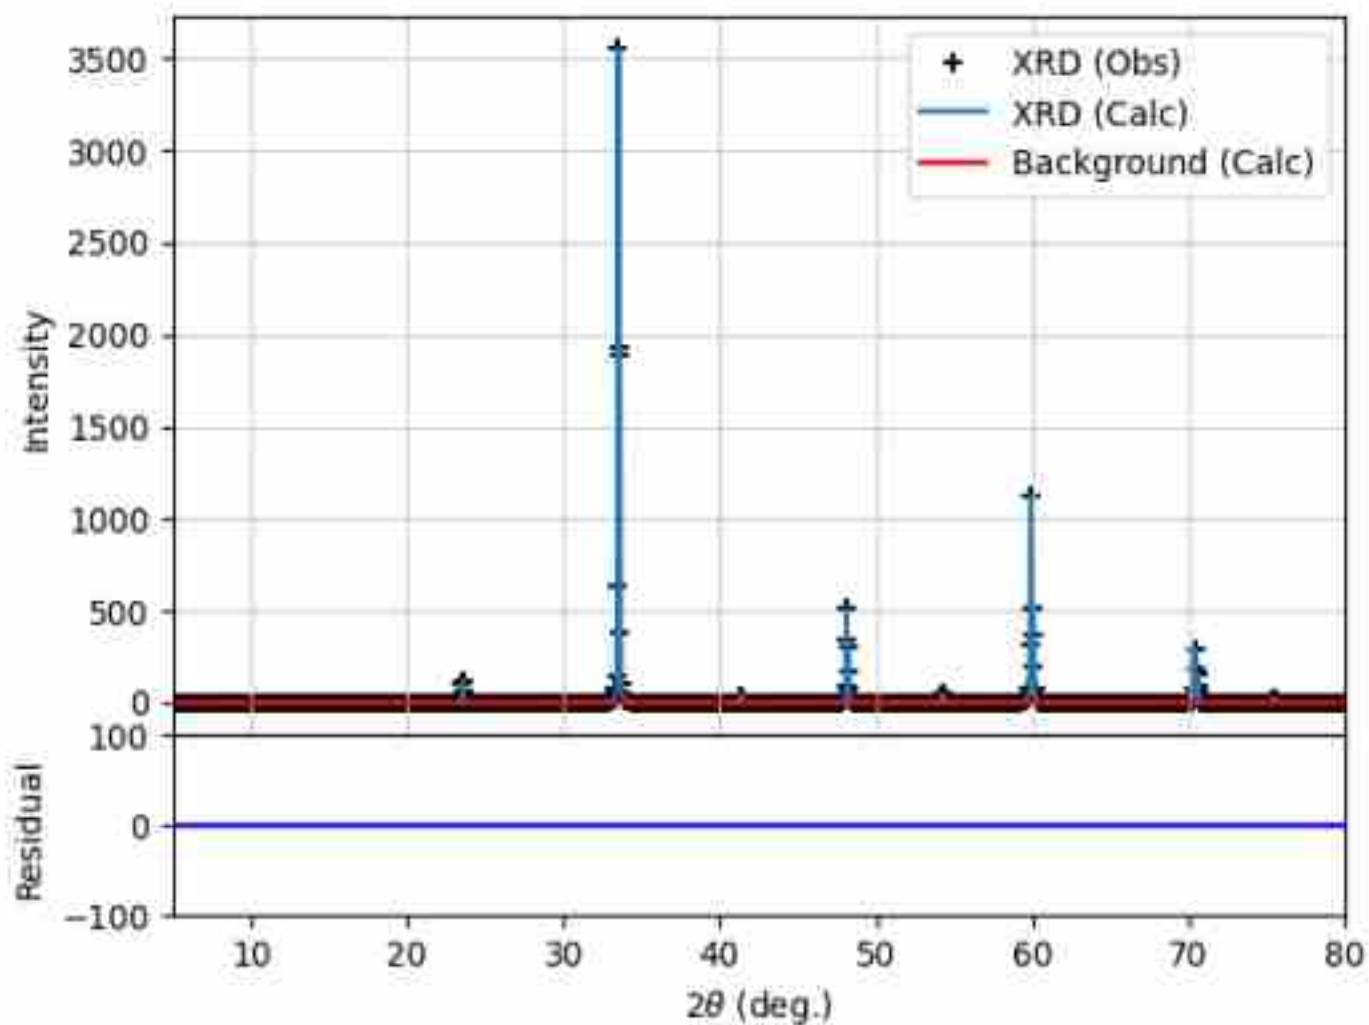

| RMSE before RR | Rwp     | RMSE after RR |
|----------------|---------|---------------|
| 0.001          | 0.00679 | 0.0003        |

# Tb<sub>2</sub>ZnAg

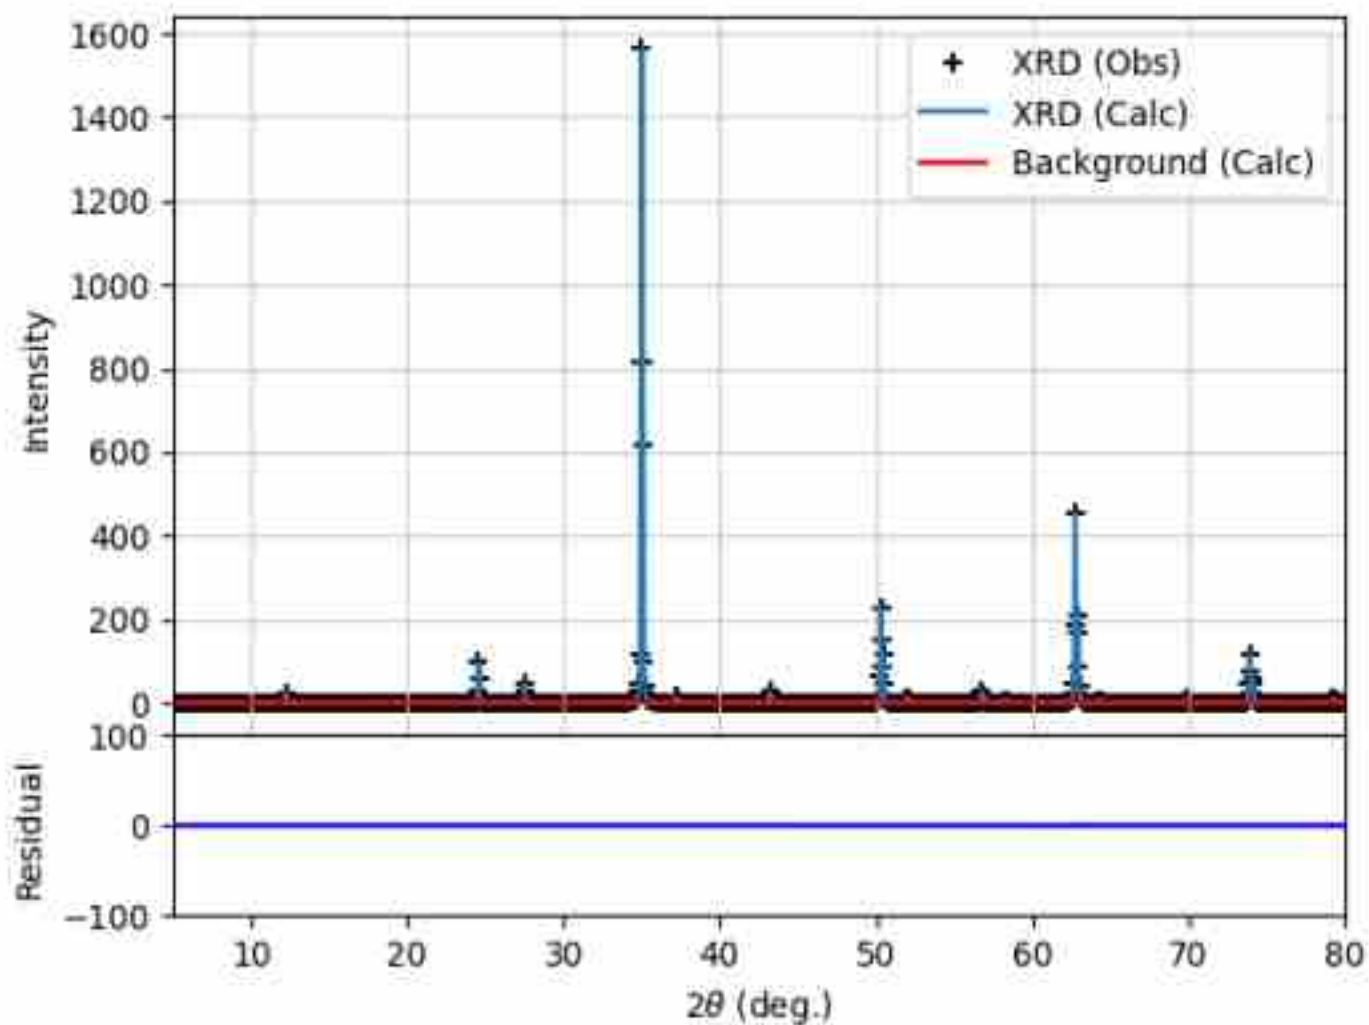

| RMSE before RR | Rwp     | RMSE after RR |
|----------------|---------|---------------|
| 0.01           | 0.04252 | 0.0006        |

# Tb3Er1

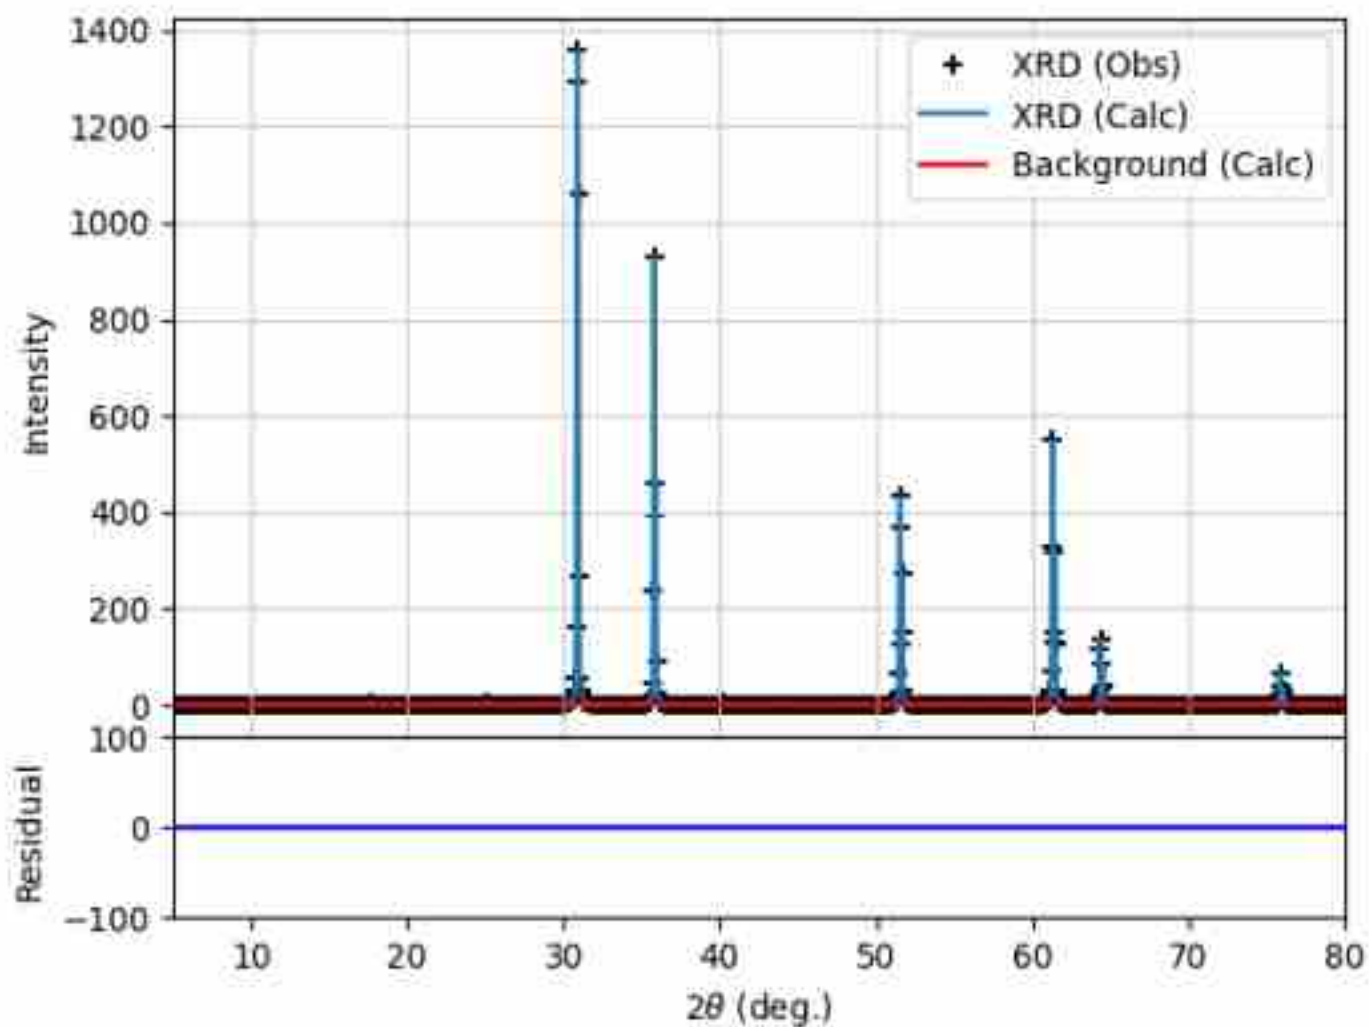

| RMSE before RR | Rwp     | RMSE after RR |
|----------------|---------|---------------|
| 0.001          | 0.00427 | 0.00036       |

# Tb3Sc2S7

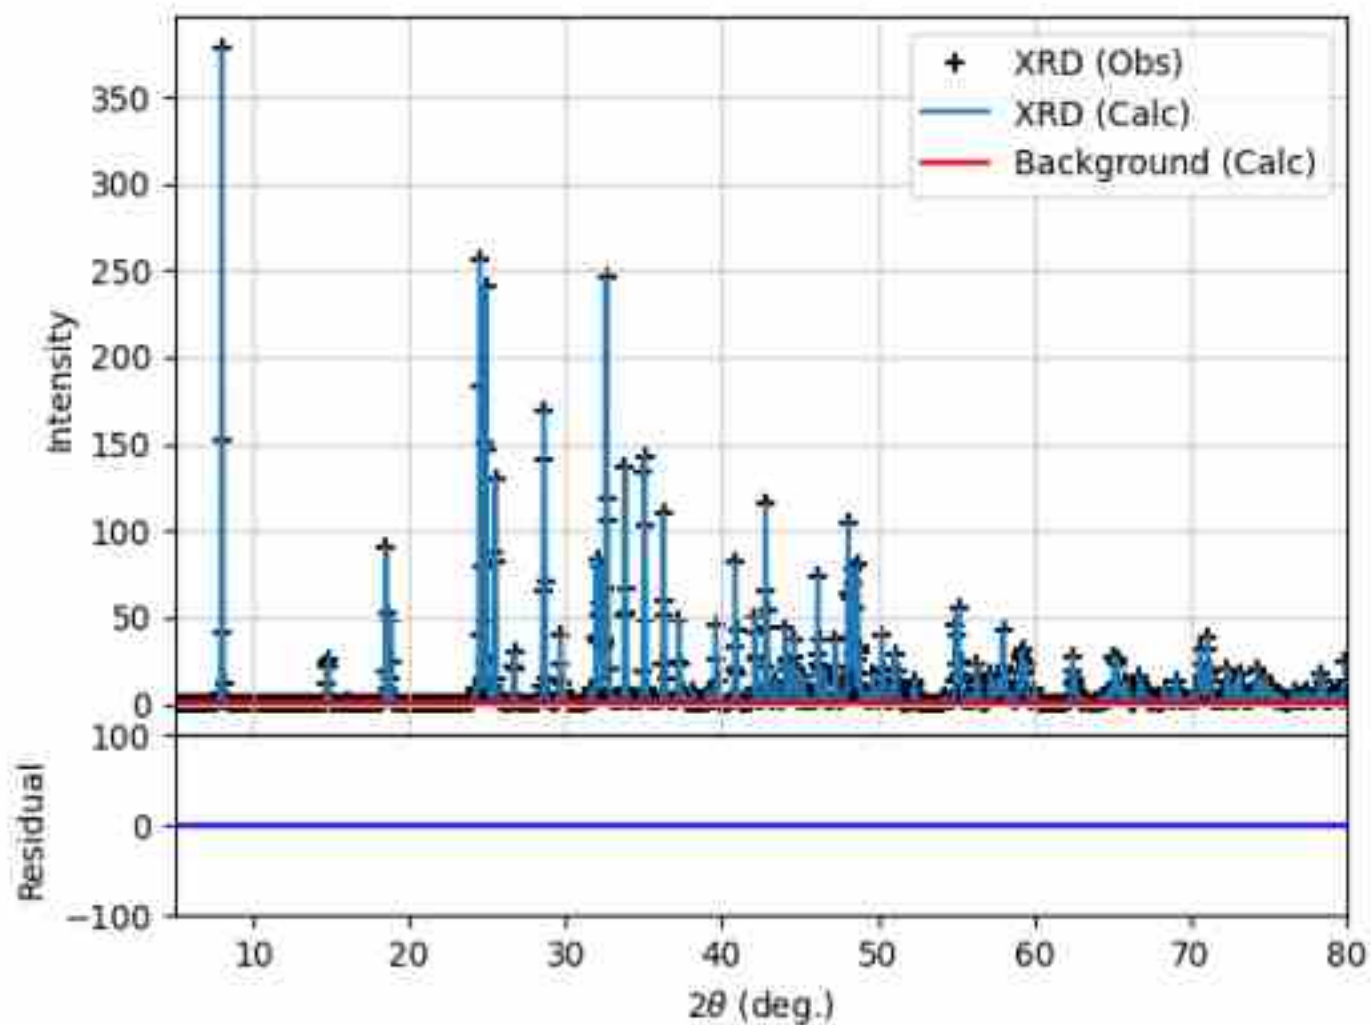

| RMSE before RR | Rwp     | RMSE after RR |
|----------------|---------|---------------|
| 0.01           | 0.00292 | 0.00045       |

# Tb3Tm1

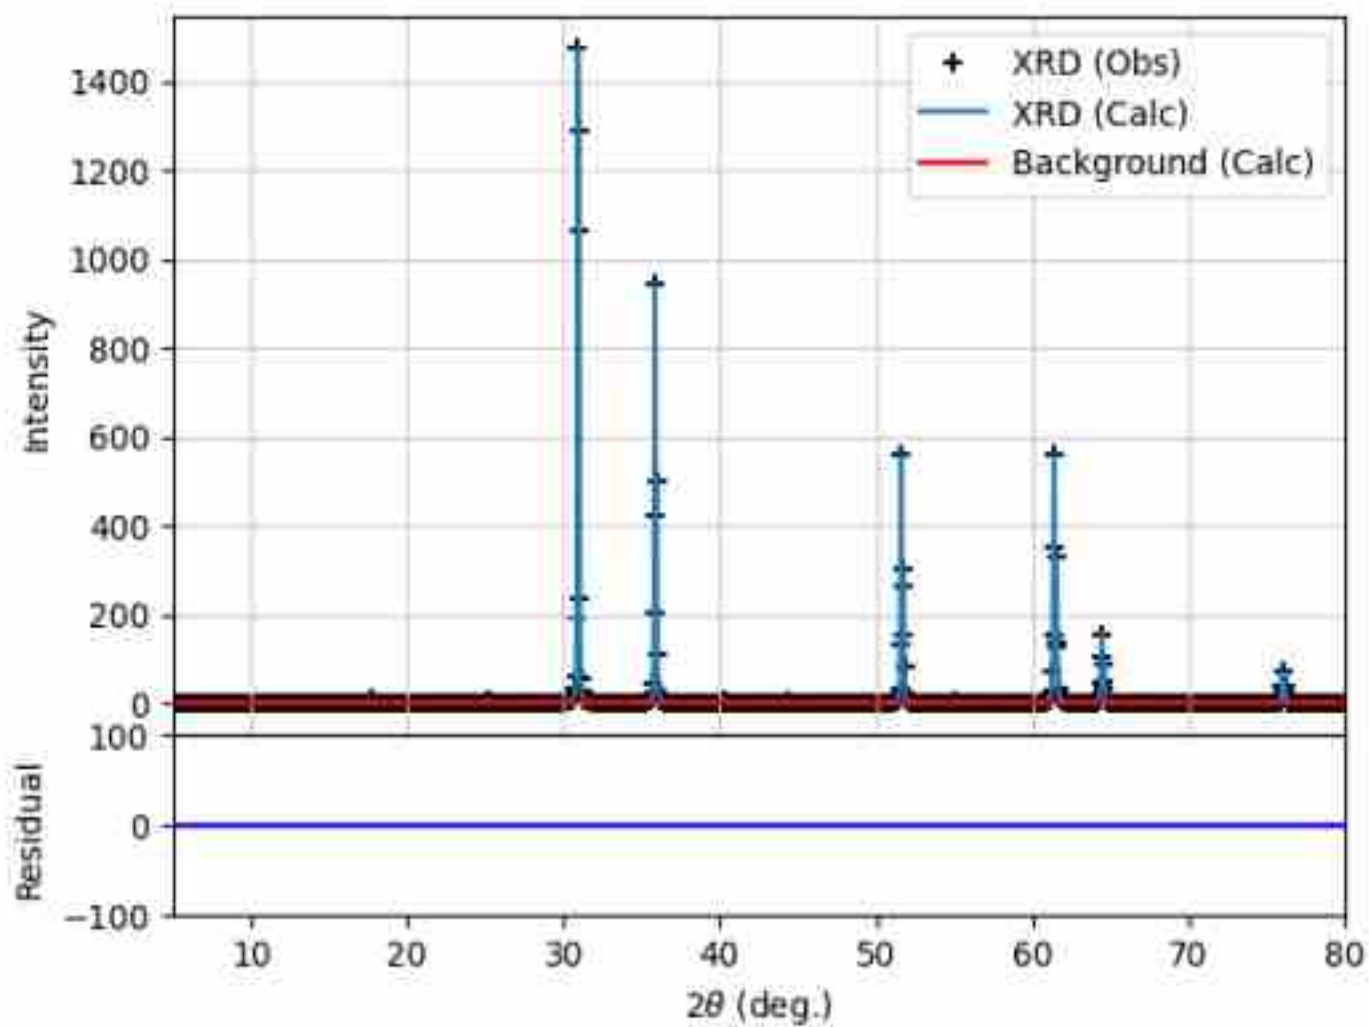

| RMSE before RR | Rwp     | RMSE after RR |
|----------------|---------|---------------|
| 0.001          | 0.00319 | 0.00043       |

# Tb3Y1

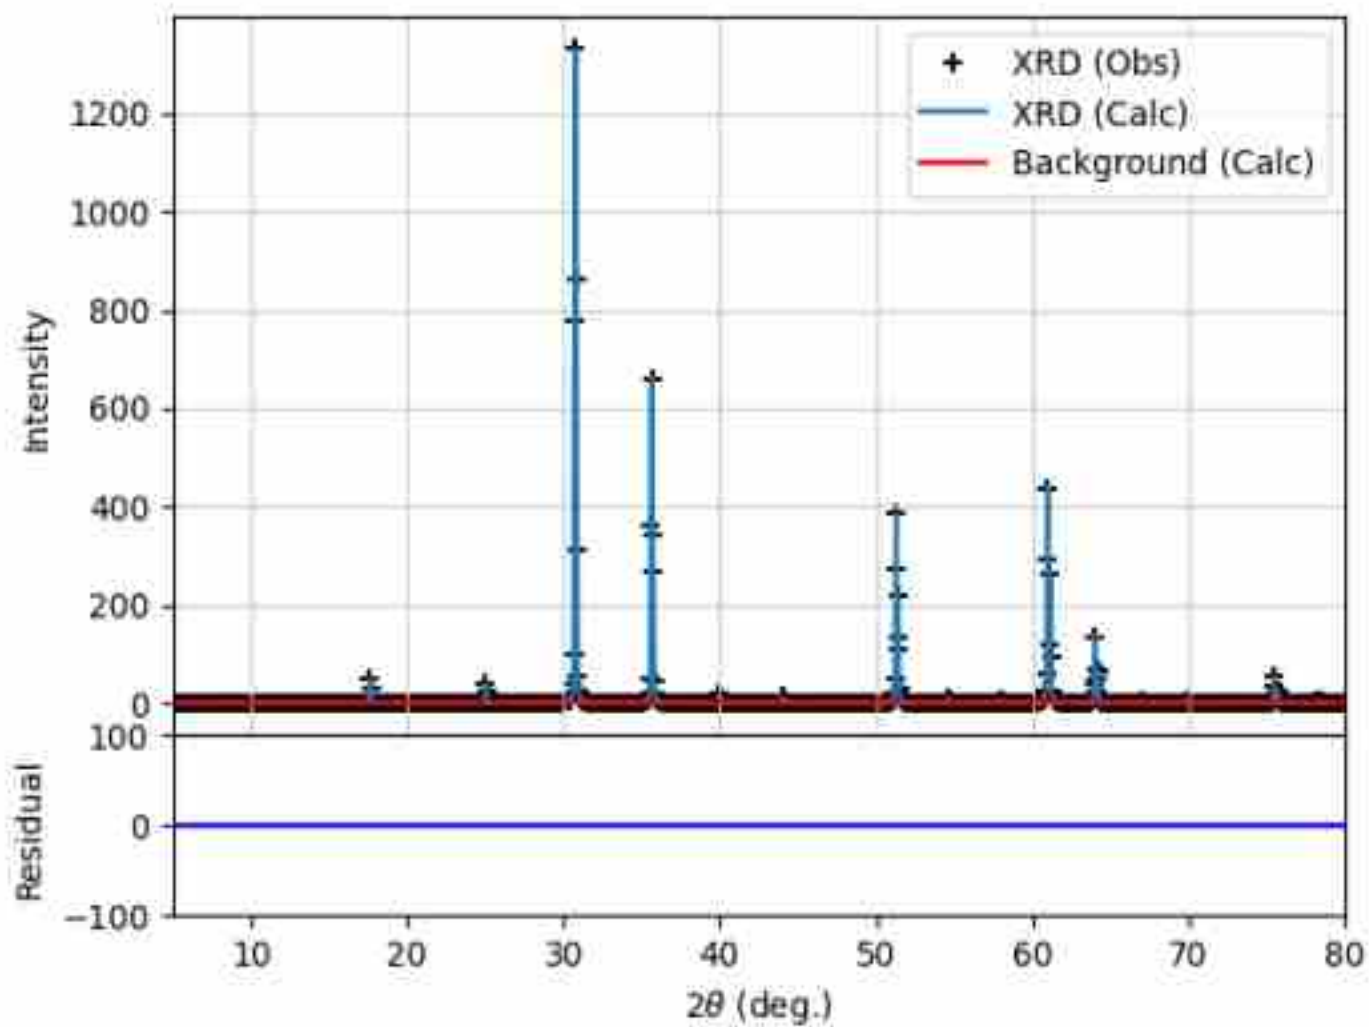

| RMSE before RR | Rwp     | RMSE after RR |
|----------------|---------|---------------|
| 0.001          | 0.00631 | 0.00054       |



# Tc3Ge1

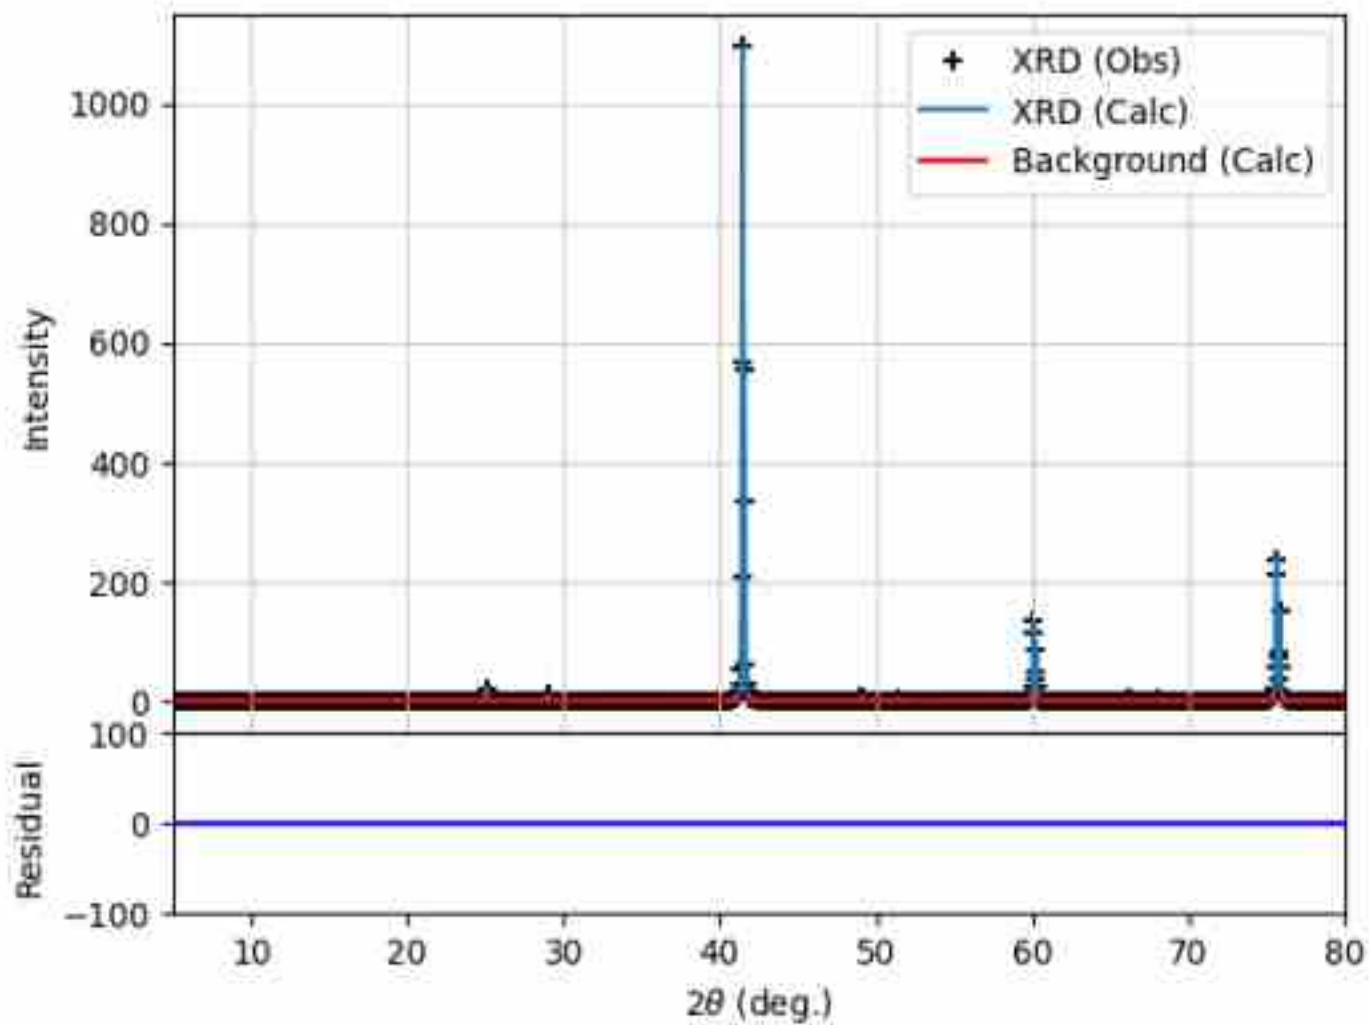

| RMSE before RR | Rwp     | RMSE after RR |
|----------------|---------|---------------|
| 0.001          | 0.00062 | 8e-05         |

# Th1Cd1Au2

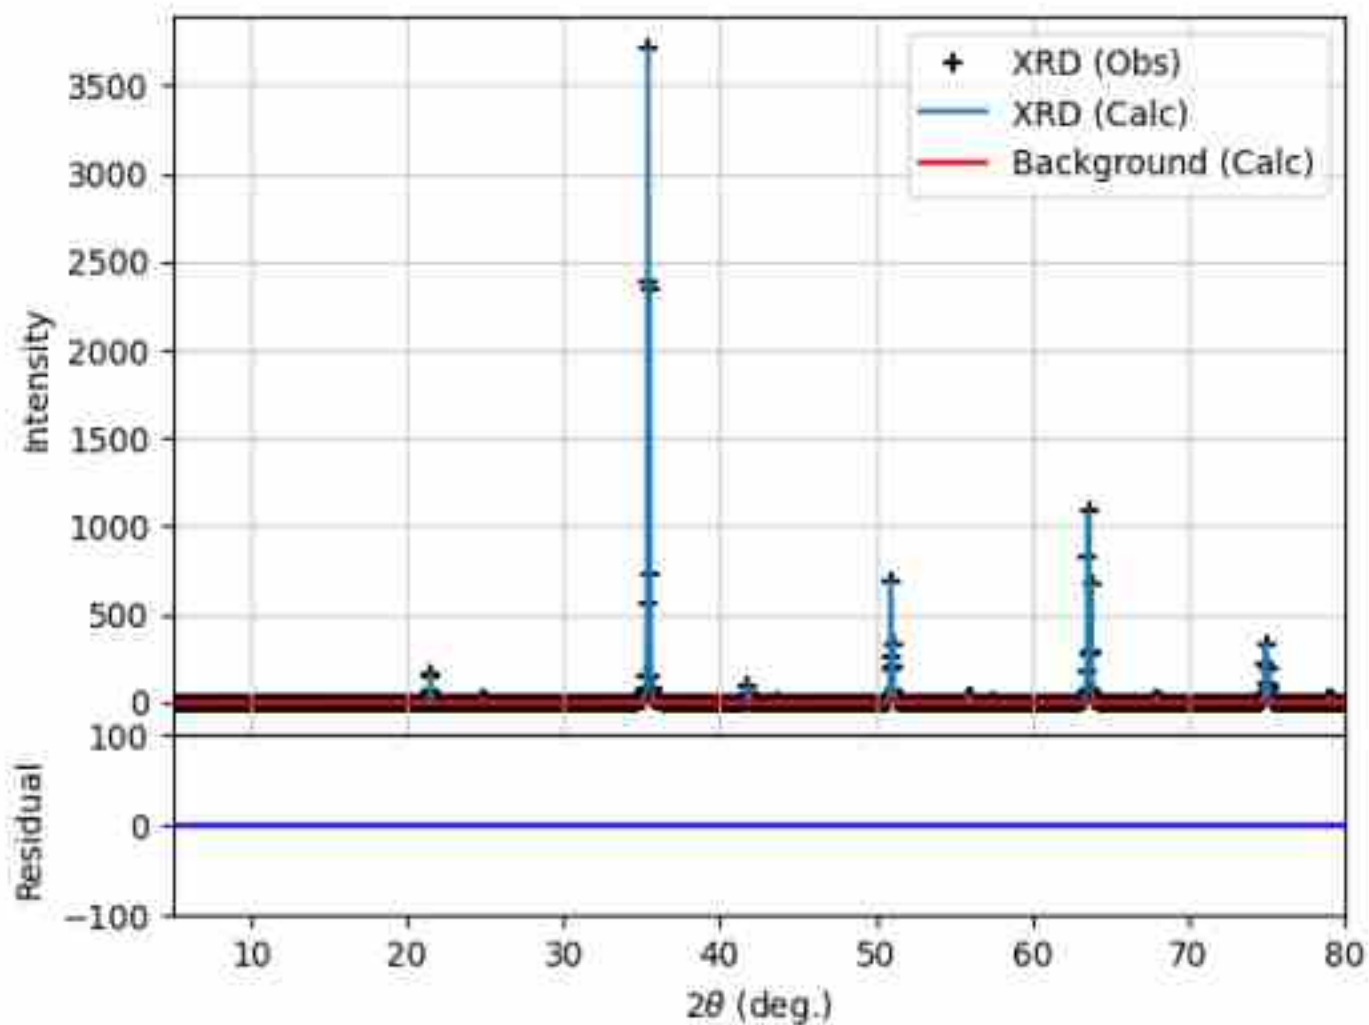

| RMSE before RR | Rwp     | RMSE after RR |
|----------------|---------|---------------|
| 0.001          | 0.00391 | 0.00059       |

# Th1Fe1Ni4

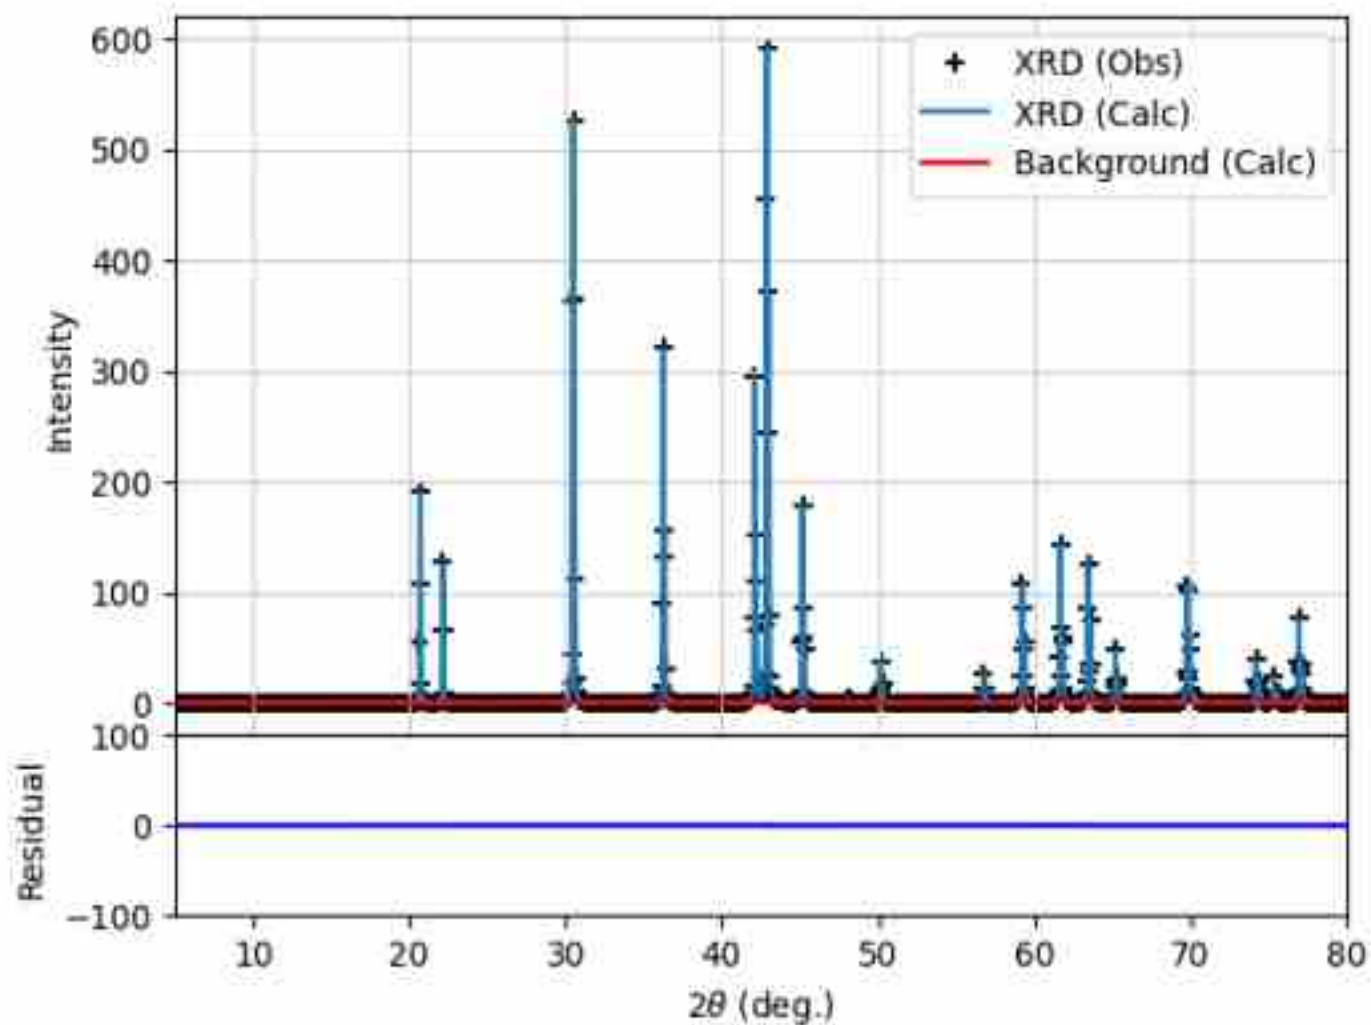

| RMSE before RR | Rwp     | RMSE after RR |
|----------------|---------|---------------|
| 0.01           | 0.09679 | 0.00137       |

# Th1Ga1Au2

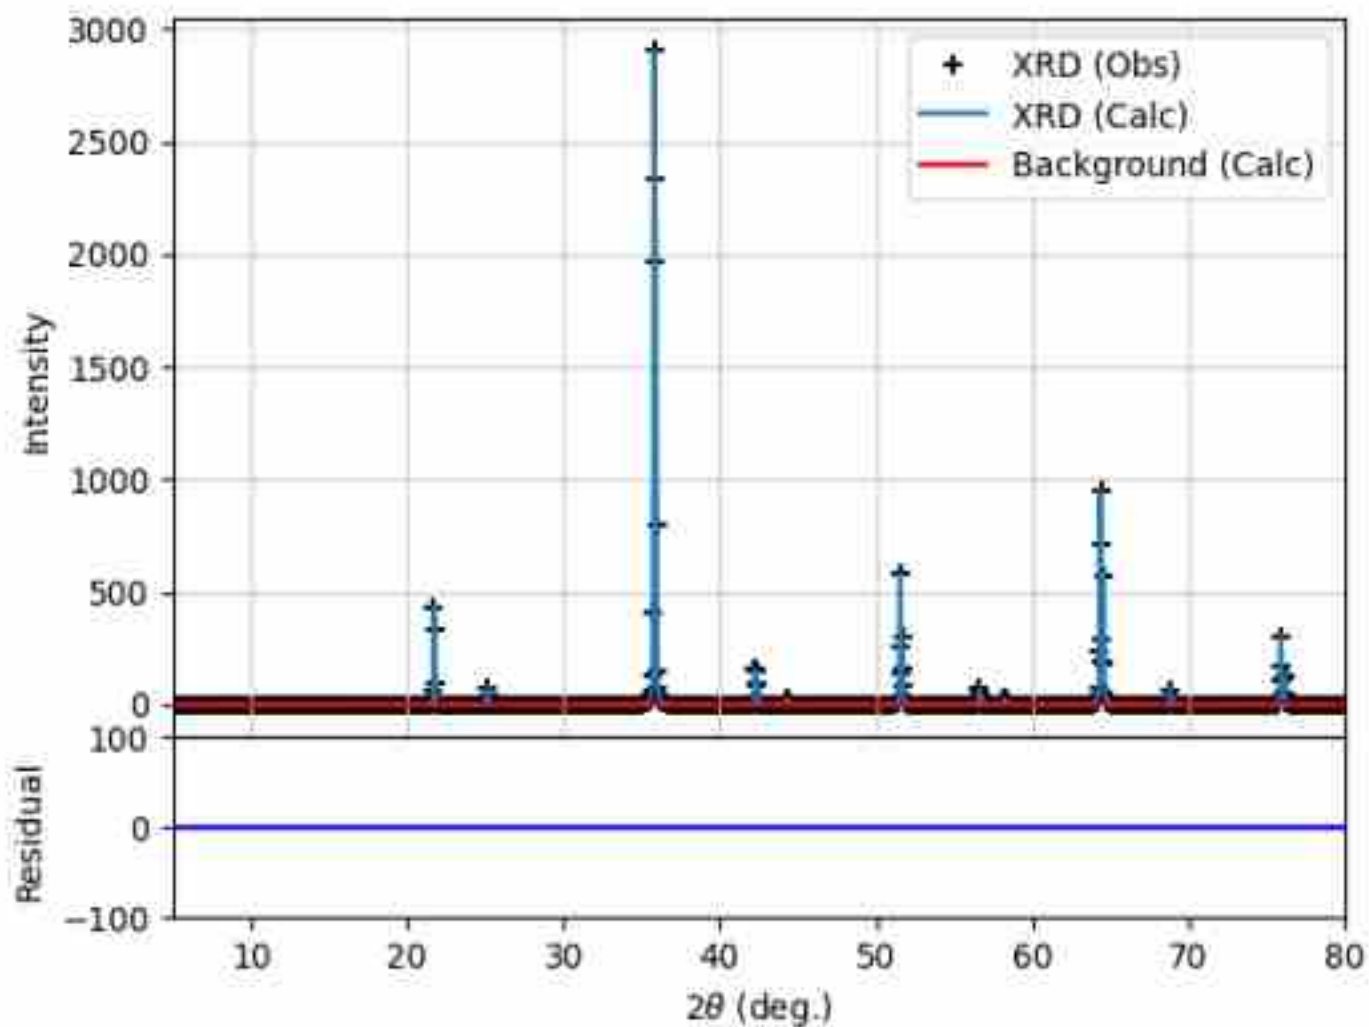

| RMSE before RR | Rwp     | RMSE after RR |
|----------------|---------|---------------|
| 0.001          | 0.00016 | 0.00011       |

# Th1Mn2Ni3

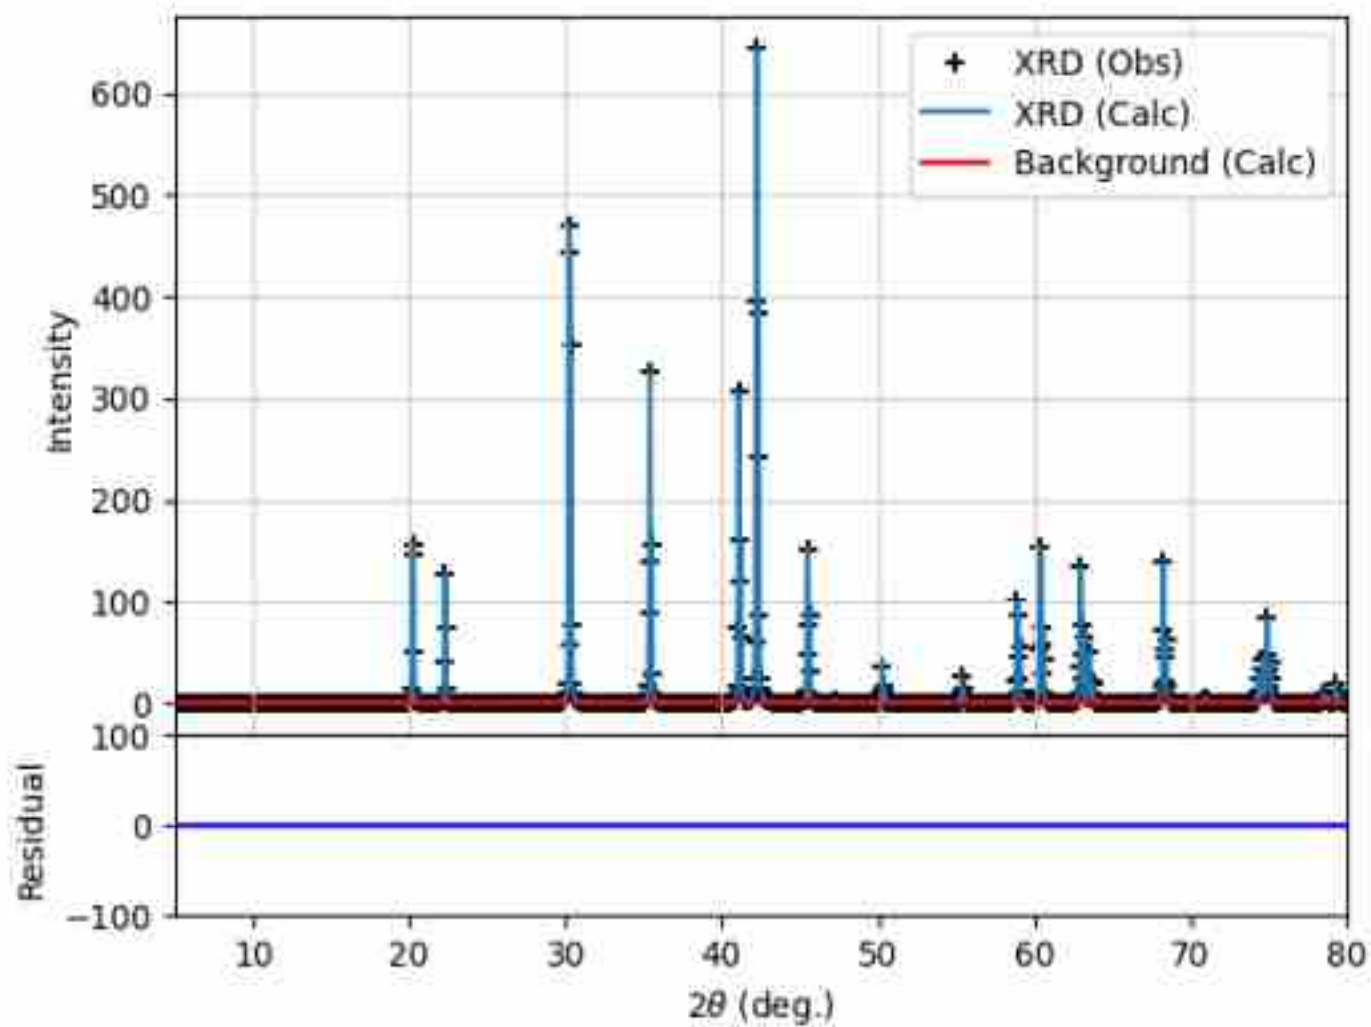

| RMSE before RR | Rwp     | RMSE after RR |
|----------------|---------|---------------|
| 0.01           | 0.00267 | 0.00064       |

# Th<sub>1</sub>Si<sub>2</sub>O<sub>s2</sub>

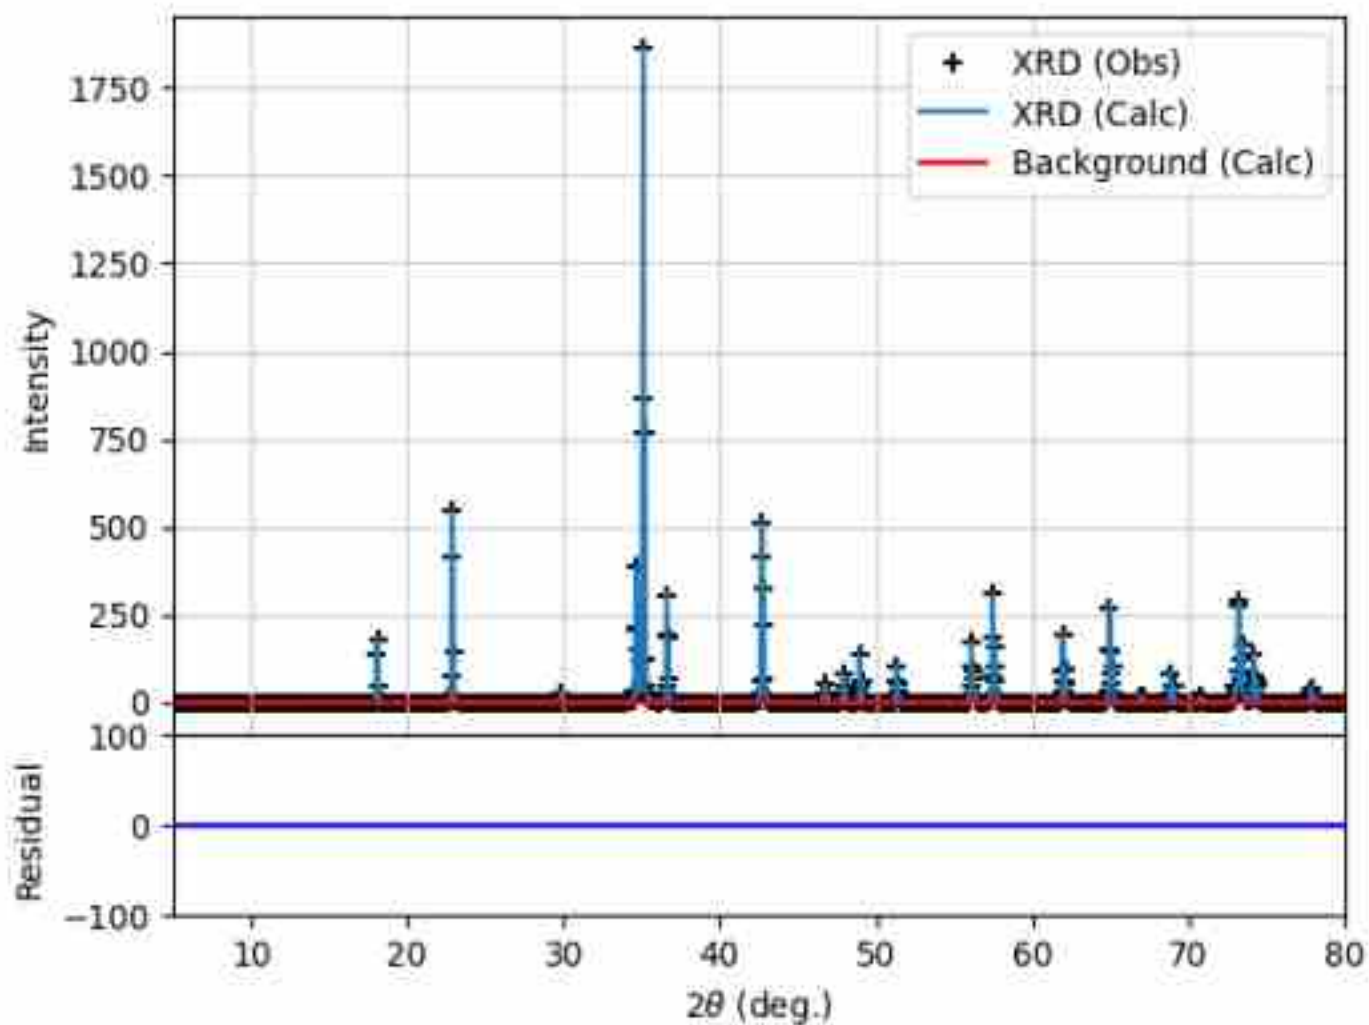

| RMSE before RR | Rwp     | RMSE after RR |
|----------------|---------|---------------|
| 0.01           | 0.00518 | 0.00093       |

# Th1Si2Ru2

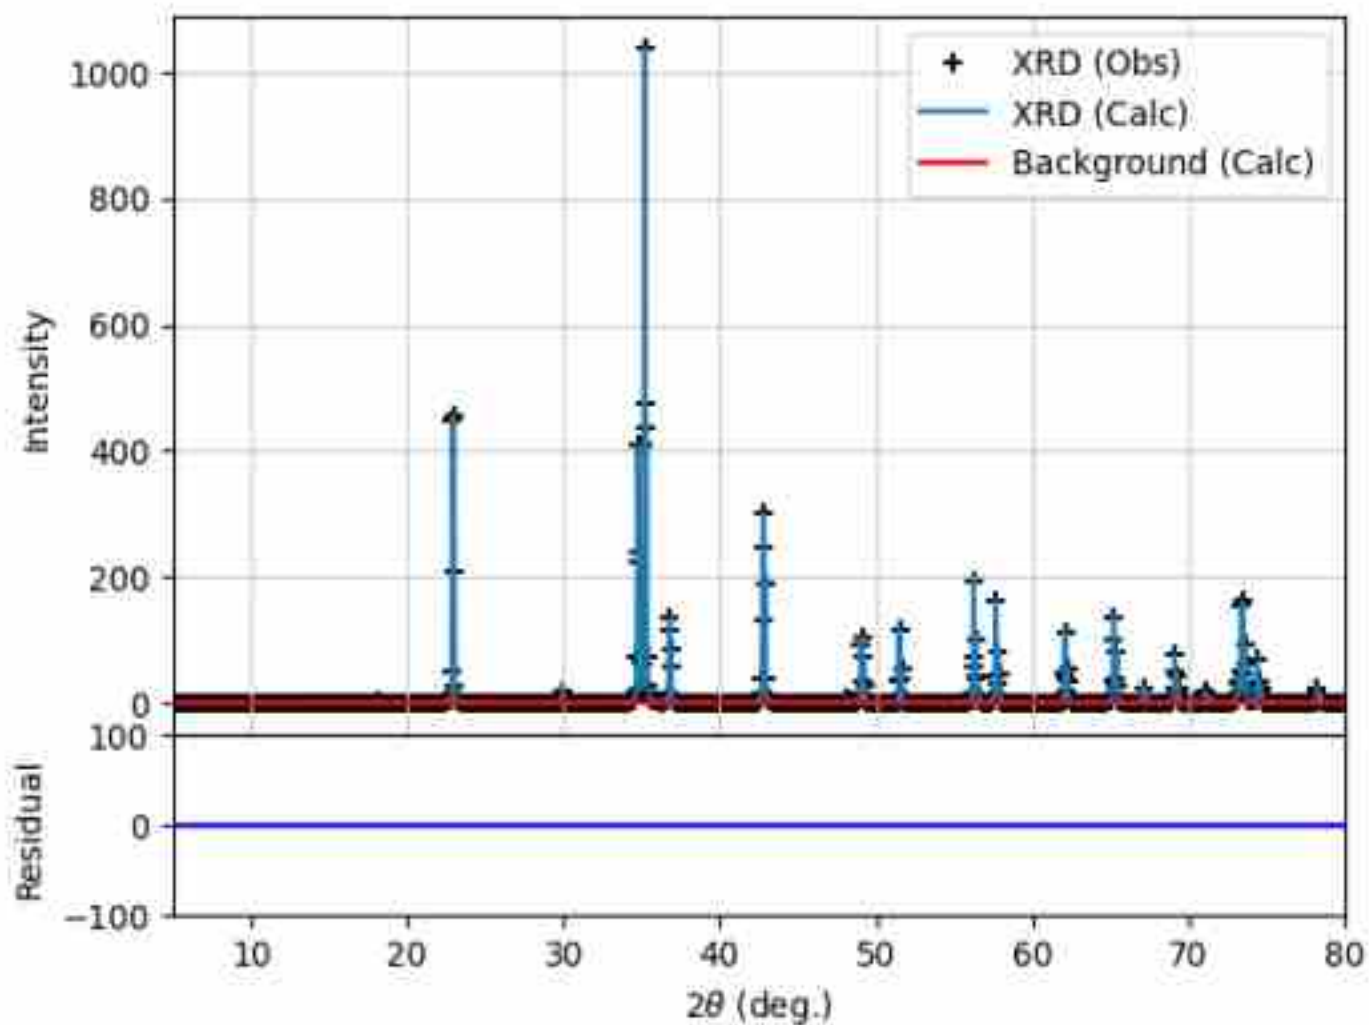

| RMSE before RR | Rwp     | RMSE after RR |
|----------------|---------|---------------|
| 0.01           | 0.00371 | 0.00058       |

# Th<sub>2</sub>Co<sub>1</sub>Si<sub>3</sub>

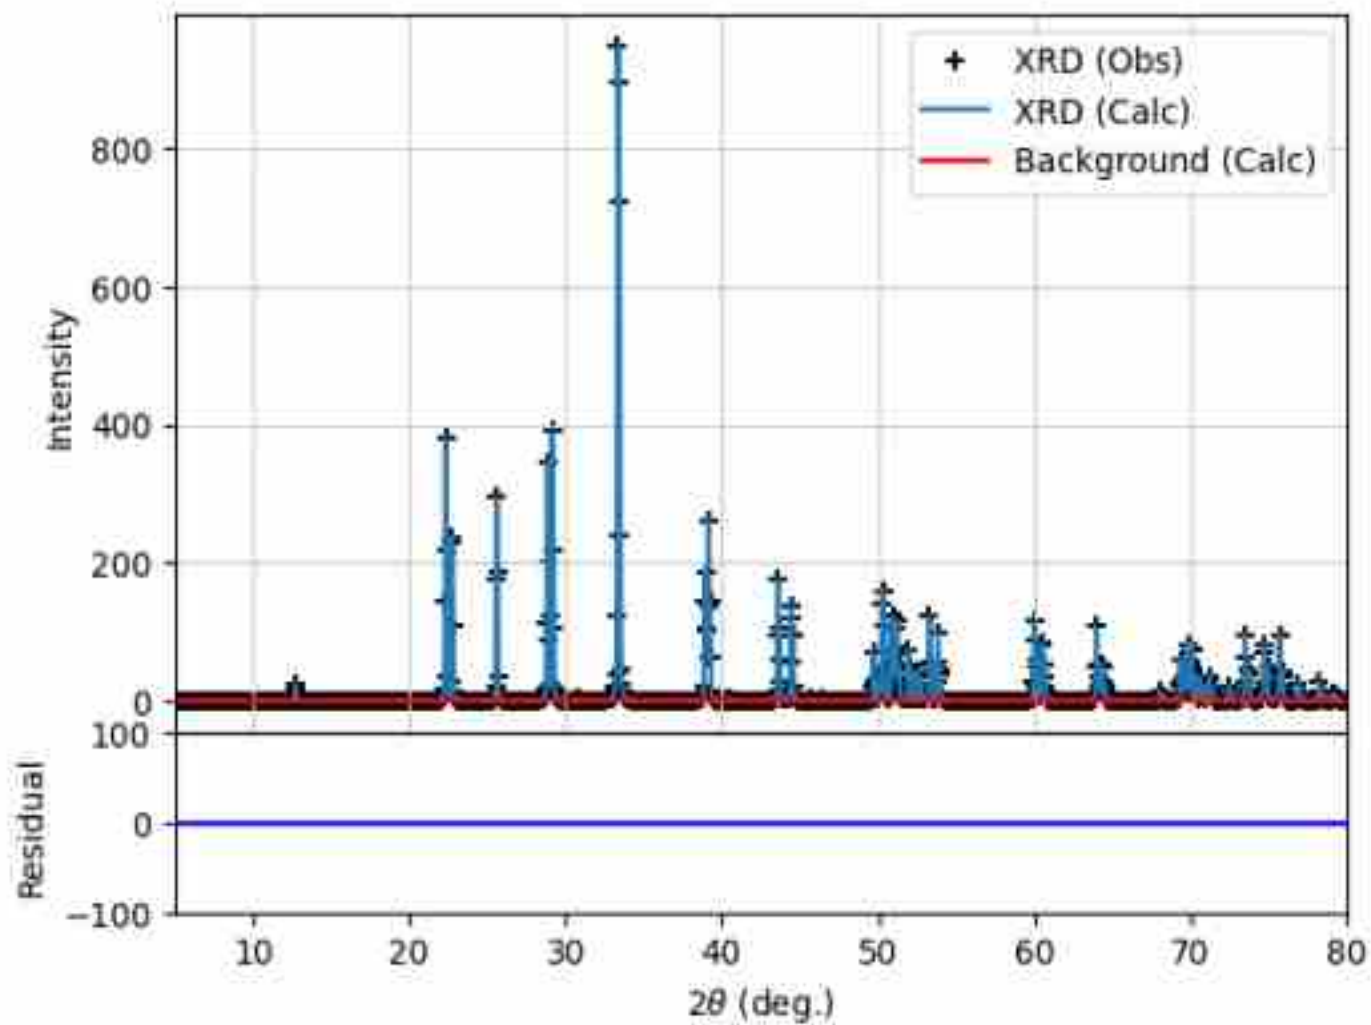

| RMSE before RR | Rwp     | RMSE after RR |
|----------------|---------|---------------|
| 0.01           | 0.00415 | 0.00053       |



# Th<sub>2</sub>O<sub>s</sub>4

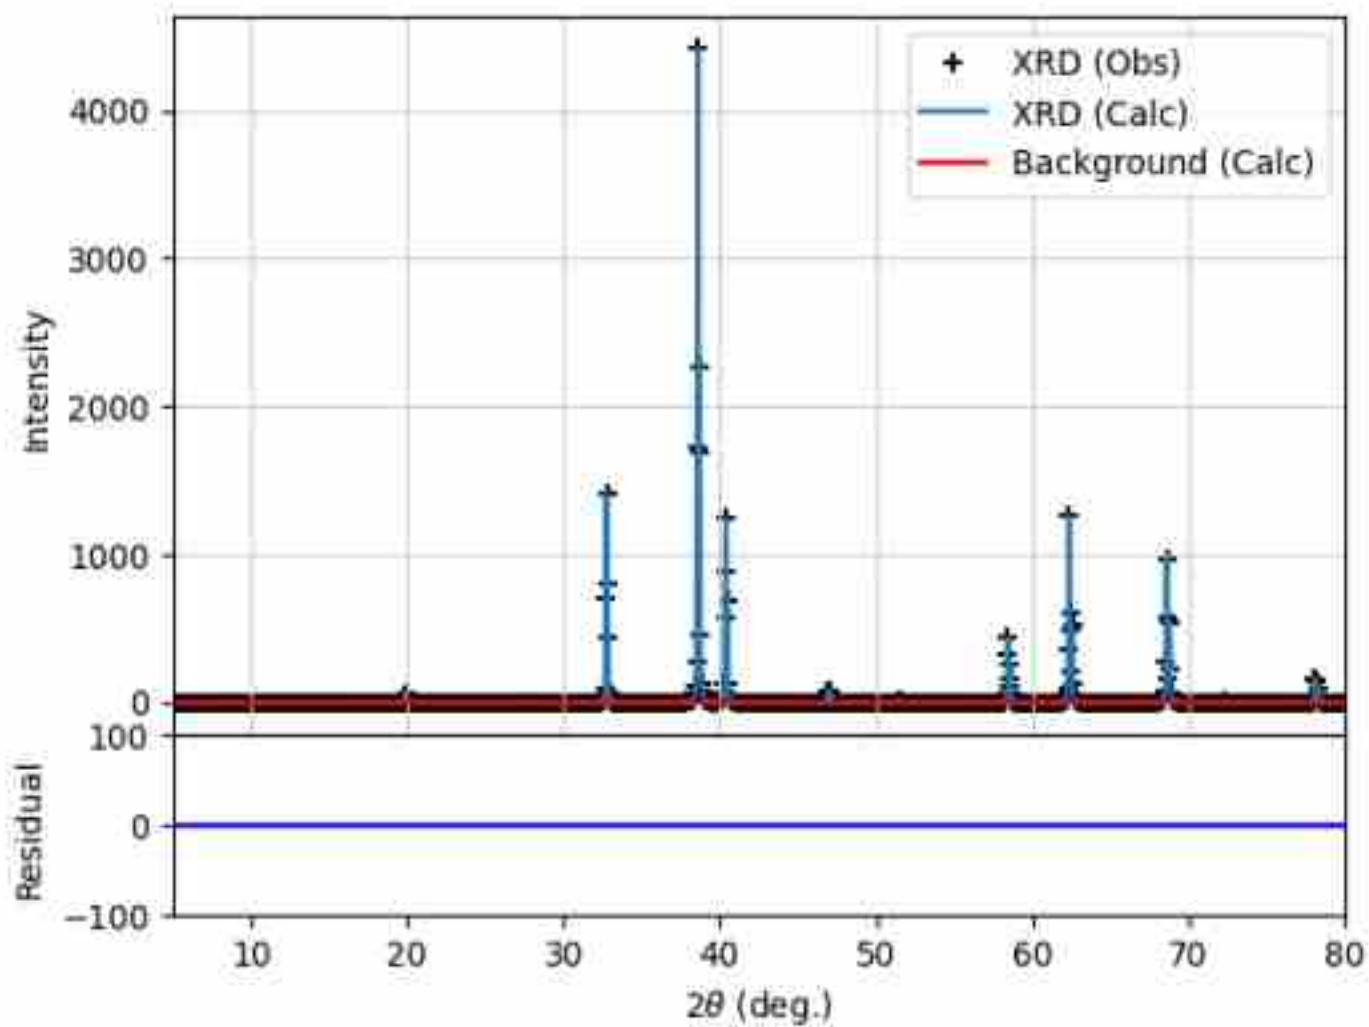

| RMSE before RR | Rwp     | RMSE after RR |
|----------------|---------|---------------|
| 0.01           | 0.02608 | 0.0011        |

# Th<sub>3</sub>In<sub>1</sub>

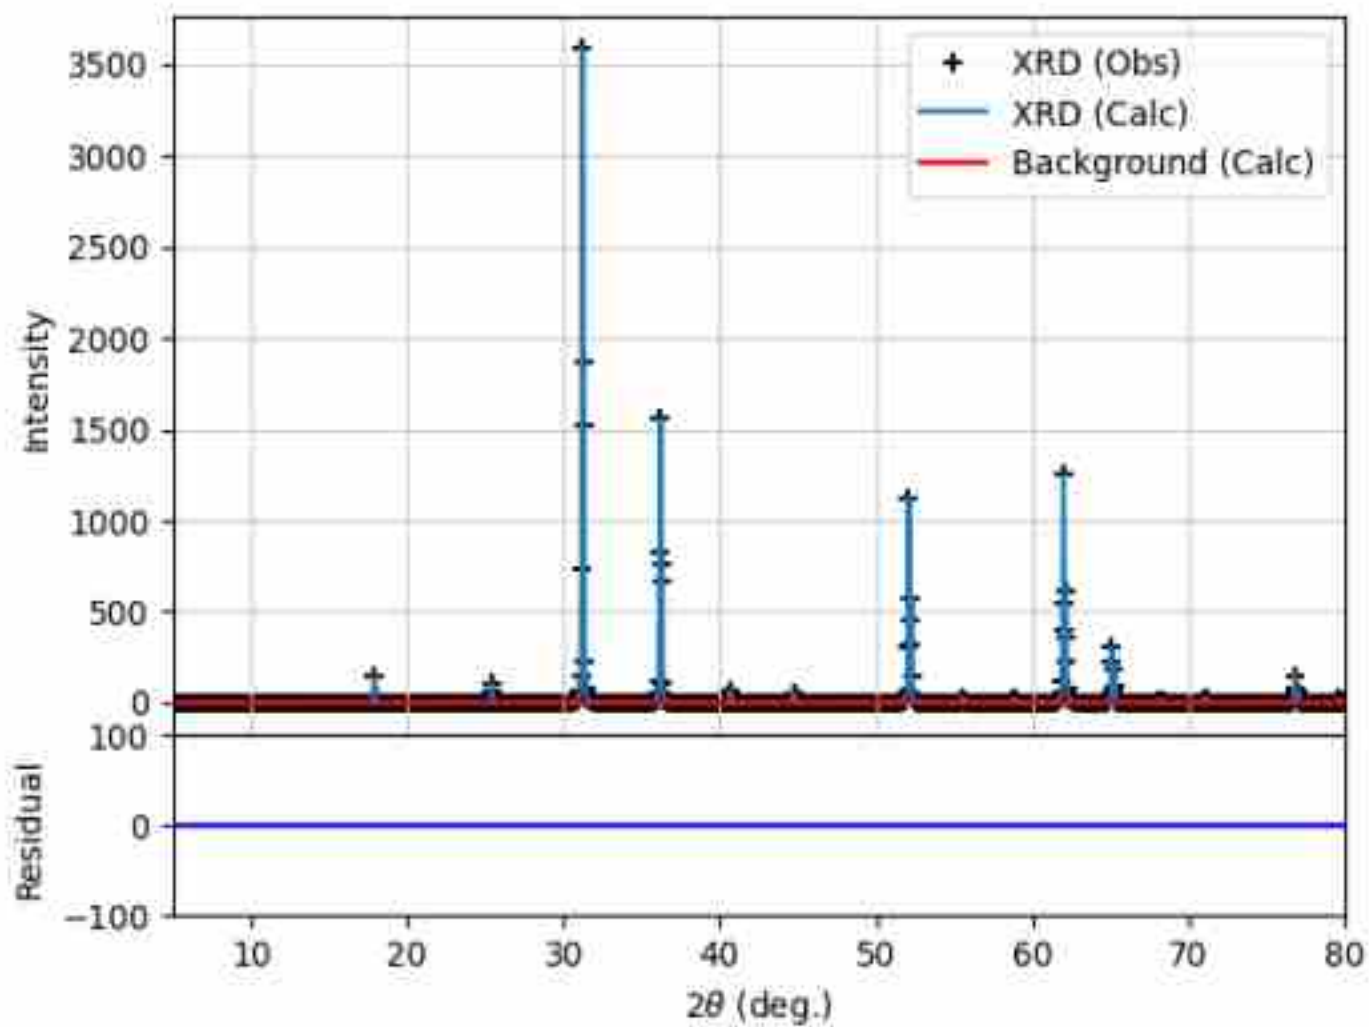

| RMSE before RR | Rwp    | RMSE after RR |
|----------------|--------|---------------|
| 0.001          | 0.0085 | 0.00063       |

# Ti1Al1Au2

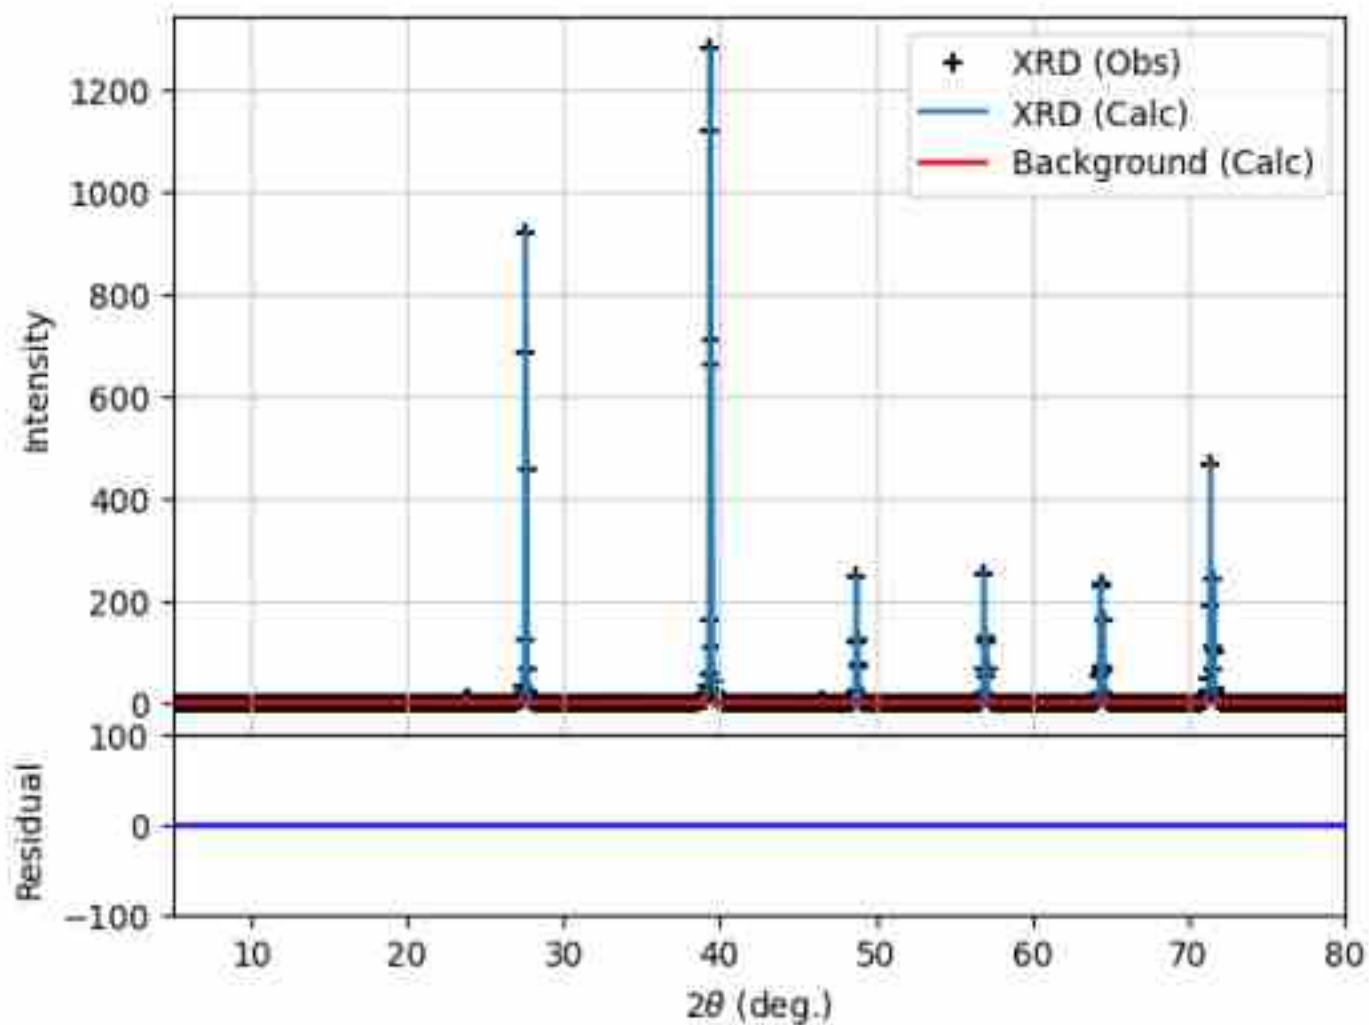

| RMSE before RR | Rwp     | RMSE after RR |
|----------------|---------|---------------|
| 0.001          | 0.00729 | 0.00117       |

# Ti1Al1Cu2

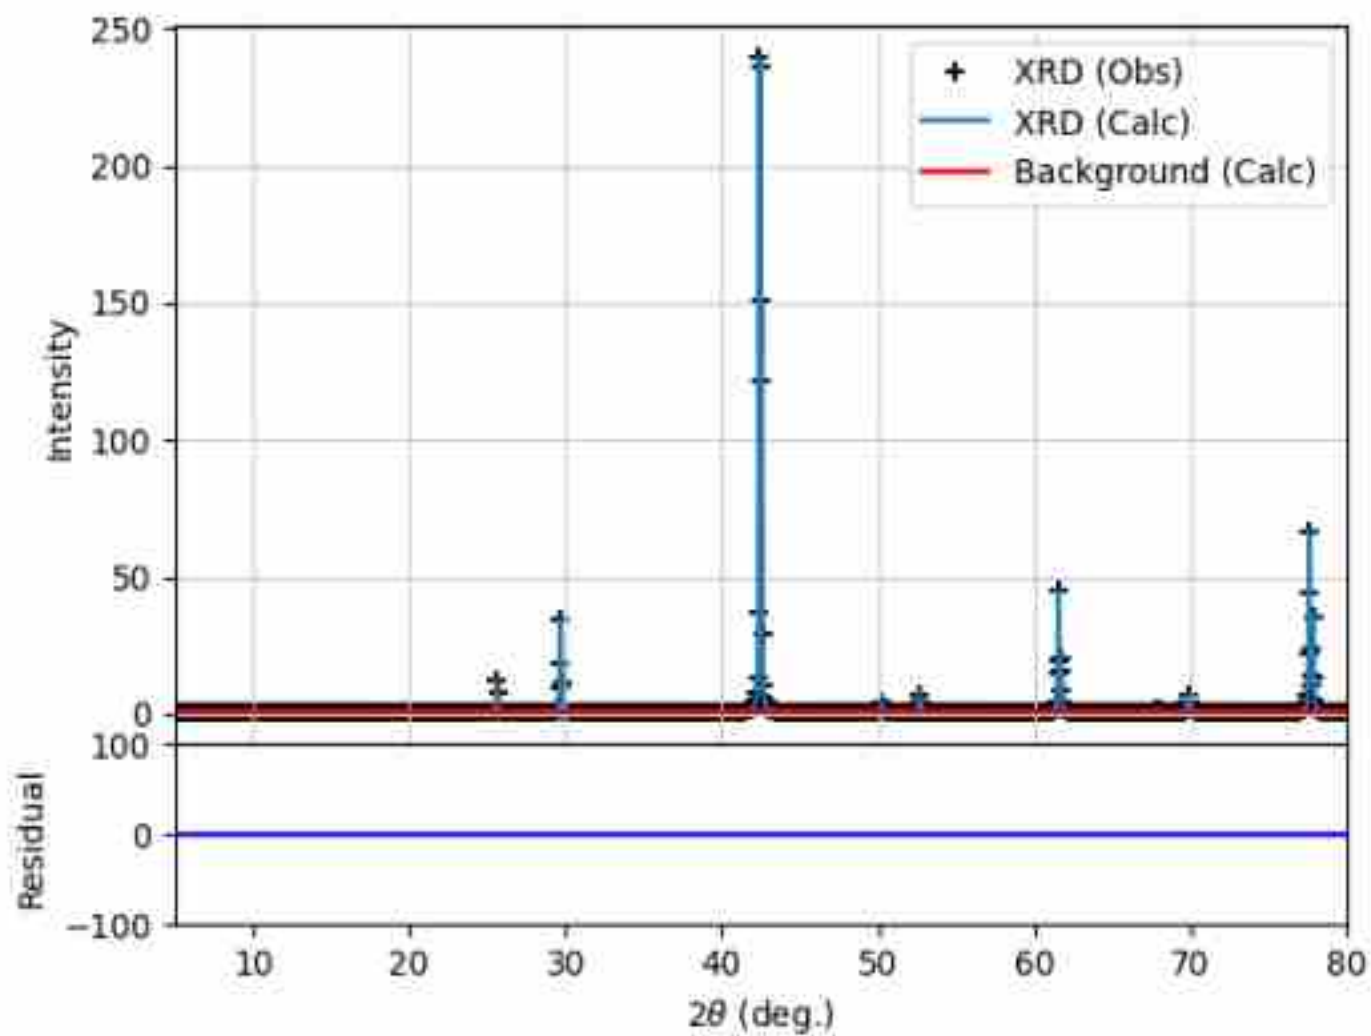

| RMSE before RR | Rwp     | RMSE after RR |
|----------------|---------|---------------|
| 0.001          | 0.00213 | 0.00036       |

# Ti1Al1Fe1Co1

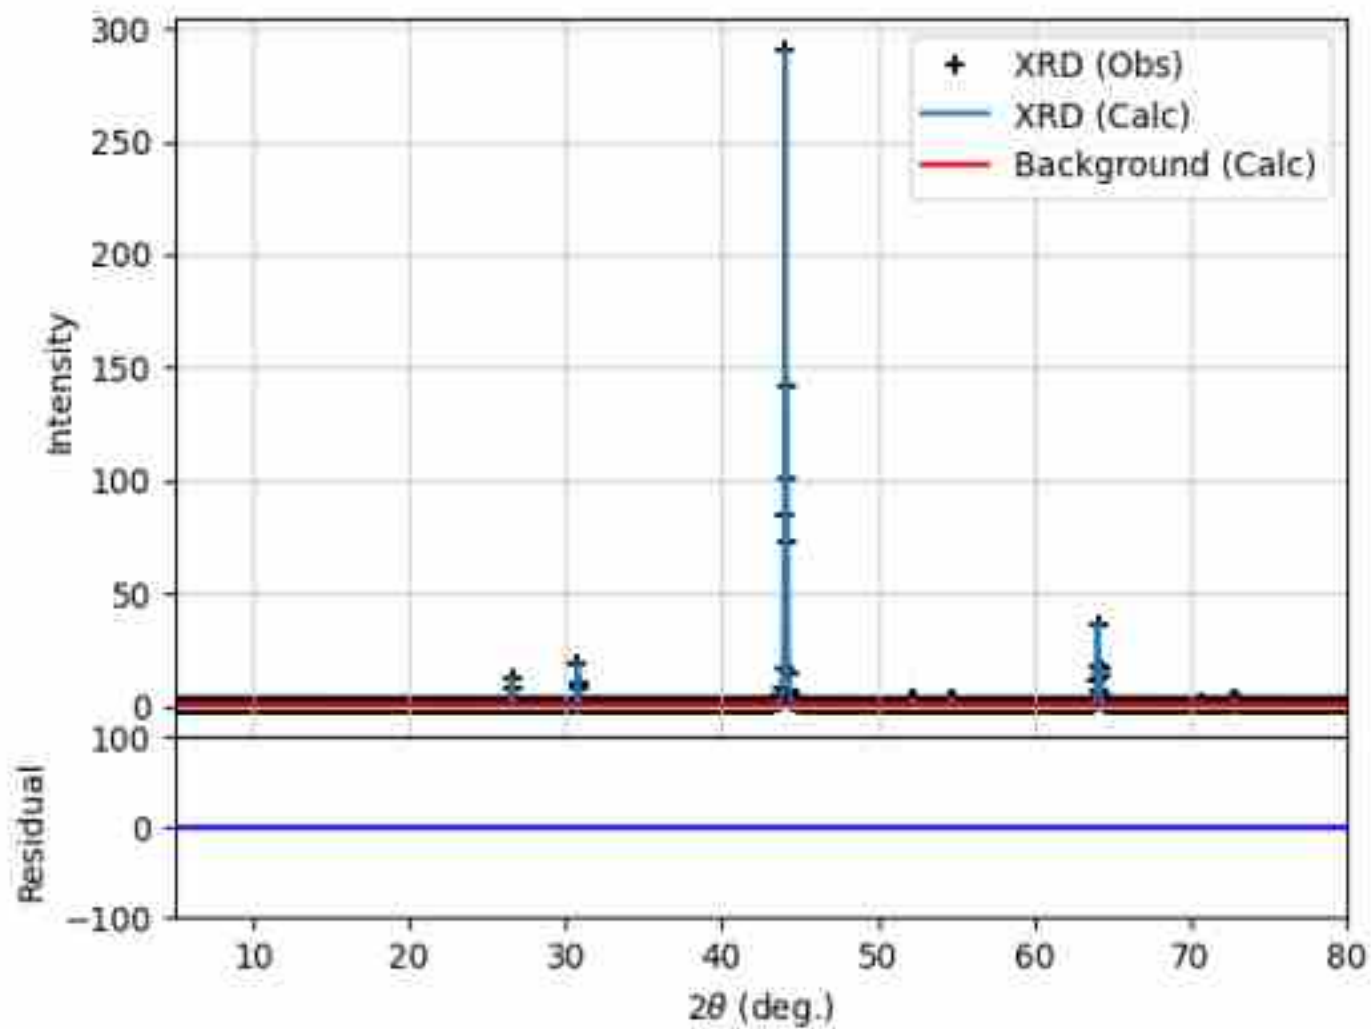

| RMSE before RR | Rwp   | RMSE after RR |
|----------------|-------|---------------|
| 0.001          | 1e-05 | 2e-05         |

# Ti1Al1Fe2

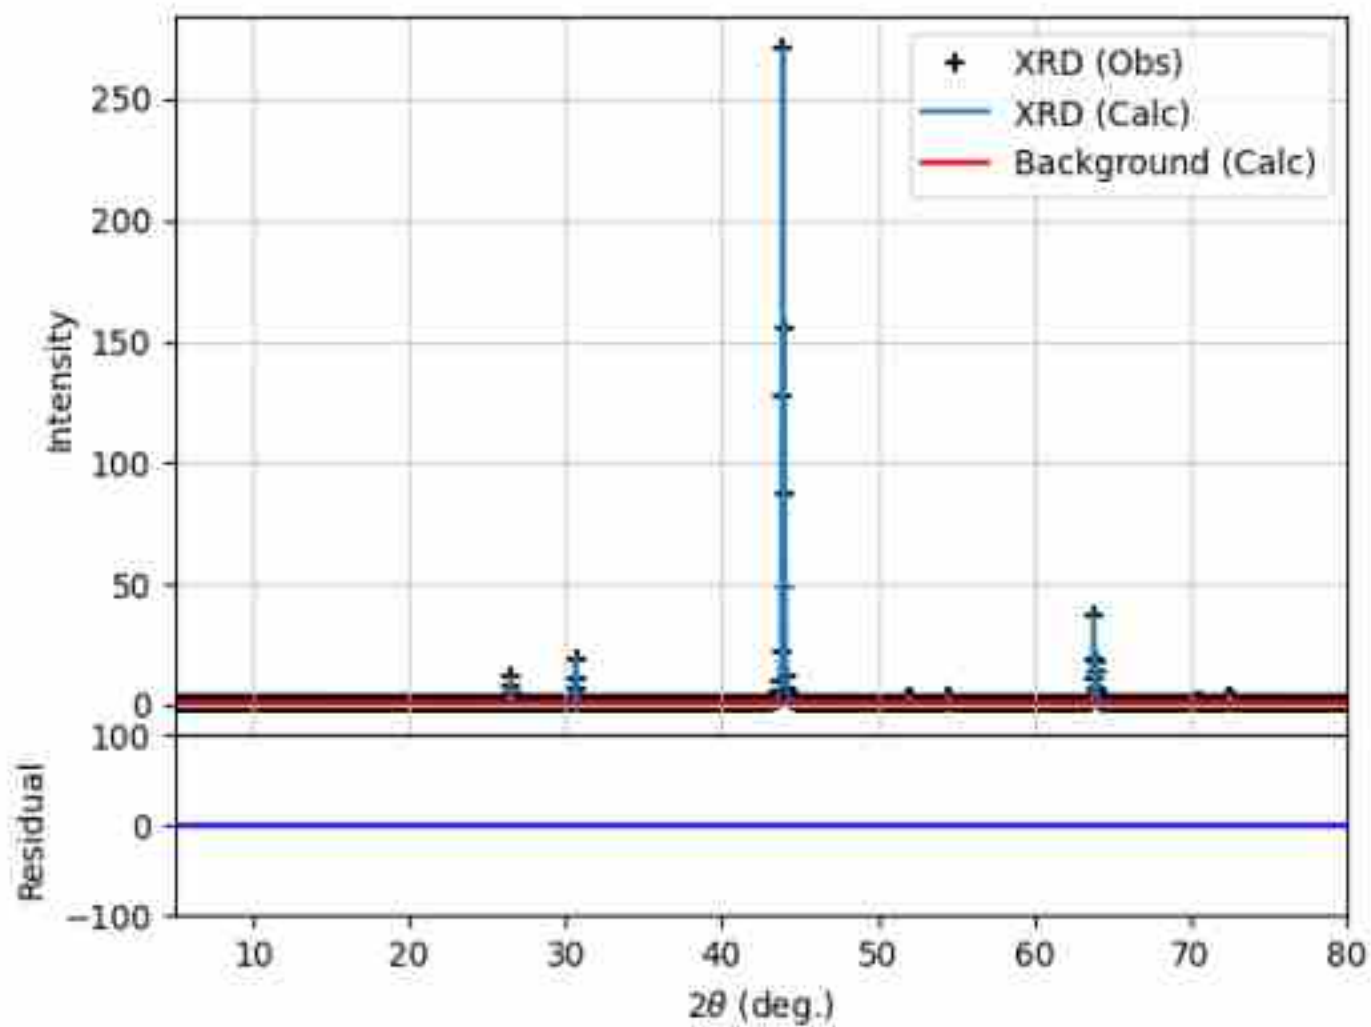

| RMSE before RR | Rwp    | RMSE after RR |
|----------------|--------|---------------|
| 0.001          | 0.0012 | 0.00053       |

# Ti1Fe2Si1

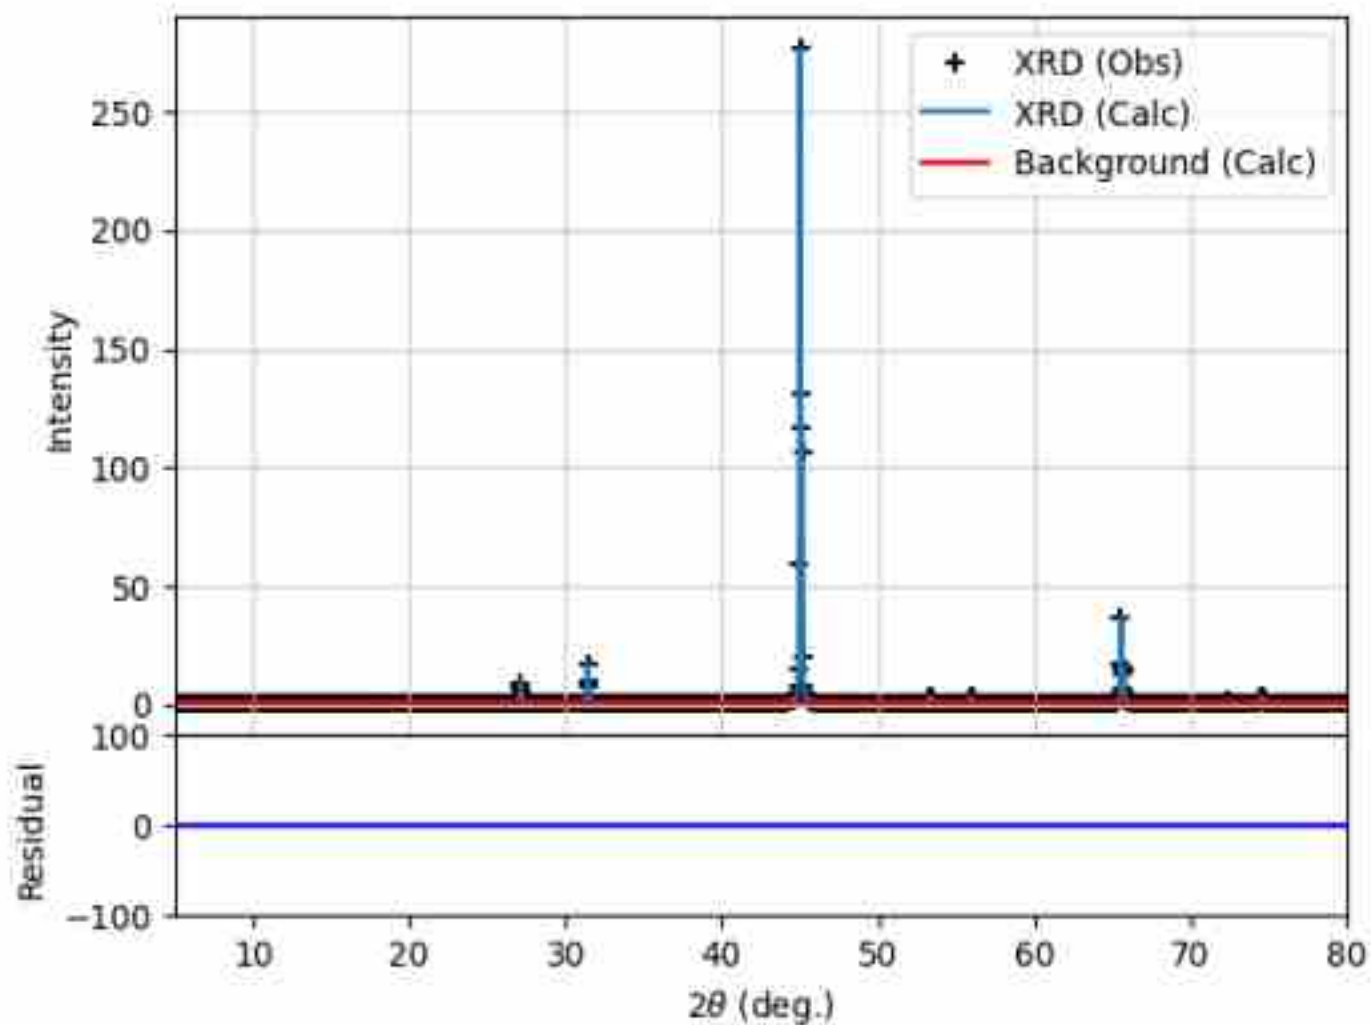

| RMSE before RR | Rwp     | RMSE after RR |
|----------------|---------|---------------|
| 0.001          | 0.00232 | 0.0004        |

# Ti1Ga1Tc2

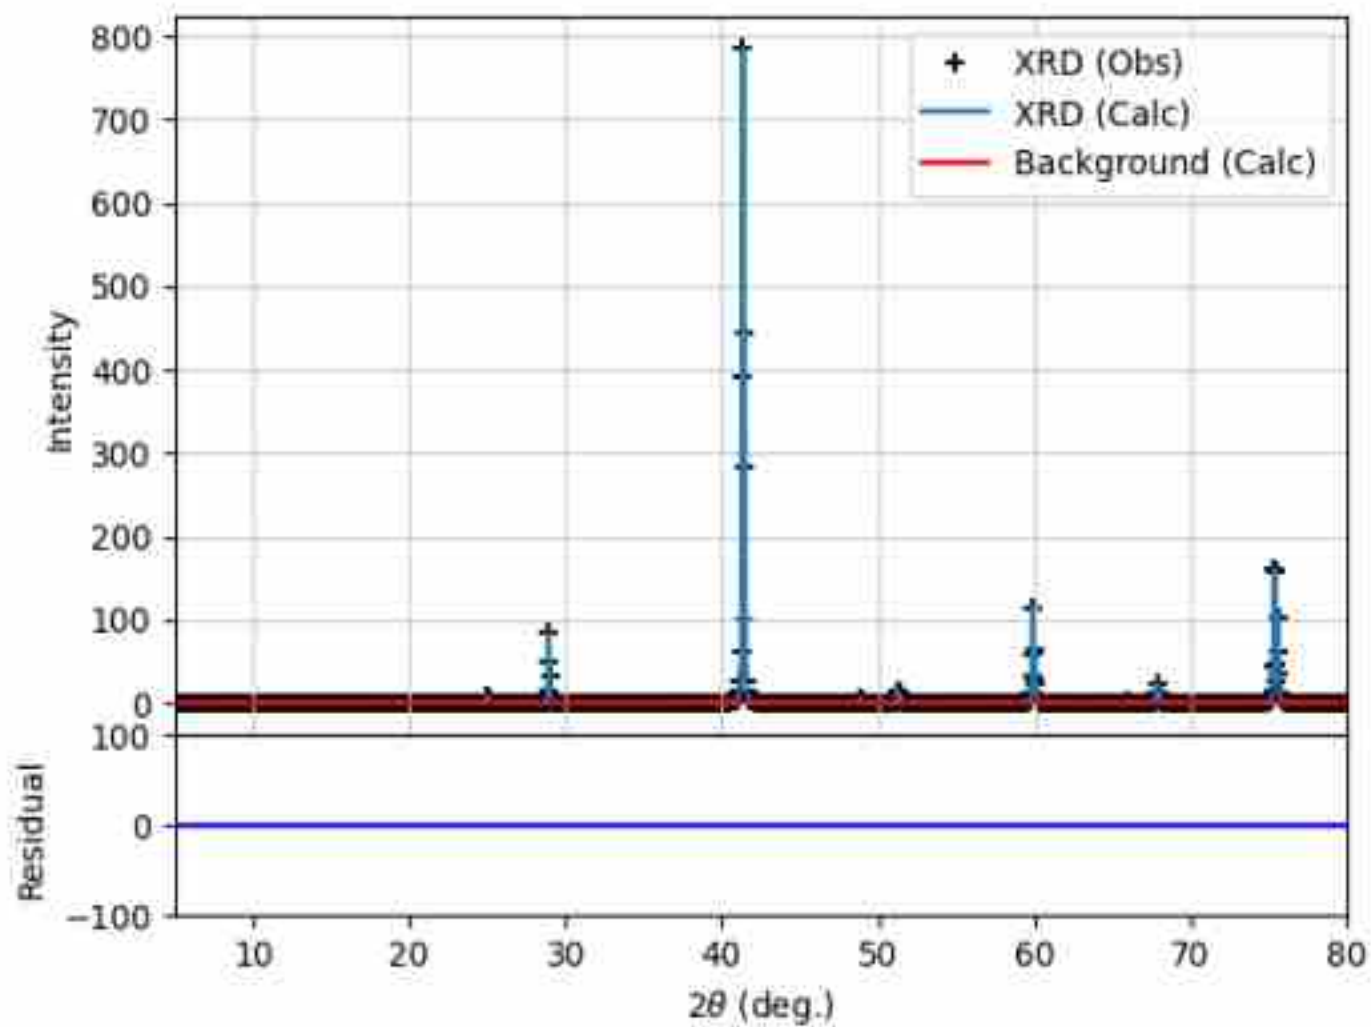

| RMSE before RR | Rwp     | RMSE after RR |
|----------------|---------|---------------|
| 0.001          | 0.00511 | 0.00084       |



# Ti1Ge1Rh2

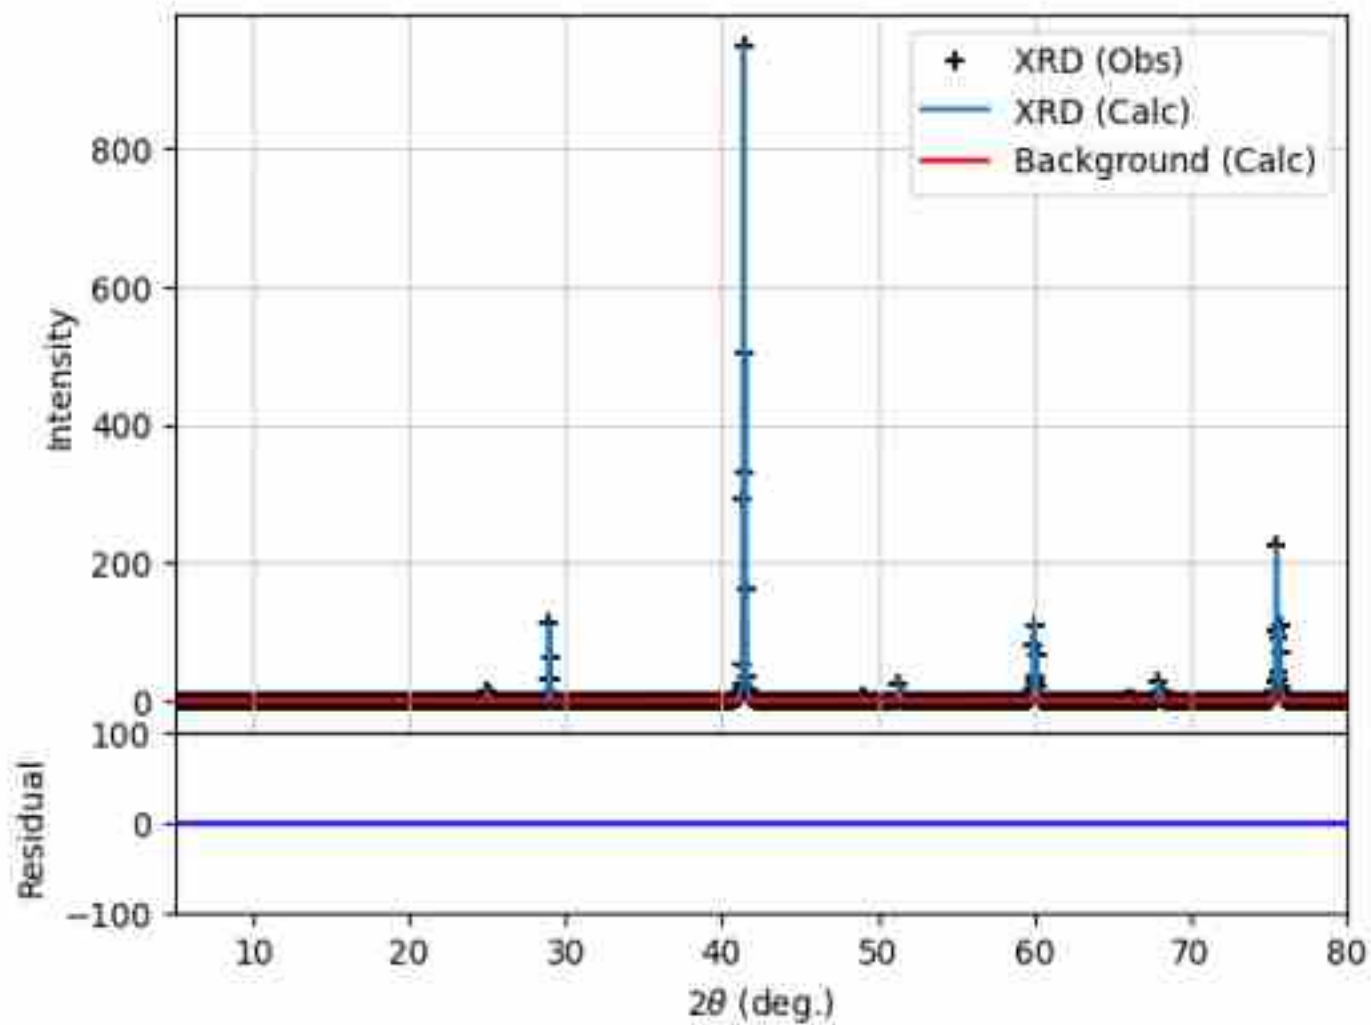

| RMSE before RR | Rwp     | RMSE after RR |
|----------------|---------|---------------|
| 0.001          | 0.00292 | 0.00063       |

# Ti1Ni2Sn1

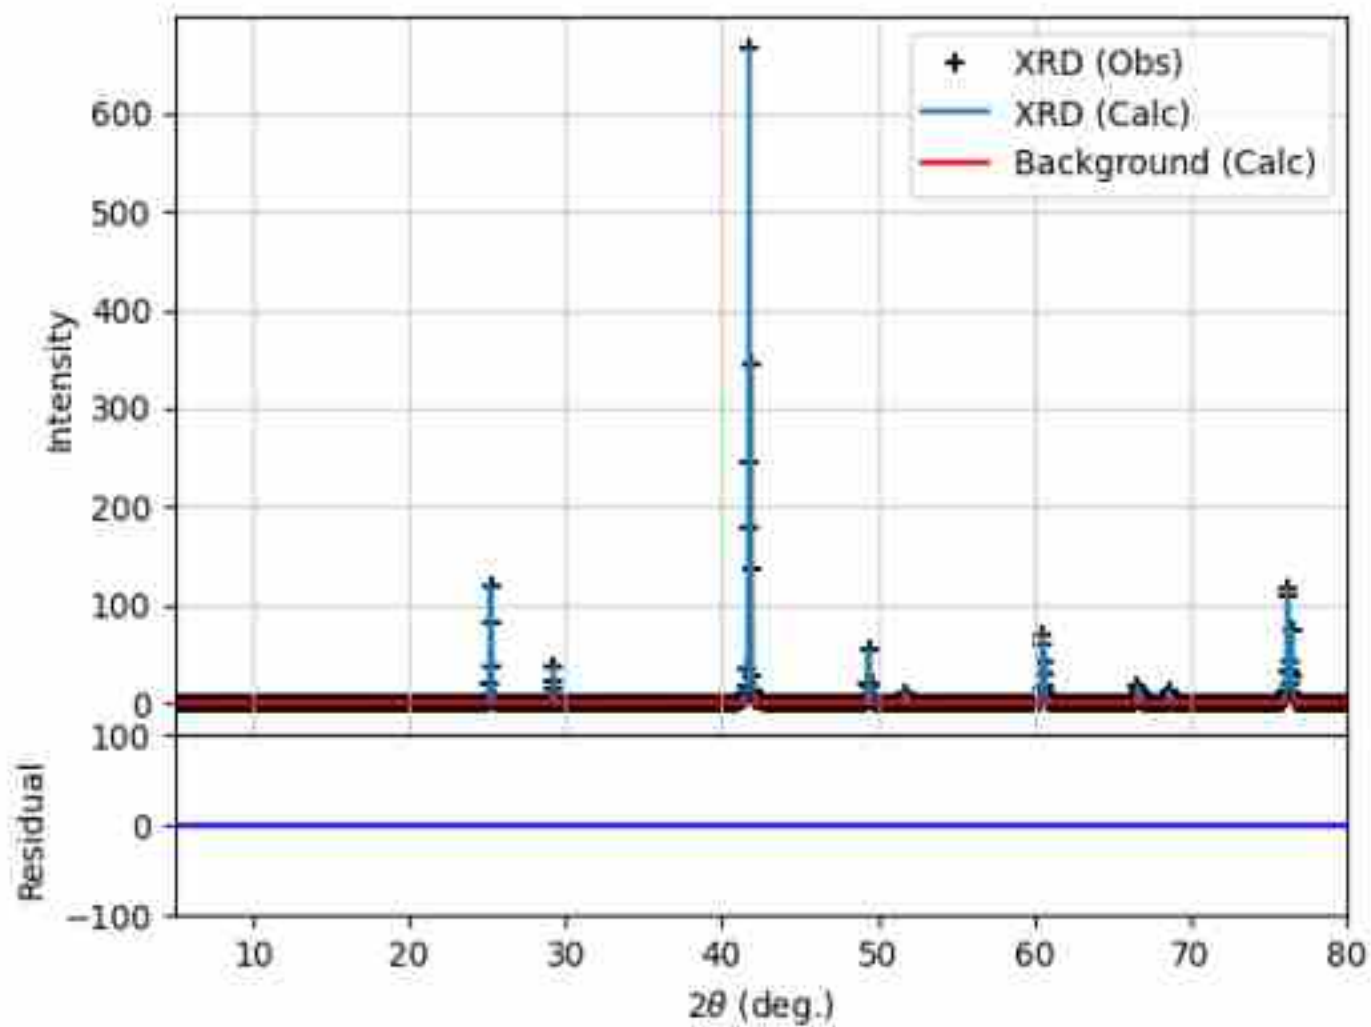

| RMSE before RR | Rwp     | RMSE after RR |
|----------------|---------|---------------|
| 0.001          | 0.00312 | 0.00059       |

# Ti1Os1

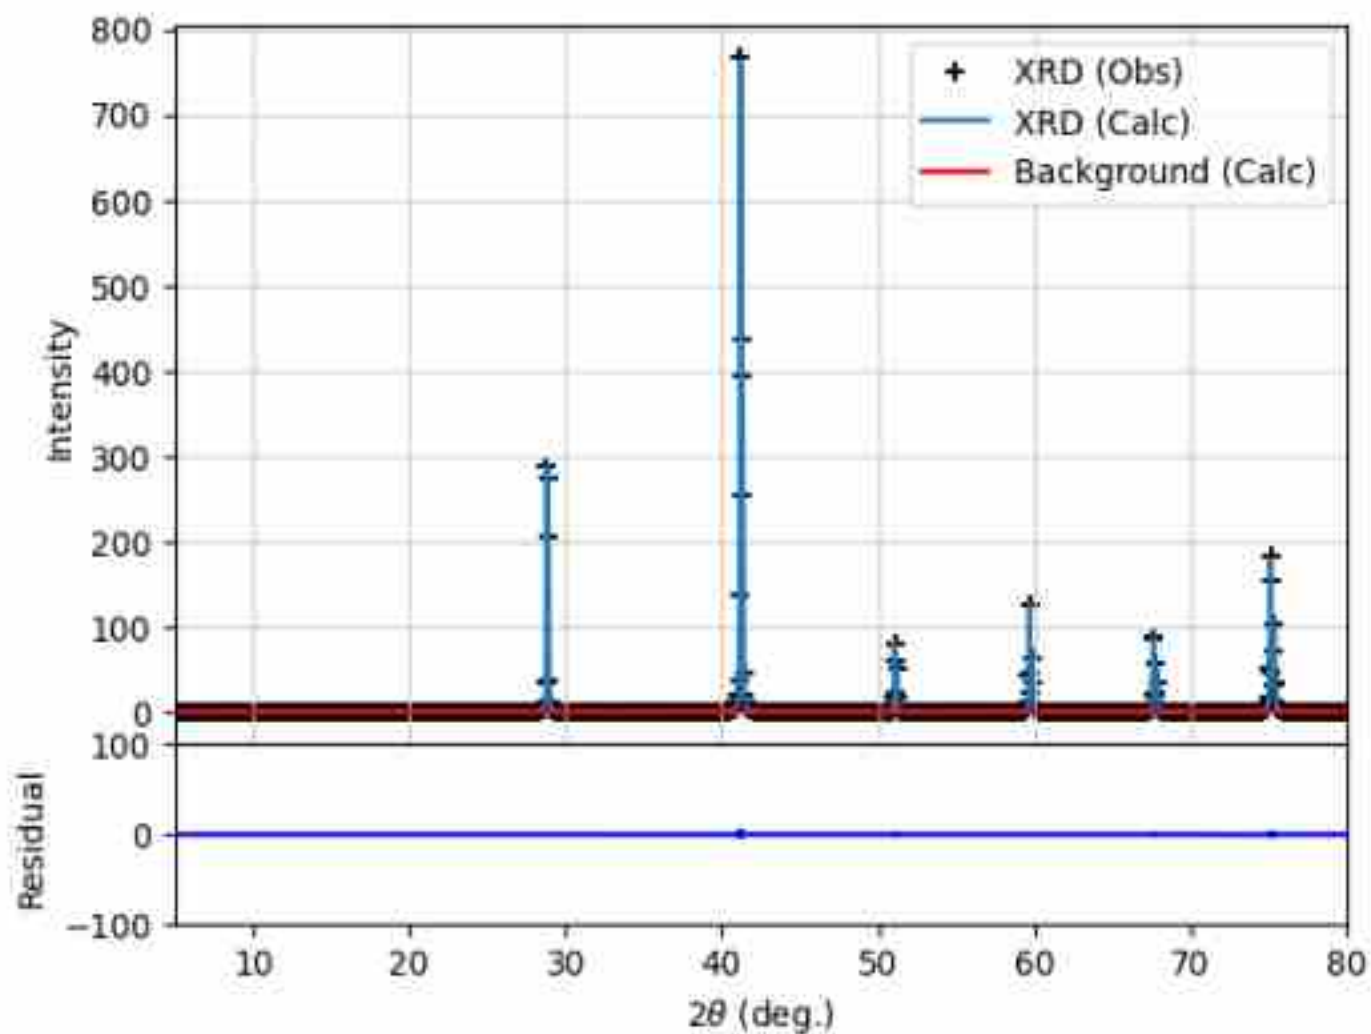

| RMSE before RR | Rwp     | RMSE after RR |
|----------------|---------|---------------|
| 0.001          | 0.86373 | 0.00133       |

# Ti1Pb1O3

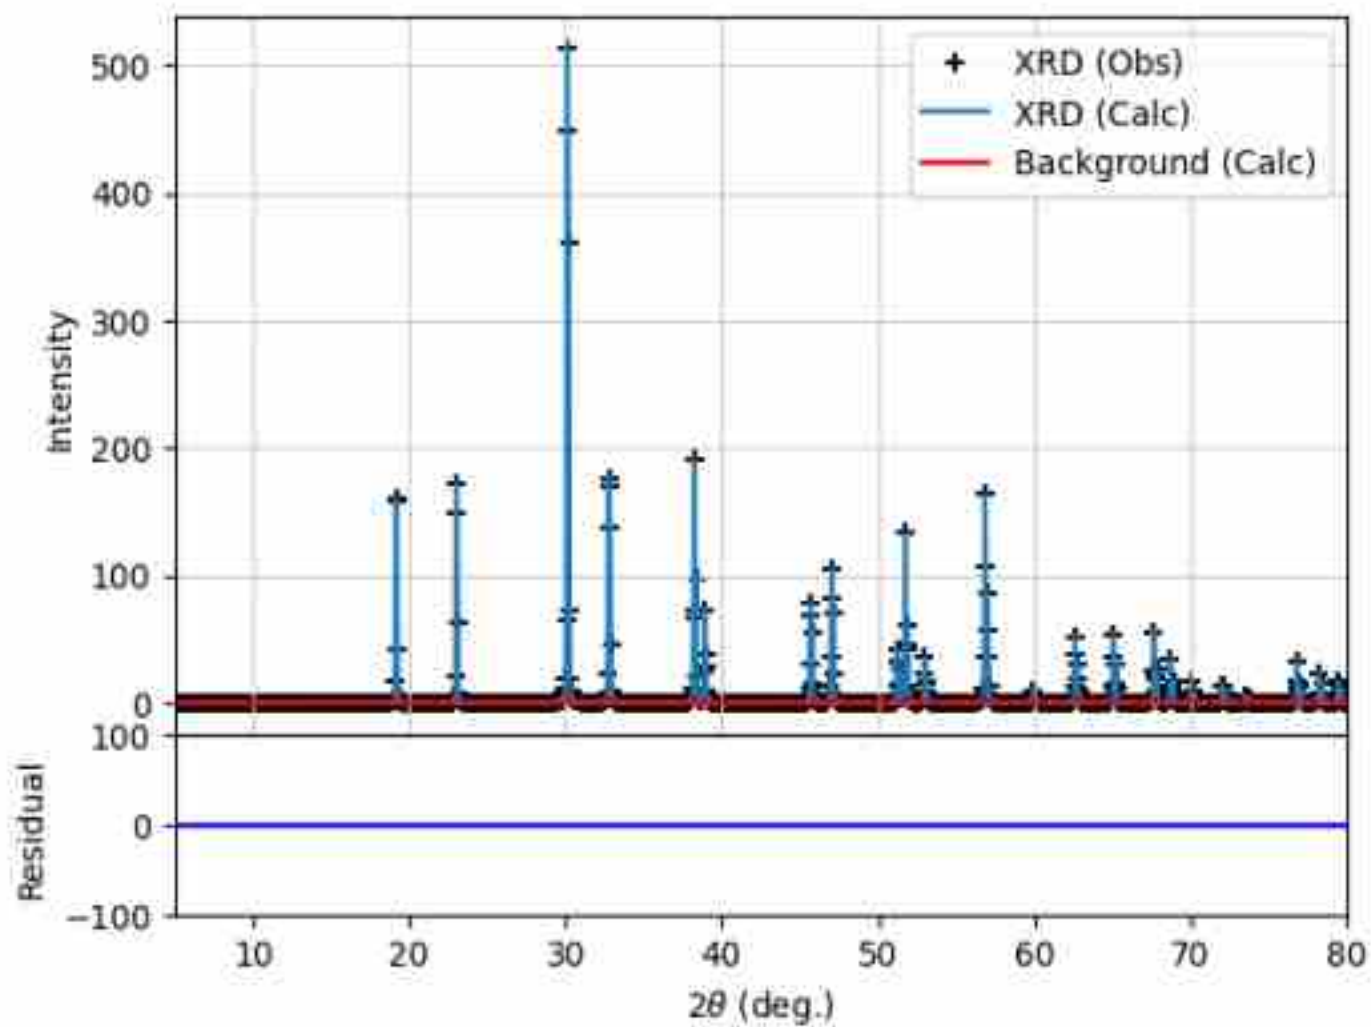

| RMSE before RR | Rwp     | RMSE after RR |
|----------------|---------|---------------|
| 0.01           | 0.00466 | 0.00105       |

# Ti1Pd1

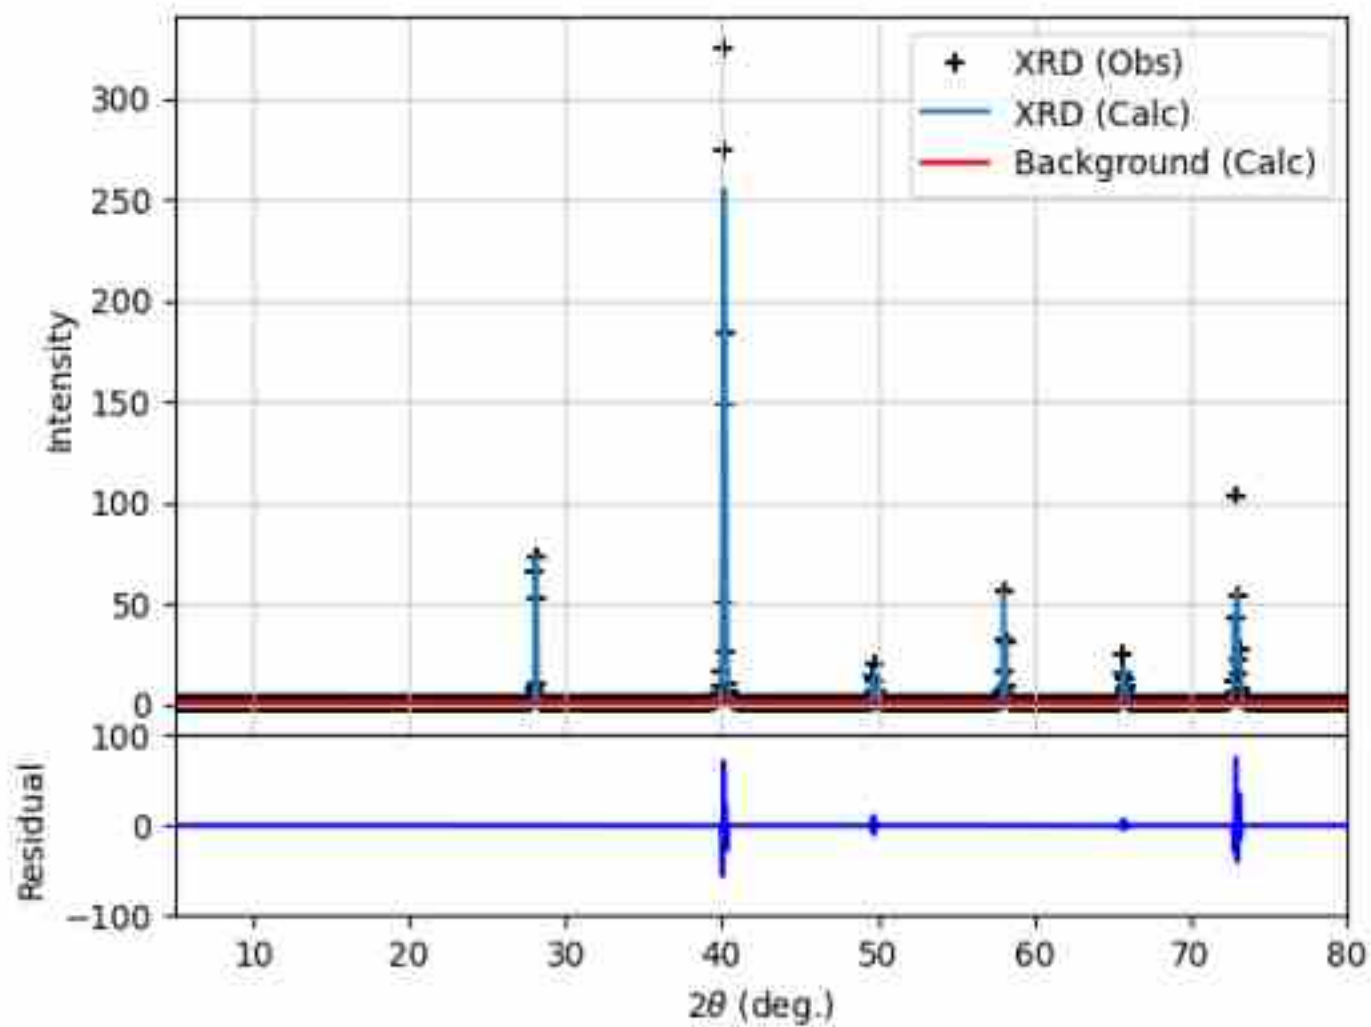

| RMSE before RR | Rwp      | RMSE after RR |
|----------------|----------|---------------|
| 0.001          | 35.69607 | 0.00052       |

# Ti1Re2Mo1

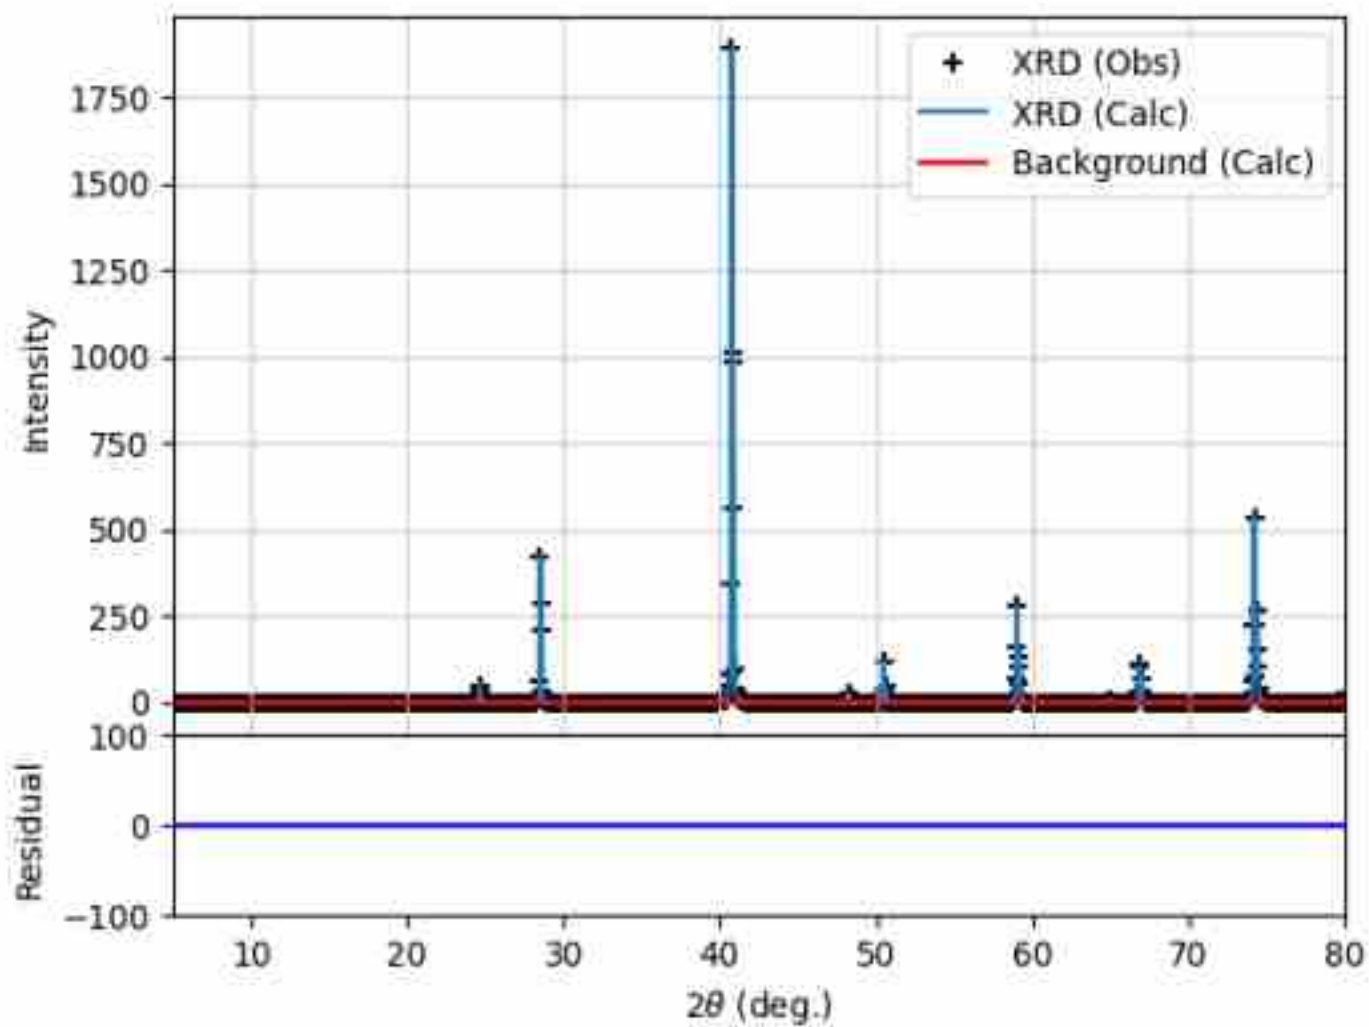

| RMSE before RR | Rwp     | RMSE after RR |
|----------------|---------|---------------|
| 0.001          | 0.00047 | 0.00038       |

# Ti1Sn1O4

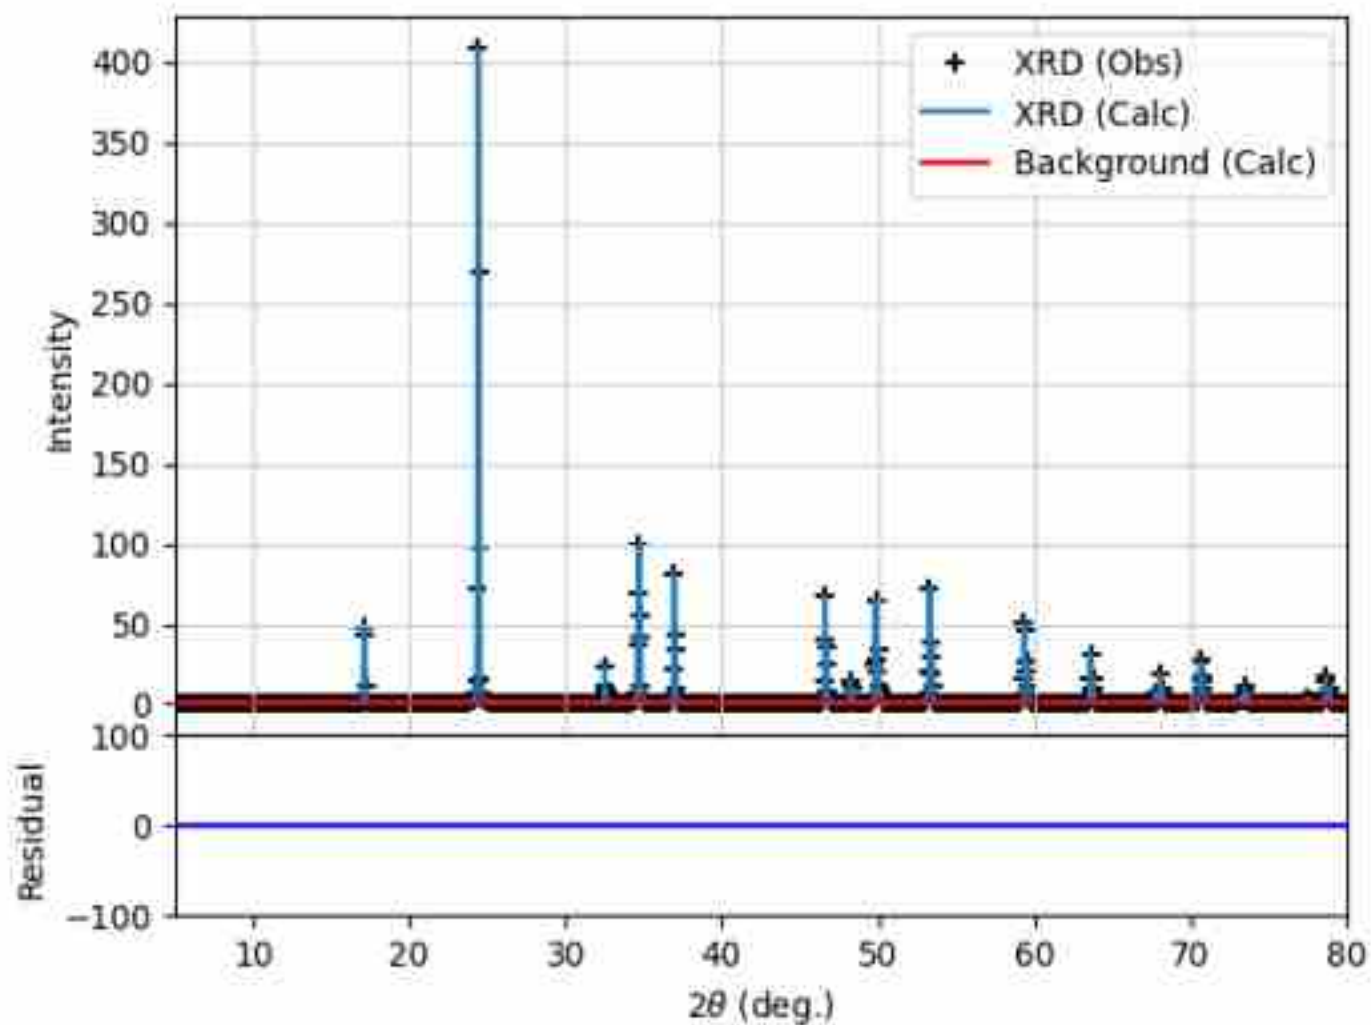

| RMSE before RR | Rwp     | RMSE after RR |
|----------------|---------|---------------|
| 0.01           | 0.00288 | 0.00081       |

# Ti1Tc2W1

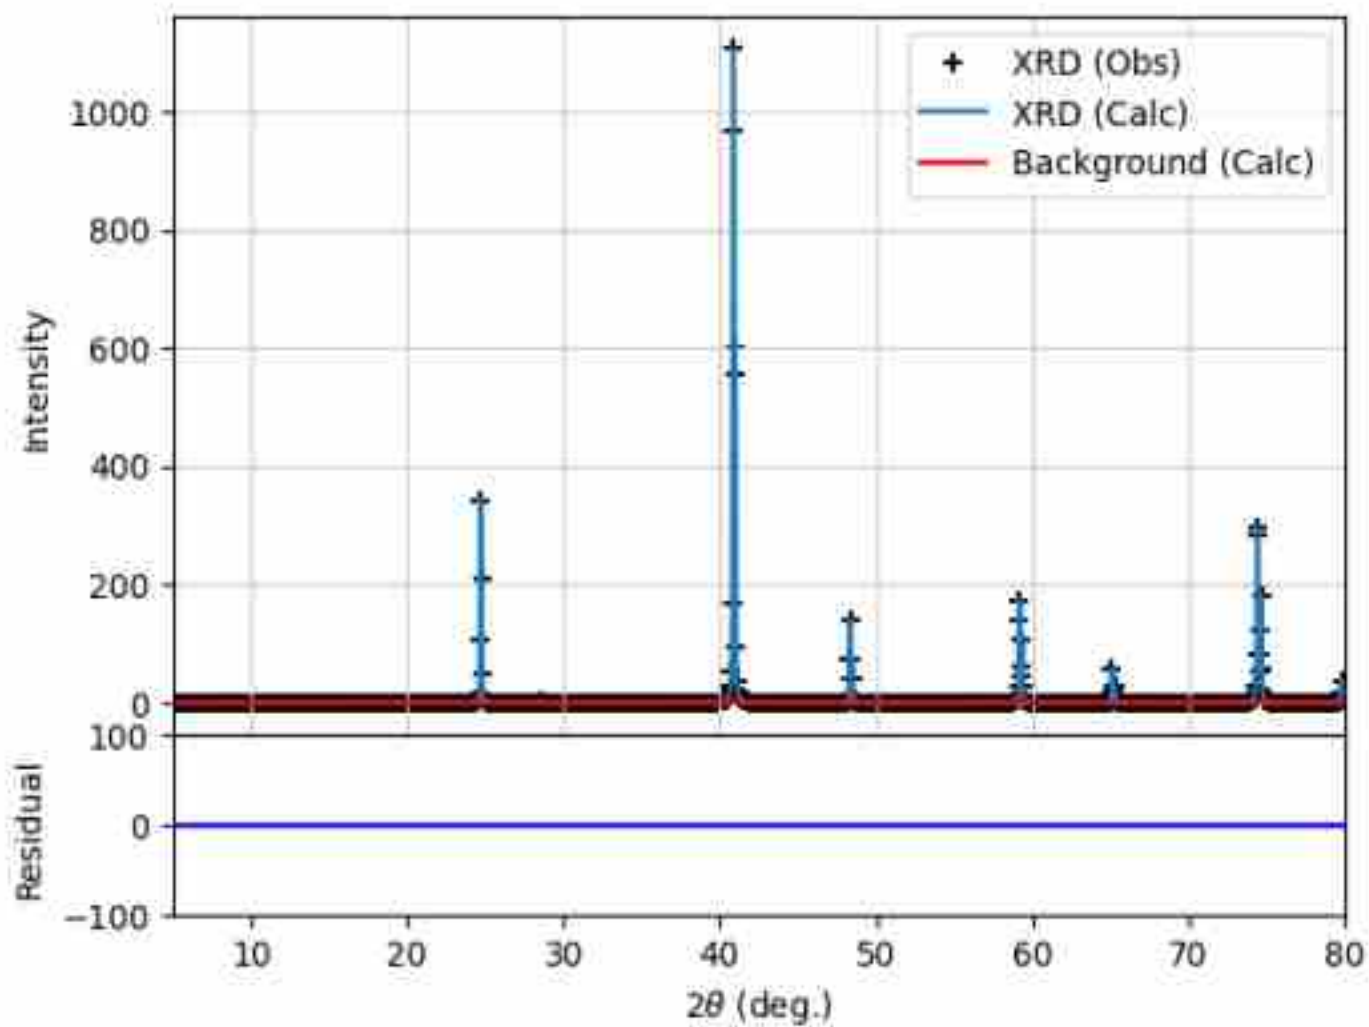

| RMSE before RR | Rwp     | RMSE after RR |
|----------------|---------|---------------|
| 0.001          | 0.00311 | 0.00035       |



# Ti1V1Tc2

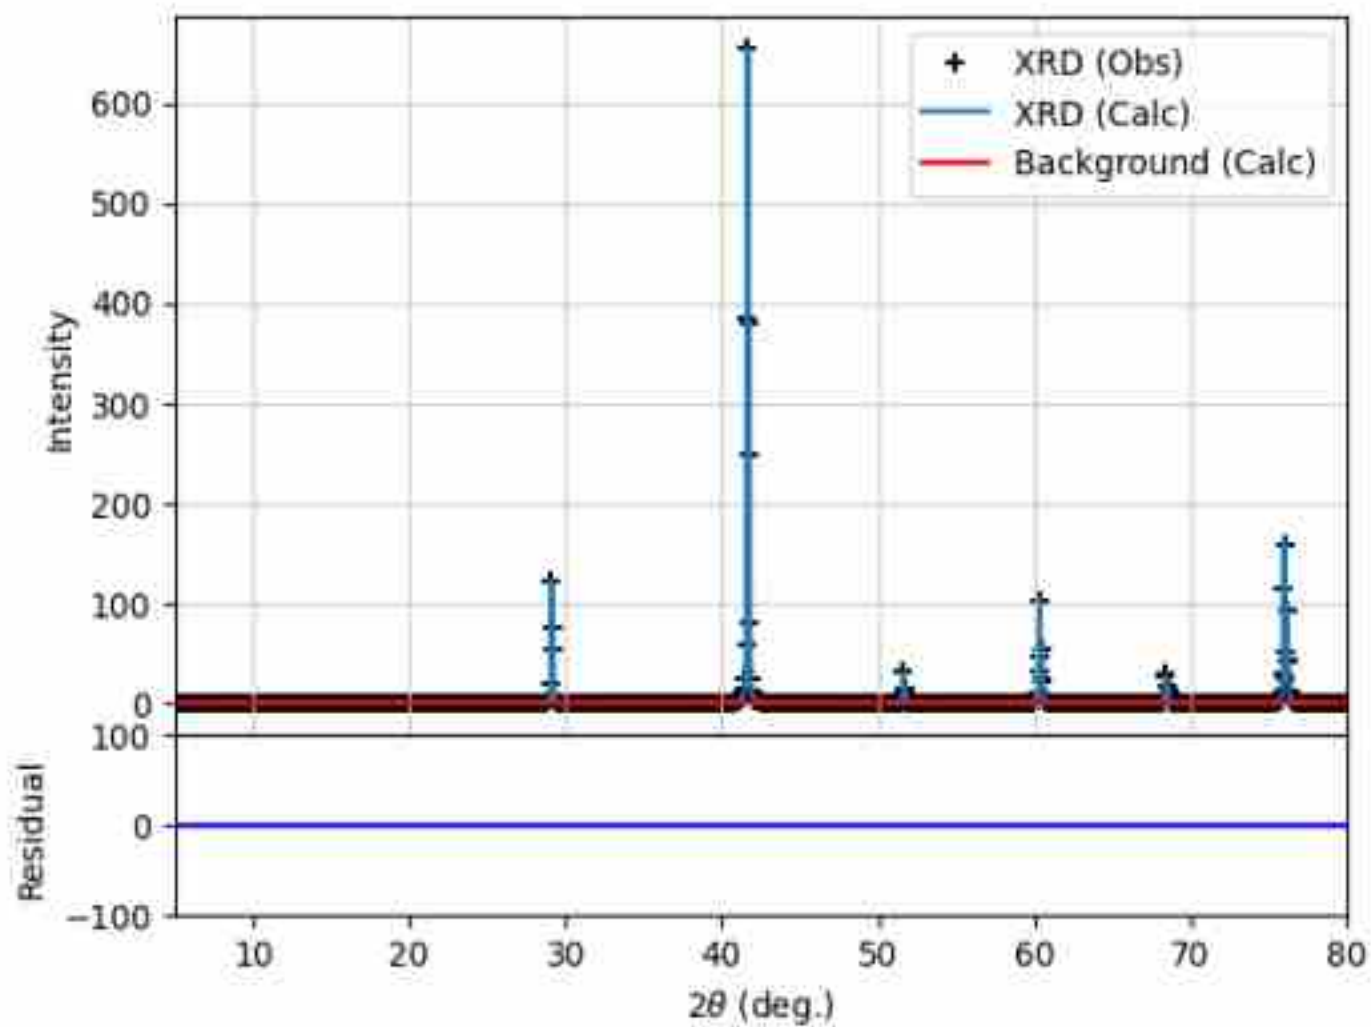

| RMSE before RR | Rwp     | RMSE after RR |
|----------------|---------|---------------|
| 0.001          | 0.00689 | 0.00094       |

# Ti1Zn1Pd2

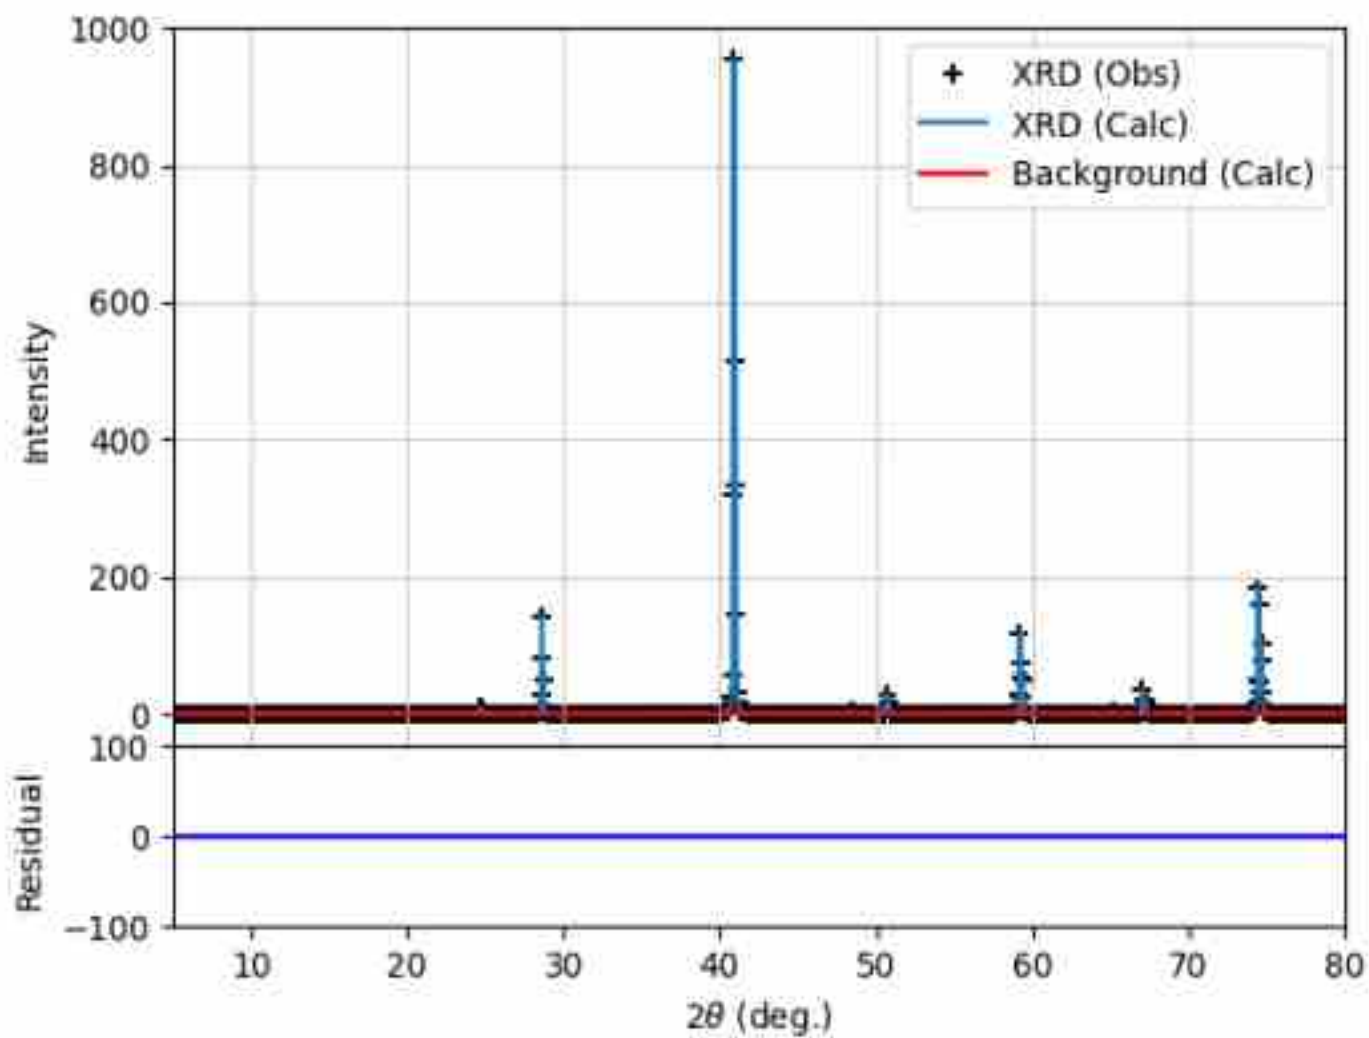

| RMSE before RR | Rwp    | RMSE after RR |
|----------------|--------|---------------|
| 0.001          | 0.0061 | 0.00112       |

# Ti<sub>2</sub>CoIr

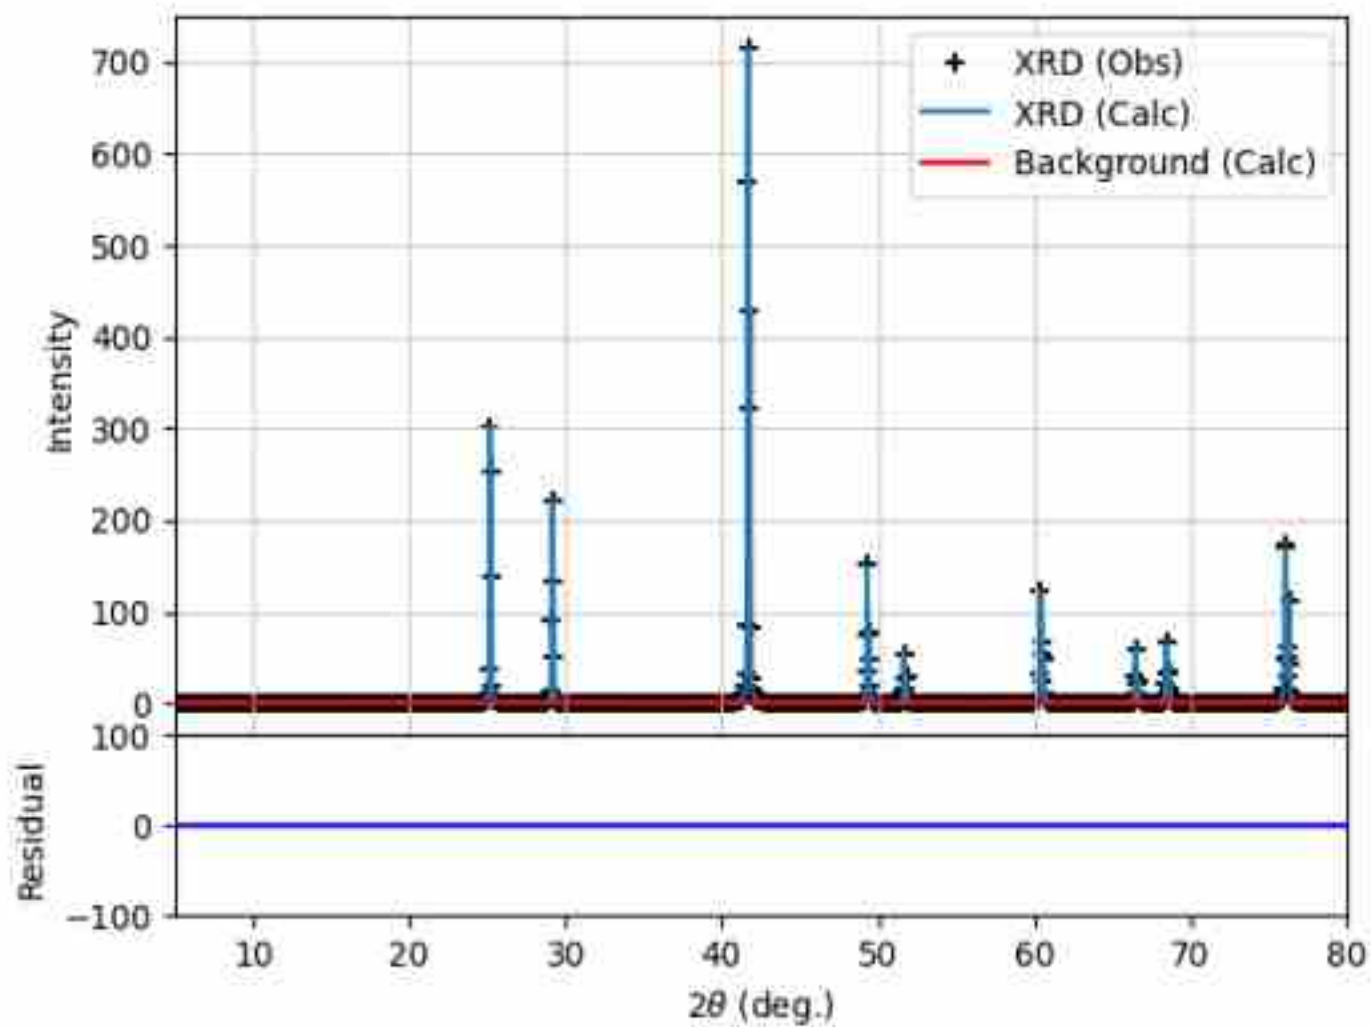

| RMSE before RR | Rwp     | RMSE after RR |
|----------------|---------|---------------|
| 0.001          | 0.00284 | 0.00069       |

# Ti<sub>2</sub>CuIr

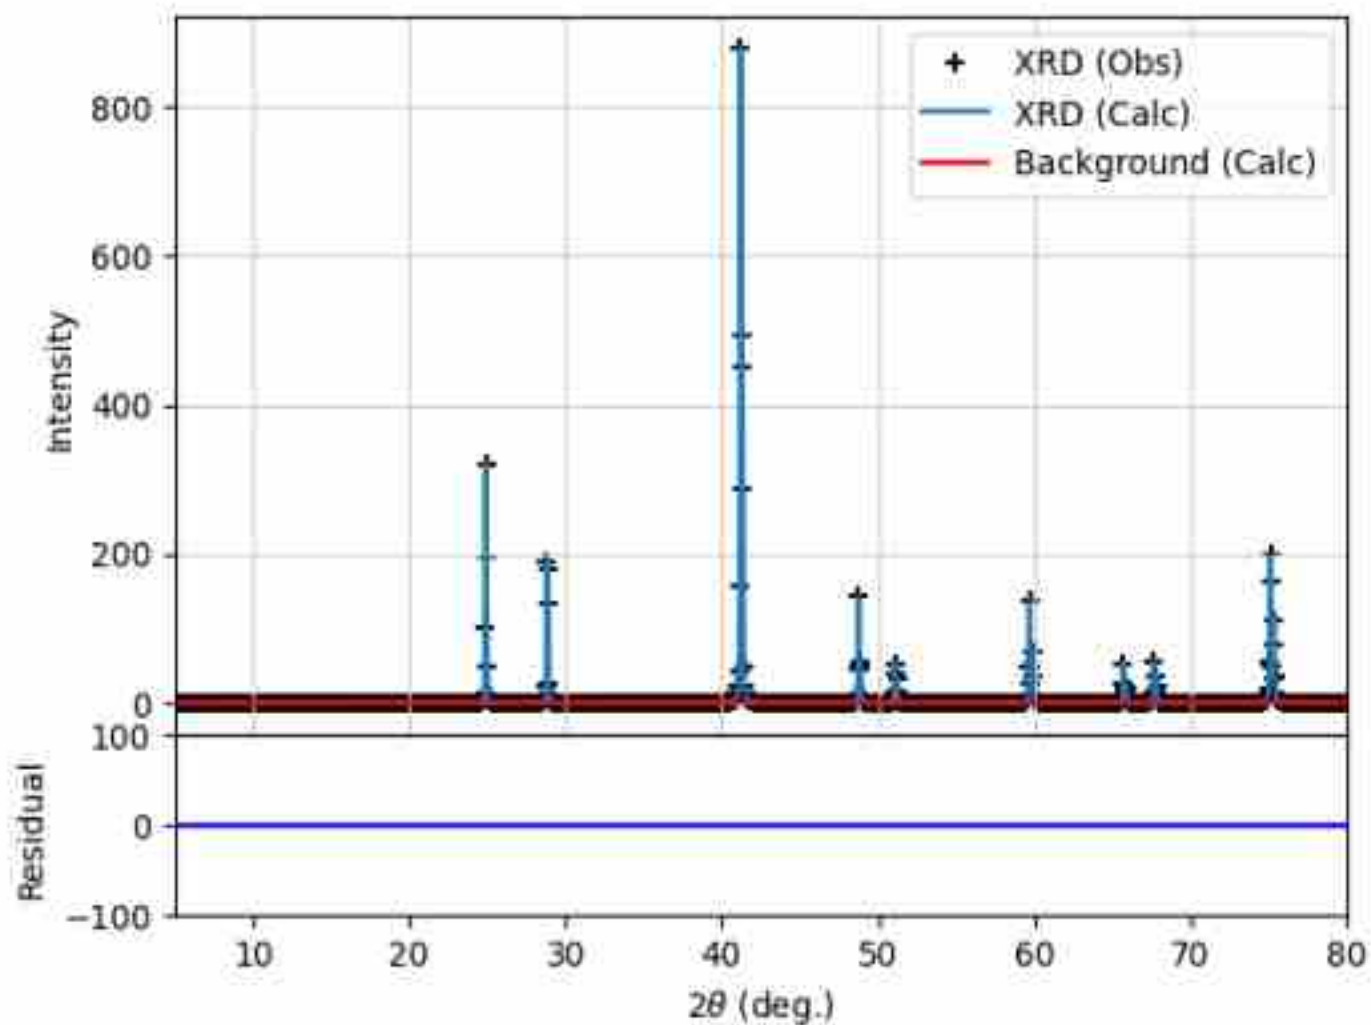

| RMSE before RR | Rwp     | RMSE after RR |
|----------------|---------|---------------|
| 0.001          | 0.00317 | 0.00035       |

# Ti<sub>2</sub>FeCo

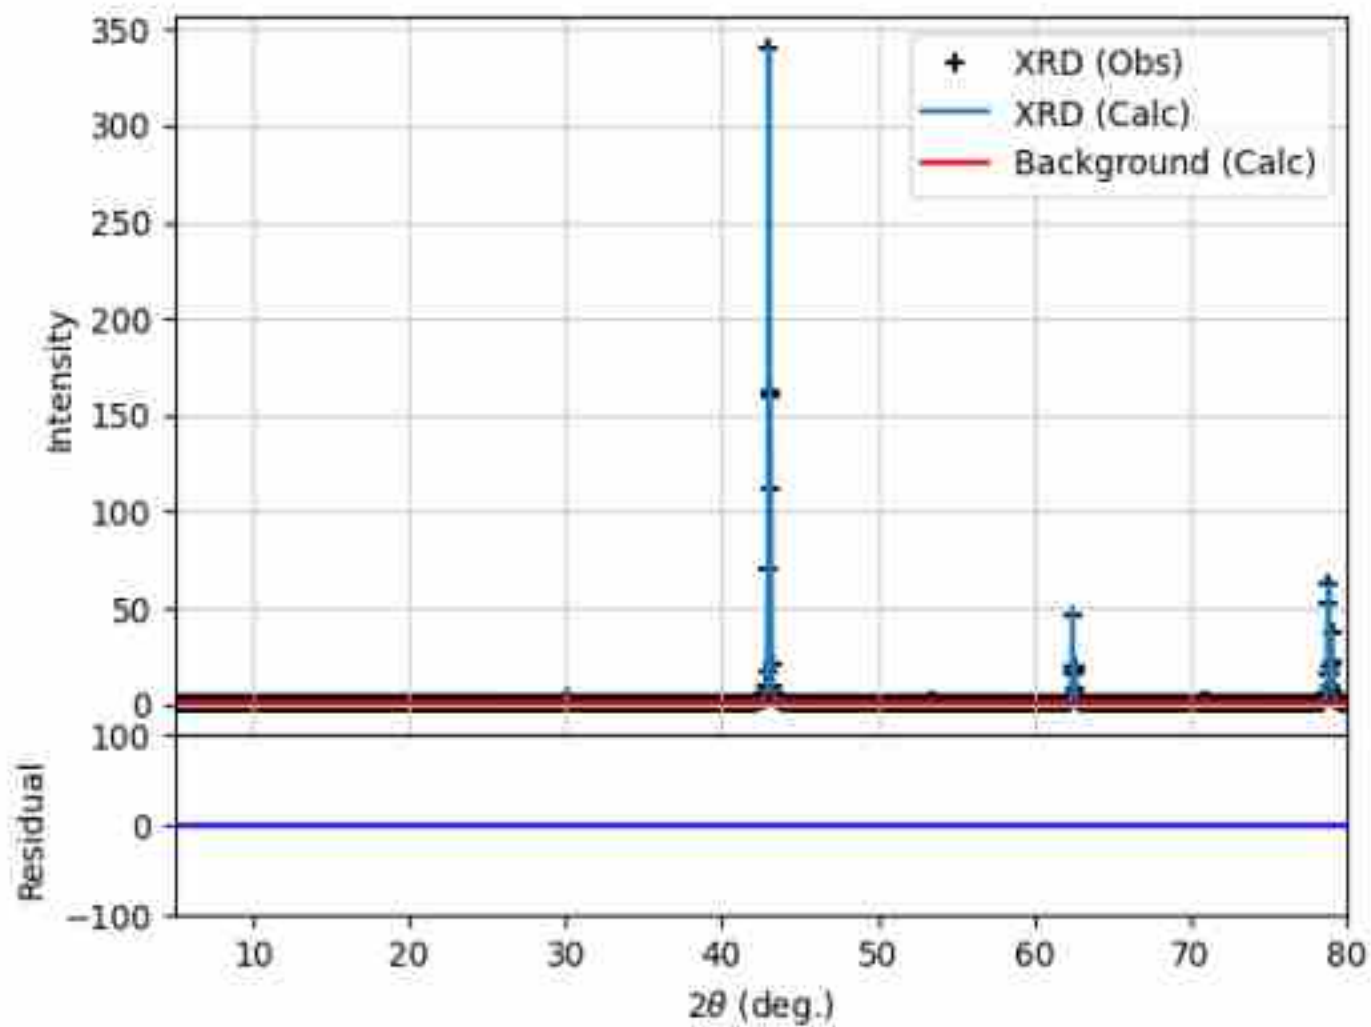

| RMSE before RR | Rwp   | RMSE after RR |
|----------------|-------|---------------|
| 0.001          | 1e-05 | 1e-05         |

# Ti<sub>2</sub>GaRe<sub>1</sub>

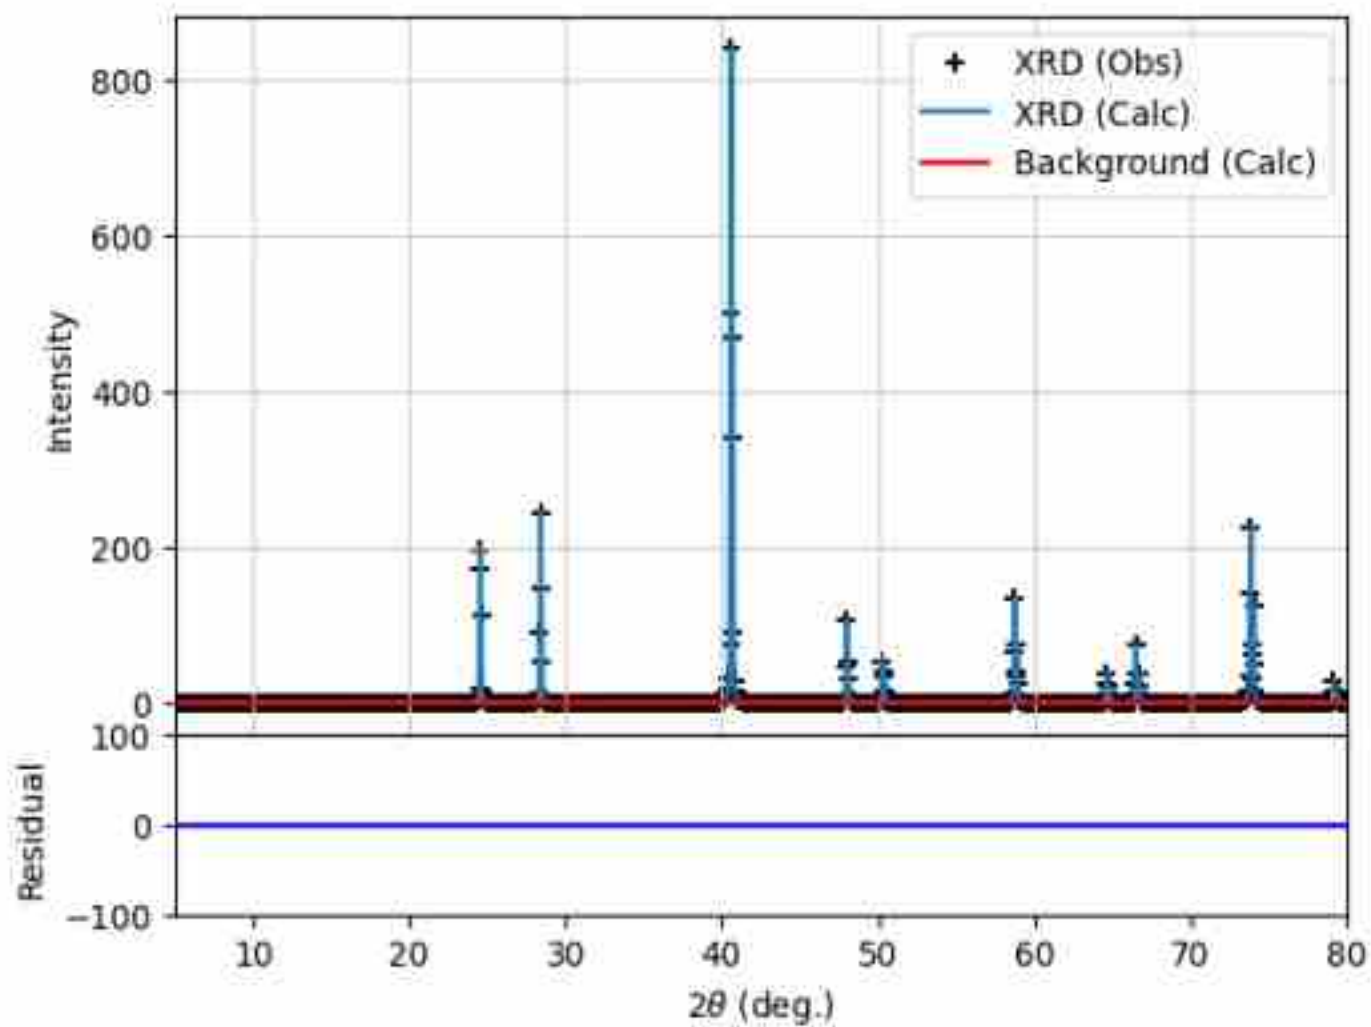

| RMSE before RR | Rwp     | RMSE after RR |
|----------------|---------|---------------|
| 0.001          | 0.00294 | 0.00049       |

# Ti2O4

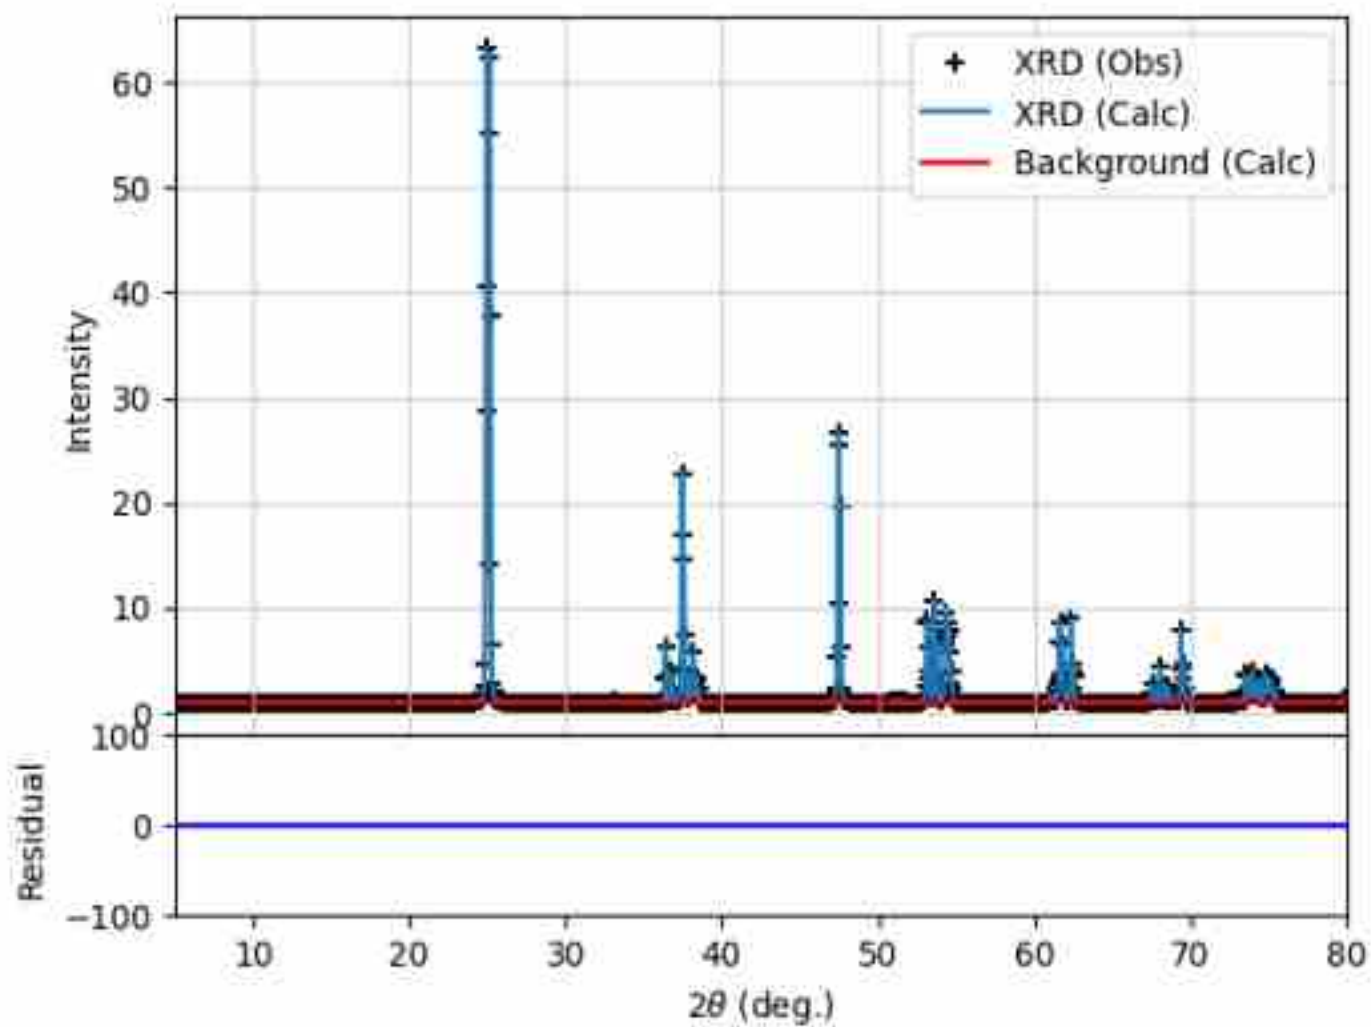

| RMSE before RR | Rwp     | RMSE after RR |
|----------------|---------|---------------|
| 0.01           | 0.00179 | 0.00065       |

# Ti<sub>2</sub>OsRu

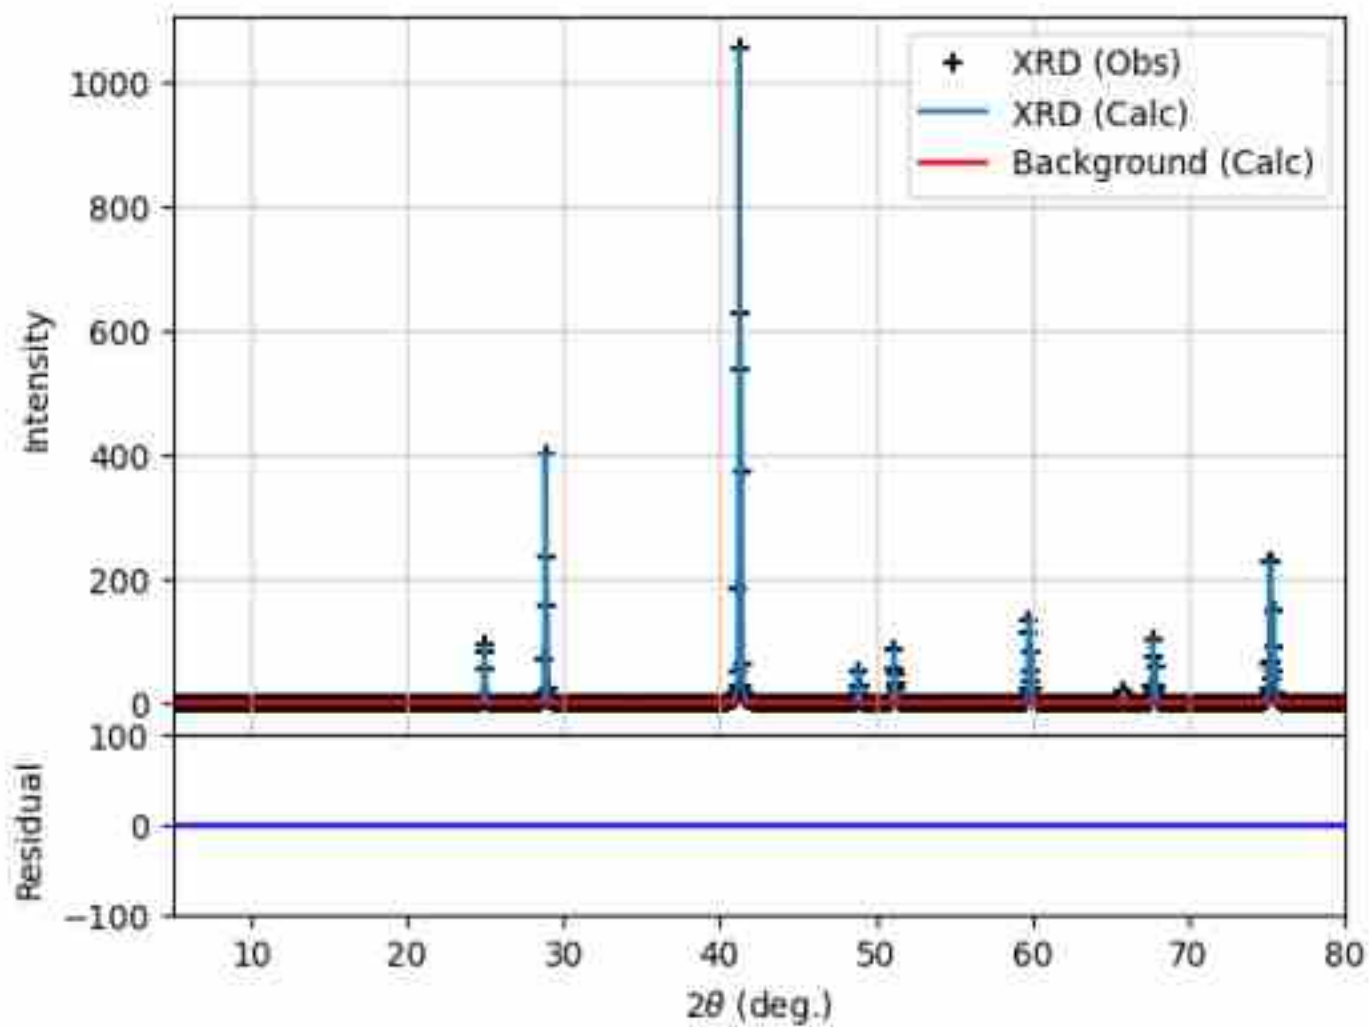

| RMSE before RR | Rwp   | RMSE after RR |
|----------------|-------|---------------|
| 0.001          | 4e-05 | 8e-05         |



# Ti<sub>2</sub>ReIr<sub>1</sub>

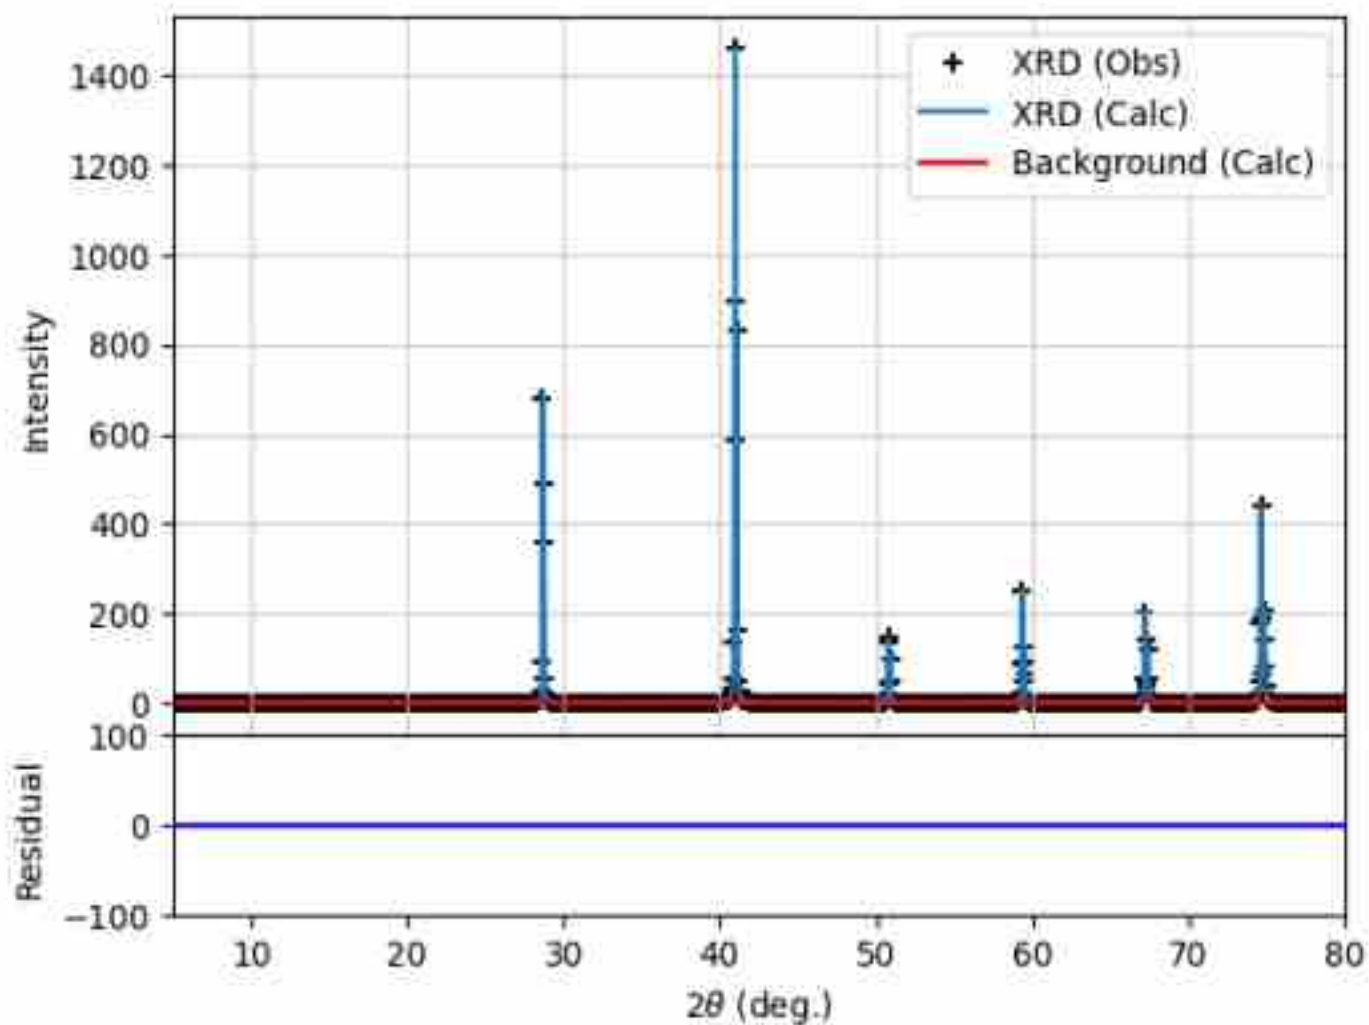

| RMSE before RR | Rwp     | RMSE after RR |
|----------------|---------|---------------|
| 0.001          | 0.07988 | 0.00126       |

# Ti<sub>2</sub>TcIr<sub>1</sub>

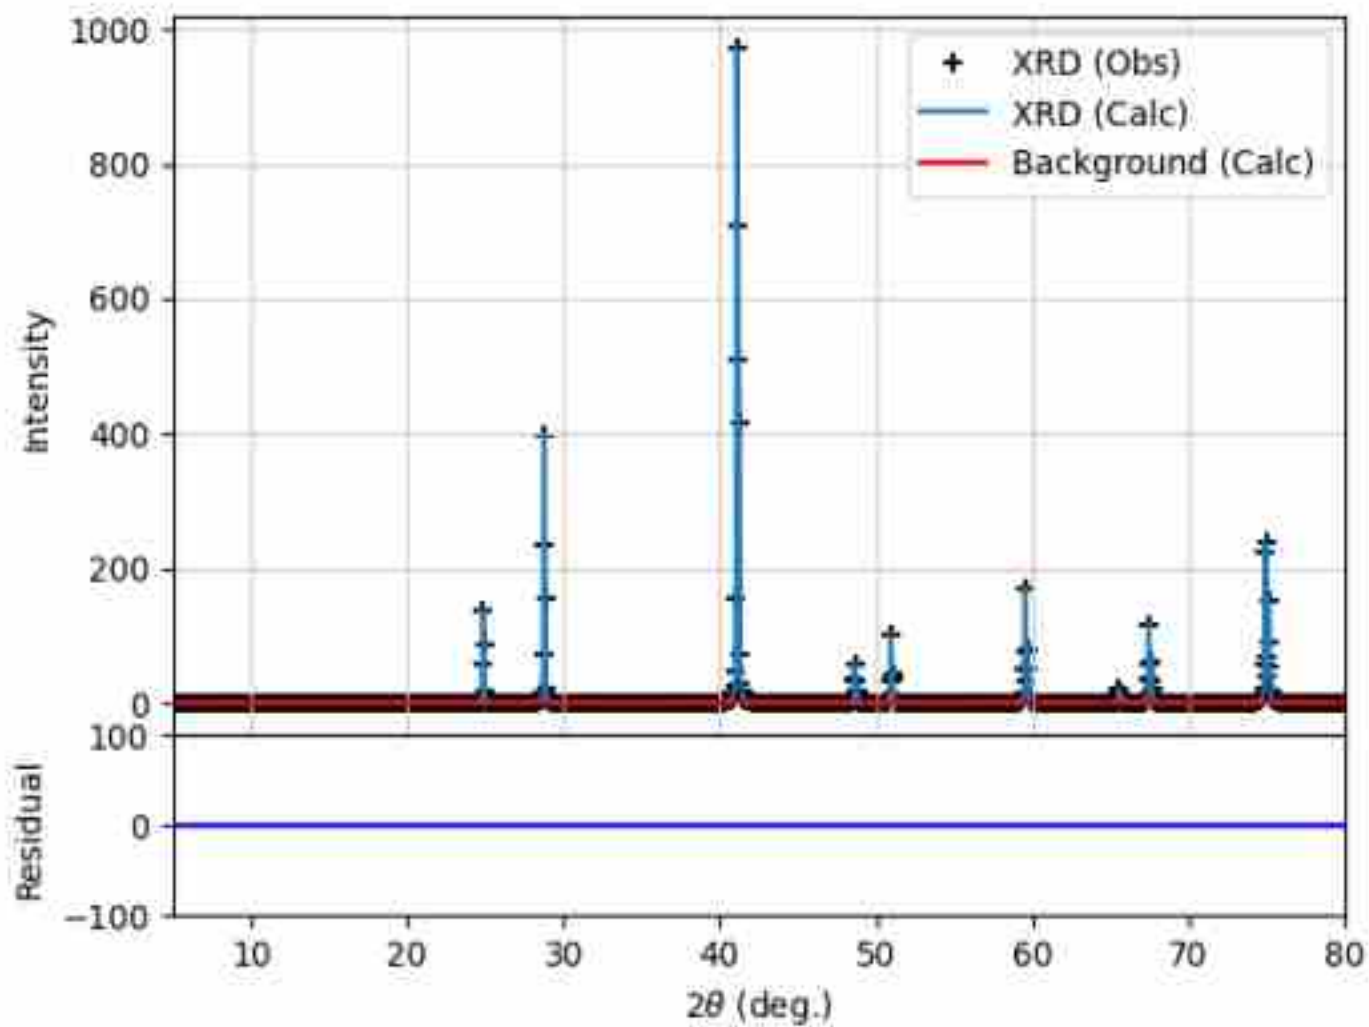

| RMSE before RR | Rwp     | RMSE after RR |
|----------------|---------|---------------|
| 0.001          | 0.00616 | 0.0014        |

Ti2Tc1Pt1

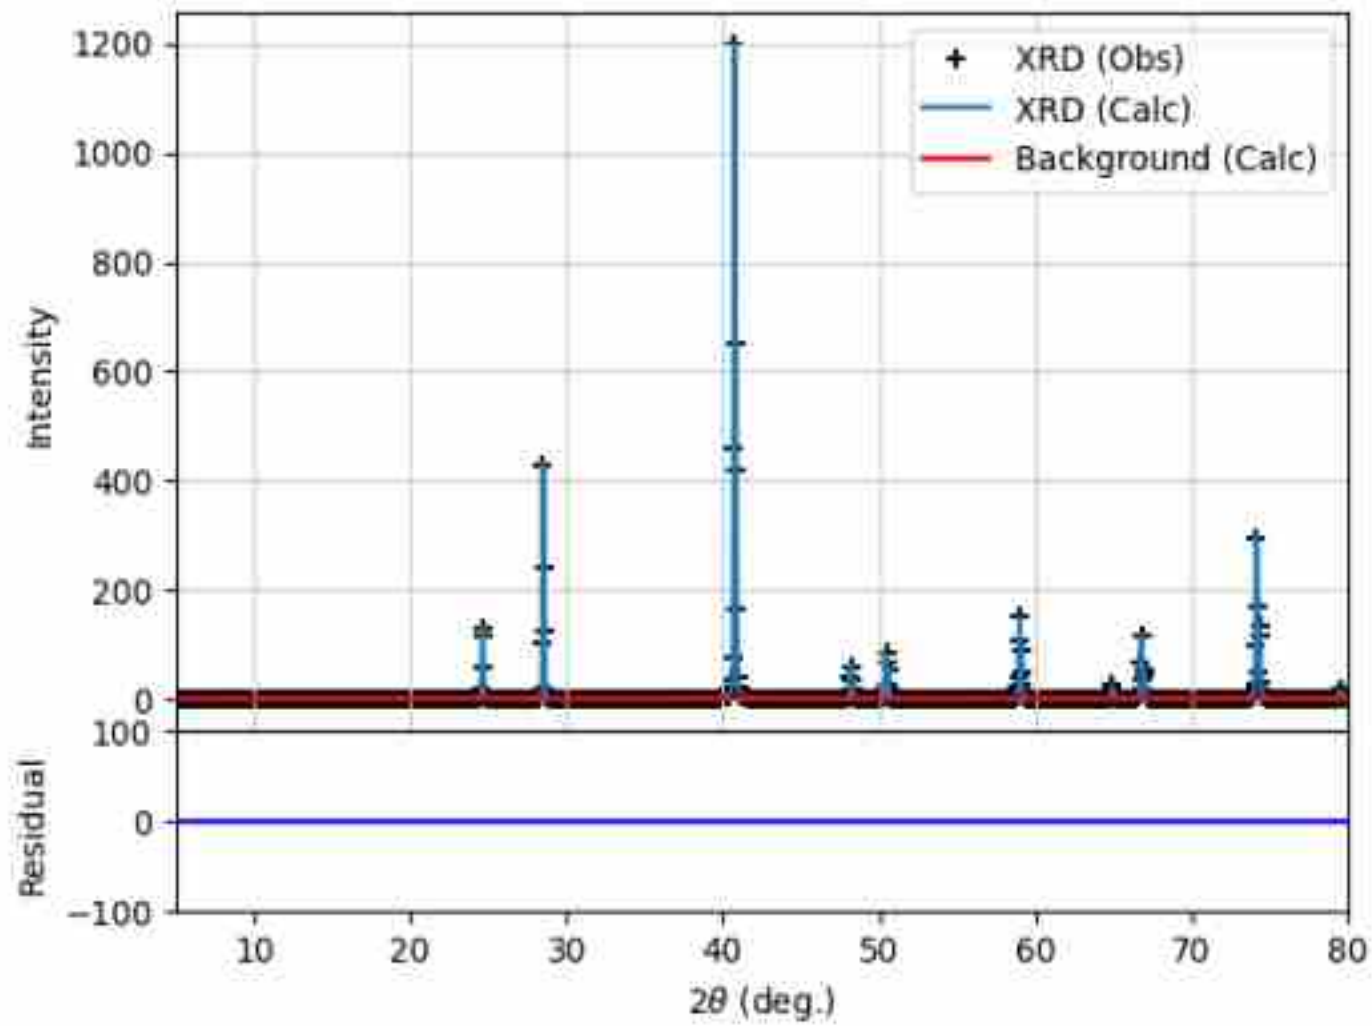

| RMSE before RR | Rwp     | RMSE after RR |
|----------------|---------|---------------|
| 0.001          | 0.00481 | 0.00109       |

# Ti3Ga1

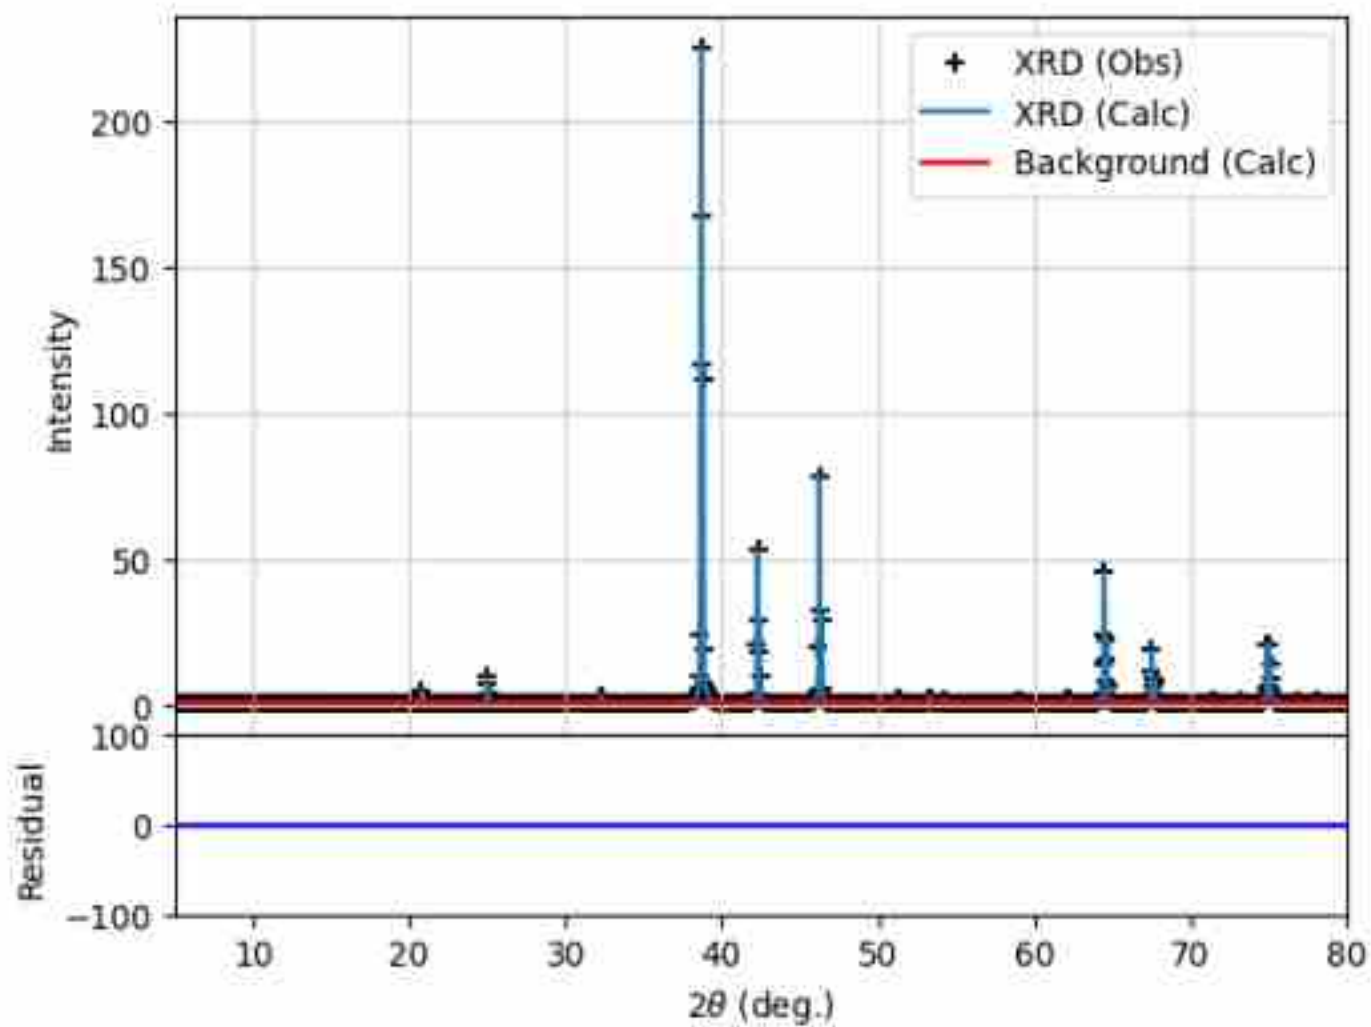

| RMSE before RR | Rwp     | RMSE after RR |
|----------------|---------|---------------|
| 0.001          | 0.00304 | 0.00038       |

# Ti4Pd1

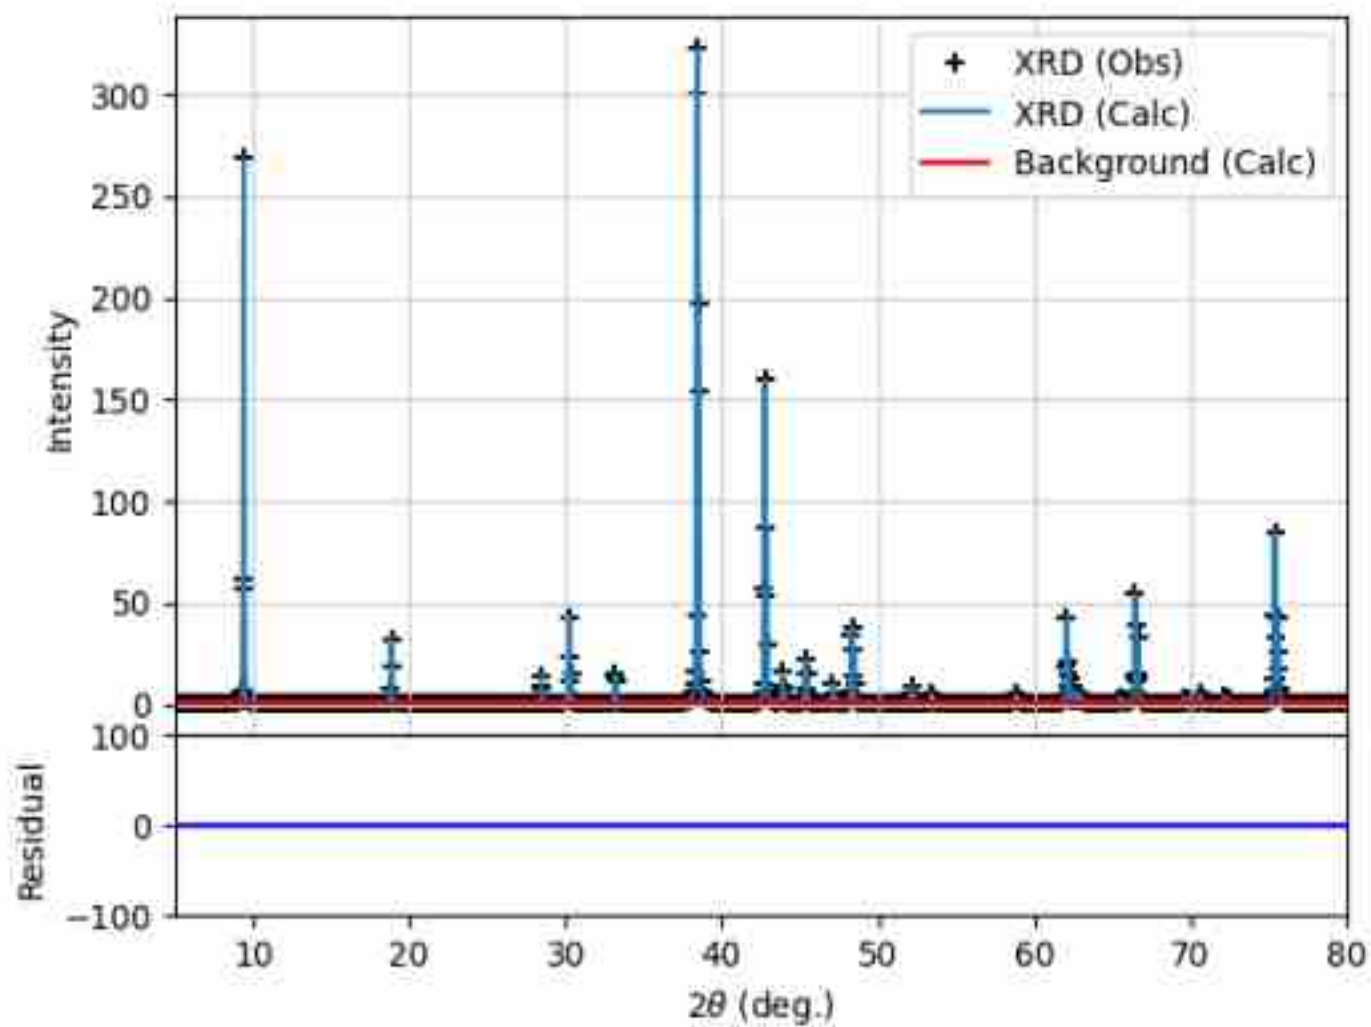

| RMSE before RR | Rwp     | RMSE after RR |
|----------------|---------|---------------|
| 0.01           | 0.00288 | 0.00046       |

# Ti4Si4Ir4

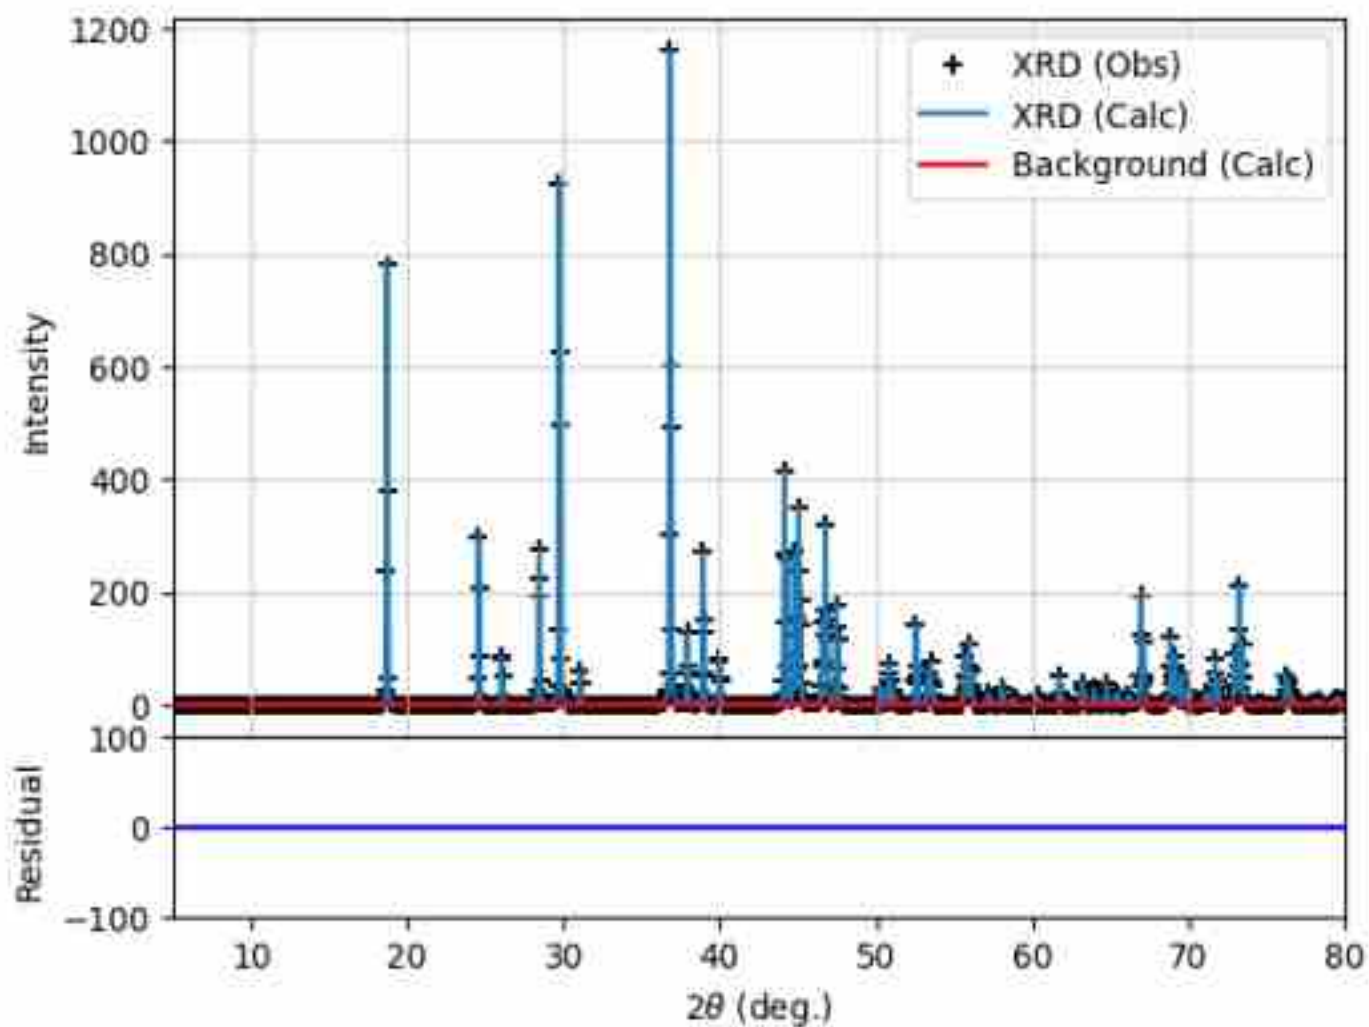

| RMSE before RR | Rwp     | RMSE after RR |
|----------------|---------|---------------|
| 0.01           | 0.00443 | 0.00086       |

# Ti6Sb2

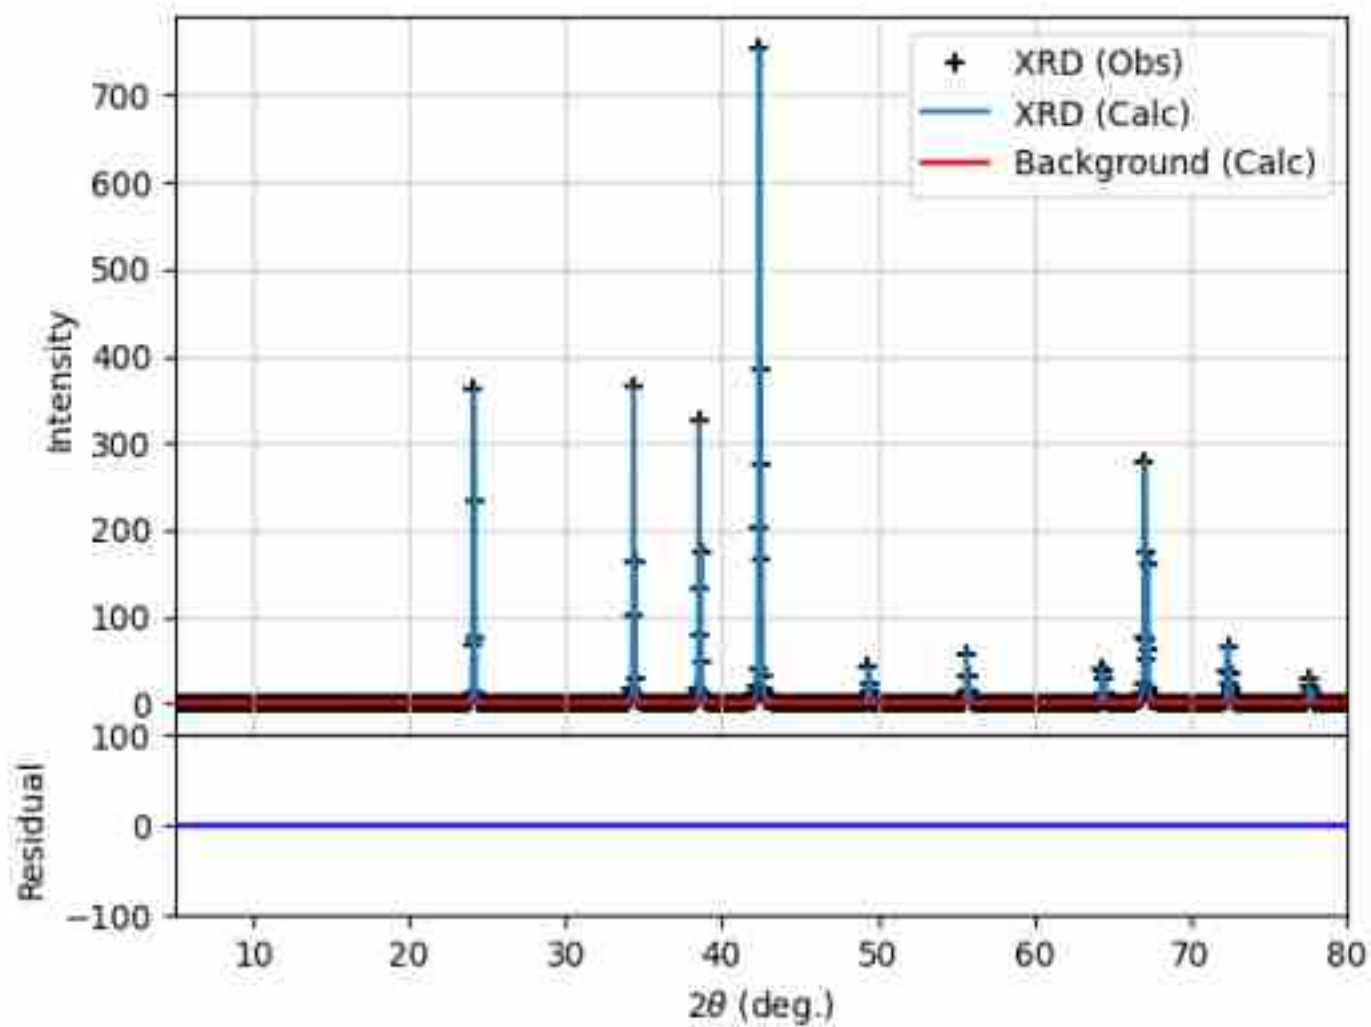

| RMSE before RR | Rwp     | RMSE after RR |
|----------------|---------|---------------|
| 0.01           | 0.00309 | 0.00066       |

# Tl1Br1

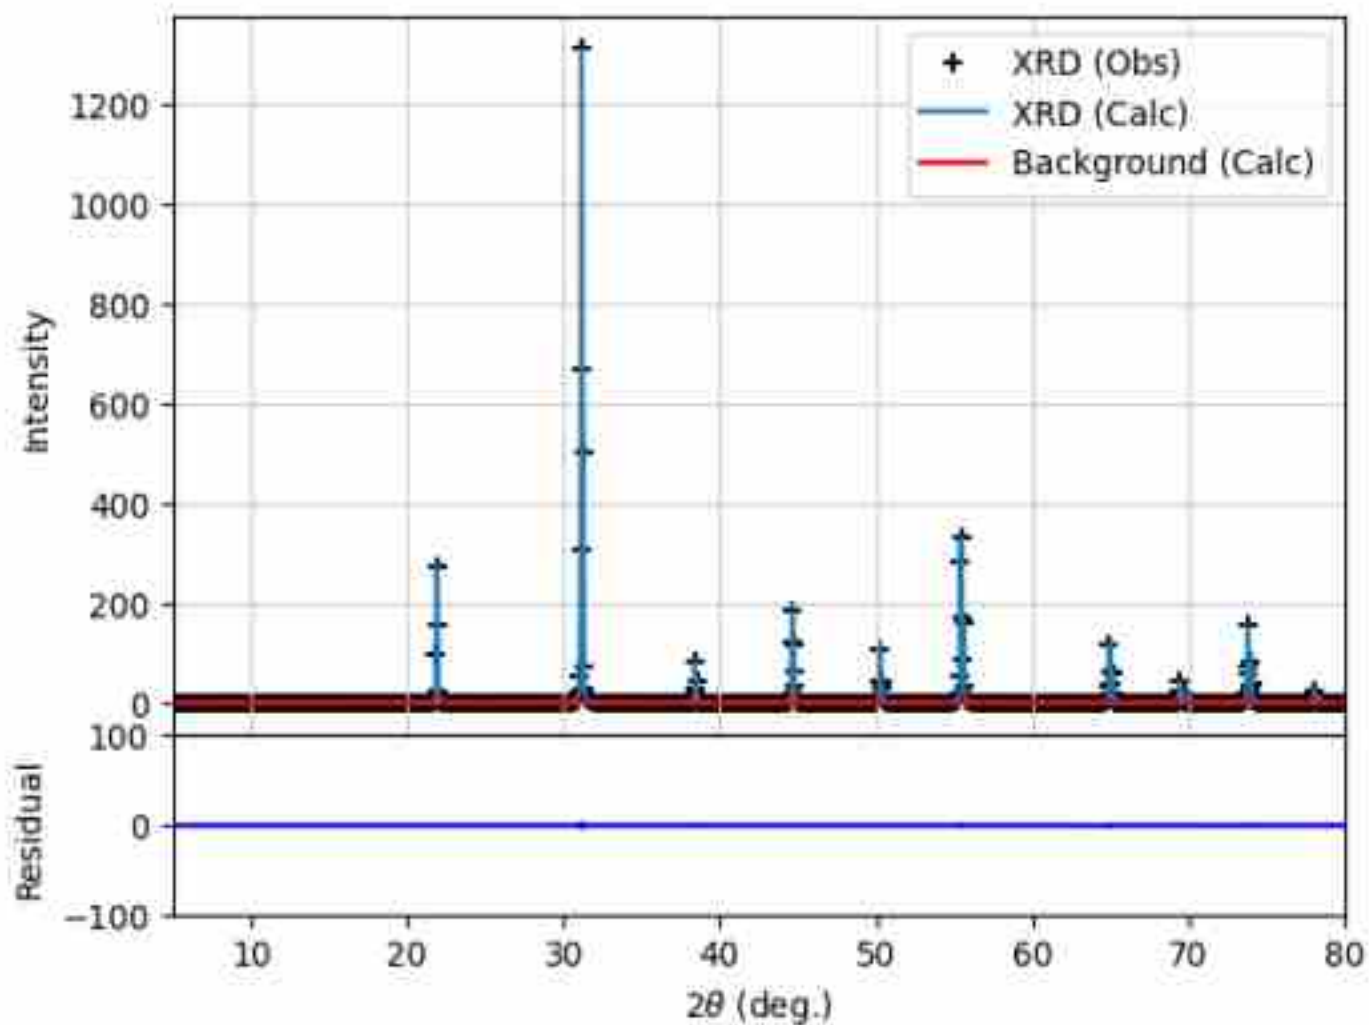

| RMSE before RR | Rwp     | RMSE after RR |
|----------------|---------|---------------|
| 0.001          | 0.24948 | 0.00066       |



# Tl1Cr1S2

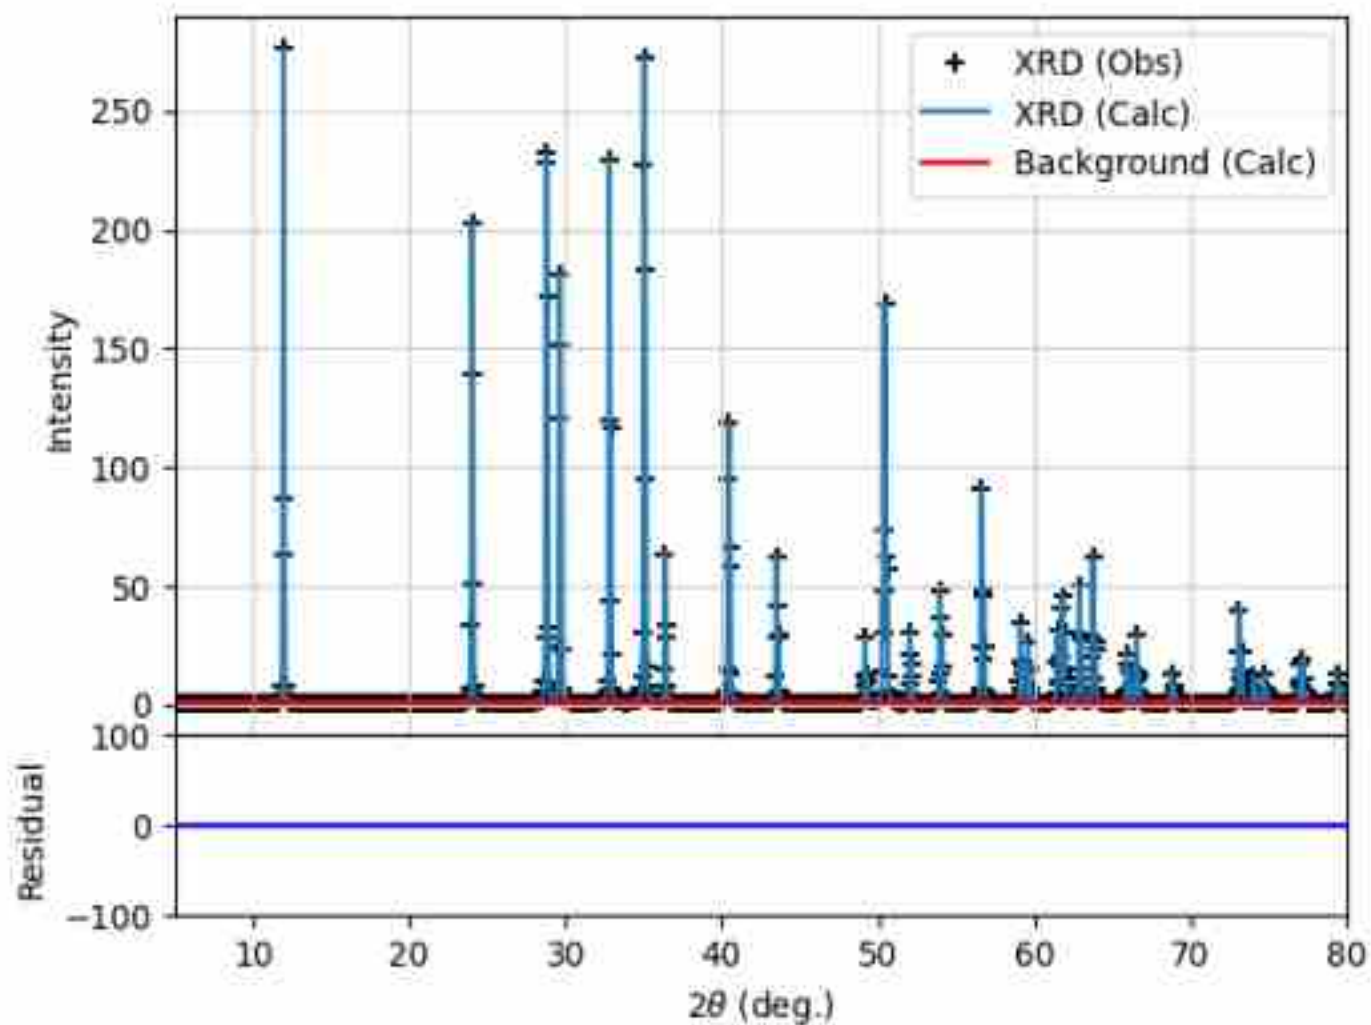

| RMSE before RR | Rwp     | RMSE after RR |
|----------------|---------|---------------|
| 0.01           | 0.00365 | 0.00063       |

# Tl1Cu1F3

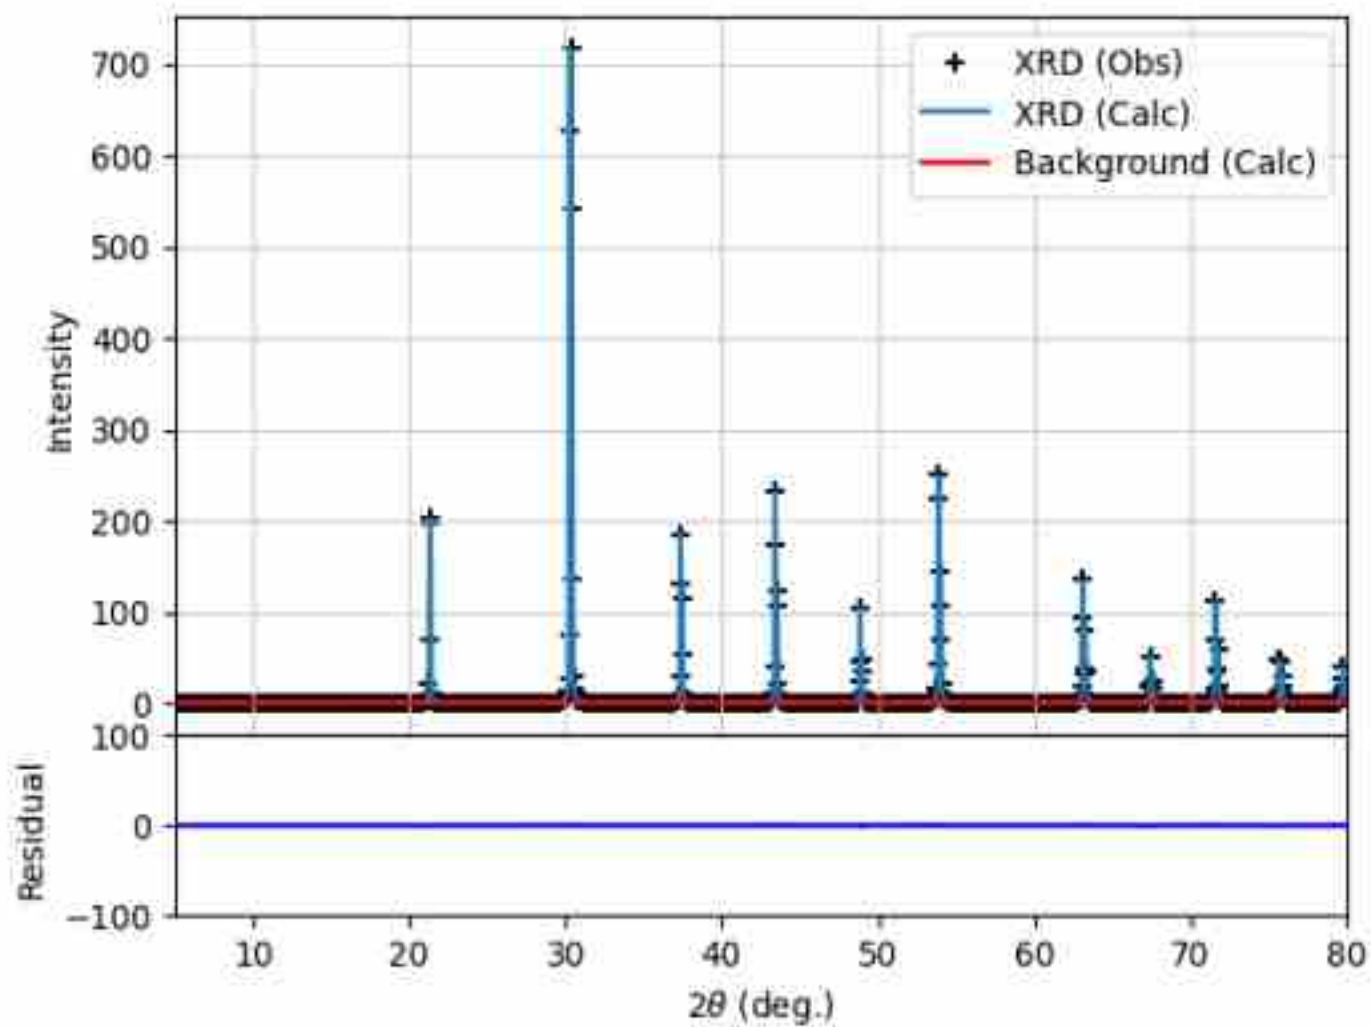

| RMSE before RR | Rwp     | RMSE after RR |
|----------------|---------|---------------|
| 0.01           | 0.46233 | 0.04124       |

# Tl3Au1

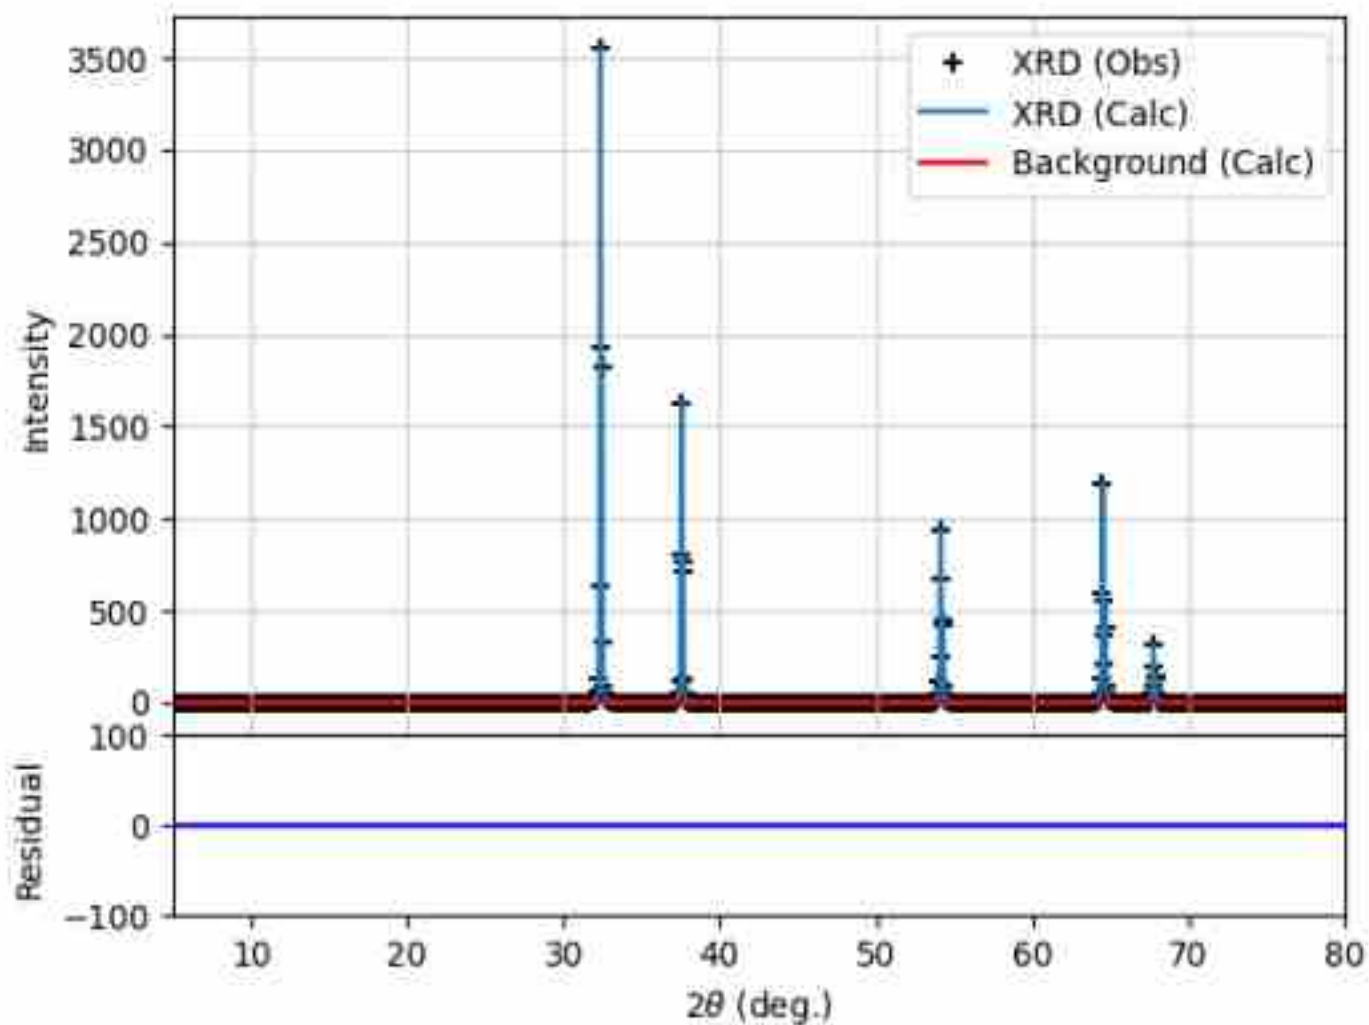

| RMSE before RR | Rwp     | RMSE after RR |
|----------------|---------|---------------|
| 0.001          | 0.00468 | 0.00015       |

# Tm1Au1

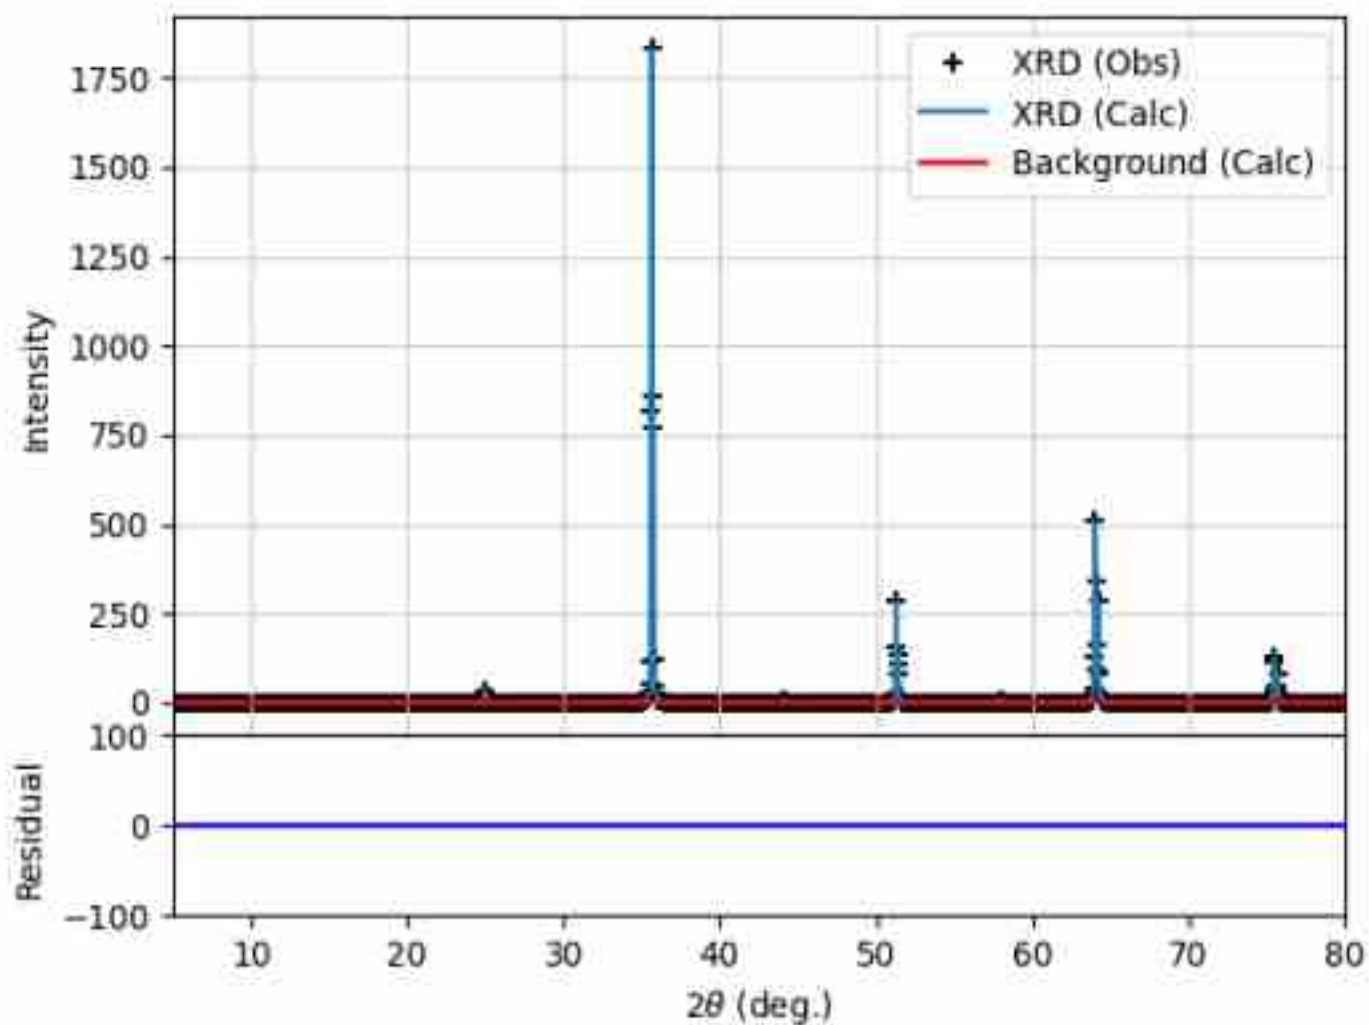

| RMSE before RR | Rwp     | RMSE after RR |
|----------------|---------|---------------|
| 0.001          | 0.00515 | 0.00028       |

# Tm1In1Au2

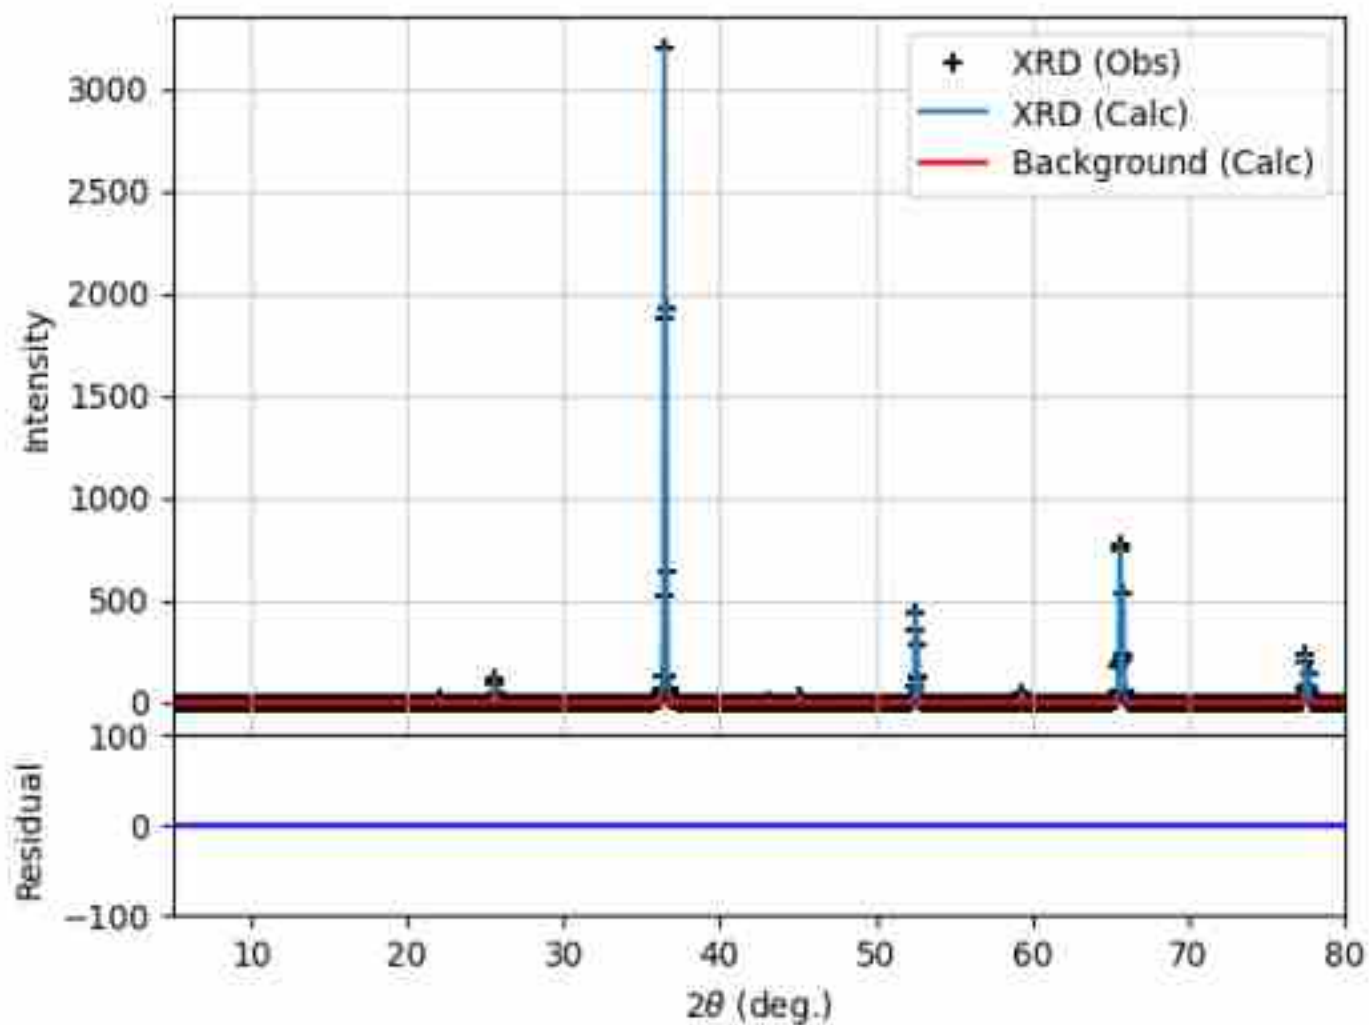

| RMSE before RR | Rwp     | RMSE after RR |
|----------------|---------|---------------|
| 0.001          | 0.00371 | 0.00018       |

# Tm1Lu1Mg2

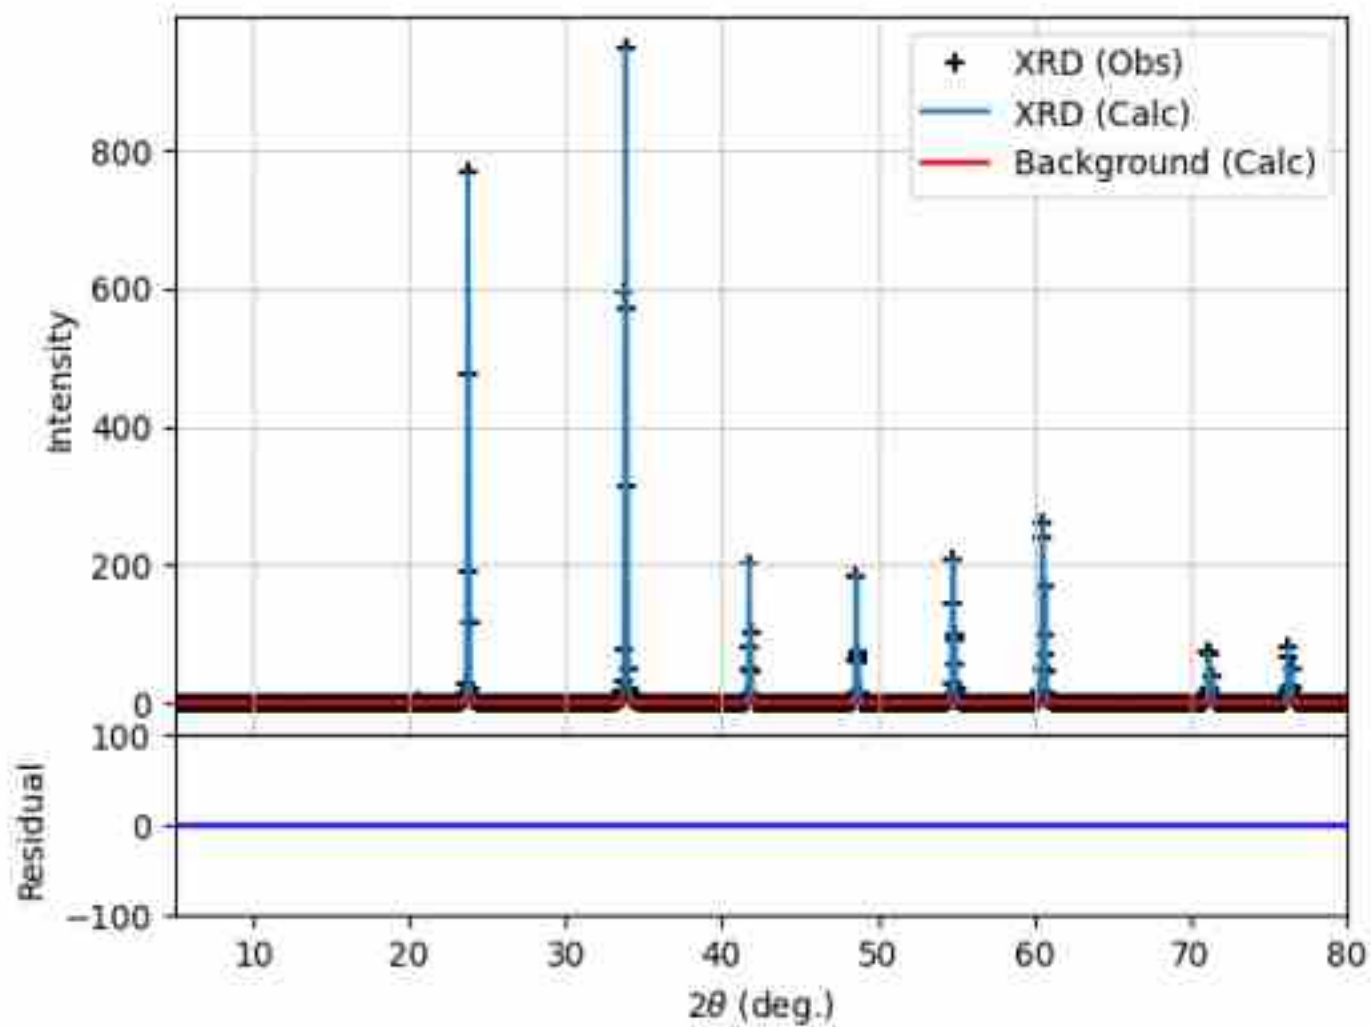

| RMSE before RR | Rwp     | RMSE after RR |
|----------------|---------|---------------|
| 0.001          | 0.02615 | 0.00105       |

# Tm1Mg1Au2

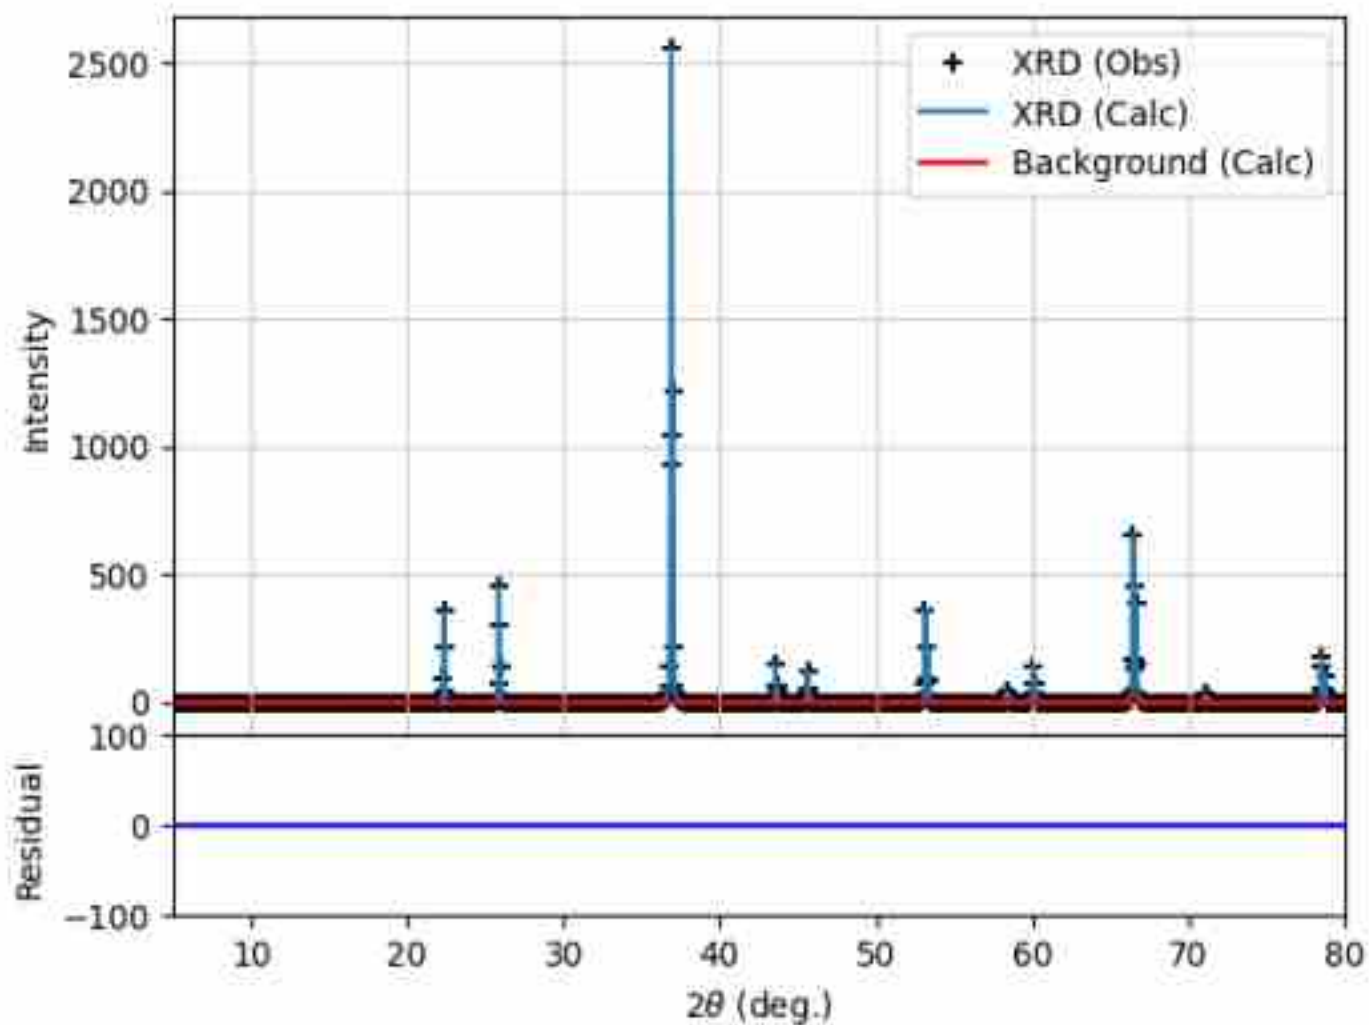

| RMSE before RR | Rwp    | RMSE after RR |
|----------------|--------|---------------|
| 0.001          | 0.0041 | 0.00089       |

# Tm1Mg1Rh2

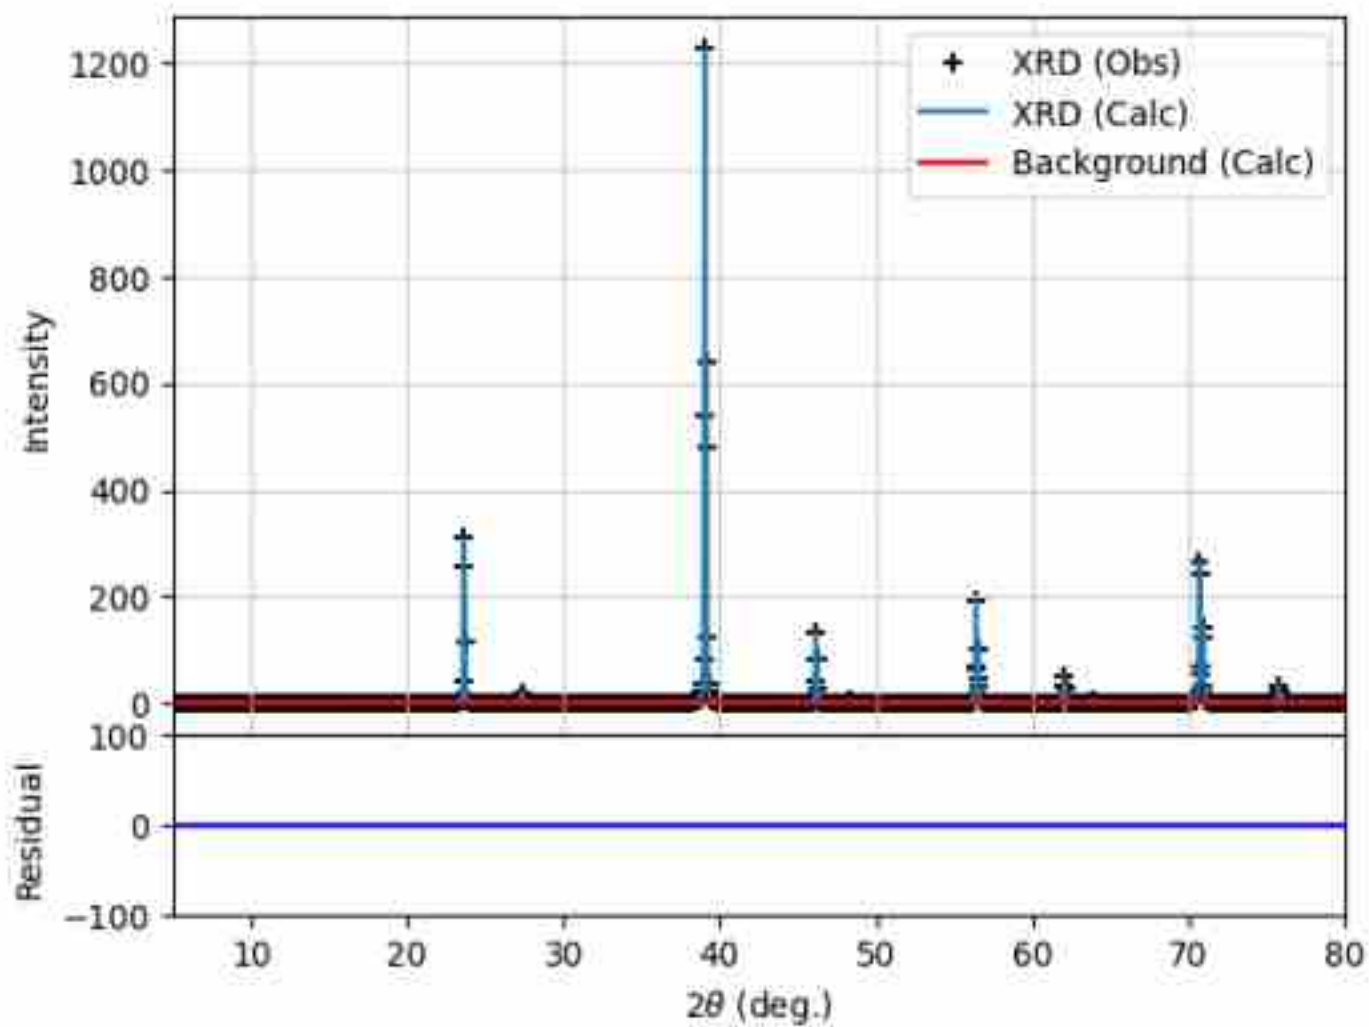

| RMSE before RR | Rwp     | RMSE after RR |
|----------------|---------|---------------|
| 0.001          | 0.00471 | 0.00249       |



# Tm1Pa1Ru2

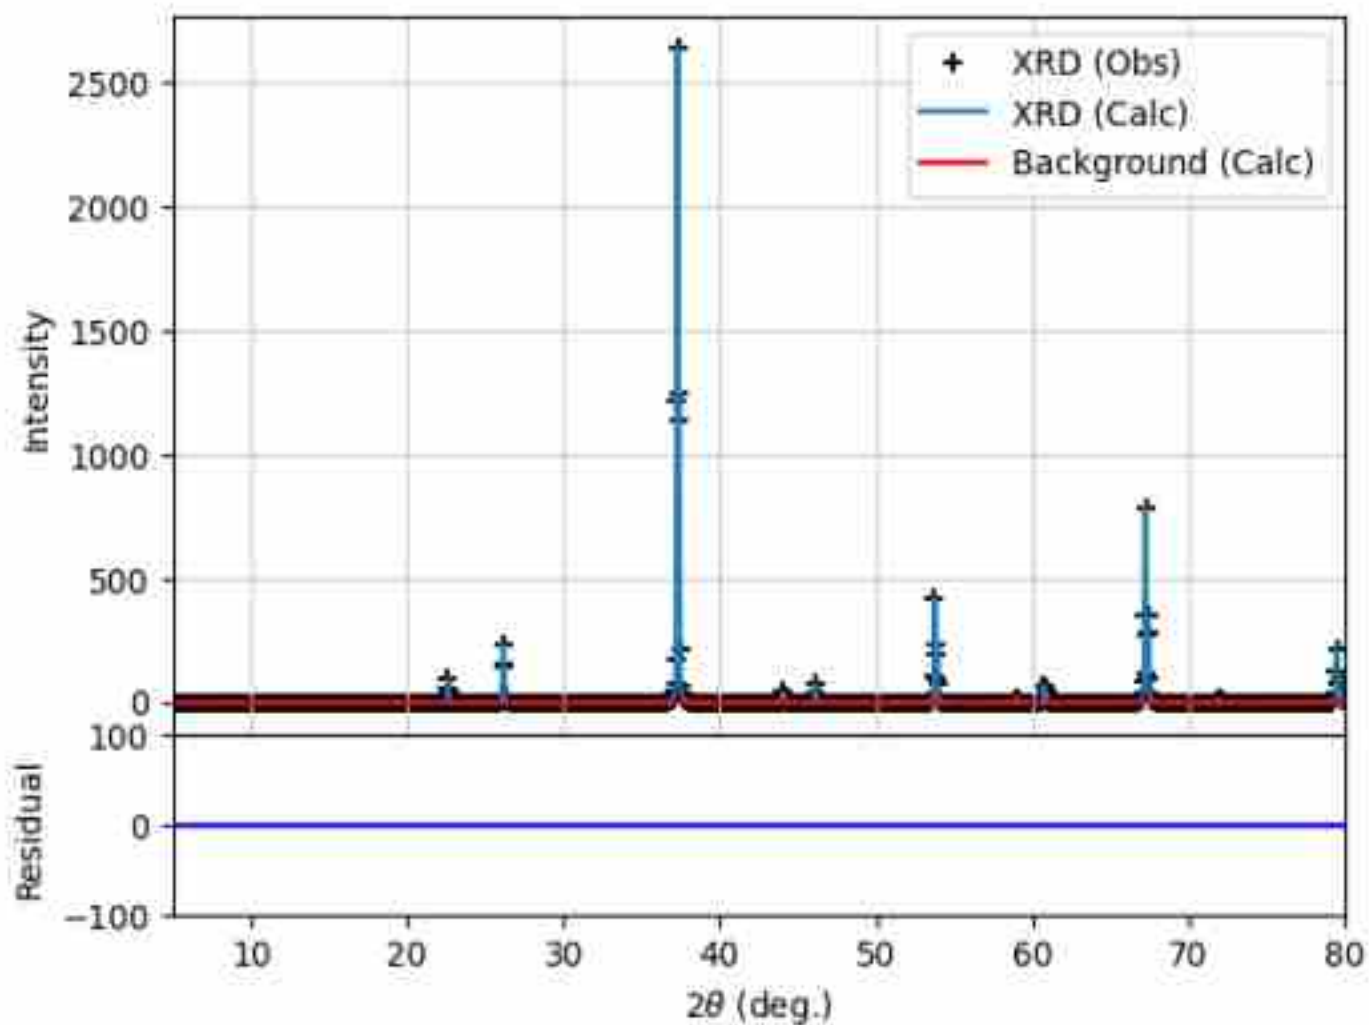

| RMSE before RR | Rwp     | RMSE after RR |
|----------------|---------|---------------|
| 0.001          | 0.00552 | 0.00059       |

# Tm1Pa1Tc2

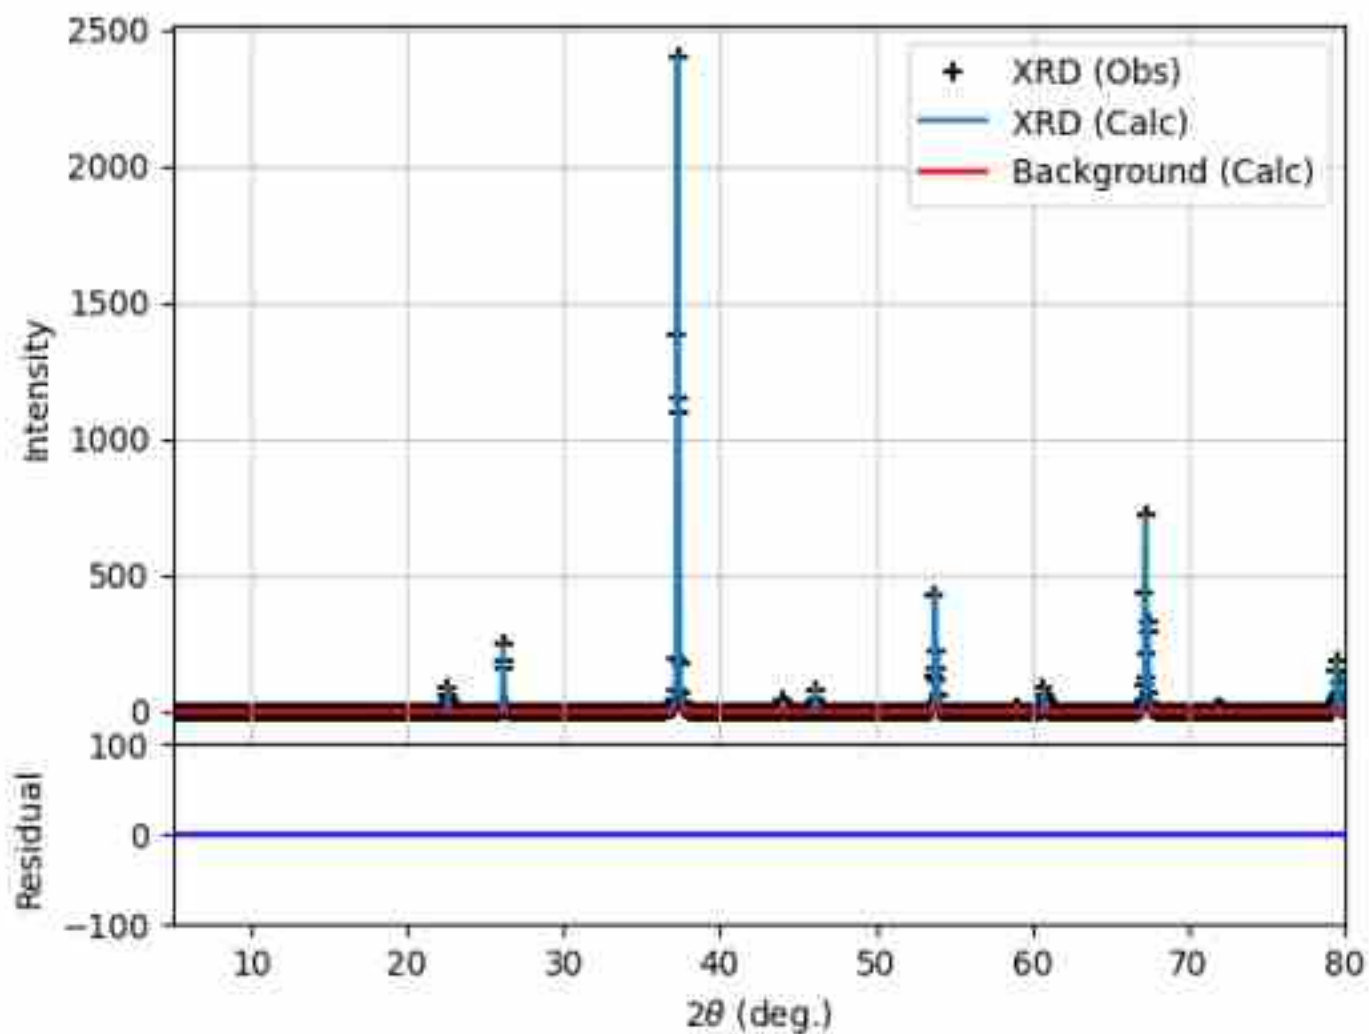

| RMSE before RR | Rwp     | RMSE after RR |
|----------------|---------|---------------|
| 0.001          | 0.00424 | 0.0005        |

# Tm1Pd1

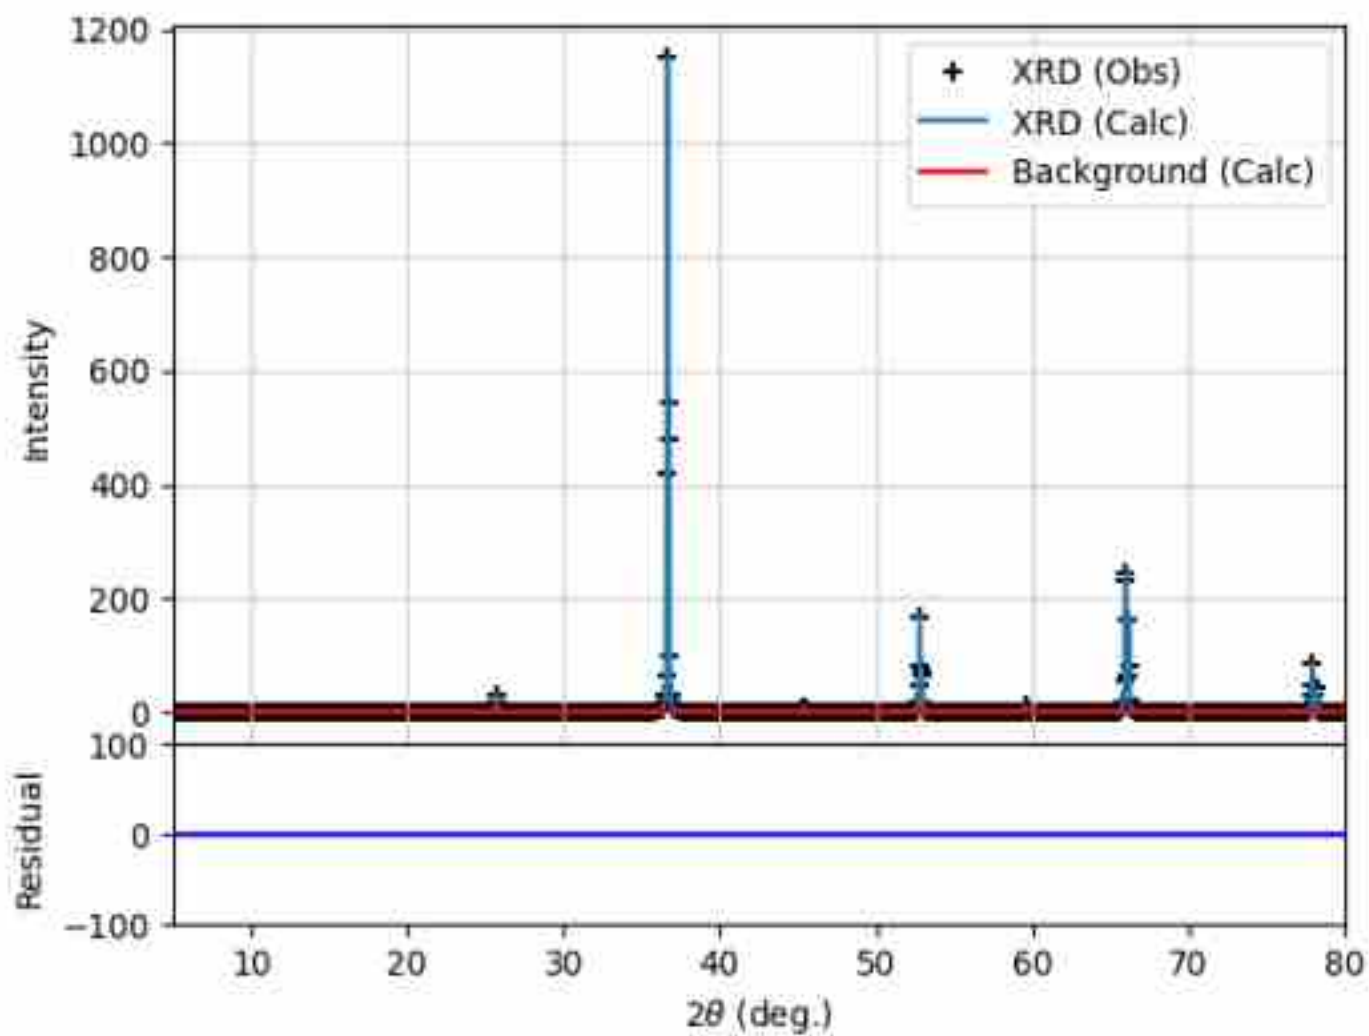

| RMSE before RR | Rwp     | RMSE after RR |
|----------------|---------|---------------|
| 0.001          | 0.00927 | 0.00062       |

# Tm1Pd2Pb1

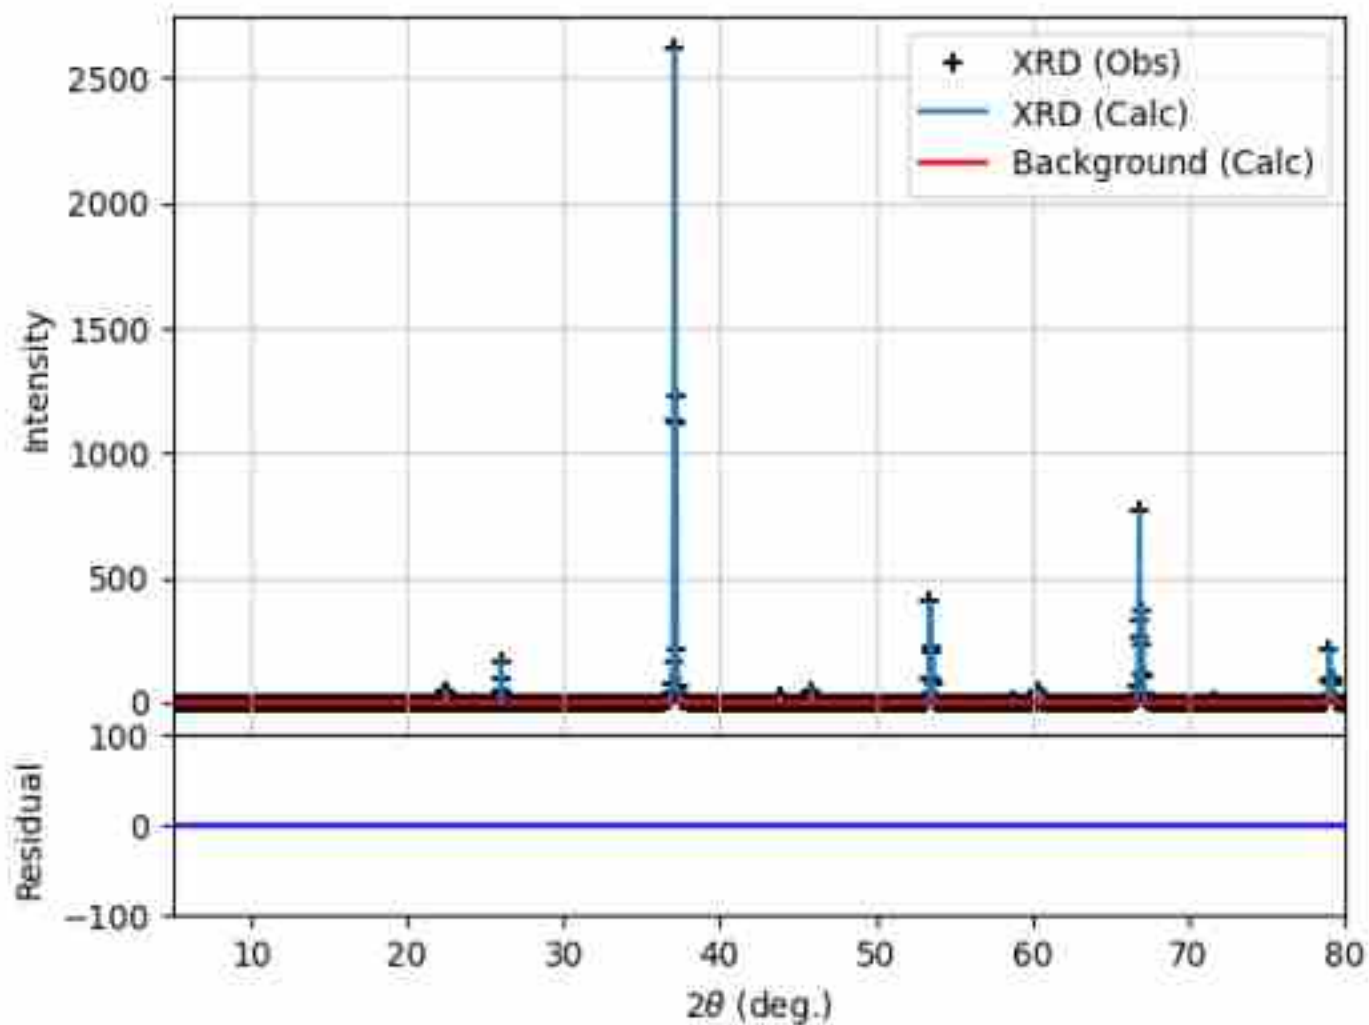

| RMSE before RR | Rwp     | RMSE after RR |
|----------------|---------|---------------|
| 0.001          | 0.01236 | 0.00069       |

# Tm1Ta1Os2

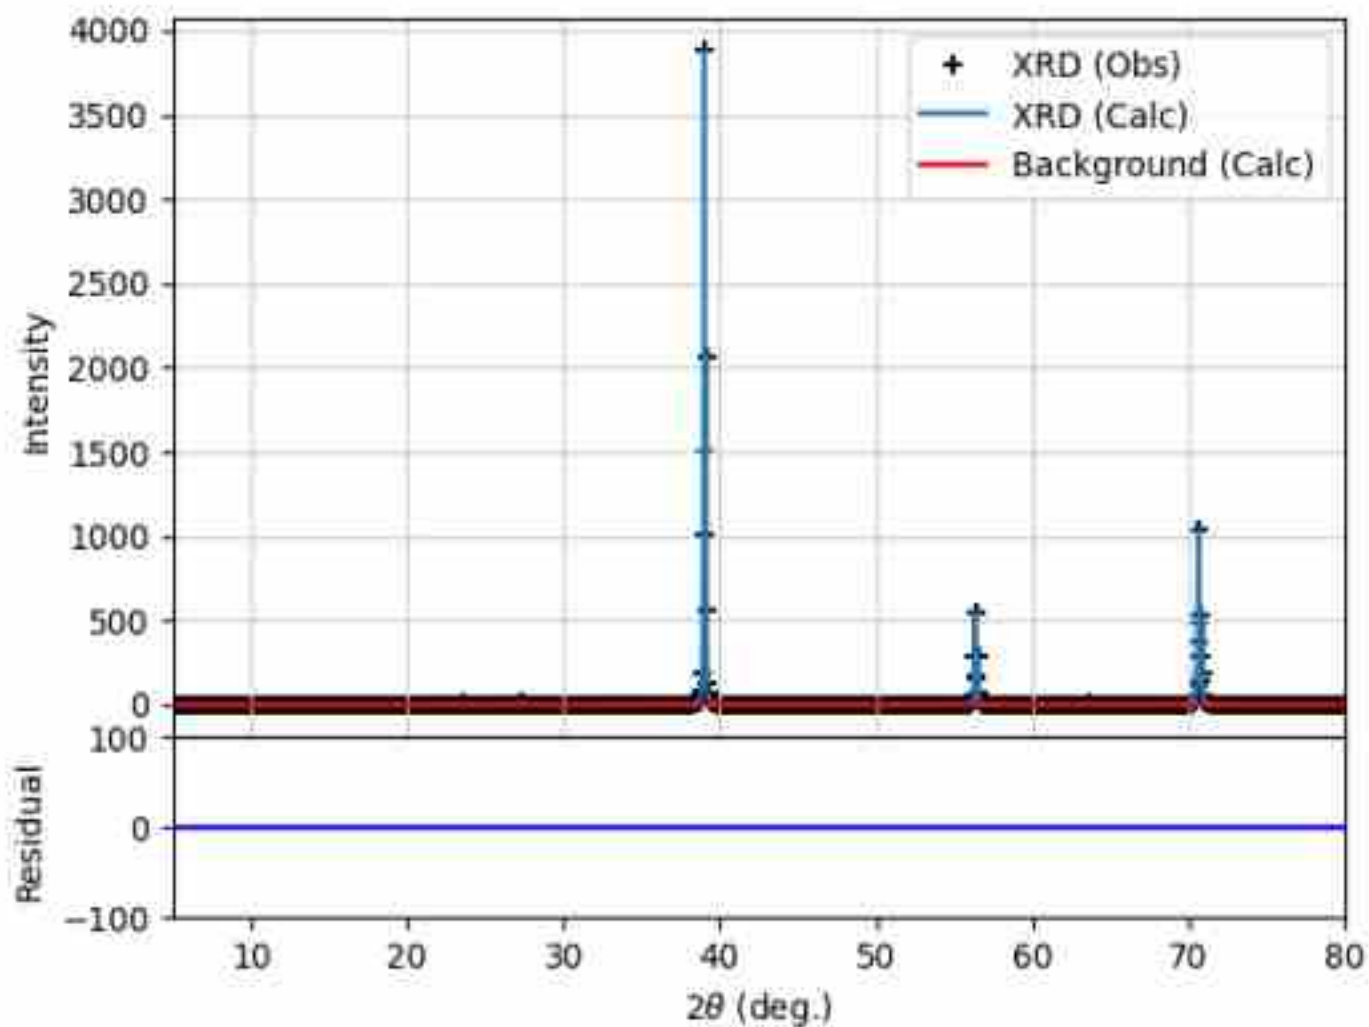

| RMSE before RR | Rwp     | RMSE after RR |
|----------------|---------|---------------|
| 0.001          | 0.00371 | 0.00029       |

# Tm2Cd1Hg1

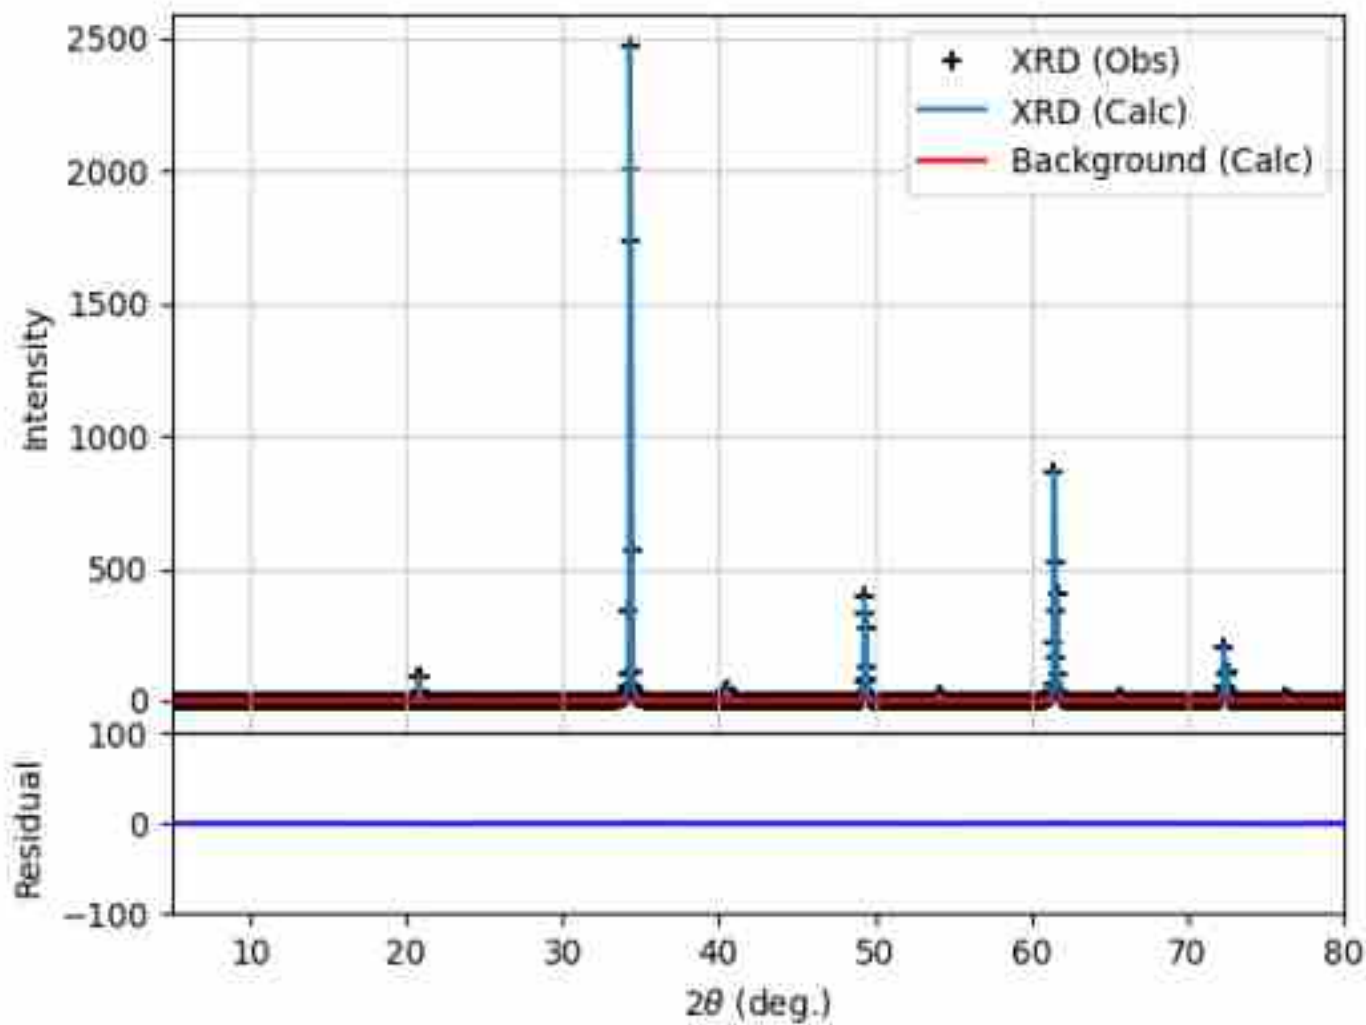

| RMSE before RR | Rwp     | RMSE after RR |
|----------------|---------|---------------|
| 0.001          | 0.69611 | 0.00243       |

# Tm<sub>2</sub>Cr<sub>2</sub>C<sub>3</sub>

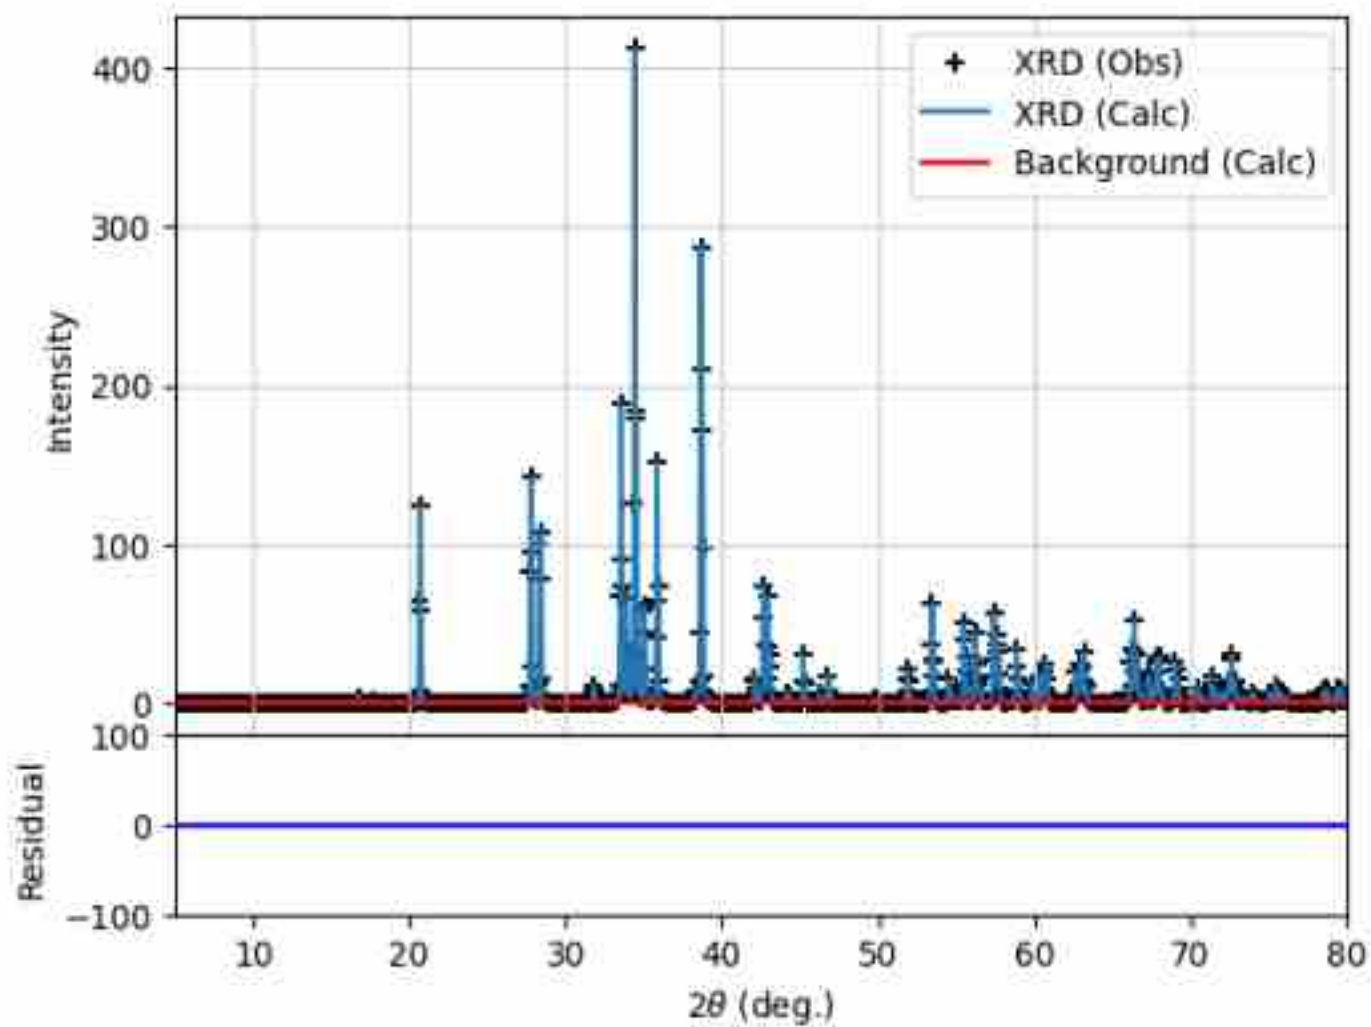

| RMSE before RR | Rwp     | RMSE after RR |
|----------------|---------|---------------|
| 0.01           | 0.00256 | 0.0006        |

# Tm<sub>2</sub>Ni<sub>1</sub>O<sub>8</sub>

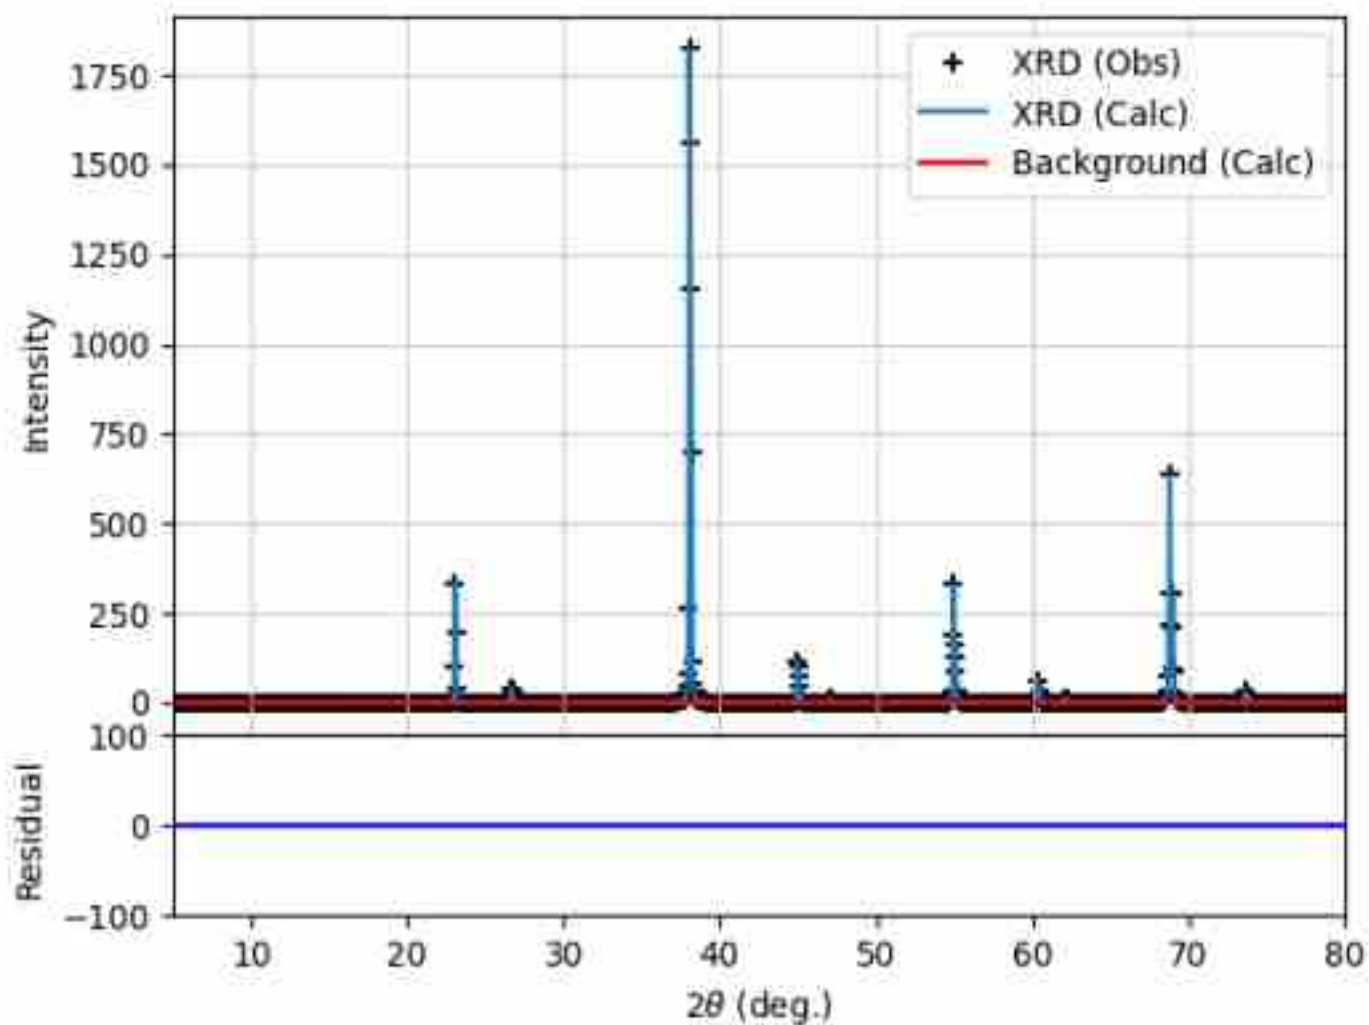

| RMSE before RR | Rwp     | RMSE after RR |
|----------------|---------|---------------|
| 0.001          | 0.00315 | 0.00029       |



# Tm<sub>2</sub>TlHg<sub>1</sub>

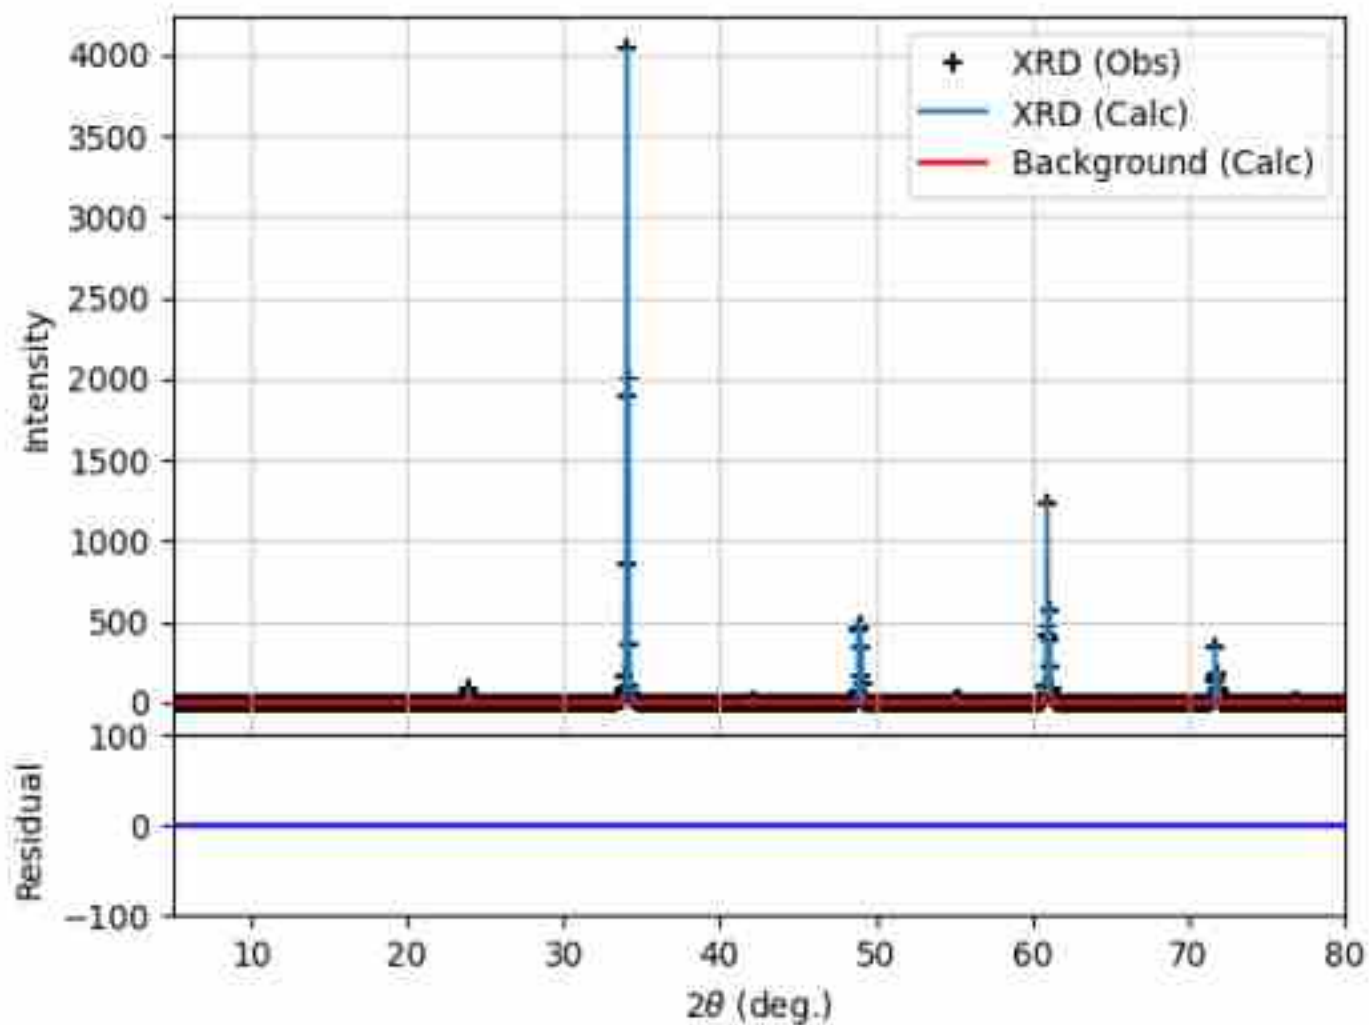

| RMSE before RR | Rwp     | RMSE after RR |
|----------------|---------|---------------|
| 0.001          | 0.07234 | 0.00088       |

# Tm<sub>2</sub>Zn<sub>1</sub>O<sub>8</sub>

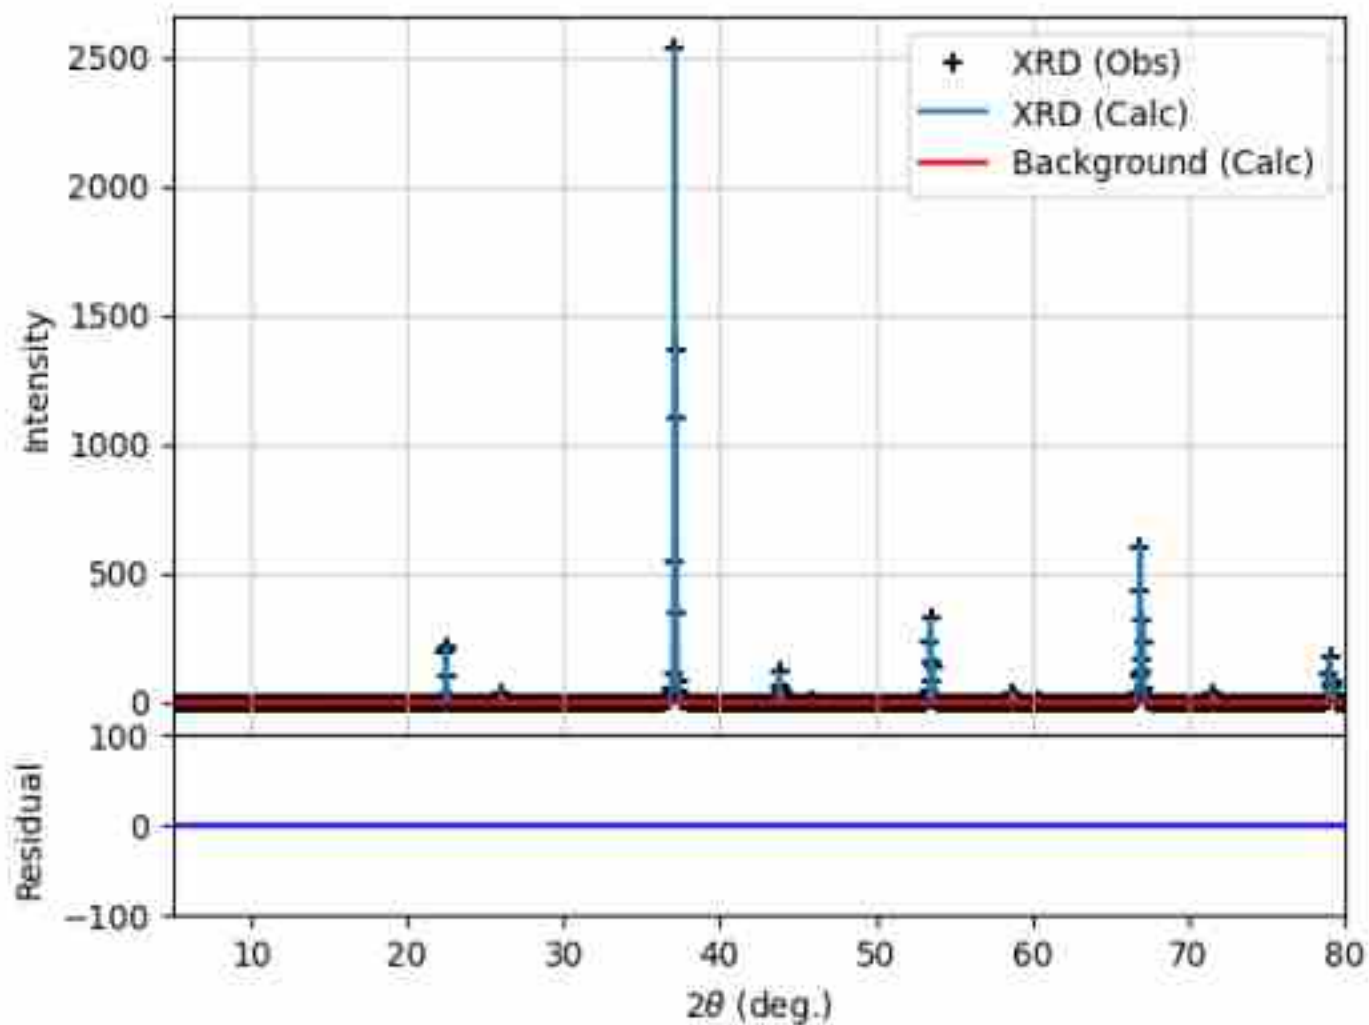

| RMSE before RR | Rwp     | RMSE after RR |
|----------------|---------|---------------|
| 0.001          | 0.03598 | 0.00153       |

# Tm<sub>4</sub>Ni<sub>4</sub>Sn<sub>2</sub>

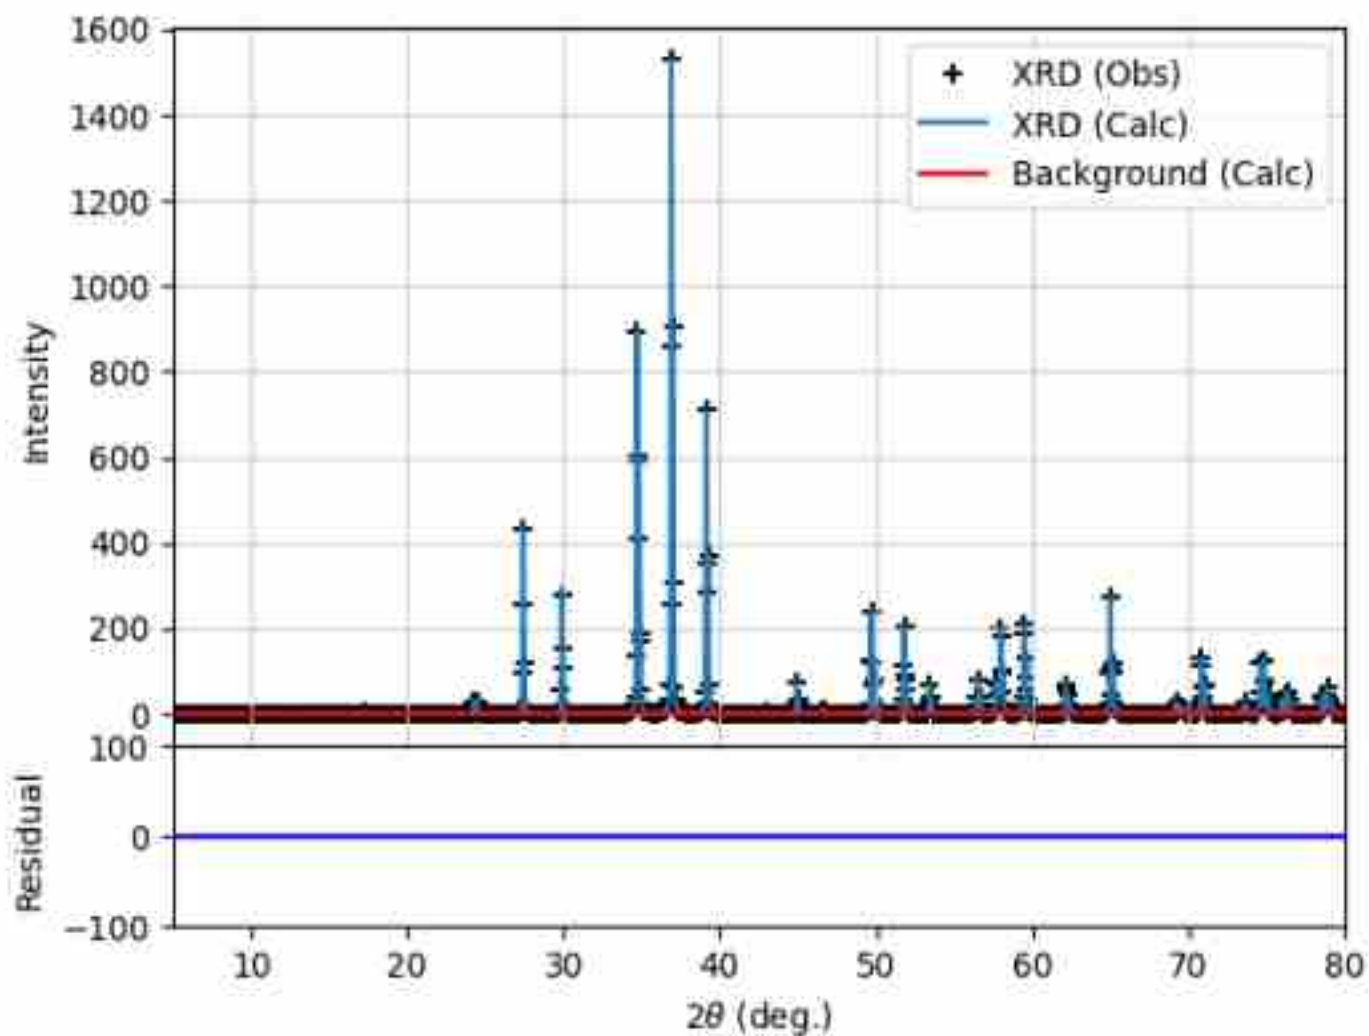

| RMSE before RR | Rwp     | RMSE after RR |
|----------------|---------|---------------|
| 0.01           | 0.00409 | 0.00042       |

# Tm6Sc2

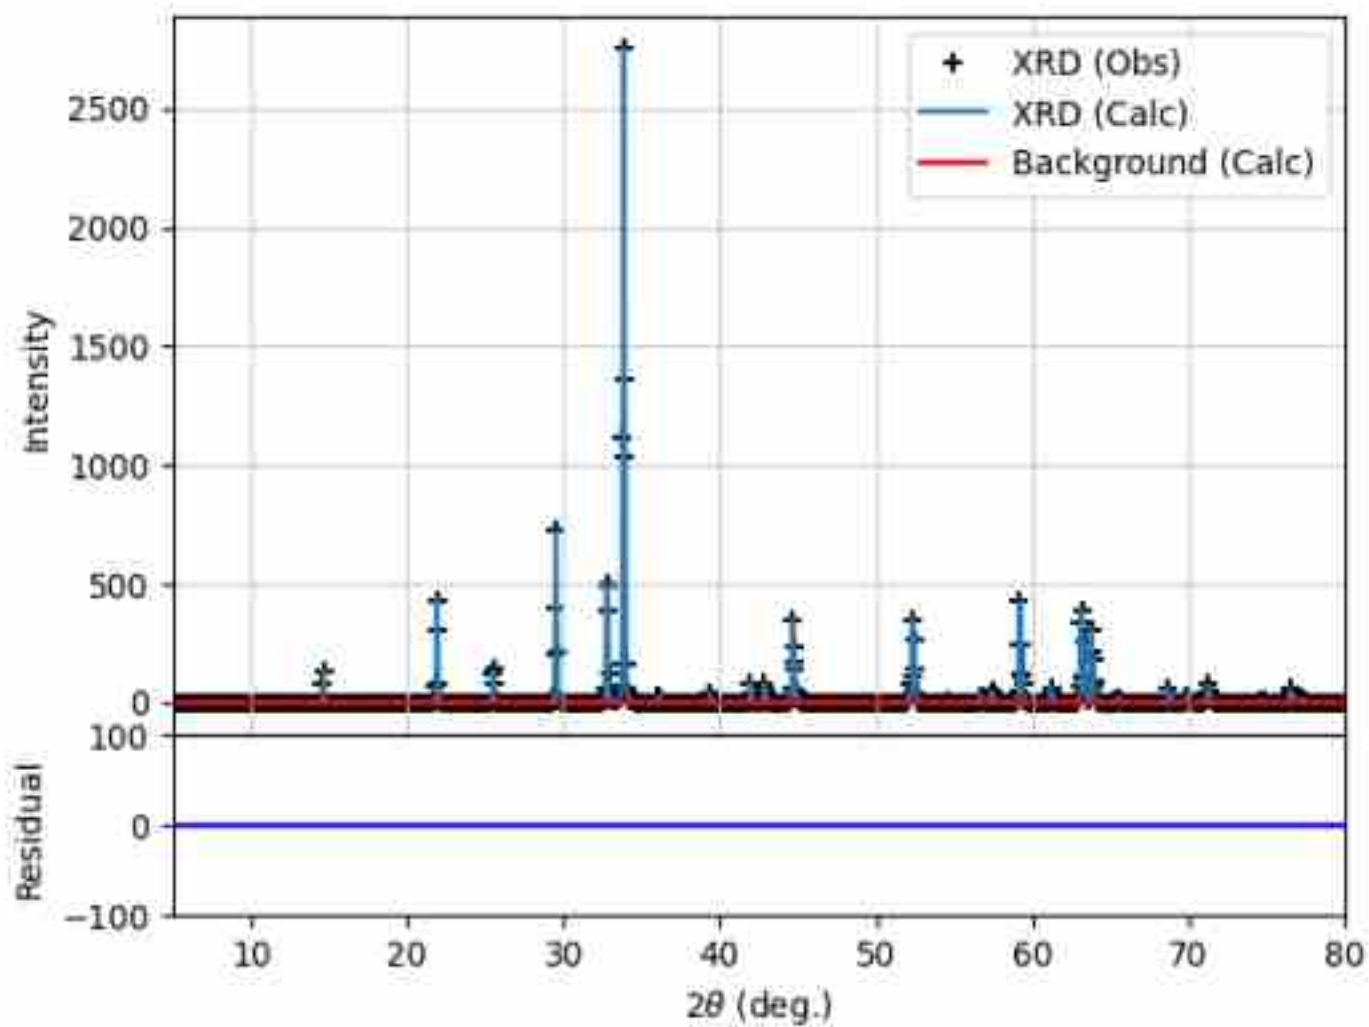

| RMSE before RR | Rwp    | RMSE after RR |
|----------------|--------|---------------|
| 0.01           | 0.0112 | 0.001         |

# U1As1

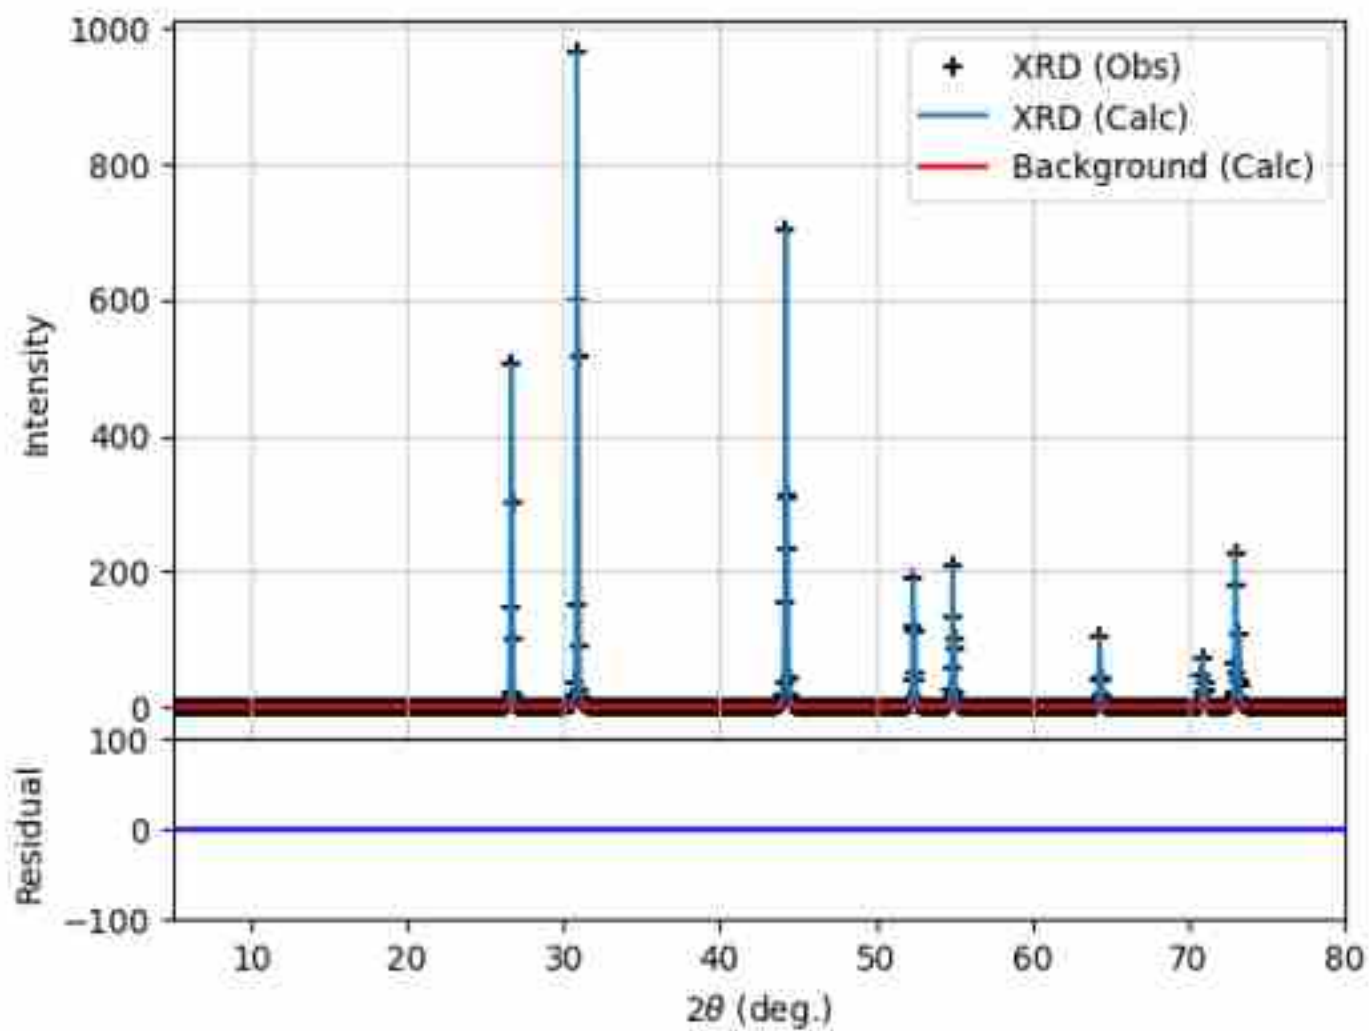

| RMSE before RR | Rwp     | RMSE after RR |
|----------------|---------|---------------|
| 0.001          | 0.00115 | 0.0002        |

# U1Ga3

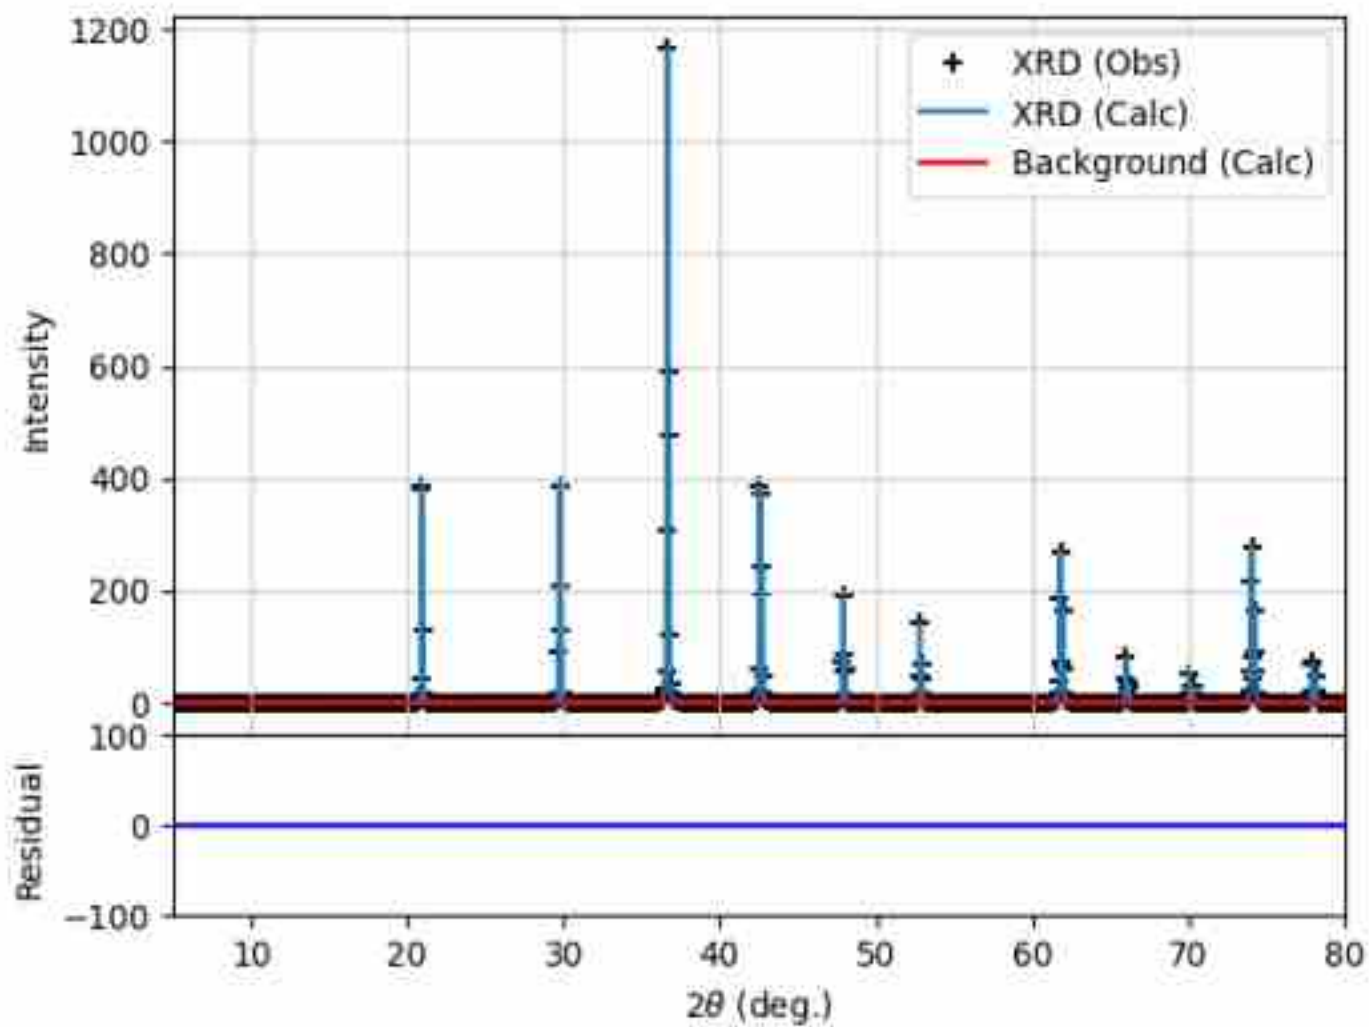

| RMSE before RR | Rwp     | RMSE after RR |
|----------------|---------|---------------|
| 0.001          | 0.00451 | 0.00223       |

# U1Sb1Rh1

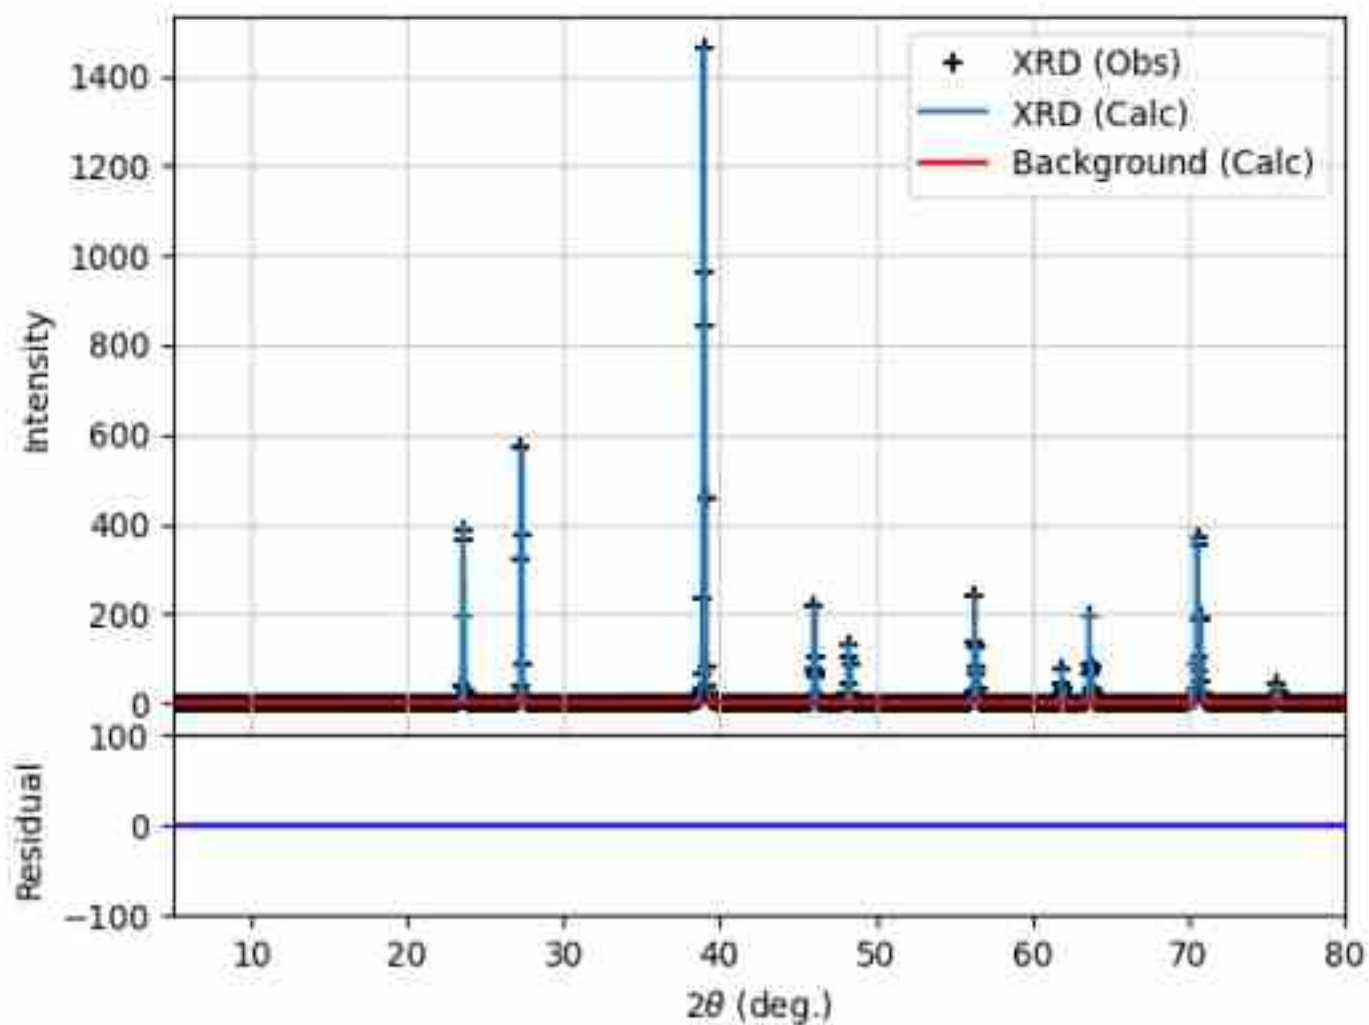

| RMSE before RR | Rwp     | RMSE after RR |
|----------------|---------|---------------|
| 0.001          | 0.00369 | 0.00042       |

# U<sub>2</sub>Bi<sub>2</sub>Sb<sub>2</sub>

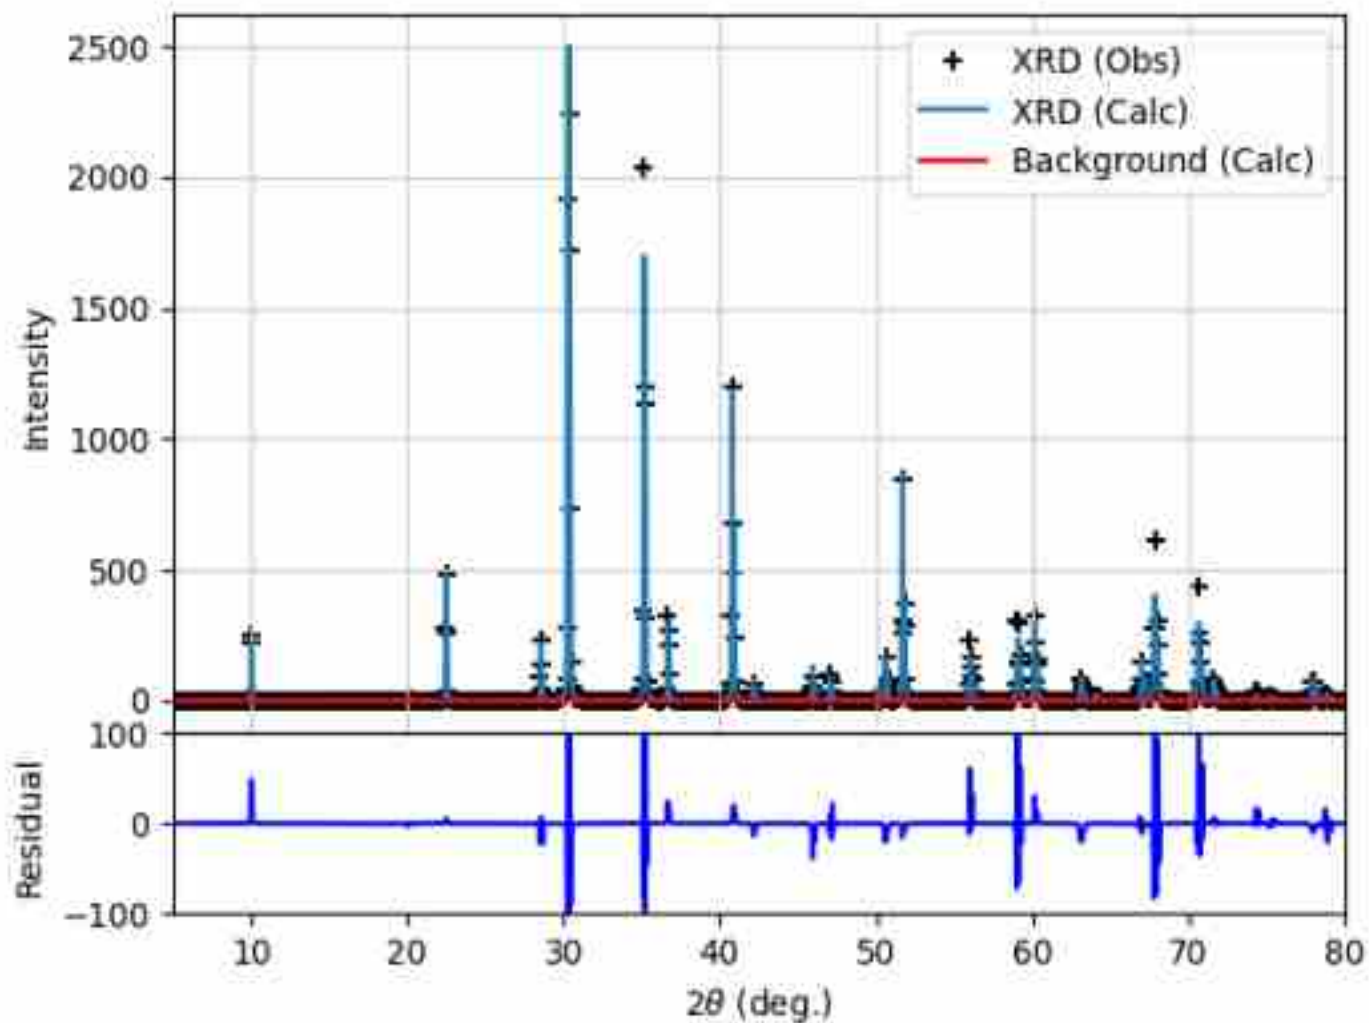

| RMSE before RR | Rwp      | RMSE after RR |
|----------------|----------|---------------|
| 0.01           | 18.56462 | 0.03169       |



# U2Sb6

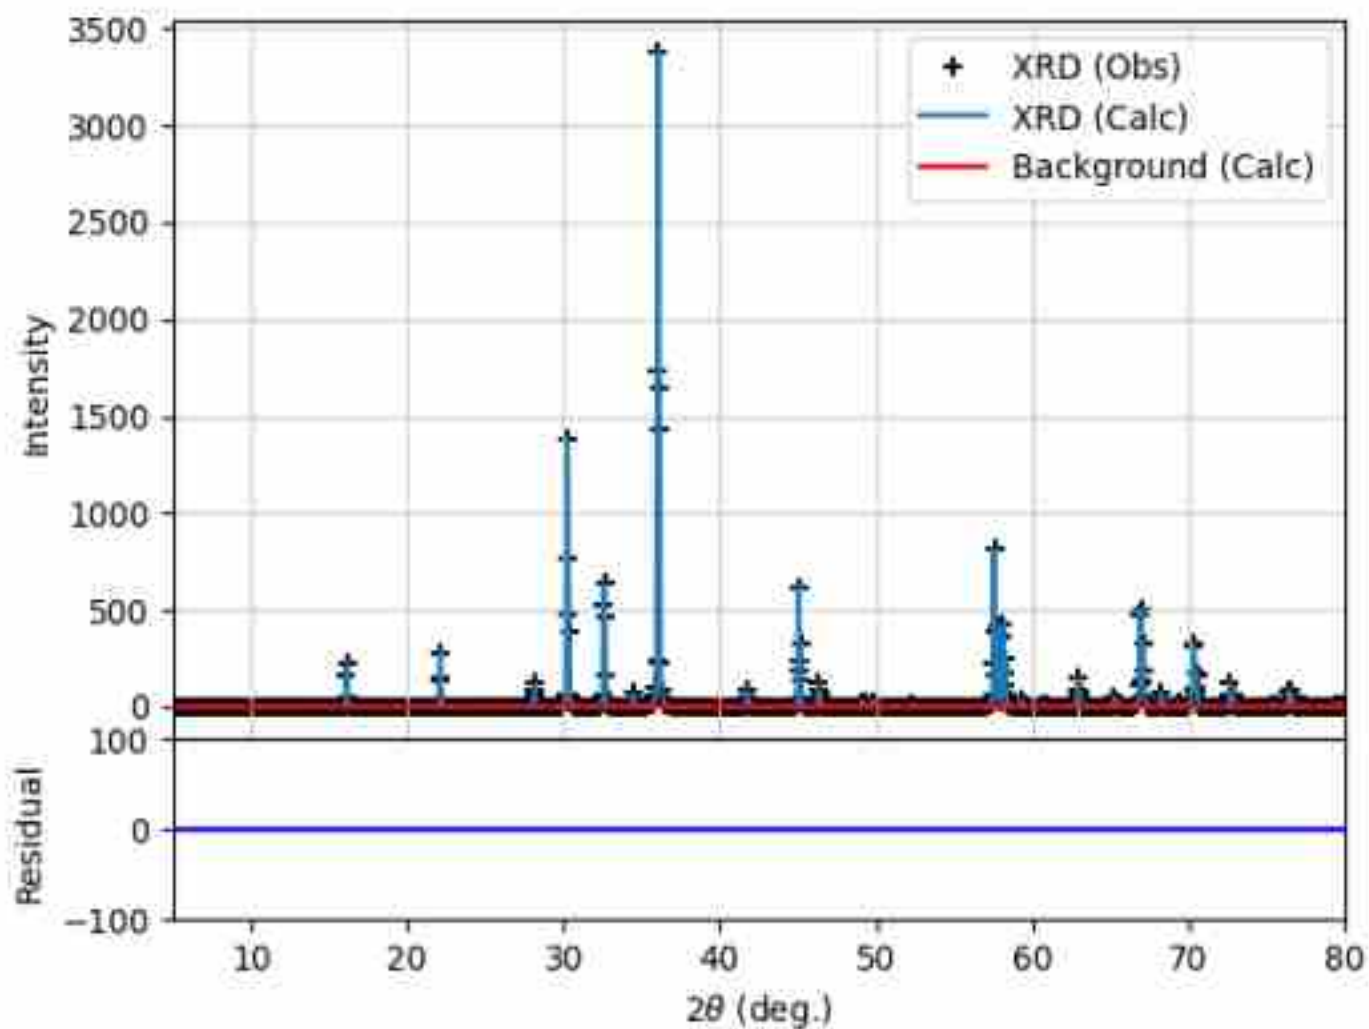

| RMSE before RR | Rwp     | RMSE after RR |
|----------------|---------|---------------|
| 0.01           | 0.02149 | 0.00145       |

# V1Co2Ge1

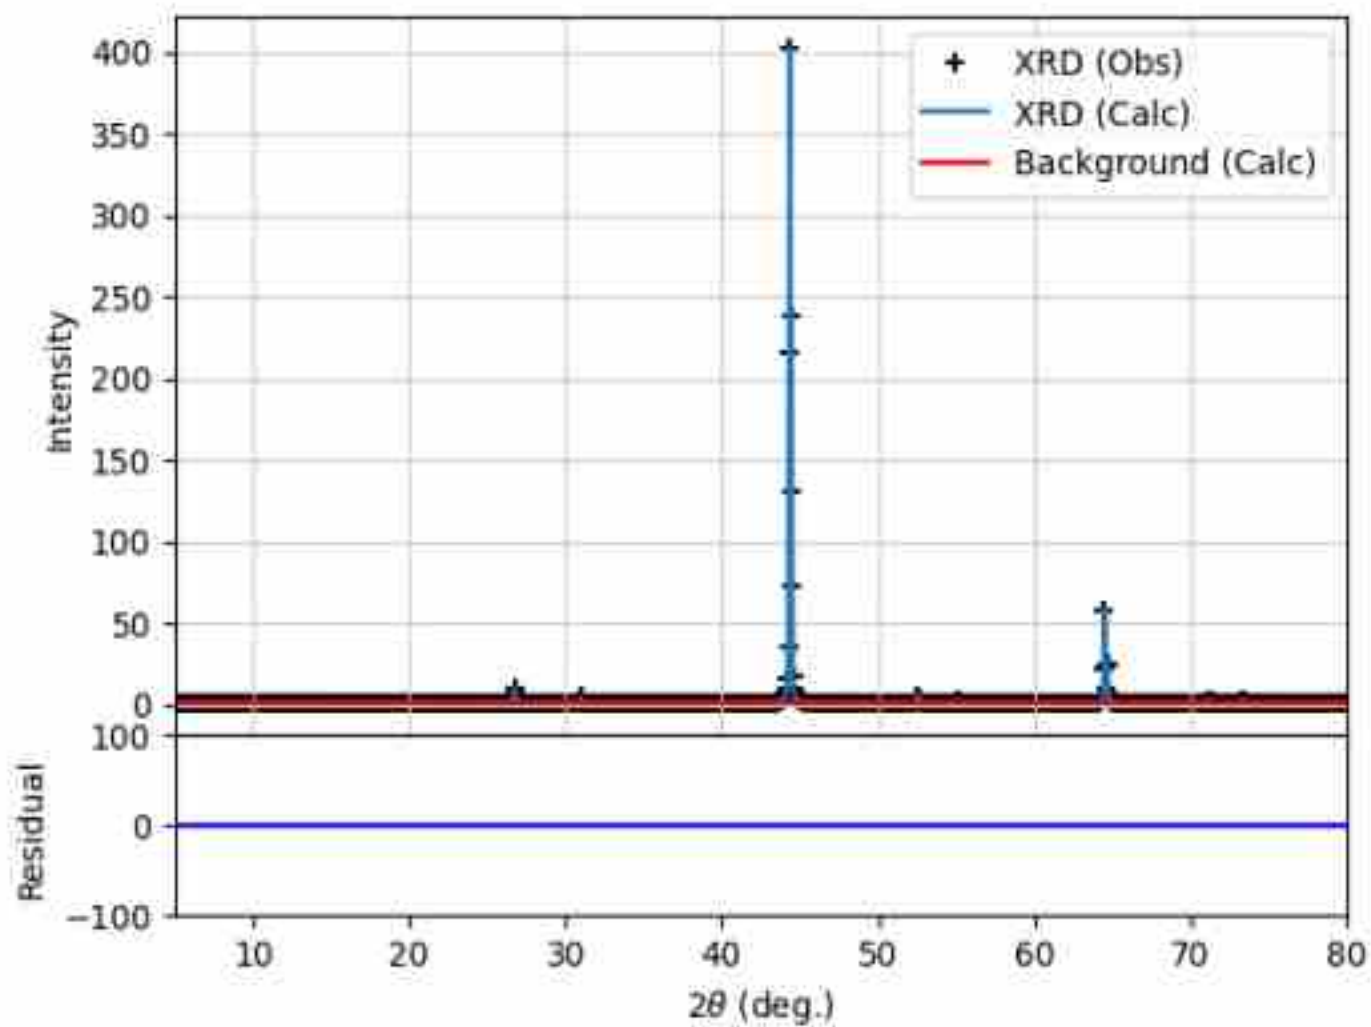

| RMSE before RR | Rwp     | RMSE after RR |
|----------------|---------|---------------|
| 0.001          | 0.01213 | 0.00044       |

# V1Cr2Si6

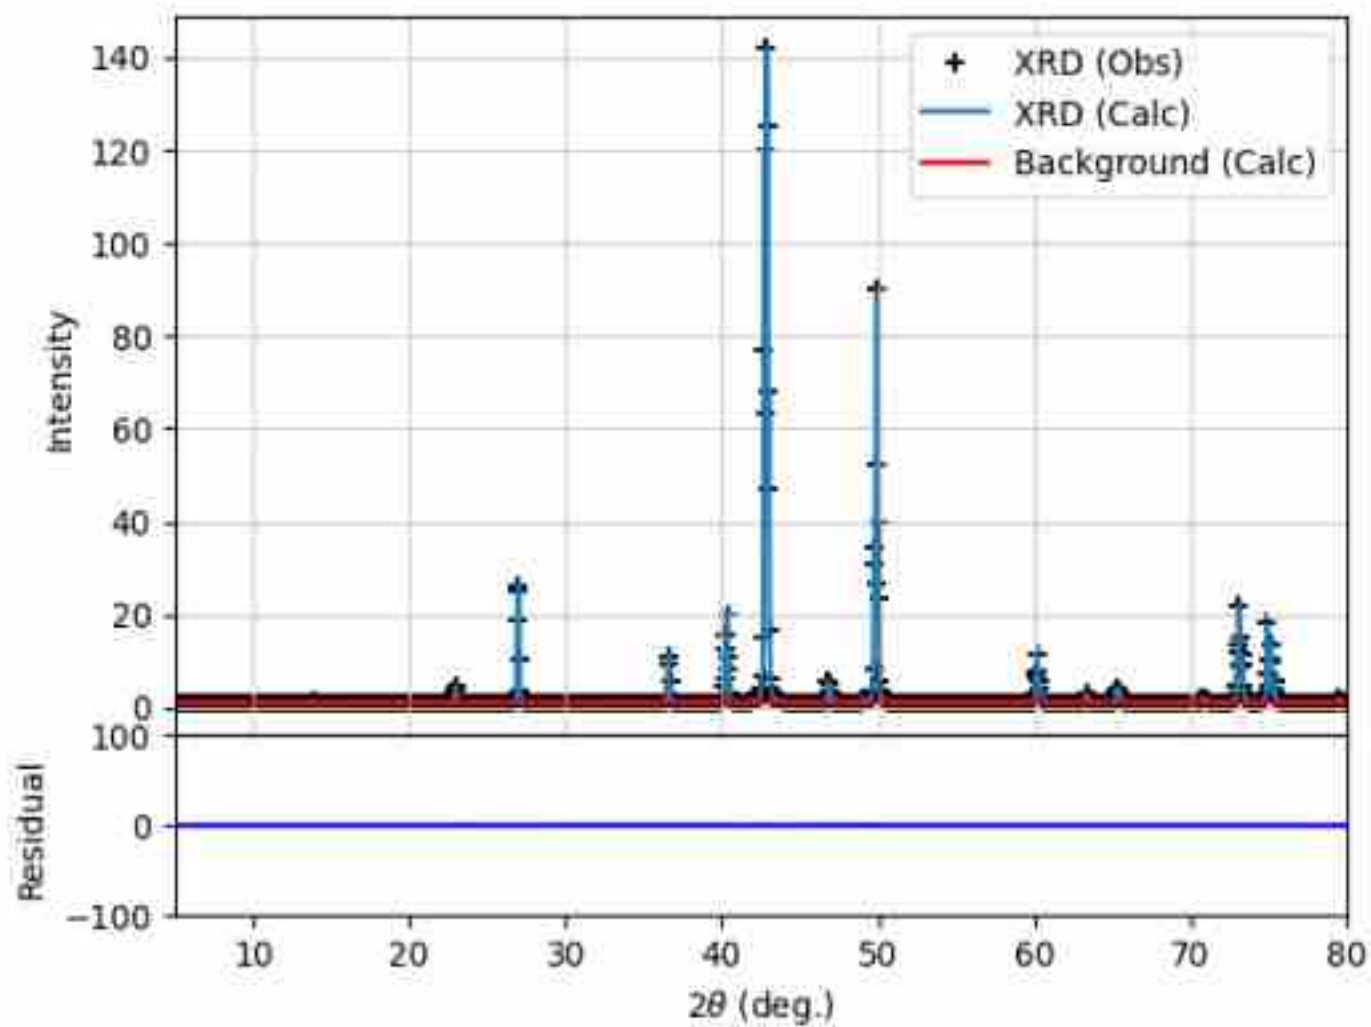

| RMSE before RR | Rwp     | RMSE after RR |
|----------------|---------|---------------|
| 0.01           | 1.23169 | 0.01763       |

# V1Cu3Se2S2

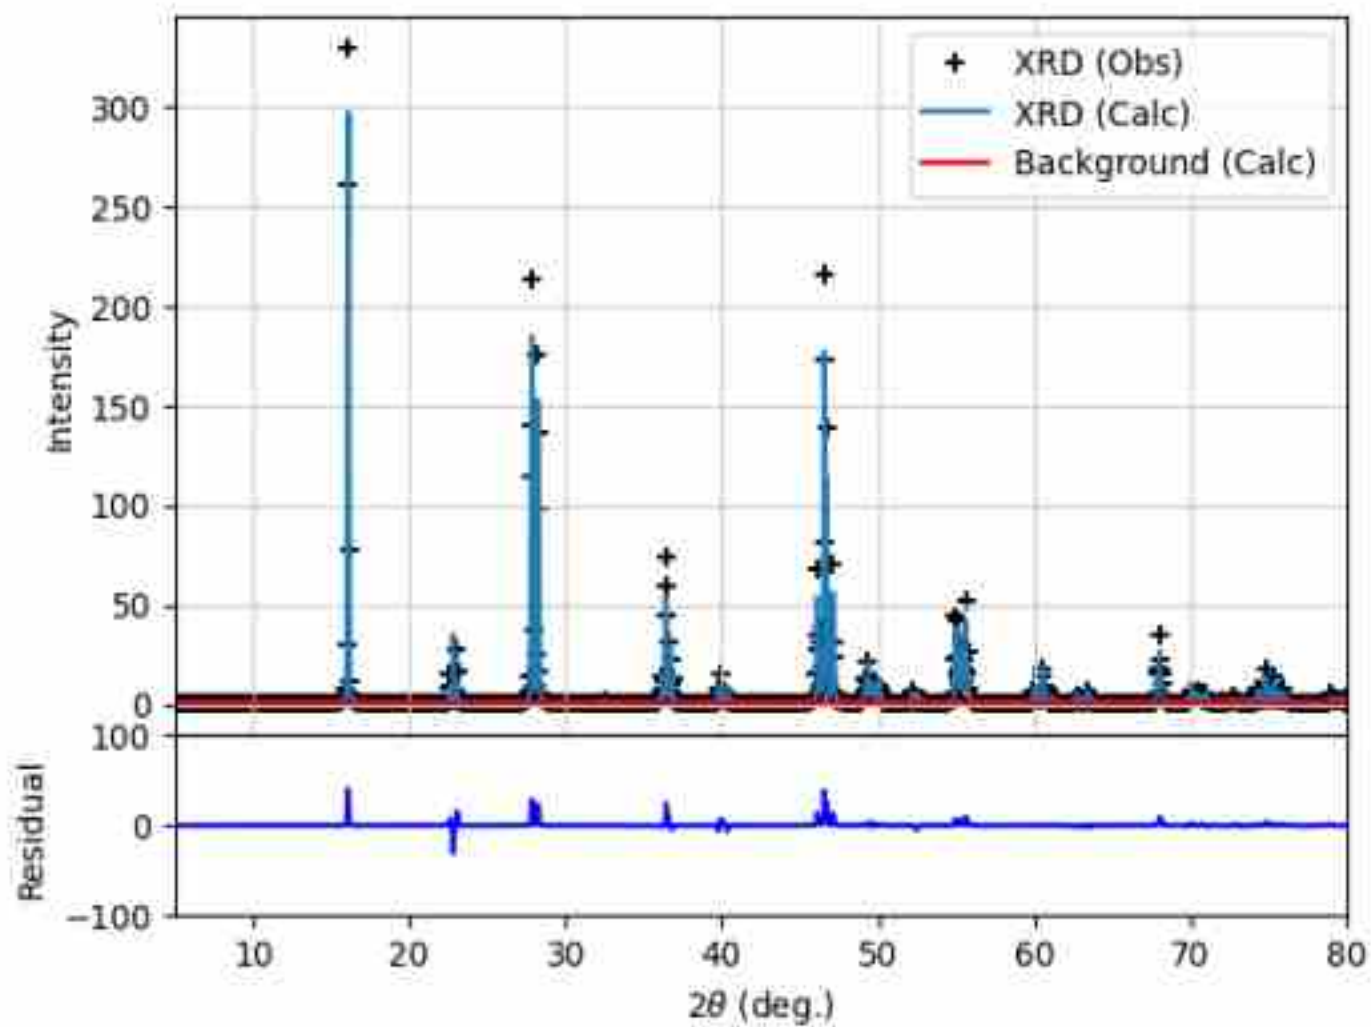

| RMSE before RR | Rwp      | RMSE after RR |
|----------------|----------|---------------|
| 0.01           | 30.94169 | 0.06005       |

# V1Fe3

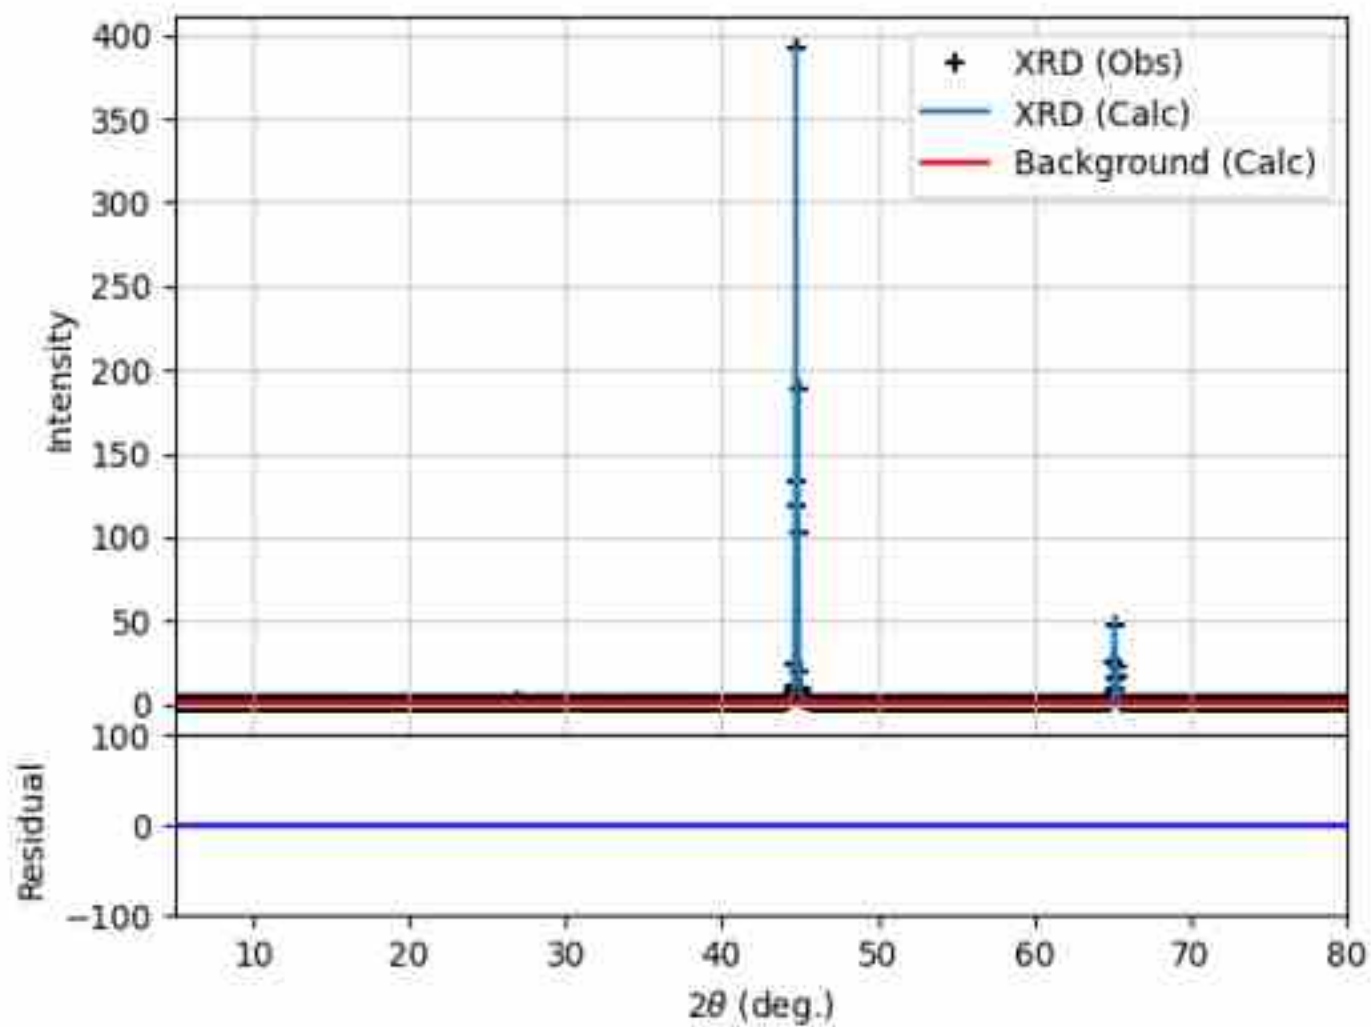

| RMSE before RR | Rwp     | RMSE after RR |
|----------------|---------|---------------|
| 0.001          | 0.00241 | 0.00071       |

# V1Ga1Os2

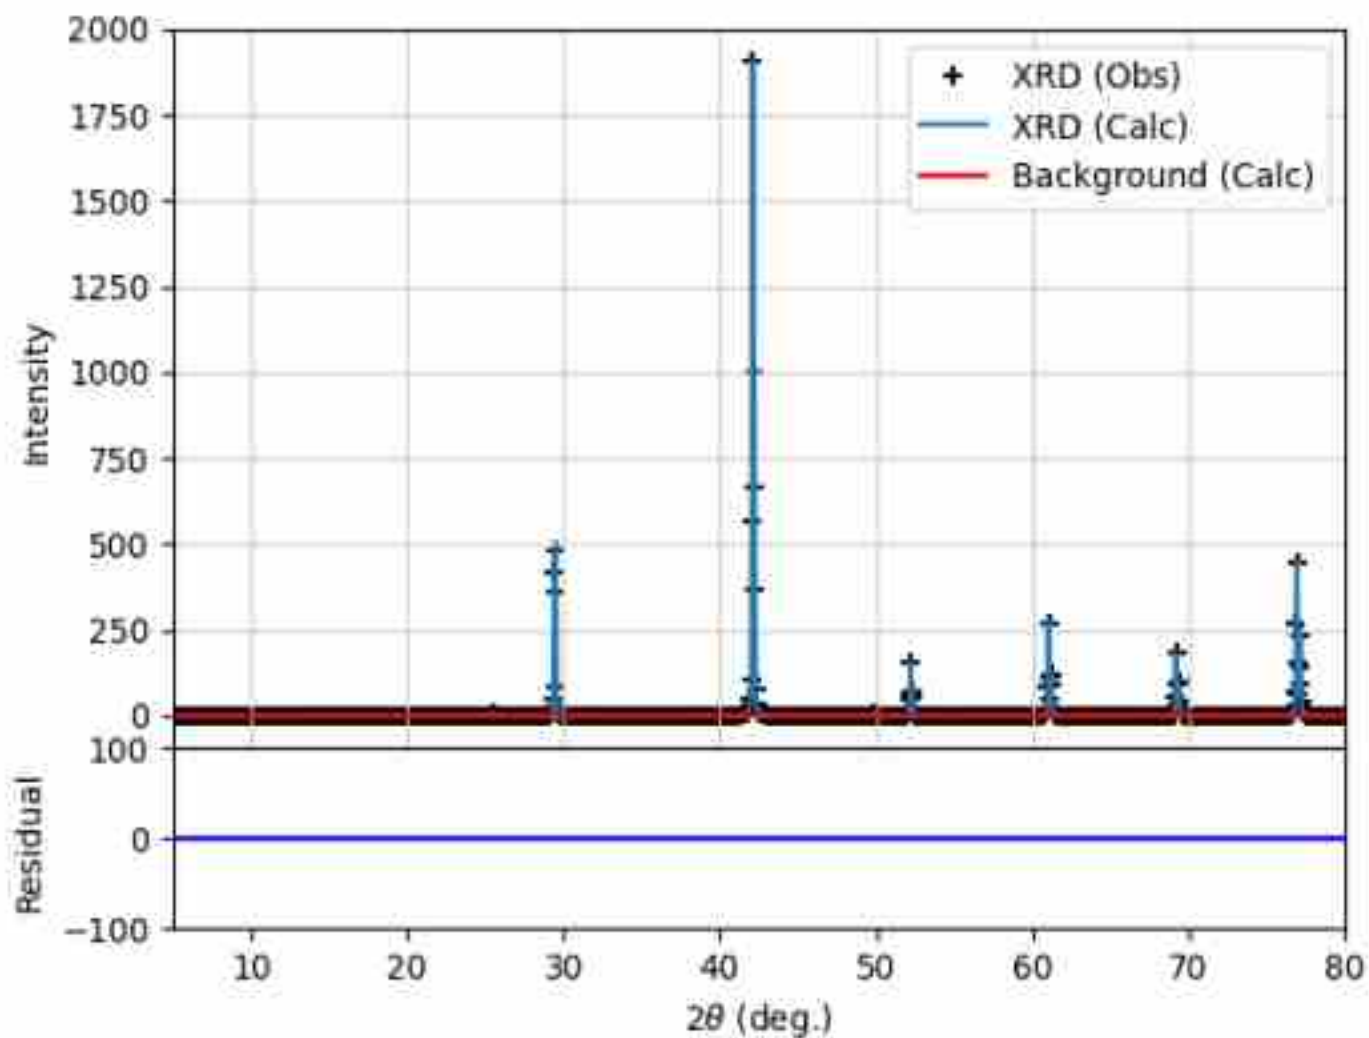

| RMSE before RR | Rwp     | RMSE after RR |
|----------------|---------|---------------|
| 0.001          | 0.00471 | 0.0007        |

# V1Os1

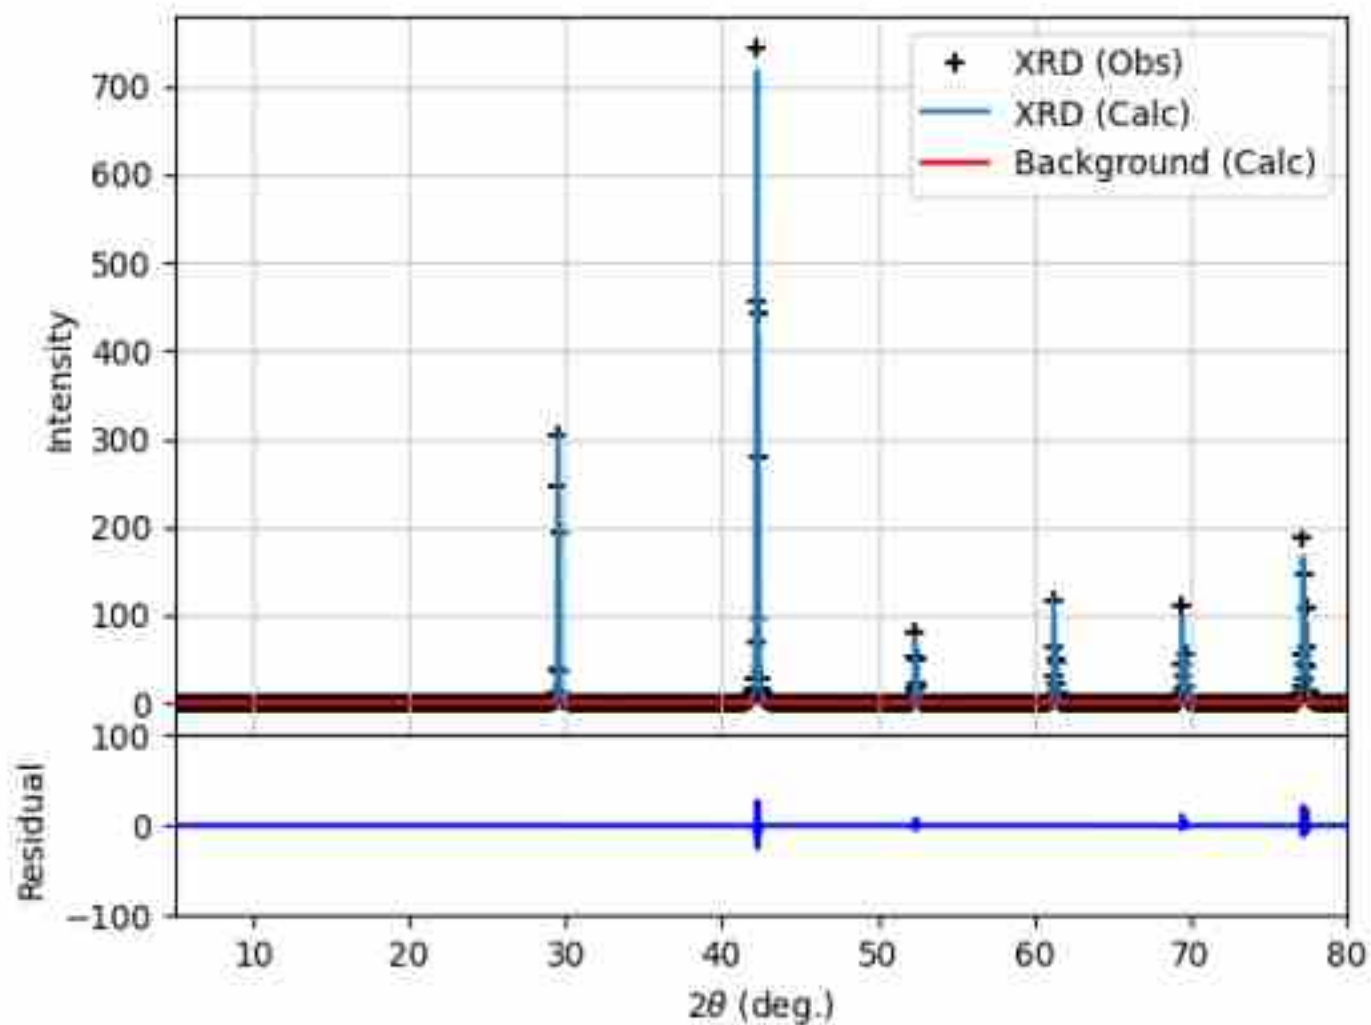

| RMSE before RR | Rwp     | RMSE after RR |
|----------------|---------|---------------|
| 0.001          | 6.37282 | 0.00075       |

# V1Pt3

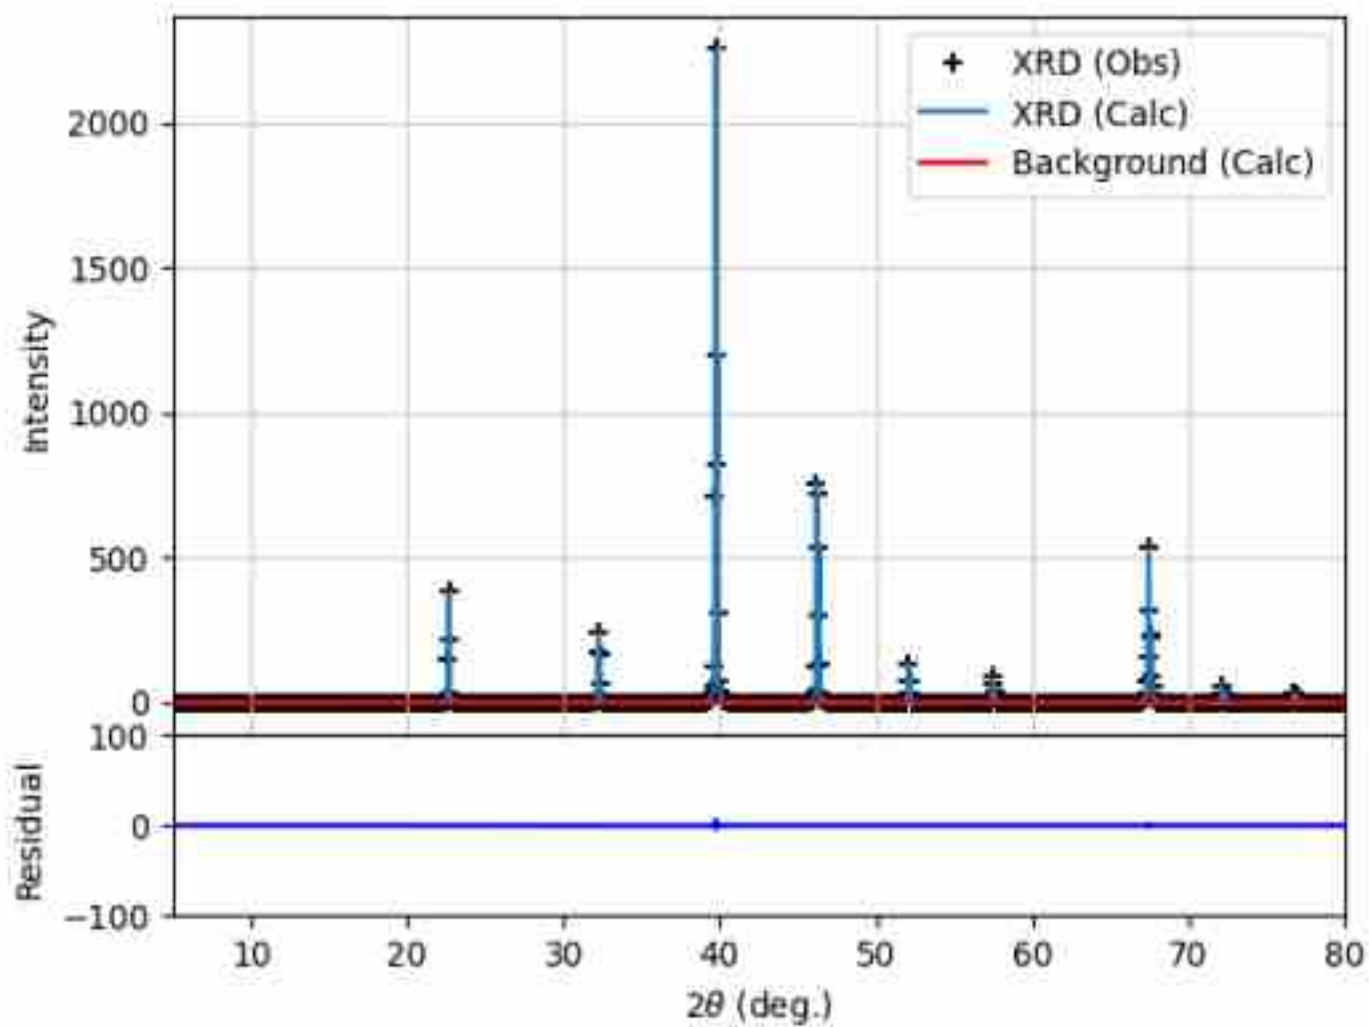

| RMSE before RR | Rwp     | RMSE after RR |
|----------------|---------|---------------|
| 0.001          | 0.18987 | 0.00114       |



# V1Rh3

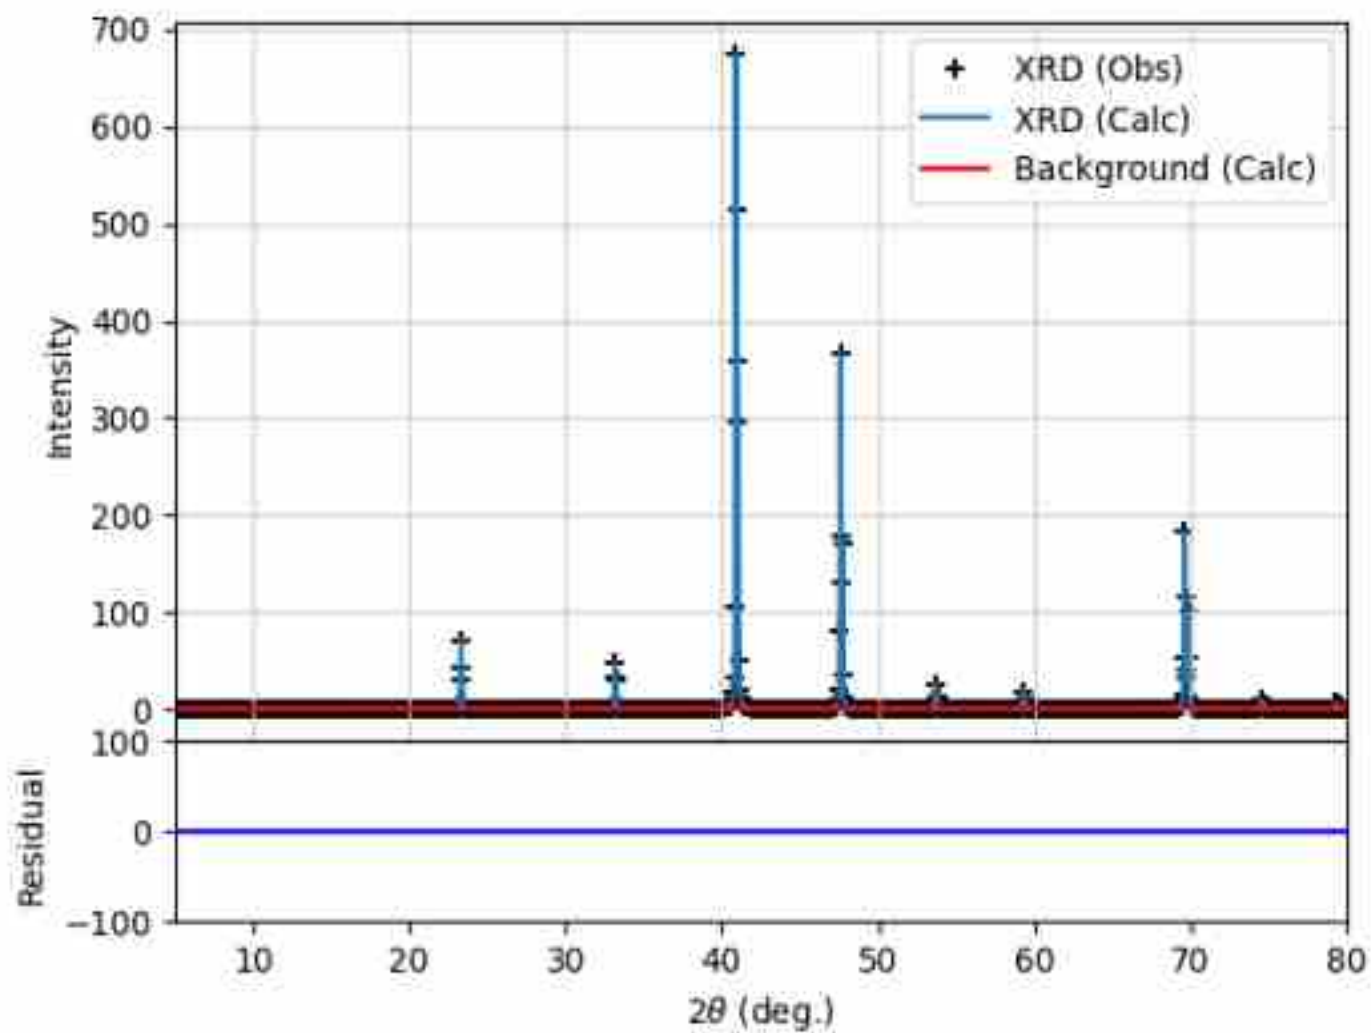

| RMSE before RR | Rwp     | RMSE after RR |
|----------------|---------|---------------|
| 0.001          | 0.00934 | 0.00112       |

# V1Si1Tc2

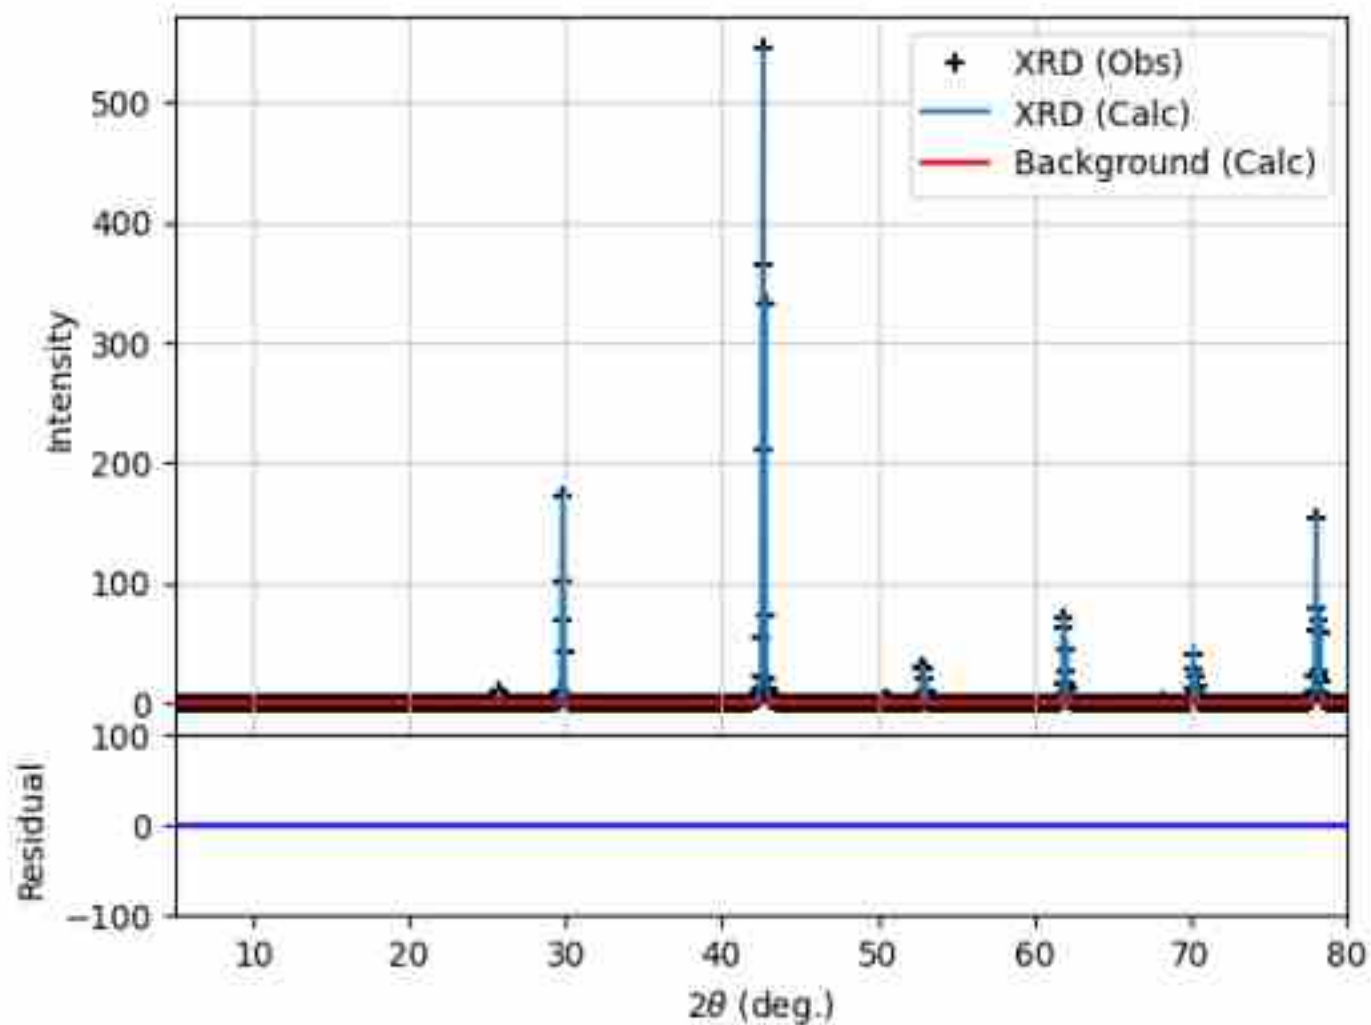

| RMSE before RR | Rwp     | RMSE after RR |
|----------------|---------|---------------|
| 0.001          | 0.00393 | 0.0008        |

# V1W3

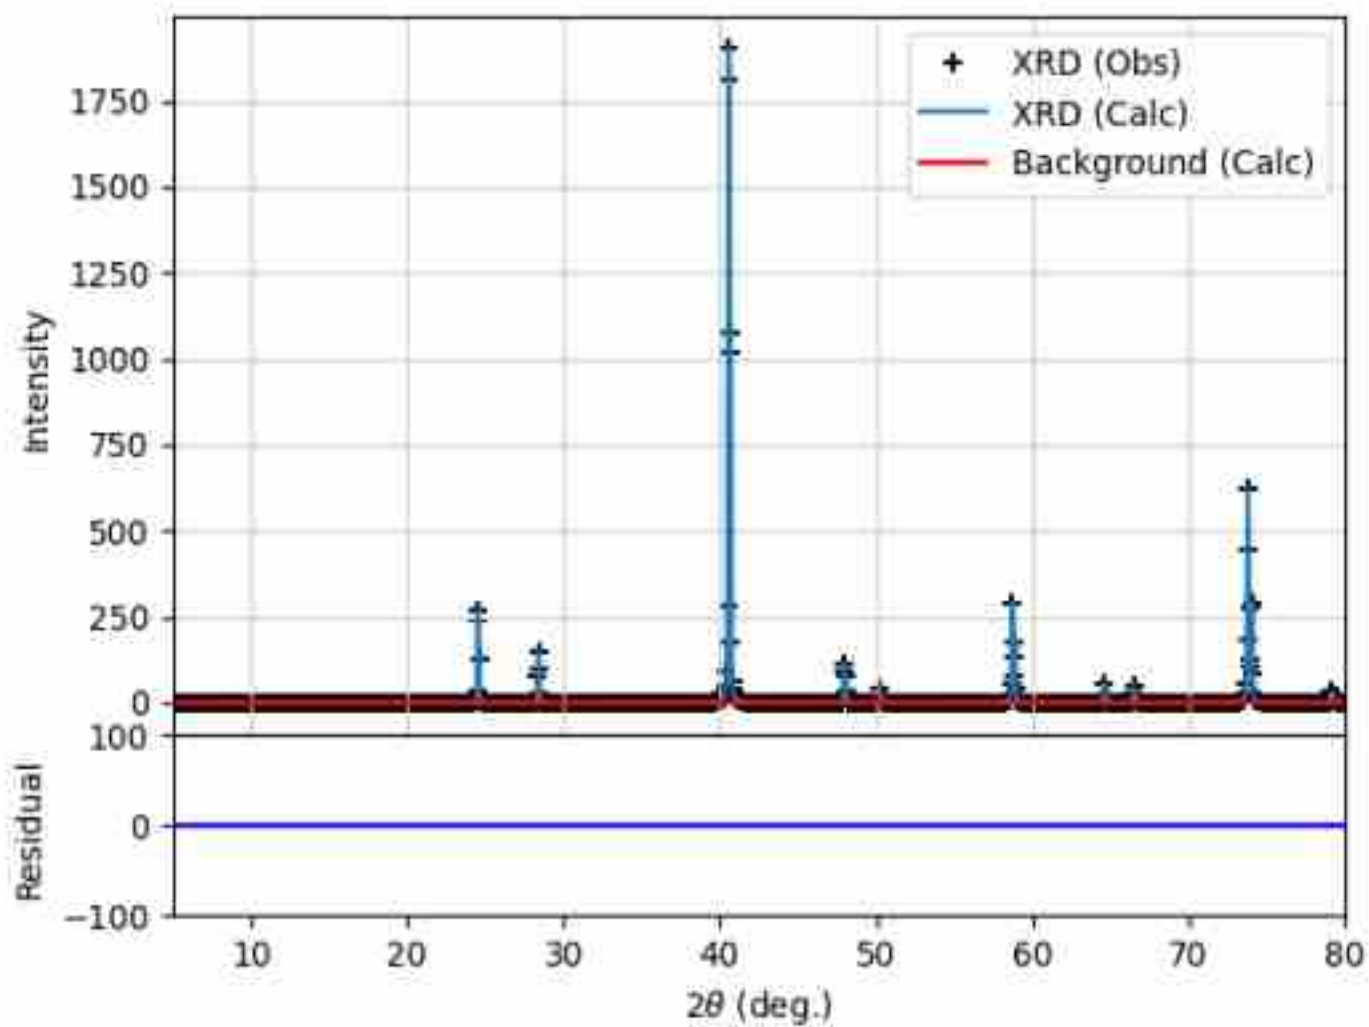

| RMSE before RR | Rwp     | RMSE after RR |
|----------------|---------|---------------|
| 0.001          | 0.00024 | 0.00015       |

# V2Cr1Ru1

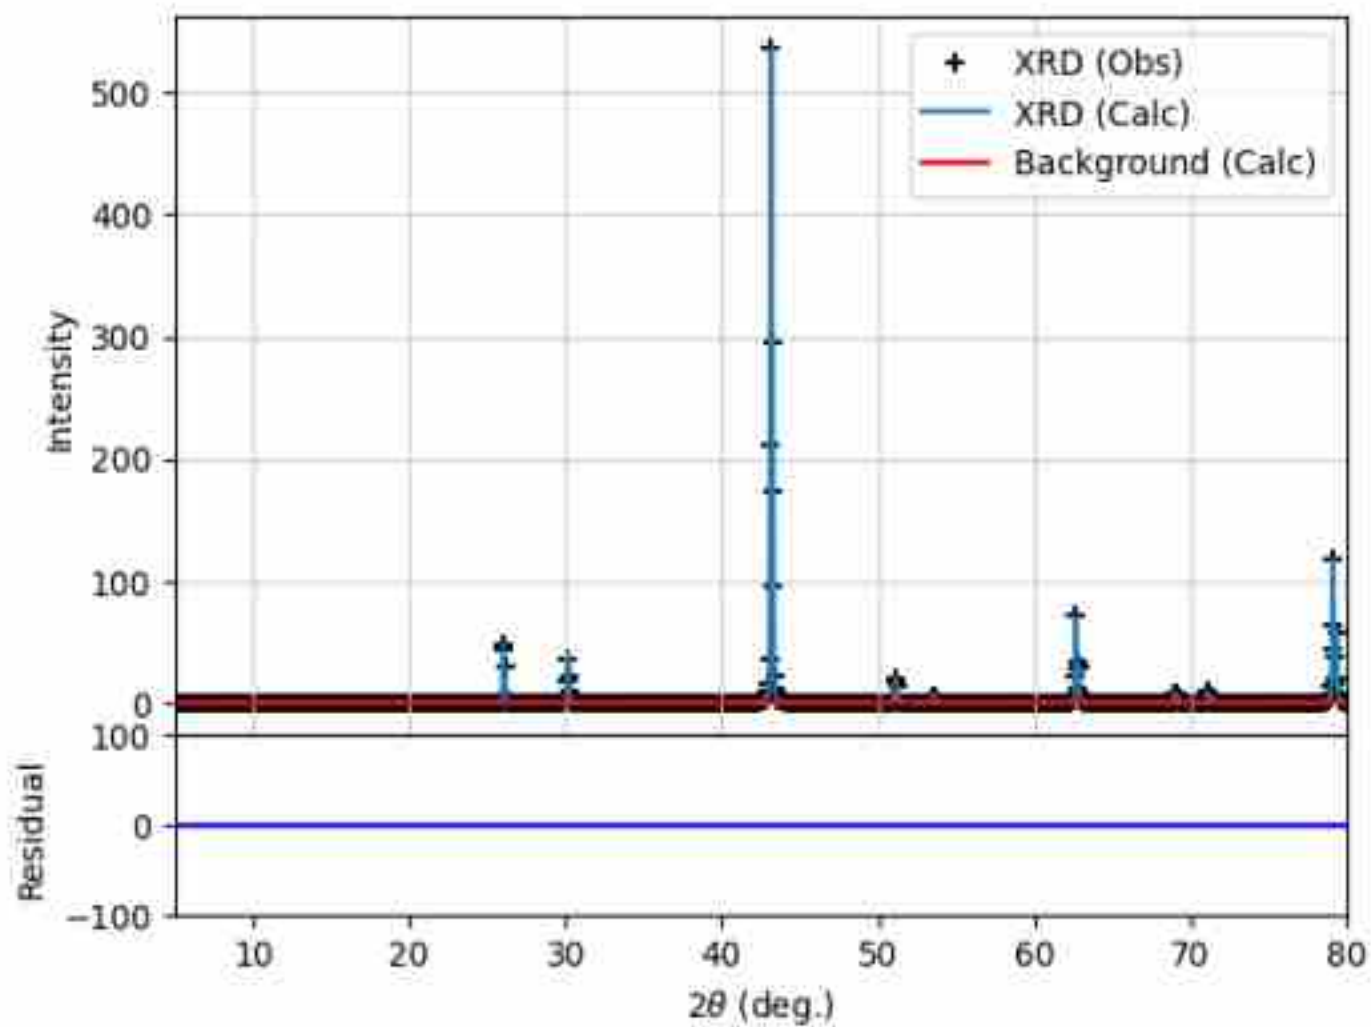

| RMSE before RR | Rwp     | RMSE after RR |
|----------------|---------|---------------|
| 0.001          | 0.00295 | 0.00057       |

# V2Re1Os1

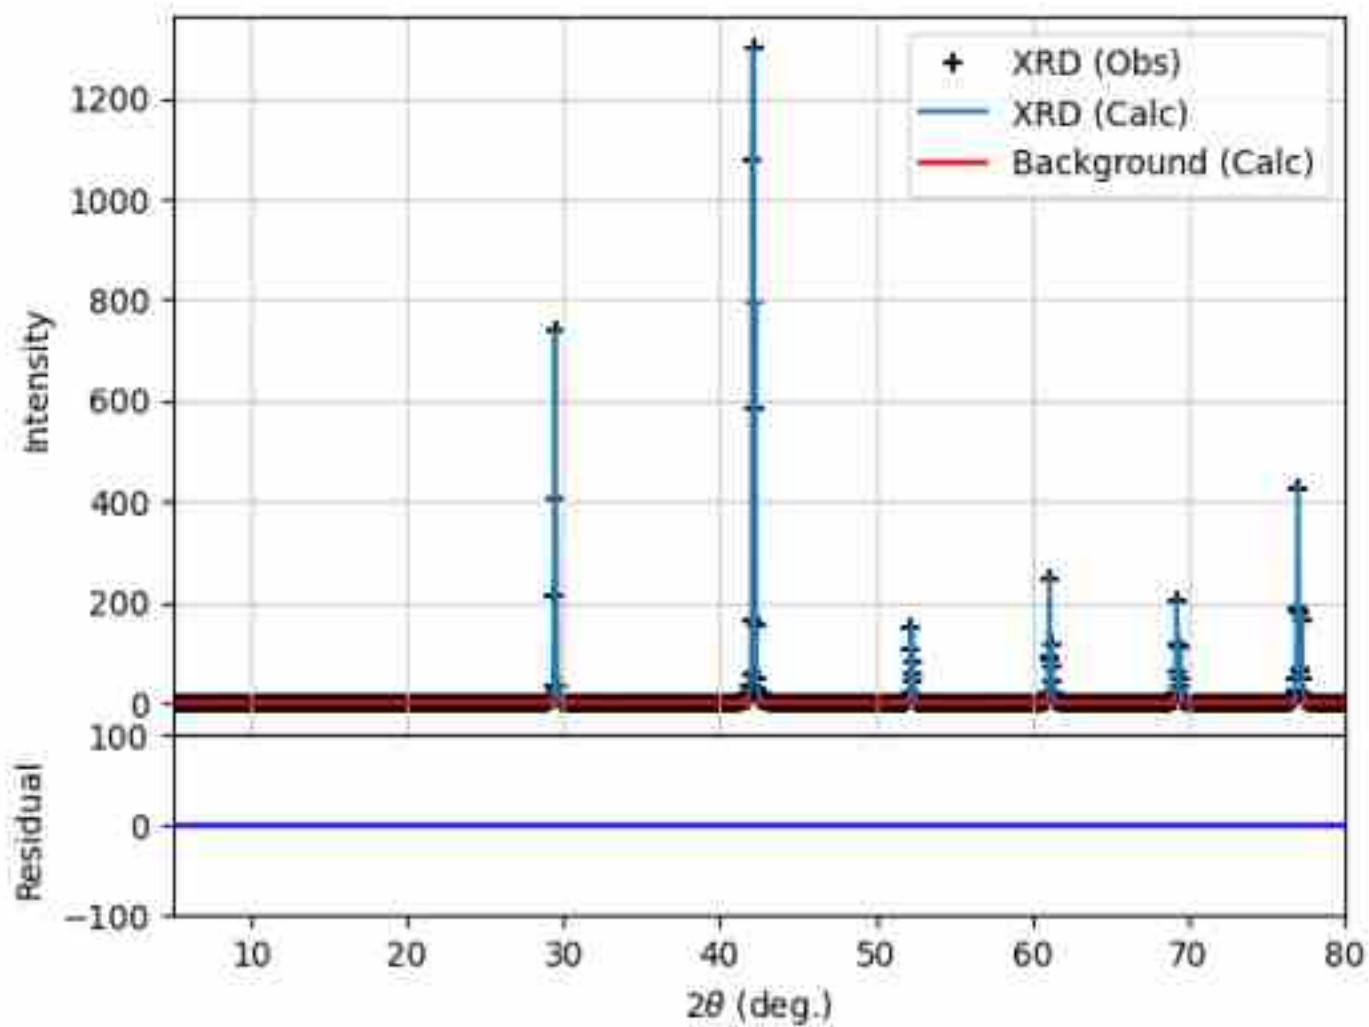

| RMSE before RR | Rwp     | RMSE after RR |
|----------------|---------|---------------|
| 0.001          | 0.15841 | 0.00255       |

# V3Ru1

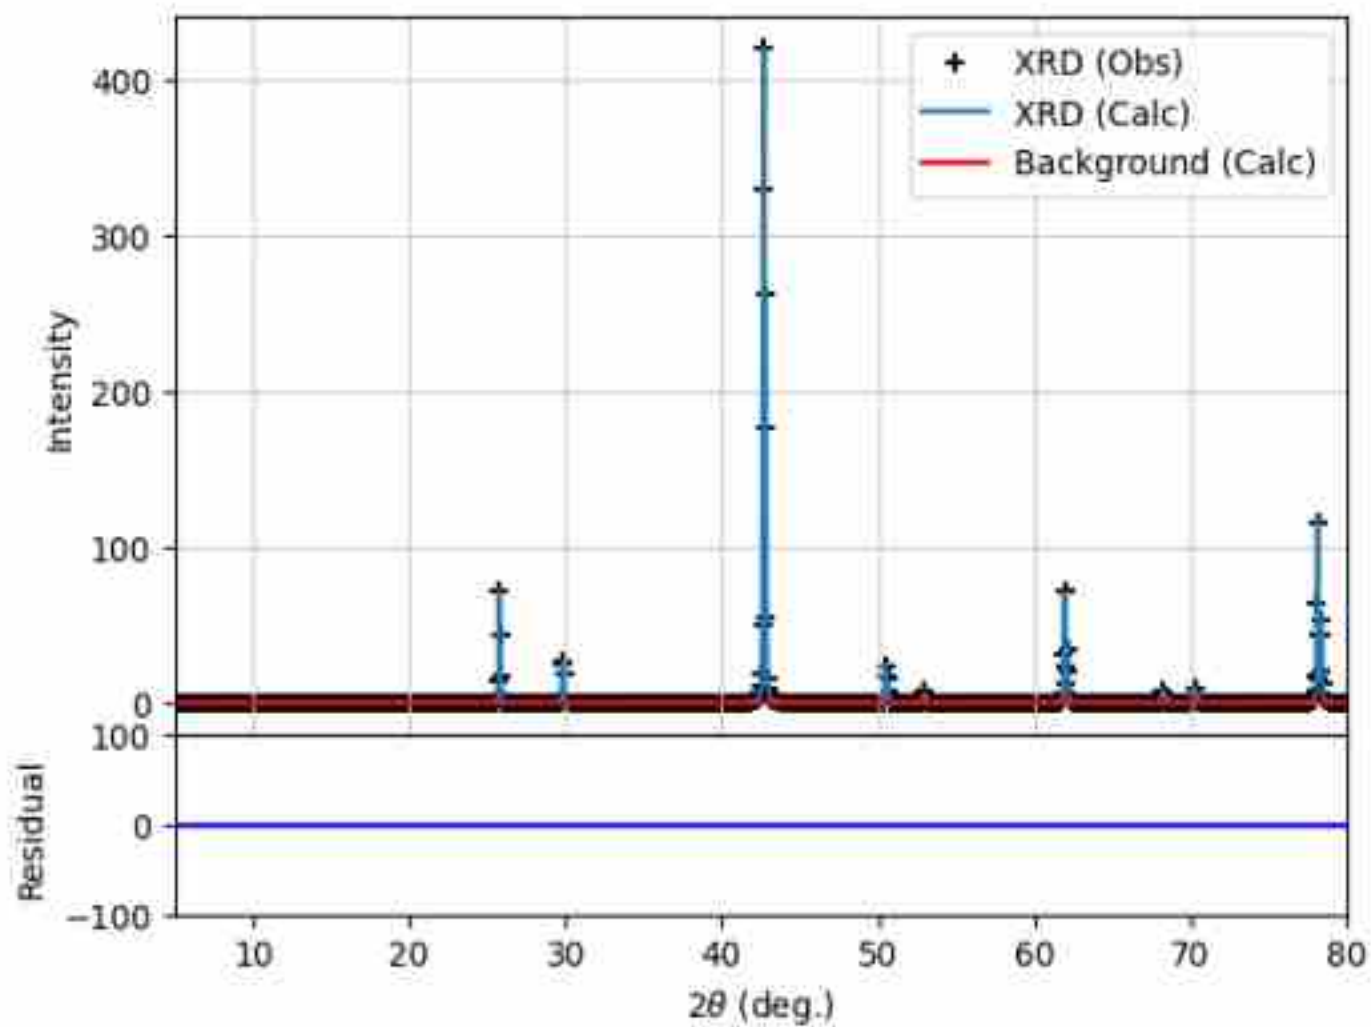

| RMSE before RR | Rwp    | RMSE after RR |
|----------------|--------|---------------|
| 0.001          | 0.0007 | 0.0003        |

# Y1Cd1Au2

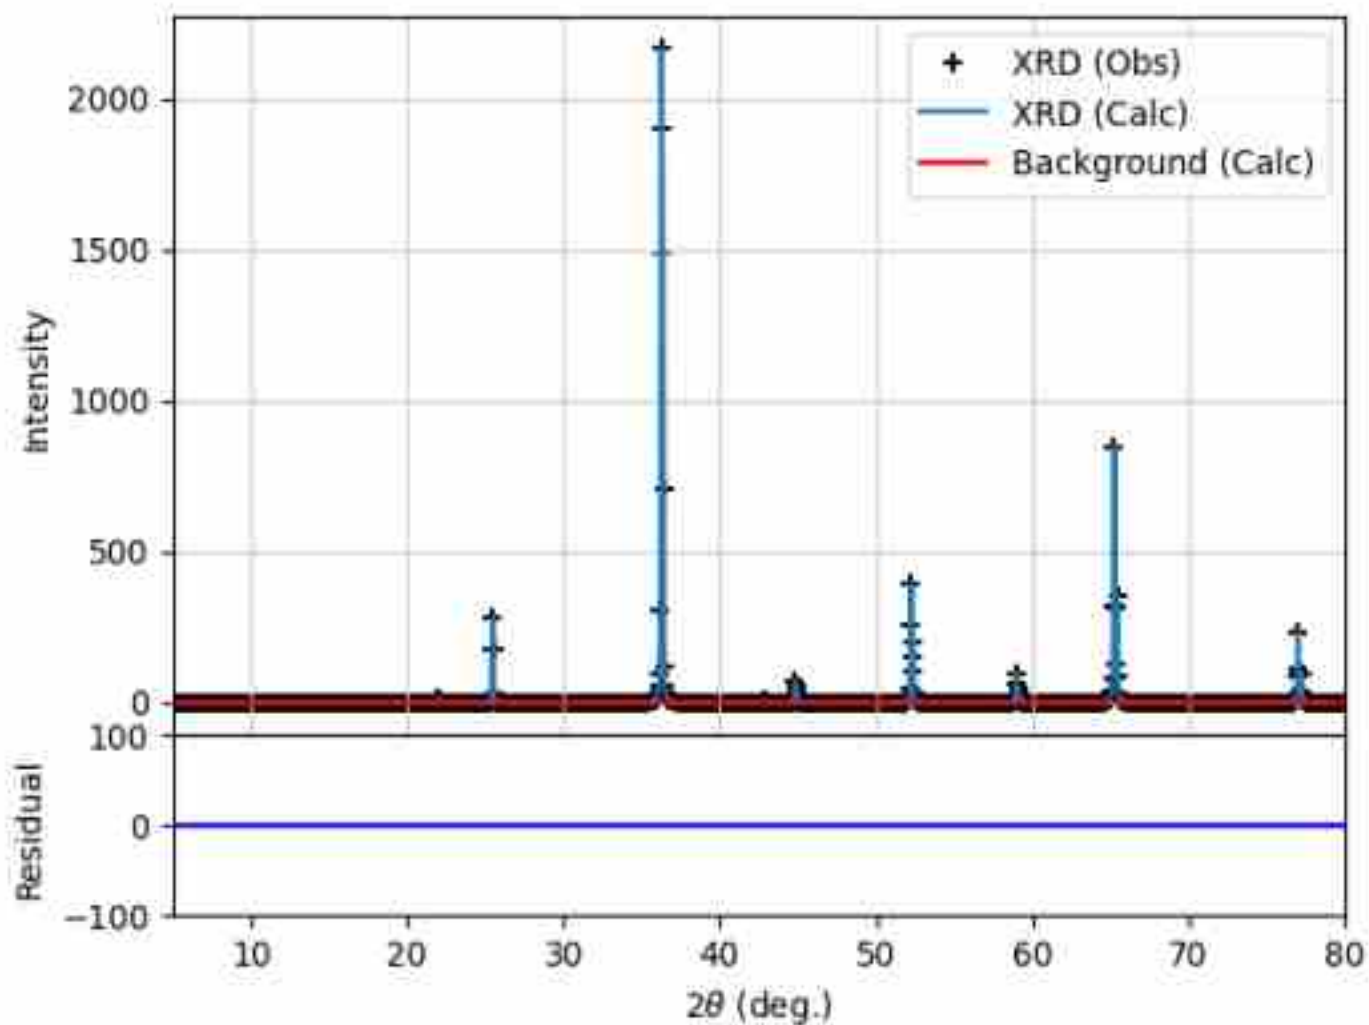

| RMSE before RR | Rwp     | RMSE after RR |
|----------------|---------|---------------|
| 0.001          | 0.00366 | 0.00037       |

# Y1Er1Cd2

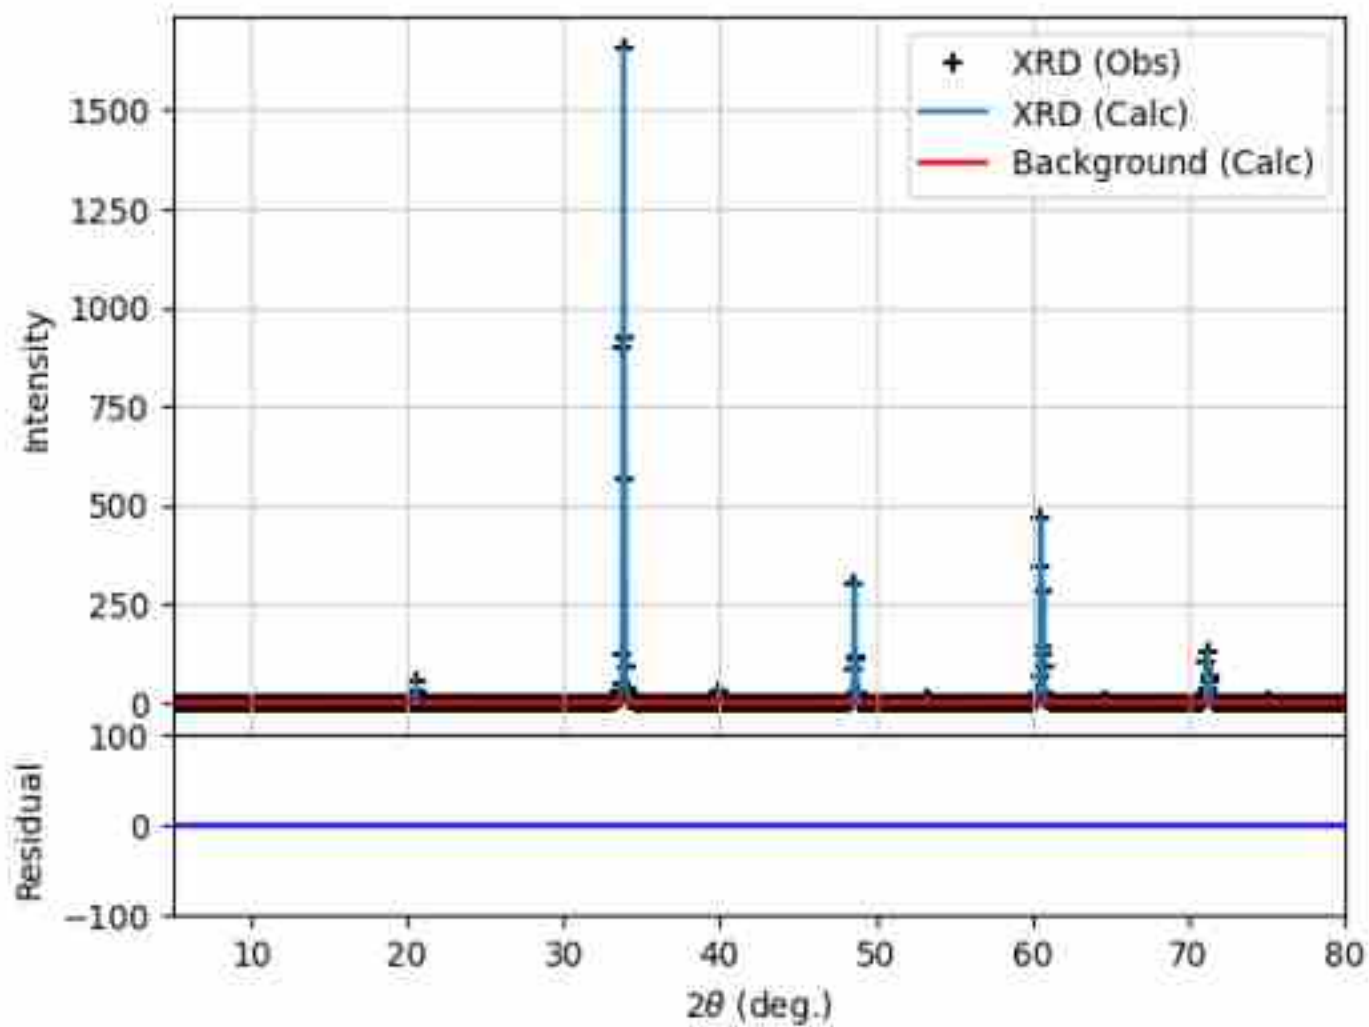

| RMSE before RR | Rwp     | RMSE after RR |
|----------------|---------|---------------|
| 0.001          | 0.03555 | 0.00084       |



# Y1Ho1C4

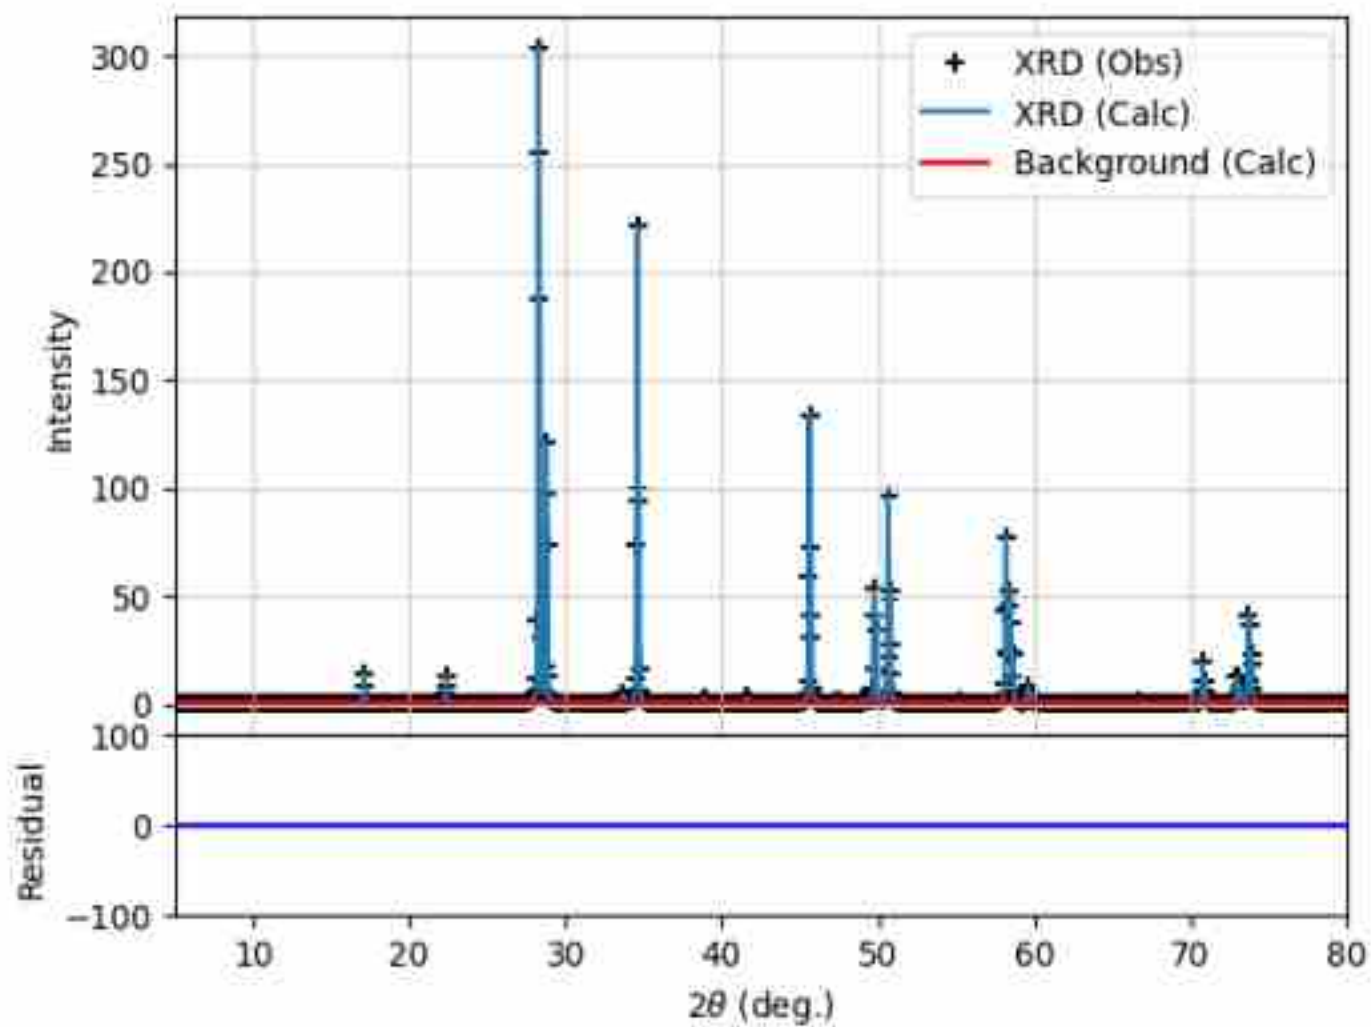

| RMSE before RR | Rwp    | RMSE after RR |
|----------------|--------|---------------|
| 0.01           | 0.0037 | 0.00242       |

# Y1Ho1Co4

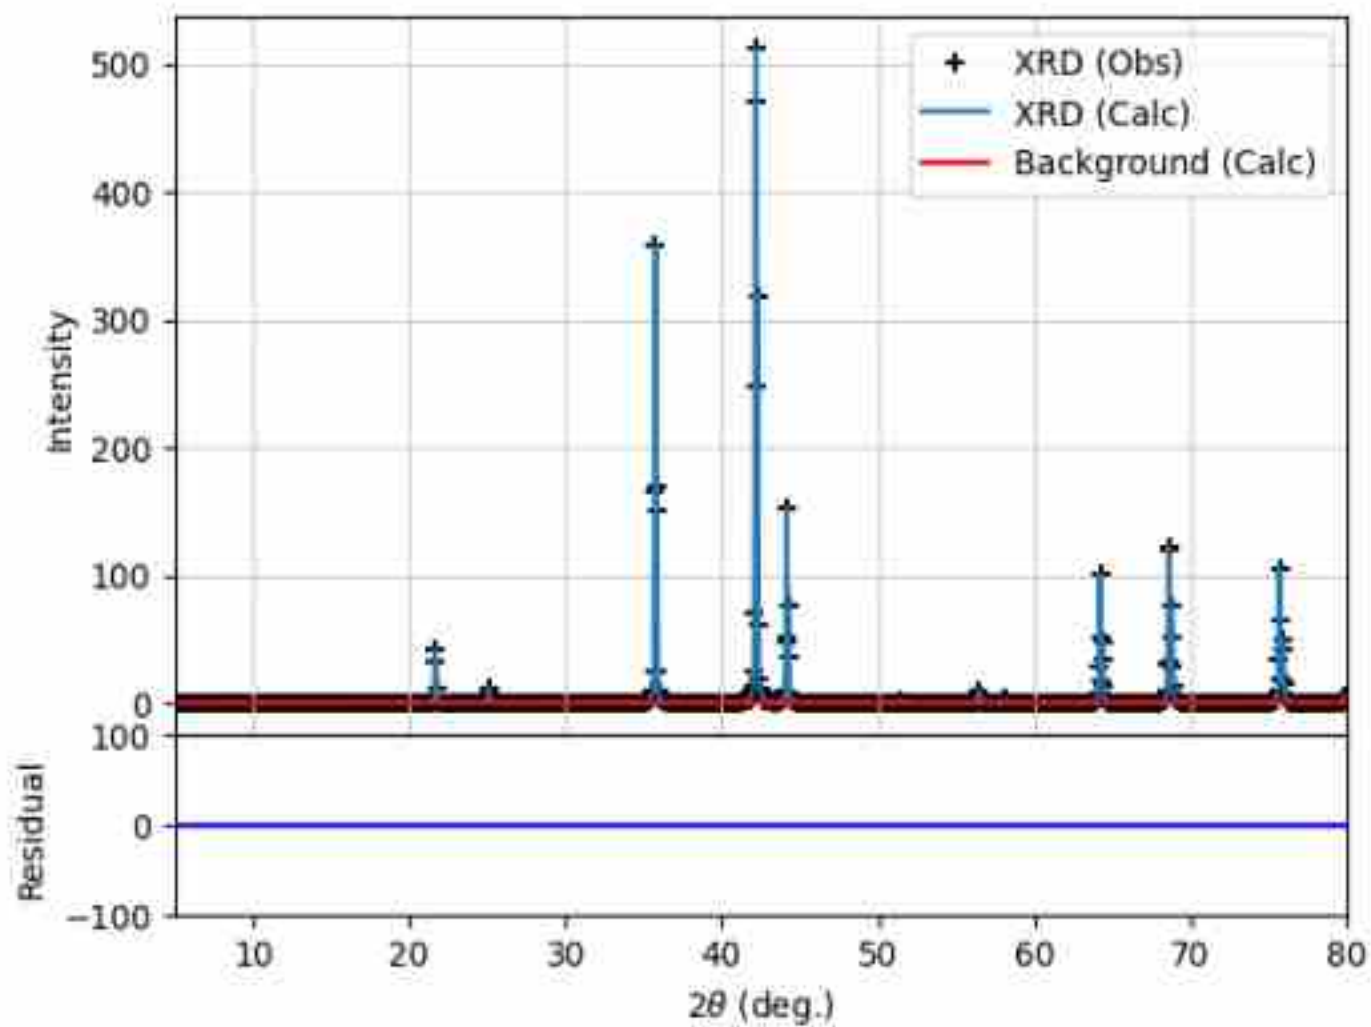

| RMSE before RR | Rwp     | RMSE after RR |
|----------------|---------|---------------|
| 0.01           | 0.00441 | 0.00077       |

# Y1Ho1In2

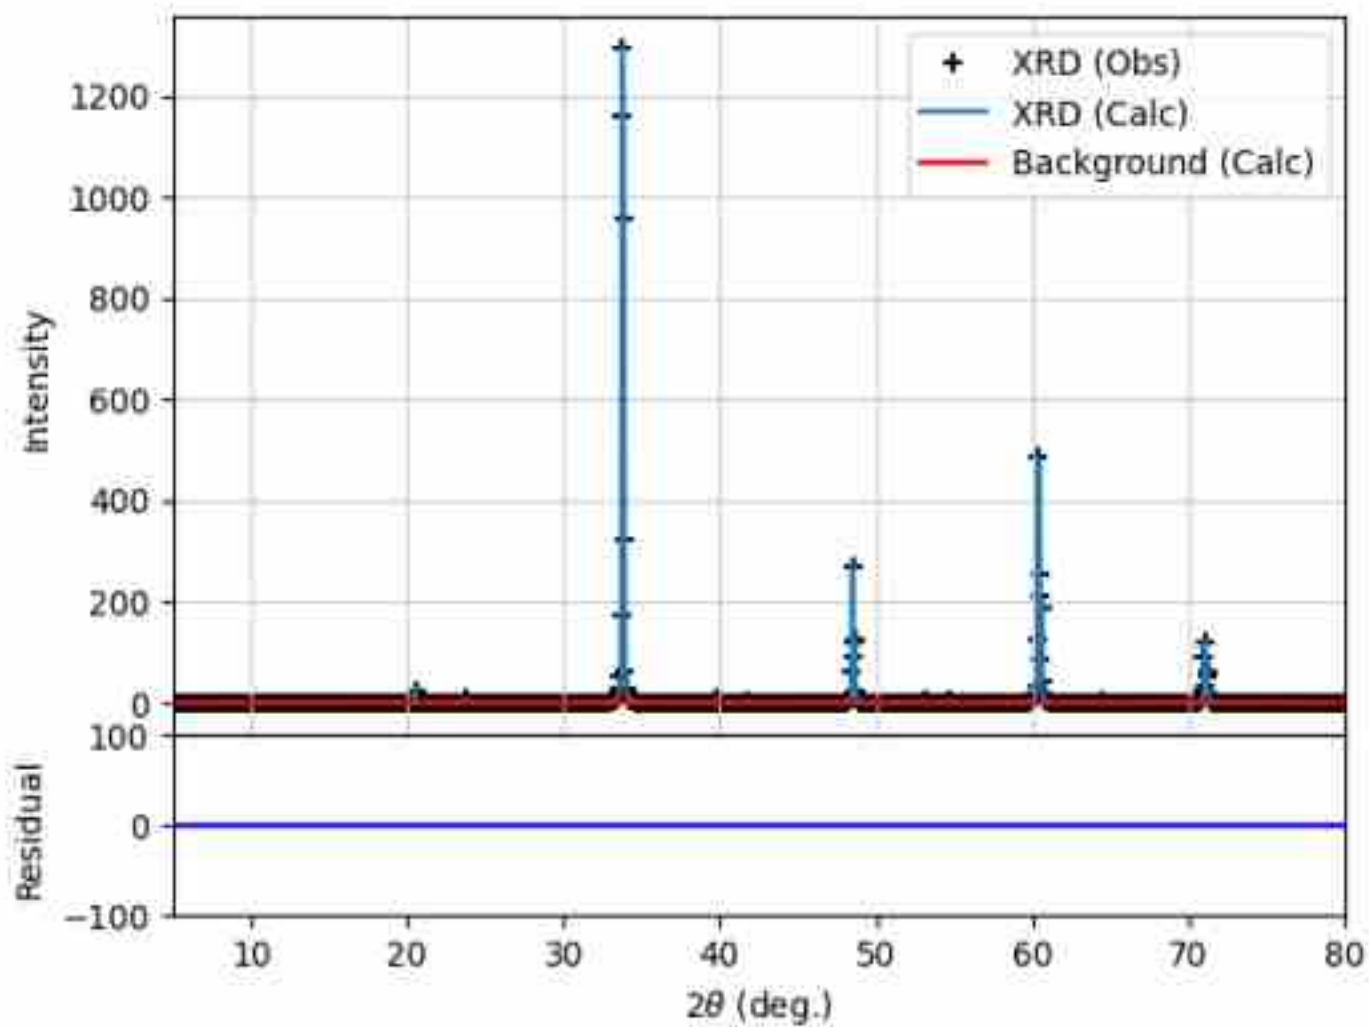

| RMSE before RR | Rwp     | RMSE after RR |
|----------------|---------|---------------|
| 0.001          | 0.00416 | 0.00083       |

# Y1Ho3

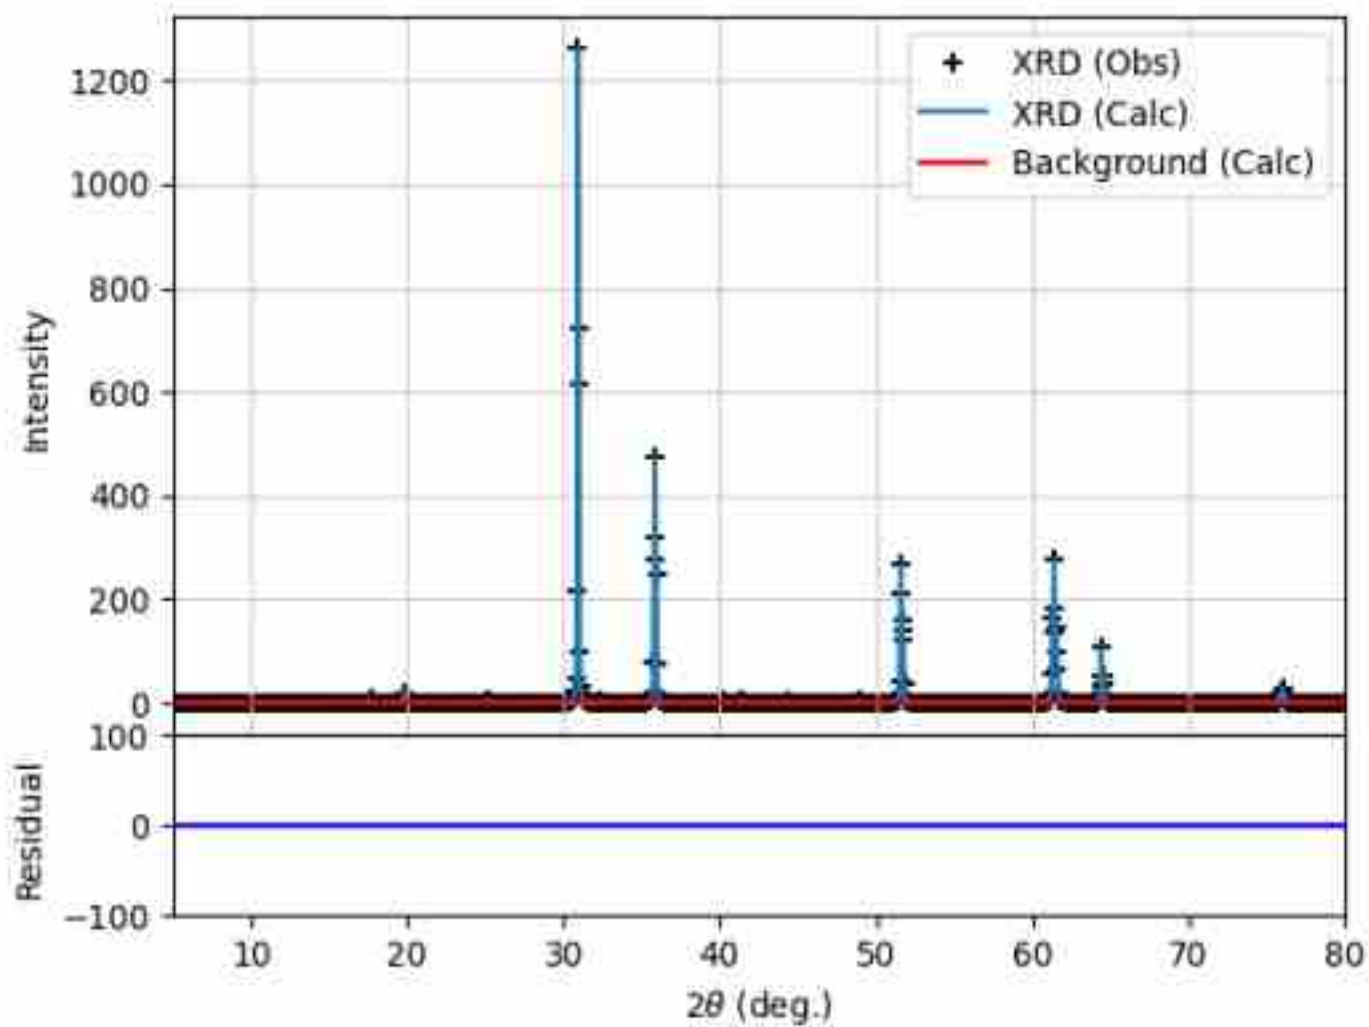

| RMSE before RR | Rwp    | RMSE after RR |
|----------------|--------|---------------|
| 0.001          | 0.0031 | 0.00029       |

# Y1Lu1Ru2

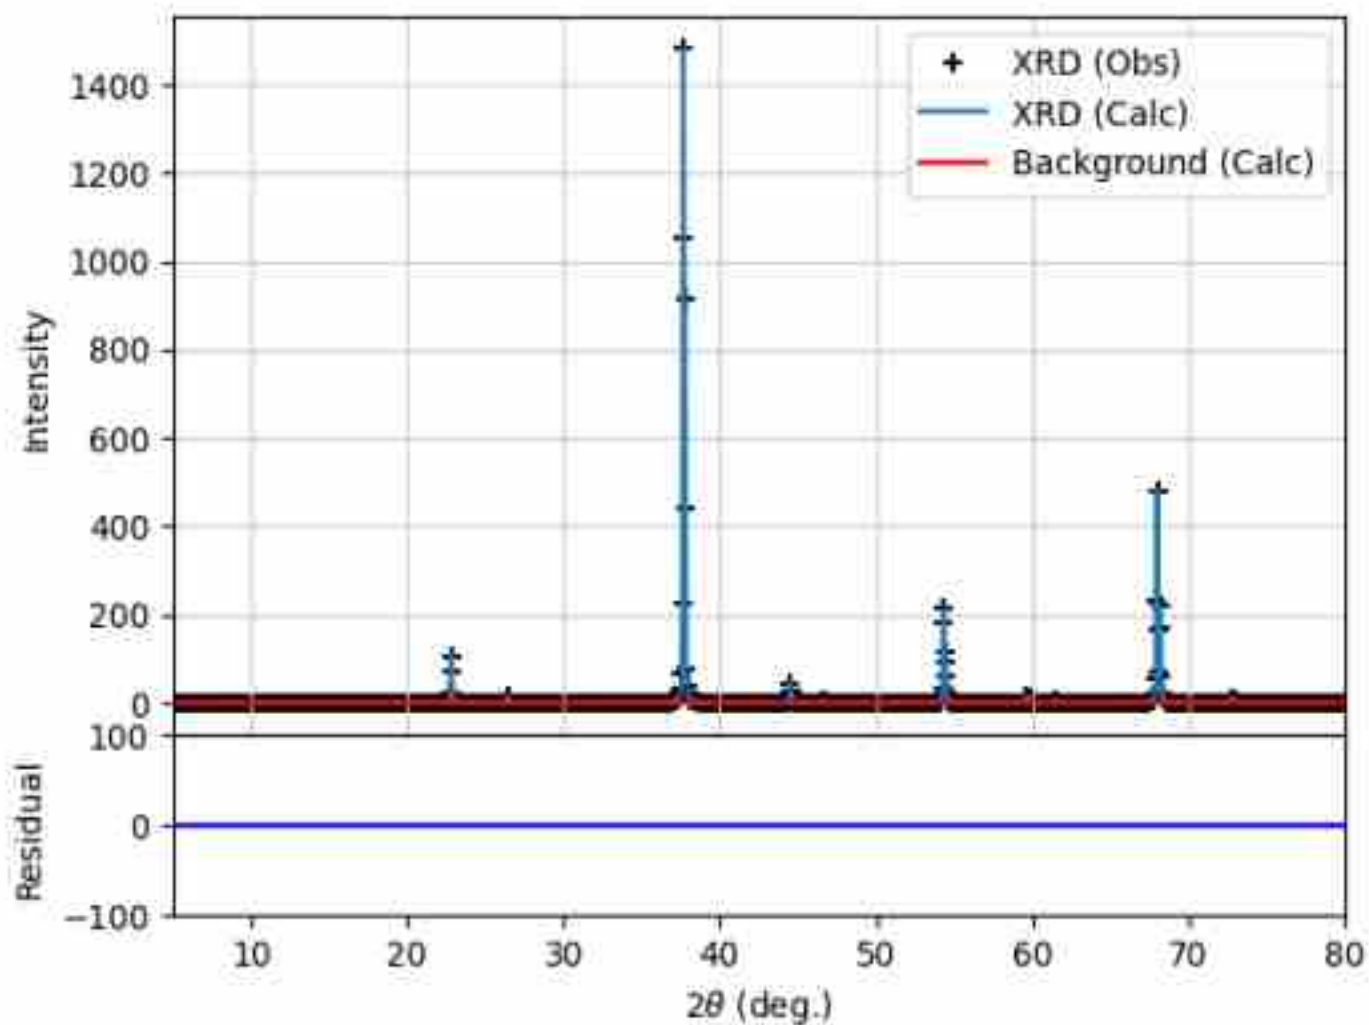

| RMSE before RR | Rwp     | RMSE after RR |
|----------------|---------|---------------|
| 0.001          | 0.06669 | 0.00267       |

# Y1Lu1Zn2

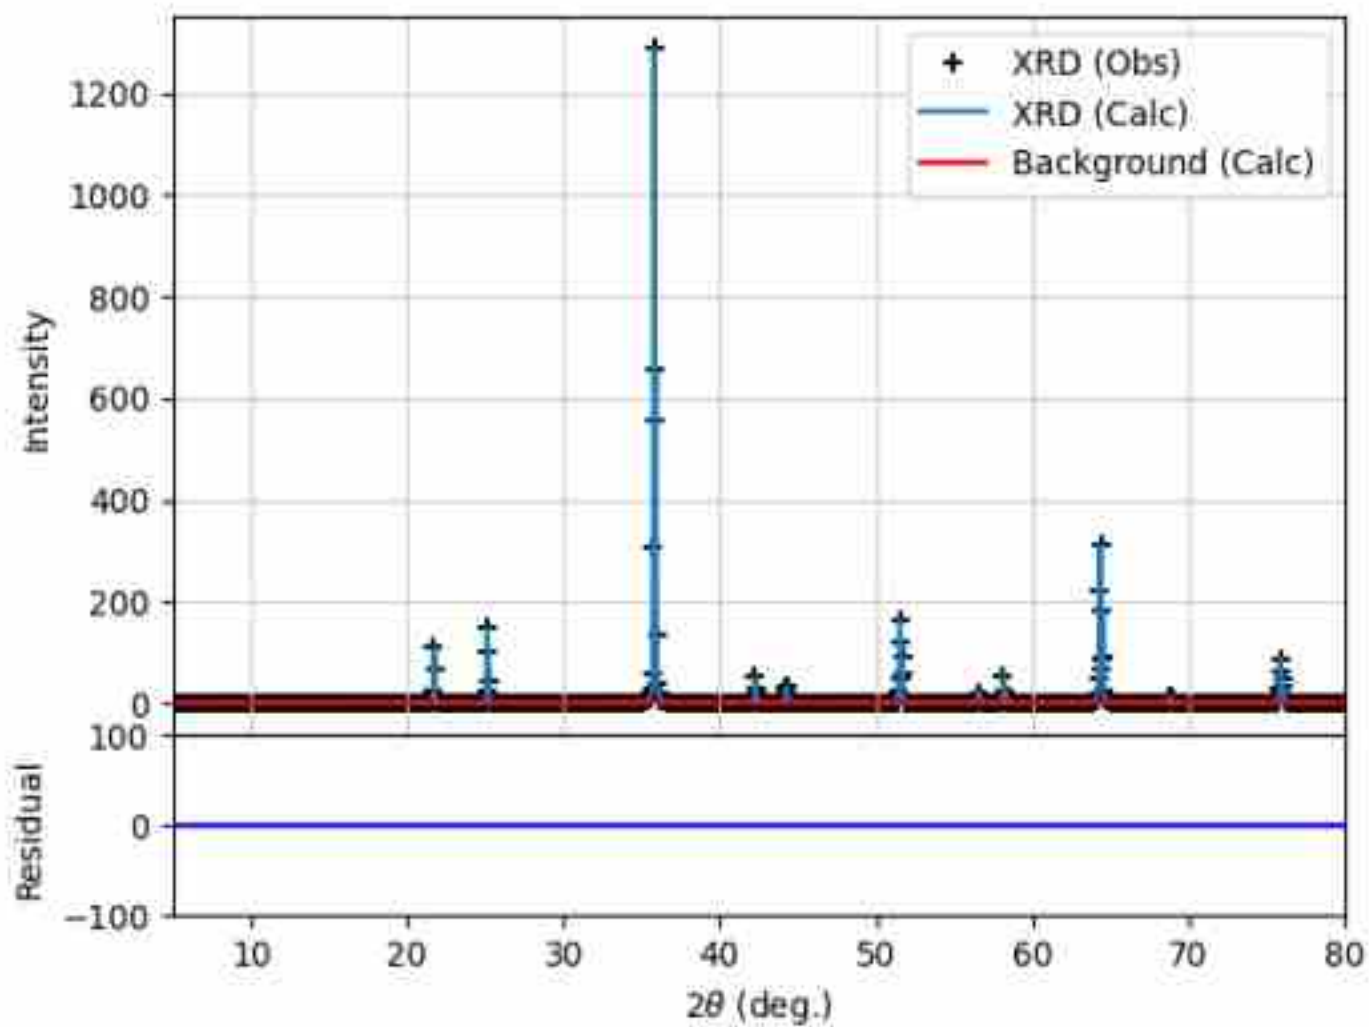

| RMSE before RR | Rwp     | RMSE after RR |
|----------------|---------|---------------|
| 0.001          | 0.01134 | 0.00139       |

# Y1Mg1Hg2

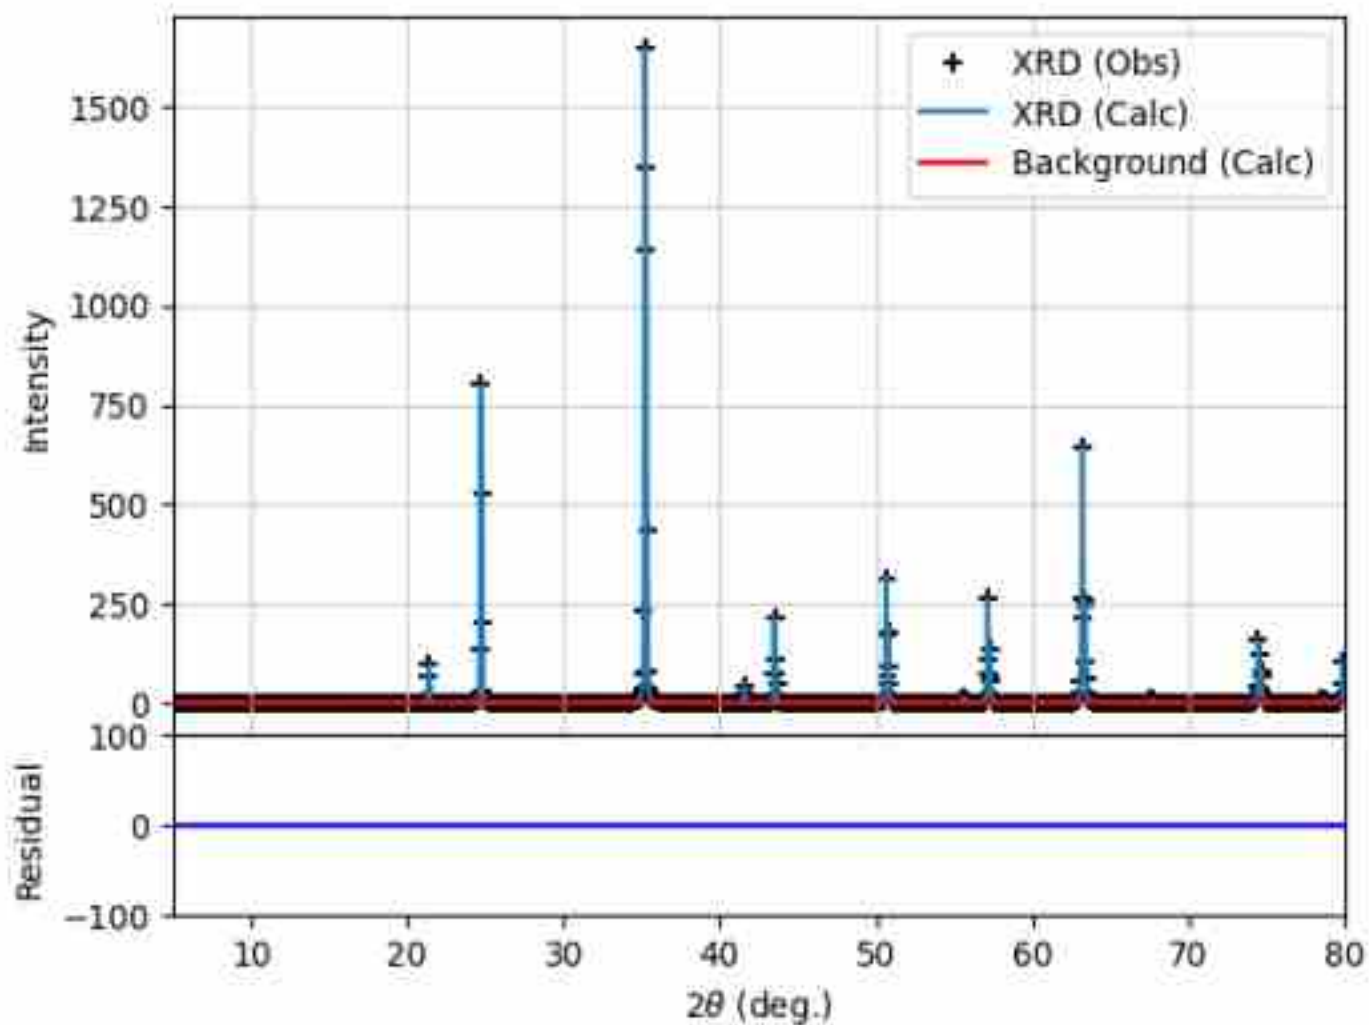

| RMSE before RR | Rwp     | RMSE after RR |
|----------------|---------|---------------|
| 0.001          | 0.00343 | 0.00054       |

# Y1Mg2Sc1

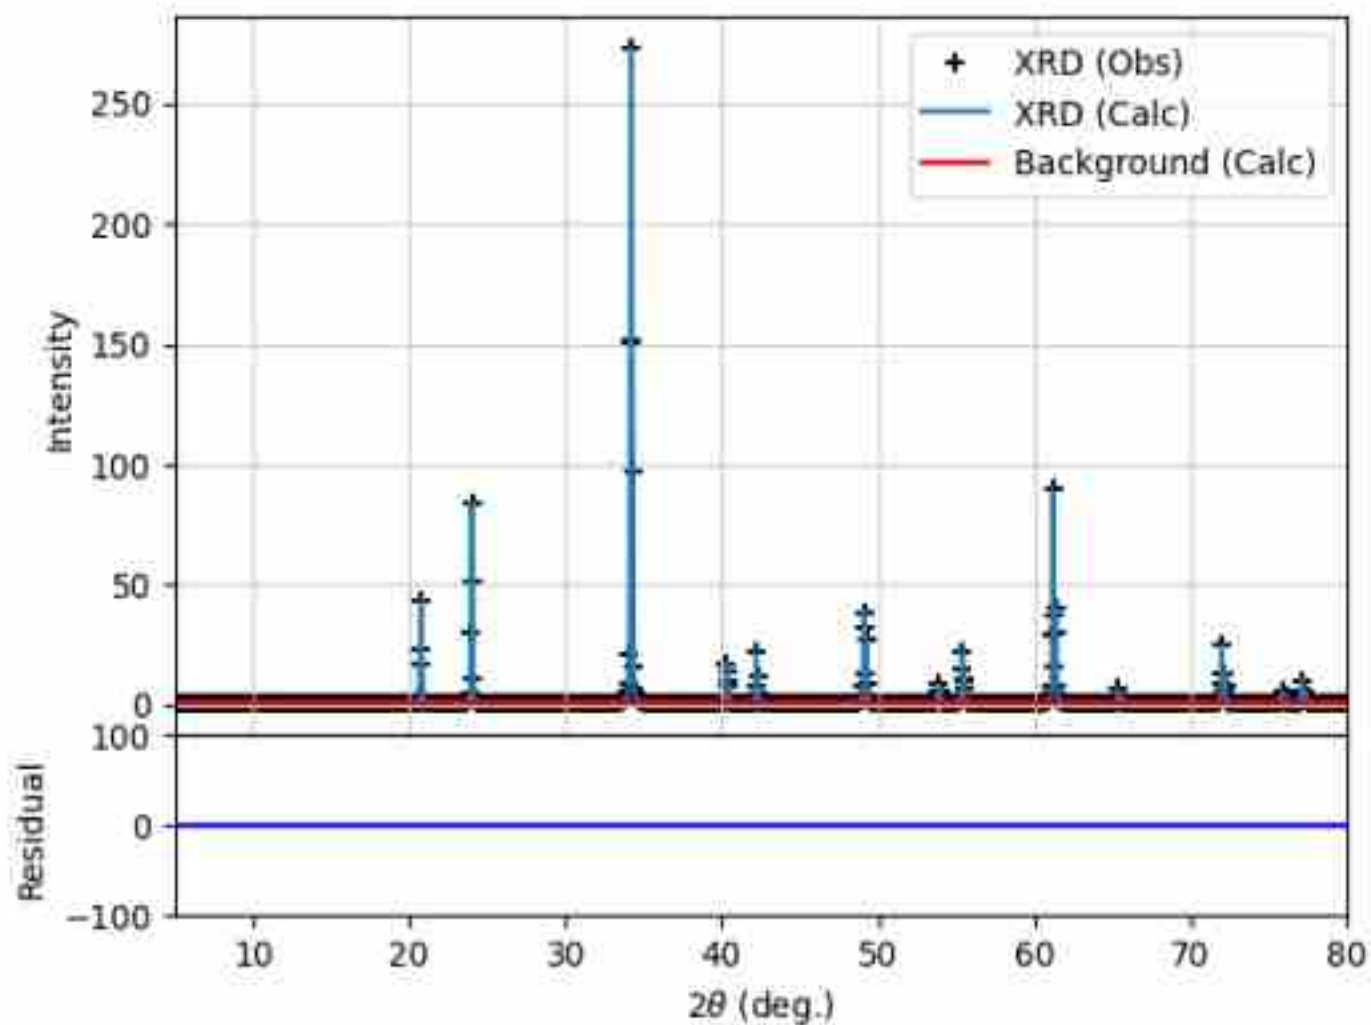

| RMSE before RR | Rwp    | RMSE after RR |
|----------------|--------|---------------|
| 0.001          | 0.0556 | 0.00265       |



# Y1Mn6Ge6

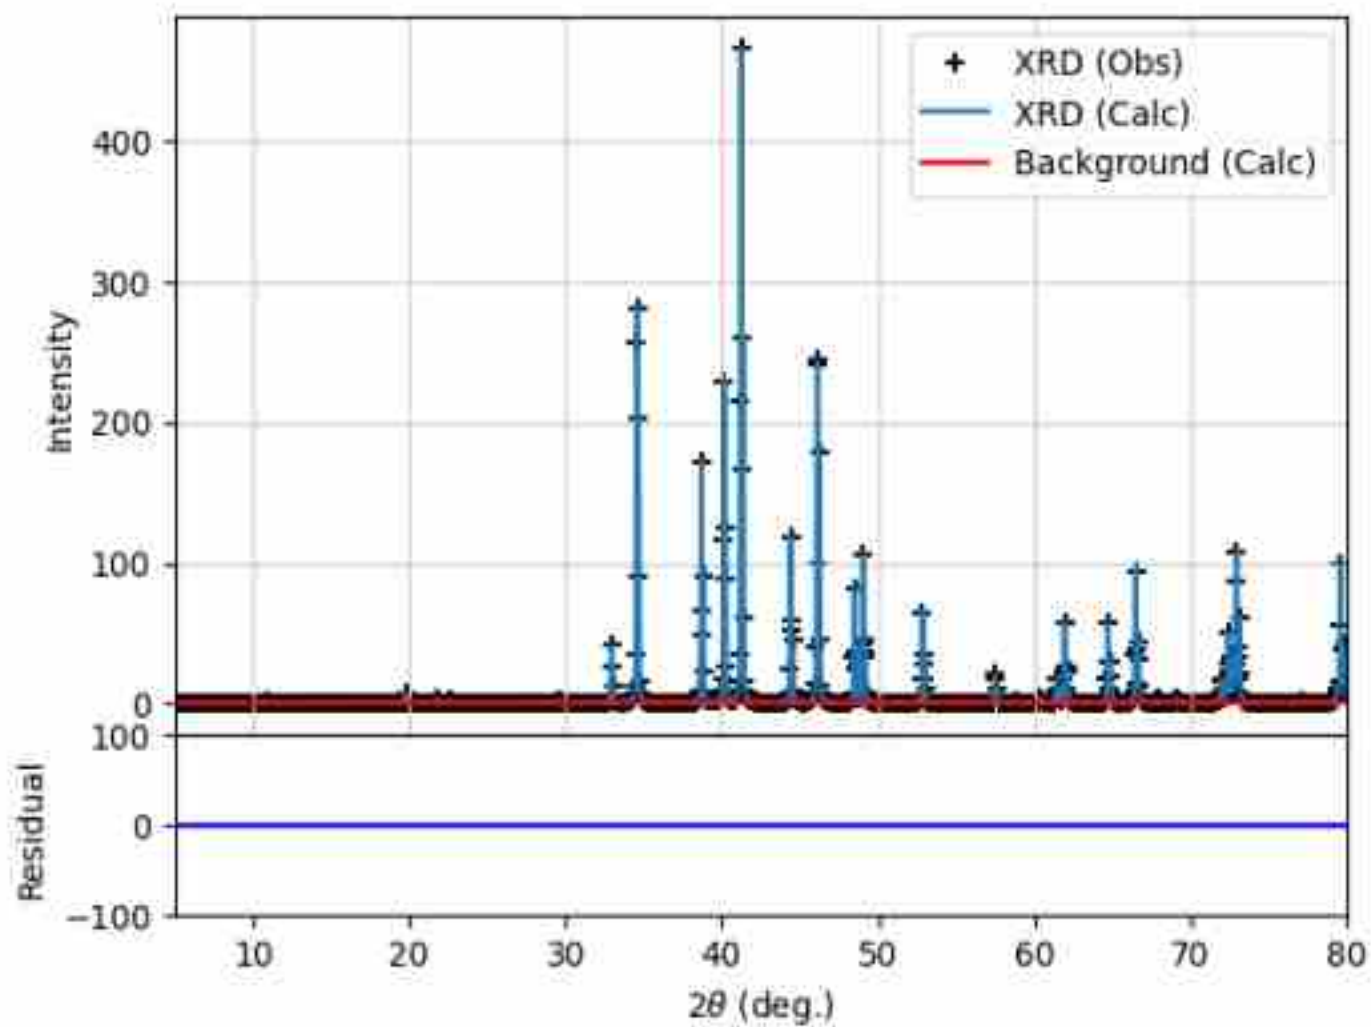

| RMSE before RR | Rwp     | RMSE after RR |
|----------------|---------|---------------|
| 0.01           | 0.00488 | 0.00111       |

# Y1Ni1Sb1

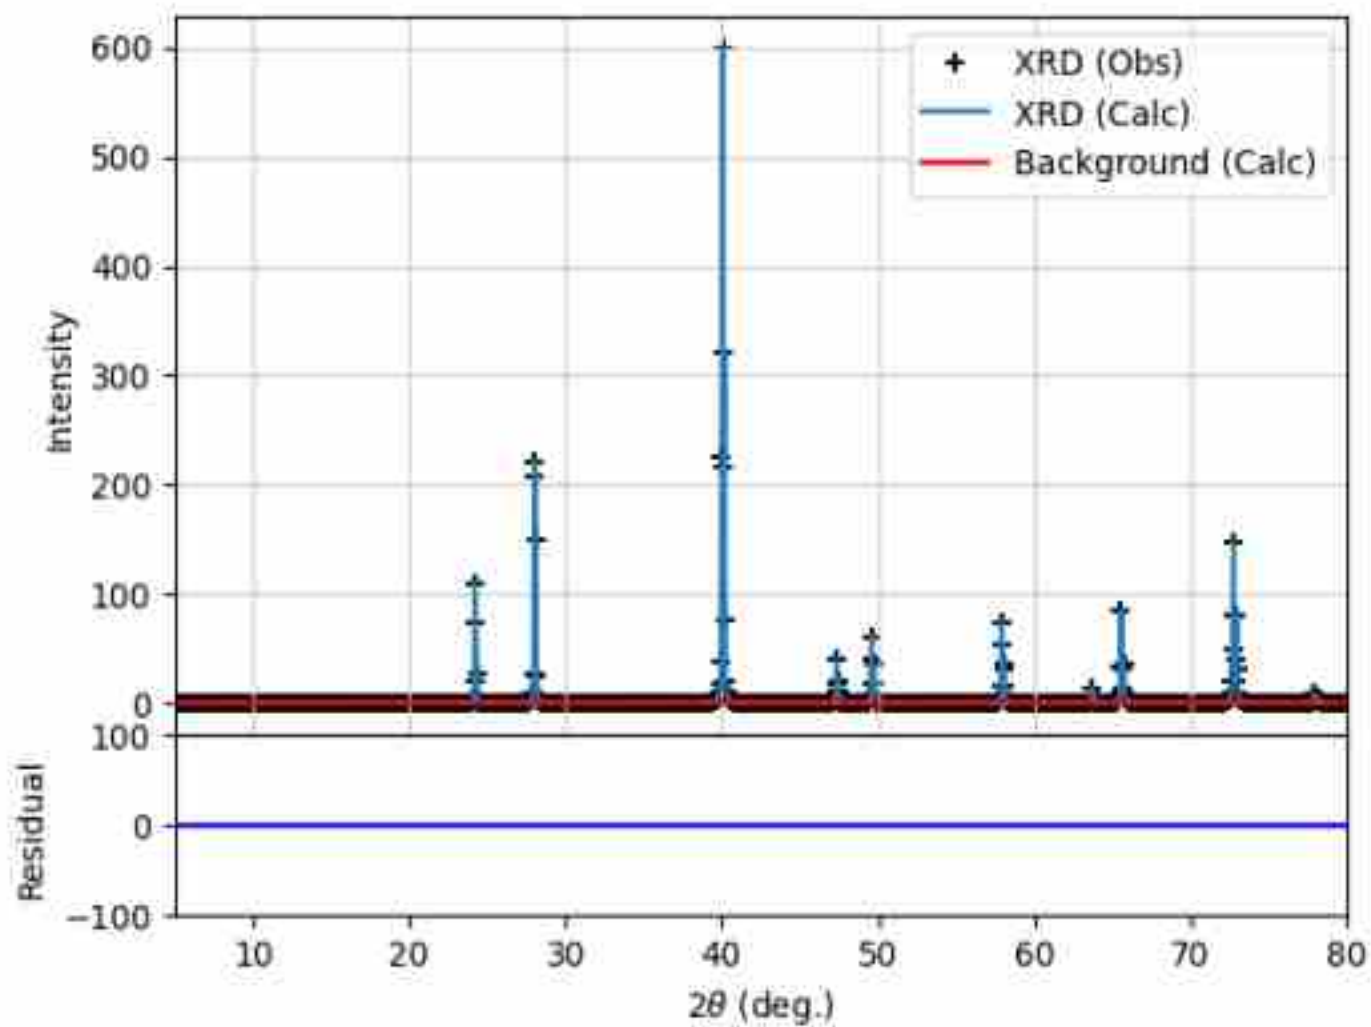

| RMSE before RR | Rwp     | RMSE after RR |
|----------------|---------|---------------|
| 0.001          | 0.00019 | 9e-05         |

# Y1Pa1Tc2

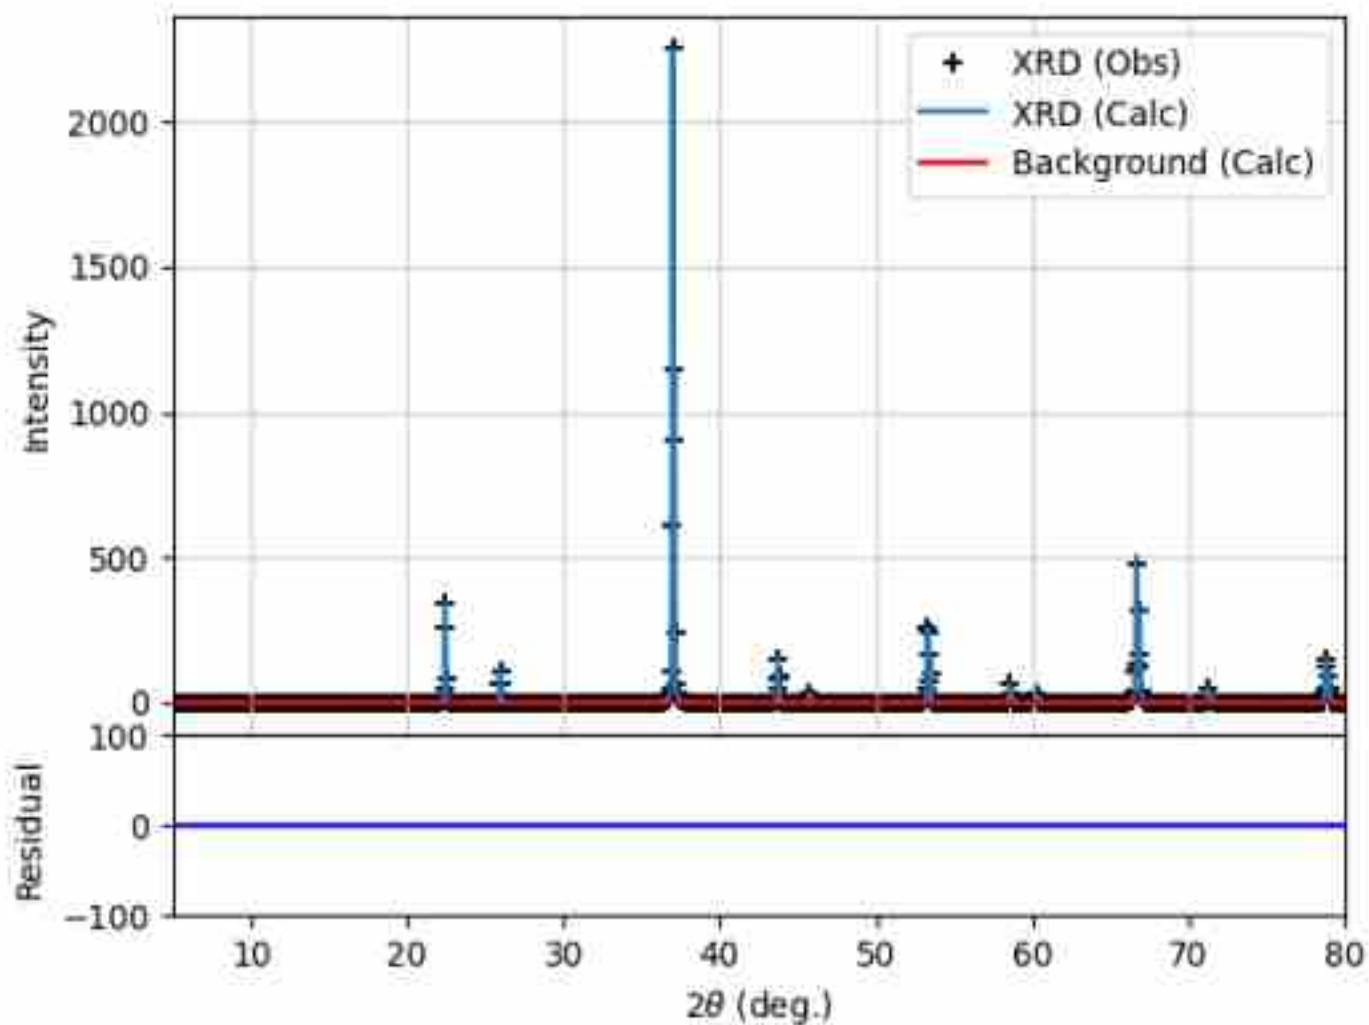

| RMSE before RR | Rwp     | RMSE after RR |
|----------------|---------|---------------|
| 0.001          | 0.00851 | 0.00059       |

# Y1Se1

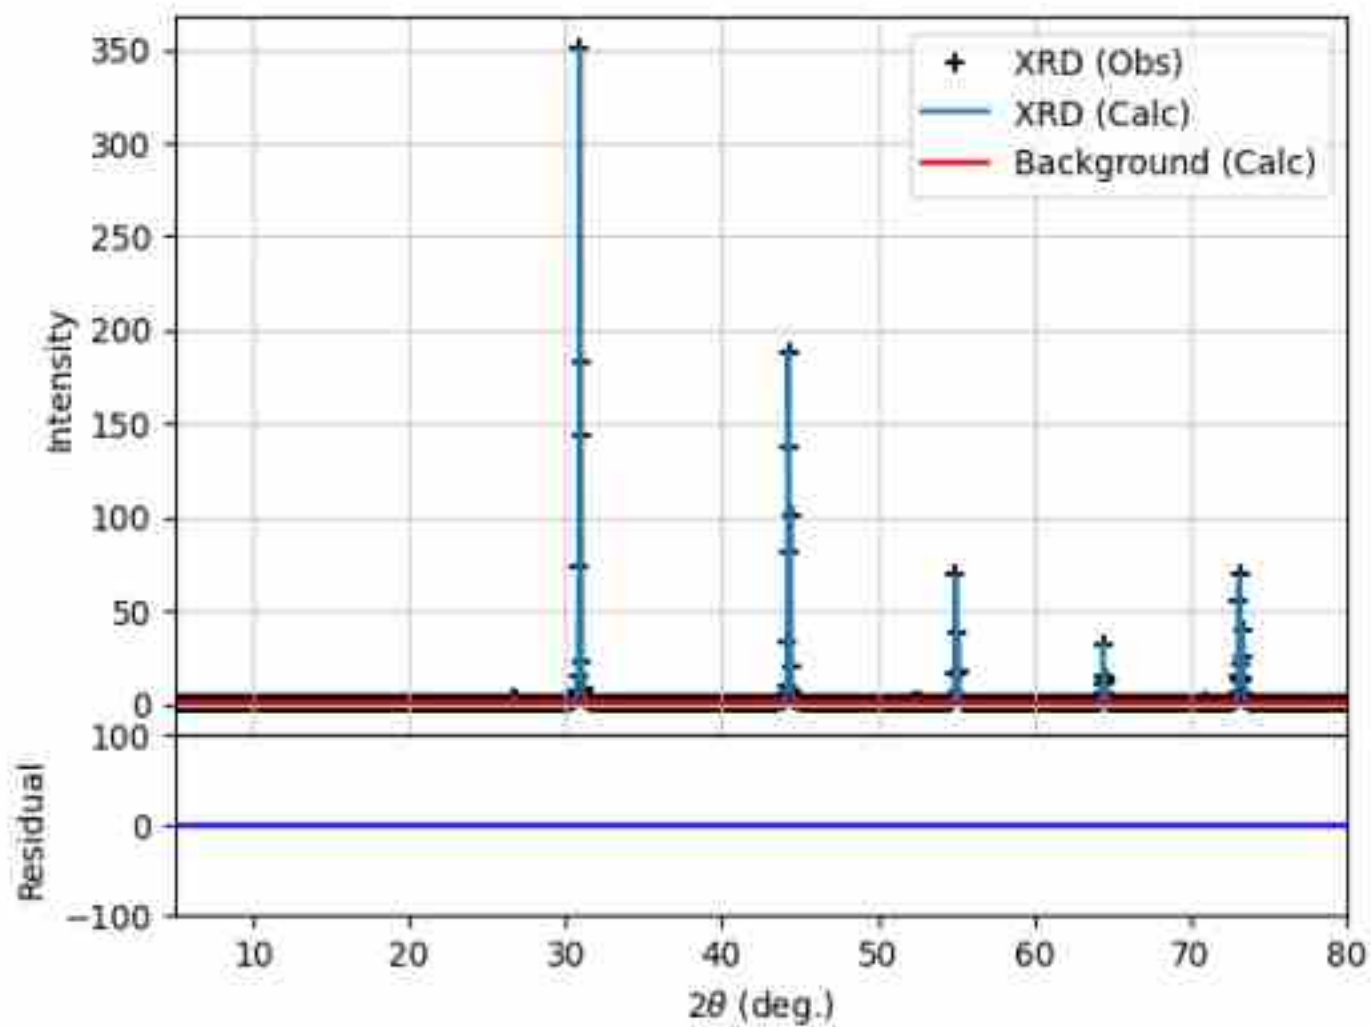

| RMSE before RR | Rwp     | RMSE after RR |
|----------------|---------|---------------|
| 0.001          | 0.07605 | 0.00105       |

# Y<sub>2</sub>Ag<sub>1</sub>Au<sub>1</sub>

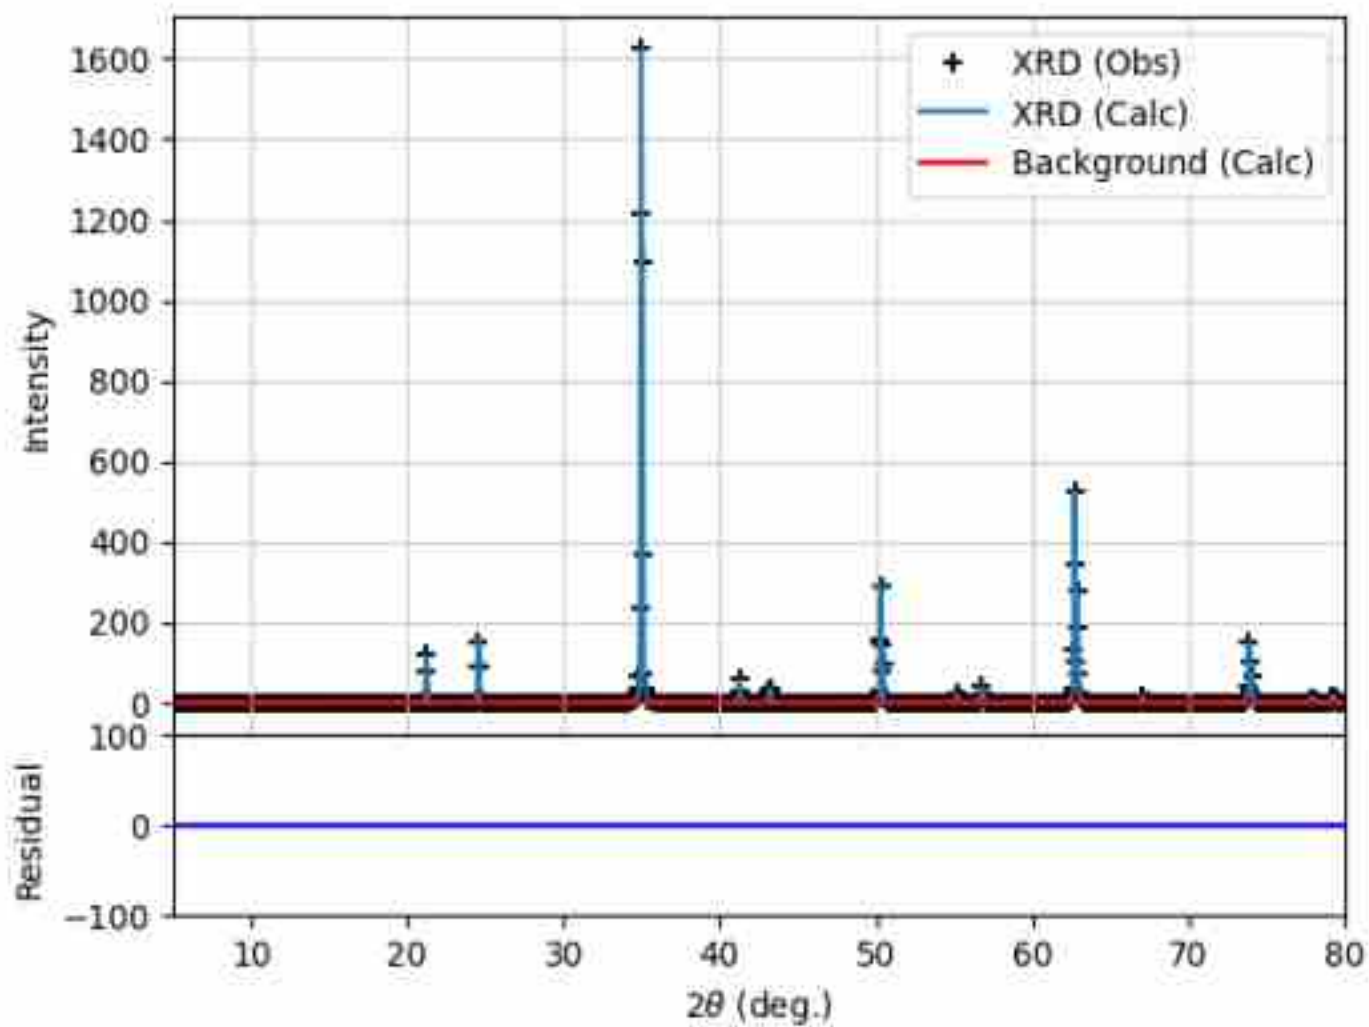

| RMSE before RR | Rwp     | RMSE after RR |
|----------------|---------|---------------|
| 0.001          | 0.00516 | 0.00024       |

# Y<sub>2</sub>Al<sub>2</sub>Si<sub>2</sub>

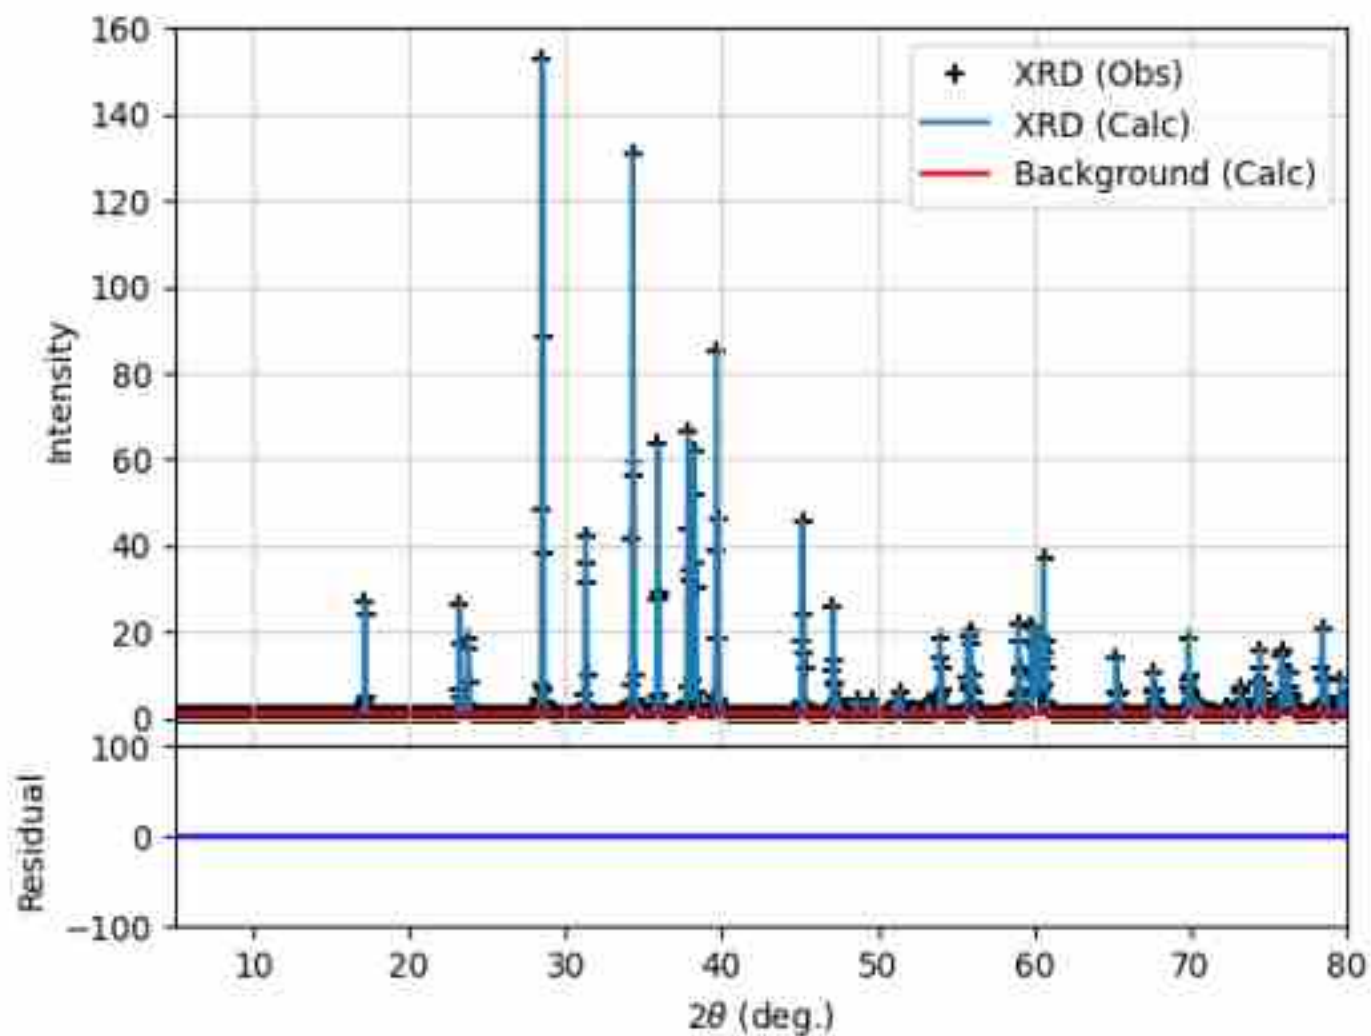

| RMSE before RR | Rwp     | RMSE after RR |
|----------------|---------|---------------|
| 0.01           | 0.00363 | 0.00063       |

# Y2Cu1Au1

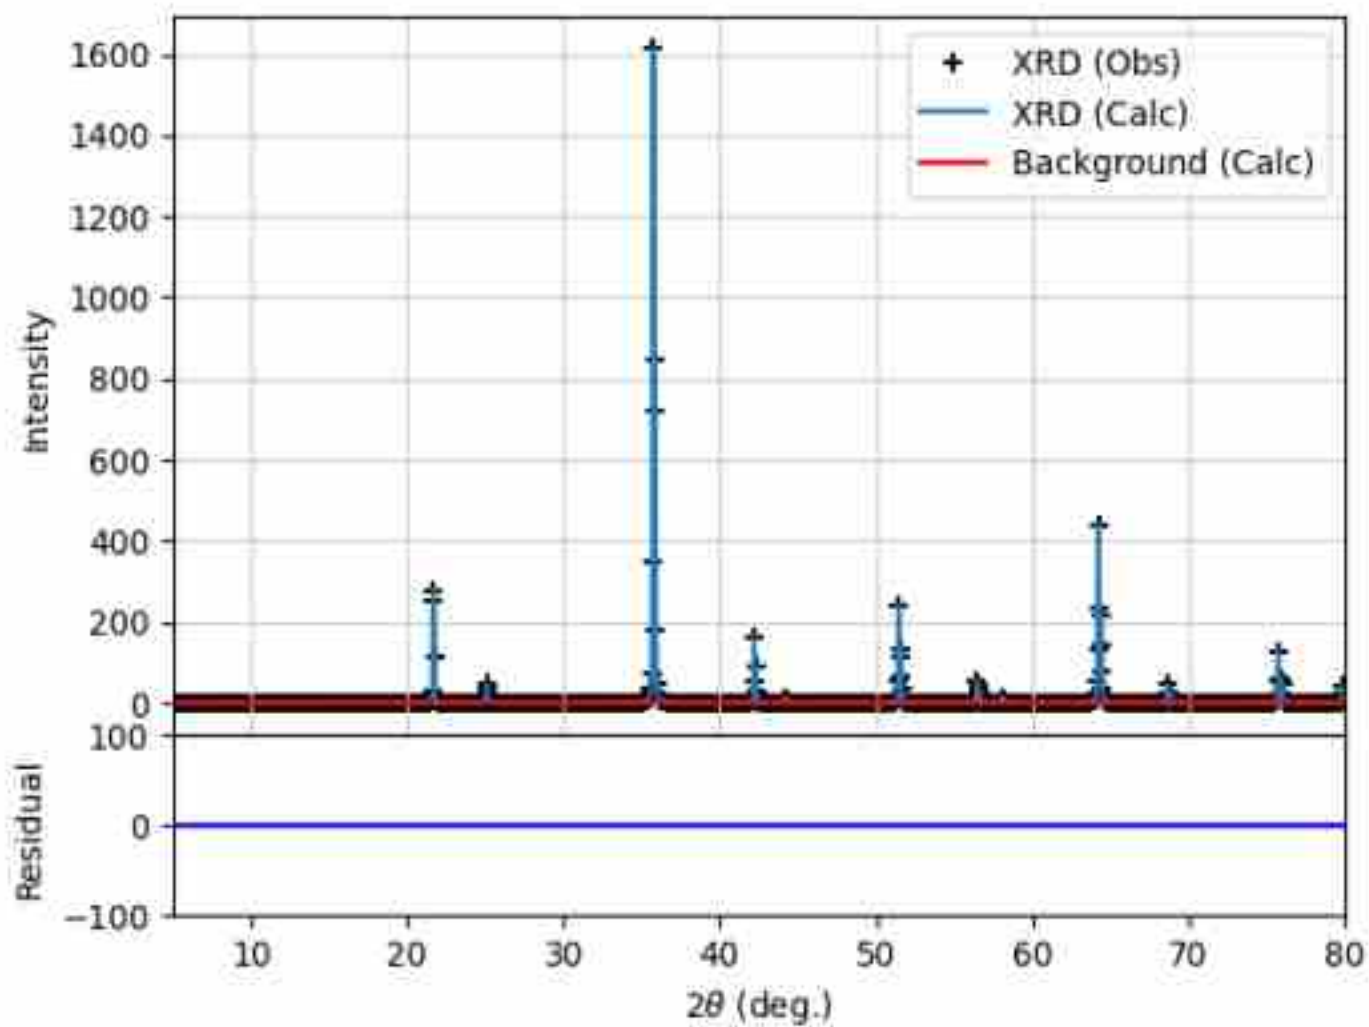

| RMSE before RR | Rwp     | RMSE after RR |
|----------------|---------|---------------|
| 0.001          | 0.00256 | 0.00037       |

# Y<sub>2</sub>In<sub>8</sub>Co<sub>1</sub>

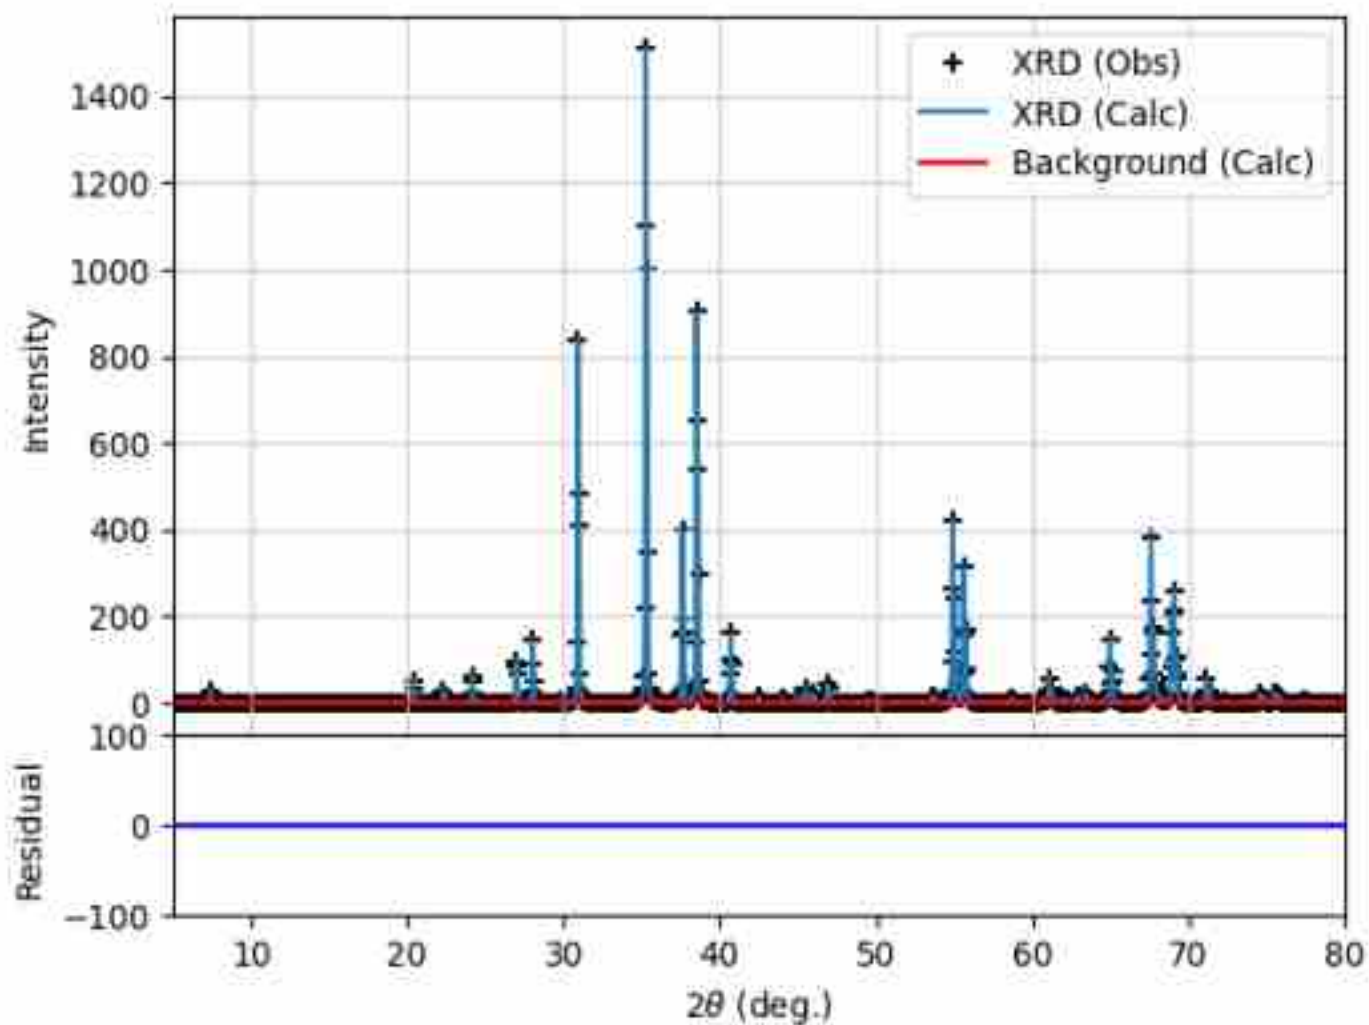

| RMSE before RR | Rwp     | RMSE after RR |
|----------------|---------|---------------|
| 0.01           | 0.00559 | 0.00049       |



# Y<sub>2</sub>MgHg

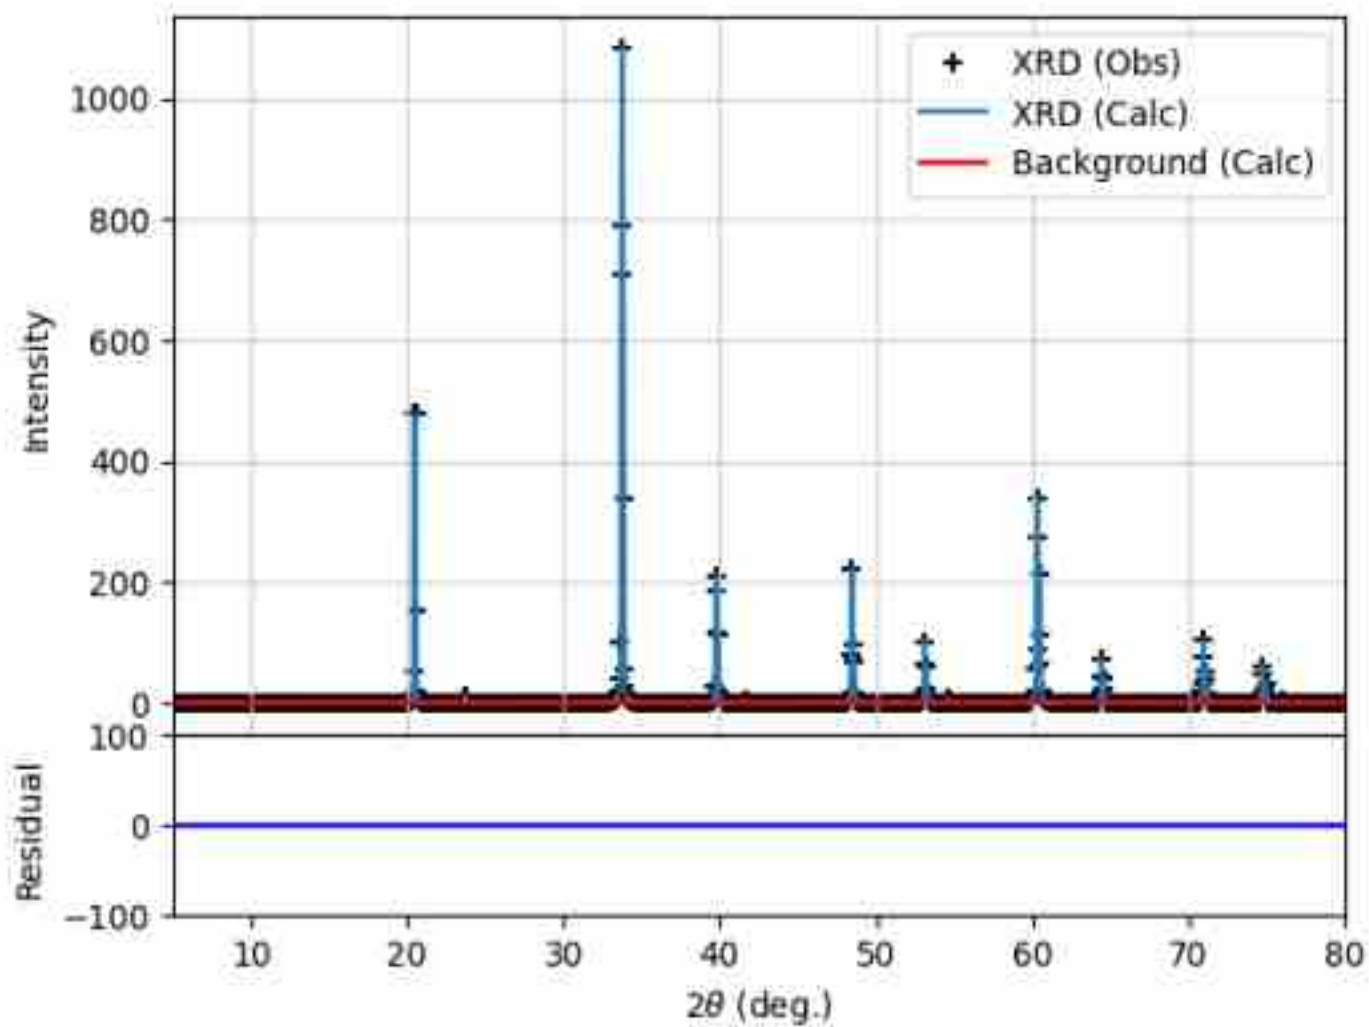

| RMSE before RR | Rwp     | RMSE after RR |
|----------------|---------|---------------|
| 0.001          | 0.02764 | 0.00114       |

# Y2Pd1Ru1

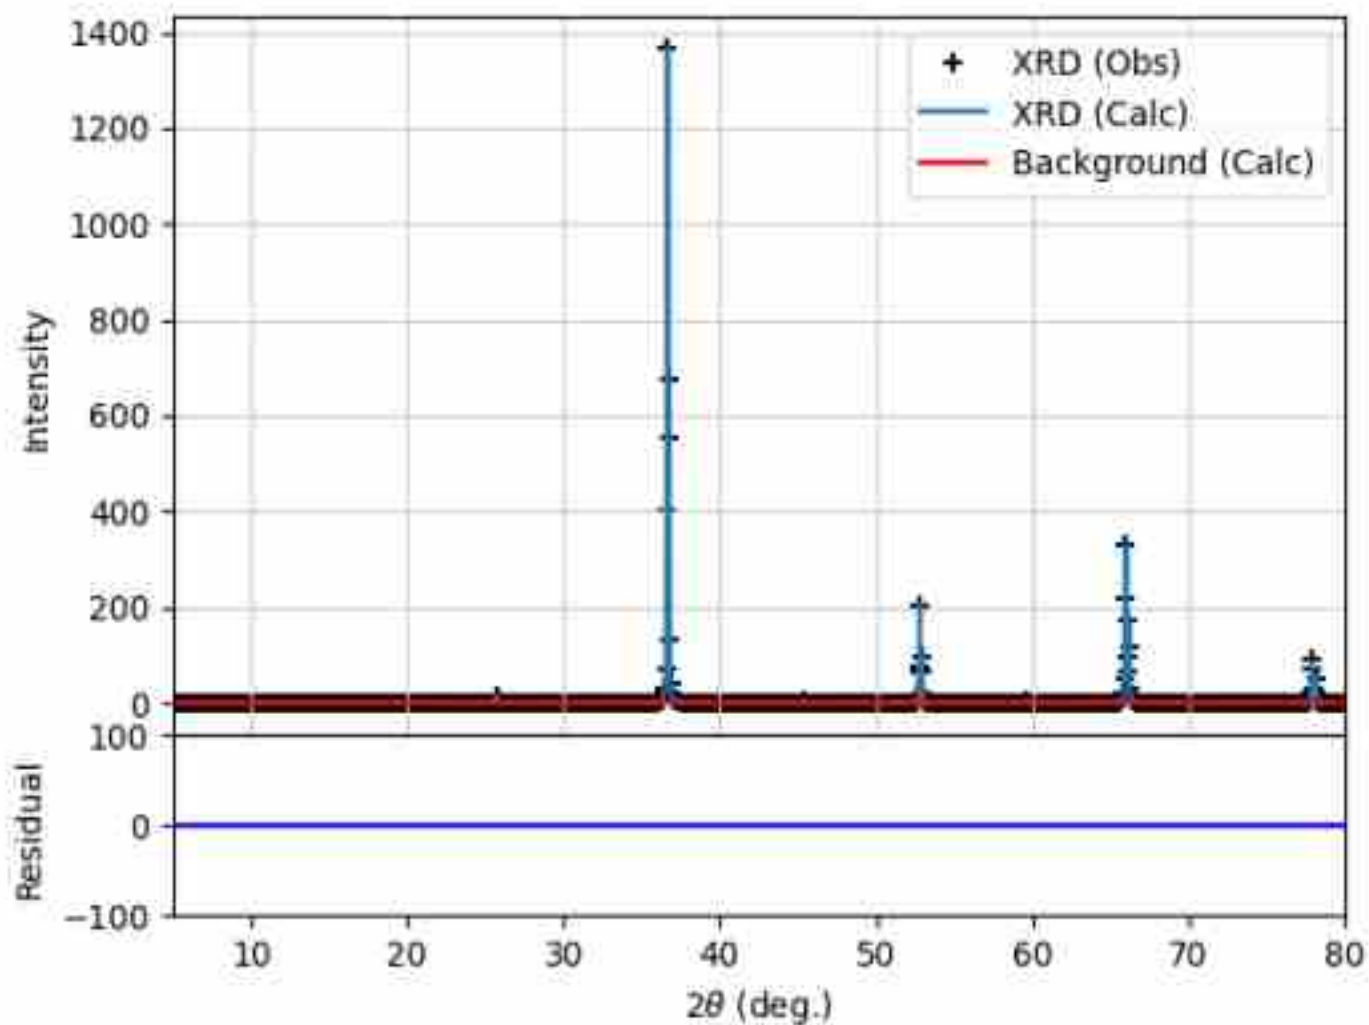

| RMSE before RR | Rwp     | RMSE after RR |
|----------------|---------|---------------|
| 0.001          | 0.00263 | 0.00031       |

# Y2Ru1Rh1

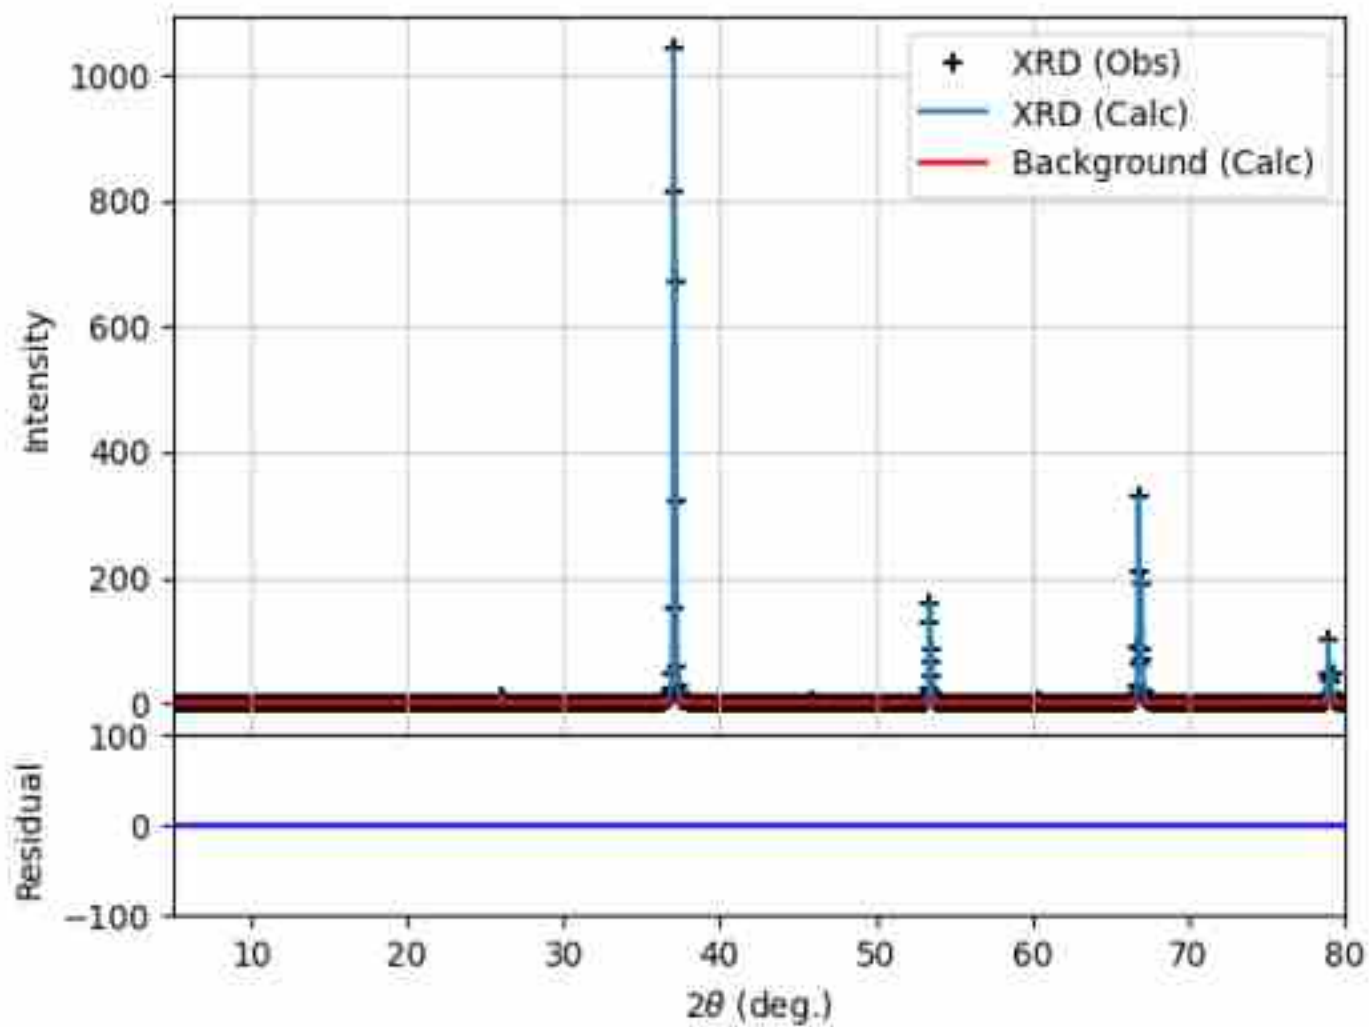

| RMSE before RR | Rwp     | RMSE after RR |
|----------------|---------|---------------|
| 0.001          | 0.00564 | 0.00026       |

# Y2Tl1Hg1

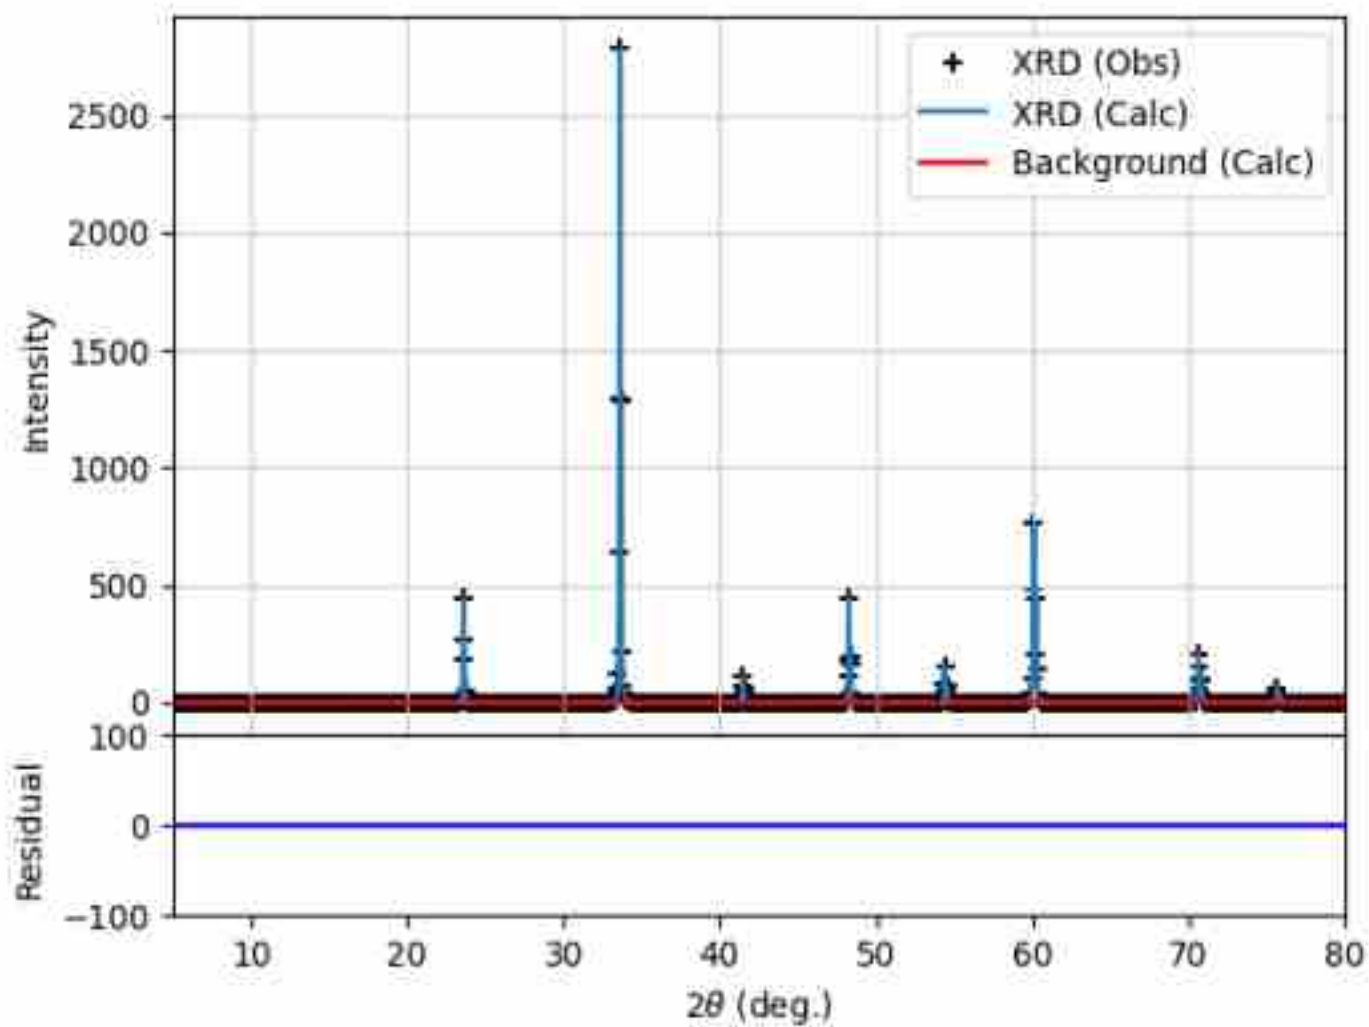

| RMSE before RR | Rwp     | RMSE after RR |
|----------------|---------|---------------|
| 0.001          | 0.01268 | 0.00127       |

# Y2Zn1Au1

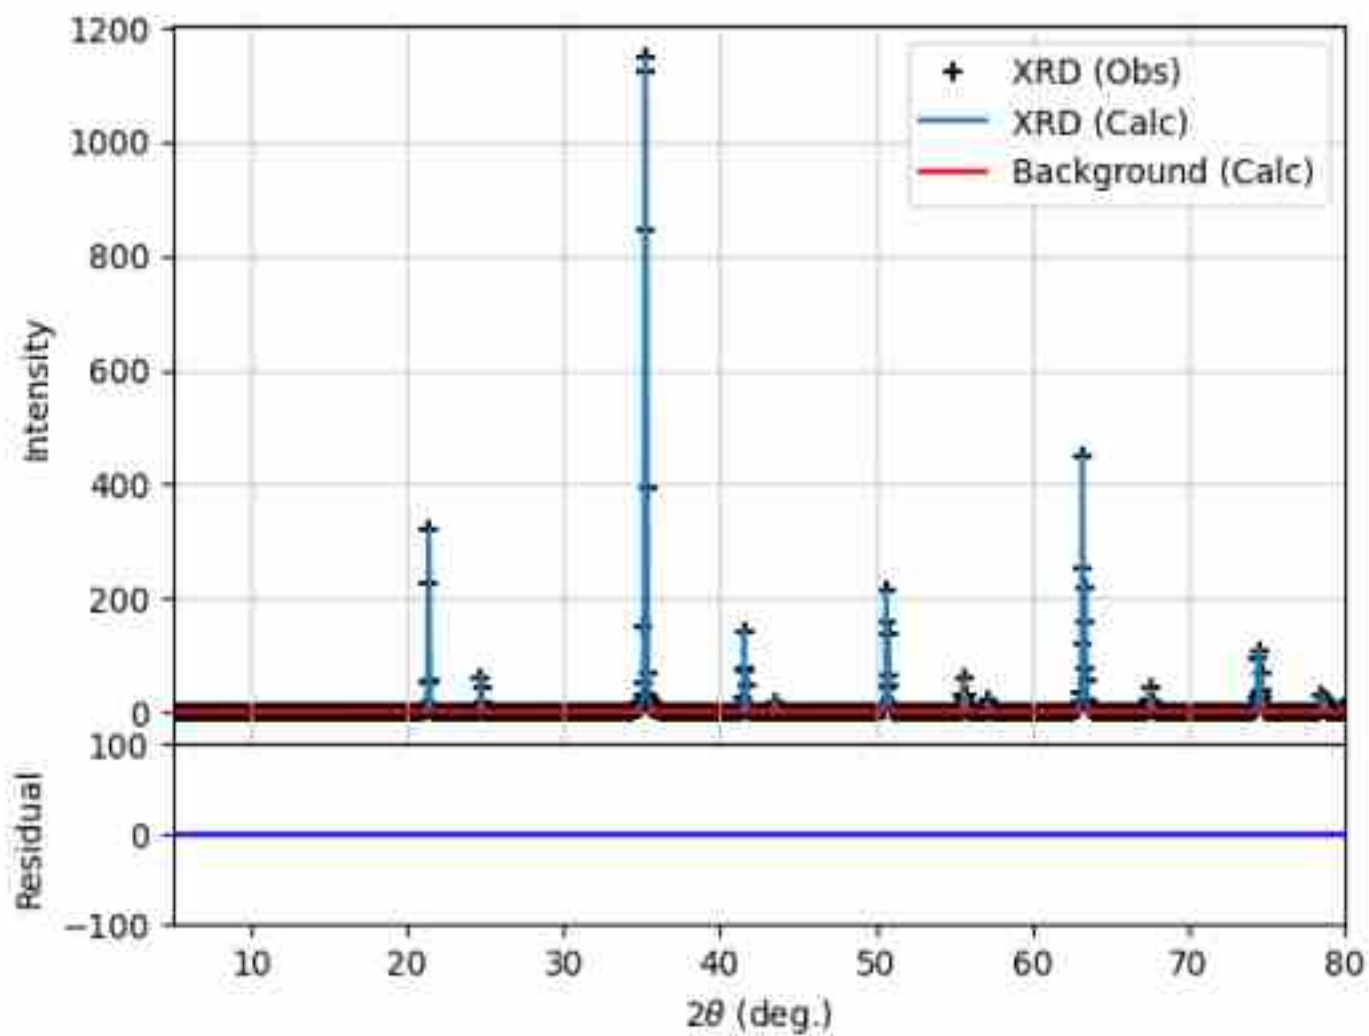

| RMSE before RR | Rwp     | RMSE after RR |
|----------------|---------|---------------|
| 0.001          | 0.01421 | 0.00092       |

# Y<sub>2</sub>ZnIn<sub>1</sub>

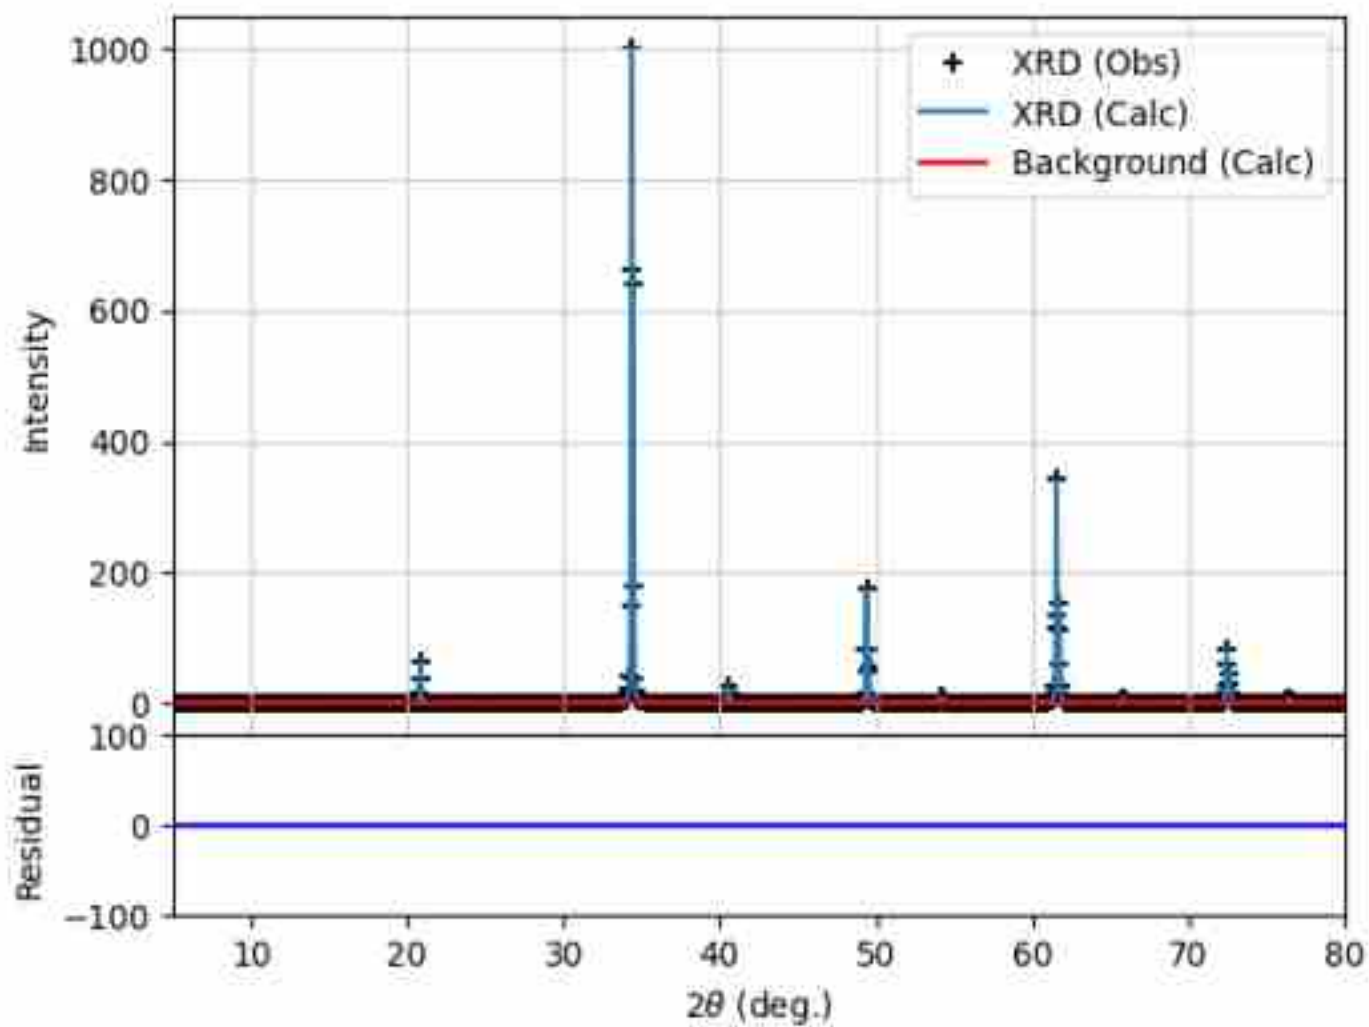

| RMSE before RR | Rwp     | RMSE after RR |
|----------------|---------|---------------|
| 0.001          | 0.00357 | 0.0003        |

# Y6Os1I10

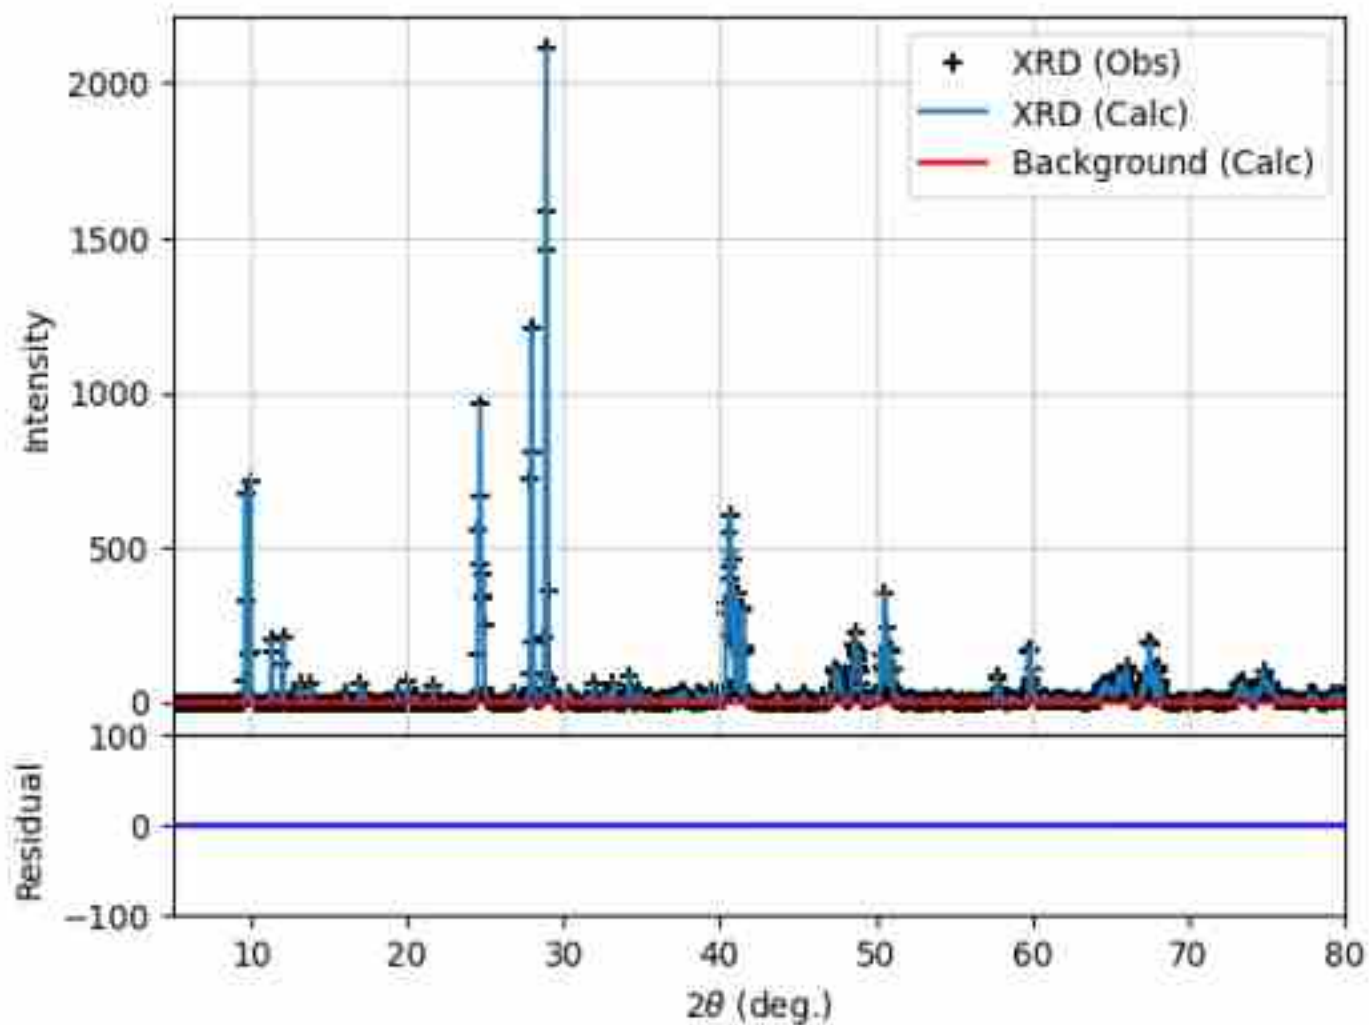

| RMSE before RR | Rwp     | RMSE after RR |
|----------------|---------|---------------|
| 0.01           | 0.10555 | 0.00151       |

# Y8Pt4

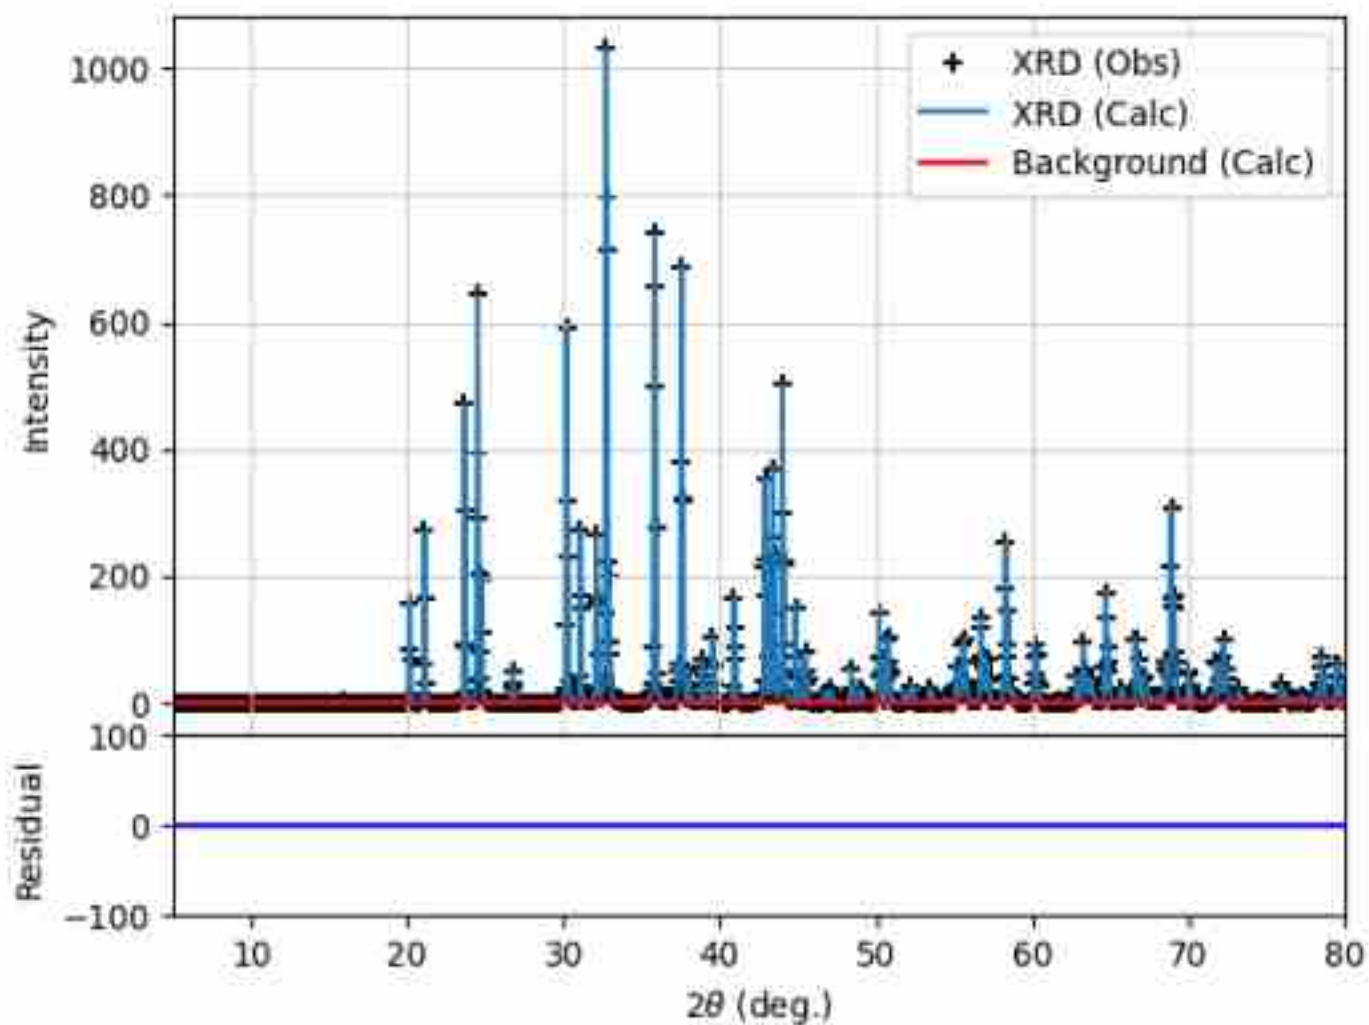

| RMSE before RR | Rwp     | RMSE after RR |
|----------------|---------|---------------|
| 0.01           | 0.00421 | 0.00047       |



# Yb1Dy1Cd2

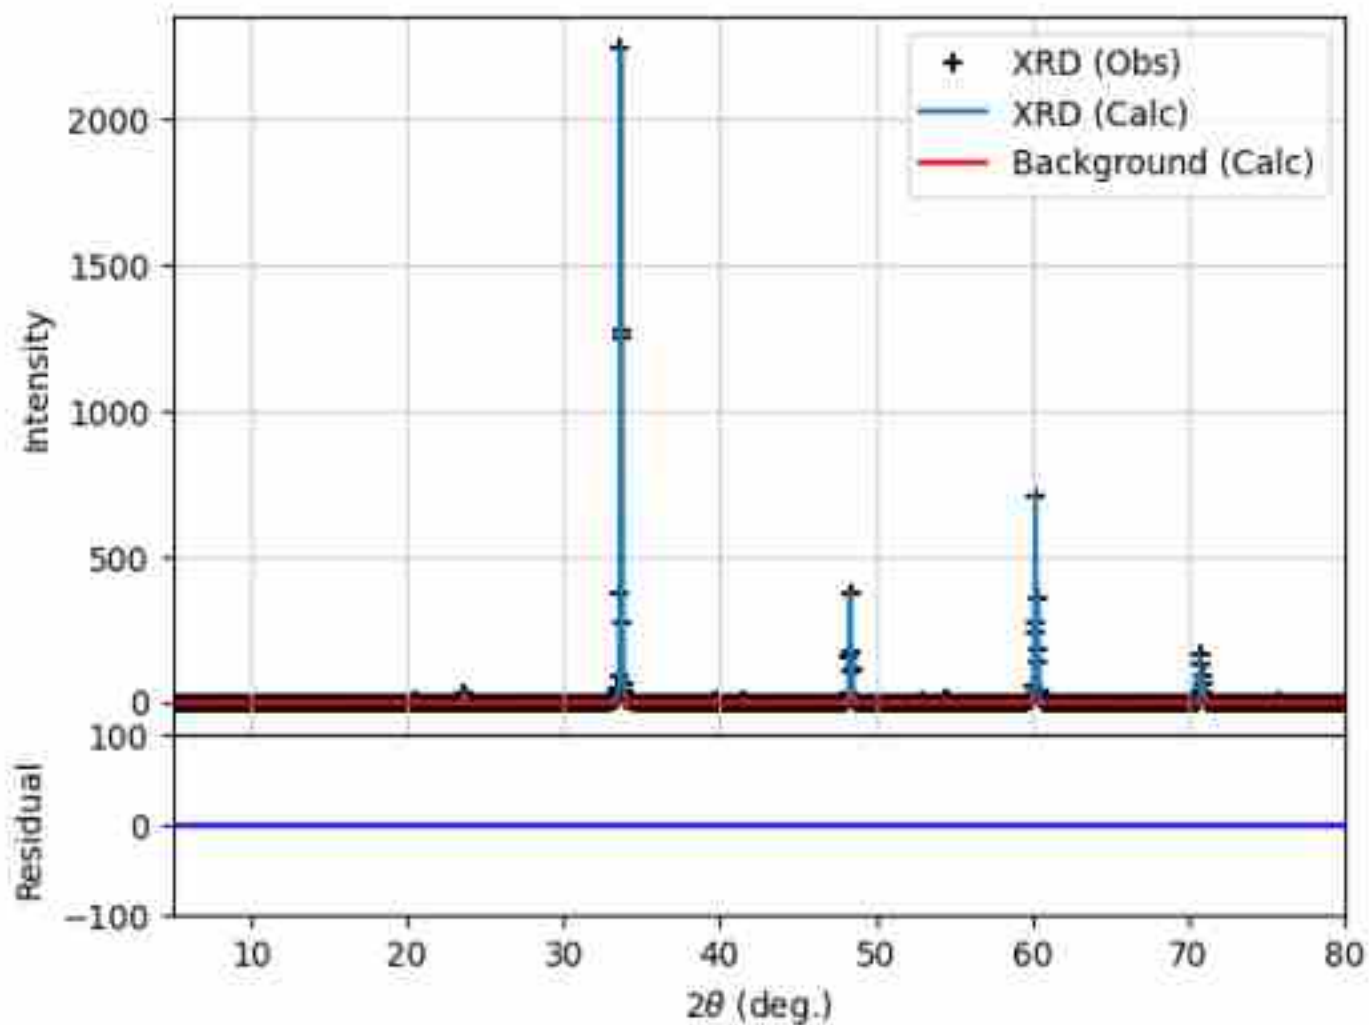

| RMSE before RR | Rwp     | RMSE after RR |
|----------------|---------|---------------|
| 0.001          | 0.00266 | 0.00024       |

# Yb1Eu1Pd2

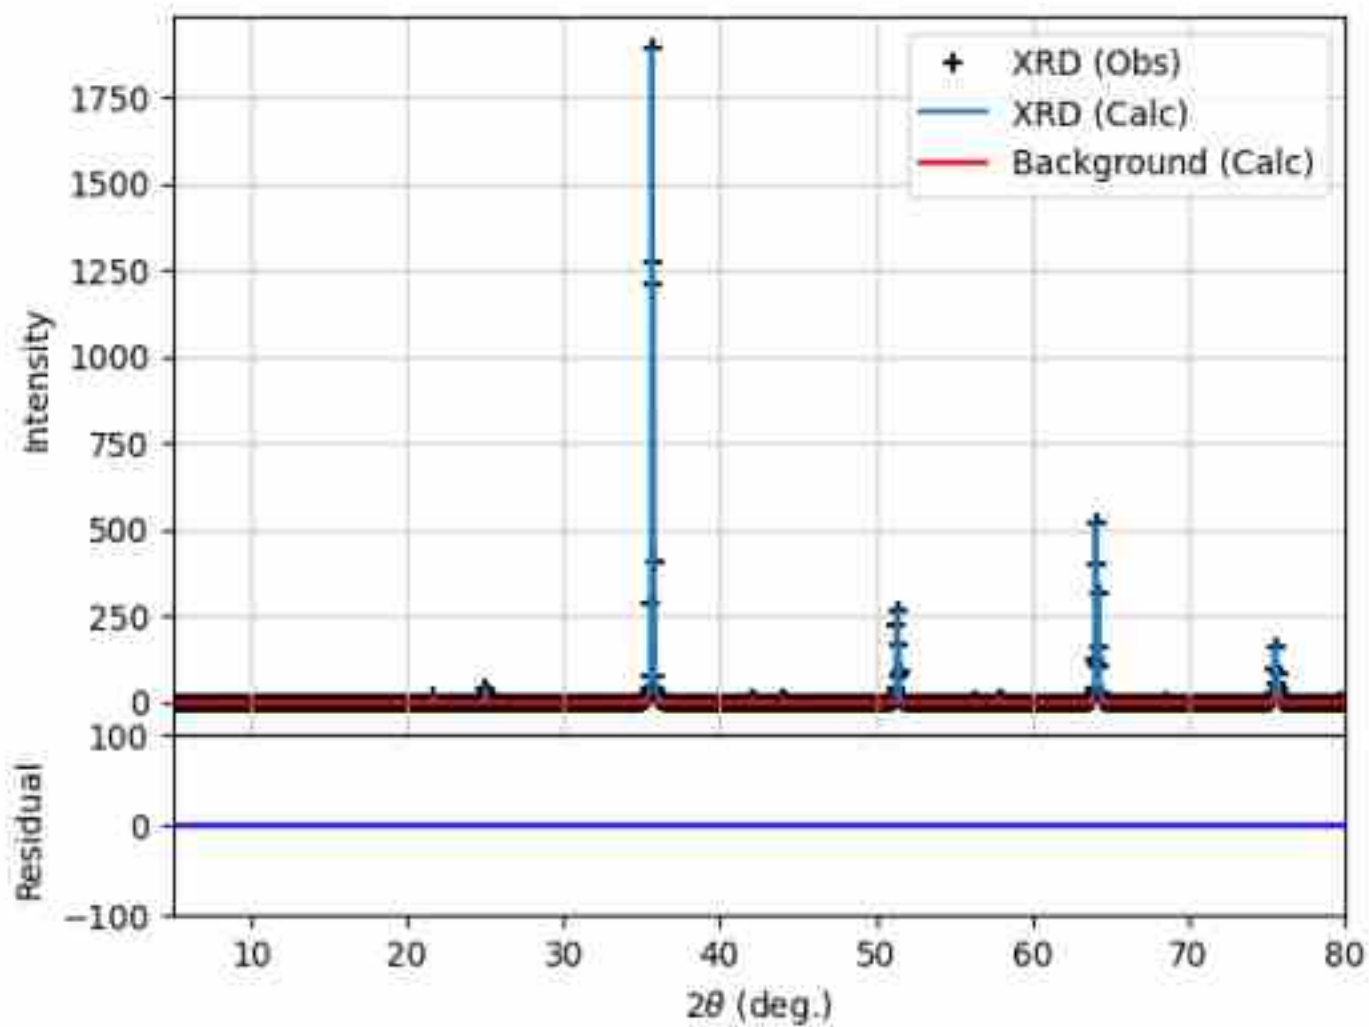

| RMSE before RR | Rwp     | RMSE after RR |
|----------------|---------|---------------|
| 0.001          | 0.03104 | 0.00324       |

# Yb1Ho1Rh2

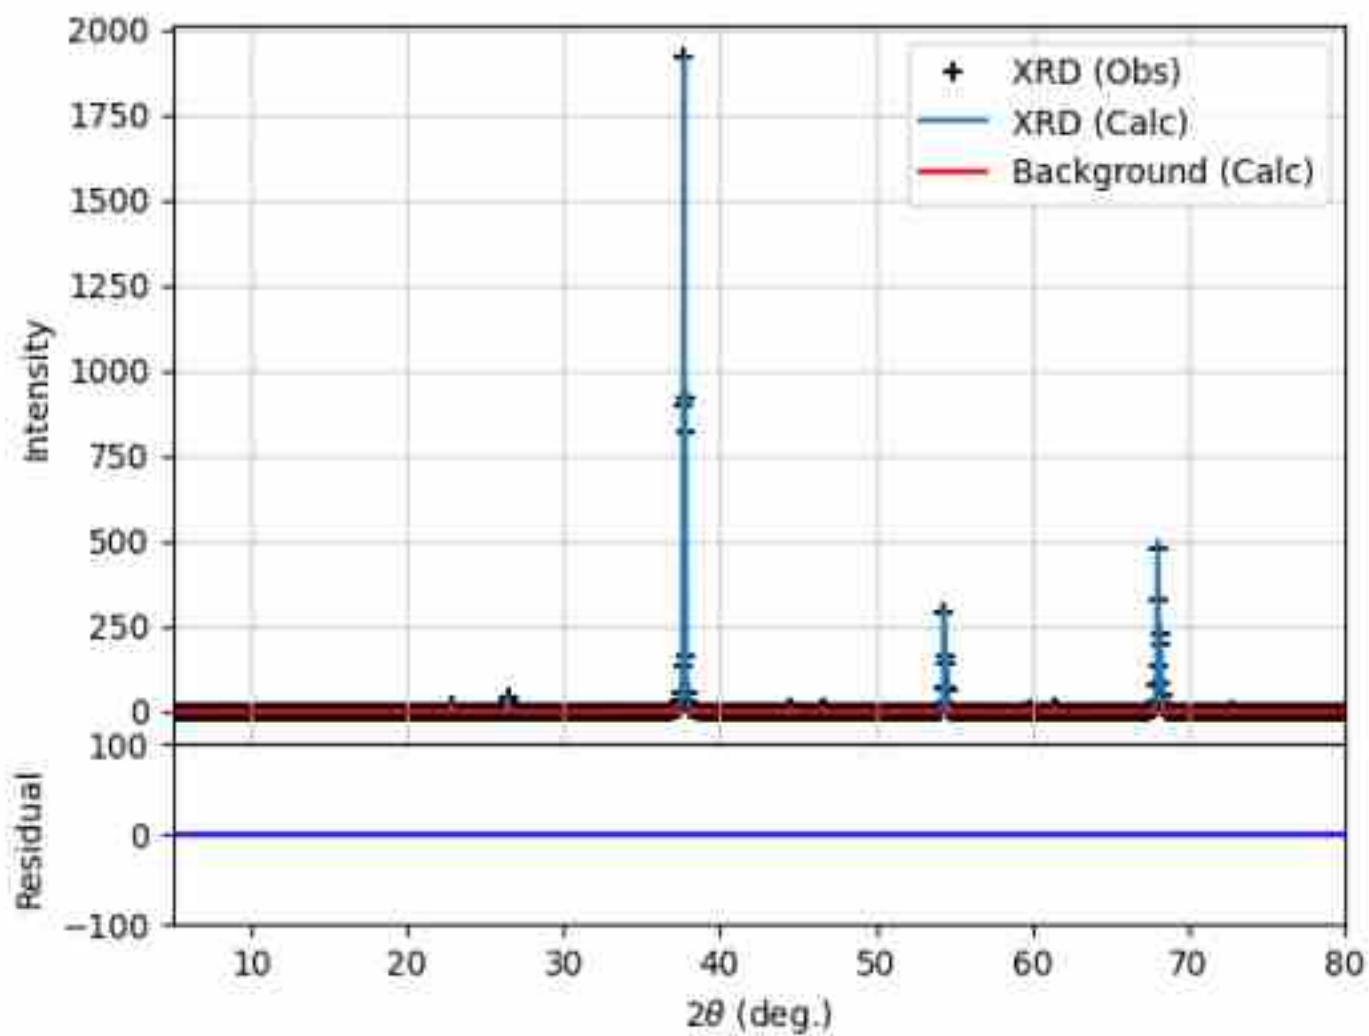

| RMSE before RR | Rwp     | RMSE after RR |
|----------------|---------|---------------|
| 0.001          | 0.00598 | 0.00063       |

# Yb1Ho1Zn2

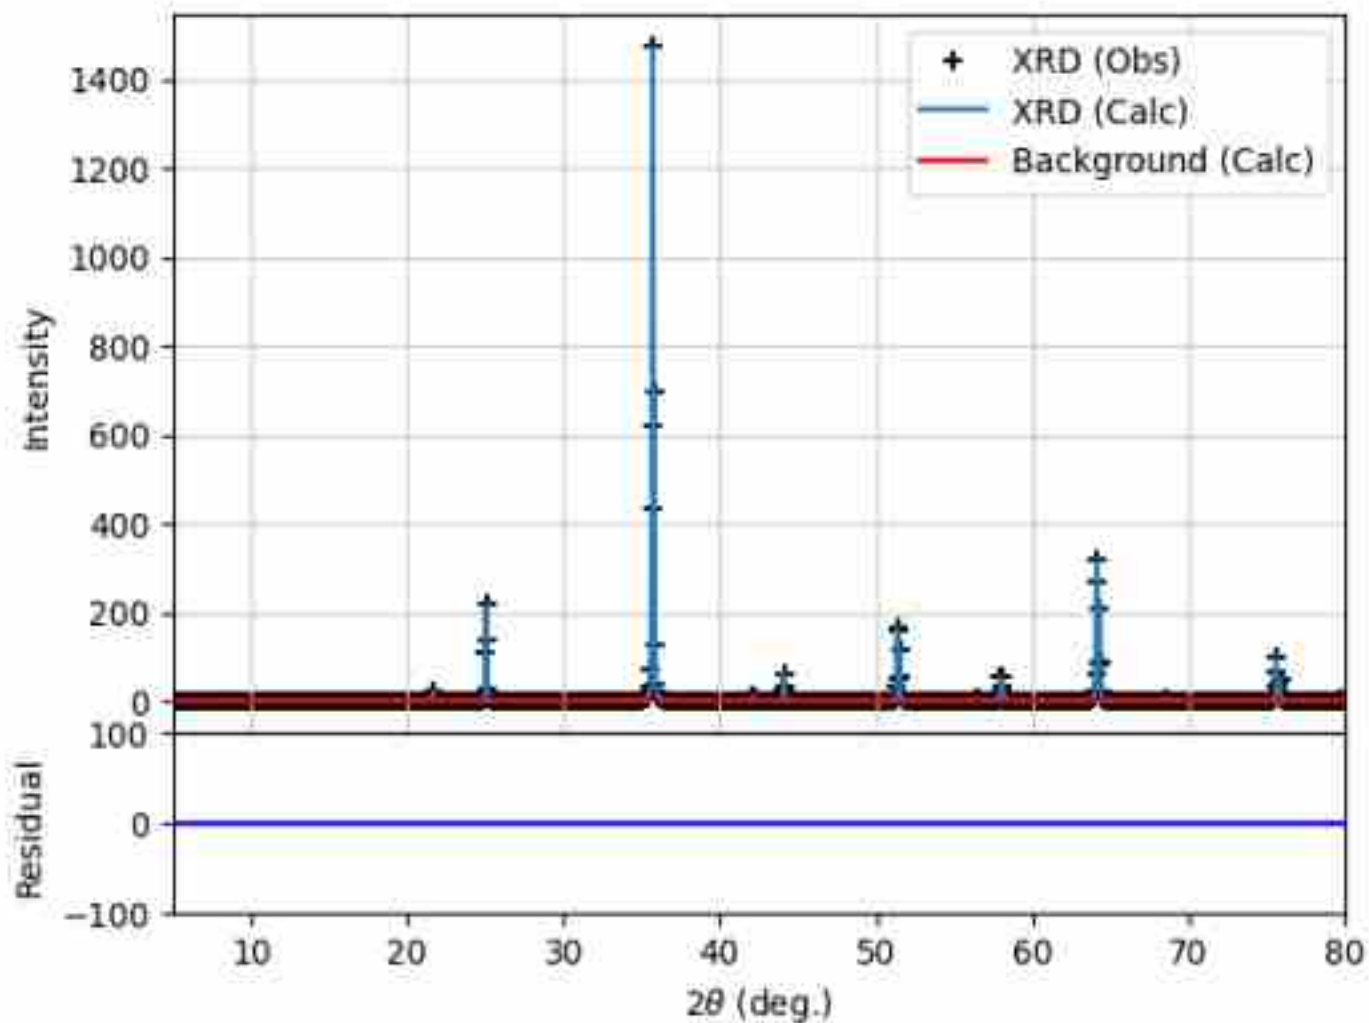

| RMSE before RR | Rwp     | RMSE after RR |
|----------------|---------|---------------|
| 0.001          | 0.00348 | 0.0004        |

# Yb1In1Rh2

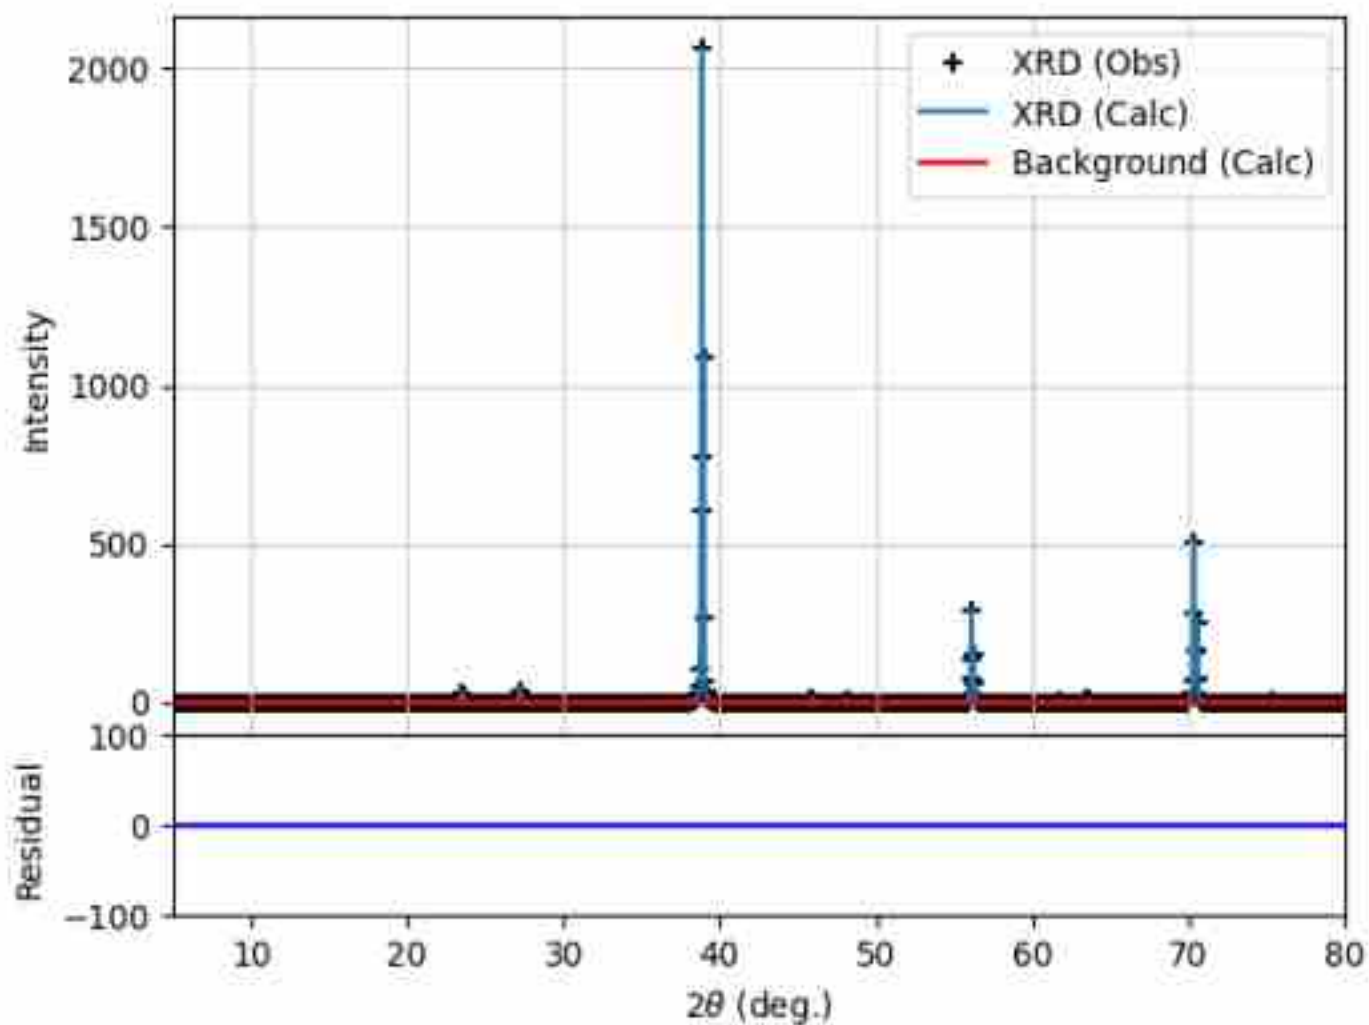

| RMSE before RR | Rwp     | RMSE after RR |
|----------------|---------|---------------|
| 0.001          | 0.00319 | 0.00089       |

# Yb1Mg1Cu4

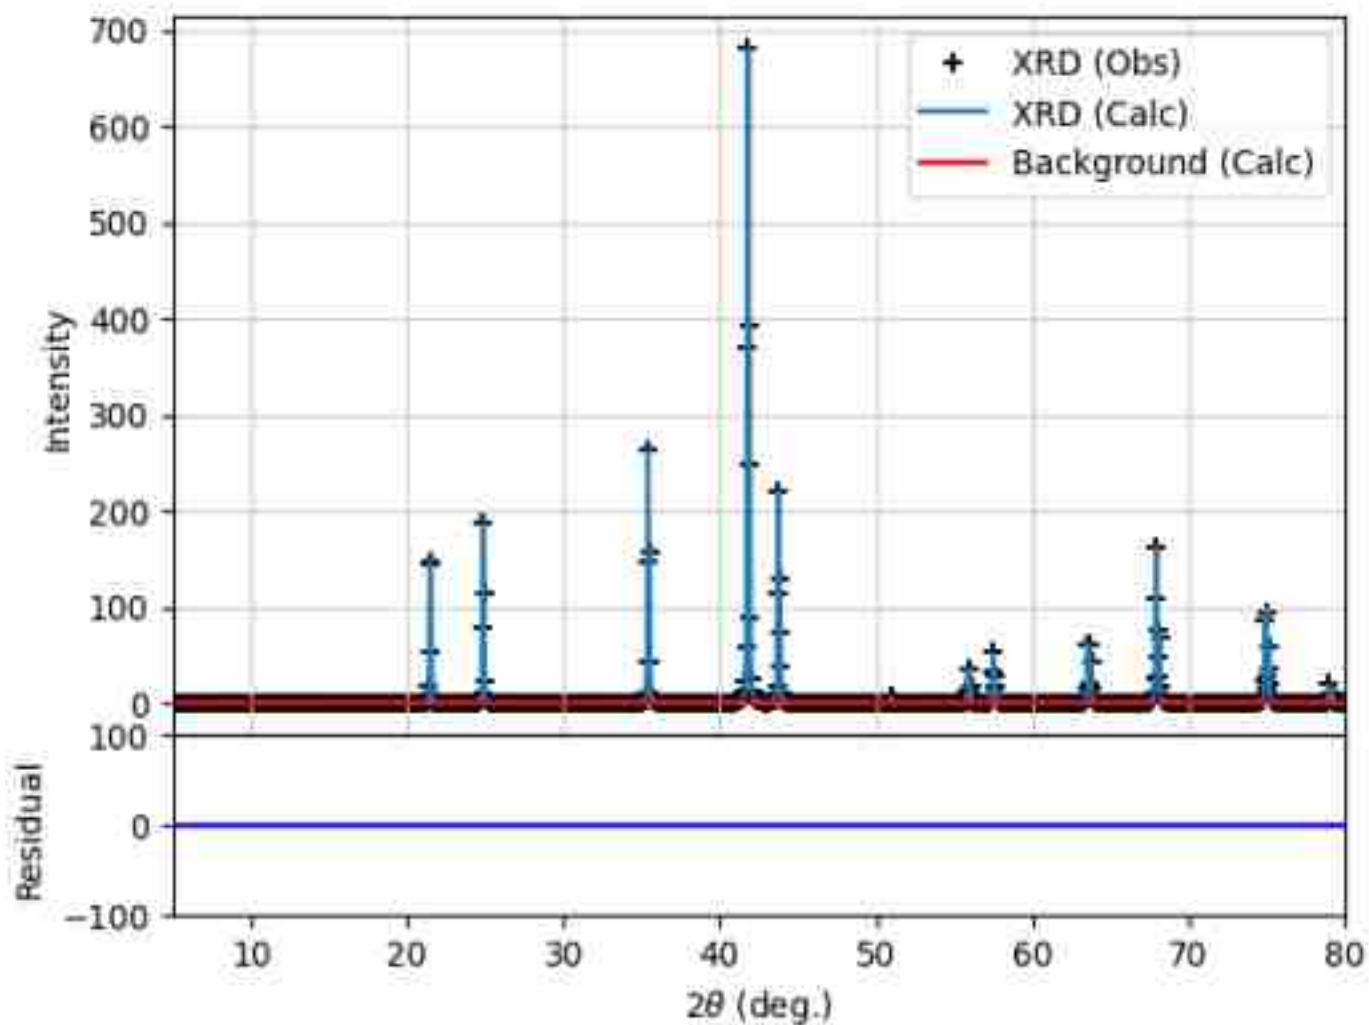

| RMSE before RR | Rwp     | RMSE after RR |
|----------------|---------|---------------|
| 0.01           | 0.00345 | 0.00087       |

# Yb1Mg1Hg2

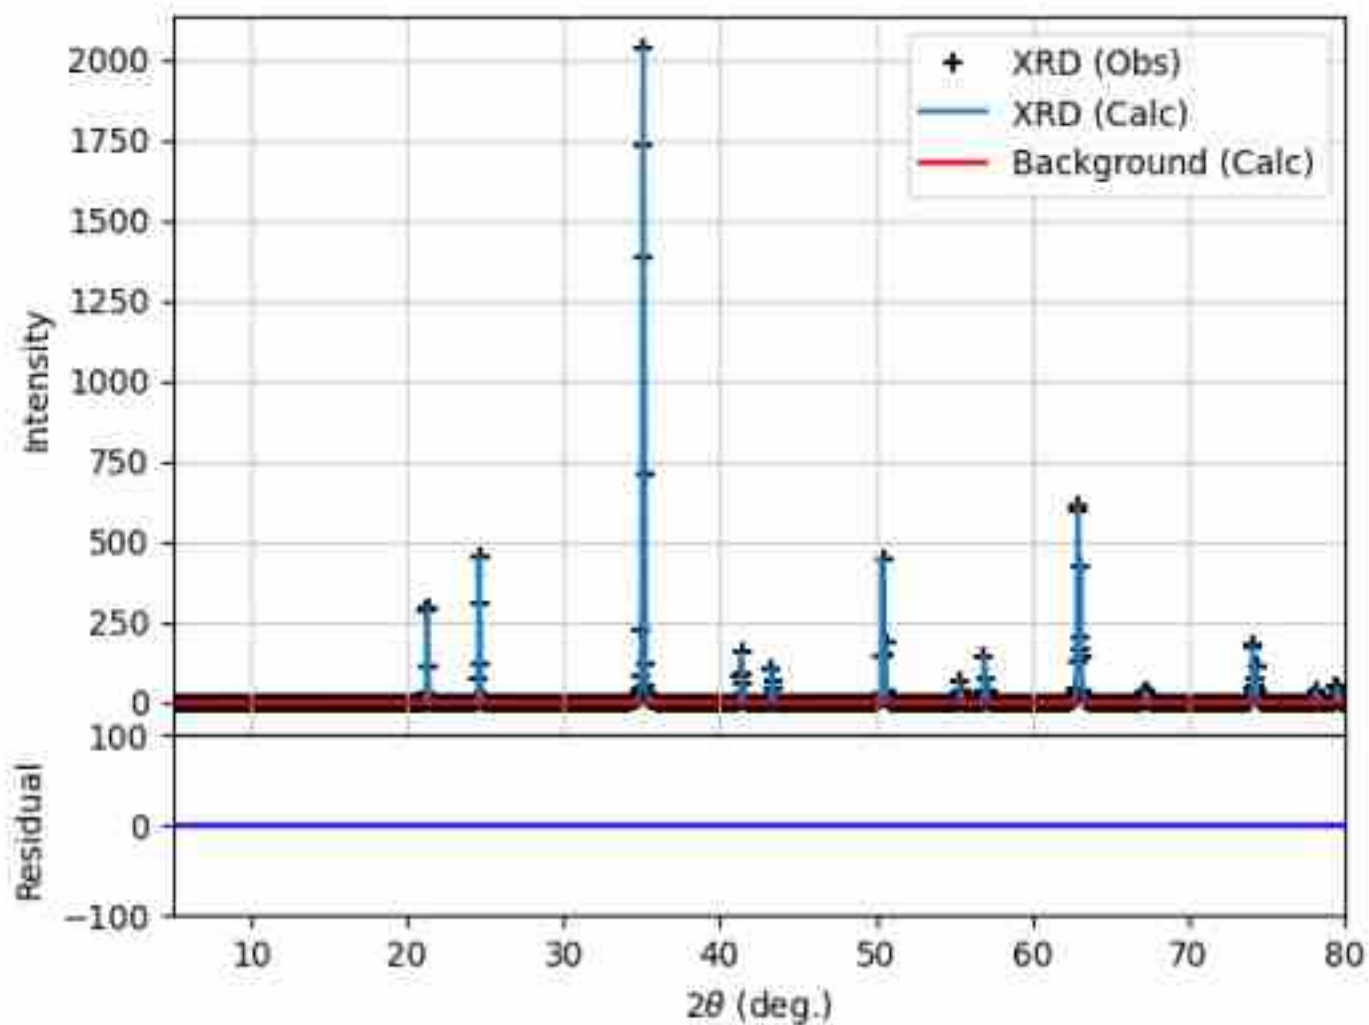

| RMSE before RR | Rwp     | RMSE after RR |
|----------------|---------|---------------|
| 0.001          | 0.00322 | 0.00042       |

# Yb1Mg1Rh2

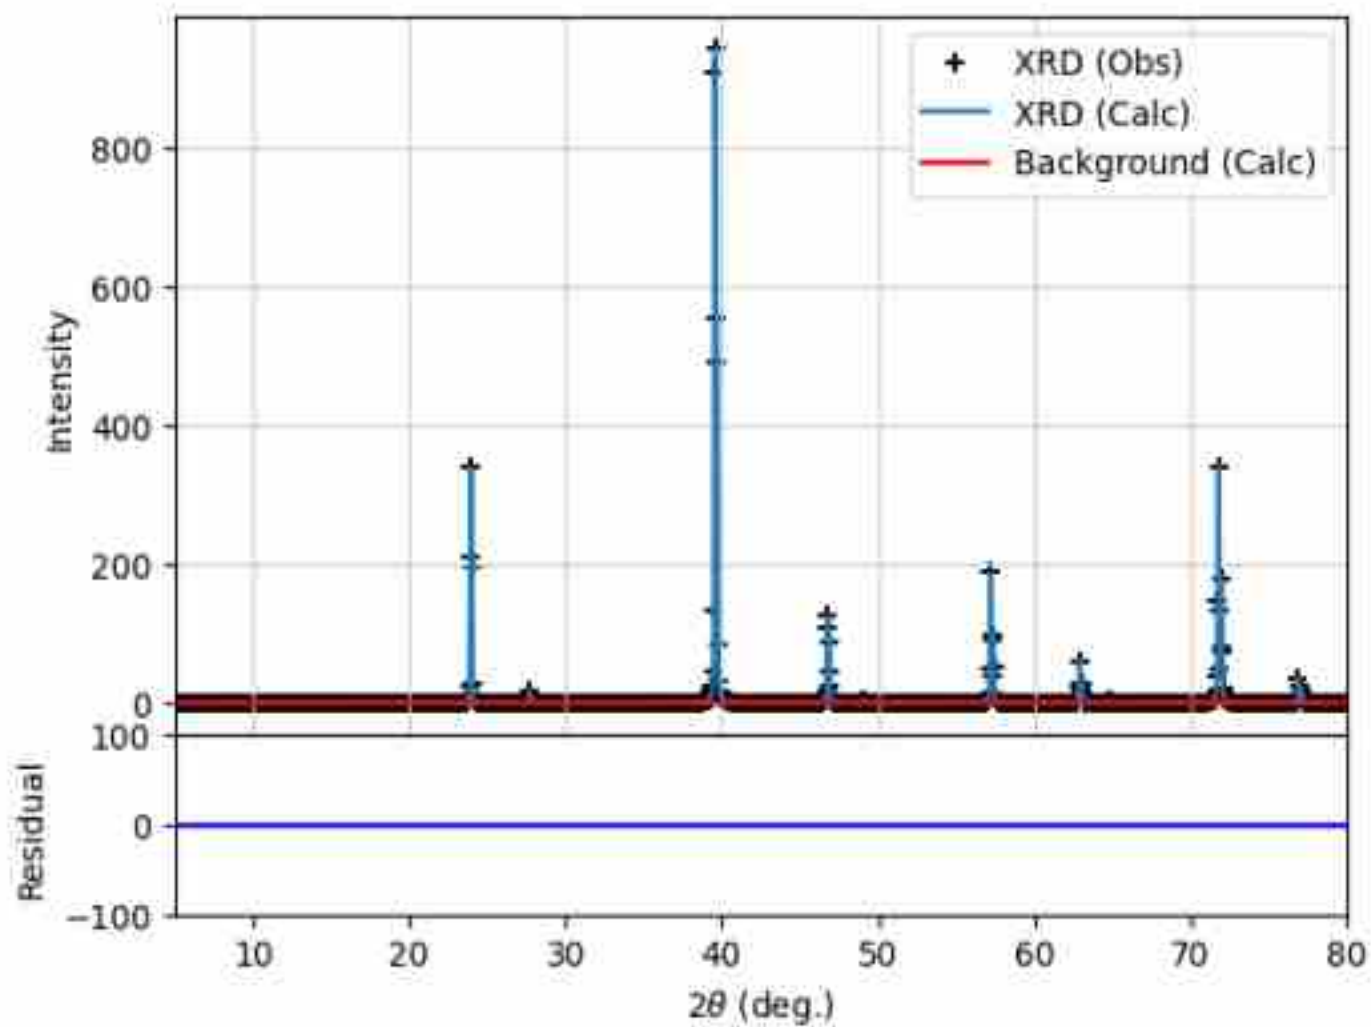

| RMSE before RR | Rwp     | RMSE after RR |
|----------------|---------|---------------|
| 0.001          | 0.00077 | 0.00021       |



# Yb1Mg3

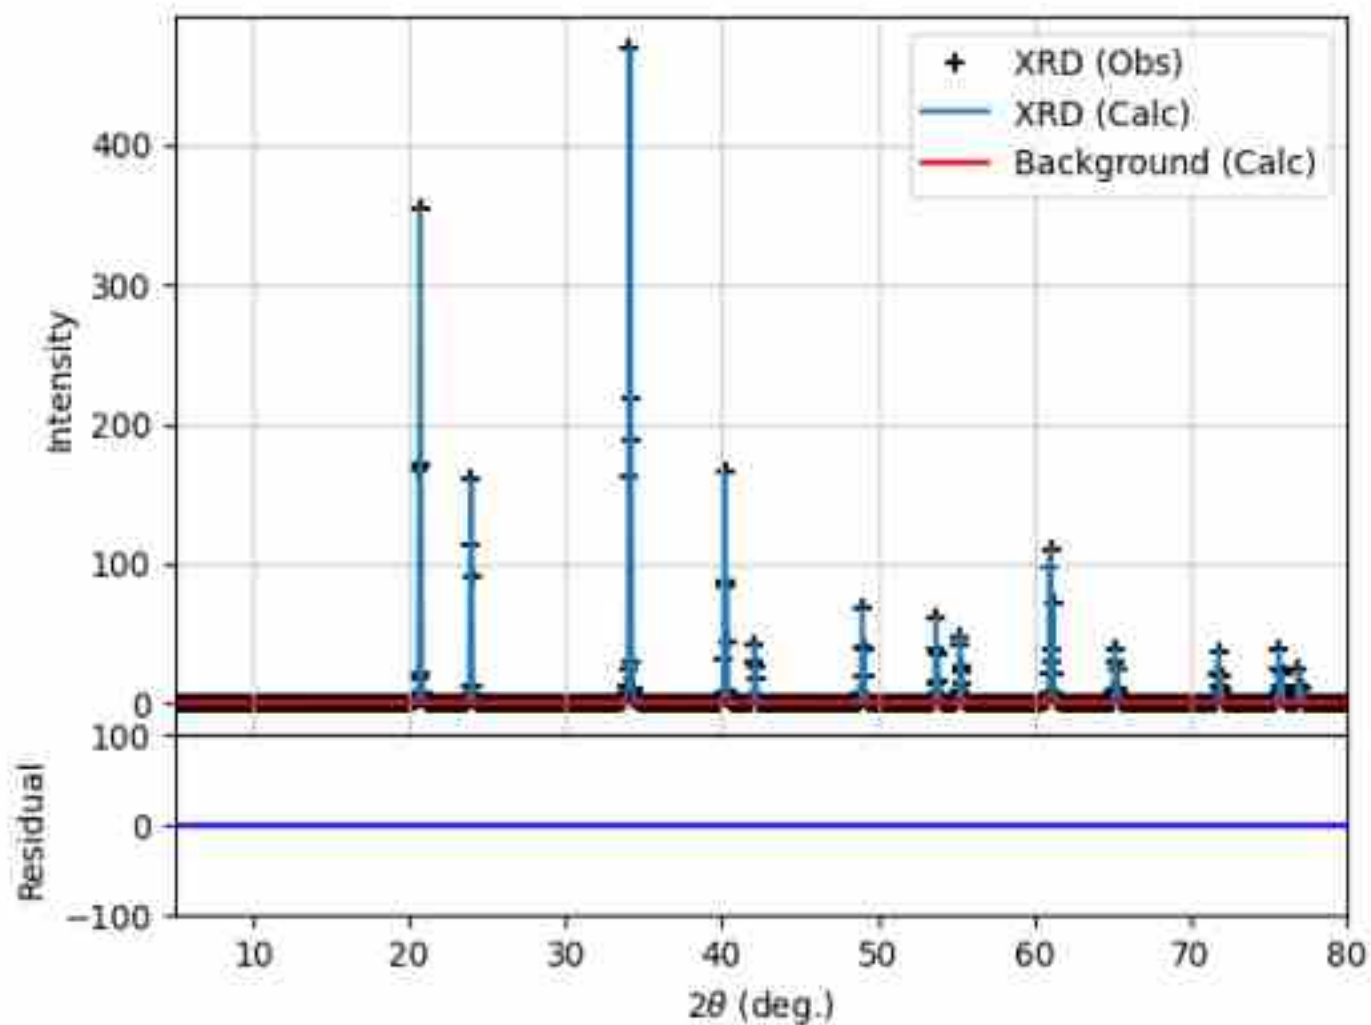

| RMSE before RR | Rwp     | RMSE after RR |
|----------------|---------|---------------|
| 0.001          | 0.00132 | 0.00028       |

# Yb1Nd1Rh2

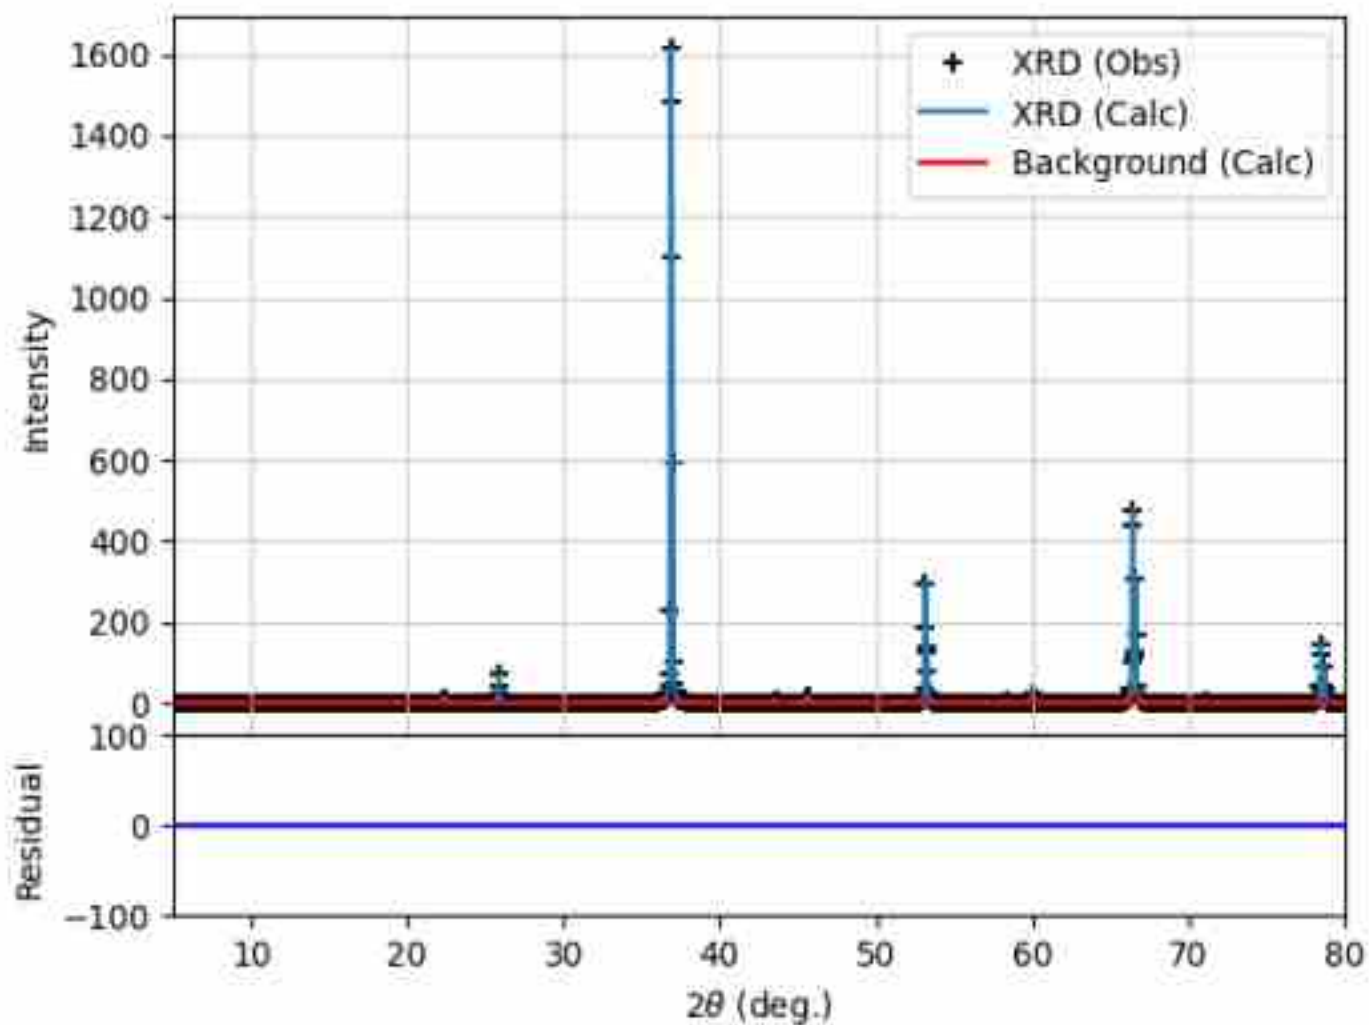

| RMSE before RR | Rwp   | RMSE after RR |
|----------------|-------|---------------|
| 0.001          | 0.007 | 0.00088       |

# Yb1Nd1Zn2

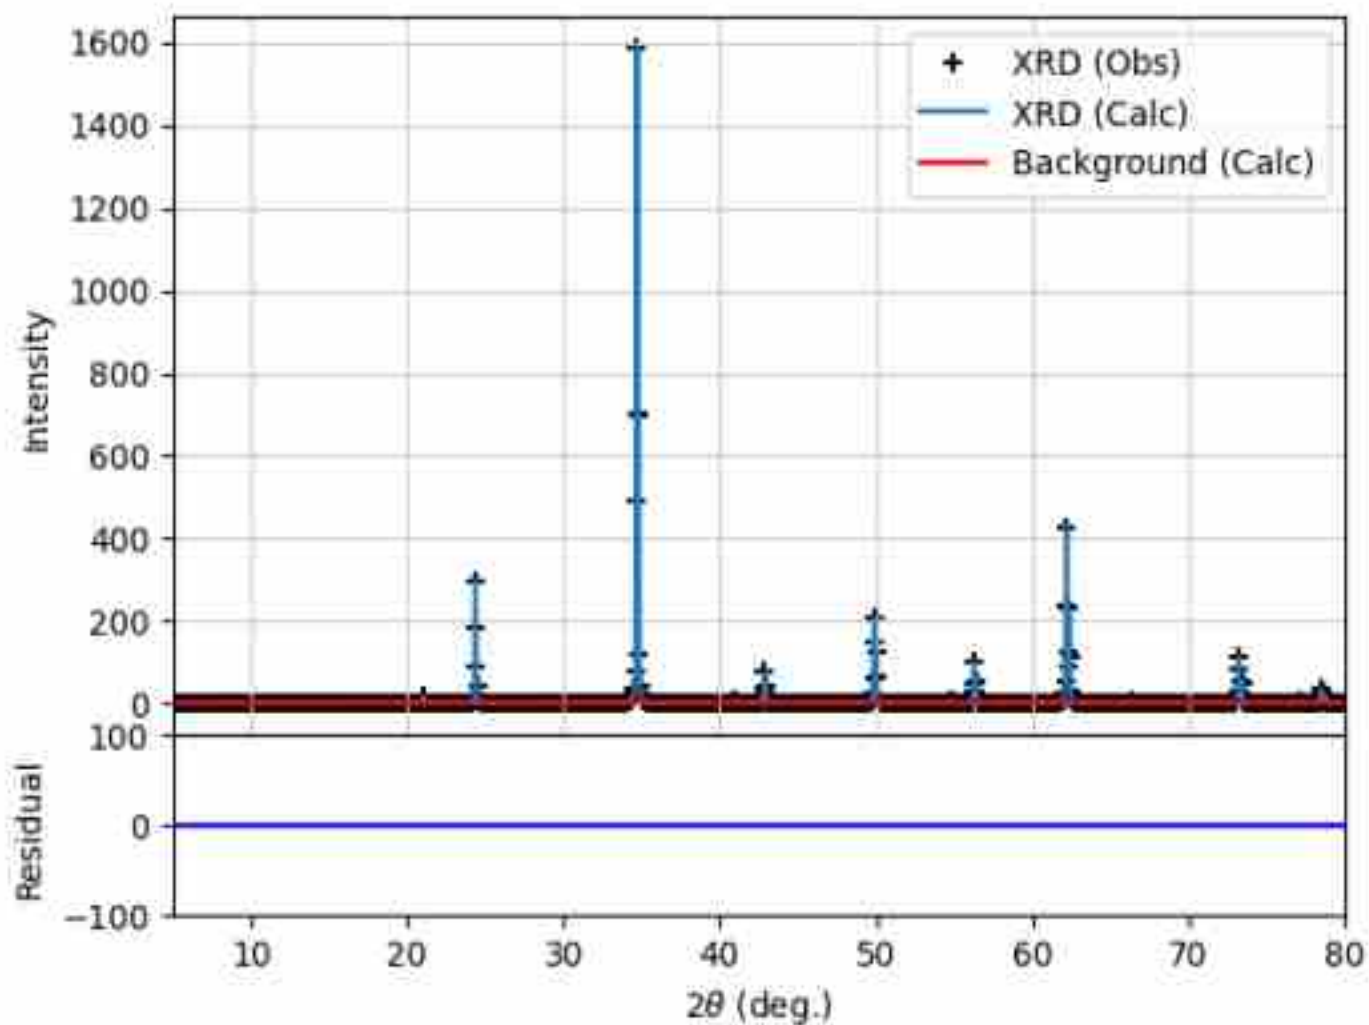

| RMSE before RR | Rwp     | RMSE after RR |
|----------------|---------|---------------|
| 0.001          | 0.00715 | 0.00119       |

# Yb1Sm1Zn2

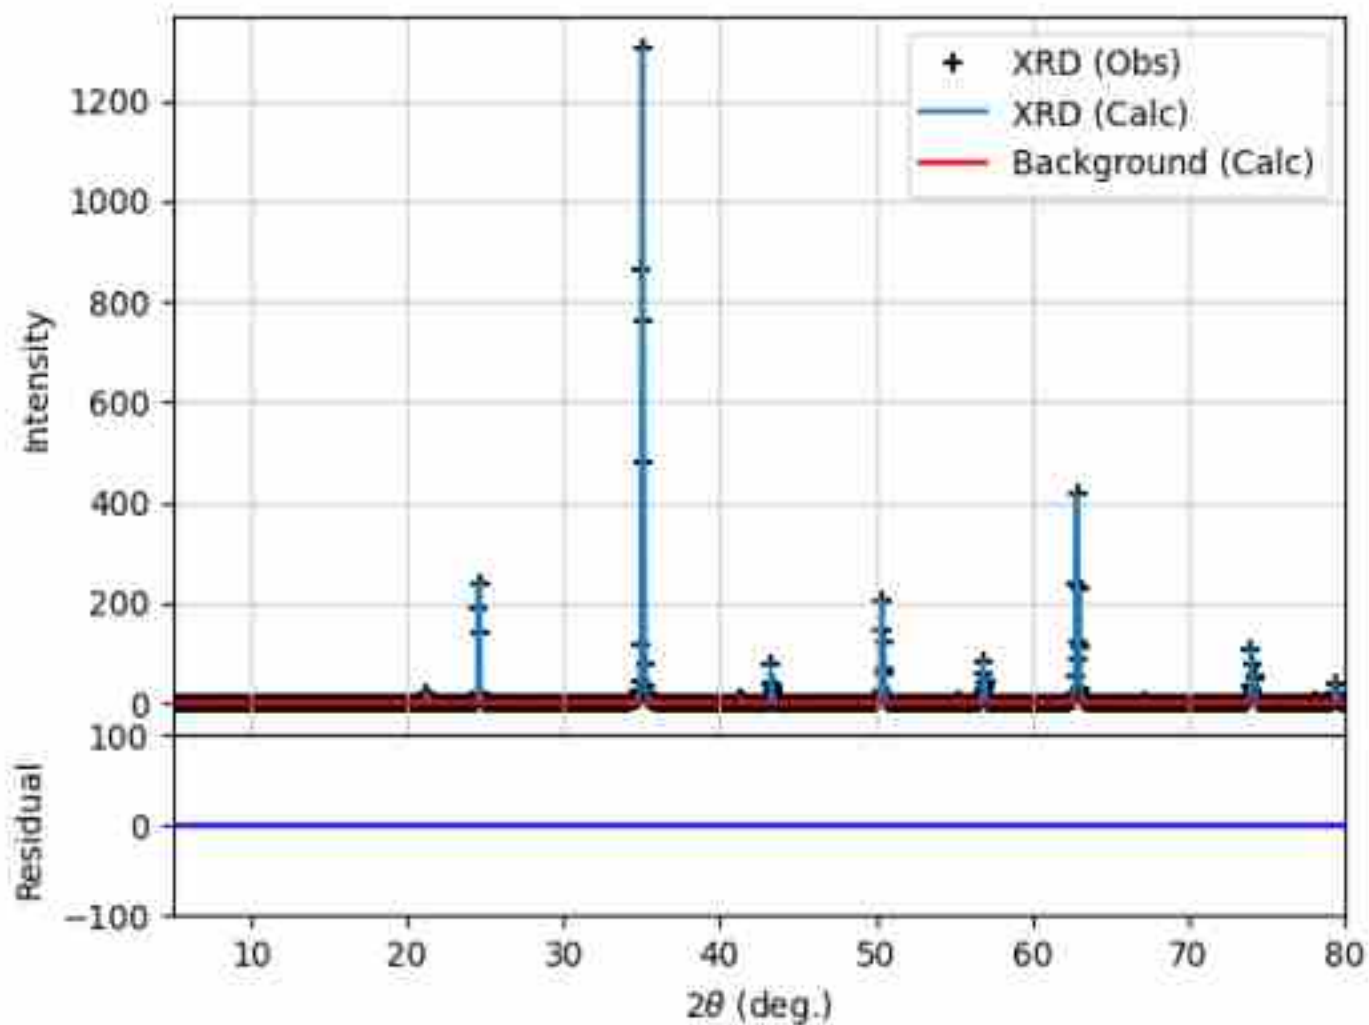

| RMSE before RR | Rwp     | RMSE after RR |
|----------------|---------|---------------|
| 0.001          | 0.00451 | 0.00049       |

# Yb1Sn1Rh2

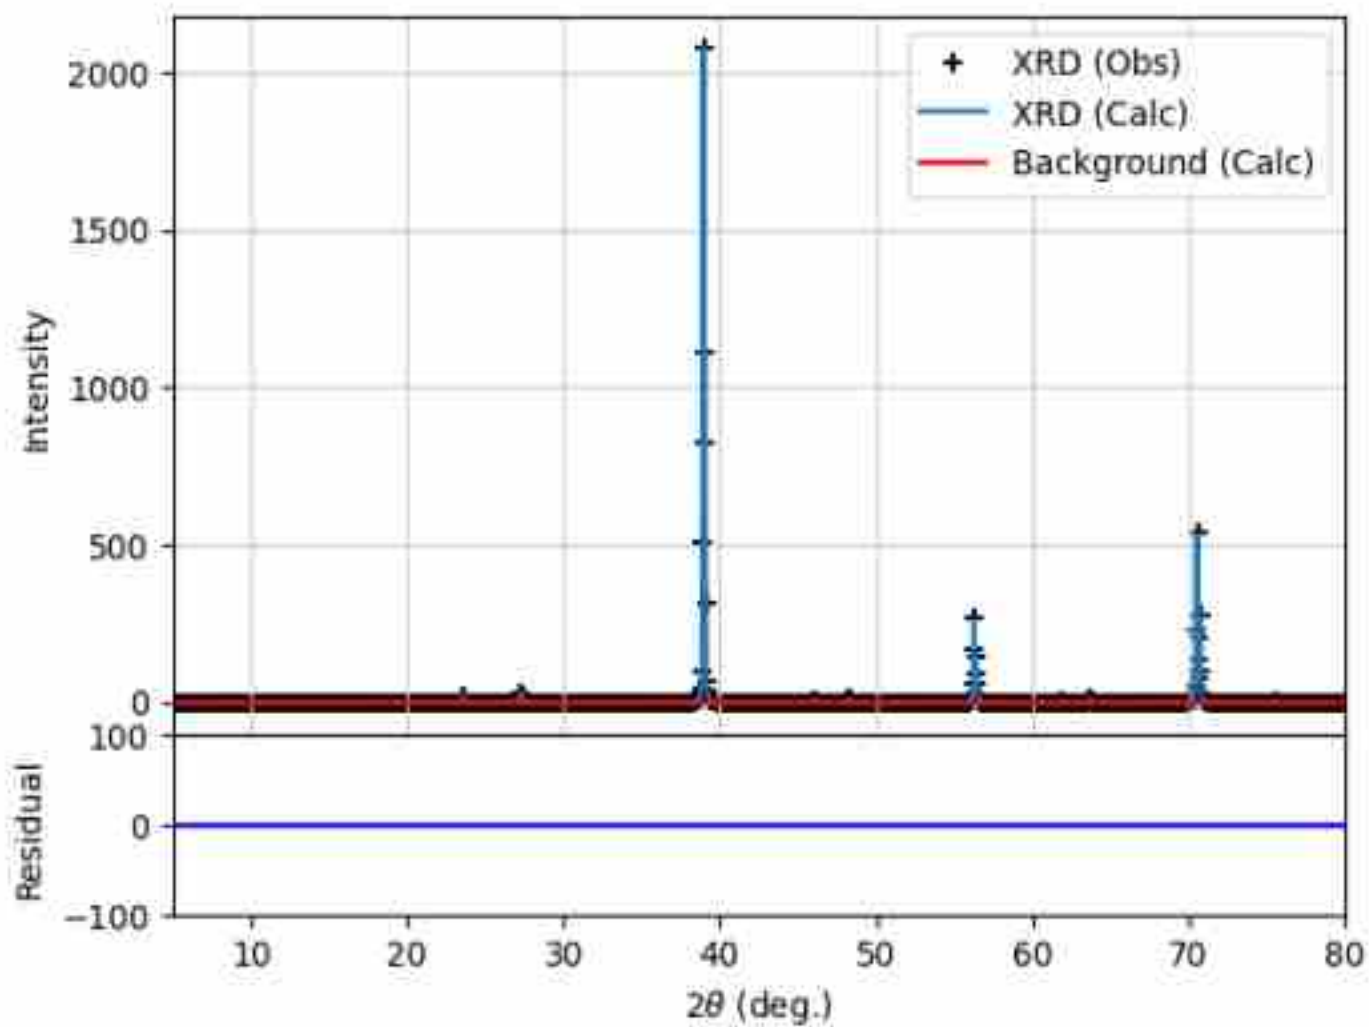

| RMSE before RR | Rwp     | RMSE after RR |
|----------------|---------|---------------|
| 0.001          | 0.01221 | 0.00099       |

# Yb1Th1Rh2

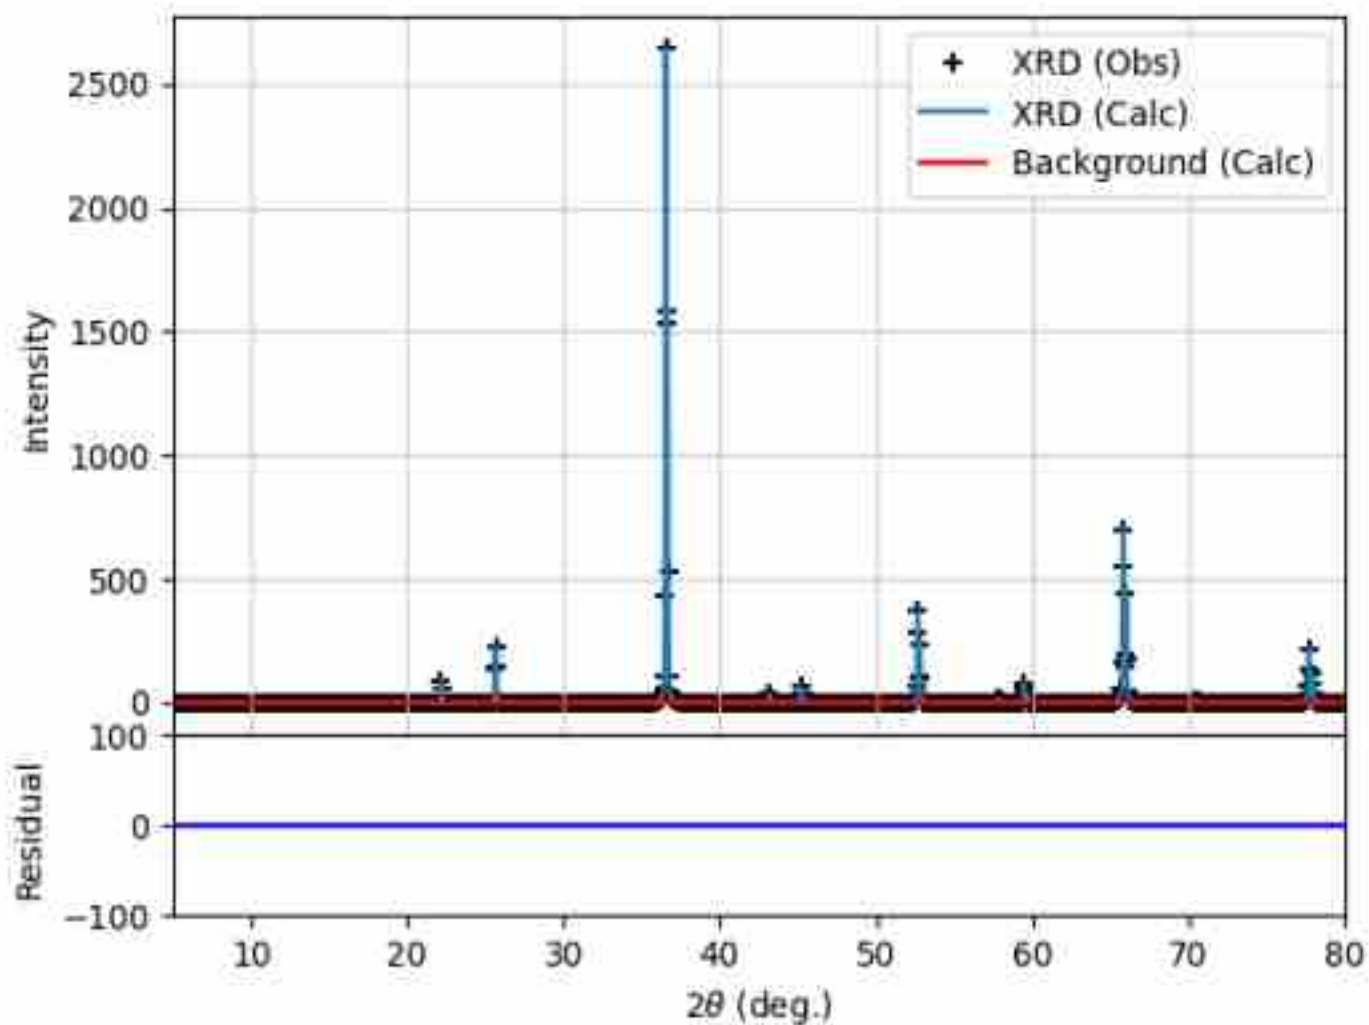

| RMSE before RR | Rwp     | RMSE after RR |
|----------------|---------|---------------|
| 0.001          | 0.01883 | 0.0011        |

Yb1Tl2Cd1

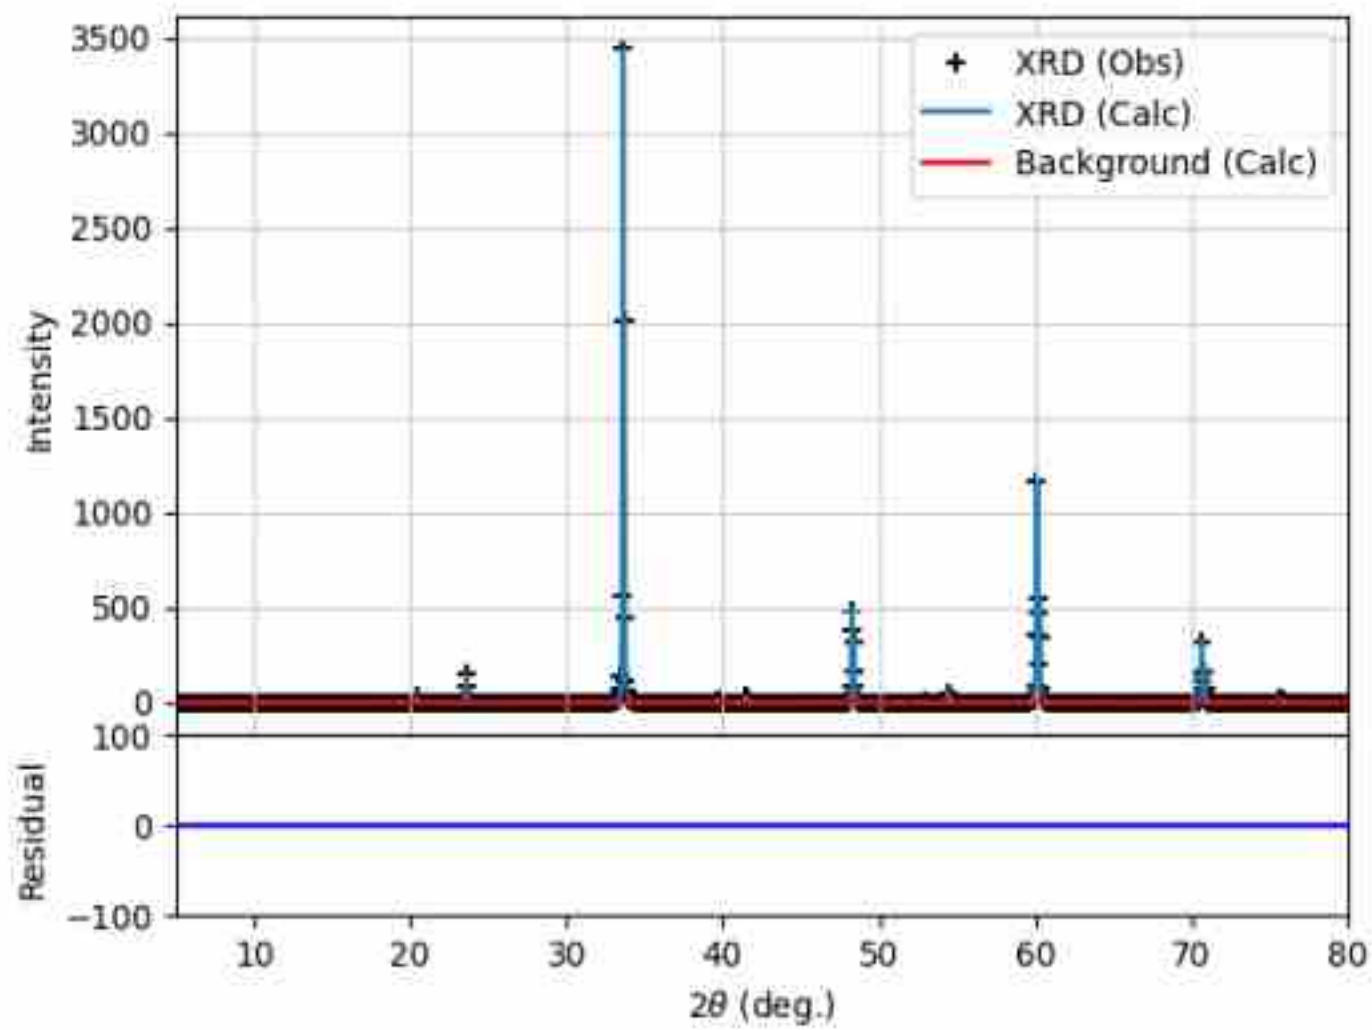

| RMSE before RR | Rwp     | RMSE after RR |
|----------------|---------|---------------|
| 0.001          | 0.00018 | 6e-05         |

# Yb1Zn1Rh2

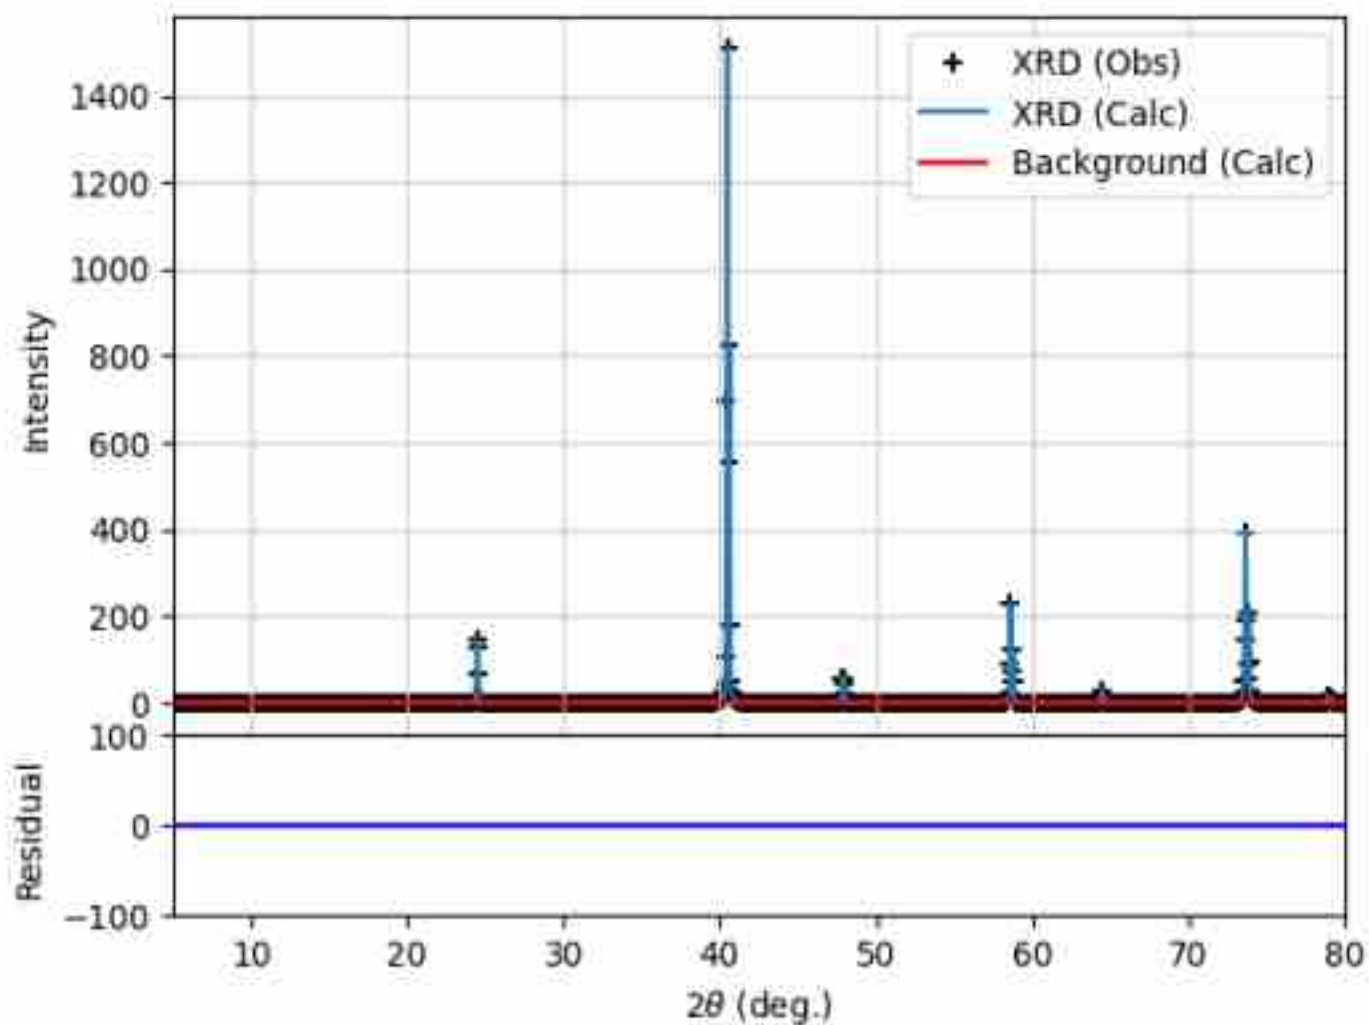

| RMSE before RR | Rwp     | RMSE after RR |
|----------------|---------|---------------|
| 0.001          | 0.00326 | 0.00022       |



# Yb<sub>2</sub>BiAu<sub>1</sub>

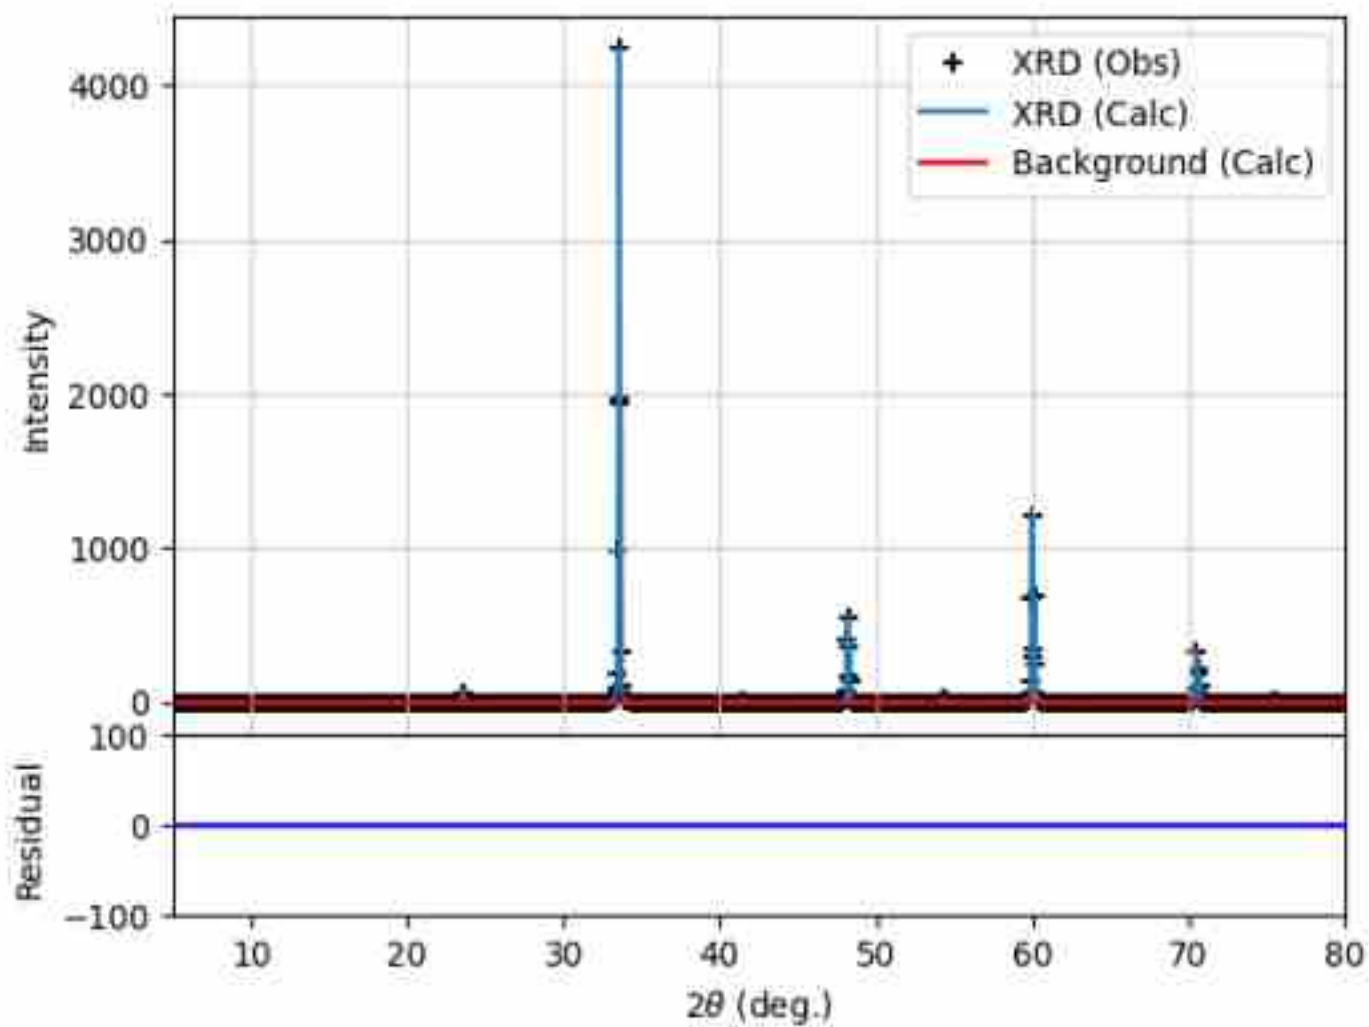

| RMSE before RR | Rwp     | RMSE after RR |
|----------------|---------|---------------|
| 0.001          | 0.01897 | 0.00054       |

# Yb<sub>2</sub>Pd<sub>1</sub>Au<sub>1</sub>

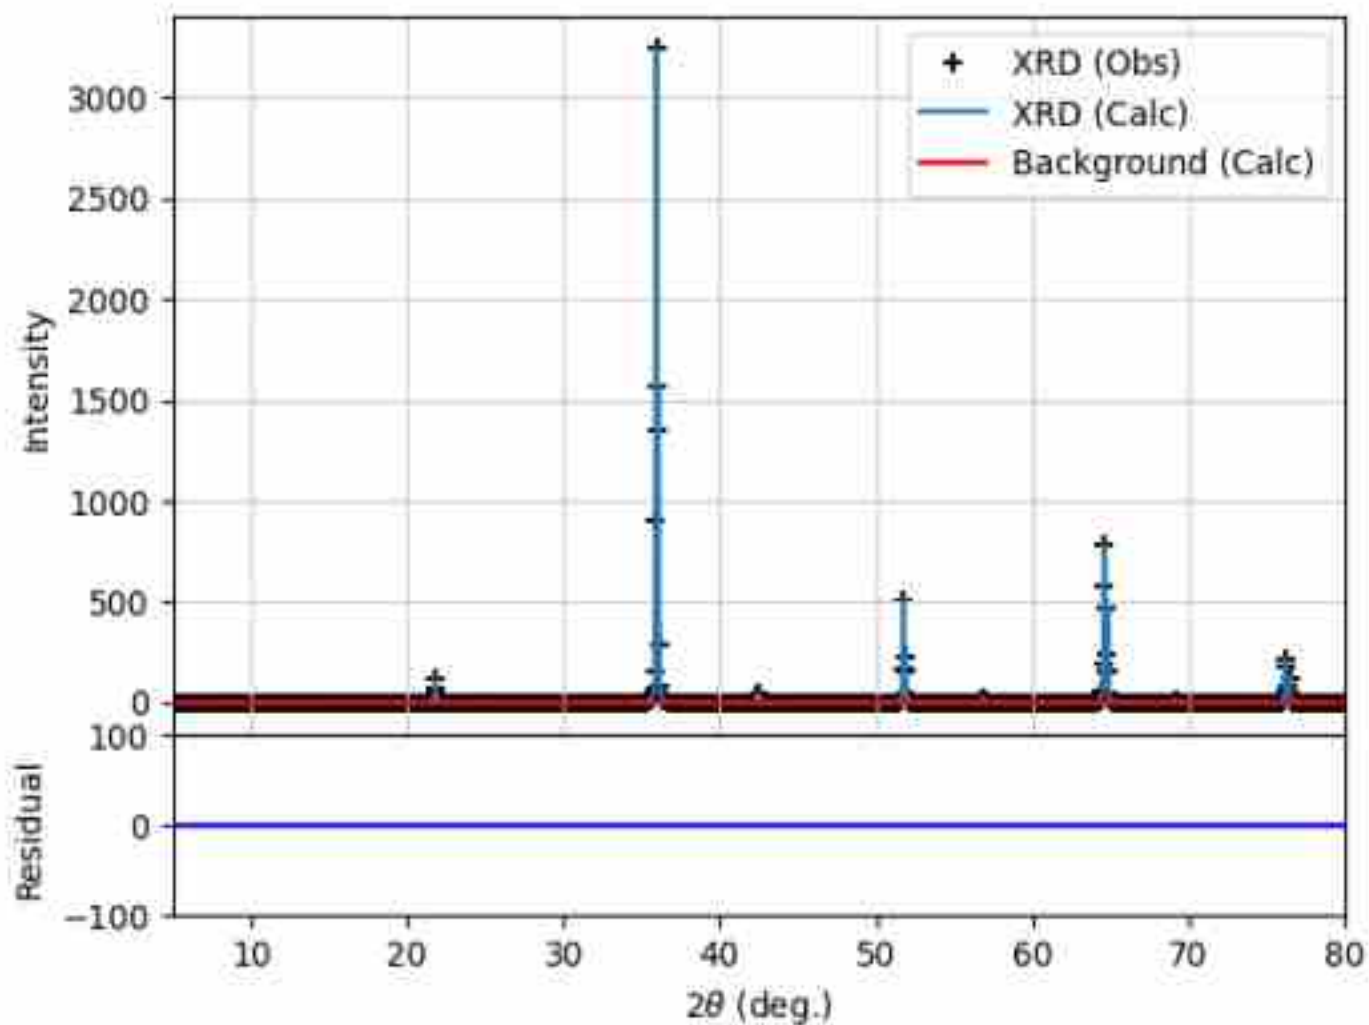

| RMSE before RR | Rwp     | RMSE after RR |
|----------------|---------|---------------|
| 0.001          | 0.04279 | 0.00096       |

# Yb2Pd1Rh1

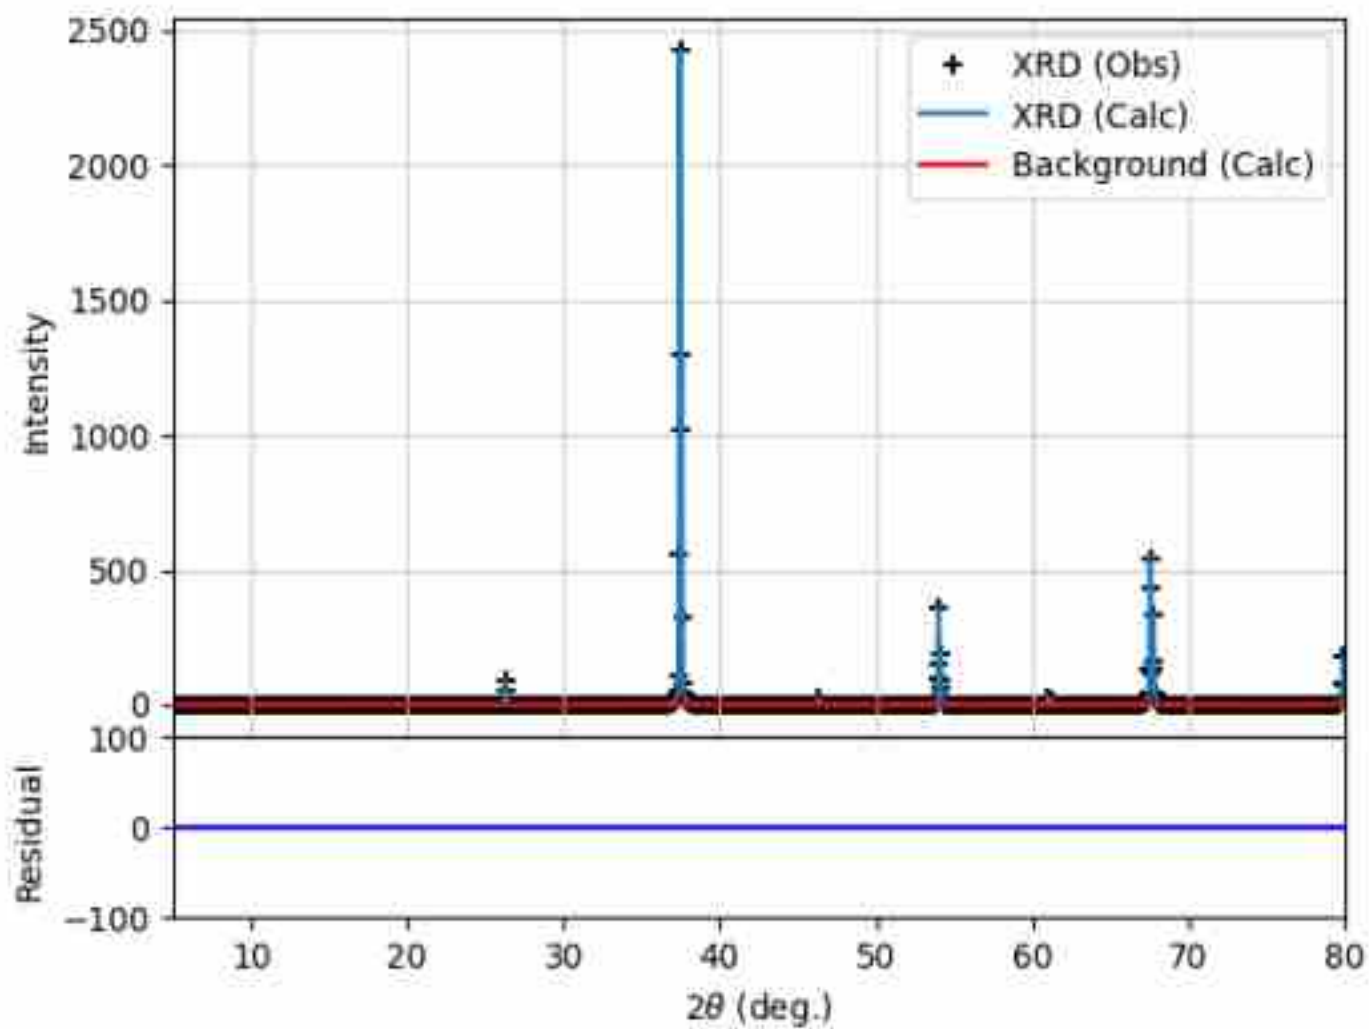

| RMSE before RR | Rwp     | RMSE after RR |
|----------------|---------|---------------|
| 0.001          | 0.00379 | 0.00042       |

# Yb<sub>2</sub>ZnIn<sub>1</sub>

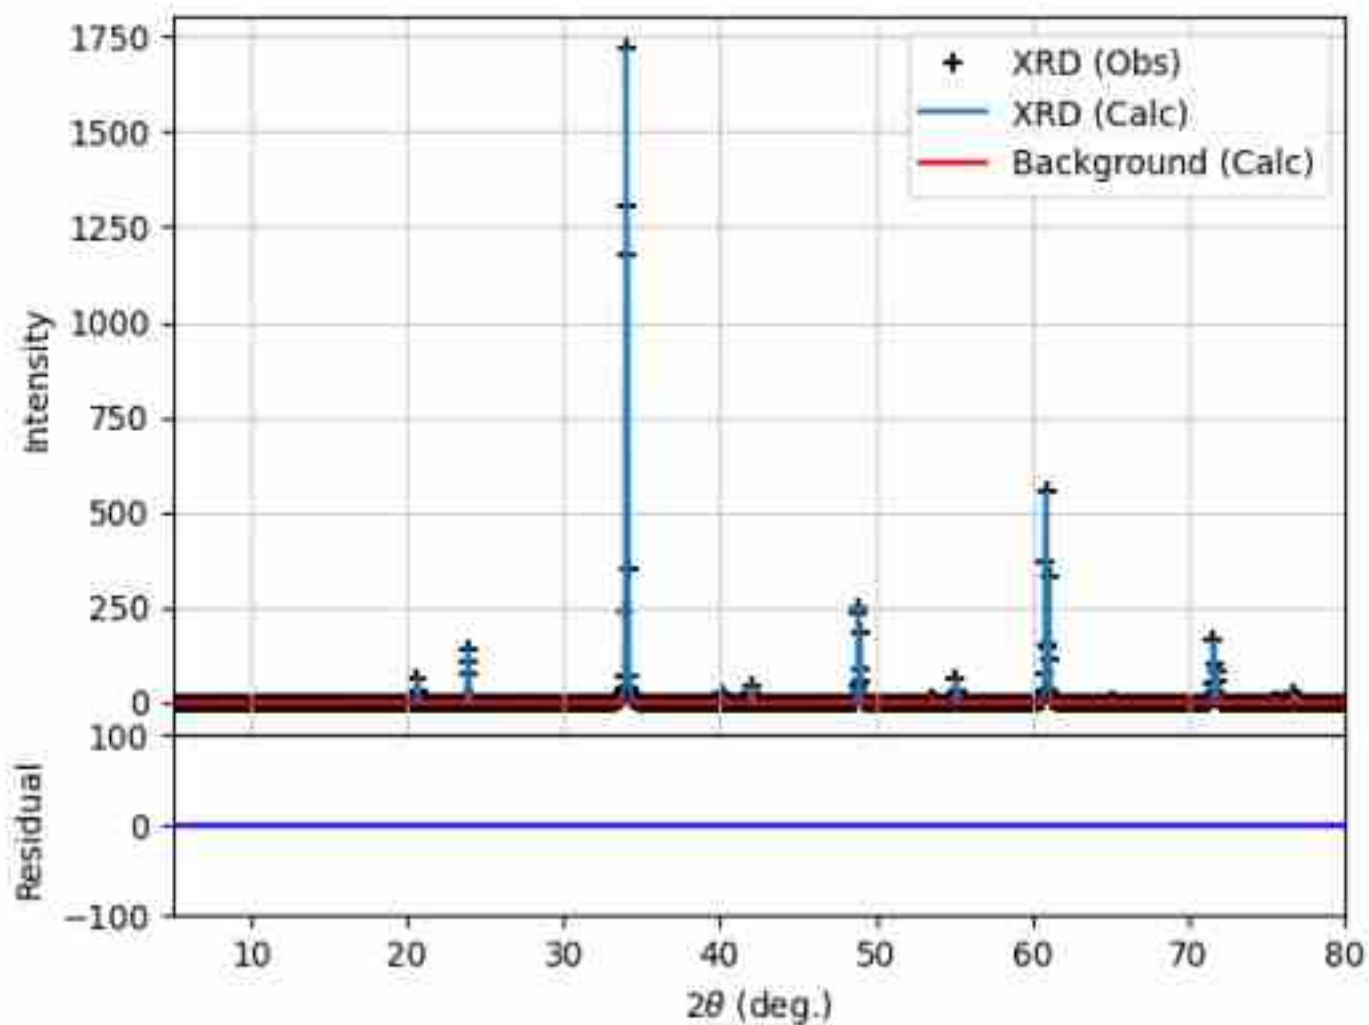

| RMSE before RR | Rwp     | RMSE after RR |
|----------------|---------|---------------|
| 0.001          | 0.00028 | 7e-05         |

# Yb<sub>2</sub>Zn<sub>1</sub>Pb<sub>1</sub>

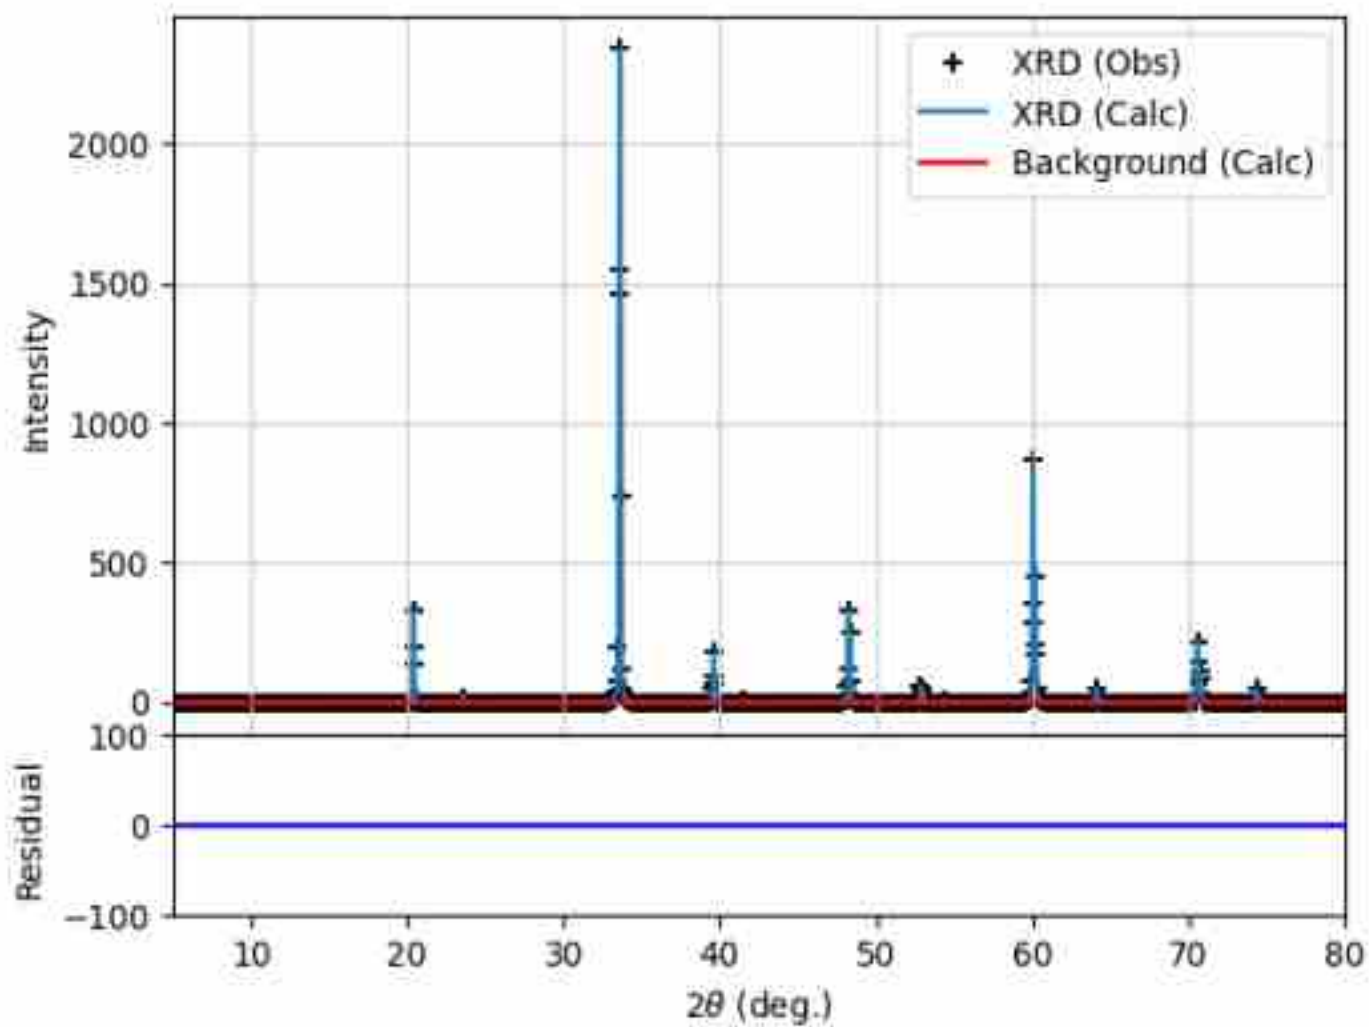

| RMSE before RR | Rwp     | RMSE after RR |
|----------------|---------|---------------|
| 0.001          | 0.00244 | 0.00011       |

# Yb3Cd1

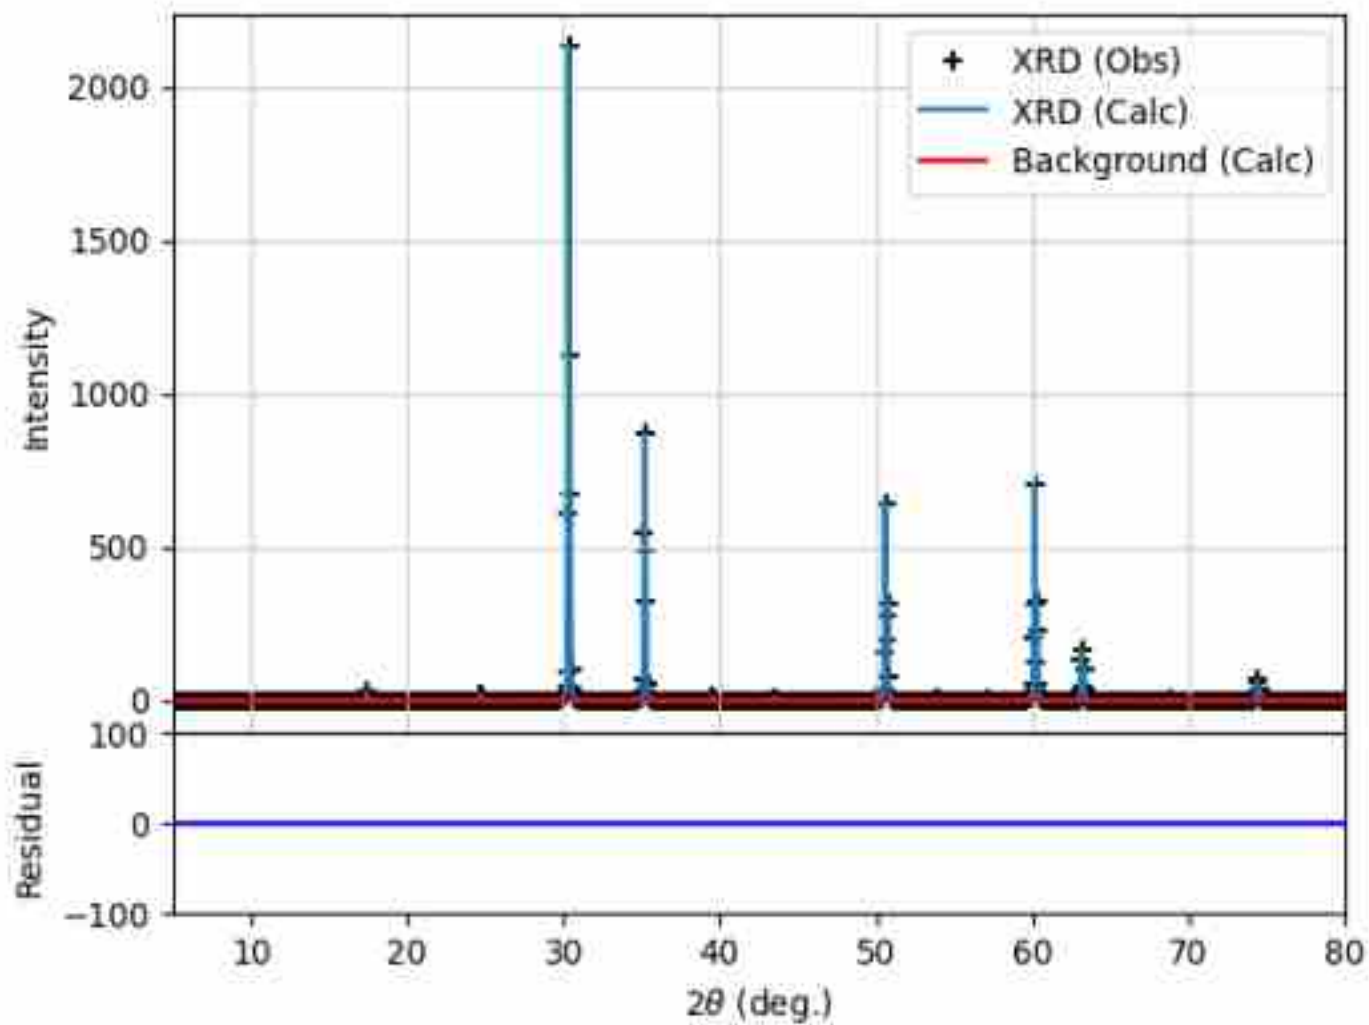

| RMSE before RR | Rwp     | RMSE after RR |
|----------------|---------|---------------|
| 0.001          | 0.00425 | 0.00042       |

# Yb3Mg1

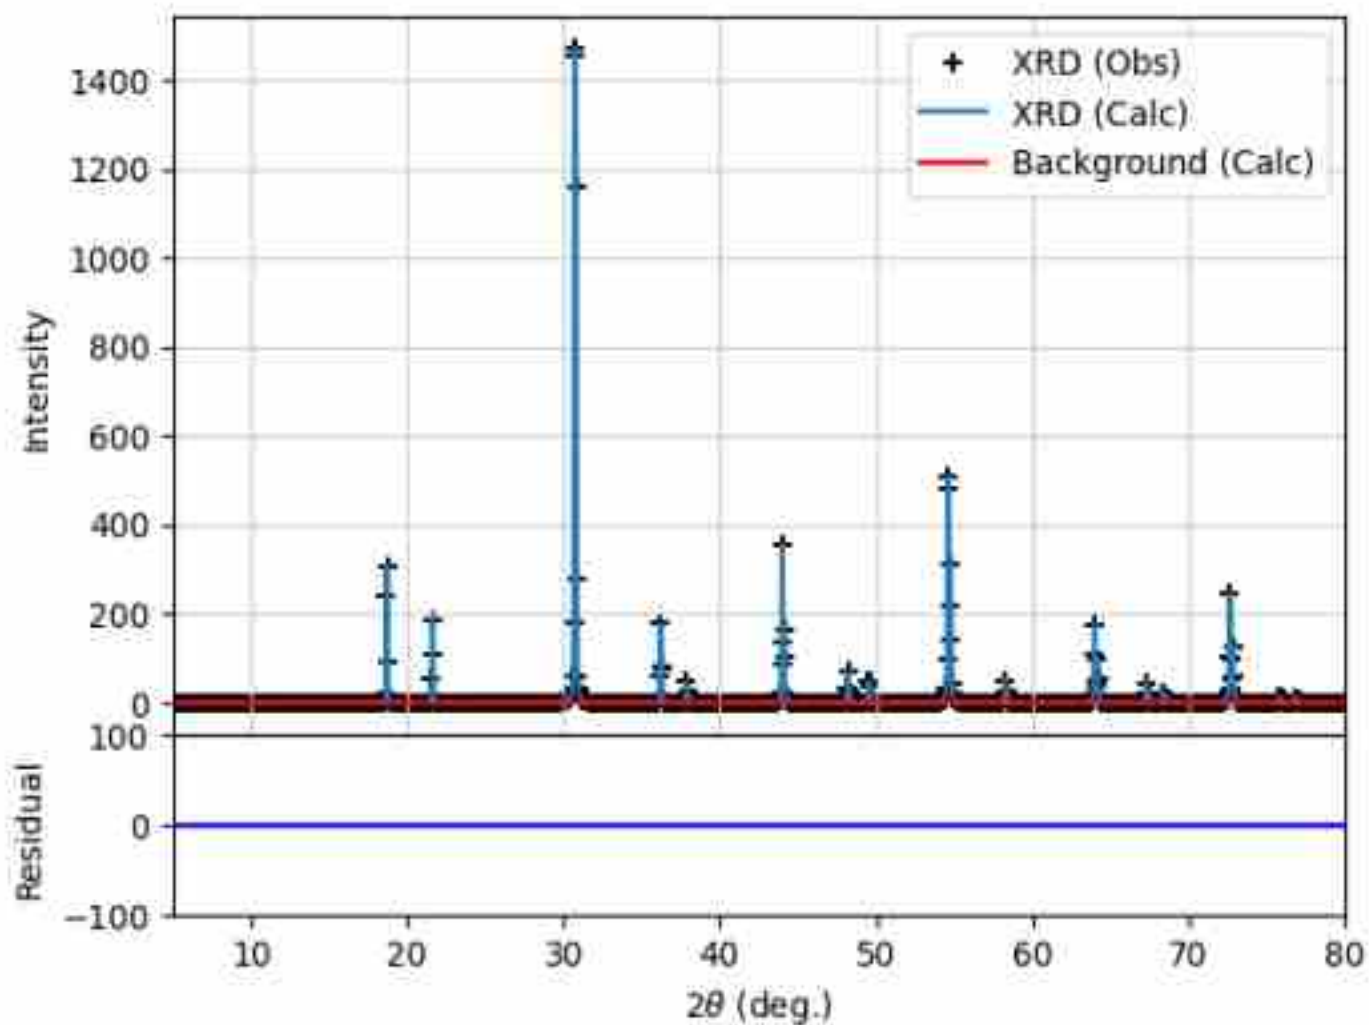

| RMSE before RR | Rwp     | RMSE after RR |
|----------------|---------|---------------|
| 0.001          | 0.00278 | 0.00044       |

# Zn1Cd3Se4

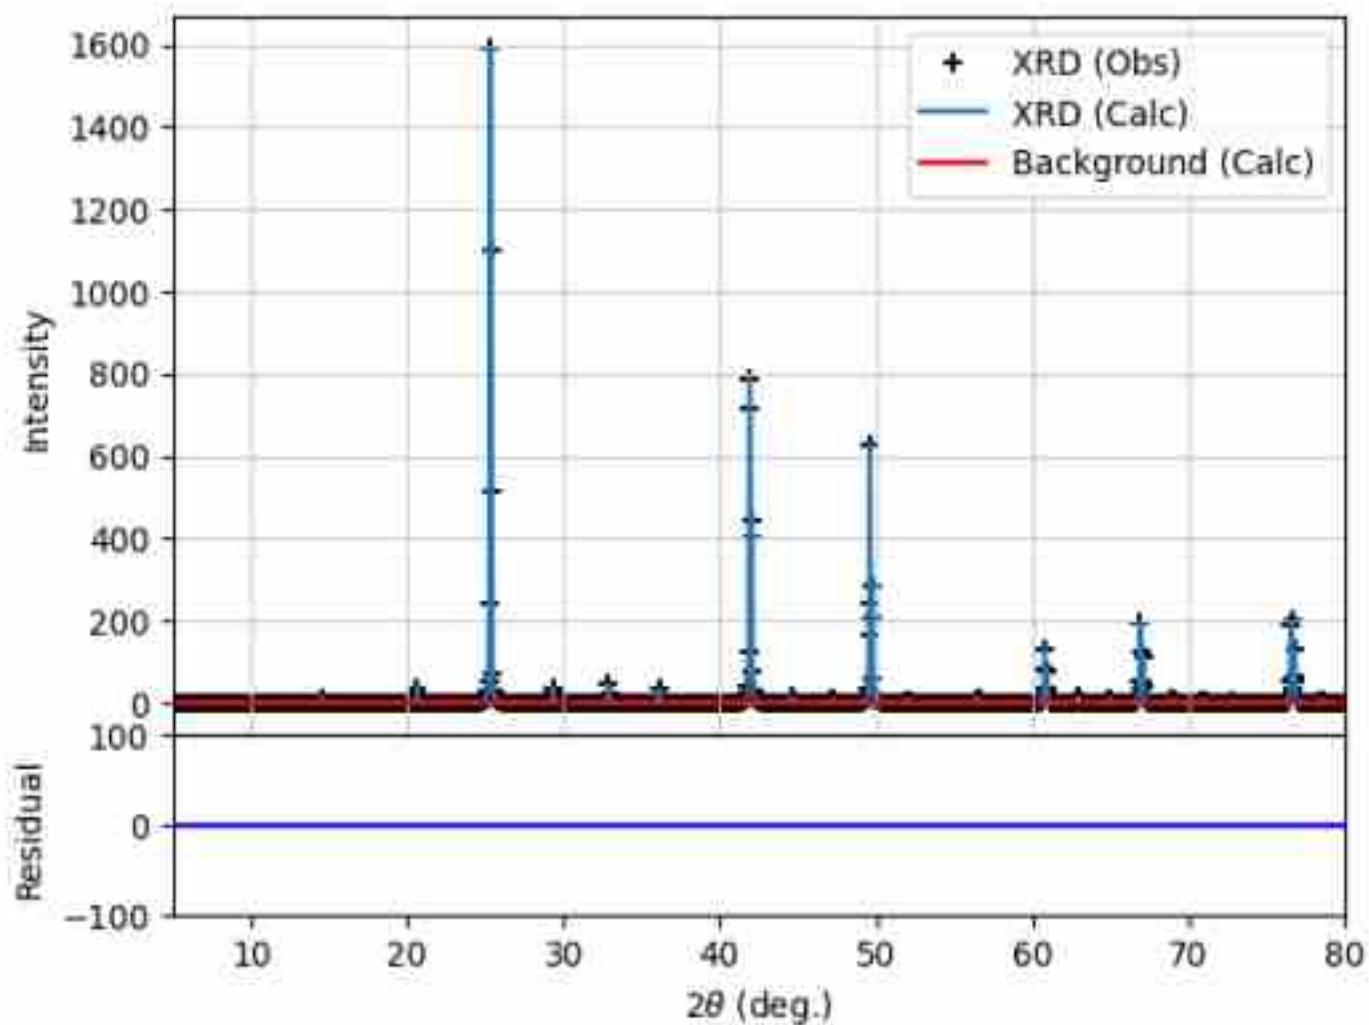

| RMSE before RR | Rwp     | RMSE after RR |
|----------------|---------|---------------|
| 0.01           | 0.01067 | 0.00123       |



# Zn1Co3

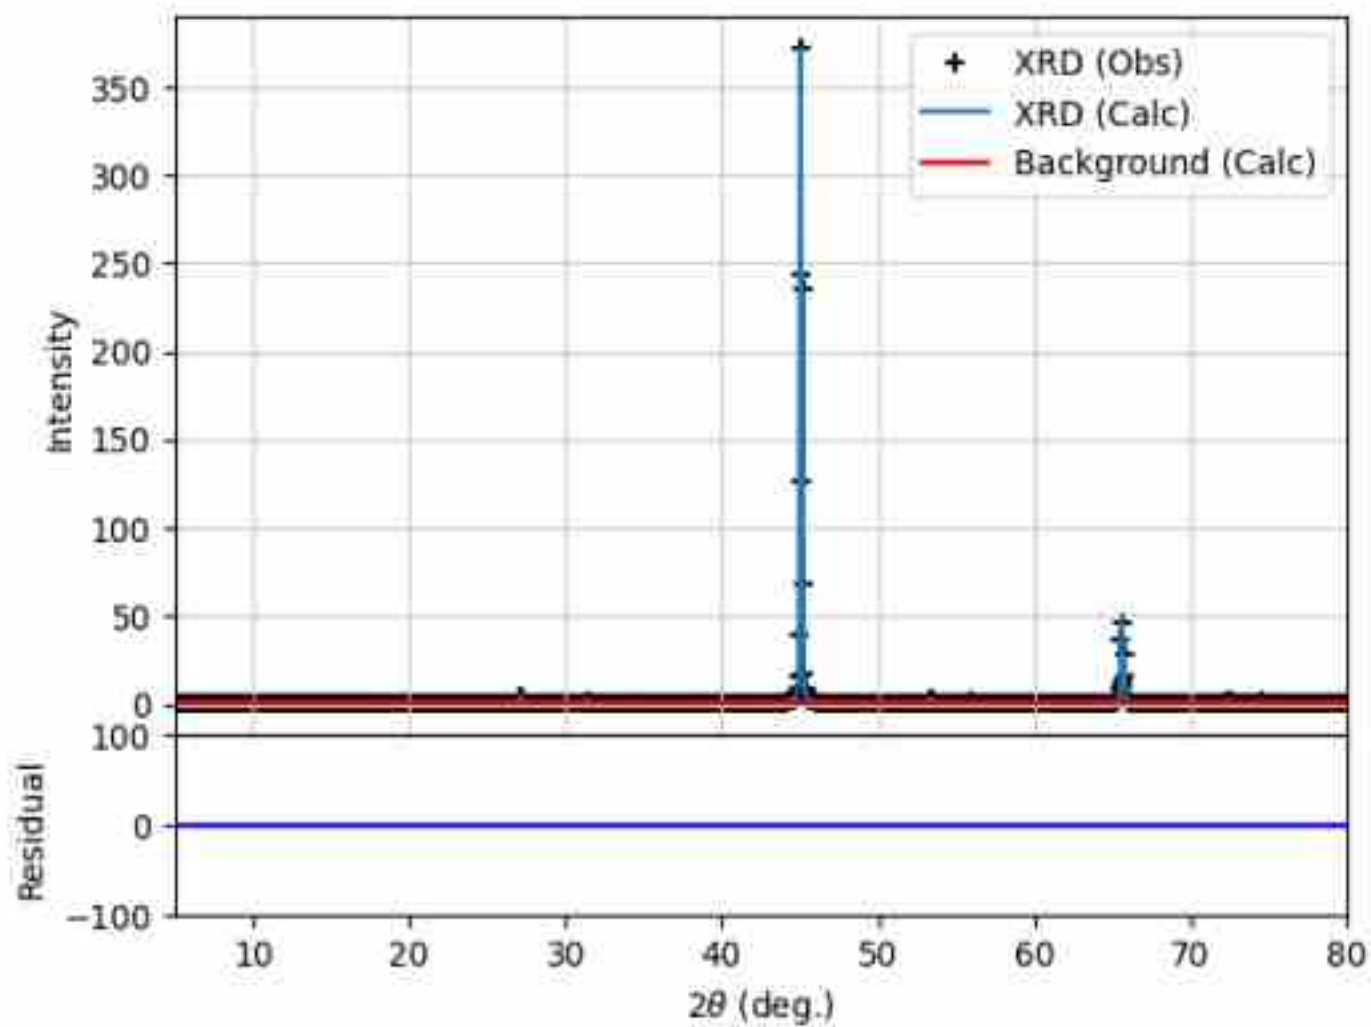

| RMSE before RR | Rwp    | RMSE after RR |
|----------------|--------|---------------|
| 0.001          | 0.0277 | 0.00096       |

# Zn1Cu1

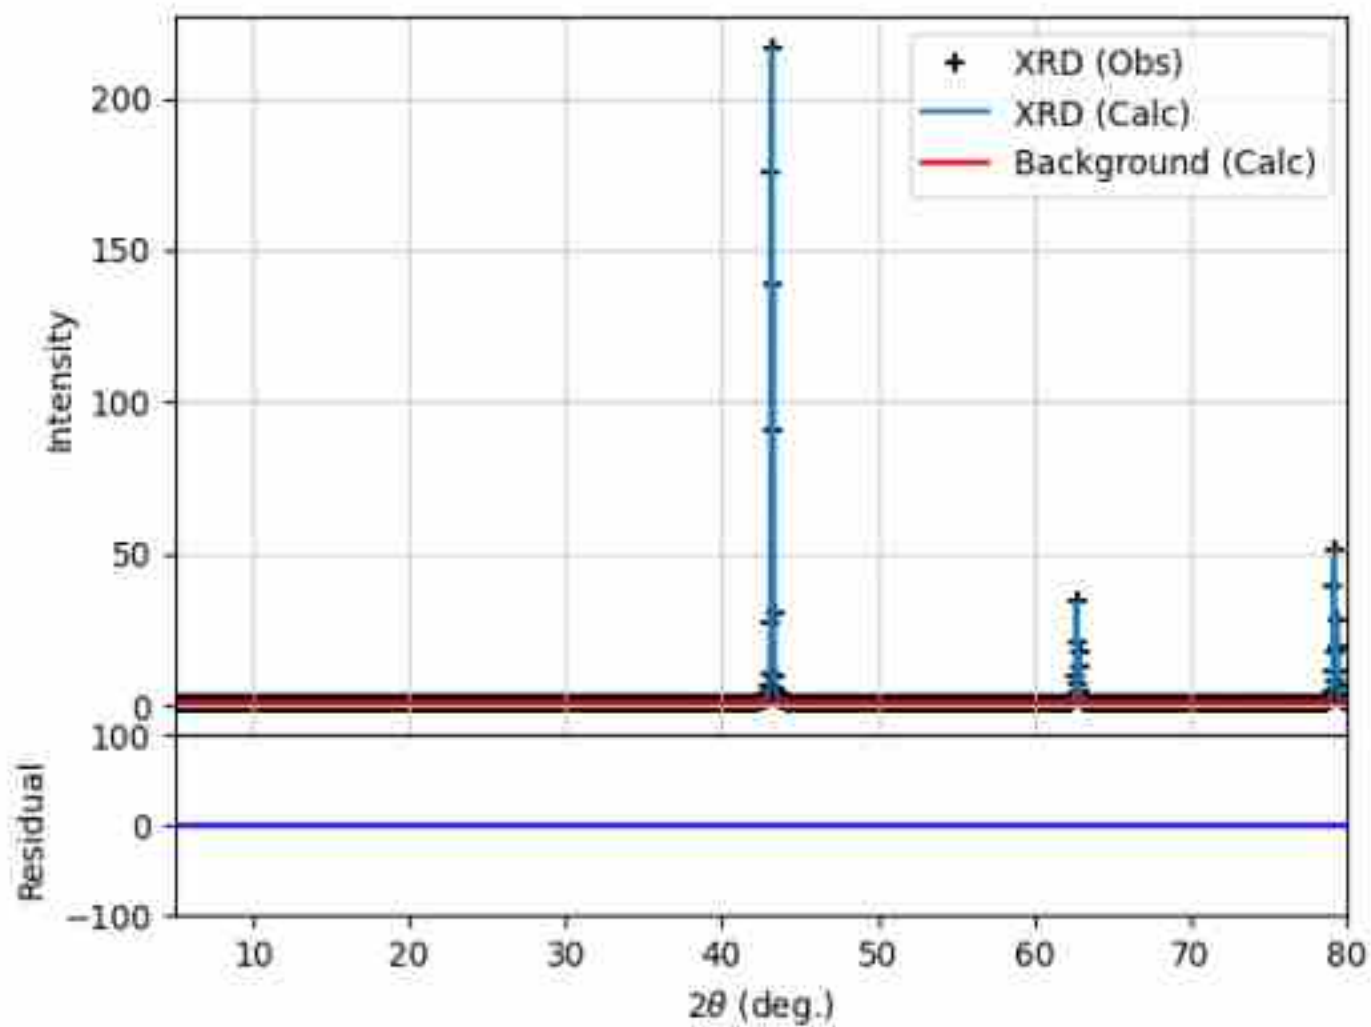

| RMSE before RR | Rwp     | RMSE after RR |
|----------------|---------|---------------|
| 0.001          | 0.00402 | 0.00032       |

Zn1Ga1Ni2

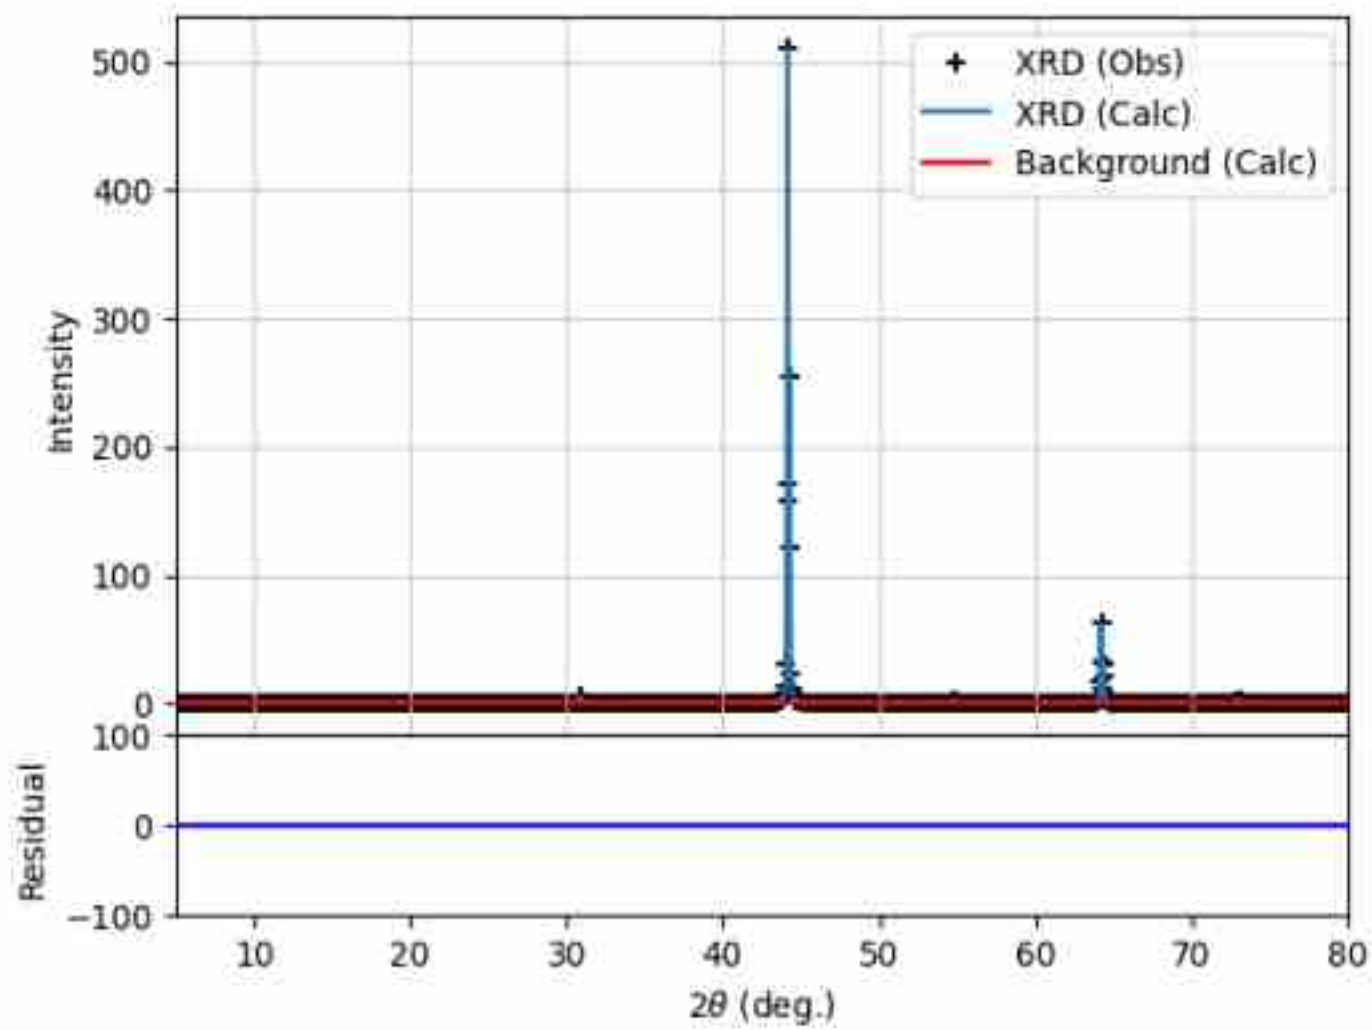

| RMSE before RR | Rwp     | RMSE after RR |
|----------------|---------|---------------|
| 0.001          | 0.00185 | 0.00044       |

# Zn<sub>1</sub>Hg<sub>1</sub>Te<sub>2</sub>

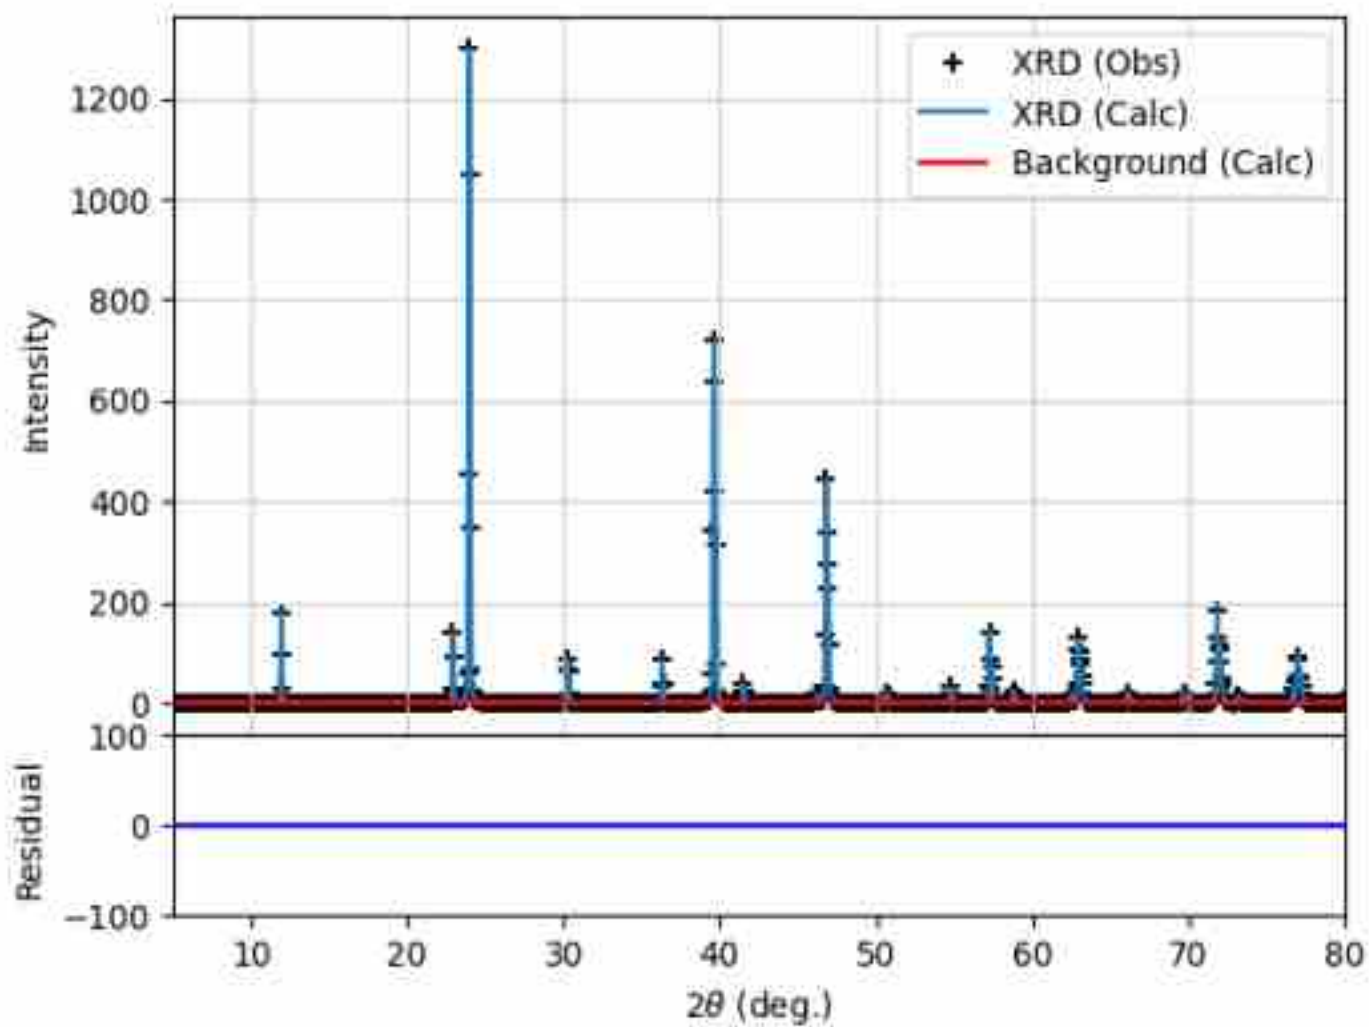

| RMSE before RR | Rwp     | RMSE after RR |
|----------------|---------|---------------|
| 0.01           | 0.00271 | 0.00012       |

# Zn1Ni1

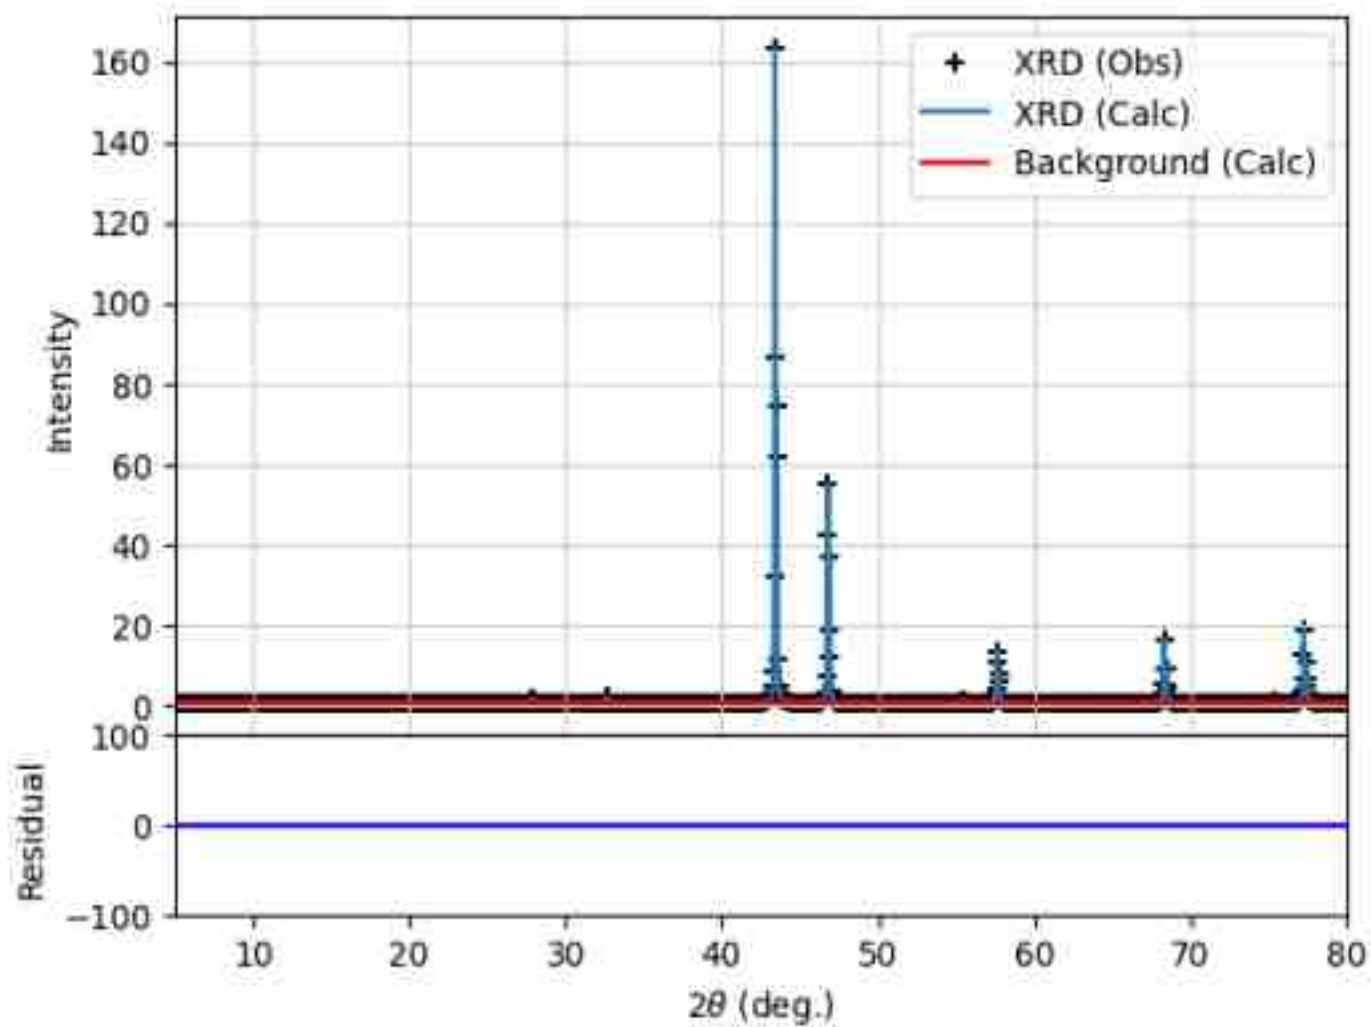

| RMSE before RR | Rwp     | RMSE after RR |
|----------------|---------|---------------|
| 0.001          | 0.02483 | 0.00086       |

# Zn<sub>2</sub>Ni<sub>1</sub>Rh<sub>1</sub>

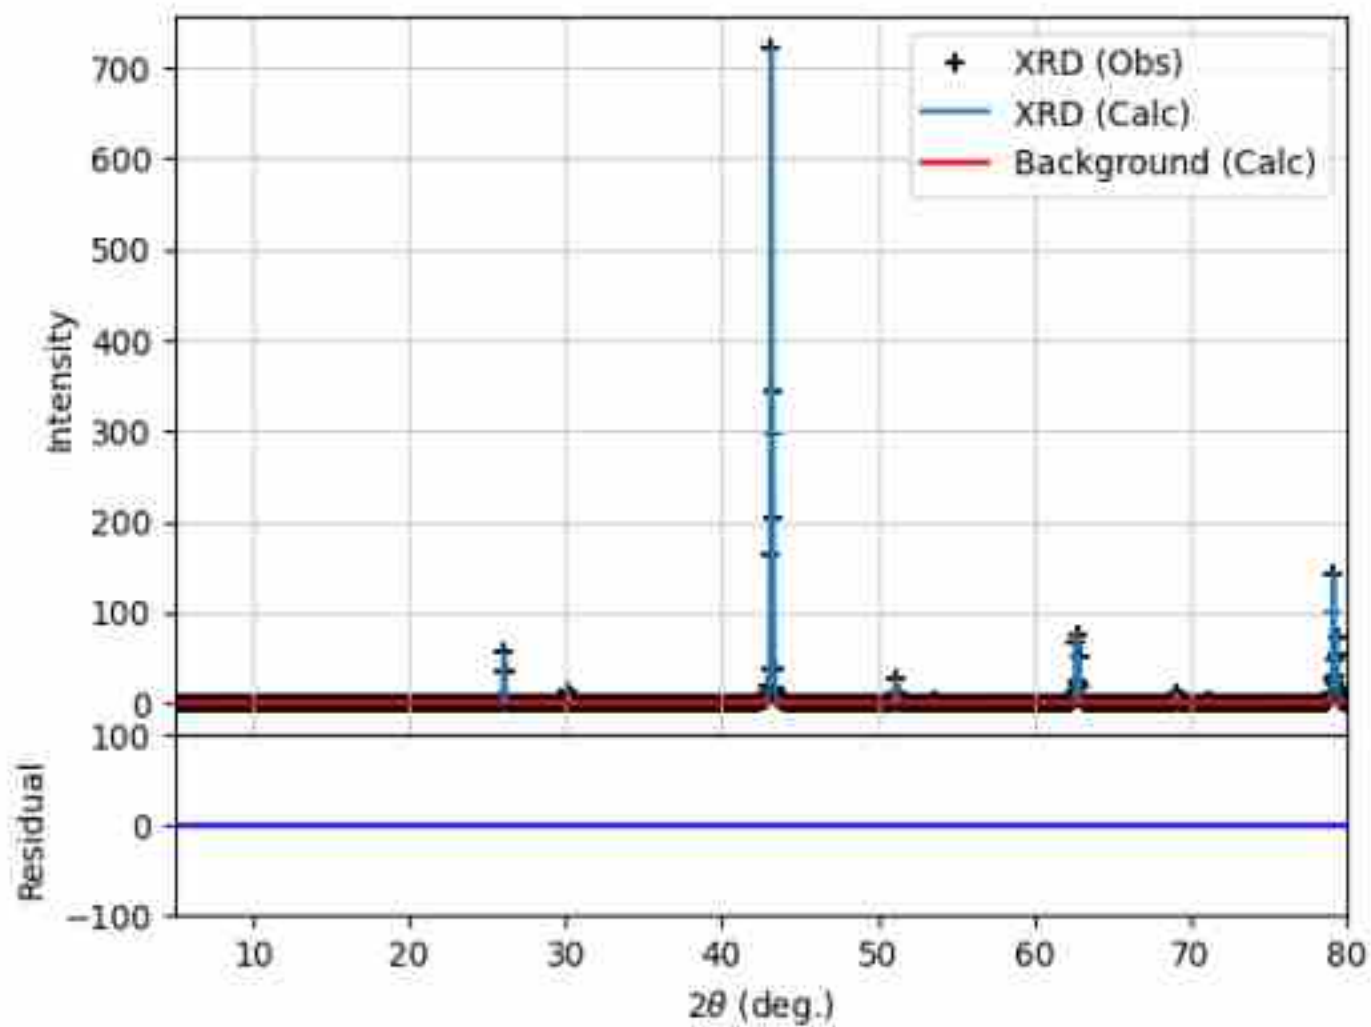

| RMSE before RR | Rwp     | RMSE after RR |
|----------------|---------|---------------|
| 0.001          | 0.00083 | 0.00025       |

# Zn<sub>3</sub>Pd<sub>1</sub>

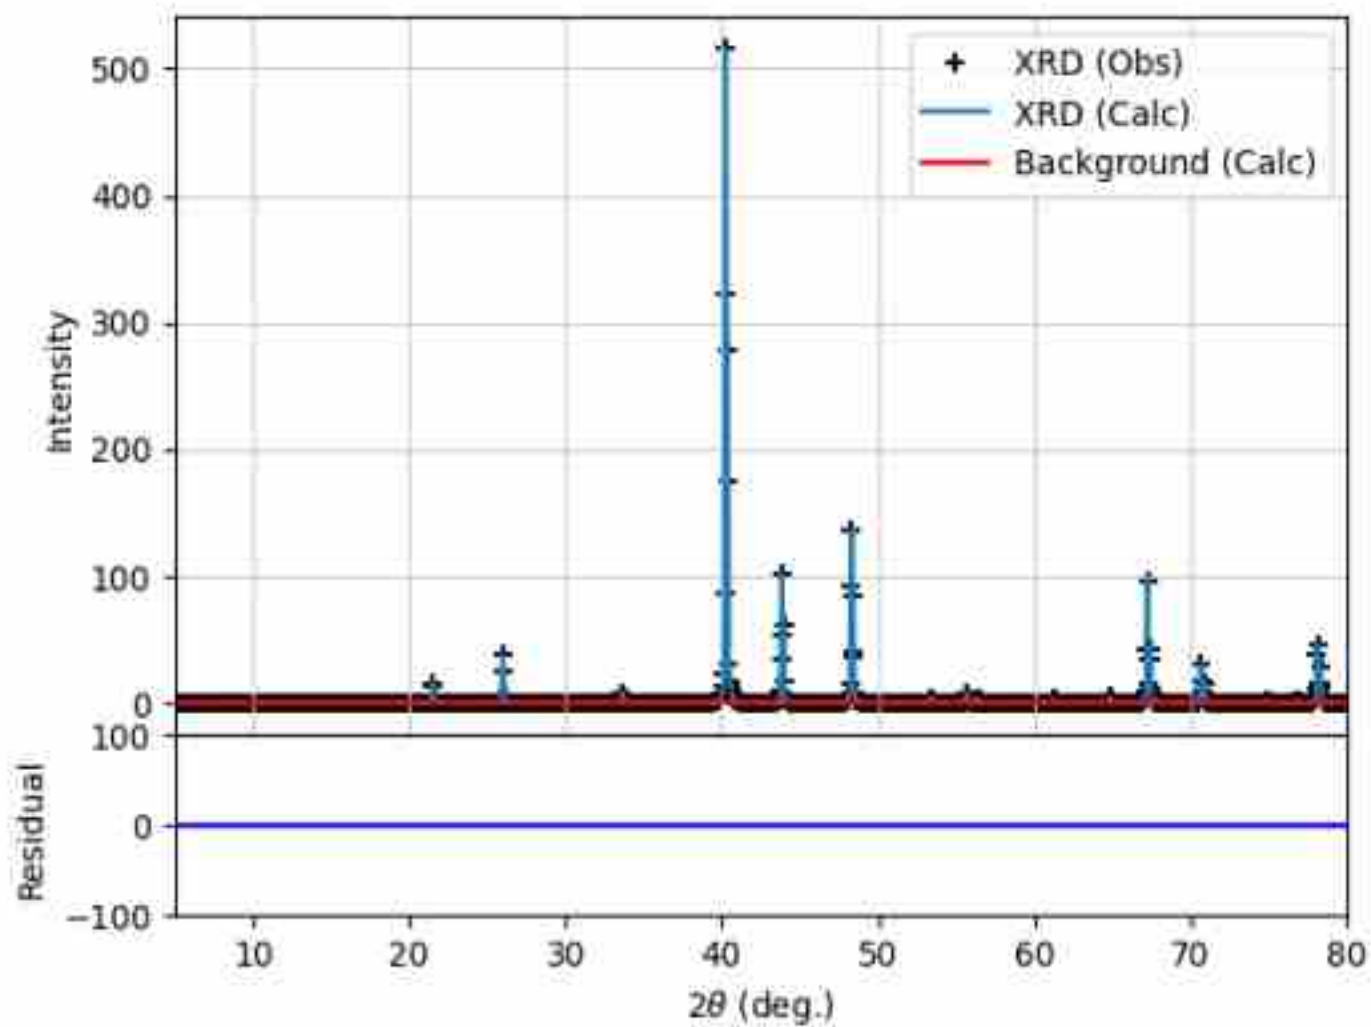

| RMSE before RR | Rwp     | RMSE after RR |
|----------------|---------|---------------|
| 0.001          | 0.00308 | 0.00043       |

# Zr1Au1

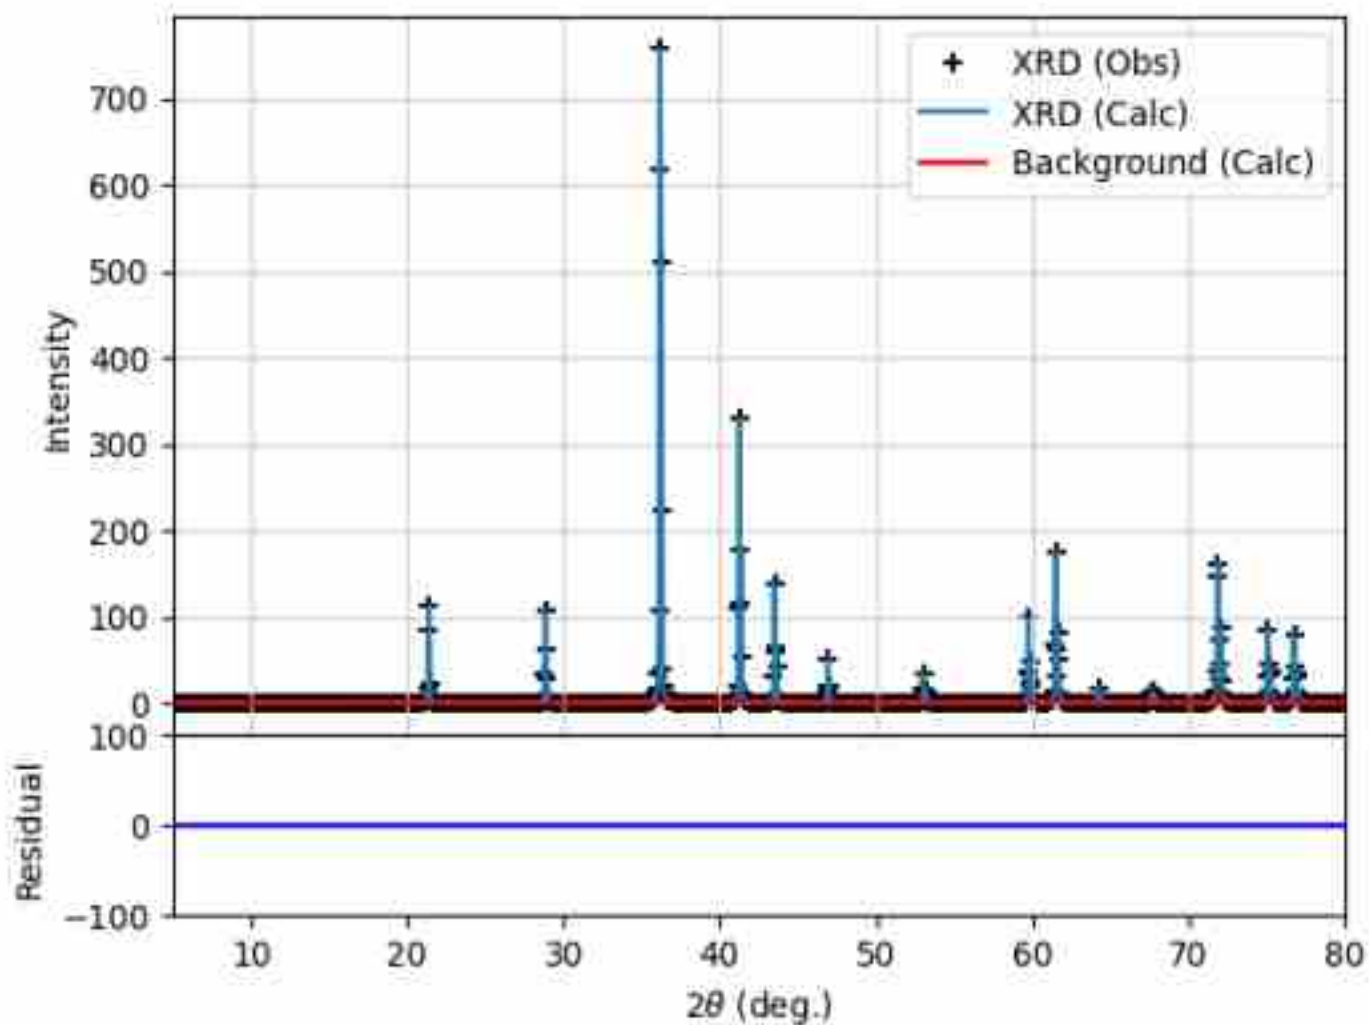

| RMSE before RR | Rwp    | RMSE after RR |
|----------------|--------|---------------|
| 0.001          | 0.0244 | 0.00057       |



# Zr1Au2

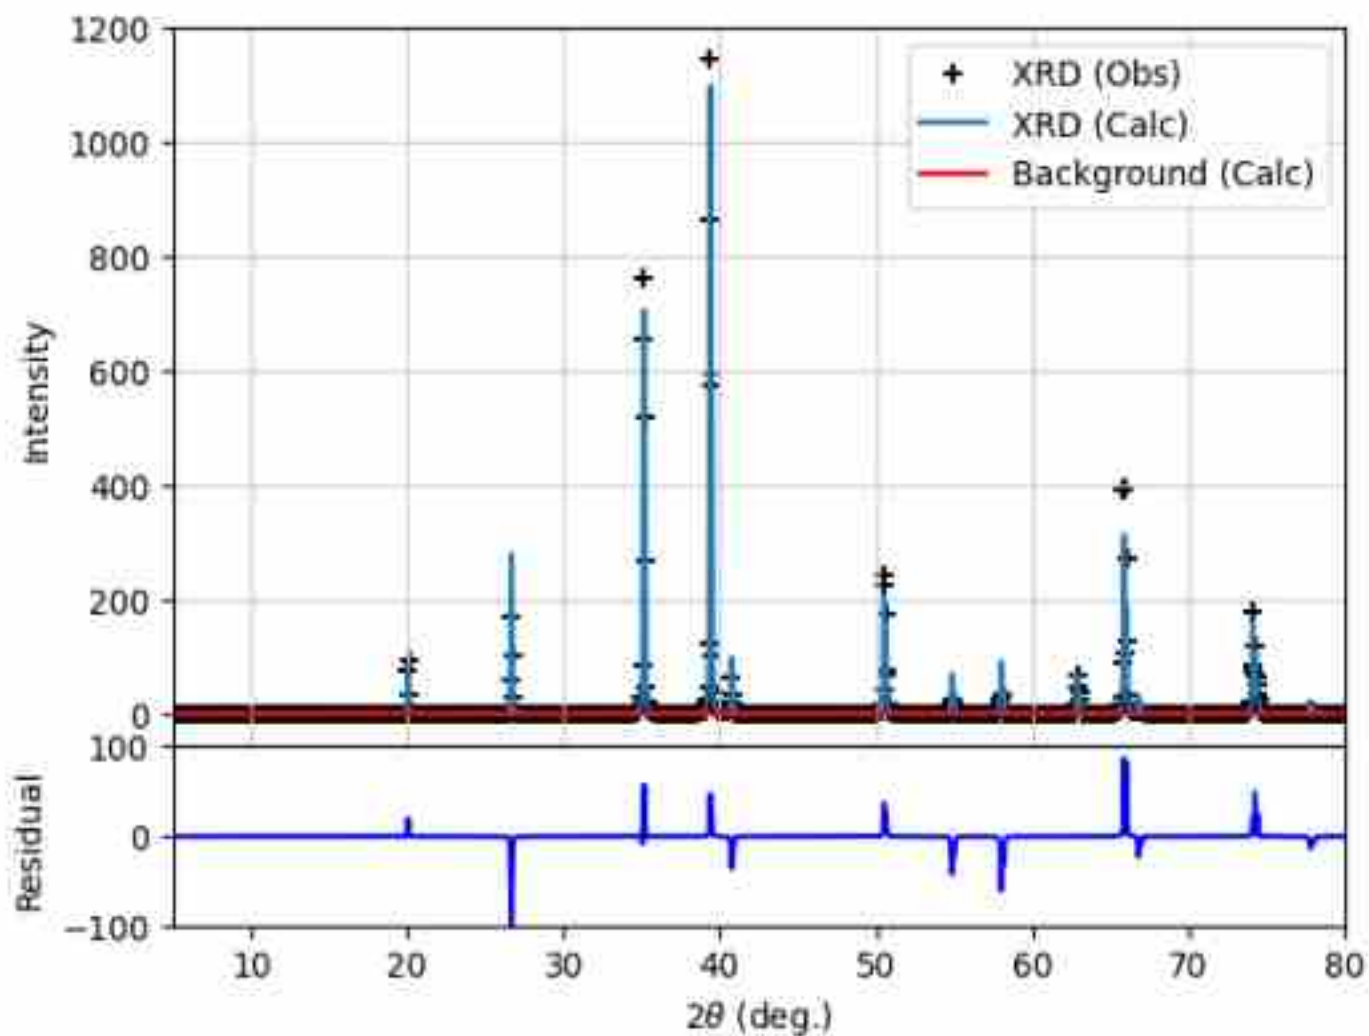

| RMSE before RR | Rwp      | RMSE after RR |
|----------------|----------|---------------|
| 0.01           | 32.45956 | 0.2303        |

# Zr1Cd1Ag2

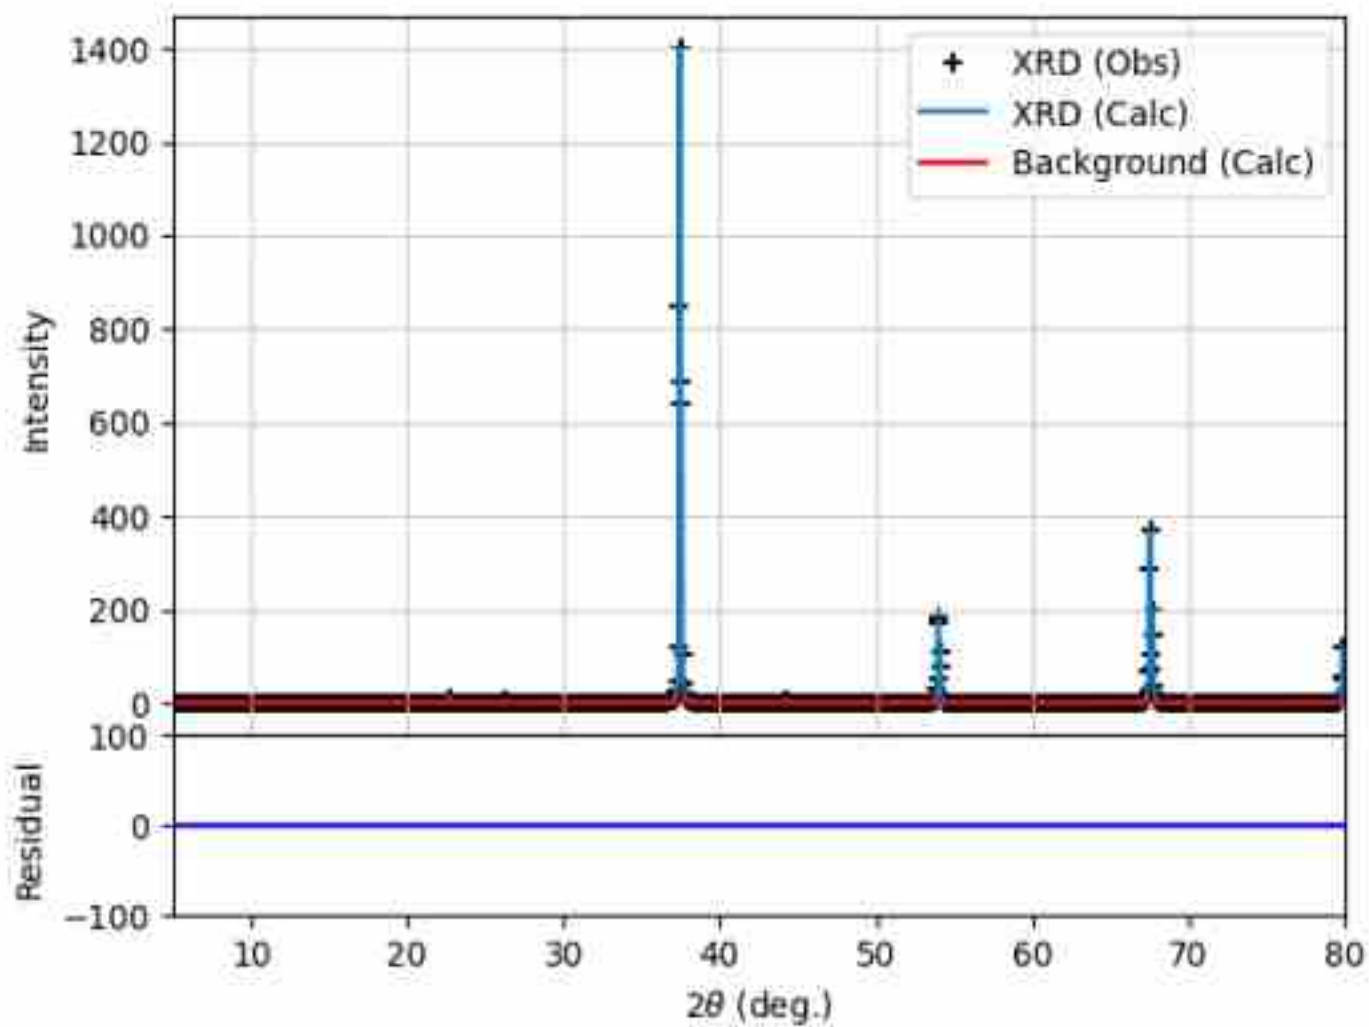

| RMSE before RR | Rwp     | RMSE after RR |
|----------------|---------|---------------|
| 0.001          | 0.00367 | 0.00304       |

# Zr1Fe6Ge6

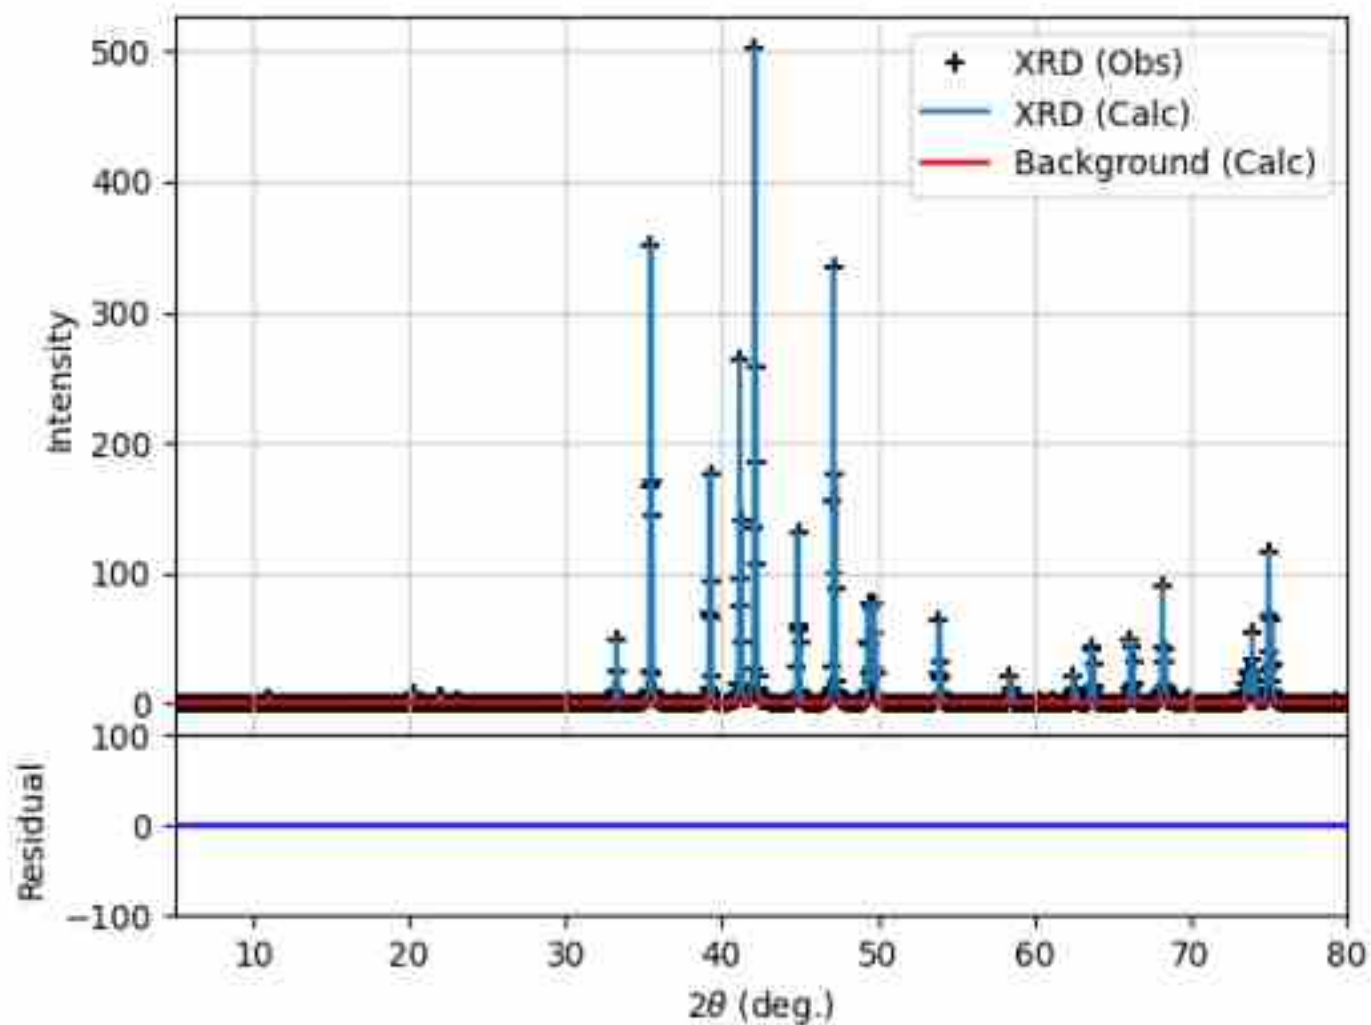

| RMSE before RR | Rwp     | RMSE after RR |
|----------------|---------|---------------|
| 0.01           | 0.00528 | 0.00115       |

# Zr1Ga1Ru2

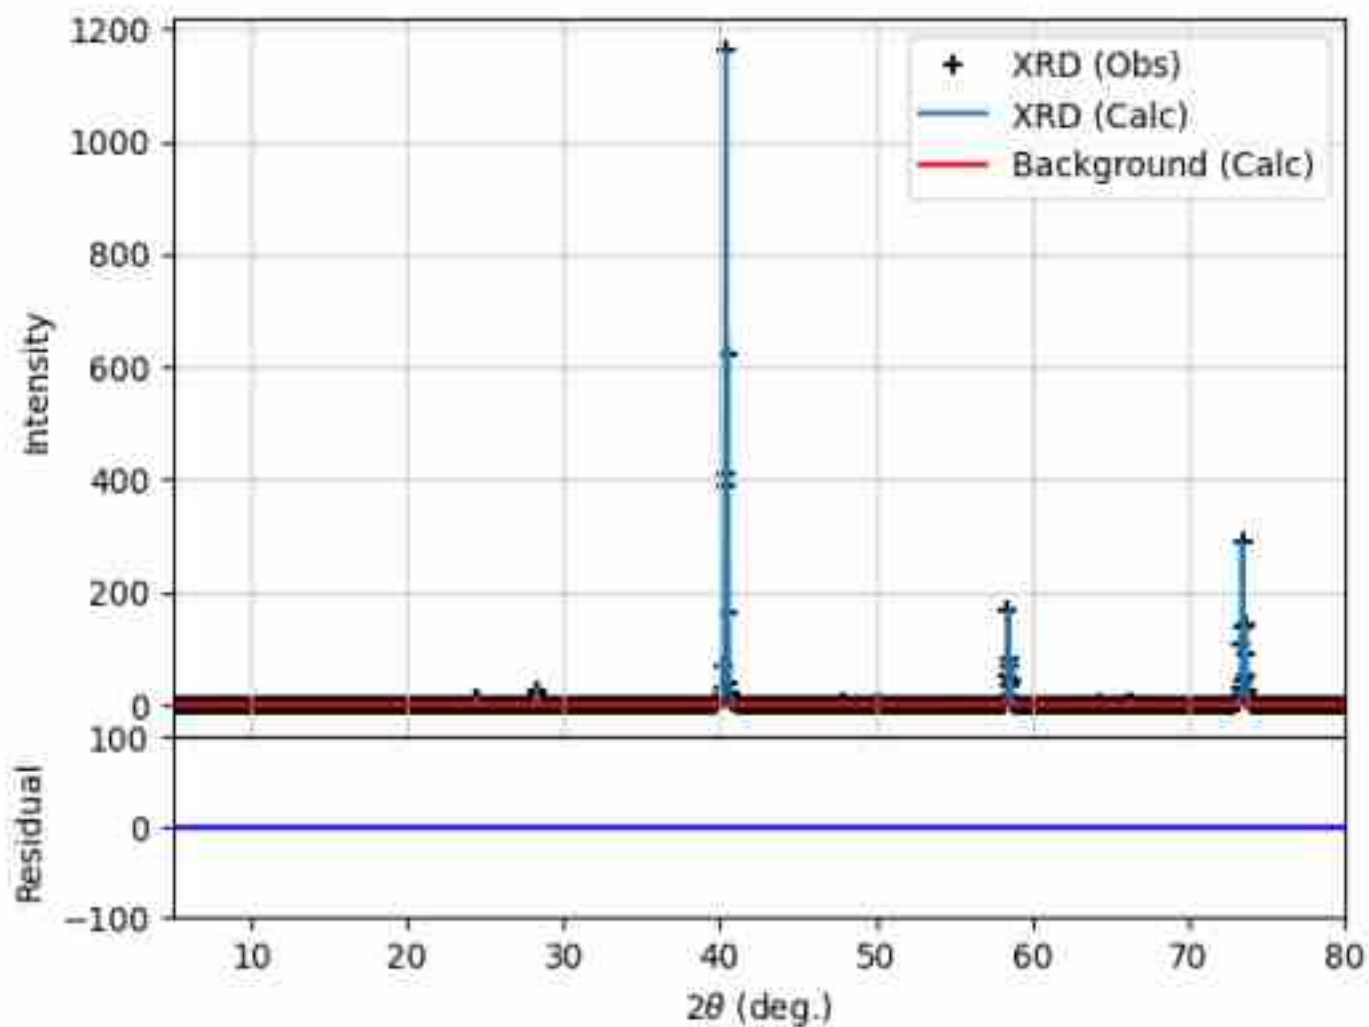

| RMSE before RR | Rwp     | RMSE after RR |
|----------------|---------|---------------|
| 0.001          | 0.01051 | 0.00353       |

# Zr1In1Pt2

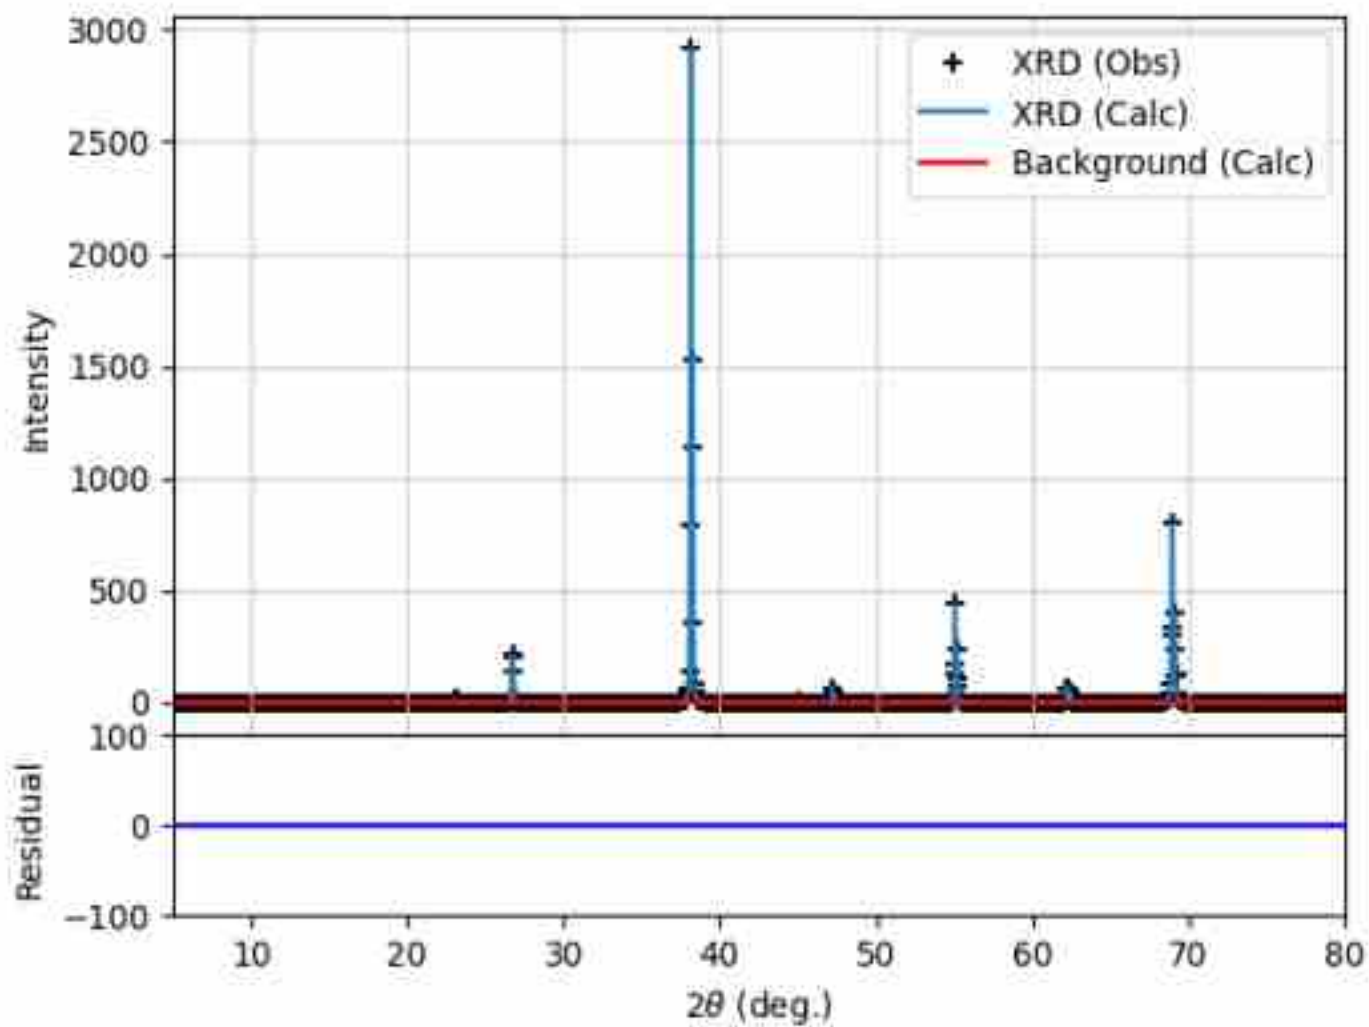

| RMSE before RR | Rwp   | RMSE after RR |
|----------------|-------|---------------|
| 0.001          | 2e-05 | 3e-05         |

# Zr1In1Rh2

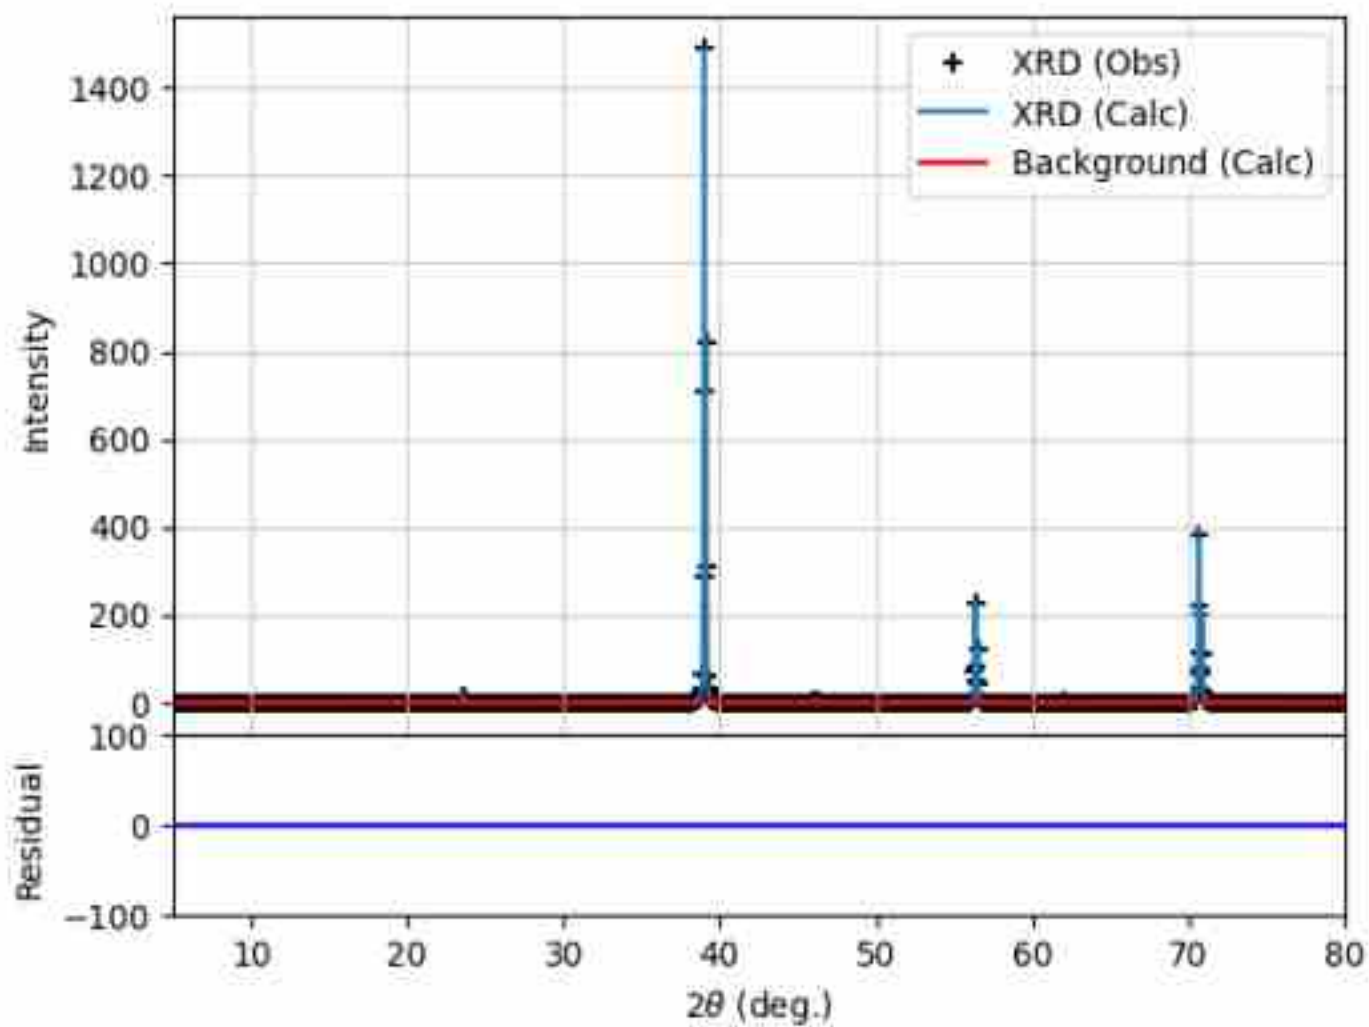

| RMSE before RR | Rwp     | RMSE after RR |
|----------------|---------|---------------|
| 0.001          | 0.02892 | 0.00106       |

# Zr1Ir3

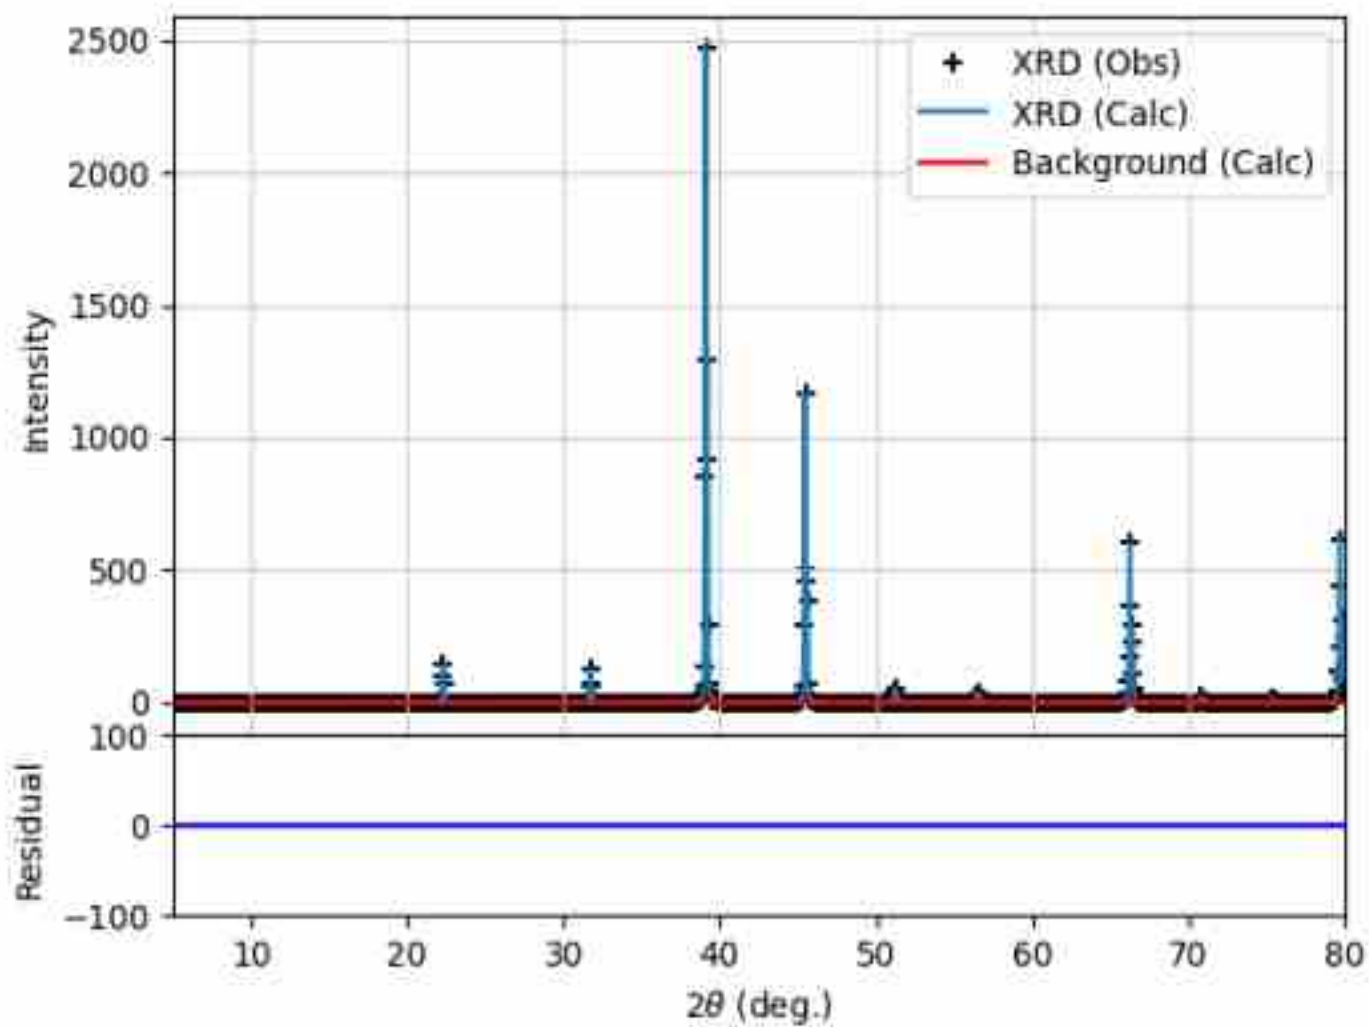

| RMSE before RR | Rwp    | RMSE after RR |
|----------------|--------|---------------|
| 0.001          | 0.0185 | 0.00123       |

# Zr1P1

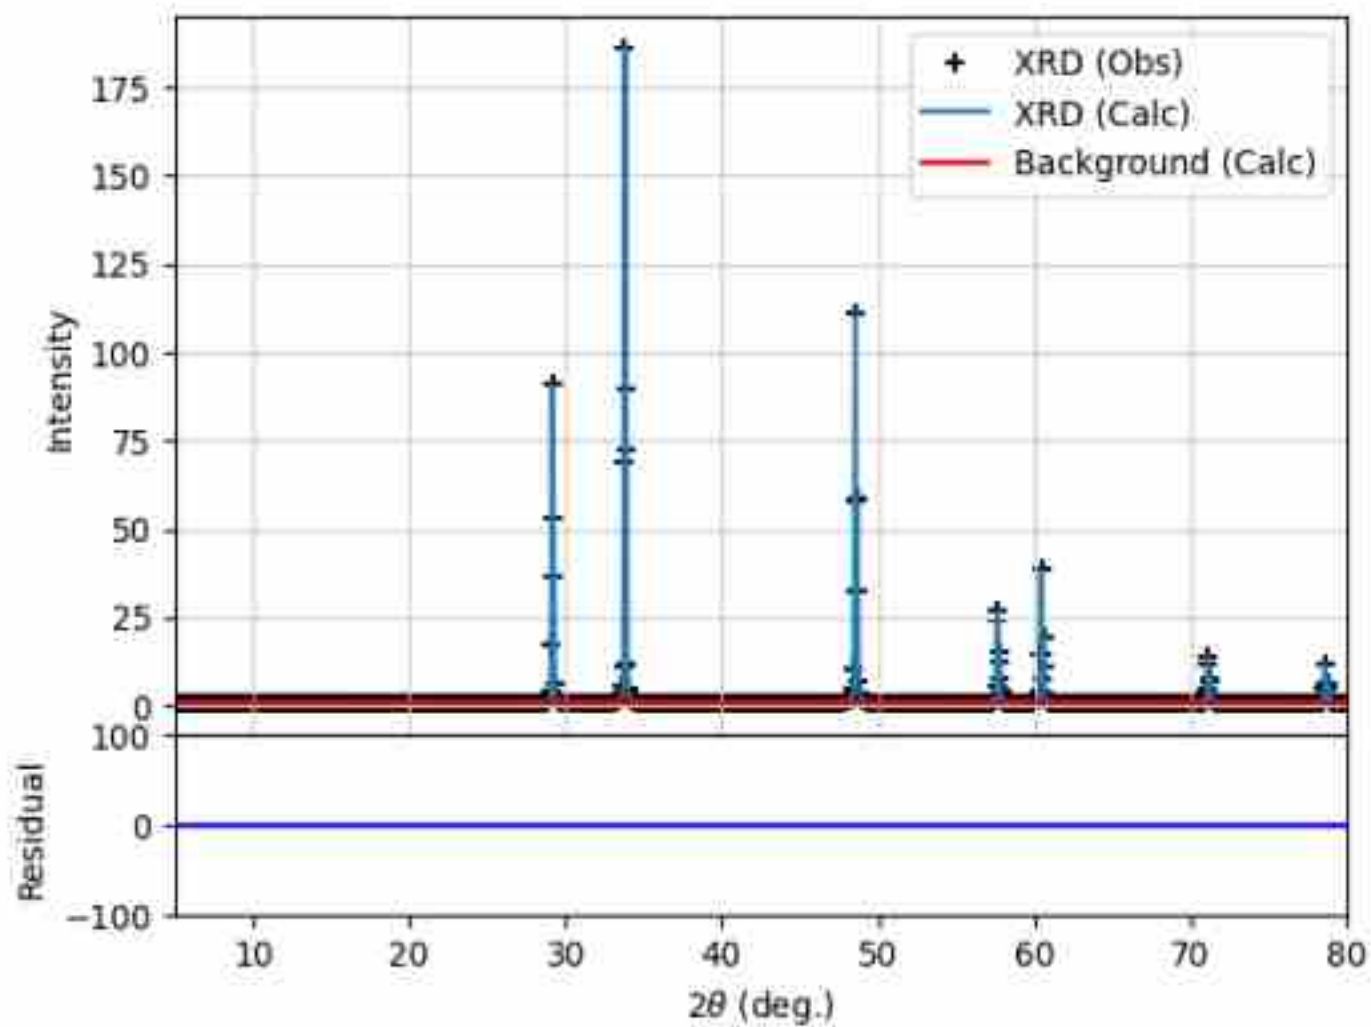

| RMSE before RR | Rwp     | RMSE after RR |
|----------------|---------|---------------|
| 0.001          | 0.00255 | 0.0001        |



# Zr1Sc1Os2

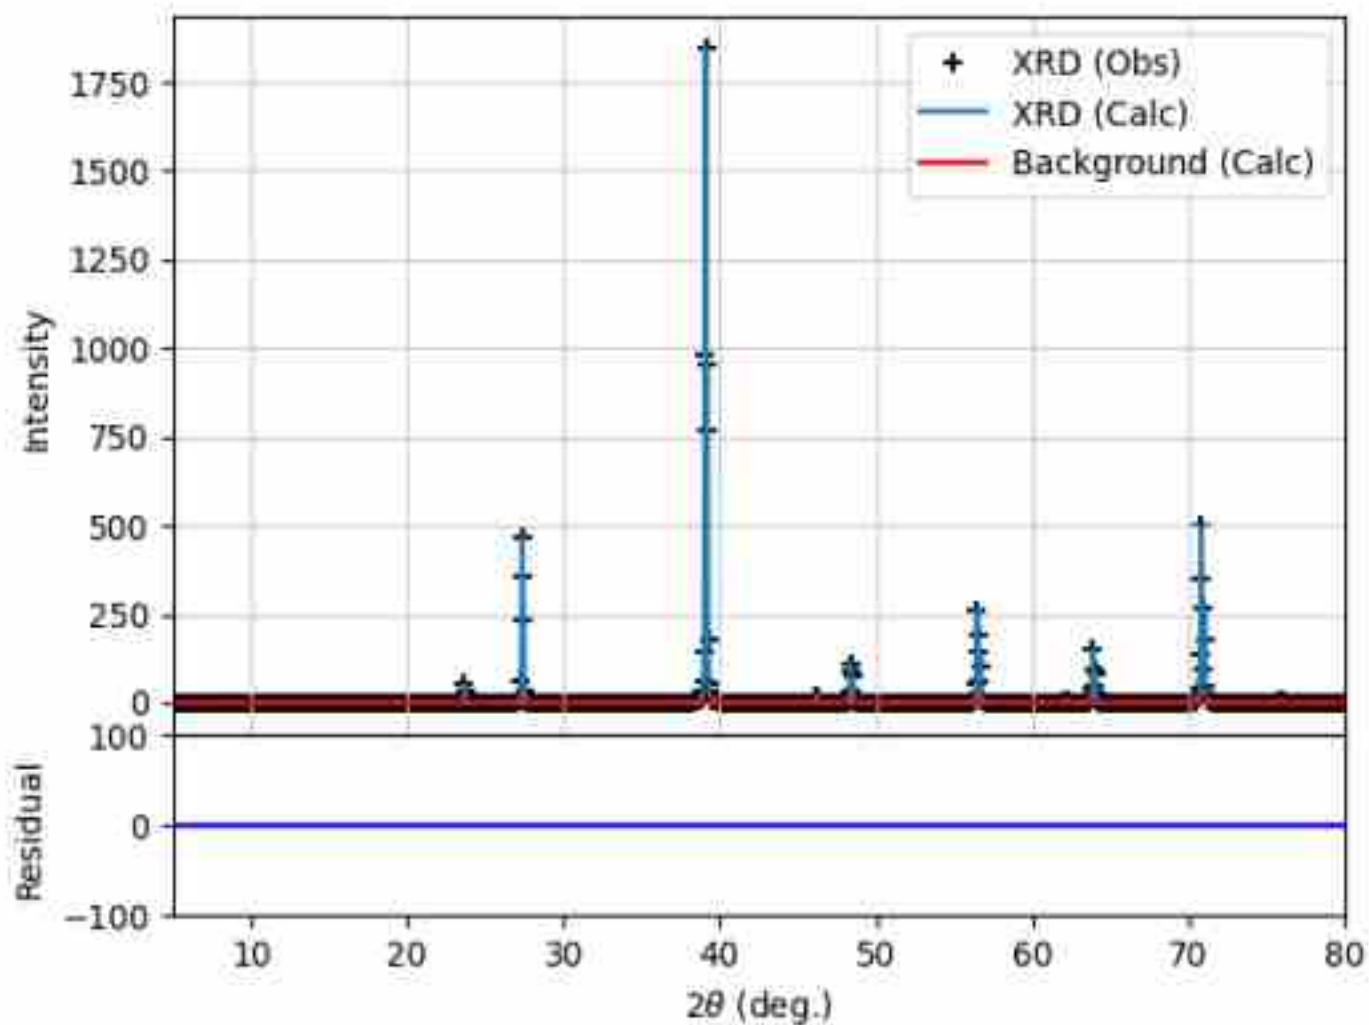

| RMSE before RR | Rwp    | RMSE after RR |
|----------------|--------|---------------|
| 0.001          | 0.0008 | 0.00033       |

# Zr1Sc1Ru2

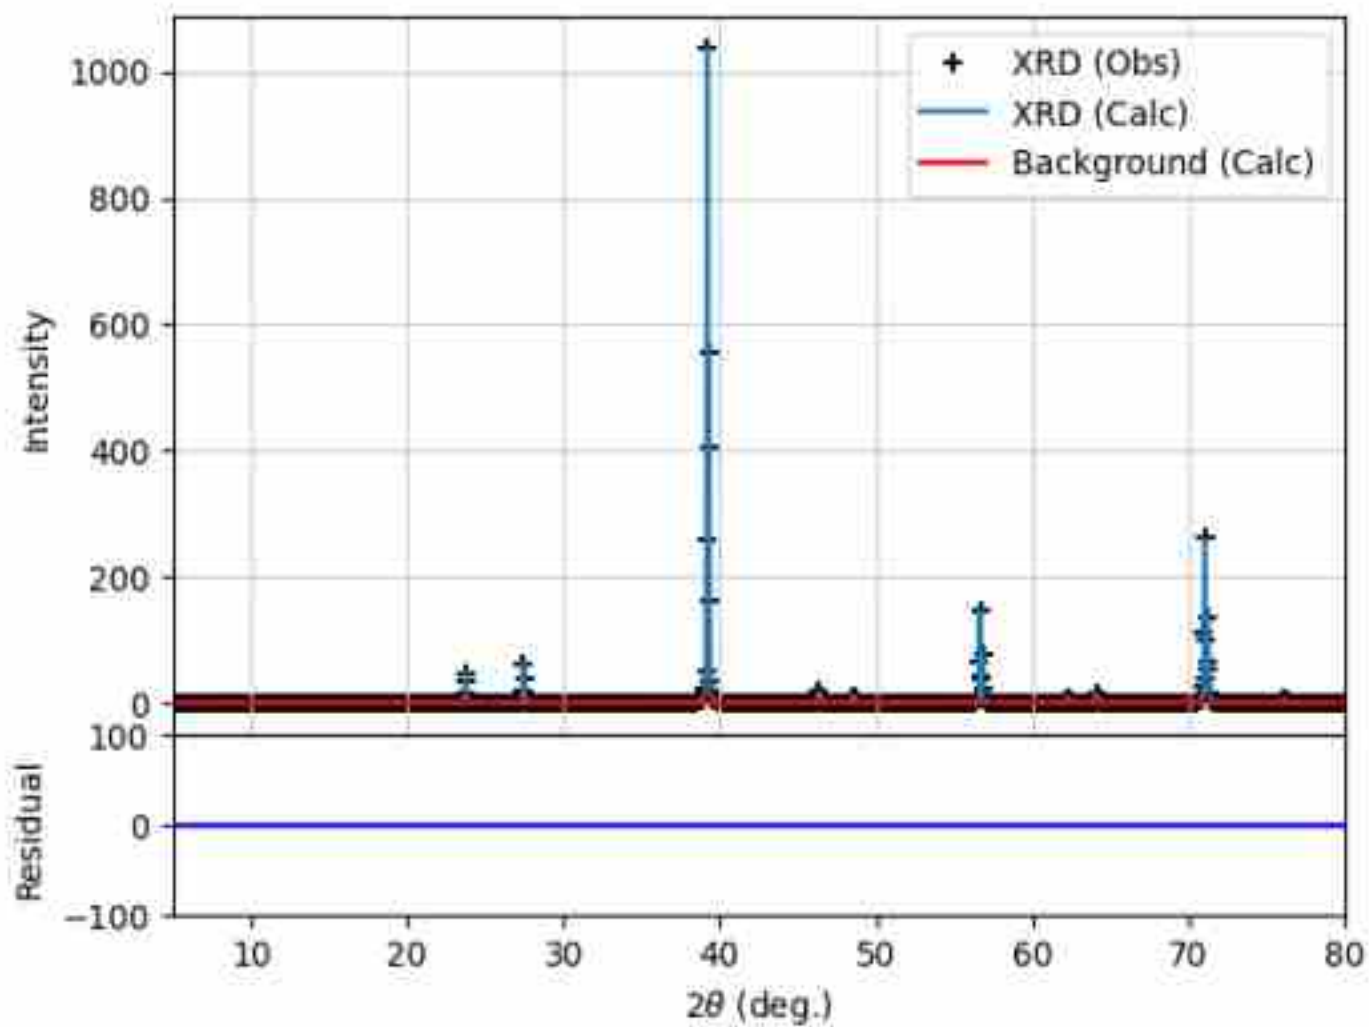

| RMSE before RR | Rwp     | RMSE after RR |
|----------------|---------|---------------|
| 0.001          | 0.00265 | 0.00052       |

# Zr1Sn1Ru2

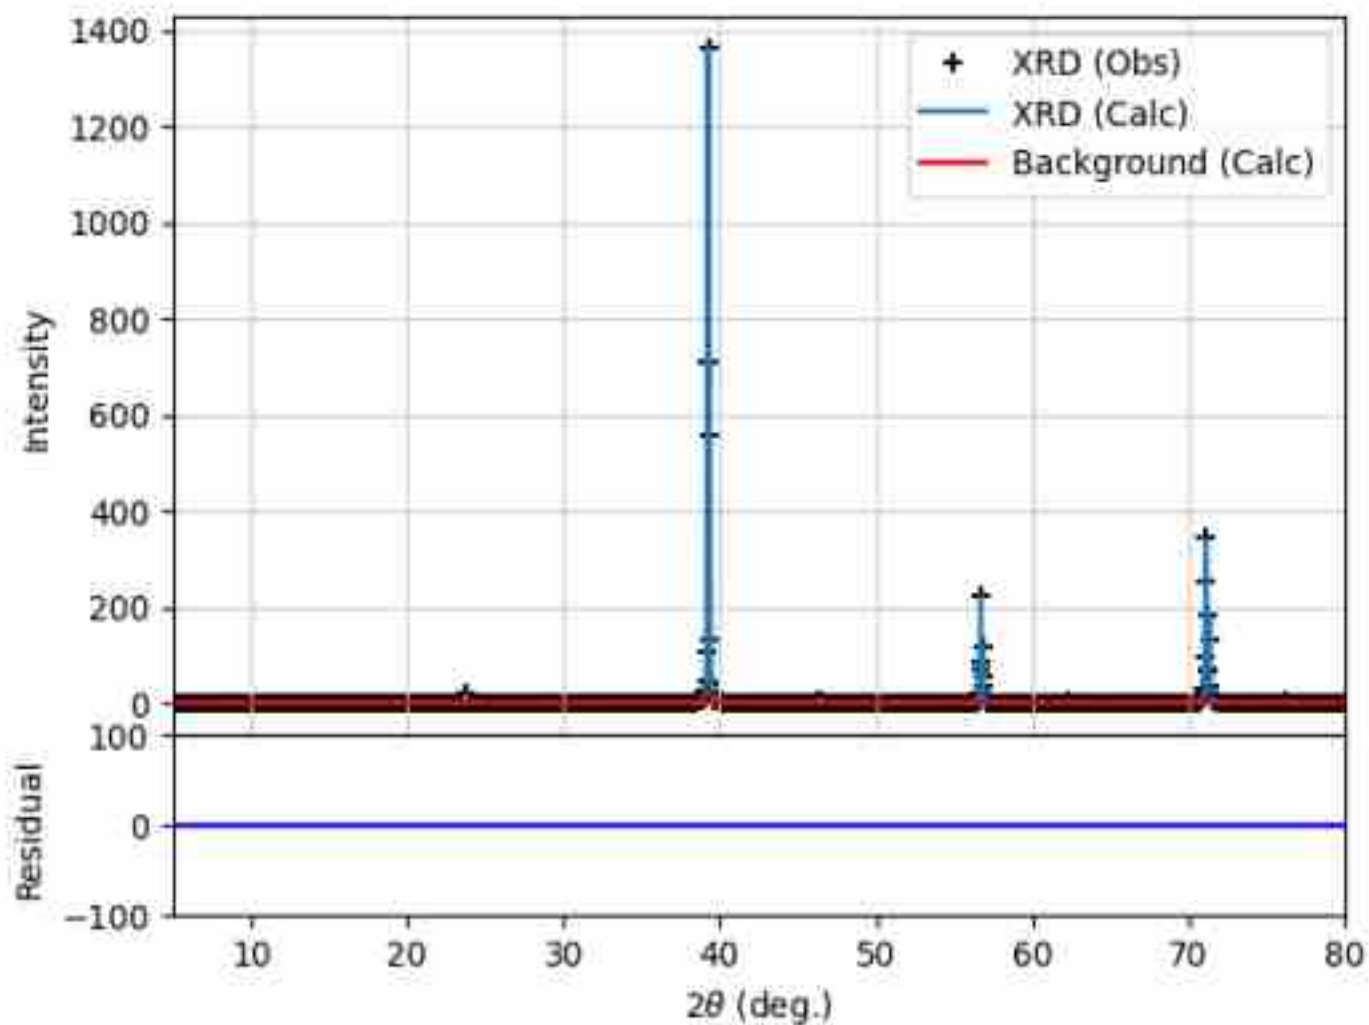

| RMSE before RR | Rwp     | RMSE after RR |
|----------------|---------|---------------|
| 0.001          | 0.00455 | 0.00044       |

# Zr1Ta1Tc2

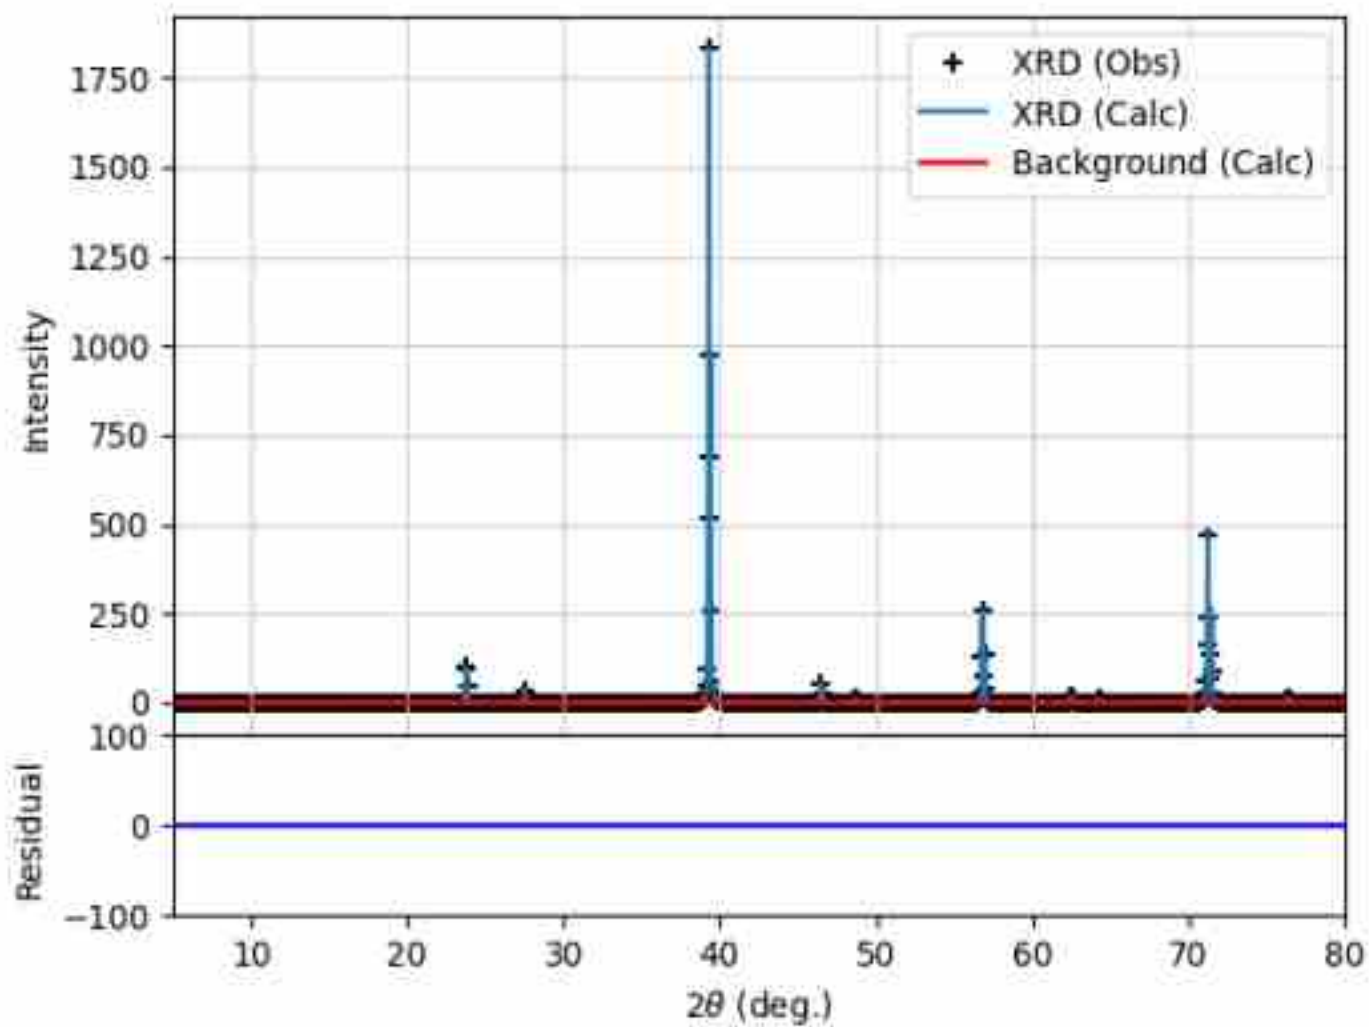

| RMSE before RR | Rwp   | RMSE after RR |
|----------------|-------|---------------|
| 0.001          | 3e-05 | 4e-05         |

# Zr<sub>3</sub>Cu<sub>4</sub>Ge<sub>2</sub>

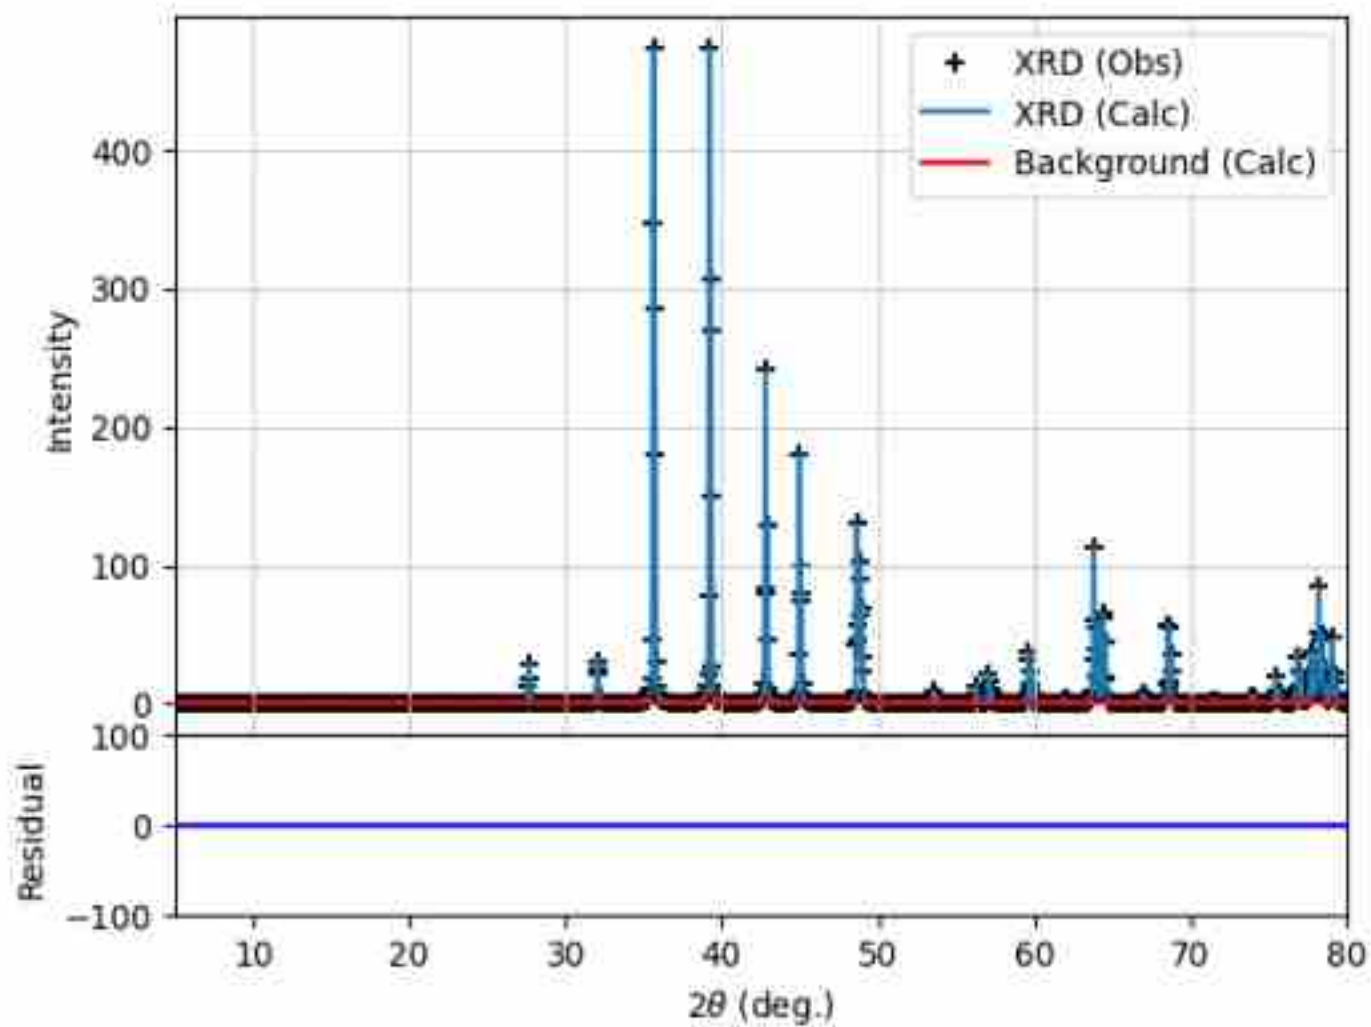

| RMSE before RR | Rwp     | RMSE after RR |
|----------------|---------|---------------|
| 0.01           | 0.00572 | 0.00102       |

# Zr<sub>4</sub>In<sub>2</sub>Ni<sub>4</sub>

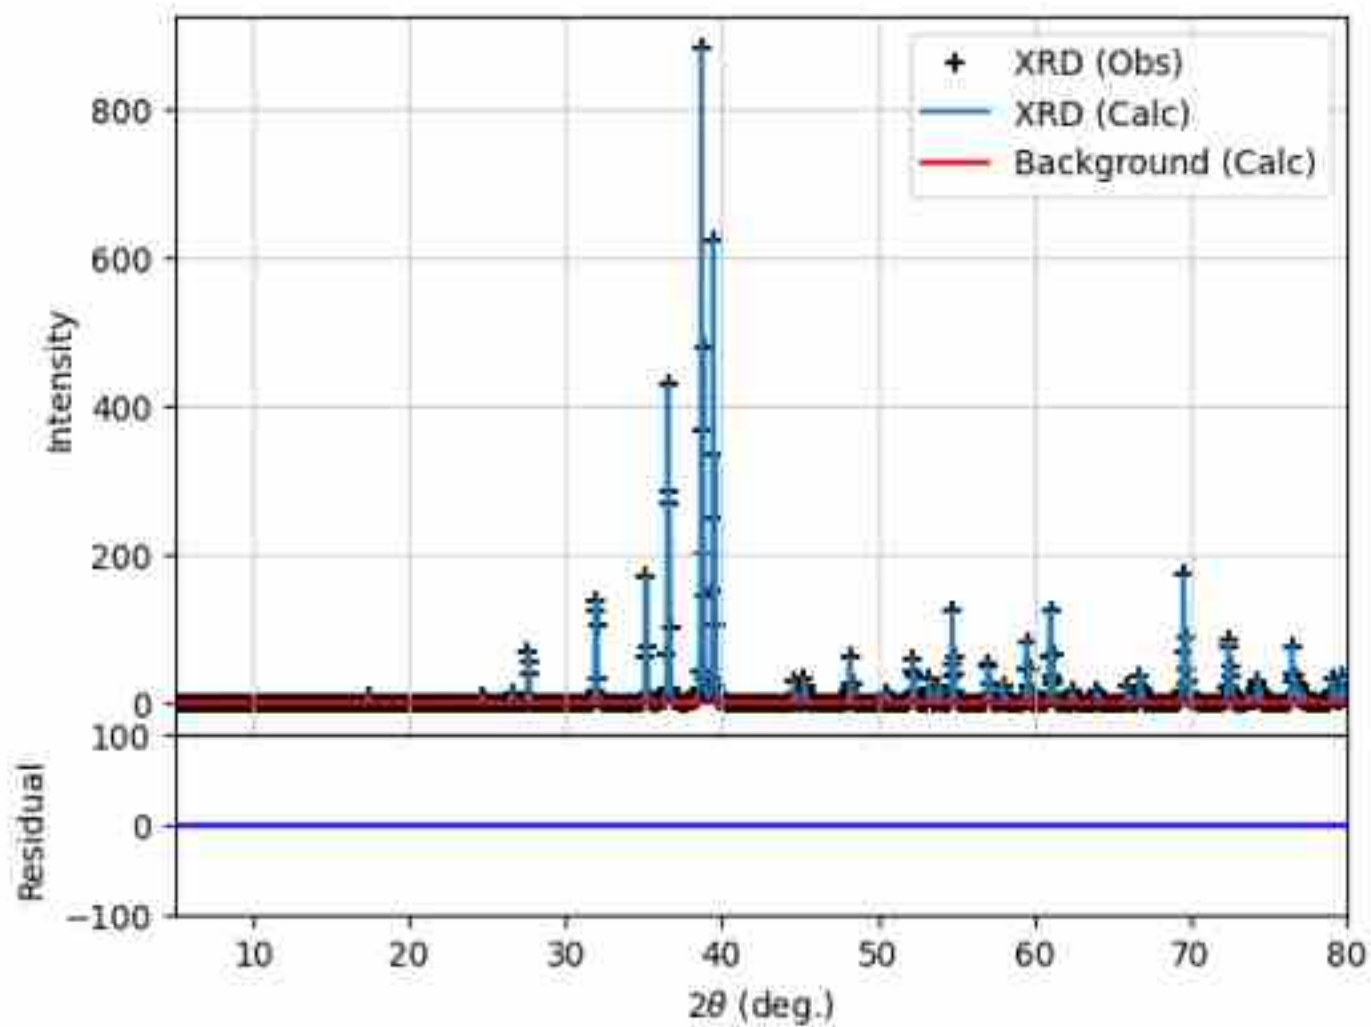

| RMSE before RR | Rwp     | RMSE after RR |
|----------------|---------|---------------|
| 0.01           | 0.00493 | 0.0006        |

# Ac1Ag1Au2

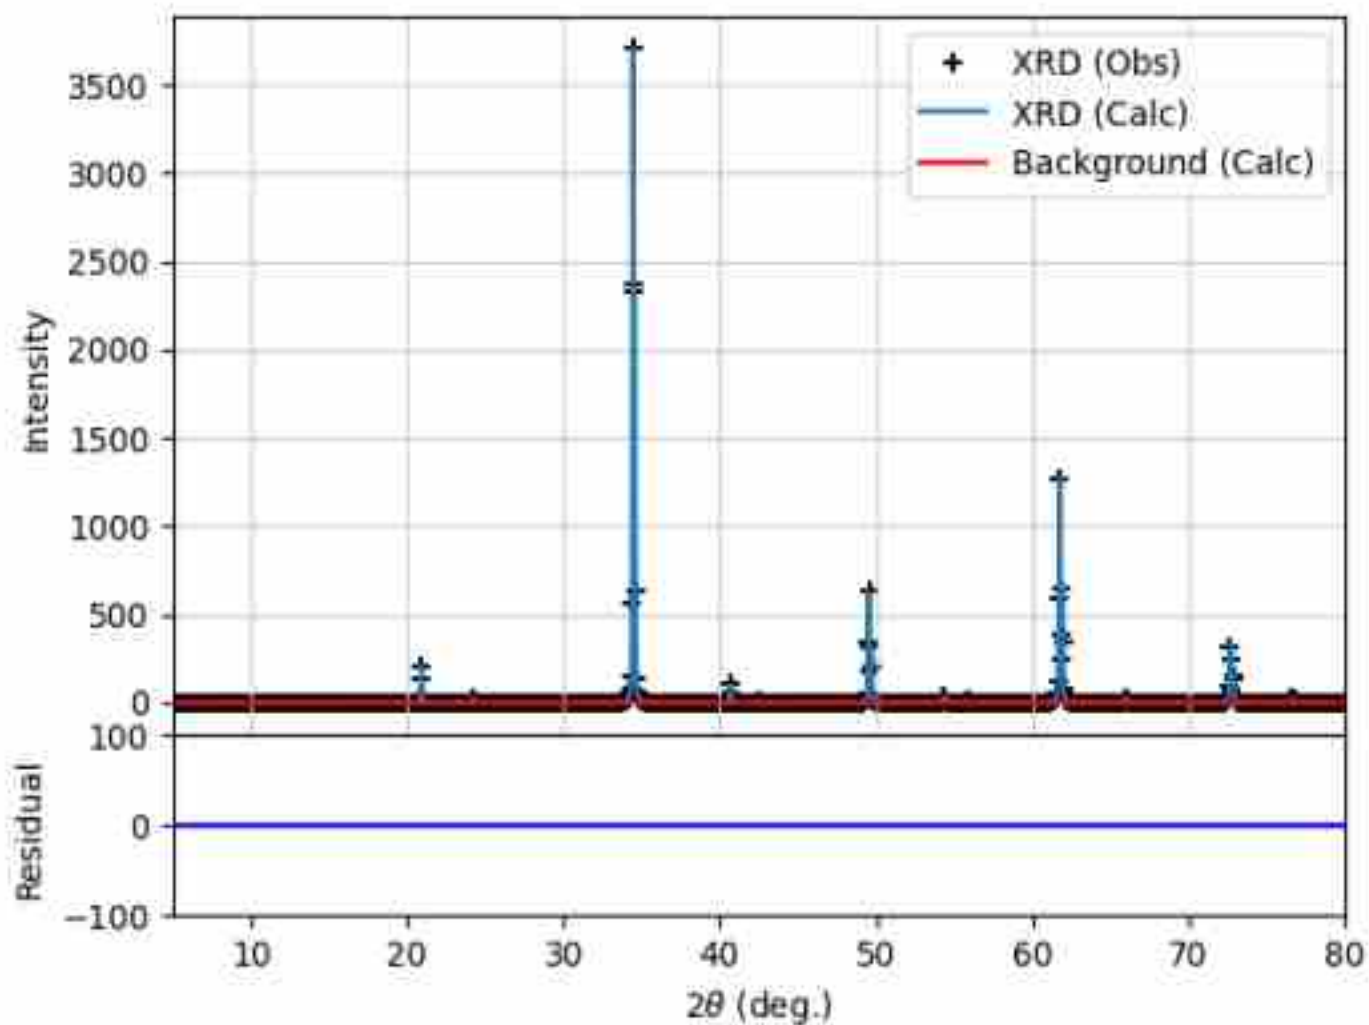

| RMSE before RR | Rwp    | RMSE after RR |
|----------------|--------|---------------|
| 0.002          | 0.0027 | 0.00025       |

# Ac1Ag1Te2

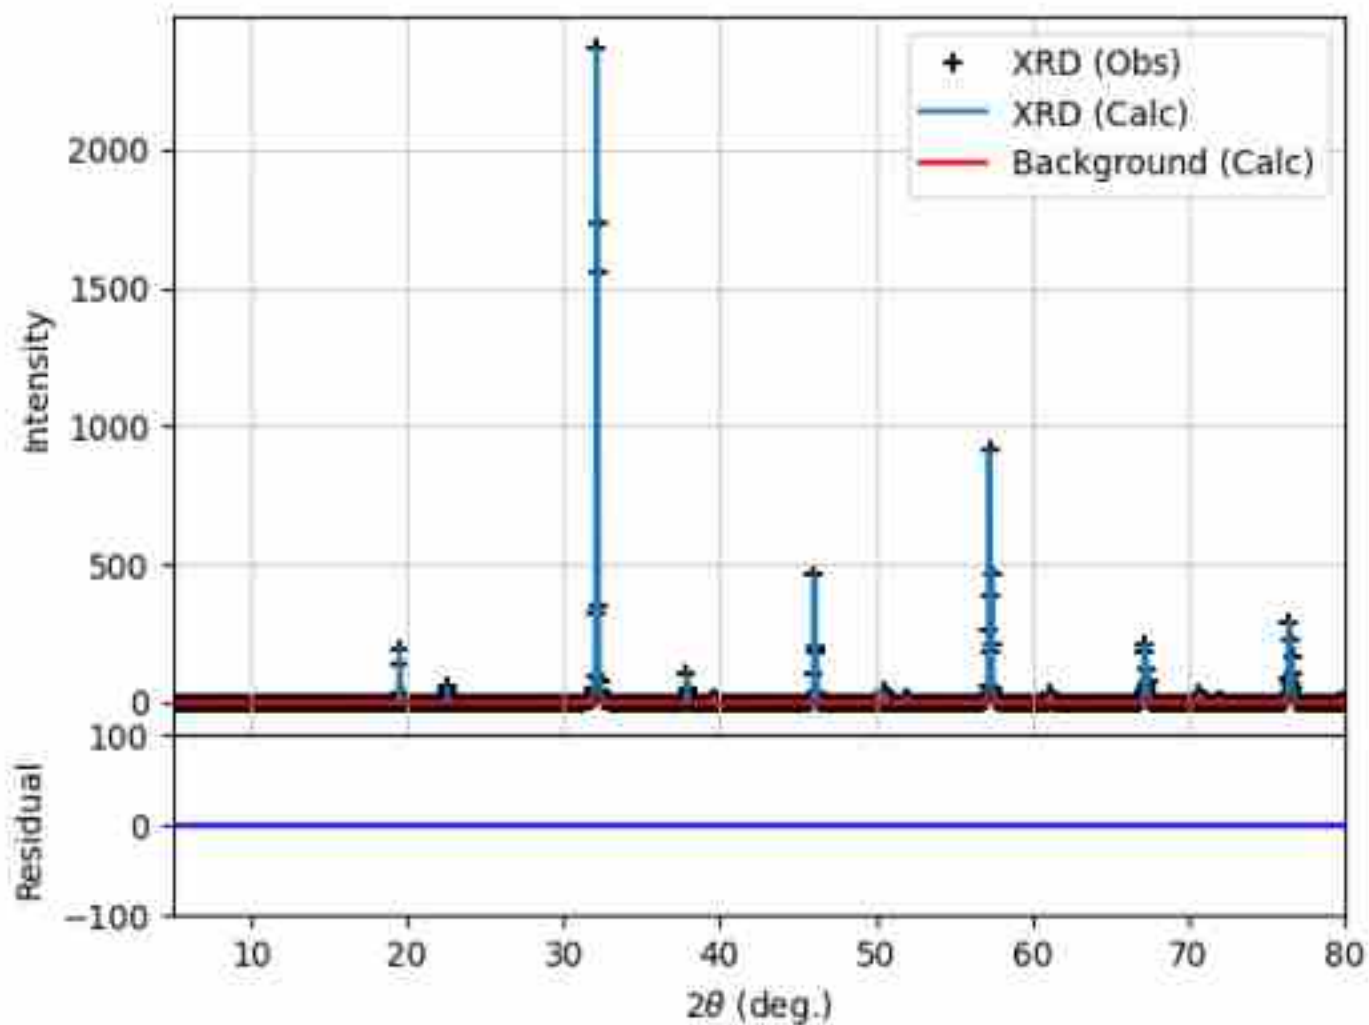

| RMSE before RR | Rwp     | RMSE after RR |
|----------------|---------|---------------|
| 0.002          | 0.10294 | 0.00136       |



# Ac1In1Te2

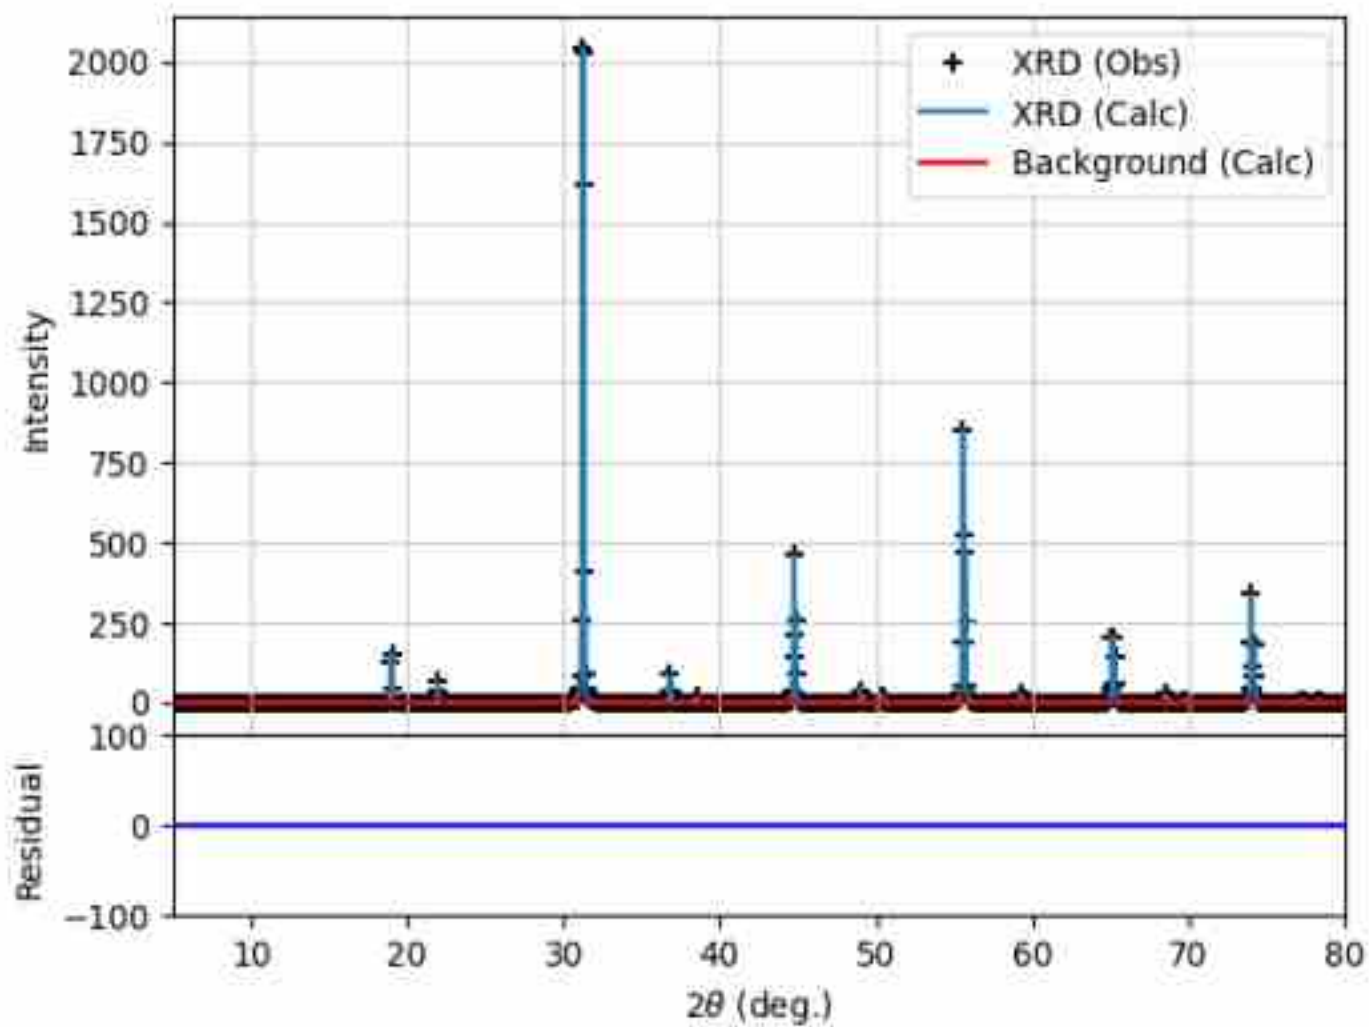

| RMSE before RR | Rwp     | RMSE after RR |
|----------------|---------|---------------|
| 0.002          | 0.00026 | 8e-05         |

# Ac1La1Cd2

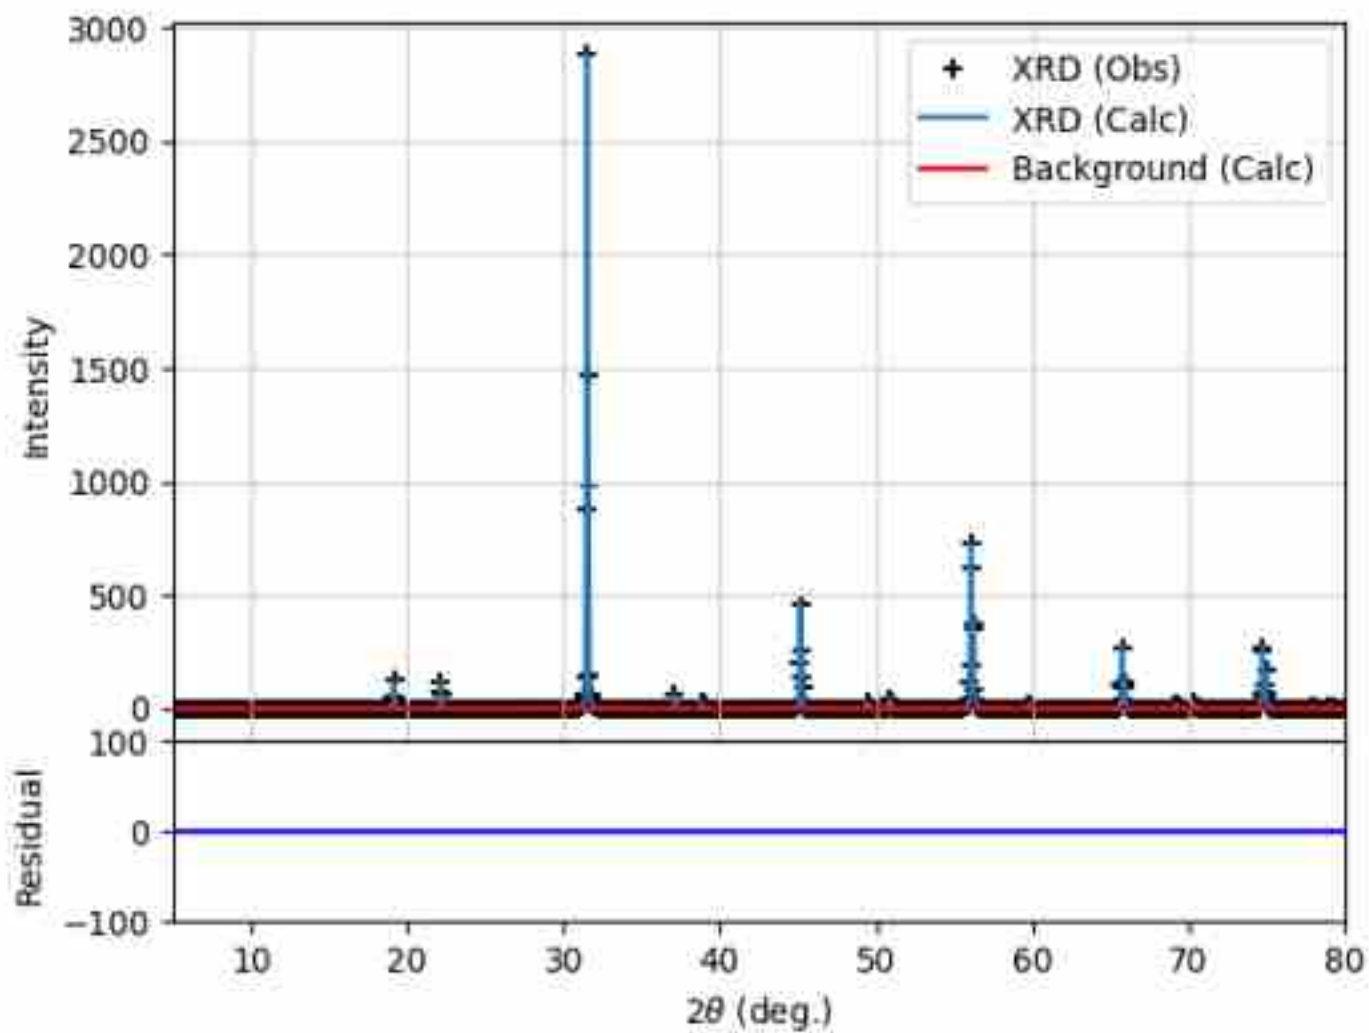

| RMSE before RR | Rwp     | RMSE after RR |
|----------------|---------|---------------|
| 0.002          | 0.04802 | 0.00105       |

# Ac1Mg1Cd2

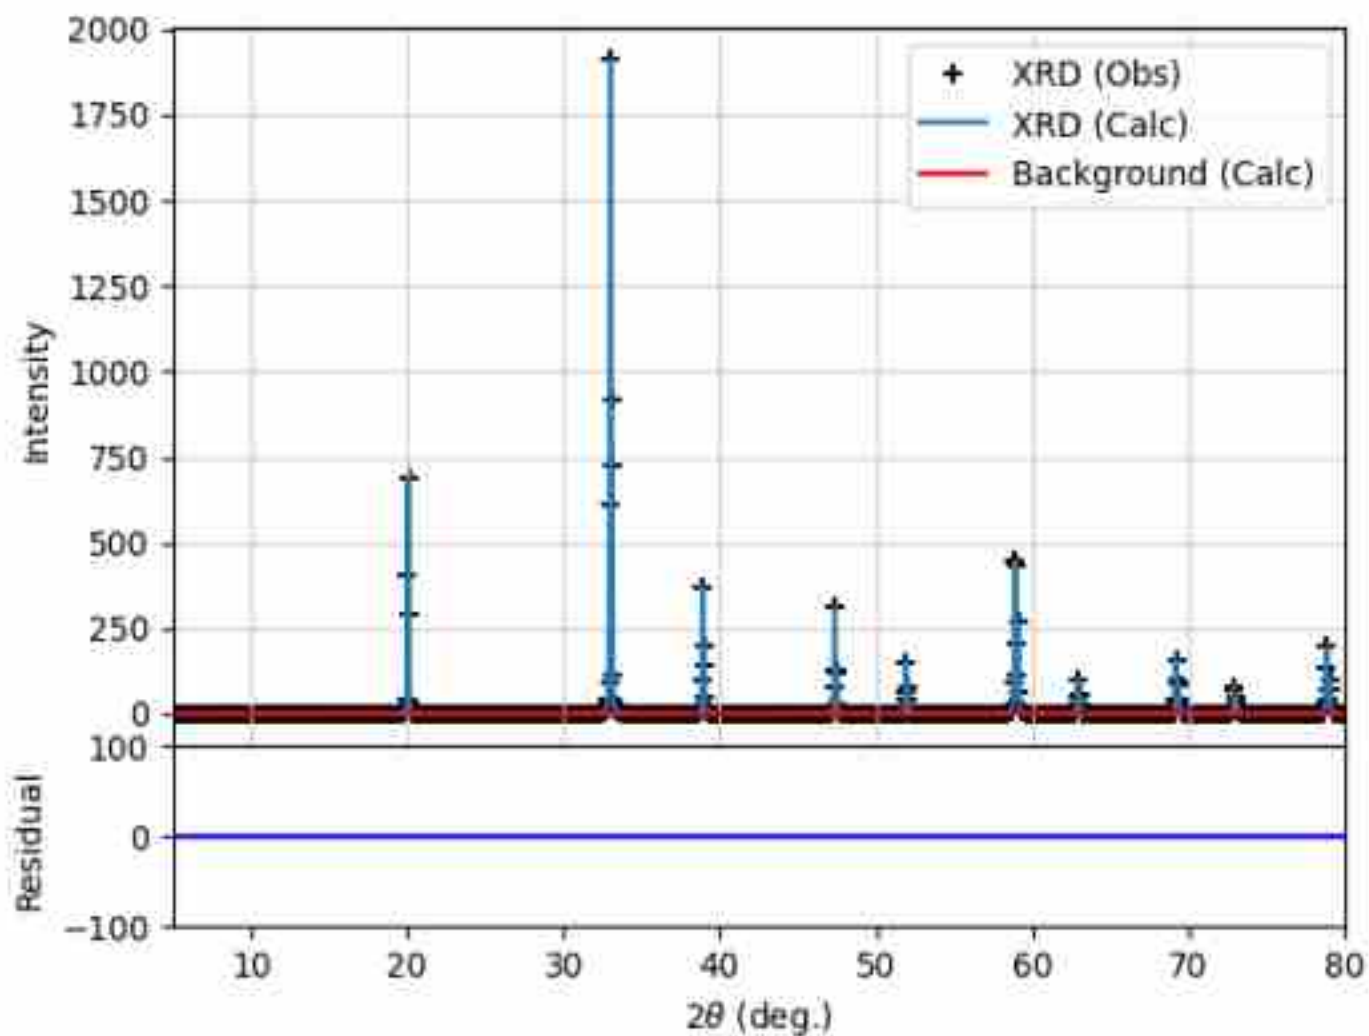

| RMSE before RR | Rwp     | RMSE after RR |
|----------------|---------|---------------|
| 0.002          | 0.00869 | 0.00122       |

# Ac1Sm3

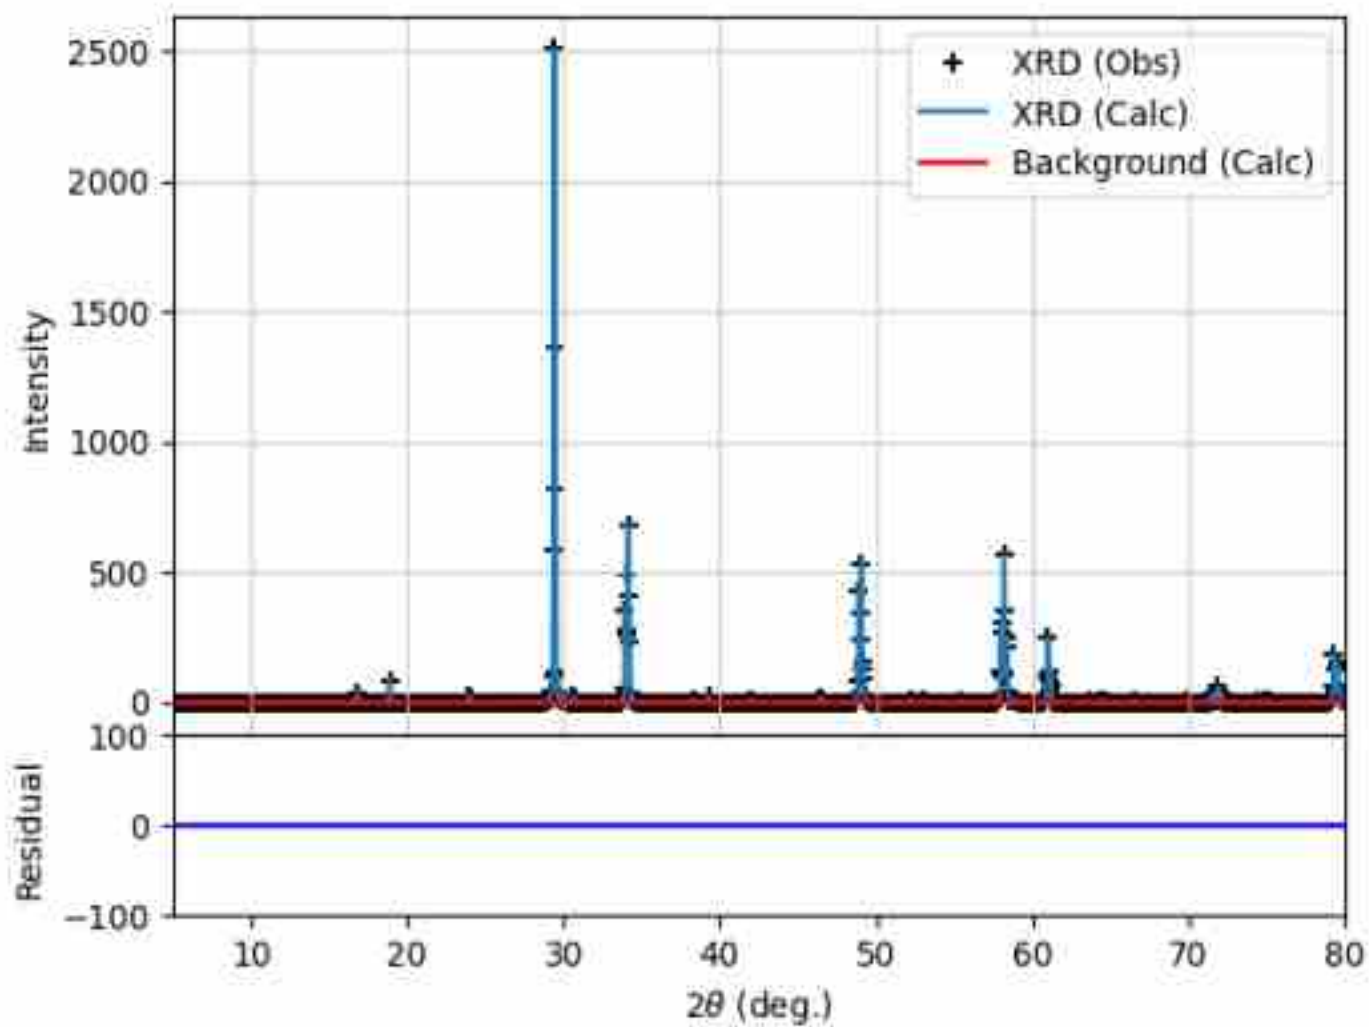

| RMSE before RR | Rwp     | RMSE after RR |
|----------------|---------|---------------|
| 0.002          | 0.00233 | 0.00032       |

# Ac1Y3

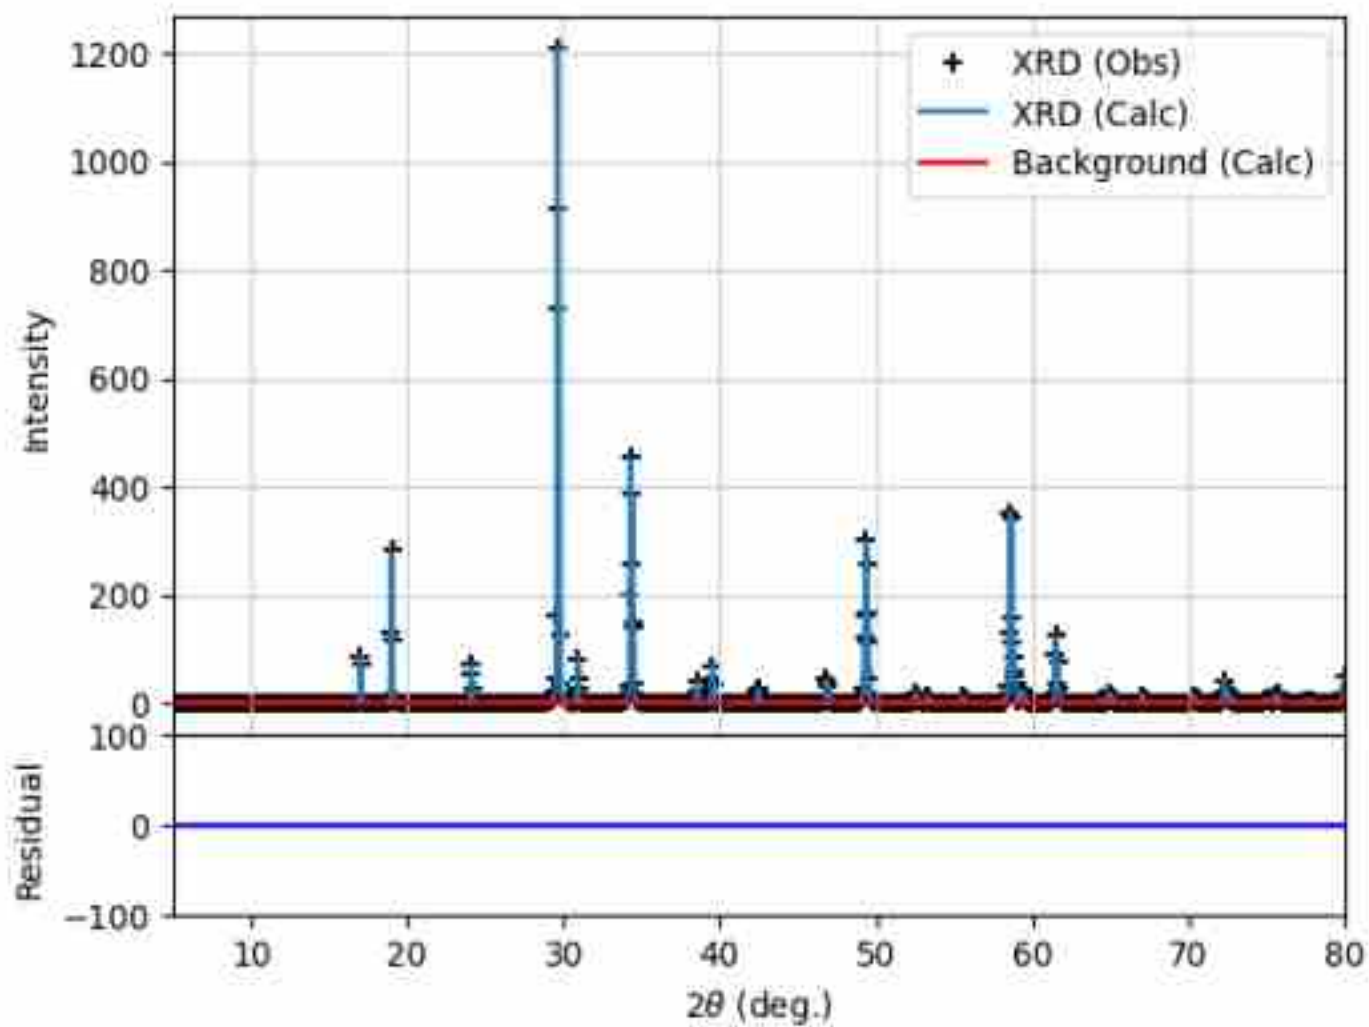

| RMSE before RR | Rwp     | RMSE after RR |
|----------------|---------|---------------|
| 0.002          | 0.00225 | 0.00025       |

# Ac1Zn1Au2

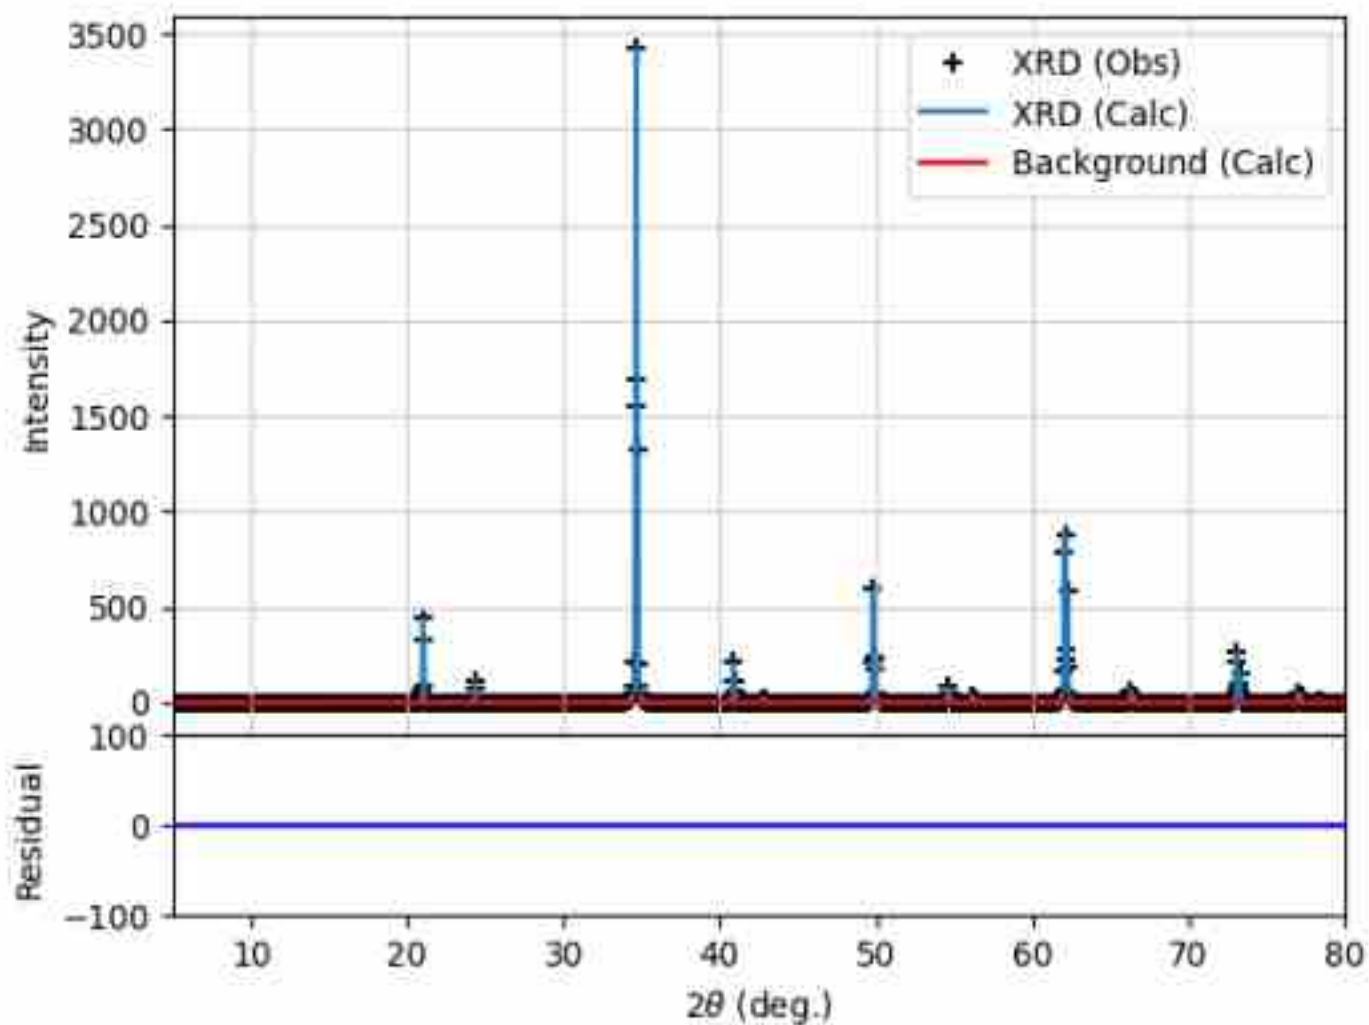

| RMSE before RR | Rwp     | RMSE after RR |
|----------------|---------|---------------|
| 0.002          | 0.00341 | 0.00029       |

# Ac<sub>2</sub>Cd<sub>1</sub>Ge<sub>1</sub>

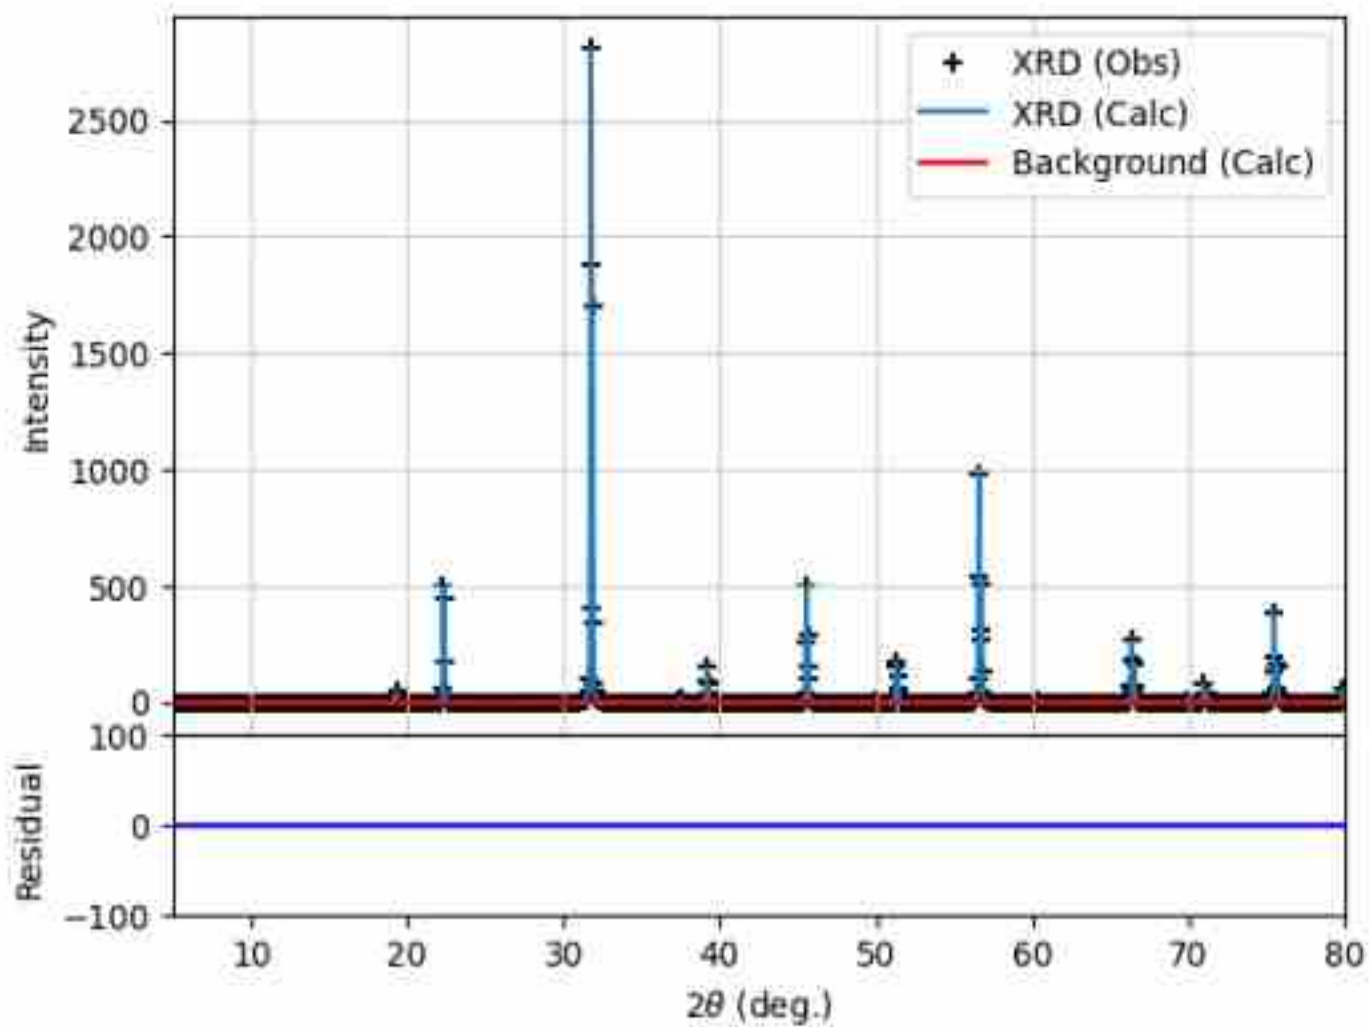

| RMSE before RR | Rwp     | RMSE after RR |
|----------------|---------|---------------|
| 0.002          | 0.02263 | 0.00088       |

# Ac<sub>2</sub>CdHg<sub>1</sub>

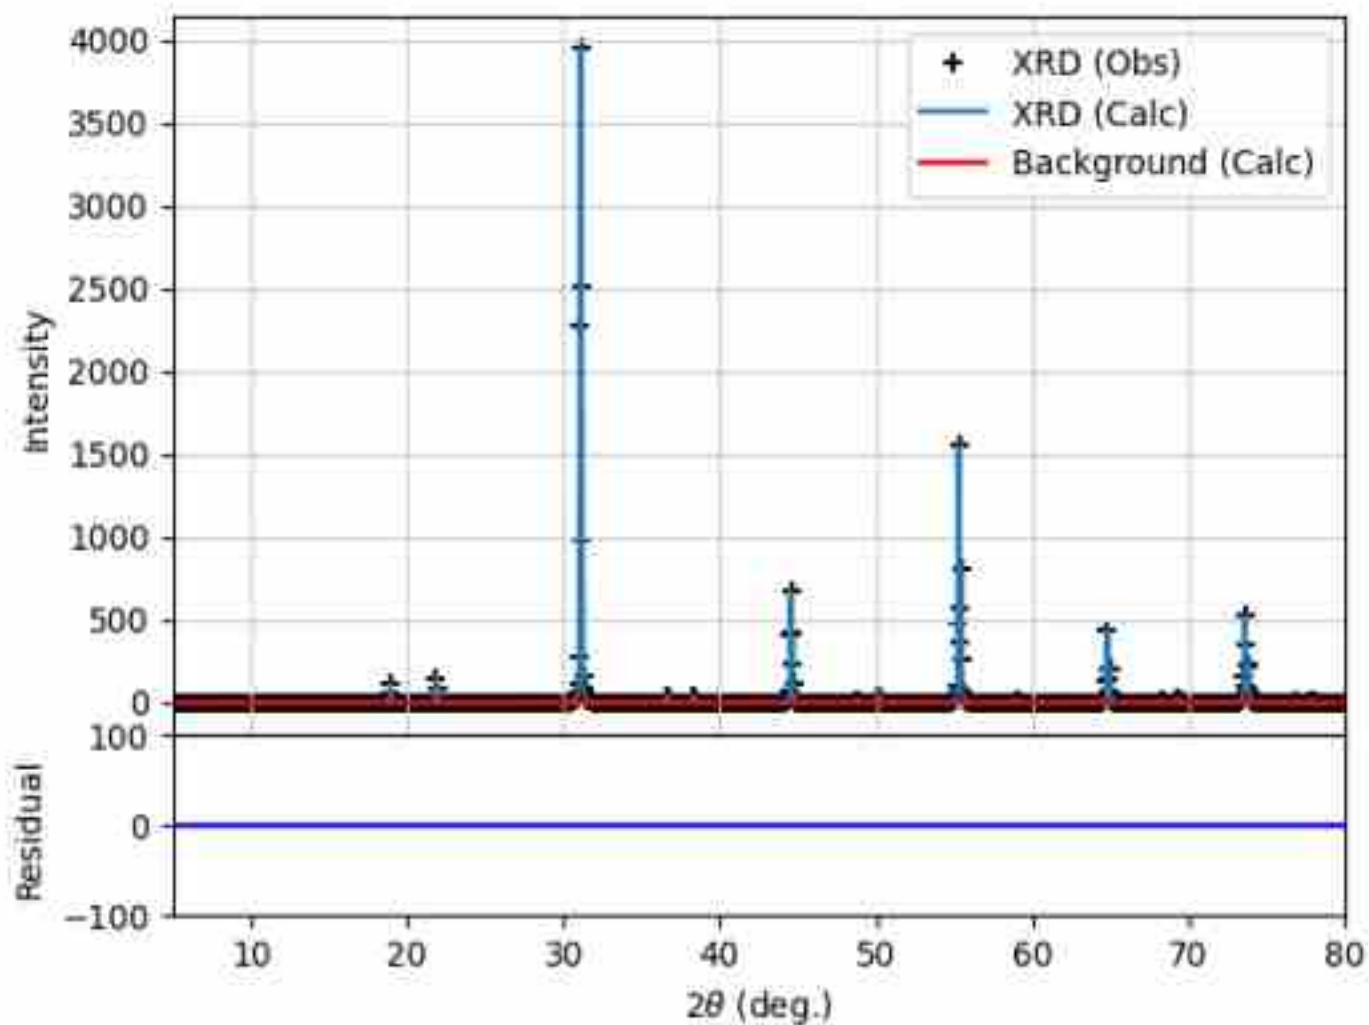

| RMSE before RR | Rwp     | RMSE after RR |
|----------------|---------|---------------|
| 0.002          | 0.05059 | 0.00124       |



# Ac2Mg1Ga1

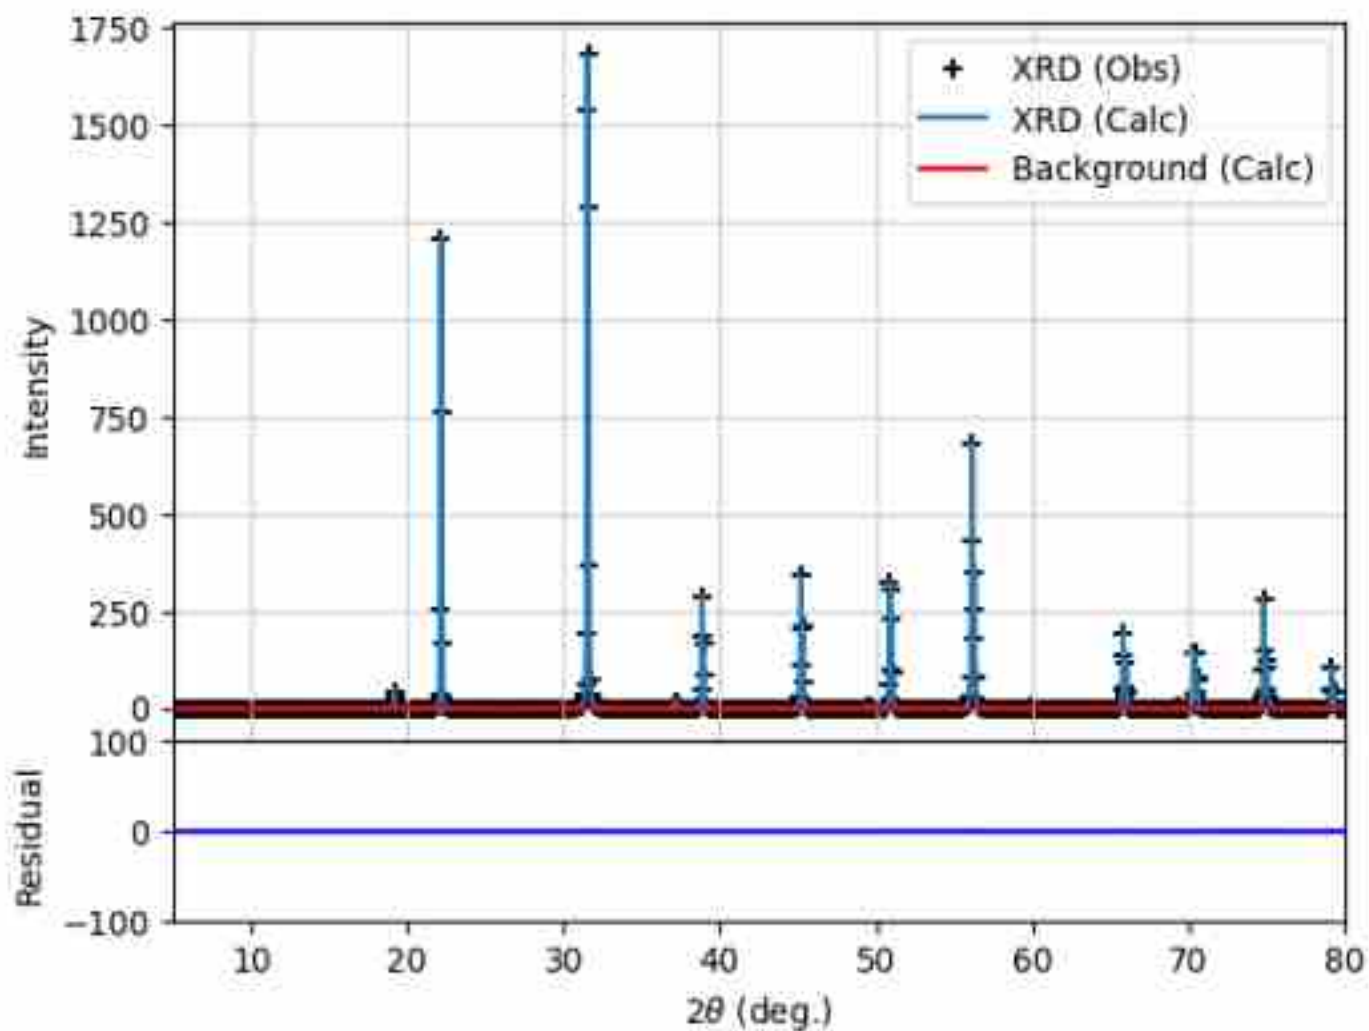

| RMSE before RR | Rwp     | RMSE after RR |
|----------------|---------|---------------|
| 0.002          | 0.19965 | 0.00122       |

# Ac<sub>2</sub>ZnHg

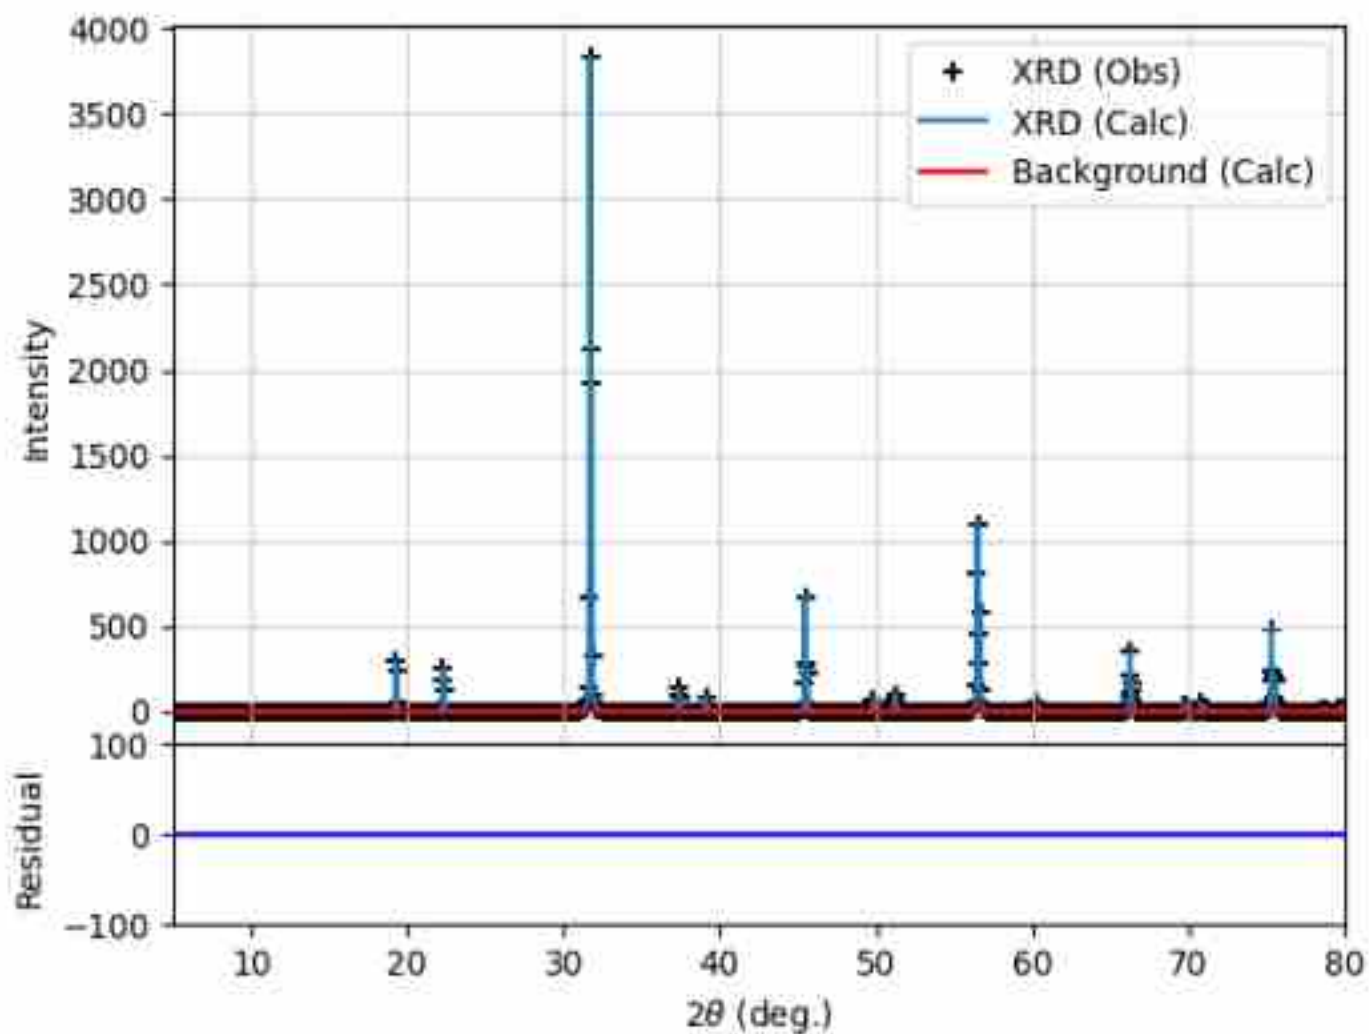

| RMSE before RR | Rwp     | RMSE after RR |
|----------------|---------|---------------|
| 0.002          | 0.00835 | 0.00097       |

# Ac3Tm1

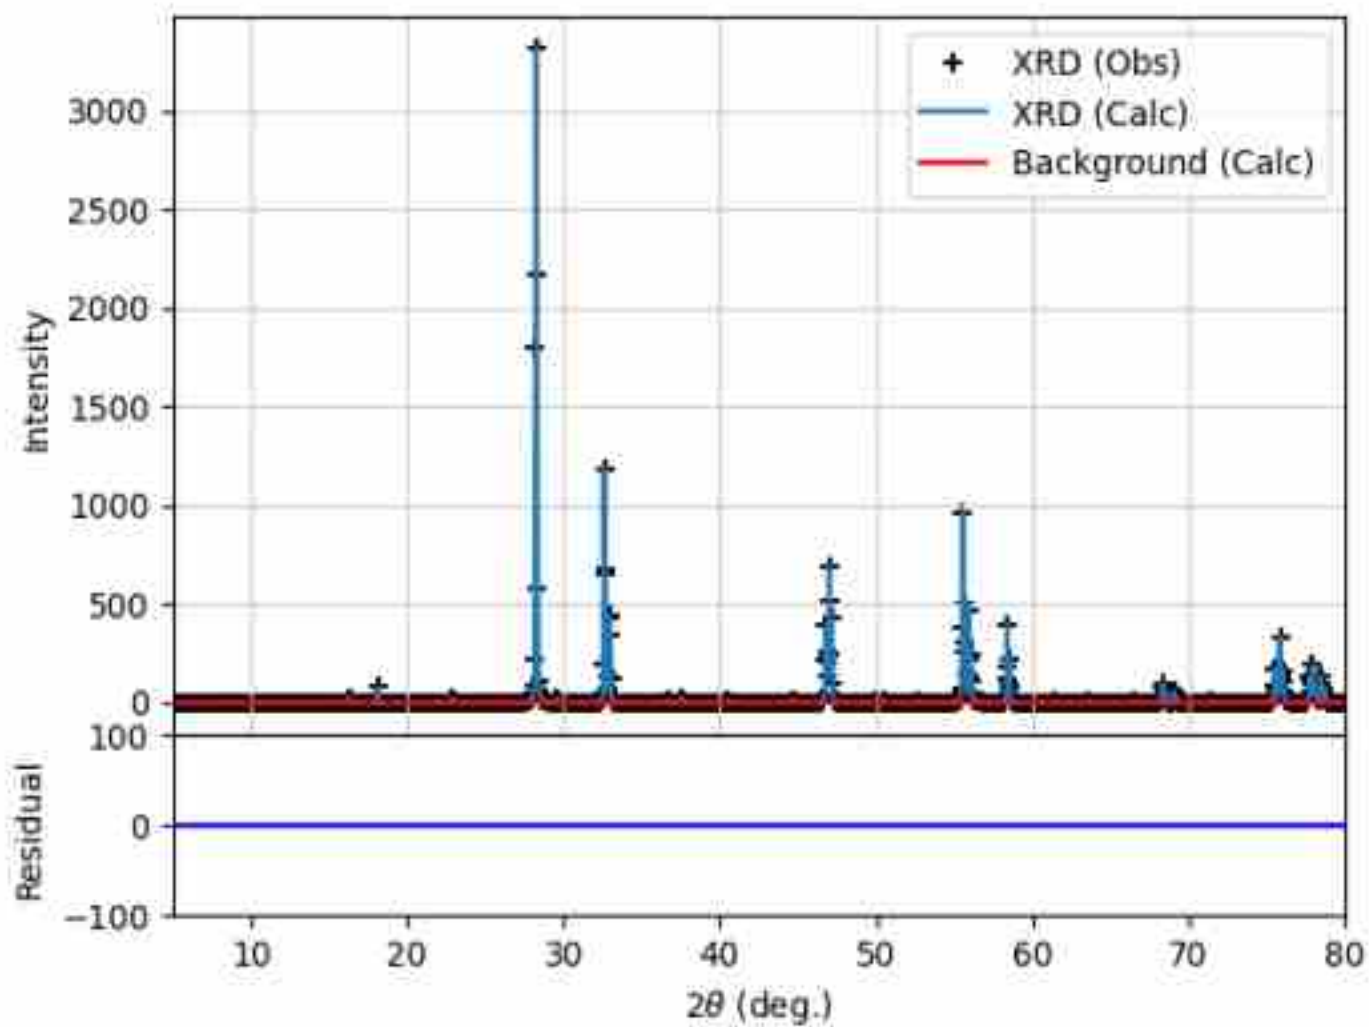

| RMSE before RR | Rwp     | RMSE after RR |
|----------------|---------|---------------|
| 0.002          | 0.00453 | 0.00037       |

# Ag1Au1

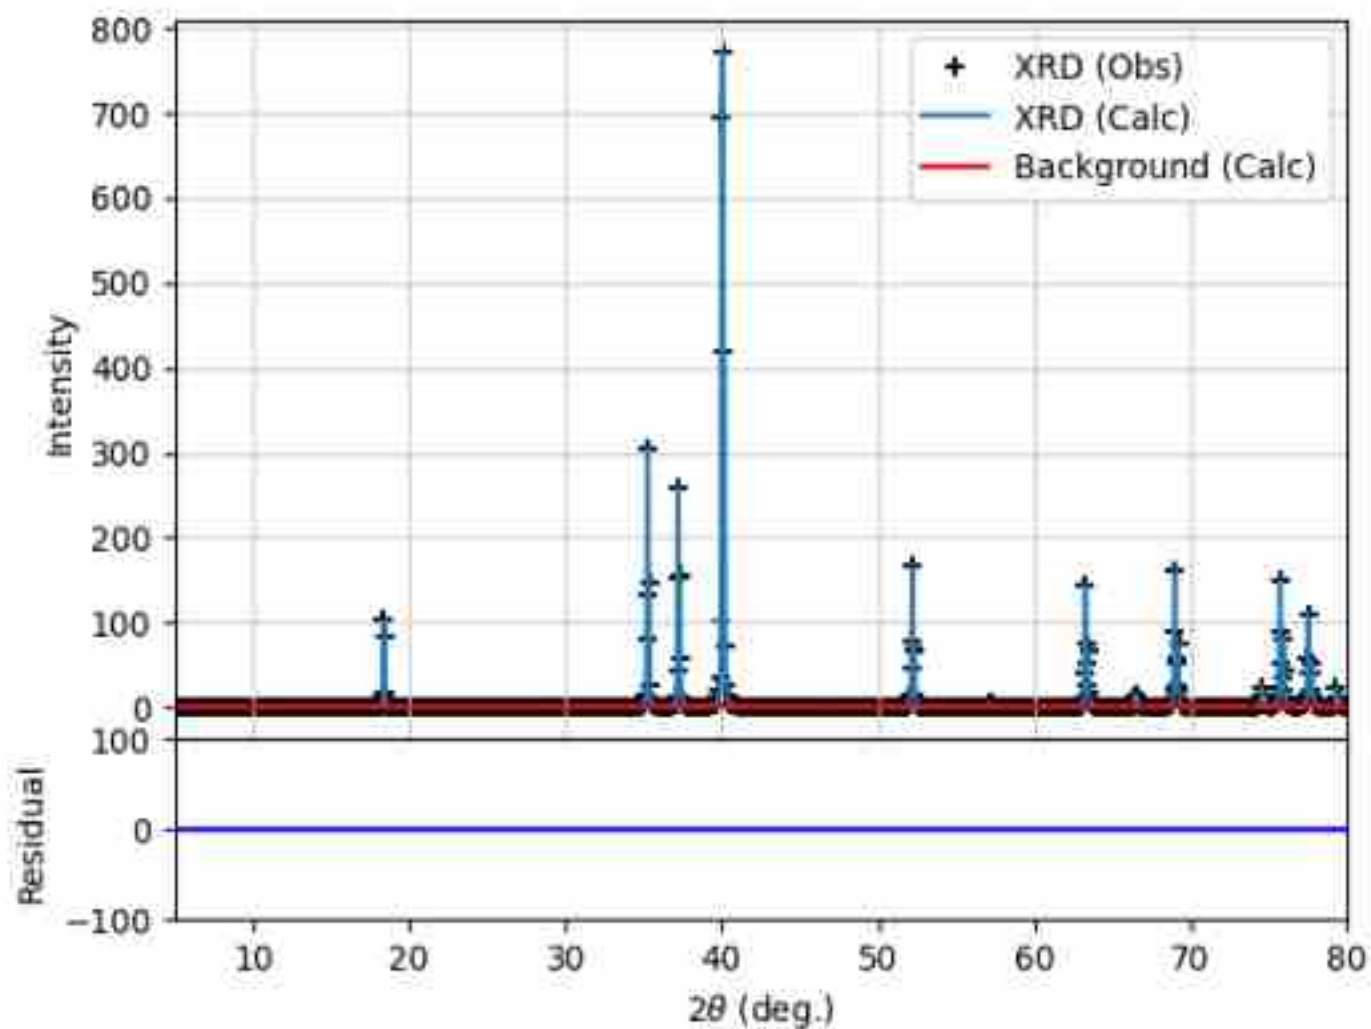

| RMSE before RR | Rwp    | RMSE after RR |
|----------------|--------|---------------|
| 0.002          | 0.0224 | 0.00197       |

# Ag<sub>1</sub>Sb<sub>1</sub>Te<sub>2</sub>

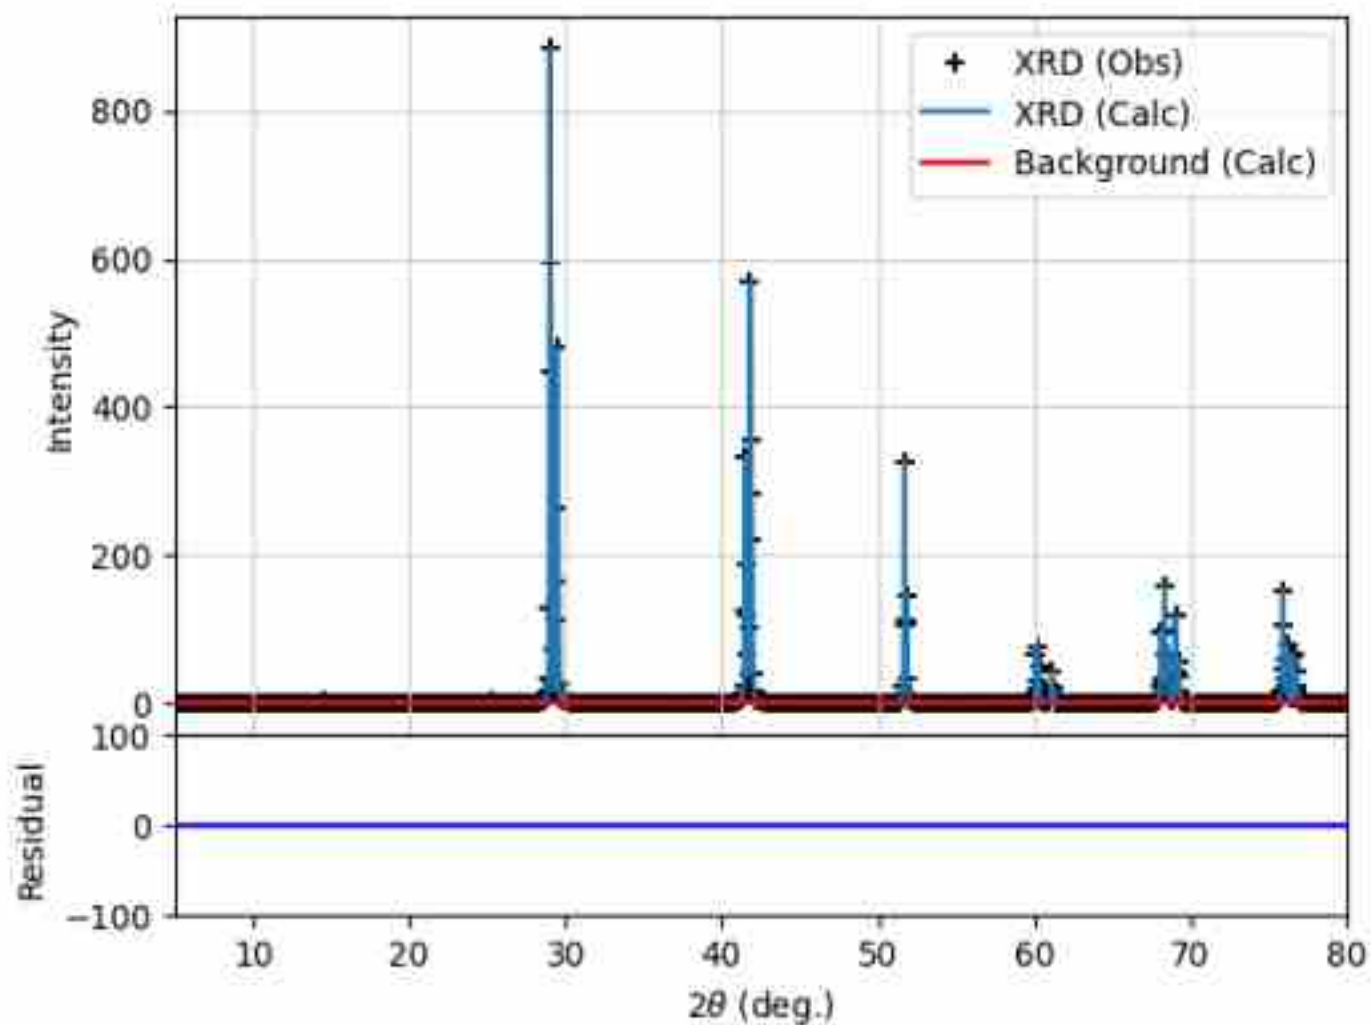

| RMSE before RR | Rwp     | RMSE after RR |
|----------------|---------|---------------|
| 0.002          | 0.02237 | 0.00044       |

# Ag<sub>2</sub>Au<sub>2</sub>F<sub>8</sub>

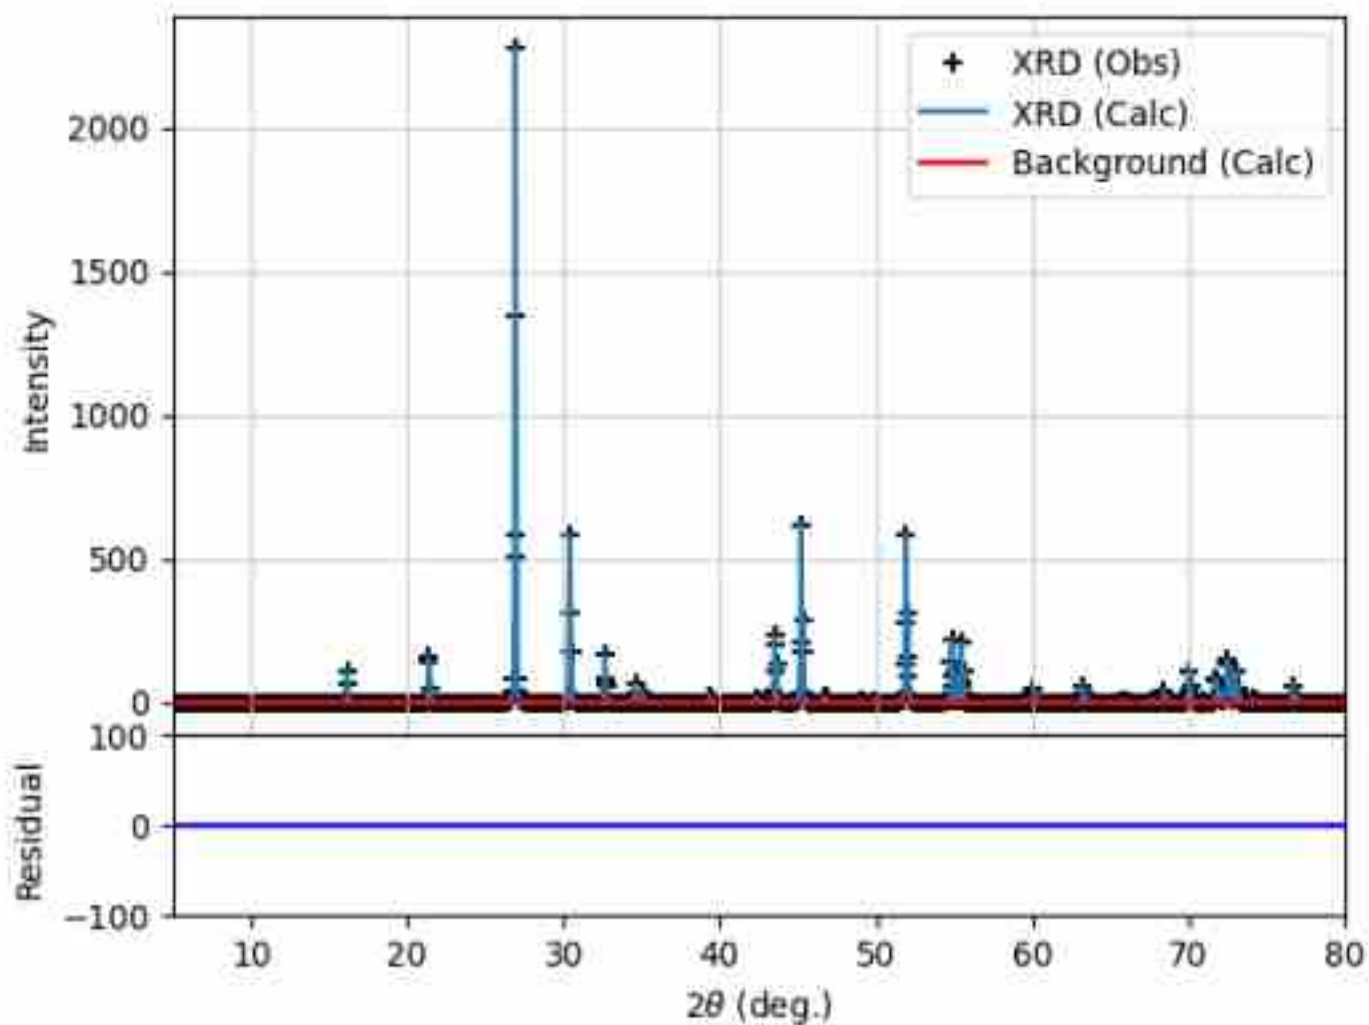

| RMSE before RR | Rwp     | RMSE after RR |
|----------------|---------|---------------|
| 0.02           | 0.00347 | 0.00113       |

# Ag<sub>2</sub>Br<sub>2</sub>O<sub>8</sub>

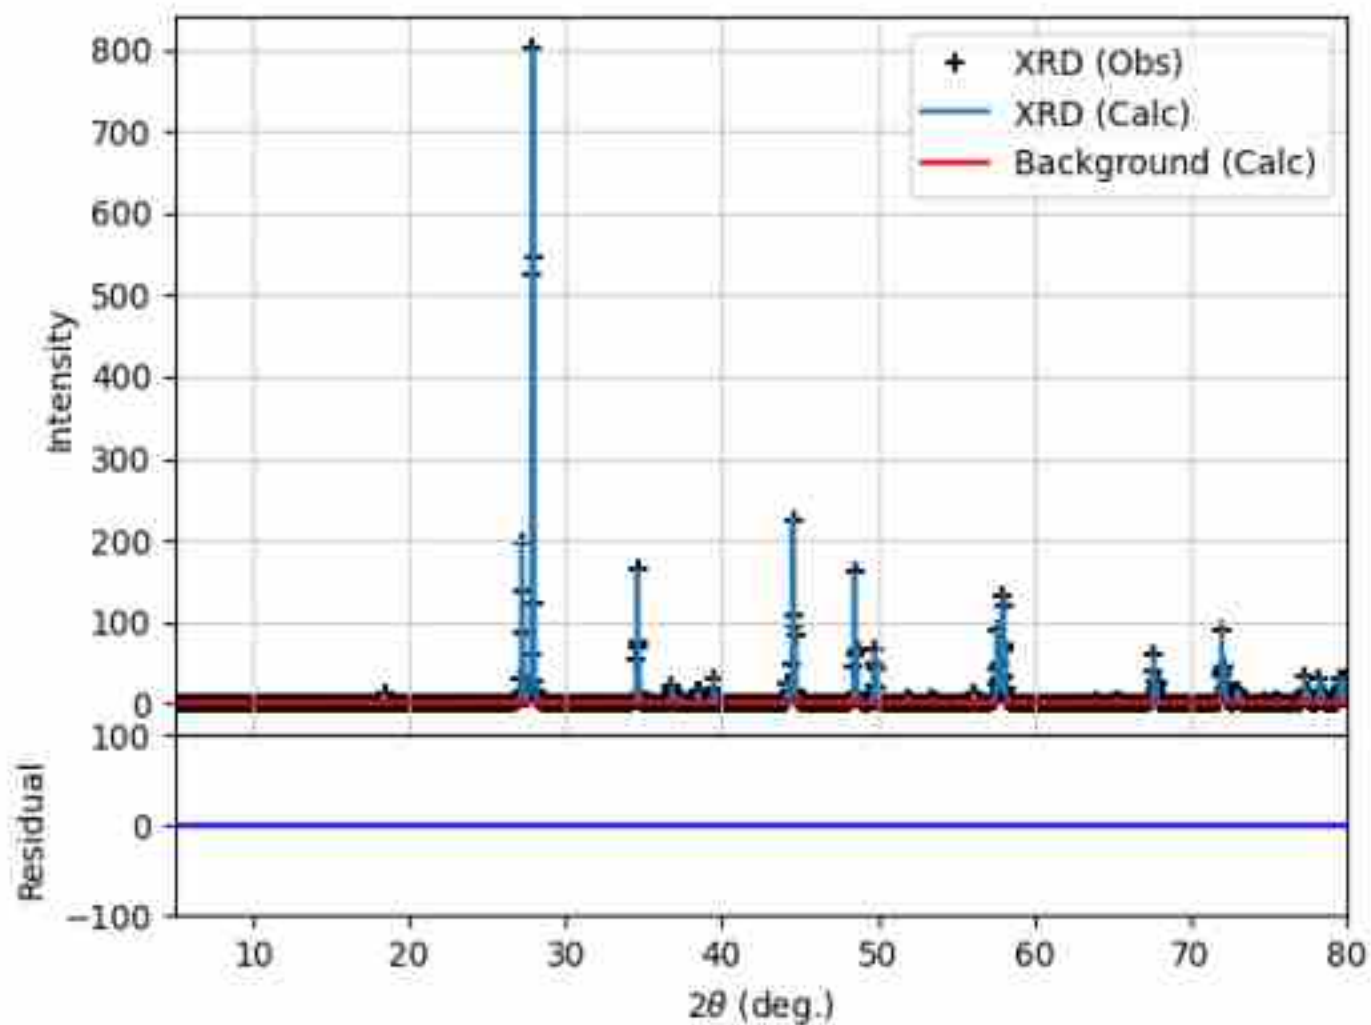

| RMSE before RR | Rwp     | RMSE after RR |
|----------------|---------|---------------|
| 0.02           | 0.00266 | 0.00101       |

# Ag<sub>3</sub>Pd<sub>1</sub>

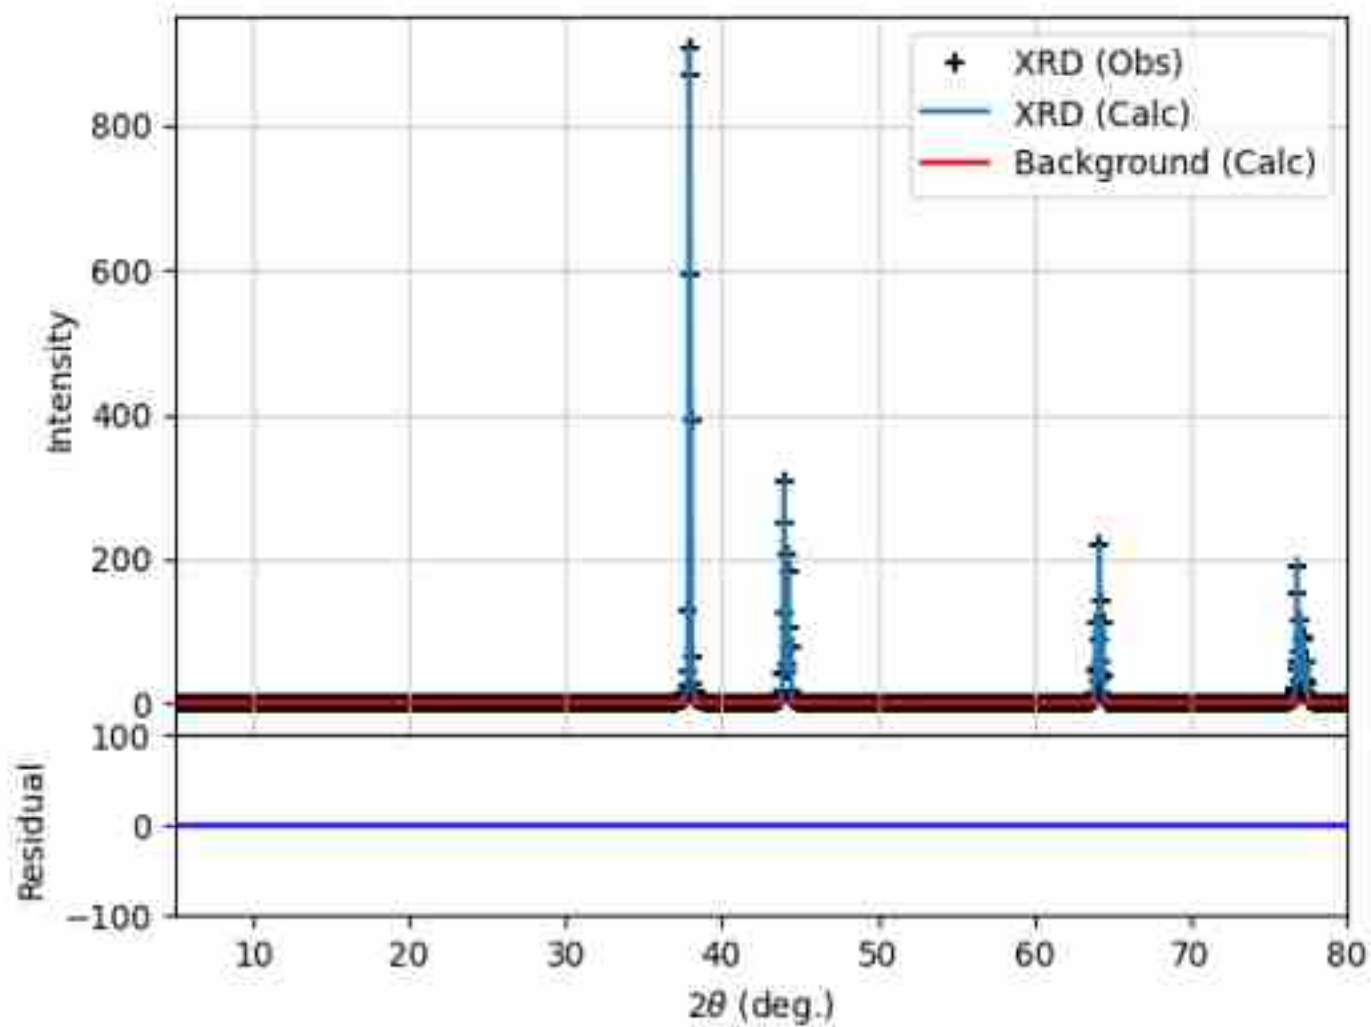

| RMSE before RR | Rwp     | RMSE after RR |
|----------------|---------|---------------|
| 0.002          | 0.00449 | 0.00016       |



# Al1Co1

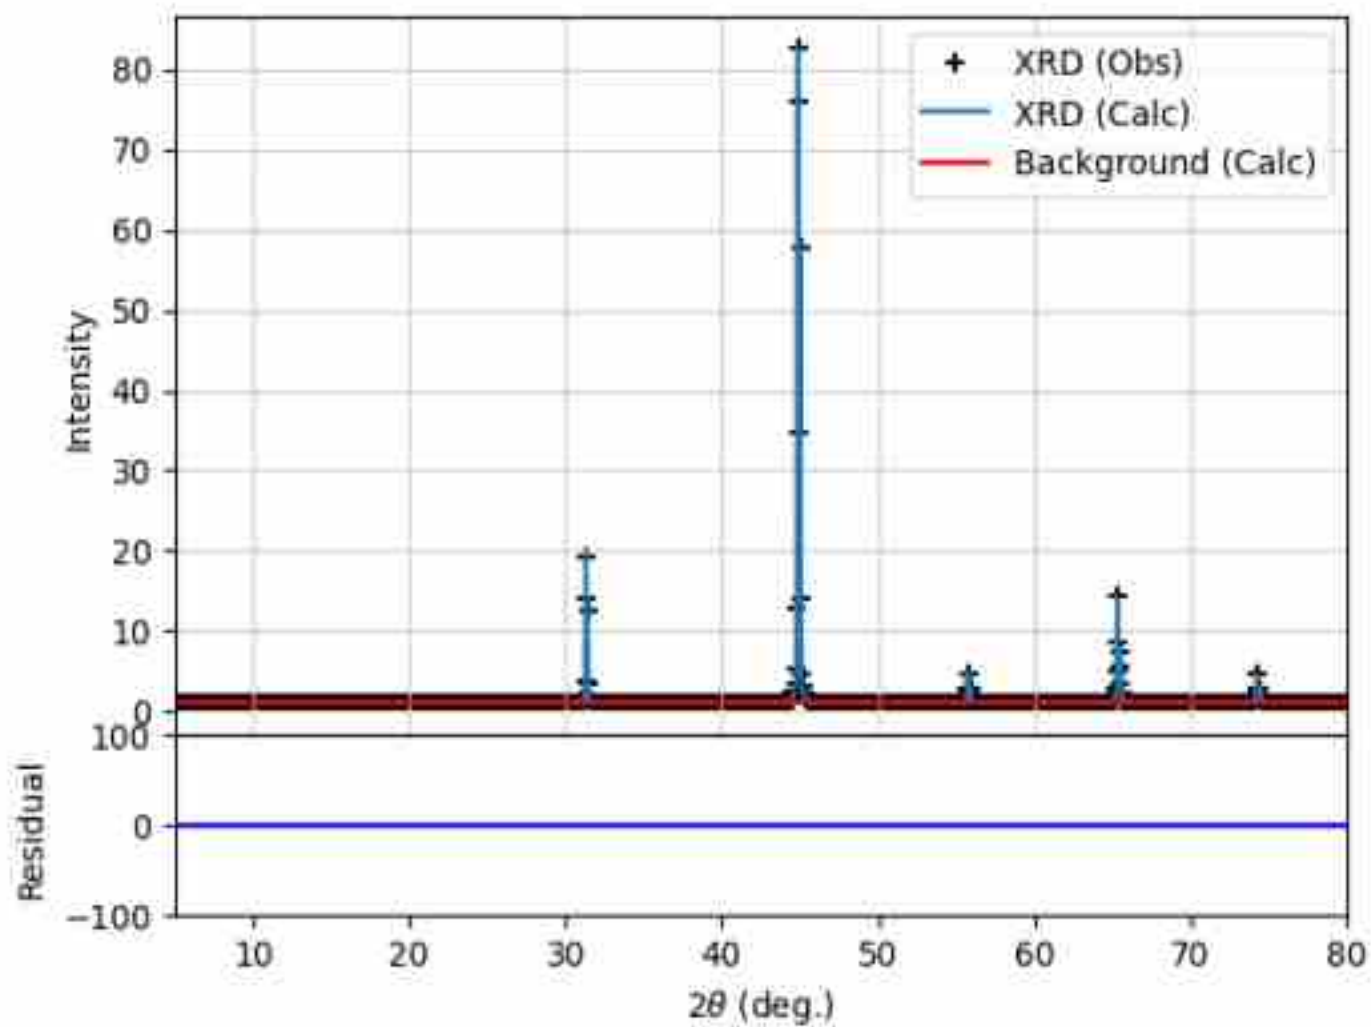

| RMSE before RR | Rwp     | RMSE after RR |
|----------------|---------|---------------|
| 0.002          | 0.01846 | 0.0012        |

# Al1Fe2Mo1

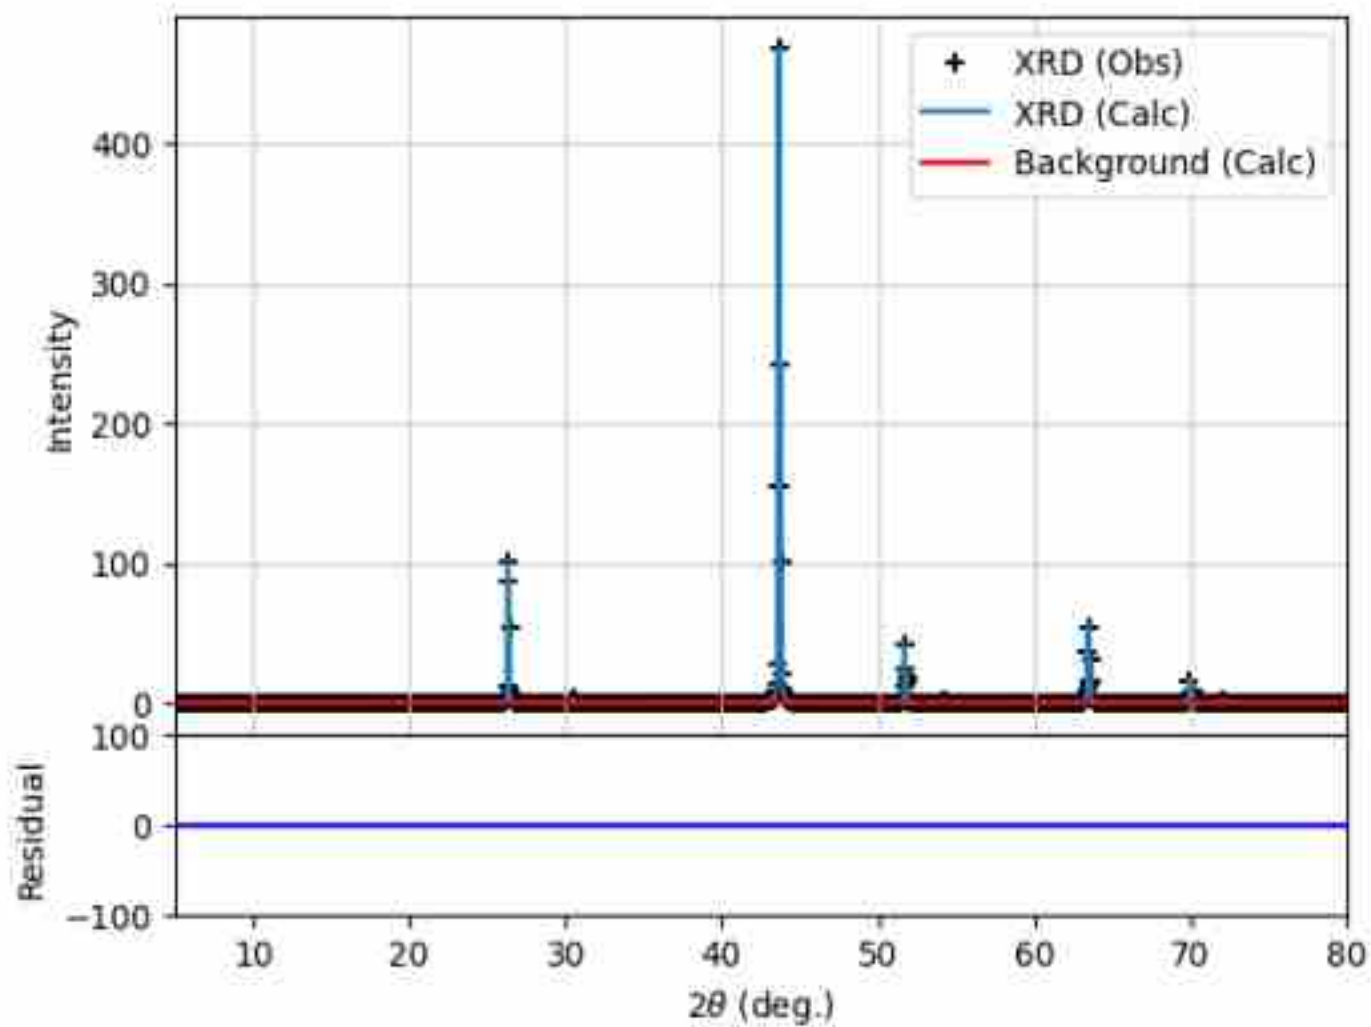

| RMSE before RR | Rwp     | RMSE after RR |
|----------------|---------|---------------|
| 0.002          | 0.00186 | 0.00043       |

# AlFe<sub>3</sub>

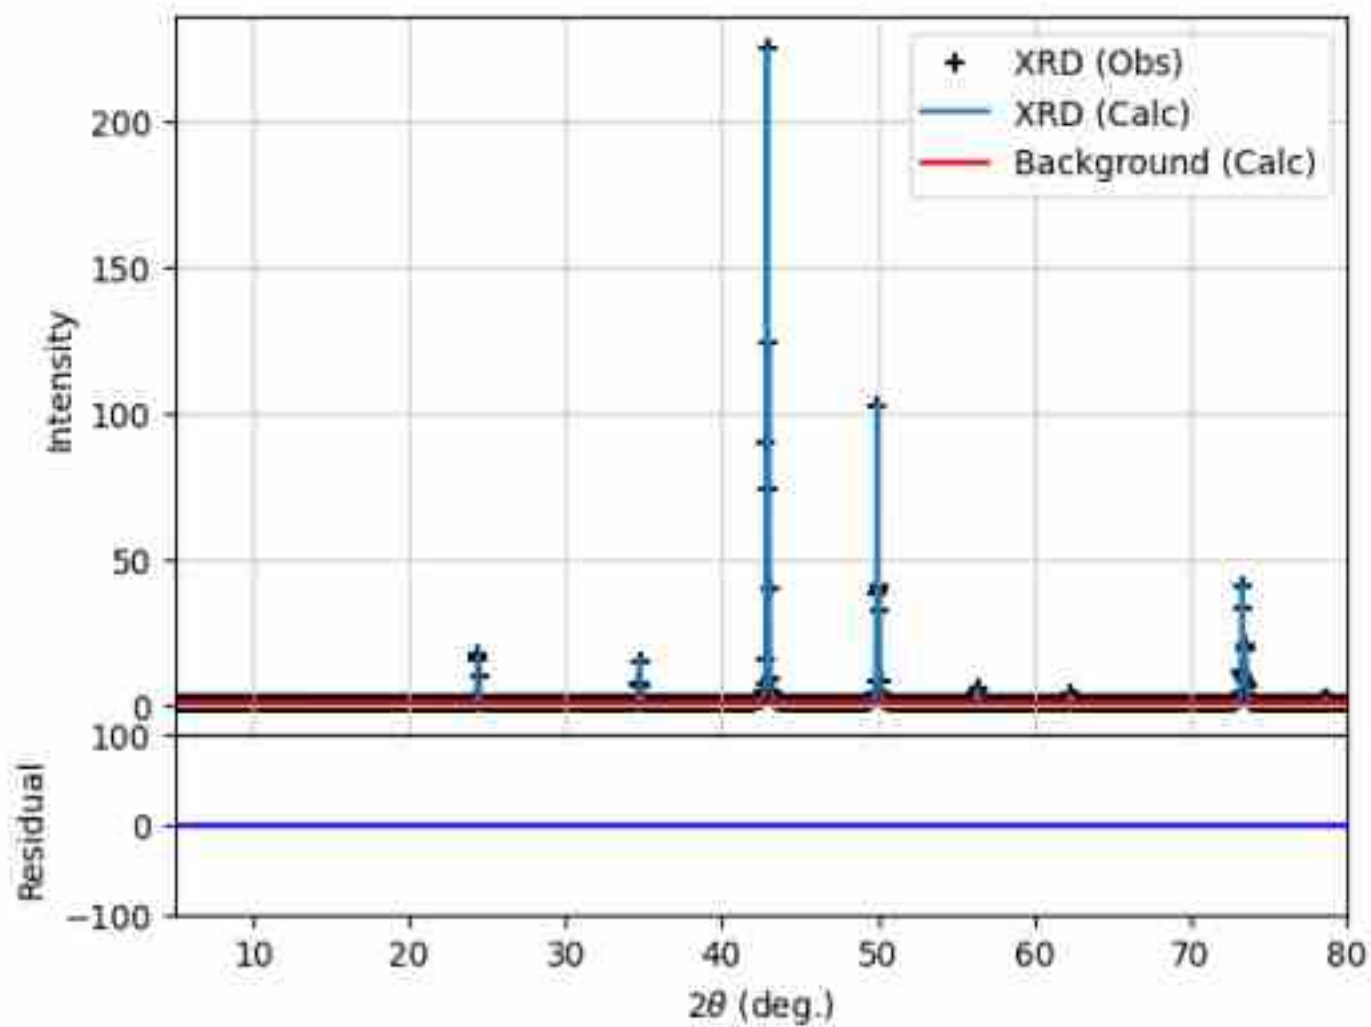

| RMSE before RR | Rwp     | RMSE after RR |
|----------------|---------|---------------|
| 0.002          | 0.00388 | 0.00078       |

# Al<sub>2</sub>Cu<sub>1</sub>

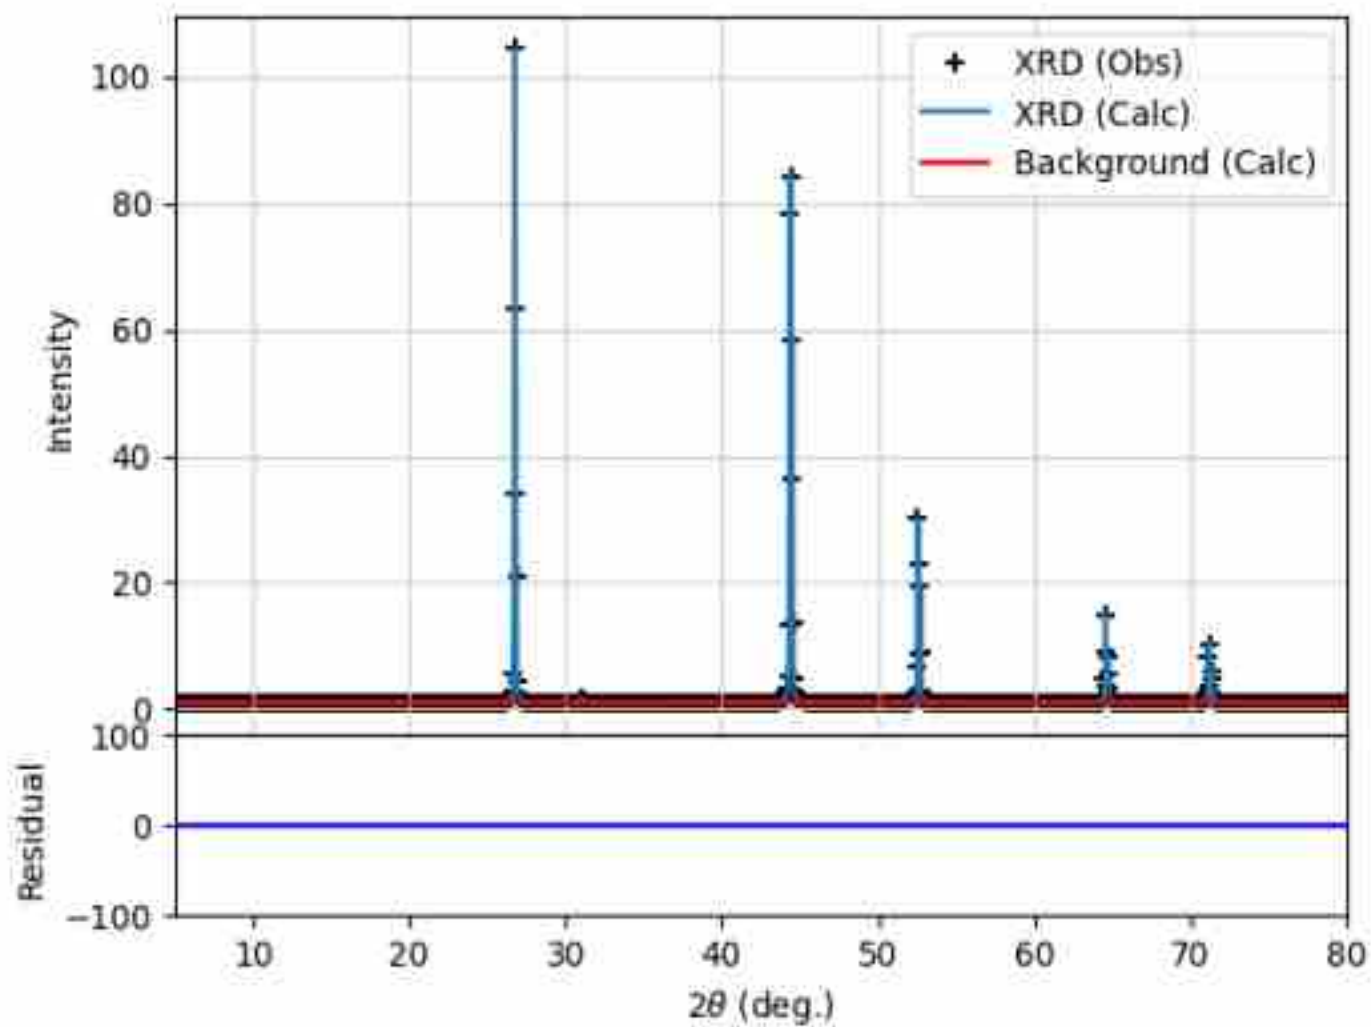

| RMSE before RR | Rwp     | RMSE after RR |
|----------------|---------|---------------|
| 0.002          | 0.00177 | 0.00059       |

# Al3V1

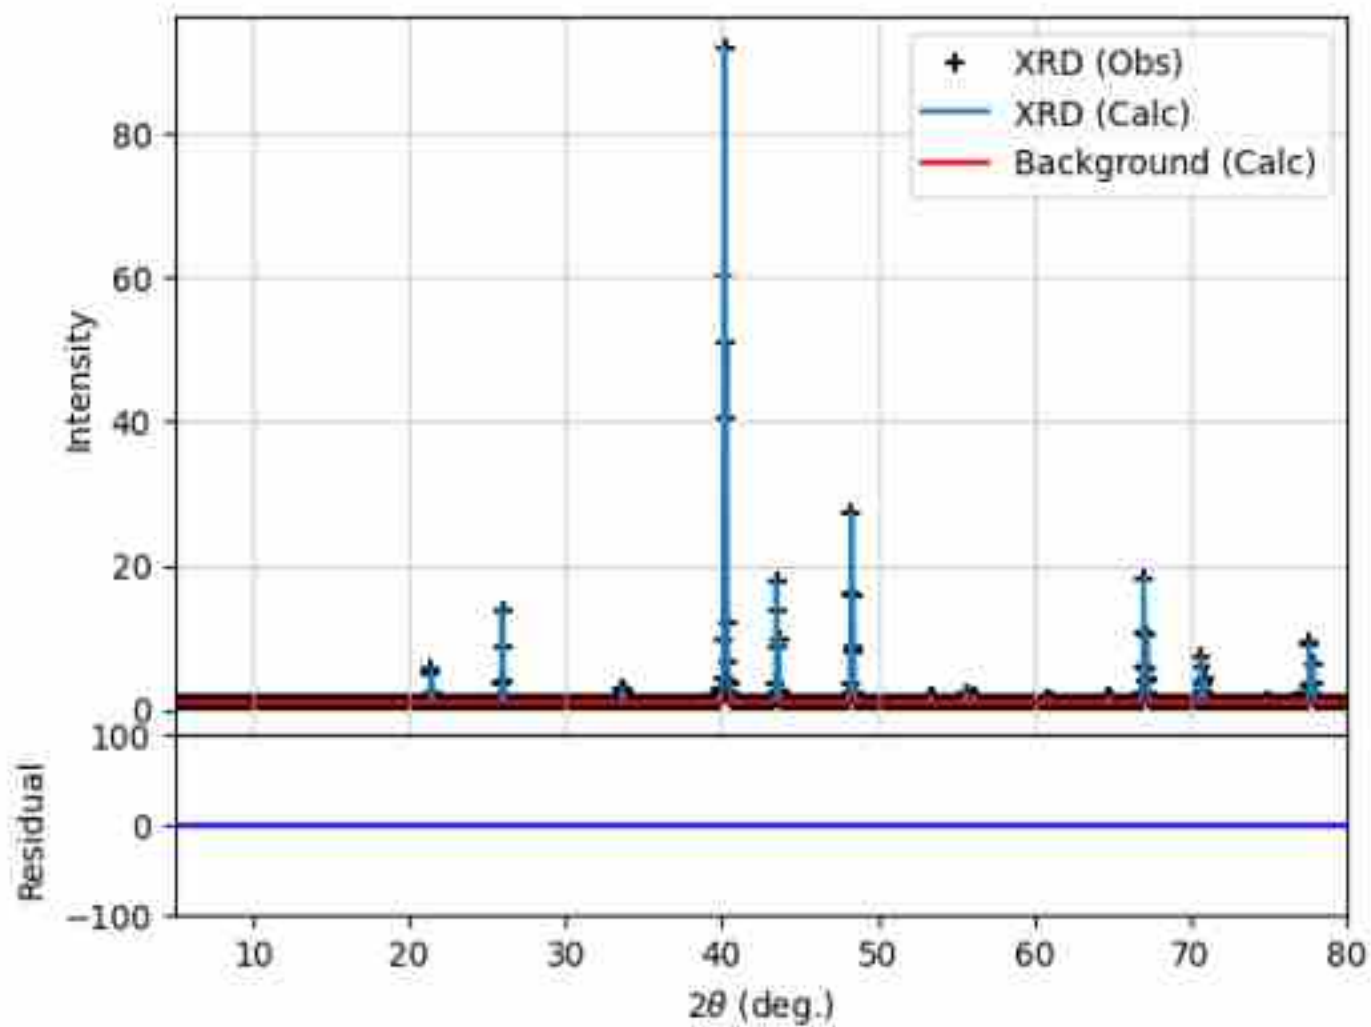

| RMSE before RR | Rwp     | RMSE after RR |
|----------------|---------|---------------|
| 0.002          | 0.00195 | 0.00066       |

# Al<sub>4</sub>Cu<sub>16</sub>

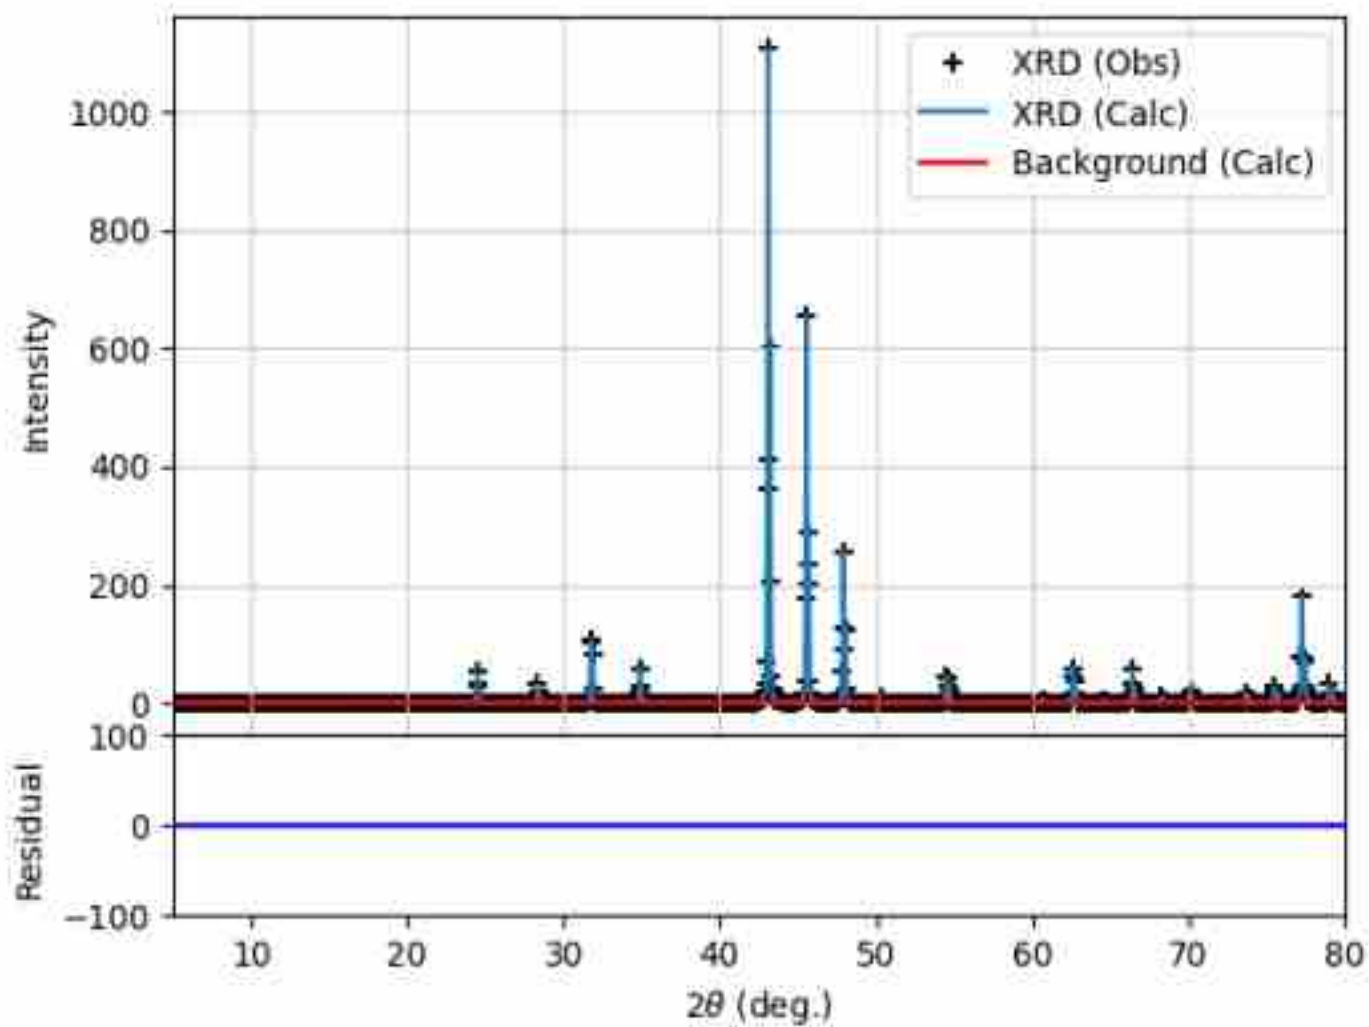

| RMSE before RR | Rwp     | RMSE after RR |
|----------------|---------|---------------|
| 0.02           | 0.00541 | 0.00048       |

# As<sub>4</sub>Pd<sub>4</sub>Se<sub>4</sub>

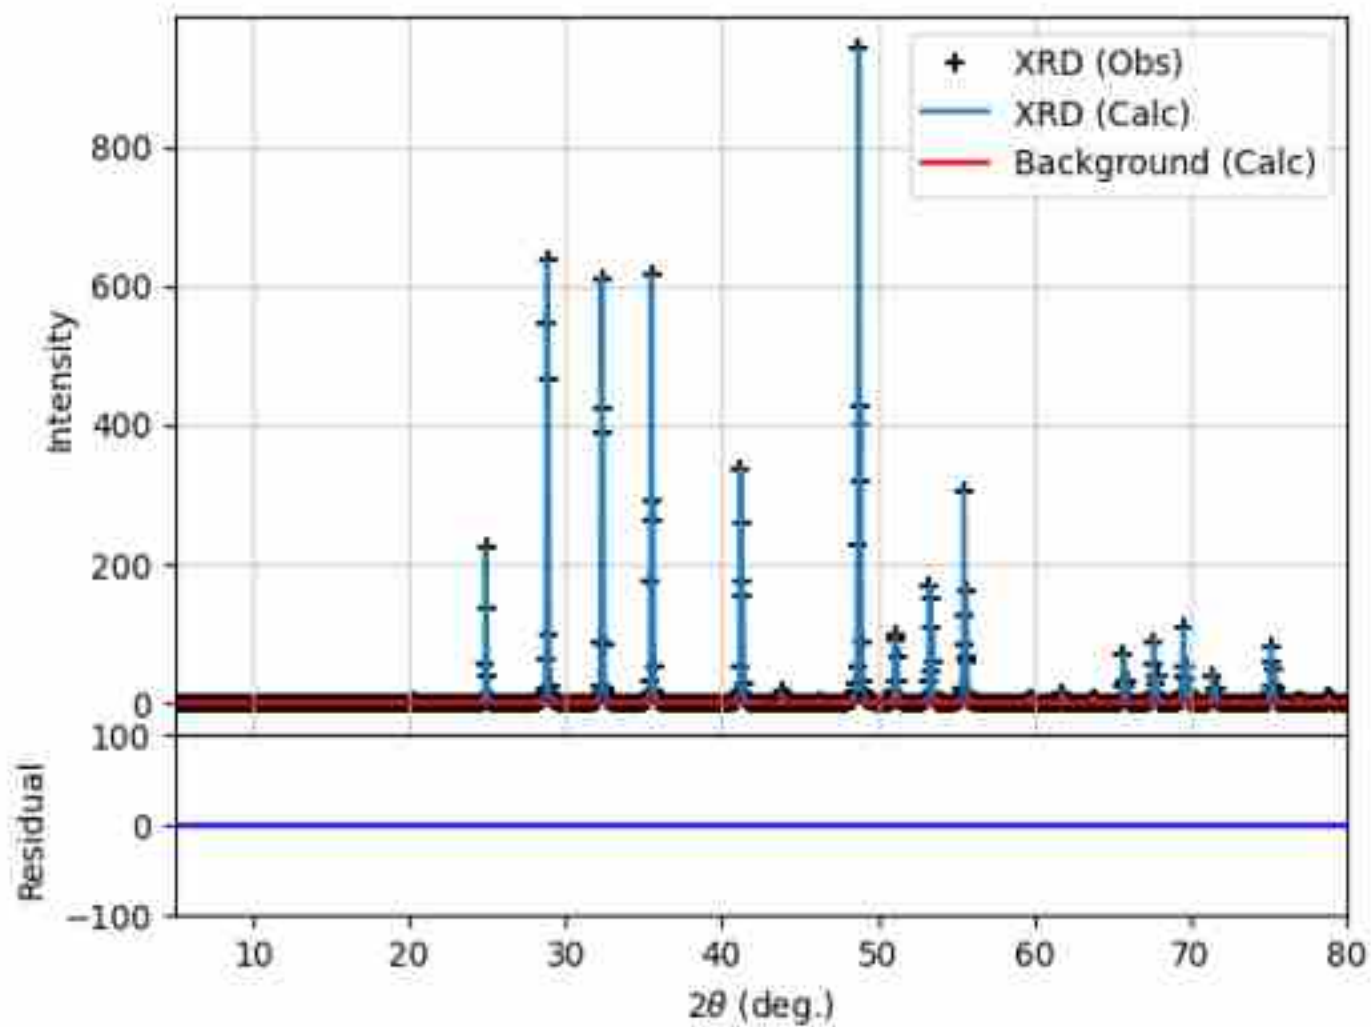

| RMSE before RR | Rwp     | RMSE after RR |
|----------------|---------|---------------|
| 0.02           | 0.00452 | 0.0006        |

# Ba1Ca1

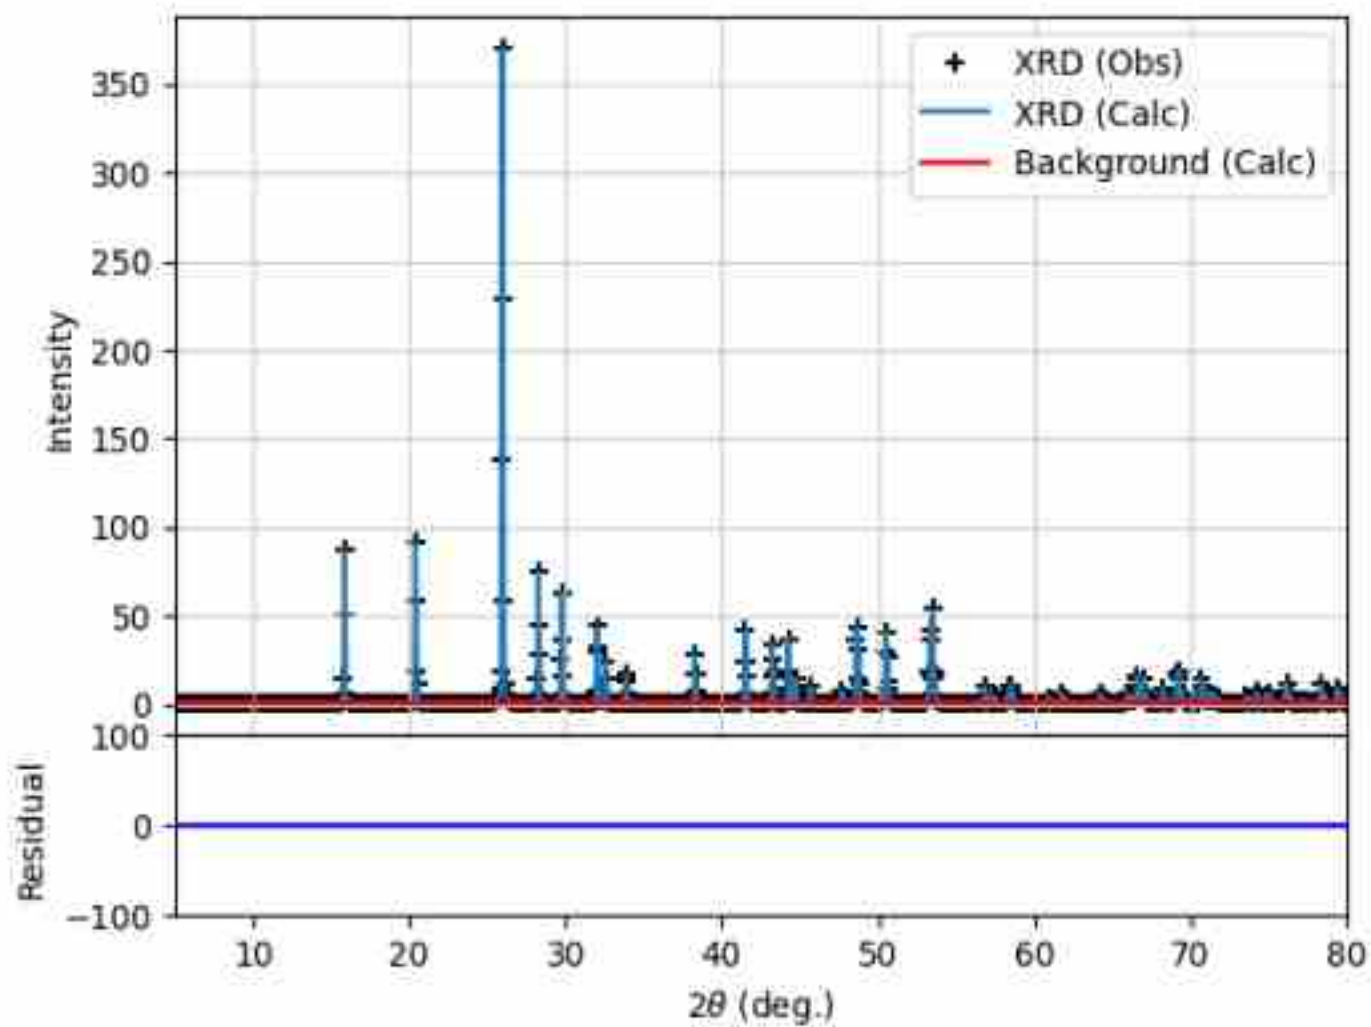

| RMSE before RR | Rwp     | RMSE after RR |
|----------------|---------|---------------|
| 0.002          | 0.00332 | 0.00048       |



# Ba<sub>1</sub>Hg<sub>2</sub>Pb<sub>1</sub>

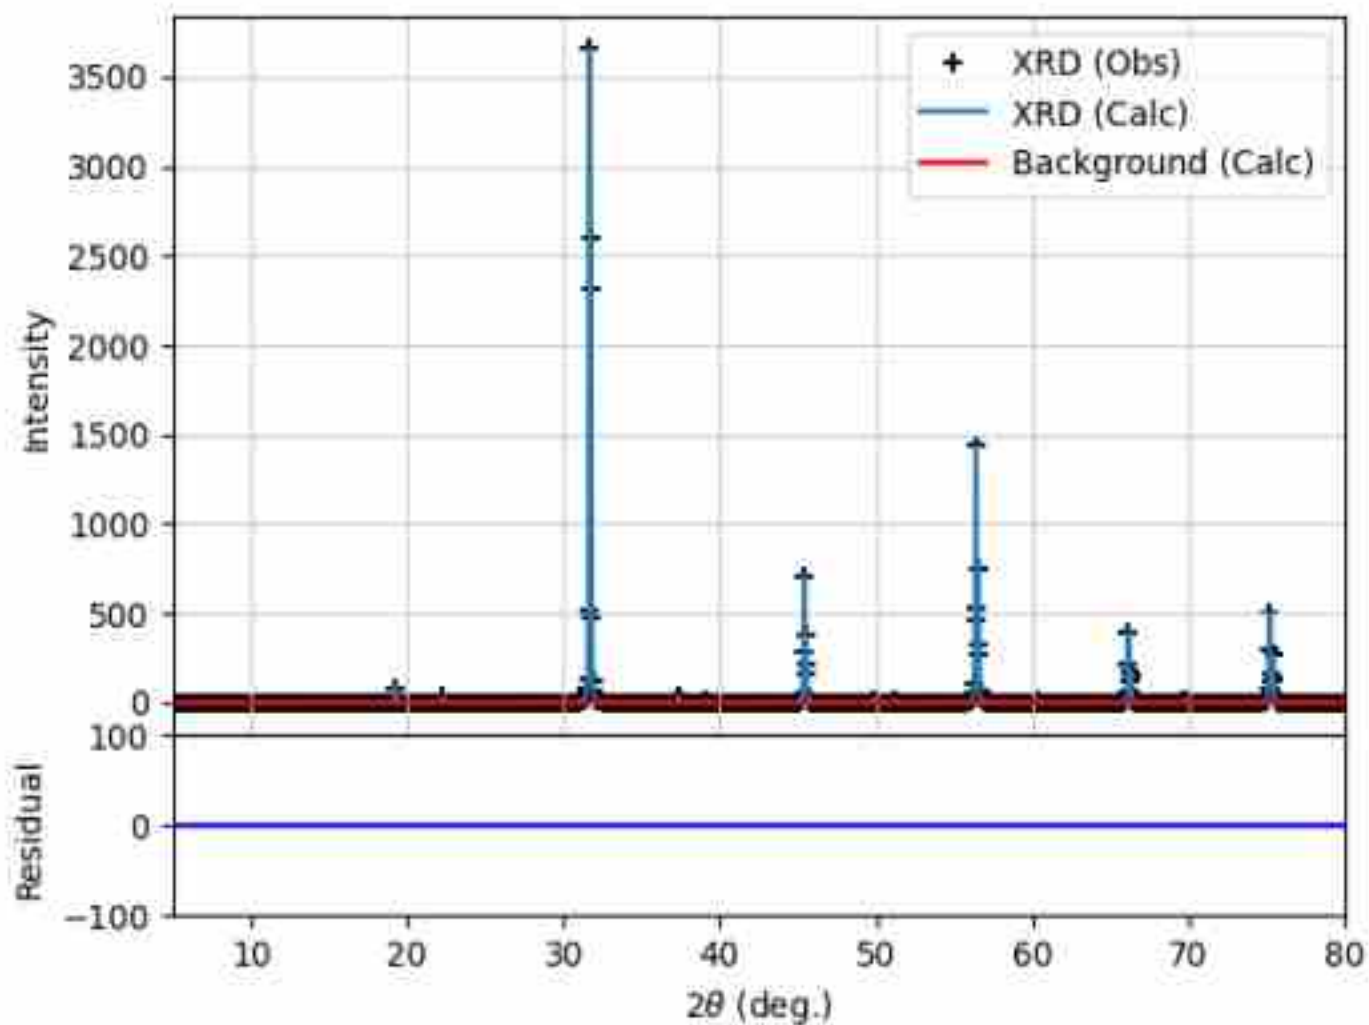

| RMSE before RR | Rwp     | RMSE after RR |
|----------------|---------|---------------|
| 0.002          | 0.01333 | 0.00077       |

# Ba1Na1Hg2

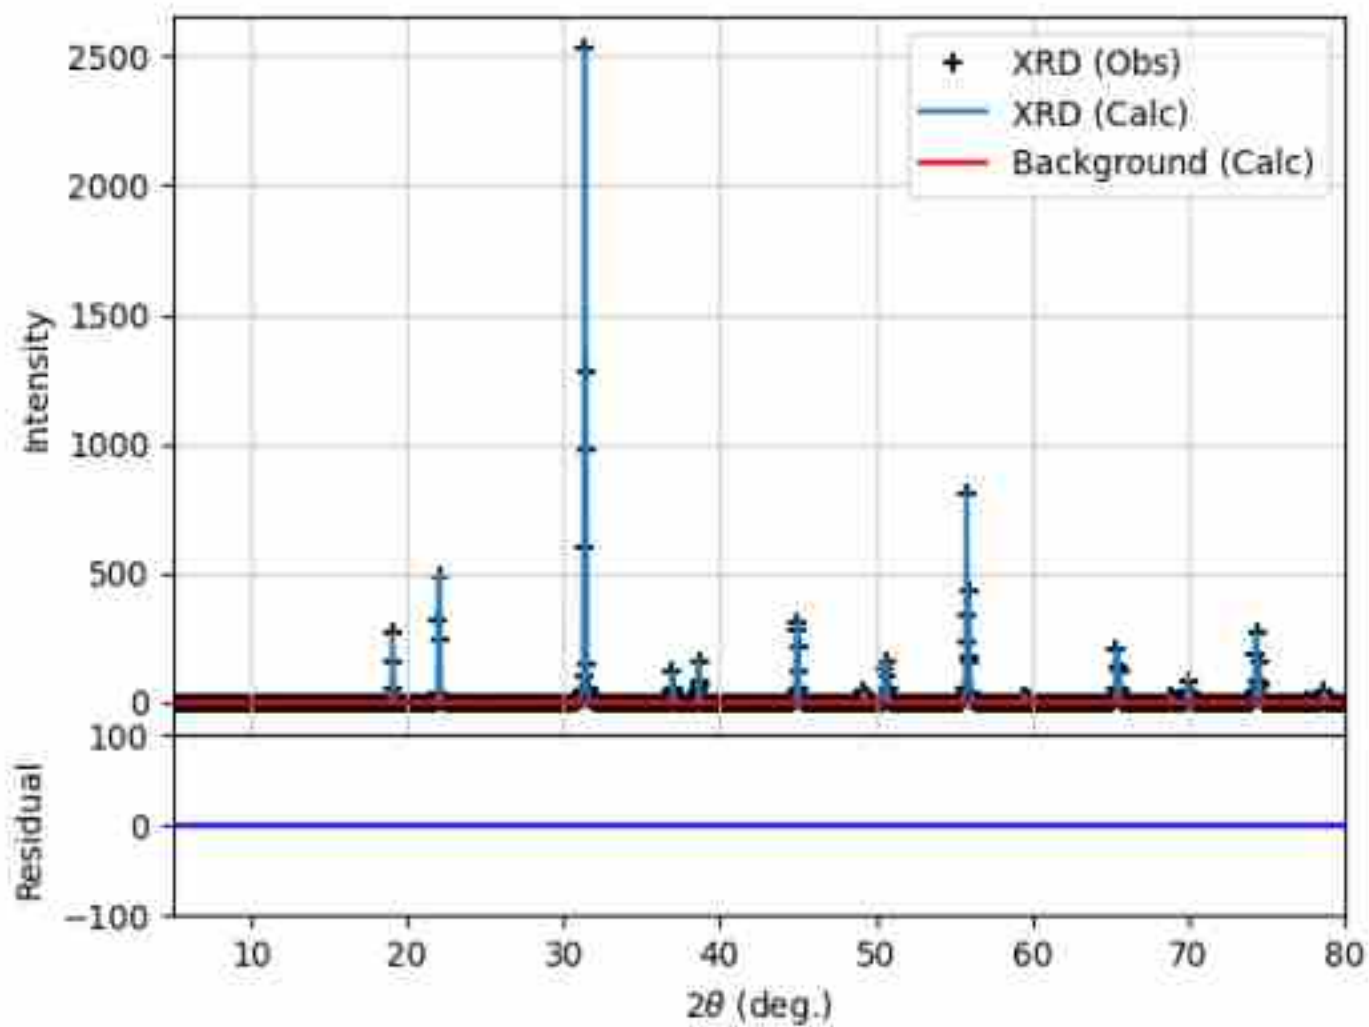

| RMSE before RR | Rwp    | RMSE after RR |
|----------------|--------|---------------|
| 0.002          | 0.0352 | 0.00186       |

# Ba<sub>1</sub>Y<sub>1</sub>Cr<sub>1</sub>Cu<sub>1</sub>O<sub>5</sub>

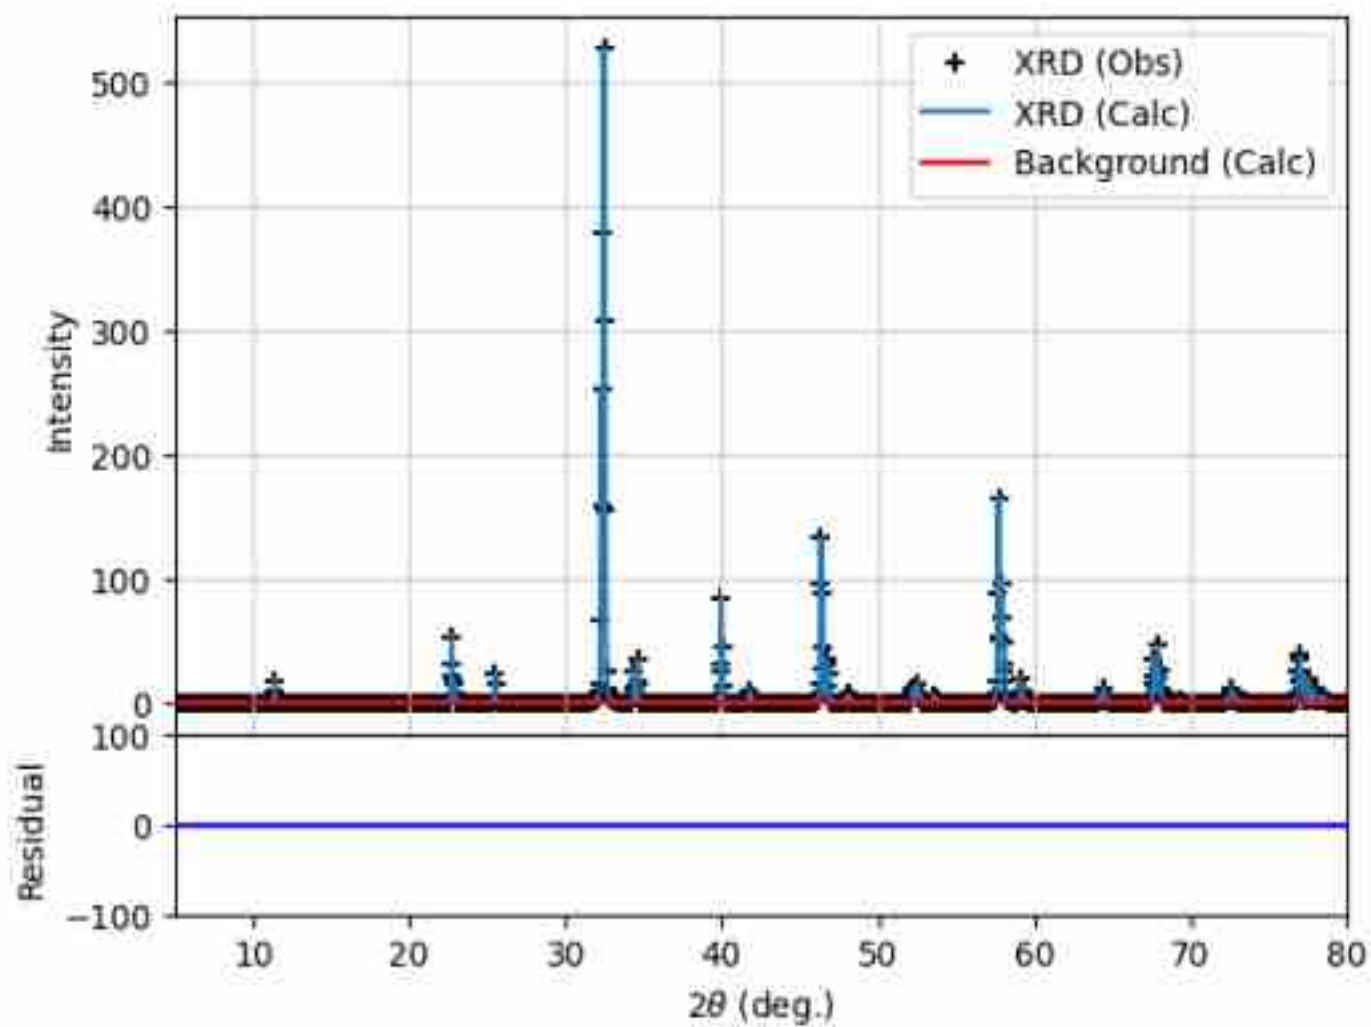

| RMSE before RR | Rwp     | RMSE after RR |
|----------------|---------|---------------|
| 0.02           | 0.00215 | 0.00087       |

# Ba1Yb3

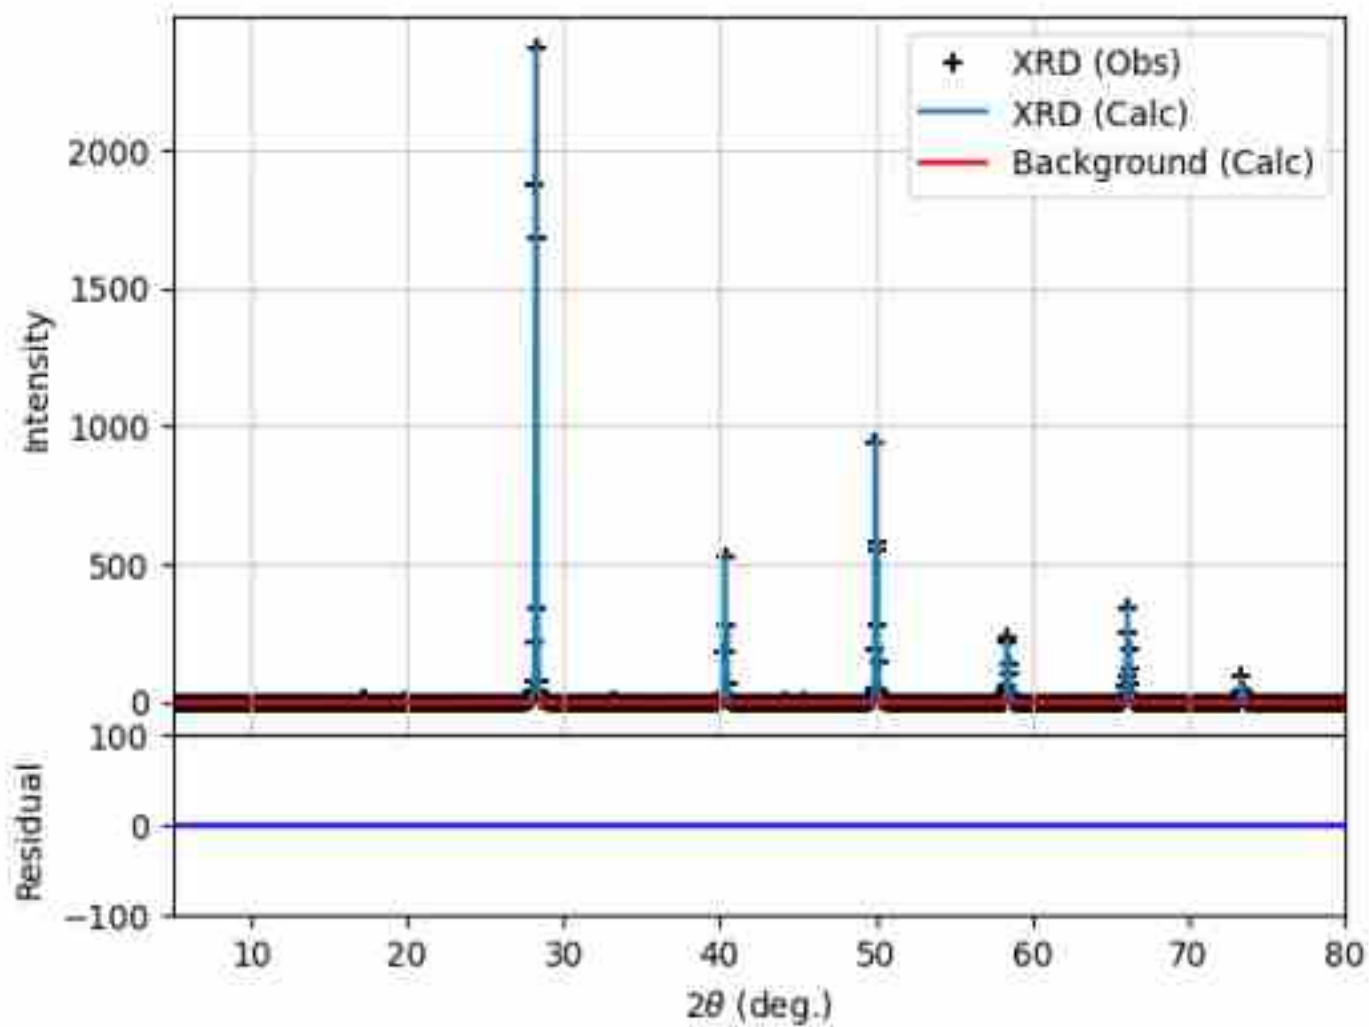

| RMSE before RR | Rwp     | RMSE after RR |
|----------------|---------|---------------|
| 0.002          | 0.00306 | 0.00013       |

# Ba<sub>2</sub>C<sub>2</sub>O<sub>6</sub>

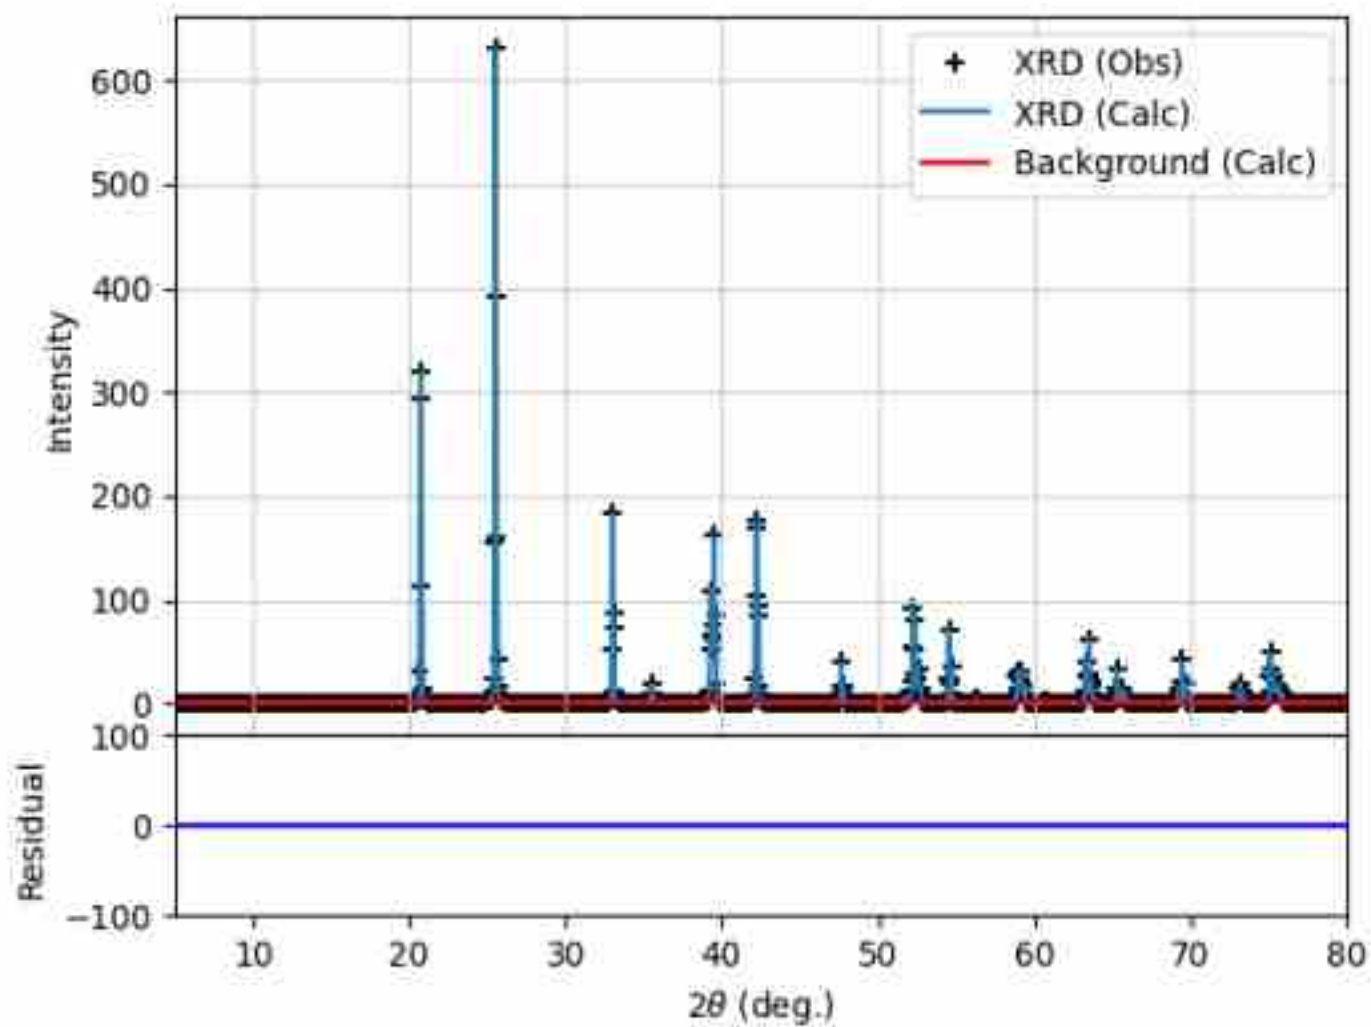

| RMSE before RR | Rwp     | RMSE after RR |
|----------------|---------|---------------|
| 0.02           | 0.00272 | 0.0013        |

# Ba<sub>2</sub>Cu<sub>1</sub>P<sub>2</sub>O<sub>8</sub>

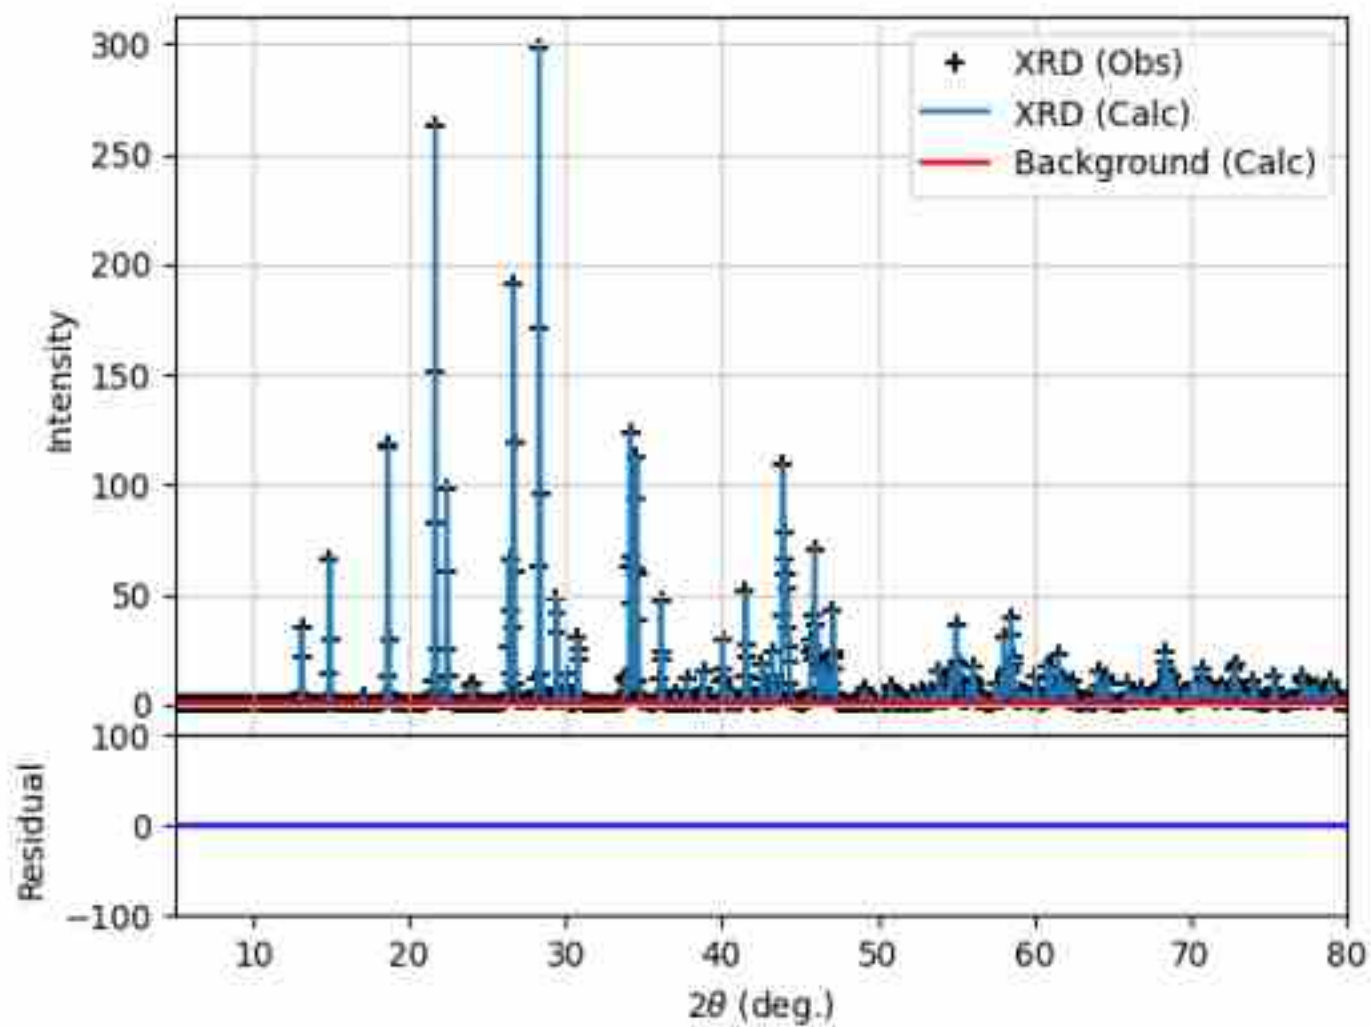

| RMSE before RR | Rwp     | RMSE after RR |
|----------------|---------|---------------|
| 0.02           | 0.00313 | 0.00092       |

# Ba<sub>2</sub>Er<sub>2</sub>Ag<sub>2</sub>S<sub>6</sub>

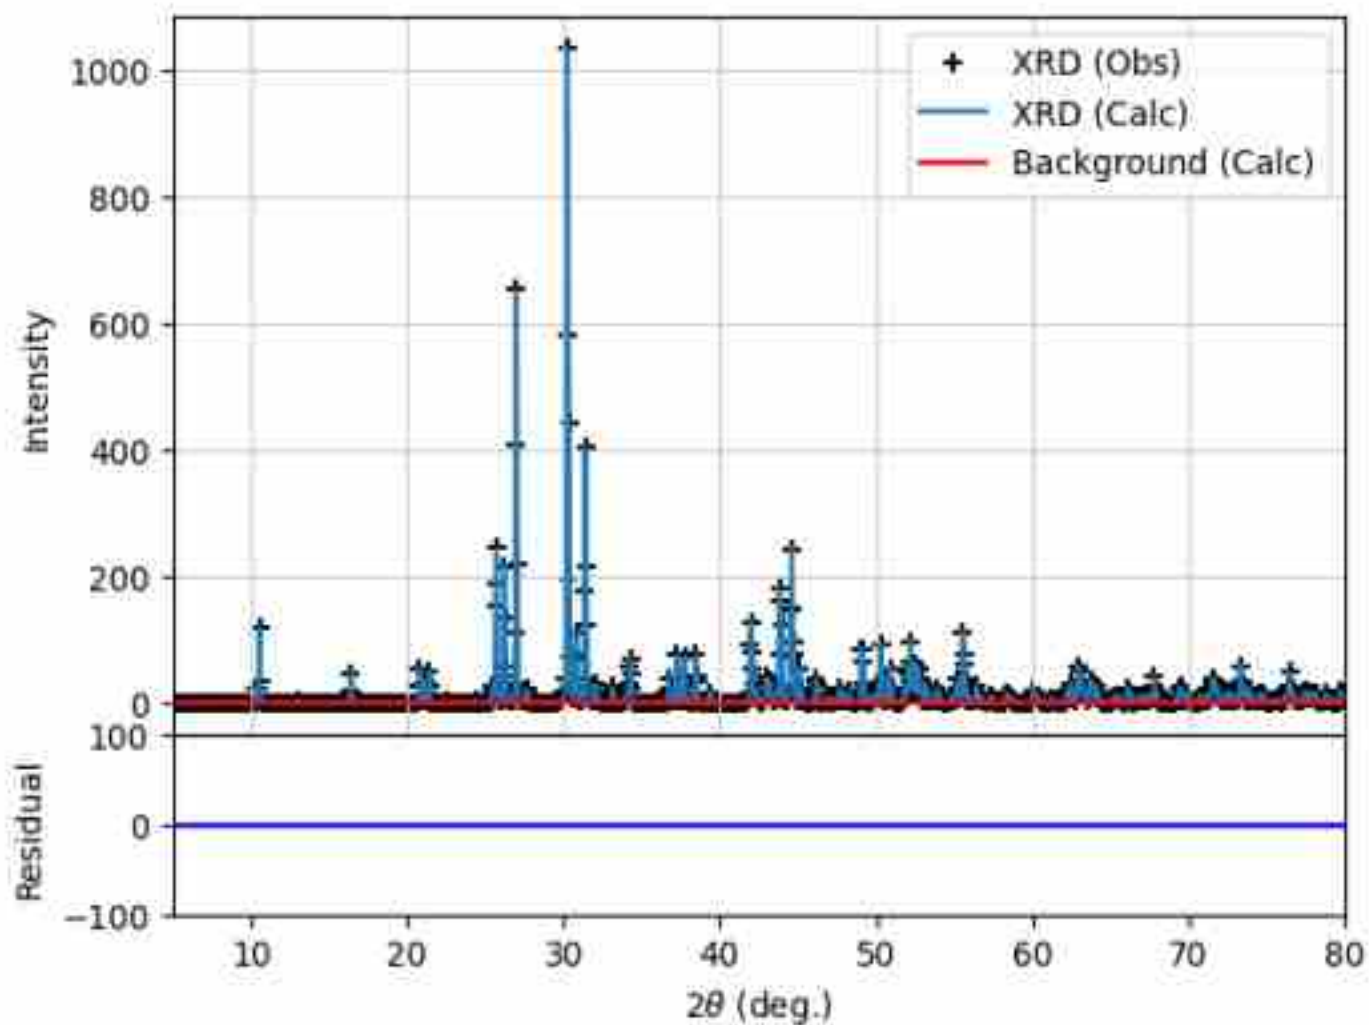

| RMSE before RR | Rwp     | RMSE after RR |
|----------------|---------|---------------|
| 0.02           | 0.00252 | 0.00033       |

# Ba<sub>2</sub>Nd<sub>4</sub>Mn<sub>2</sub>S<sub>10</sub>

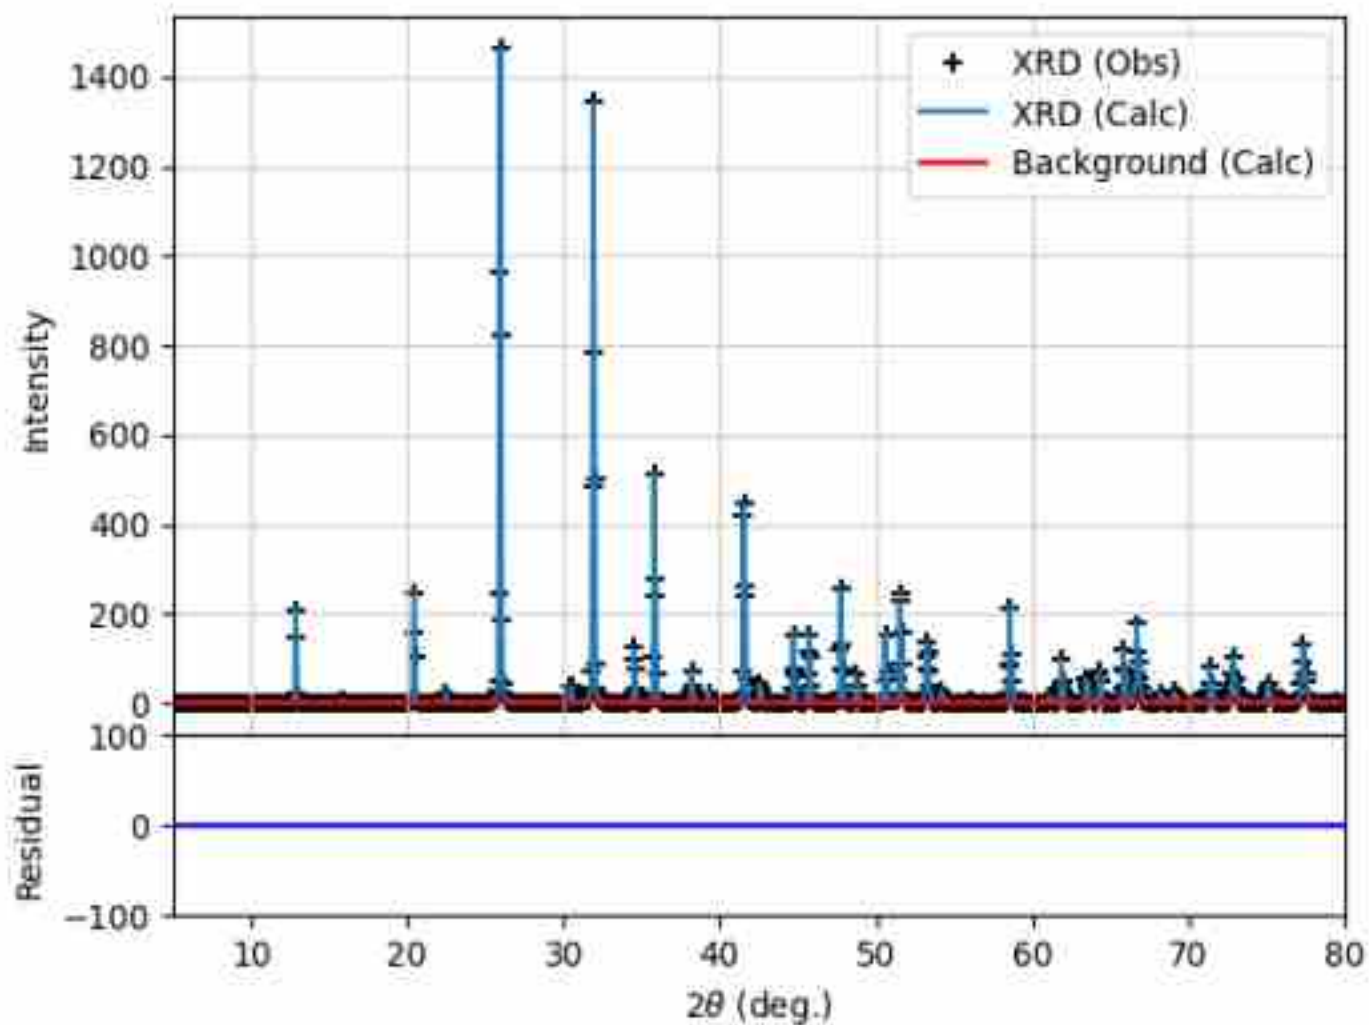

| RMSE before RR | Rwp    | RMSE after RR |
|----------------|--------|---------------|
| 0.02           | 0.0036 | 0.0012        |



# Ba<sub>2</sub>Tb<sub>2</sub>Eu<sub>2</sub>W<sub>2</sub>O<sub>12</sub>

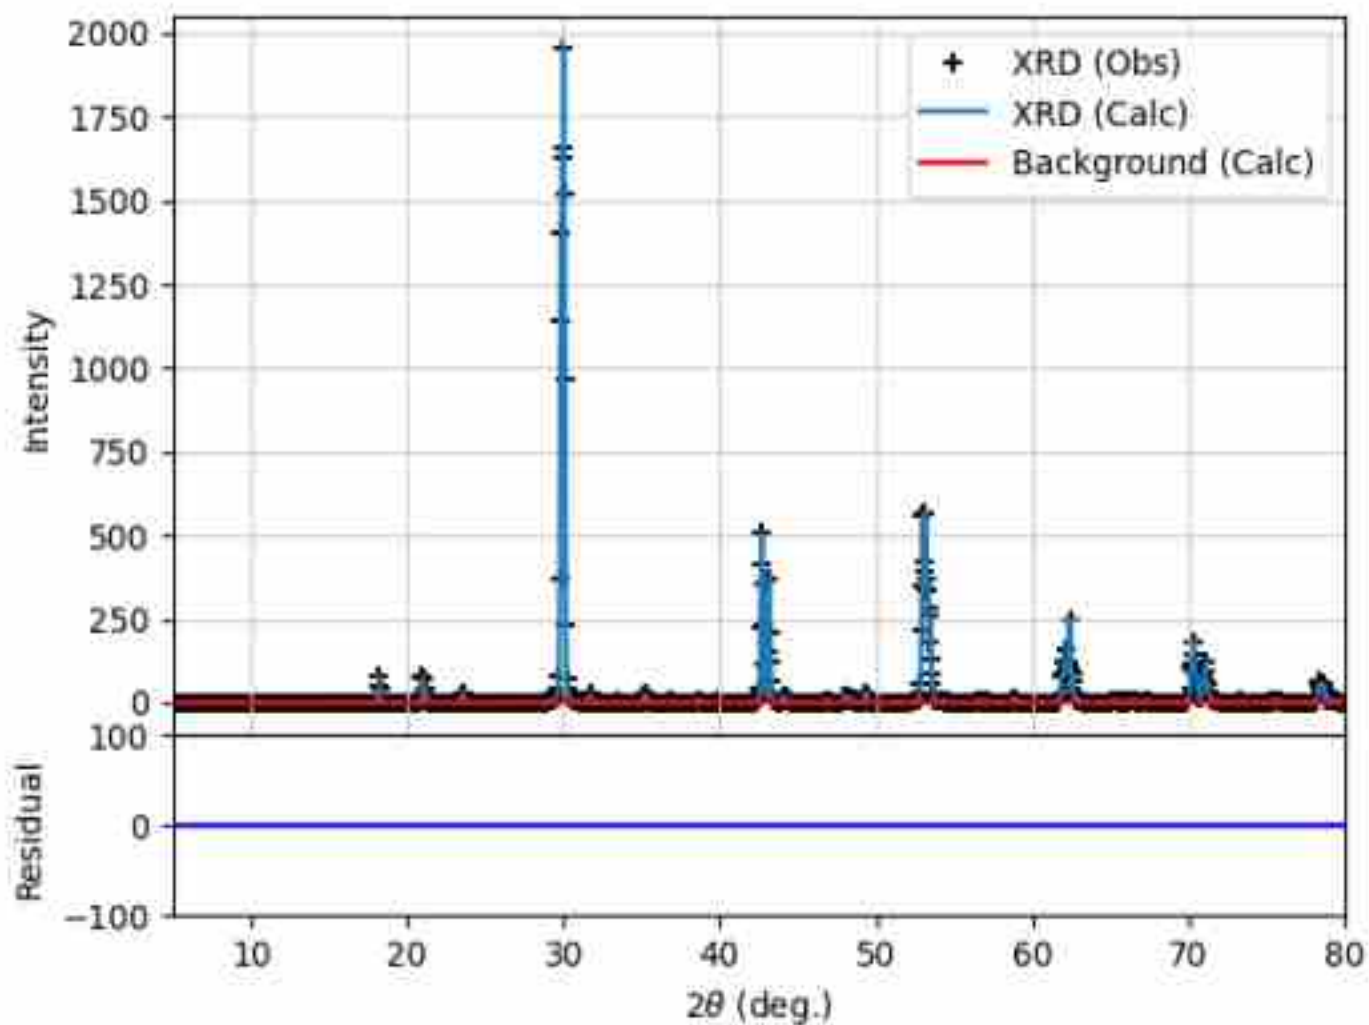

| RMSE before RR | Rwp     | RMSE after RR |
|----------------|---------|---------------|
| 0.02           | 0.00976 | 0.00303       |

# Ba<sub>3</sub>Ca<sub>1</sub>Ru<sub>2</sub>O<sub>9</sub>

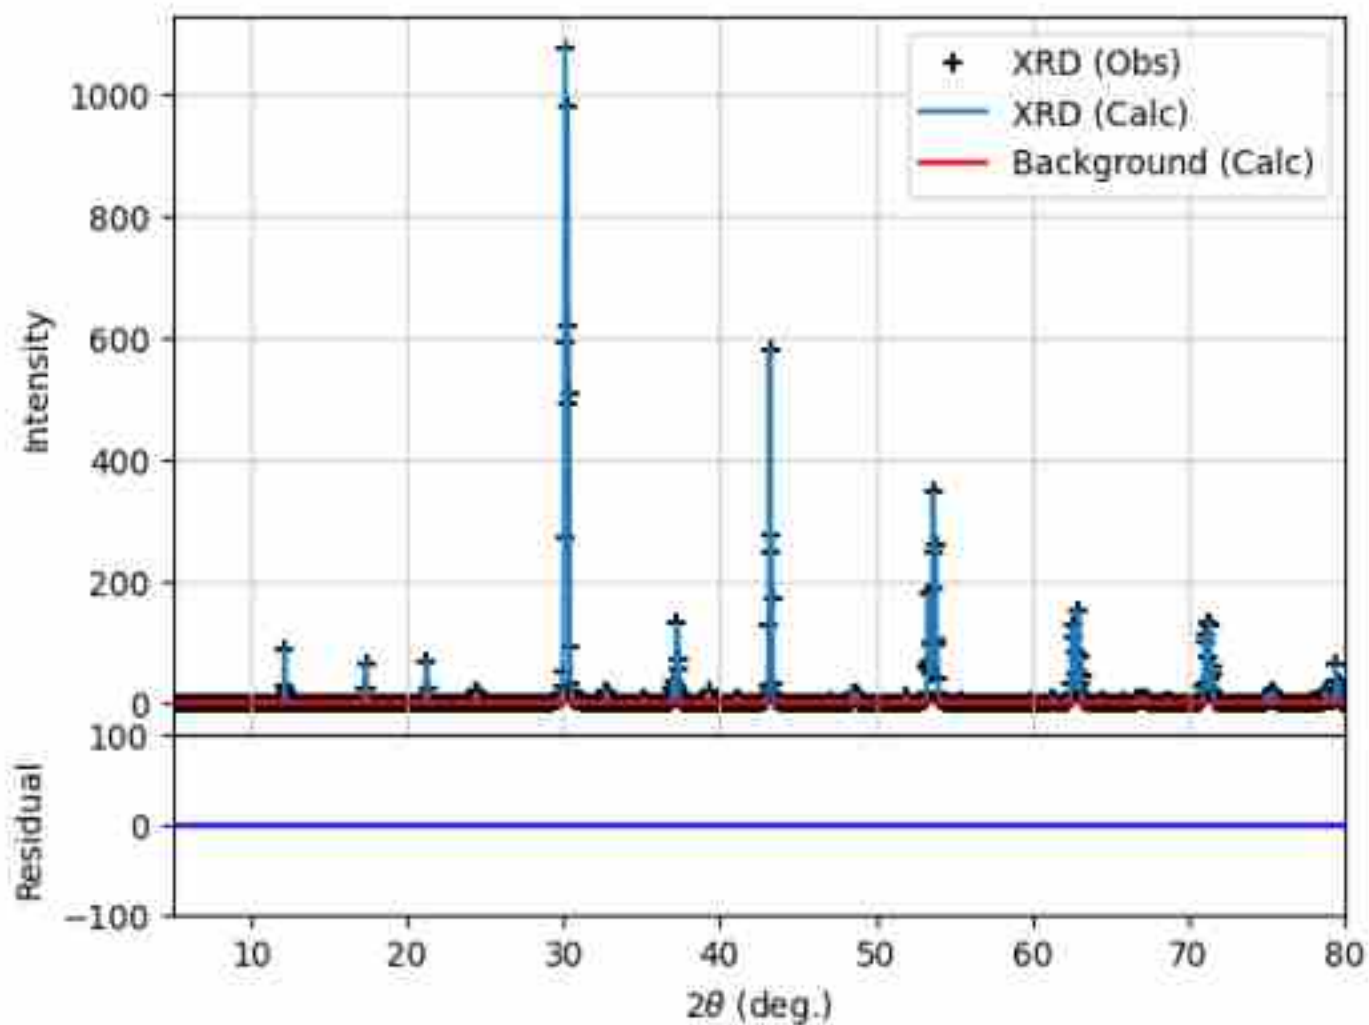

| RMSE before RR | Rwp    | RMSE after RR |
|----------------|--------|---------------|
| 0.02           | 0.0052 | 0.00256       |

# Ba<sub>3</sub>Na<sub>1</sub>

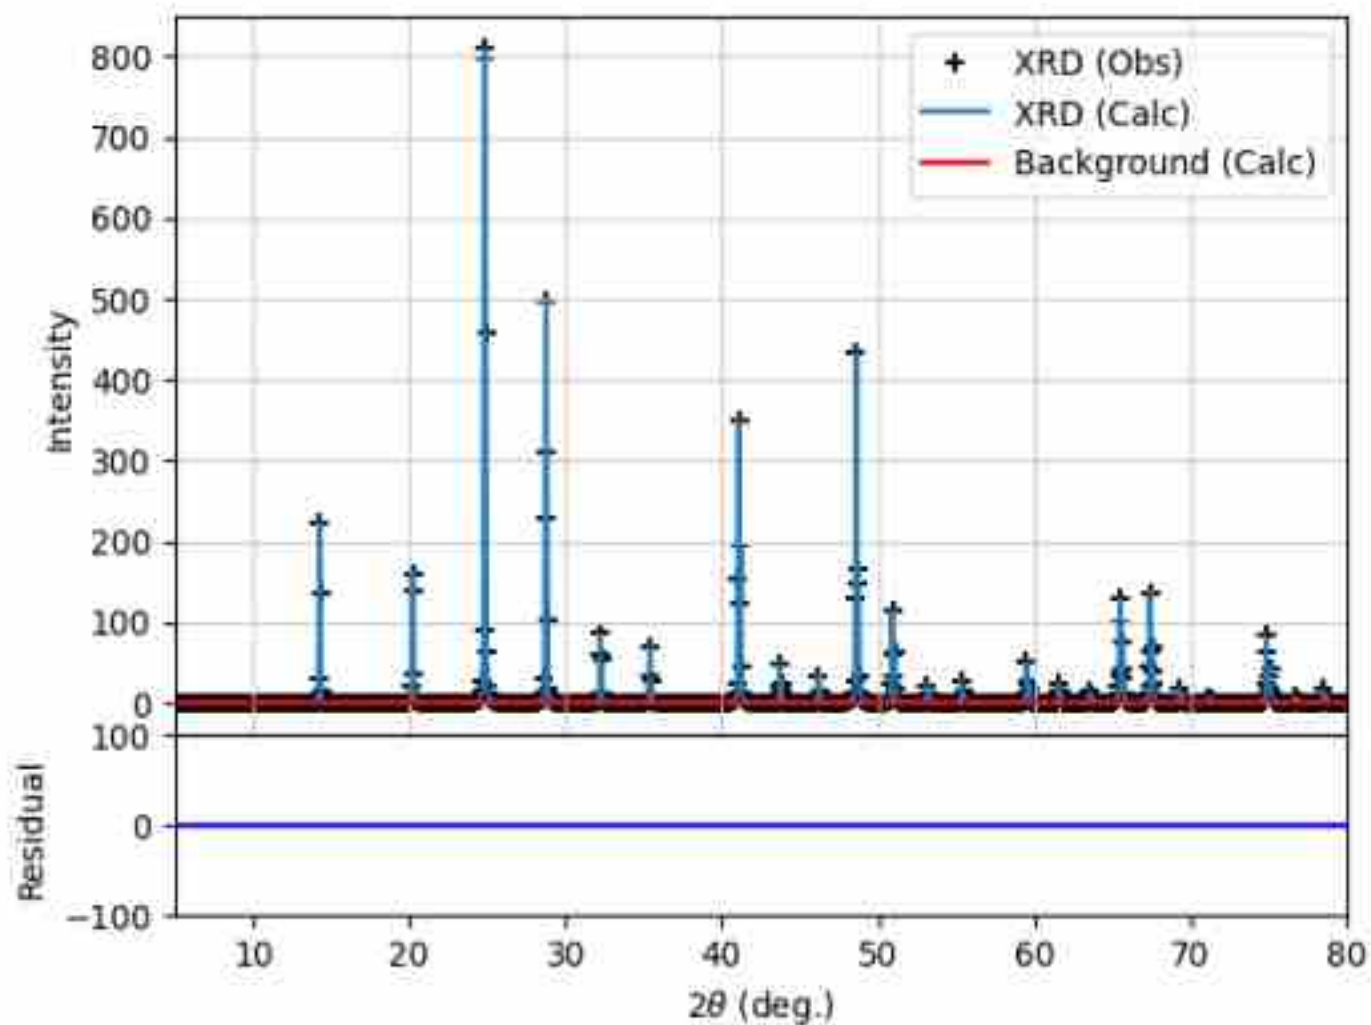

| RMSE before RR | Rwp     | RMSE after RR |
|----------------|---------|---------------|
| 0.002          | 0.01485 | 0.00078       |

# Ba<sub>3</sub>Pu<sub>10</sub>O<sub>6</sub>

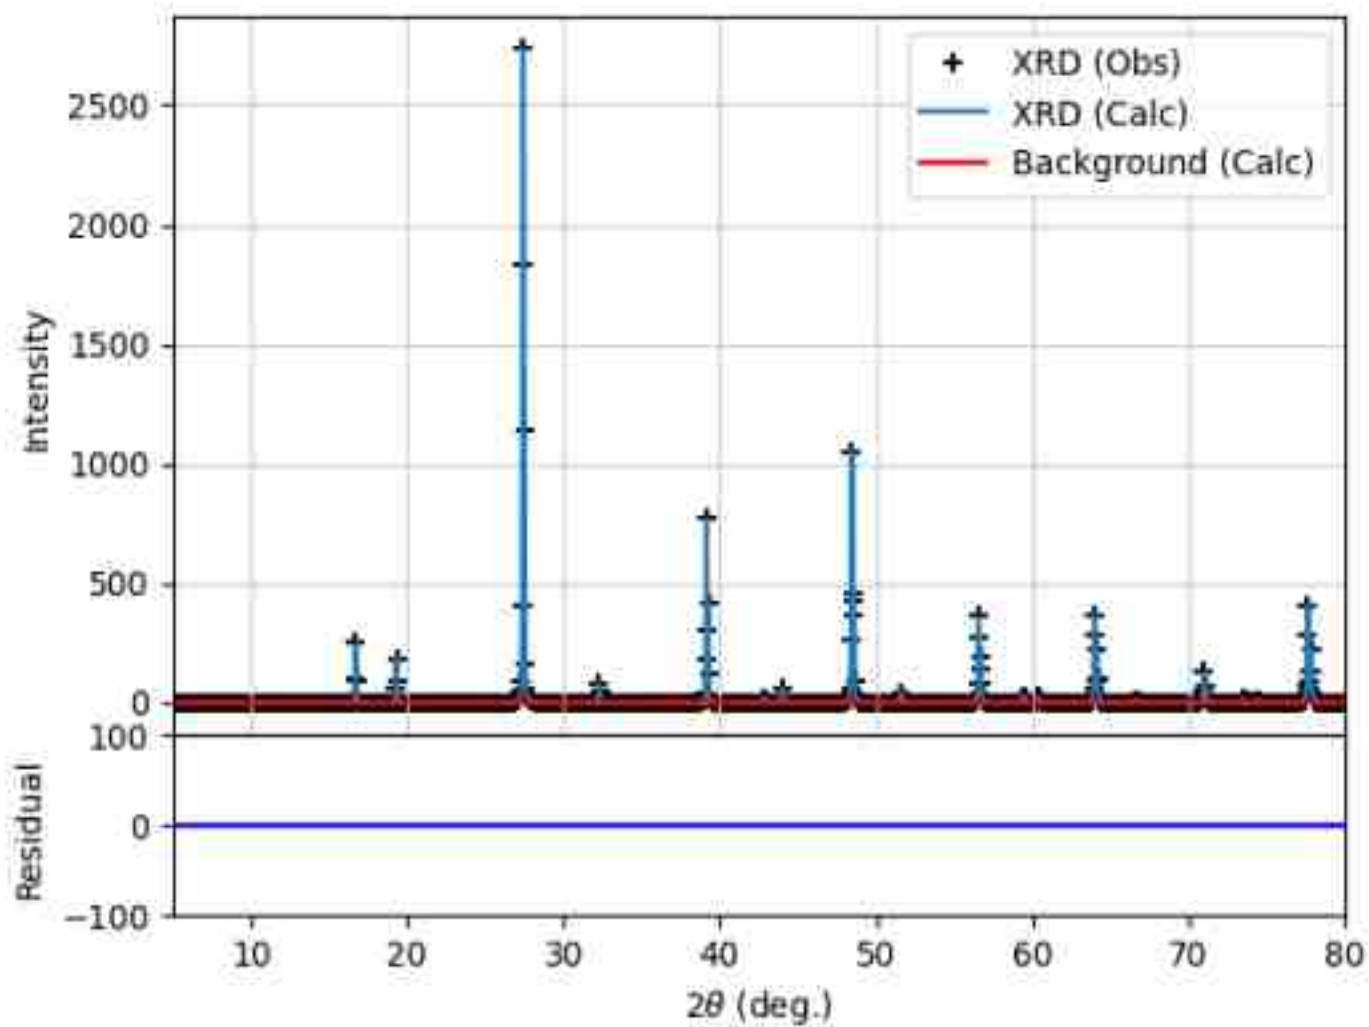

| RMSE before RR | Rwp     | RMSE after RR |
|----------------|---------|---------------|
| 0.02           | 0.00771 | 0.0038        |

# Ba3Sr1Ca2Mo2O12

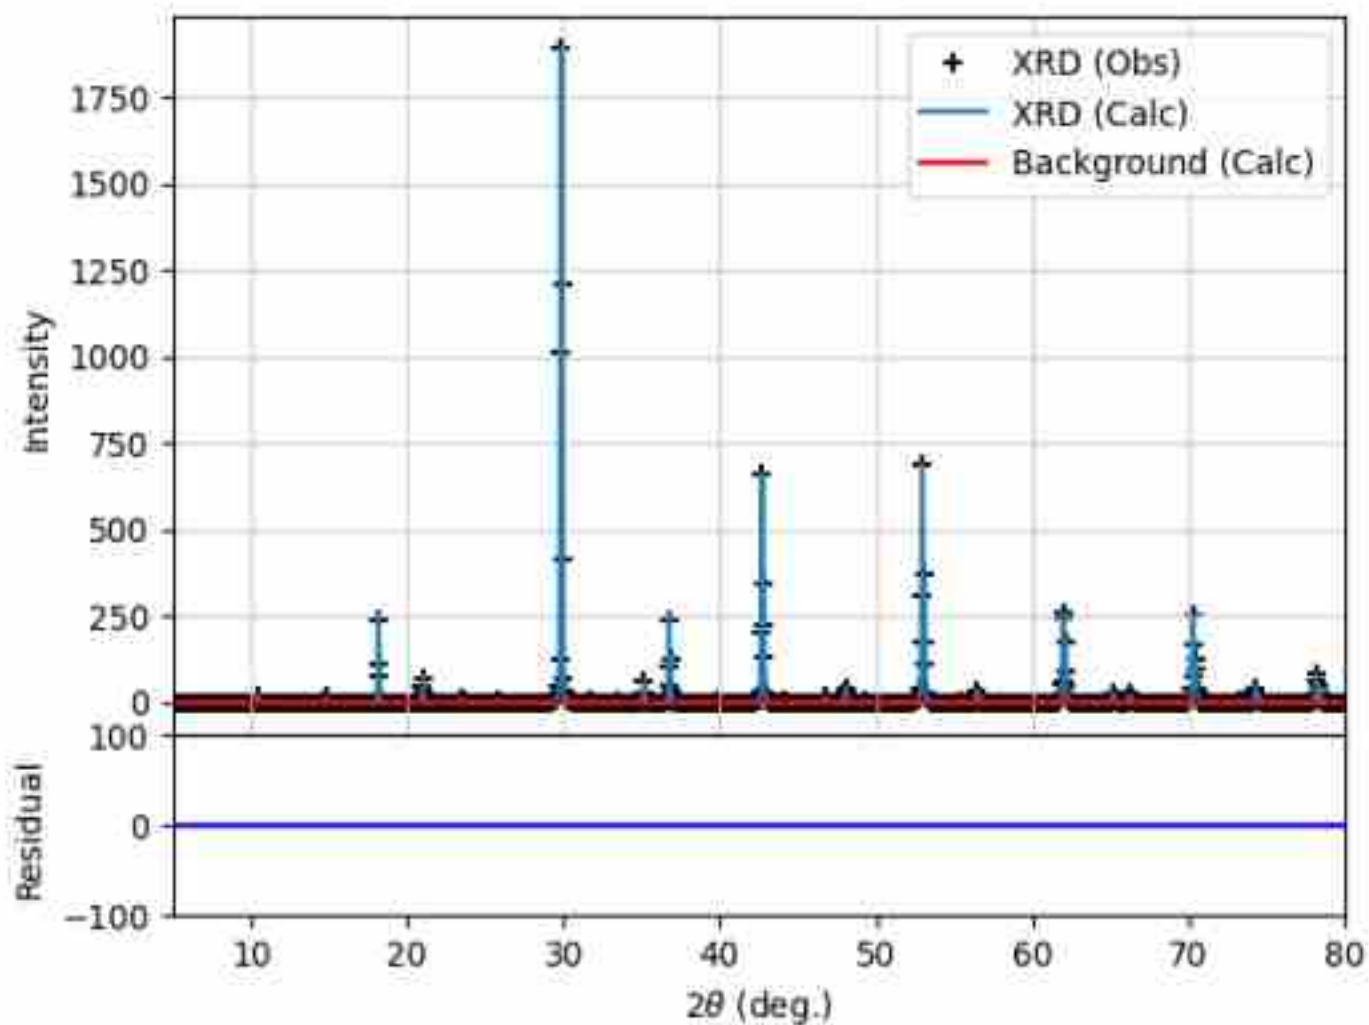

| RMSE before RR | Rwp     | RMSE after RR |
|----------------|---------|---------------|
| 0.02           | 0.00895 | 0.00244       |

# Ba3Sr1

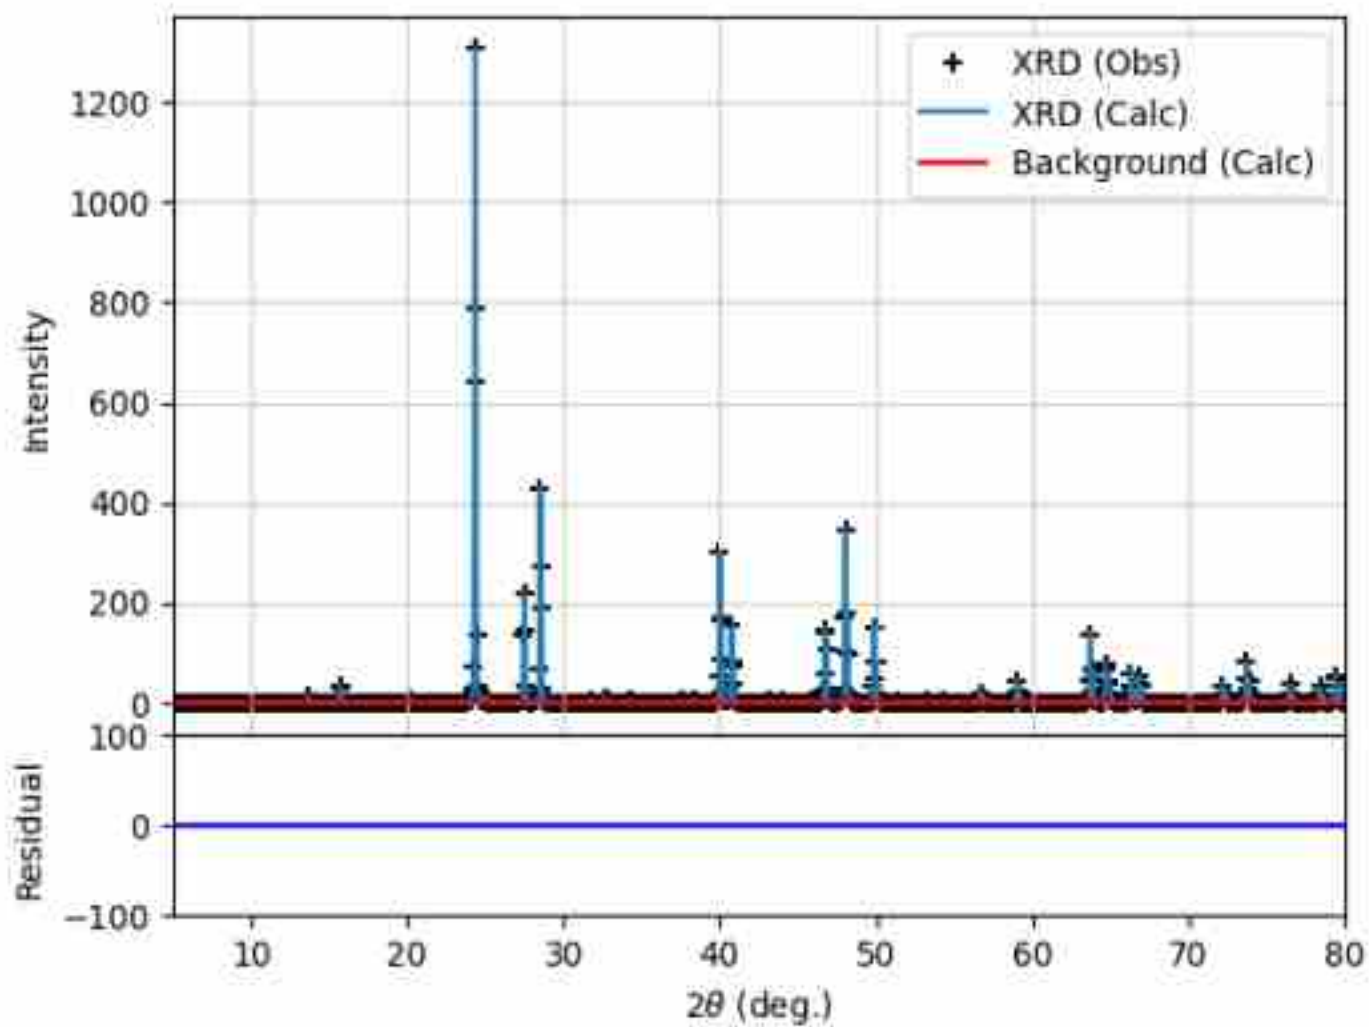

| RMSE before RR | Rwp     | RMSE after RR |
|----------------|---------|---------------|
| 0.002          | 0.00282 | 0.00014       |

# Be1Cr1Fe2

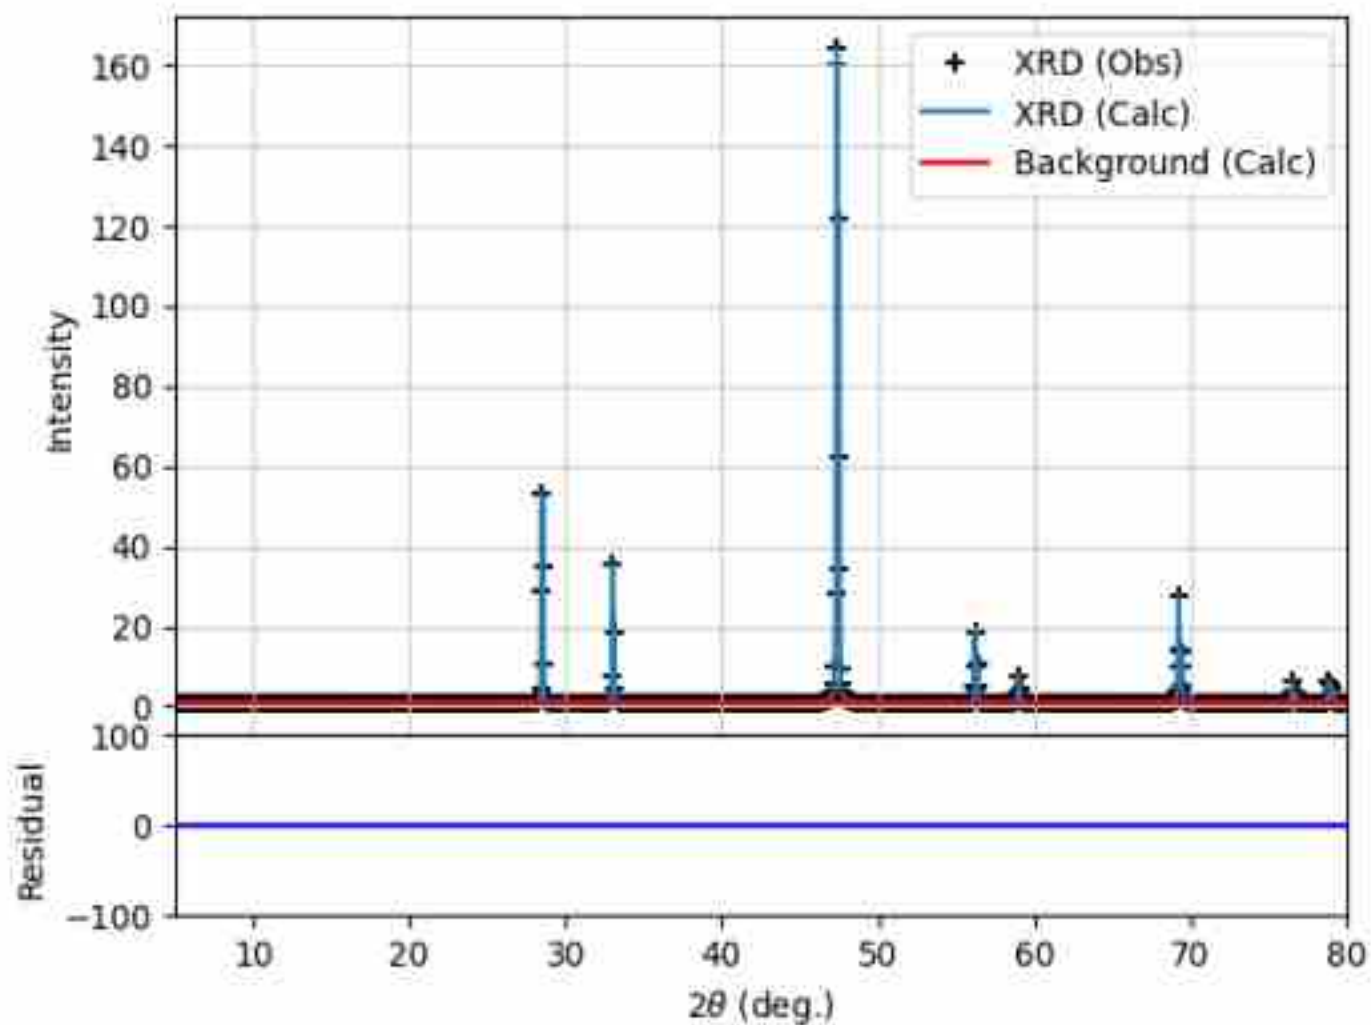

| RMSE before RR | Rwp    | RMSE after RR |
|----------------|--------|---------------|
| 0.002          | 0.0027 | 0.00163       |

# Be1Fe1Rh2

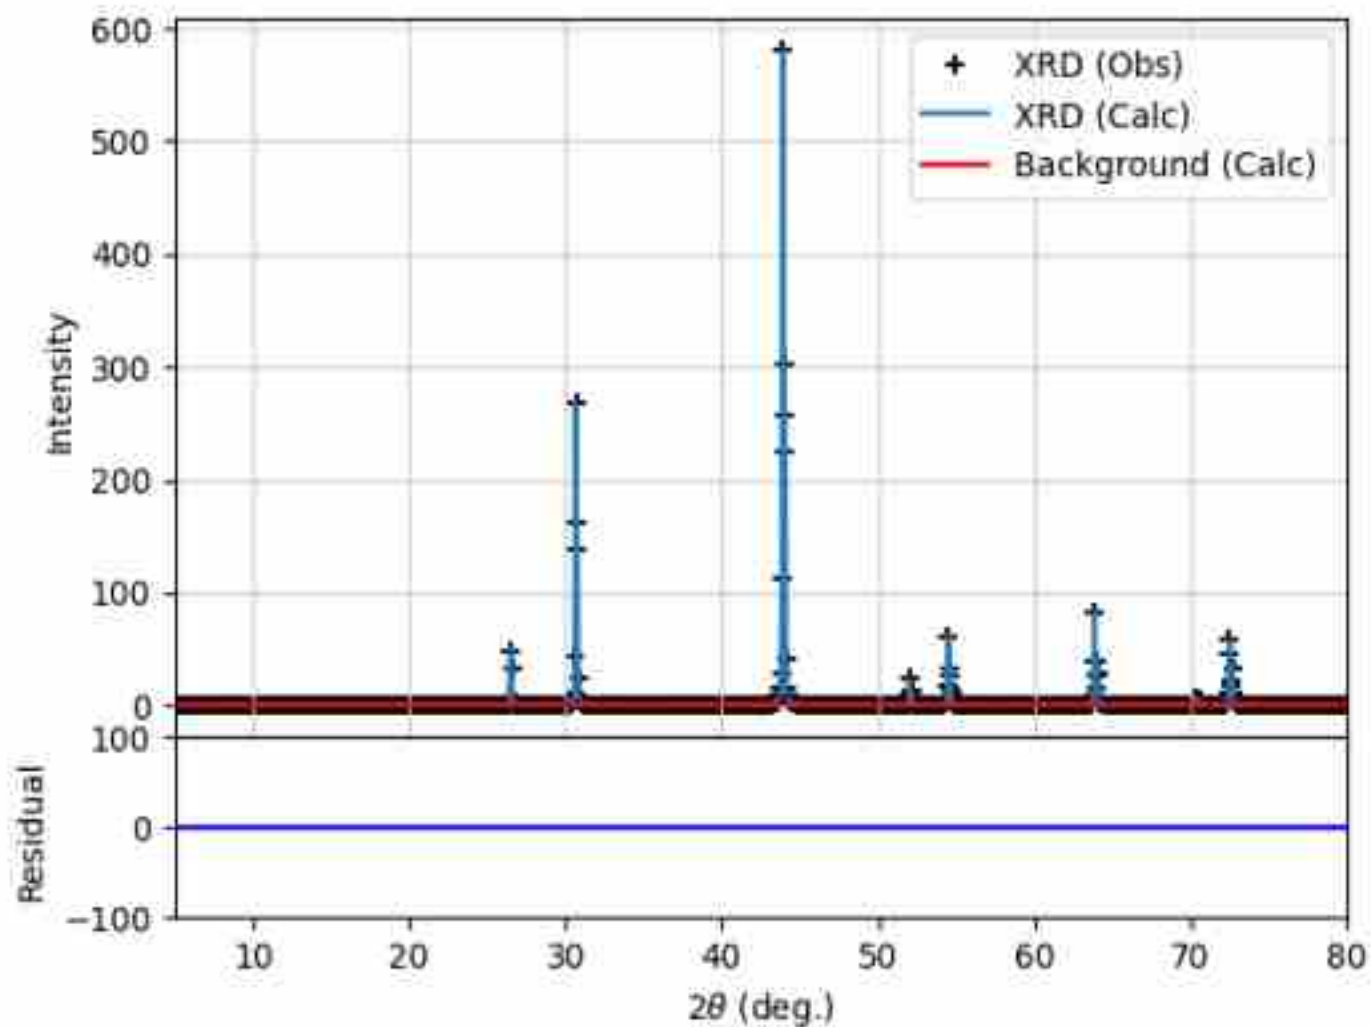

| RMSE before RR | Rwp     | RMSE after RR |
|----------------|---------|---------------|
| 0.002          | 0.00309 | 0.0009        |



# Be1Si1Ir2

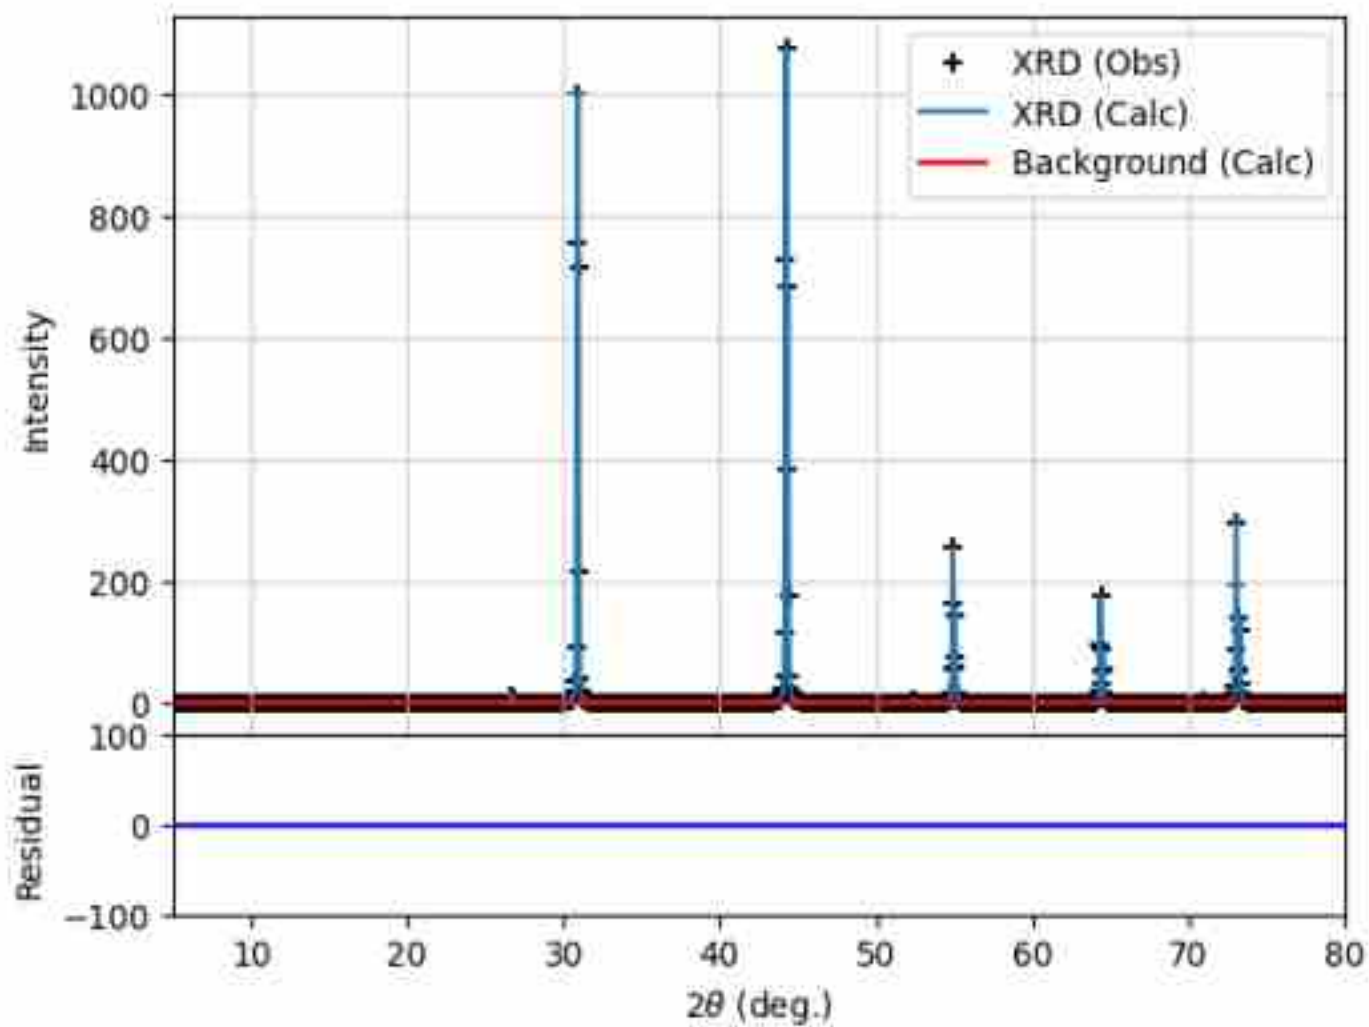

| RMSE before RR | Rwp     | RMSE after RR |
|----------------|---------|---------------|
| 0.002          | 0.00934 | 0.0013        |

# Be1V1Os2

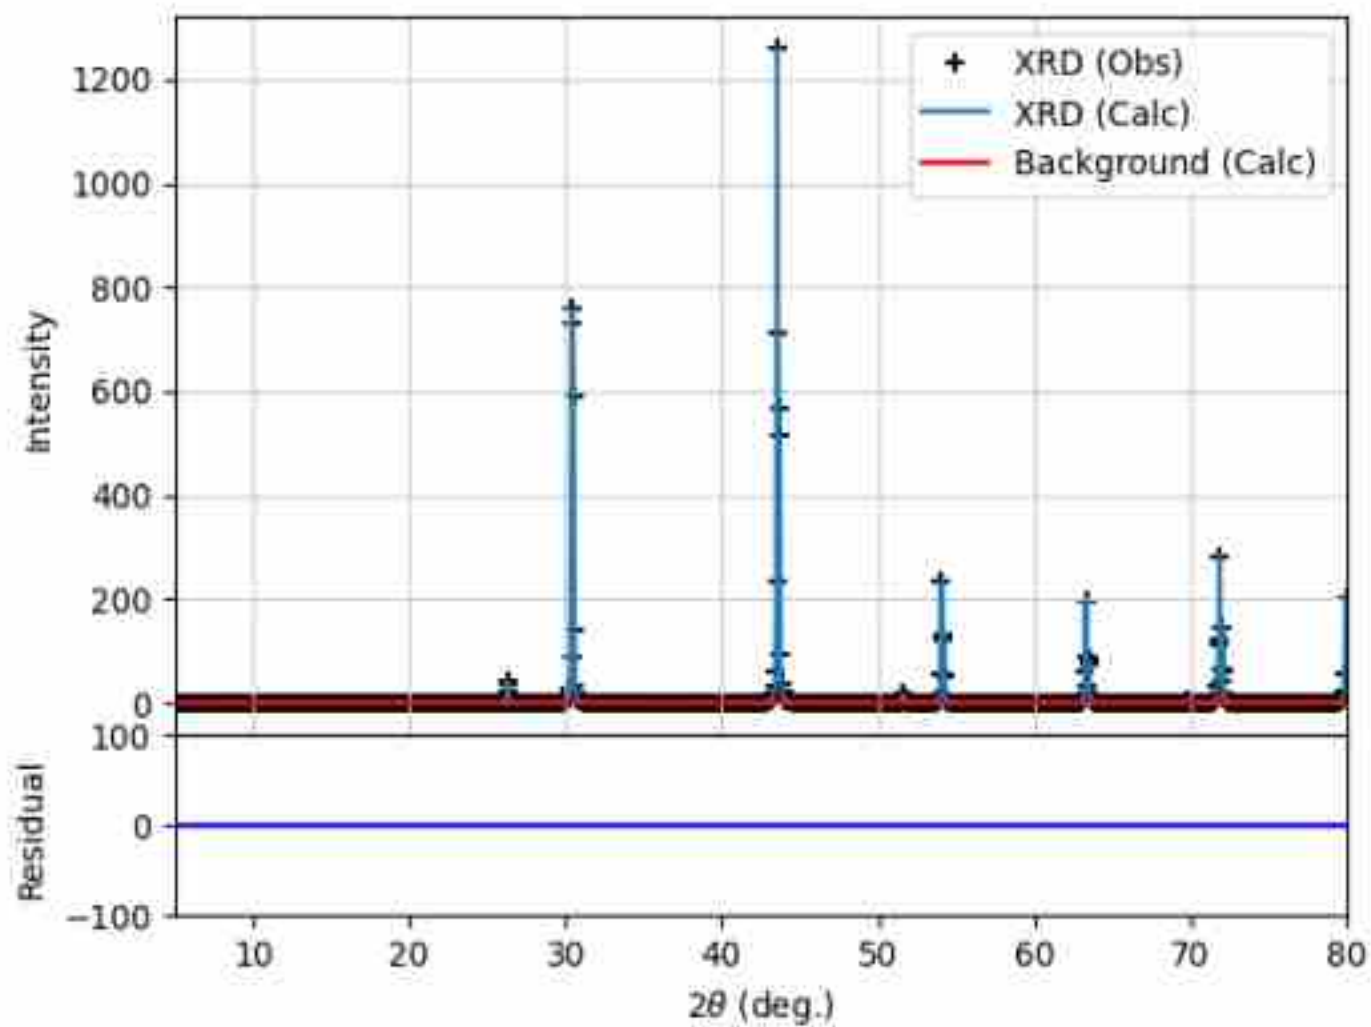

| RMSE before RR | Rwp    | RMSE after RR |
|----------------|--------|---------------|
| 0.002          | 0.0001 | 0.00015       |

# Be<sub>2</sub>Pd<sub>1</sub>Pt<sub>1</sub>

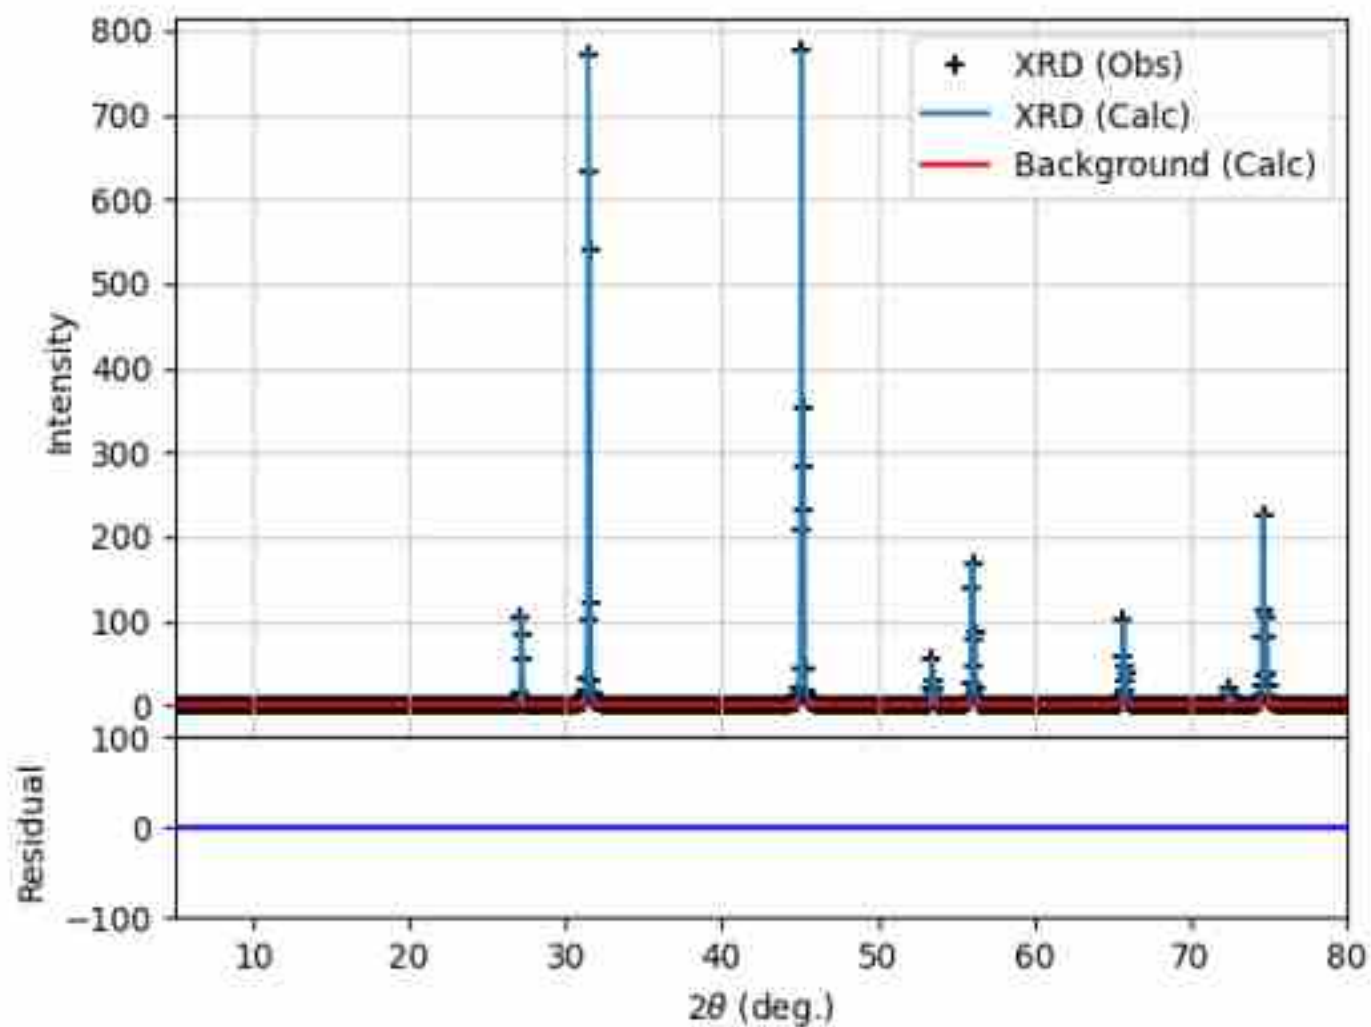

| RMSE before RR | Rwp     | RMSE after RR |
|----------------|---------|---------------|
| 0.002          | 0.00475 | 0.00159       |

# Ca1Ac1Hg2

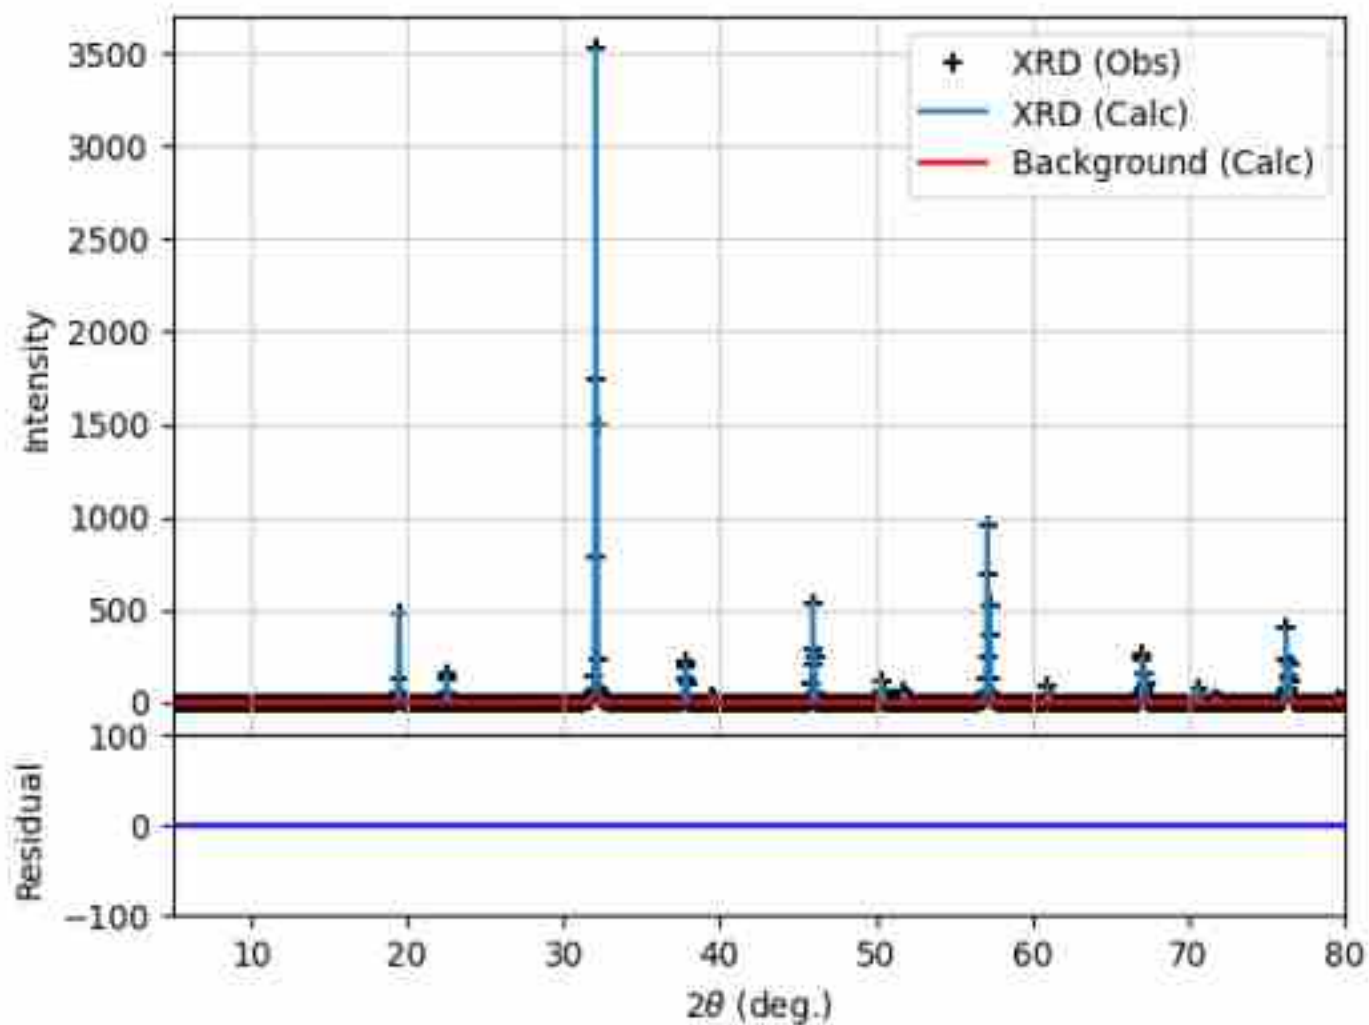

| RMSE before RR | Rwp     | RMSE after RR |
|----------------|---------|---------------|
| 0.002          | 0.00437 | 0.00314       |

# Ca1Ac1Rh2

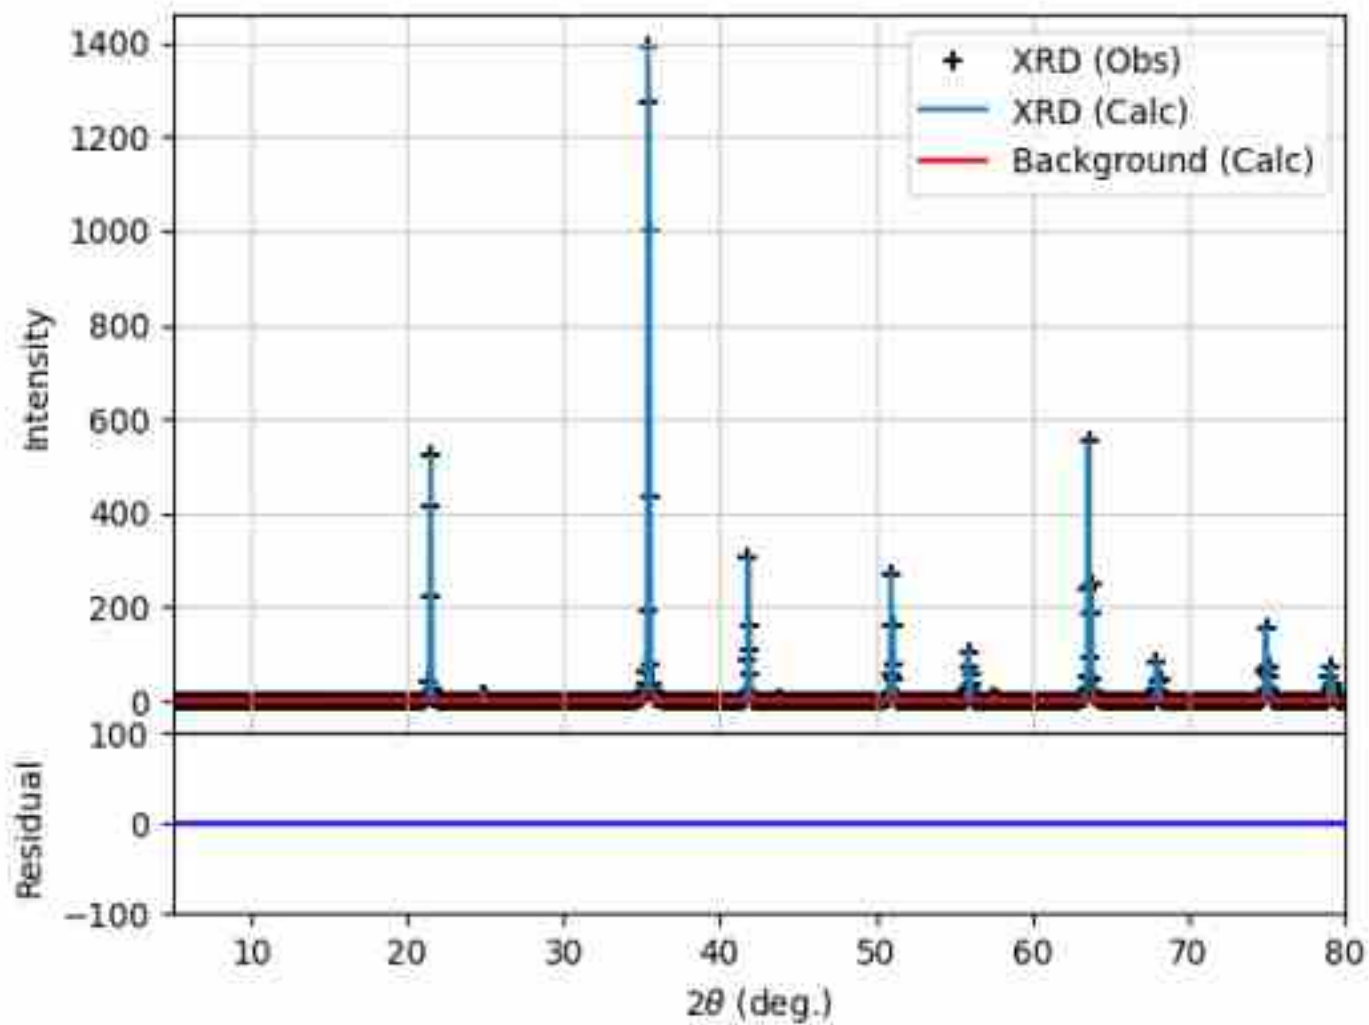

| RMSE before RR | Rwp     | RMSE after RR |
|----------------|---------|---------------|
| 0.002          | 0.10074 | 0.00084       |

# Ca1Cd1Hg2

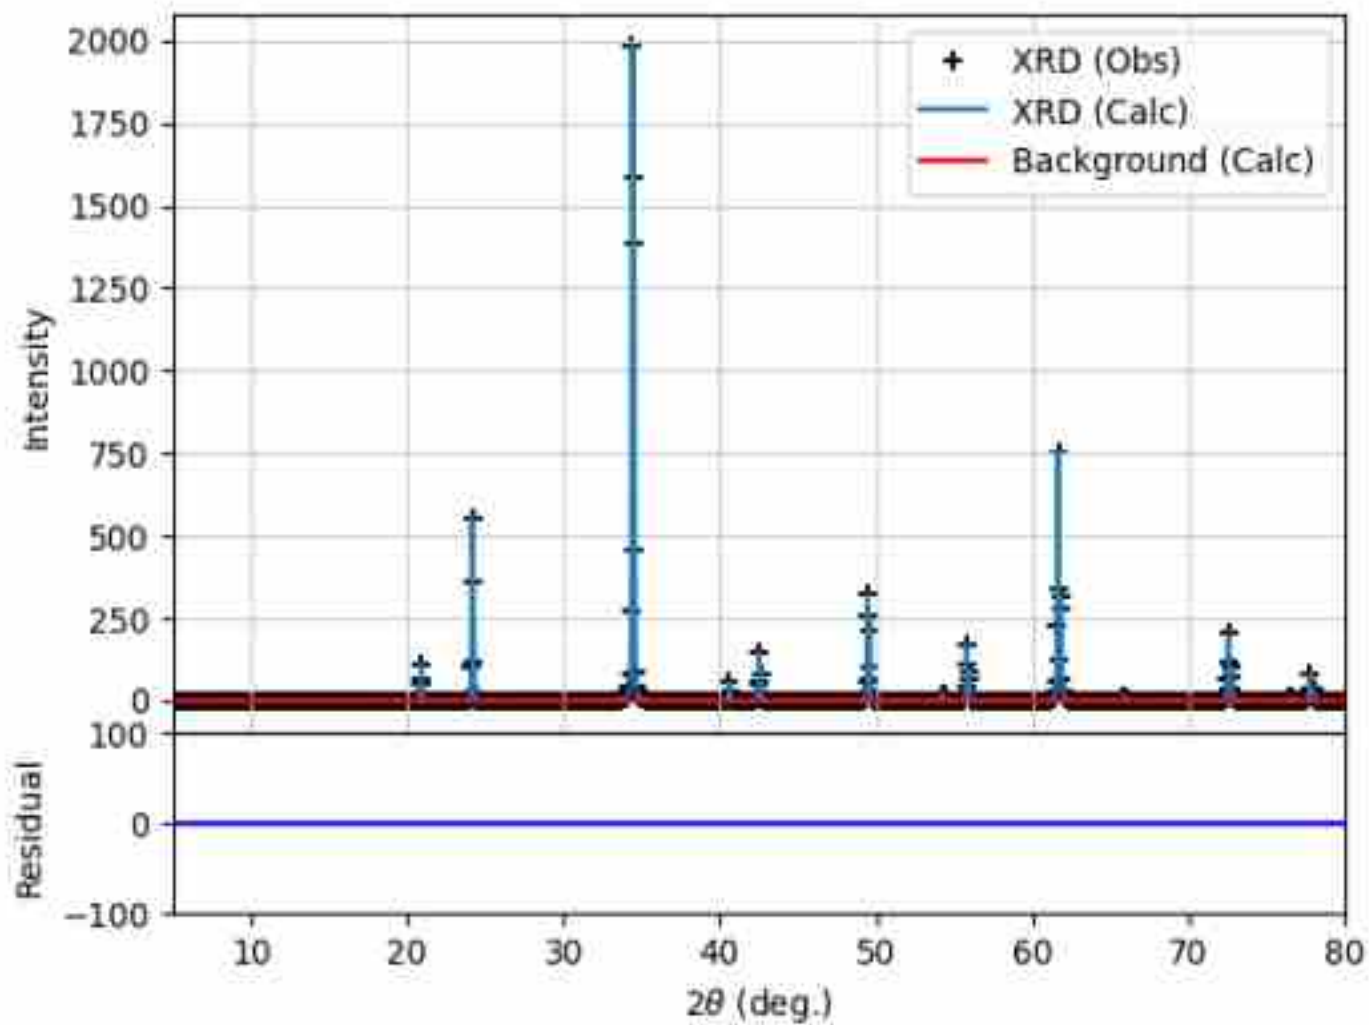

| RMSE before RR | Rwp     | RMSE after RR |
|----------------|---------|---------------|
| 0.002          | 0.00304 | 0.00064       |

# Ca1Ce1In2

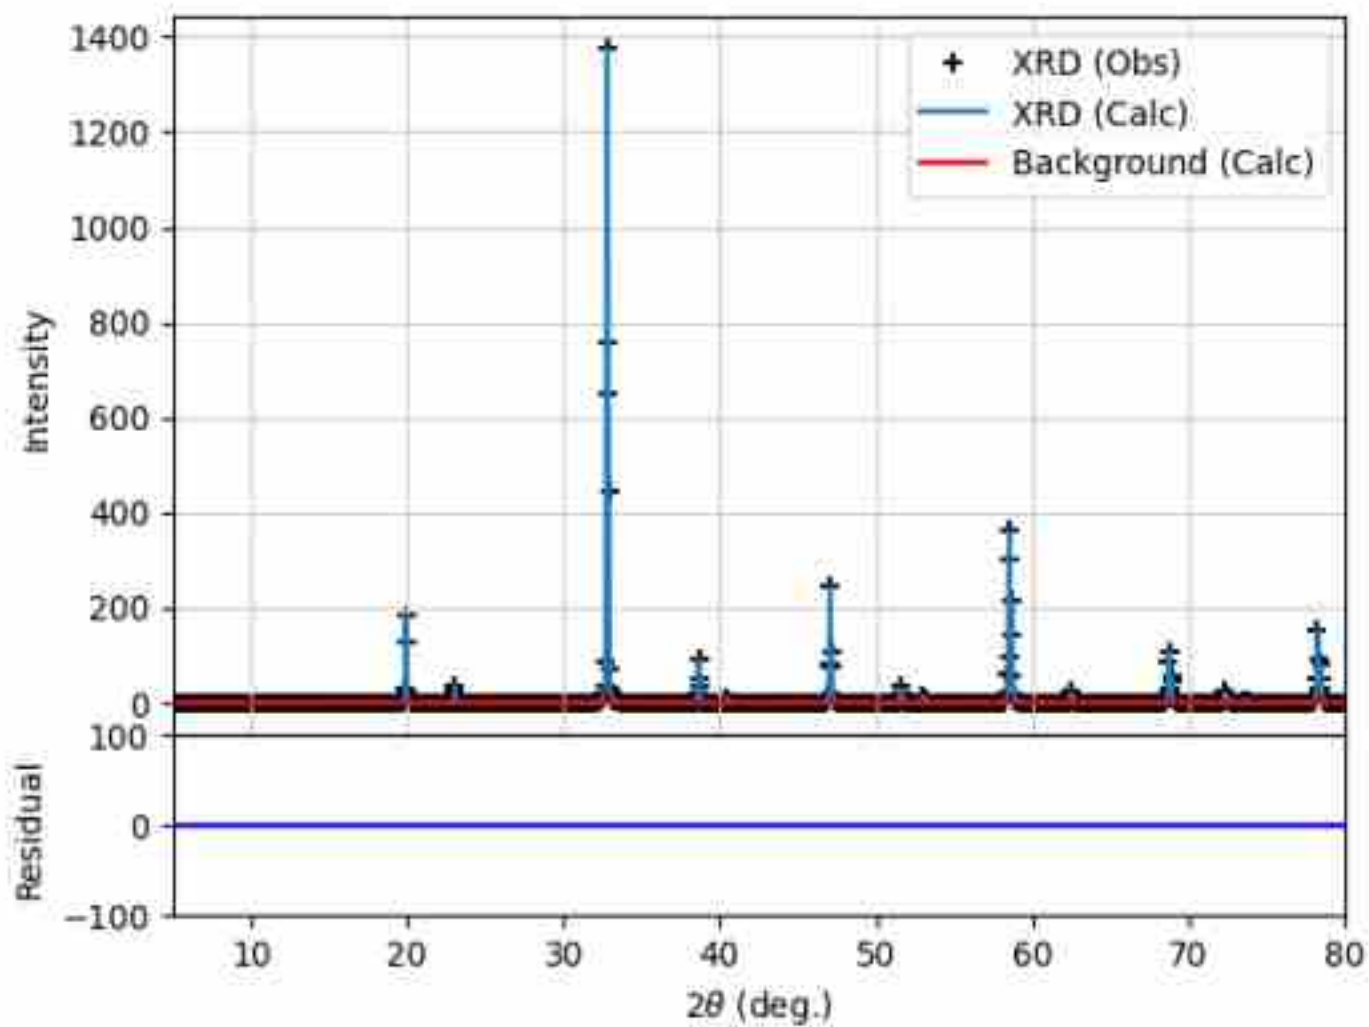

| RMSE before RR | Rwp     | RMSE after RR |
|----------------|---------|---------------|
| 0.002          | 0.06887 | 0.00345       |

# Ca1Gd1Zn2

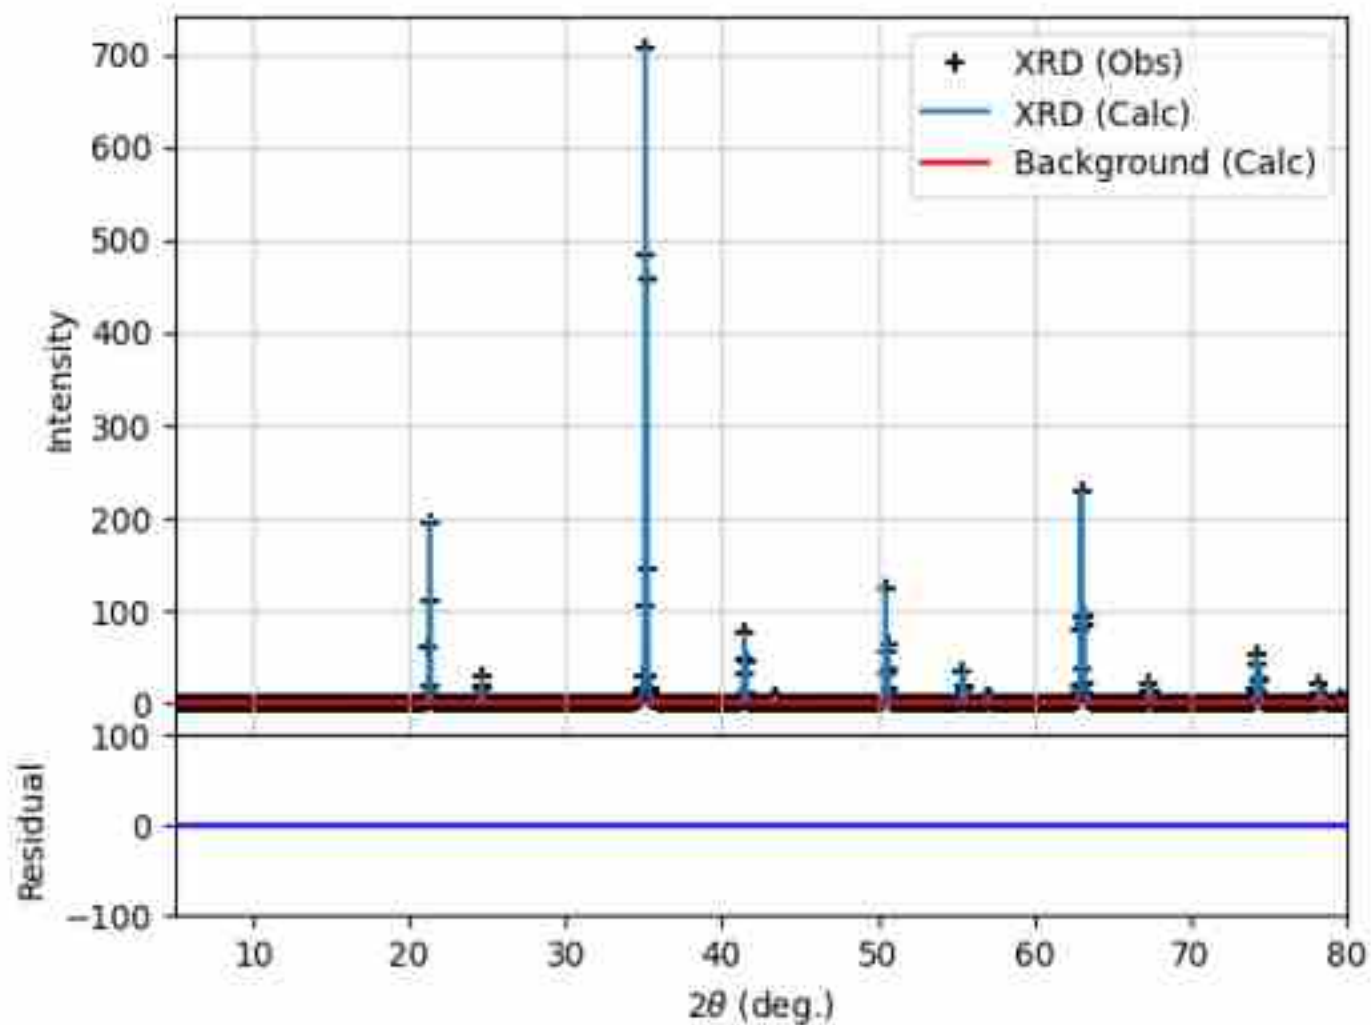

| RMSE before RR | Rwp     | RMSE after RR |
|----------------|---------|---------------|
| 0.002          | 0.06886 | 0.00229       |



# CaIn1

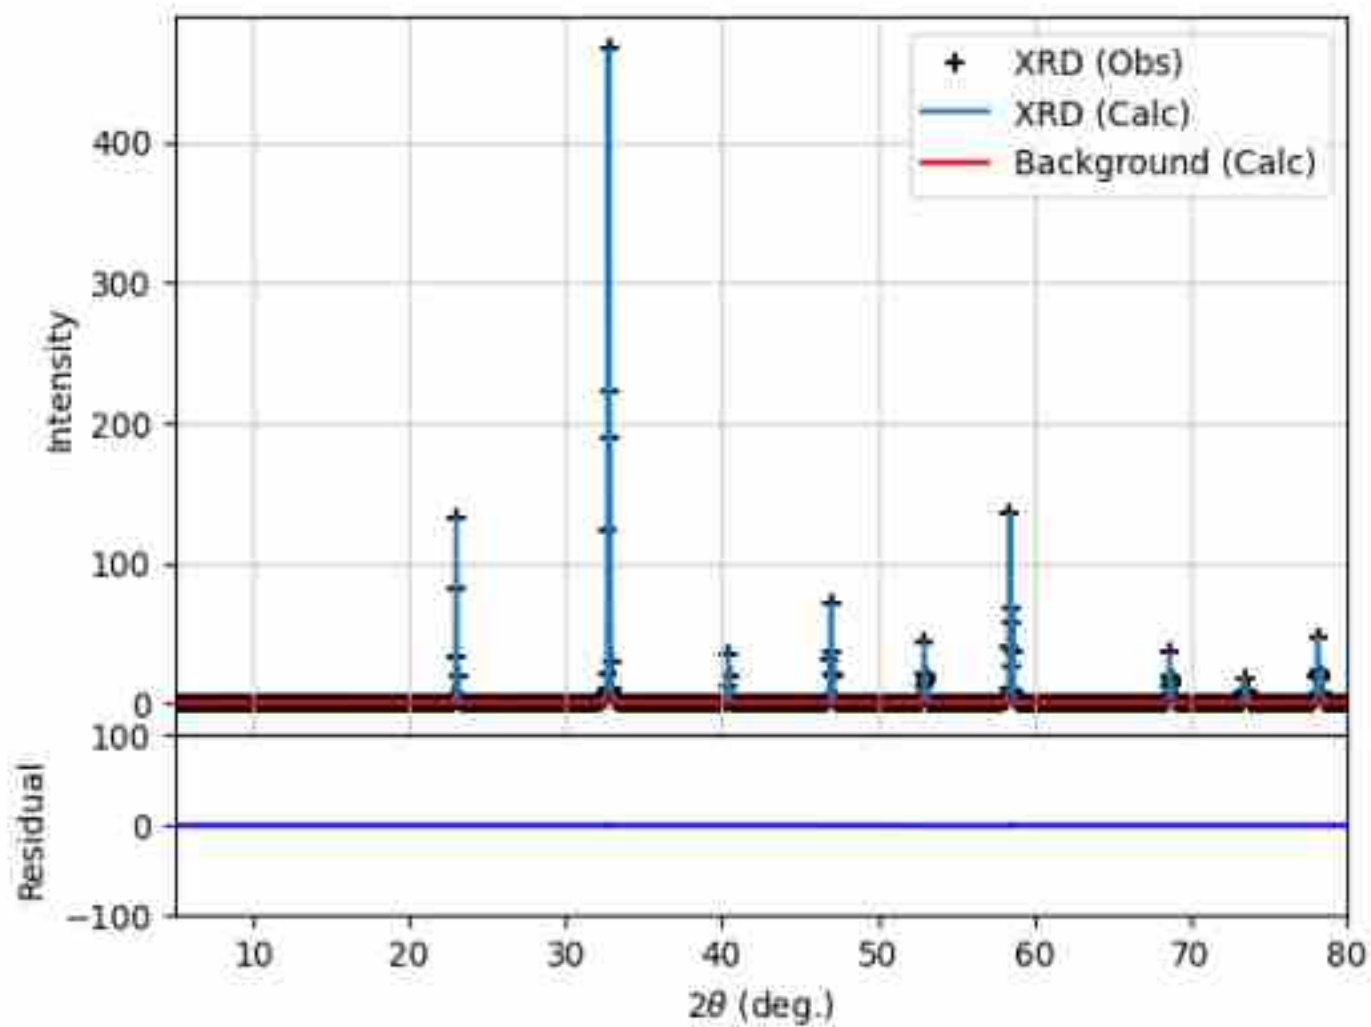

| RMSE before RR | Rwp     | RMSE after RR |
|----------------|---------|---------------|
| 0.002          | 0.20386 | 0.00128       |

# Ca1La1Hg2

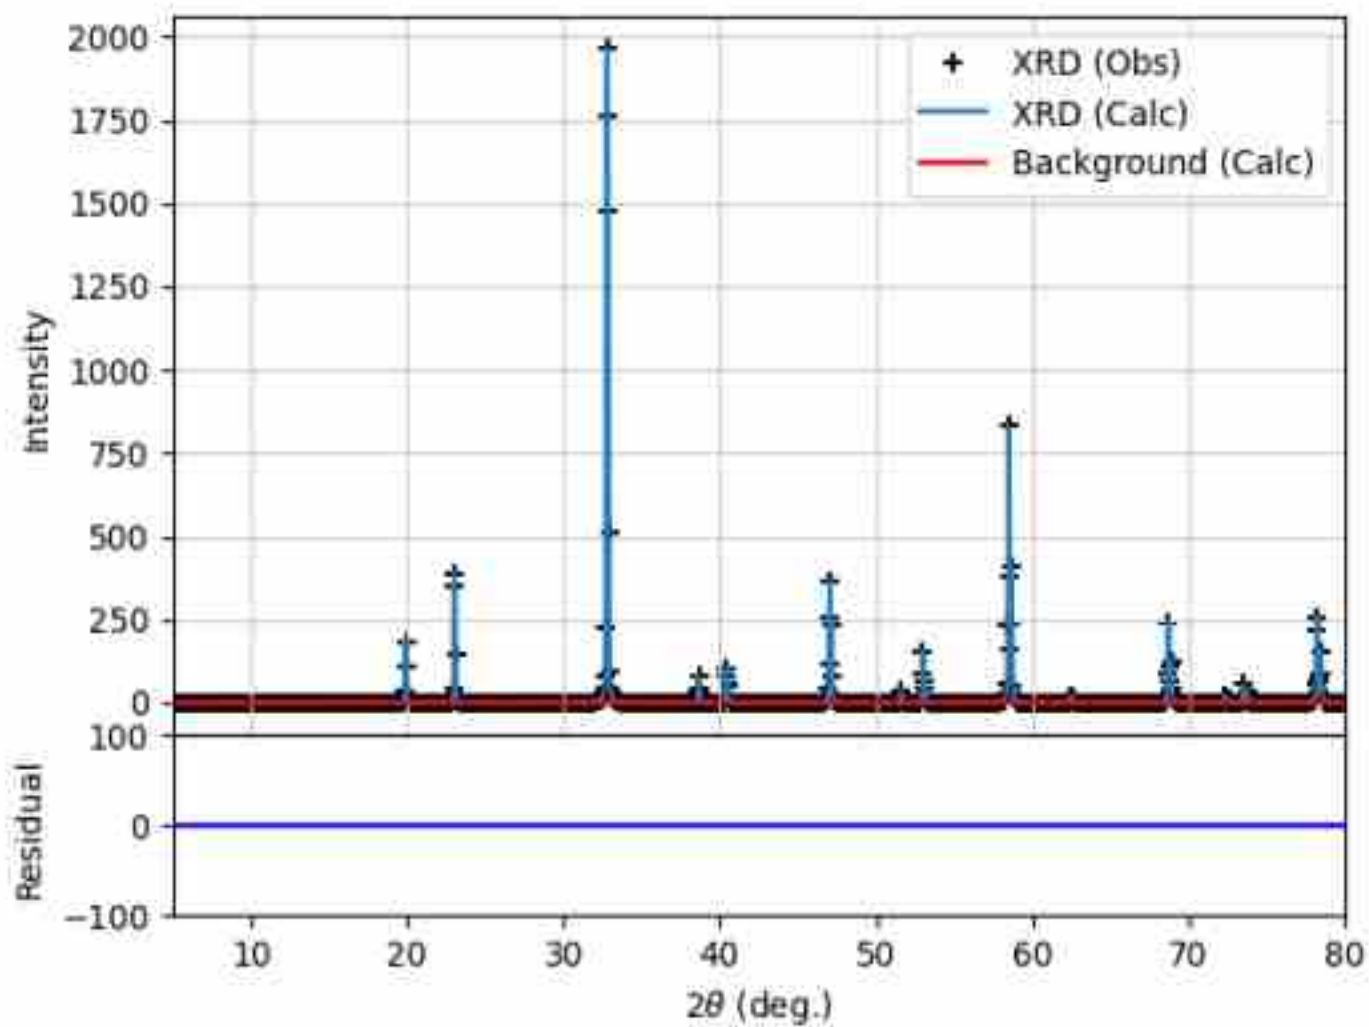

| RMSE before RR | Rwp     | RMSE after RR |
|----------------|---------|---------------|
| 0.002          | 0.00354 | 0.00064       |

# Ca1Nd1Hg2

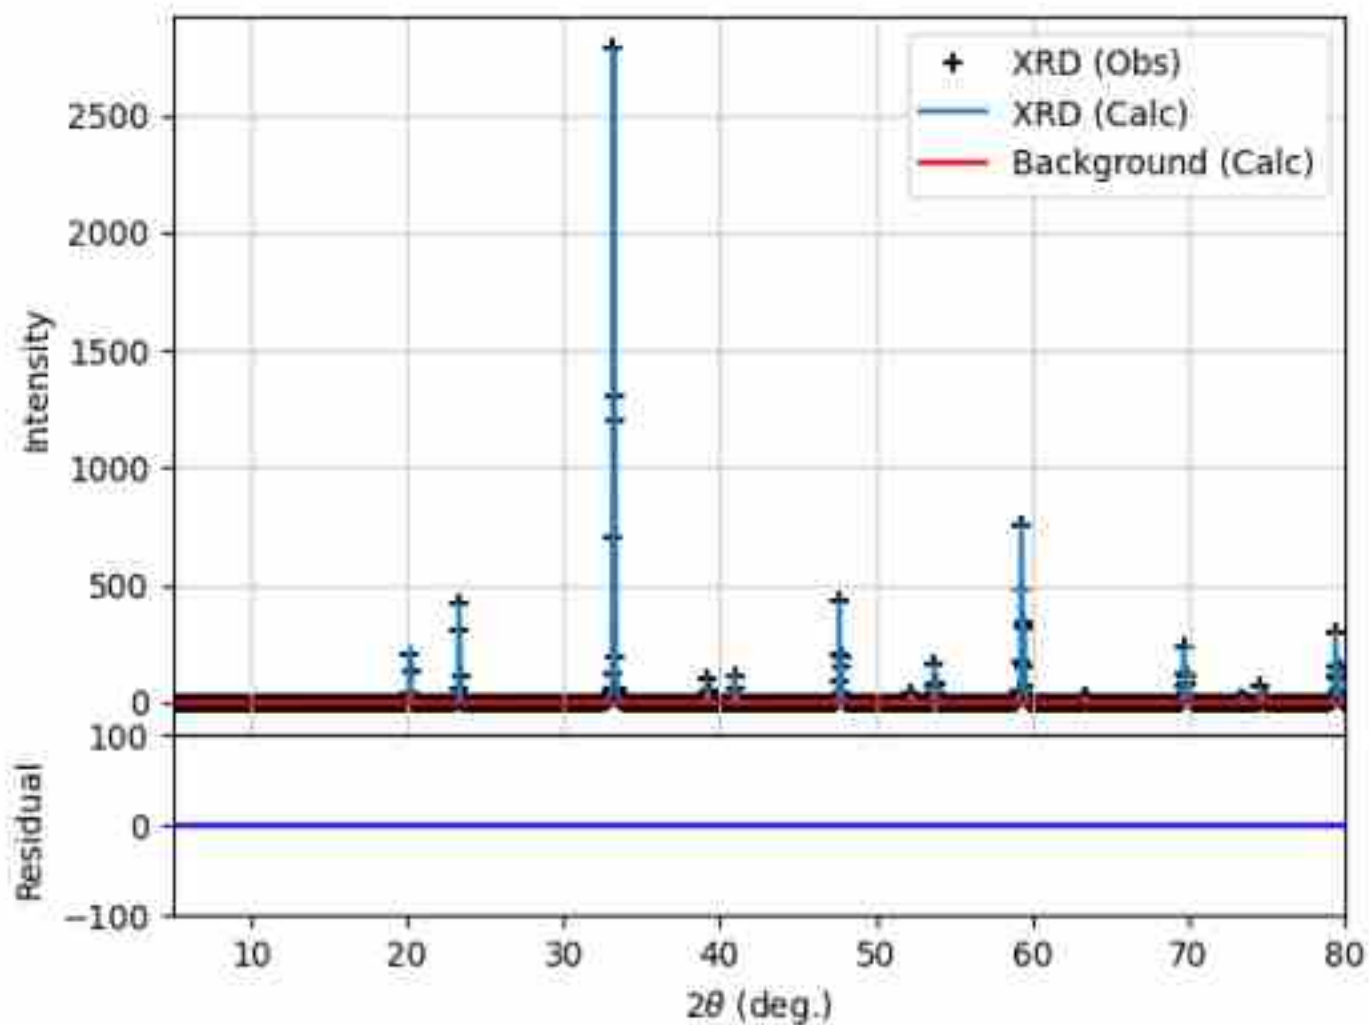

| RMSE before RR | Rwp     | RMSE after RR |
|----------------|---------|---------------|
| 0.002          | 0.00327 | 0.00224       |

# Ca1Sb1Pd2

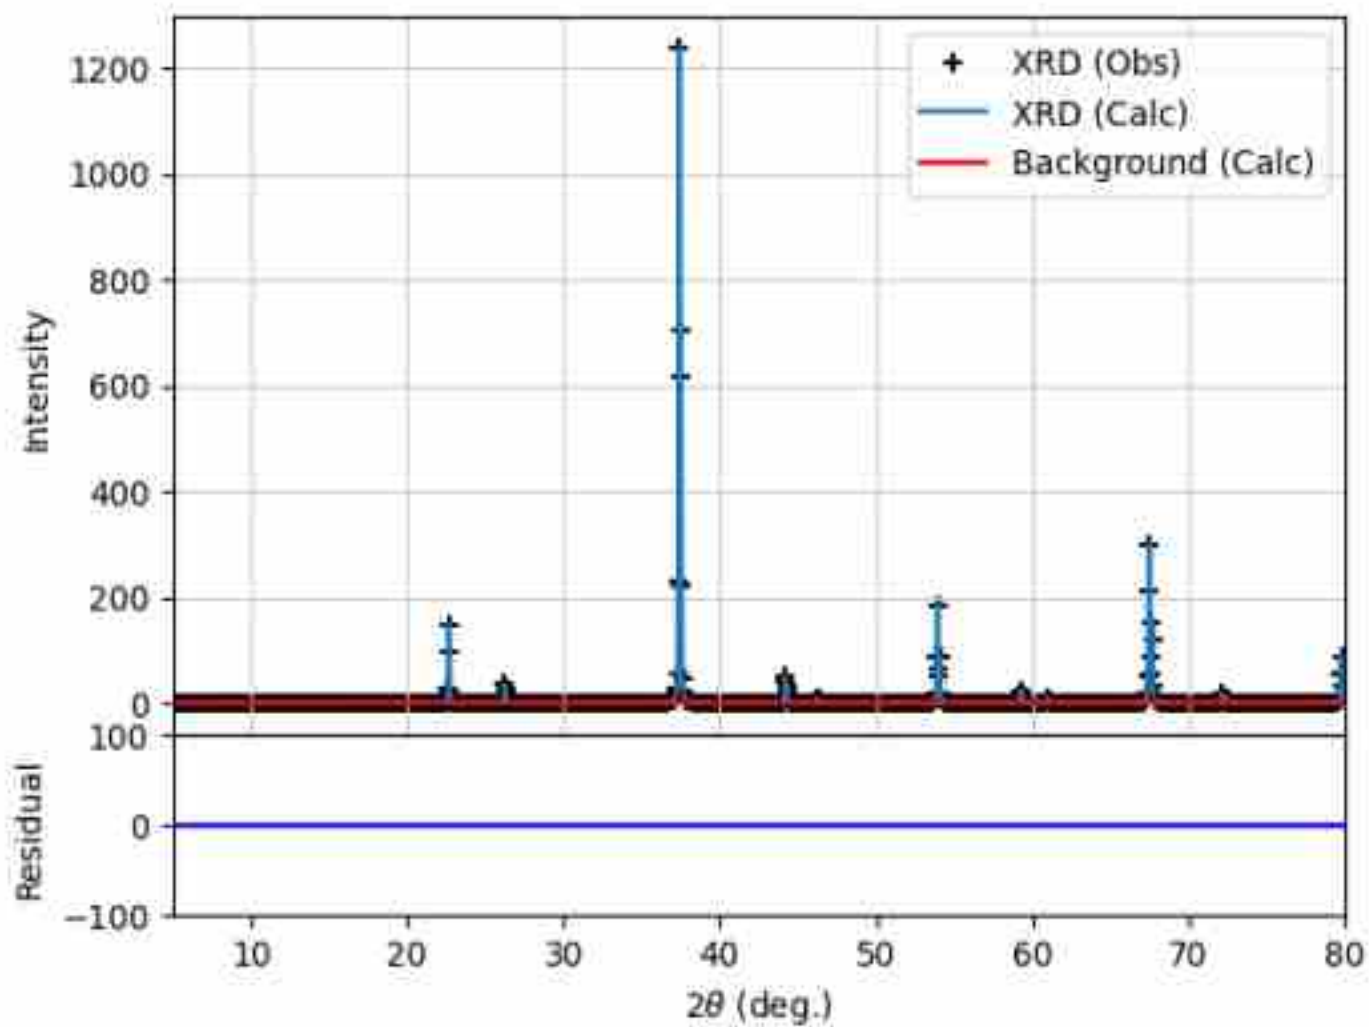

| RMSE before RR | Rwp     | RMSE after RR |
|----------------|---------|---------------|
| 0.002          | 0.00346 | 0.00039       |

# Ca1Si1Au1

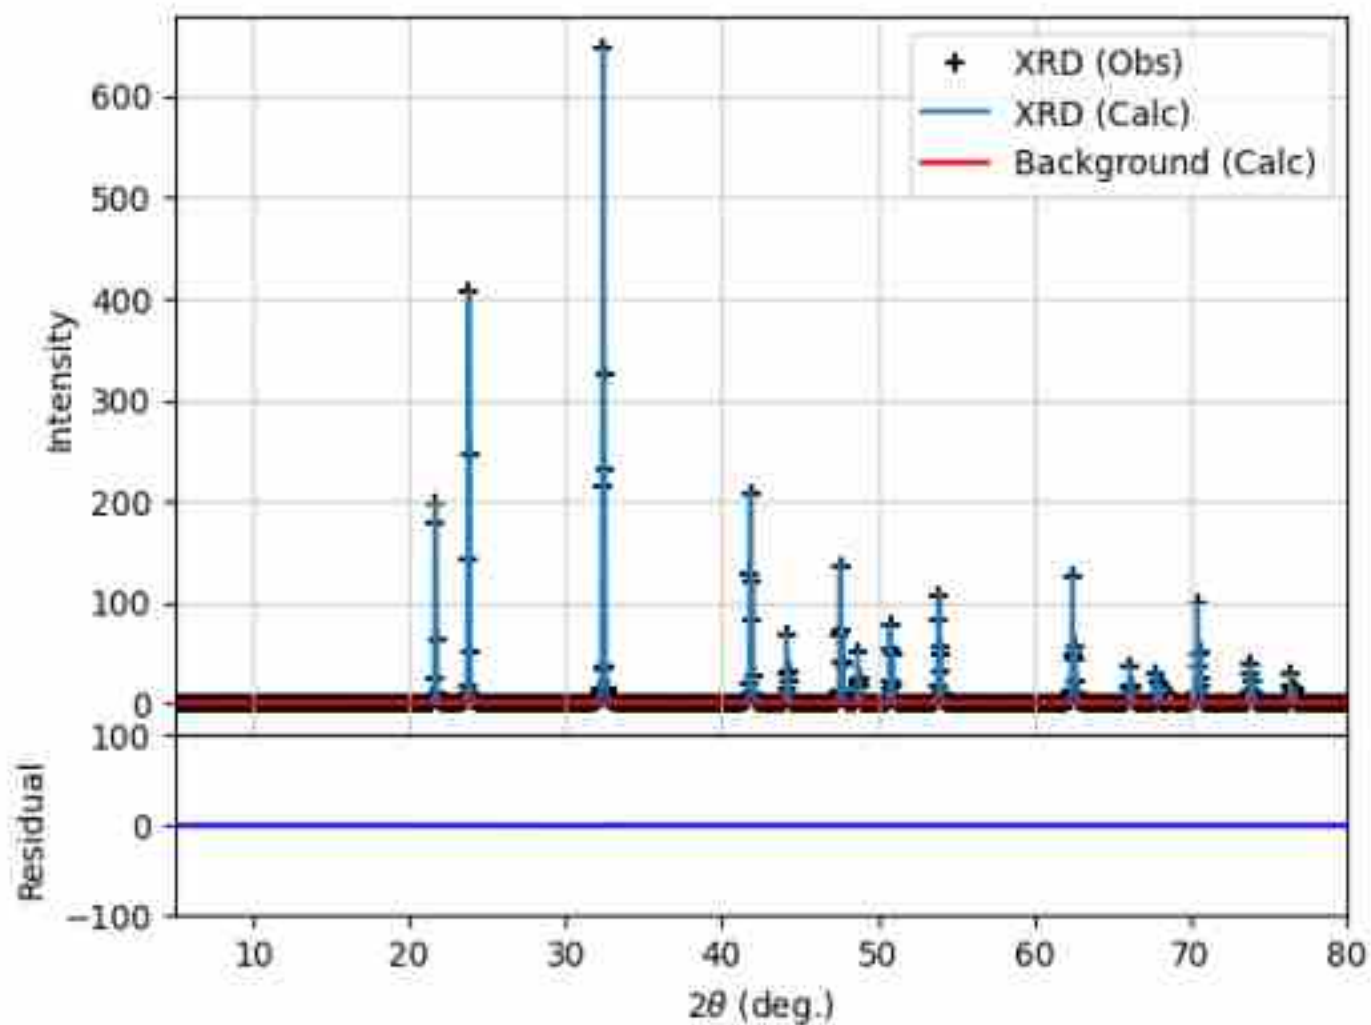

| RMSE before RR | Rwp     | RMSE after RR |
|----------------|---------|---------------|
| 0.002          | 0.06227 | 0.00172       |

# Ca1Sm1Zn2

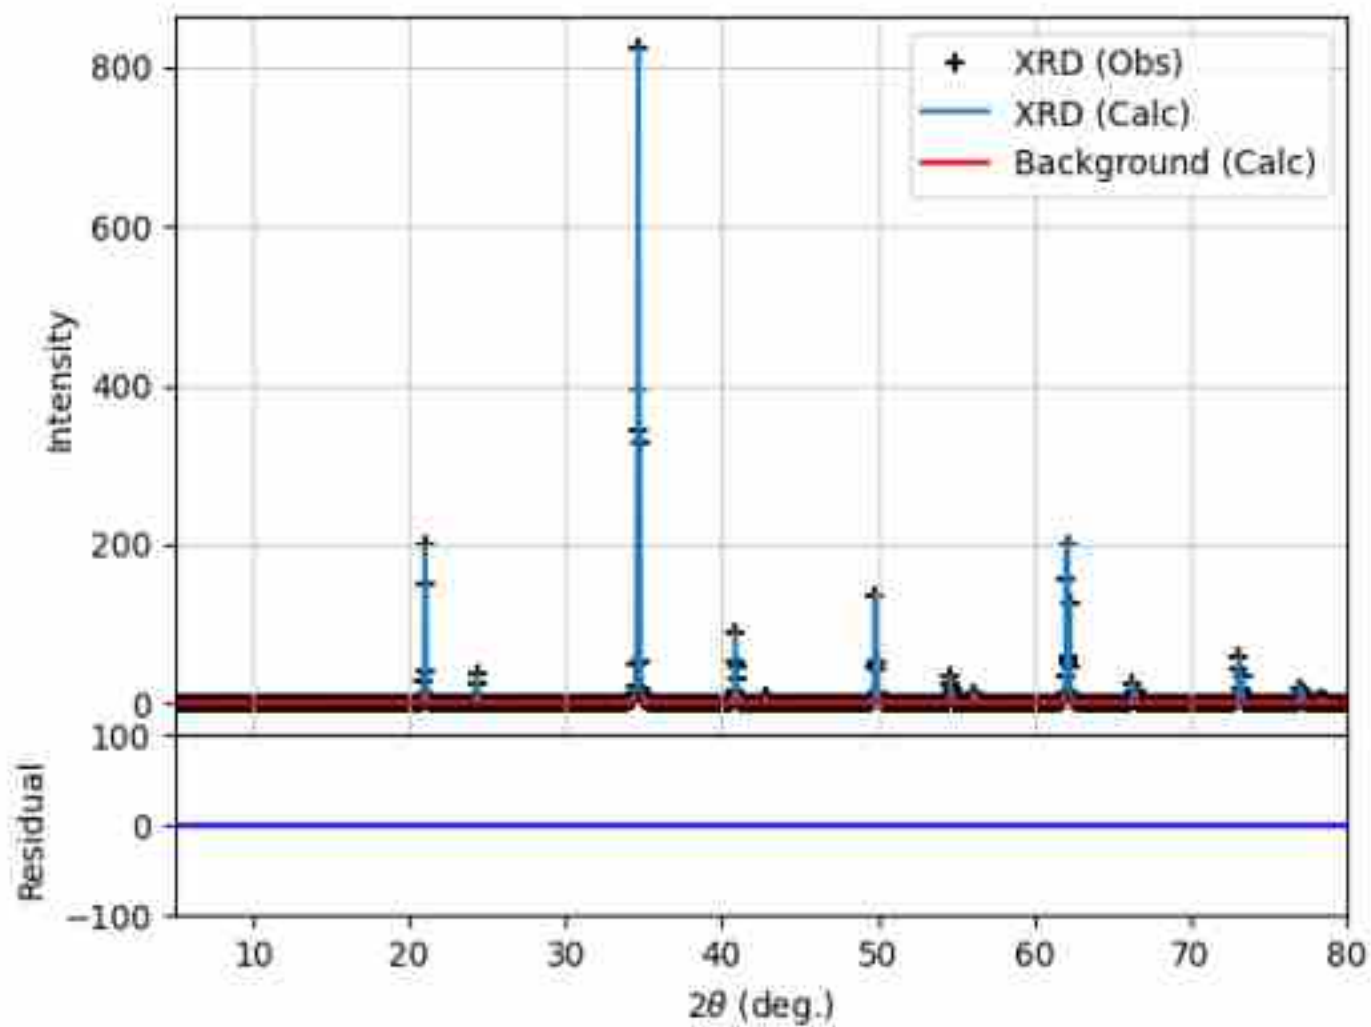

| RMSE before RR | Rwp     | RMSE after RR |
|----------------|---------|---------------|
| 0.002          | 0.01753 | 0.00145       |

# Ca1Sn1Rh2

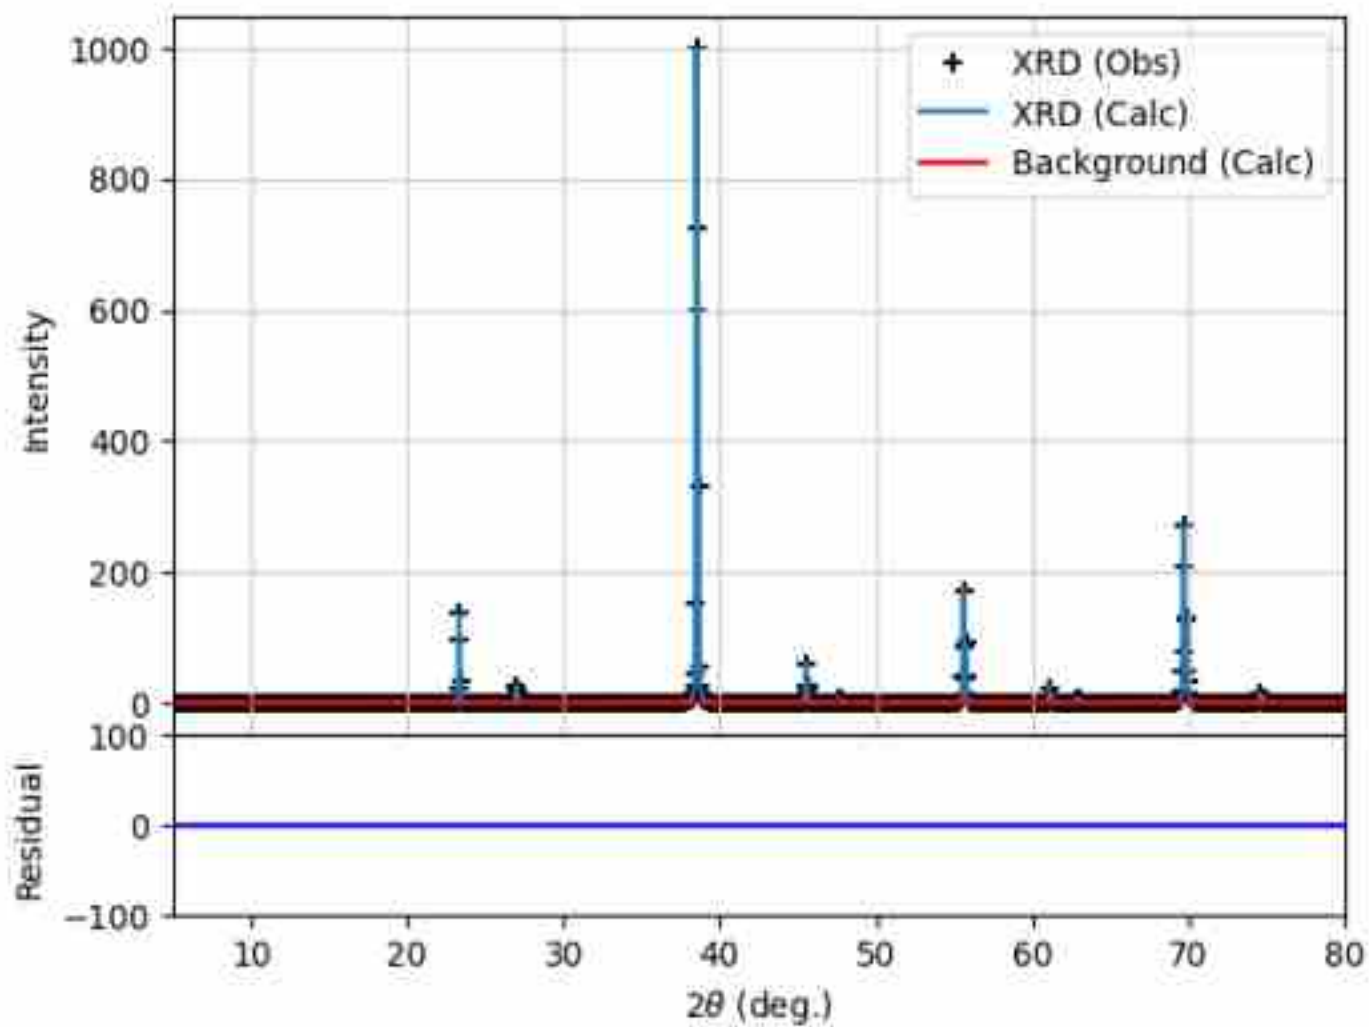

| RMSE before RR | Rwp     | RMSE after RR |
|----------------|---------|---------------|
| 0.002          | 0.00248 | 0.00015       |

# Ca1Tm1Pt2

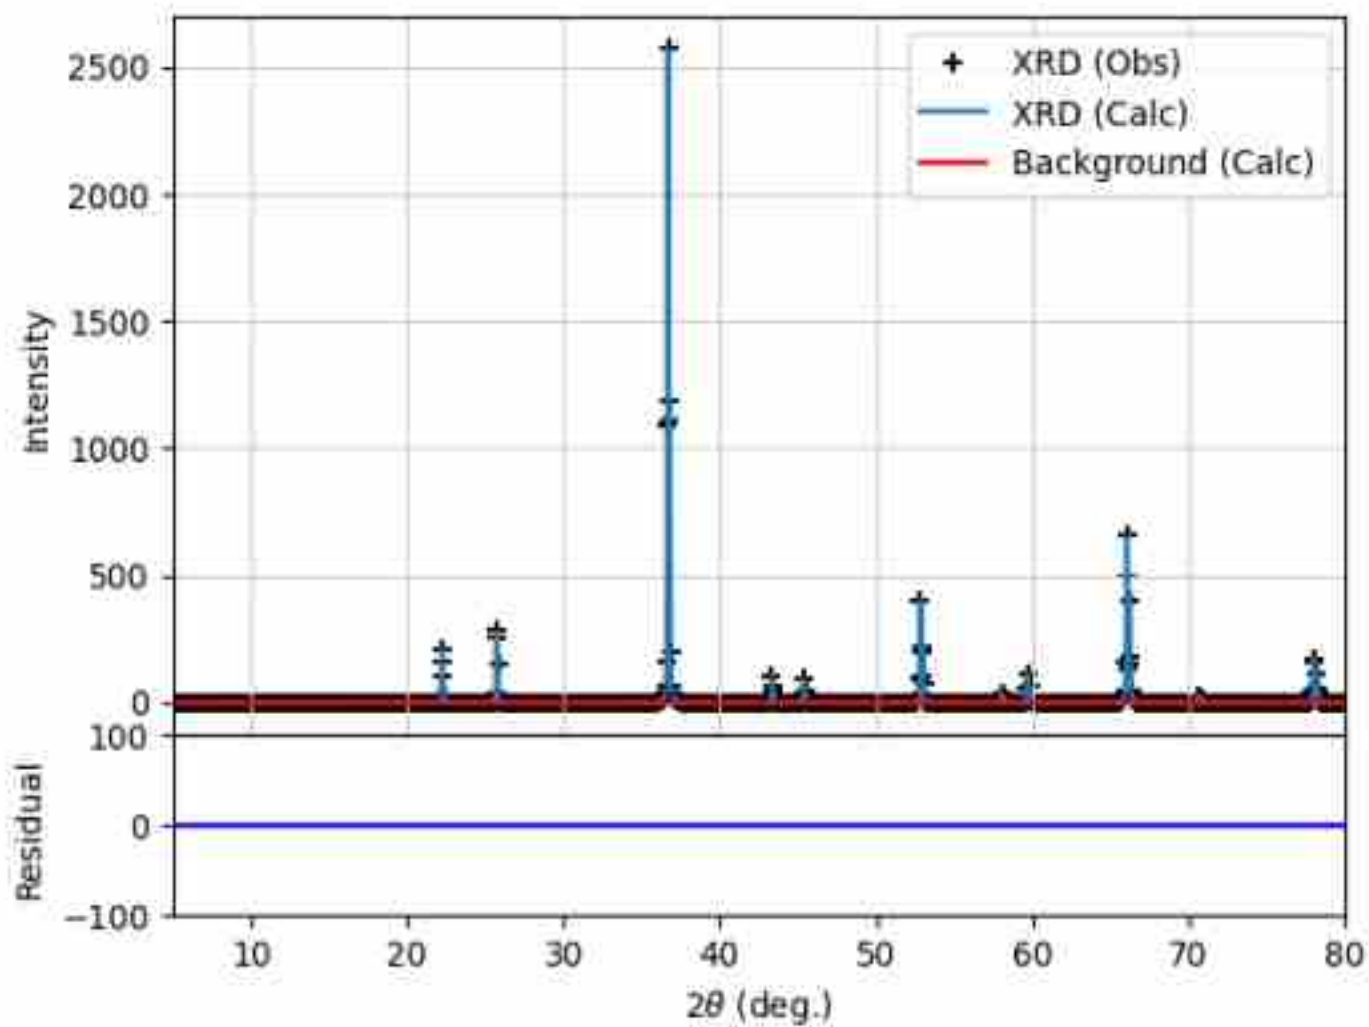

| RMSE before RR | Rwp     | RMSE after RR |
|----------------|---------|---------------|
| 0.002          | 0.00484 | 0.00086       |



# Ca1Yb1Pb2

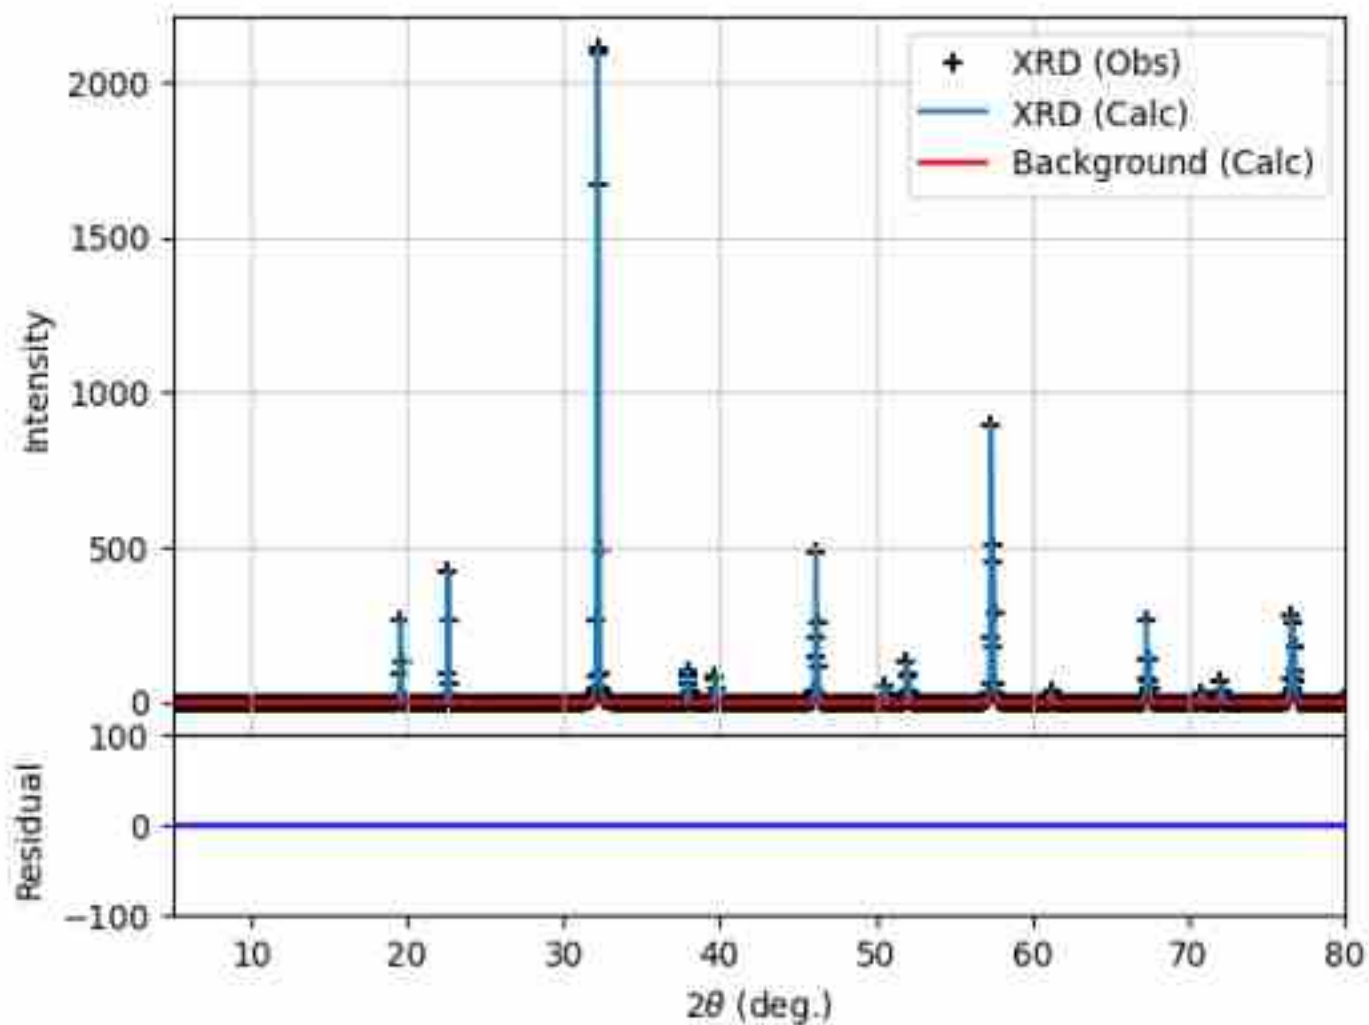

| RMSE before RR | Rwp     | RMSE after RR |
|----------------|---------|---------------|
| 0.002          | 0.04875 | 0.00221       |

Ca2Ag1Bi1

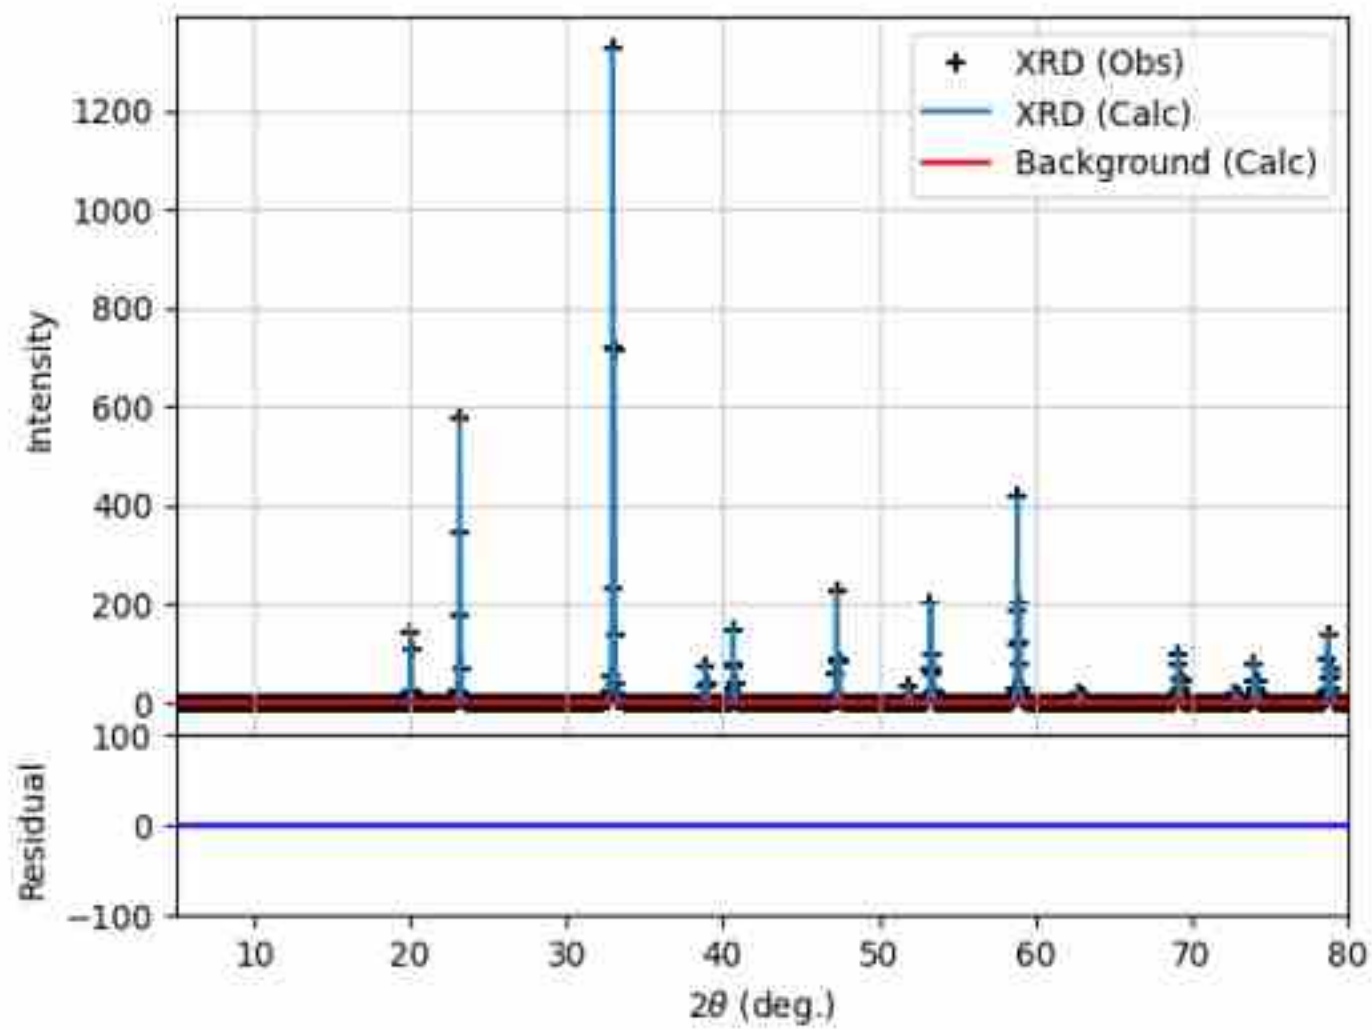

| RMSE before RR | Rwp     | RMSE after RR |
|----------------|---------|---------------|
| 0.002          | 0.02102 | 0.00068       |

# Ca<sub>2</sub>Al<sub>11</sub>Zn<sub>16</sub>

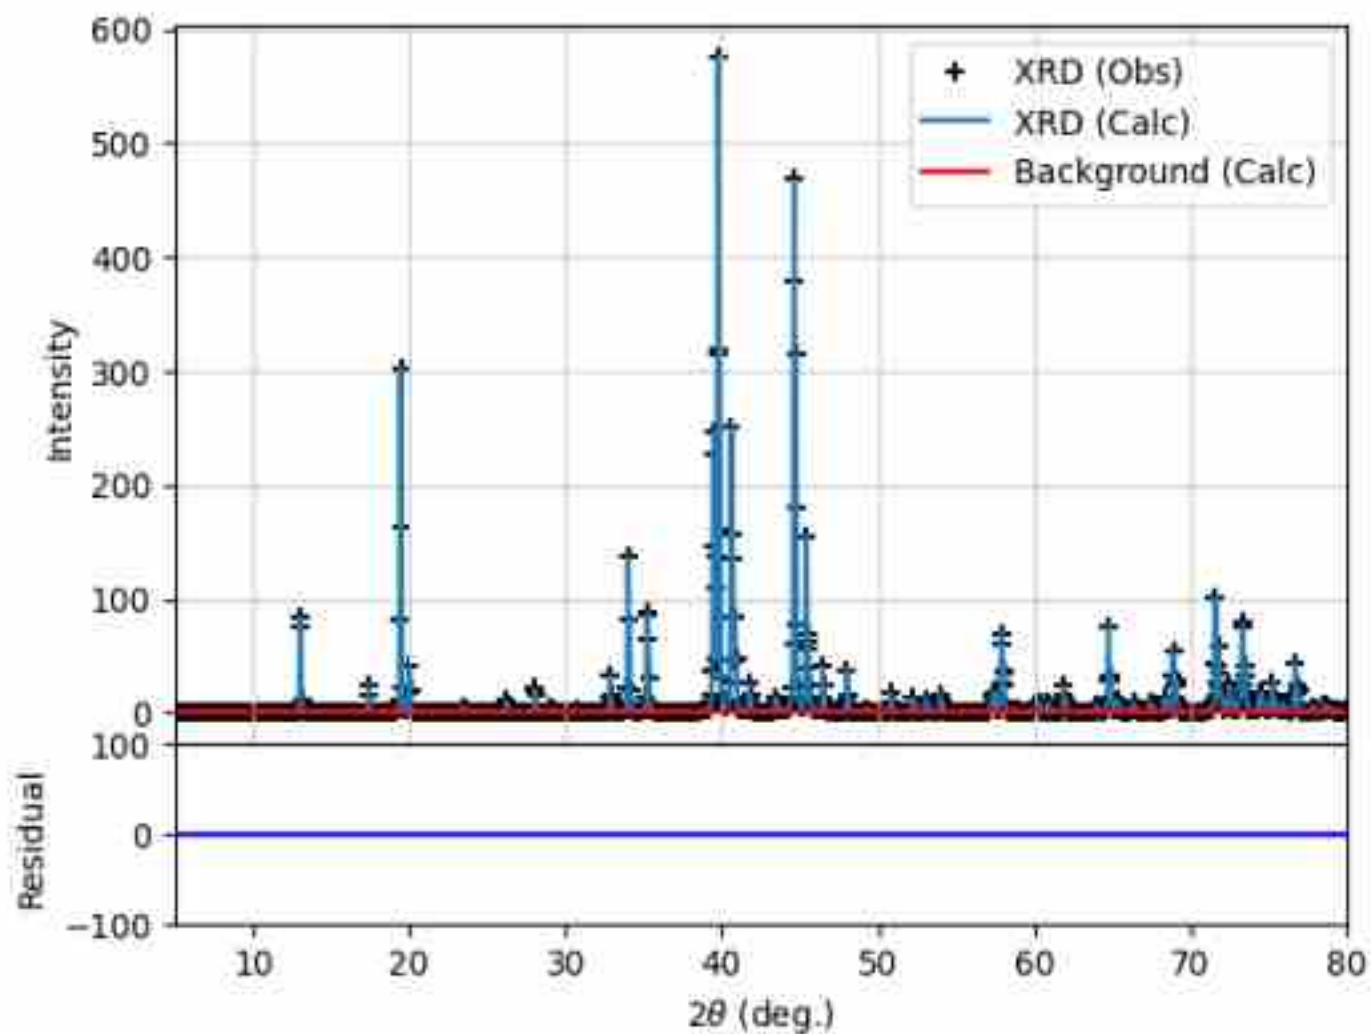

| RMSE before RR | Rwp     | RMSE after RR |
|----------------|---------|---------------|
| 0.02           | 0.00332 | 0.00044       |

# Ca<sub>2</sub>La<sub>2</sub>Fe<sub>2</sub>Sb<sub>2</sub>O<sub>12</sub>

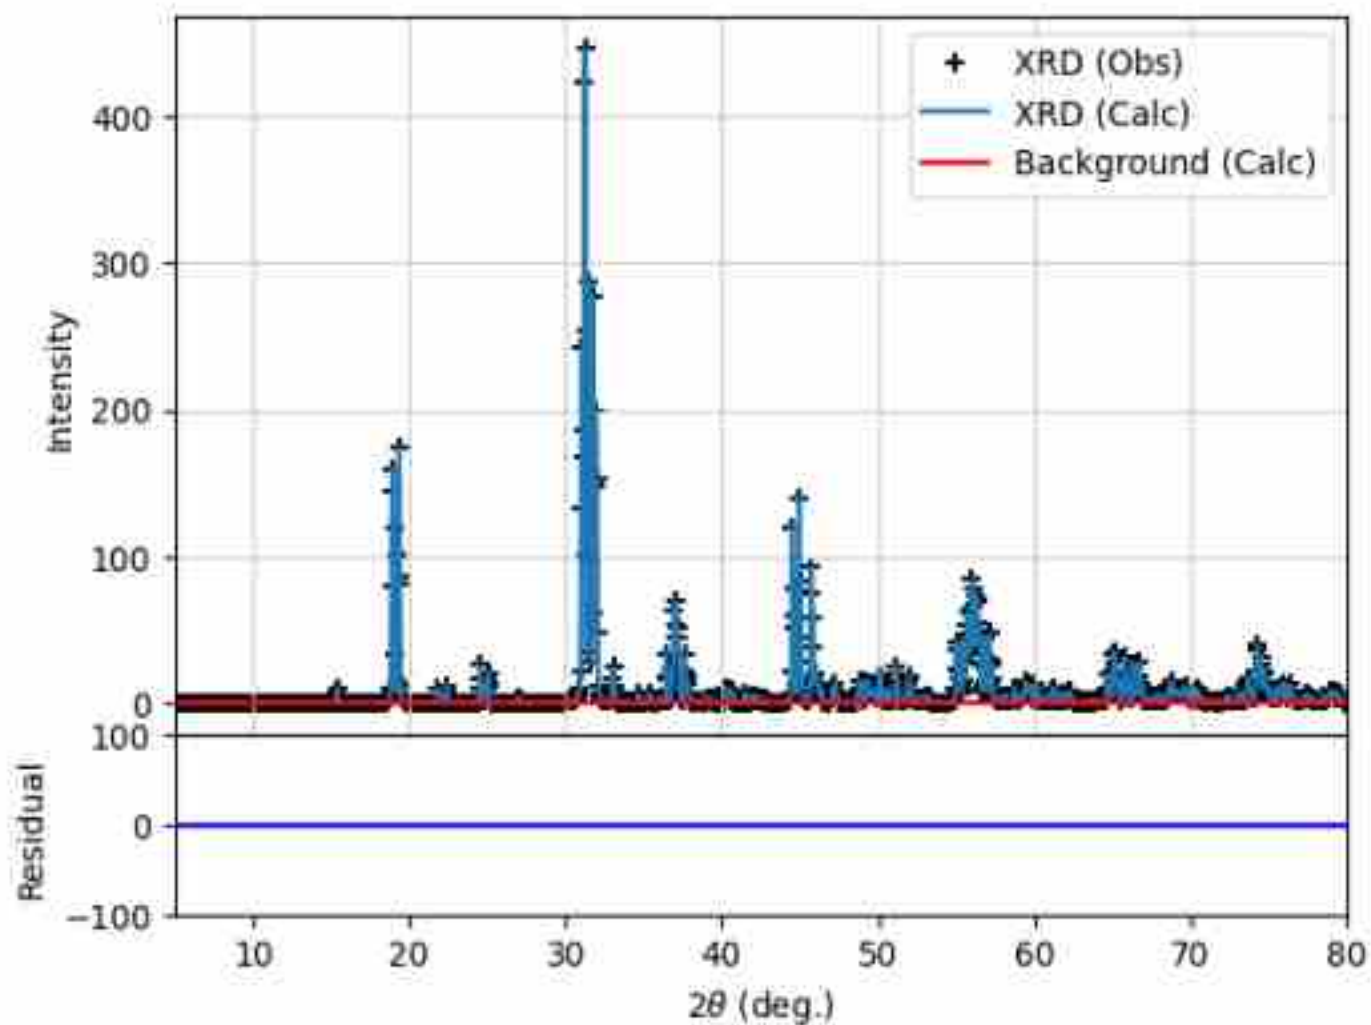

| RMSE before RR | Rwp     | RMSE after RR |
|----------------|---------|---------------|
| 0.02           | 0.00187 | 0.0           |

# Ca<sub>2</sub>Nd<sub>4</sub>S<sub>8</sub>

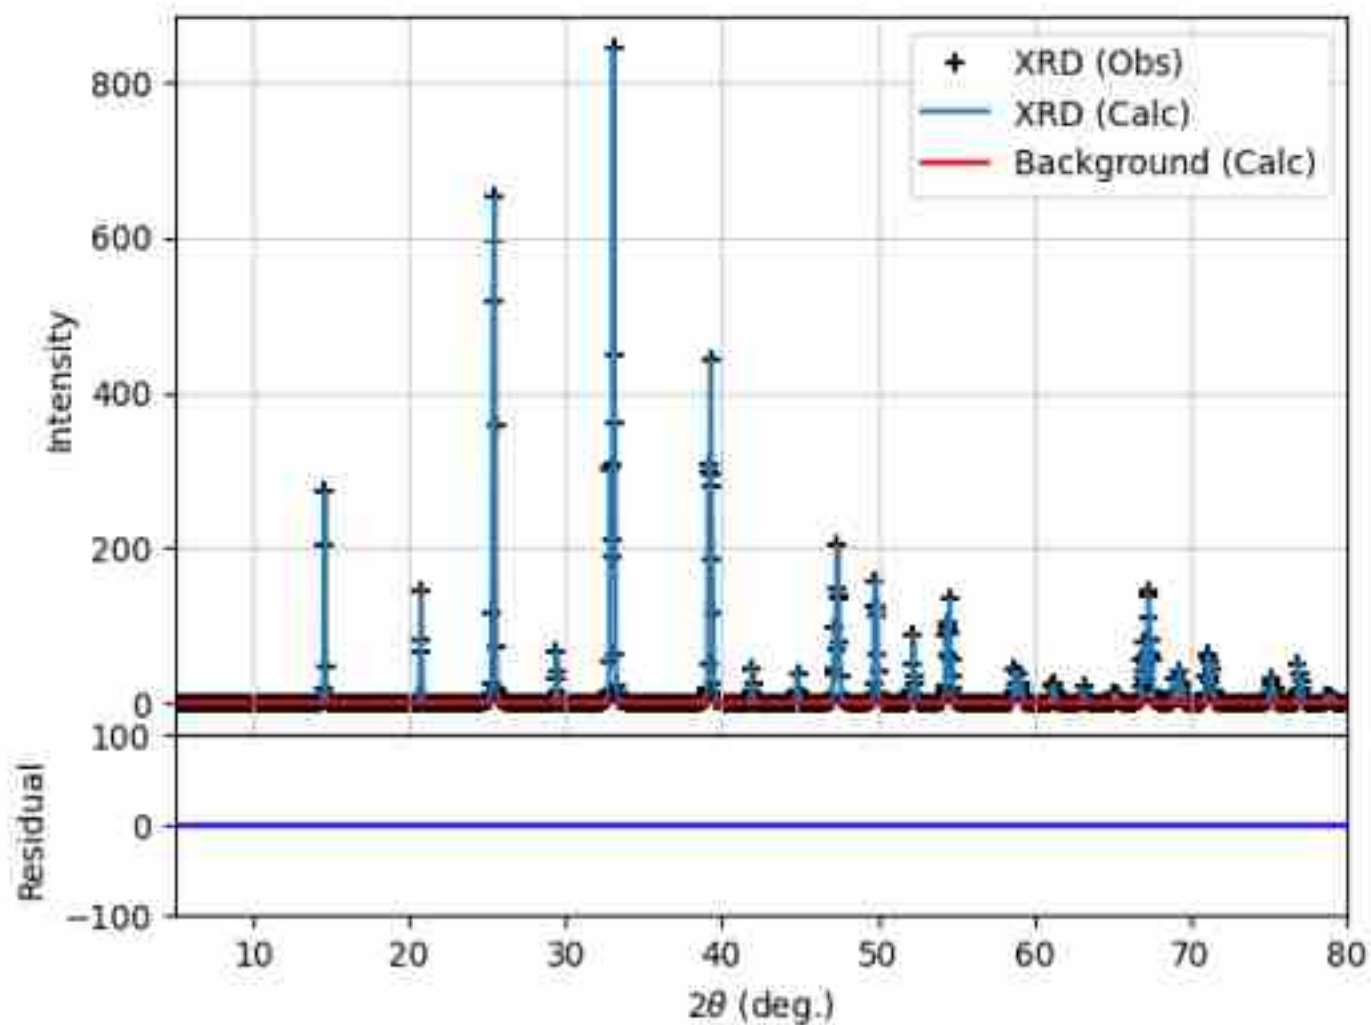

| RMSE before RR | Rwp     | RMSE after RR |
|----------------|---------|---------------|
| 0.02           | 0.00353 | 0.00058       |

# Ca<sub>2</sub>TlZn<sub>1</sub>

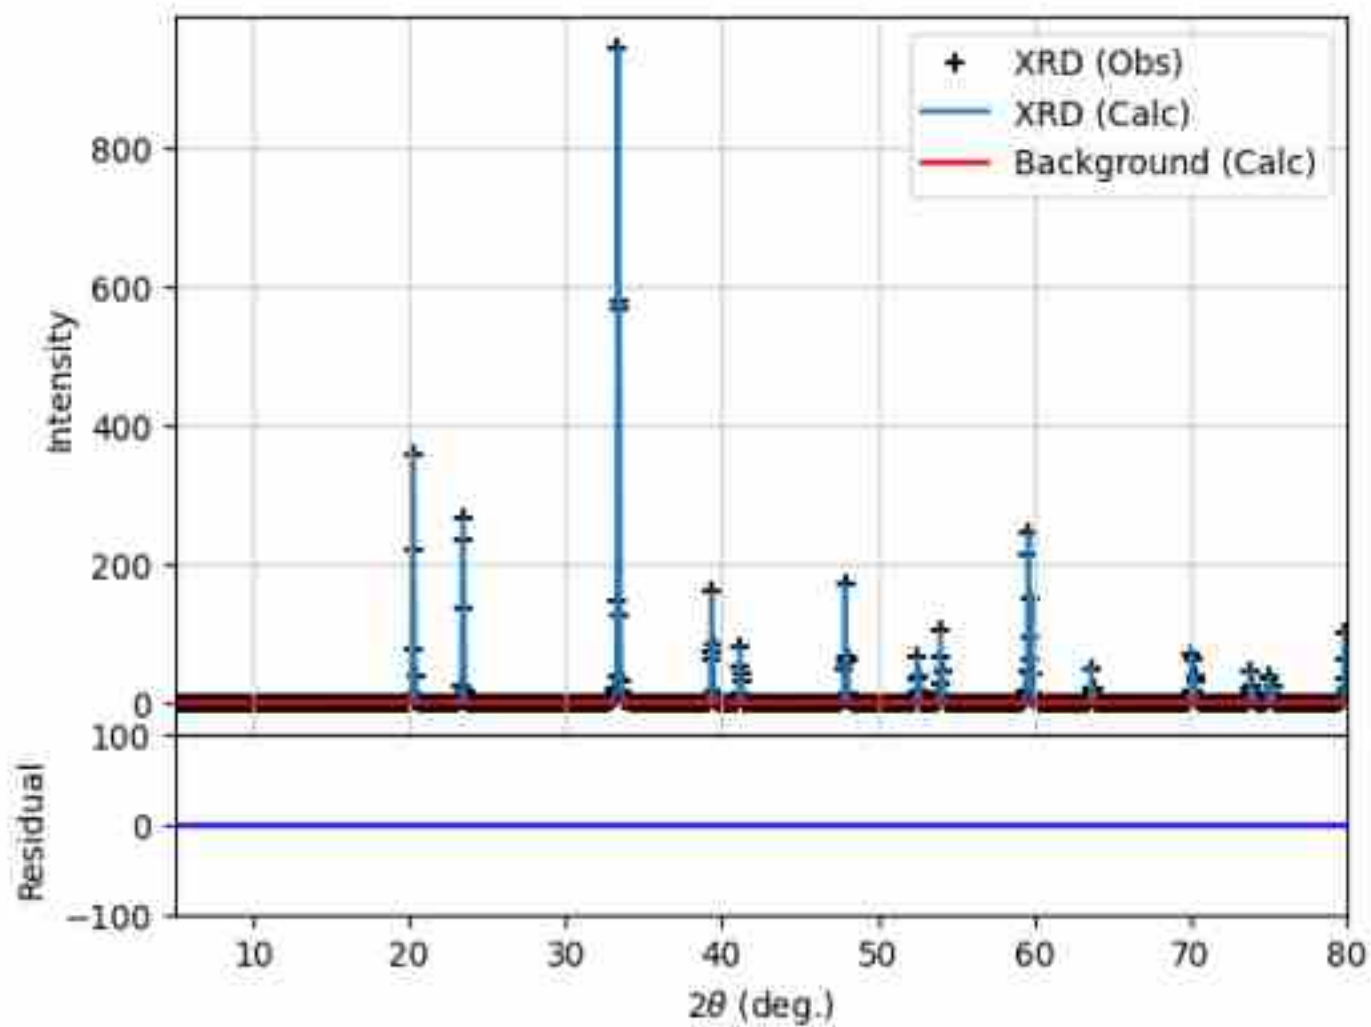

| RMSE before RR | Rwp     | RMSE after RR |
|----------------|---------|---------------|
| 0.002          | 0.00401 | 0.00092       |

# Ca<sub>2</sub>ZnCd<sub>1</sub>

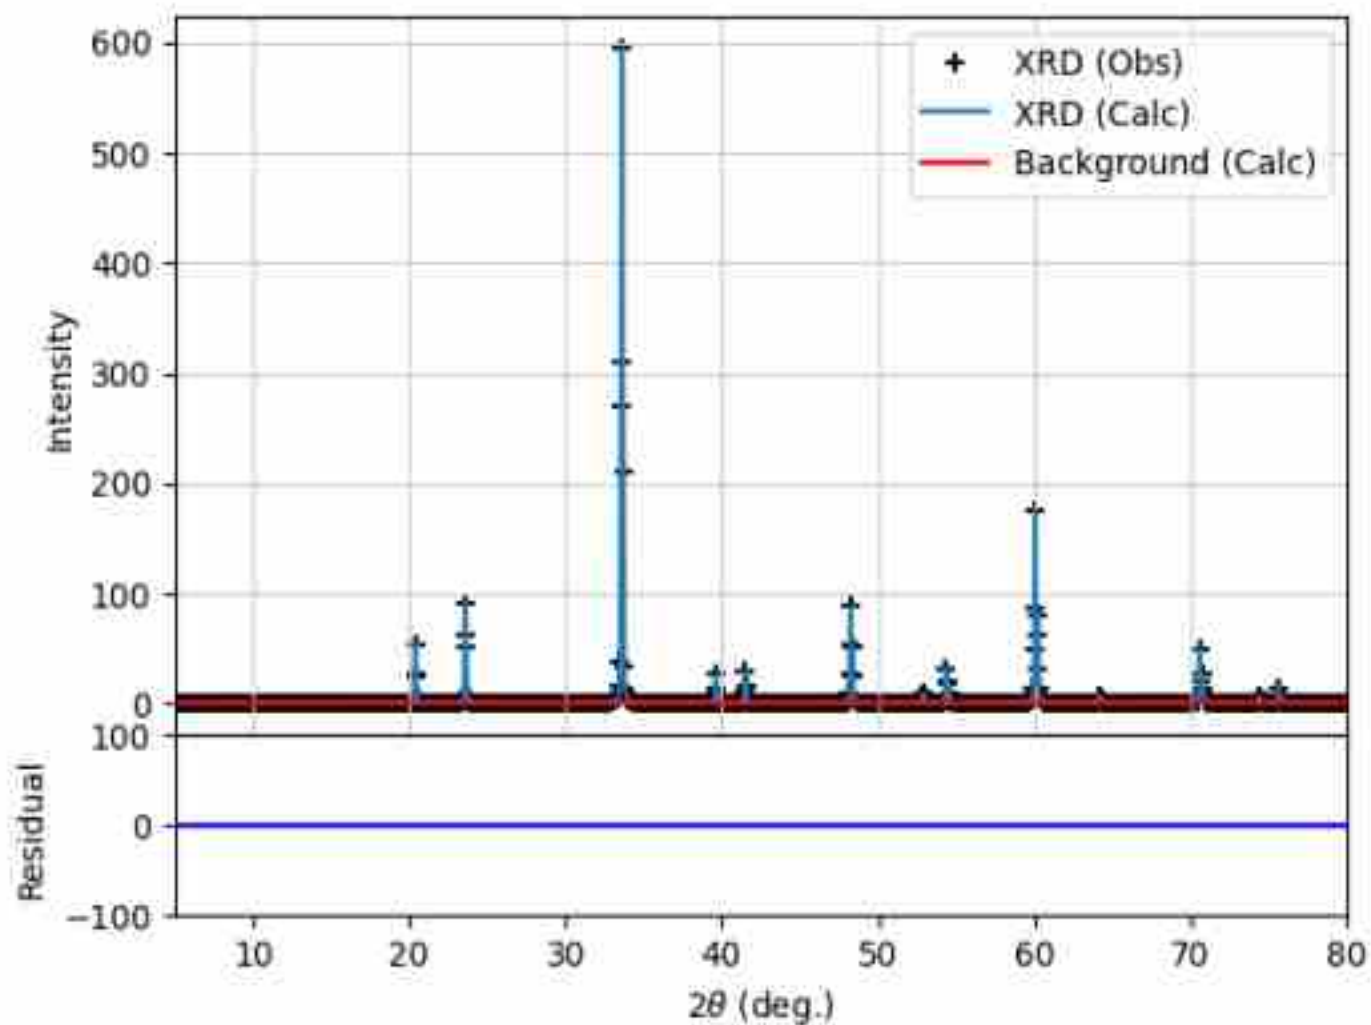

| RMSE before RR | Rwp     | RMSE after RR |
|----------------|---------|---------------|
| 0.002          | 0.00331 | 0.00064       |

# Ca<sub>2</sub>ZnGa<sub>4</sub>

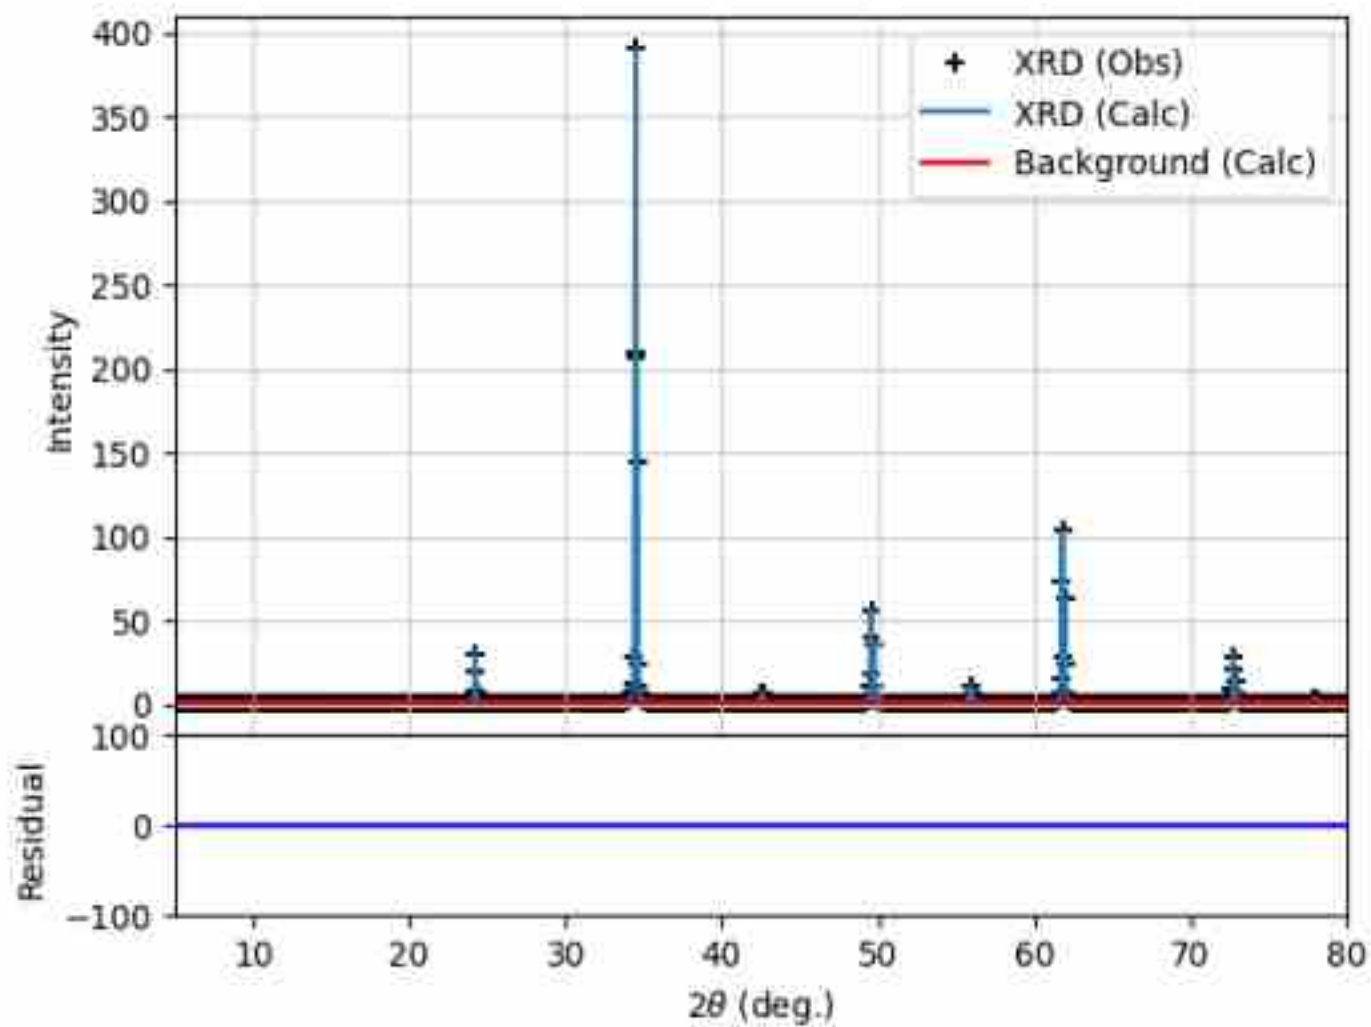

| RMSE before RR | Rwp     | RMSE after RR |
|----------------|---------|---------------|
| 0.002          | 0.00213 | 0.0003        |



# Ca<sub>2</sub>ZnHg

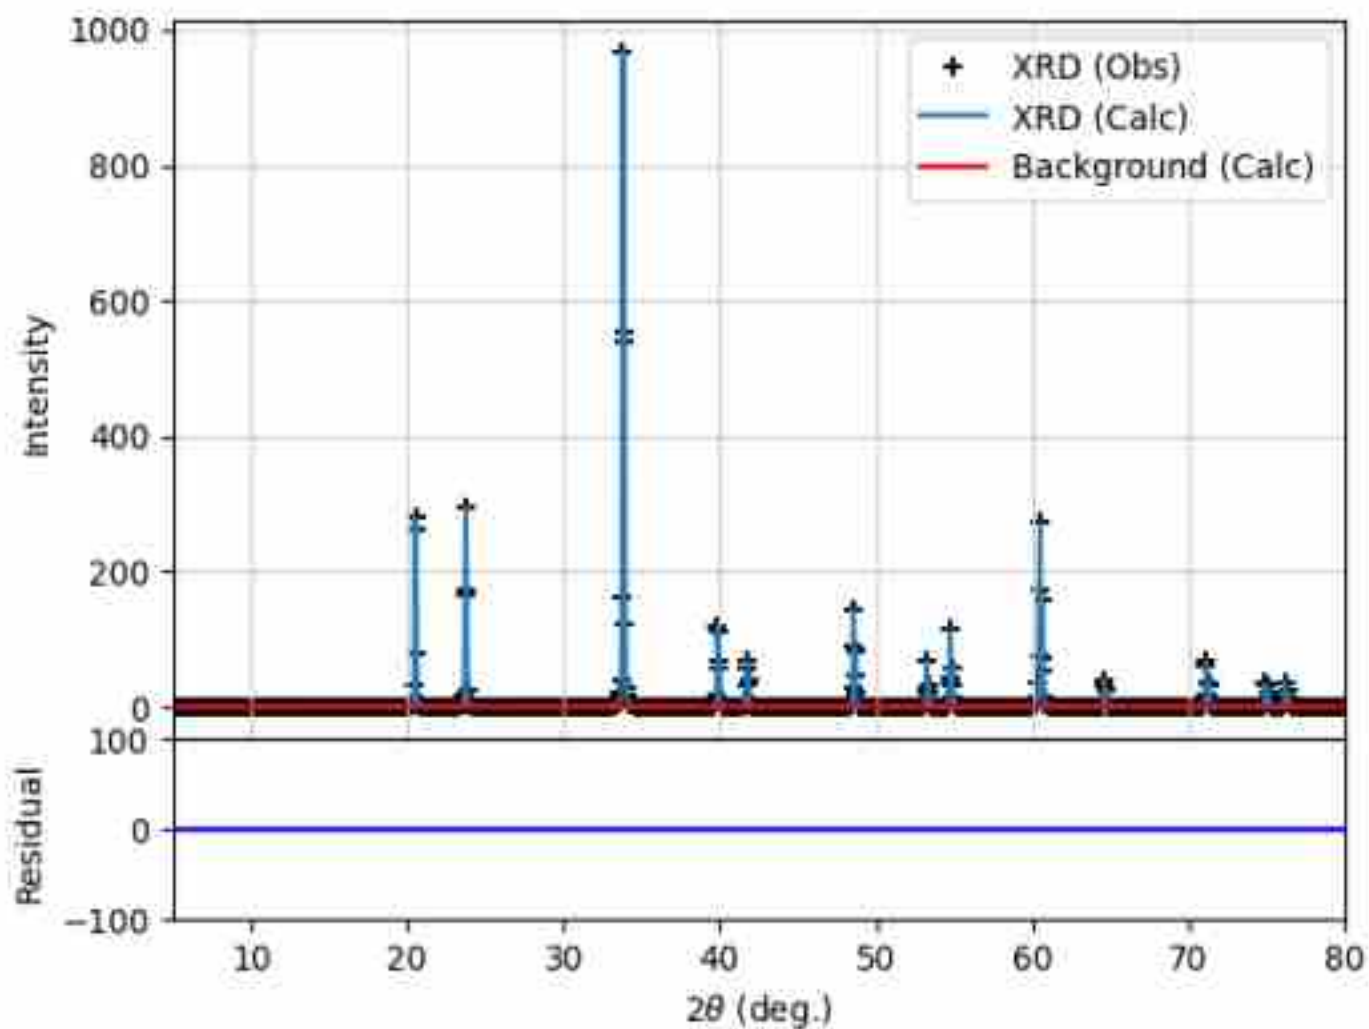

| RMSE before RR | Rwp    | RMSE after RR |
|----------------|--------|---------------|
| 0.002          | 0.0001 | 7e-05         |

# Ca<sub>4</sub>Ce<sub>4</sub>O<sub>12</sub>

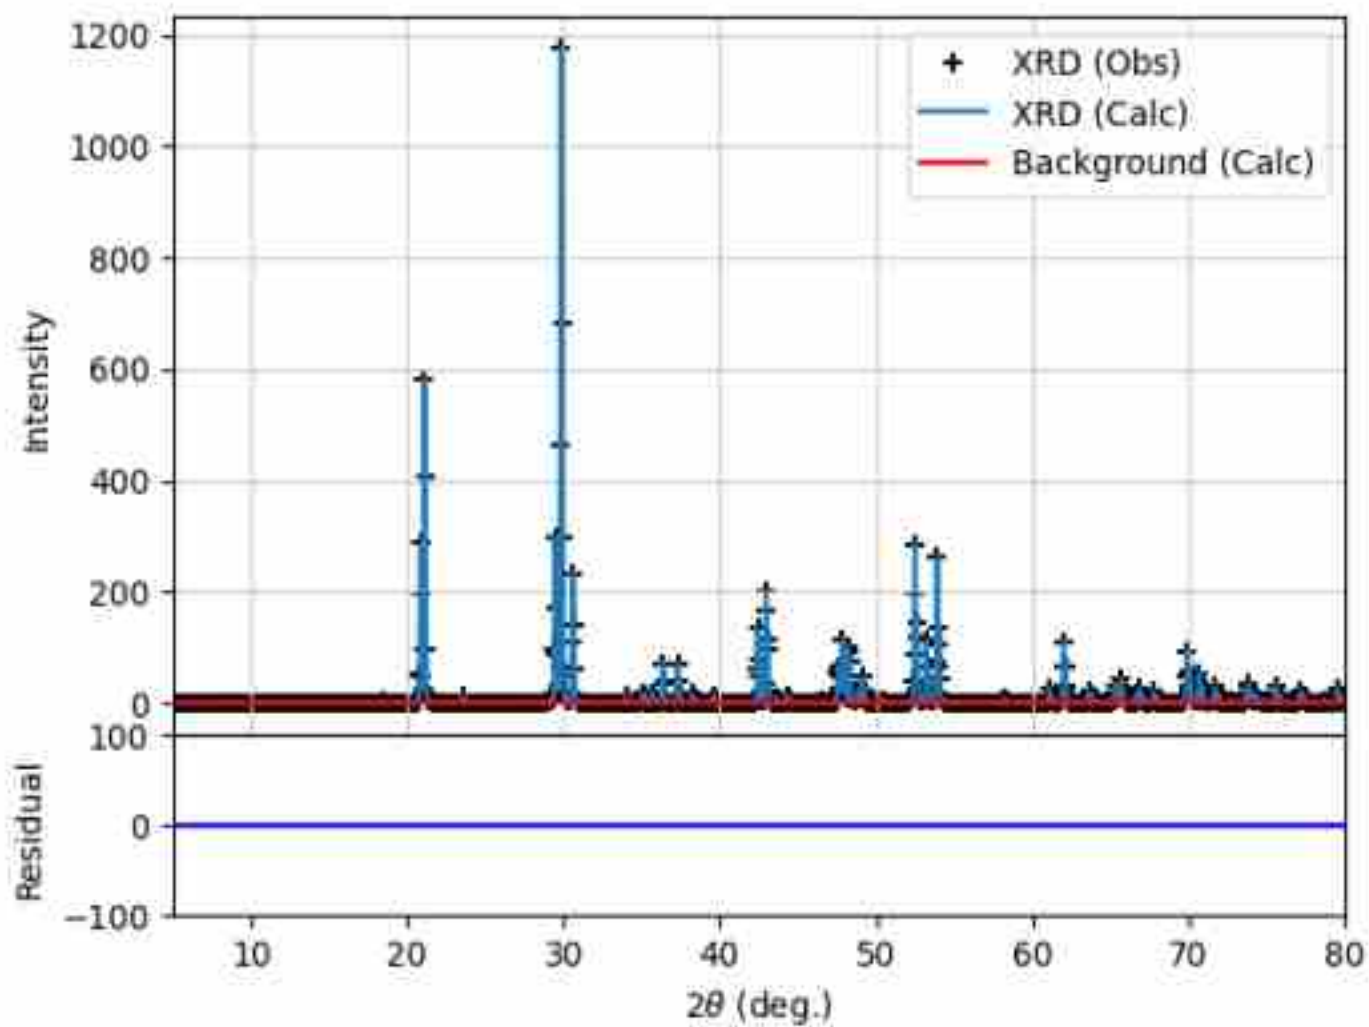

| RMSE before RR | Rwp     | RMSE after RR |
|----------------|---------|---------------|
| 0.02           | 0.00399 | 0.0014        |

# Ca<sub>4</sub>Y<sub>2</sub>Nb<sub>2</sub>O<sub>12</sub>

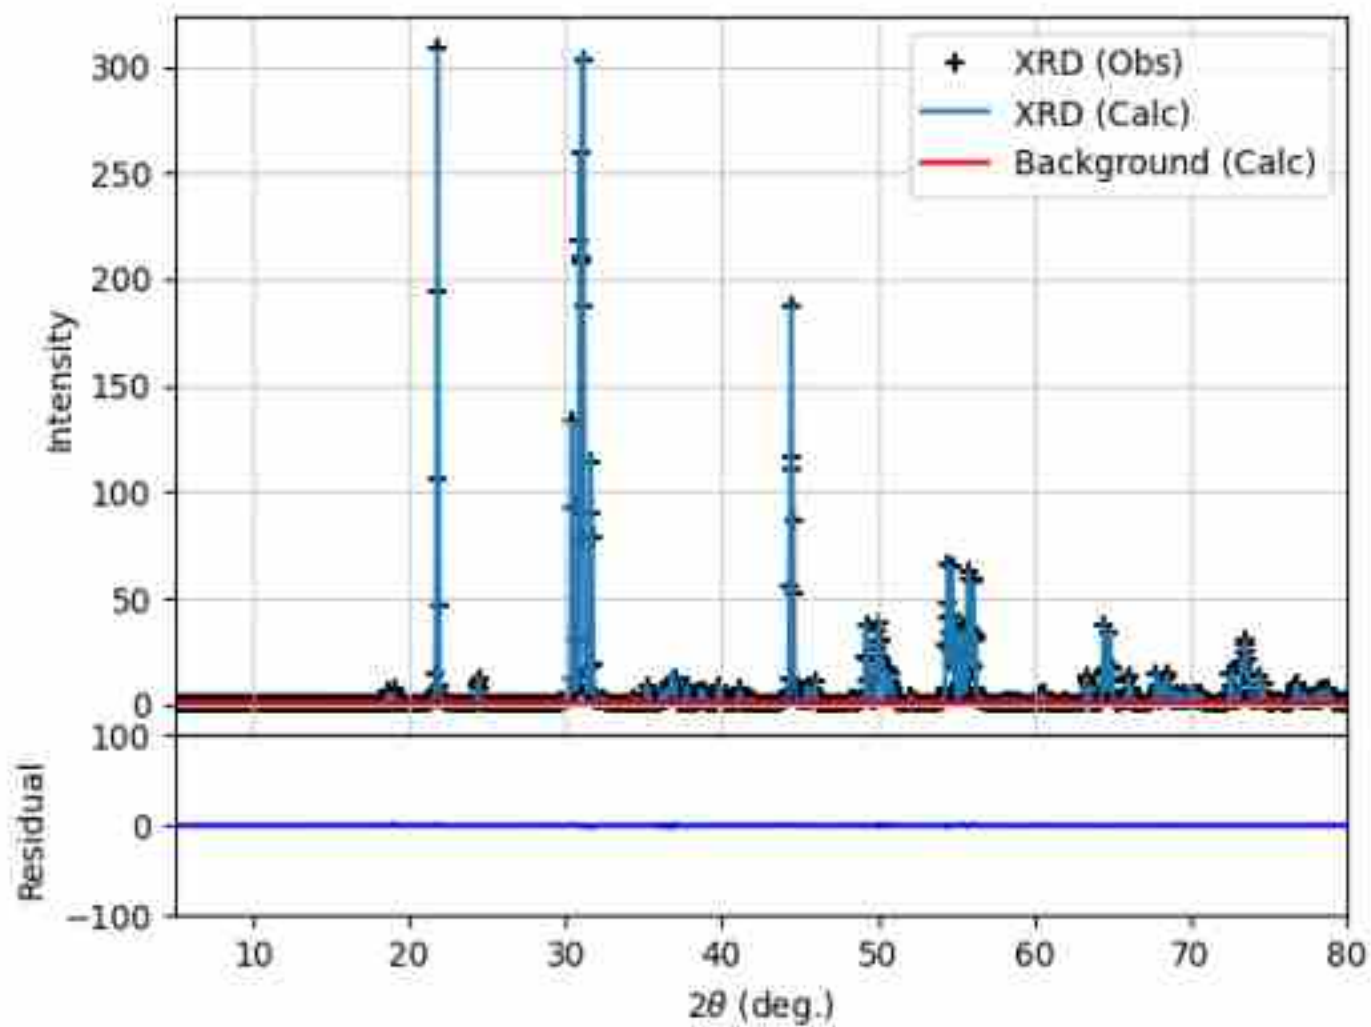

| RMSE before RR | Rwp     | RMSE after RR |
|----------------|---------|---------------|
| 0.02           | 3.41098 | 0.09465       |

# Ca<sub>4</sub>Yb<sub>2</sub>Ru<sub>2</sub>O<sub>12</sub>

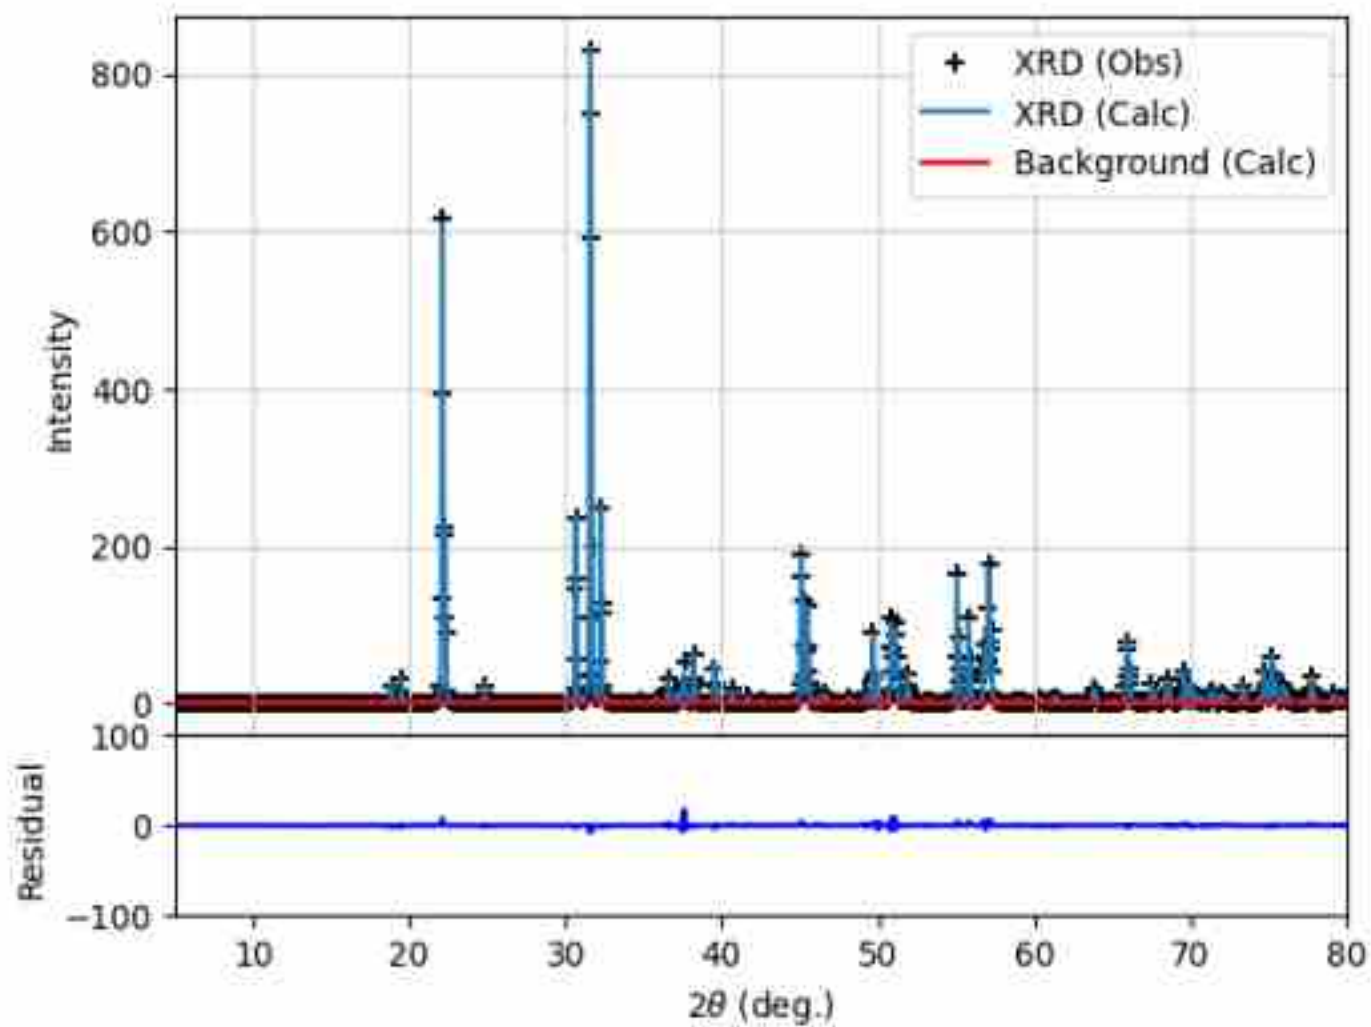

| RMSE before RR | Rwp     | RMSE after RR |
|----------------|---------|---------------|
| 0.02           | 5.89754 | 0.12771       |

# Ca6Sn2H4

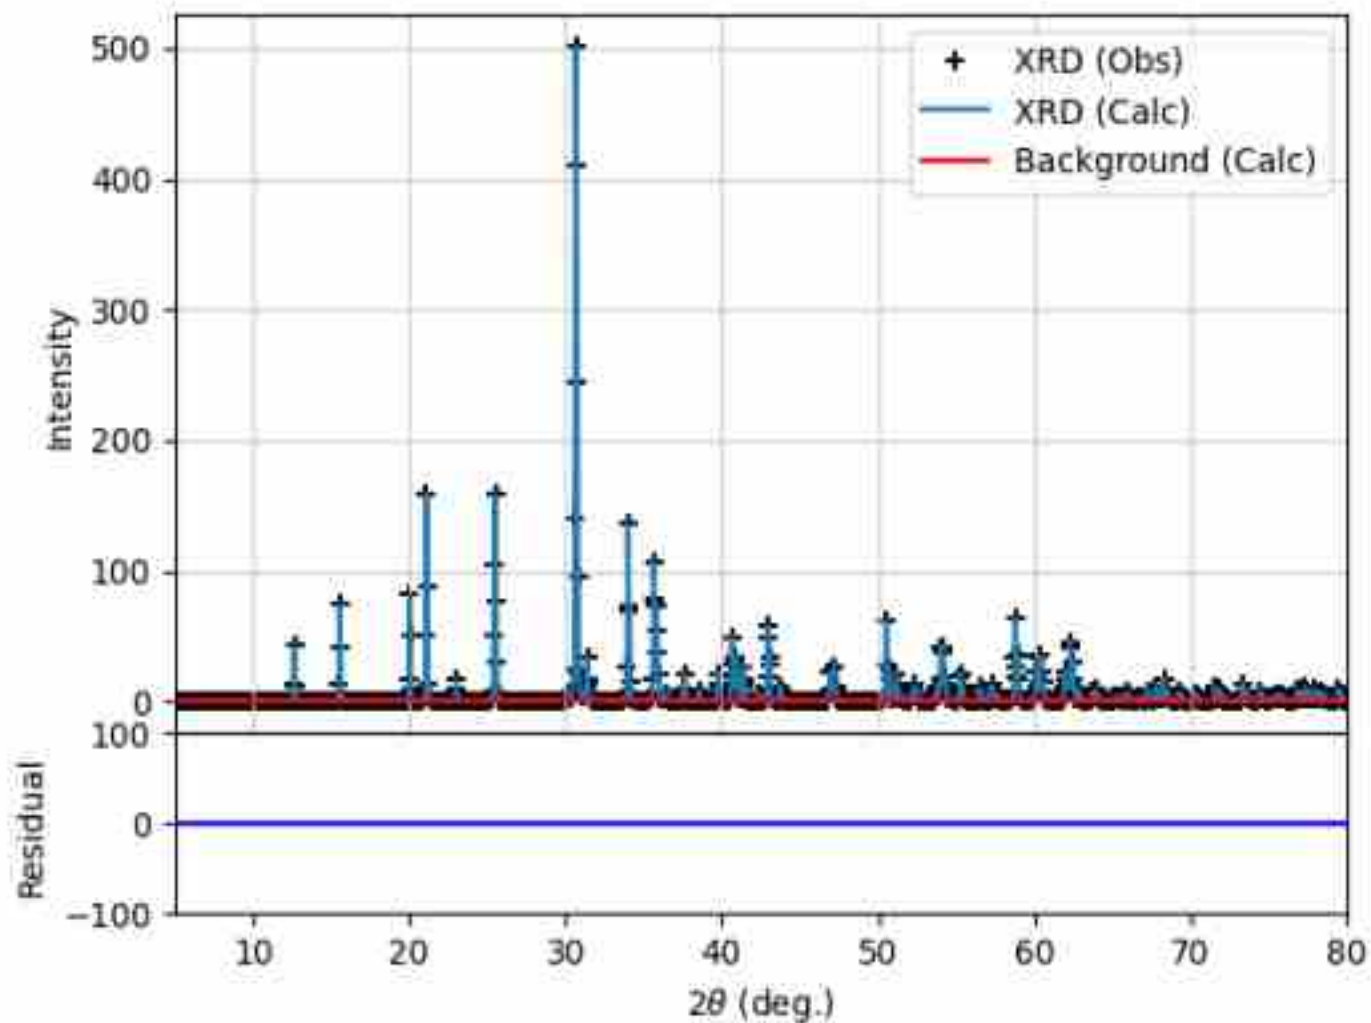

| RMSE before RR | Rwp     | RMSE after RR |
|----------------|---------|---------------|
| 0.02           | 0.00349 | 0.00332       |

# Cd1Ag3

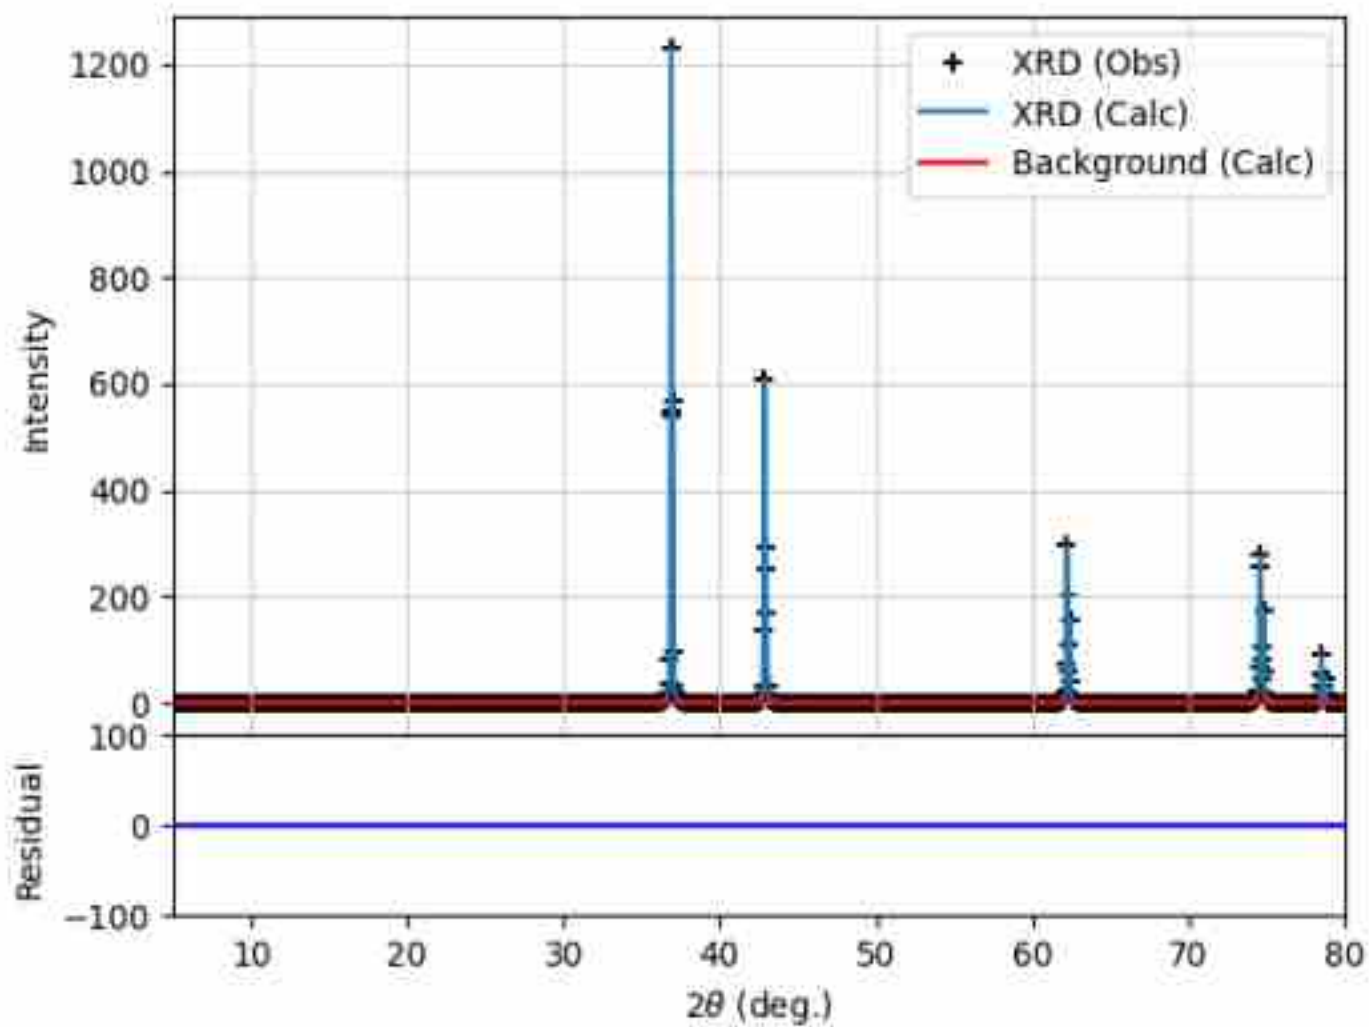

| RMSE before RR | Rwp     | RMSE after RR |
|----------------|---------|---------------|
| 0.002          | 0.00686 | 0.00042       |

# Cd1Pd3

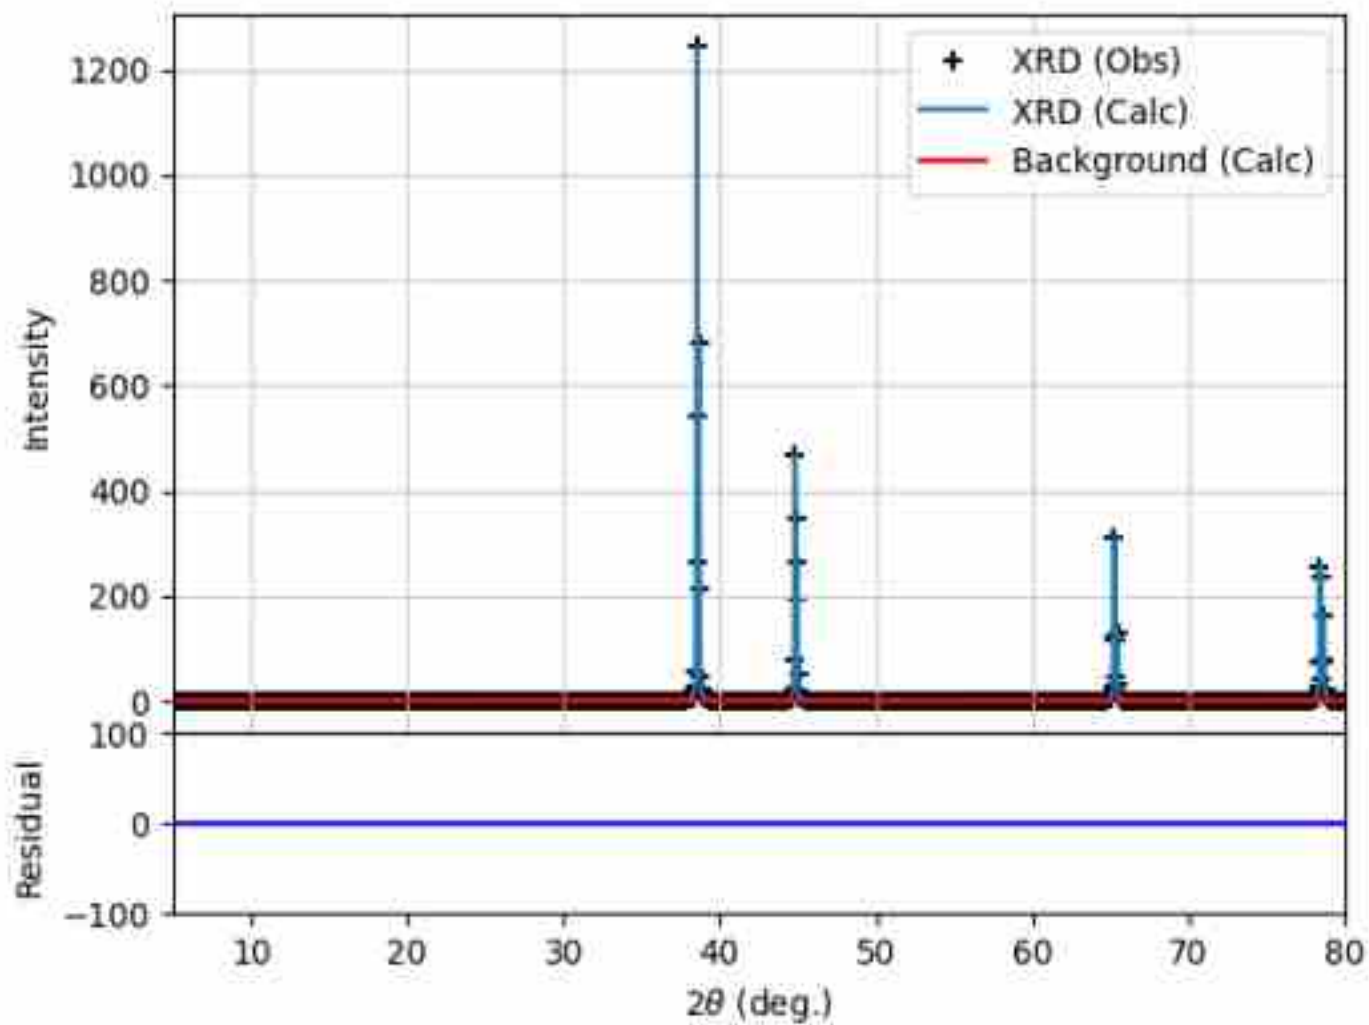

| RMSE before RR | Rwp     | RMSE after RR |
|----------------|---------|---------------|
| 0.002          | 0.00766 | 0.0005        |

# Cd<sub>2</sub>In<sub>1</sub>Cu<sub>1</sub>Se<sub>4</sub>

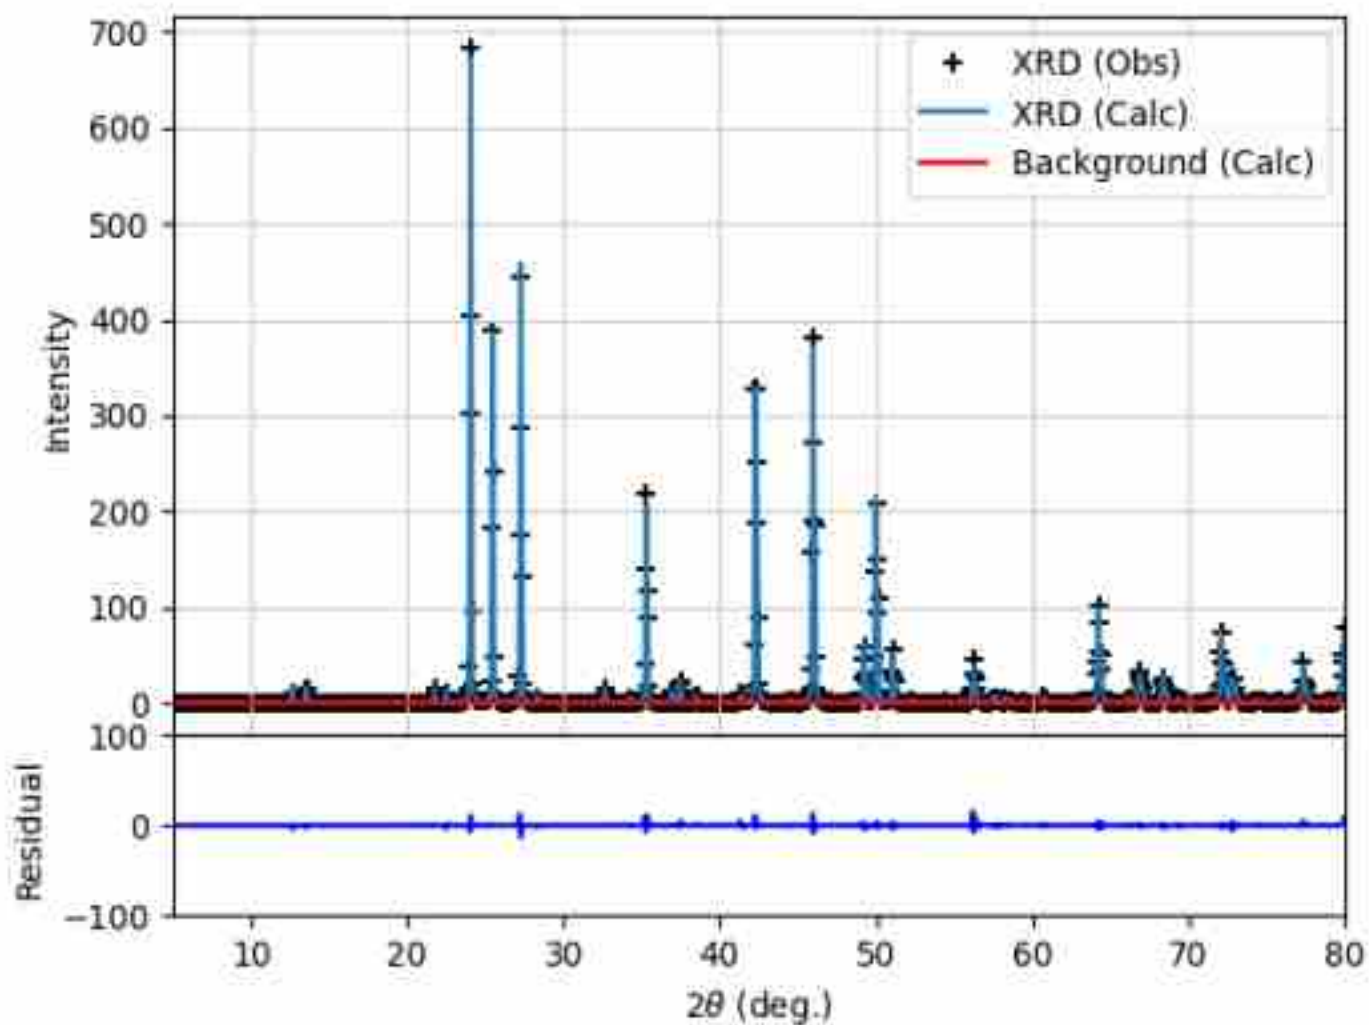

| RMSE before RR | Rwp     | RMSE after RR |
|----------------|---------|---------------|
| 0.02           | 7.32515 | 0.02518       |



# Cd<sub>2</sub>Mo<sub>1</sub>W<sub>1</sub>O<sub>8</sub>

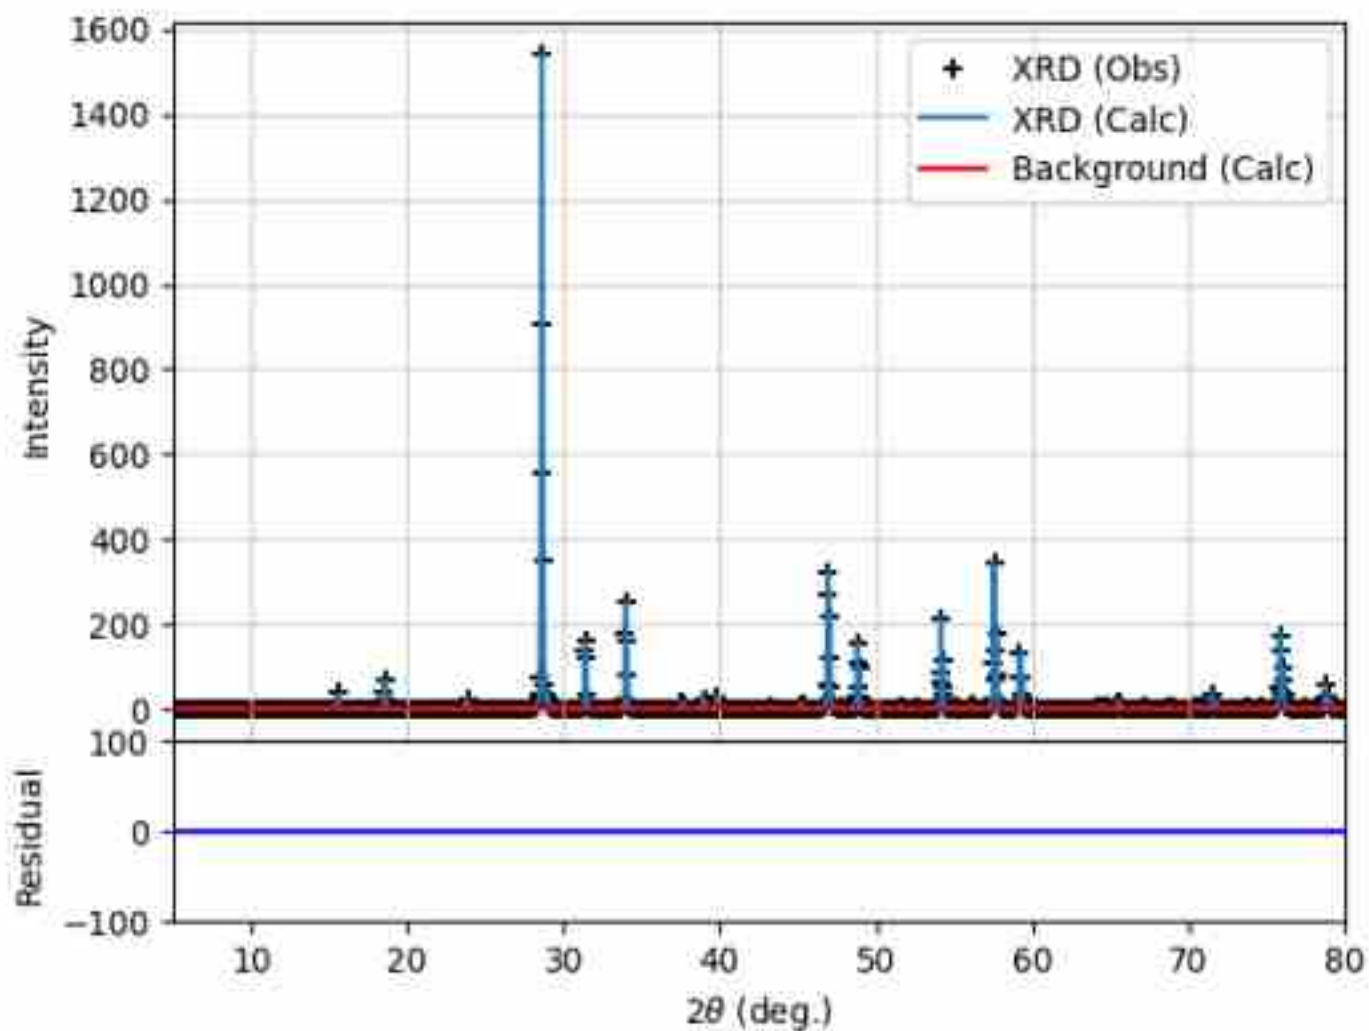

| RMSE before RR | Rwp     | RMSE after RR |
|----------------|---------|---------------|
| 0.02           | 0.00301 | 0.0013        |

# Cd<sub>2</sub>Sn<sub>2</sub>P<sub>4</sub>

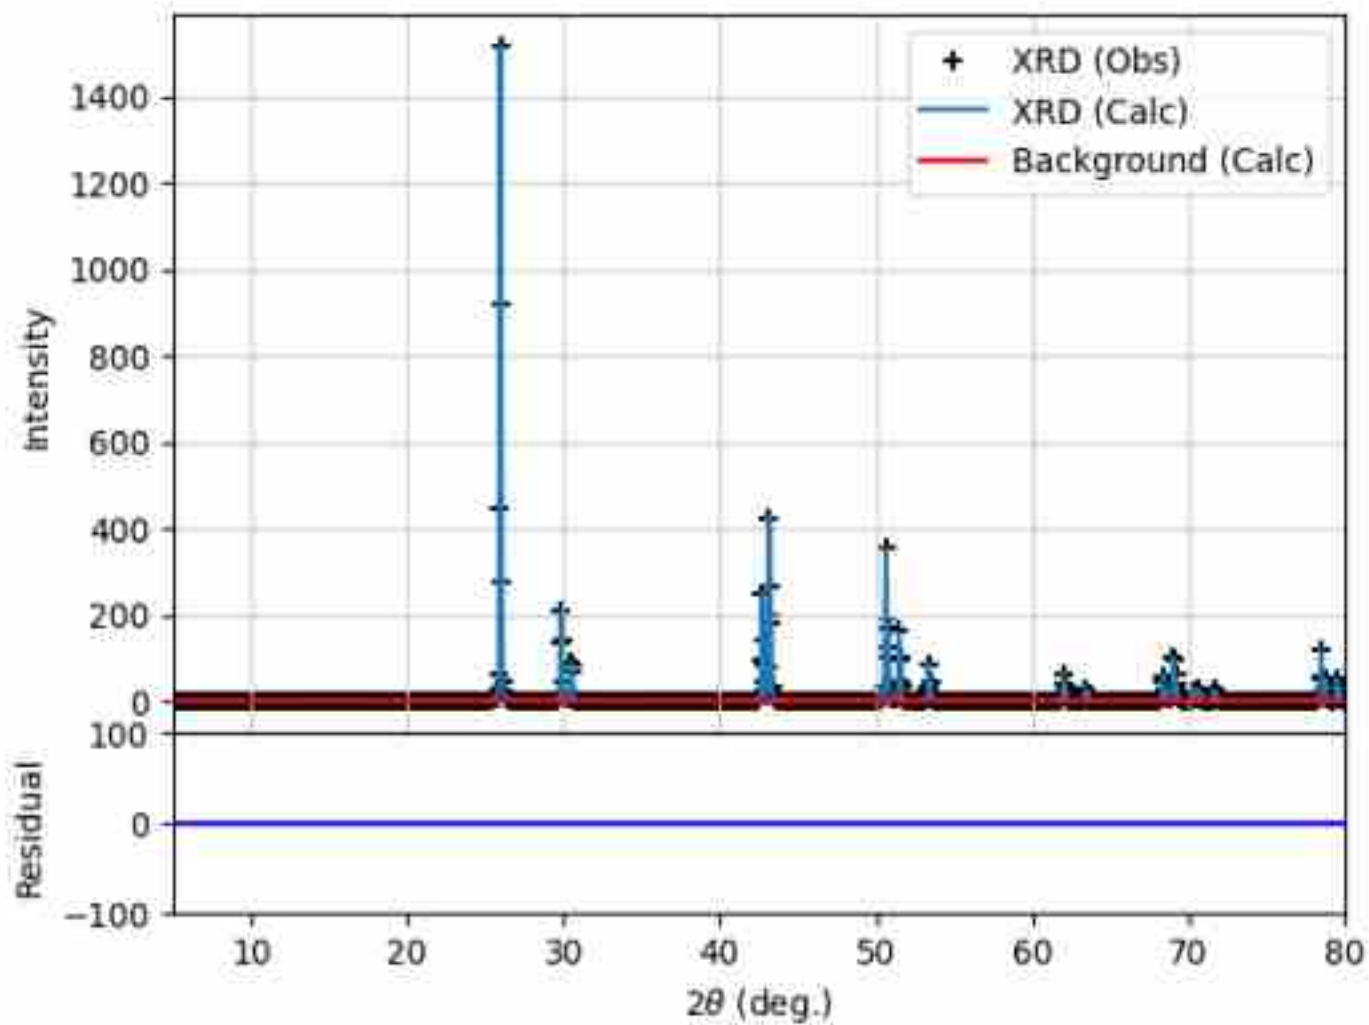

| RMSE before RR | Rwp     | RMSE after RR |
|----------------|---------|---------------|
| 0.02           | 0.00397 | 0.0009        |

# Ce1Ag1Hg2

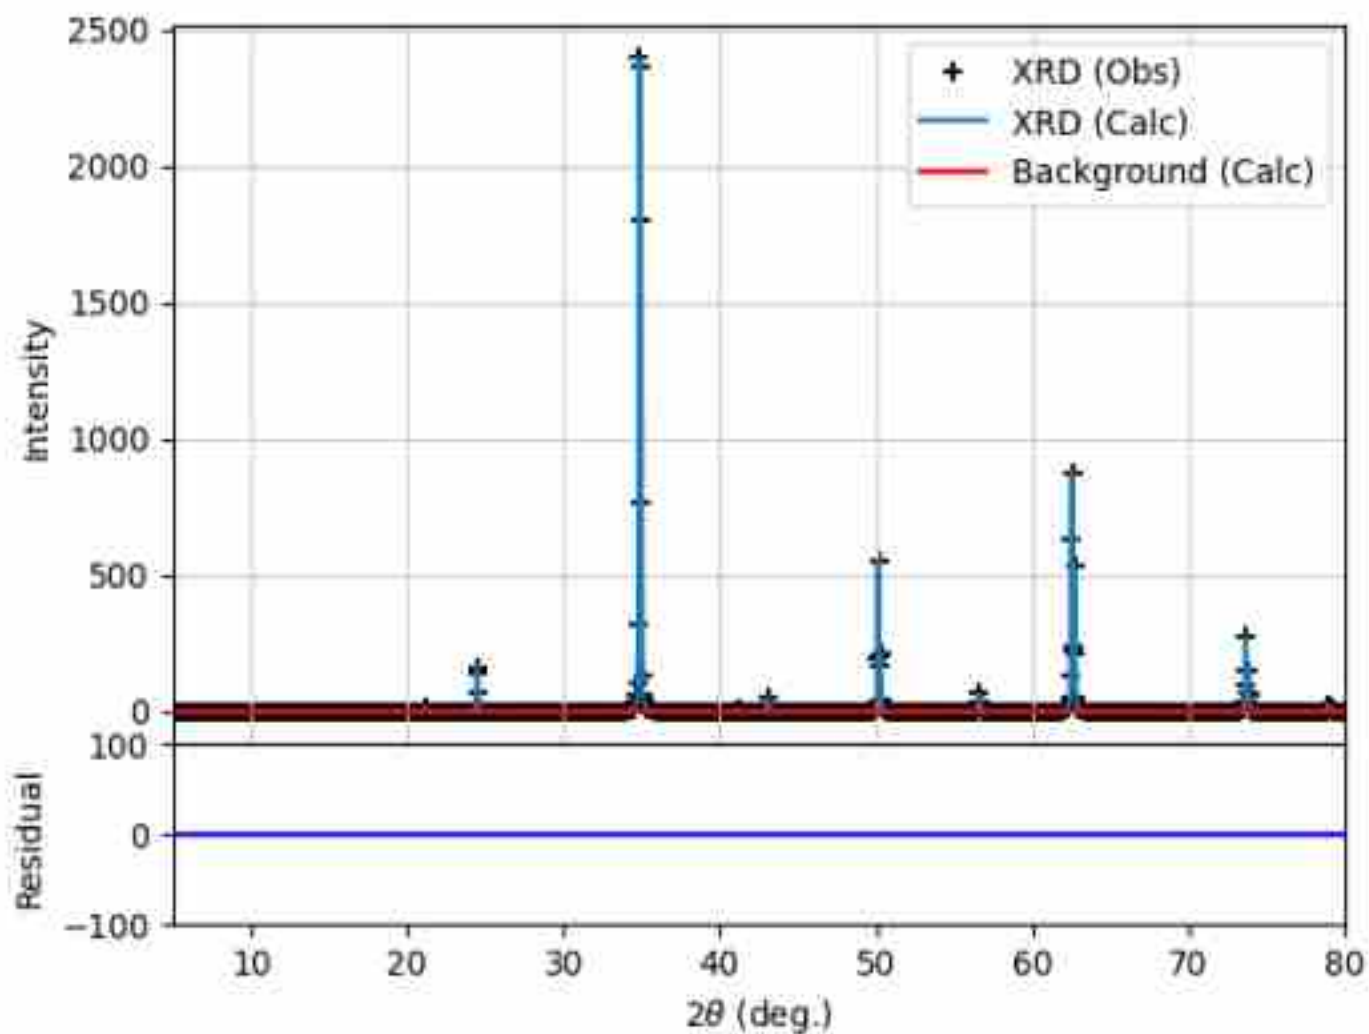

| RMSE before RR | Rwp    | RMSE after RR |
|----------------|--------|---------------|
| 0.002          | 0.0231 | 0.00086       |

# Ce1As1

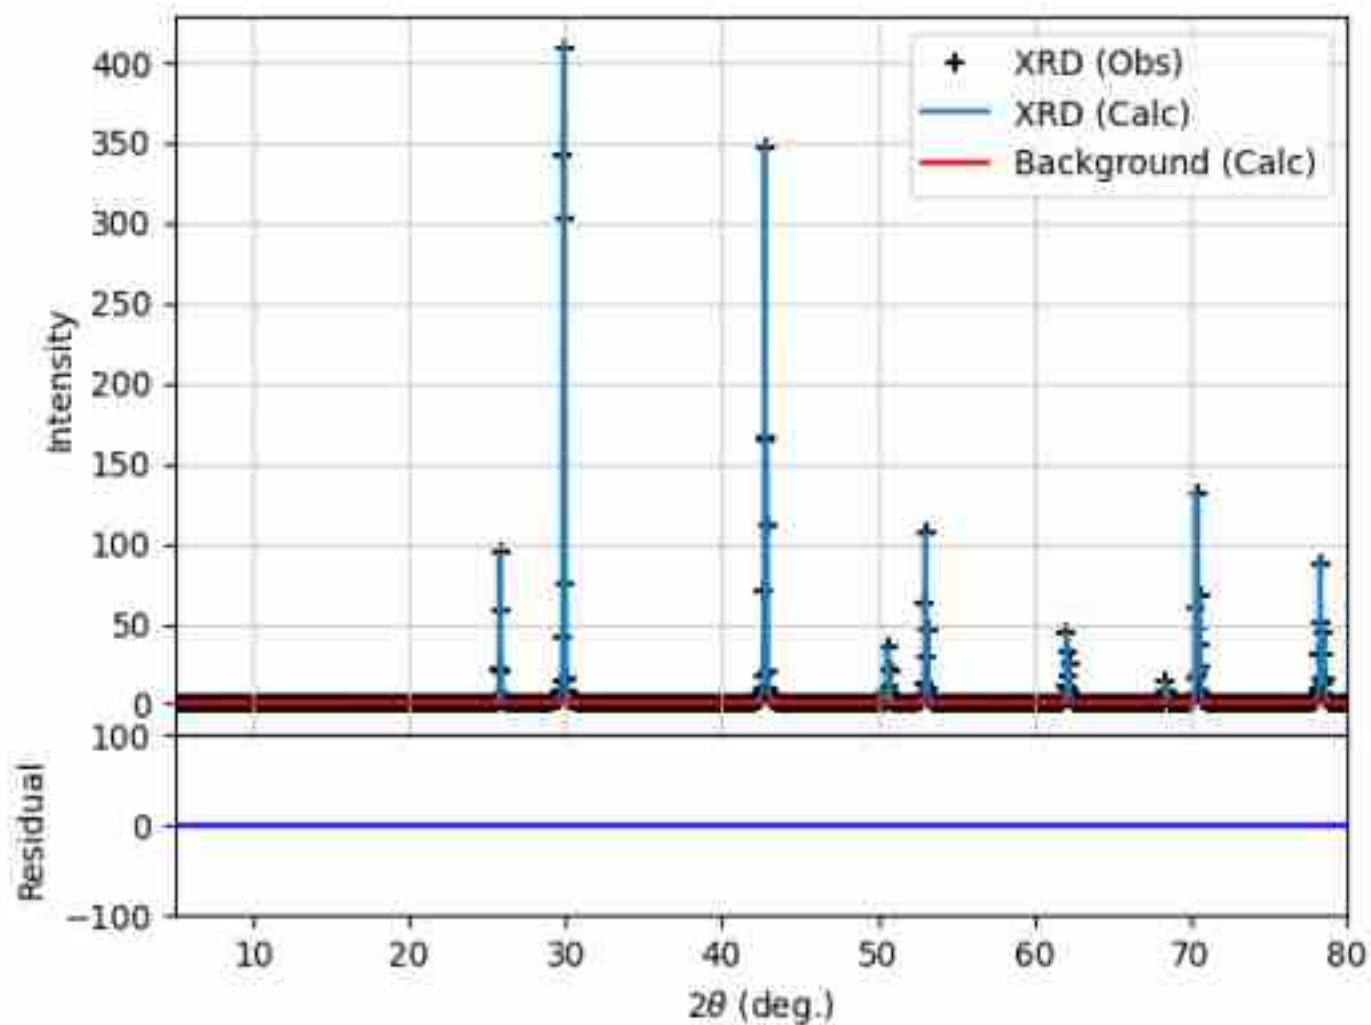

| RMSE before RR | Rwp     | RMSE after RR |
|----------------|---------|---------------|
| 0.002          | 0.08416 | 0.00053       |

# Ce1Eu1Zn2

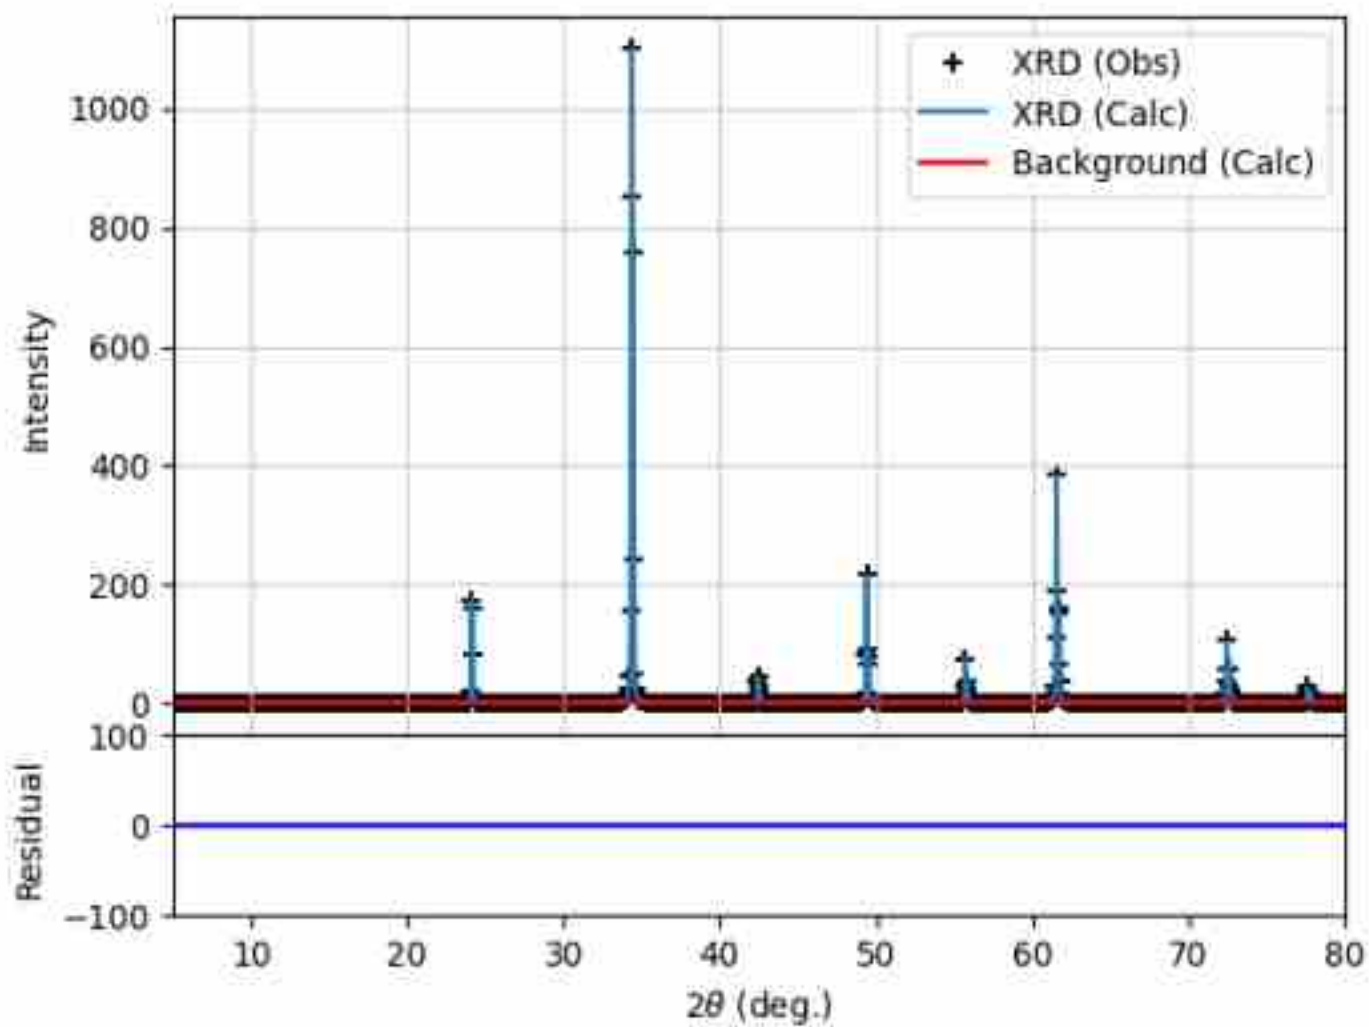

| RMSE before RR | Rwp    | RMSE after RR |
|----------------|--------|---------------|
| 0.002          | 0.0073 | 0.00048       |

# Ce1H3

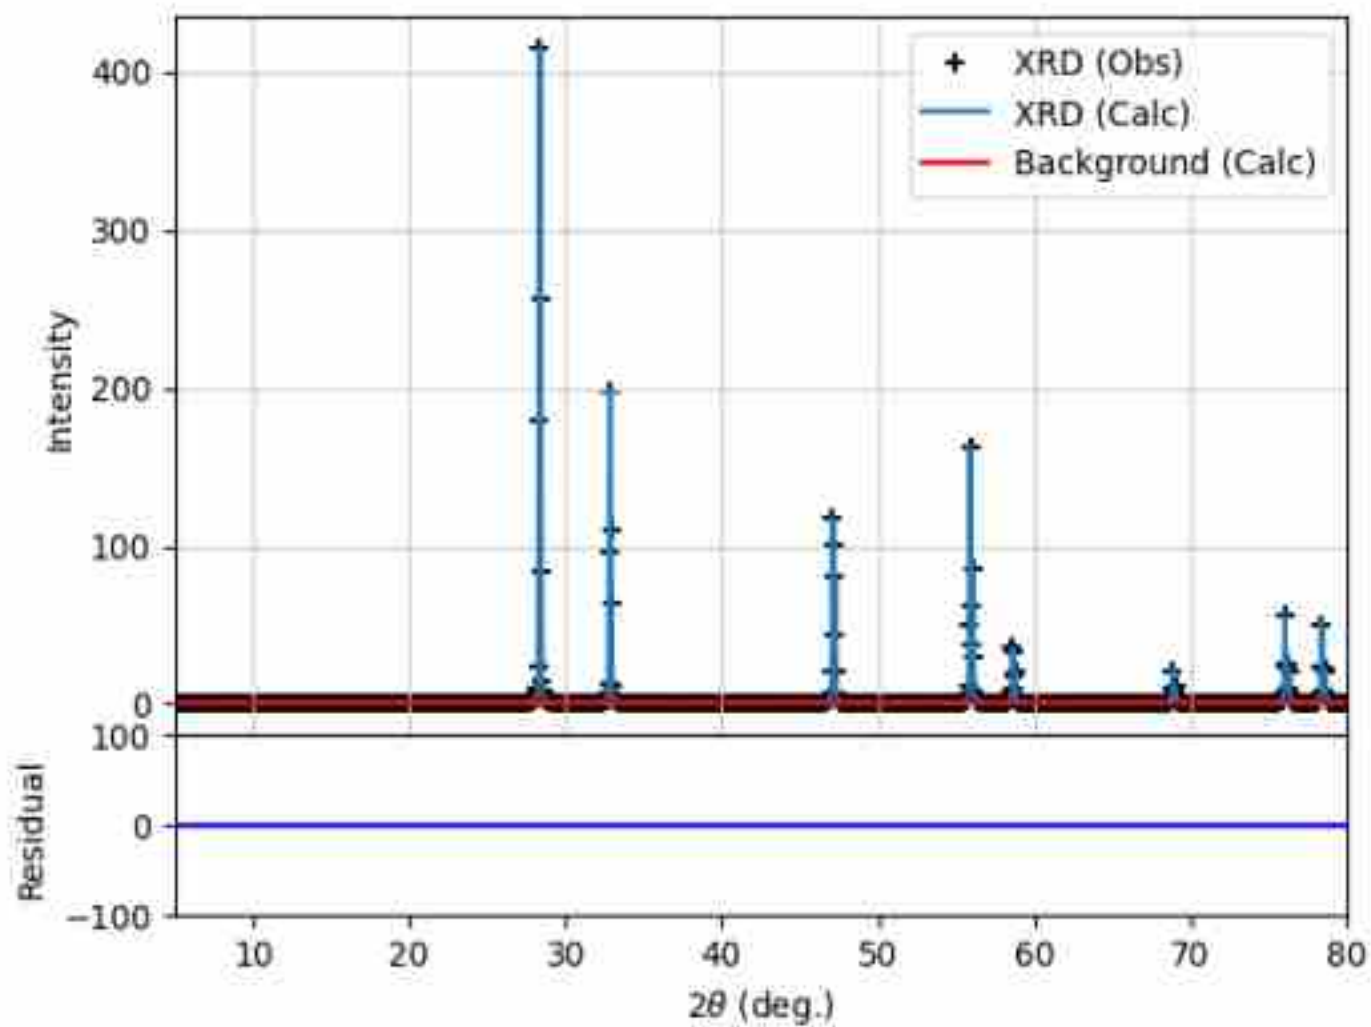

| RMSE before RR | Rwp     | RMSE after RR |
|----------------|---------|---------------|
| 0.002          | 0.00257 | 0.00319       |

# Ce1Hg1

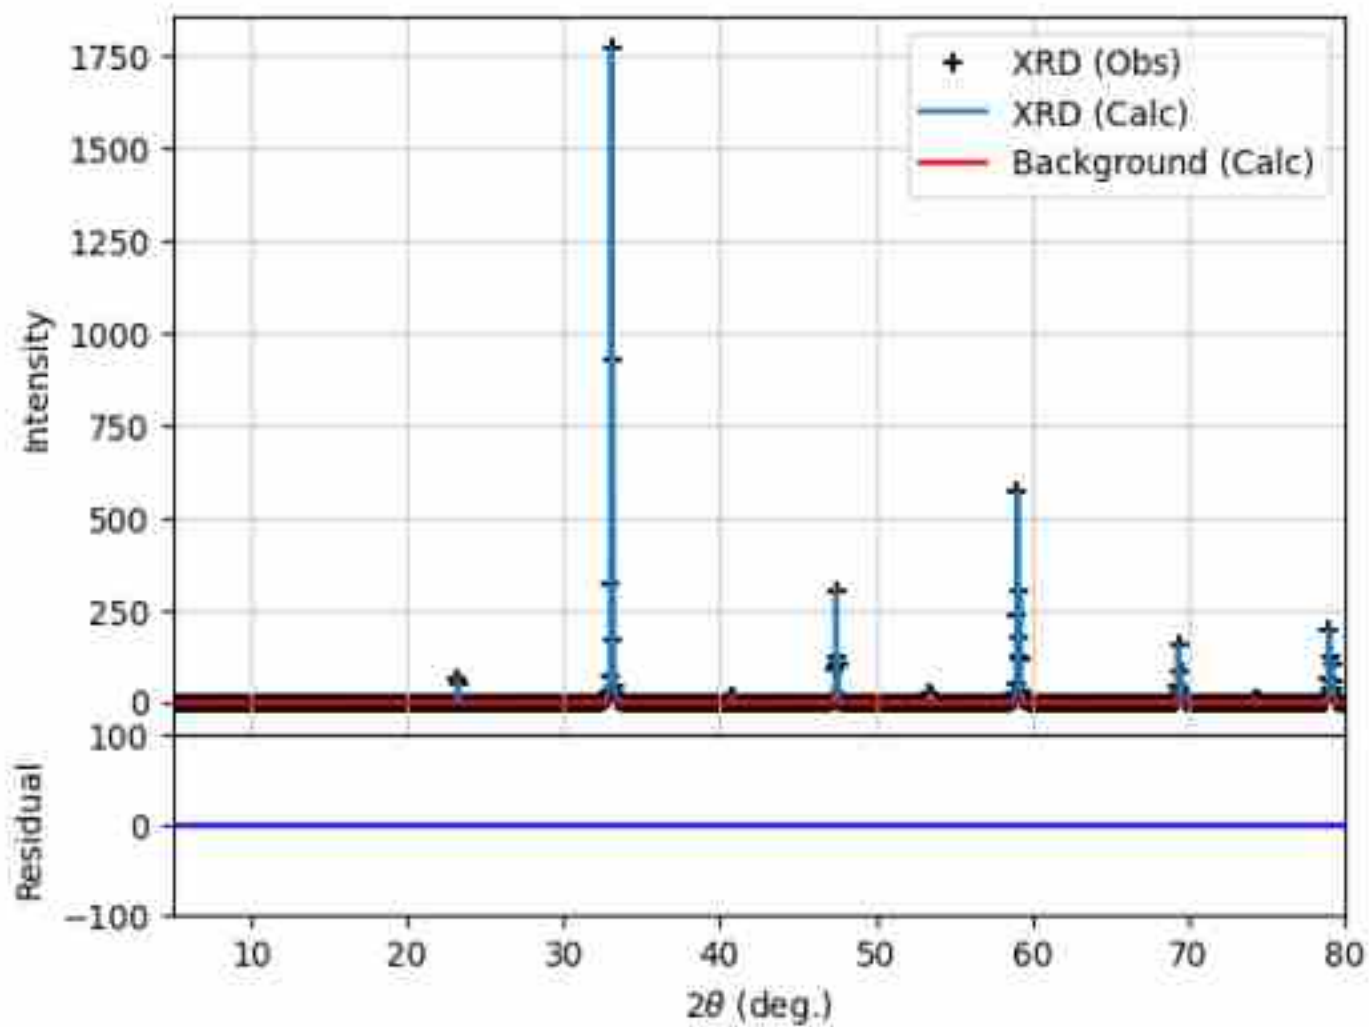

| RMSE before RR | Rwp     | RMSE after RR |
|----------------|---------|---------------|
| 0.002          | 0.08192 | 0.00198       |

# Ce1Ho3

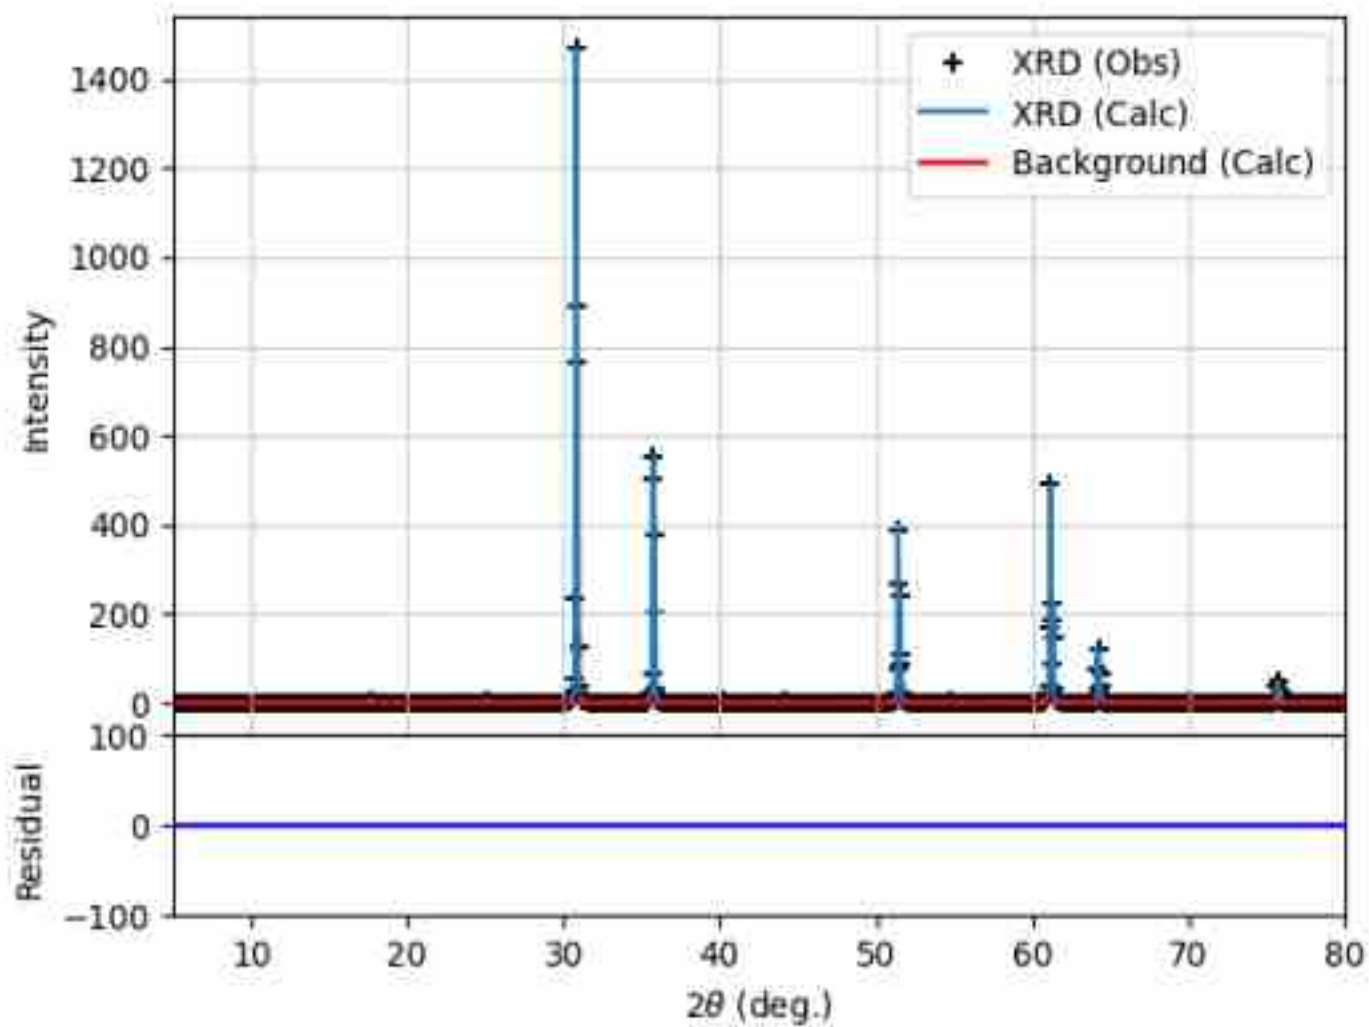

| RMSE before RR | Rwp     | RMSE after RR |
|----------------|---------|---------------|
| 0.002          | 0.01513 | 0.00061       |



# Ce1Pd3

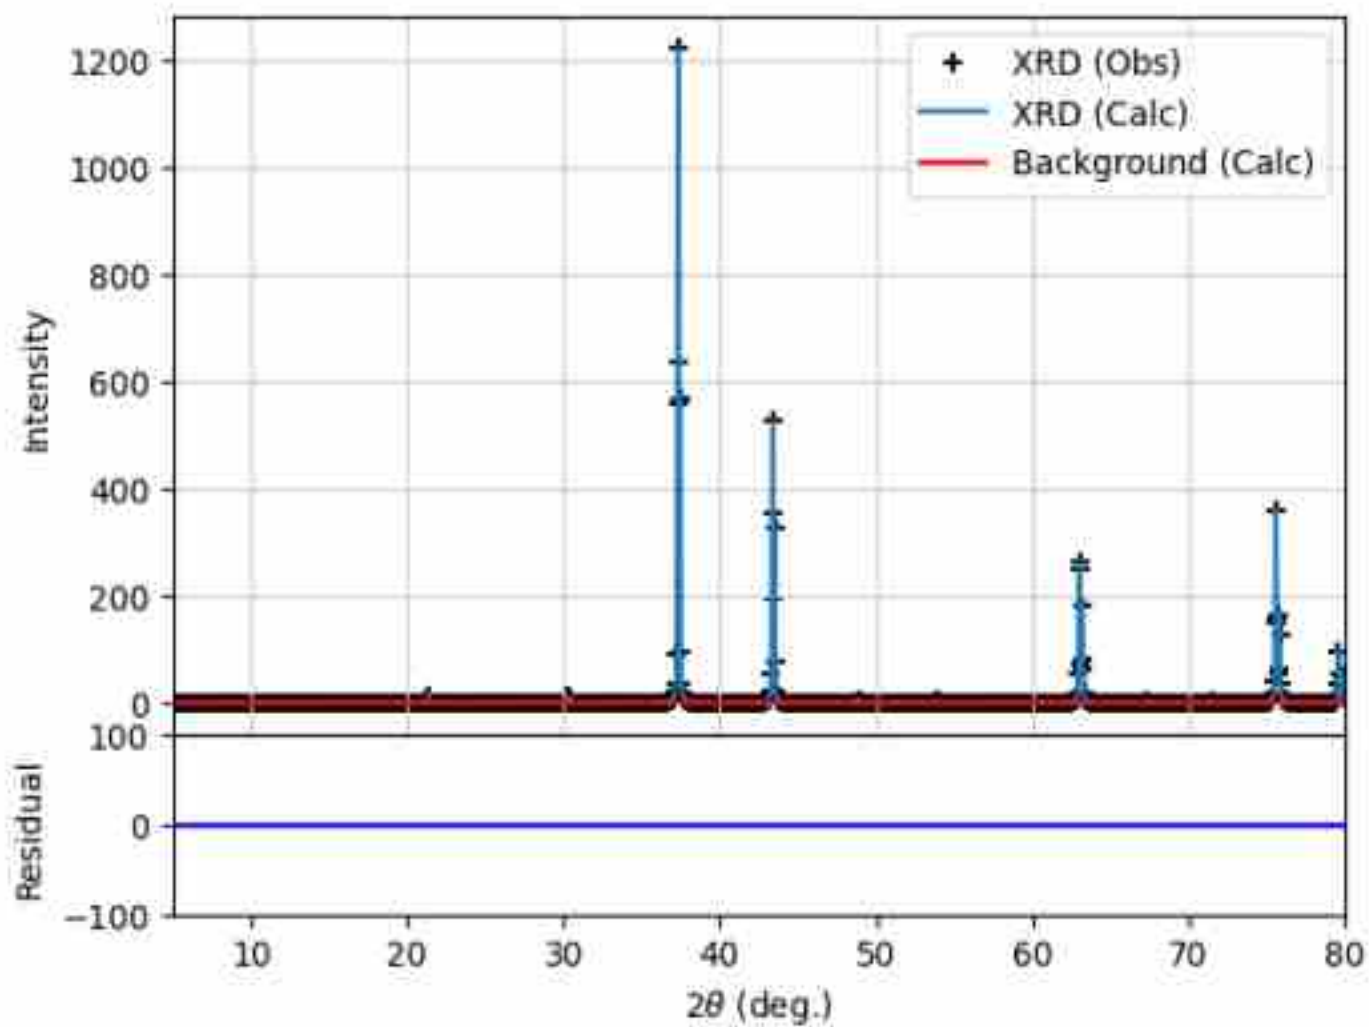

| RMSE before RR | Rwp     | RMSE after RR |
|----------------|---------|---------------|
| 0.002          | 0.00573 | 0.00046       |

# Ce1Pr2O6

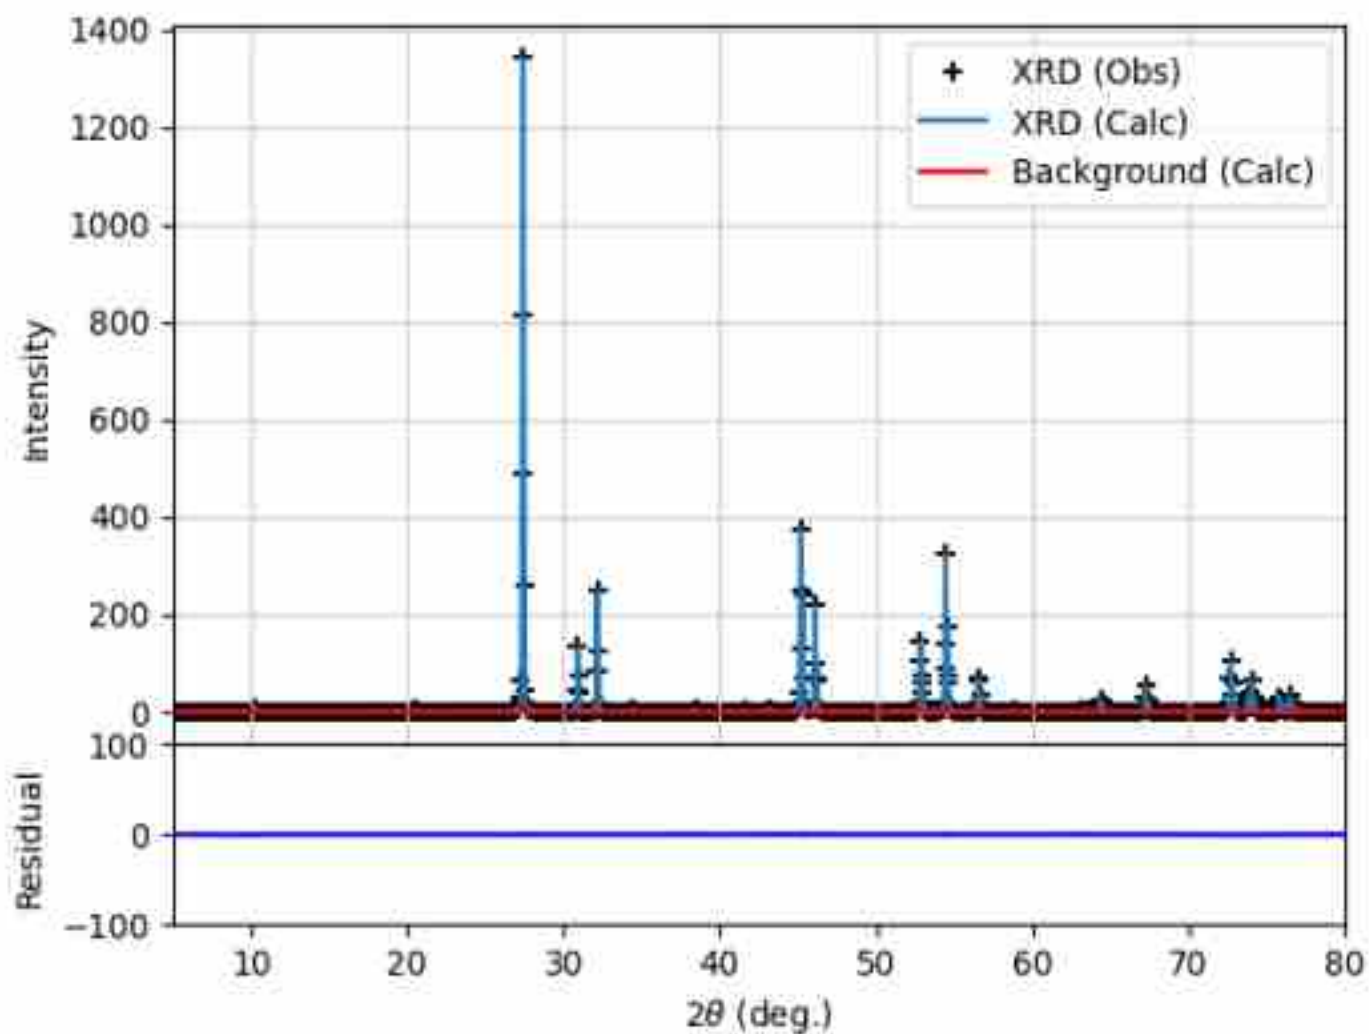

| RMSE before RR | Rwp     | RMSE after RR |
|----------------|---------|---------------|
| 0.02           | 0.98303 | 0.04683       |

# Ce1Pr4O10

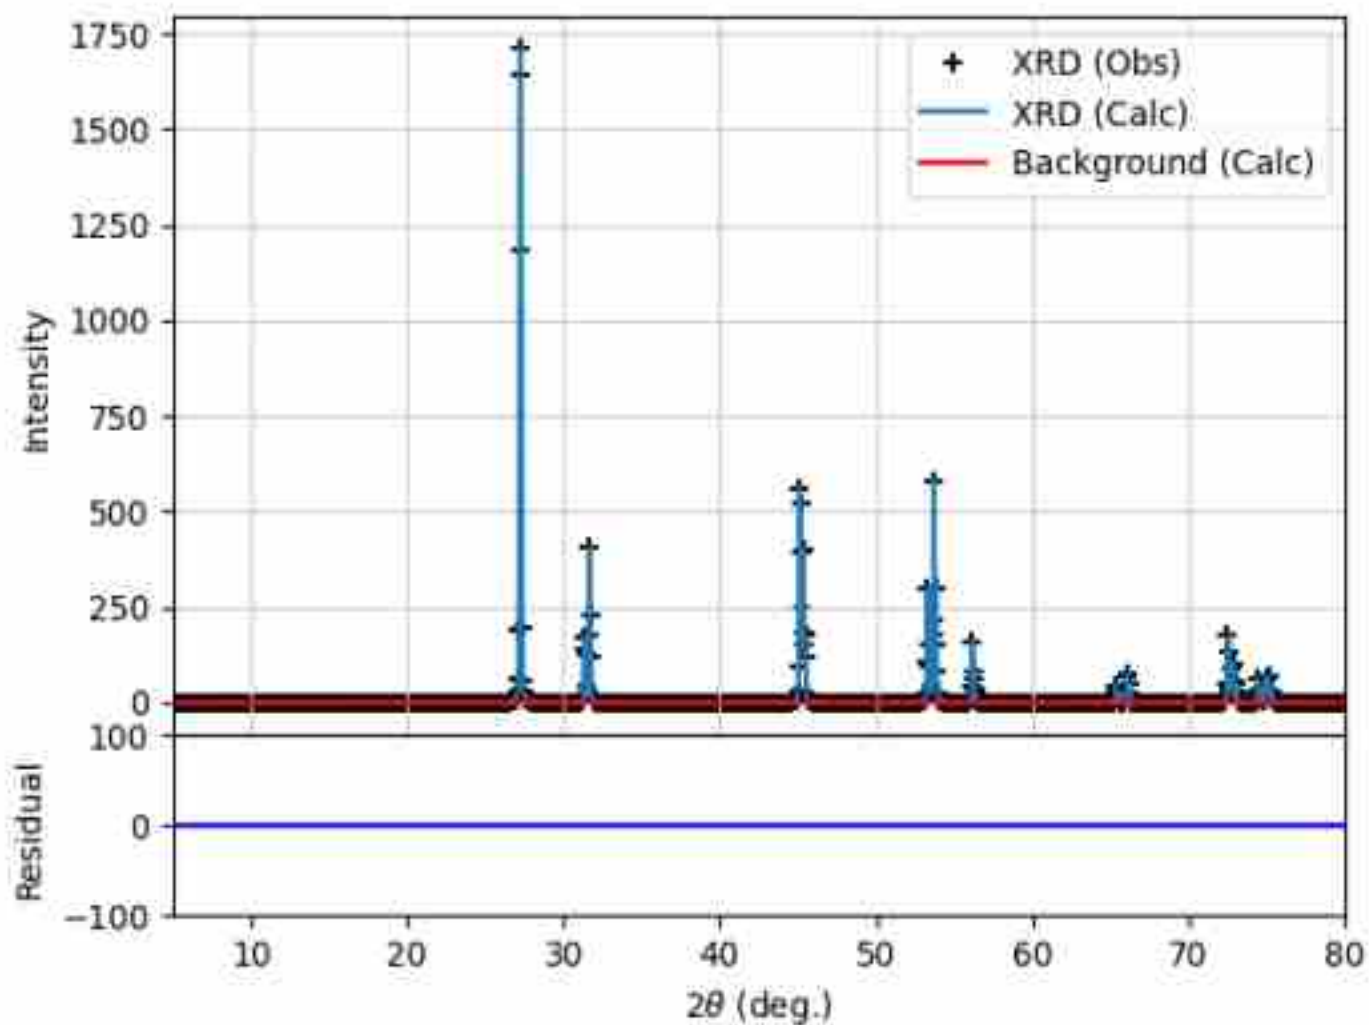

| RMSE before RR | Rwp     | RMSE after RR |
|----------------|---------|---------------|
| 0.02           | 0.00321 | 0.00145       |

# Ce1Sb1

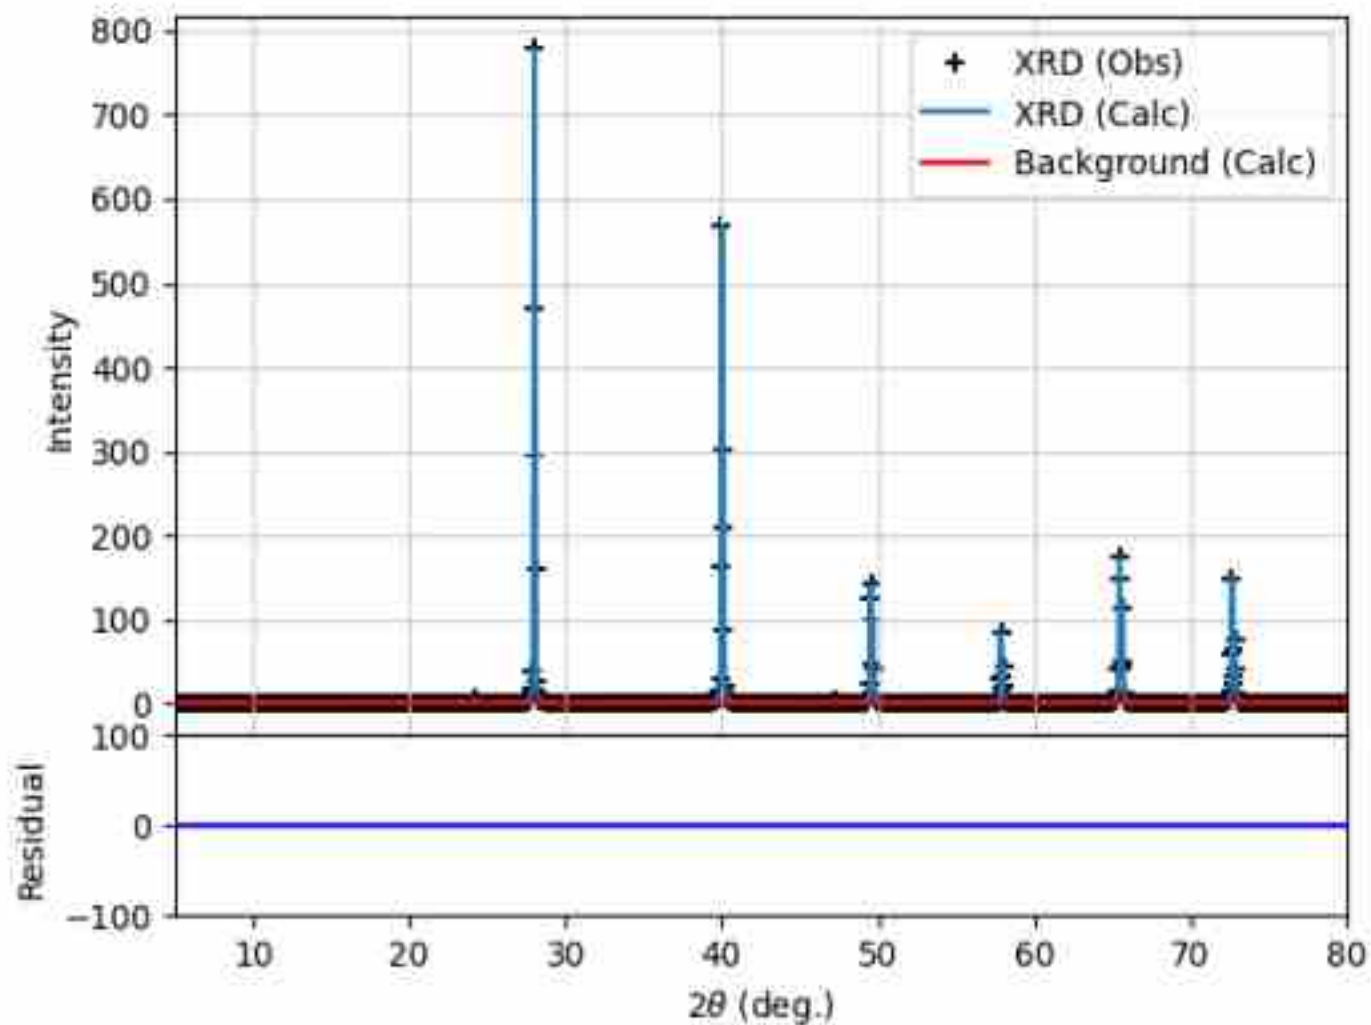

| RMSE before RR | Rwp     | RMSE after RR |
|----------------|---------|---------------|
| 0.002          | 0.09188 | 0.00162       |

# Ce1Sm3

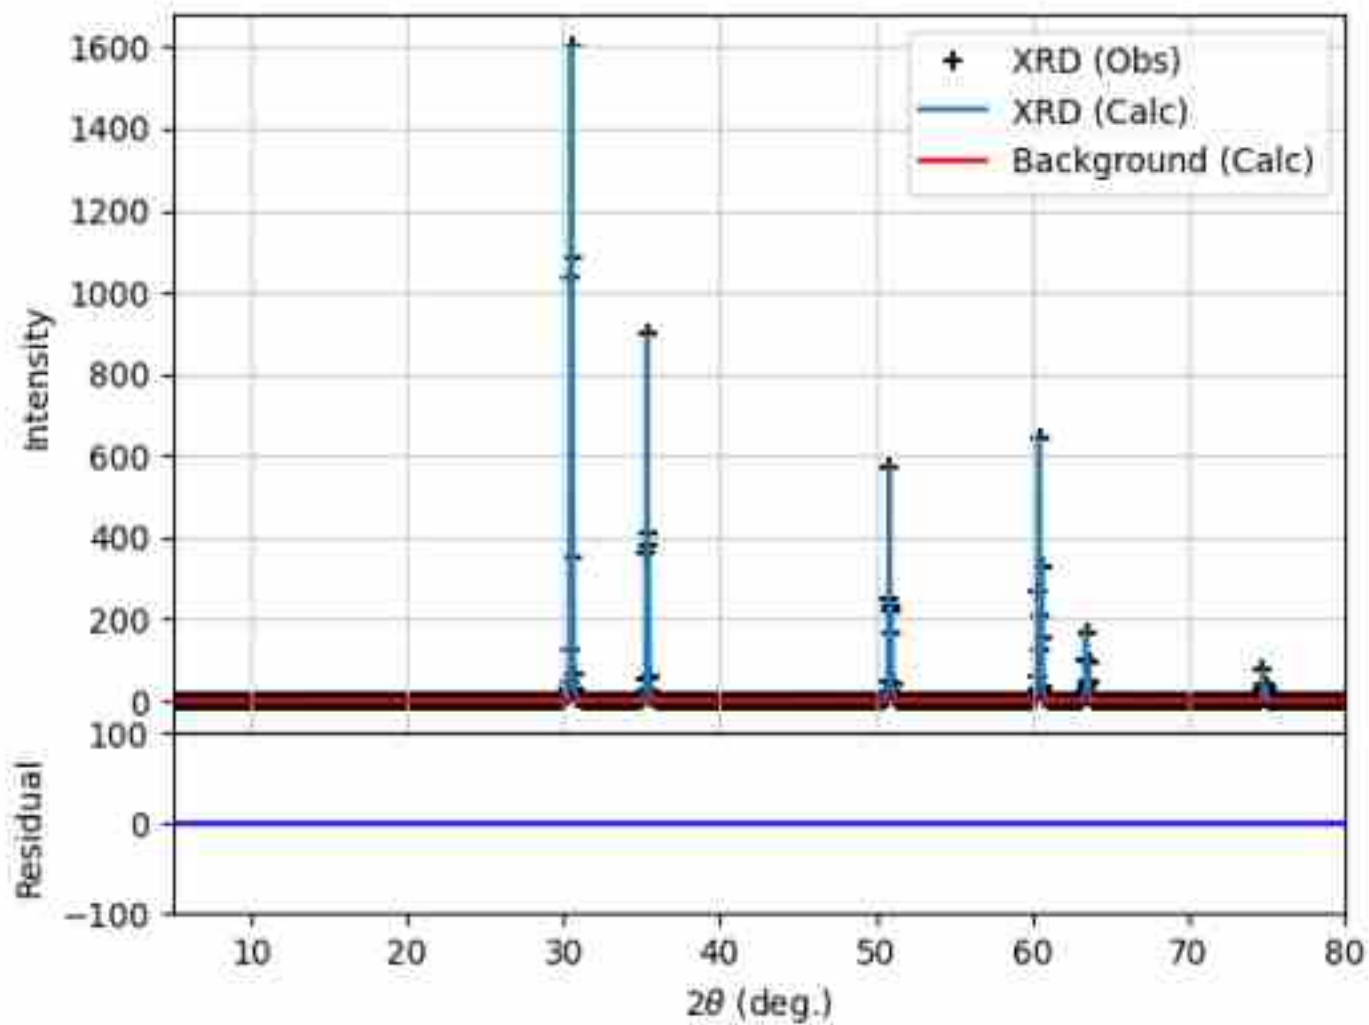

| RMSE before RR | Rwp    | RMSE after RR |
|----------------|--------|---------------|
| 0.002          | 0.0161 | 0.00093       |

# Ce1Y1In6

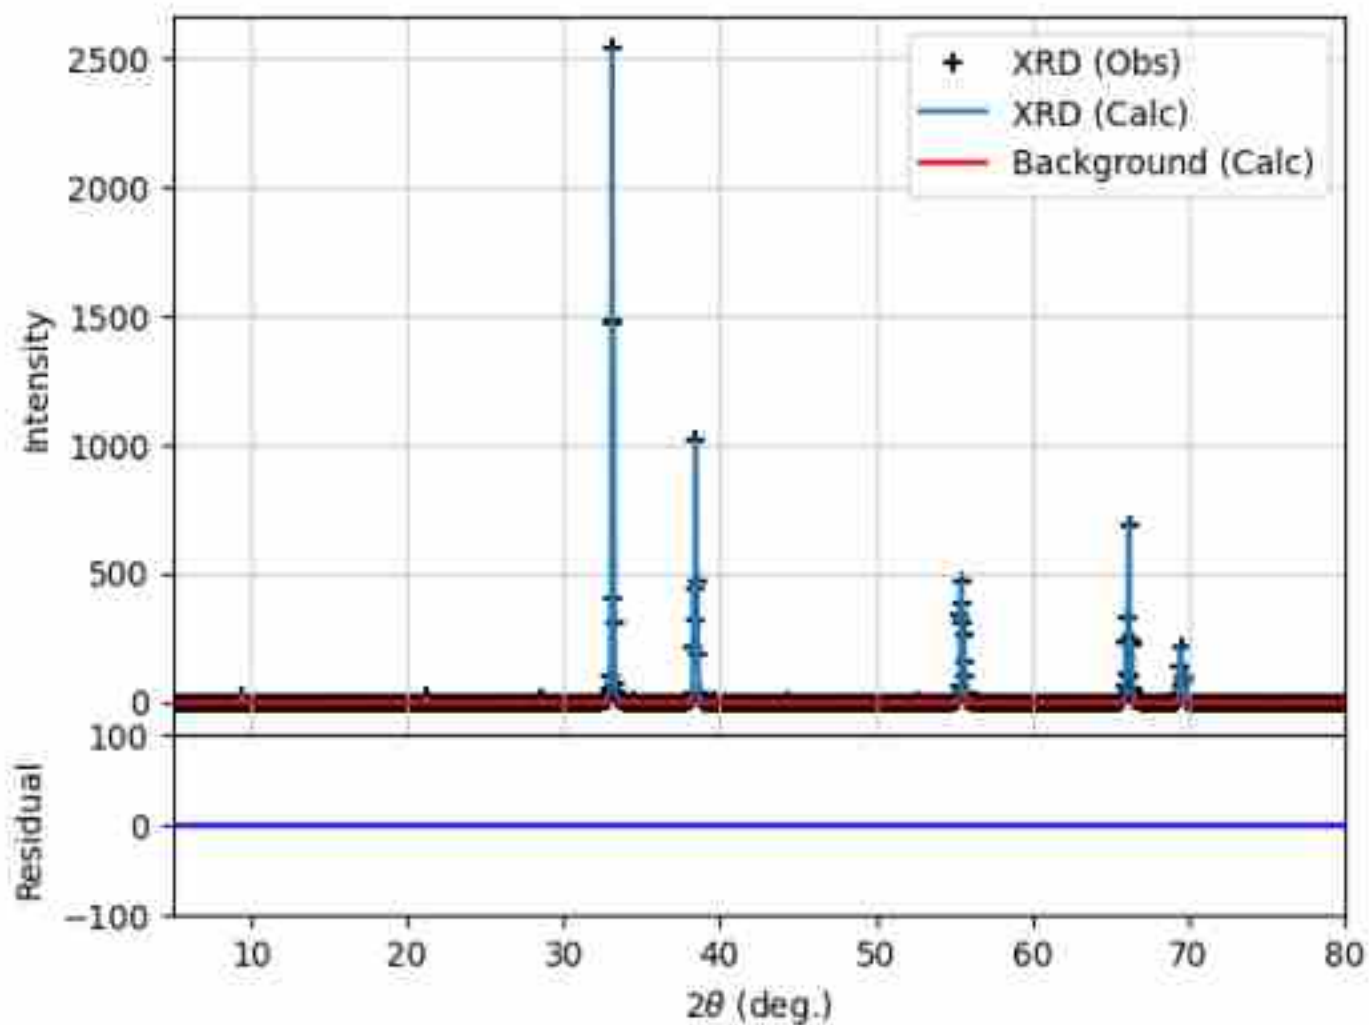

| RMSE before RR | Rwp     | RMSE after RR |
|----------------|---------|---------------|
| 0.002          | 0.00989 | 0.00064       |

# Ce1Y1Zn2

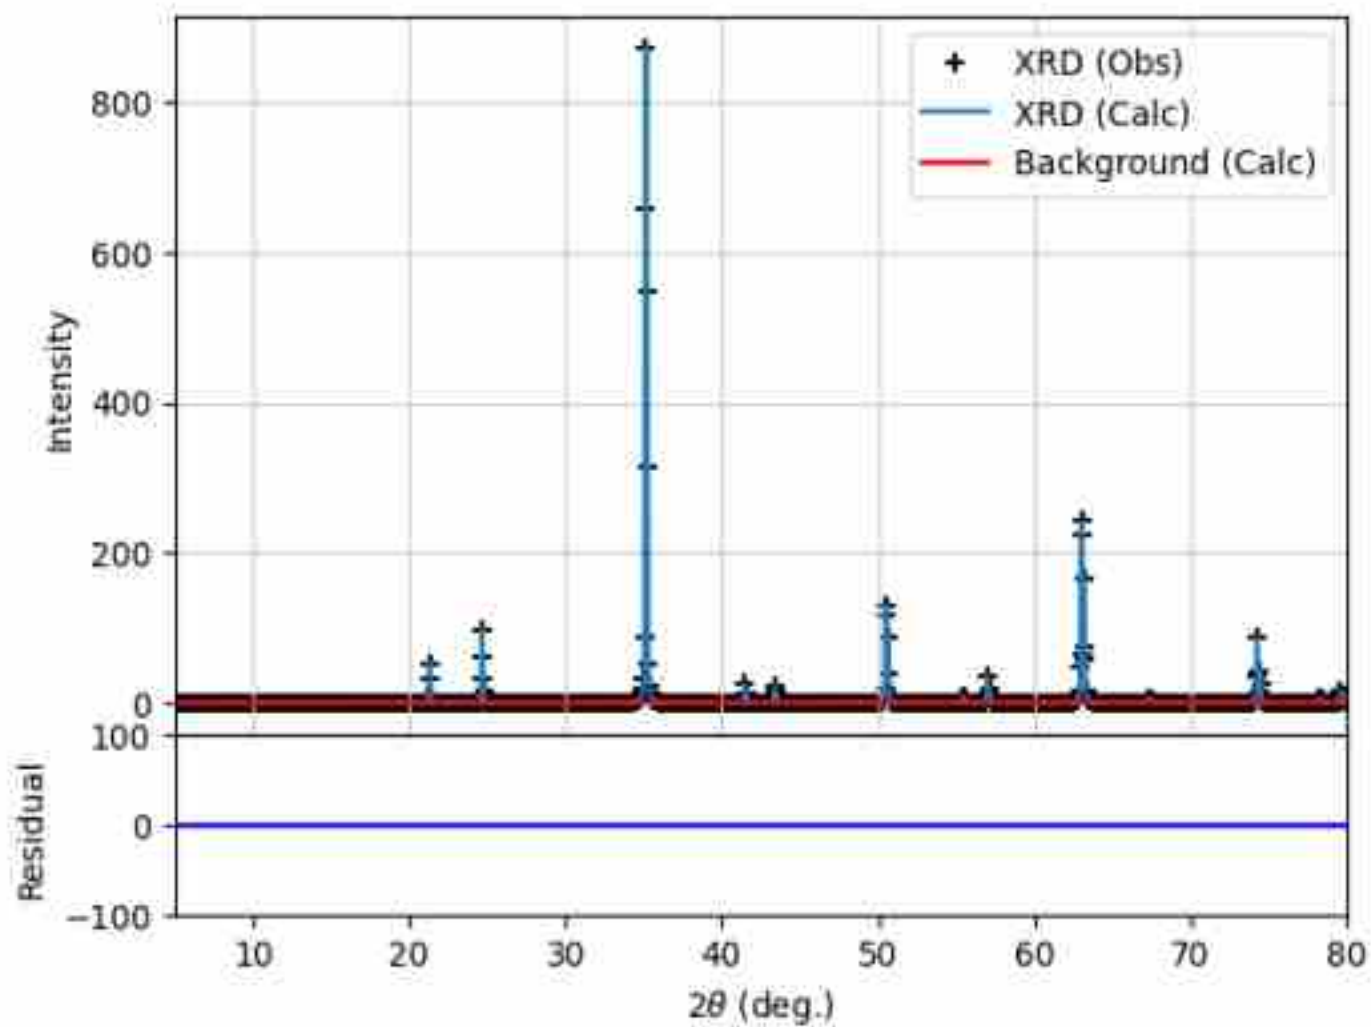

| RMSE before RR | Rwp     | RMSE after RR |
|----------------|---------|---------------|
| 0.002          | 0.00225 | 0.00061       |

# Ce<sub>2</sub>In<sub>4</sub>Ir<sub>2</sub>

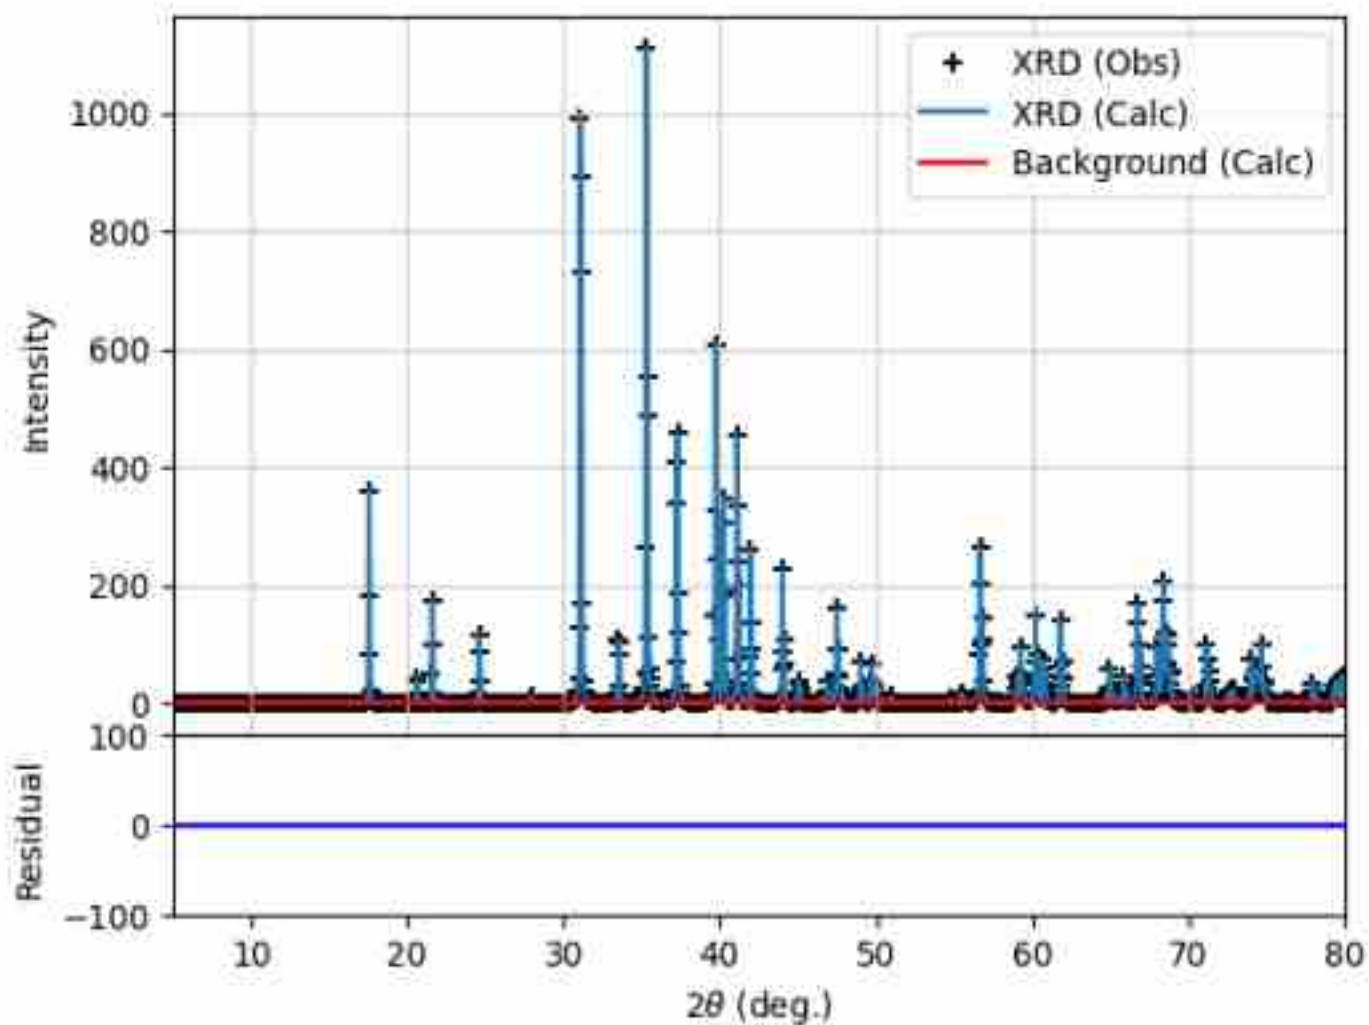

| RMSE before RR | Rwp     | RMSE after RR |
|----------------|---------|---------------|
| 0.02           | 0.00366 | 0.00027       |



# Ce<sub>2</sub>Mg<sub>6</sub>

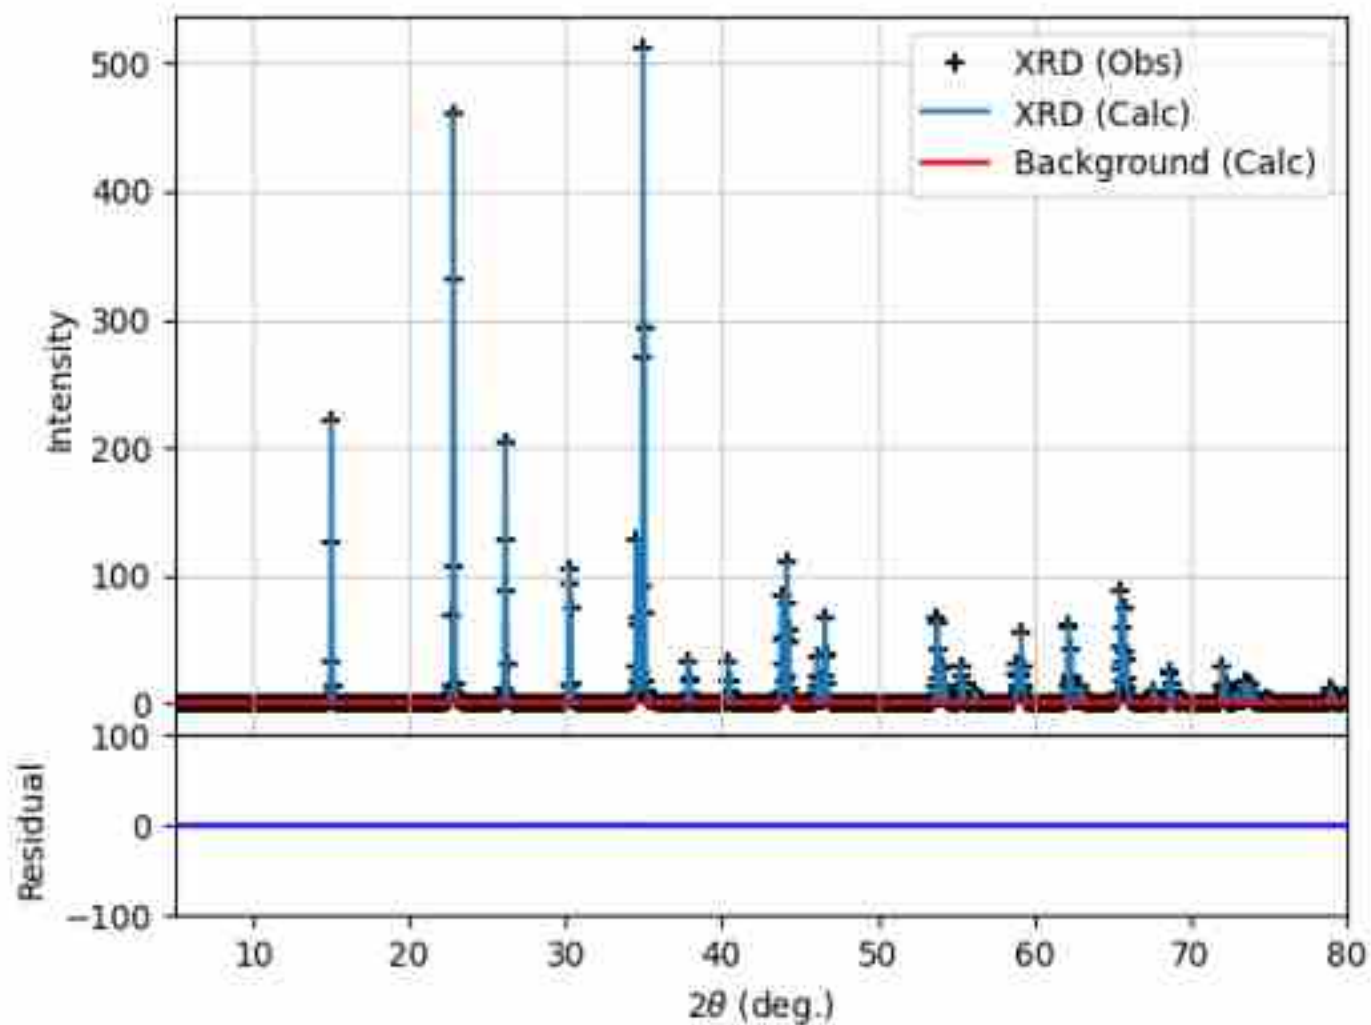

| RMSE before RR | Rwp    | RMSE after RR |
|----------------|--------|---------------|
| 0.02           | 0.1081 | 0.00755       |

# Ce<sub>2</sub>Pr<sub>2</sub>O<sub>4</sub>

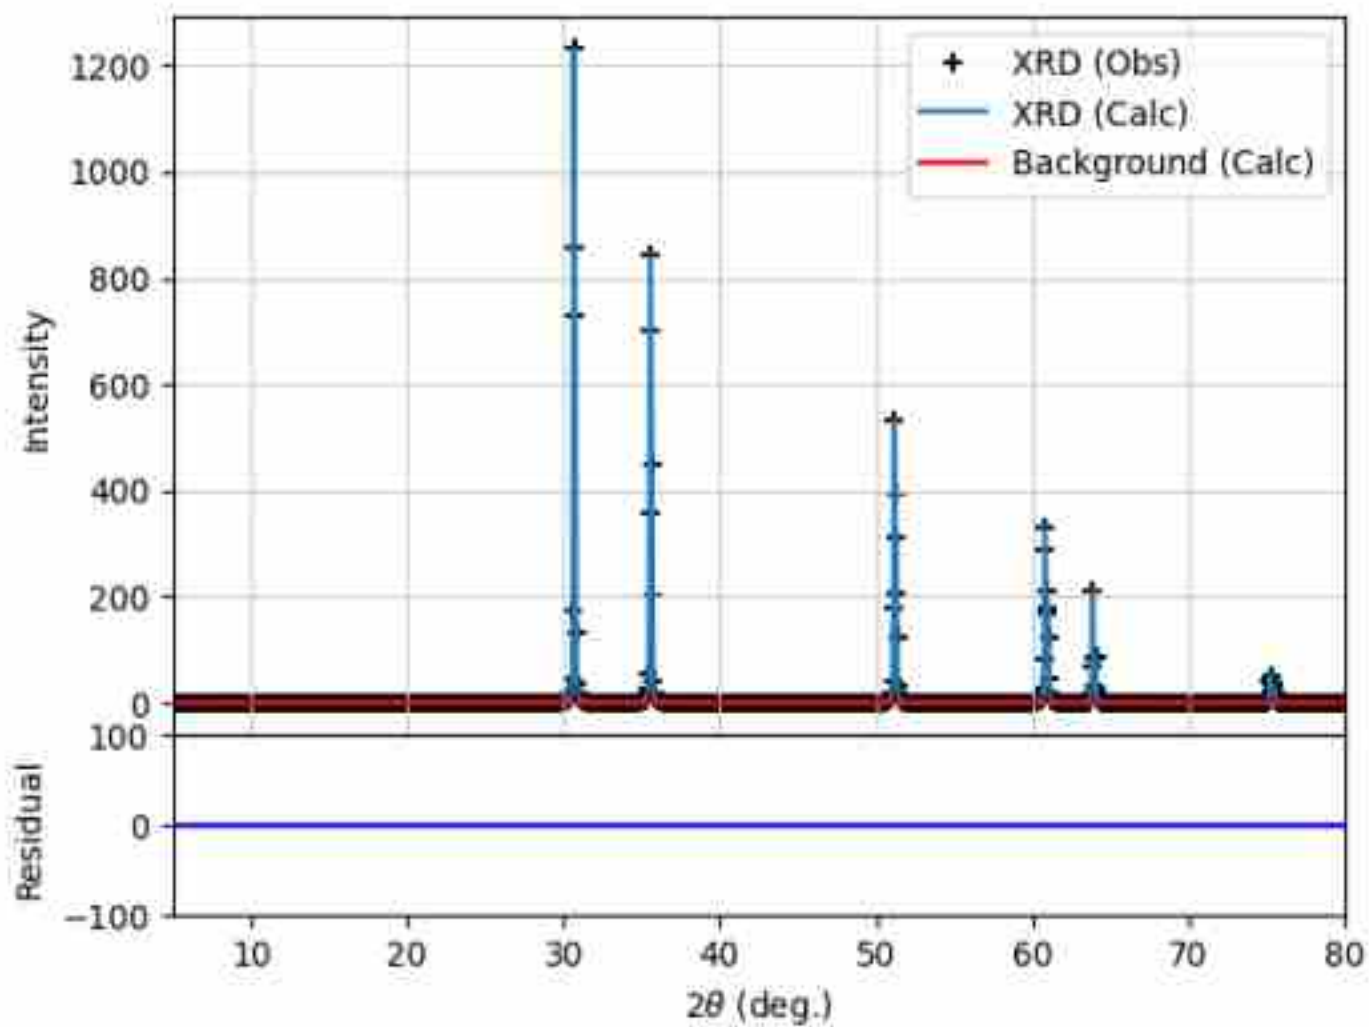

| RMSE before RR | Rwp     | RMSE after RR |
|----------------|---------|---------------|
| 0.02           | 0.00366 | 0.00125       |

# Ce<sub>2</sub>Zn<sub>4</sub>

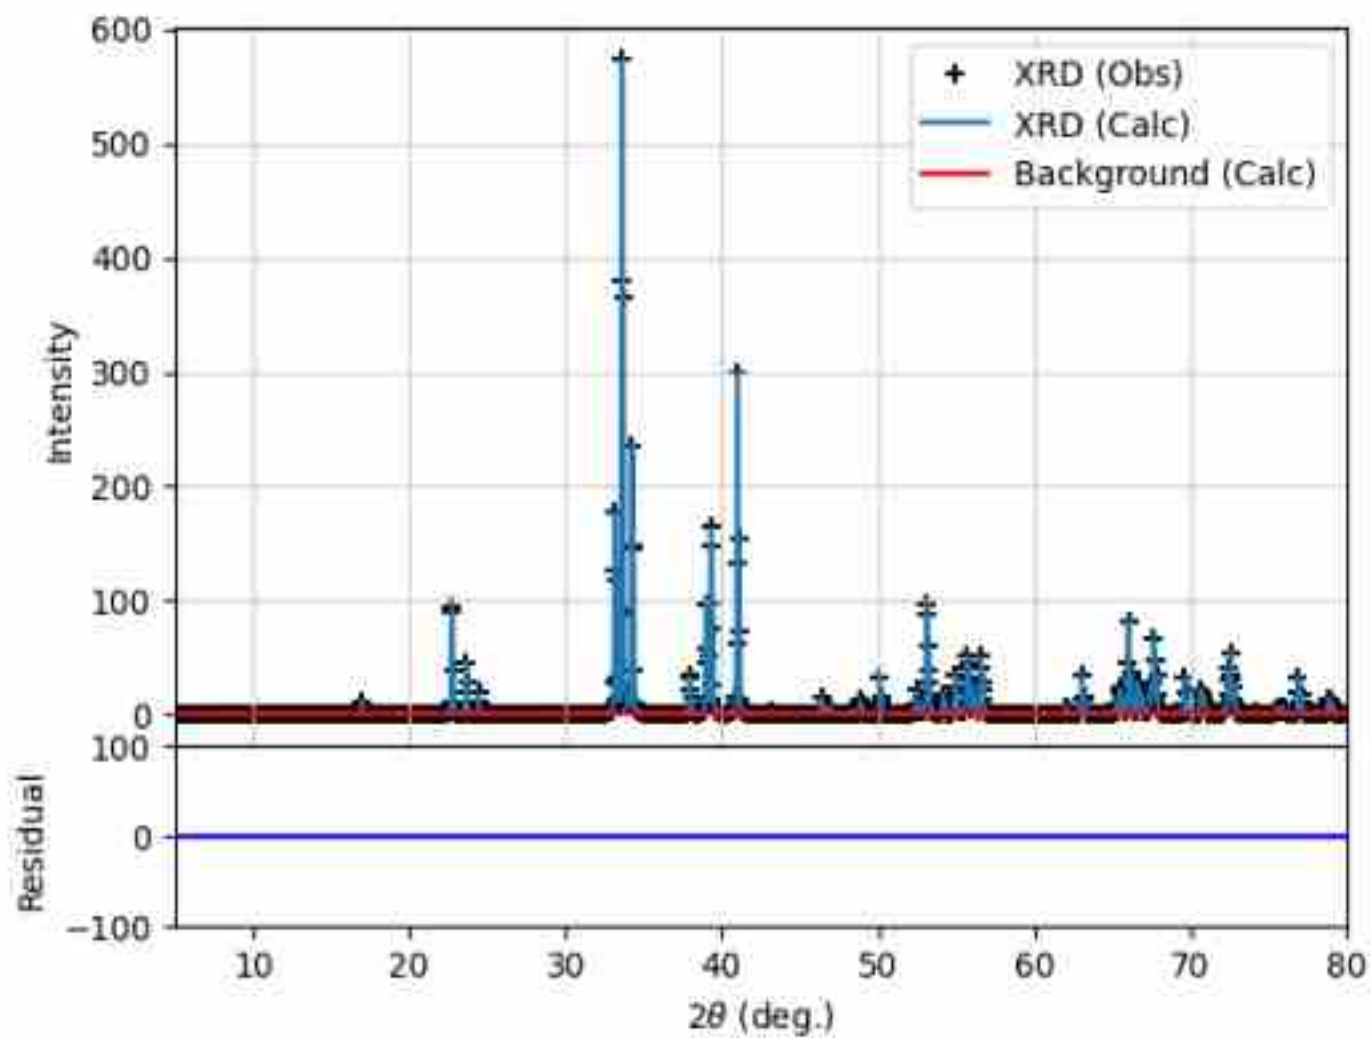

| RMSE before RR | Rwp    | RMSE after RR |
|----------------|--------|---------------|
| 0.02           | 0.0045 | 0.0007        |

# Ce3Cd1

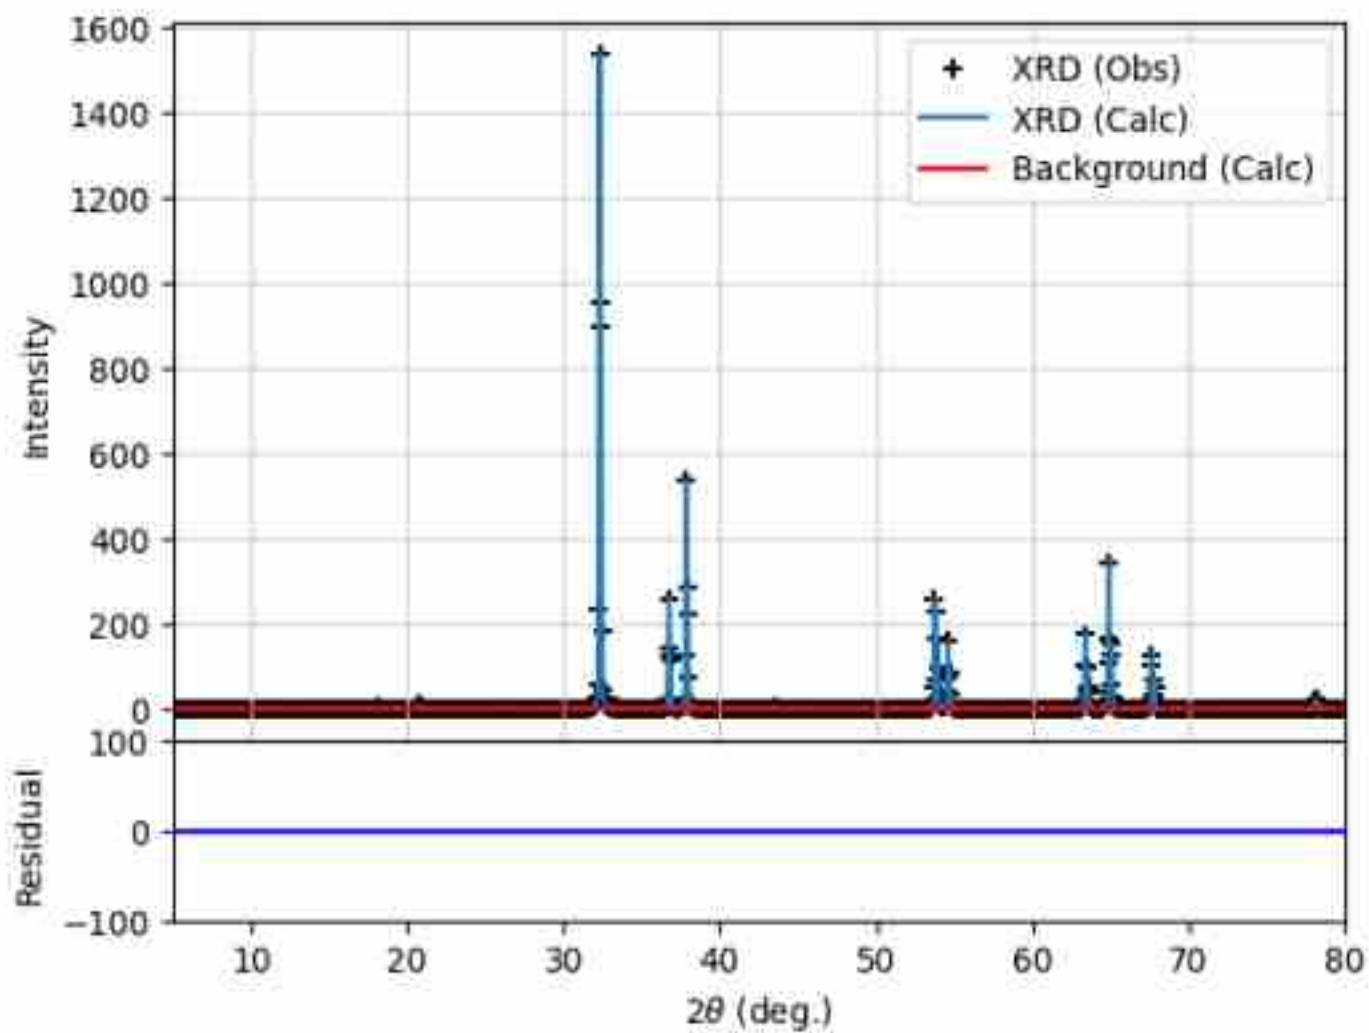

| RMSE before RR | Rwp     | RMSE after RR |
|----------------|---------|---------------|
| 0.002          | 0.00429 | 0.00028       |

# Ce<sub>3</sub>Cd<sub>3</sub>Au<sub>3</sub>

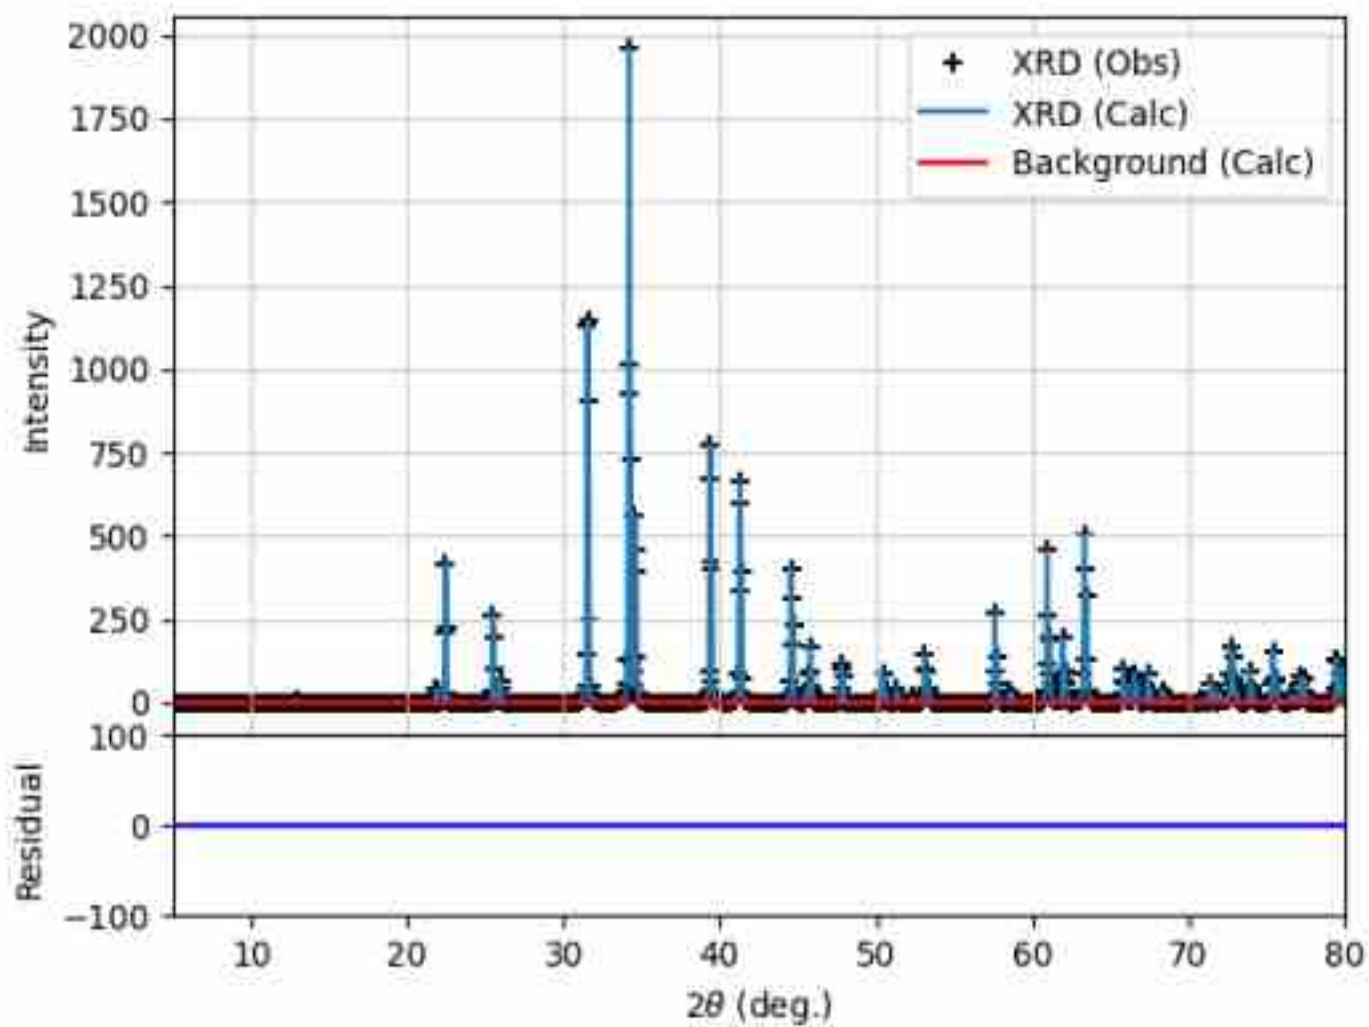

| RMSE before RR | Rwp     | RMSE after RR |
|----------------|---------|---------------|
| 0.02           | 0.00298 | 0.00069       |

# Ce<sub>3</sub>Cu<sub>4</sub>Sn<sub>4</sub>

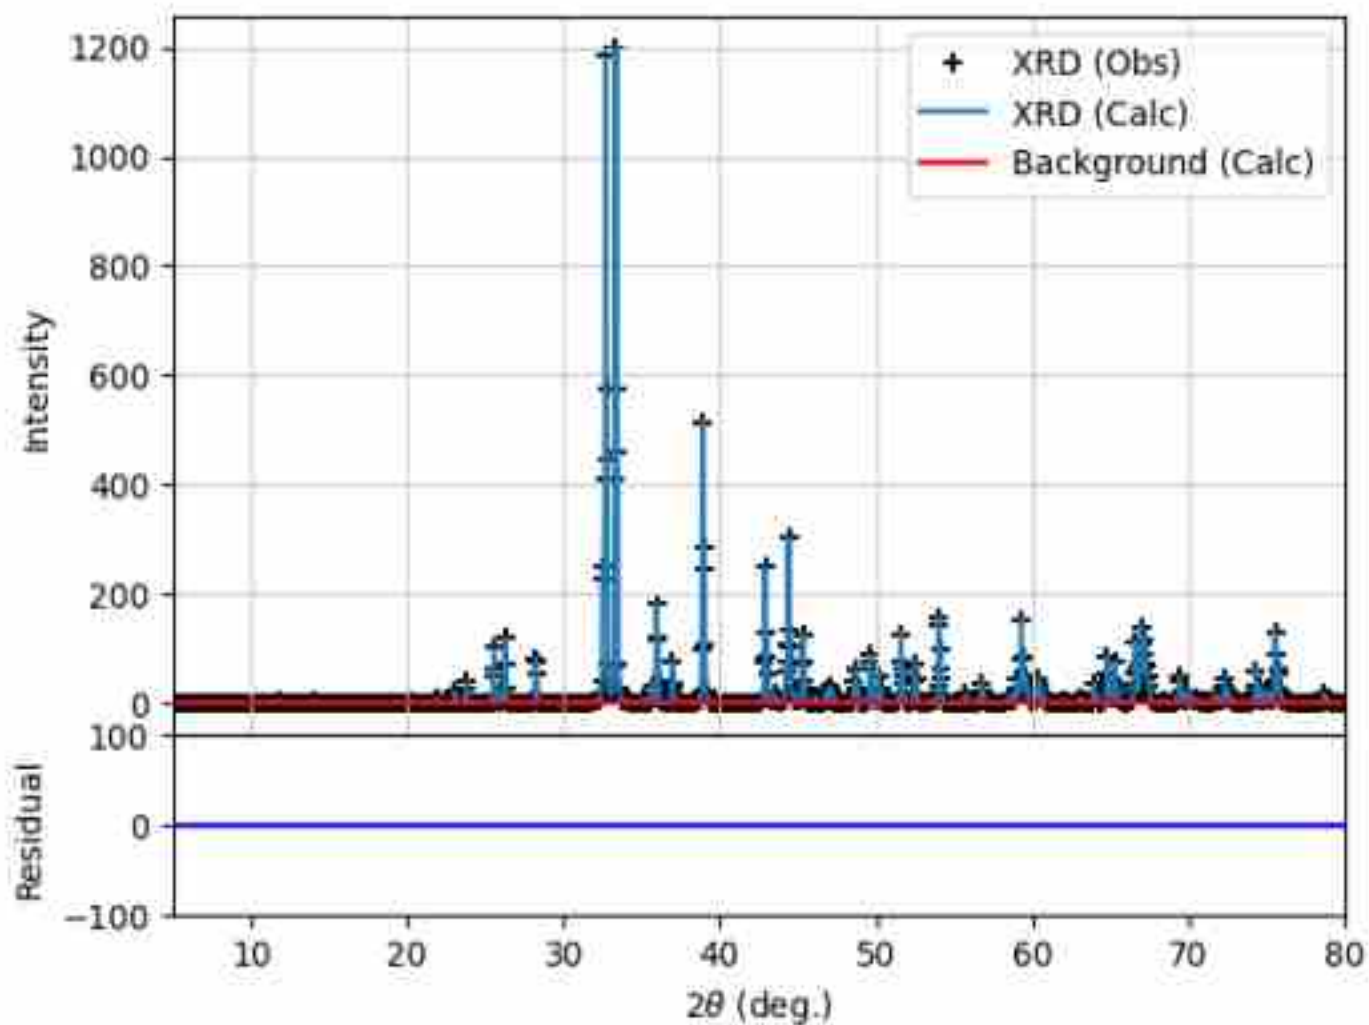

| RMSE before RR | Rwp     | RMSE after RR |
|----------------|---------|---------------|
| 0.02           | 0.00381 | 0.00061       |

Ce<sub>3</sub>Ga<sub>6</sub>Ni<sub>9</sub>

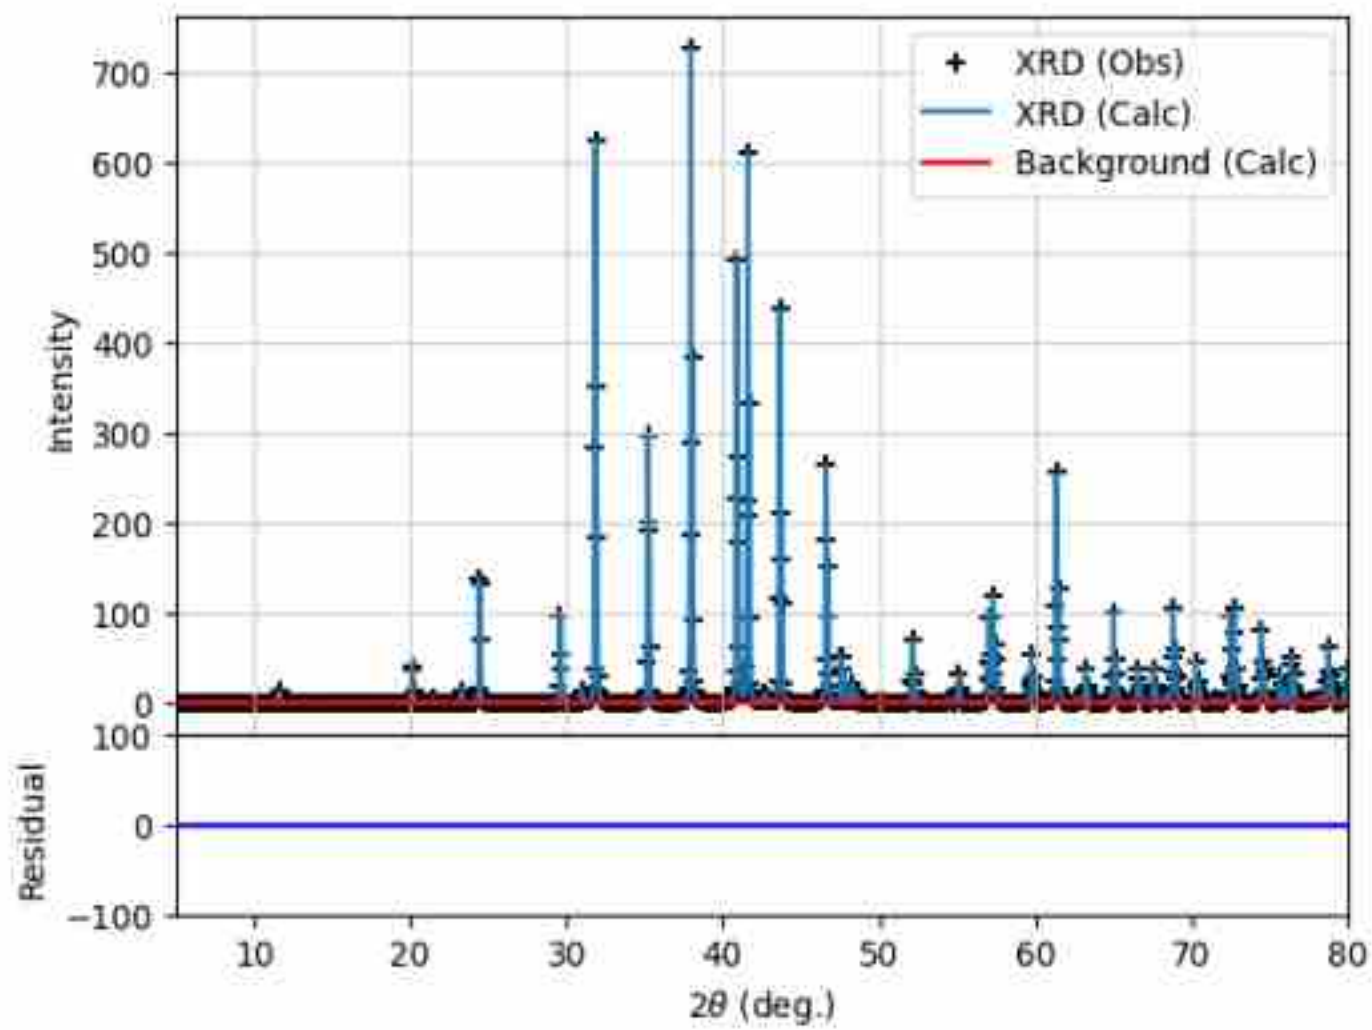

| RMSE before RR | Rwp     | RMSE after RR |
|----------------|---------|---------------|
| 0.02           | 0.00384 | 0.00107       |

# Ce4Ge4Ir4

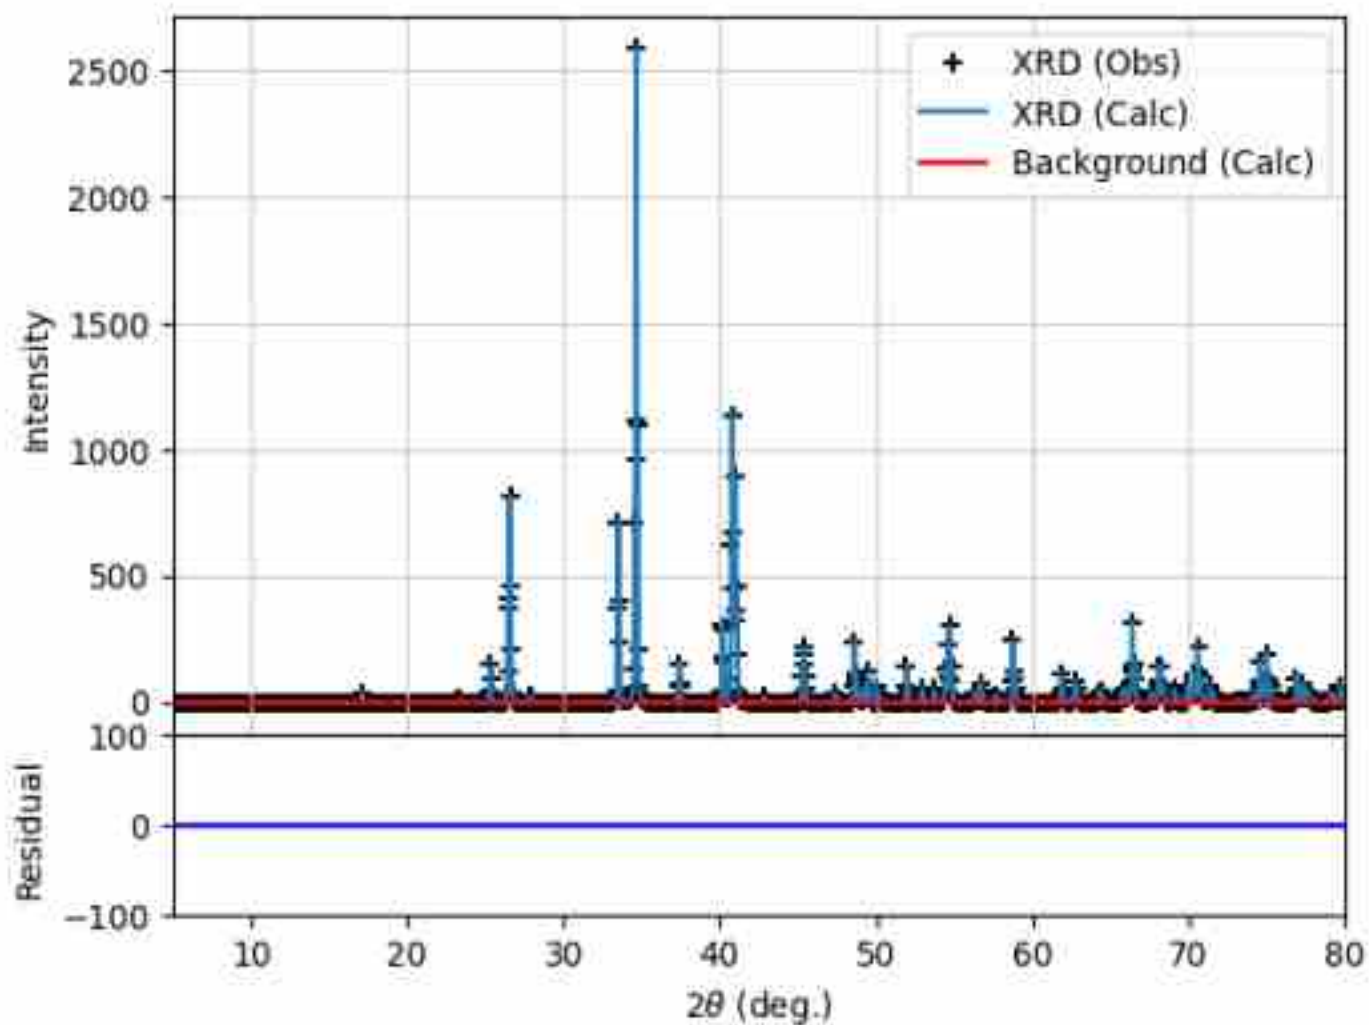

| RMSE before RR | Rwp     | RMSE after RR |
|----------------|---------|---------------|
| 0.02           | 0.00454 | 0.00054       |



# Ce8Sb6

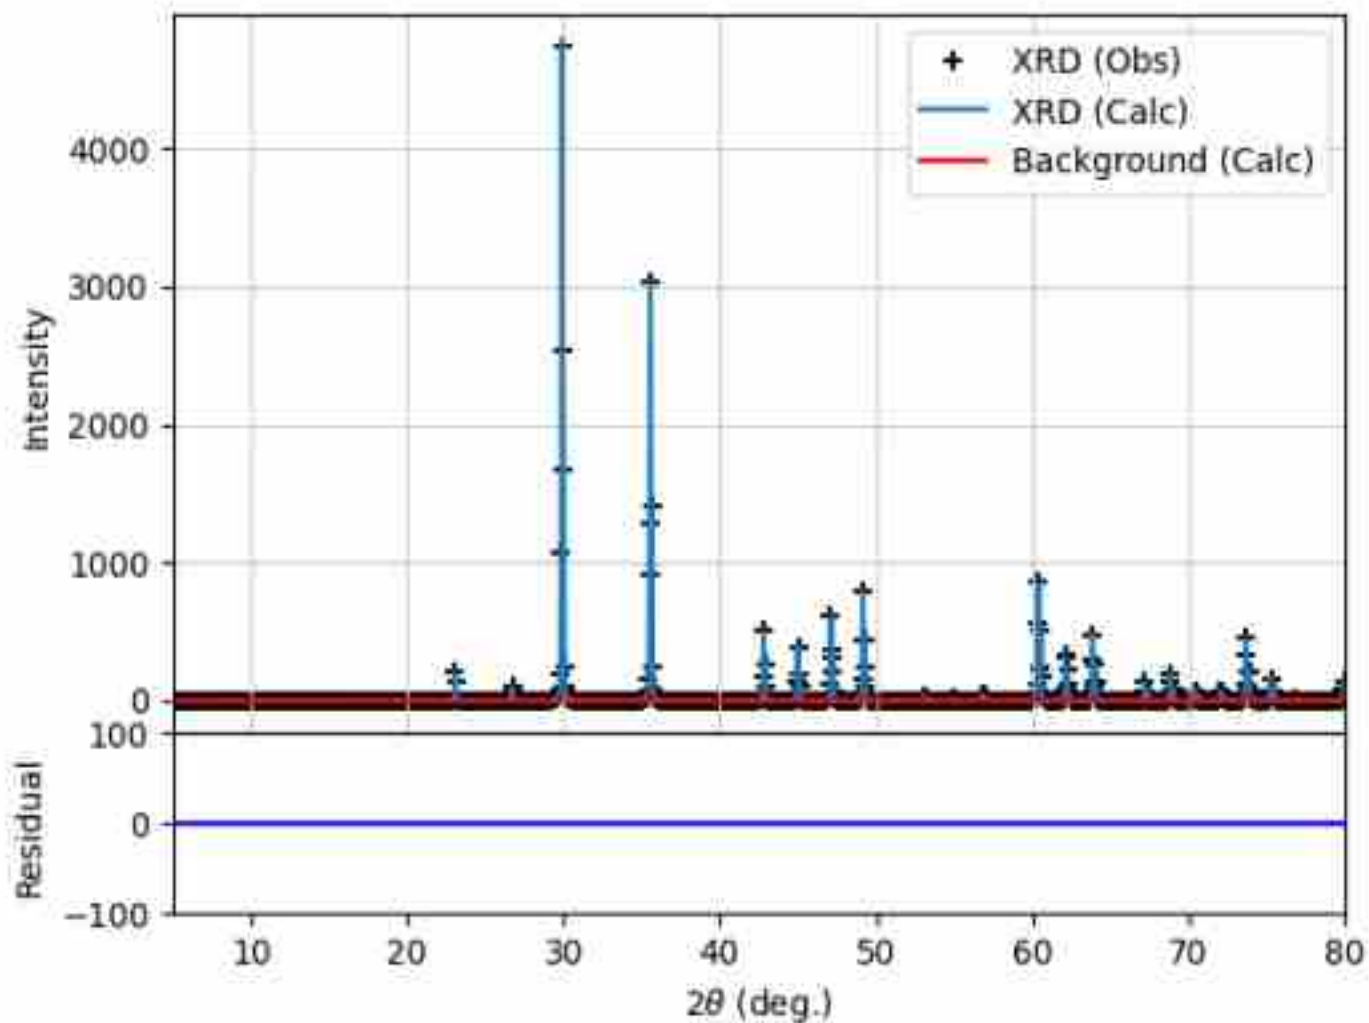

| RMSE before RR | Rwp     | RMSE after RR |
|----------------|---------|---------------|
| 0.02           | 0.02131 | 0.00111       |

# Co1Pt1

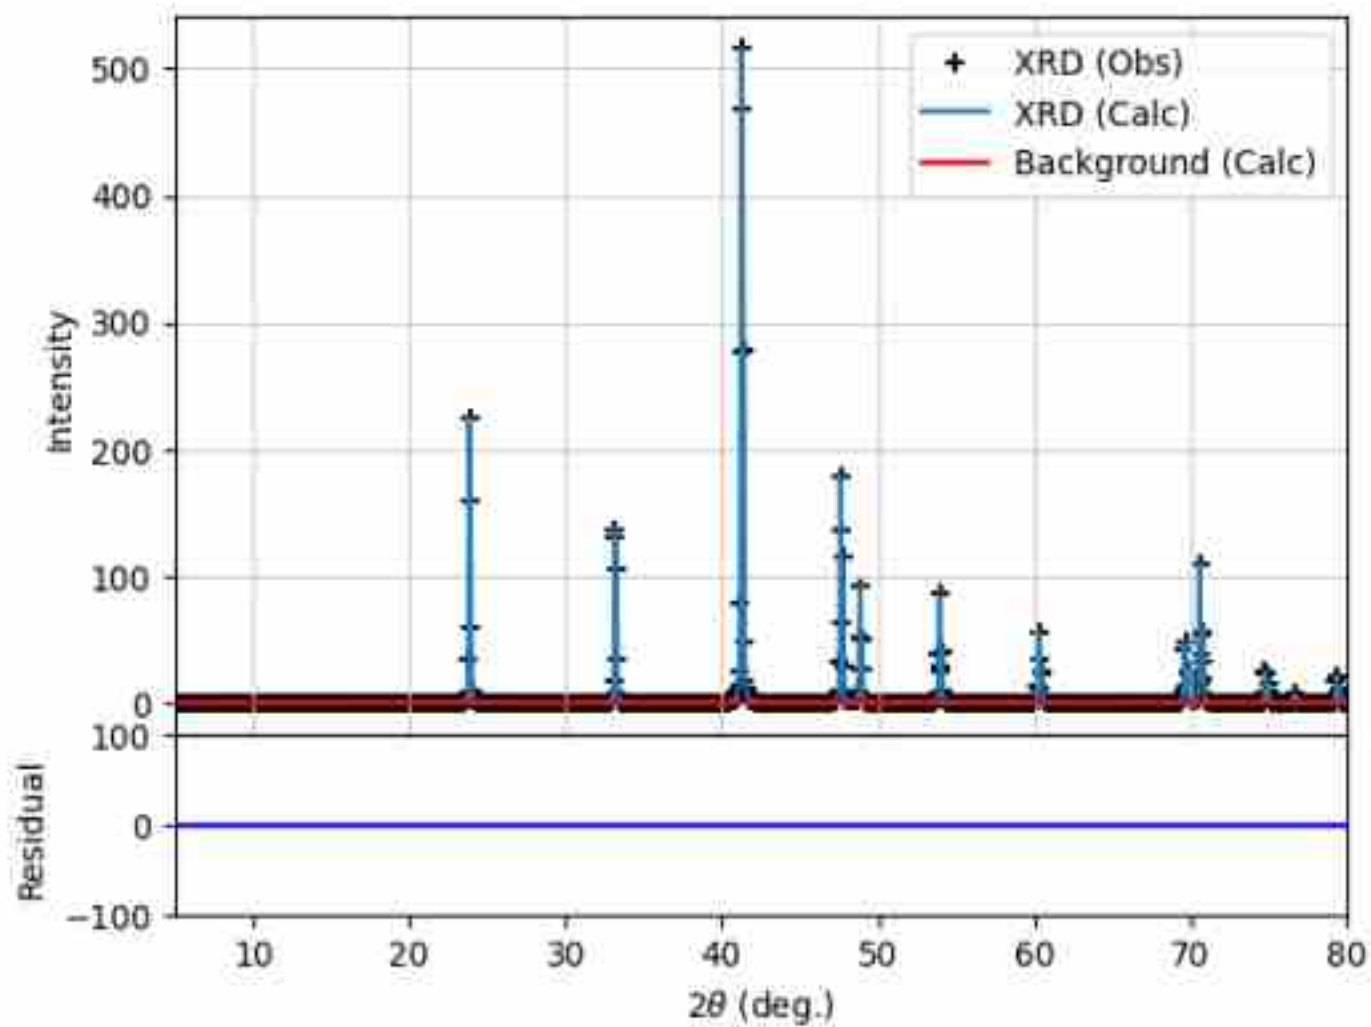

| RMSE before RR | Rwp     | RMSE after RR |
|----------------|---------|---------------|
| 0.002          | 0.05024 | 0.00156       |

# Co1Pt3

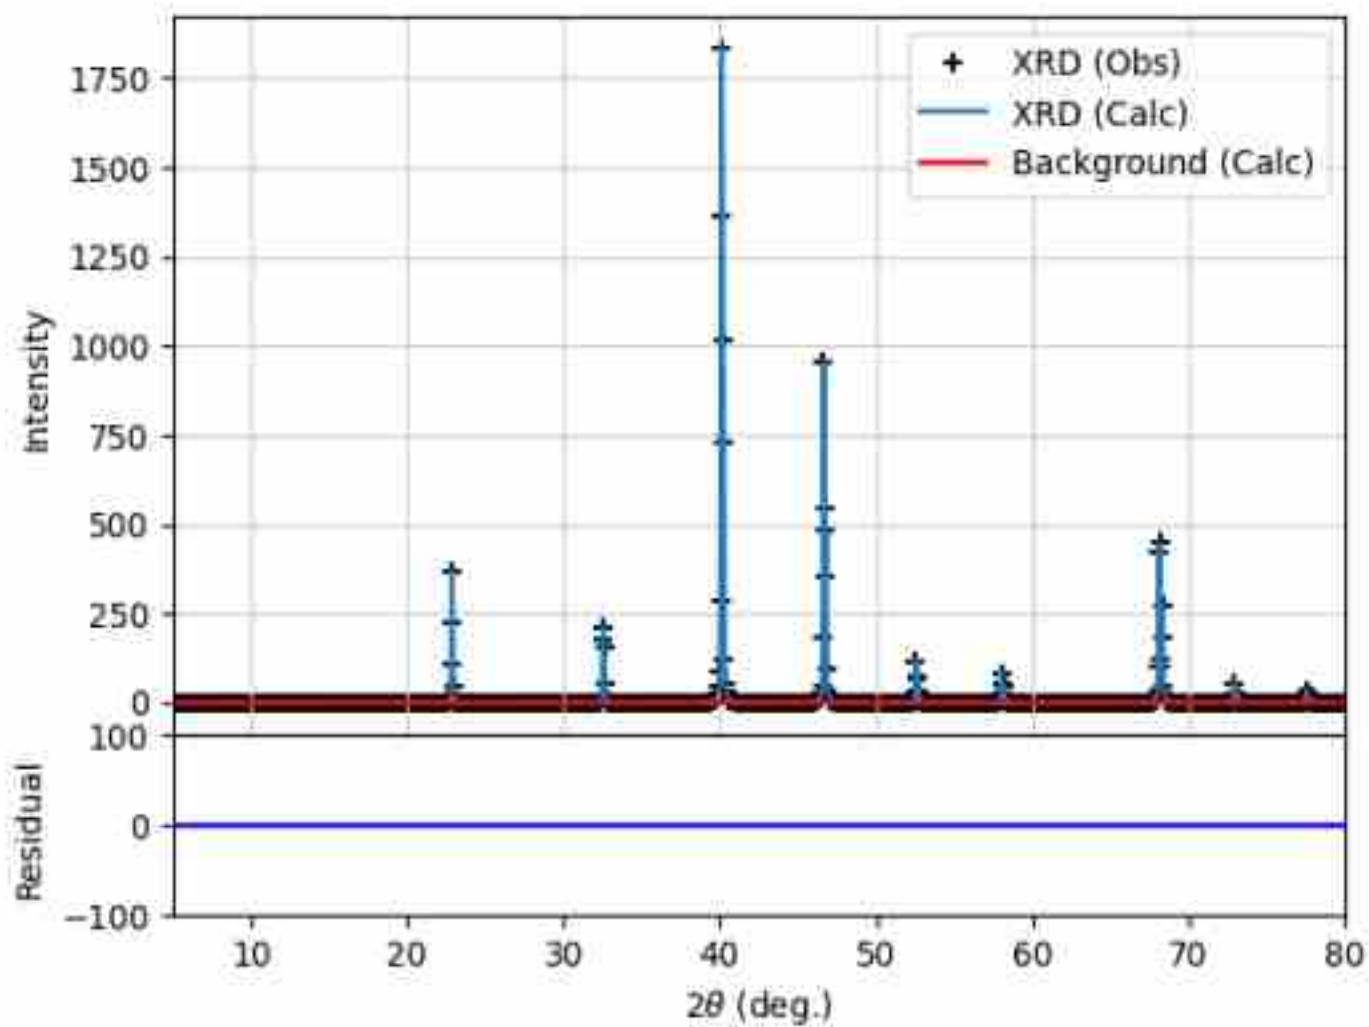

| RMSE before RR | Rwp     | RMSE after RR |
|----------------|---------|---------------|
| 0.002          | 0.00742 | 0.00084       |

# Co<sub>2</sub>Ag<sub>2</sub>O<sub>4</sub>

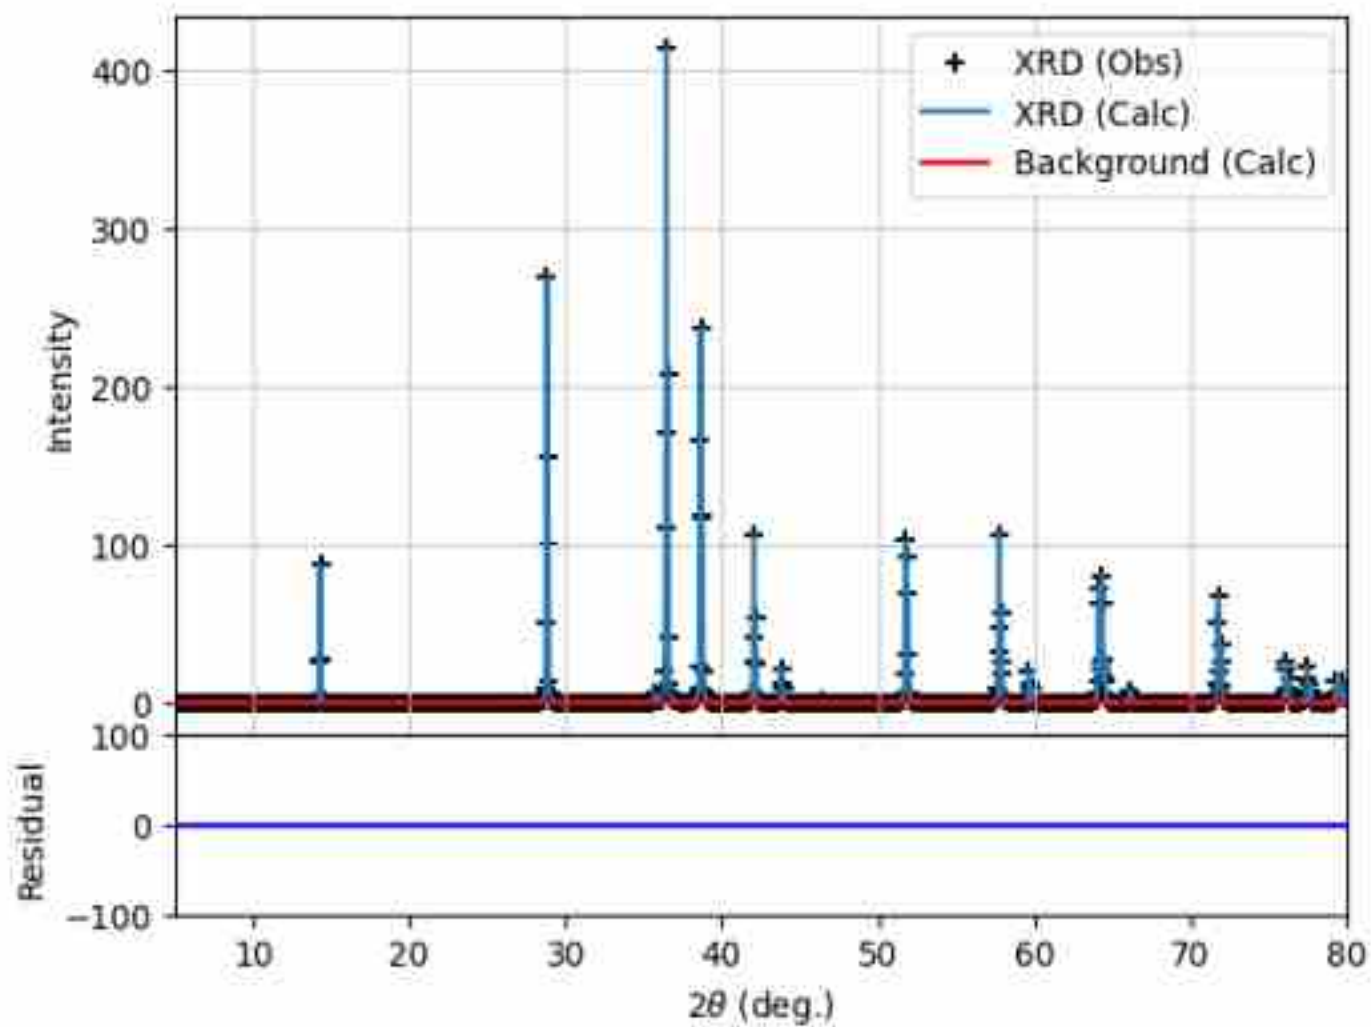

| RMSE before RR | Rwp     | RMSE after RR |
|----------------|---------|---------------|
| 0.02           | 0.01026 | 0.00473       |

# Co<sub>3</sub>Ni<sub>1</sub>

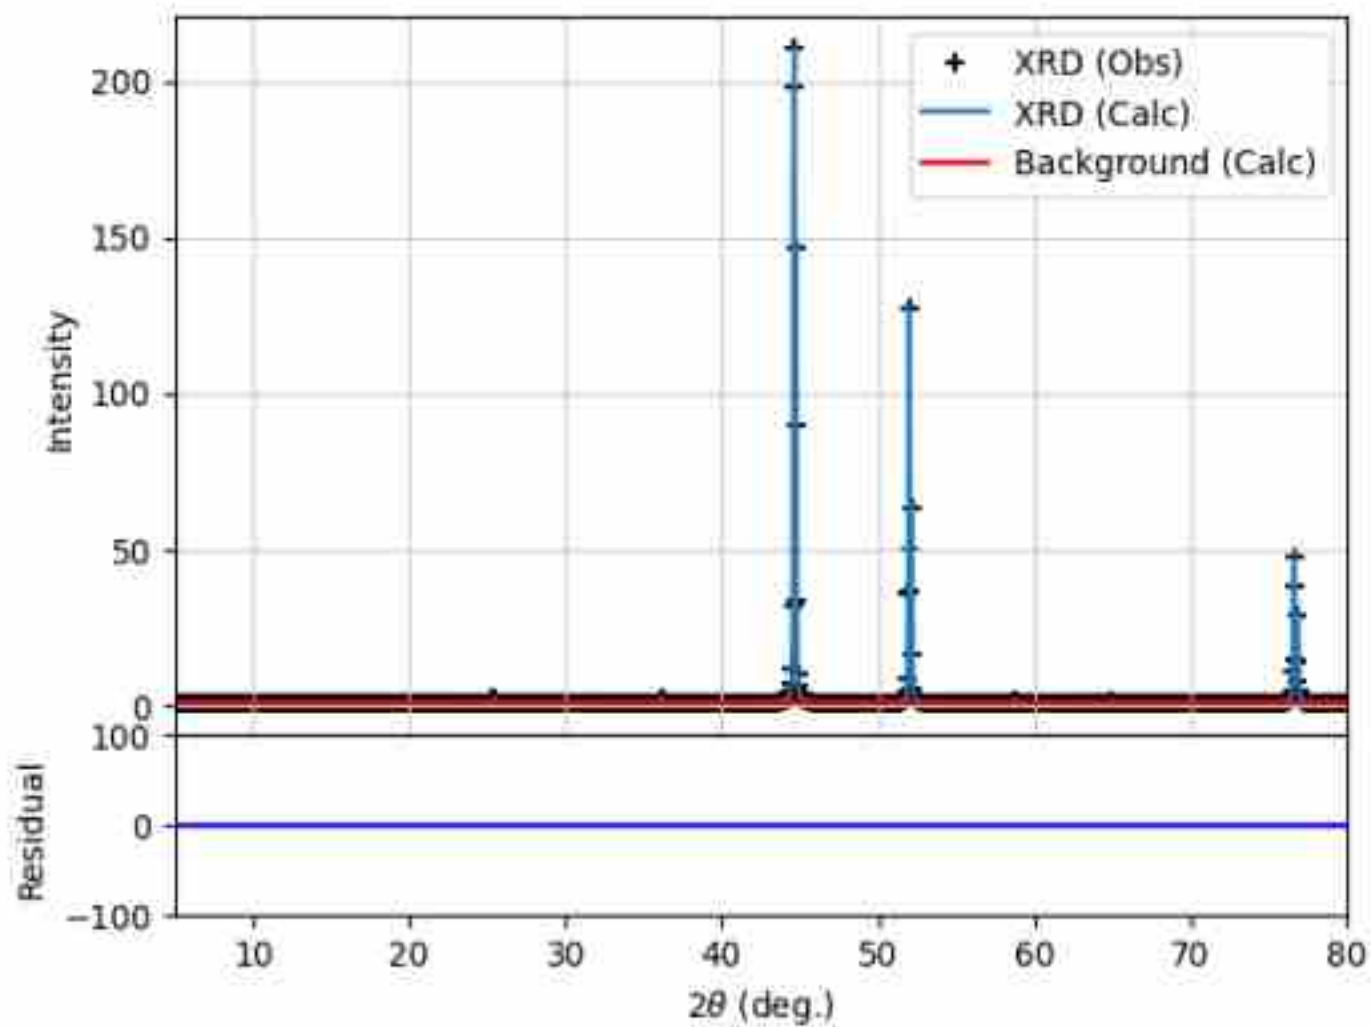

| RMSE before RR | Rwp     | RMSE after RR |
|----------------|---------|---------------|
| 0.002          | 0.04038 | 0.0013        |

# Co<sub>4</sub>Se<sub>4</sub>S<sub>4</sub>

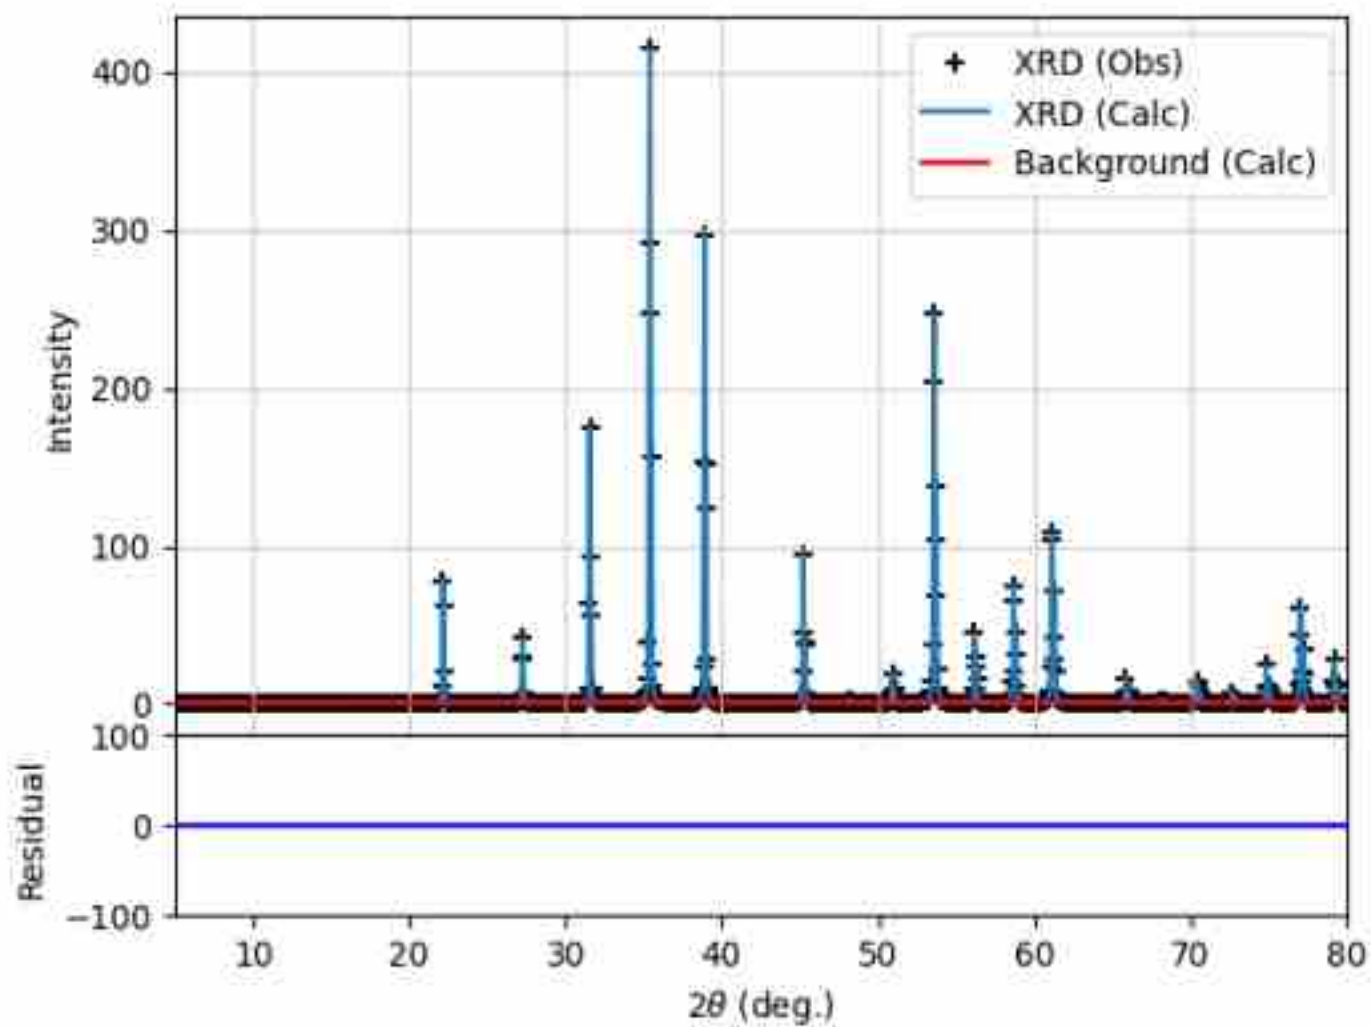

| RMSE before RR | Rwp     | RMSE after RR |
|----------------|---------|---------------|
| 0.02           | 0.00825 | 0.00058       |

# Cr1Si1Ru2

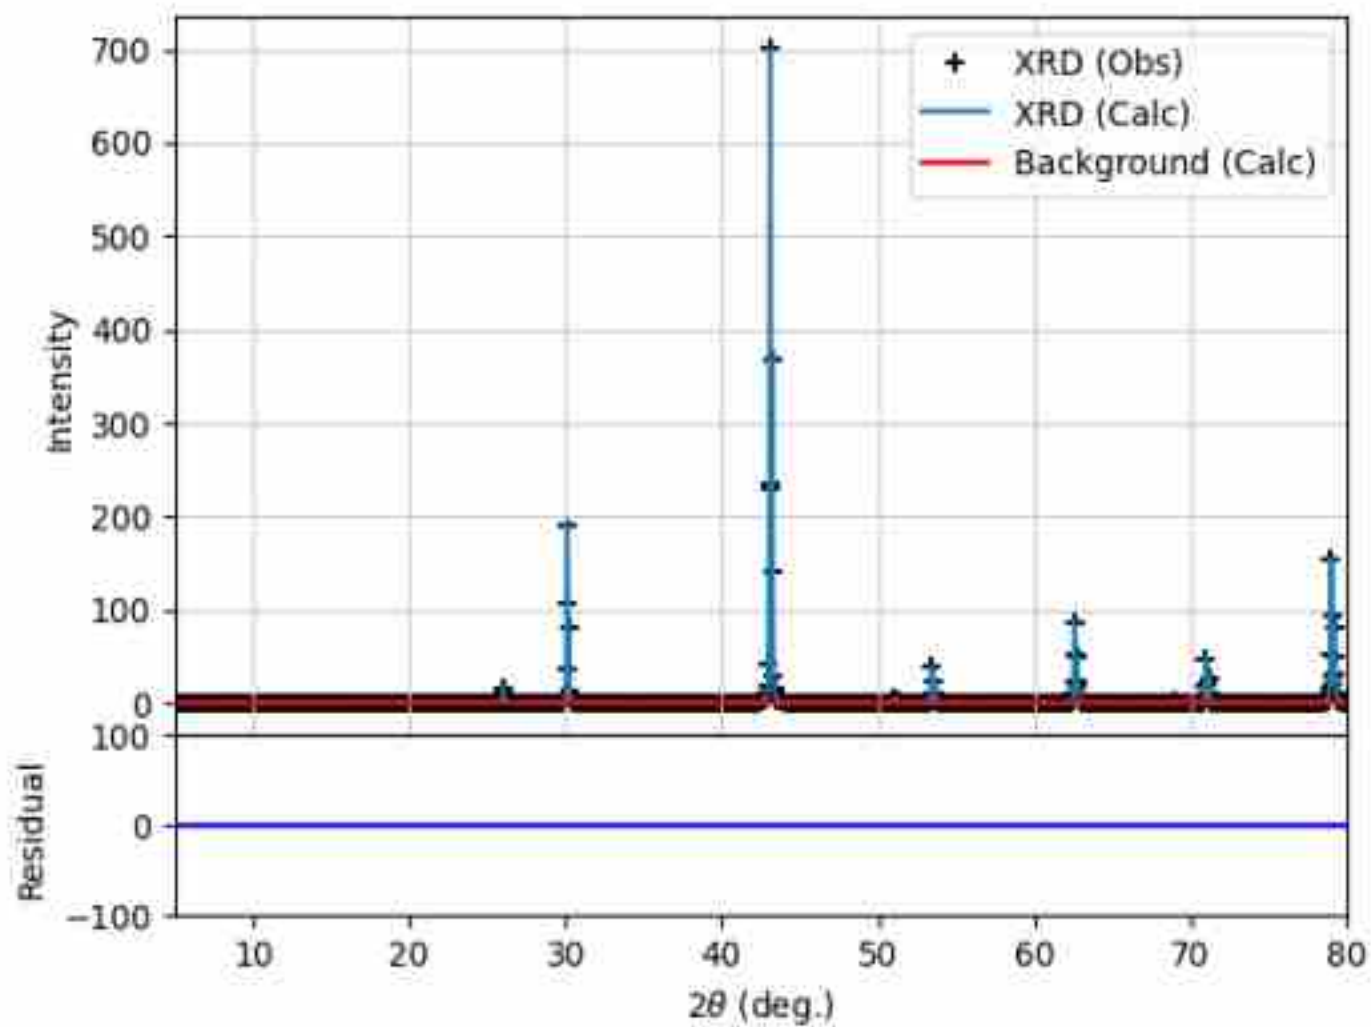

| RMSE before RR | Rwp   | RMSE after RR |
|----------------|-------|---------------|
| 0.002          | 0.001 | 0.00053       |

# Cr2Sb4

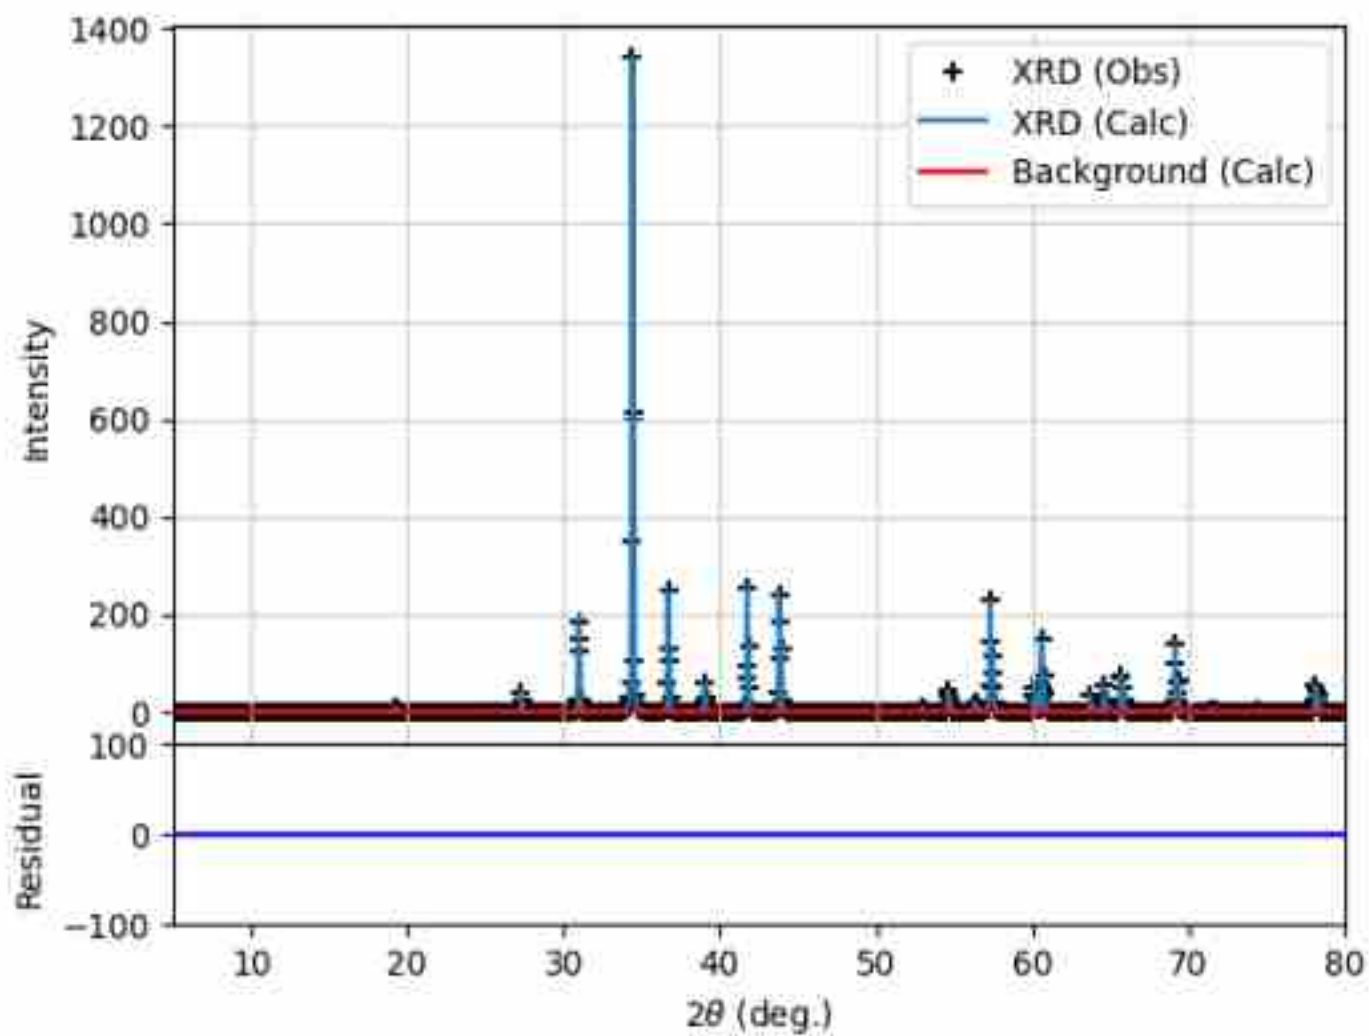

| RMSE before RR | Rwp    | RMSE after RR |
|----------------|--------|---------------|
| 0.02           | 0.0038 | 0.00025       |



Cs1Ac1Te2

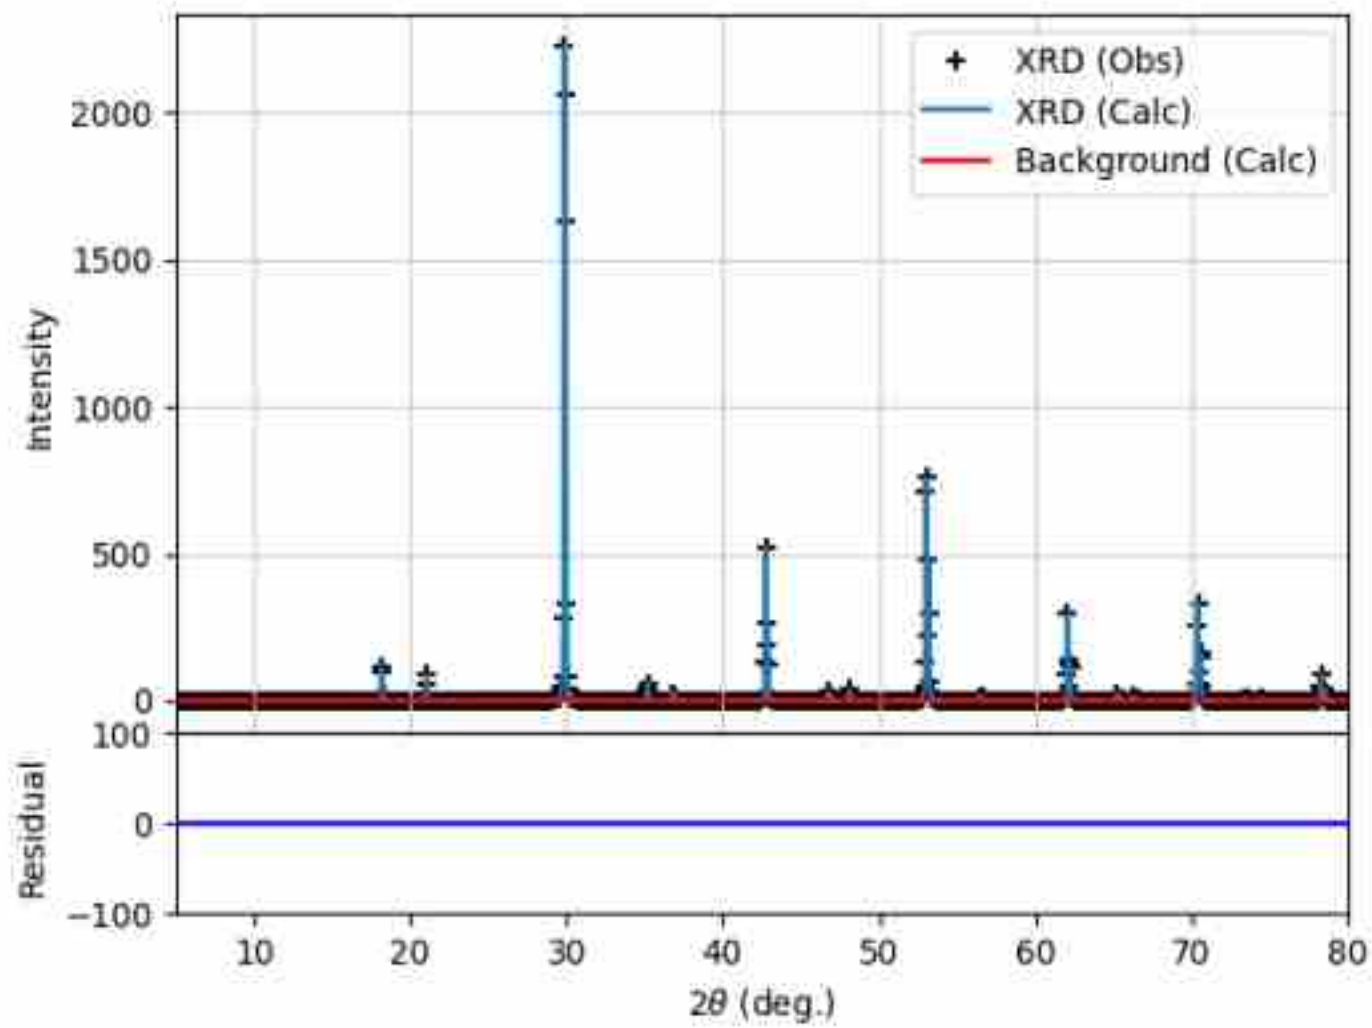

| RMSE before RR | Rwp    | RMSE after RR |
|----------------|--------|---------------|
| 0.002          | 0.0042 | 0.00038       |

# Cs1Br1

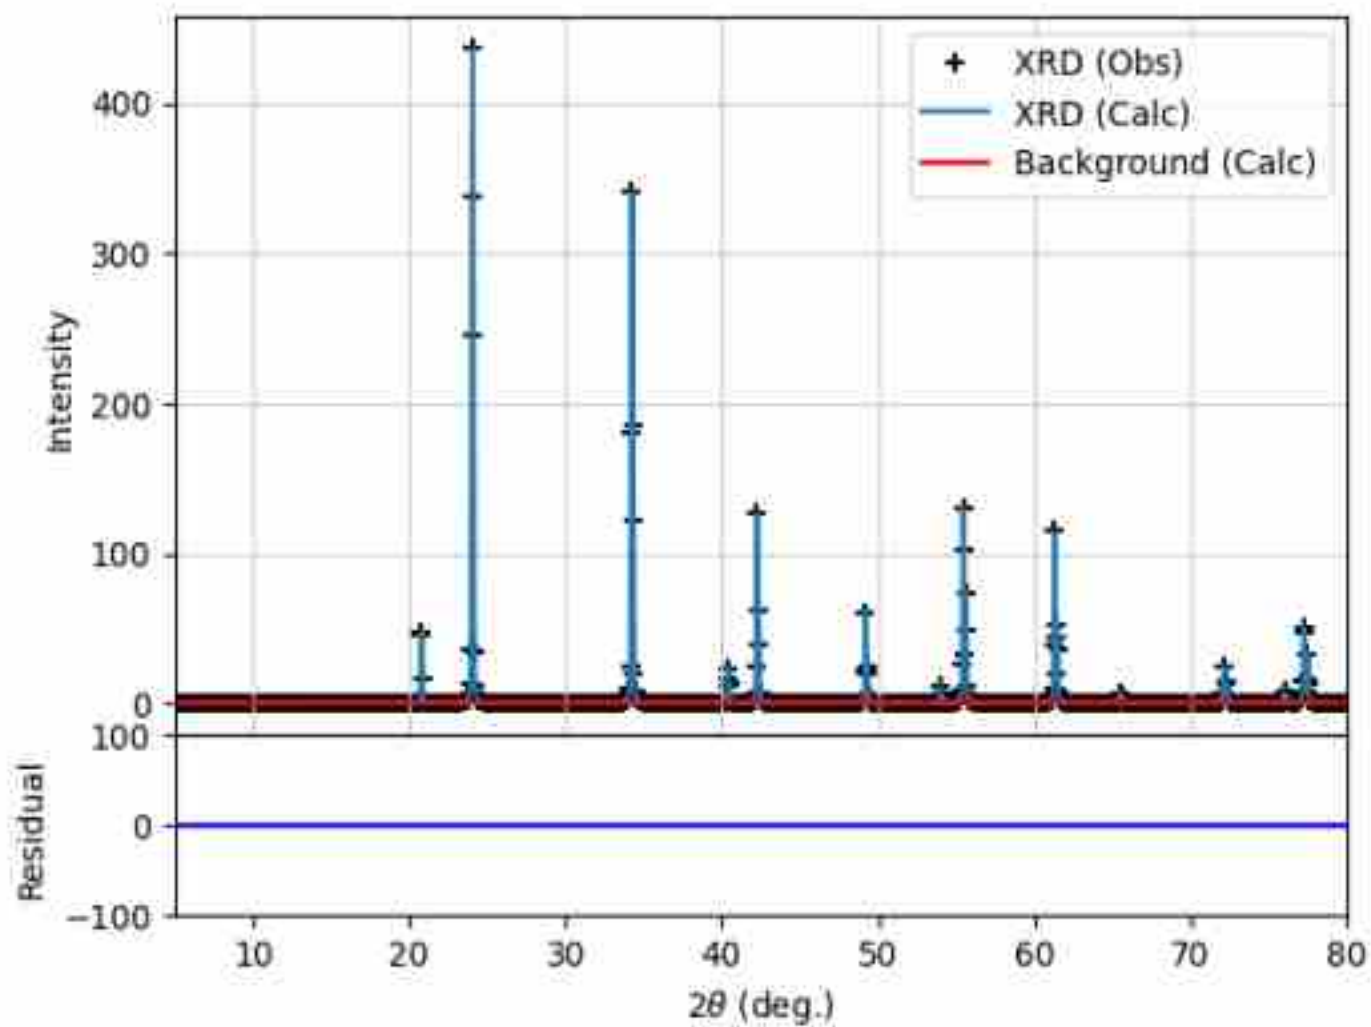

| RMSE before RR | Rwp     | RMSE after RR |
|----------------|---------|---------------|
| 0.002          | 0.02755 | 0.00086       |

# Cs1H1

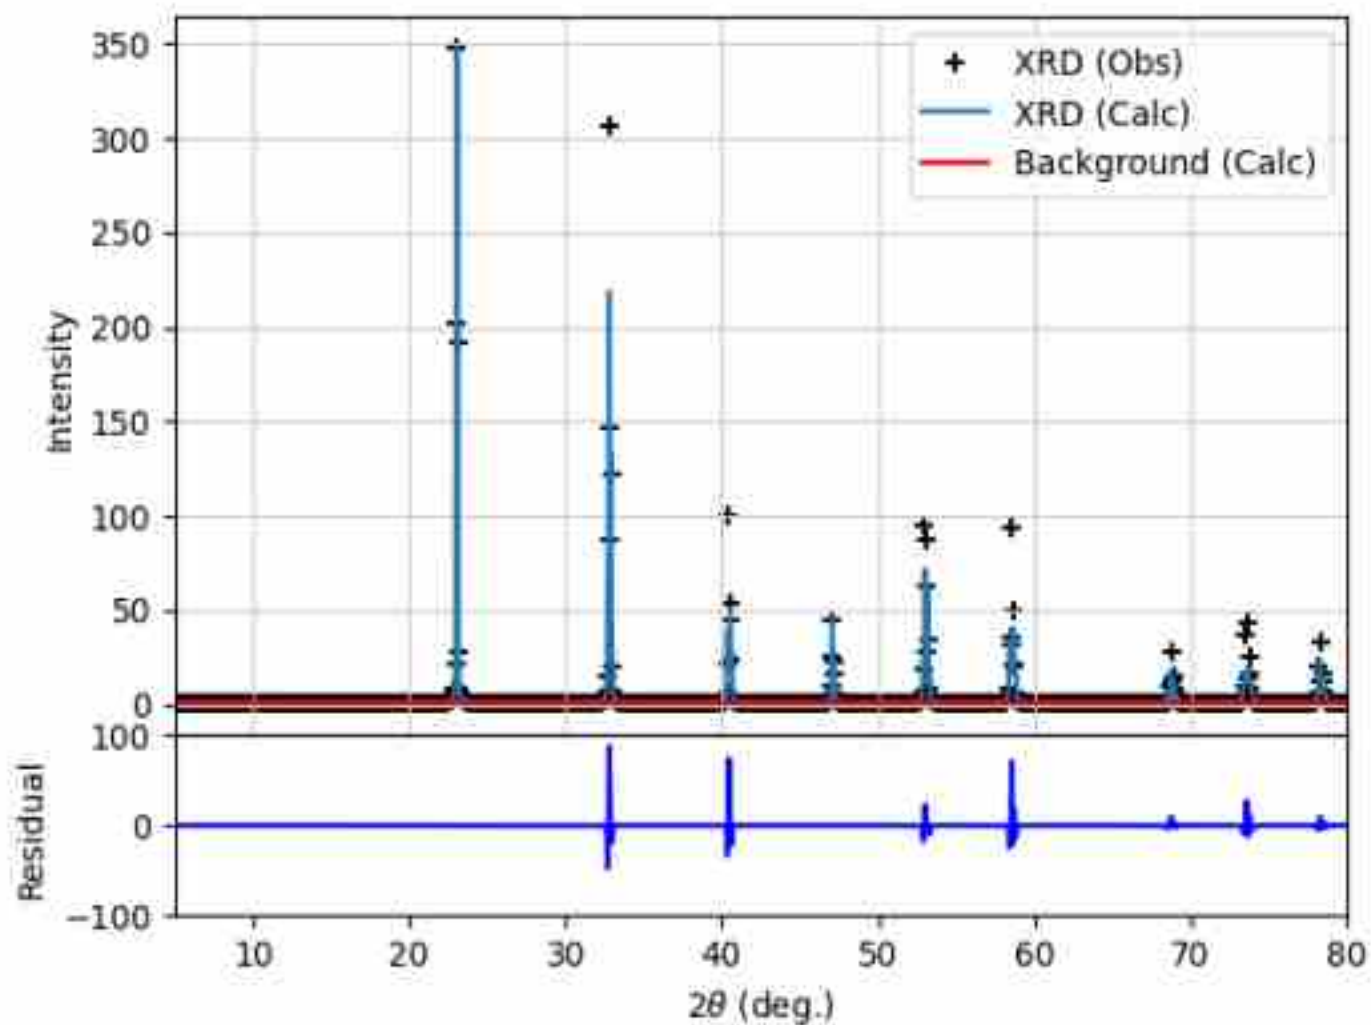

| RMSE before RR | Rwp      | RMSE after RR |
|----------------|----------|---------------|
| 0.002          | 53.87761 | 0.00179       |

# Cs<sub>2</sub>Fe<sub>2</sub>S<sub>4</sub>

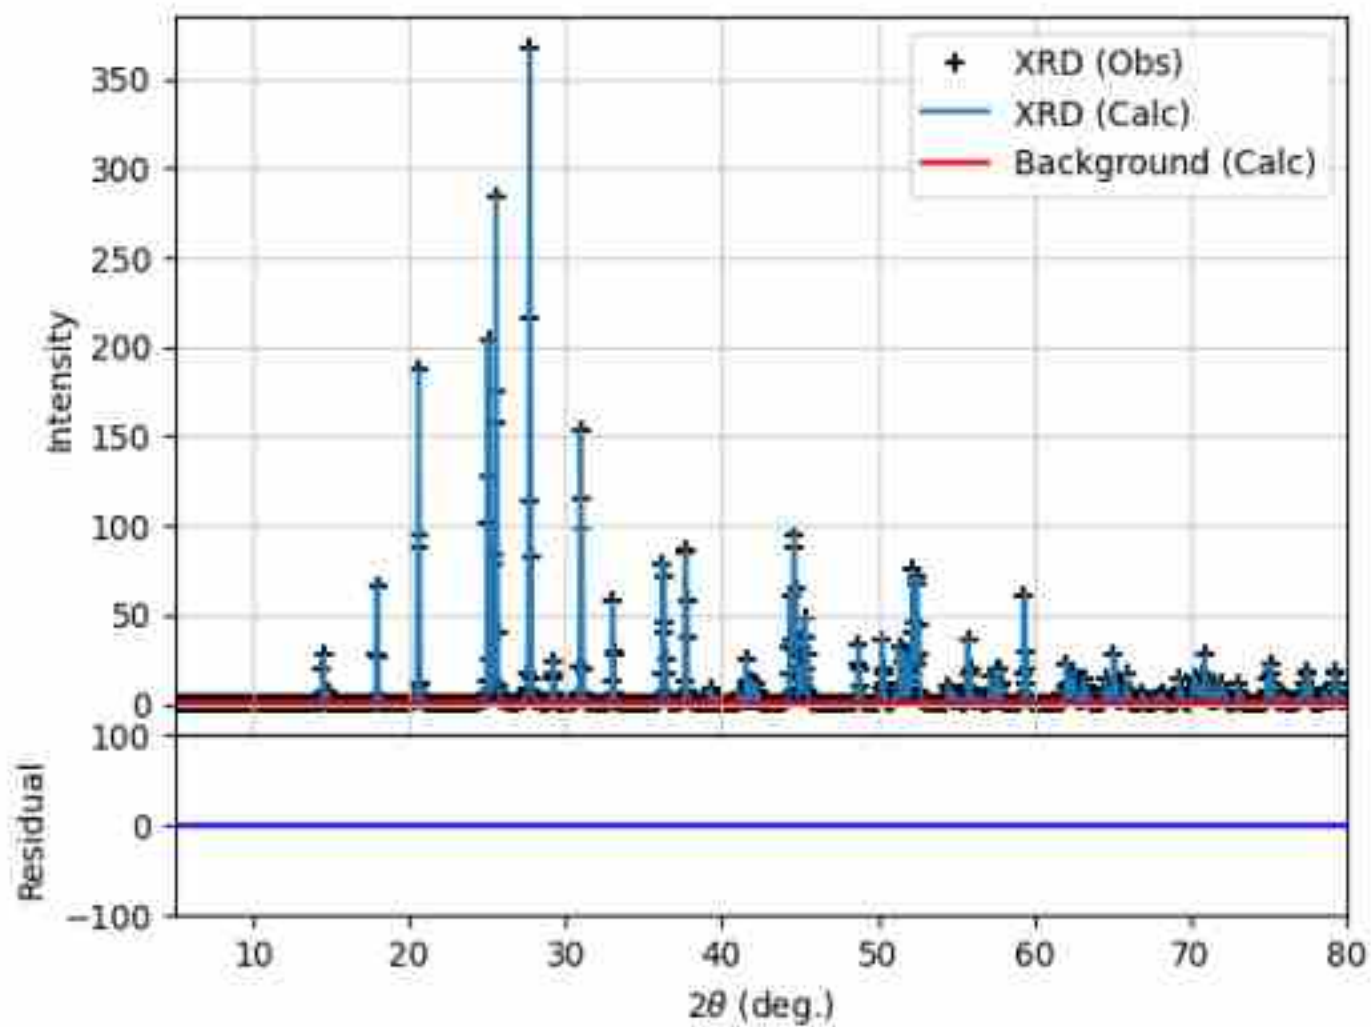

| RMSE before RR | Rwp     | RMSE after RR |
|----------------|---------|---------------|
| 0.02           | 0.00336 | 0.00041       |

# Cs<sub>2</sub>LiAlF<sub>6</sub>

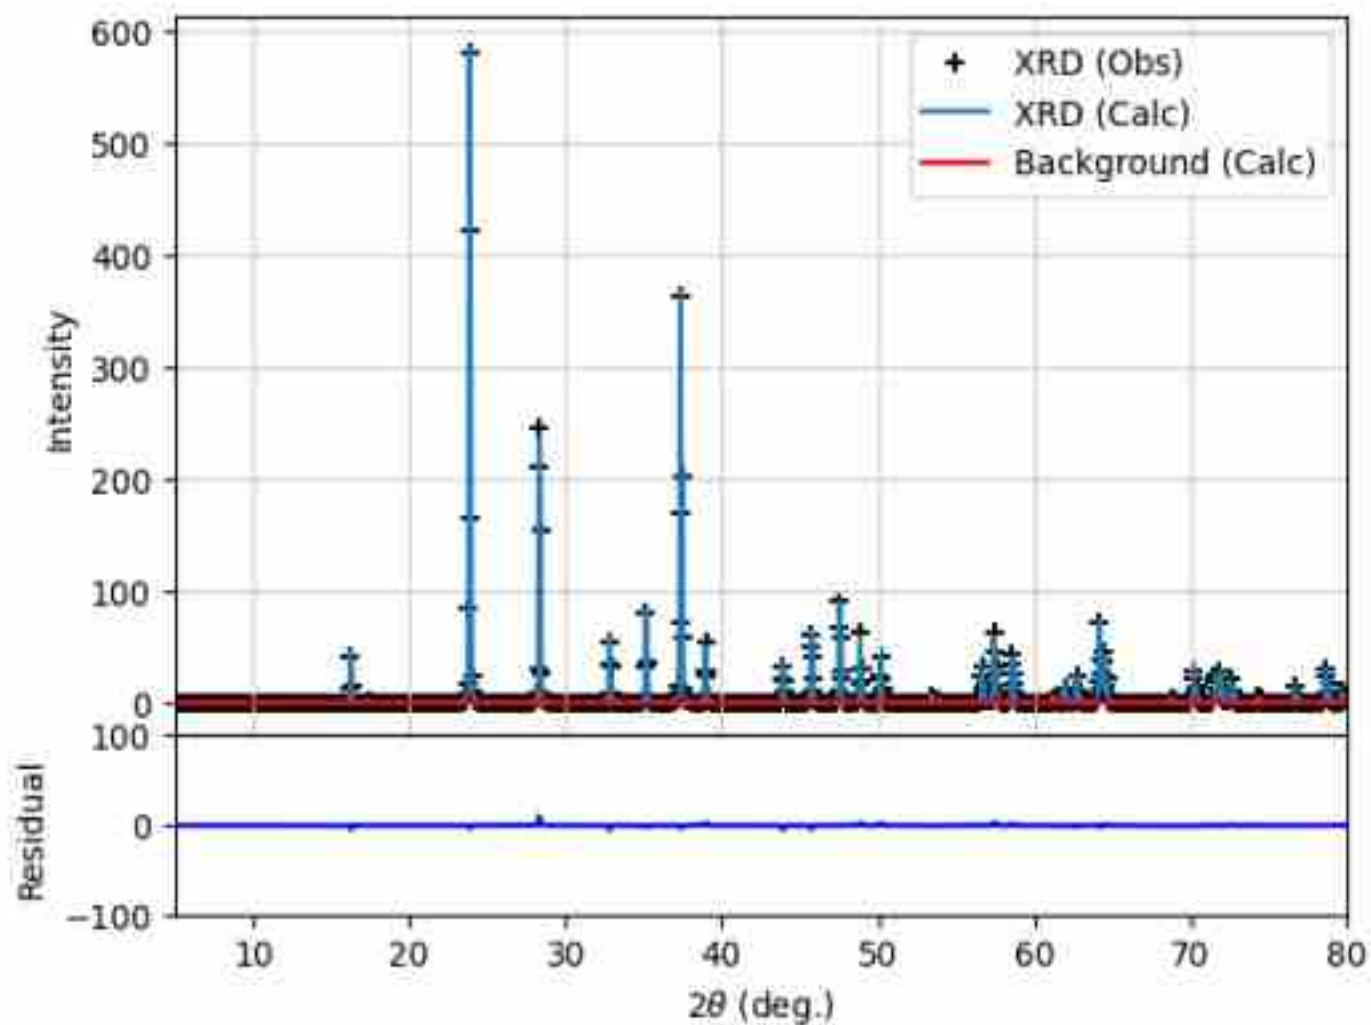

| RMSE before RR | Rwp     | RMSE after RR |
|----------------|---------|---------------|
| 0.02           | 3.90617 | 0.18528       |

# Cs<sub>2</sub>NaAlF<sub>6</sub>

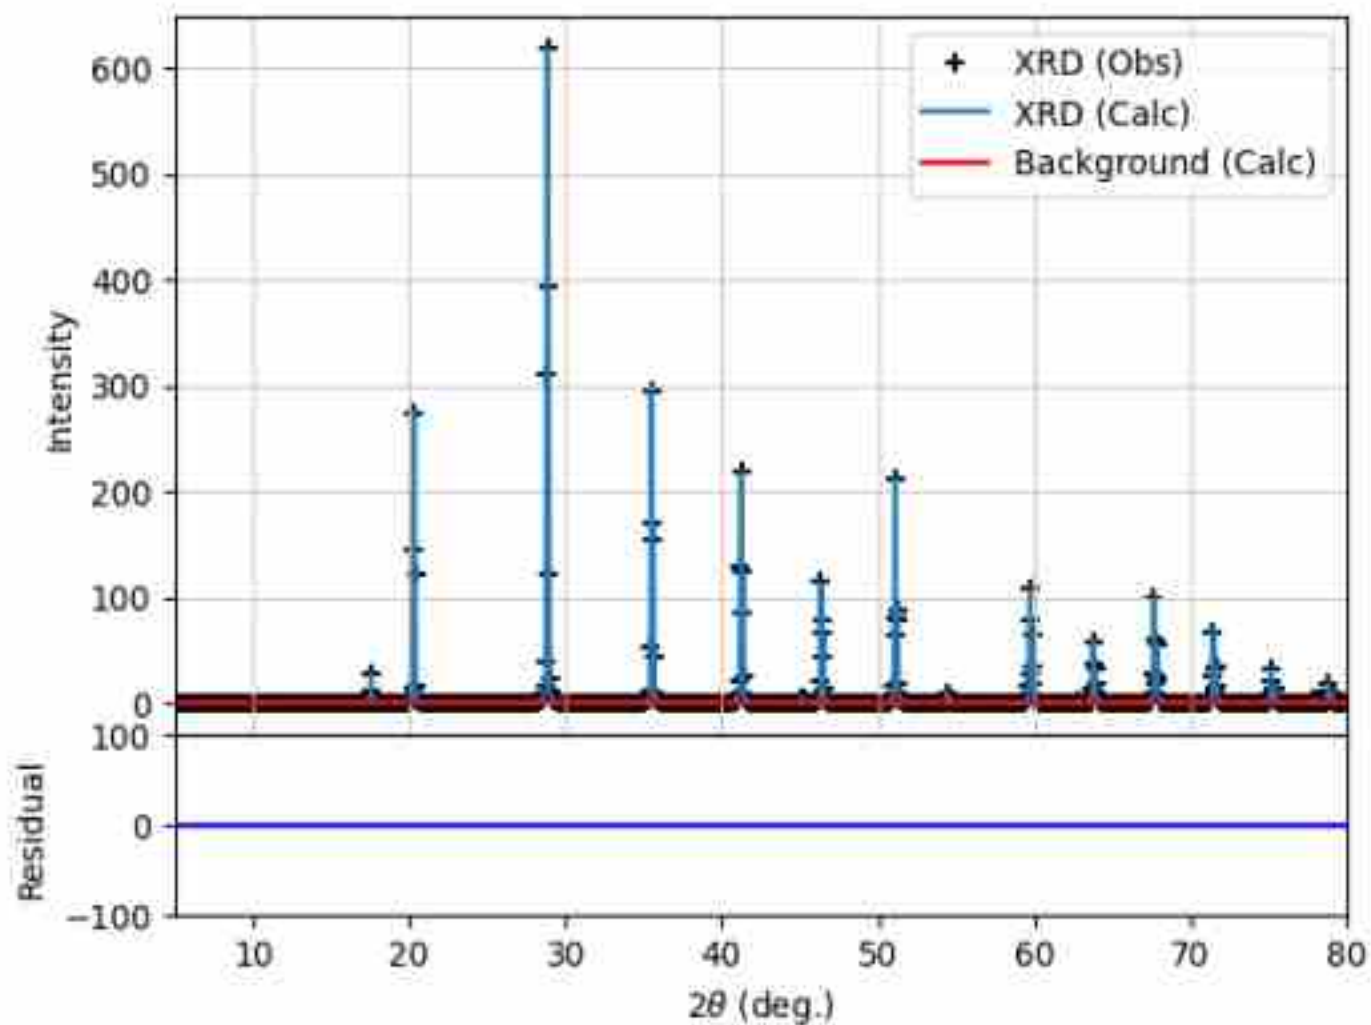

| RMSE before RR | Rwp     | RMSE after RR |
|----------------|---------|---------------|
| 0.02           | 0.06672 | 0.00653       |

# Cs<sub>4</sub>Mn<sub>2</sub>Se<sub>4</sub>

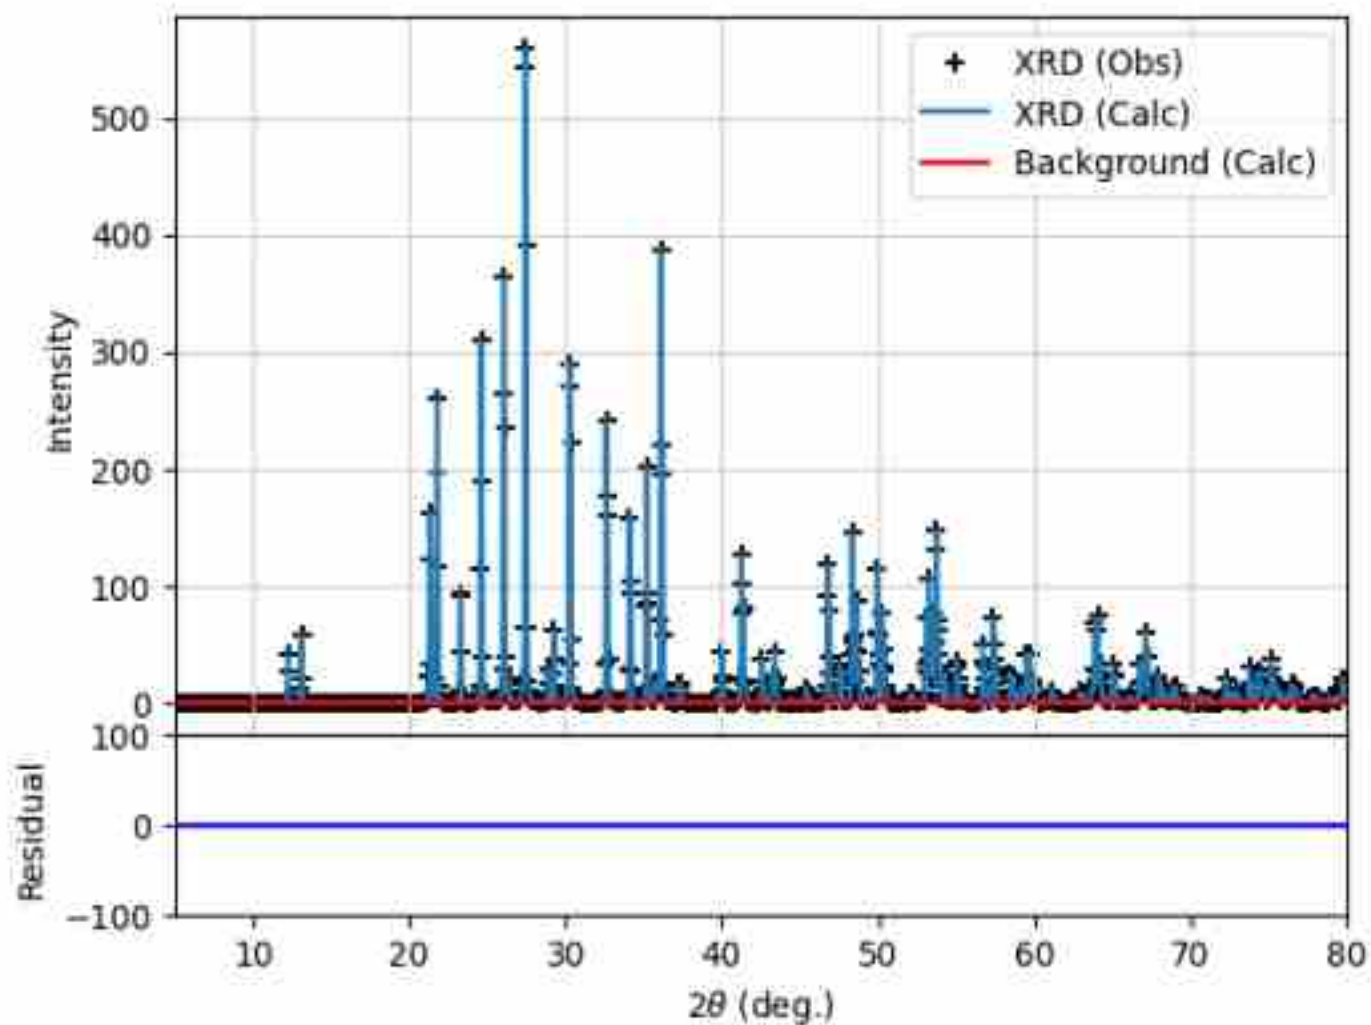

| RMSE before RR | Rwp     | RMSE after RR |
|----------------|---------|---------------|
| 0.02           | 0.00358 | 0.00021       |

# Cs<sub>4</sub>Pd<sub>2</sub>Cl<sub>8</sub>

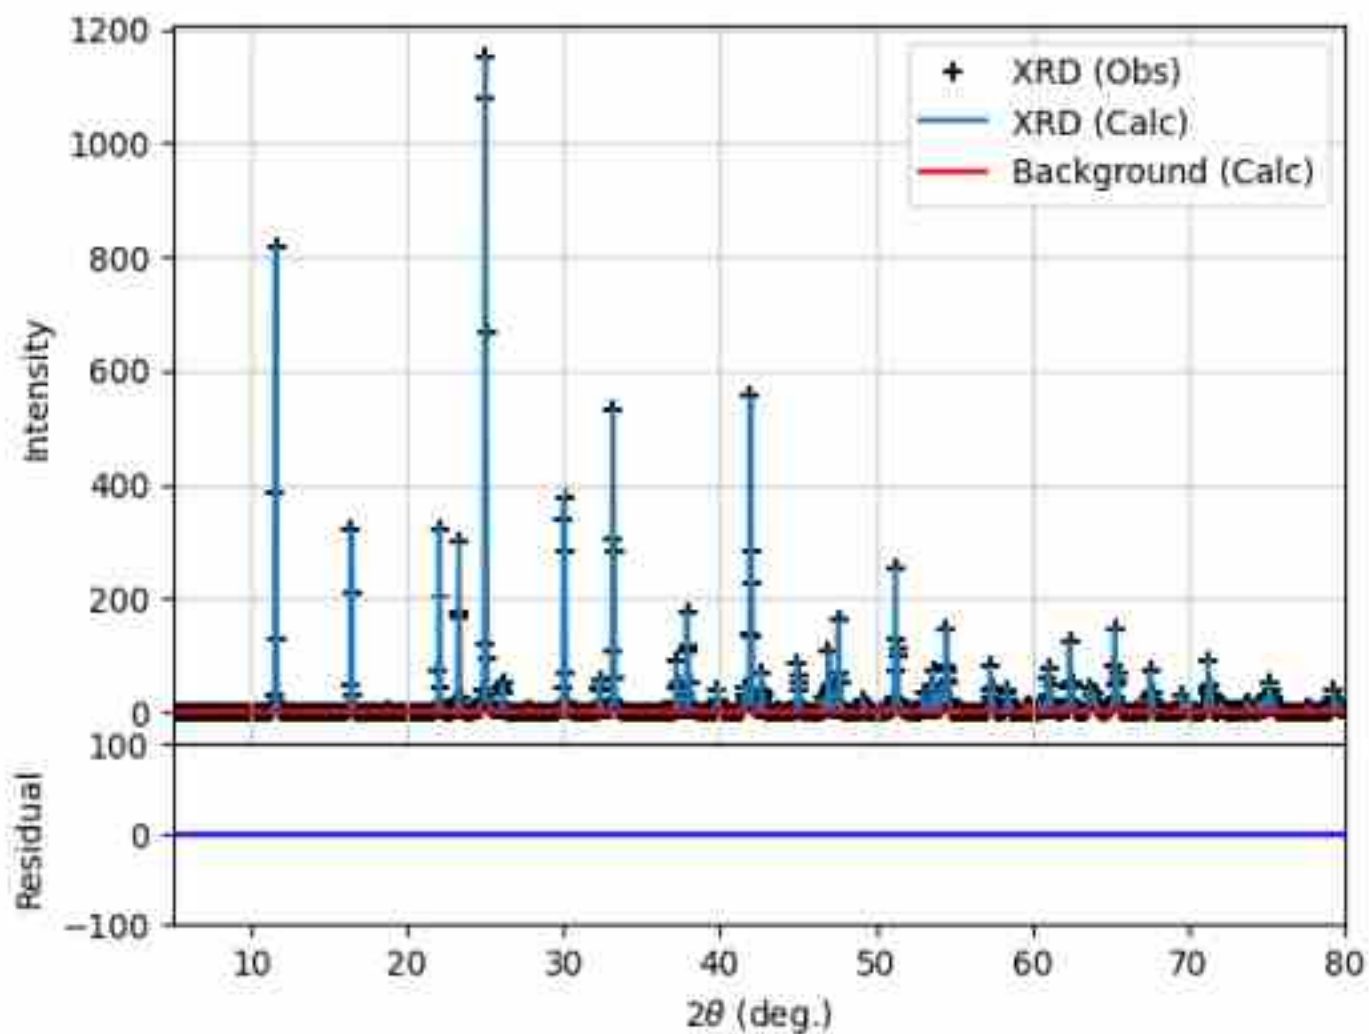

| RMSE before RR | Rwp     | RMSE after RR |
|----------------|---------|---------------|
| 0.02           | 0.00382 | 0.00061       |



# Cu<sub>1</sub>Au<sub>3</sub>

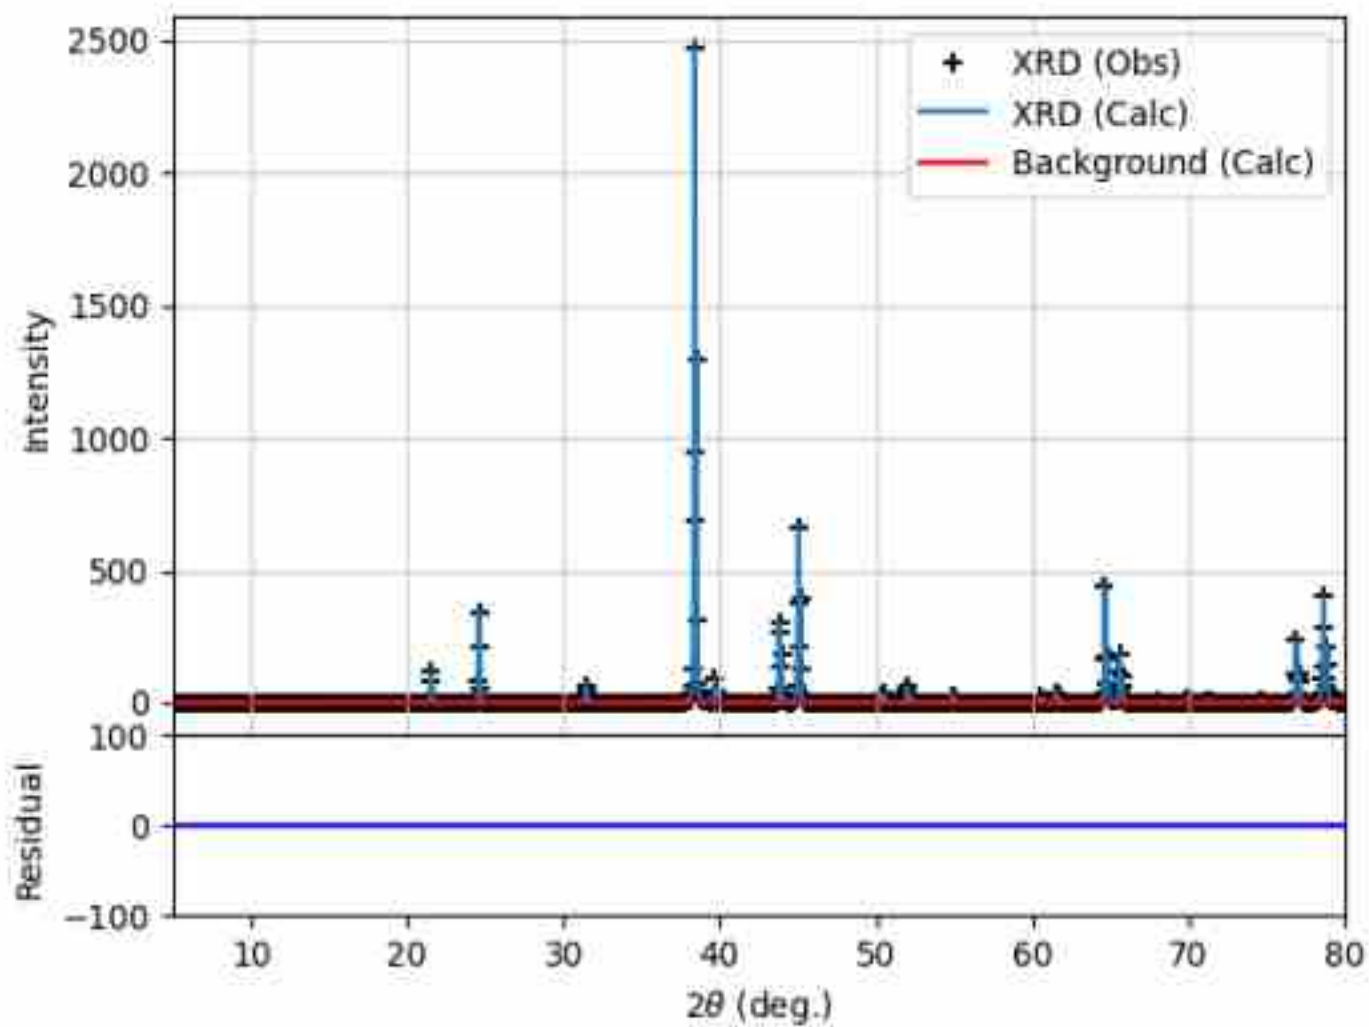

| RMSE before RR | Rwp     | RMSE after RR |
|----------------|---------|---------------|
| 0.002          | 0.00352 | 0.00015       |

# Cu1Mo1F6

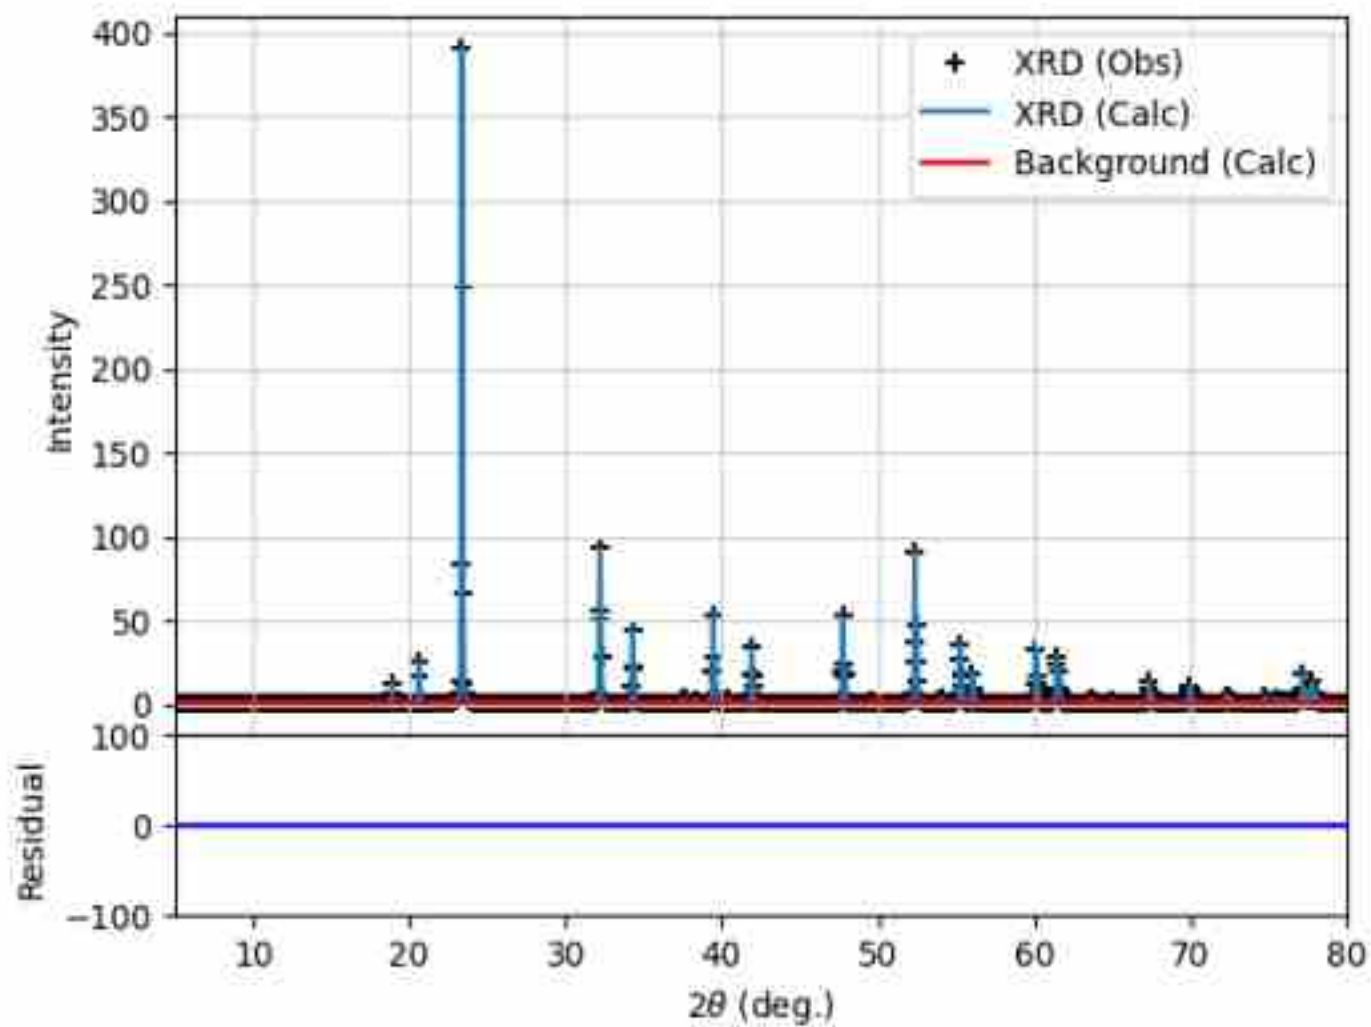

| RMSE before RR | Rwp     | RMSE after RR |
|----------------|---------|---------------|
| 0.02           | 0.00267 | 0.00093       |

# Cu<sub>1</sub>Sn<sub>1</sub>Pd<sub>2</sub>

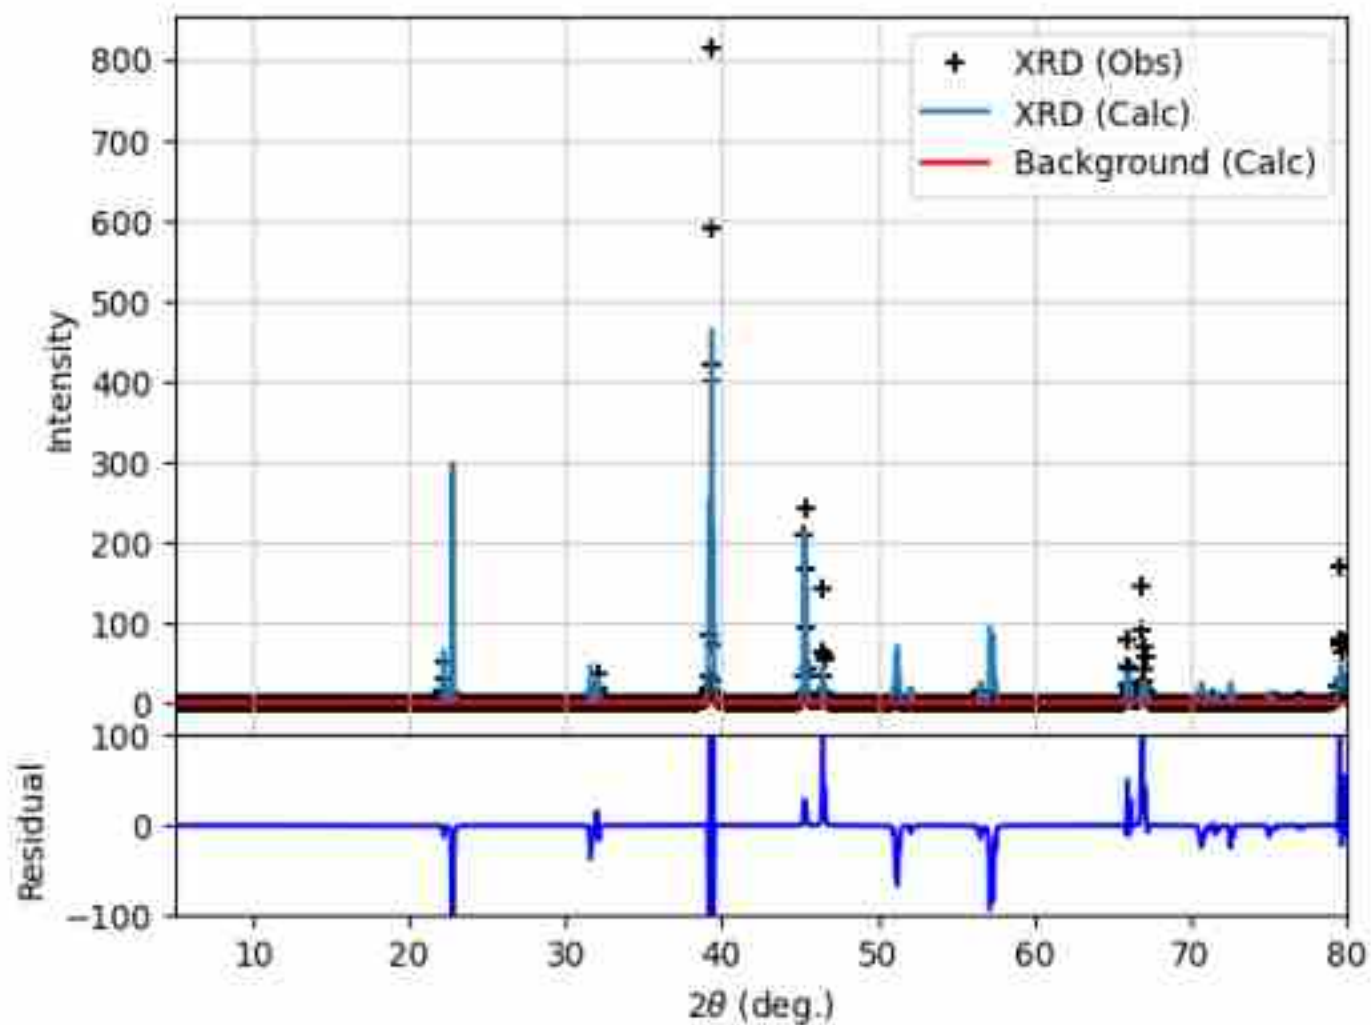

| RMSE before RR | Rwp   | RMSE after RR |
|----------------|-------|---------------|
| 0.002          | 100.0 | 0.01369       |

# Cu<sub>2</sub>Ge<sub>1</sub>Se<sub>3</sub>

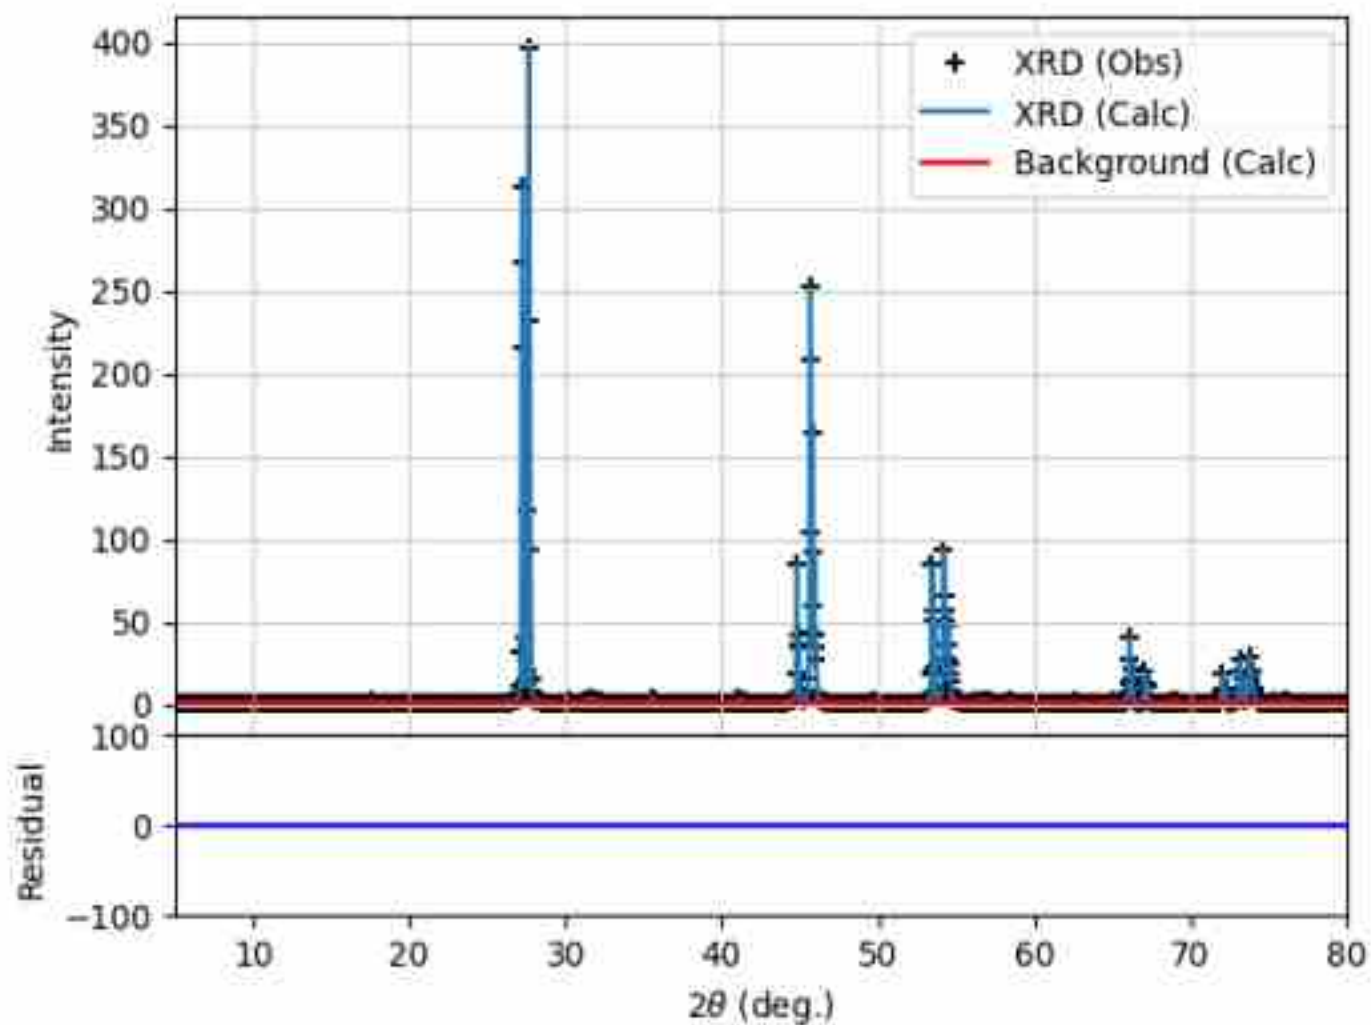

| RMSE before RR | Rwp     | RMSE after RR |
|----------------|---------|---------------|
| 0.02           | 0.00313 | 0.00024       |

# Cu<sub>2</sub>O<sub>2</sub>

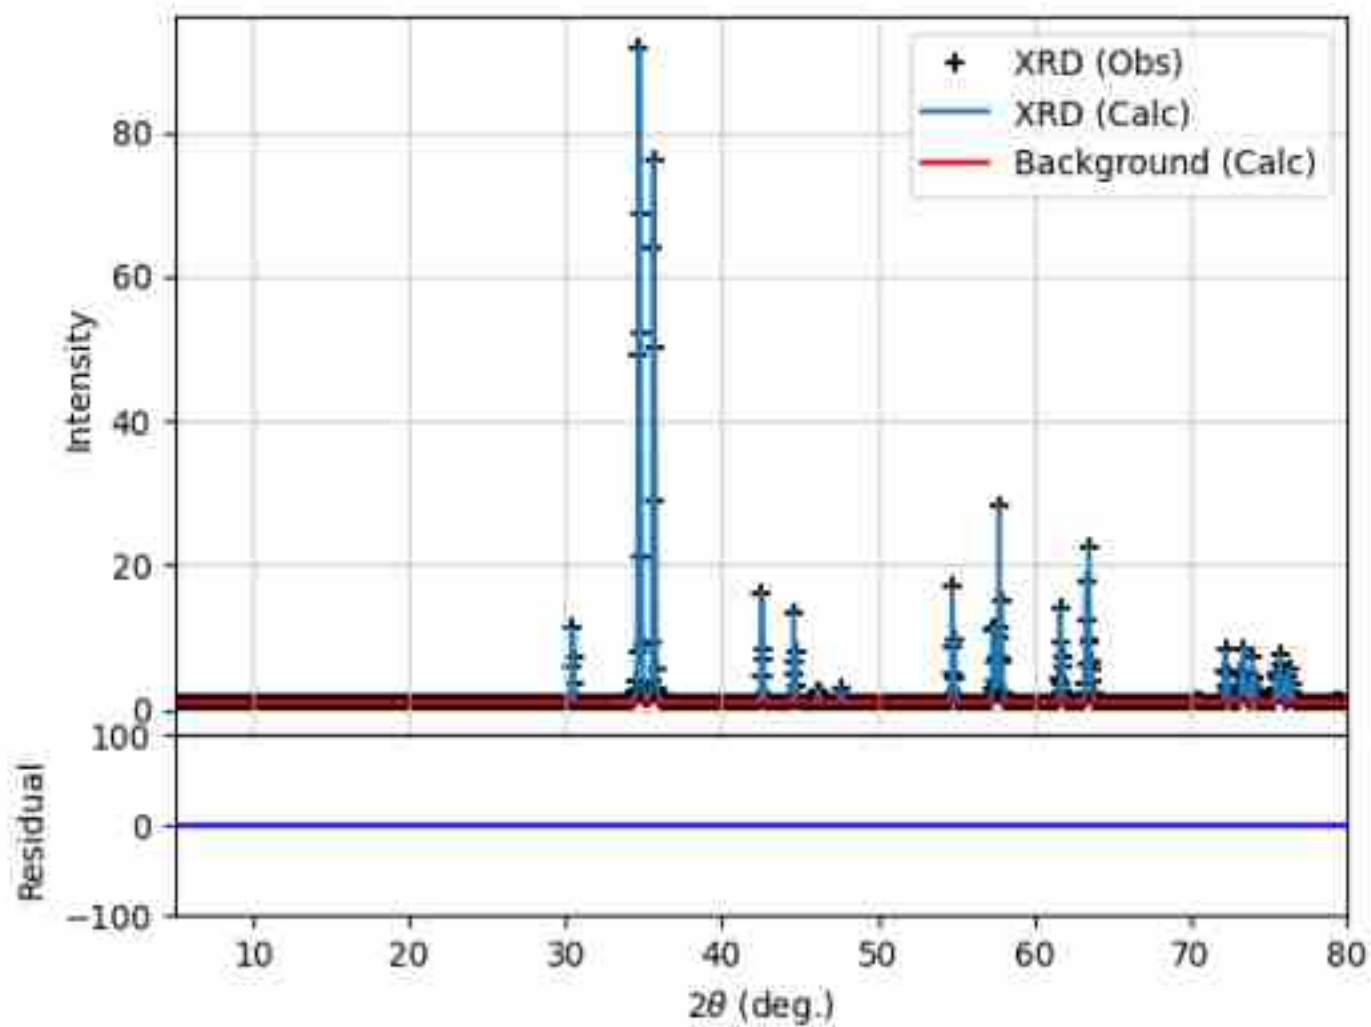

| RMSE before RR | Rwp     | RMSE after RR |
|----------------|---------|---------------|
| 0.02           | 0.00273 | 0.00085       |

Cu<sub>2</sub>

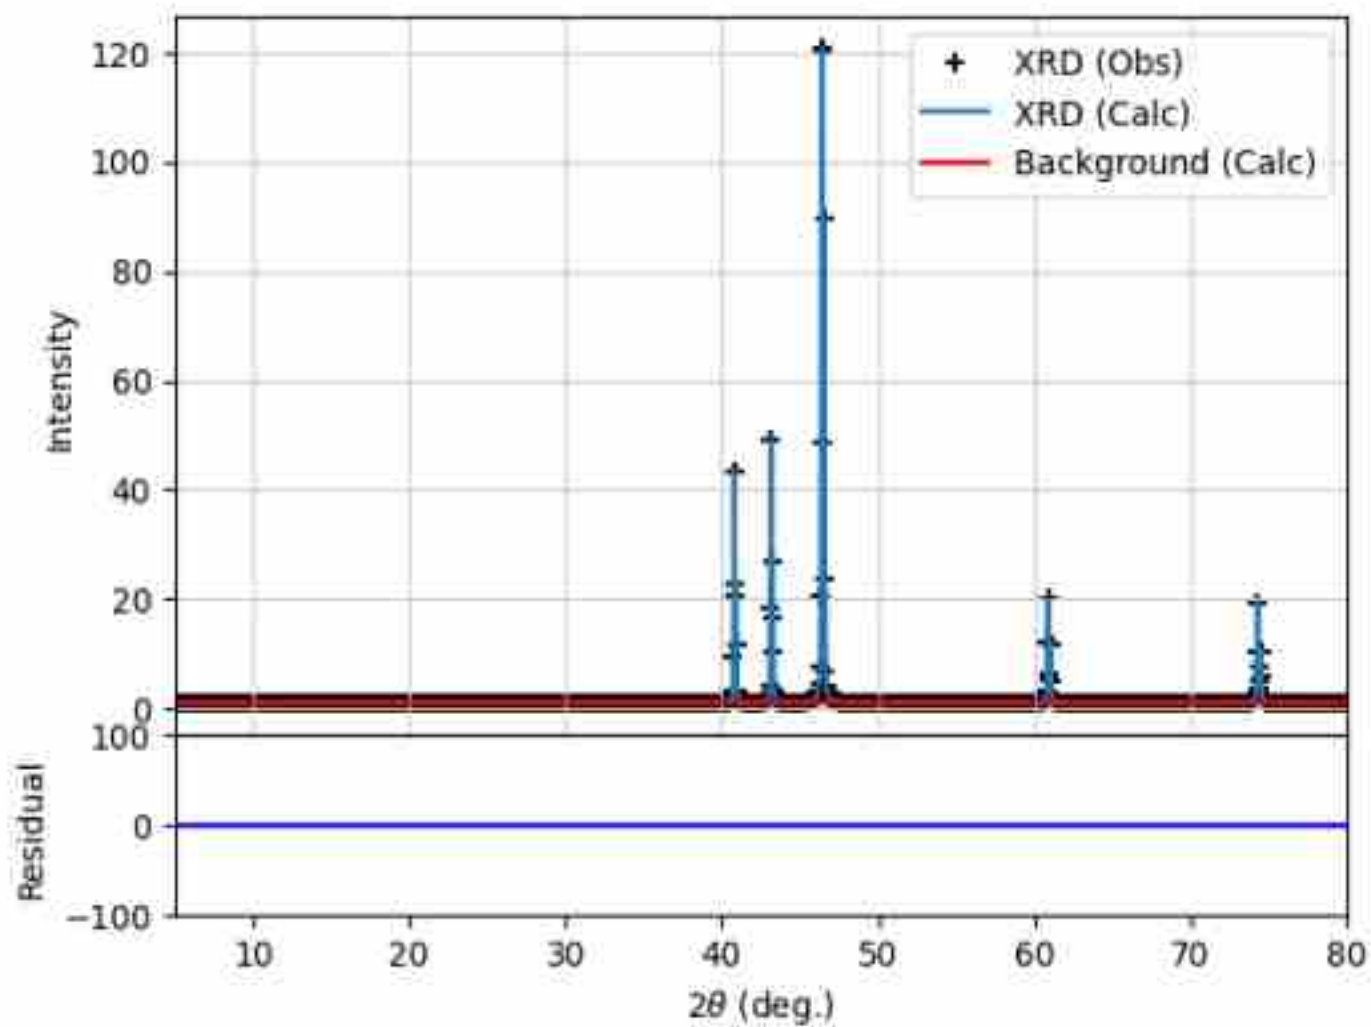

| RMSE before RR | Rwp     | RMSE after RR |
|----------------|---------|---------------|
| 0.002          | 0.03459 | 0.00173       |

# Cu<sub>3</sub>Rh1

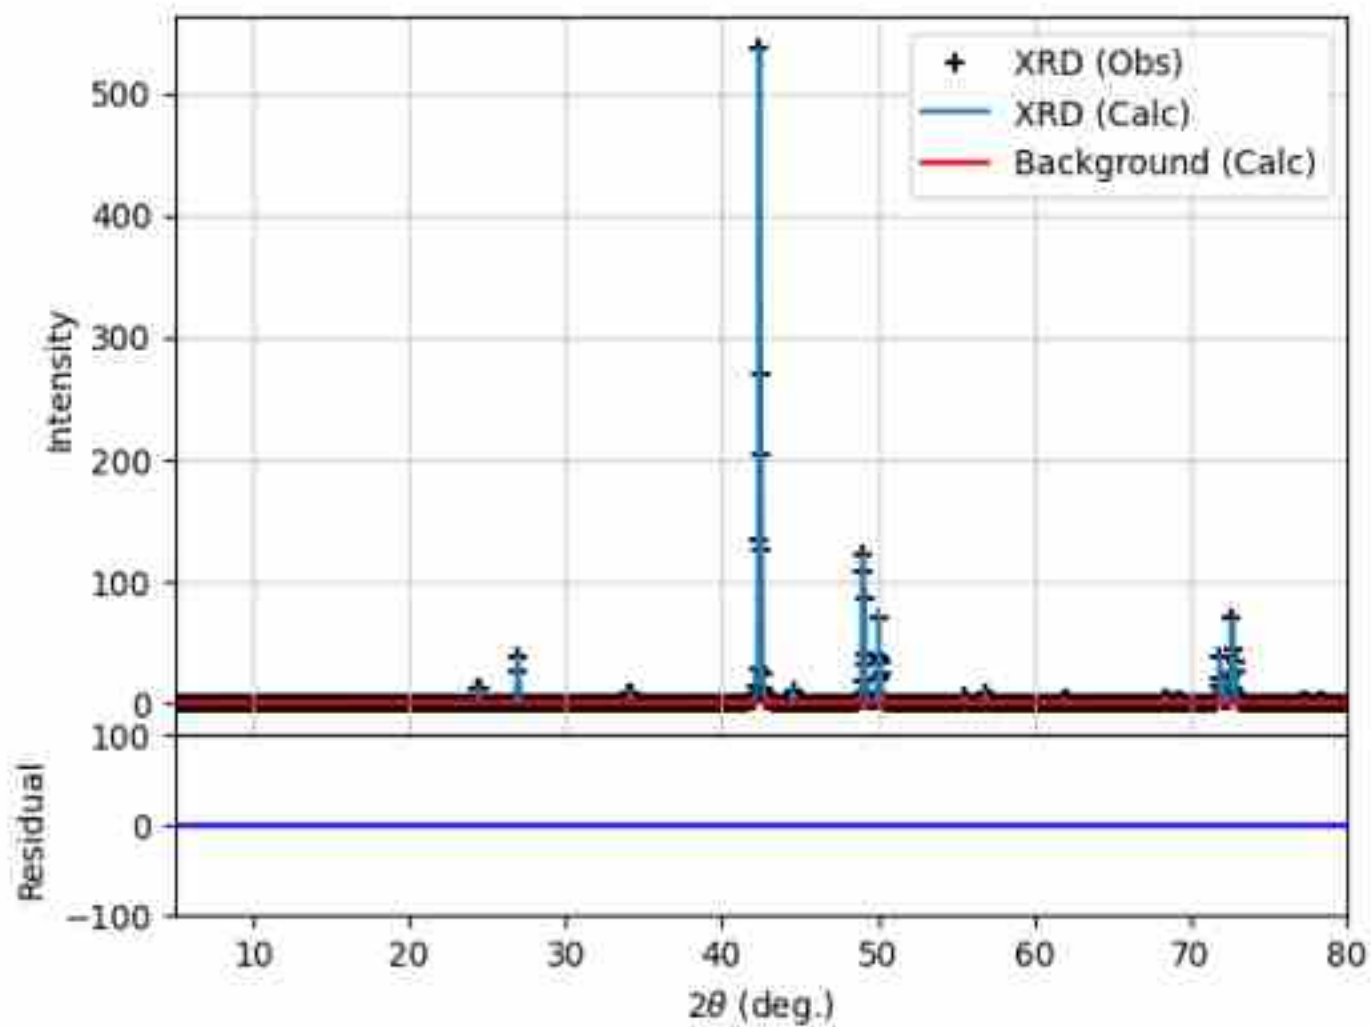

| RMSE before RR | Rwp     | RMSE after RR |
|----------------|---------|---------------|
| 0.002          | 0.00239 | 0.0004        |

# Dy1Ag1Sn2

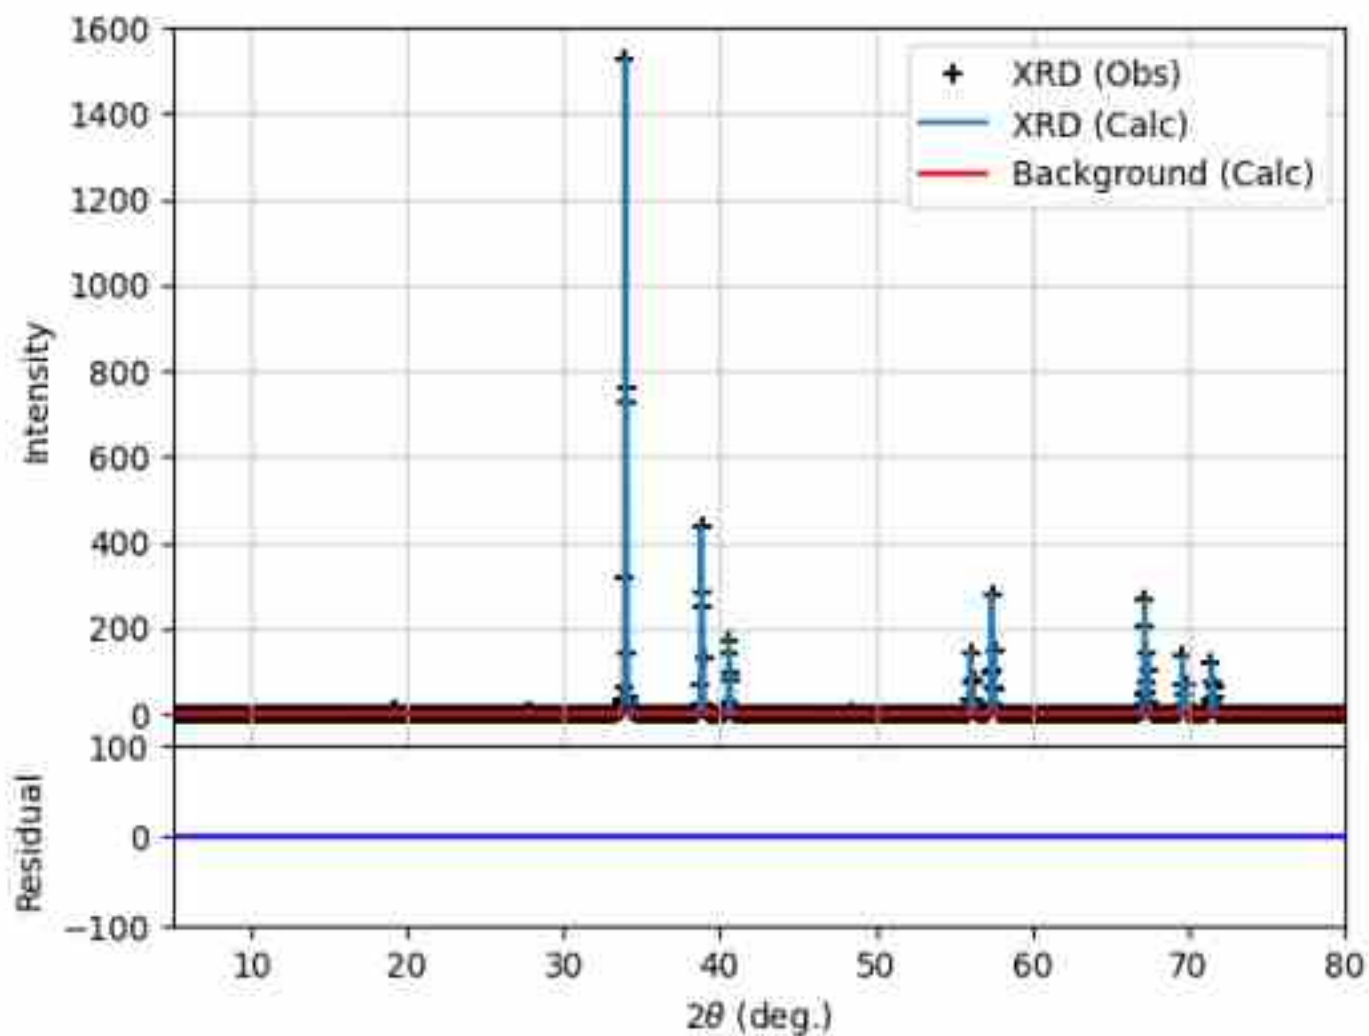

| RMSE before RR | Rwp     | RMSE after RR |
|----------------|---------|---------------|
| 0.002          | 0.00452 | 0.00025       |



# Dy1Cd1

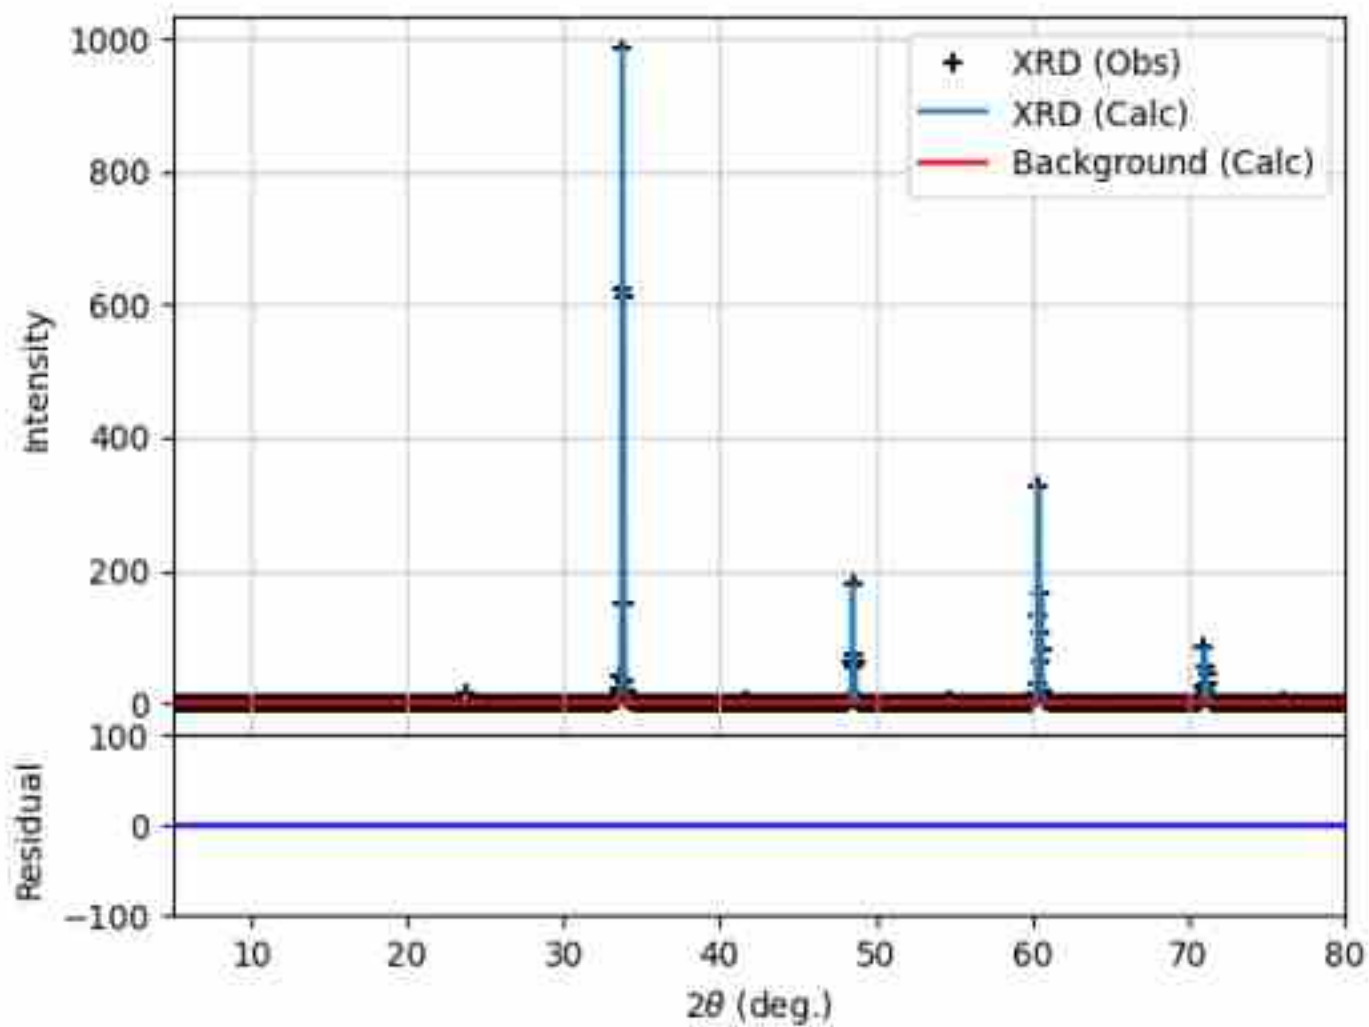

| RMSE before RR | Rwp     | RMSE after RR |
|----------------|---------|---------------|
| 0.002          | 0.07455 | 0.00152       |

# Dy1Er1Al2

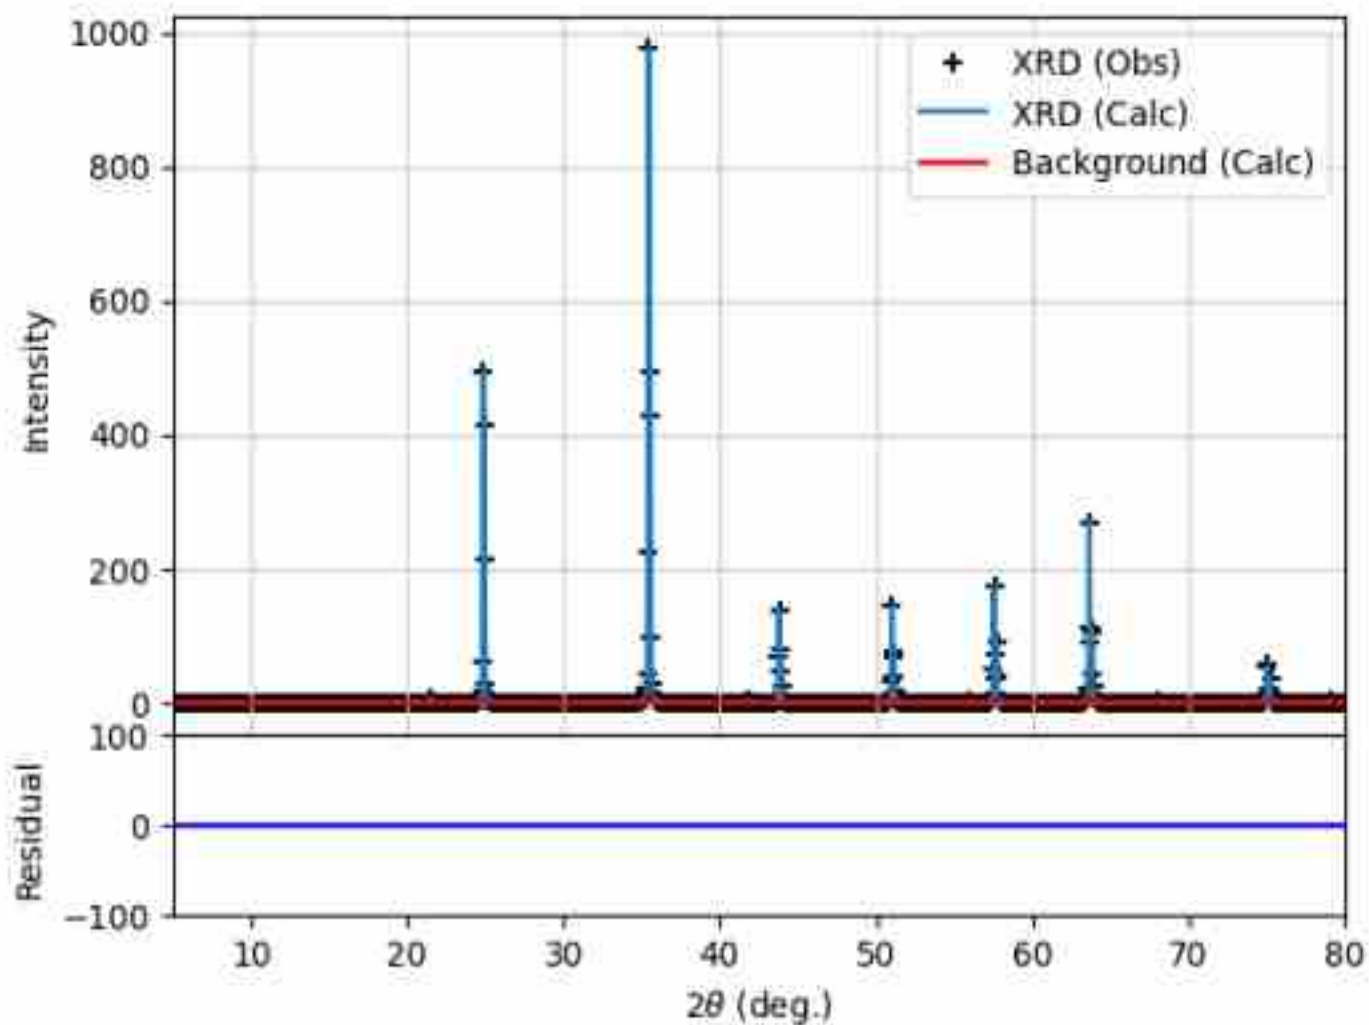

| RMSE before RR | Rwp     | RMSE after RR |
|----------------|---------|---------------|
| 0.002          | 0.02123 | 0.00116       |

# Dy1Er1Cu2

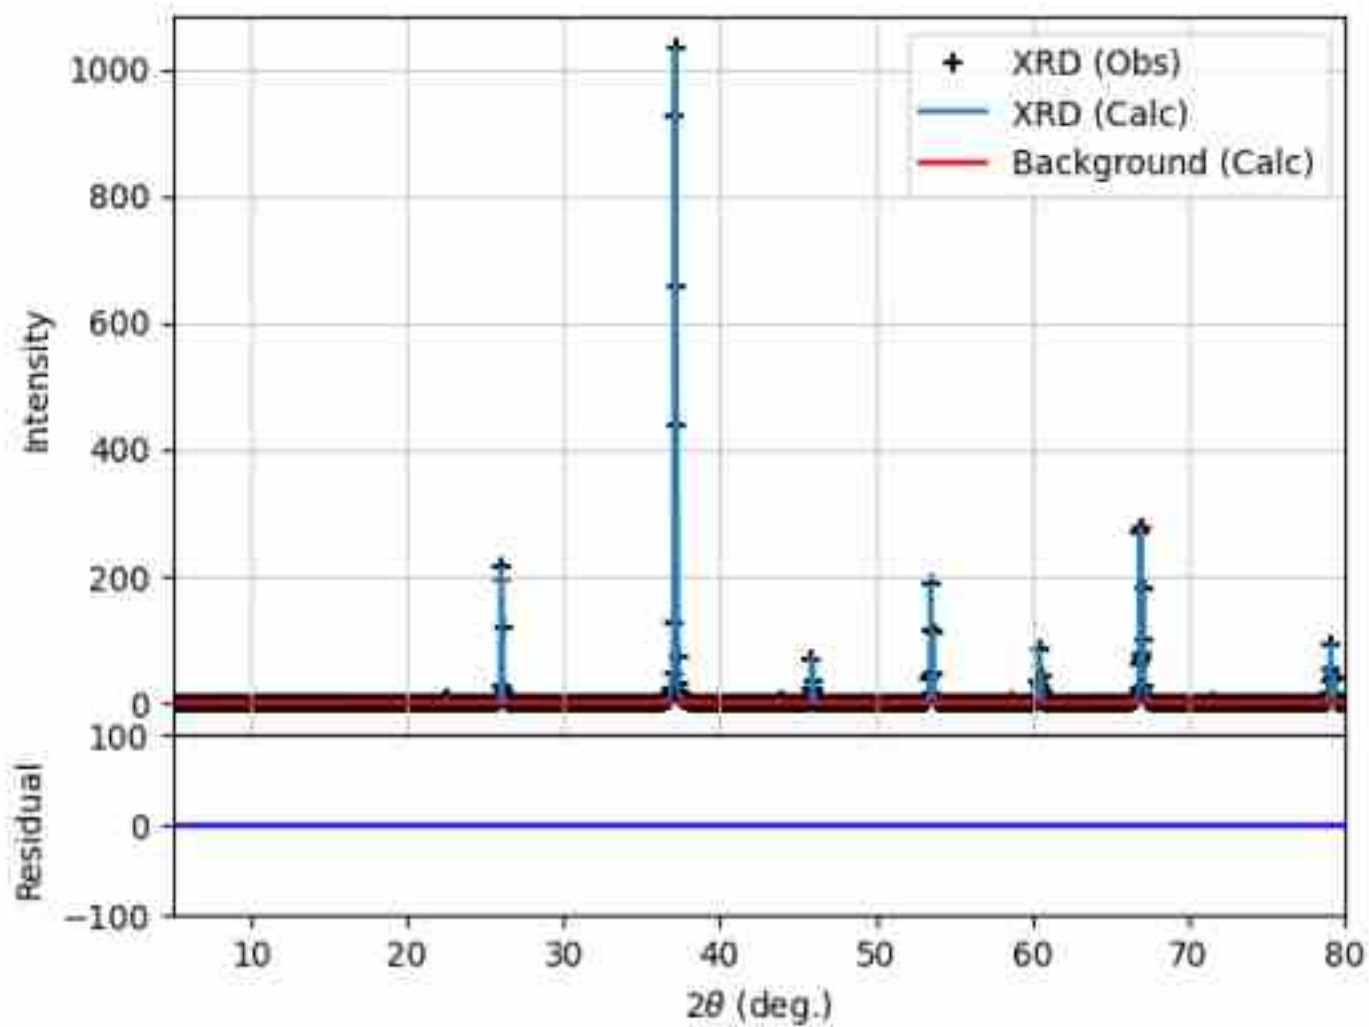

| RMSE before RR | Rwp     | RMSE after RR |
|----------------|---------|---------------|
| 0.002          | 0.00069 | 0.00033       |

# Dy1Er1Tl2

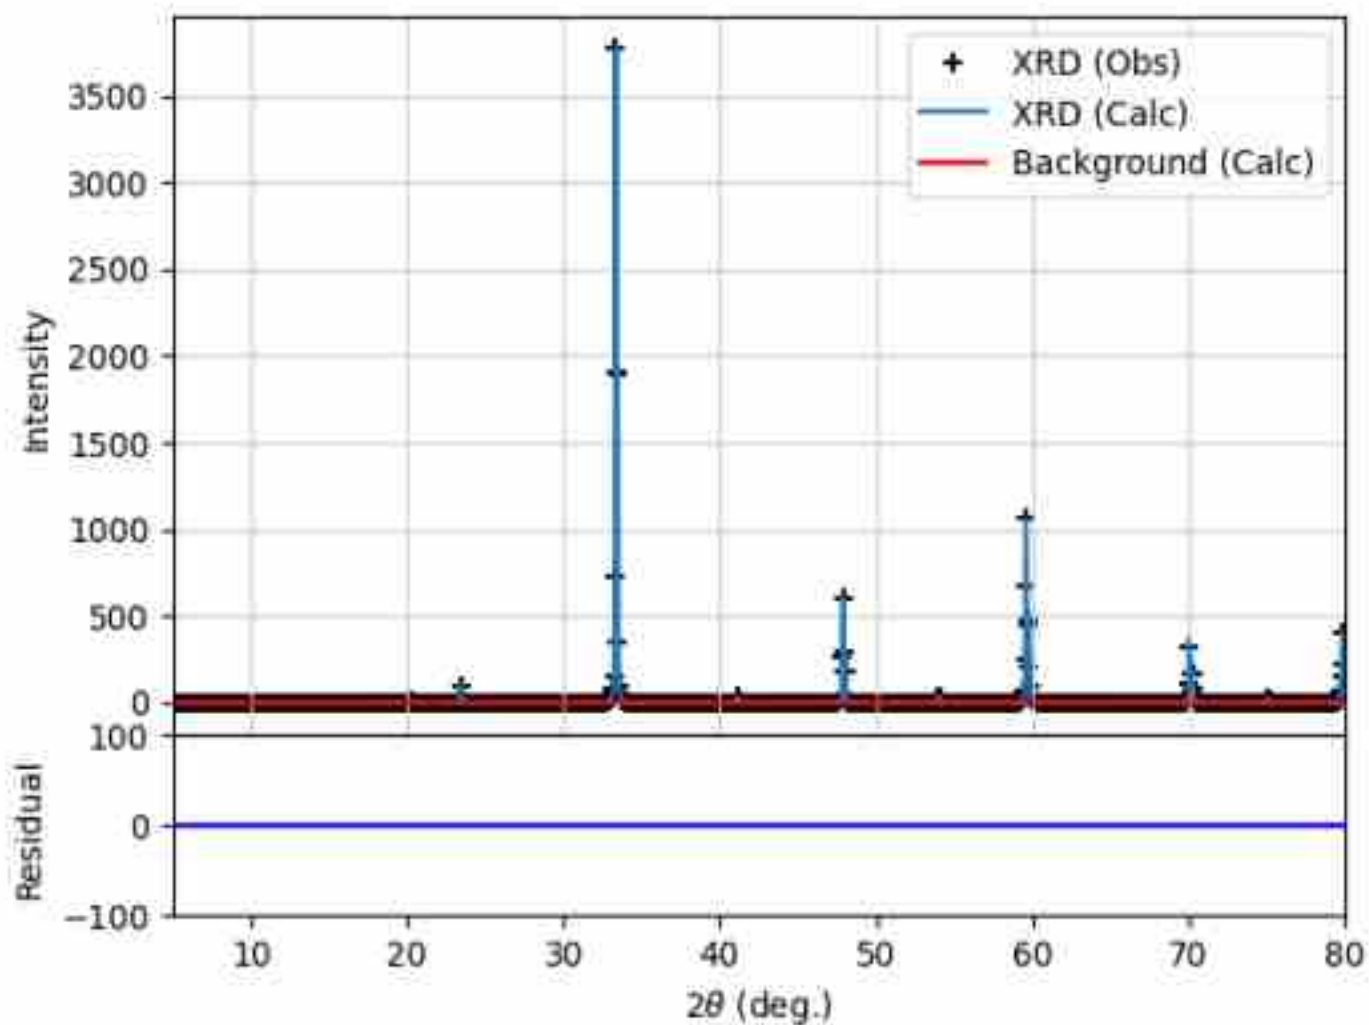

| RMSE before RR | Rwp     | RMSE after RR |
|----------------|---------|---------------|
| 0.002          | 0.00287 | 0.00022       |

# Dy1In1Co4

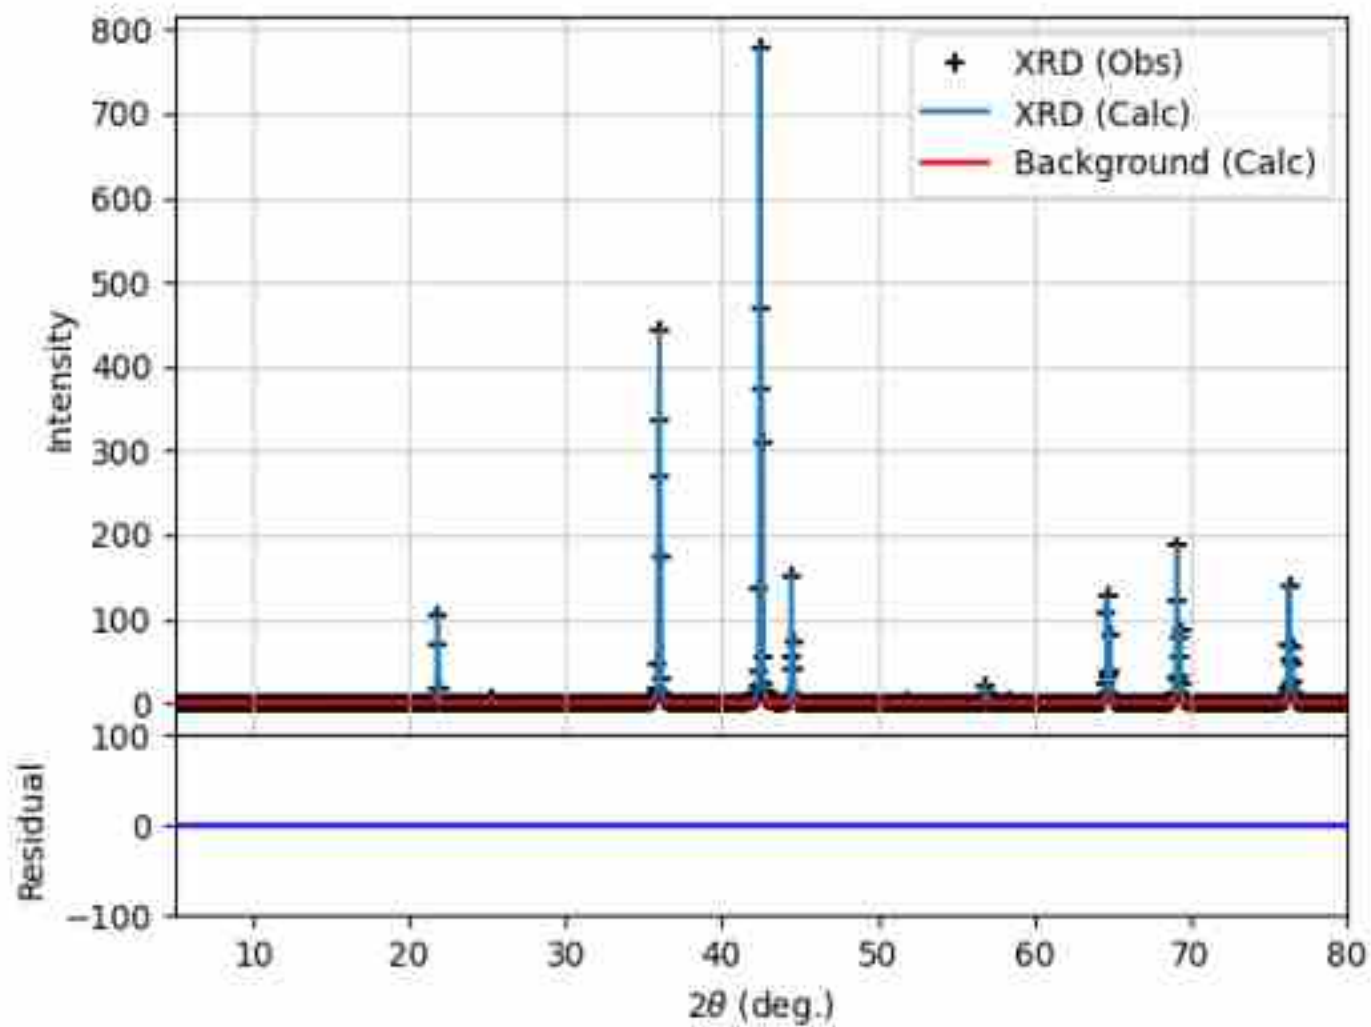

| RMSE before RR | Rwp     | RMSE after RR |
|----------------|---------|---------------|
| 0.02           | 0.00558 | 0.00104       |

# Dy1In3

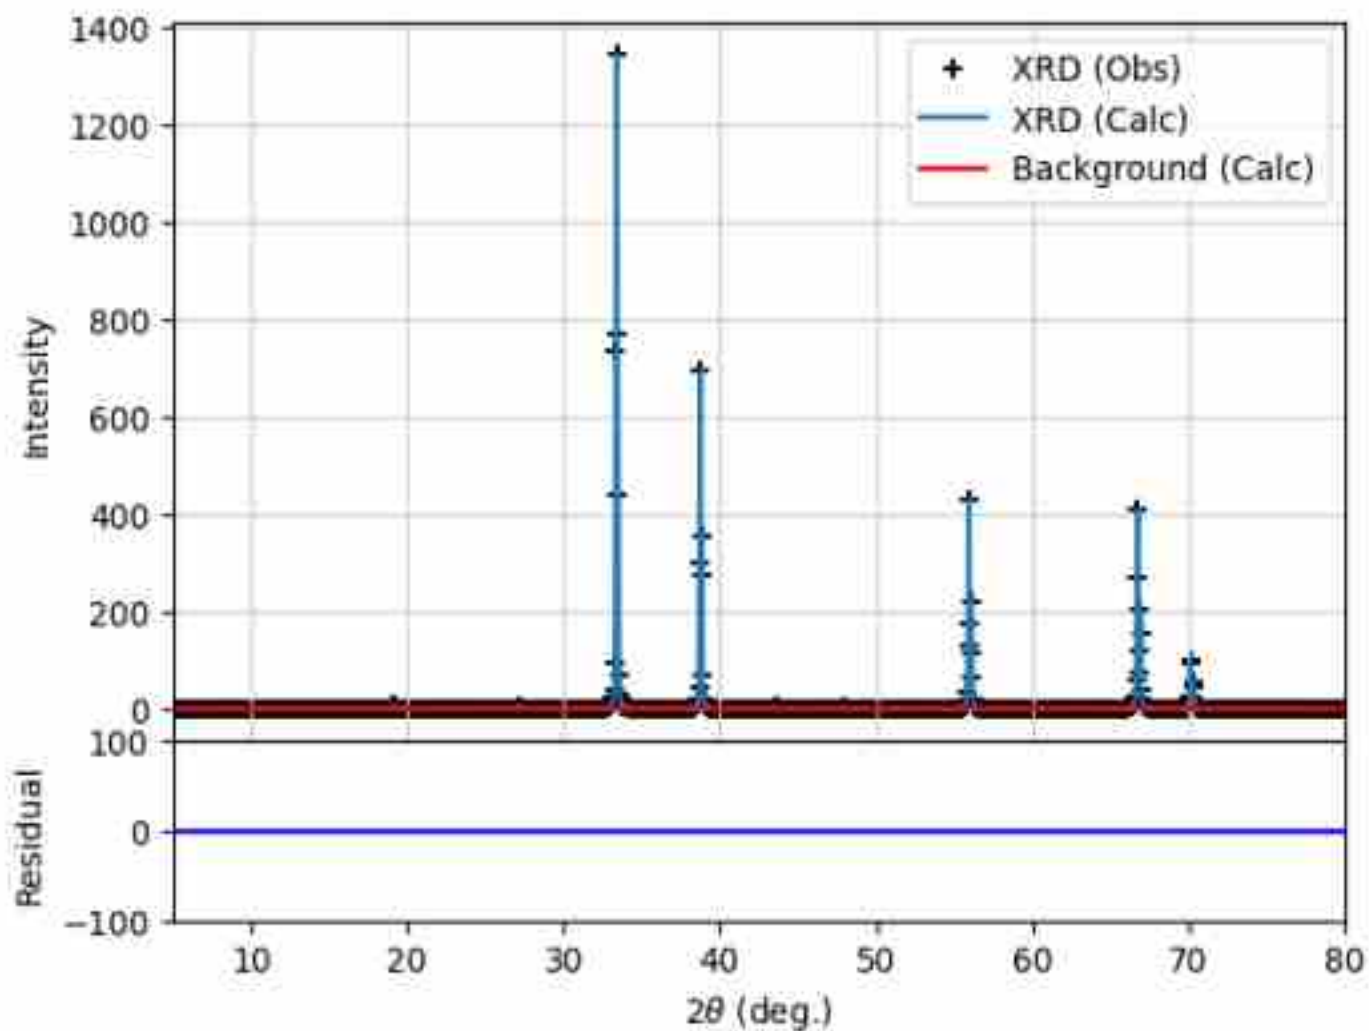

| RMSE before RR | Rwp     | RMSE after RR |
|----------------|---------|---------------|
| 0.002          | 0.03179 | 0.00084       |

# Dy1Lu1Cu2

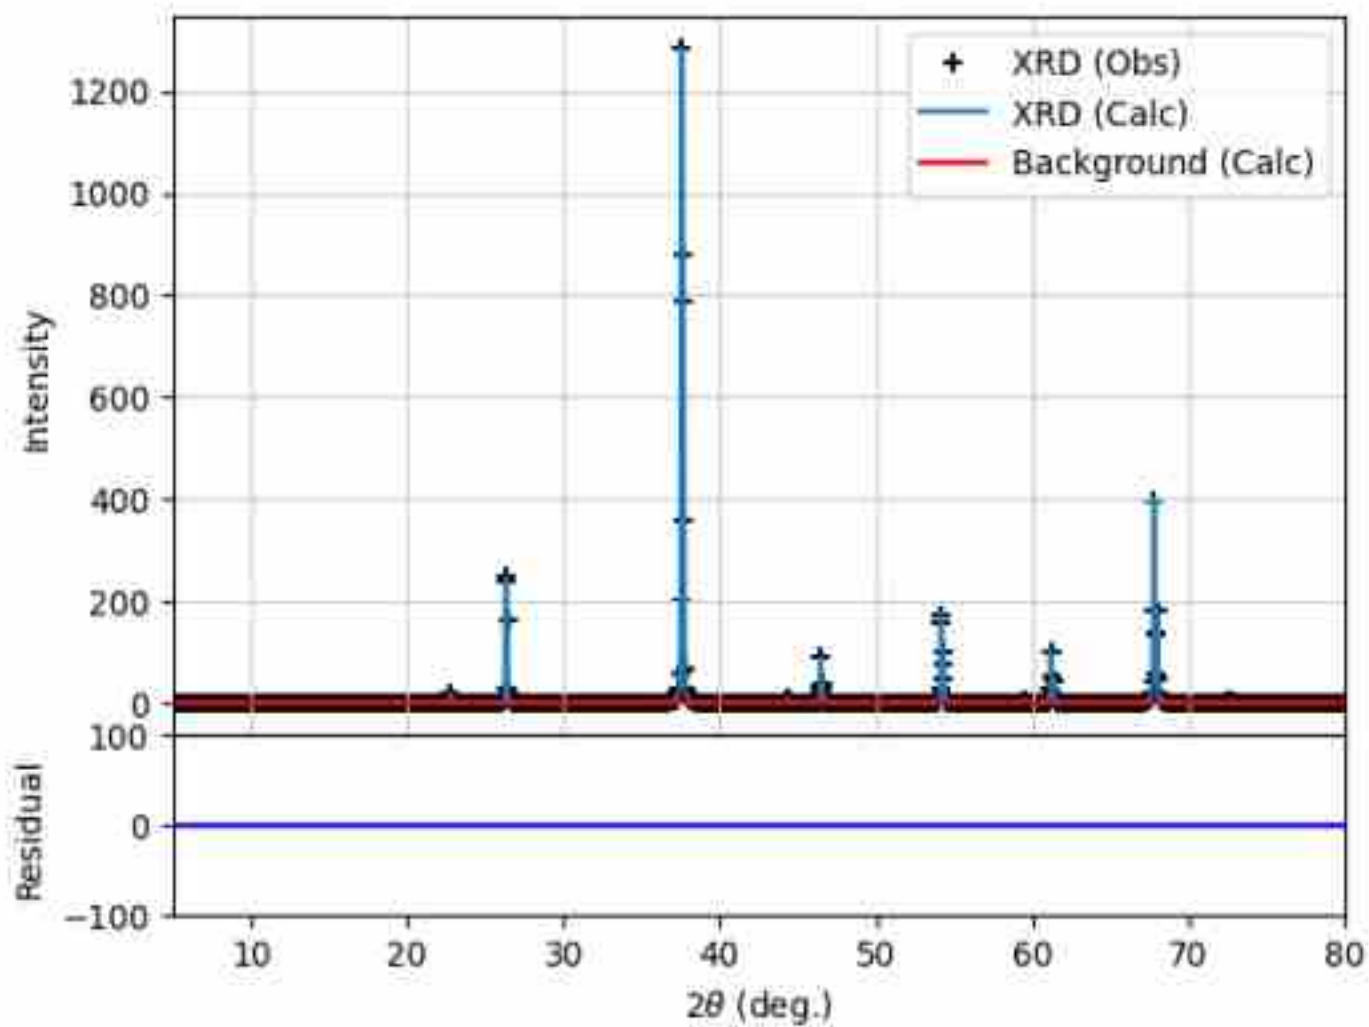

| RMSE before RR | Rwp     | RMSE after RR |
|----------------|---------|---------------|
| 0.002          | 0.00337 | 0.00038       |

# Dy1Pd2Pb1

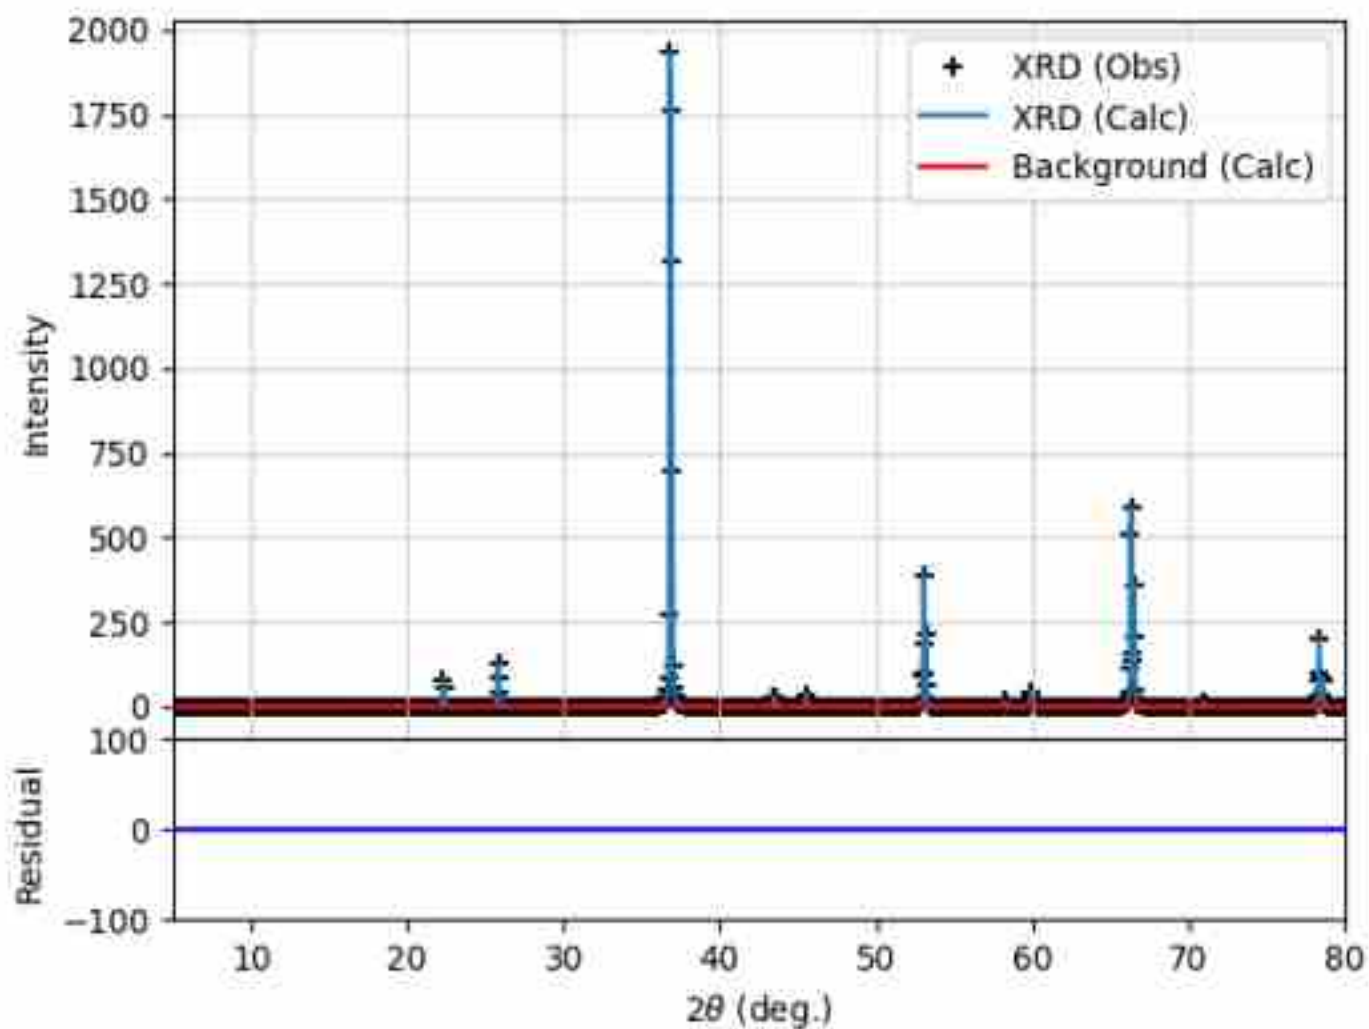

| RMSE before RR | Rwp     | RMSE after RR |
|----------------|---------|---------------|
| 0.002          | 0.00494 | 0.00023       |



# Dy1Pd3

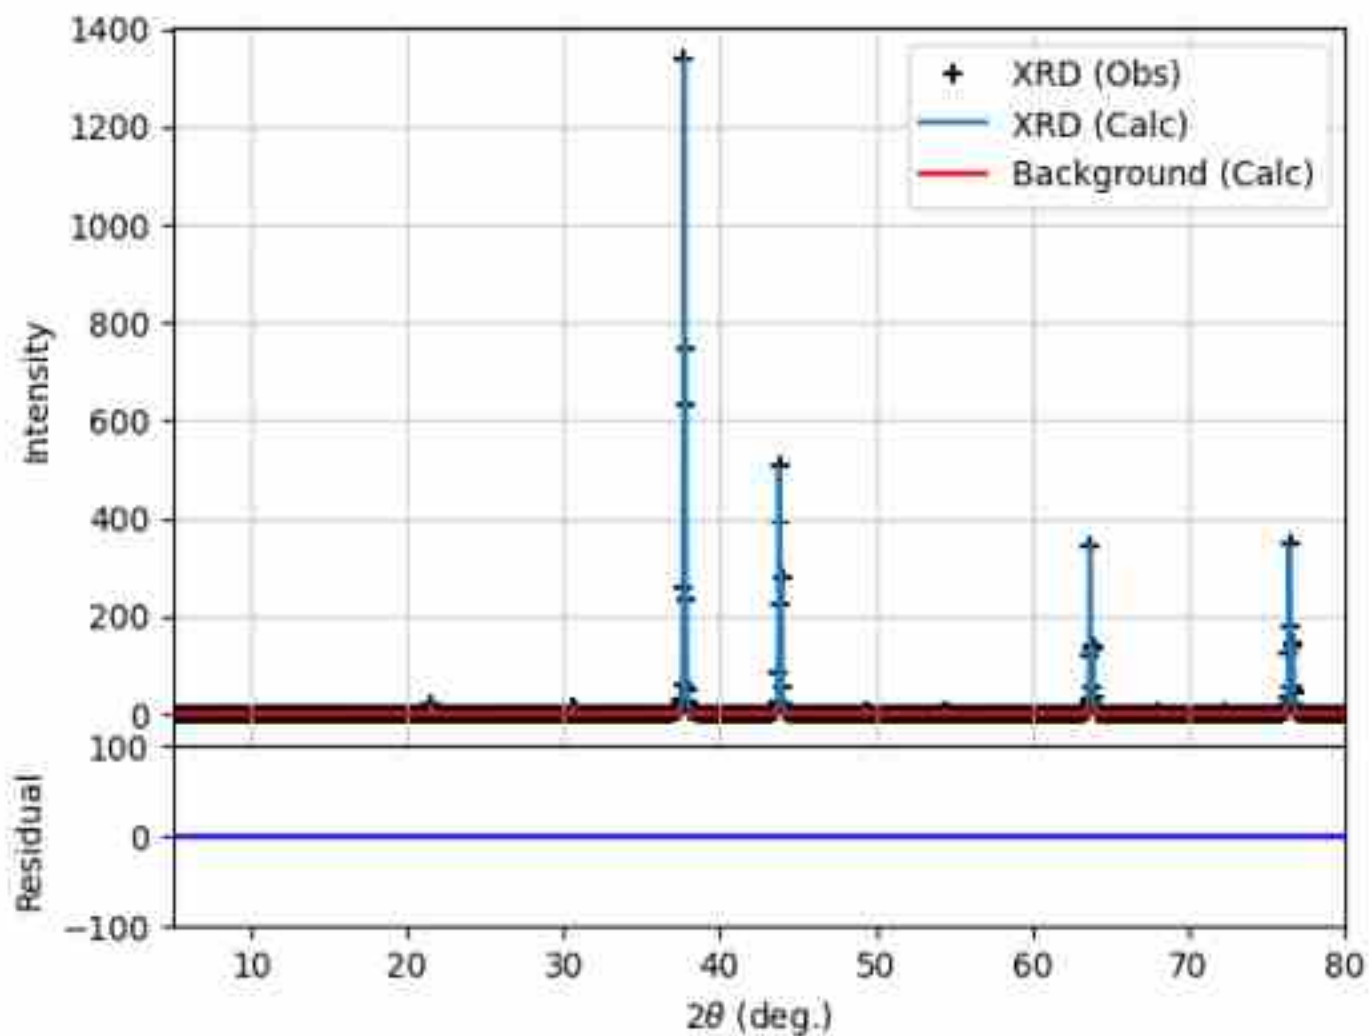

| RMSE before RR | Rwp     | RMSE after RR |
|----------------|---------|---------------|
| 0.002          | 0.00993 | 0.00067       |

# Dy1Sn1Rh2

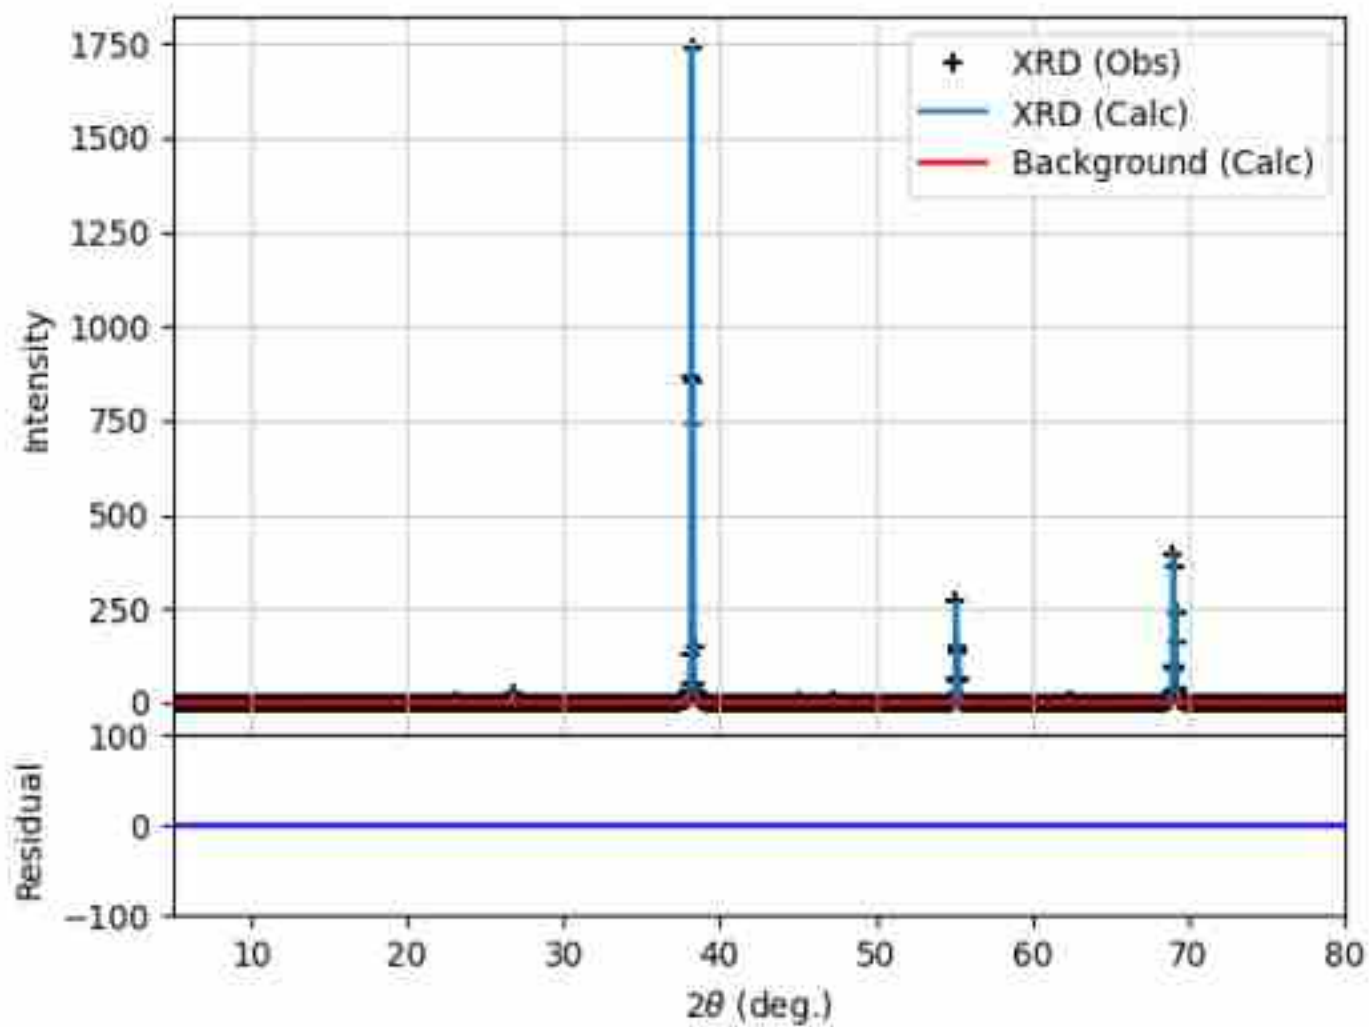

| RMSE before RR | Rwp | RMSE after RR |
|----------------|-----|---------------|
| 0.002          | 0.0 | 0.0           |

# Dy1Te1

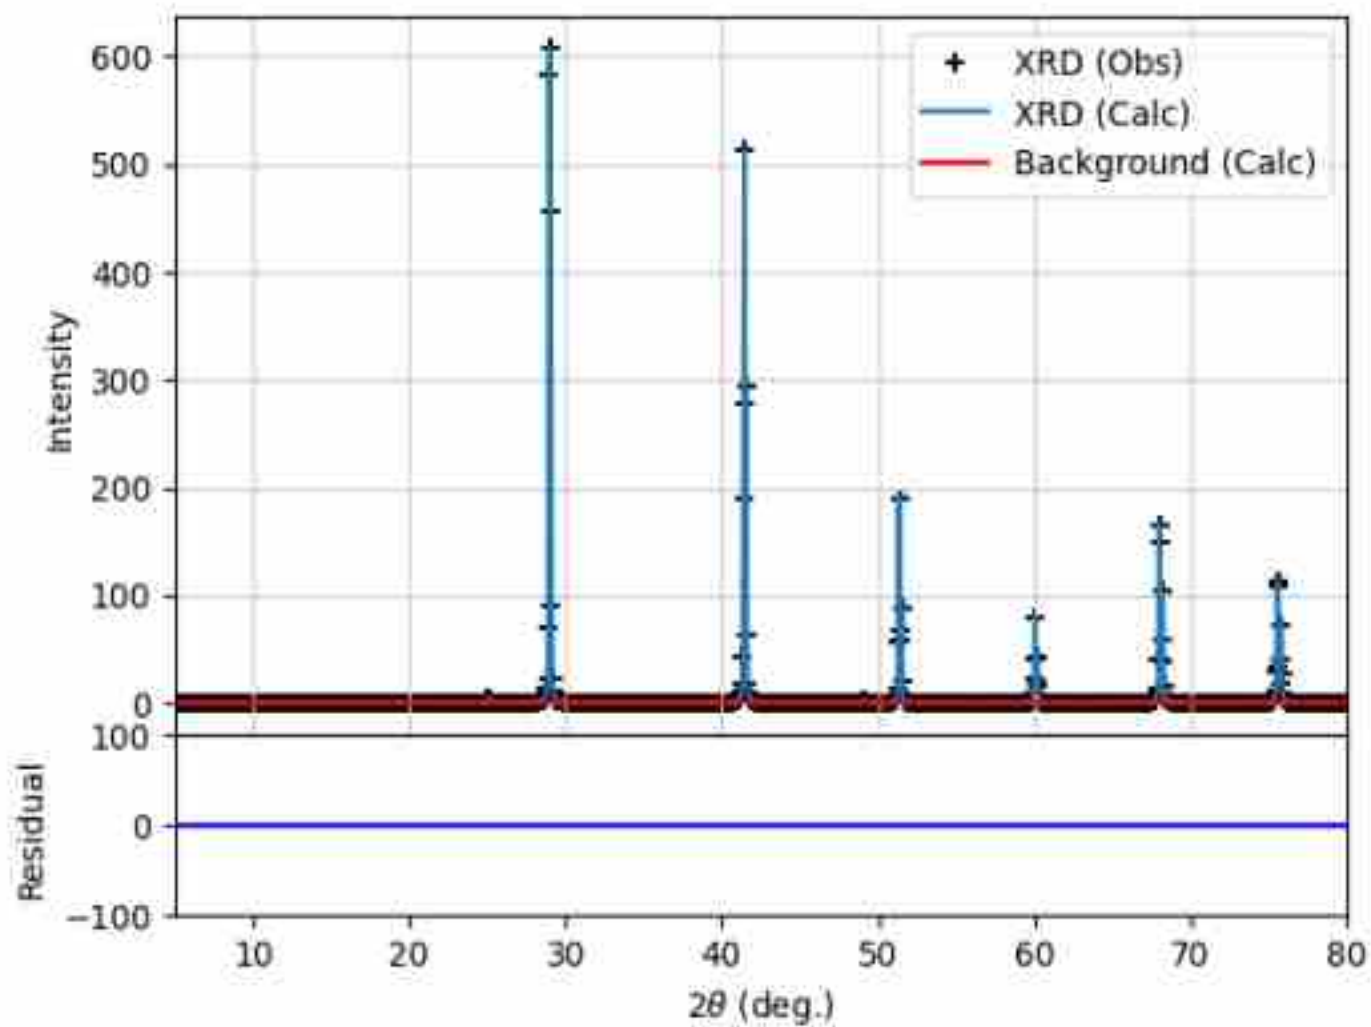

| RMSE before RR | Rwp     | RMSE after RR |
|----------------|---------|---------------|
| 0.002          | 0.14268 | 0.00135       |

# Dy1Y1Mg2

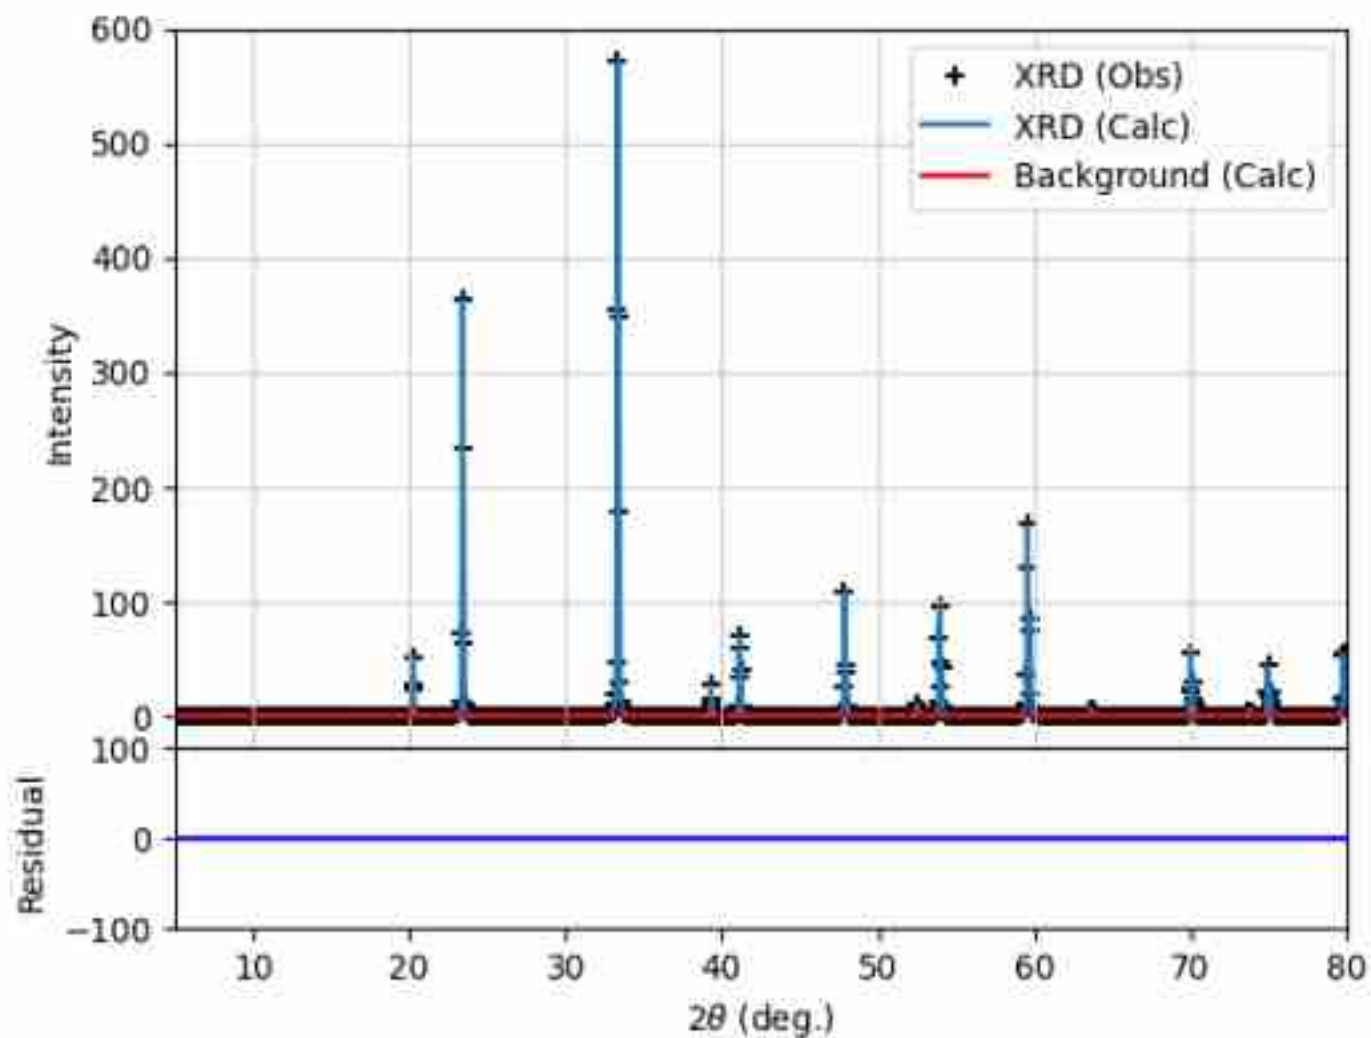

| RMSE before RR | Rwp     | RMSE after RR |
|----------------|---------|---------------|
| 0.002          | 0.00318 | 0.00065       |

# Dy1Y1Tl2

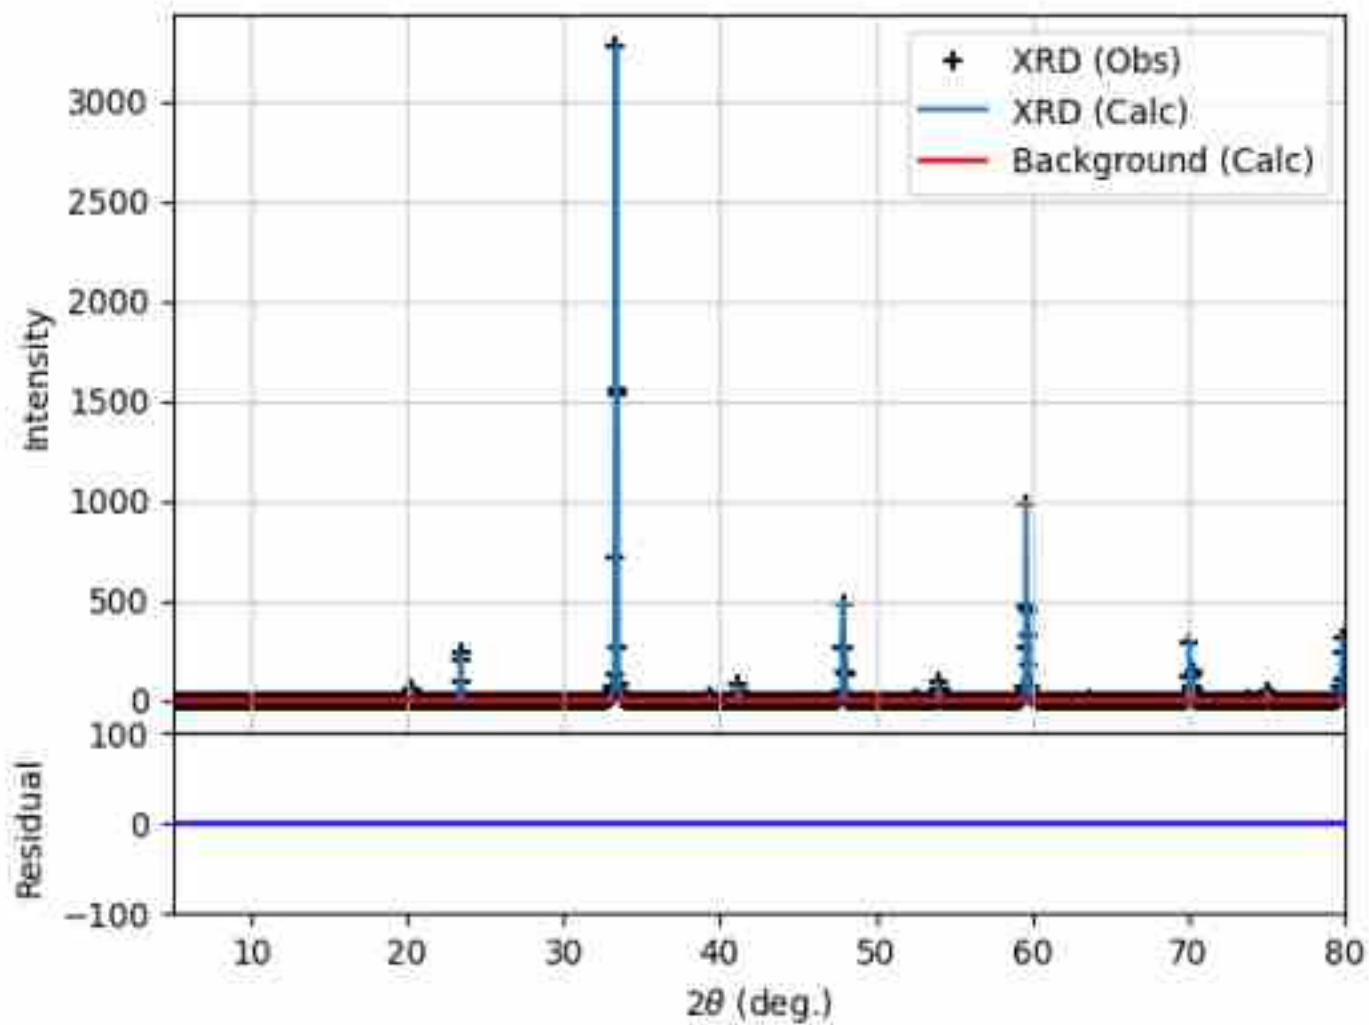

| RMSE before RR | Rwp     | RMSE after RR |
|----------------|---------|---------------|
| 0.002          | 0.06159 | 0.00211       |

# Dy<sub>2</sub>Ag<sub>1</sub>Au<sub>1</sub>

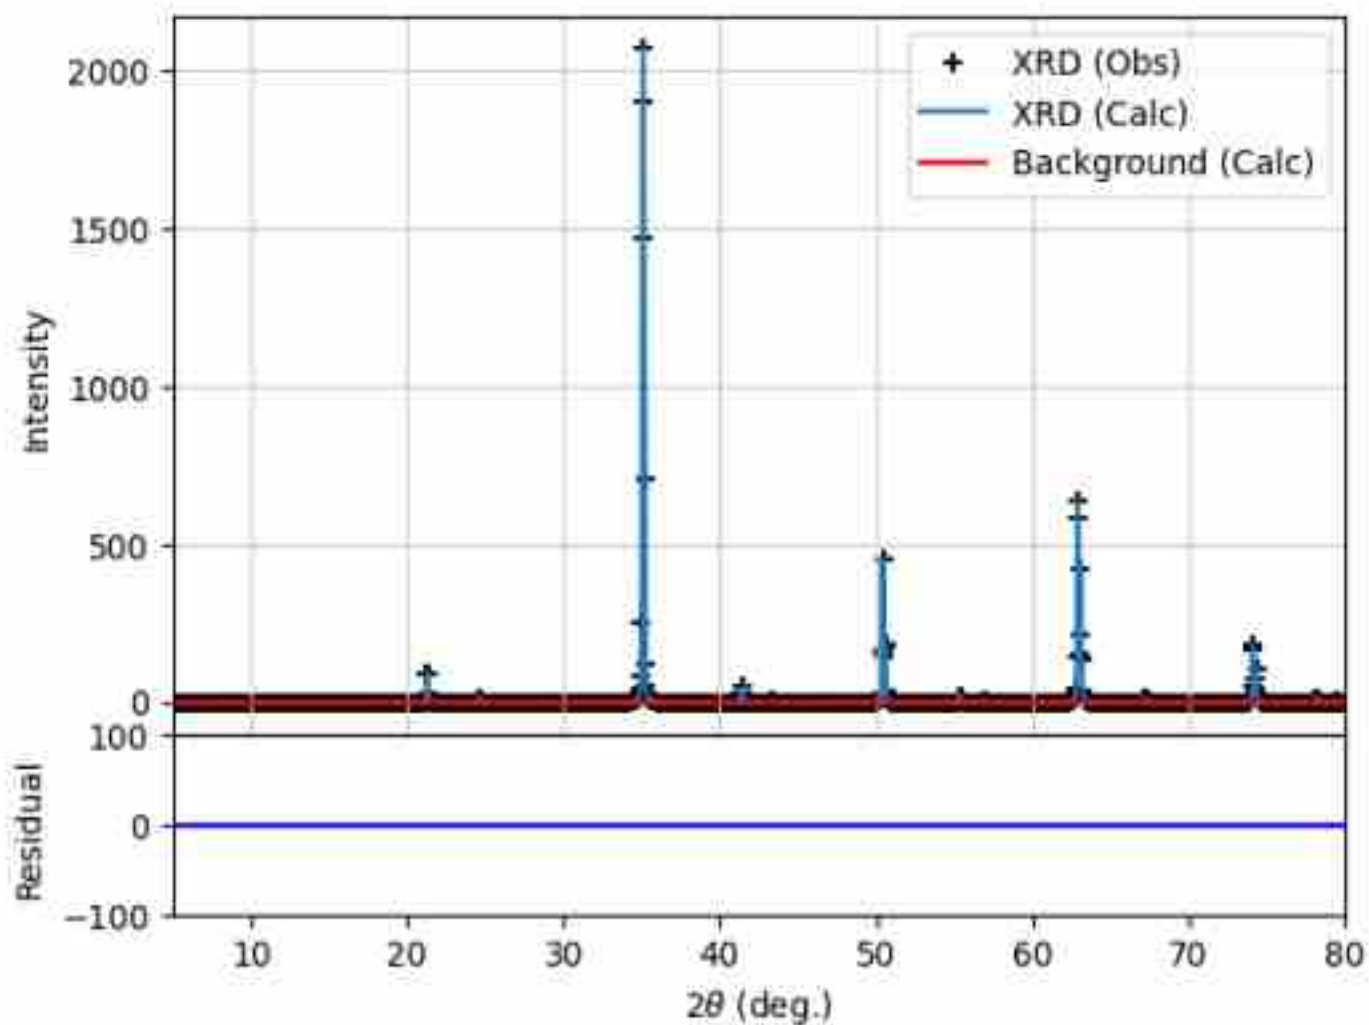

| RMSE before RR | Rwp     | RMSE after RR |
|----------------|---------|---------------|
| 0.002          | 0.00565 | 0.00028       |

# Dy<sub>2</sub>Ag<sub>10</sub>S<sub>1</sub>

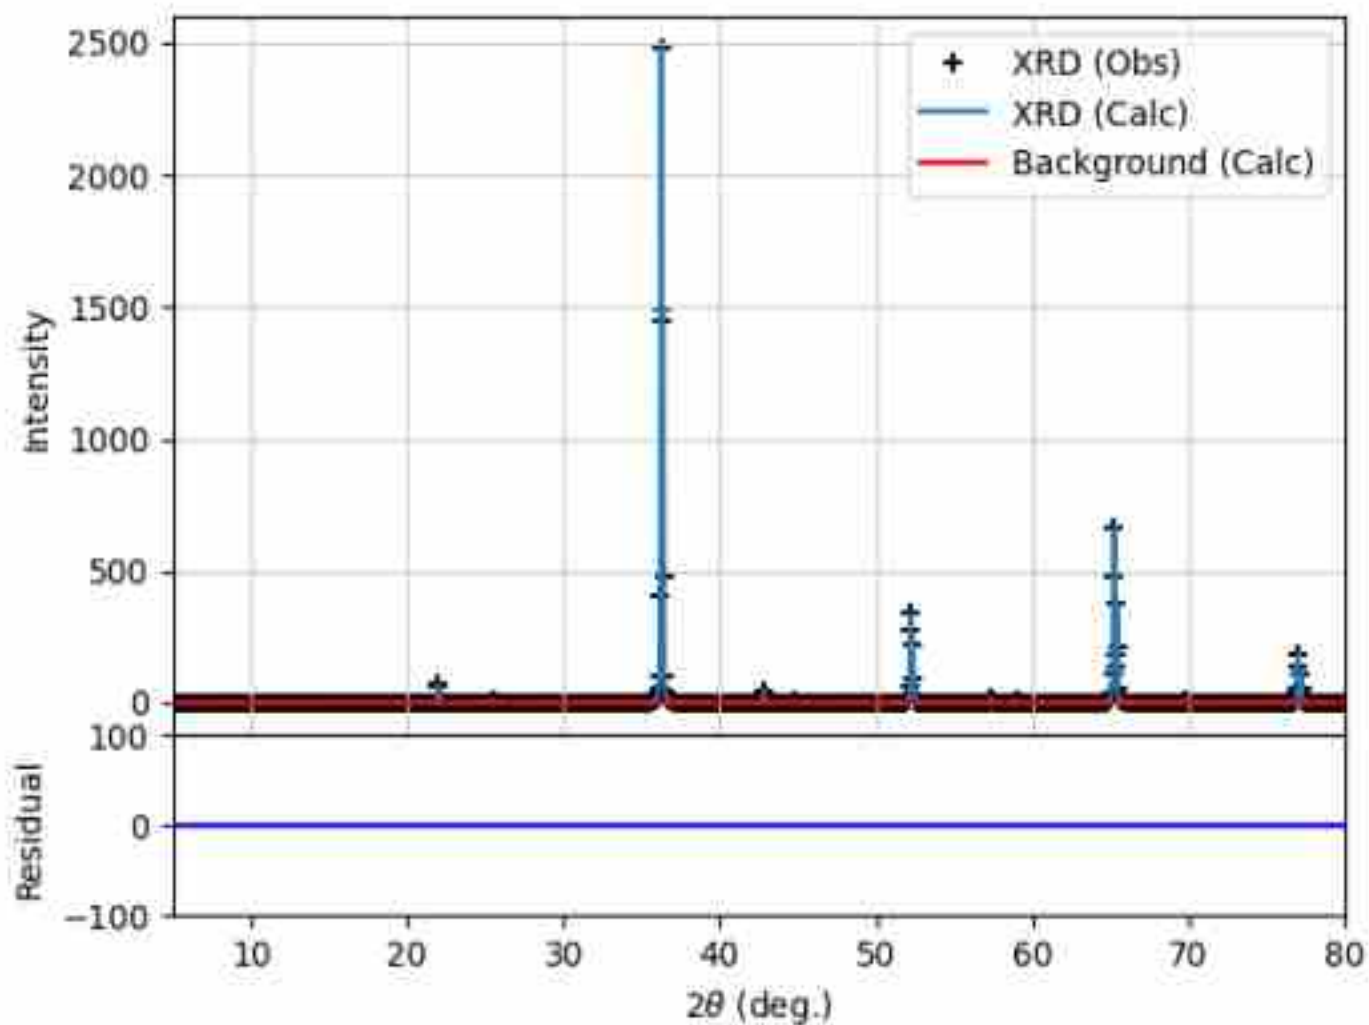

| RMSE before RR | Rwp     | RMSE after RR |
|----------------|---------|---------------|
| 0.002          | 0.00321 | 0.00016       |

# Dy<sub>2</sub>Ag<sub>1</sub>Ru<sub>1</sub>

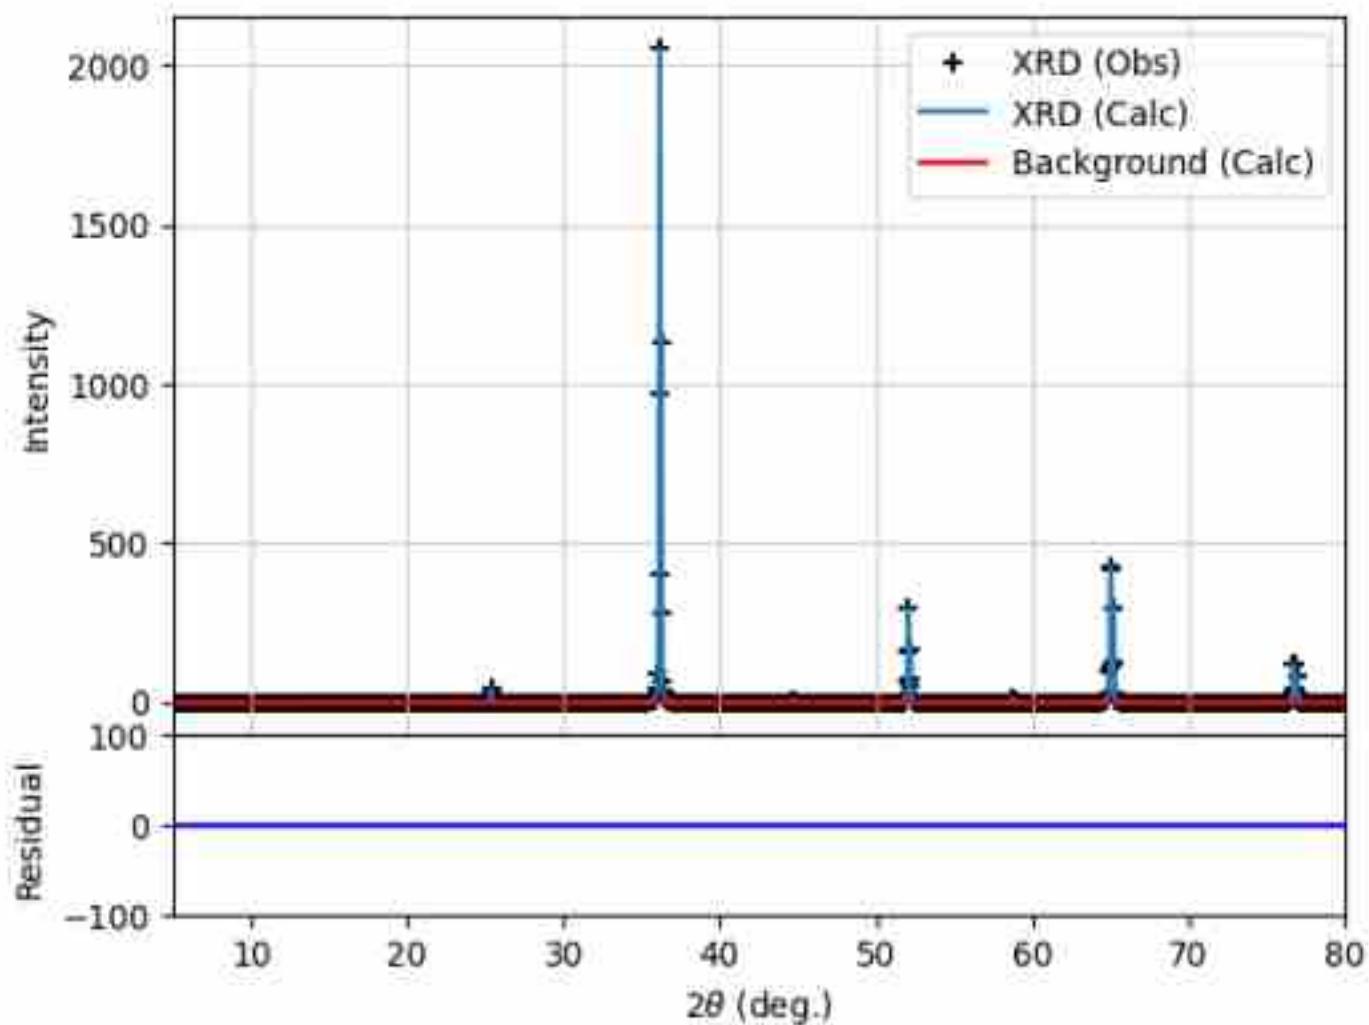

| RMSE before RR | Rwp     | RMSE after RR |
|----------------|---------|---------------|
| 0.002          | 0.02446 | 0.00141       |



# Dy<sub>2</sub>Al<sub>11</sub>Zn<sub>1</sub>

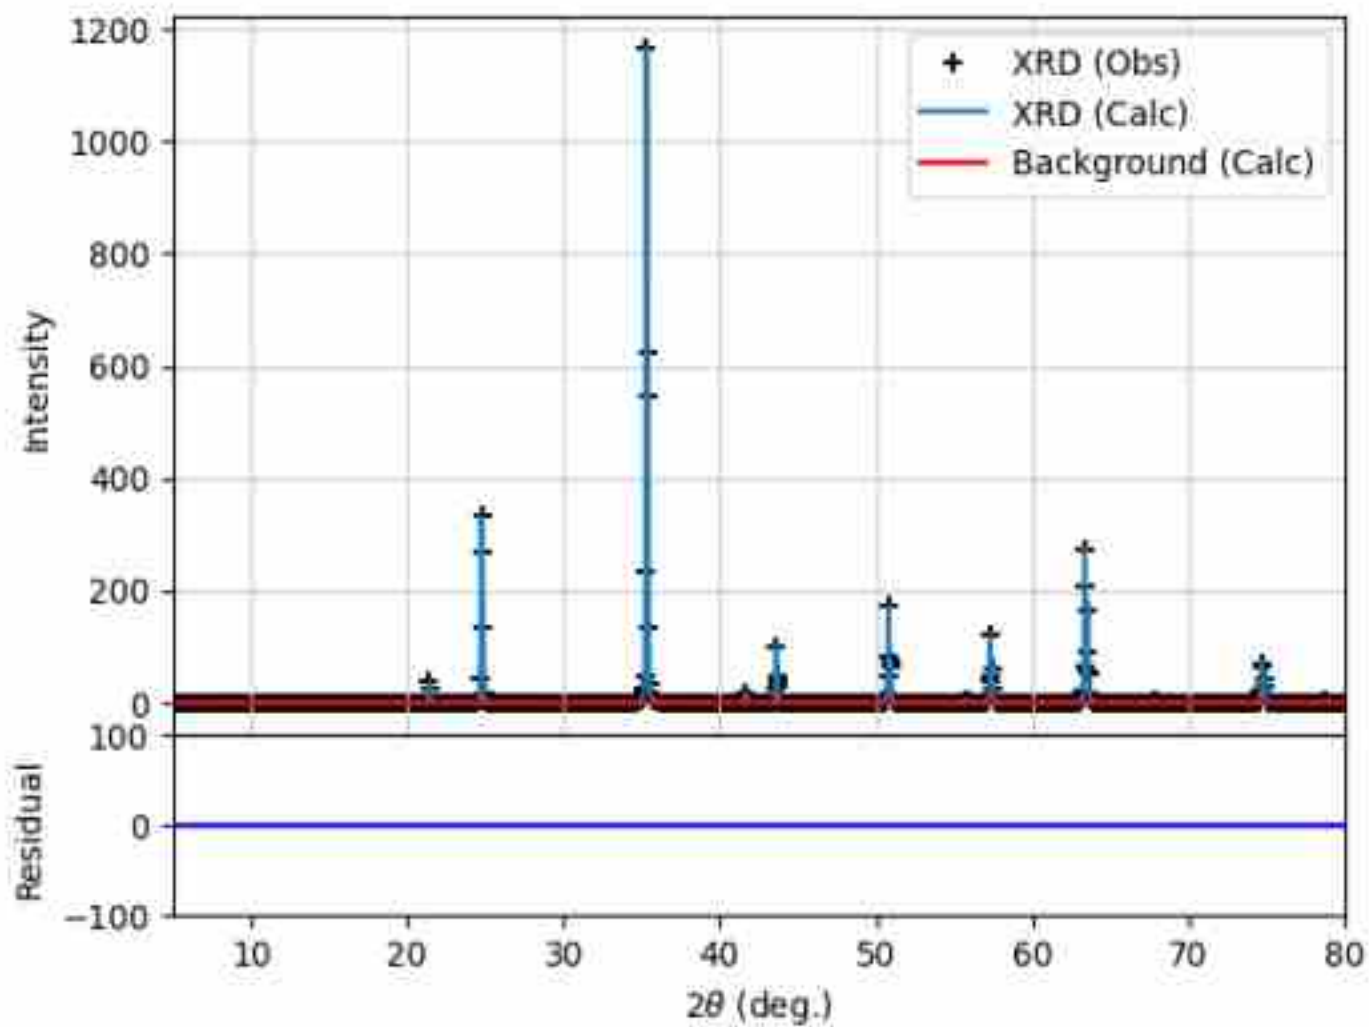

| RMSE before RR | Rwp     | RMSE after RR |
|----------------|---------|---------------|
| 0.002          | 0.00465 | 0.00039       |

# Dy<sub>2</sub>Cu<sub>1</sub>Rh<sub>1</sub>

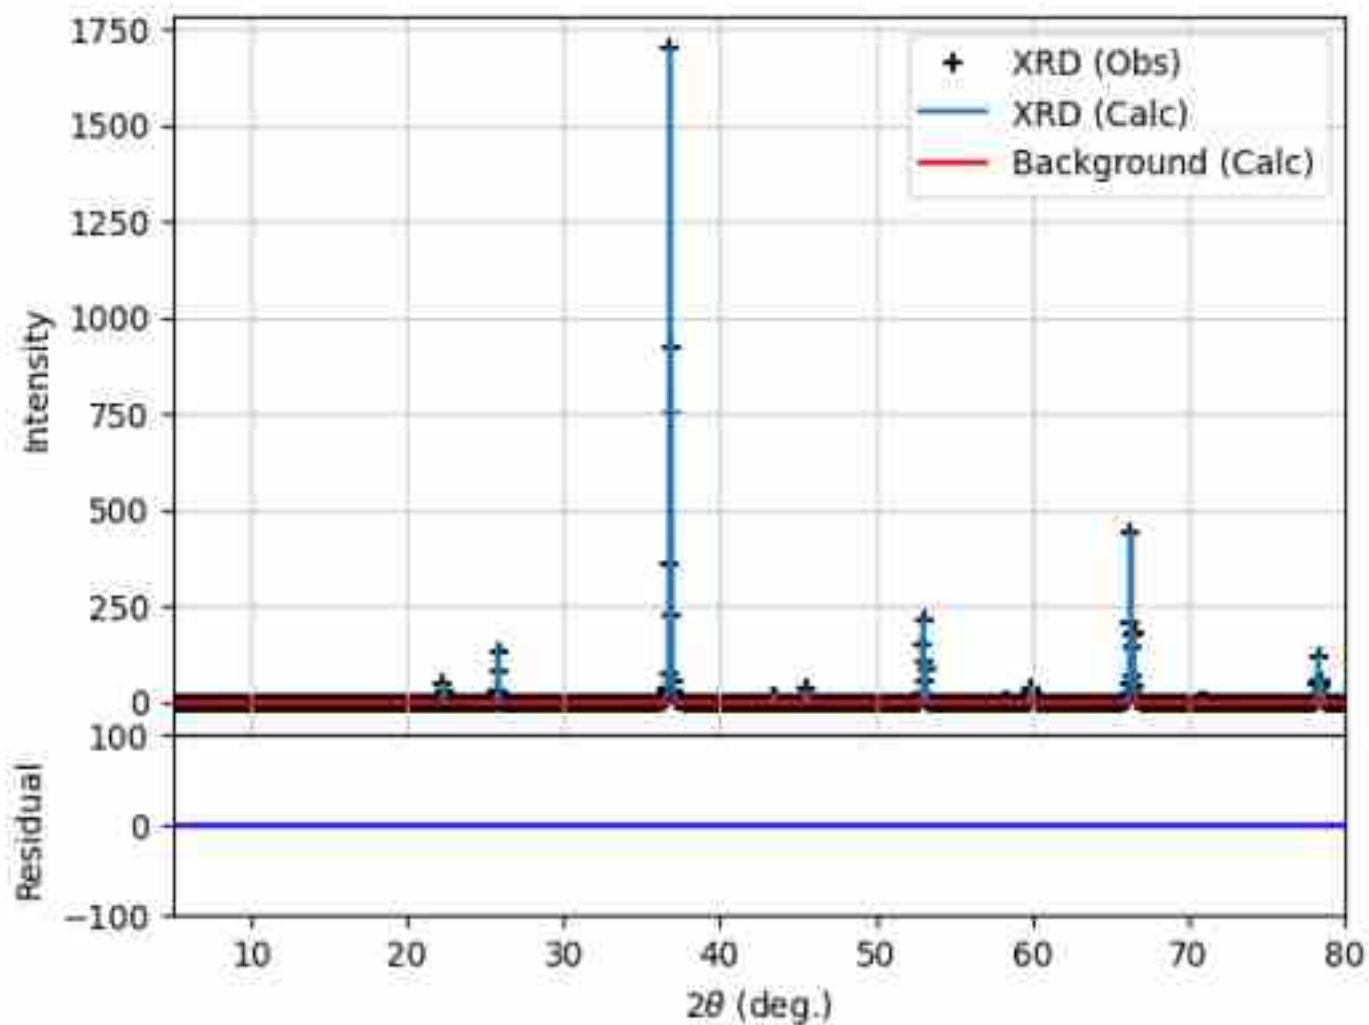

| RMSE before RR | Rwp     | RMSE after RR |
|----------------|---------|---------------|
| 0.002          | 0.00389 | 0.00027       |

# Dy<sub>2</sub>InAg<sub>1</sub>

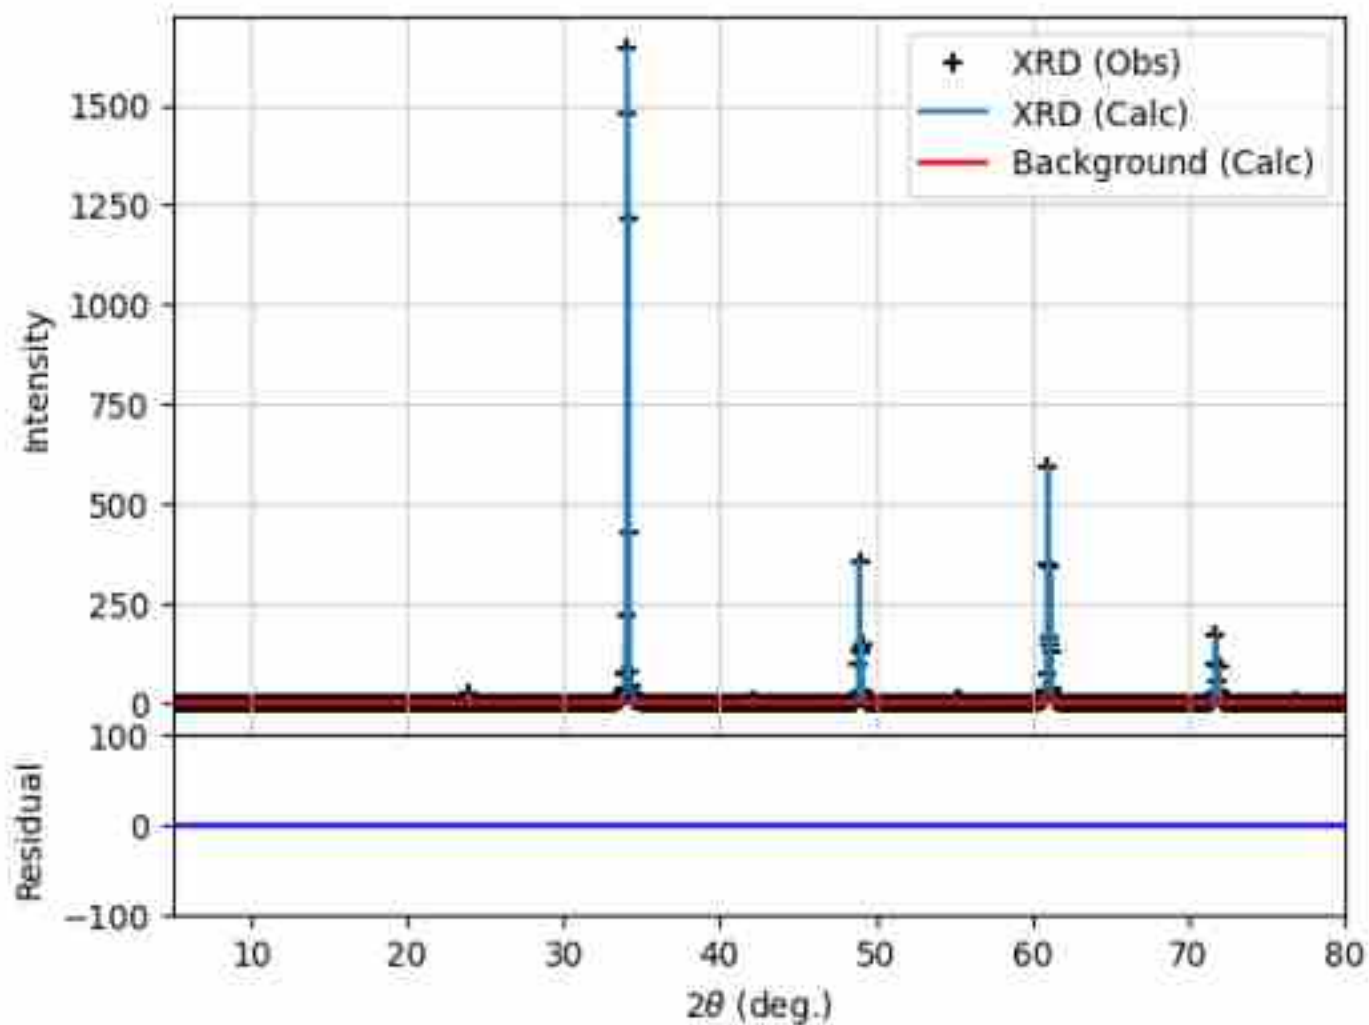

| RMSE before RR | Rwp     | RMSE after RR |
|----------------|---------|---------------|
| 0.002          | 0.00728 | 0.00011       |

# Dy<sub>2</sub>Ir<sub>1</sub>Au<sub>1</sub>

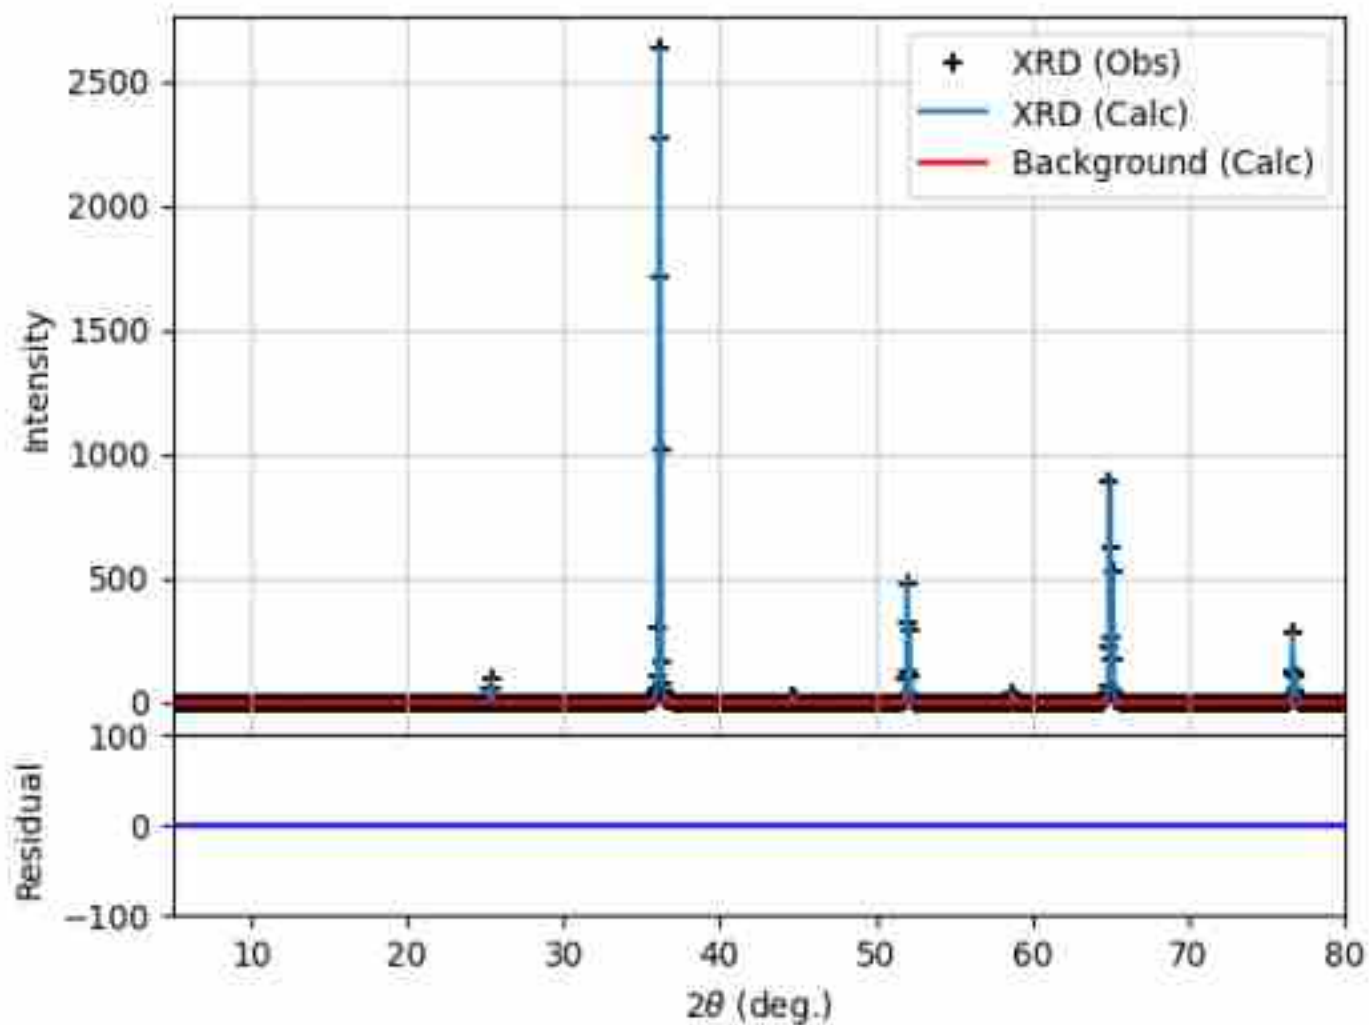

| RMSE before RR | Rwp    | RMSE after RR |
|----------------|--------|---------------|
| 0.002          | 0.0036 | 0.0002        |

# Dy<sub>2</sub>Pd<sub>1</sub>Rh<sub>1</sub>

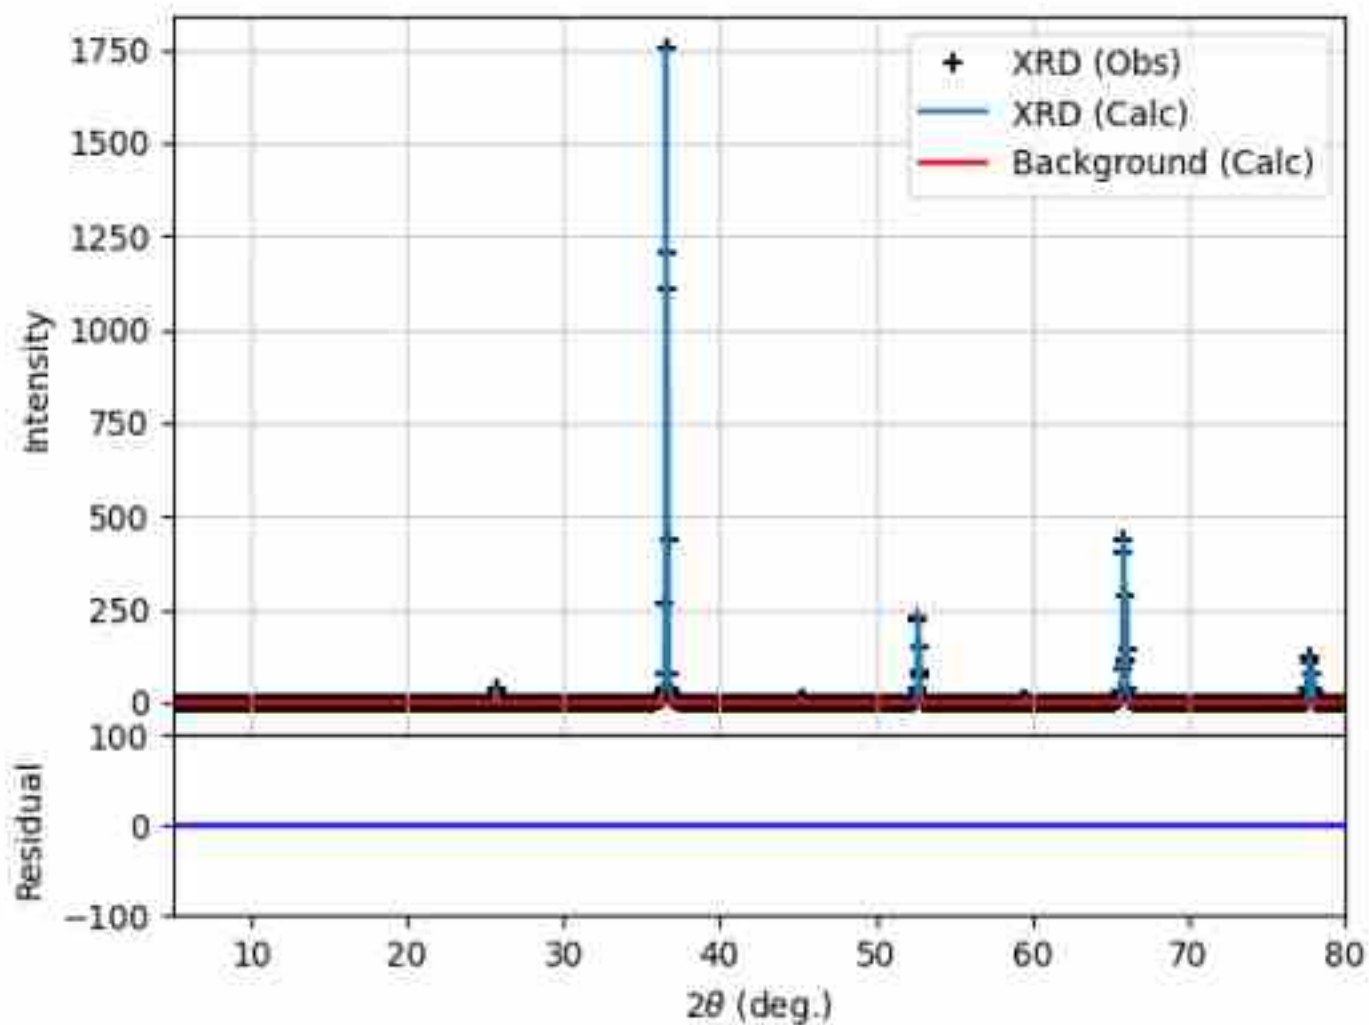

| RMSE before RR | Rwp    | RMSE after RR |
|----------------|--------|---------------|
| 0.002          | 0.0272 | 0.00058       |

# Dy<sub>2</sub>ZnIn<sub>1</sub>

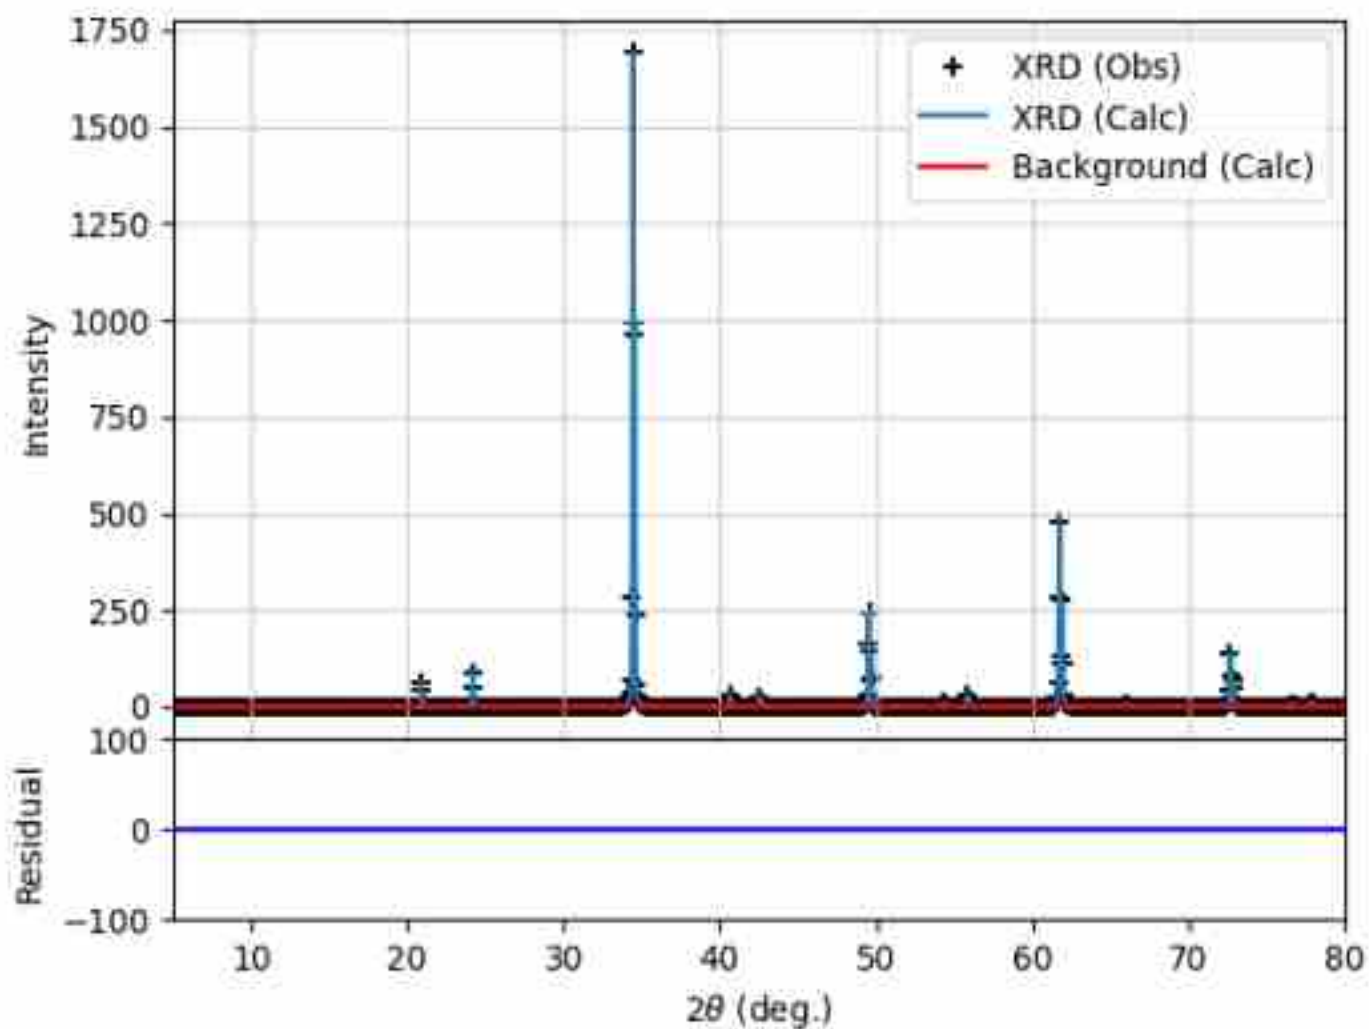

| RMSE before RR | Rwp     | RMSE after RR |
|----------------|---------|---------------|
| 0.002          | 0.00644 | 0.00075       |

# Dy<sub>2</sub>Zn<sub>1</sub>Os<sub>1</sub>

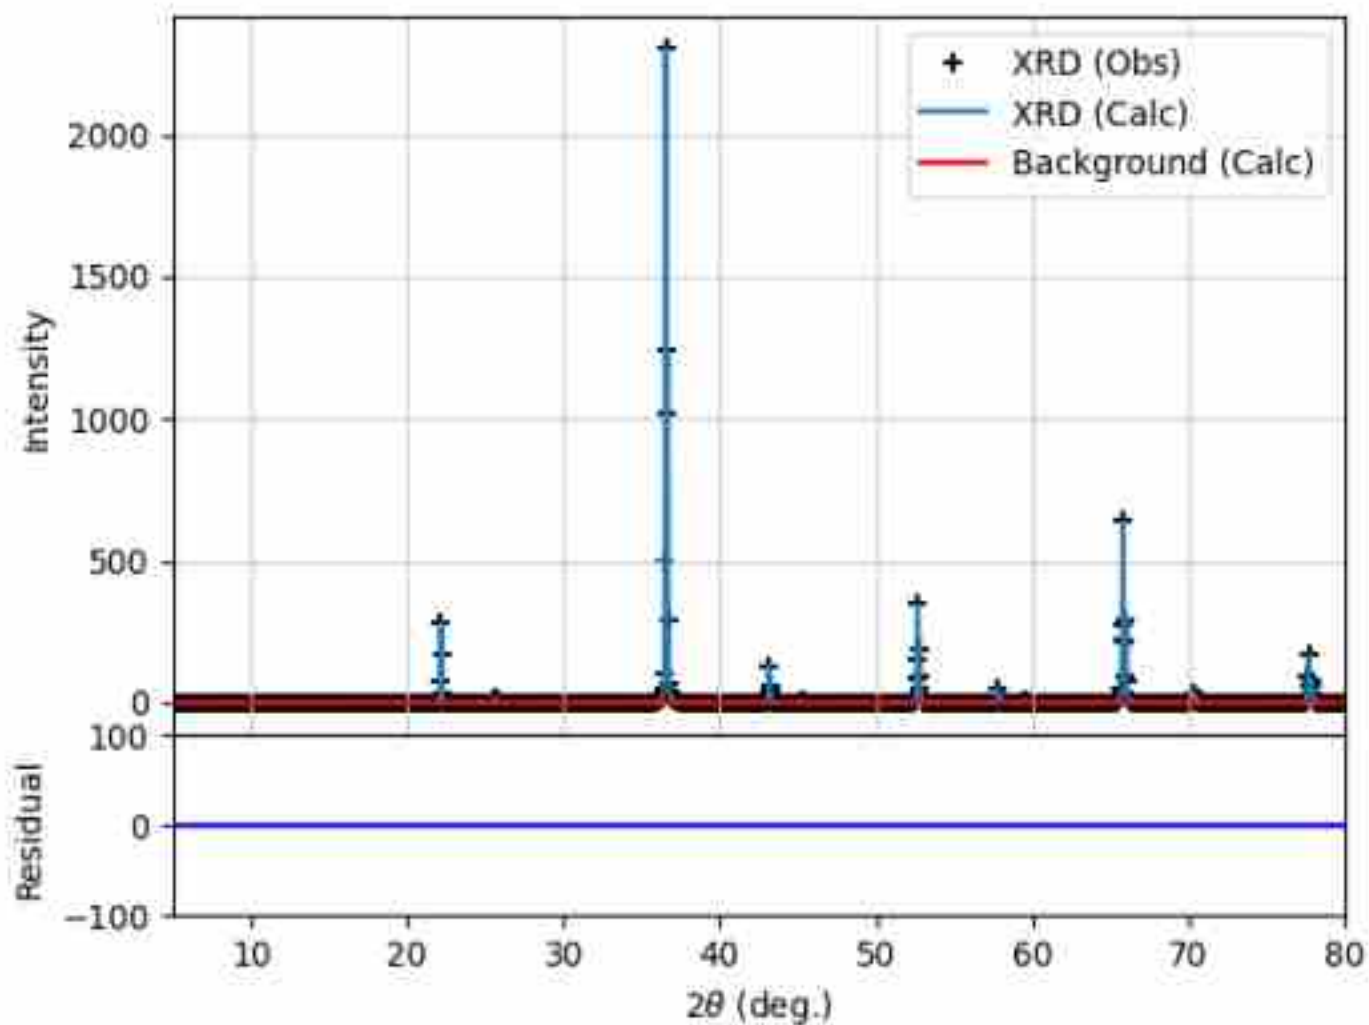

| RMSE before RR | Rwp     | RMSE after RR |
|----------------|---------|---------------|
| 0.002          | 0.14349 | 0.00205       |

# Dy<sub>3</sub>Tm<sub>1</sub>Mn<sub>8</sub>

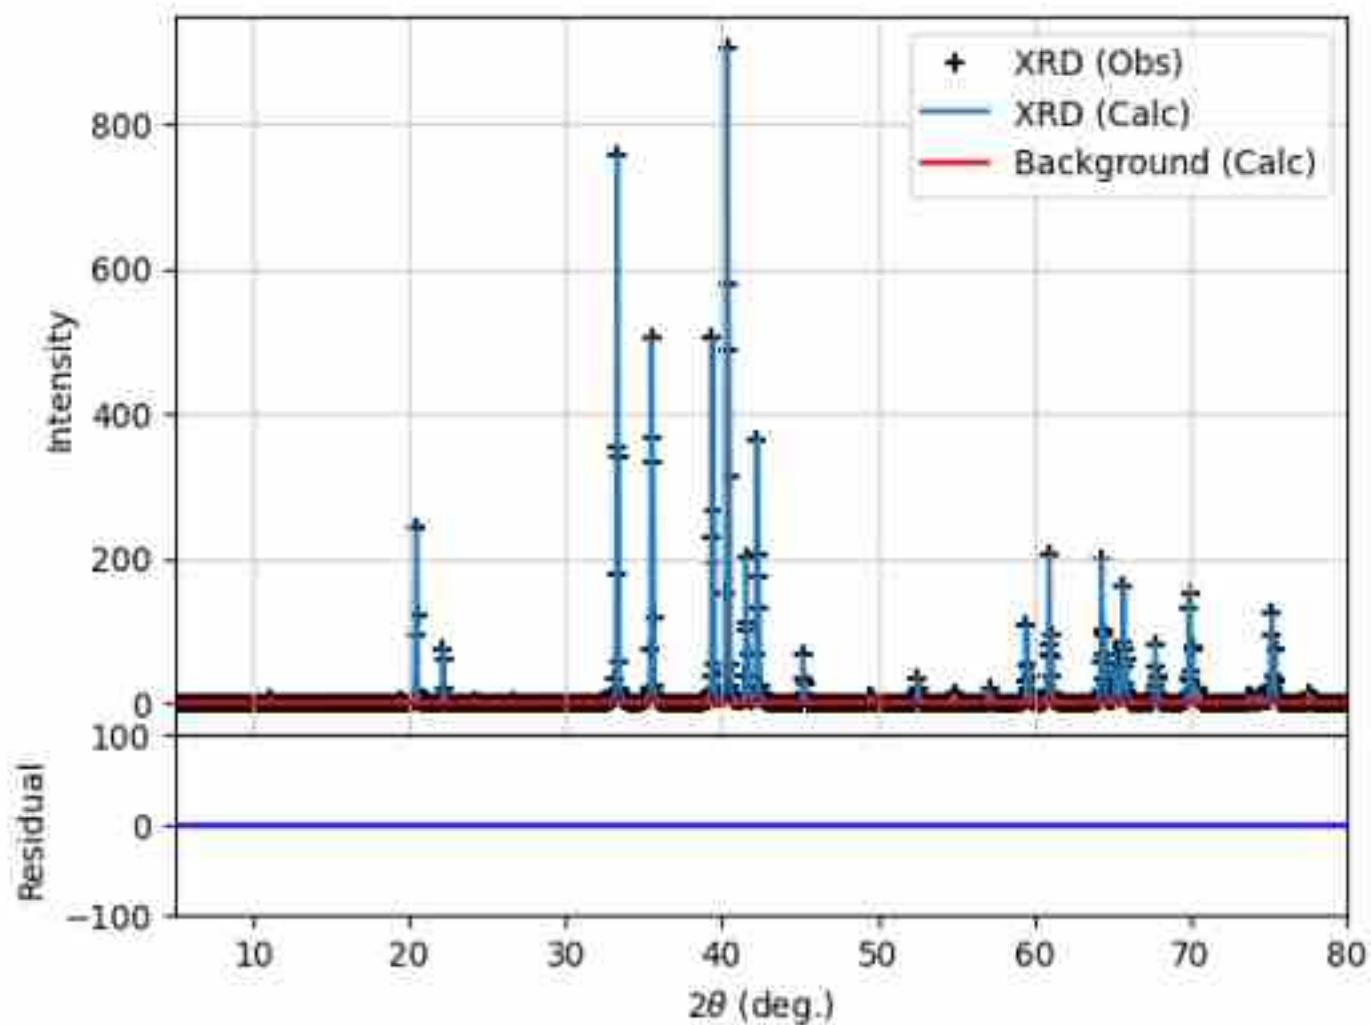

| RMSE before RR | Rwp     | RMSE after RR |
|----------------|---------|---------------|
| 0.02           | 0.00431 | 0.00052       |



# Dy<sub>4</sub>Co<sub>1</sub>Sn<sub>8</sub>

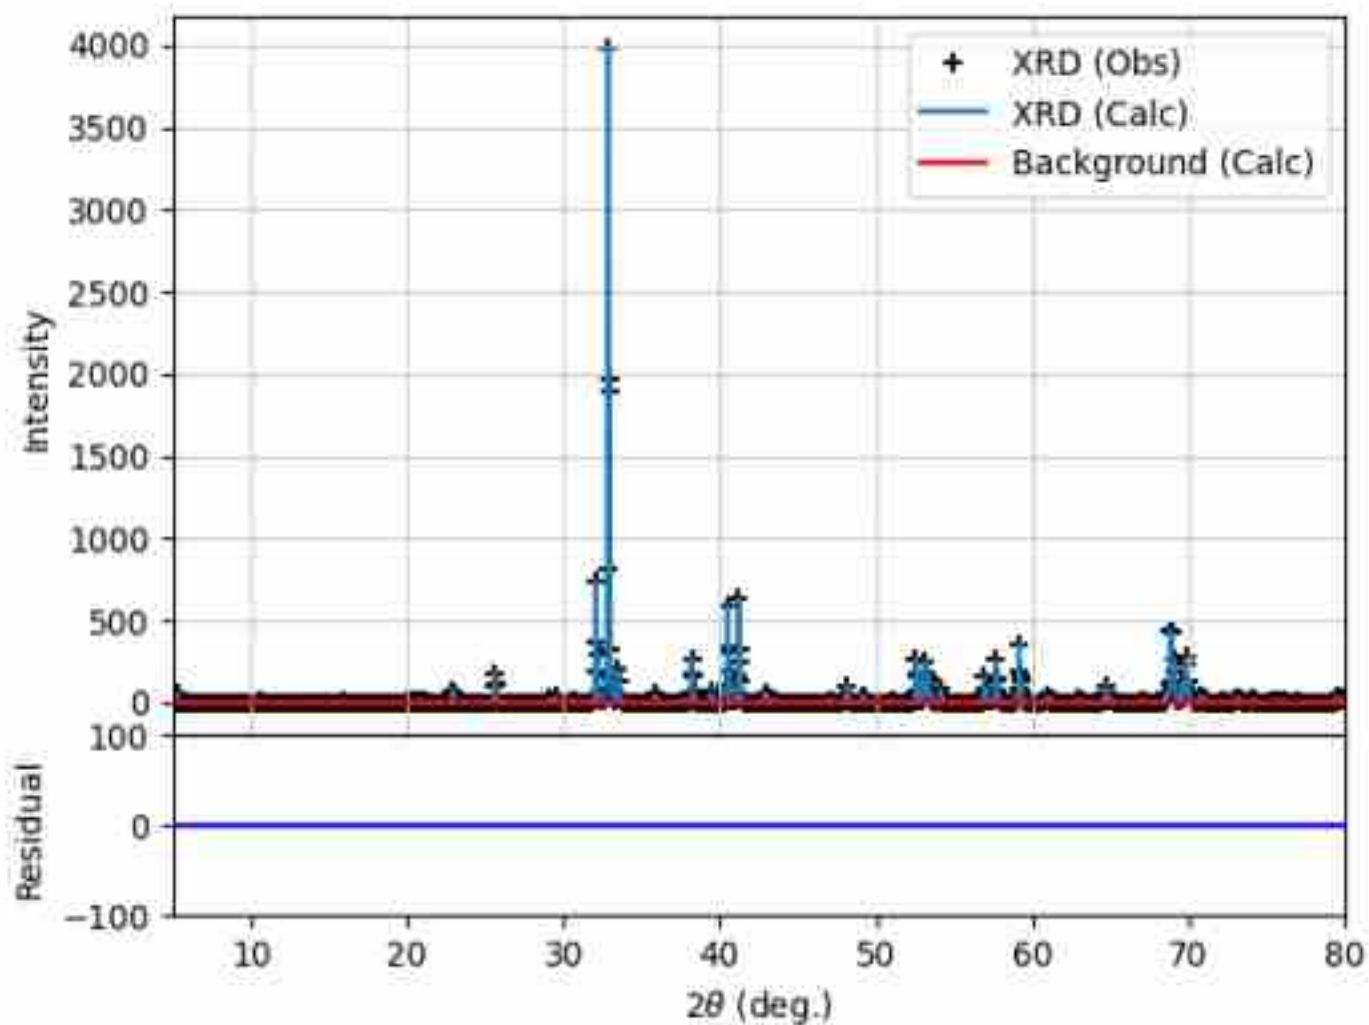

| RMSE before RR | Rwp     | RMSE after RR |
|----------------|---------|---------------|
| 0.02           | 0.00396 | 0.00022       |

# Dy<sub>4</sub>In<sub>4</sub>O<sub>12</sub>

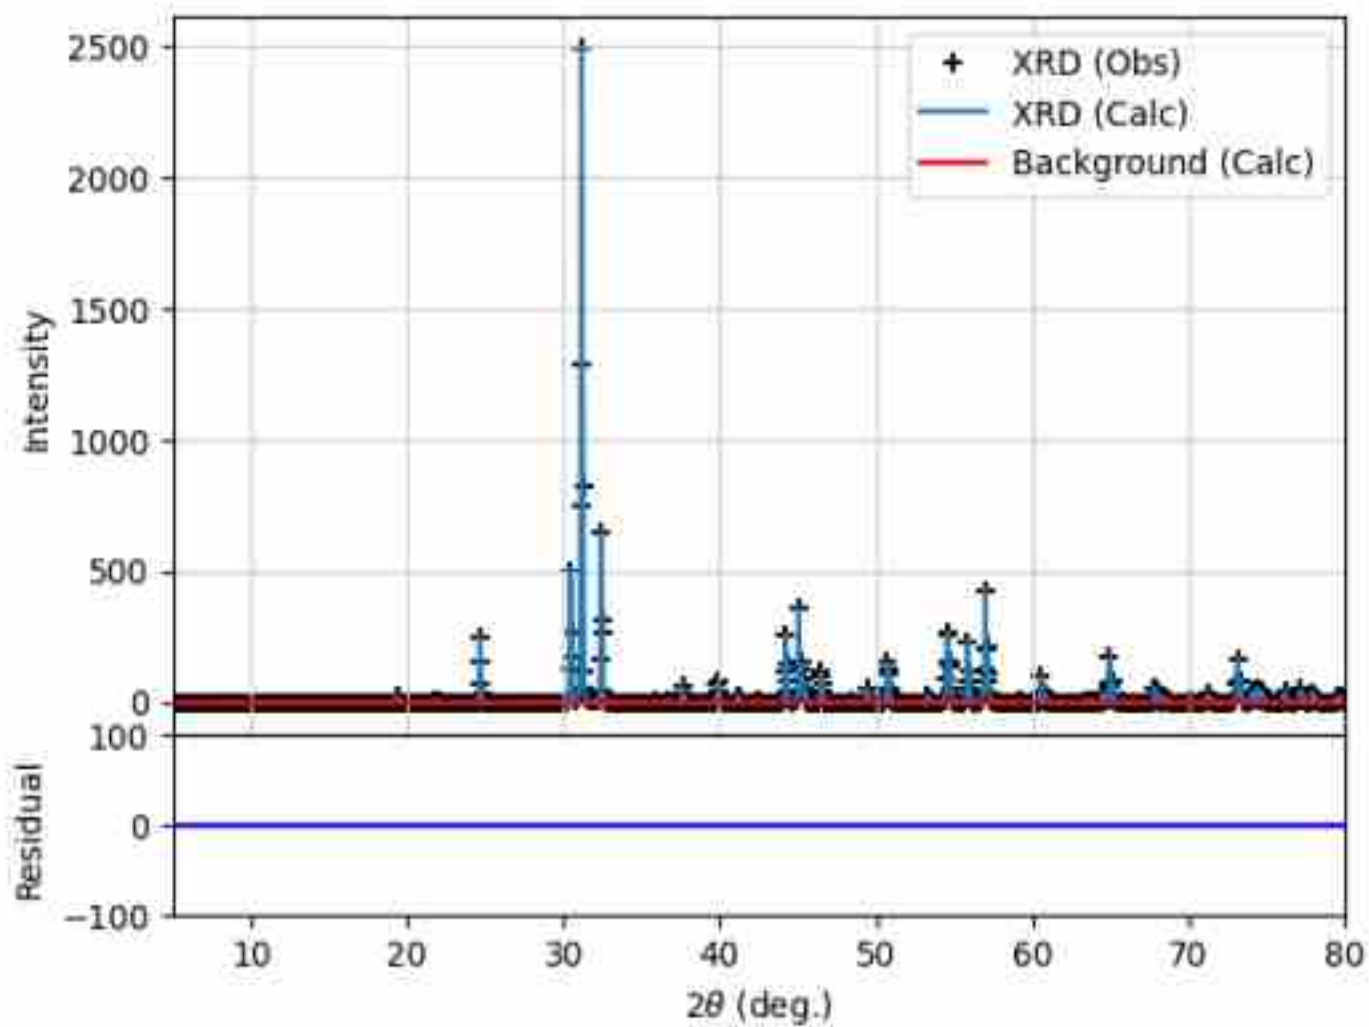

| RMSE before RR | Rwp     | RMSE after RR |
|----------------|---------|---------------|
| 0.02           | 0.00486 | 0.00214       |

# Dy<sub>6</sub>S<sub>2</sub>O<sub>2</sub>F<sub>10</sub>

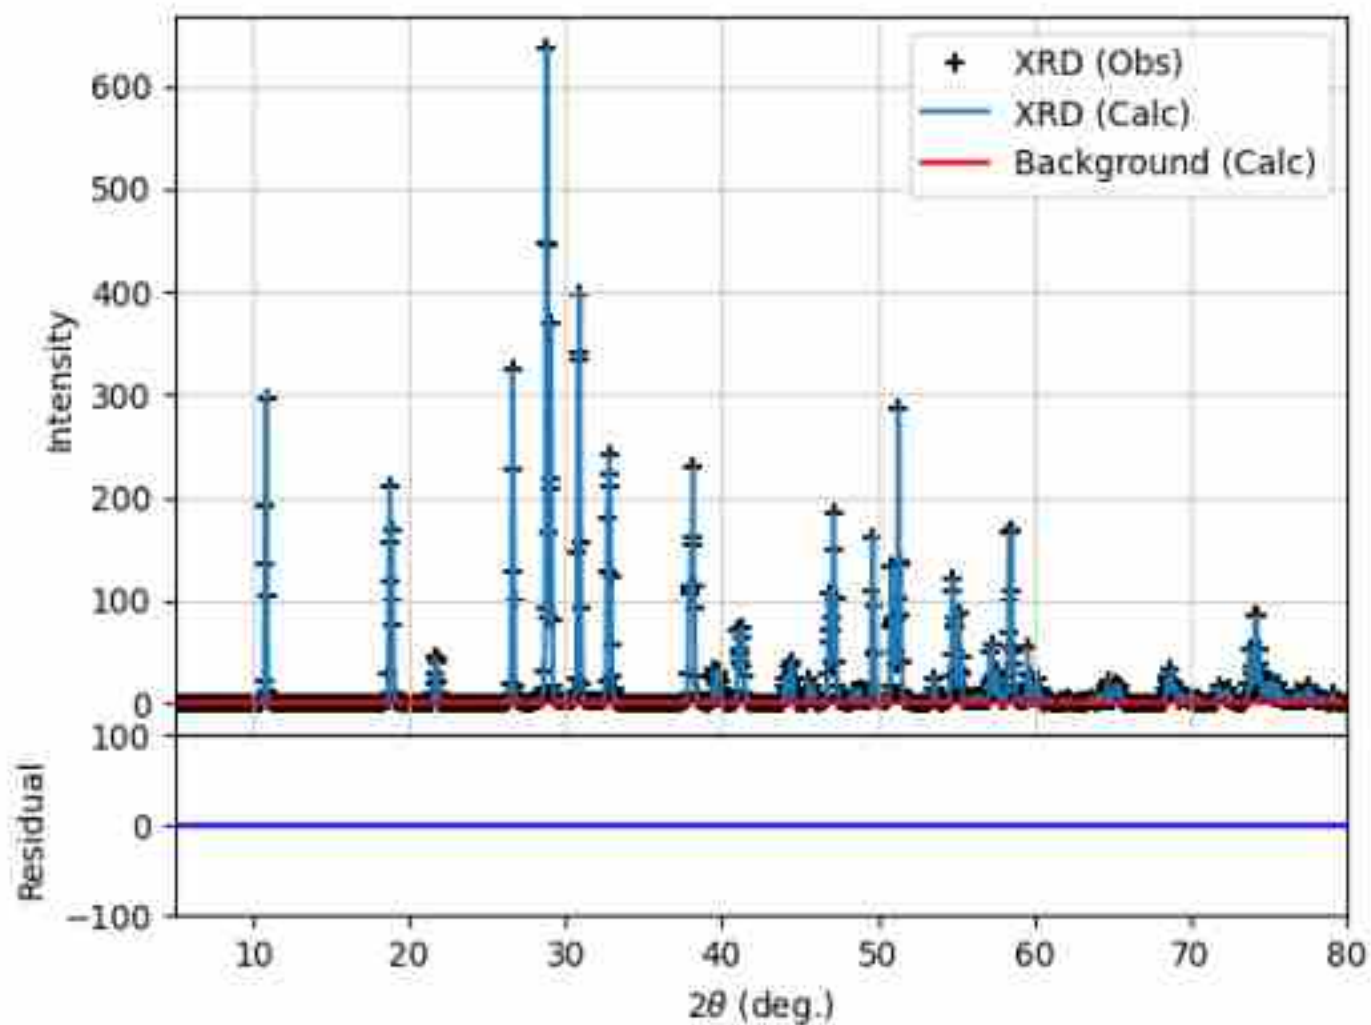

| RMSE before RR | Rwp     | RMSE after RR |
|----------------|---------|---------------|
| 0.02           | 0.00242 | 0.00065       |

# Dy<sub>10</sub>Cu<sub>2</sub>Pb<sub>6</sub>

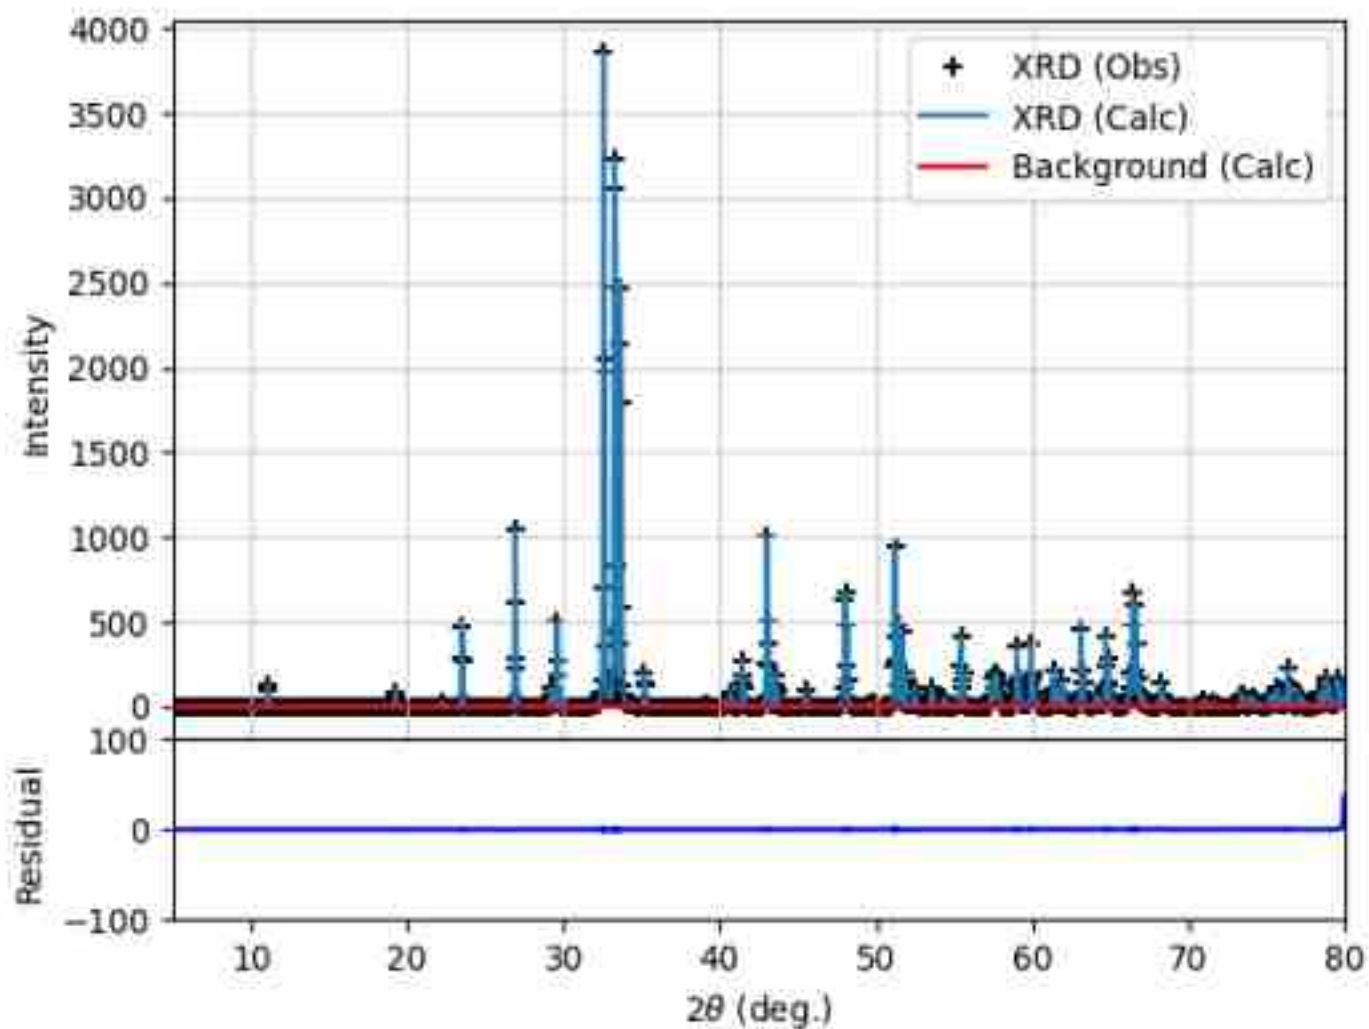

| RMSE before RR | Rwp     | RMSE after RR |
|----------------|---------|---------------|
| 0.02           | 2.76241 | 0.0104        |

# Er1Cd1Hg2

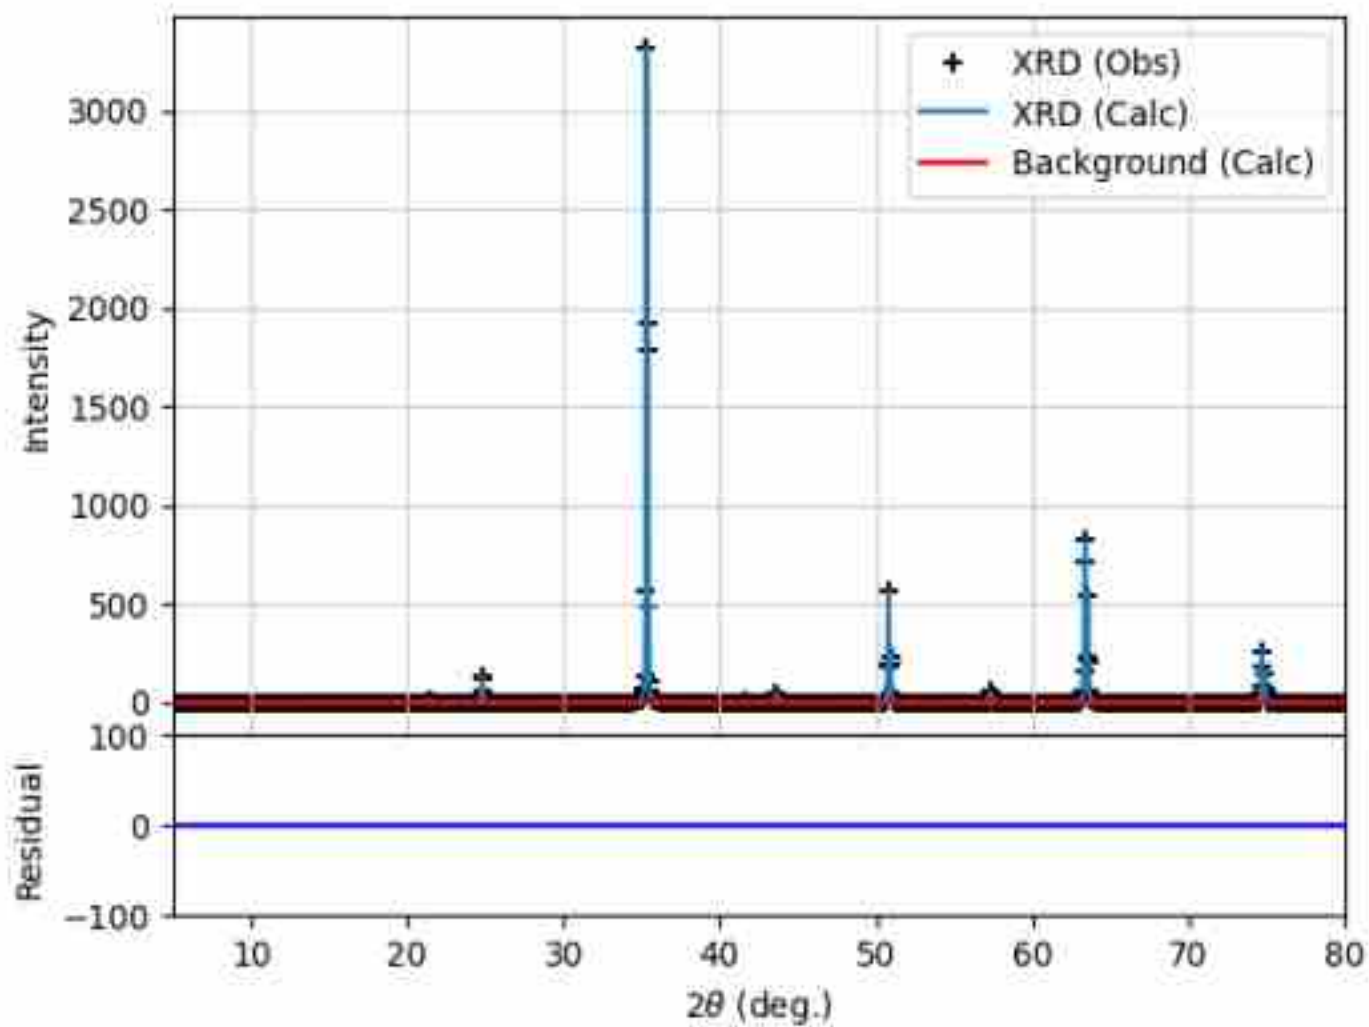

| RMSE before RR | Rwp     | RMSE after RR |
|----------------|---------|---------------|
| 0.002          | 0.01037 | 0.00064       |

# Er1Cu1

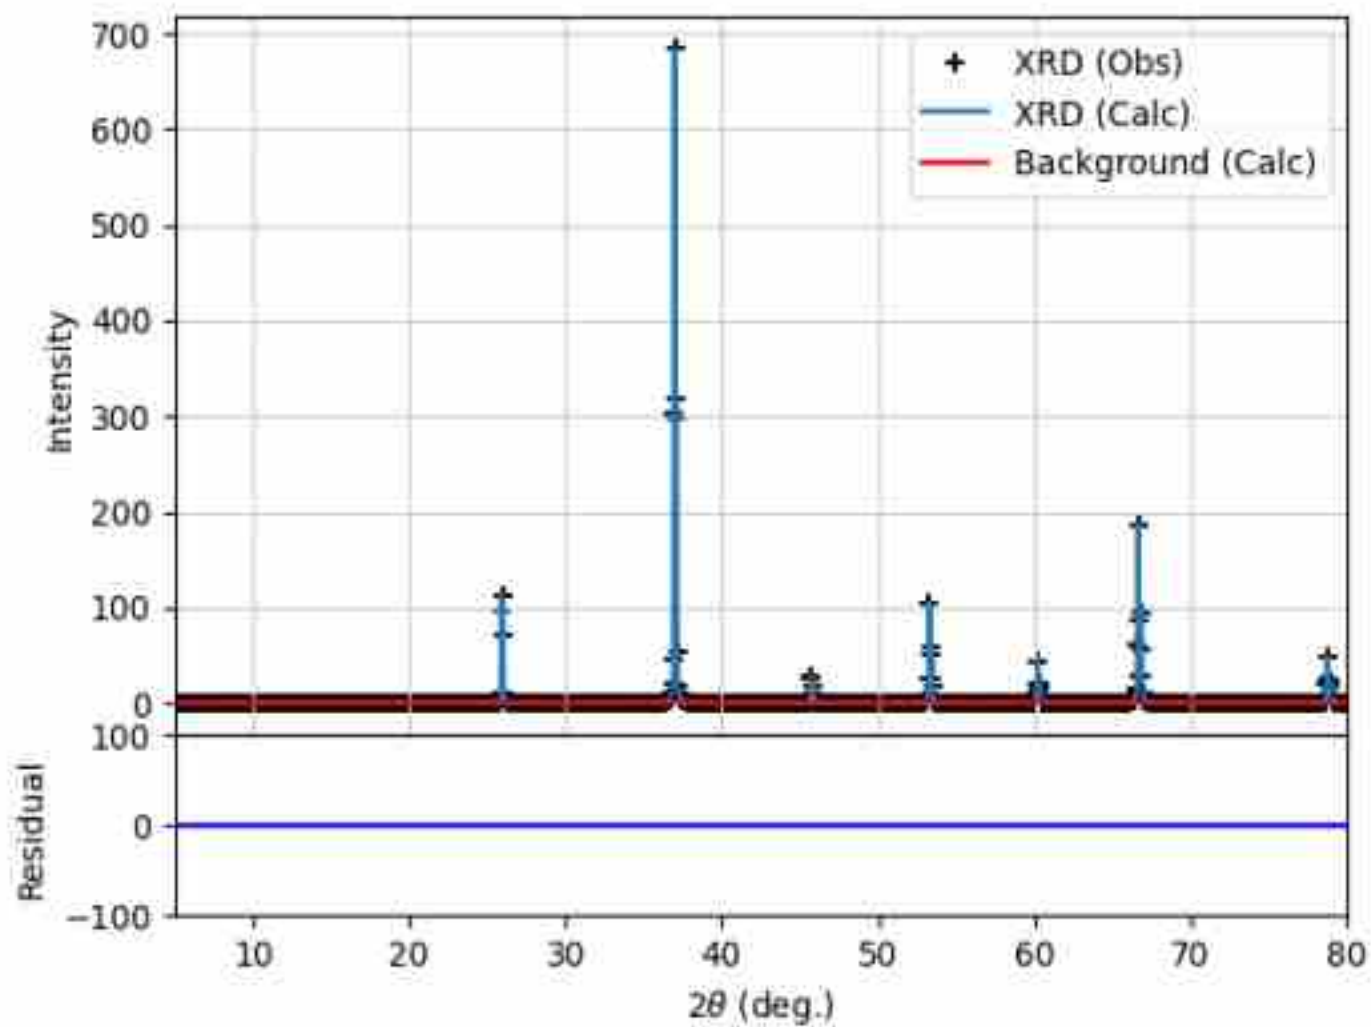

| RMSE before RR | Rwp     | RMSE after RR |
|----------------|---------|---------------|
| 0.002          | 0.00976 | 0.00101       |

# Er1Lu1Cu2

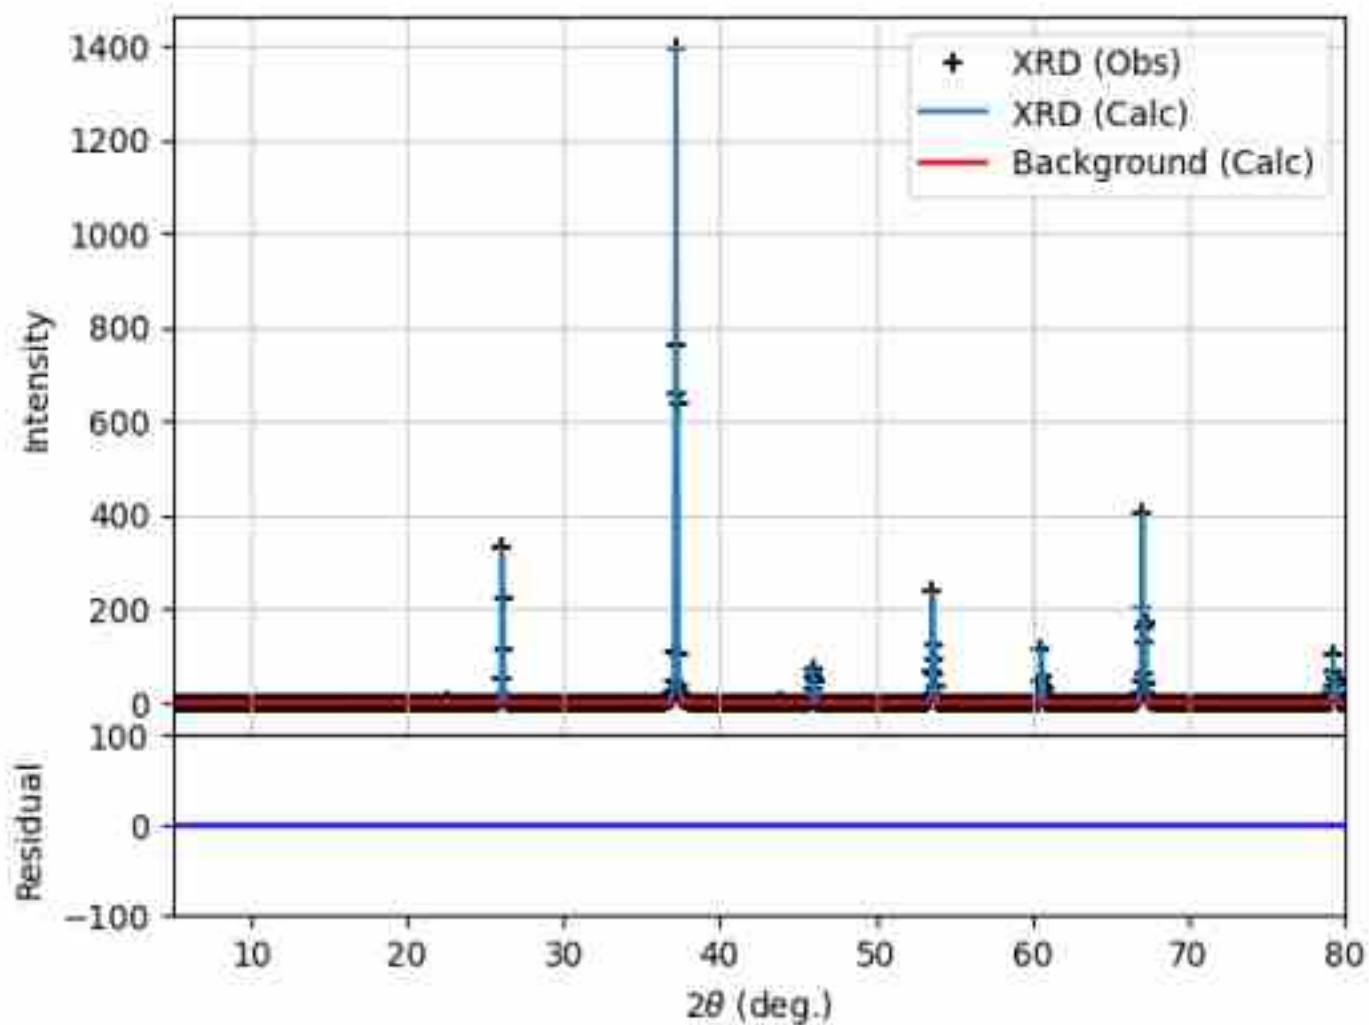

| RMSE before RR | Rwp     | RMSE after RR |
|----------------|---------|---------------|
| 0.002          | 0.00384 | 0.00059       |

# Er1Lu1Pd2

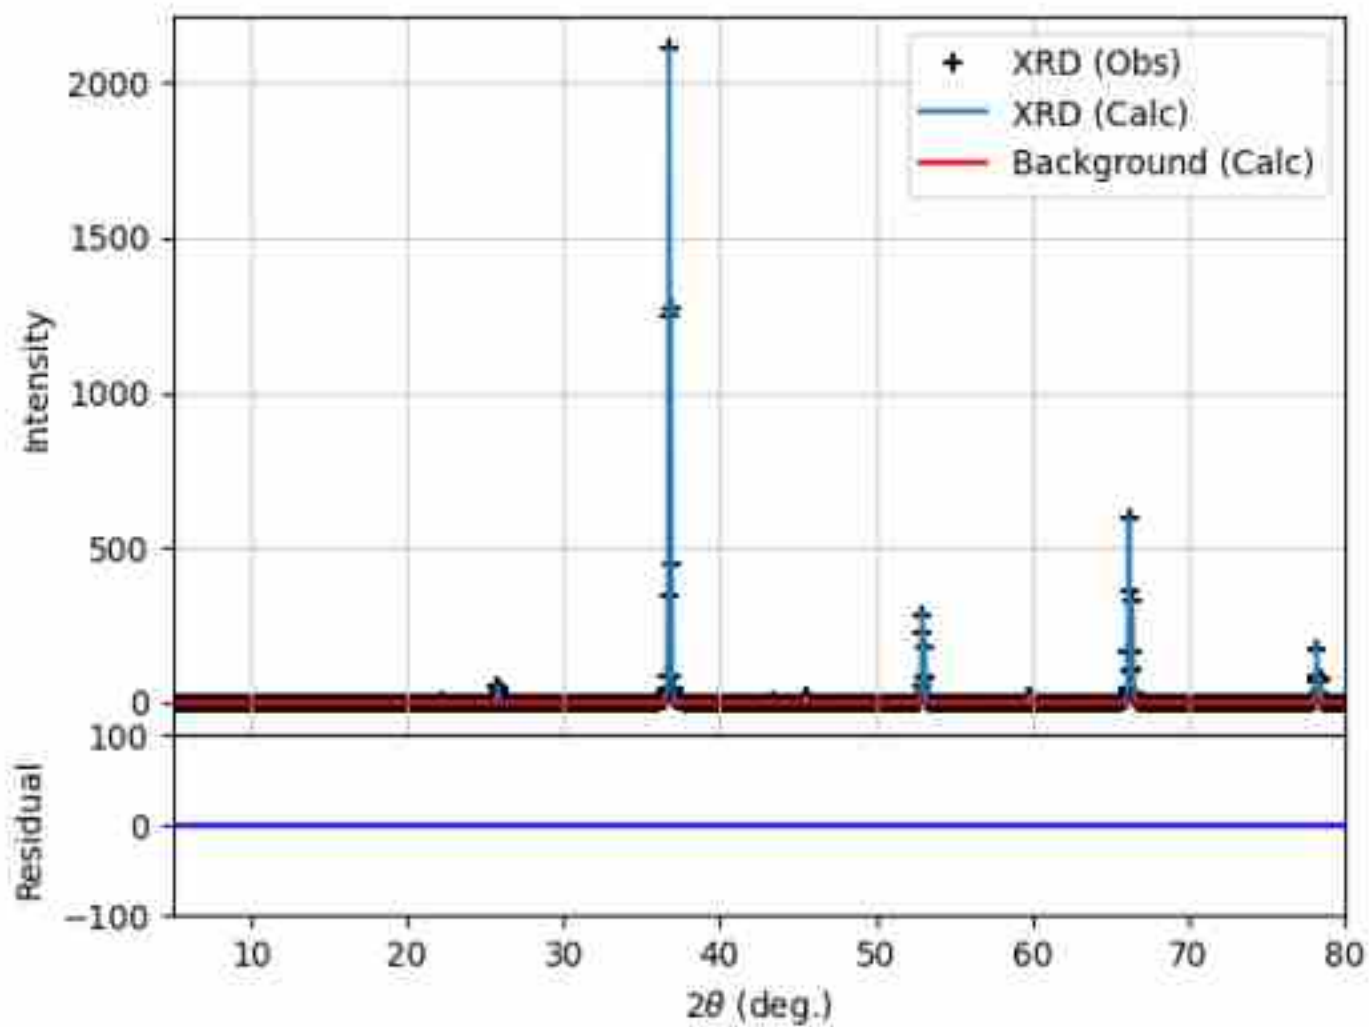

| RMSE before RR | Rwp     | RMSE after RR |
|----------------|---------|---------------|
| 0.002          | 0.01404 | 0.00372       |



# Er1N1

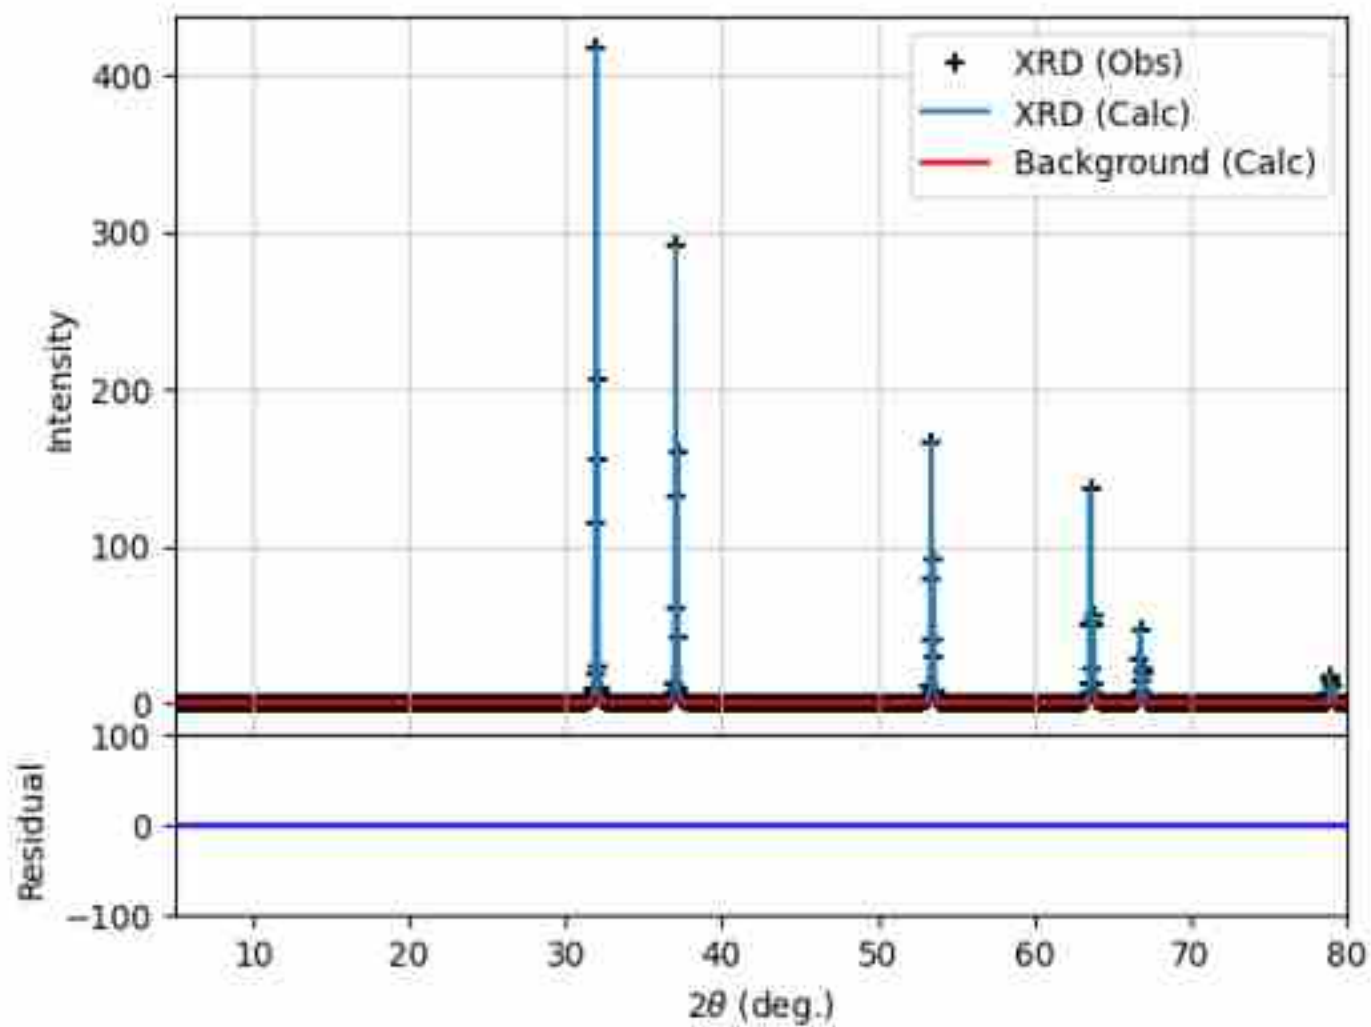

| RMSE before RR | Rwp     | RMSE after RR |
|----------------|---------|---------------|
| 0.002          | 0.00289 | 0.00108       |

# Er1Sb1Rh2

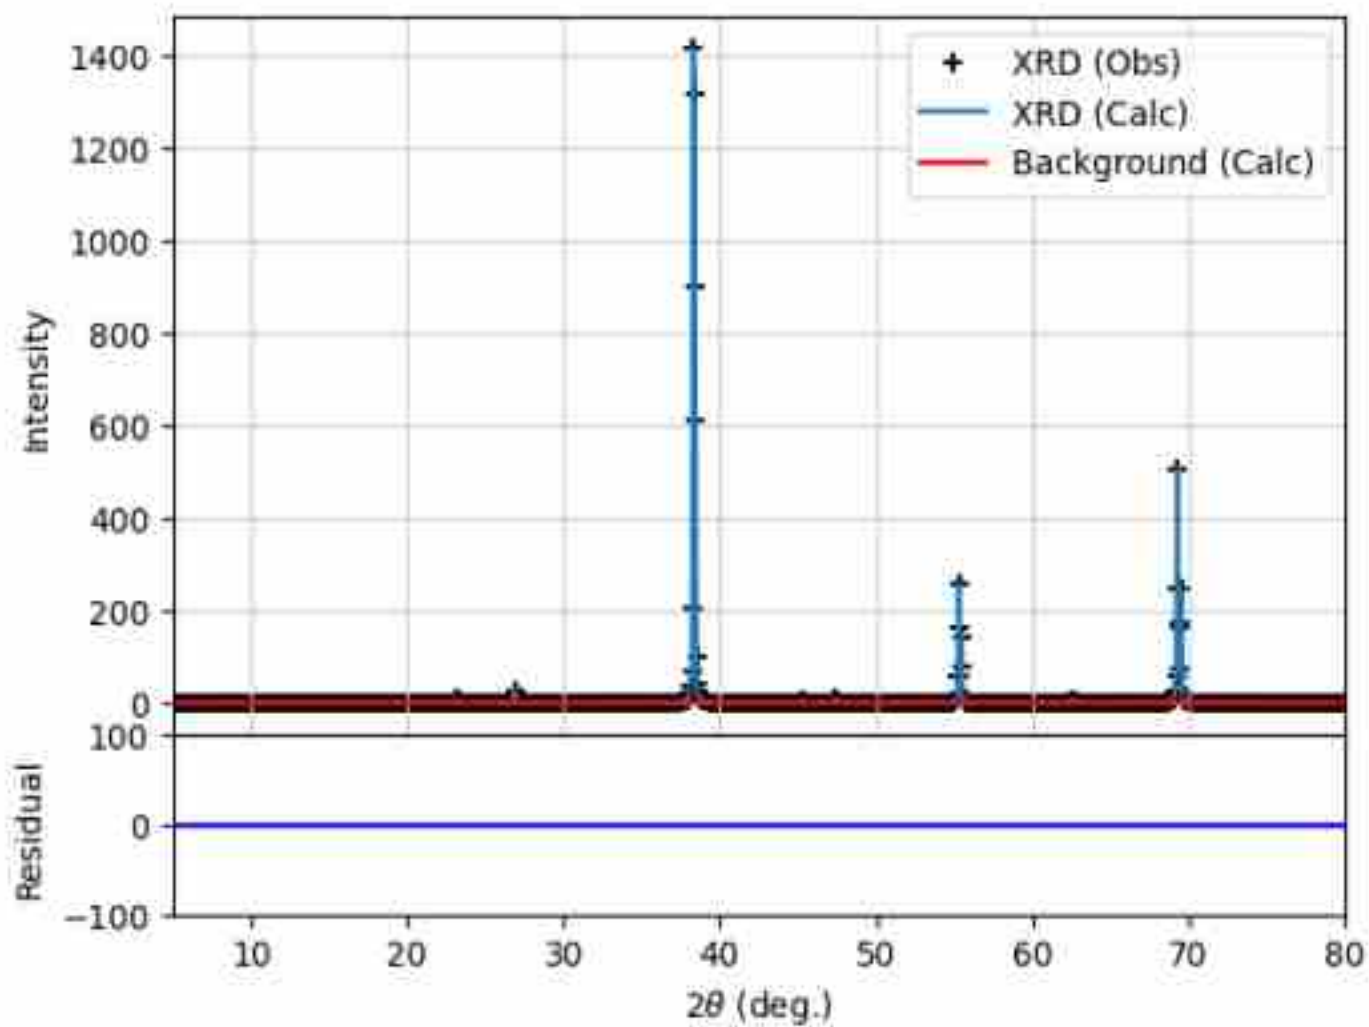

| RMSE before RR | Rwp   | RMSE after RR |
|----------------|-------|---------------|
| 0.002          | 9e-05 | 7e-05         |

# Er1Sn1Ru2

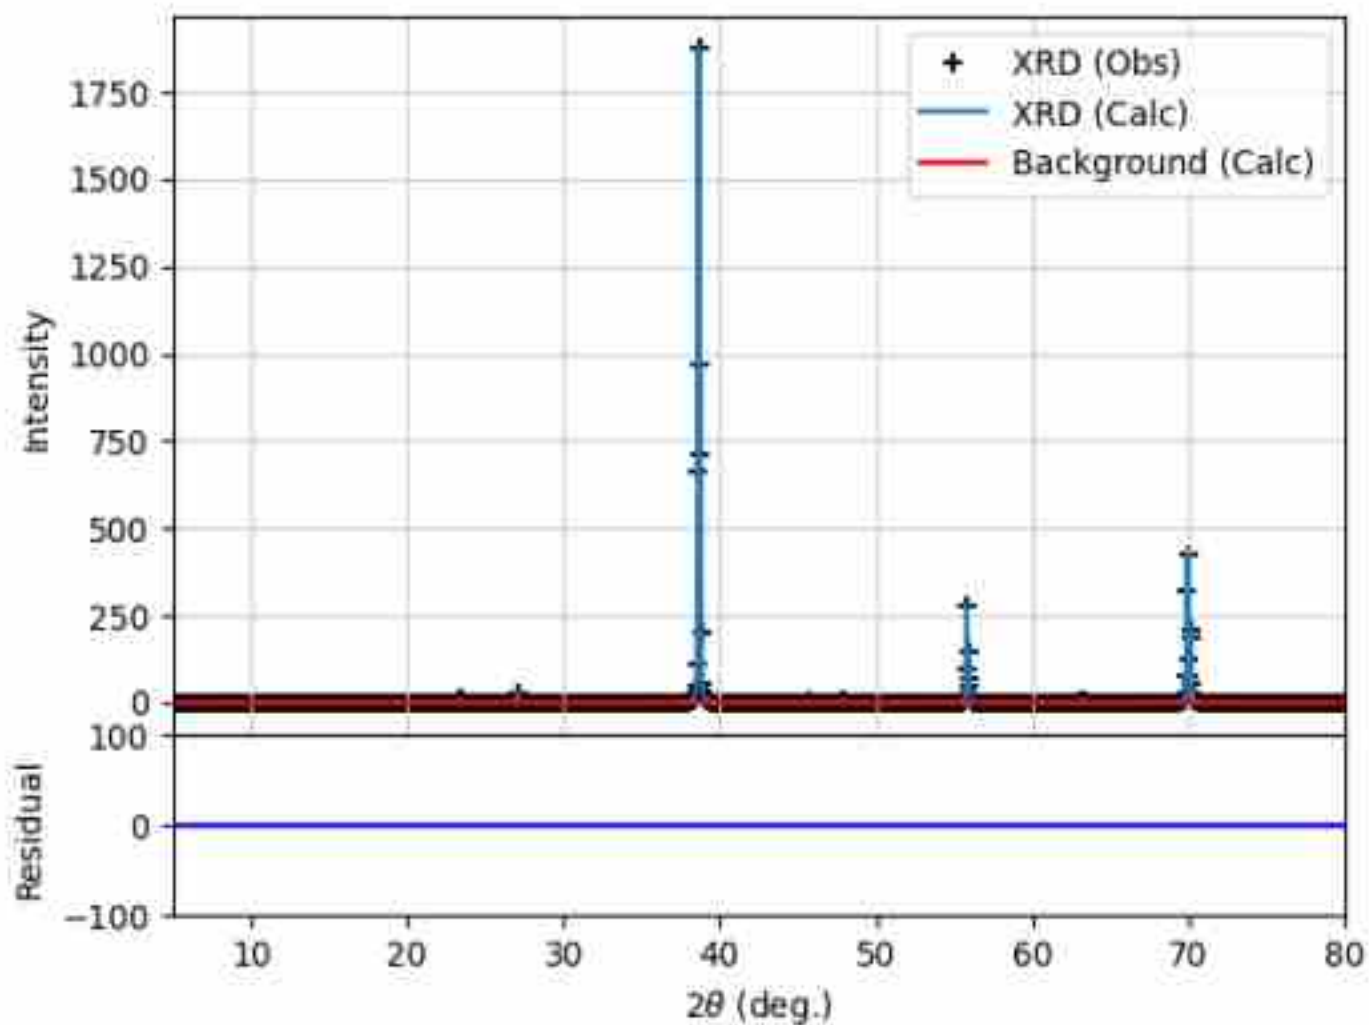

| RMSE before RR | Rwp     | RMSE after RR |
|----------------|---------|---------------|
| 0.002          | 0.00692 | 0.00046       |

# Er1Sn3

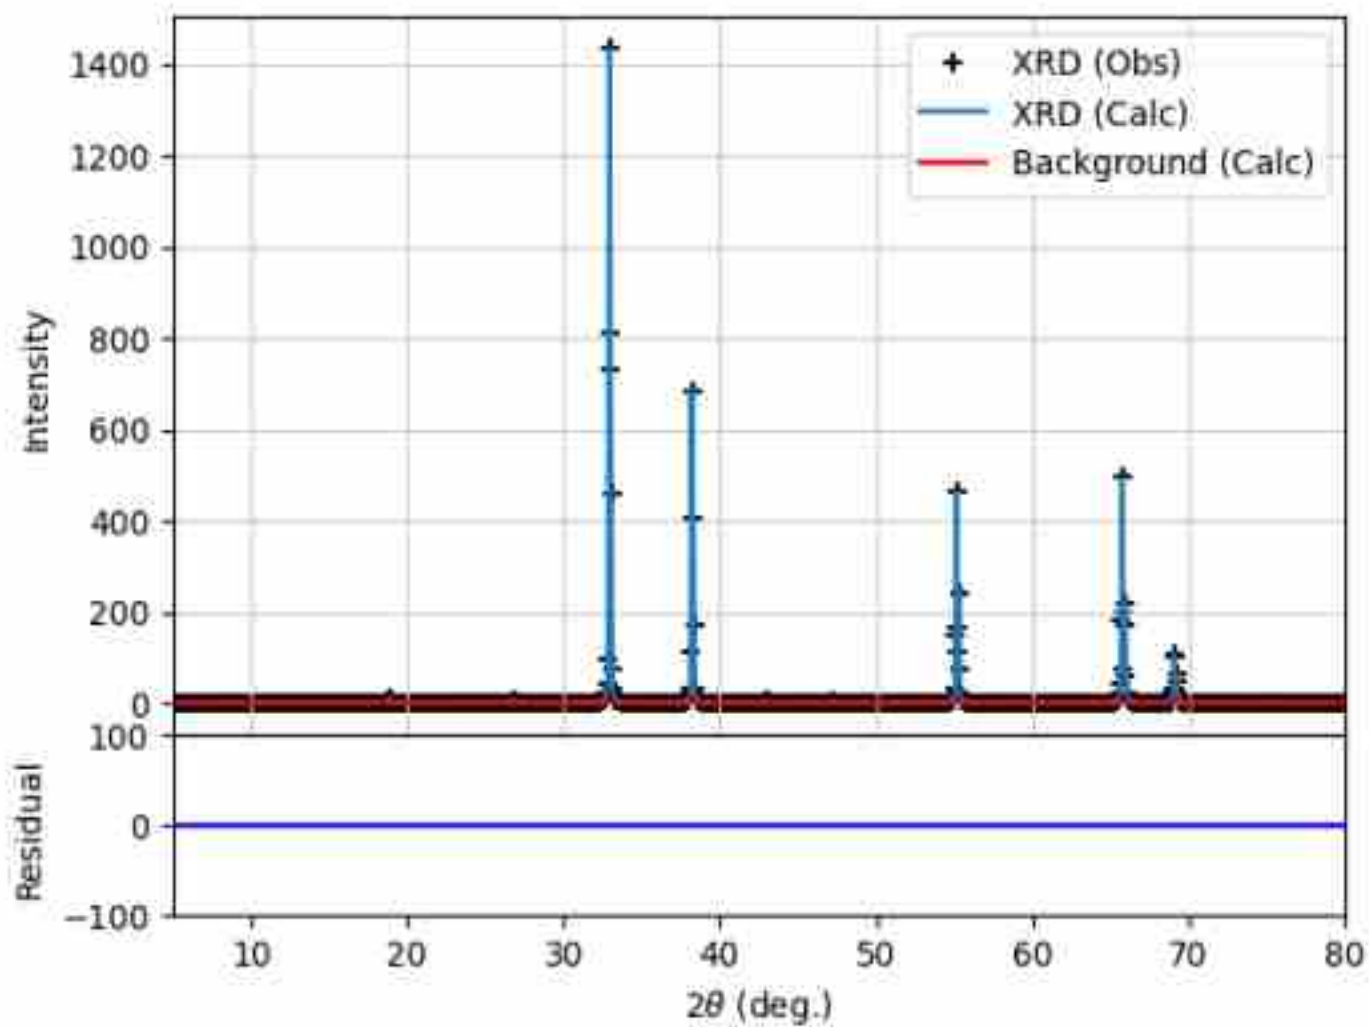

| RMSE before RR | Rwp     | RMSE after RR |
|----------------|---------|---------------|
| 0.002          | 0.17297 | 0.00182       |

# Er<sub>1</sub>Zn<sub>1</sub>Pd<sub>2</sub>

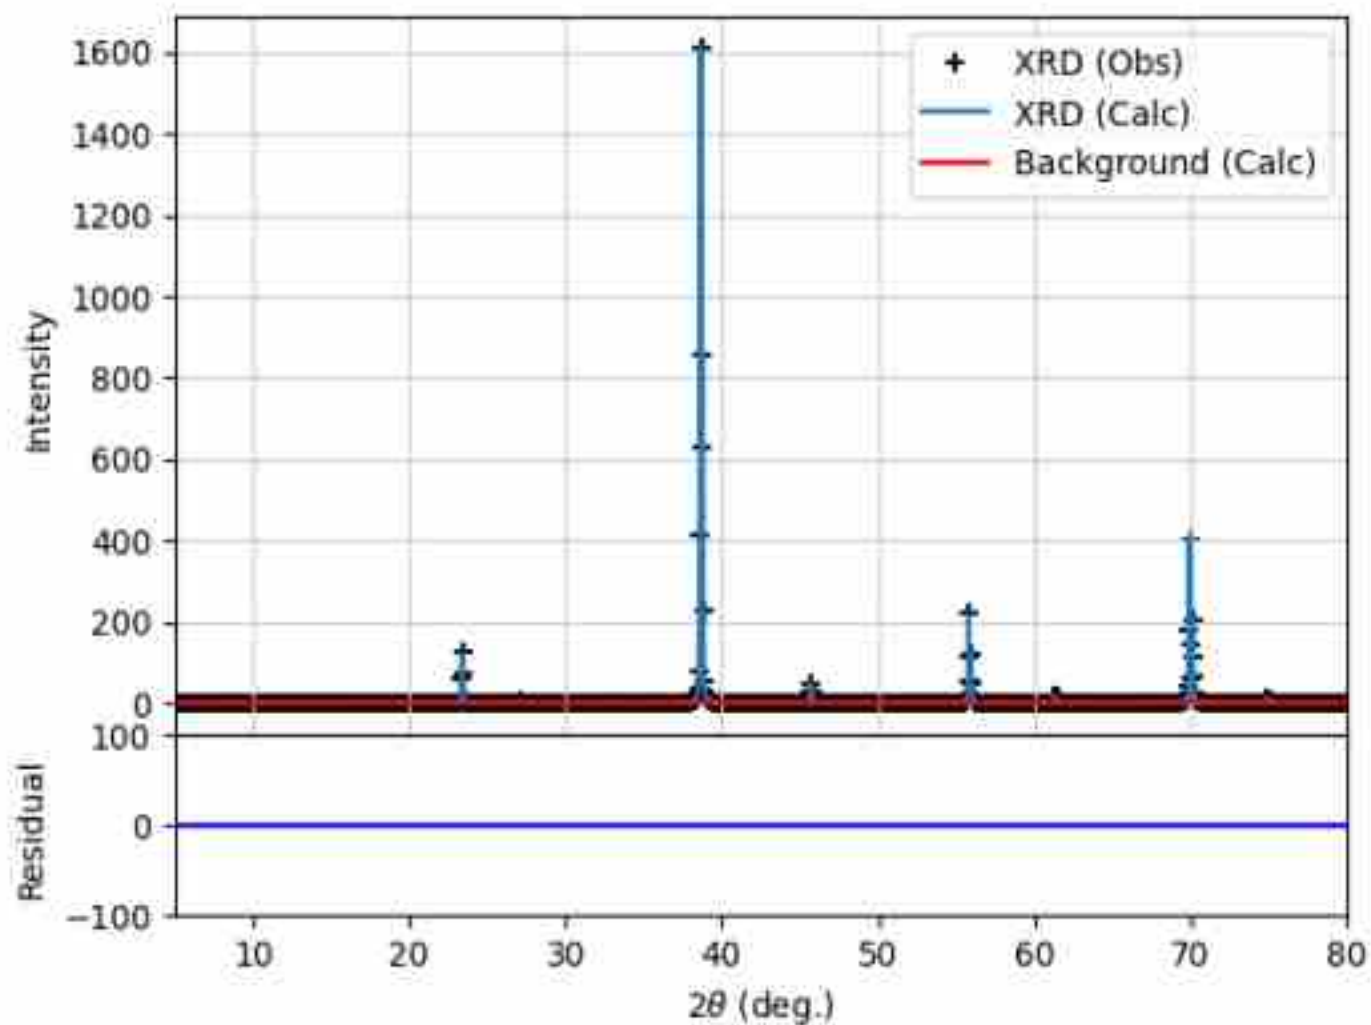

| RMSE before RR | Rwp     | RMSE after RR |
|----------------|---------|---------------|
| 0.002          | 0.00359 | 0.00014       |

# Er1Zn1

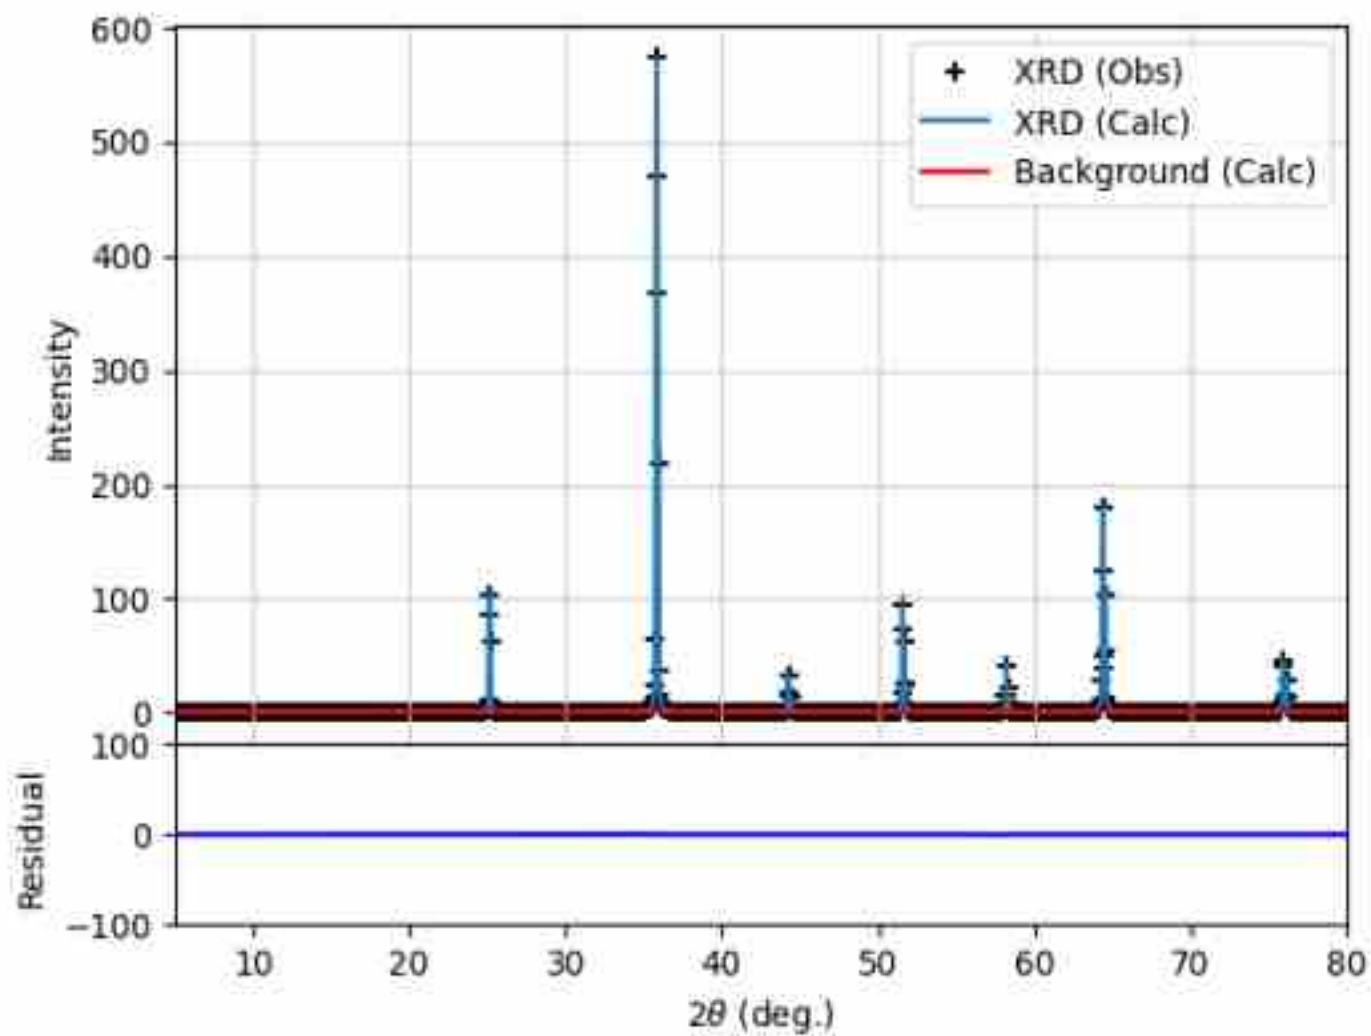

| RMSE before RR | Rwp     | RMSE after RR |
|----------------|---------|---------------|
| 0.002          | 0.21963 | 0.00031       |

# Er<sub>2</sub>Ag<sub>1</sub>Hg<sub>1</sub>

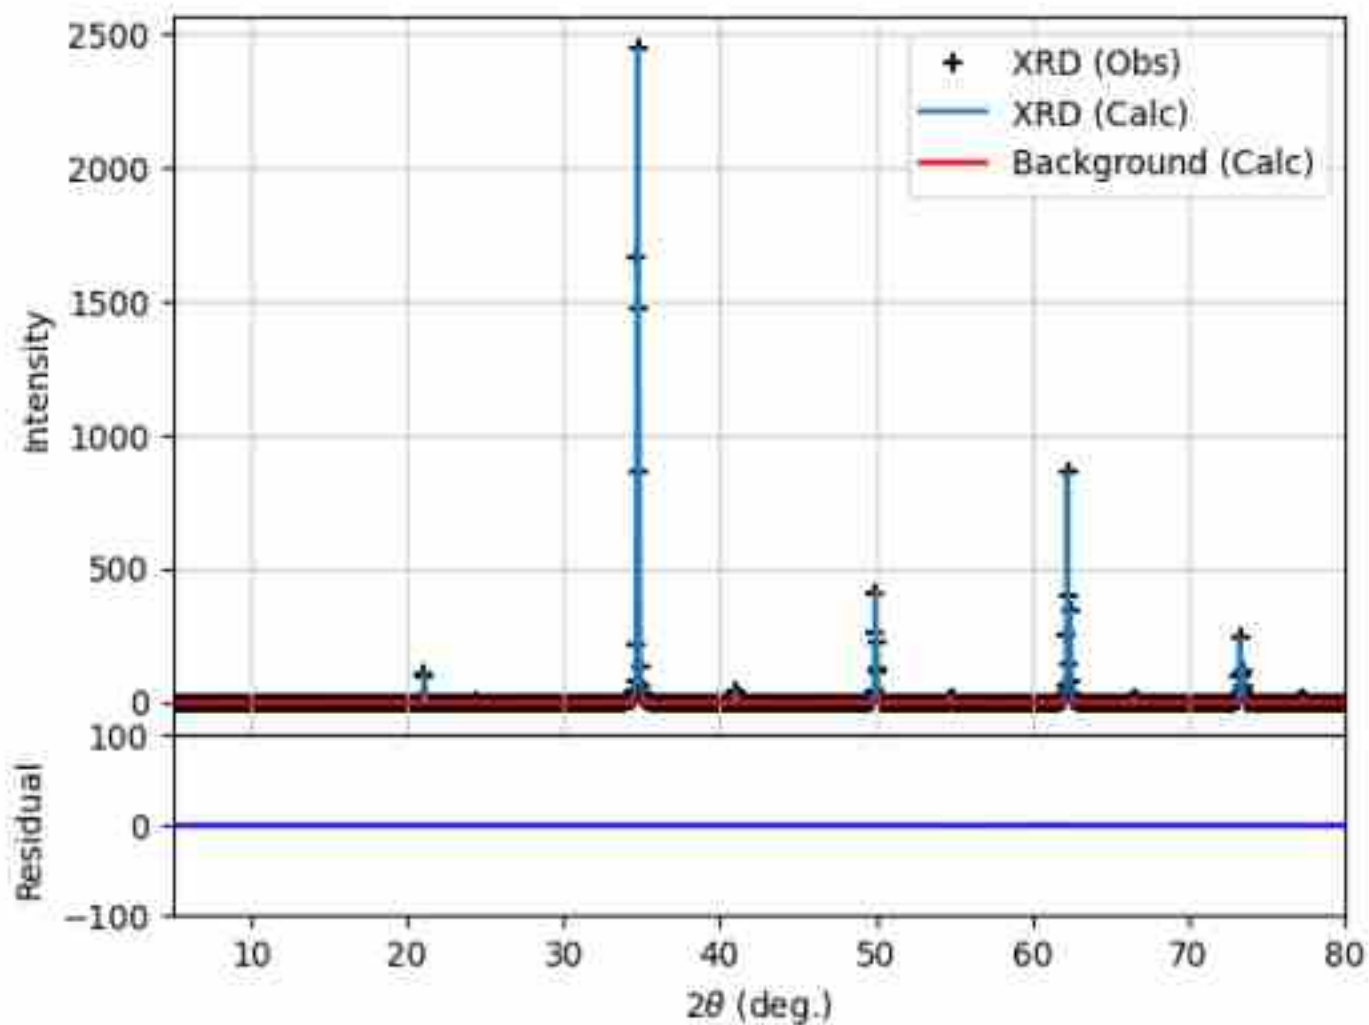

| RMSE before RR | Rwp     | RMSE after RR |
|----------------|---------|---------------|
| 0.002          | 0.53999 | 0.00255       |

# Er<sub>2</sub>AgIr

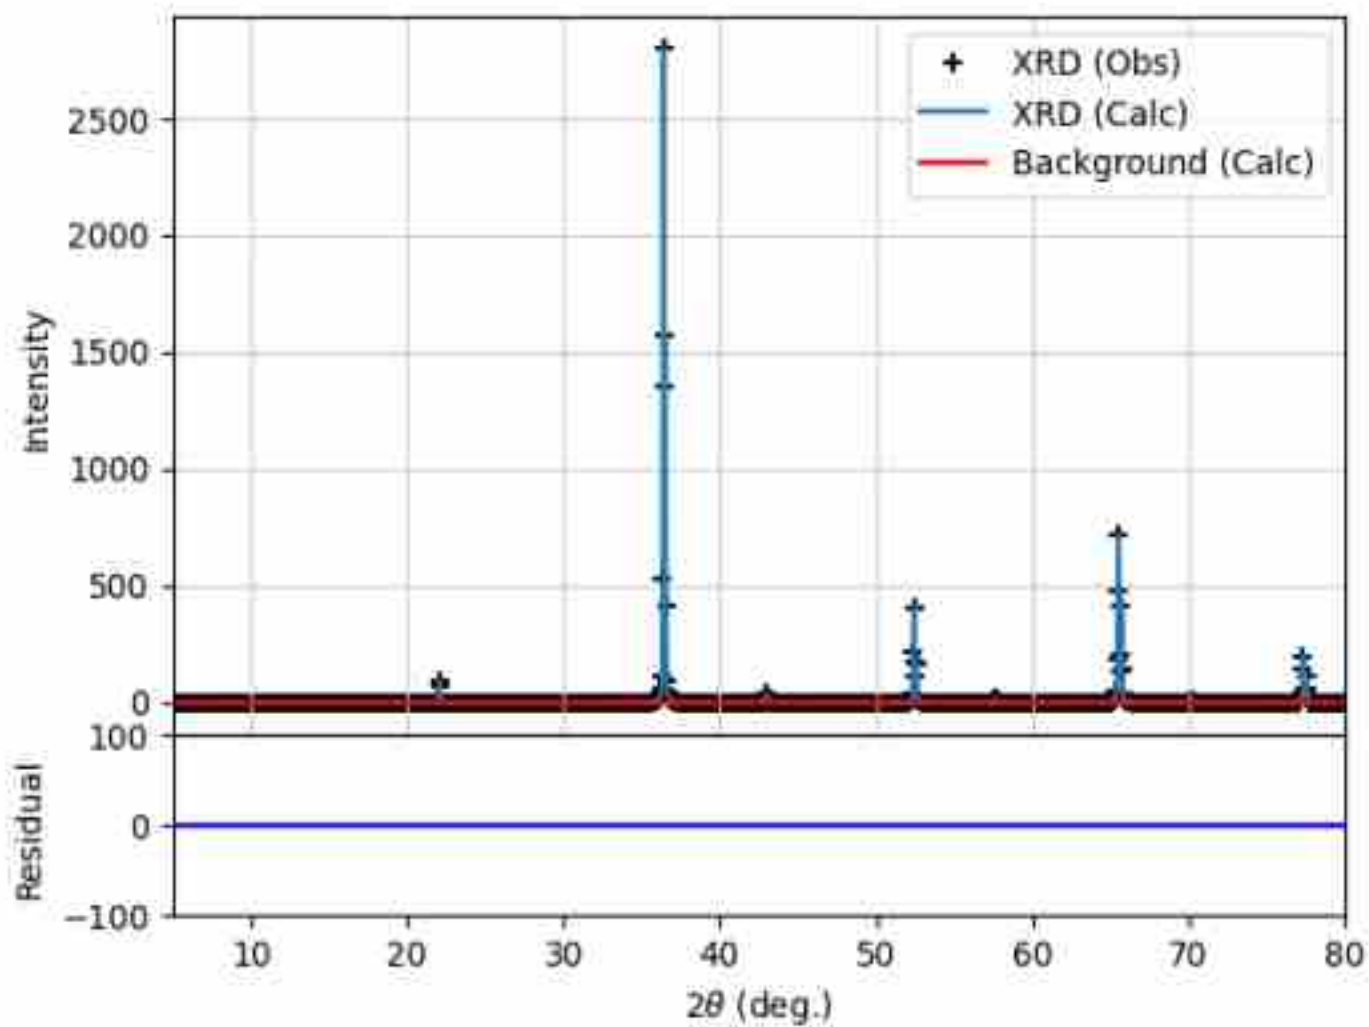

| RMSE before RR | Rwp     | RMSE after RR |
|----------------|---------|---------------|
| 0.002          | 0.22778 | 0.00188       |



# Er<sub>2</sub>Cu<sub>4</sub>O<sub>8</sub>

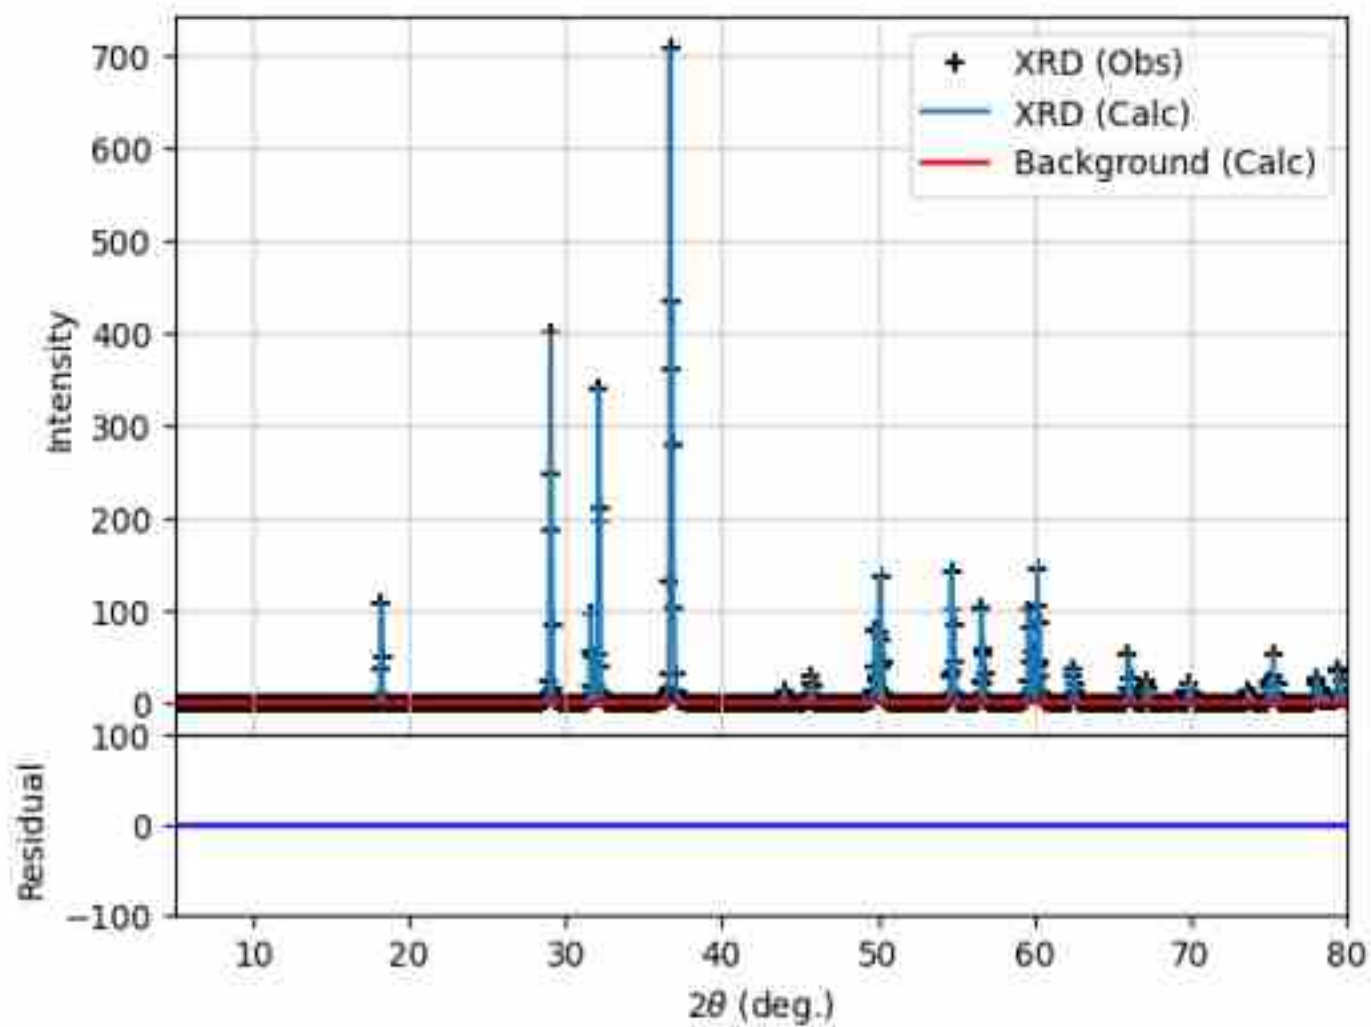

| RMSE before RR | Rwp     | RMSE after RR |
|----------------|---------|---------------|
| 0.02           | 0.00368 | 0.00143       |

# Er<sub>2</sub>Cu<sub>6</sub>Te<sub>6</sub>

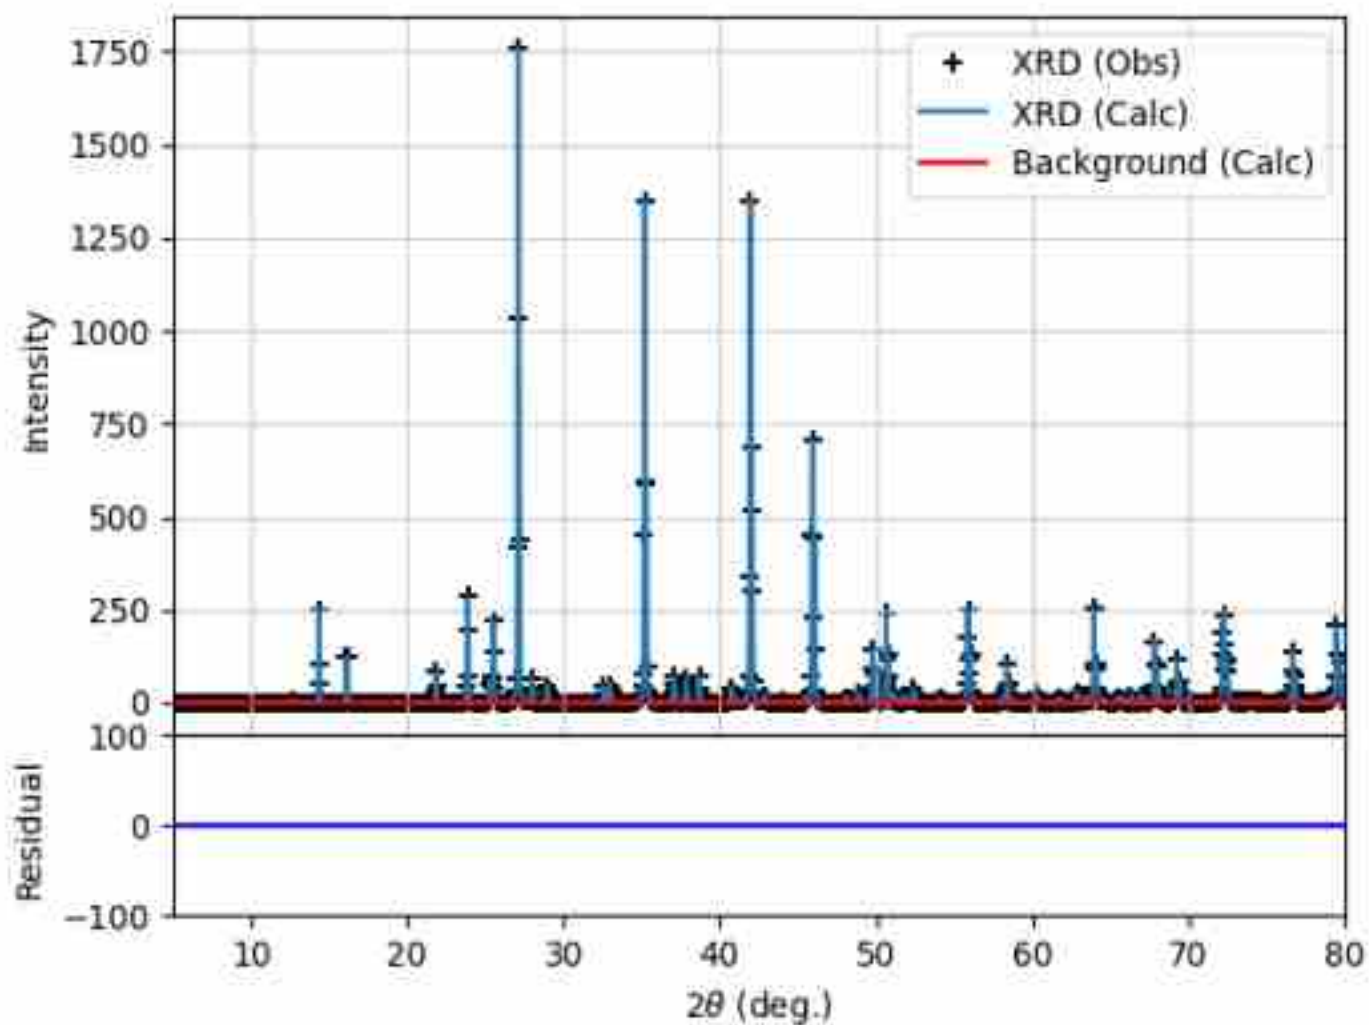

| RMSE before RR | Rwp    | RMSE after RR |
|----------------|--------|---------------|
| 0.02           | 0.0031 | 0.00027       |

# Er<sub>2</sub>MgAl<sub>11</sub>

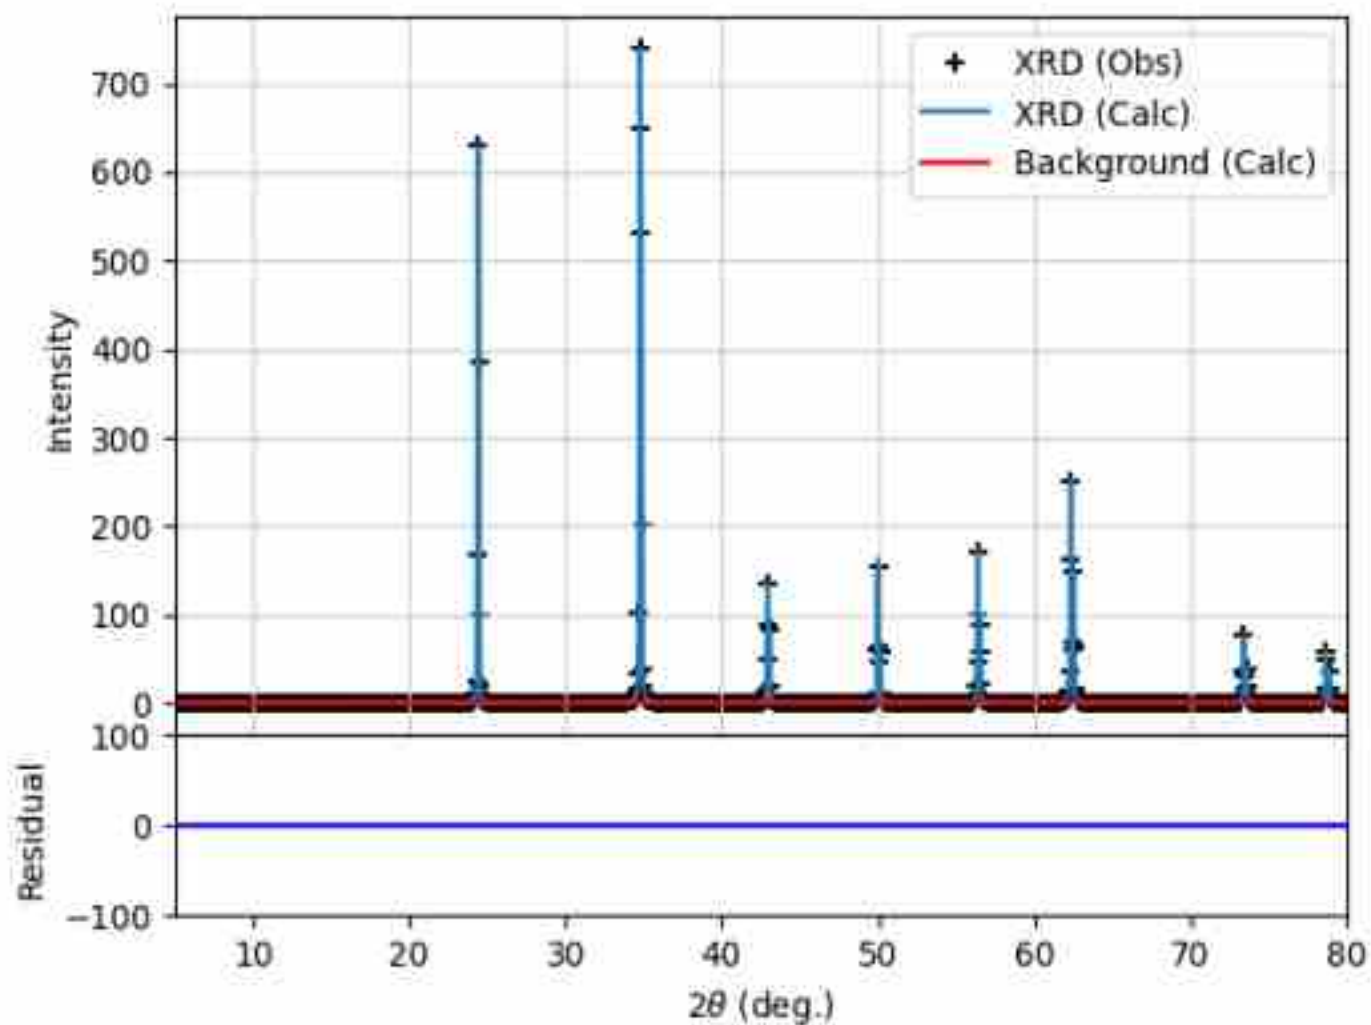

| RMSE before RR | Rwp    | RMSE after RR |
|----------------|--------|---------------|
| 0.002          | 0.0973 | 0.00234       |

# Er<sub>2</sub>Ru<sub>1</sub>Au<sub>1</sub>

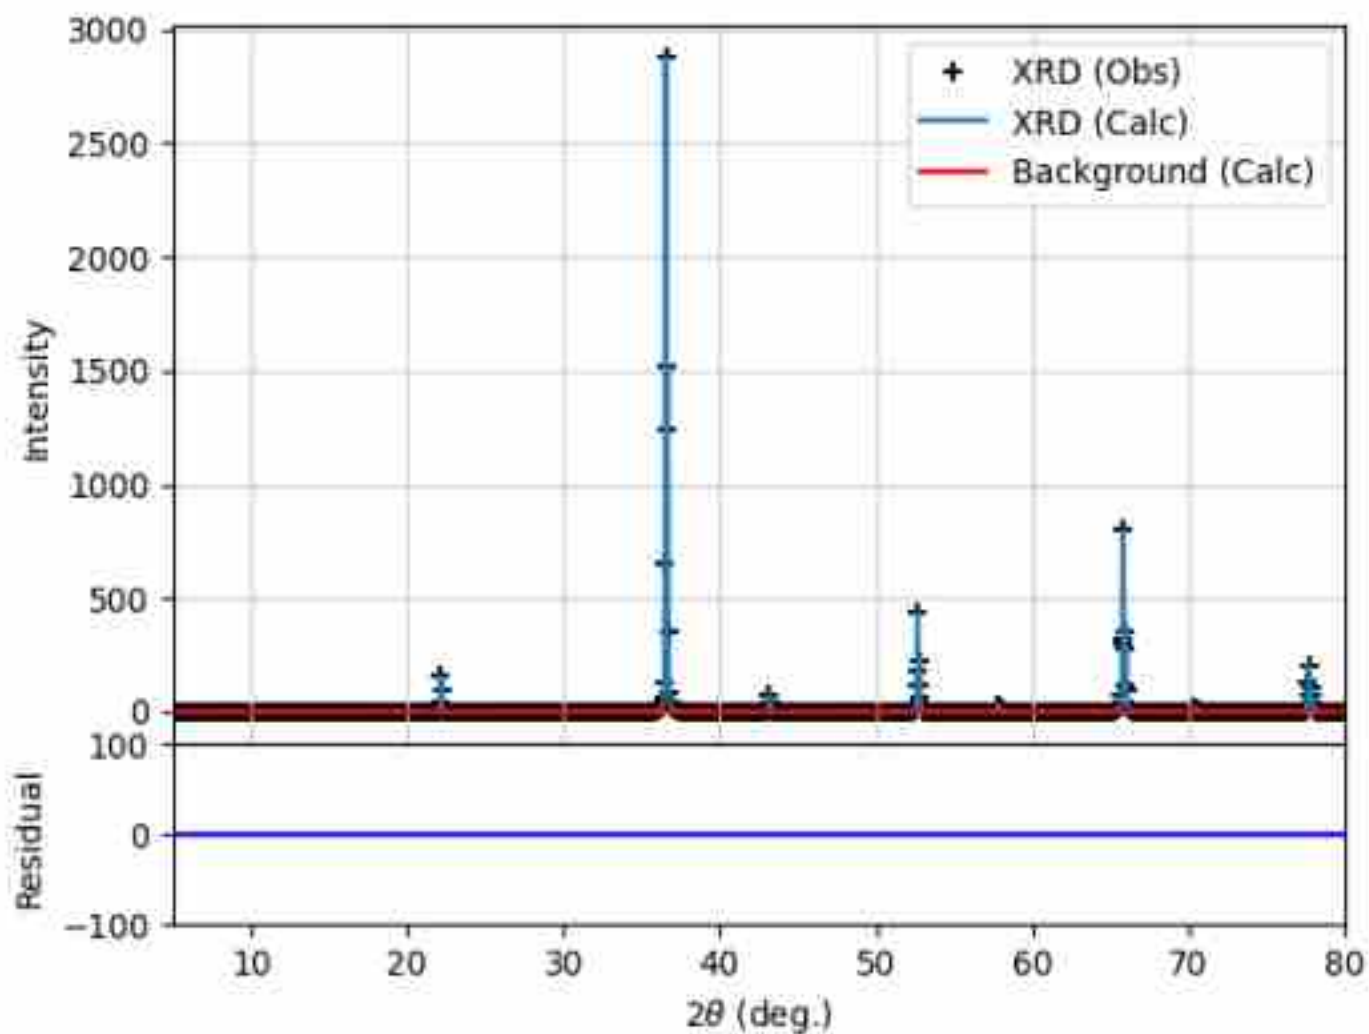

| RMSE before RR | Rwp     | RMSE after RR |
|----------------|---------|---------------|
| 0.002          | 0.04751 | 0.00115       |

# Er<sub>2</sub>ZnHg<sub>1</sub>

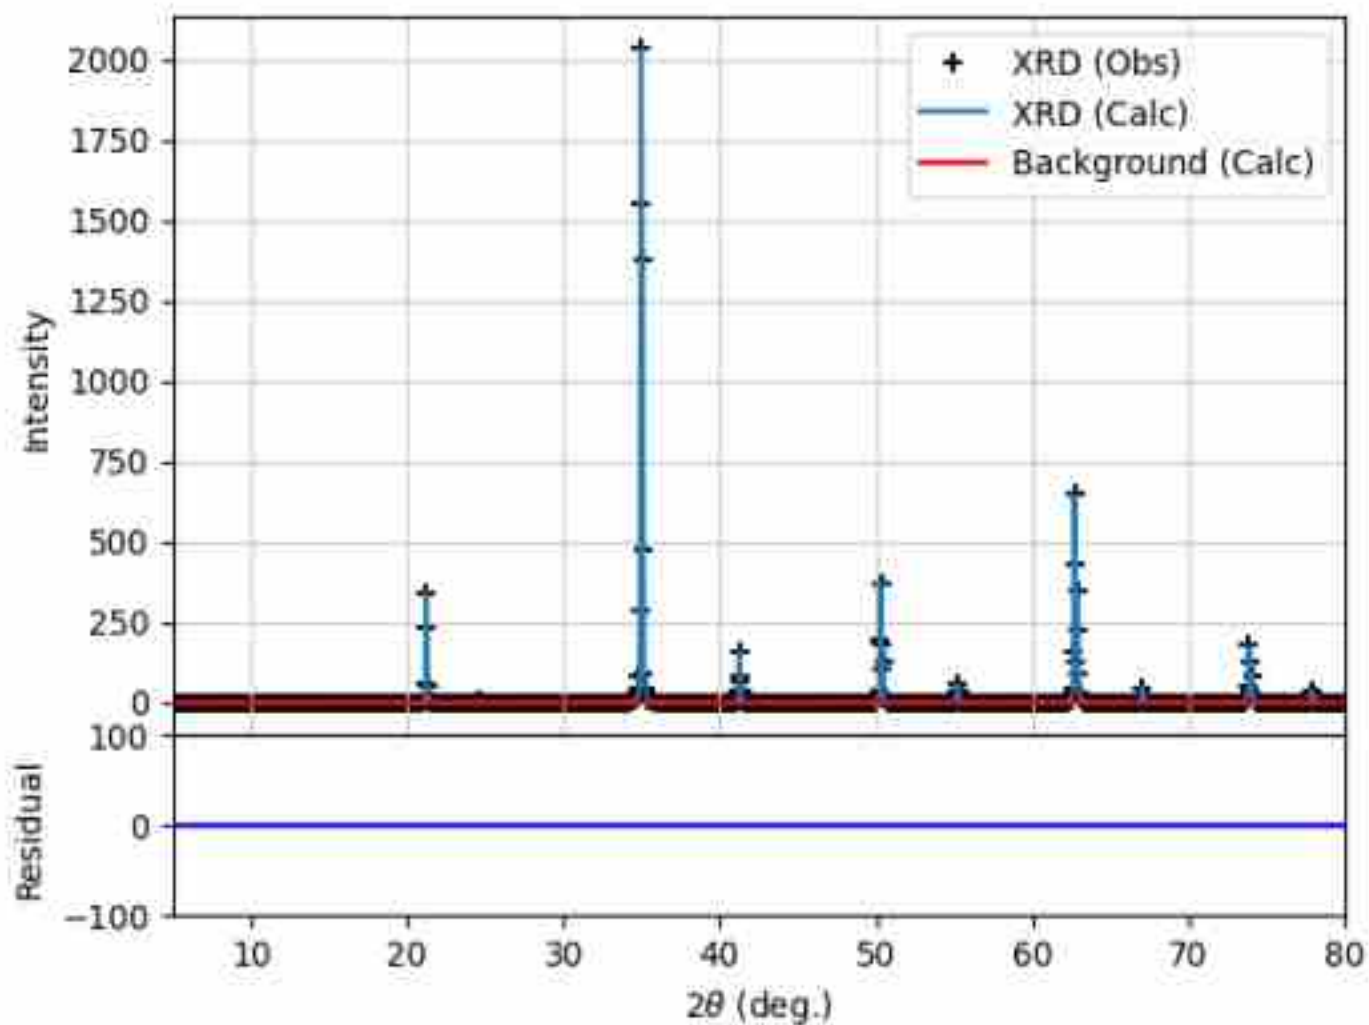

| RMSE before RR | Rwp     | RMSE after RR |
|----------------|---------|---------------|
| 0.002          | 0.09506 | 0.00118       |

# Er<sub>3</sub>Al<sub>3</sub>Co<sub>1</sub>Ge<sub>2</sub>

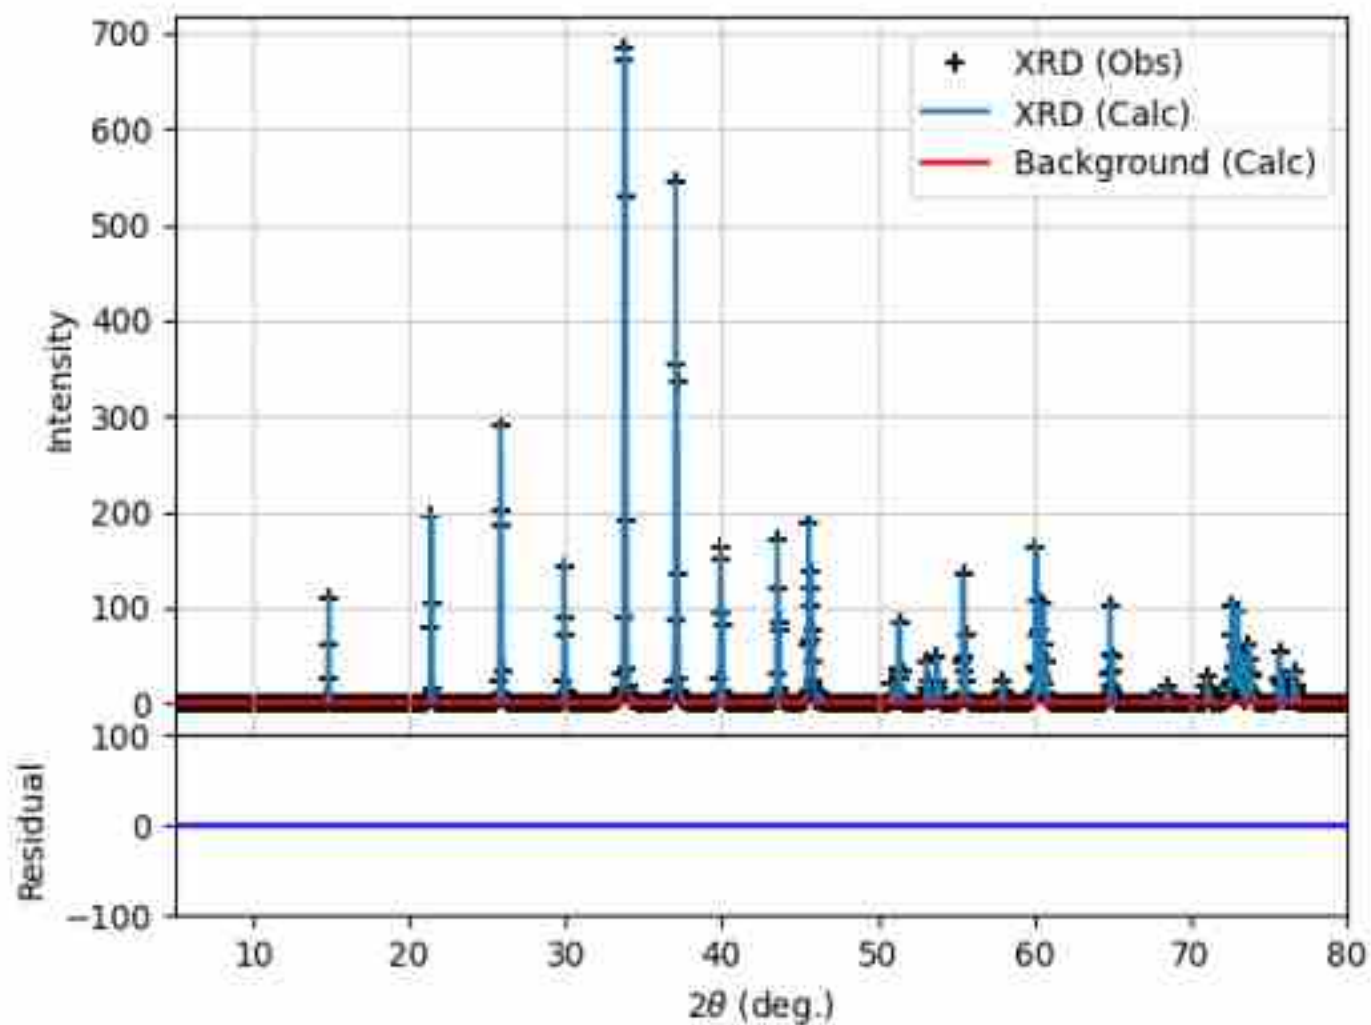

| RMSE before RR | Rwp     | RMSE after RR |
|----------------|---------|---------------|
| 0.02           | 0.00371 | 0.00123       |

# Er<sub>3</sub>In<sub>1</sub>

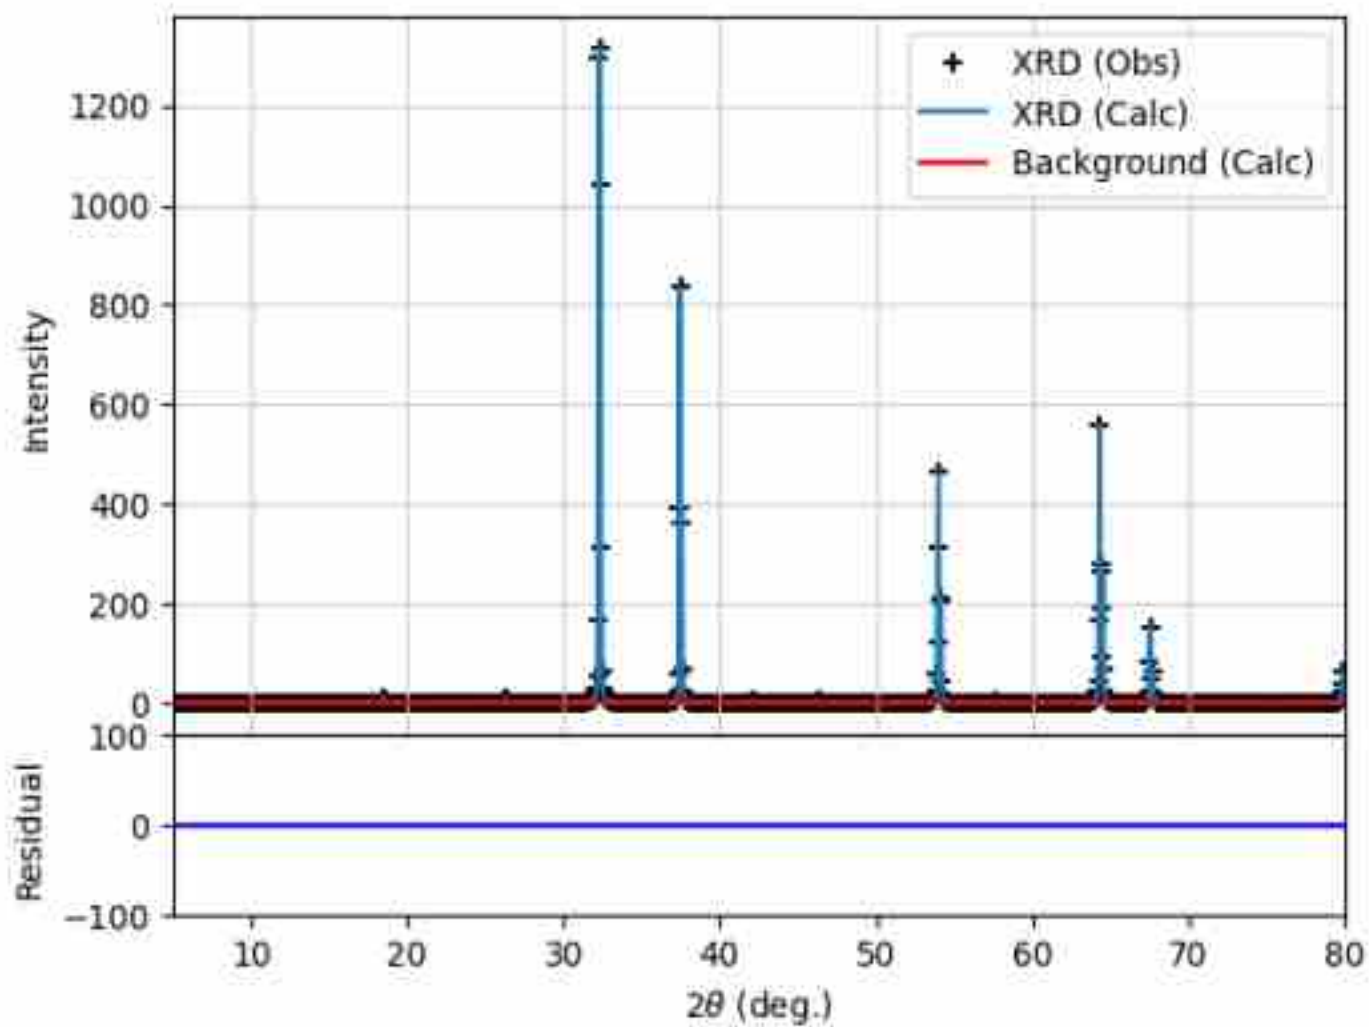

| RMSE before RR | Rwp     | RMSE after RR |
|----------------|---------|---------------|
| 0.002          | 0.00619 | 0.00037       |

# Er5Mo2O12

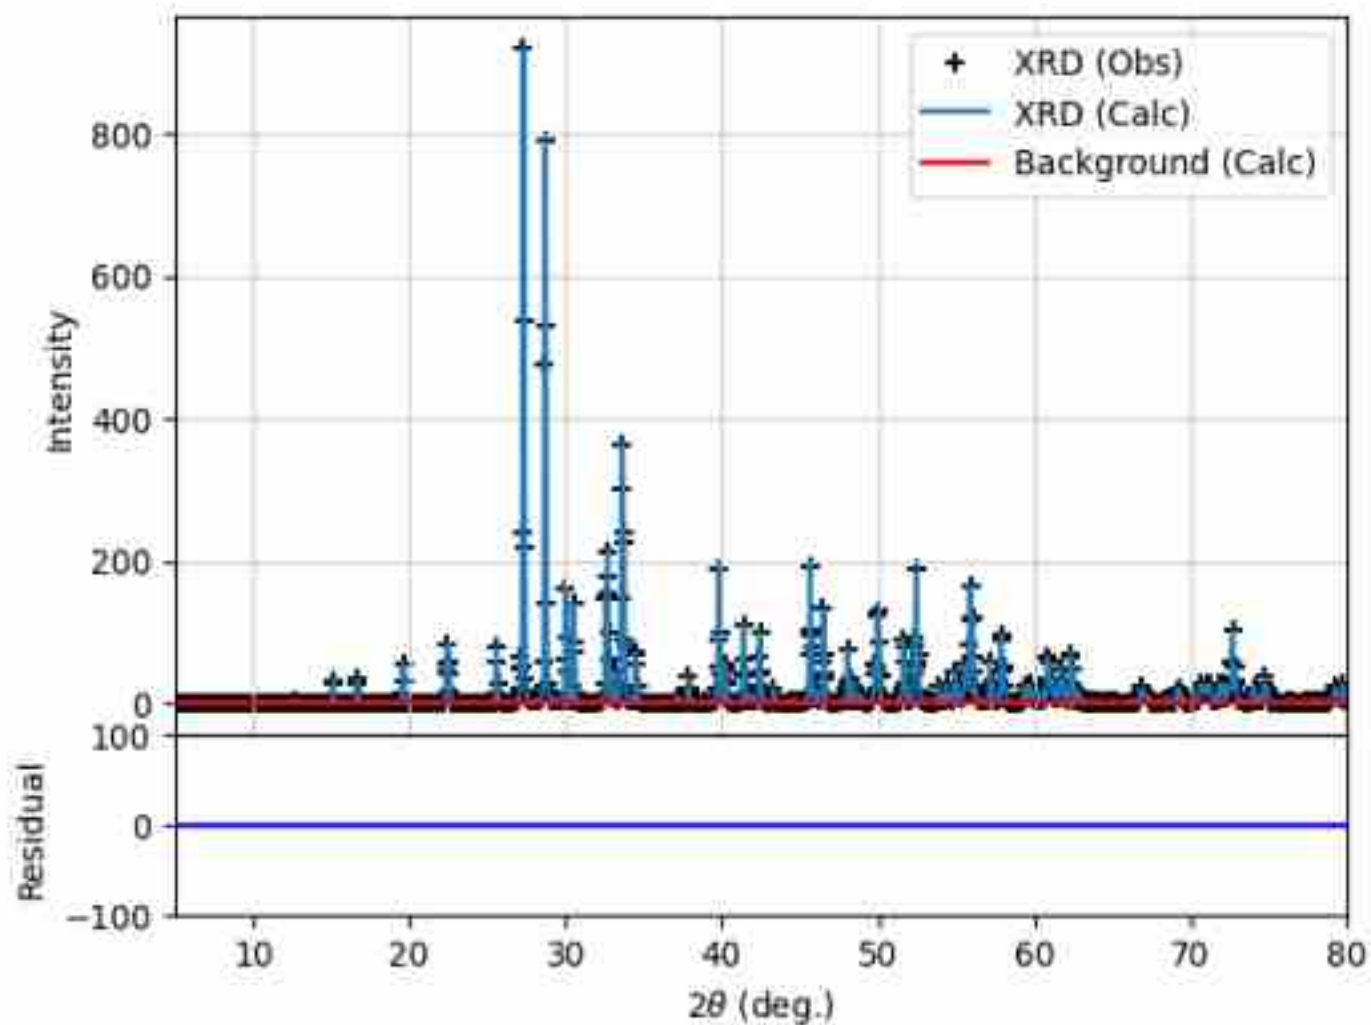

| RMSE before RR | Rwp    | RMSE after RR |
|----------------|--------|---------------|
| 0.02           | 0.0035 | 0.00111       |



# Er<sub>6</sub>Sb<sub>8</sub>Au<sub>6</sub>

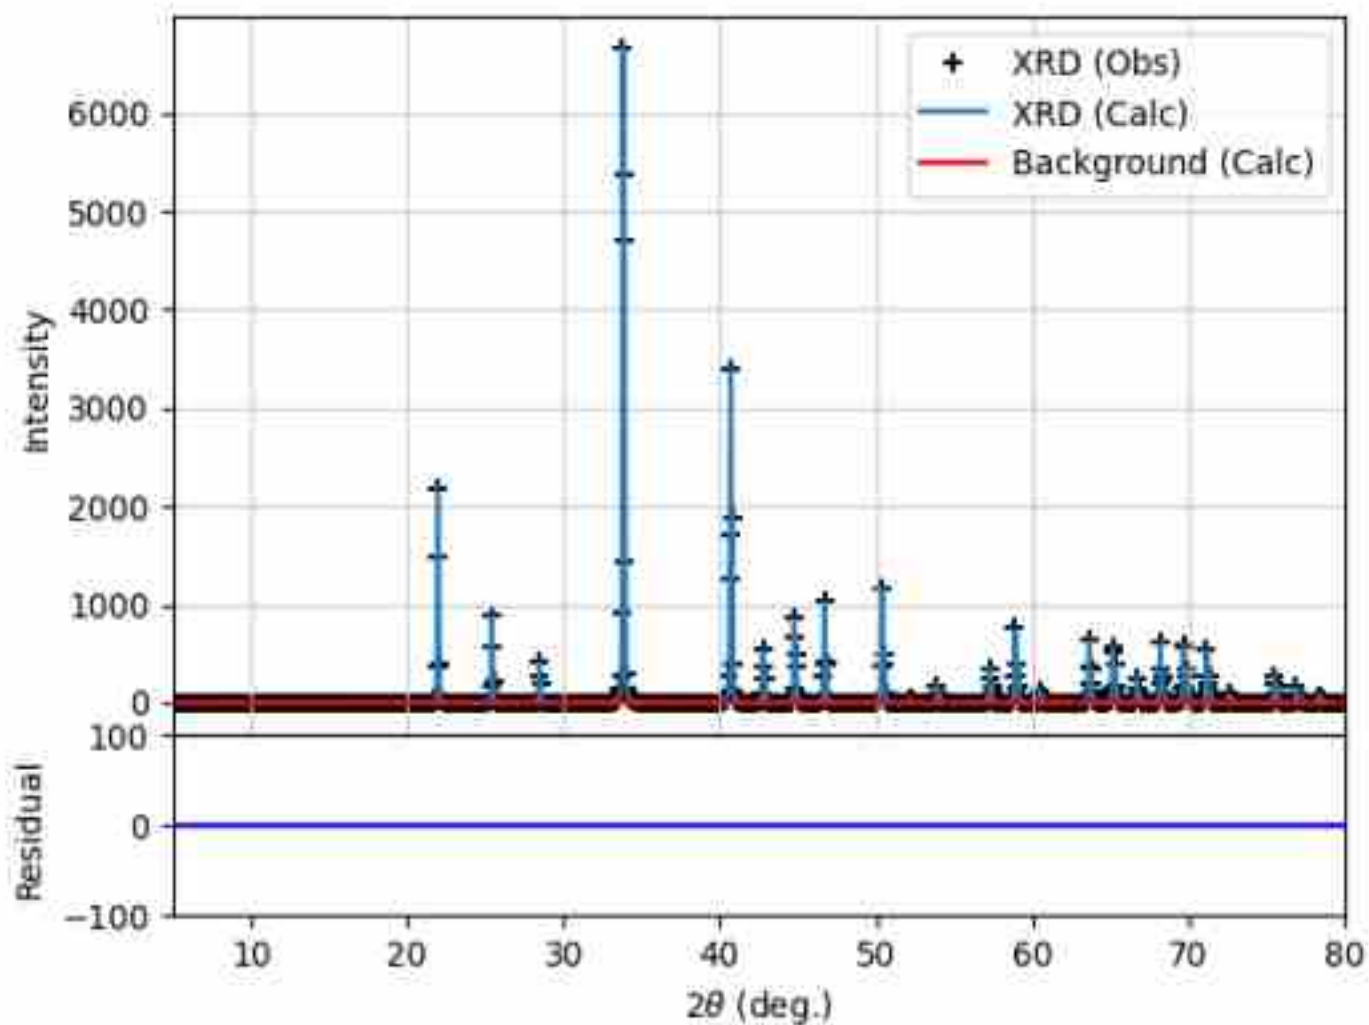

| RMSE before RR | Rwp     | RMSE after RR |
|----------------|---------|---------------|
| 0.02           | 0.00624 | 0.00068       |

# Er10Ni2Pb6

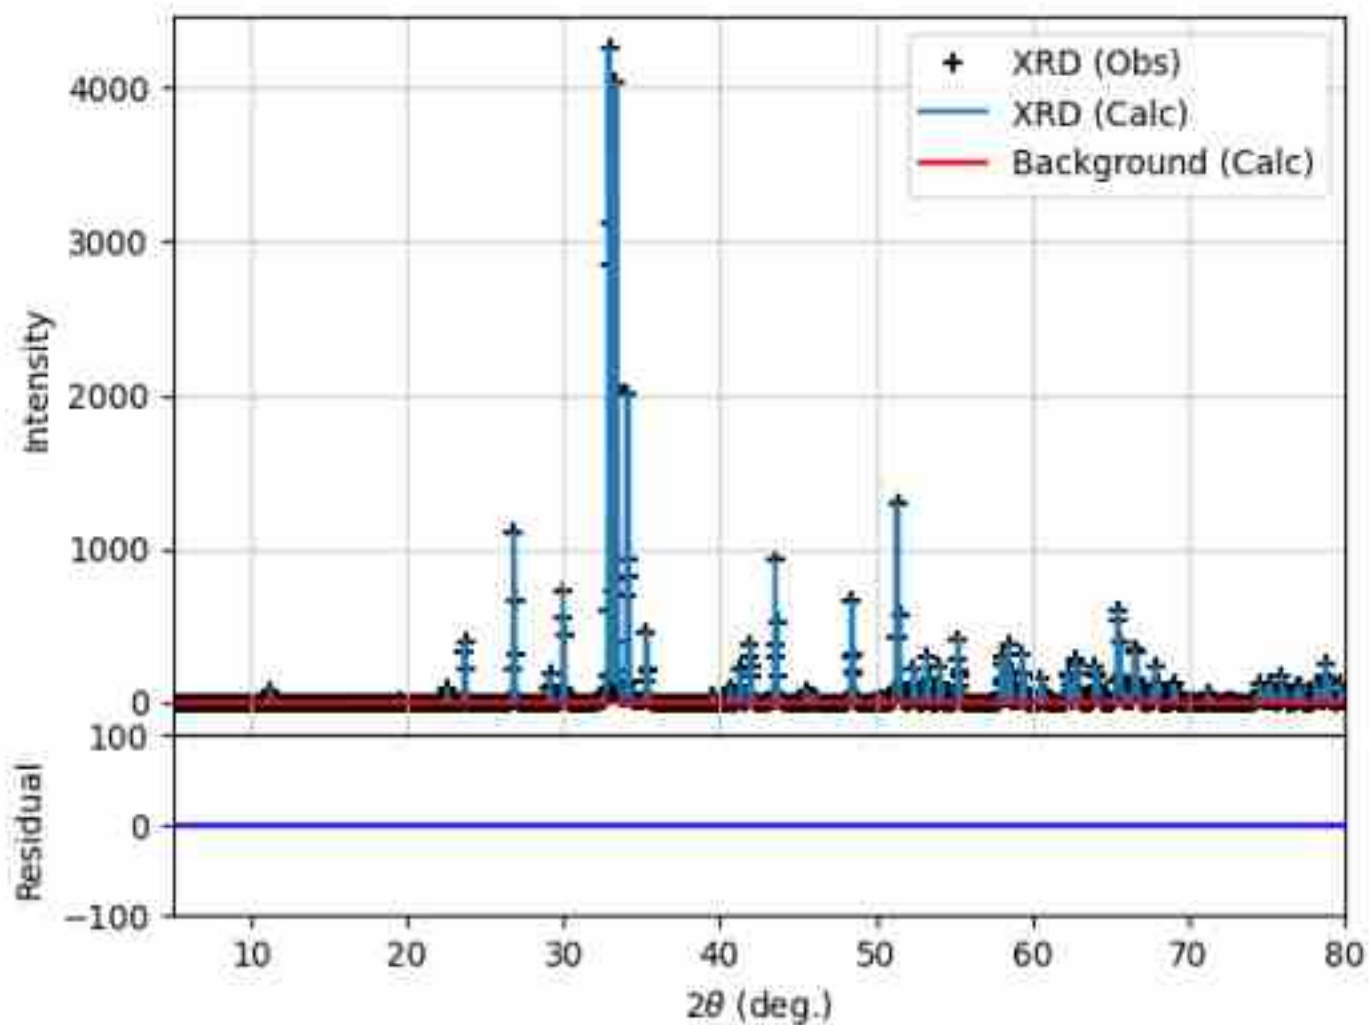

| RMSE before RR | Rwp     | RMSE after RR |
|----------------|---------|---------------|
| 0.02           | 0.00559 | 0.00062       |

# Eu1Ge2

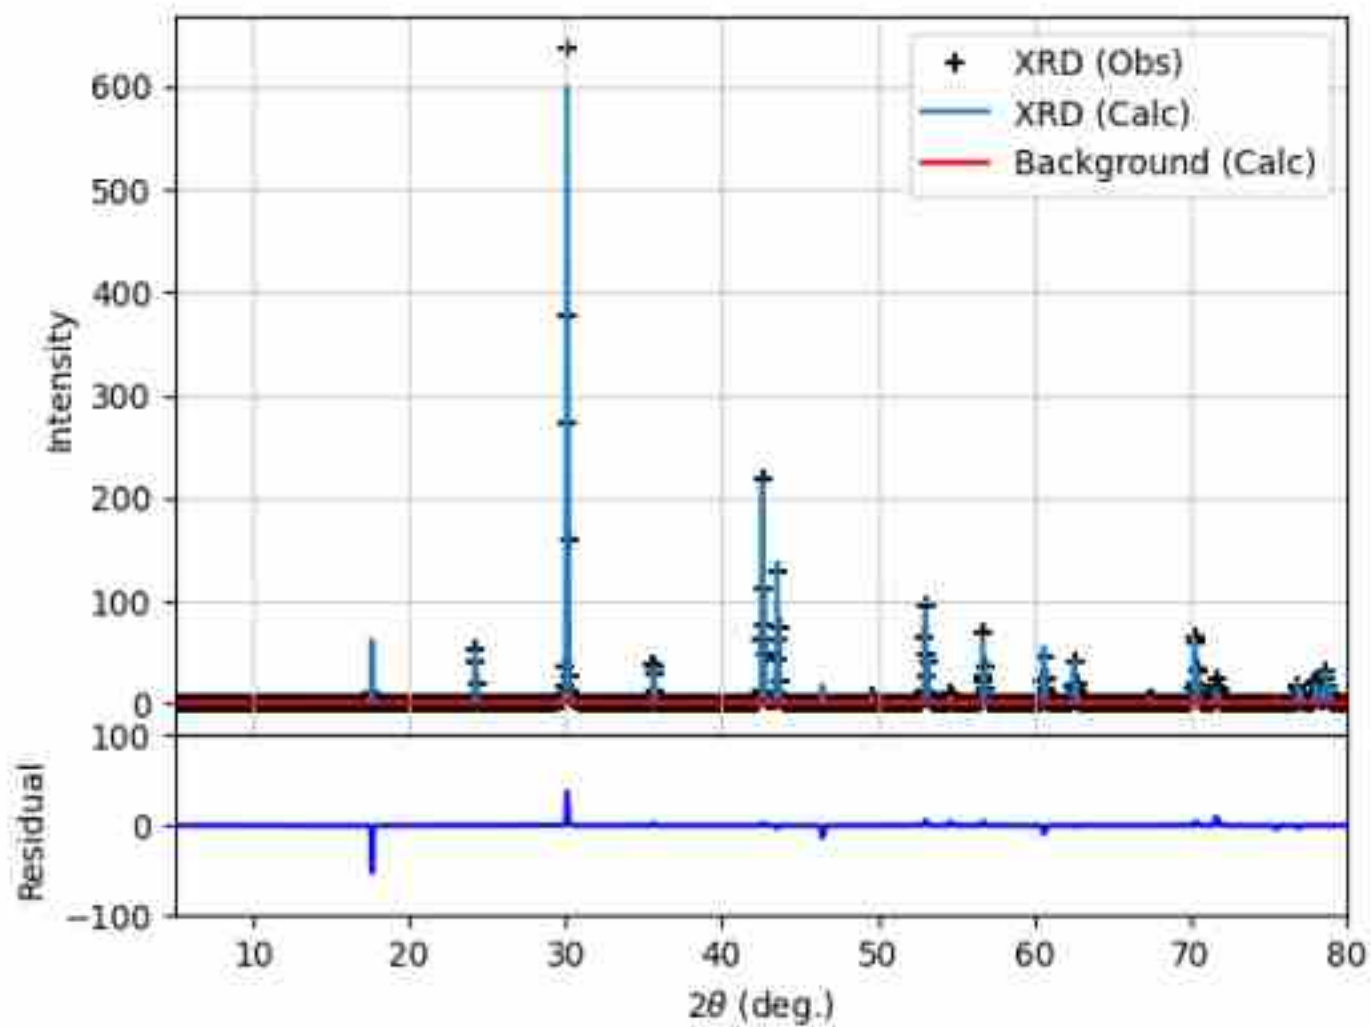

| RMSE before RR | Rwp      | RMSE after RR |
|----------------|----------|---------------|
| 0.02           | 33.22983 | 0.0222        |

Eu1Hg2Bi1

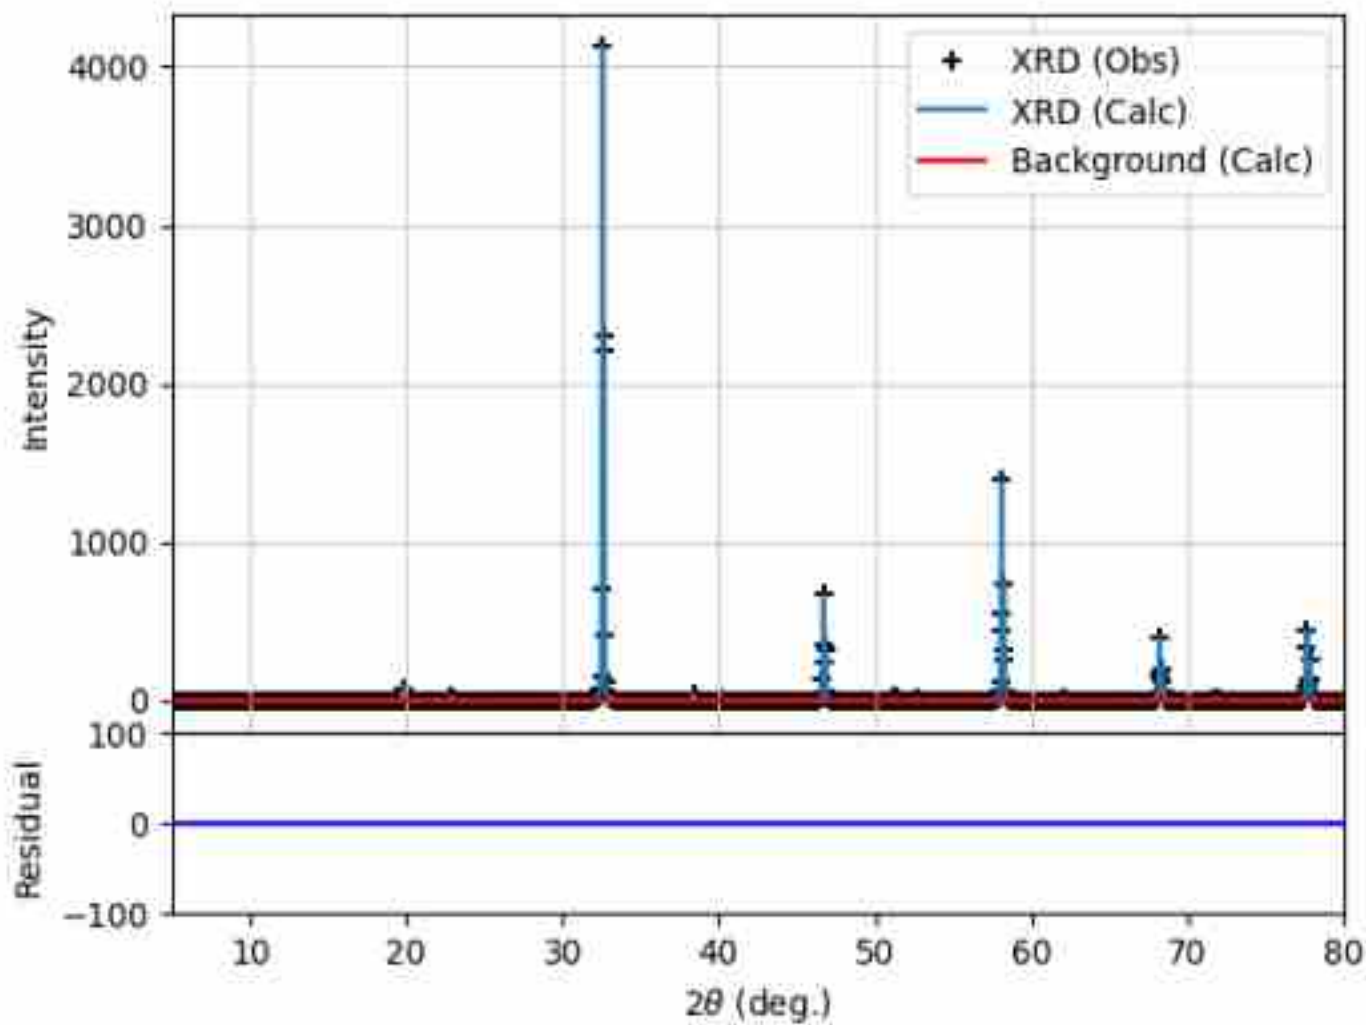

| RMSE before RR | Rwp     | RMSE after RR |
|----------------|---------|---------------|
| 0.002          | 0.07547 | 0.00162       |

# Eu1Mg1Cd2

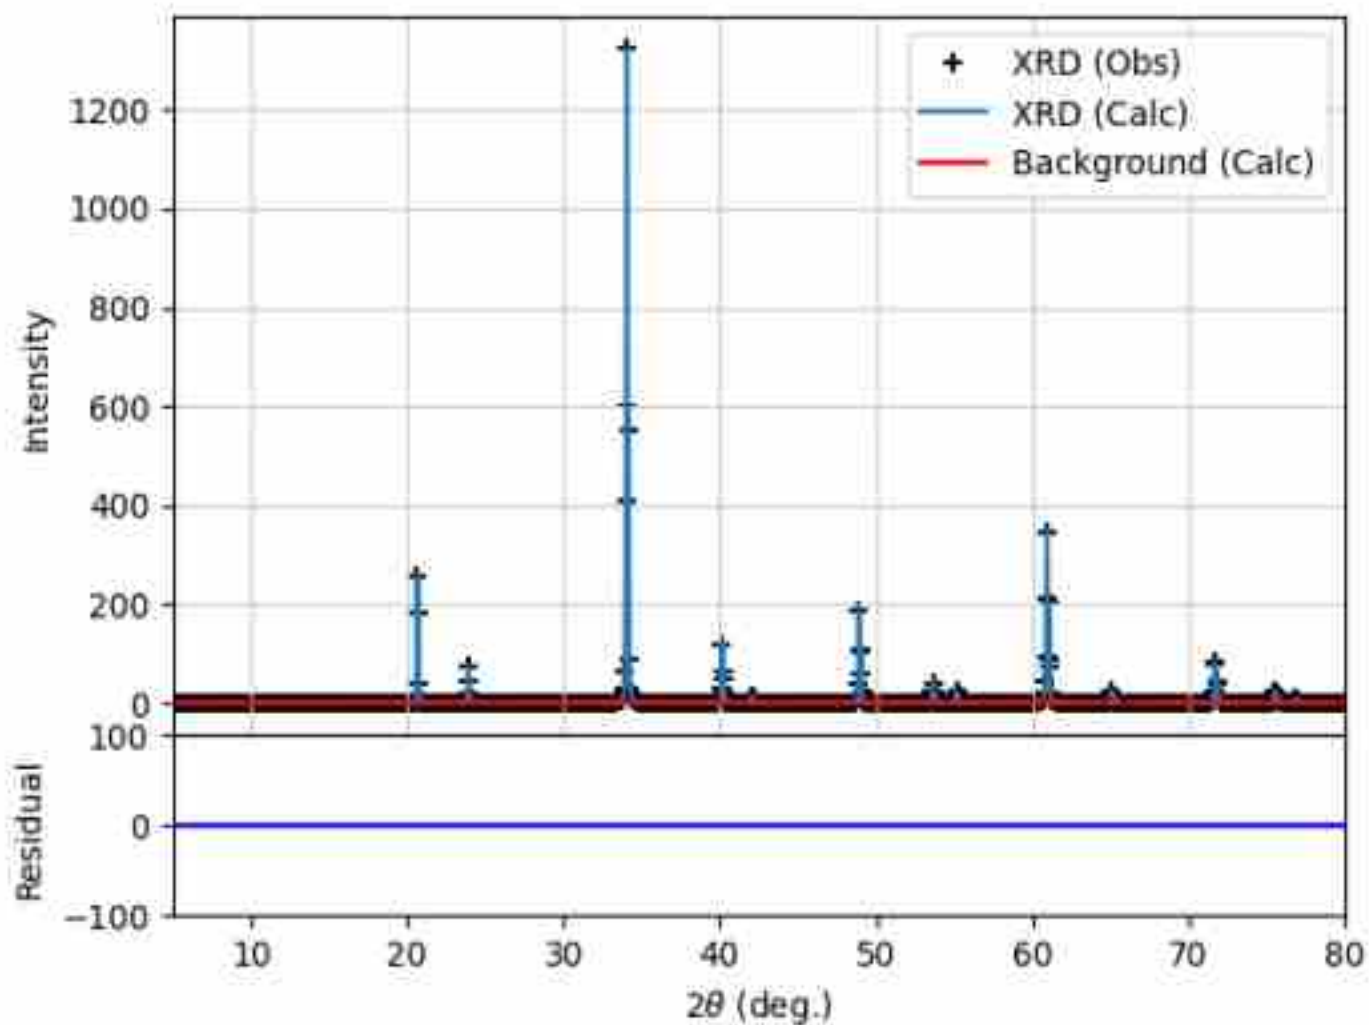

| RMSE before RR | Rwp    | RMSE after RR |
|----------------|--------|---------------|
| 0.002          | 0.0029 | 0.00325       |

# Eu1Mg1

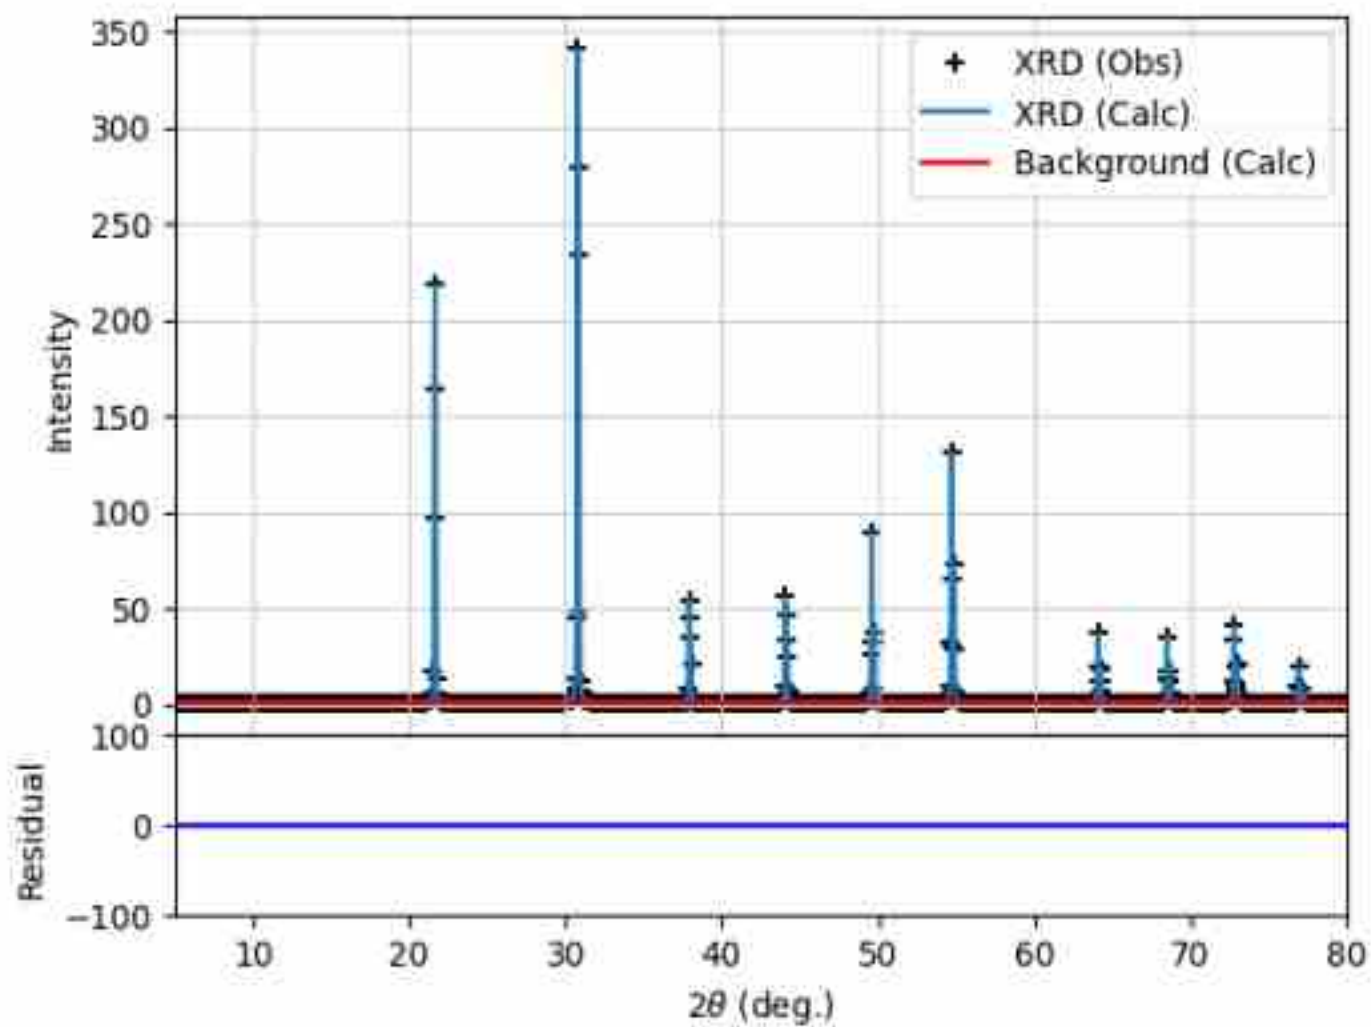

| RMSE before RR | Rwp     | RMSE after RR |
|----------------|---------|---------------|
| 0.002          | 0.03993 | 0.00151       |

# Eu1Te1

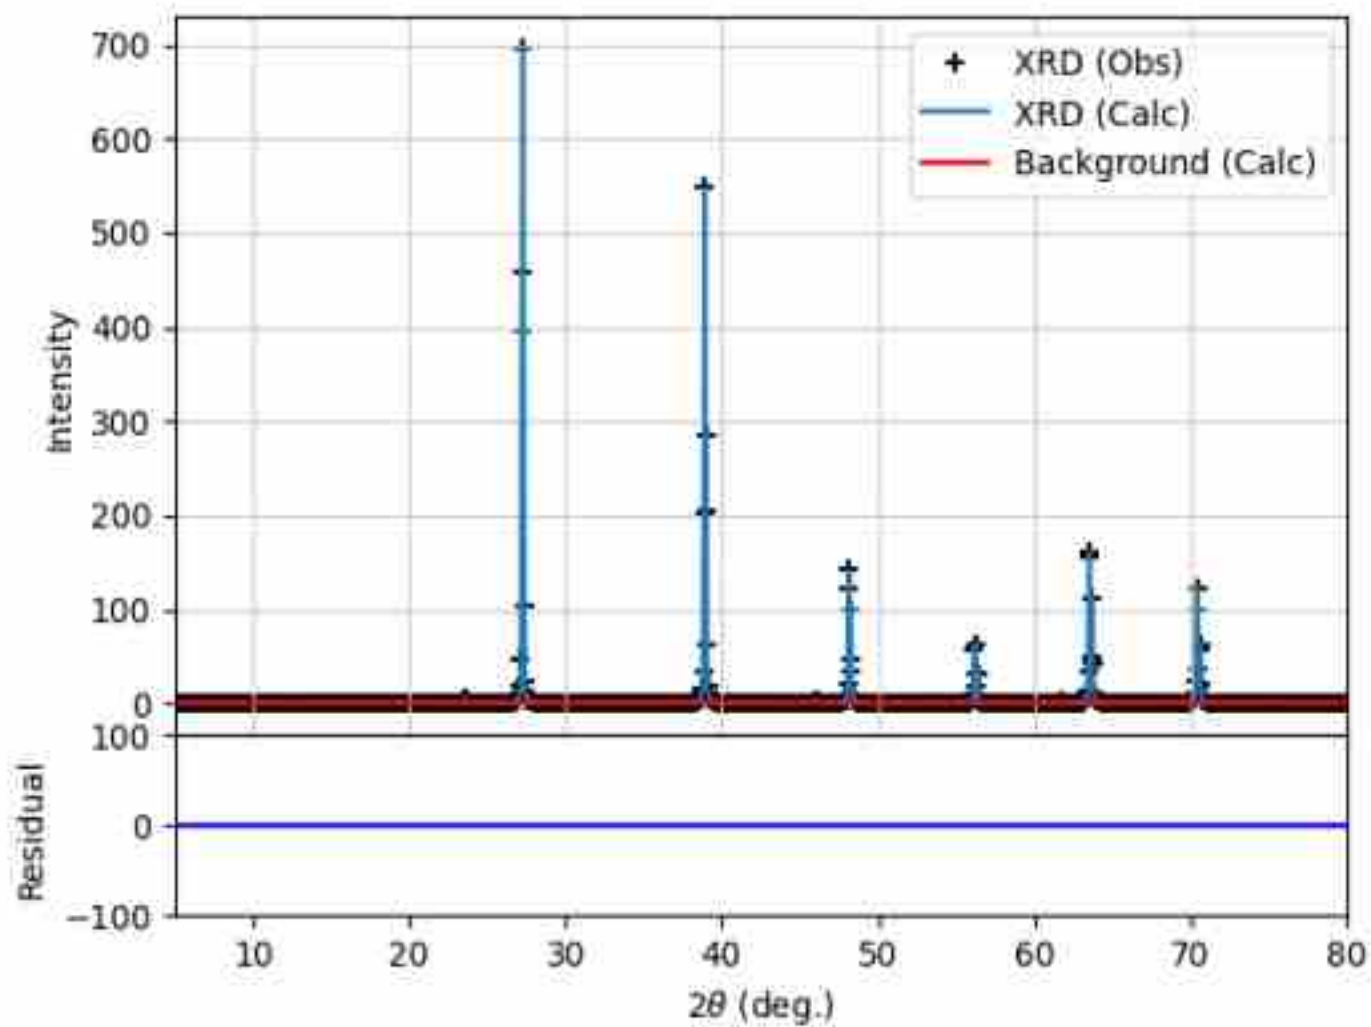

| RMSE before RR | Rwp     | RMSE after RR |
|----------------|---------|---------------|
| 0.002          | 0.09525 | 0.00166       |

# Eu1Tl1Au2

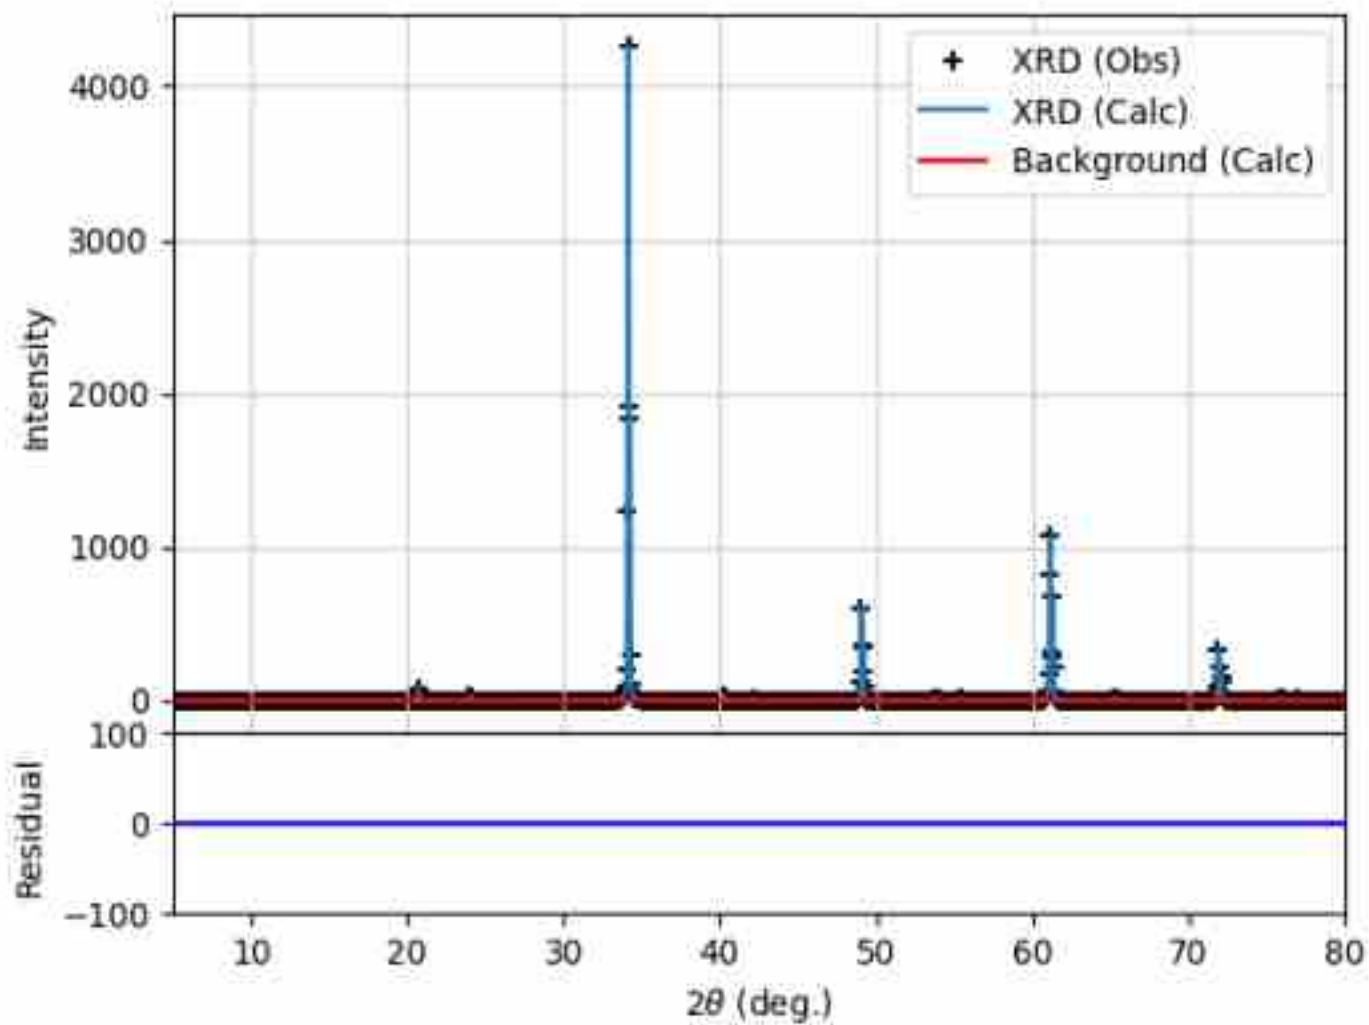

| RMSE before RR | Rwp     | RMSE after RR |
|----------------|---------|---------------|
| 0.002          | 0.03367 | 0.00169       |



# Eu1Tl3

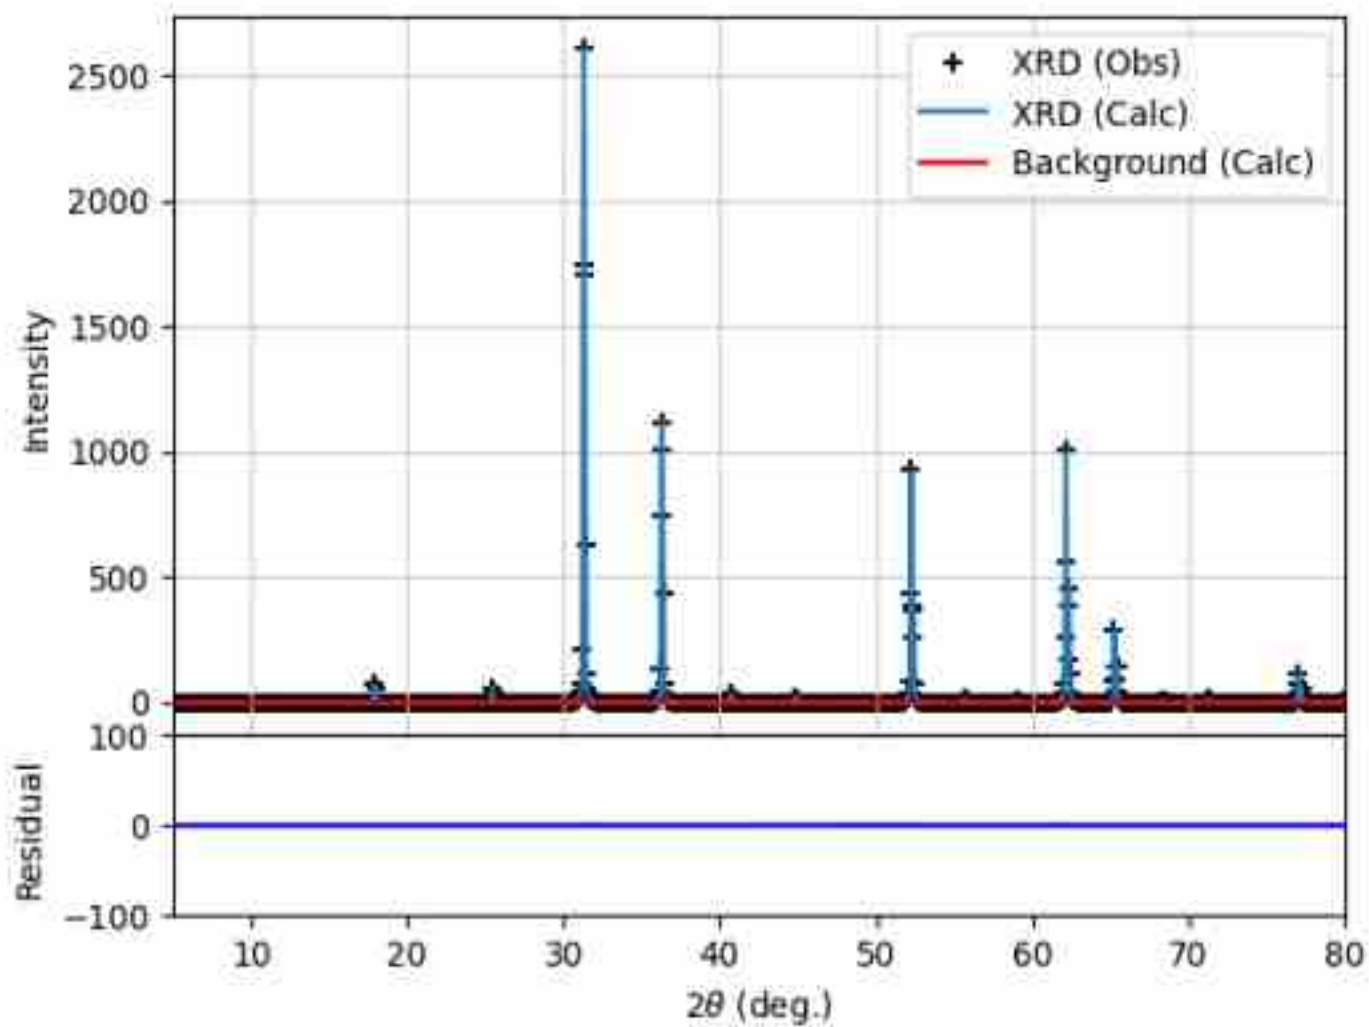

| RMSE before RR | Rwp     | RMSE after RR |
|----------------|---------|---------------|
| 0.002          | 0.14101 | 0.00137       |

# Eu<sub>2</sub>Ag<sub>1</sub>Sn<sub>1</sub>

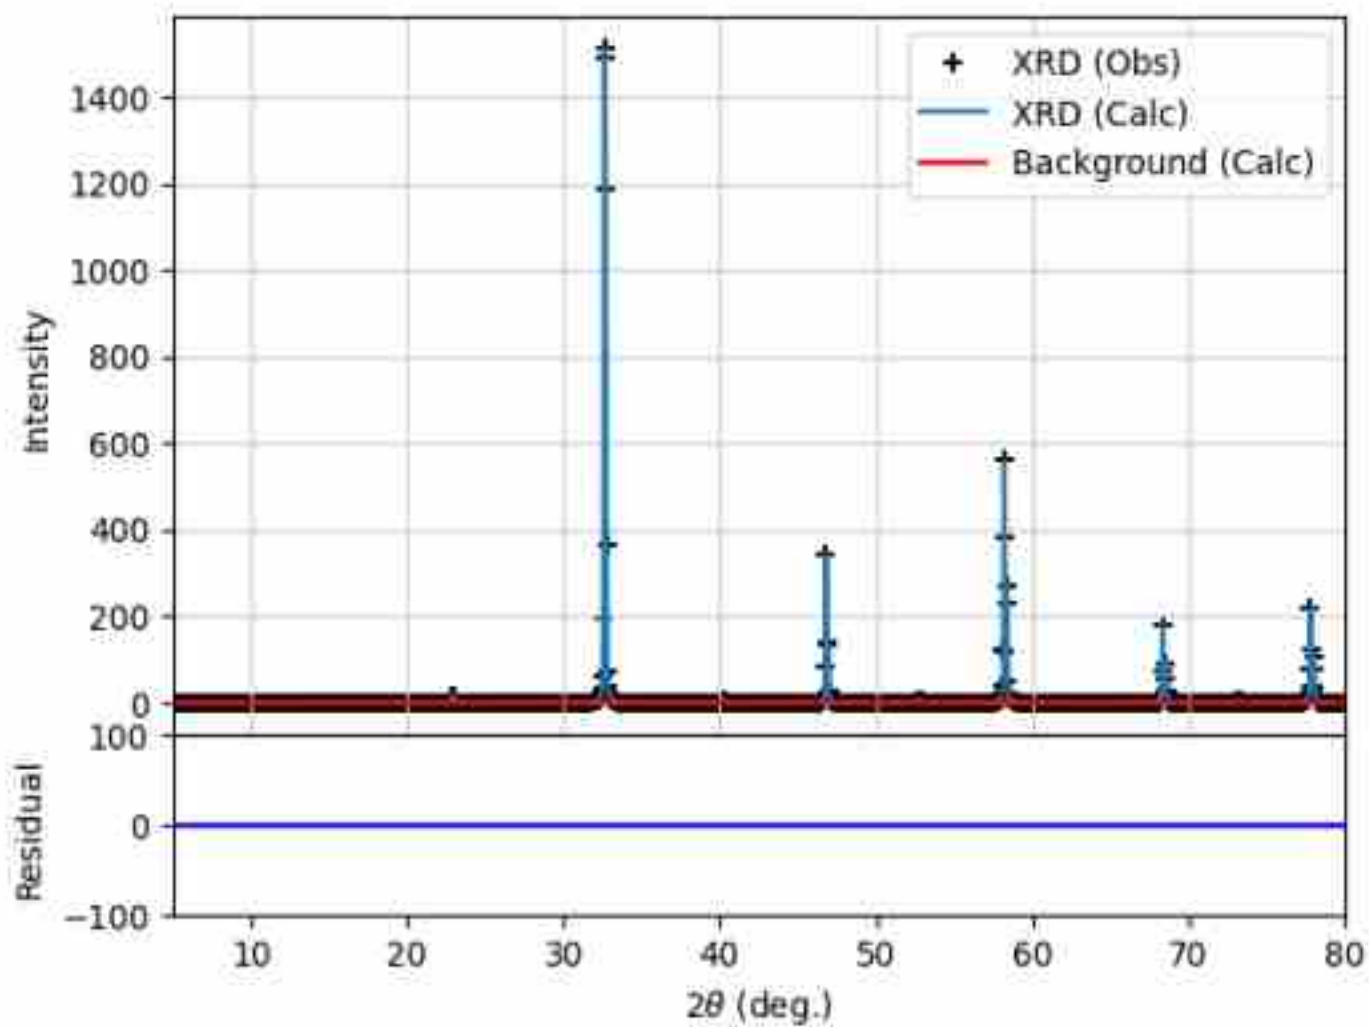

| RMSE before RR | Rwp     | RMSE after RR |
|----------------|---------|---------------|
| 0.002          | 0.21689 | 0.00074       |

# Eu<sub>2</sub>CdGa<sub>1</sub>

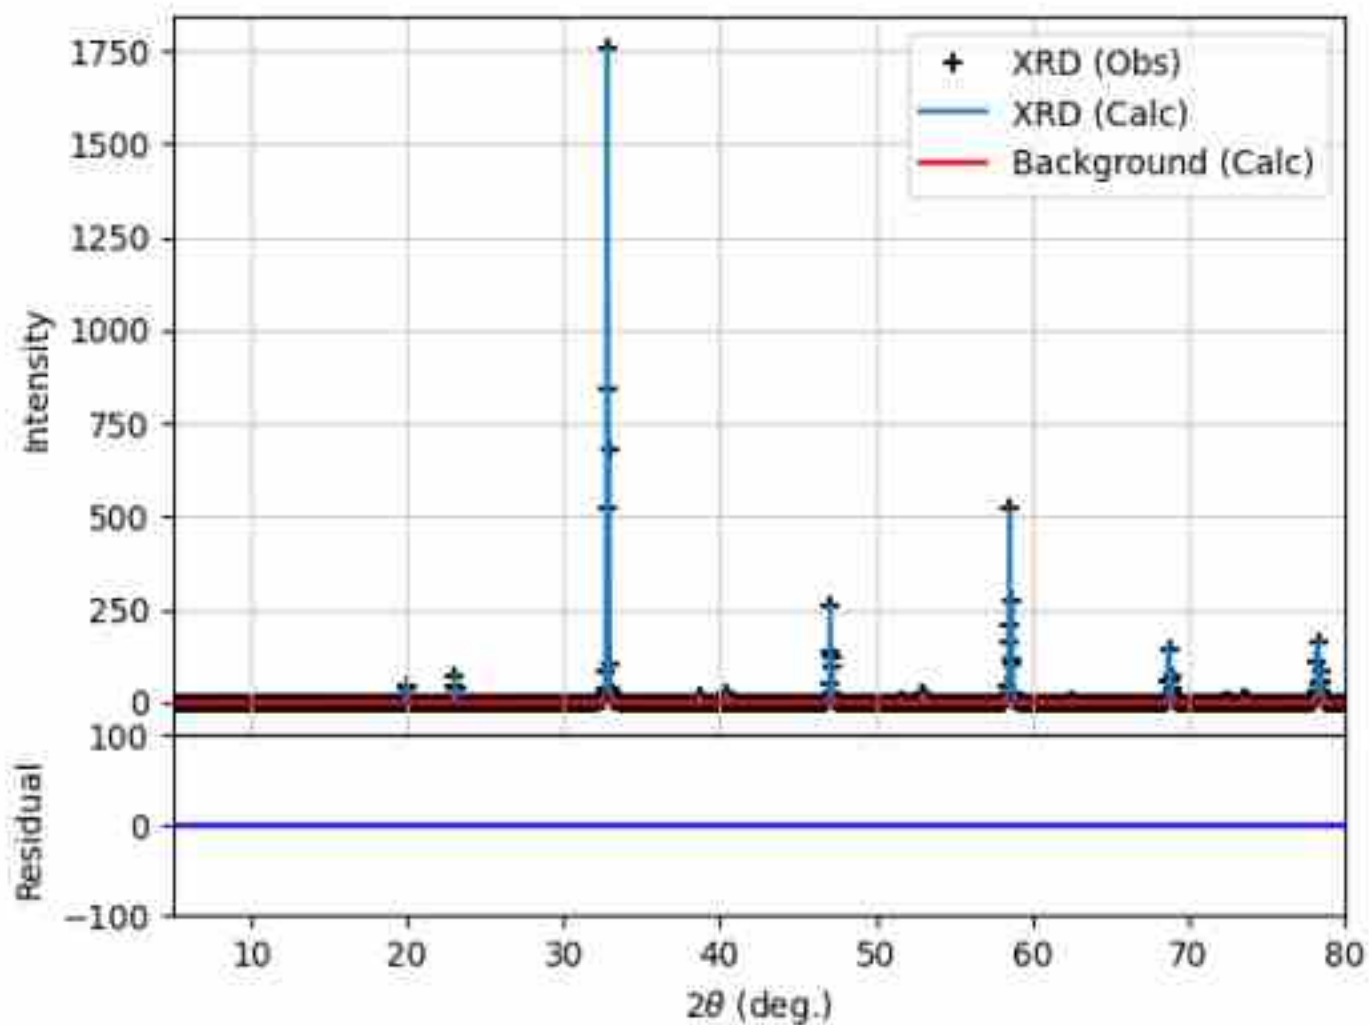

| RMSE before RR | Rwp     | RMSE after RR |
|----------------|---------|---------------|
| 0.002          | 0.00488 | 0.00039       |

# Eu<sub>2</sub>CuIr<sub>1</sub>

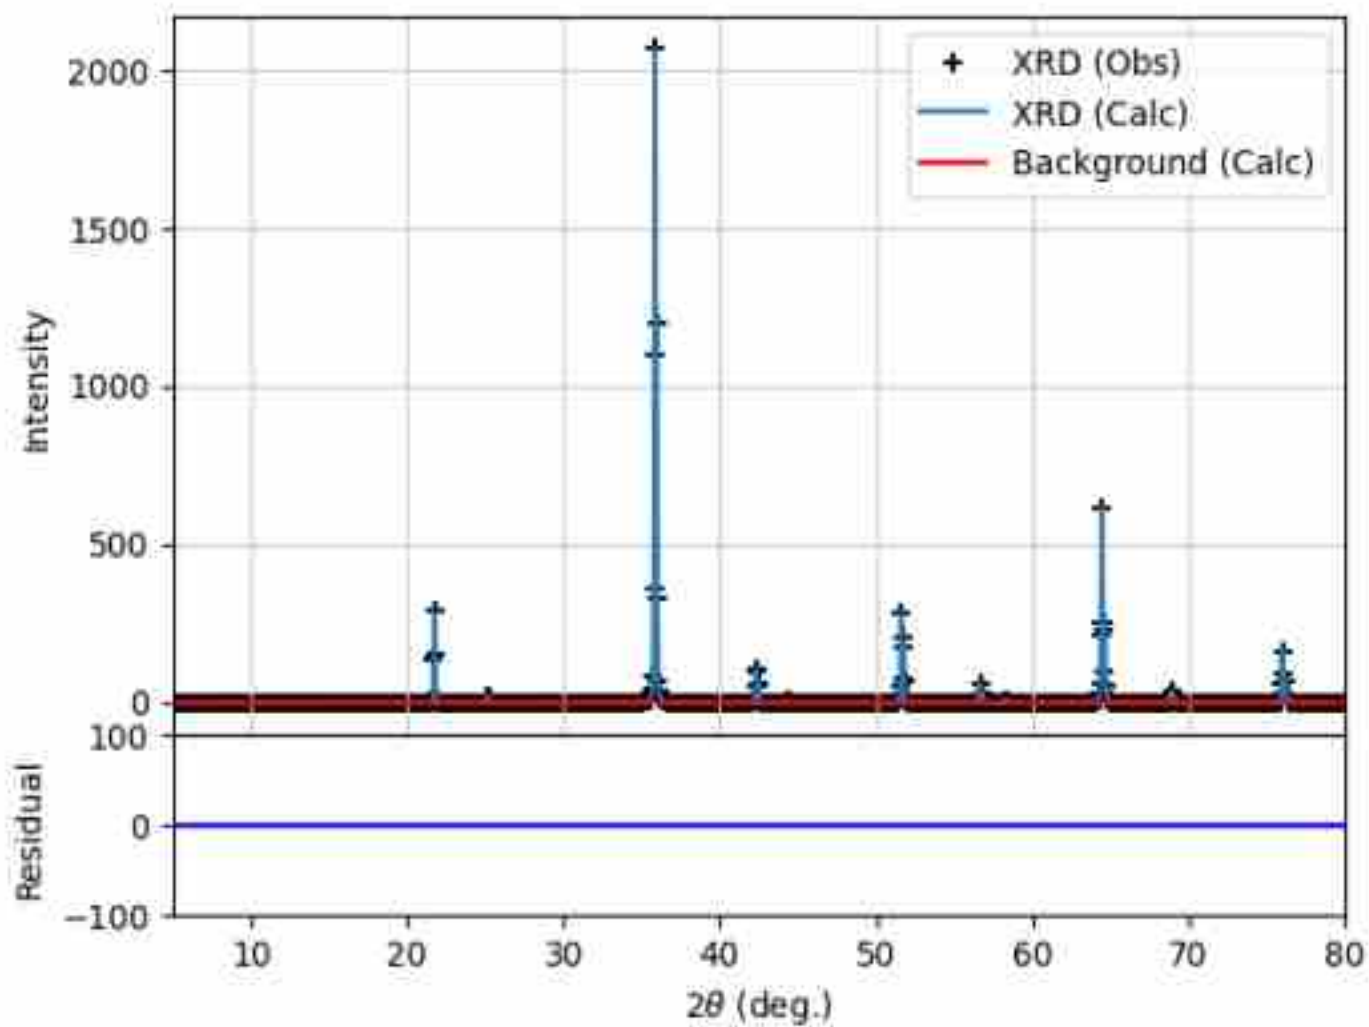

| RMSE before RR | Rwp     | RMSE after RR |
|----------------|---------|---------------|
| 0.002          | 0.00378 | 0.00071       |

# Eu<sub>2</sub>Cu<sub>2</sub>Sn<sub>2</sub>

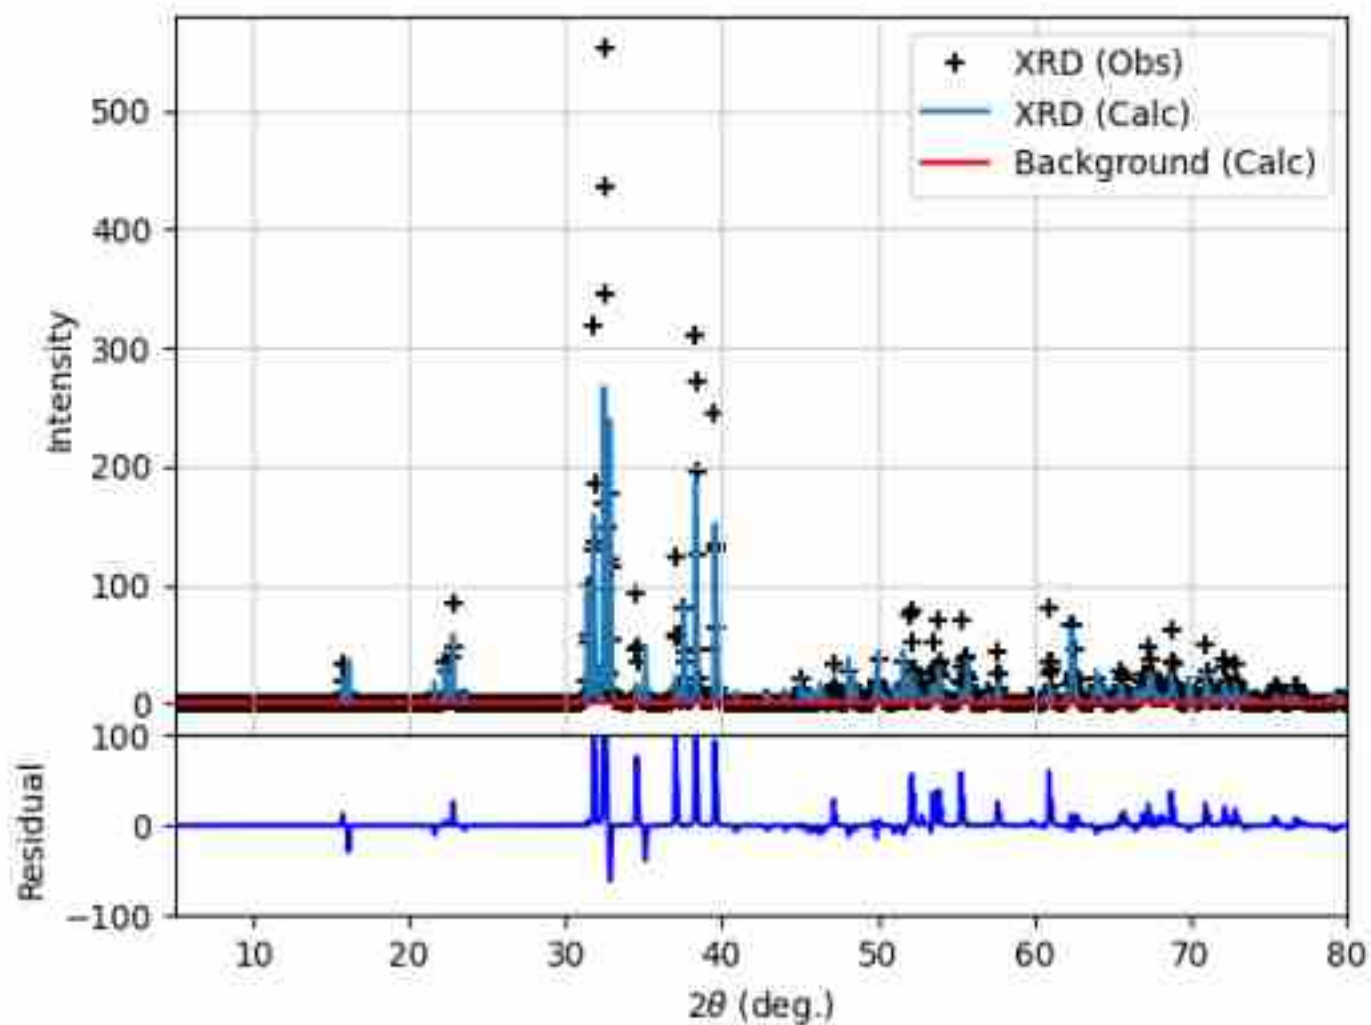

| RMSE before RR | Rwp      | RMSE after RR |
|----------------|----------|---------------|
| 0.02           | 54.31076 | 0.07754       |

# Eu<sub>2</sub>MgIn<sub>1</sub>

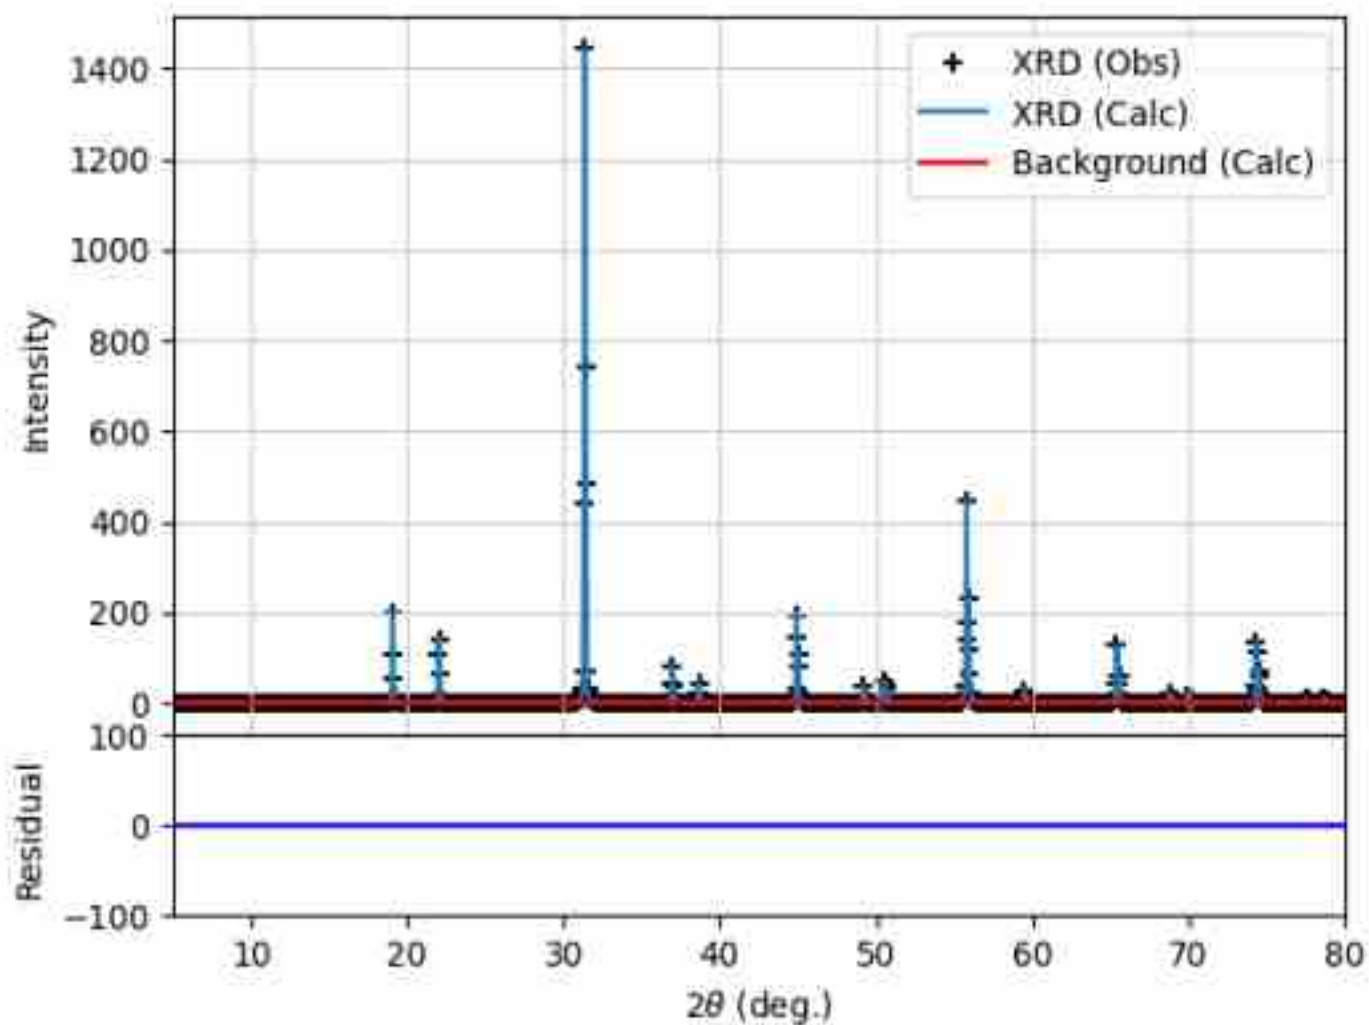

| RMSE before RR | Rwp    | RMSE after RR |
|----------------|--------|---------------|
| 0.002          | 0.0029 | 0.00054       |

# Eu<sub>2</sub>PtAu

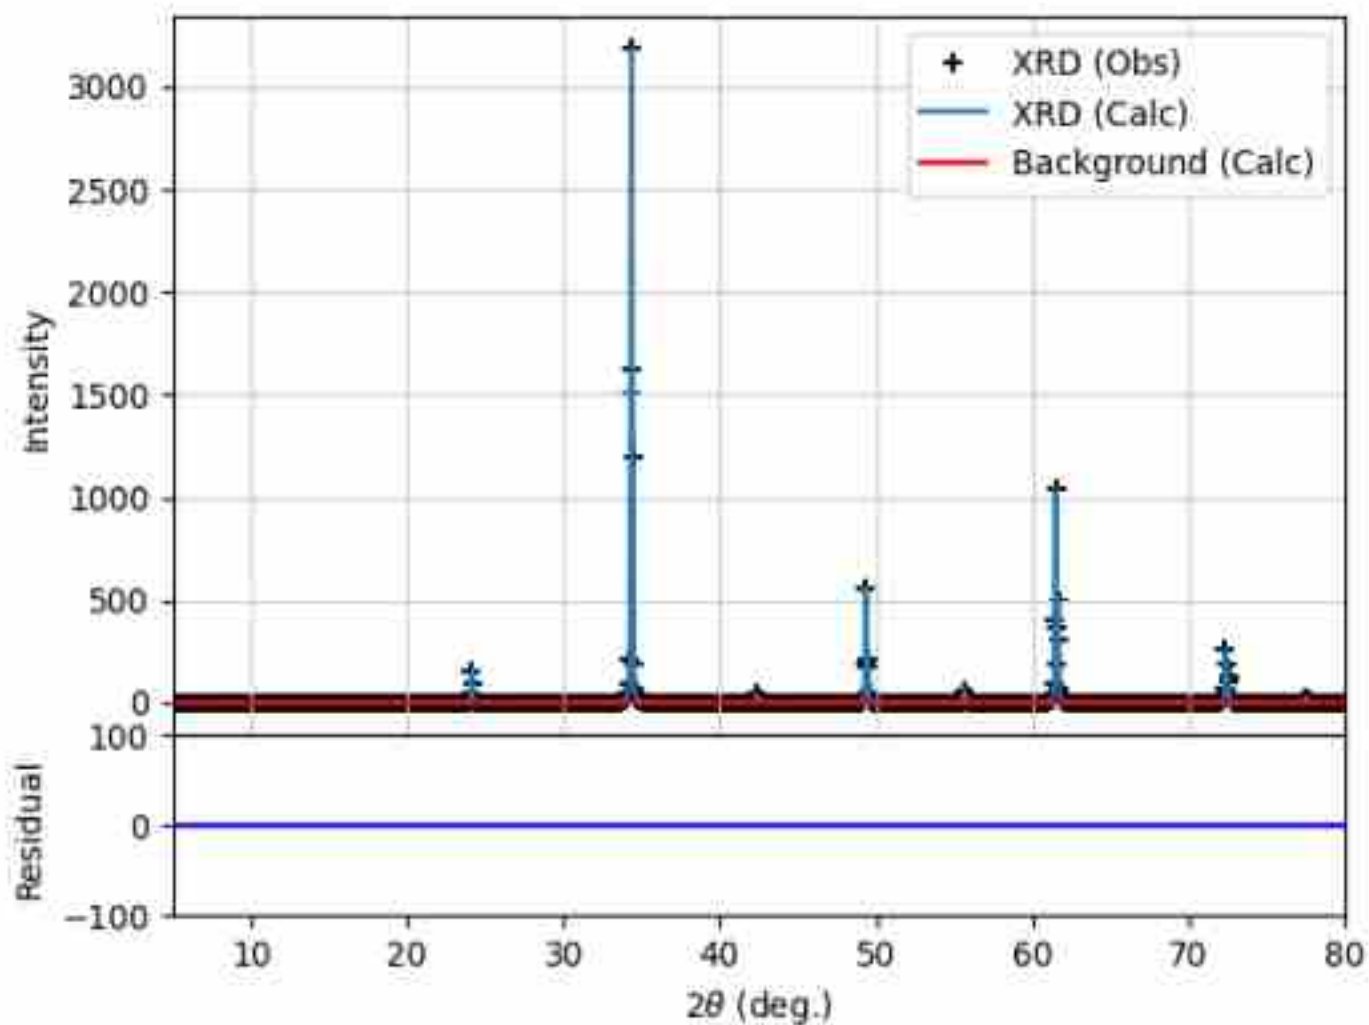

| RMSE before RR | Rwp    | RMSE after RR |
|----------------|--------|---------------|
| 0.002          | 0.0389 | 0.00097       |

# Eu3Mg1

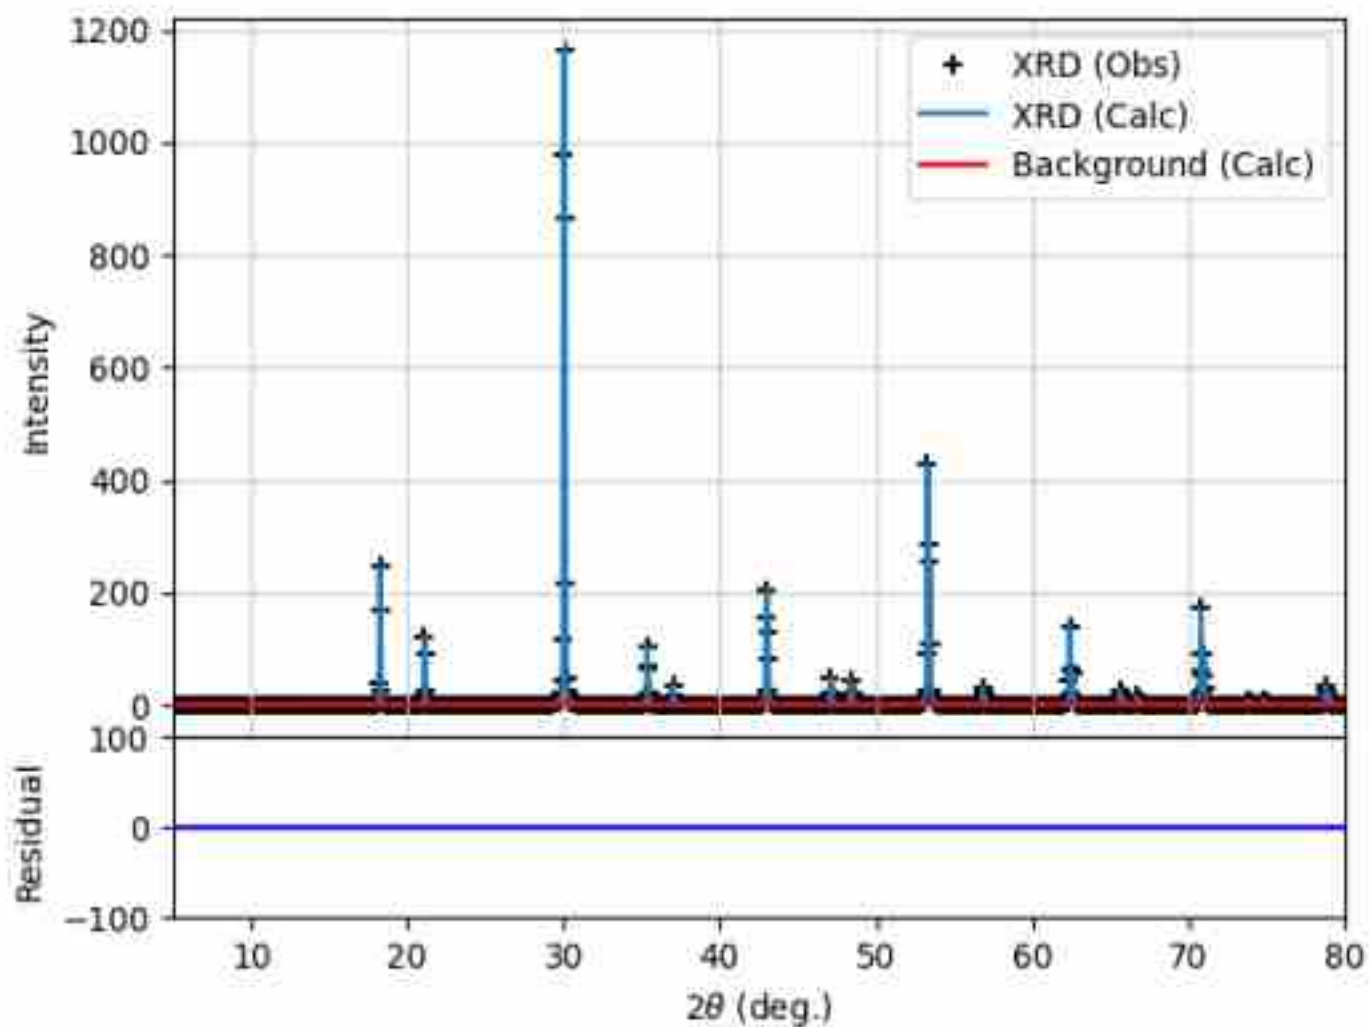

| RMSE before RR | Rwp     | RMSE after RR |
|----------------|---------|---------------|
| 0.002          | 0.00288 | 0.00027       |



# Eu10Ge6

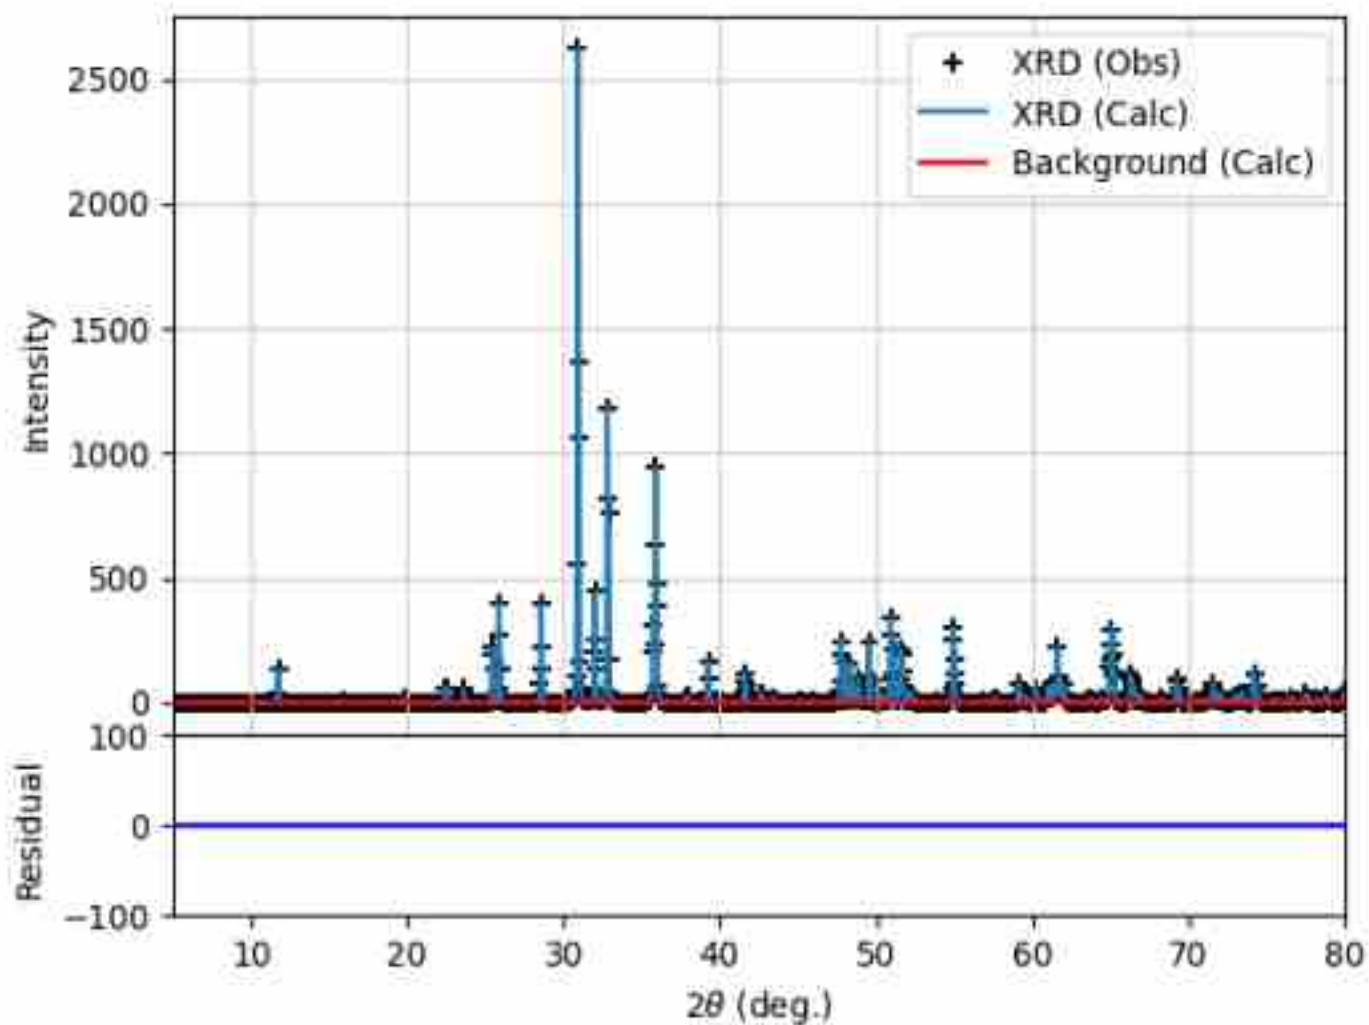

| RMSE before RR | Rwp     | RMSE after RR |
|----------------|---------|---------------|
| 0.02           | 0.00351 | 0.00037       |

# Fe1Ir1

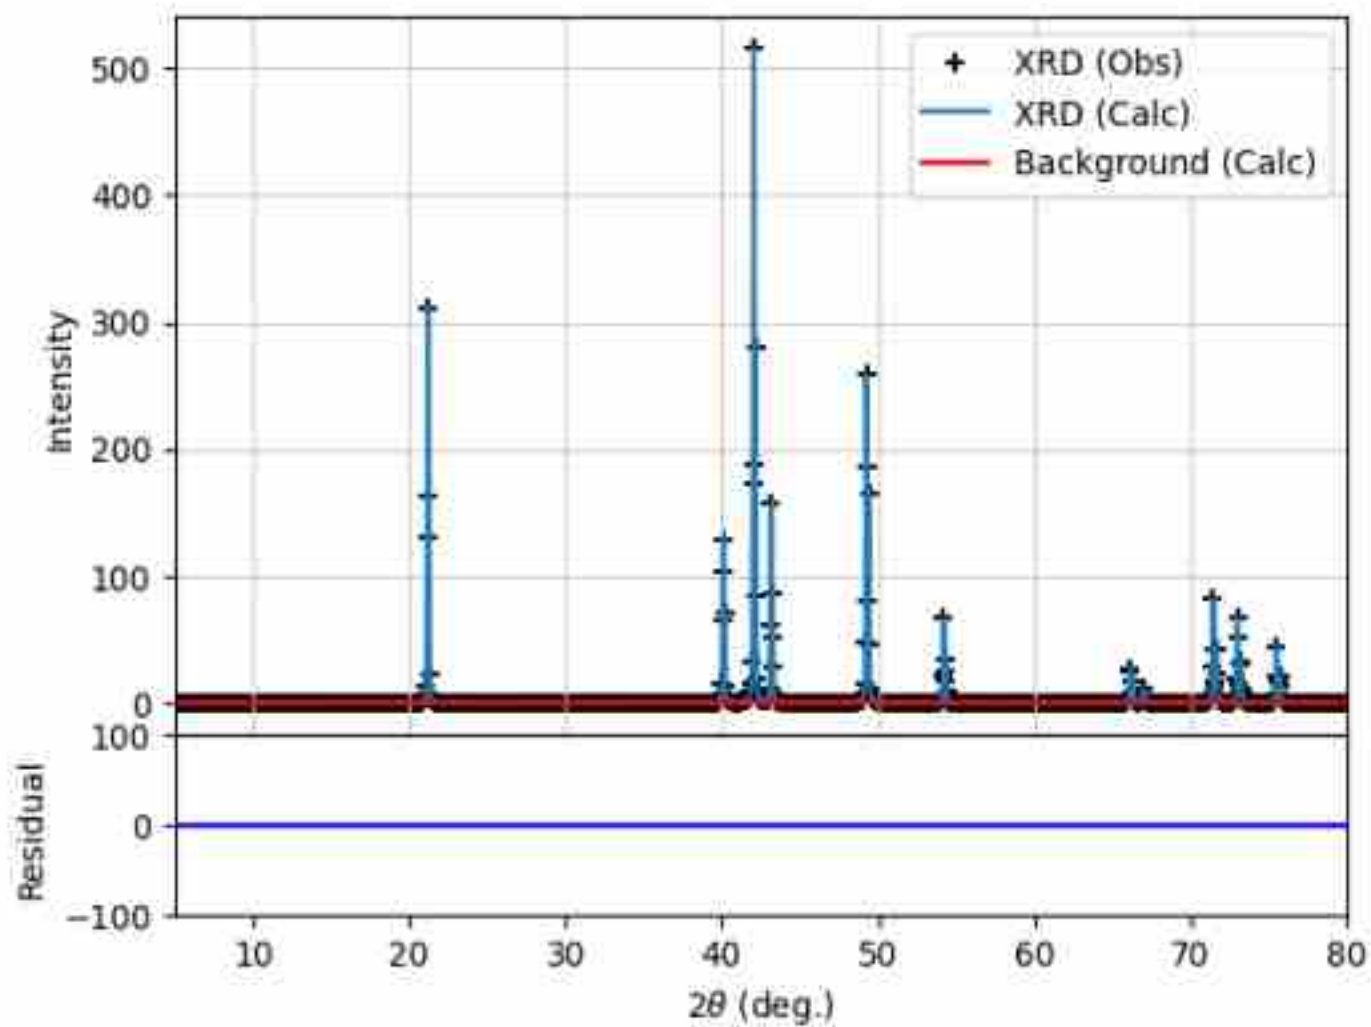

| RMSE before RR | Rwp     | RMSE after RR |
|----------------|---------|---------------|
| 0.002          | 0.00244 | 0.00037       |

# Fe1Ni3

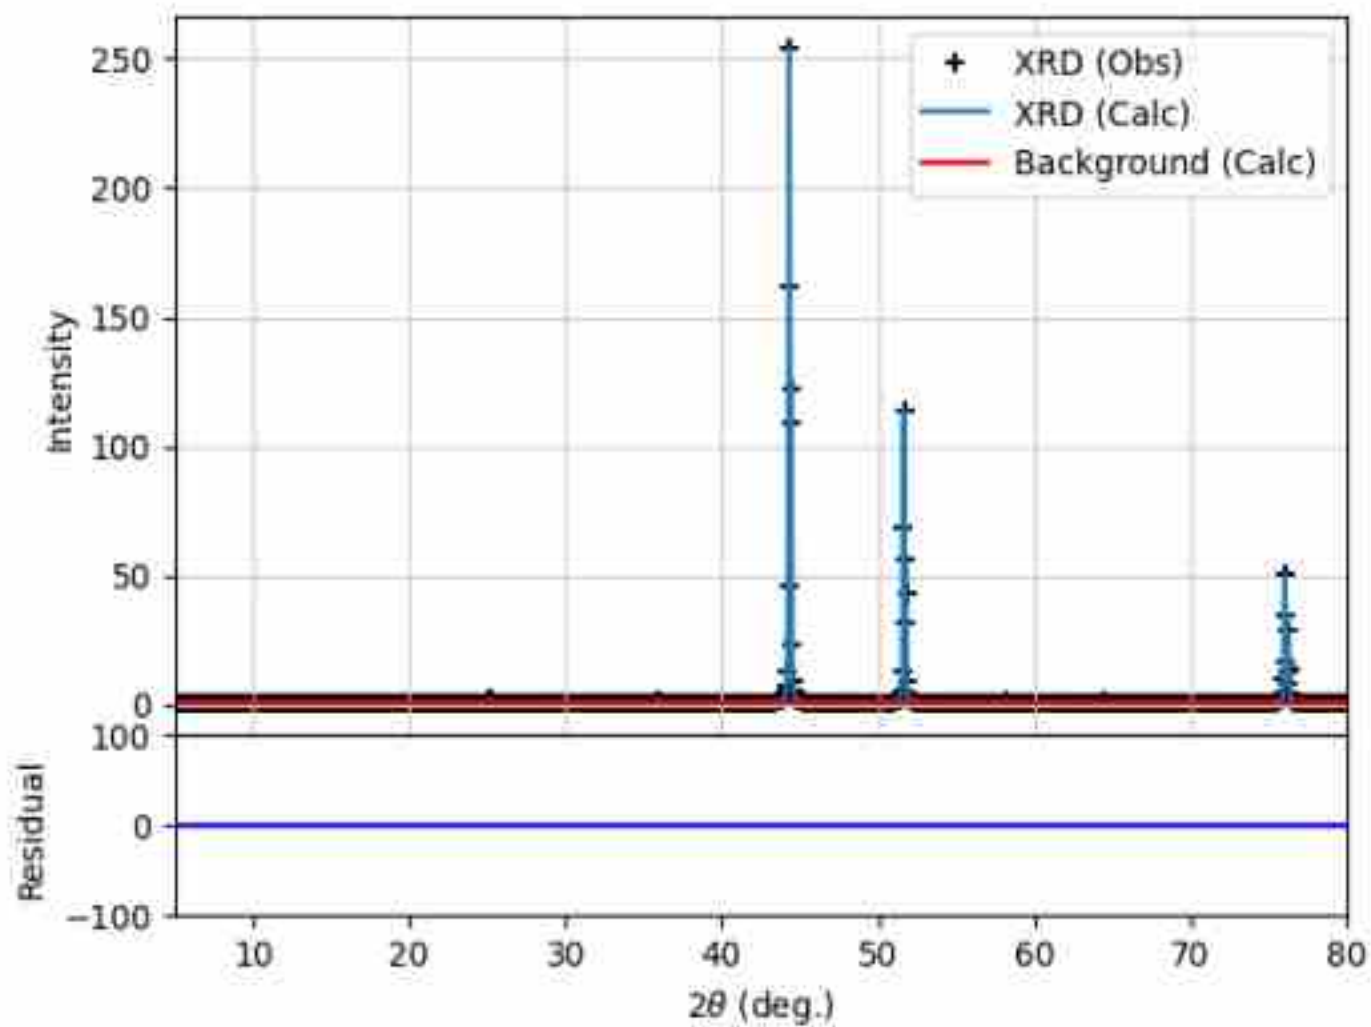

| RMSE before RR | Rwp     | RMSE after RR |
|----------------|---------|---------------|
| 0.002          | 0.02483 | 0.00091       |

Fe1Tc2Ge1

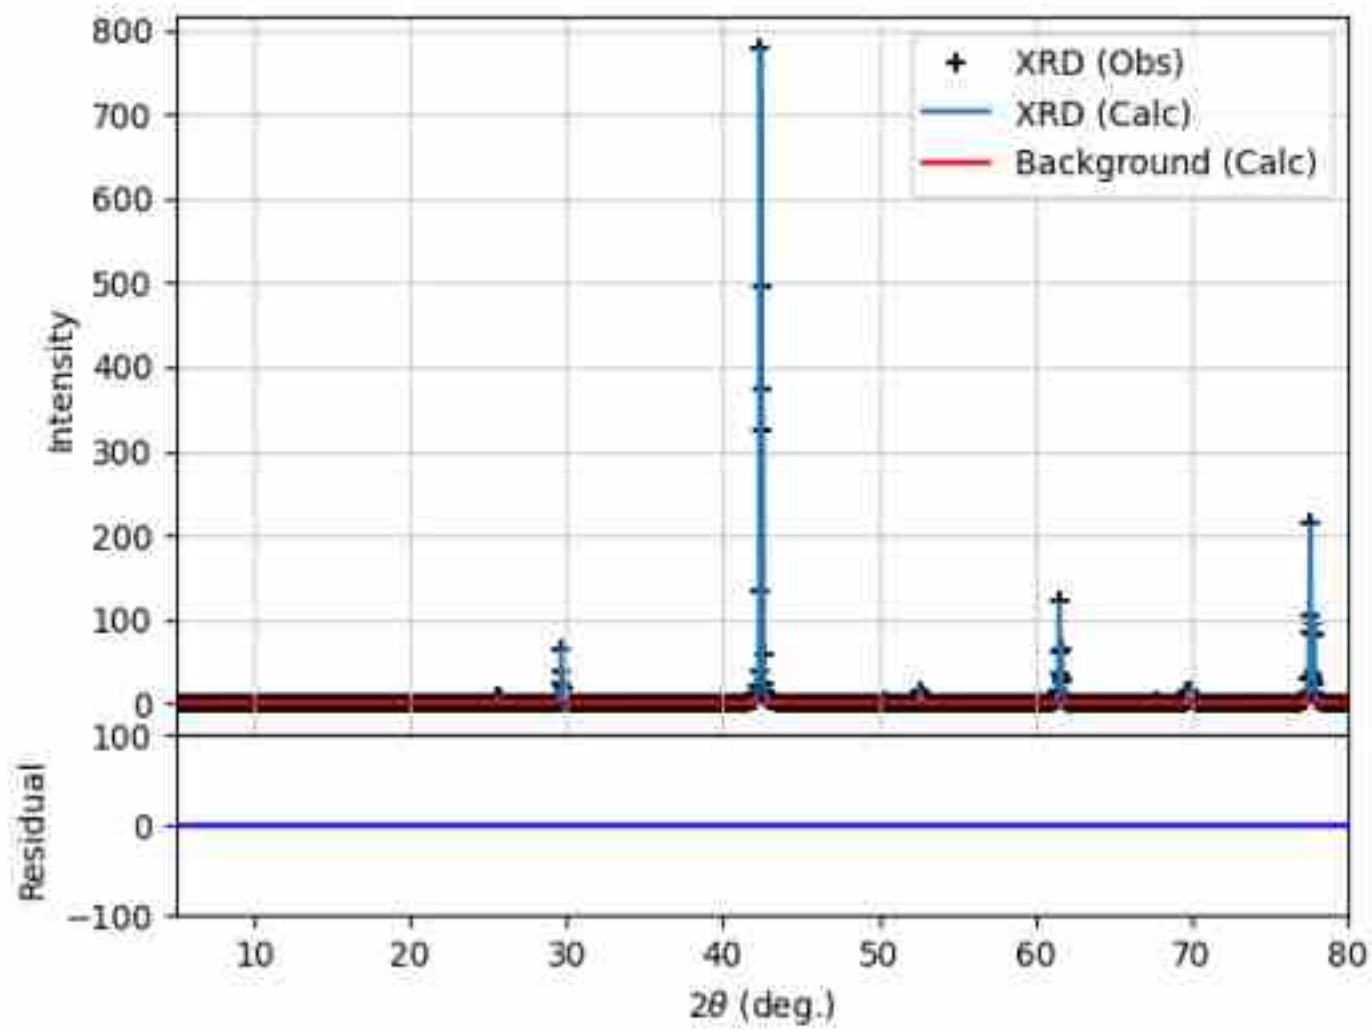

| RMSE before RR | Rwp     | RMSE after RR |
|----------------|---------|---------------|
| 0.002          | 0.00178 | 0.00049       |

# Ga1Cu3

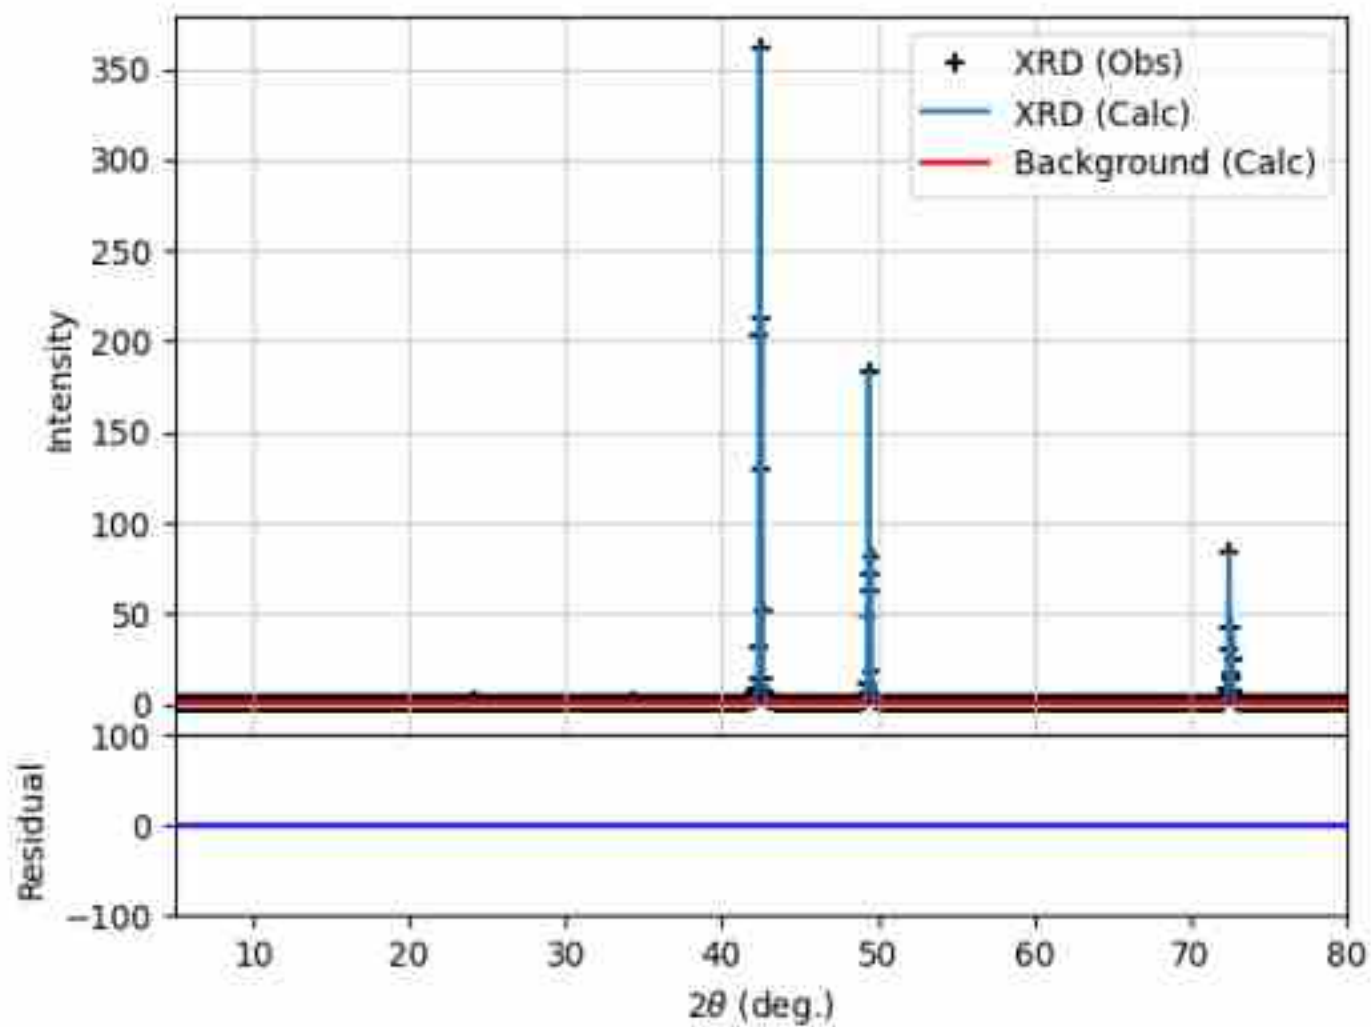

| RMSE before RR | Rwp    | RMSE after RR |
|----------------|--------|---------------|
| 0.002          | 0.1463 | 0.00109       |

# GalFe1Ru2

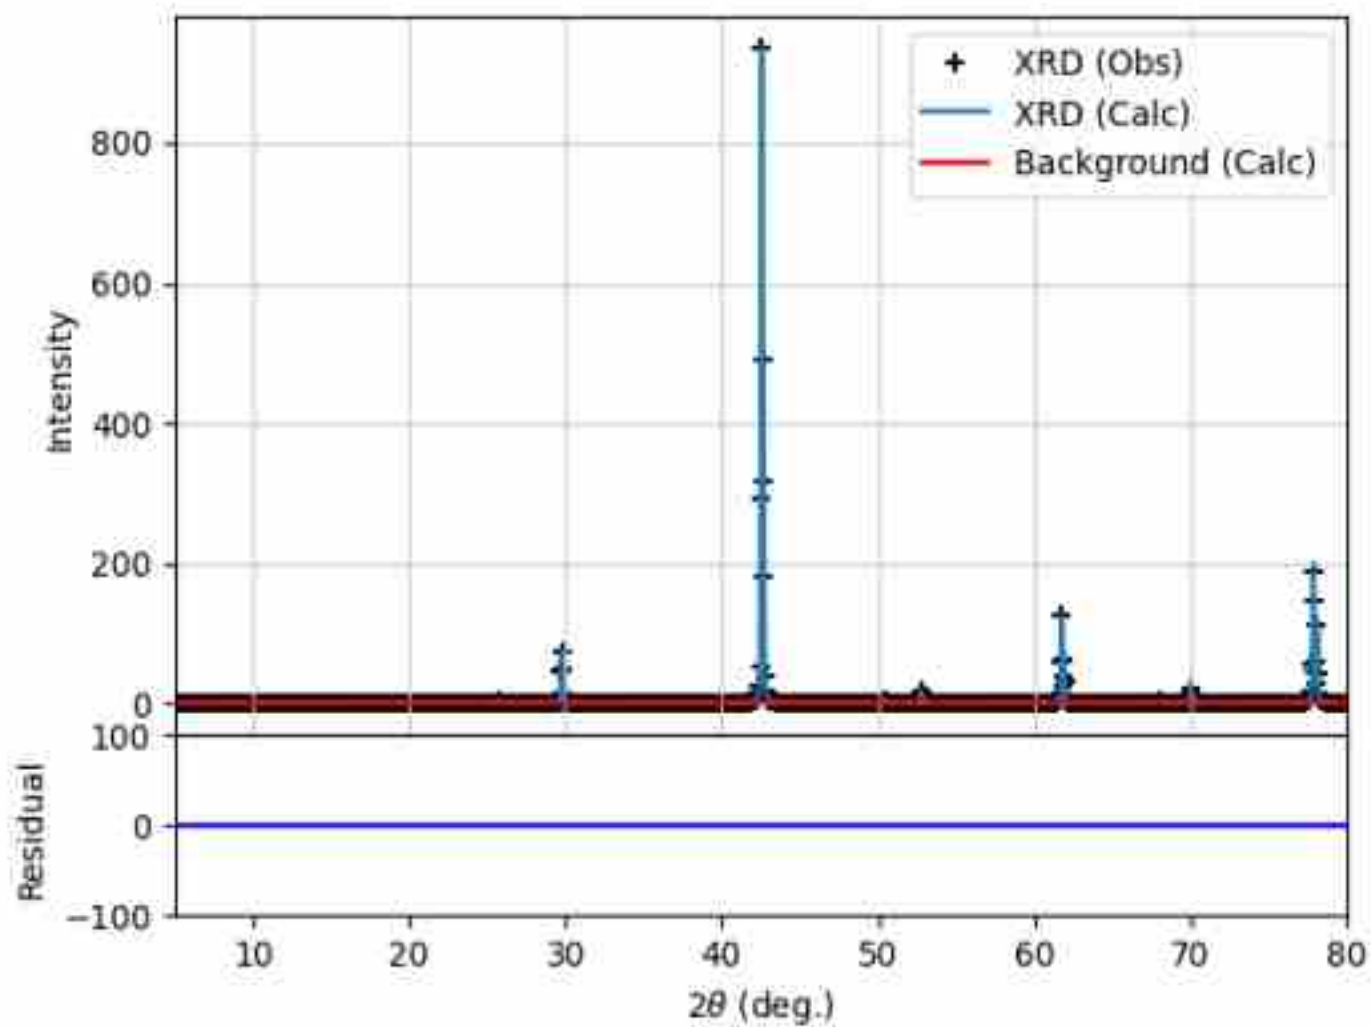

| RMSE before RR | Rwp     | RMSE after RR |
|----------------|---------|---------------|
| 0.002          | 0.00416 | 0.00067       |

# Ga1Hg3

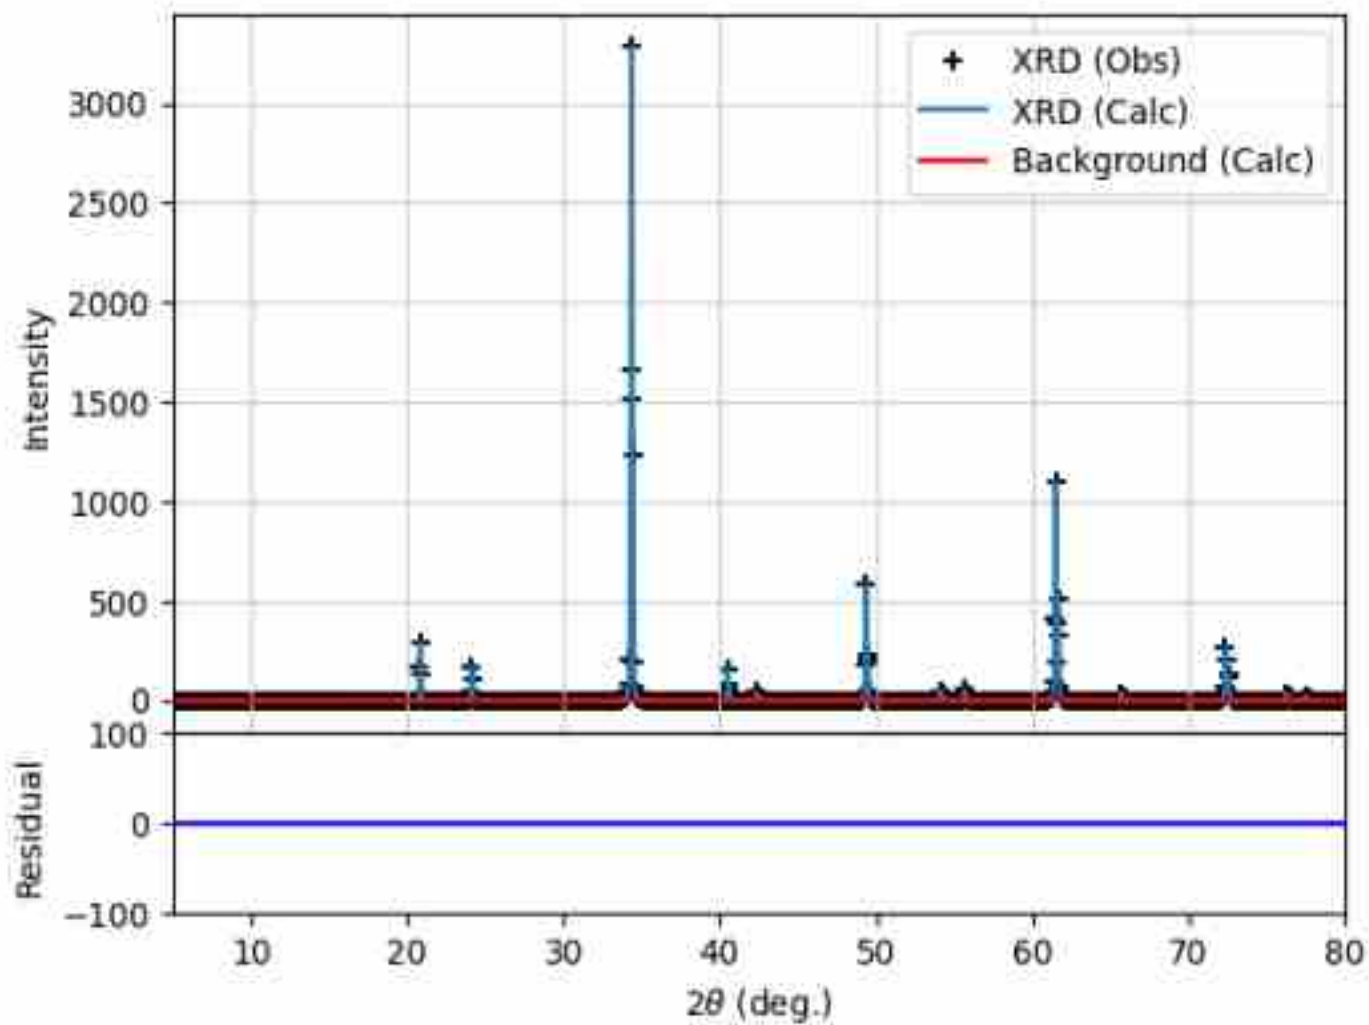

| RMSE before RR | Rwp     | RMSE after RR |
|----------------|---------|---------------|
| 0.002          | 0.00806 | 0.00068       |

# Ga1Si1Ru2

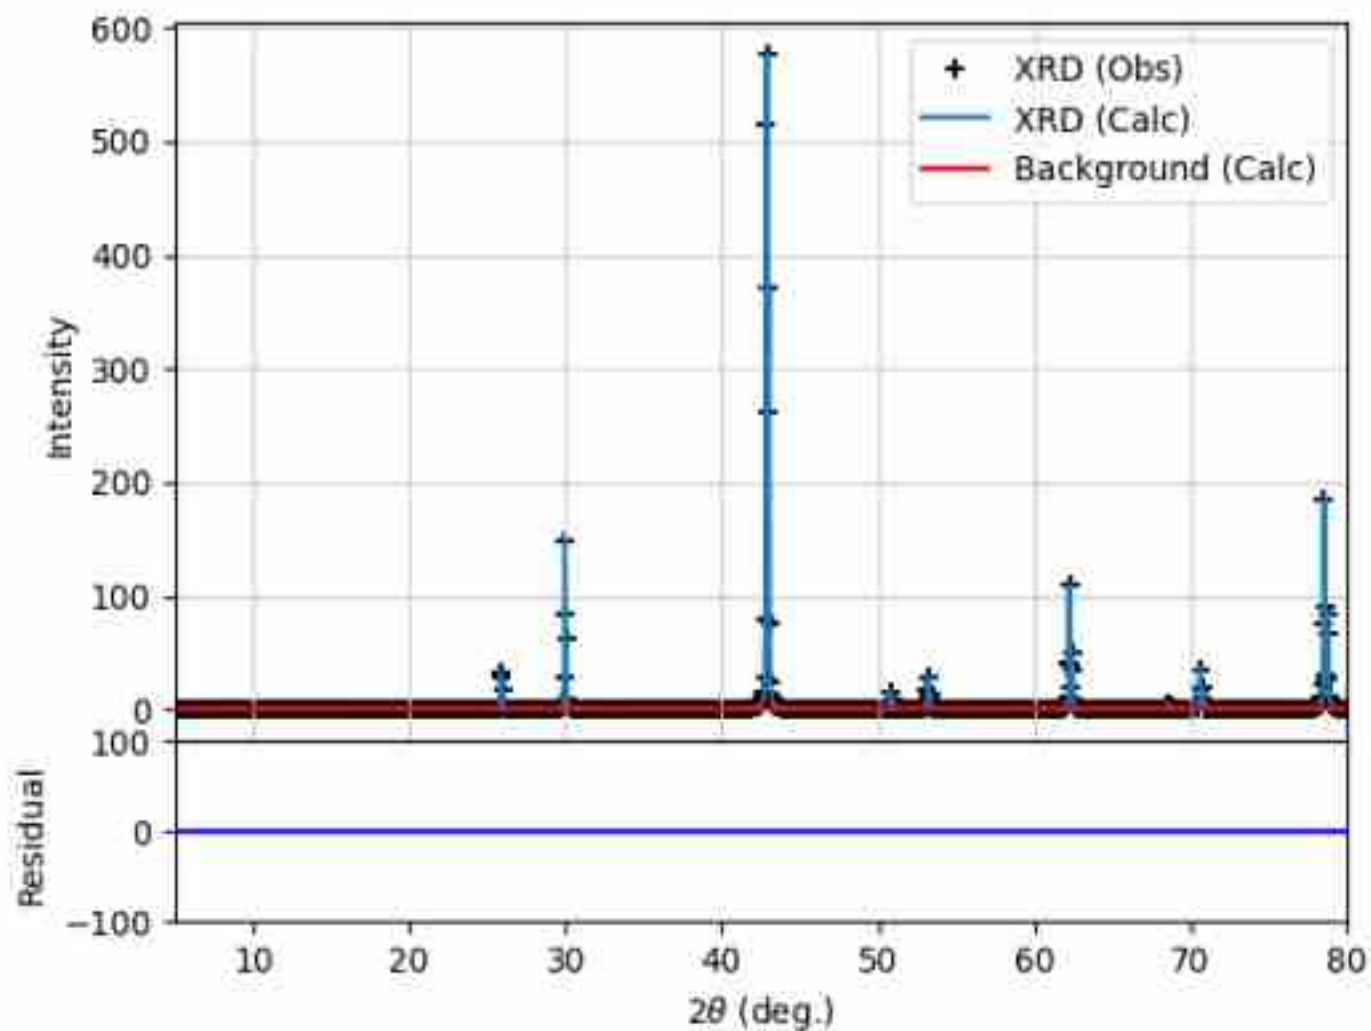

| RMSE before RR | Rwp     | RMSE after RR |
|----------------|---------|---------------|
| 0.002          | 0.00271 | 0.00083       |



# Ga1Sn3

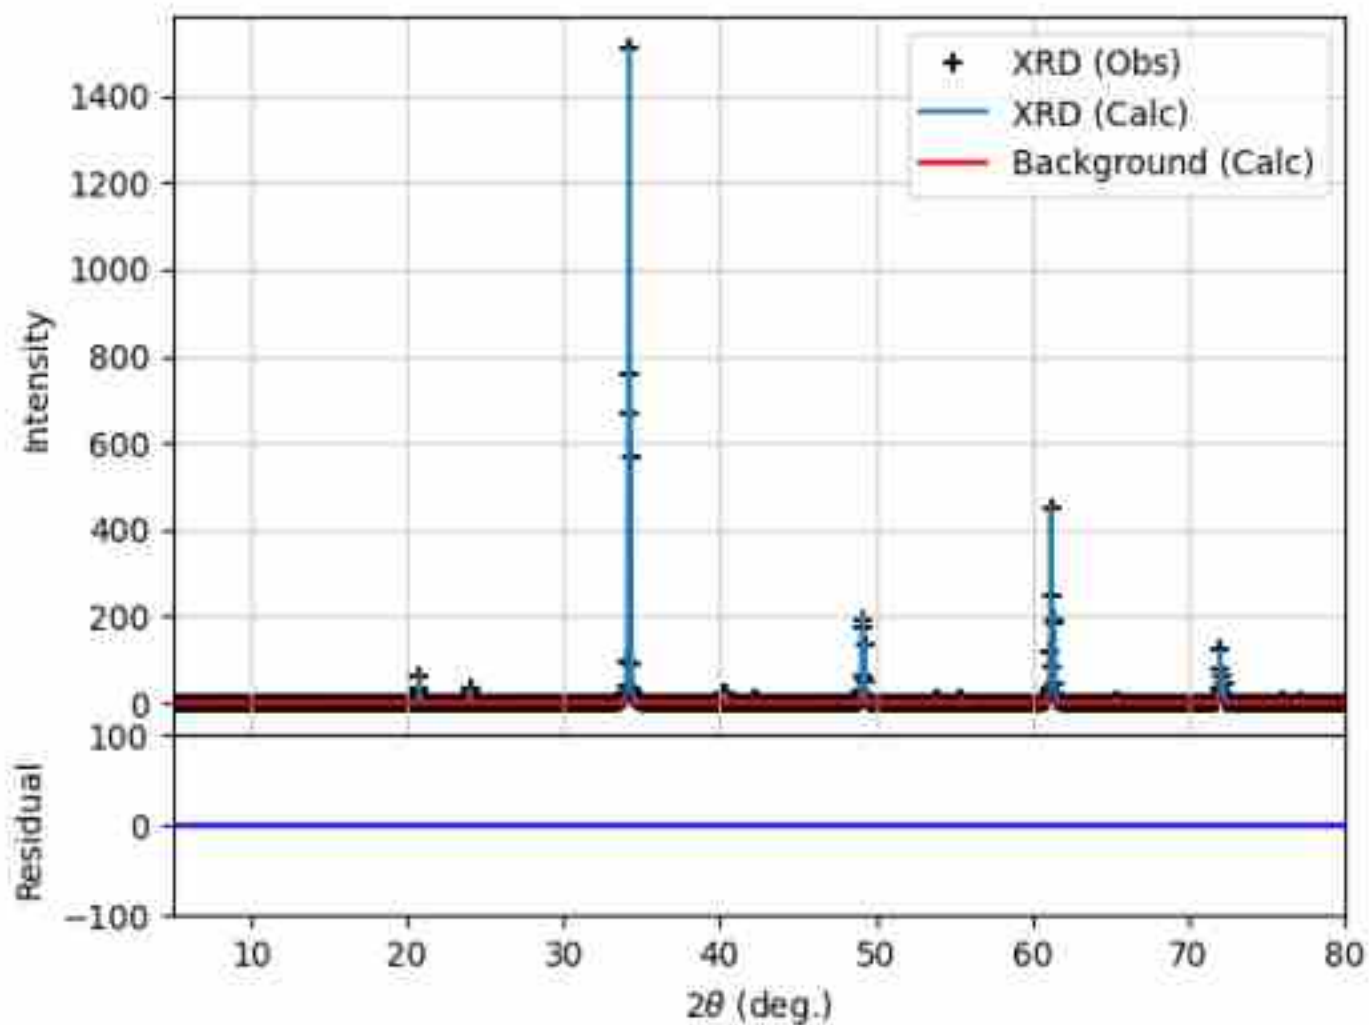

| RMSE before RR | Rwp     | RMSE after RR |
|----------------|---------|---------------|
| 0.002          | 0.02373 | 0.00104       |

# Gd1Cd1Hg2

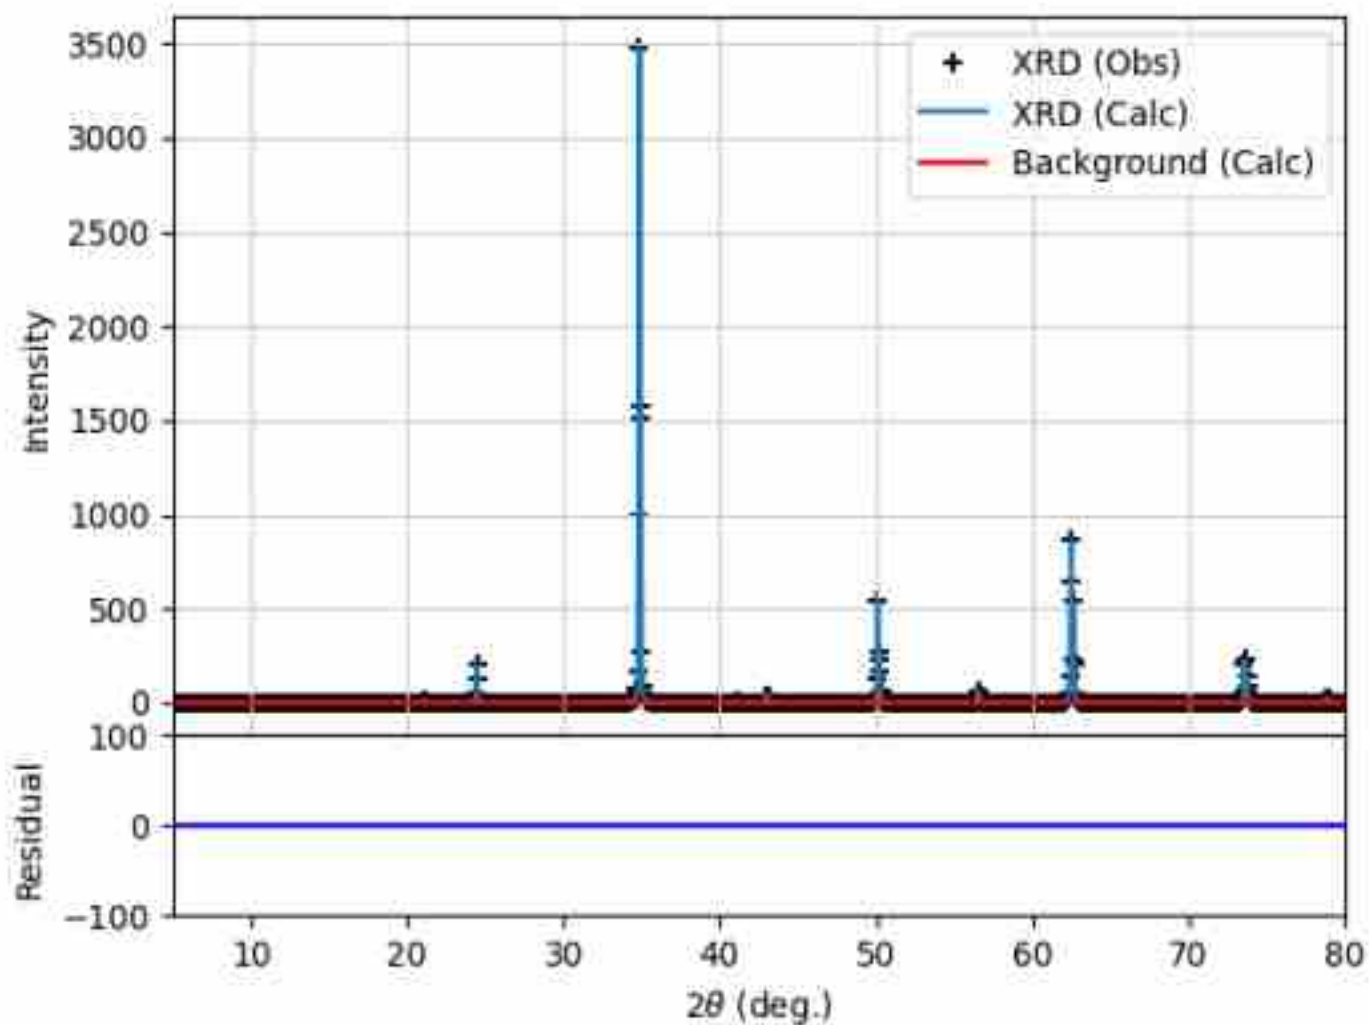

| RMSE before RR | Rwp     | RMSE after RR |
|----------------|---------|---------------|
| 0.002          | 0.00515 | 0.0004        |

# Gd1In1Pd2

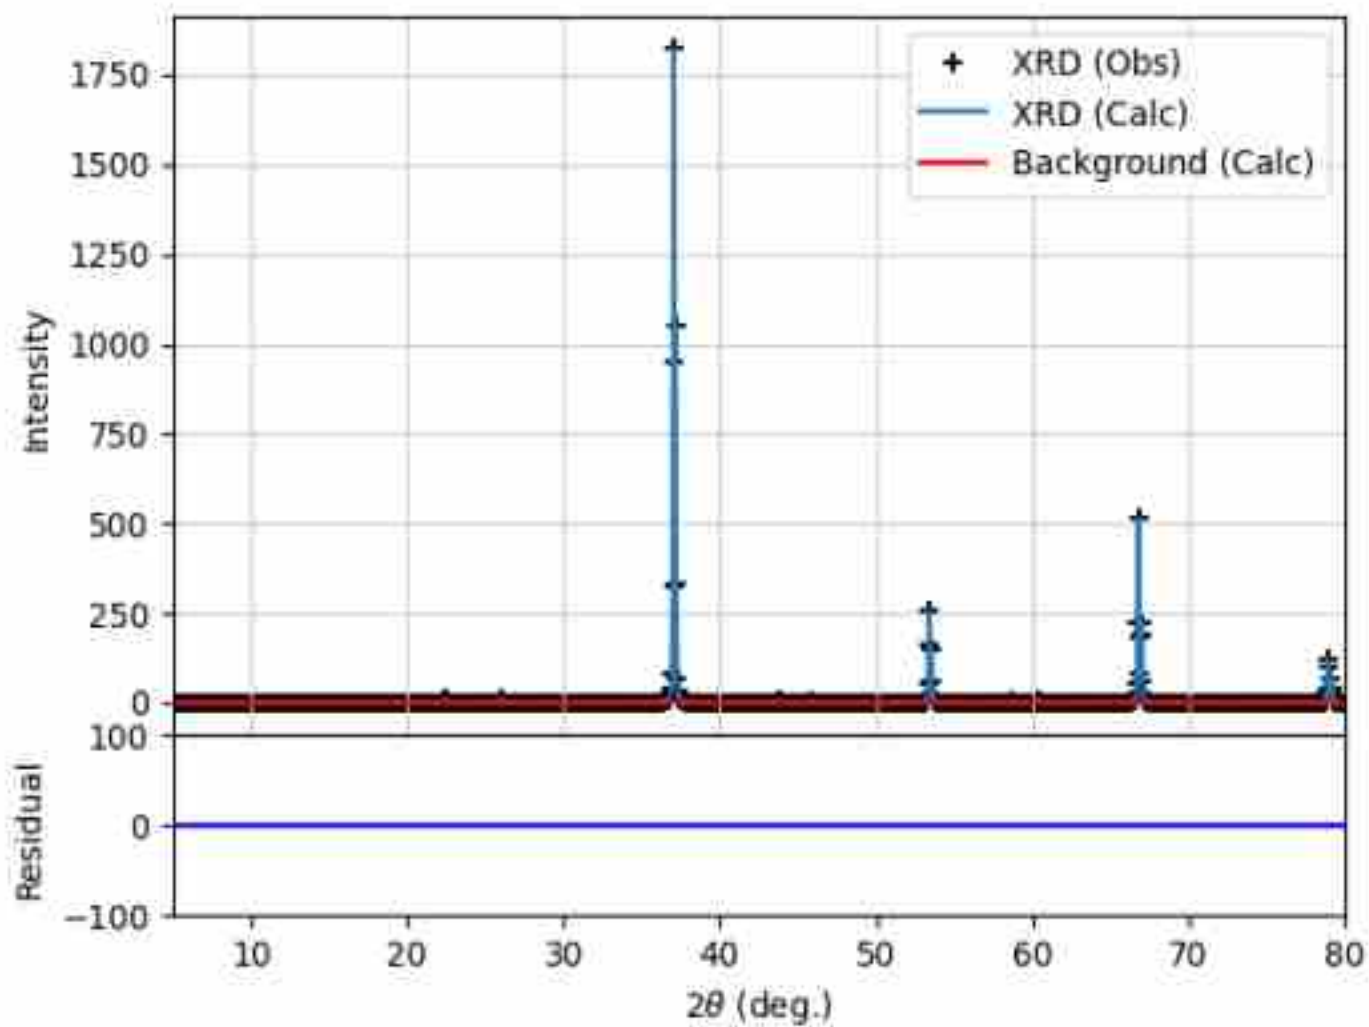

| RMSE before RR | Rwp   | RMSE after RR |
|----------------|-------|---------------|
| 0.002          | 1e-05 | 2e-05         |

# Gd1In3

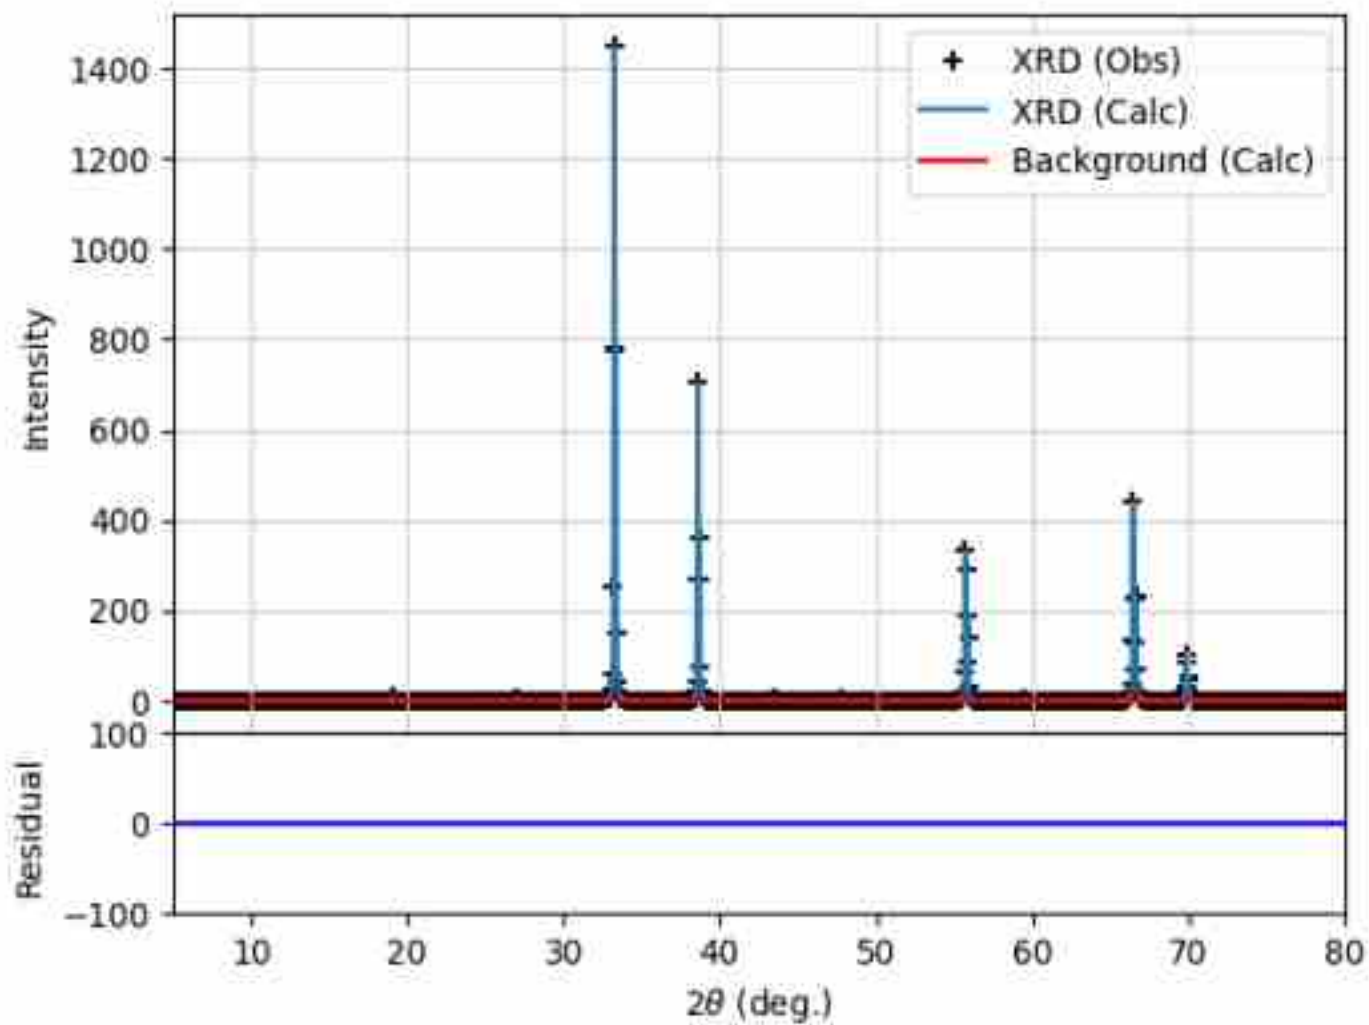

| RMSE before RR | Rwp     | RMSE after RR |
|----------------|---------|---------------|
| 0.002          | 0.00835 | 0.00038       |

# Gd1Lu1Cu2

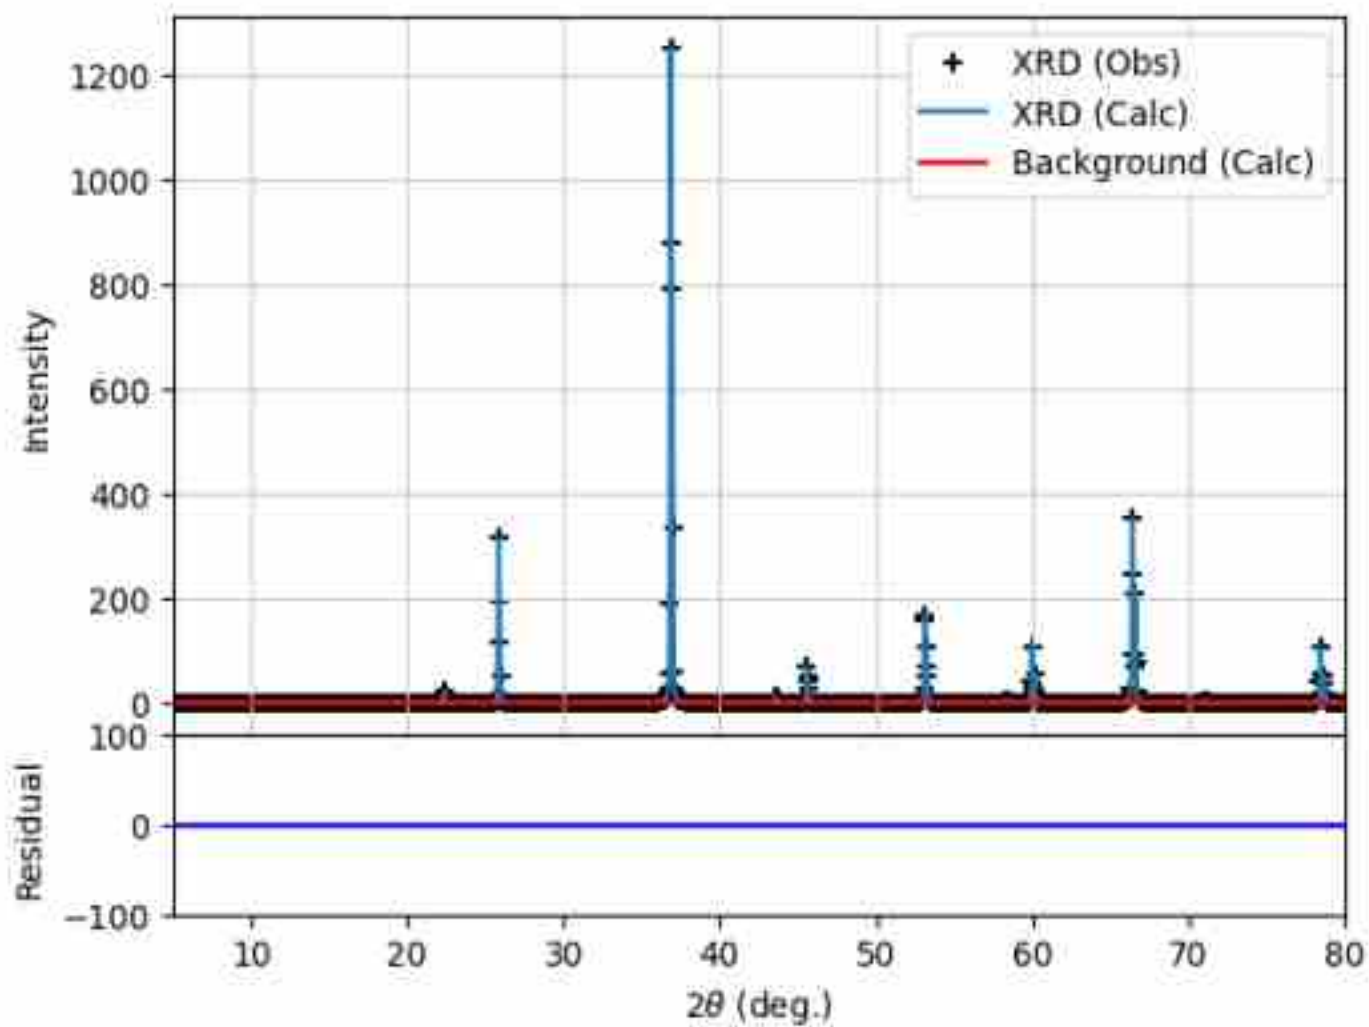

| RMSE before RR | Rwp     | RMSE after RR |
|----------------|---------|---------------|
| 0.002          | 0.01651 | 0.00161       |

# Gd1P1Pt1

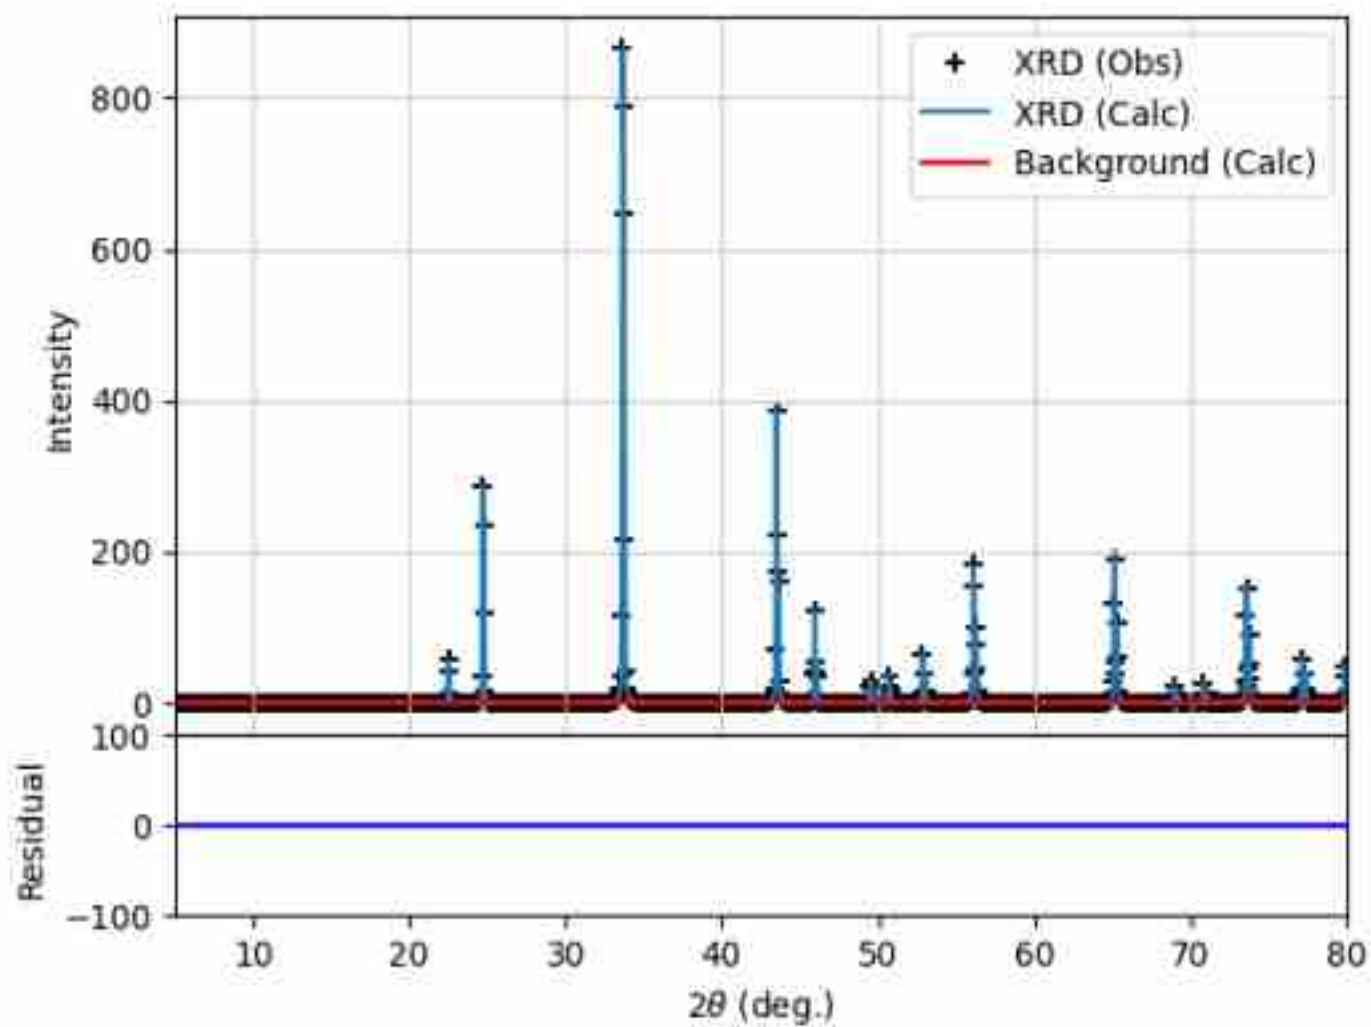

| RMSE before RR | Rwp     | RMSE after RR |
|----------------|---------|---------------|
| 0.002          | 0.00442 | 0.00079       |

# Gd1Pt3

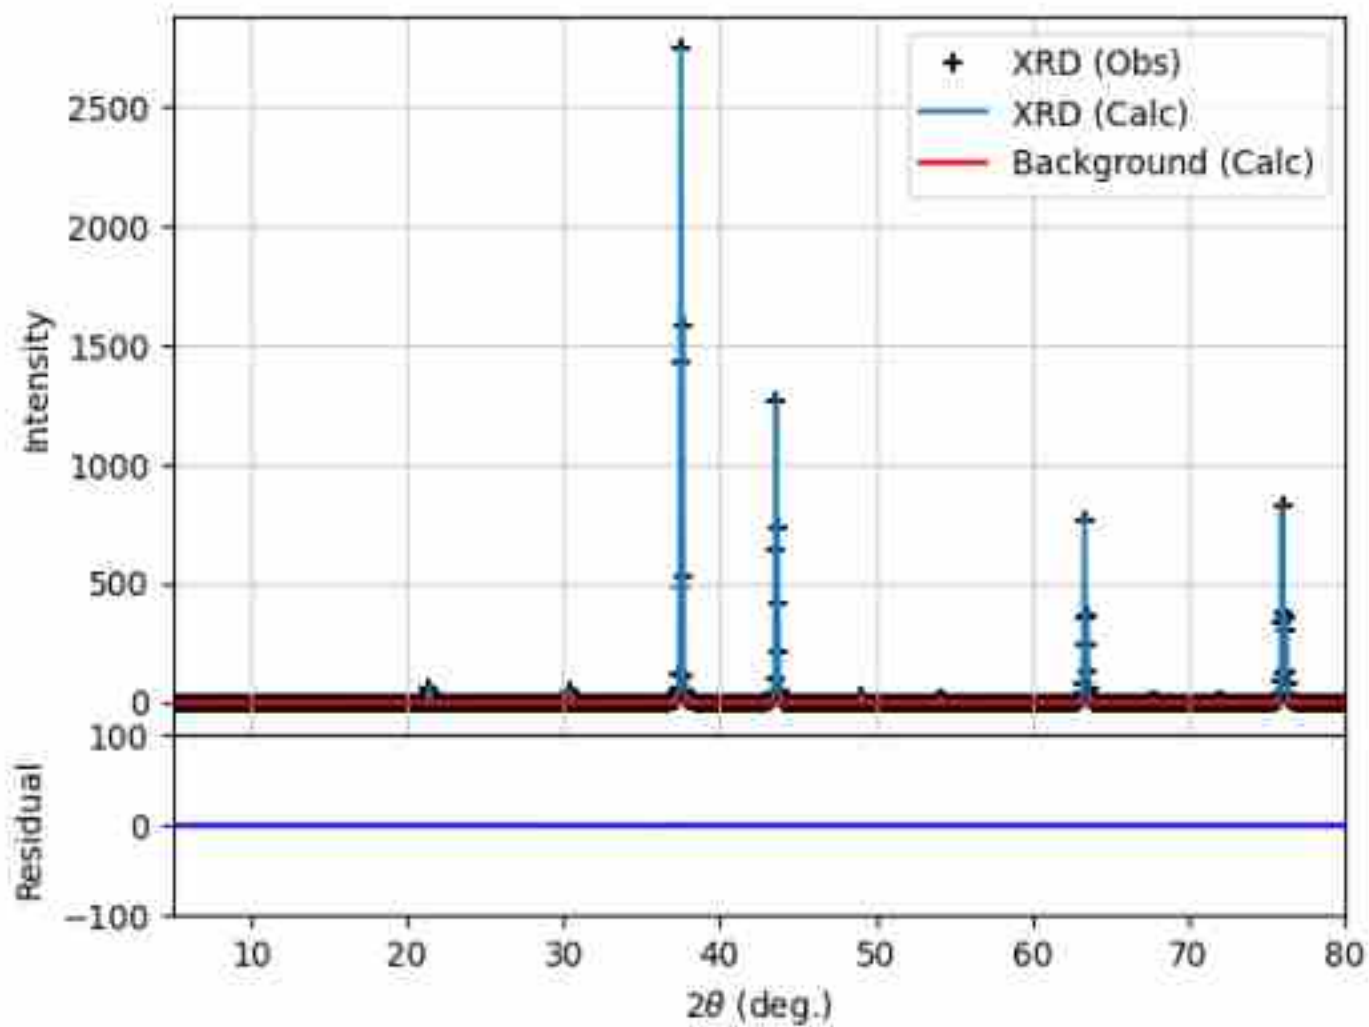

| RMSE before RR | Rwp     | RMSE after RR |
|----------------|---------|---------------|
| 0.002          | 0.02016 | 0.00106       |

# Gd1Y1Hg2

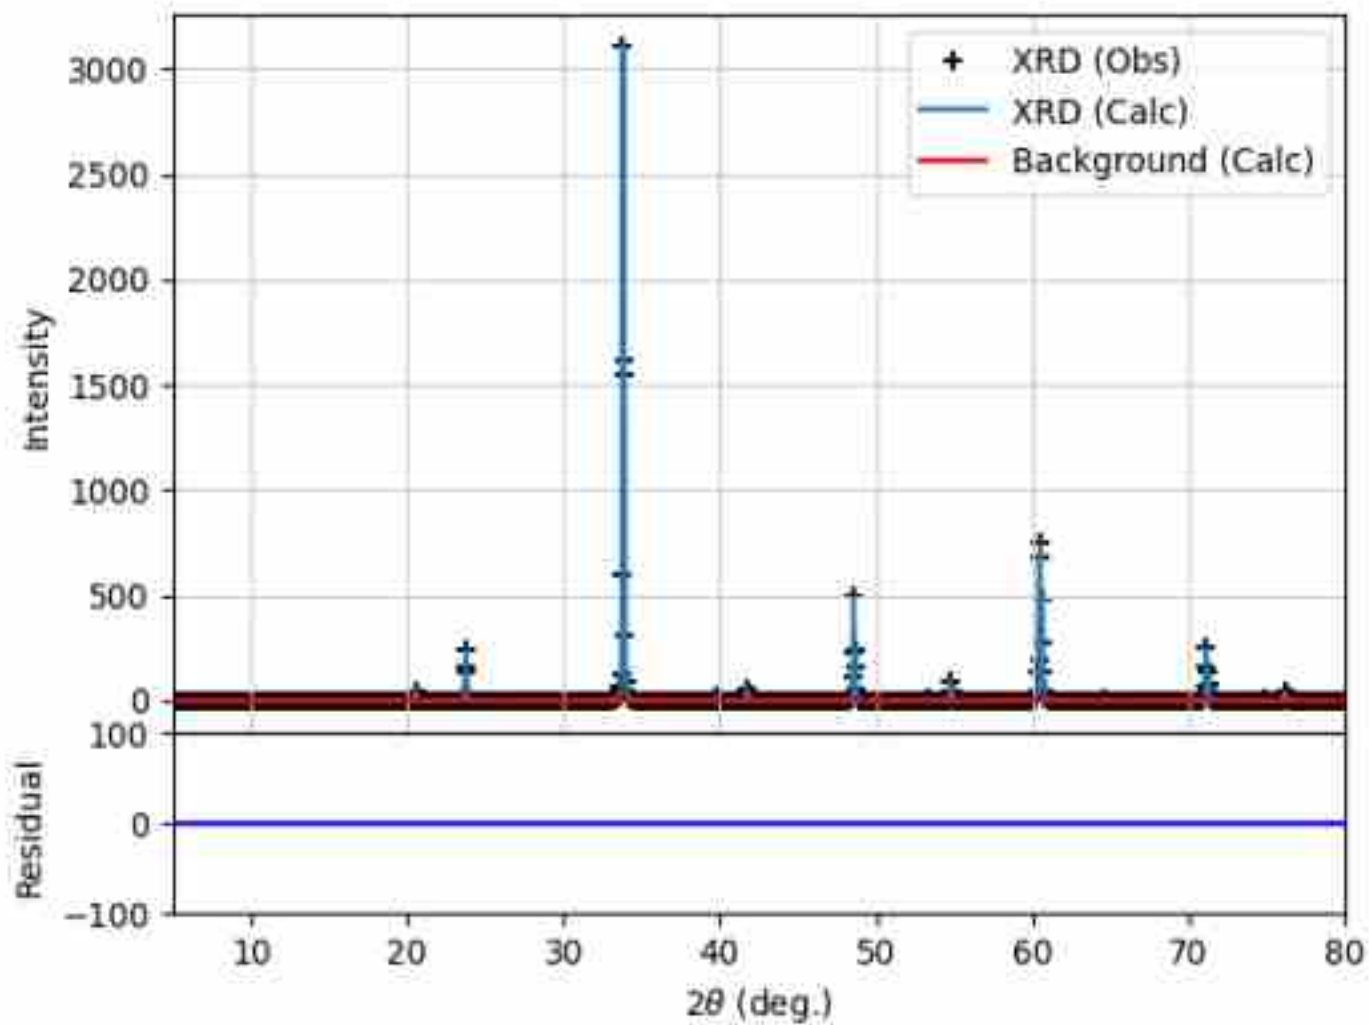

| RMSE before RR | Rwp     | RMSE after RR |
|----------------|---------|---------------|
| 0.002          | 0.00067 | 0.00024       |



# Gd1Zn1

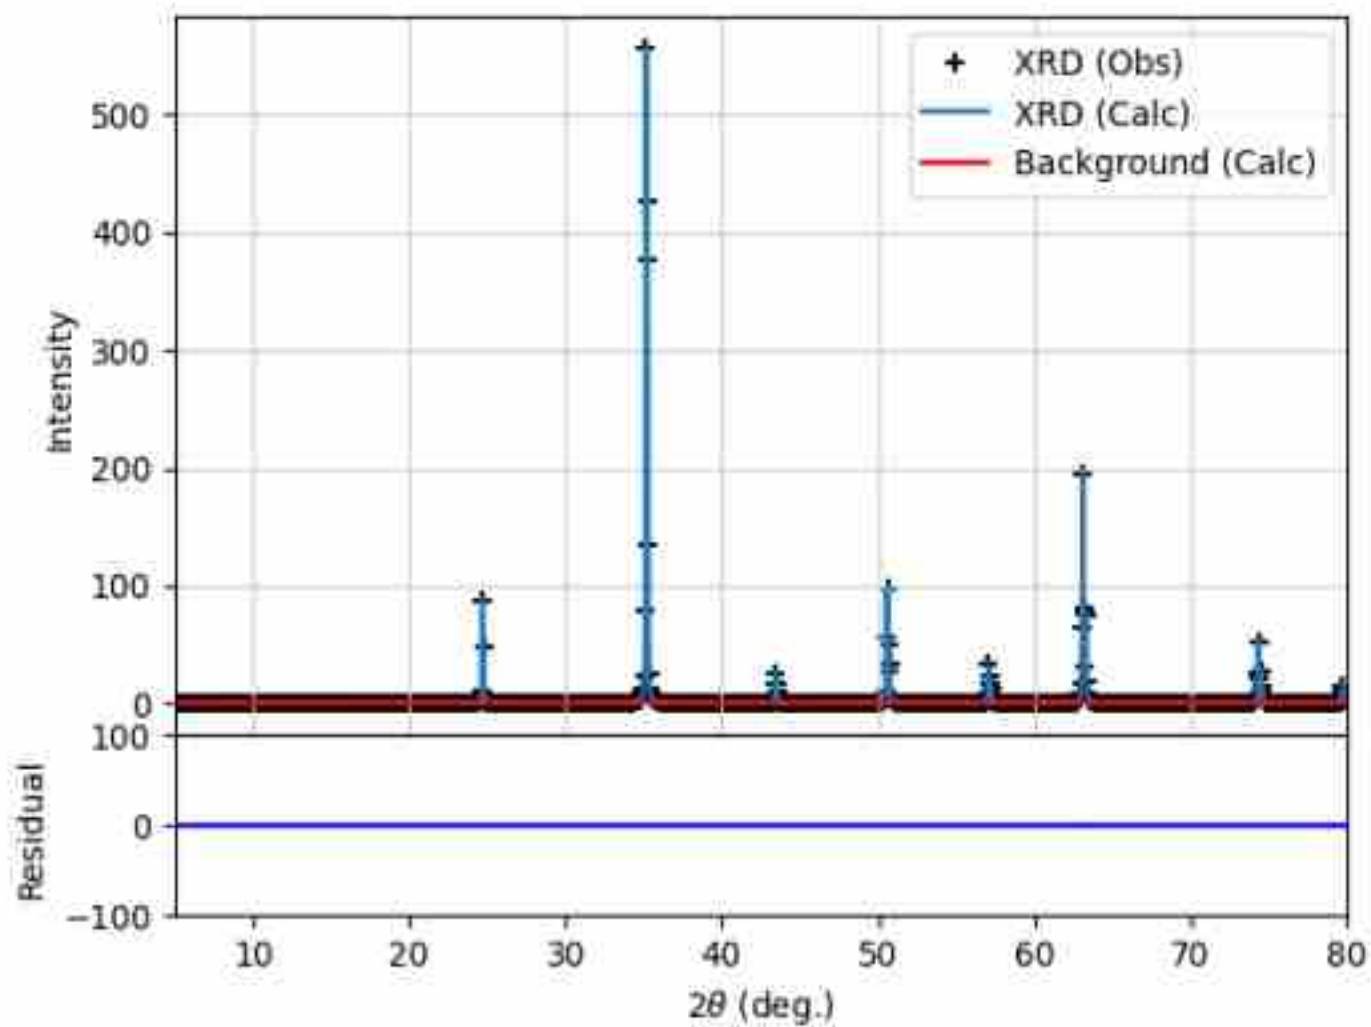

| RMSE before RR | Rwp     | RMSE after RR |
|----------------|---------|---------------|
| 0.002          | 0.06559 | 0.00219       |

# Gd<sub>2</sub>Ag<sub>1</sub>Hg<sub>1</sub>

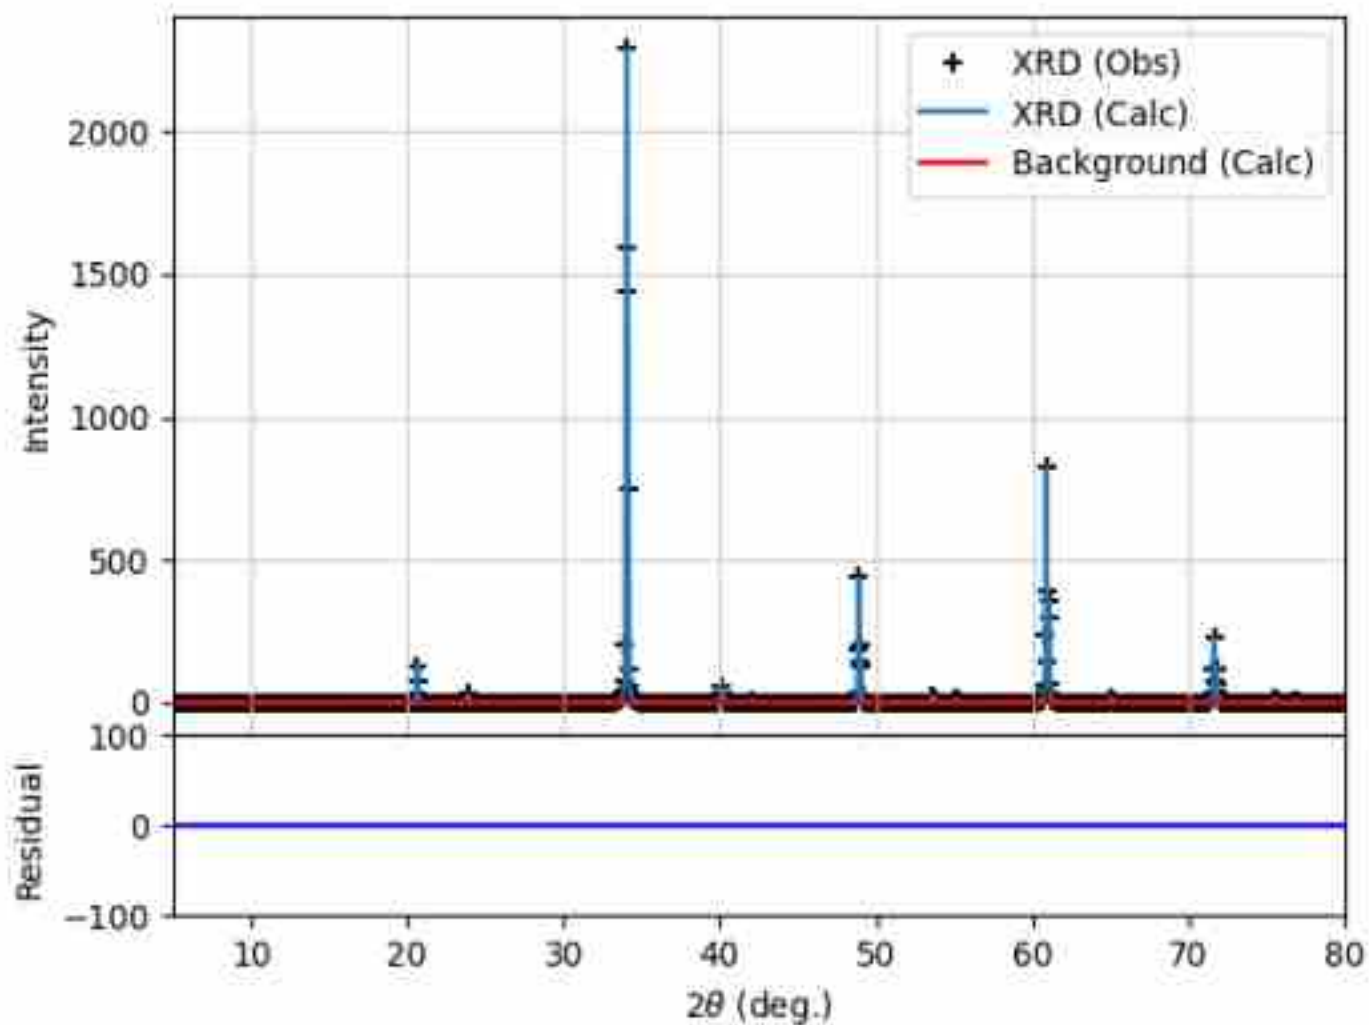

| RMSE before RR | Rwp     | RMSE after RR |
|----------------|---------|---------------|
| 0.002          | 0.01838 | 0.00089       |

# Gd<sub>2</sub>AgIr

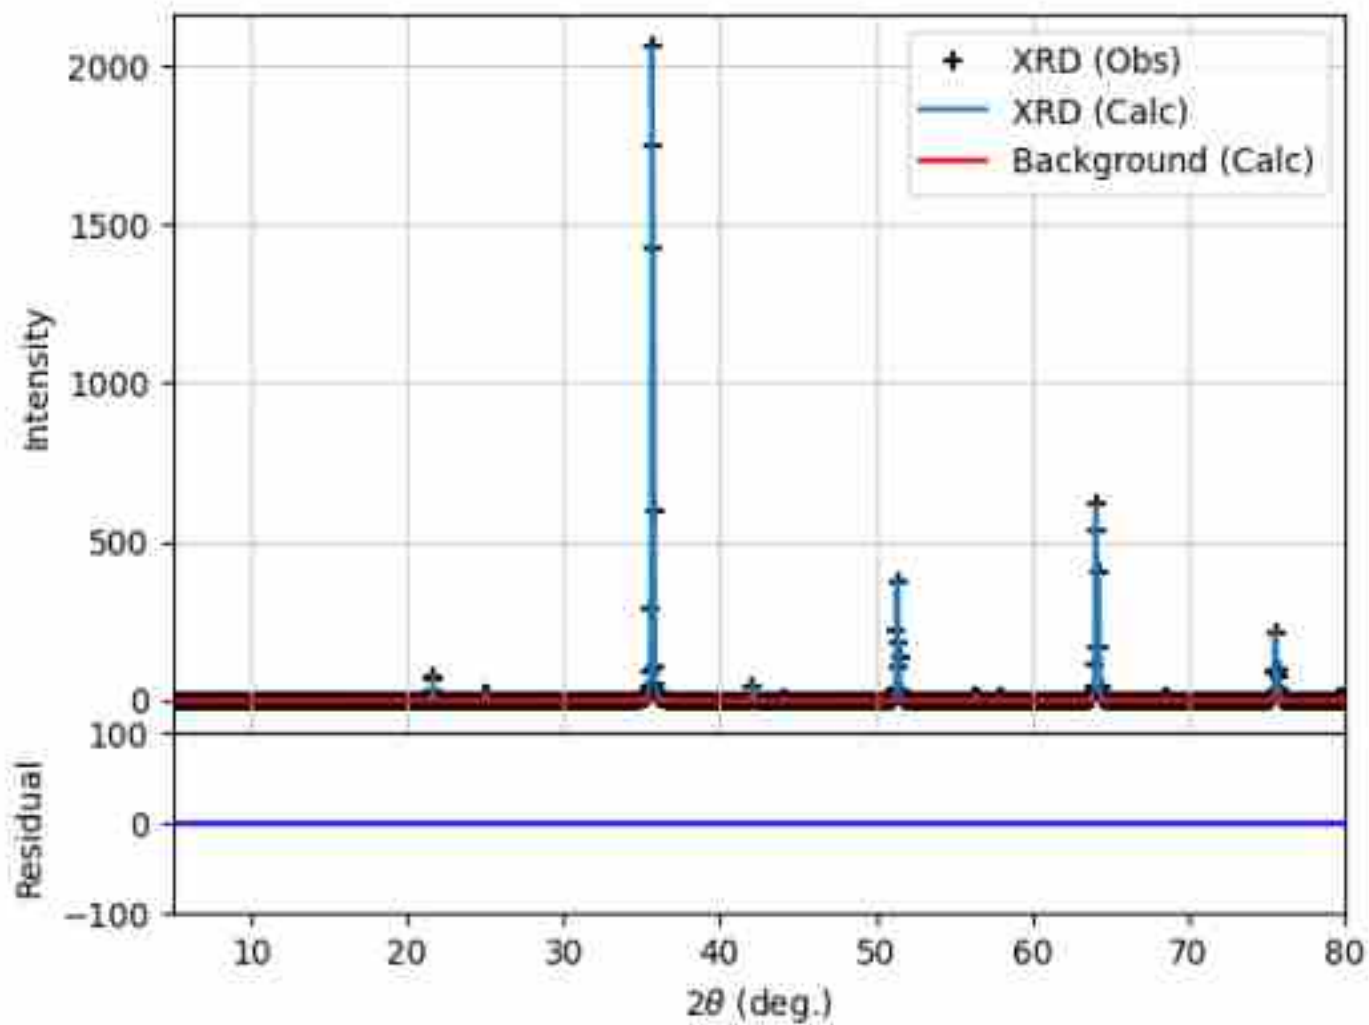

| RMSE before RR | Rwp     | RMSE after RR |
|----------------|---------|---------------|
| 0.002          | 0.00581 | 0.00046       |

# Gd<sub>2</sub>C<sub>2</sub>Br<sub>2</sub>

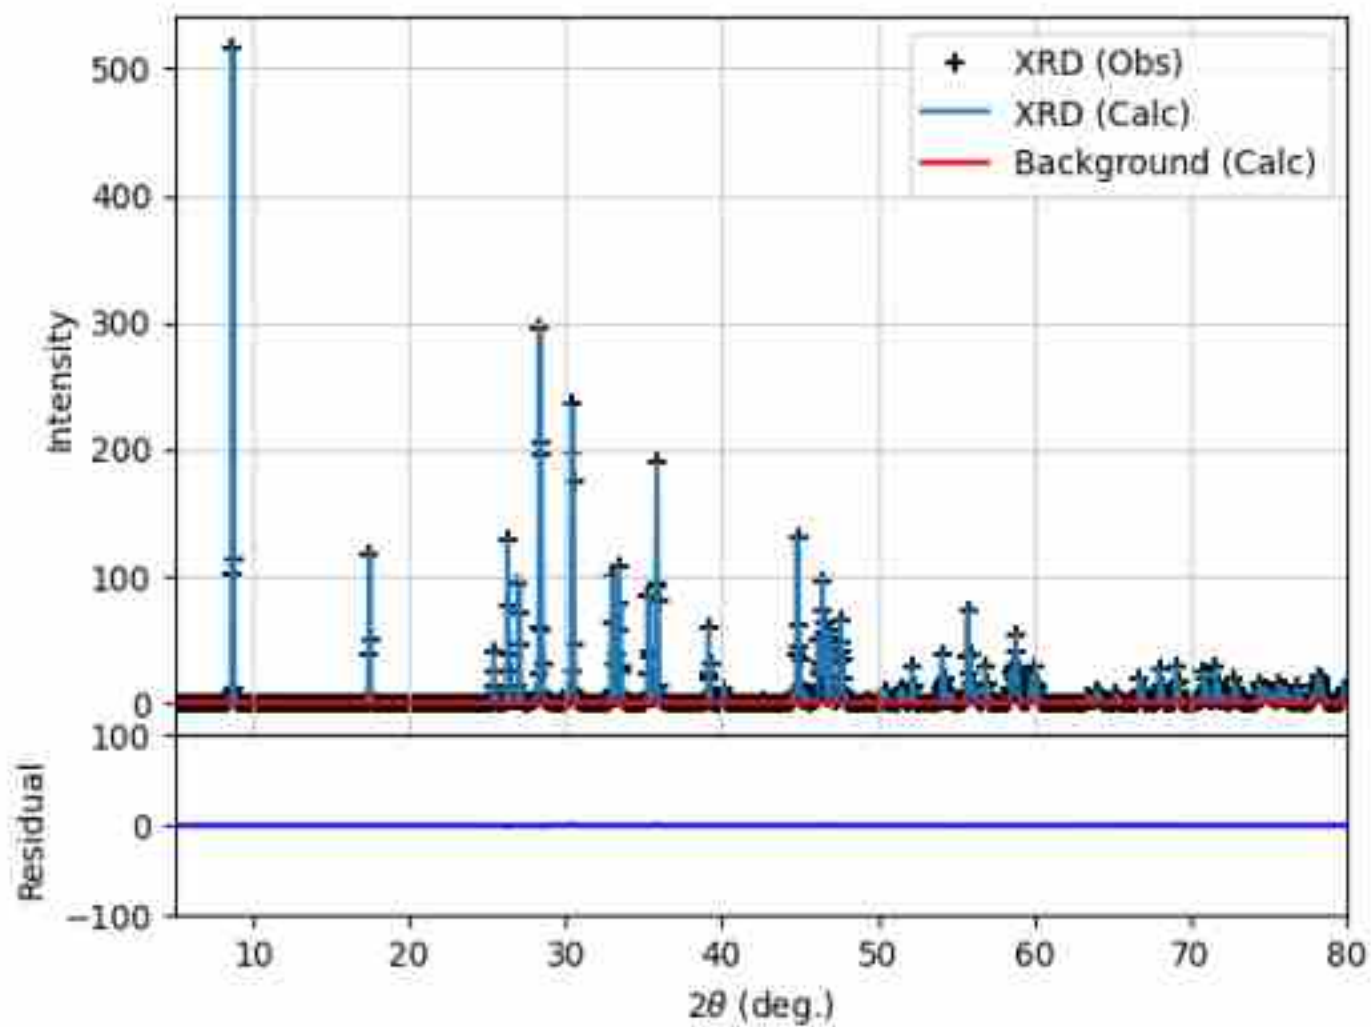

| RMSE before RR | Rwp     | RMSE after RR |
|----------------|---------|---------------|
| 0.02           | 0.62876 | 0.16431       |

# Gd<sub>2</sub>Cd<sub>1</sub>Hg<sub>1</sub>

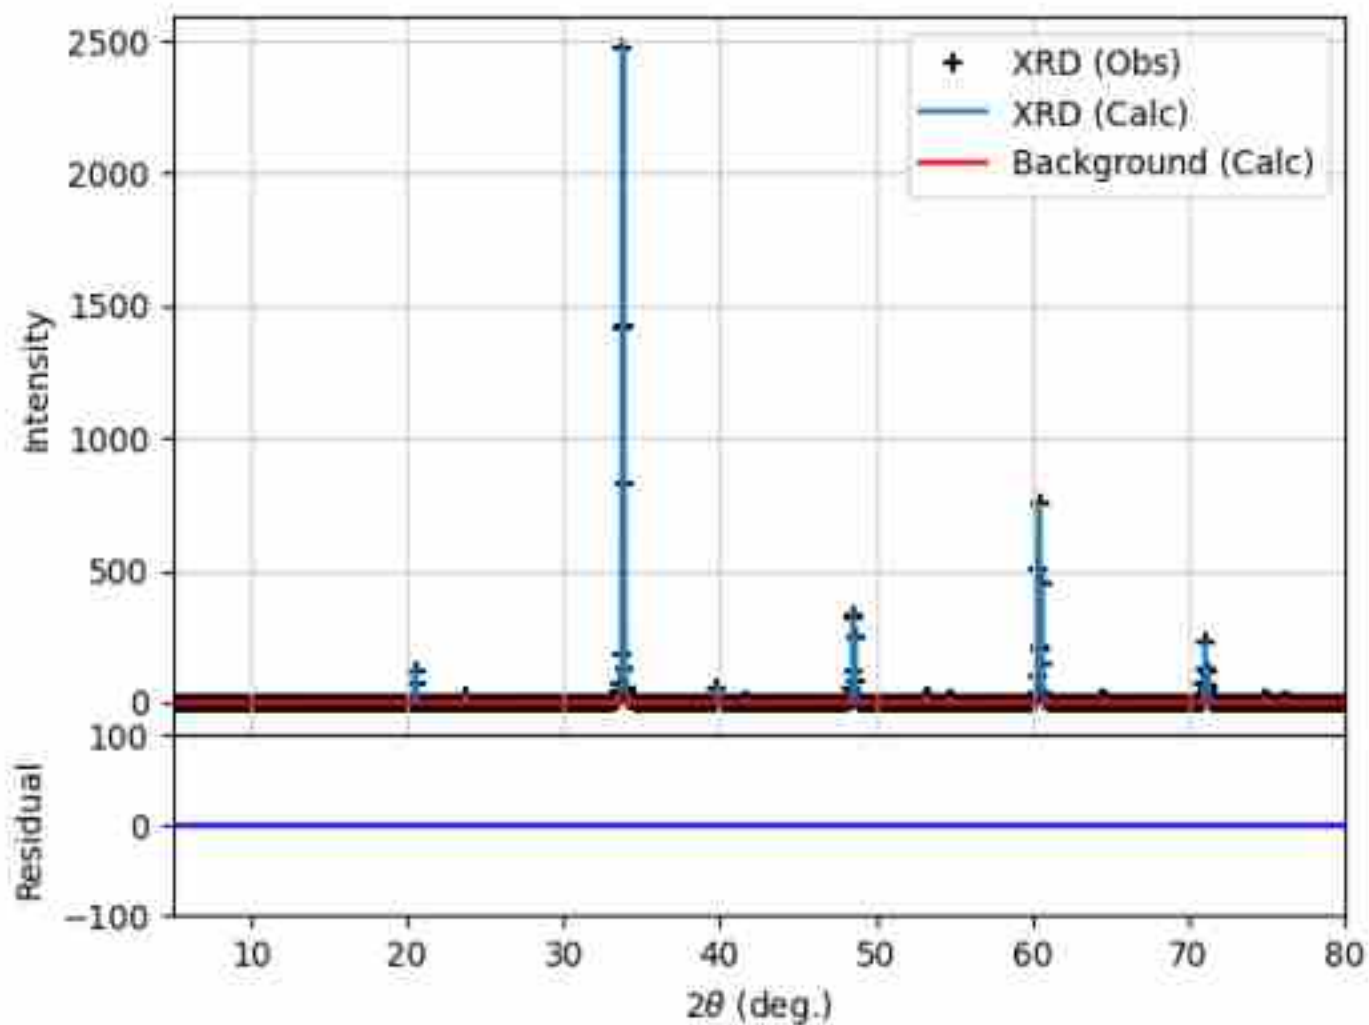

| RMSE before RR | Rwp     | RMSE after RR |
|----------------|---------|---------------|
| 0.002          | 0.01918 | 0.00105       |

# Gd<sub>2</sub>Mg<sub>1</sub>Al<sub>1</sub>

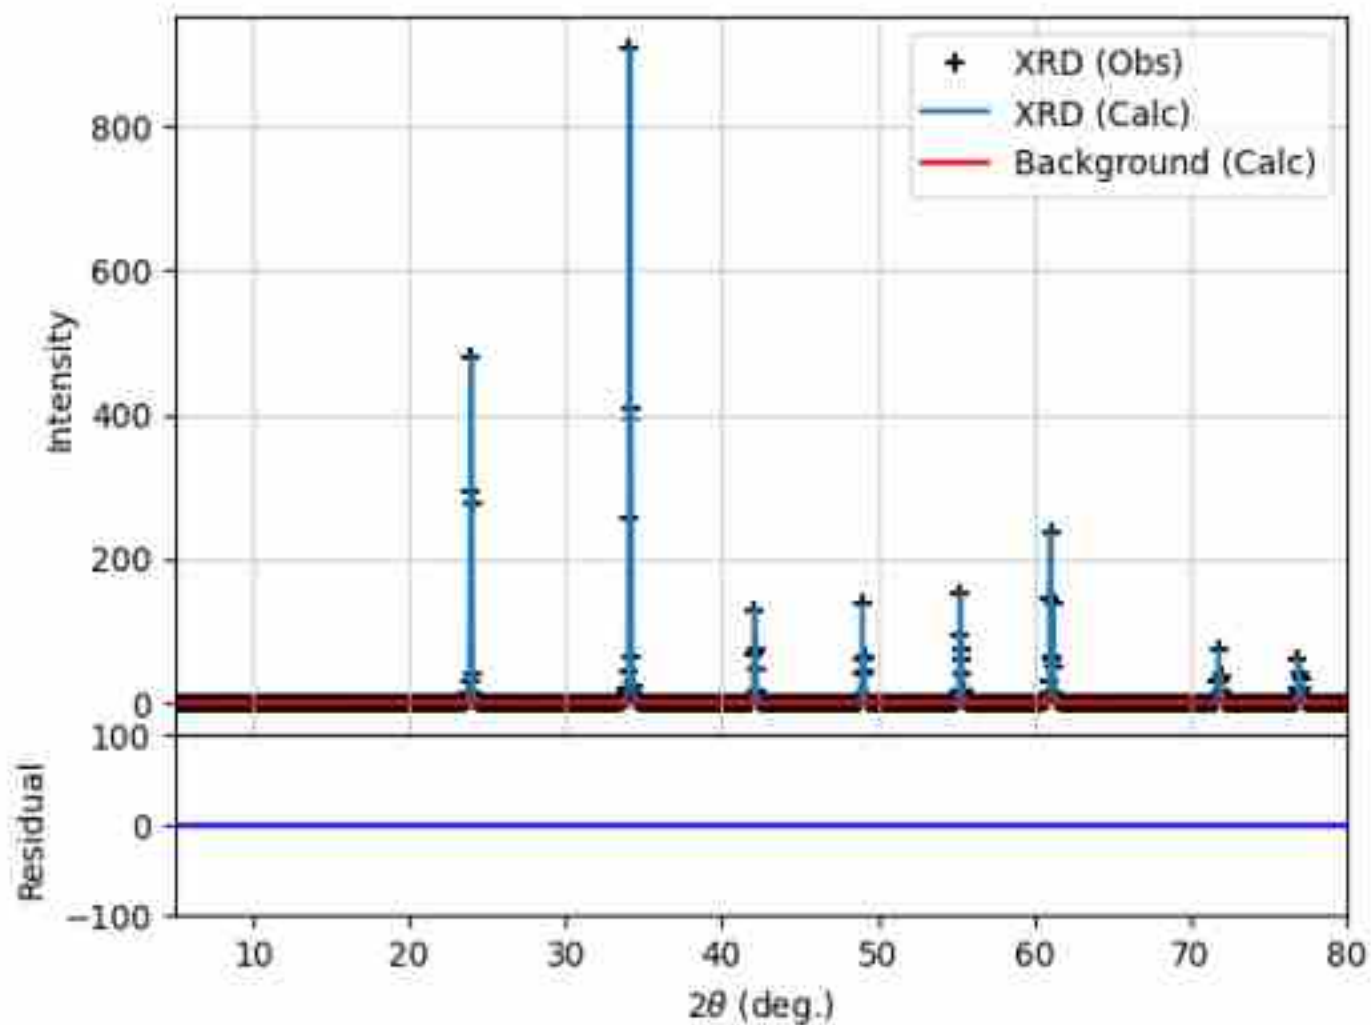

| RMSE before RR | Rwp     | RMSE after RR |
|----------------|---------|---------------|
| 0.002          | 0.01615 | 0.00063       |

# Gd<sub>2</sub>TlHg

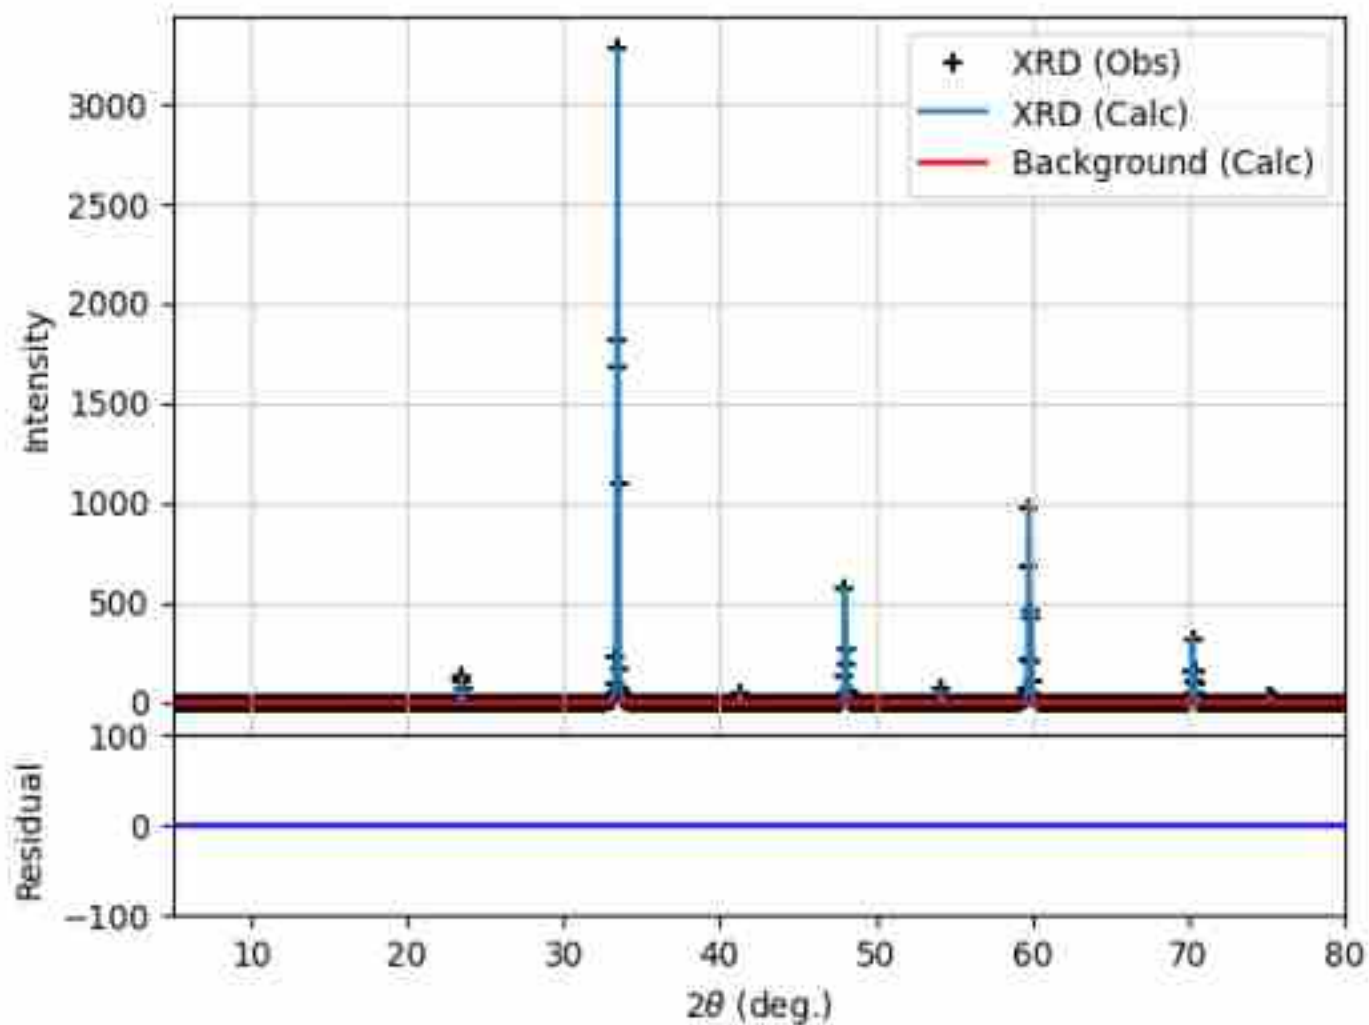

| RMSE before RR | Rwp     | RMSE after RR |
|----------------|---------|---------------|
| 0.002          | 0.00327 | 0.00026       |

# Gd<sub>2</sub>Tl<sub>11</sub>Zn<sub>1</sub>

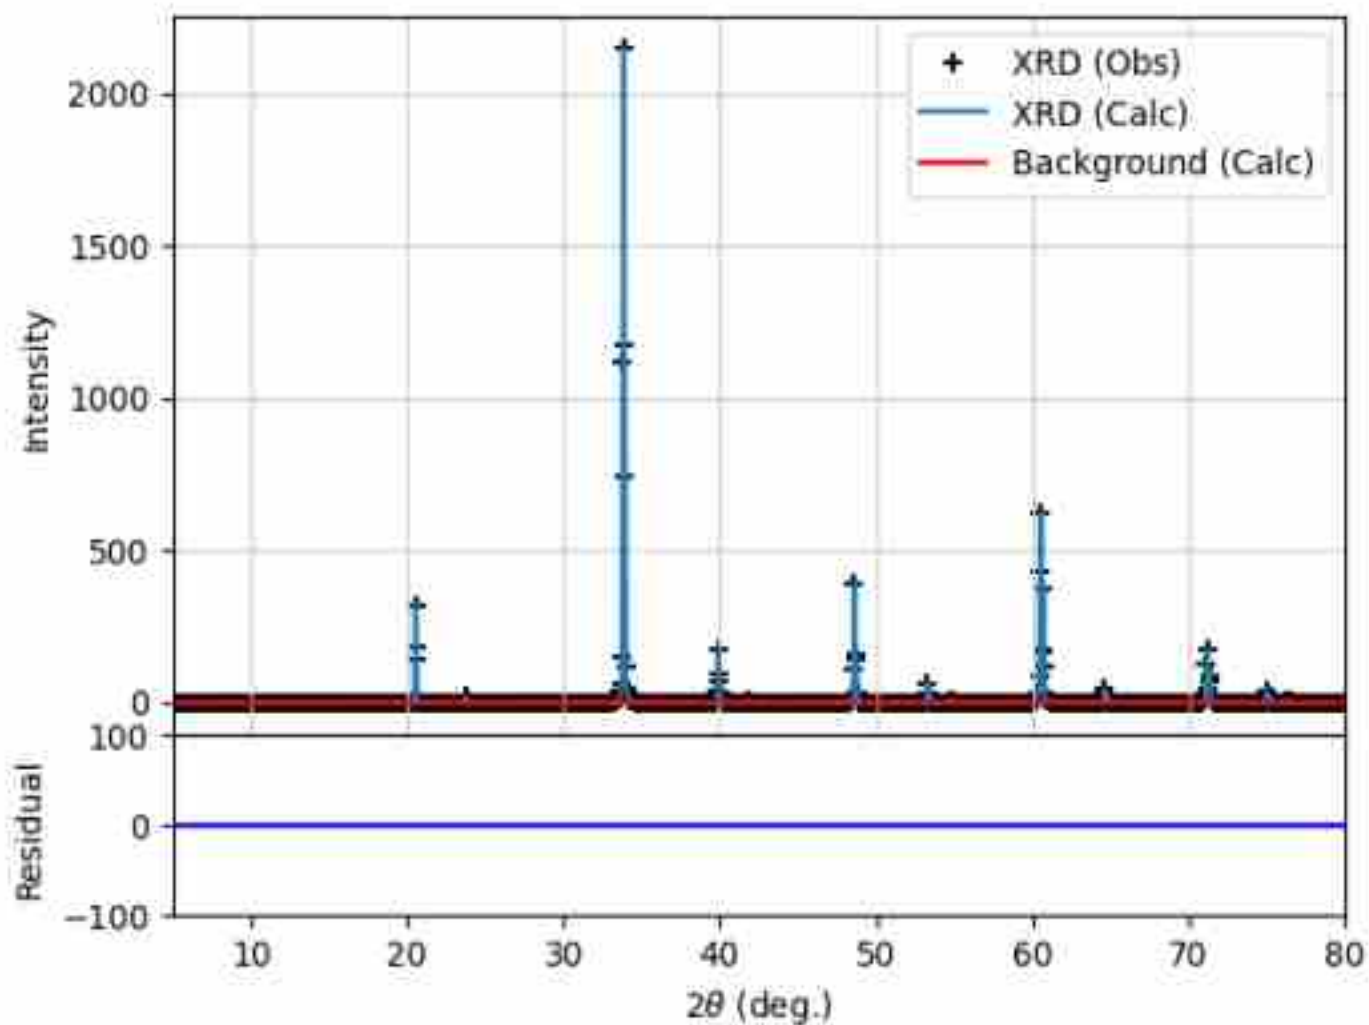

| RMSE before RR | Rwp     | RMSE after RR |
|----------------|---------|---------------|
| 0.002          | 0.09469 | 0.00168       |



# Gd<sub>3</sub>Mg<sub>3</sub>Au<sub>3</sub>

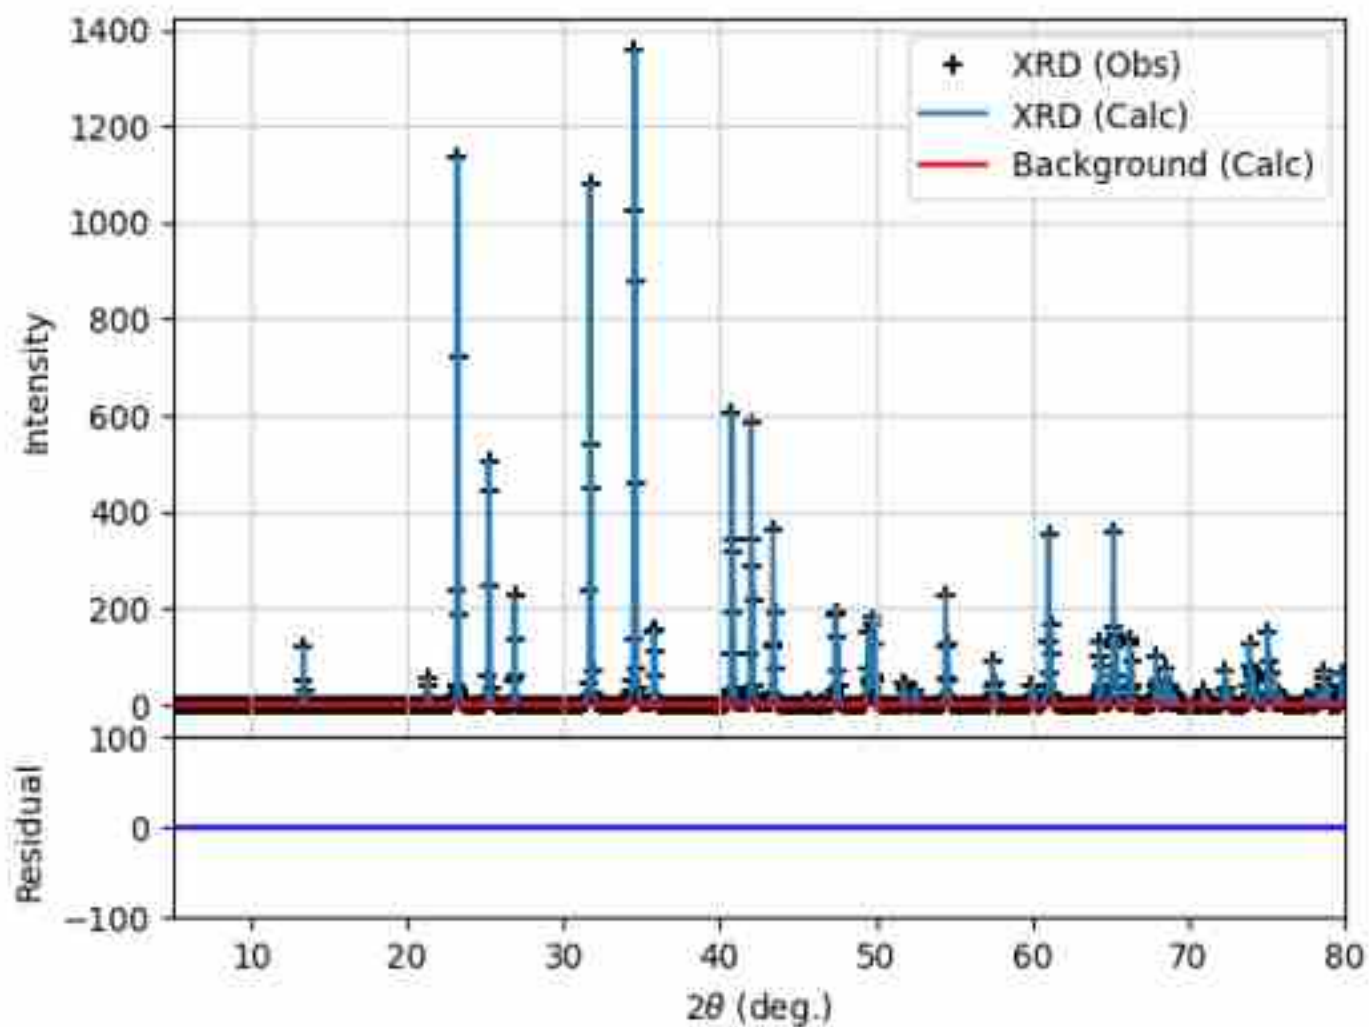

| RMSE before RR | Rwp     | RMSE after RR |
|----------------|---------|---------------|
| 0.02           | 0.00266 | 0.00114       |

# Gd<sub>8</sub>Se<sub>12</sub>

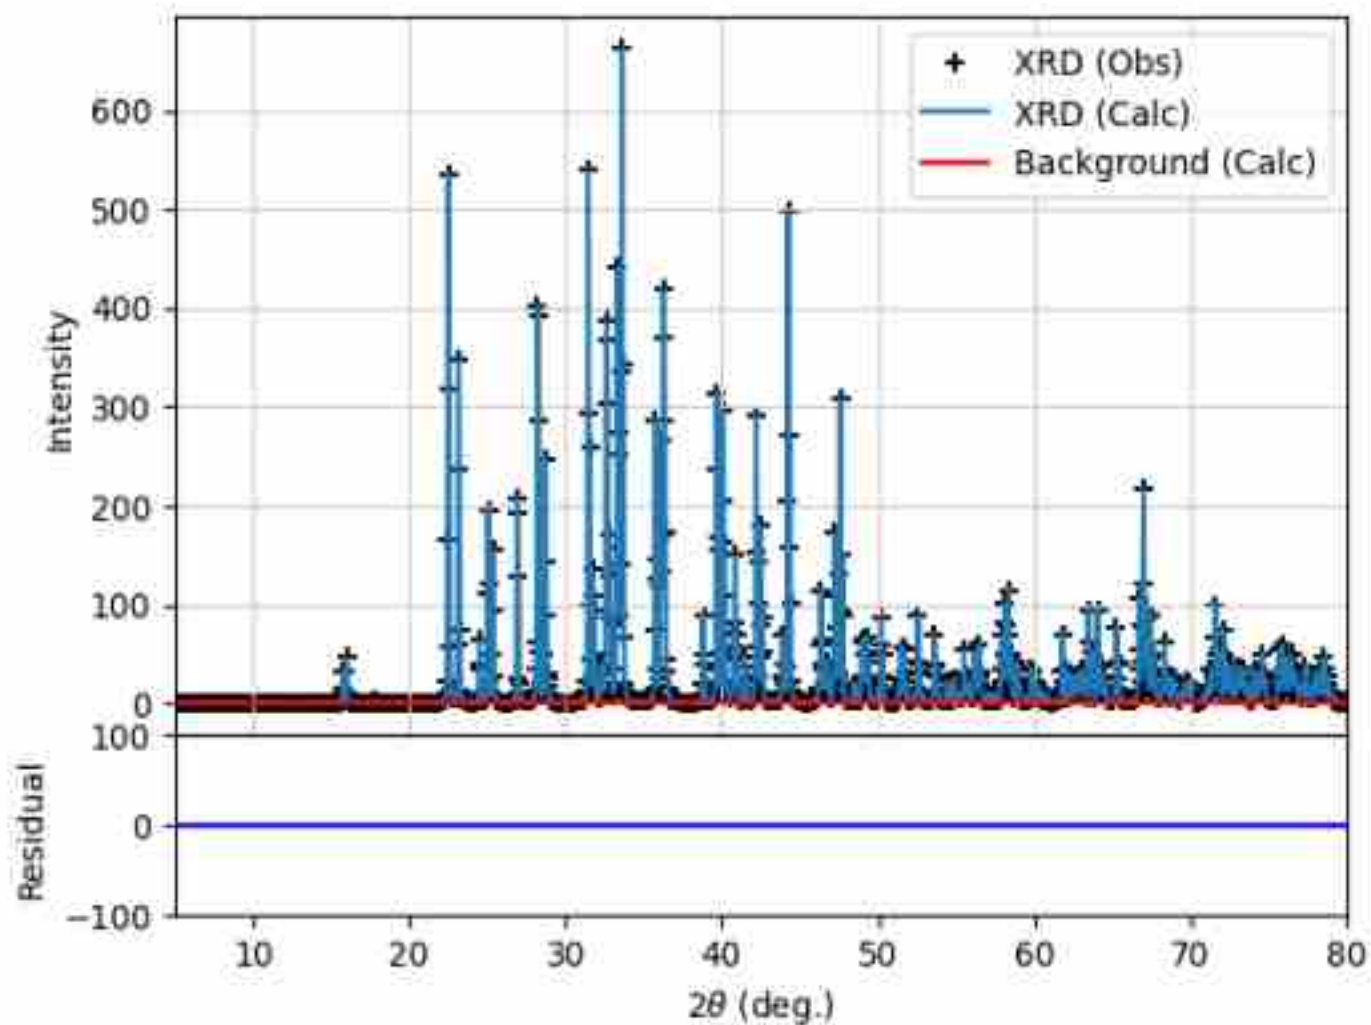

| RMSE before RR | Rwp     | RMSE after RR |
|----------------|---------|---------------|
| 0.02           | 0.00418 | 0.00043       |

# Hf1Ga1Co2

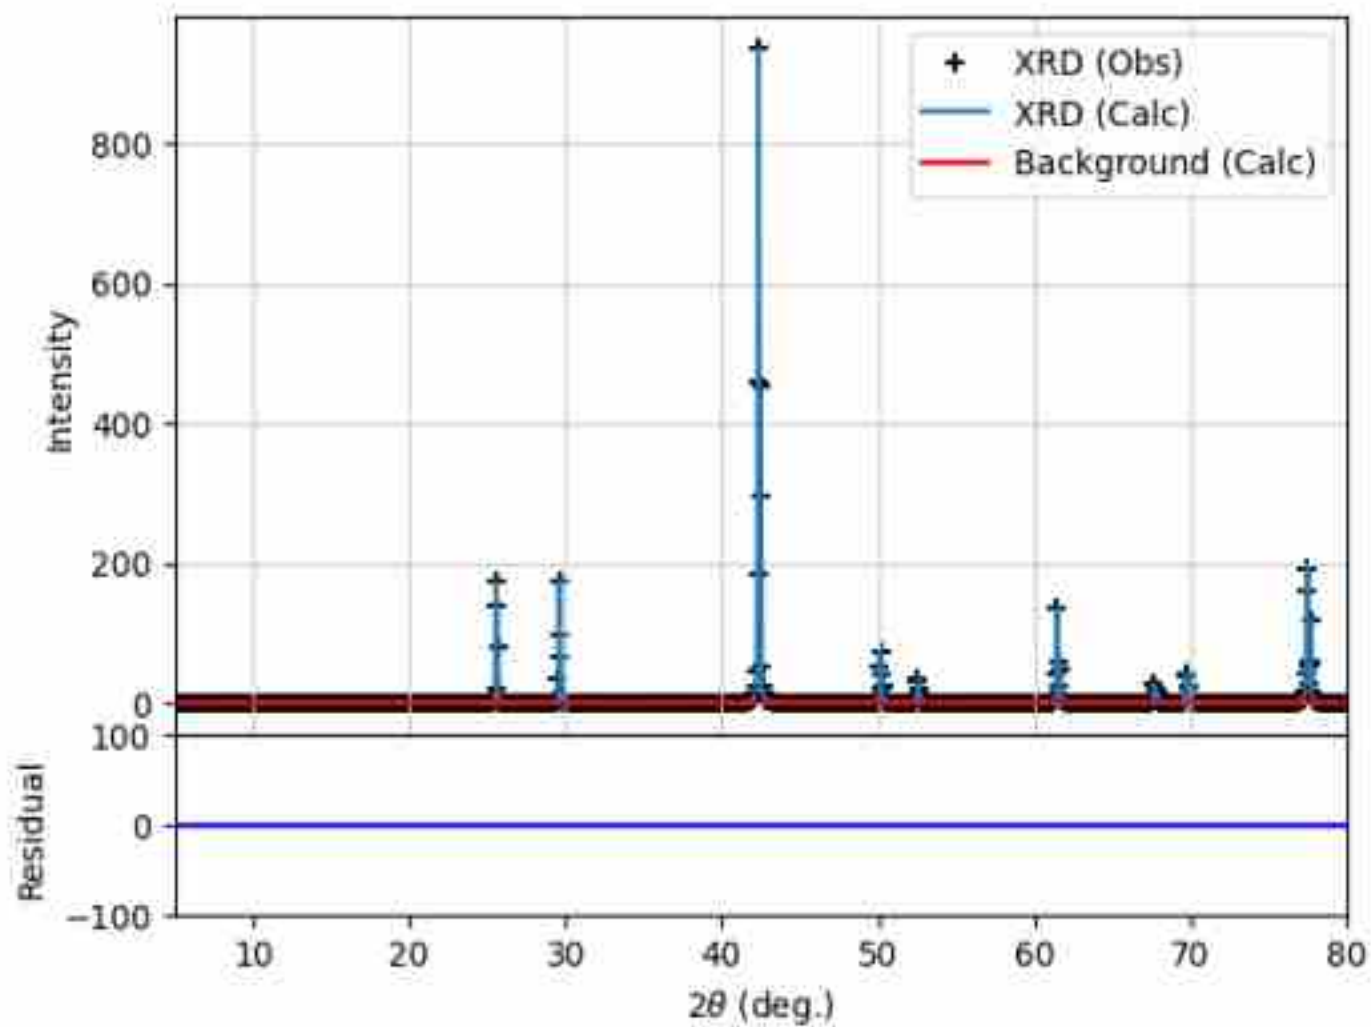

| RMSE before RR | Rwp     | RMSE after RR |
|----------------|---------|---------------|
| 0.002          | 0.00413 | 0.00265       |

# Hf1Ga1Ru2

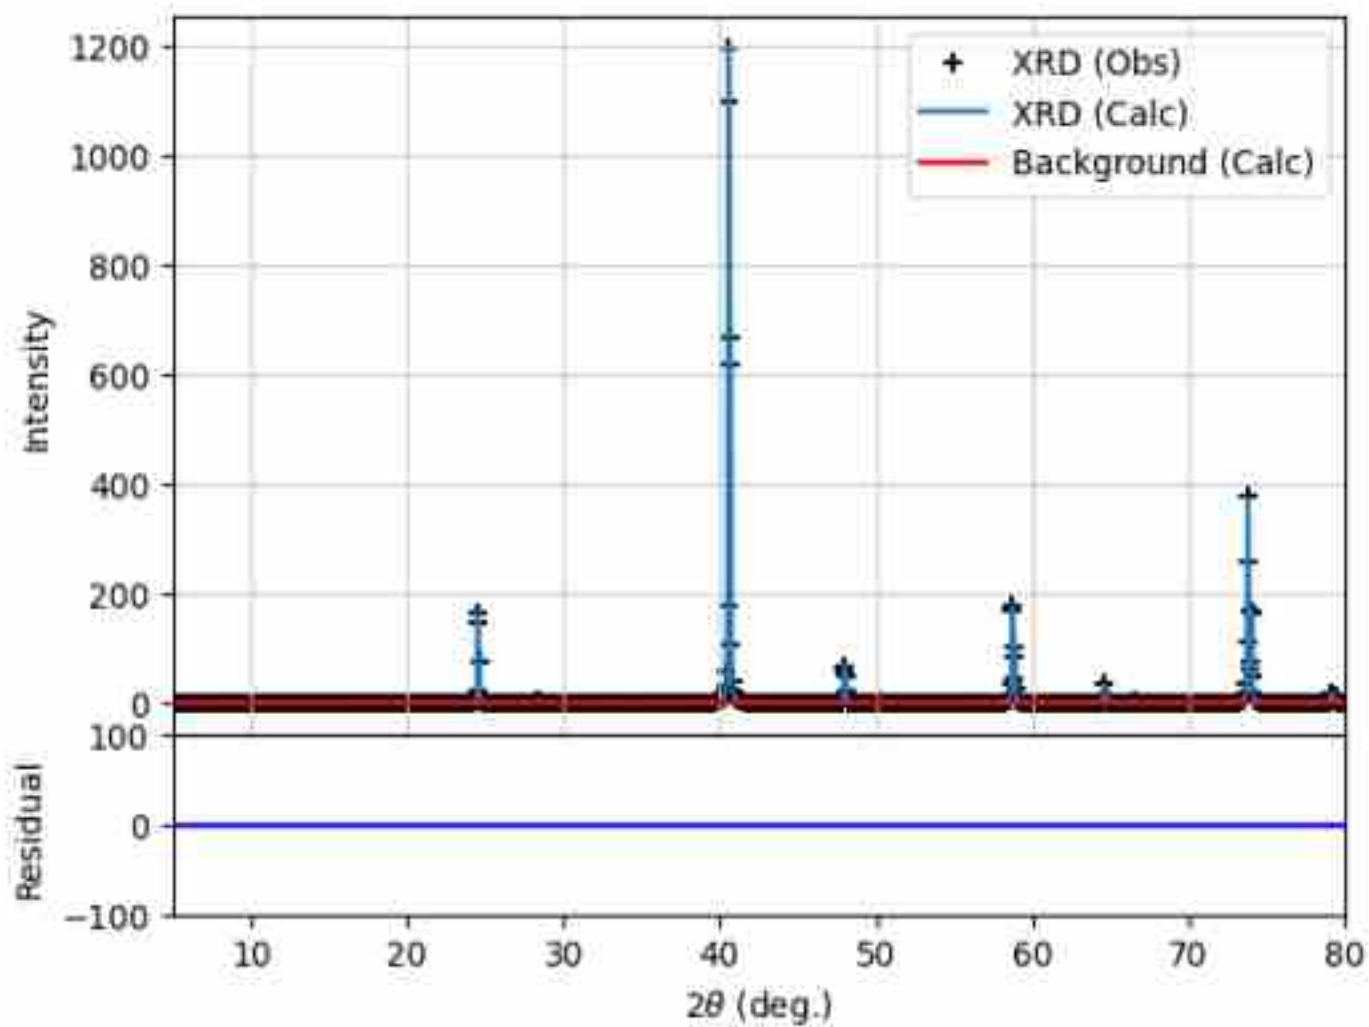

| RMSE before RR | Rwp     | RMSE after RR |
|----------------|---------|---------------|
| 0.002          | 0.00296 | 0.00019       |

# Hf1Pd3

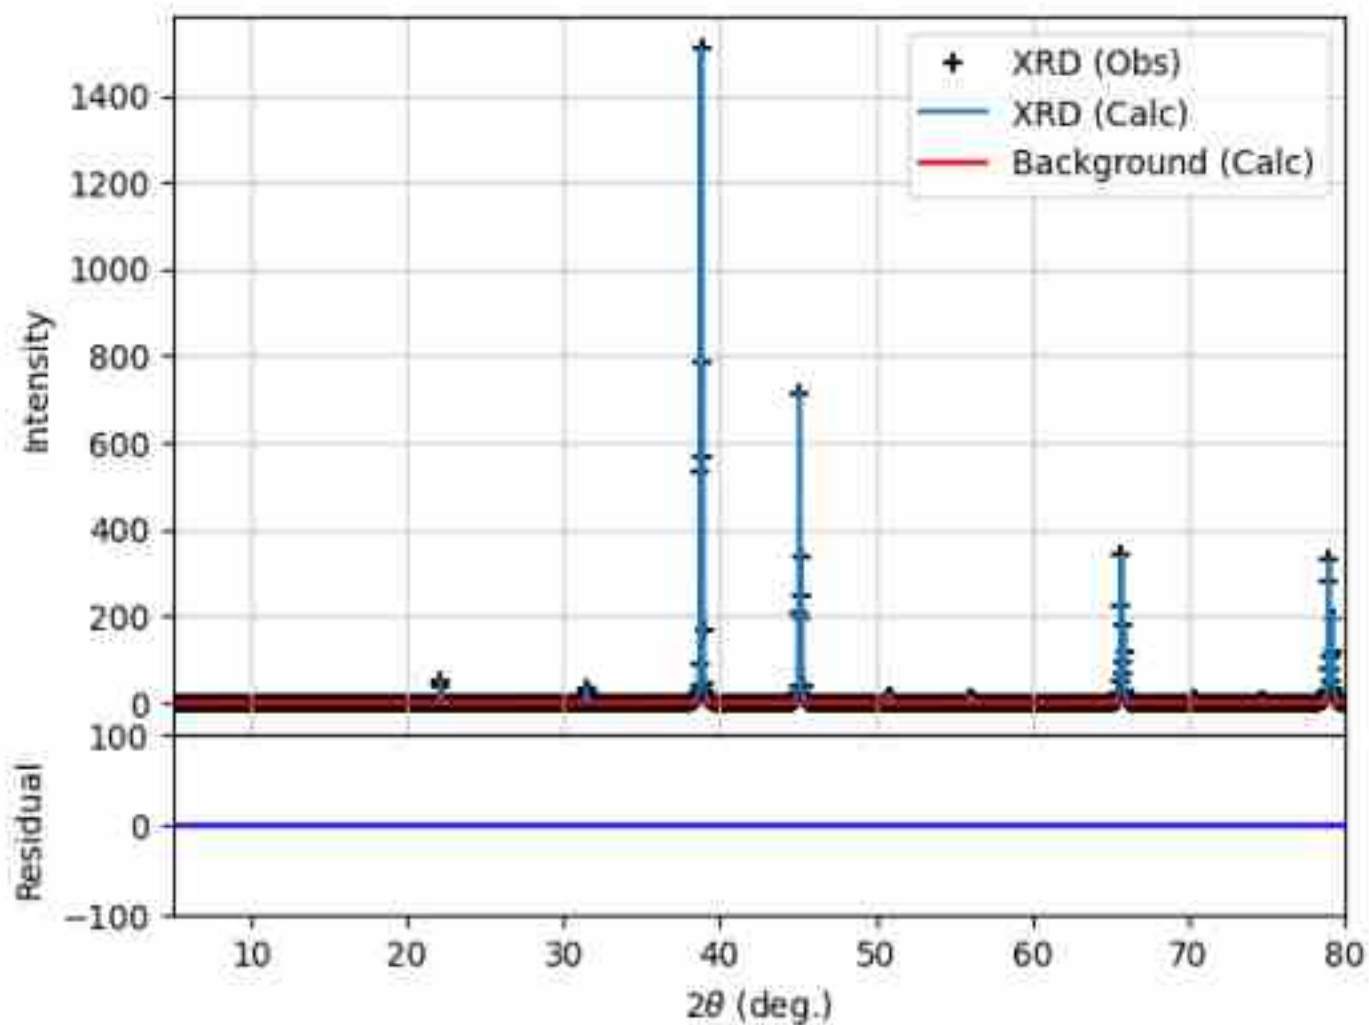

| RMSE before RR | Rwp     | RMSE after RR |
|----------------|---------|---------------|
| 0.002          | 0.00337 | 0.00029       |

# Hf1Sc1Co2

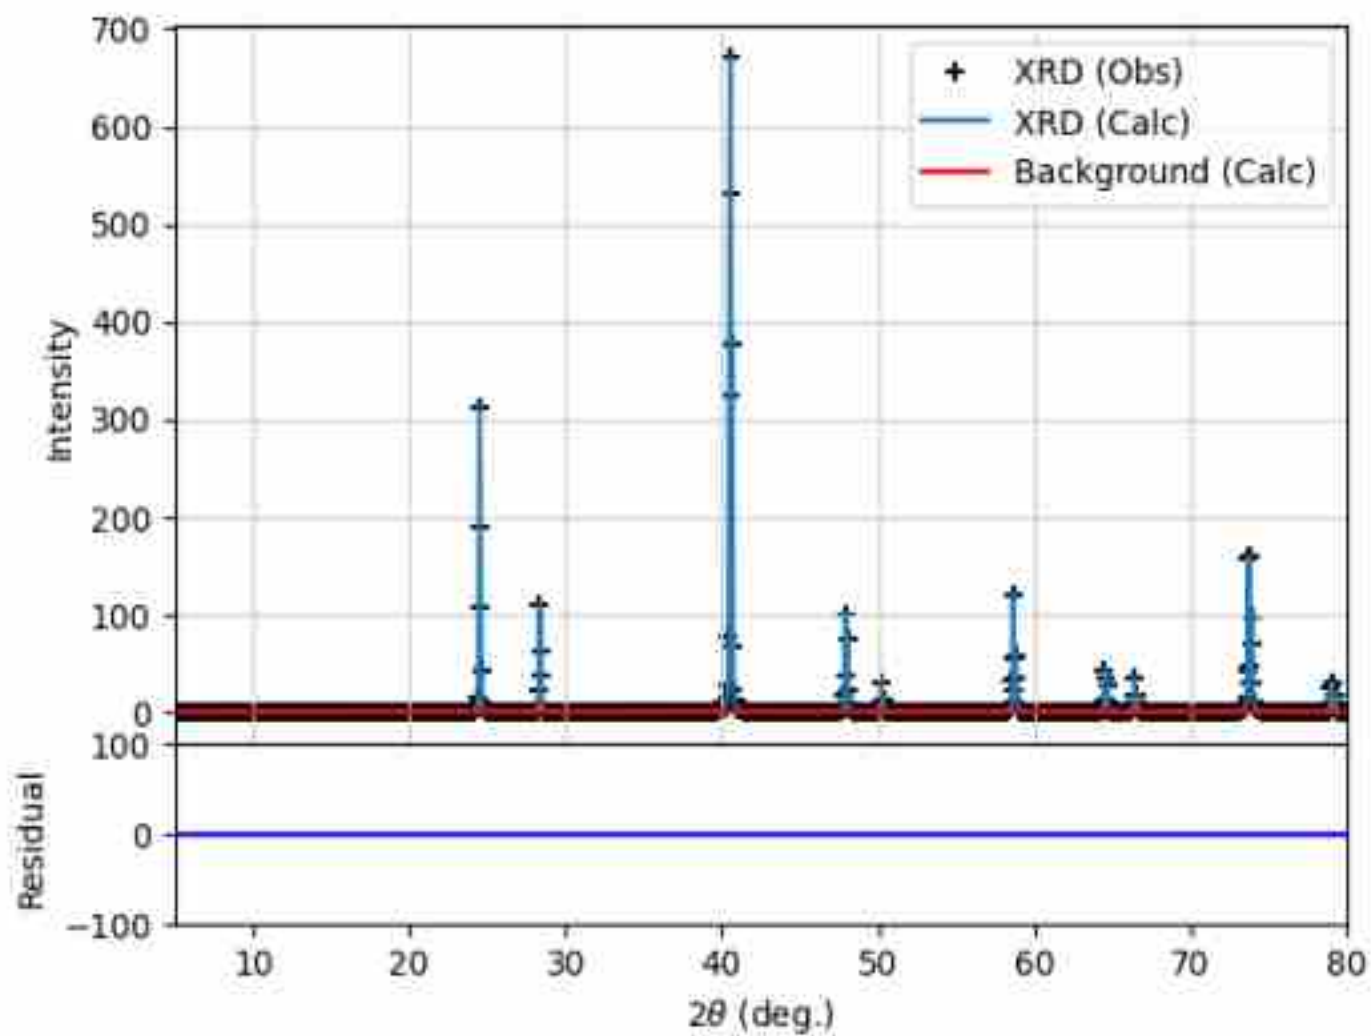

| RMSE before RR | Rwp     | RMSE after RR |
|----------------|---------|---------------|
| 0.002          | 0.01428 | 0.0012        |

# Hf1Zn1Ni2

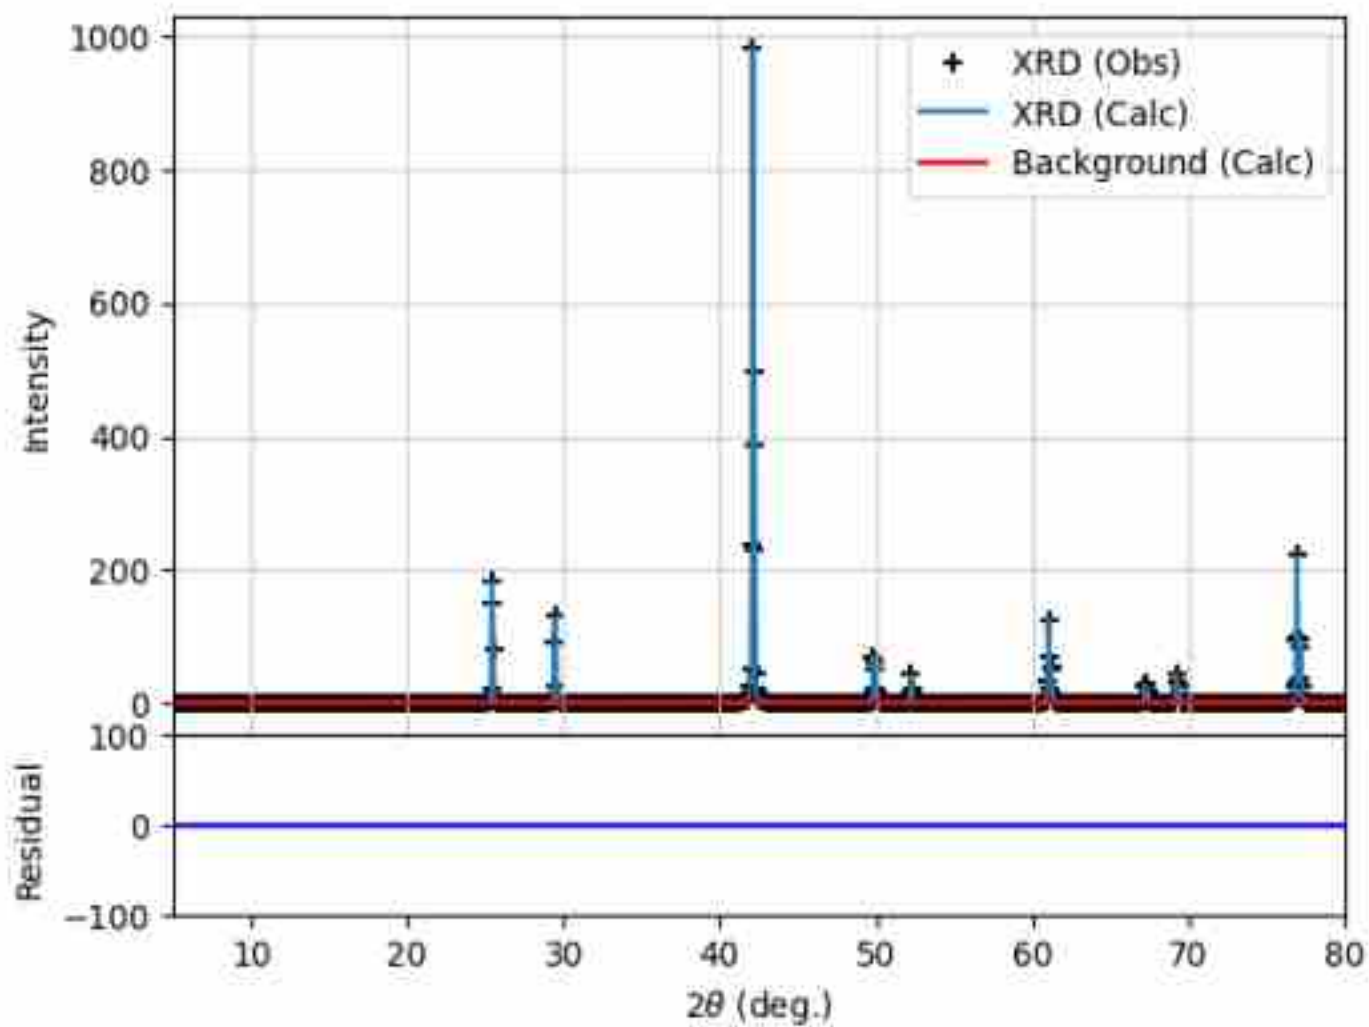

| RMSE before RR | Rwp     | RMSE after RR |
|----------------|---------|---------------|
| 0.002          | 0.00419 | 0.00098       |

# Hf2A16

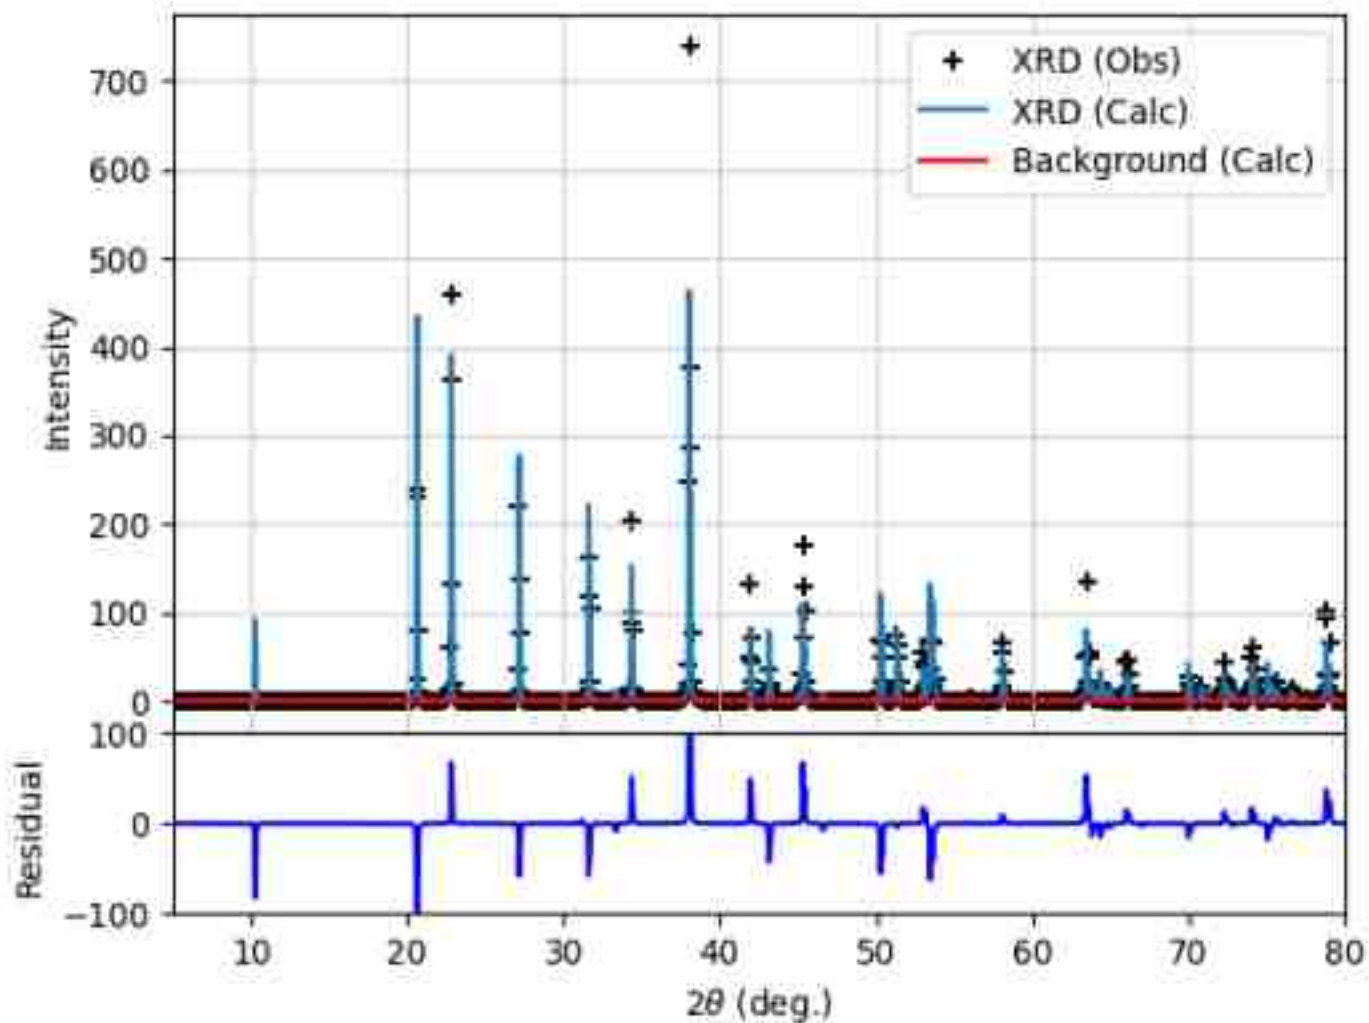

| RMSE before RR | Rwp      | RMSE after RR |
|----------------|----------|---------------|
| 0.02           | 55.23353 | None          |



# Hf2Cu1Re1

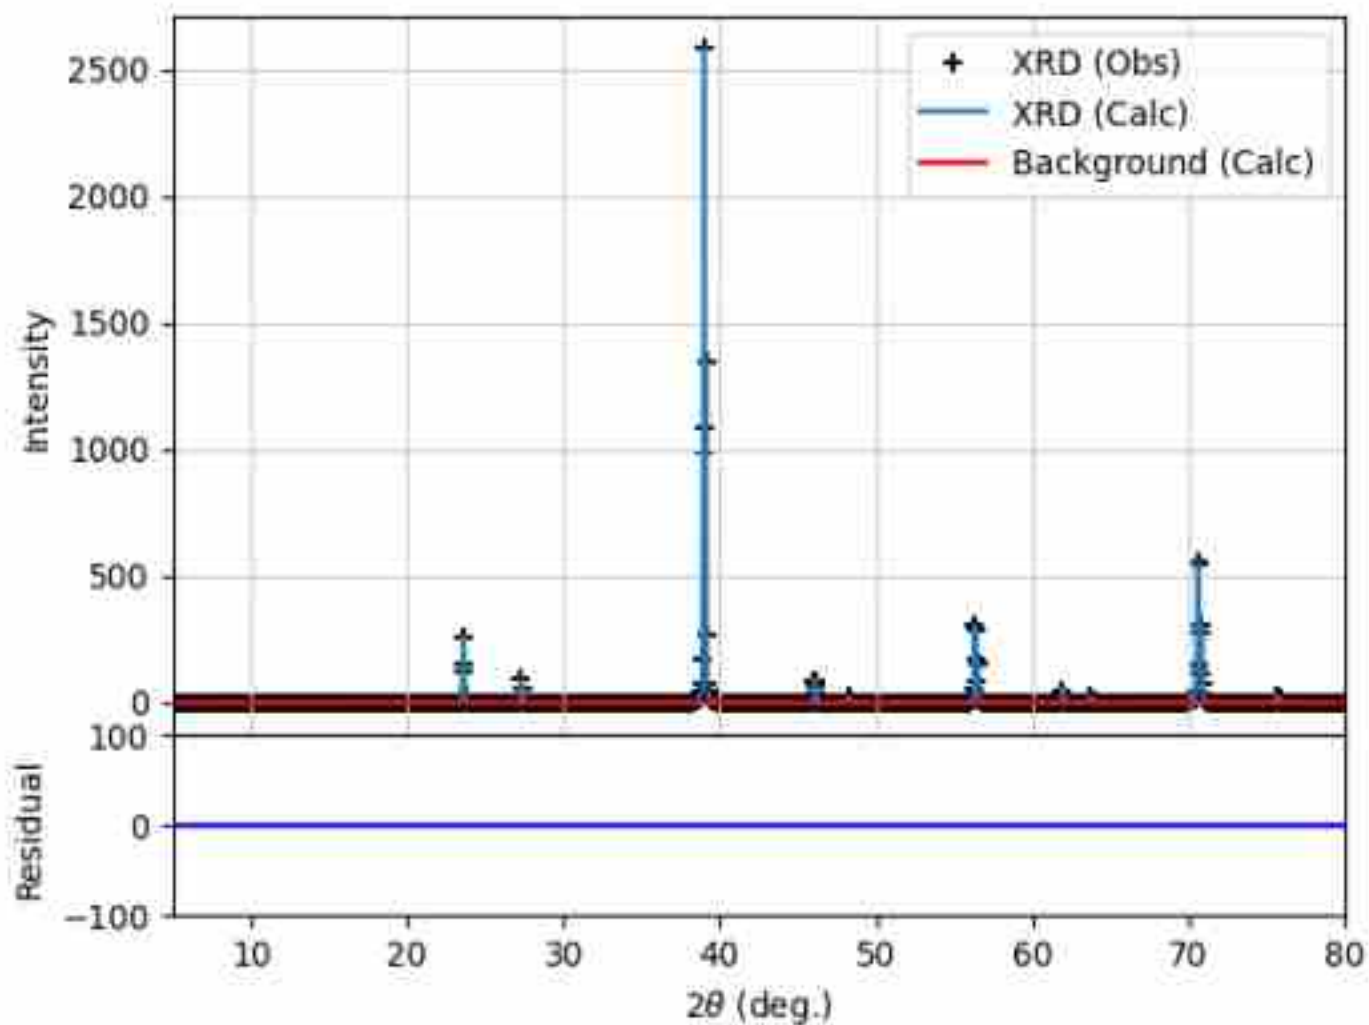

| RMSE before RR | Rwp    | RMSE after RR |
|----------------|--------|---------------|
| 0.002          | 0.0035 | 0.00055       |

# Hf2Re1Ru1

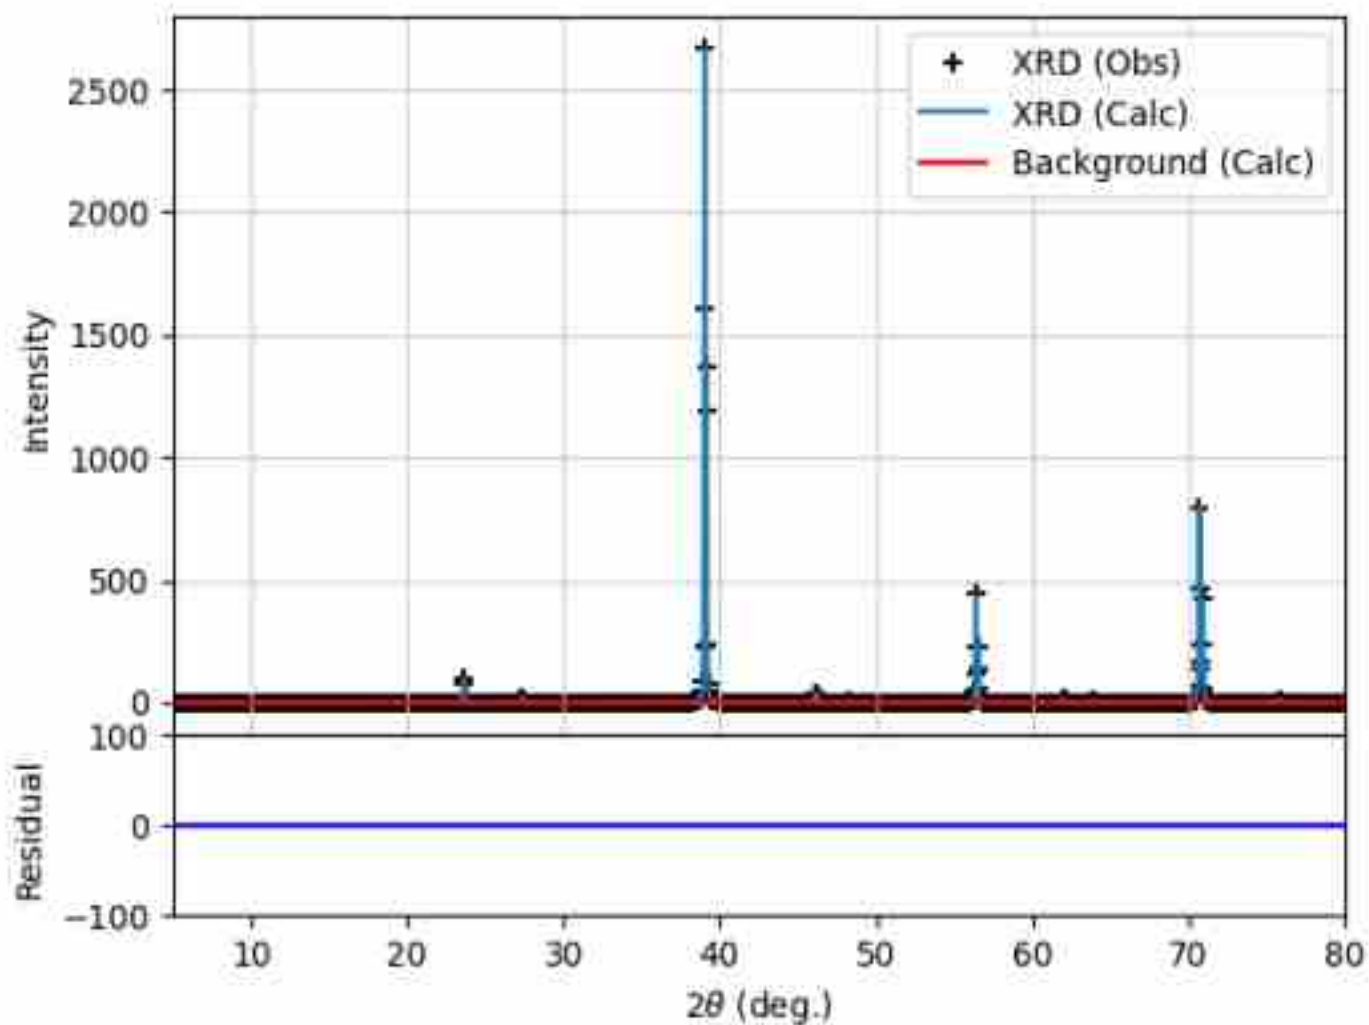

| RMSE before RR | Rwp     | RMSE after RR |
|----------------|---------|---------------|
| 0.002          | 0.03345 | 0.00158       |

# Hf3Pb1

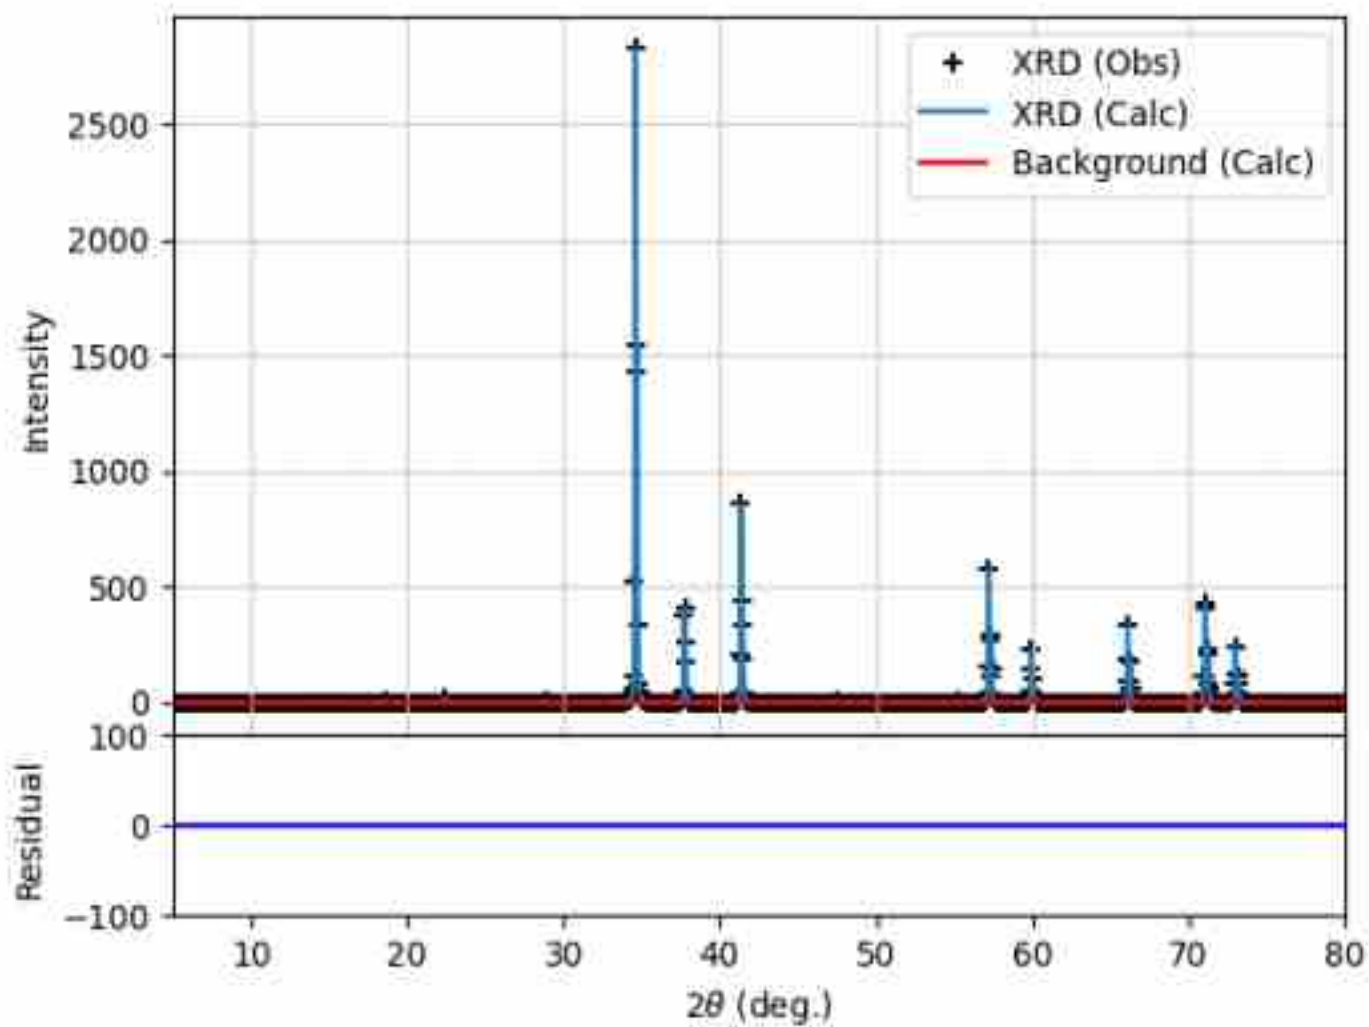

| RMSE before RR | Rwp     | RMSE after RR |
|----------------|---------|---------------|
| 0.002          | 0.00309 | 0.00016       |

# Hf<sub>4</sub>Co<sub>4</sub>Si<sub>4</sub>

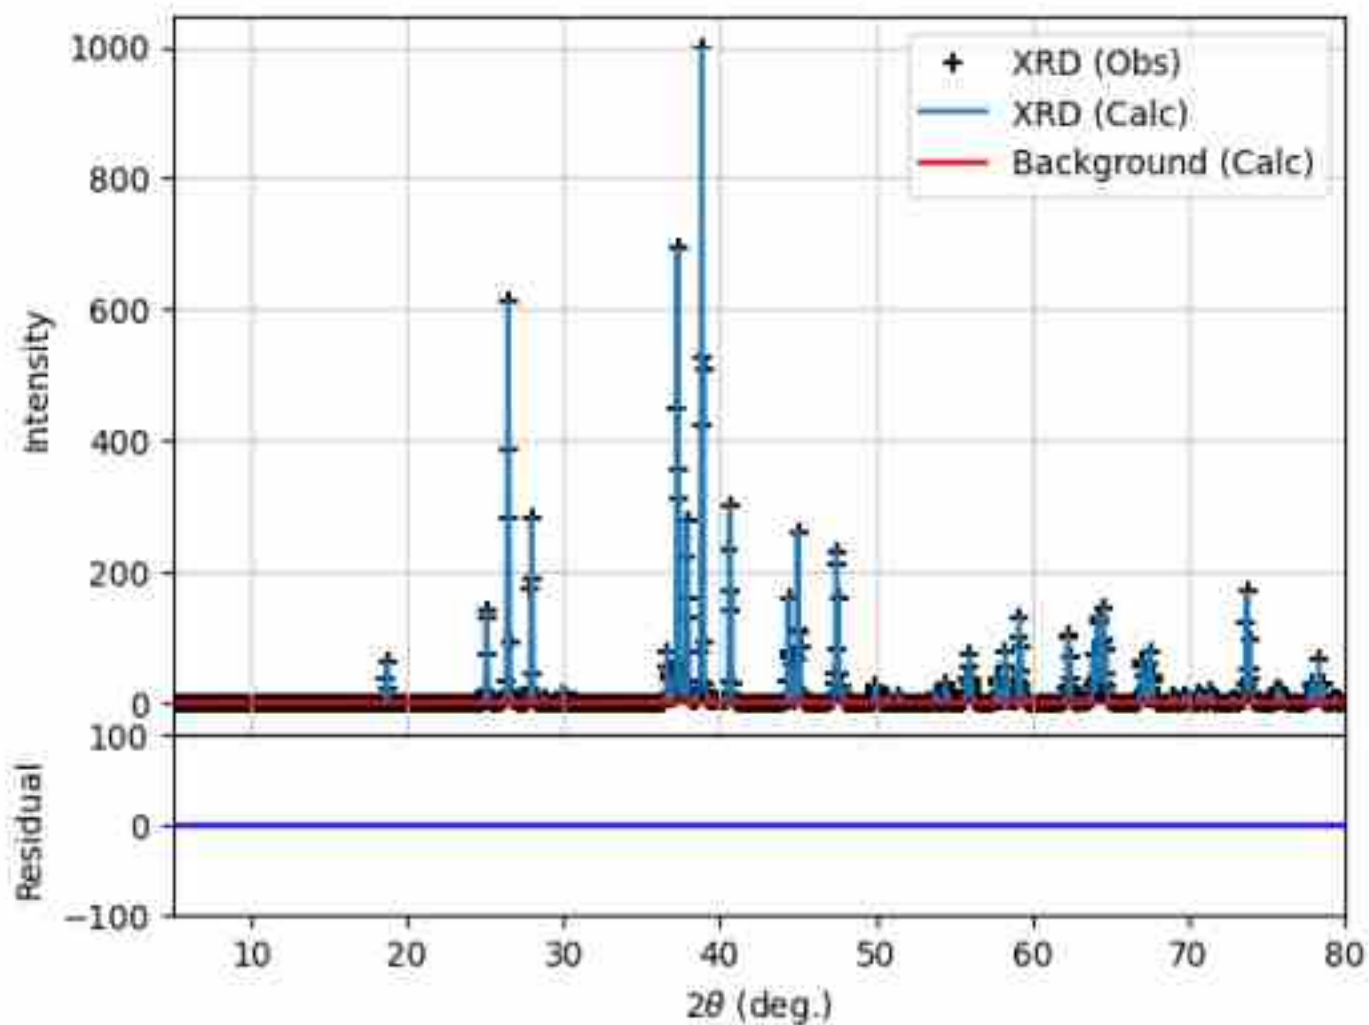

| RMSE before RR | Rwp     | RMSE after RR |
|----------------|---------|---------------|
| 0.02           | 0.00434 | 0.00053       |

# Hf<sub>4</sub>Fe<sub>4</sub>P<sub>4</sub>

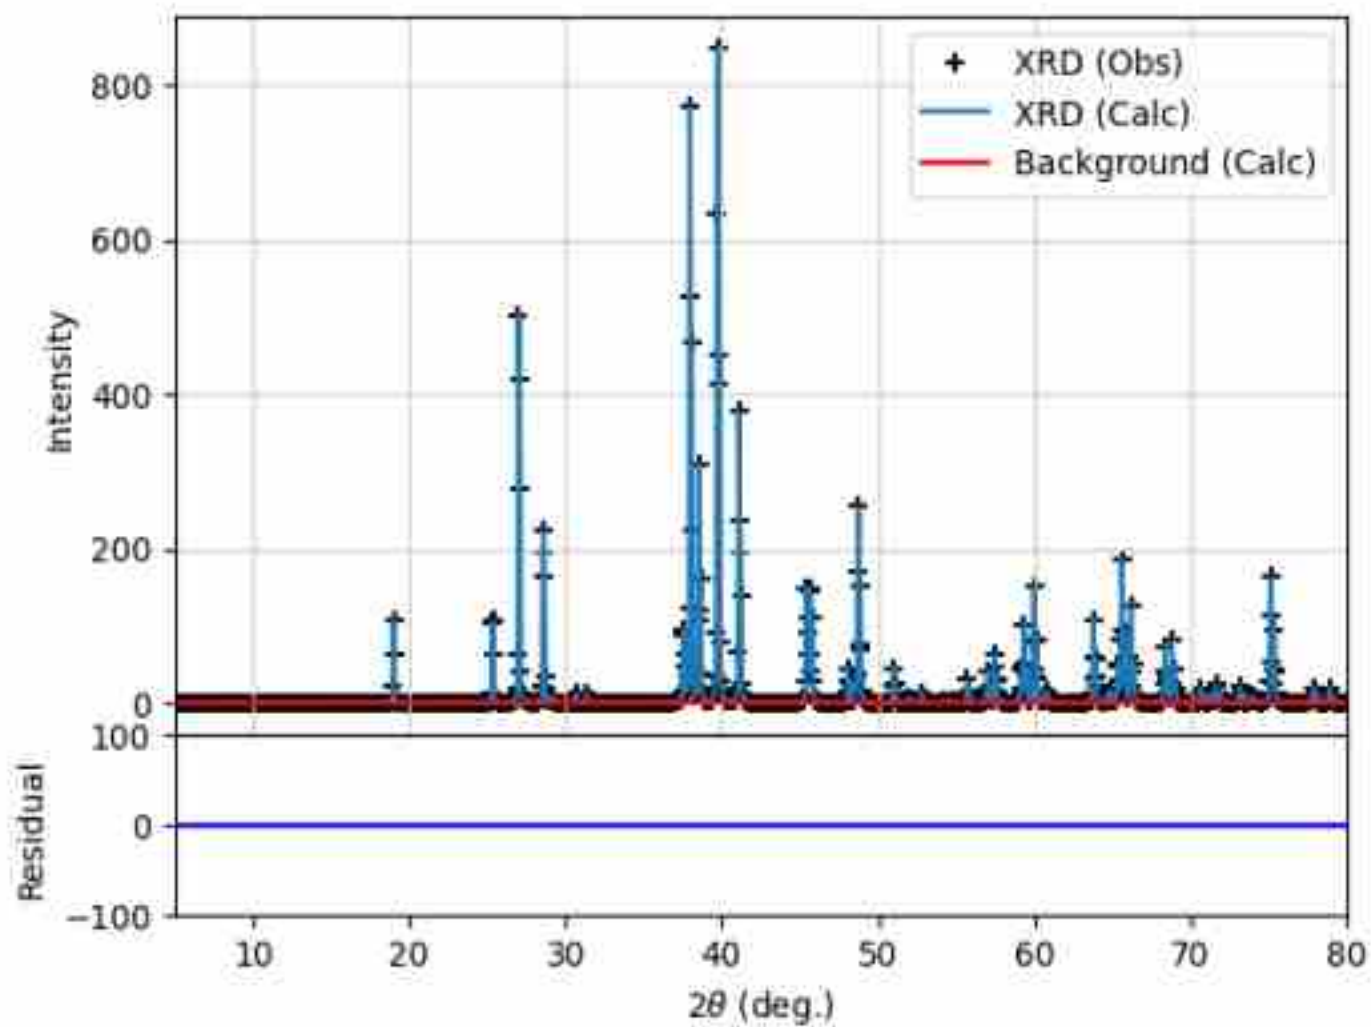

| RMSE before RR | Rwp     | RMSE after RR |
|----------------|---------|---------------|
| 0.02           | 0.00721 | 0.00058       |

# Hf6Ti4Ga6

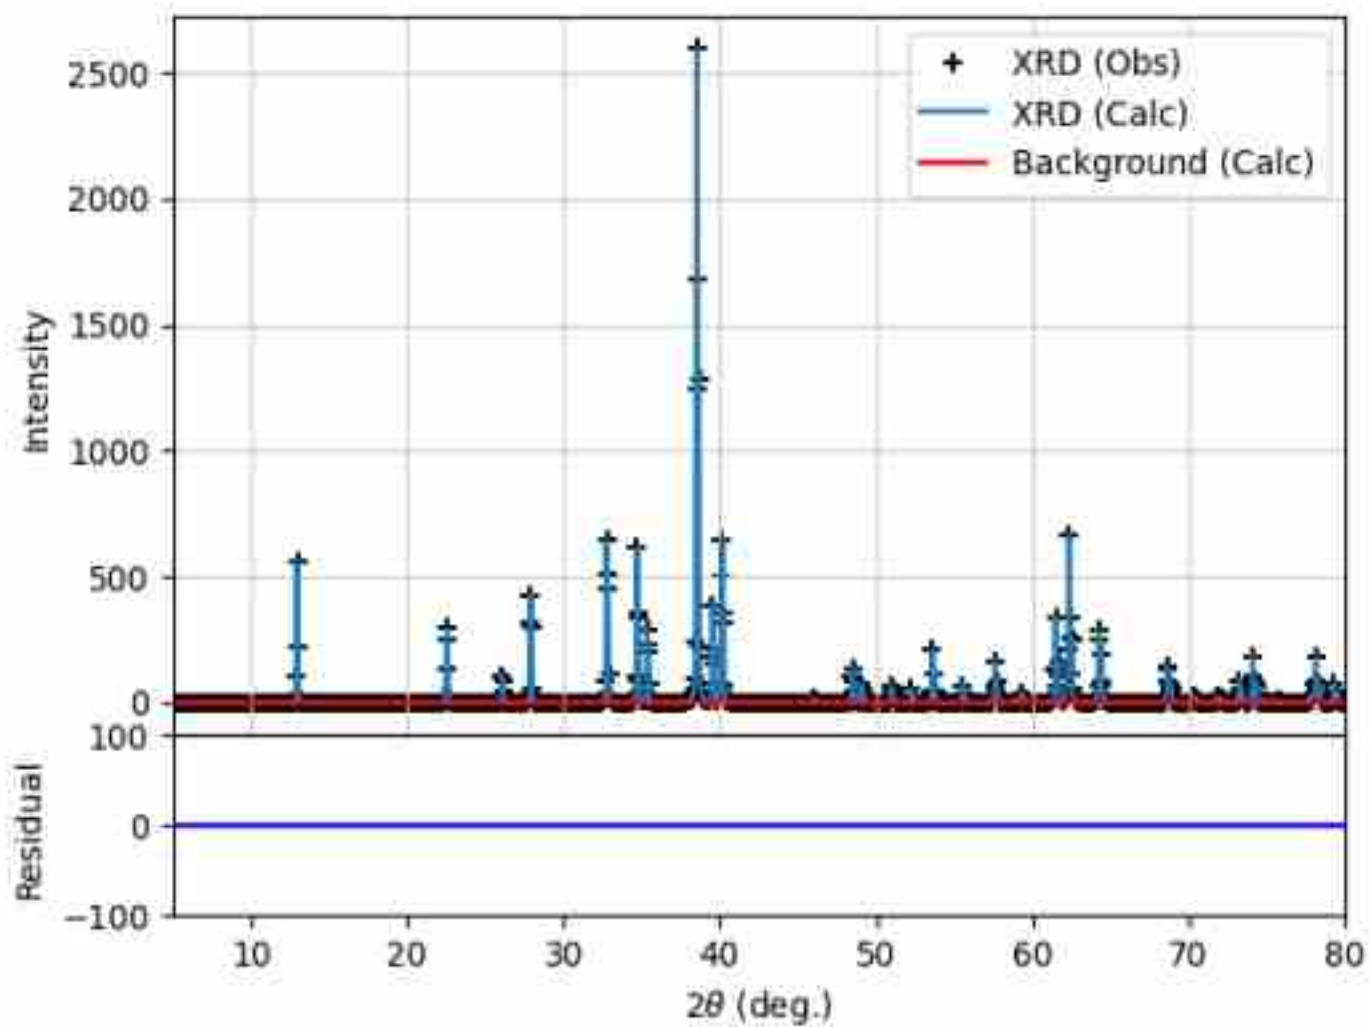

| RMSE before RR | Rwp     | RMSE after RR |
|----------------|---------|---------------|
| 0.02           | 0.00509 | 0.00086       |

# Hg1Au4

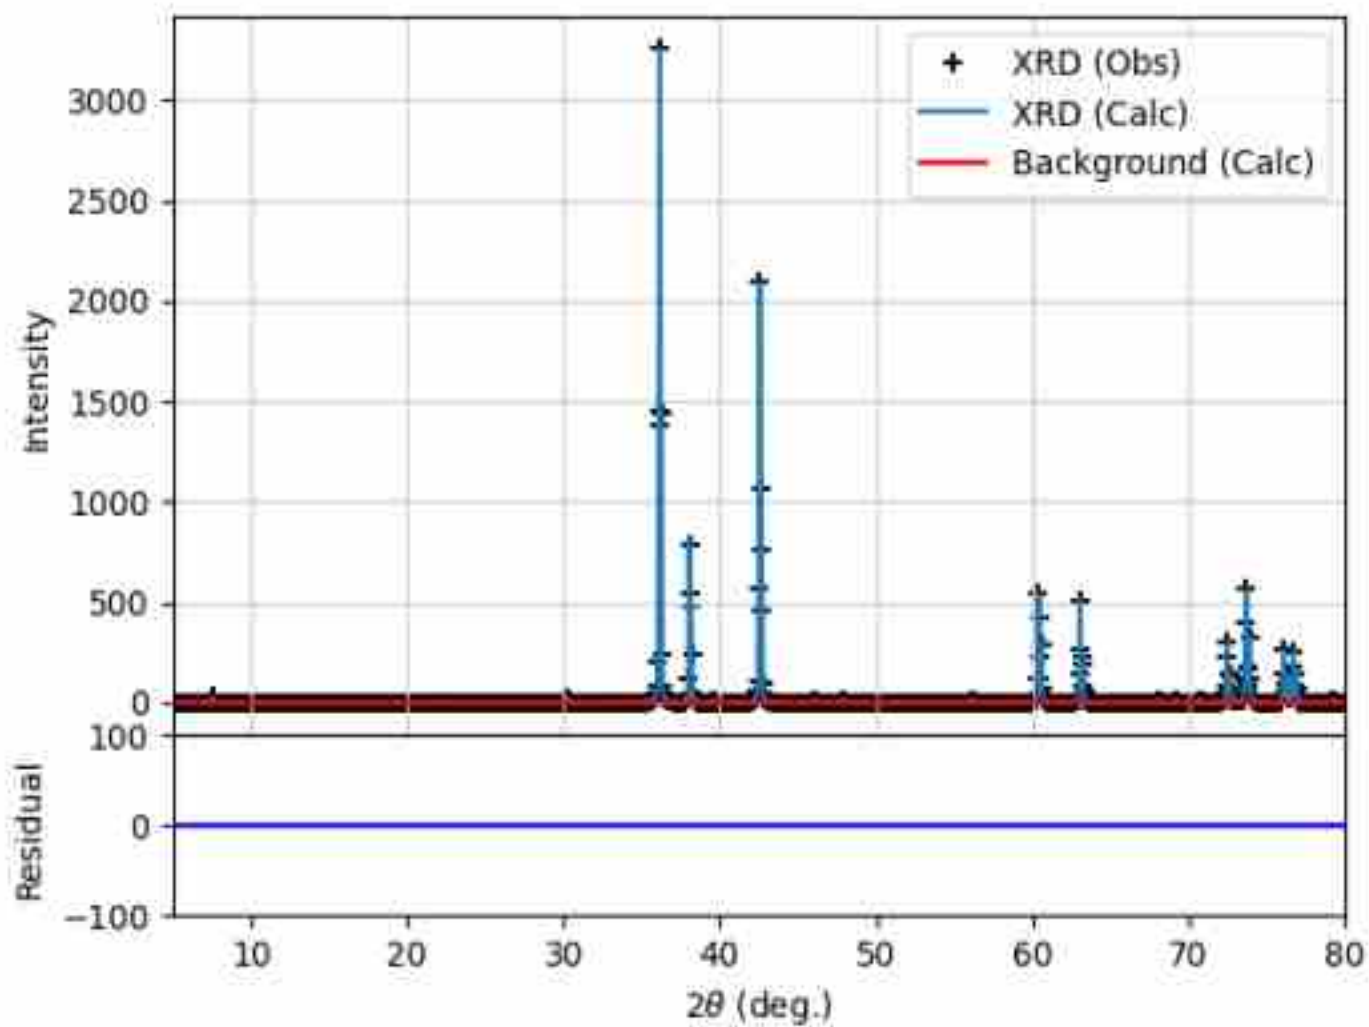

| RMSE before RR | Rwp     | RMSE after RR |
|----------------|---------|---------------|
| 0.02           | 0.00813 | 0.00053       |

# Hg1Pd3

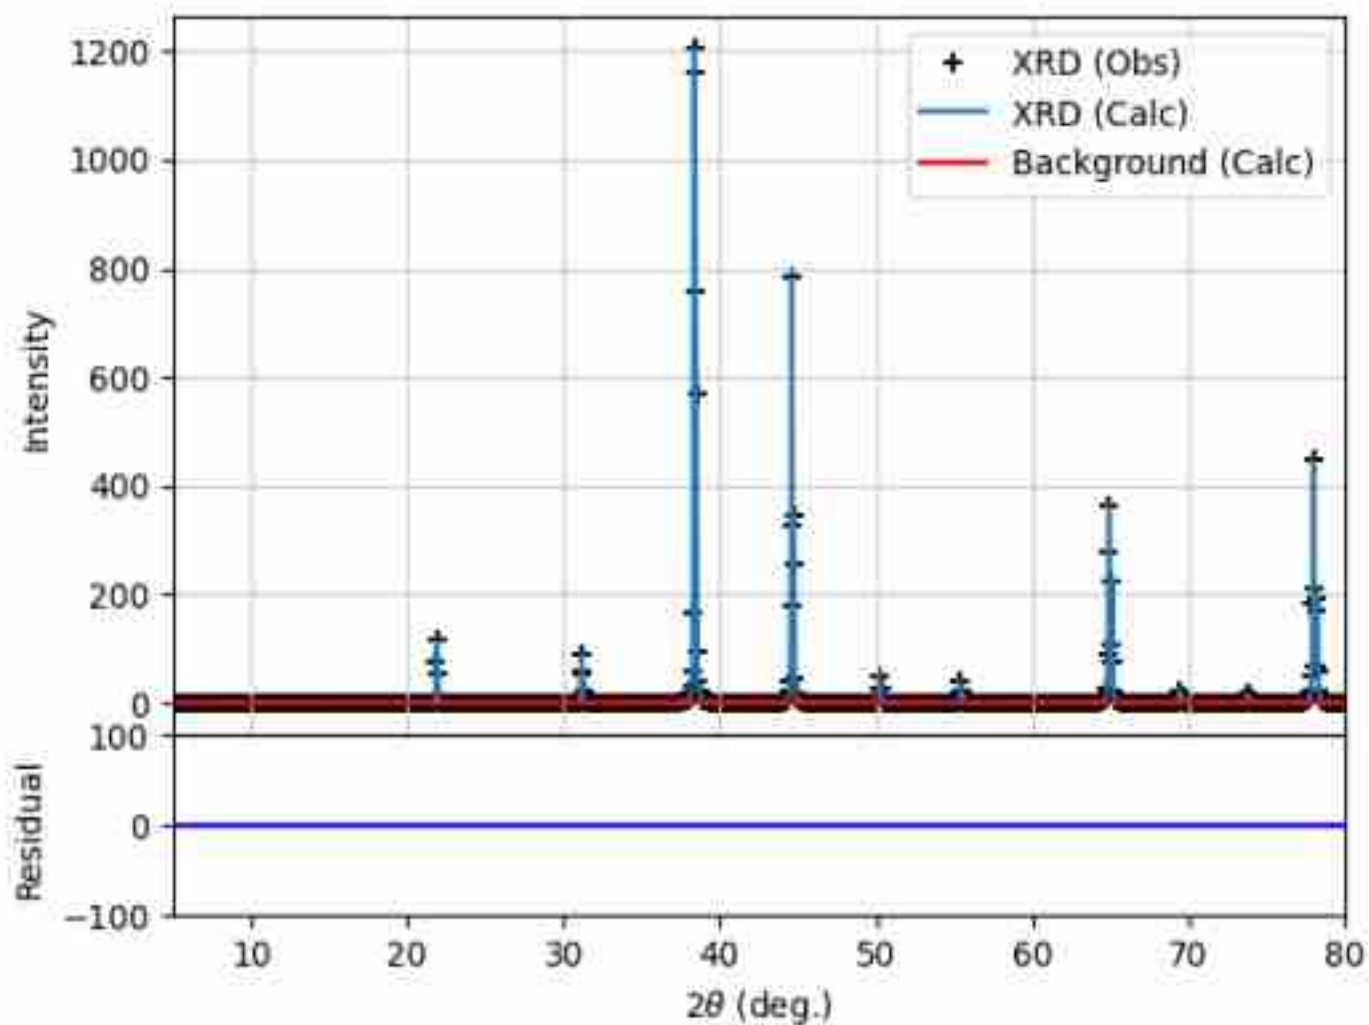

| RMSE before RR | Rwp     | RMSE after RR |
|----------------|---------|---------------|
| 0.002          | 0.03486 | 0.00133       |



# Hg6Pb2

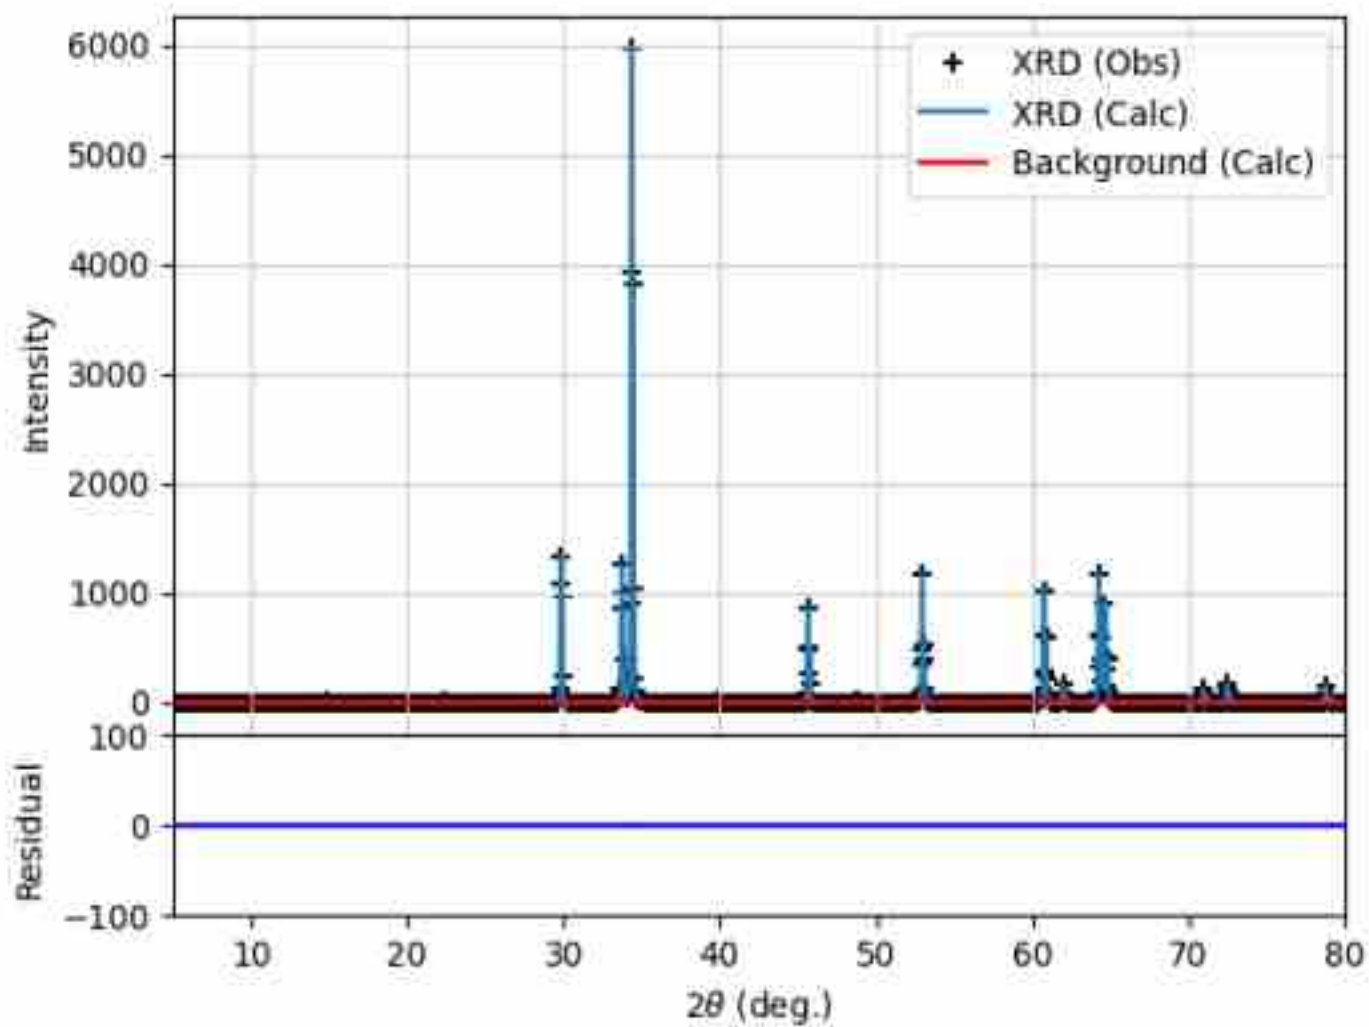

| RMSE before RR | Rwp     | RMSE after RR |
|----------------|---------|---------------|
| 0.02           | 0.03035 | 0.00092       |

# Ho1Ag1

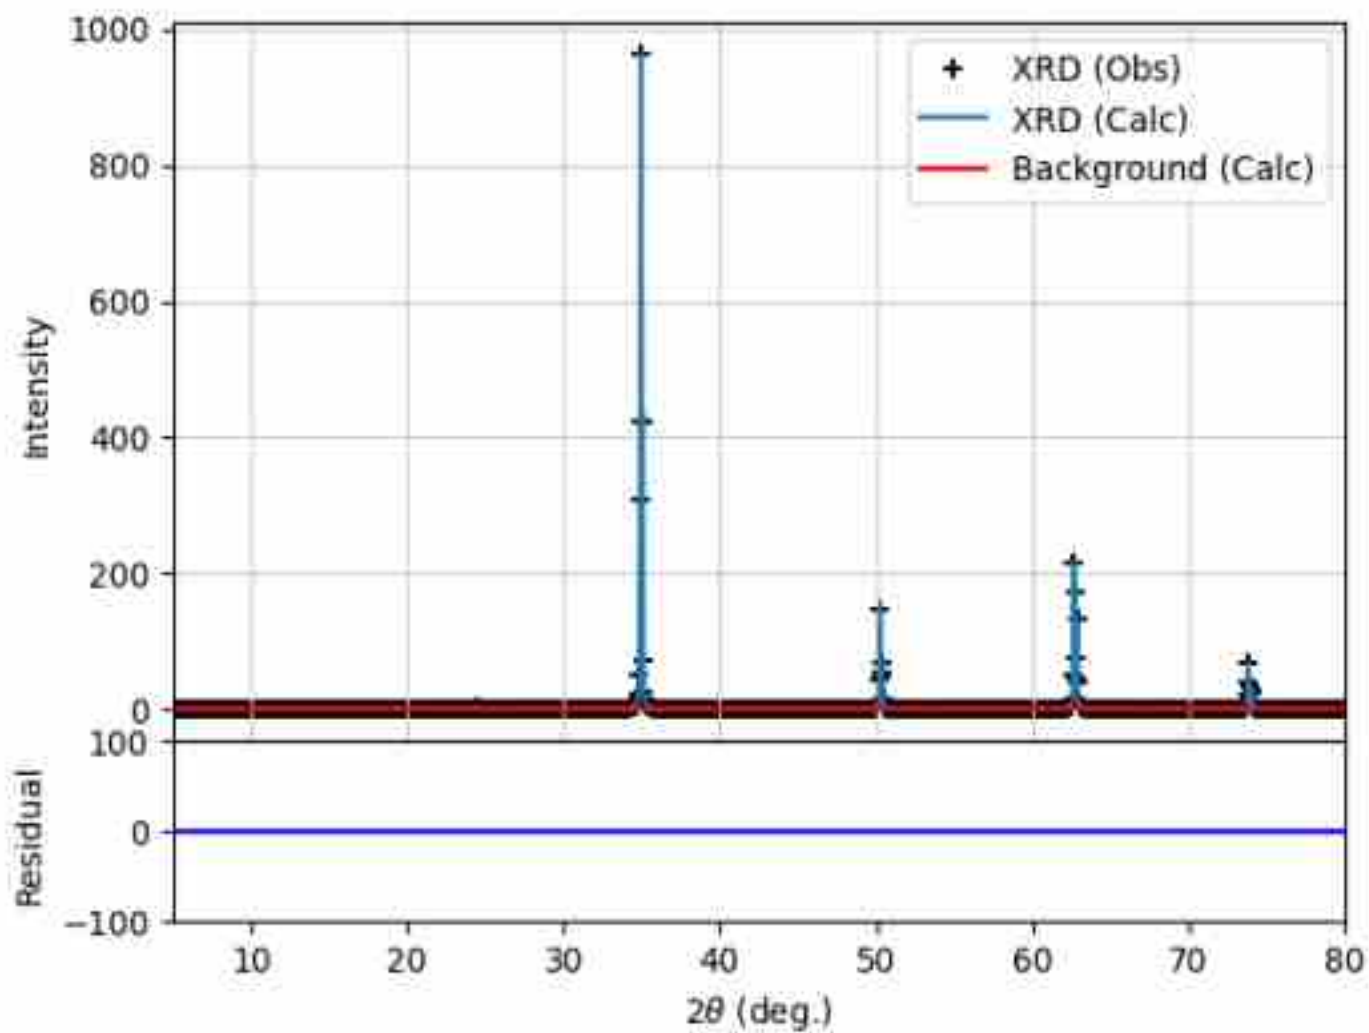

| RMSE before RR | Rwp     | RMSE after RR |
|----------------|---------|---------------|
| 0.002          | 0.04142 | 0.0009        |

# Ho1As1

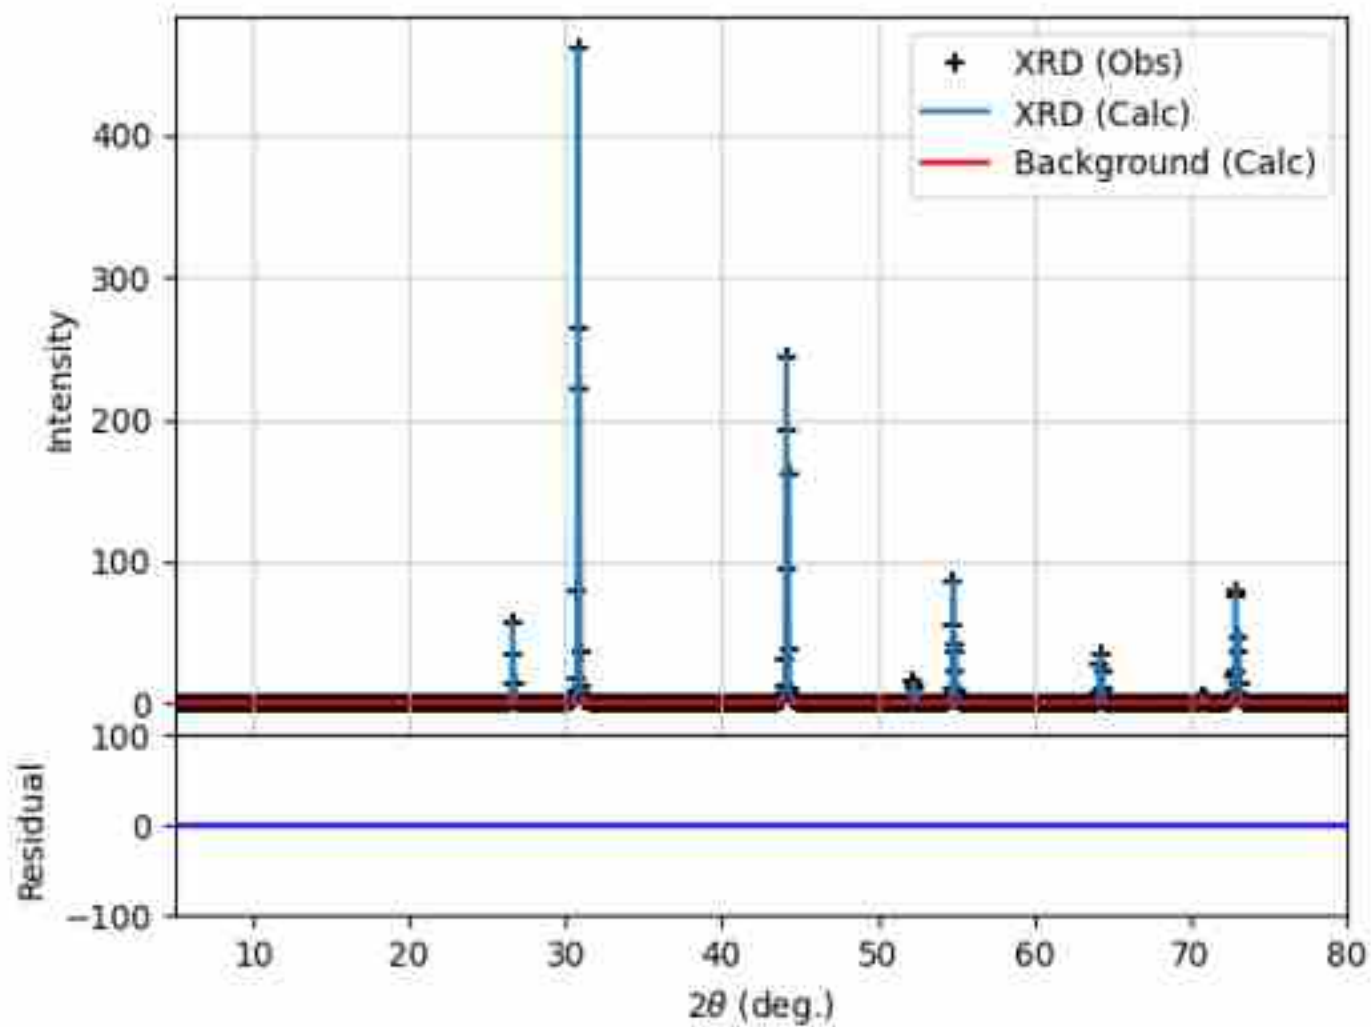

| RMSE before RR | Rwp     | RMSE after RR |
|----------------|---------|---------------|
| 0.002          | 0.00667 | 0.00051       |

# Ho1Cd1Ag2

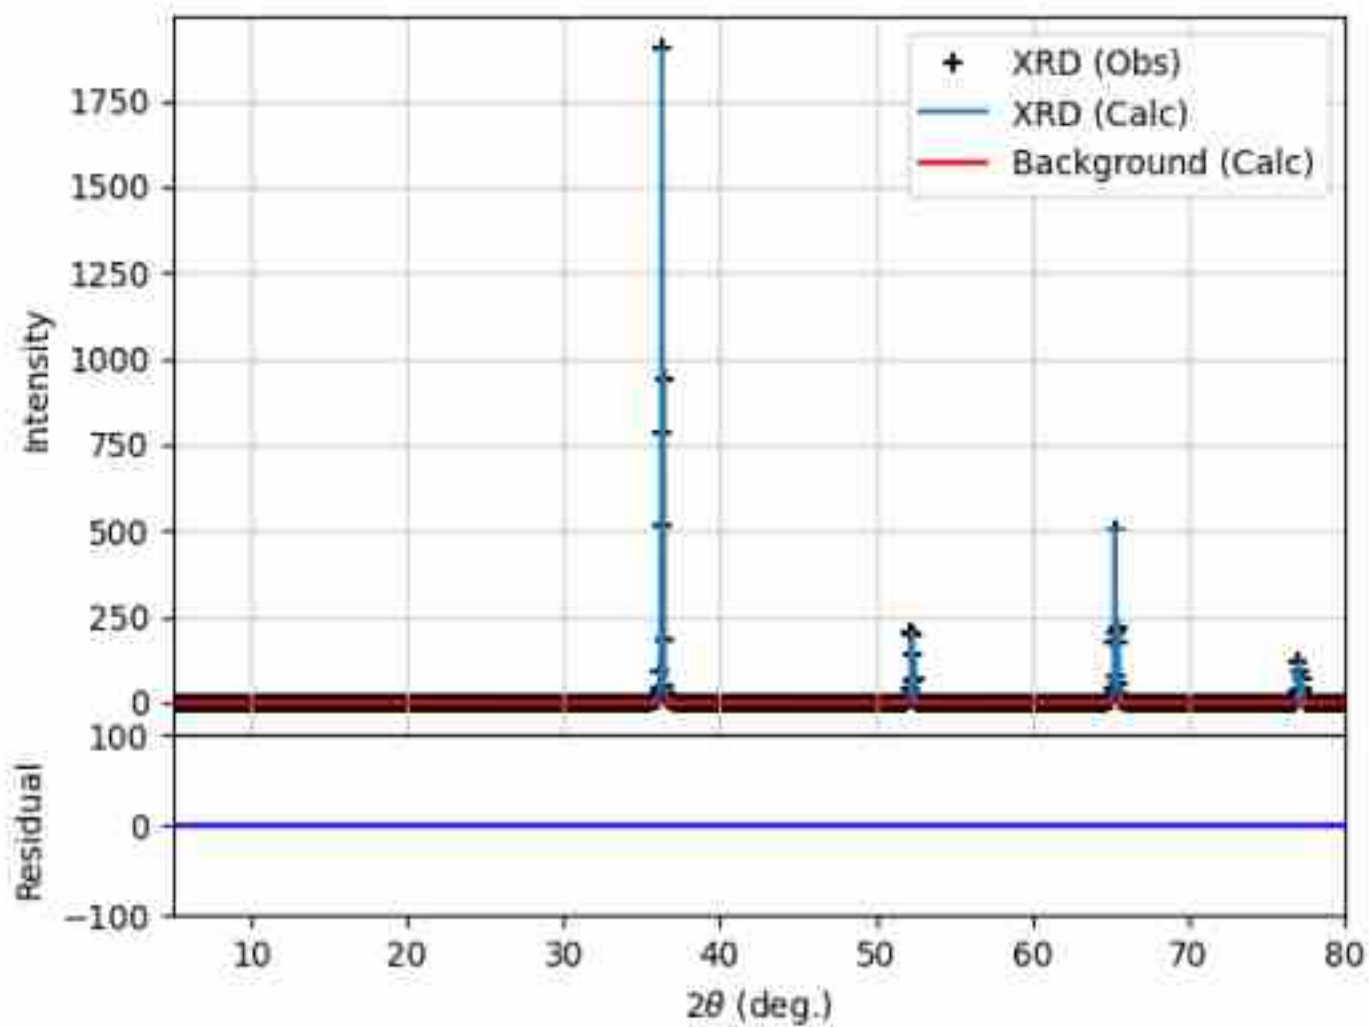

| RMSE before RR | Rwp     | RMSE after RR |
|----------------|---------|---------------|
| 0.002          | 0.00816 | 0.00055       |

# Ho1Cd1Rh2

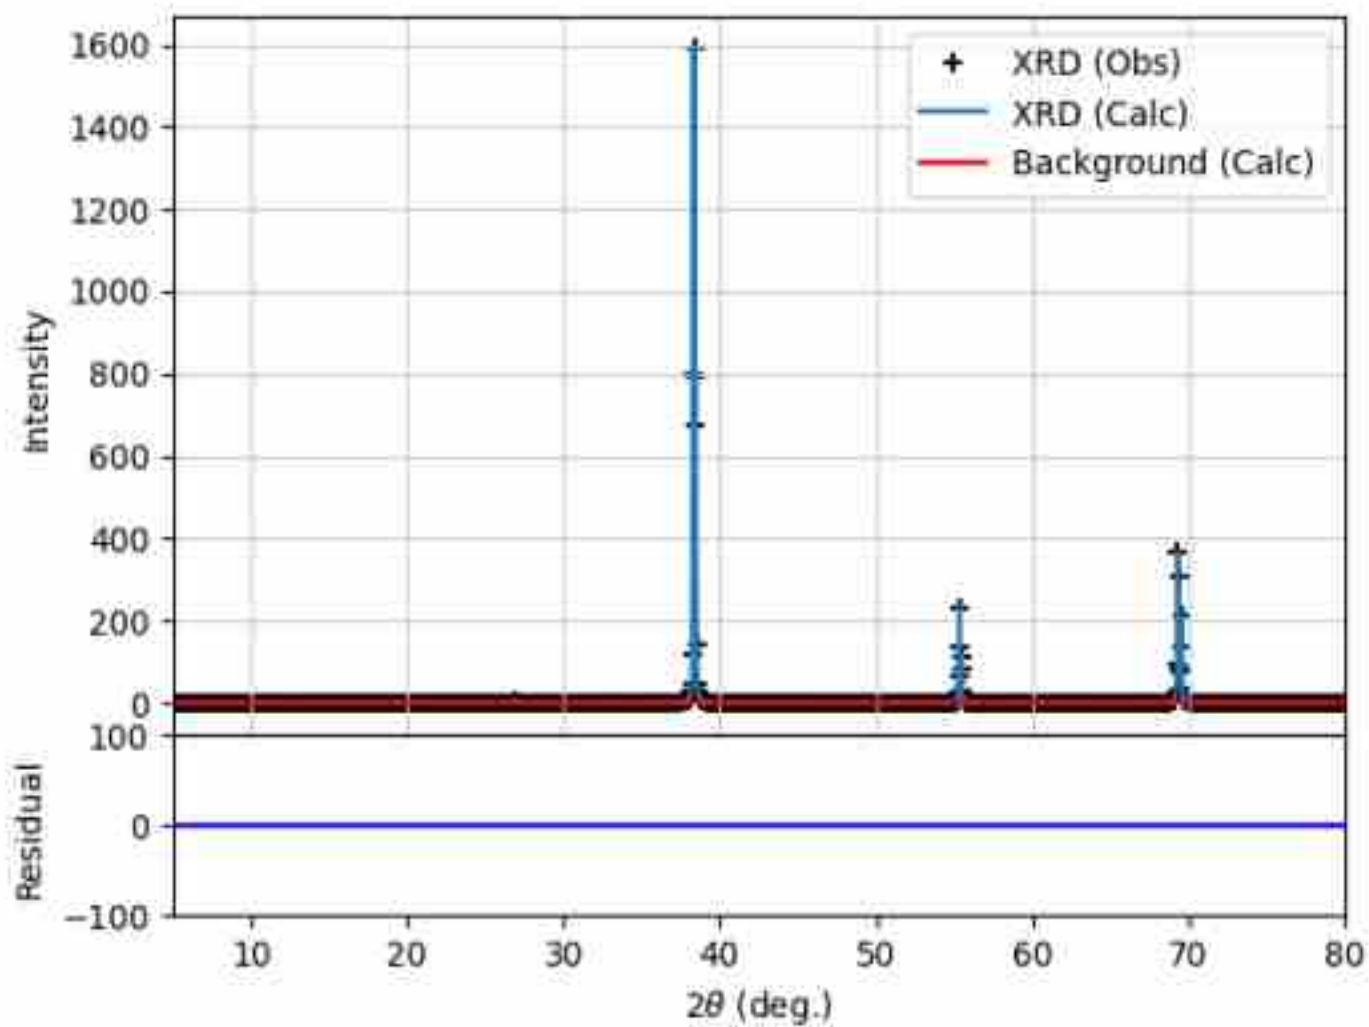

| RMSE before RR | Rwp     | RMSE after RR |
|----------------|---------|---------------|
| 0.002          | 0.00407 | 0.00018       |

# Ho1Er1Pd2

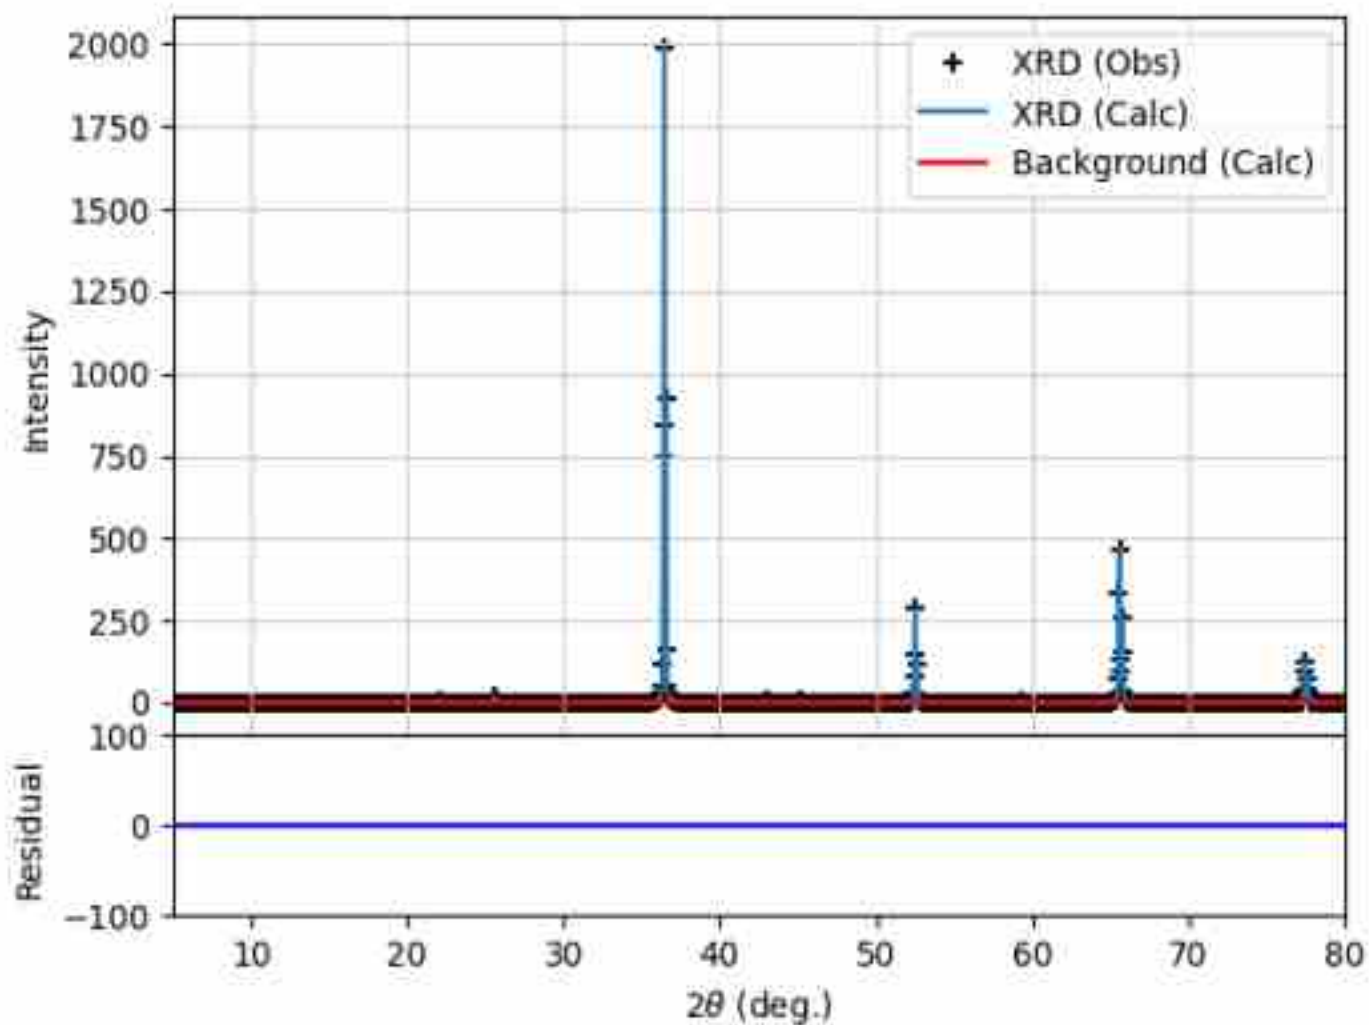

| RMSE before RR | Rwp     | RMSE after RR |
|----------------|---------|---------------|
| 0.002          | 0.02157 | 0.00065       |

# Ho1In1Ag2

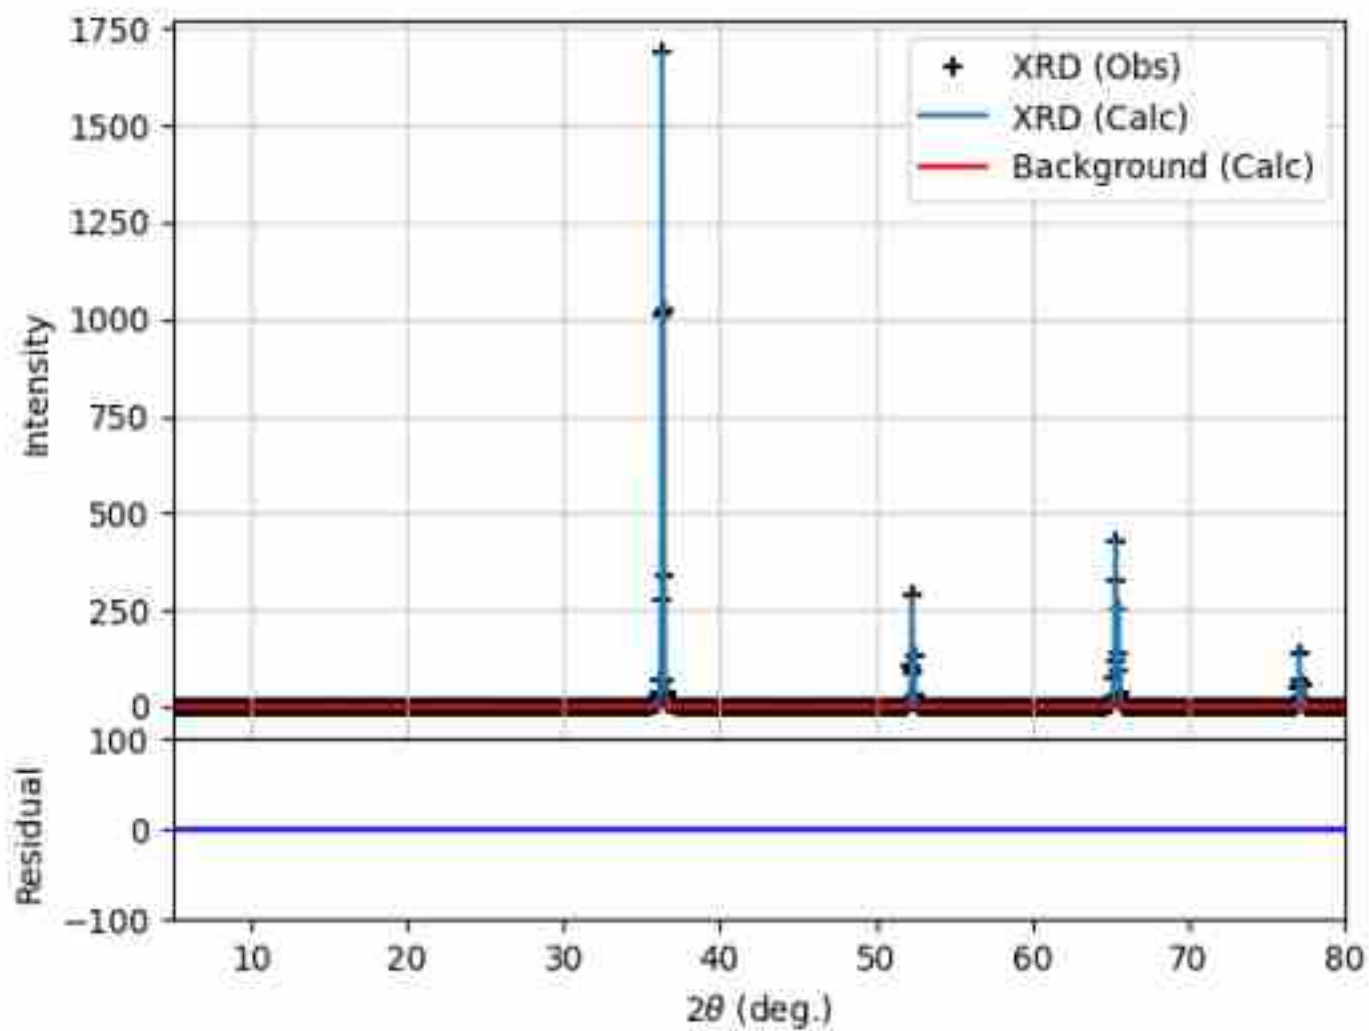

| RMSE before RR | Rwp     | RMSE after RR |
|----------------|---------|---------------|
| 0.002          | 0.00191 | 0.00018       |

# Ho1In1Rh2

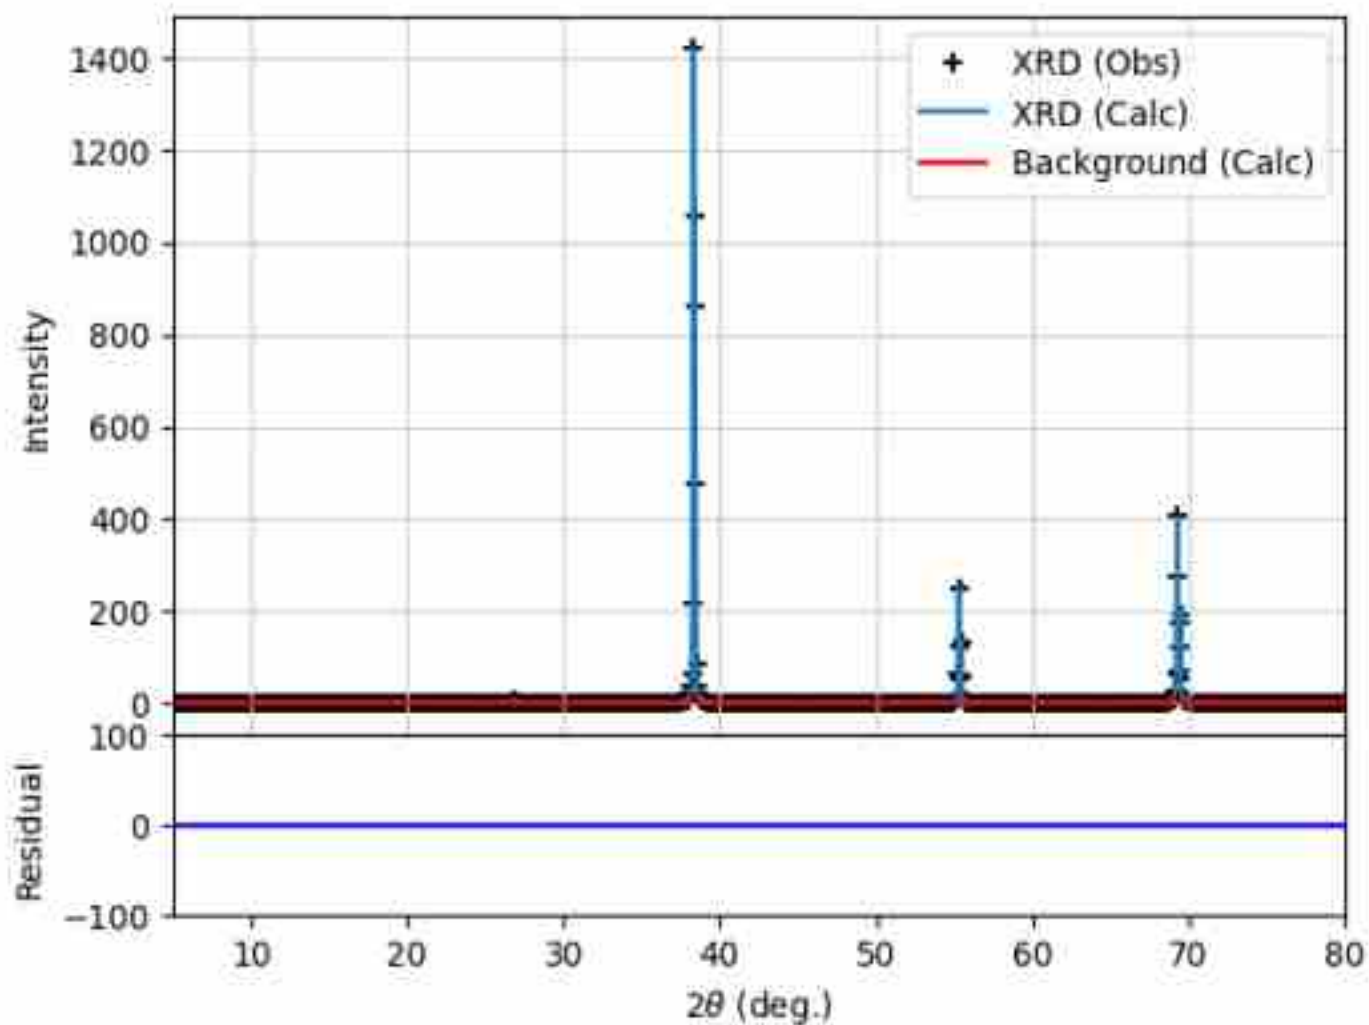

| RMSE before RR | Rwp     | RMSE after RR |
|----------------|---------|---------------|
| 0.002          | 0.00401 | 0.00018       |



# HoIn1

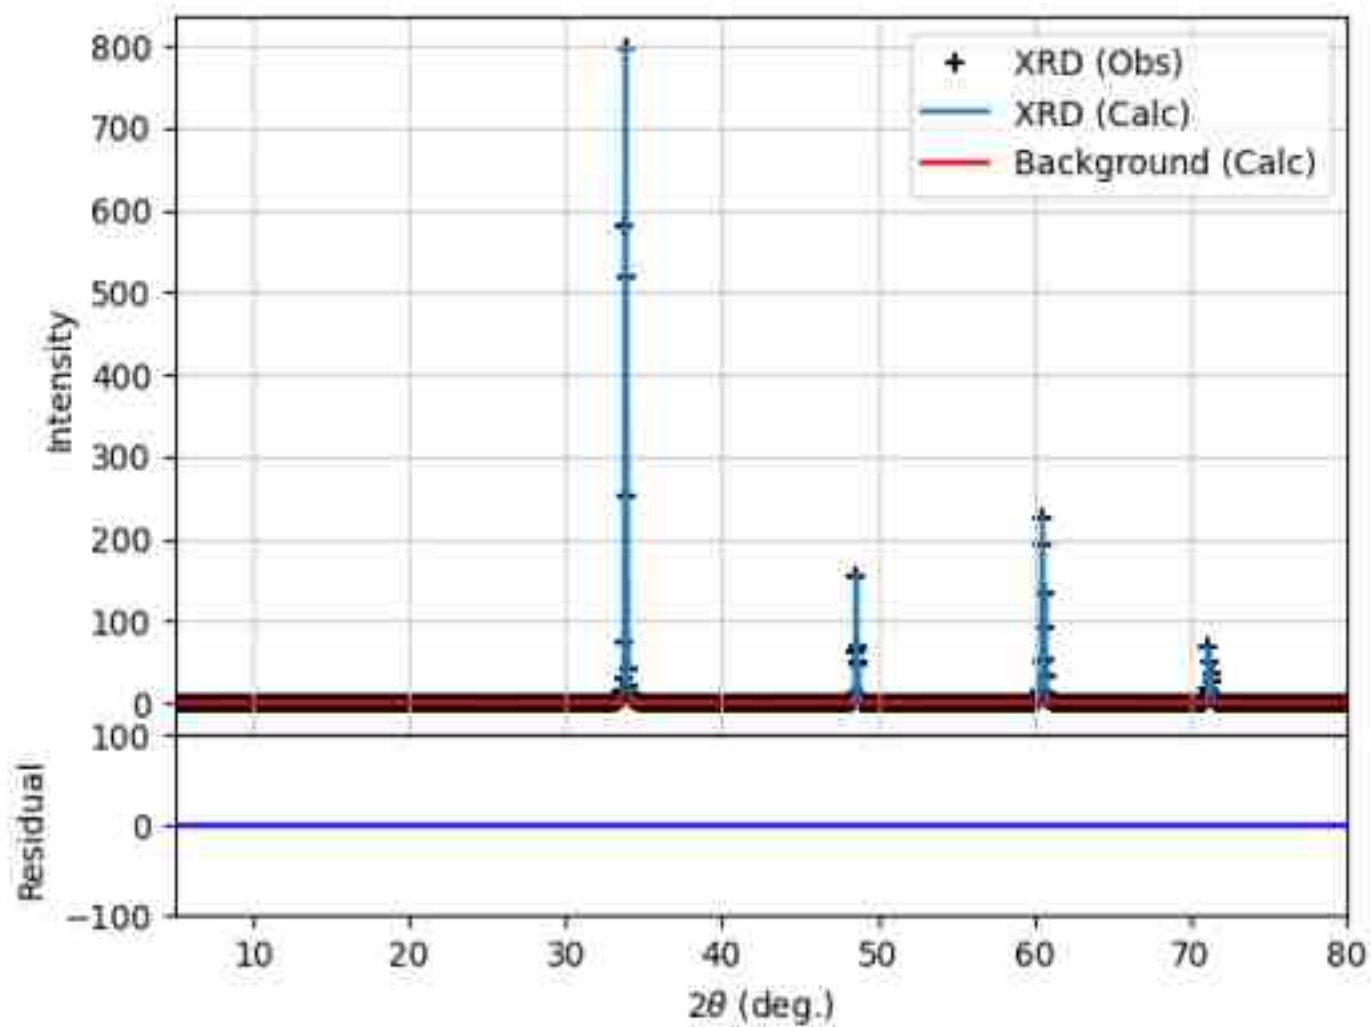

| RMSE before RR | Rwp     | RMSE after RR |
|----------------|---------|---------------|
| 0.002          | 0.01716 | 0.00022       |

# Ho1Lu1Cu2

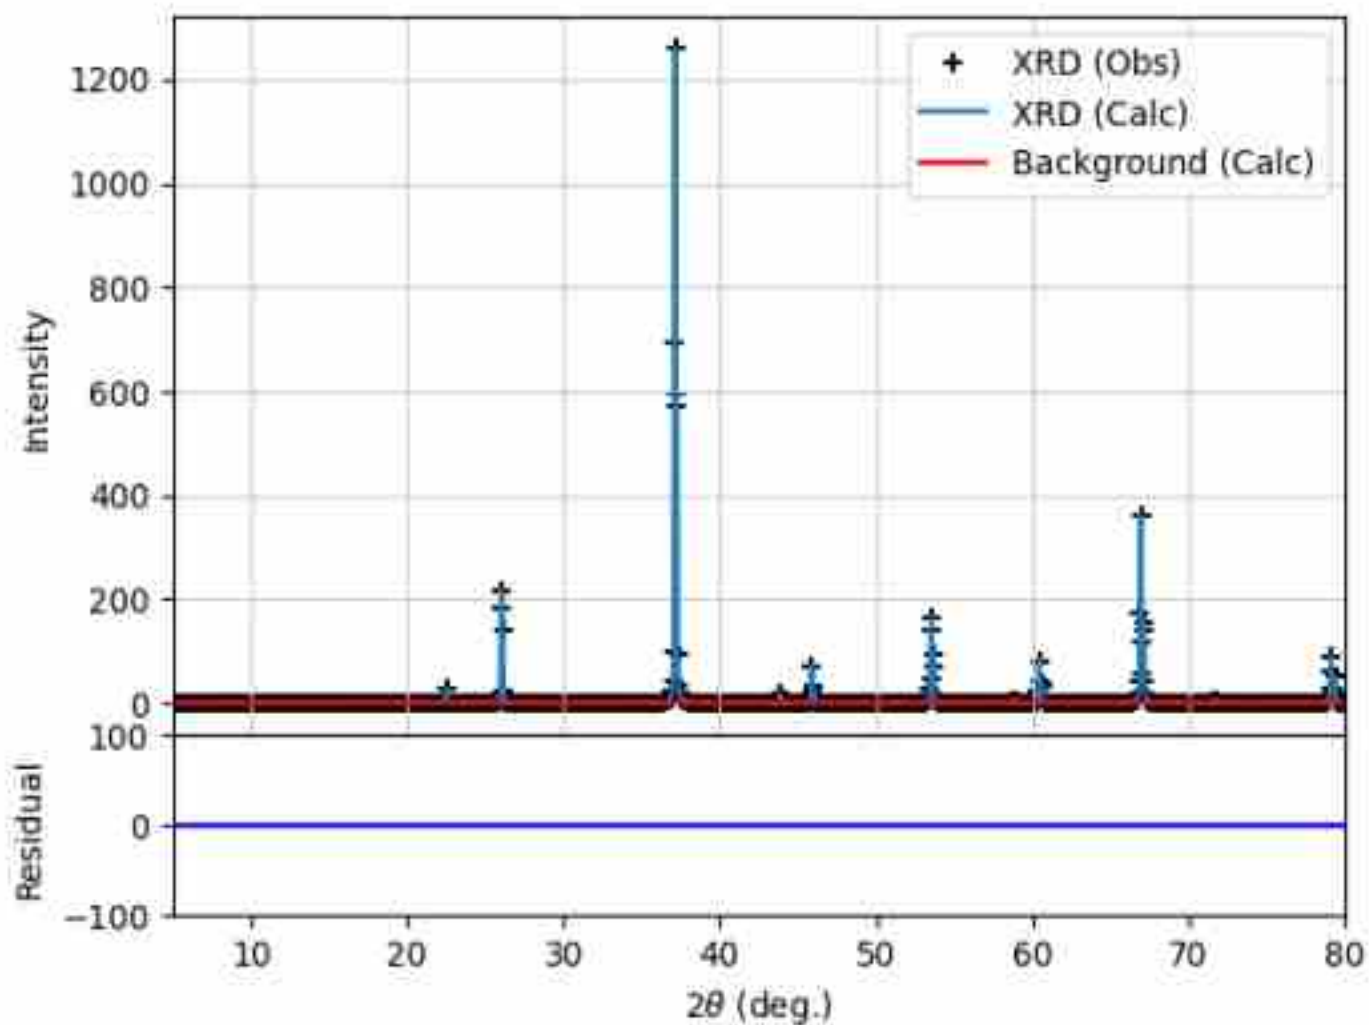

| RMSE before RR | Rwp     | RMSE after RR |
|----------------|---------|---------------|
| 0.002          | 0.00048 | 0.00024       |

# Ho1Lu1Pd2

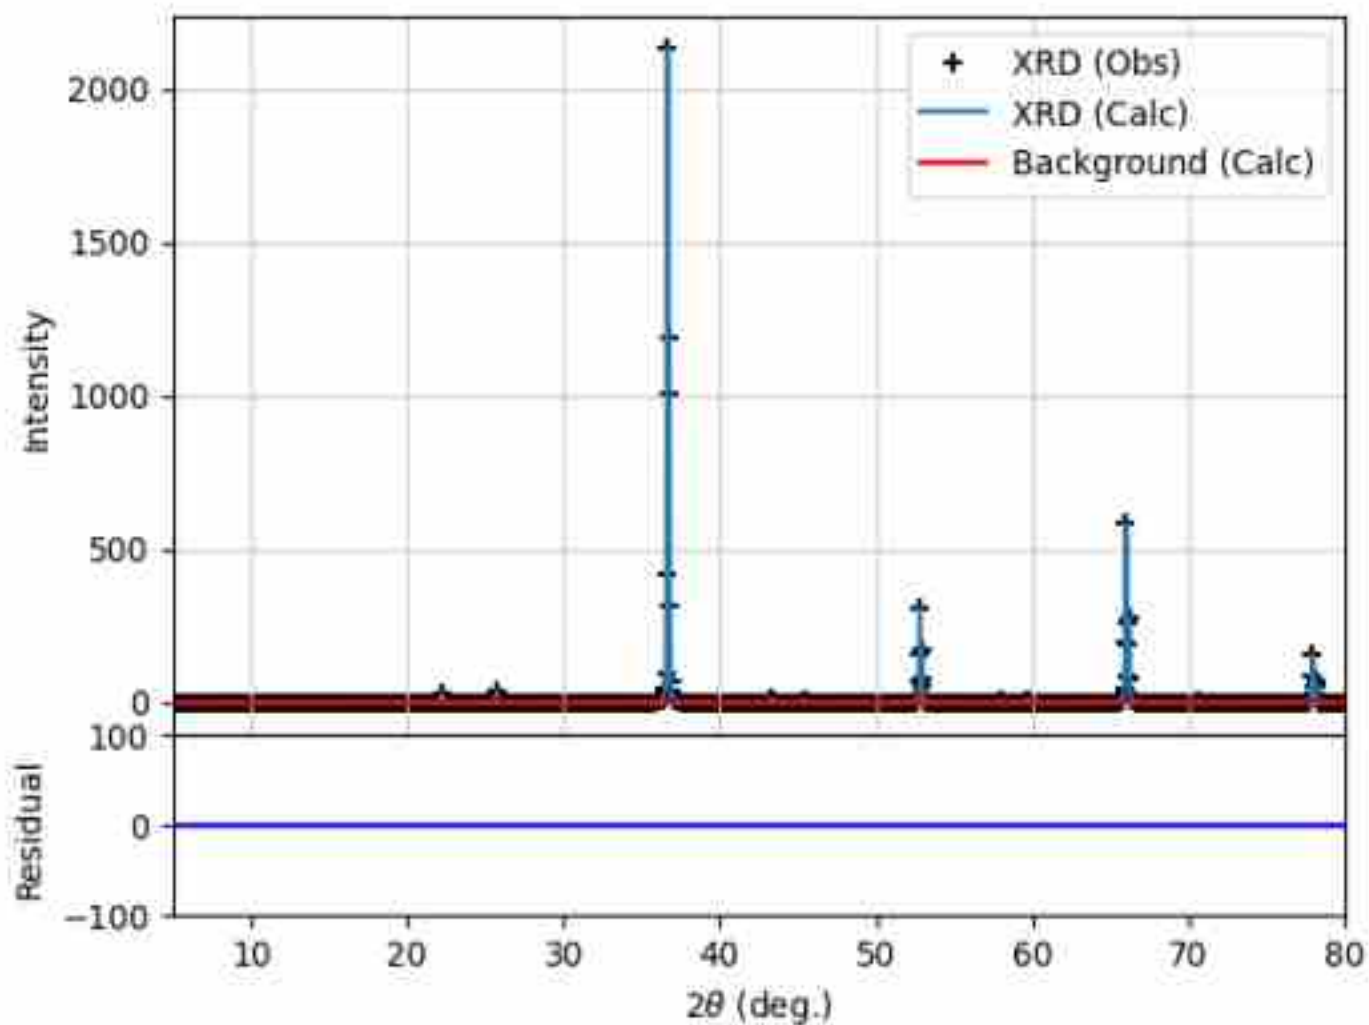

| RMSE before RR | Rwp   | RMSE after RR |
|----------------|-------|---------------|
| 0.002          | 2e-05 | 4e-05         |

# Ho<sub>1</sub>Mn<sub>4</sub>Cu<sub>3</sub>O<sub>12</sub>

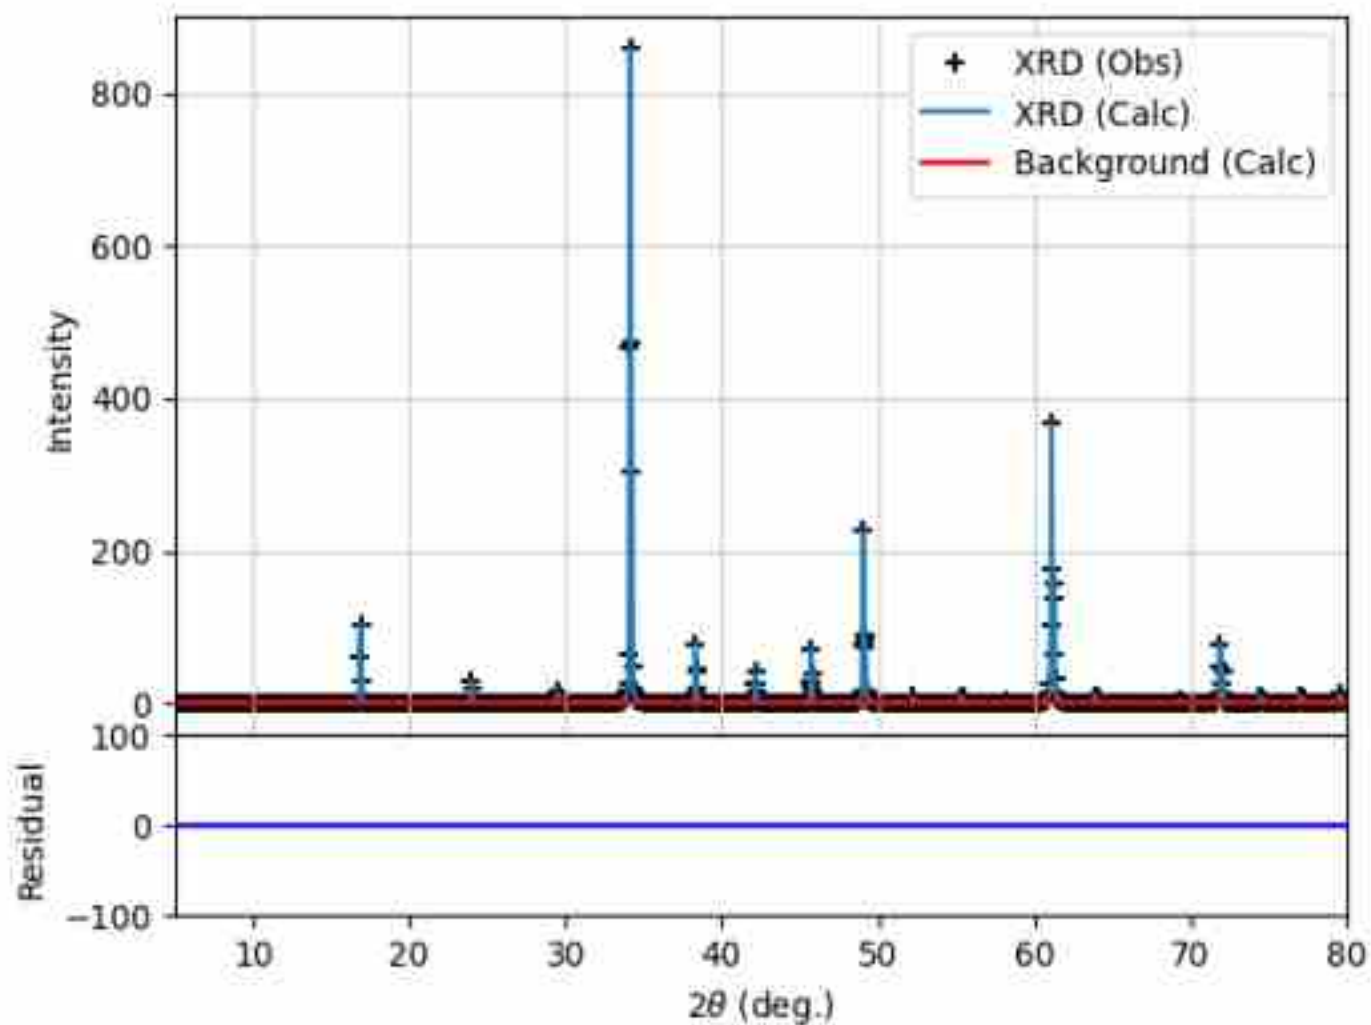

| RMSE before RR | Rwp     | RMSE after RR |
|----------------|---------|---------------|
| 0.02           | 0.01838 | 0.00378       |

# Ho1Nb1Ru2

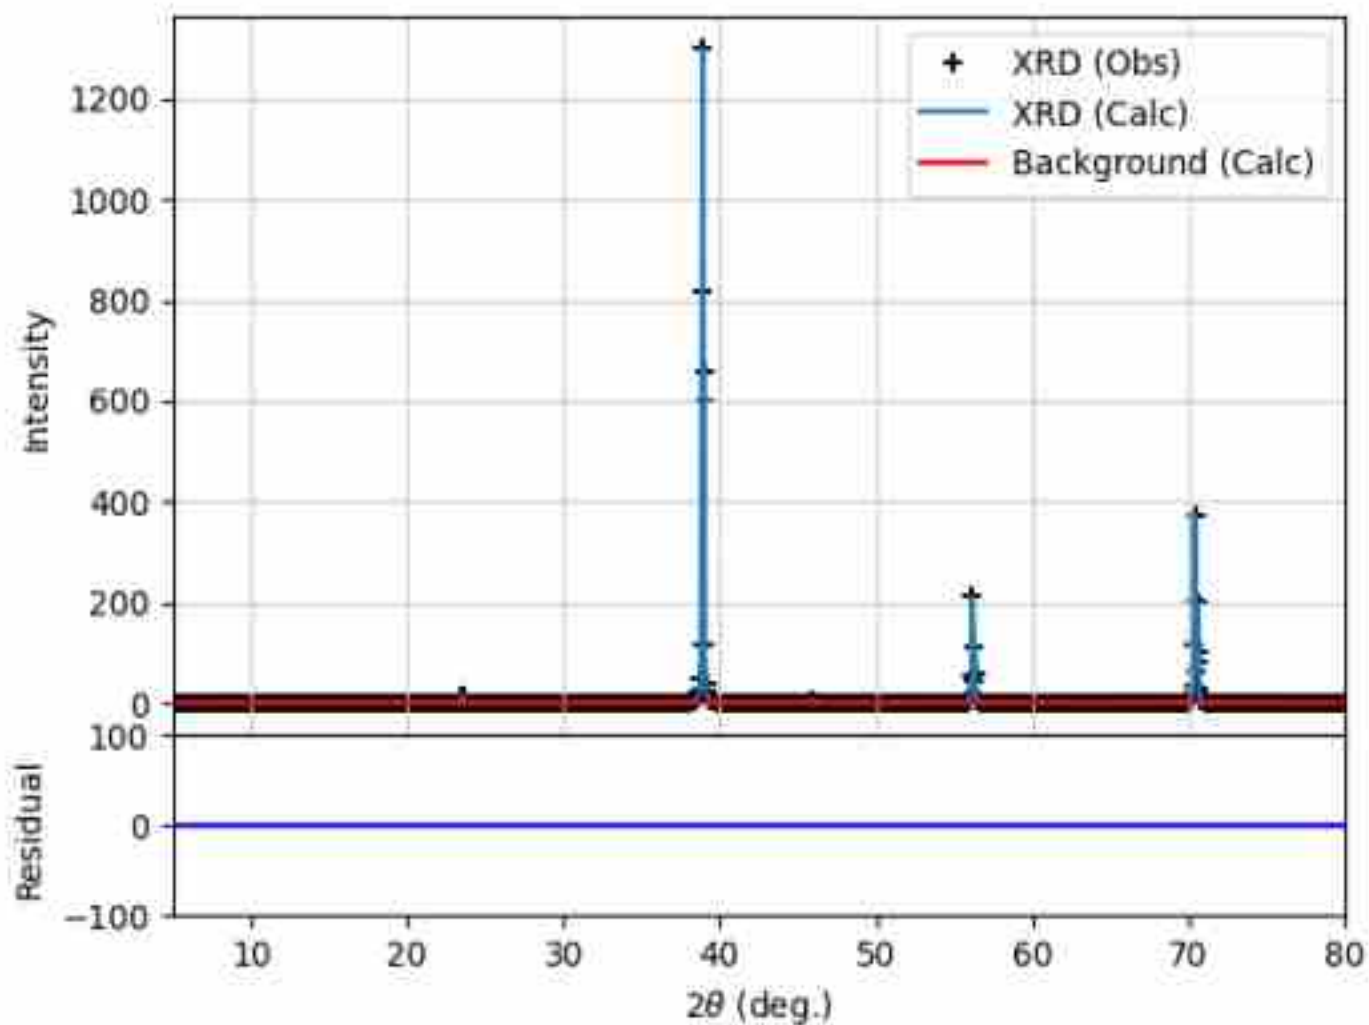

| RMSE before RR | Rwp     | RMSE after RR |
|----------------|---------|---------------|
| 0.002          | 0.00575 | 0.00032       |

# Ho1Ni1As1

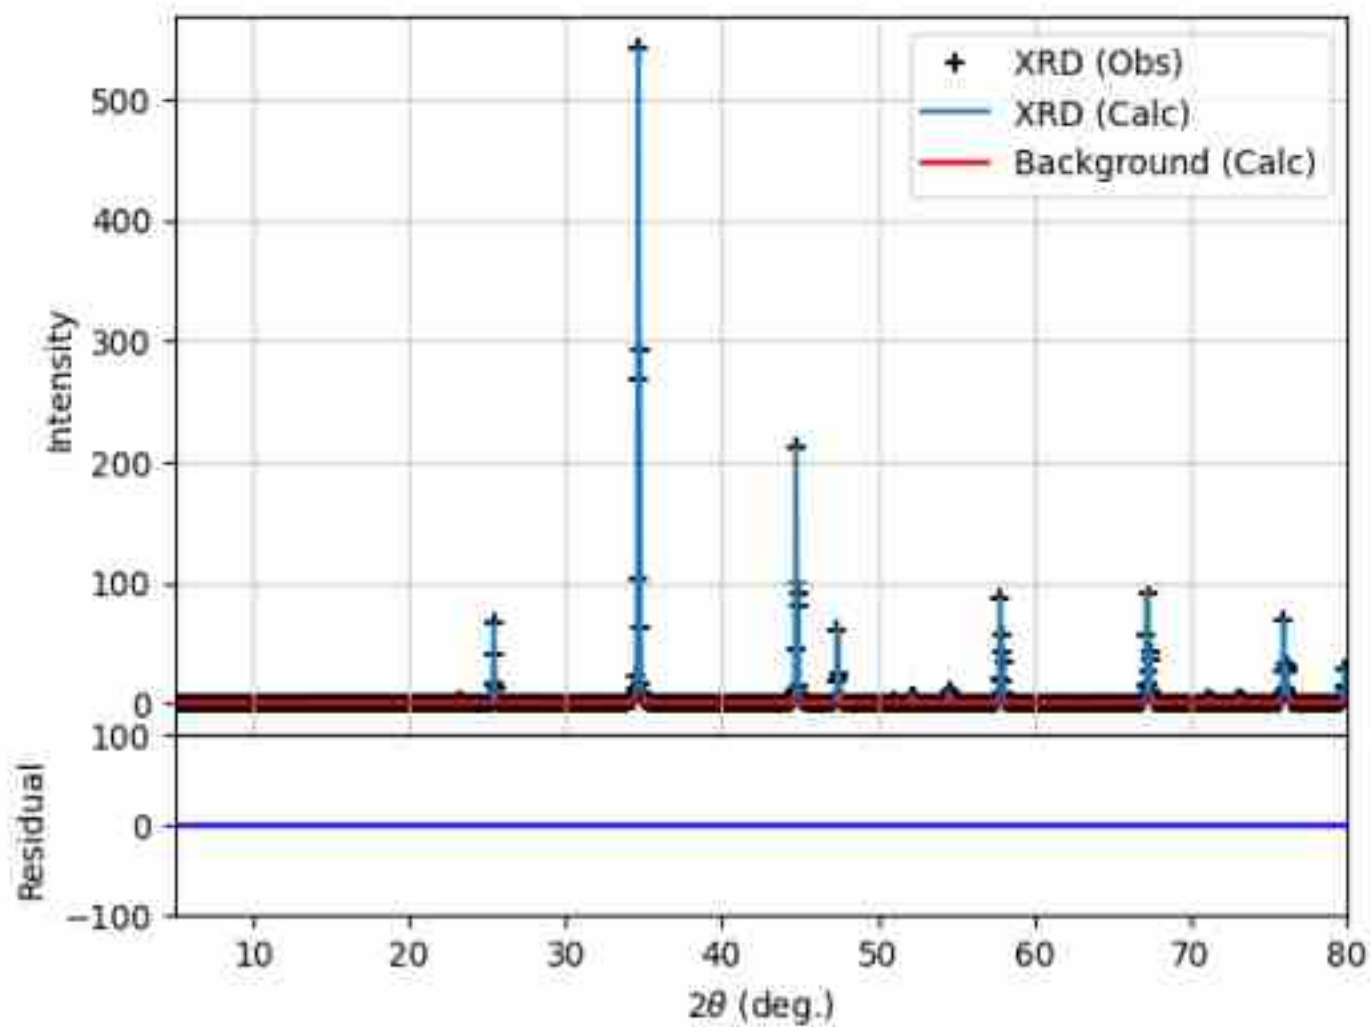

| RMSE before RR | Rwp     | RMSE after RR |
|----------------|---------|---------------|
| 0.002          | 0.03651 | 0.00122       |

# Ho1Ni1Bi1

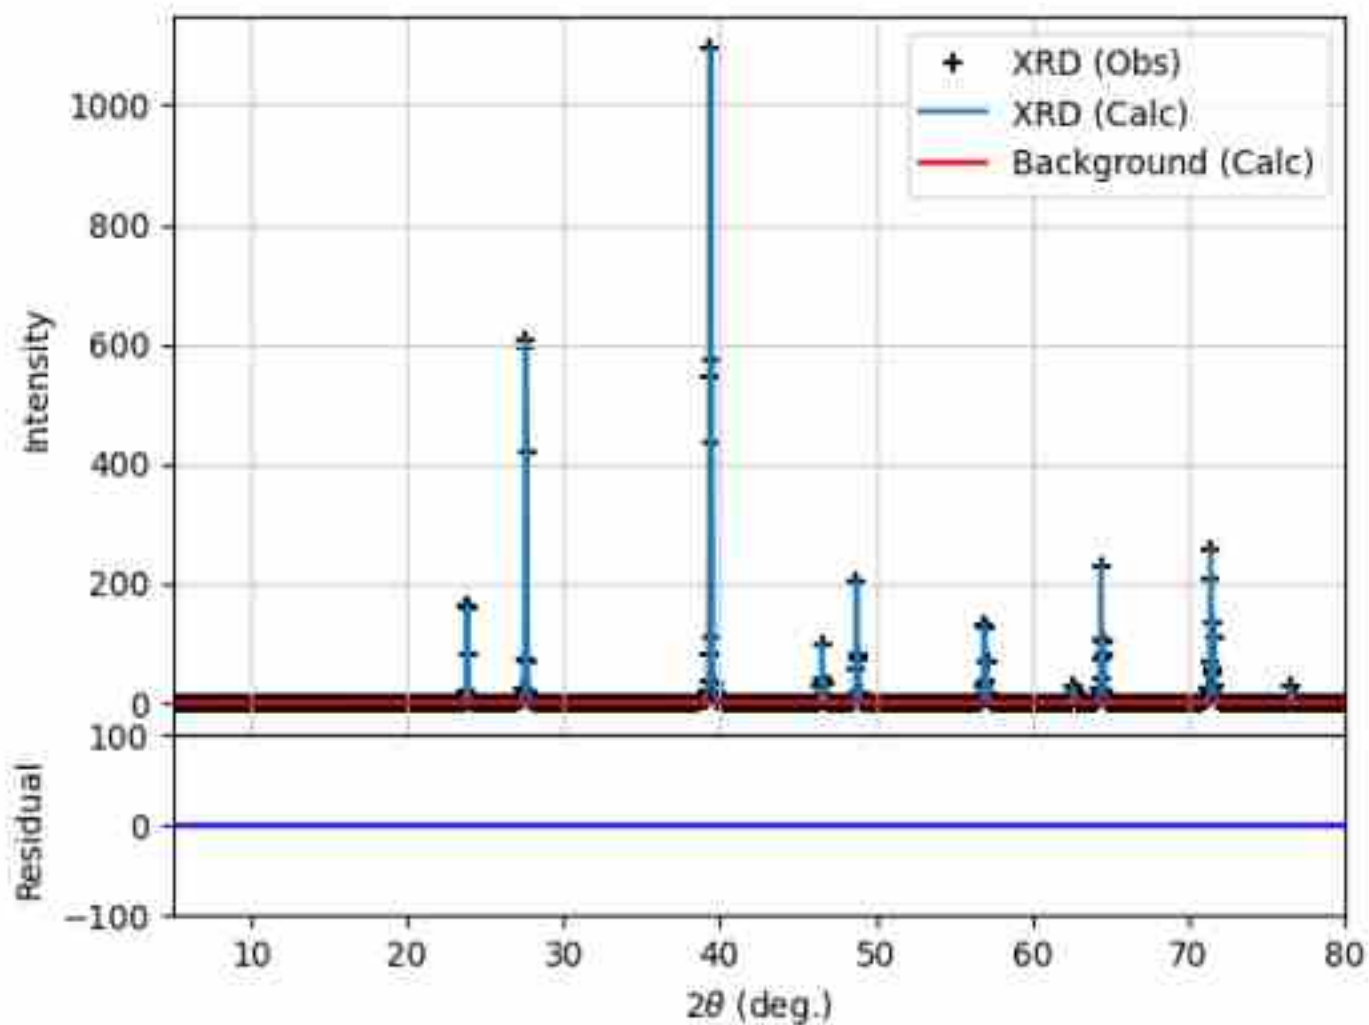

| RMSE before RR | Rwp     | RMSE after RR |
|----------------|---------|---------------|
| 0.002          | 0.00357 | 0.00075       |

# Ho1Pa1Os2

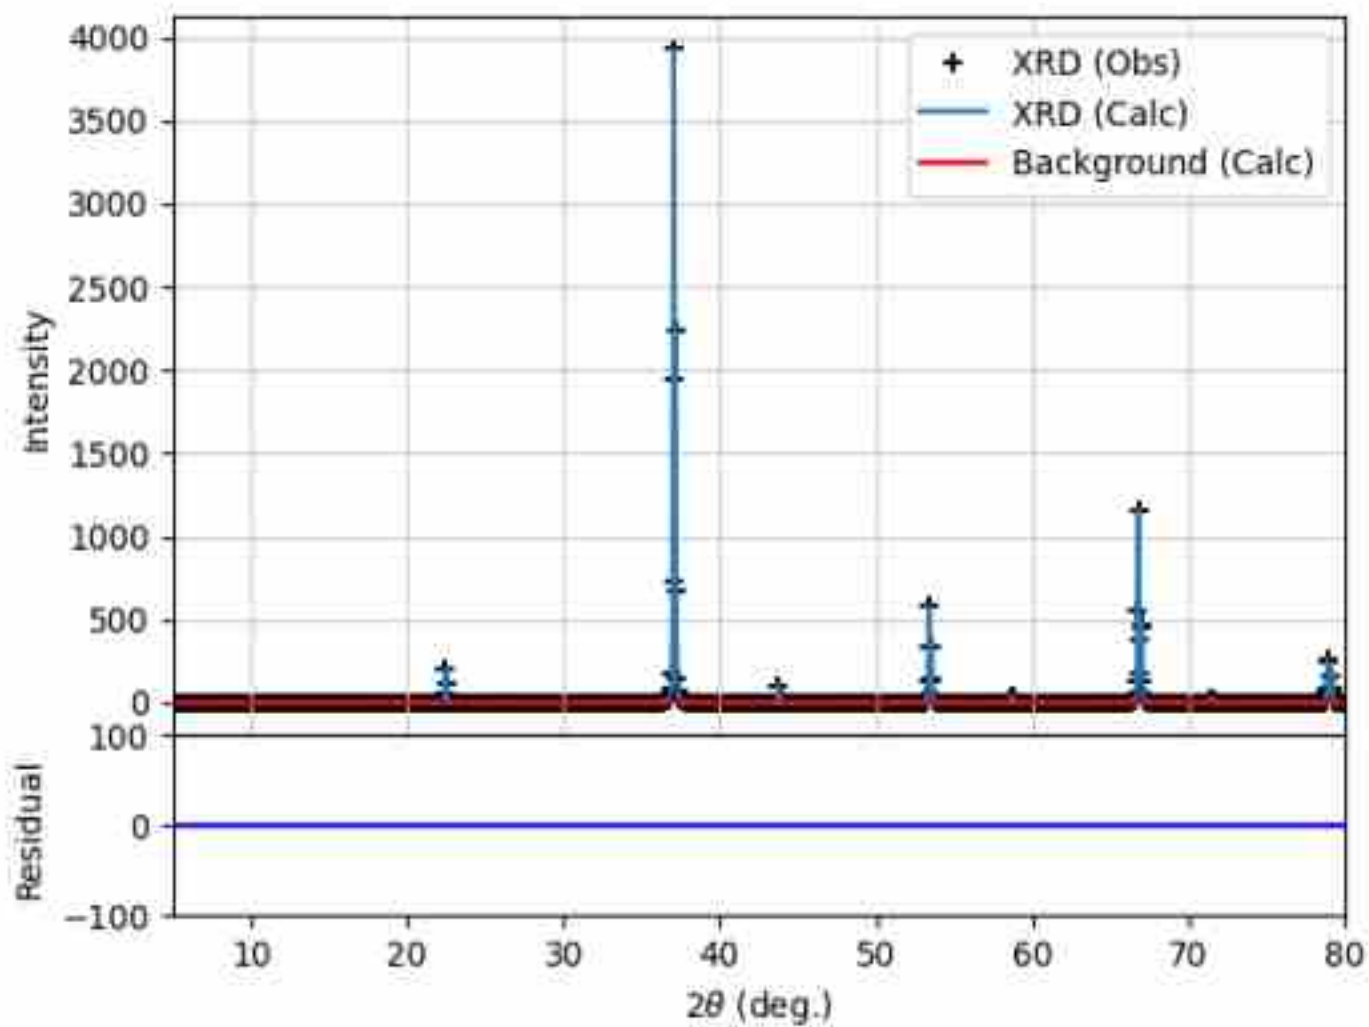

| RMSE before RR | Rwp     | RMSE after RR |
|----------------|---------|---------------|
| 0.002          | 0.00455 | 0.00036       |



# Ho1Pd3

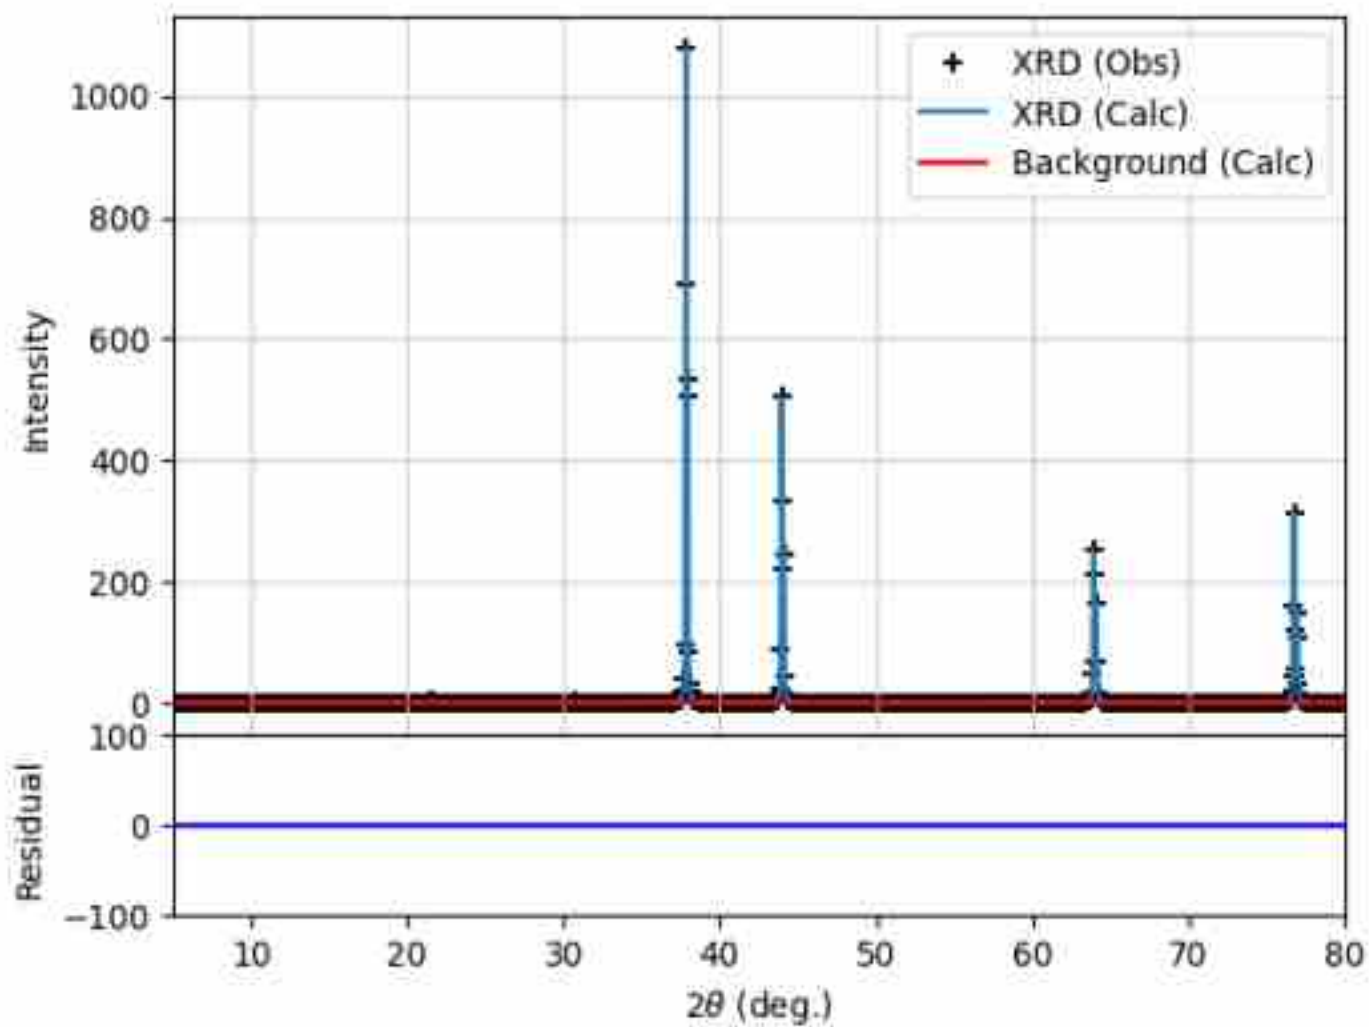

| RMSE before RR | Rwp     | RMSE after RR |
|----------------|---------|---------------|
| 0.002          | 0.02397 | 0.00061       |

# Ho1Rh1

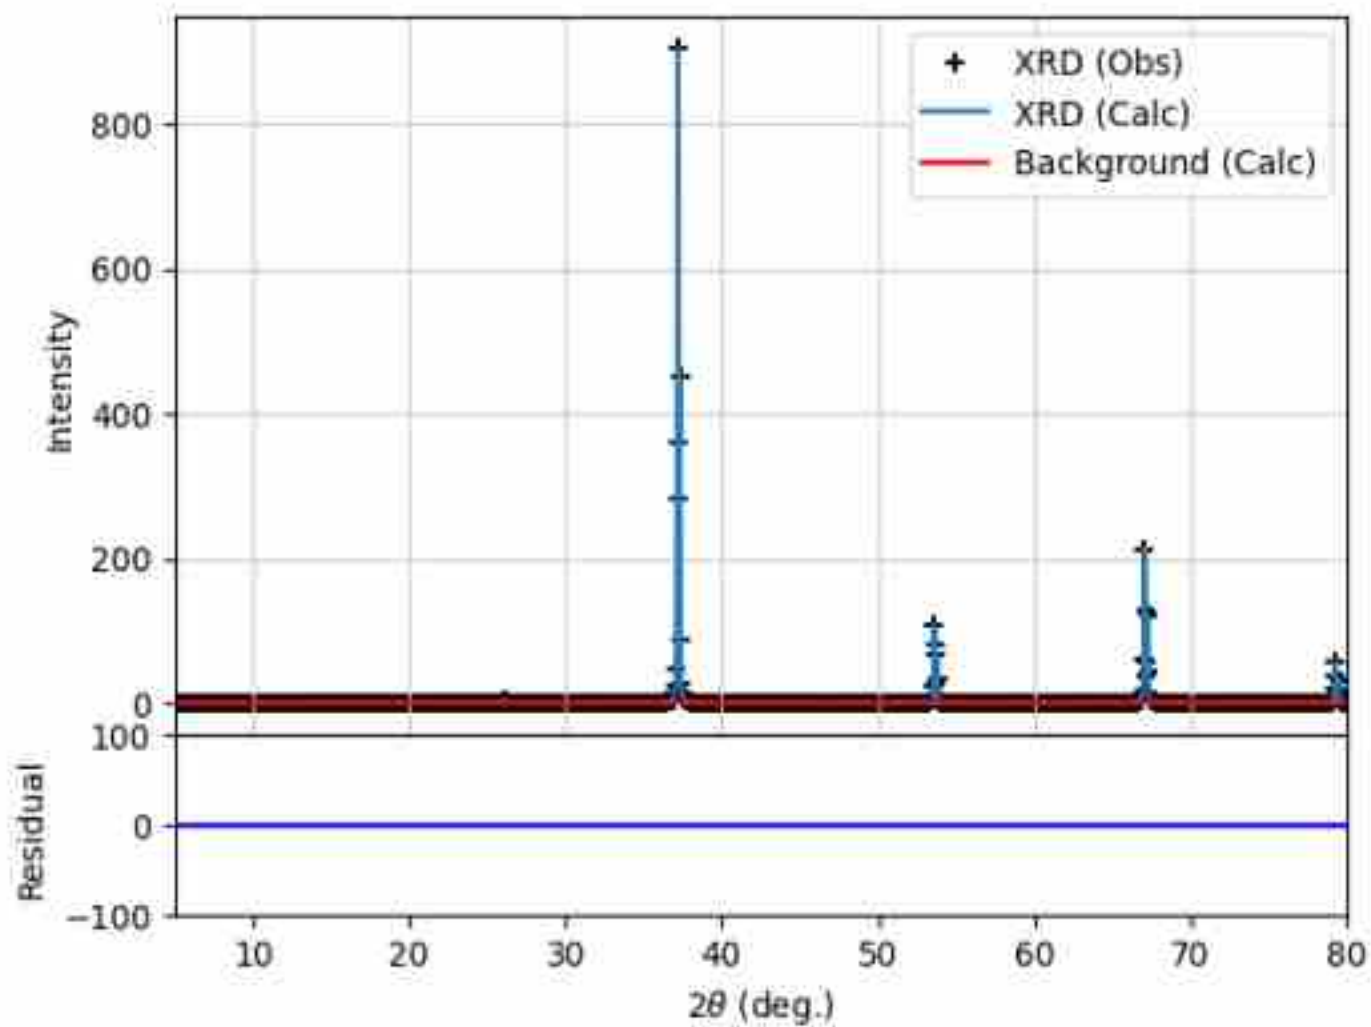

| RMSE before RR | Rwp    | RMSE after RR |
|----------------|--------|---------------|
| 0.002          | 0.1582 | 0.00195       |

# Ho1Te1

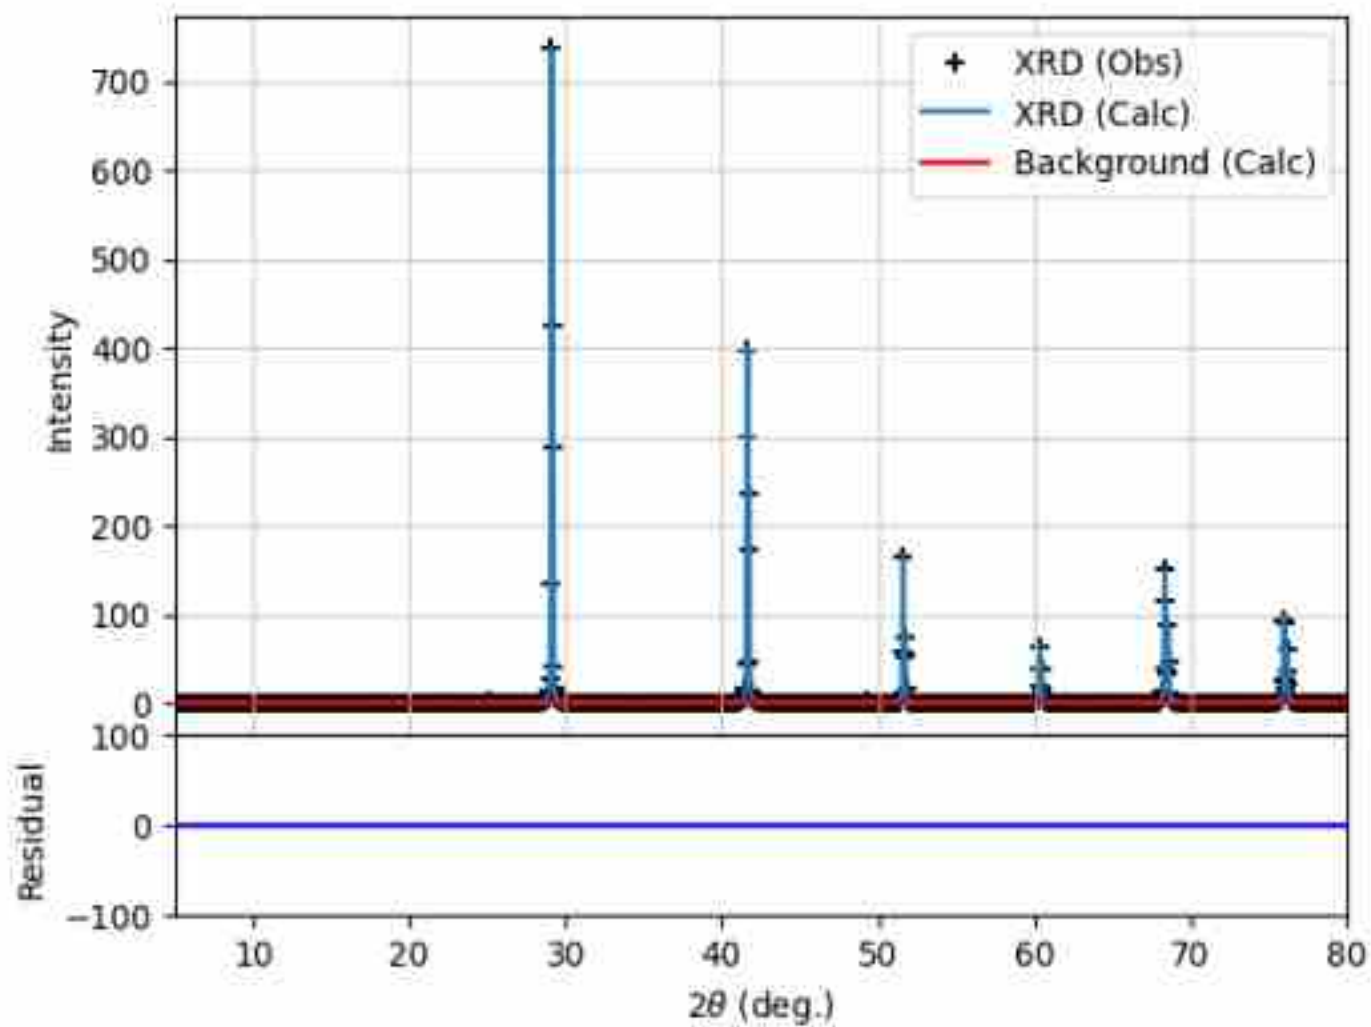

| RMSE before RR | Rwp     | RMSE after RR |
|----------------|---------|---------------|
| 0.002          | 0.00719 | 0.00043       |

# Ho<sub>2</sub>Ag<sub>1</sub>Os<sub>1</sub>

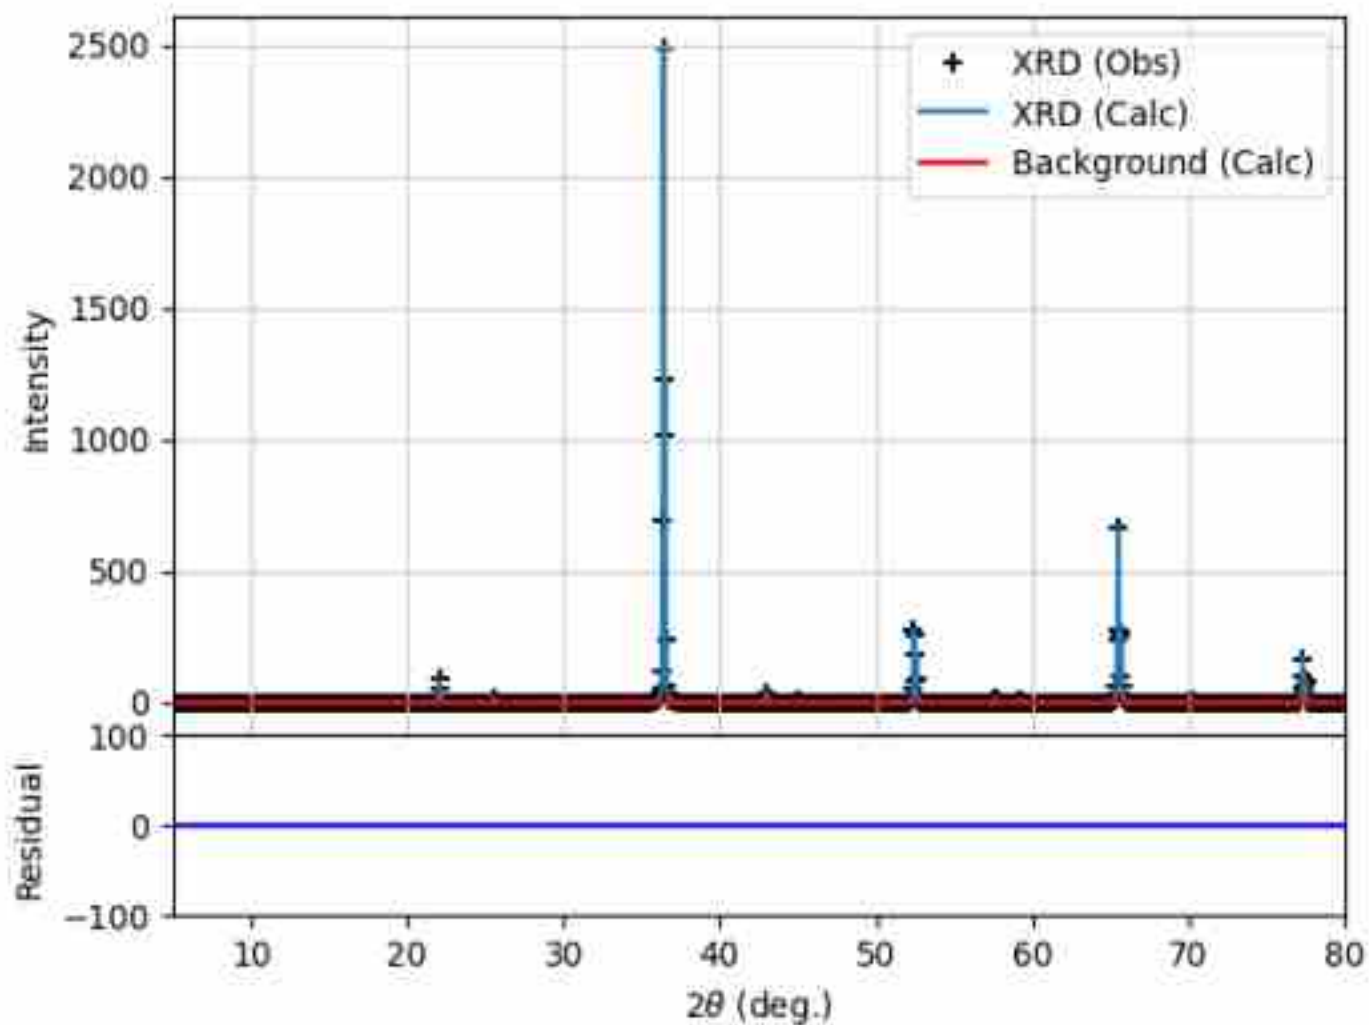

| RMSE before RR | Rwp     | RMSE after RR |
|----------------|---------|---------------|
| 0.002          | 0.05047 | 0.00117       |

# Ho<sub>2</sub>Al<sub>2</sub>Ge<sub>2</sub>

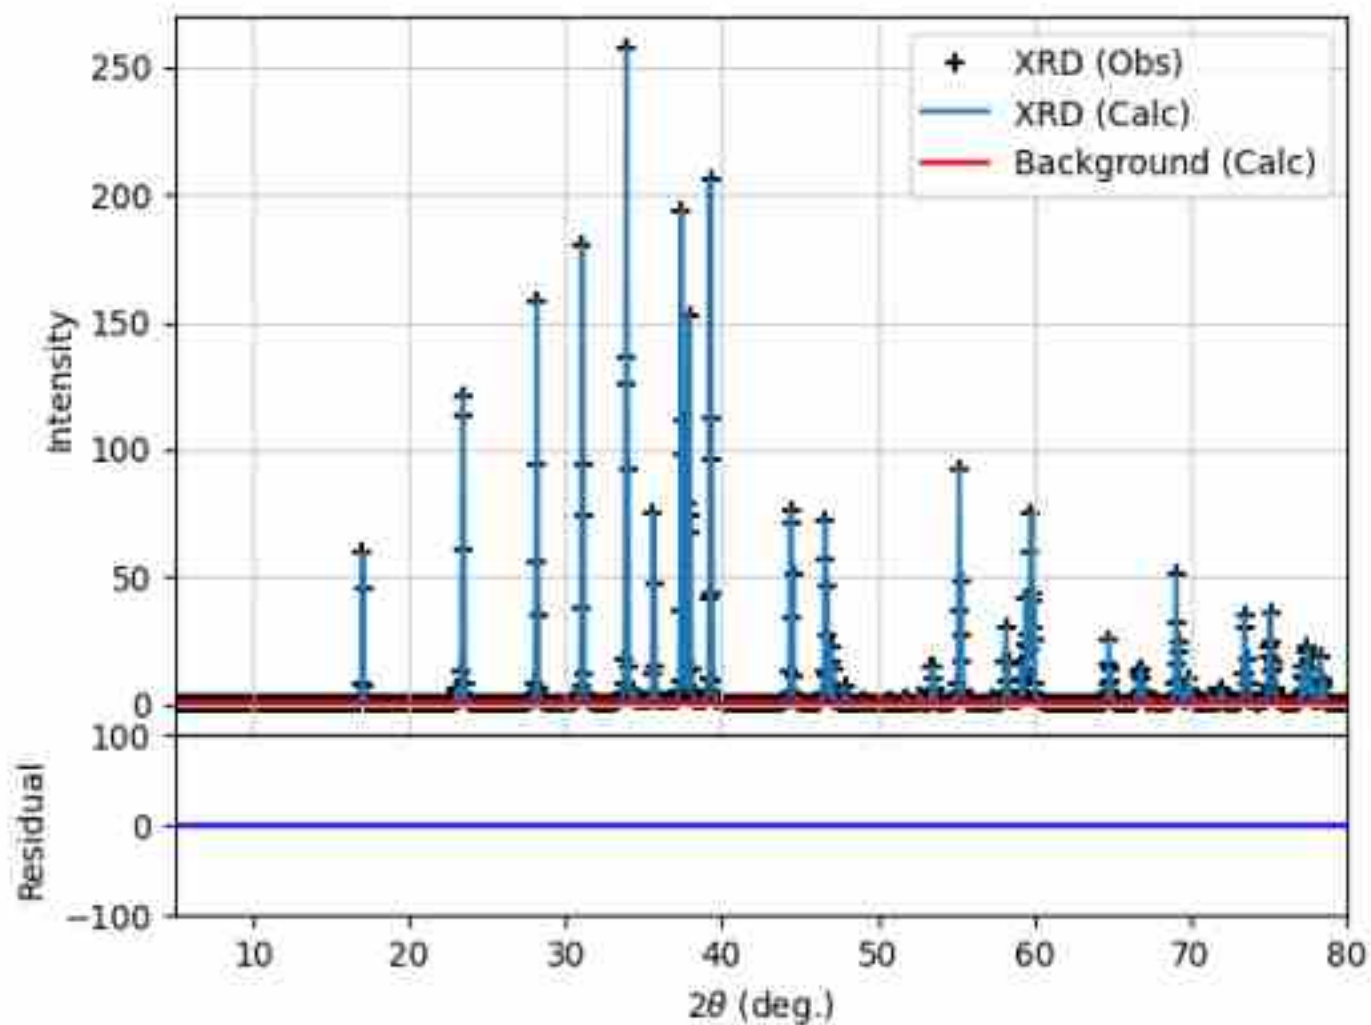

| RMSE before RR | Rwp     | RMSE after RR |
|----------------|---------|---------------|
| 0.02           | 0.01755 | 0.00187       |

# Ho<sub>2</sub>Cu<sub>1</sub>Ir<sub>1</sub>

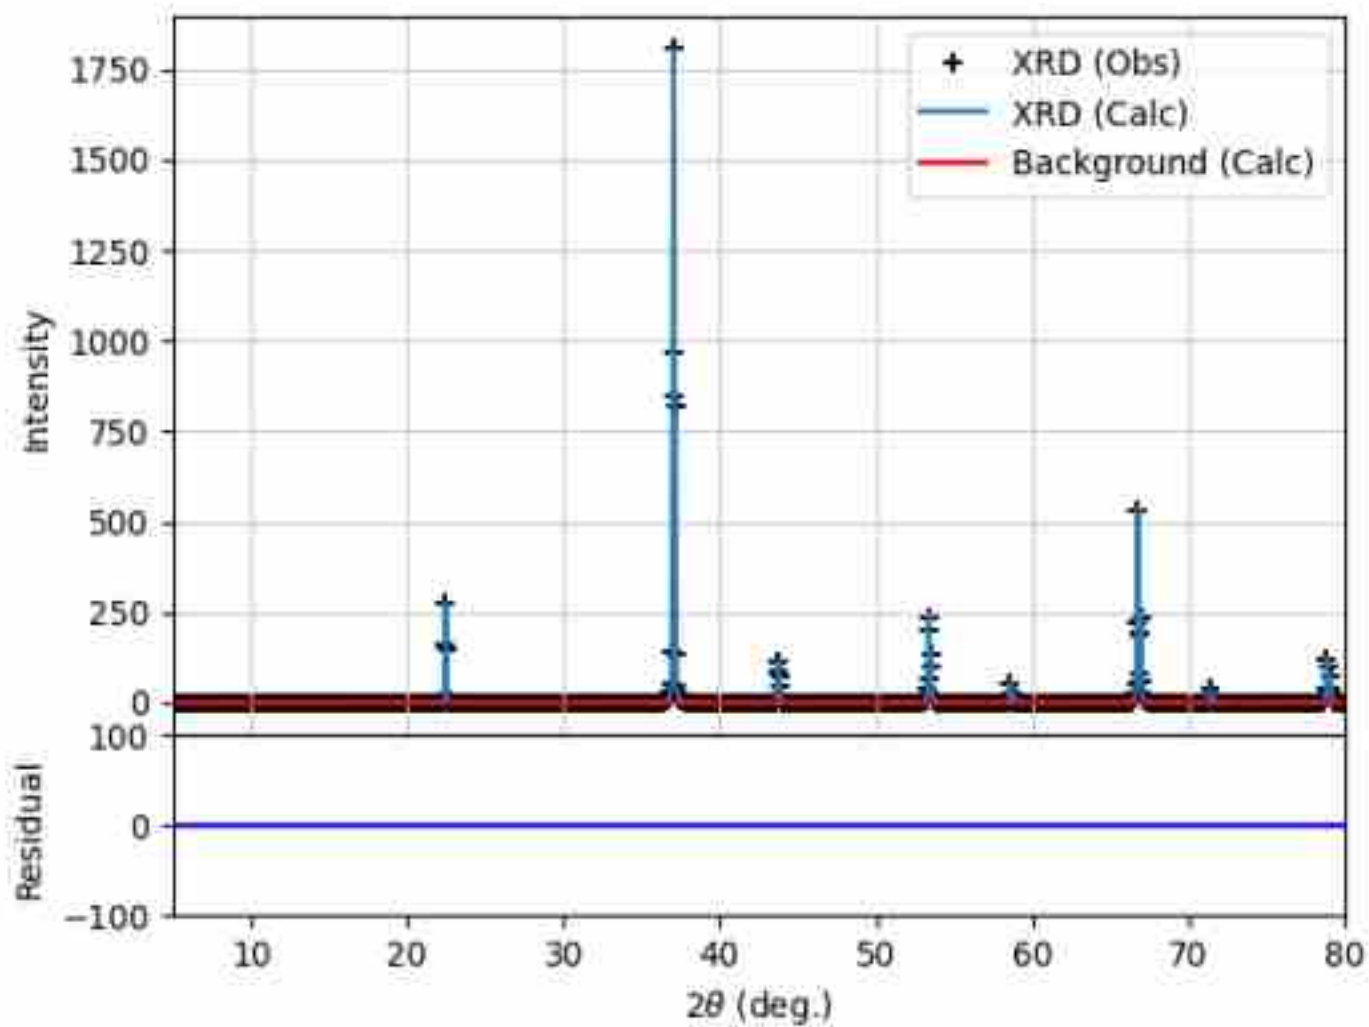

| RMSE before RR | Rwp     | RMSE after RR |
|----------------|---------|---------------|
| 0.002          | 0.00477 | 0.00047       |

# Ho2Ir1Ru1

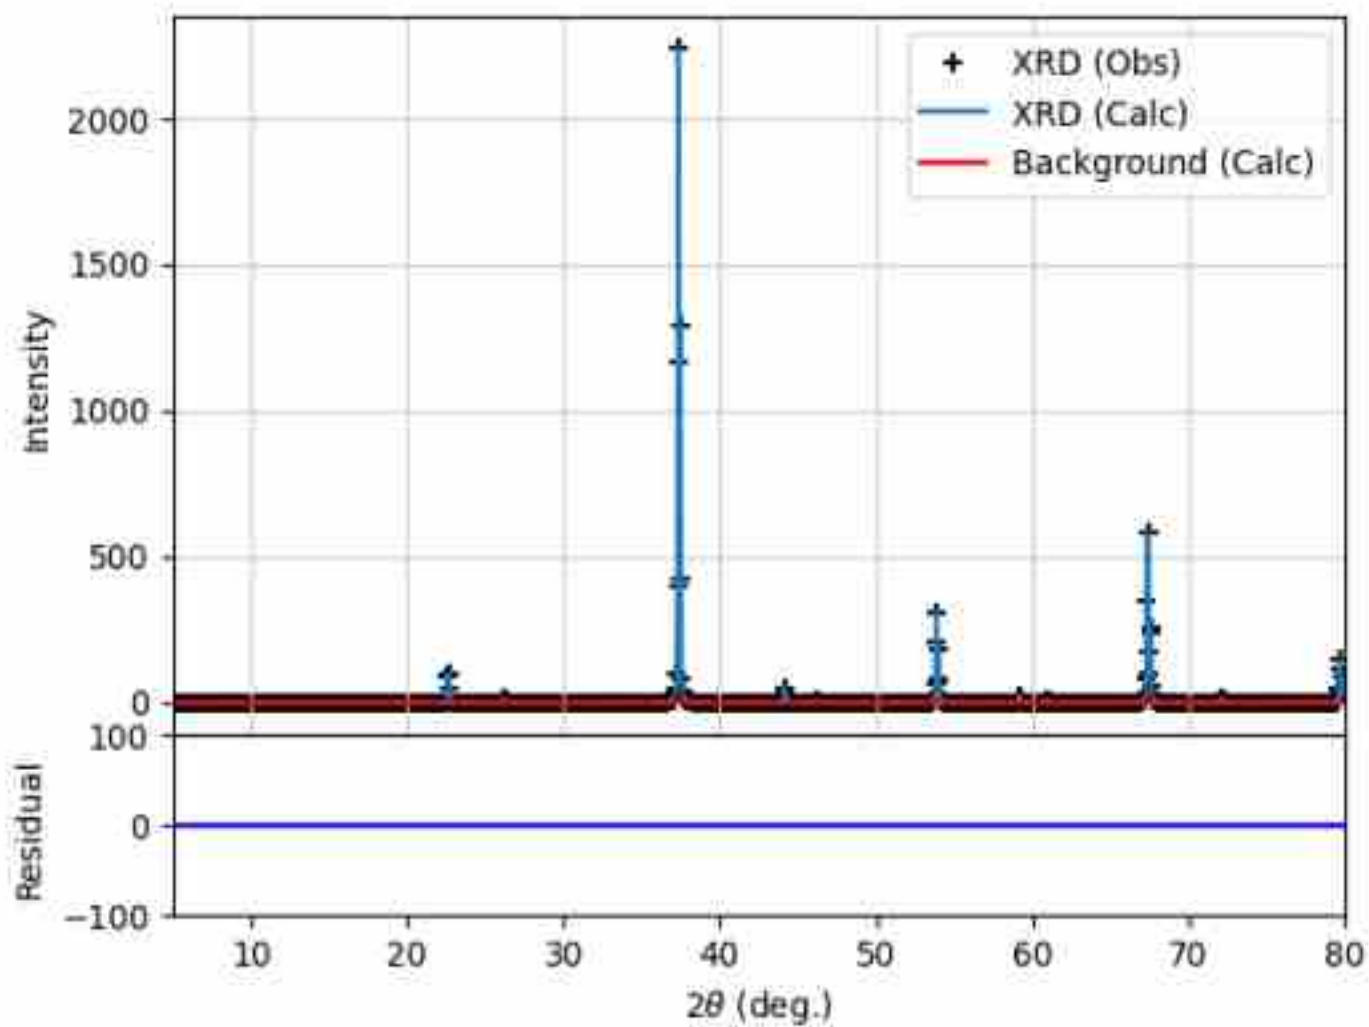

| RMSE before RR | Rwp     | RMSE after RR |
|----------------|---------|---------------|
| 0.002          | 0.00304 | 0.00065       |

# Ho<sub>2</sub>MnGe<sub>4</sub>

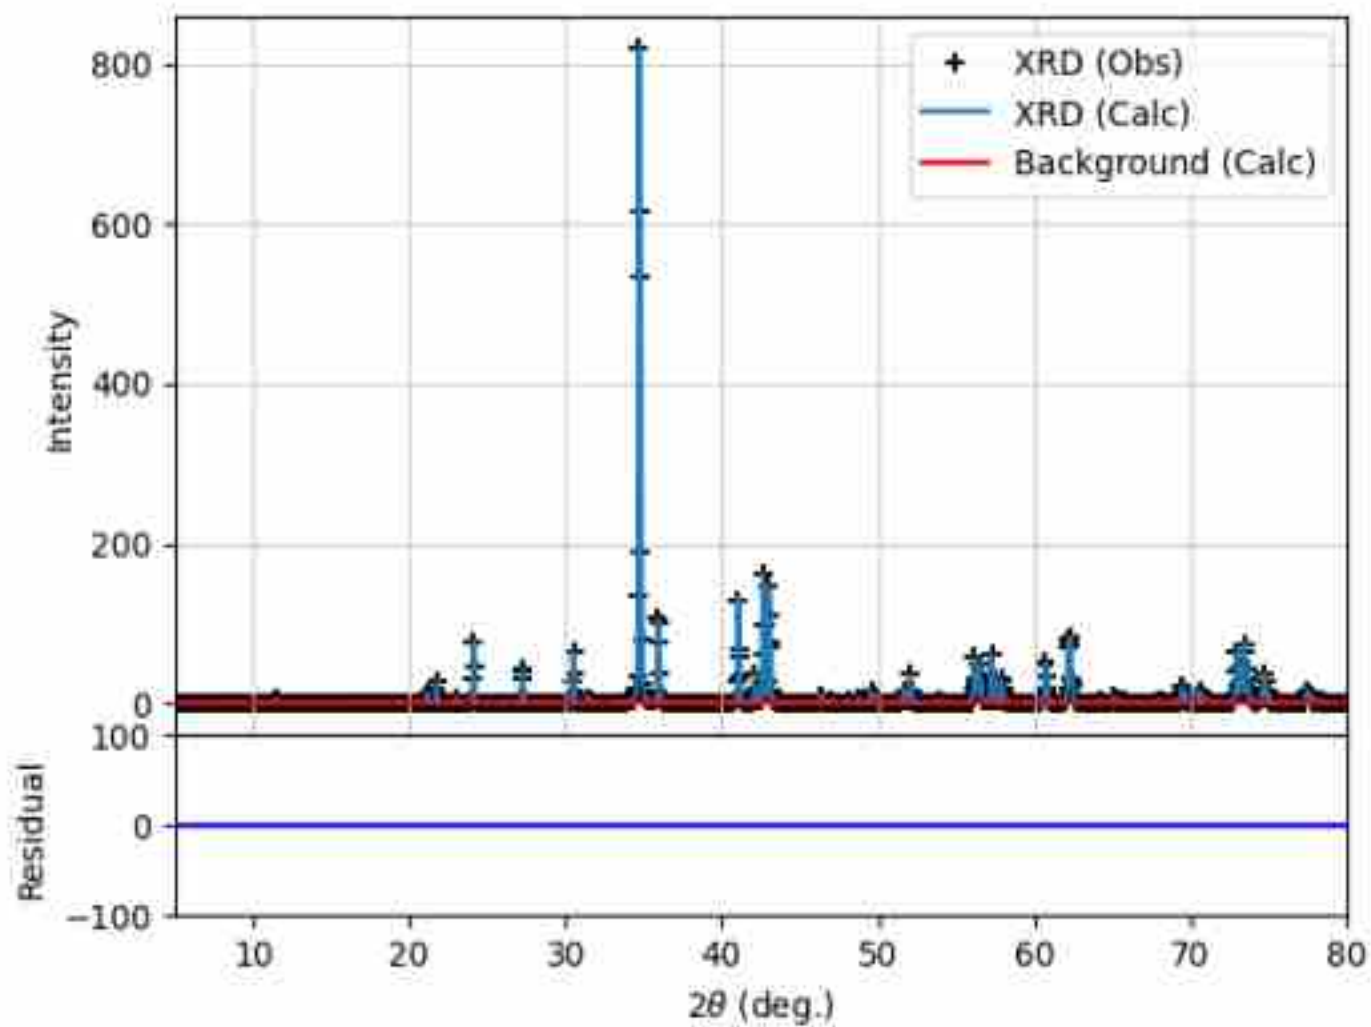

| RMSE before RR | Rwp     | RMSE after RR |
|----------------|---------|---------------|
| 0.02           | 0.00349 | 0.00025       |



# Ho3Er1

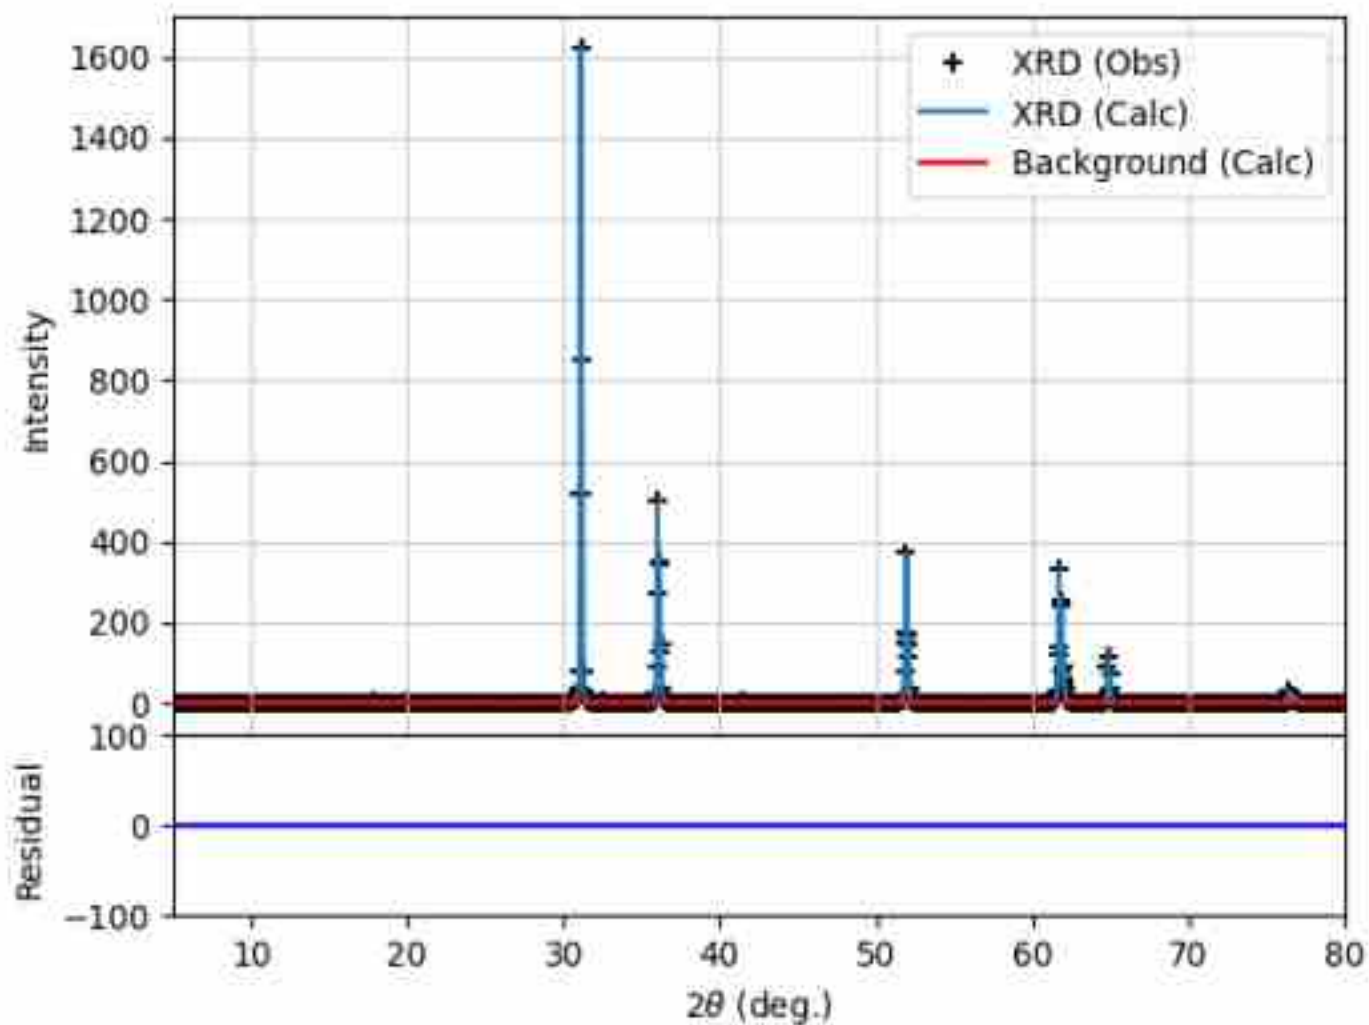

| RMSE before RR | Rwp     | RMSE after RR |
|----------------|---------|---------------|
| 0.002          | 0.00258 | 0.00015       |

# Ho<sub>4</sub>Ge<sub>8</sub>Rh<sub>1</sub>

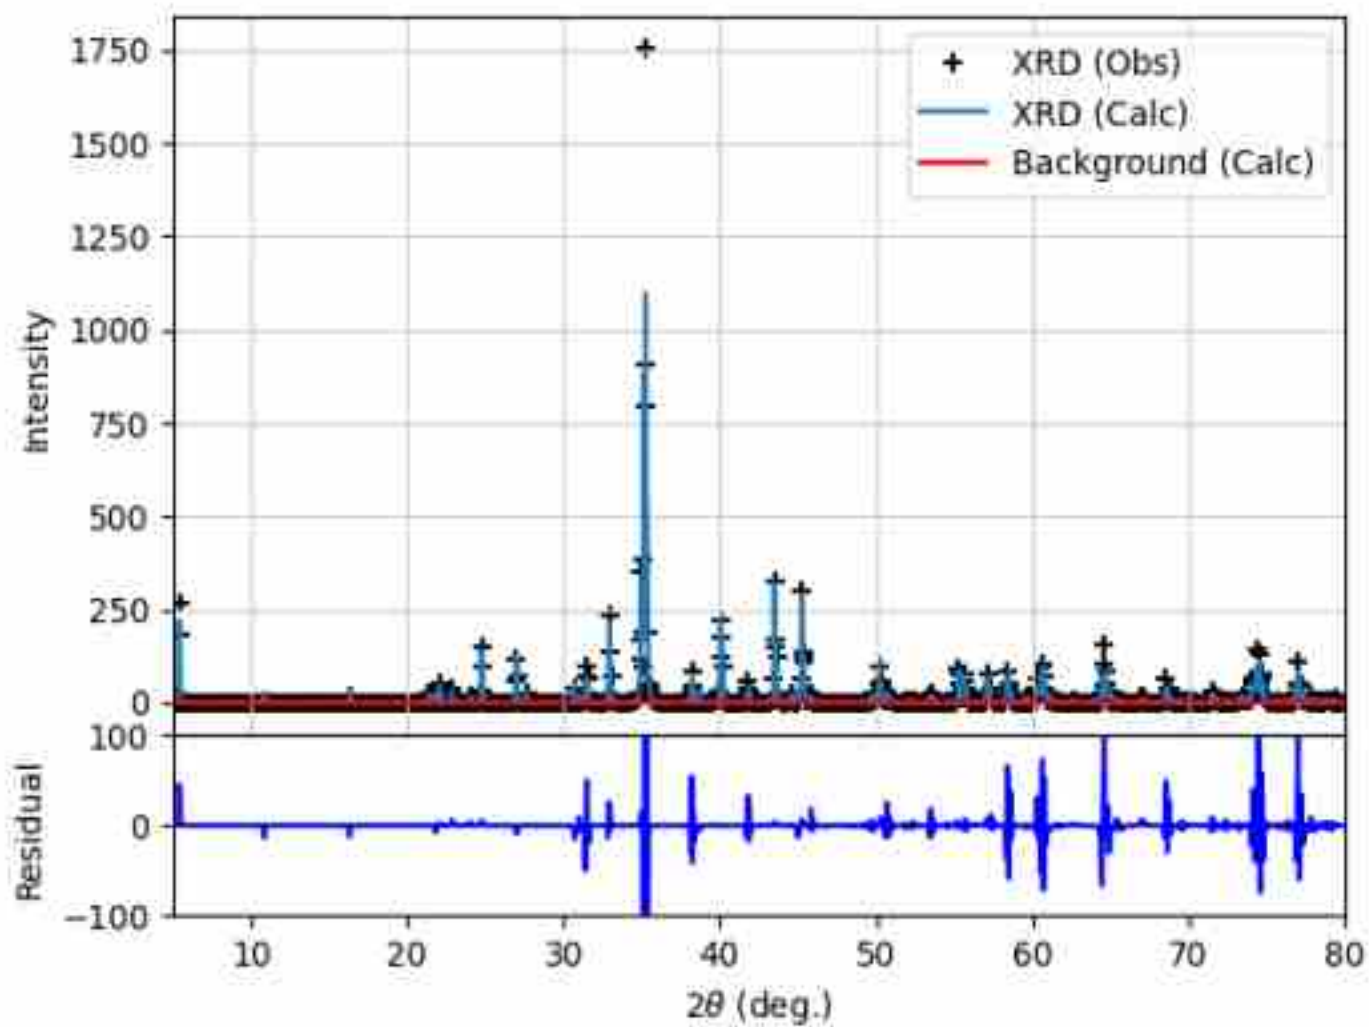

| RMSE before RR | Rwp      | RMSE after RR |
|----------------|----------|---------------|
| 0.02           | 69.19656 | 0.02022       |

# Ho4Ge8Ru1

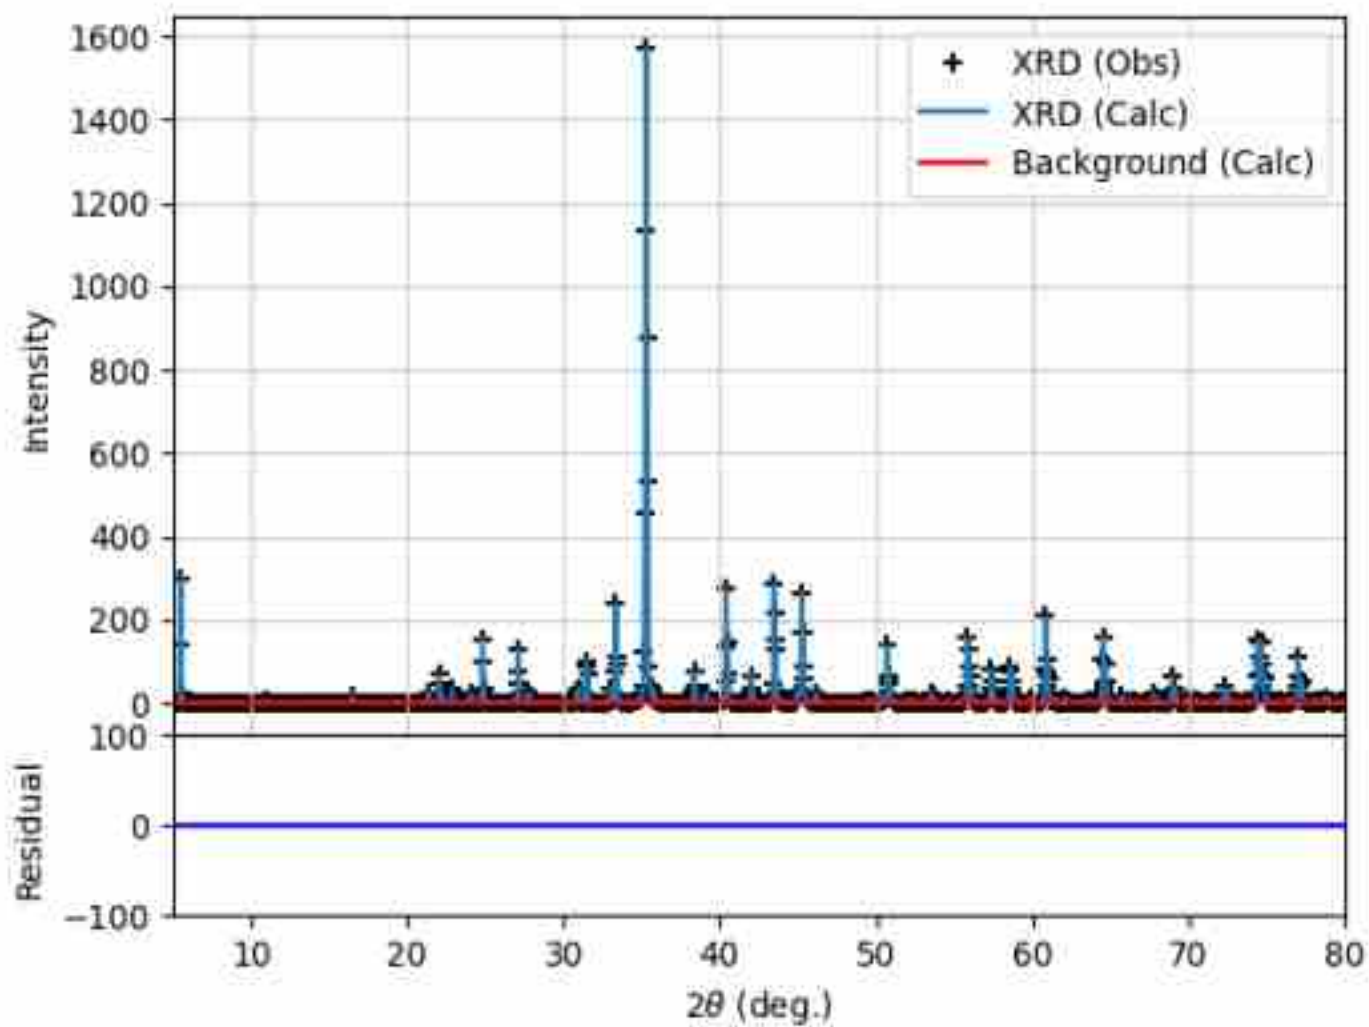

| RMSE before RR | Rwp     | RMSE after RR |
|----------------|---------|---------------|
| 0.02           | 0.00389 | 0.00035       |

# Ho4Sc4O12

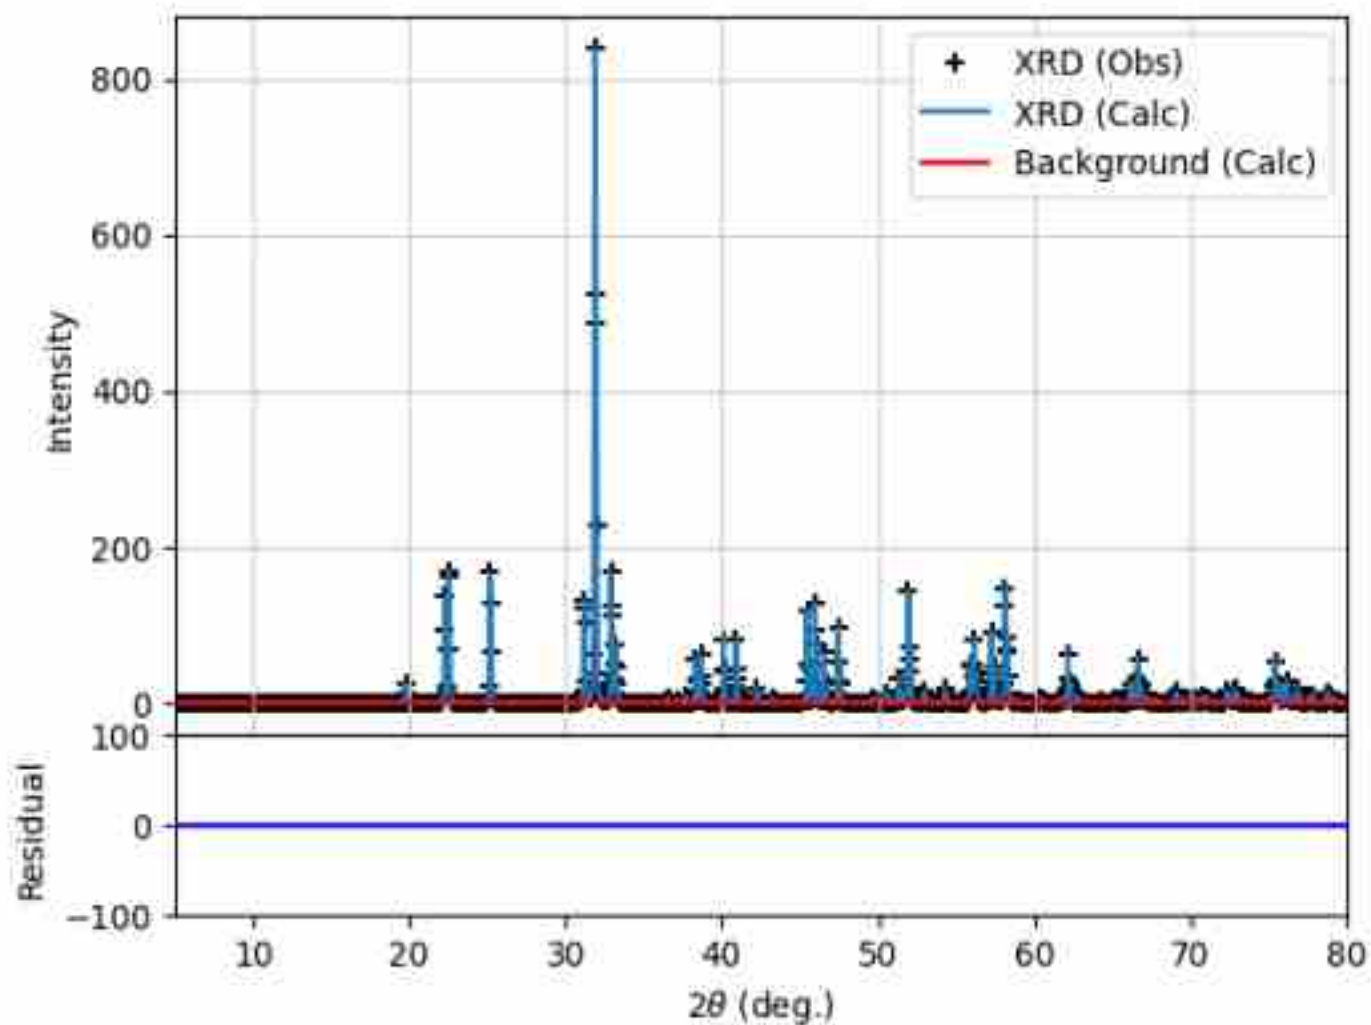

| RMSE before RR | Rwp     | RMSE after RR |
|----------------|---------|---------------|
| 0.02           | 0.00388 | 0.00158       |

# Ho<sub>10</sub>Sb<sub>2</sub>Au<sub>4</sub>

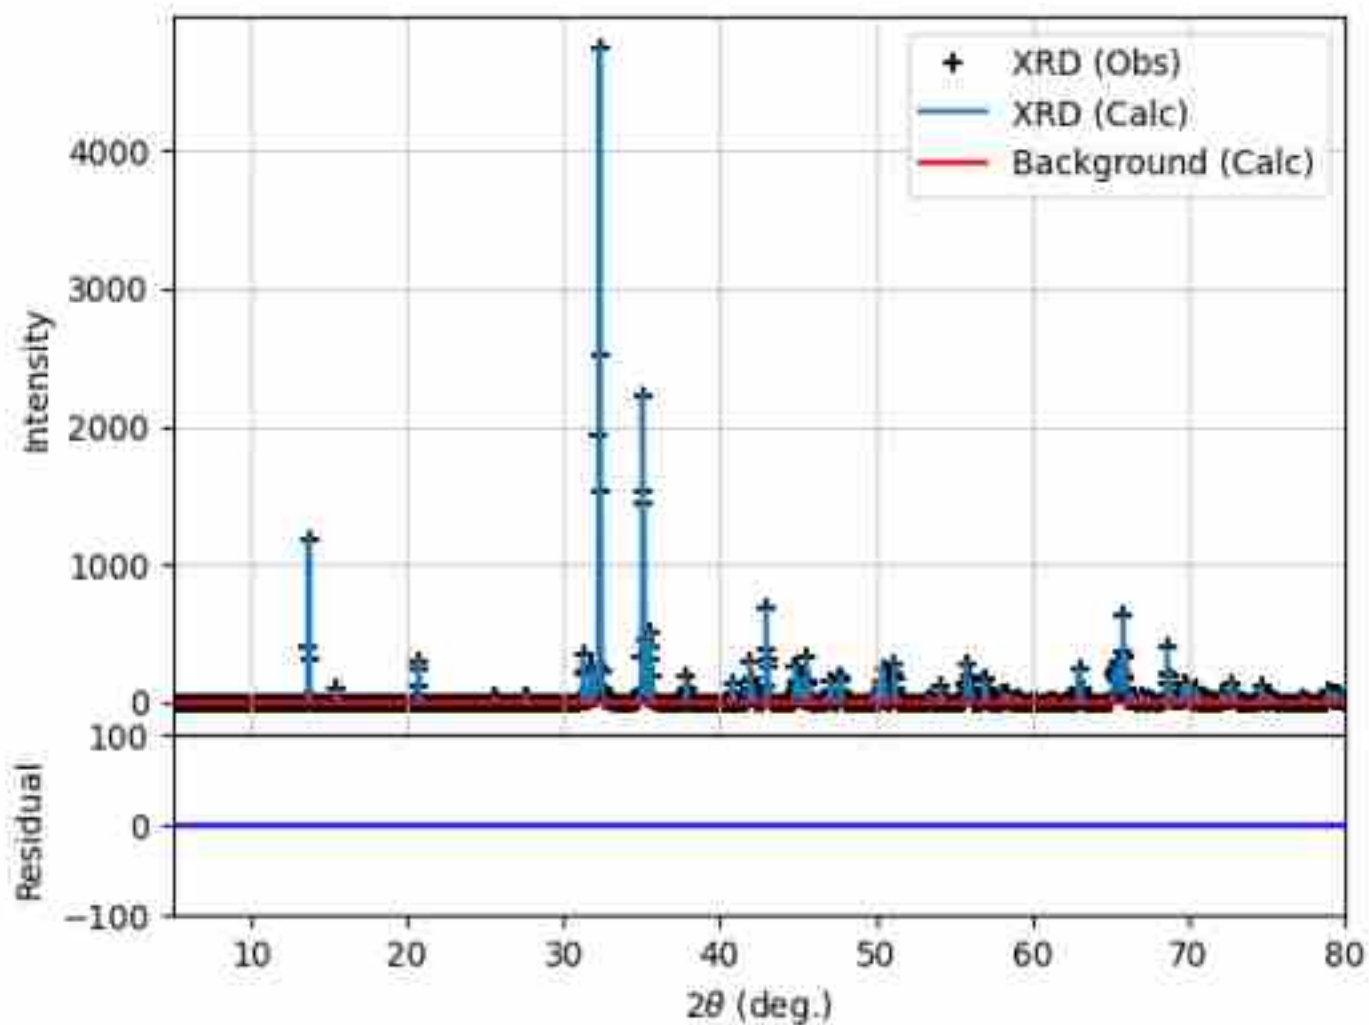

| RMSE before RR | Rwp     | RMSE after RR |
|----------------|---------|---------------|
| 0.02           | 0.00457 | 0.00041       |

# K1Cr1P2S7

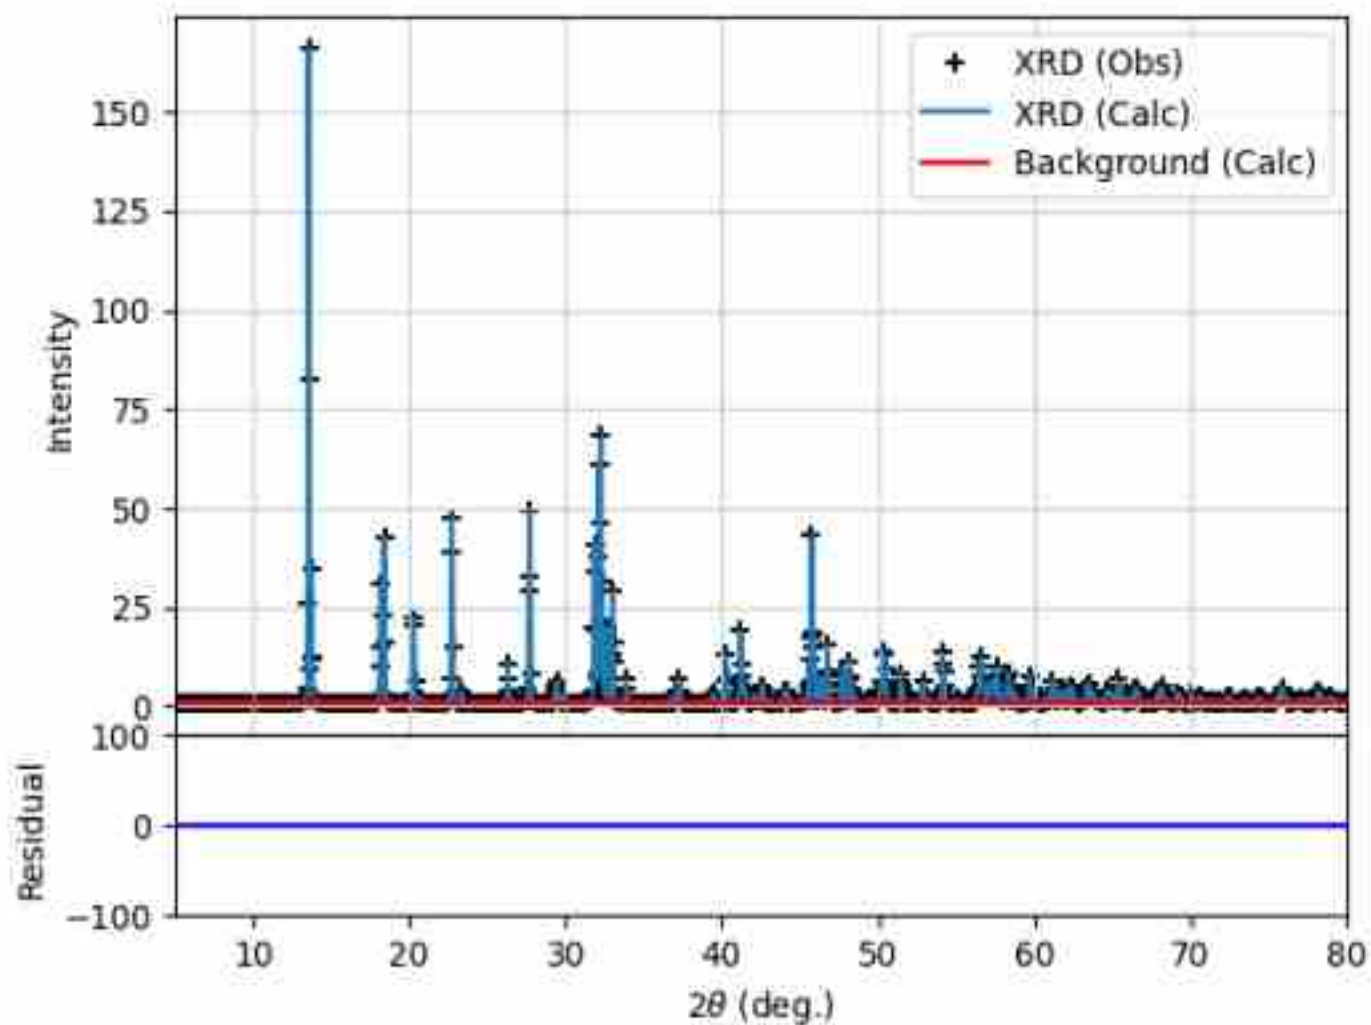

| RMSE before RR | Rwp     | RMSE after RR |
|----------------|---------|---------------|
| 0.02           | 0.00219 | 0.00027       |

# K1Fe1Sn3O8

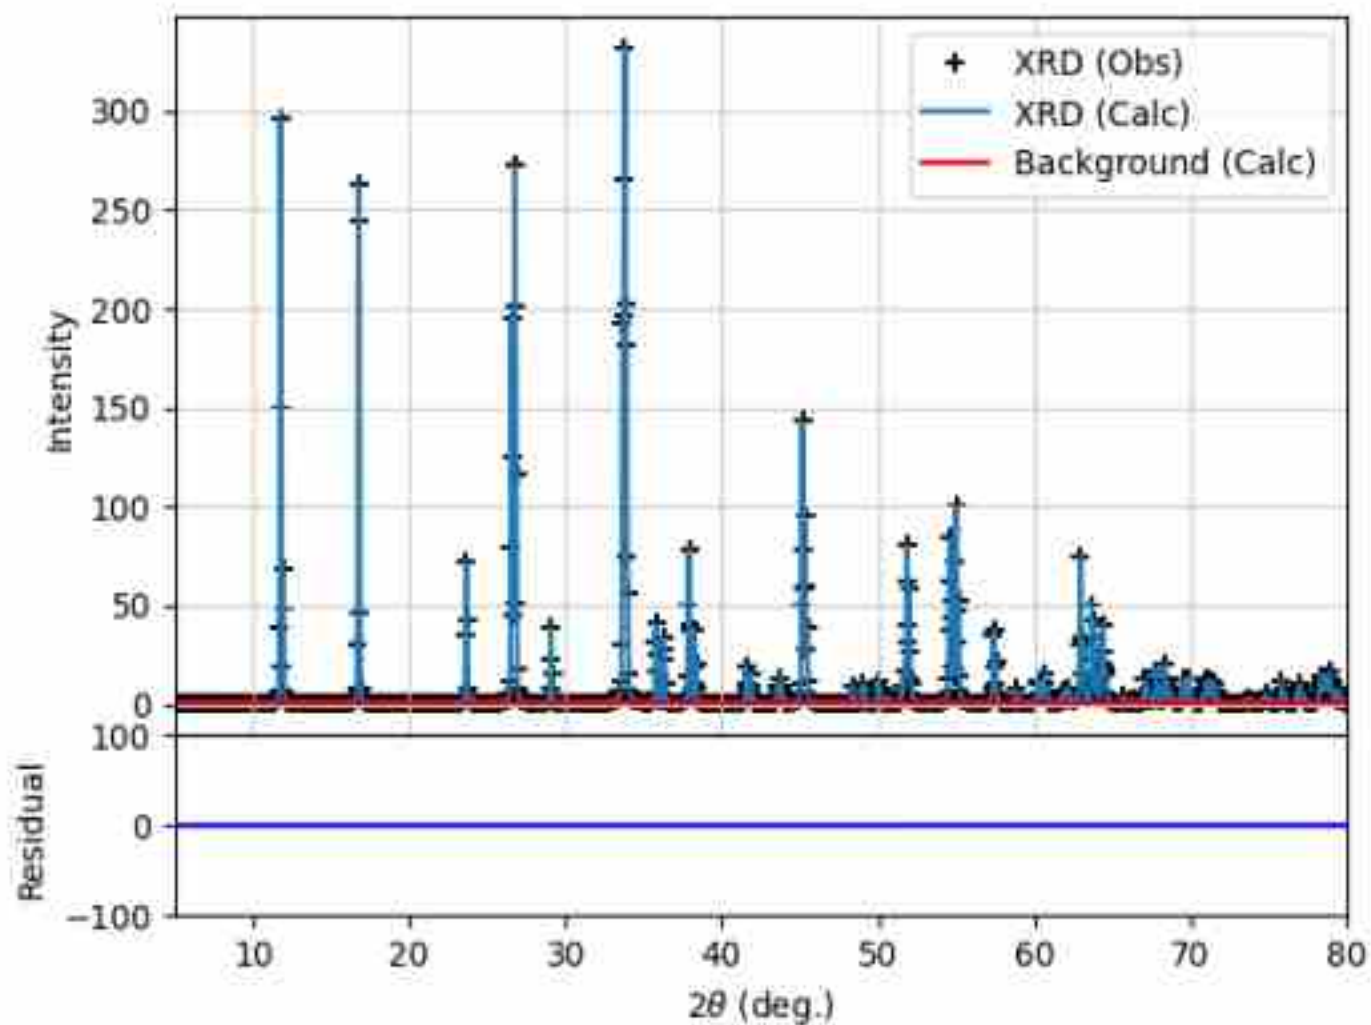

| RMSE before RR | Rwp     | RMSE after RR |
|----------------|---------|---------------|
| 0.02           | 0.13238 | 0.00808       |

# K1In9Co2

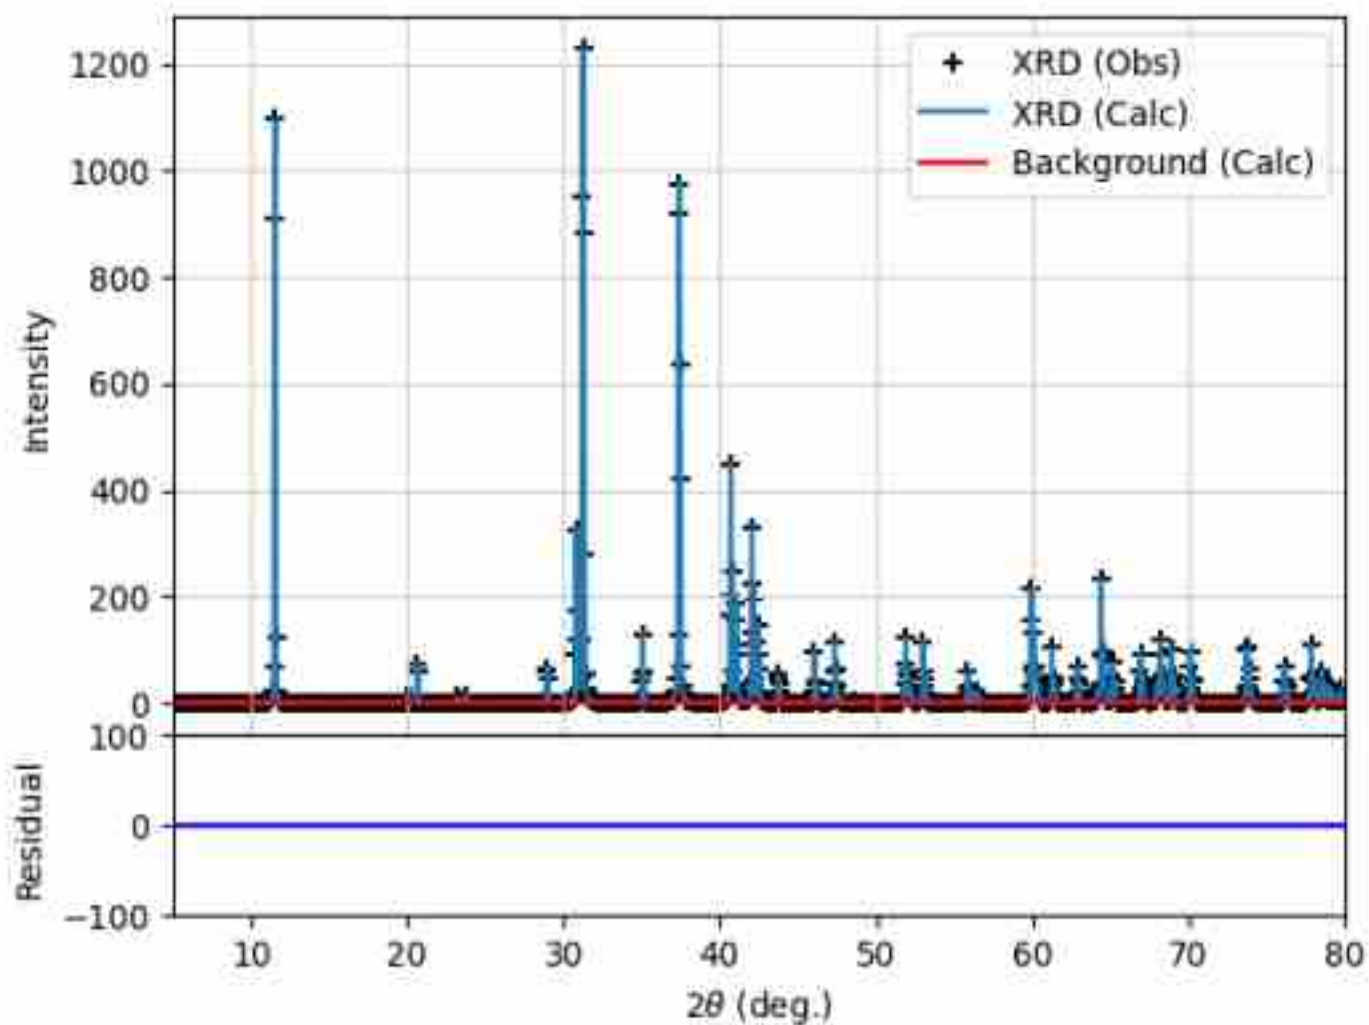

| RMSE before RR | Rwp     | RMSE after RR |
|----------------|---------|---------------|
| 0.02           | 0.01106 | 0.00116       |



# K1Na2Sb1

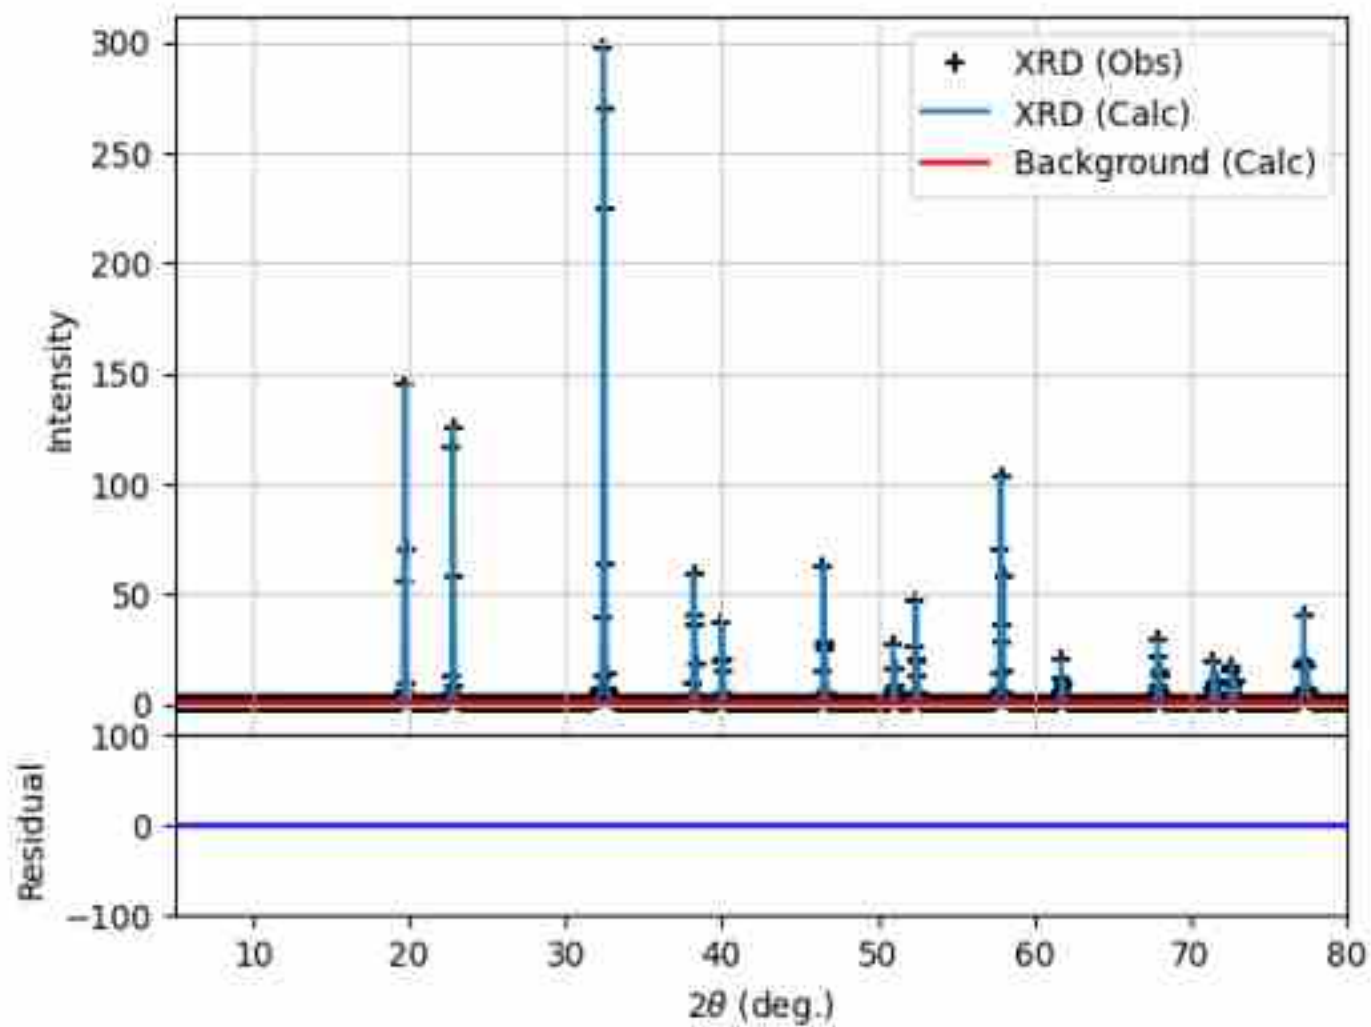

| RMSE before RR | Rwp     | RMSE after RR |
|----------------|---------|---------------|
| 0.002          | 0.00308 | 0.00053       |

# K1Tl2Bi1

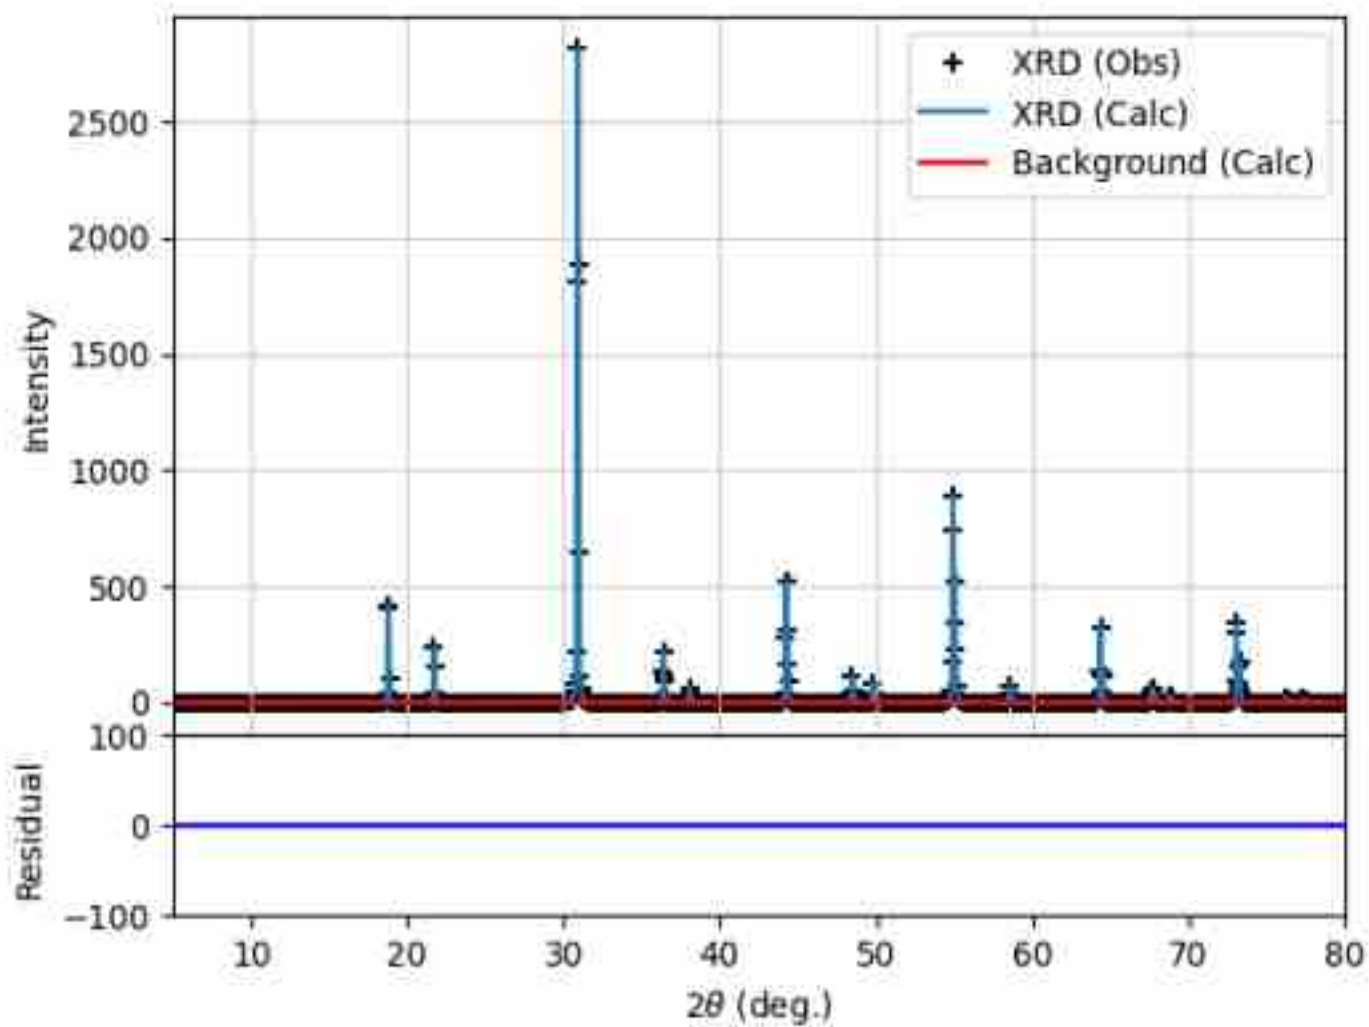

| RMSE before RR | Rwp     | RMSE after RR |
|----------------|---------|---------------|
| 0.002          | 0.00416 | 0.00227       |

# K<sub>2</sub>Hg<sub>6</sub>

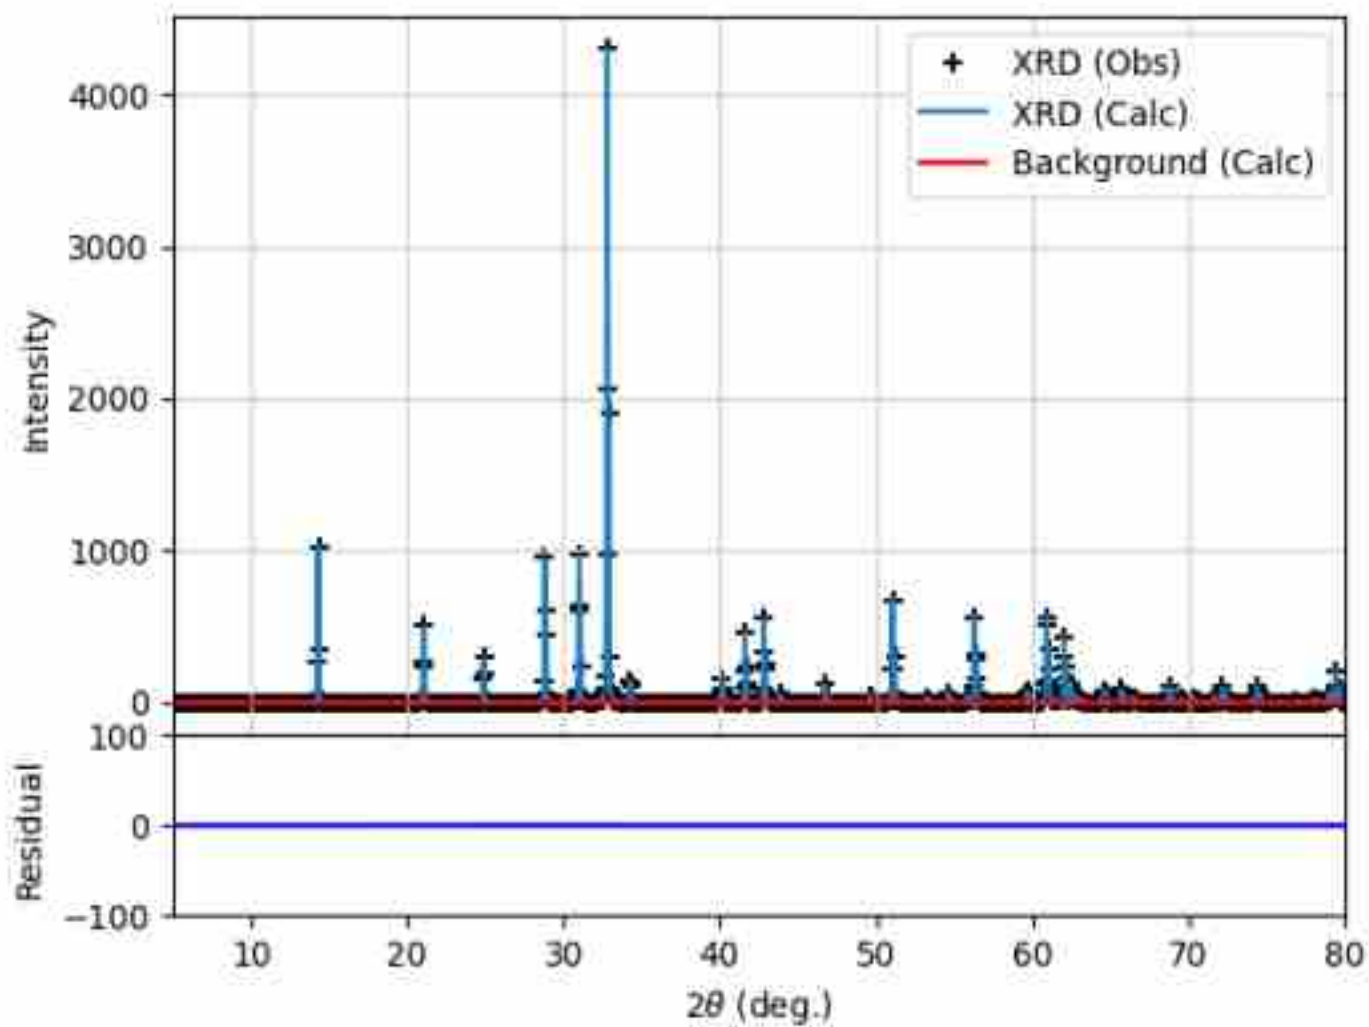

| RMSE before RR | Rwp     | RMSE after RR |
|----------------|---------|---------------|
| 0.02           | 0.04346 | 0.00209       |

# K2I2

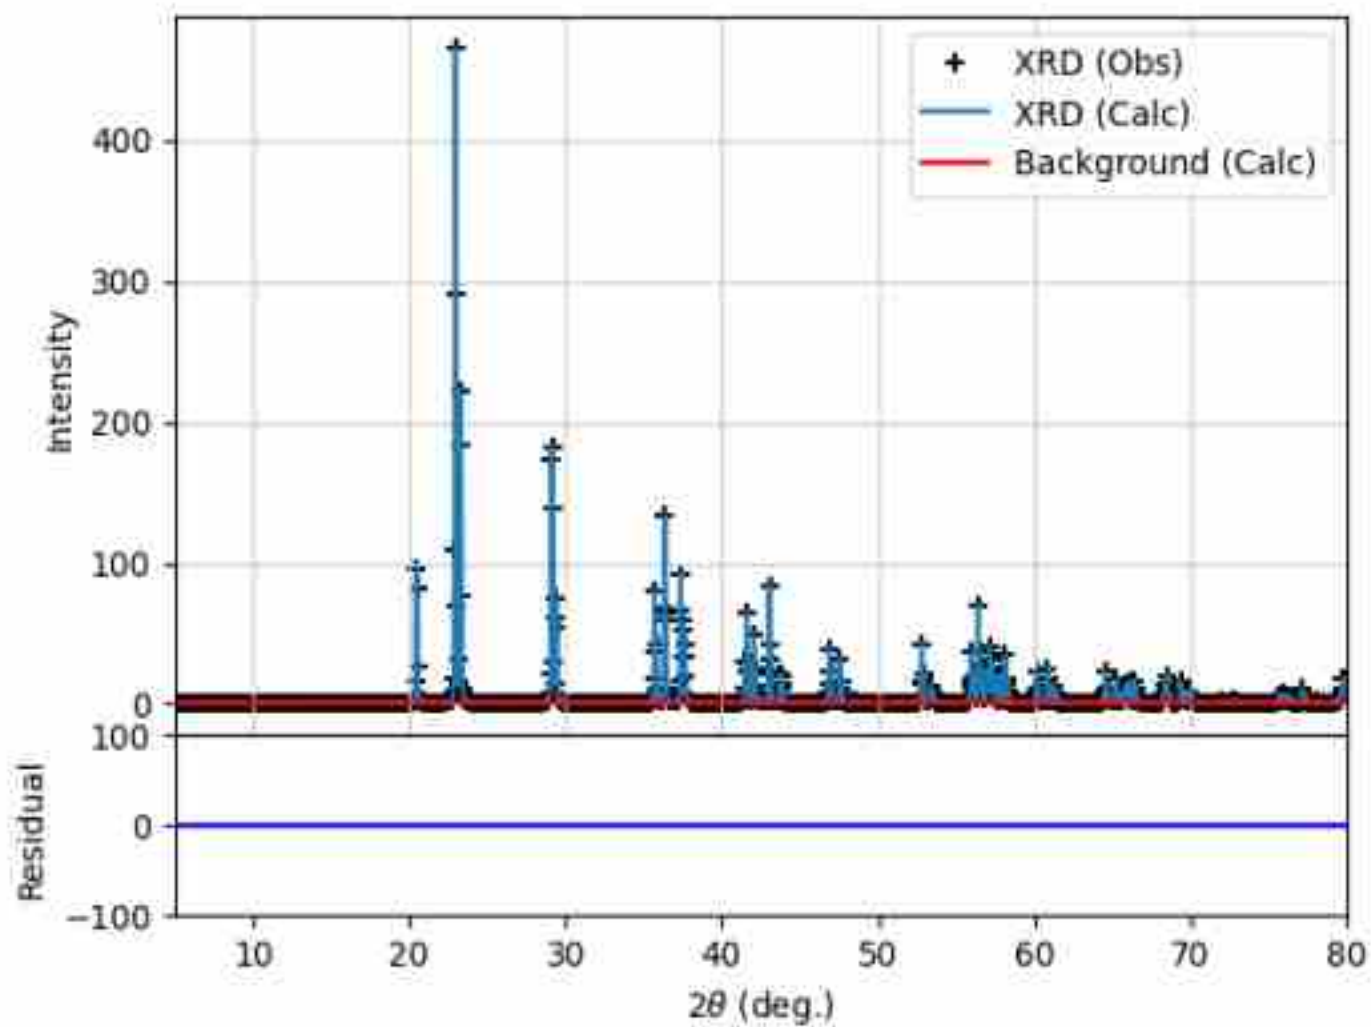

| RMSE before RR | Rwp     | RMSE after RR |
|----------------|---------|---------------|
| 0.02           | 0.00392 | 0.00025       |

# K<sub>2</sub>LiCuF<sub>6</sub>

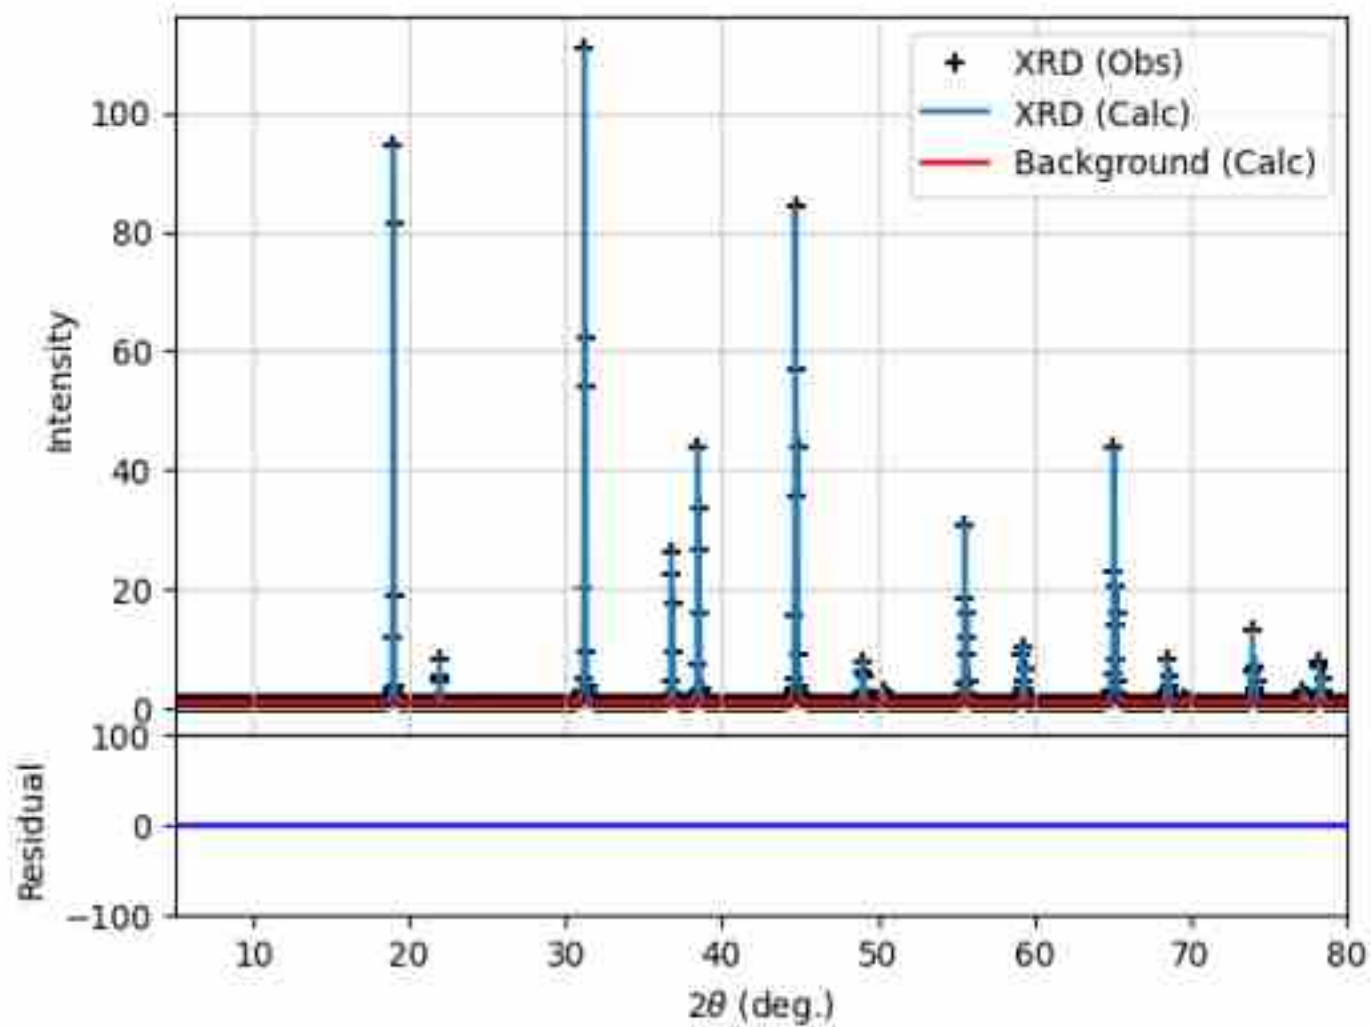

| RMSE before RR | Rwp     | RMSE after RR |
|----------------|---------|---------------|
| 0.02           | 0.01889 | 0.00456       |

# K<sub>2</sub>Na<sub>2</sub>Pr<sub>2</sub>Ta<sub>2</sub>O<sub>10</sub>

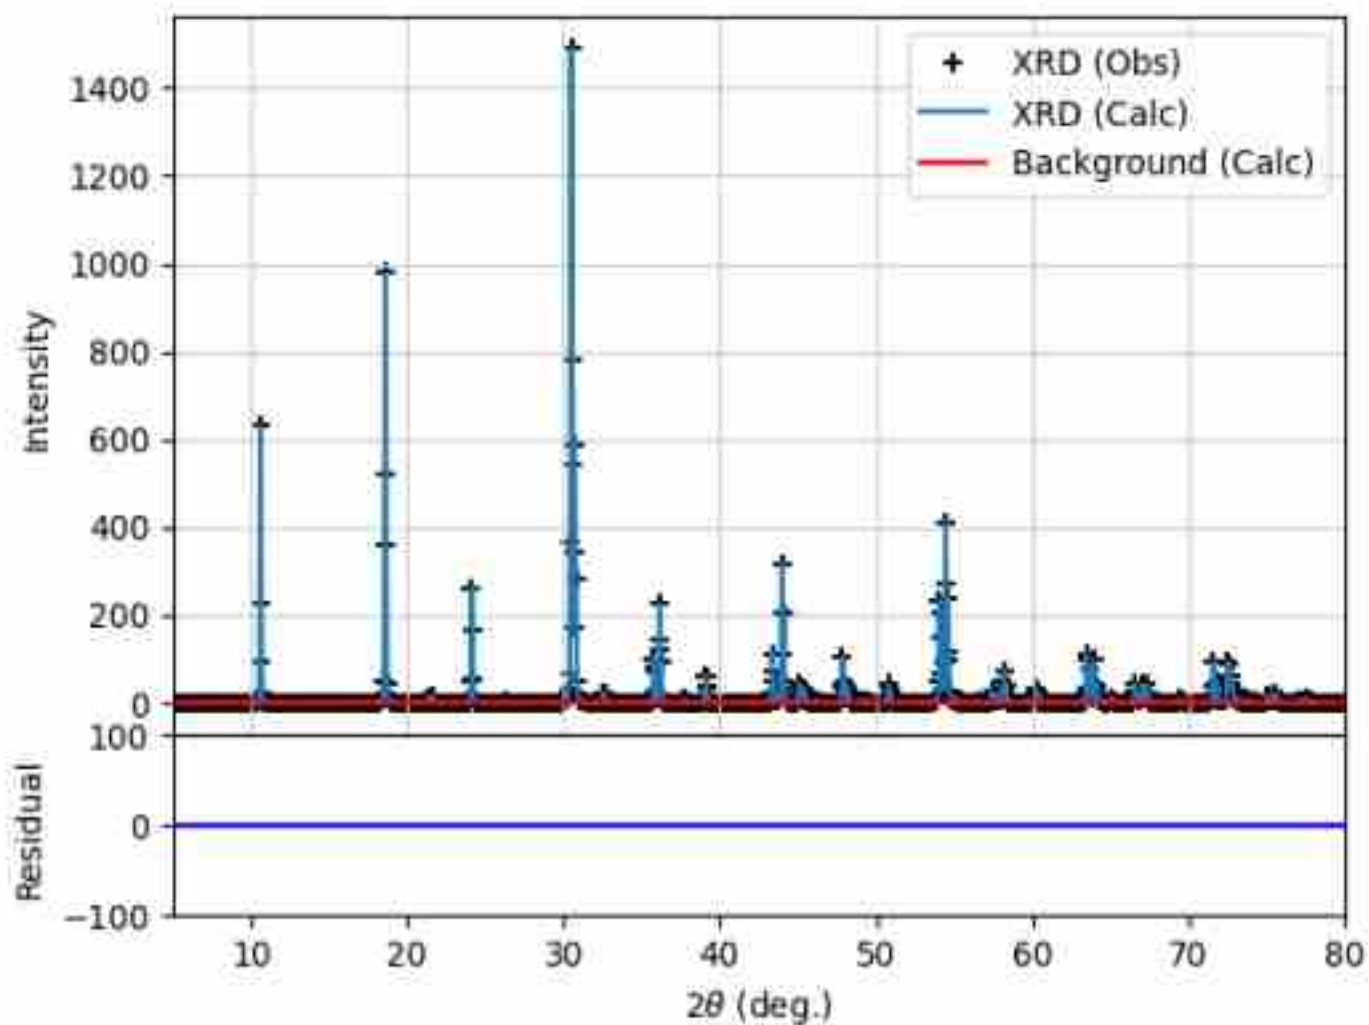

| RMSE before RR | Rwp     | RMSE after RR |
|----------------|---------|---------------|
| 0.02           | 0.00545 | 0.00173       |

# K<sub>2</sub>Ru<sub>2</sub>O<sub>8</sub>

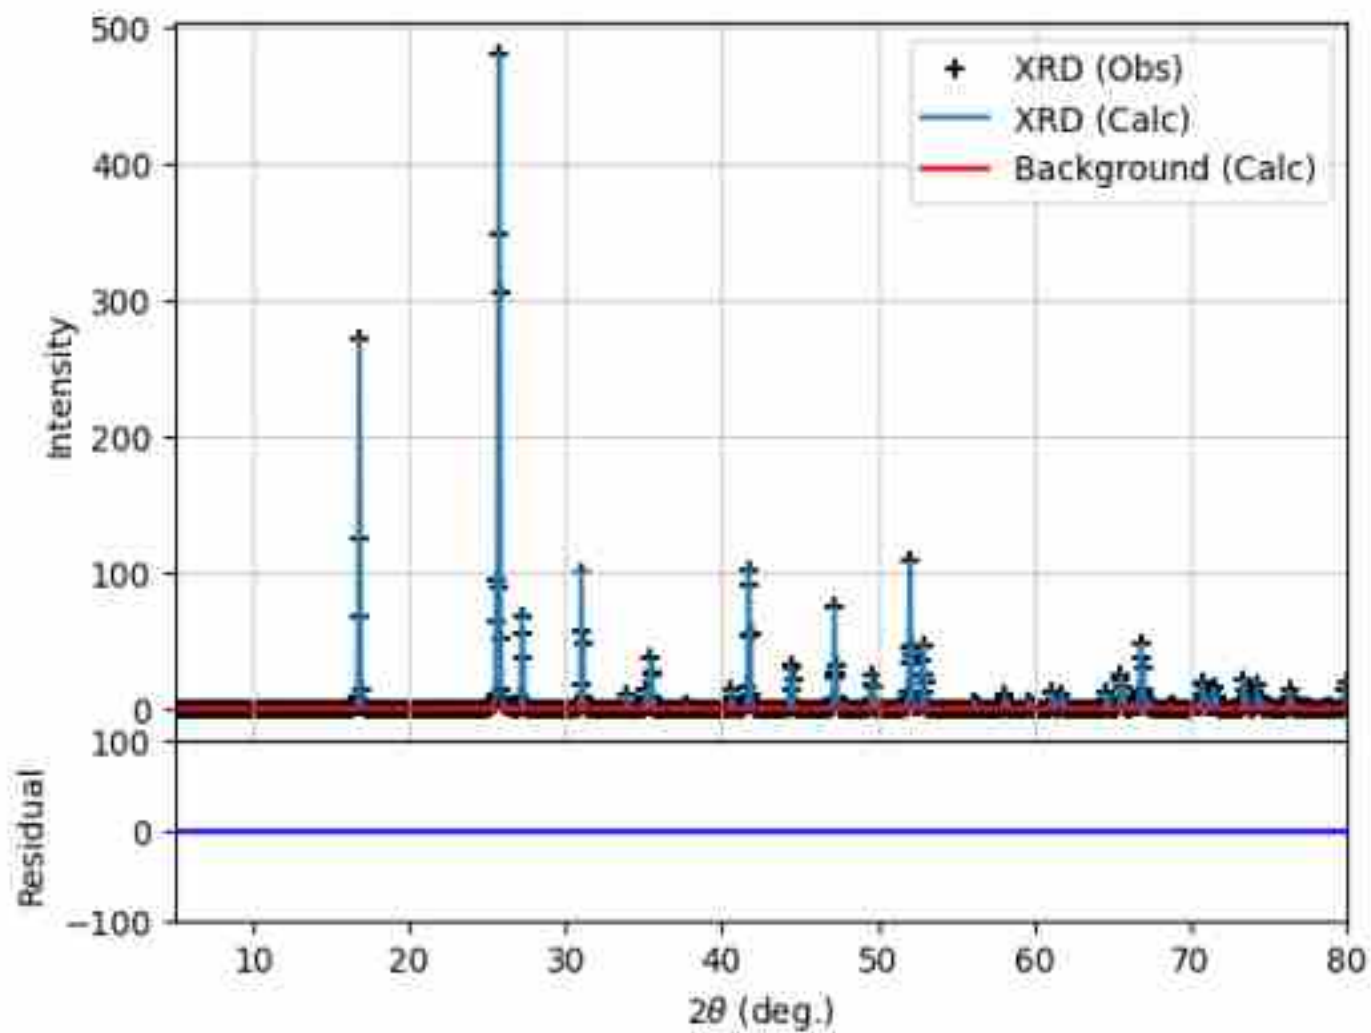

| RMSE before RR | Rwp    | RMSE after RR |
|----------------|--------|---------------|
| 0.02           | 0.0028 | 0.001         |

# K<sub>2</sub>Sn<sub>1</sub>Hg<sub>1</sub>Se<sub>4</sub>

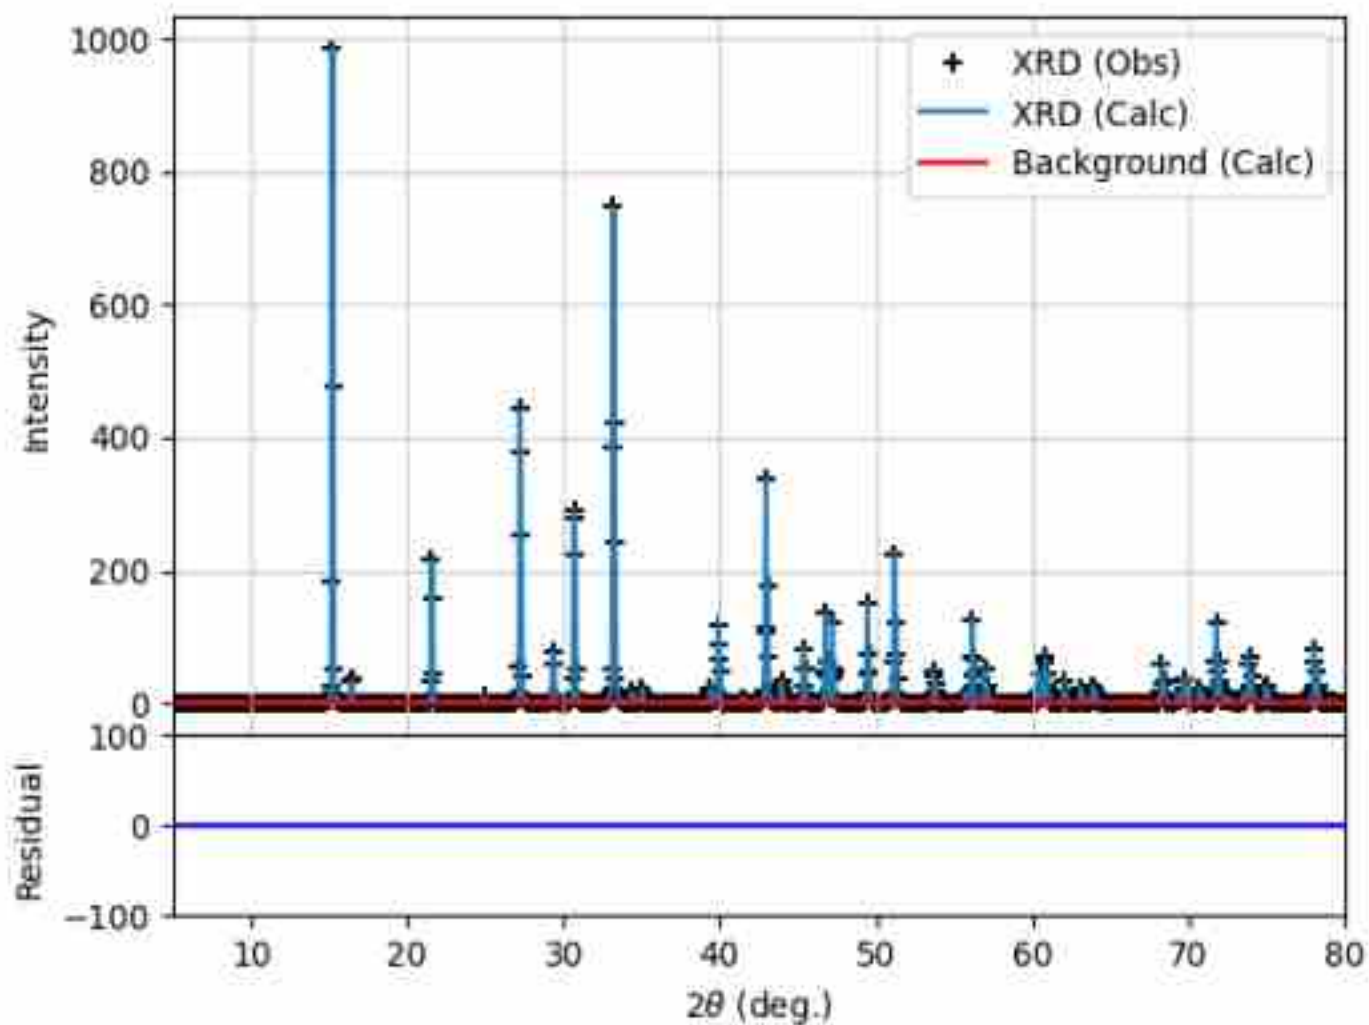

| RMSE before RR | Rwp    | RMSE after RR |
|----------------|--------|---------------|
| 0.02           | 0.0034 | 0.00038       |



# K2Te1

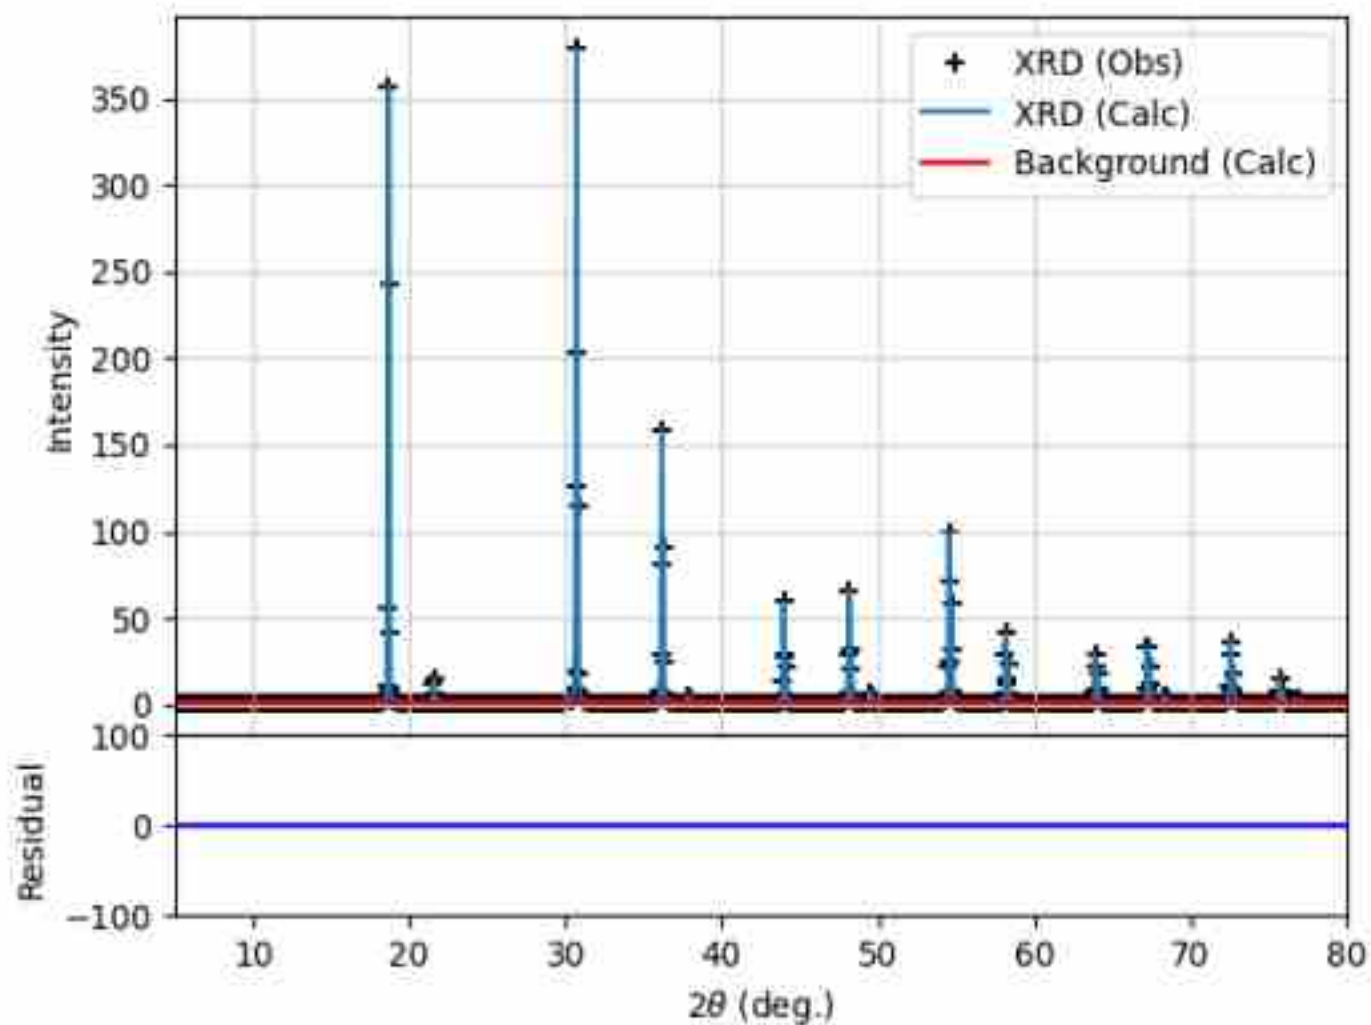

| RMSE before RR | Rwp     | RMSE after RR |
|----------------|---------|---------------|
| 0.002          | 0.17257 | 0.00075       |

# K<sub>2</sub>Zn<sub>2</sub>P<sub>2</sub>

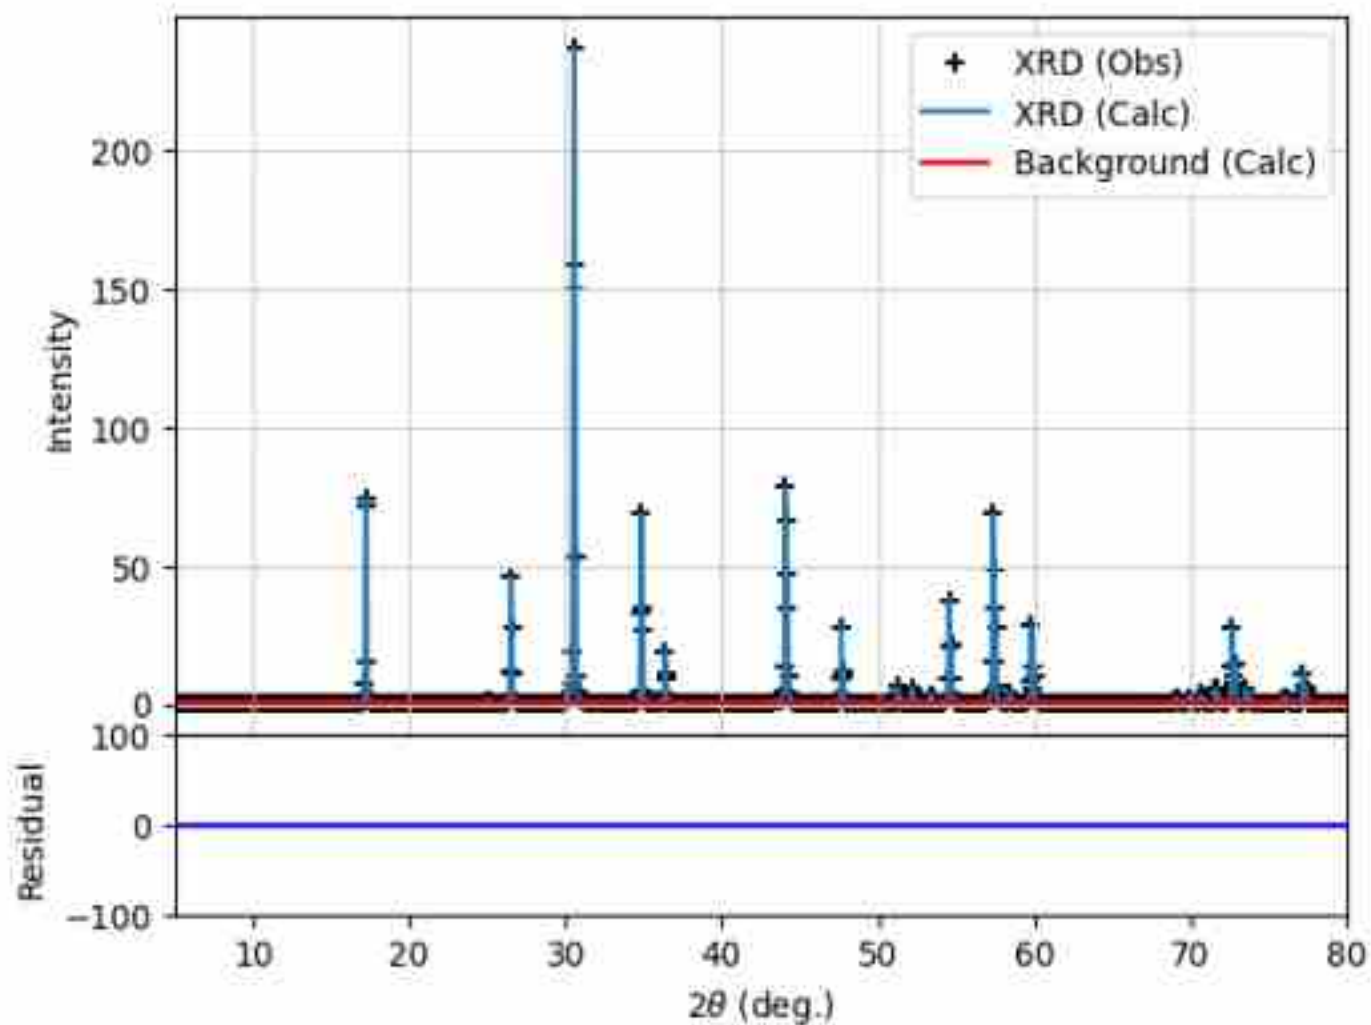

| RMSE before RR | Rwp     | RMSE after RR |
|----------------|---------|---------------|
| 0.02           | 0.03936 | 0.00103       |

# K<sub>2</sub>Zn<sub>3</sub>Ge<sub>1</sub>As<sub>4</sub>

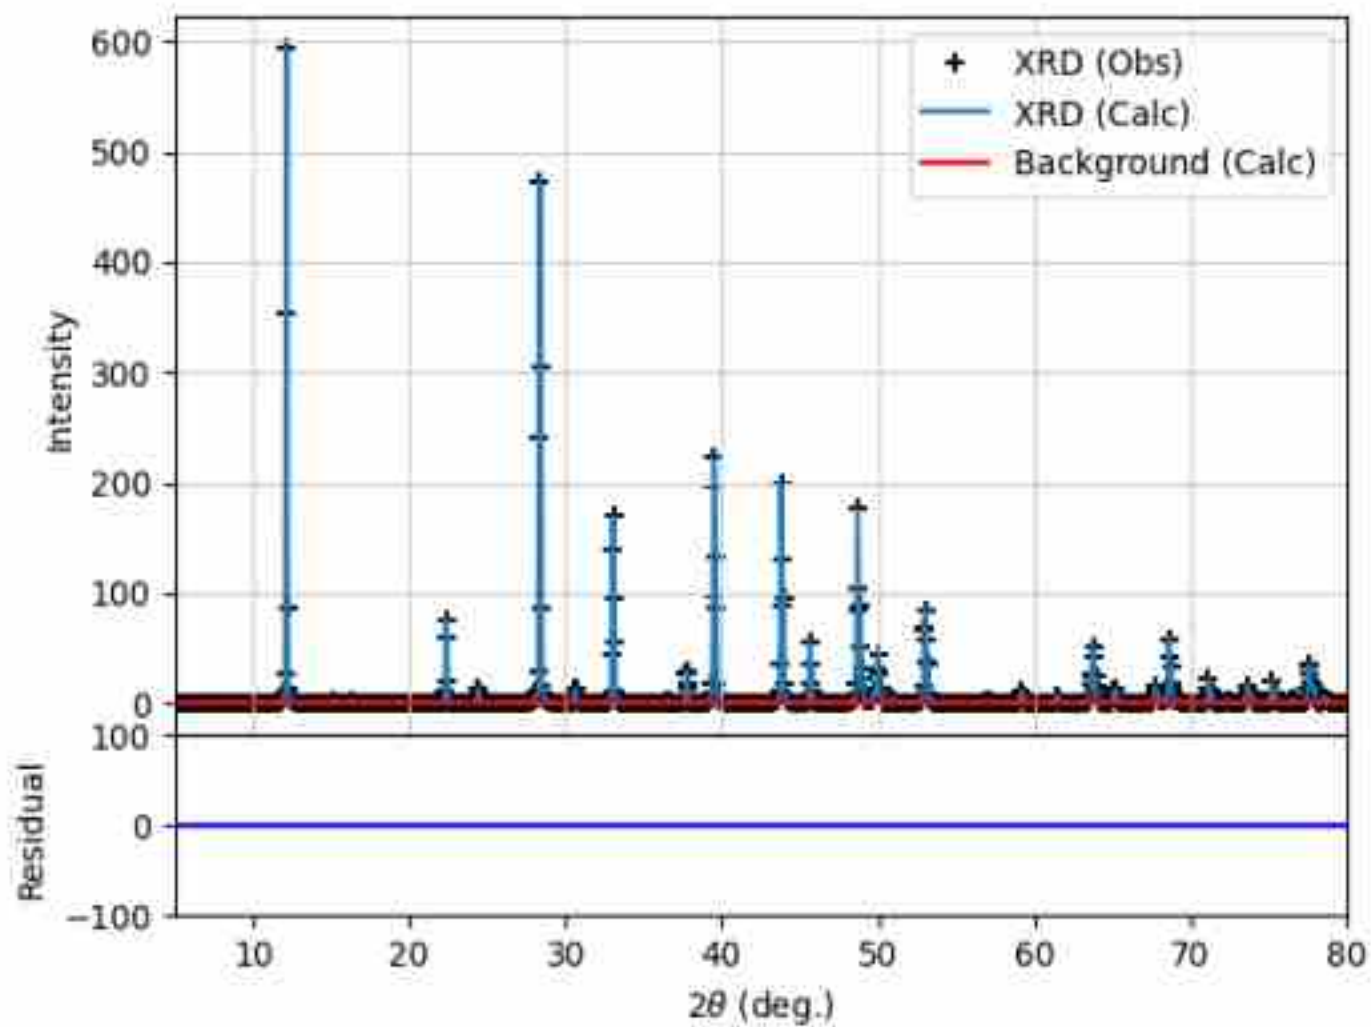

| RMSE before RR | Rwp    | RMSE after RR |
|----------------|--------|---------------|
| 0.02           | 0.0035 | 0.0003        |

# K3Bi1

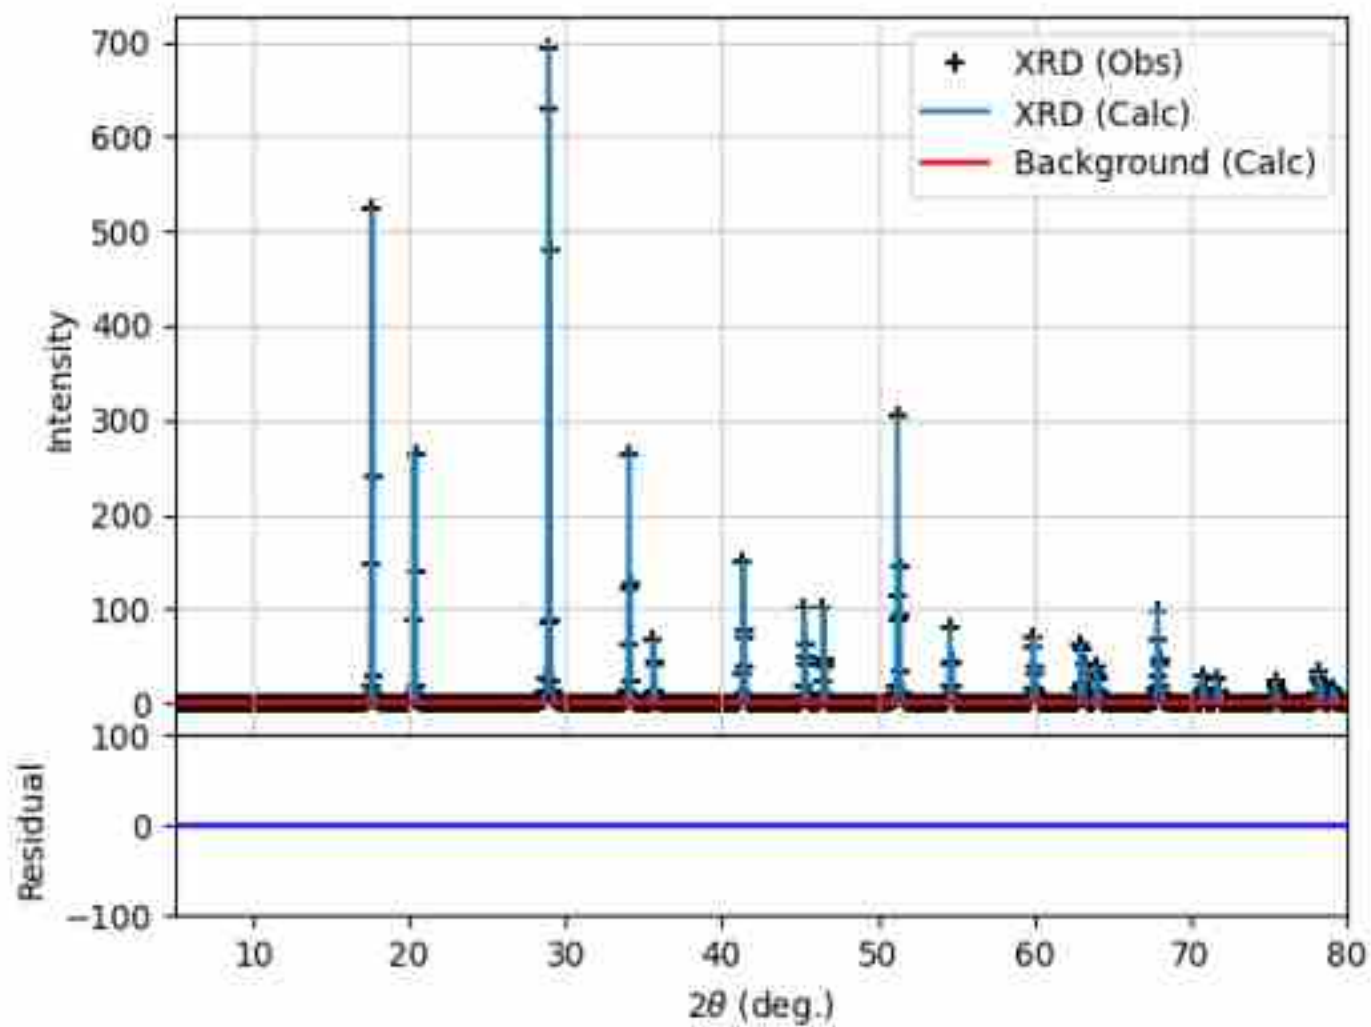

| RMSE before RR | Rwp     | RMSE after RR |
|----------------|---------|---------------|
| 0.002          | 0.00284 | 0.00076       |

# K3Na1Cr2O8

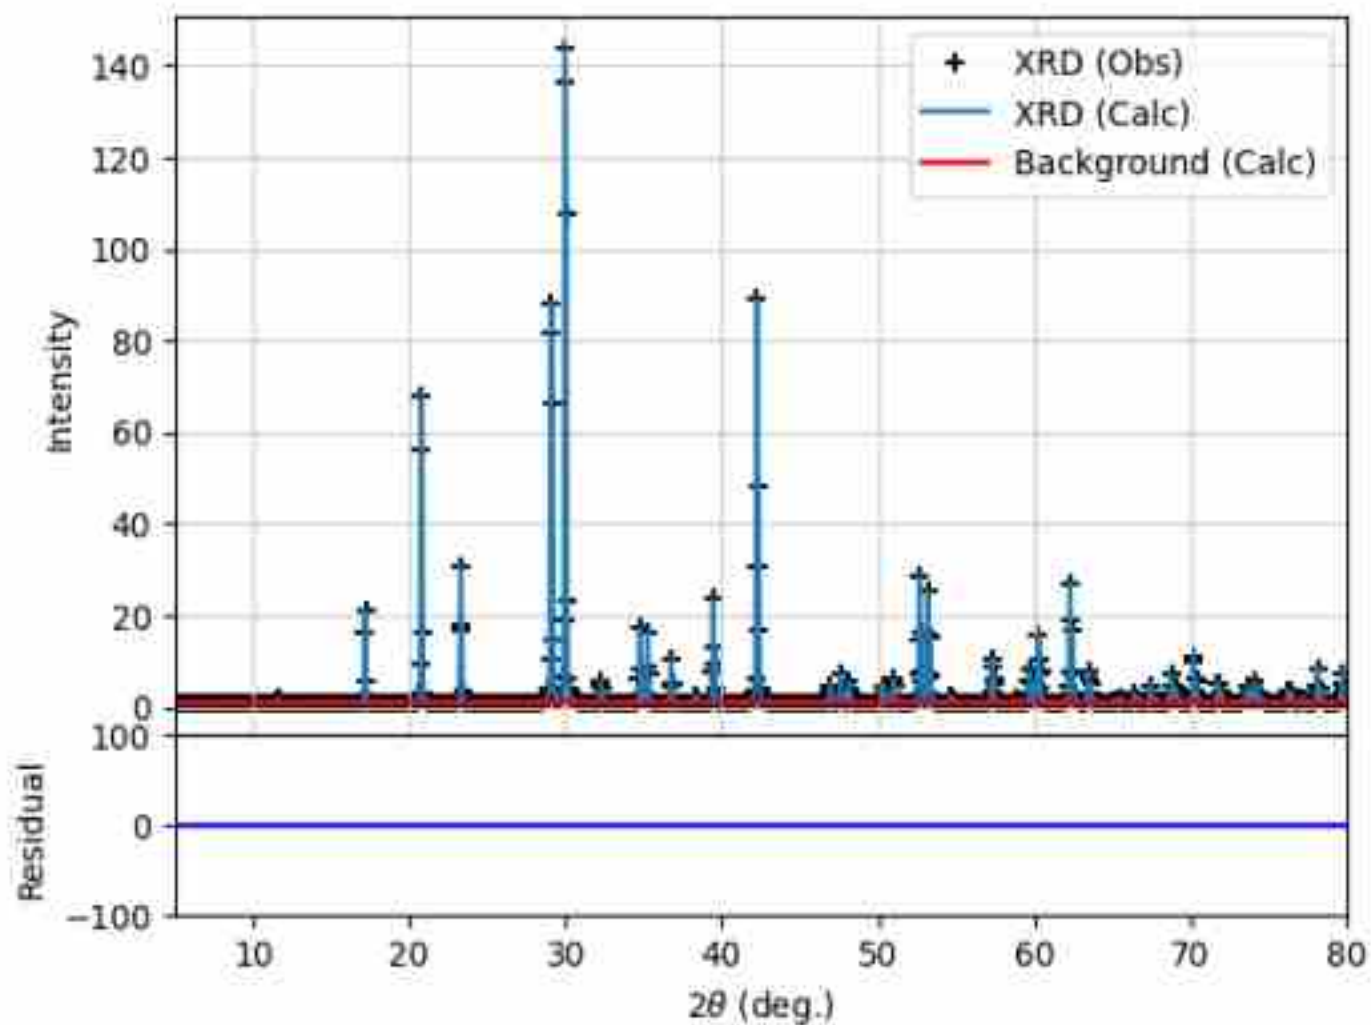

| RMSE before RR | Rwp     | RMSE after RR |
|----------------|---------|---------------|
| 0.02           | 0.00239 | 0.00108       |

# K3Rb1

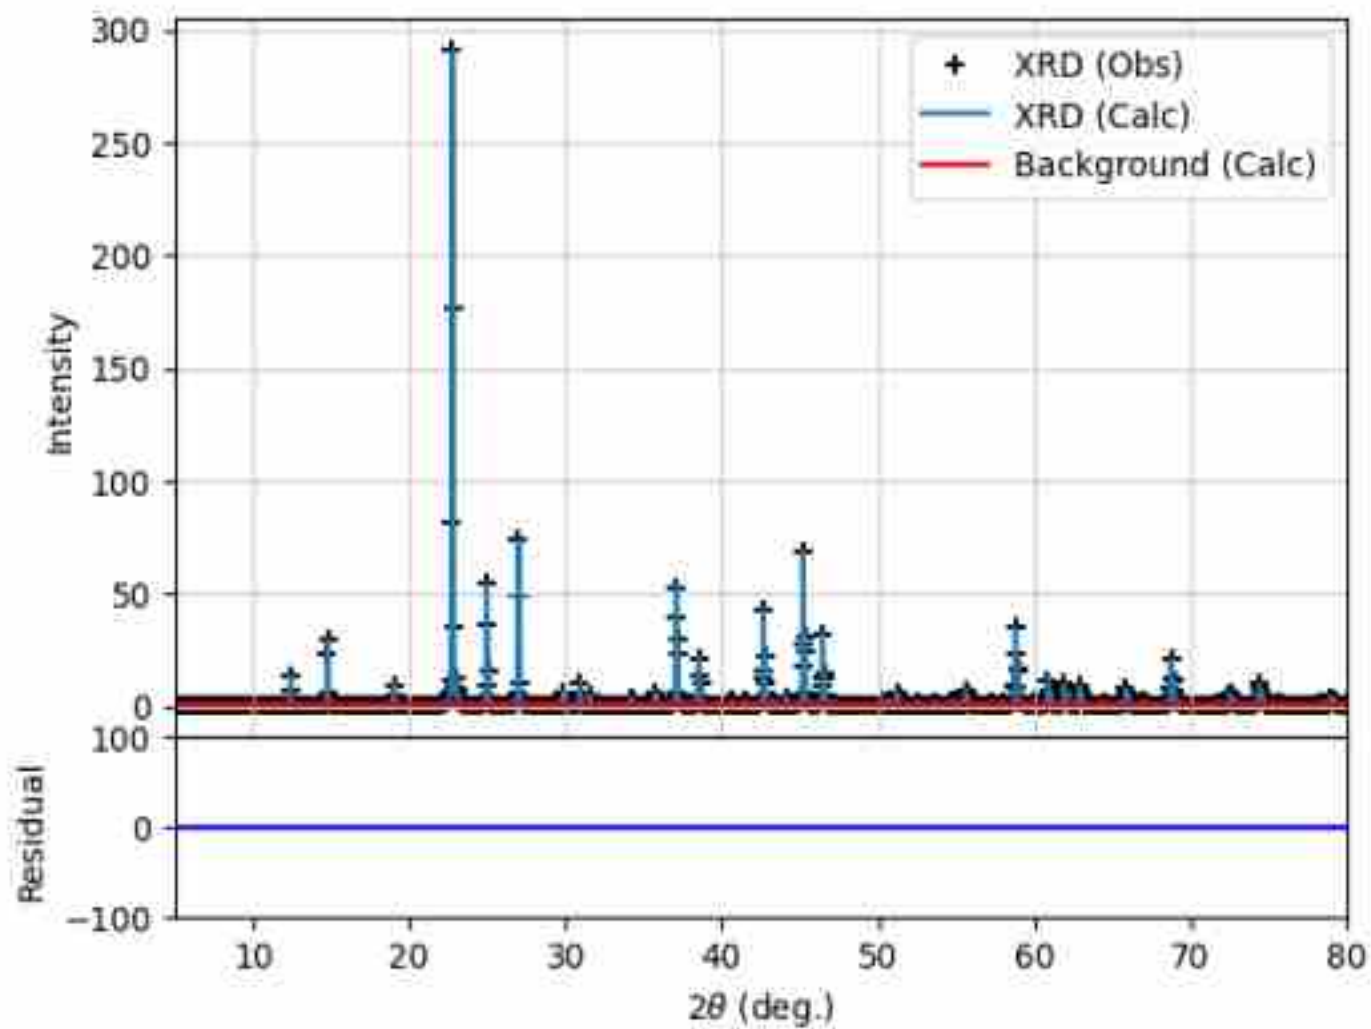

| RMSE before RR | Rwp     | RMSE after RR |
|----------------|---------|---------------|
| 0.002          | 0.00189 | 0.00024       |

# K6As2

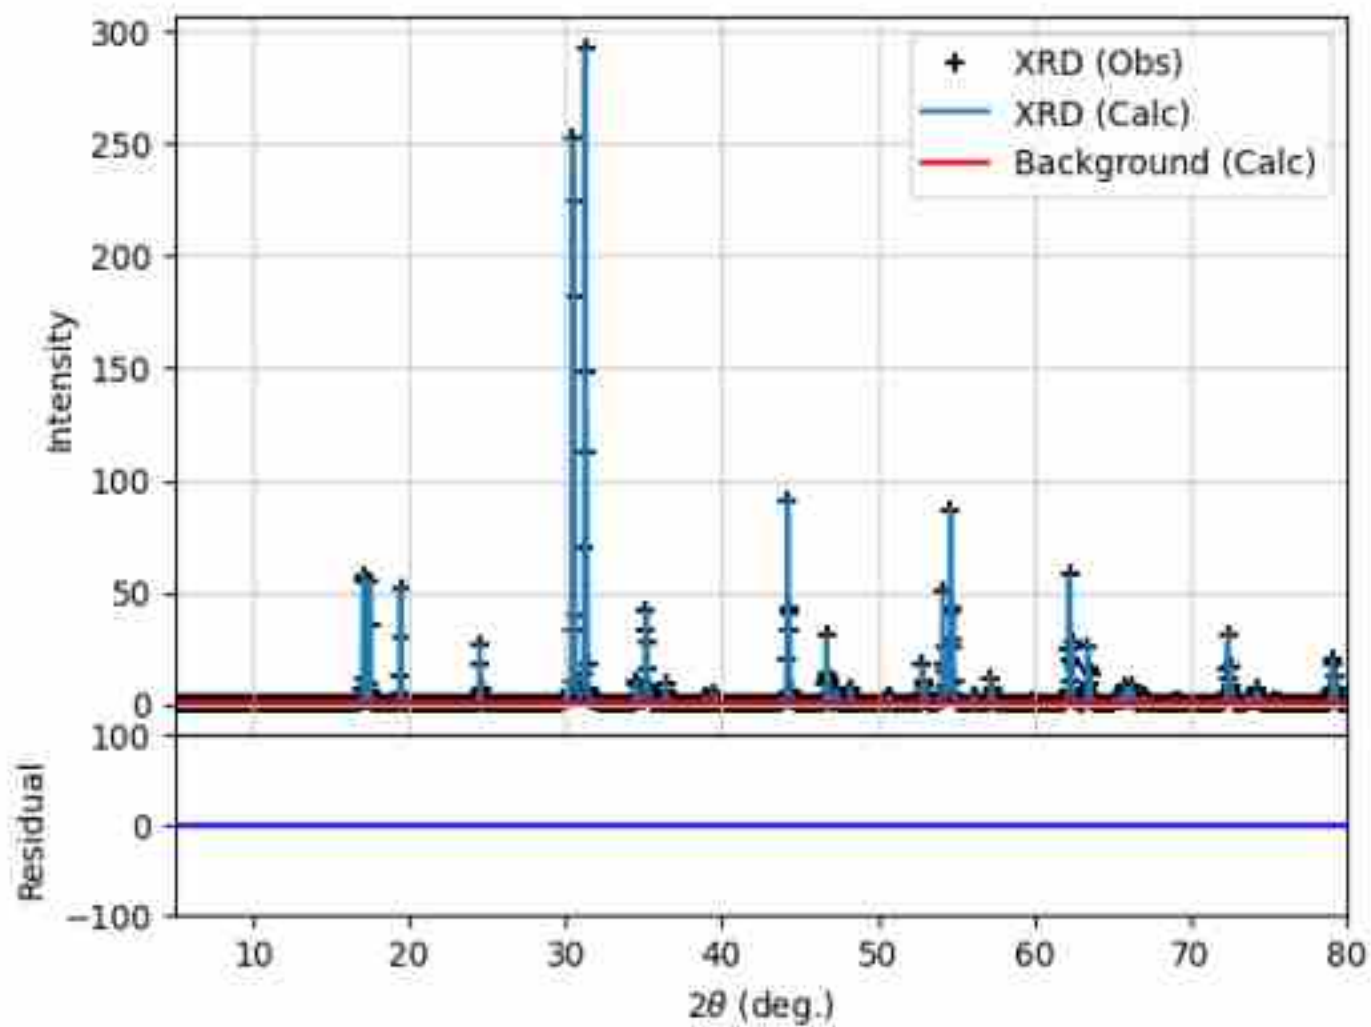

| RMSE before RR | Rwp     | RMSE after RR |
|----------------|---------|---------------|
| 0.02           | 0.00219 | 0.00053       |

# La1Cd1

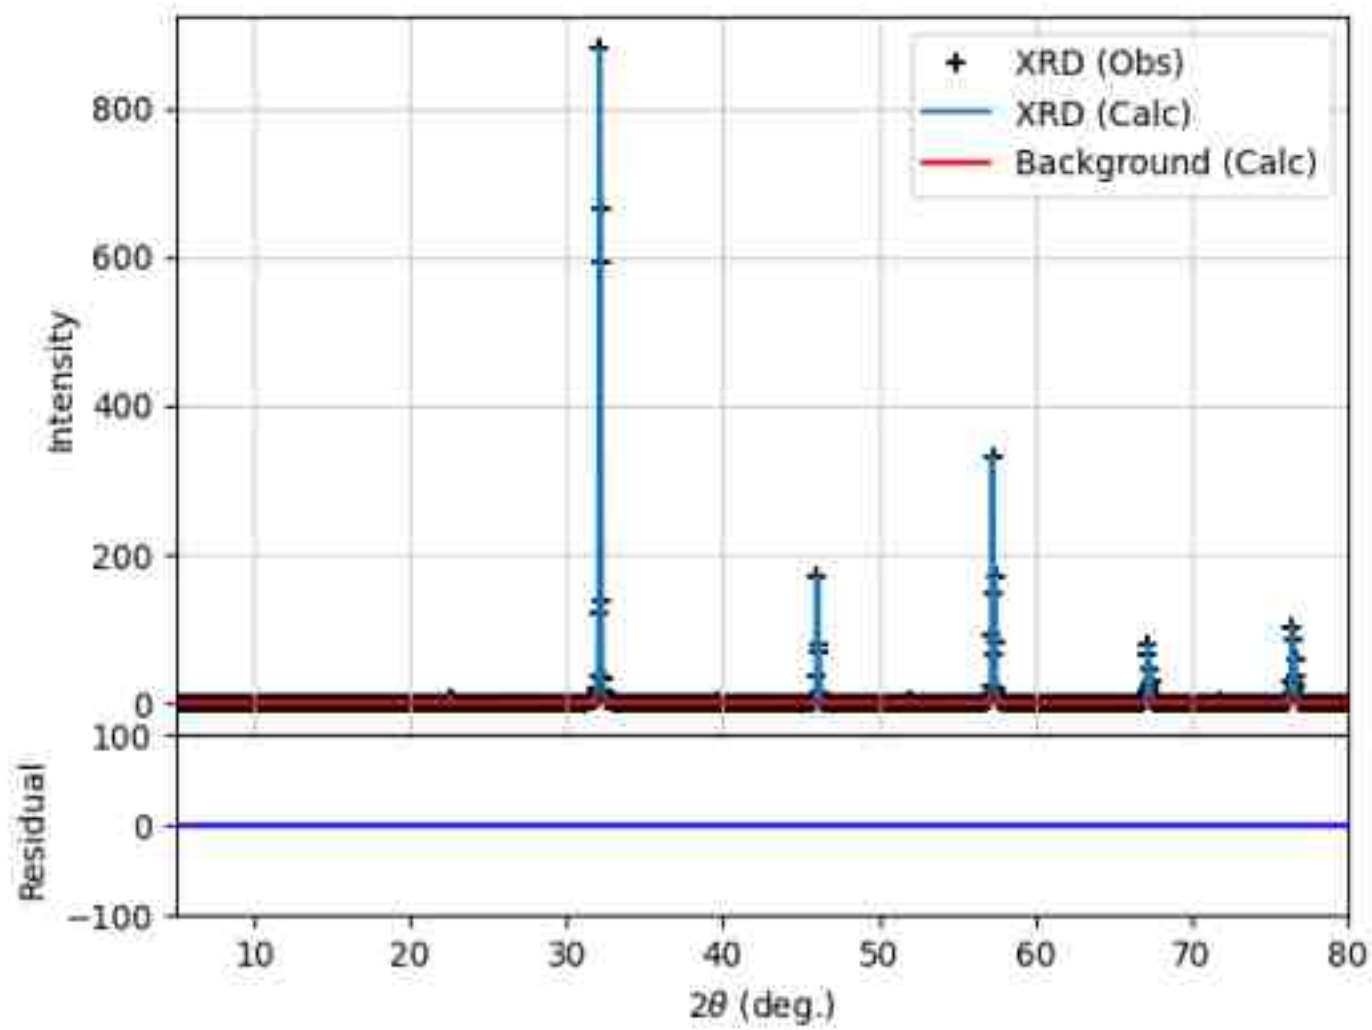

| RMSE before RR | Rwp     | RMSE after RR |
|----------------|---------|---------------|
| 0.002          | 0.10111 | 0.00199       |



# La1Cd2

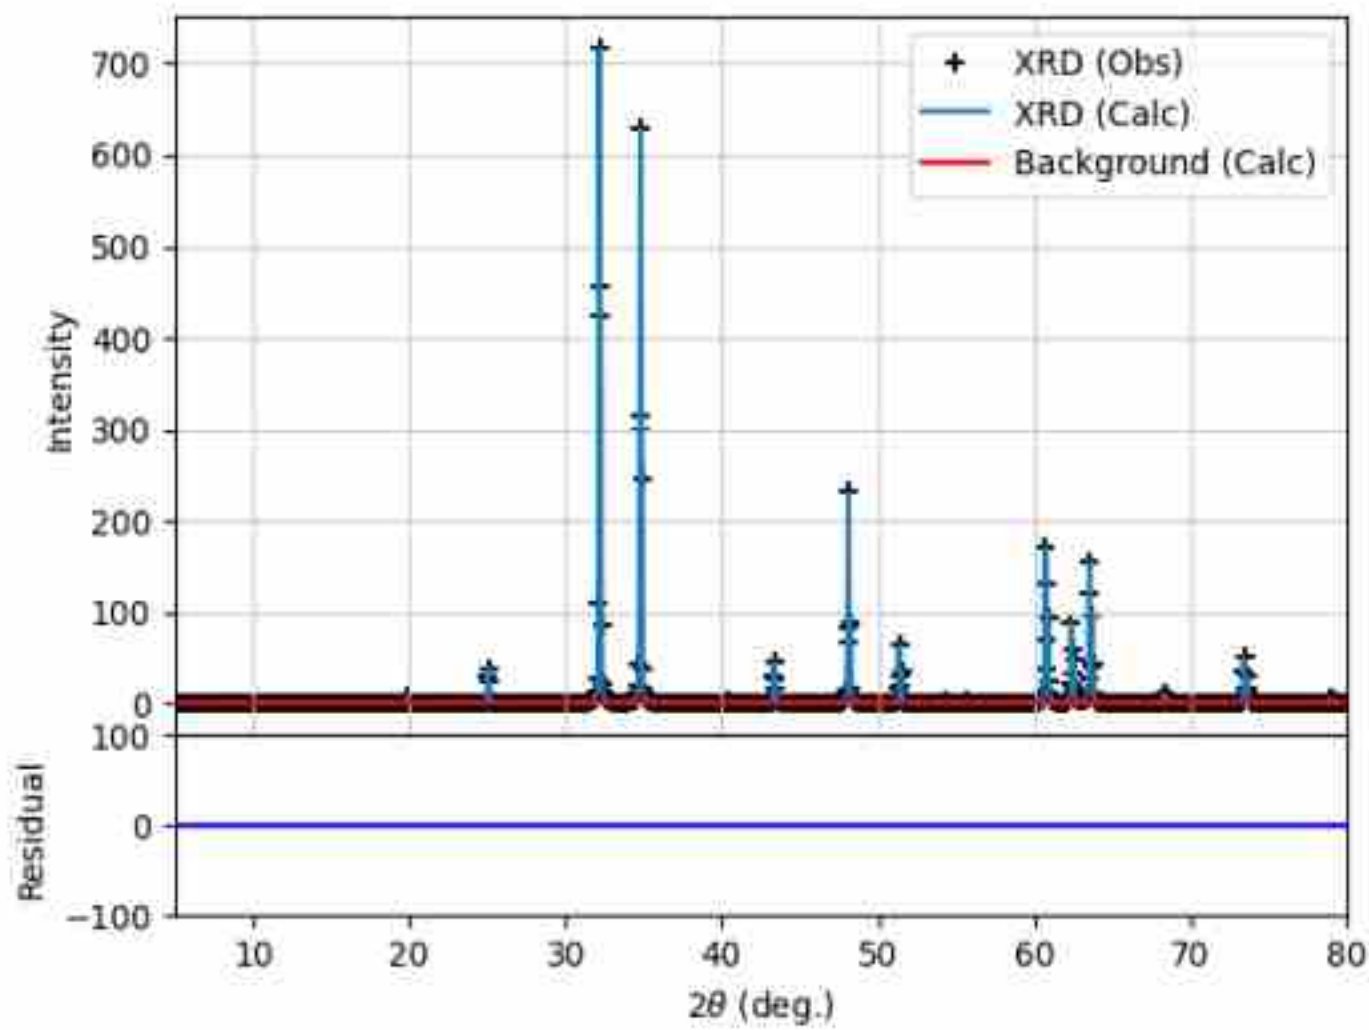

| RMSE before RR | Rwp     | RMSE after RR |
|----------------|---------|---------------|
| 0.002          | 0.00471 | 0.00044       |

# La1Cu1Sn1

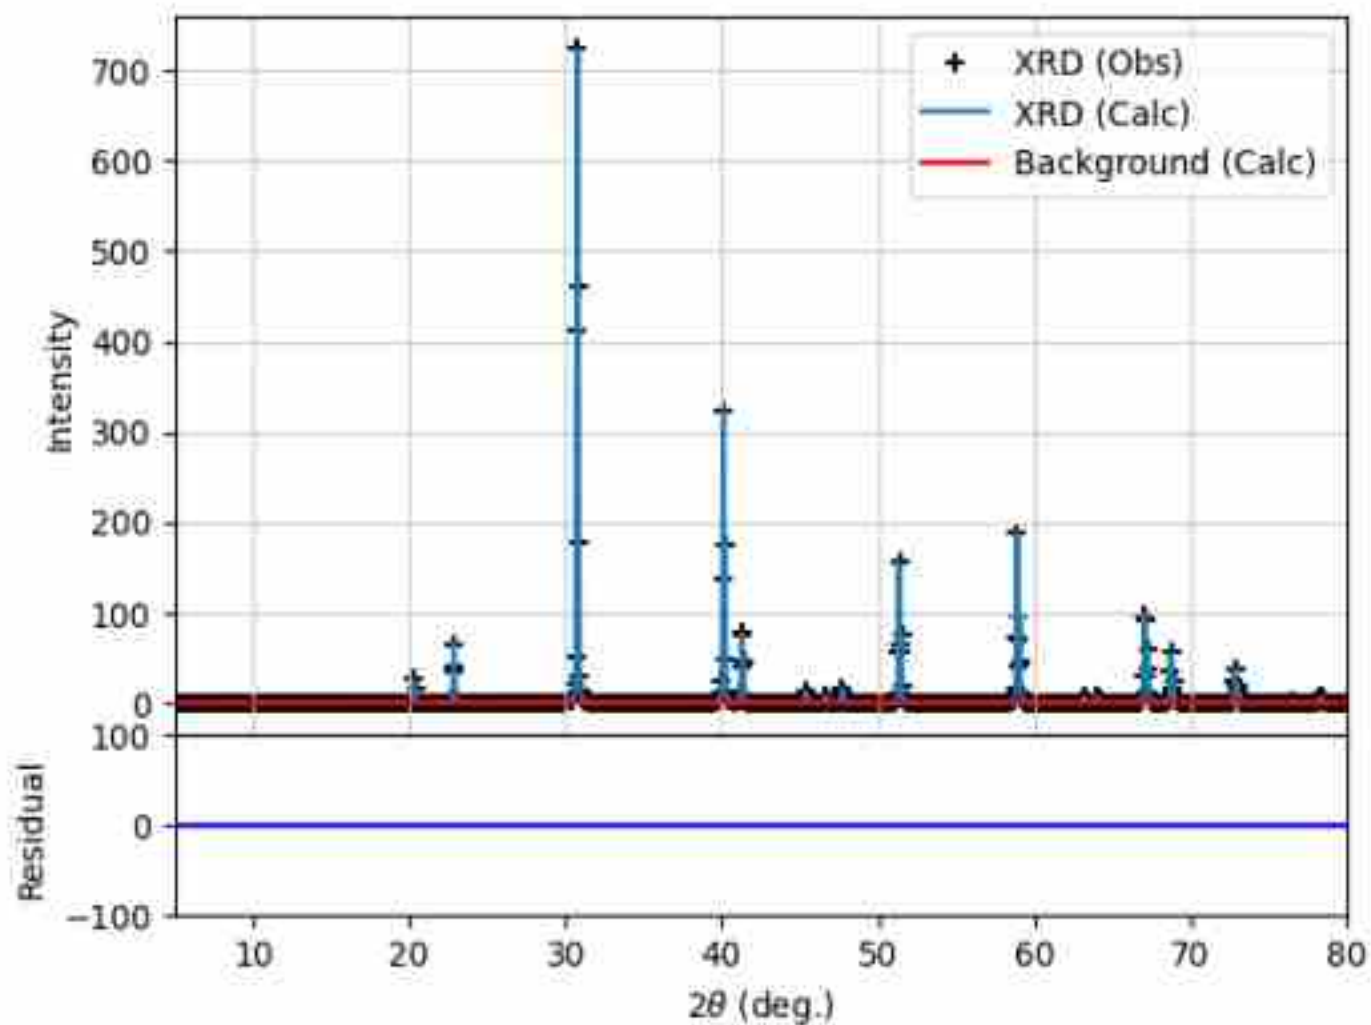

| RMSE before RR | Rwp     | RMSE after RR |
|----------------|---------|---------------|
| 0.002          | 0.00218 | 0.0001        |

# La1H3

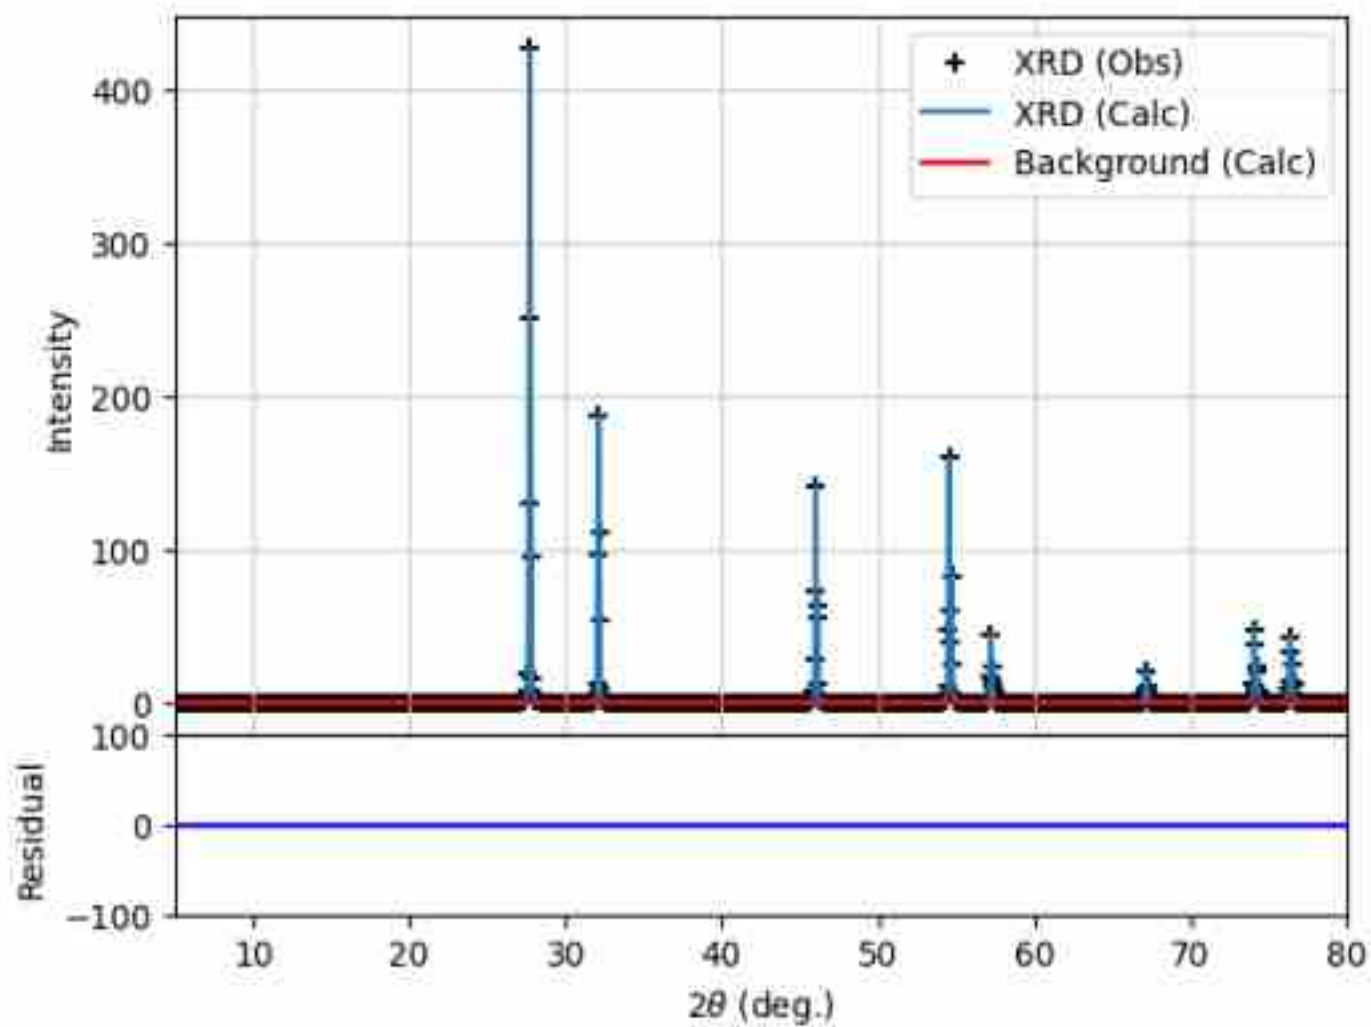

| RMSE before RR | Rwp    | RMSE after RR |
|----------------|--------|---------------|
| 0.002          | 0.0034 | 0.00209       |

# La1P1

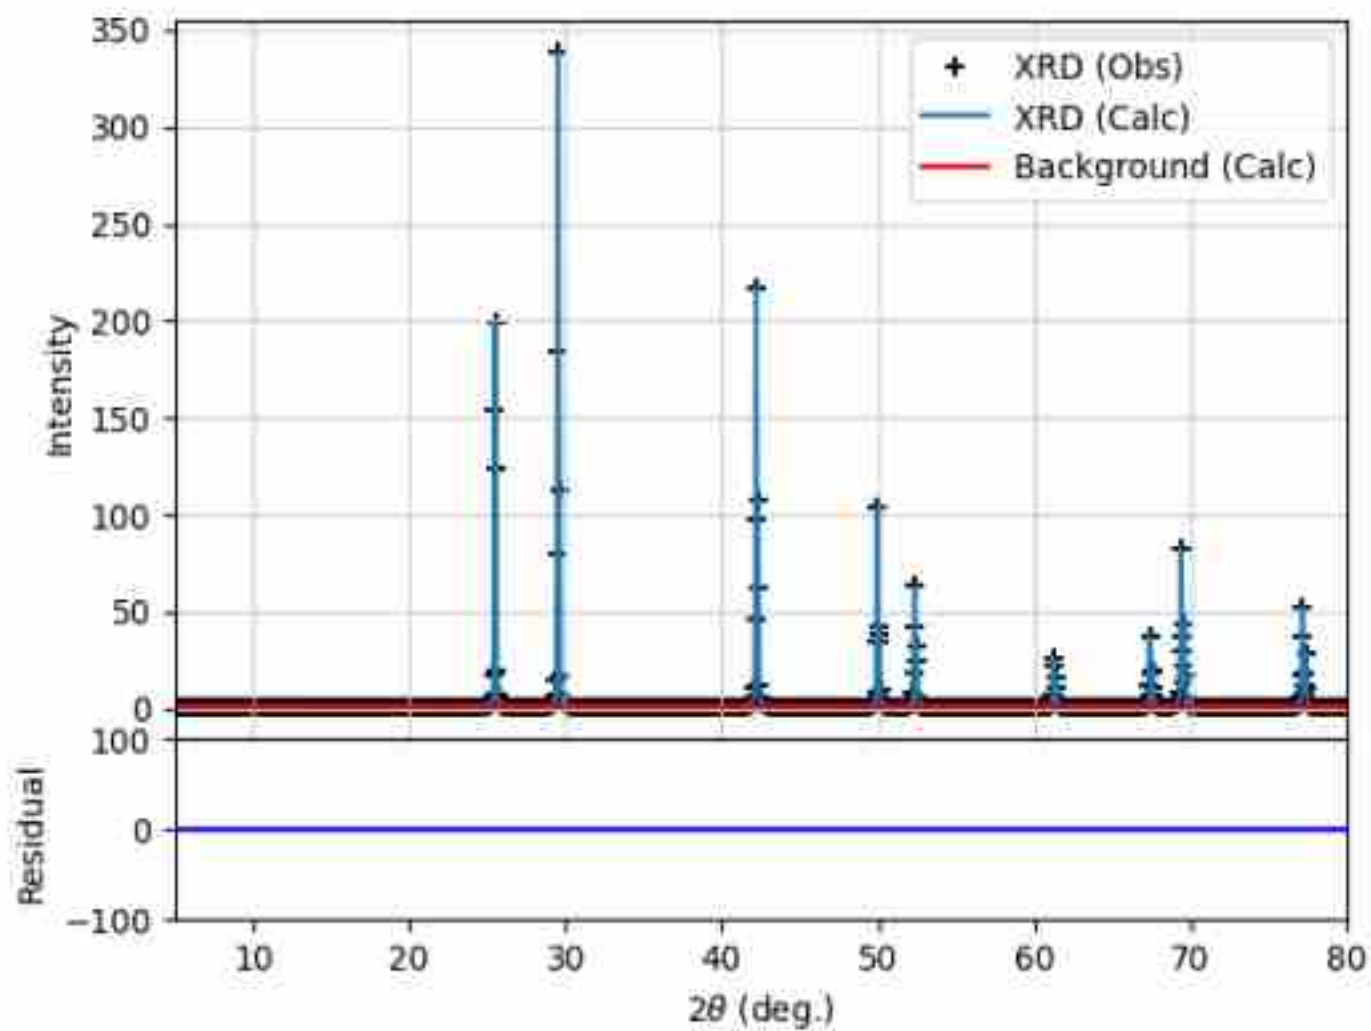

| RMSE before RR | Rwp     | RMSE after RR |
|----------------|---------|---------------|
| 0.002          | 0.00955 | 0.00111       |

# La1Pd3

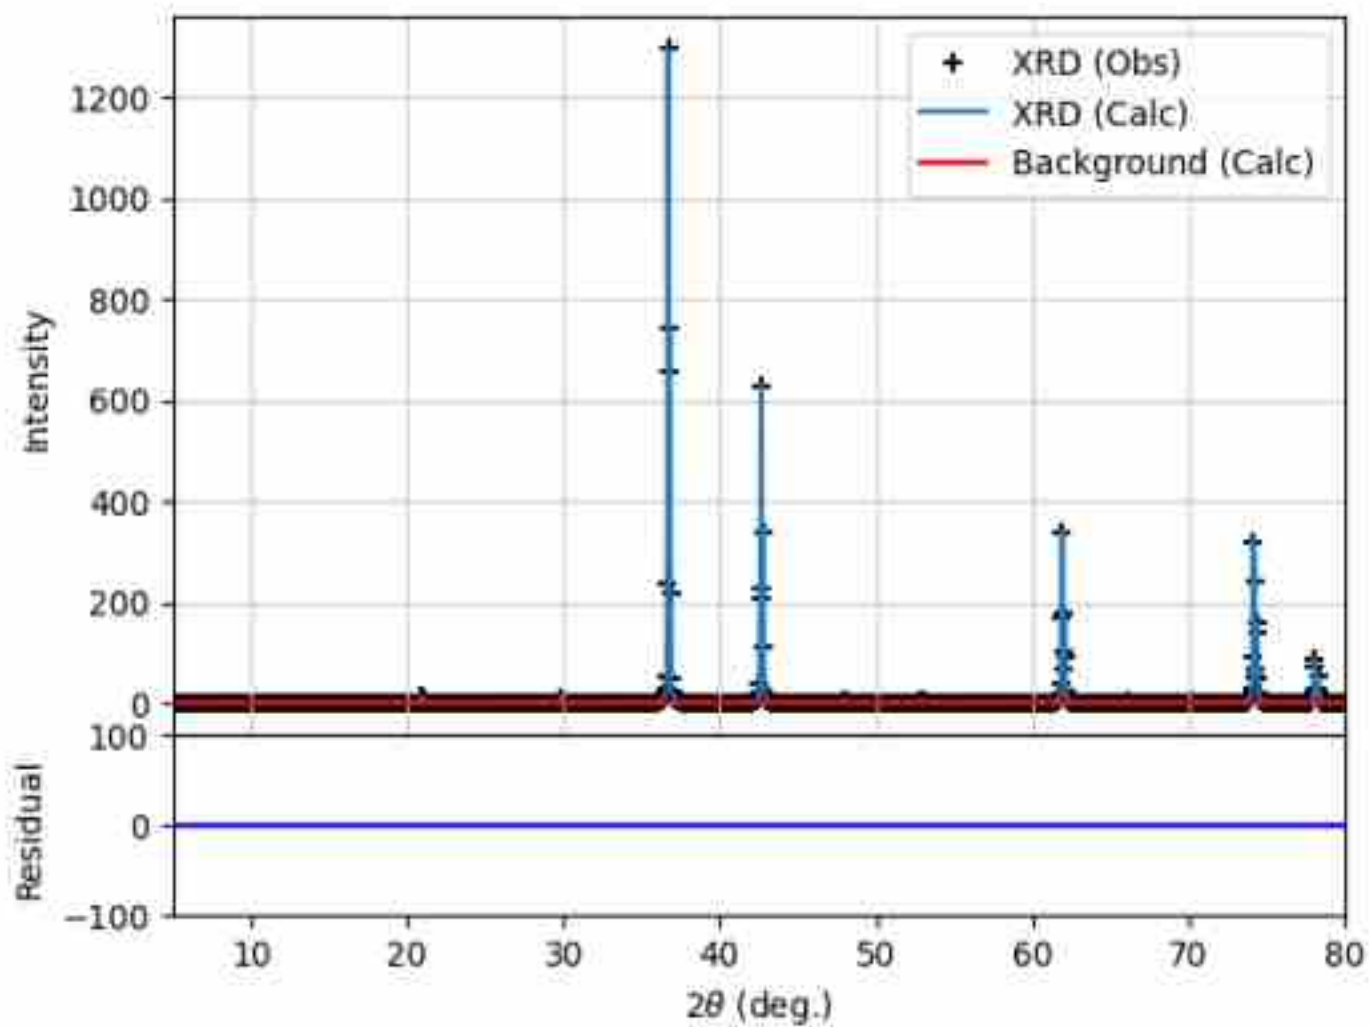

| RMSE before RR | Rwp     | RMSE after RR |
|----------------|---------|---------------|
| 0.002          | 0.01375 | 0.00073       |

# La1Zn1

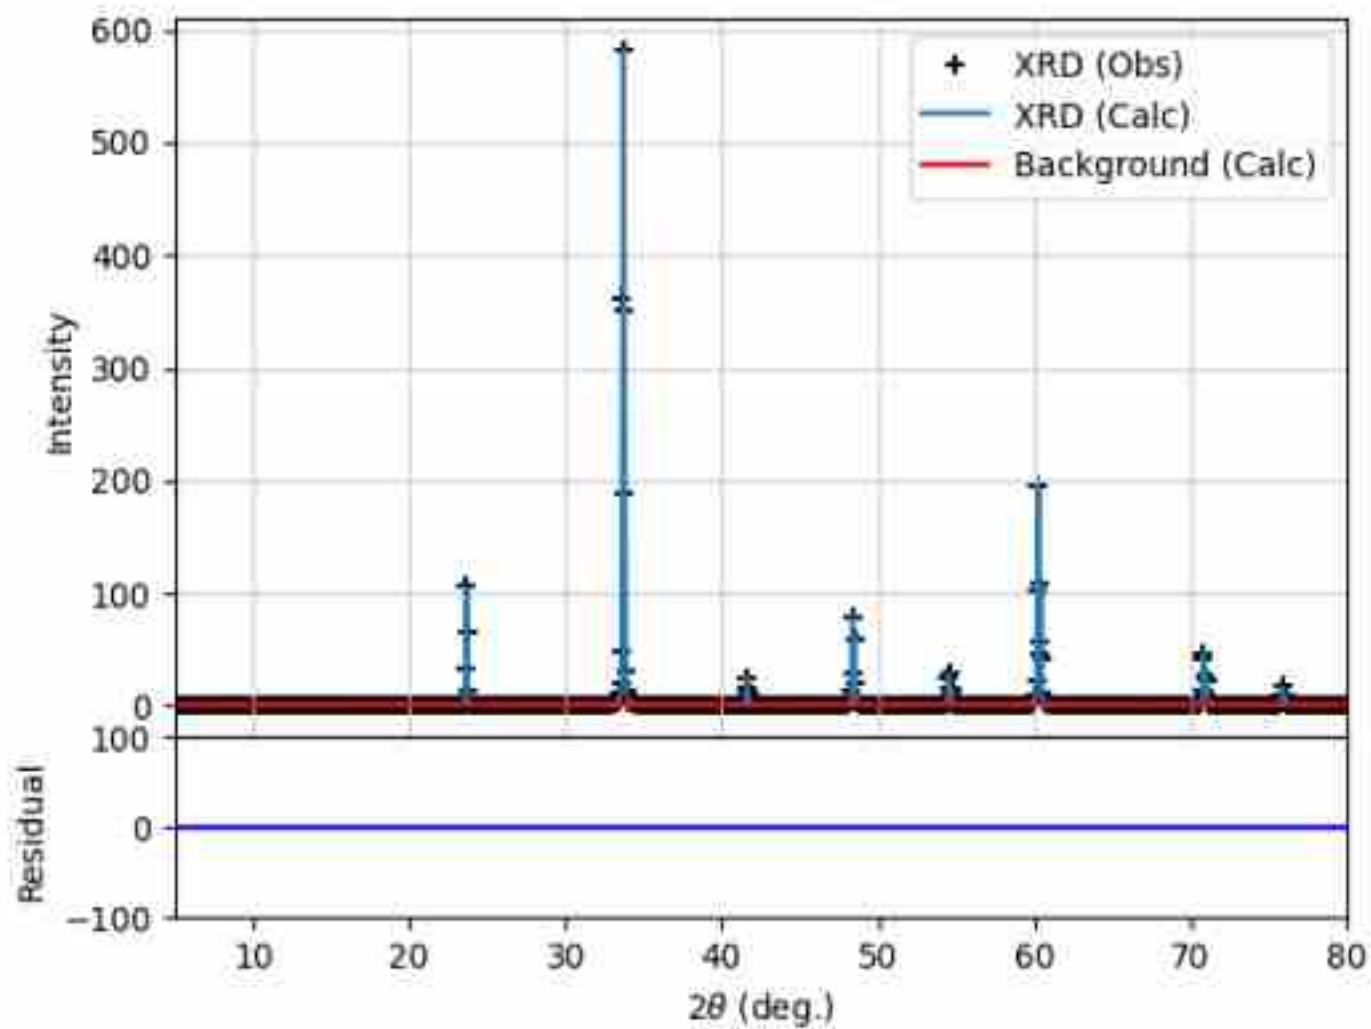

| RMSE before RR | Rwp    | RMSE after RR |
|----------------|--------|---------------|
| 0.002          | 0.0275 | 0.00171       |

# La<sub>2</sub>B<sub>6</sub>O<sub>12</sub>

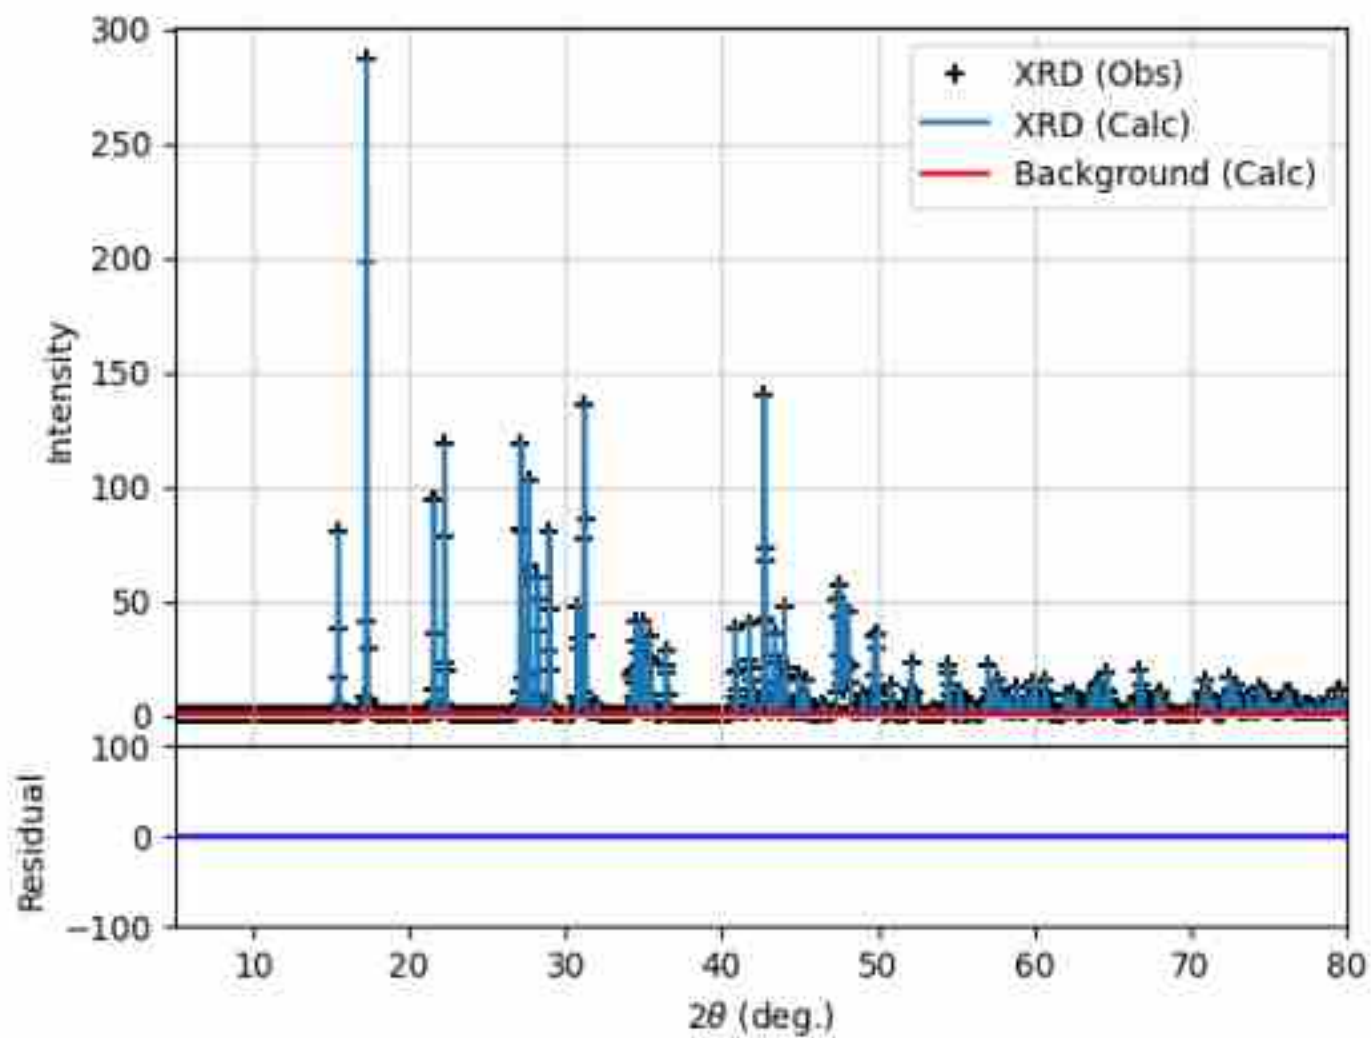

| RMSE before RR | Rwp    | RMSE after RR |
|----------------|--------|---------------|
| 0.02           | 0.0033 | 0.00124       |

# La<sub>2</sub>Cr<sub>2</sub>O<sub>6</sub>

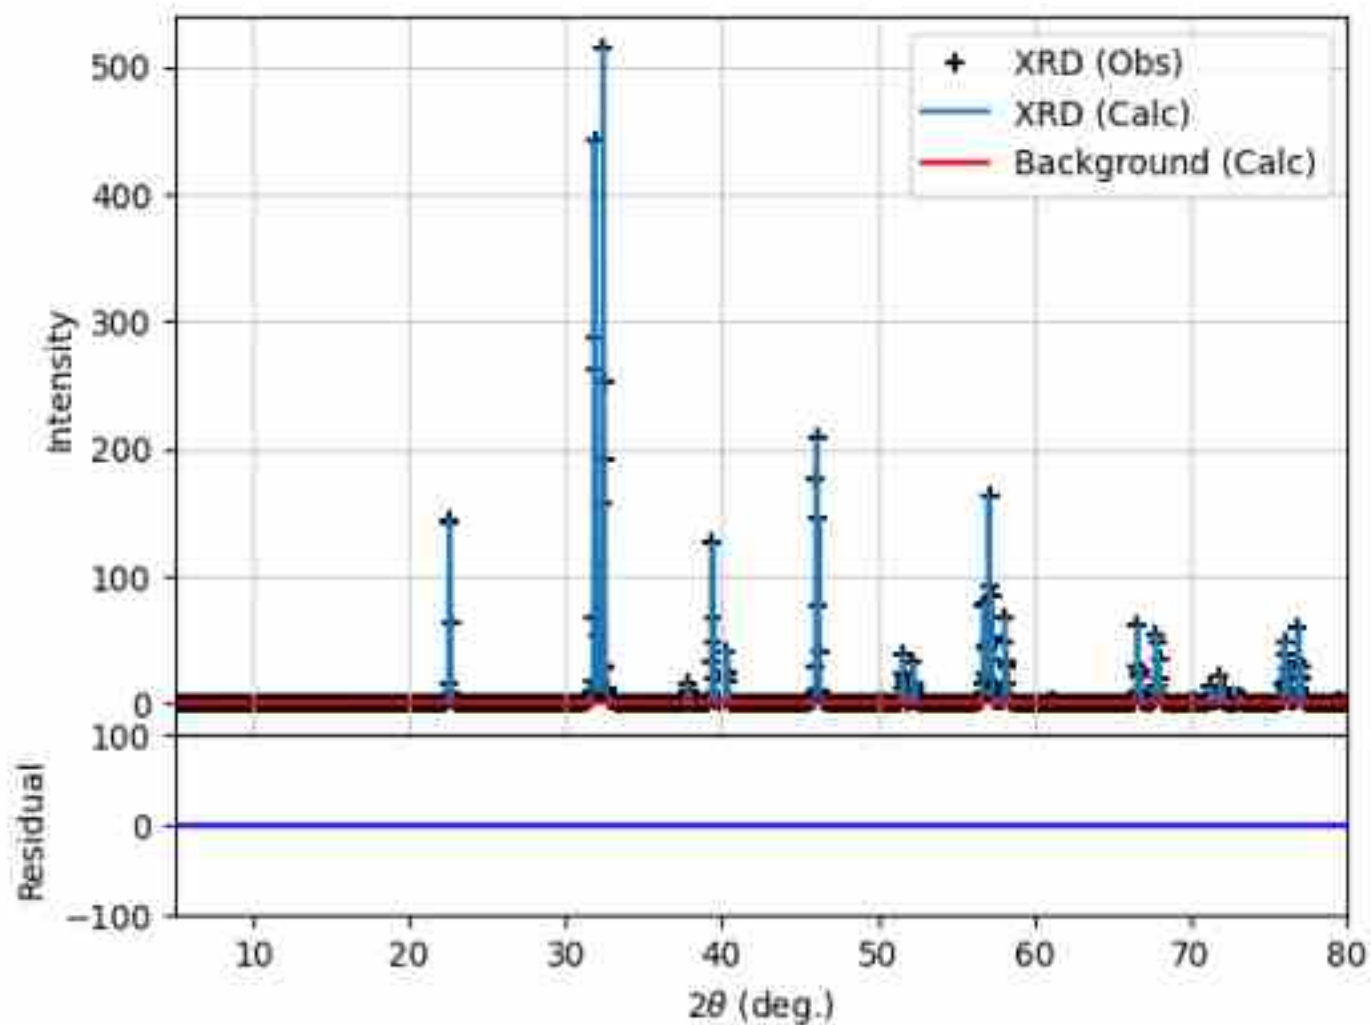

| RMSE before RR | Rwp    | RMSE after RR |
|----------------|--------|---------------|
| 0.02           | 0.0026 | 0.00114       |



# La2Ga1Ag1

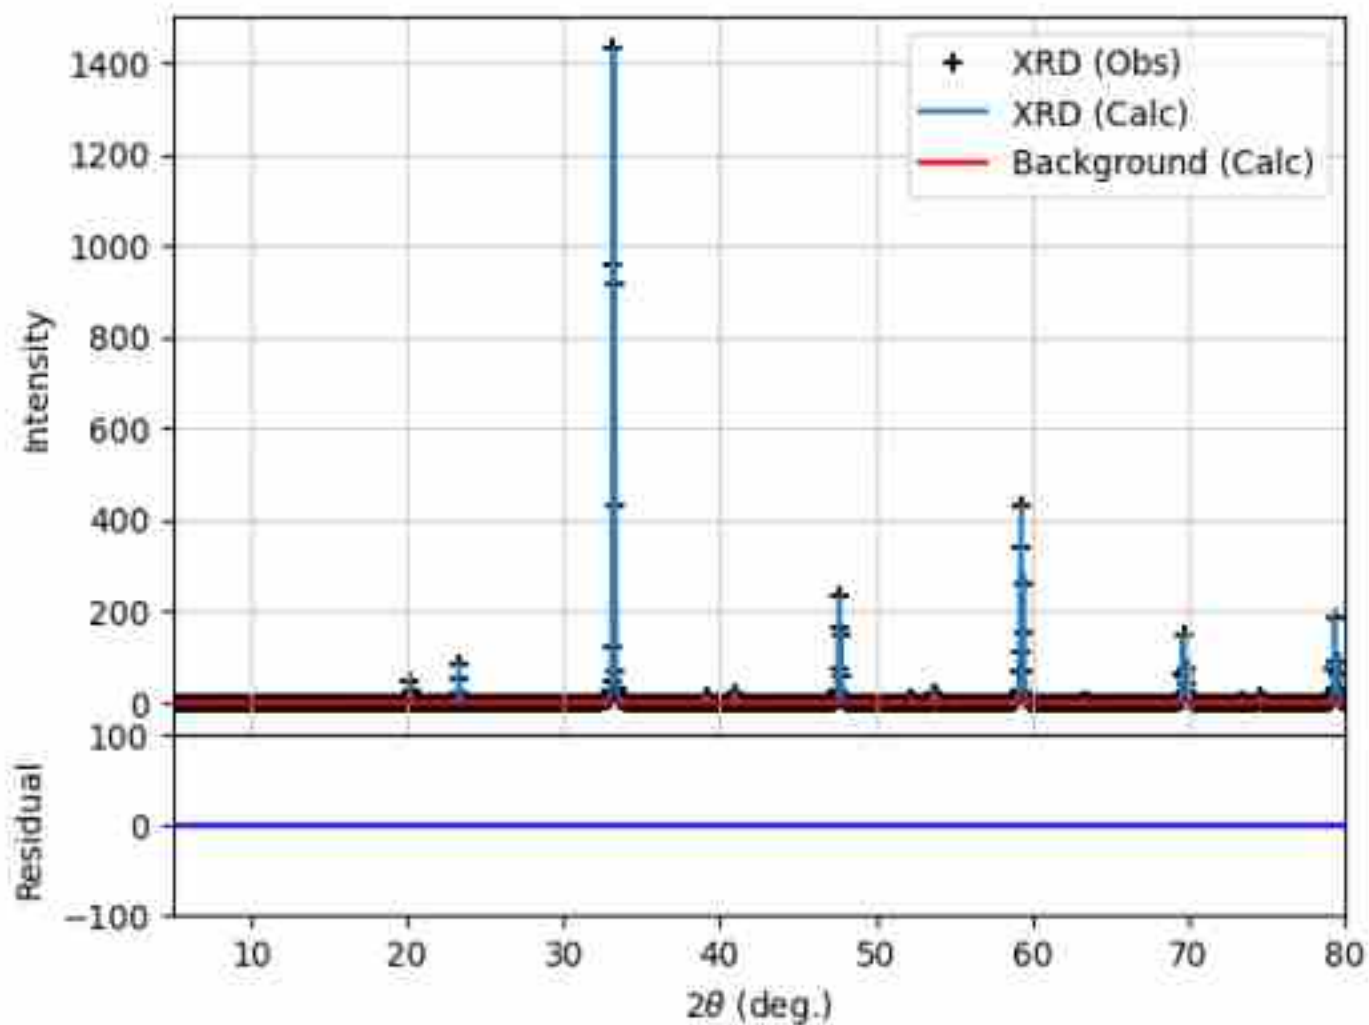

| RMSE before RR | Rwp     | RMSE after RR |
|----------------|---------|---------------|
| 0.002          | 0.00606 | 0.00048       |

# La<sub>2</sub>Mg<sub>2</sub>Cu<sub>4</sub>

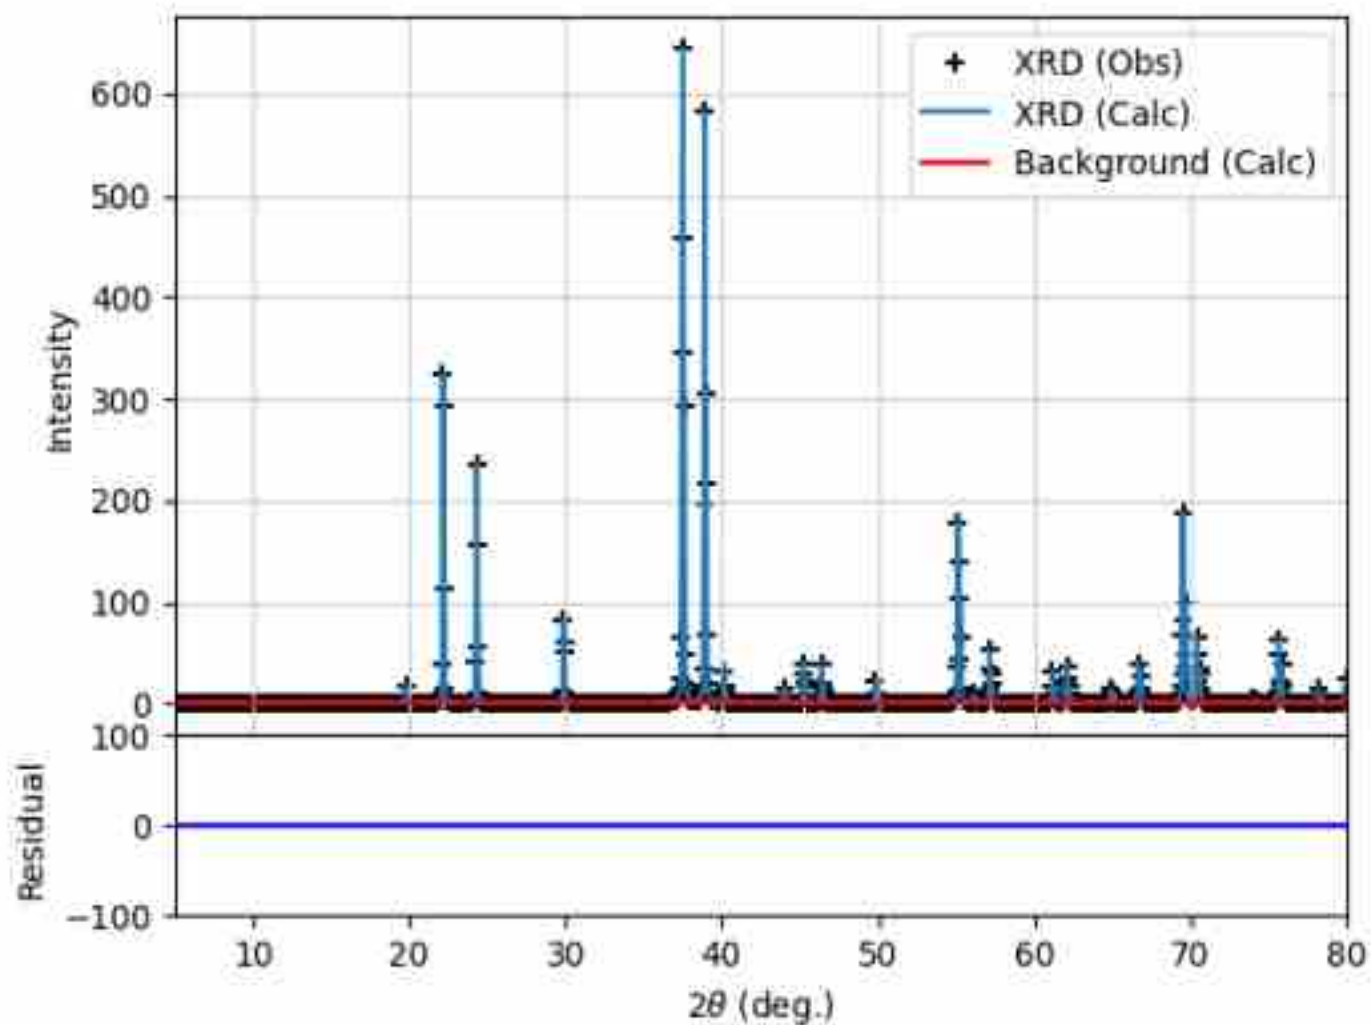

| RMSE before RR | Rwp     | RMSE after RR |
|----------------|---------|---------------|
| 0.02           | 0.00443 | 0.00103       |

# La<sub>2</sub>Tl<sub>11</sub>Cd<sub>1</sub>

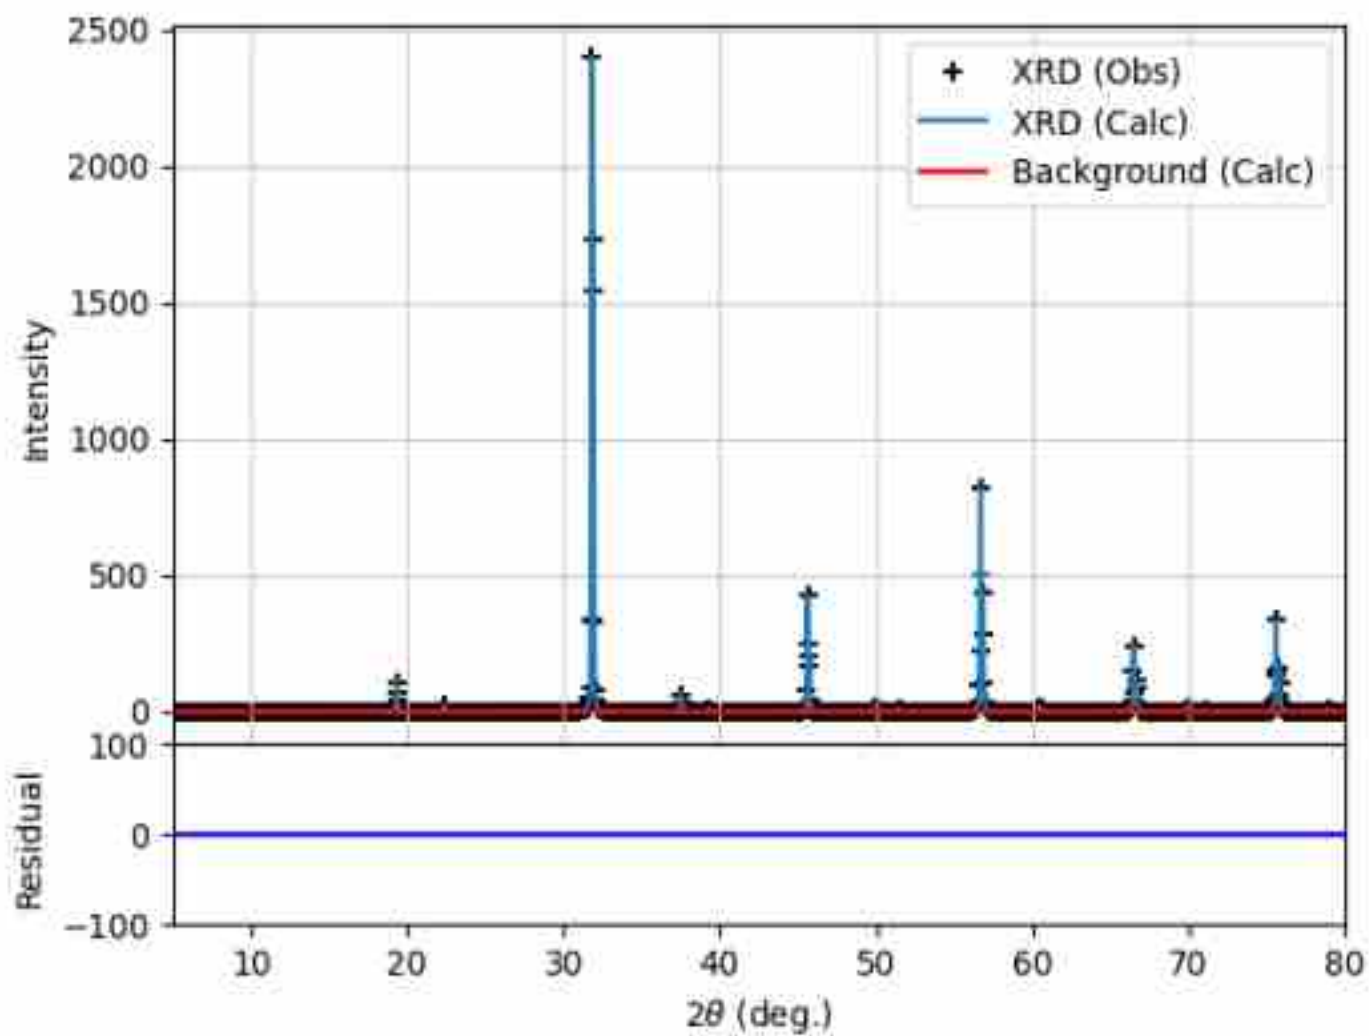

| RMSE before RR | Rwp     | RMSE after RR |
|----------------|---------|---------------|
| 0.002          | 0.09095 | 0.00188       |

# La3Al11

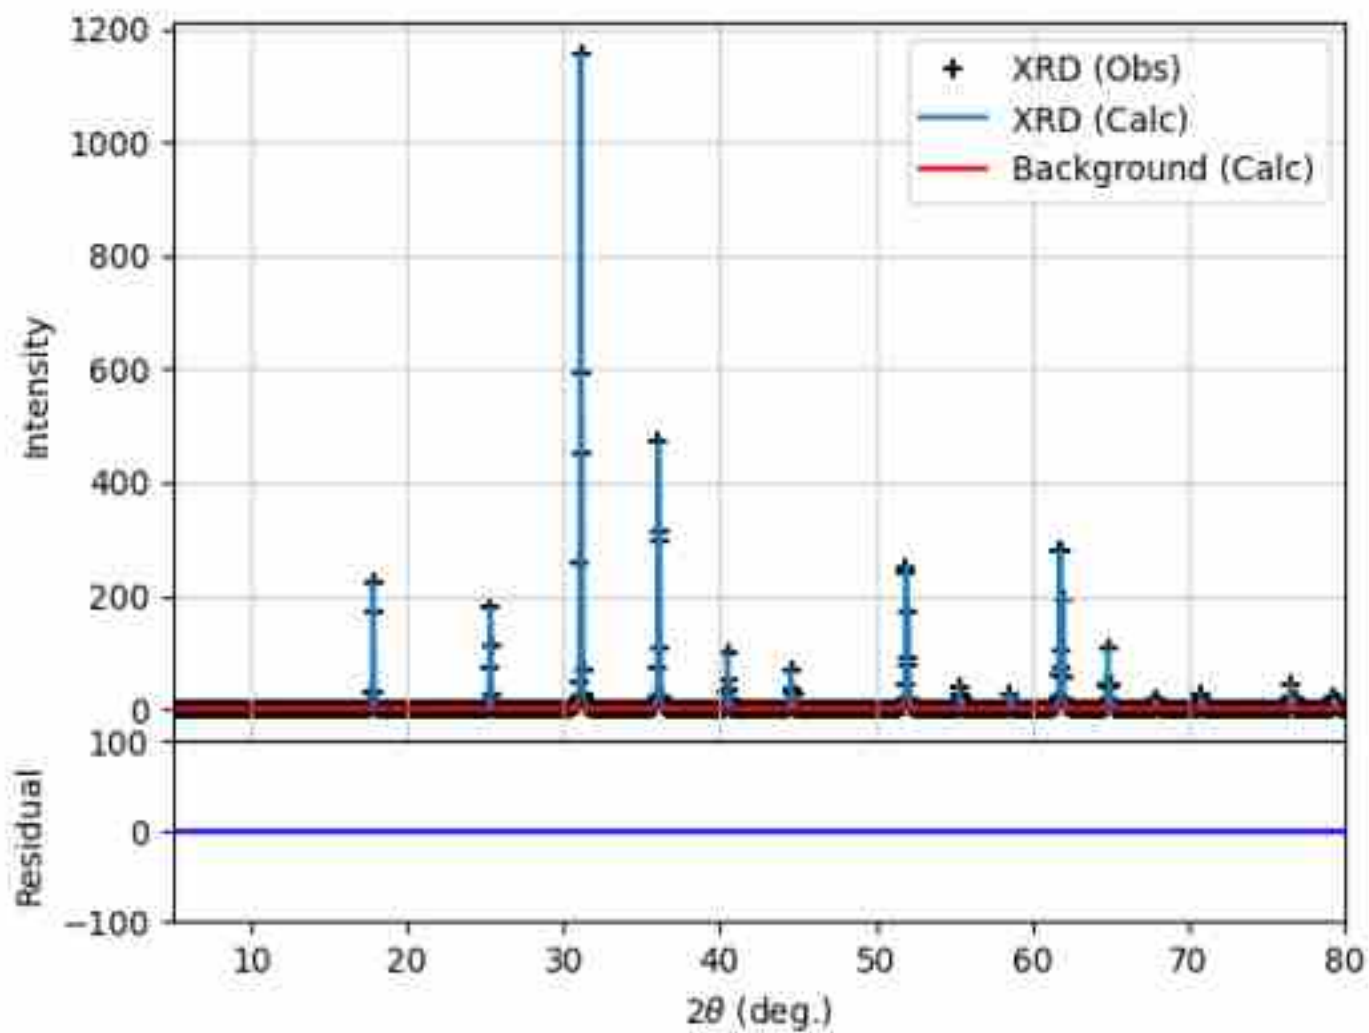

| RMSE before RR | Rwp     | RMSE after RR |
|----------------|---------|---------------|
| 0.002          | 0.04113 | 0.00118       |

# La3Dy1

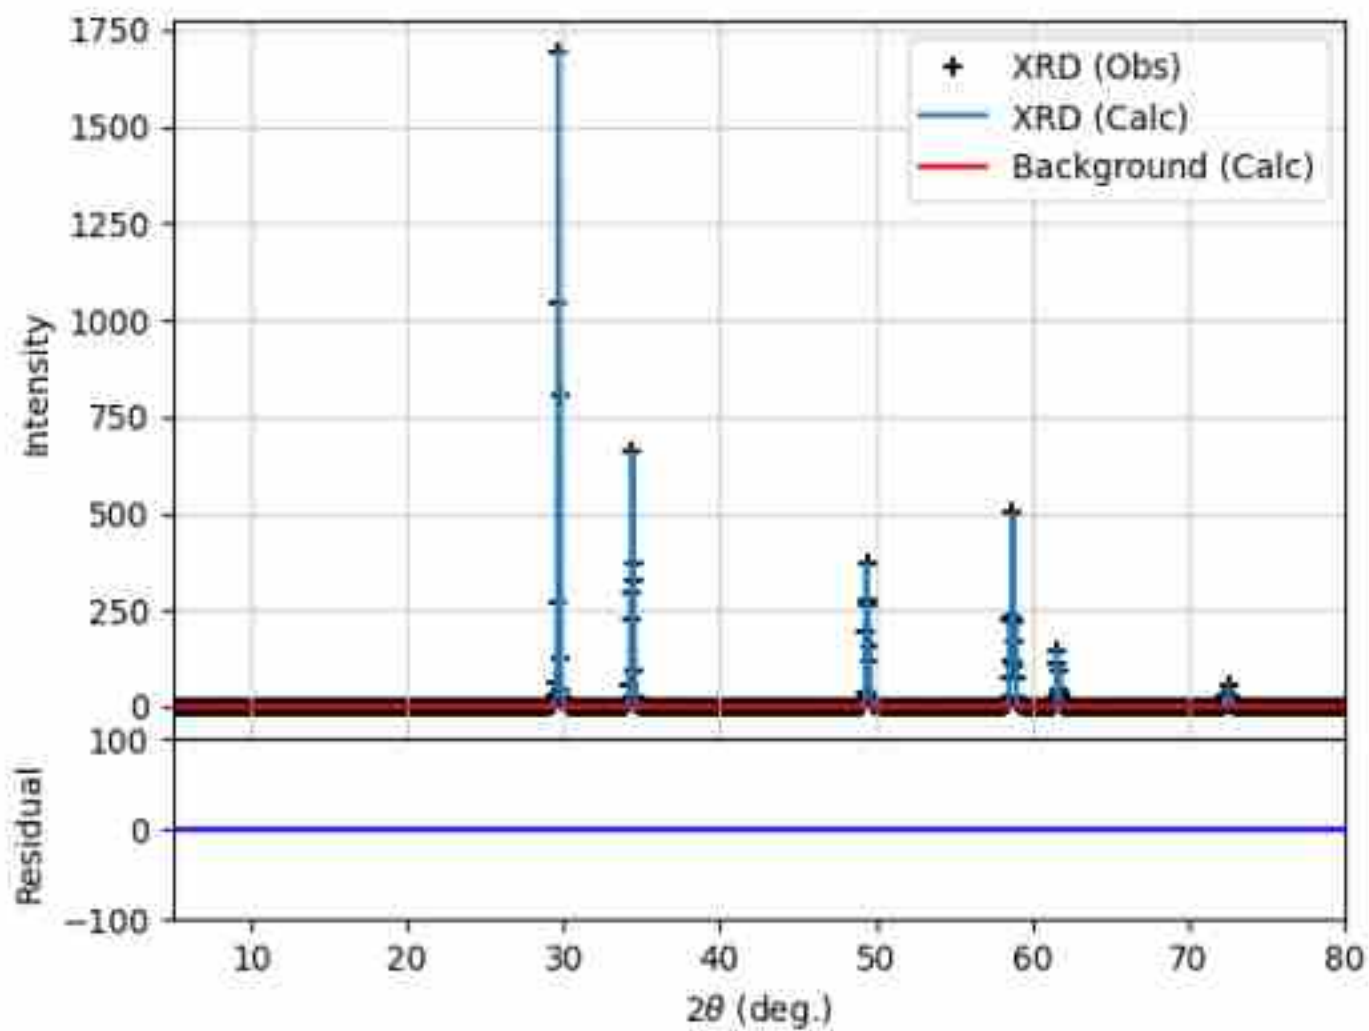

| RMSE before RR | Rwp     | RMSE after RR |
|----------------|---------|---------------|
| 0.002          | 0.00215 | 0.00014       |

# La3Eu1

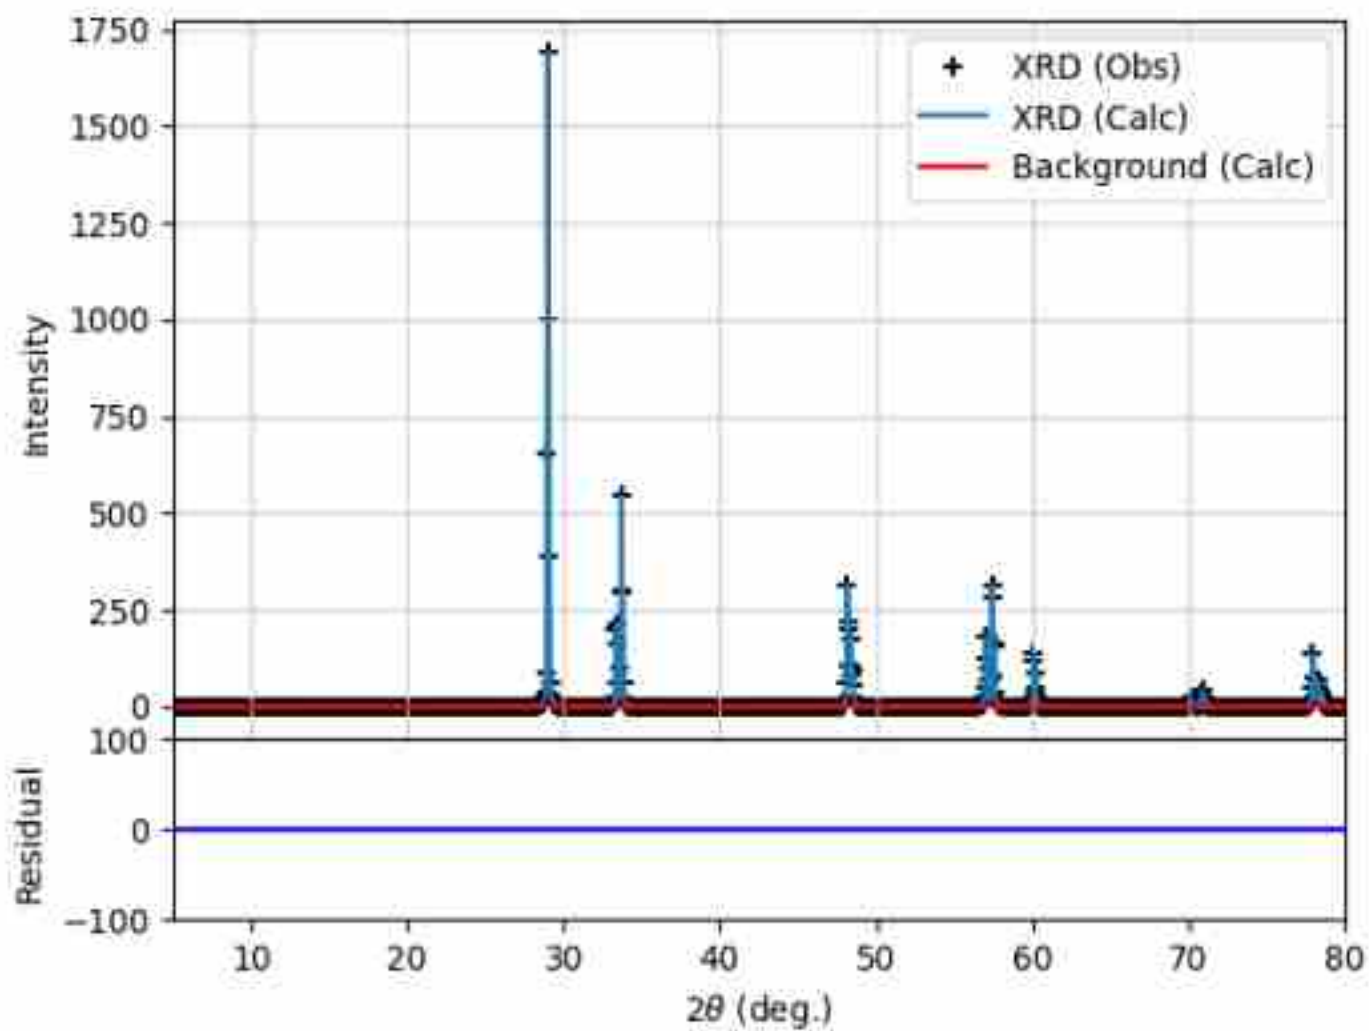

| RMSE before RR | Rwp     | RMSE after RR |
|----------------|---------|---------------|
| 0.002          | 0.00345 | 0.00015       |

# La<sub>3</sub>Pd<sub>3</sub>Pb<sub>3</sub>

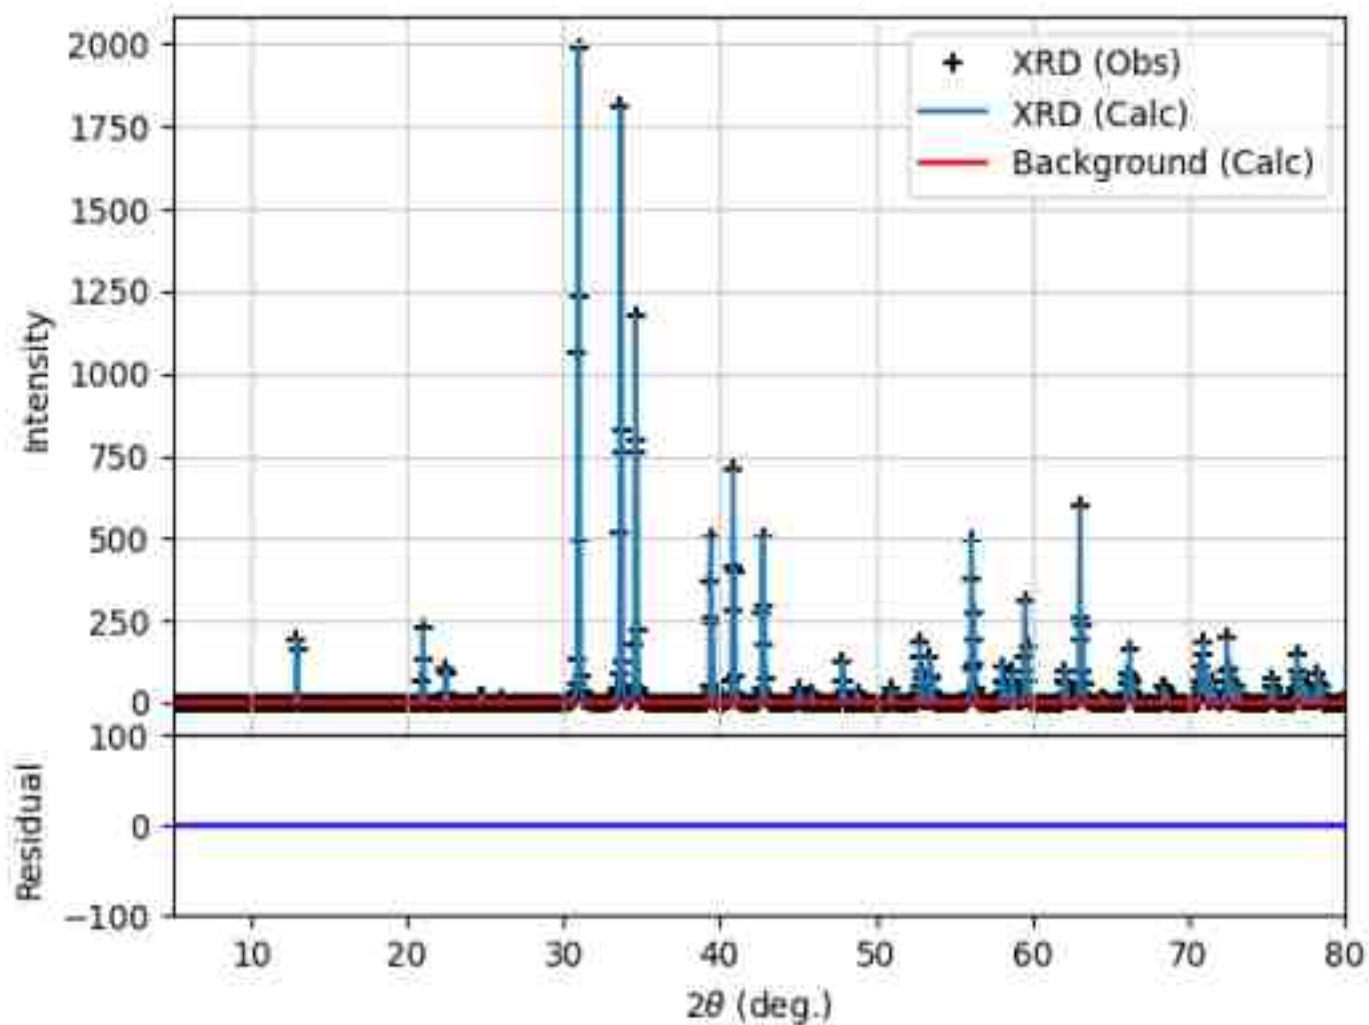

| RMSE before RR | Rwp     | RMSE after RR |
|----------------|---------|---------------|
| 0.02           | 0.00444 | 0.00102       |

# Li1Ac1Rh2

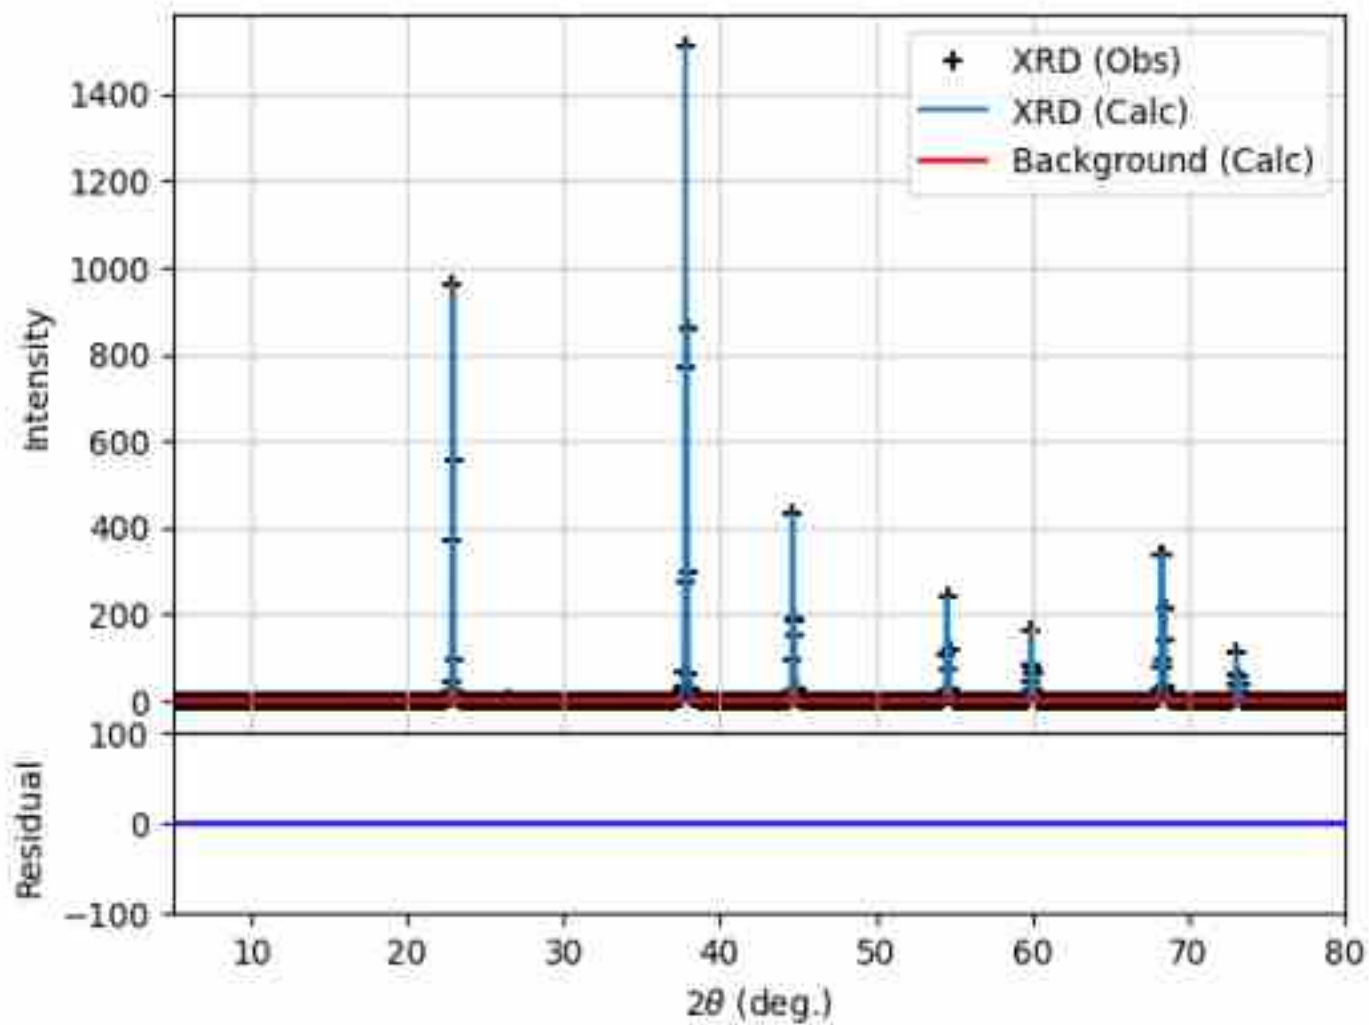

| RMSE before RR | Rwp     | RMSE after RR |
|----------------|---------|---------------|
| 0.002          | 0.00388 | 0.00252       |



# Li1Ce1Hg2

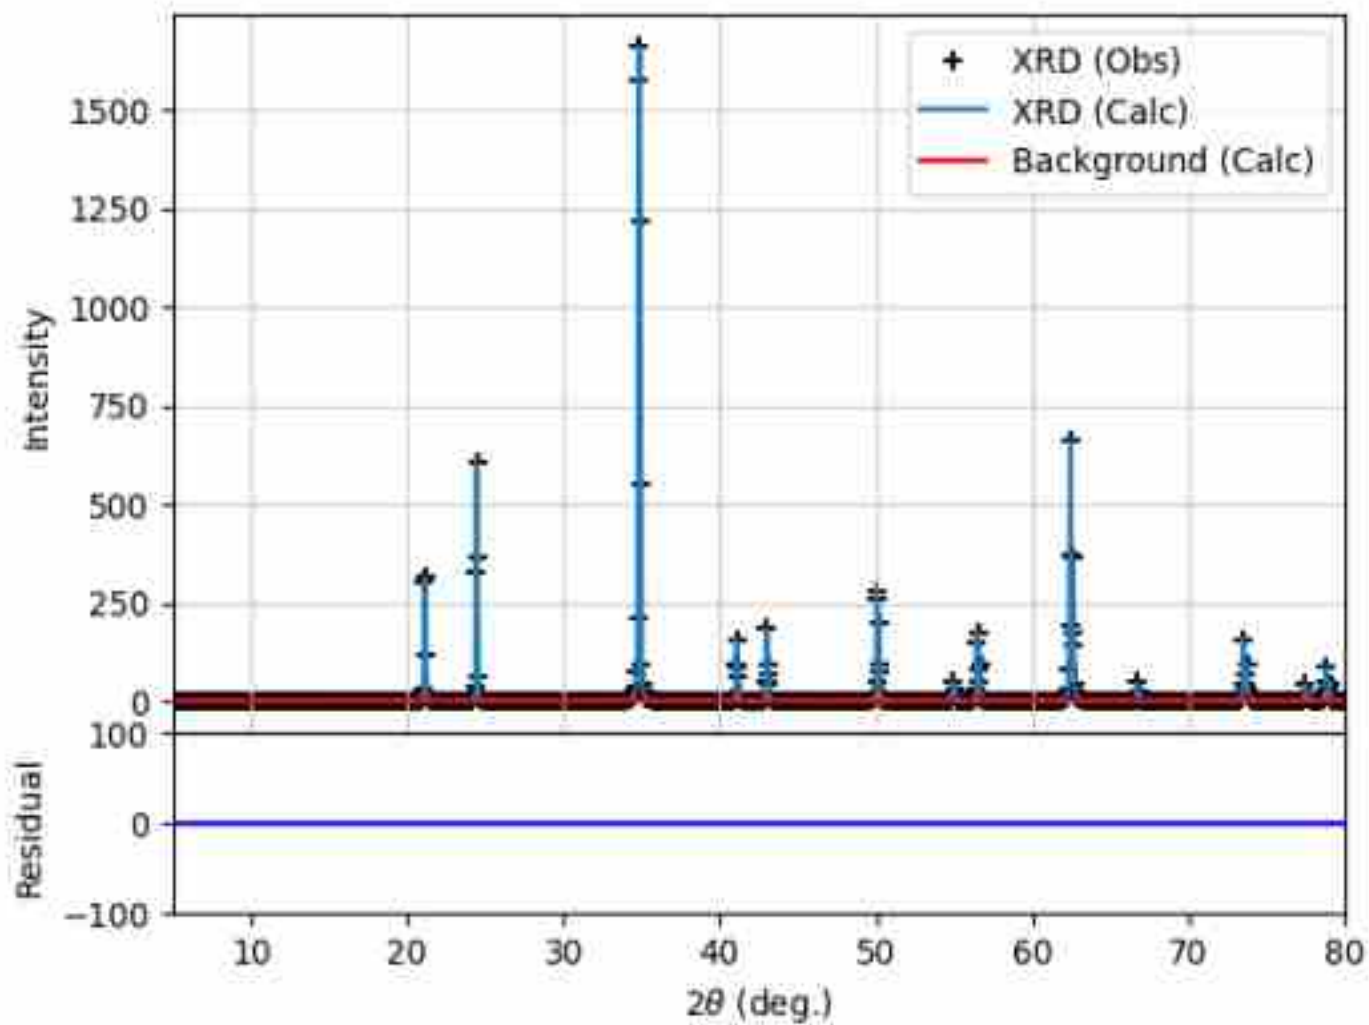

| RMSE before RR | Rwp     | RMSE after RR |
|----------------|---------|---------------|
| 0.002          | 0.01269 | 0.00153       |

# Li1Cr1Rh2

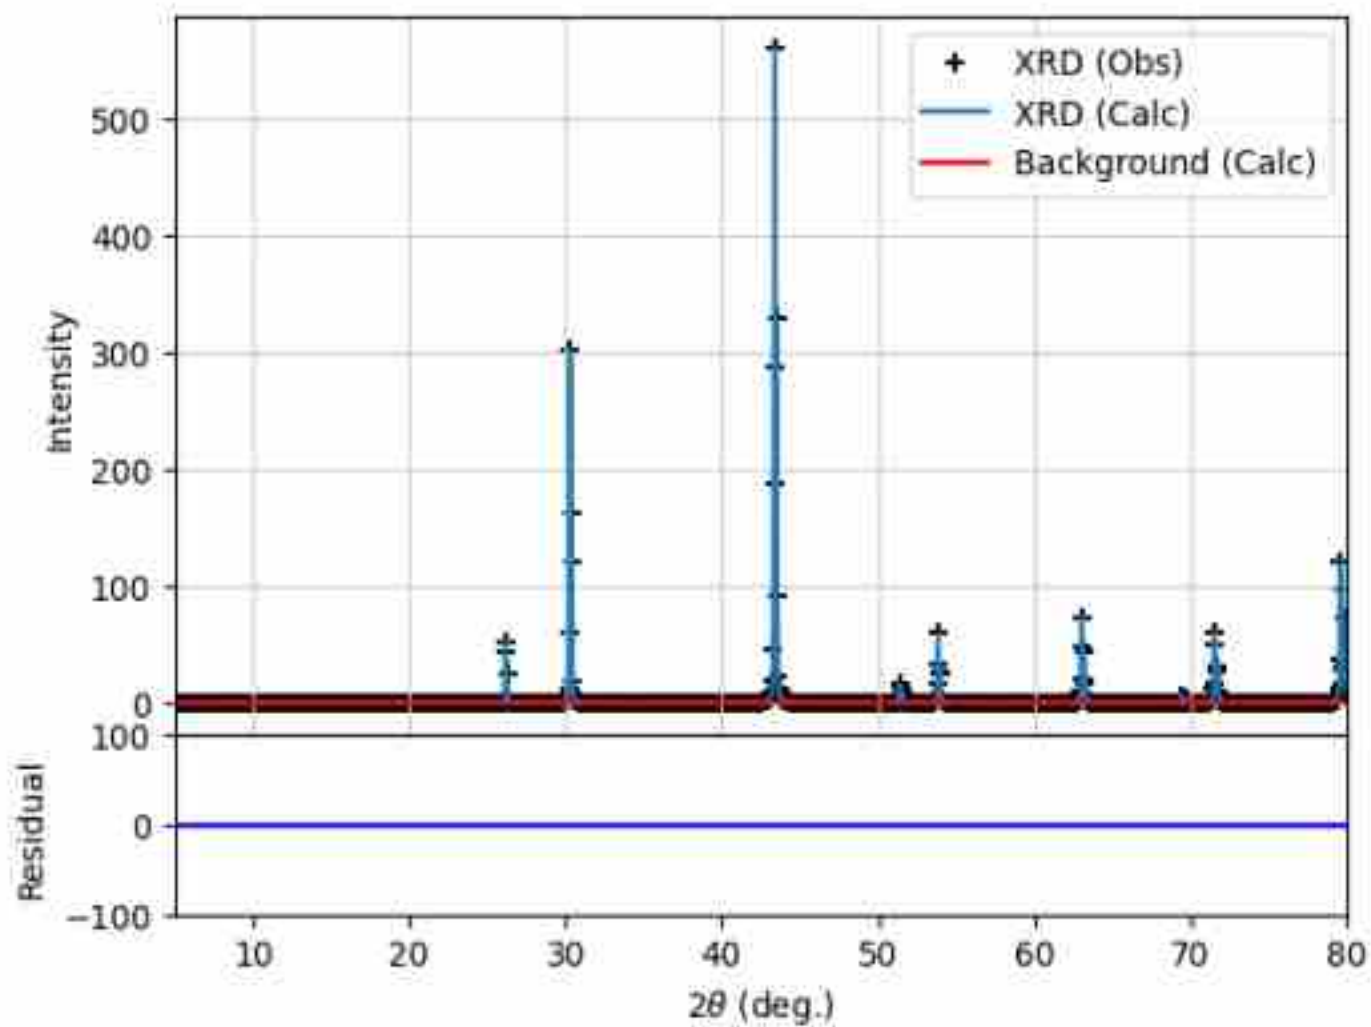

| RMSE before RR | Rwp     | RMSE after RR |
|----------------|---------|---------------|
| 0.002          | 0.00571 | 0.00443       |

# Li1Dy2Pt1

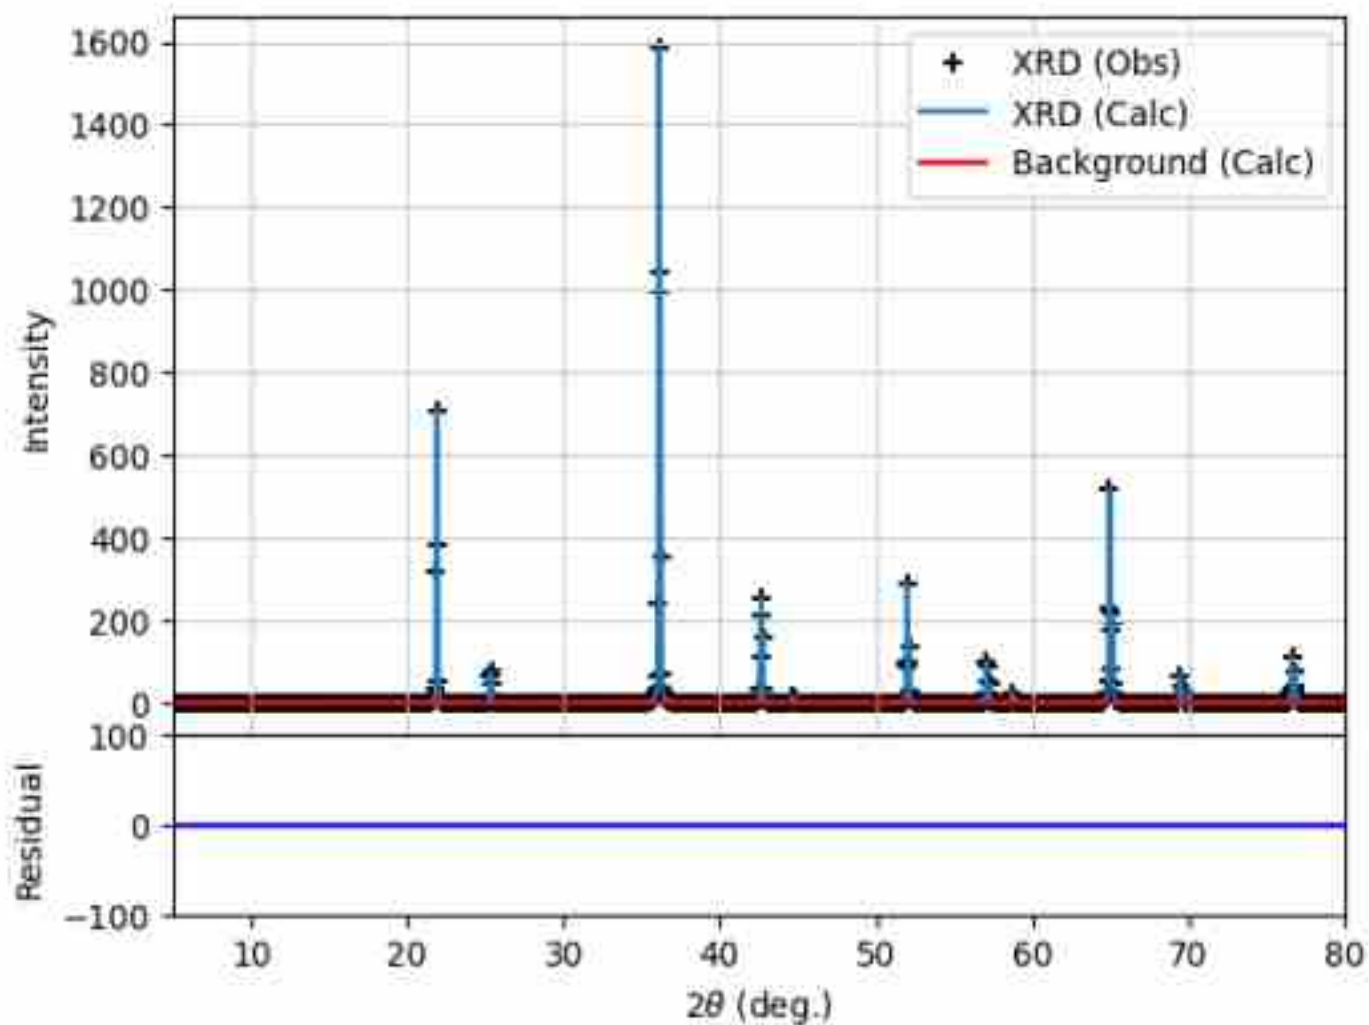

| RMSE before RR | Rwp     | RMSE after RR |
|----------------|---------|---------------|
| 0.002          | 0.00315 | 0.00083       |

# Li1Dy2Rh1

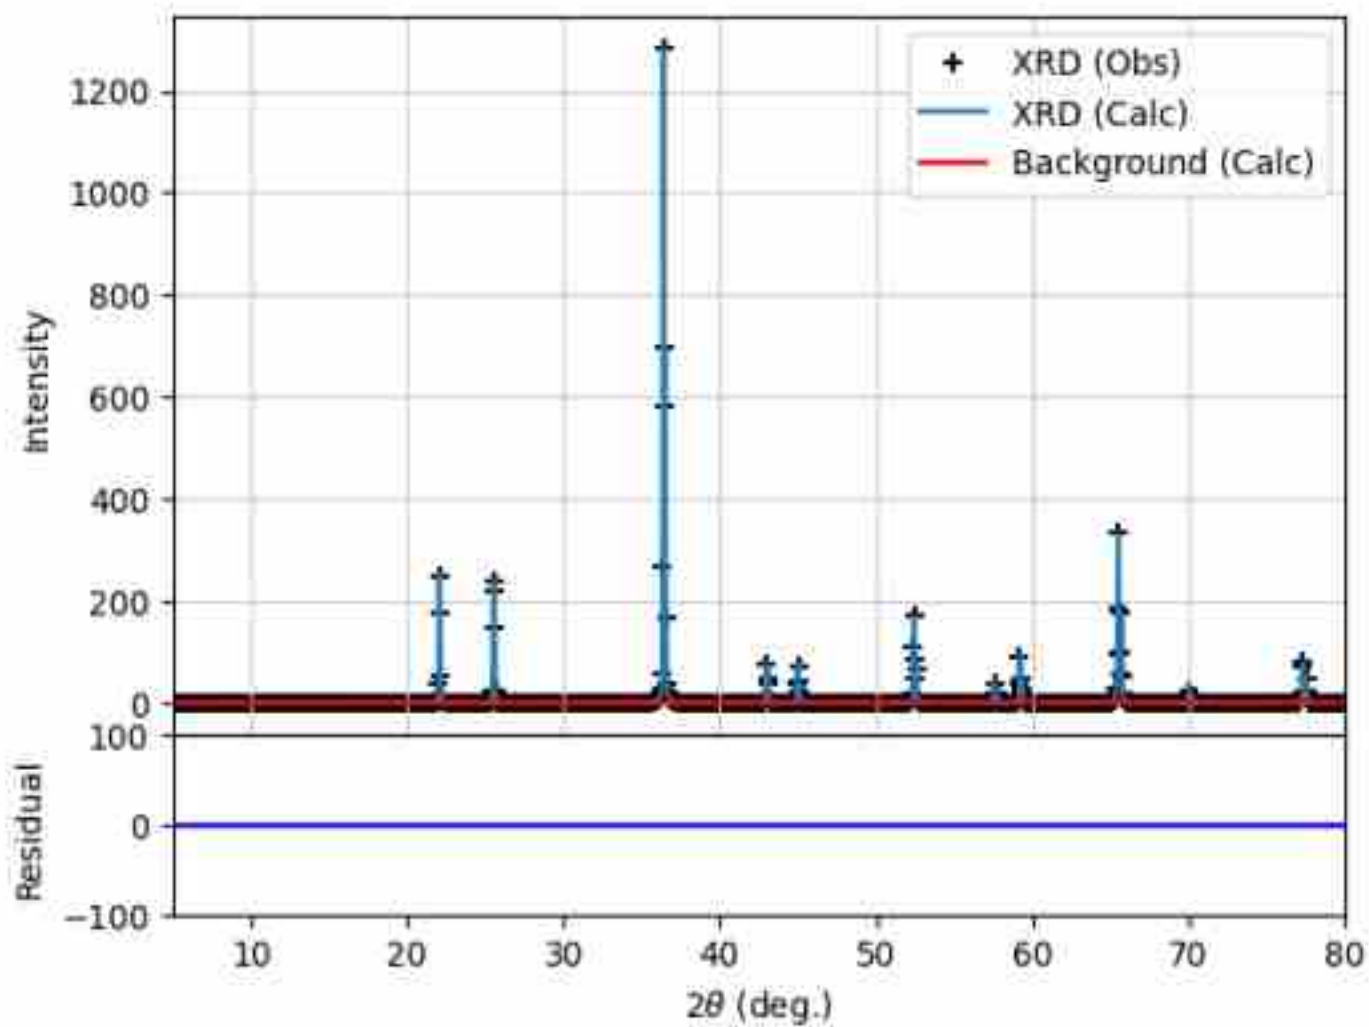

| RMSE before RR | Rwp     | RMSE after RR |
|----------------|---------|---------------|
| 0.002          | 0.00836 | 0.00234       |

# Li1Er1Ti2

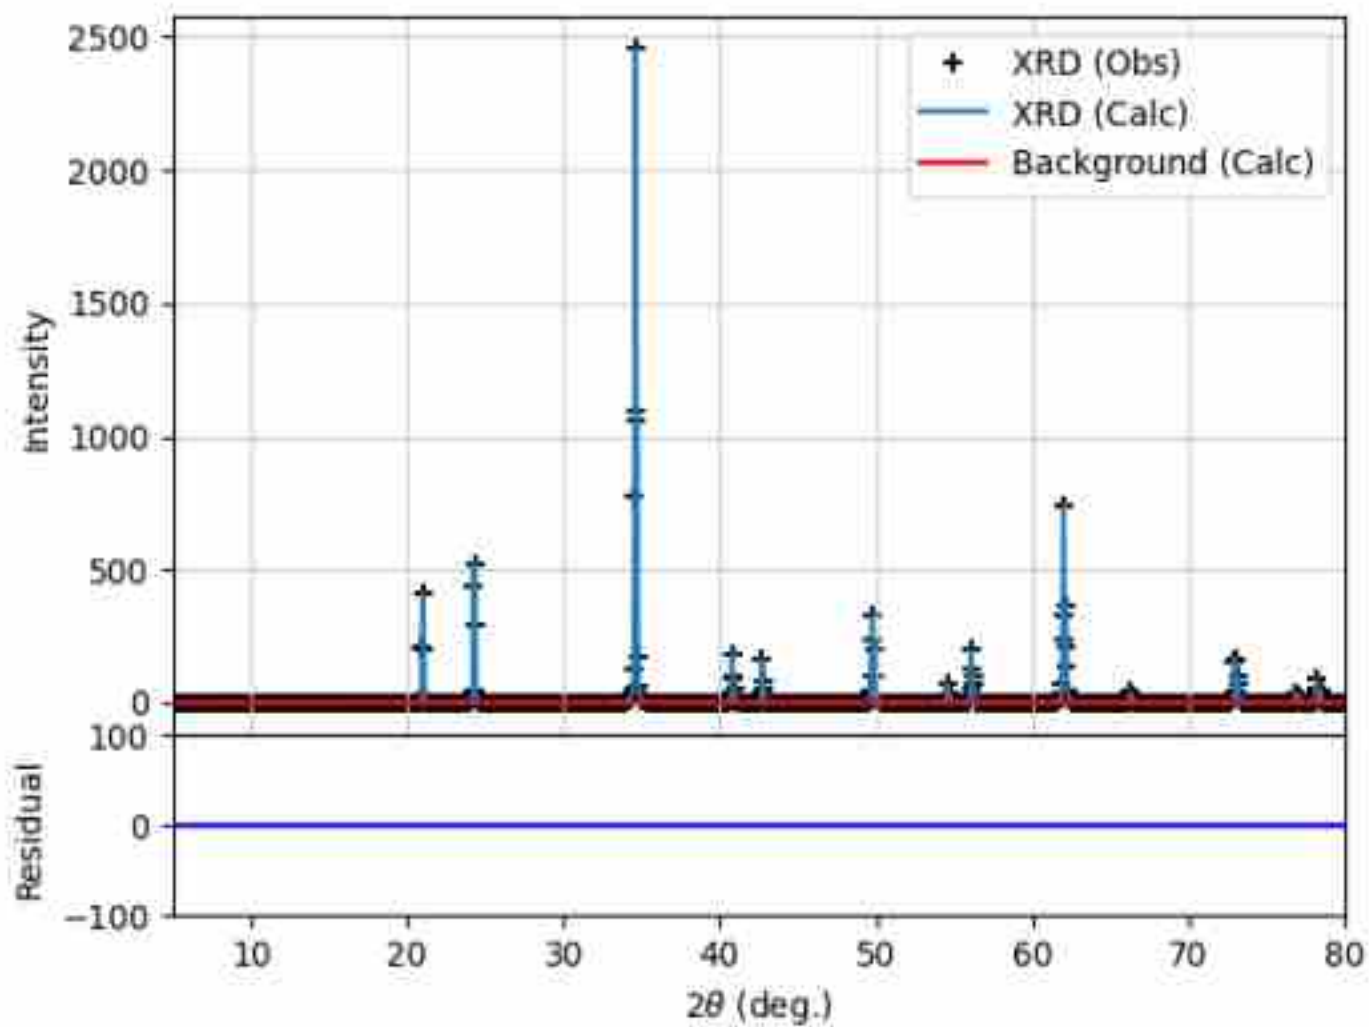

| RMSE before RR | Rwp     | RMSE after RR |
|----------------|---------|---------------|
| 0.002          | 0.00102 | 0.00055       |

# Li1Fe1Pd2

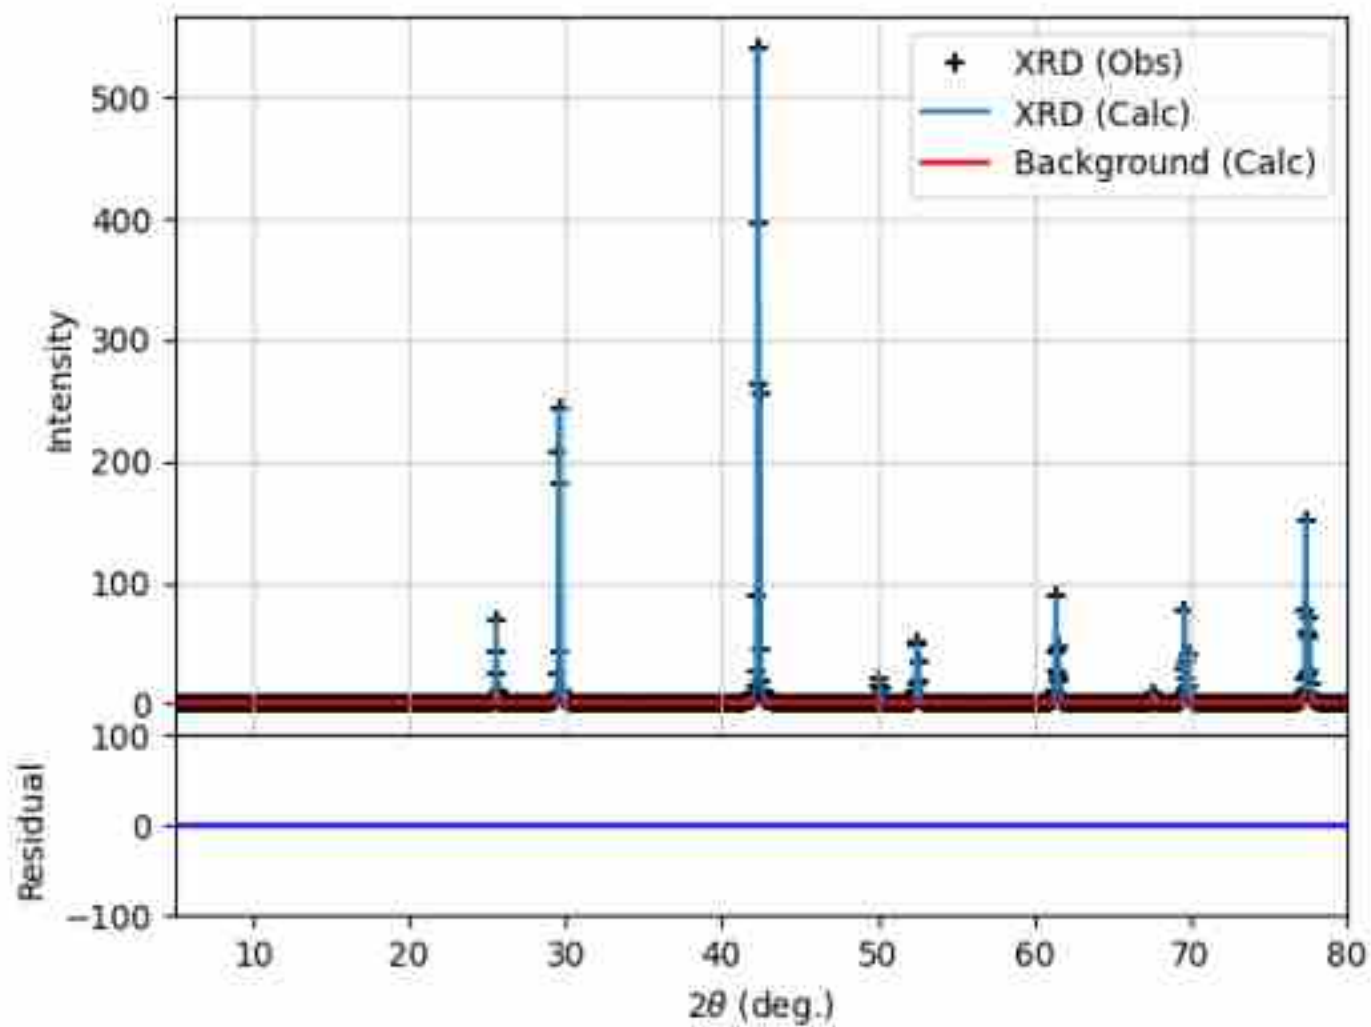

| RMSE before RR | Rwp     | RMSE after RR |
|----------------|---------|---------------|
| 0.002          | 0.00413 | 0.00246       |

# Li1Gd1Se2

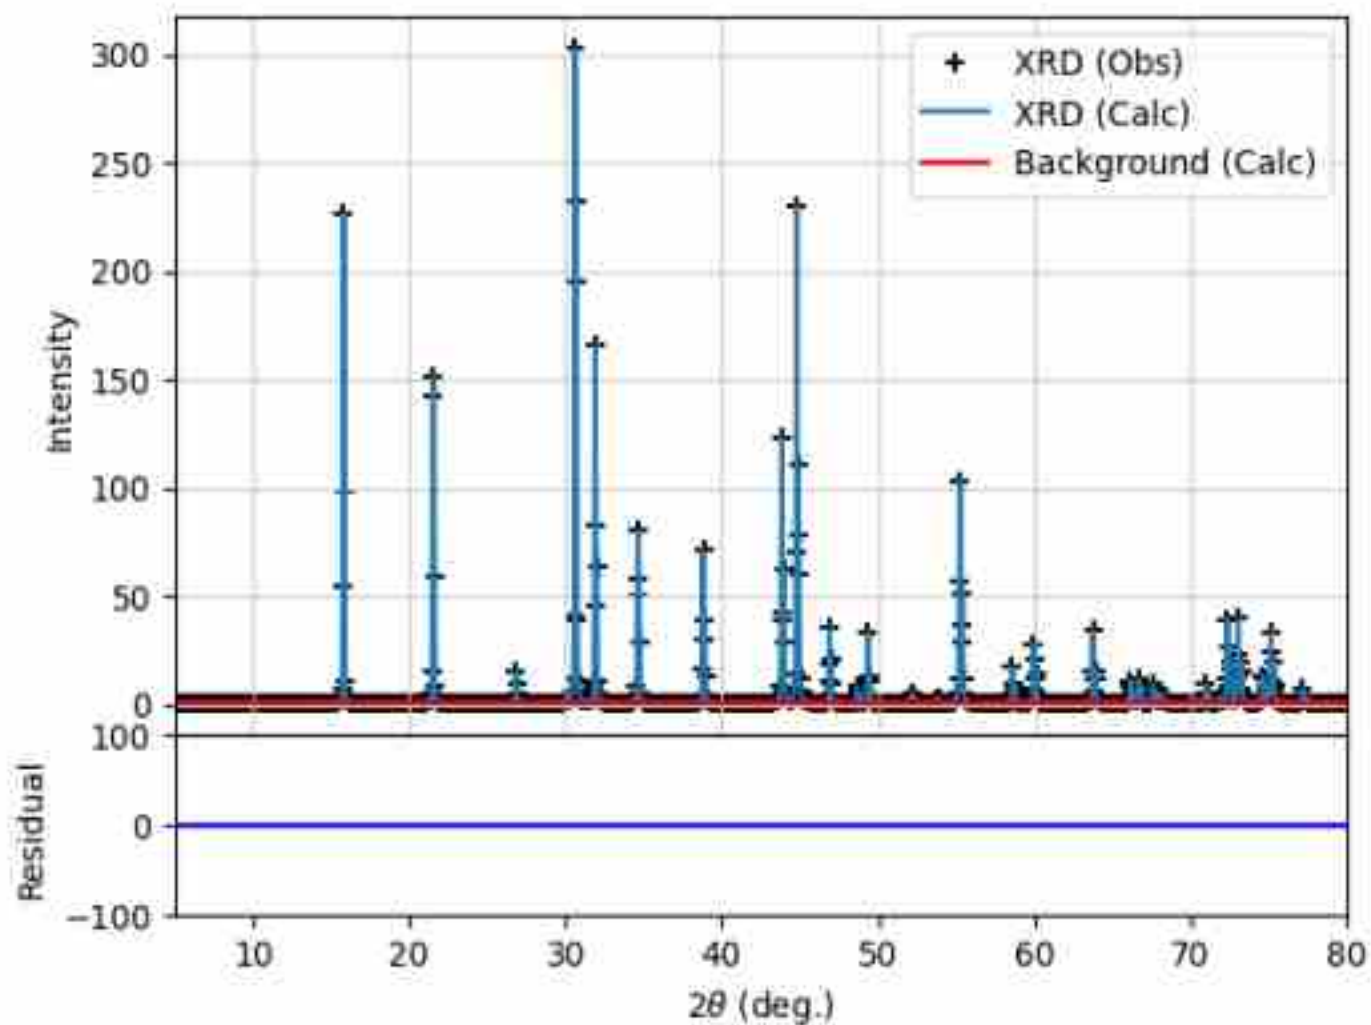

| RMSE before RR | Rwp     | RMSE after RR |
|----------------|---------|---------------|
| 0.002          | 0.00496 | 0.00184       |

# Li1Ge2Ir1

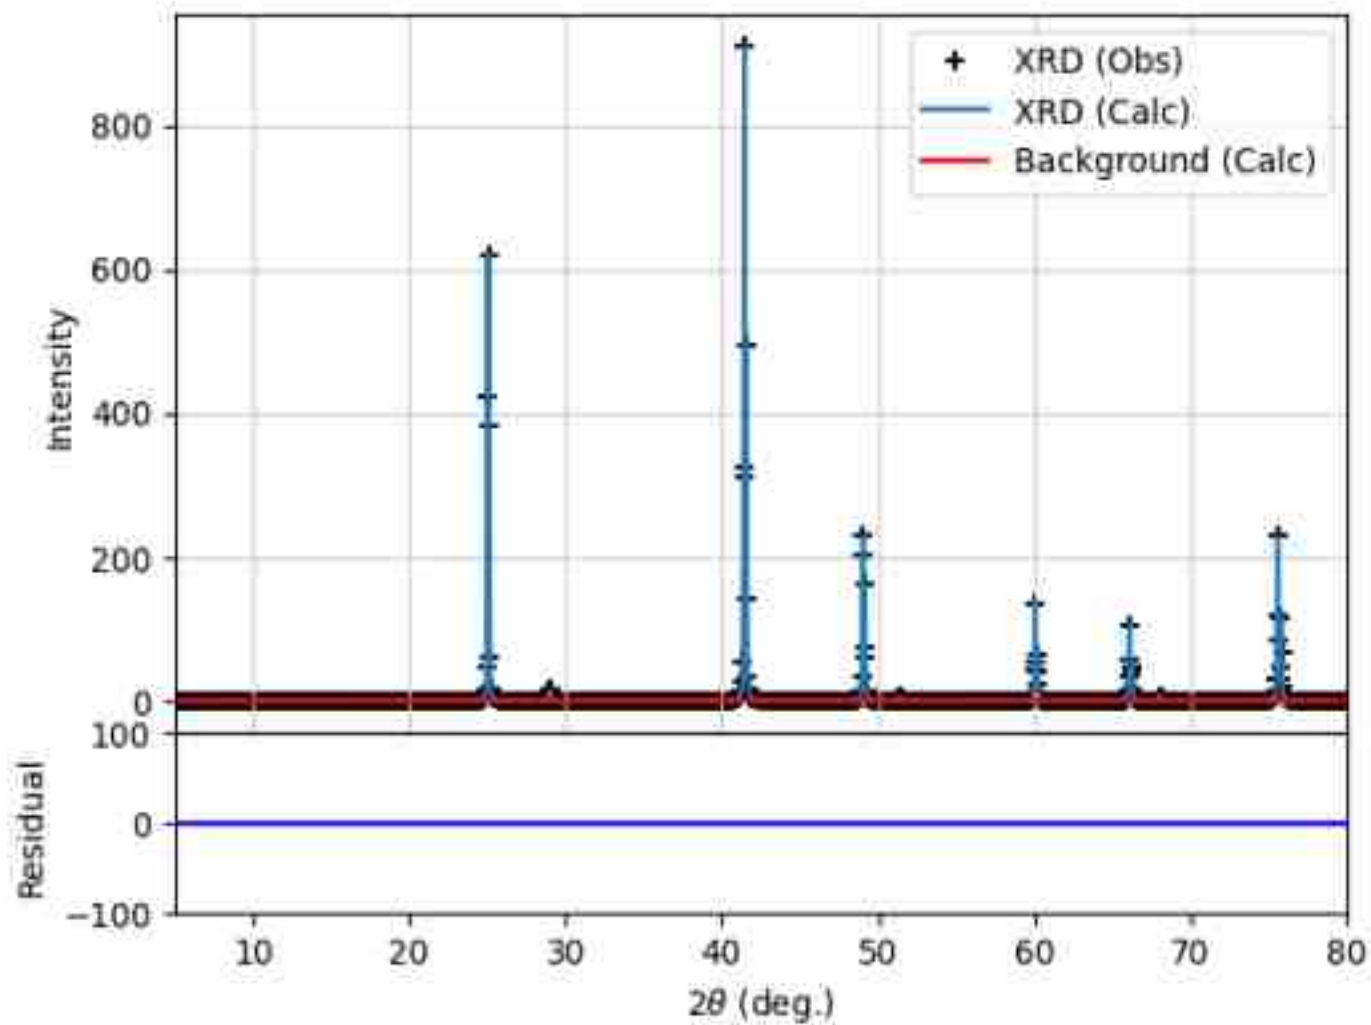

| RMSE before RR | Rwp    | RMSE after RR |
|----------------|--------|---------------|
| 0.002          | 0.0005 | 0.00045       |



# Li1Hg3

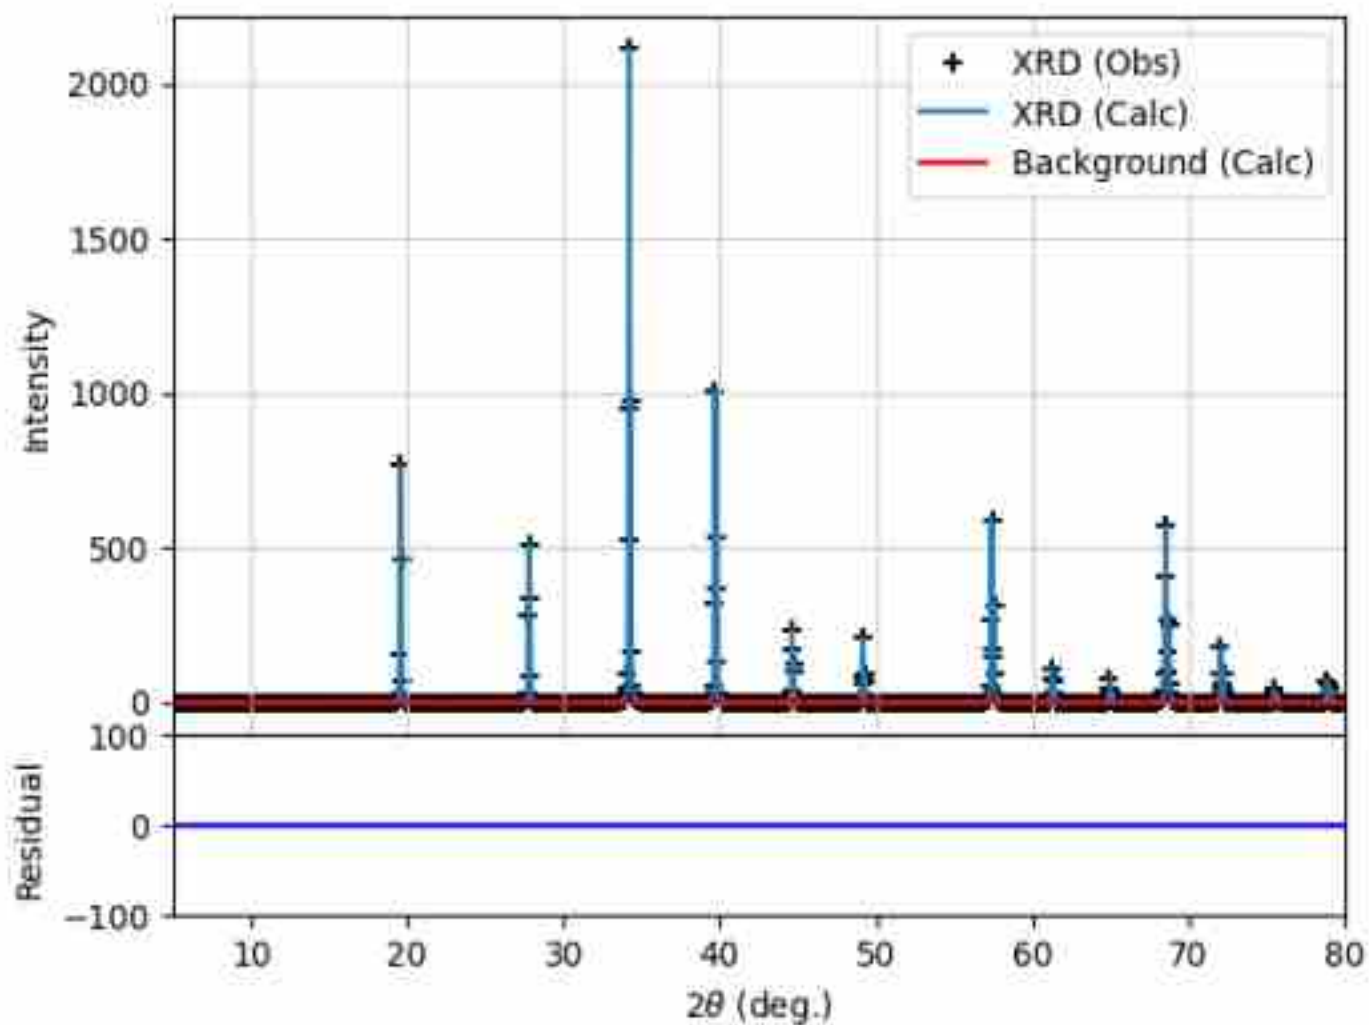

| RMSE before RR | Rwp     | RMSE after RR |
|----------------|---------|---------------|
| 0.002          | 0.02176 | 0.00379       |

# Li1Ho1Au2

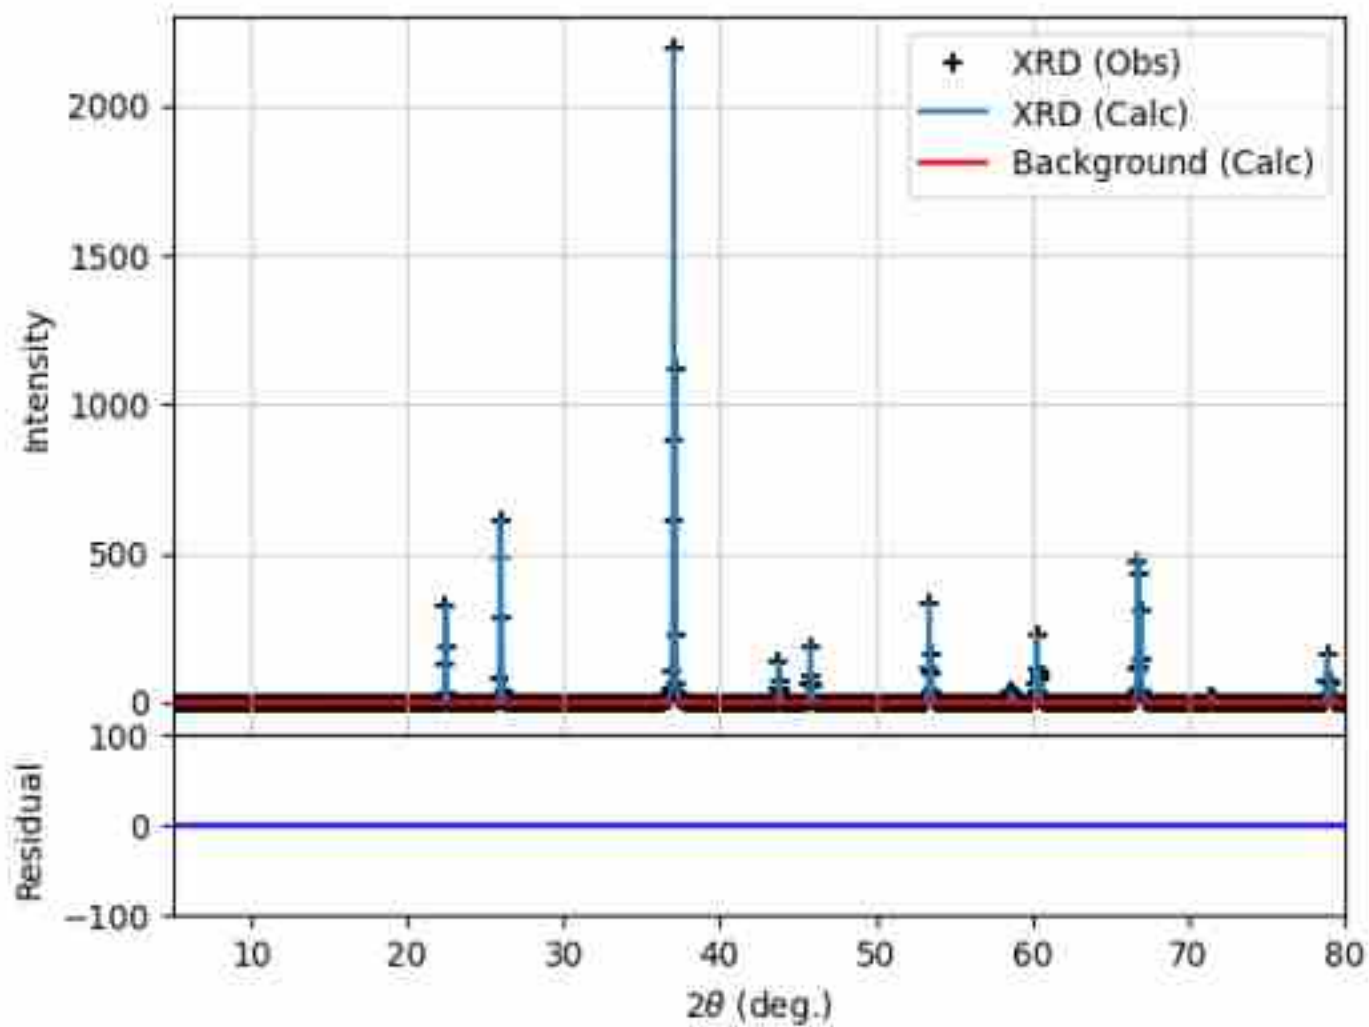

| RMSE before RR | Rwp     | RMSE after RR |
|----------------|---------|---------------|
| 0.002          | 0.02848 | 0.00742       |

# Li1Ho2Pt1

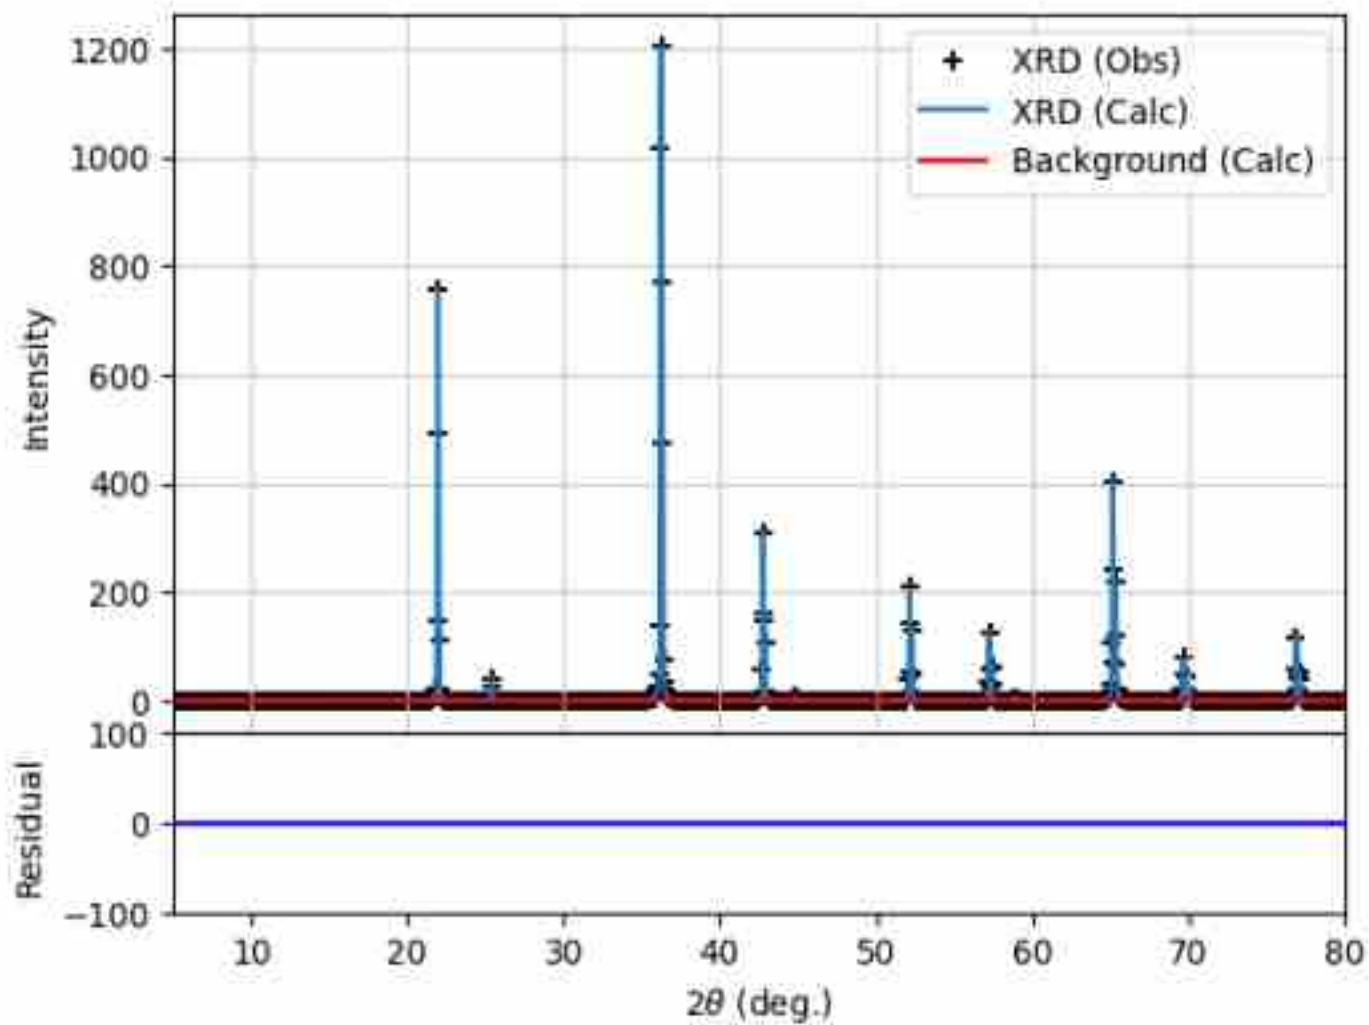

| RMSE before RR | Rwp     | RMSE after RR |
|----------------|---------|---------------|
| 0.002          | 0.02802 | 0.00283       |

# Li1In1Ge1

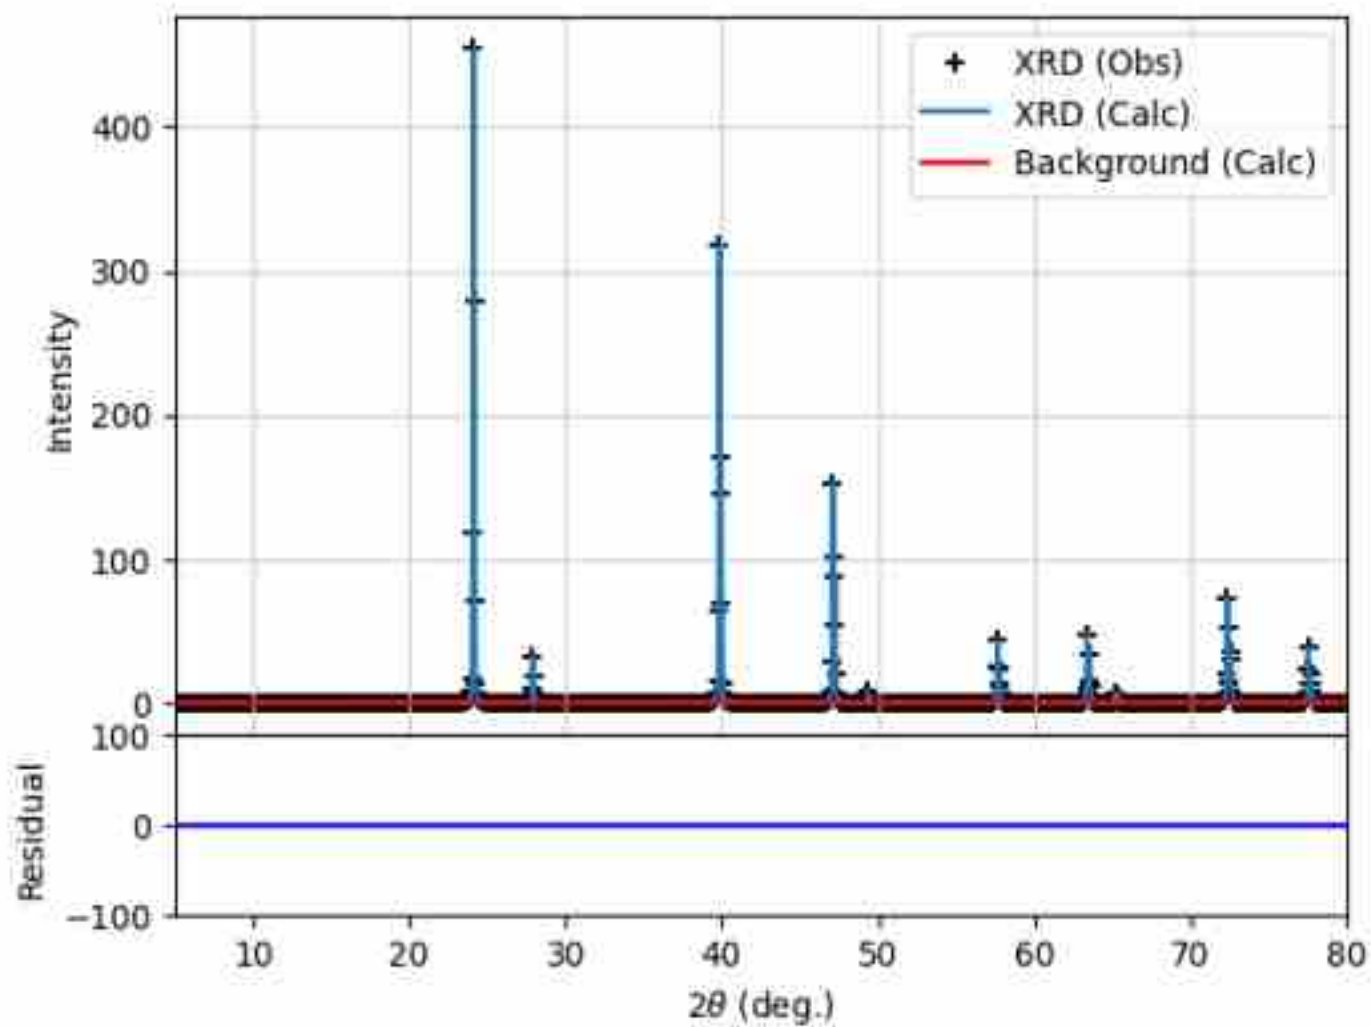

| RMSE before RR | Rwp     | RMSE after RR |
|----------------|---------|---------------|
| 0.002          | 0.01166 | 0.00318       |

# LiIn<sub>3</sub>

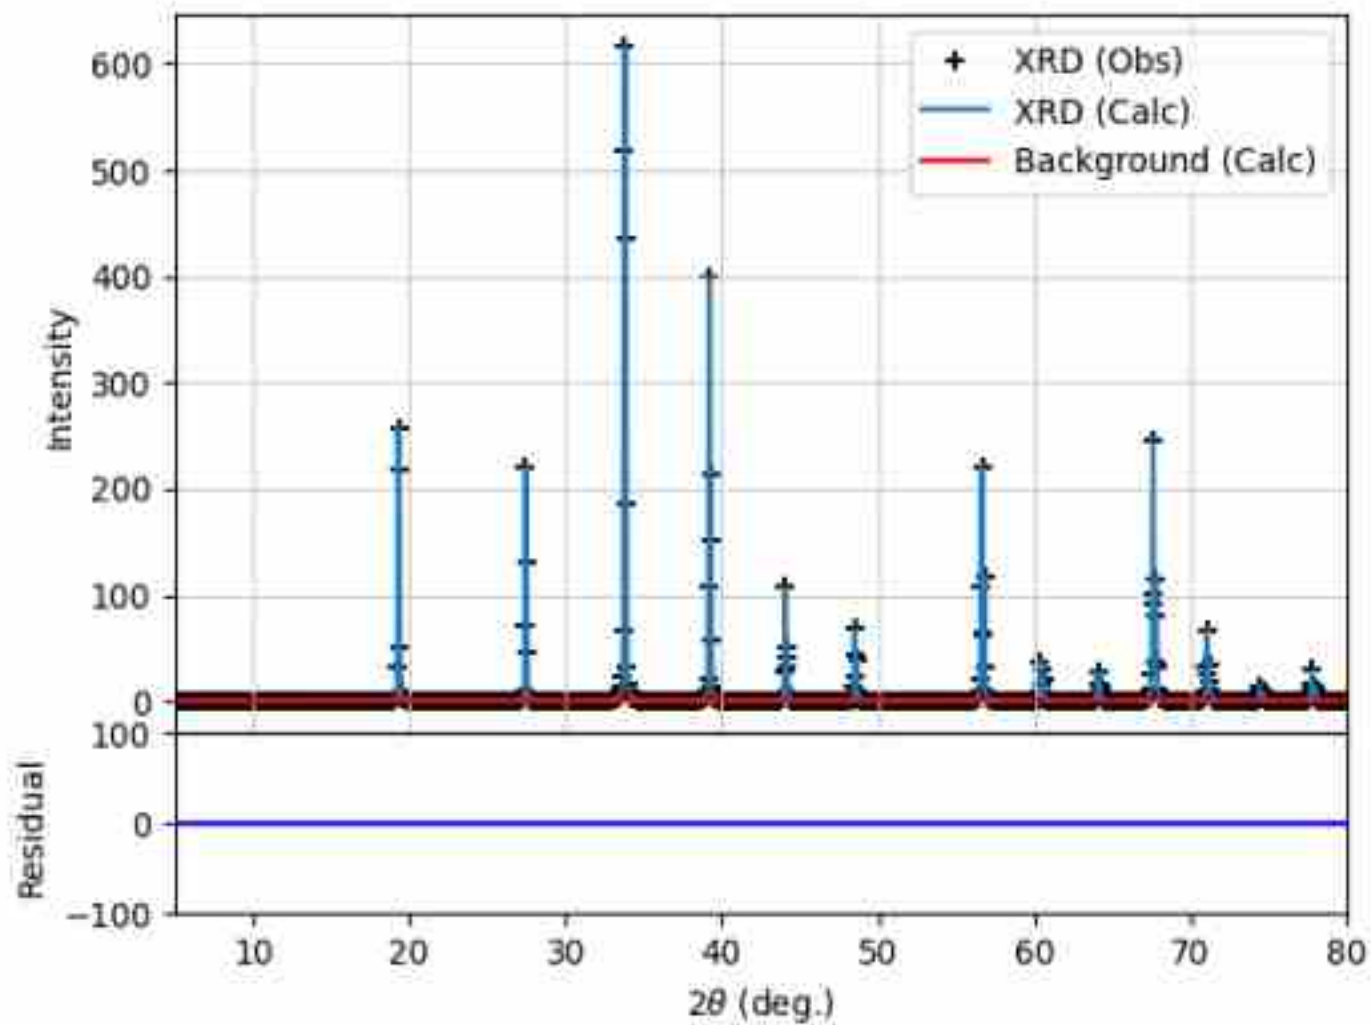

| RMSE before RR | Rwp     | RMSE after RR |
|----------------|---------|---------------|
| 0.002          | 0.05194 | 0.0014        |

# Li1Lu2Tc1

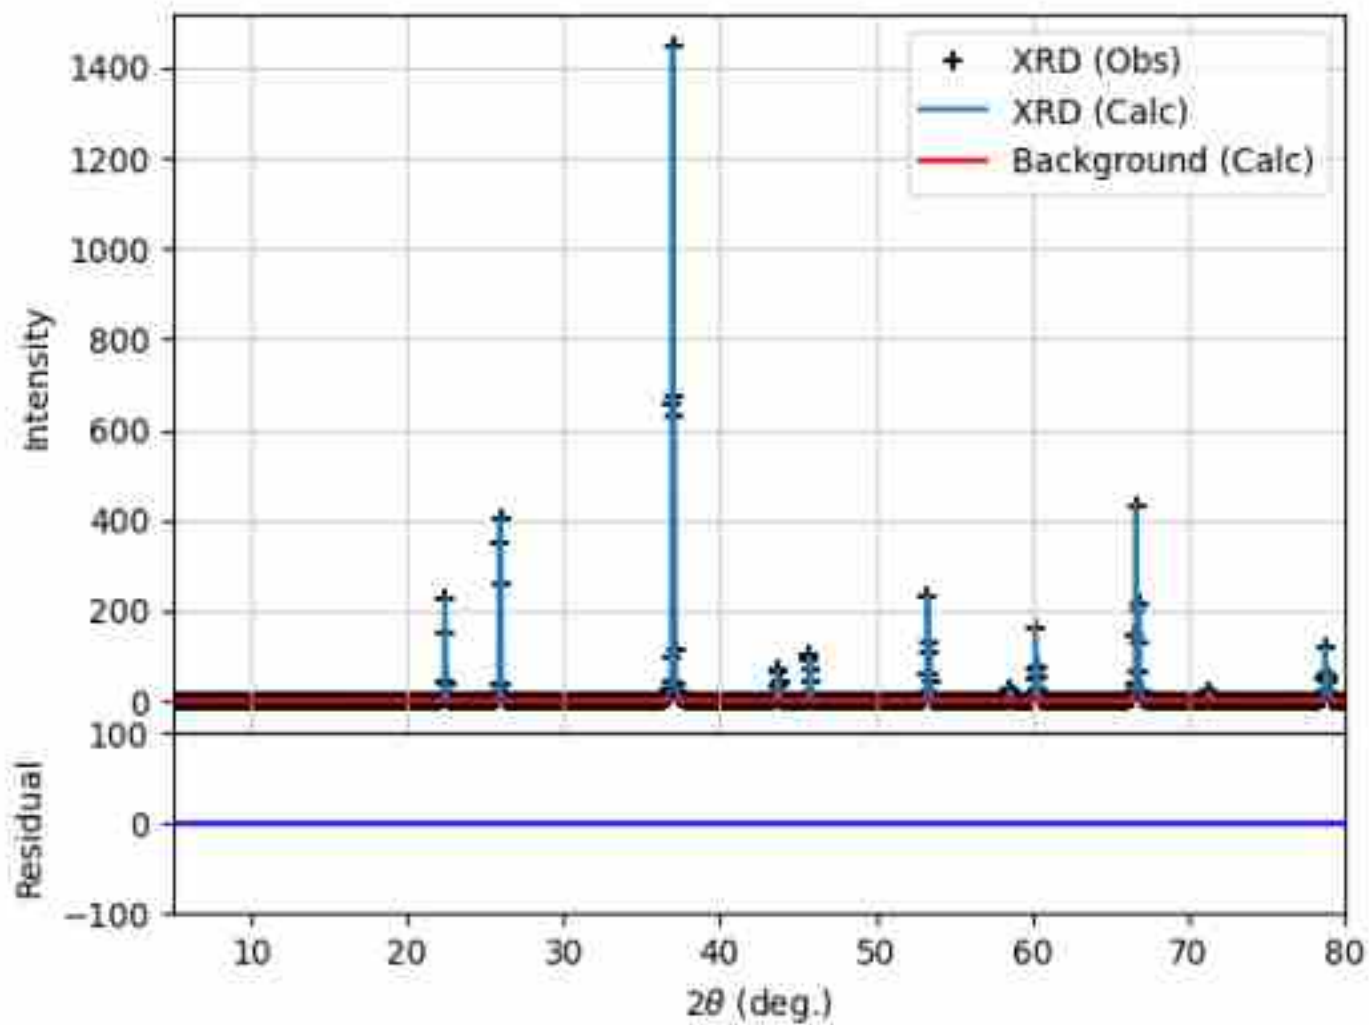

| RMSE before RR | Rwp     | RMSE after RR |
|----------------|---------|---------------|
| 0.002          | 0.00892 | 0.00206       |

# Li1Mg1Hg2

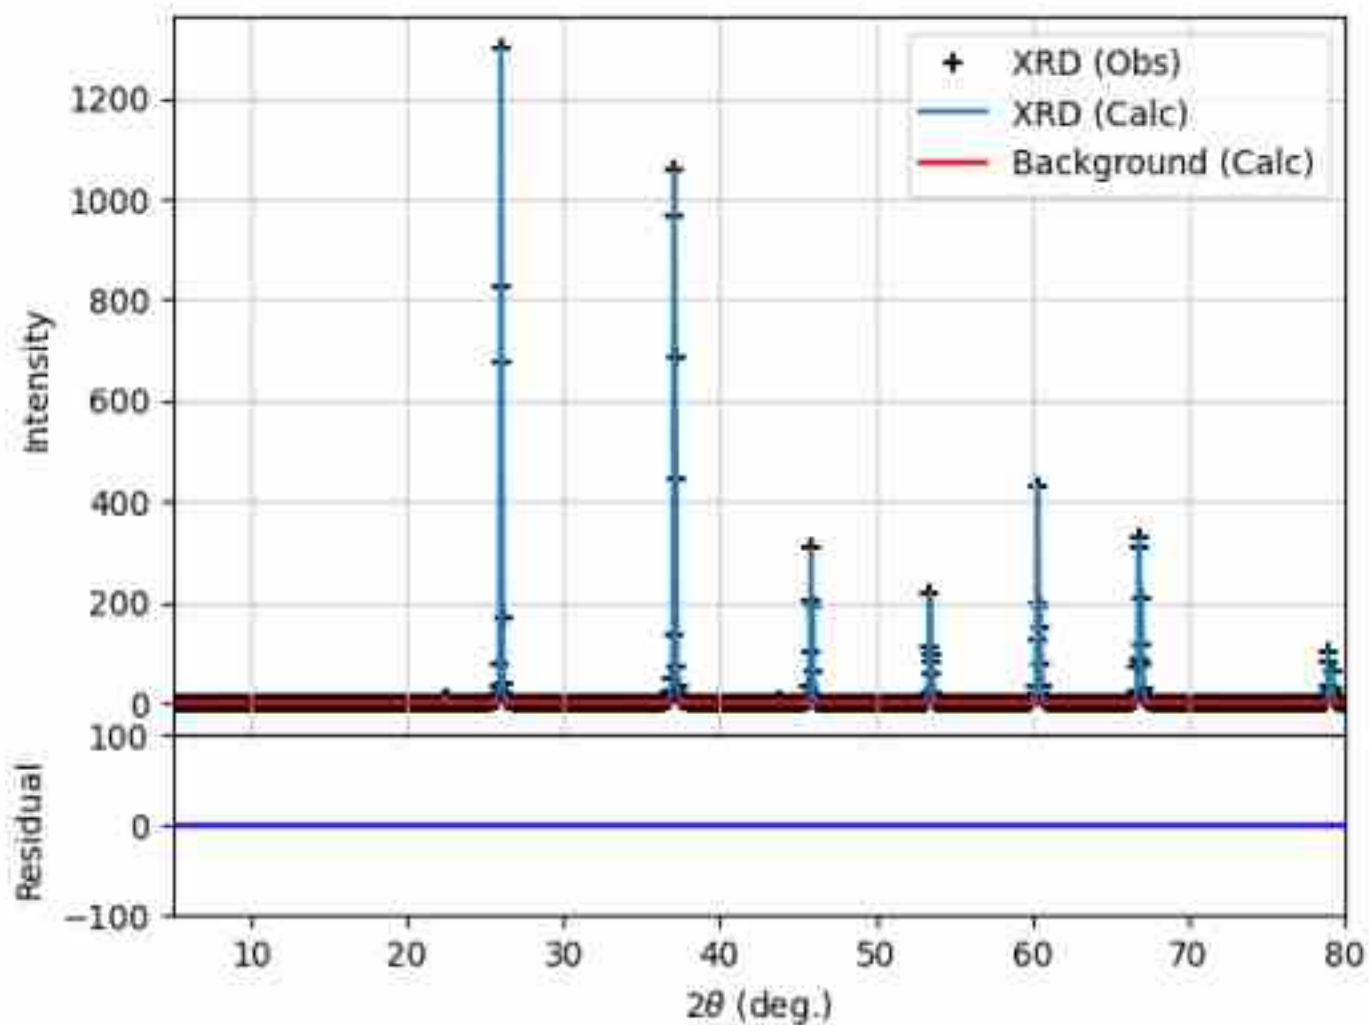

| RMSE before RR | Rwp     | RMSE after RR |
|----------------|---------|---------------|
| 0.002          | 0.00319 | 0.00313       |

# Li1Mg1

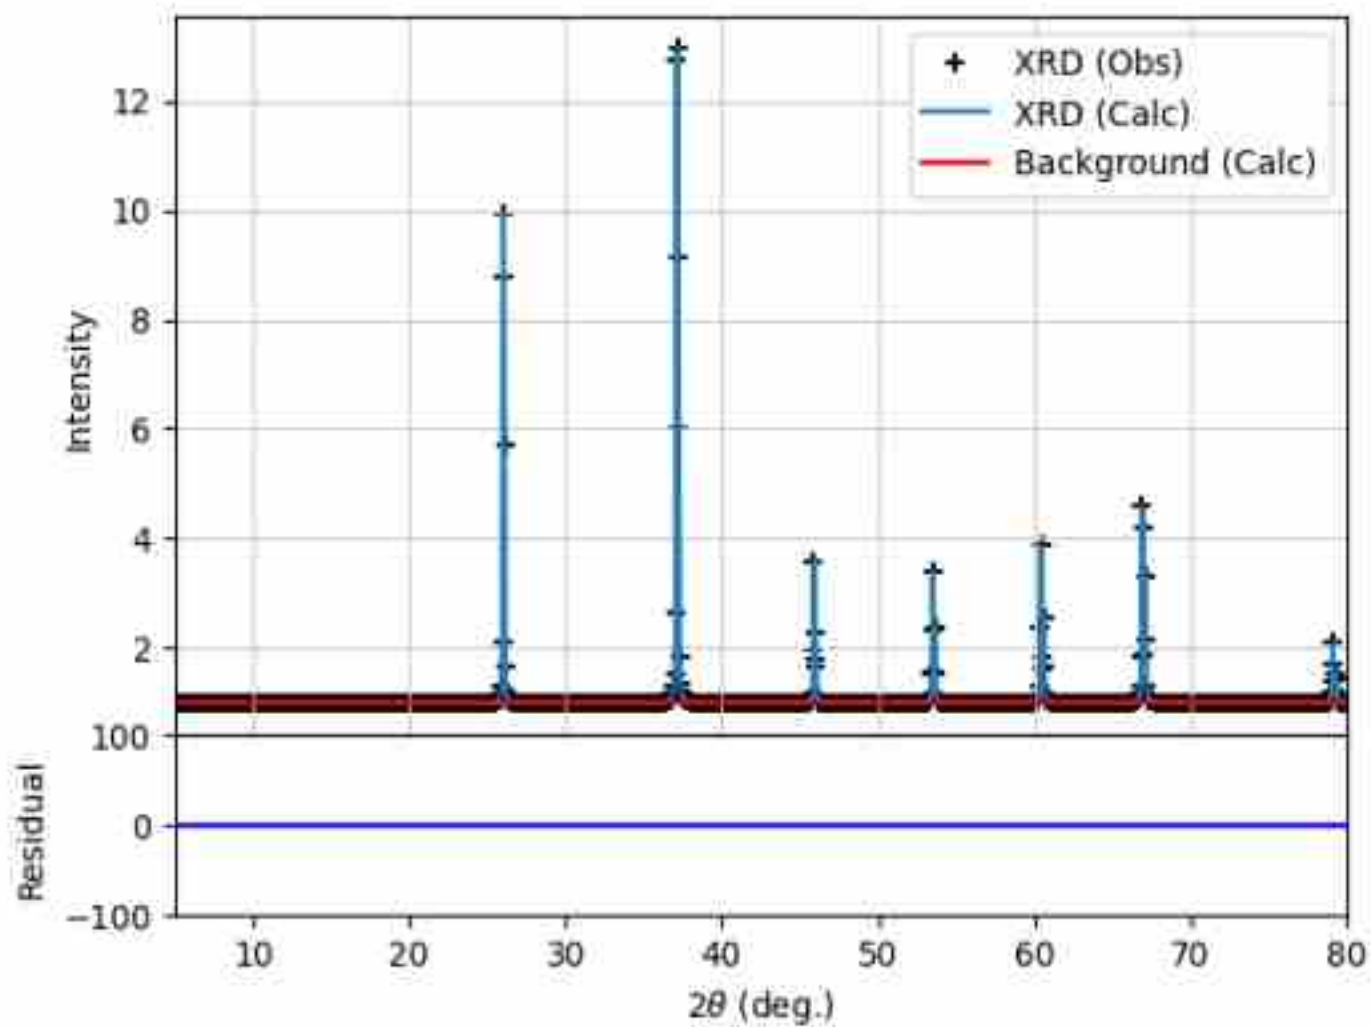

| RMSE before RR | Rwp    | RMSE after RR |
|----------------|--------|---------------|
| 0.002          | 0.0013 | 0.00045       |



# Li1Mg2Ni1

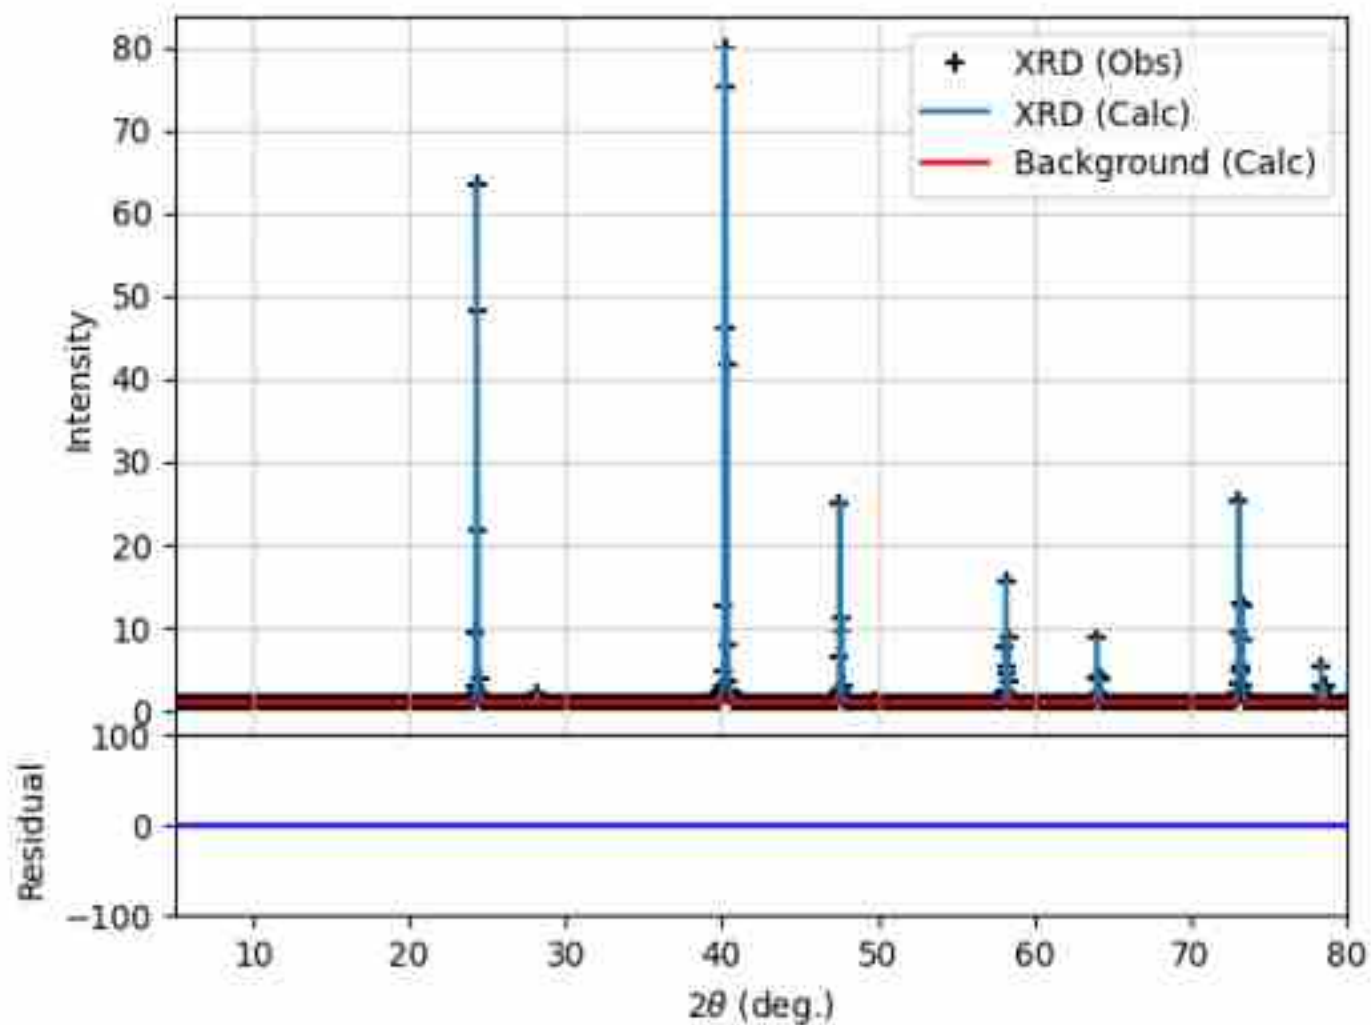

| RMSE before RR | Rwp     | RMSE after RR |
|----------------|---------|---------------|
| 0.002          | 0.00159 | 0.00079       |

# Li1Nd1Se2

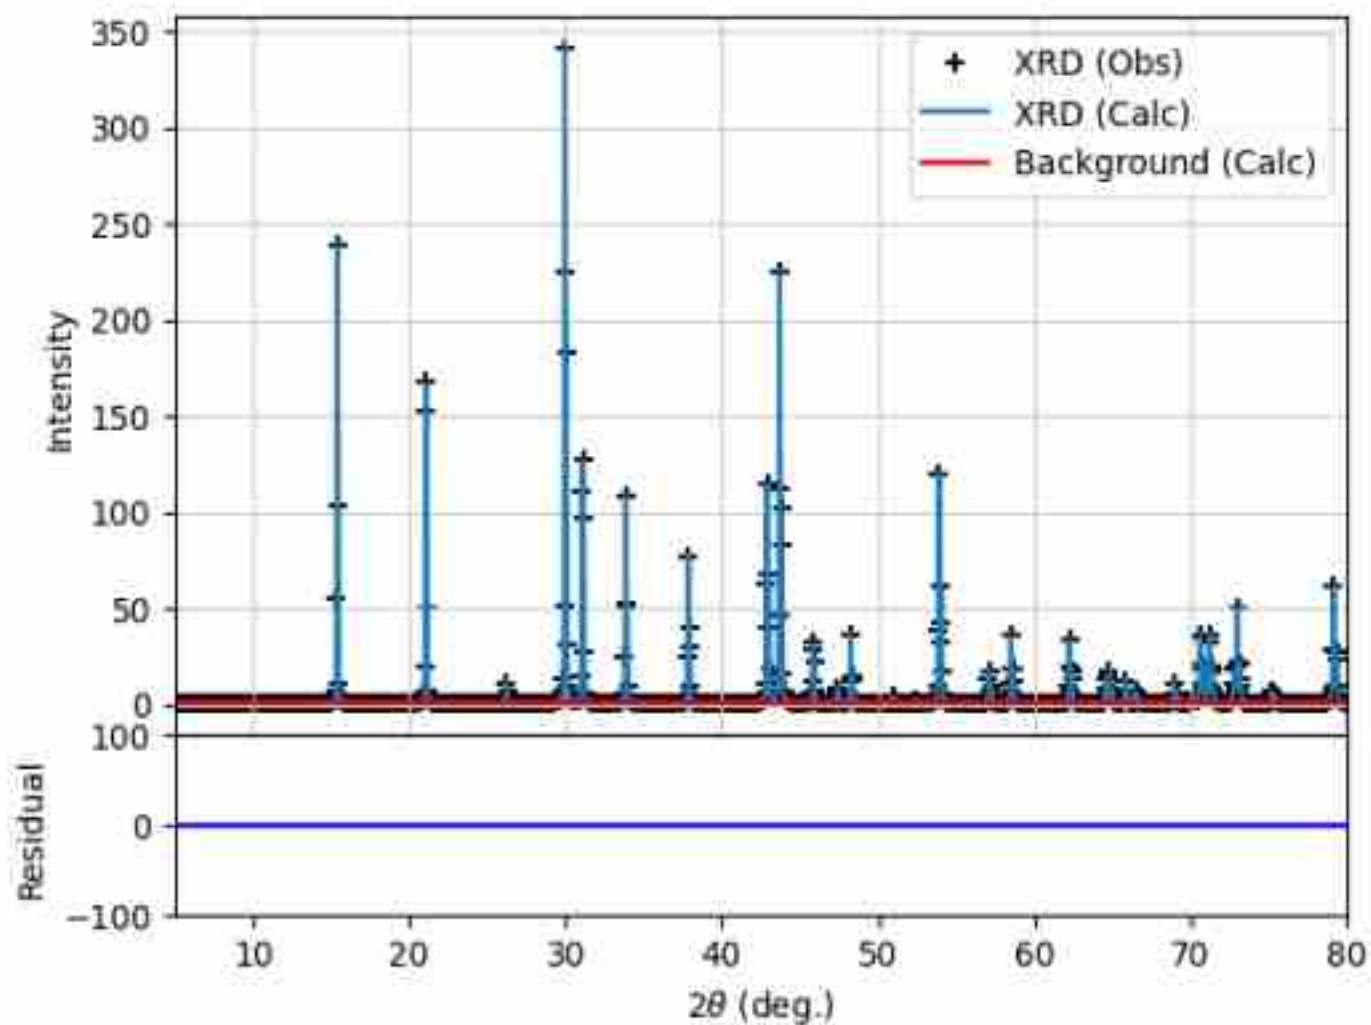

| RMSE before RR | Rwp     | RMSE after RR |
|----------------|---------|---------------|
| 0.002          | 0.00366 | 0.00116       |

Li1Nd1Zn2

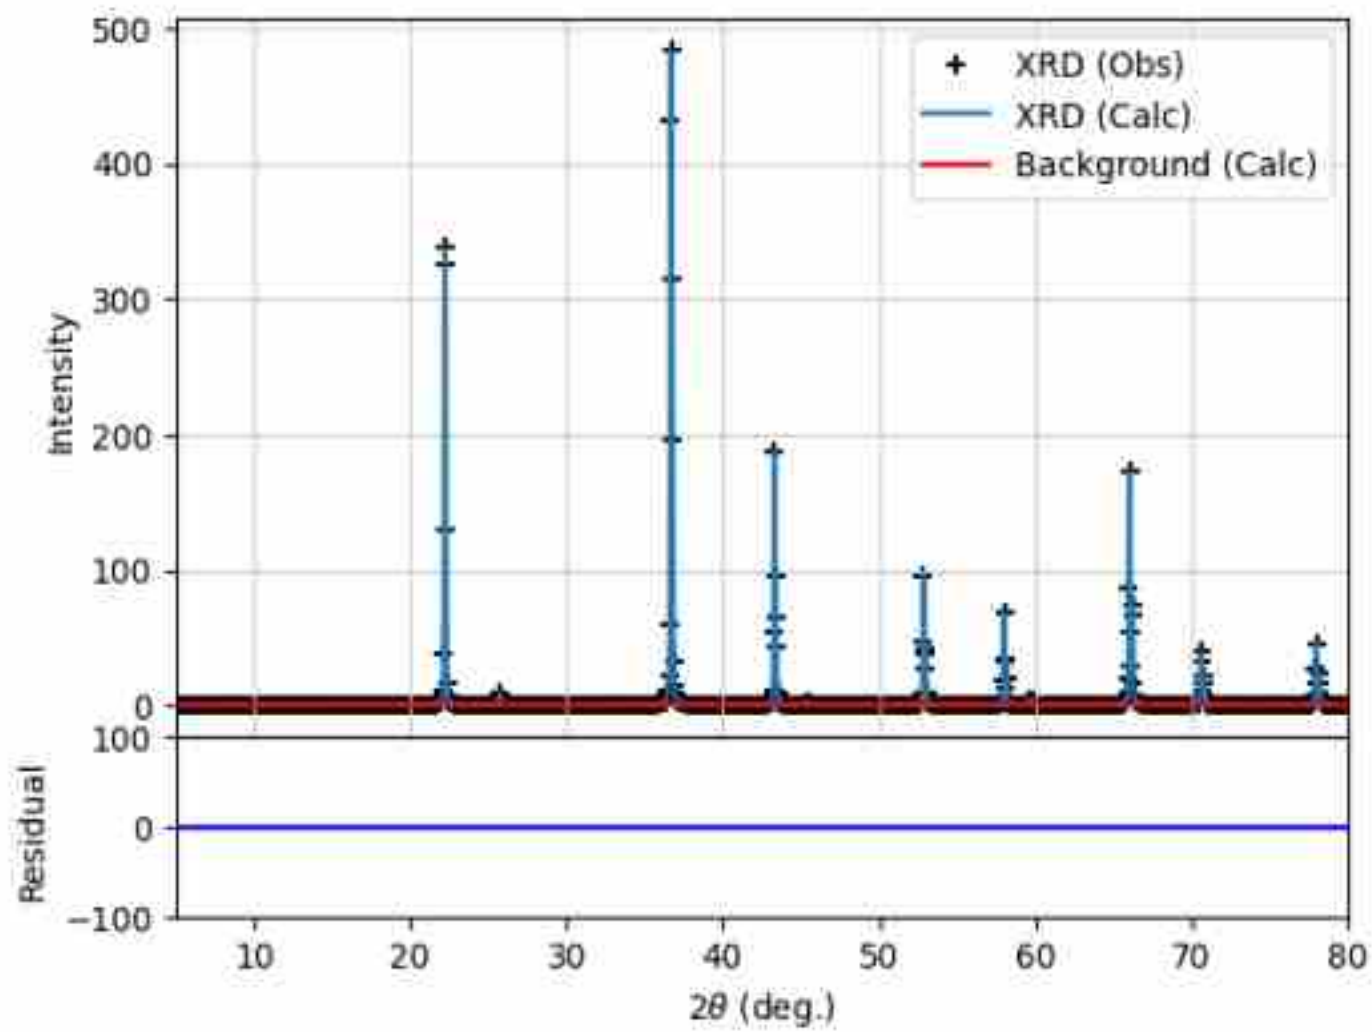

| RMSE before RR | Rwp     | RMSE after RR |
|----------------|---------|---------------|
| 0.002          | 0.00584 | 0.00136       |

# Li1Nd2Al1

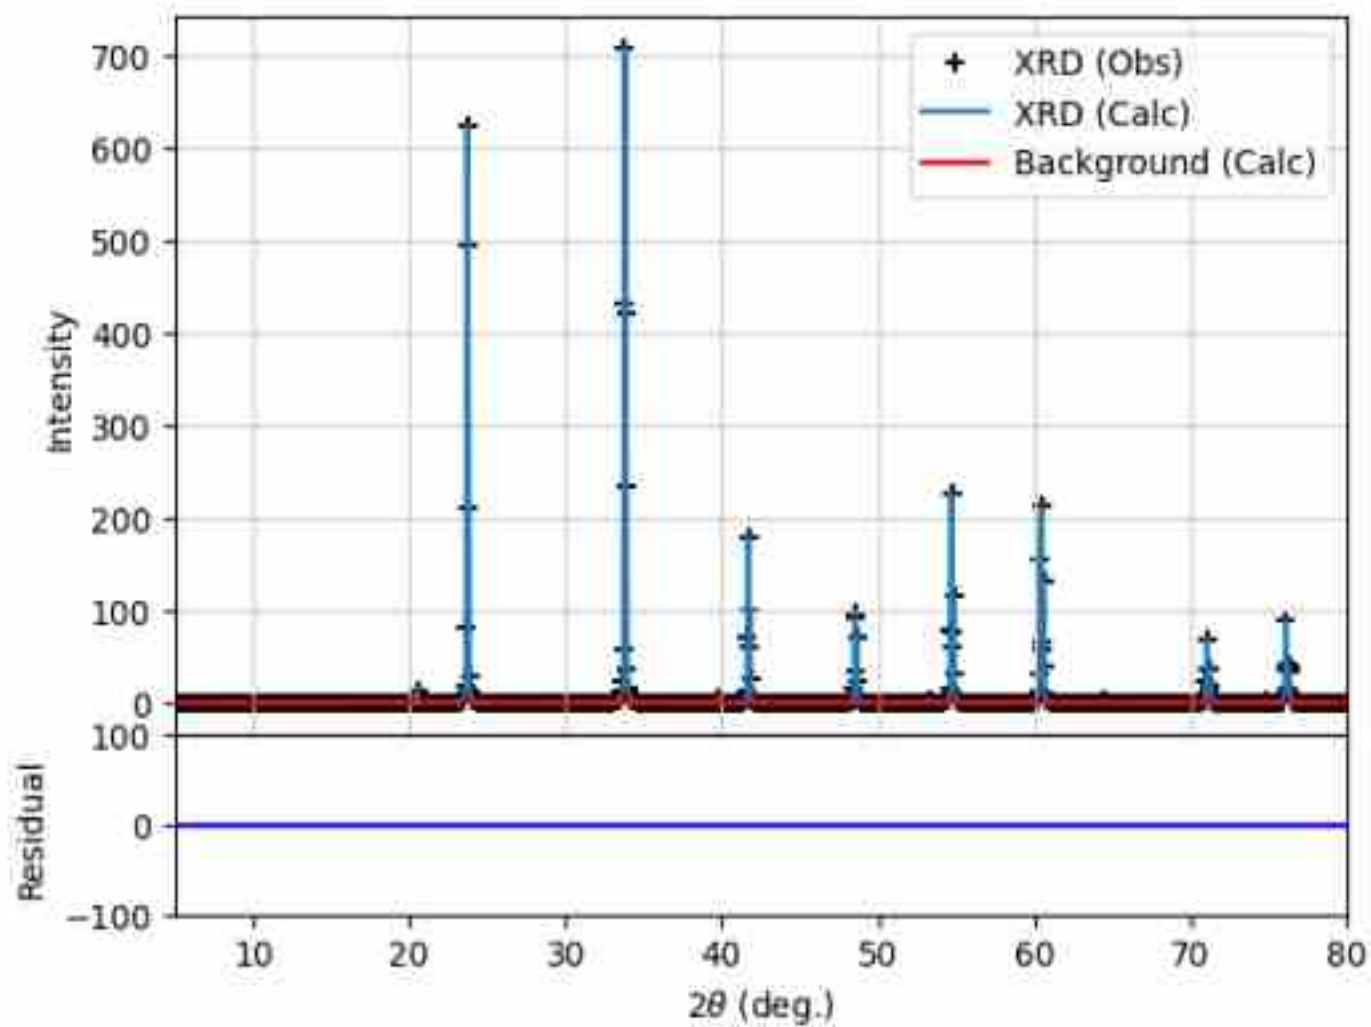

| RMSE before RR | Rwp     | RMSE after RR |
|----------------|---------|---------------|
| 0.002          | 0.02798 | 0.0014        |

# Li1Pr1Hg2

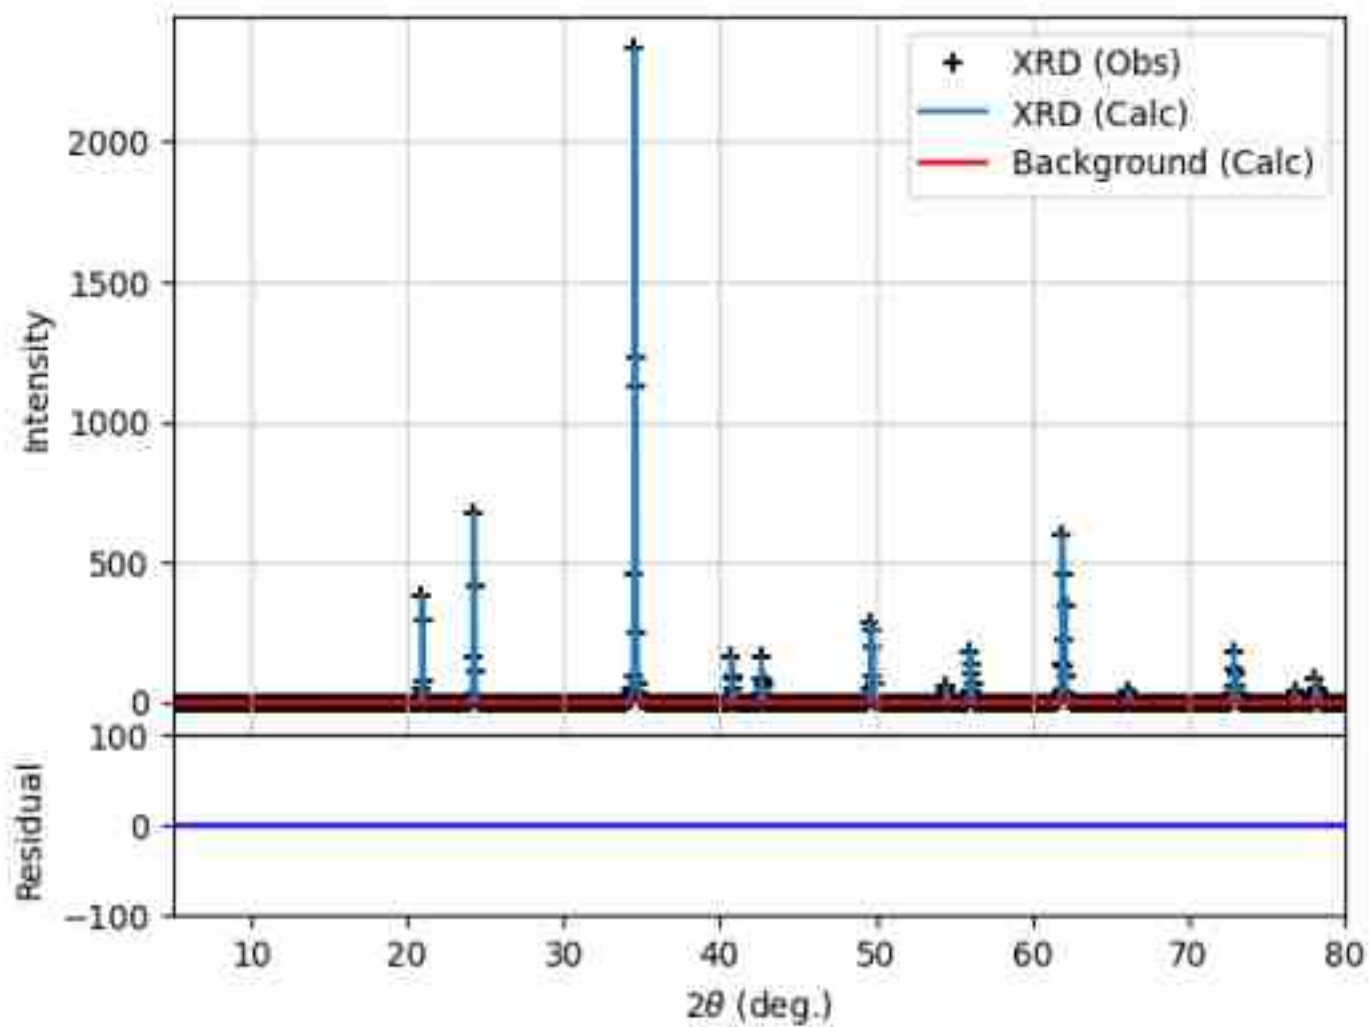

| RMSE before RR | Rwp     | RMSE after RR |
|----------------|---------|---------------|
| 0.002          | 0.00566 | 0.00087       |

# Li1Pr2Os1

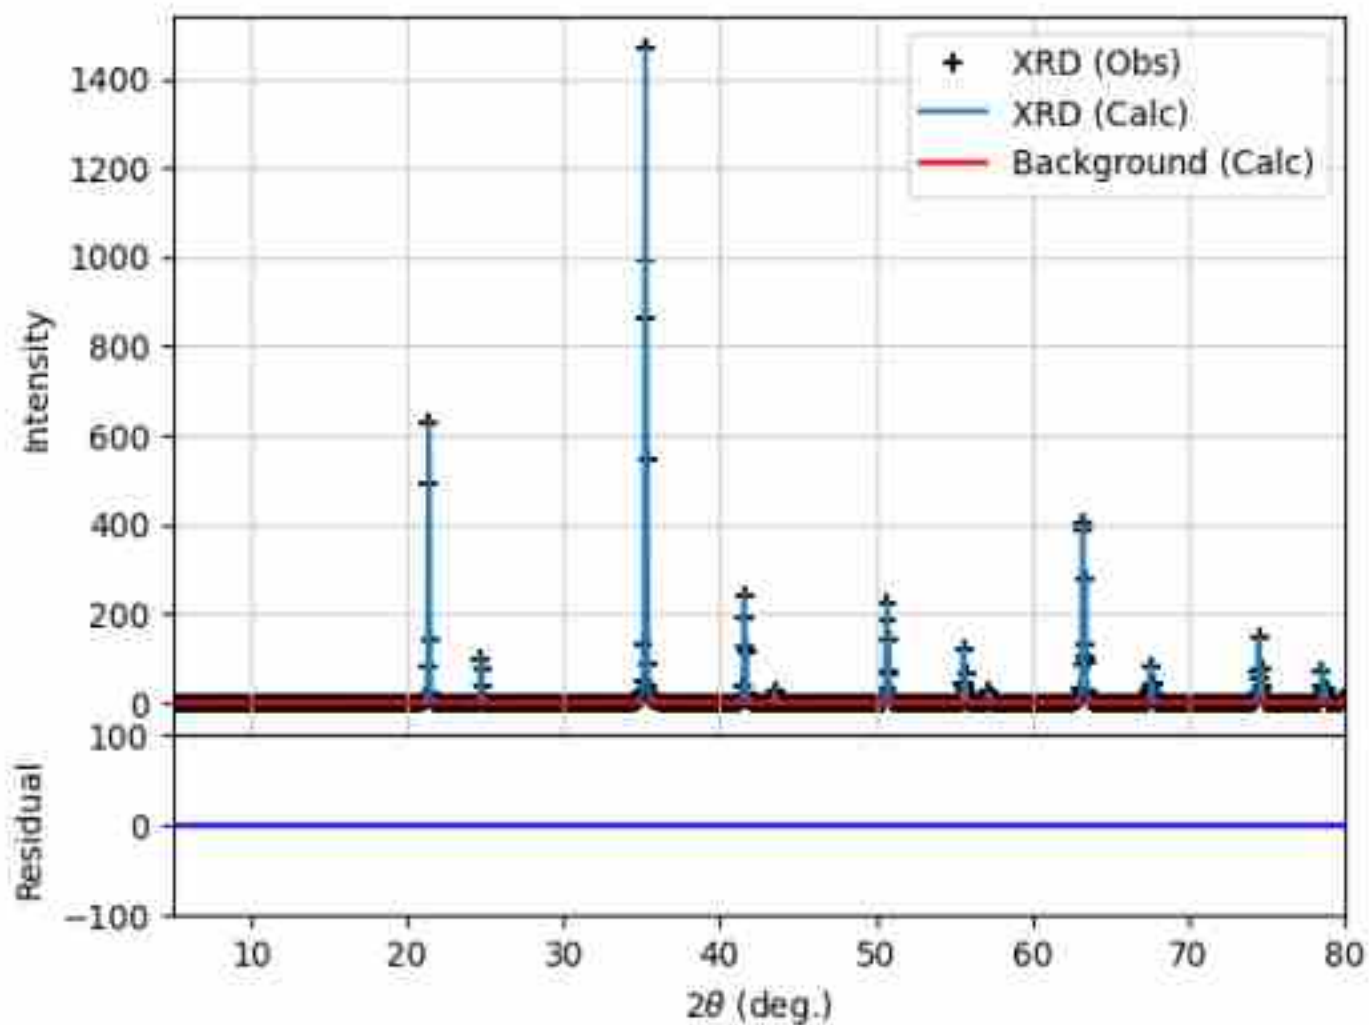

| RMSE before RR | Rwp     | RMSE after RR |
|----------------|---------|---------------|
| 0.002          | 0.02442 | 0.00488       |

# Li1Rh3

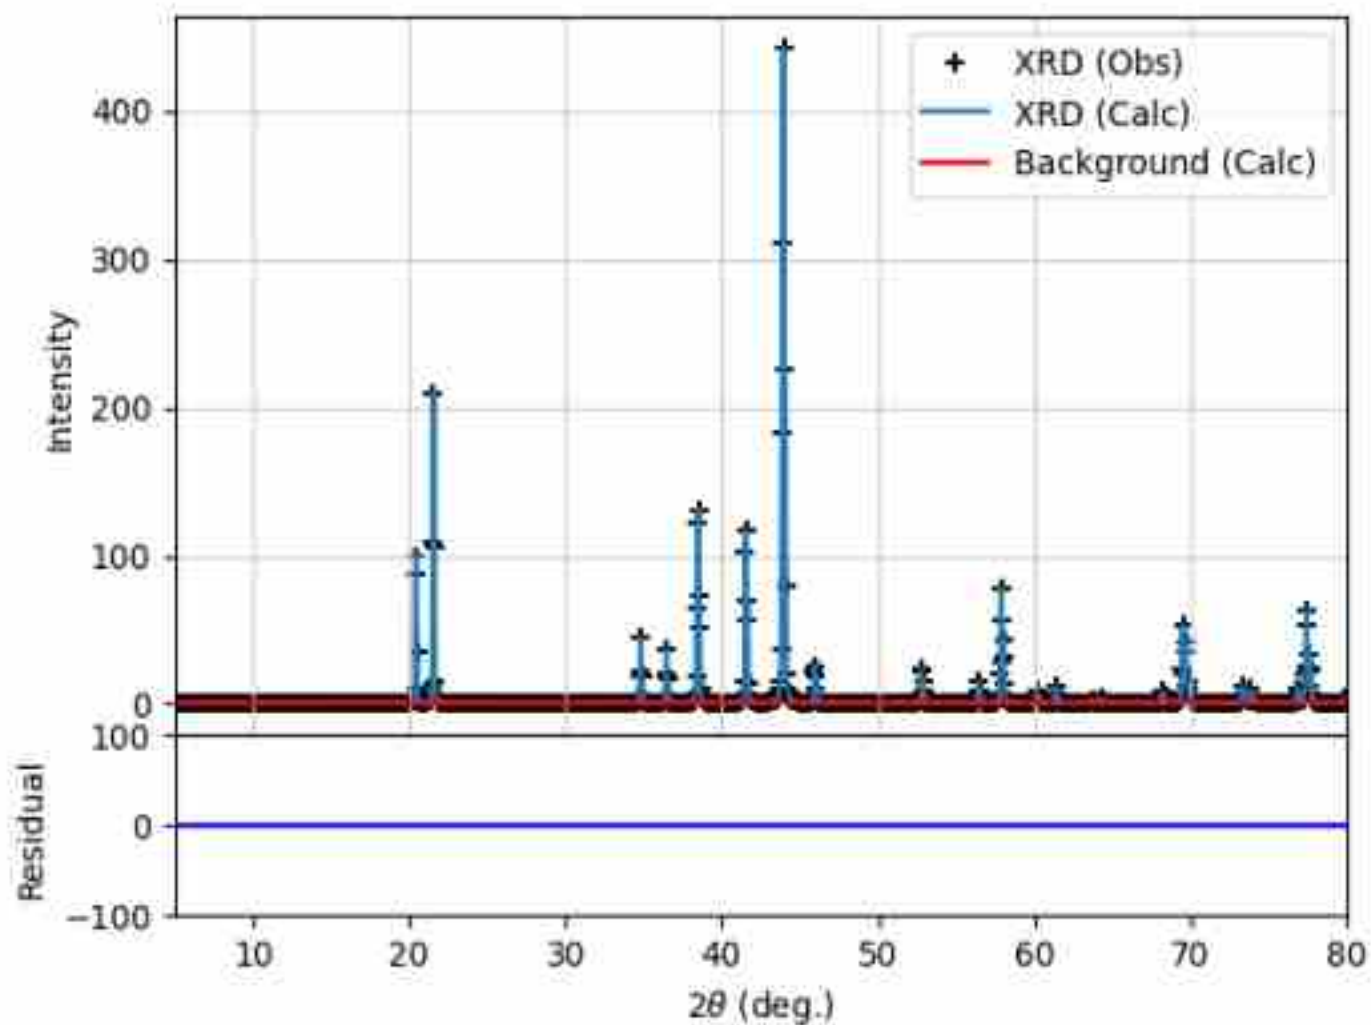

| RMSE before RR | Rwp     | RMSE after RR |
|----------------|---------|---------------|
| 0.02           | 0.00352 | 0.00092       |

# Li1Sb1Pd2

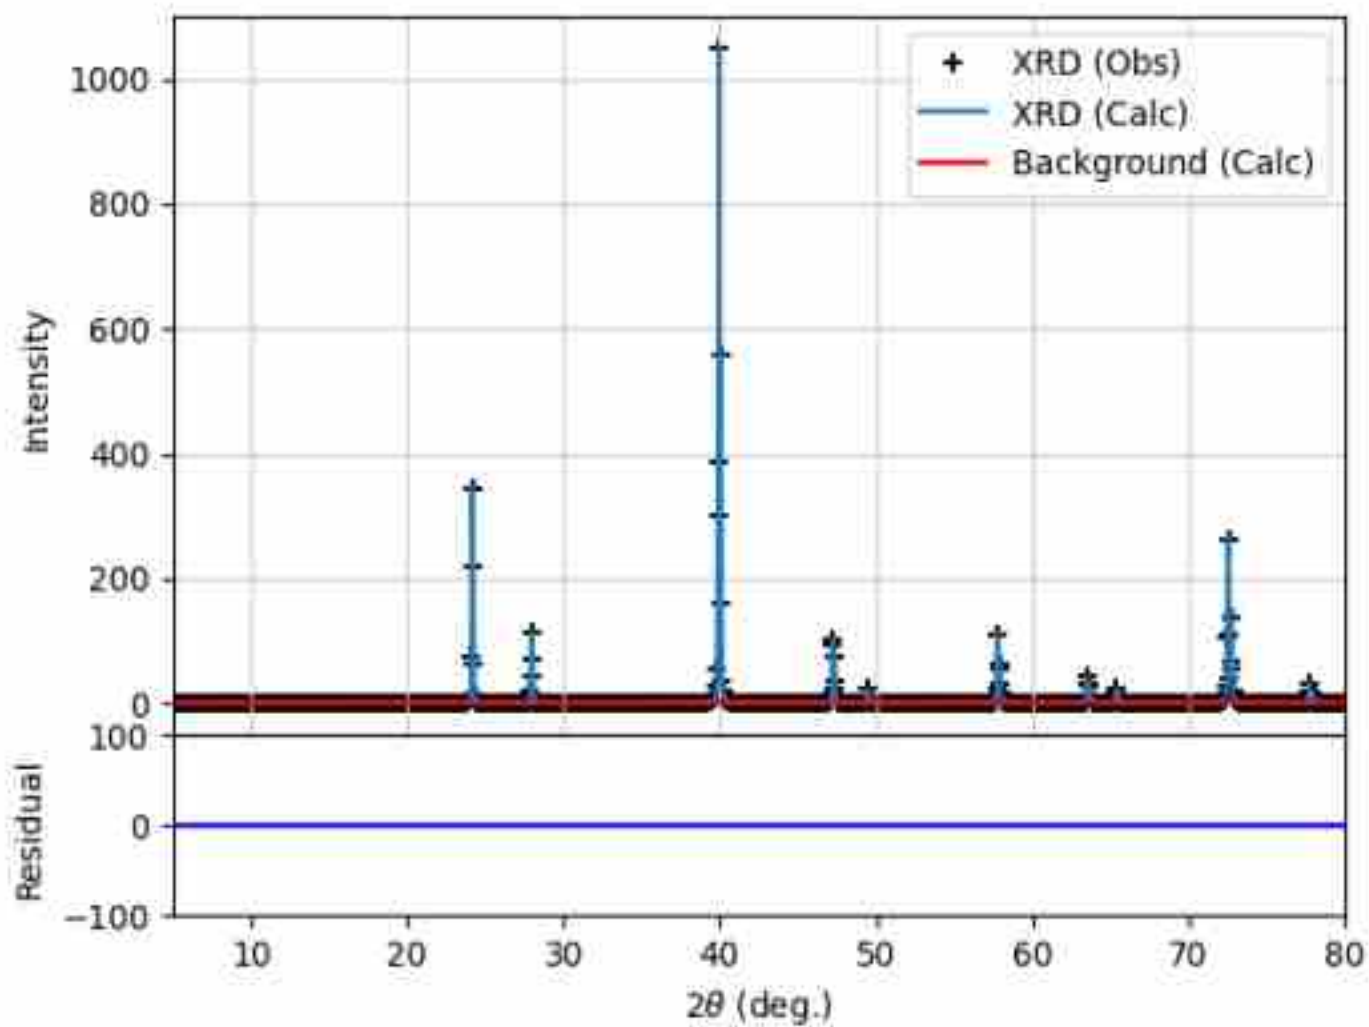

| RMSE before RR | Rwp     | RMSE after RR |
|----------------|---------|---------------|
| 0.002          | 0.00065 | 0.00043       |



# Li1Sb1Te2

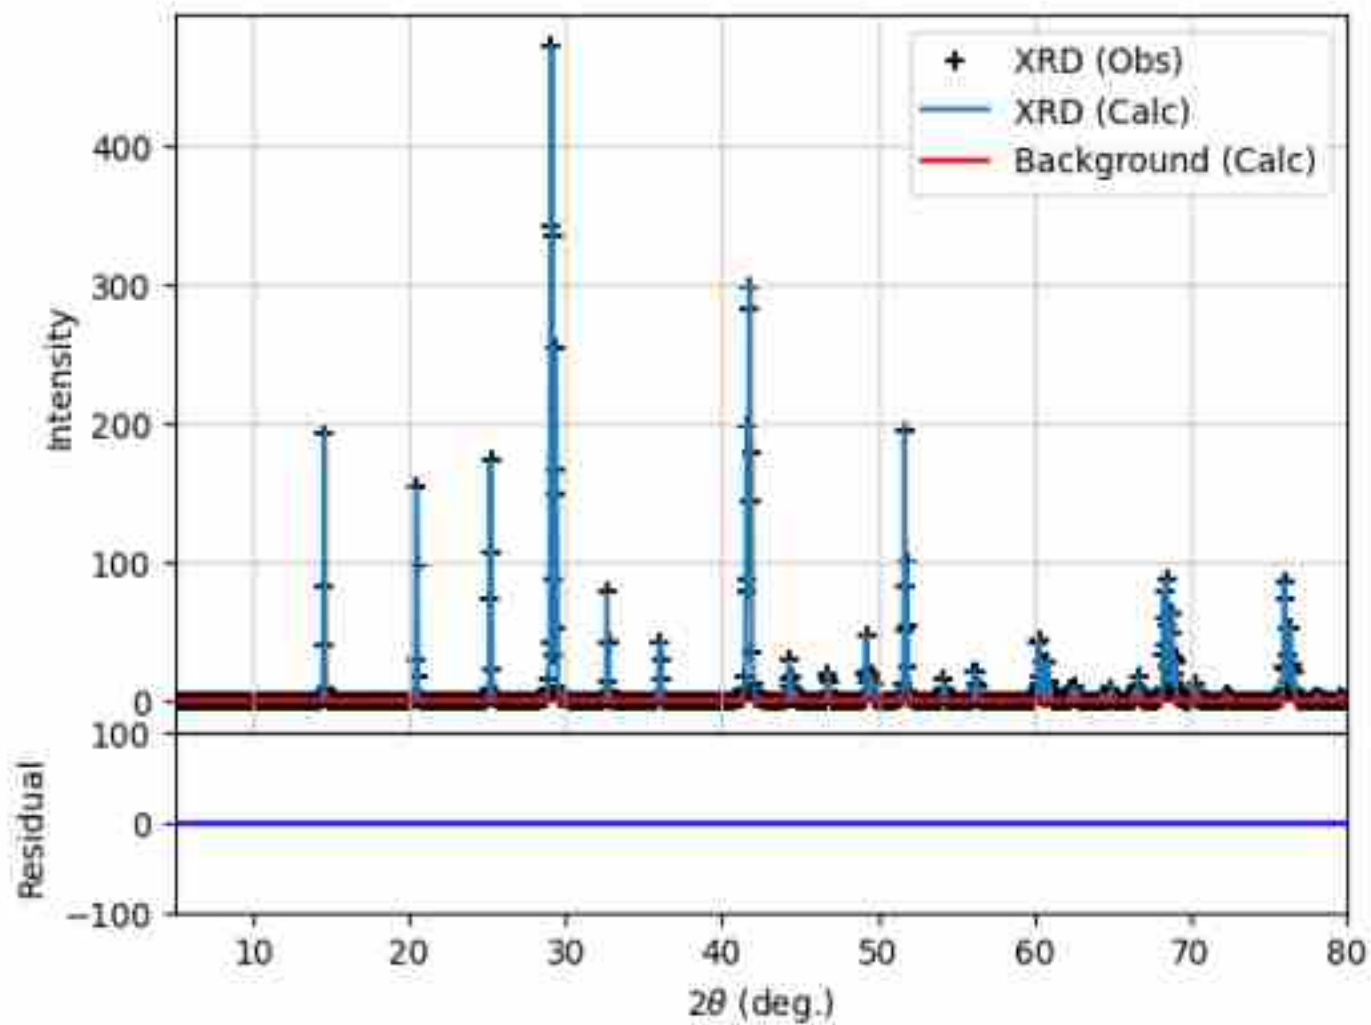

| RMSE before RR | Rwp     | RMSE after RR |
|----------------|---------|---------------|
| 0.002          | 0.00433 | 0.00068       |

# Li1Sc1Hg2

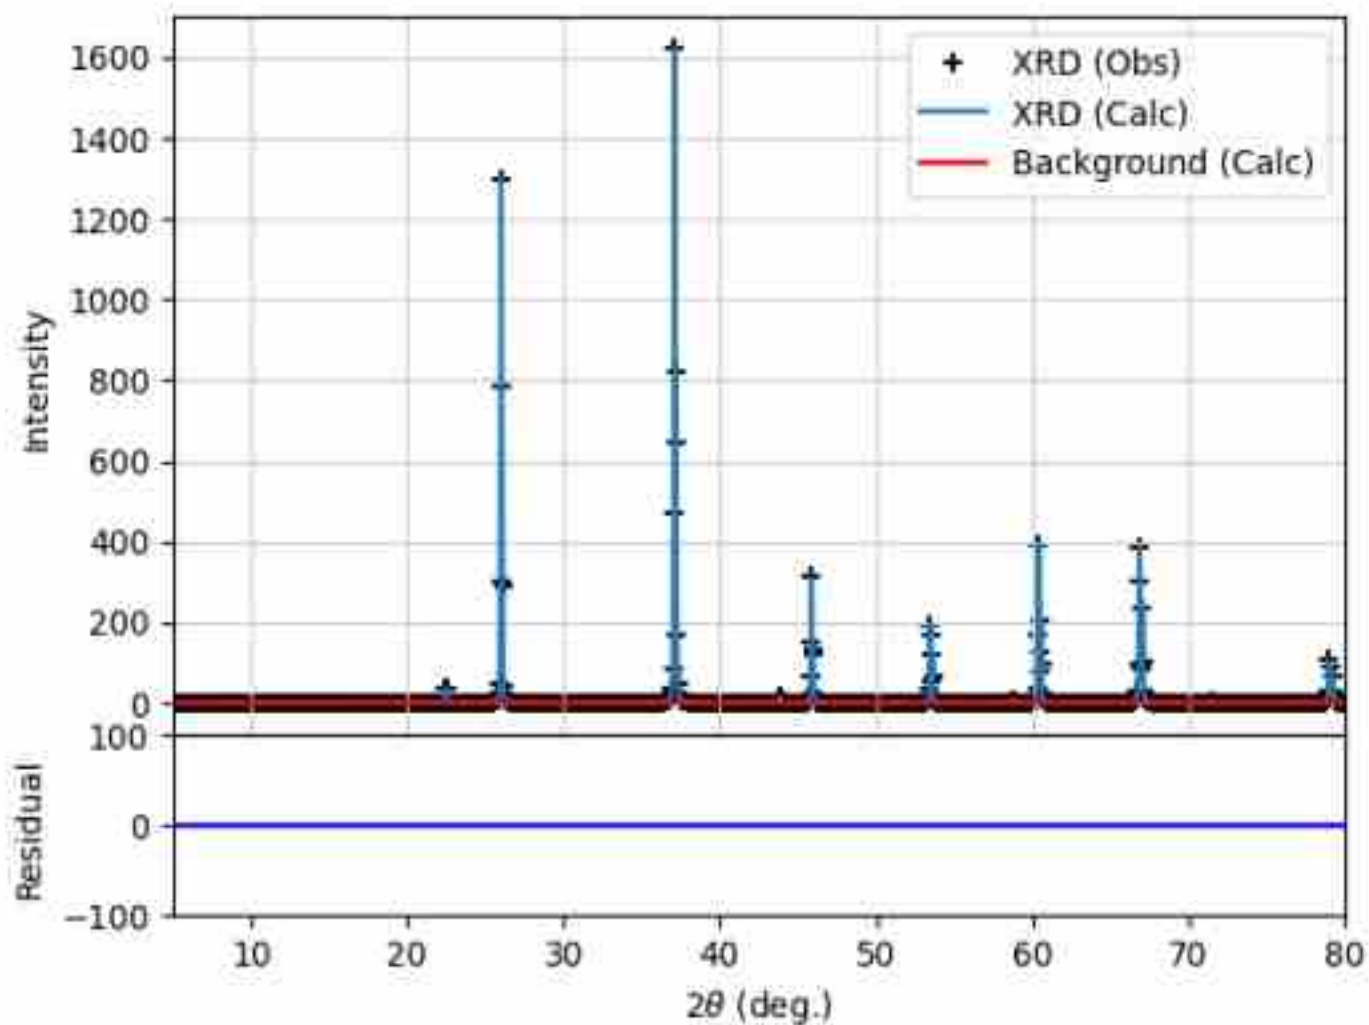

| RMSE before RR | Rwp     | RMSE after RR |
|----------------|---------|---------------|
| 0.002          | 0.00939 | 0.00358       |

# Li1Sm2Ru1

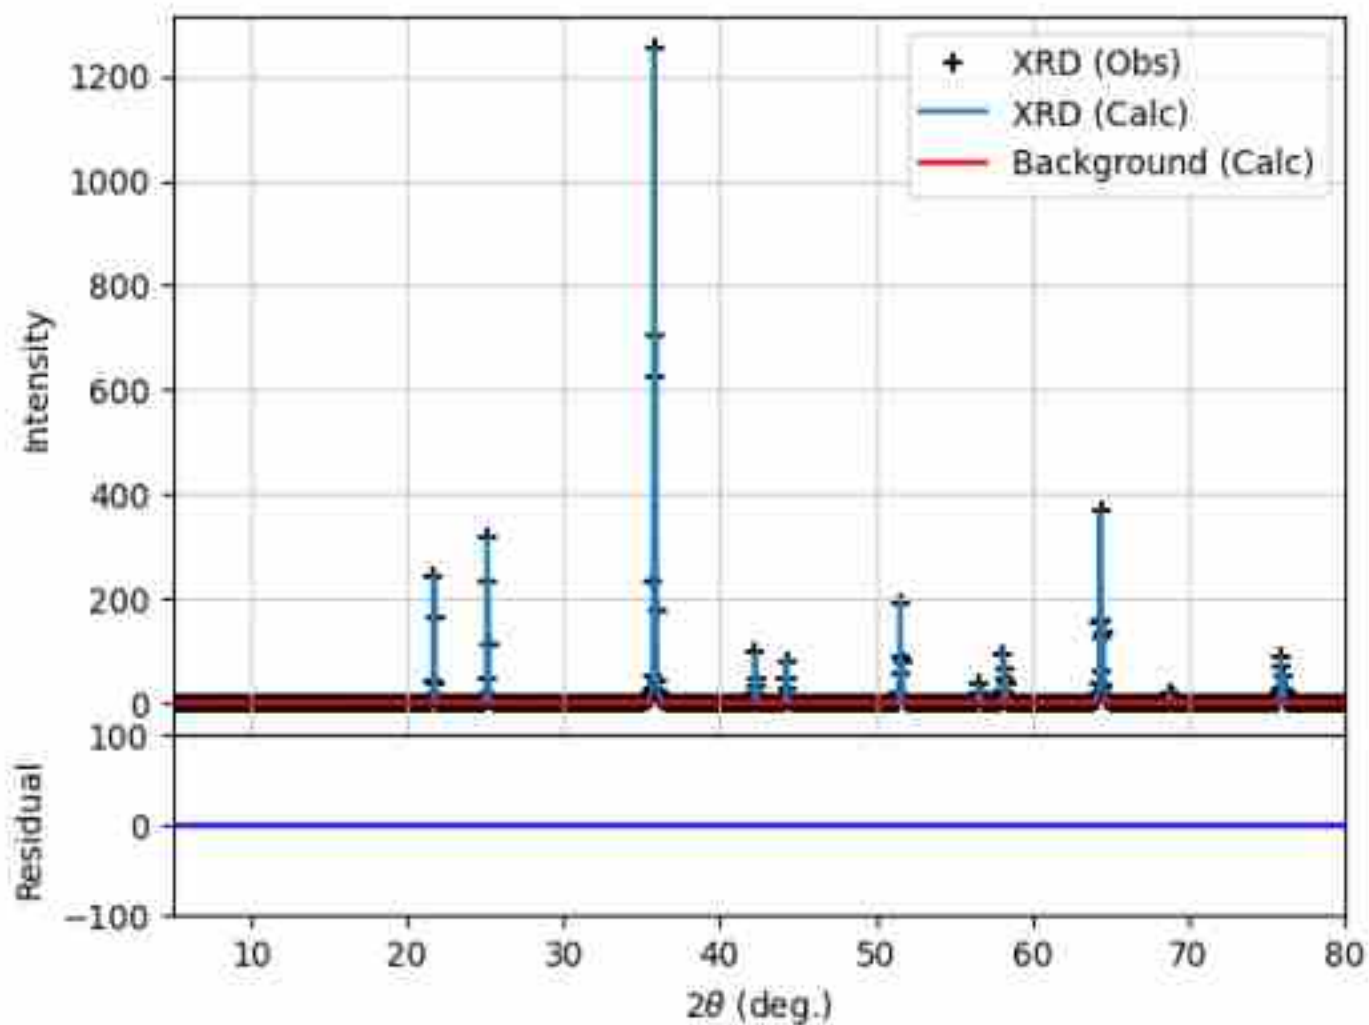

| RMSE before RR | Rwp     | RMSE after RR |
|----------------|---------|---------------|
| 0.002          | 0.00332 | 0.00116       |

# Li1Th1Pt2

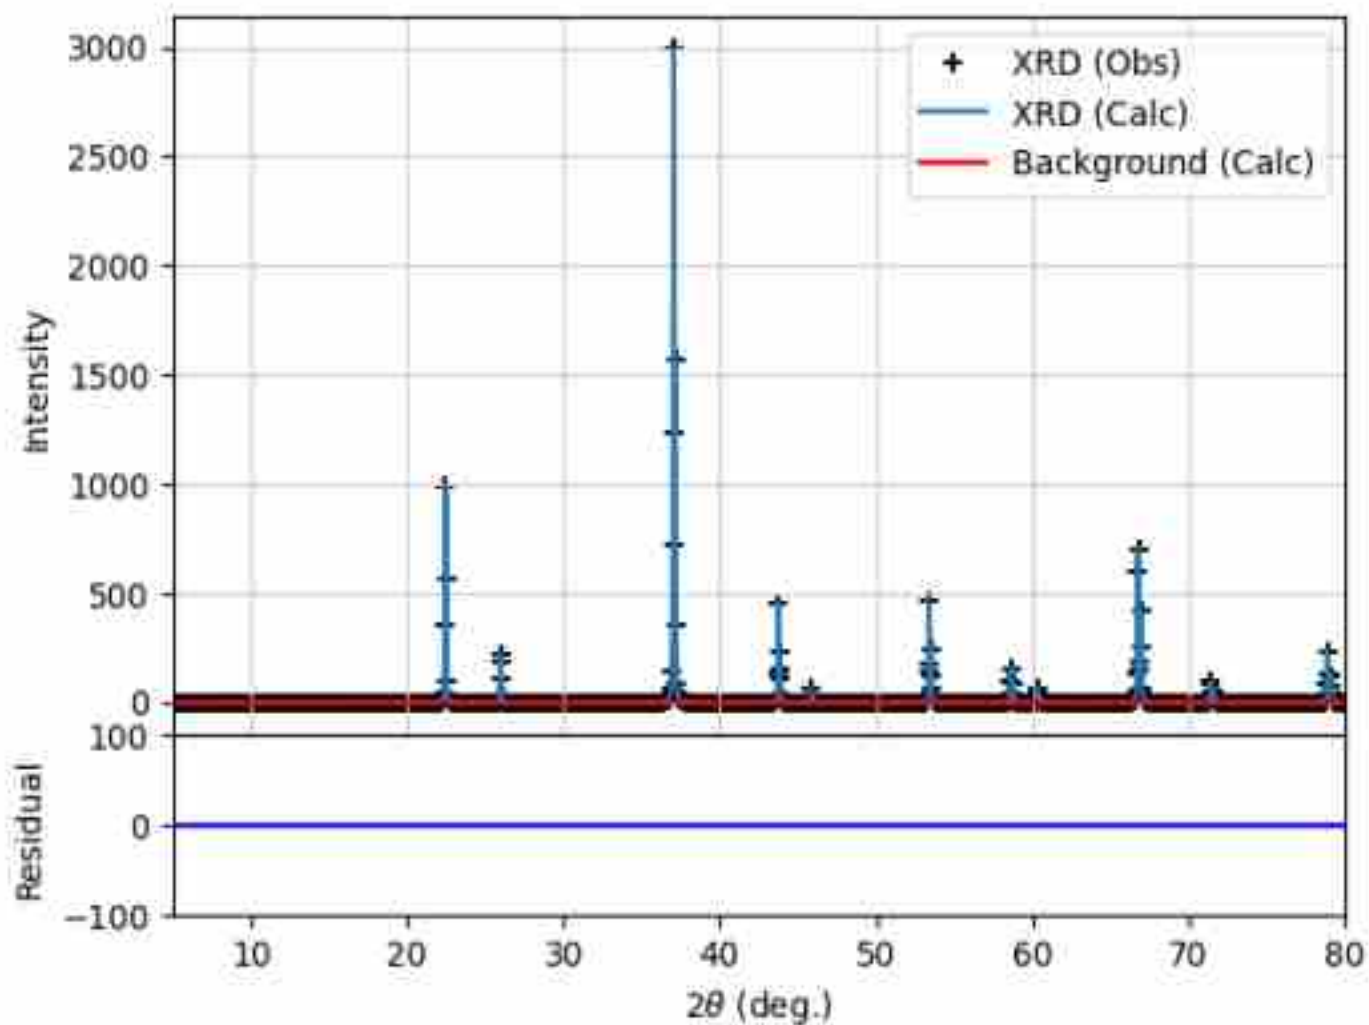

| RMSE before RR | Rwp     | RMSE after RR |
|----------------|---------|---------------|
| 0.002          | 0.00509 | 0.00167       |

# Li1Ti1Ir2

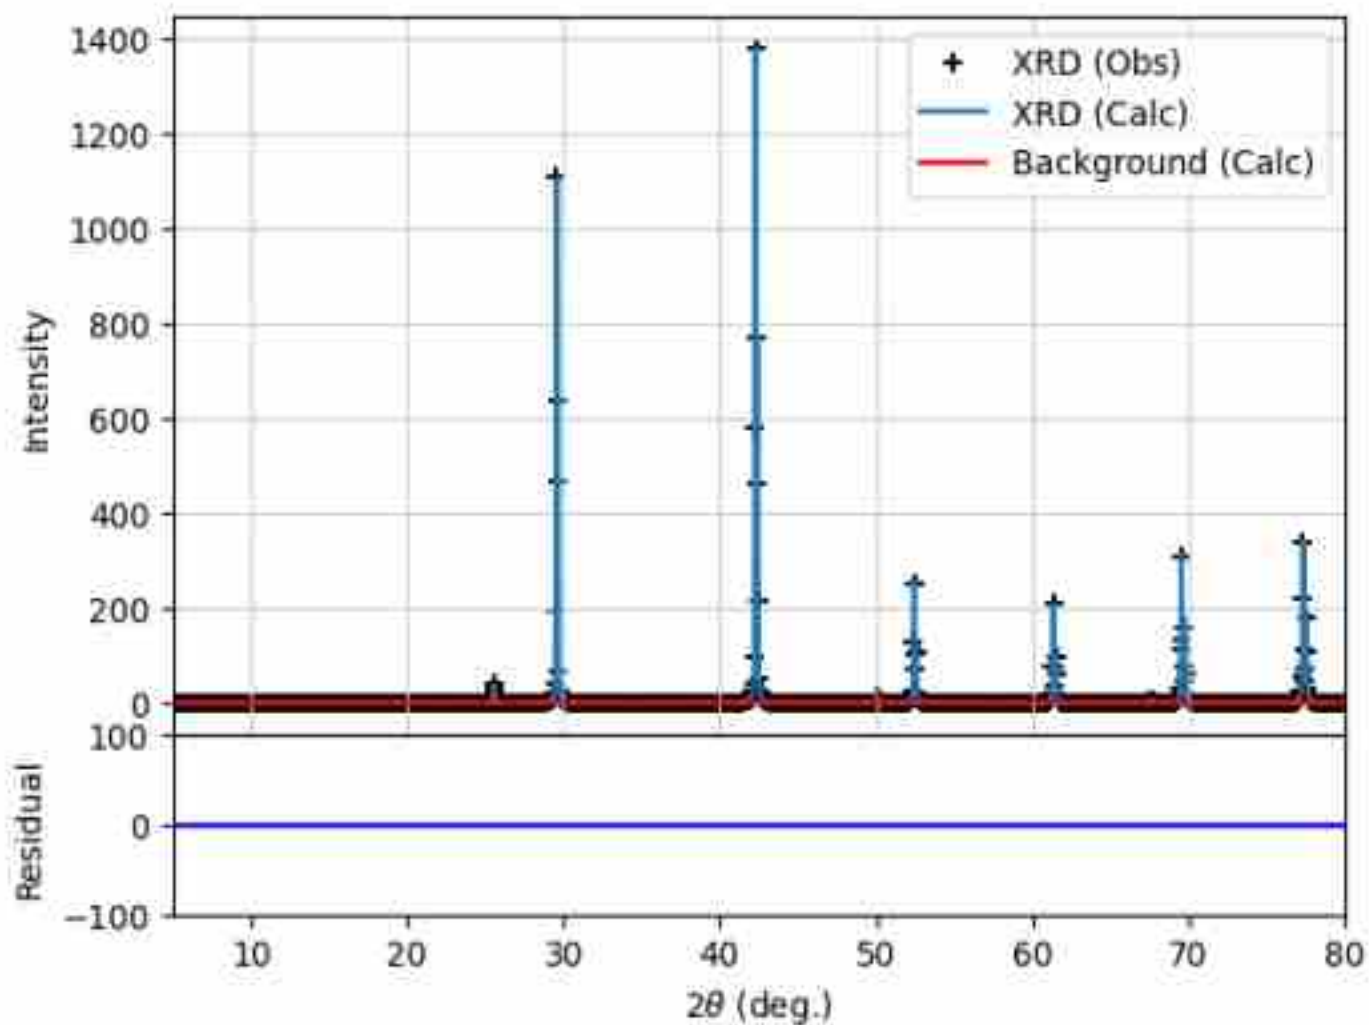

| RMSE before RR | Rwp     | RMSE after RR |
|----------------|---------|---------------|
| 0.002          | 0.00294 | 0.00177       |

# Li1Ti1Rh2

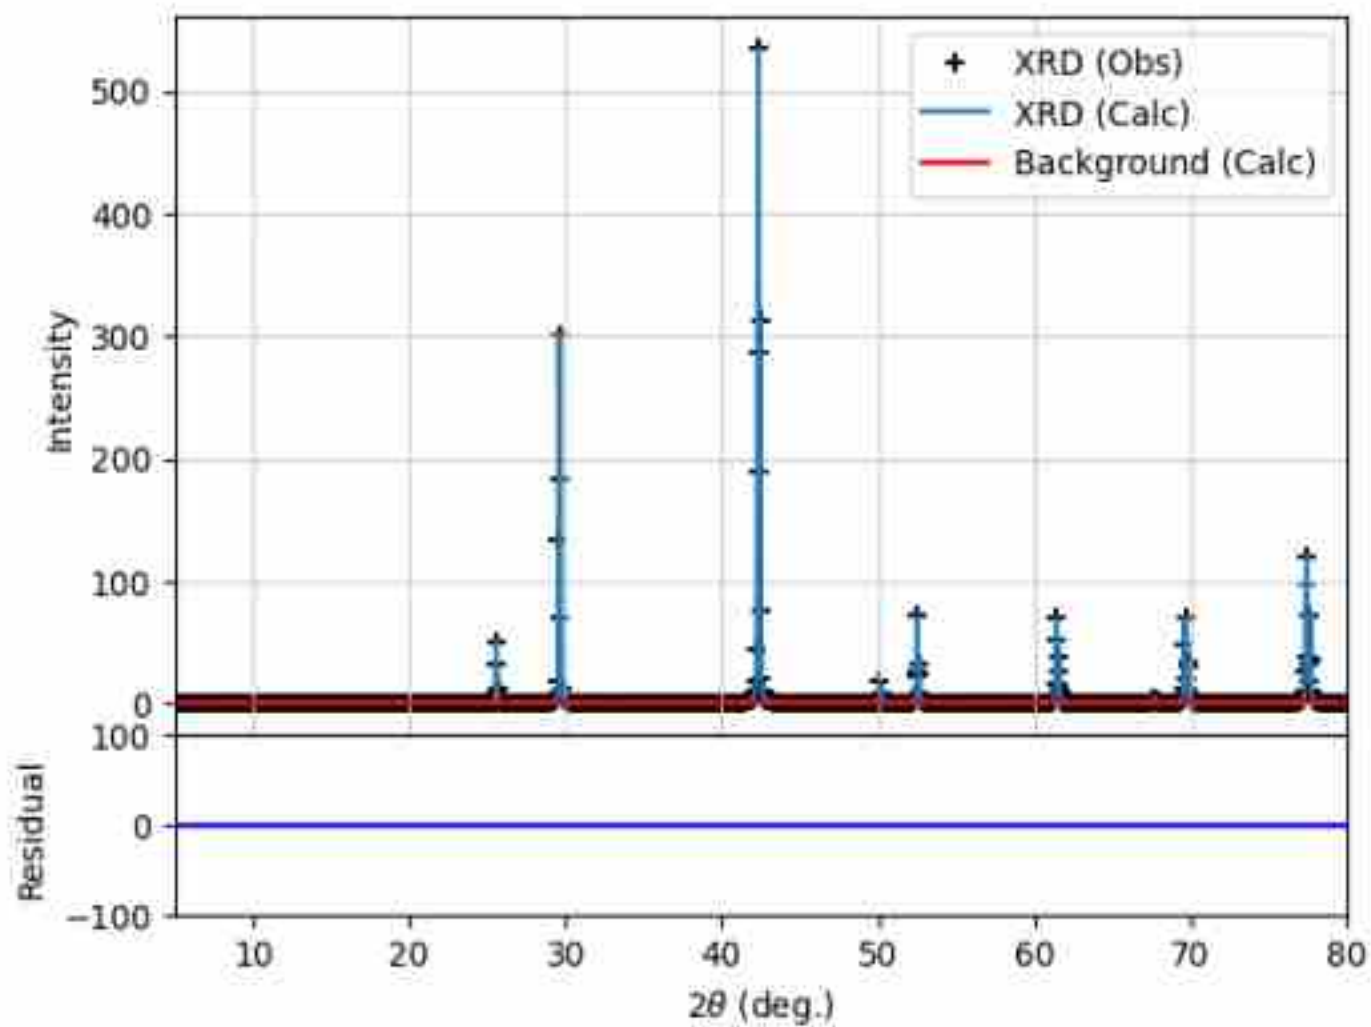

| RMSE before RR | Rwp     | RMSE after RR |
|----------------|---------|---------------|
| 0.002          | 0.00269 | 0.00412       |

# Li1Tm2Al1

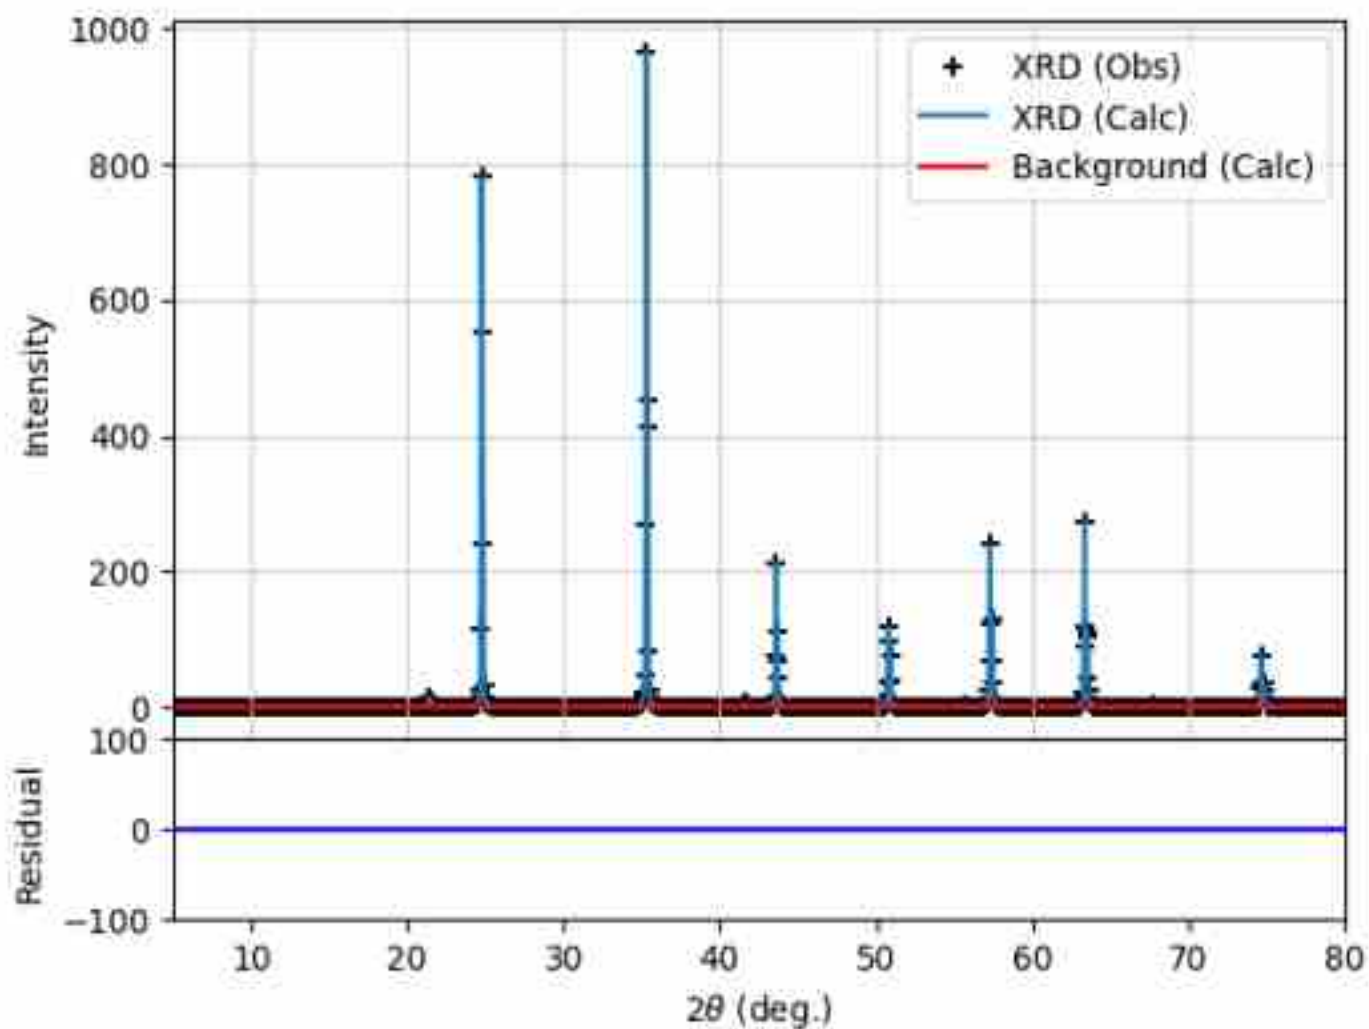

| RMSE before RR | Rwp    | RMSE after RR |
|----------------|--------|---------------|
| 0.002          | 0.0445 | 0.00413       |

# Li1Tm2Rh1

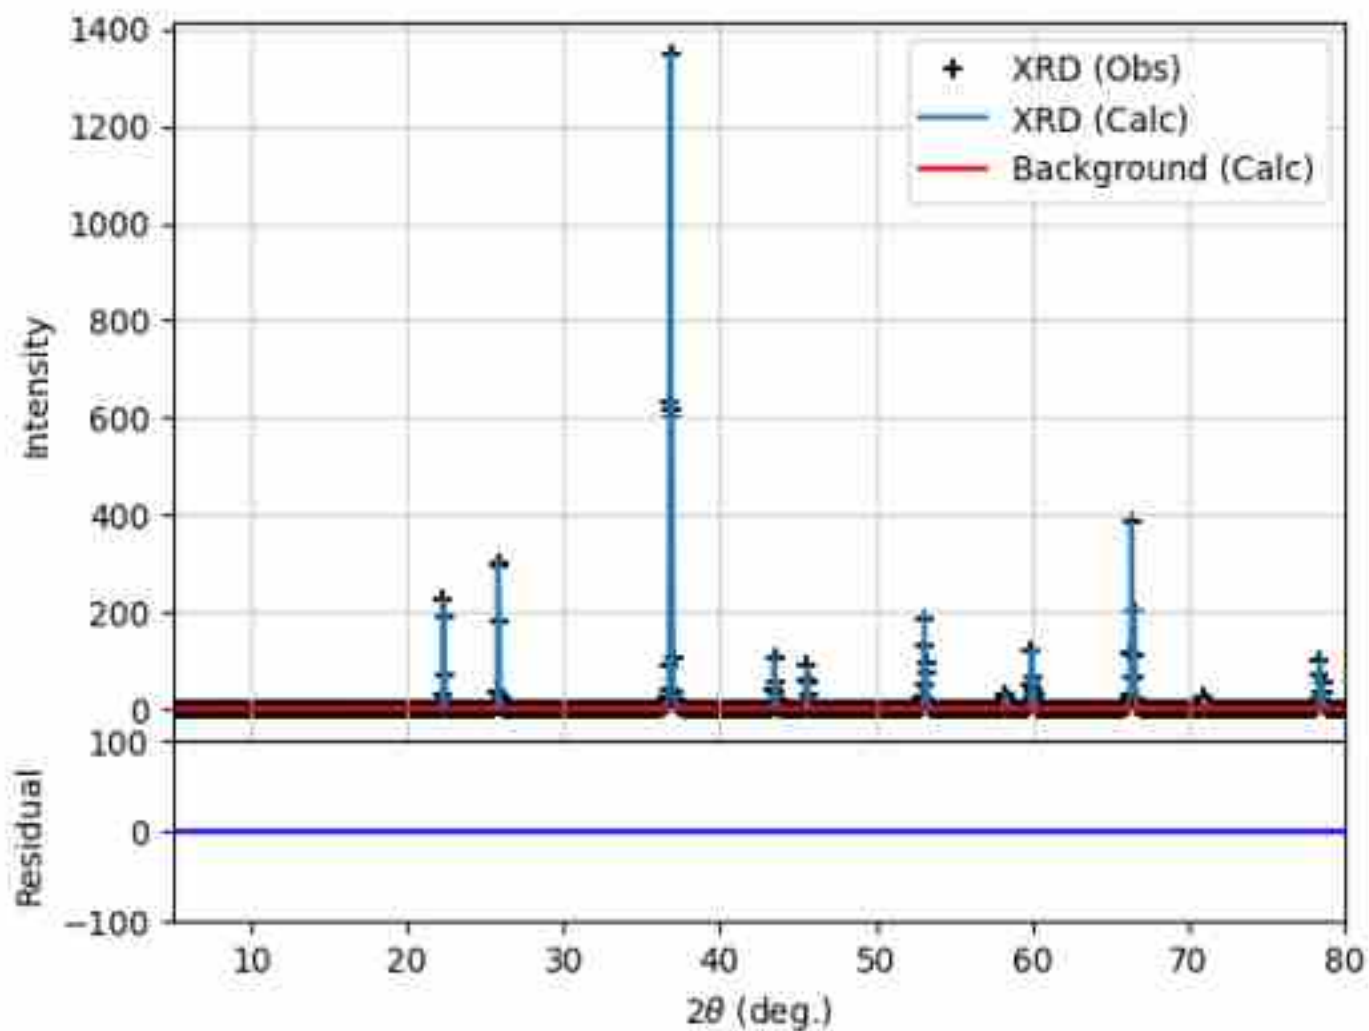

| RMSE before RR | Rwp     | RMSE after RR |
|----------------|---------|---------------|
| 0.002          | 0.00325 | 0.00356       |



# Li1Tm2Ru1

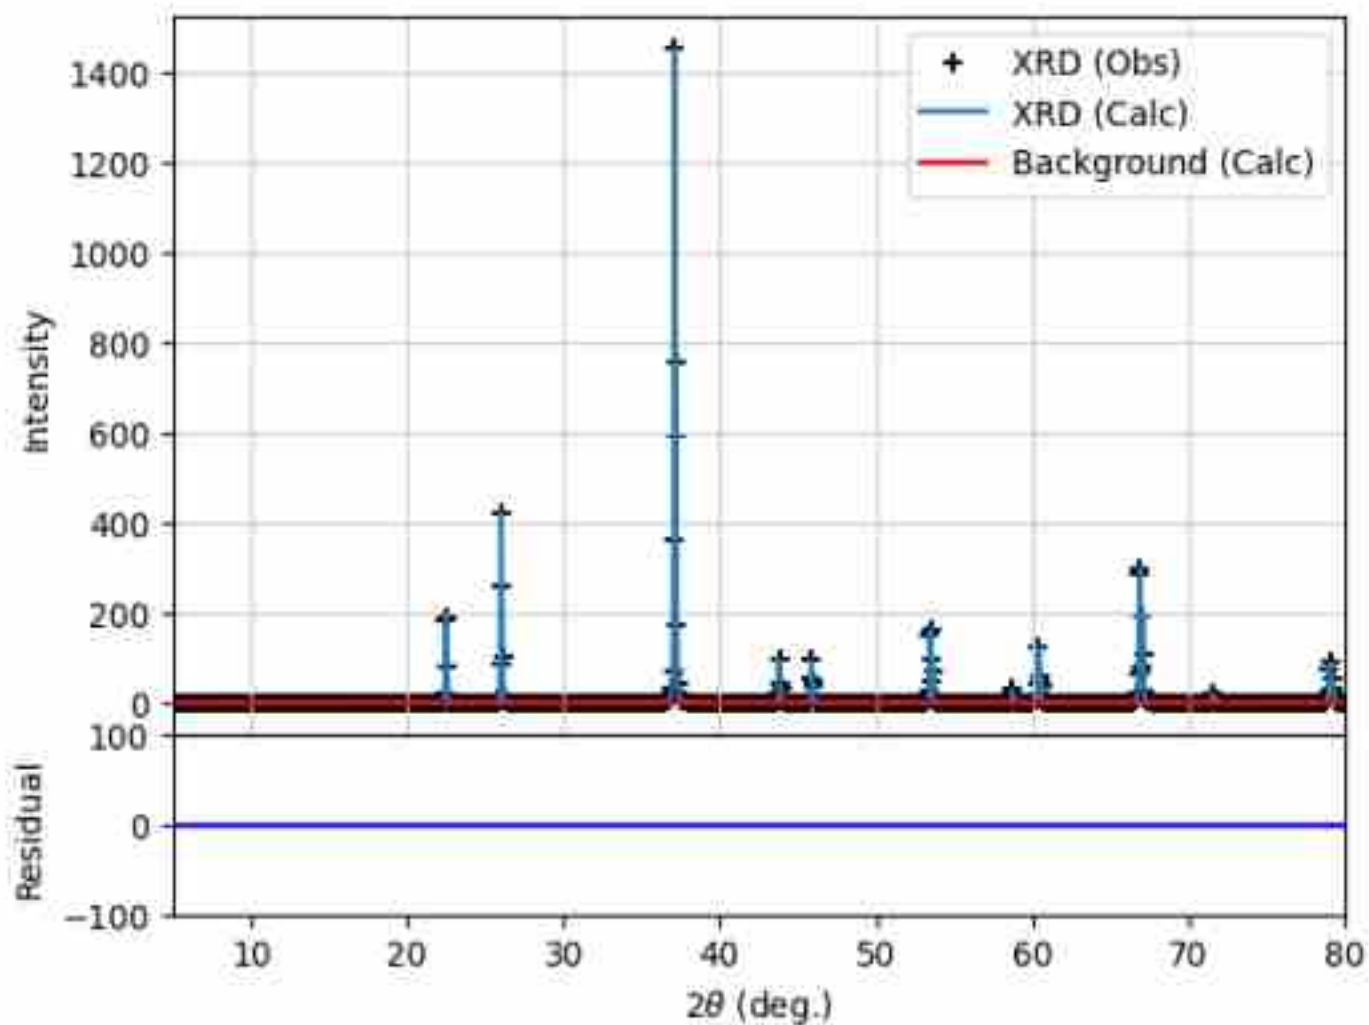

| RMSE before RR | Rwp     | RMSE after RR |
|----------------|---------|---------------|
| 0.002          | 0.00987 | 0.00435       |

# Li1Y1Ga4

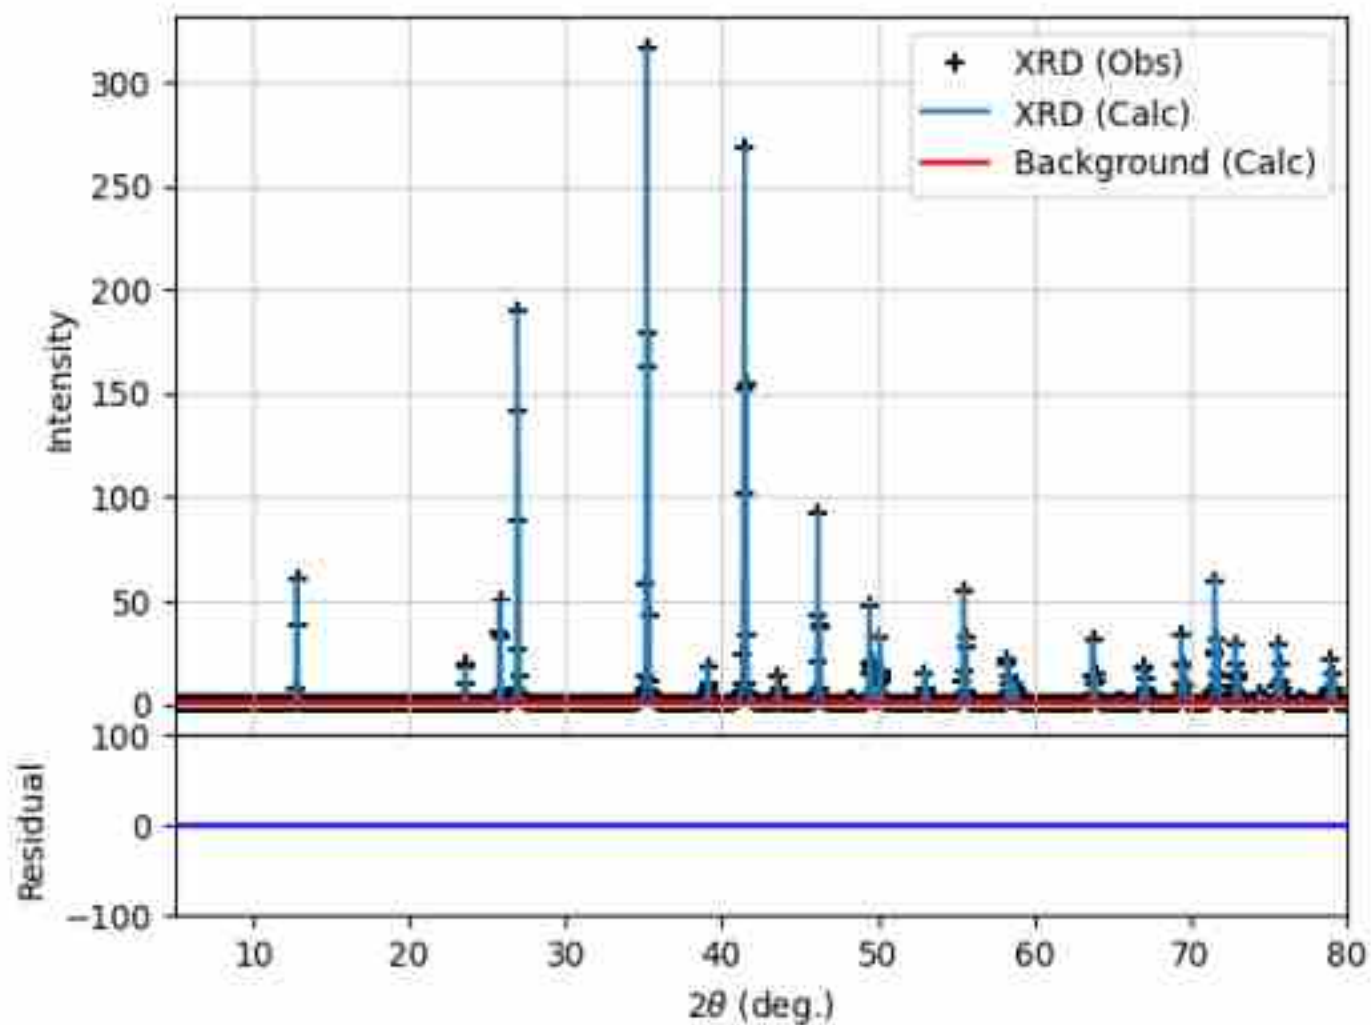

| RMSE before RR | Rwp     | RMSE after RR |
|----------------|---------|---------------|
| 0.02           | 0.00322 | 0.00049       |

# Li1Yb1Ti2

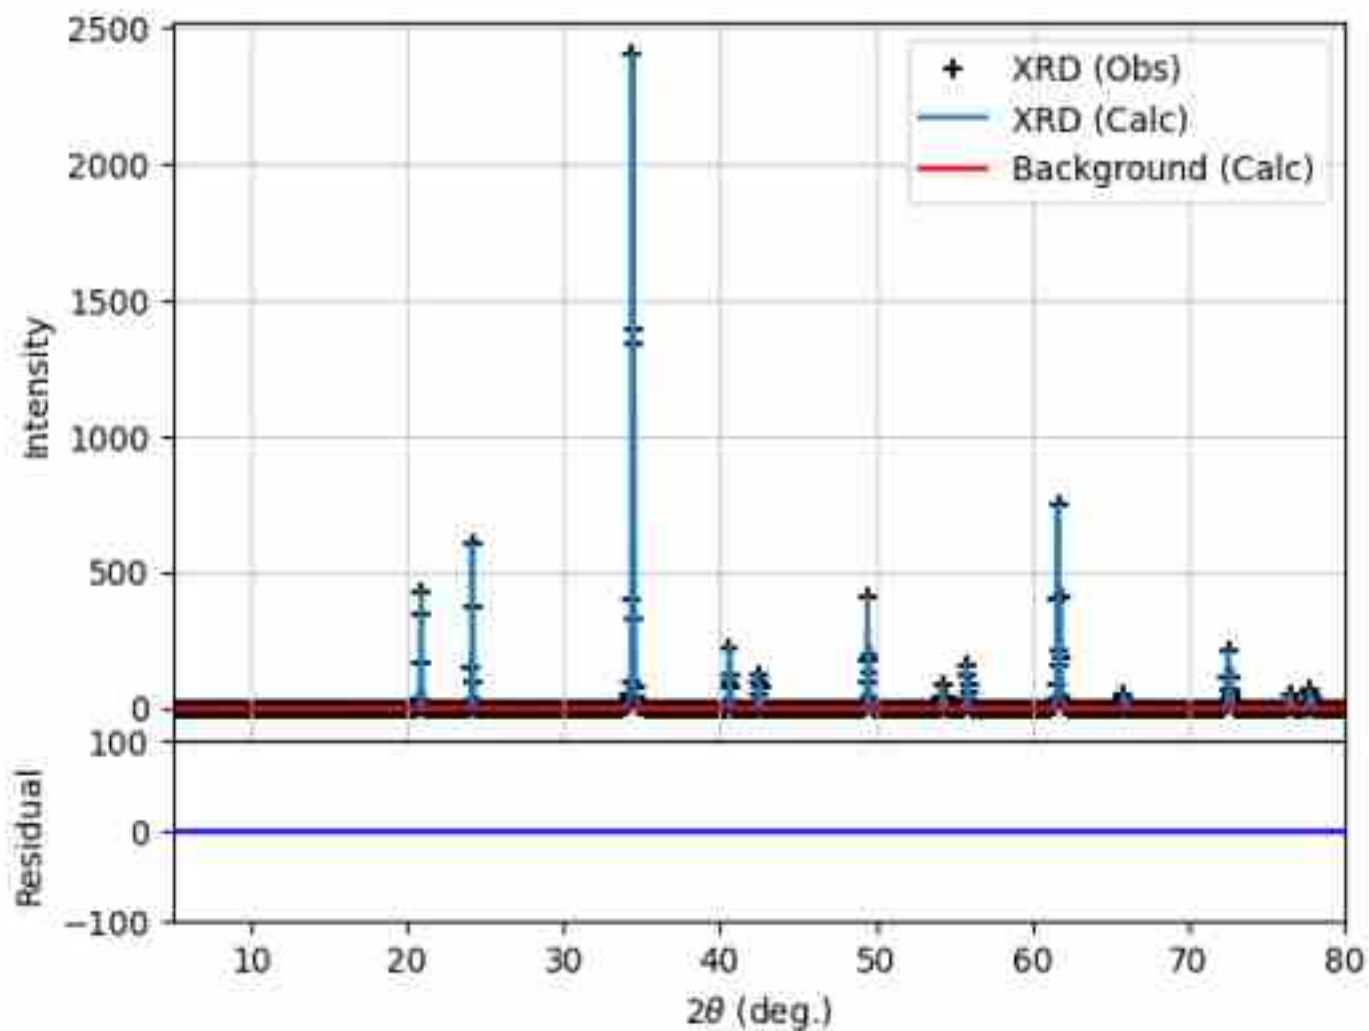

| RMSE before RR | Rwp     | RMSE after RR |
|----------------|---------|---------------|
| 0.002          | 0.01041 | 0.00312       |

# Li1Zn2Au1

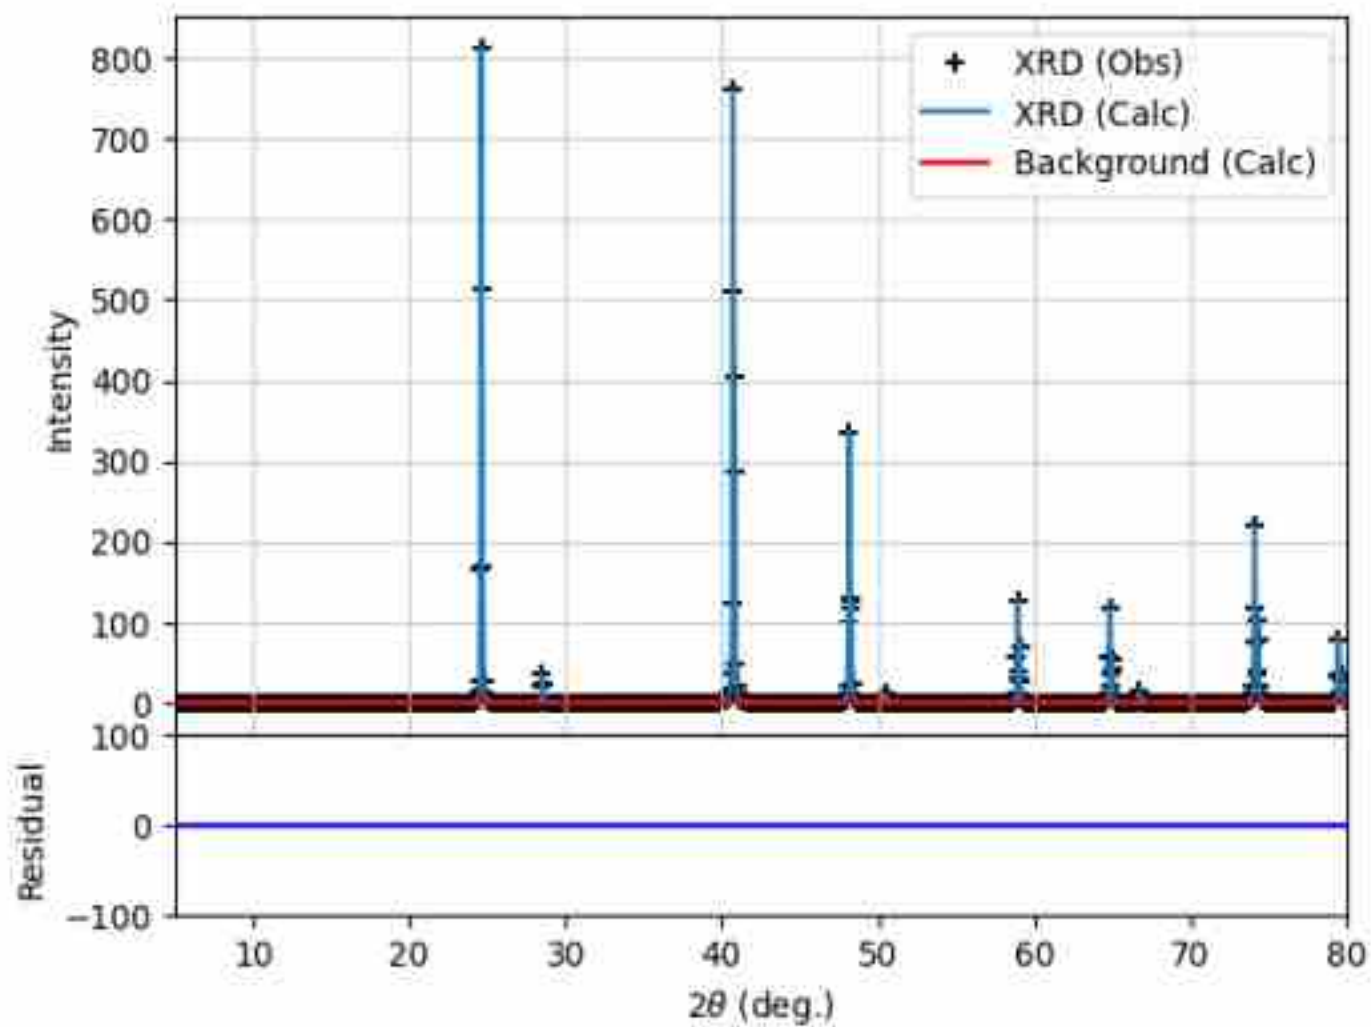

| RMSE before RR | Rwp     | RMSE after RR |
|----------------|---------|---------------|
| 0.002          | 0.00456 | 0.00256       |

# Li<sub>2</sub>CaSi

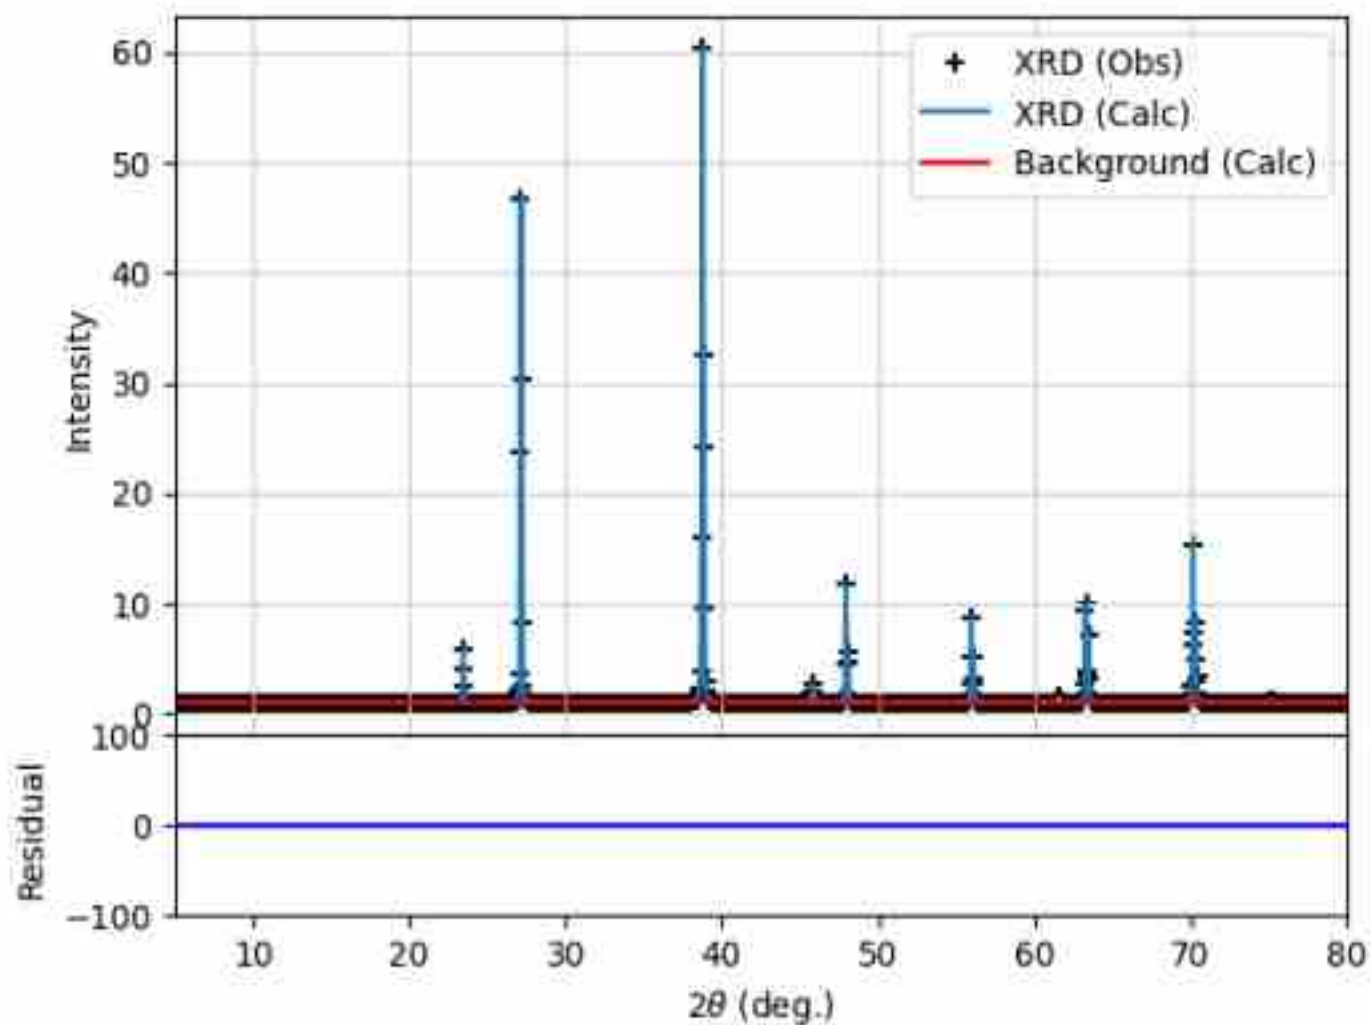

| RMSE before RR | Rwp     | RMSE after RR |
|----------------|---------|---------------|
| 0.002          | 0.00125 | 0.00105       |

# Li<sub>2</sub>Cd<sub>1</sub>Pt<sub>1</sub>

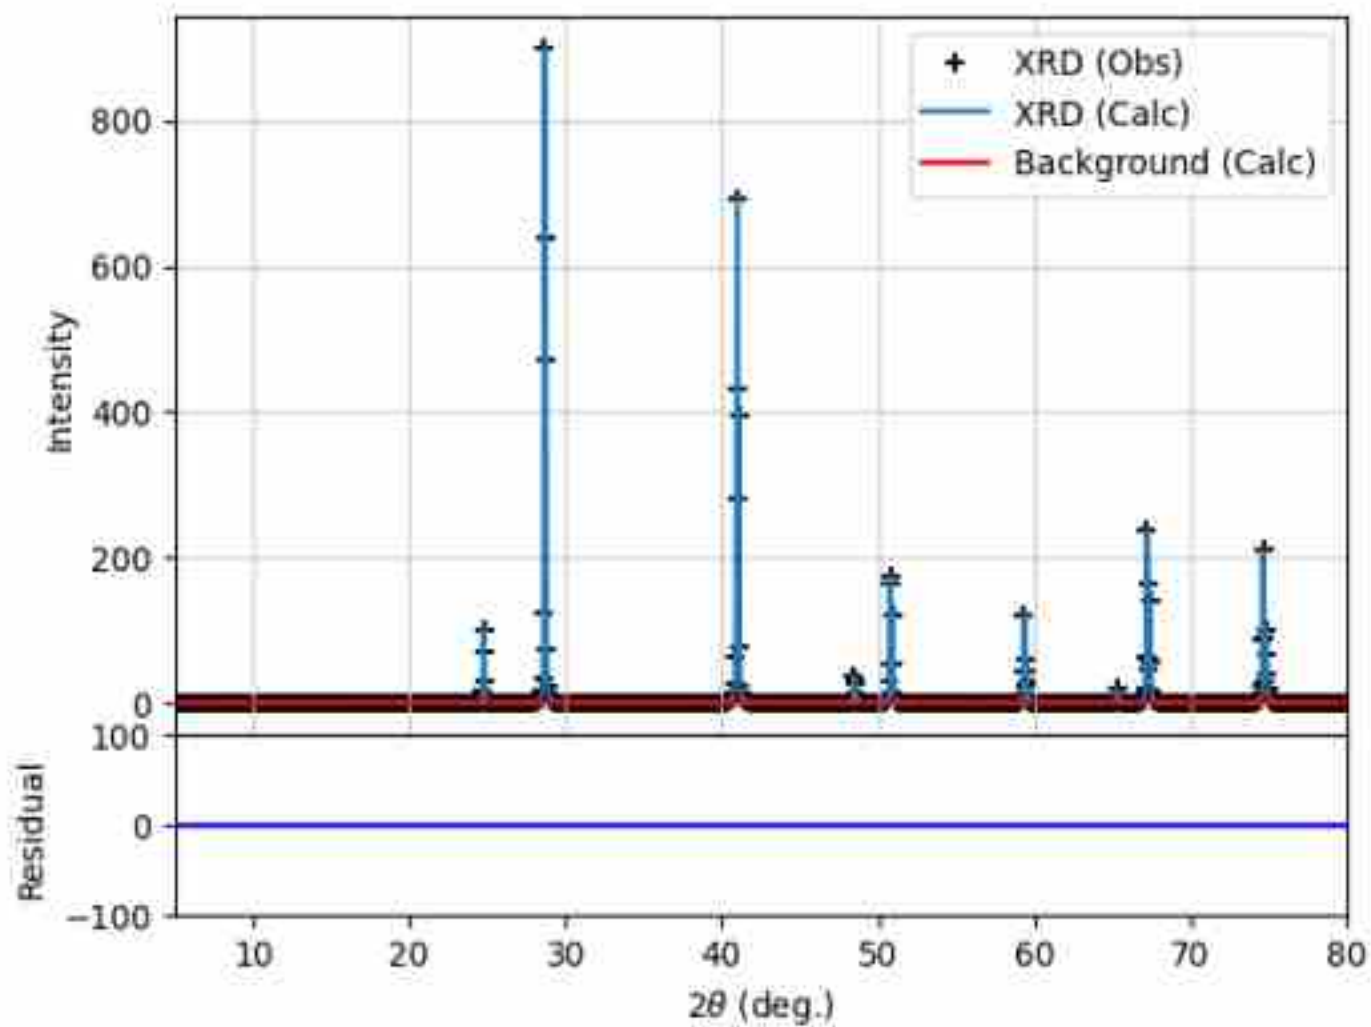

| RMSE before RR | Rwp     | RMSE after RR |
|----------------|---------|---------------|
| 0.002          | 0.00359 | 0.00086       |

# Li<sub>2</sub>Co<sub>2</sub>P<sub>2</sub>O<sub>8</sub>

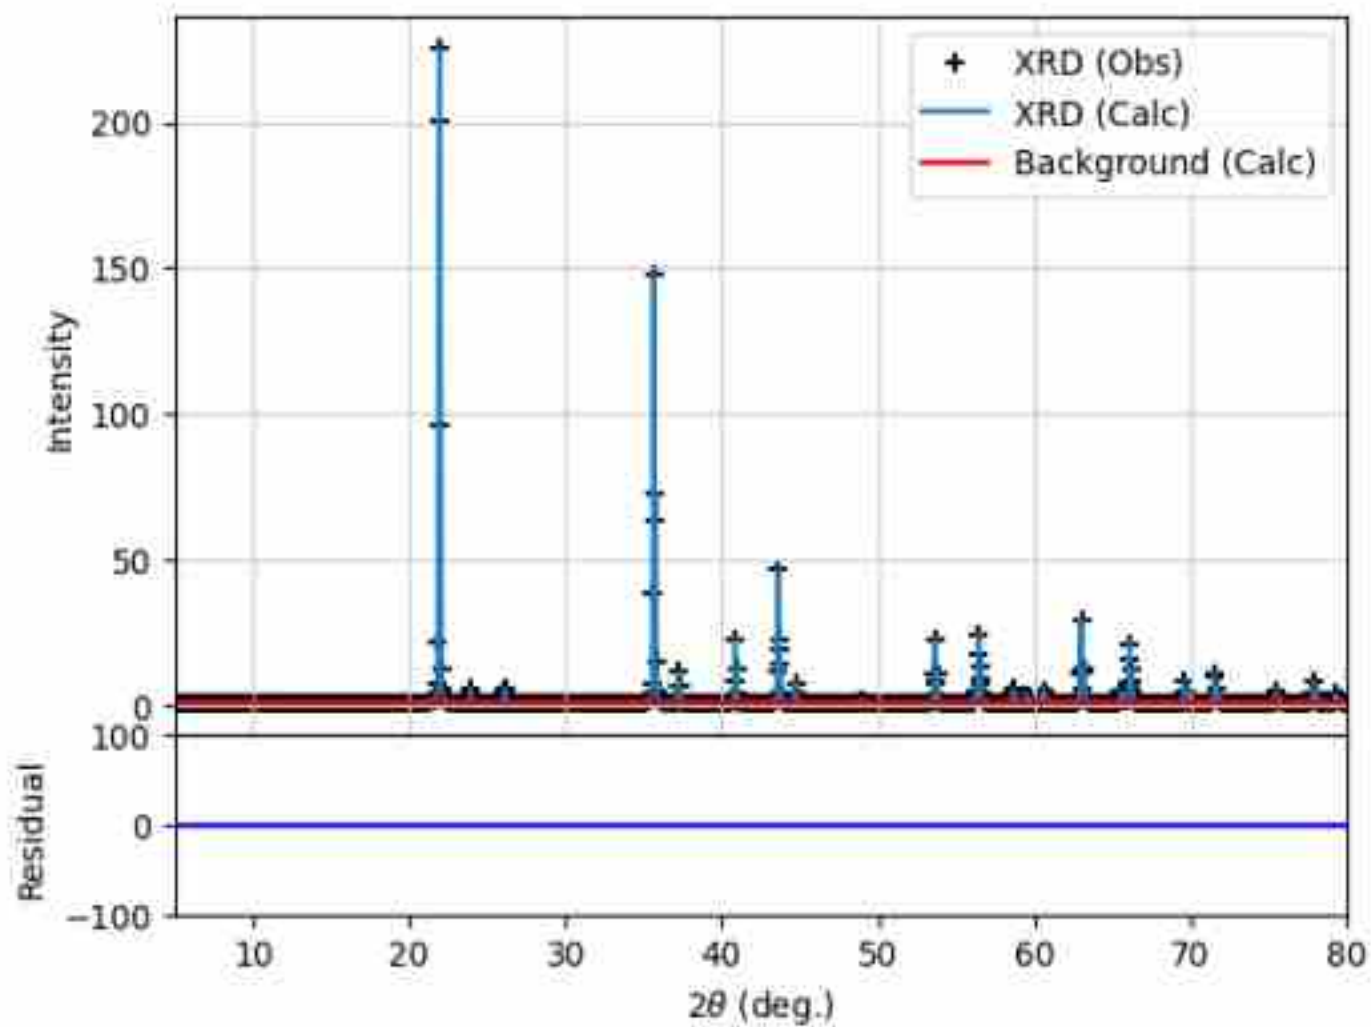

| RMSE before RR | Rwp     | RMSE after RR |
|----------------|---------|---------------|
| 0.02           | 0.00226 | 0.00095       |

# Li<sub>2</sub>Co<sub>3</sub>Ni<sub>10</sub>O<sub>8</sub>

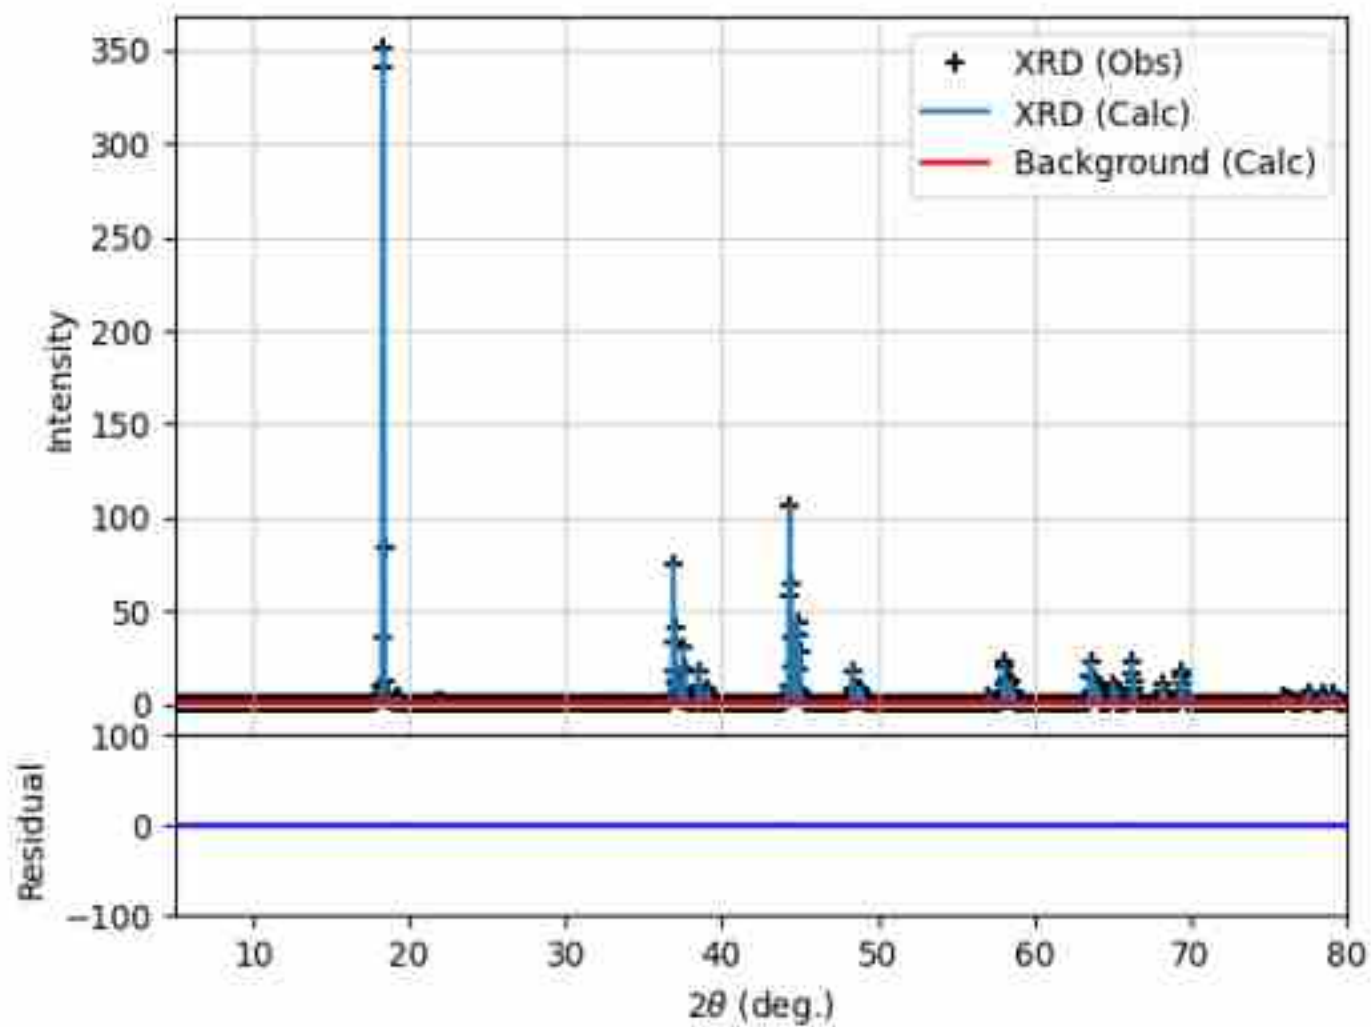

| RMSE before RR | Rwp    | RMSE after RR |
|----------------|--------|---------------|
| 0.02           | 1.6162 | 0.05462       |



# Li<sub>2</sub>CuSb

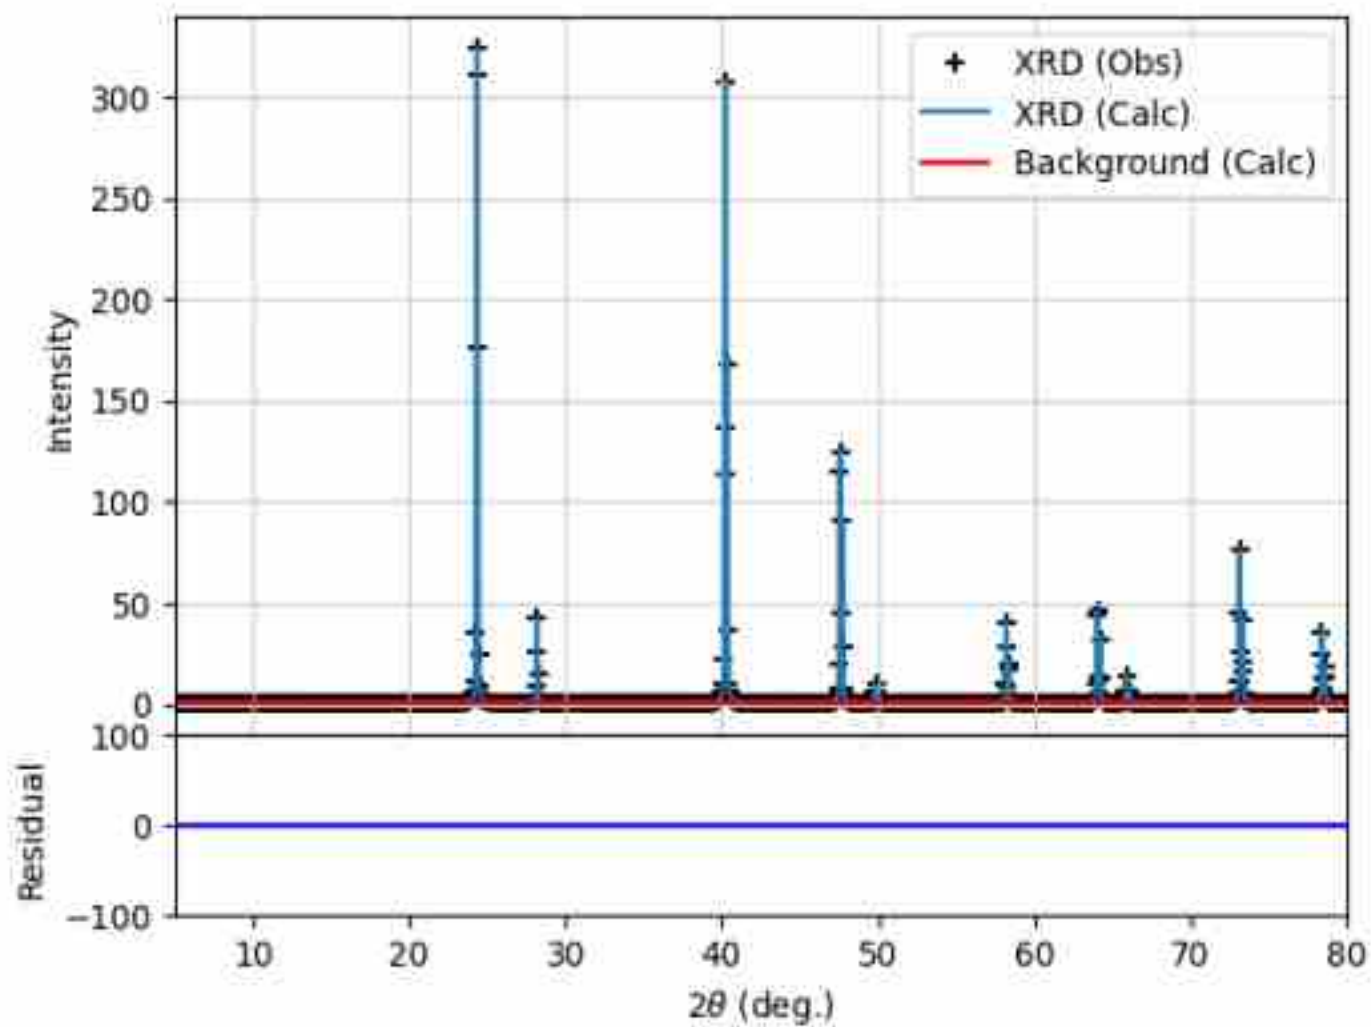

| RMSE before RR | Rwp     | RMSE after RR |
|----------------|---------|---------------|
| 0.002          | 0.00284 | 0.00151       |

# Li<sub>2</sub>Ho<sub>1</sub>Tl<sub>1</sub>

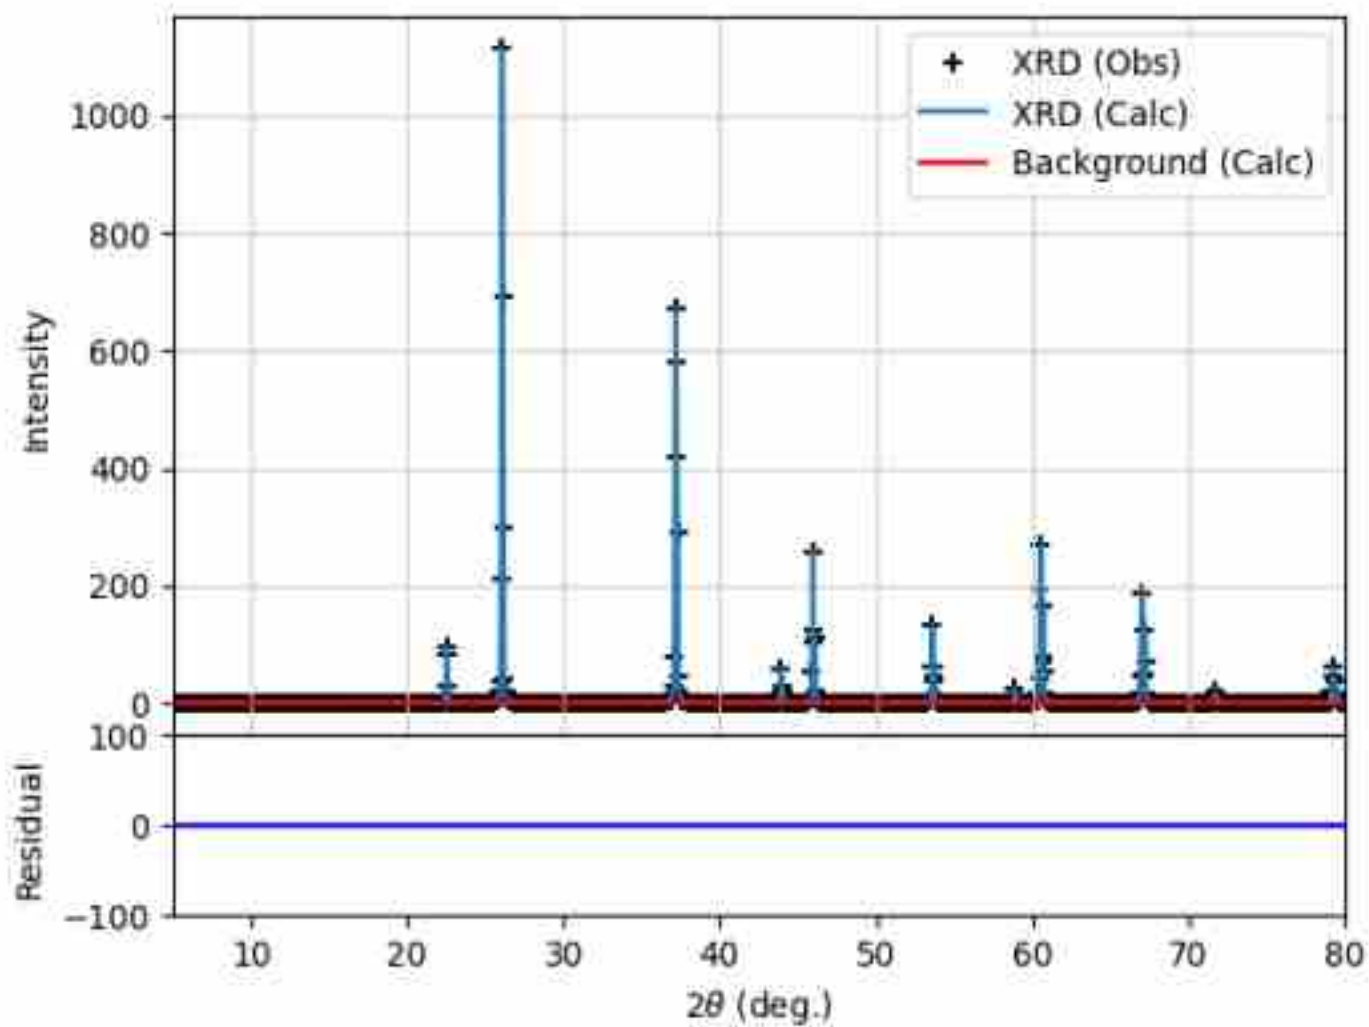

| RMSE before RR | Rwp     | RMSE after RR |
|----------------|---------|---------------|
| 0.002          | 0.00498 | 0.00397       |

Li2In1Sn1

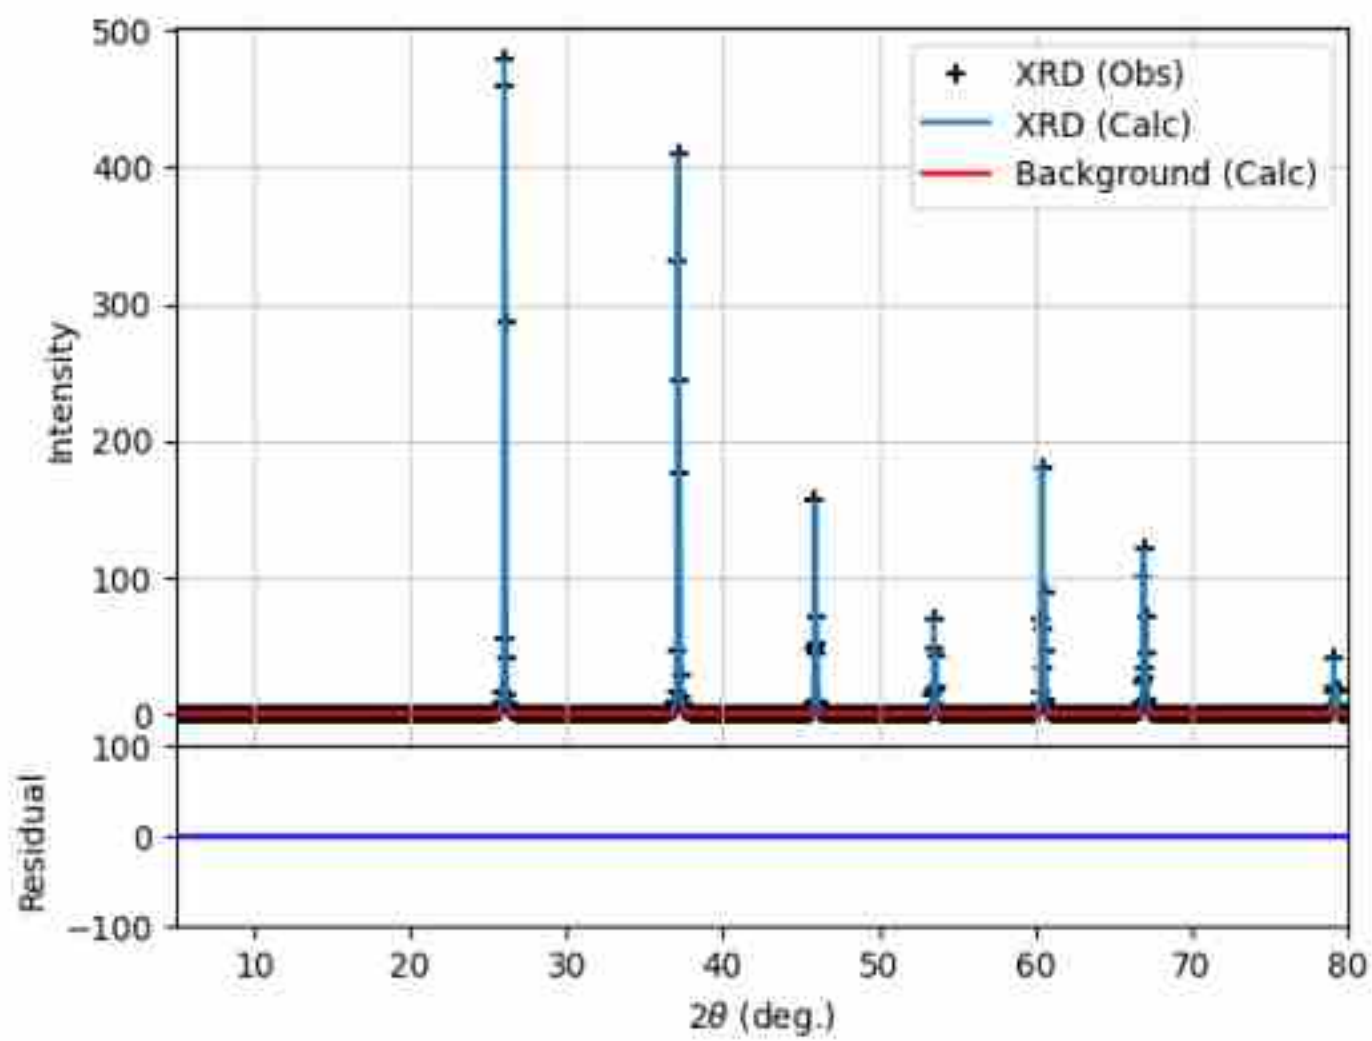

| RMSE before RR | Rwp     | RMSE after RR |
|----------------|---------|---------------|
| 0.002          | 0.00366 | 0.00103       |

# Li<sub>2</sub>La<sub>1</sub>Sn<sub>1</sub>

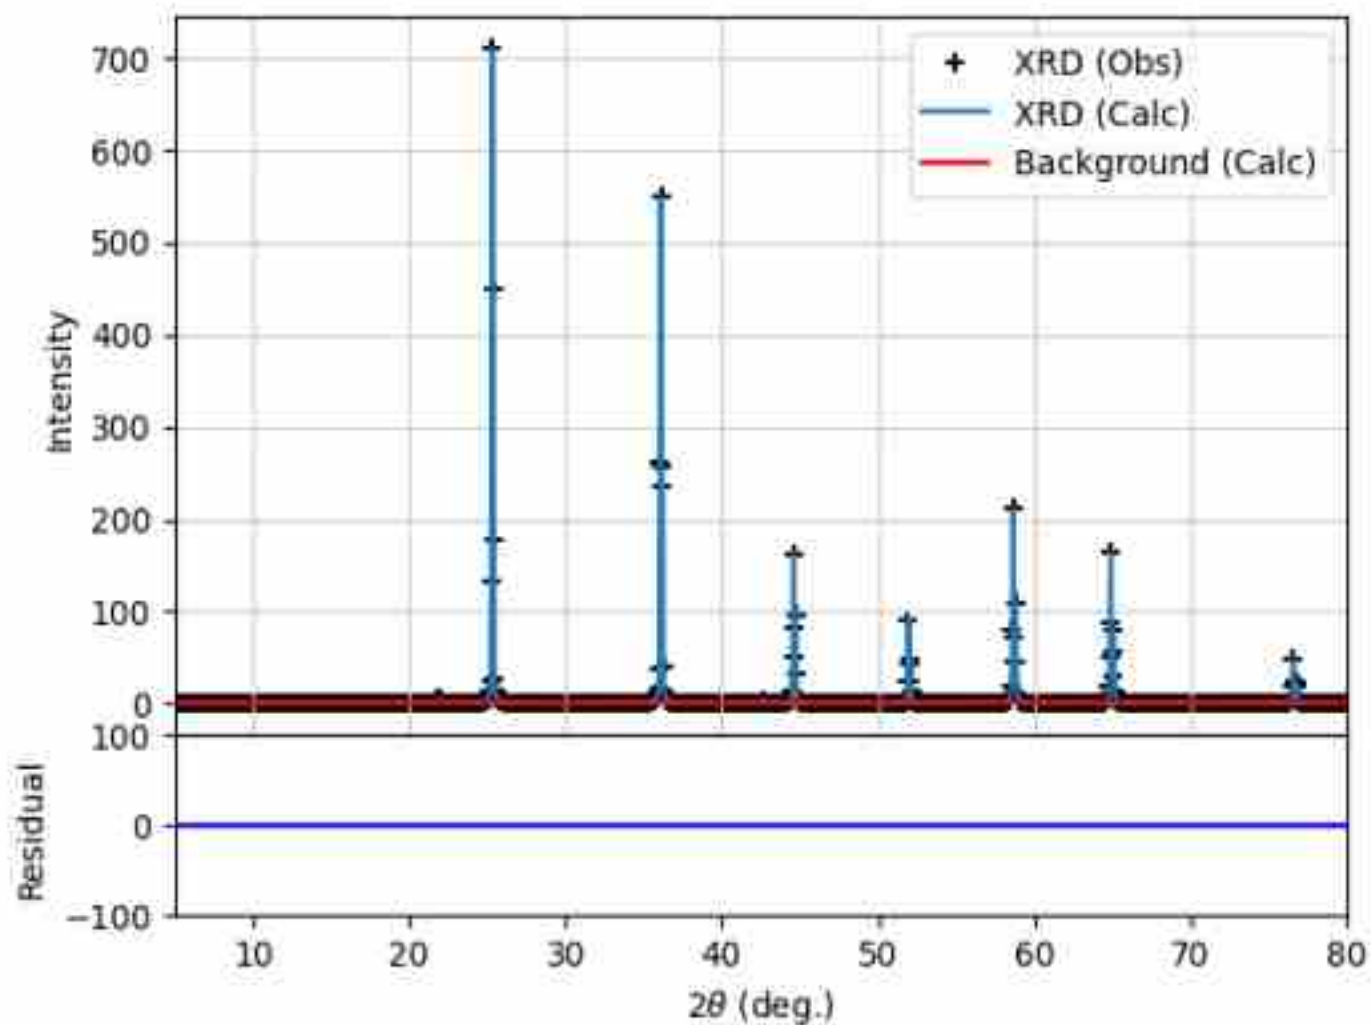

| RMSE before RR | Rwp    | RMSE after RR |
|----------------|--------|---------------|
| 0.002          | 0.0039 | 0.00394       |

# Li<sub>2</sub>La<sub>1</sub>Tl<sub>1</sub>

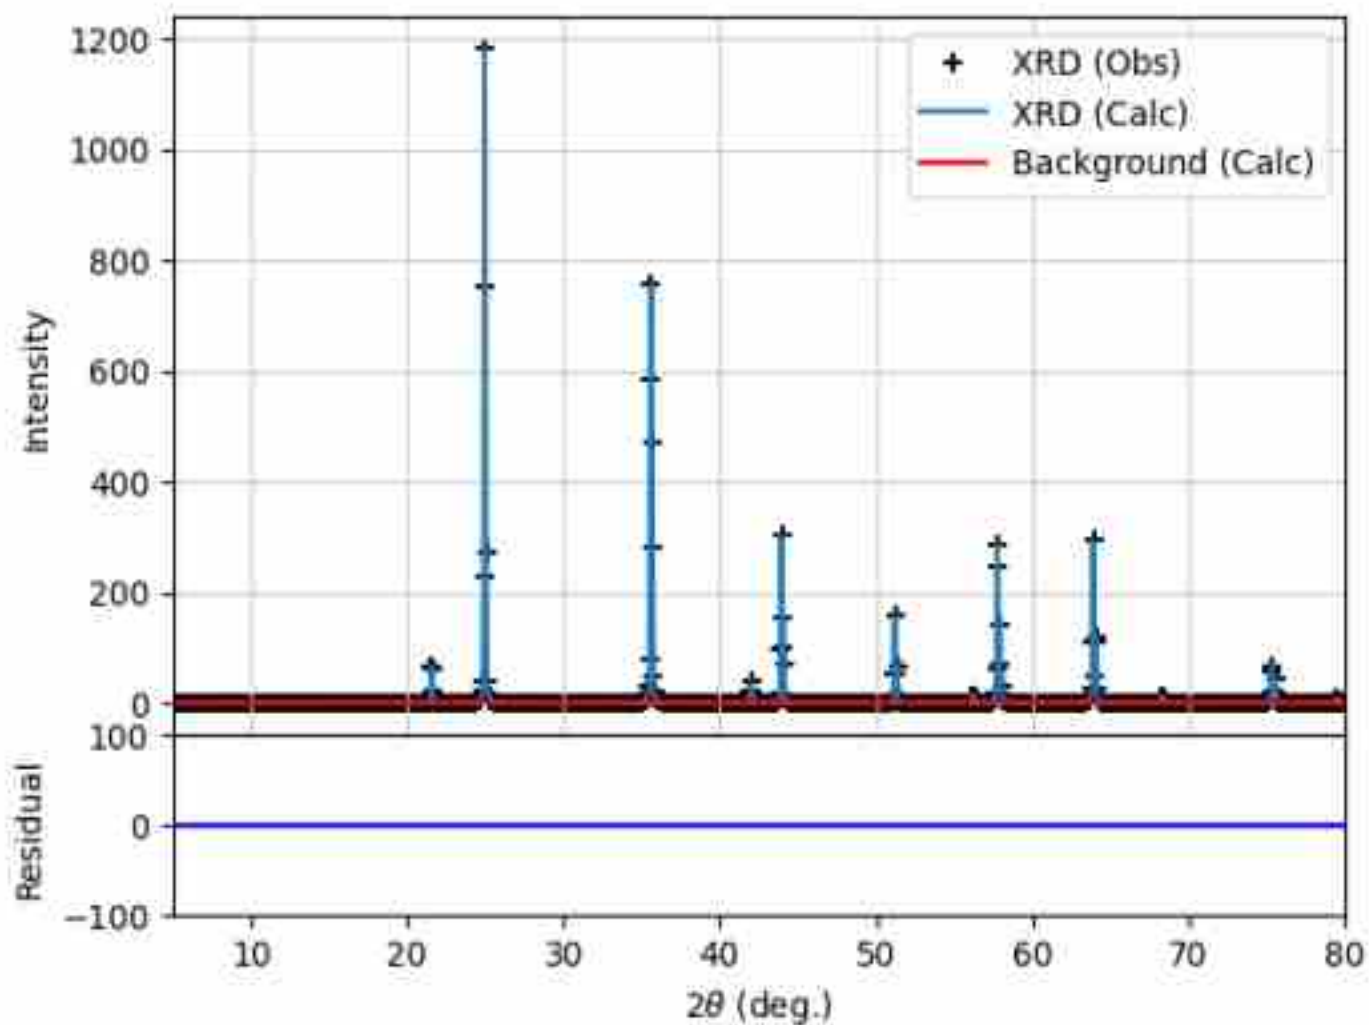

| RMSE before RR | Rwp     | RMSE after RR |
|----------------|---------|---------------|
| 0.002          | 0.00294 | 0.00119       |

# Li<sub>2</sub>Mg<sub>1</sub>Sn<sub>1</sub>

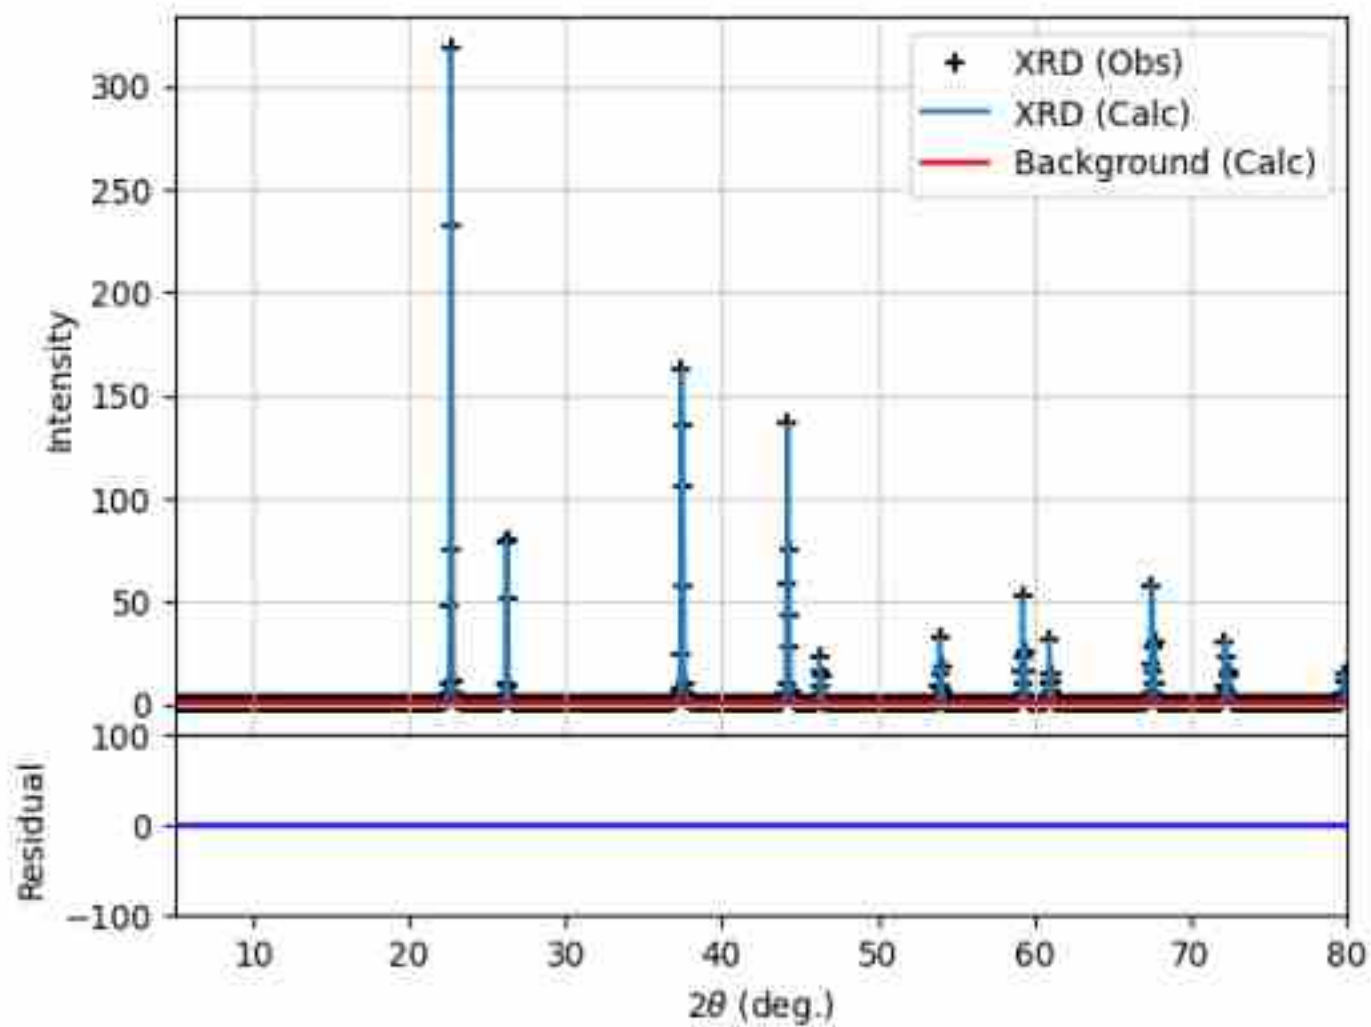

| RMSE before RR | Rwp     | RMSE after RR |
|----------------|---------|---------------|
| 0.002          | 0.00315 | 0.00175       |

# Li<sub>2</sub>Mg<sub>1</sub>Tl<sub>1</sub>

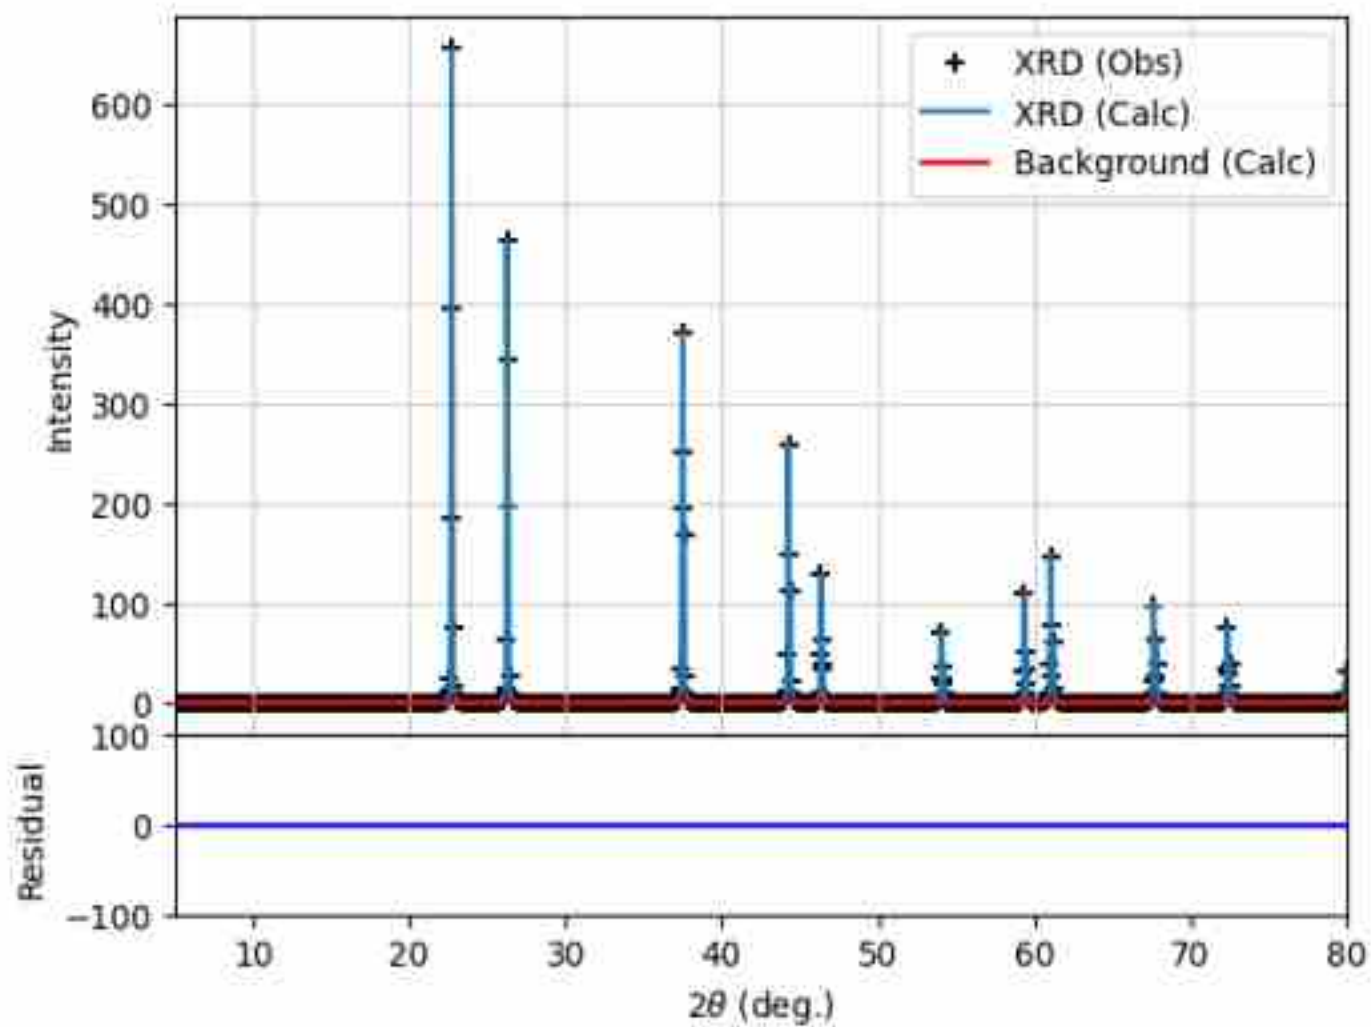

| RMSE before RR | Rwp     | RMSE after RR |
|----------------|---------|---------------|
| 0.002          | 0.00348 | 0.00205       |

# Li2Sm1Tl1

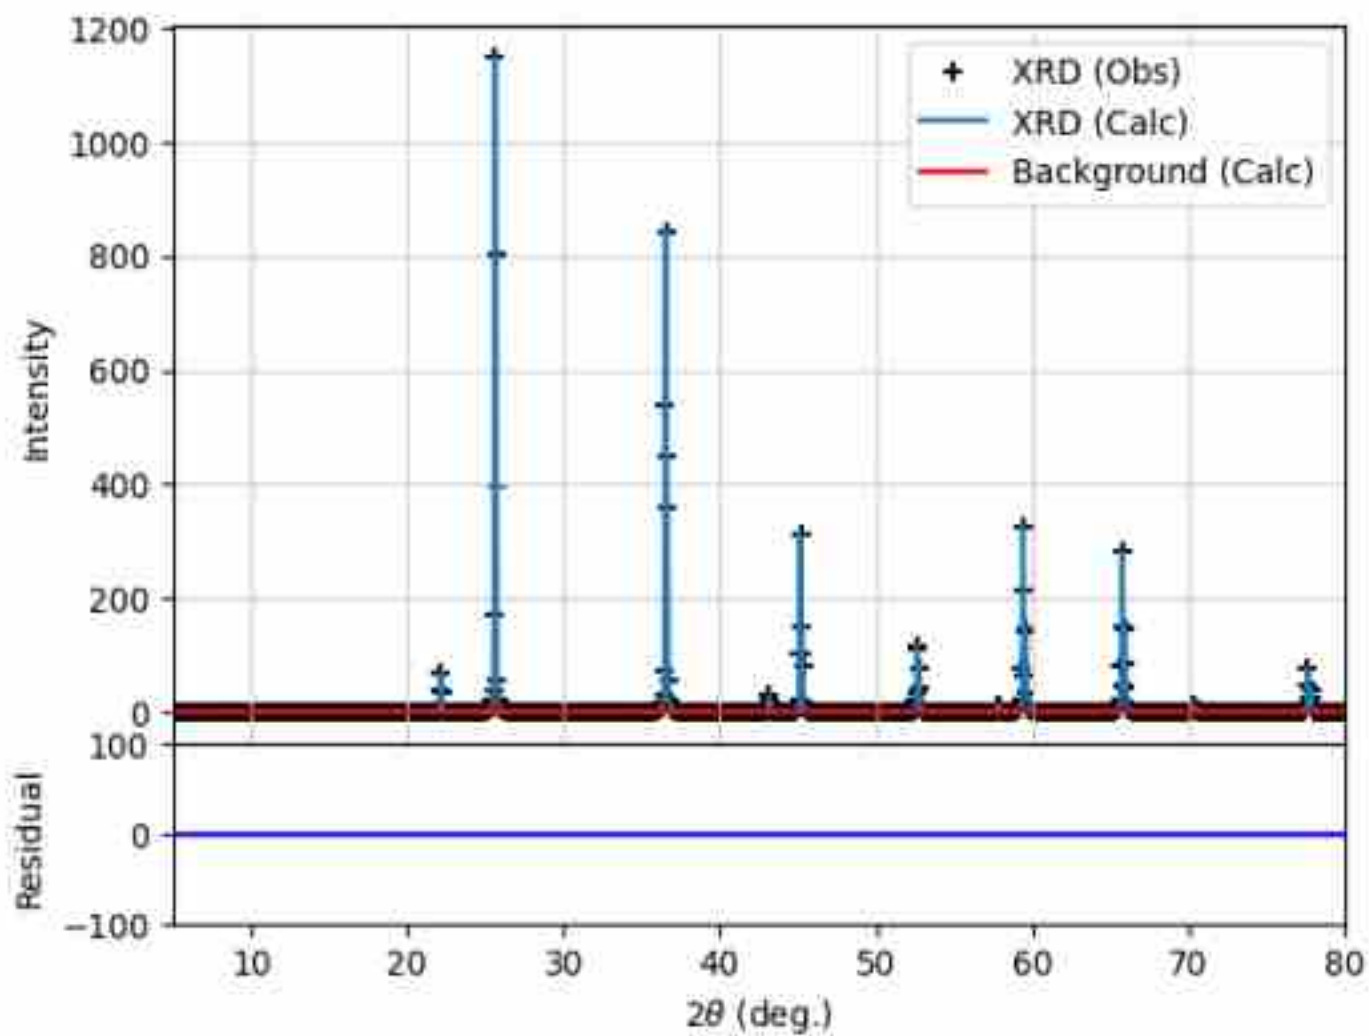

| RMSE before RR | Rwp     | RMSE after RR |
|----------------|---------|---------------|
| 0.002          | 0.02338 | 0.03314       |



# Li<sub>2</sub>Ti<sub>2</sub>Al<sub>2</sub>O<sub>8</sub>

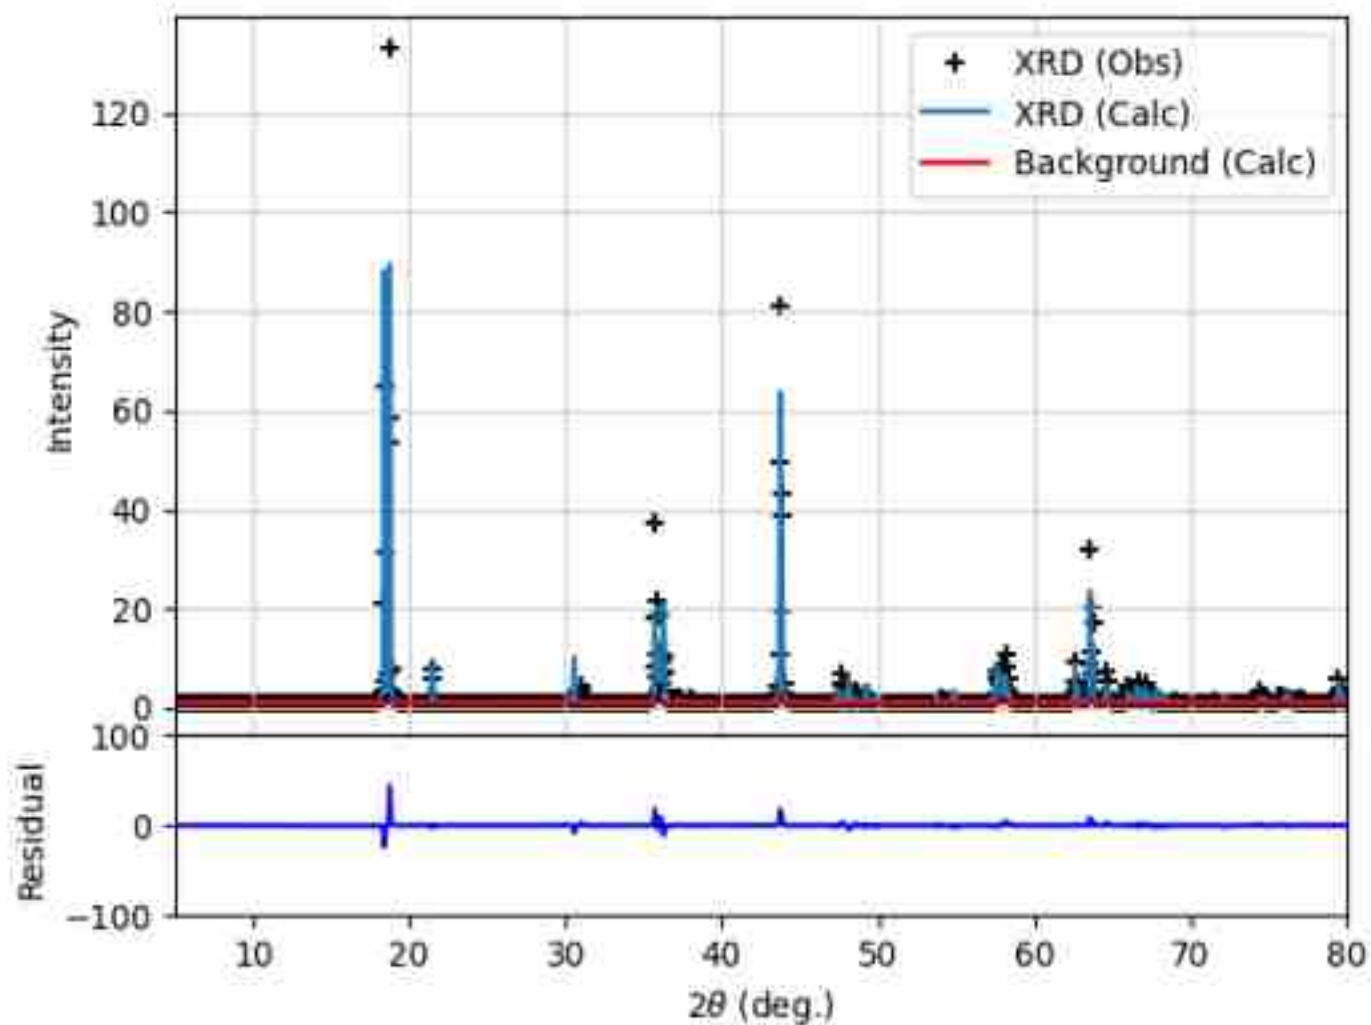

| RMSE before RR | Rwp      | RMSE after RR |
|----------------|----------|---------------|
| 0.02           | 31.52106 | 0.02246       |

# Li<sub>2</sub>Tl<sub>11</sub>Pd<sub>1</sub>

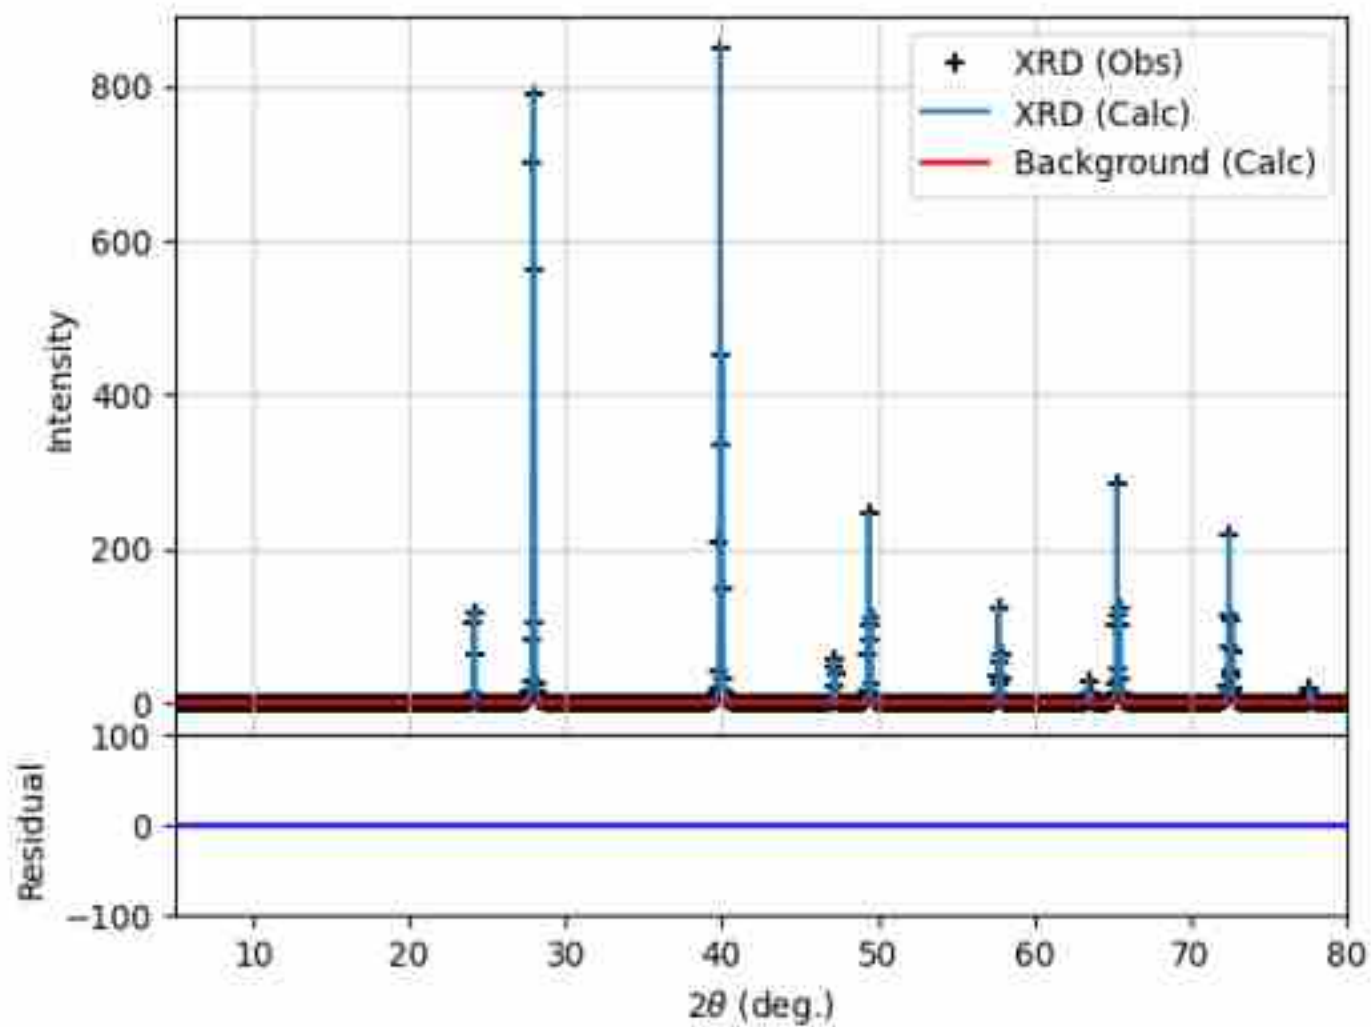

| RMSE before RR | Rwp     | RMSE after RR |
|----------------|---------|---------------|
| 0.002          | 0.00368 | 0.00703       |

# Li2Tm1Tl1

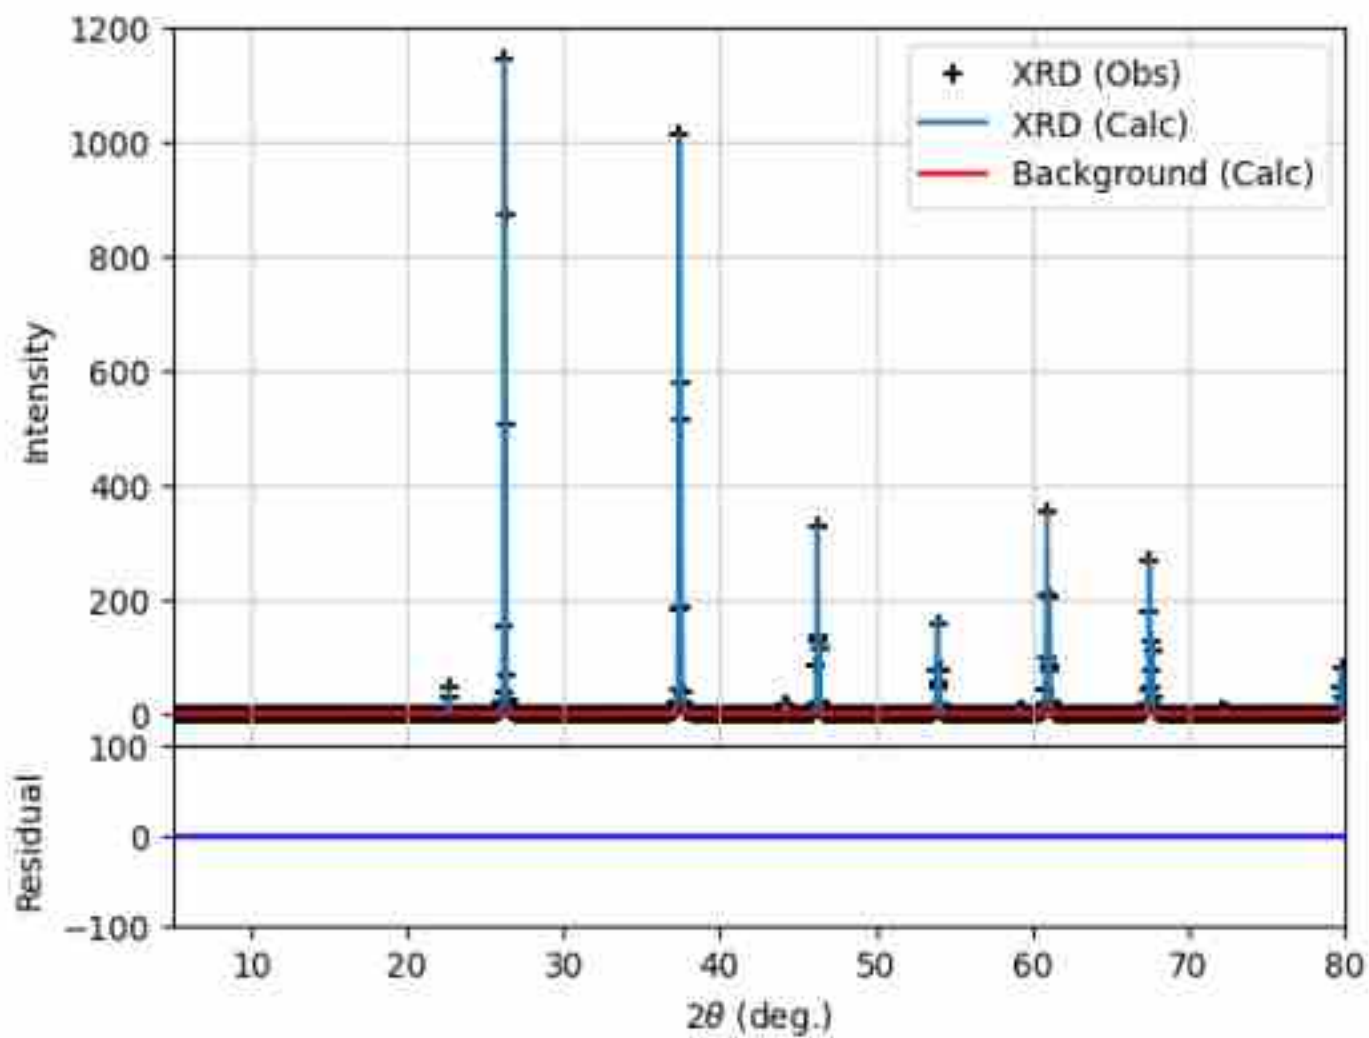

| RMSE before RR | Rwp     | RMSE after RR |
|----------------|---------|---------------|
| 0.002          | 0.00245 | 0.00553       |

# Li<sub>3</sub>Pb1

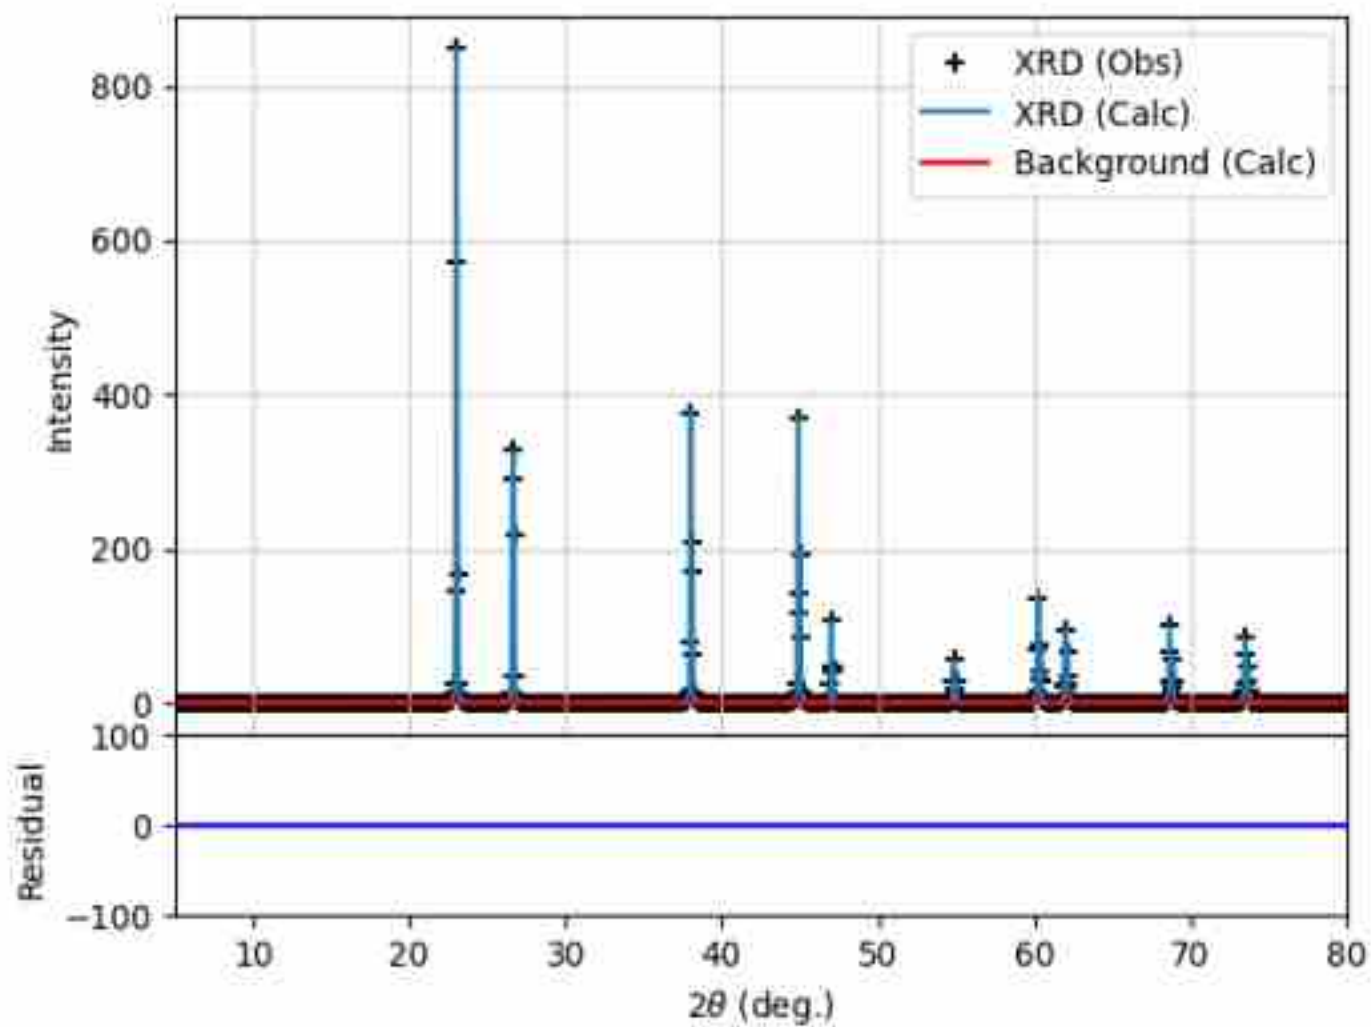

| RMSE before RR | Rwp     | RMSE after RR |
|----------------|---------|---------------|
| 0.002          | 0.00326 | 0.00335       |

# Li<sub>4</sub>Ni<sub>3</sub>W<sub>1</sub>O<sub>8</sub>

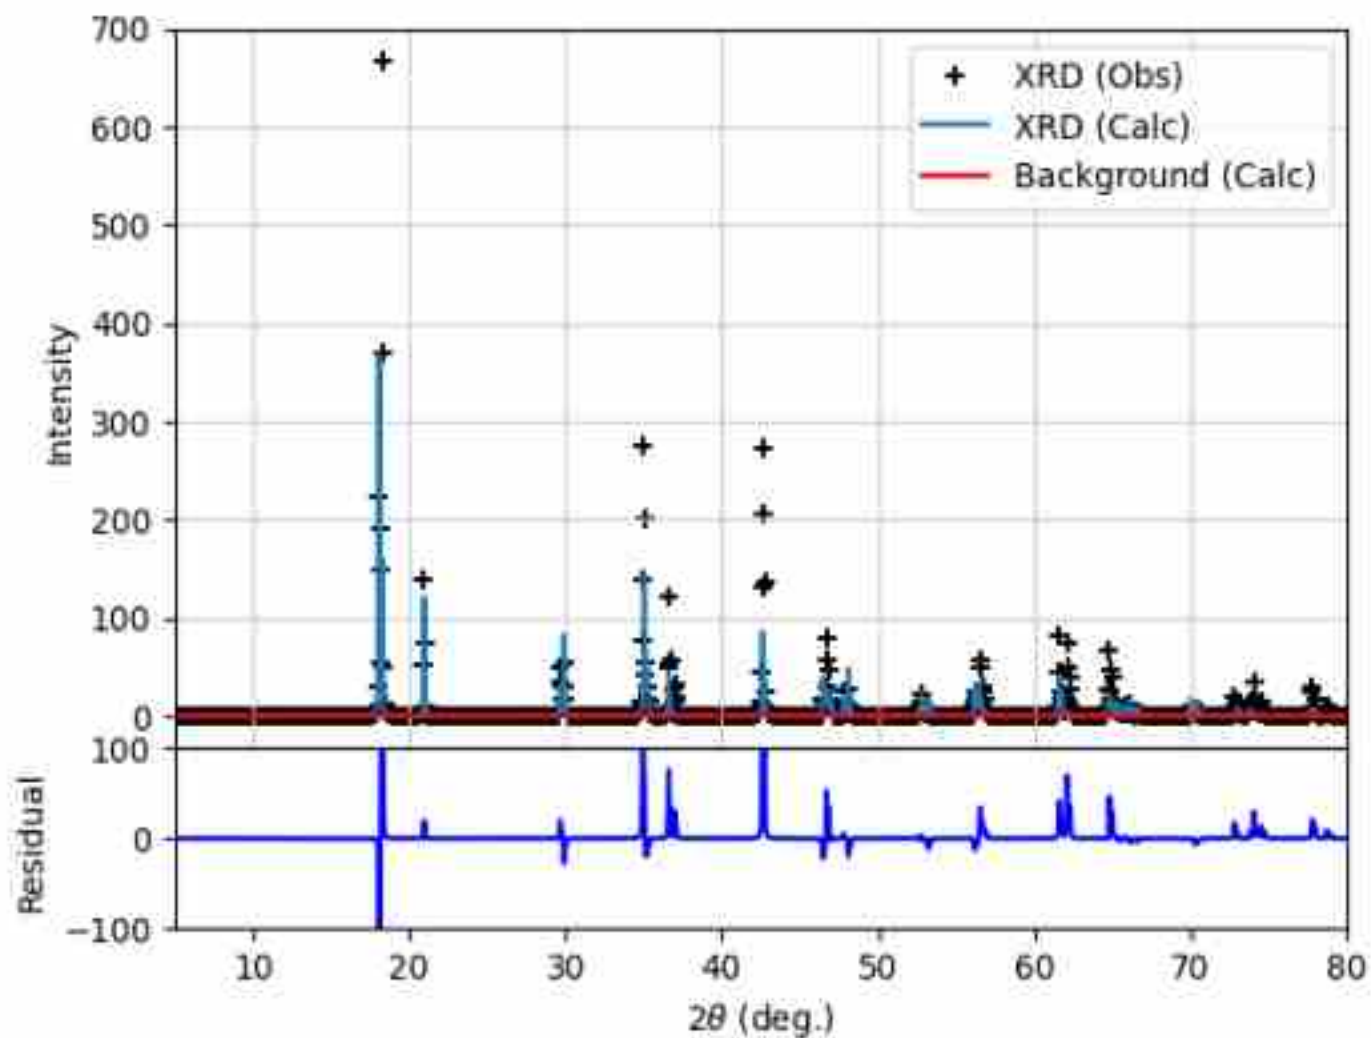

| RMSE before RR | Rwp      | RMSE after RR |
|----------------|----------|---------------|
| 0.02           | 59.38403 | None          |

# Li<sub>4</sub>Sm<sub>3</sub>Ge<sub>4</sub>

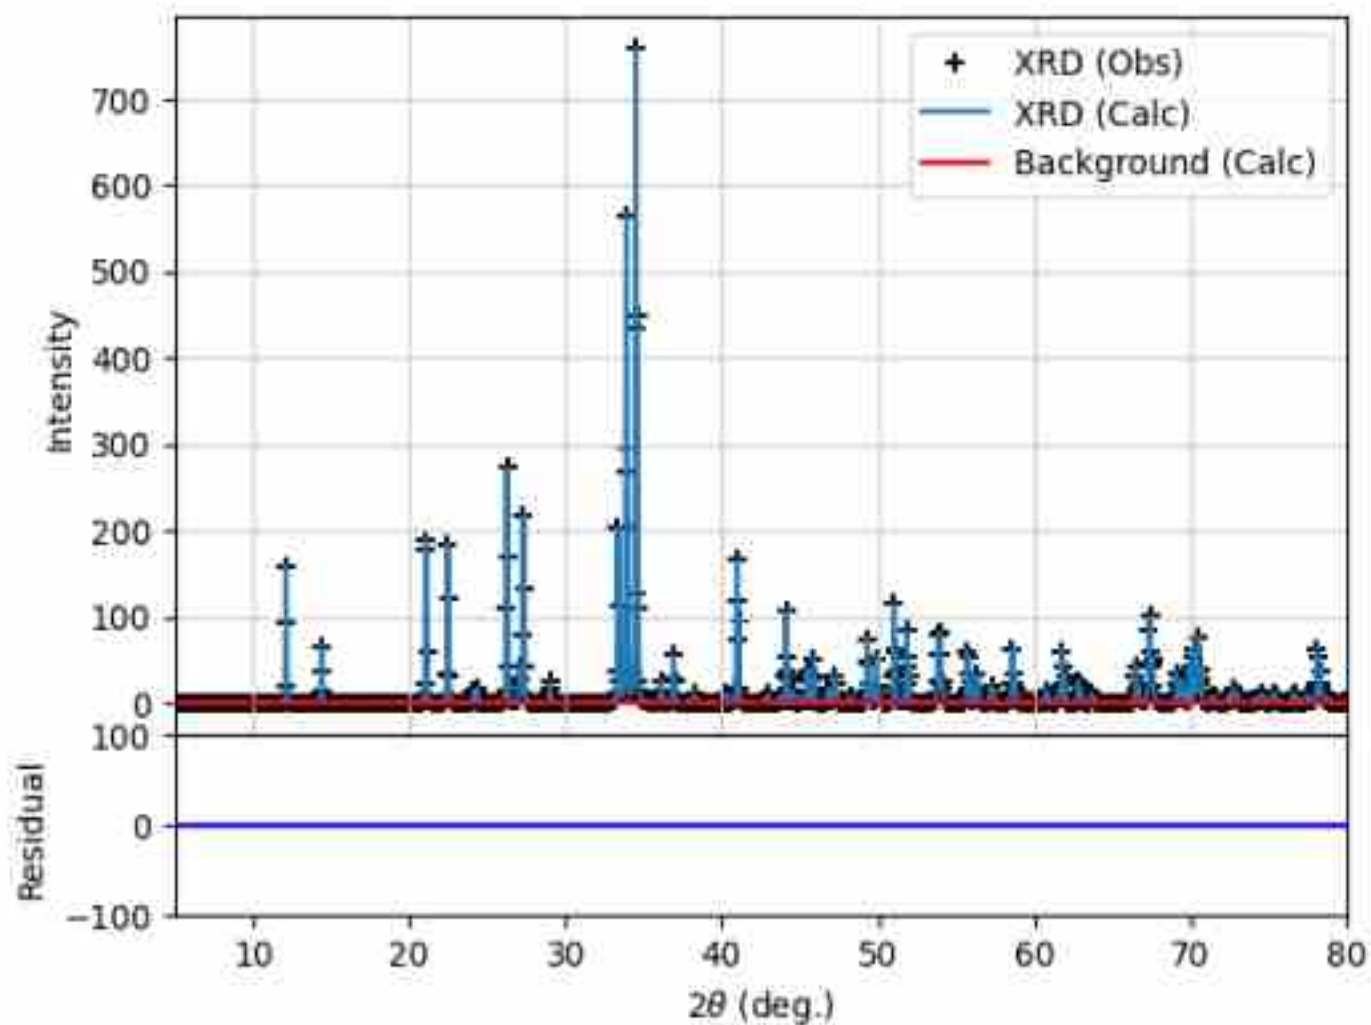

| RMSE before RR | Rwp     | RMSE after RR |
|----------------|---------|---------------|
| 0.02           | 0.00351 | 0.00242       |

# Li<sub>4</sub>V<sub>2</sub>O<sub>4</sub>F<sub>2</sub>

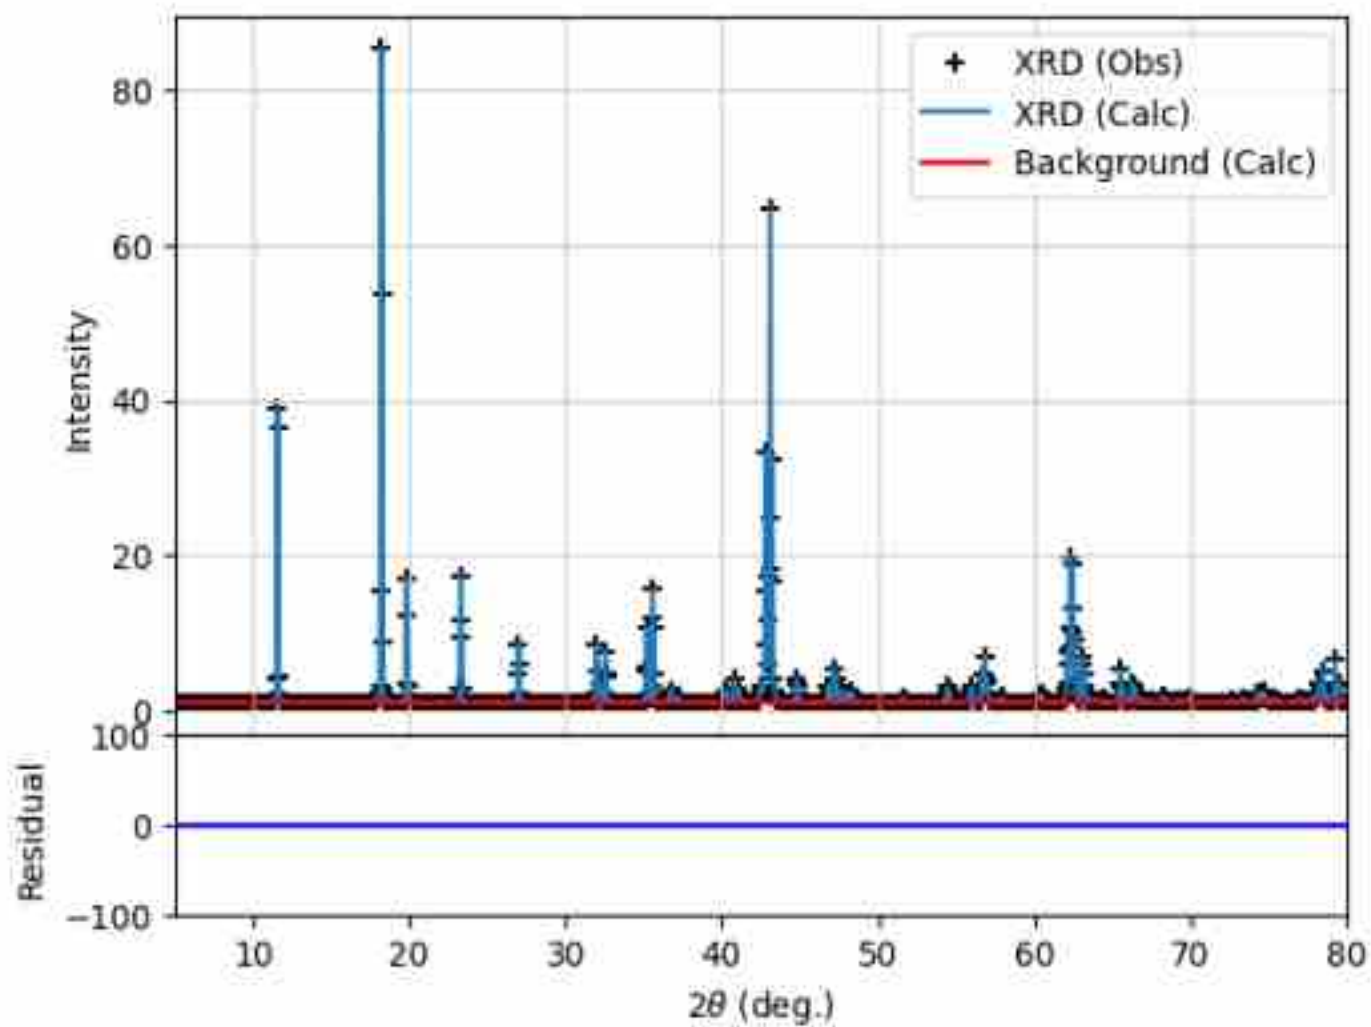

| RMSE before RR | Rwp     | RMSE after RR |
|----------------|---------|---------------|
| 0.02           | 0.00263 | 0.00105       |

# Li<sub>5</sub>MnF<sub>8</sub>

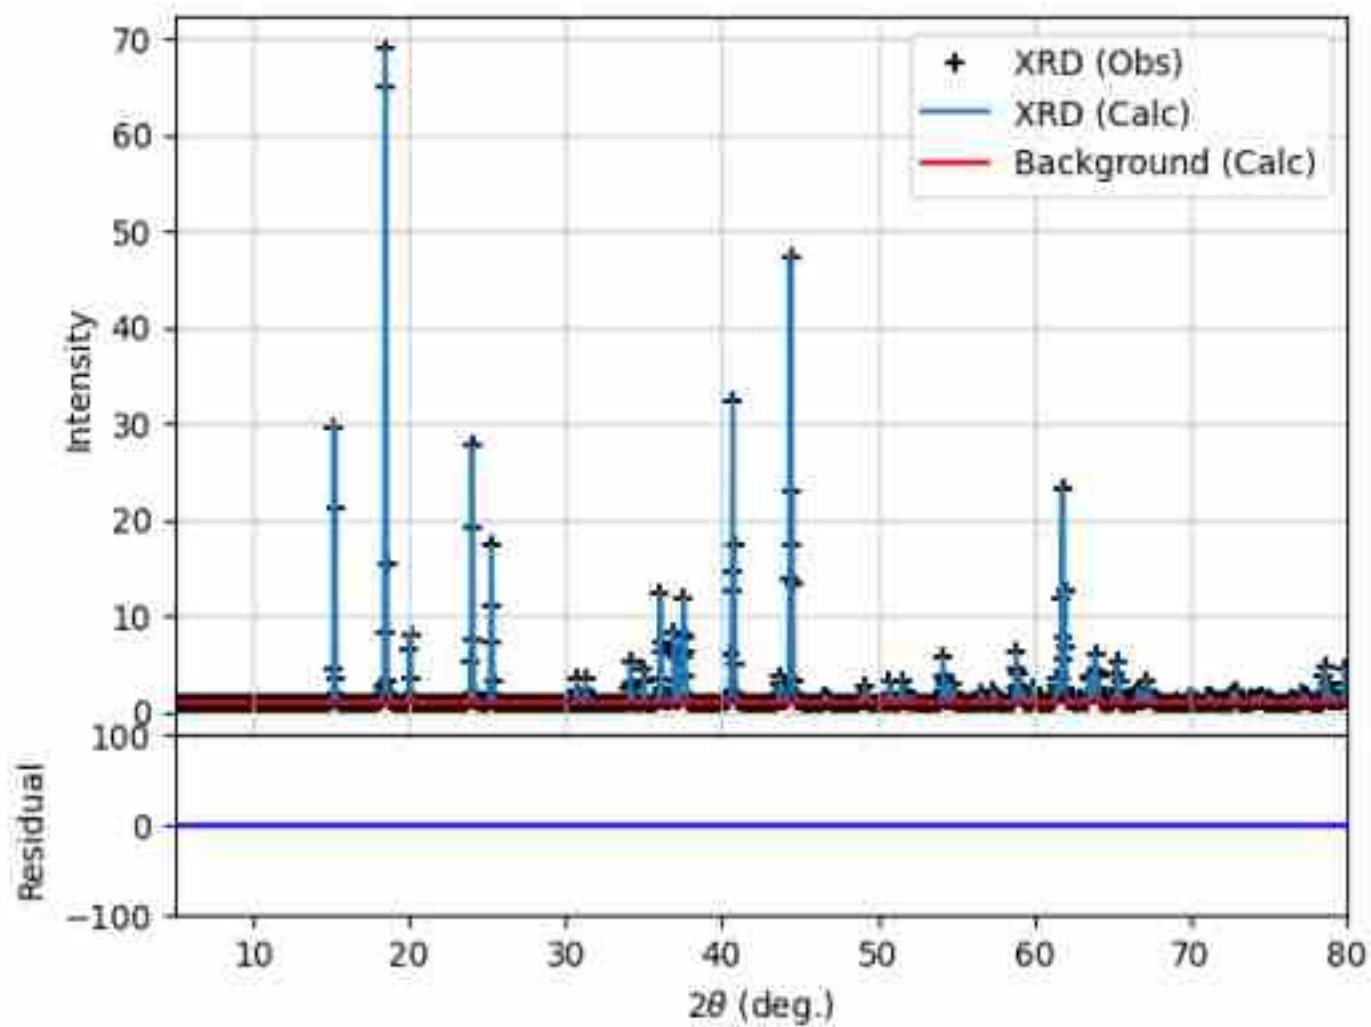

| RMSE before RR | Rwp     | RMSE after RR |
|----------------|---------|---------------|
| 0.02           | 0.00213 | 0.00089       |



# Lu1Cd1Pd2

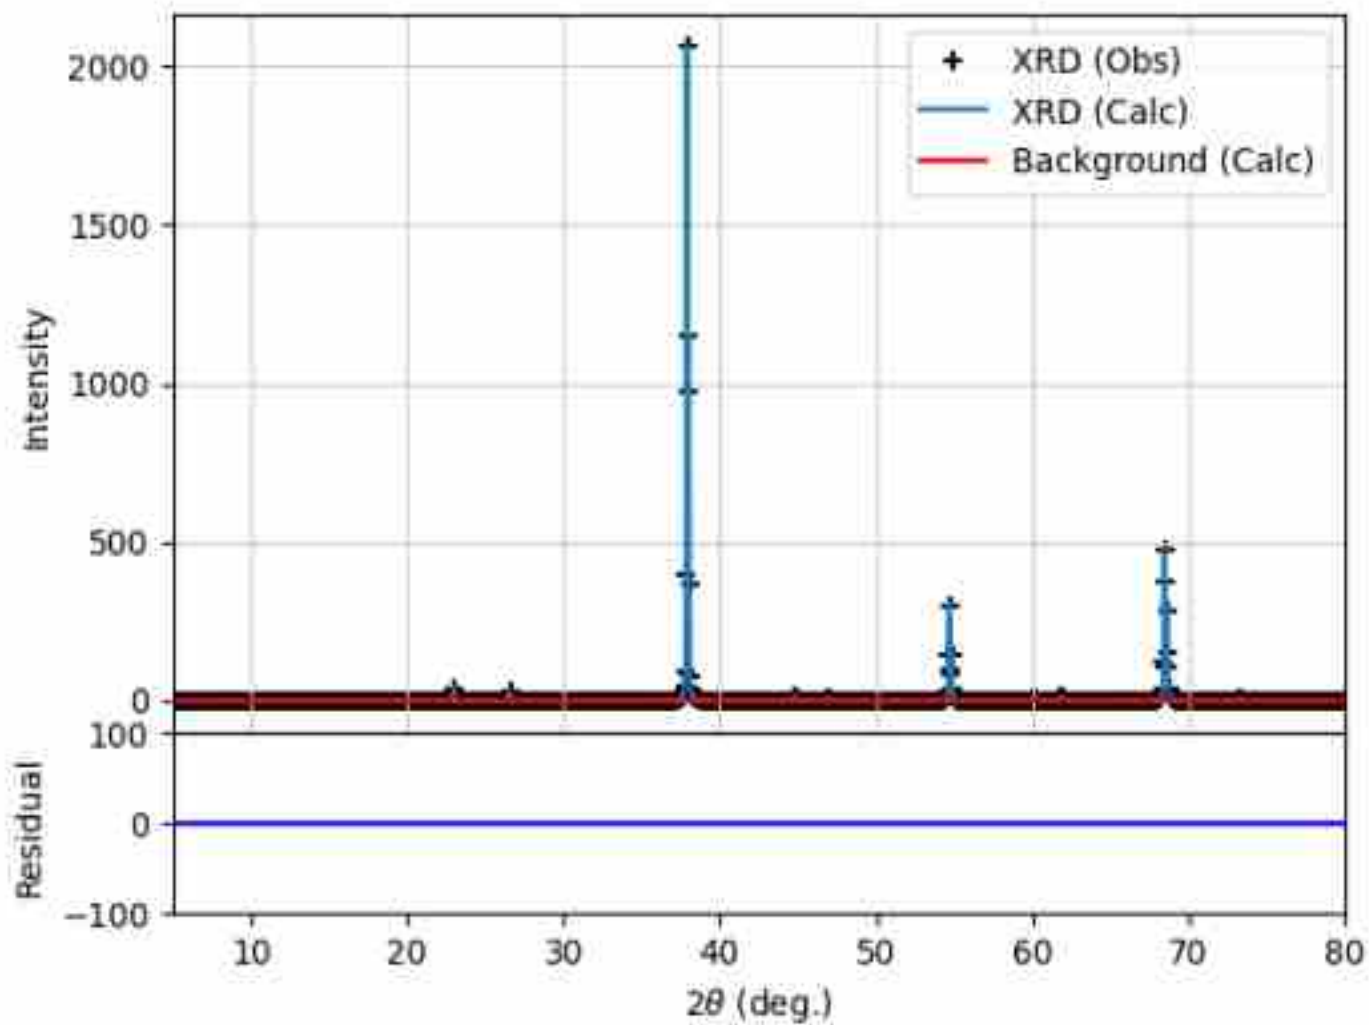

| RMSE before RR | Rwp     | RMSE after RR |
|----------------|---------|---------------|
| 0.002          | 0.00481 | 0.00047       |

# Lu1Cd1Rh2

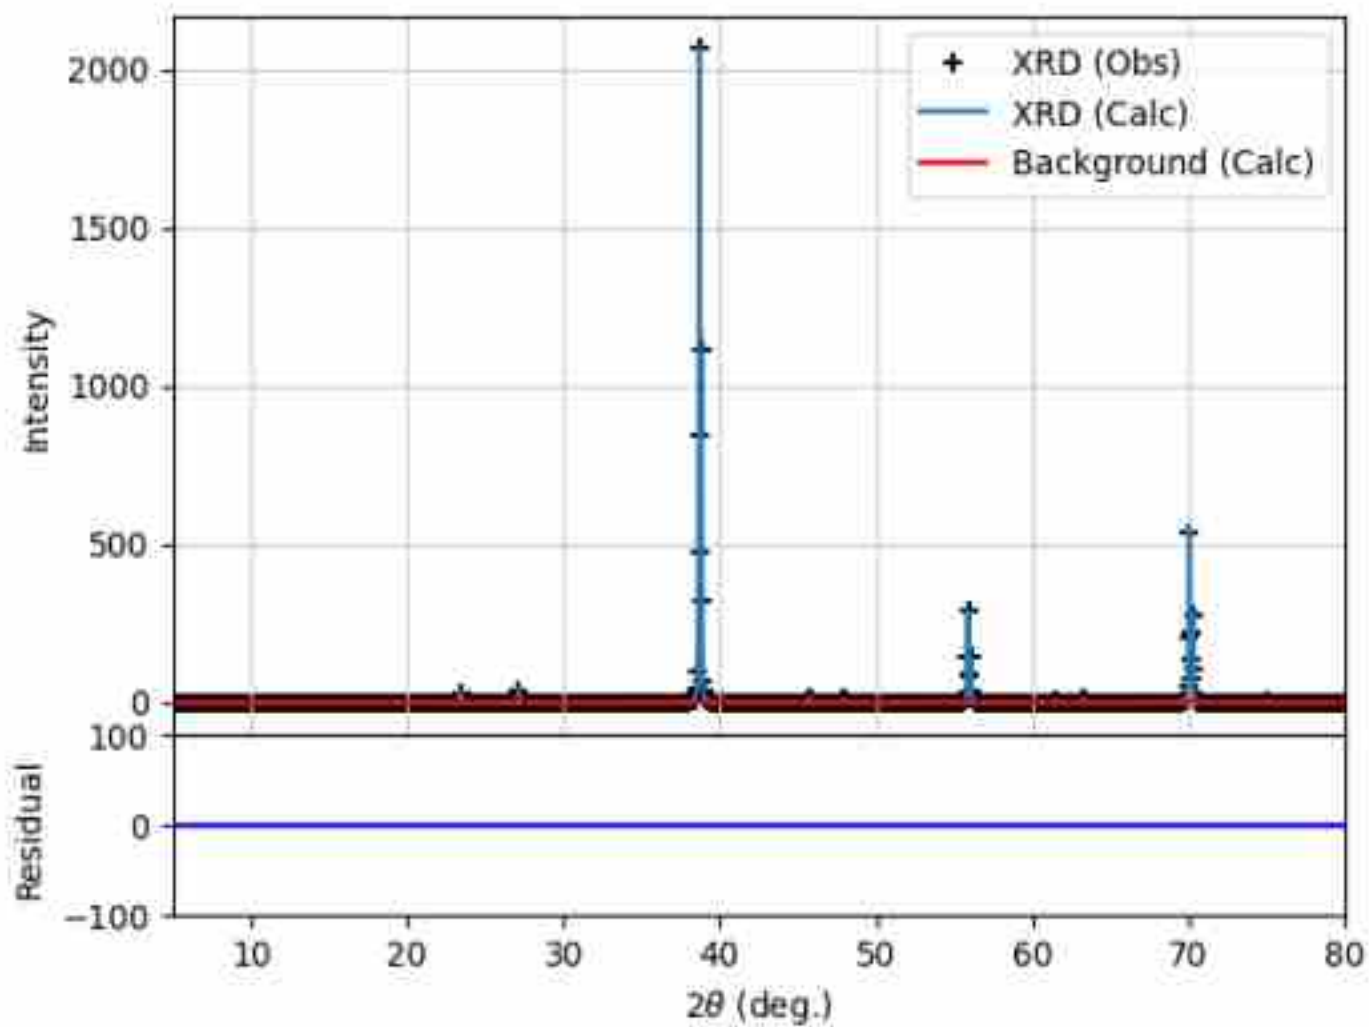

| RMSE before RR | Rwp     | RMSE after RR |
|----------------|---------|---------------|
| 0.002          | 0.00449 | 0.00033       |

# Lu1Ga1Rh2

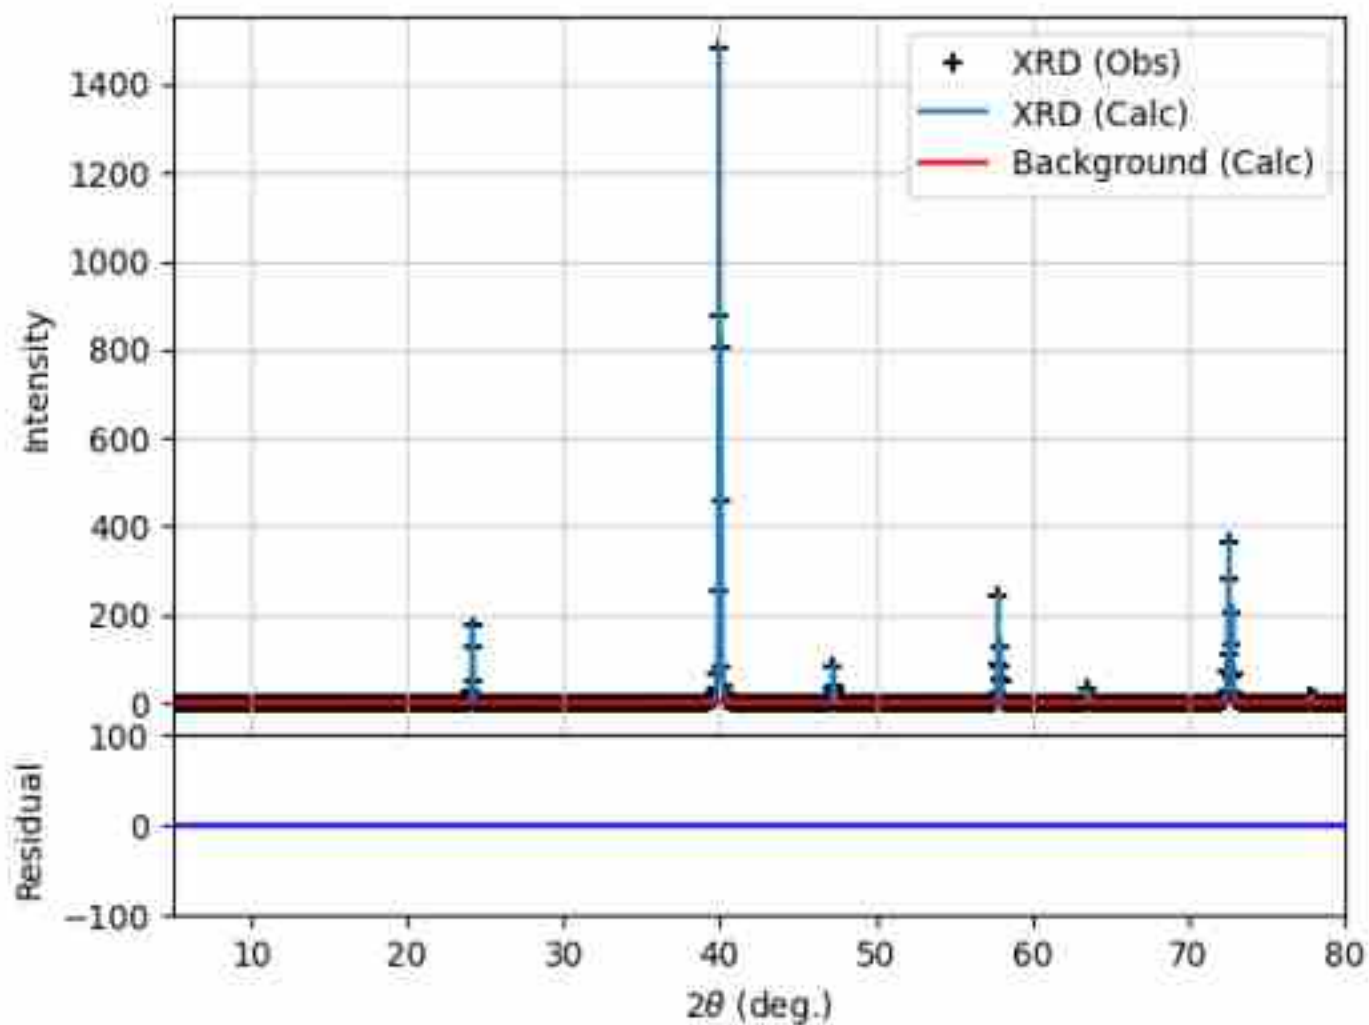

| RMSE before RR | Rwp     | RMSE after RR |
|----------------|---------|---------------|
| 0.002          | 0.00933 | 0.00056       |

# Lu1In1

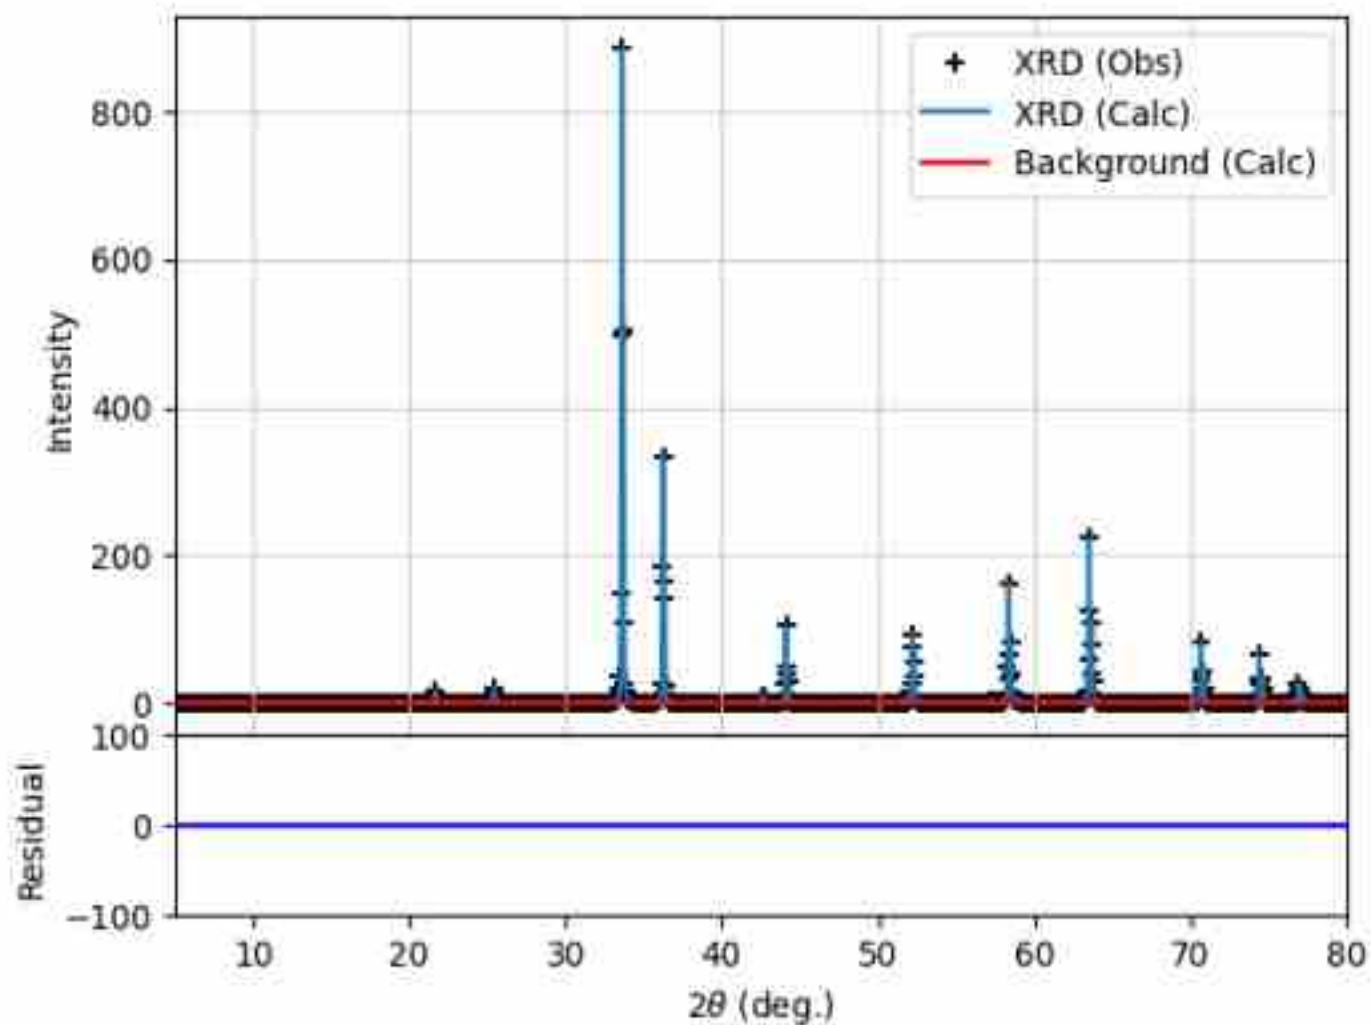

| RMSE before RR | Rwp     | RMSE after RR |
|----------------|---------|---------------|
| 0.002          | 0.00499 | 0.0004        |

# Lu1Mg1Cd2

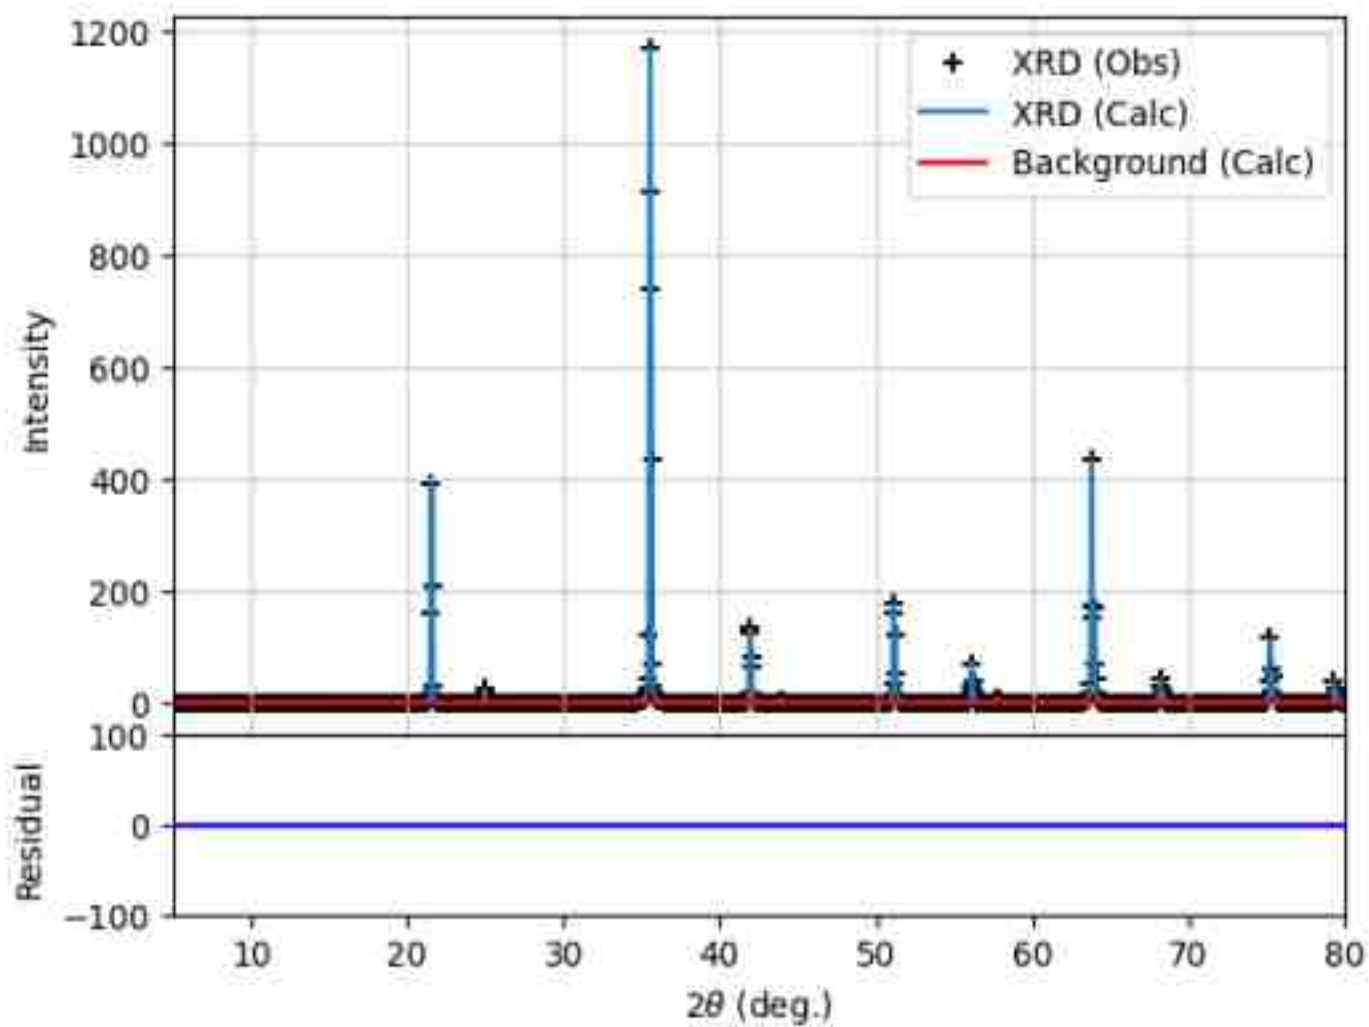

| RMSE before RR | Rwp     | RMSE after RR |
|----------------|---------|---------------|
| 0.002          | 0.00261 | 0.00016       |

# Lu1Mg1Pd2

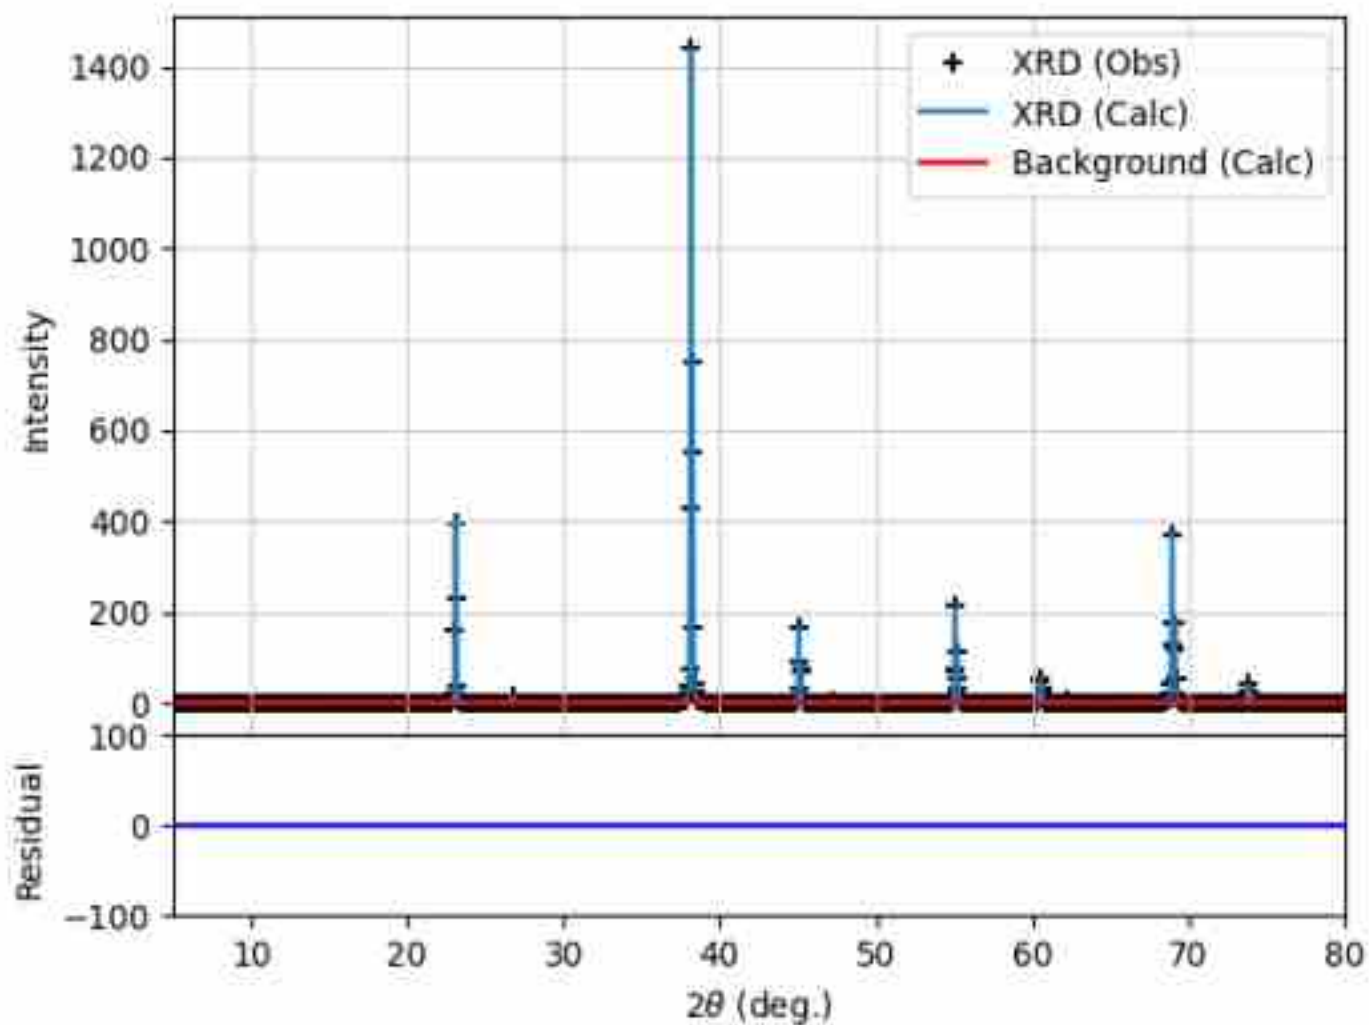

| RMSE before RR | Rwp     | RMSE after RR |
|----------------|---------|---------------|
| 0.002          | 0.00684 | 0.00055       |

# Lu1N1

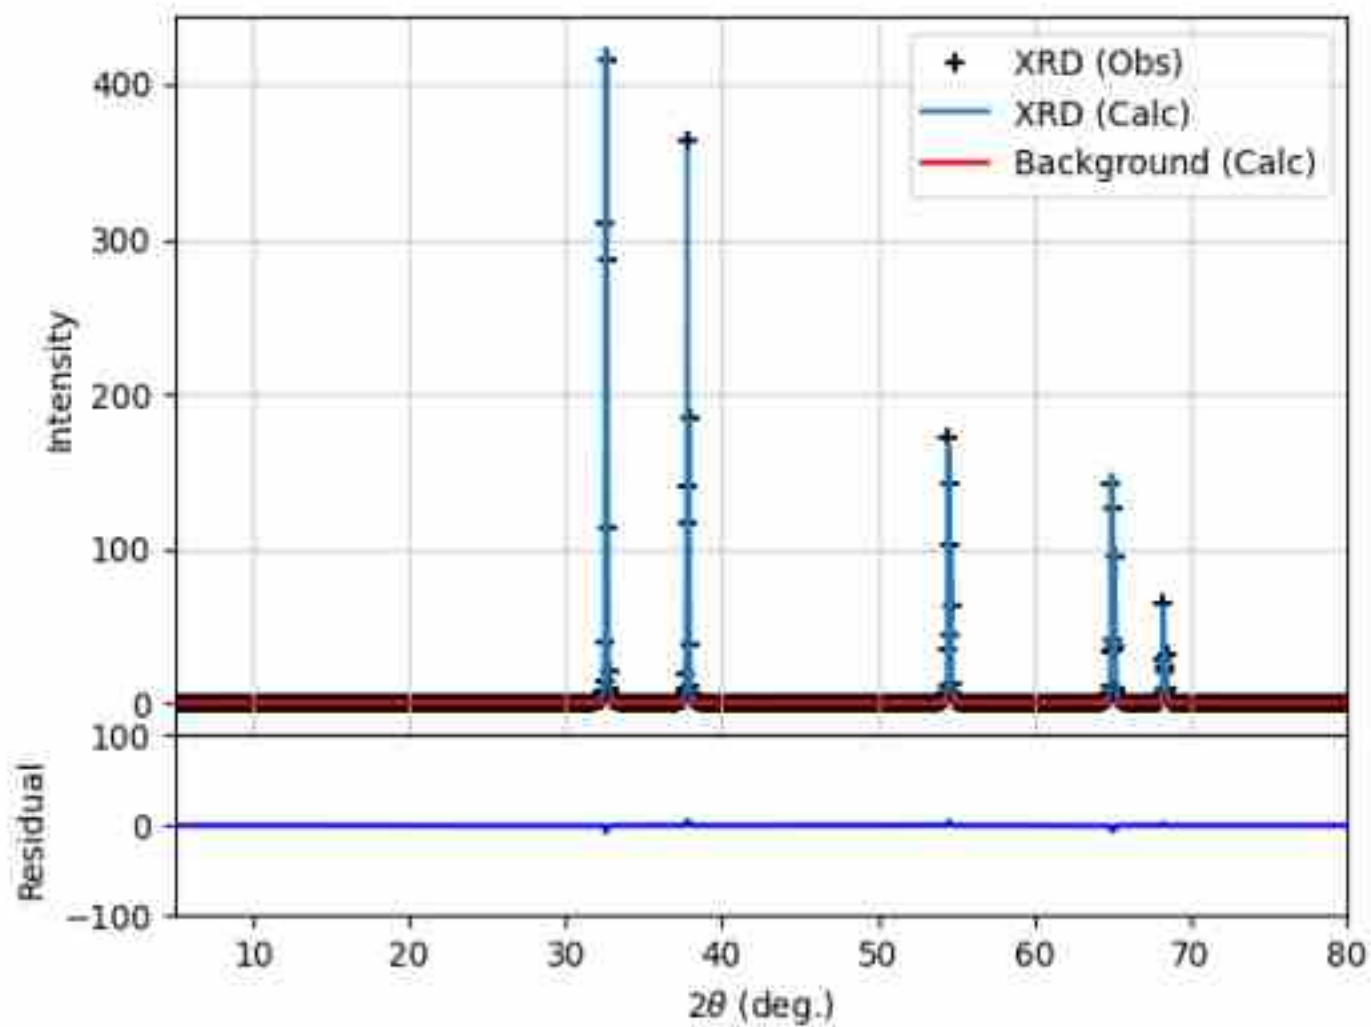

| RMSE before RR | Rwp     | RMSE after RR |
|----------------|---------|---------------|
| 0.002          | 2.20518 | 0.00072       |

# Lu1Nb1Ru2

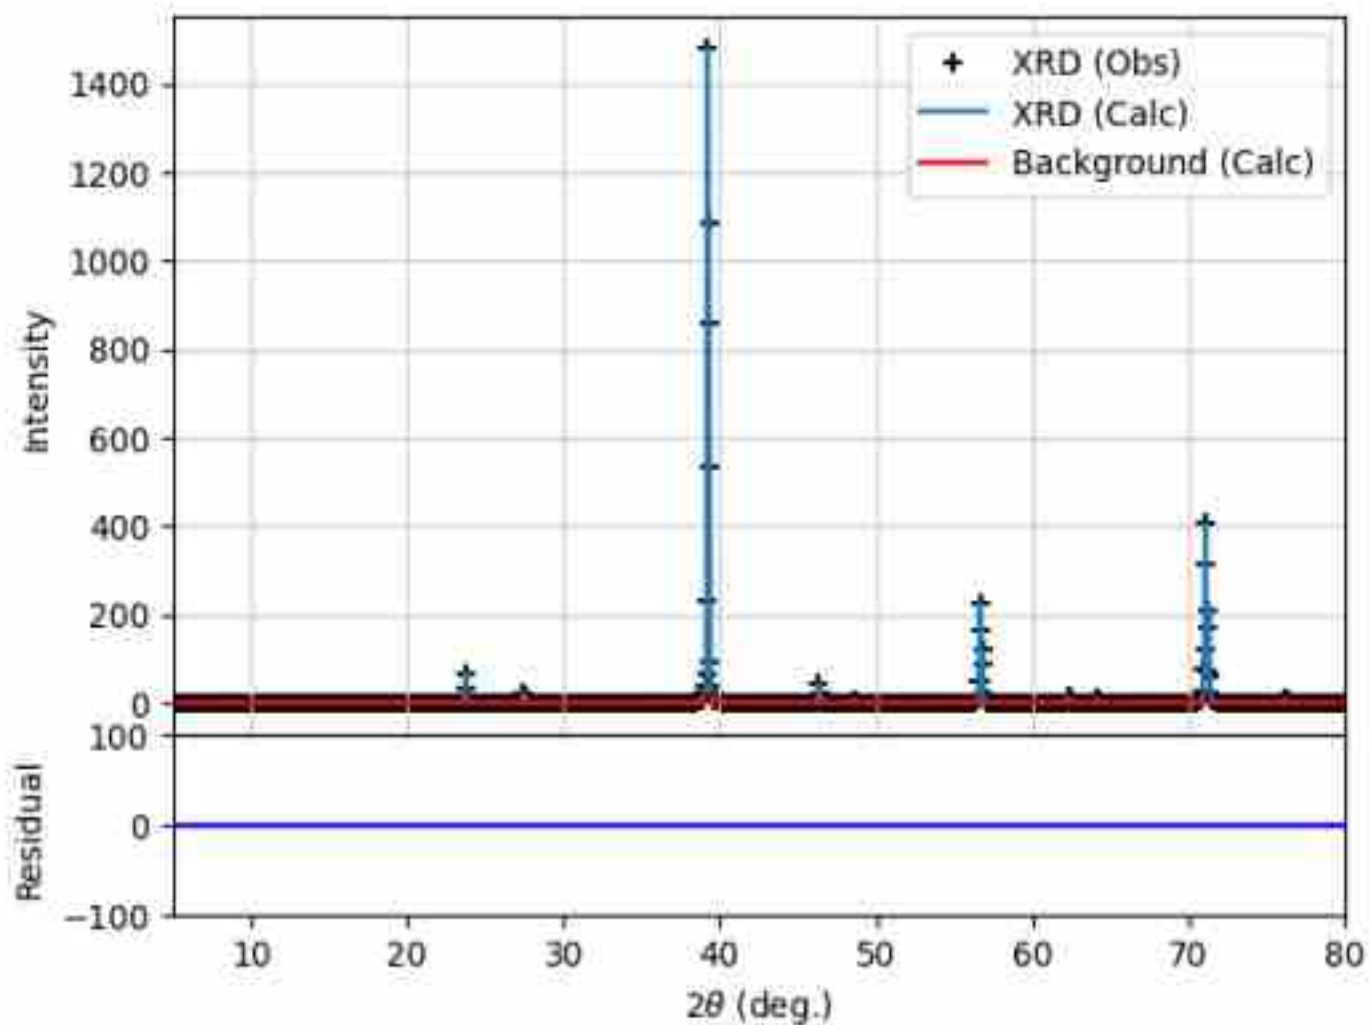

| RMSE before RR | Rwp     | RMSE after RR |
|----------------|---------|---------------|
| 0.002          | 0.00392 | 0.00047       |



# Lu1Rh1

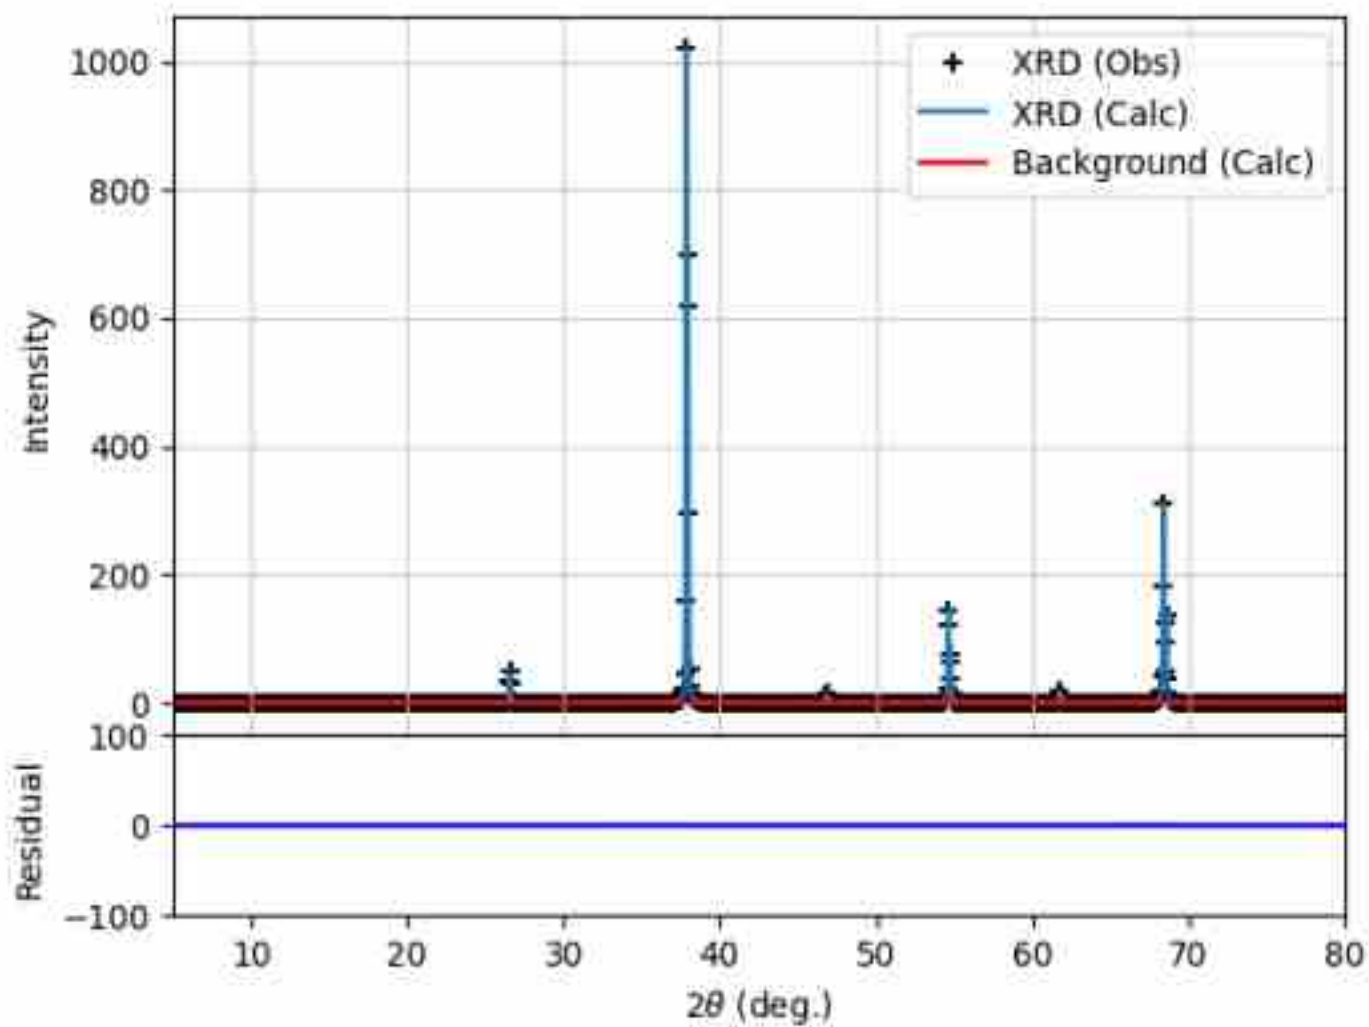

| RMSE before RR | Rwp     | RMSE after RR |
|----------------|---------|---------------|
| 0.002          | 0.21631 | 0.00056       |

# Lu1Sb1Rh2

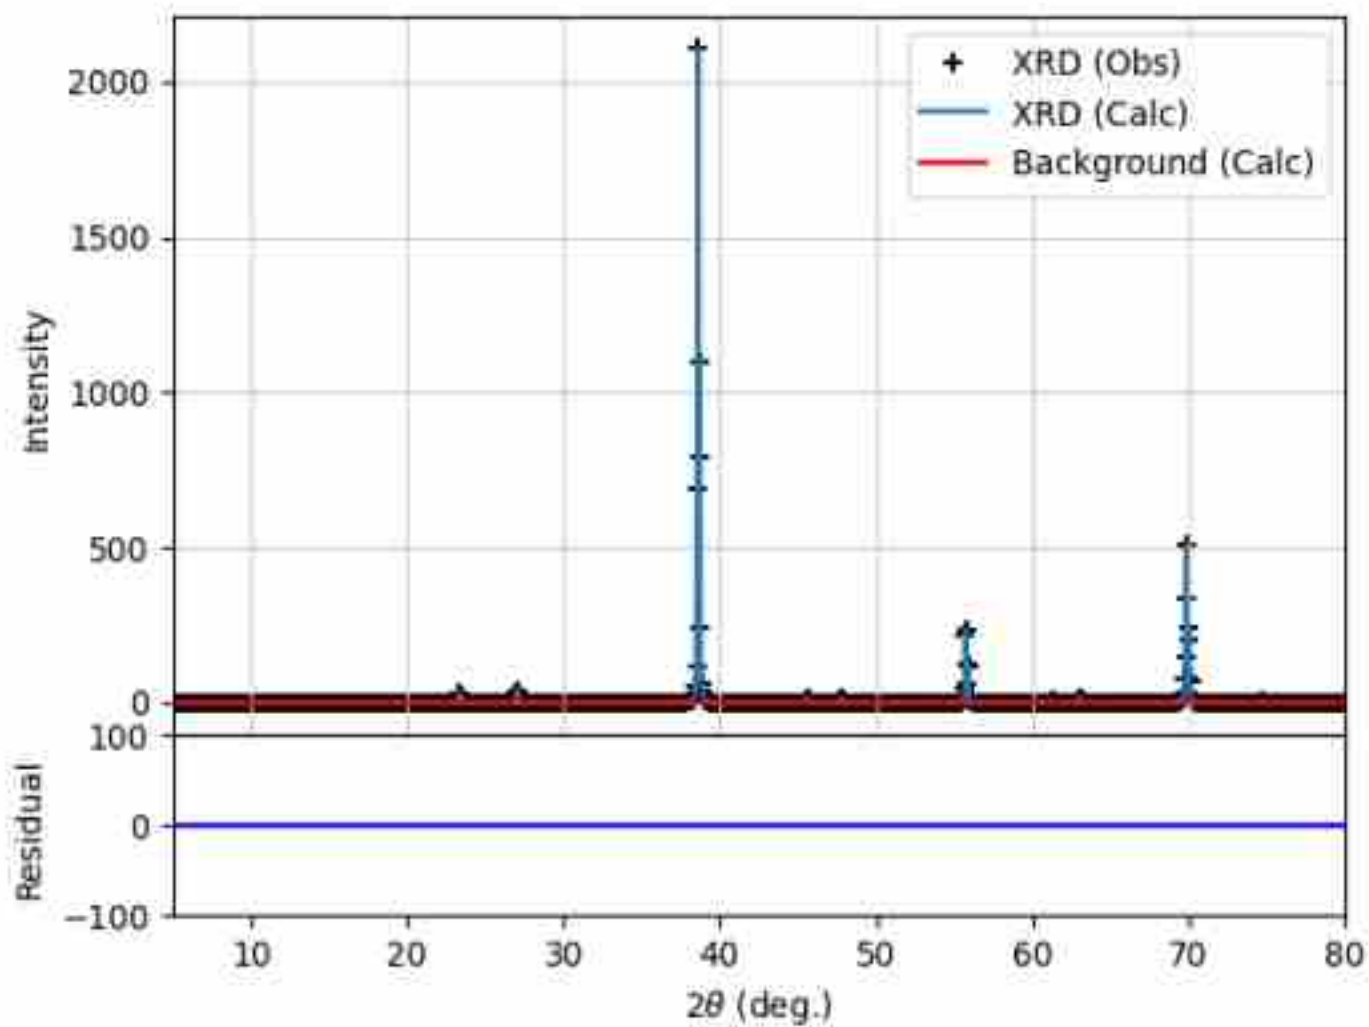

| RMSE before RR | Rwp     | RMSE after RR |
|----------------|---------|---------------|
| 0.002          | 0.00547 | 0.00078       |

# Lu<sub>2</sub>Al<sub>11</sub>Ru<sub>1</sub>

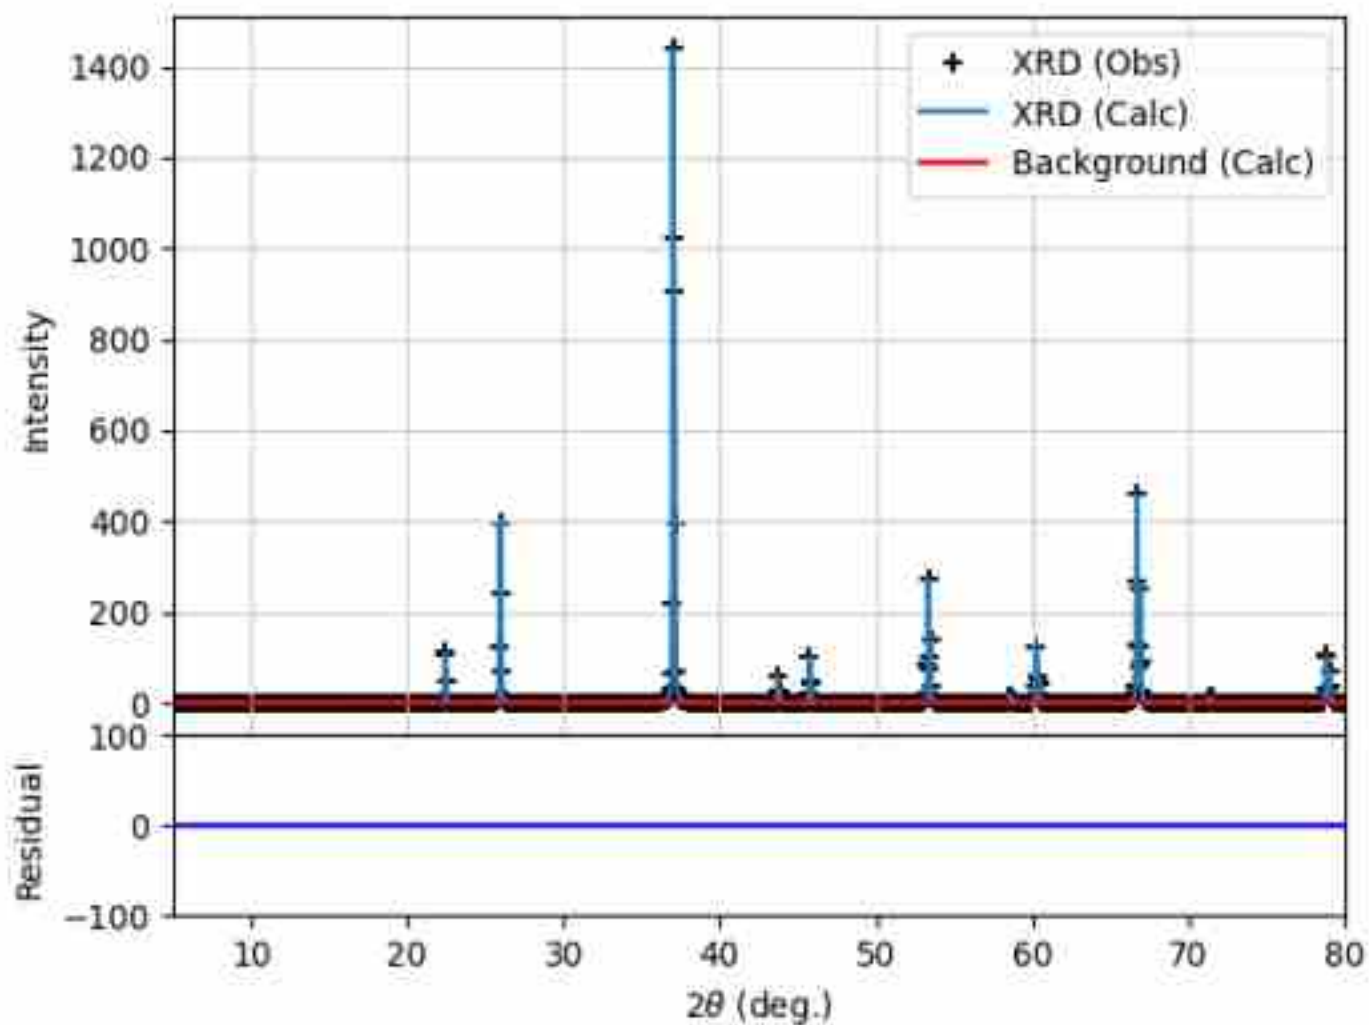

| RMSE before RR | Rwp     | RMSE after RR |
|----------------|---------|---------------|
| 0.002          | 0.00662 | 0.00352       |

# Lu<sub>2</sub>Al<sub>11</sub>Tc<sub>1</sub>

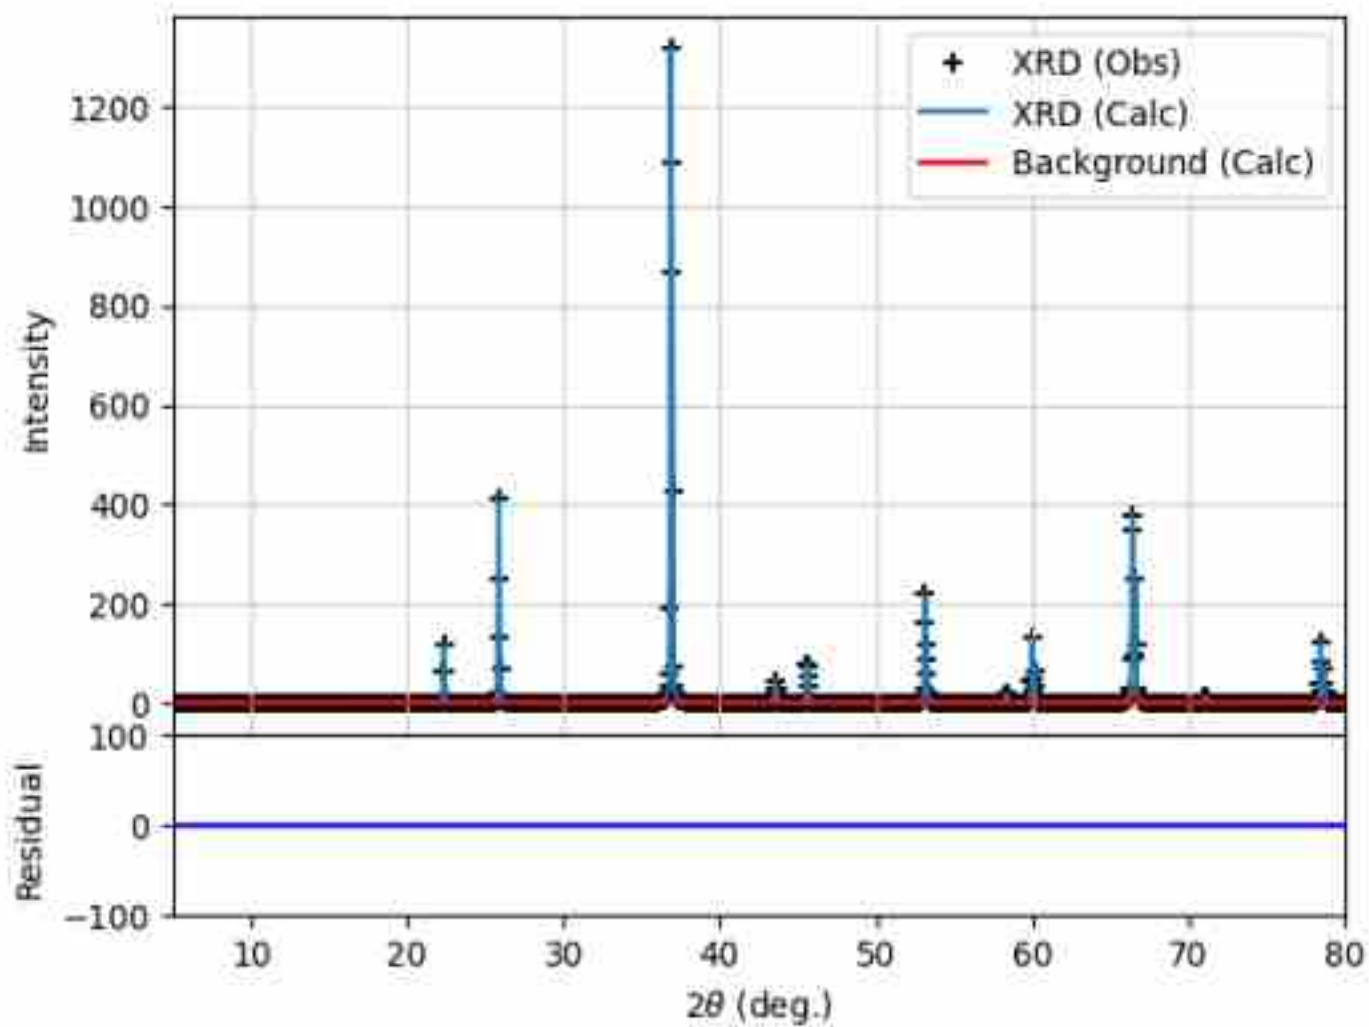

| RMSE before RR | Rwp     | RMSE after RR |
|----------------|---------|---------------|
| 0.002          | 0.00443 | 0.00214       |

# Lu<sub>2</sub>Al<sub>11</sub>Zn<sub>1</sub>

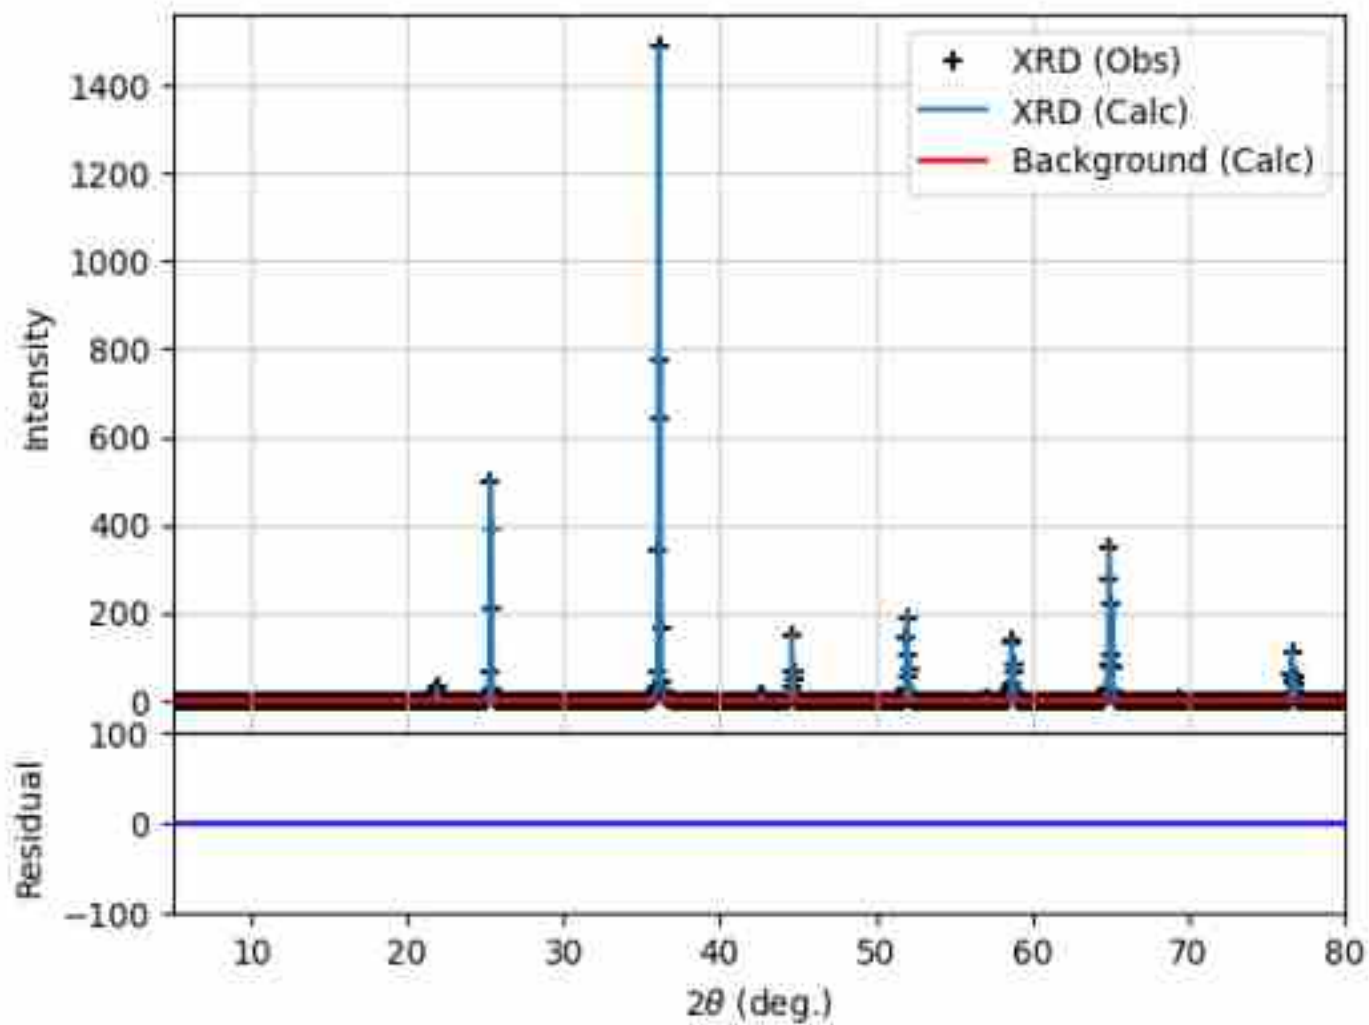

| RMSE before RR | Rwp     | RMSE after RR |
|----------------|---------|---------------|
| 0.002          | 0.00513 | 0.00088       |

# Lu<sub>2</sub>CdOs<sub>1</sub>

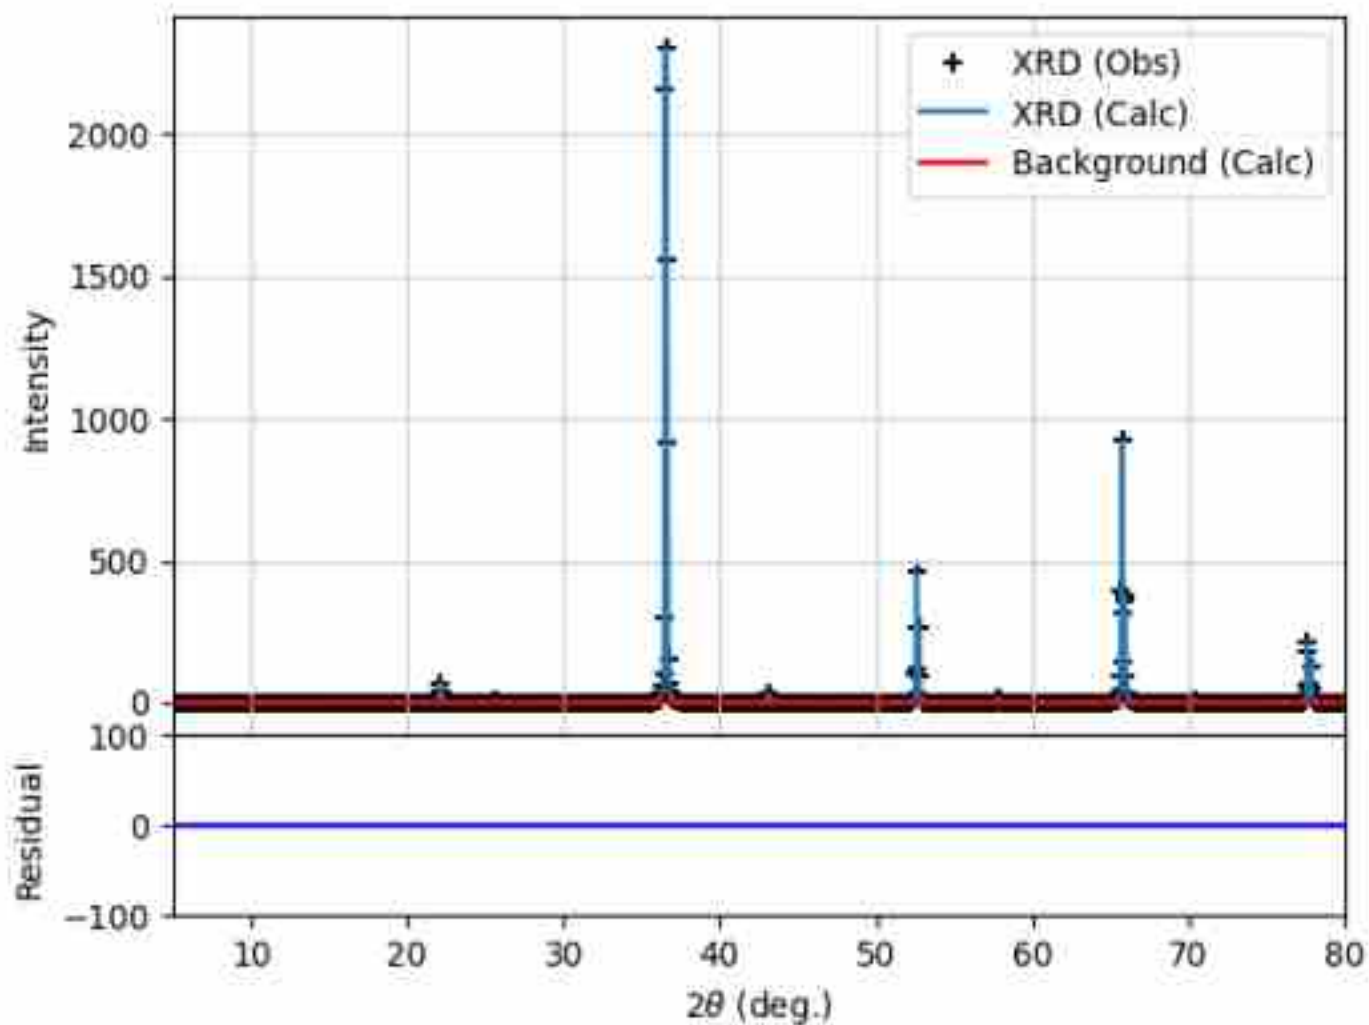

| RMSE before RR | Rwp     | RMSE after RR |
|----------------|---------|---------------|
| 0.002          | 0.00394 | 0.00086       |

# Lu<sub>2</sub>MgAl<sub>11</sub>

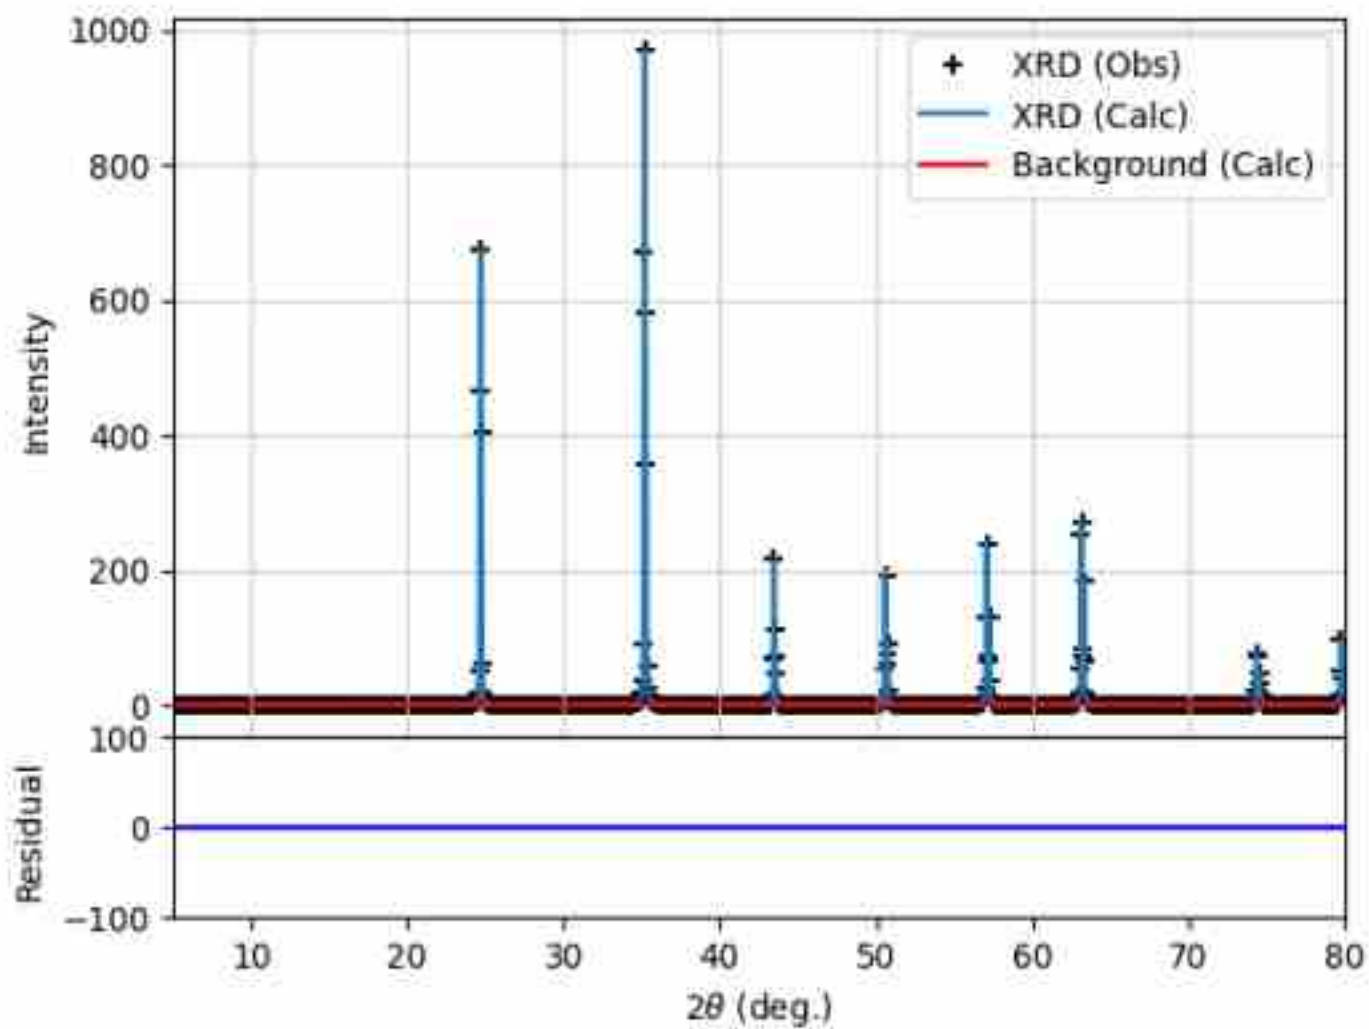

| RMSE before RR | Rwp     | RMSE after RR |
|----------------|---------|---------------|
| 0.002          | 0.00588 | 0.00123       |

# Lu<sub>2</sub>Mg<sub>10</sub>S<sub>1</sub>

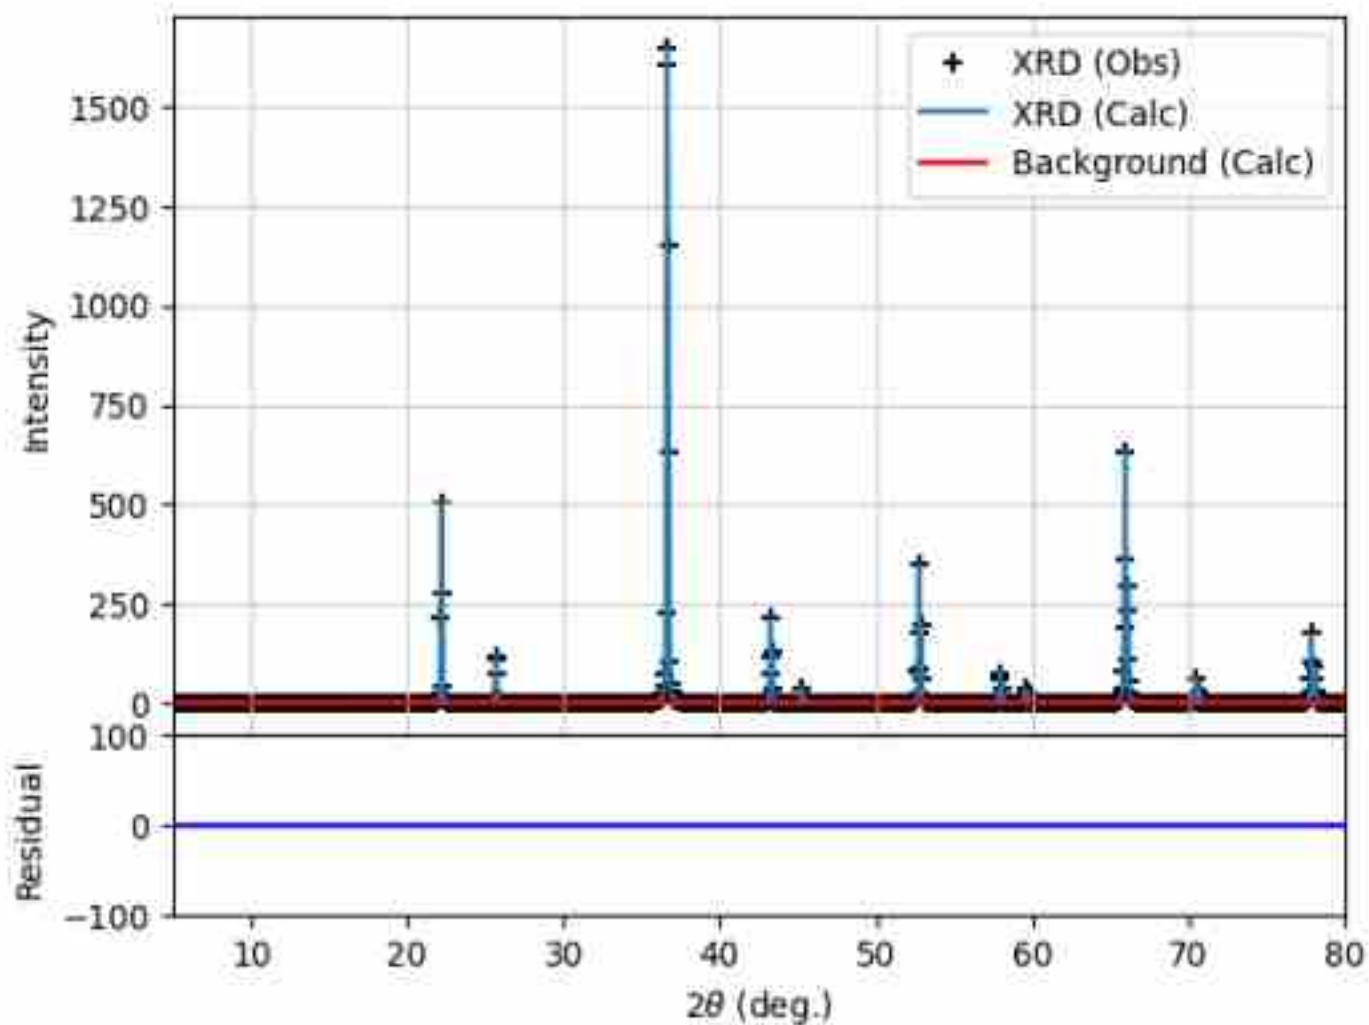

| RMSE before RR | Rwp     | RMSE after RR |
|----------------|---------|---------------|
| 0.002          | 0.03294 | 0.0015        |



Lu2Ni1Ir1

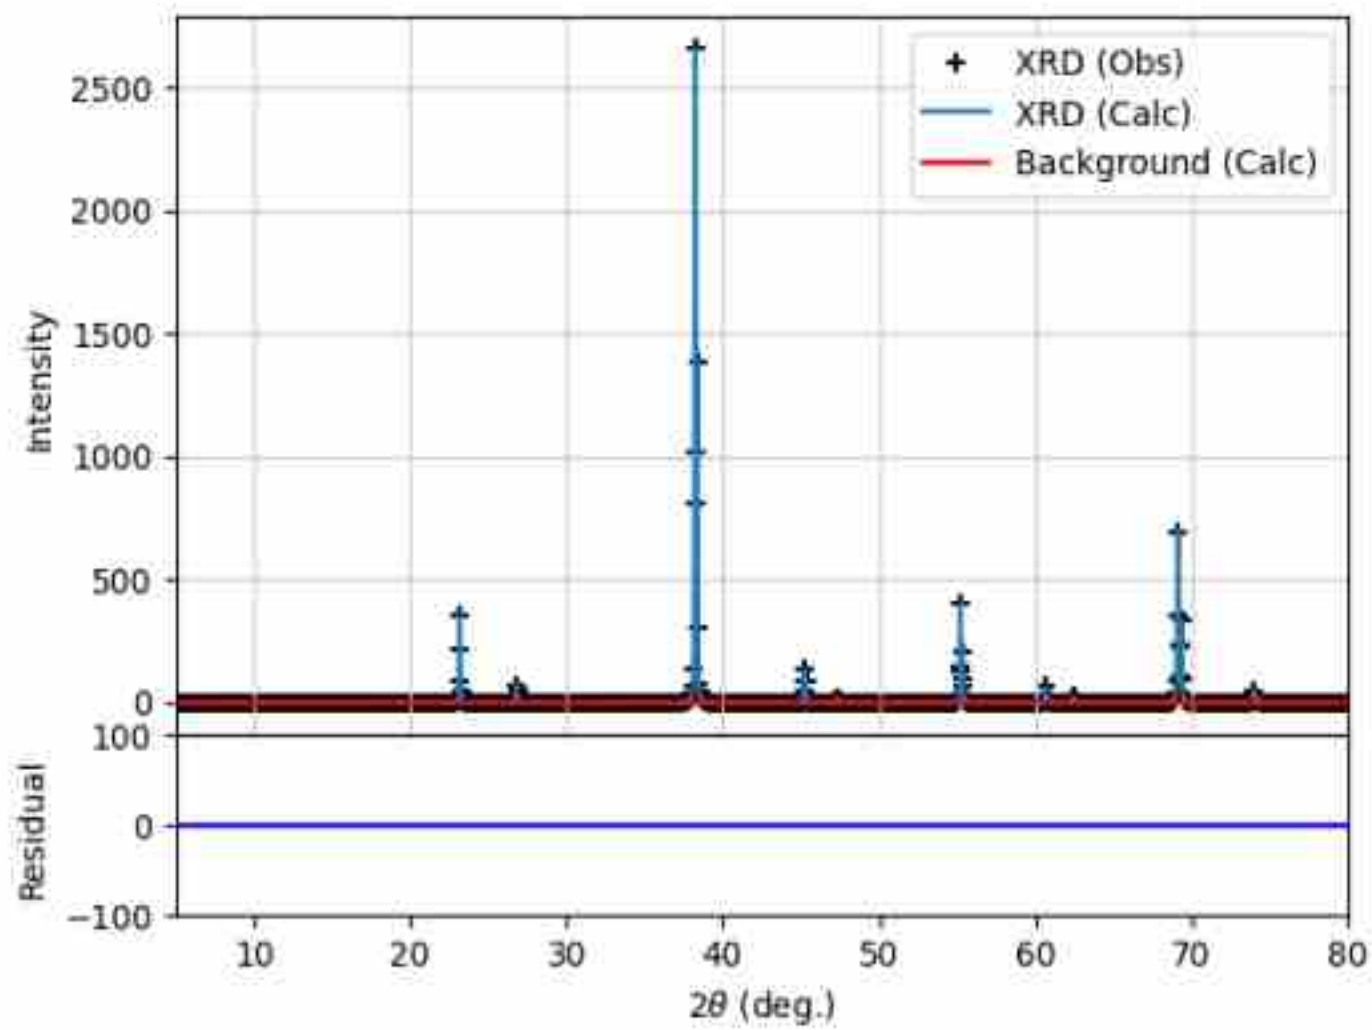

| RMSE before RR | Rwp     | RMSE after RR |
|----------------|---------|---------------|
| 0.002          | 0.00532 | 0.0009        |

# Lu<sub>2</sub>ZnGa

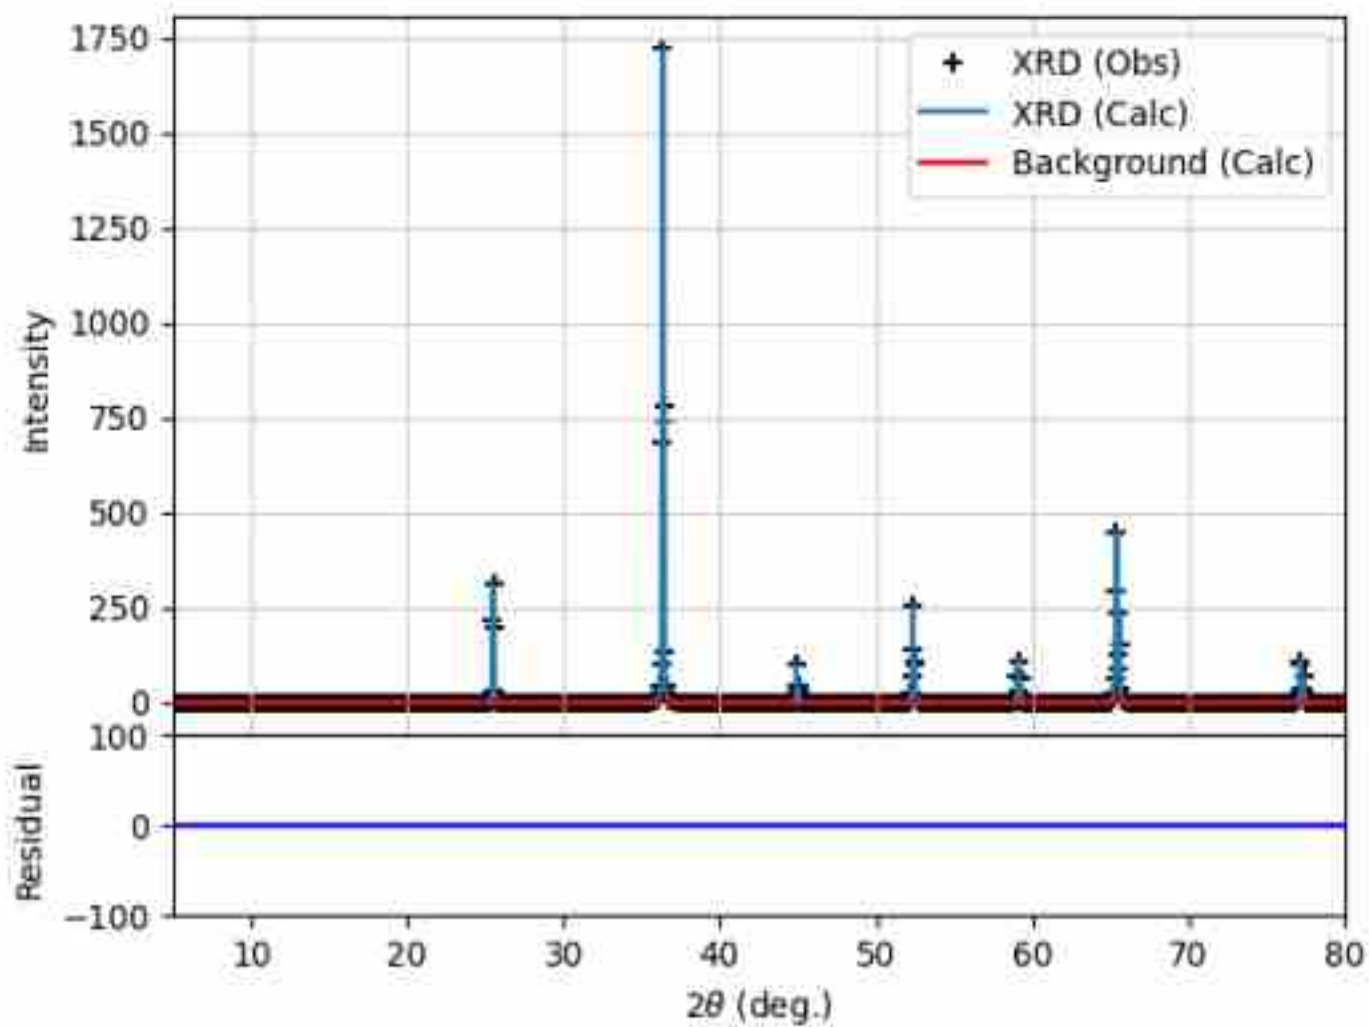

| RMSE before RR | Rwp     | RMSE after RR |
|----------------|---------|---------------|
| 0.002          | 0.00397 | 0.0002        |

# Lu<sub>2</sub>Zn<sub>1</sub>Tc<sub>1</sub>

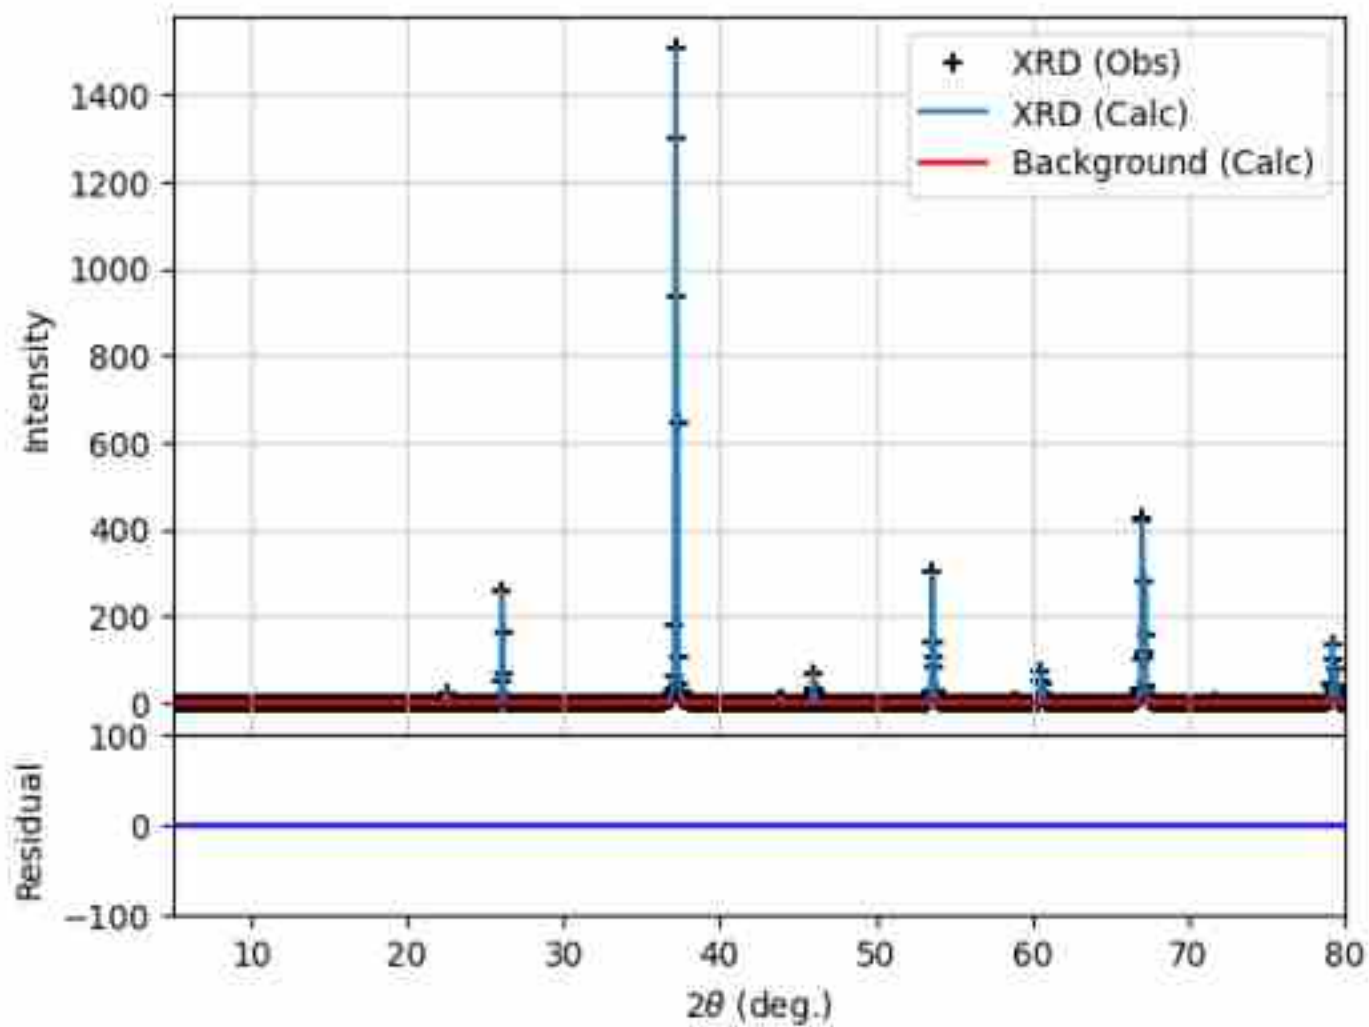

| RMSE before RR | Rwp     | RMSE after RR |
|----------------|---------|---------------|
| 0.002          | 0.00566 | 0.0041        |

# Lu<sub>3</sub>In<sub>3</sub>Pd<sub>3</sub>

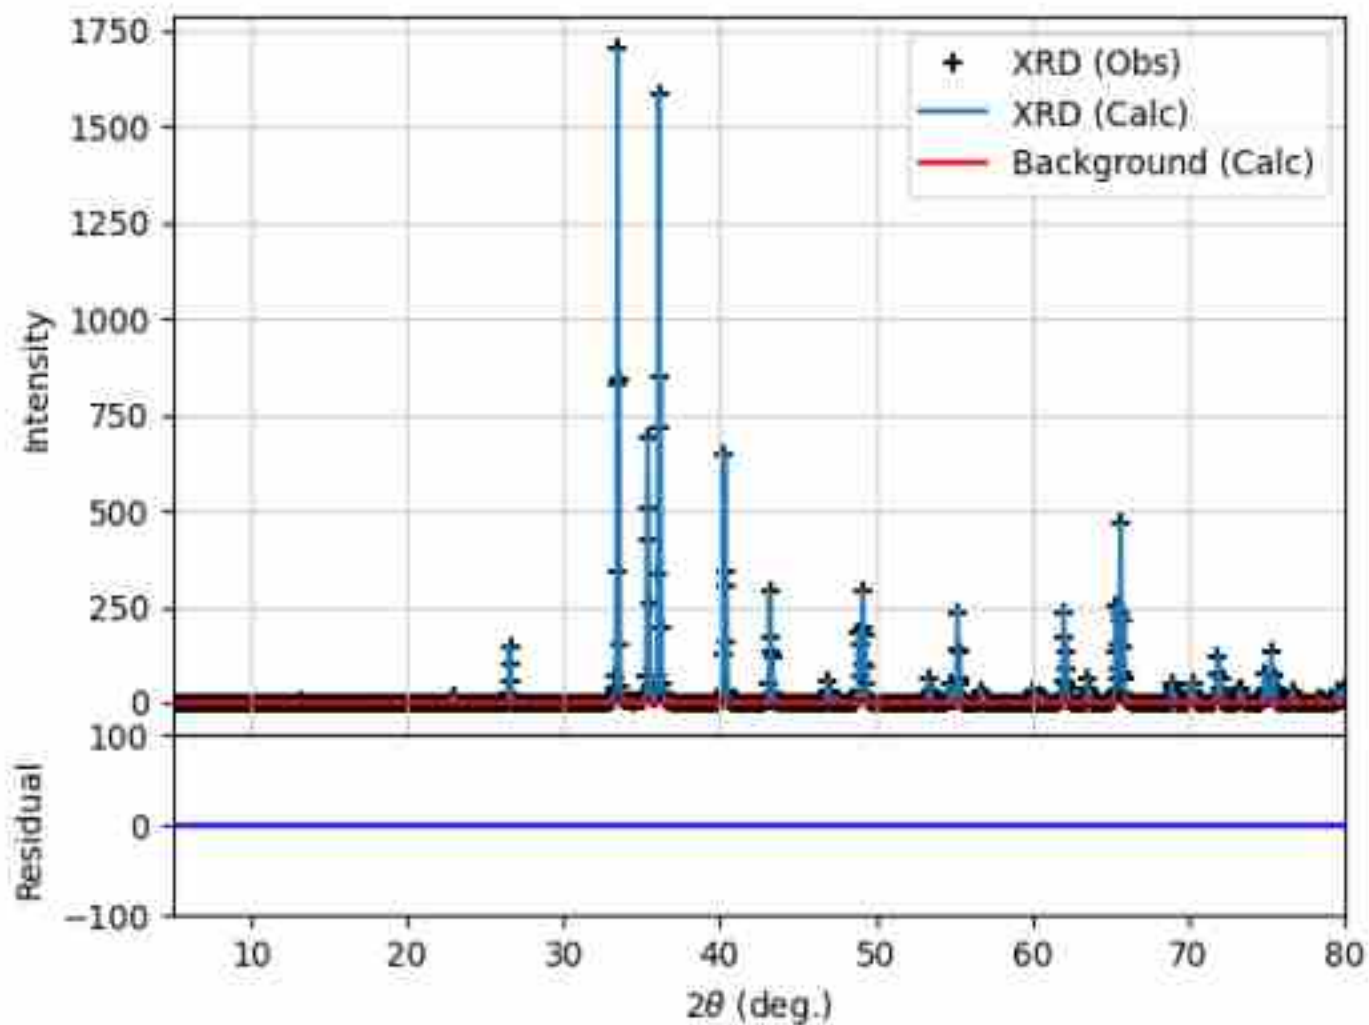

| RMSE before RR | Rwp     | RMSE after RR |
|----------------|---------|---------------|
| 0.02           | 0.00626 | 0.00088       |

# Lu<sub>4</sub>Ge<sub>8</sub>Pd<sub>1</sub>

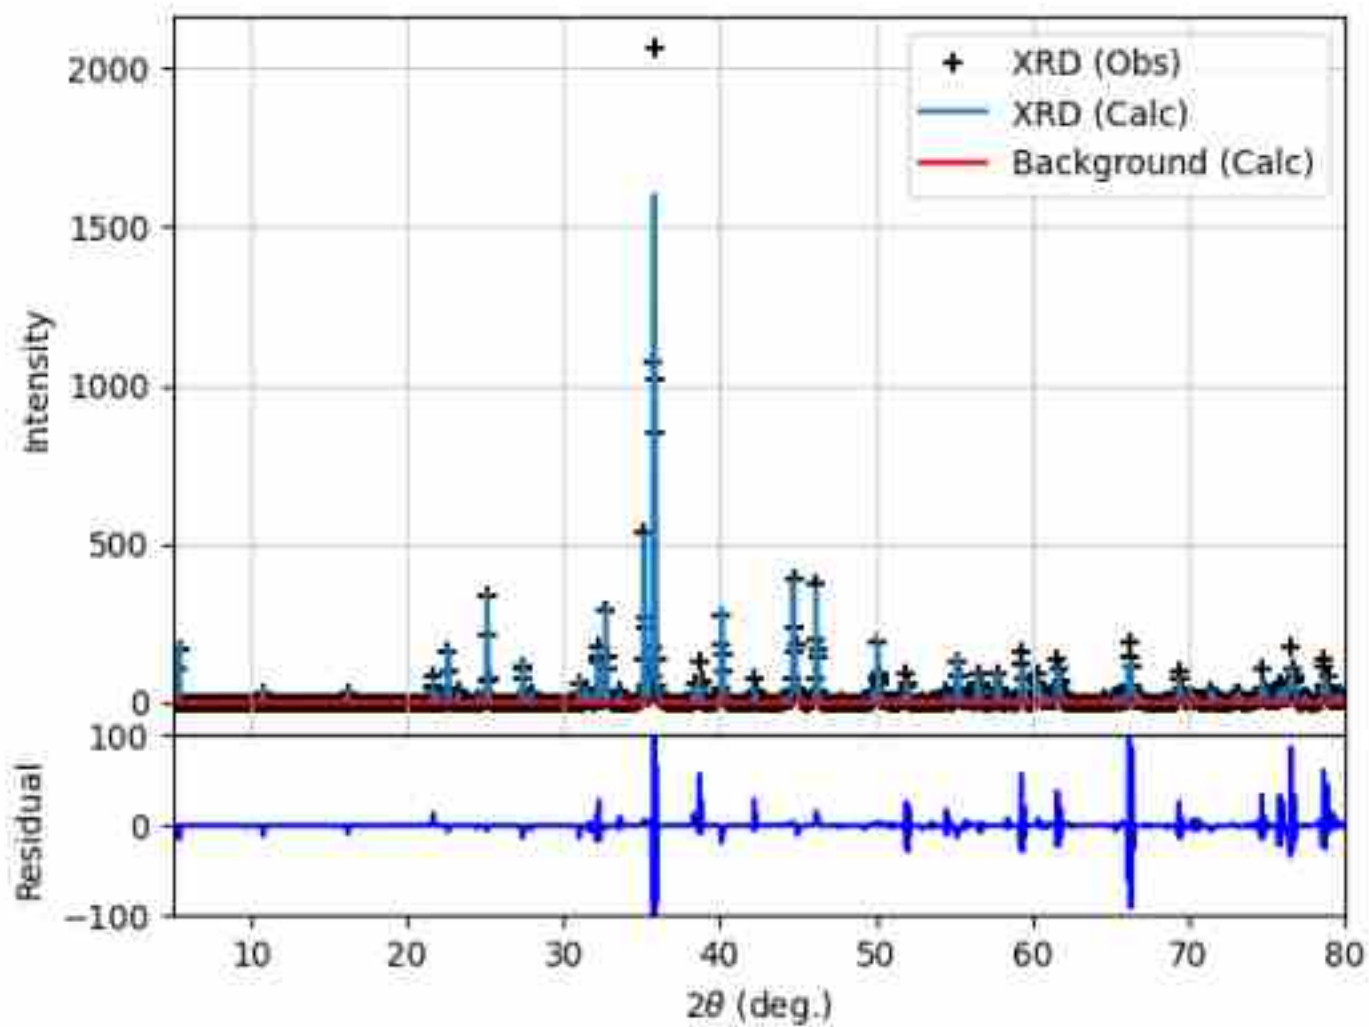

| RMSE before RR | Rwp      | RMSE after RR |
|----------------|----------|---------------|
| 0.02           | 28.30368 | 0.0216        |

# Lu<sub>4</sub>Si<sub>4</sub>Pt<sub>8</sub>

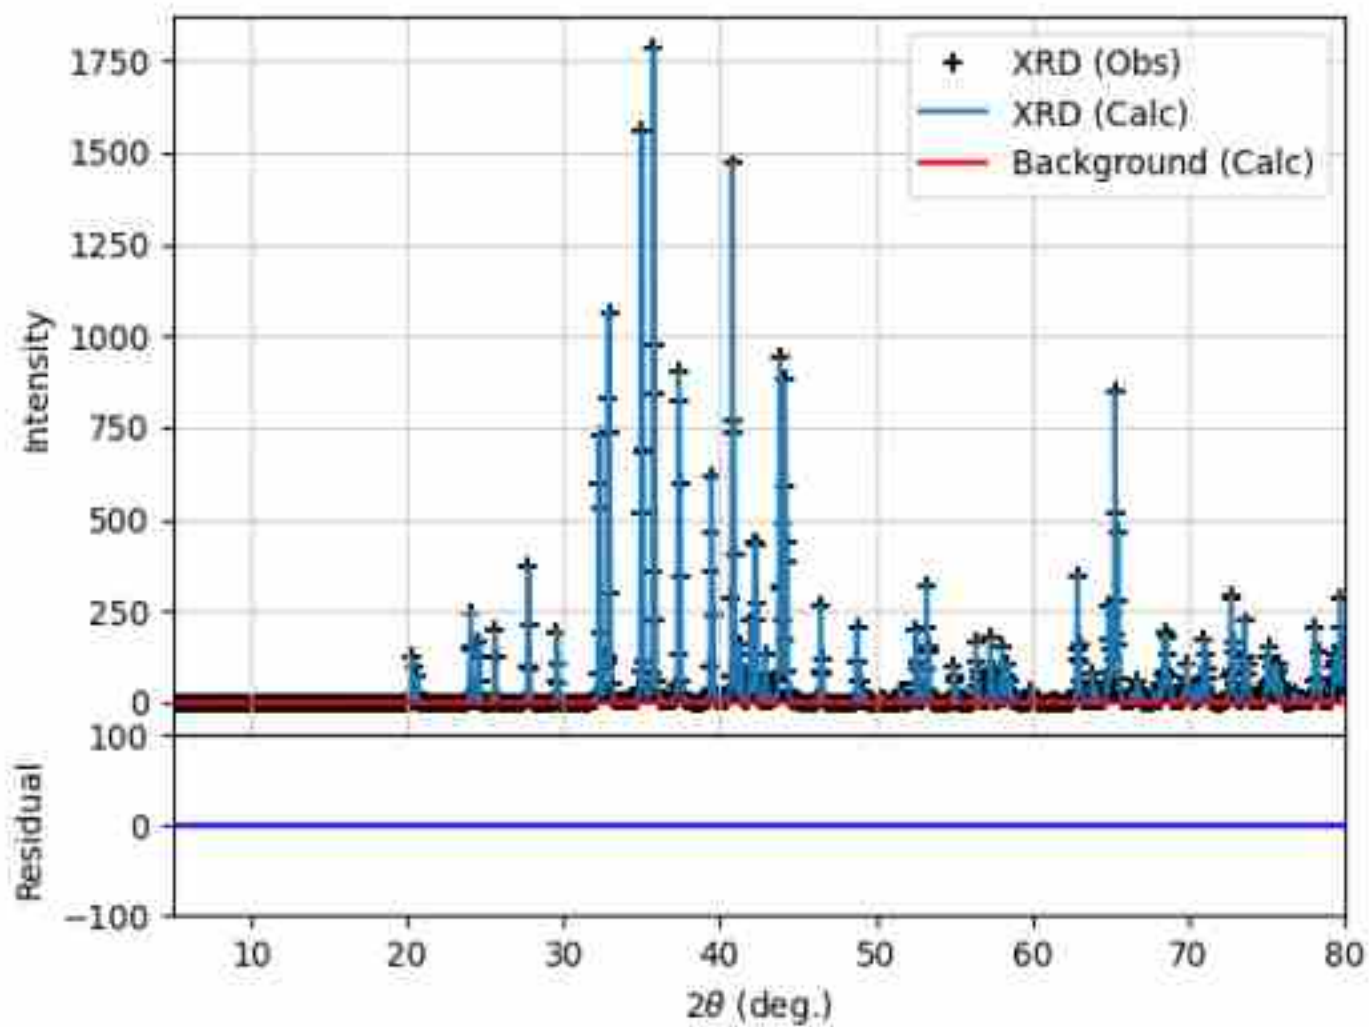

| RMSE before RR | Rwp     | RMSE after RR |
|----------------|---------|---------------|
| 0.02           | 0.00461 | 0.00057       |

# Lu6Te1O12

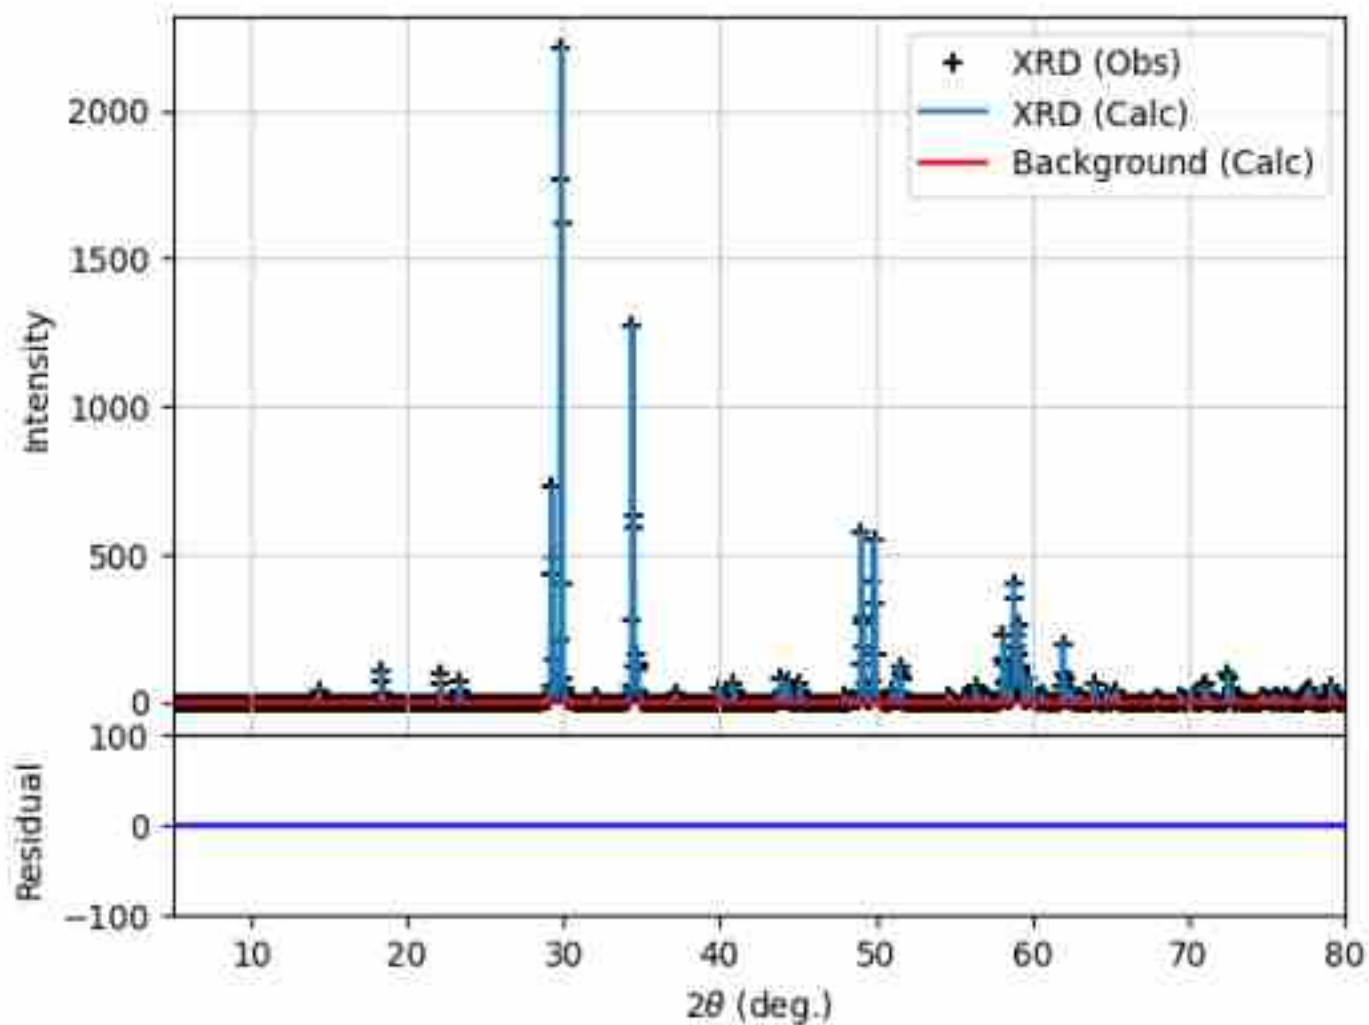

| RMSE before RR | Rwp     | RMSE after RR |
|----------------|---------|---------------|
| 0.02           | 0.00289 | 0.00157       |

# Mg1Al1Au2

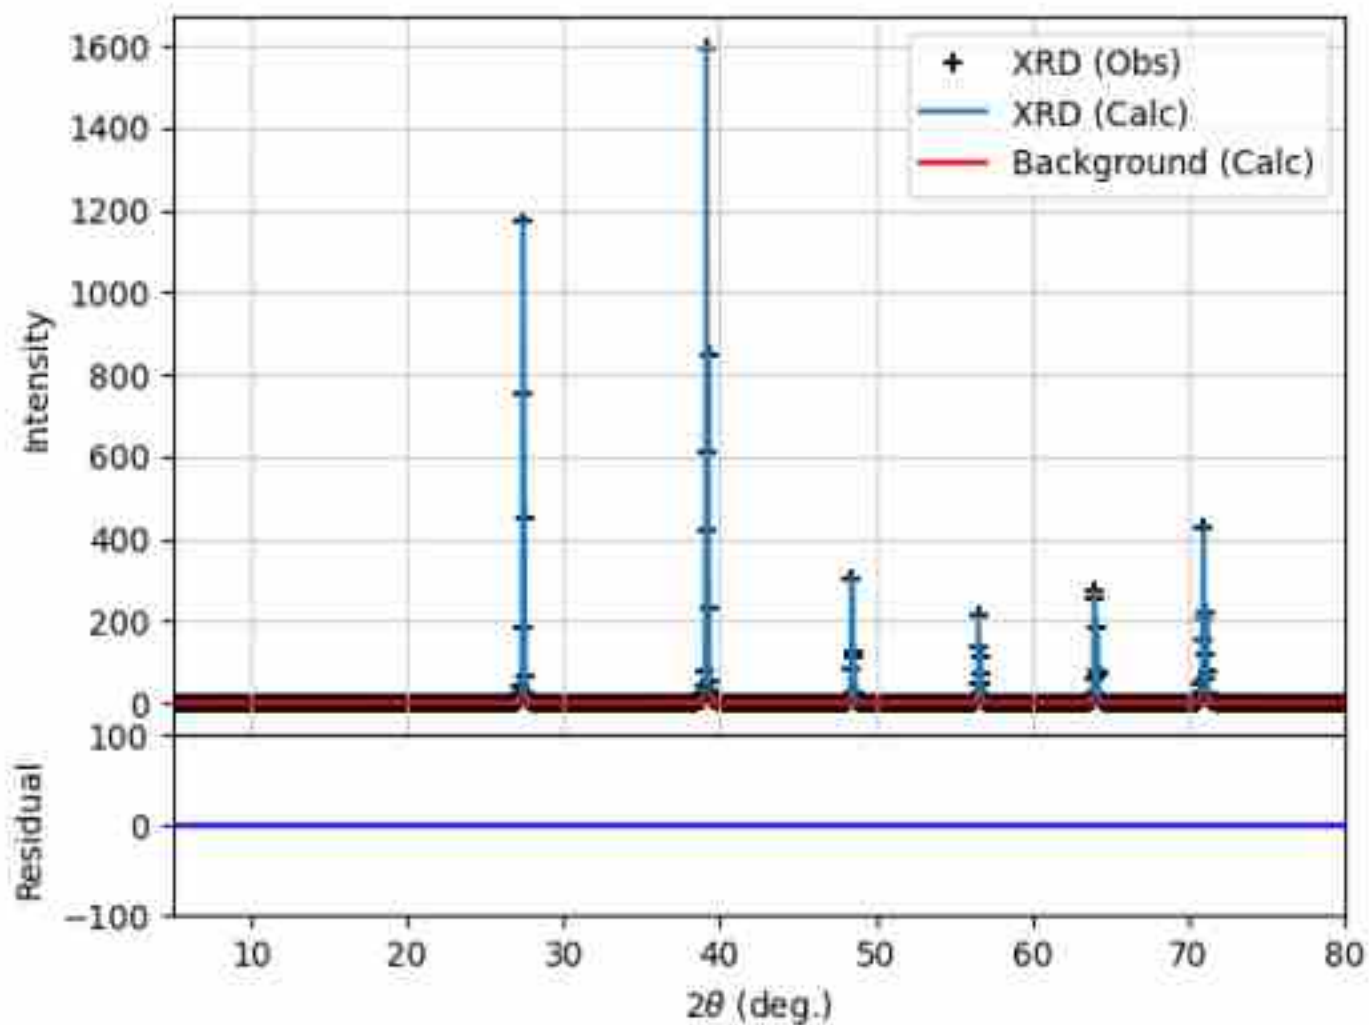

| RMSE before RR | Rwp    | RMSE after RR |
|----------------|--------|---------------|
| 0.002          | 0.2206 | 0.00351       |



# Mg1Mn1Ir2

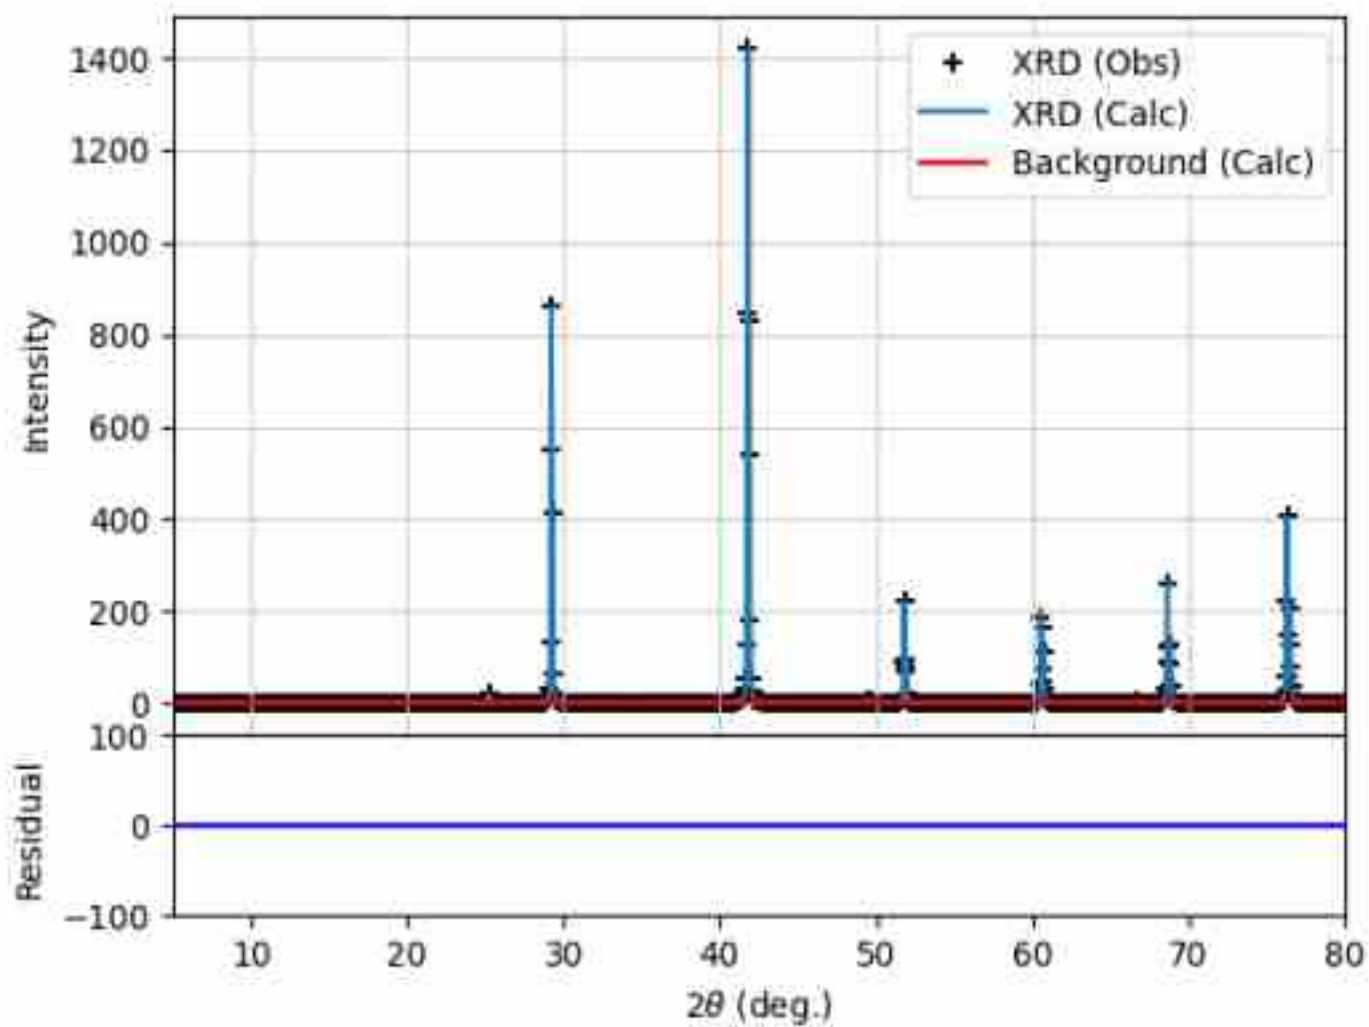

| RMSE before RR | Rwp     | RMSE after RR |
|----------------|---------|---------------|
| 0.002          | 0.02261 | 0.00191       |

# Mg1Mn1Pt2

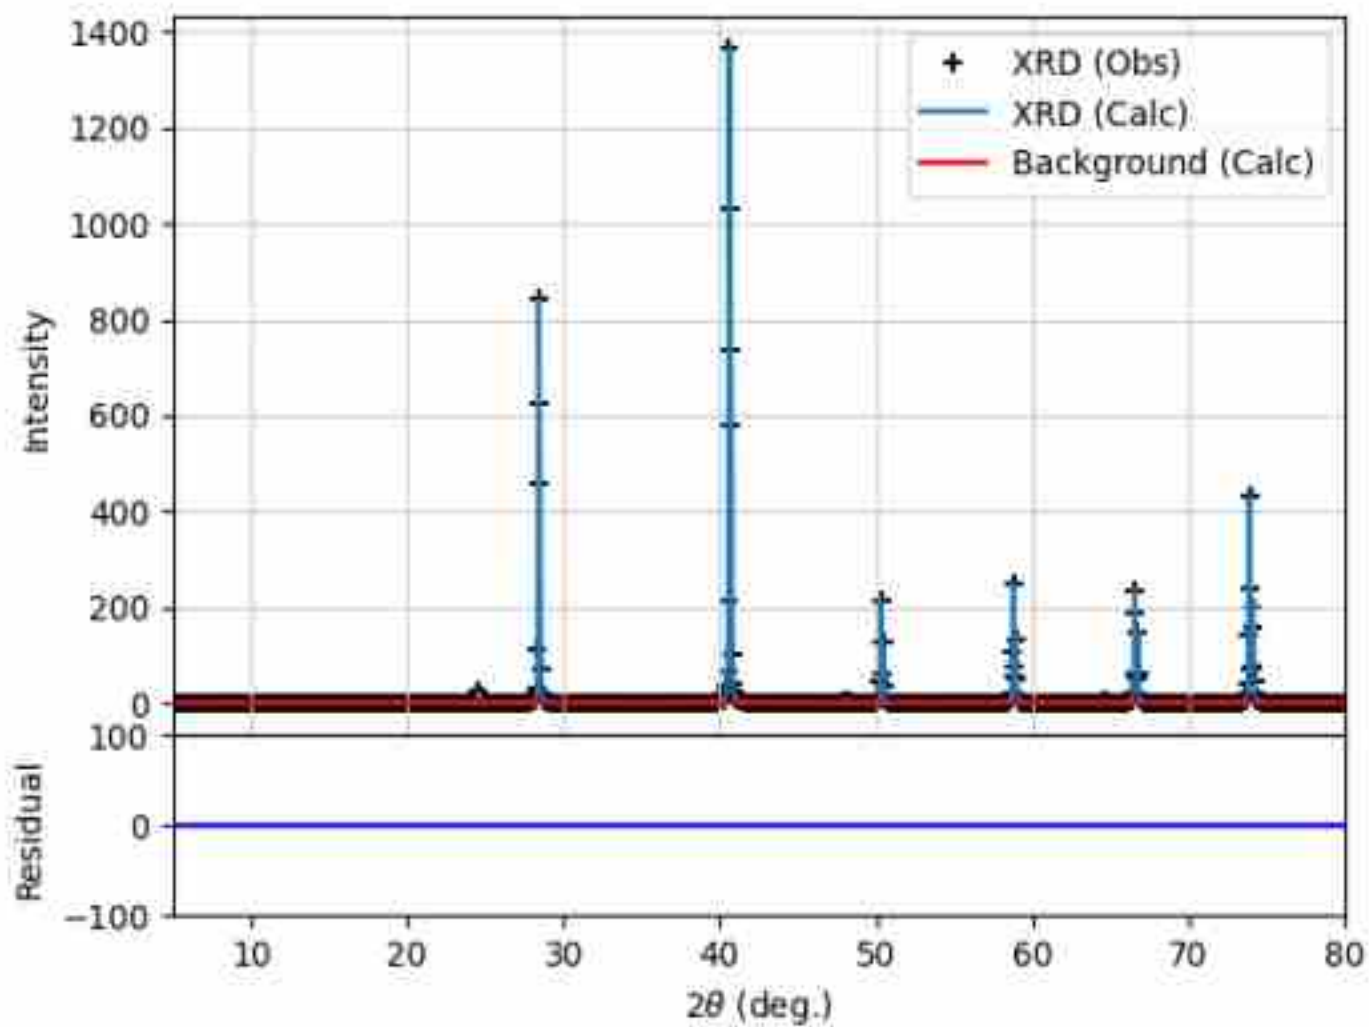

| RMSE before RR | Rwp     | RMSE after RR |
|----------------|---------|---------------|
| 0.002          | 0.00444 | 0.00077       |

# Mg1Pa1Rh2

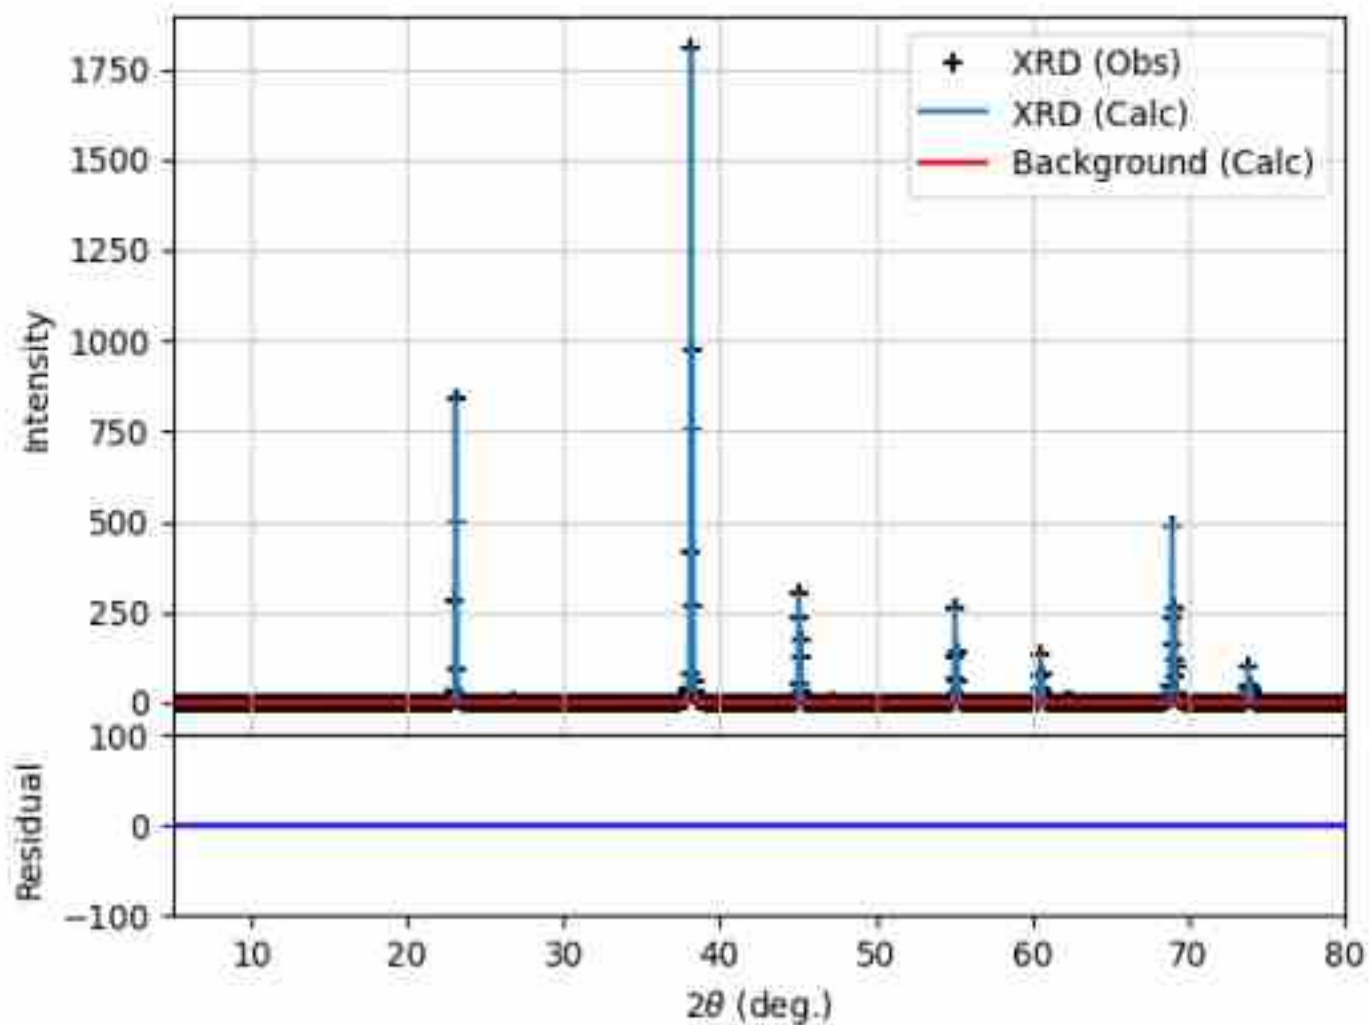

| RMSE before RR | Rwp     | RMSE after RR |
|----------------|---------|---------------|
| 0.002          | 0.00355 | 0.00083       |

# Mg1Sb1Pt1

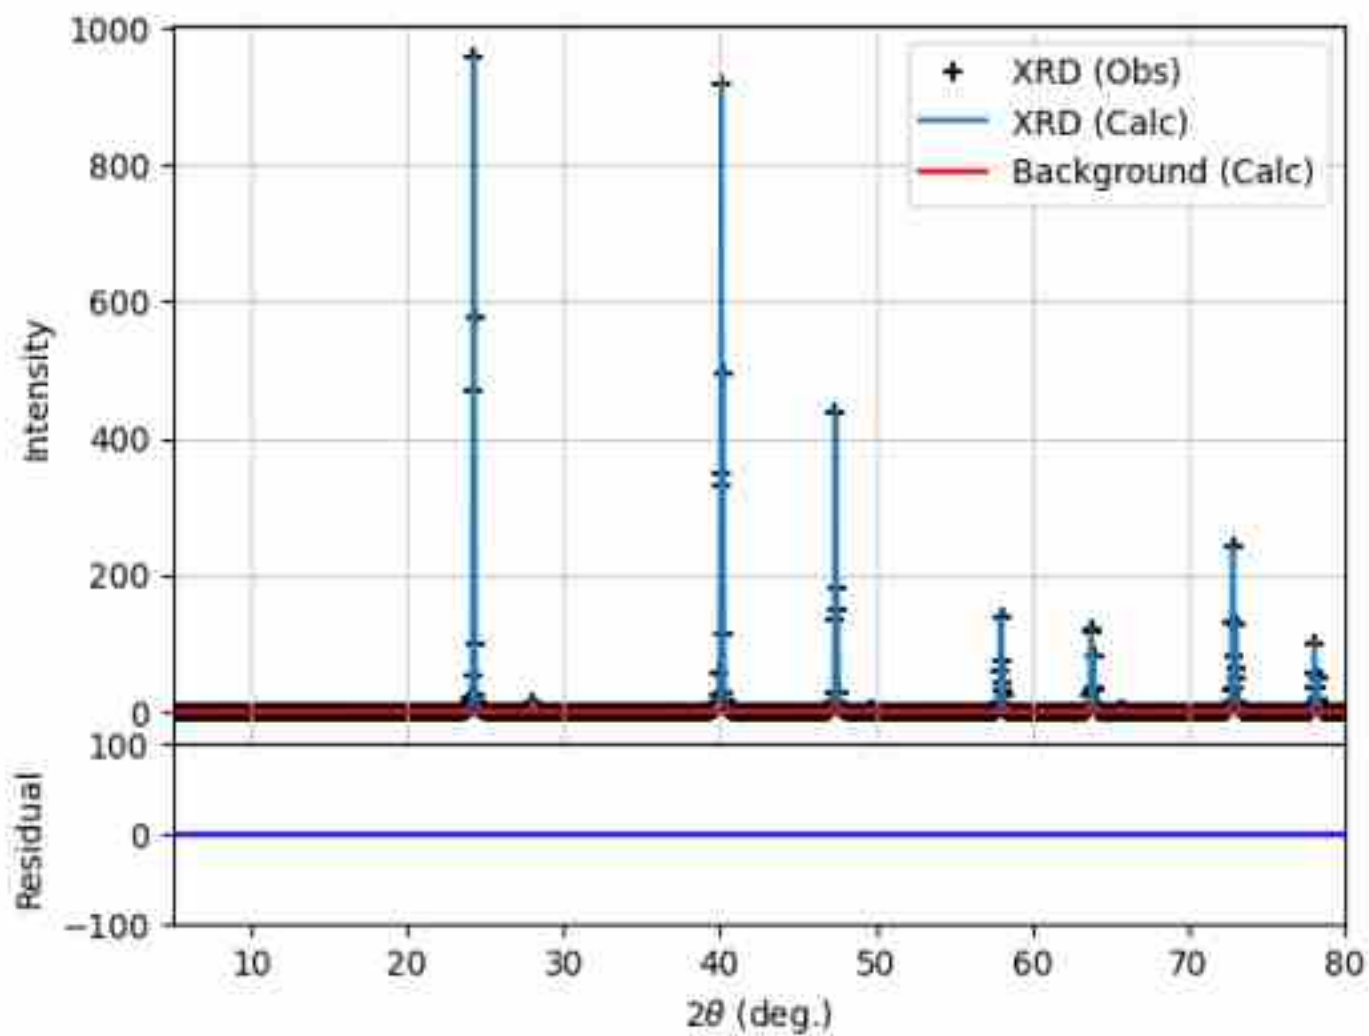

| RMSE before RR | Rwp     | RMSE after RR |
|----------------|---------|---------------|
| 0.002          | 0.00624 | 0.00106       |

# Mg1Sc1Zn2

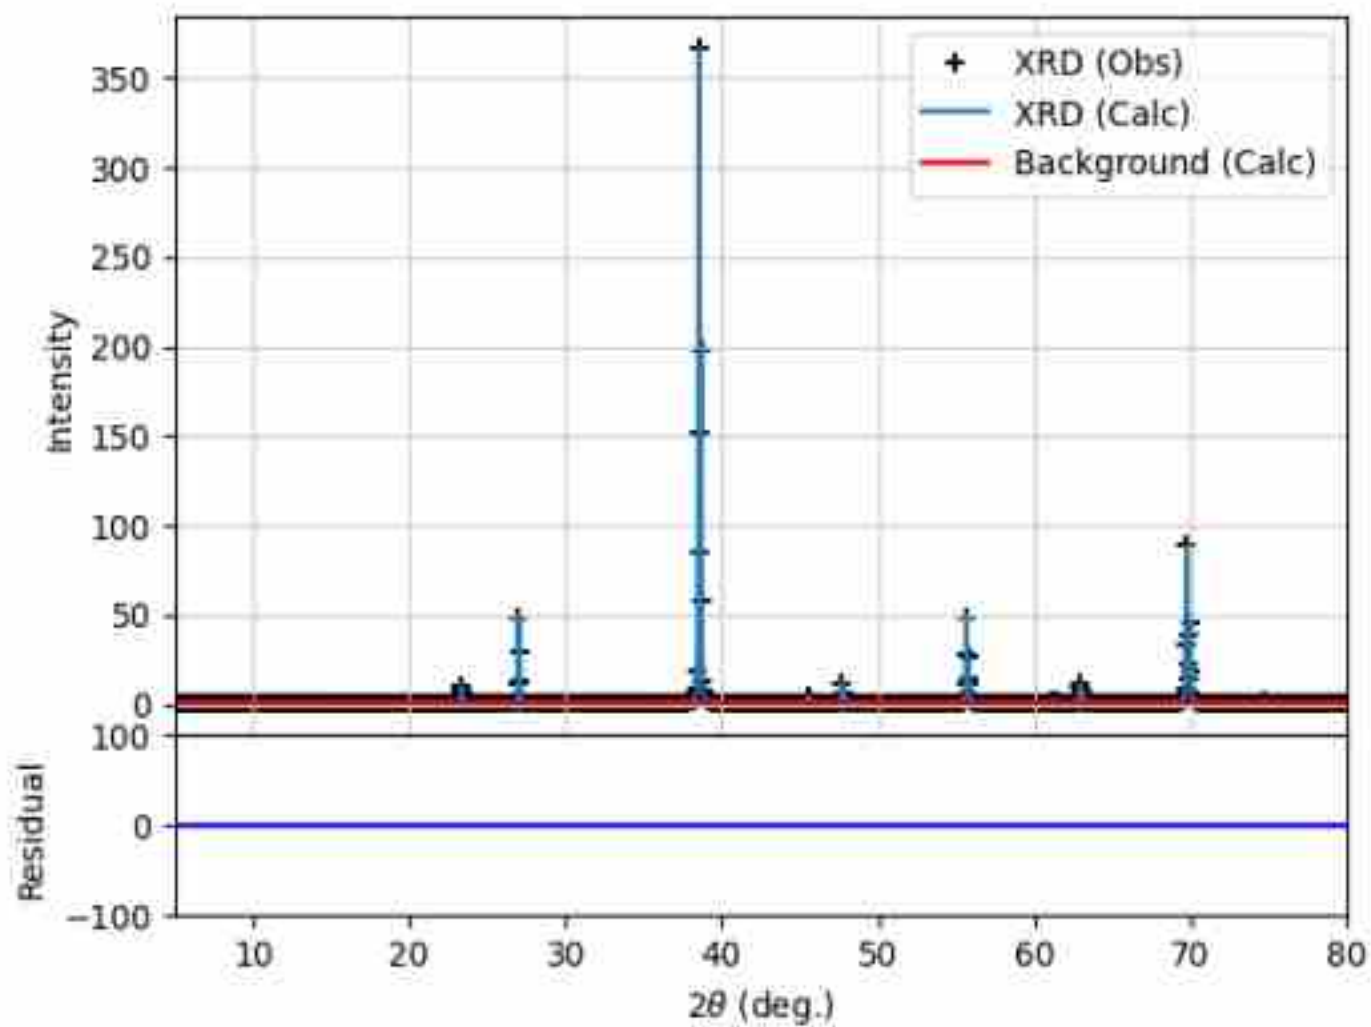

| RMSE before RR | Rwp     | RMSE after RR |
|----------------|---------|---------------|
| 0.002          | 0.00613 | 0.00091       |

# Mg1Se1

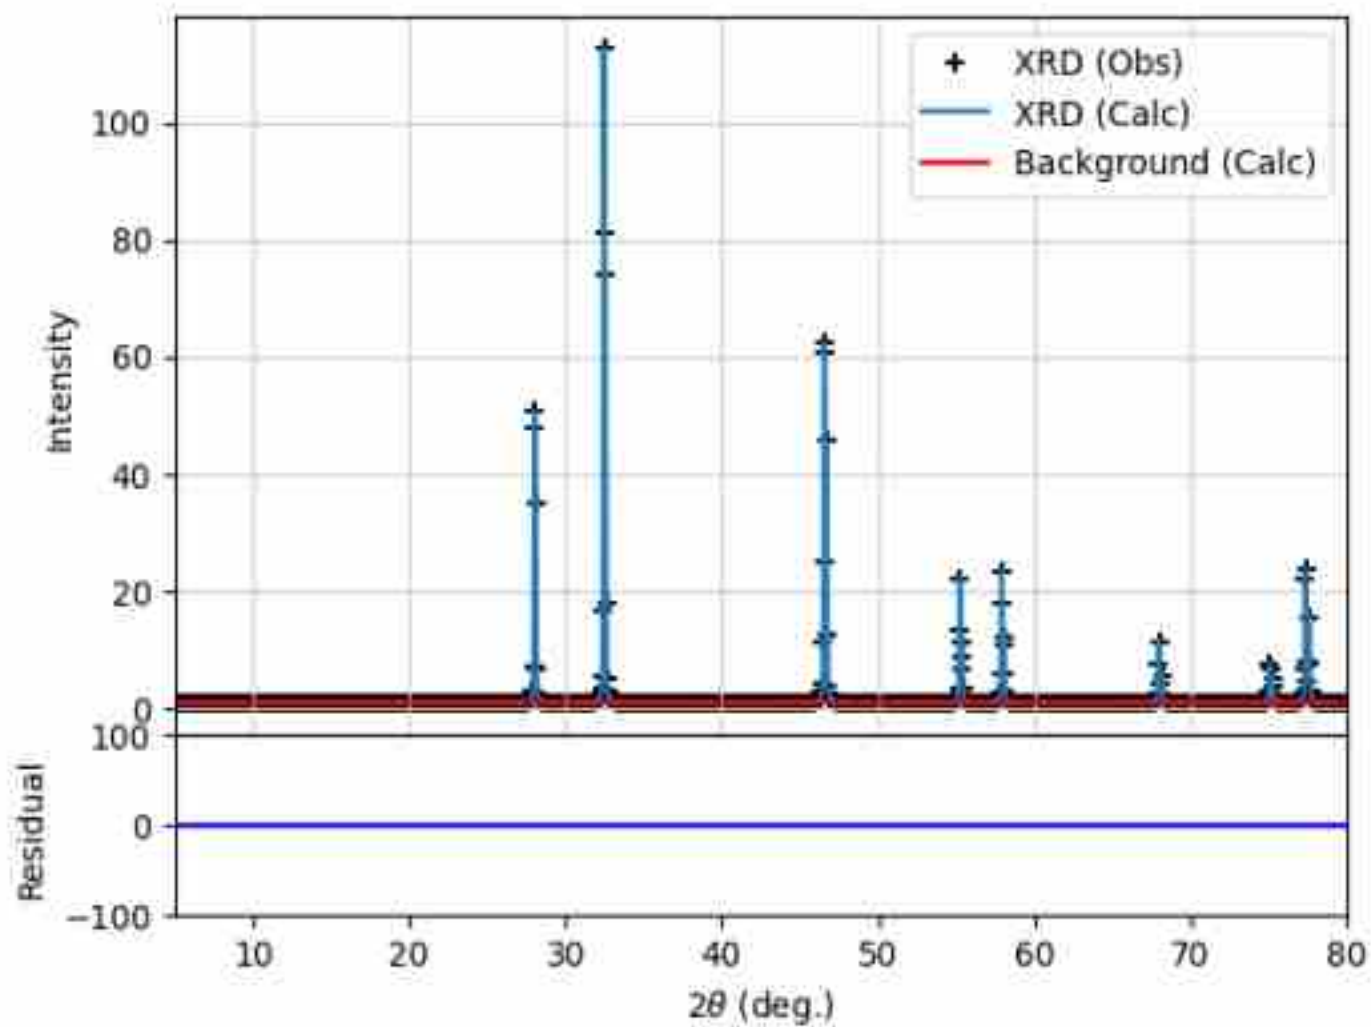

| RMSE before RR | Rwp     | RMSE after RR |
|----------------|---------|---------------|
| 0.002          | 0.00022 | 0.0002        |

# Mg1Tl1

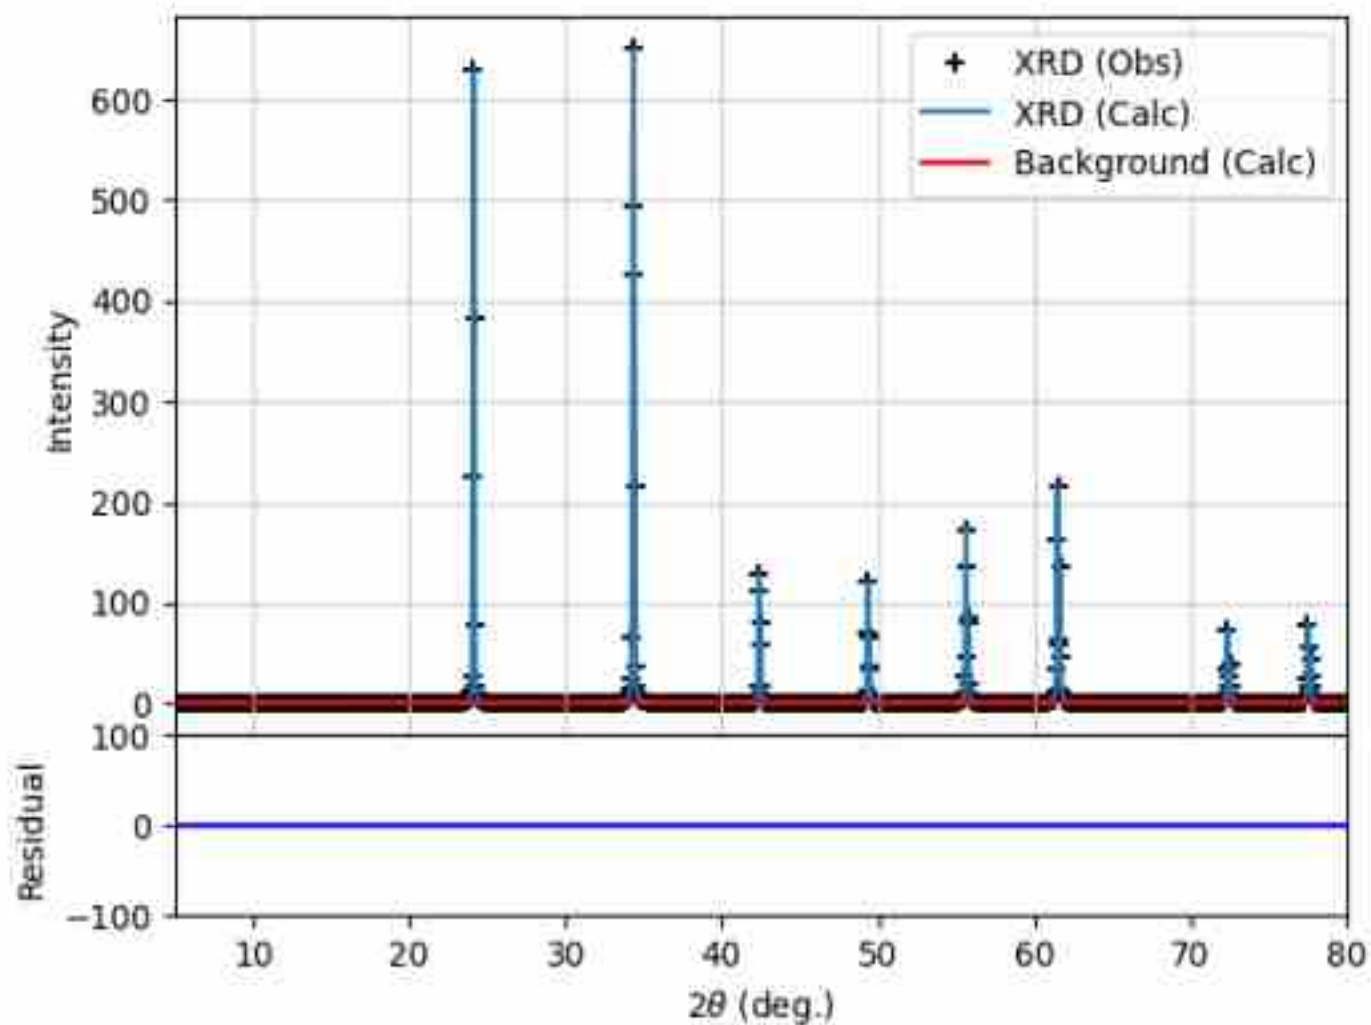

| RMSE before RR | Rwp     | RMSE after RR |
|----------------|---------|---------------|
| 0.002          | 0.00402 | 0.00058       |

# Mg<sub>1</sub>Zr<sub>1</sub>Pd<sub>2</sub>

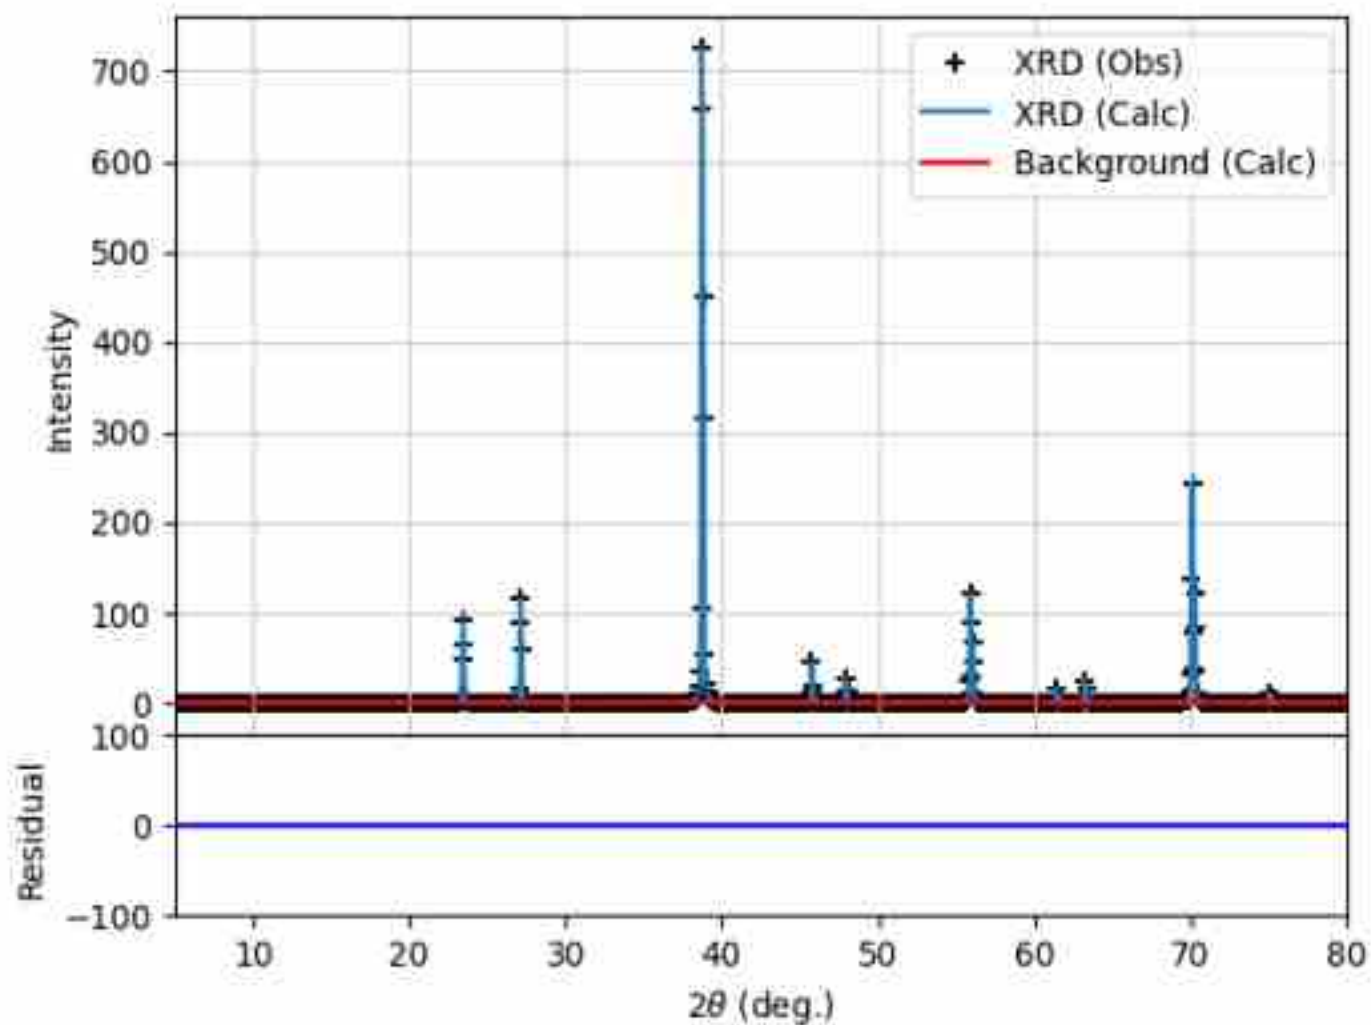

| RMSE before RR | Rwp     | RMSE after RR |
|----------------|---------|---------------|
| 0.002          | 0.00297 | 0.0002        |



# Mg1Zr1Zn2

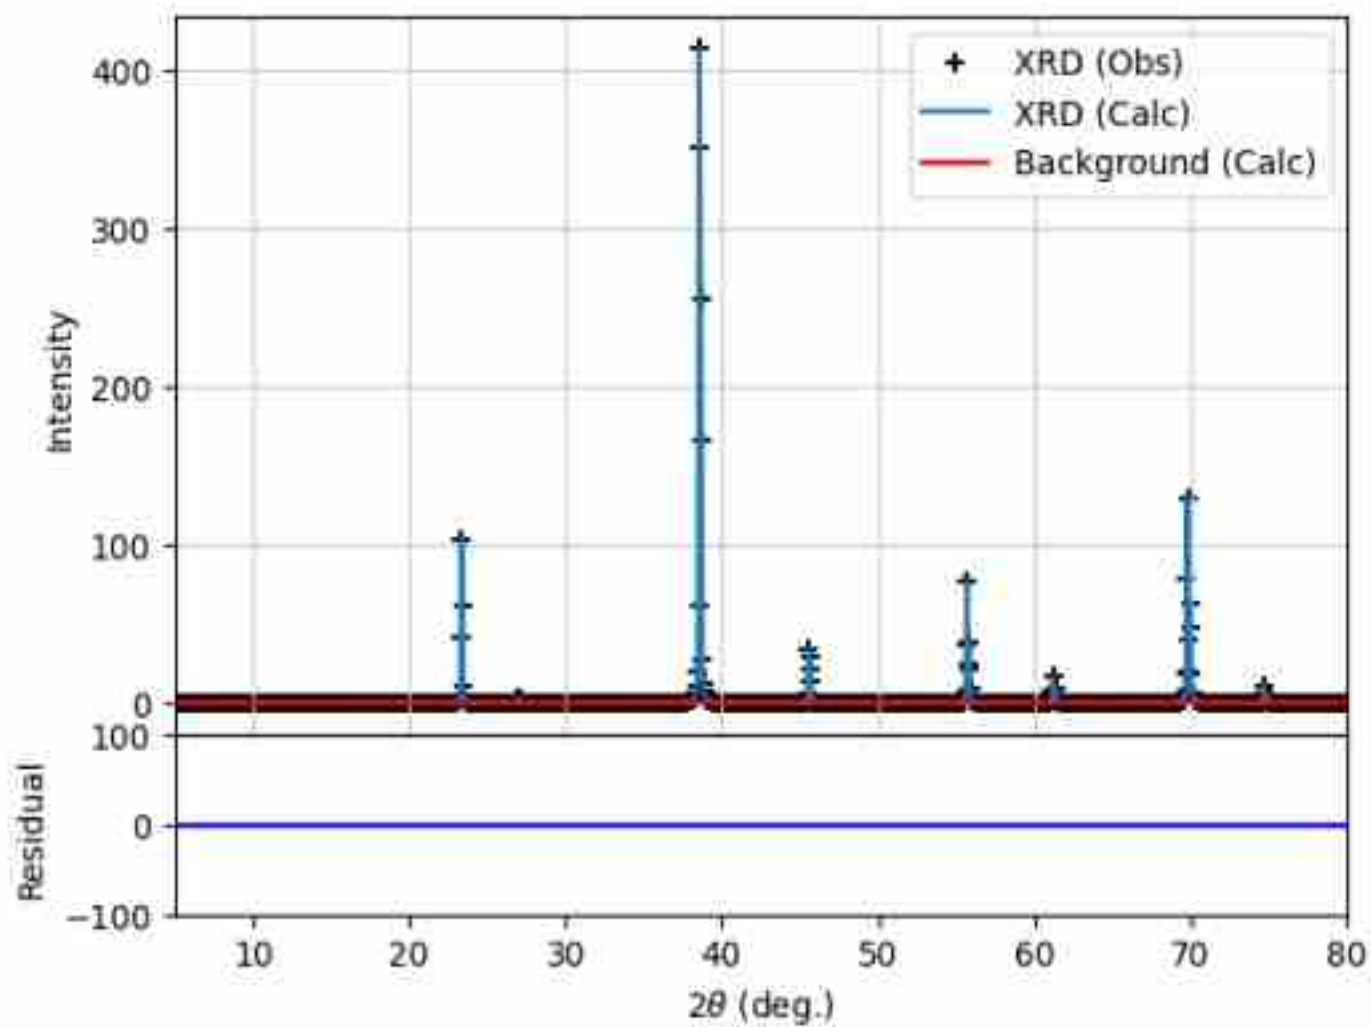

| RMSE before RR | Rwp    | RMSE after RR |
|----------------|--------|---------------|
| 0.002          | 0.0046 | 0.00061       |

# Mg<sub>2</sub>Ir<sub>2</sub>

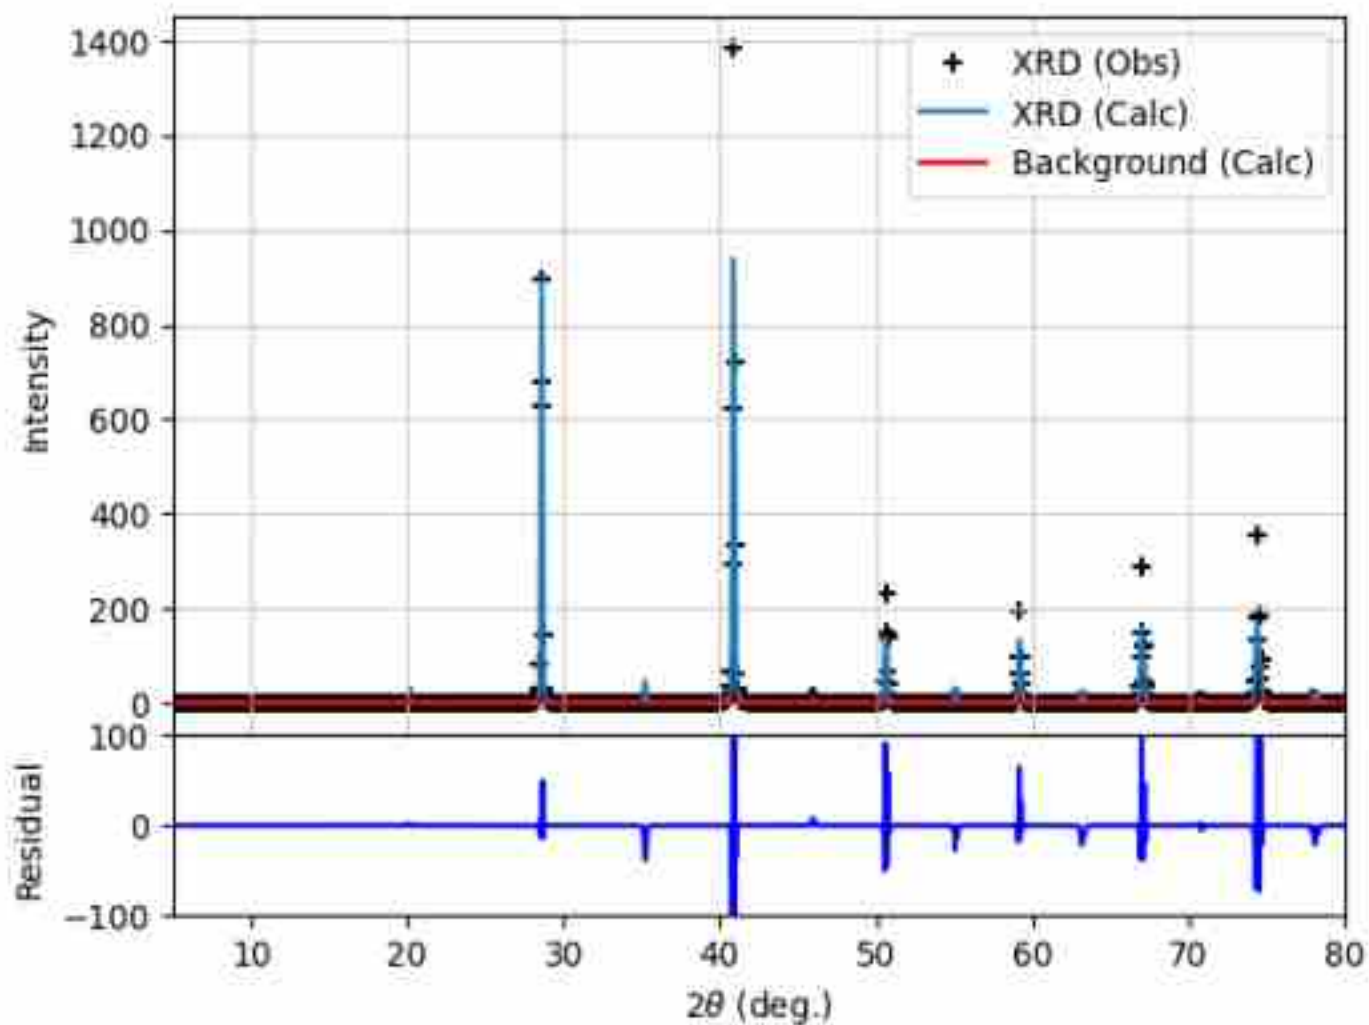

| RMSE before RR | Rwp      | RMSE after RR |
|----------------|----------|---------------|
| 0.002          | 51.66216 | None          |

# Mg<sub>2</sub>Mn<sub>2</sub>Te<sub>8</sub>

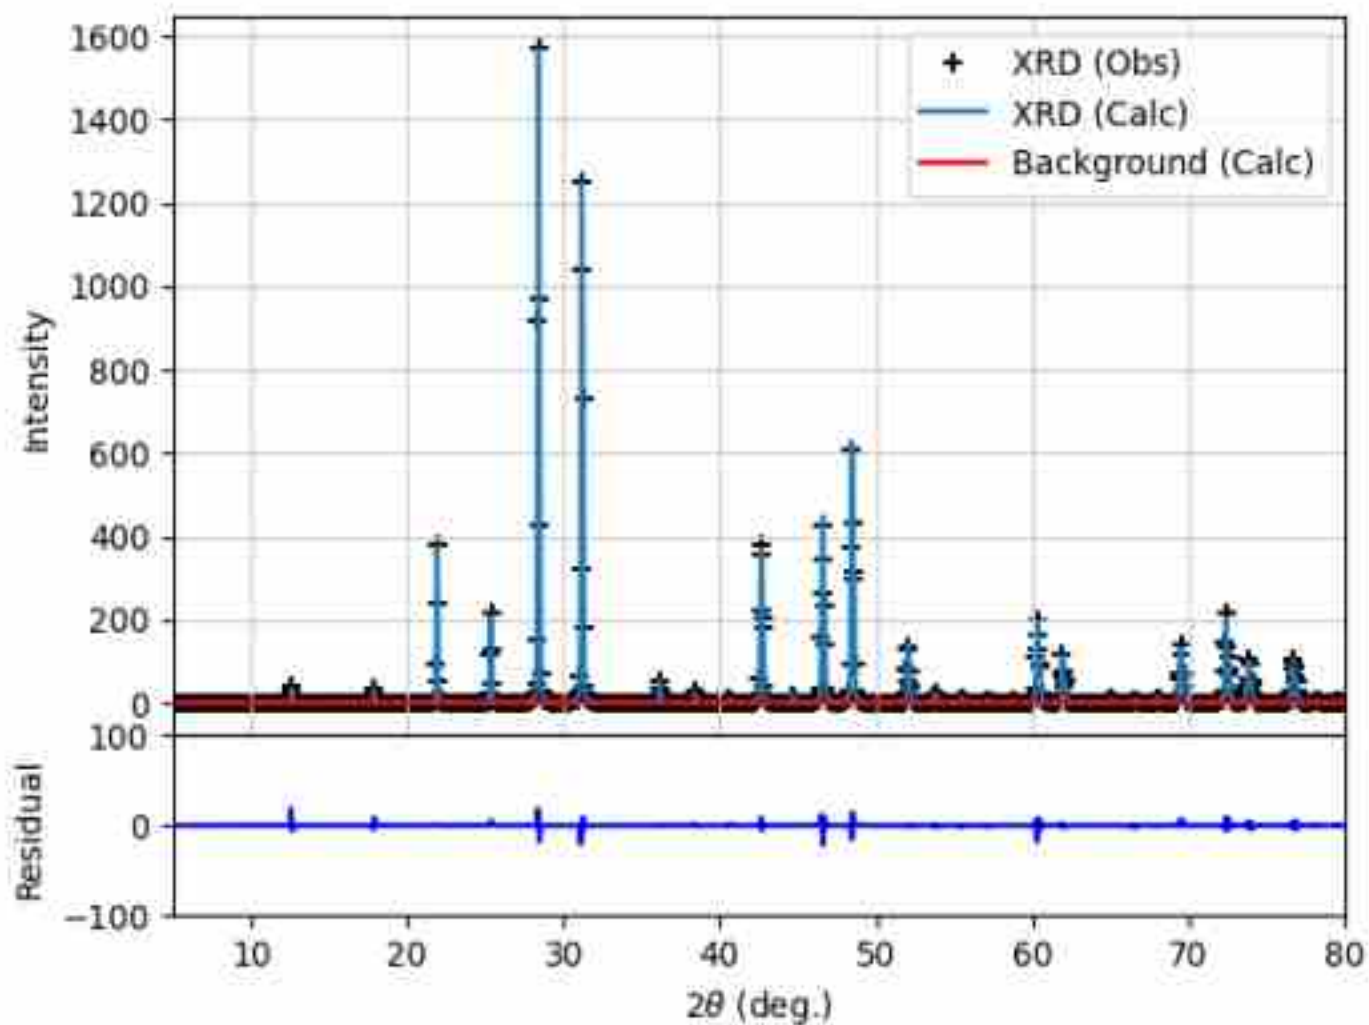

| RMSE before RR | Rwp     | RMSE after RR |
|----------------|---------|---------------|
| 0.02           | 4.70236 | 0.02308       |

# Mg<sub>2</sub>P<sub>2</sub>Se<sub>6</sub>

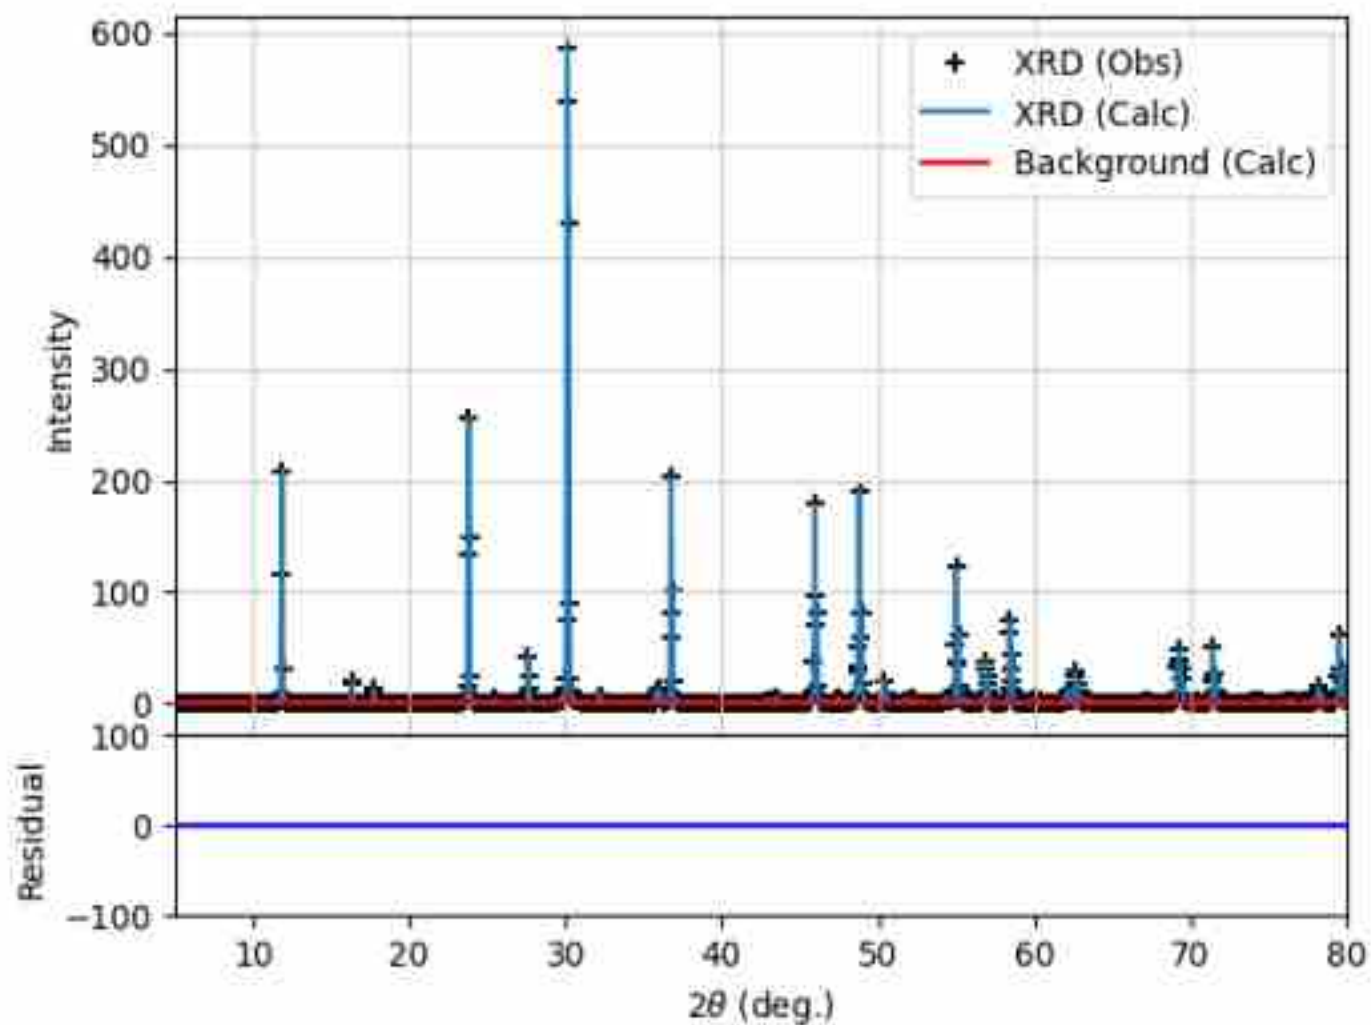

| RMSE before RR | Rwp     | RMSE after RR |
|----------------|---------|---------------|
| 0.02           | 0.00212 | 0.0005        |

# Mg<sub>2</sub>Ti<sub>2</sub>Al<sub>2</sub>S<sub>8</sub>

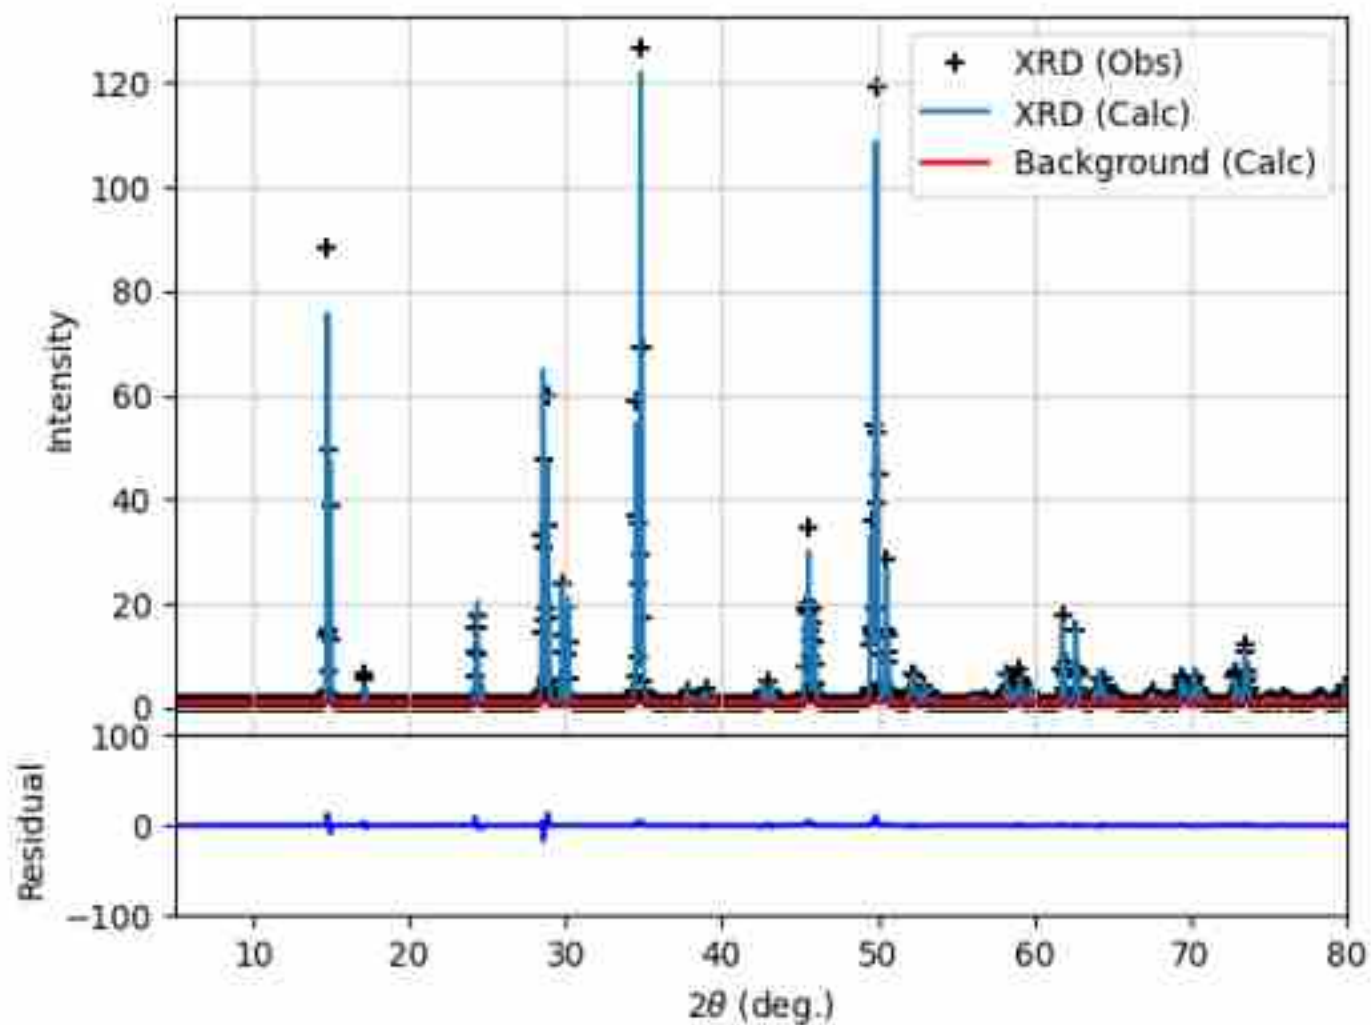

| RMSE before RR | Rwp      | RMSE after RR |
|----------------|----------|---------------|
| 0.02           | 15.80814 | 0.0534        |

# Mg<sub>3</sub>Sn<sub>1</sub>

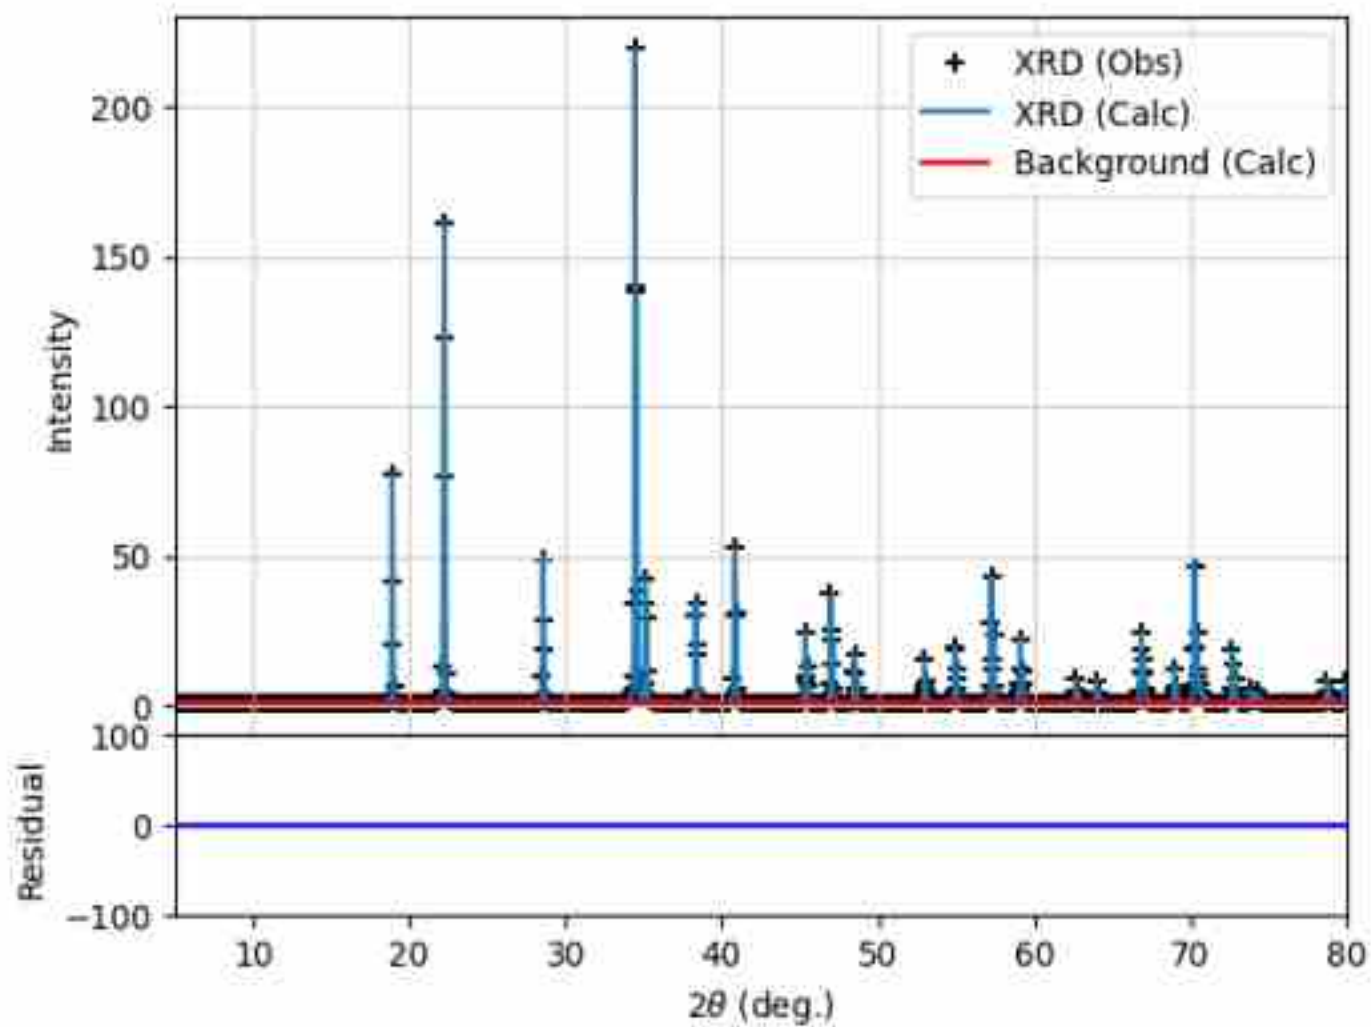

| RMSE before RR | Rwp     | RMSE after RR |
|----------------|---------|---------------|
| 0.002          | 0.01512 | 0.00198       |

# Mg<sub>4</sub>Co<sub>2</sub>W<sub>2</sub>O<sub>12</sub>

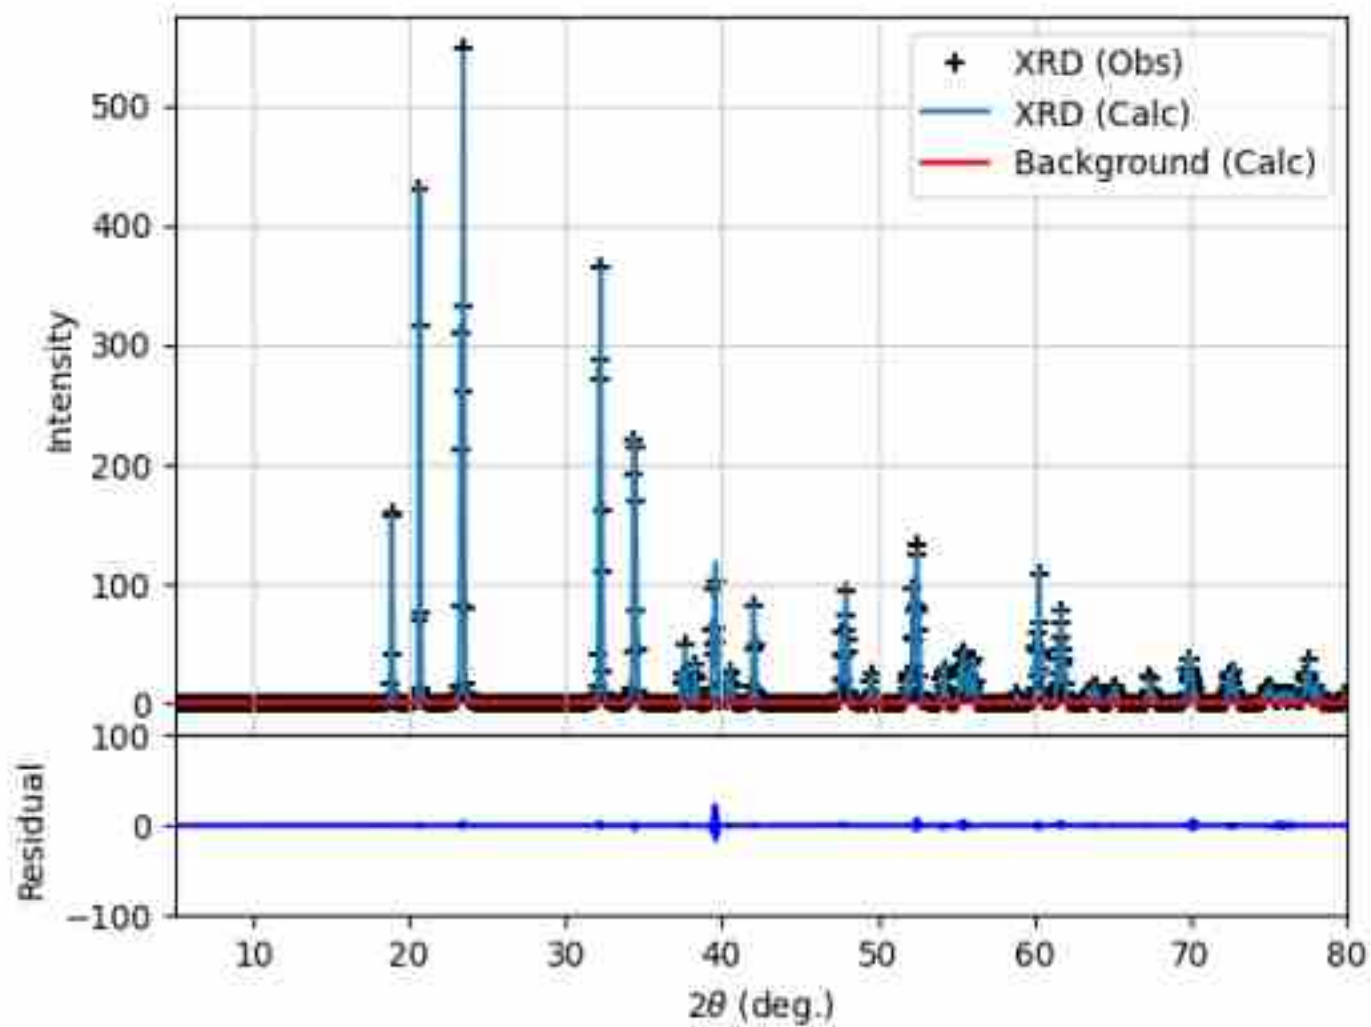

| RMSE before RR | Rwp     | RMSE after RR |
|----------------|---------|---------------|
| 0.02           | 5.73381 | None          |

# Mg<sub>4</sub>Ga<sub>2</sub>

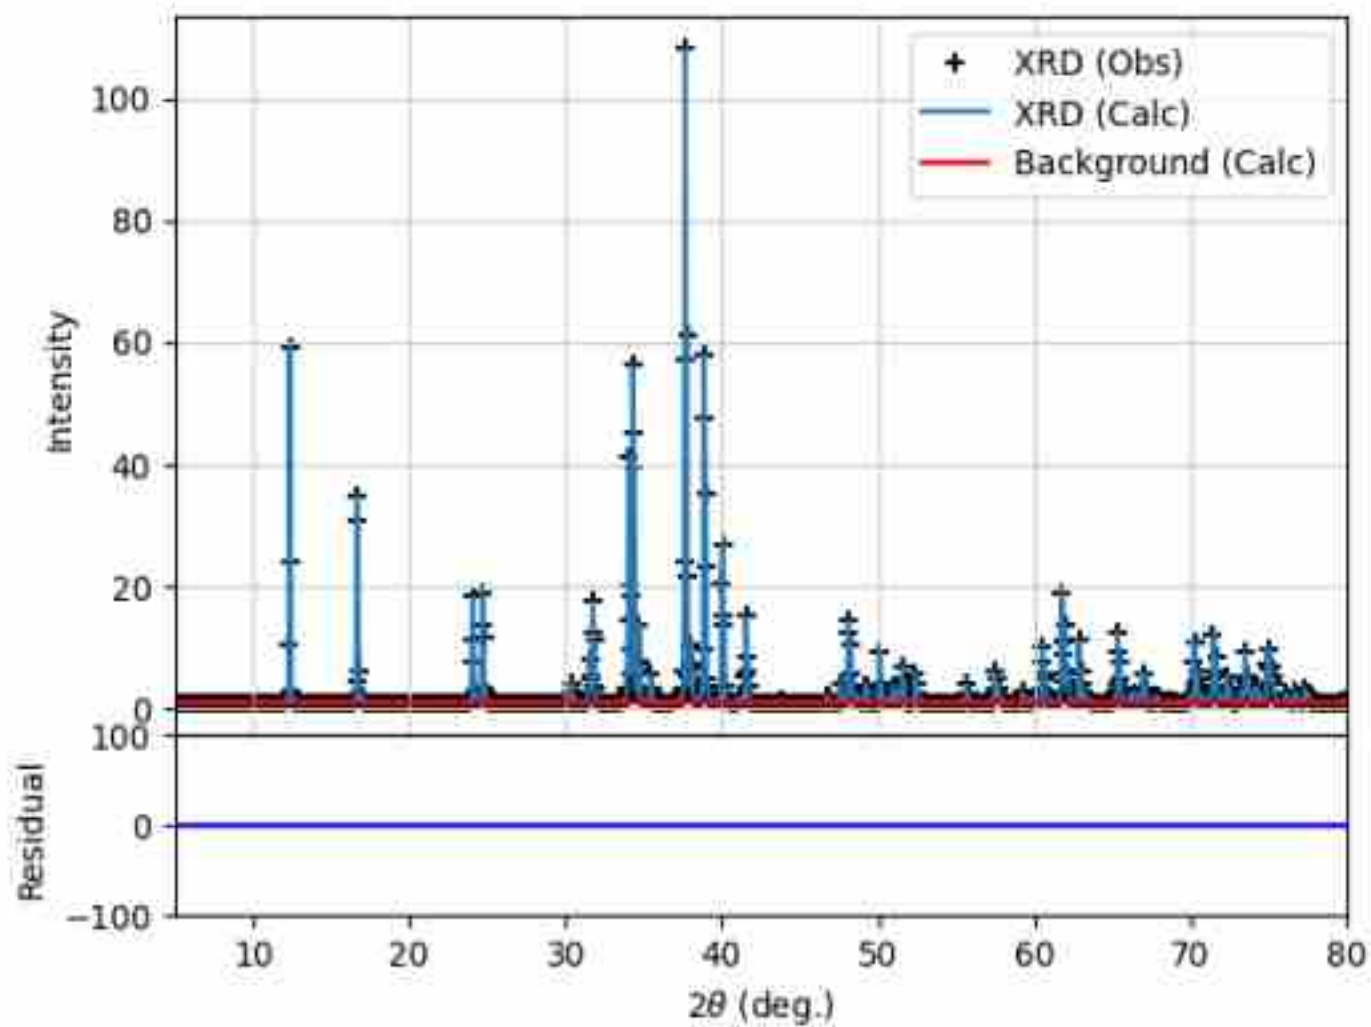

| RMSE before RR | Rwp     | RMSE after RR |
|----------------|---------|---------------|
| 0.02           | 0.00323 | 0.00082       |



# Mn1Al1Fe2

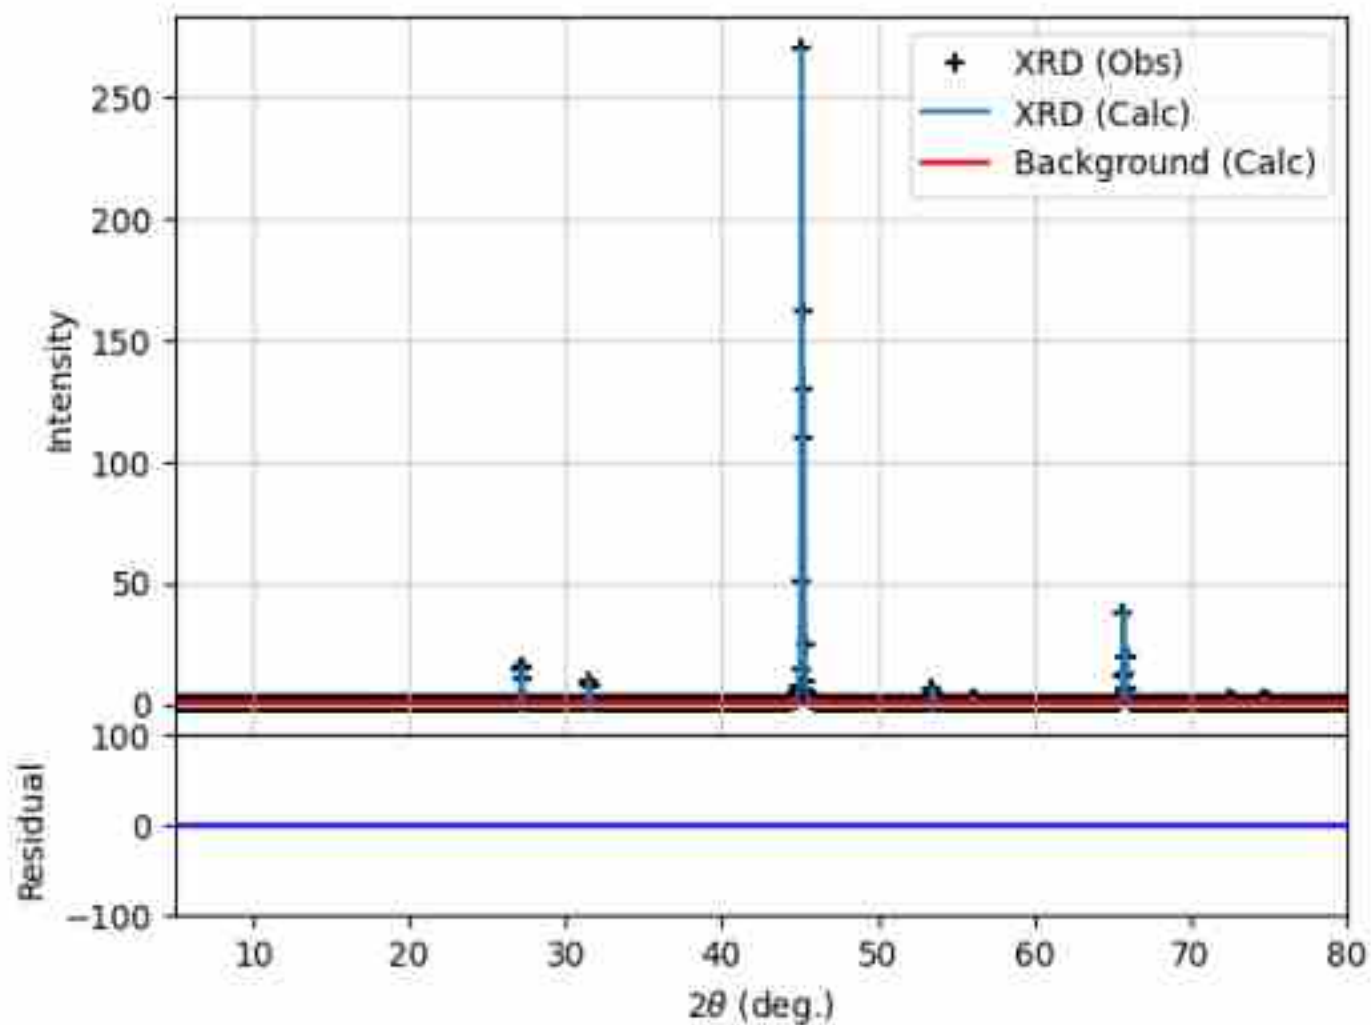

| RMSE before RR | Rwp     | RMSE after RR |
|----------------|---------|---------------|
| 0.002          | 0.00289 | 0.00041       |

# Mn1Be2Pt1

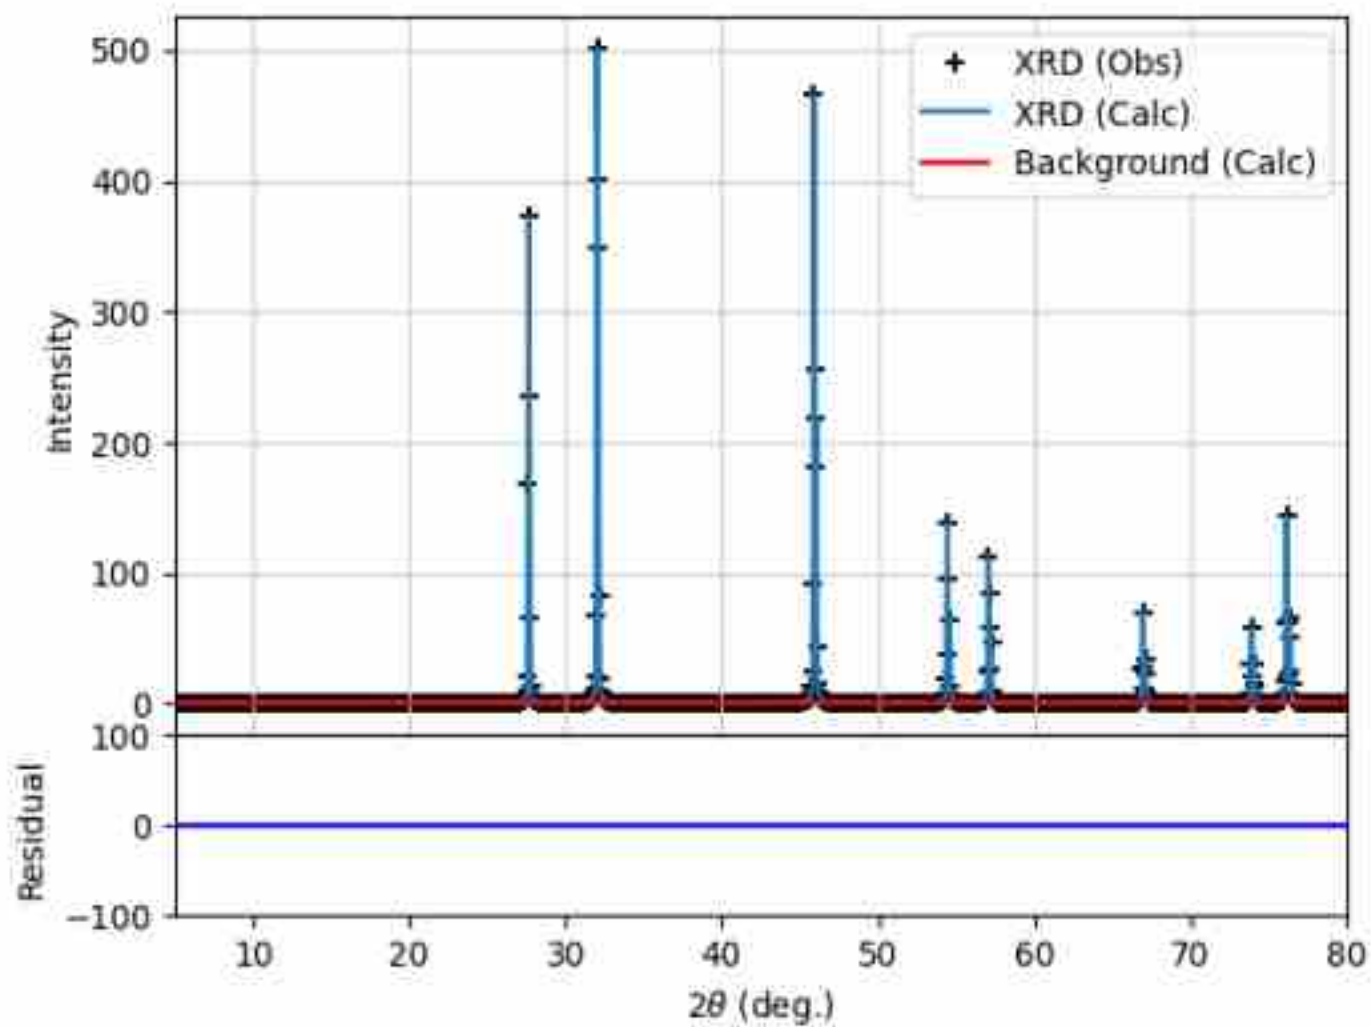

| RMSE before RR | Rwp     | RMSE after RR |
|----------------|---------|---------------|
| 0.002          | 0.00333 | 0.00274       |

# Mn1Co2Sb1

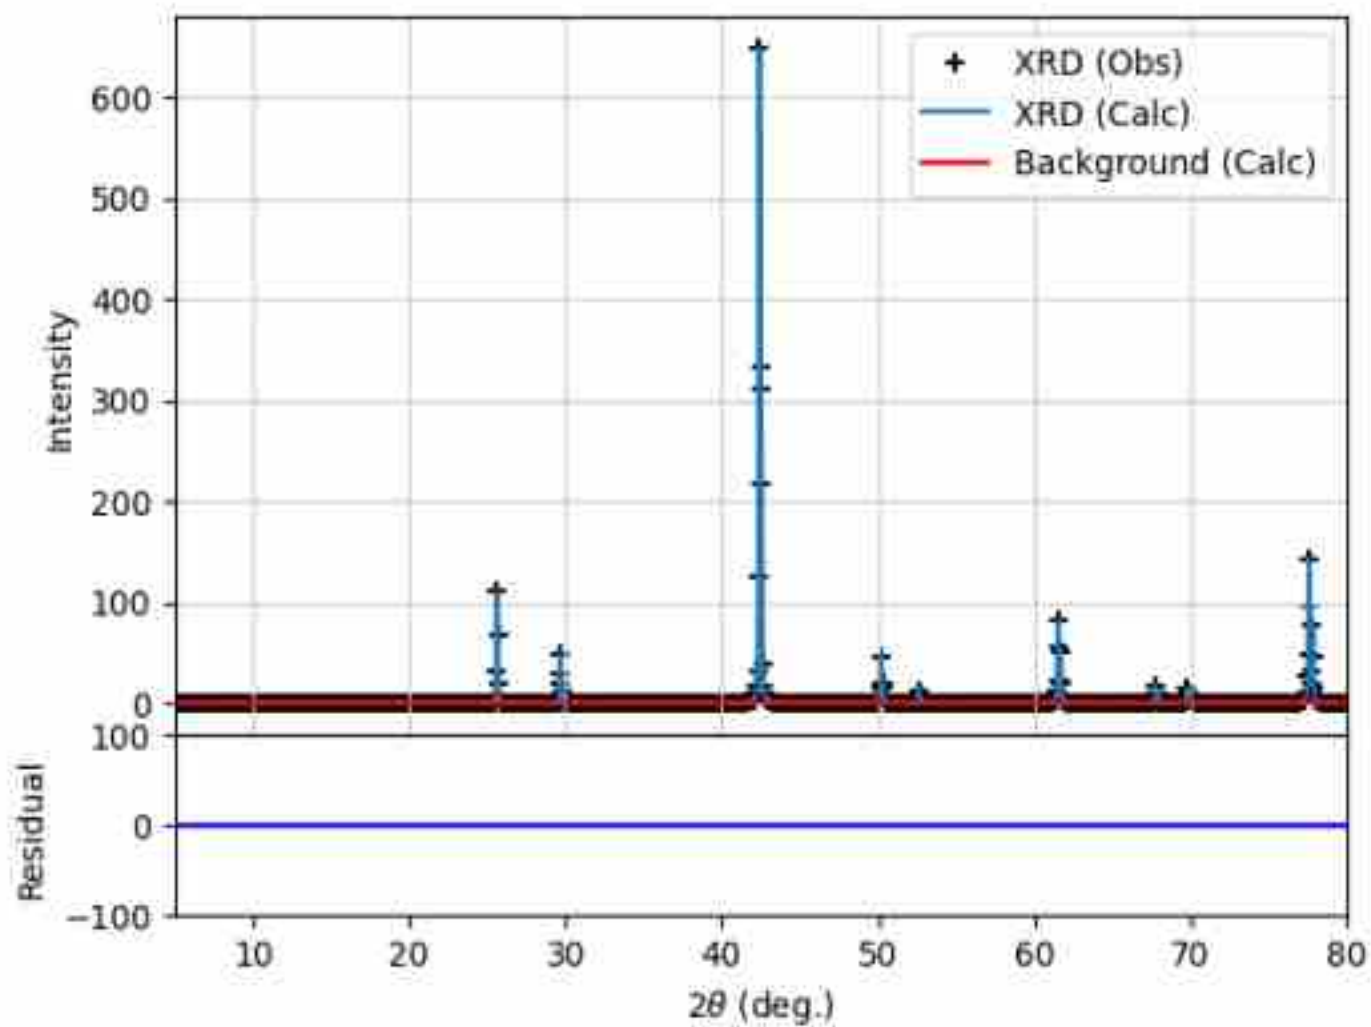

| RMSE before RR | Rwp     | RMSE after RR |
|----------------|---------|---------------|
| 0.002          | 0.00283 | 0.00048       |

# Mn1Ga1Pt2

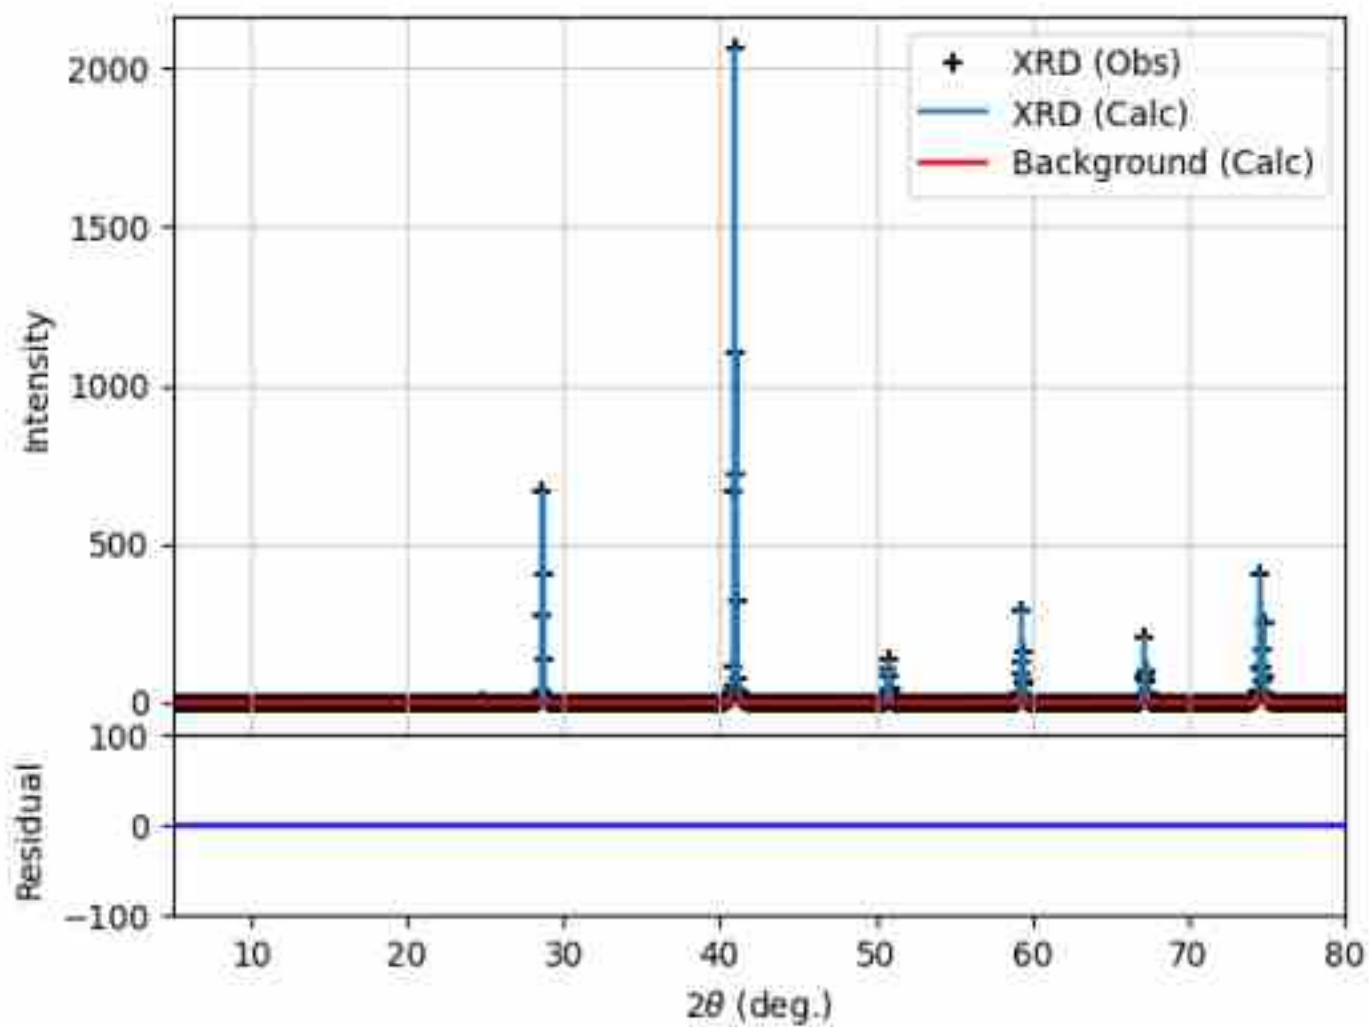

| RMSE before RR | Rwp     | RMSE after RR |
|----------------|---------|---------------|
| 0.002          | 0.04297 | 0.00121       |

# Mn1Ge1Ru2

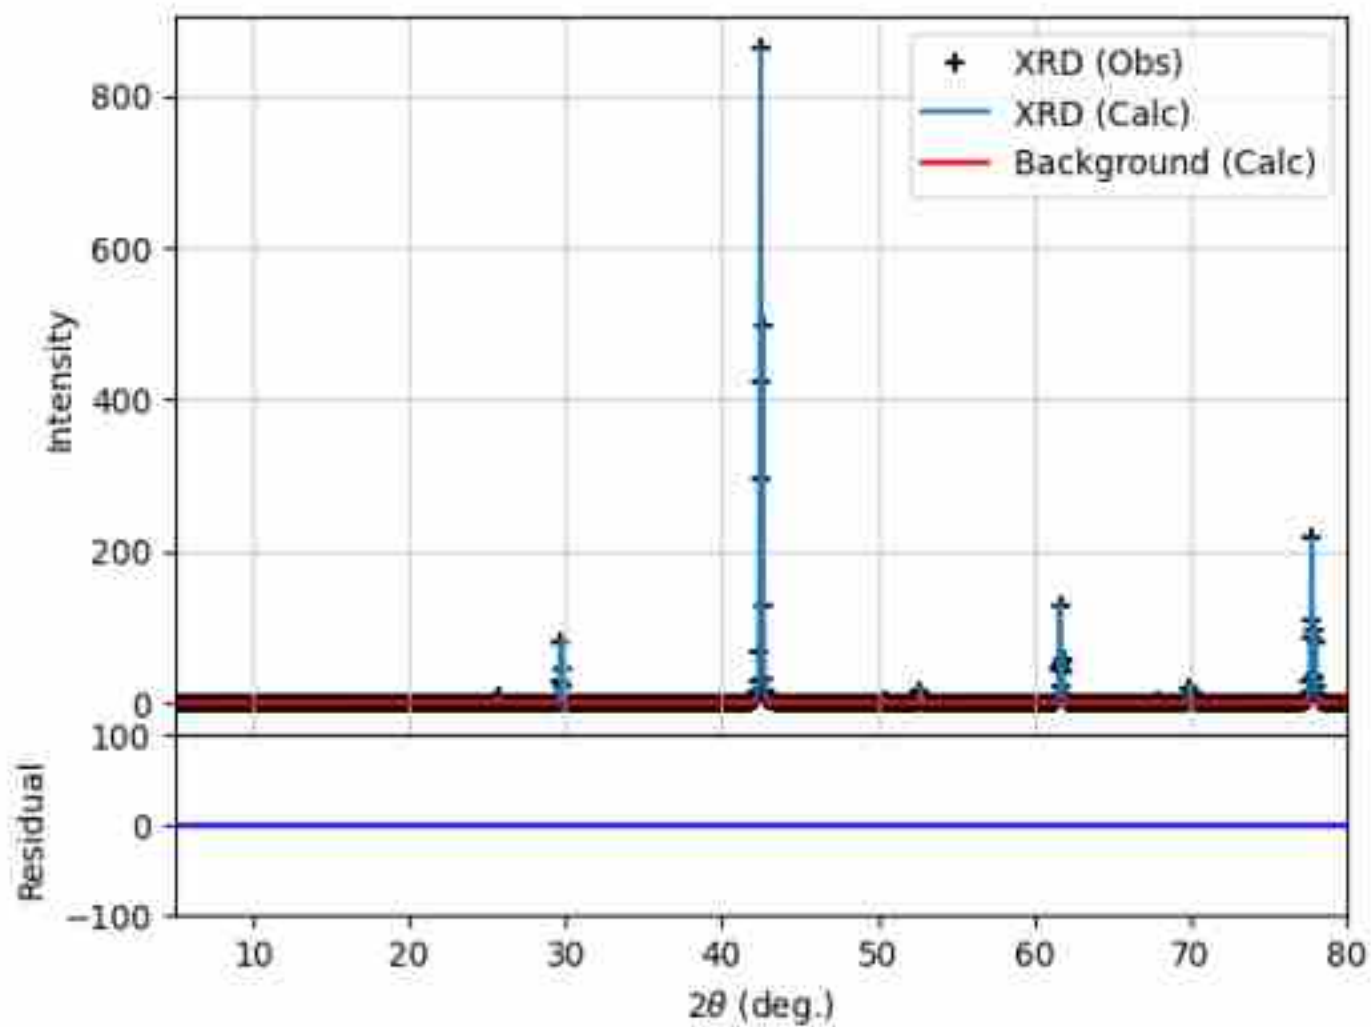

| RMSE before RR | Rwp     | RMSE after RR |
|----------------|---------|---------------|
| 0.002          | 0.00253 | 0.0002        |

# Mn1In1Pd2

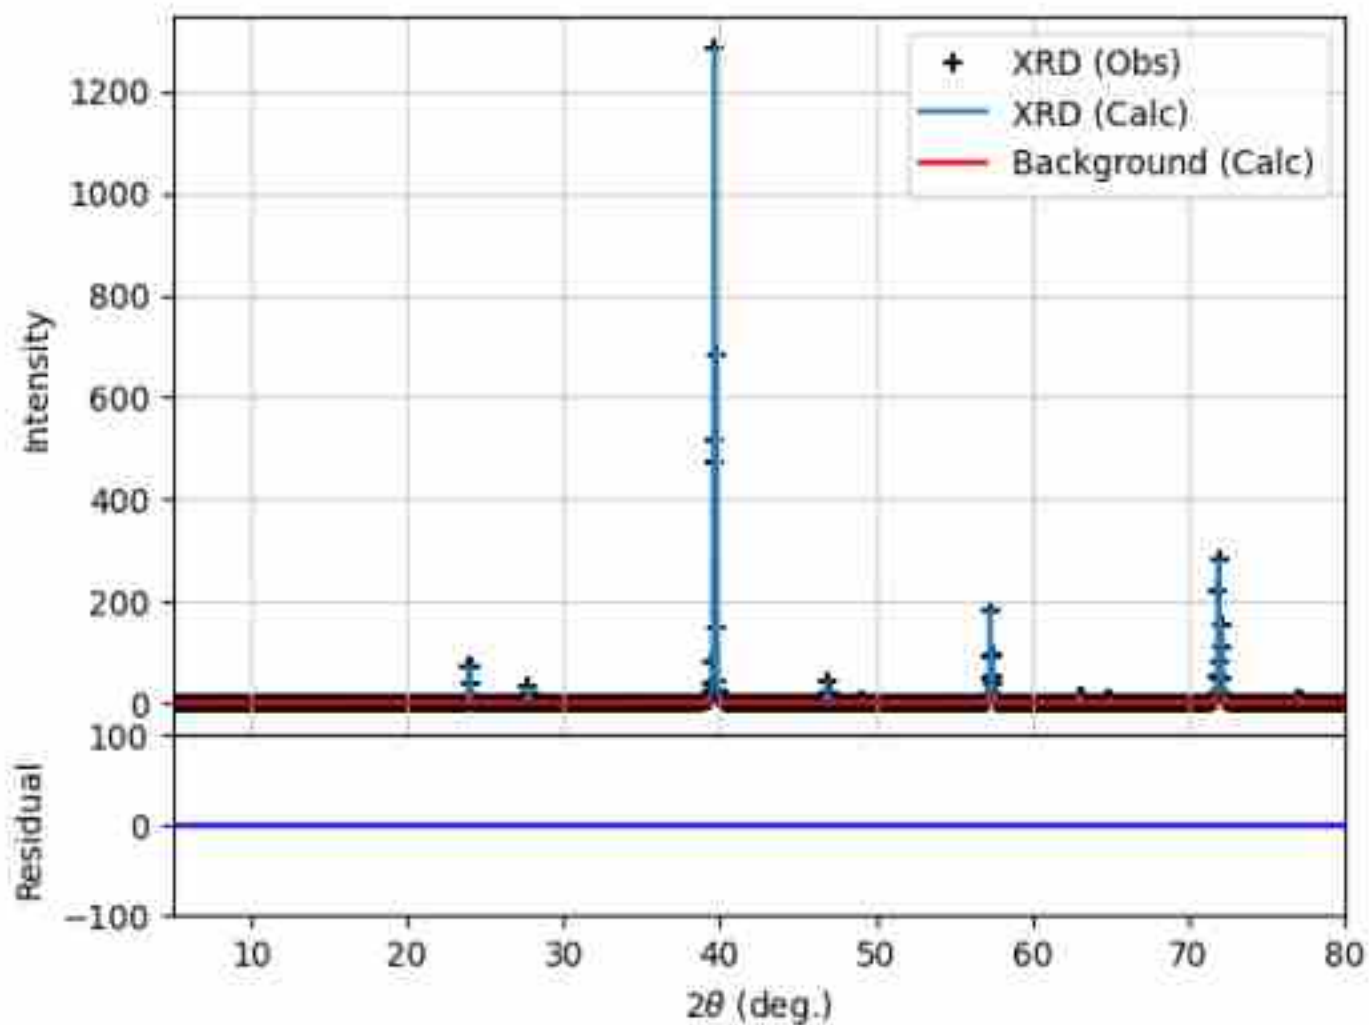

| RMSE before RR | Rwp     | RMSE after RR |
|----------------|---------|---------------|
| 0.002          | 0.00442 | 0.0003        |

# Mn1Nb1Ru2

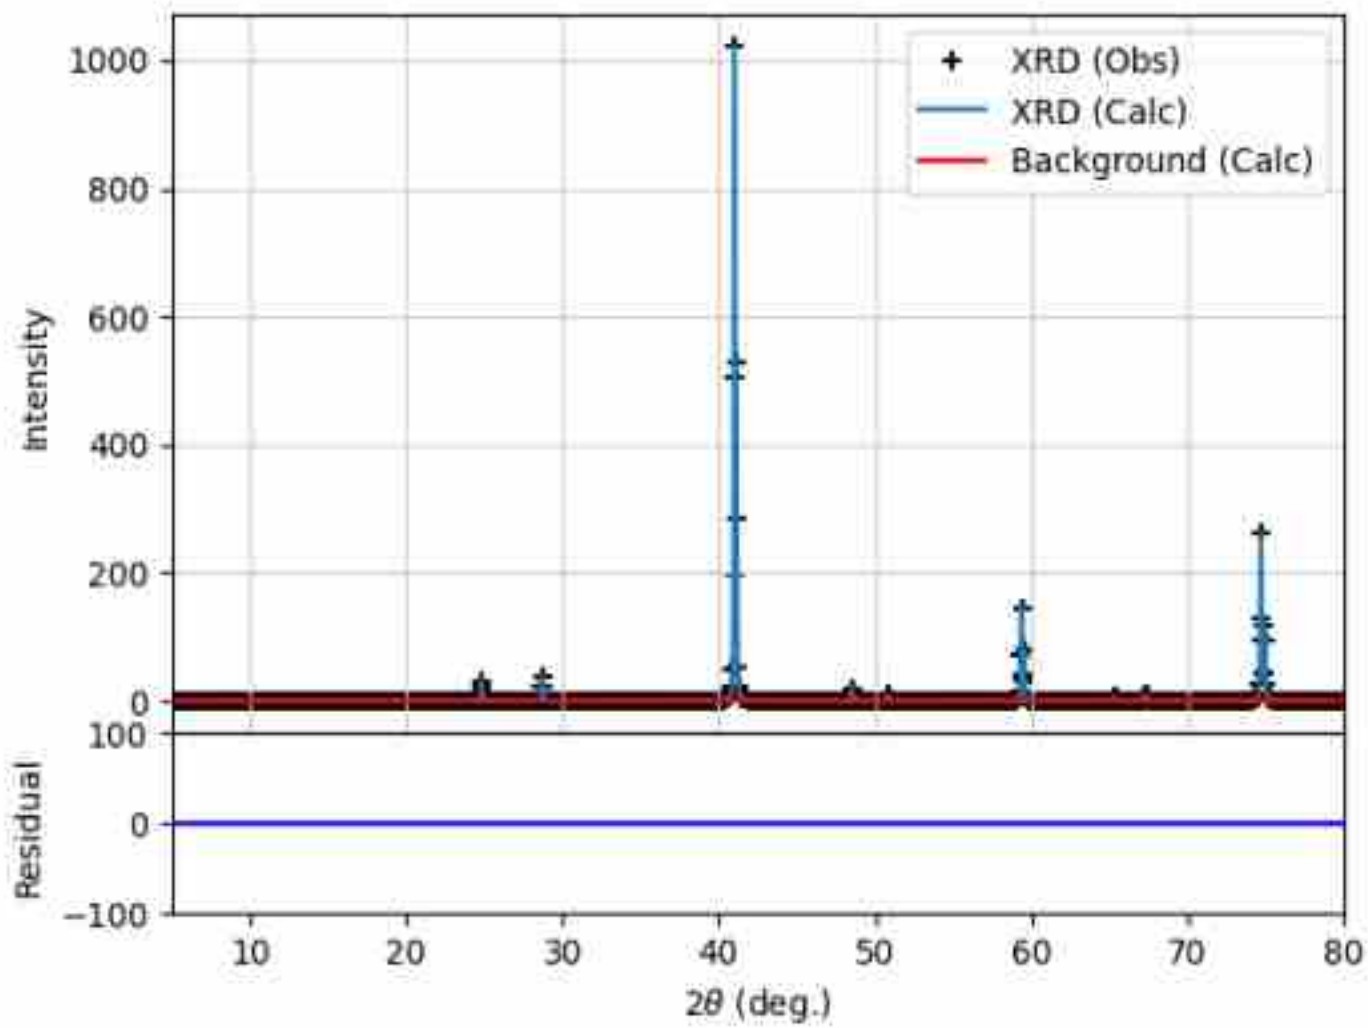

| RMSE before RR | Rwp     | RMSE after RR |
|----------------|---------|---------------|
| 0.002          | 0.00266 | 0.00063       |

# Mn1Ni2Sb1

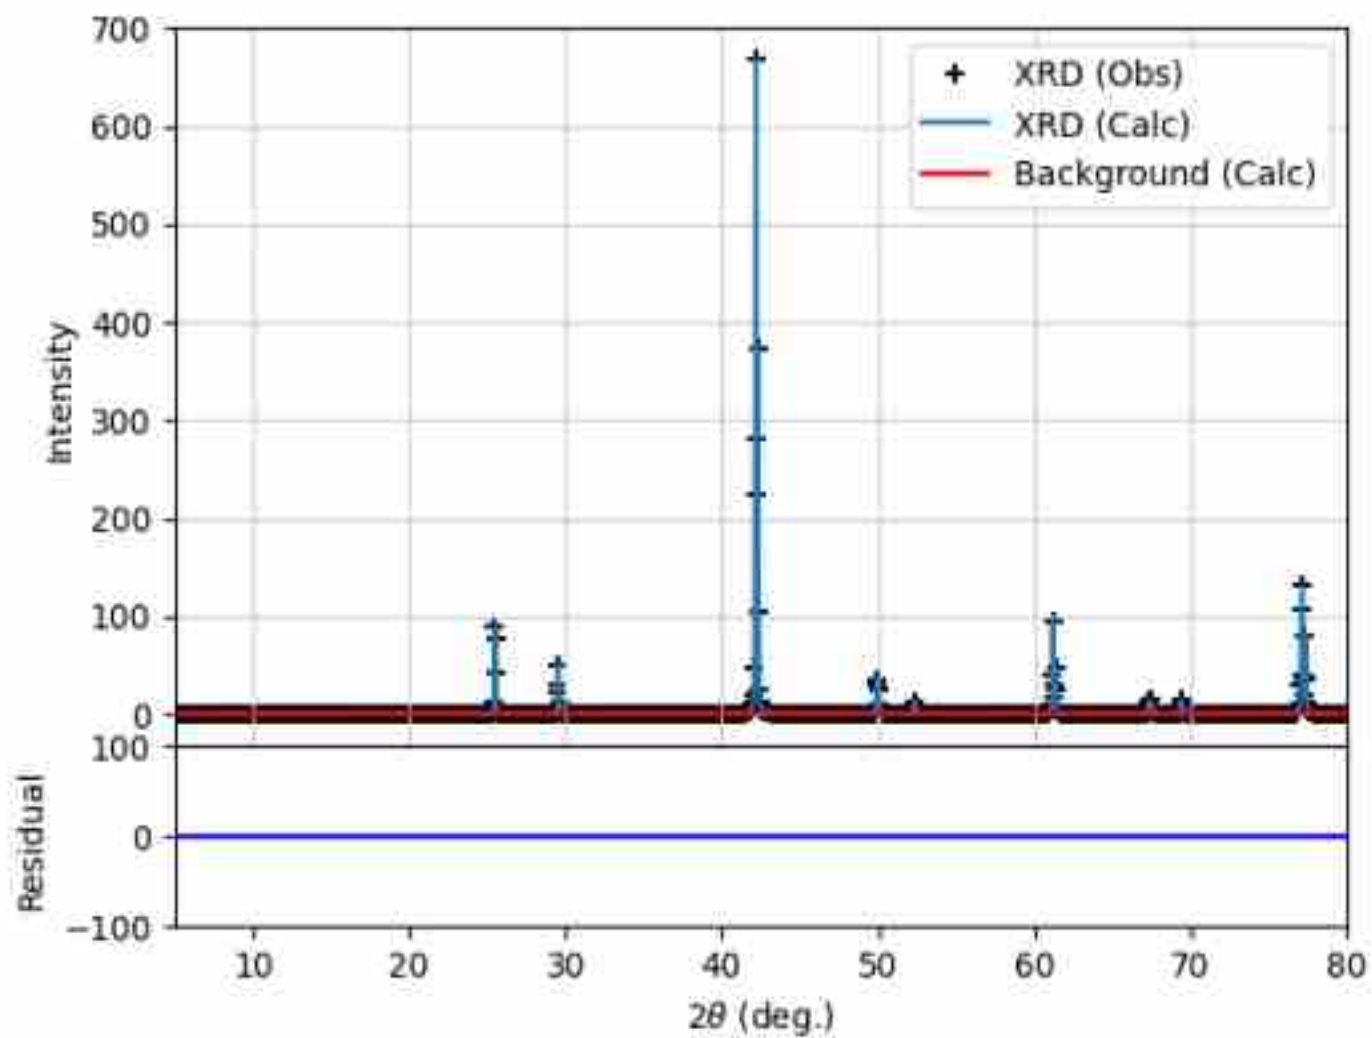

| RMSE before RR | Rwp     | RMSE after RR |
|----------------|---------|---------------|
| 0.002          | 0.00022 | 0.00019       |



# Mn1Rh1

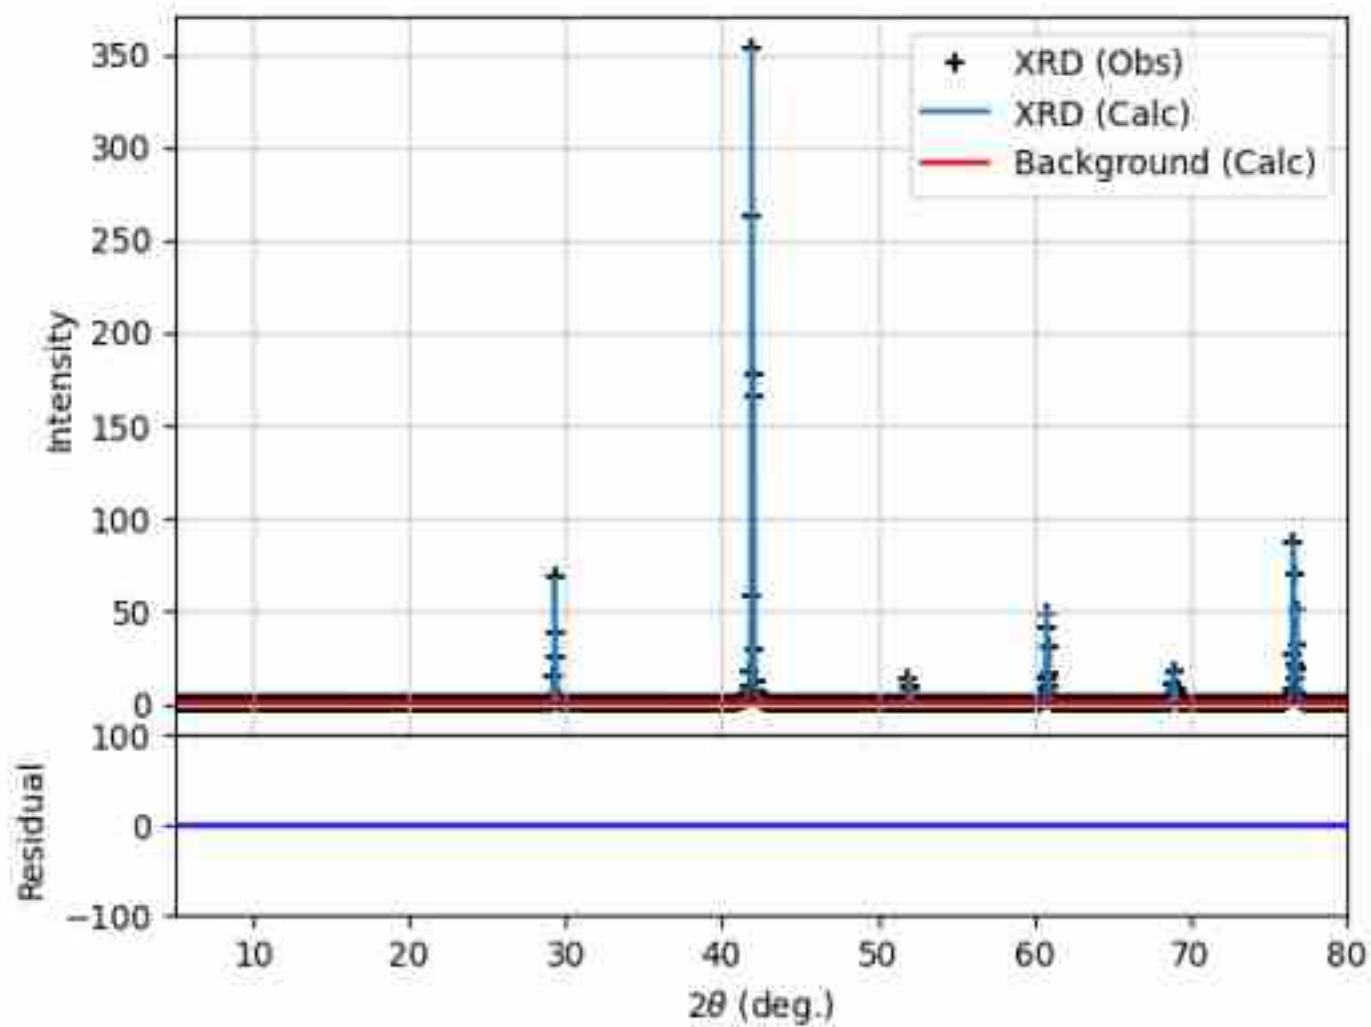

| RMSE before RR | Rwp     | RMSE after RR |
|----------------|---------|---------------|
| 0.002          | 0.00687 | 0.00121       |

# Mn1V2Fe1

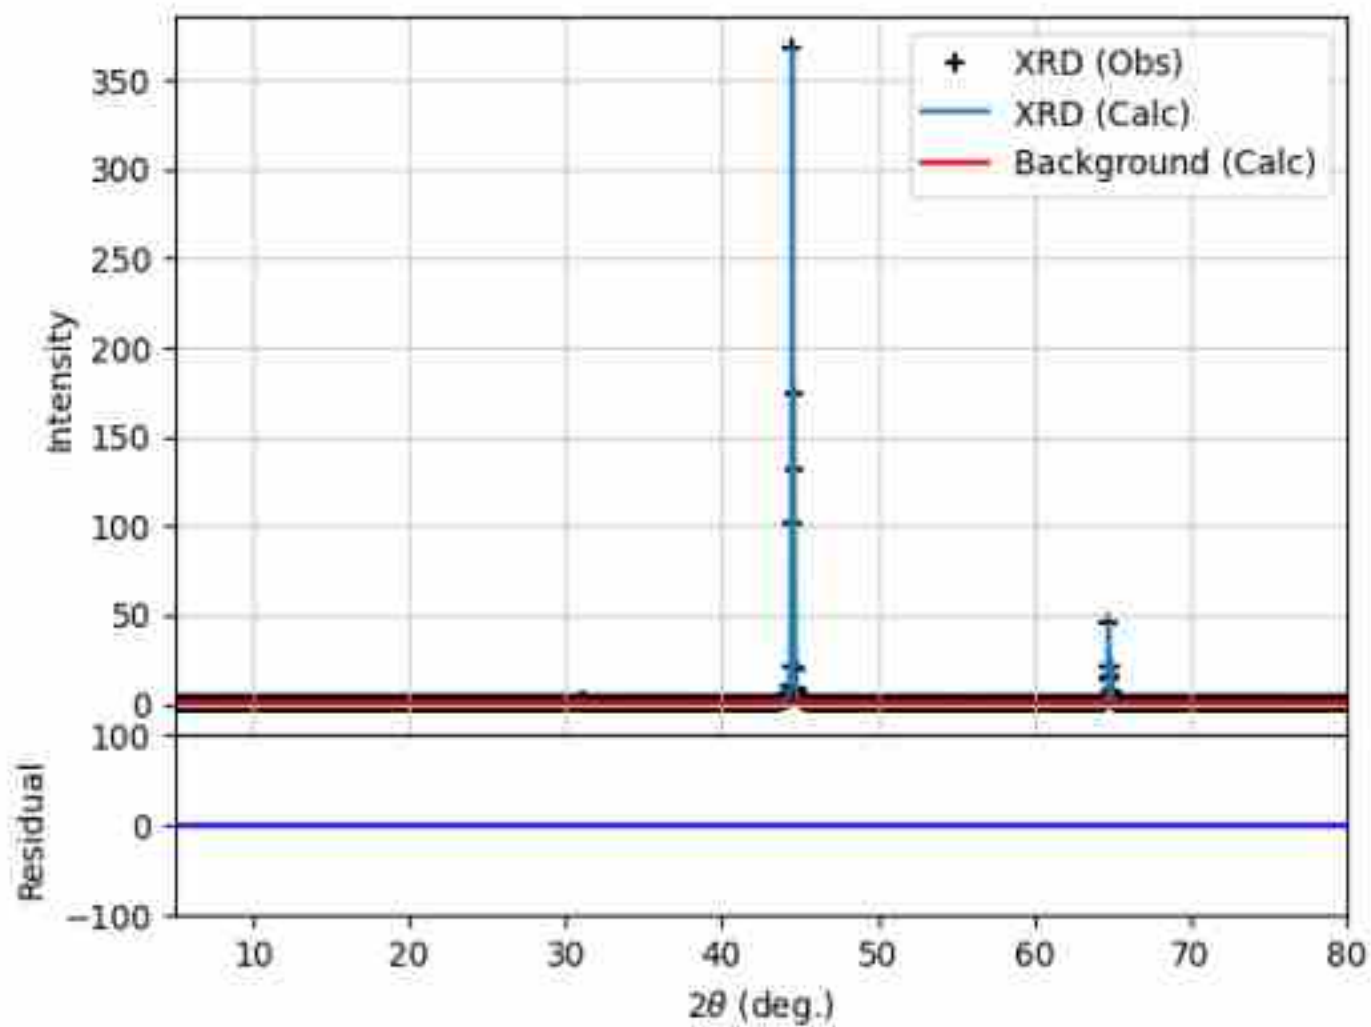

| RMSE before RR | Rwp     | RMSE after RR |
|----------------|---------|---------------|
| 0.002          | 0.00018 | 6e-05         |

# Mn1Zn1Pd2

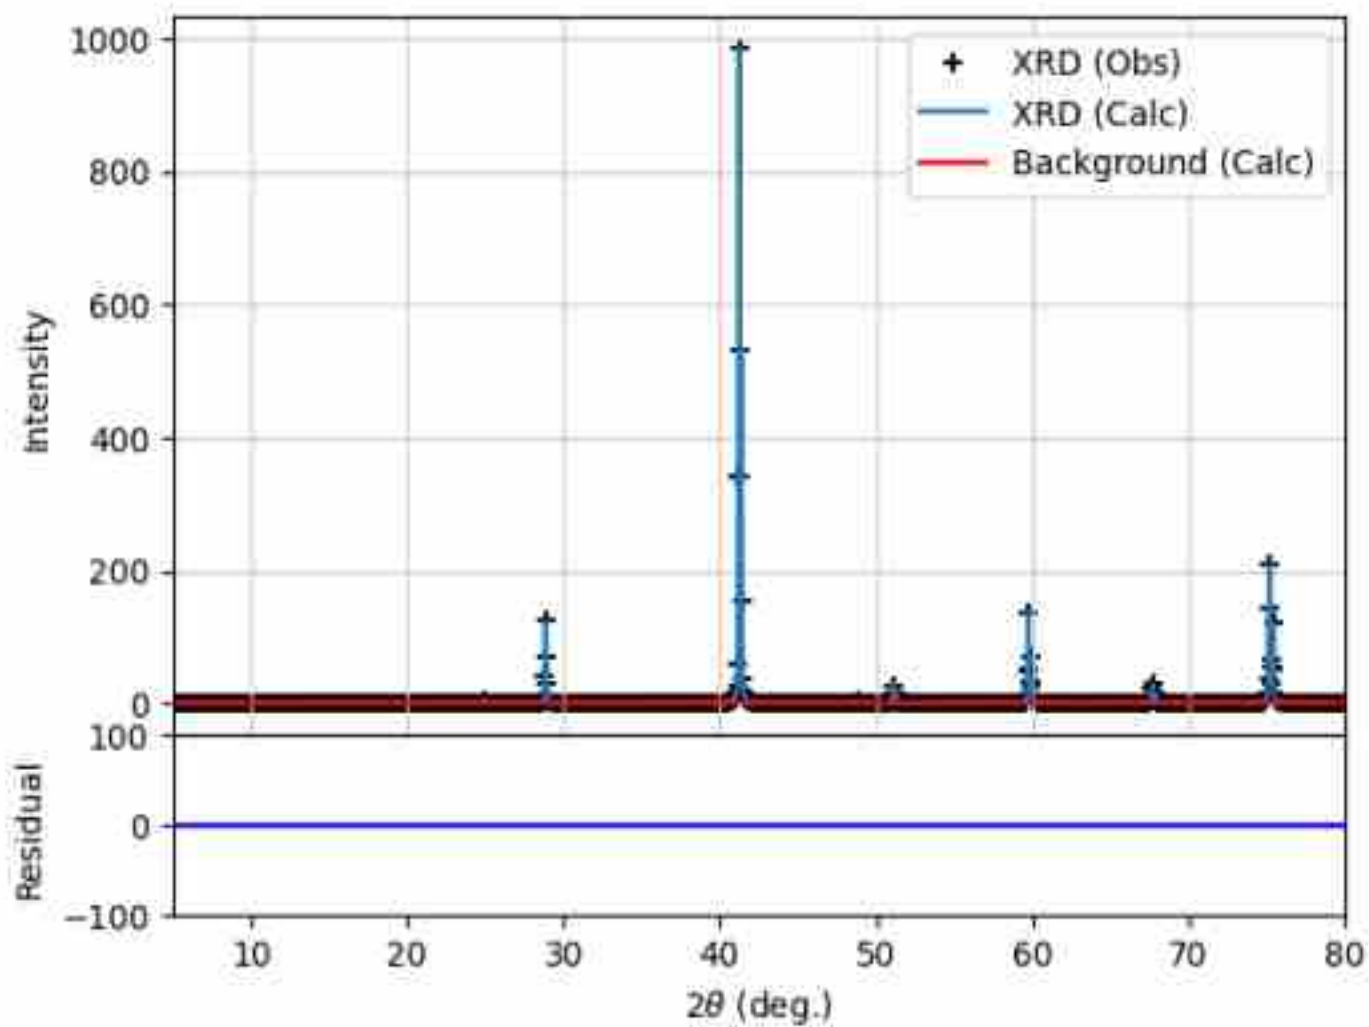

| RMSE before RR | Rwp     | RMSE after RR |
|----------------|---------|---------------|
| 0.002          | 0.00322 | 0.00023       |

# Mn1Zn1Pt2

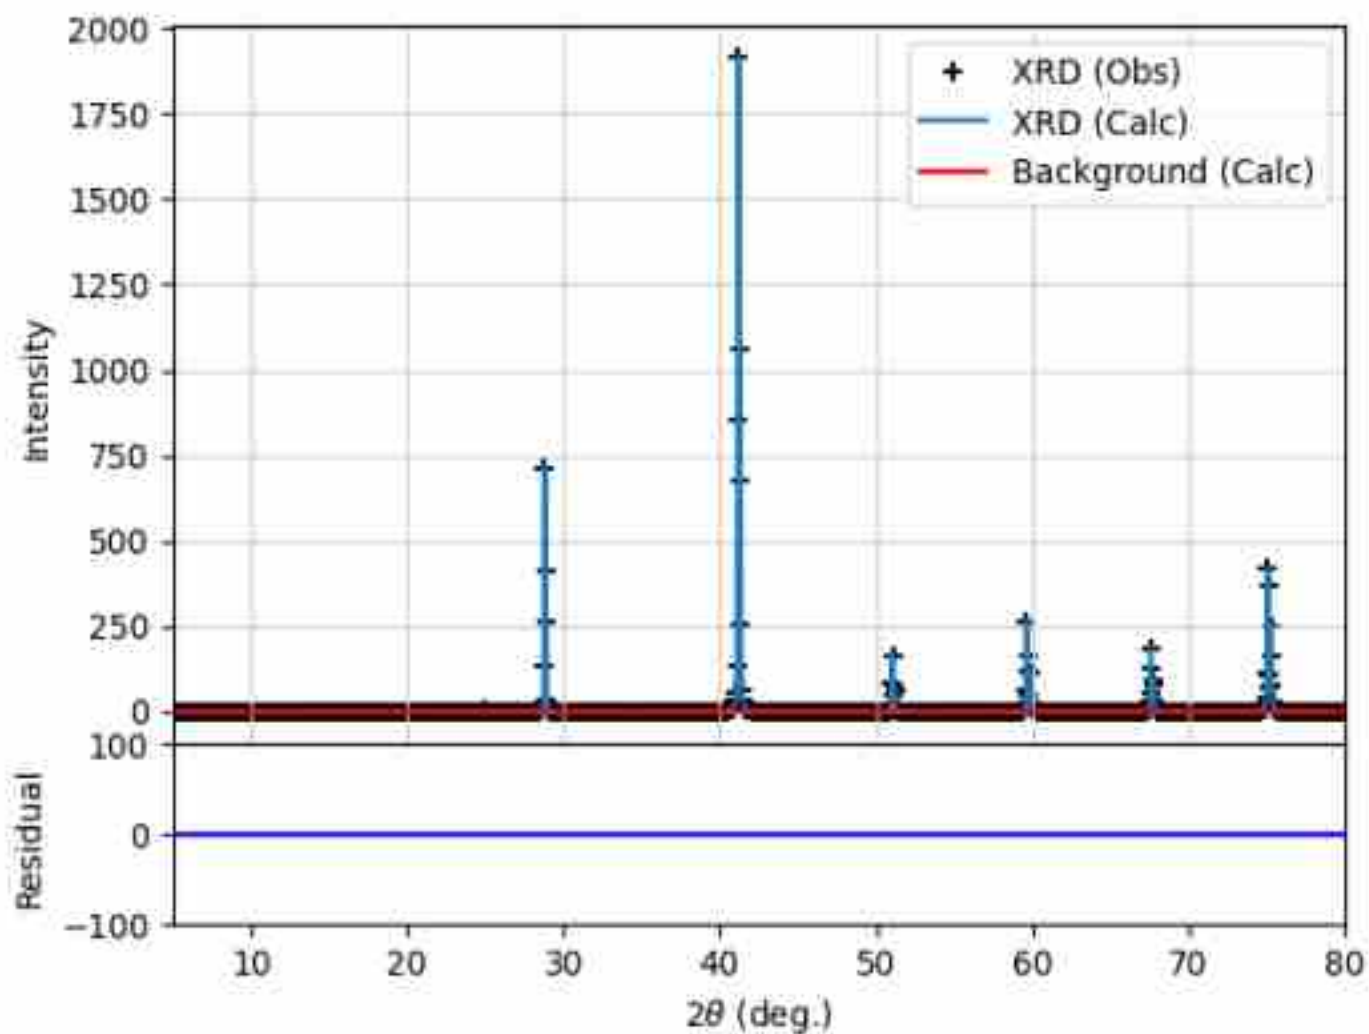

| RMSE before RR | Rwp     | RMSE after RR |
|----------------|---------|---------------|
| 0.002          | 0.01313 | 0.00134       |

# Mn<sub>2</sub>Co<sub>2</sub>P<sub>4</sub>

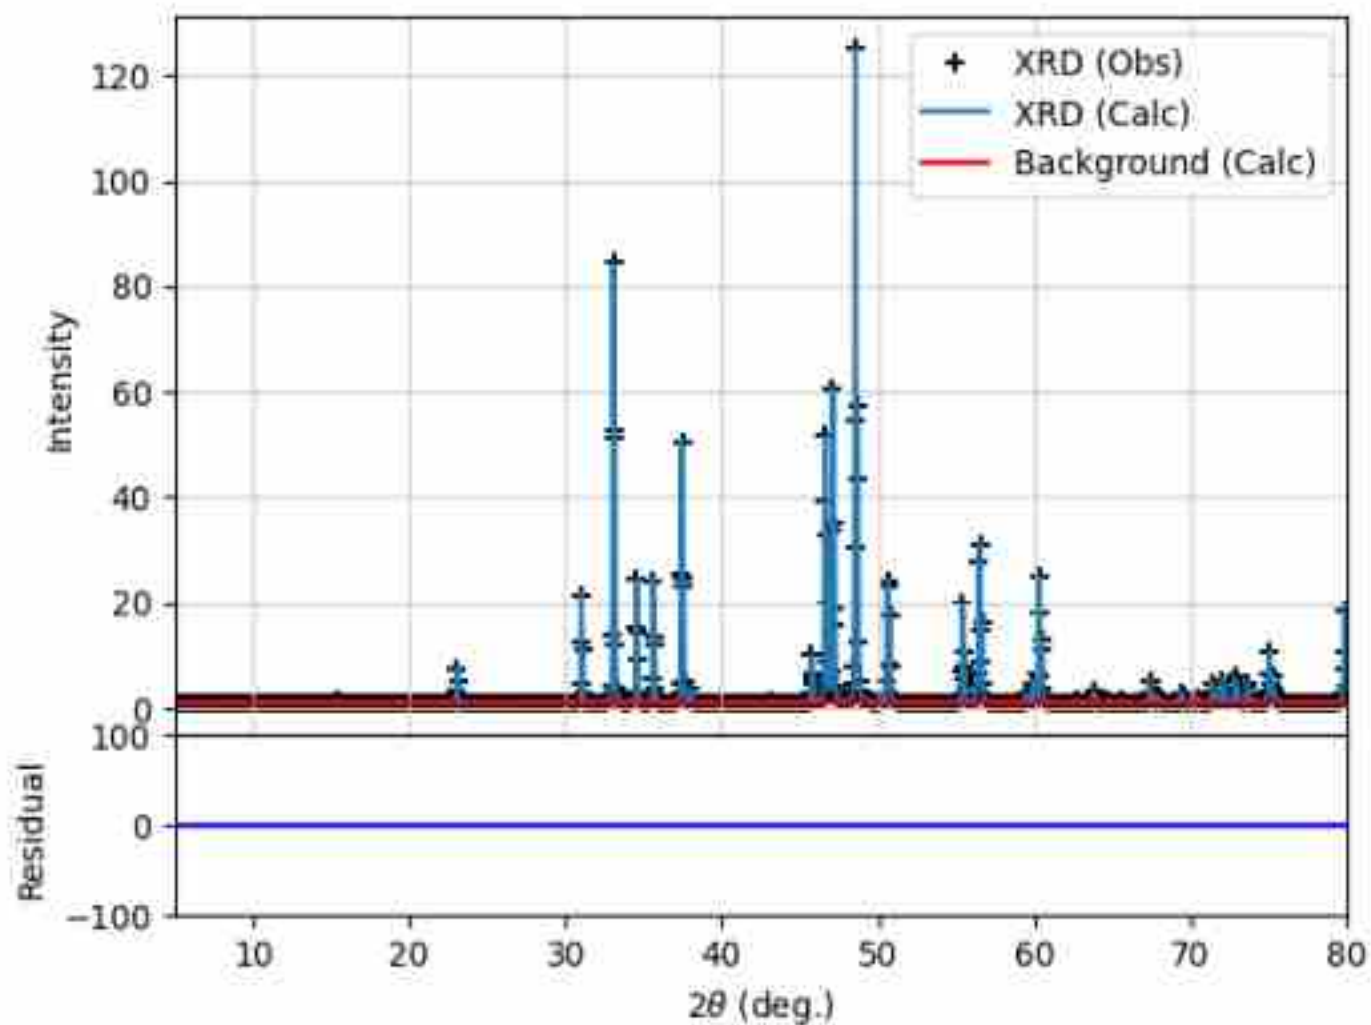

| RMSE before RR | Rwp     | RMSE after RR |
|----------------|---------|---------------|
| 0.02           | 0.04384 | 0.00157       |

# Mn<sub>2</sub>P<sub>2</sub>O<sub>8</sub>

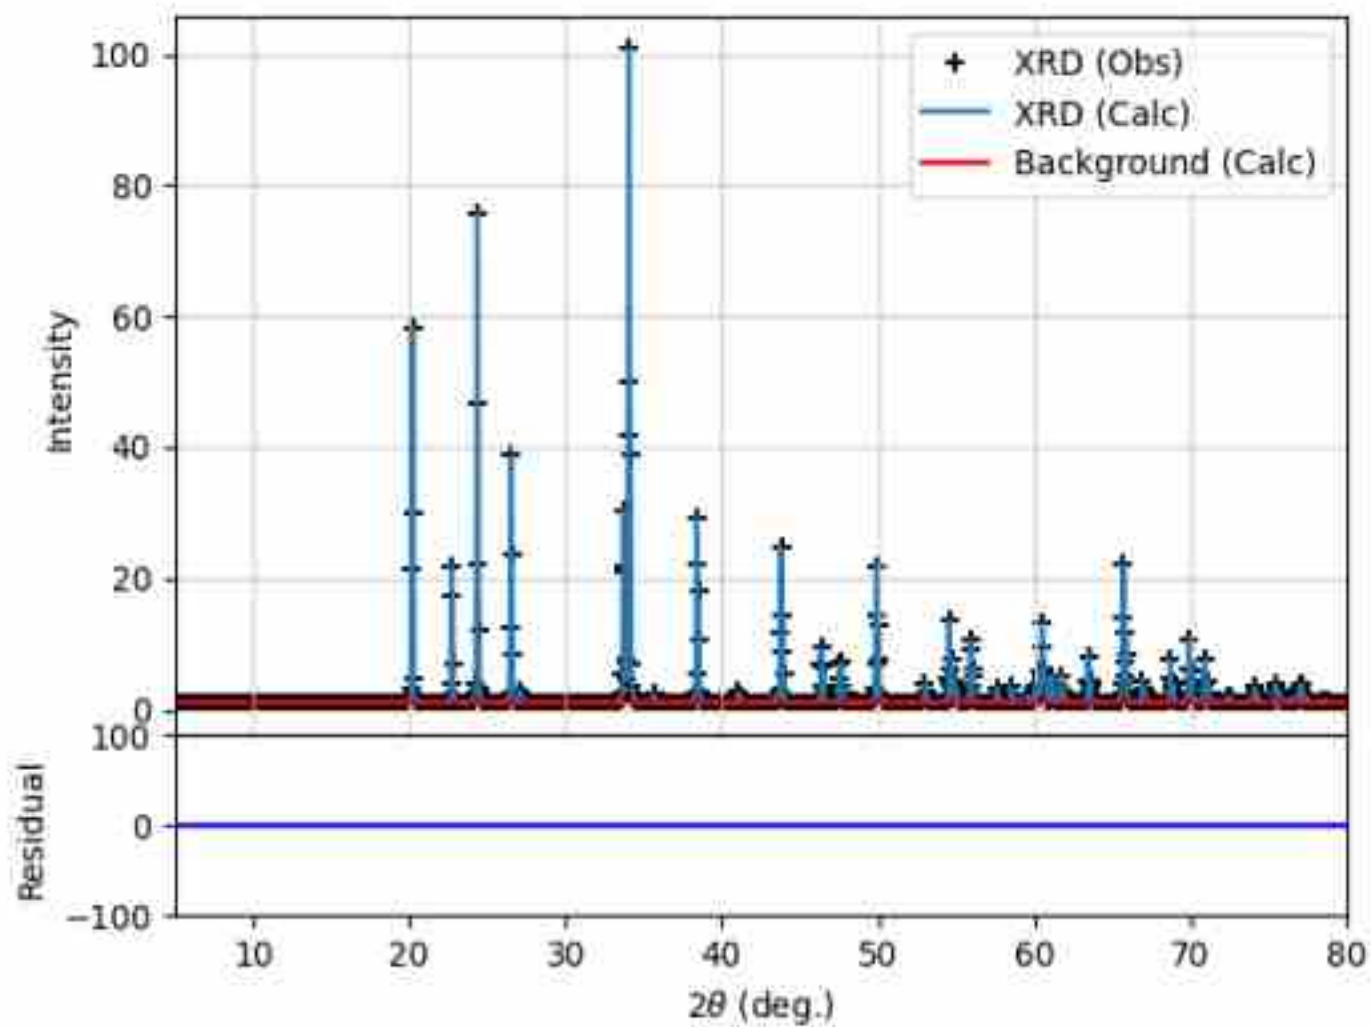

| RMSE before RR | Rwp     | RMSE after RR |
|----------------|---------|---------------|
| 0.02           | 0.00175 | 0.00043       |

# Mn<sub>2</sub>V<sub>1</sub>Ga<sub>1</sub>

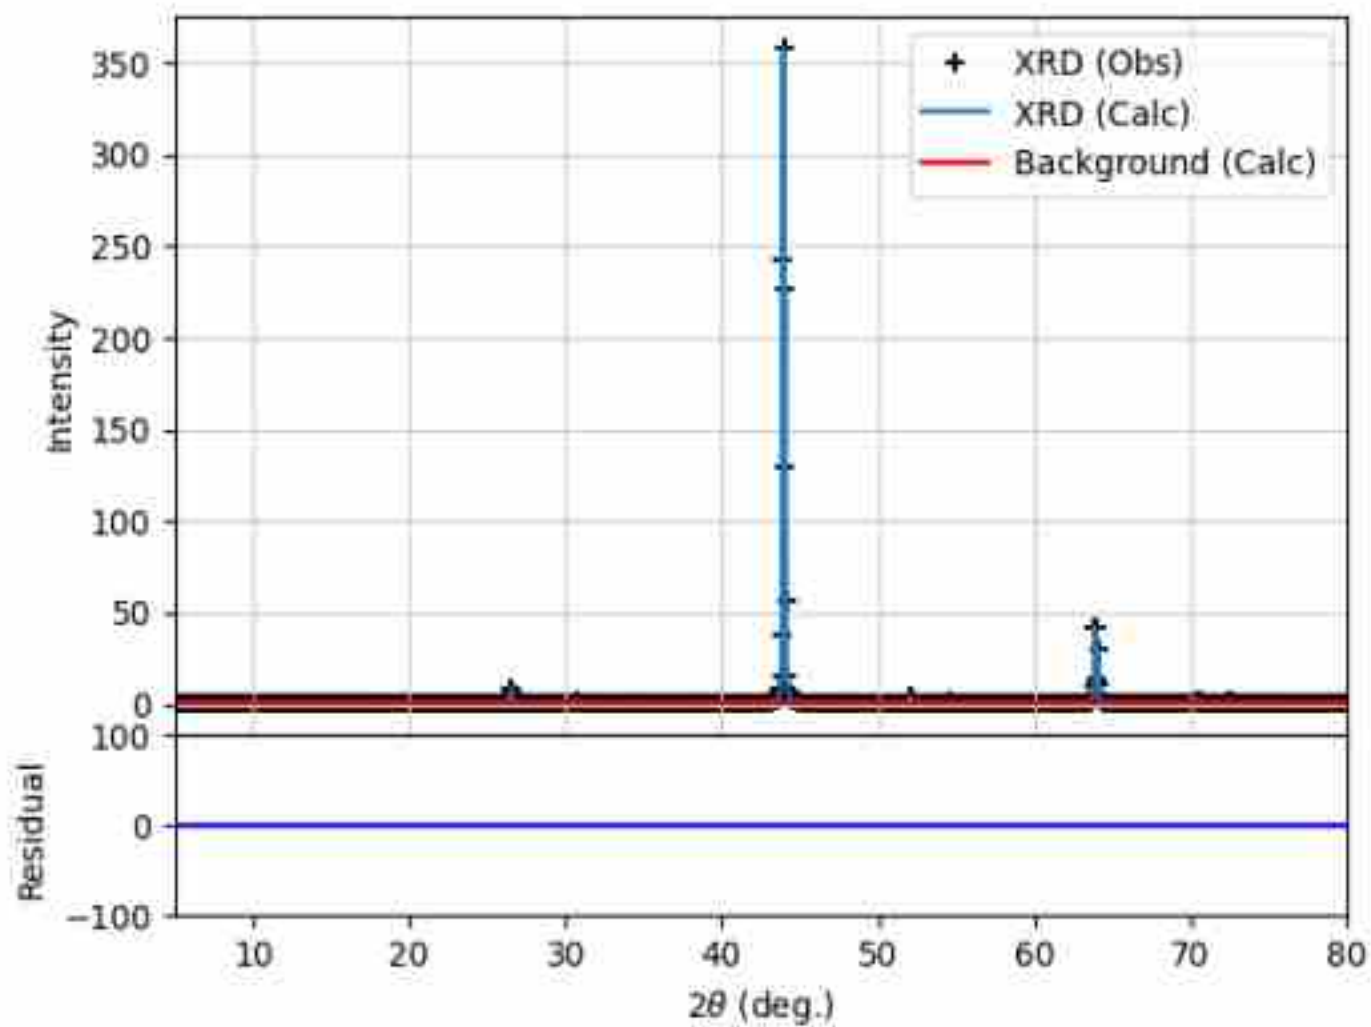

| RMSE before RR | Rwp     | RMSE after RR |
|----------------|---------|---------------|
| 0.002          | 0.01068 | 0.00069       |

# Mn<sub>8</sub>Fe<sub>2</sub>Ge<sub>6</sub>

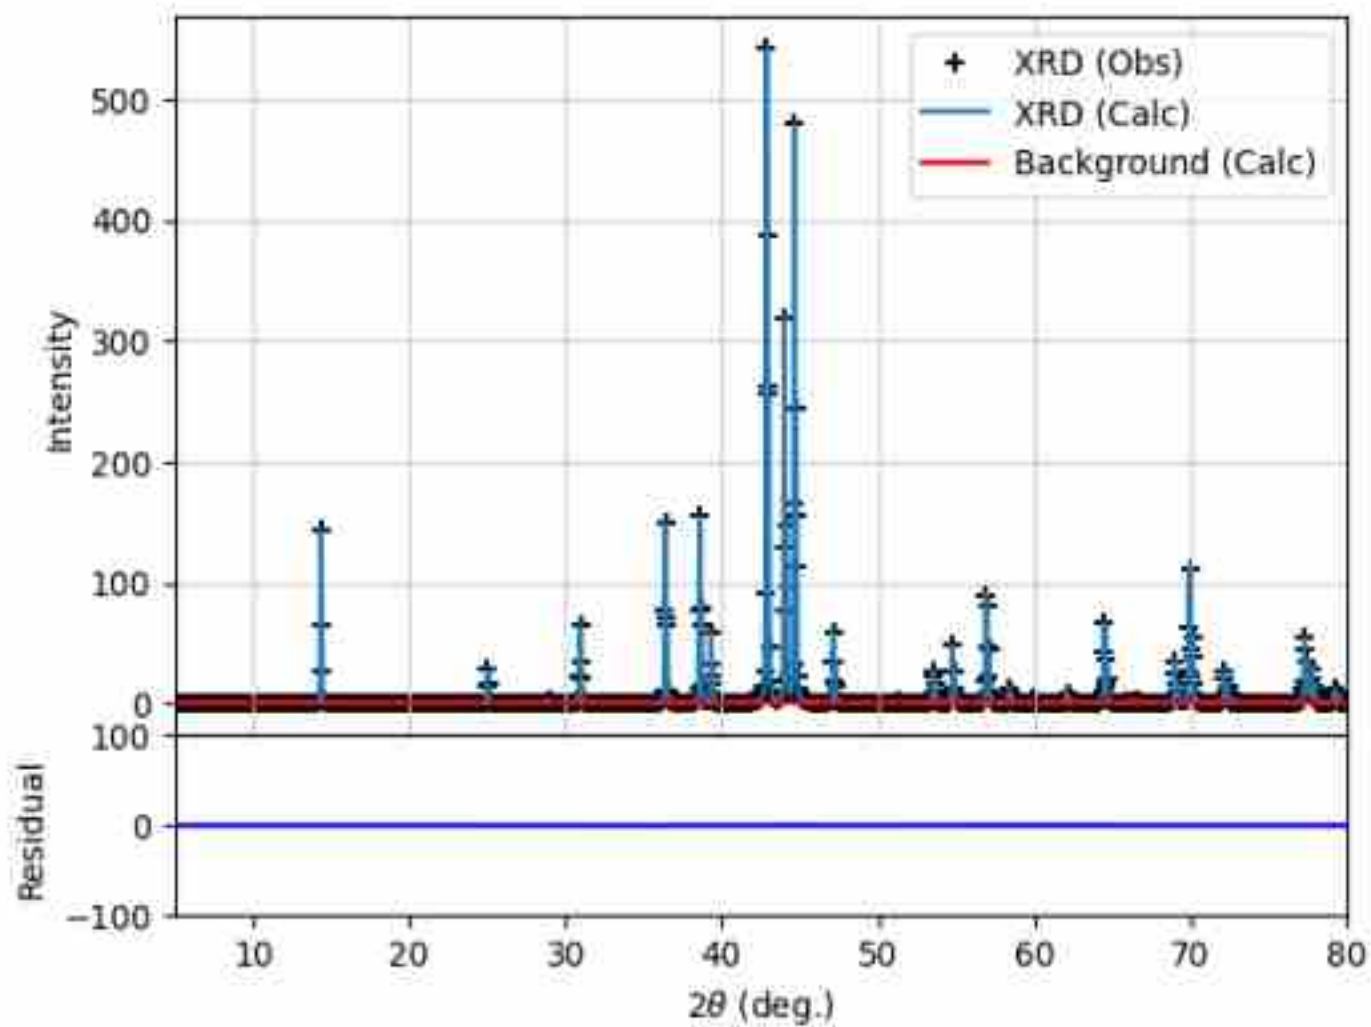

| RMSE before RR | Rwp     | RMSE after RR |
|----------------|---------|---------------|
| 0.02           | 0.34453 | 0.0162        |



# Na1Ca1Pb2

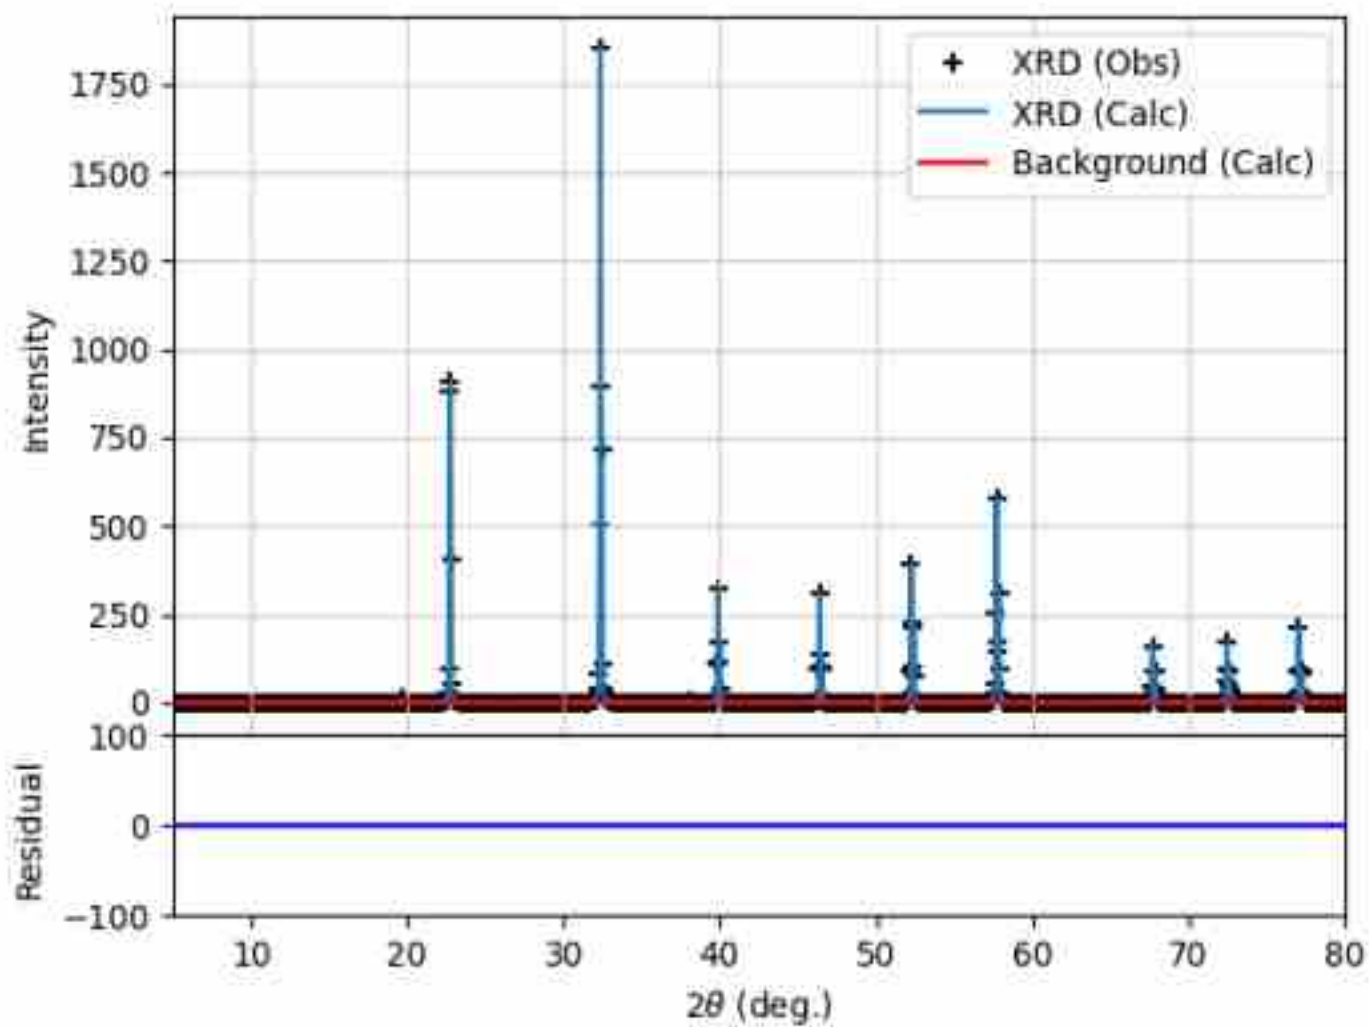

| RMSE before RR | Rwp     | RMSE after RR |
|----------------|---------|---------------|
| 0.002          | 0.00597 | 0.00121       |

# Na1Cd2Ag1

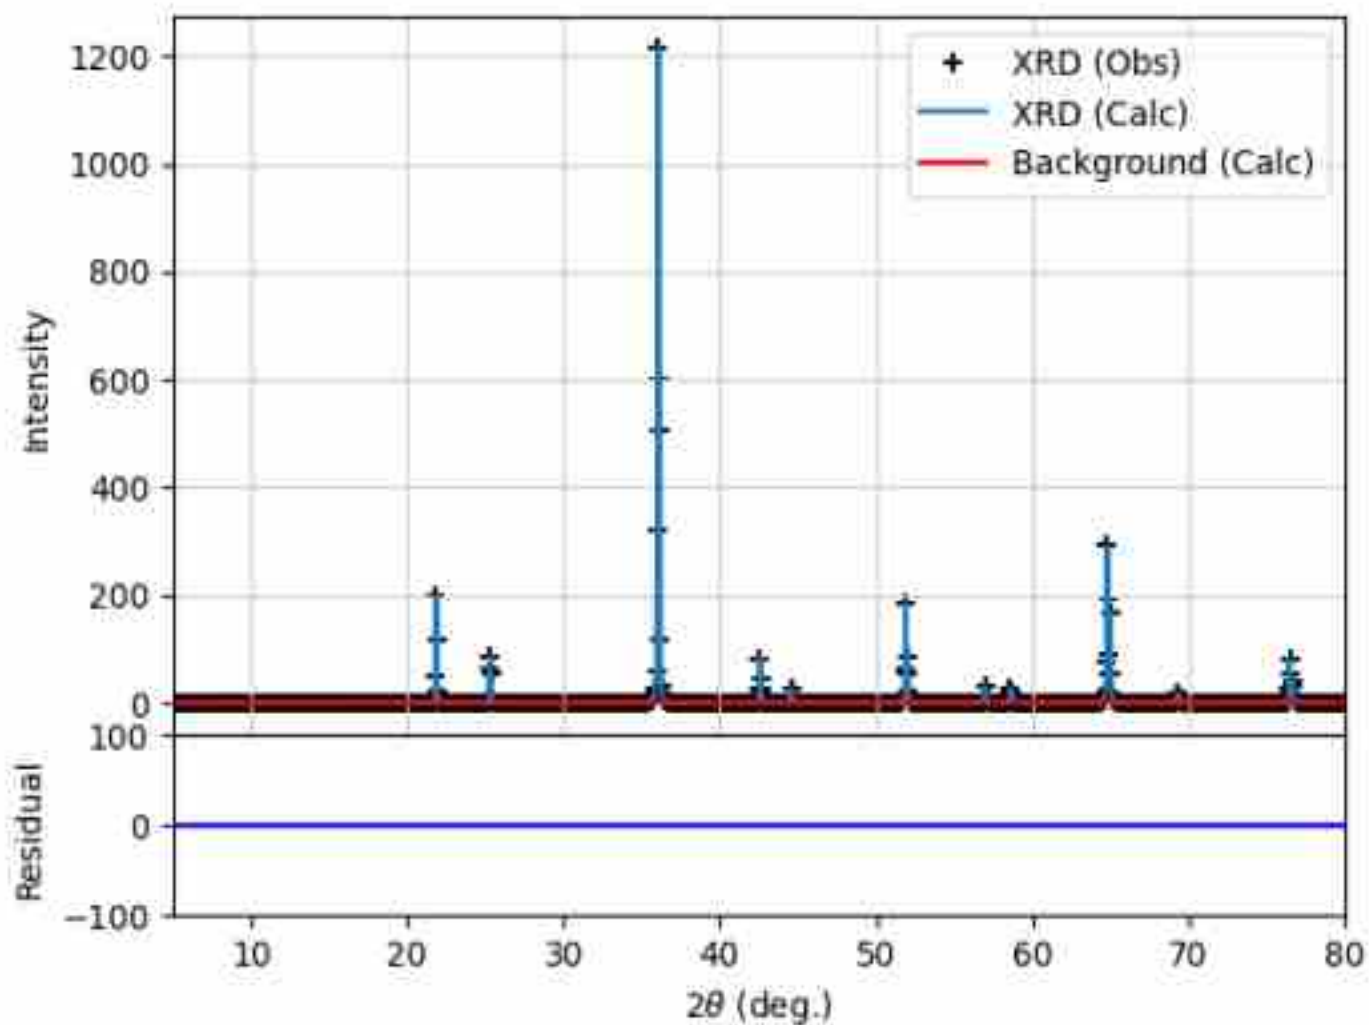

| RMSE before RR | Rwp     | RMSE after RR |
|----------------|---------|---------------|
| 0.002          | 0.03252 | 0.00159       |

# Na1Cd2Au1

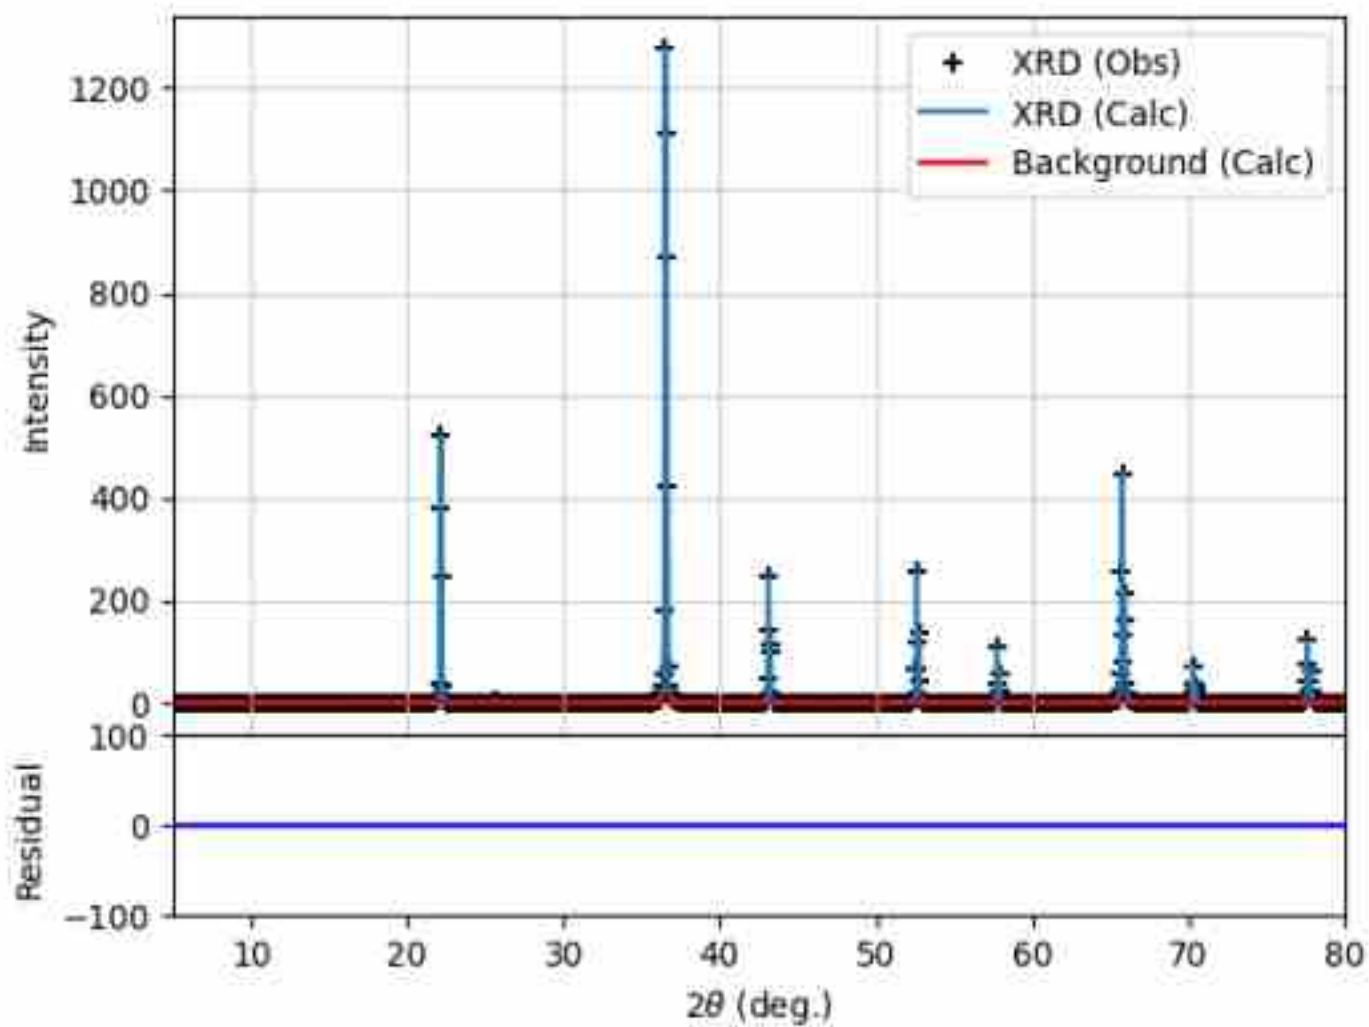

| RMSE before RR | Rwp     | RMSE after RR |
|----------------|---------|---------------|
| 0.002          | 0.00489 | 0.00038       |

# Na1Hg3

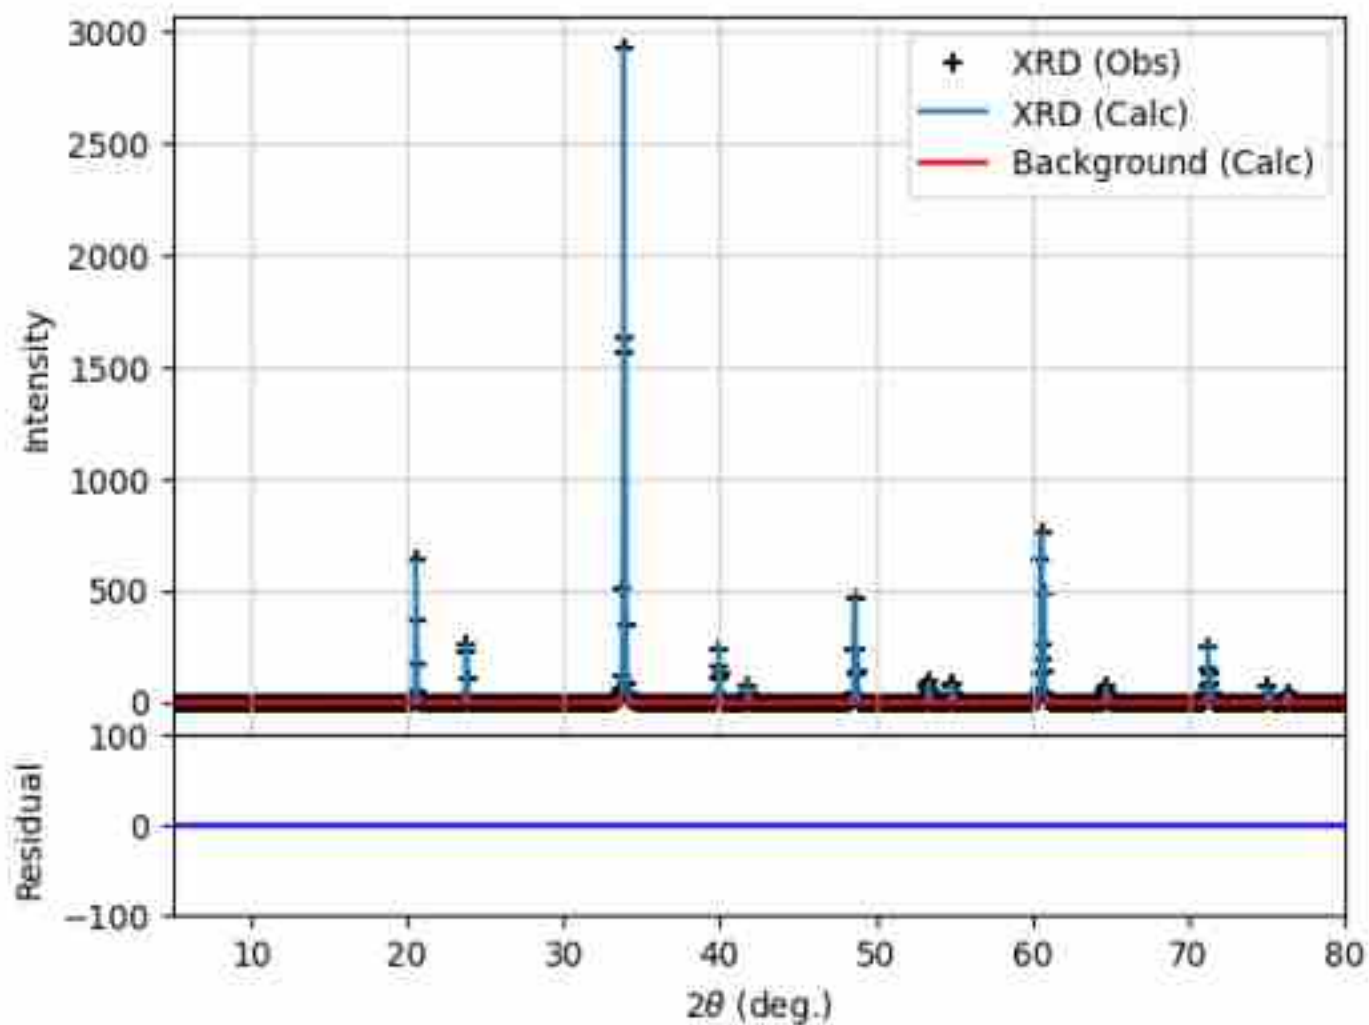

| RMSE before RR | Rwp     | RMSE after RR |
|----------------|---------|---------------|
| 0.002          | 0.00396 | 0.00393       |

# Na1Li2Sn1

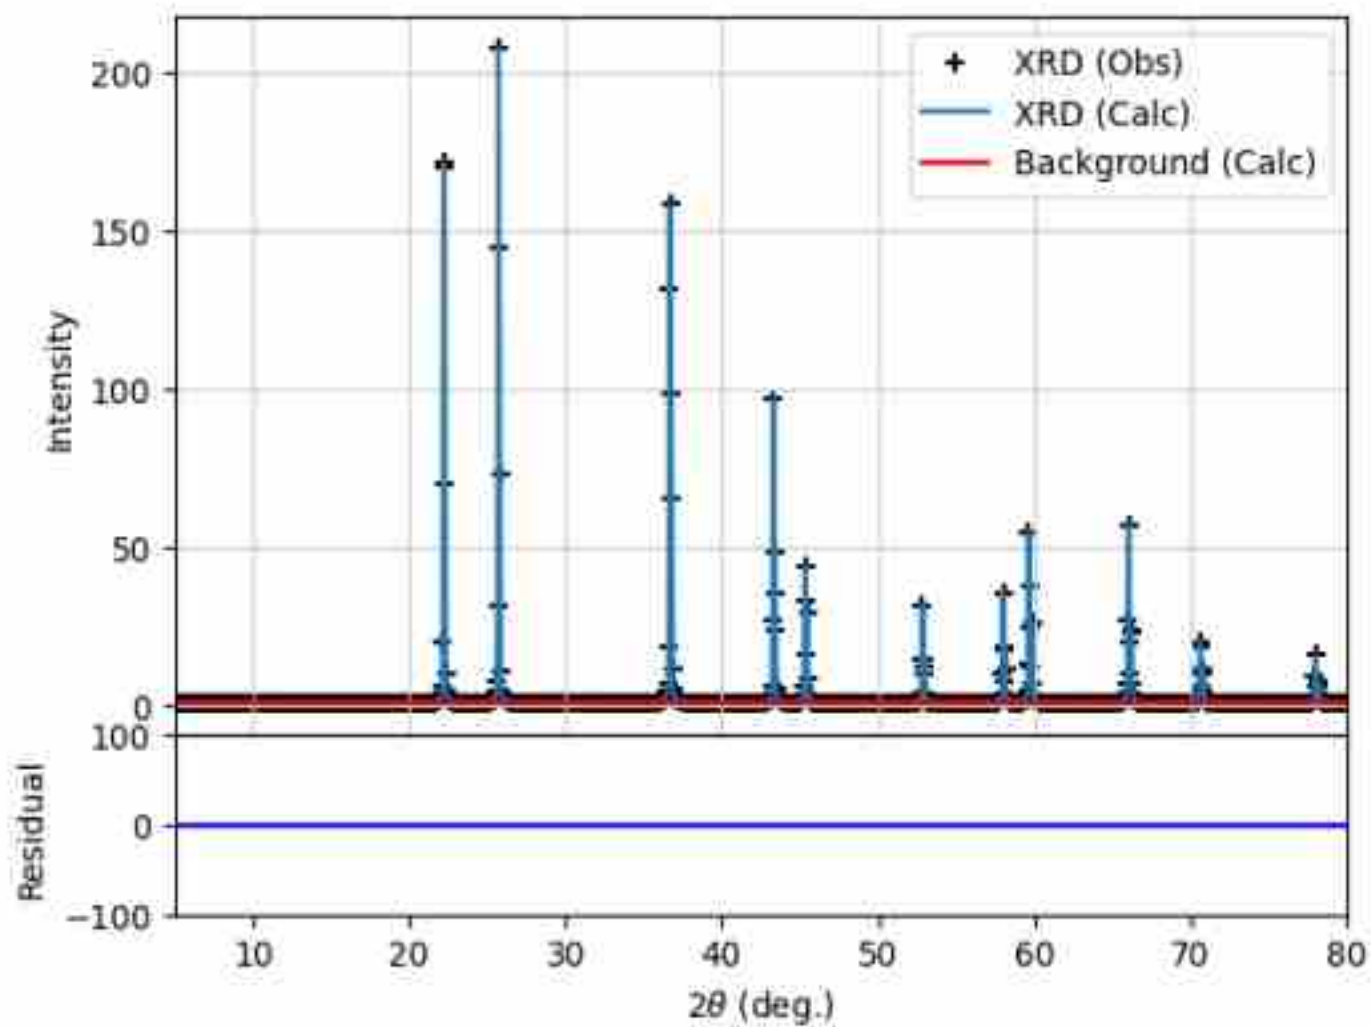

| RMSE before RR | Rwp     | RMSE after RR |
|----------------|---------|---------------|
| 0.002          | 0.00407 | 0.00422       |

# Na1Pr1Hg2

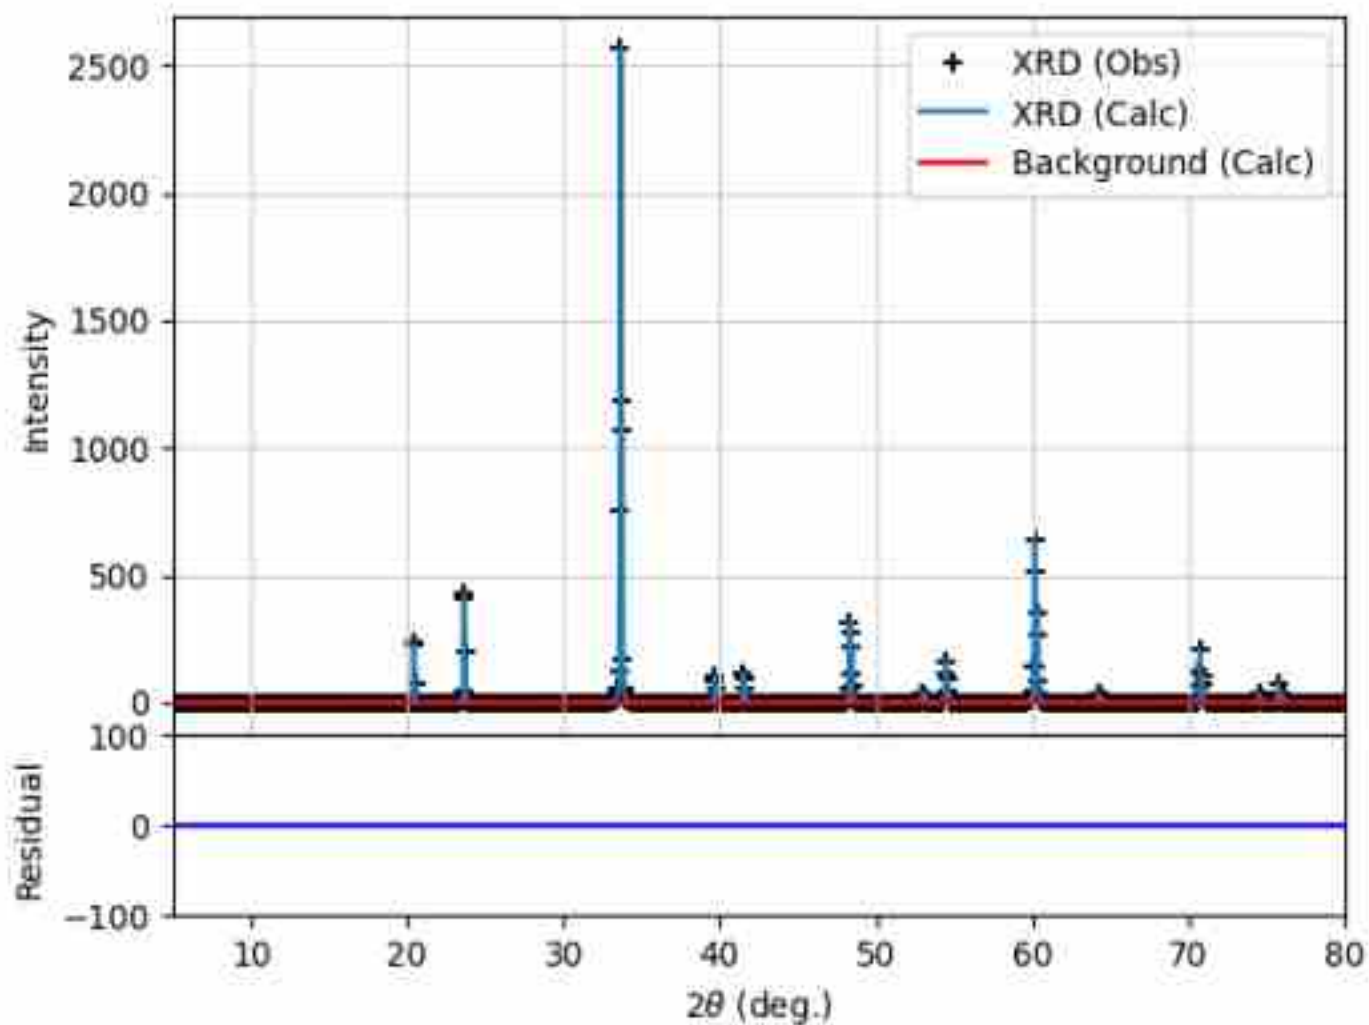

| RMSE before RR | Rwp     | RMSE after RR |
|----------------|---------|---------------|
| 0.002          | 0.00868 | 0.00107       |

# Na1Tl2Sb1

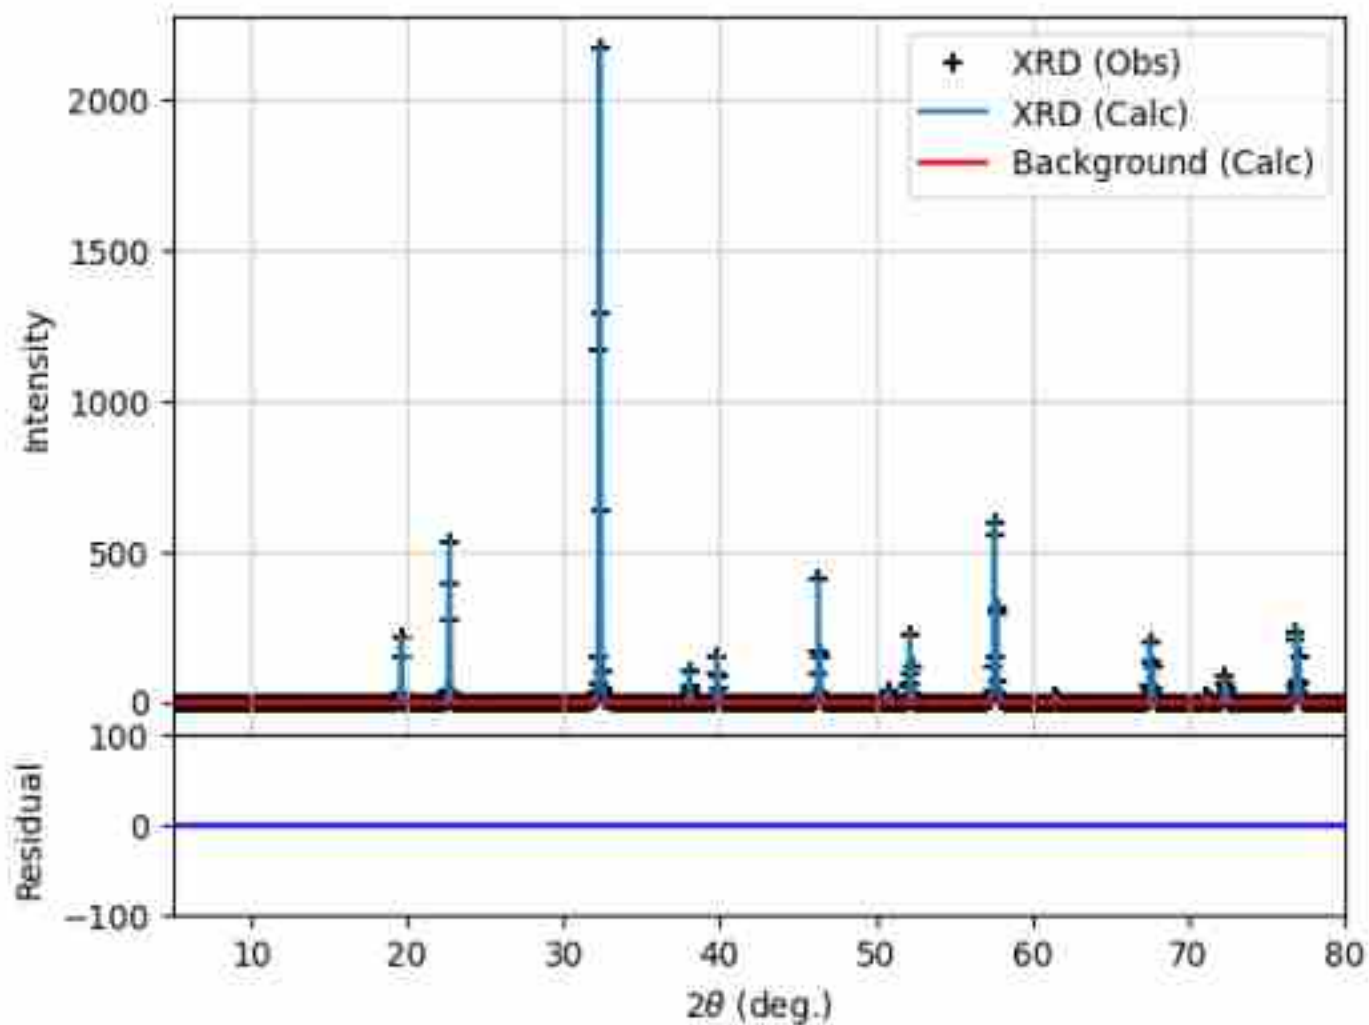

| RMSE before RR | Rwp     | RMSE after RR |
|----------------|---------|---------------|
| 0.002          | 0.00471 | 0.00056       |

# Na<sub>1</sub>Y<sub>1</sub>Tl<sub>2</sub>

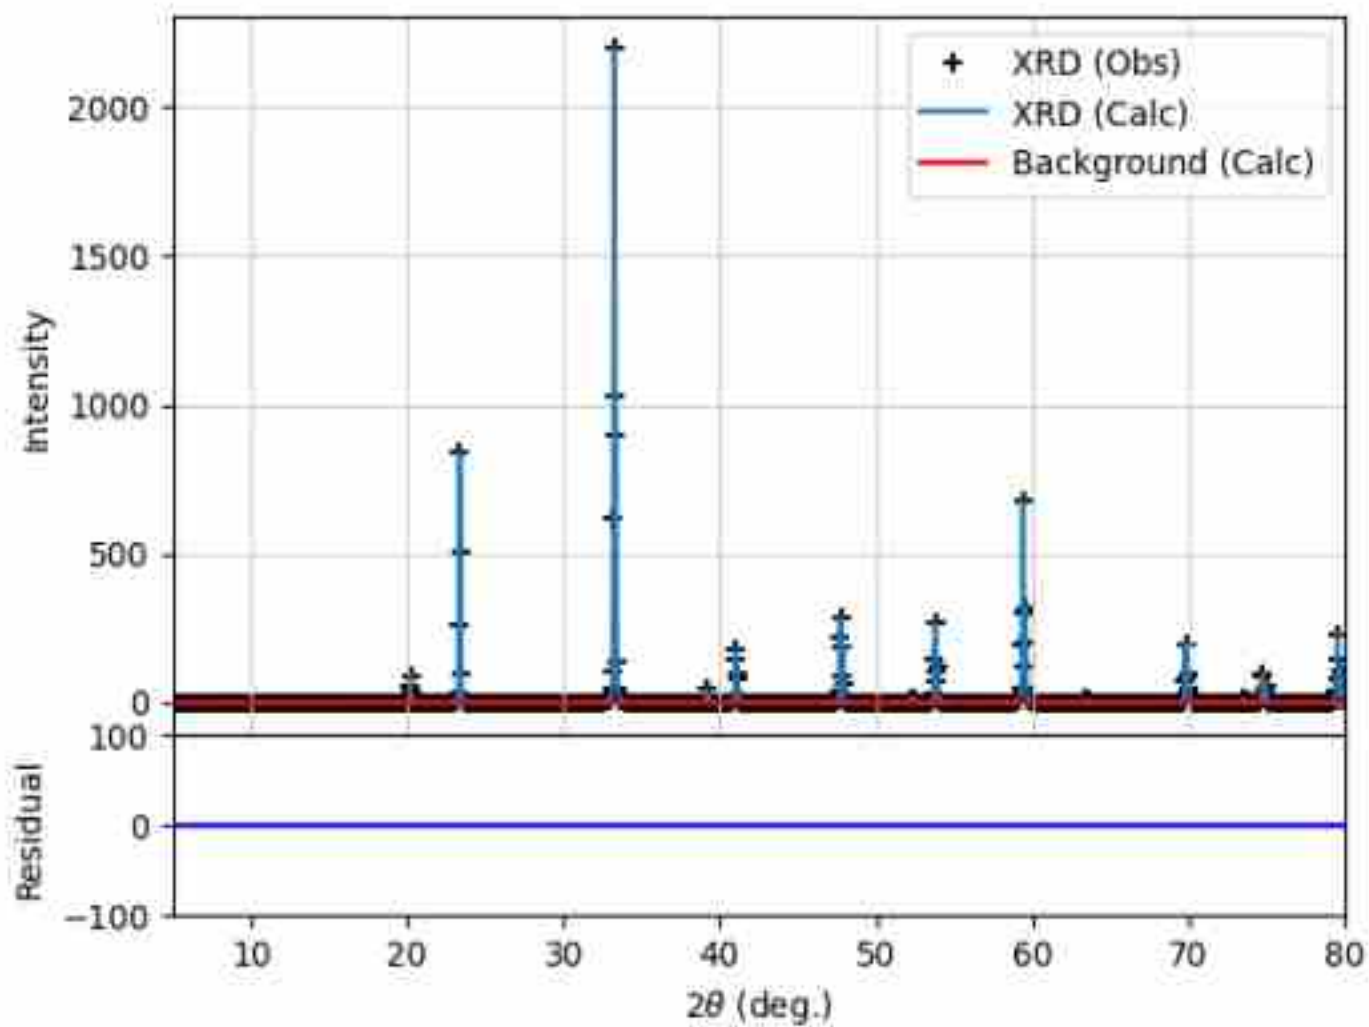

| RMSE before RR | Rwp   | RMSE after RR |
|----------------|-------|---------------|
| 0.002          | 0.004 | 0.00048       |



# Na<sub>2</sub>Au<sub>2</sub>F<sub>8</sub>

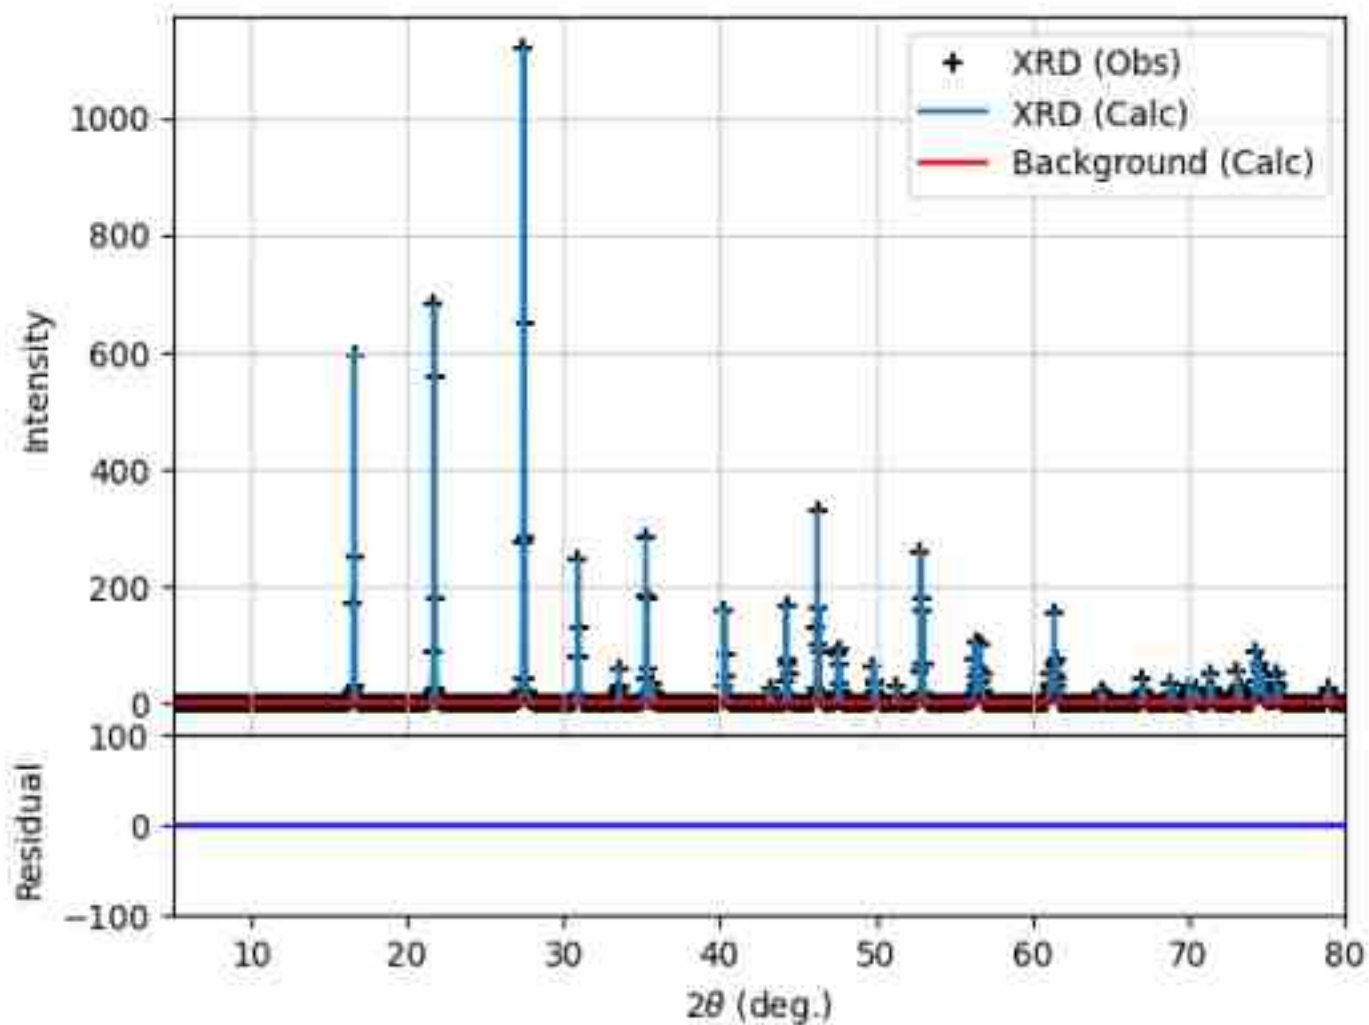

| RMSE before RR | Rwp     | RMSE after RR |
|----------------|---------|---------------|
| 0.02           | 0.00415 | 0.00117       |

# Na<sub>2</sub>Cd<sub>1</sub>Hg<sub>1</sub>

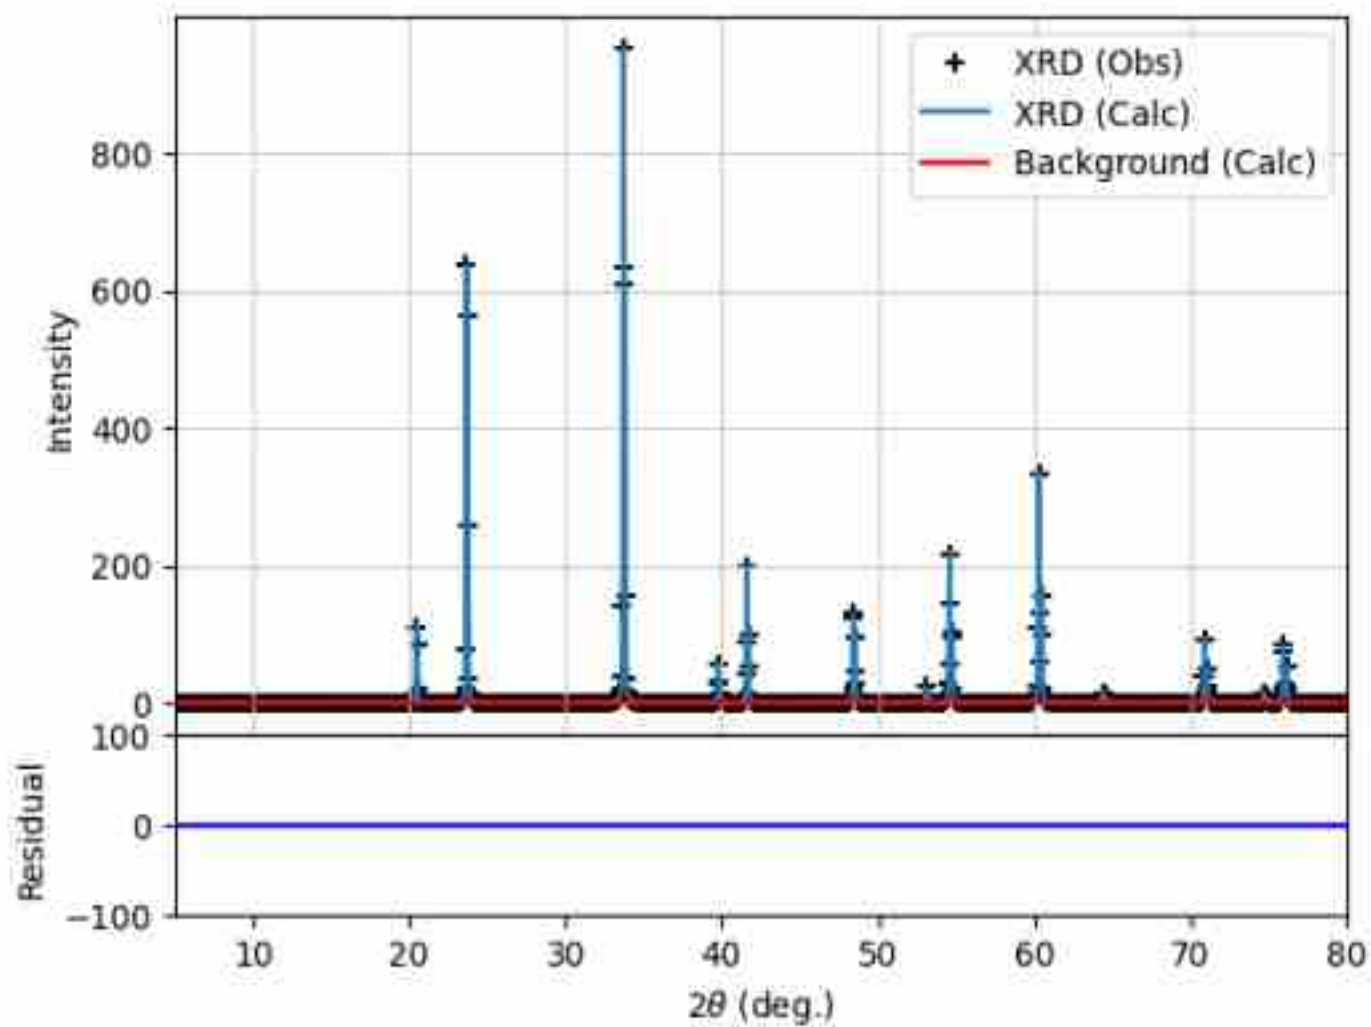

| RMSE before RR | Rwp     | RMSE after RR |
|----------------|---------|---------------|
| 0.002          | 0.00334 | 0.00115       |

# Na<sub>2</sub>Cd<sub>1</sub>Pb<sub>1</sub>

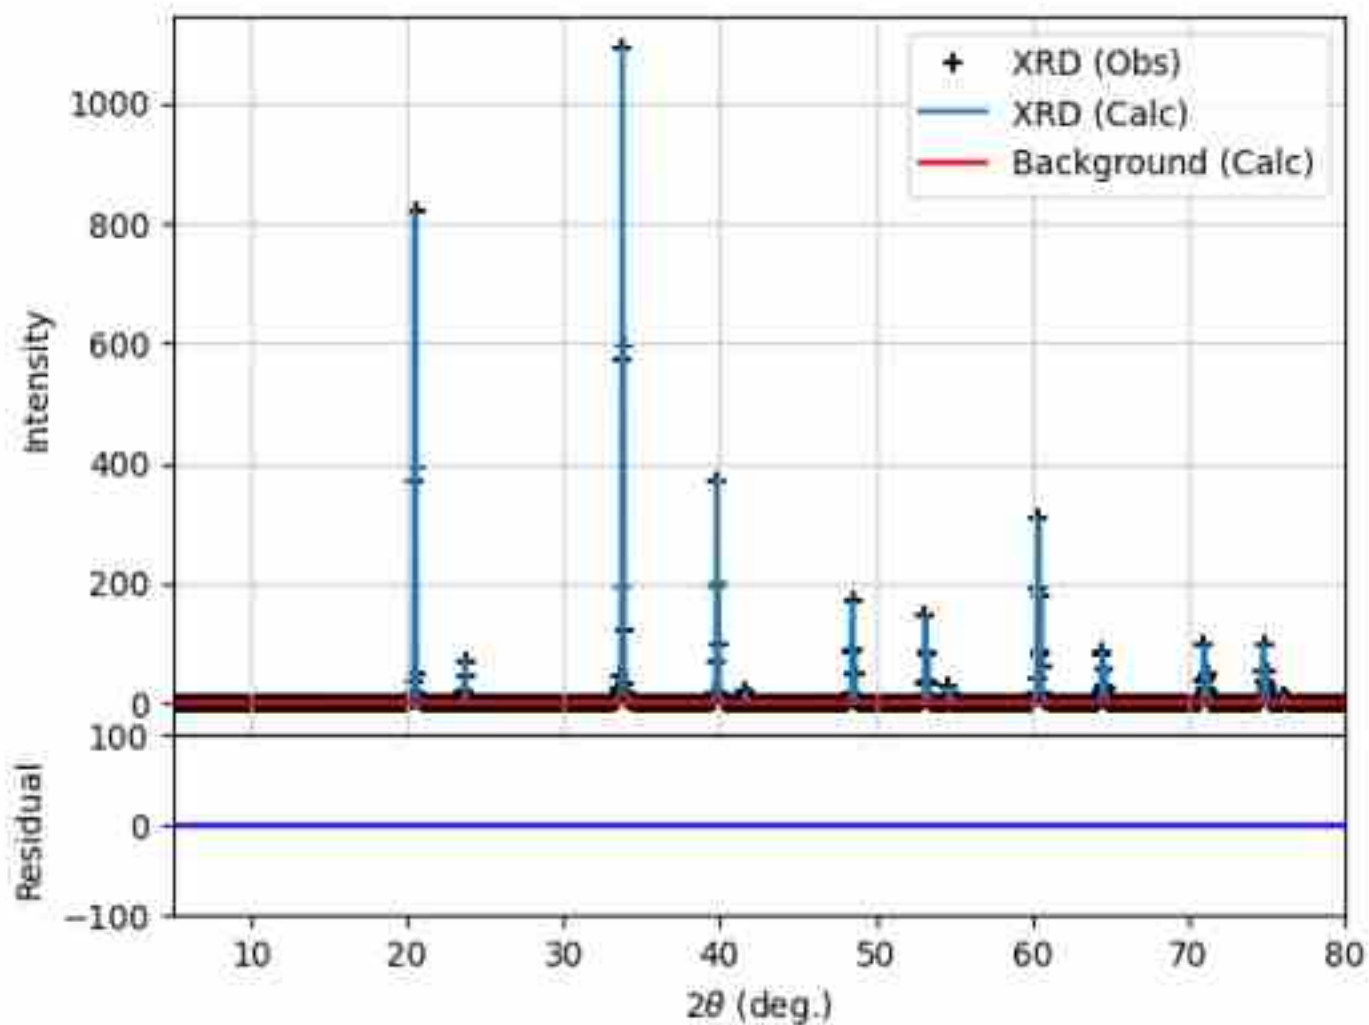

| RMSE before RR | Rwp    | RMSE after RR |
|----------------|--------|---------------|
| 0.002          | 0.0031 | 0.00073       |

# Na<sub>2</sub>Cr<sub>2</sub>Si<sub>4</sub>O<sub>12</sub>

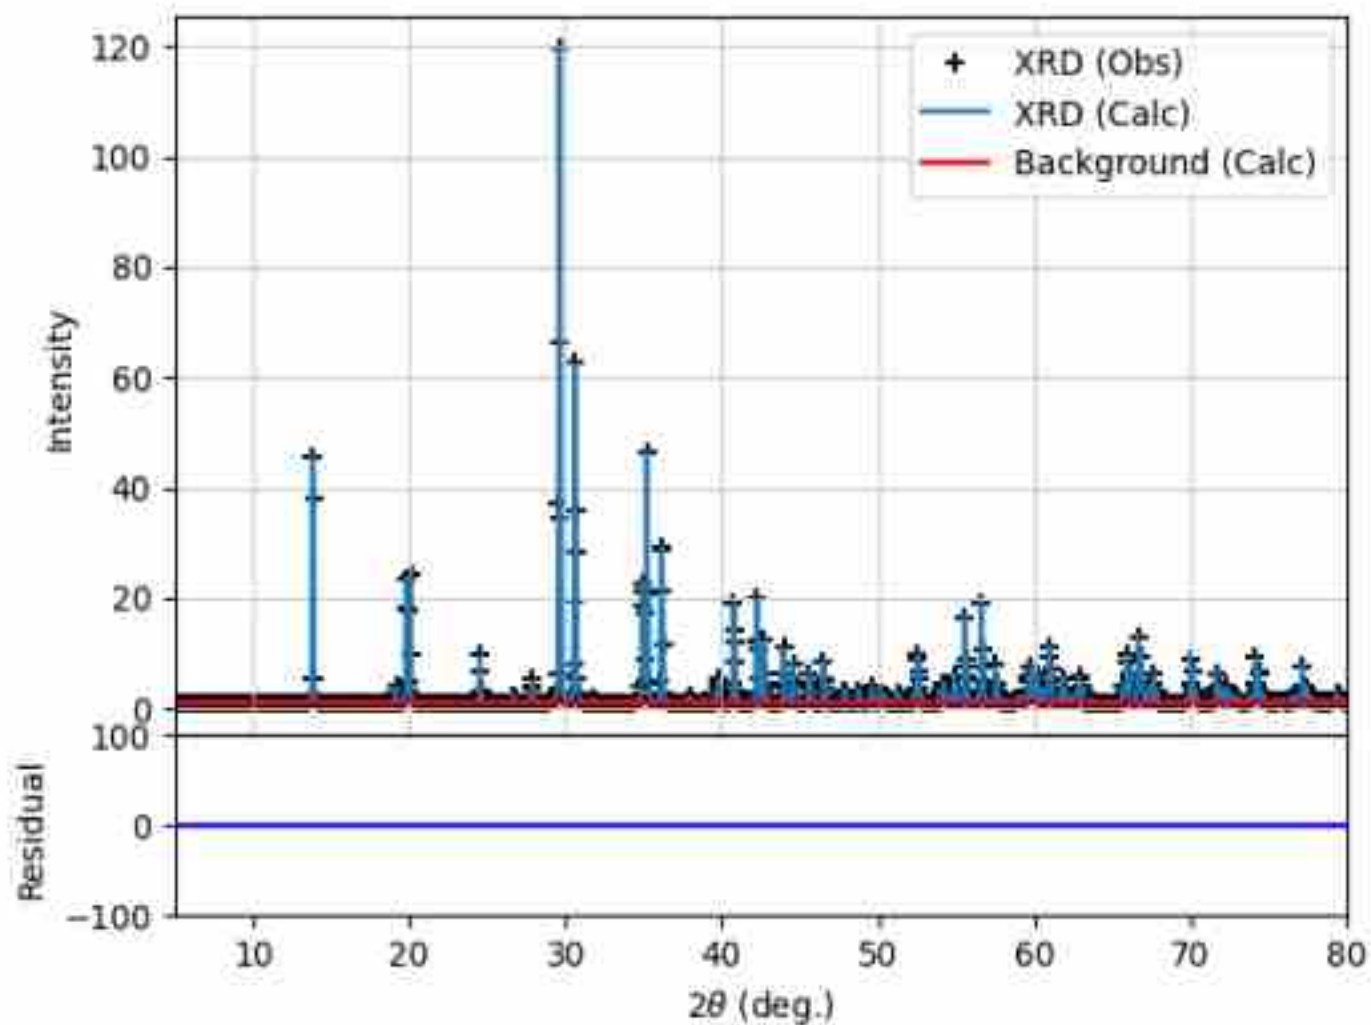

| RMSE before RR | Rwp     | RMSE after RR |
|----------------|---------|---------------|
| 0.02           | 0.00328 | 0.00084       |

# Na<sub>2</sub>Gd<sub>2</sub>O<sub>4</sub>

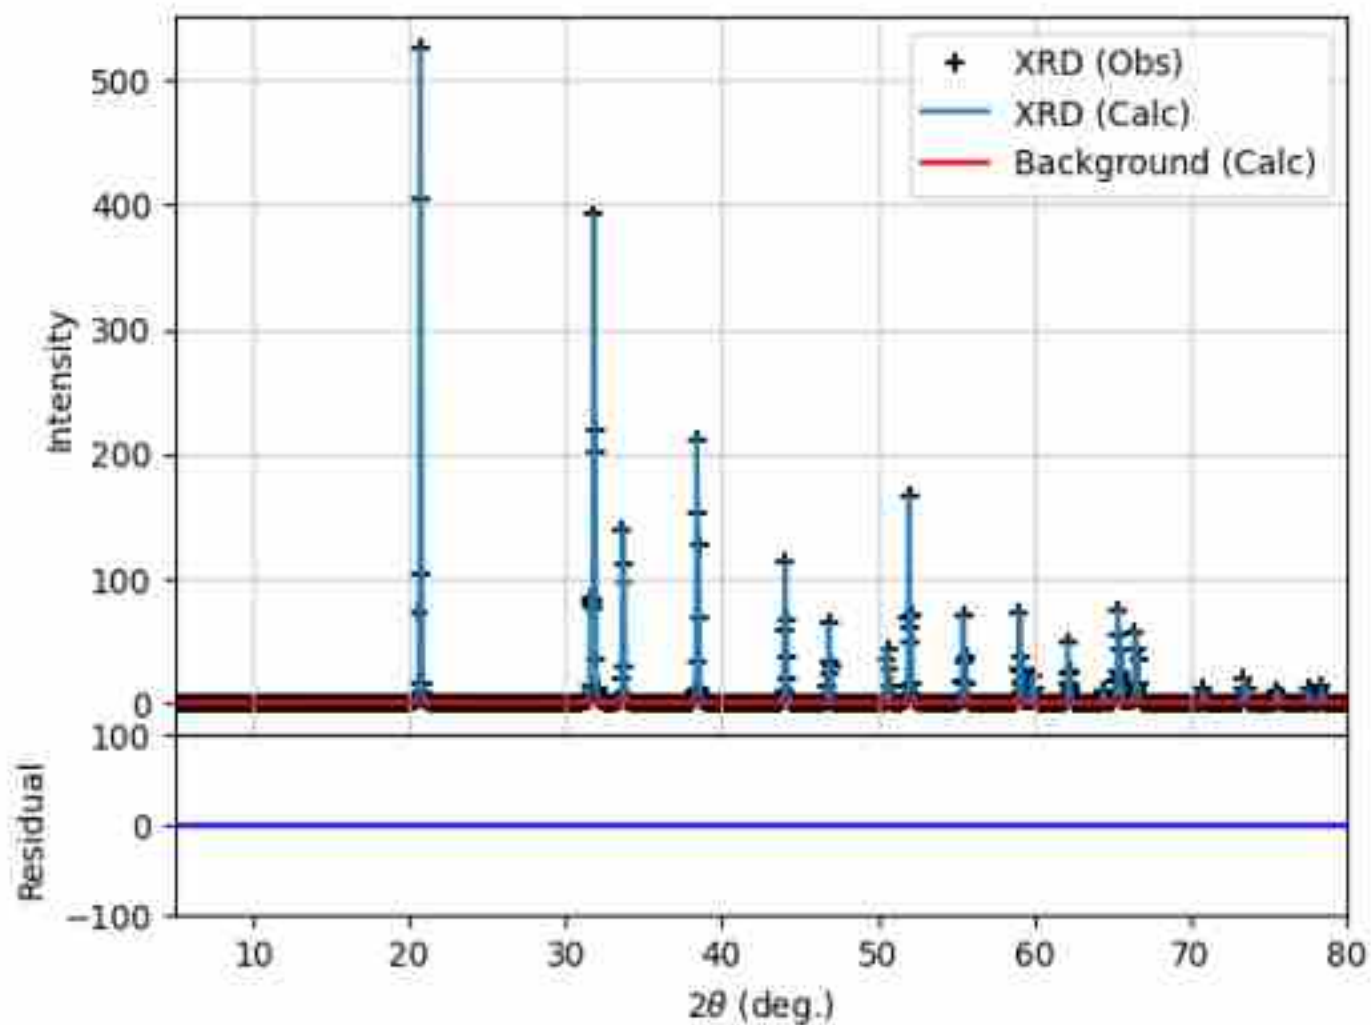

| RMSE before RR | Rwp     | RMSE after RR |
|----------------|---------|---------------|
| 0.02           | 0.00247 | 0.00186       |

# Na<sub>2</sub>La<sub>2</sub>Ti<sub>4</sub>O<sub>12</sub>

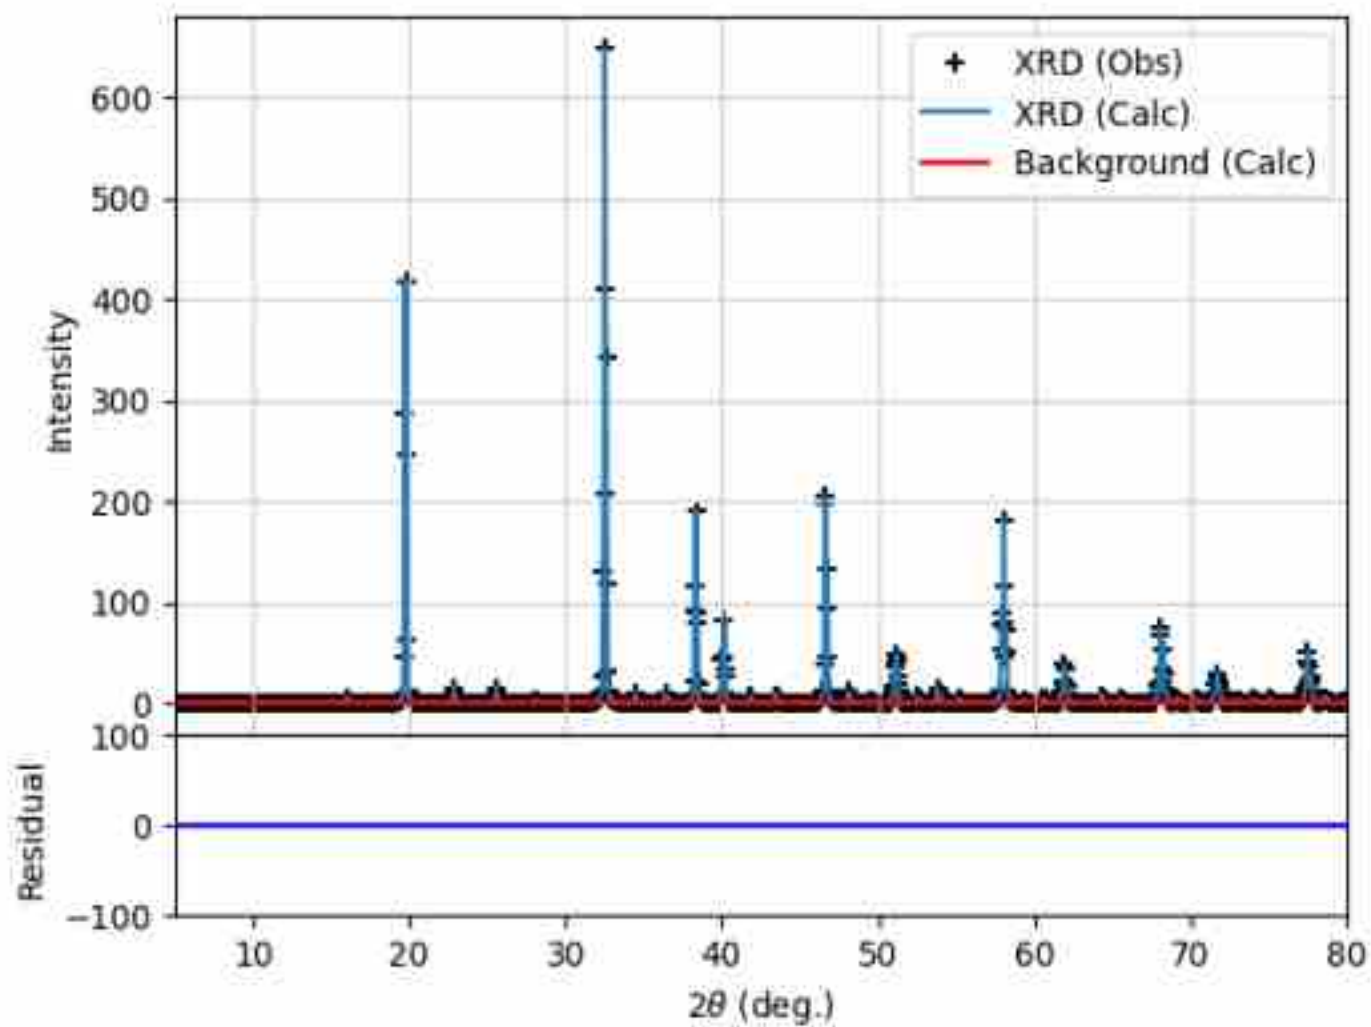

| RMSE before RR | Rwp     | RMSE after RR |
|----------------|---------|---------------|
| 0.02           | 0.00324 | 0.00158       |

# Na<sub>2</sub>Tb<sub>2</sub>O<sub>4</sub>

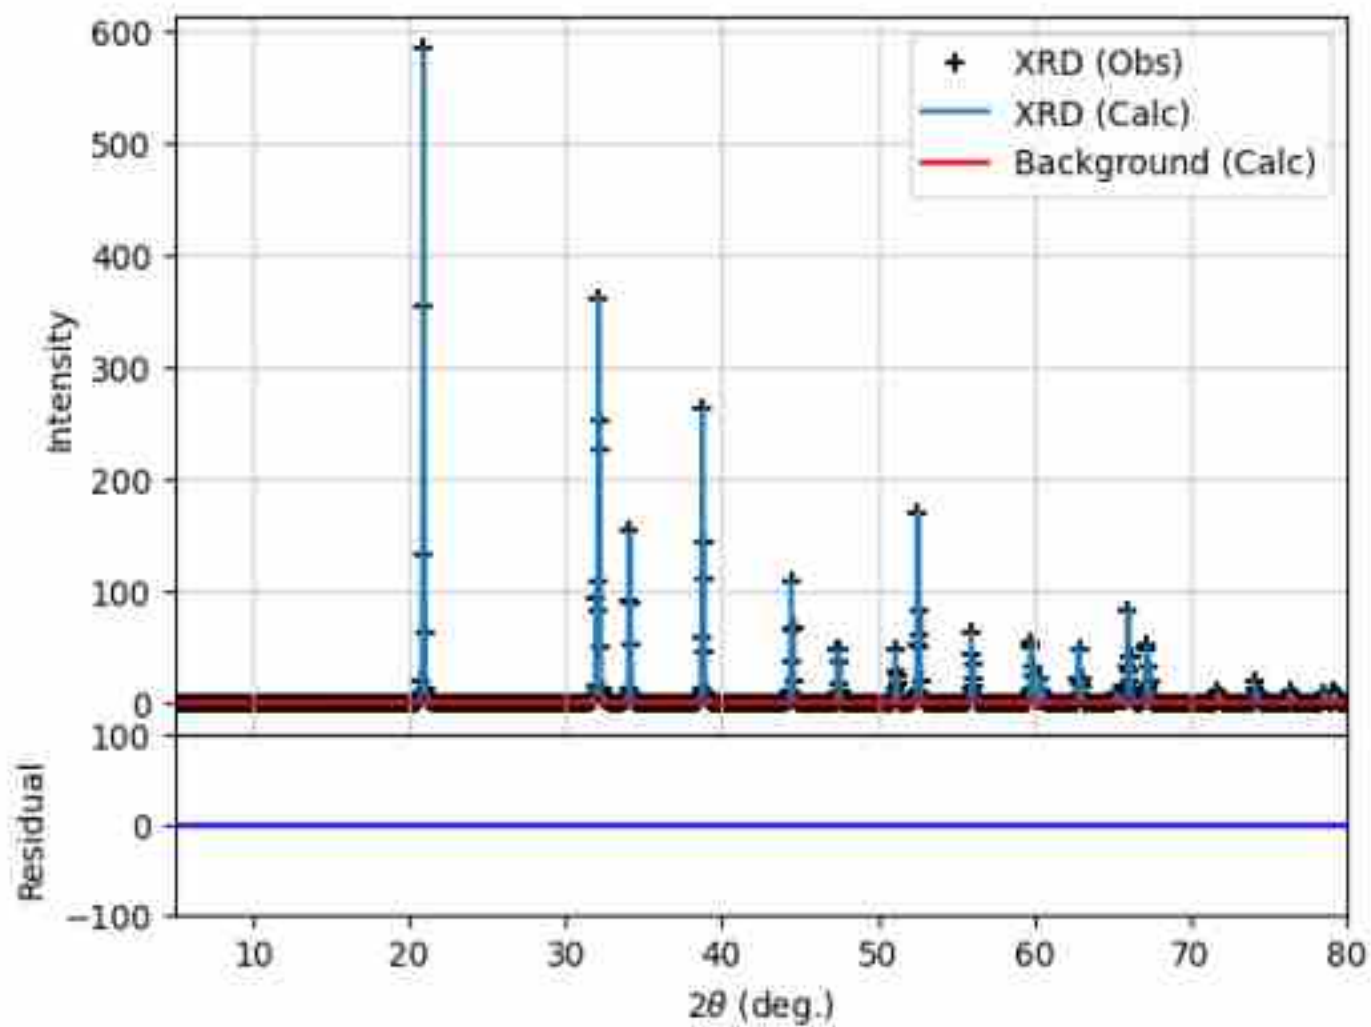

| RMSE before RR | Rwp   | RMSE after RR |
|----------------|-------|---------------|
| 0.02           | 0.004 | 0.00157       |

# Na<sub>2</sub>TlBi

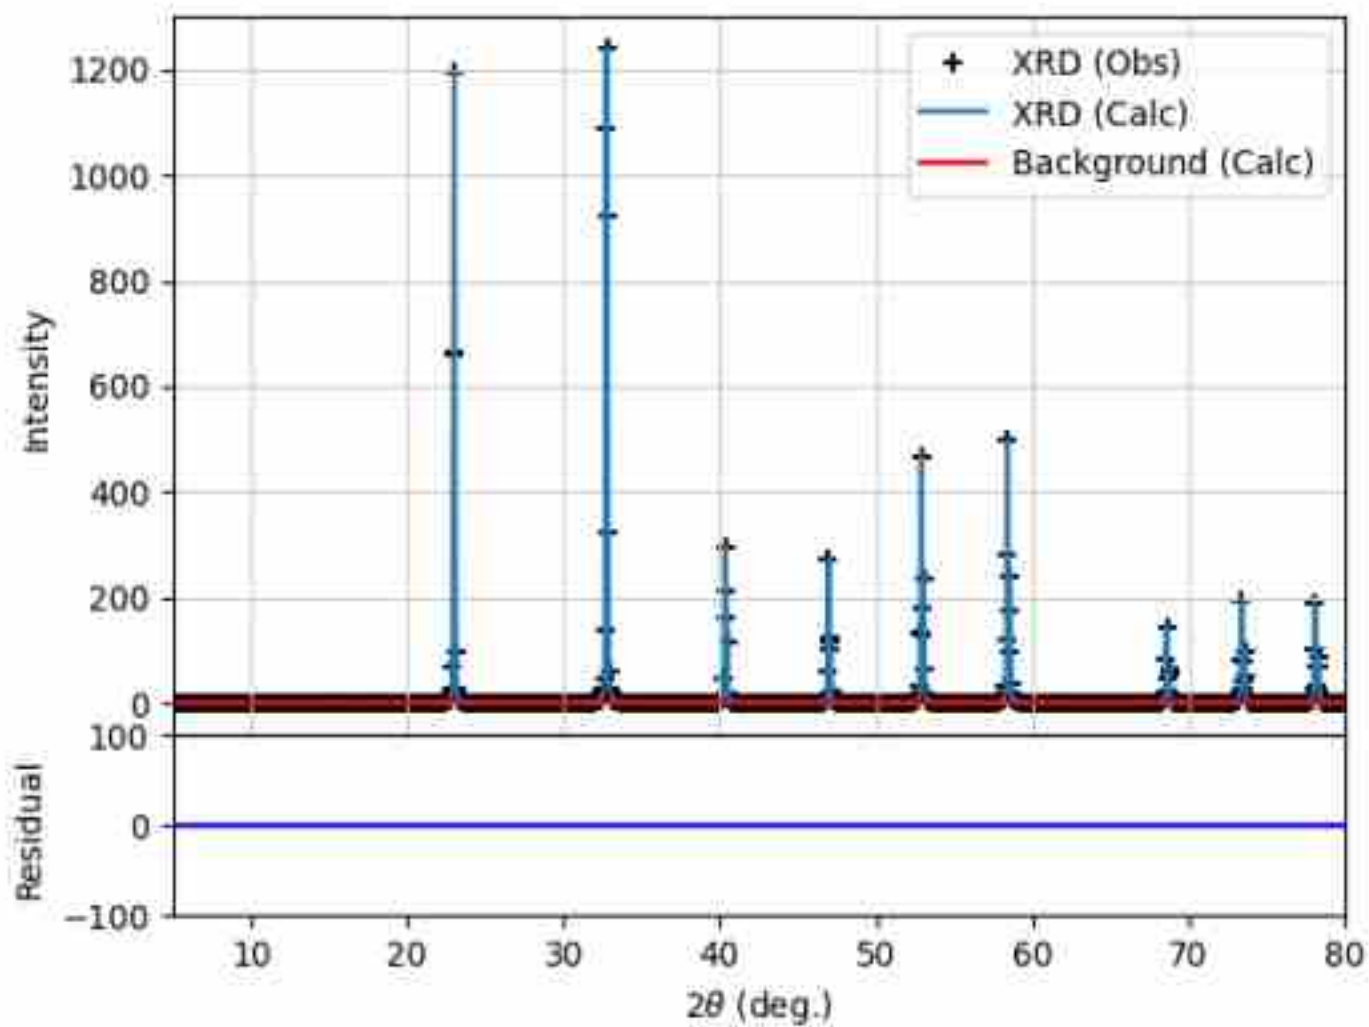

| RMSE before RR | Rwp     | RMSE after RR |
|----------------|---------|---------------|
| 0.002          | 0.07169 | 0.00109       |



# Na<sub>3</sub>AgI

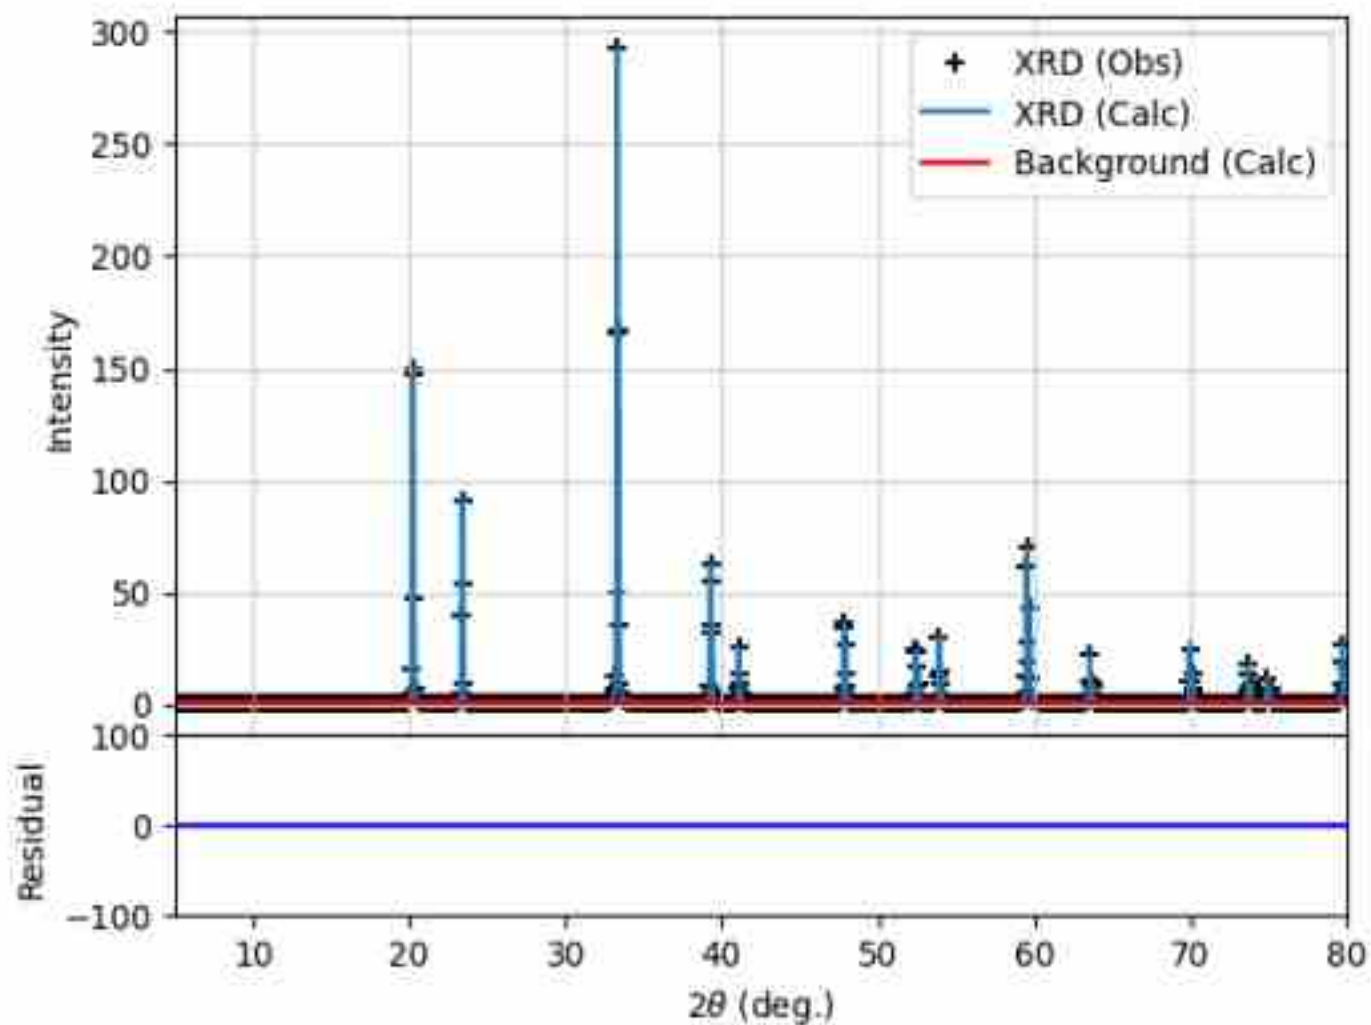

| RMSE before RR | Rwp    | RMSE after RR |
|----------------|--------|---------------|
| 0.002          | 0.0037 | 0.00086       |

# Na<sub>3</sub>Tl1

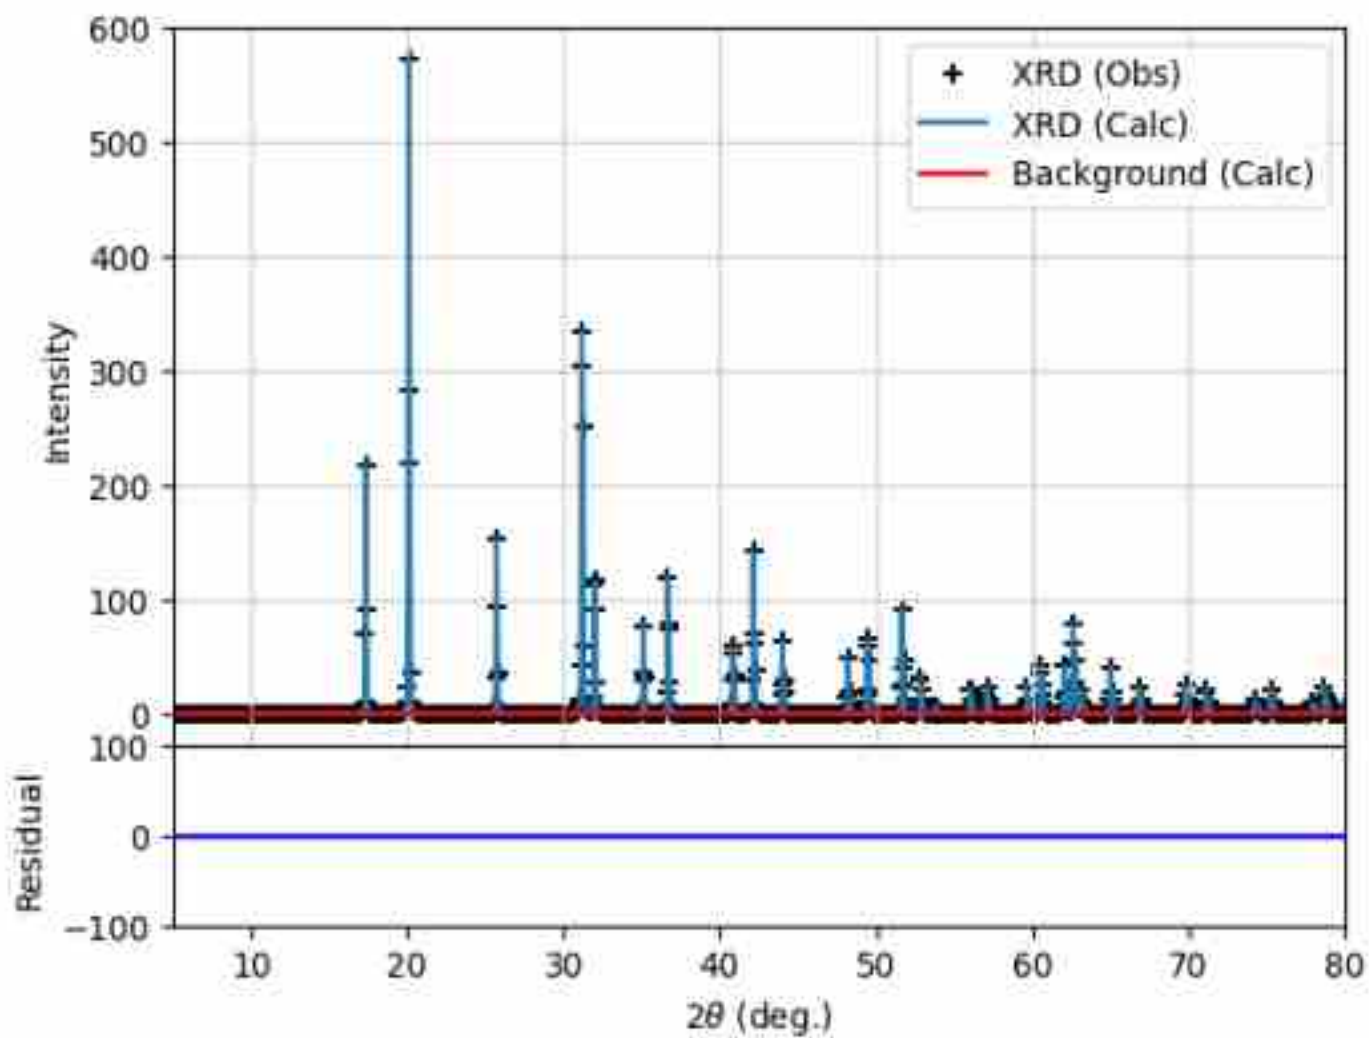

| RMSE before RR | Rwp     | RMSE after RR |
|----------------|---------|---------------|
| 0.002          | 0.00382 | 0.00045       |

# Na<sub>4</sub>Mn<sub>4</sub>F<sub>12</sub>

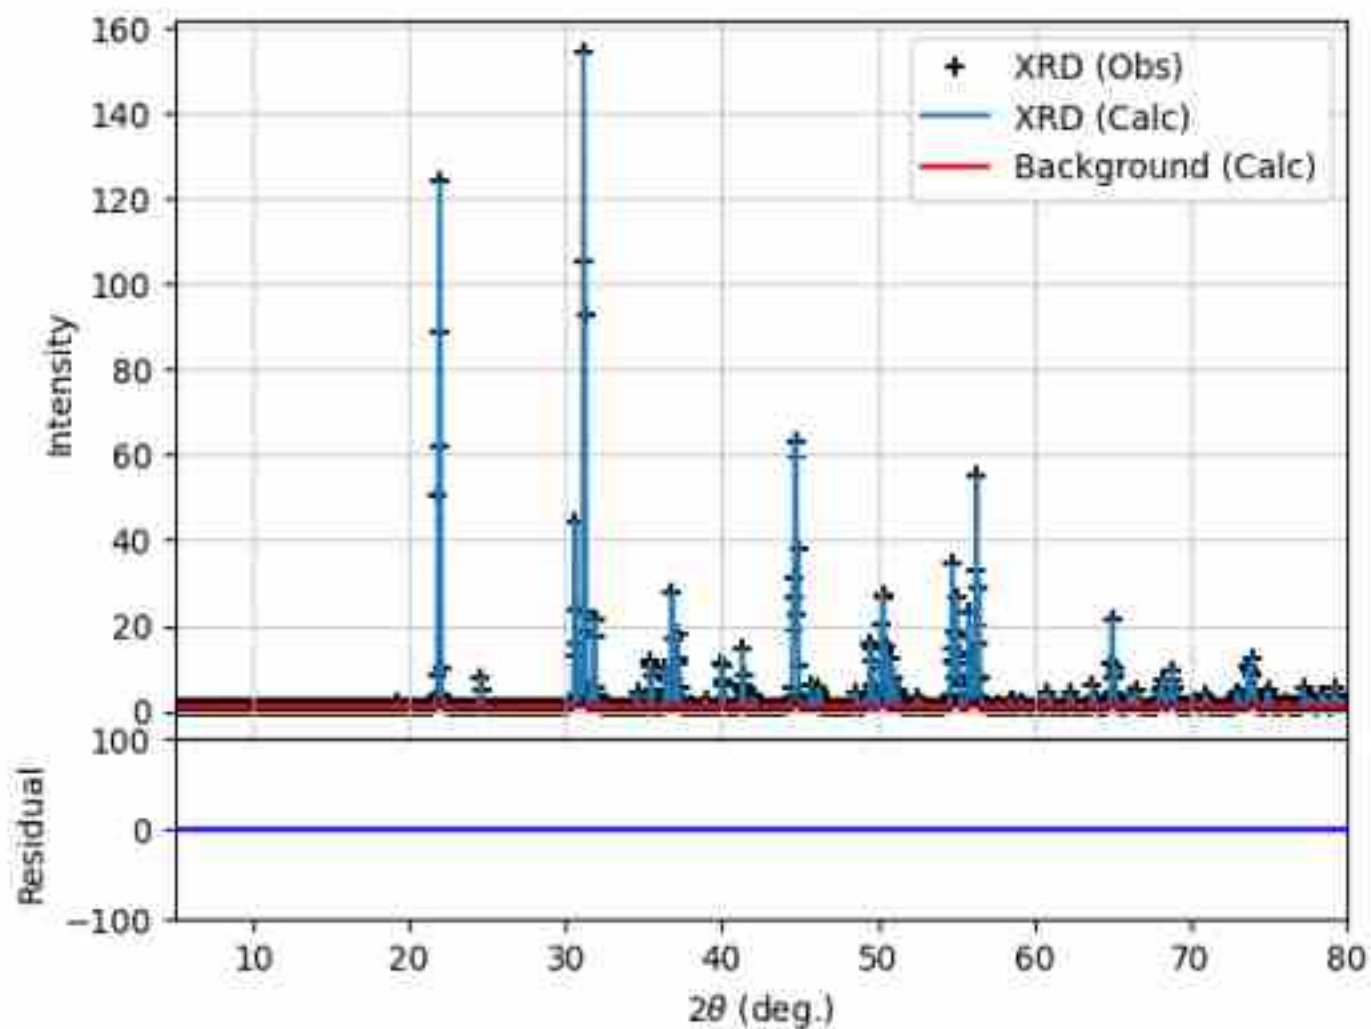

| RMSE before RR | Rwp     | RMSE after RR |
|----------------|---------|---------------|
| 0.02           | 0.00315 | 0.00093       |

# Na<sub>8</sub>Si<sub>2</sub>O<sub>8</sub>

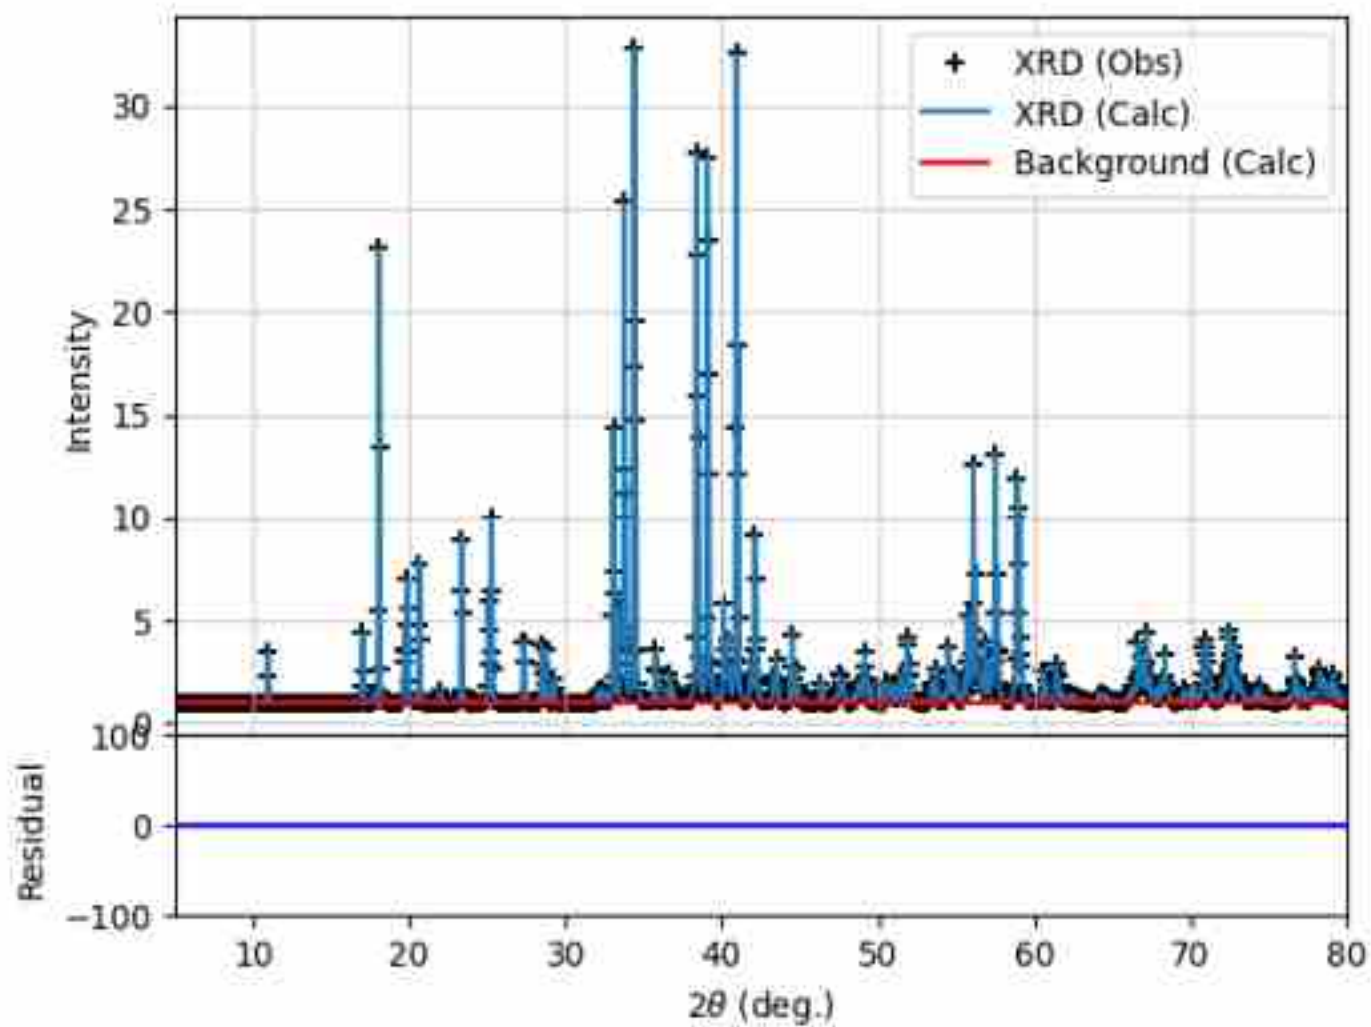

| RMSE before RR | Rwp     | RMSE after RR |
|----------------|---------|---------------|
| 0.02           | 0.00109 | 0.00019       |

# Na<sub>8</sub>Ti<sub>2</sub>O<sub>8</sub>

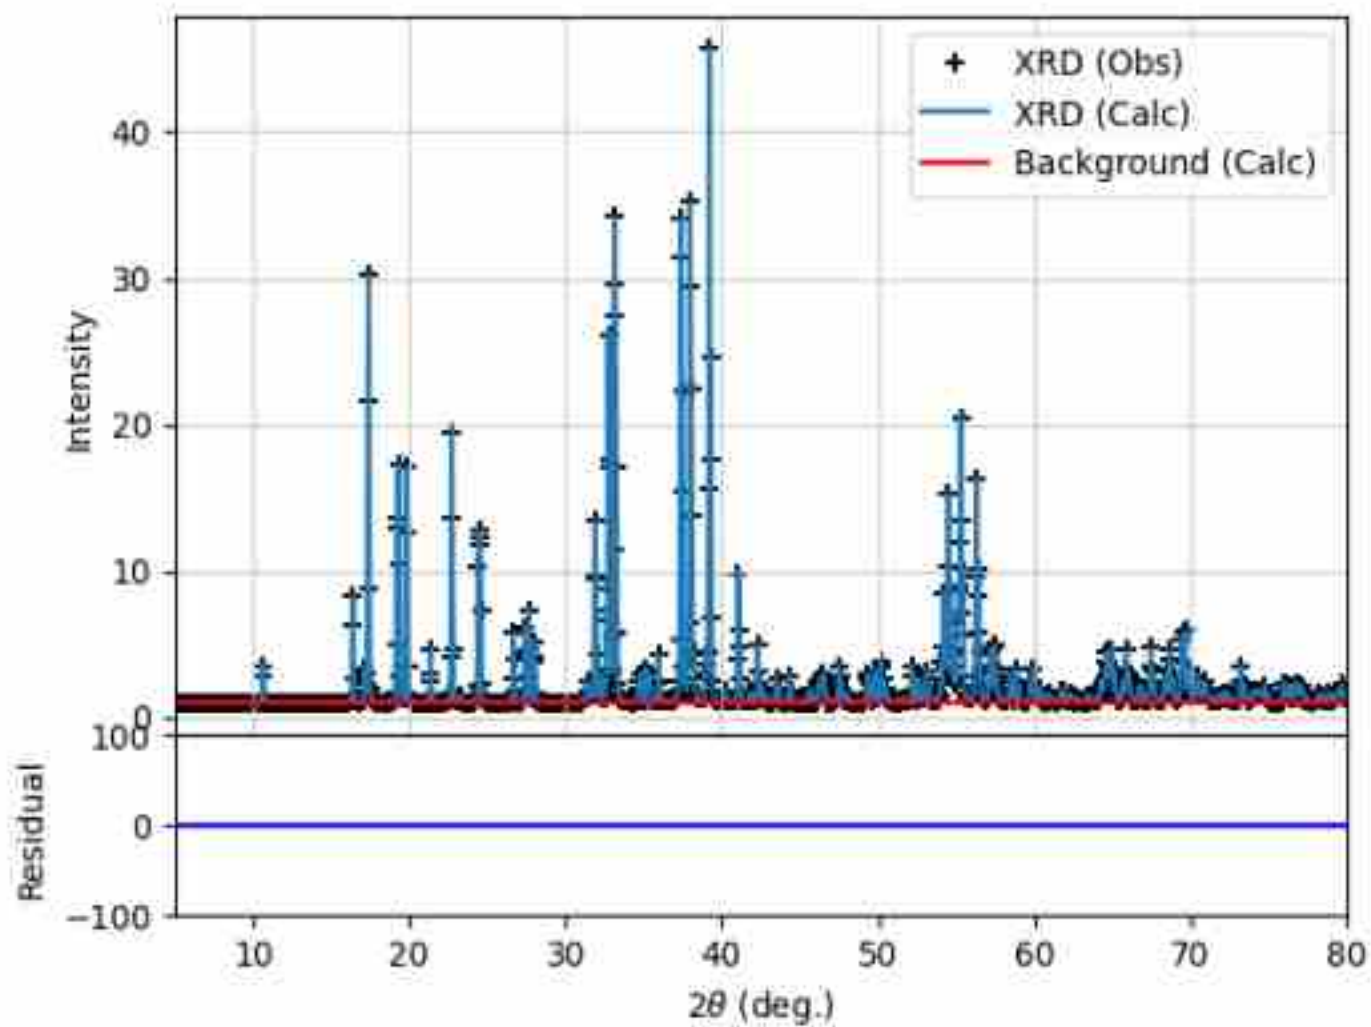

| RMSE before RR | Rwp     | RMSE after RR |
|----------------|---------|---------------|
| 0.02           | 0.00214 | 0.00056       |

Nb1Al1Ni2

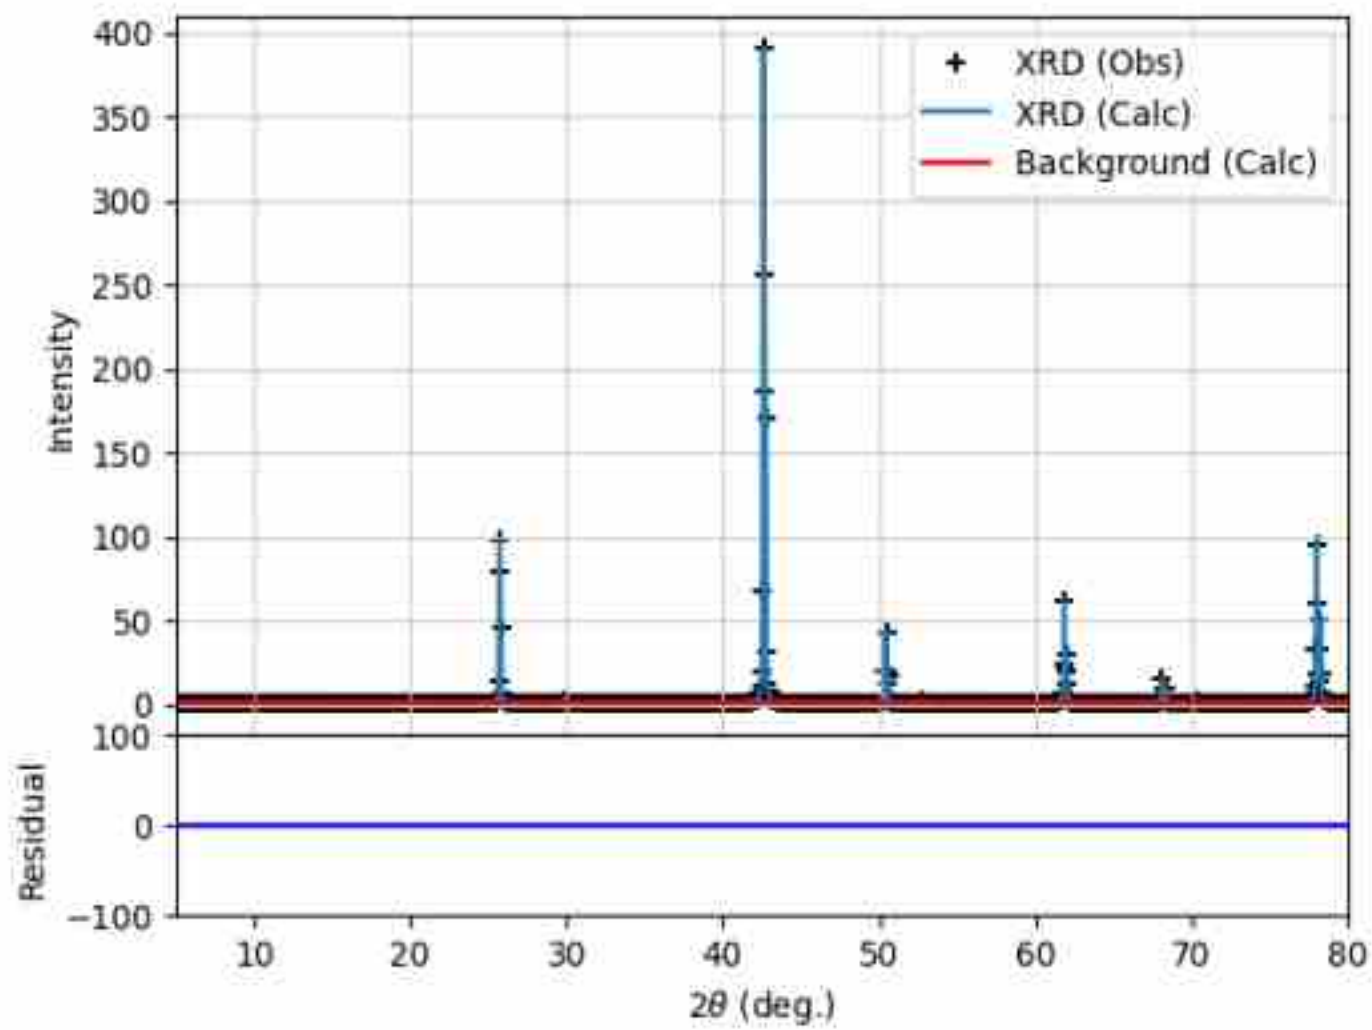

| RMSE before RR | Rwp    | RMSE after RR |
|----------------|--------|---------------|
| 0.002          | 0.0031 | 0.00081       |

# Nb1Ga1Ni2

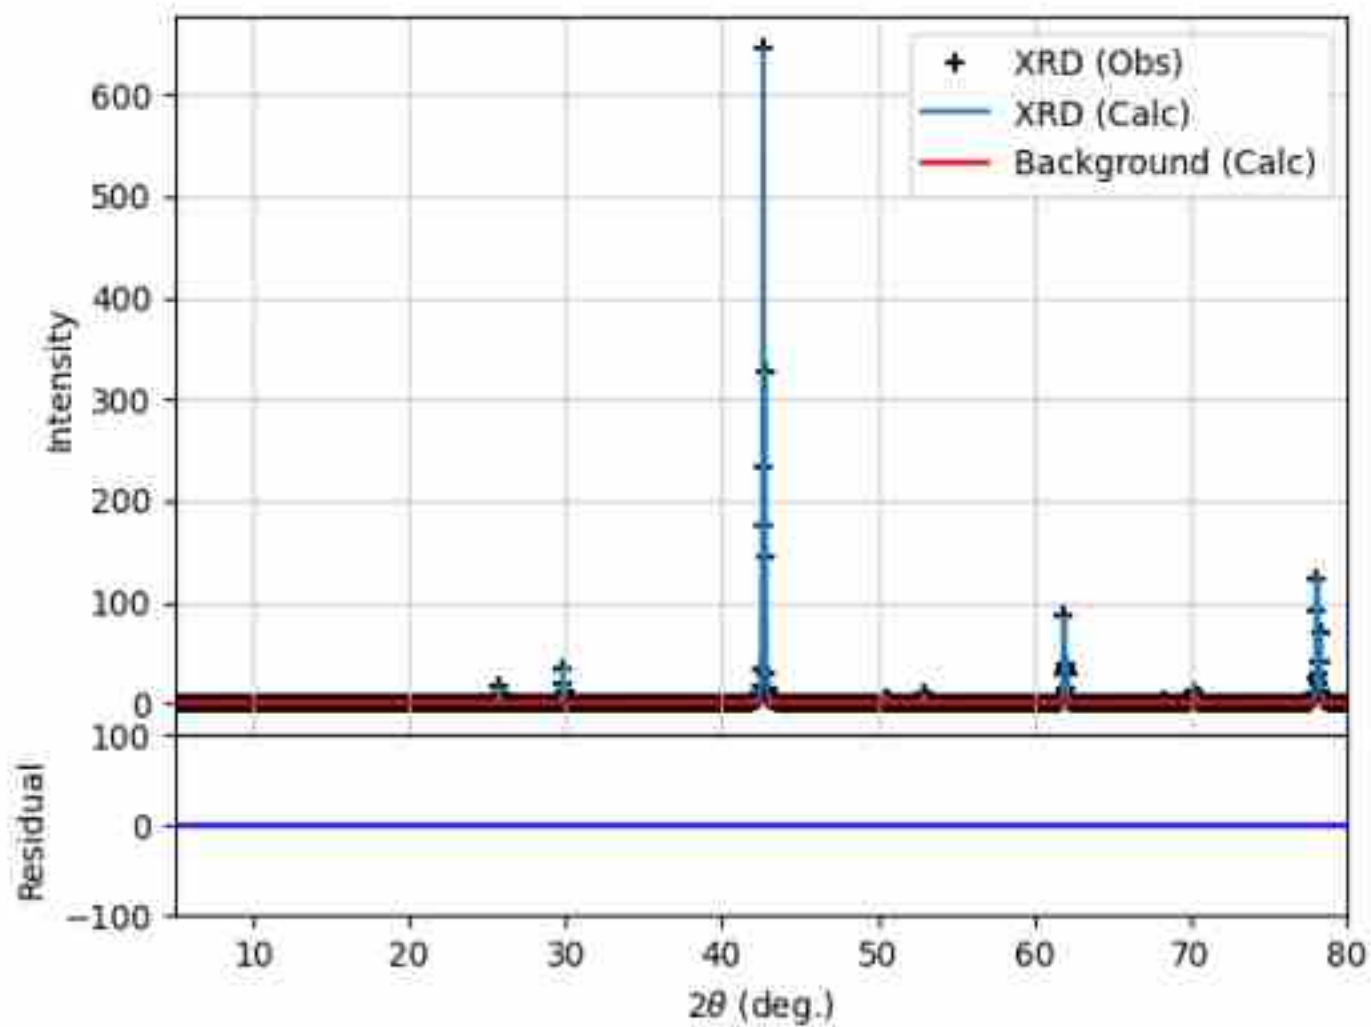

| RMSE before RR | Rwp   | RMSE after RR |
|----------------|-------|---------------|
| 0.002          | 4e-05 | 6e-05         |

# Nb1Os3

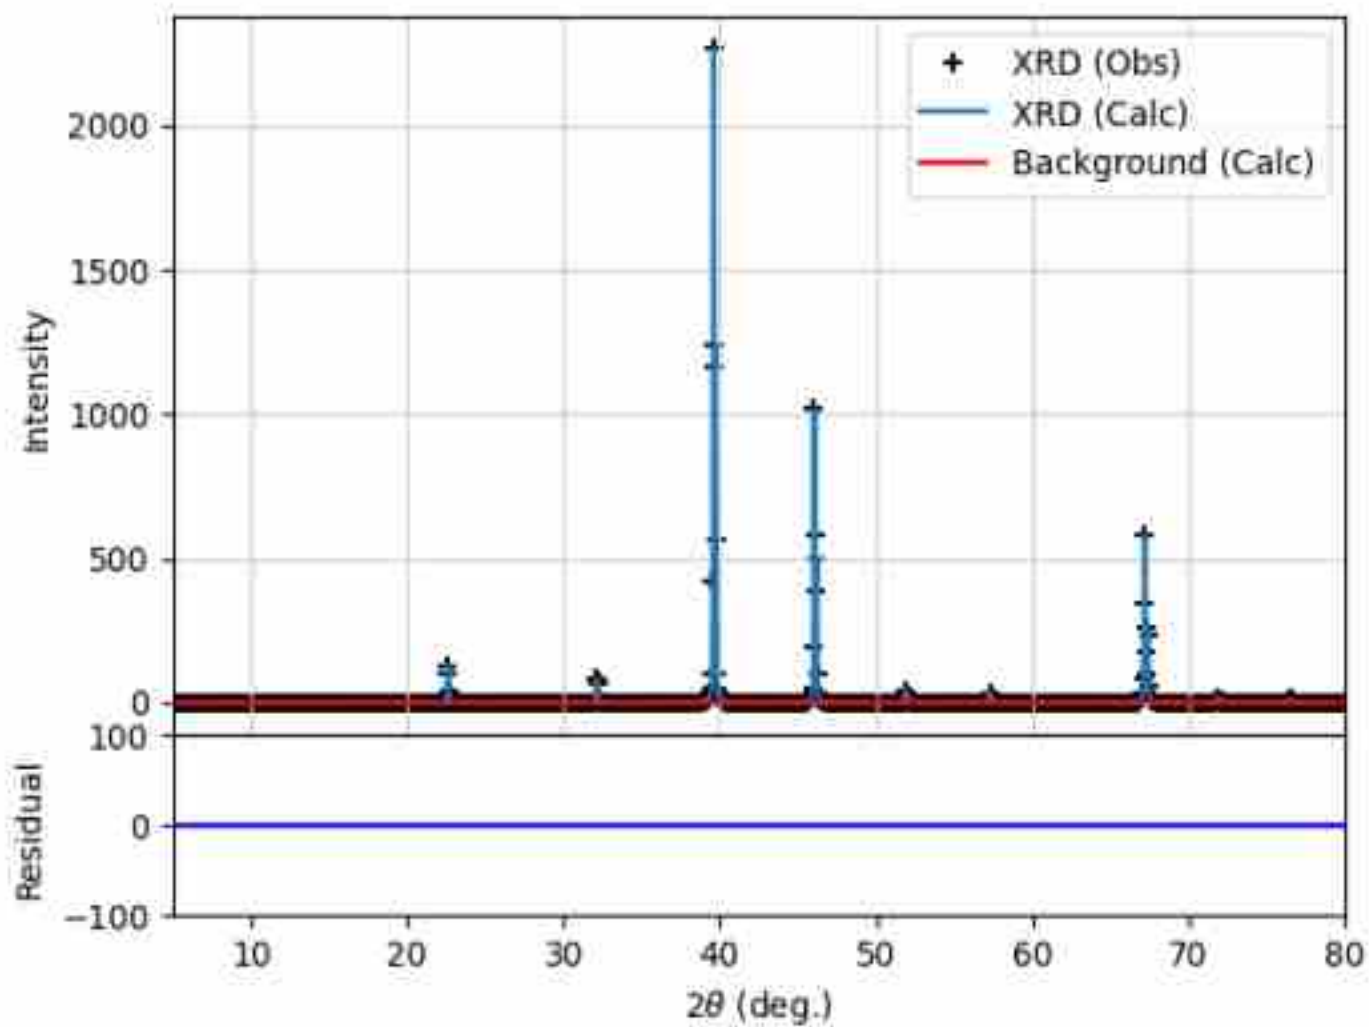

| RMSE before RR | Rwp     | RMSE after RR |
|----------------|---------|---------------|
| 0.002          | 0.01298 | 0.00082       |



# Nb<sub>6</sub>Fe<sub>7</sub>

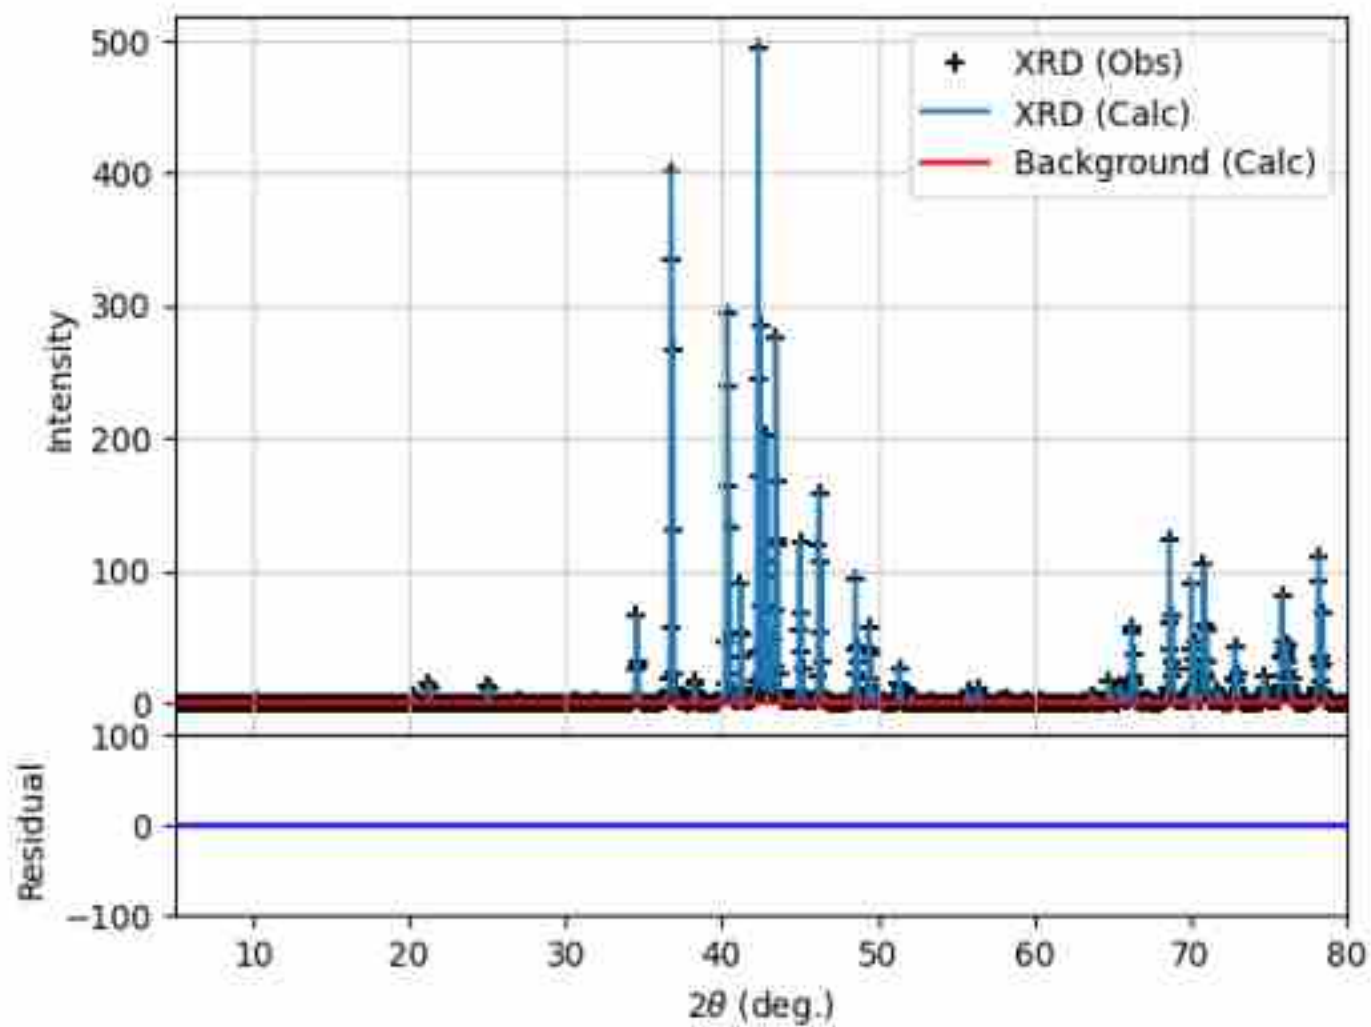

| RMSE before RR | Rwp     | RMSE after RR |
|----------------|---------|---------------|
| 0.02           | 0.00331 | 0.00039       |

# Nb<sub>10</sub>Ga<sub>2</sub>Sn<sub>4</sub>

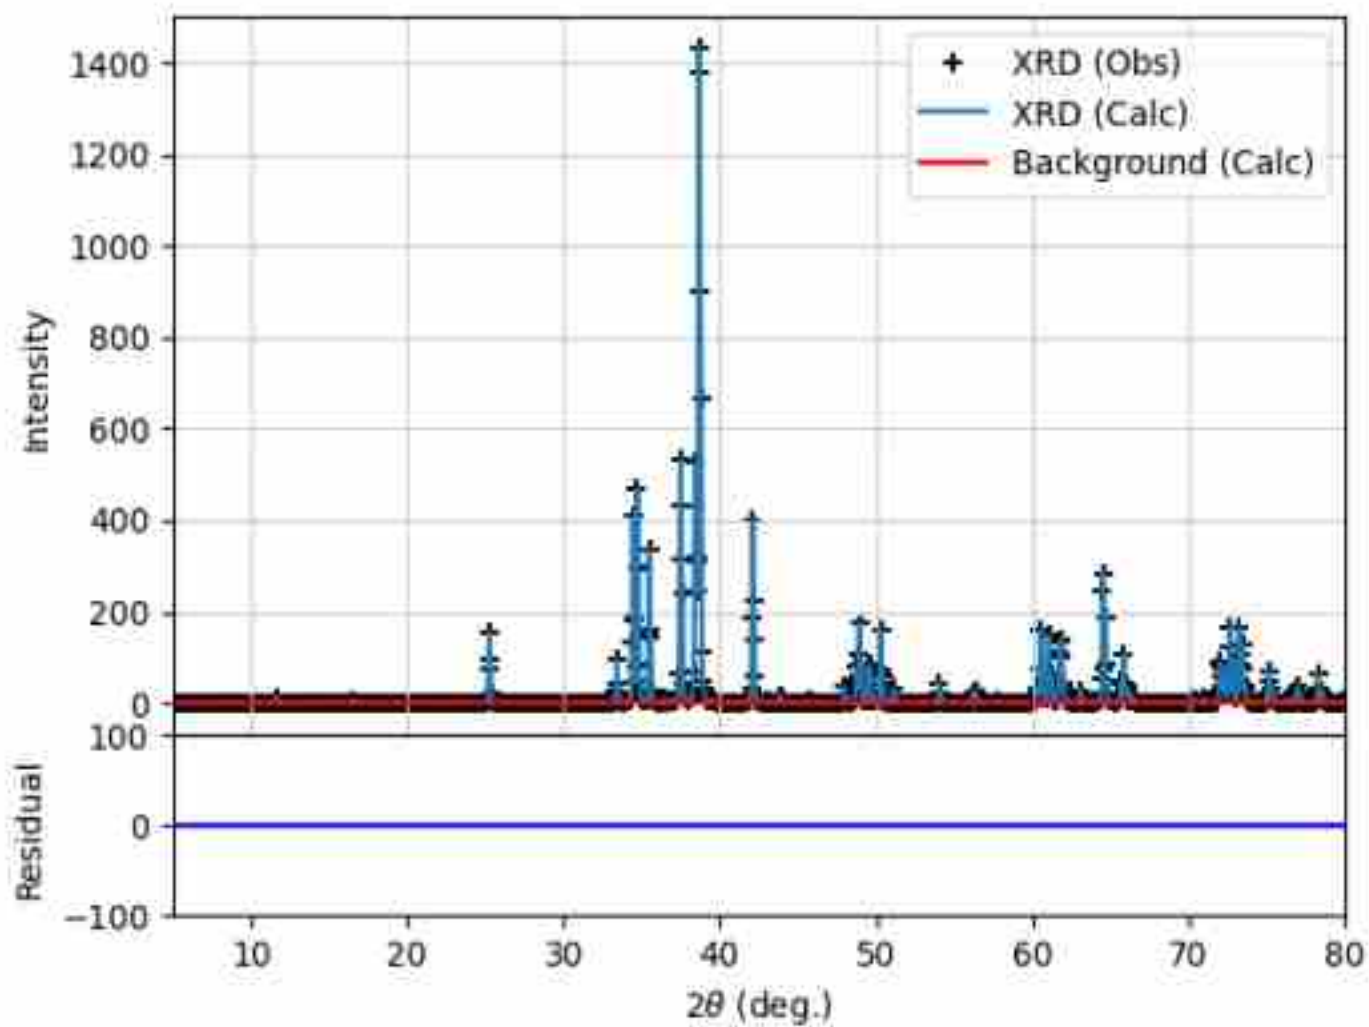

| RMSE before RR | Rwp     | RMSE after RR |
|----------------|---------|---------------|
| 0.02           | 0.00368 | 0.00039       |

# Nb10Ge6

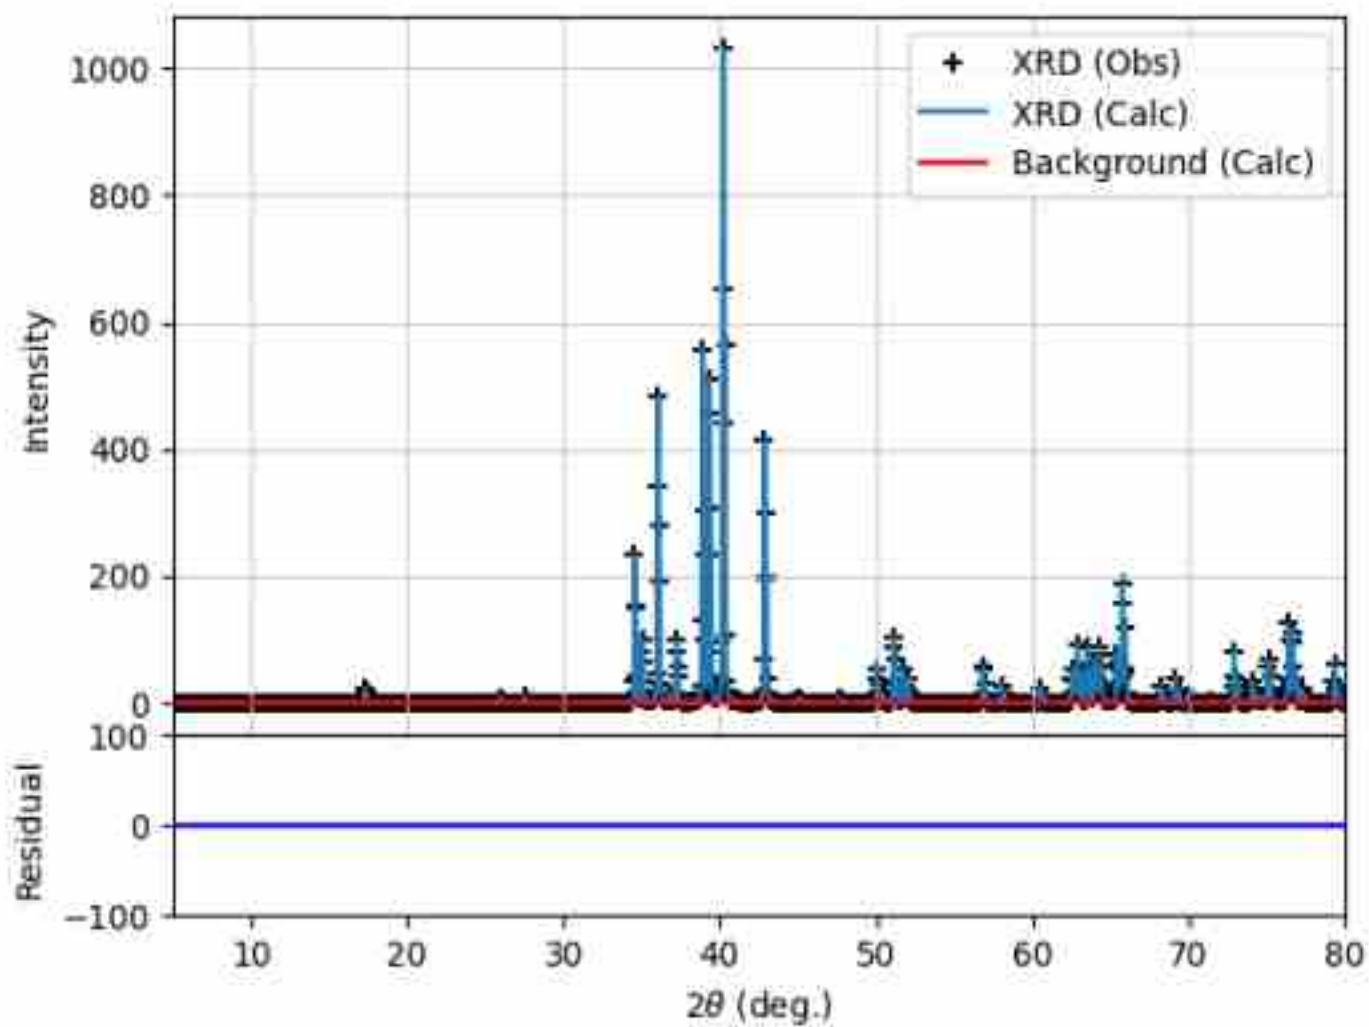

| RMSE before RR | Rwp     | RMSE after RR |
|----------------|---------|---------------|
| 0.02           | 0.00362 | 0.00059       |

# Nb12Al3Ga1

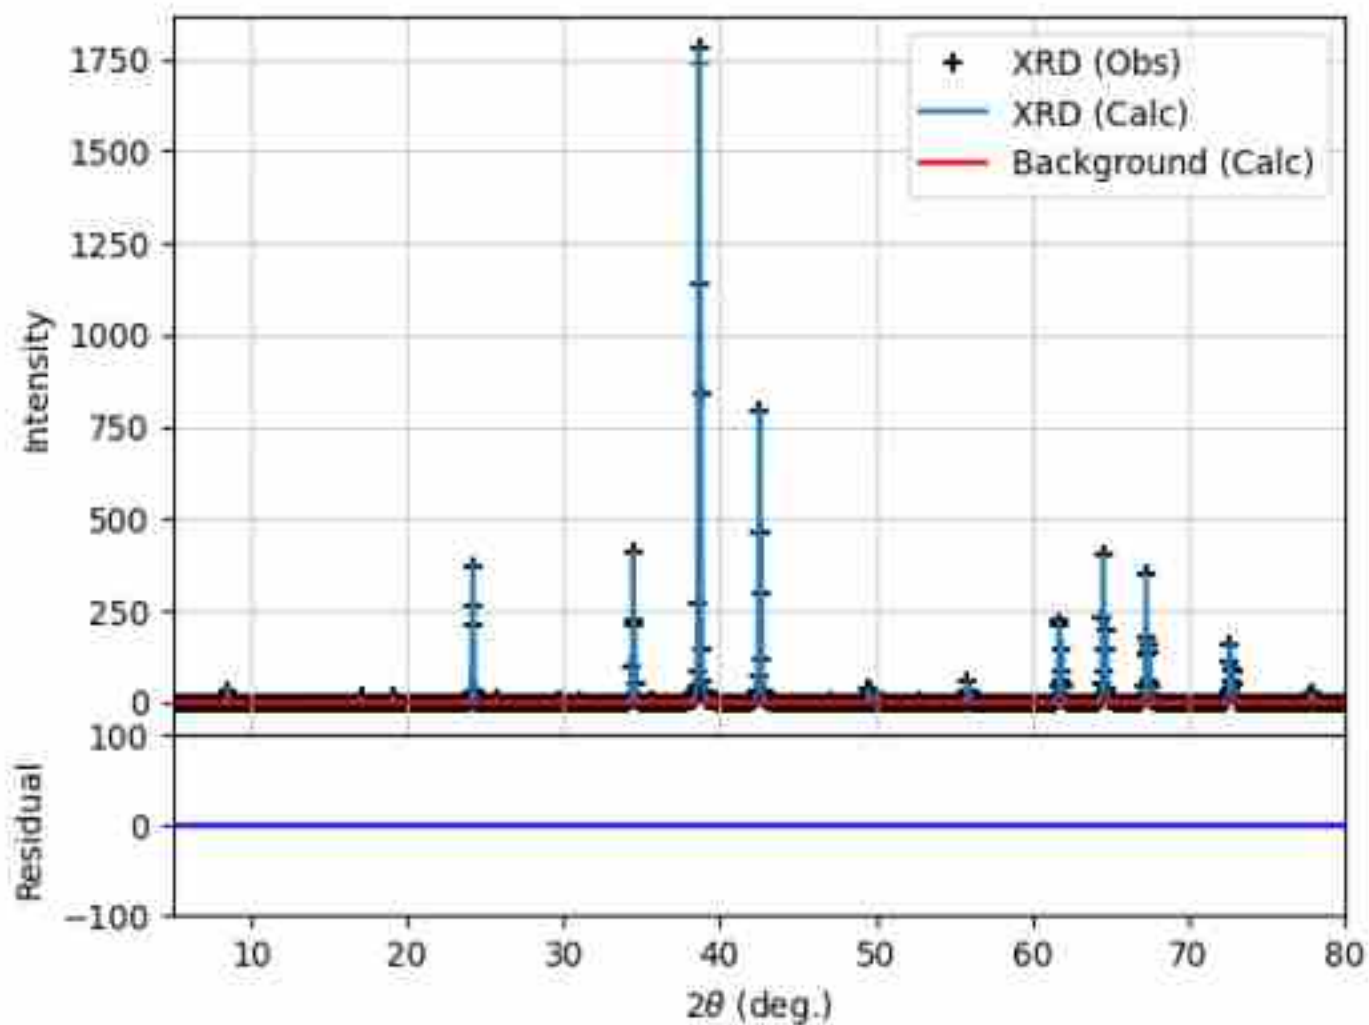

| RMSE before RR | Rwp     | RMSE after RR |
|----------------|---------|---------------|
| 0.02           | 0.00218 | 0.00033       |

# Nd1Ag1Hg2

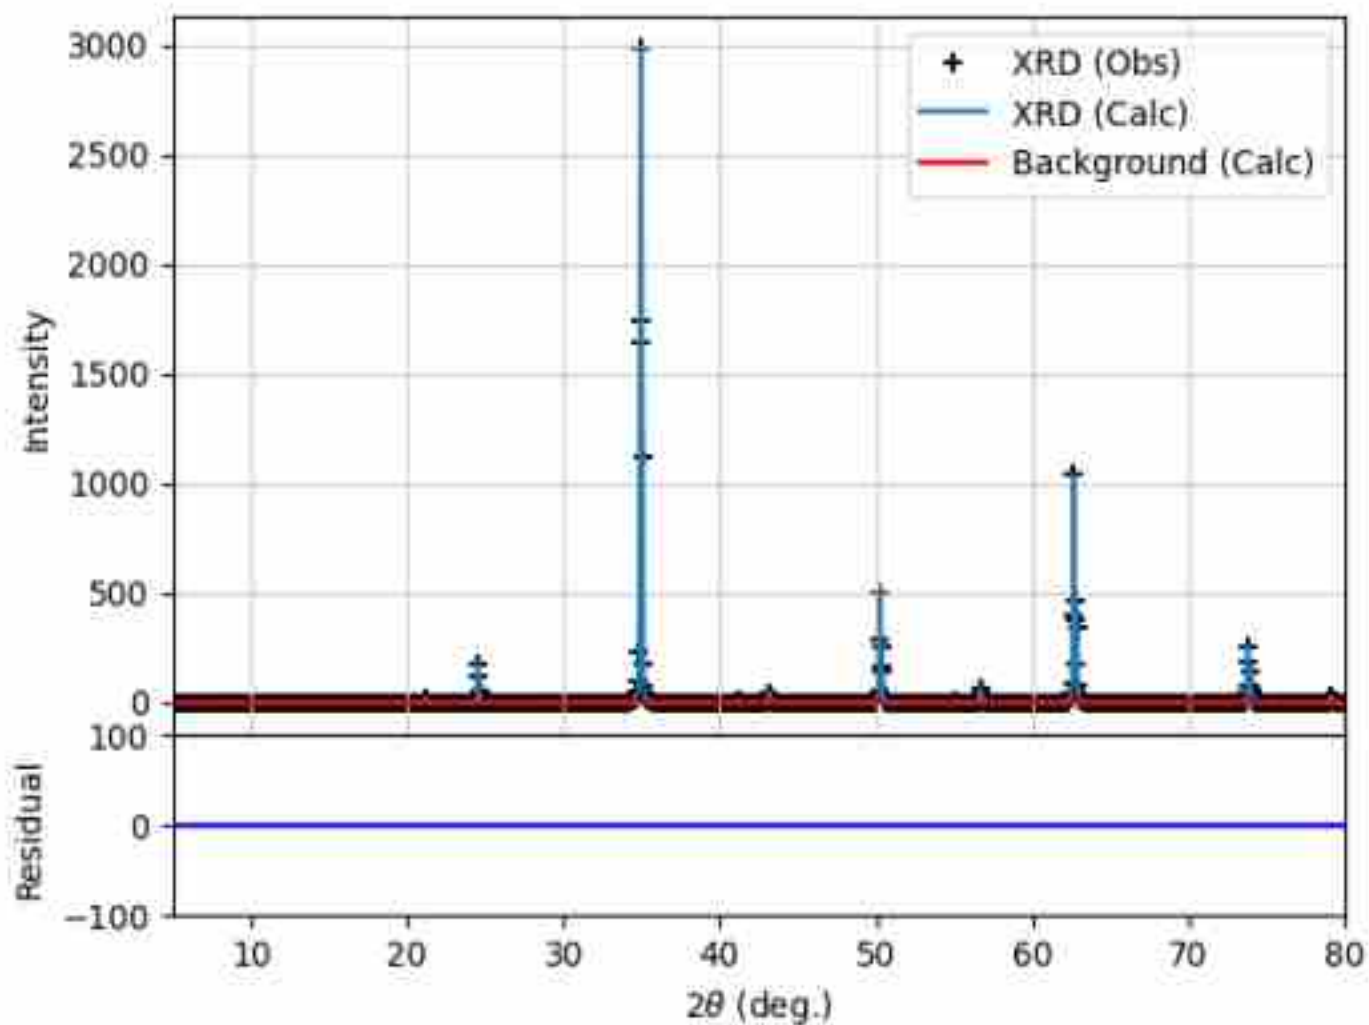

| RMSE before RR | Rwp     | RMSE after RR |
|----------------|---------|---------------|
| 0.002          | 0.02491 | 0.00081       |

# Nd1As1

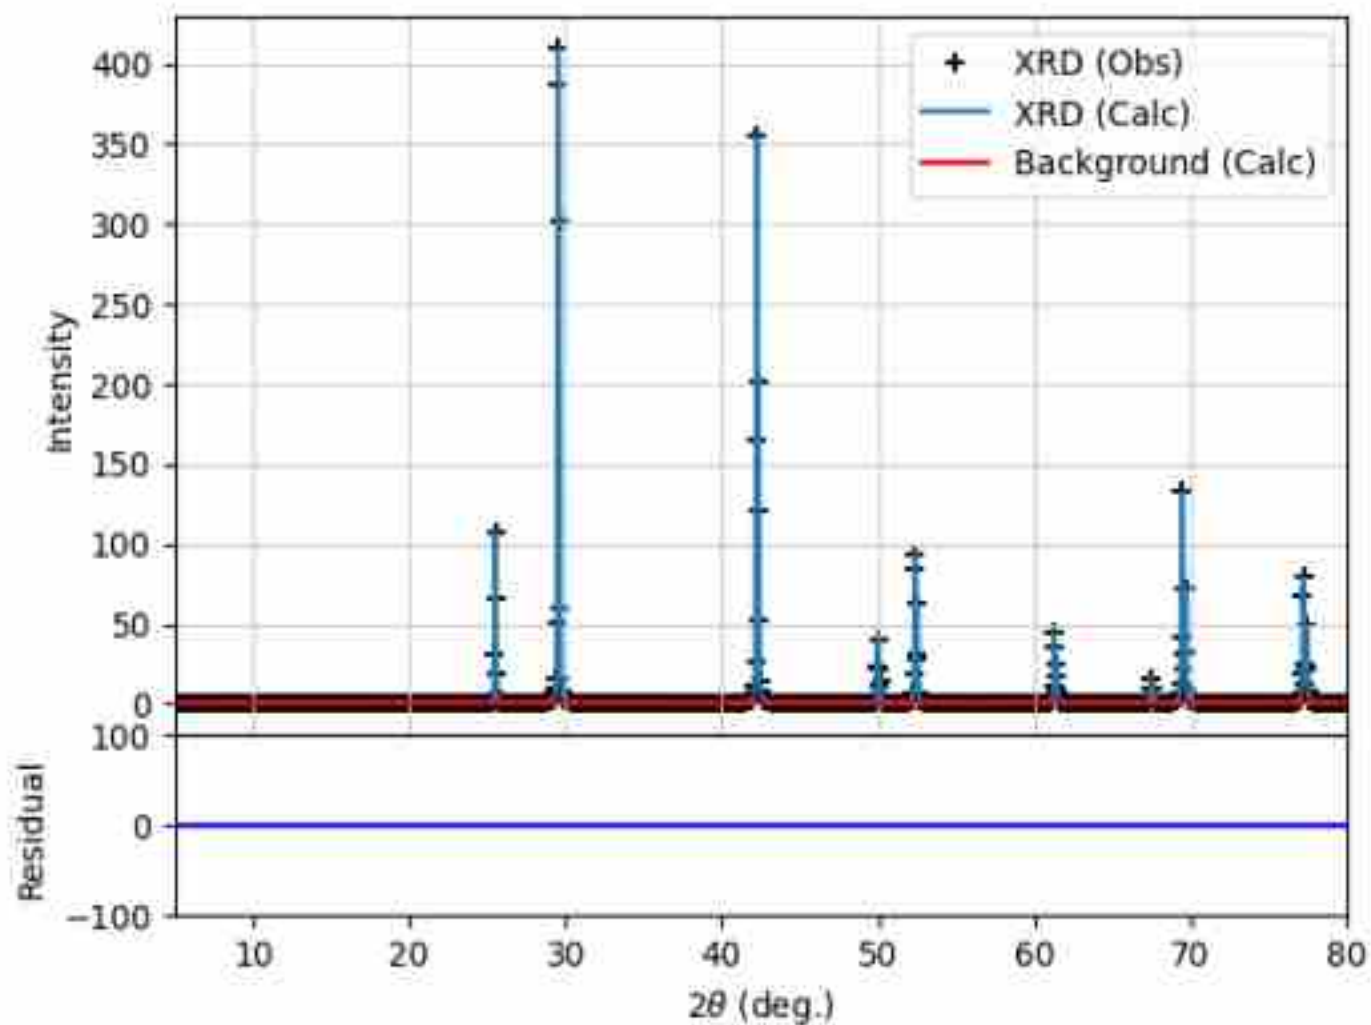

| RMSE before RR | Rwp     | RMSE after RR |
|----------------|---------|---------------|
| 0.002          | 0.02289 | 0.00128       |

# Nd1In1Rh2

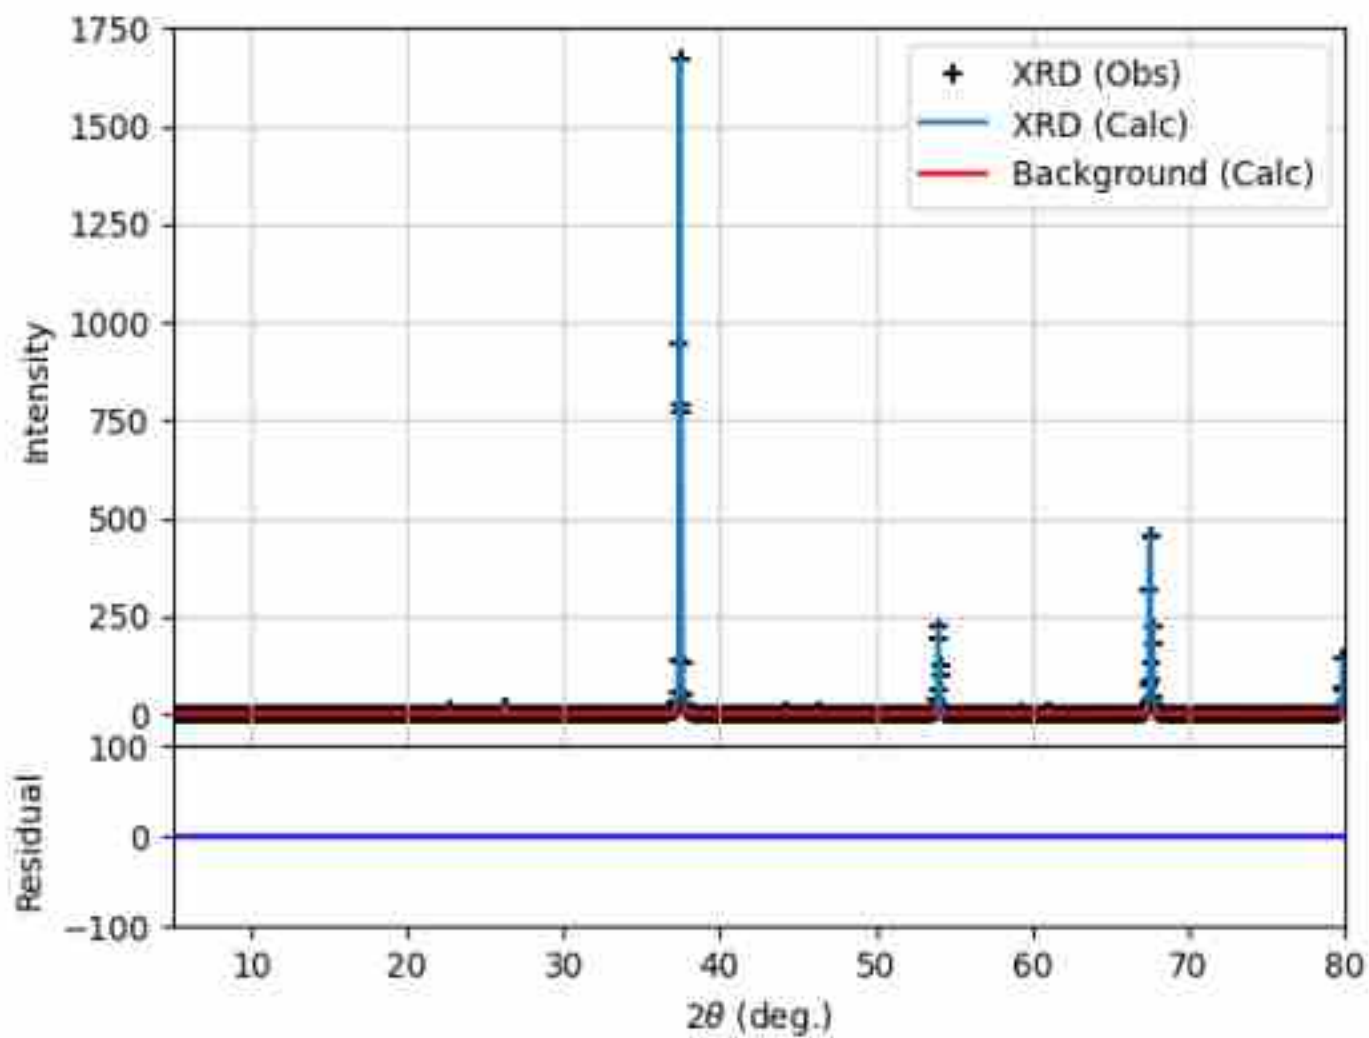

| RMSE before RR | Rwp    | RMSE after RR |
|----------------|--------|---------------|
| 0.002          | 0.0067 | 0.00066       |

# Nd1Lu1In2

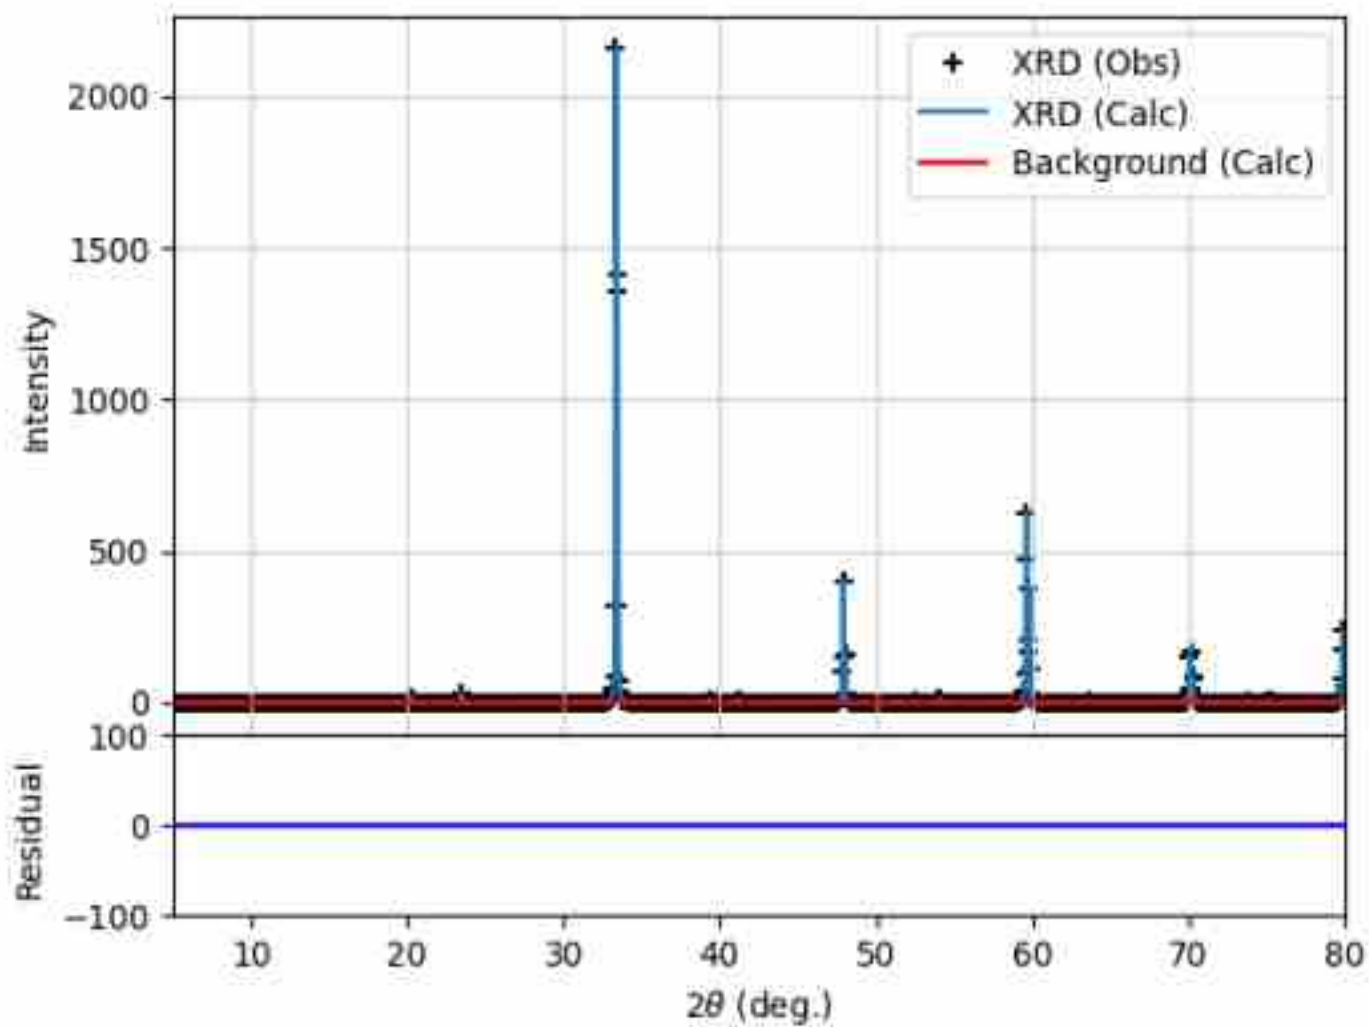

| RMSE before RR | Rwp     | RMSE after RR |
|----------------|---------|---------------|
| 0.002          | 0.02291 | 0.00051       |



# Nd1Si2Ru2

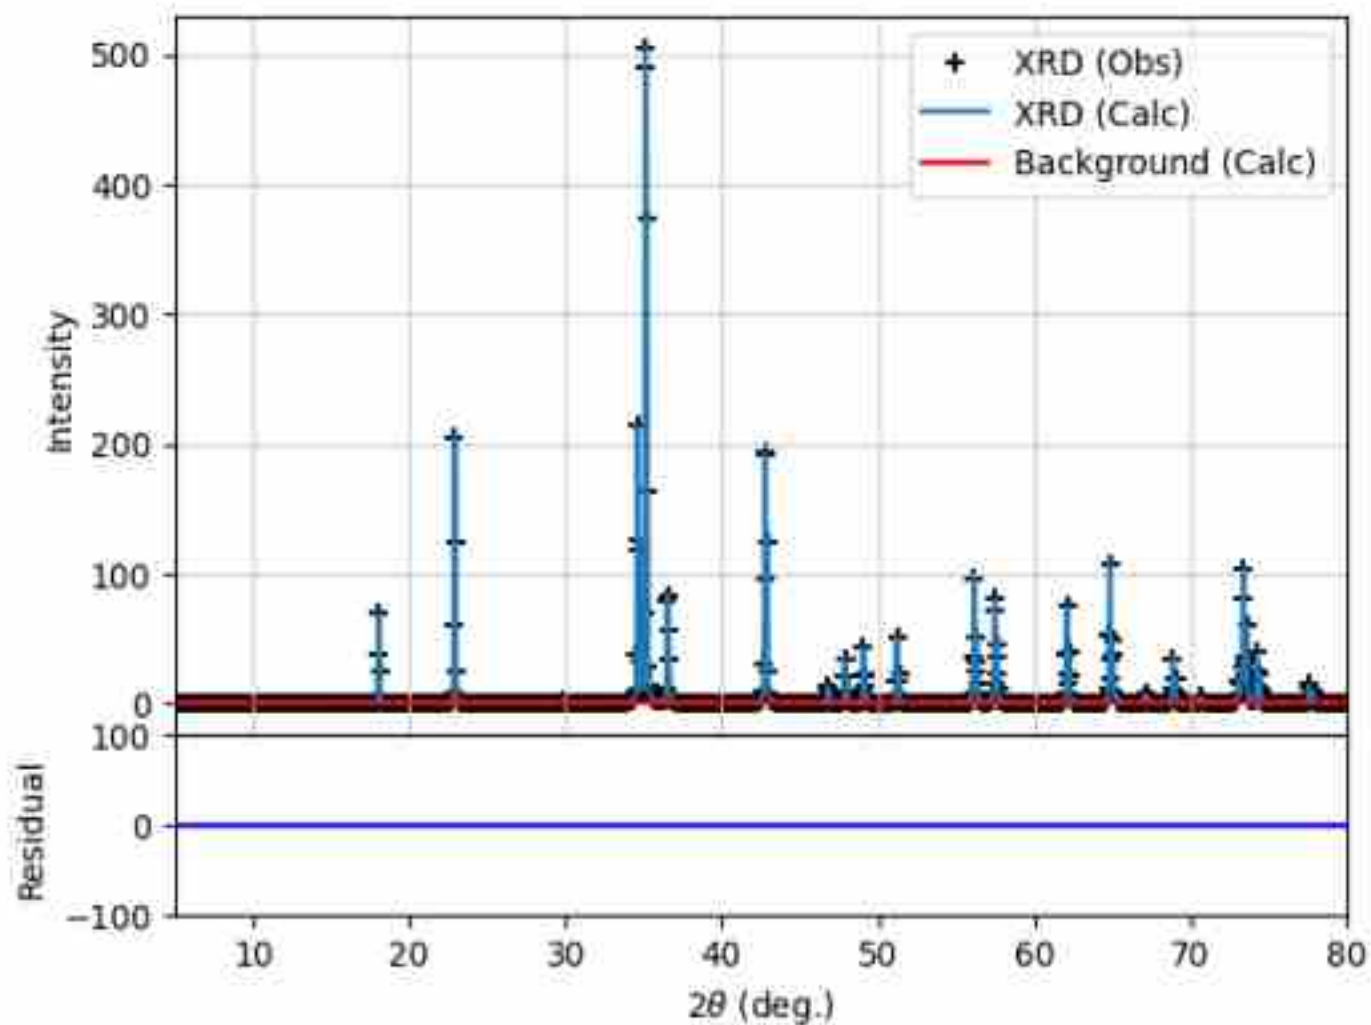

| RMSE before RR | Rwp     | RMSE after RR |
|----------------|---------|---------------|
| 0.02           | 0.00498 | 0.00075       |

# Nd1Ti2Co10

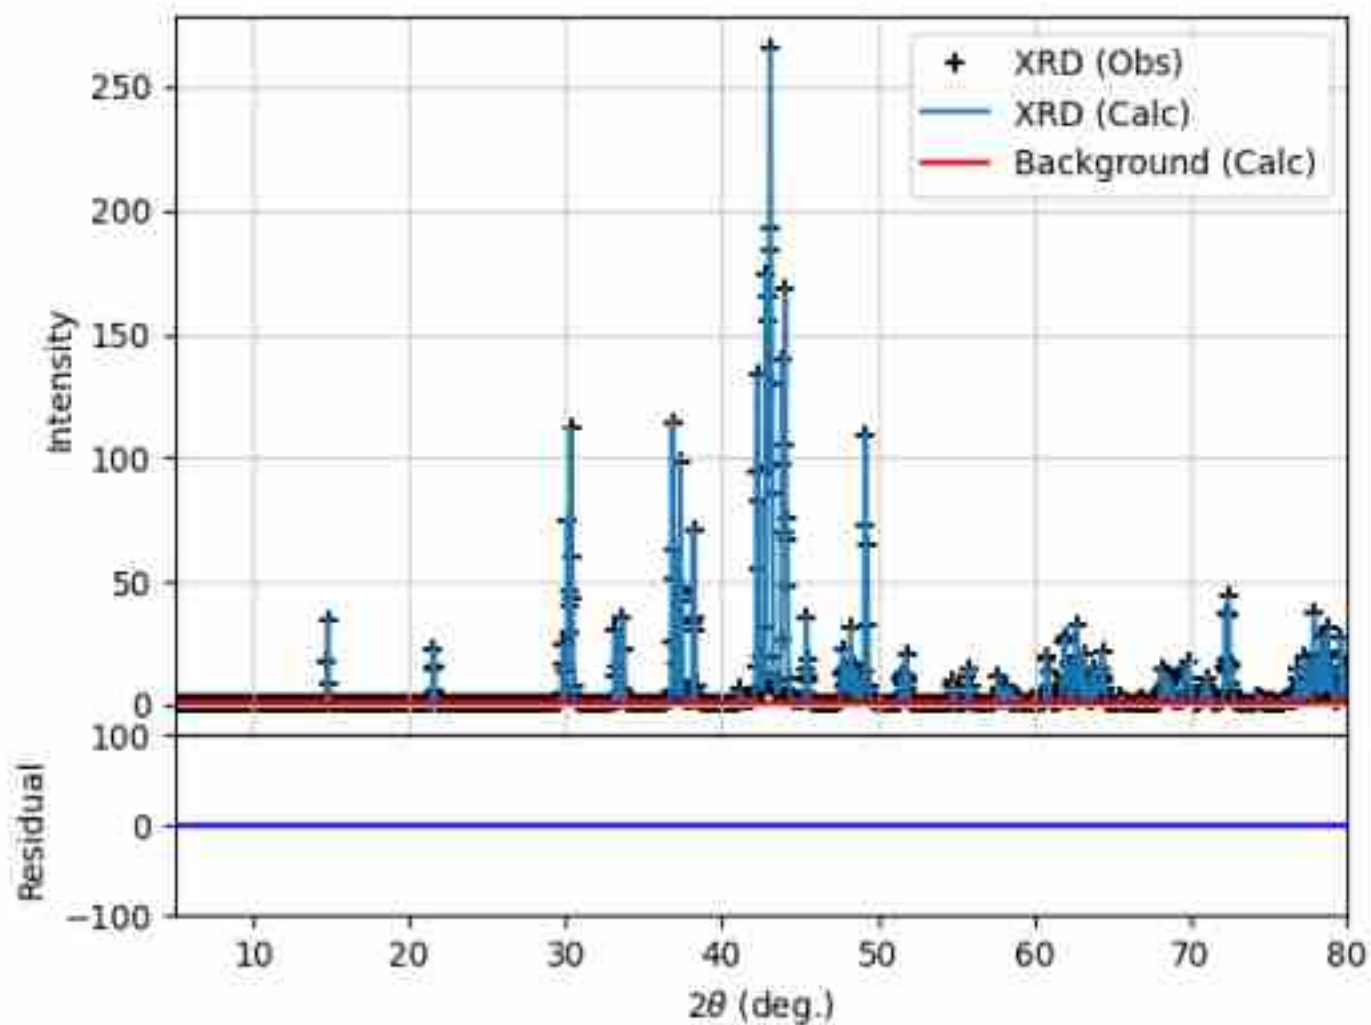

| RMSE before RR | Rwp     | RMSE after RR |
|----------------|---------|---------------|
| 0.02           | 0.00352 | 0.00046       |

# Nd1Tm3

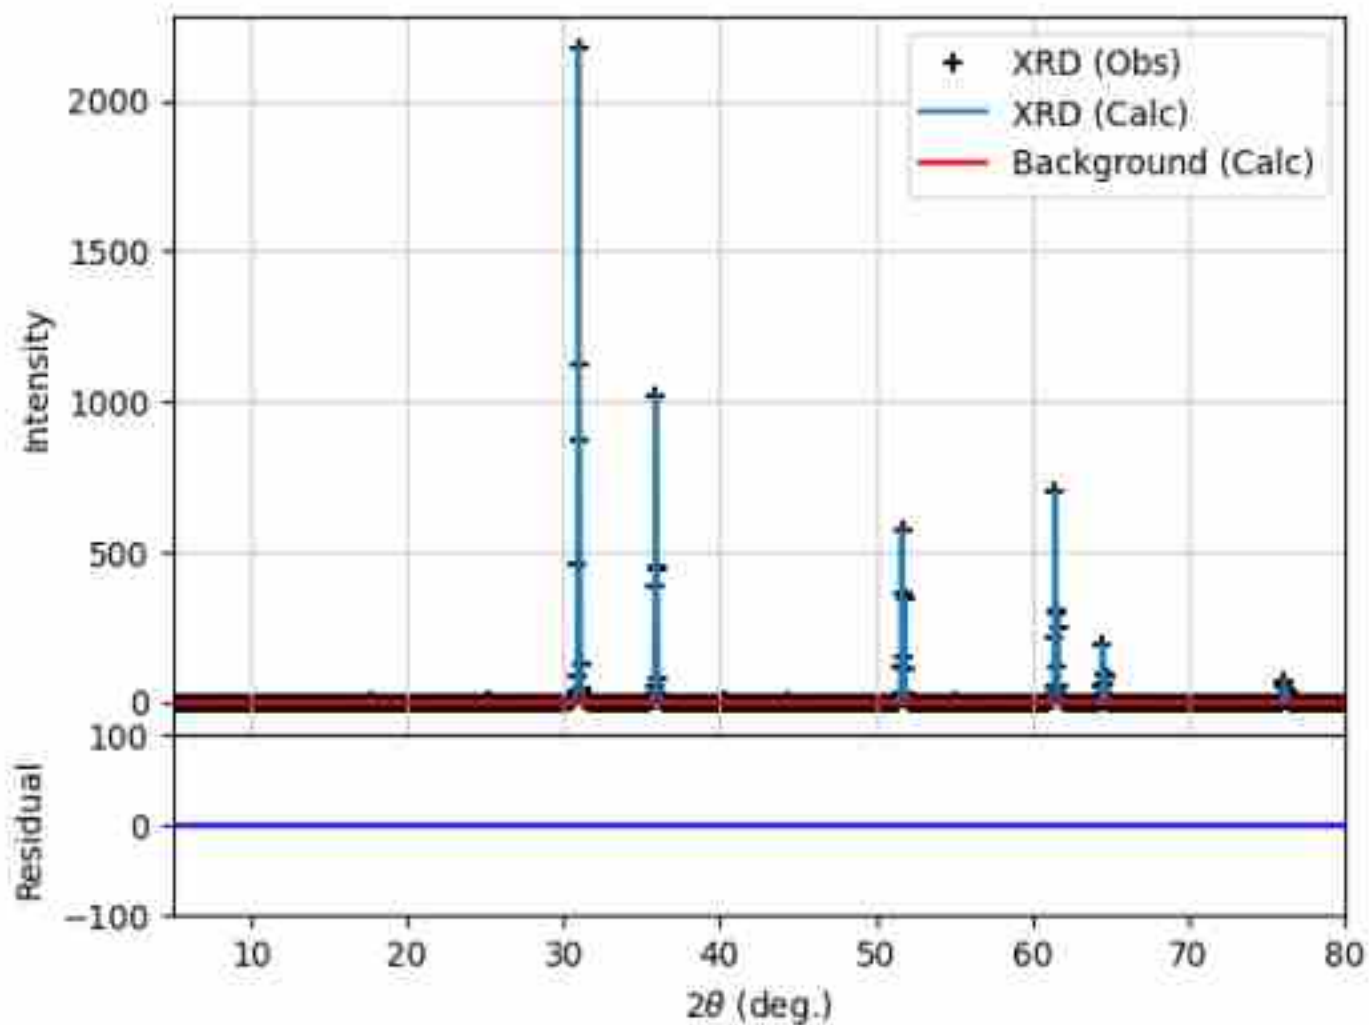

| RMSE before RR | Rwp     | RMSE after RR |
|----------------|---------|---------------|
| 0.002          | 0.01873 | 0.00088       |

# Nd1Zn1

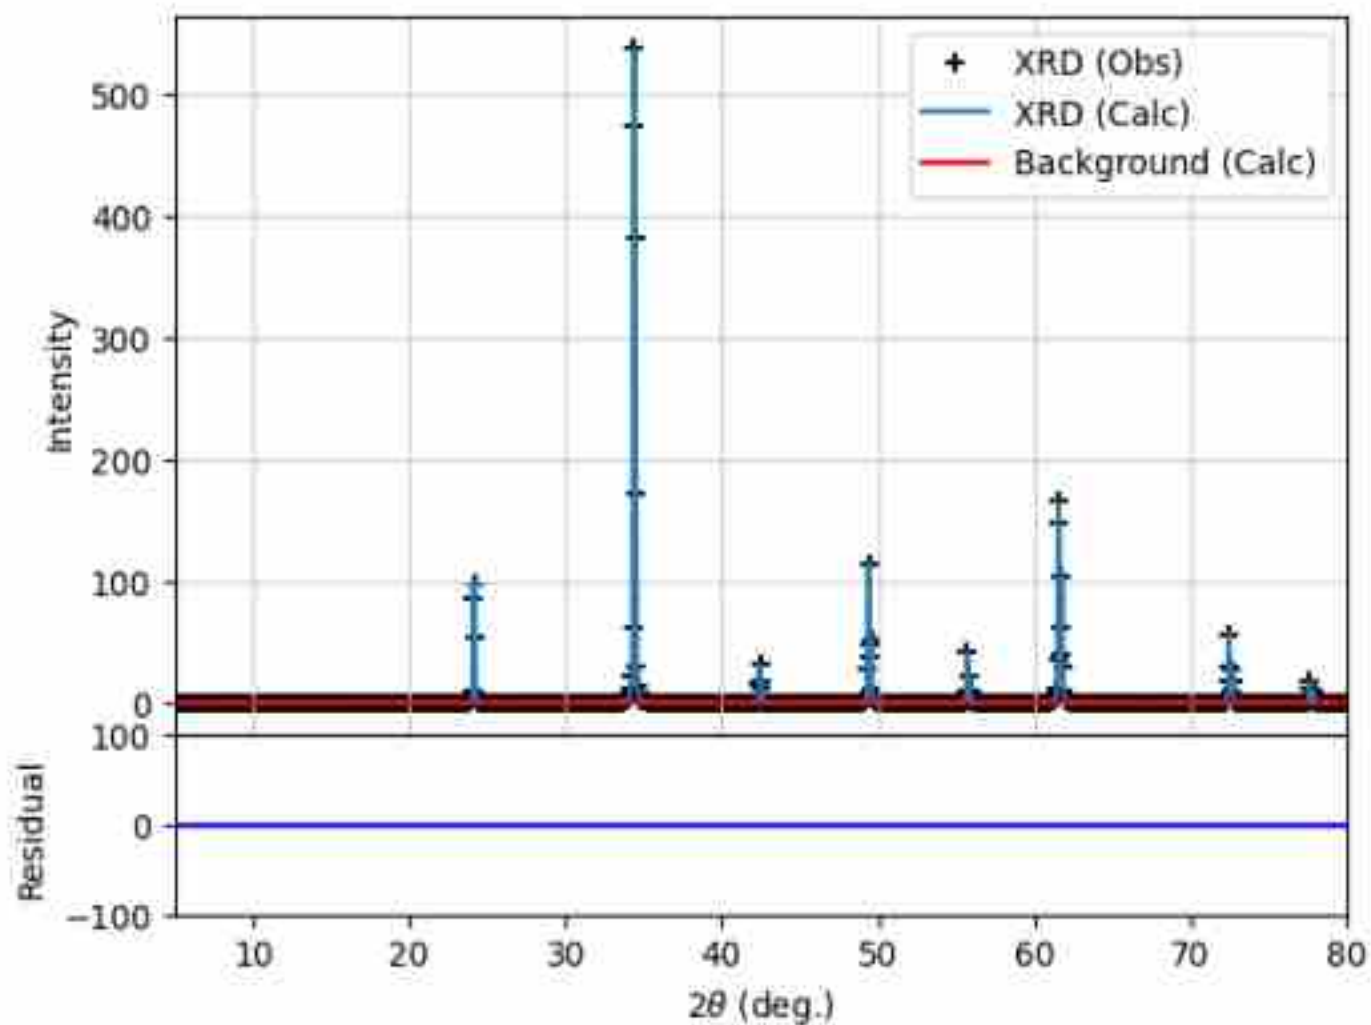

| RMSE before RR | Rwp     | RMSE after RR |
|----------------|---------|---------------|
| 0.002          | 0.01644 | 0.0007        |

# Nd<sub>2</sub>Ag<sub>1</sub>Ru<sub>1</sub>

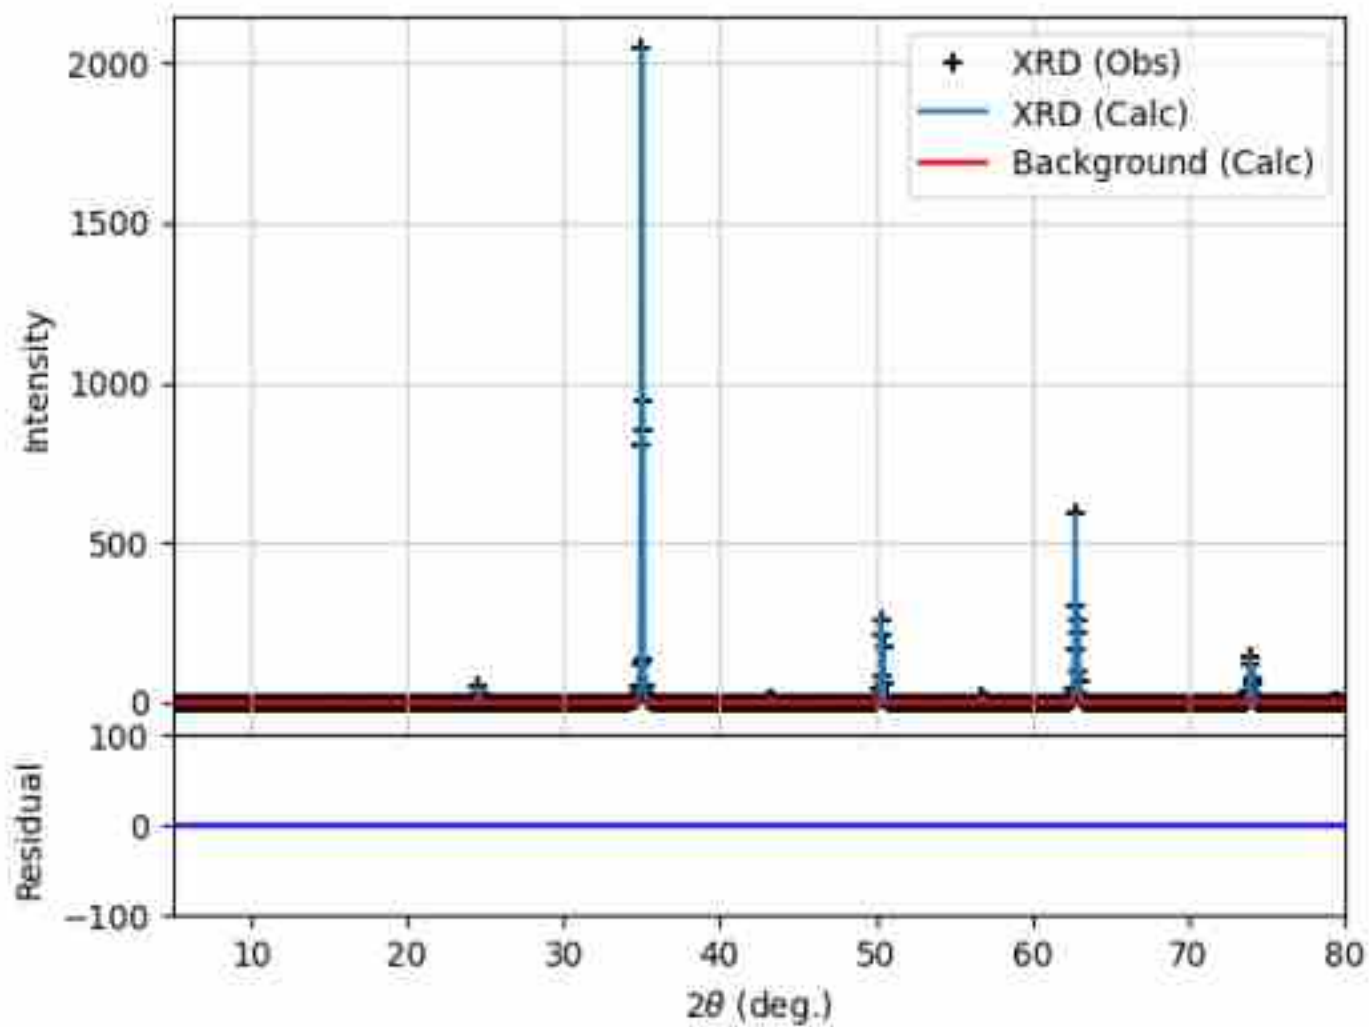

| RMSE before RR | Rwp    | RMSE after RR |
|----------------|--------|---------------|
| 0.002          | 0.0024 | 0.00032       |

# Nd<sub>2</sub>Cu<sub>1</sub>Ru<sub>1</sub>

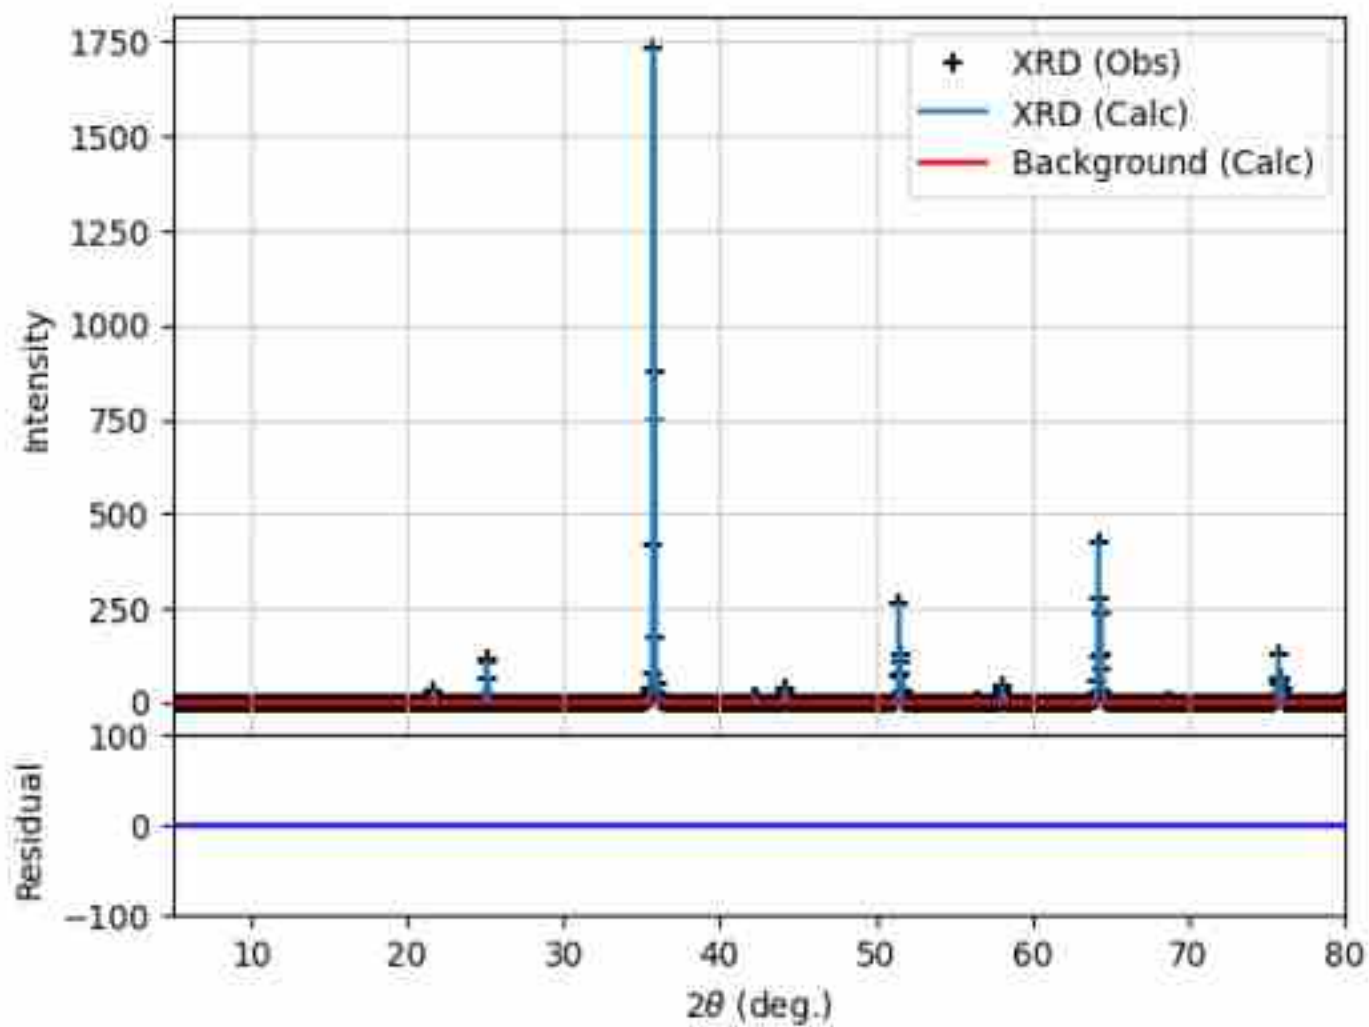

| RMSE before RR | Rwp     | RMSE after RR |
|----------------|---------|---------------|
| 0.002          | 0.00373 | 0.00018       |

# Nd<sub>2</sub>GaAg

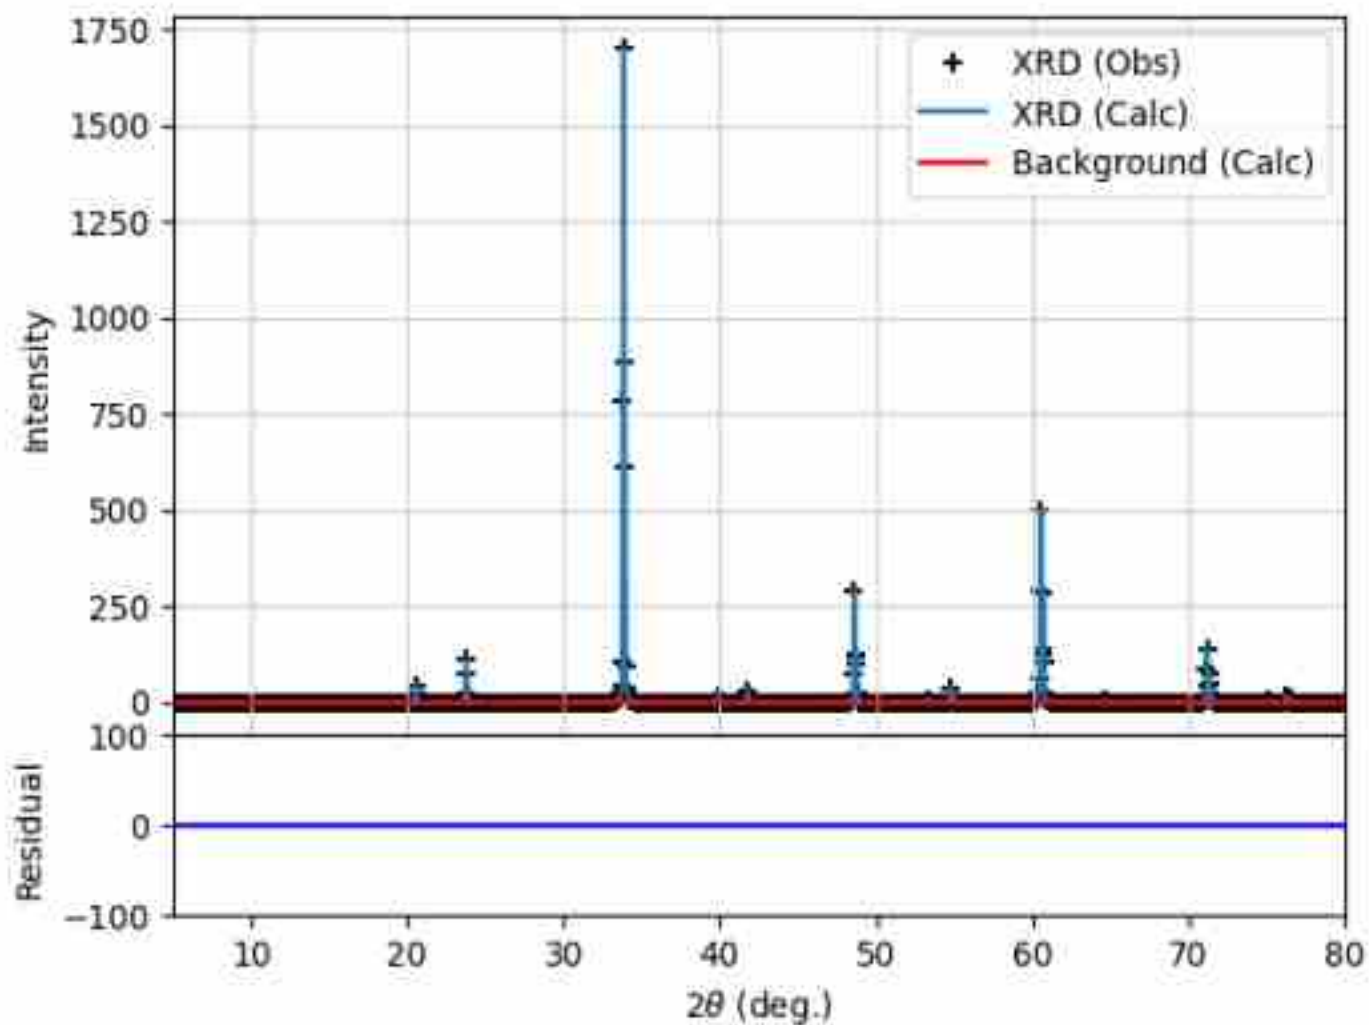

| RMSE before RR | Rwp     | RMSE after RR |
|----------------|---------|---------------|
| 0.002          | 0.00278 | 0.00021       |

# Nd<sub>2</sub>In<sub>1</sub>Hg<sub>1</sub>

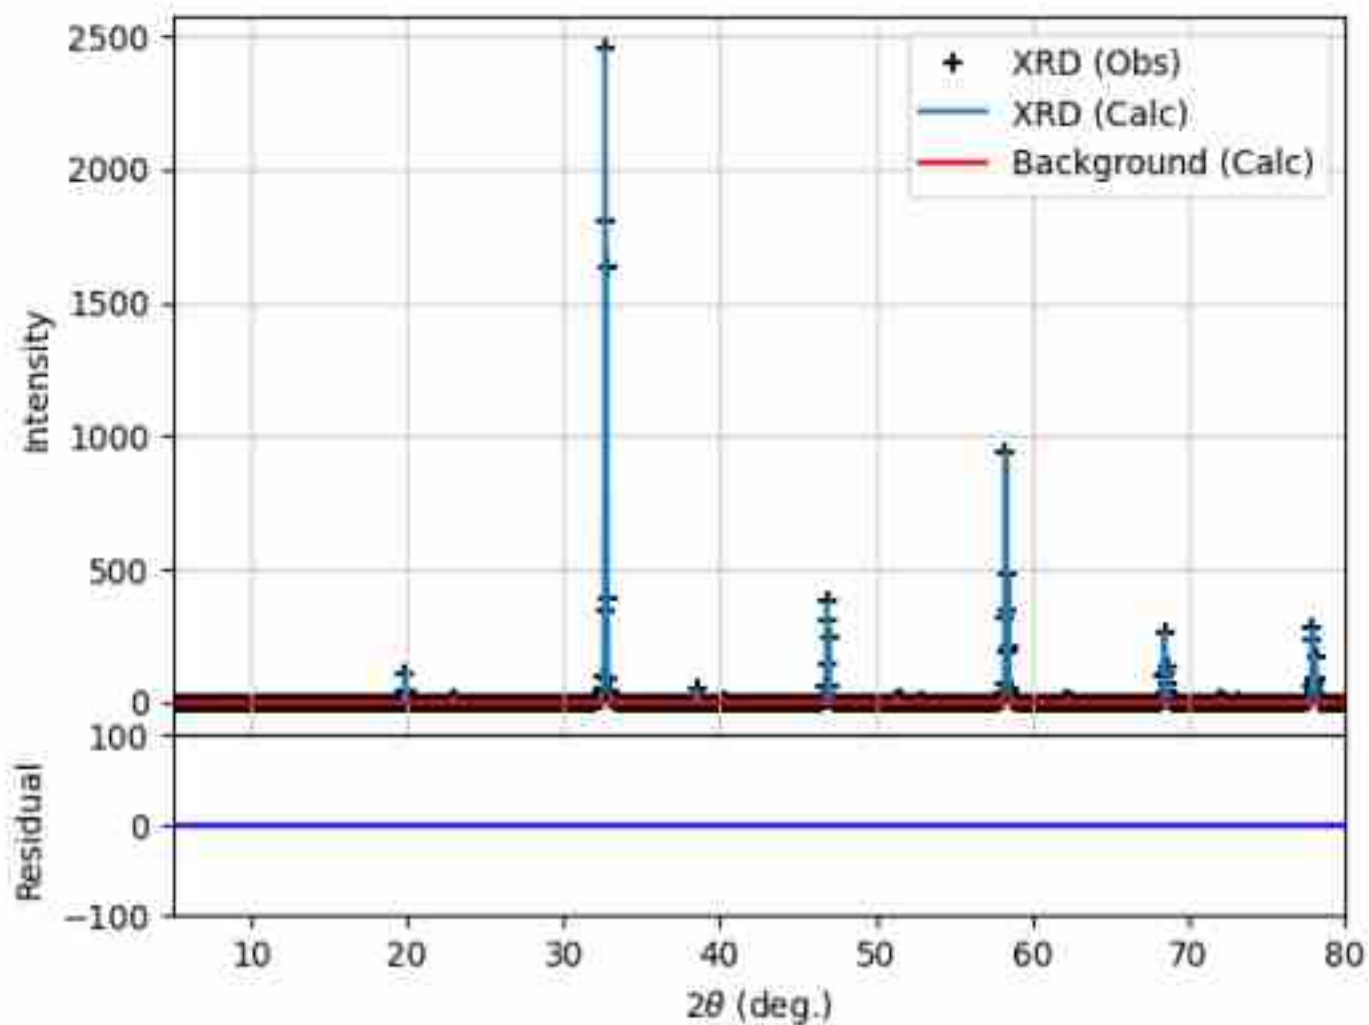

| RMSE before RR | Rwp     | RMSE after RR |
|----------------|---------|---------------|
| 0.002          | 0.00485 | 0.00037       |



# Nd<sub>2</sub>IrAu<sub>1</sub>

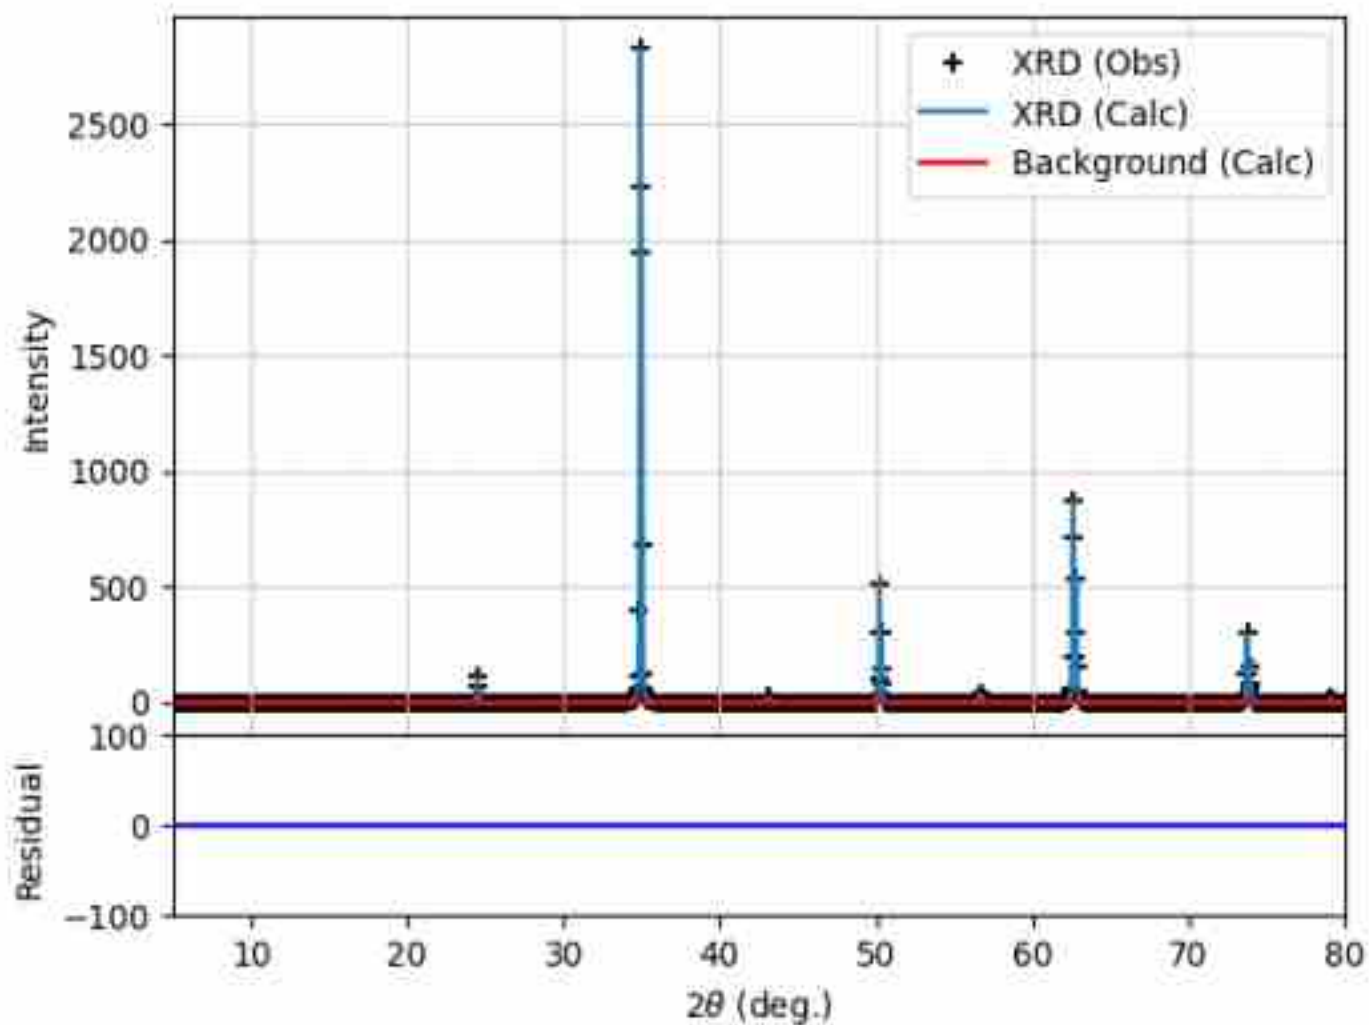

| RMSE before RR | Rwp     | RMSE after RR |
|----------------|---------|---------------|
| 0.002          | 0.00393 | 0.00023       |

# Nd<sub>2</sub>Ni<sub>1</sub>Ir<sub>1</sub>

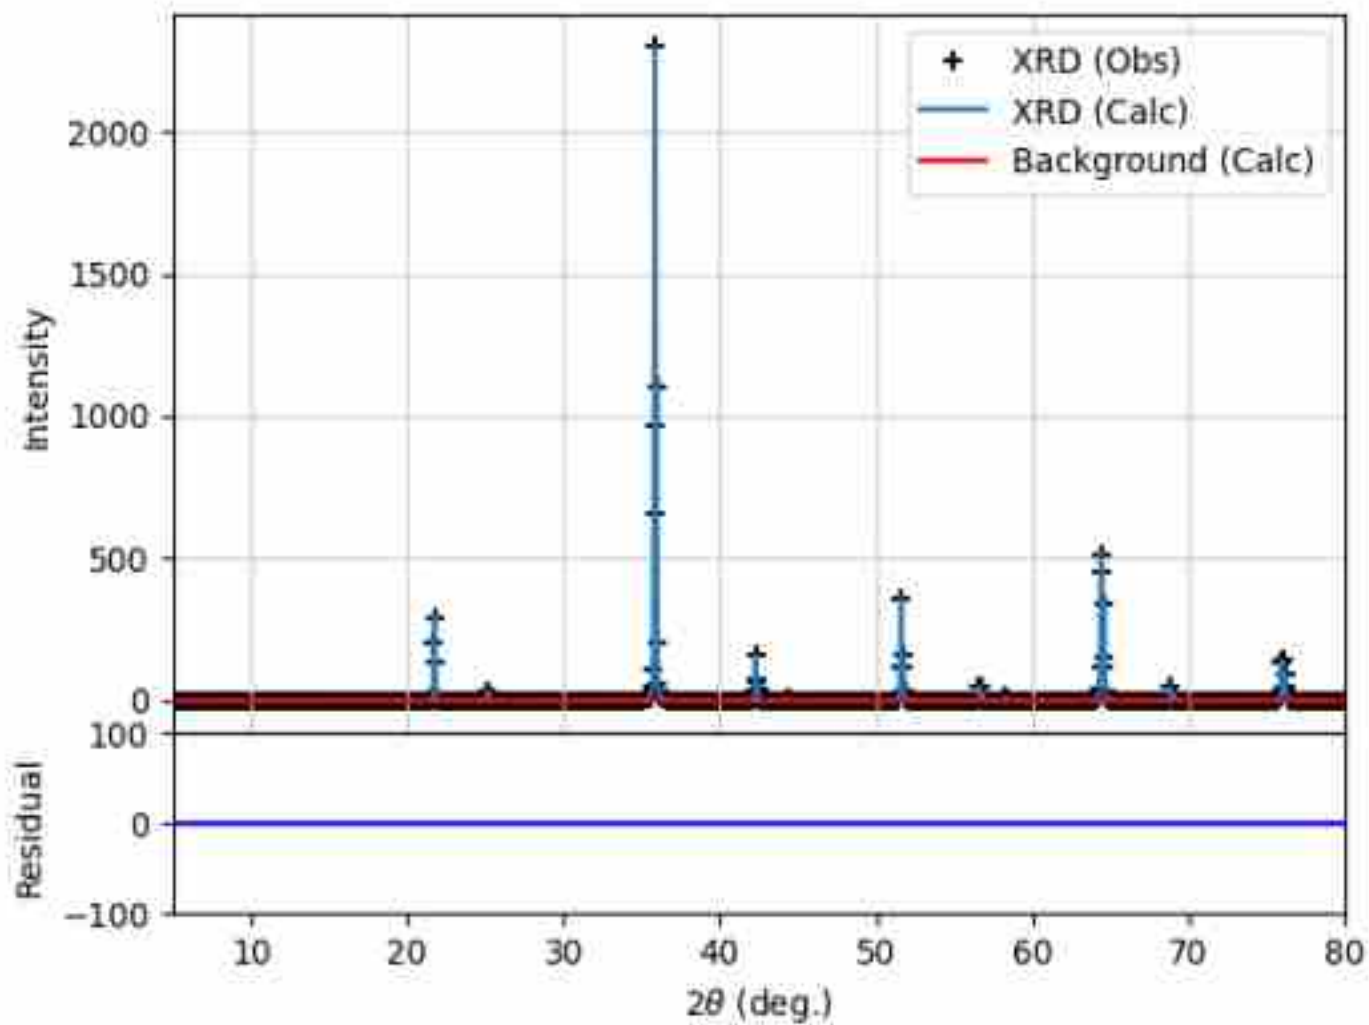

| RMSE before RR | Rwp     | RMSE after RR |
|----------------|---------|---------------|
| 0.002          | 0.00408 | 0.00064       |

# Nd<sub>2</sub>Re<sub>4</sub>Si<sub>2</sub>C<sub>2</sub>

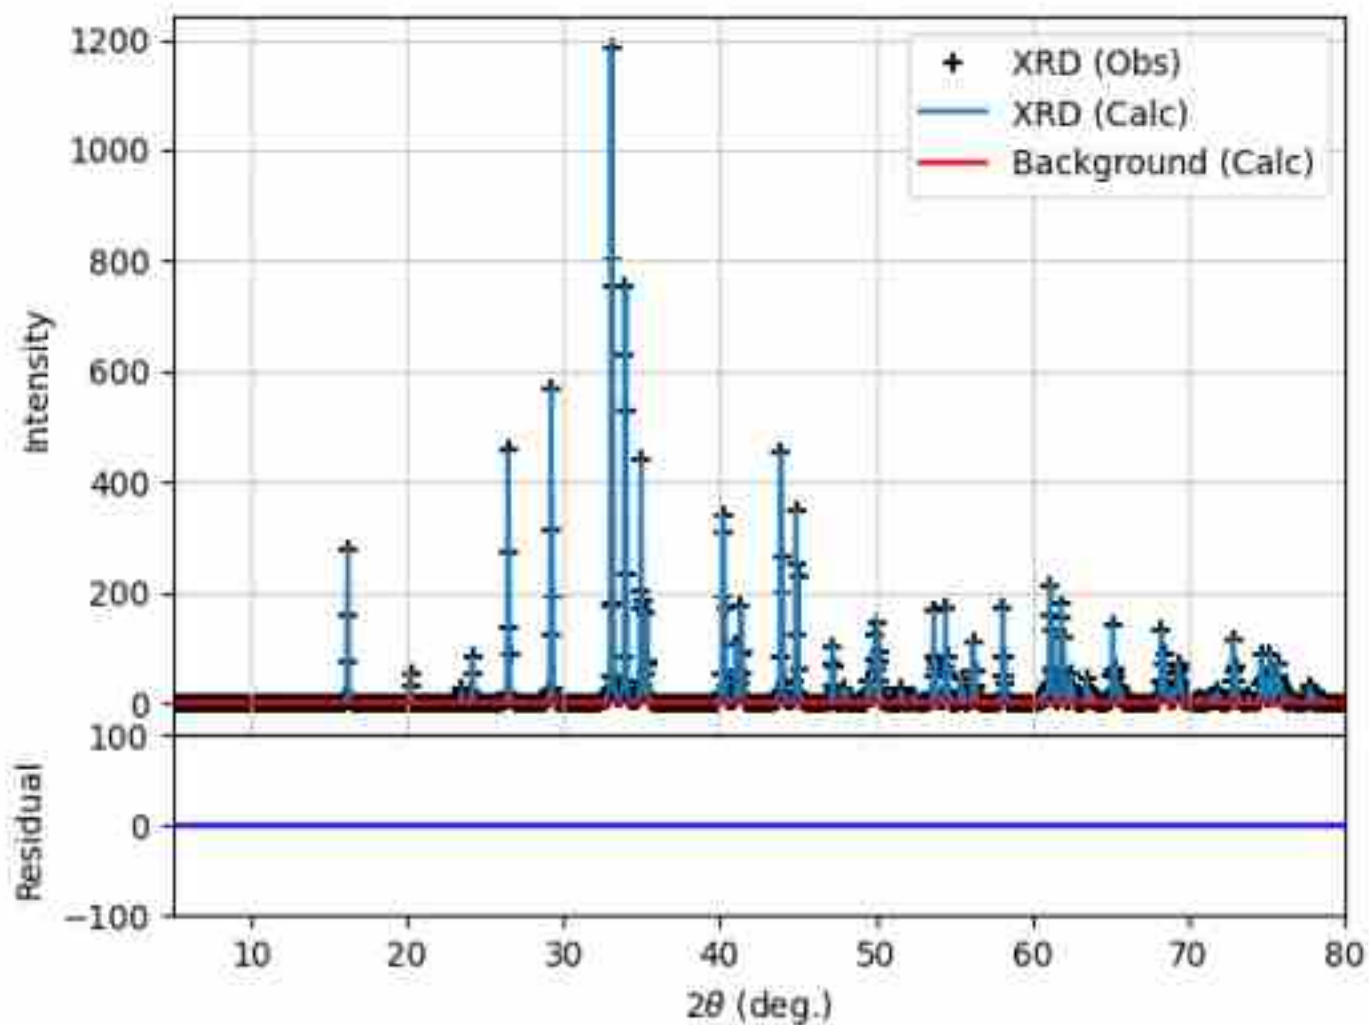

| RMSE before RR | Rwp     | RMSE after RR |
|----------------|---------|---------------|
| 0.02           | 0.00453 | 0.00113       |

# Nd<sub>2</sub>Ta<sub>2</sub>O<sub>8</sub>

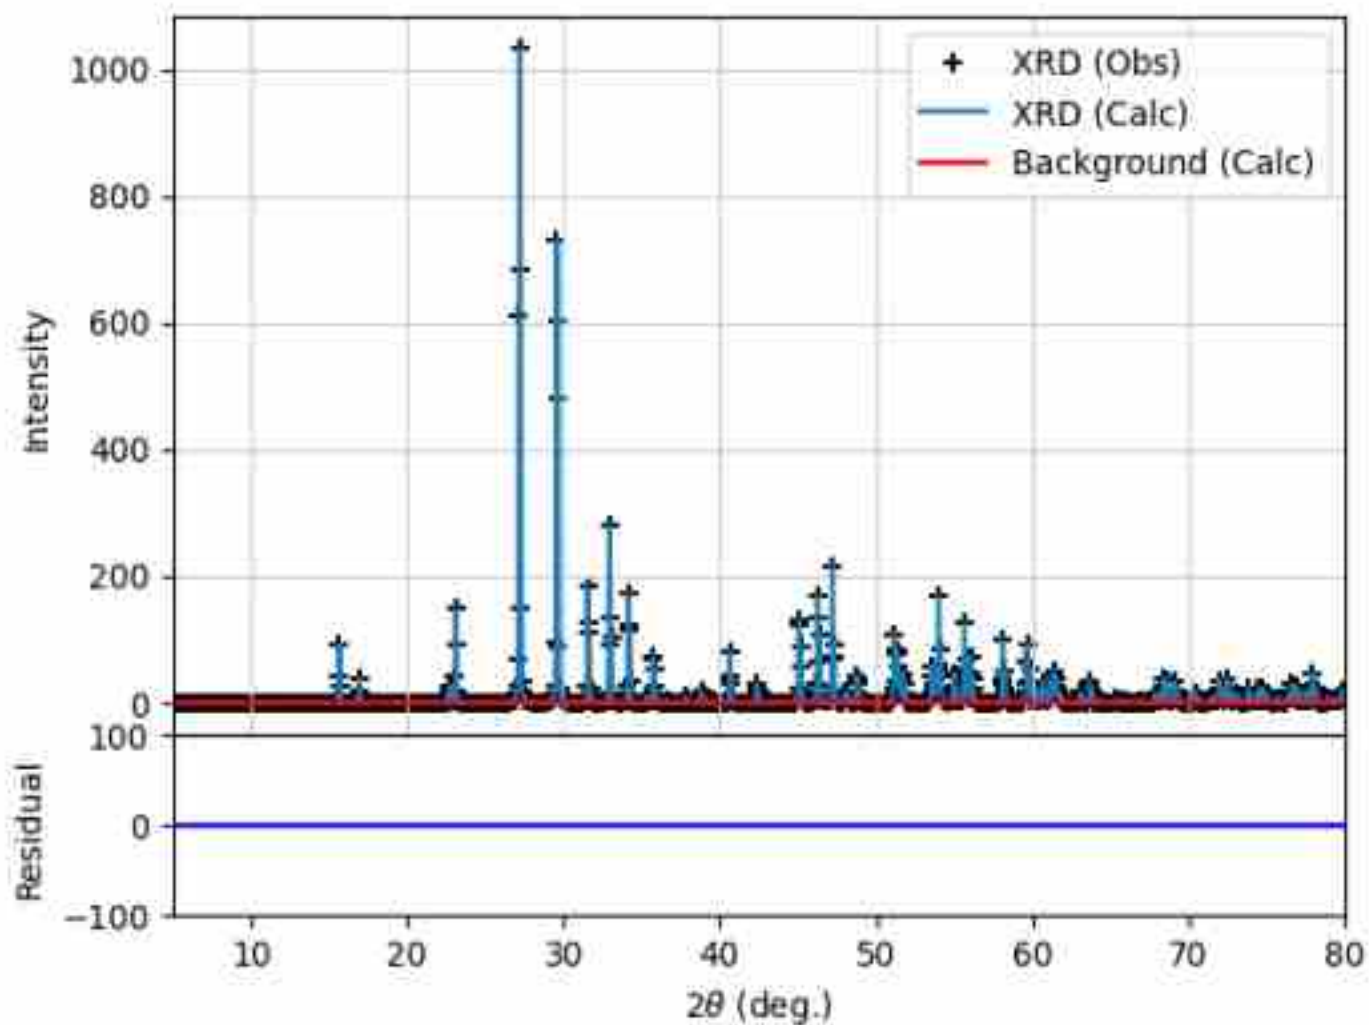

| RMSE before RR | Rwp     | RMSE after RR |
|----------------|---------|---------------|
| 0.02           | 0.00522 | 0.00135       |

# Nd<sub>2</sub>Zn<sub>1</sub>Ru<sub>1</sub>

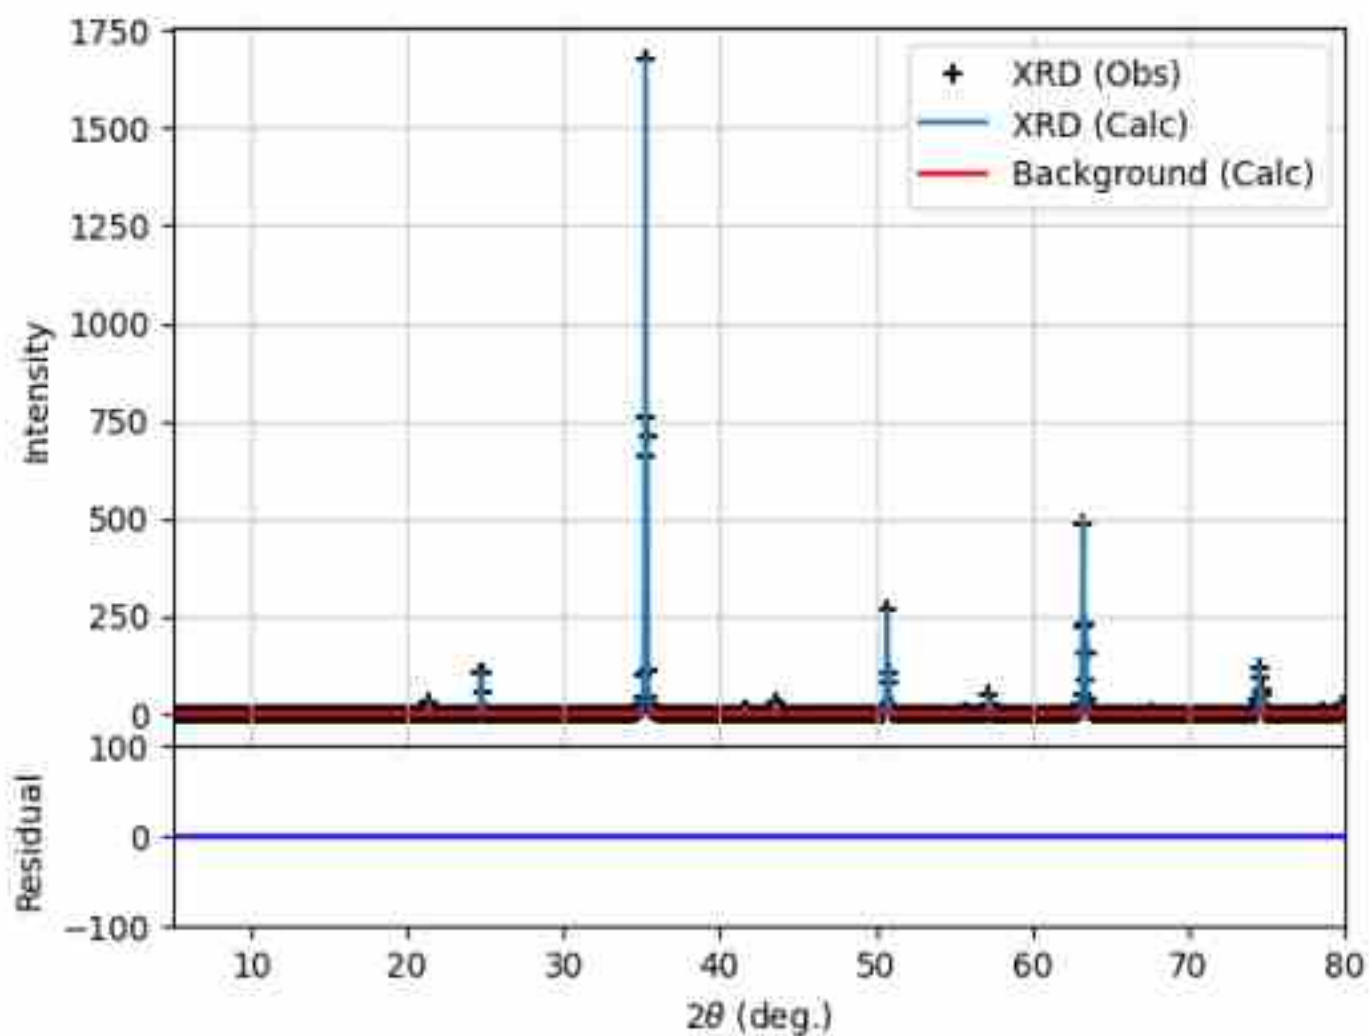

| RMSE before RR | Rwp     | RMSE after RR |
|----------------|---------|---------------|
| 0.002          | 0.00505 | 0.00055       |

Nd3Al1

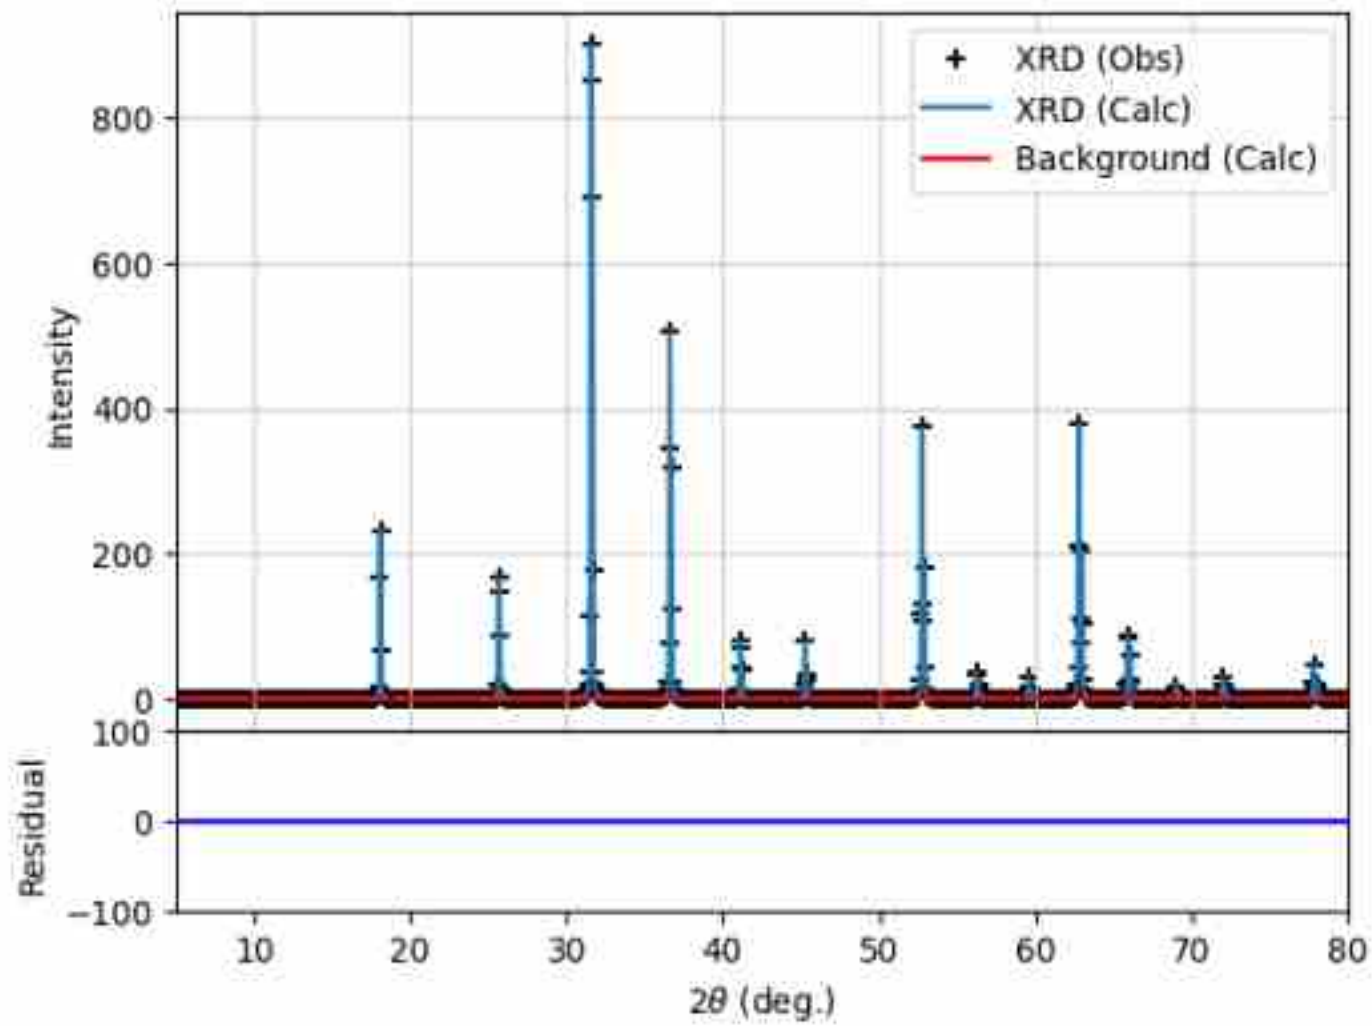

| RMSE before RR | Rwp     | RMSE after RR |
|----------------|---------|---------------|
| 0.002          | 0.01102 | 0.00127       |

# Nd<sub>4</sub>Eu<sub>2</sub>S<sub>8</sub>

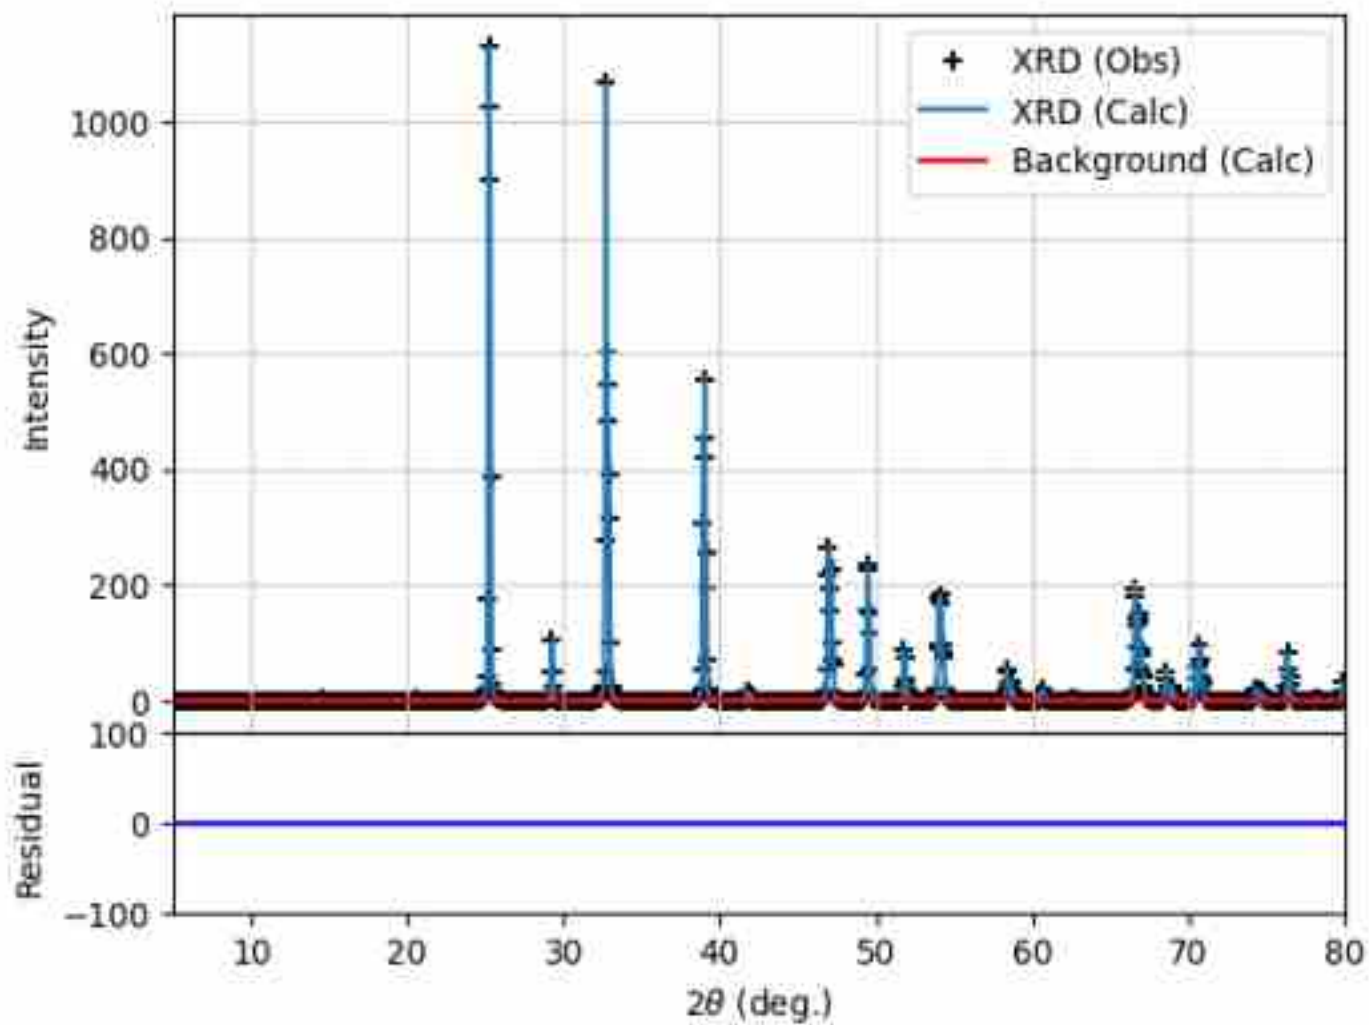

| RMSE before RR | Rwp    | RMSE after RR |
|----------------|--------|---------------|
| 0.02           | 0.0031 | 0.00084       |

# Nd<sub>4</sub>Pb<sub>2</sub>S<sub>8</sub>

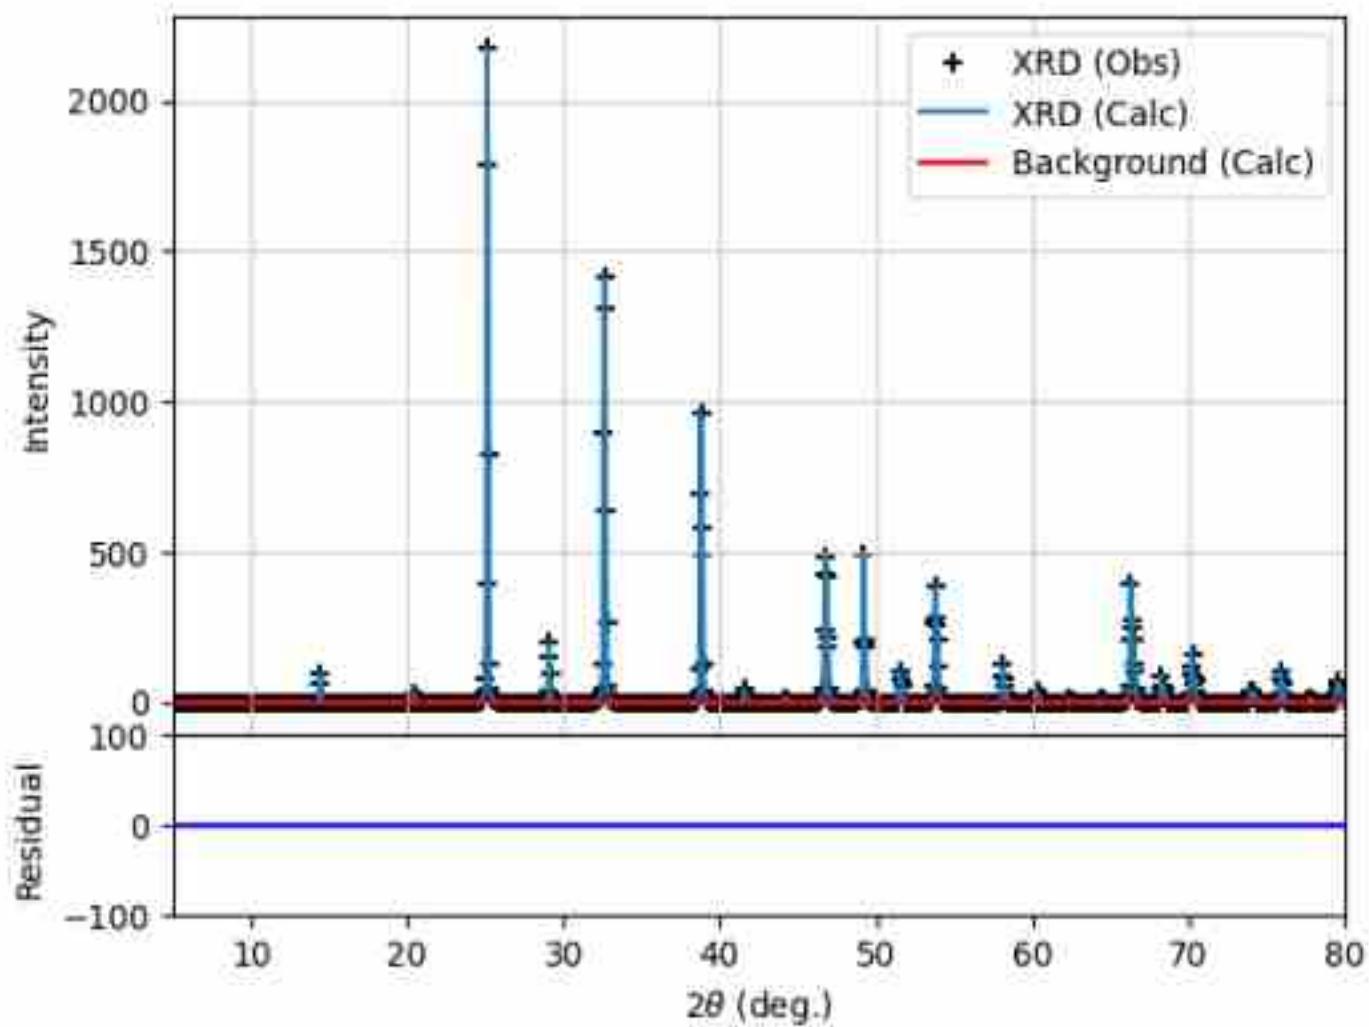

| RMSE before RR | Rwp     | RMSE after RR |
|----------------|---------|---------------|
| 0.02           | 0.00192 | 0.00062       |



# Ni1Rh1

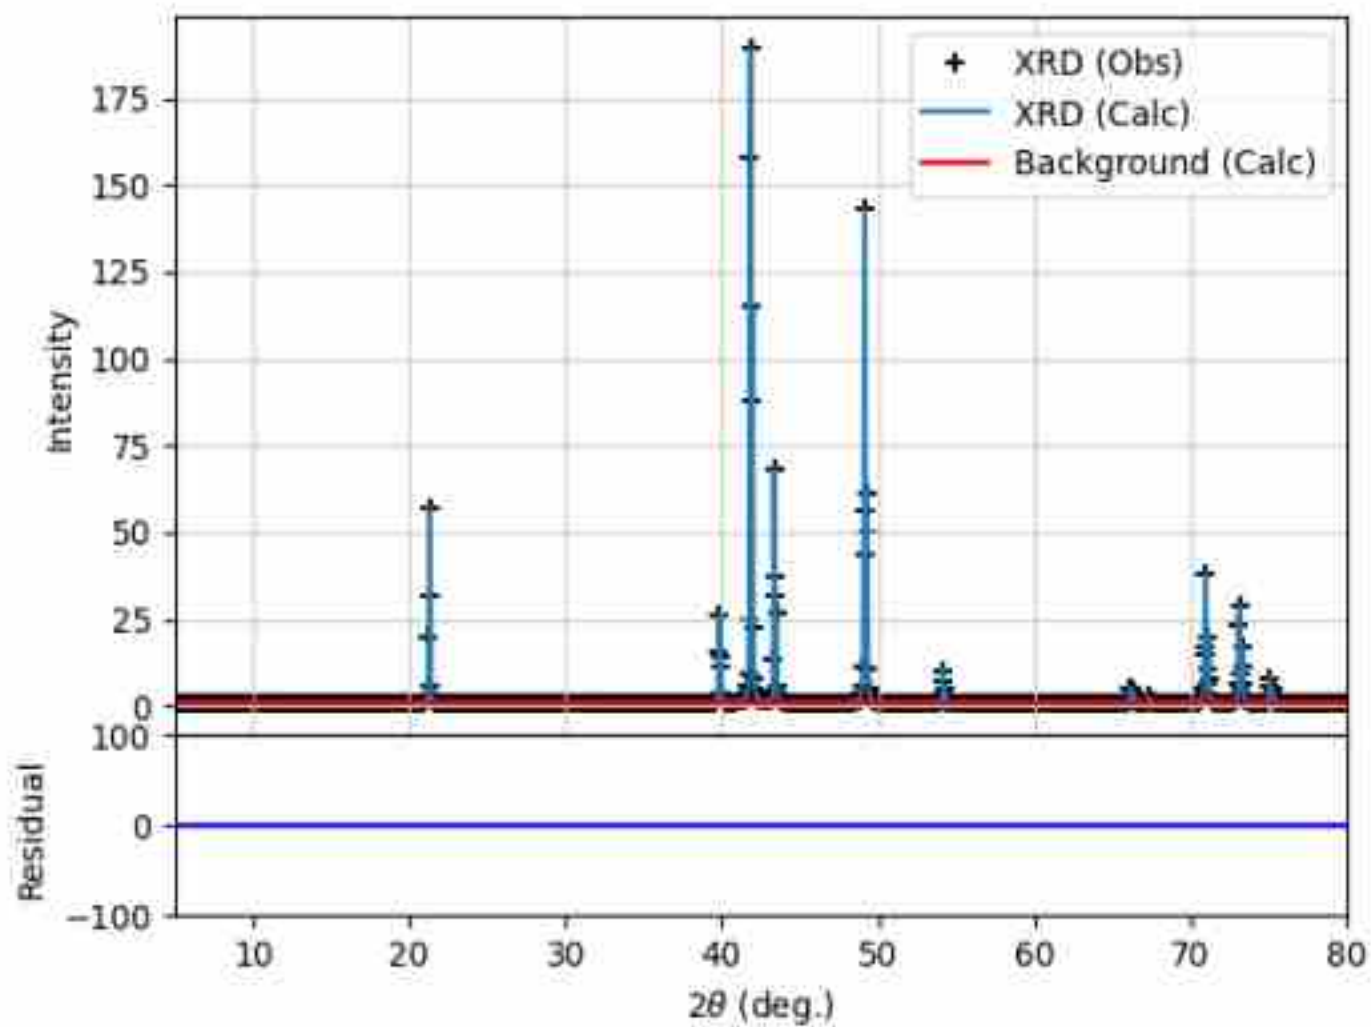

| RMSE before RR | Rwp     | RMSE after RR |
|----------------|---------|---------------|
| 0.002          | 0.00266 | 0.00029       |

# Ni<sub>3</sub>Pt<sub>1</sub>

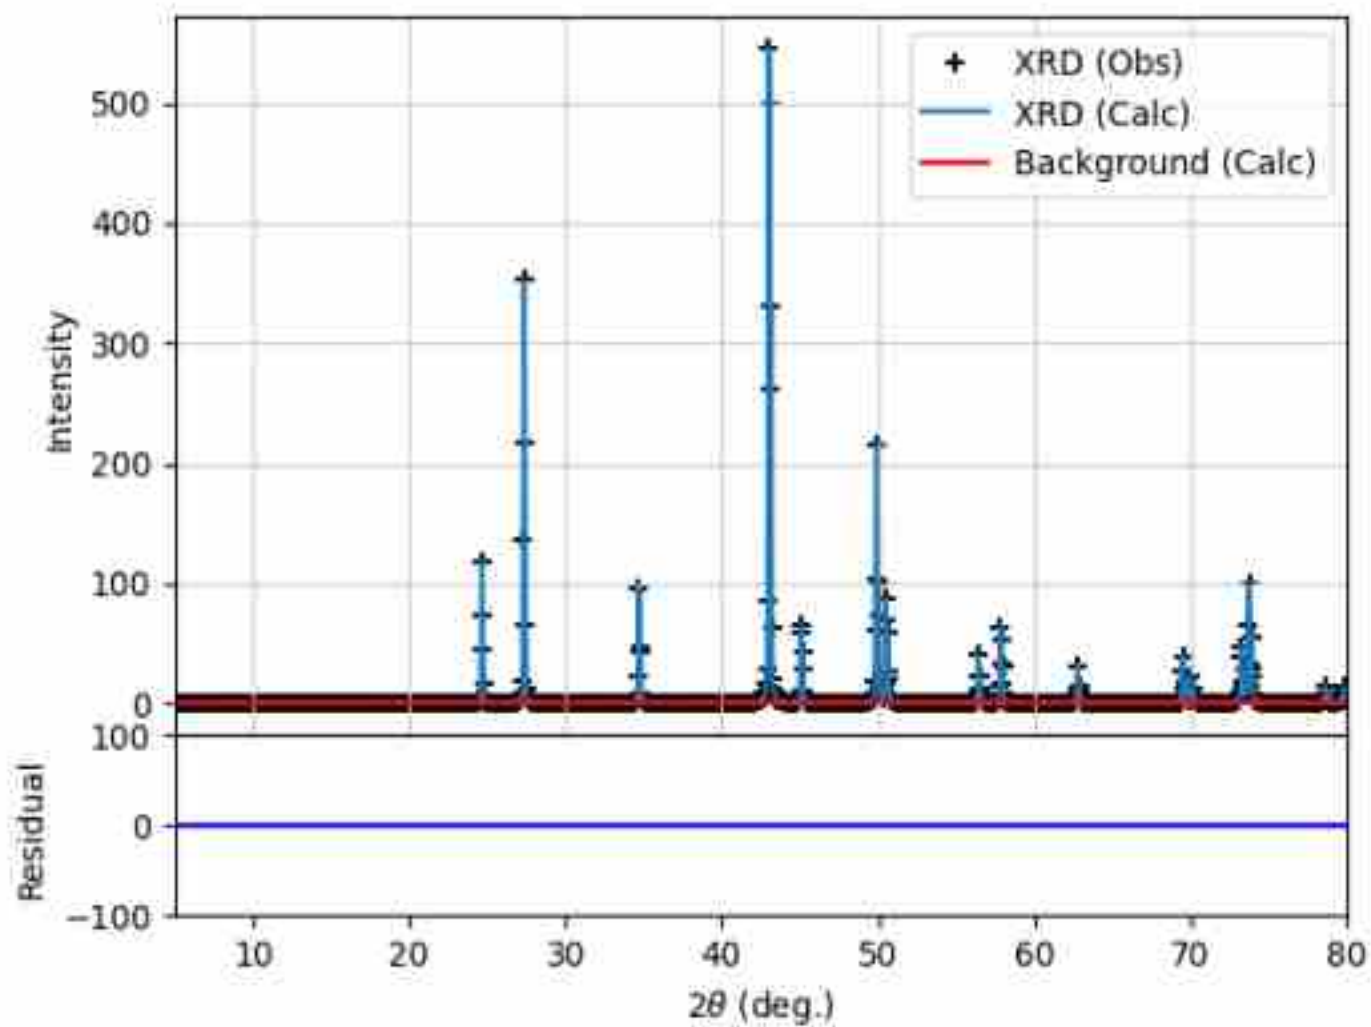

| RMSE before RR | Rwp     | RMSE after RR |
|----------------|---------|---------------|
| 0.002          | 0.00255 | 0.0006        |

# Ni6O2F10

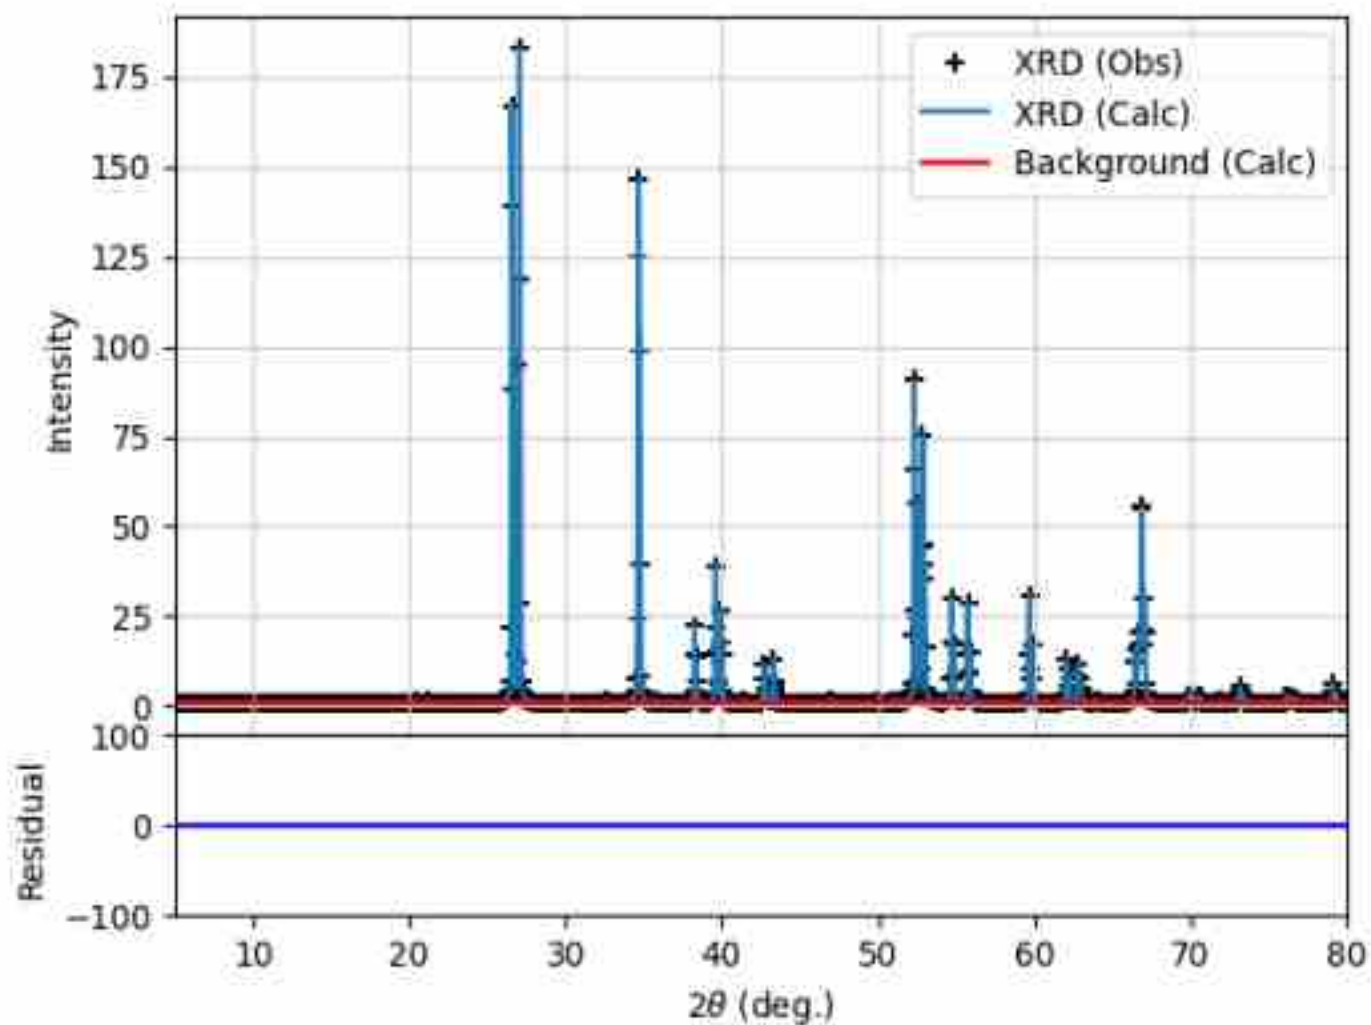

| RMSE before RR | Rwp     | RMSE after RR |
|----------------|---------|---------------|
| 0.02           | 0.00266 | 0.00036       |

# Np2H6

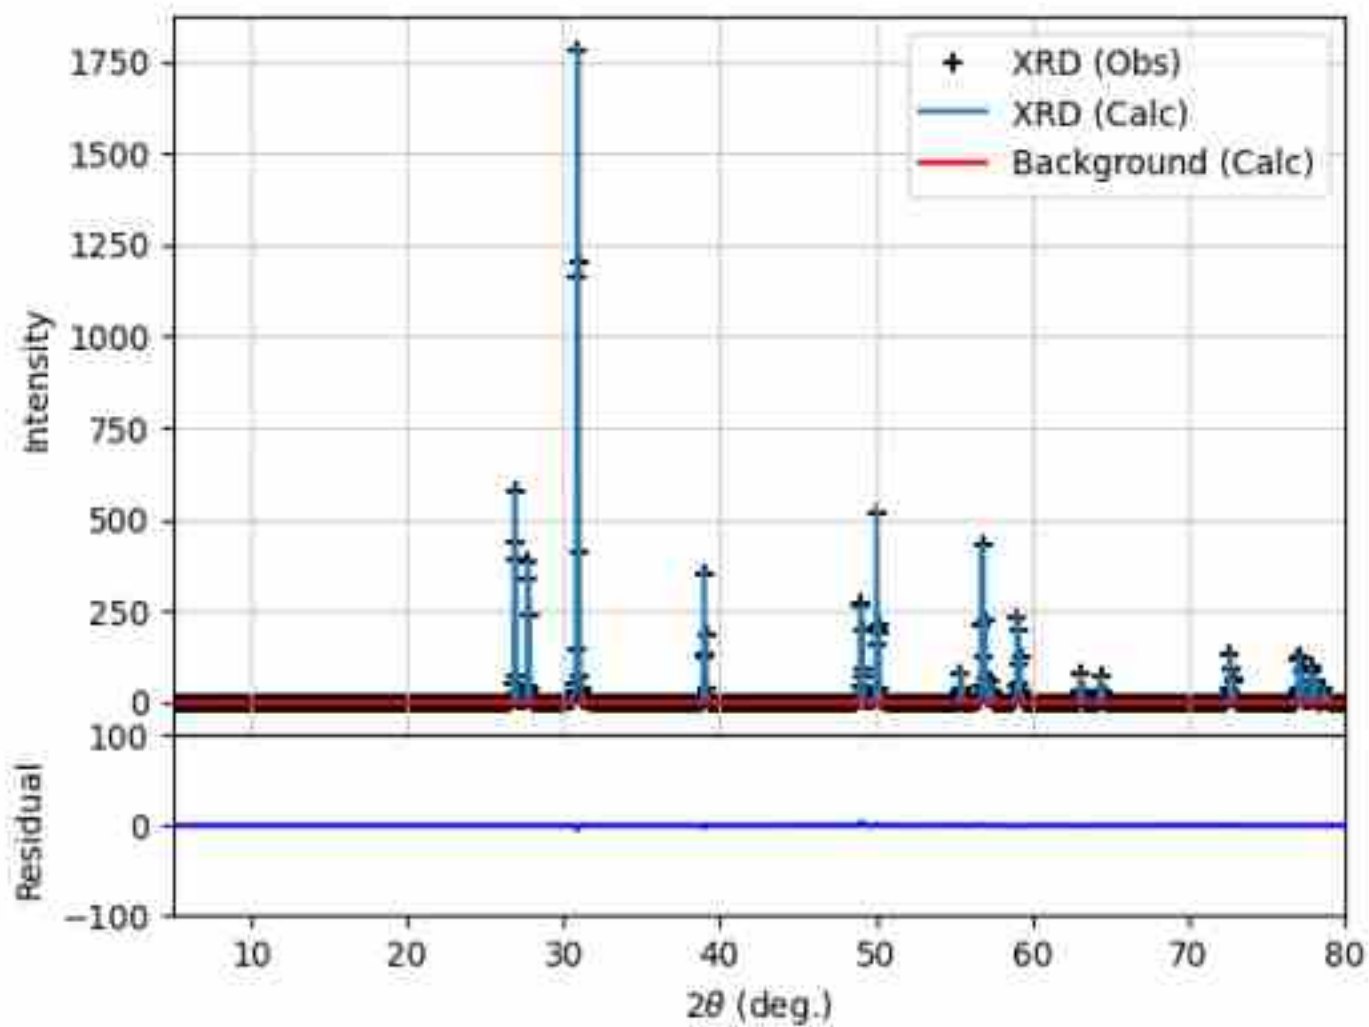

| RMSE before RR | Rwp     | RMSE after RR |
|----------------|---------|---------------|
| 0.02           | 0.41341 | 0.15652       |

# Pa1Ag1Au2

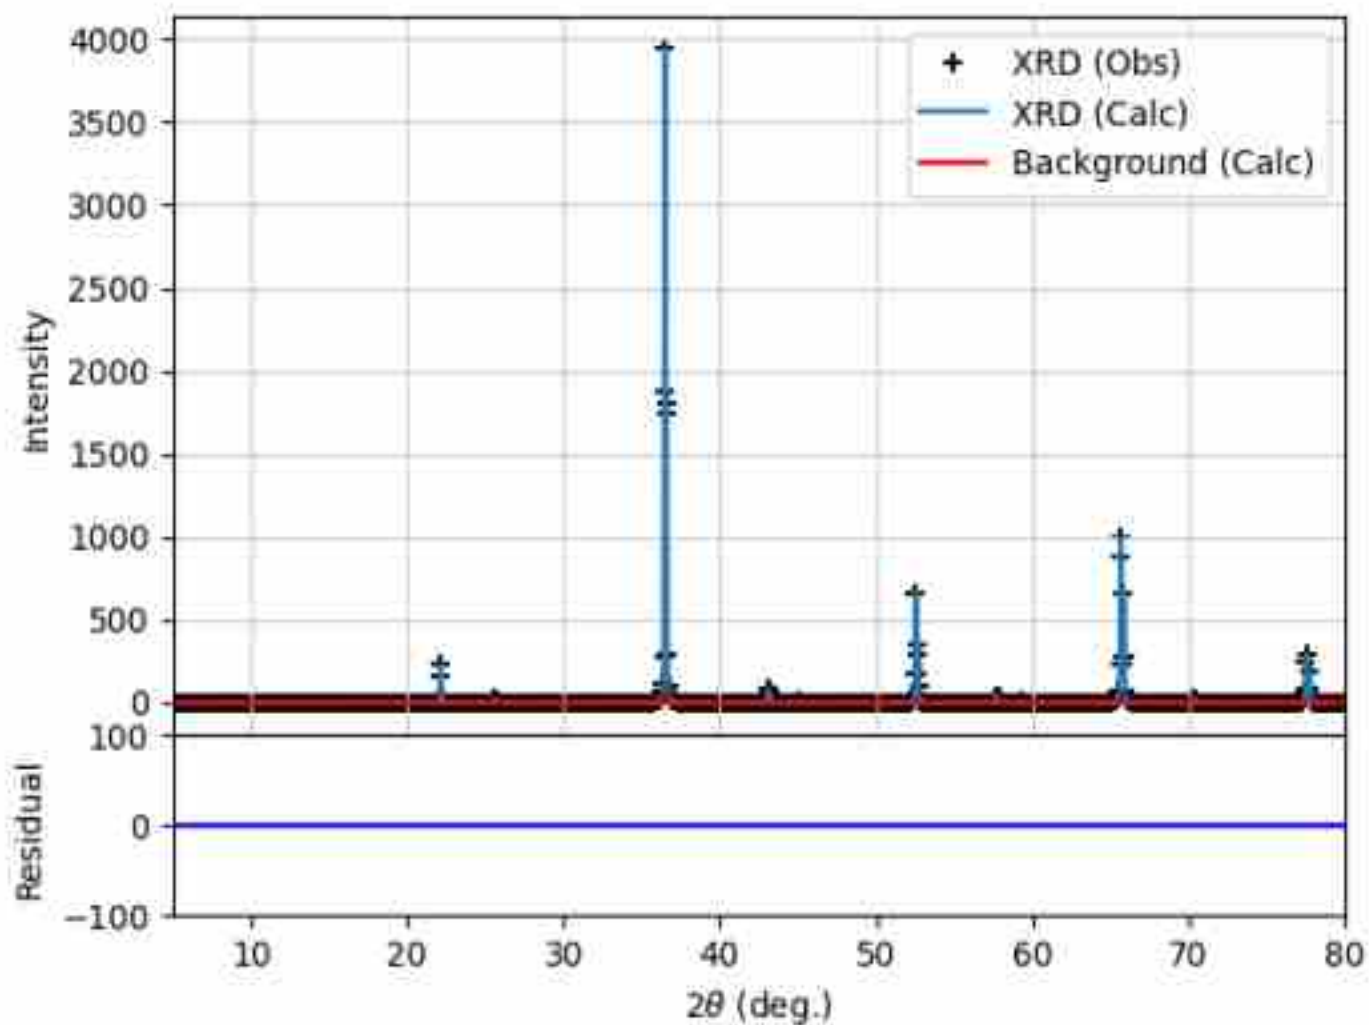

| RMSE before RR | Rwp     | RMSE after RR |
|----------------|---------|---------------|
| 0.002          | 0.00476 | 0.00043       |

# Pa1Al1Cu2

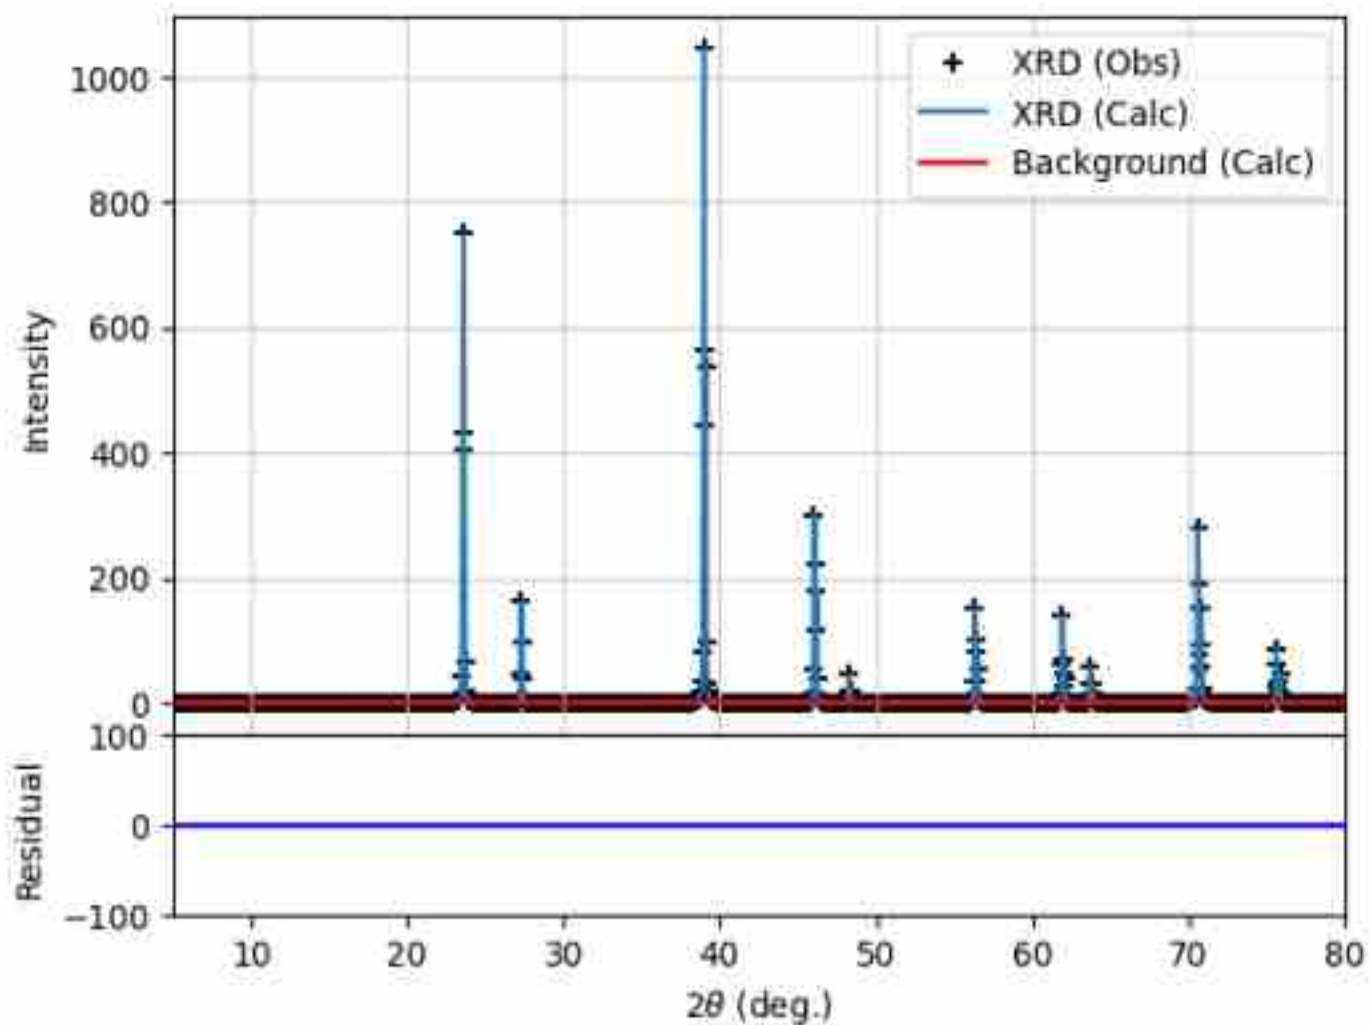

| RMSE before RR | Rwp     | RMSE after RR |
|----------------|---------|---------------|
| 0.002          | 0.00327 | 0.00042       |

# Pa1Ga1Cu2

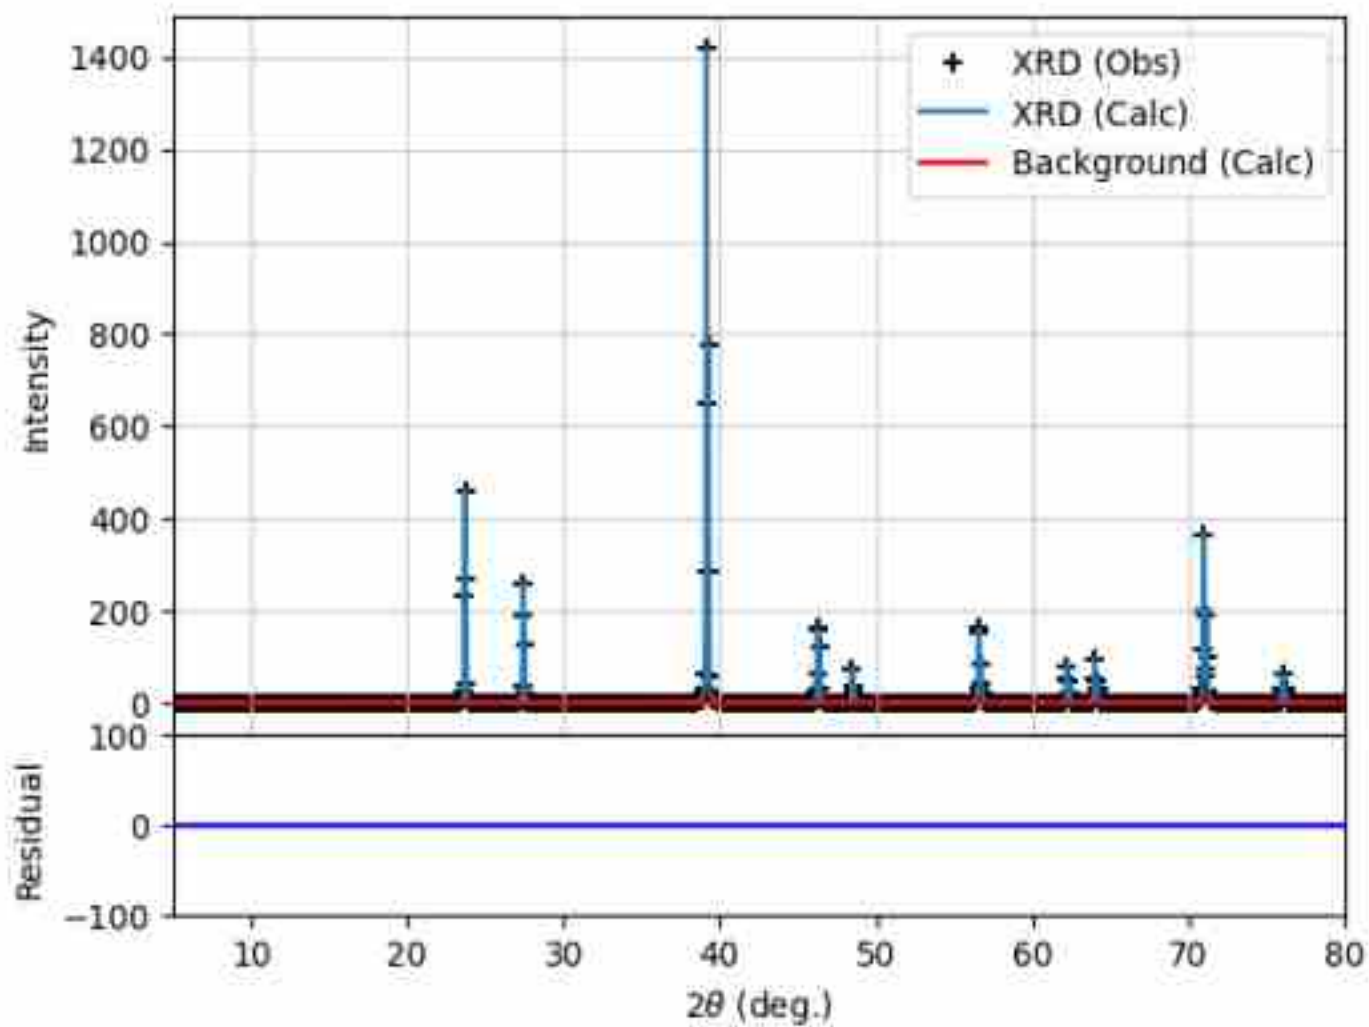

| RMSE before RR | Rwp     | RMSE after RR |
|----------------|---------|---------------|
| 0.002          | 0.00012 | 0.00011       |

# Pa1Ga1Pt2

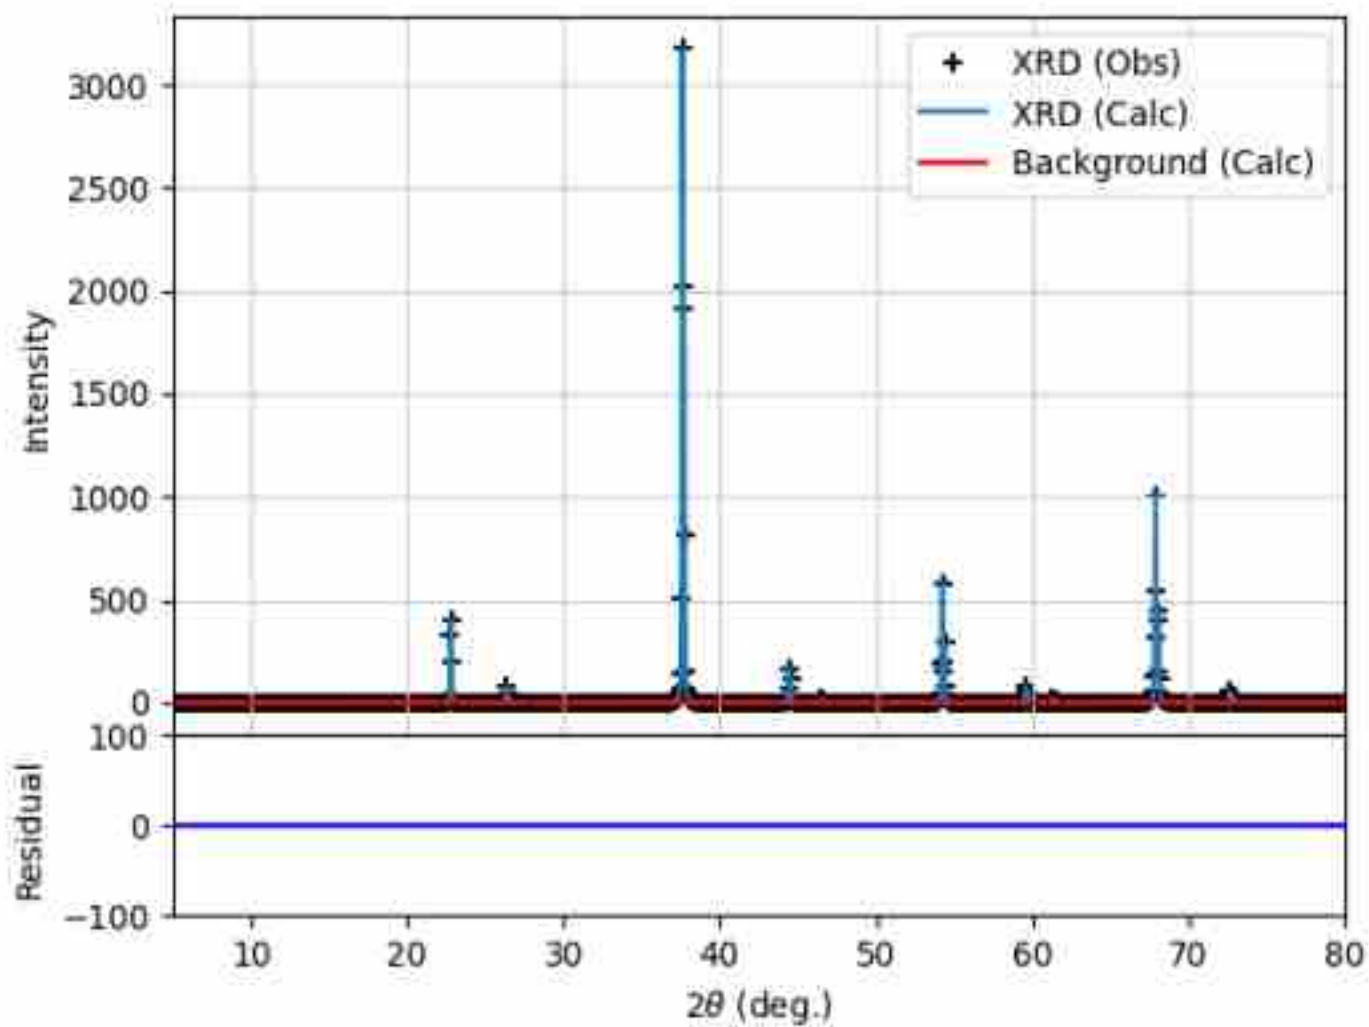

| RMSE before RR | Rwp     | RMSE after RR |
|----------------|---------|---------------|
| 0.002          | 0.00444 | 0.00025       |



# Pa1Ga3

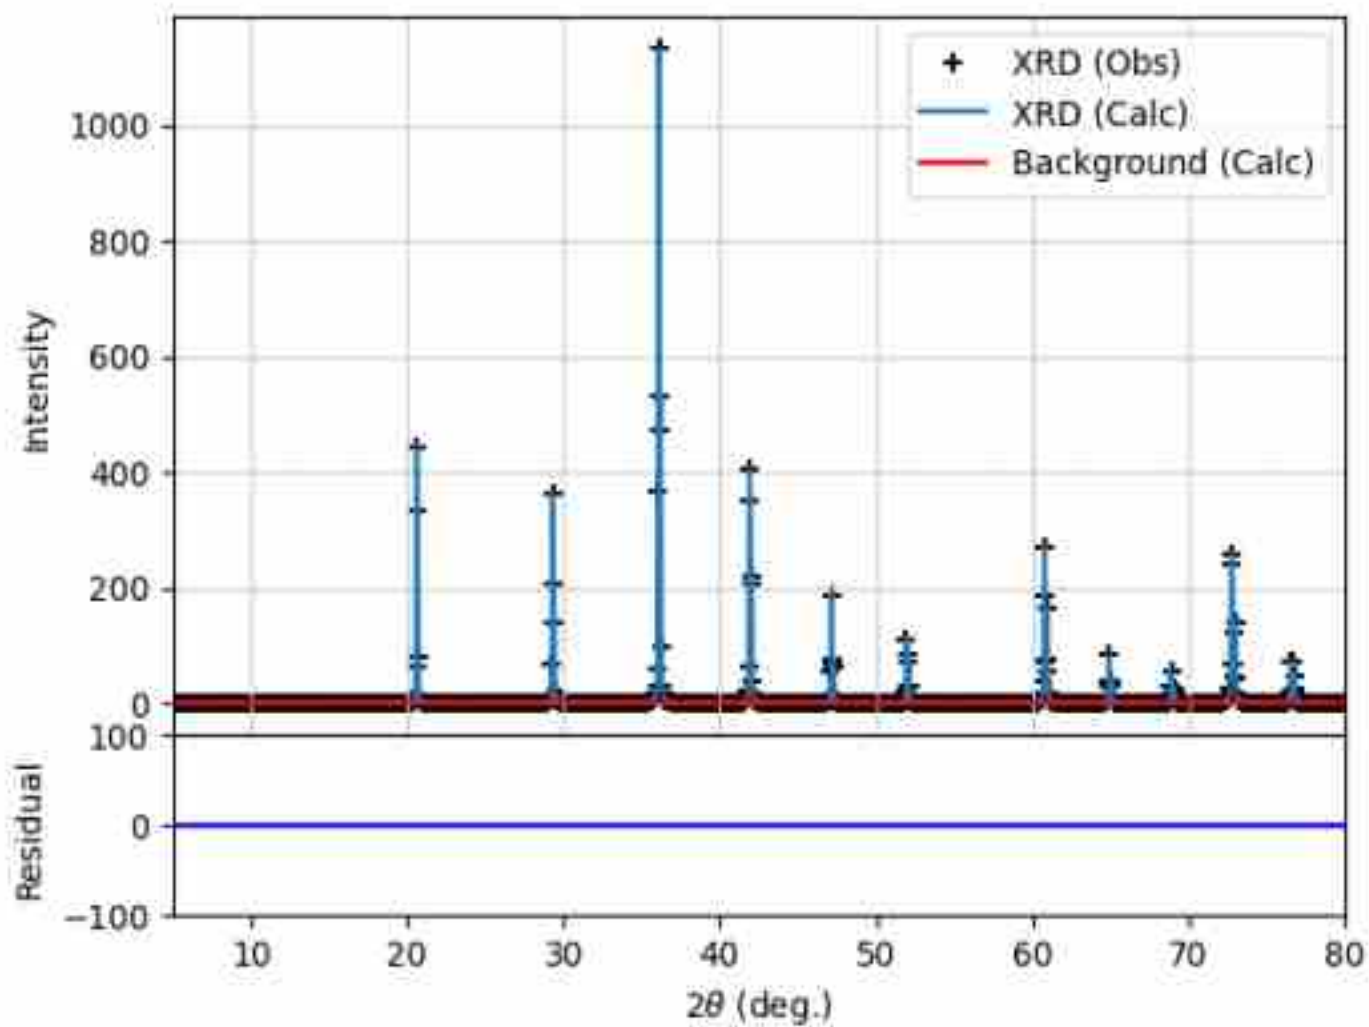

| RMSE before RR | Rwp     | RMSE after RR |
|----------------|---------|---------------|
| 0.002          | 0.00492 | 0.00104       |

# Pa1Hg1Au2

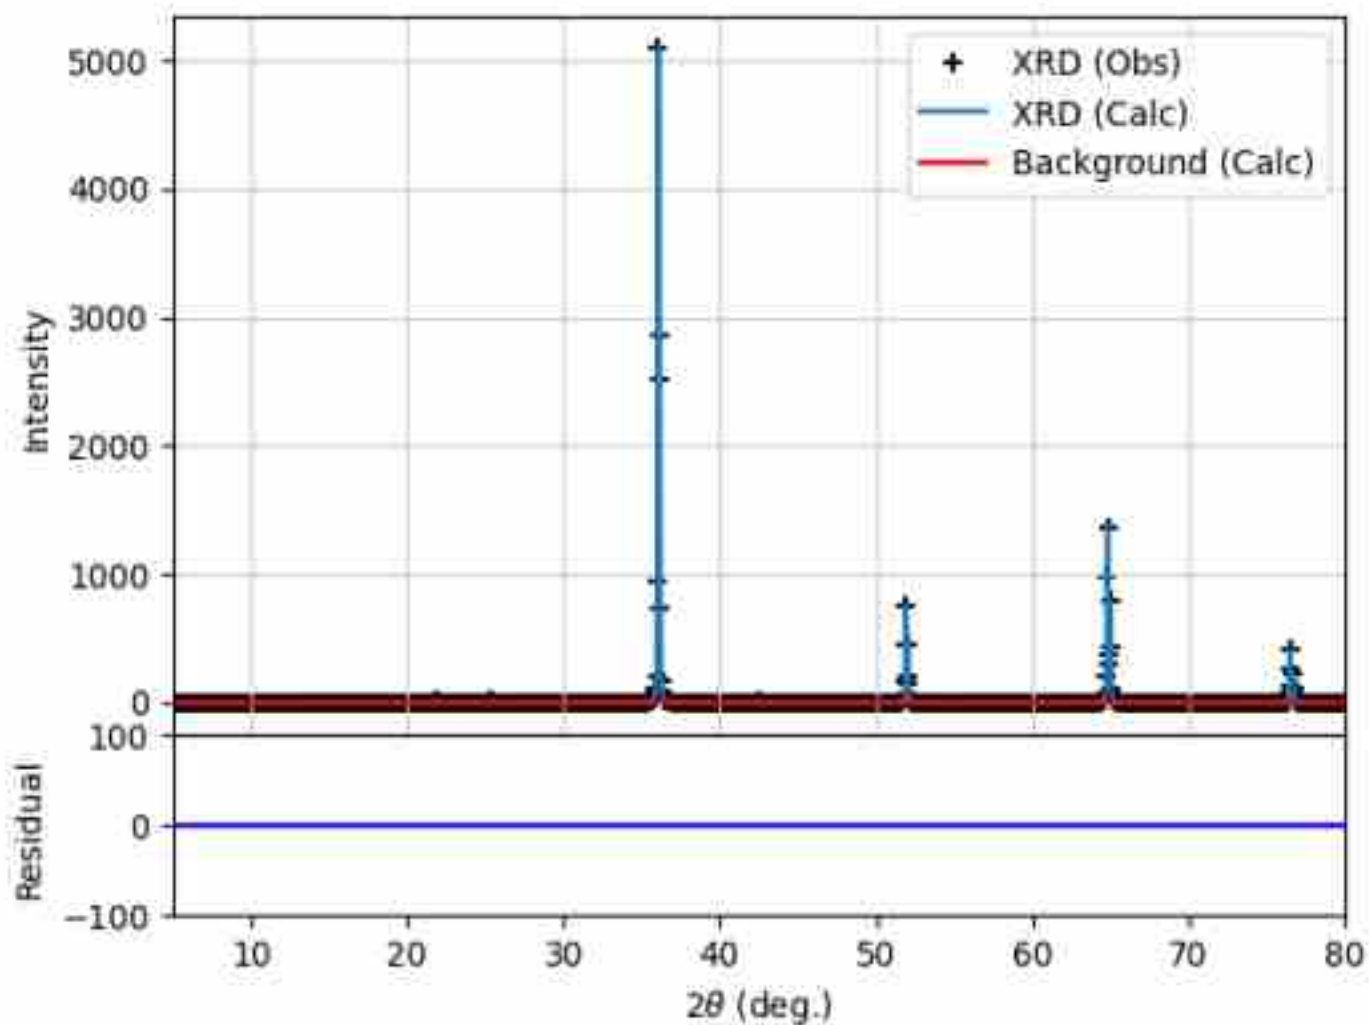

| RMSE before RR | Rwp     | RMSE after RR |
|----------------|---------|---------------|
| 0.002          | 0.00497 | 0.00043       |

# Pa1In1Ni2

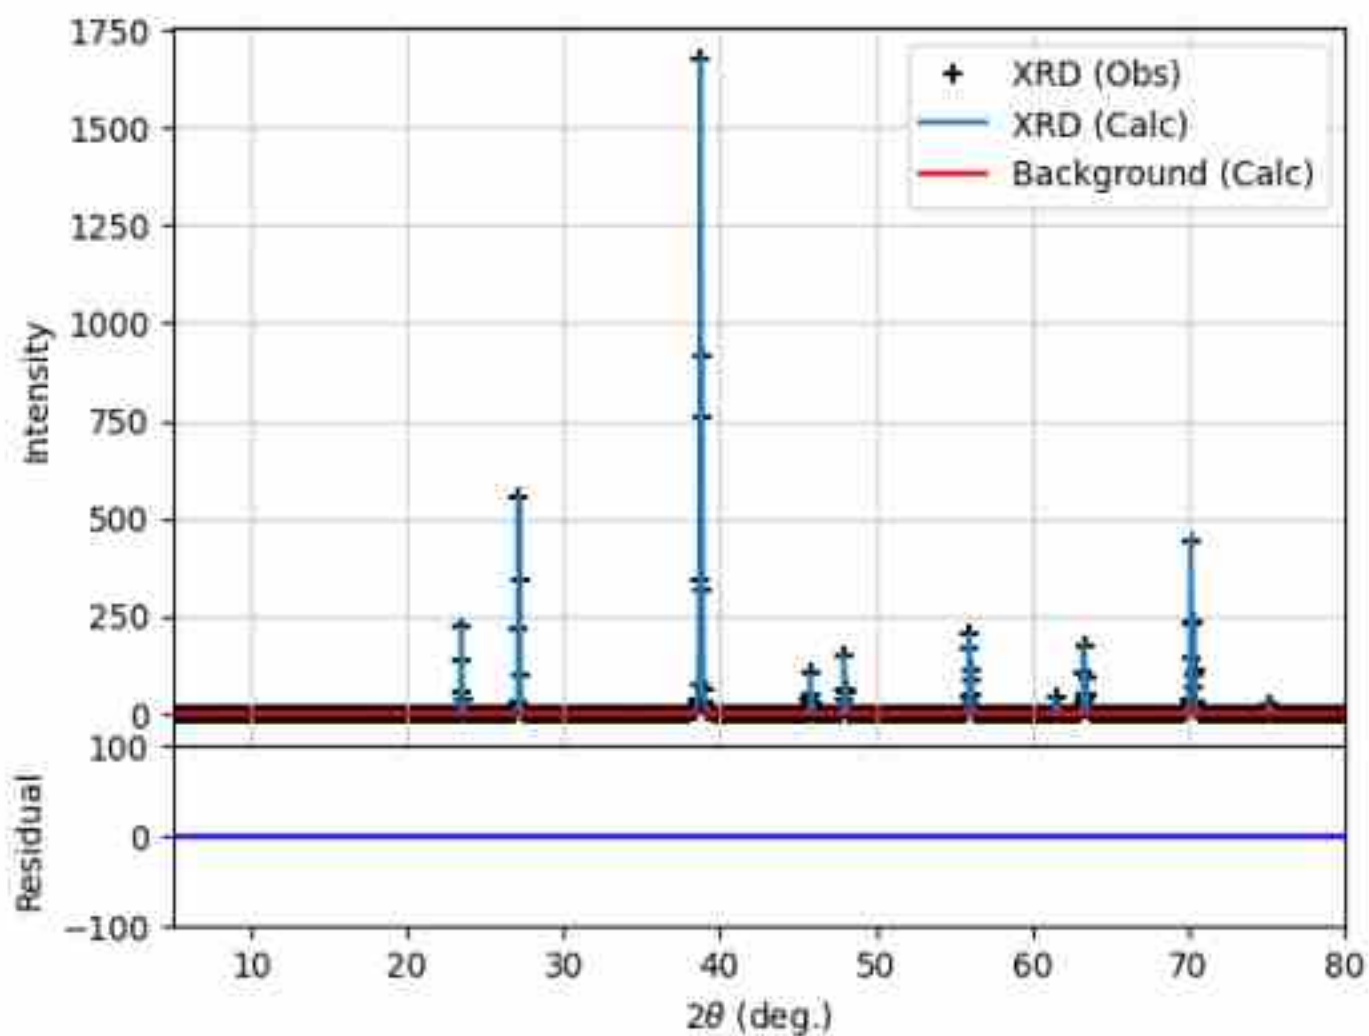

| RMSE before RR | Rwp     | RMSE after RR |
|----------------|---------|---------------|
| 0.002          | 0.00462 | 0.00073       |

# Pa1Si1Tc2

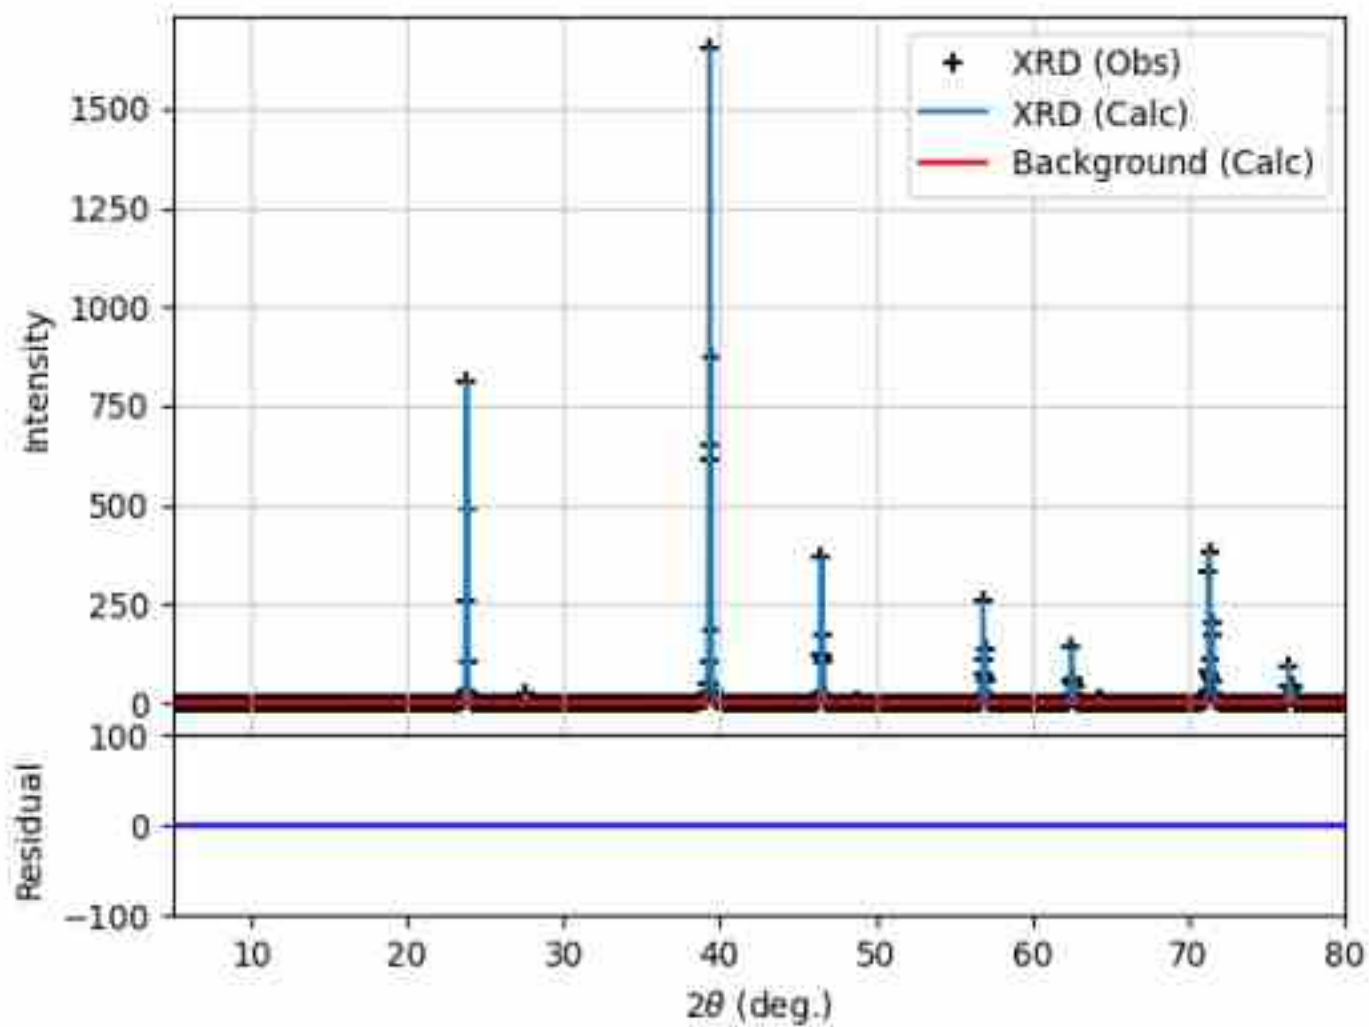

| RMSE before RR | Rwp     | RMSE after RR |
|----------------|---------|---------------|
| 0.002          | 0.00383 | 0.00088       |

# Pa1Sn1Pd2

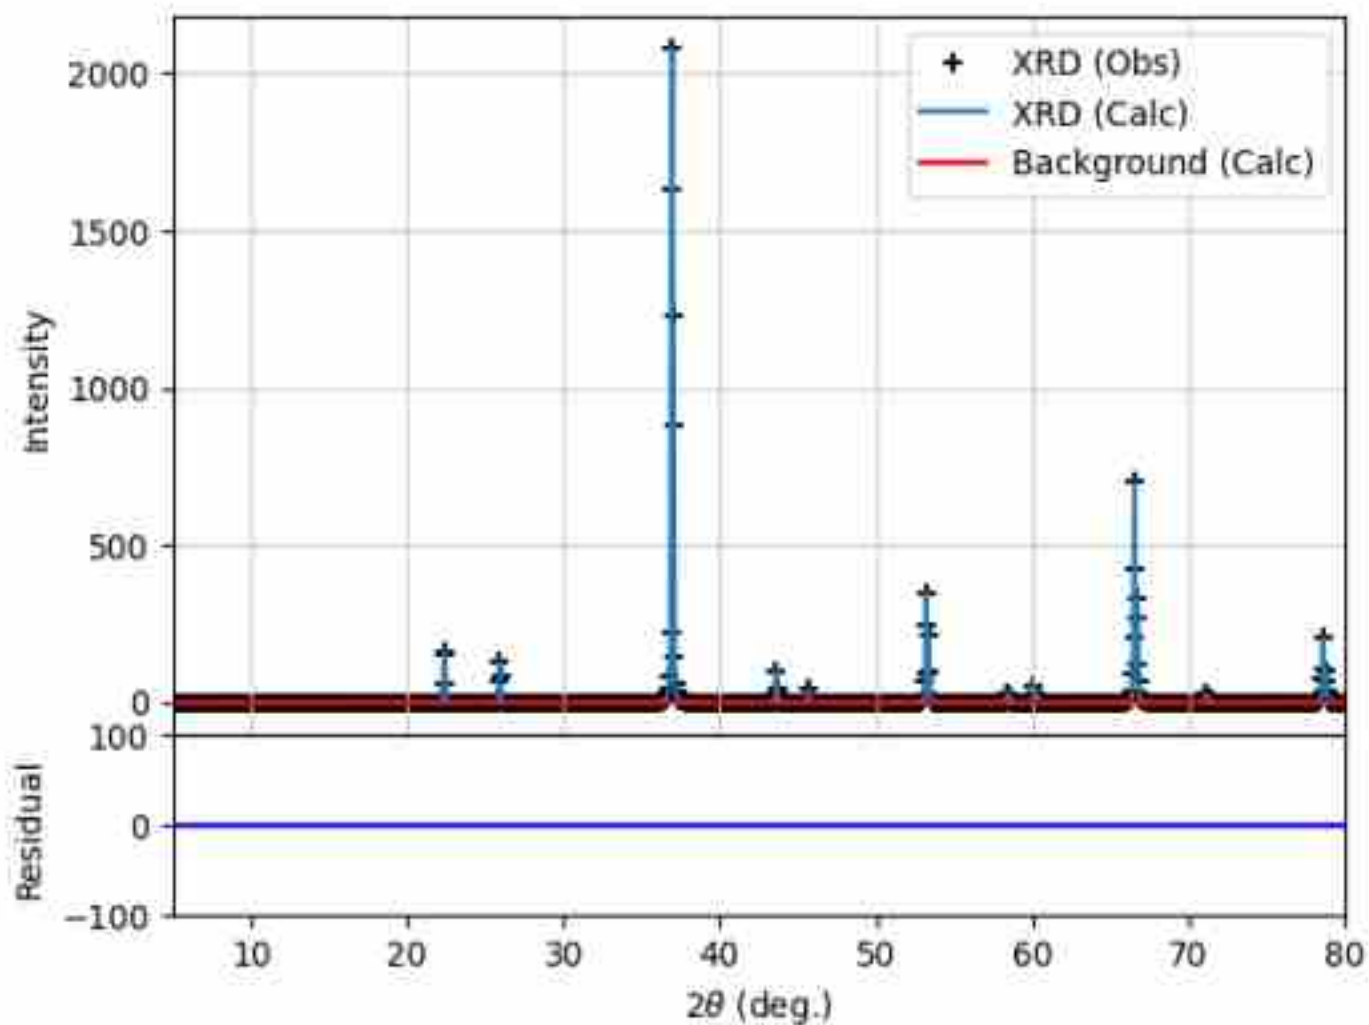

| RMSE before RR | Rwp     | RMSE after RR |
|----------------|---------|---------------|
| 0.002          | 0.00826 | 0.00103       |

# Pa1Zn1Rh2

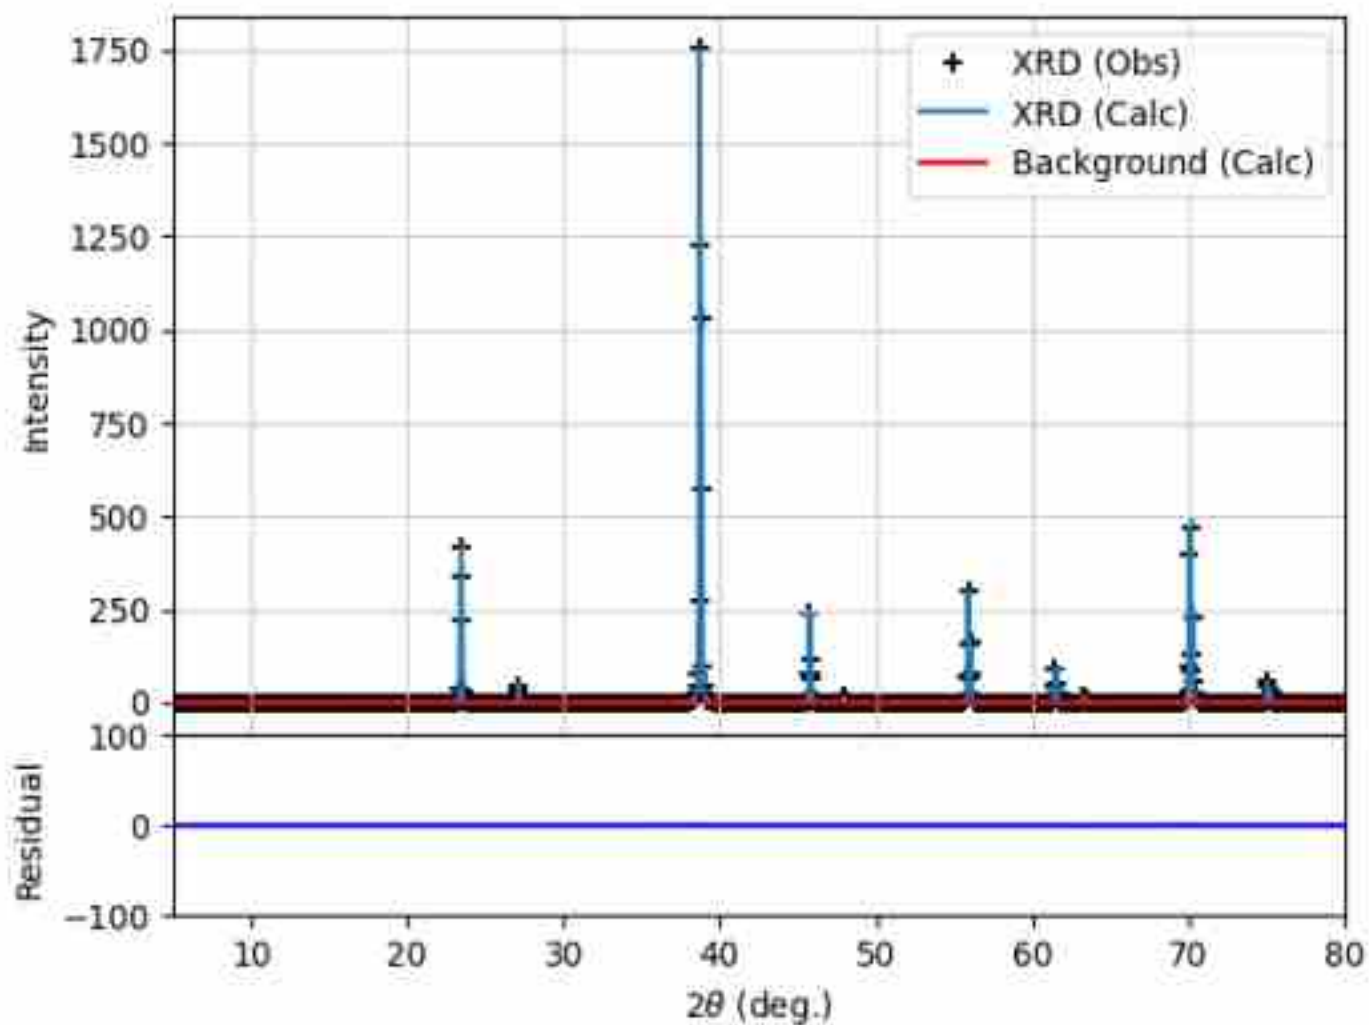

| RMSE before RR | Rwp     | RMSE after RR |
|----------------|---------|---------------|
| 0.002          | 0.18907 | 0.00304       |

# Pd4F8

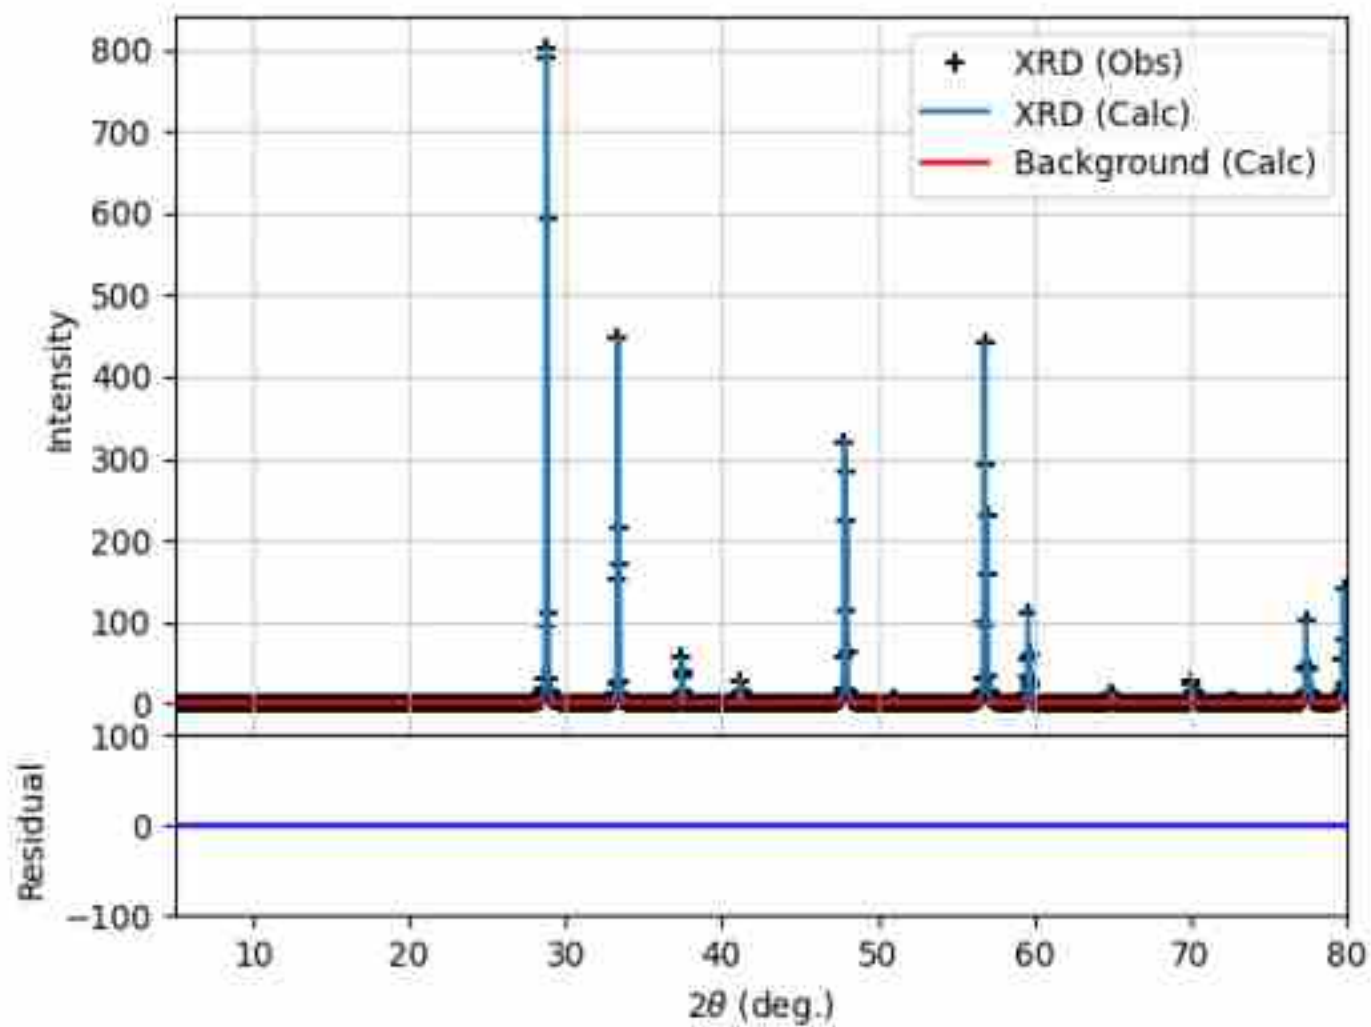

| RMSE before RR | Rwp     | RMSE after RR |
|----------------|---------|---------------|
| 0.02           | 0.00451 | 0.00134       |

# Pm<sub>2</sub>Ni<sub>1</sub>Ir<sub>1</sub>

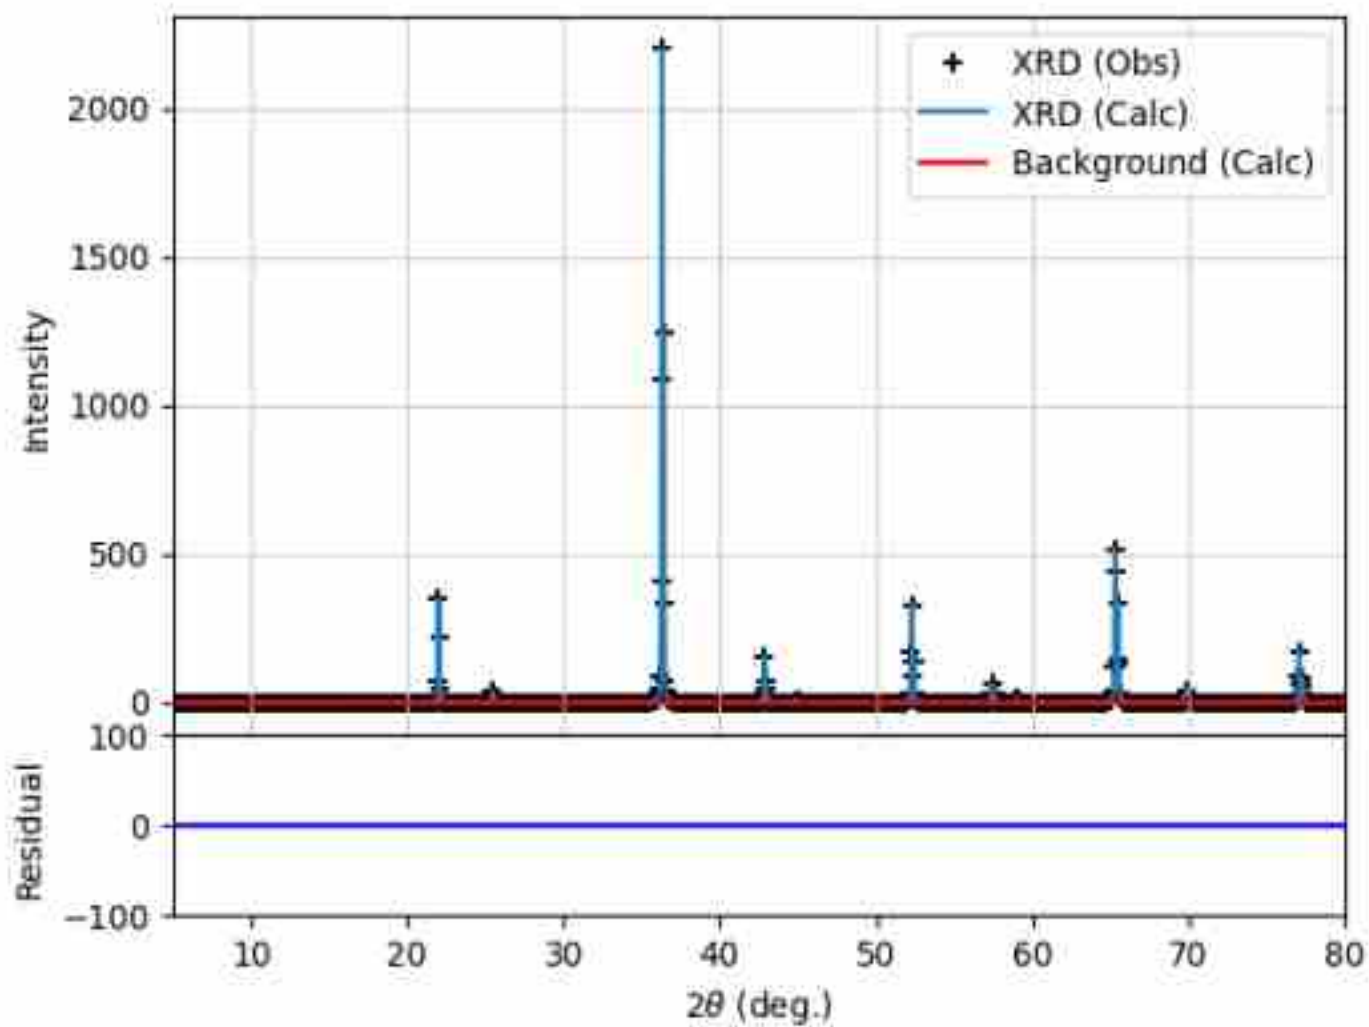

| RMSE before RR | Rwp     | RMSE after RR |
|----------------|---------|---------------|
| 0.002          | 0.00656 | 0.00024       |



# Pm<sub>2</sub>Si<sub>1</sub>Ni<sub>1</sub>

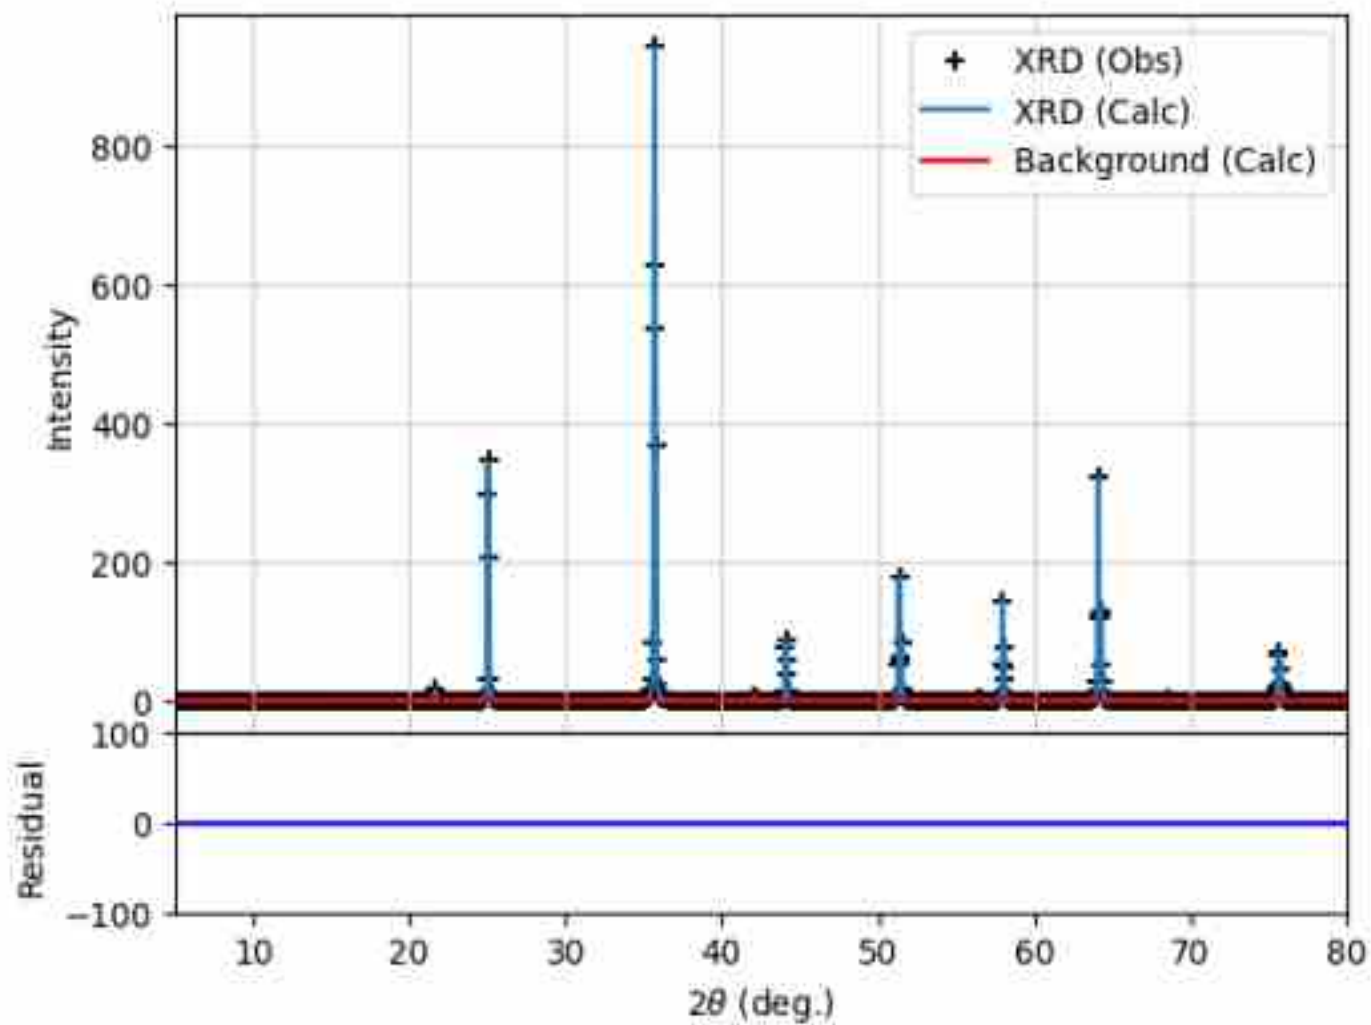

| RMSE before RR | Rwp     | RMSE after RR |
|----------------|---------|---------------|
| 0.002          | 0.00971 | 0.00093       |

# Pr<sub>1</sub>Ag<sub>1</sub>Hg<sub>2</sub>

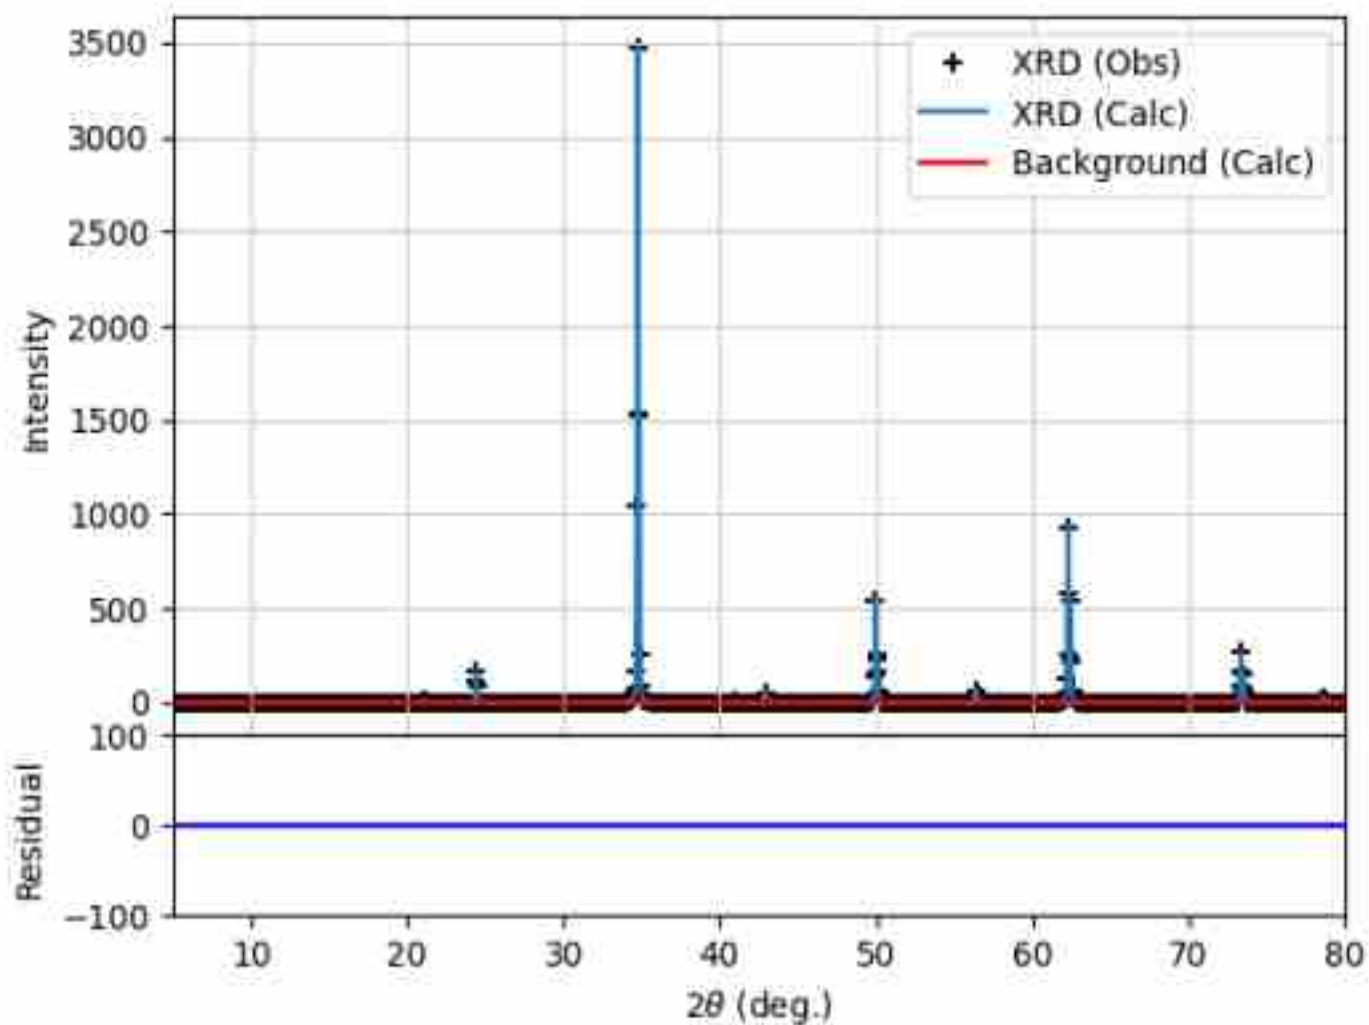

| RMSE before RR | Rwp     | RMSE after RR |
|----------------|---------|---------------|
| 0.002          | 0.00512 | 0.00044       |

# Pr1Ag1

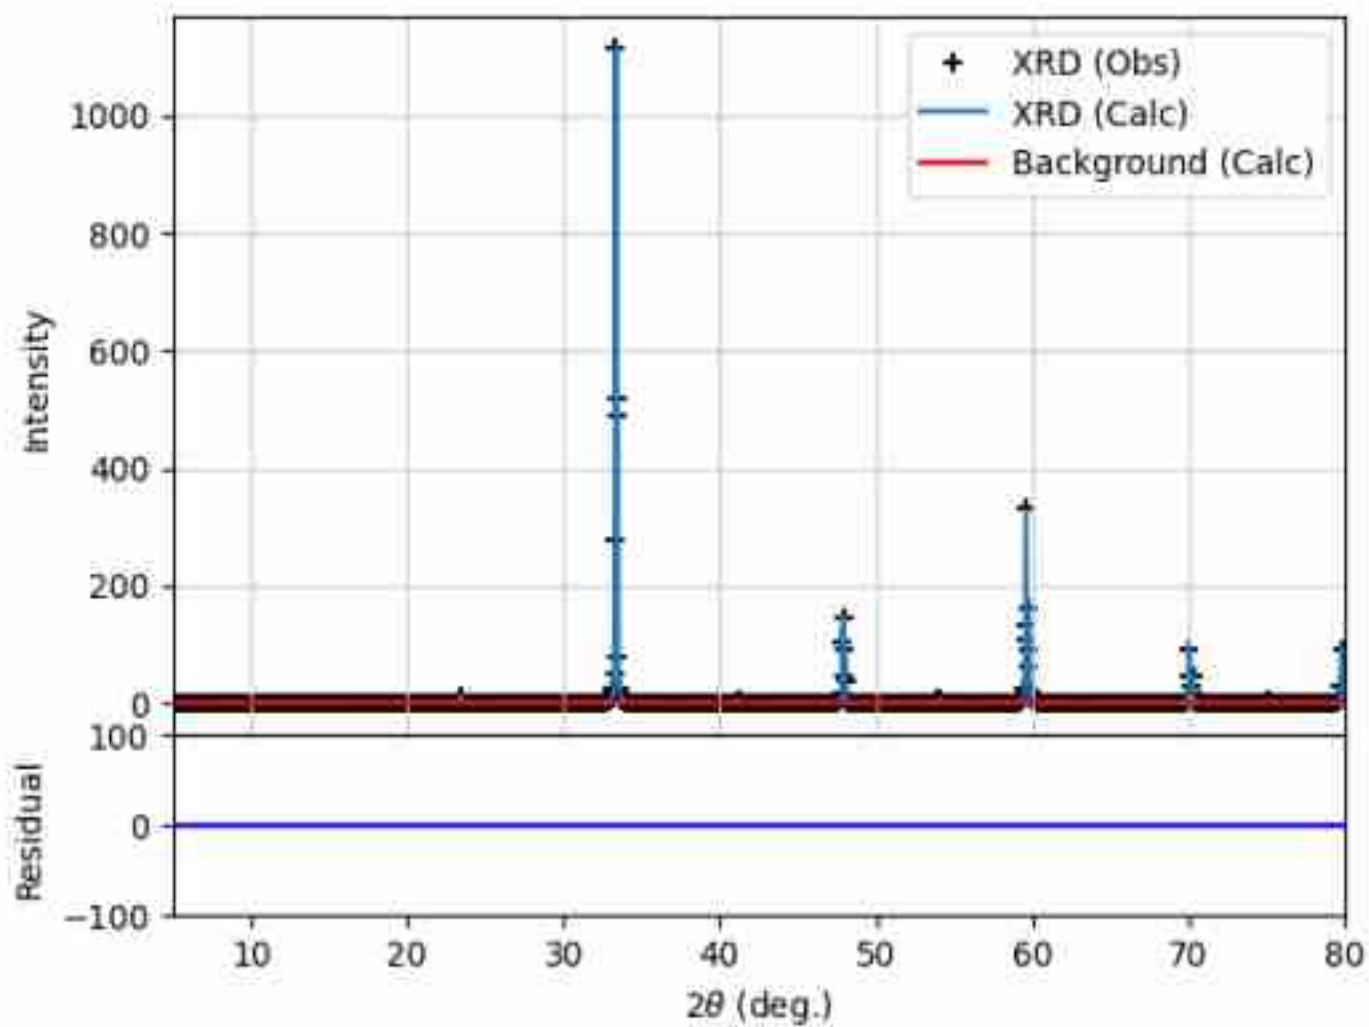

| RMSE before RR | Rwp     | RMSE after RR |
|----------------|---------|---------------|
| 0.002          | 0.10773 | 0.00217       |

# Pr1Cd1Hg2

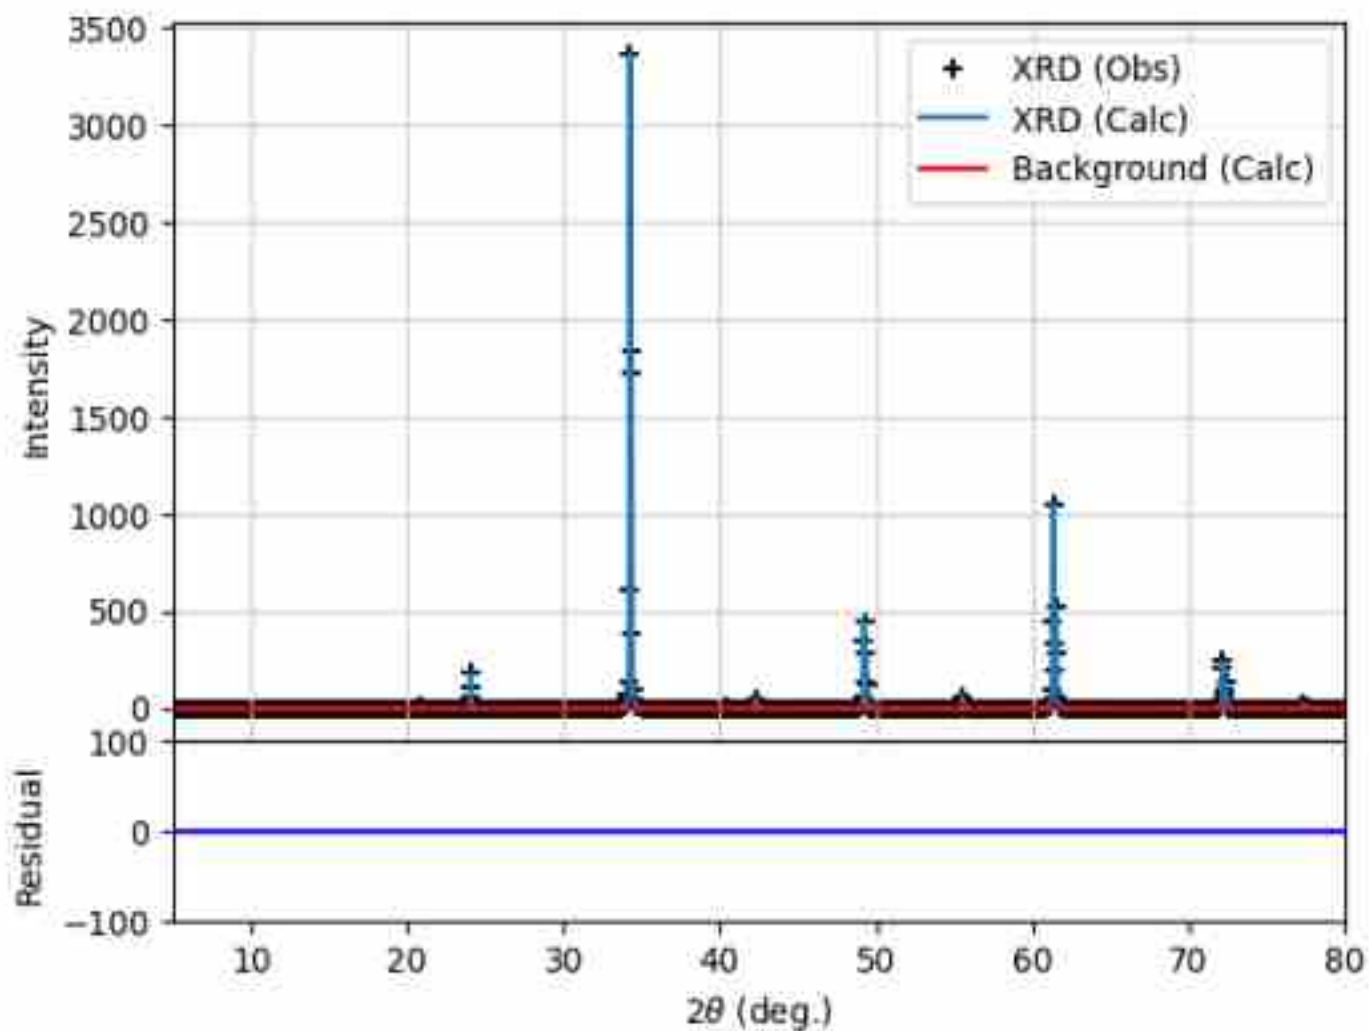

| RMSE before RR | Rwp     | RMSE after RR |
|----------------|---------|---------------|
| 0.002          | 0.00306 | 0.00025       |

Pr1Dy1Zn2

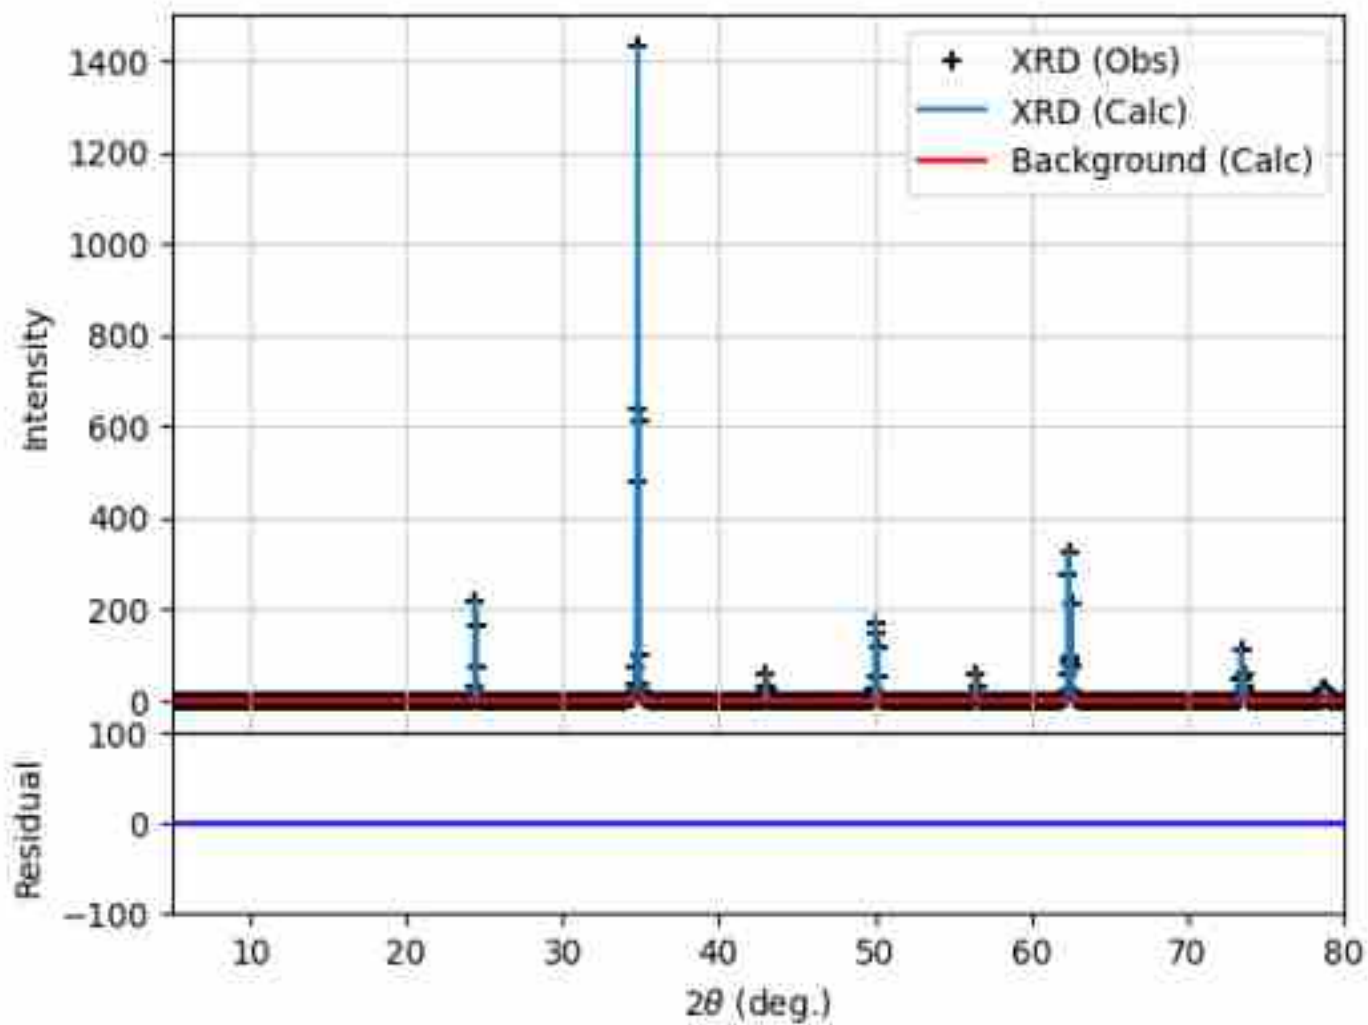

| RMSE before RR | Rwp   | RMSE after RR |
|----------------|-------|---------------|
| 0.002          | 3e-05 | 3e-05         |

# Pr1Dy3

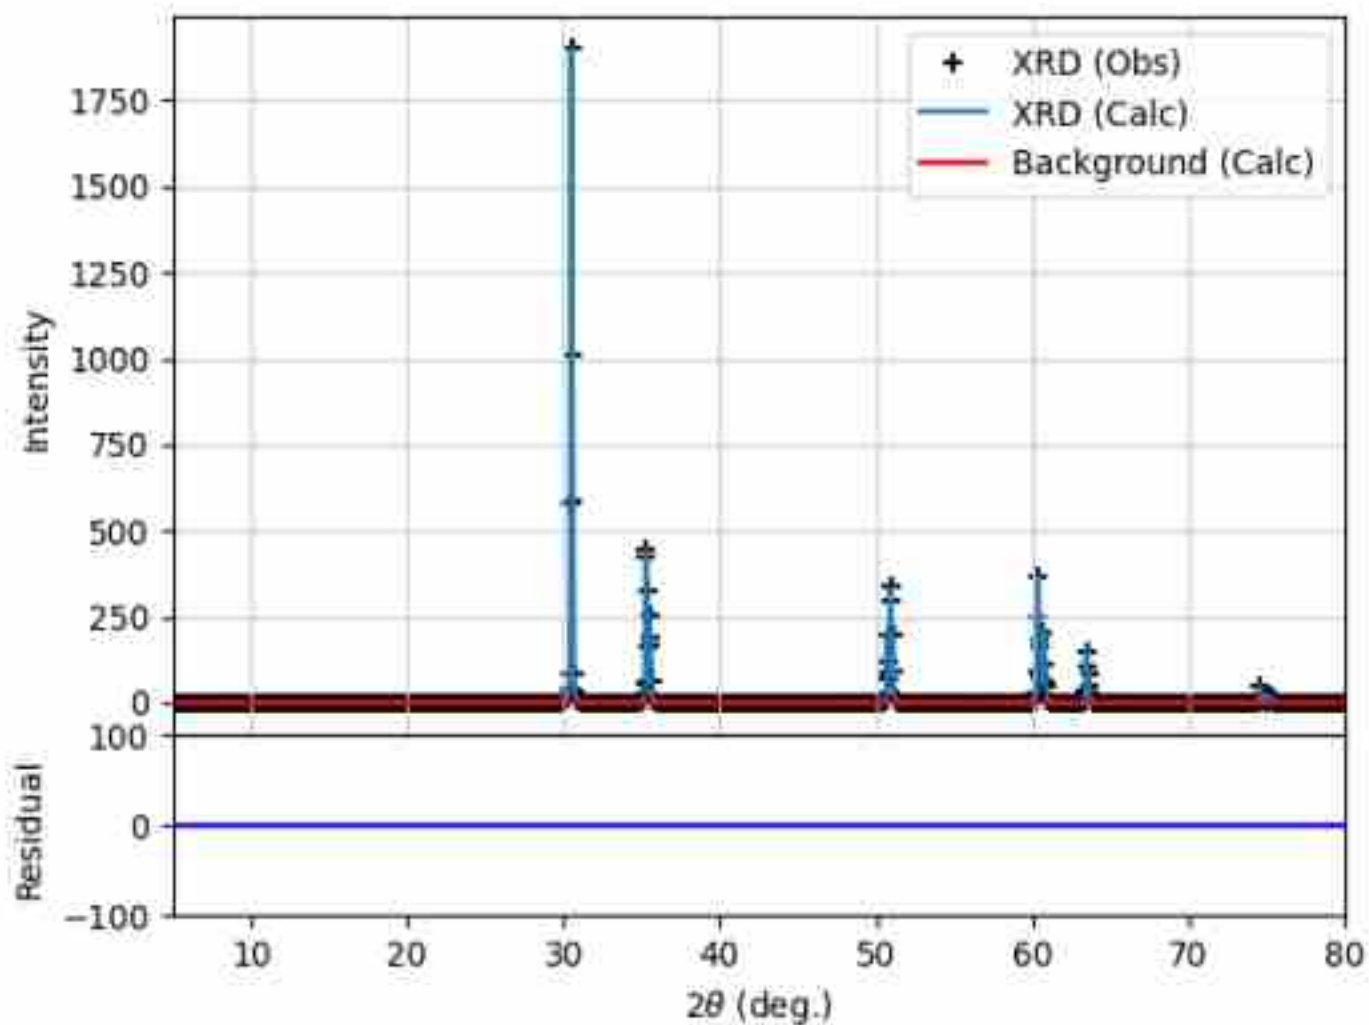

| RMSE before RR | Rwp     | RMSE after RR |
|----------------|---------|---------------|
| 0.002          | 0.00485 | 0.00037       |

# Pr1Er1Zn2

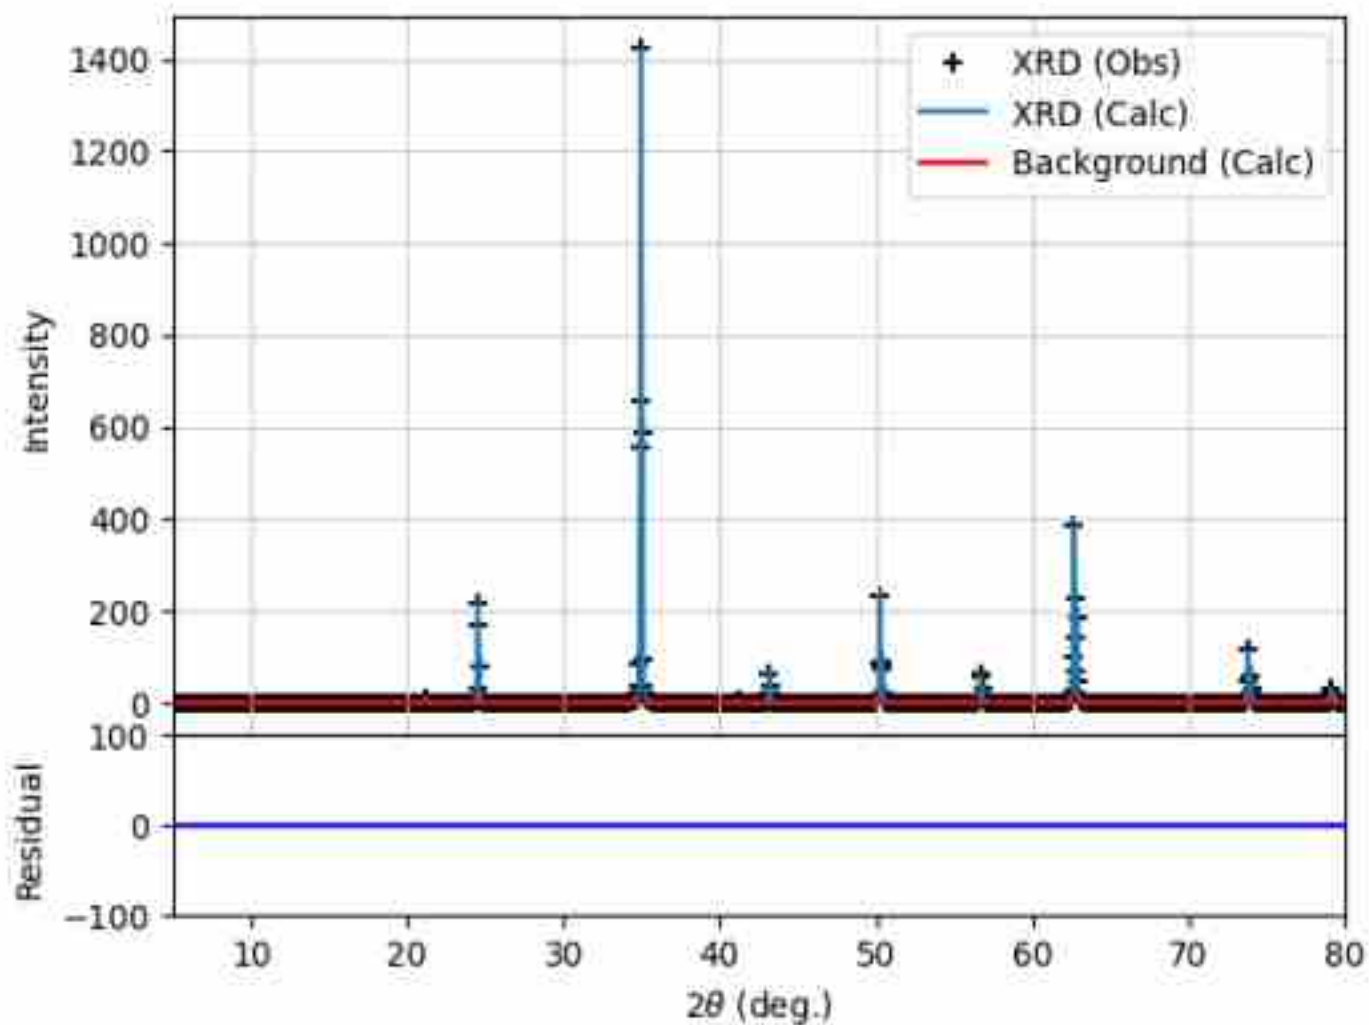

| RMSE before RR | Rwp     | RMSE after RR |
|----------------|---------|---------------|
| 0.002          | 0.00363 | 0.00037       |

# Pr<sub>1</sub>Fe<sub>4</sub>Cu<sub>3</sub>O<sub>12</sub>

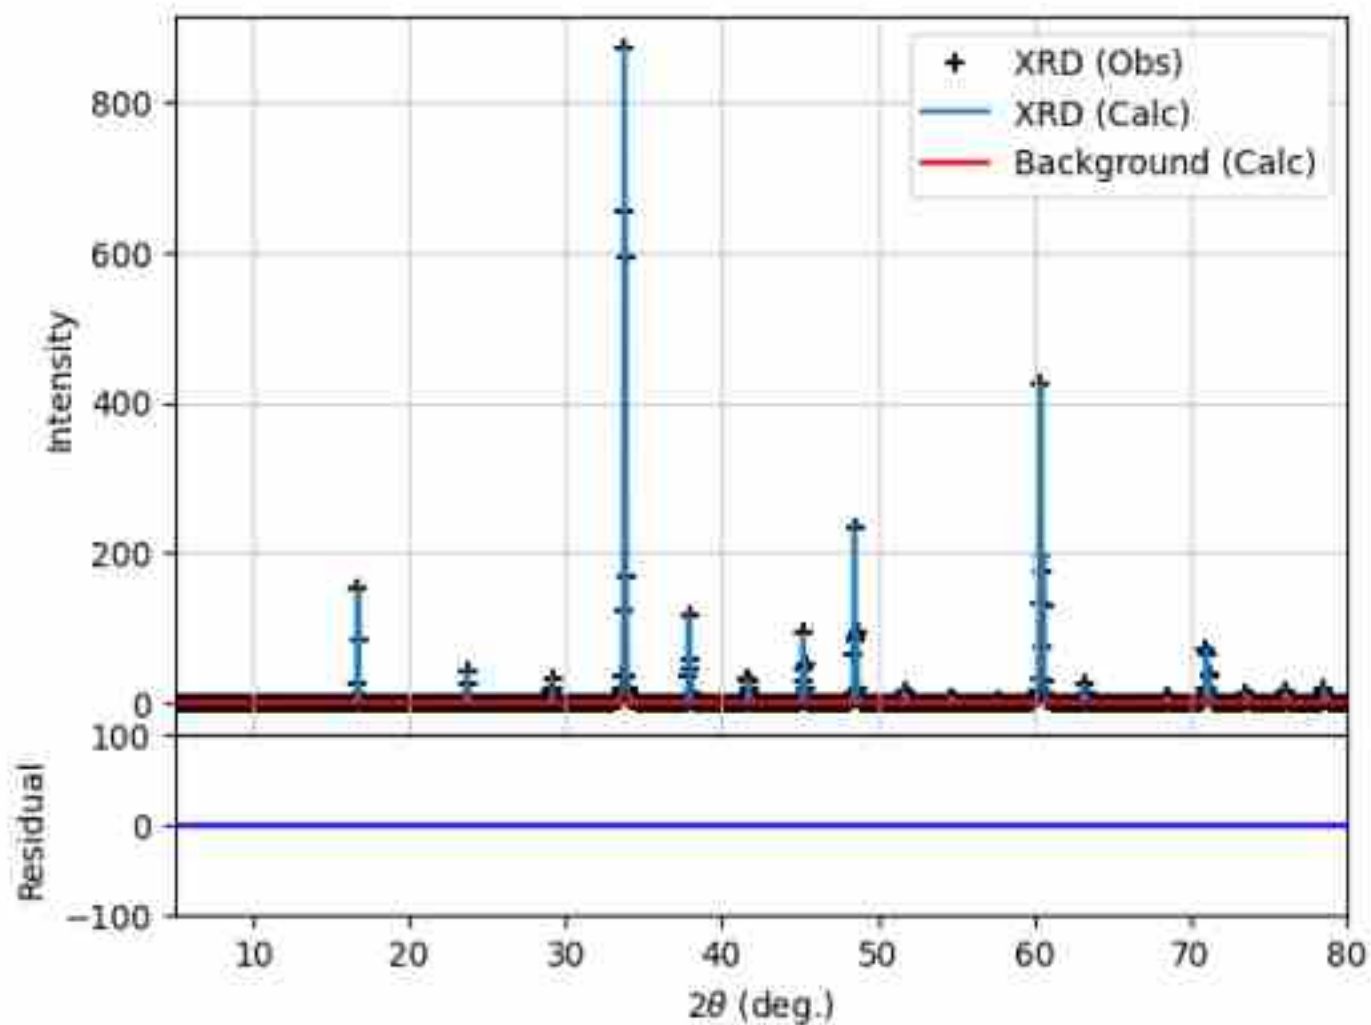

| RMSE before RR | Rwp     | RMSE after RR |
|----------------|---------|---------------|
| 0.02           | 0.01029 | 0.00462       |



# Pr1Ho1Zn2

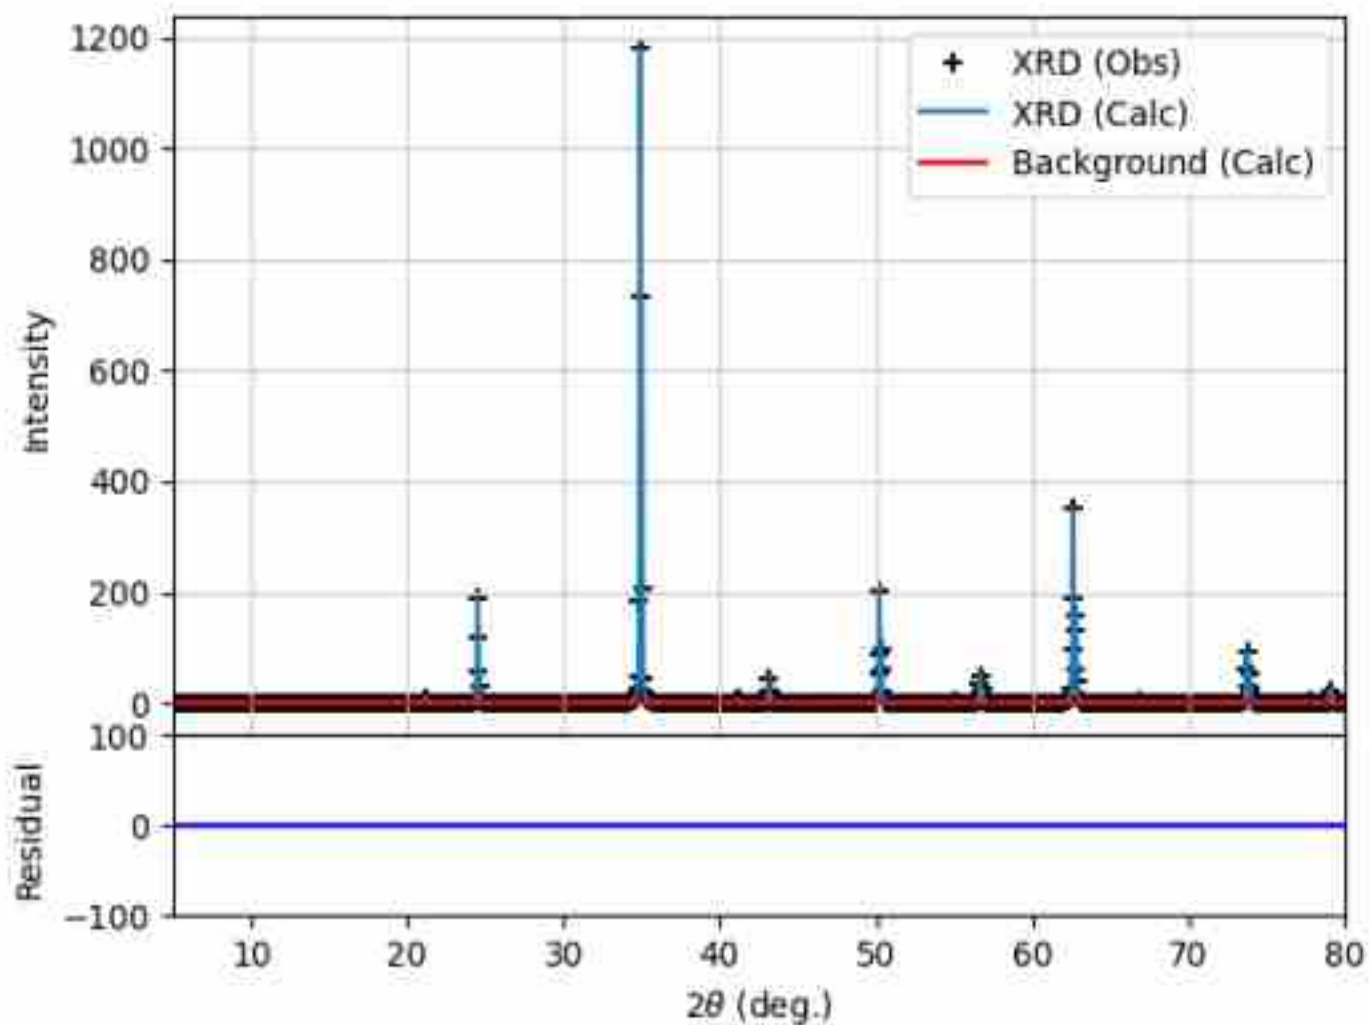

| RMSE before RR | Rwp     | RMSE after RR |
|----------------|---------|---------------|
| 0.002          | 0.00448 | 0.00074       |

# Pr1In1

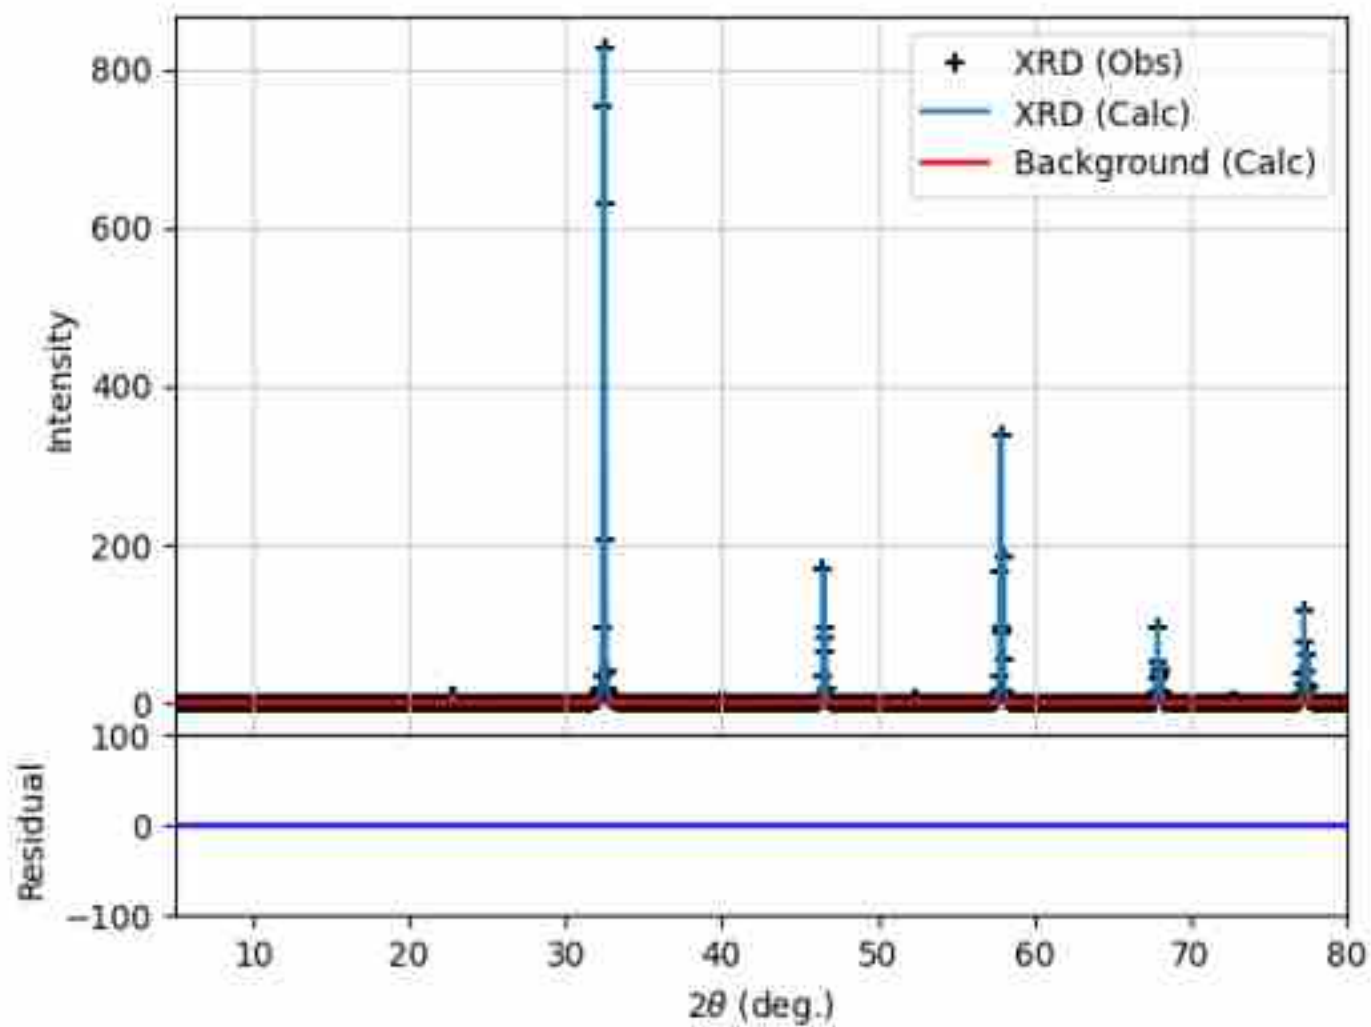

| RMSE before RR | Rwp     | RMSE after RR |
|----------------|---------|---------------|
| 0.002          | 0.09361 | 0.00158       |

# Pr1Mg1Zn2

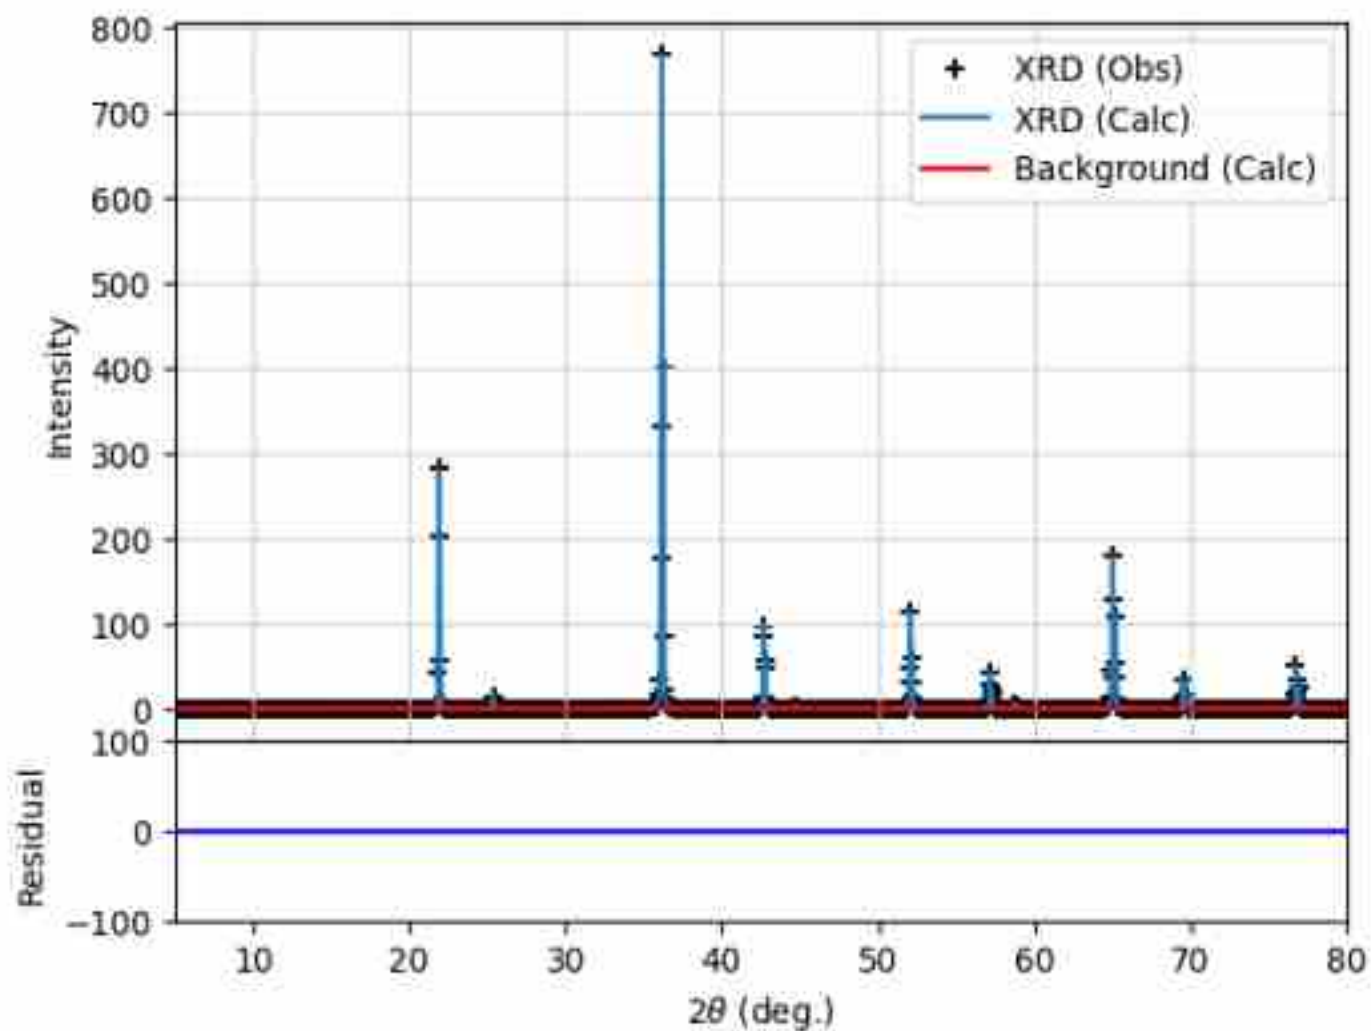

| RMSE before RR | Rwp     | RMSE after RR |
|----------------|---------|---------------|
| 0.002          | 0.00308 | 0.00035       |

# Pr1P1

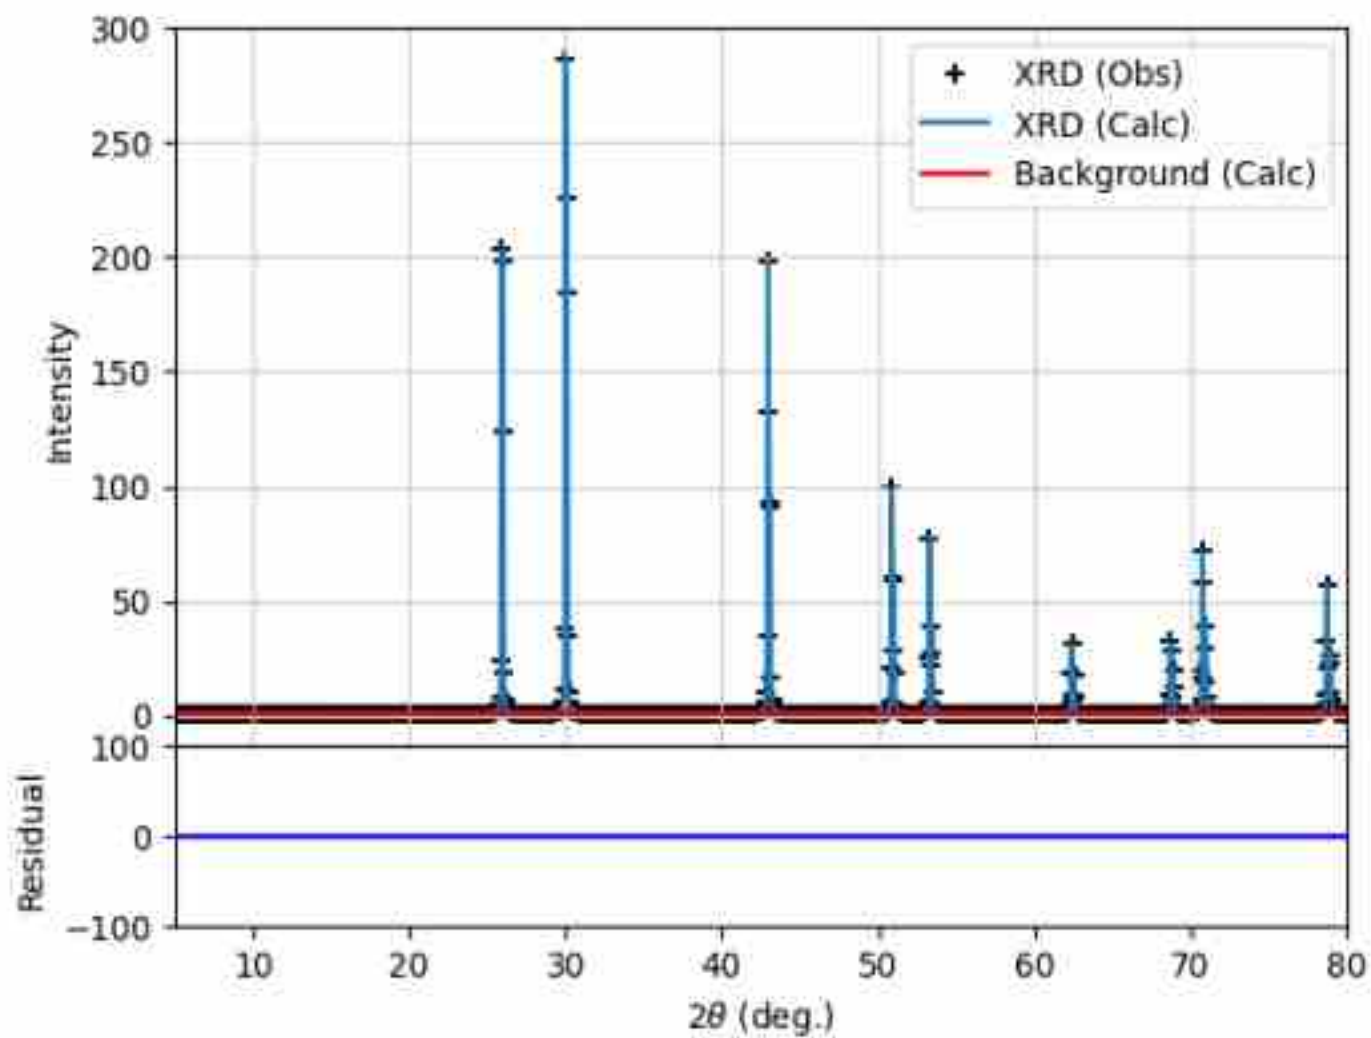

| RMSE before RR | Rwp     | RMSE after RR |
|----------------|---------|---------------|
| 0.002          | 0.00449 | 0.00121       |

# Pr1Tl3

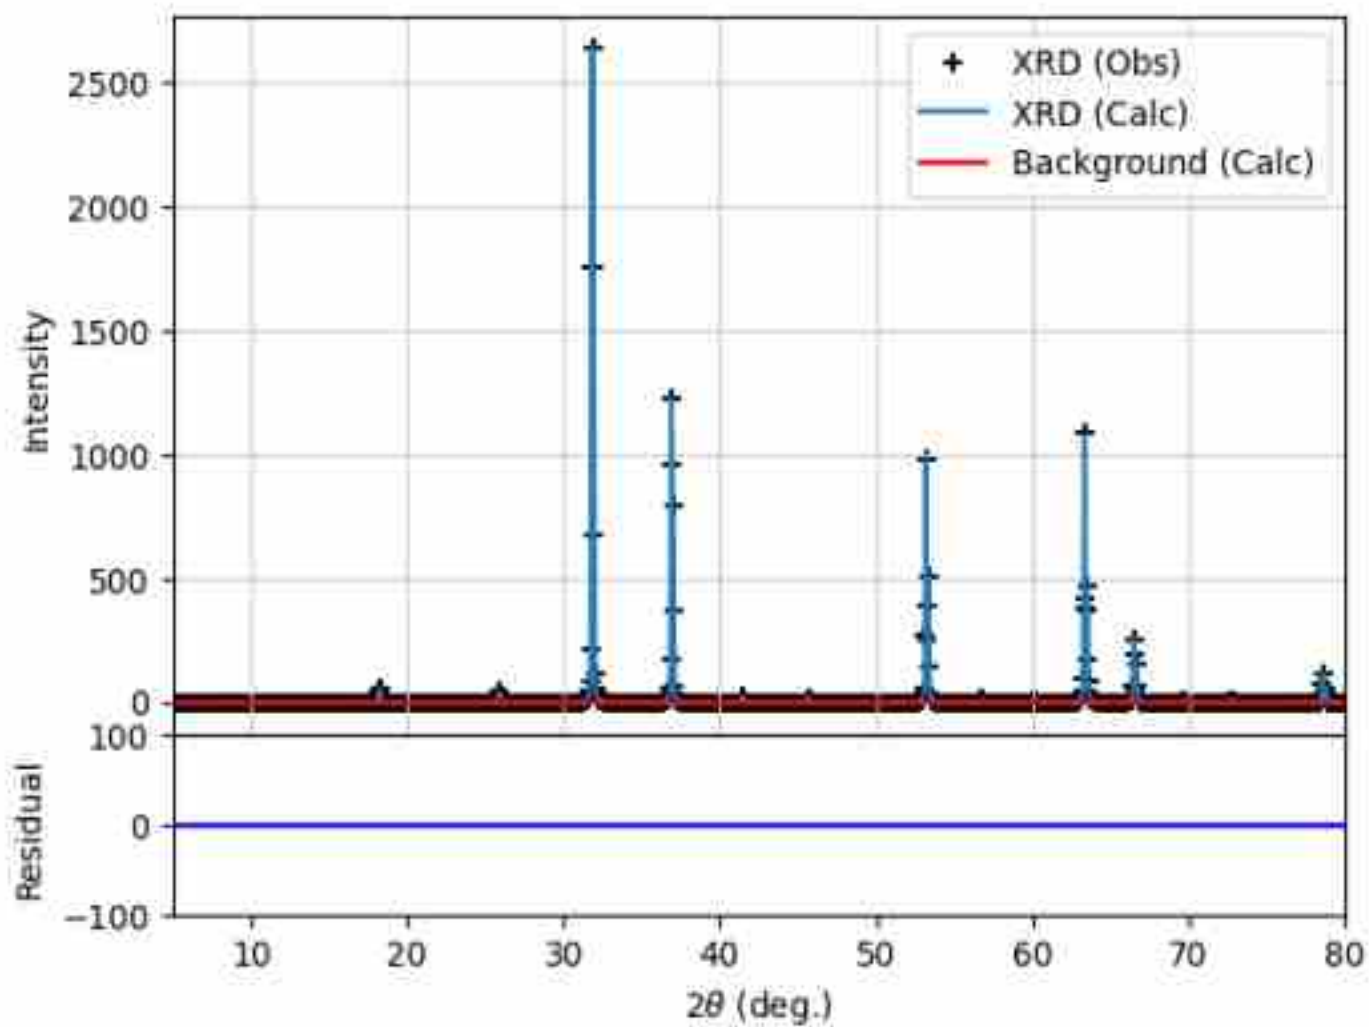

| RMSE before RR | Rwp     | RMSE after RR |
|----------------|---------|---------------|
| 0.002          | 0.00558 | 0.00036       |

# Pr1Y3

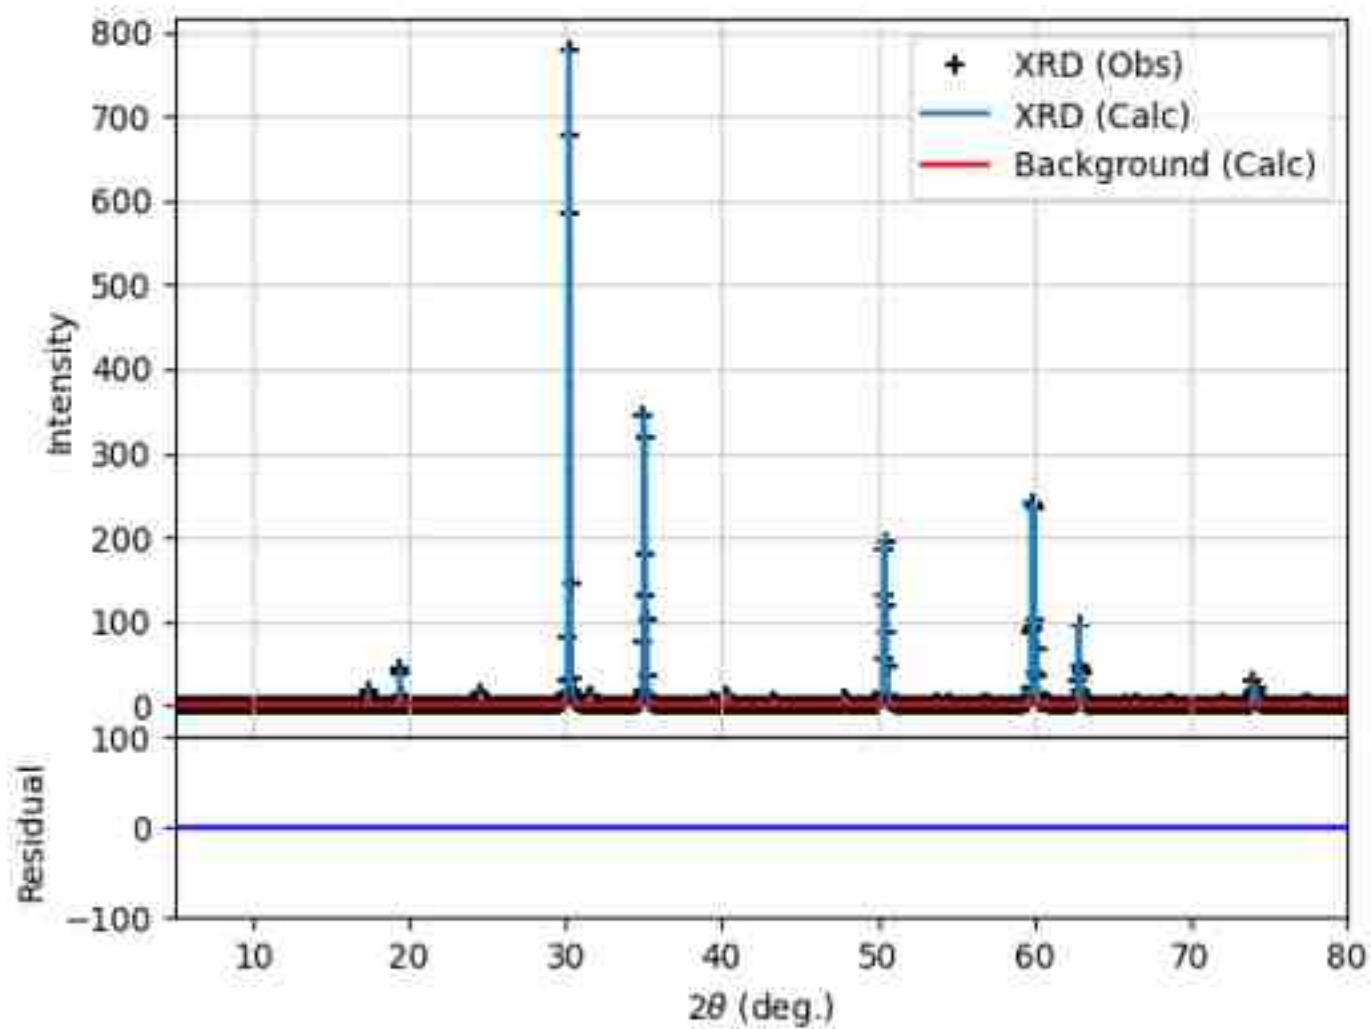

| RMSE before RR | Rwp     | RMSE after RR |
|----------------|---------|---------------|
| 0.002          | 0.00343 | 0.00022       |

# Pr<sub>1</sub>Zn<sub>1</sub>Ag<sub>1</sub>P<sub>2</sub>

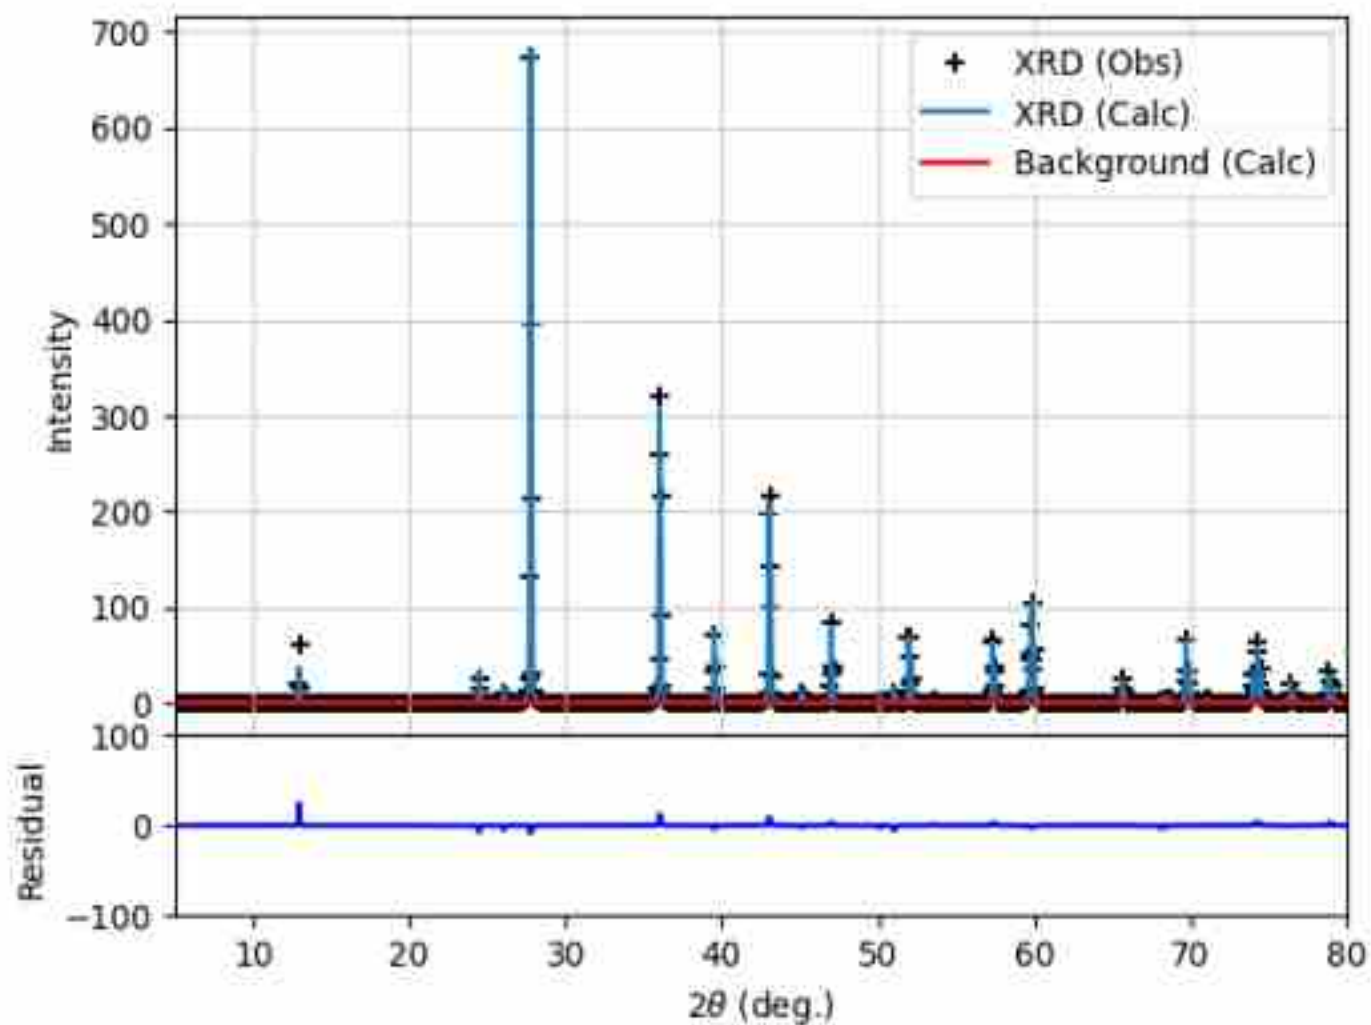

| RMSE before RR | Rwp     | RMSE after RR |
|----------------|---------|---------------|
| 0.02           | 8.91862 | 0.0205        |

# Pr<sub>2</sub>CdAg<sub>1</sub>

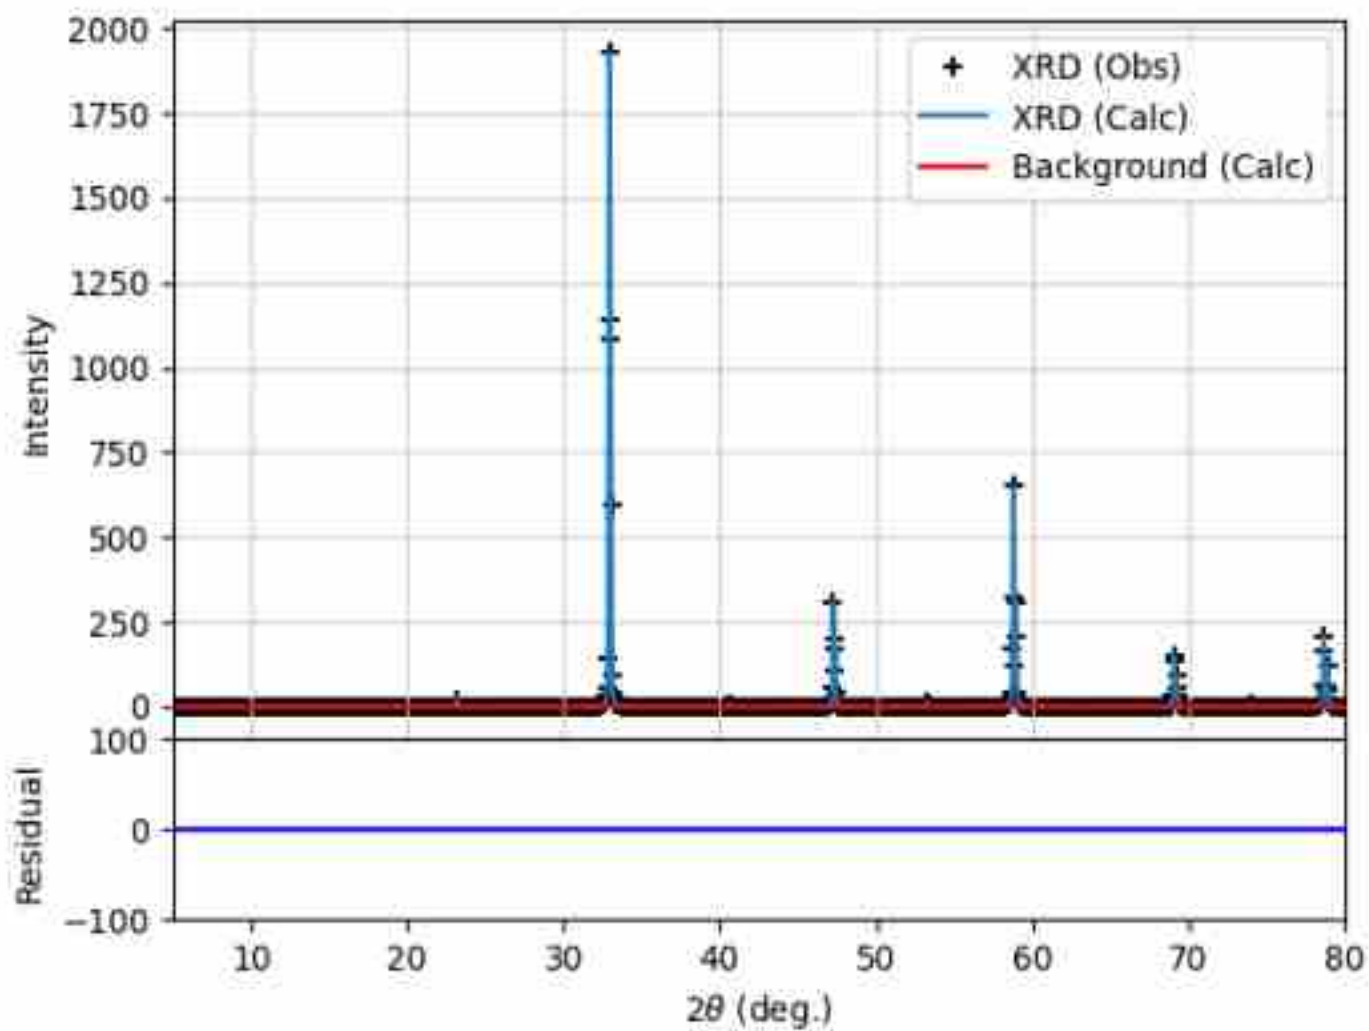

| RMSE before RR | Rwp     | RMSE after RR |
|----------------|---------|---------------|
| 0.002          | 0.00692 | 0.00039       |



# Pr<sub>2</sub>Zn<sub>1</sub>Ru<sub>1</sub>

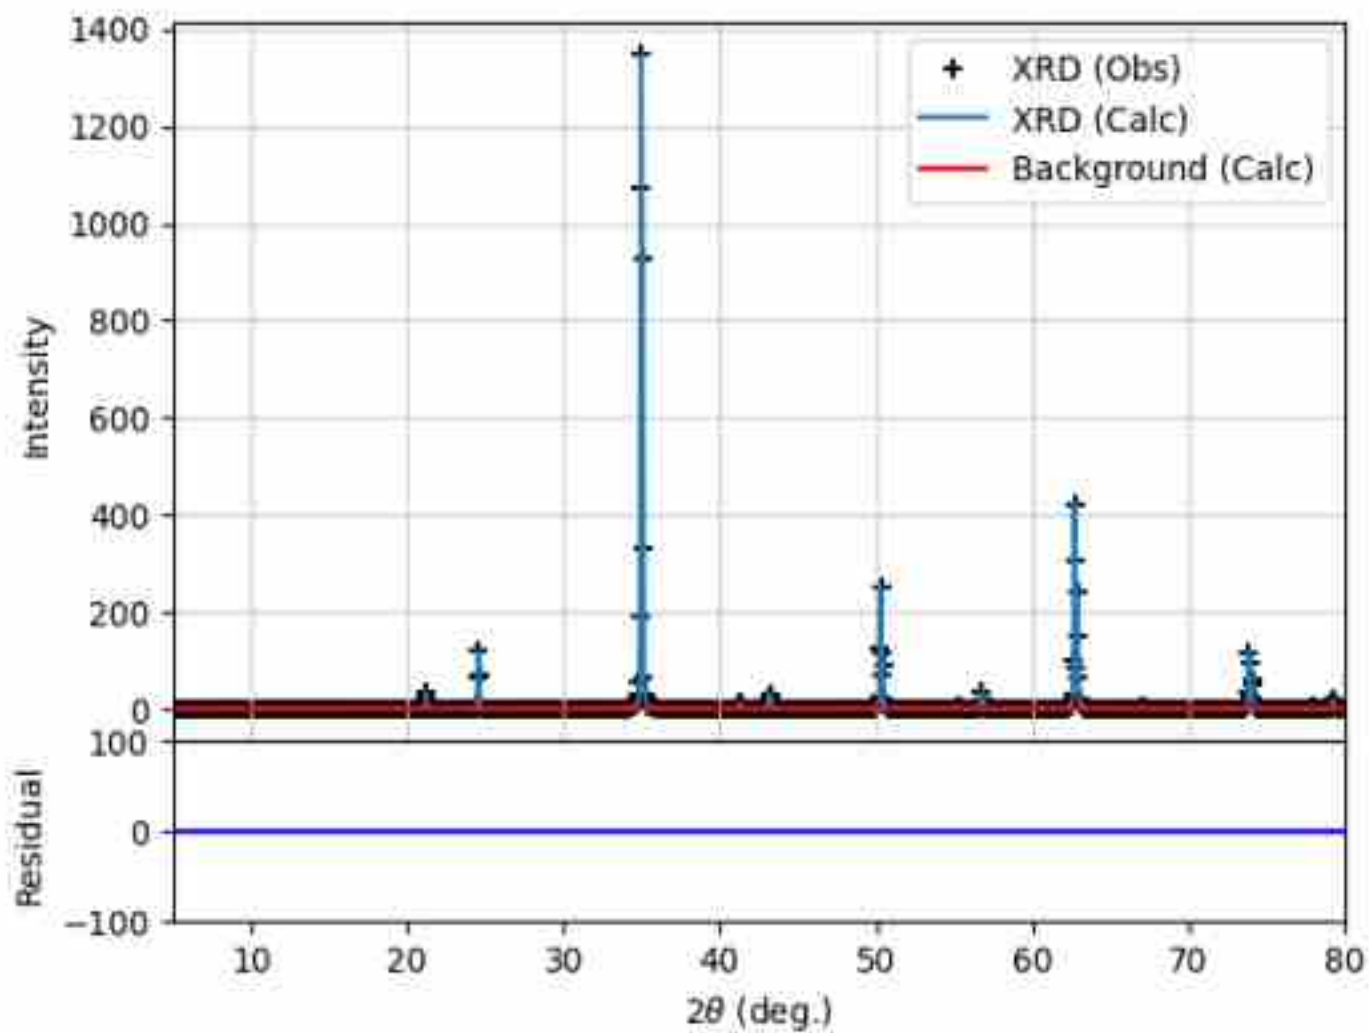

| RMSE before RR | Rwp     | RMSE after RR |
|----------------|---------|---------------|
| 0.002          | 0.00508 | 0.0005        |

# Pr<sub>3</sub>Al<sub>3</sub>Pd<sub>3</sub>

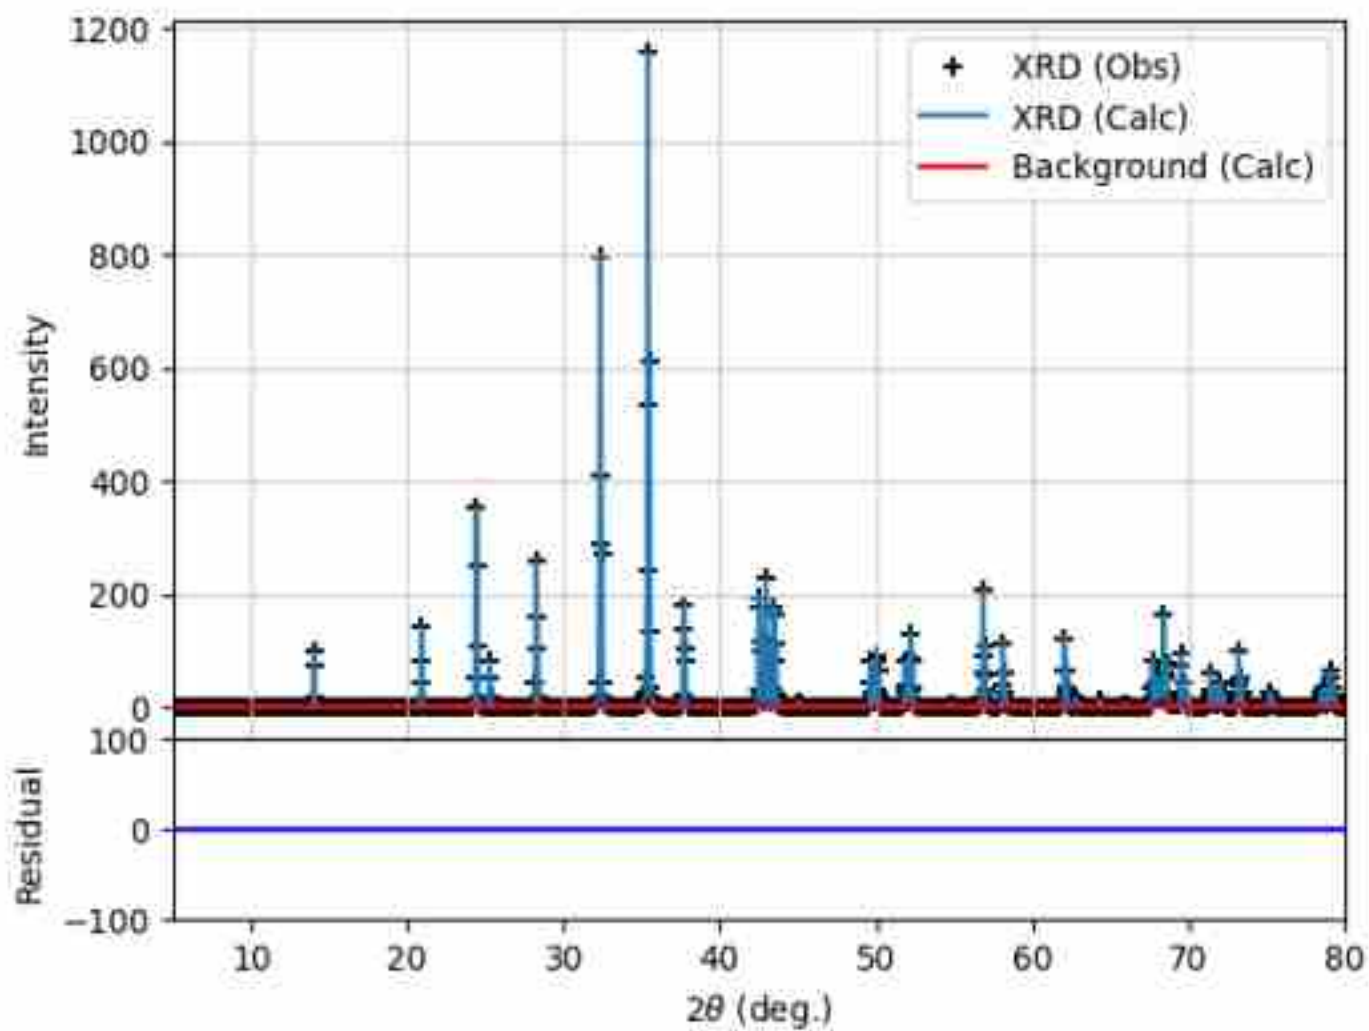

| RMSE before RR | Rwp    | RMSE after RR |
|----------------|--------|---------------|
| 0.02           | 0.0048 | 0.00088       |

# Pr<sub>6</sub>Hf<sub>2</sub>Sb<sub>10</sub>

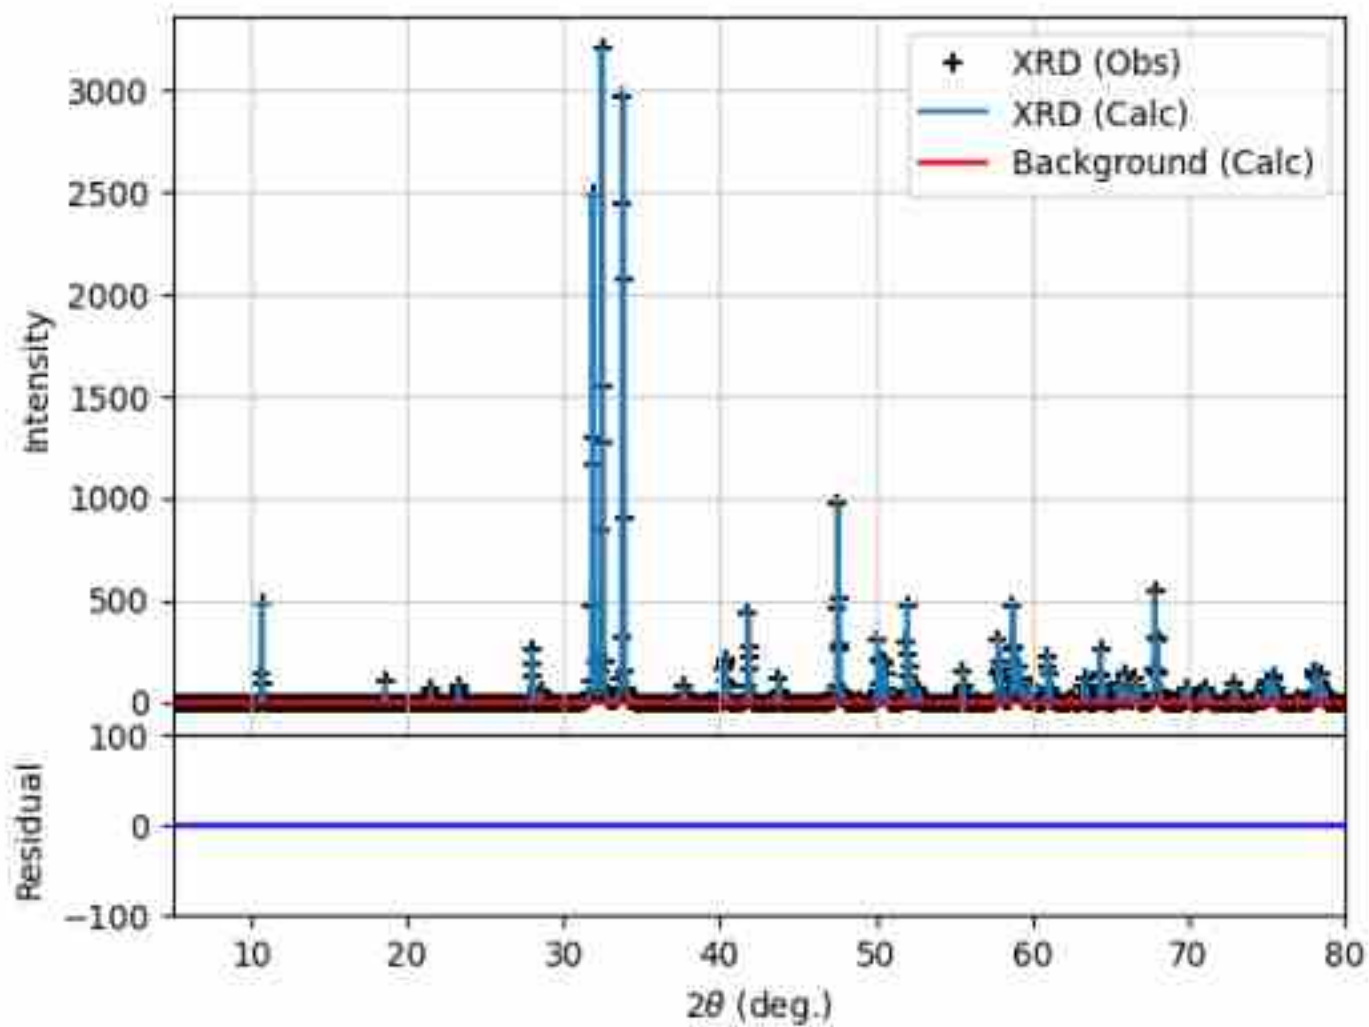

| RMSE before RR | Rwp    | RMSE after RR |
|----------------|--------|---------------|
| 0.02           | 0.0044 | 0.00034       |

# Pt1Au1

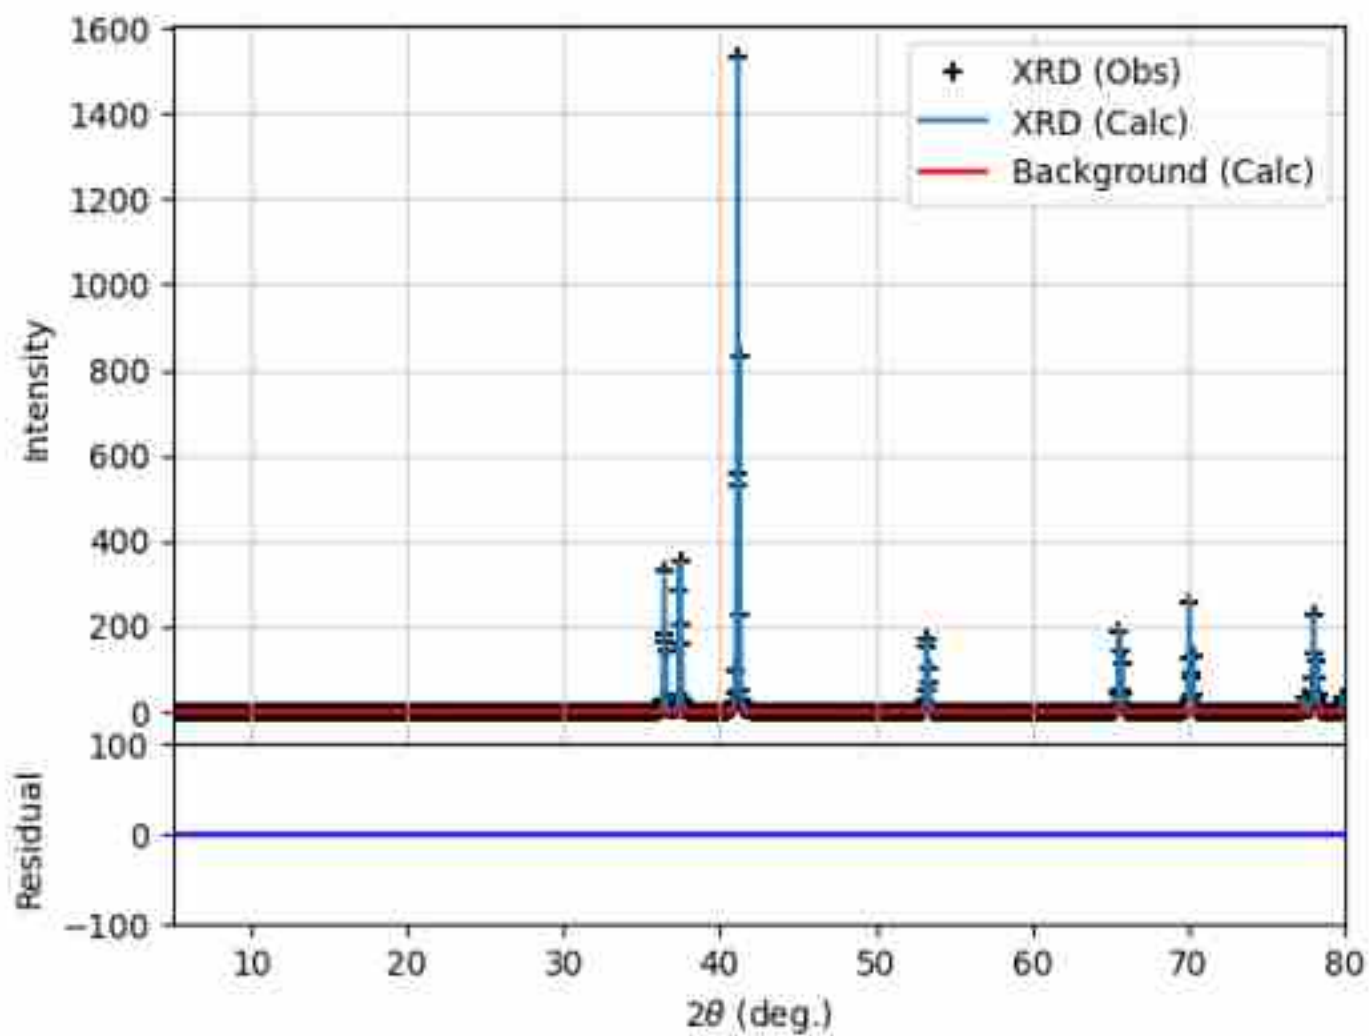

| RMSE before RR | Rwp     | RMSE after RR |
|----------------|---------|---------------|
| 0.002          | 0.00472 | 0.00015       |

# Pu1Bi1

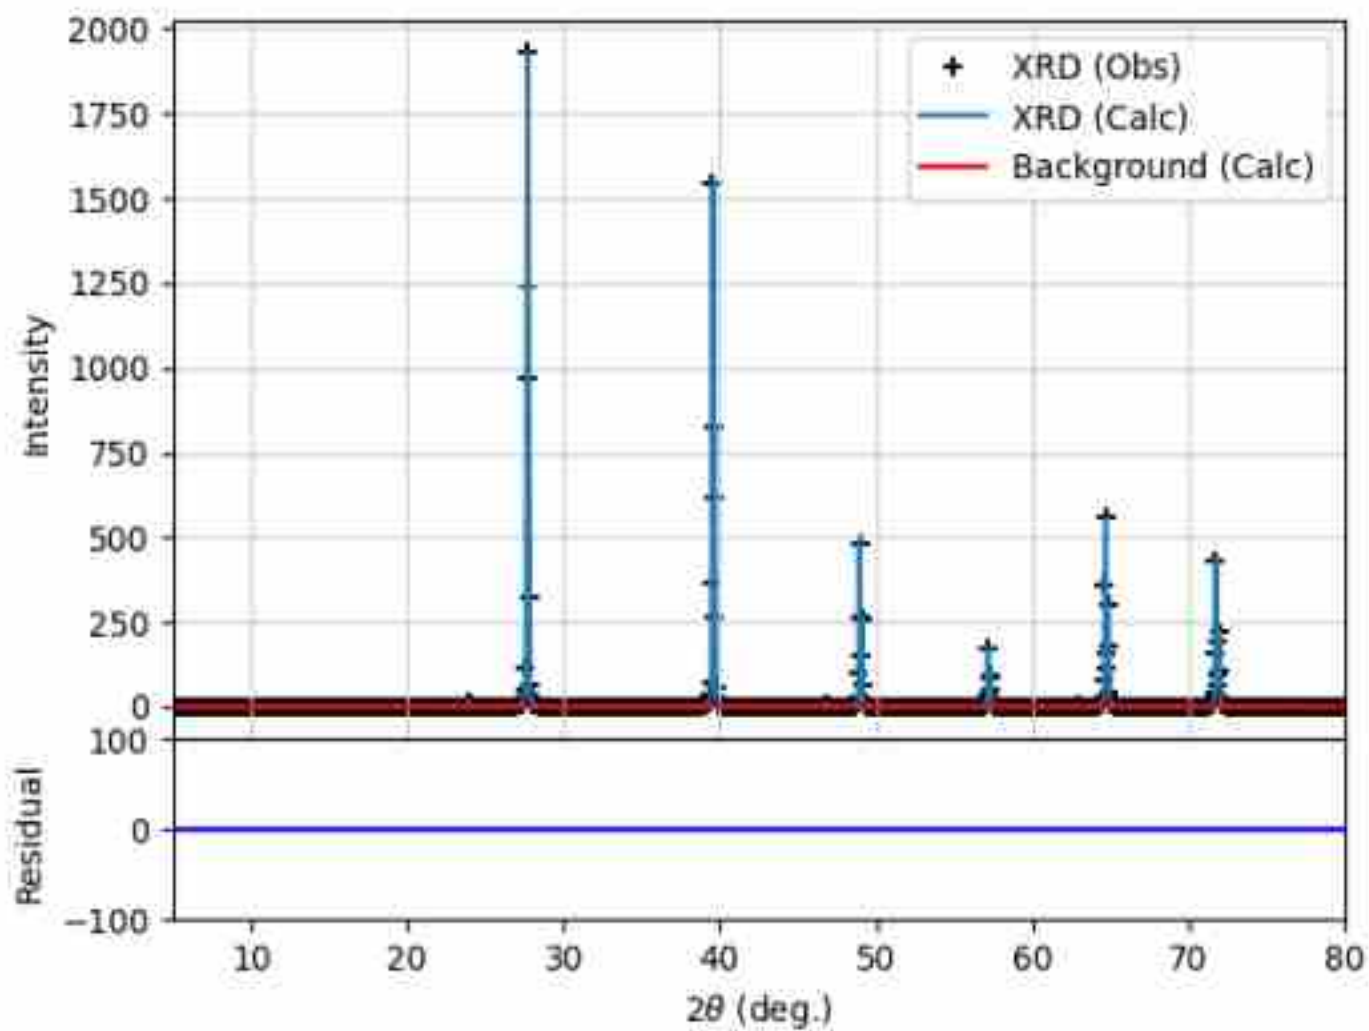

| RMSE before RR | Rwp     | RMSE after RR |
|----------------|---------|---------------|
| 0.002          | 0.01375 | 0.00062       |

# Pu<sub>2</sub>Br<sub>6</sub>

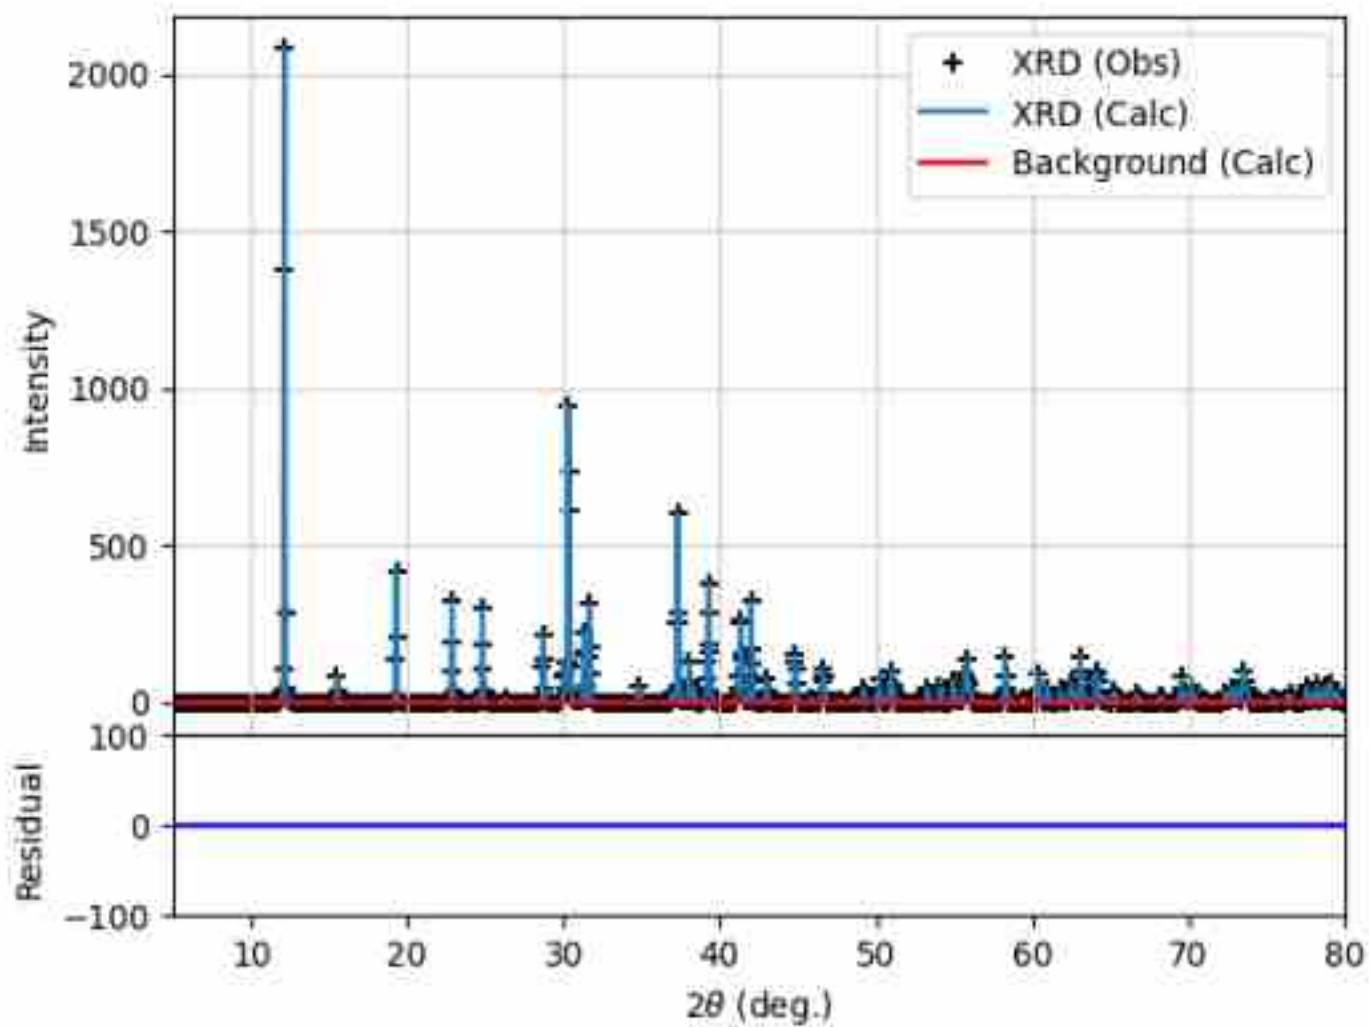

| RMSE before RR | Rwp     | RMSE after RR |
|----------------|---------|---------------|
| 0.02           | 0.00432 | 0.00031       |

# Rb<sub>2</sub>Bi<sub>4</sub>

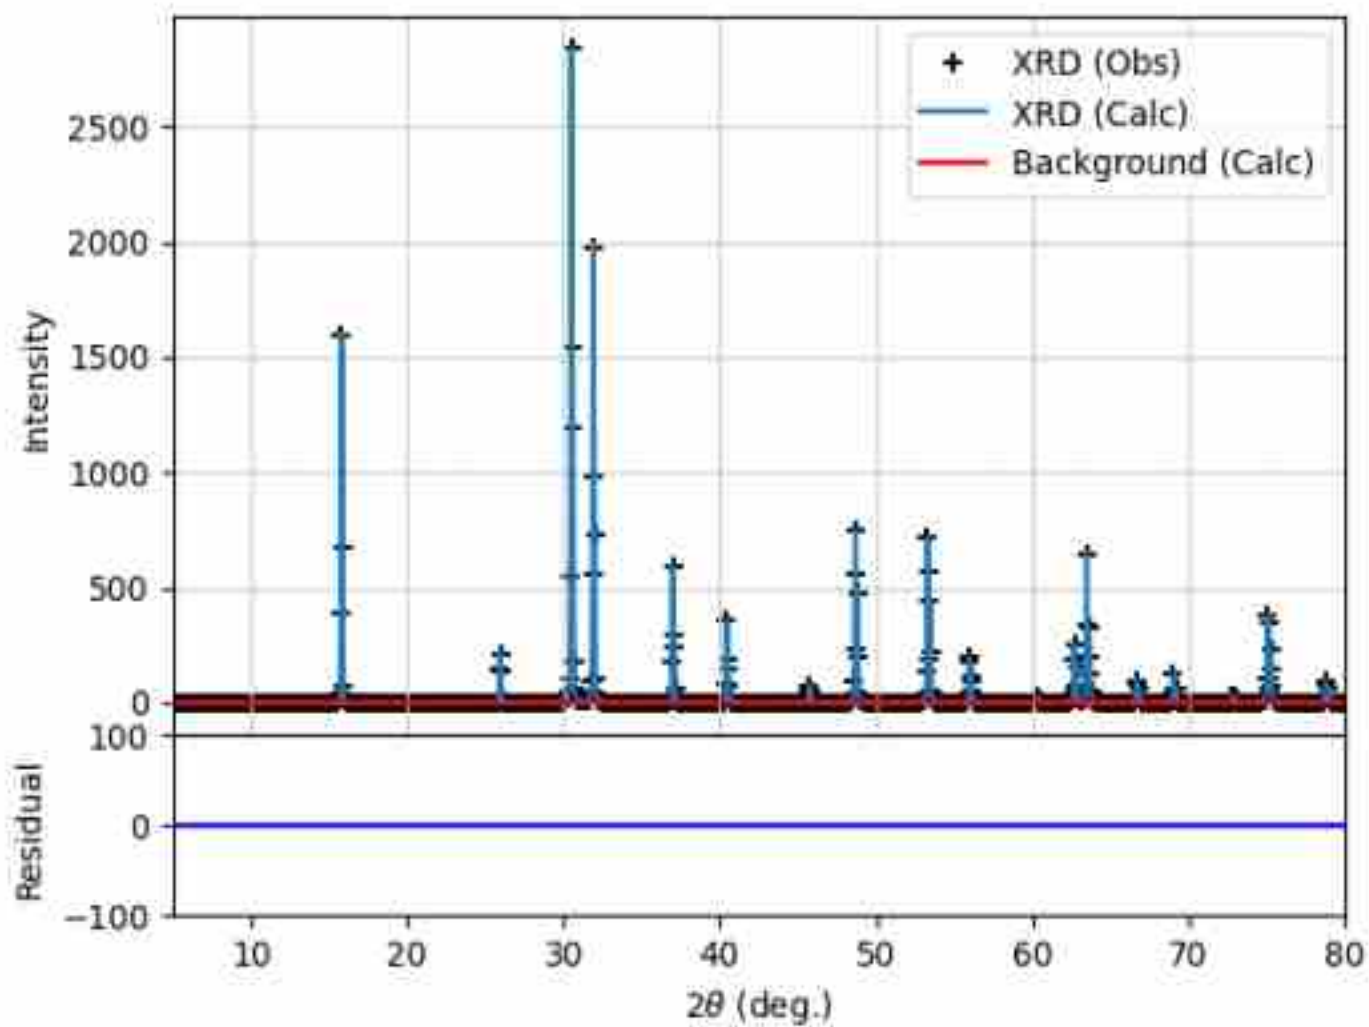

| RMSE before RR | Rwp     | RMSE after RR |
|----------------|---------|---------------|
| 0.02           | 0.00892 | 0.00077       |

# Rb<sub>2</sub>Fe<sub>2</sub>S<sub>4</sub>

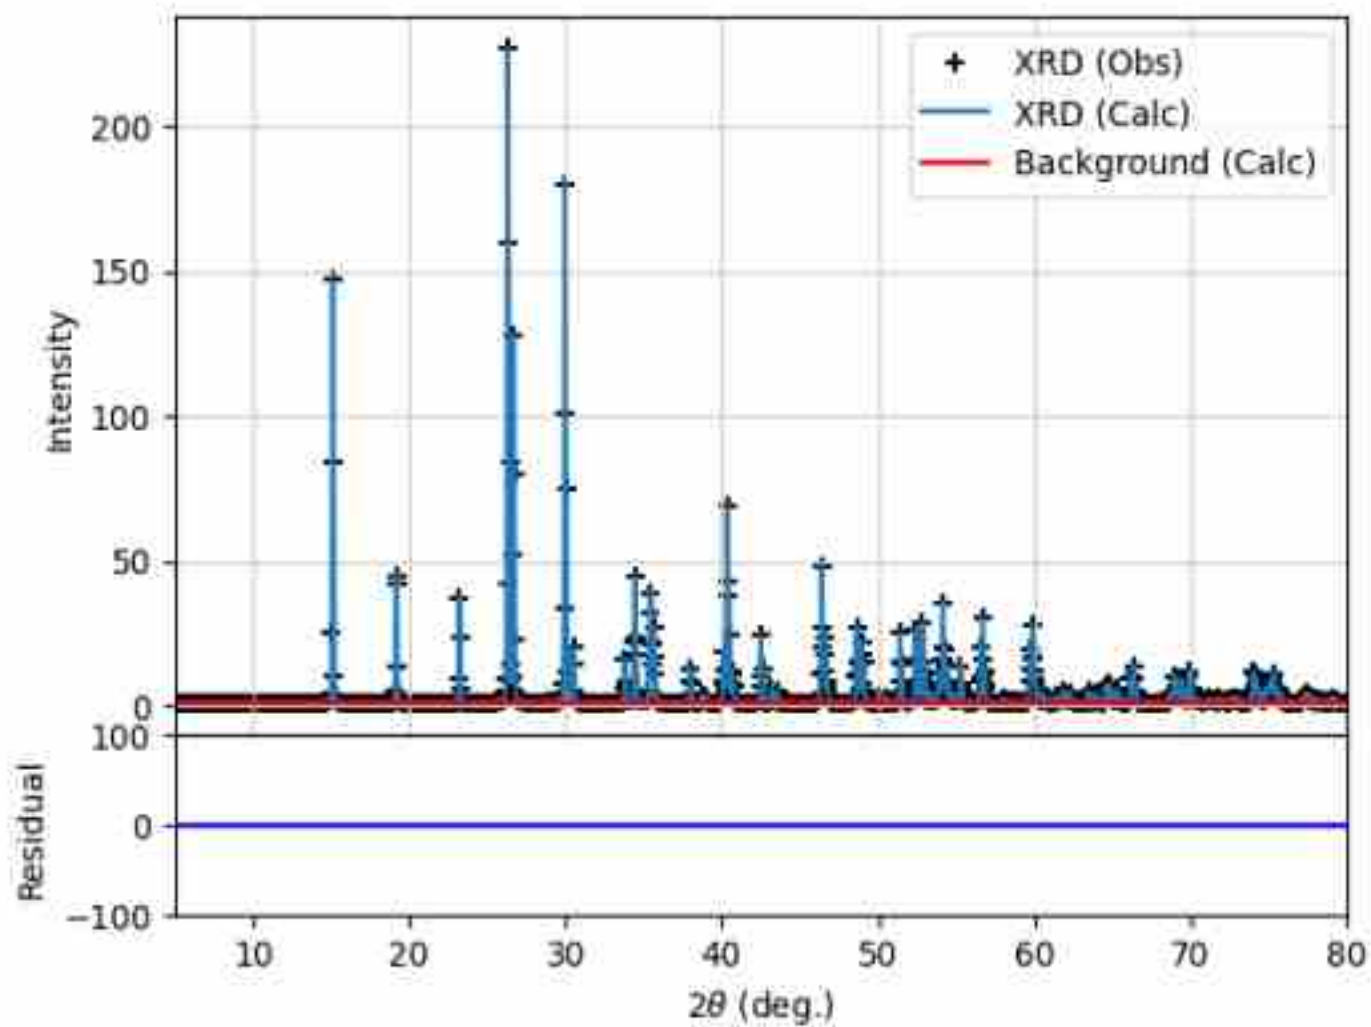

| RMSE before RR | Rwp     | RMSE after RR |
|----------------|---------|---------------|
| 0.02           | 0.00299 | 0.00029       |



# Rb<sub>2</sub>MnF<sub>5</sub>

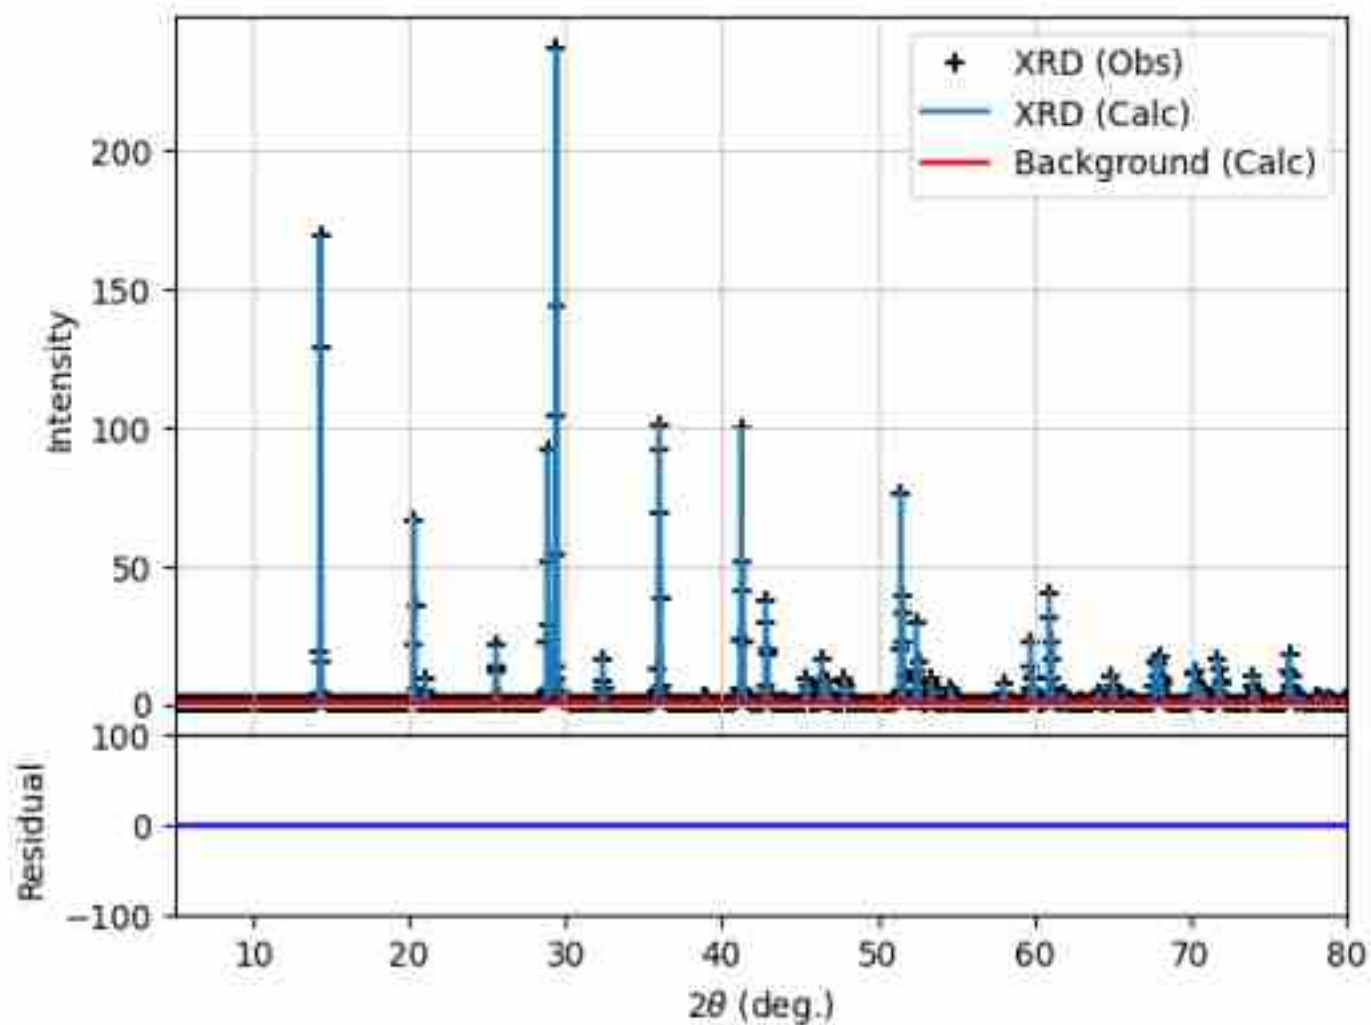

| RMSE before RR | Rwp     | RMSE after RR |
|----------------|---------|---------------|
| 0.02           | 0.00325 | 0.00081       |

# Rb<sub>2</sub>Sm<sub>2</sub>C<sub>4</sub>O<sub>12</sub>

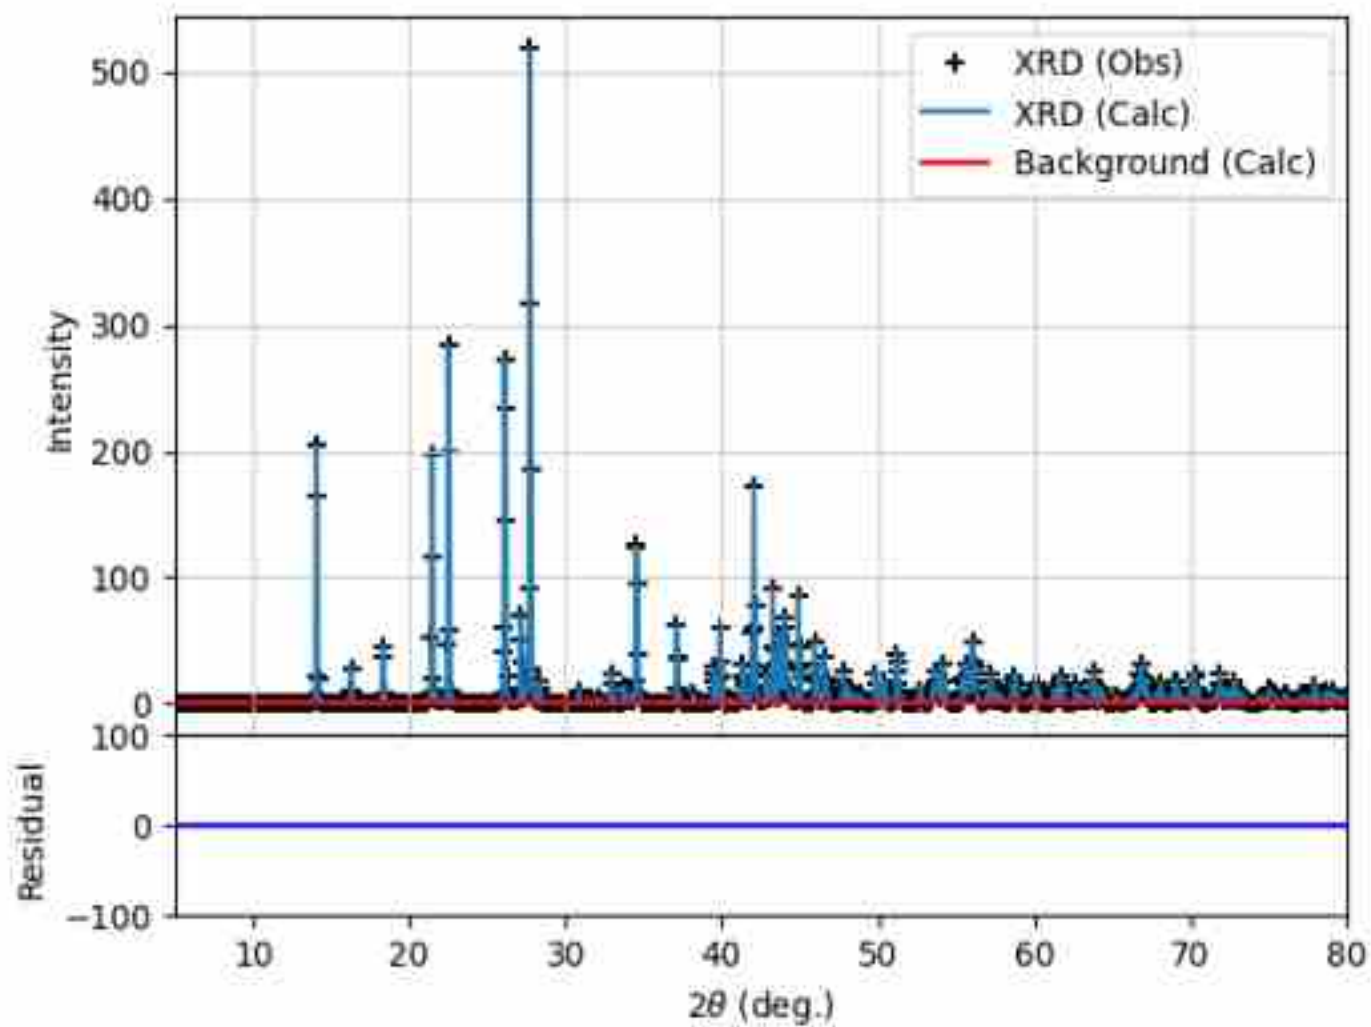

| RMSE before RR | Rwp     | RMSE after RR |
|----------------|---------|---------------|
| 0.02           | 0.00367 | 0.00145       |

# Rb<sub>3</sub>TmF<sub>6</sub>

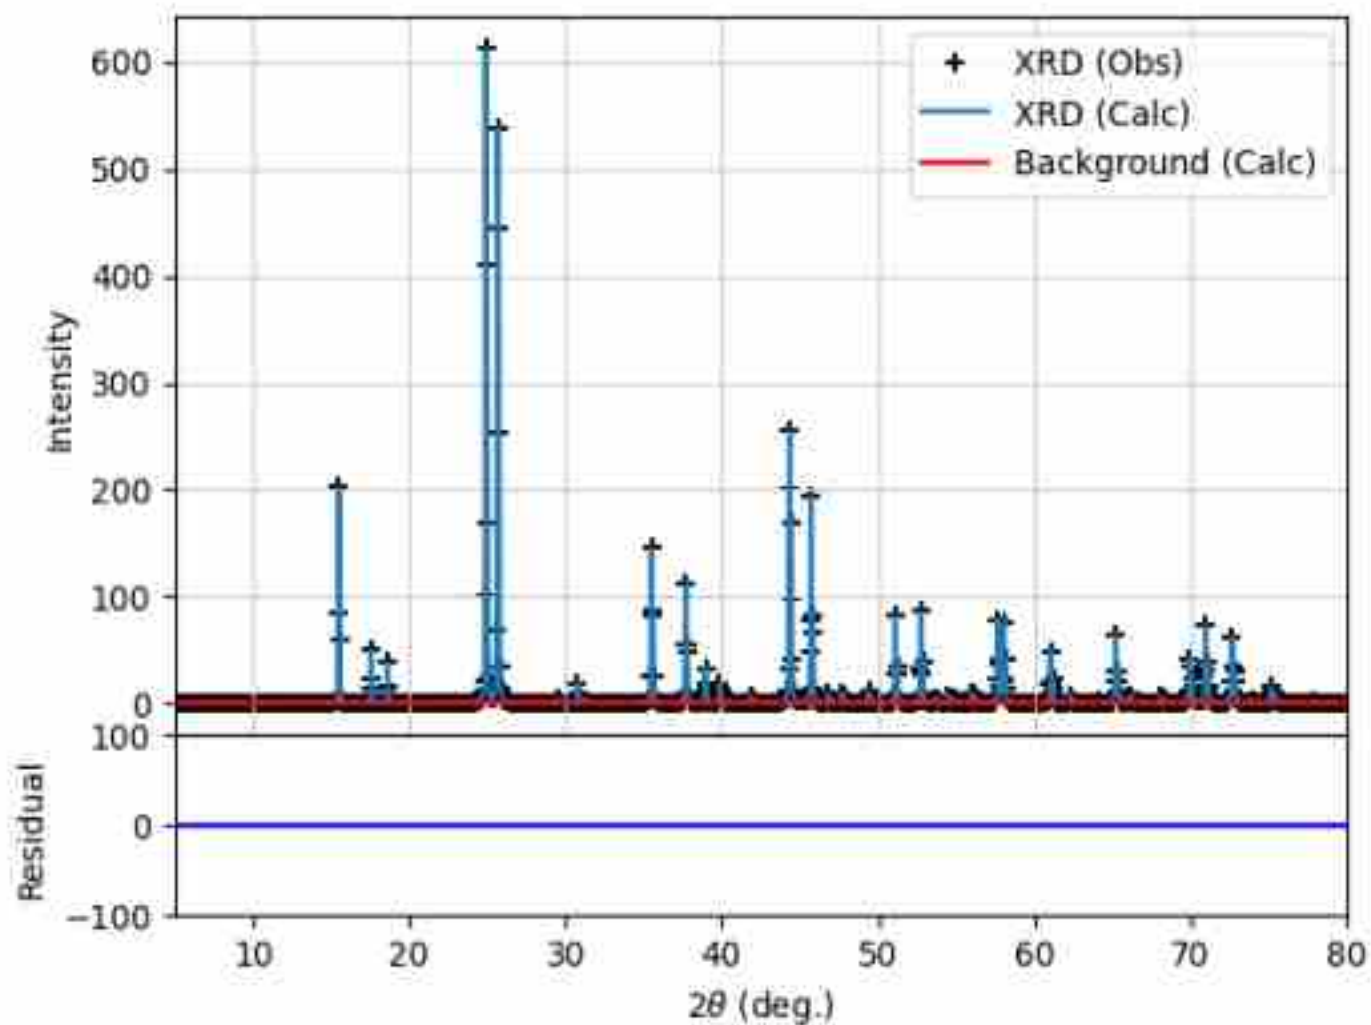

| RMSE before RR | Rwp     | RMSE after RR |
|----------------|---------|---------------|
| 0.02           | 0.00405 | 0.00165       |

# Rb<sub>4</sub>Ge<sub>2</sub>S<sub>6</sub>

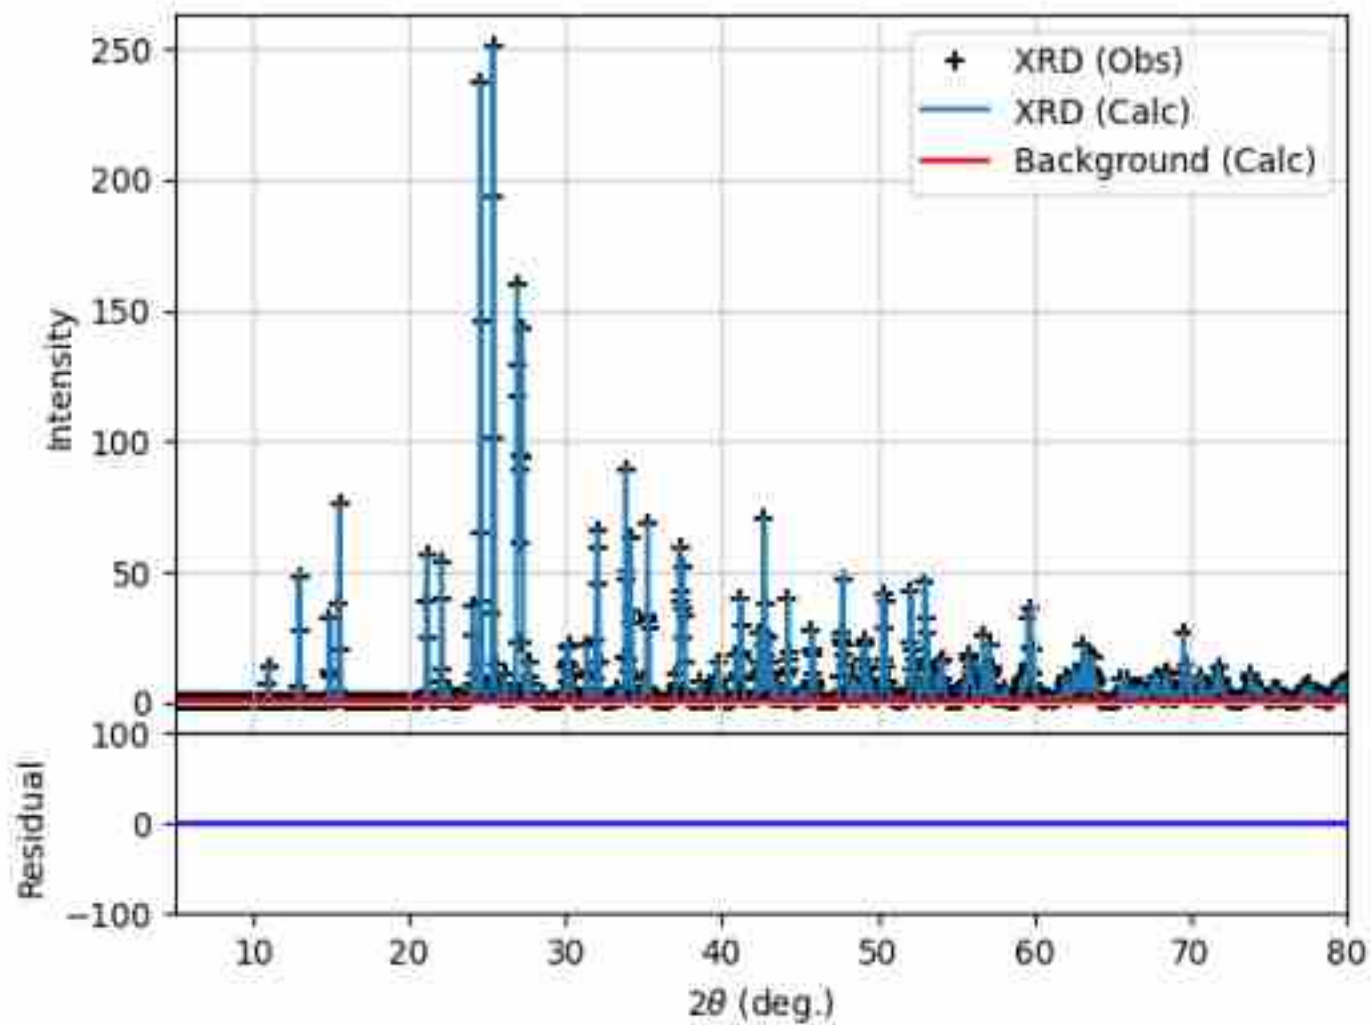

| RMSE before RR | Rwp     | RMSE after RR |
|----------------|---------|---------------|
| 0.02           | 0.00259 | 0.00033       |

# Sb1Pb4

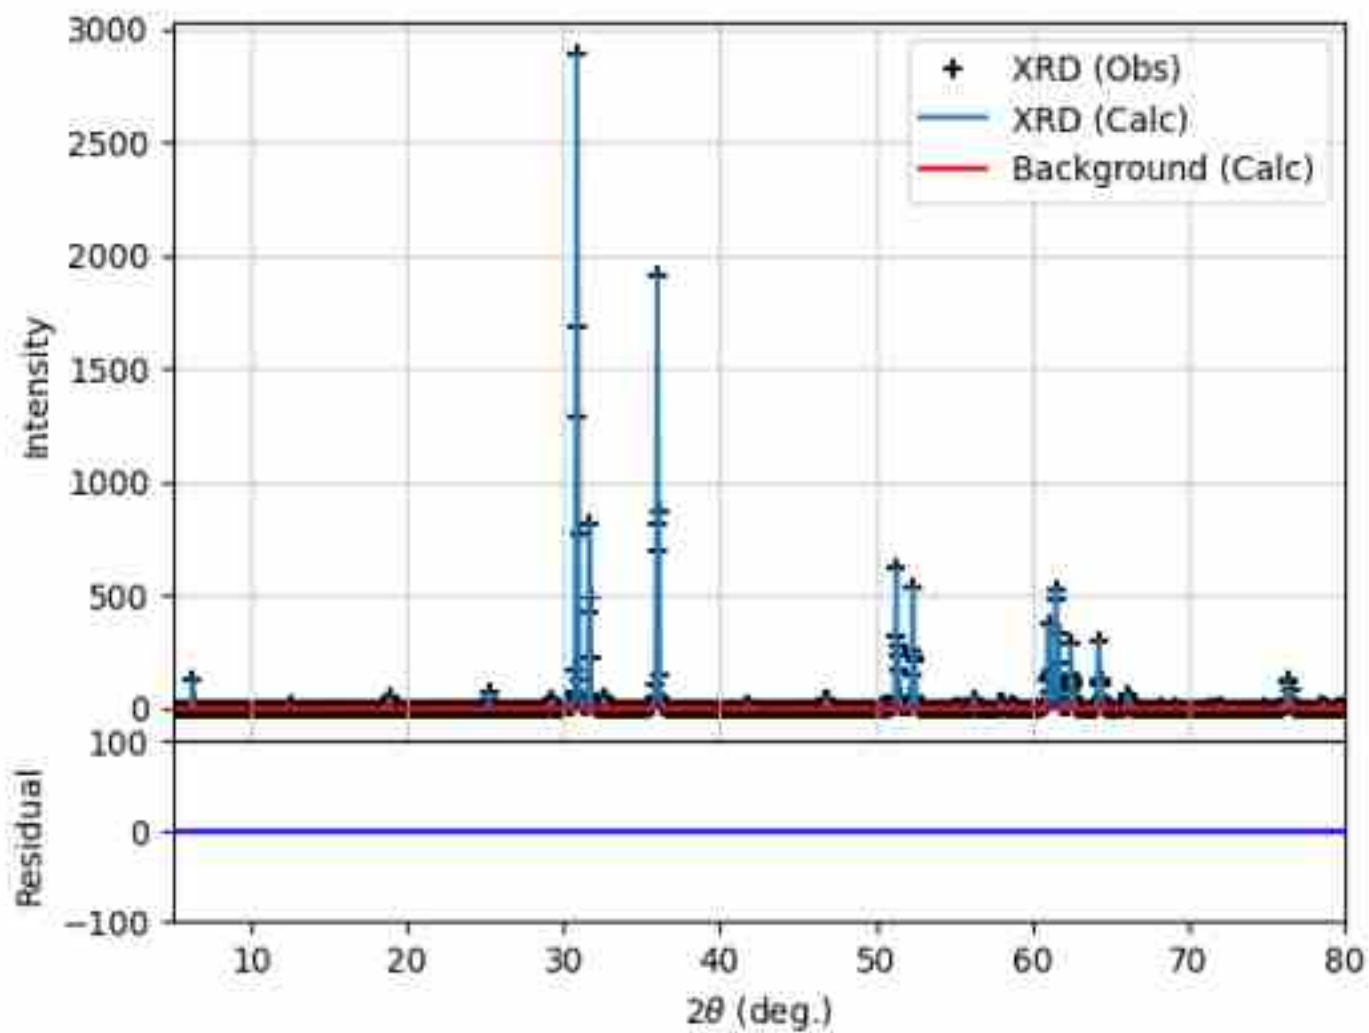

| RMSE before RR | Rwp     | RMSE after RR |
|----------------|---------|---------------|
| 0.02           | 0.00252 | 0.00017       |

# Sb1Pd3

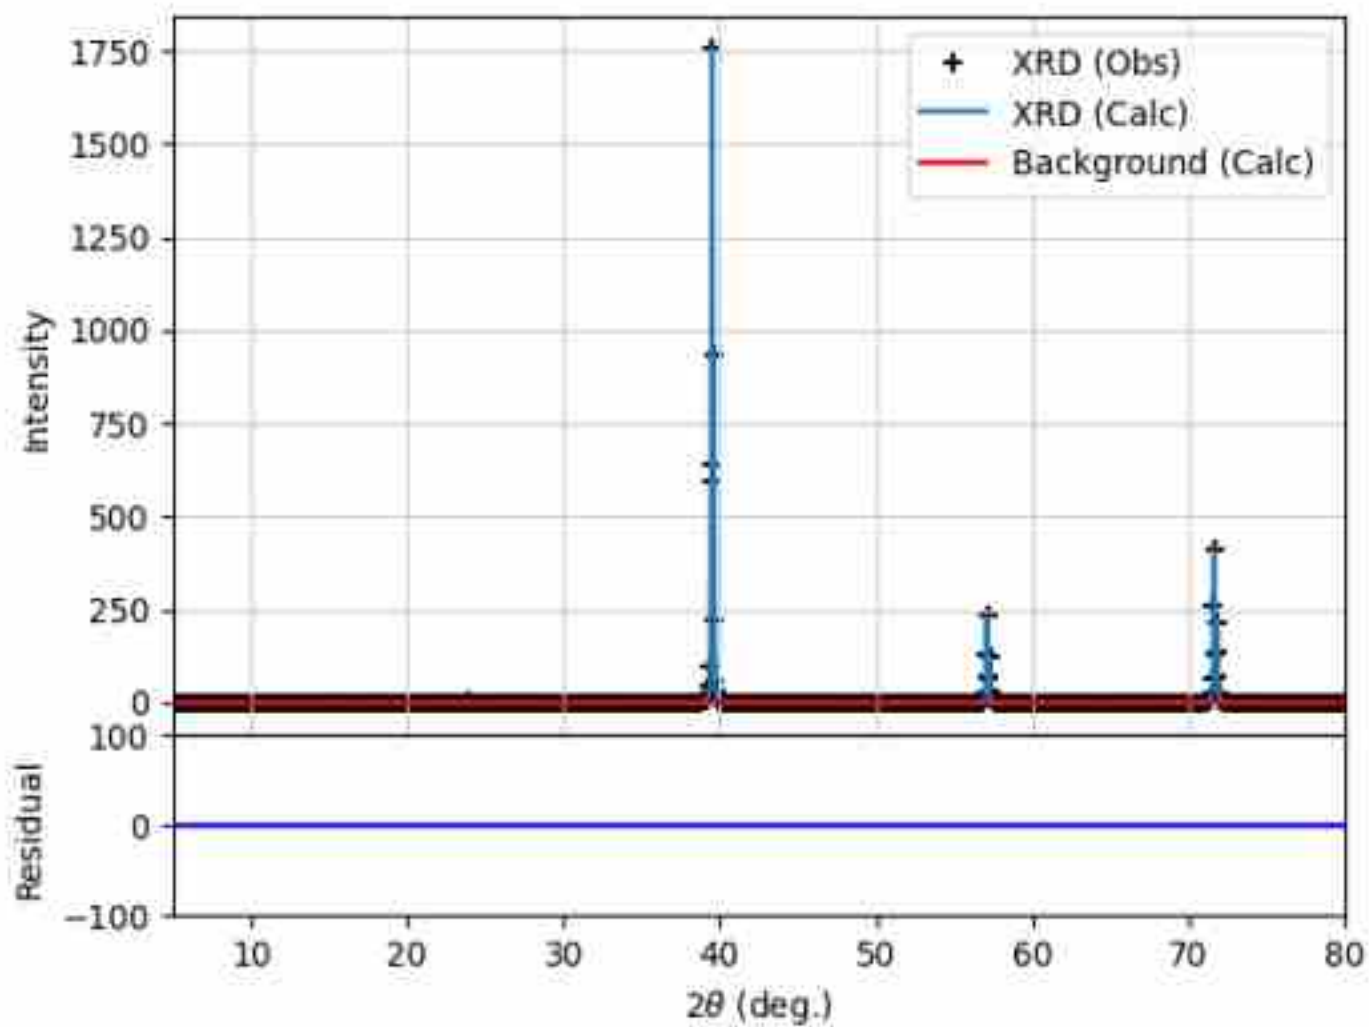

| RMSE before RR | Rwp     | RMSE after RR |
|----------------|---------|---------------|
| 0.002          | 0.02009 | 0.00056       |

# Sb4Ir4S4

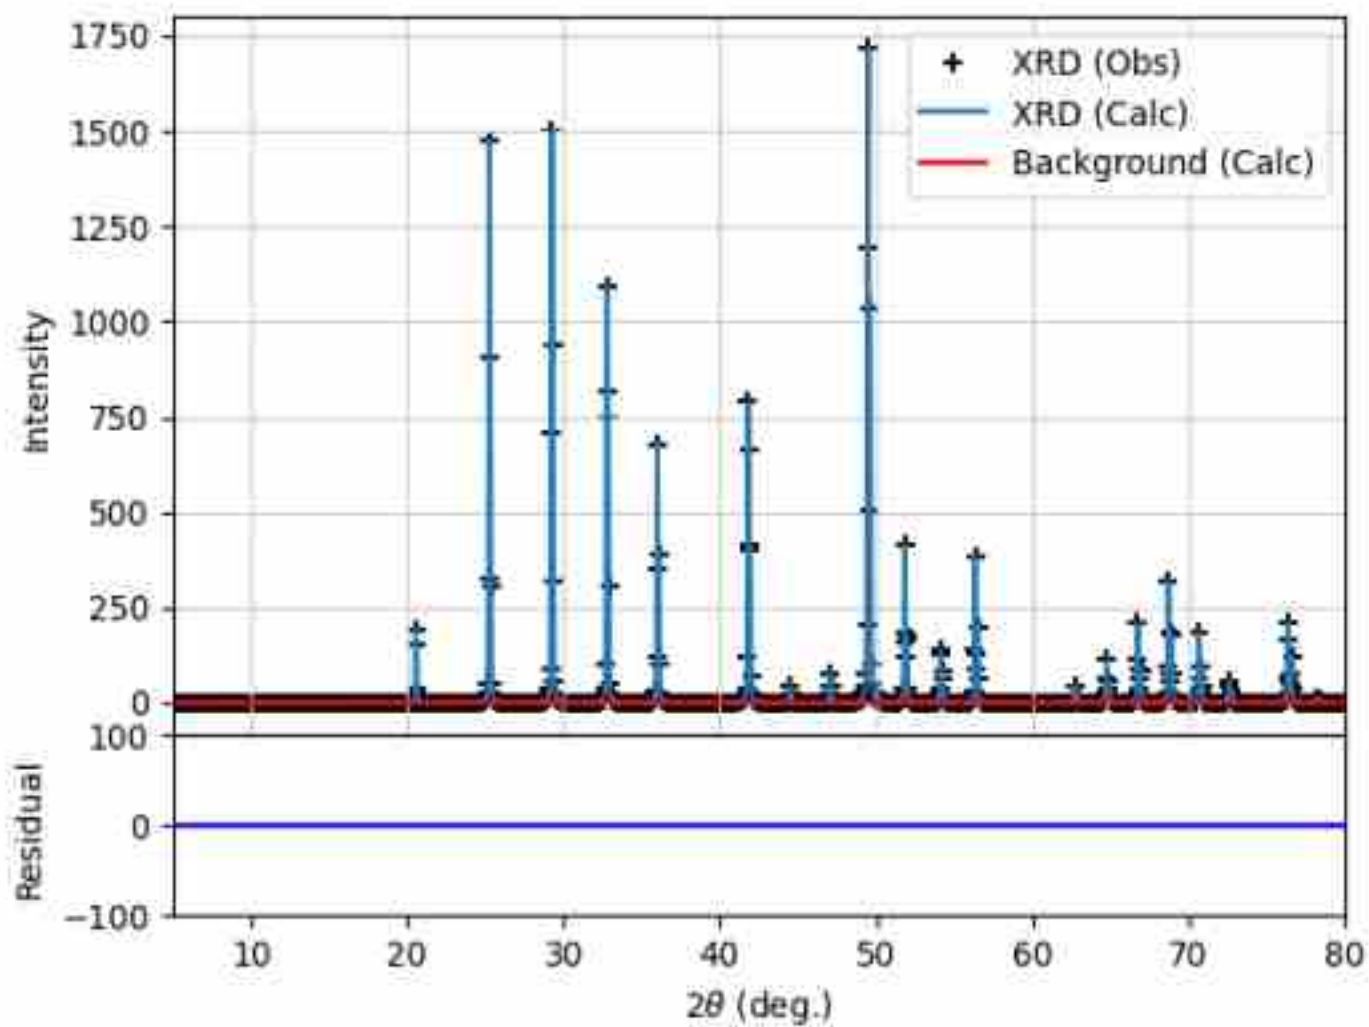

| RMSE before RR | Rwp     | RMSE after RR |
|----------------|---------|---------------|
| 0.02           | 0.00454 | 0.0007        |

# Sc1Al3

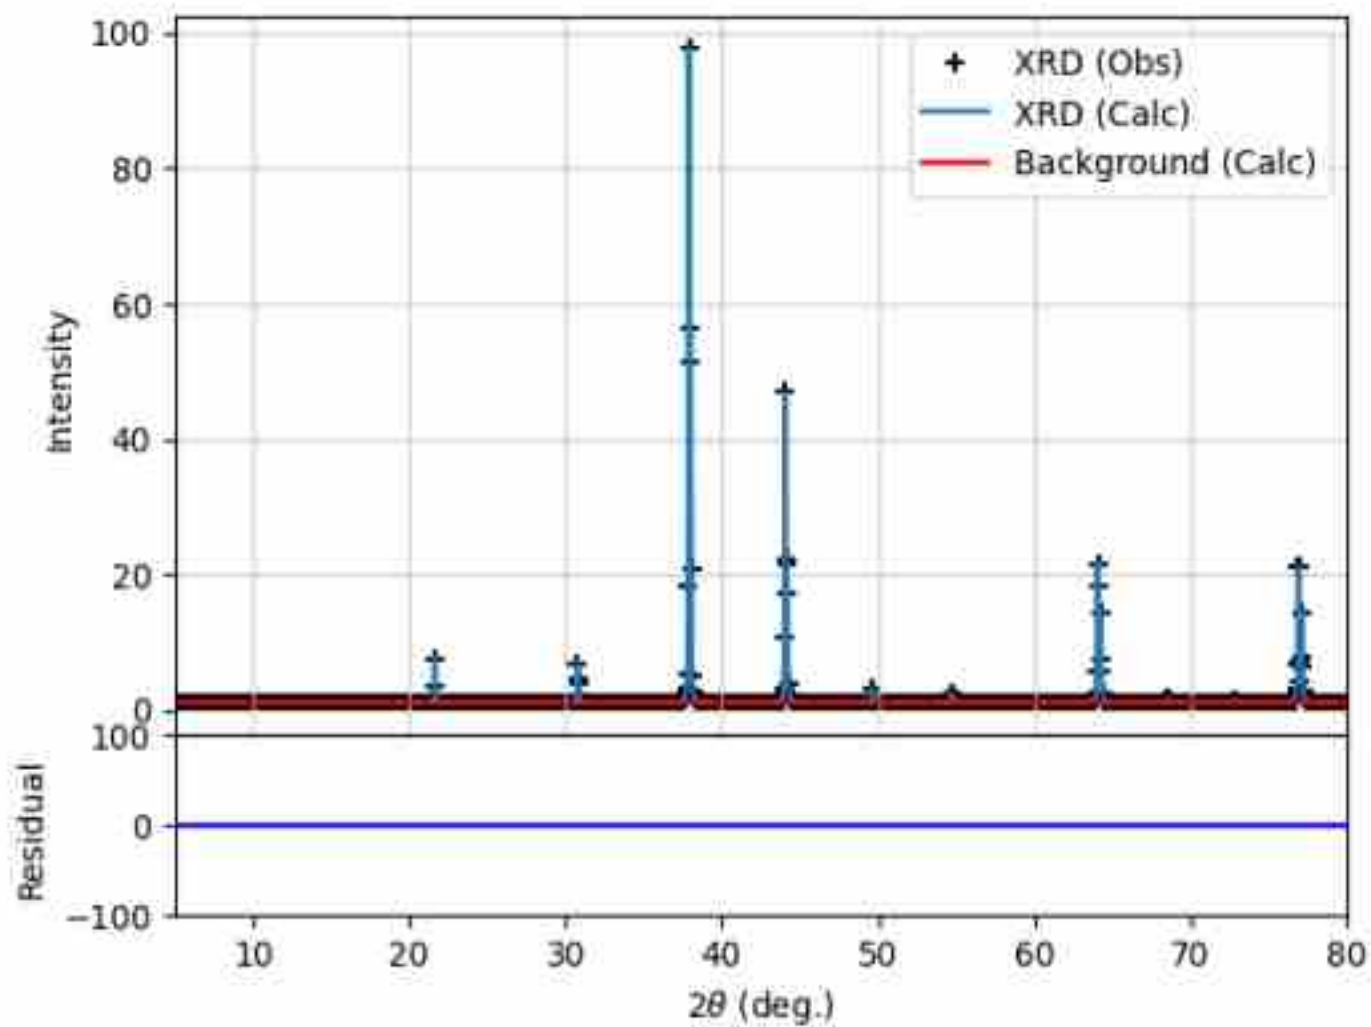

| RMSE before RR | Rwp     | RMSE after RR |
|----------------|---------|---------------|
| 0.002          | 0.01754 | 0.00076       |



# Sc1Ga1Co2

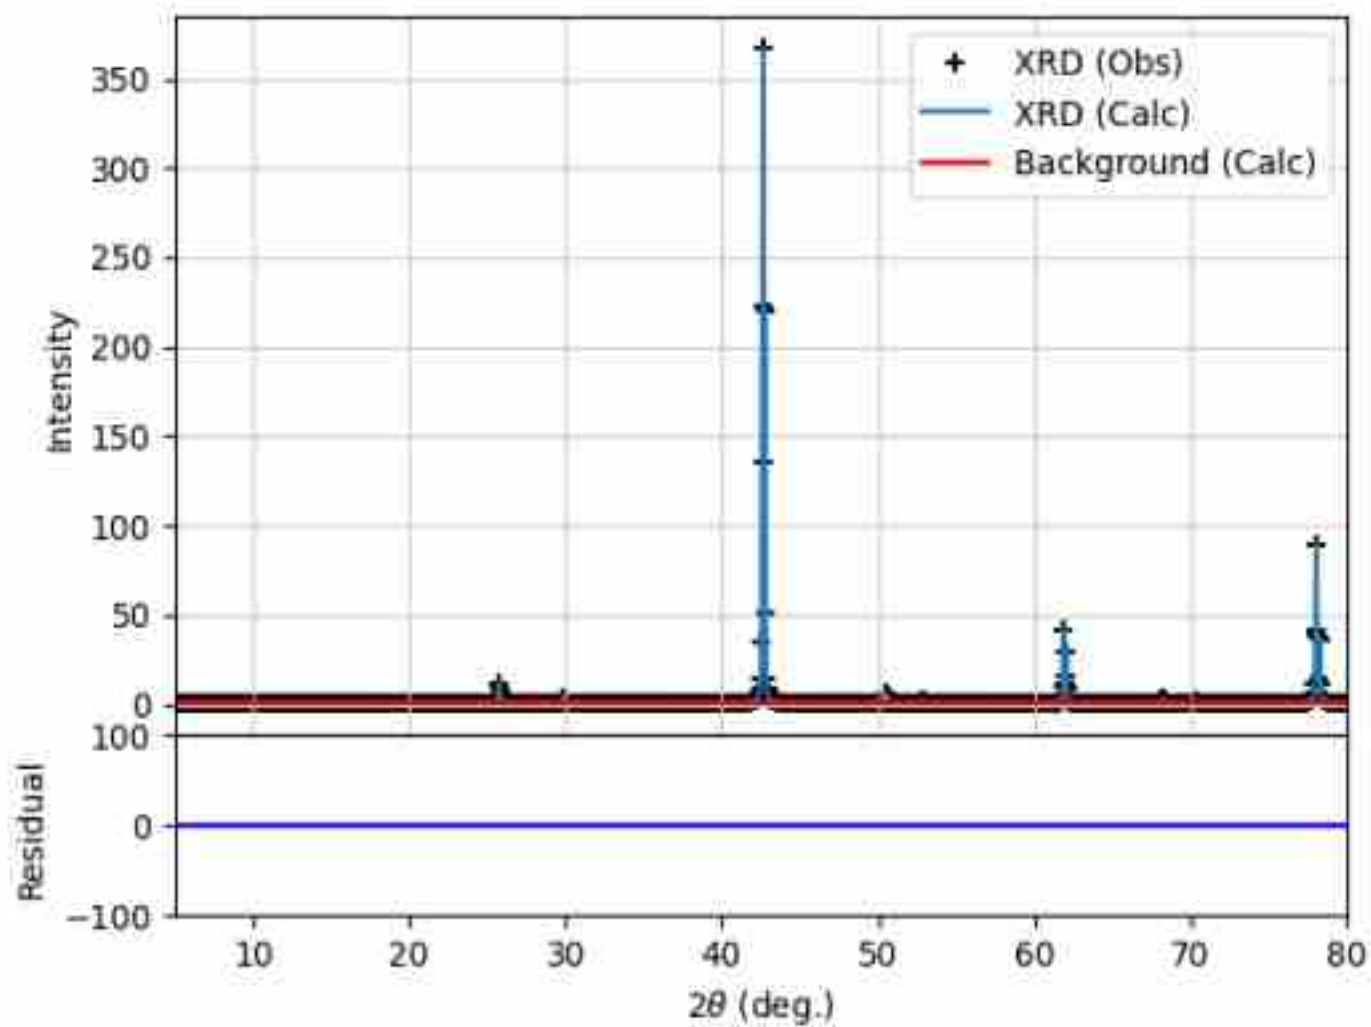

| RMSE before RR | Rwp     | RMSE after RR |
|----------------|---------|---------------|
| 0.002          | 0.00288 | 0.00096       |

# Sc1Ga1Cu2

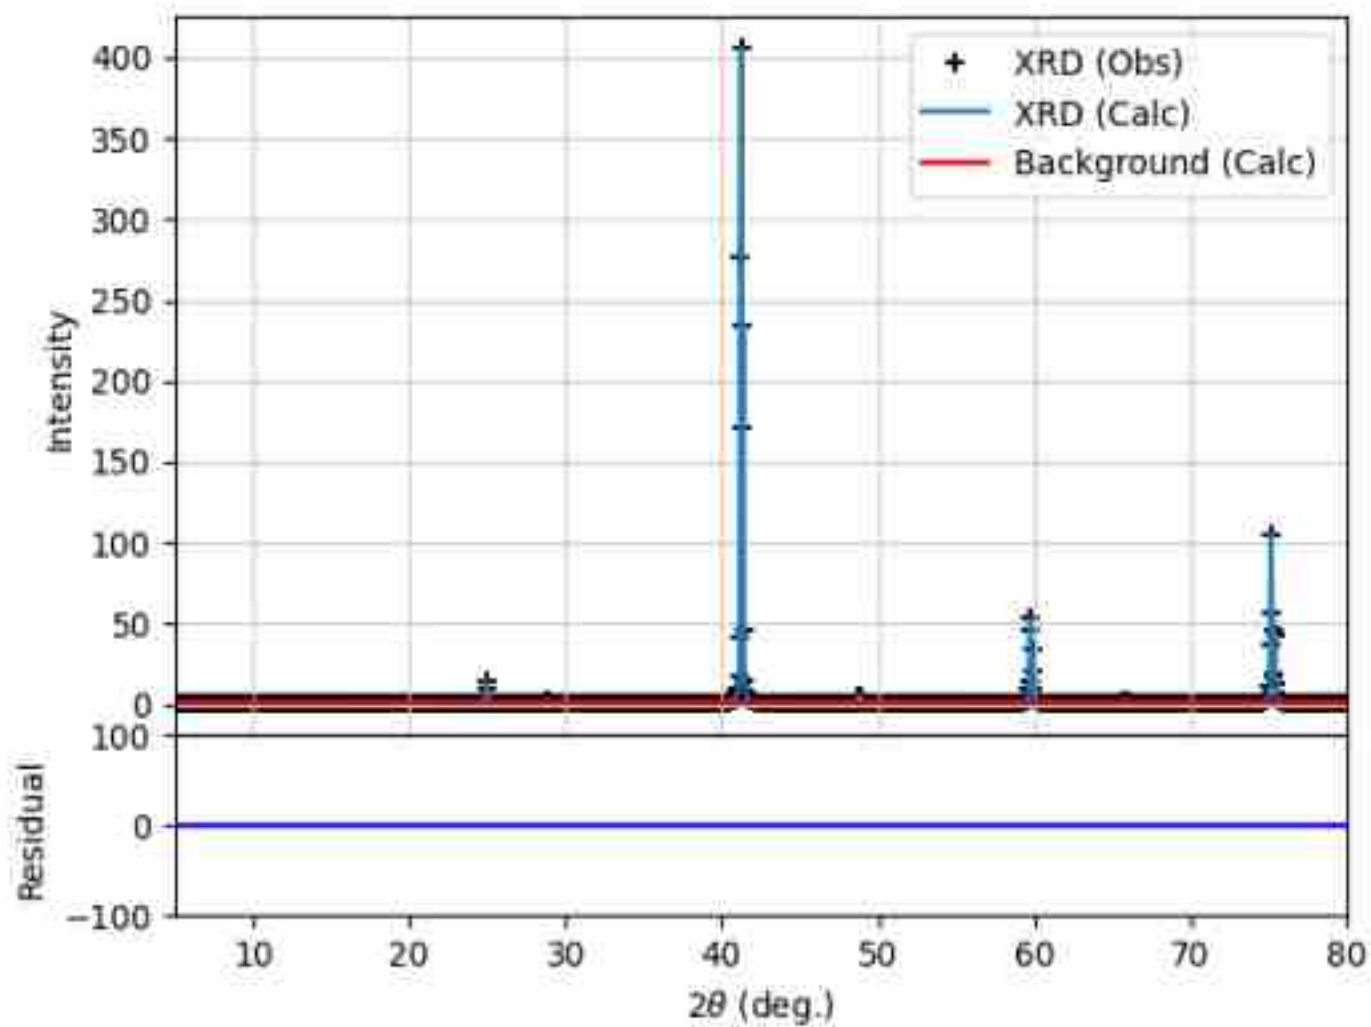

| RMSE before RR | Rwp     | RMSE after RR |
|----------------|---------|---------------|
| 0.002          | 0.00138 | 0.00049       |

# Sc1Ga1Rh2

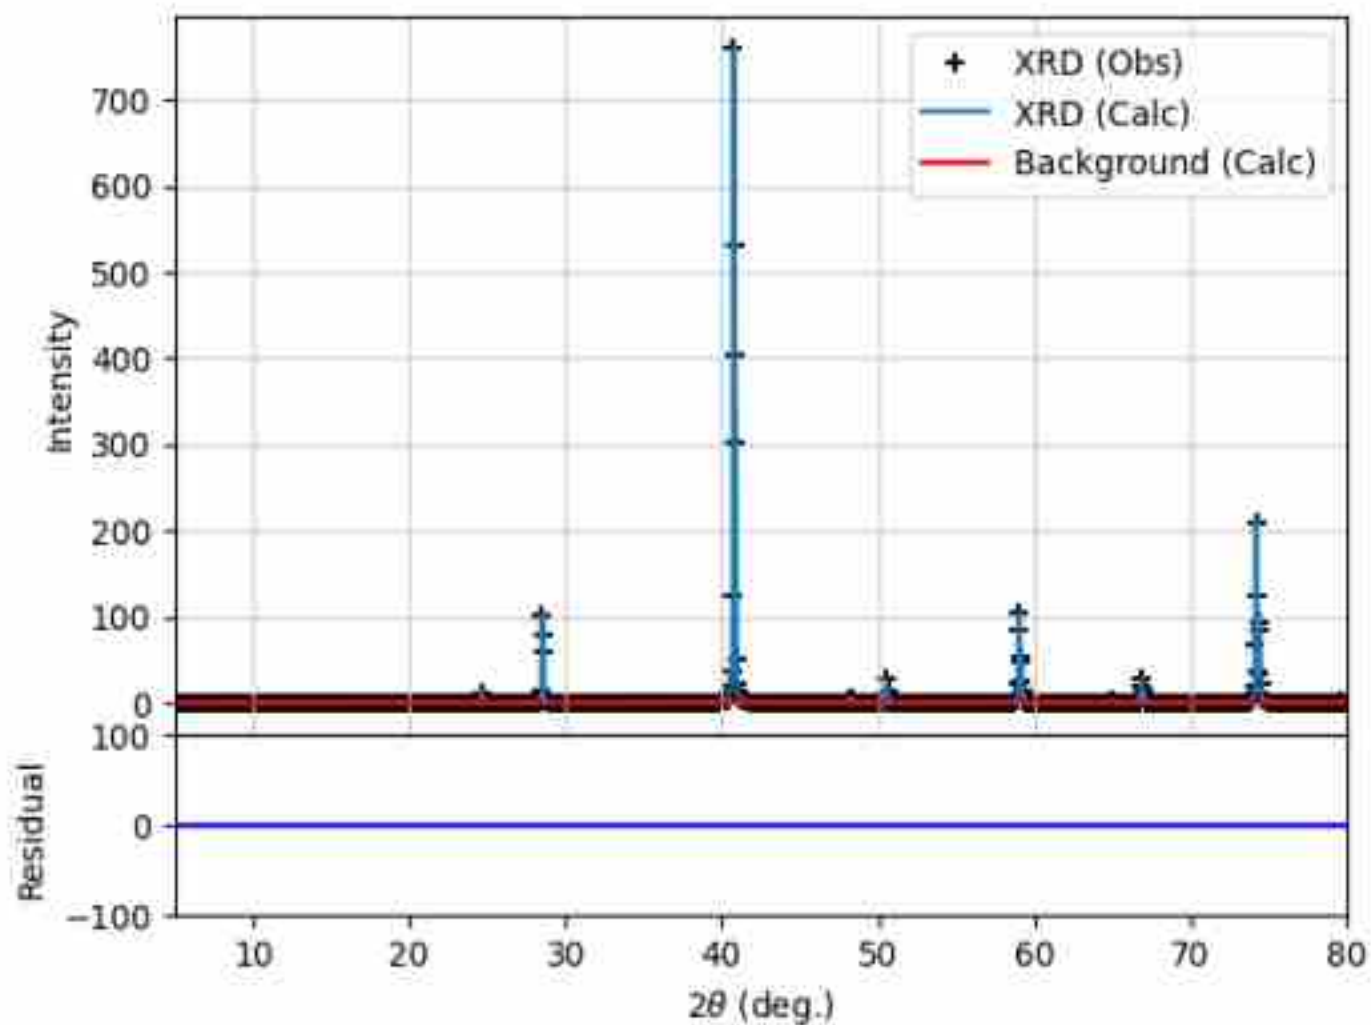

| RMSE before RR | Rwp     | RMSE after RR |
|----------------|---------|---------------|
| 0.002          | 0.00349 | 0.00043       |

# Sc1H3

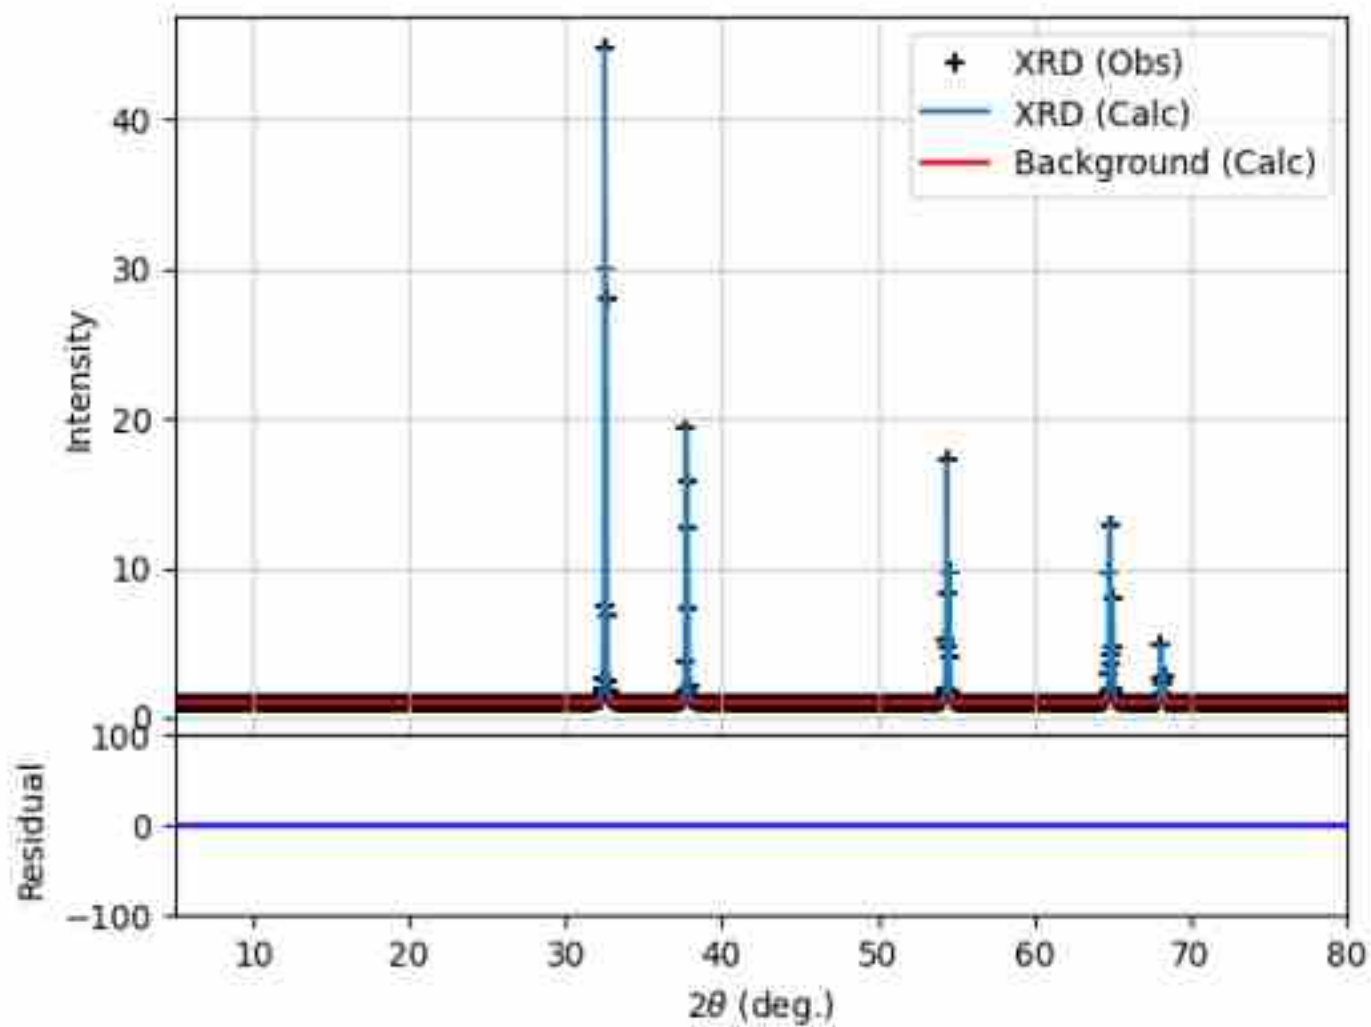

| RMSE before RR | Rwp    | RMSE after RR |
|----------------|--------|---------------|
| 0.002          | 0.0016 | 0.0023        |

# Sc1In1Au2

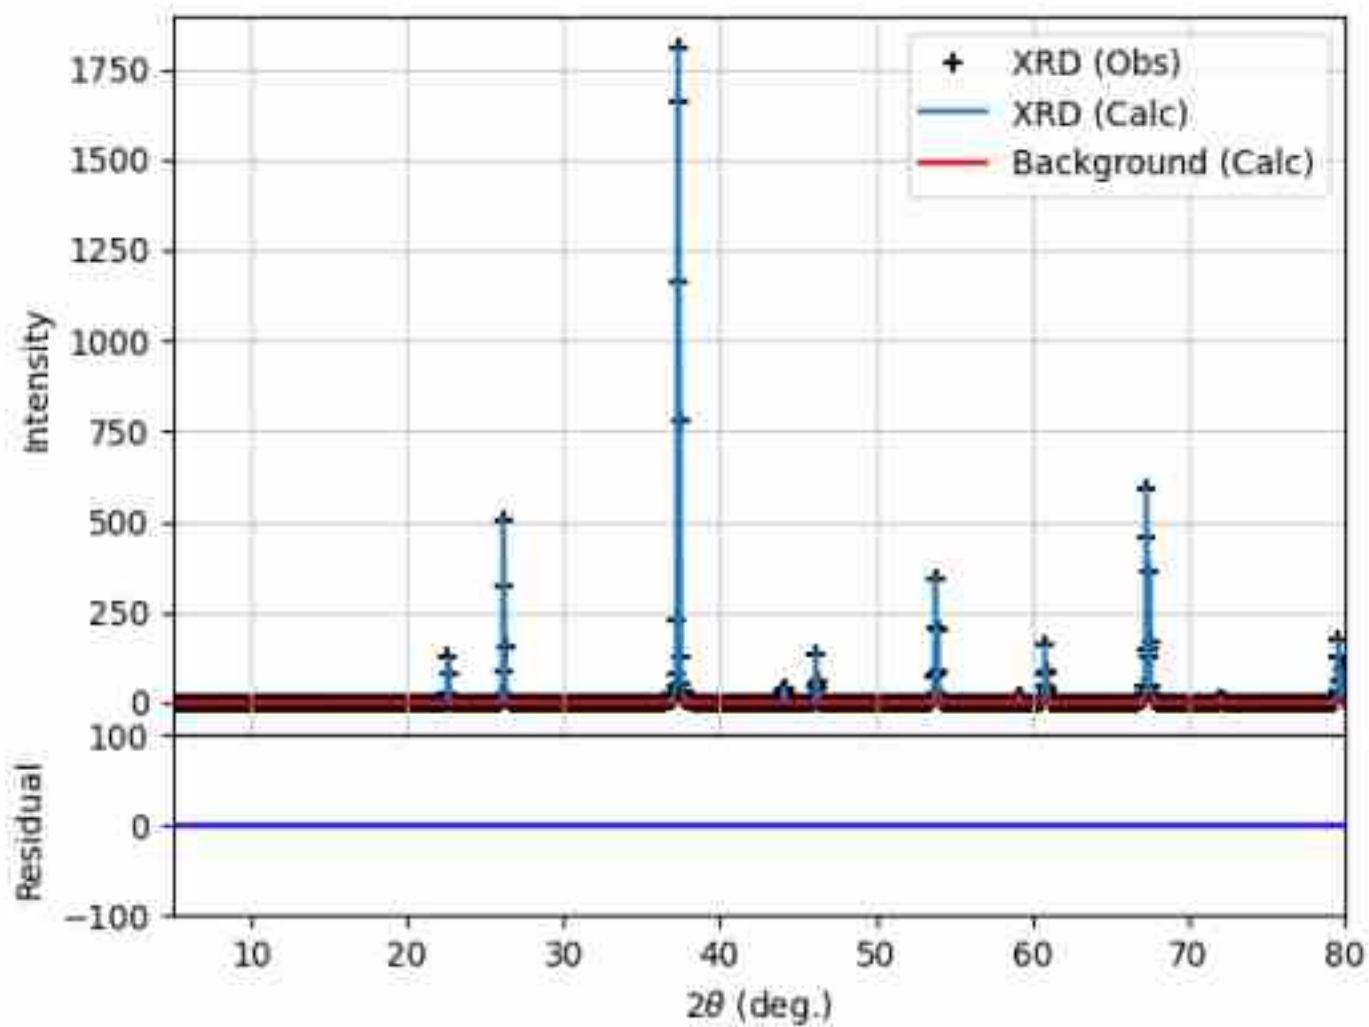

| RMSE before RR | Rwp     | RMSE after RR |
|----------------|---------|---------------|
| 0.002          | 0.00936 | 0.0011        |

# Sc1In1Ir2

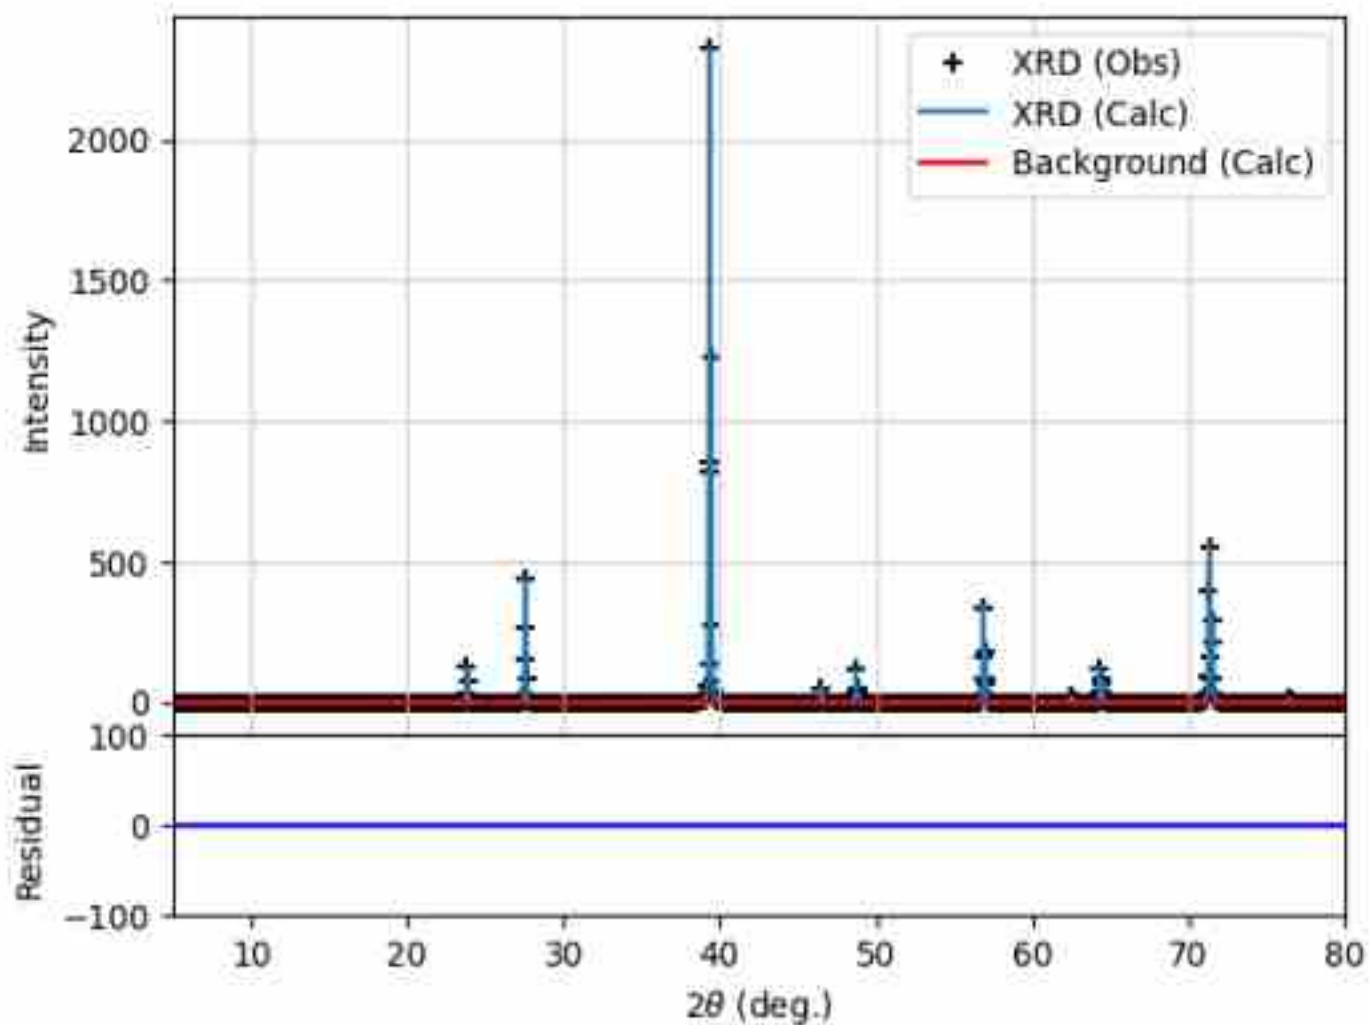

| RMSE before RR | Rwp     | RMSE after RR |
|----------------|---------|---------------|
| 0.002          | 0.00208 | 0.00042       |

# Sc1Ir3

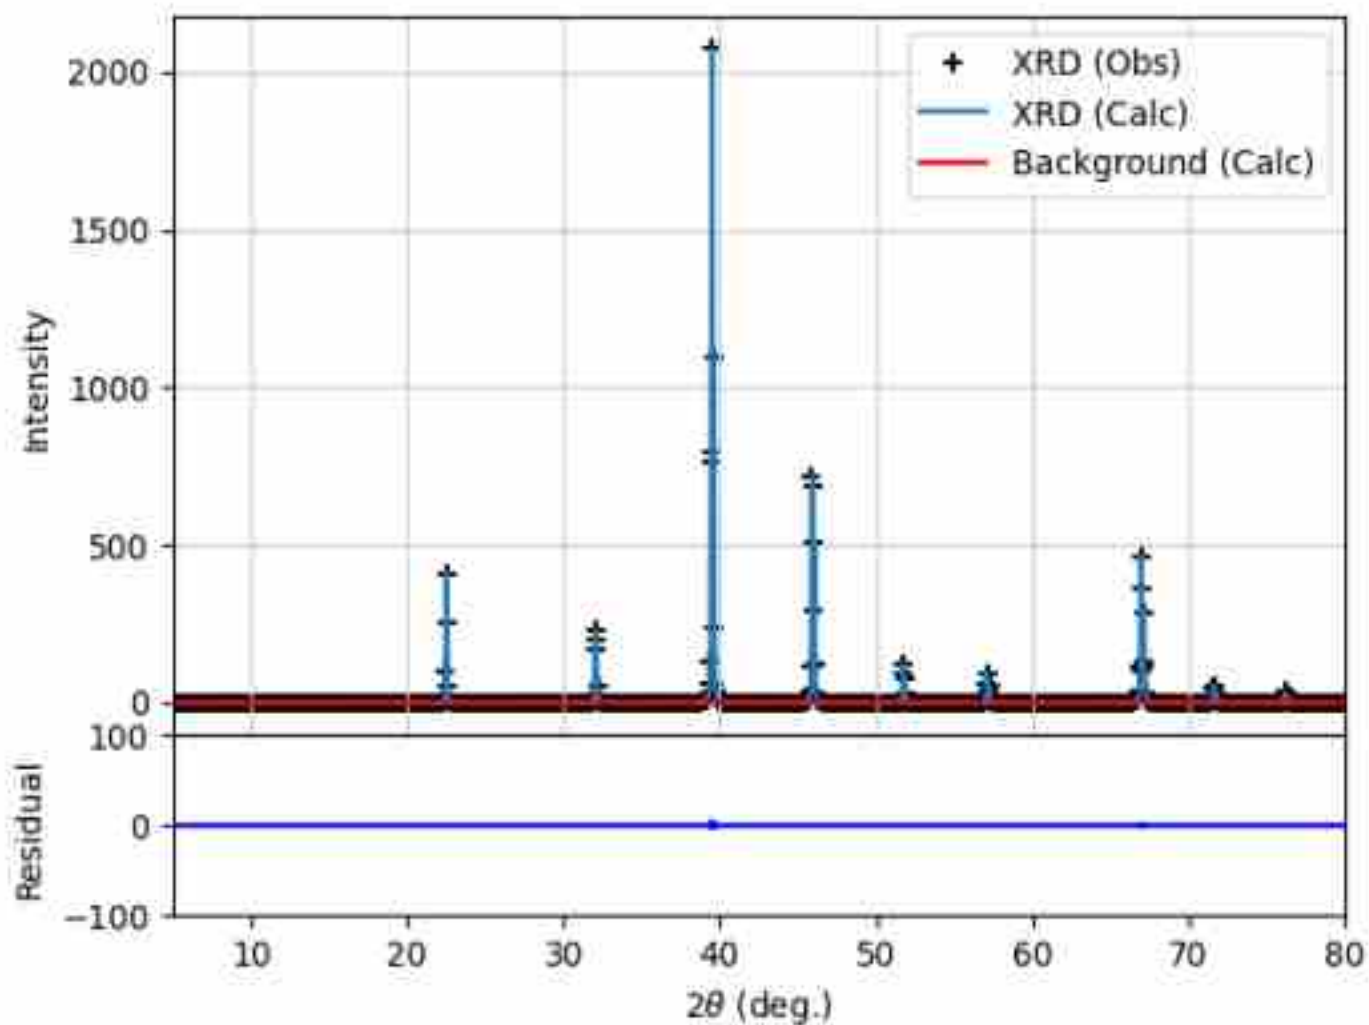

| RMSE before RR | Rwp    | RMSE after RR |
|----------------|--------|---------------|
| 0.002          | 0.2052 | 0.00133       |

# Sc1Ni2Sn1

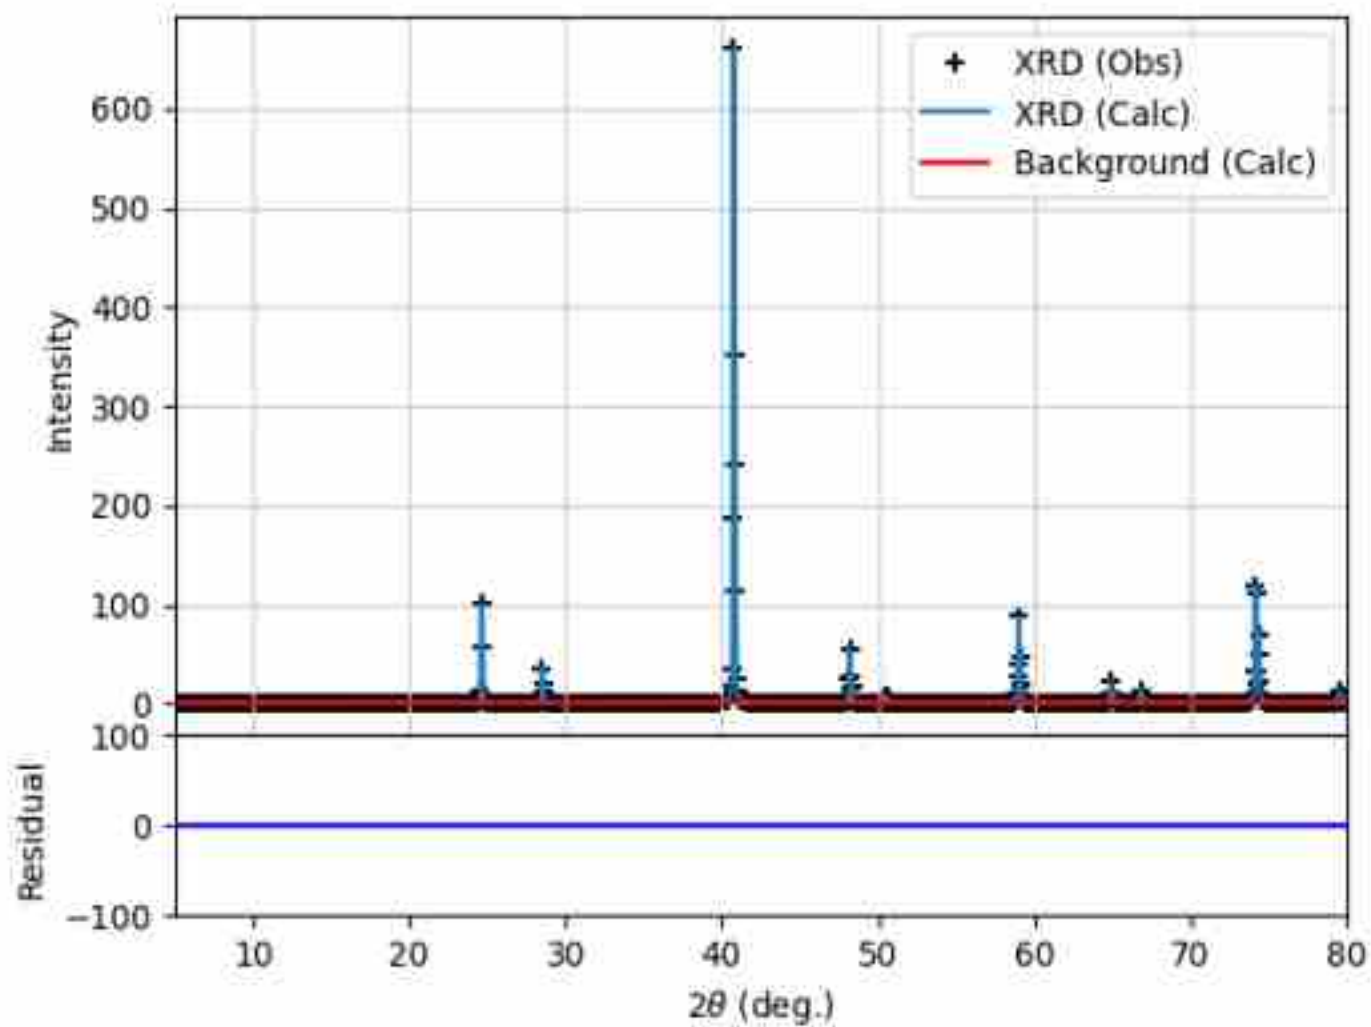

| RMSE before RR | Rwp     | RMSE after RR |
|----------------|---------|---------------|
| 0.002          | 0.00267 | 0.00047       |



# Sc1Pt3

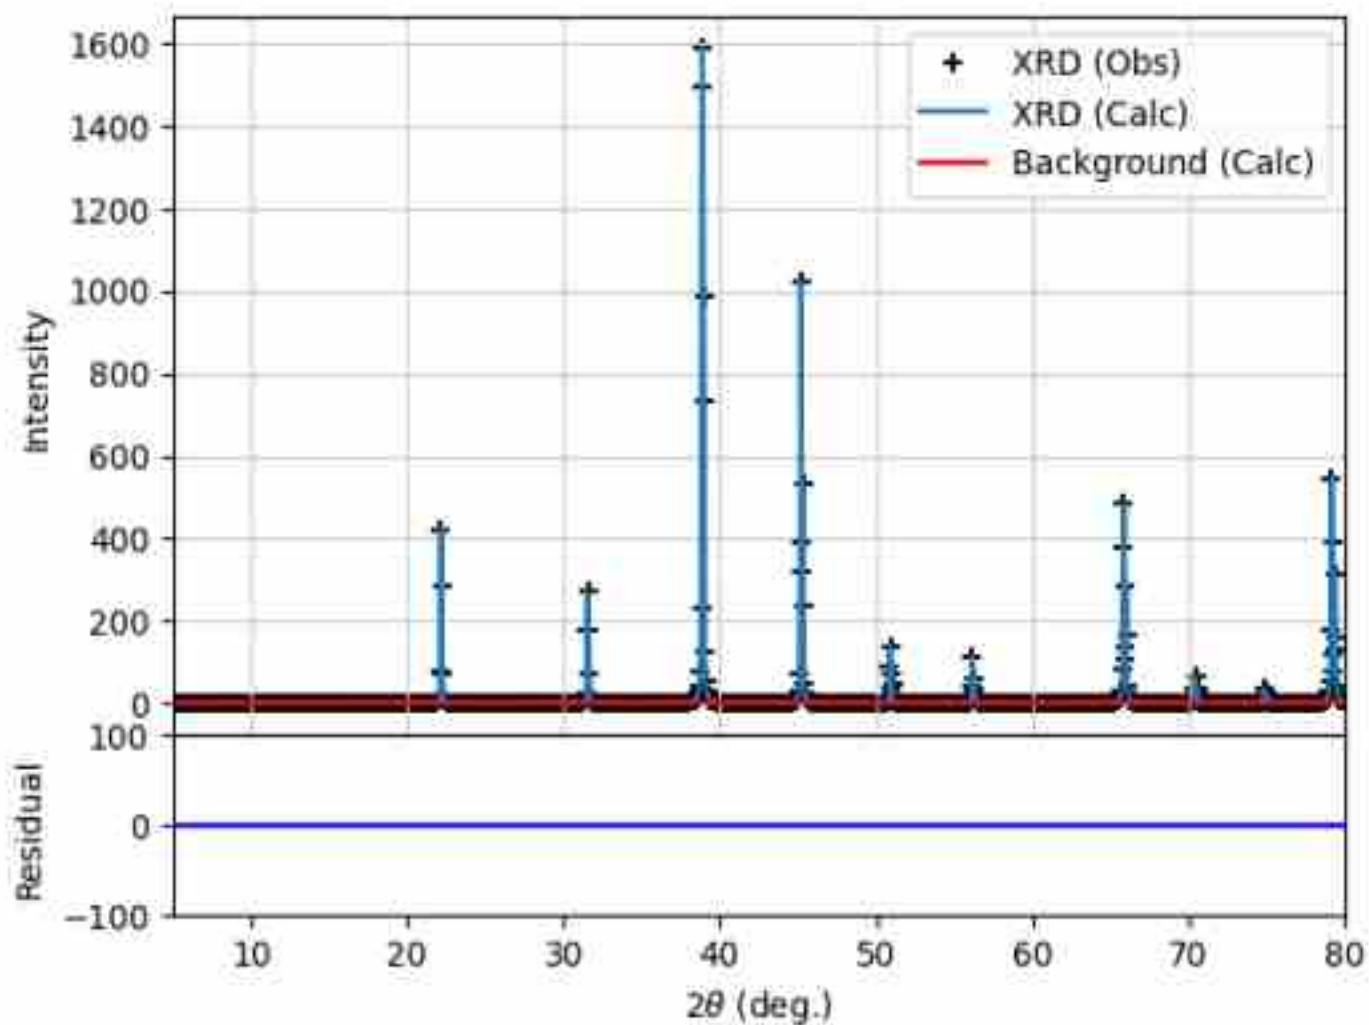

| RMSE before RR | Rwp     | RMSE after RR |
|----------------|---------|---------------|
| 0.002          | 0.02027 | 0.00153       |

# Sc1Ru1

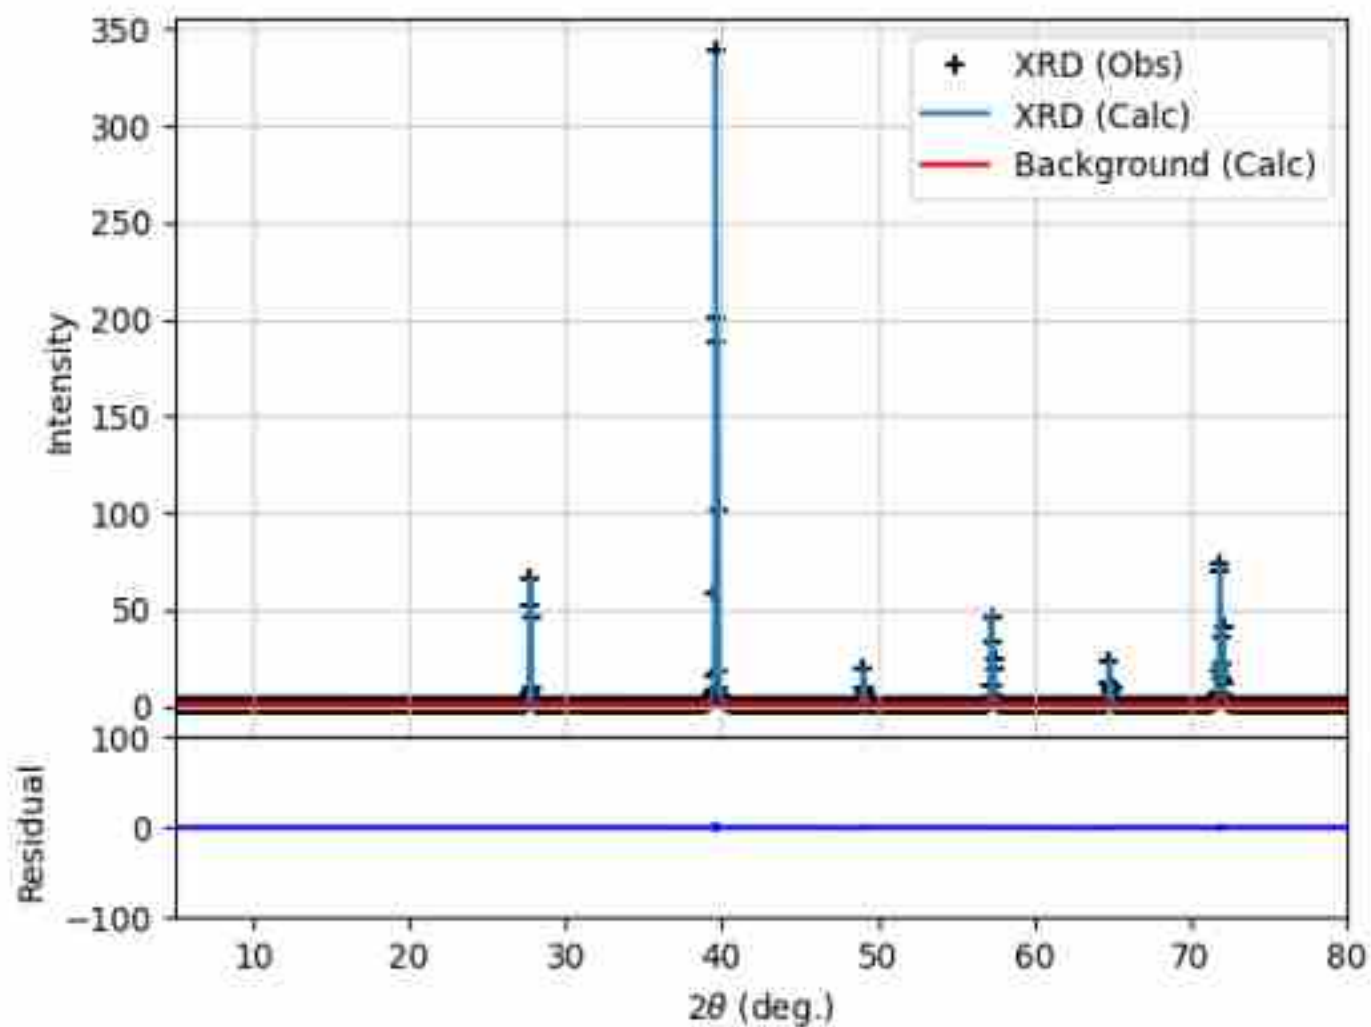

| RMSE before RR | Rwp   | RMSE after RR |
|----------------|-------|---------------|
| 0.002          | 1.505 | 0.00194       |

# Sc1Zn1Au2

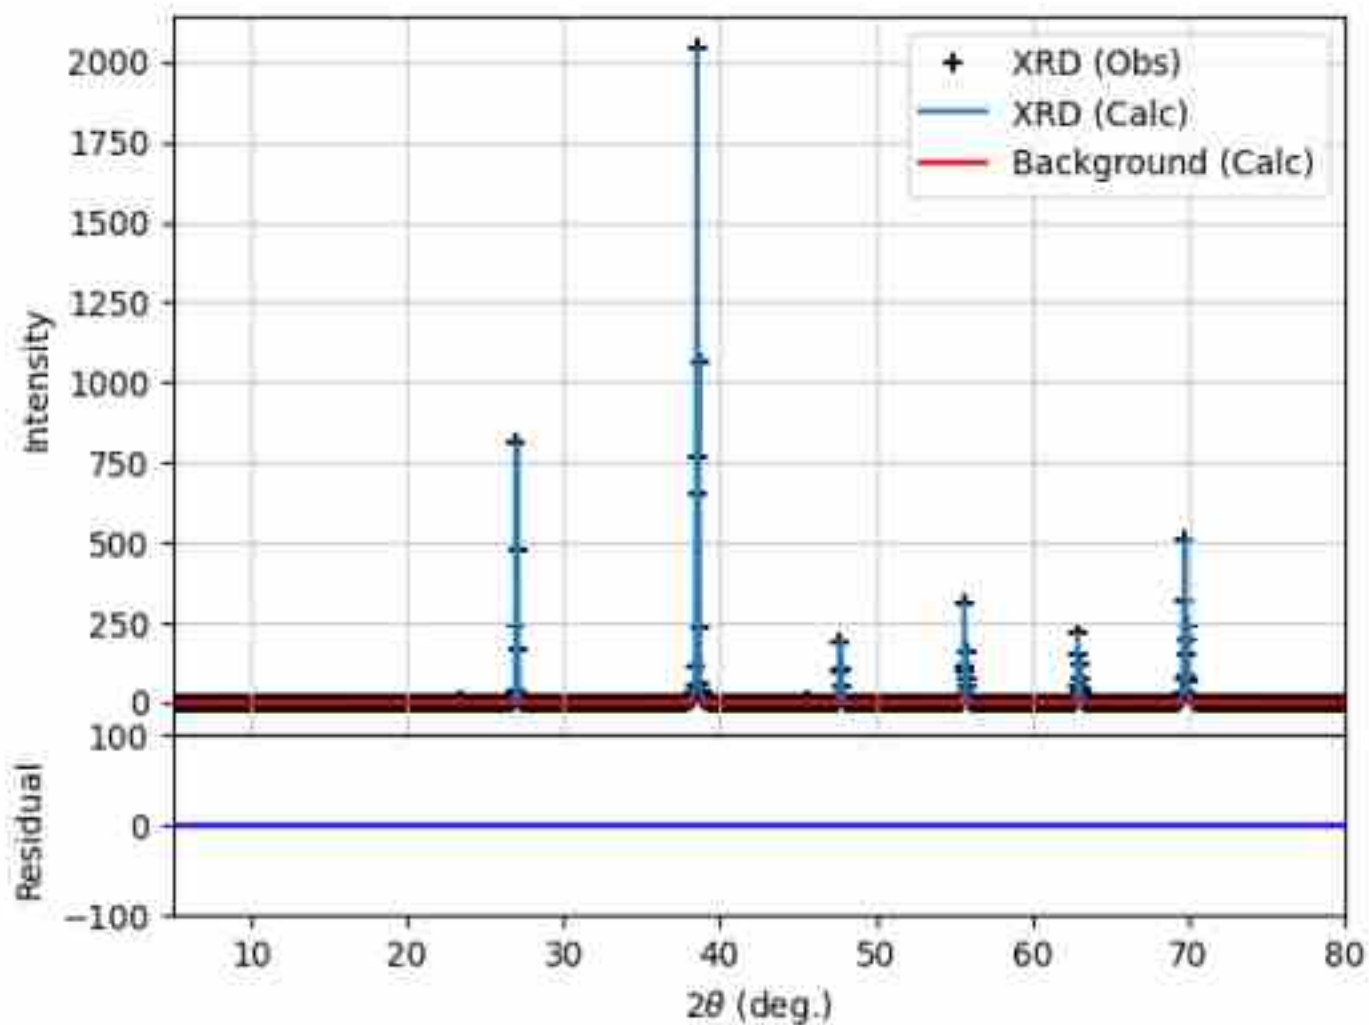

| RMSE before RR | Rwp     | RMSE after RR |
|----------------|---------|---------------|
| 0.002          | 0.08356 | 0.00128       |

# Sc1Zn2Pt1

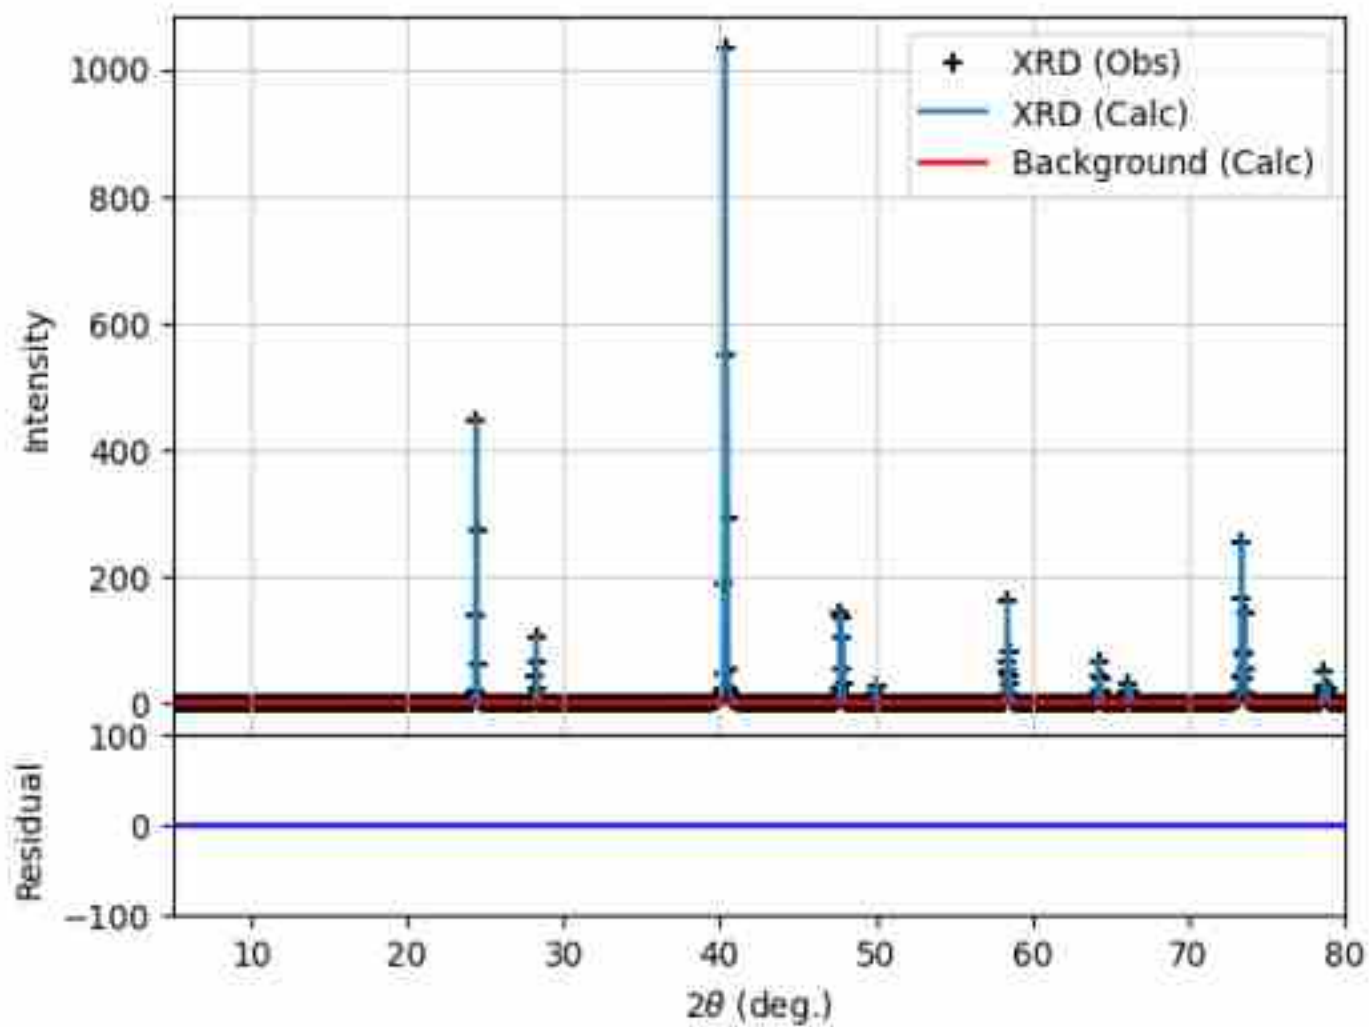

| RMSE before RR | Rwp     | RMSE after RR |
|----------------|---------|---------------|
| 0.002          | 0.00328 | 0.0005        |

# Sc2Ag1Ir1

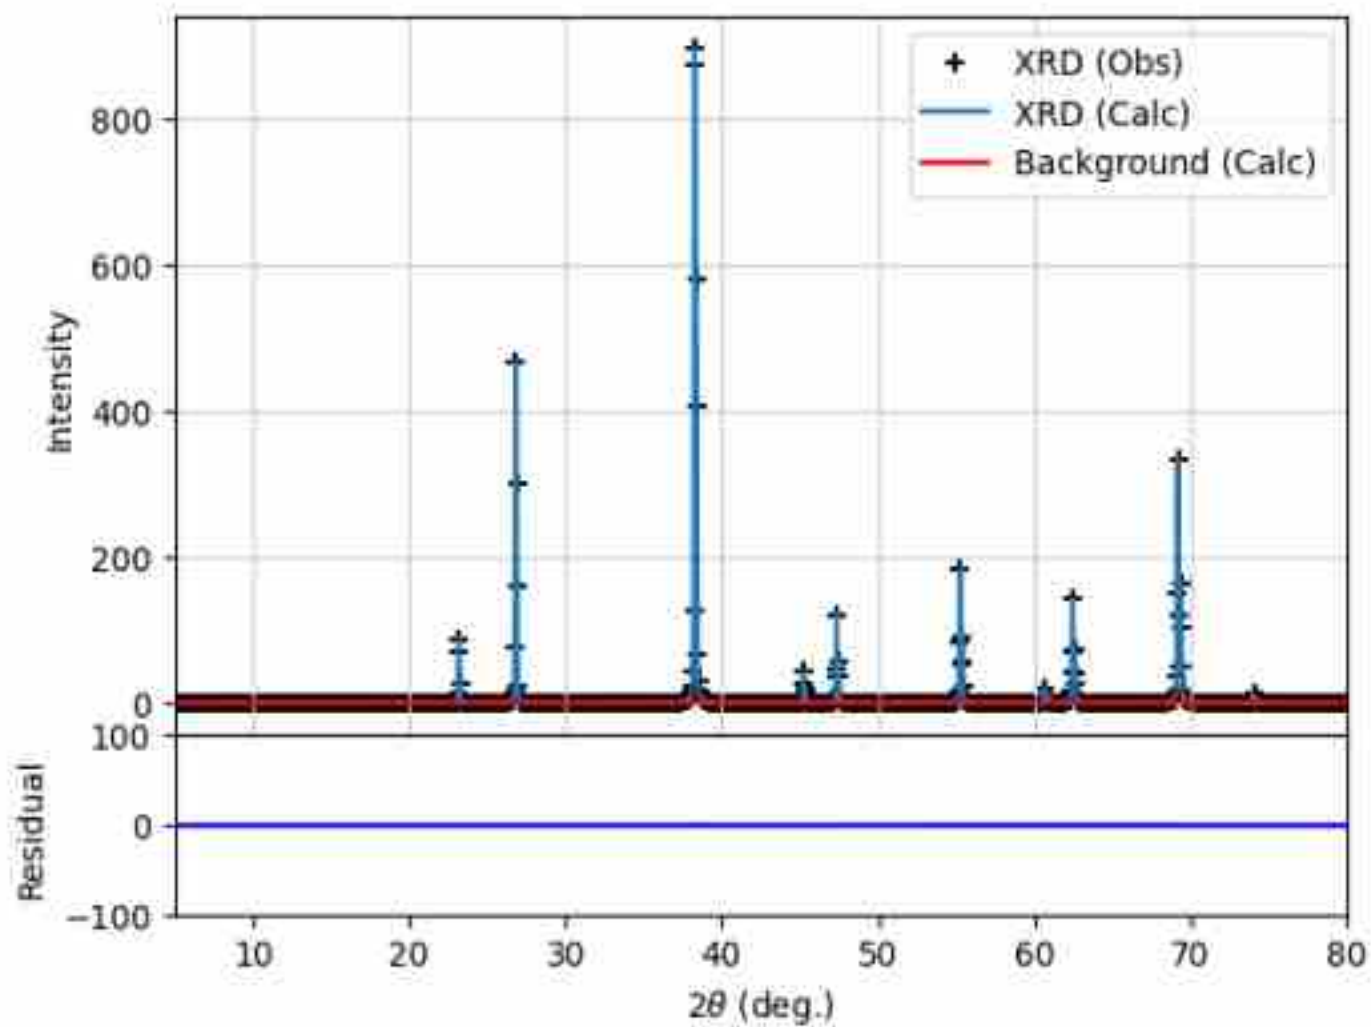

| RMSE before RR | Rwp     | RMSE after RR |
|----------------|---------|---------------|
| 0.002          | 0.11005 | 0.00154       |

# Sc<sub>2</sub>AlCo<sub>3</sub>

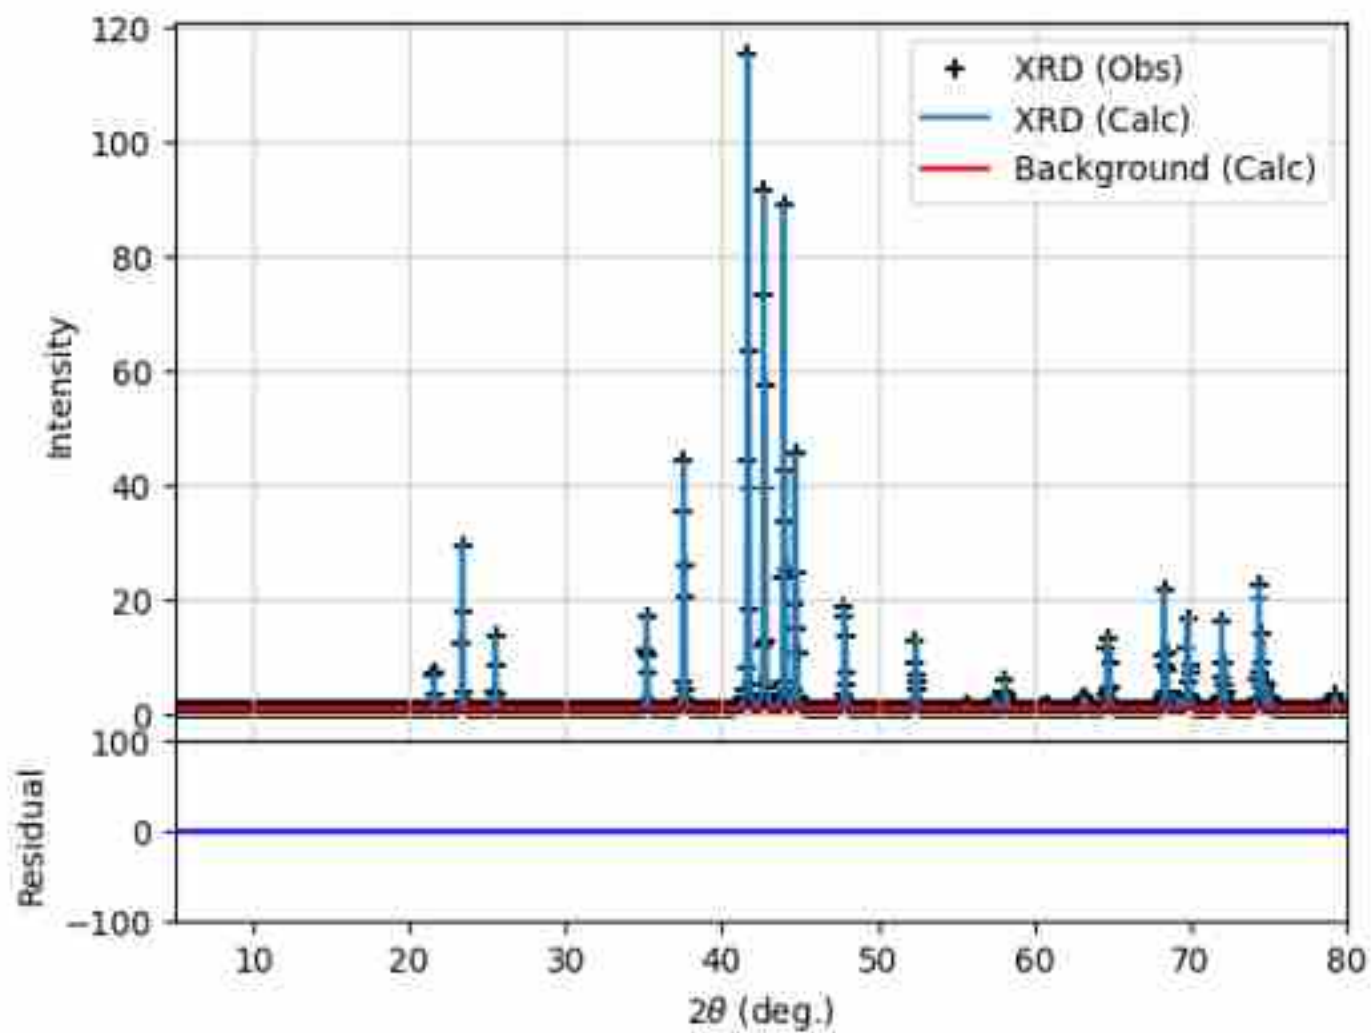

| RMSE before RR | Rwp     | RMSE after RR |
|----------------|---------|---------------|
| 0.02           | 0.00345 | 0.00054       |

# Sc<sub>2</sub>Cu<sub>1</sub>Pd<sub>1</sub>

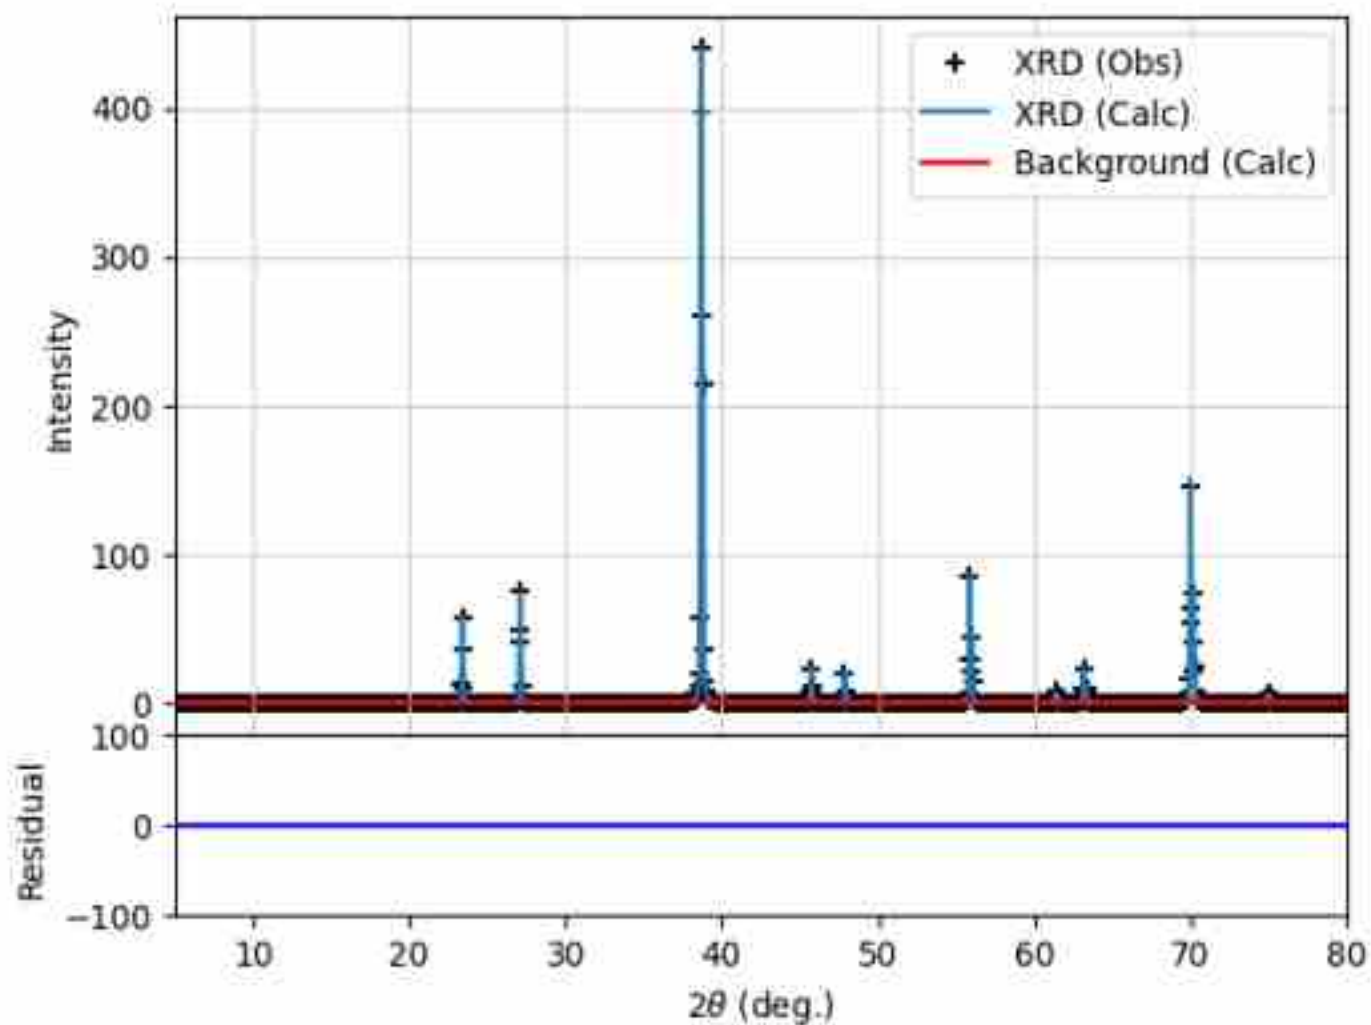

| RMSE before RR | Rwp     | RMSE after RR |
|----------------|---------|---------------|
| 0.002          | 0.00381 | 0.00065       |

# Sc<sub>2</sub>Ga<sub>1</sub>Os<sub>1</sub>

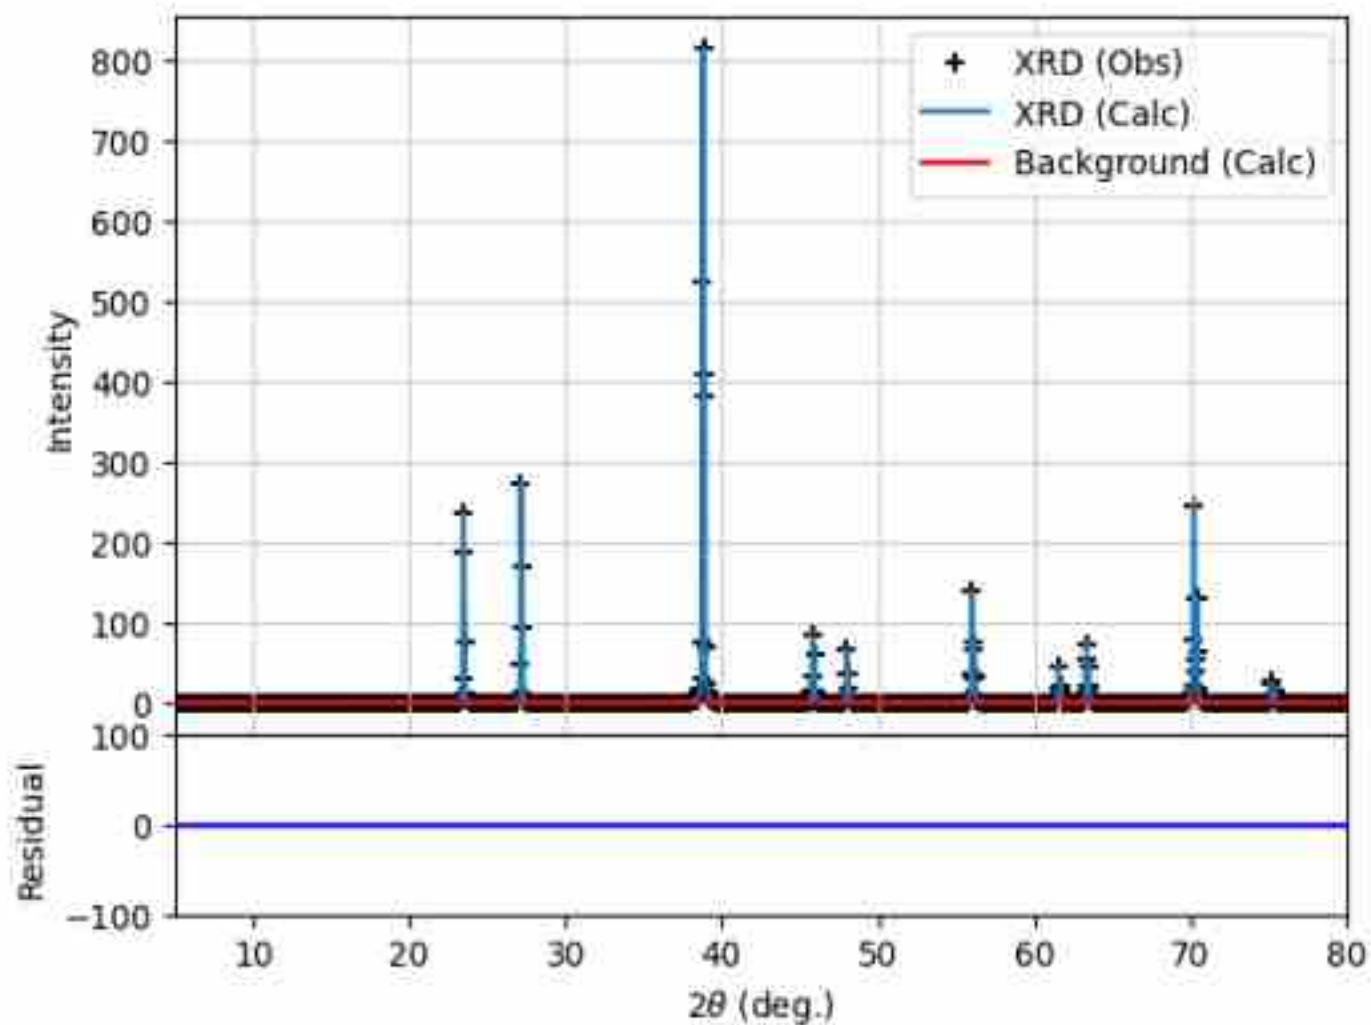

| RMSE before RR | Rwp     | RMSE after RR |
|----------------|---------|---------------|
| 0.002          | 0.00381 | 0.00054       |



# Sc2Tl1Hg1

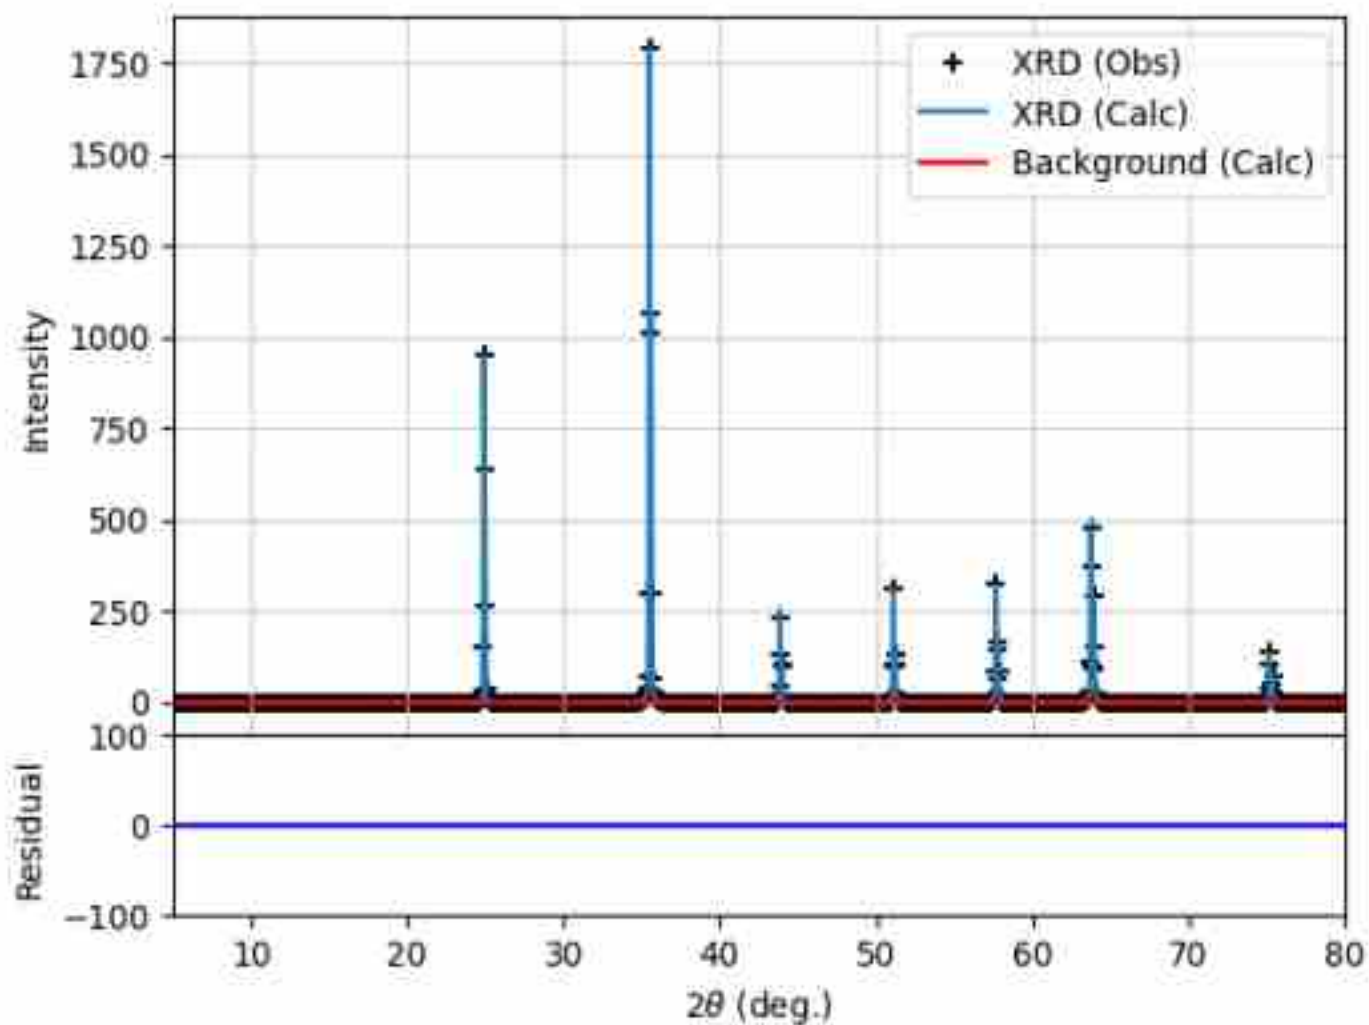

| RMSE before RR | Rwp     | RMSE after RR |
|----------------|---------|---------------|
| 0.002          | 0.00145 | 0.00048       |

# Sc<sub>2</sub>U<sub>2</sub>S<sub>6</sub>

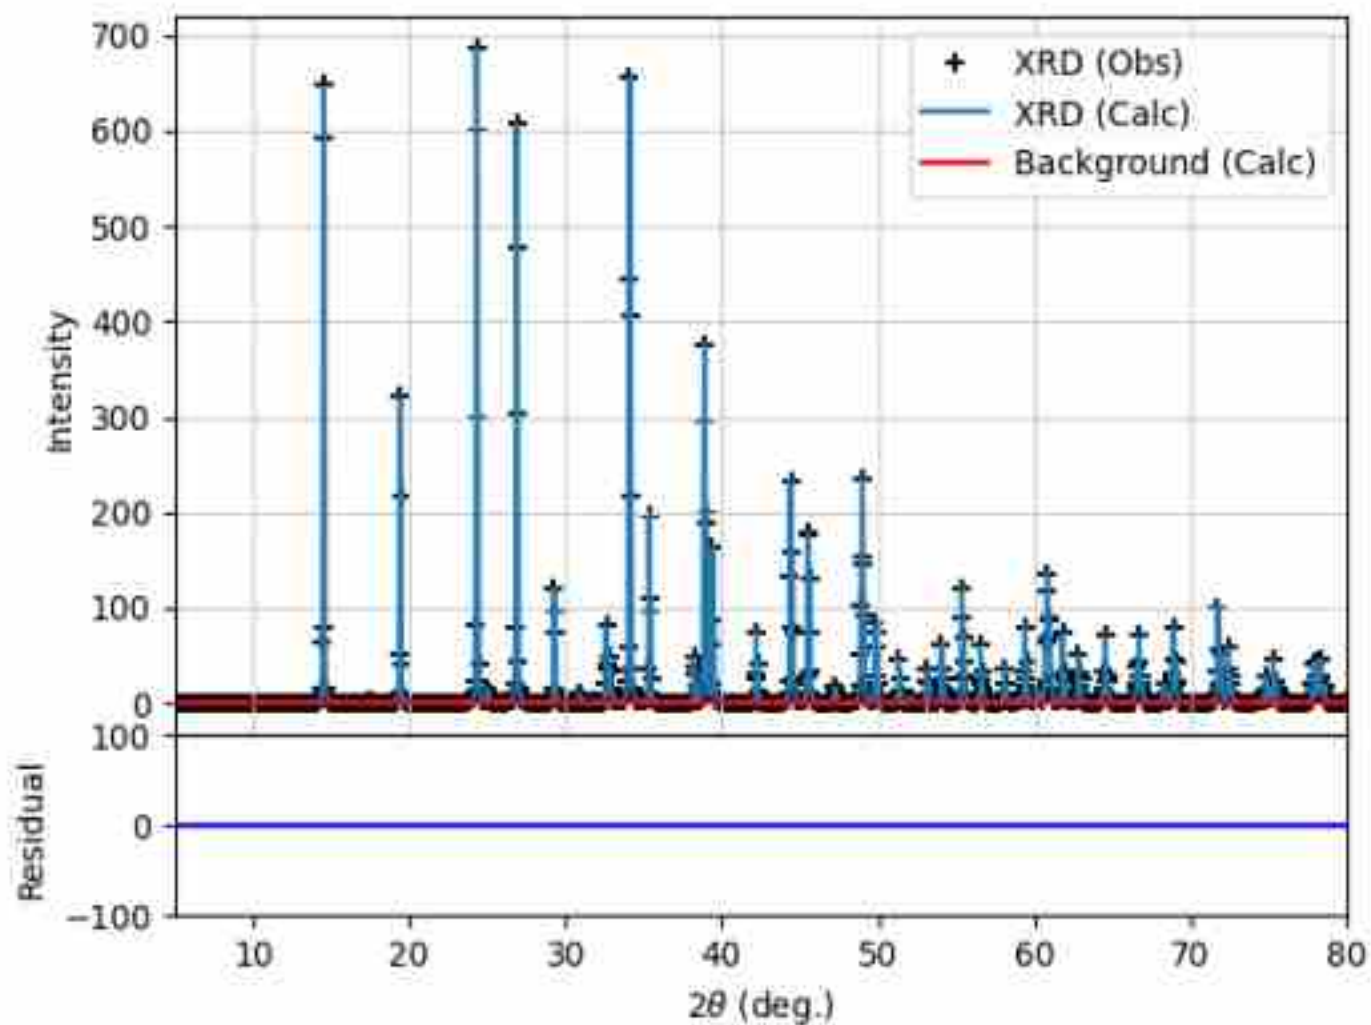

| RMSE before RR | Rwp     | RMSE after RR |
|----------------|---------|---------------|
| 0.02           | 0.00348 | 0.00084       |

# Sc<sub>2</sub>U<sub>6</sub>Sb<sub>10</sub>

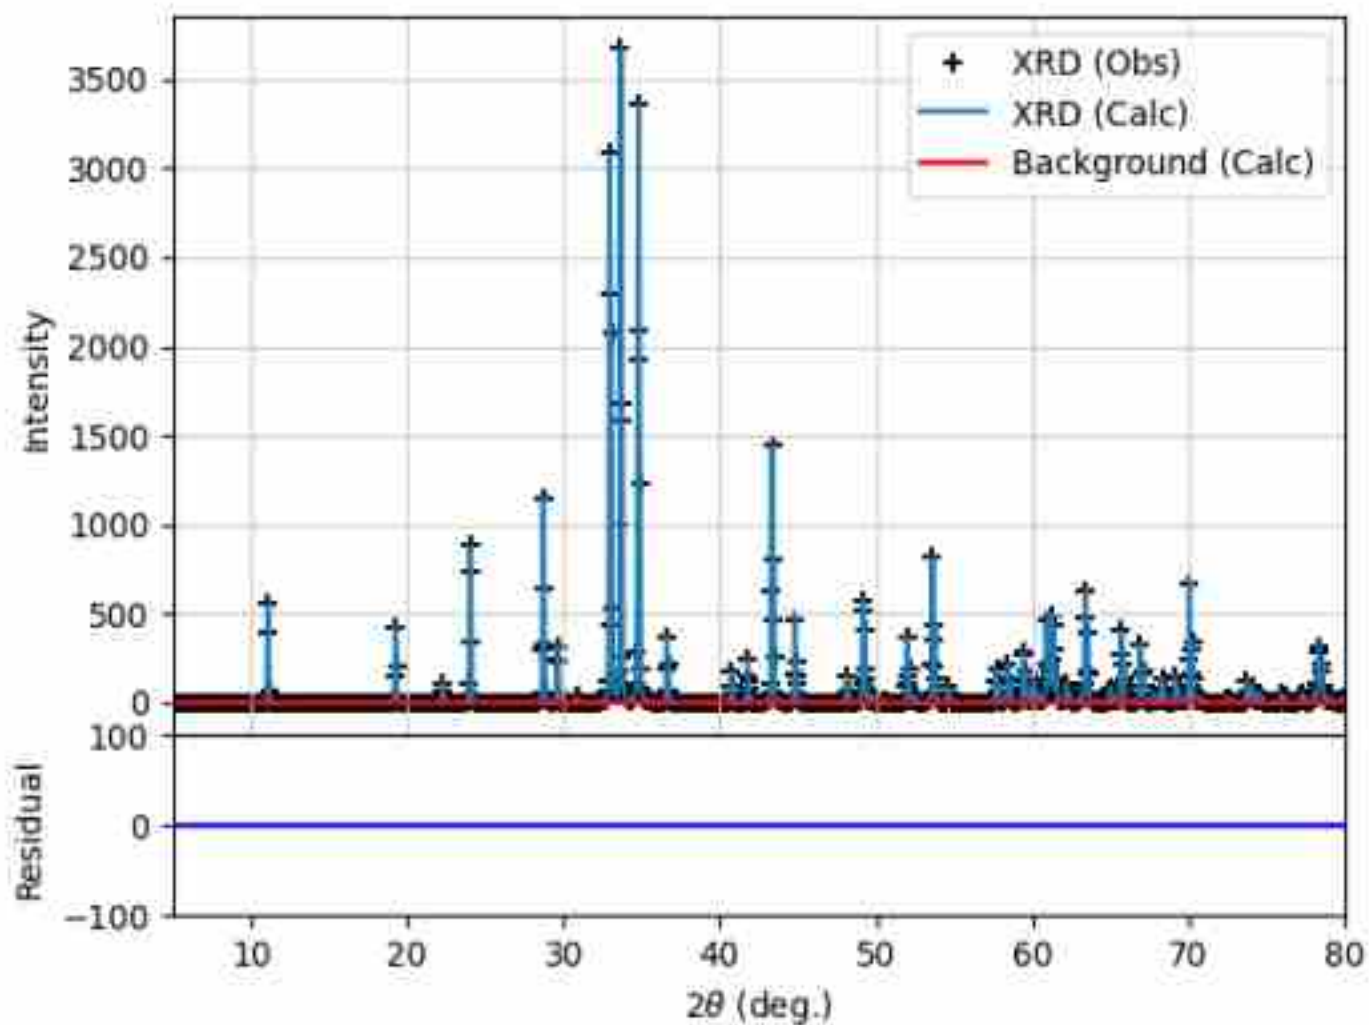

| RMSE before RR | Rwp     | RMSE after RR |
|----------------|---------|---------------|
| 0.02           | 0.00935 | 0.00128       |

Sc2Zn1Ga1

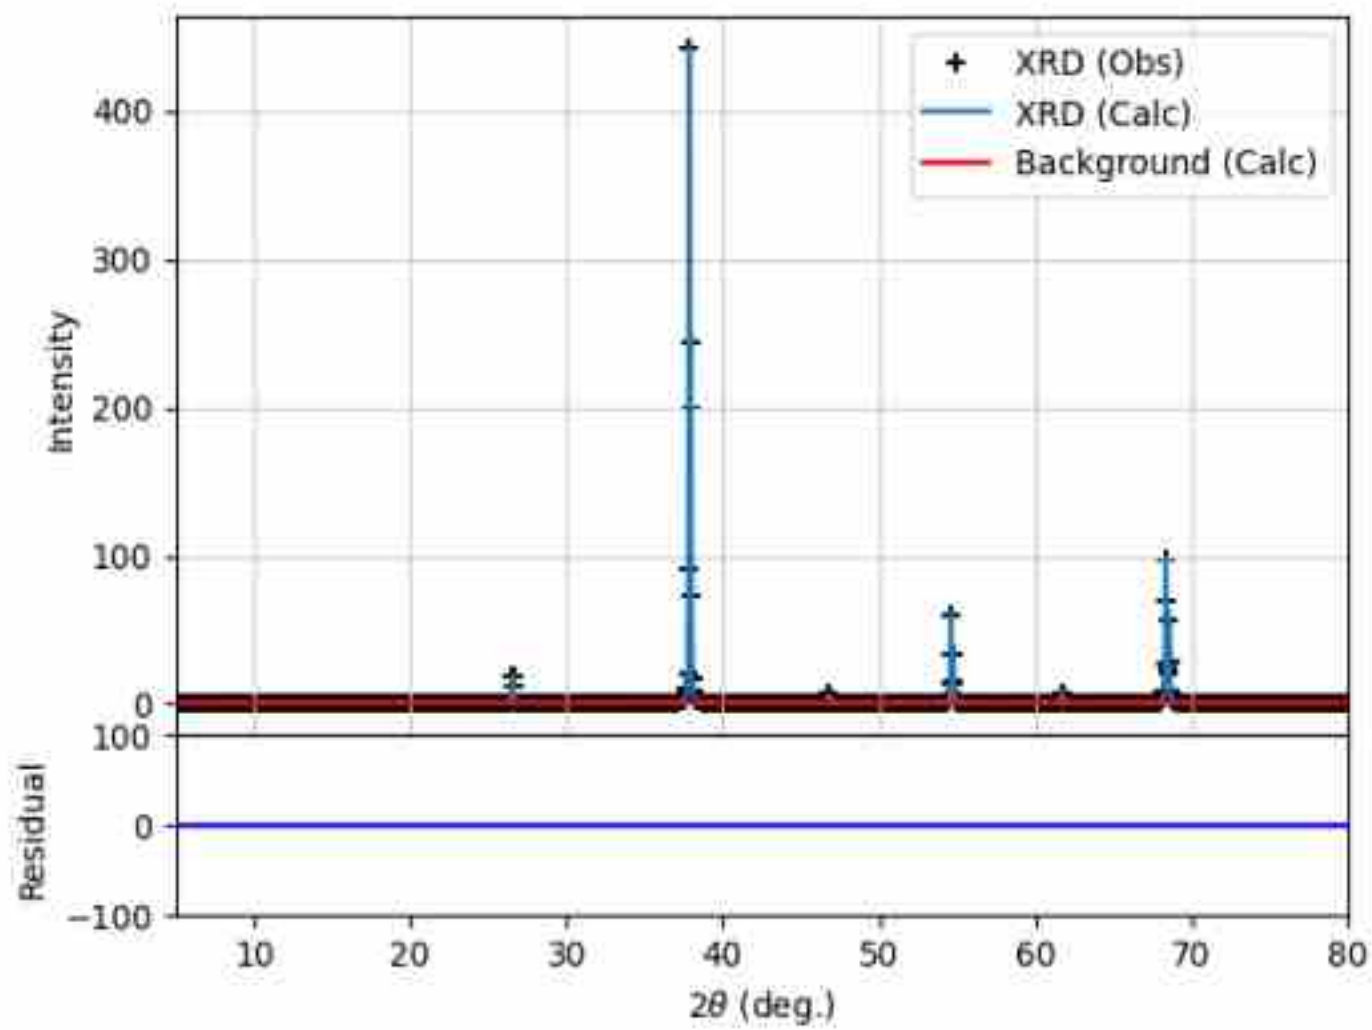

| RMSE before RR | Rwp     | RMSE after RR |
|----------------|---------|---------------|
| 0.002          | 0.00412 | 0.00053       |

# Sc<sub>2</sub>ZnIn<sub>1</sub>

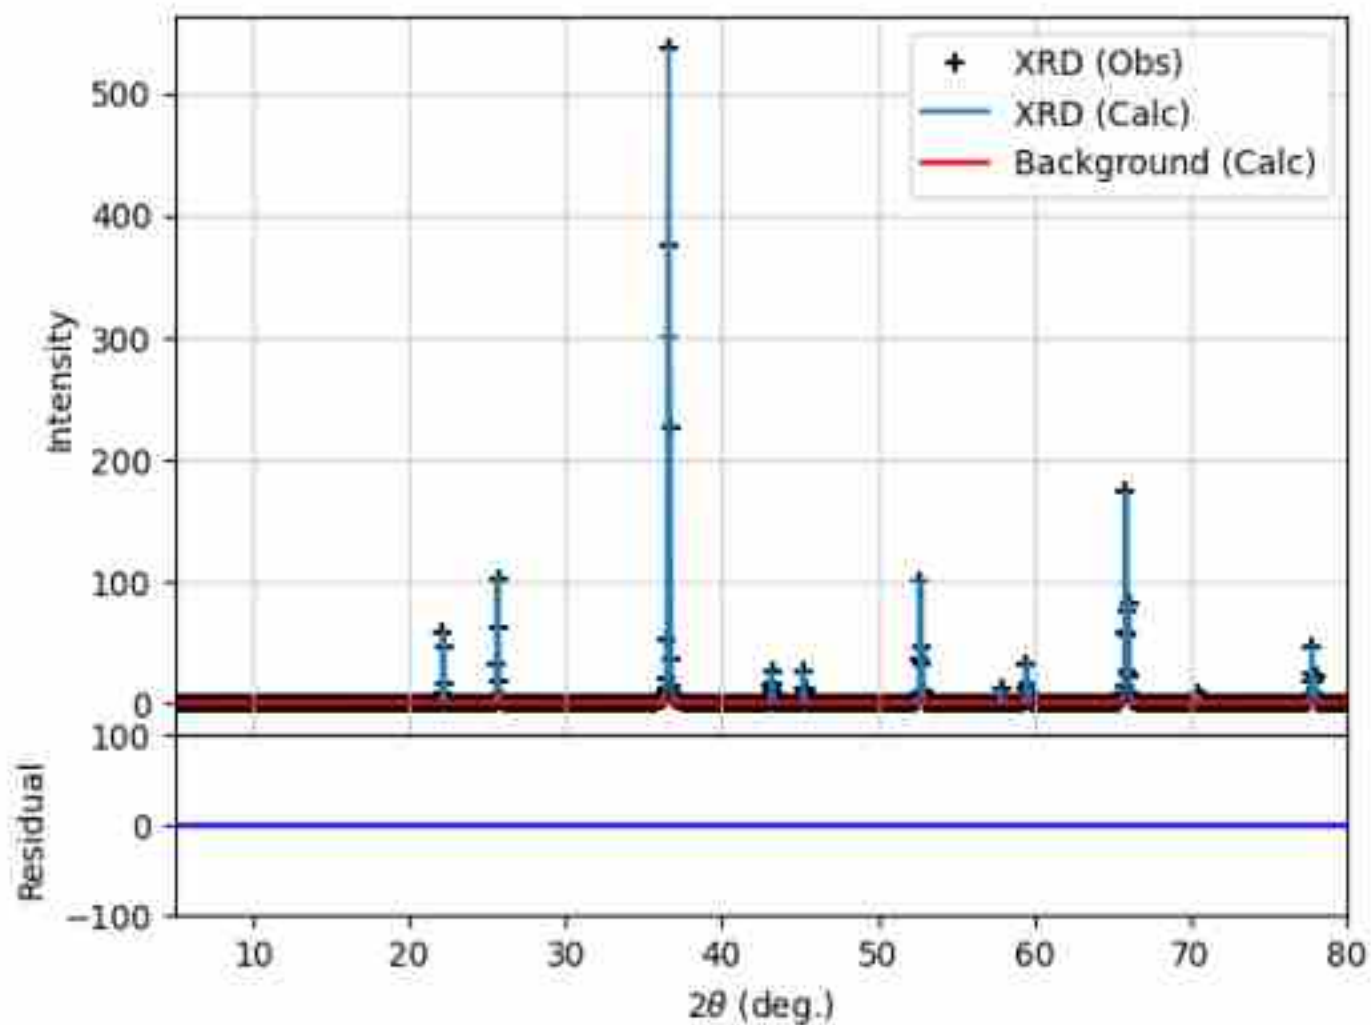

| RMSE before RR | Rwp     | RMSE after RR |
|----------------|---------|---------------|
| 0.002          | 0.01299 | 0.00165       |

# Sc3Al1

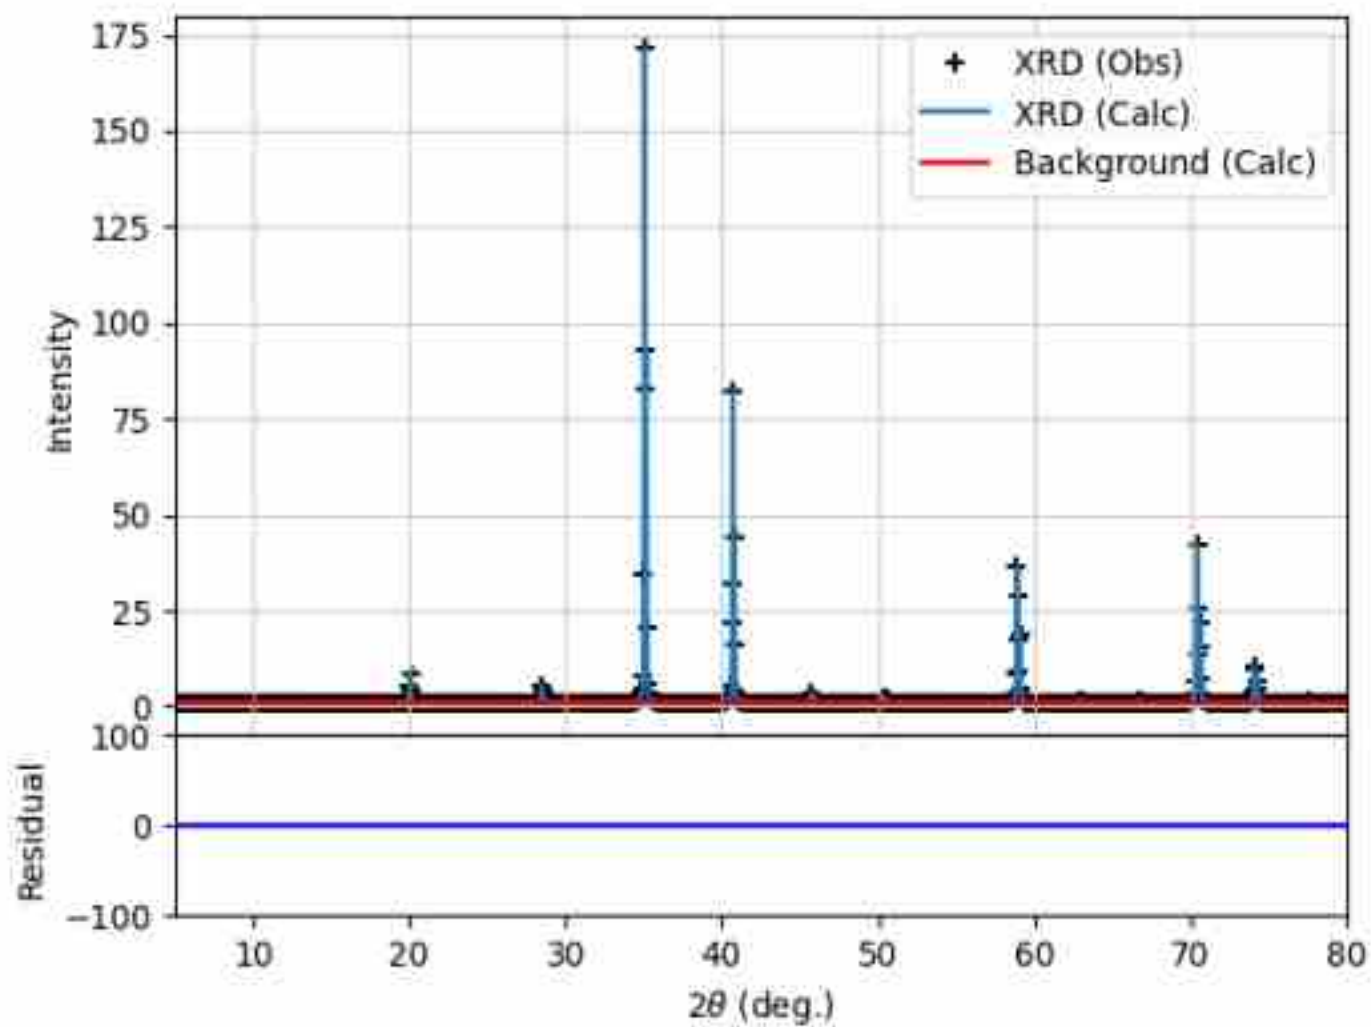

| RMSE before RR | Rwp     | RMSE after RR |
|----------------|---------|---------------|
| 0.002          | 0.02233 | 0.0017        |

# Sc3Os1C4

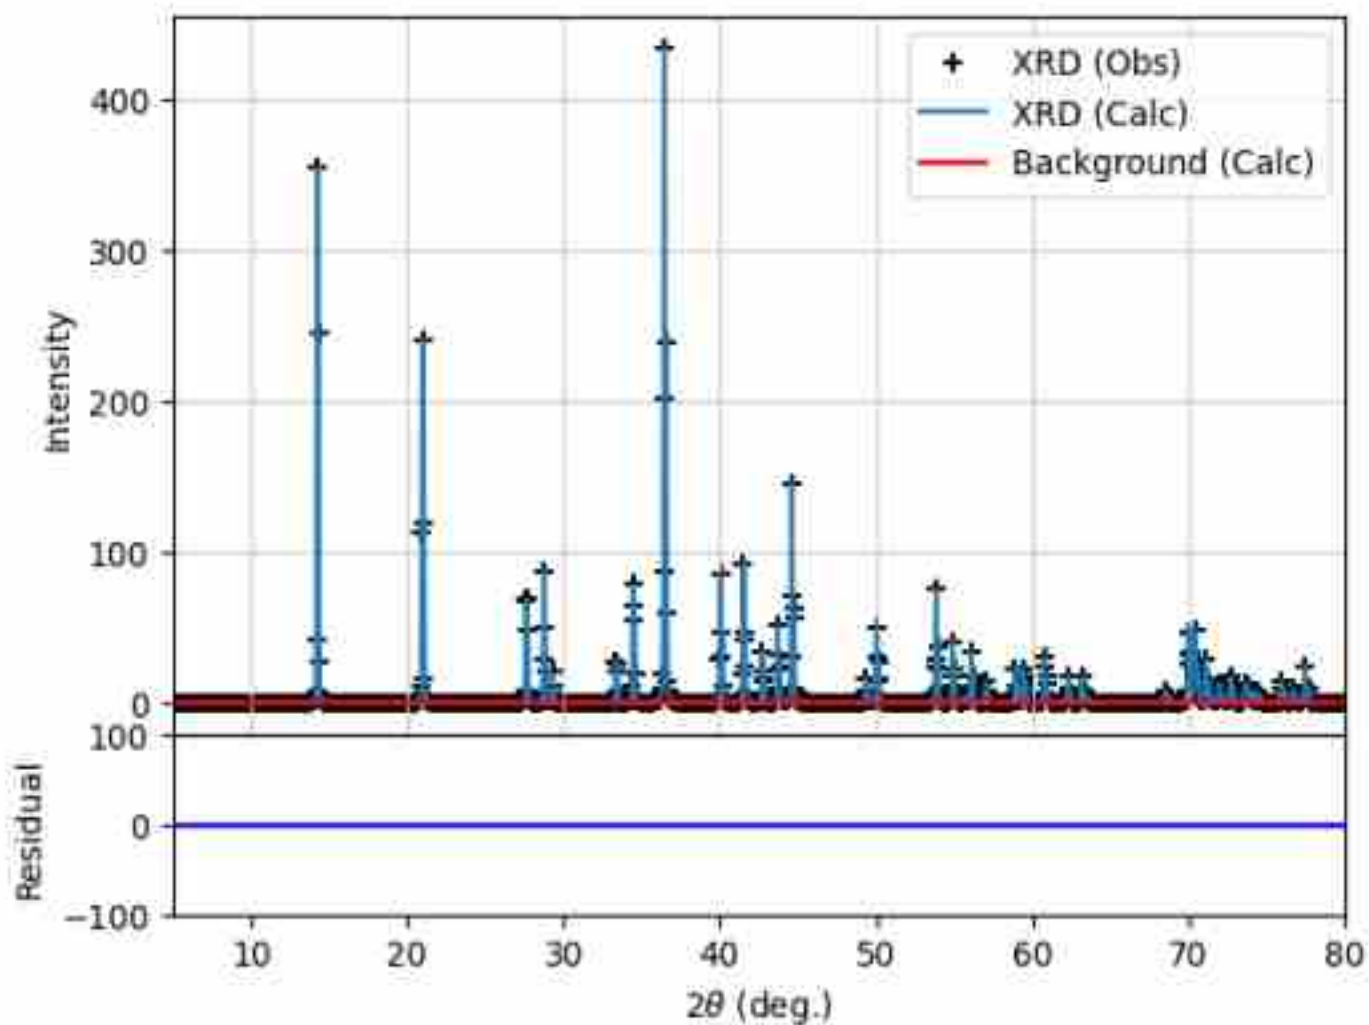

| RMSE before RR | Rwp     | RMSE after RR |
|----------------|---------|---------------|
| 0.02           | 0.00479 | 0.00301       |

# Sc3Sn1

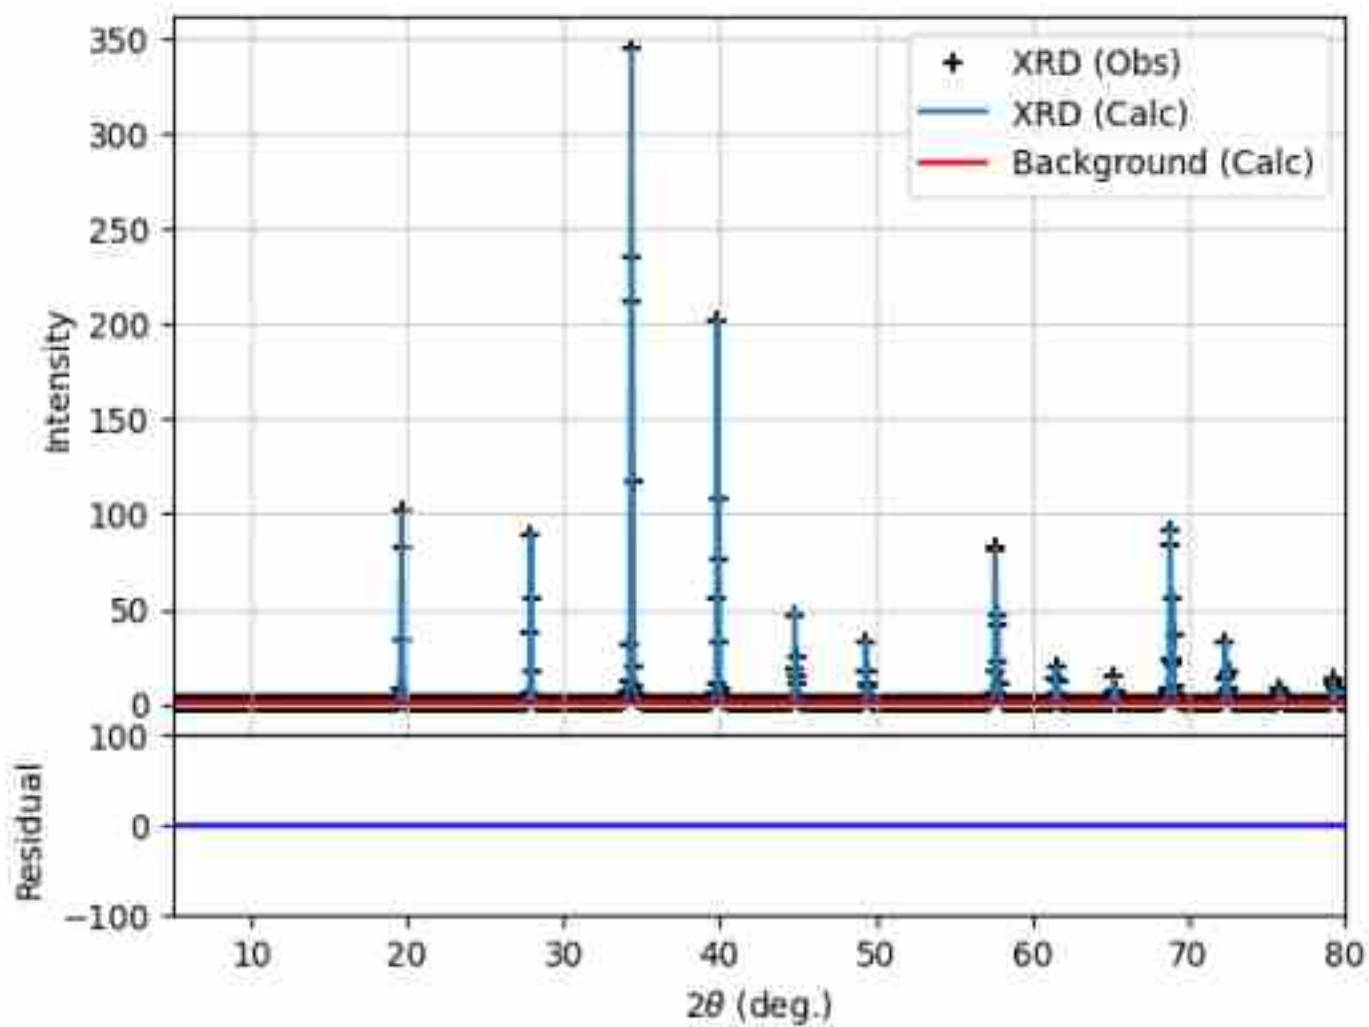

| RMSE before RR | Rwp    | RMSE after RR |
|----------------|--------|---------------|
| 0.002          | 0.0053 | 0.00077       |



# Sc4Co6Si10

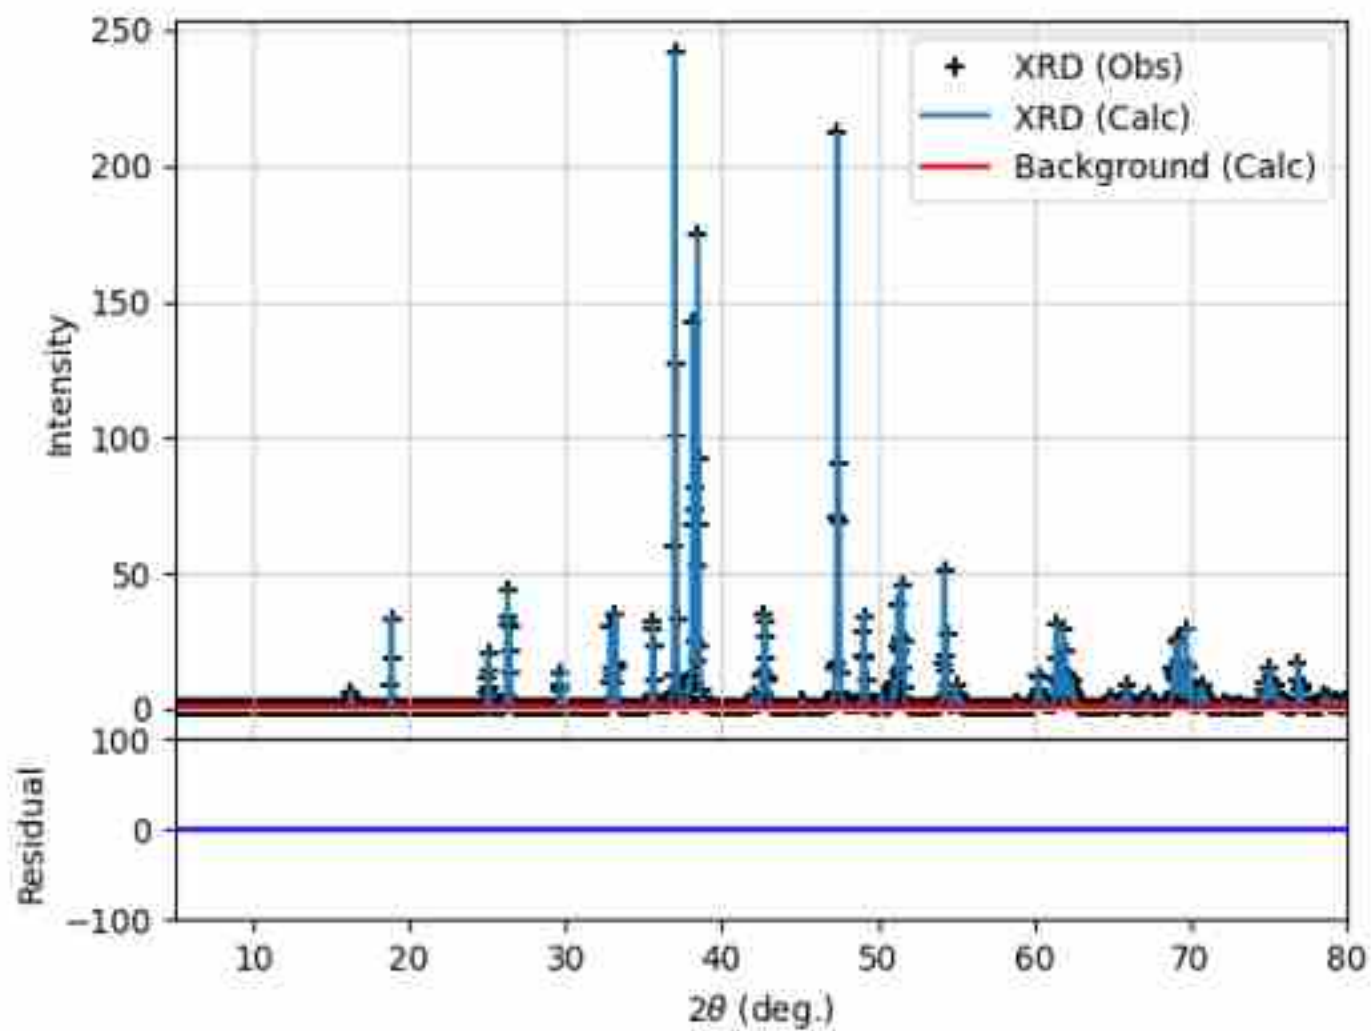

| RMSE before RR | Rwp     | RMSE after RR |
|----------------|---------|---------------|
| 0.02           | 0.00403 | 0.00073       |

# Sc<sub>4</sub>Fe<sub>2</sub>B<sub>4</sub>Ru<sub>4</sub>Rh<sub>6</sub>

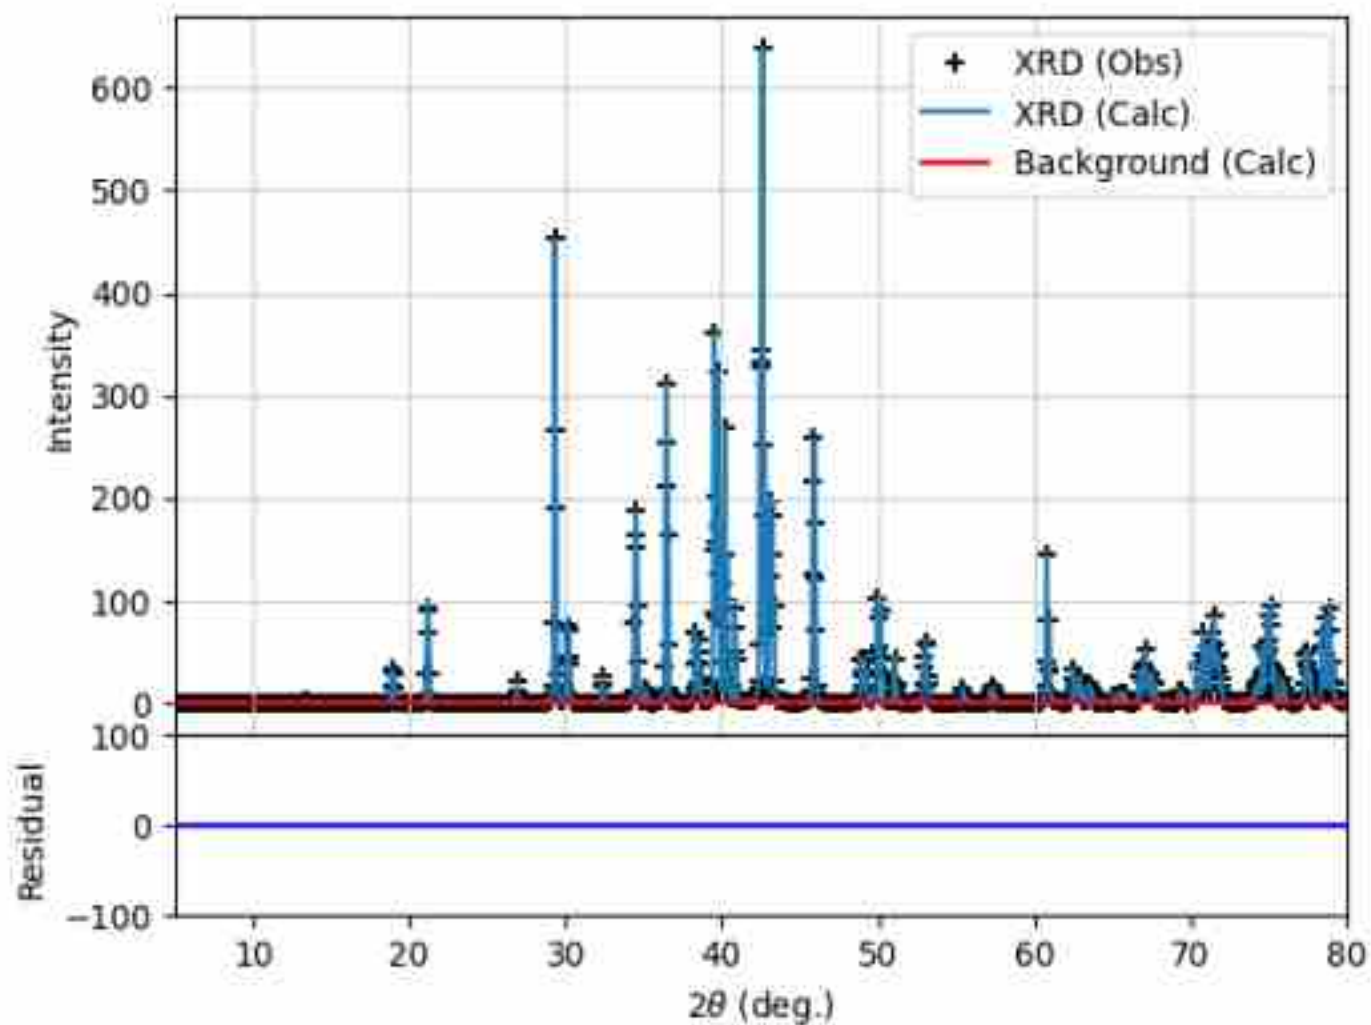

| RMSE before RR | Rwp     | RMSE after RR |
|----------------|---------|---------------|
| 0.02           | 0.00406 | 0.00085       |

# Sm1As1

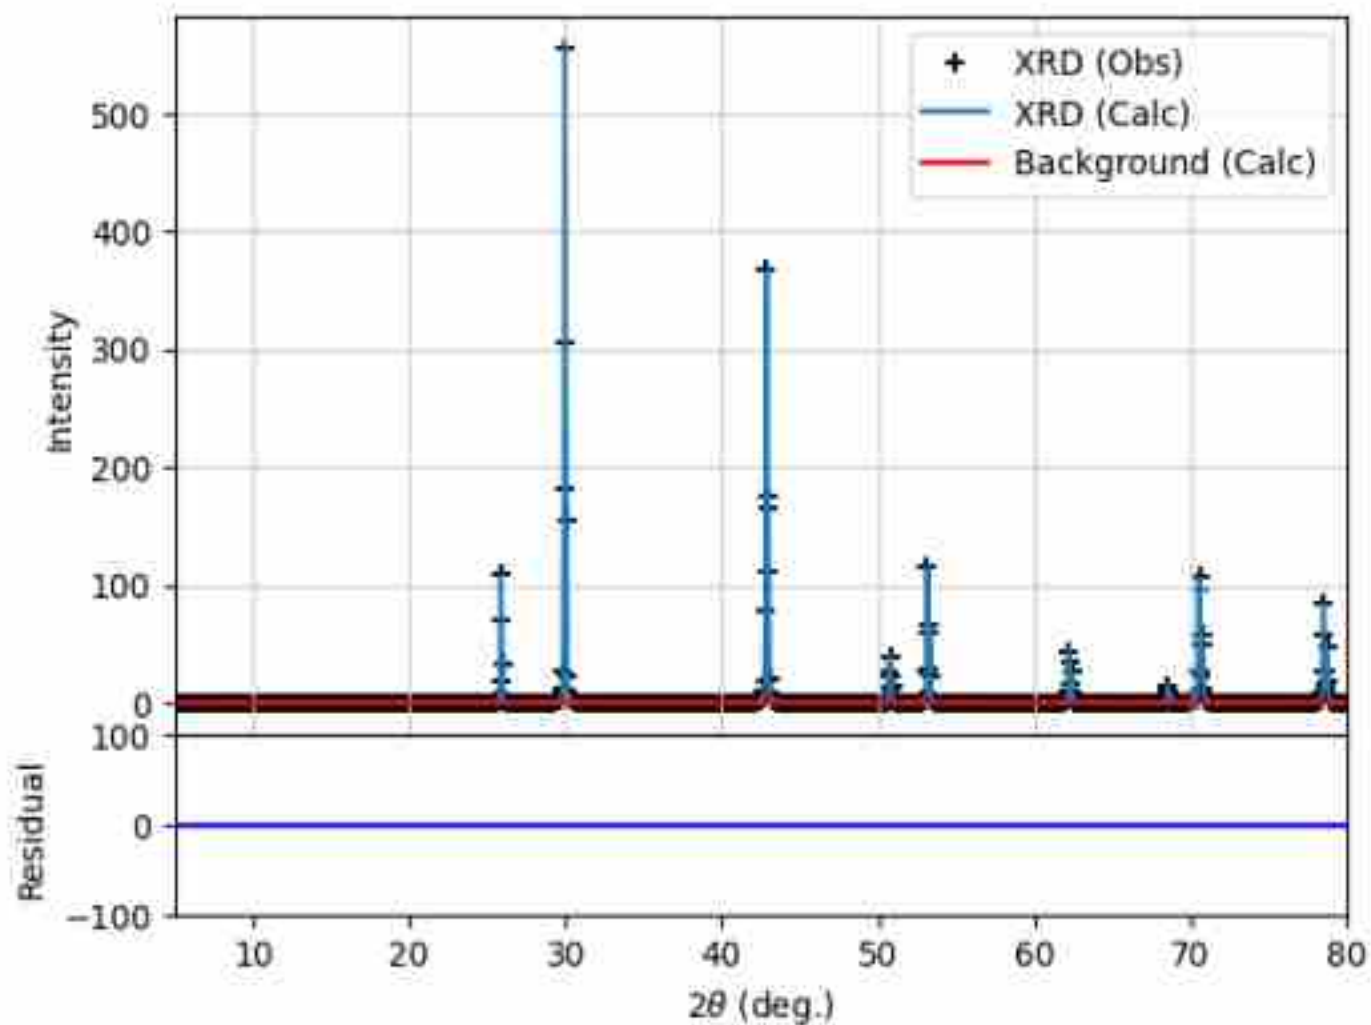

| RMSE before RR | Rwp     | RMSE after RR |
|----------------|---------|---------------|
| 0.002          | 0.01407 | 0.00135       |

# Sm1Eu1Rh2

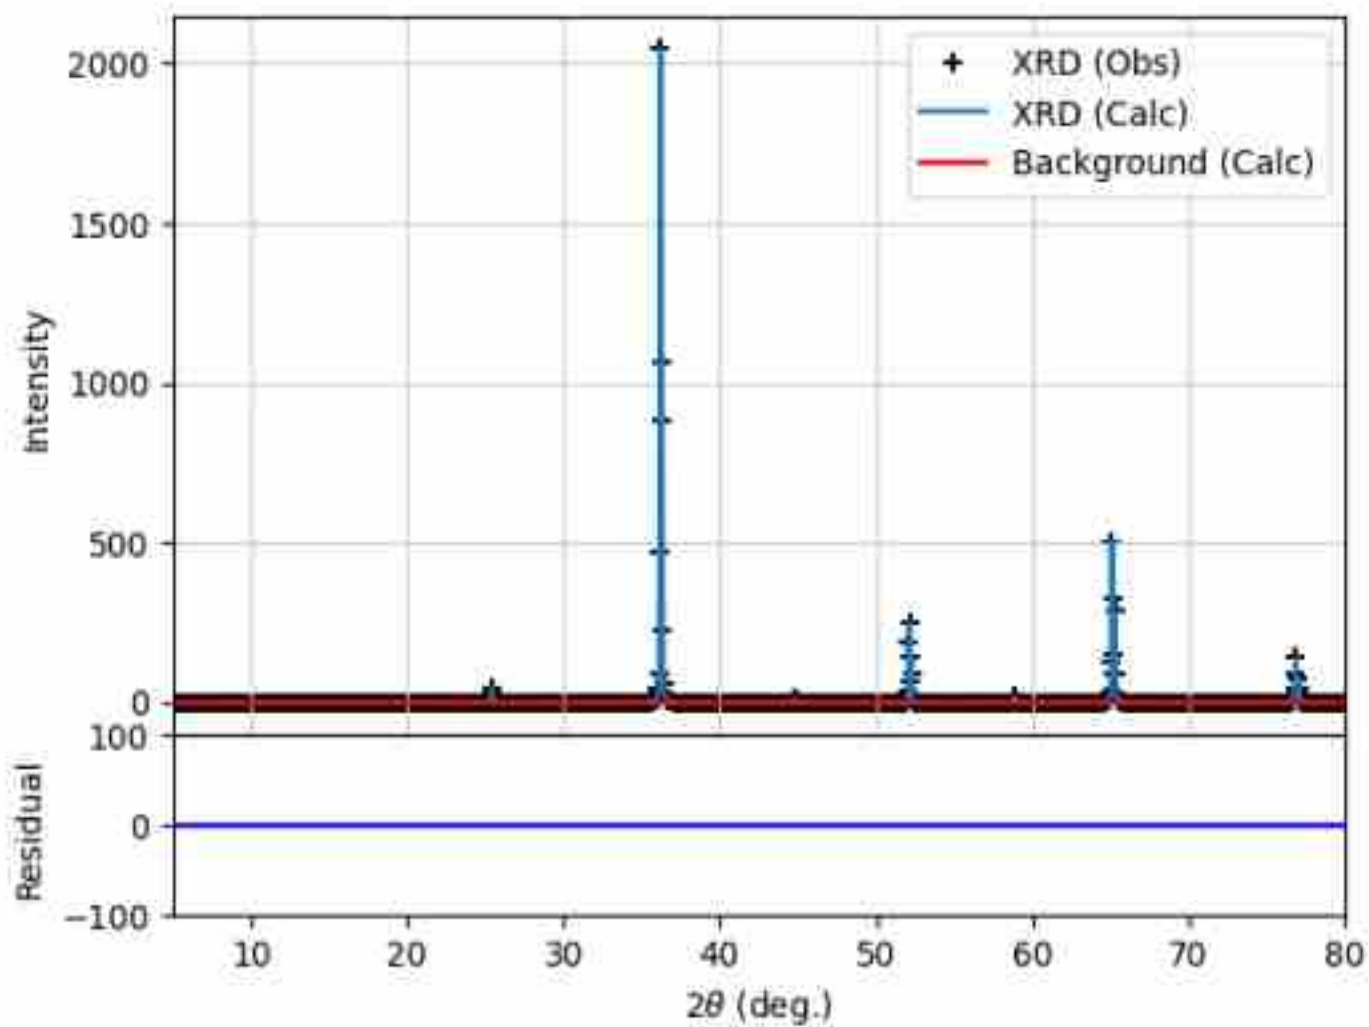

| RMSE before RR | Rwp     | RMSE after RR |
|----------------|---------|---------------|
| 0.002          | 0.02005 | 0.00081       |

# Sm1Eu1Zn2

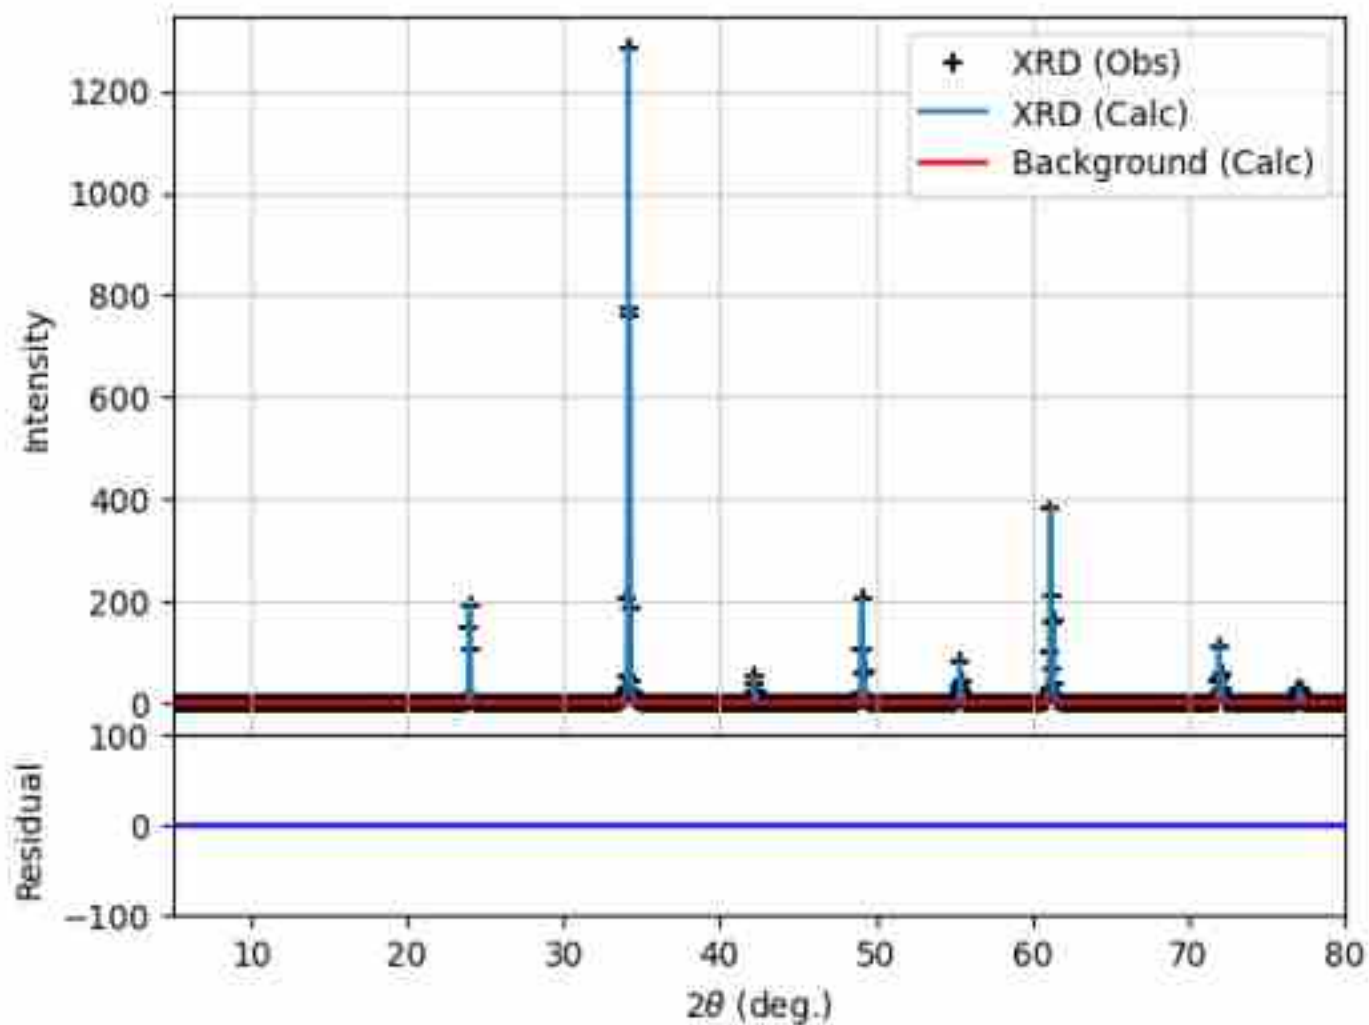

| RMSE before RR | Rwp     | RMSE after RR |
|----------------|---------|---------------|
| 0.002          | 0.00789 | 0.00055       |

# Sm1Fe10Re2

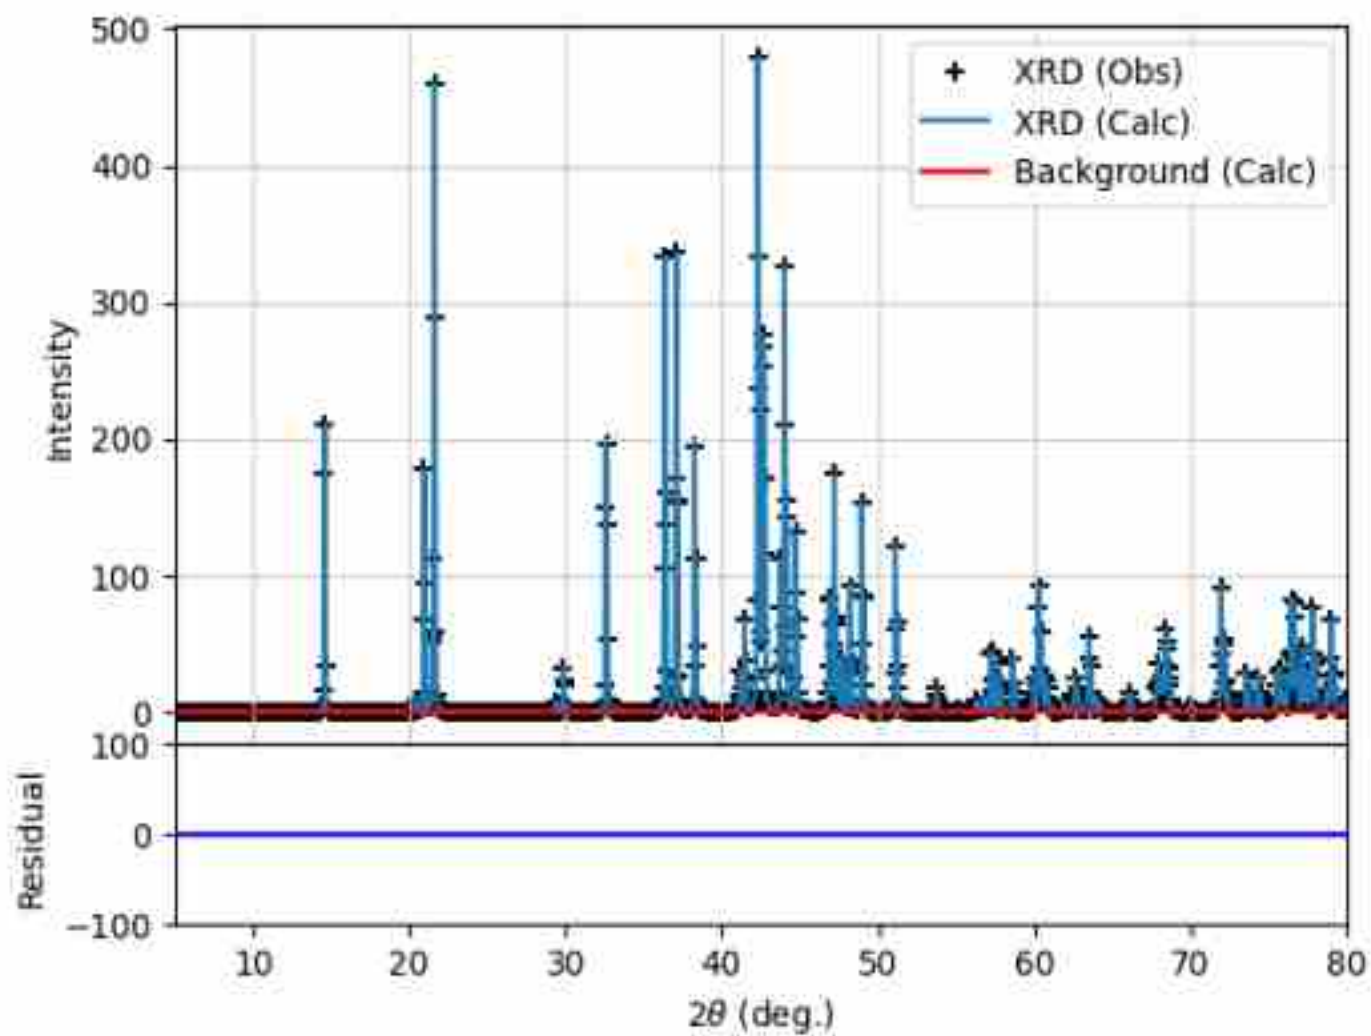

| RMSE before RR | Rwp     | RMSE after RR |
|----------------|---------|---------------|
| 0.02           | 0.00403 | 0.00061       |

# Sm1Ga1Rh2

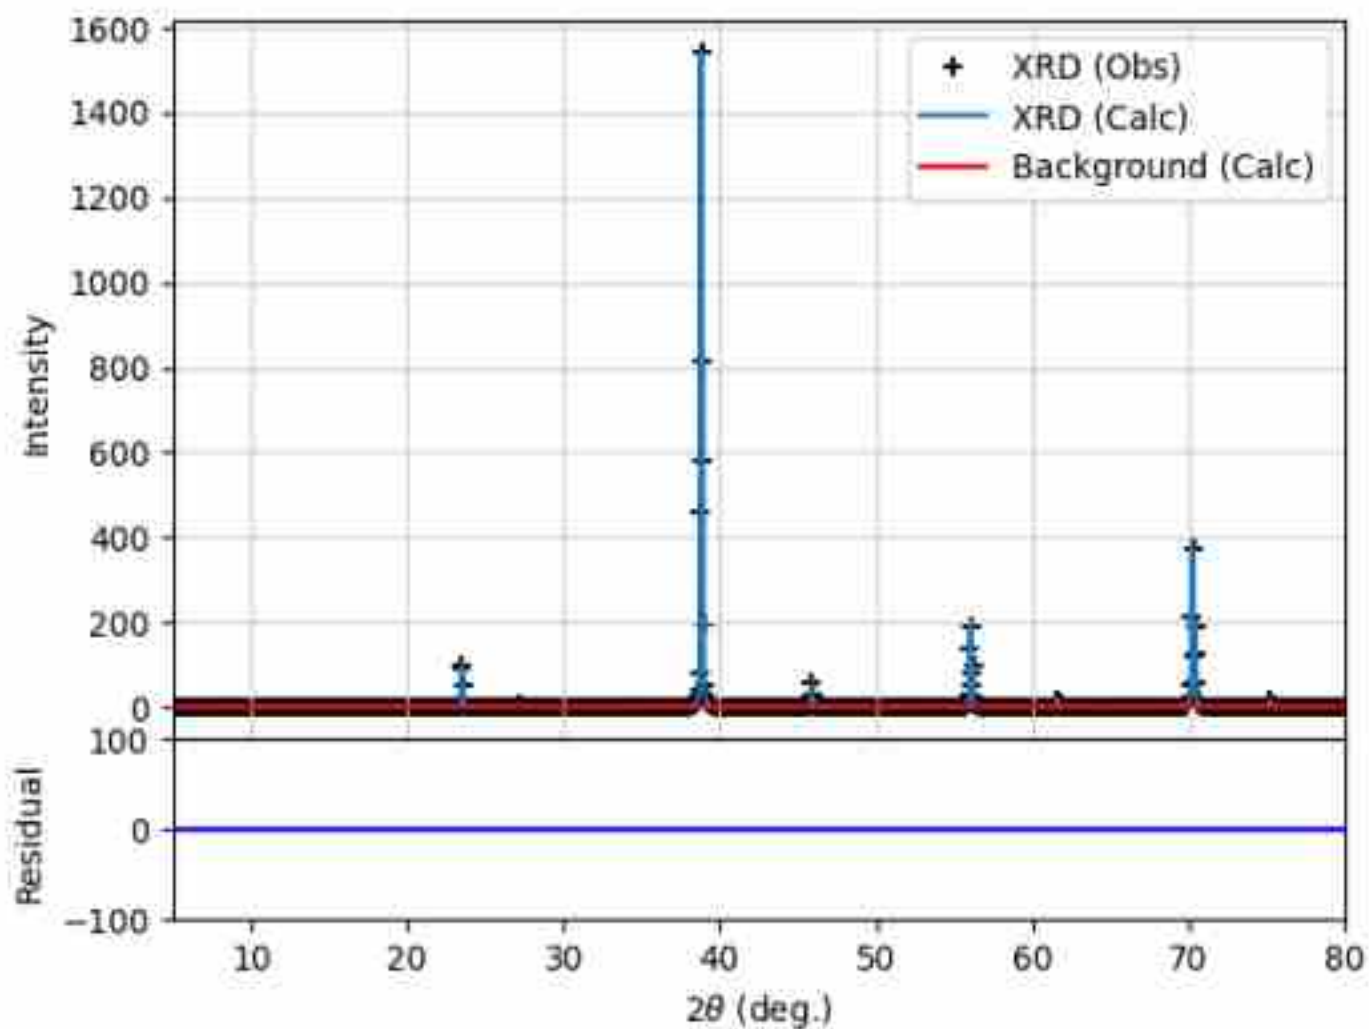

| RMSE before RR | Rwp   | RMSE after RR |
|----------------|-------|---------------|
| 0.002          | 1e-05 | 3e-05         |

# Sm1H3

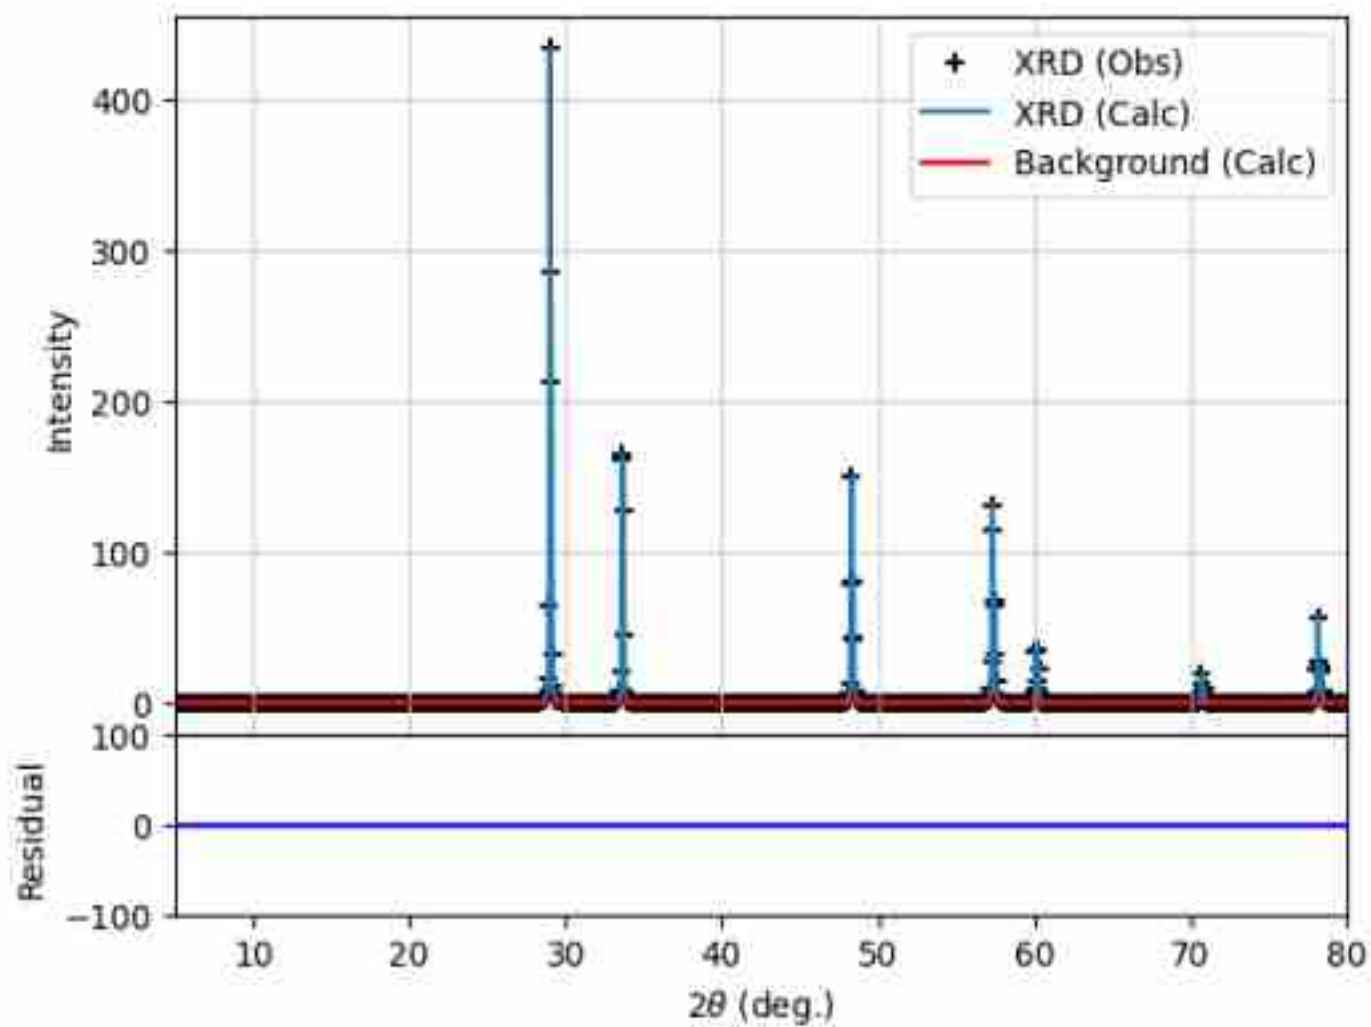

| RMSE before RR | Rwp     | RMSE after RR |
|----------------|---------|---------------|
| 0.002          | 0.00332 | 0.00383       |



# Sm1In1Ag2

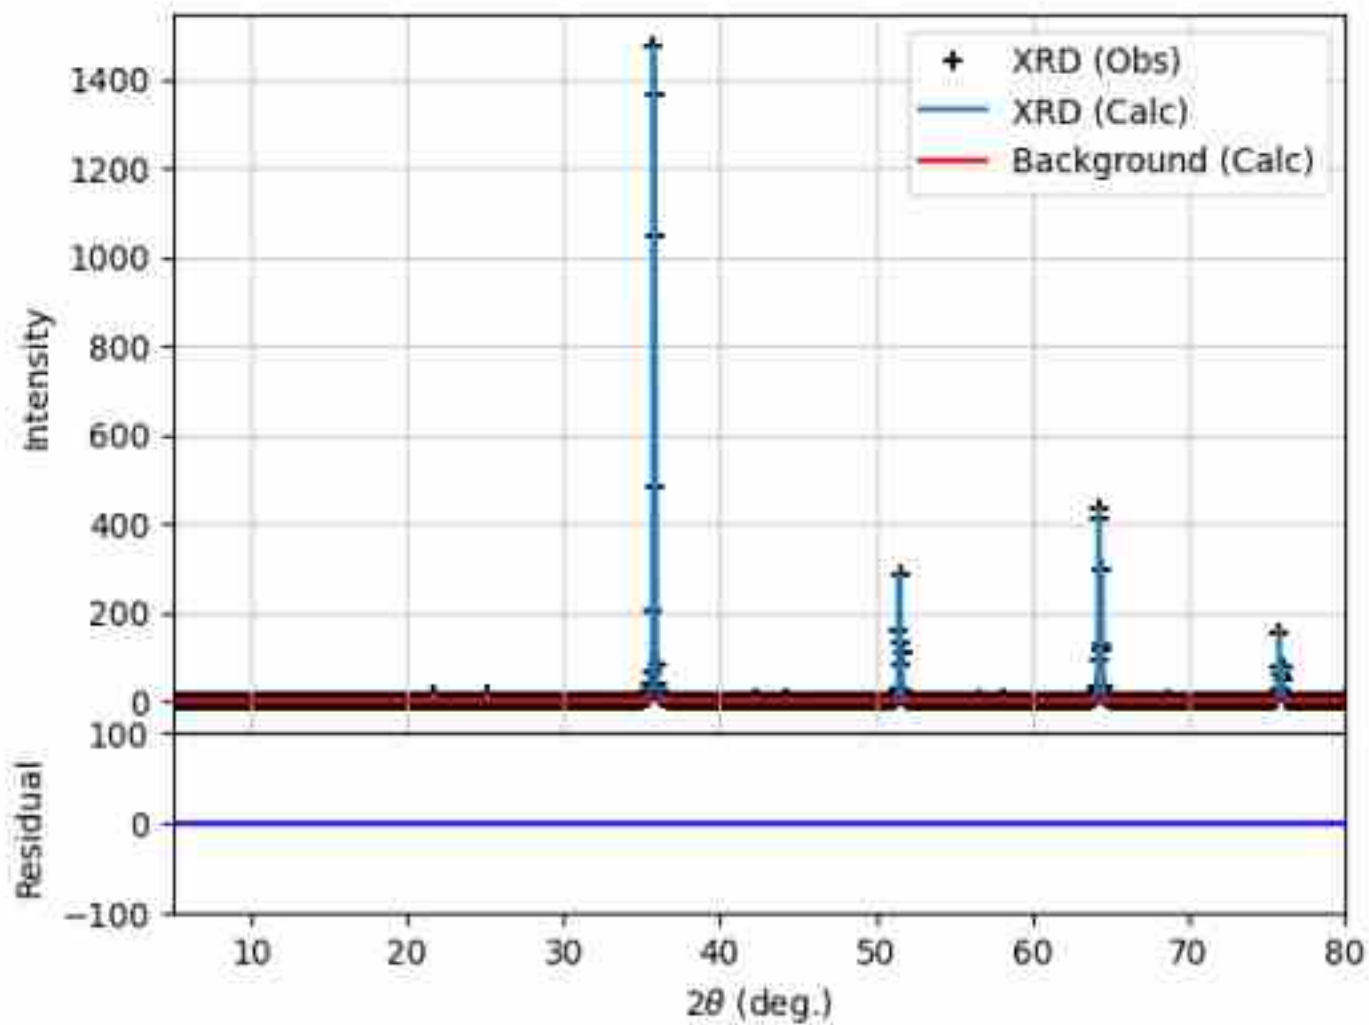

| RMSE before RR | Rwp     | RMSE after RR |
|----------------|---------|---------------|
| 0.002          | 0.07932 | 0.00173       |

# Sm1Mn4Cu3O12

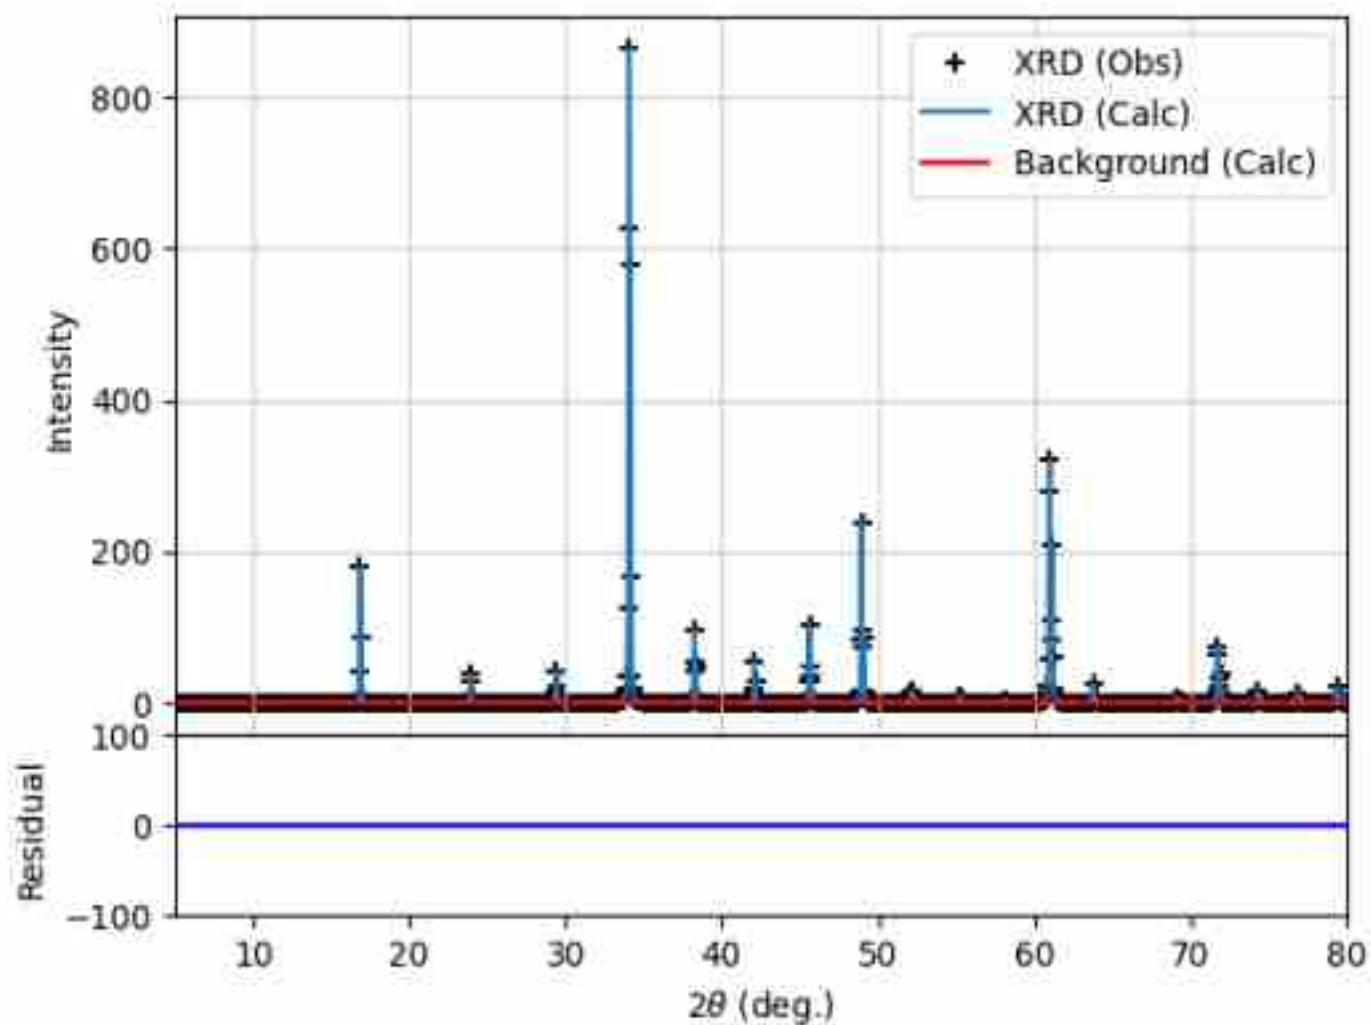

| RMSE before RR | Rwp     | RMSE after RR |
|----------------|---------|---------------|
| 0.02           | 0.00999 | 0.00463       |

# Sm1Pd3

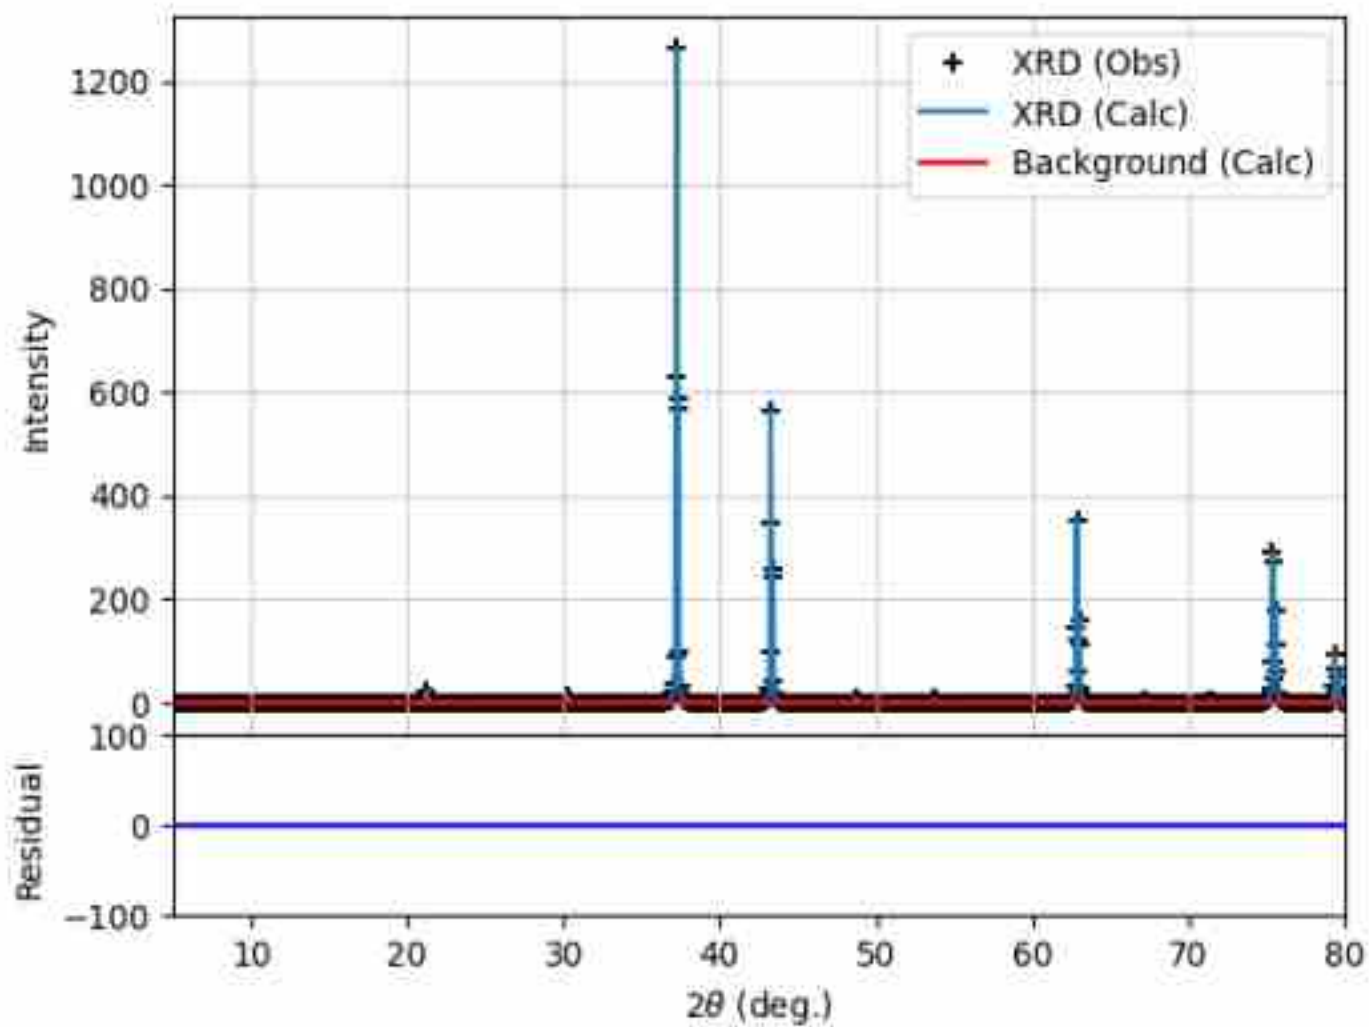

| RMSE before RR | Rwp     | RMSE after RR |
|----------------|---------|---------------|
| 0.002          | 0.00415 | 0.00033       |

# Sm1Pt3

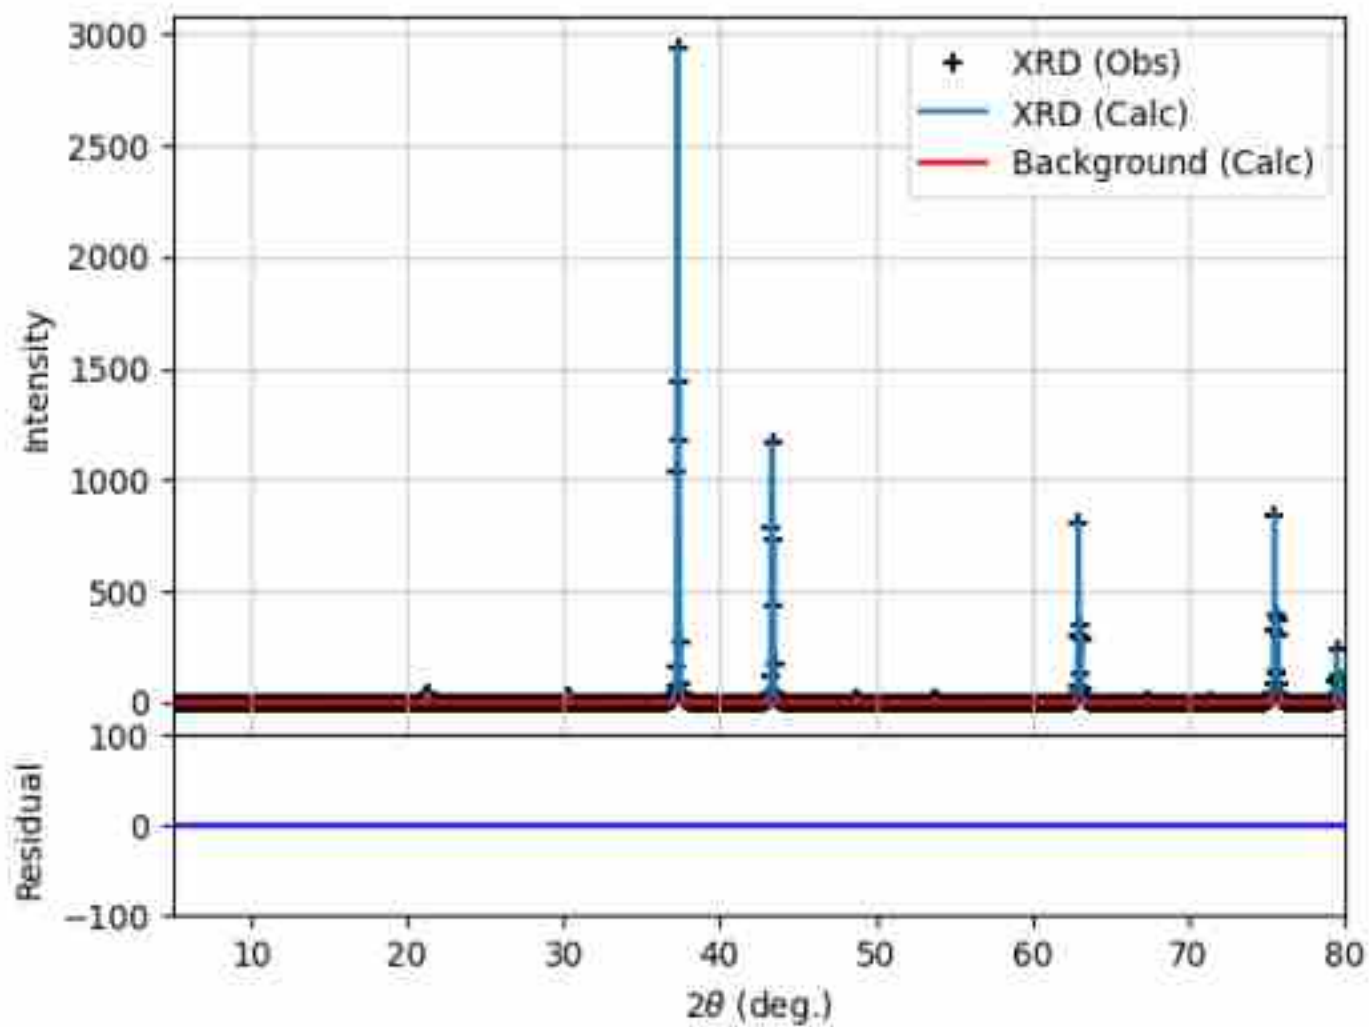

| RMSE before RR | Rwp     | RMSE after RR |
|----------------|---------|---------------|
| 0.002          | 0.01074 | 0.00068       |

# Sm1Sn1Rh2

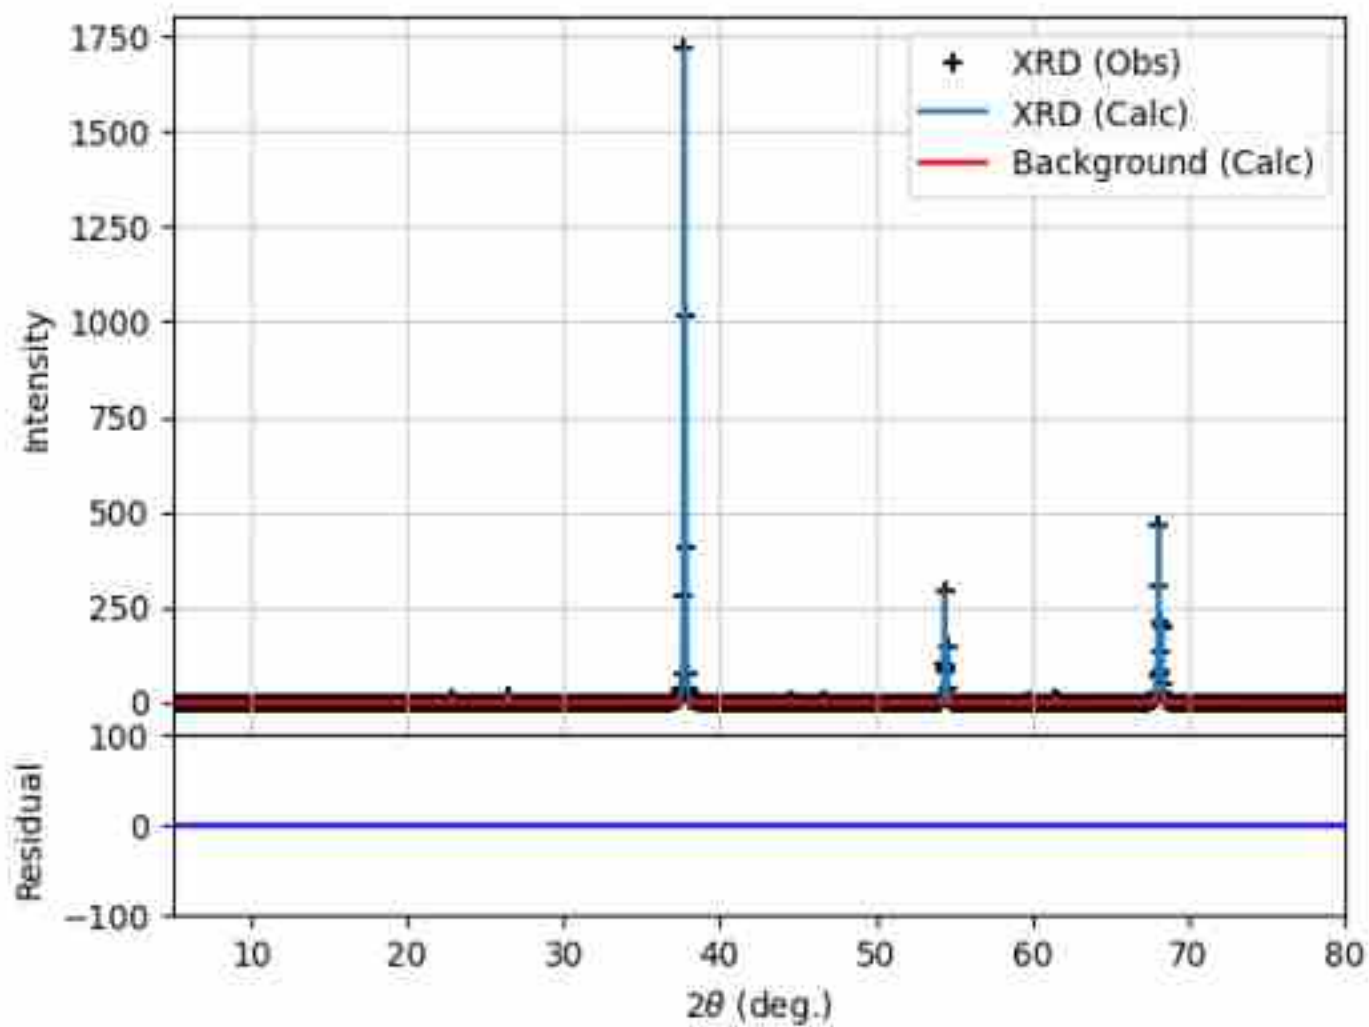

| RMSE before RR | Rwp     | RMSE after RR |
|----------------|---------|---------------|
| 0.002          | 0.05665 | 0.00144       |

# Sm2Cu1Ru1

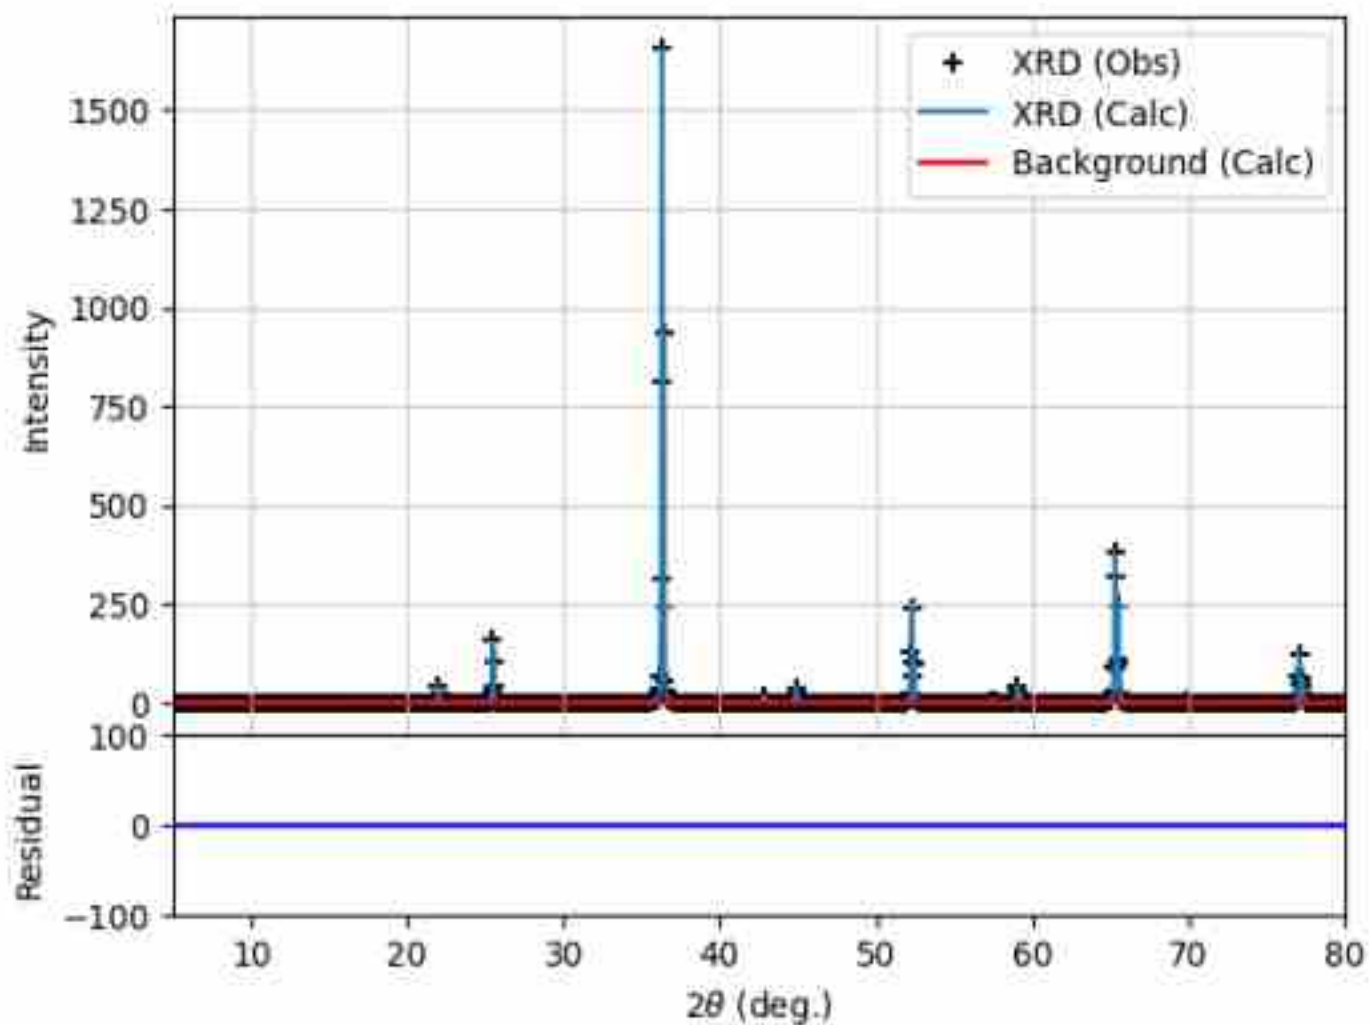

| RMSE before RR | Rwp     | RMSE after RR |
|----------------|---------|---------------|
| 0.002          | 0.00375 | 0.00054       |

# Sm2Ir1Au1

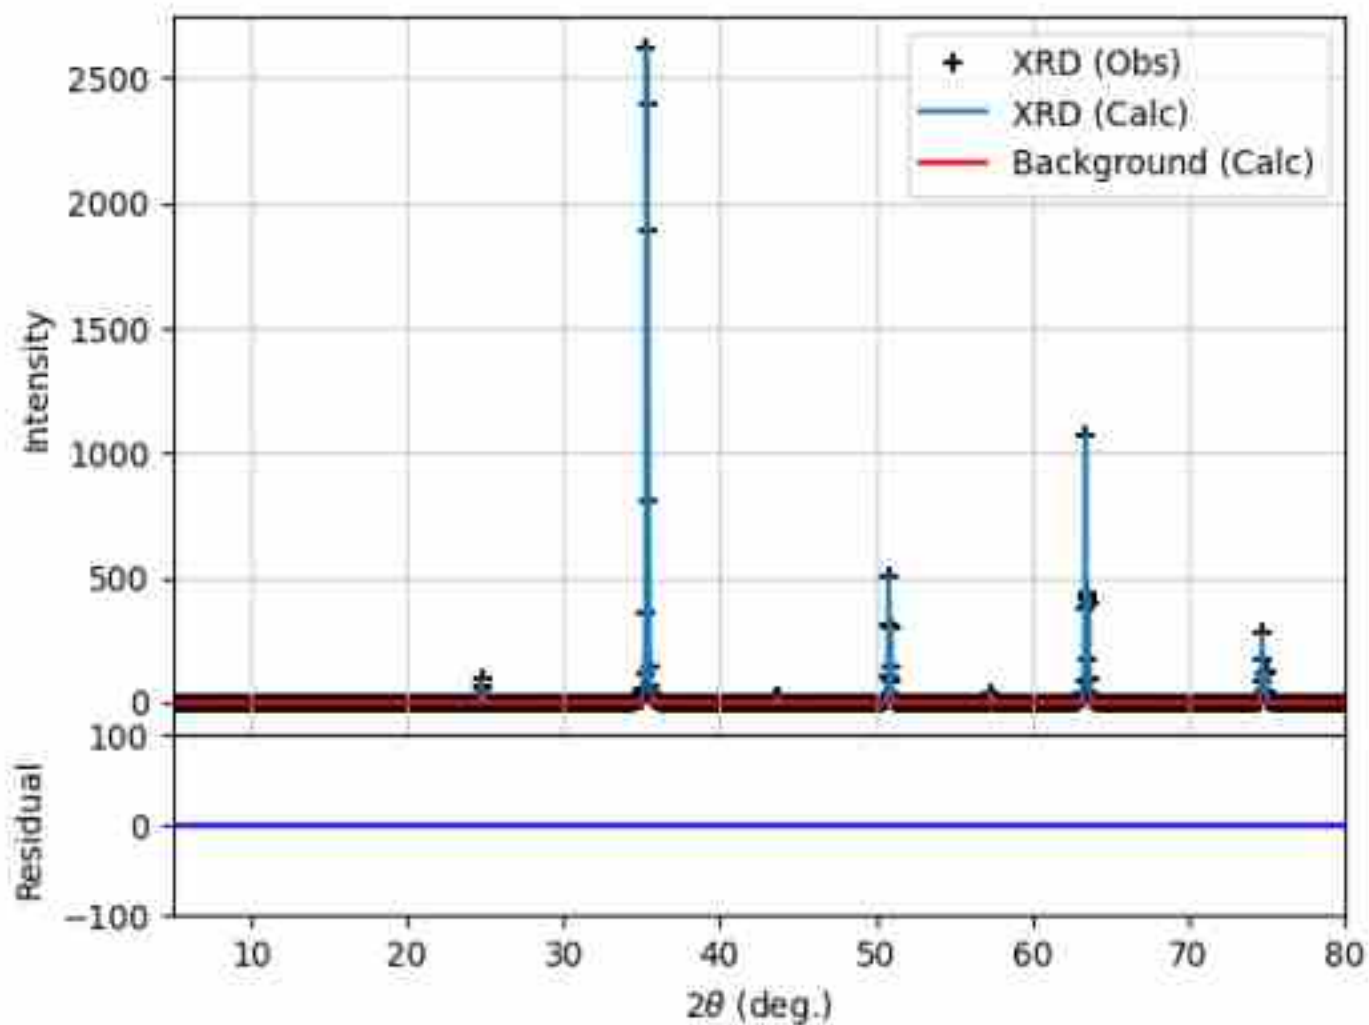

| RMSE before RR | Rwp     | RMSE after RR |
|----------------|---------|---------------|
| 0.002          | 0.00492 | 0.00046       |

# Sm2Mg1Al1

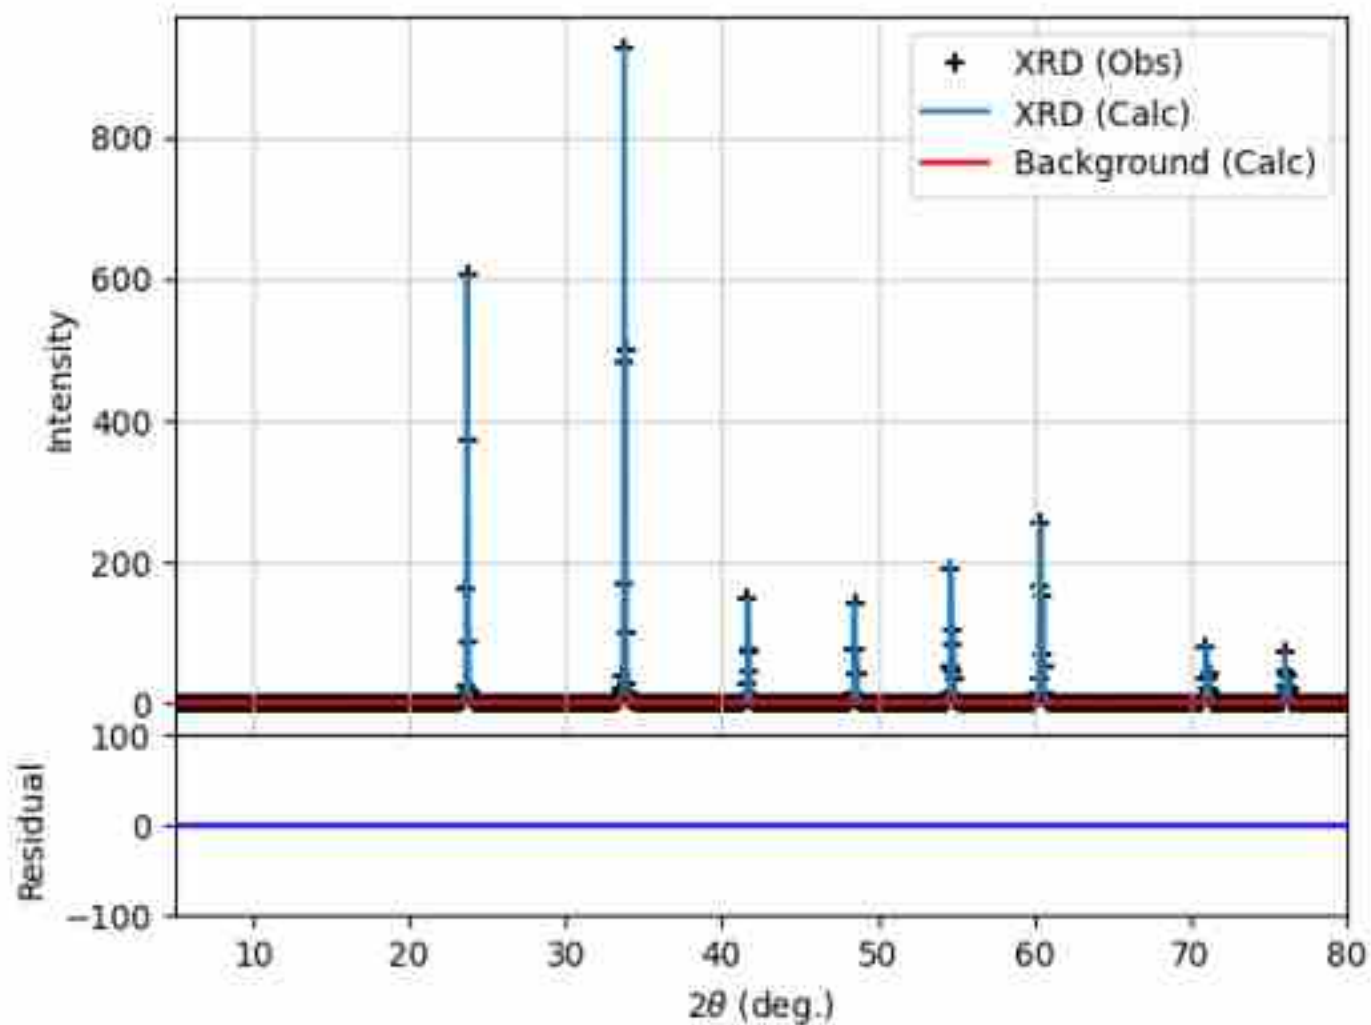

| RMSE before RR | Rwp     | RMSE after RR |
|----------------|---------|---------------|
| 0.002          | 0.00372 | 0.00048       |



# Sm2Ni1Ir1

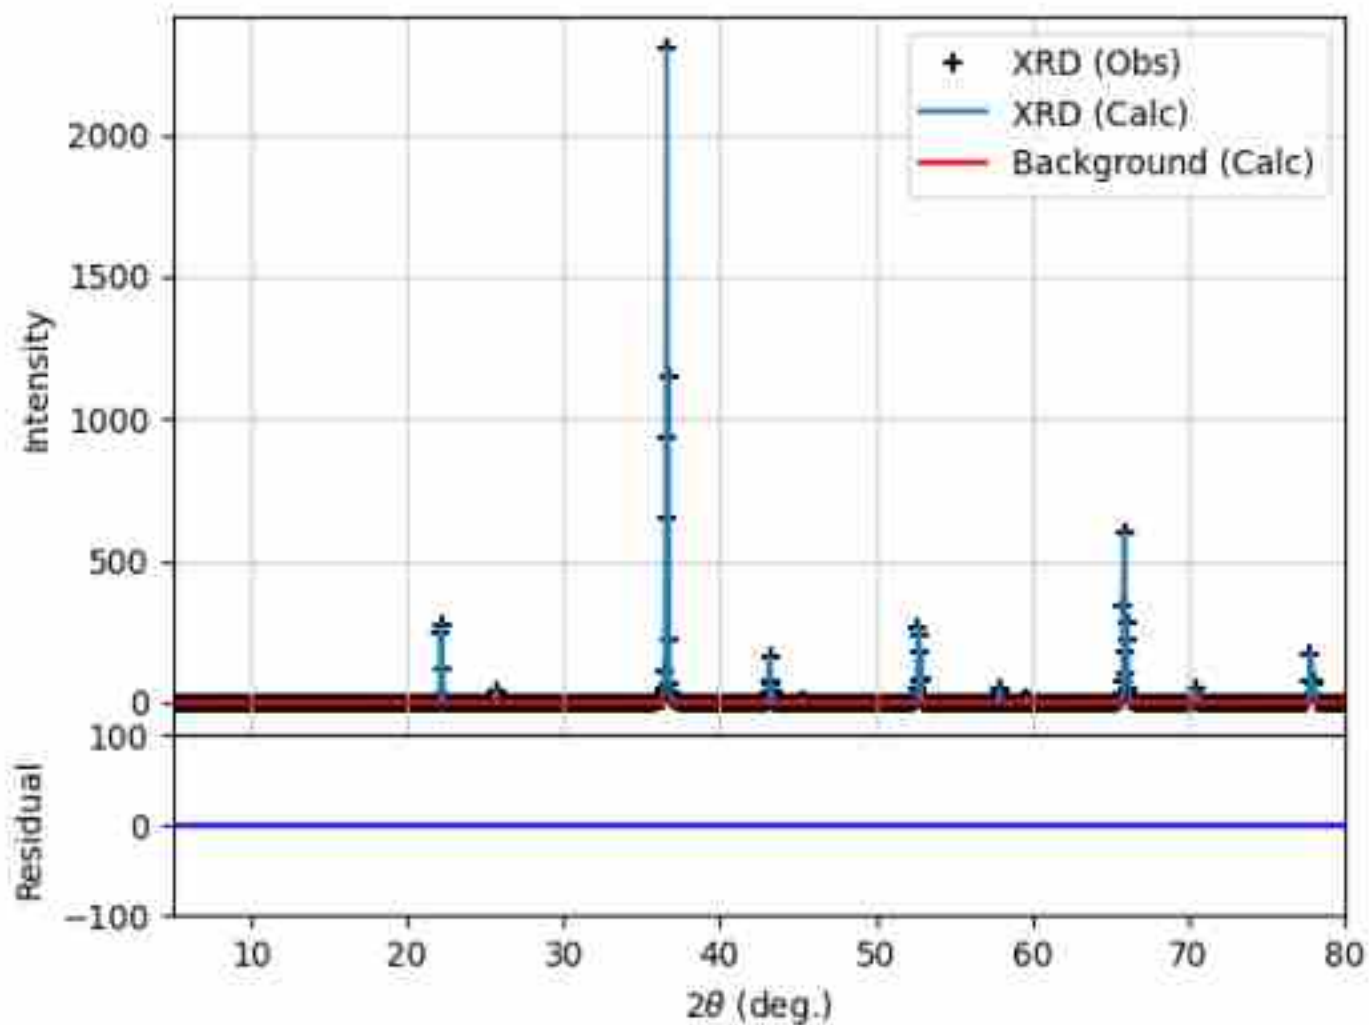

| RMSE before RR | Rwp     | RMSE after RR |
|----------------|---------|---------------|
| 0.002          | 0.04268 | 0.00189       |

# Sm<sub>2</sub>P<sub>2</sub>O<sub>8</sub>

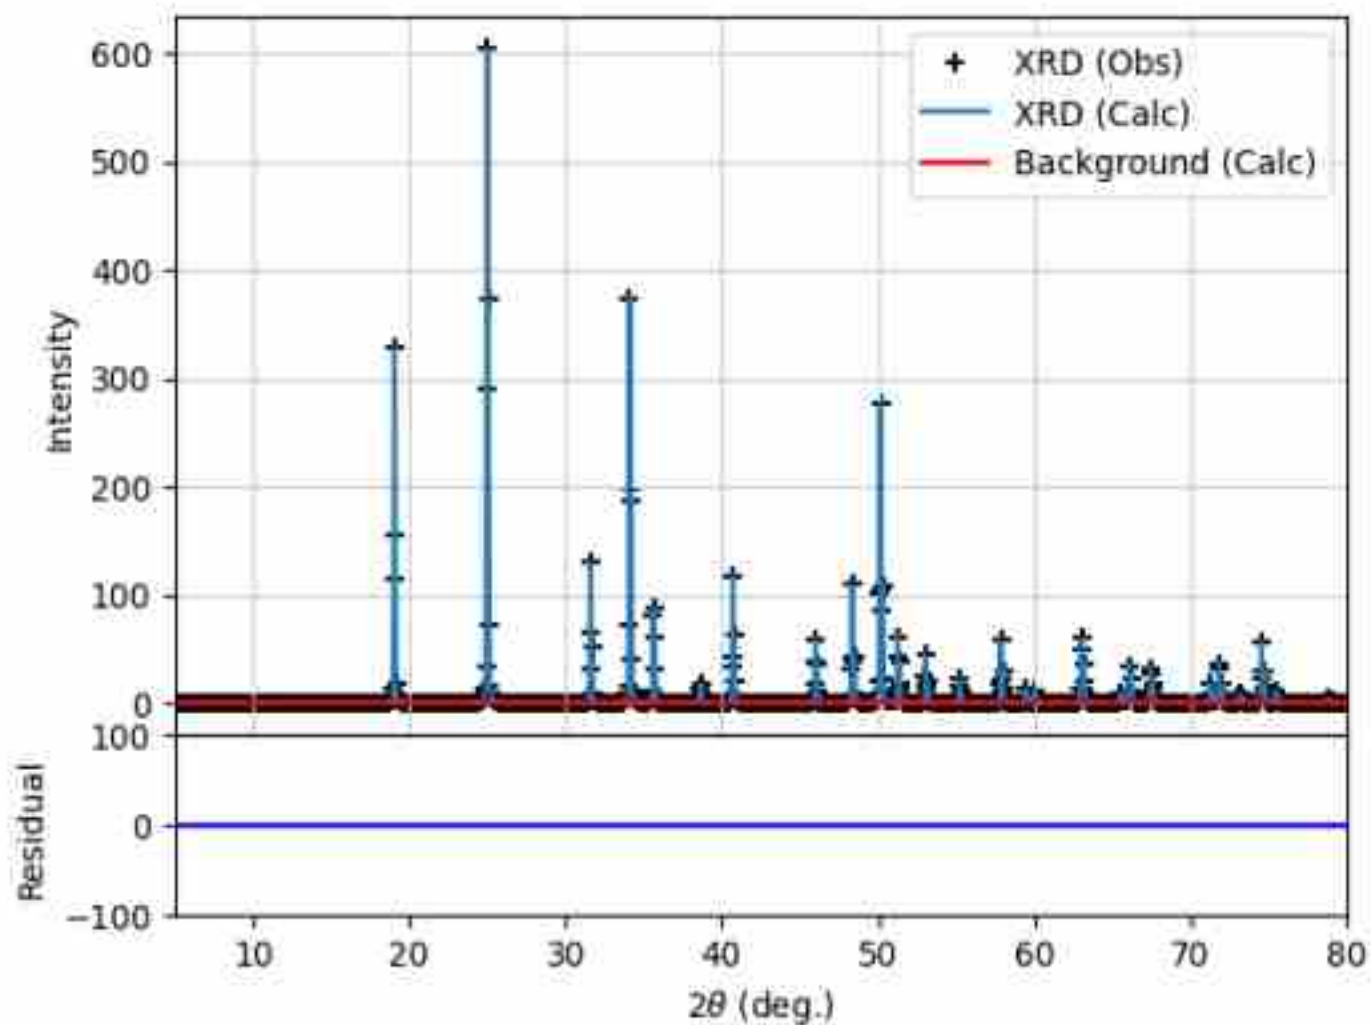

| RMSE before RR | Rwp     | RMSE after RR |
|----------------|---------|---------------|
| 0.02           | 0.00293 | 0.0013        |

# Sm<sub>2</sub>ZnAg

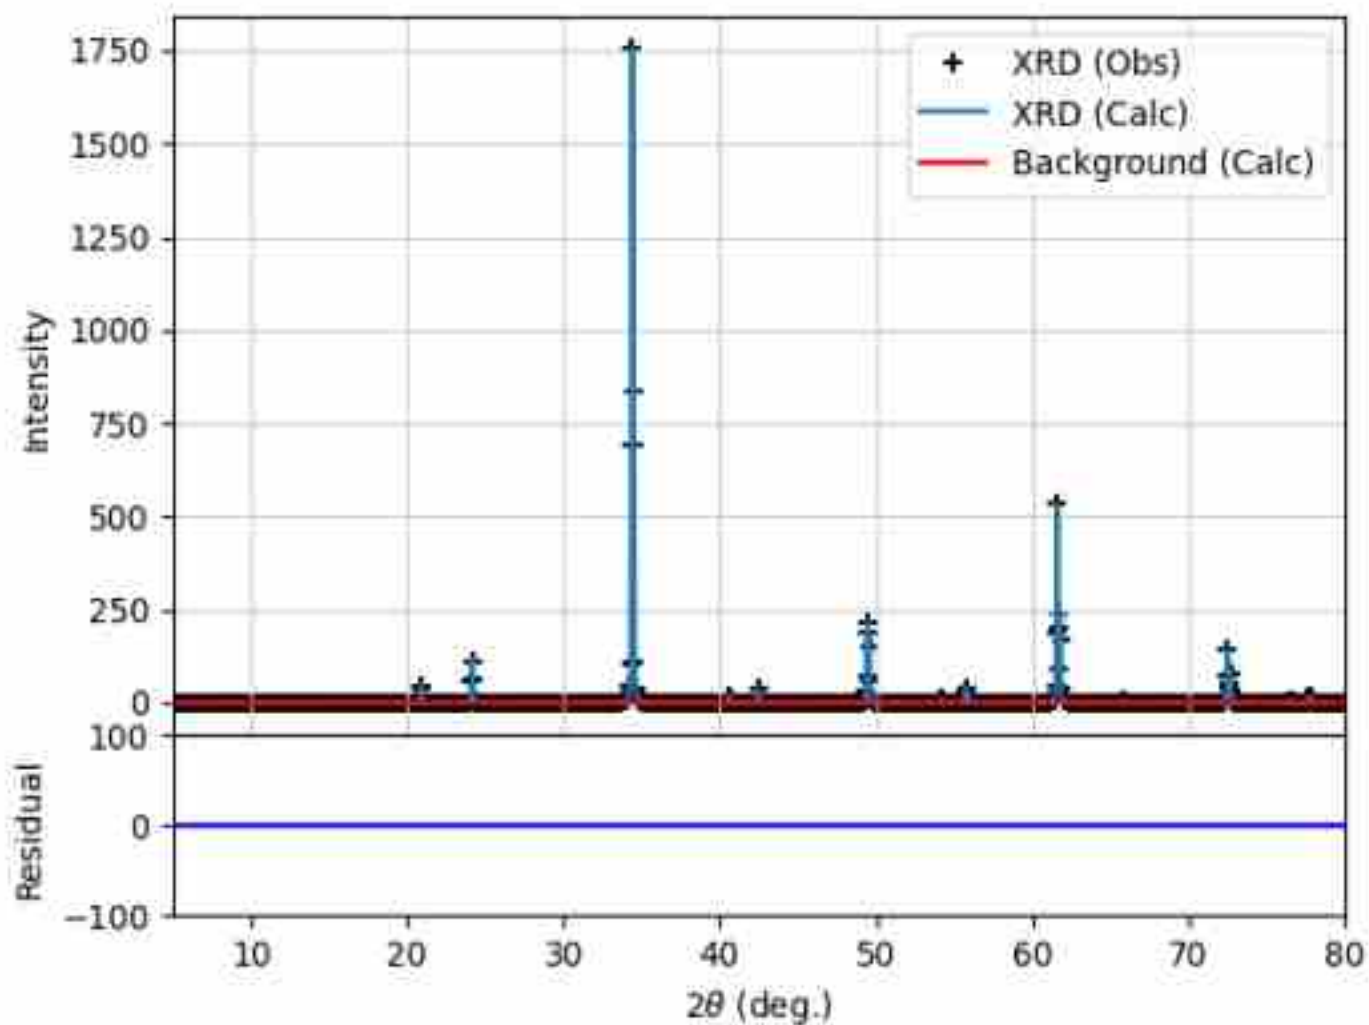

| RMSE before RR | Rwp     | RMSE after RR |
|----------------|---------|---------------|
| 0.002          | 0.00321 | 0.00048       |

# Sm3Eu1

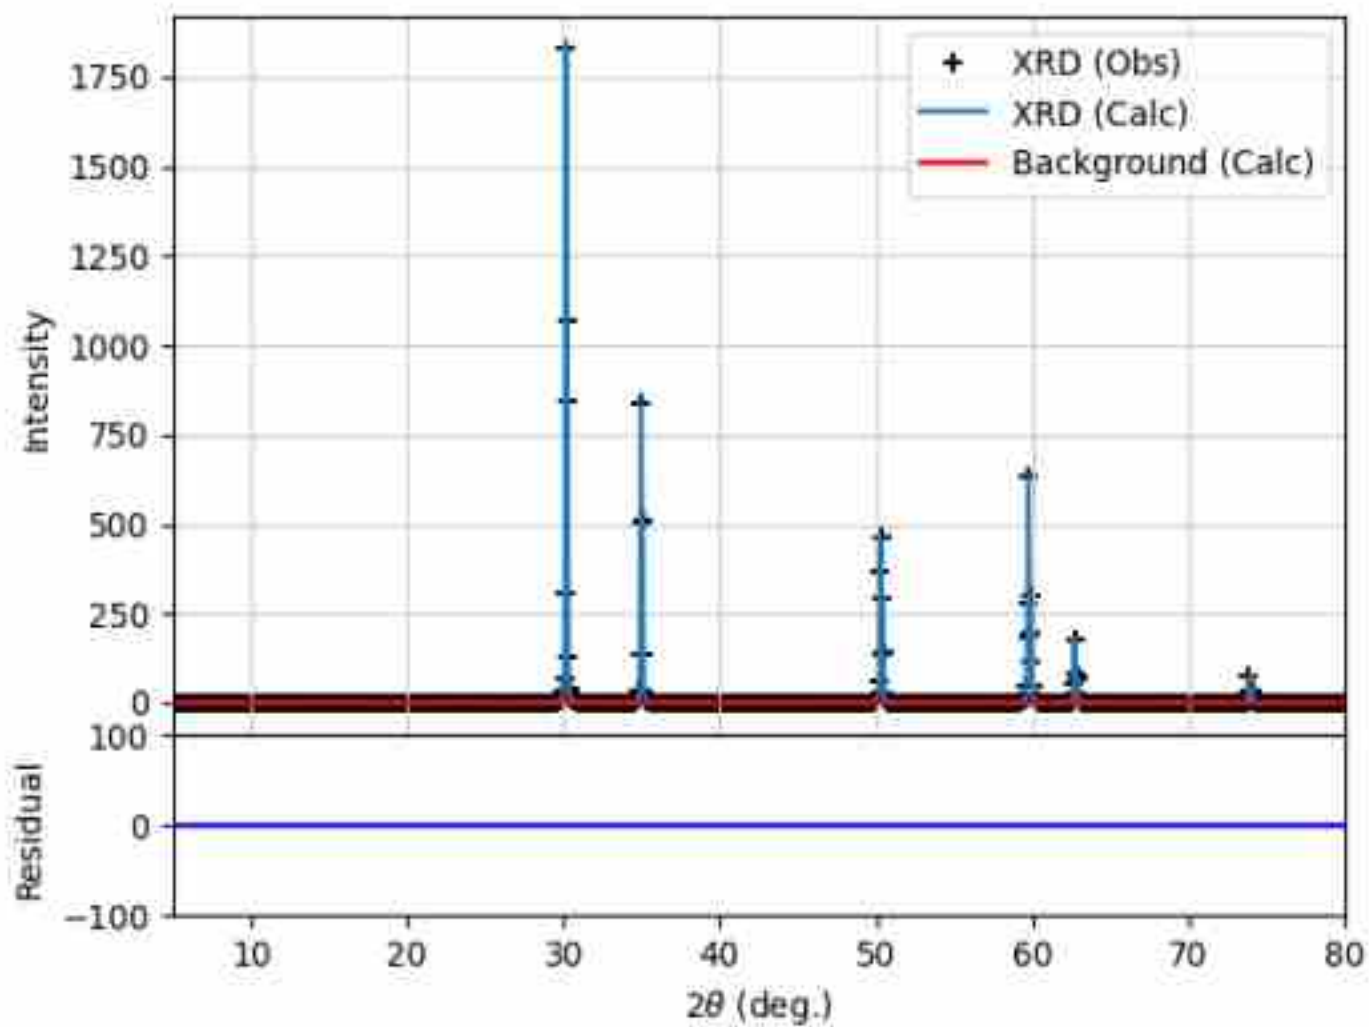

| RMSE before RR | Rwp     | RMSE after RR |
|----------------|---------|---------------|
| 0.002          | 0.04305 | 0.00101       |

# Sm3Hg1

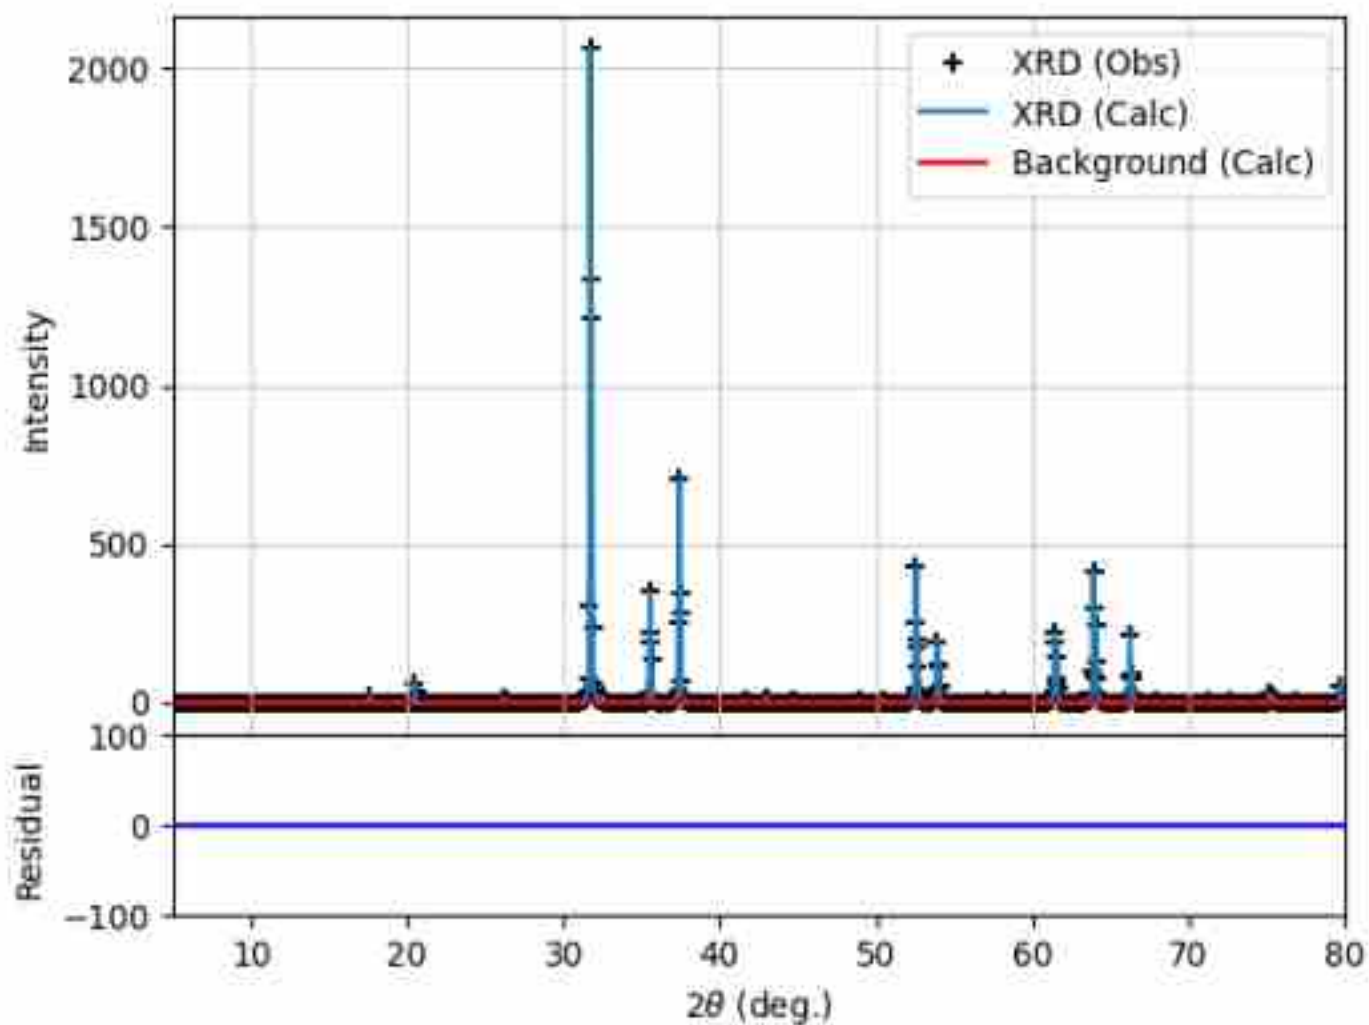

| RMSE before RR | Rwp     | RMSE after RR |
|----------------|---------|---------------|
| 0.002          | 0.00291 | 0.00028       |

# Sm3In1

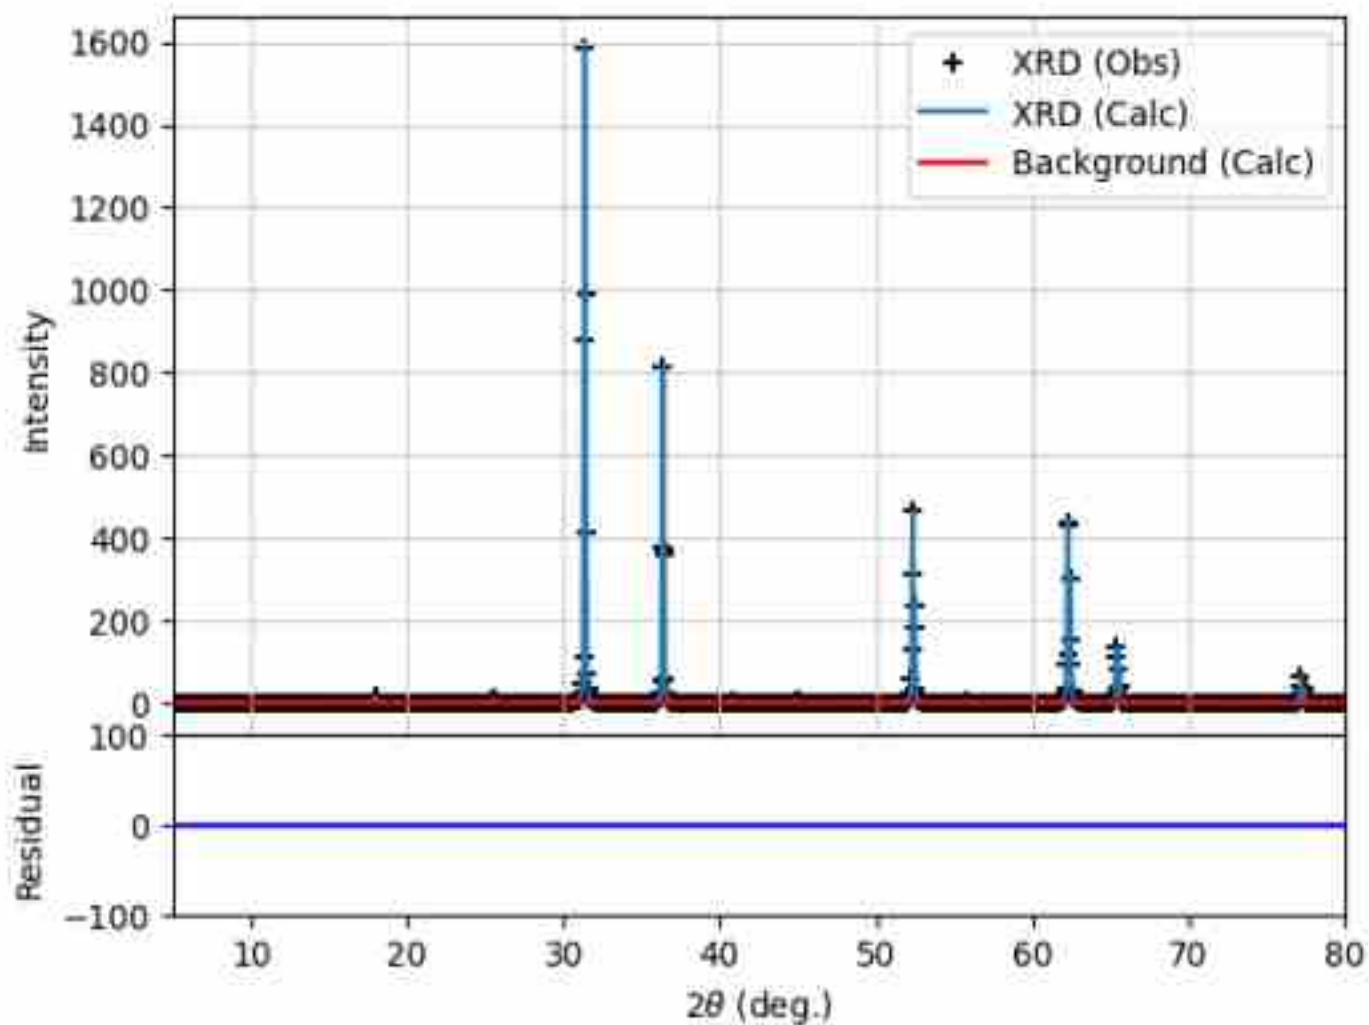

| RMSE before RR | Rwp     | RMSE after RR |
|----------------|---------|---------------|
| 0.002          | 0.02168 | 0.00073       |

# Sn1Rh3

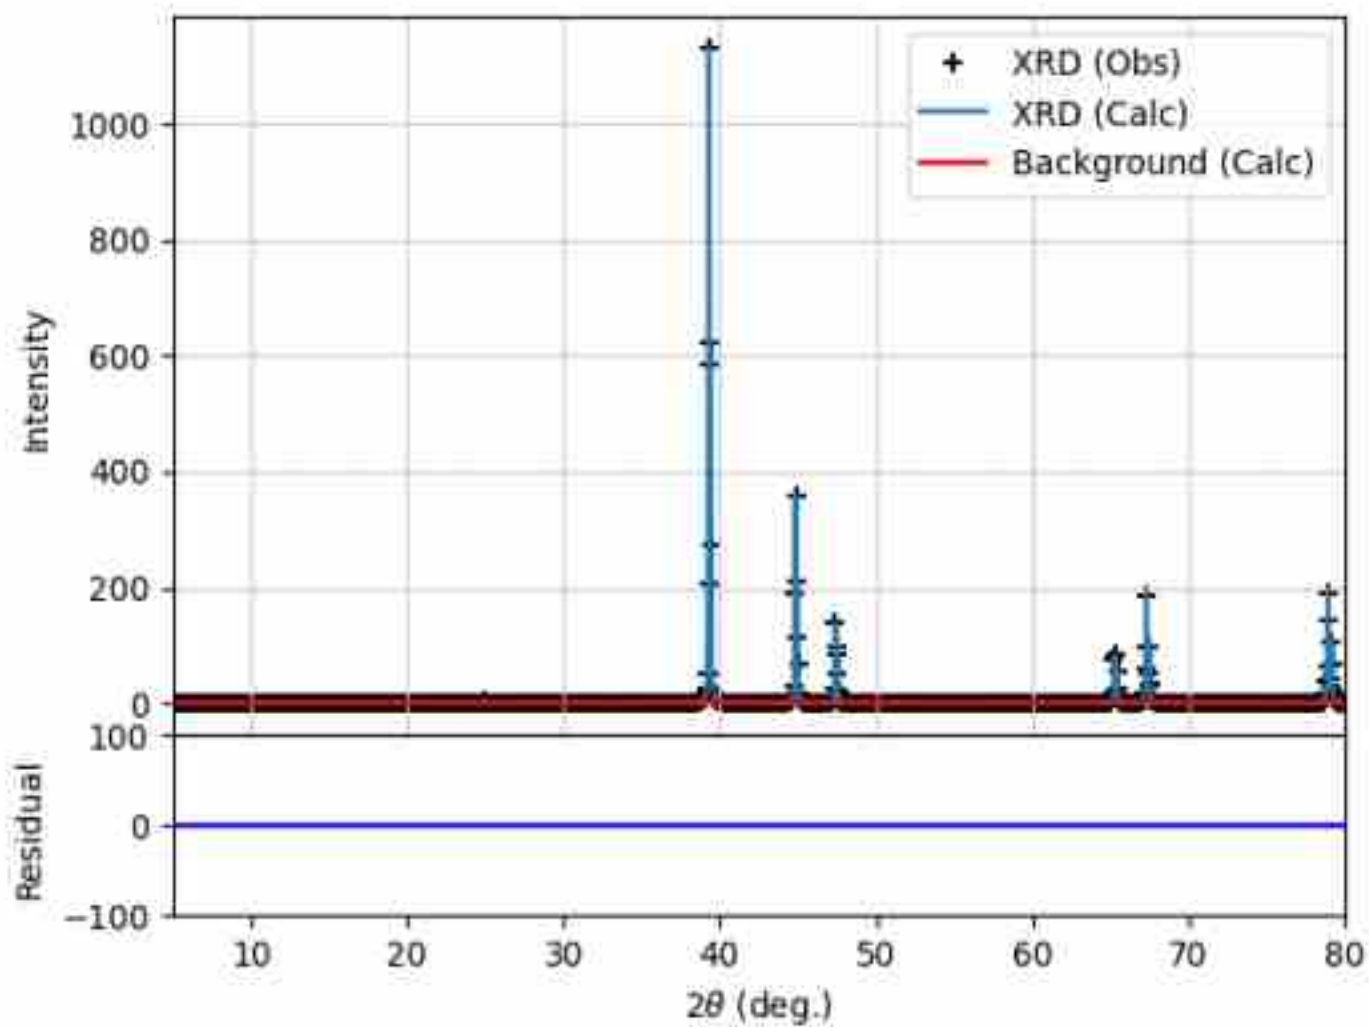

| RMSE before RR | Rwp     | RMSE after RR |
|----------------|---------|---------------|
| 0.002          | 0.00283 | 0.00032       |

# Sr1Ca1Ti2

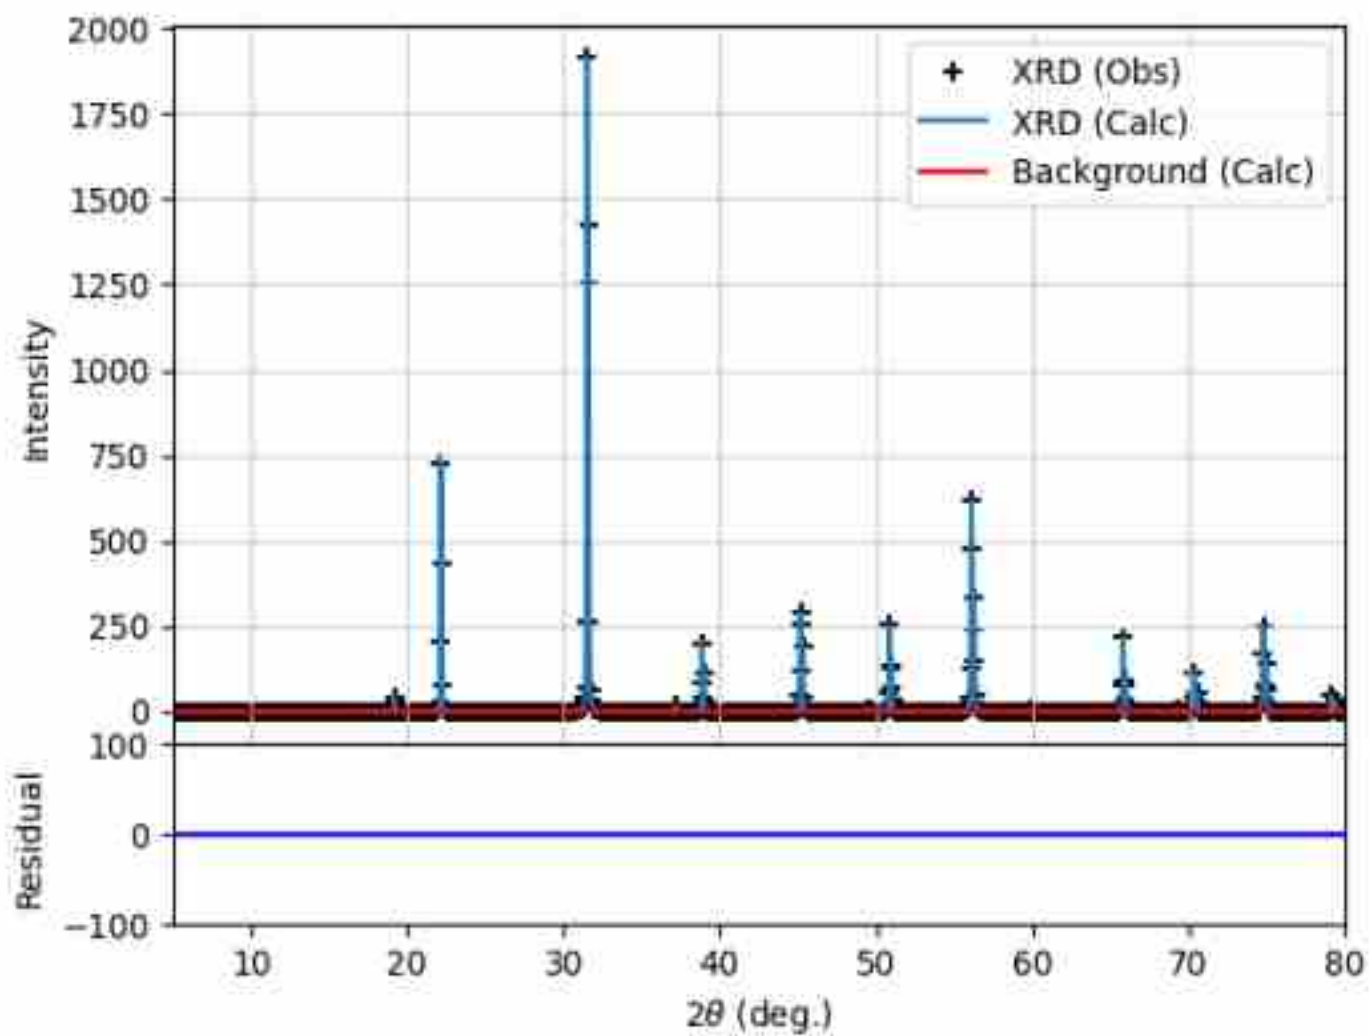

| RMSE before RR | Rwp     | RMSE after RR |
|----------------|---------|---------------|
| 0.002          | 0.00271 | 0.00029       |



# Sr1Ce1Hg2

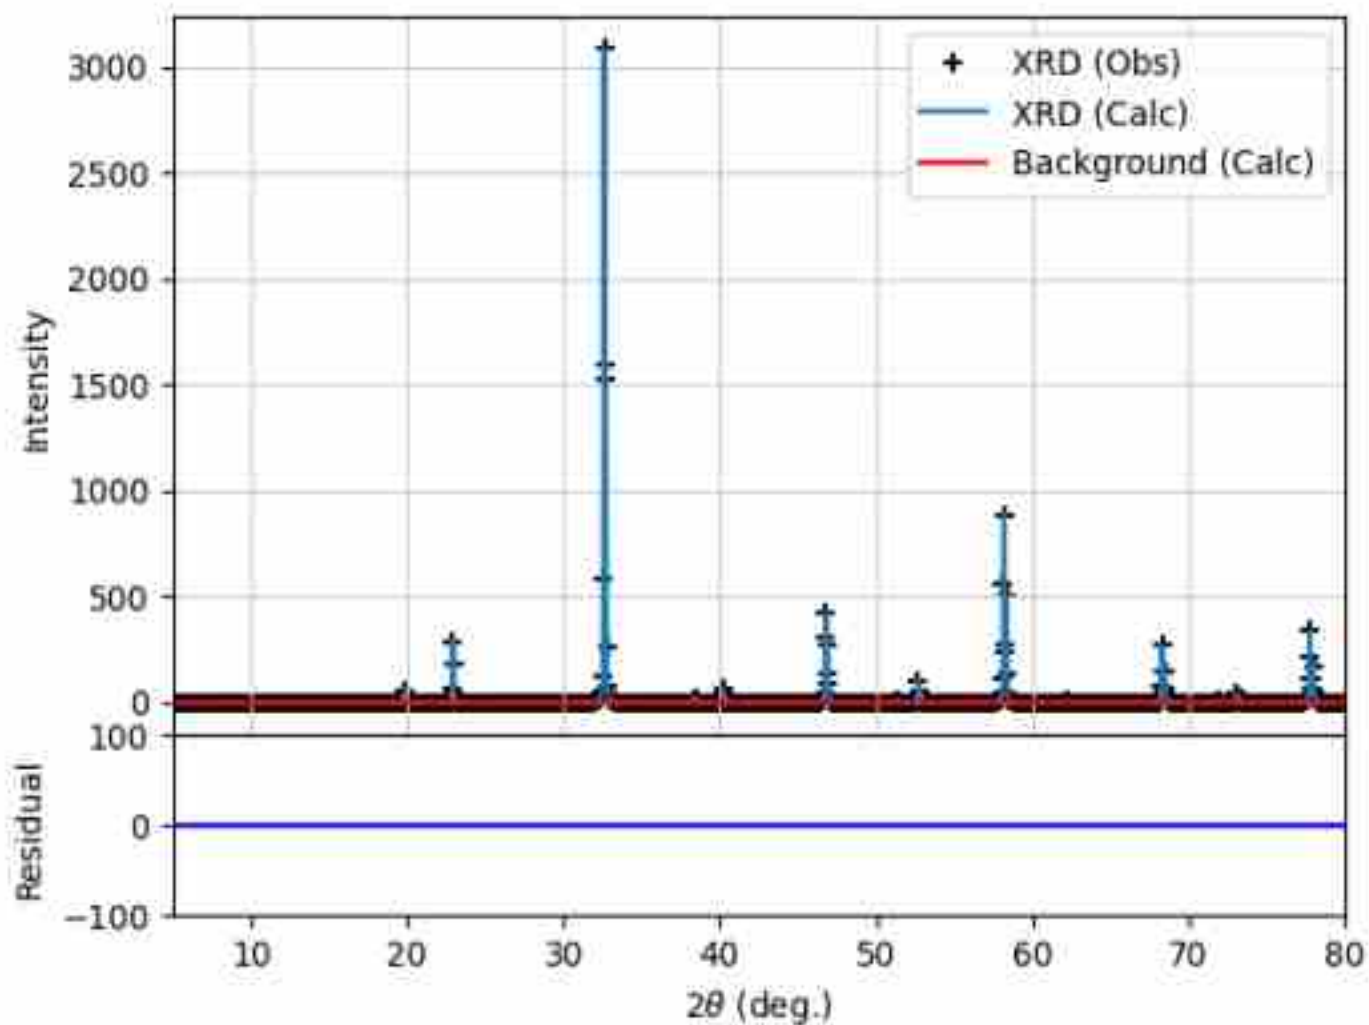

| RMSE before RR | Rwp     | RMSE after RR |
|----------------|---------|---------------|
| 0.002          | 0.00531 | 0.00168       |

# Sr<sub>1</sub>Hg<sub>2</sub>Pb<sub>1</sub>

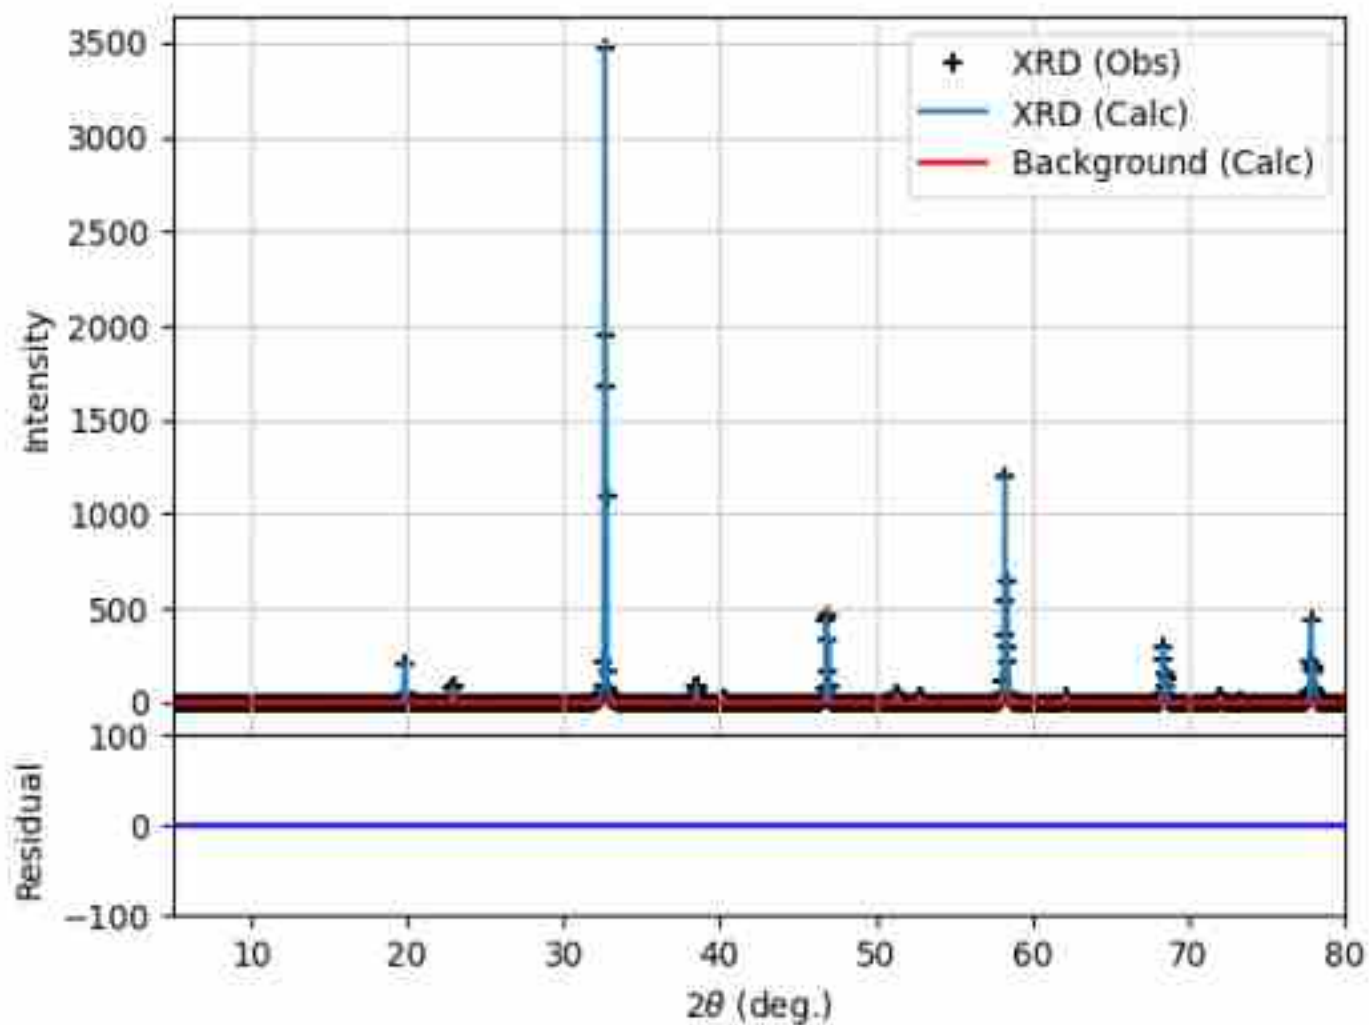

| RMSE before RR | Rwp     | RMSE after RR |
|----------------|---------|---------------|
| 0.002          | 0.00326 | 0.00021       |

# Sr1In1Hg2

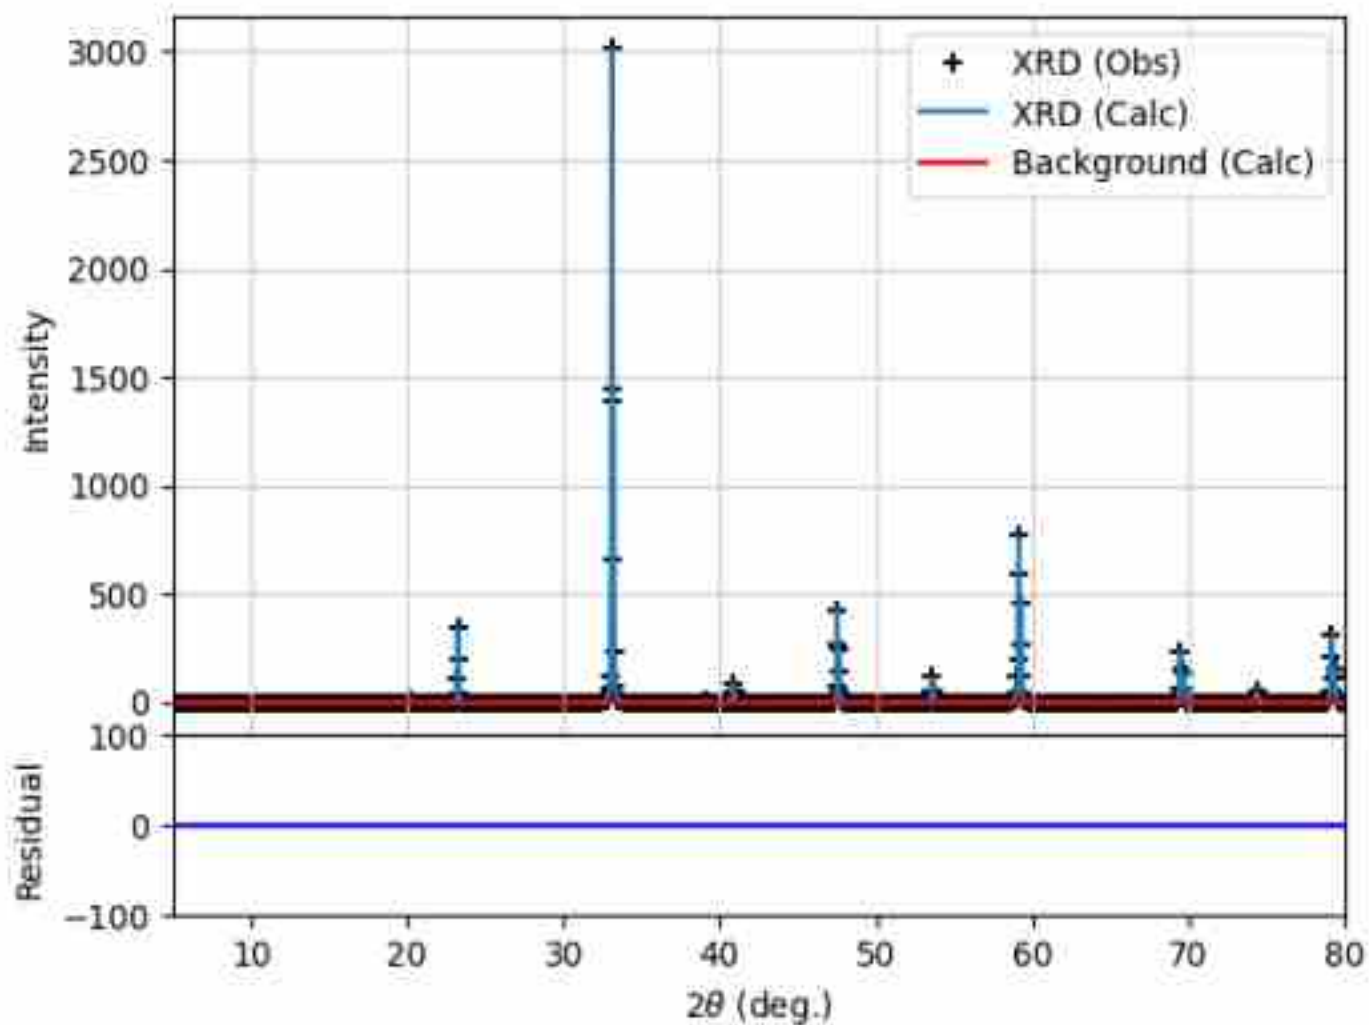

| RMSE before RR | Rwp     | RMSE after RR |
|----------------|---------|---------------|
| 0.002          | 0.00422 | 0.0003        |

# SrIn3

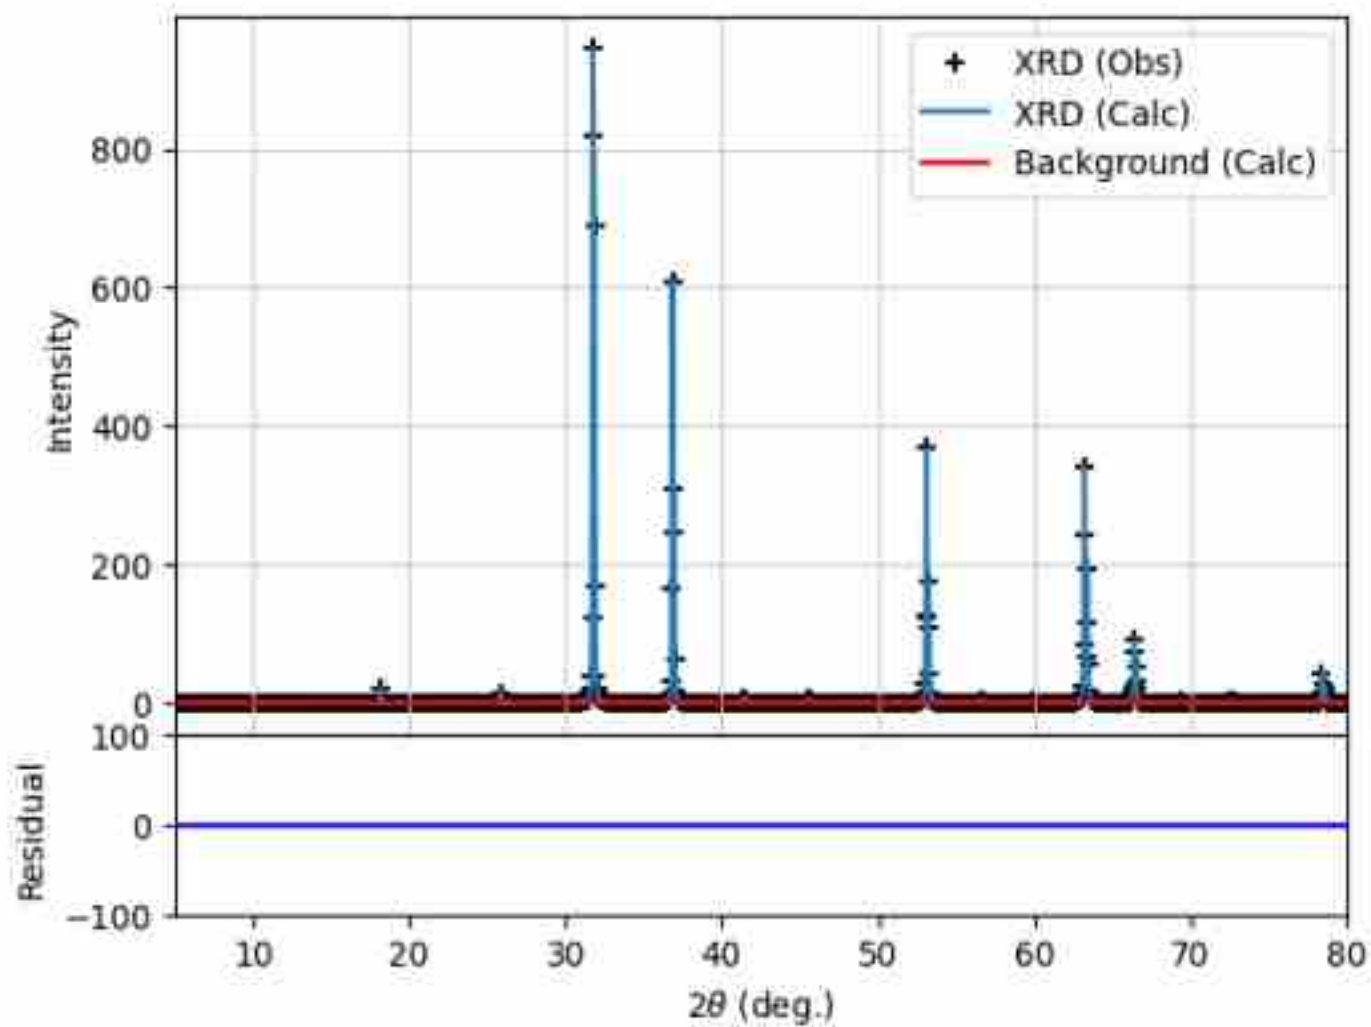

| RMSE before RR | Rwp     | RMSE after RR |
|----------------|---------|---------------|
| 0.002          | 0.02164 | 0.00038       |

# Sr1O1

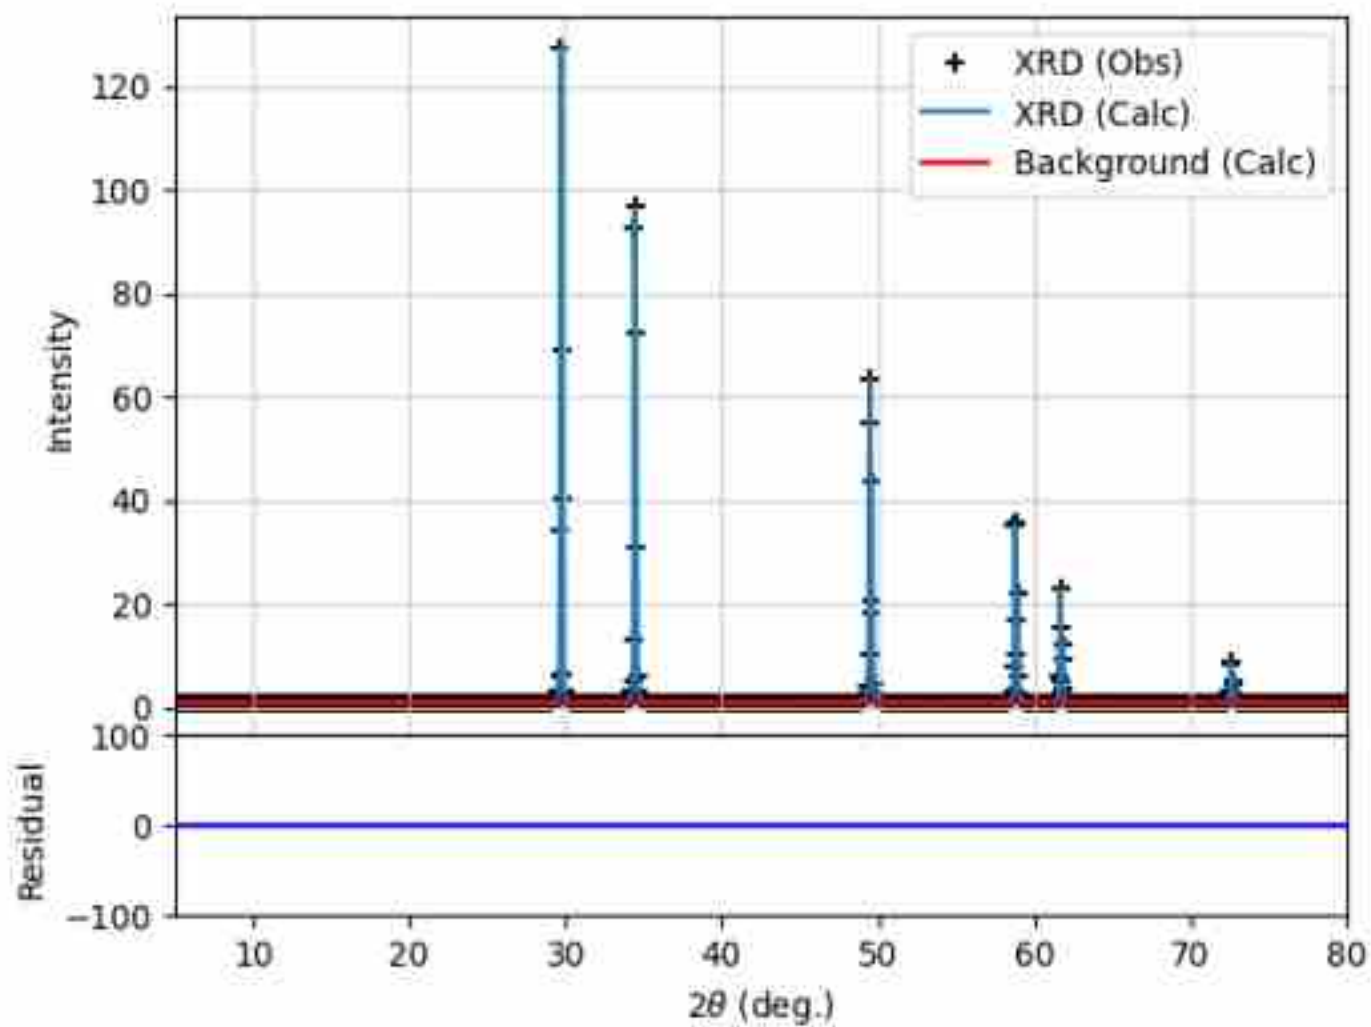

| RMSE before RR | Rwp     | RMSE after RR |
|----------------|---------|---------------|
| 0.002          | 0.00277 | 0.00147       |

# Sr<sub>2</sub>Cd<sub>1</sub>Pb<sub>1</sub>

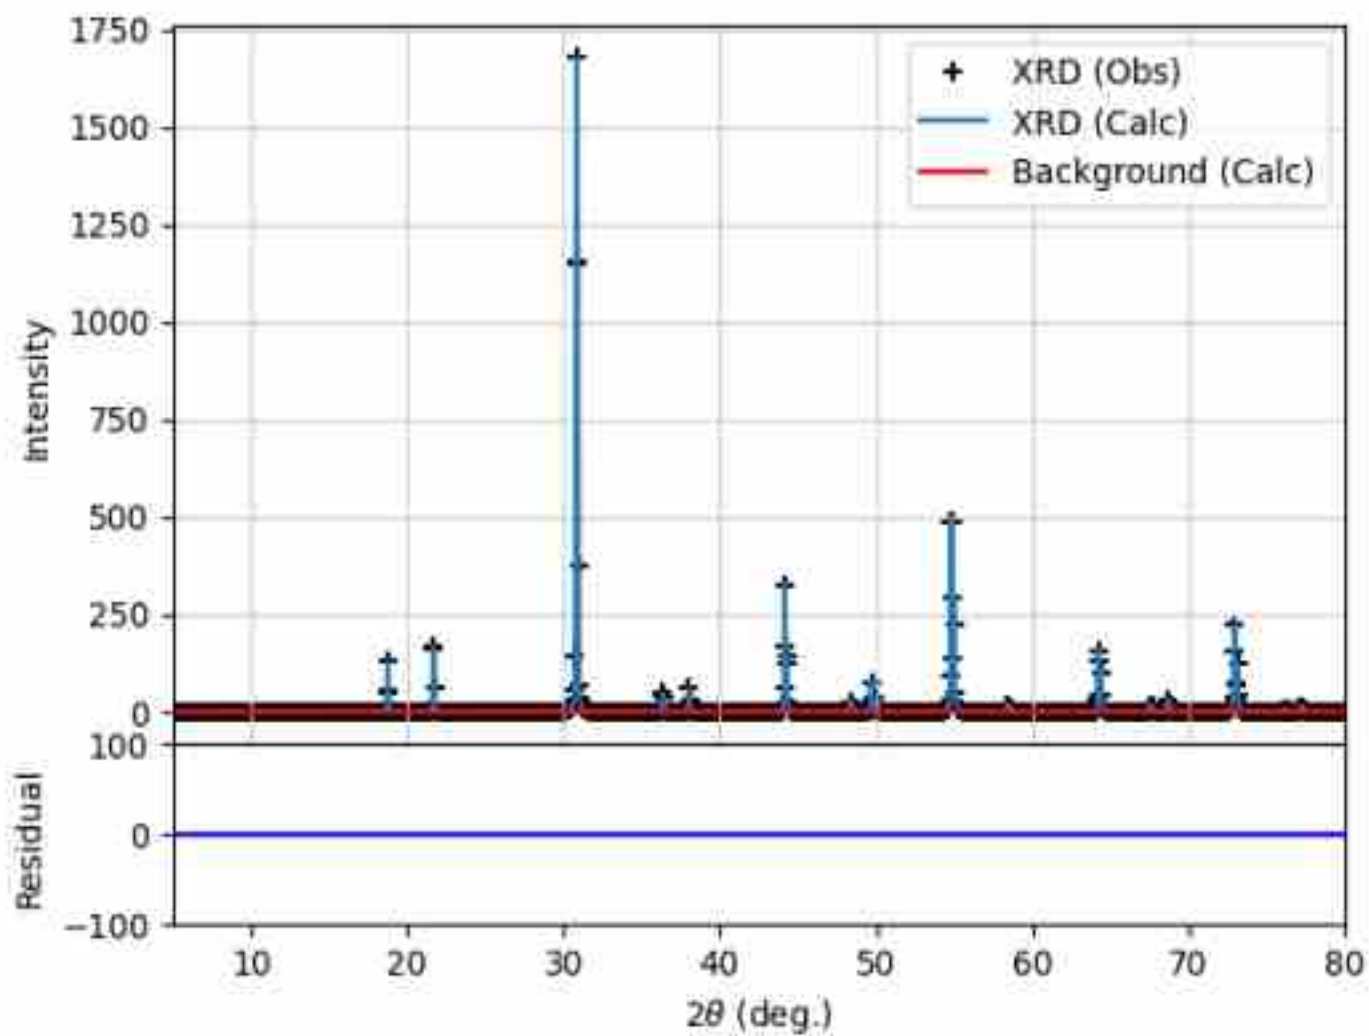

| RMSE before RR | Rwp     | RMSE after RR |
|----------------|---------|---------------|
| 0.002          | 0.00123 | 0.00032       |

# Sr<sub>2</sub>Gd<sub>1</sub>Cu<sub>2</sub>Ru<sub>1</sub>O<sub>8</sub>

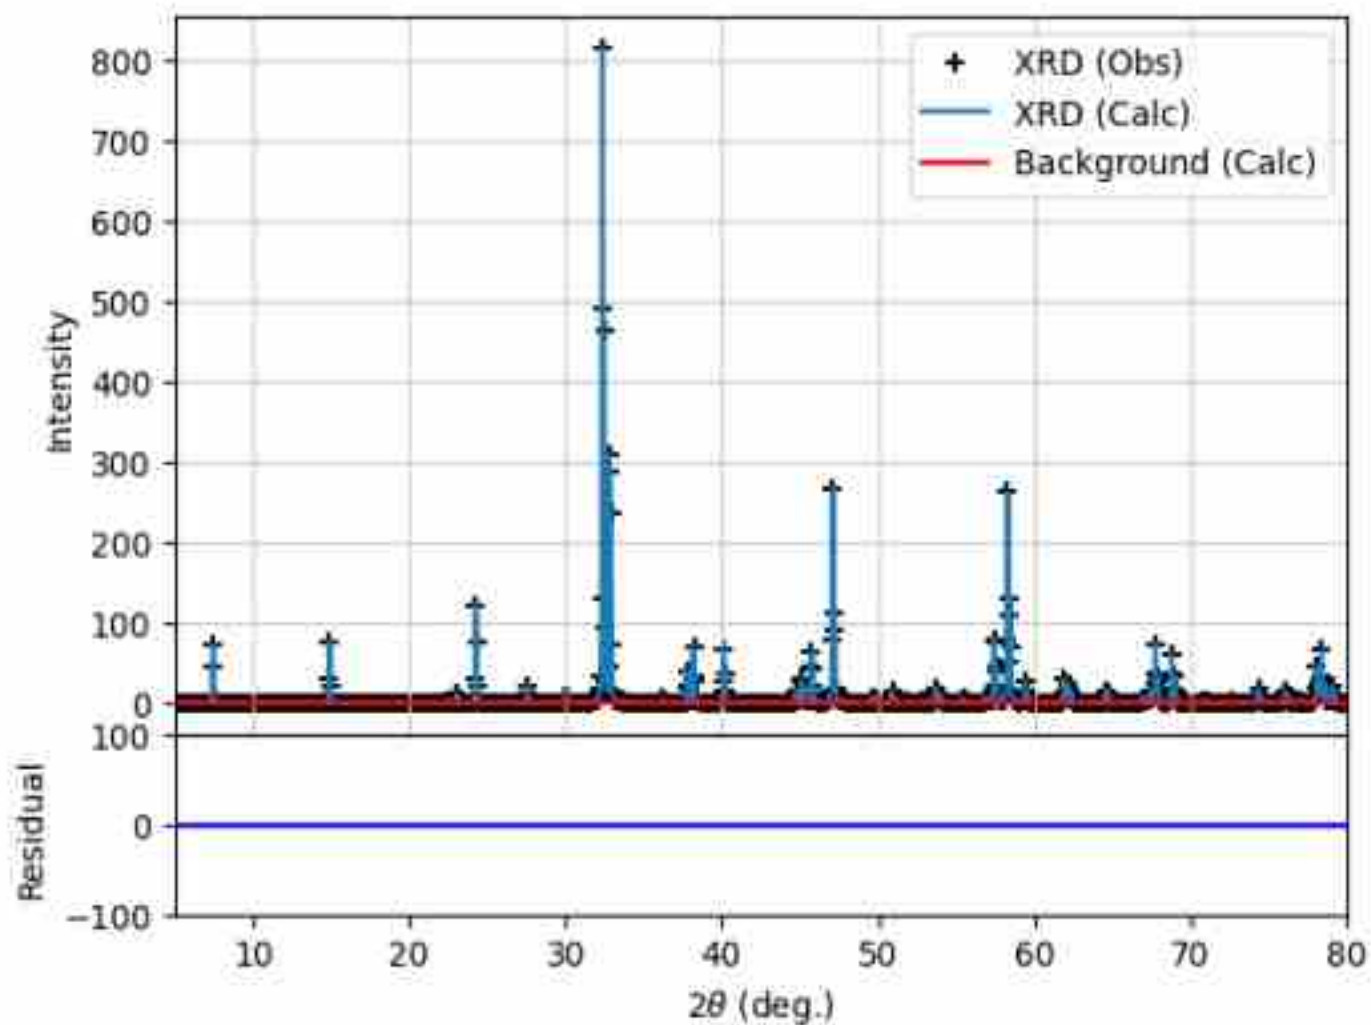

| RMSE before RR | Rwp     | RMSE after RR |
|----------------|---------|---------------|
| 0.02           | 0.03287 | 0.00591       |

# Sr<sub>2</sub>HgPb

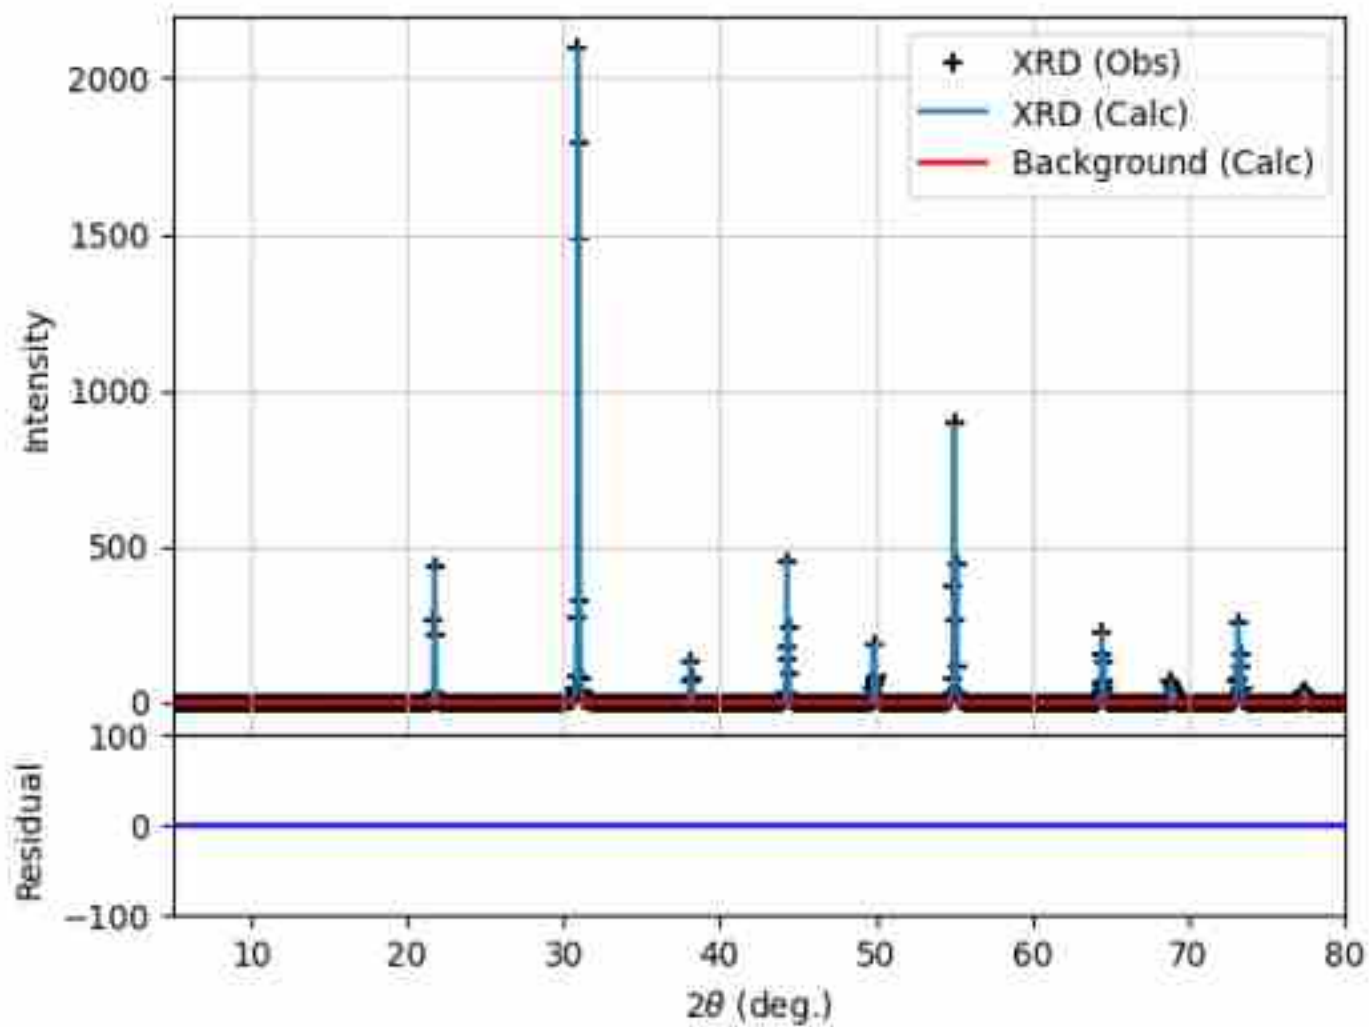

| RMSE before RR | Rwp     | RMSE after RR |
|----------------|---------|---------------|
| 0.002          | 0.08654 | 0.00114       |



# Sr2Ir1

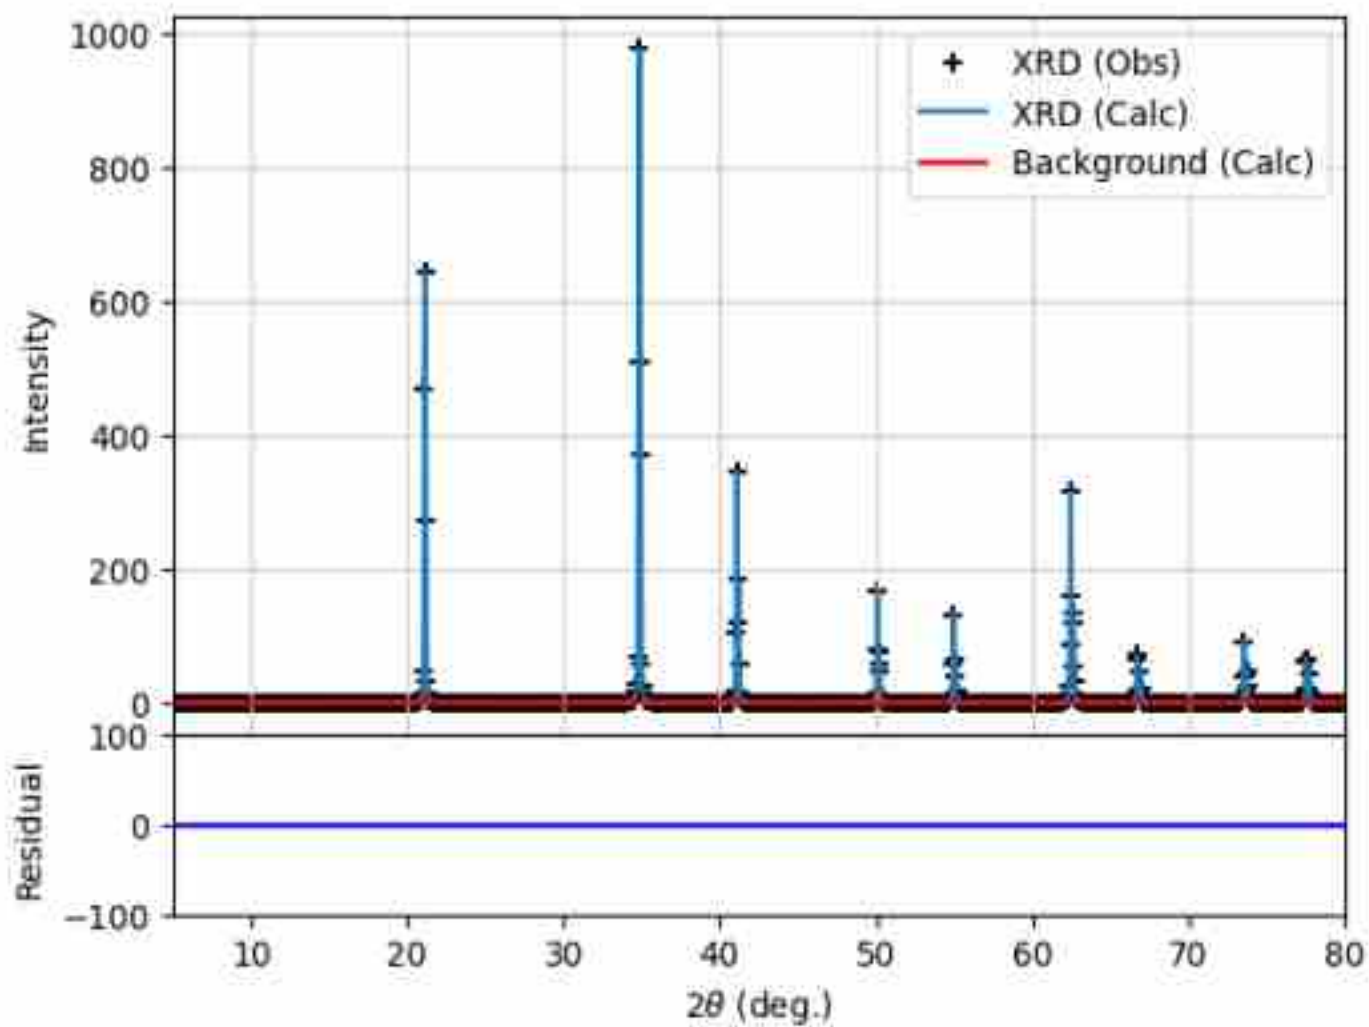

| RMSE before RR | Rwp     | RMSE after RR |
|----------------|---------|---------------|
| 0.002          | 0.00491 | 0.00069       |

# Sr<sub>2</sub>La<sub>2</sub>Fe<sub>2</sub>Ru<sub>2</sub>O<sub>12</sub>

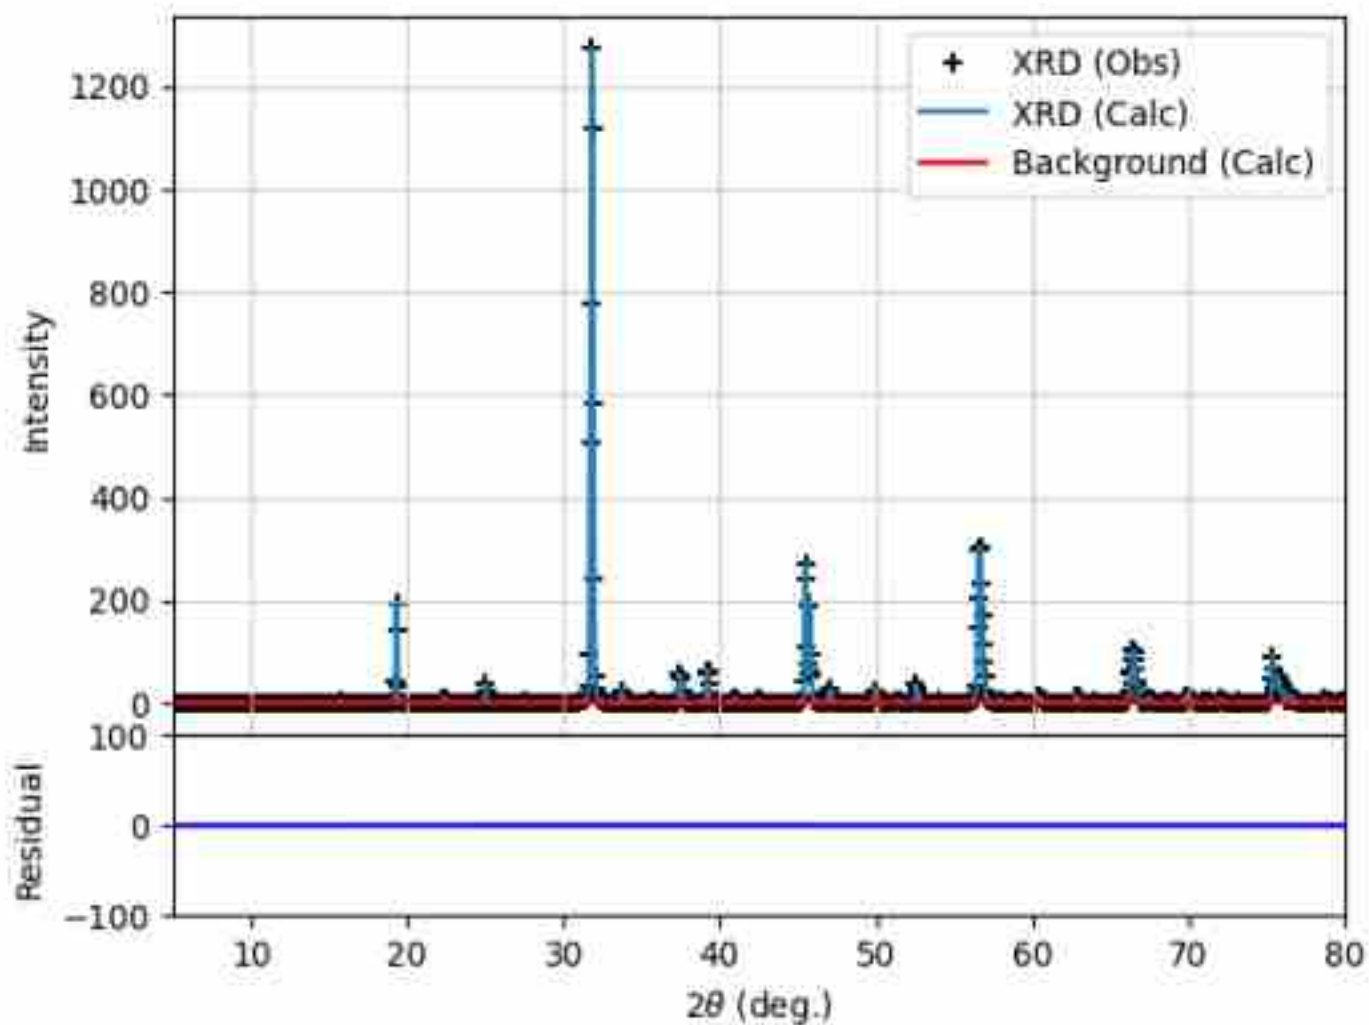

| RMSE before RR | Rwp     | RMSE after RR |
|----------------|---------|---------------|
| 0.02           | 0.24469 | 0.01078       |

# Sr<sub>2</sub>La<sub>2</sub>Mn<sub>2</sub>Ru<sub>2</sub>O<sub>12</sub>

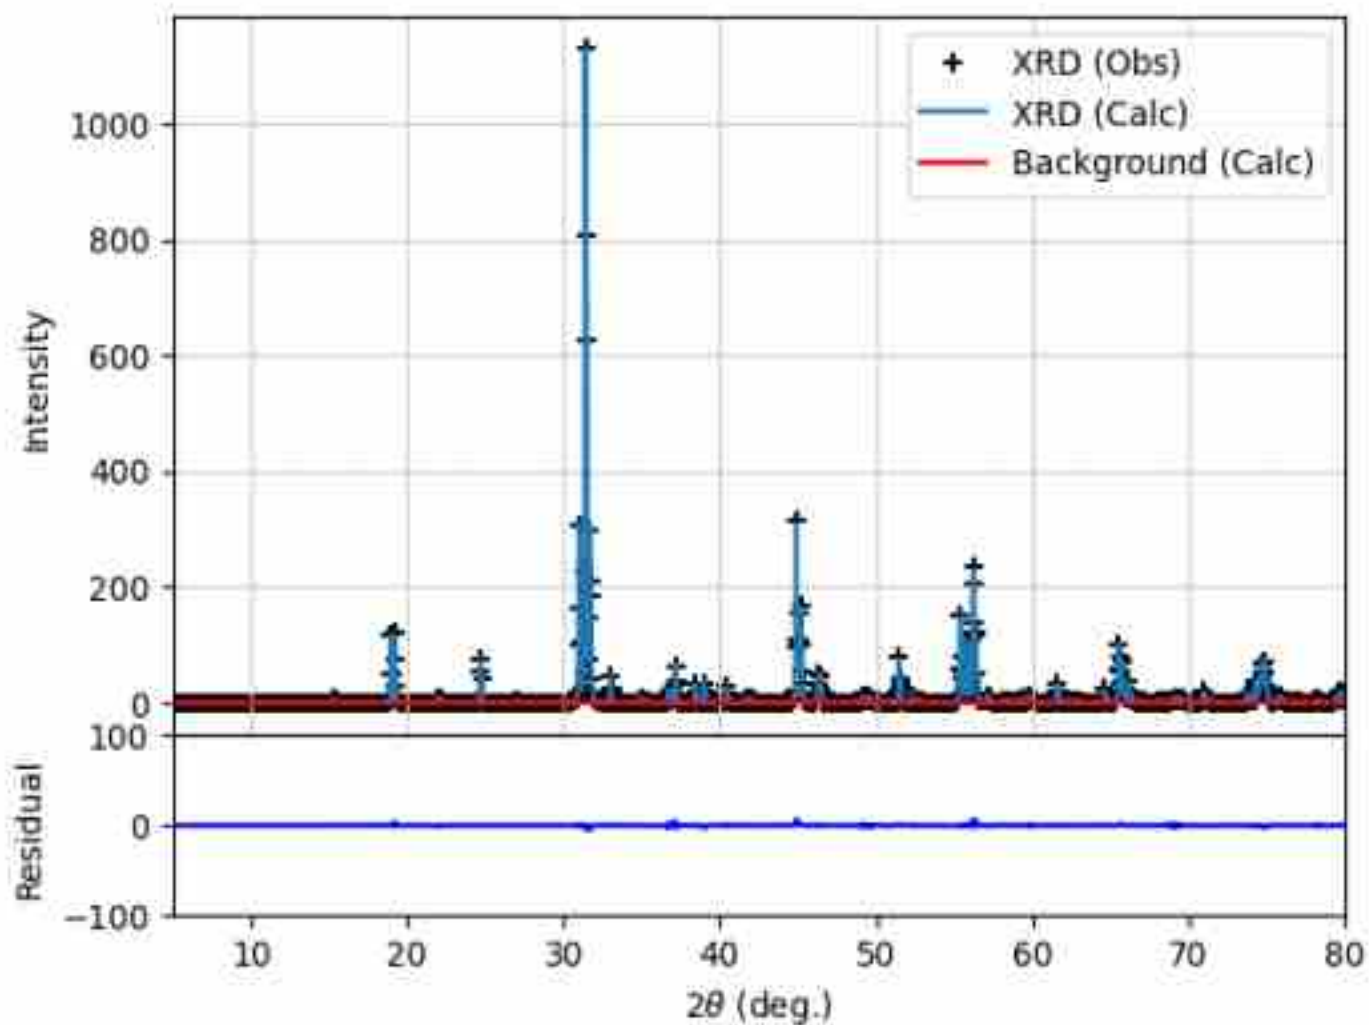

| RMSE before RR | Rwp     | RMSE after RR |
|----------------|---------|---------------|
| 0.02           | 3.71835 | 0.08359       |

# Sr<sub>2</sub>MgIn<sub>1</sub>

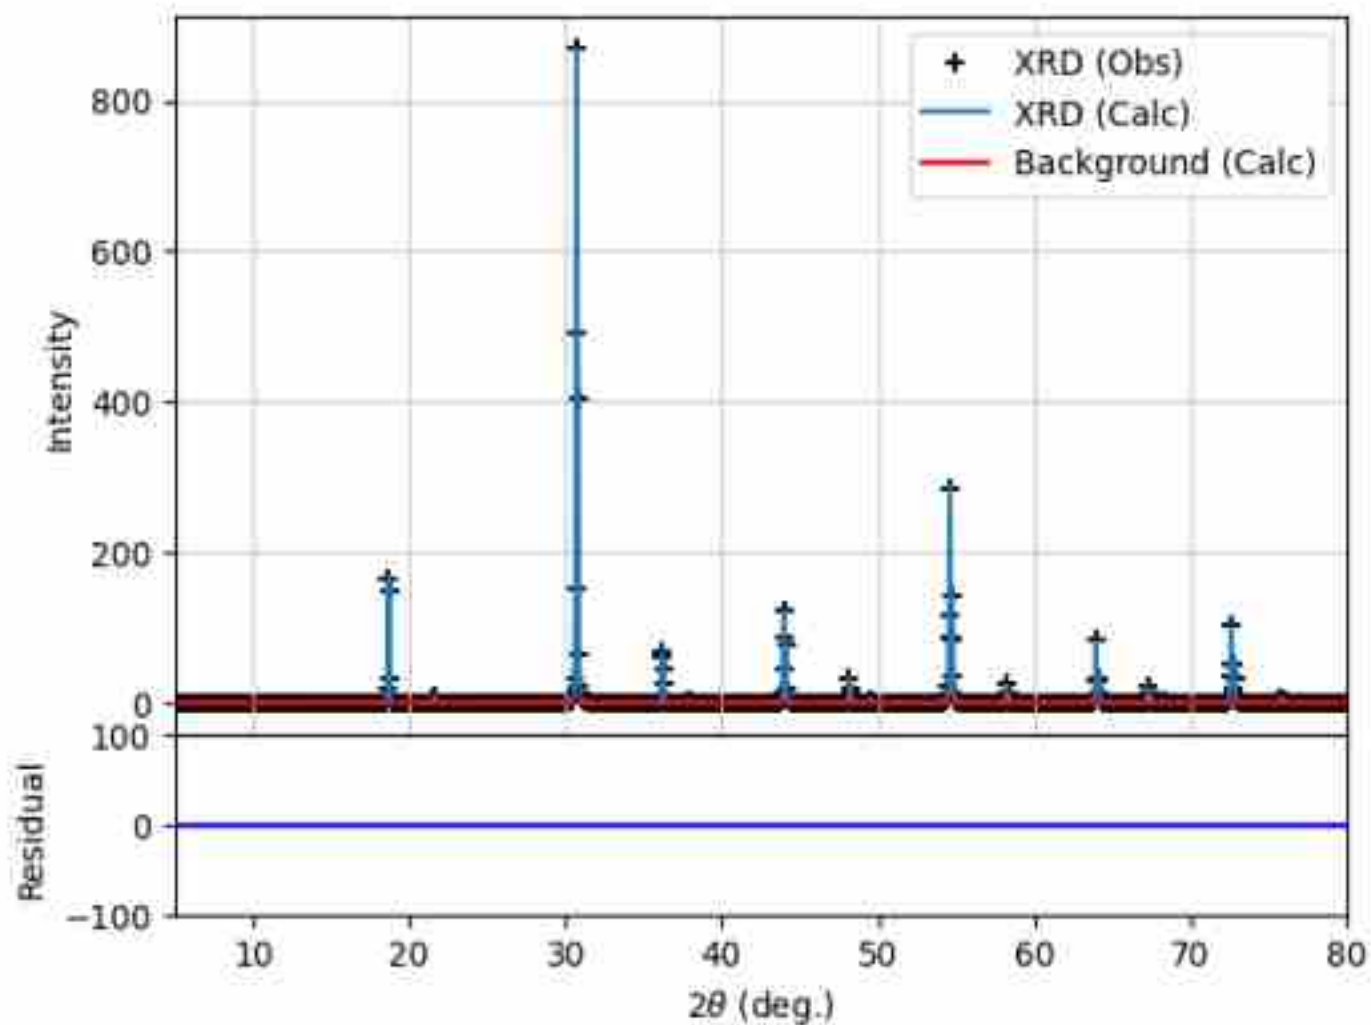

| RMSE before RR | Rwp     | RMSE after RR |
|----------------|---------|---------------|
| 0.002          | 0.00347 | 0.00057       |

# Sr<sub>2</sub>TlHg

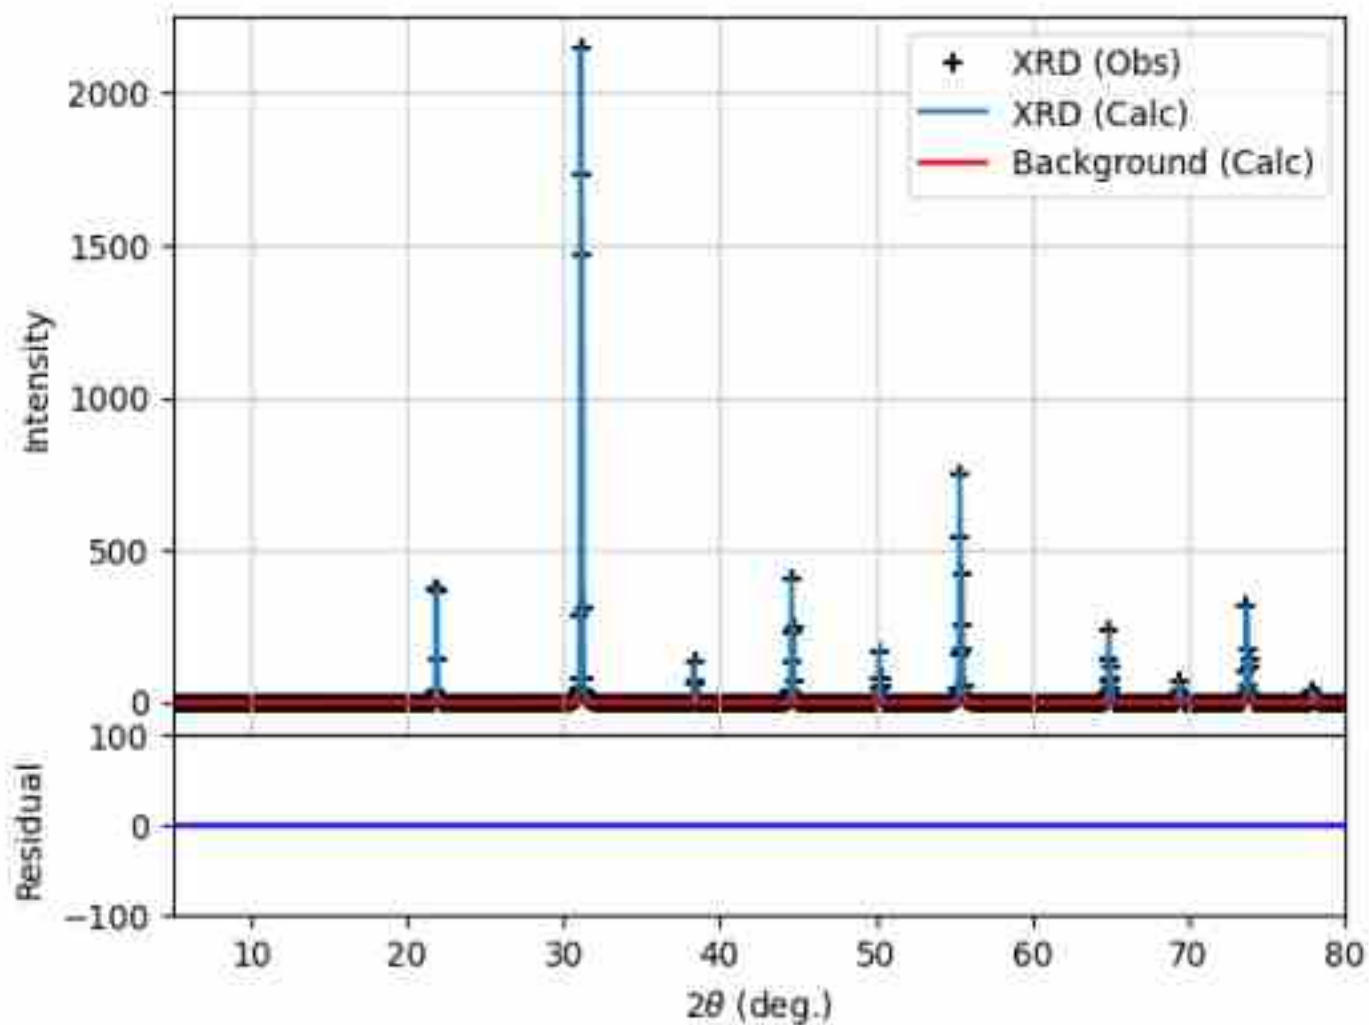

| RMSE before RR | Rwp     | RMSE after RR |
|----------------|---------|---------------|
| 0.002          | 0.00789 | 0.00065       |

# Sr<sub>2</sub>Zn<sub>1</sub>Pb<sub>1</sub>

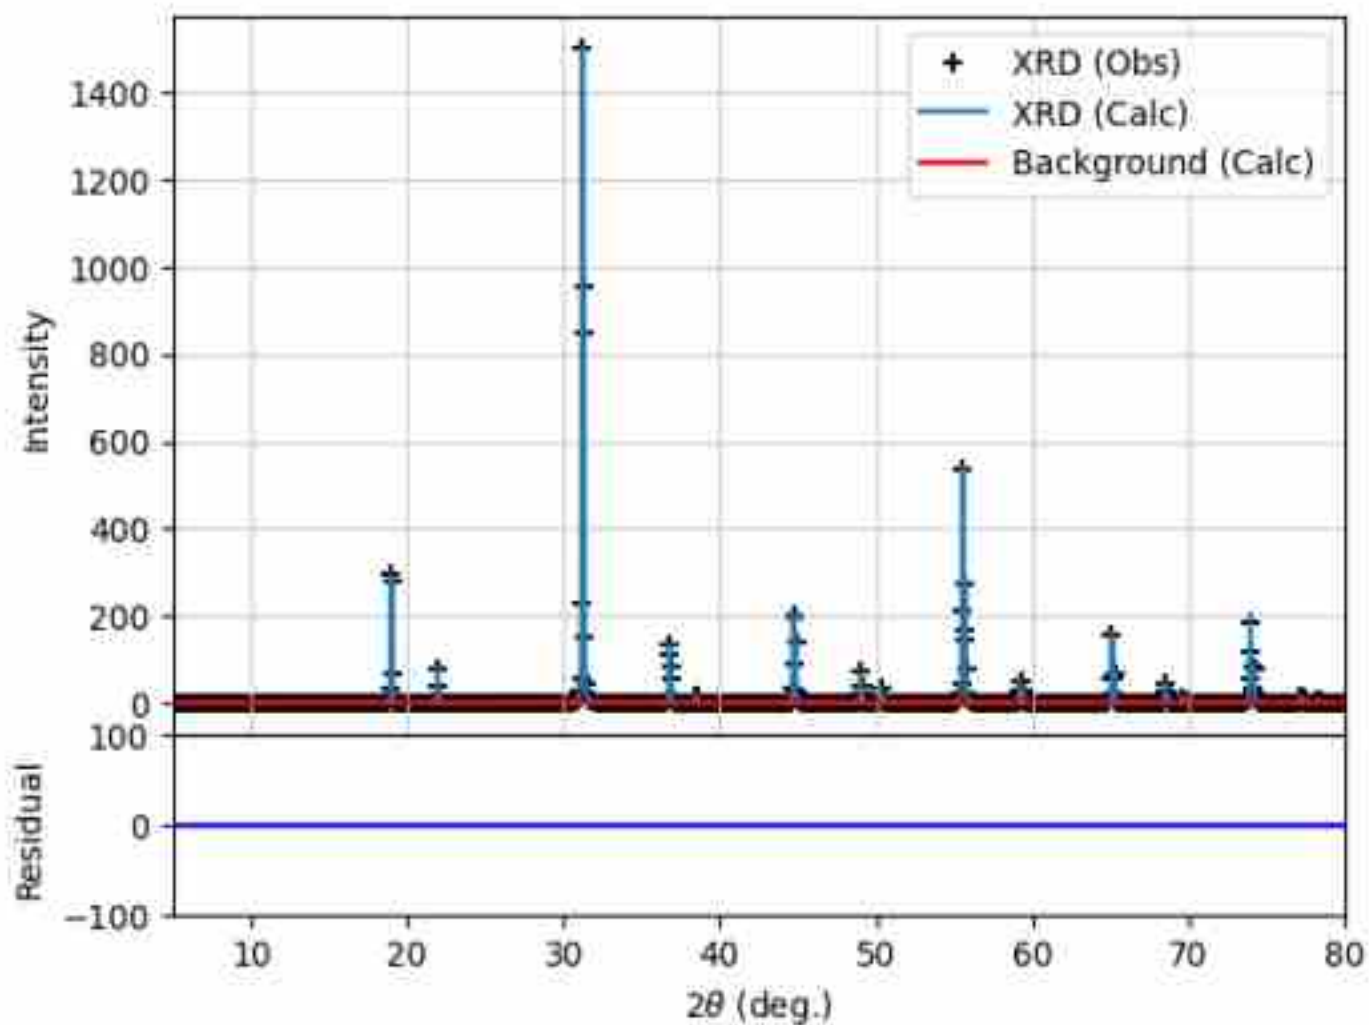

| RMSE before RR | Rwp    | RMSE after RR |
|----------------|--------|---------------|
| 0.002          | 0.0043 | 0.00066       |

# Sr<sub>3</sub>Sm<sub>1</sub>Co<sub>2</sub>O<sub>8</sub>

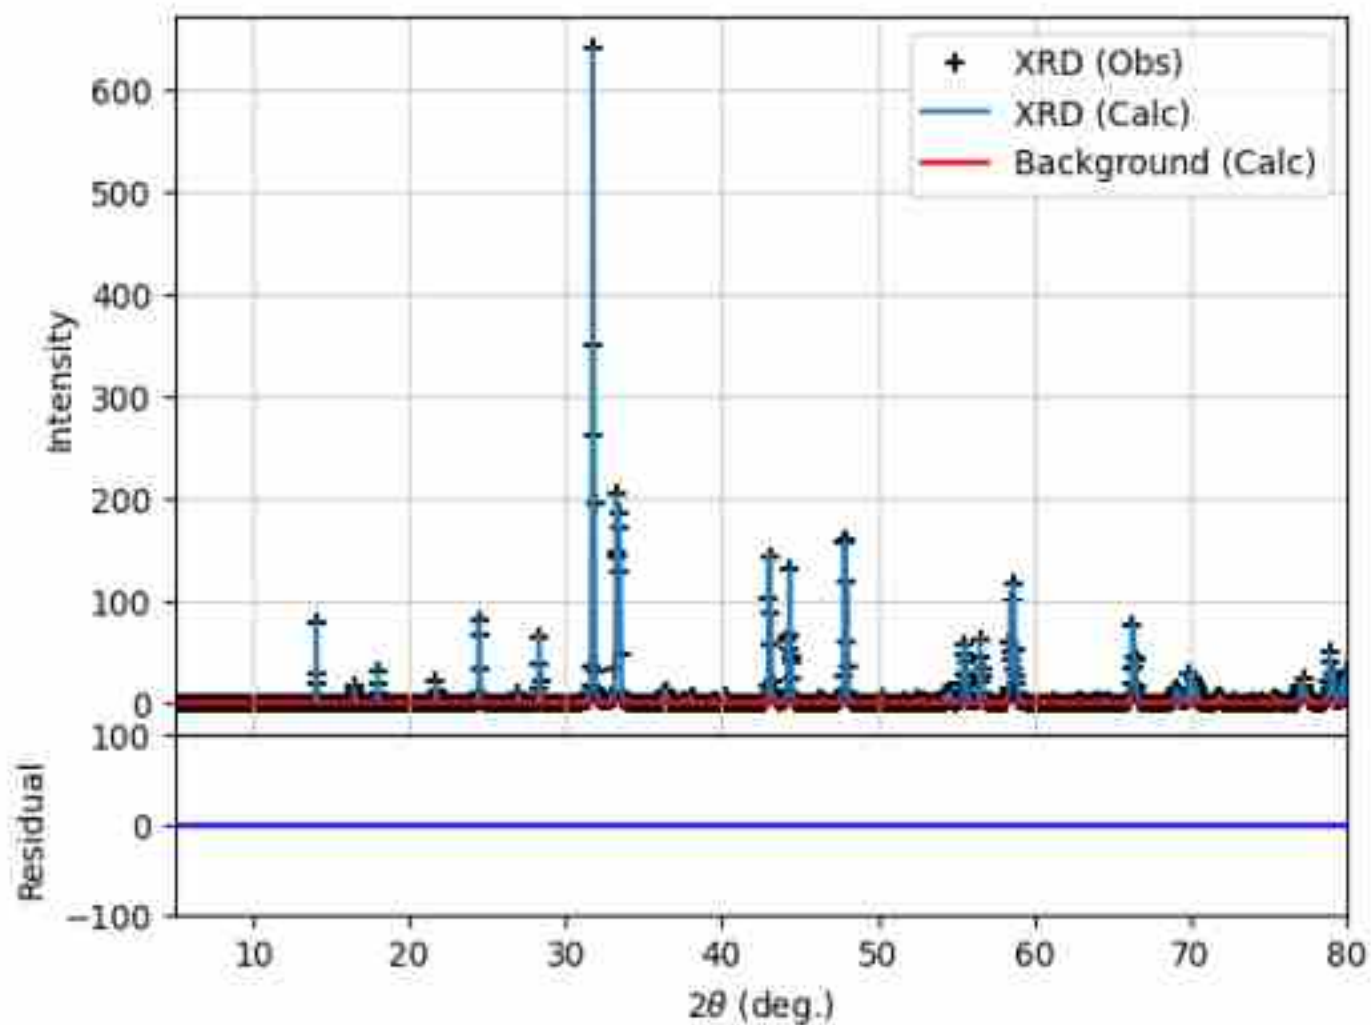

| RMSE before RR | Rwp     | RMSE after RR |
|----------------|---------|---------------|
| 0.02           | 0.00458 | 0.00086       |

# Sr<sub>4</sub>FeRuO<sub>8</sub>

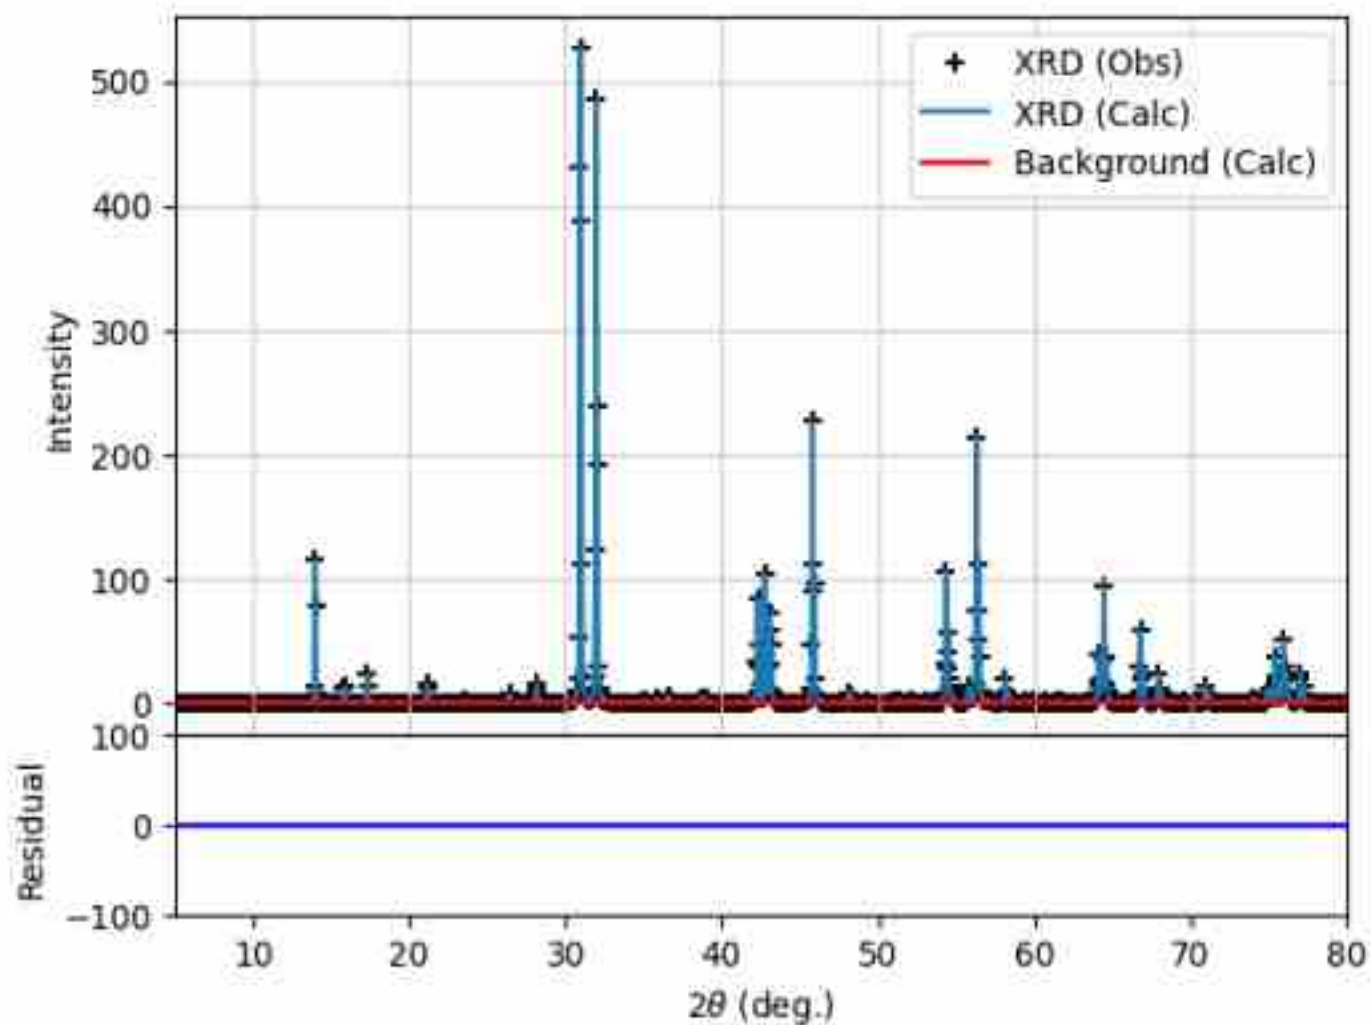

| RMSE before RR | Rwp     | RMSE after RR |
|----------------|---------|---------------|
| 0.02           | 0.00315 | 0.00161       |



# Sr<sub>4</sub>Fe<sub>2</sub>Sb<sub>2</sub>O<sub>12</sub>

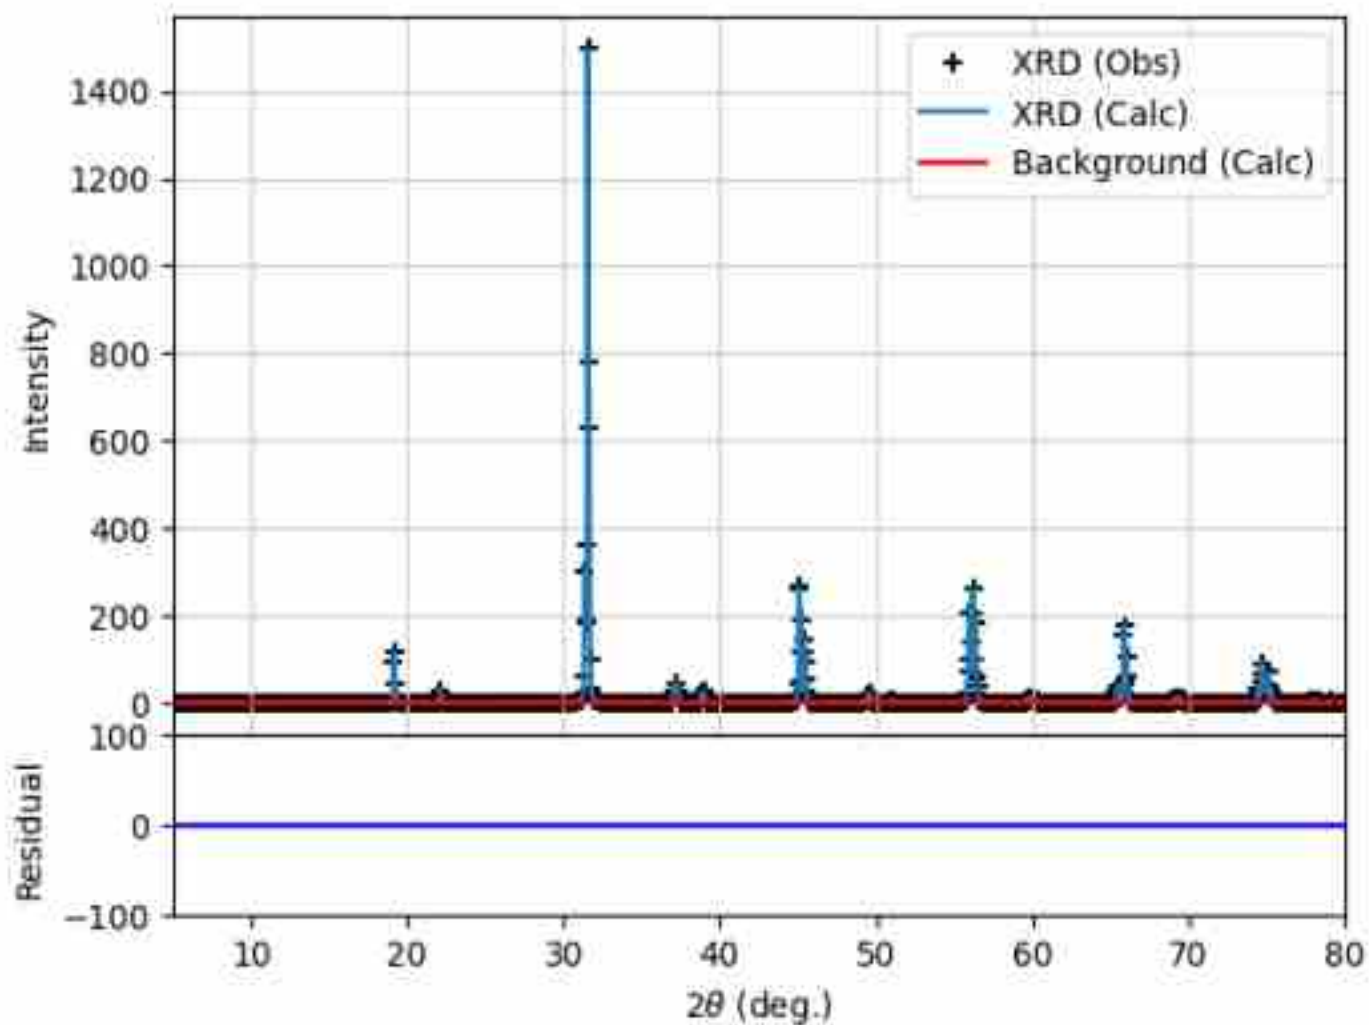

| RMSE before RR | Rwp     | RMSE after RR |
|----------------|---------|---------------|
| 0.02           | 0.00466 | 0.00099       |

# Sr<sub>4</sub>Lu<sub>2</sub>Nb<sub>2</sub>O<sub>12</sub>

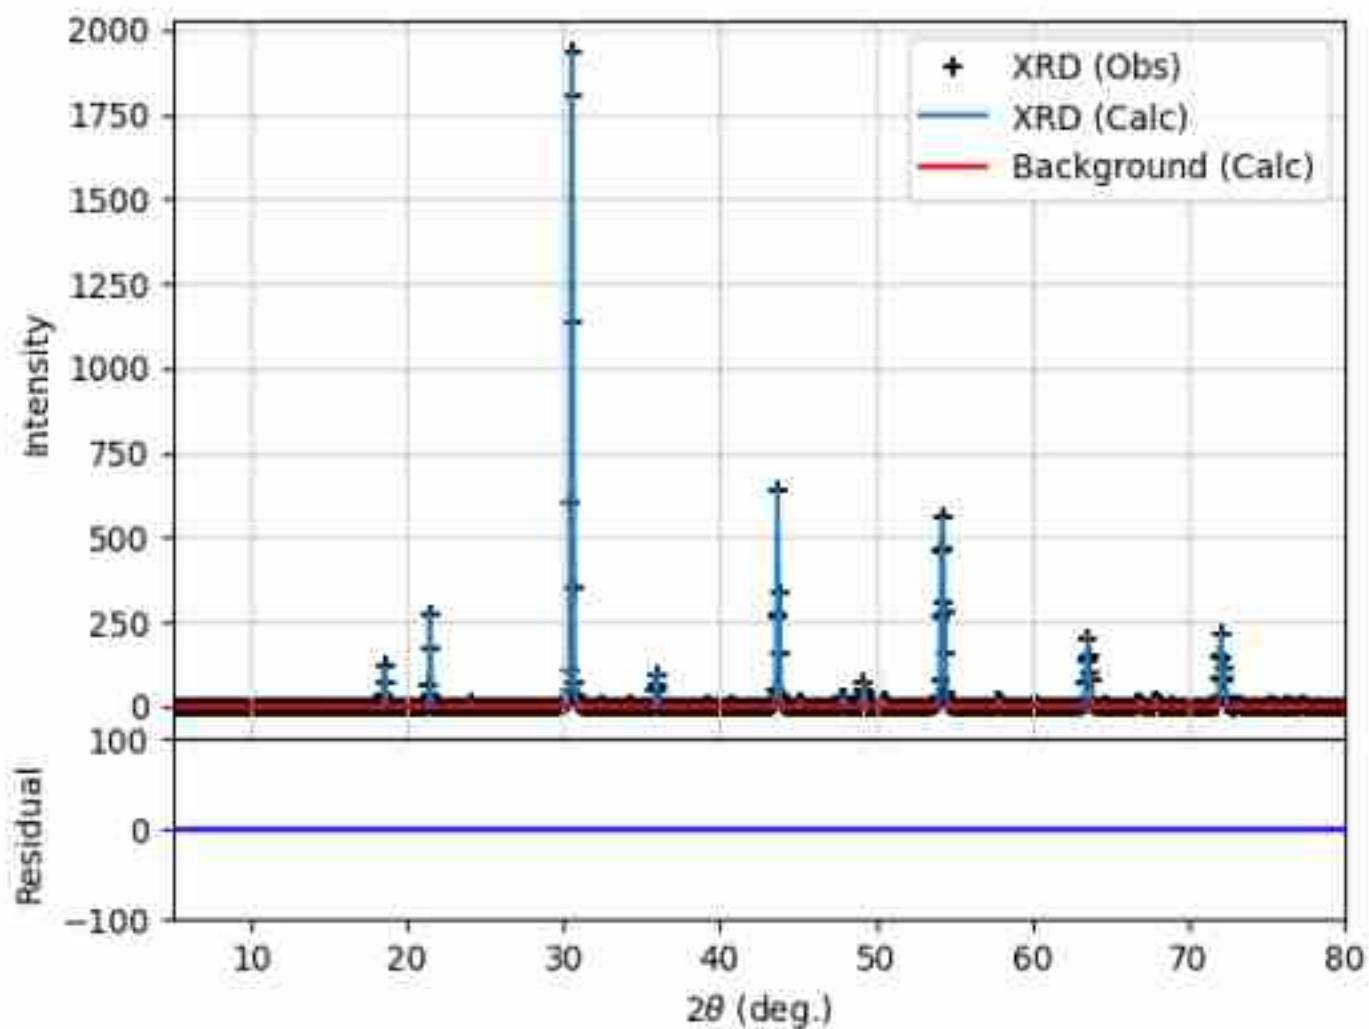

| RMSE before RR | Rwp     | RMSE after RR |
|----------------|---------|---------------|
| 0.02           | 0.00267 | 0.00086       |

# Ta1Co3

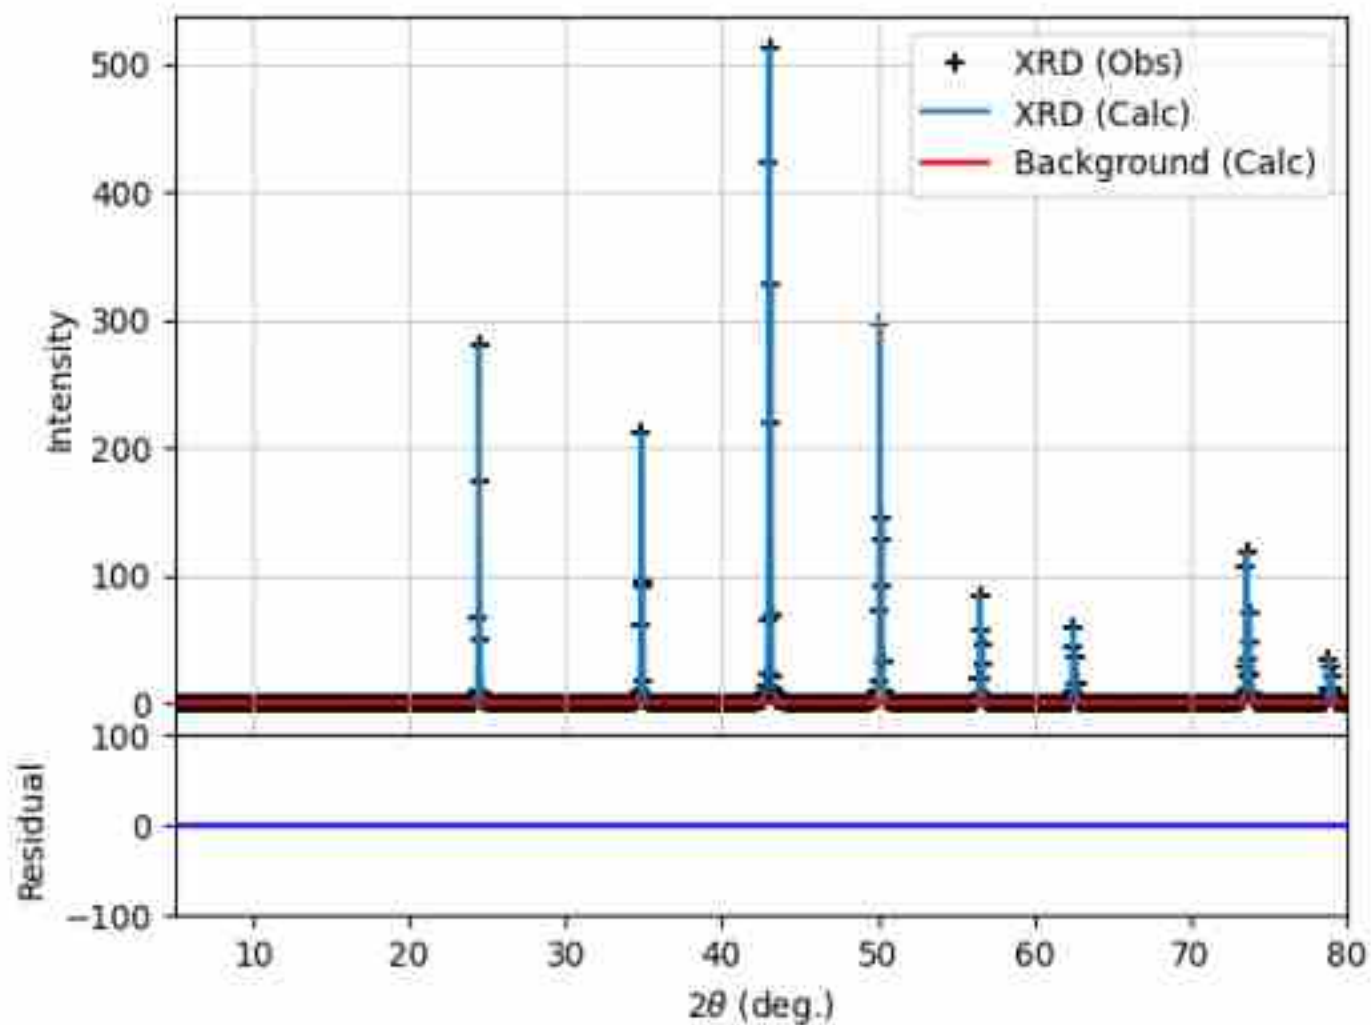

| RMSE before RR | Rwp     | RMSE after RR |
|----------------|---------|---------------|
| 0.002          | 0.01186 | 0.00132       |

# Ta1Cr3Cu2S8

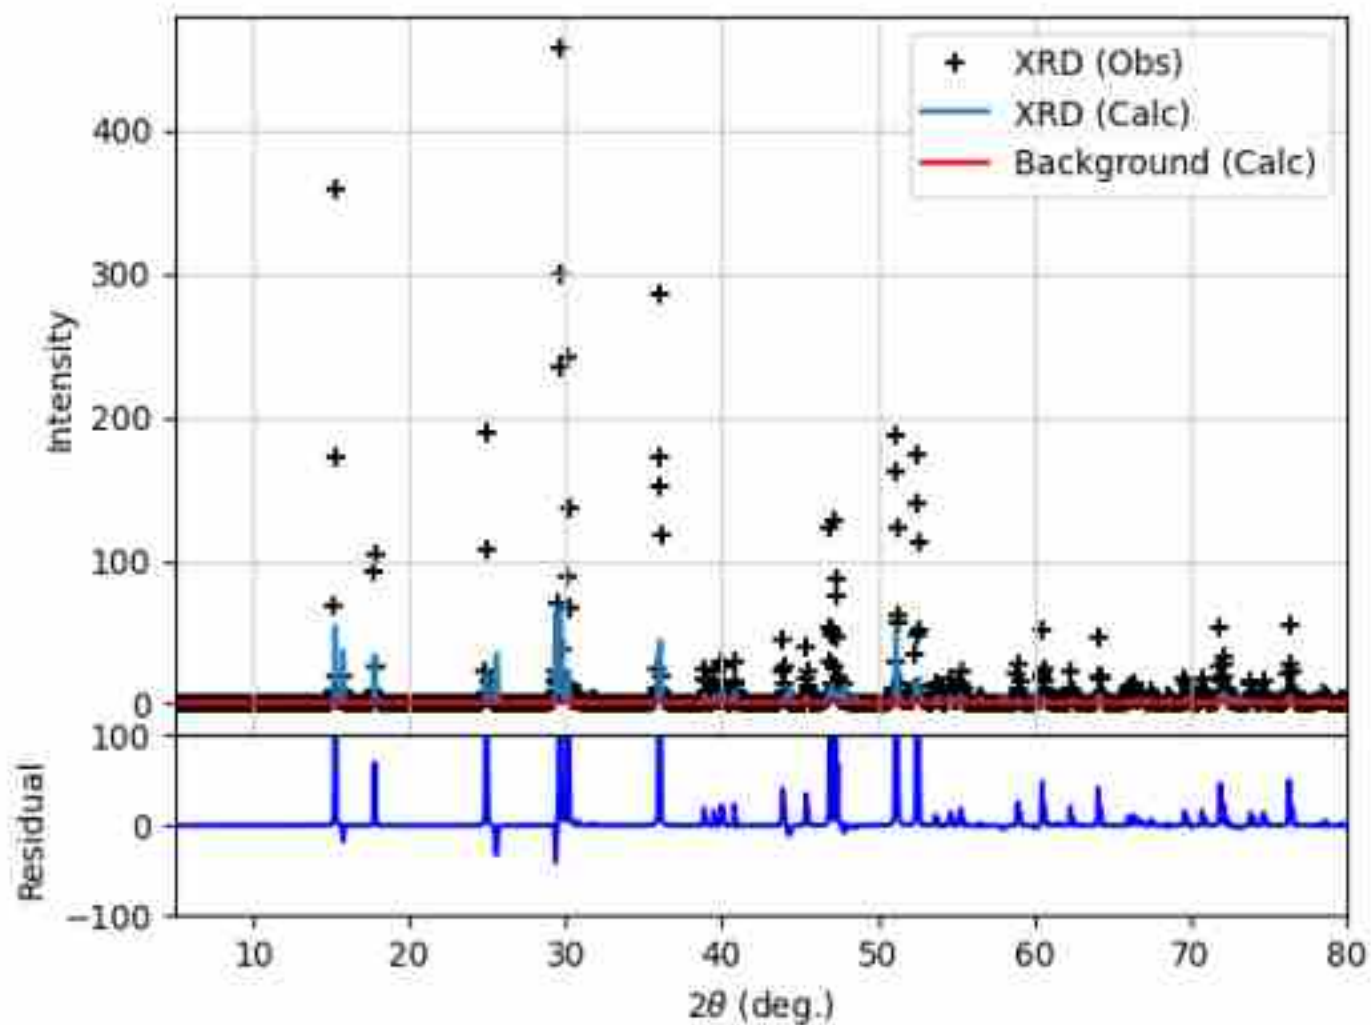

| RMSE before RR | Rwp      | RMSE after RR |
|----------------|----------|---------------|
| 0.02           | 84.32059 | 0.02459       |

# Ta1In1Ru2

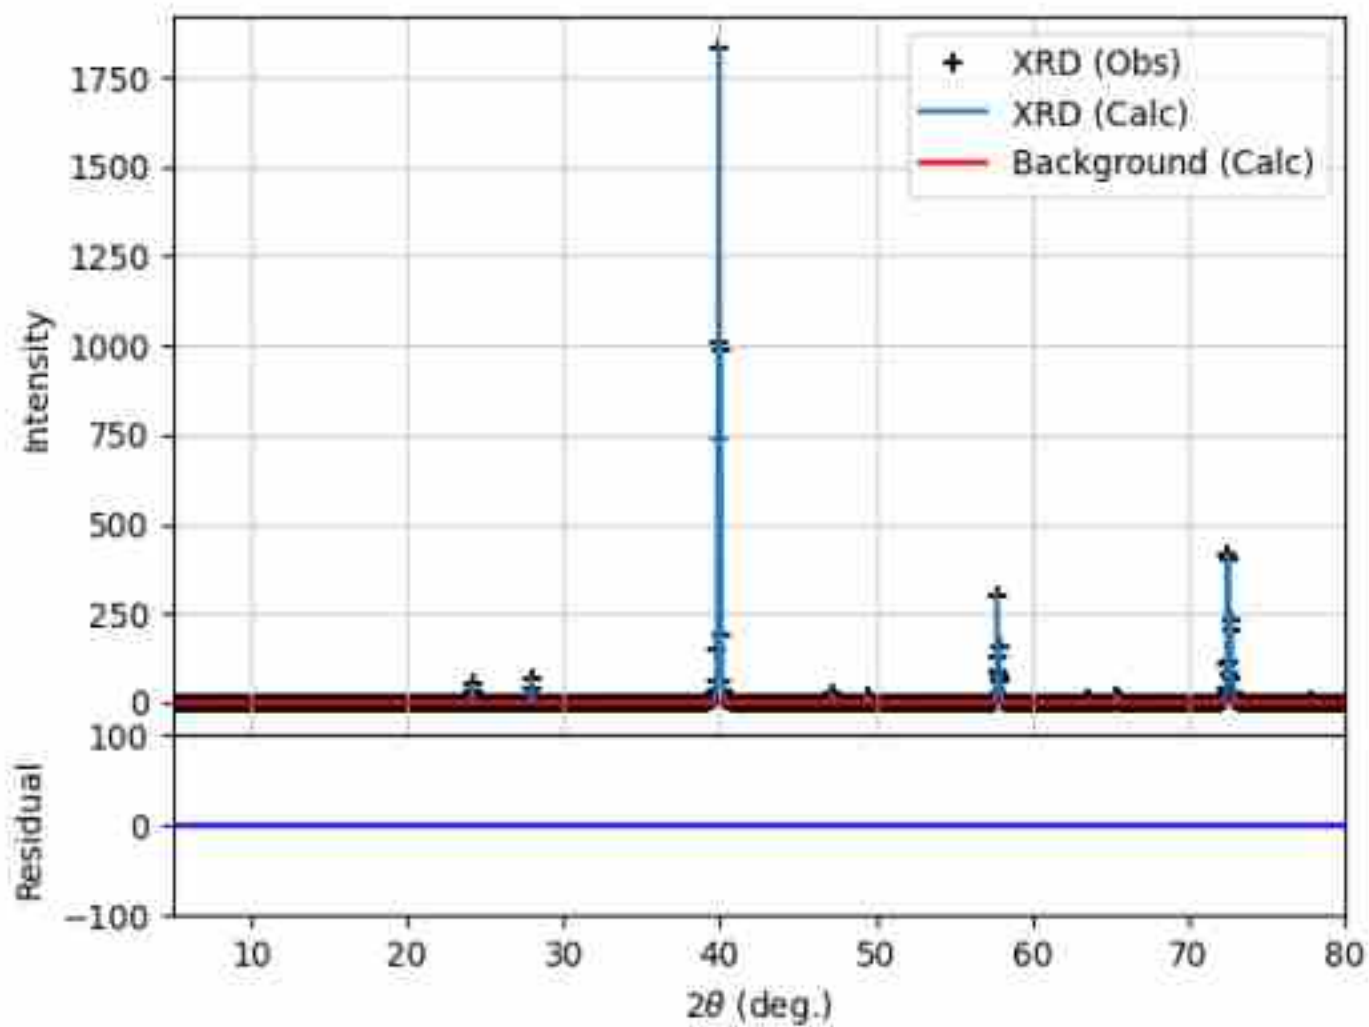

| RMSE before RR | Rwp     | RMSE after RR |
|----------------|---------|---------------|
| 0.002          | 0.00978 | 0.00097       |

# Ta1Mo1

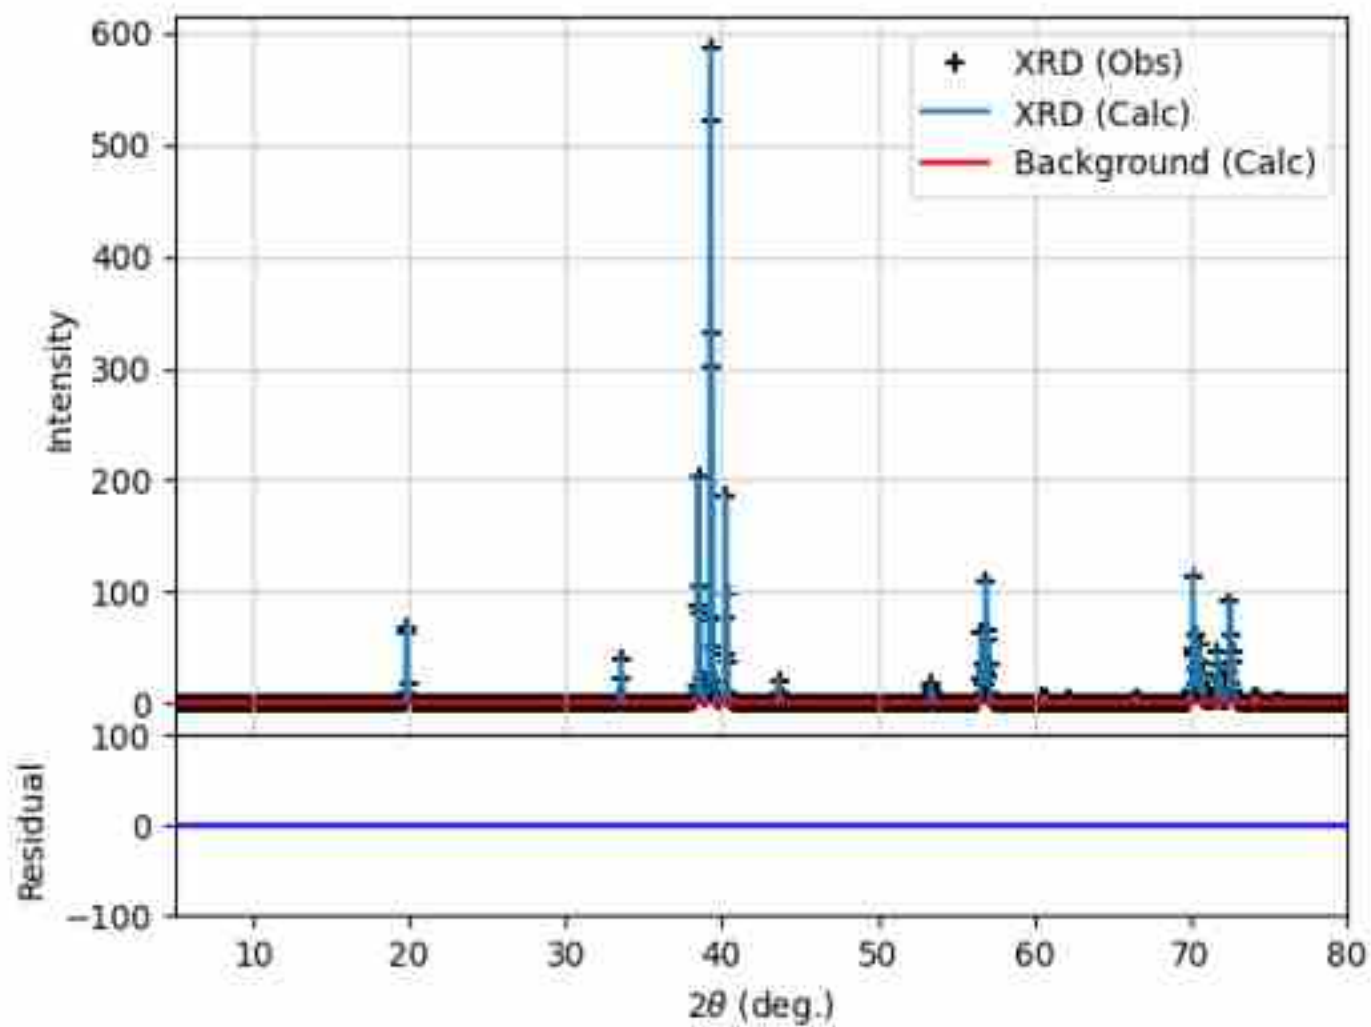

| RMSE before RR | Rwp     | RMSE after RR |
|----------------|---------|---------------|
| 0.002          | 0.00467 | 0.00022       |

# Ta1Os3

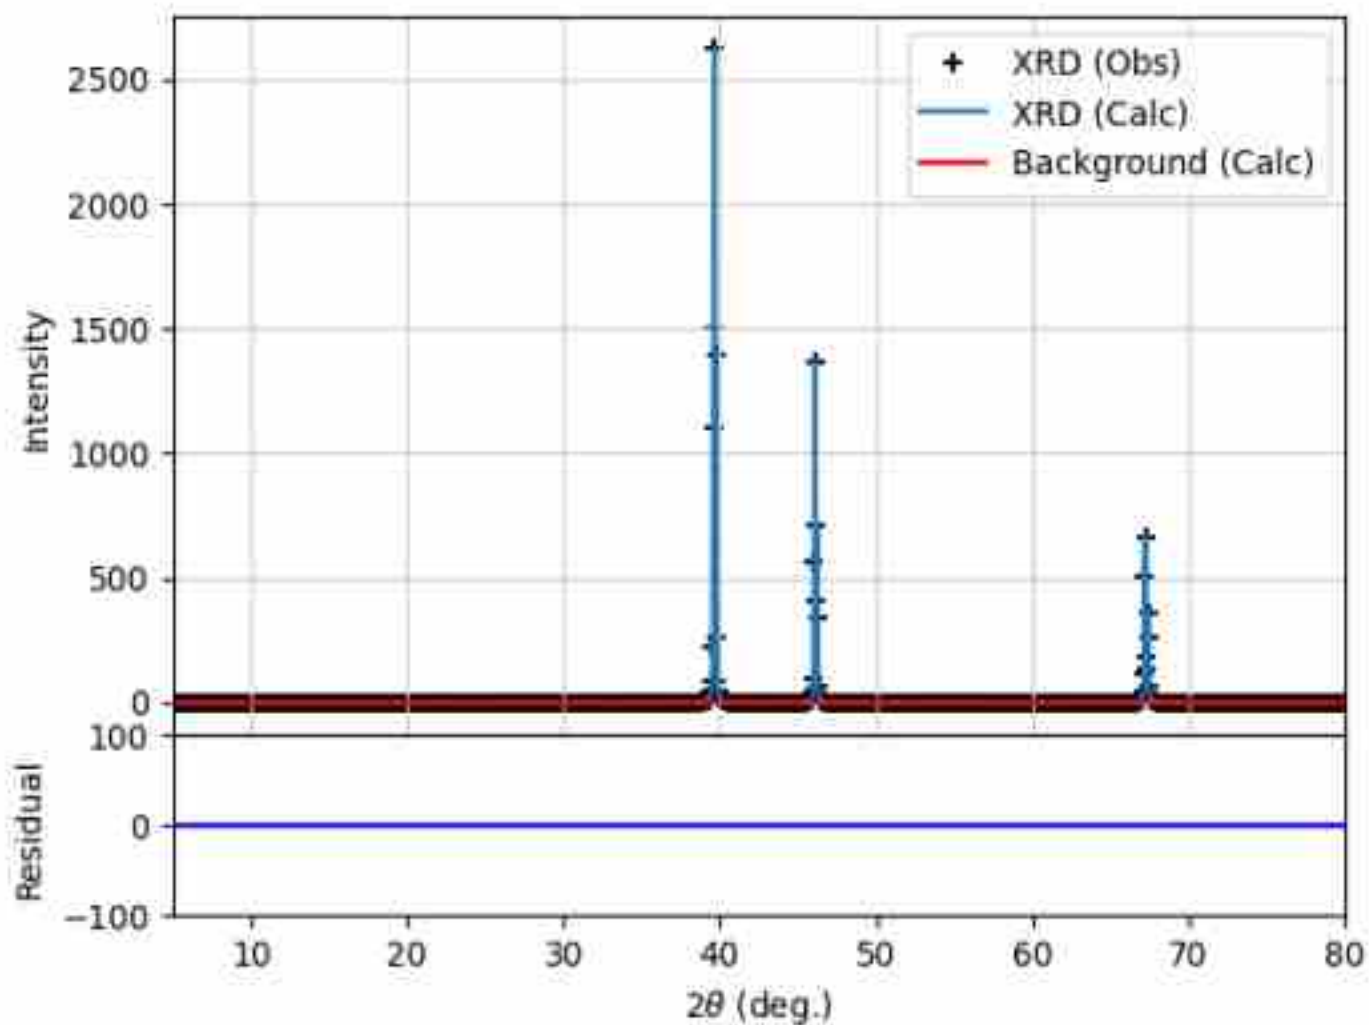

| RMSE before RR | Rwp     | RMSE after RR |
|----------------|---------|---------------|
| 0.002          | 0.03358 | 0.0004        |

# Ta1Ti1Fe2

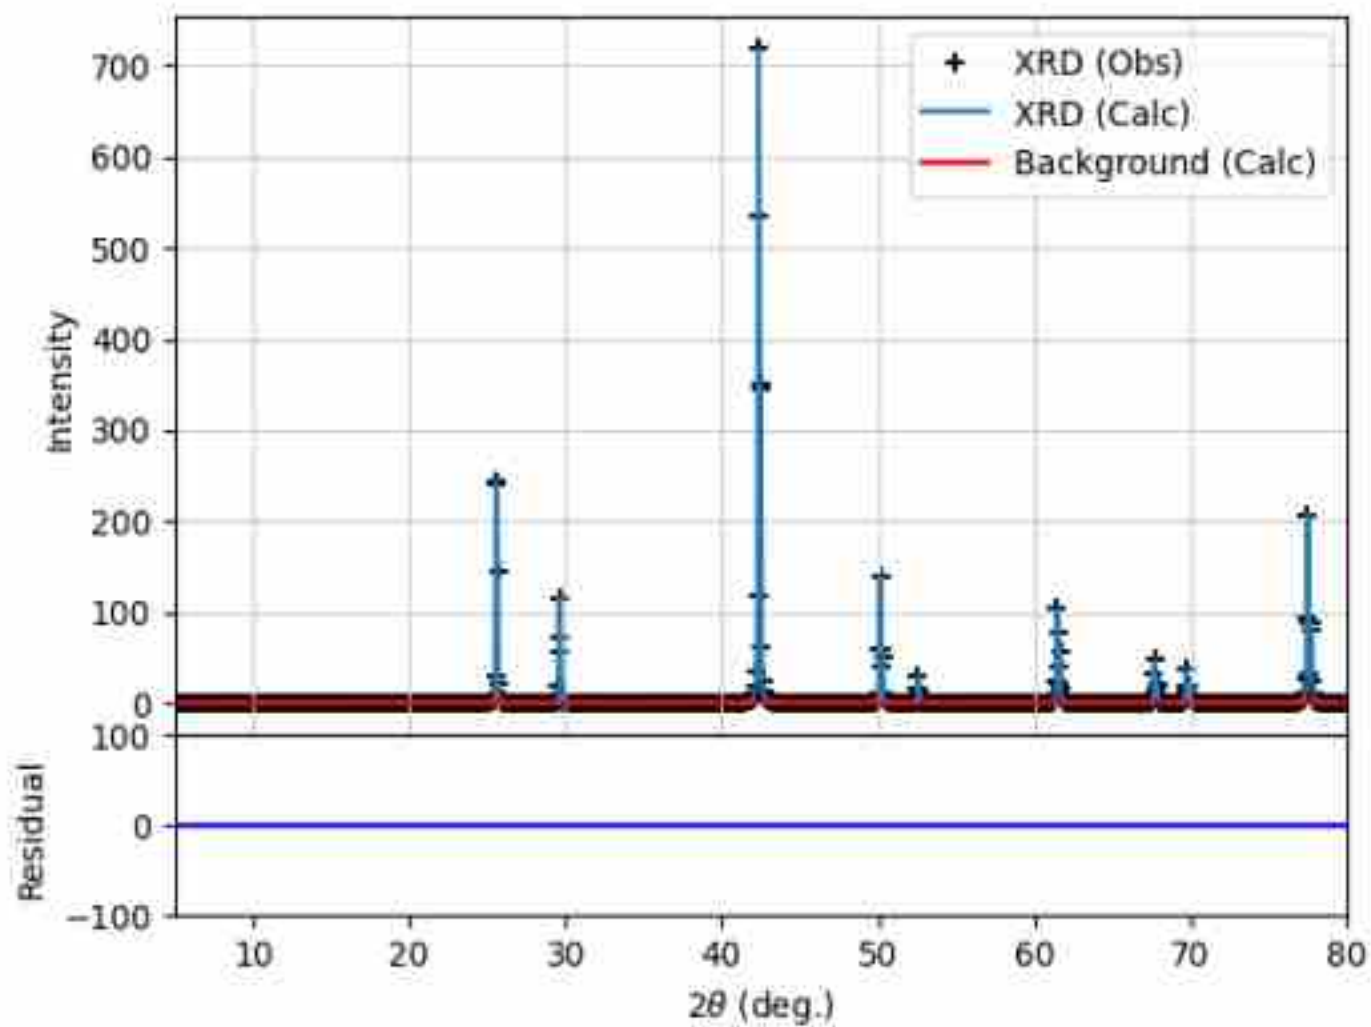

| RMSE before RR | Rwp     | RMSE after RR |
|----------------|---------|---------------|
| 0.002          | 0.00312 | 0.00051       |



# Ta<sub>2</sub>Be<sub>4</sub>

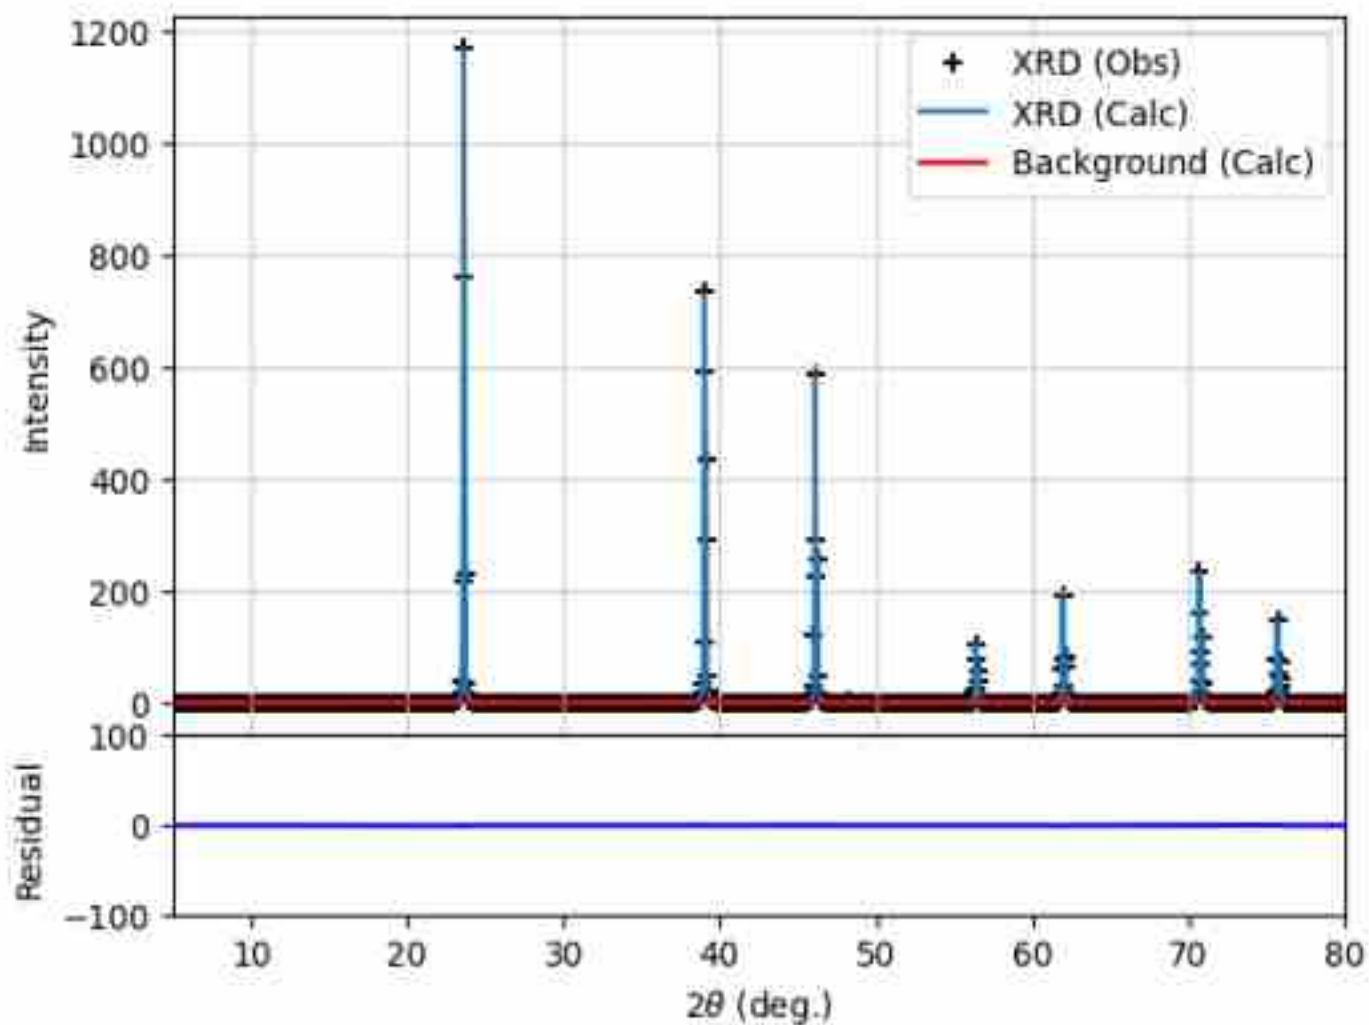

| RMSE before RR | Rwp     | RMSE after RR |
|----------------|---------|---------------|
| 0.02           | 0.19338 | 0.02676       |

# Tb1Al1Ga1

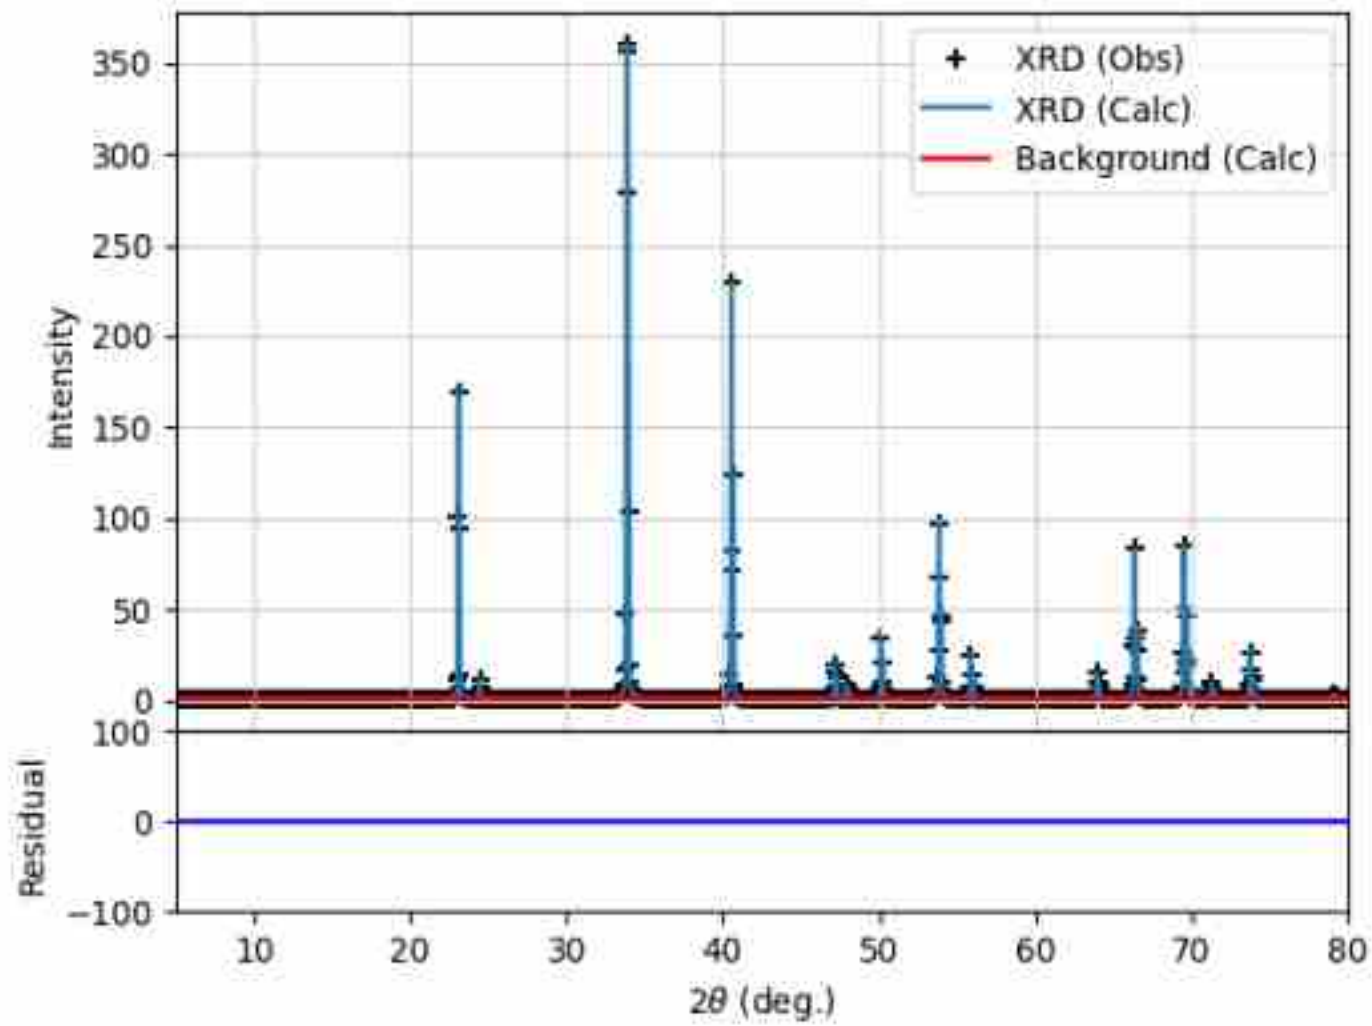

| RMSE before RR | Rwp     | RMSE after RR |
|----------------|---------|---------------|
| 0.002          | 0.01759 | 0.00133       |

# Tb1Cd1Ag2

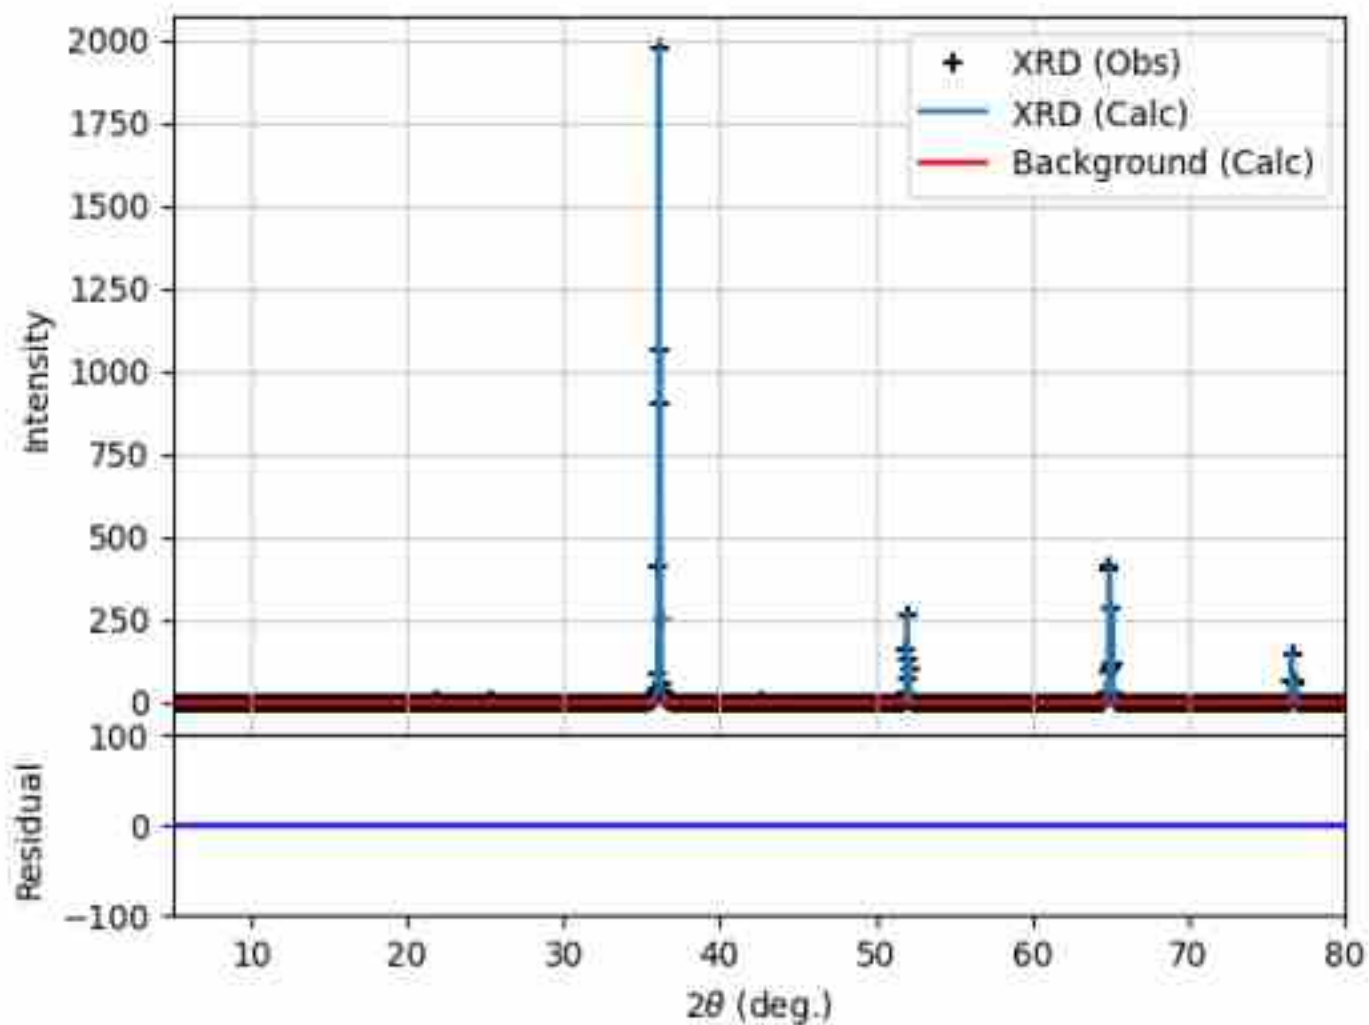

| RMSE before RR | Rwp     | RMSE after RR |
|----------------|---------|---------------|
| 0.002          | 0.04333 | 0.0018        |

# Tb1Cd1Pd2

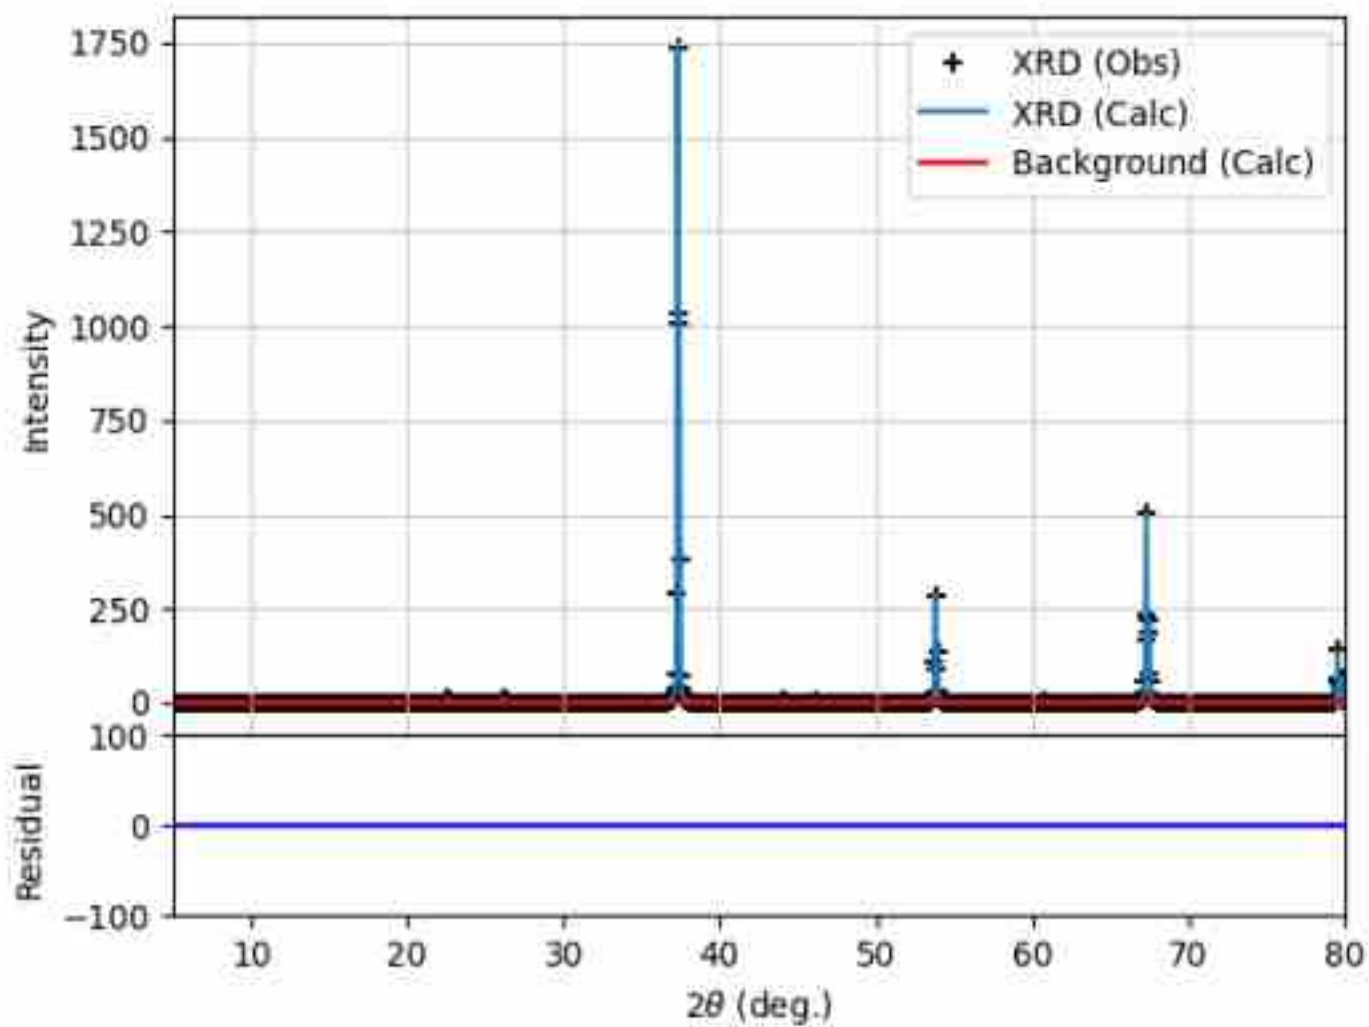

| RMSE before RR | Rwp     | RMSE after RR |
|----------------|---------|---------------|
| 0.002          | 0.00393 | 0.00051       |

# Tb1Cd1

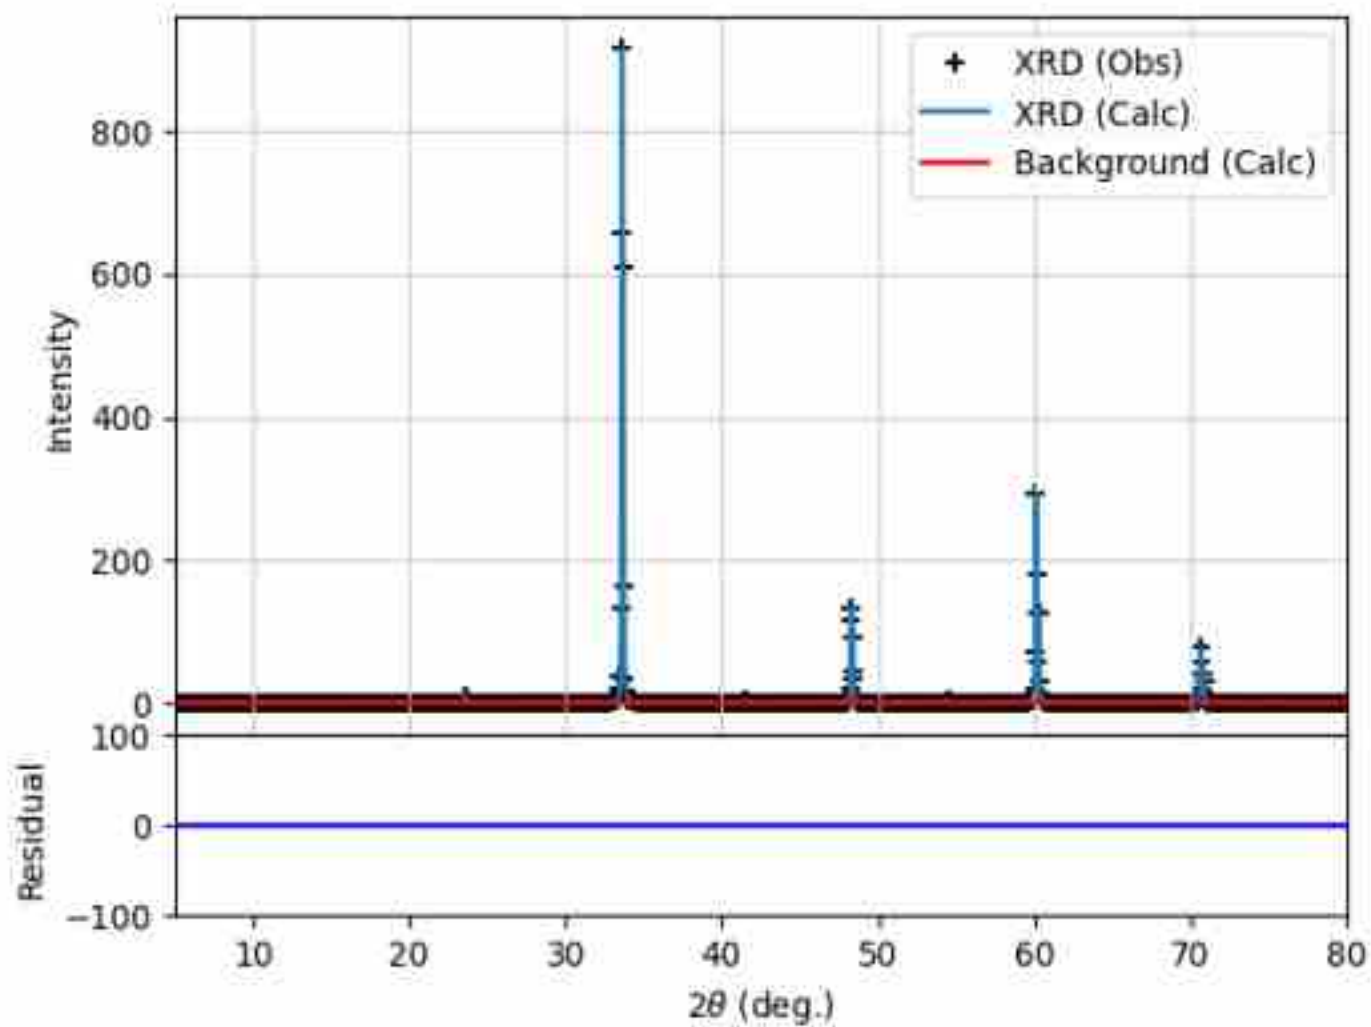

| RMSE before RR | Rwp     | RMSE after RR |
|----------------|---------|---------------|
| 0.002          | 0.28979 | 0.0012        |

# Tb1Ga1Au2

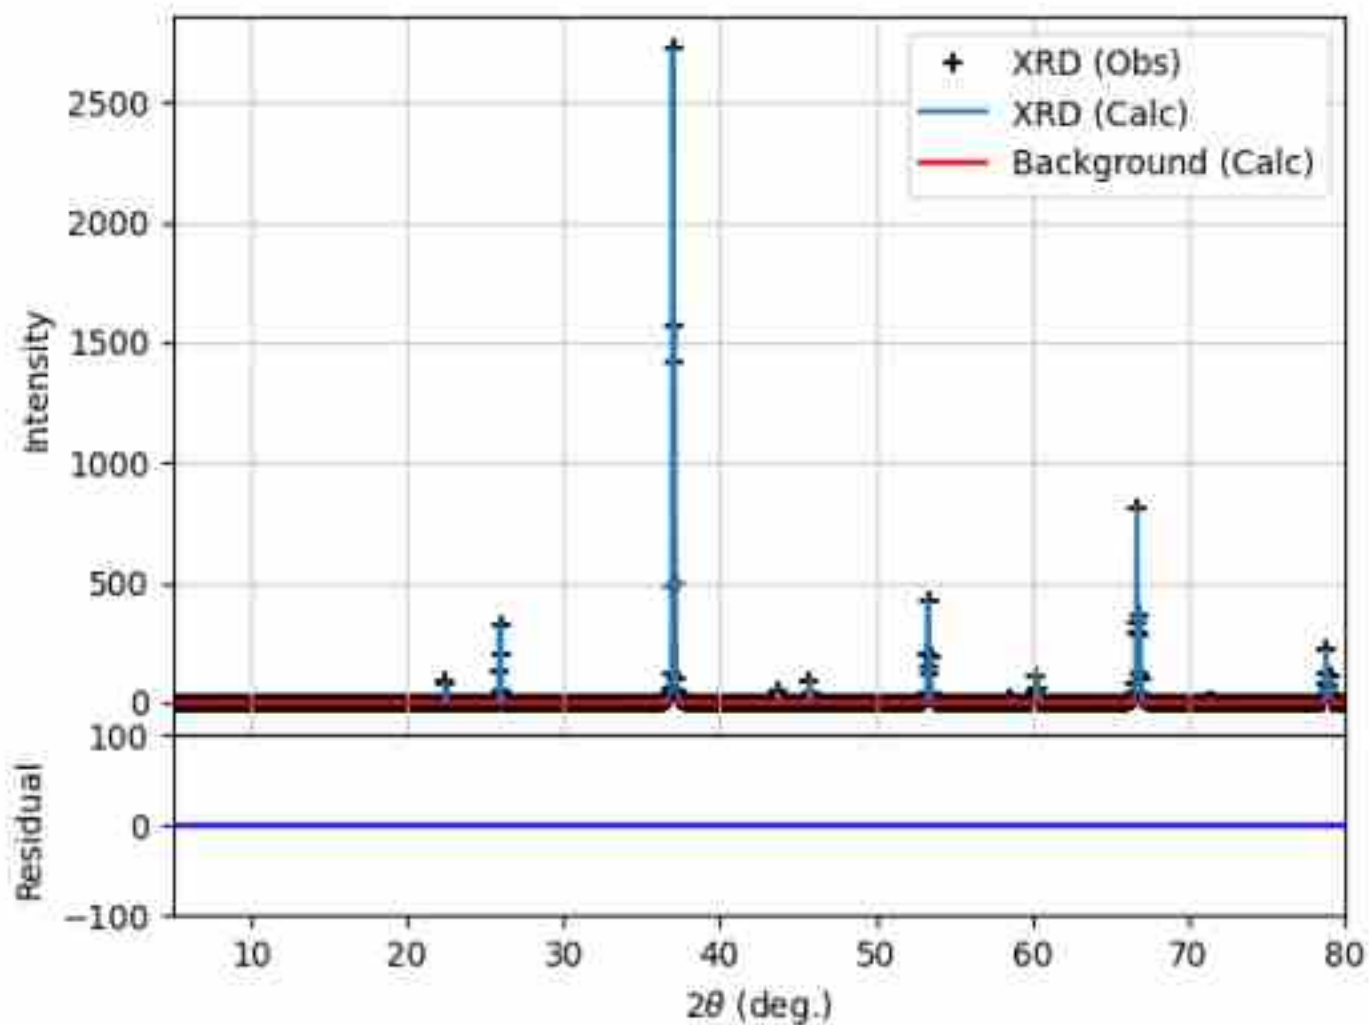

| RMSE before RR | Rwp     | RMSE after RR |
|----------------|---------|---------------|
| 0.002          | 0.00328 | 0.00036       |

# Tb1Gd1Rh2

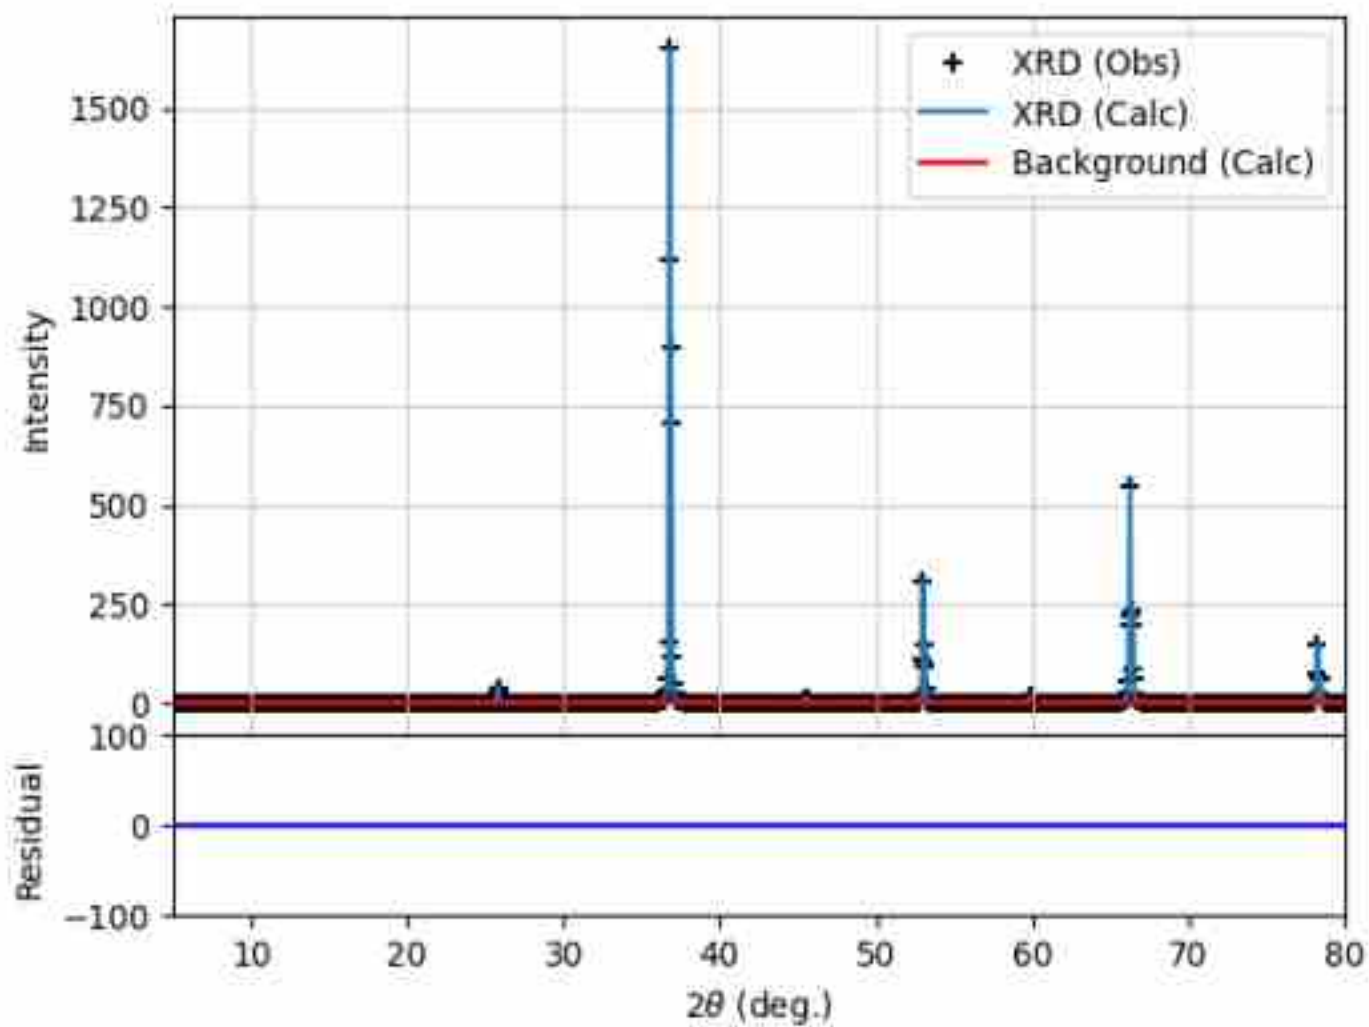

| RMSE before RR | Rwp    | RMSE after RR |
|----------------|--------|---------------|
| 0.002          | 0.0004 | 0.00015       |

# Tb1In1Pd2

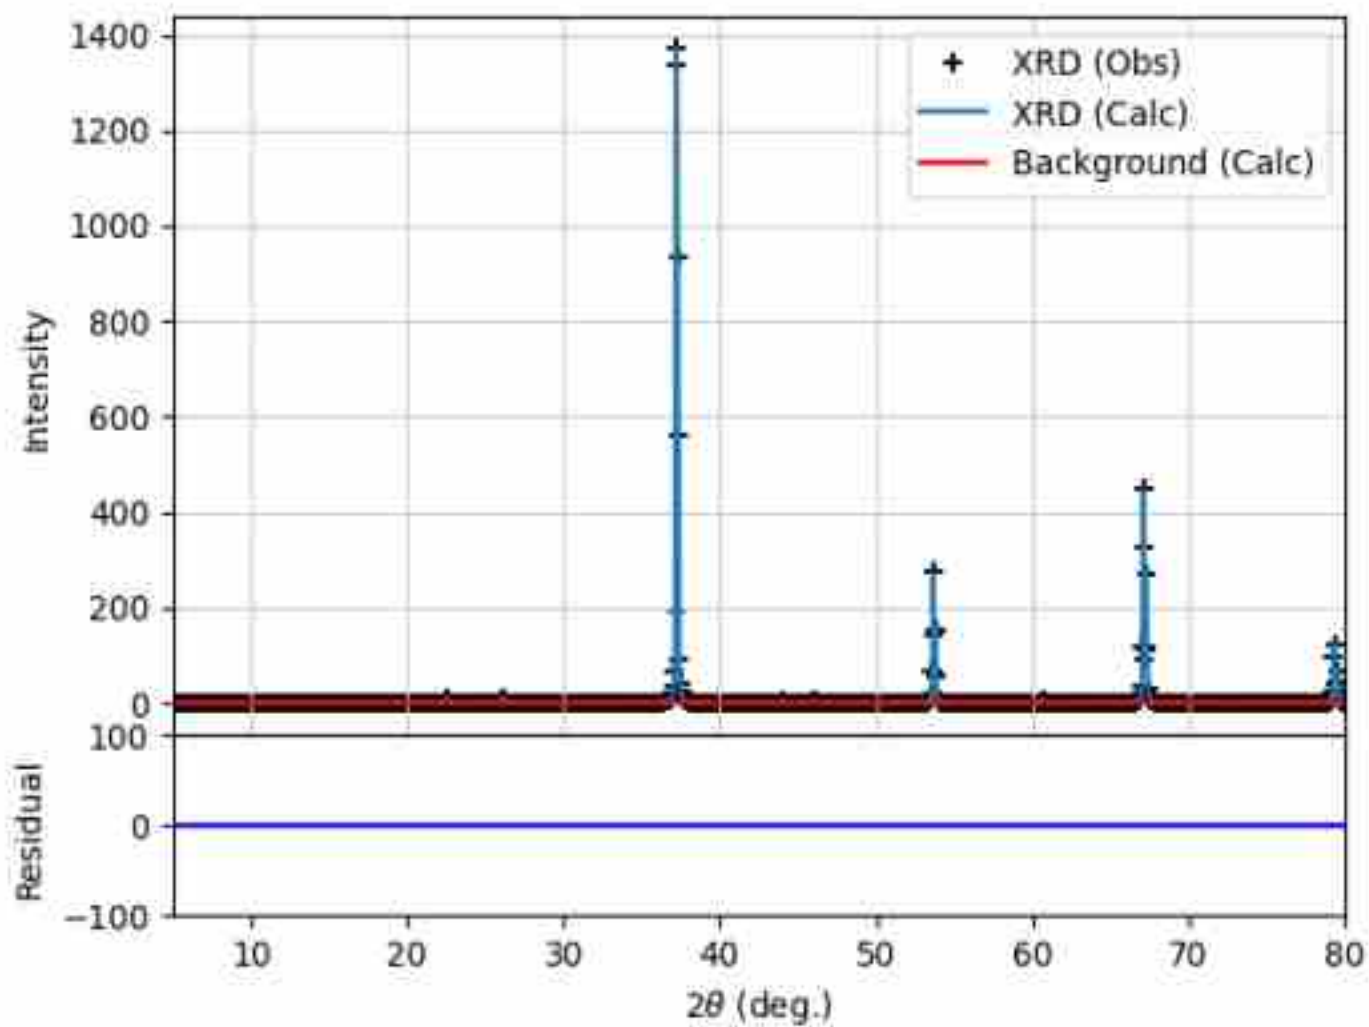

| RMSE before RR | Rwp     | RMSE after RR |
|----------------|---------|---------------|
| 0.002          | 0.00427 | 0.00041       |



# Tb1In1Rh2

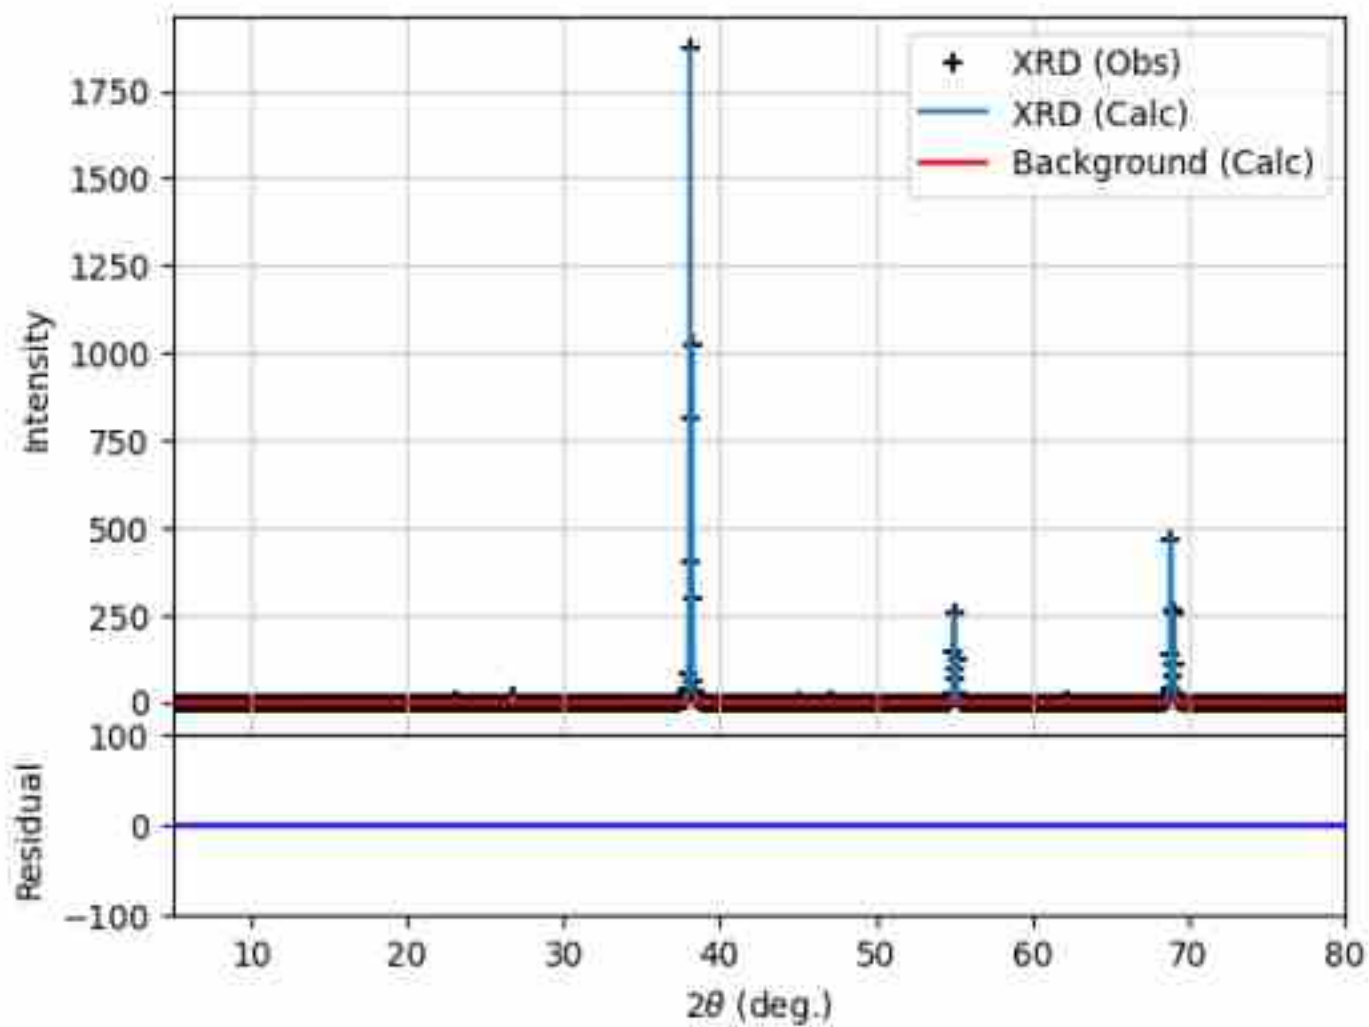

| RMSE before RR | Rwp     | RMSE after RR |
|----------------|---------|---------------|
| 0.002          | 0.00401 | 0.0007        |

# Tb1Lu1Hg2

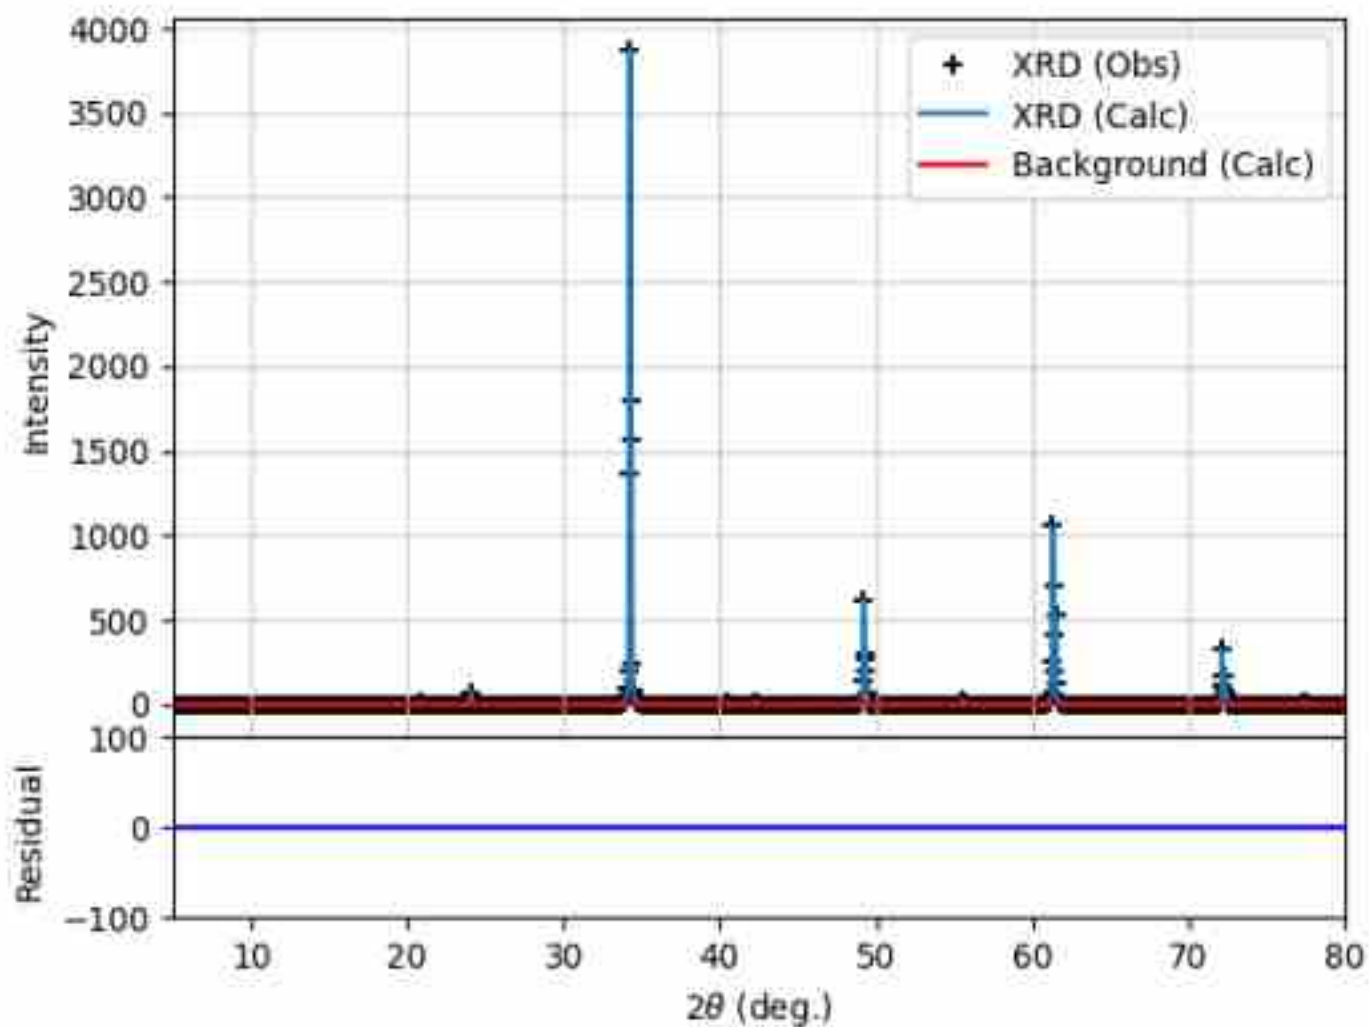

| RMSE before RR | Rwp     | RMSE after RR |
|----------------|---------|---------------|
| 0.002          | 0.00389 | 0.00022       |

# Tb1Pb3

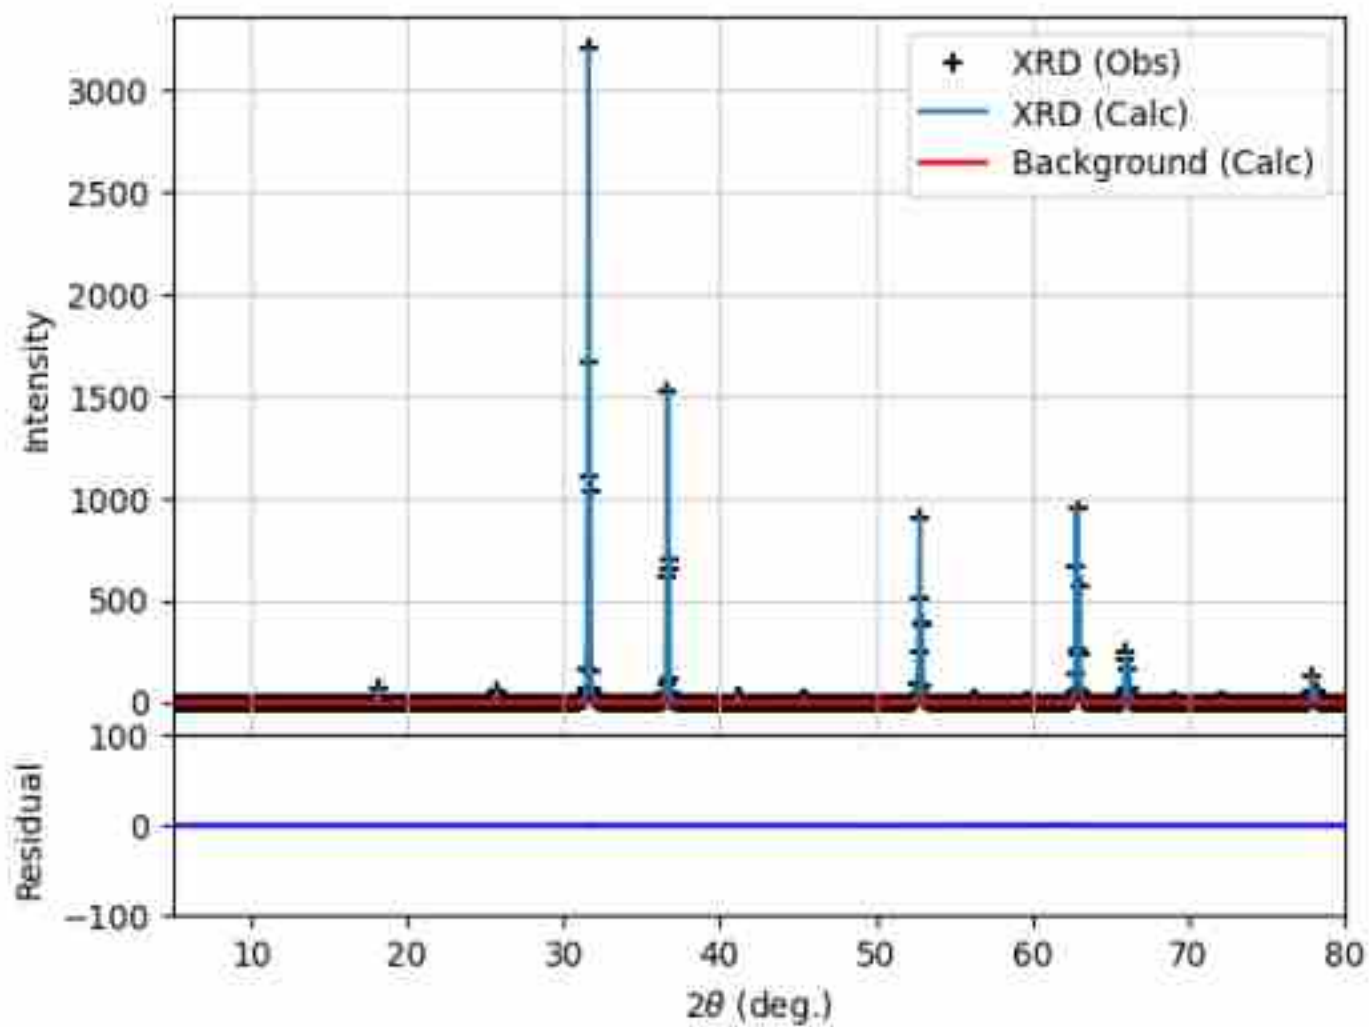

| RMSE before RR | Rwp     | RMSE after RR |
|----------------|---------|---------------|
| 0.002          | 0.03342 | 0.00056       |

# Tb1Sn1Au2

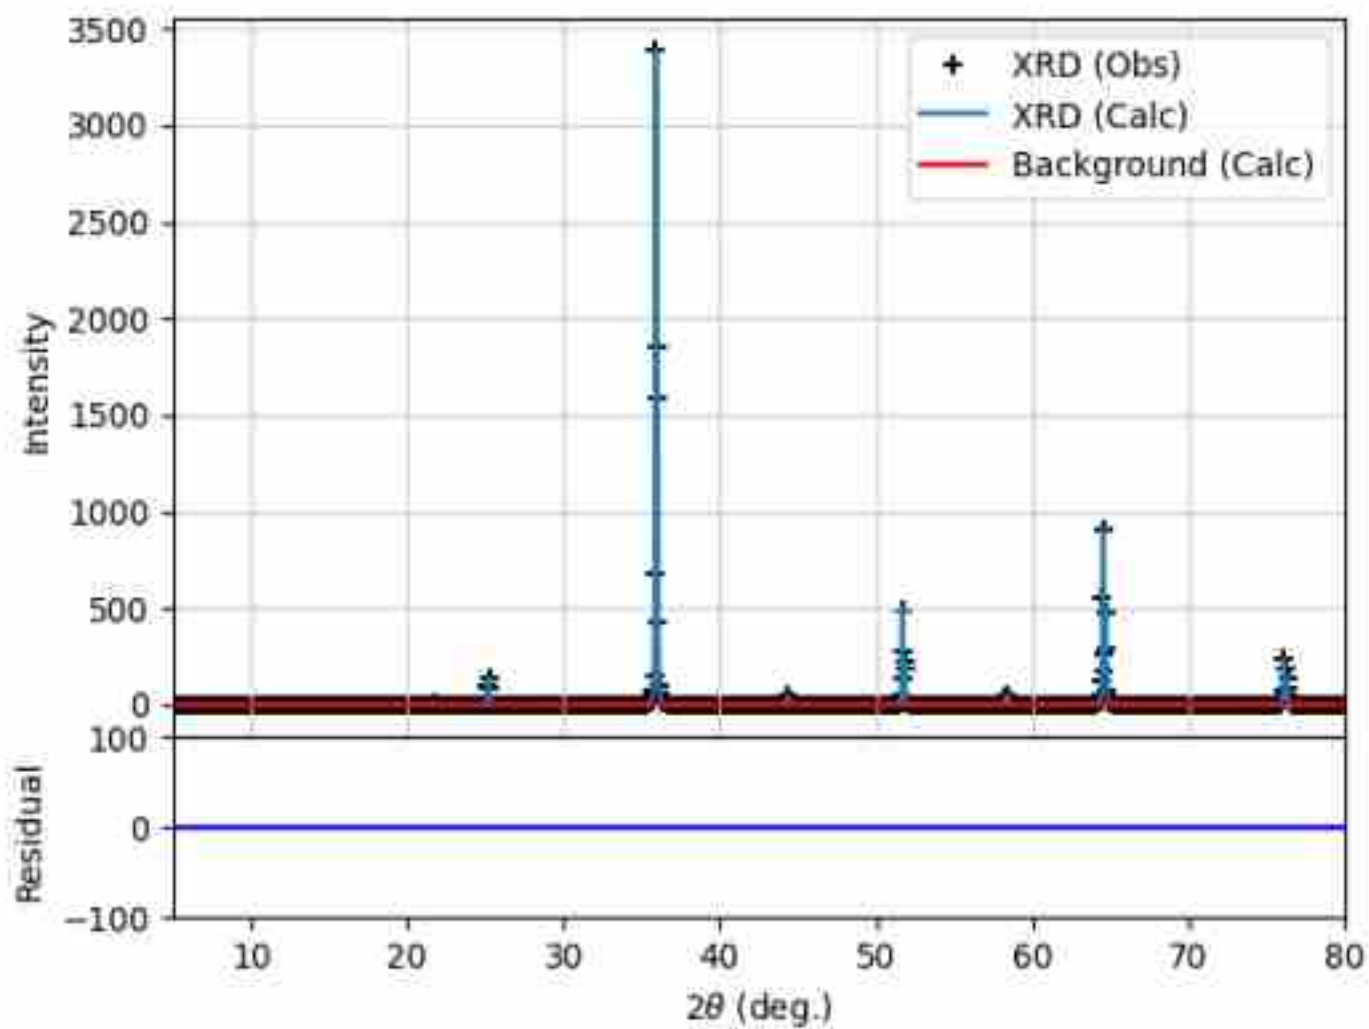

| RMSE before RR | Rwp     | RMSE after RR |
|----------------|---------|---------------|
| 0.002          | 0.00361 | 0.00022       |

# Tb1Sn1Ru2

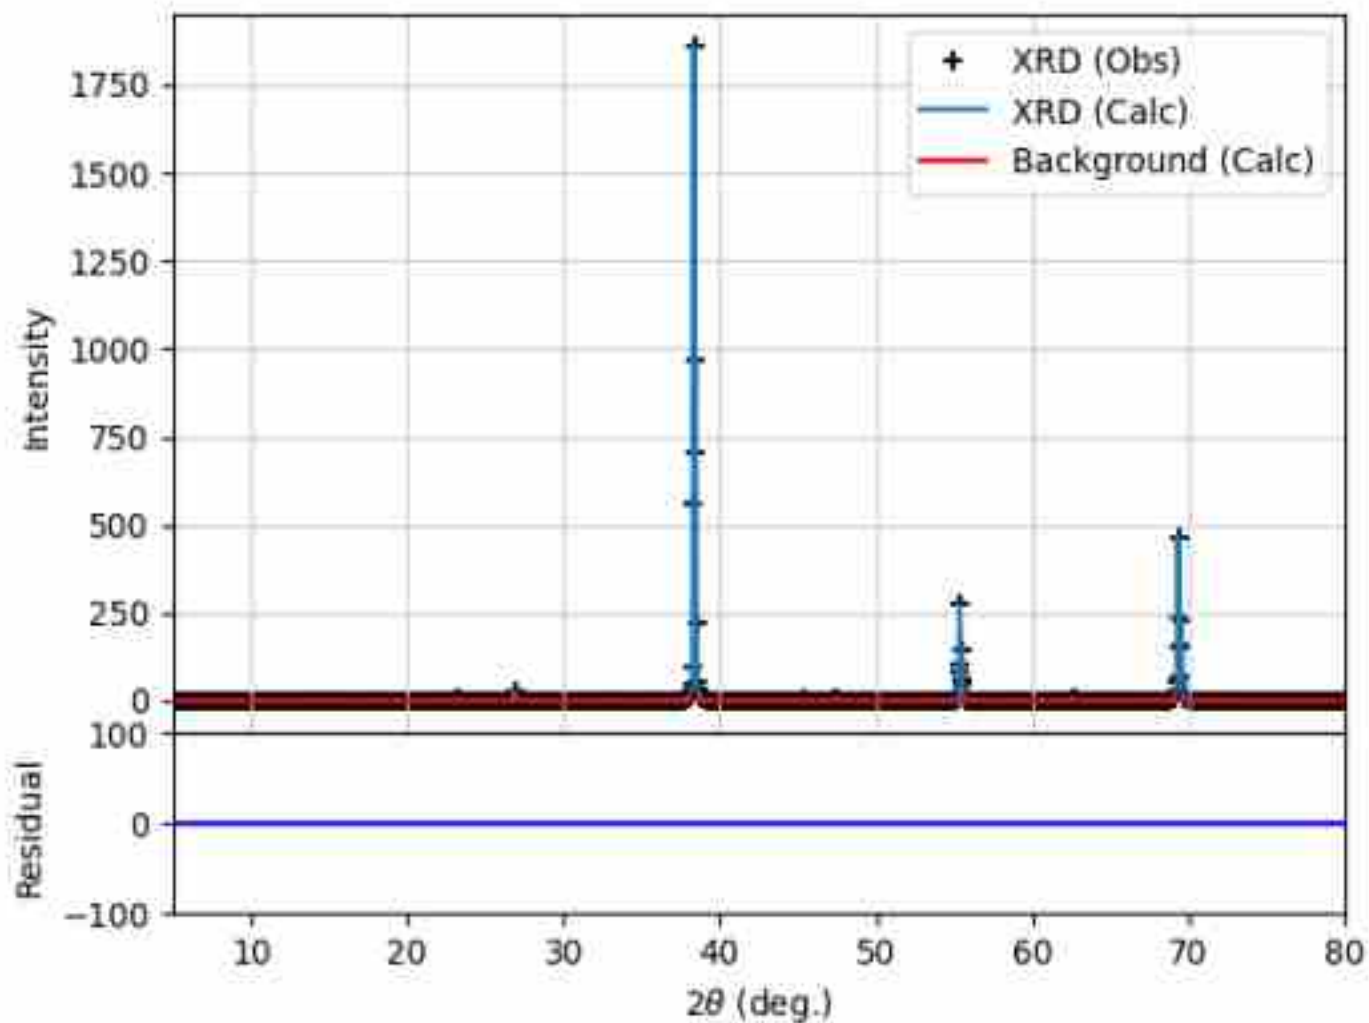

| RMSE before RR | Rwp     | RMSE after RR |
|----------------|---------|---------------|
| 0.002          | 0.01367 | 0.00052       |

# Tb1Te1

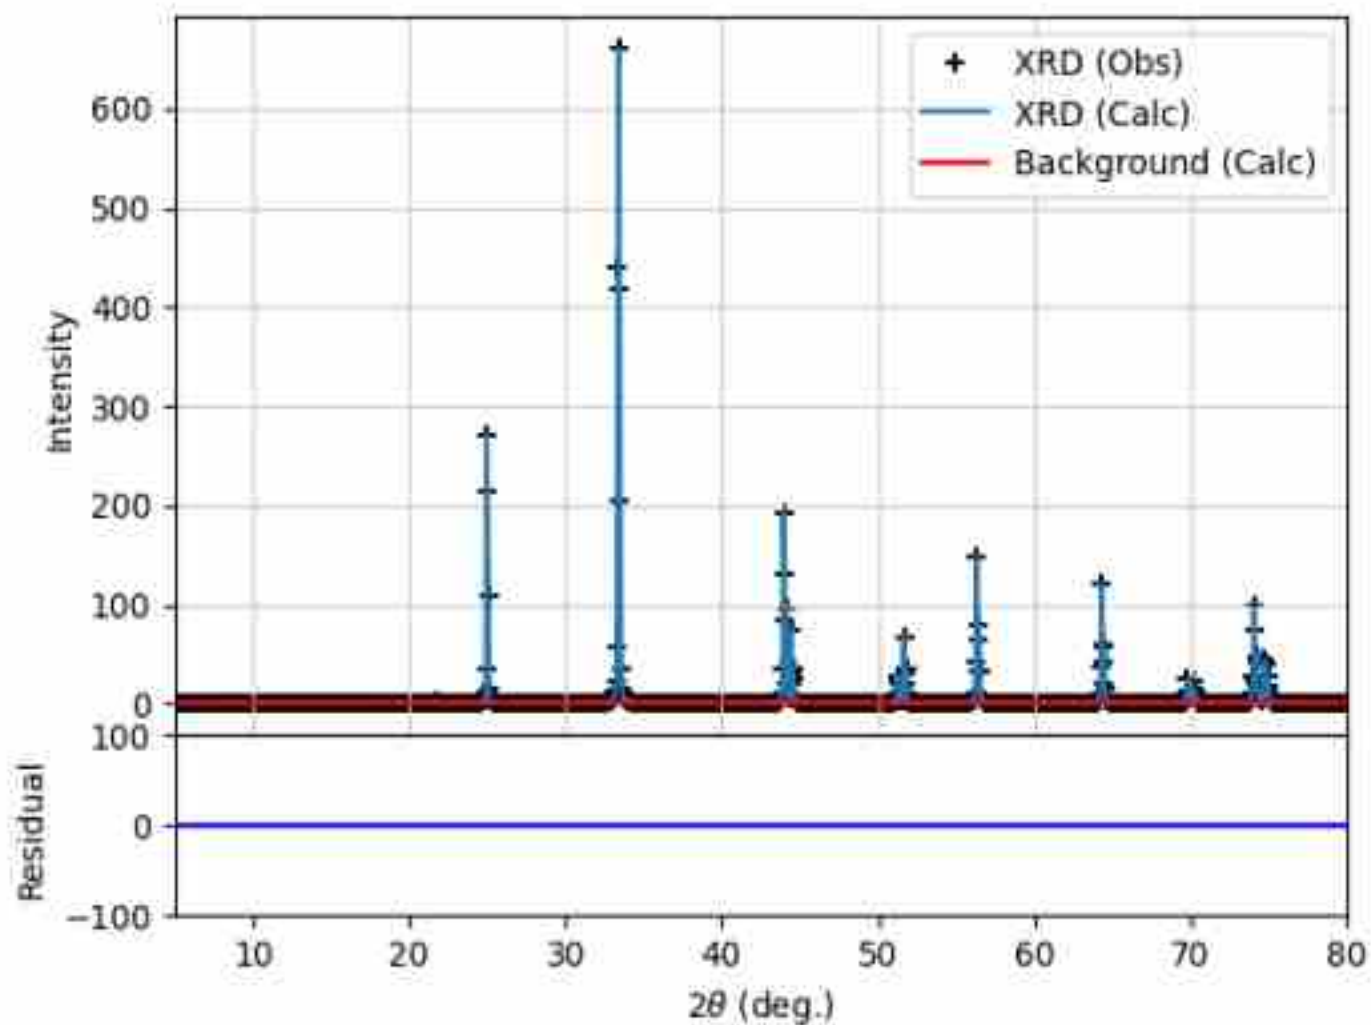

| RMSE before RR | Rwp     | RMSE after RR |
|----------------|---------|---------------|
| 0.002          | 0.01576 | 0.00061       |

# Tb1Tm1Hg2

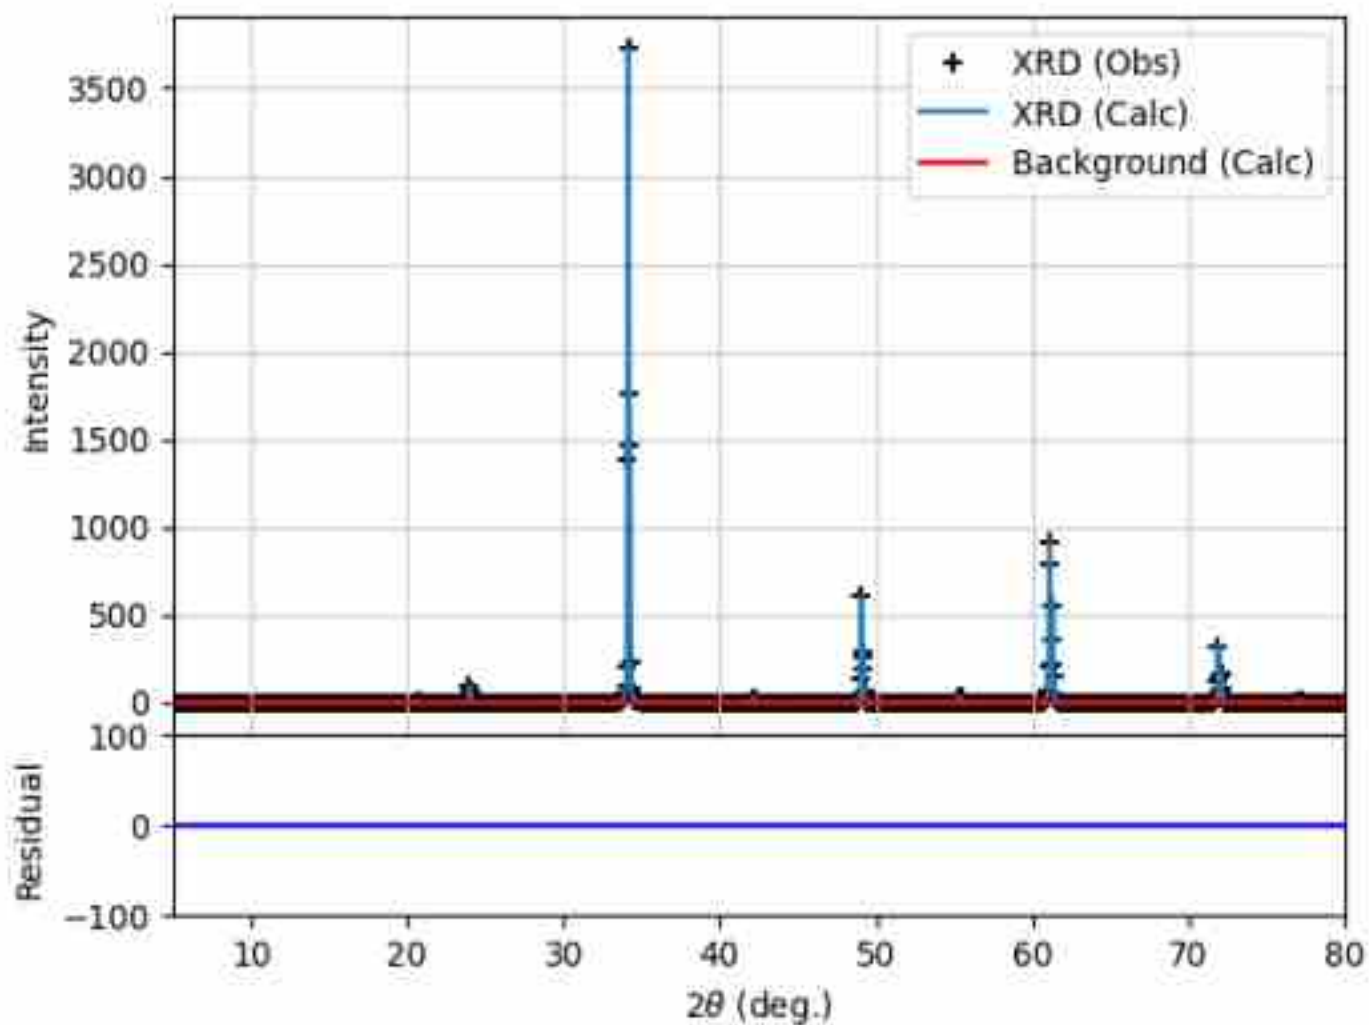

| RMSE before RR | Rwp     | RMSE after RR |
|----------------|---------|---------------|
| 0.002          | 0.00381 | 0.00012       |

# Tb<sub>2</sub>AgIr<sub>1</sub>

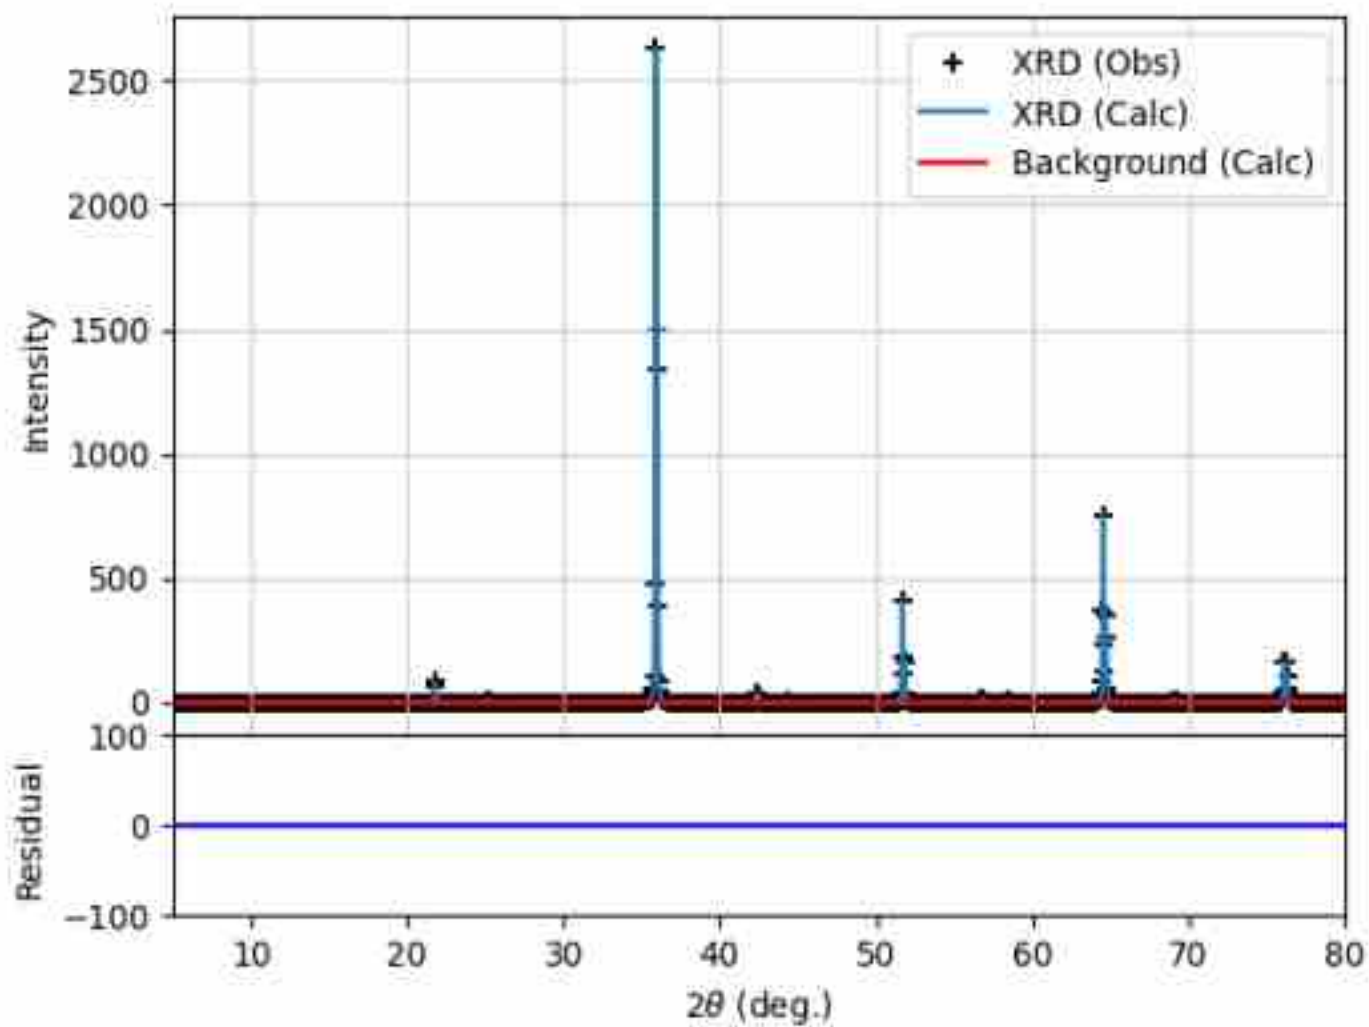

| RMSE before RR | Rwp     | RMSE after RR |
|----------------|---------|---------------|
| 0.002          | 0.02684 | 0.00102       |



# Tb<sub>2</sub>B<sub>4</sub>Ir<sub>4</sub>

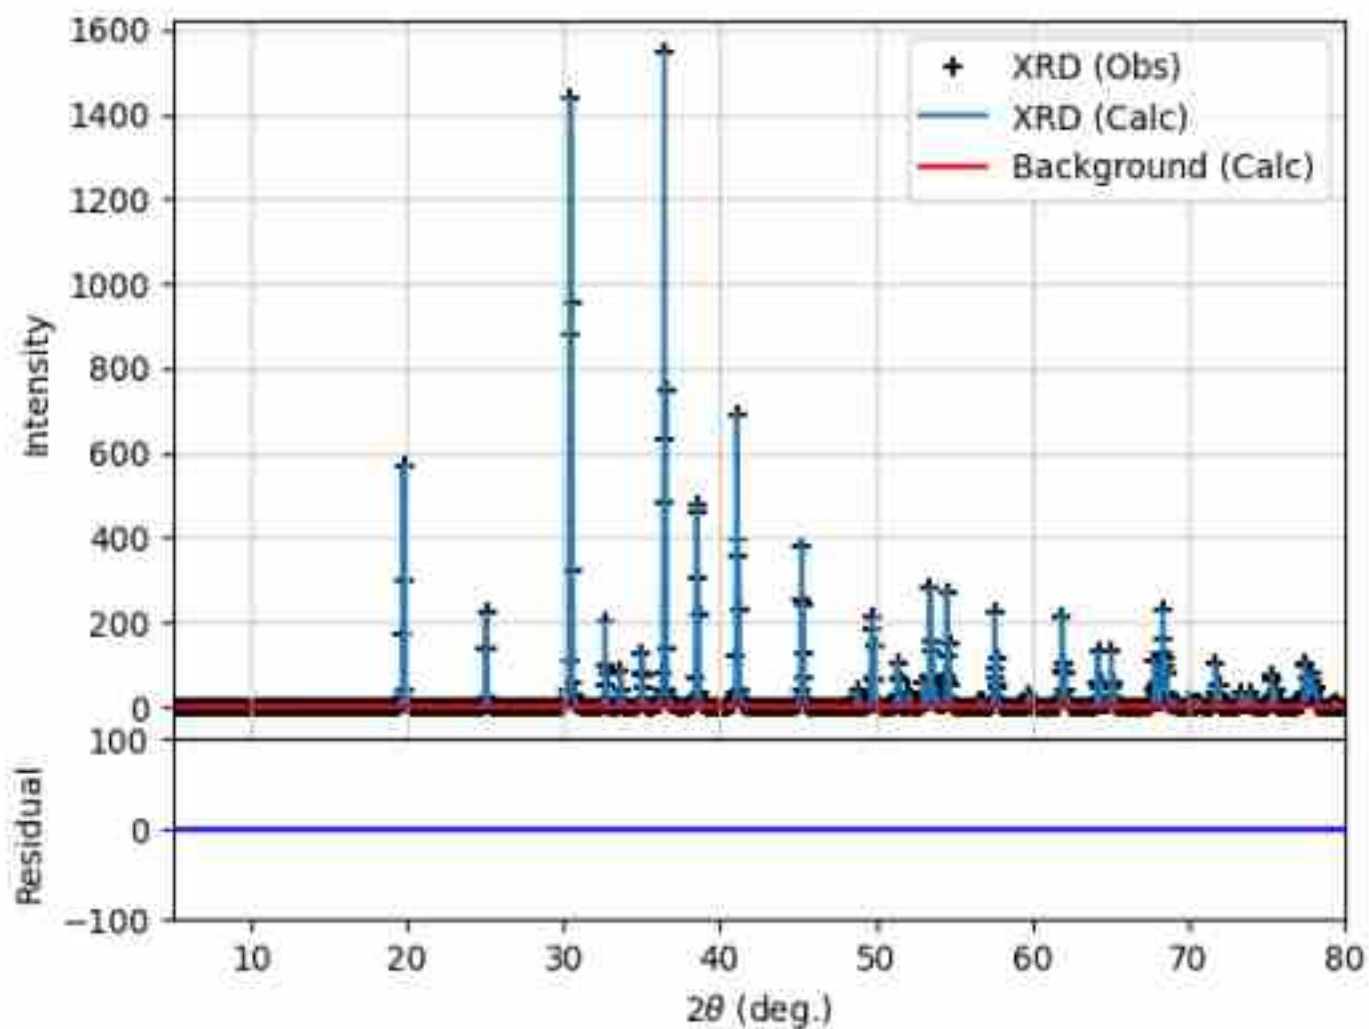

| RMSE before RR | Rwp     | RMSE after RR |
|----------------|---------|---------------|
| 0.02           | 0.00493 | 0.00188       |

# Tb<sub>2</sub>Cr<sub>2</sub>O<sub>8</sub>

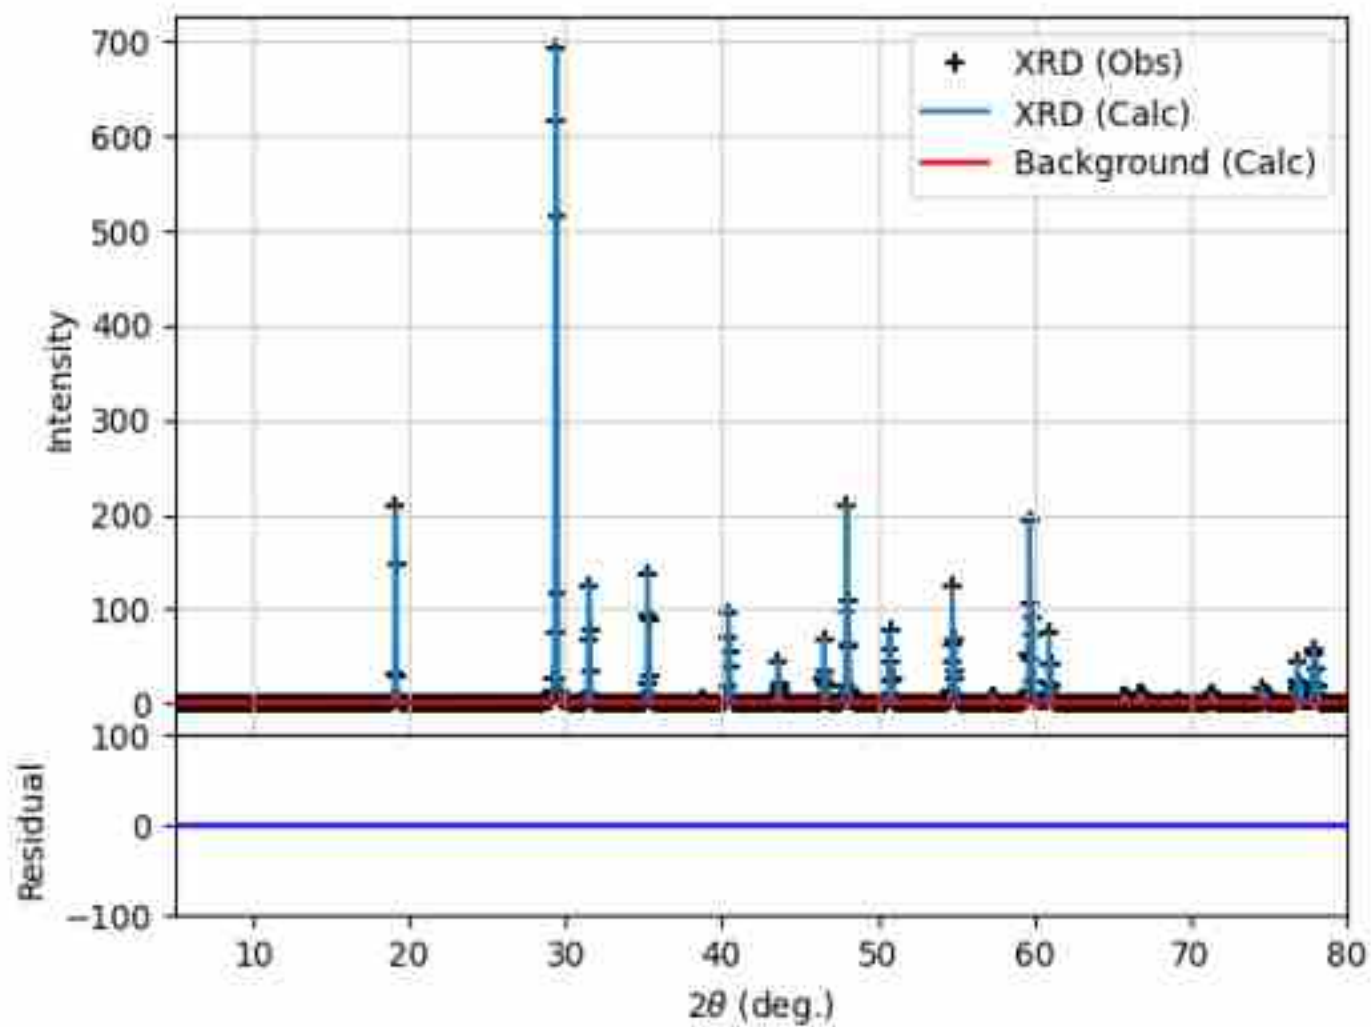

| RMSE before RR | Rwp     | RMSE after RR |
|----------------|---------|---------------|
| 0.02           | 0.00395 | 0.00251       |

# Tb<sub>2</sub>Mg<sub>2</sub>Ni<sub>2</sub>

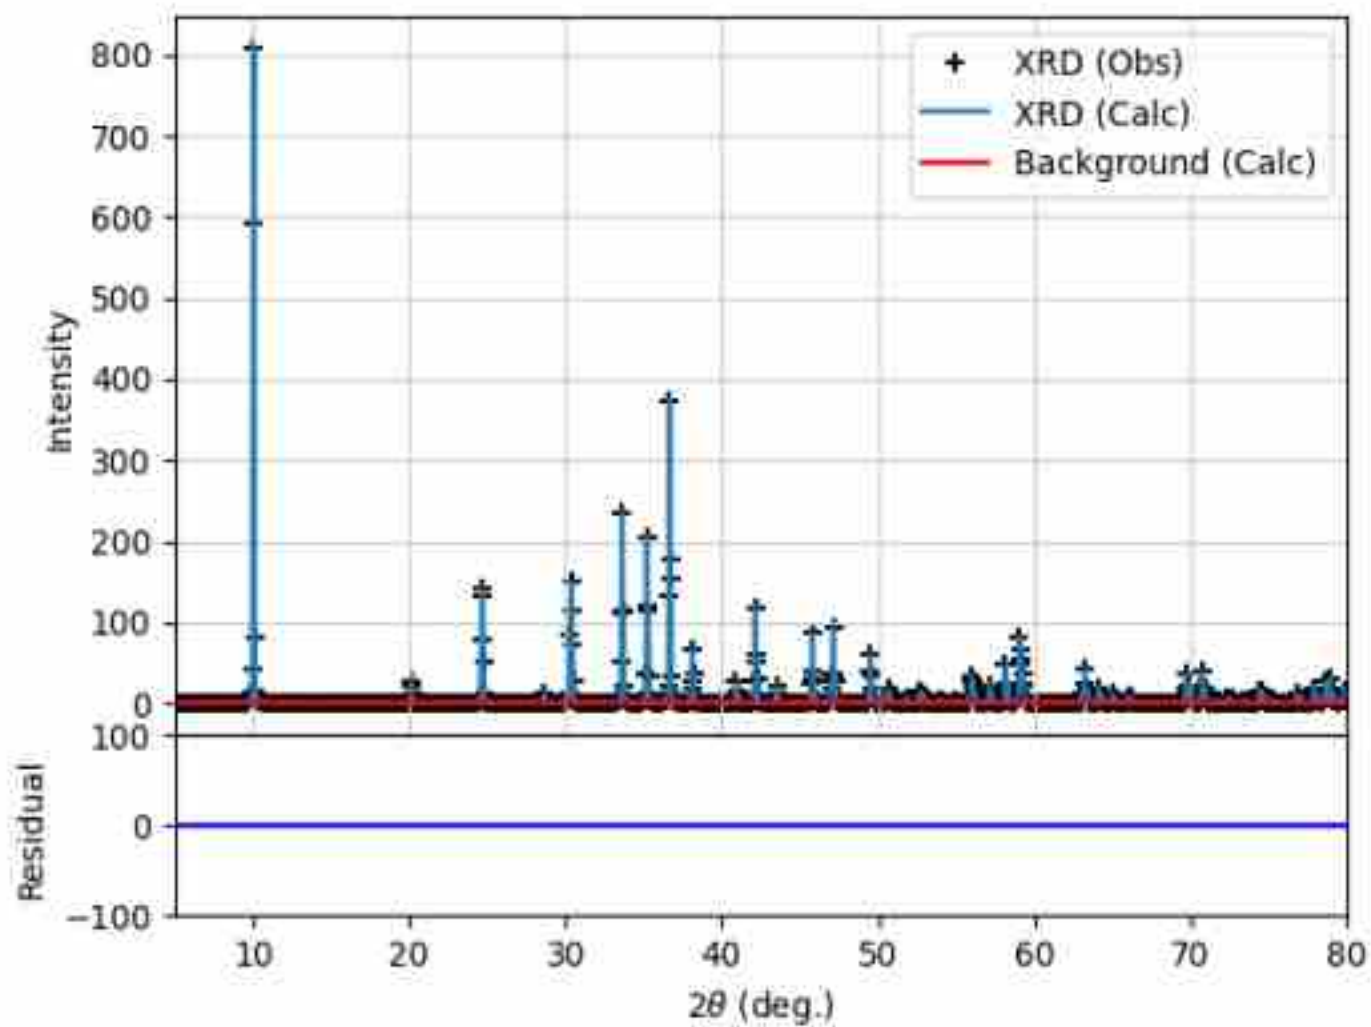

| RMSE before RR | Rwp     | RMSE after RR |
|----------------|---------|---------------|
| 0.02           | 0.00318 | 0.00077       |

# Tb<sub>2</sub>Re<sub>4</sub>Si<sub>2</sub>C<sub>2</sub>

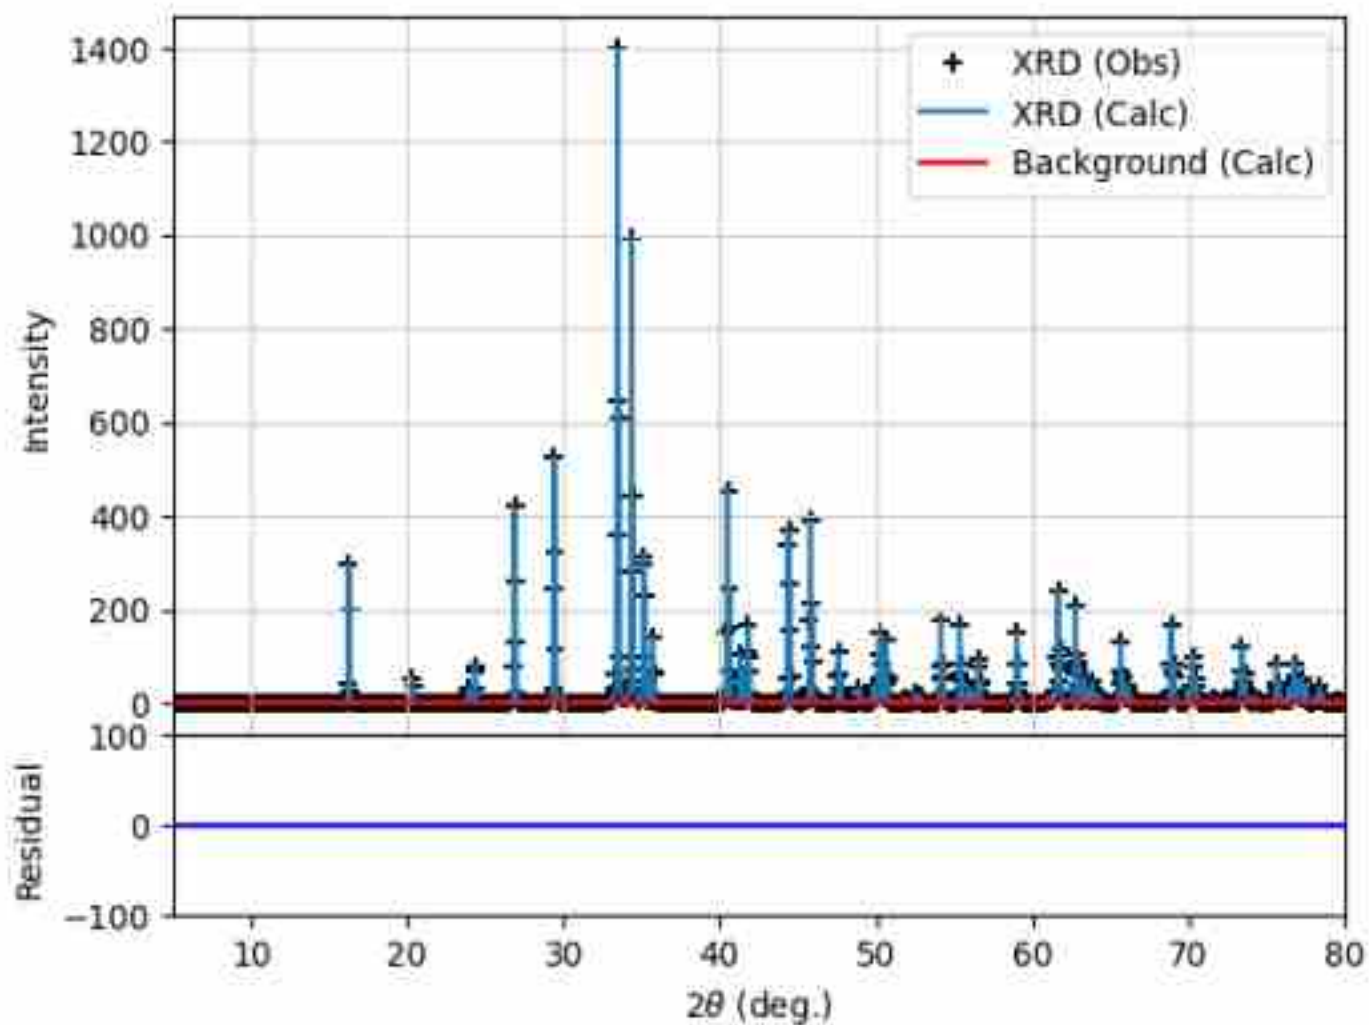

| RMSE before RR | Rwp     | RMSE after RR |
|----------------|---------|---------------|
| 0.02           | 0.00441 | 0.00112       |

# Tb<sub>2</sub>Si<sub>2</sub>Ru<sub>4</sub>C<sub>2</sub>

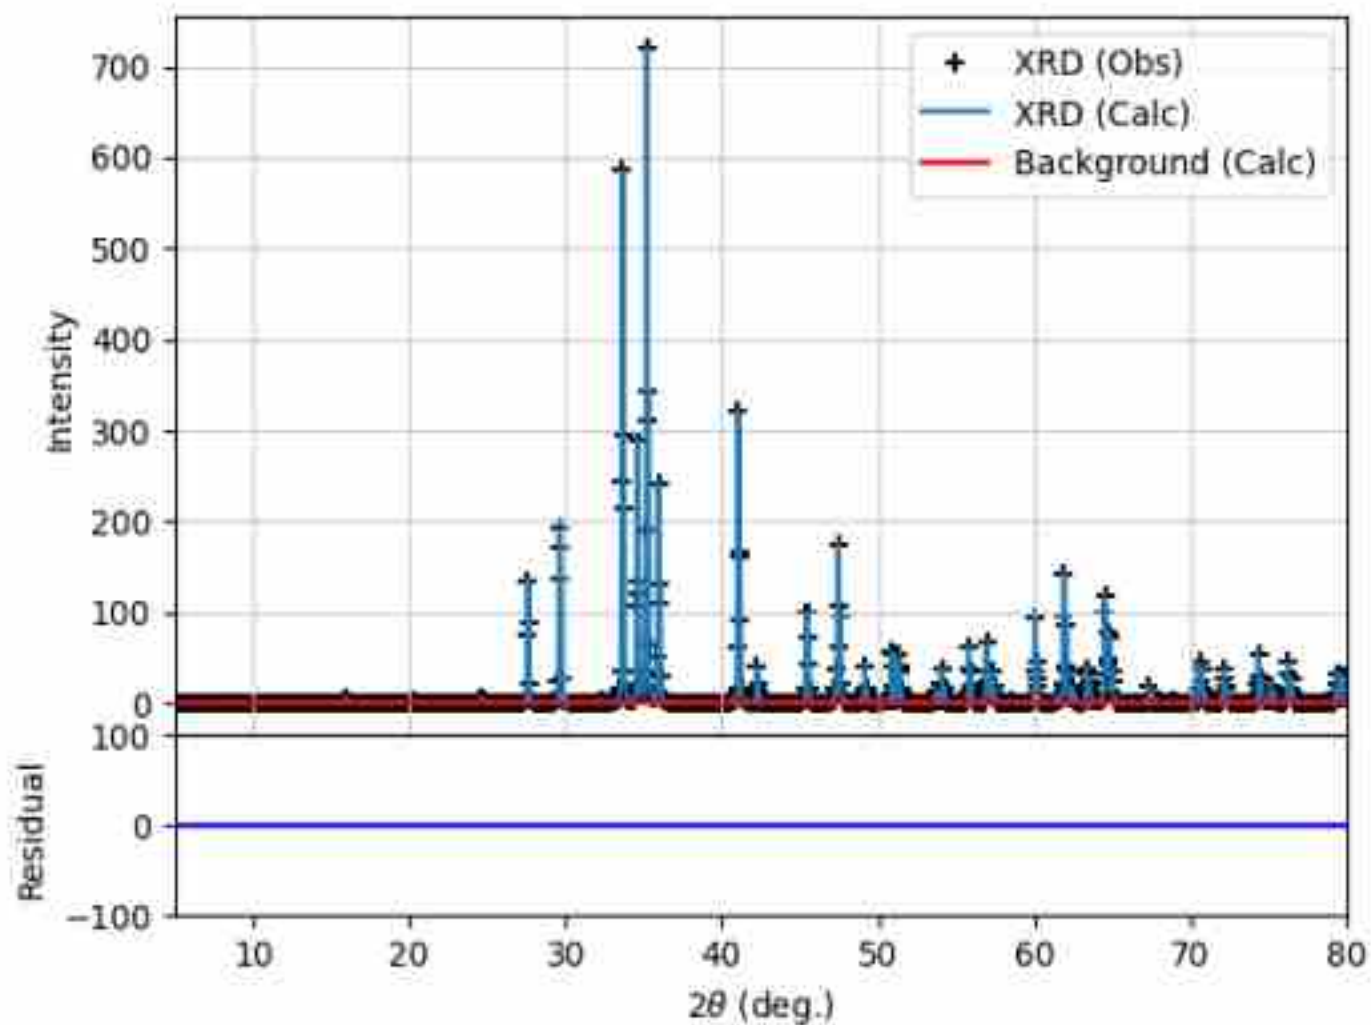

| RMSE before RR | Rwp     | RMSE after RR |
|----------------|---------|---------------|
| 0.02           | 0.00436 | 0.00127       |

# Tb<sub>2</sub>ZnIr<sub>1</sub>

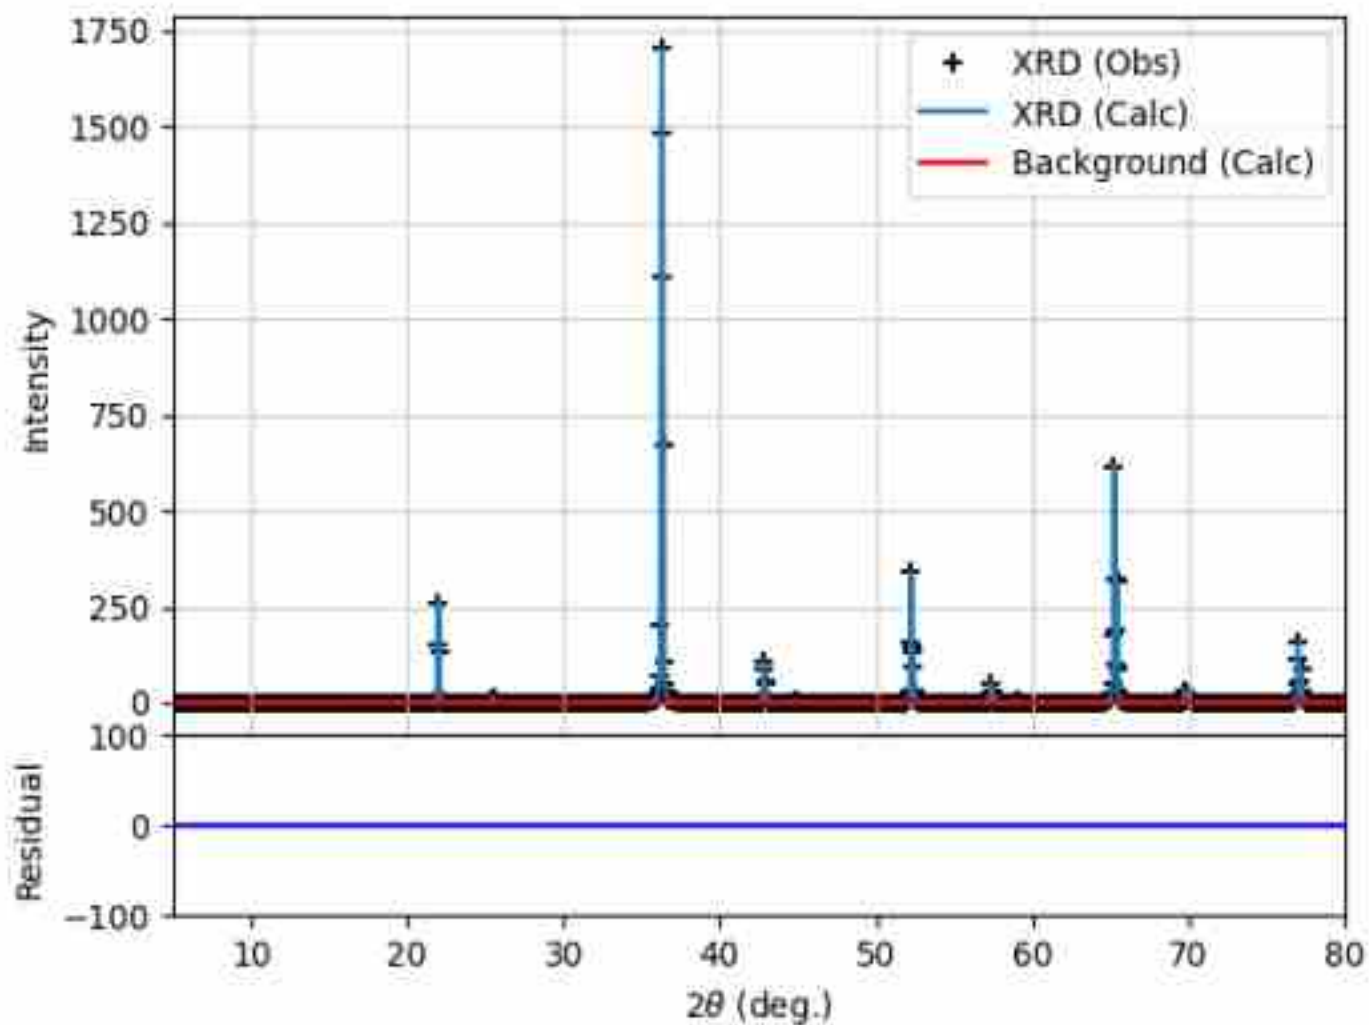

| RMSE before RR | Rwp     | RMSE after RR |
|----------------|---------|---------------|
| 0.002          | 0.08976 | 0.00343       |

# Tb3Pr1

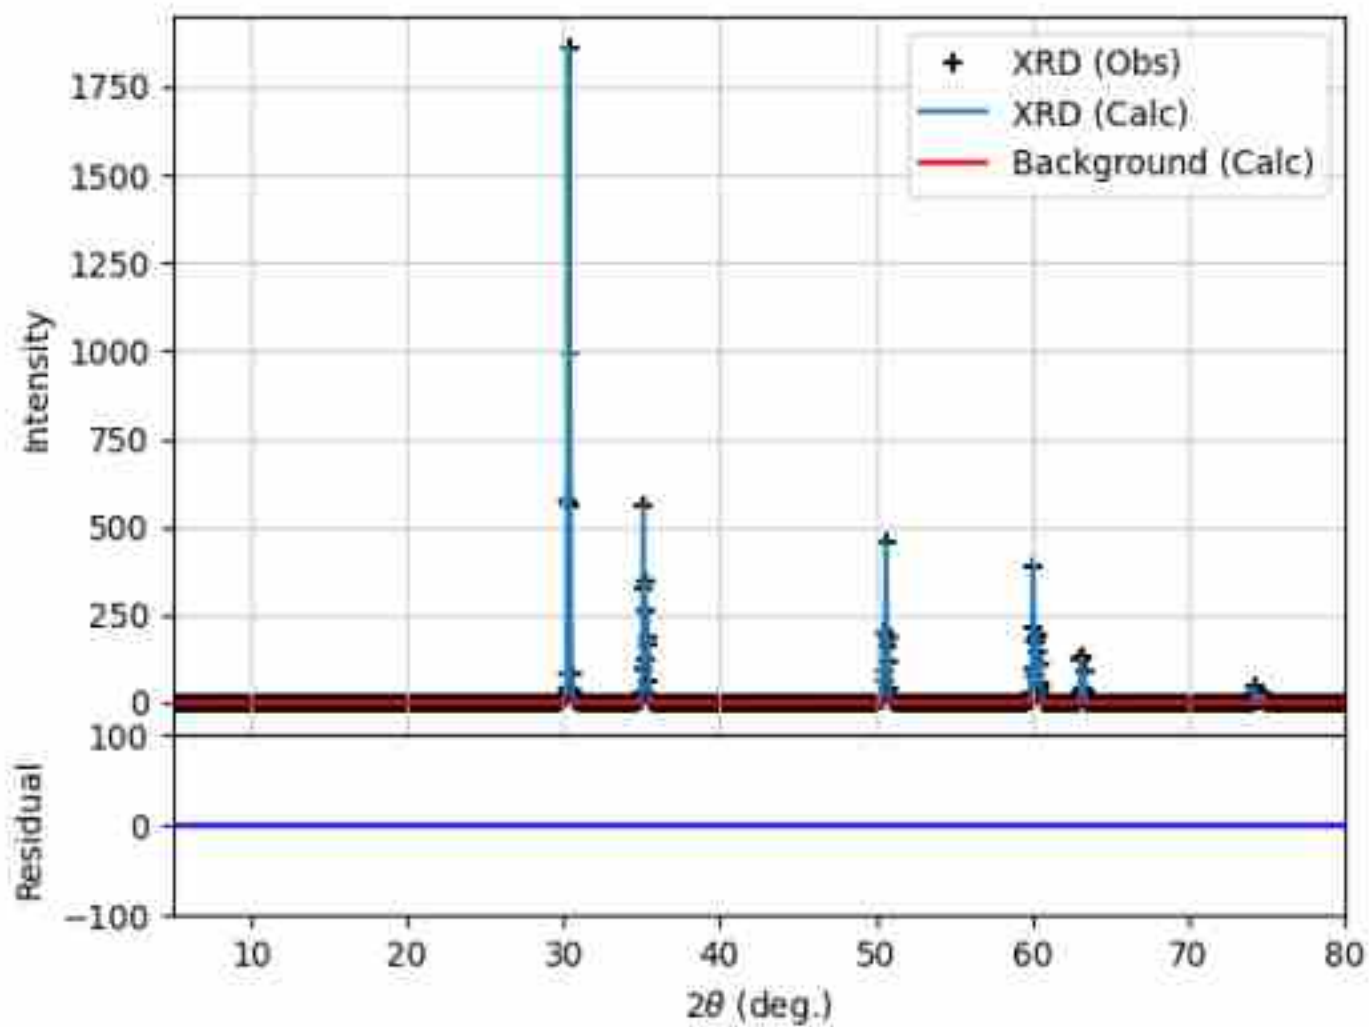

| RMSE before RR | Rwp    | RMSE after RR |
|----------------|--------|---------------|
| 0.002          | 0.0041 | 0.00038       |

# Tb<sub>4</sub>Co<sub>2</sub>Pt<sub>2</sub>O<sub>12</sub>

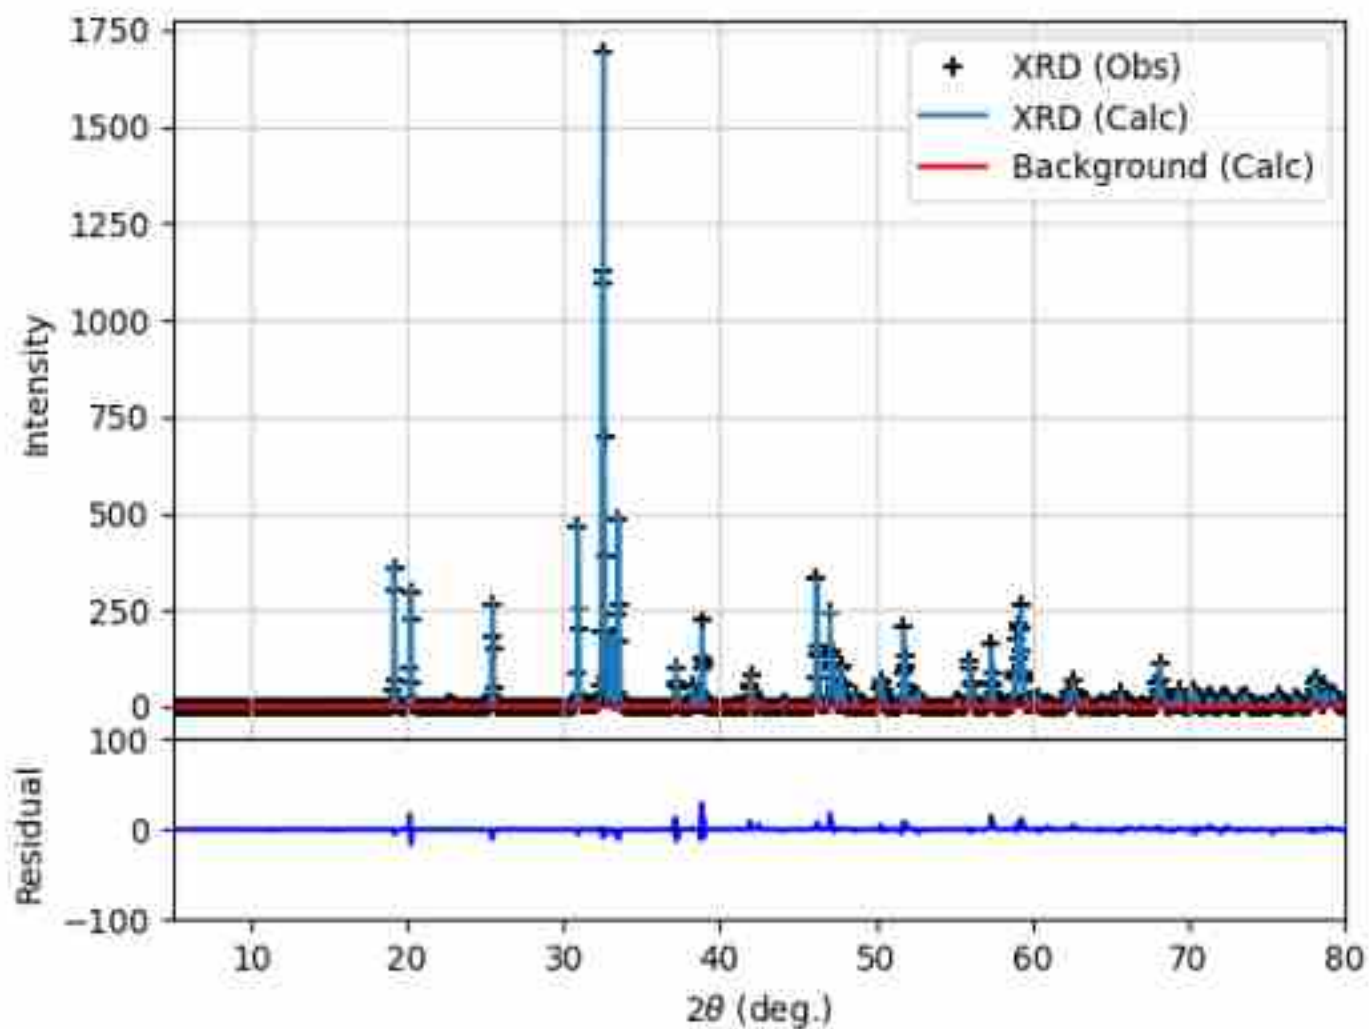

| RMSE before RR | Rwp     | RMSE after RR |
|----------------|---------|---------------|
| 0.02           | 6.05738 | 0.38205       |



# Tb<sub>4</sub>Rh<sub>4</sub>O<sub>12</sub>

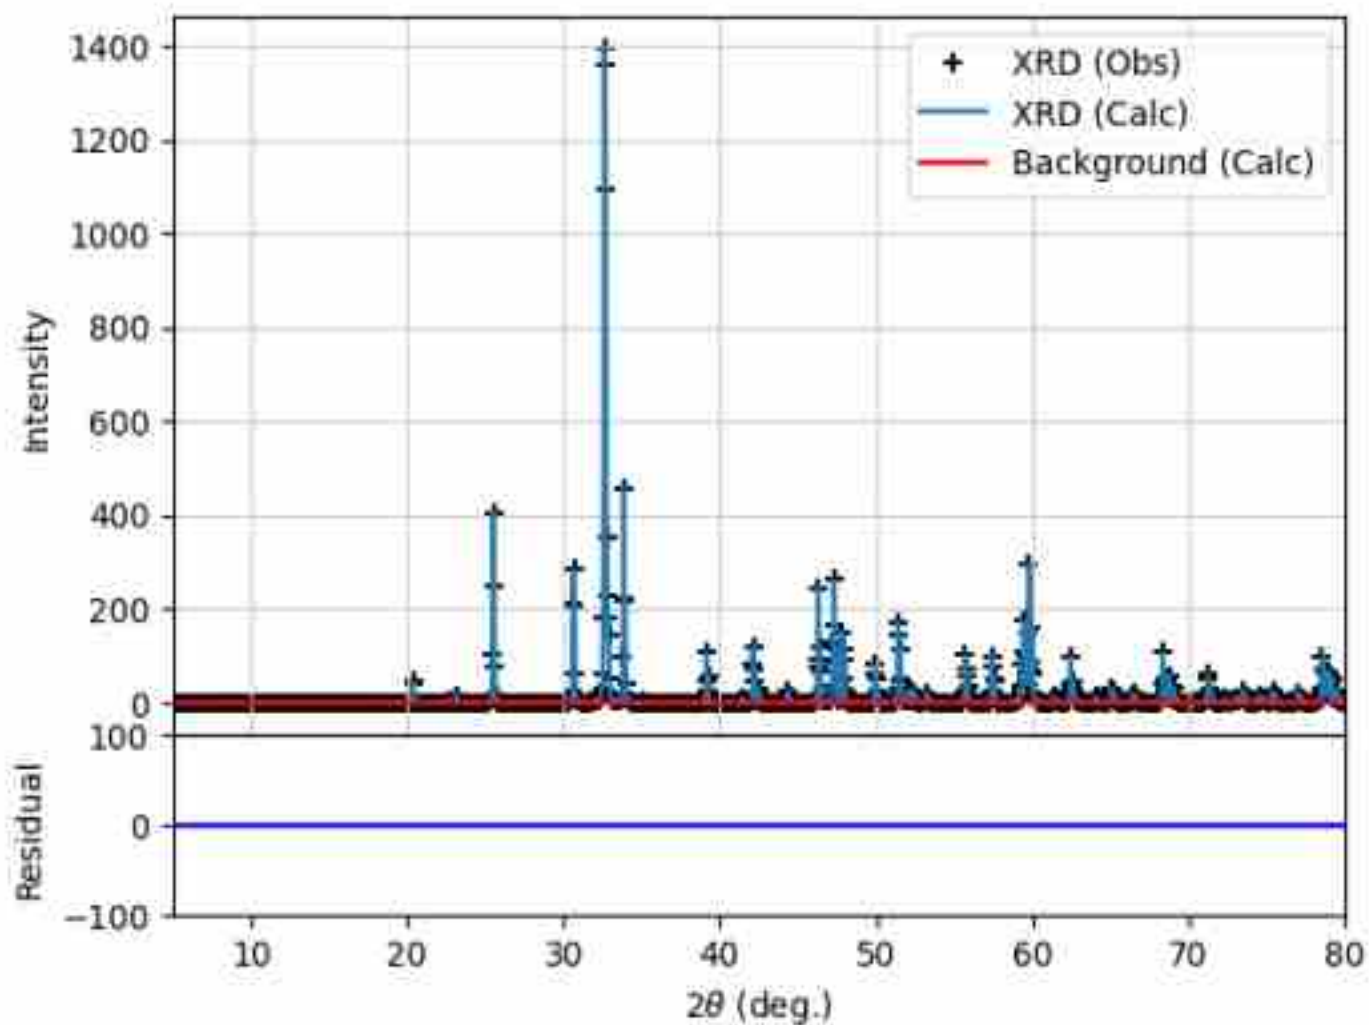

| RMSE before RR | Rwp     | RMSE after RR |
|----------------|---------|---------------|
| 0.02           | 0.00392 | 0.00109       |

# Th1Ag1Hg2

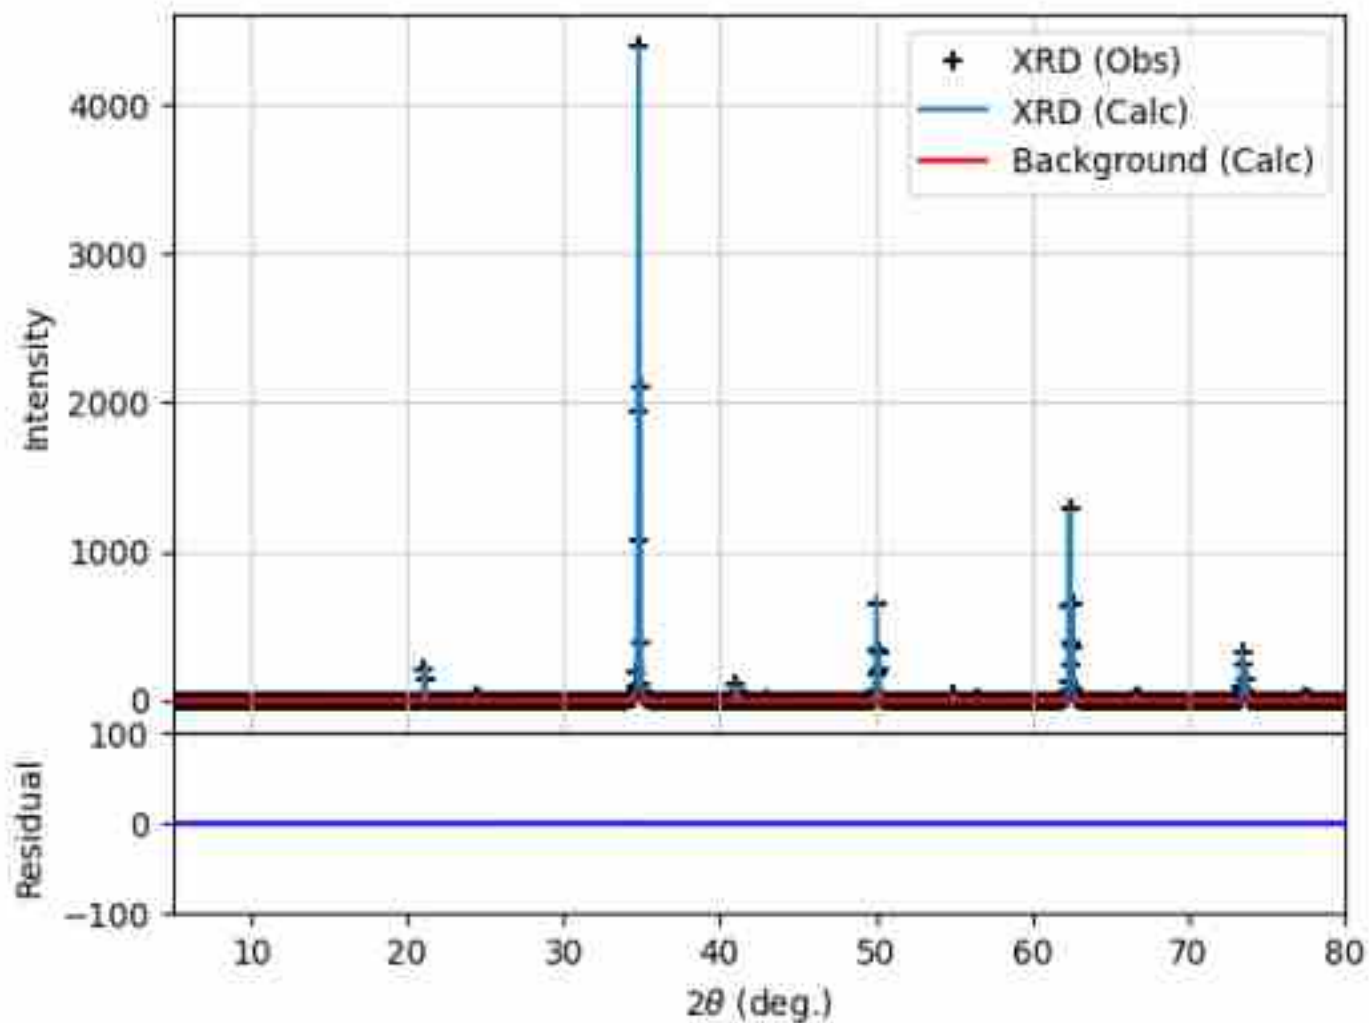

| RMSE before RR | Rwp     | RMSE after RR |
|----------------|---------|---------------|
| 0.002          | 0.02624 | 0.001         |

# Th1Al2

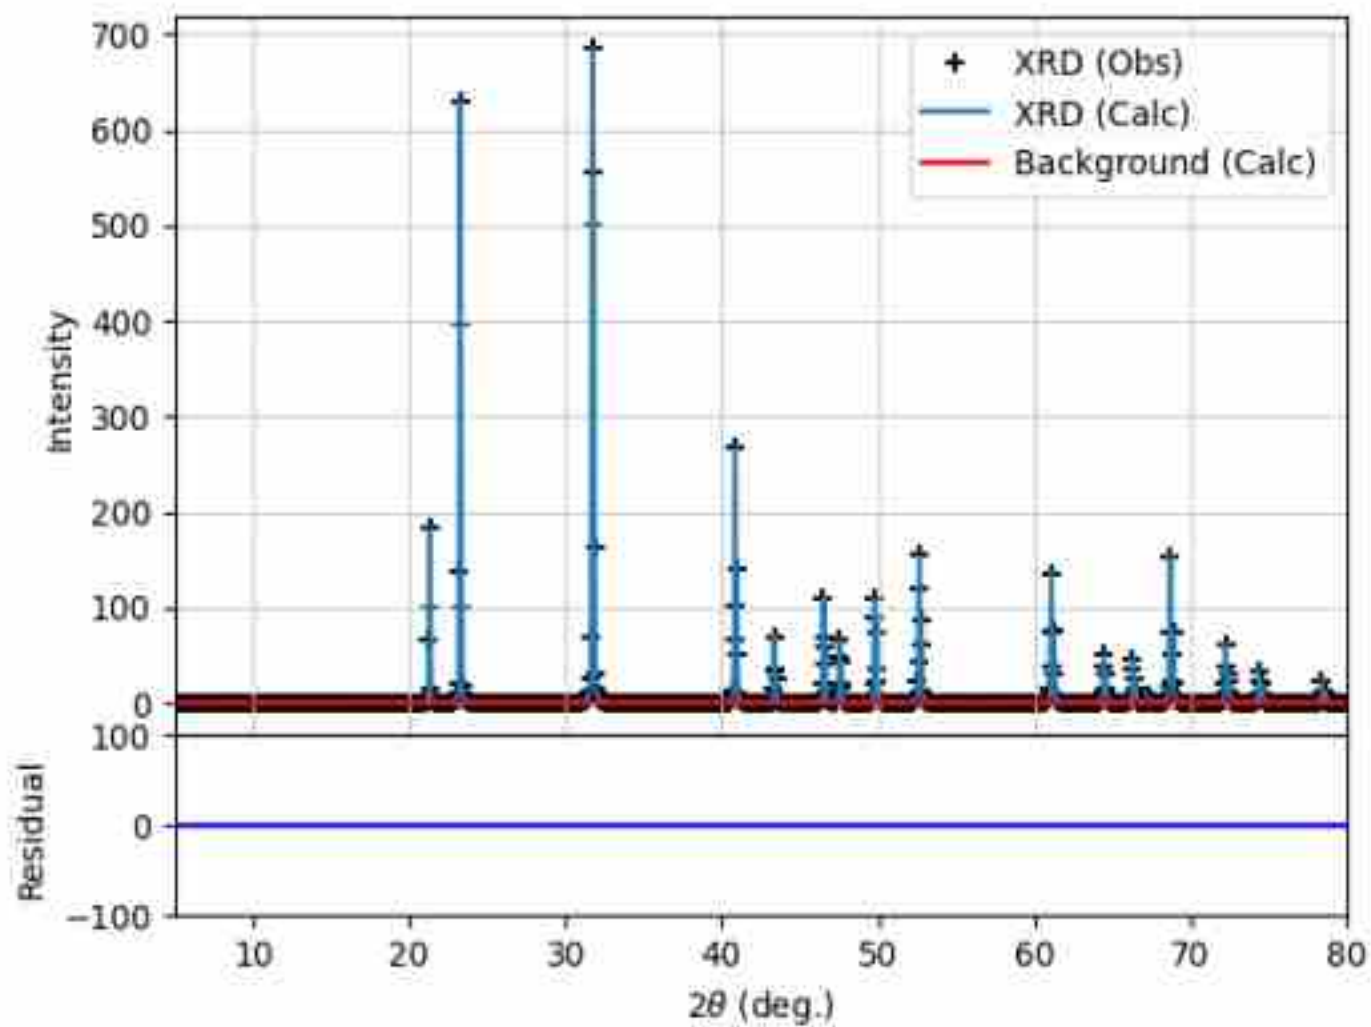

| RMSE before RR | Rwp     | RMSE after RR |
|----------------|---------|---------------|
| 0.002          | 0.00273 | 0.00065       |

# Th1Bi3

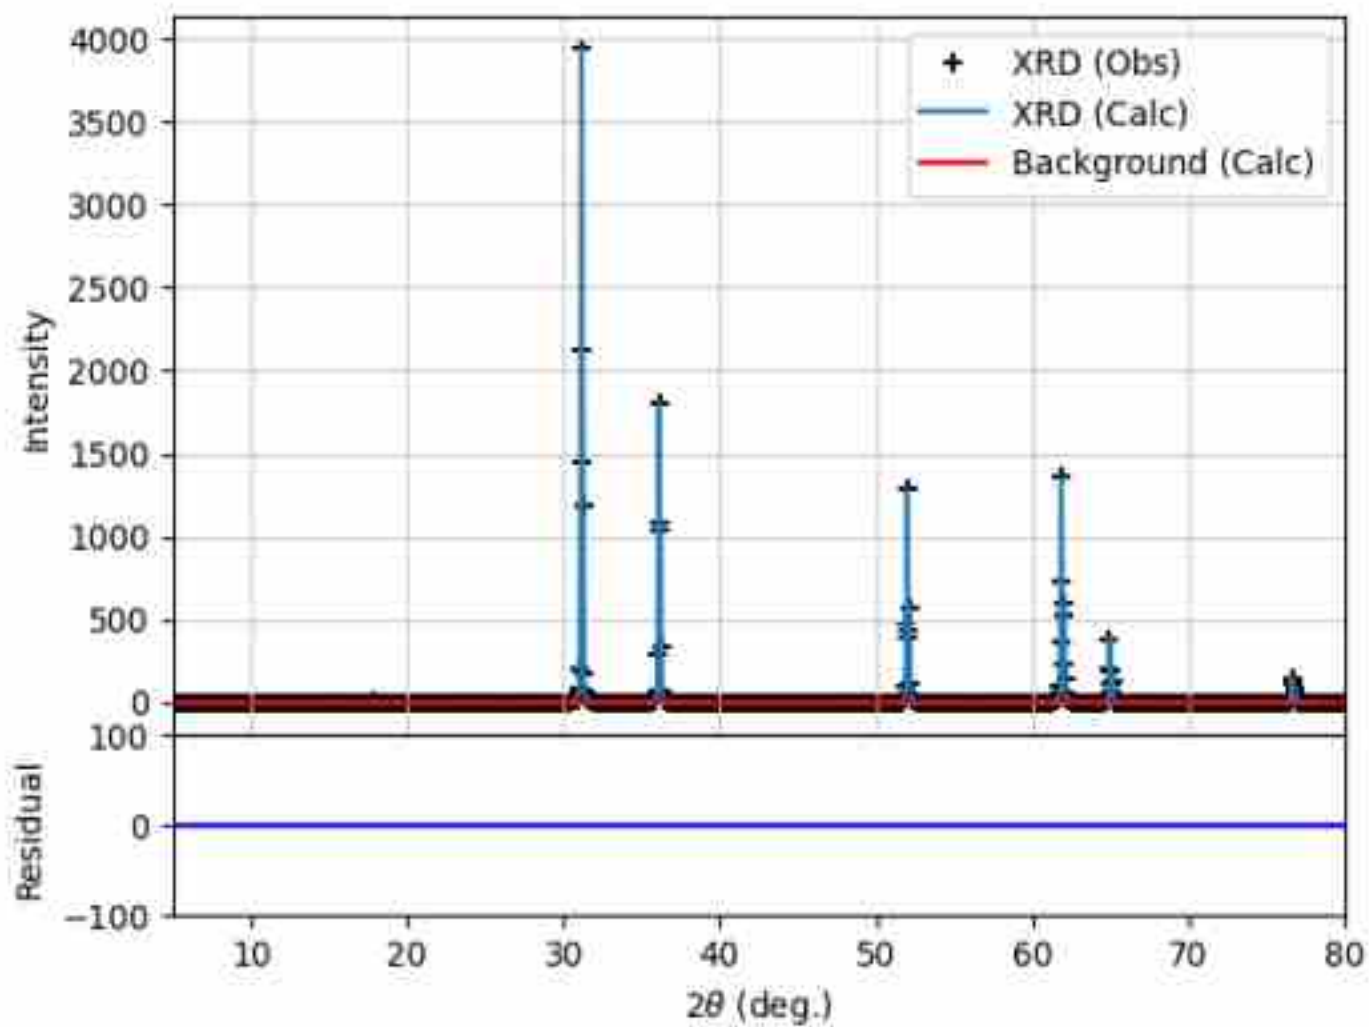

| RMSE before RR | Rwp     | RMSE after RR |
|----------------|---------|---------------|
| 0.002          | 0.03261 | 0.00066       |

# Th1Pa1Tc2

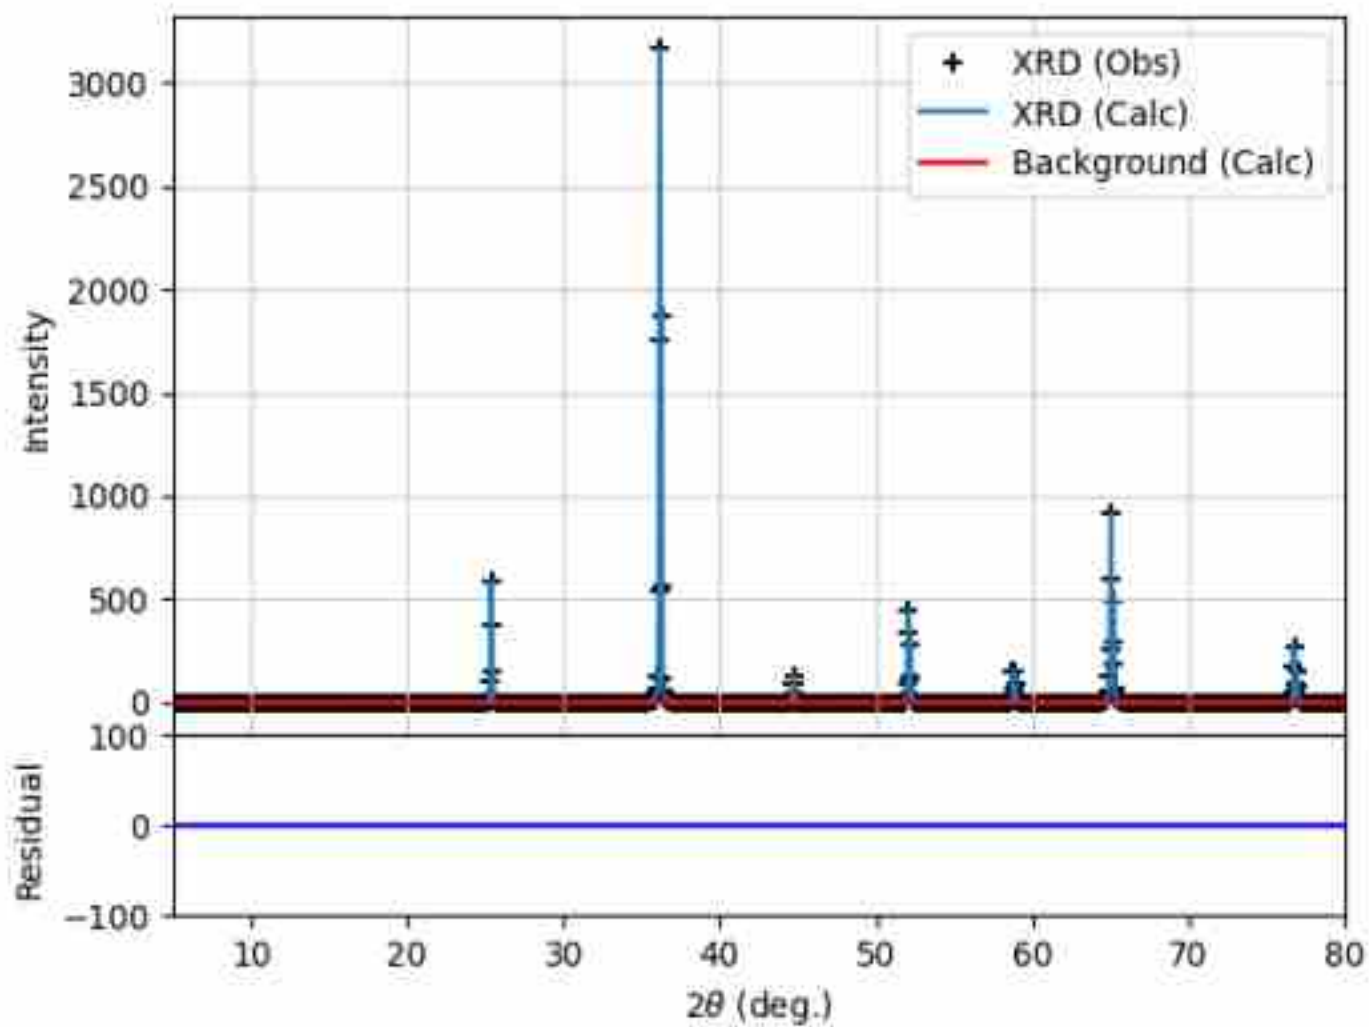

| RMSE before RR | Rwp     | RMSE after RR |
|----------------|---------|---------------|
| 0.002          | 0.01183 | 0.00082       |

# Th1Sb1Rh1

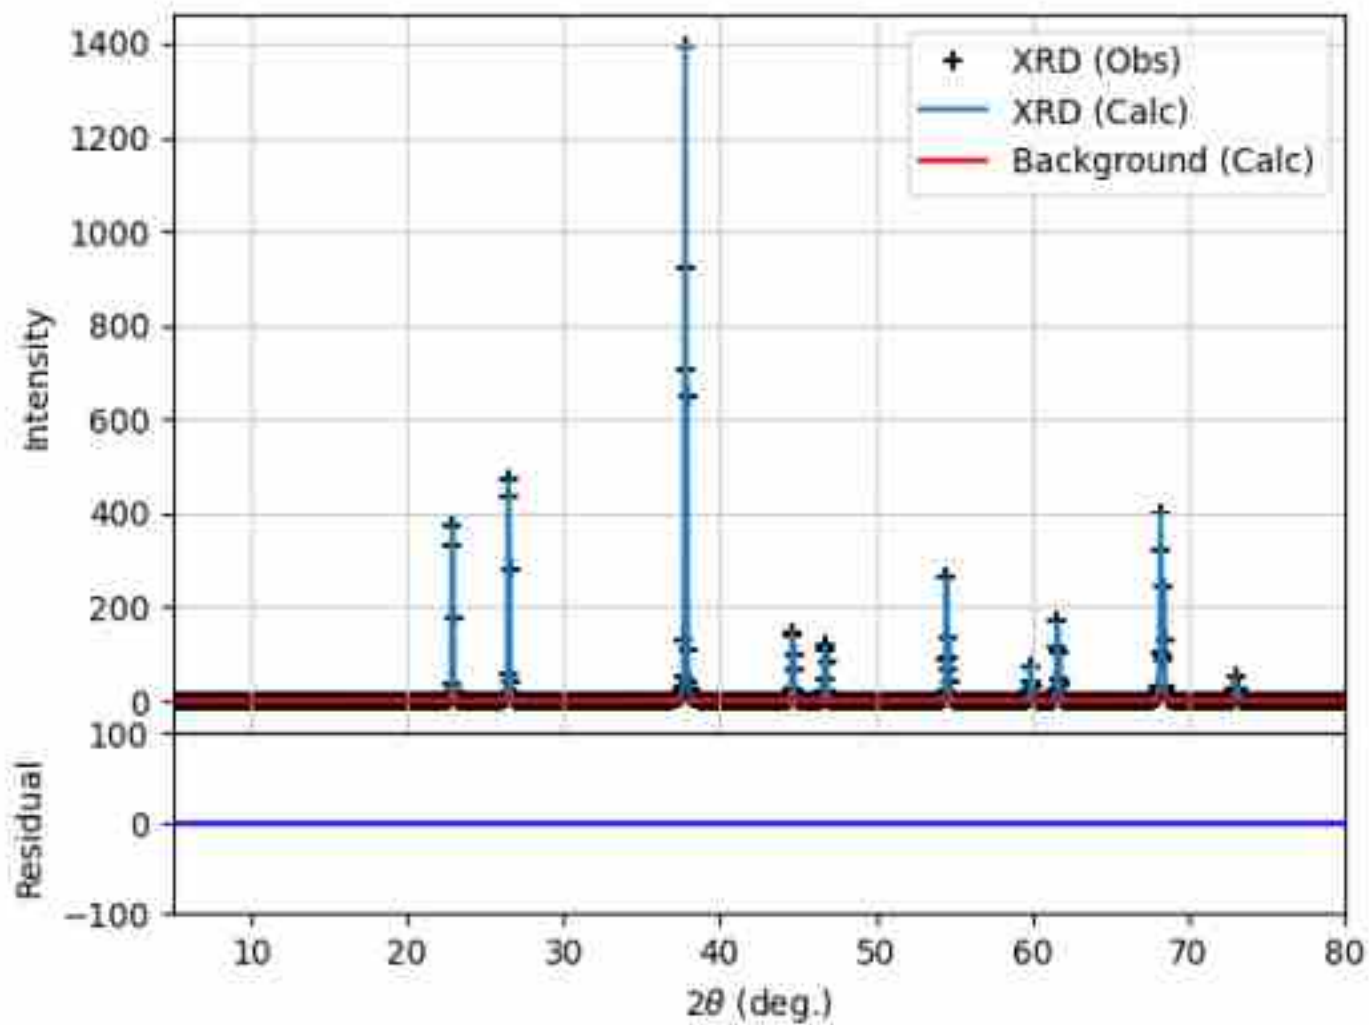

| RMSE before RR | Rwp     | RMSE after RR |
|----------------|---------|---------------|
| 0.002          | 0.00637 | 0.00081       |

# Th1Sc3

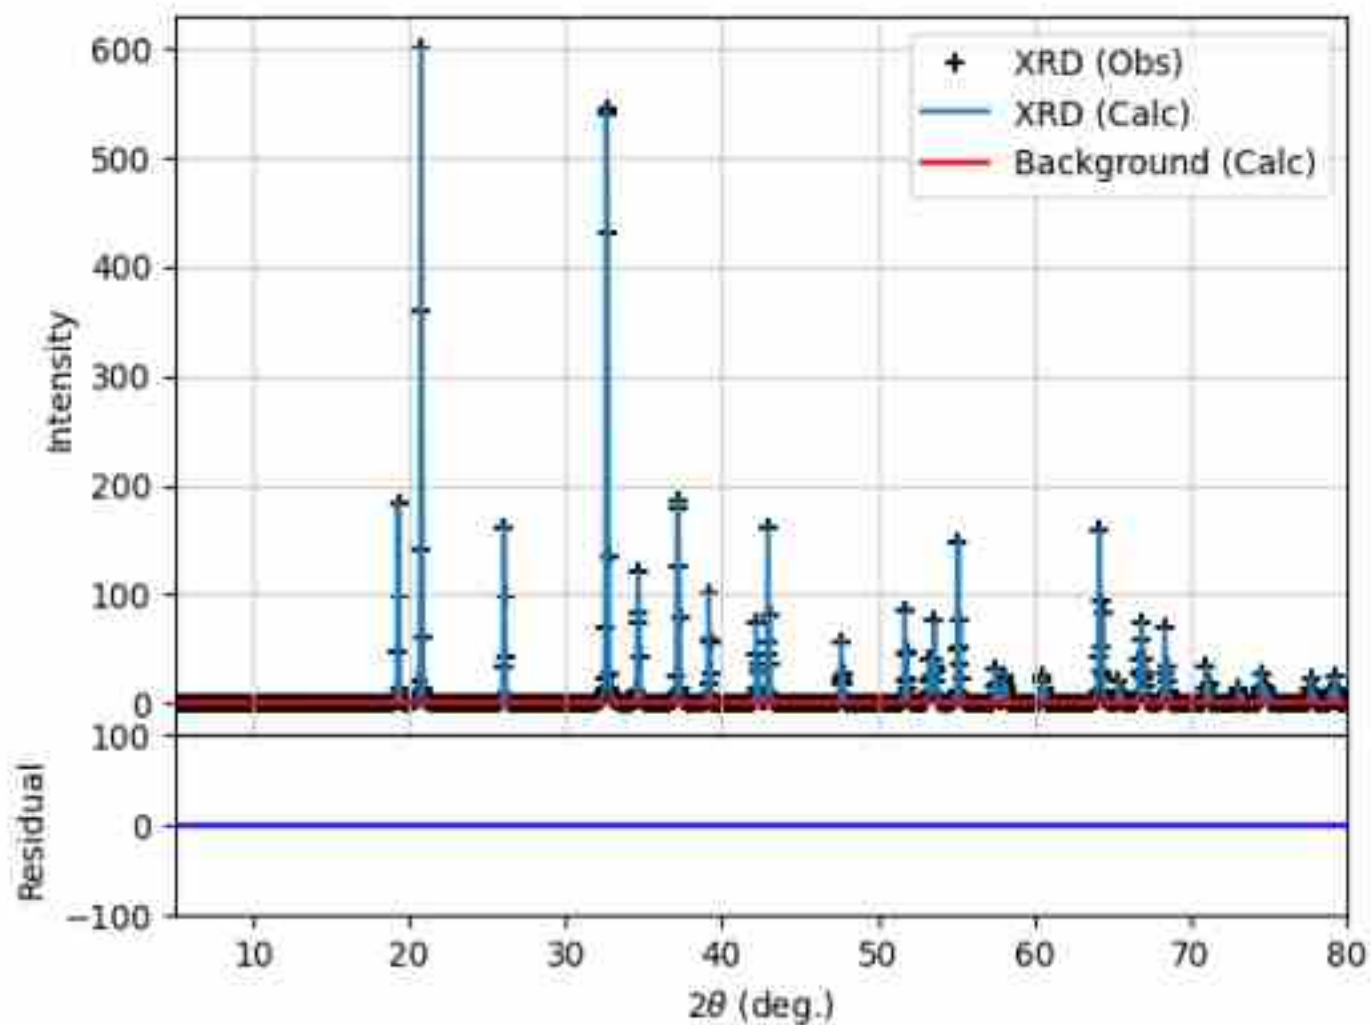

| RMSE before RR | Rwp     | RMSE after RR |
|----------------|---------|---------------|
| 0.002          | 0.00415 | 0.00075       |

# Ti1Al1Pd2

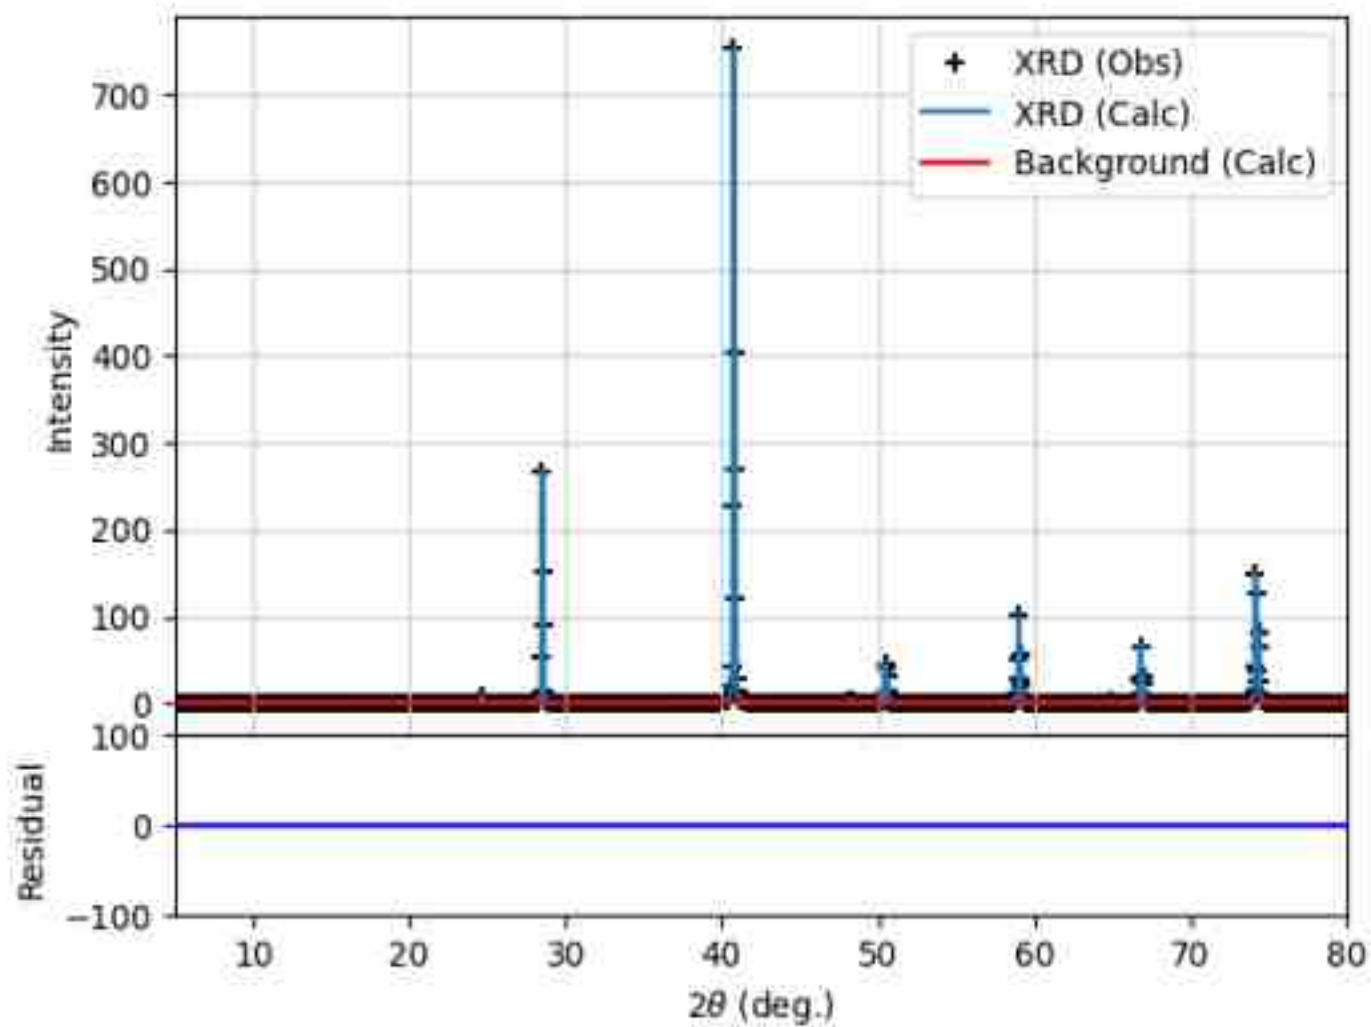

| RMSE before RR | Rwp    | RMSE after RR |
|----------------|--------|---------------|
| 0.002          | 0.0016 | 0.00054       |



# Ti1Be1Ir2

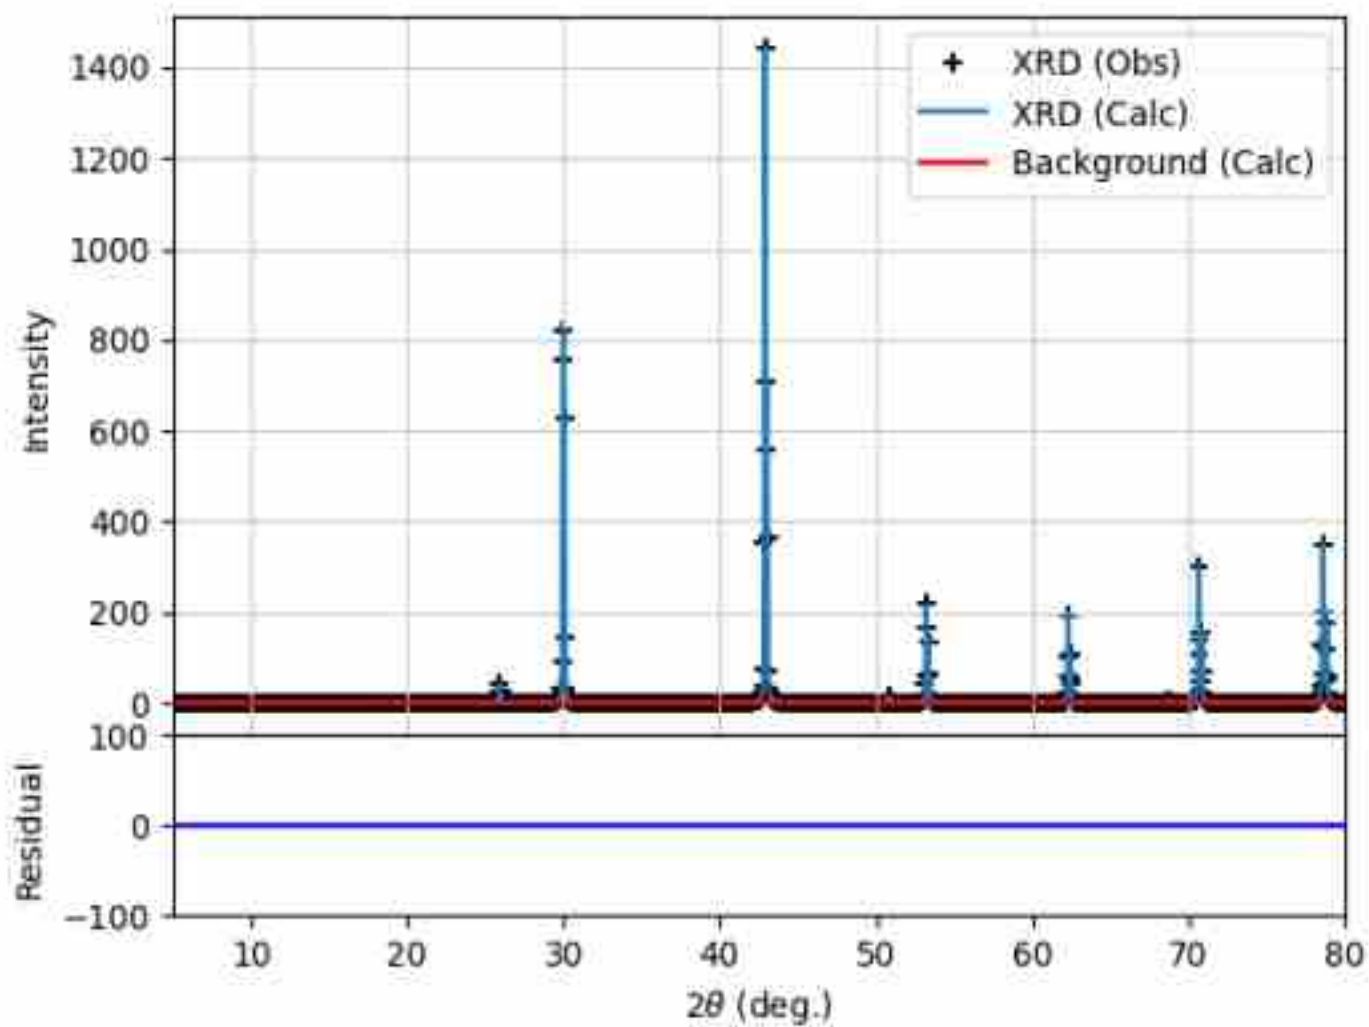

| RMSE before RR | Rwp     | RMSE after RR |
|----------------|---------|---------------|
| 0.002          | 0.00719 | 0.00301       |

# Ti1Fe2Ge1

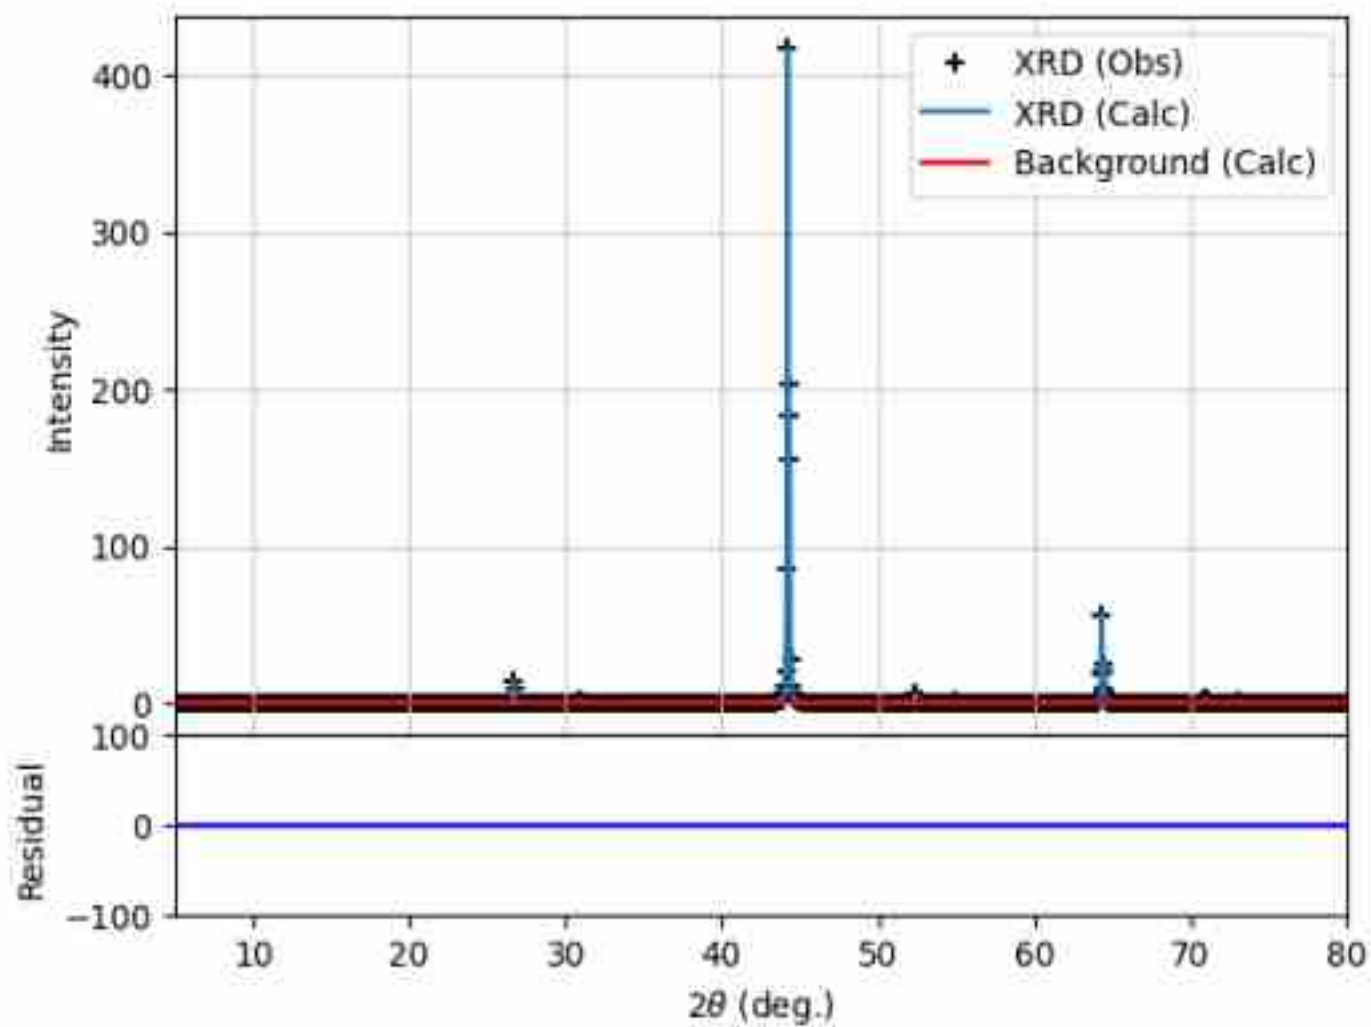

| RMSE before RR | Rwp     | RMSE after RR |
|----------------|---------|---------------|
| 0.002          | 0.00269 | 0.00041       |

# Ti1In1Au2

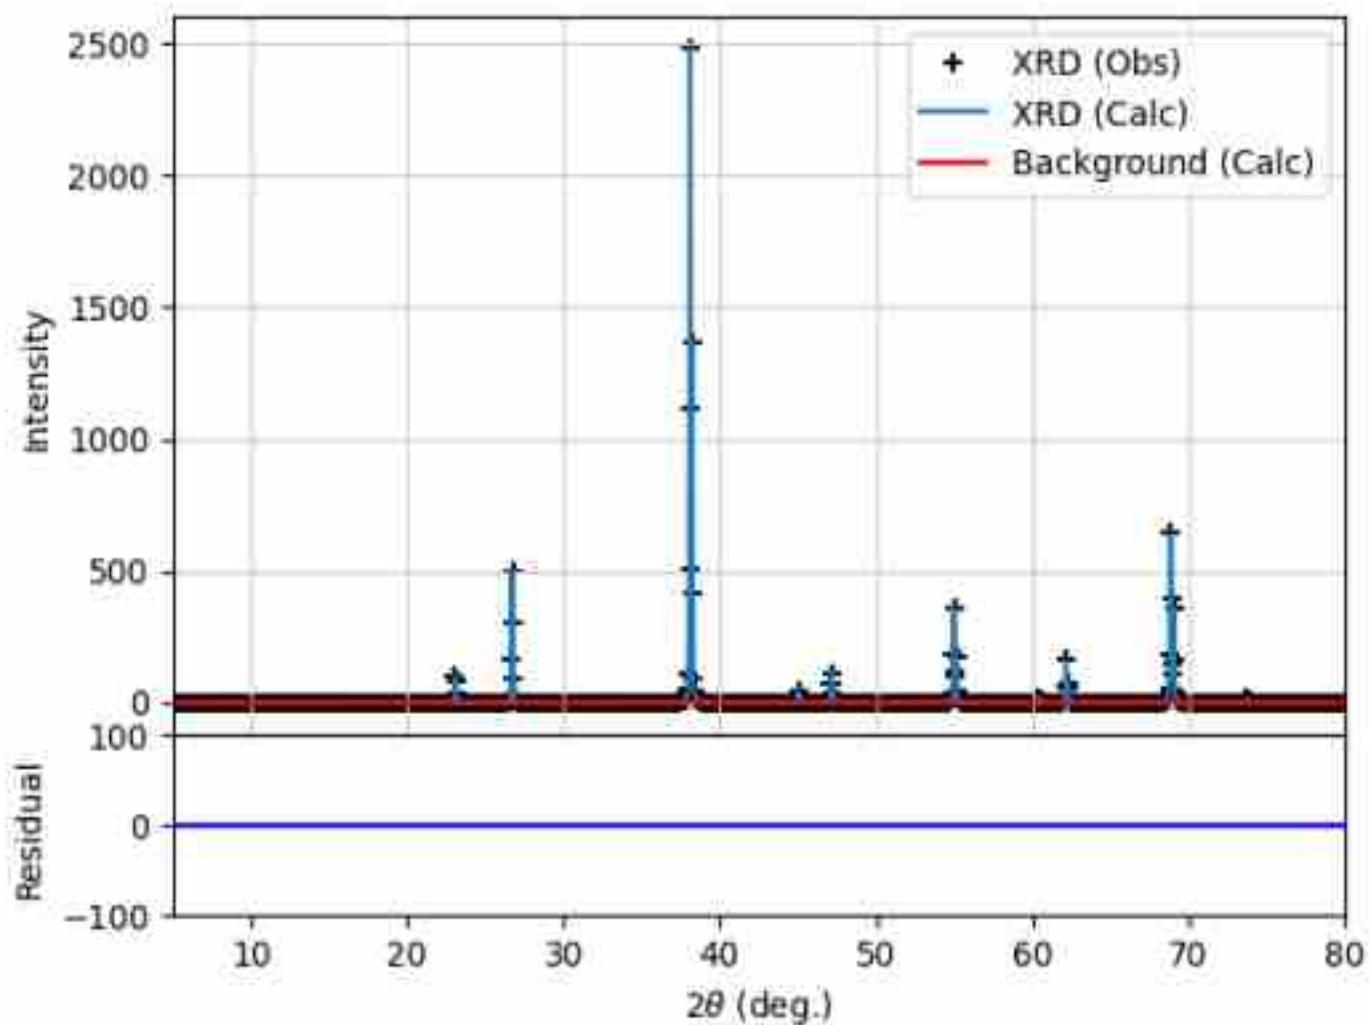

| RMSE before RR | Rwp    | RMSE after RR |
|----------------|--------|---------------|
| 0.002          | 0.0034 | 0.00039       |

# Ti1In1Rh2

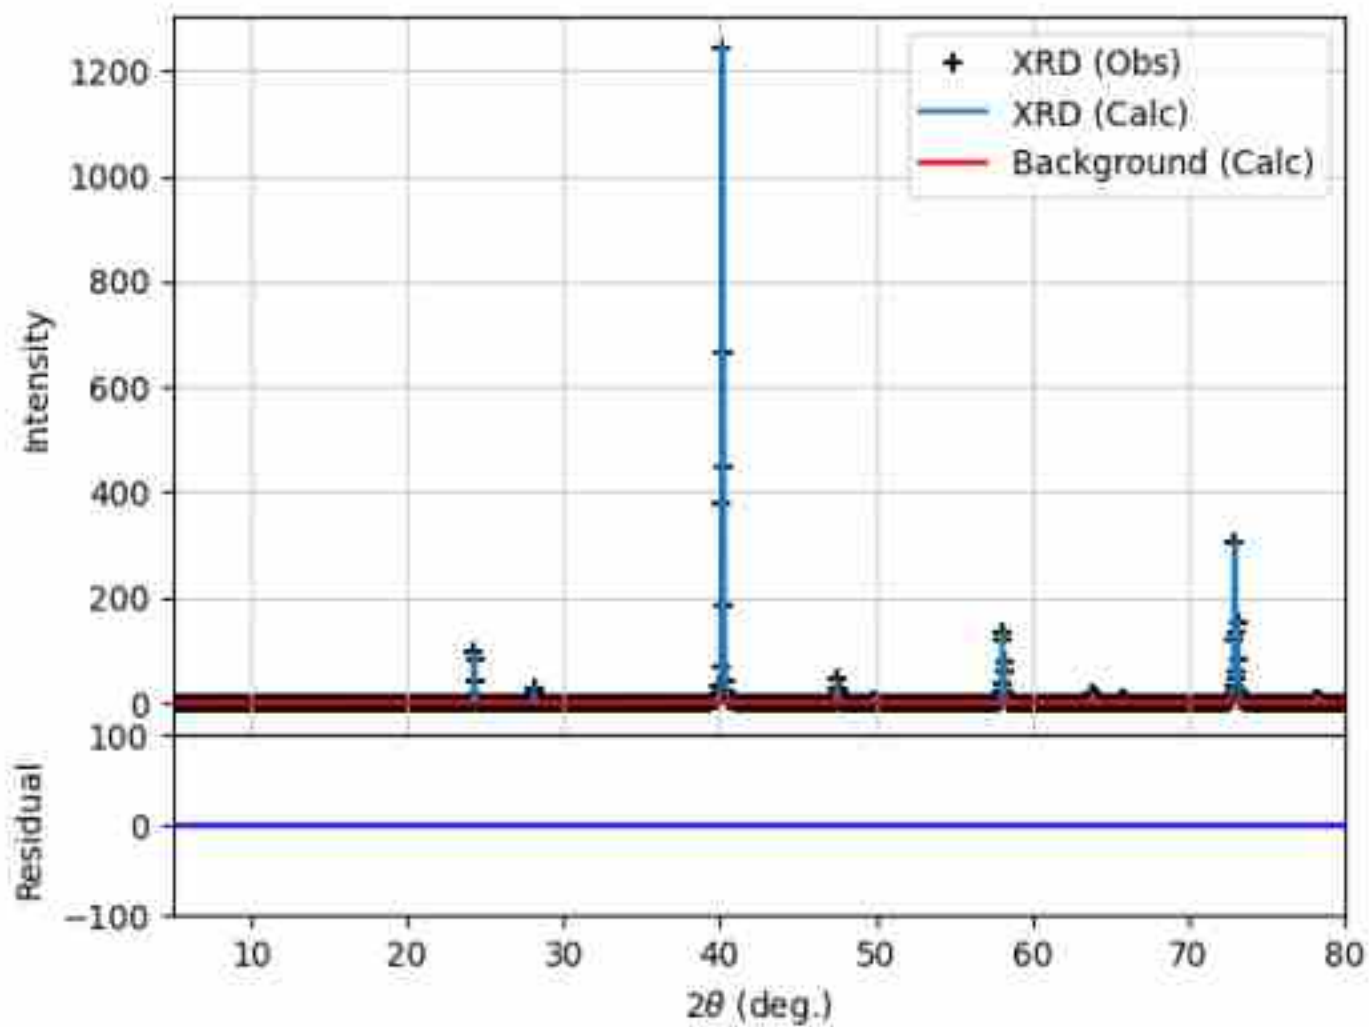

| RMSE before RR | Rwp    | RMSE after RR |
|----------------|--------|---------------|
| 0.002          | 0.0347 | 0.00132       |

# Ti1Pd2

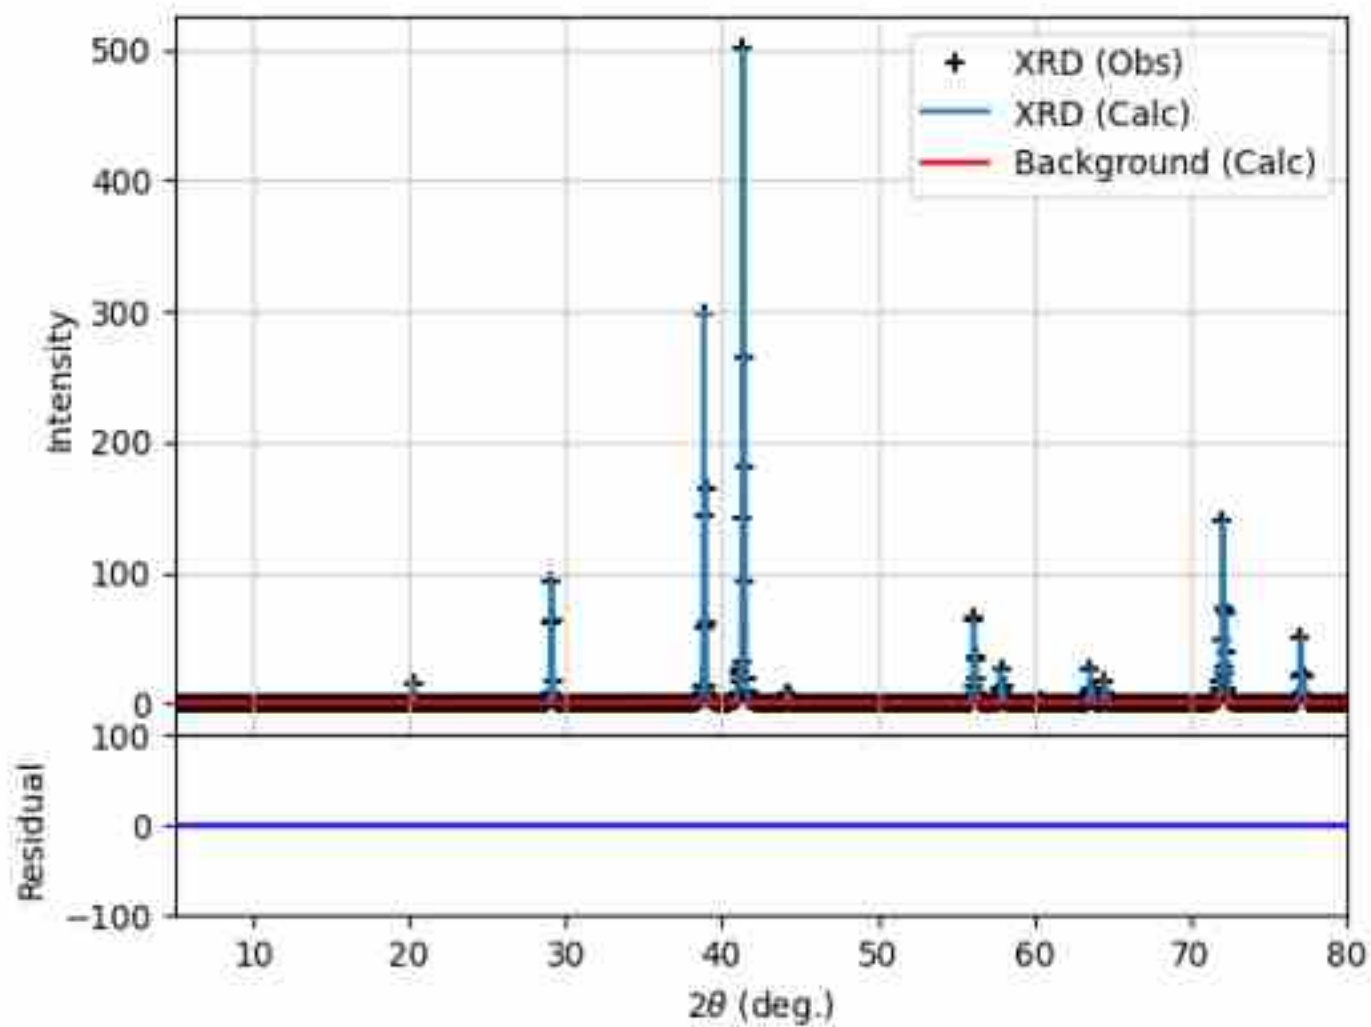

| RMSE before RR | Rwp     | RMSE after RR |
|----------------|---------|---------------|
| 0.02           | 0.00726 | 0.00126       |

# Ti1Zn1Rh2

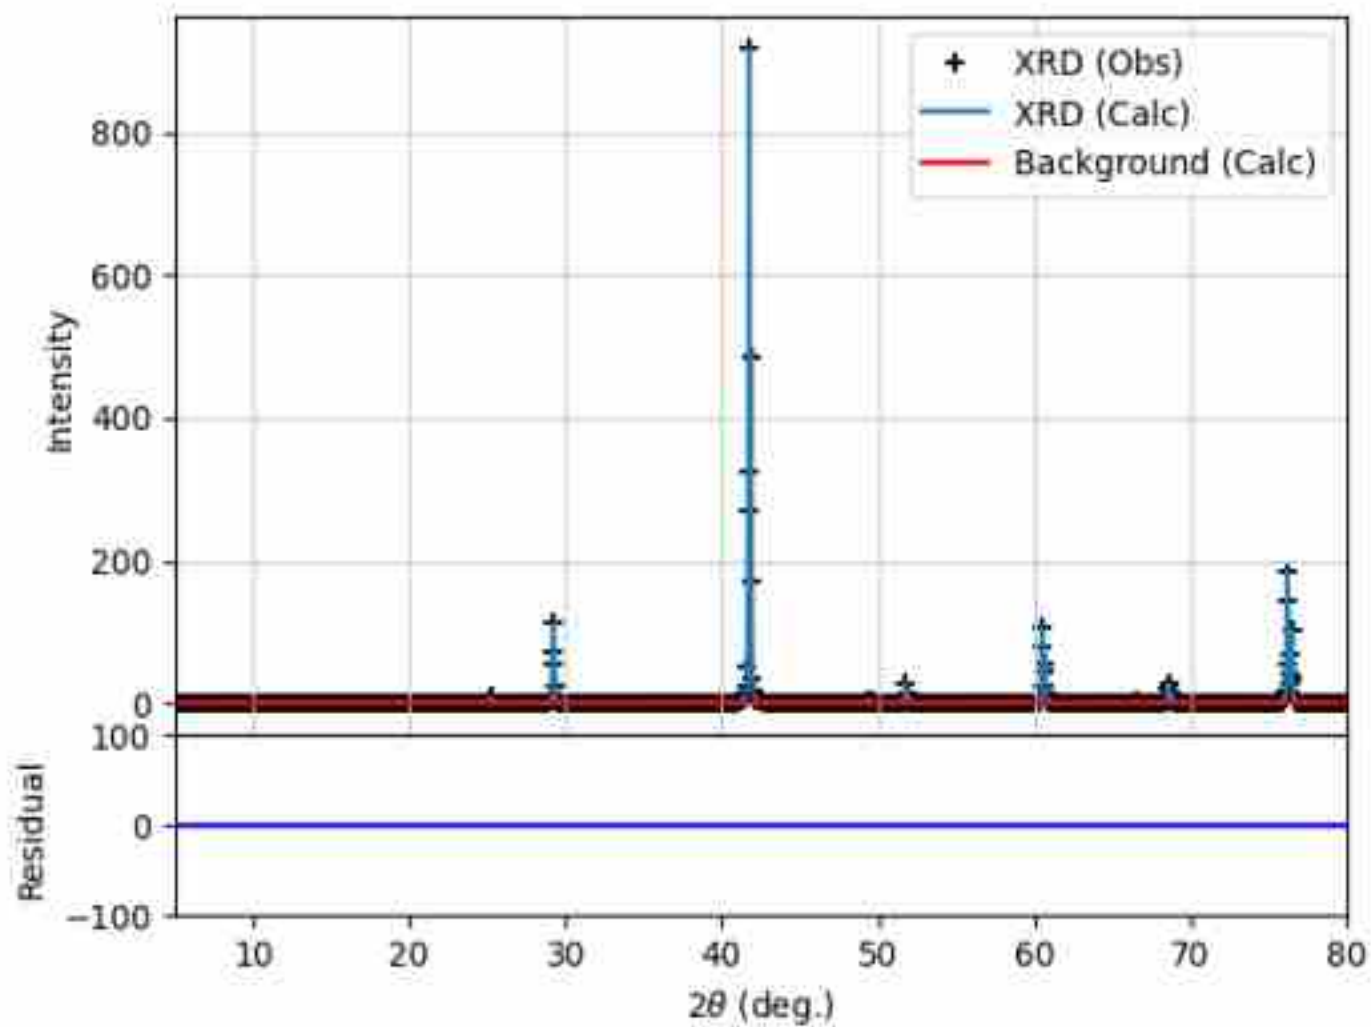

| RMSE before RR | Rwp     | RMSE after RR |
|----------------|---------|---------------|
| 0.002          | 0.00472 | 0.00059       |

# Ti<sub>2</sub>Al<sub>1</sub>Tc<sub>1</sub>

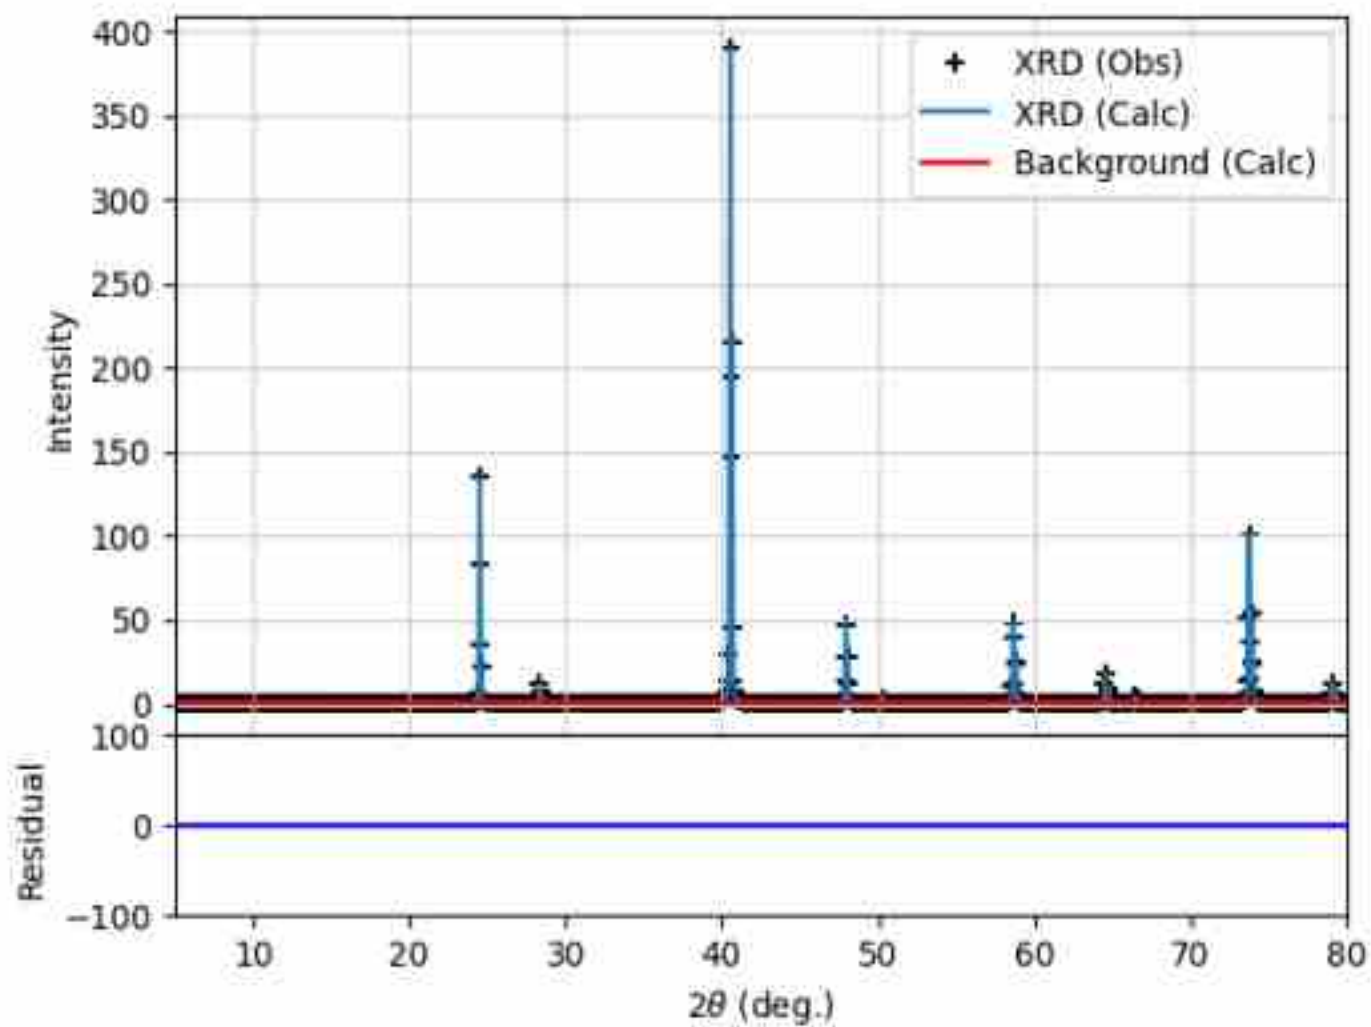

| RMSE before RR | Rwp     | RMSE after RR |
|----------------|---------|---------------|
| 0.002          | 0.06422 | 0.01547       |

# Ti2Mn1Fe1

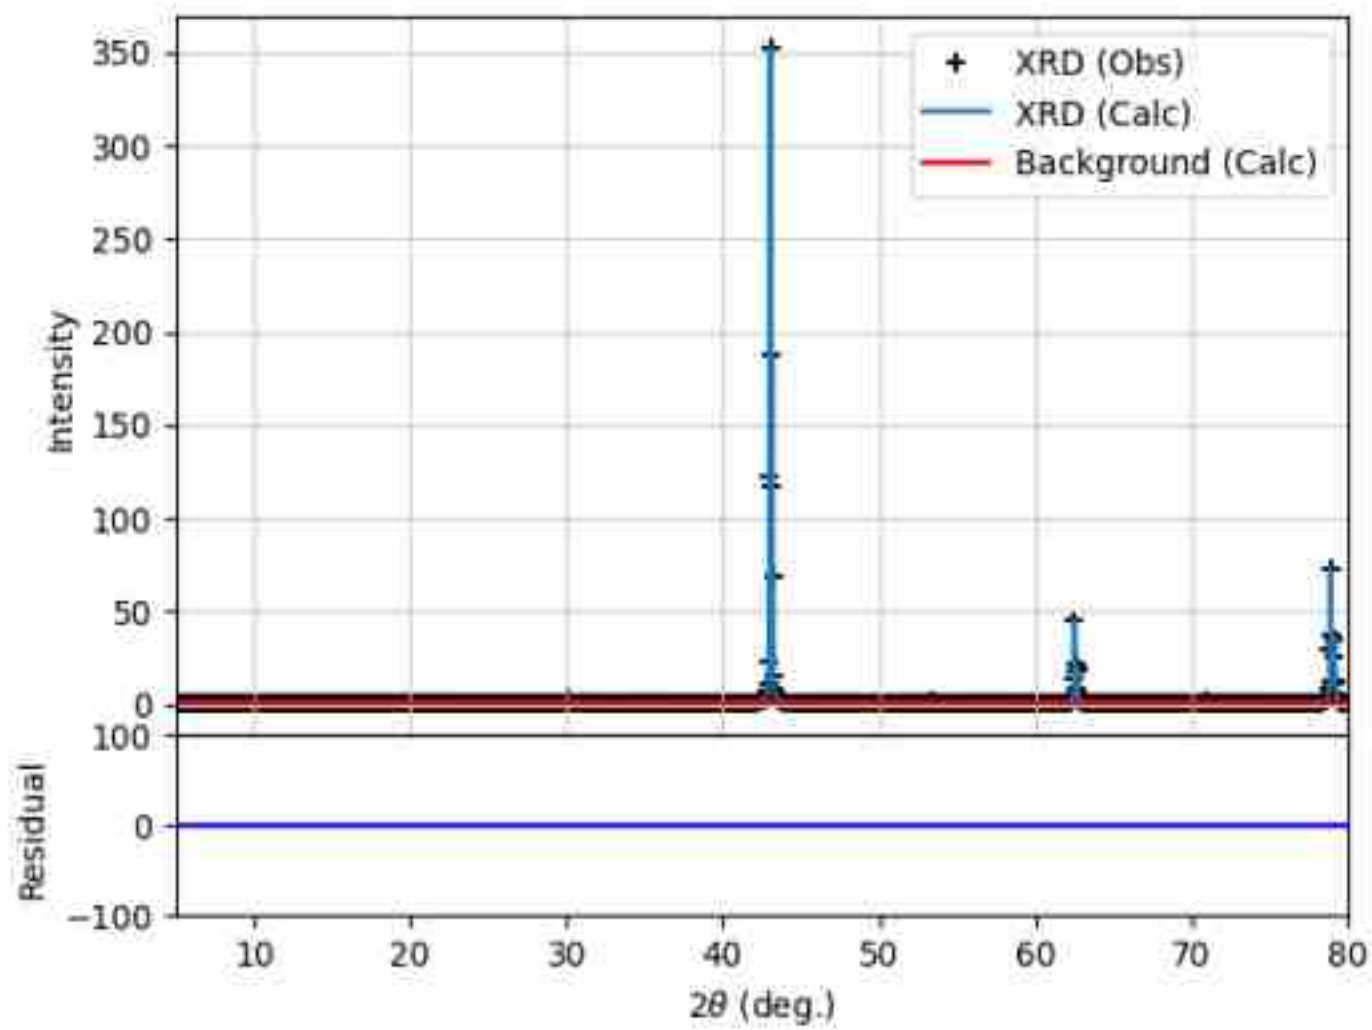

| RMSE before RR | Rwp    | RMSE after RR |
|----------------|--------|---------------|
| 0.002          | 0.0018 | 0.00061       |



# Ti<sub>2</sub>Nb<sub>2</sub>Ga<sub>2</sub>O<sub>12</sub>

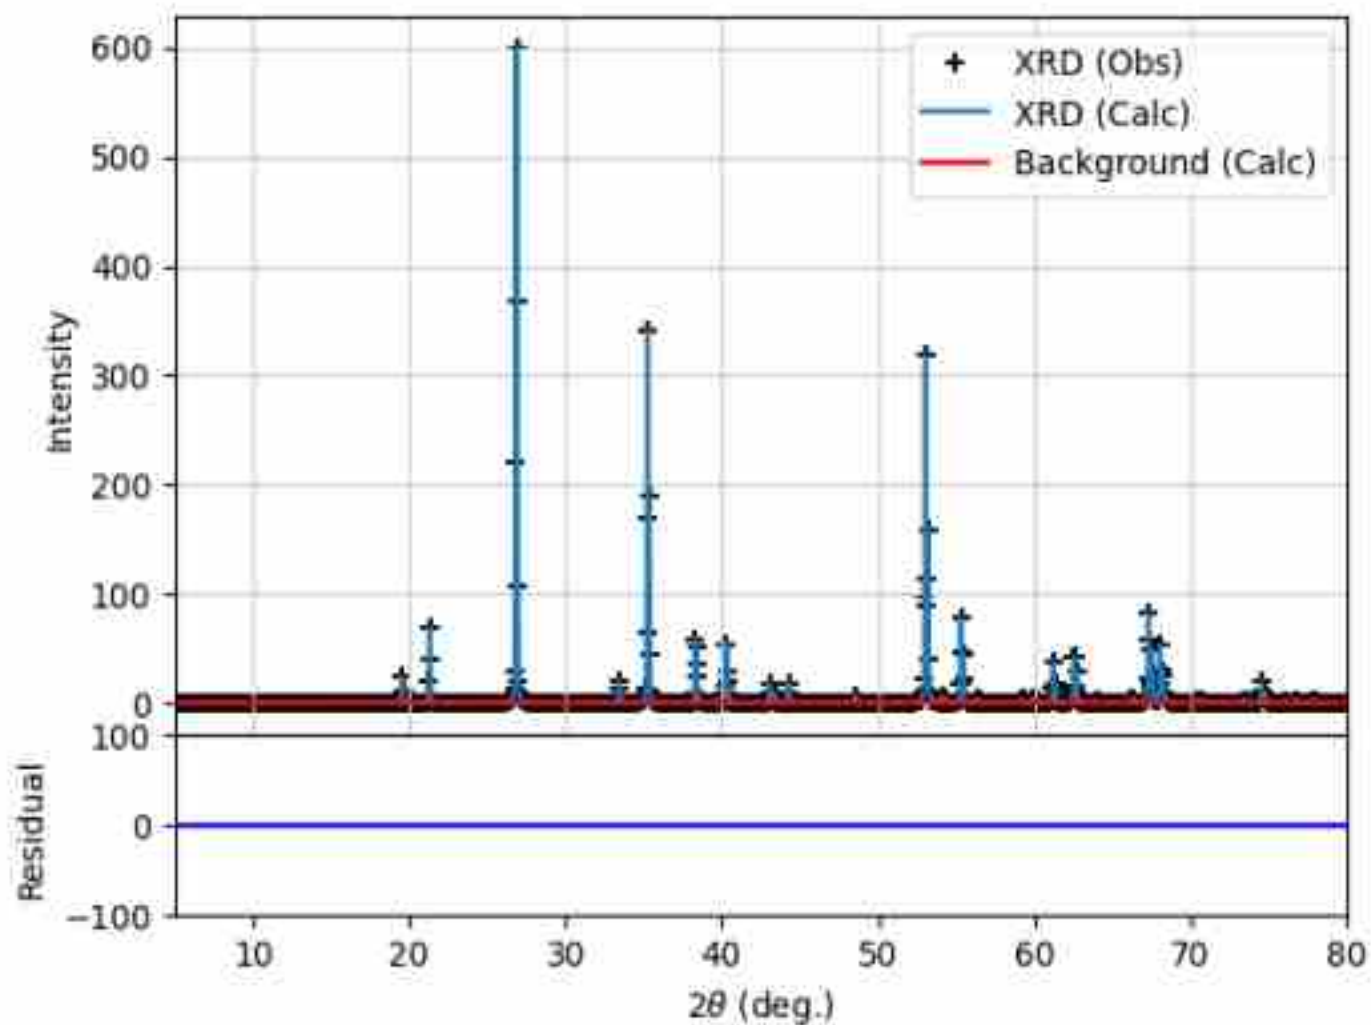

| RMSE before RR | Rwp     | RMSE after RR |
|----------------|---------|---------------|
| 0.02           | 0.00499 | 0.00135       |

Ti<sub>2</sub>Ni<sub>1</sub>Mo<sub>1</sub>

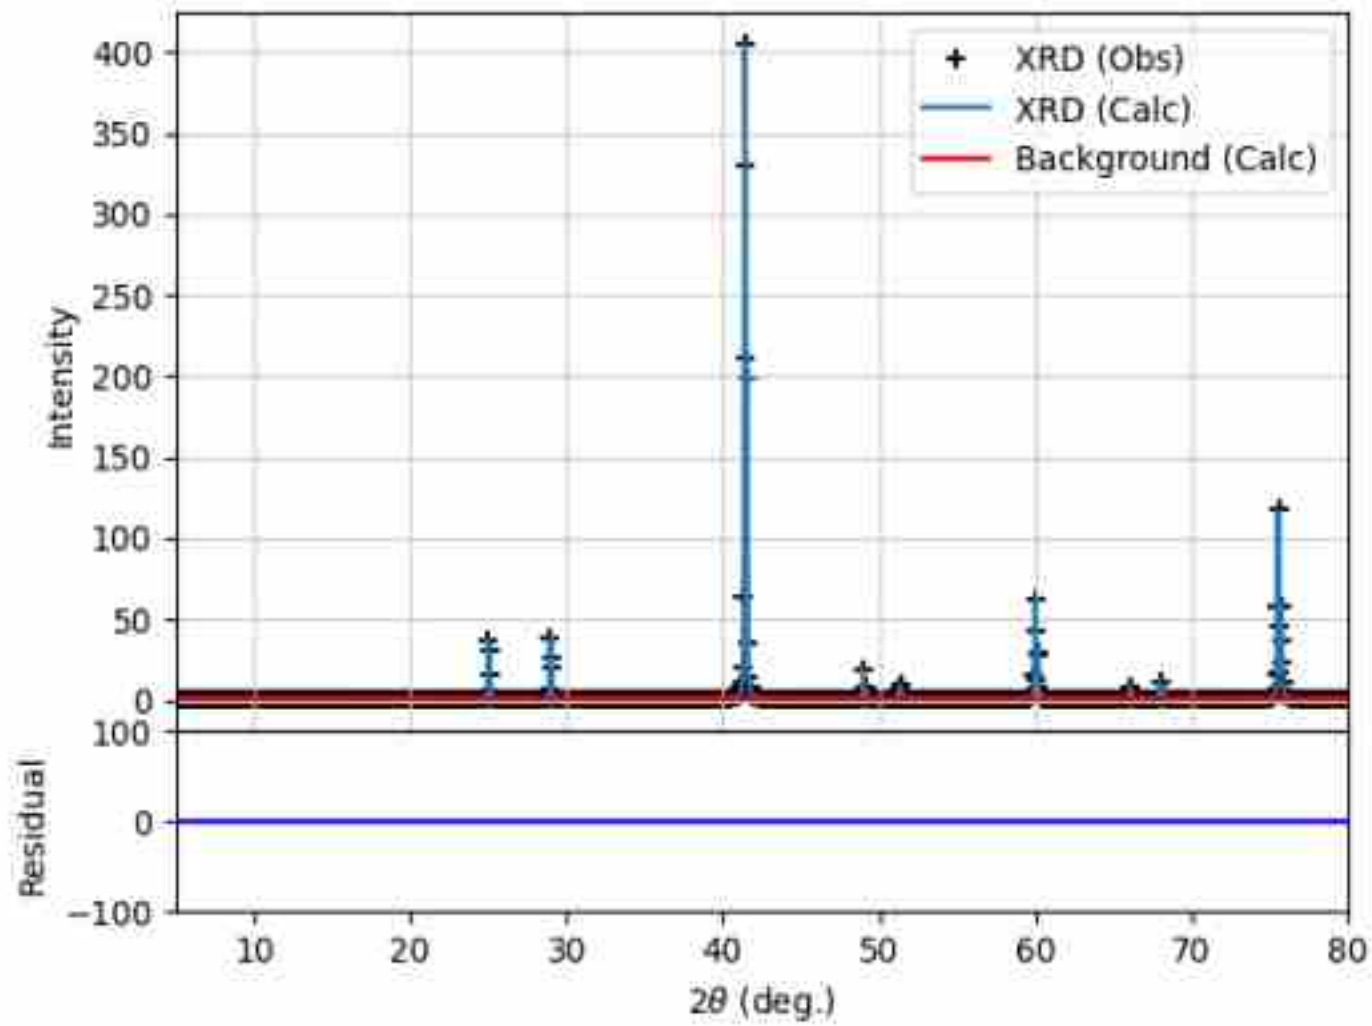

| RMSE before RR | Rwp     | RMSE after RR |
|----------------|---------|---------------|
| 0.002          | 0.00321 | 0.00082       |

# Ti<sub>3</sub>Nb<sub>3</sub>O<sub>12</sub>

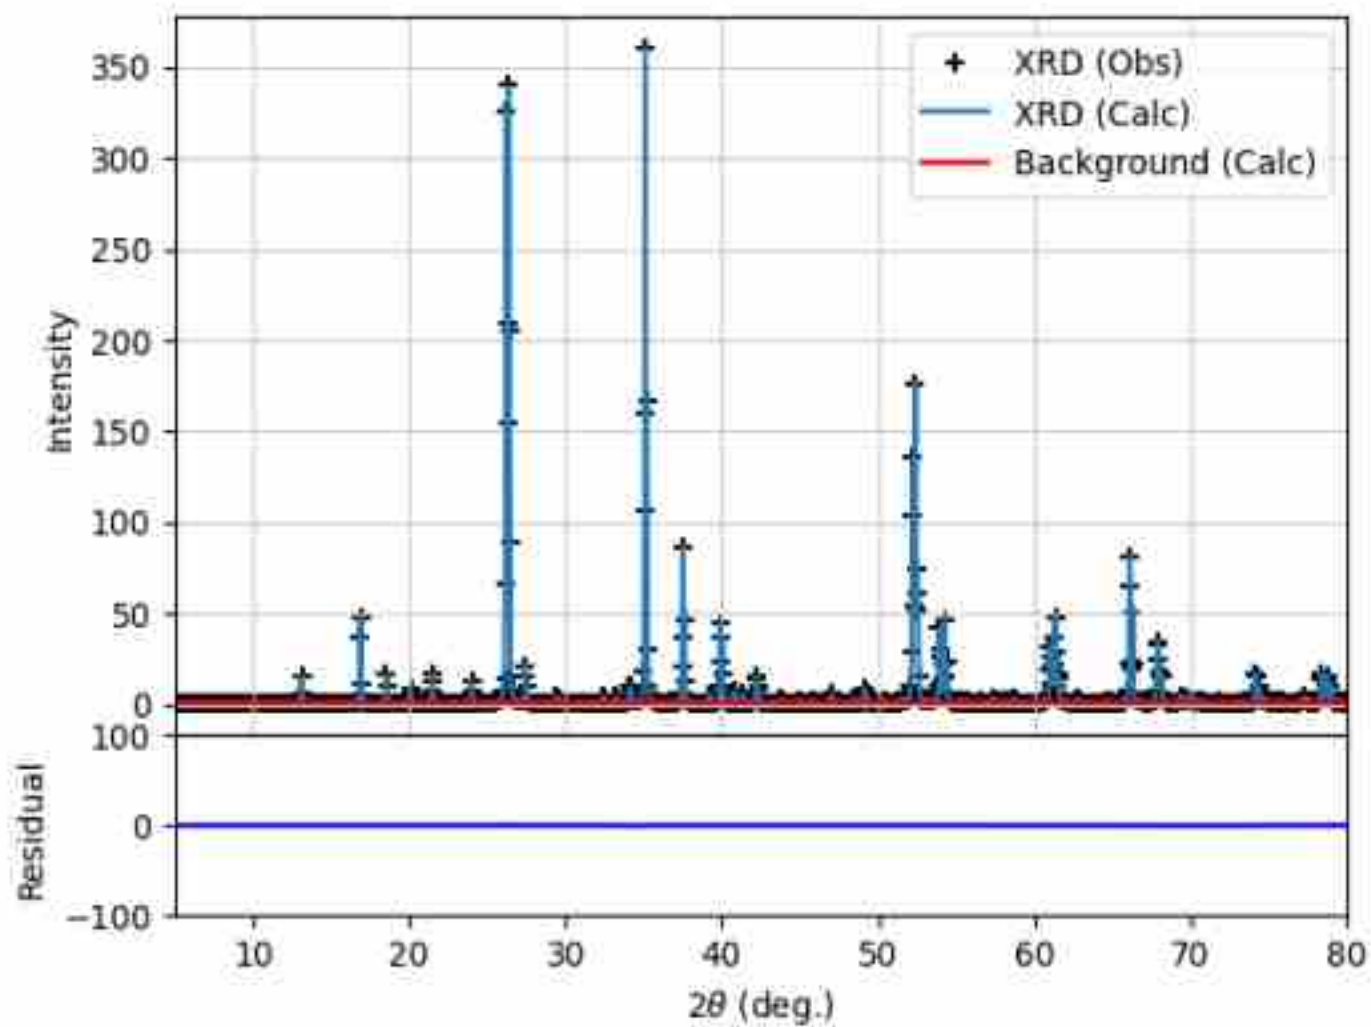

| RMSE before RR | Rwp     | RMSE after RR |
|----------------|---------|---------------|
| 0.02           | 0.48234 | 0.02282       |

# Ti3Ti1

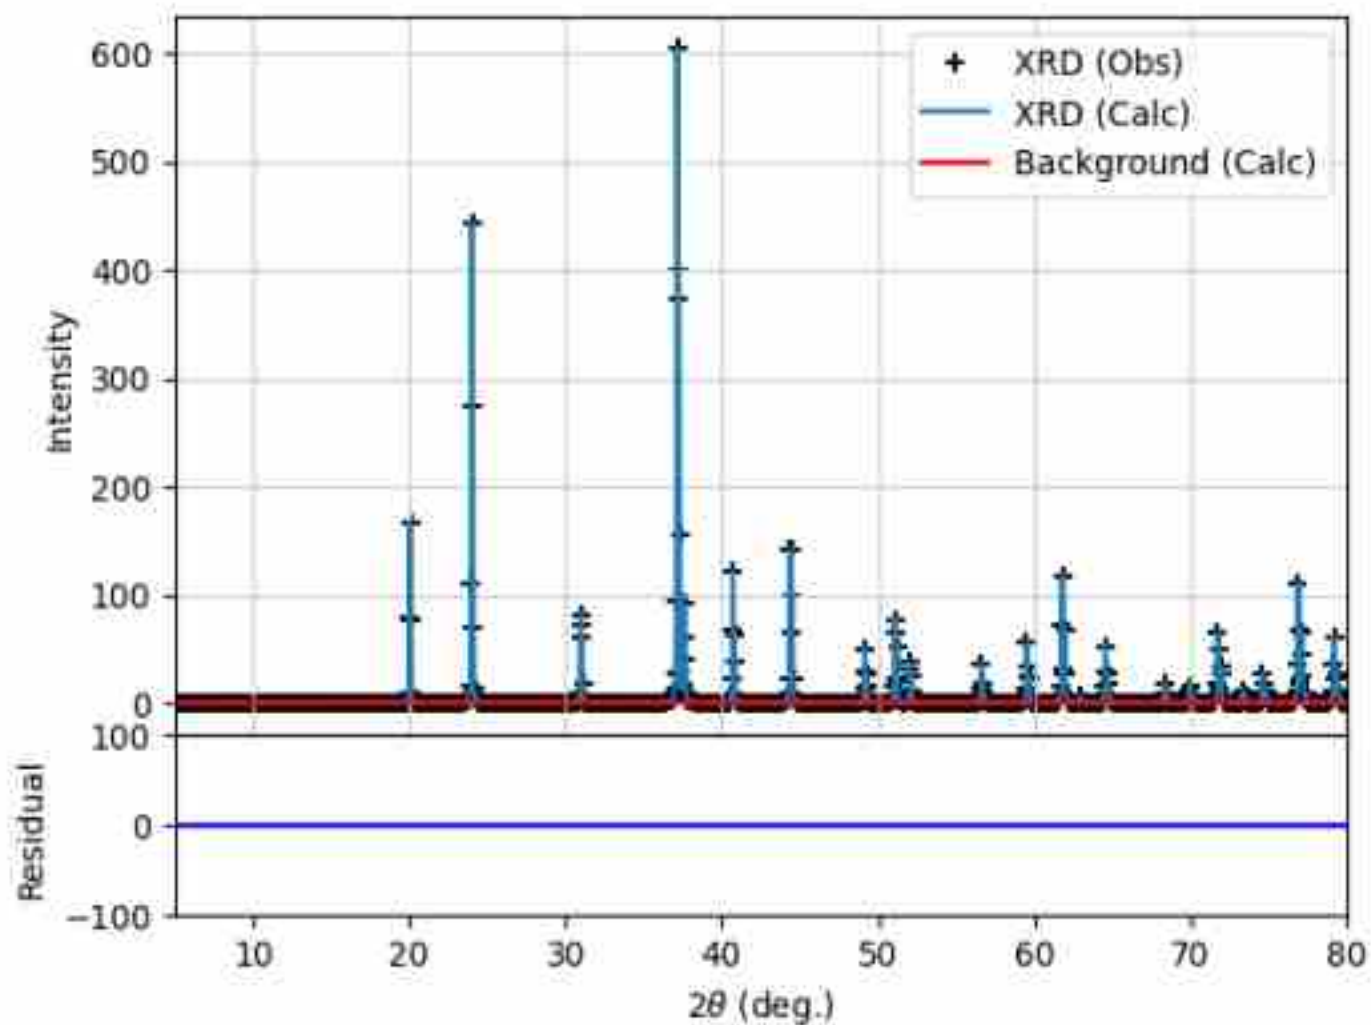

| RMSE before RR | Rwp     | RMSE after RR |
|----------------|---------|---------------|
| 0.002          | 0.00308 | 0.0029        |

# Ti3

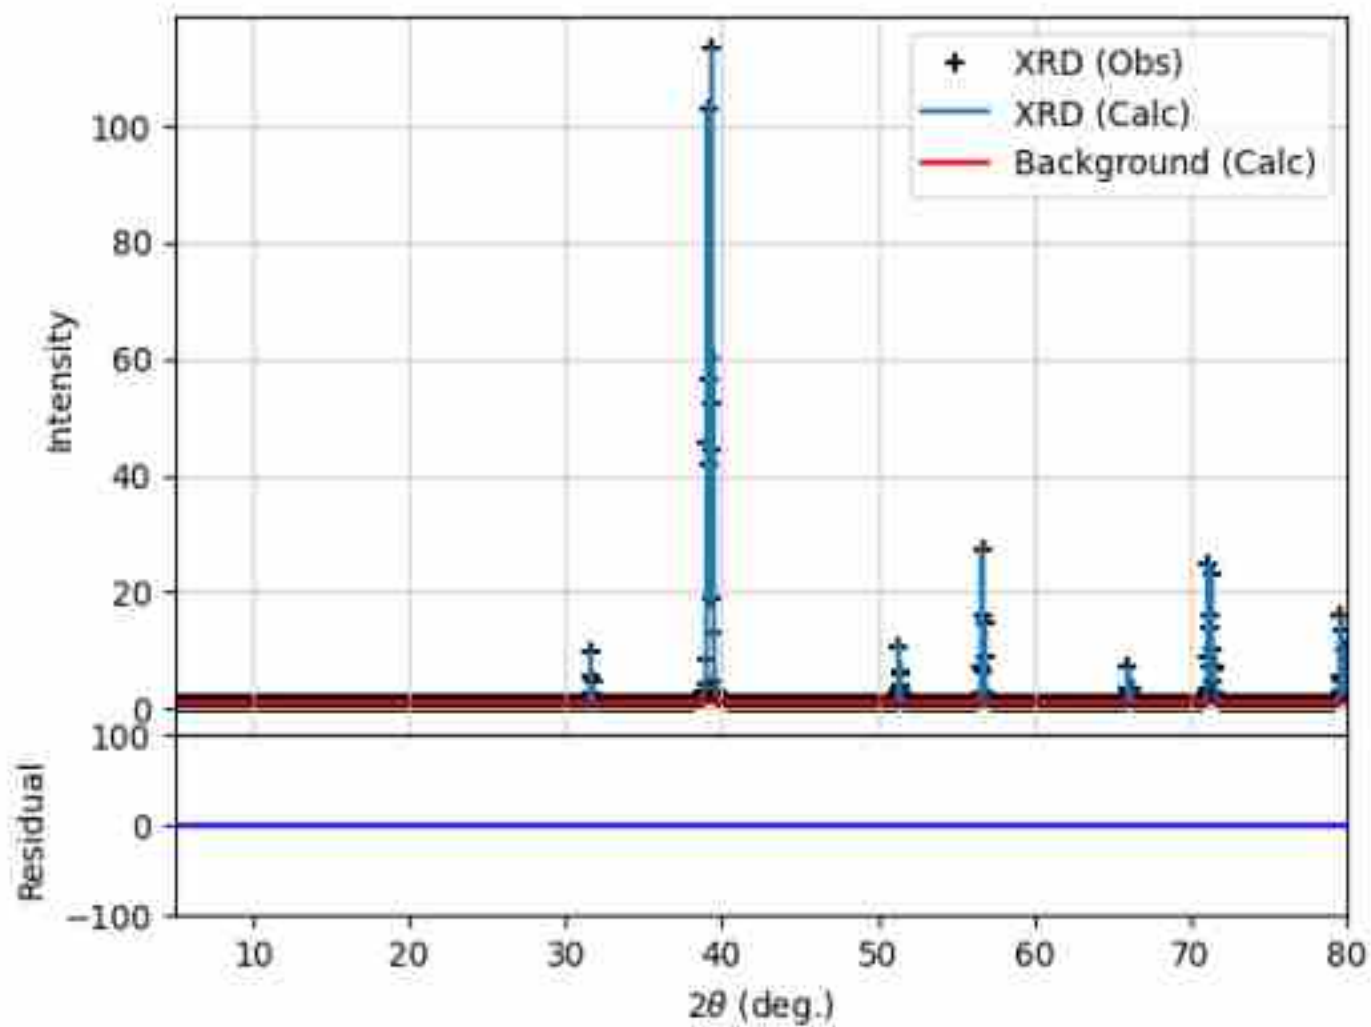

| RMSE before RR | Rwp     | RMSE after RR |
|----------------|---------|---------------|
| 0.002          | 0.00236 | 0.00048       |

# Ti<sub>8</sub>Co<sub>2</sub>Bi<sub>4</sub>

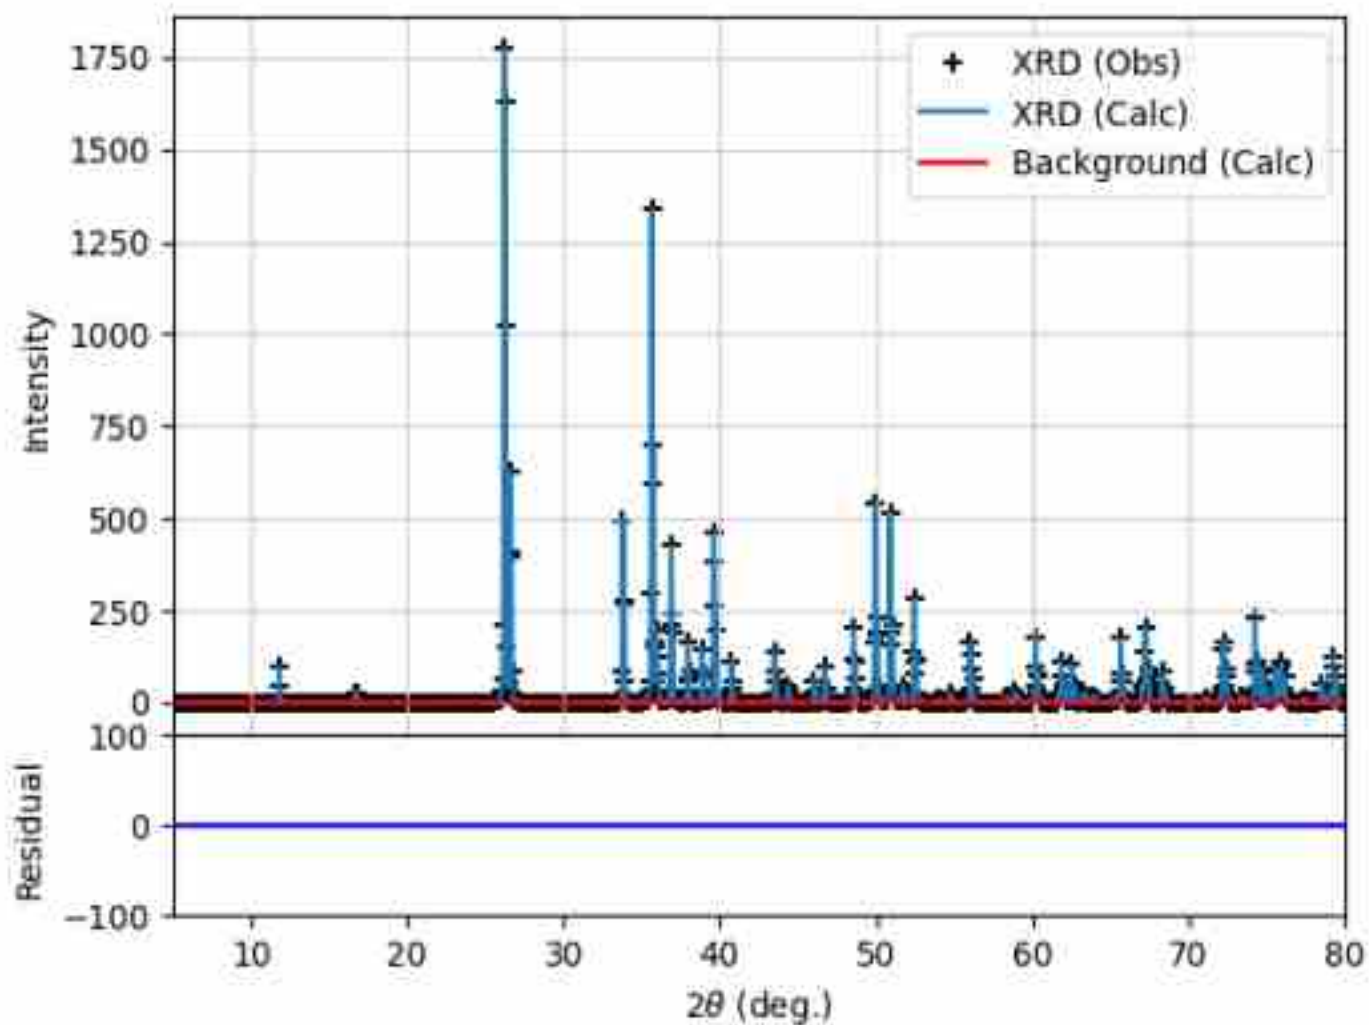

| RMSE before RR | Rwp     | RMSE after RR |
|----------------|---------|---------------|
| 0.02           | 0.00429 | 0.00079       |

# Ti10Cu2Bi6

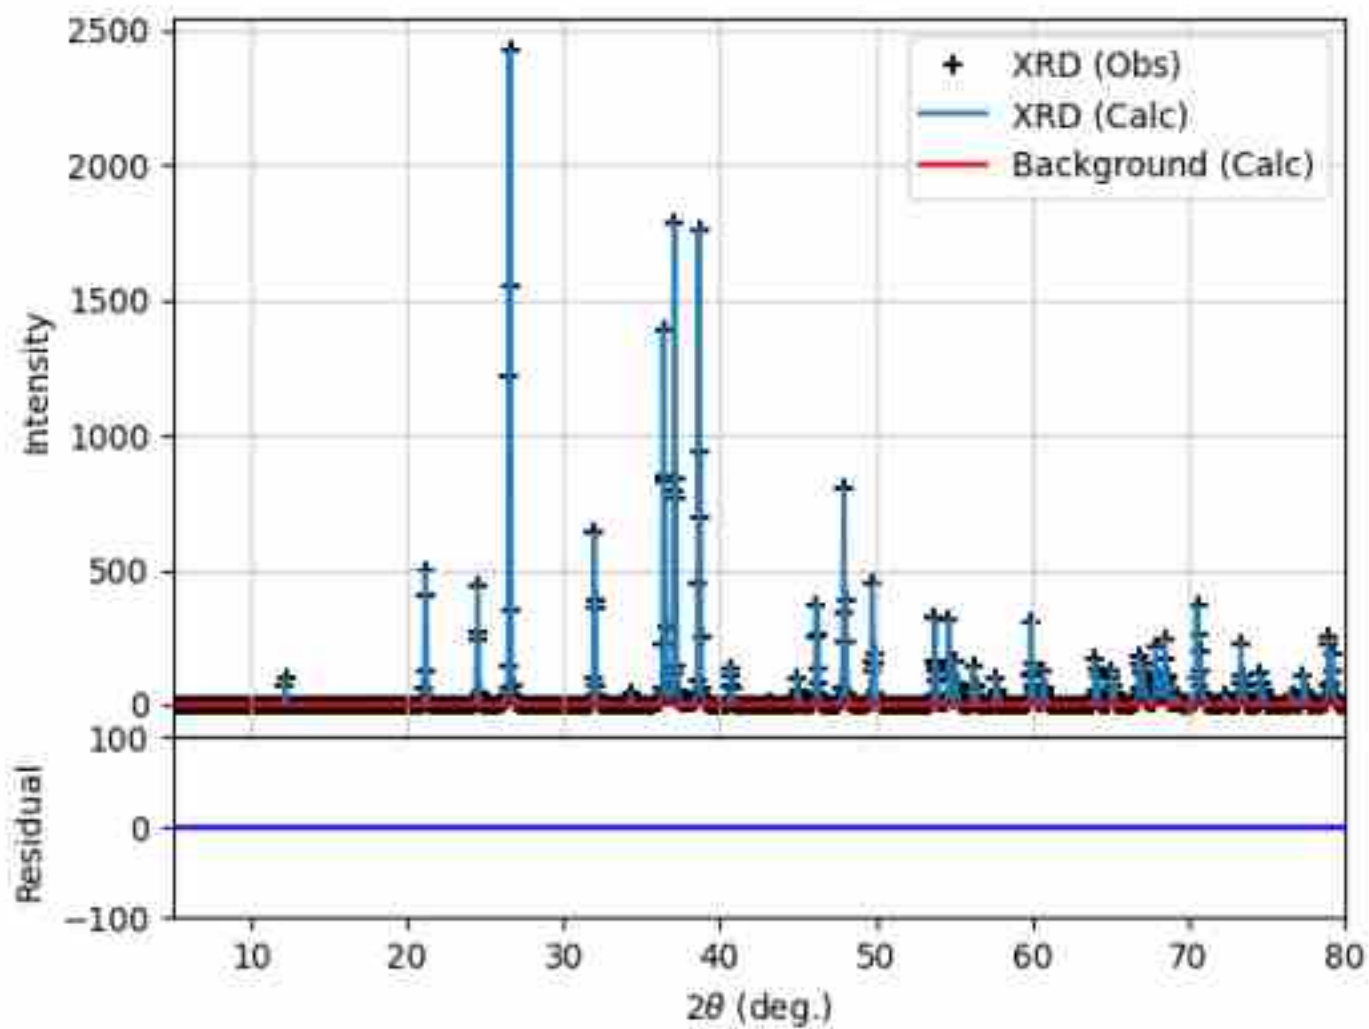

| RMSE before RR | Rwp     | RMSE after RR |
|----------------|---------|---------------|
| 0.02           | 0.00462 | 0.00089       |

# Ti10Fe2Sb4

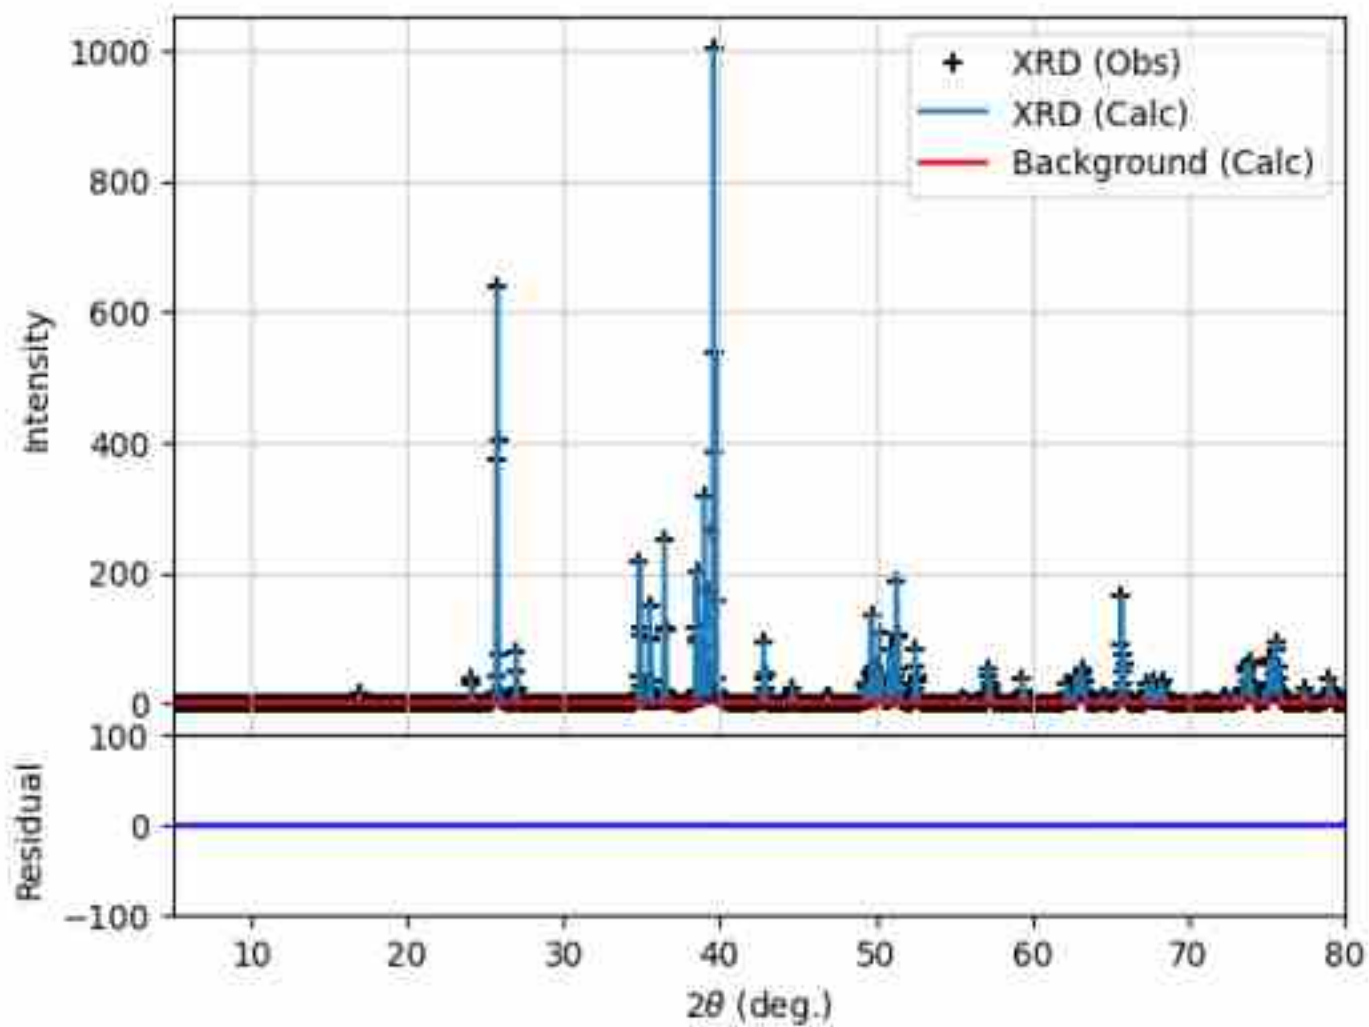

| RMSE before RR | Rwp     | RMSE after RR |
|----------------|---------|---------------|
| 0.02           | 1.72173 | 0.00557       |



# Tm1Ag1

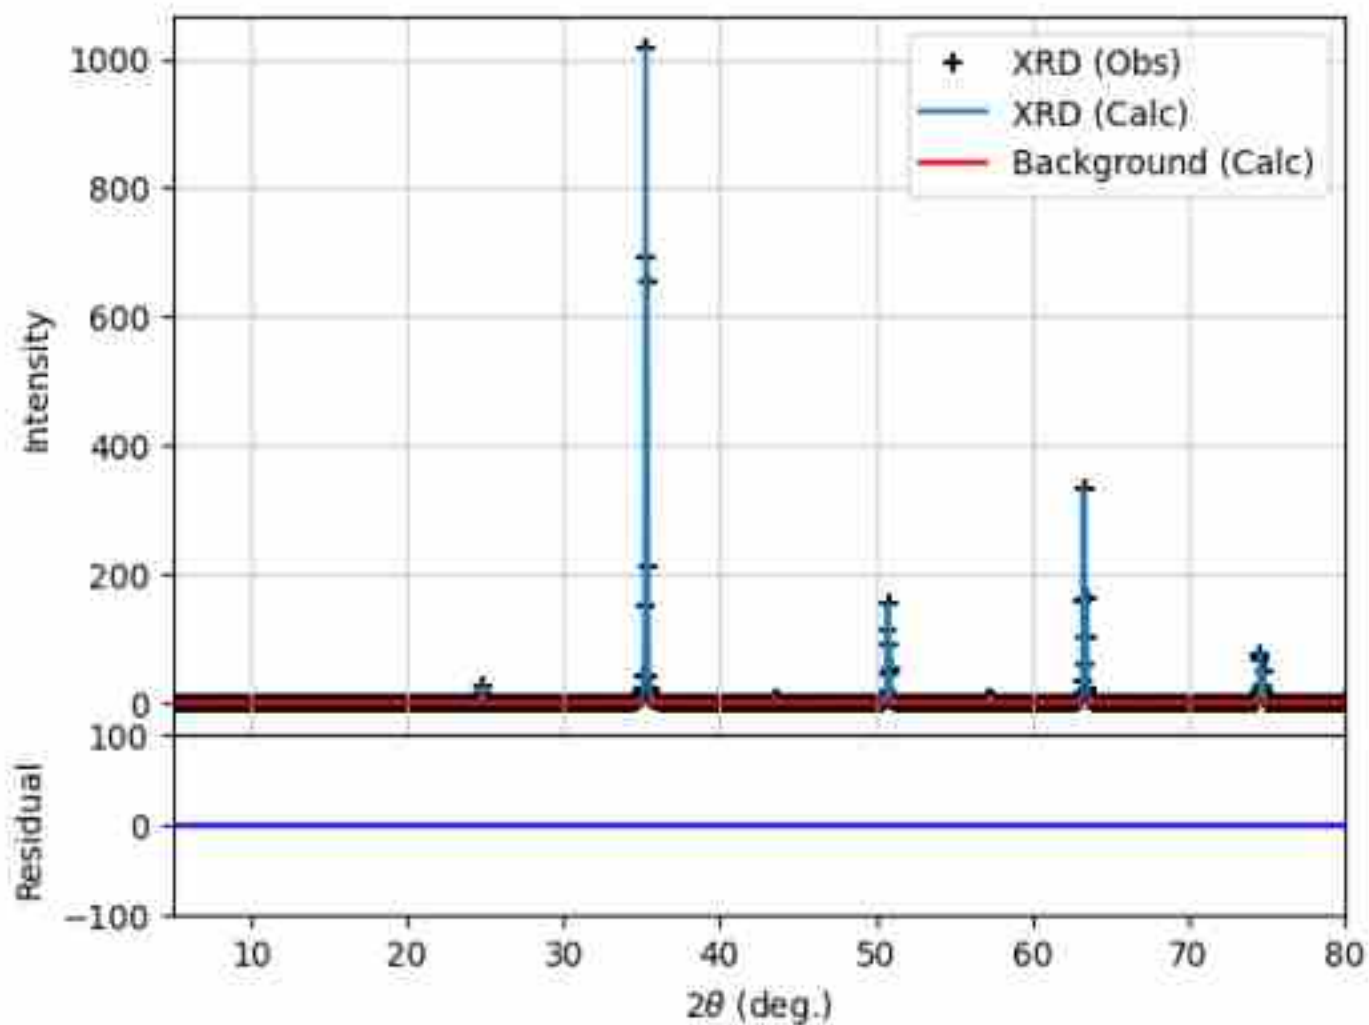

| RMSE before RR | Rwp    | RMSE after RR |
|----------------|--------|---------------|
| 0.002          | 0.0815 | 0.00141       |

# Tm1Cd1Ag2

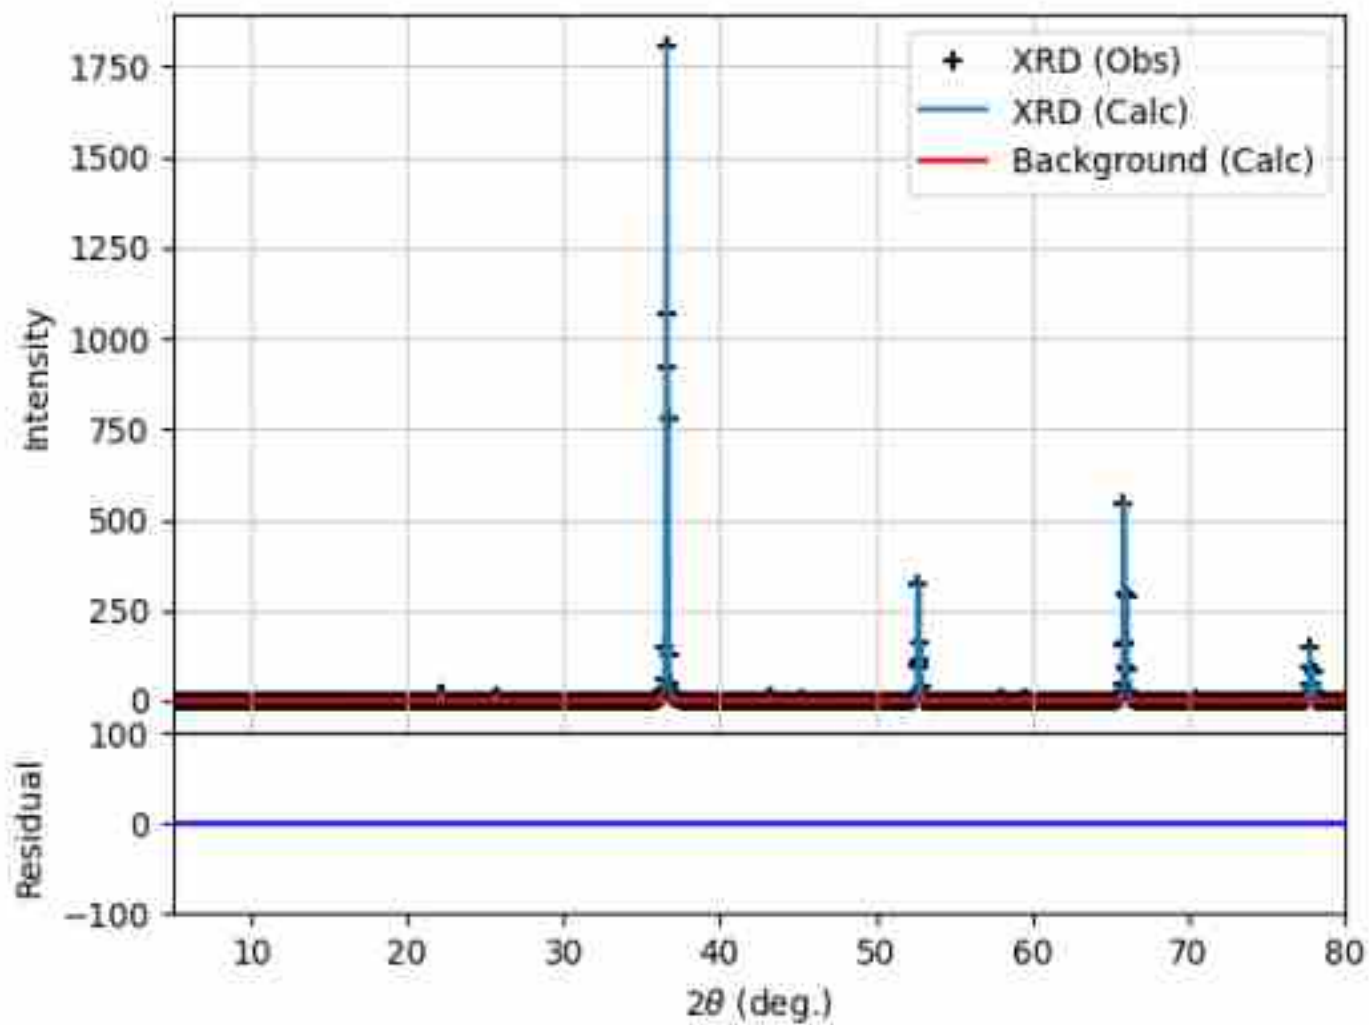

| RMSE before RR | Rwp | RMSE after RR |
|----------------|-----|---------------|
| 0.002          | 0.0 | 1e-05         |

# Tm<sub>1</sub>Fe<sub>4</sub>Cu<sub>3</sub>O<sub>12</sub>

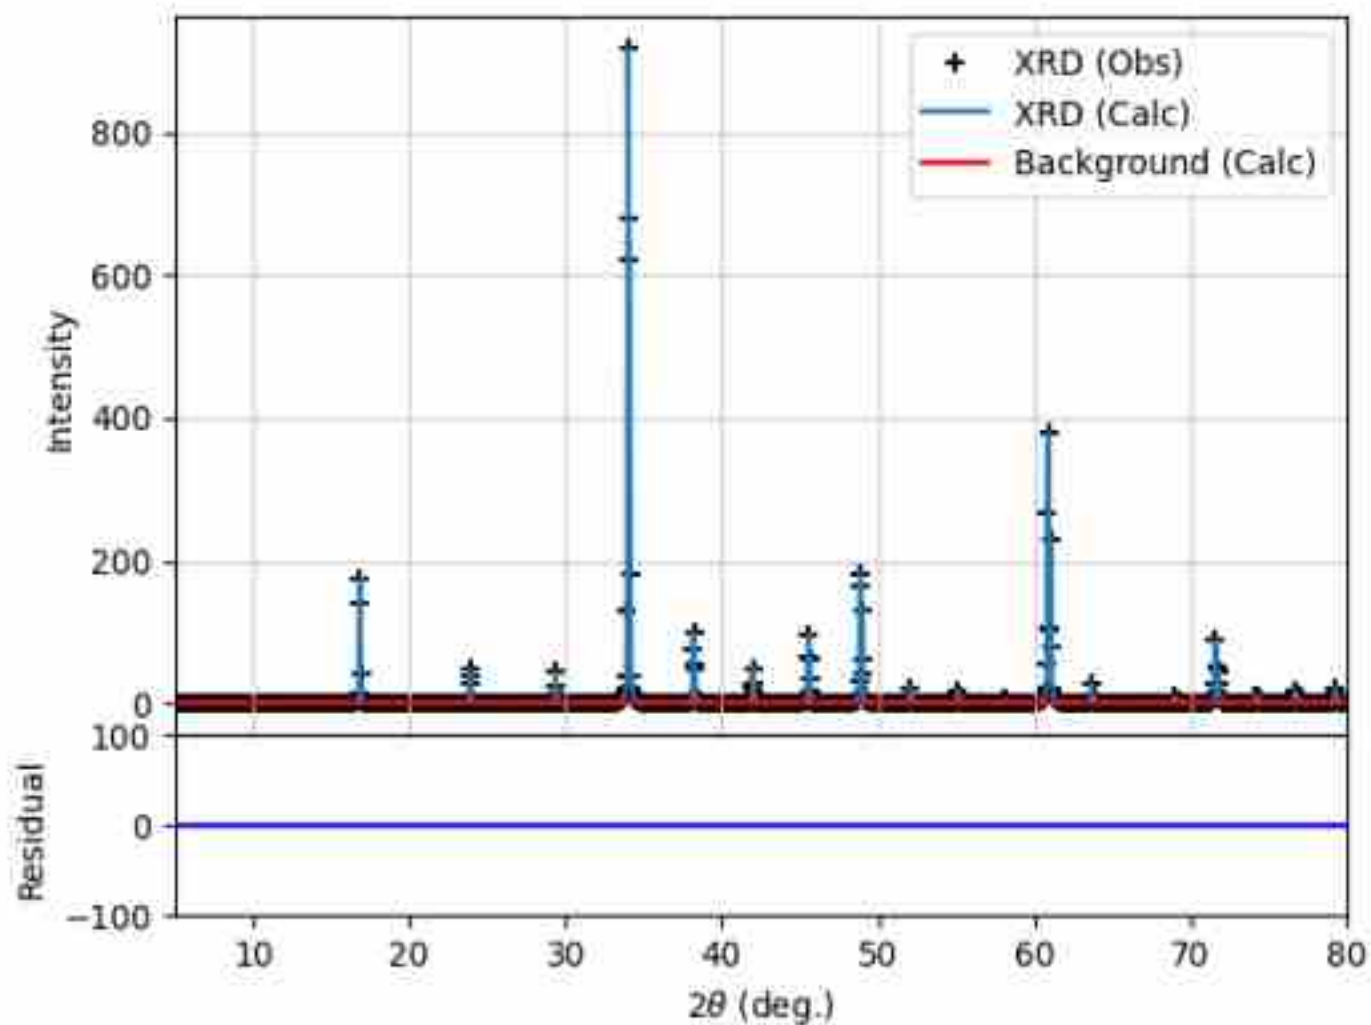

| RMSE before RR | Rwp     | RMSE after RR |
|----------------|---------|---------------|
| 0.02           | 0.00869 | 0.00433       |

# Tm1Ga1Rh2

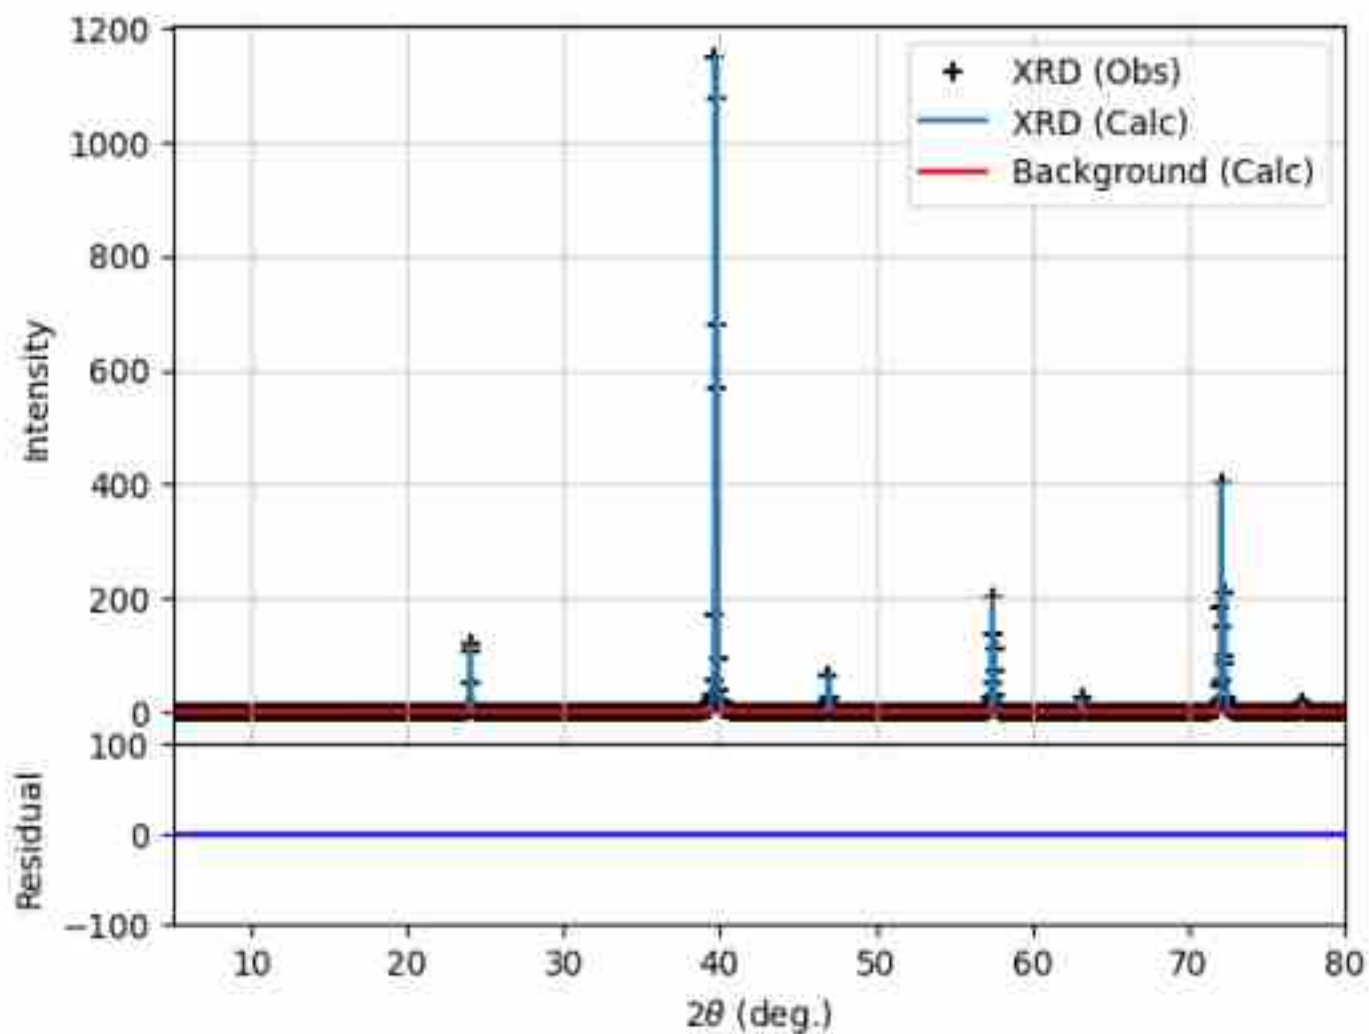

| RMSE before RR | Rwp     | RMSE after RR |
|----------------|---------|---------------|
| 0.002          | 0.02168 | 0.00107       |

Tm1In2Sn1

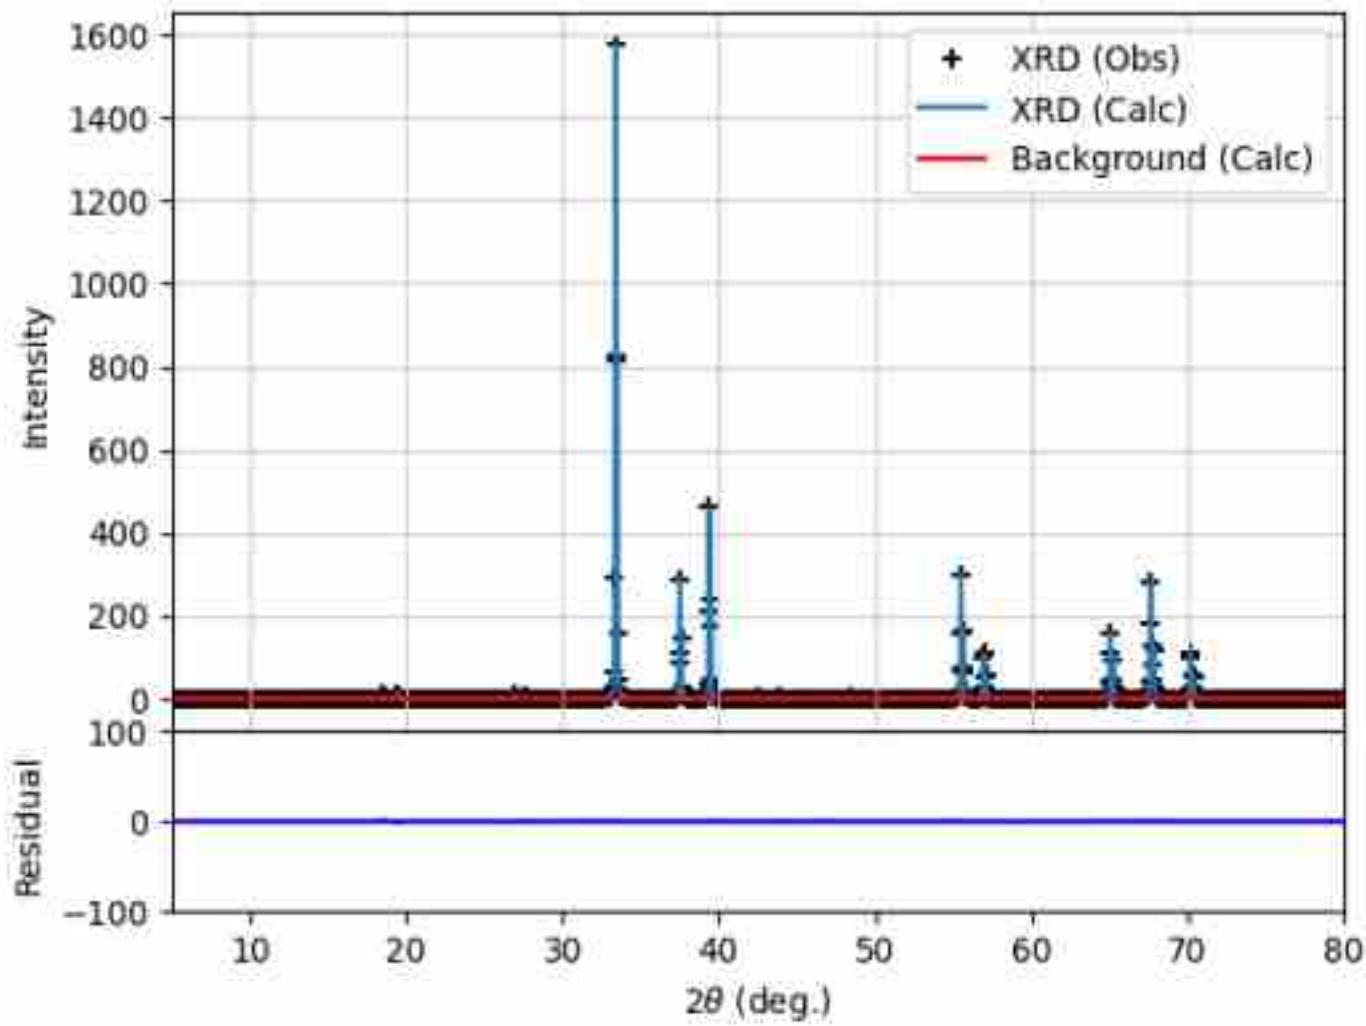

| RMSE before RR | Rwp     | RMSE after RR |
|----------------|---------|---------------|
| 0.002          | 1.66044 | 0.00133       |

# Tm1Lu1Zn2

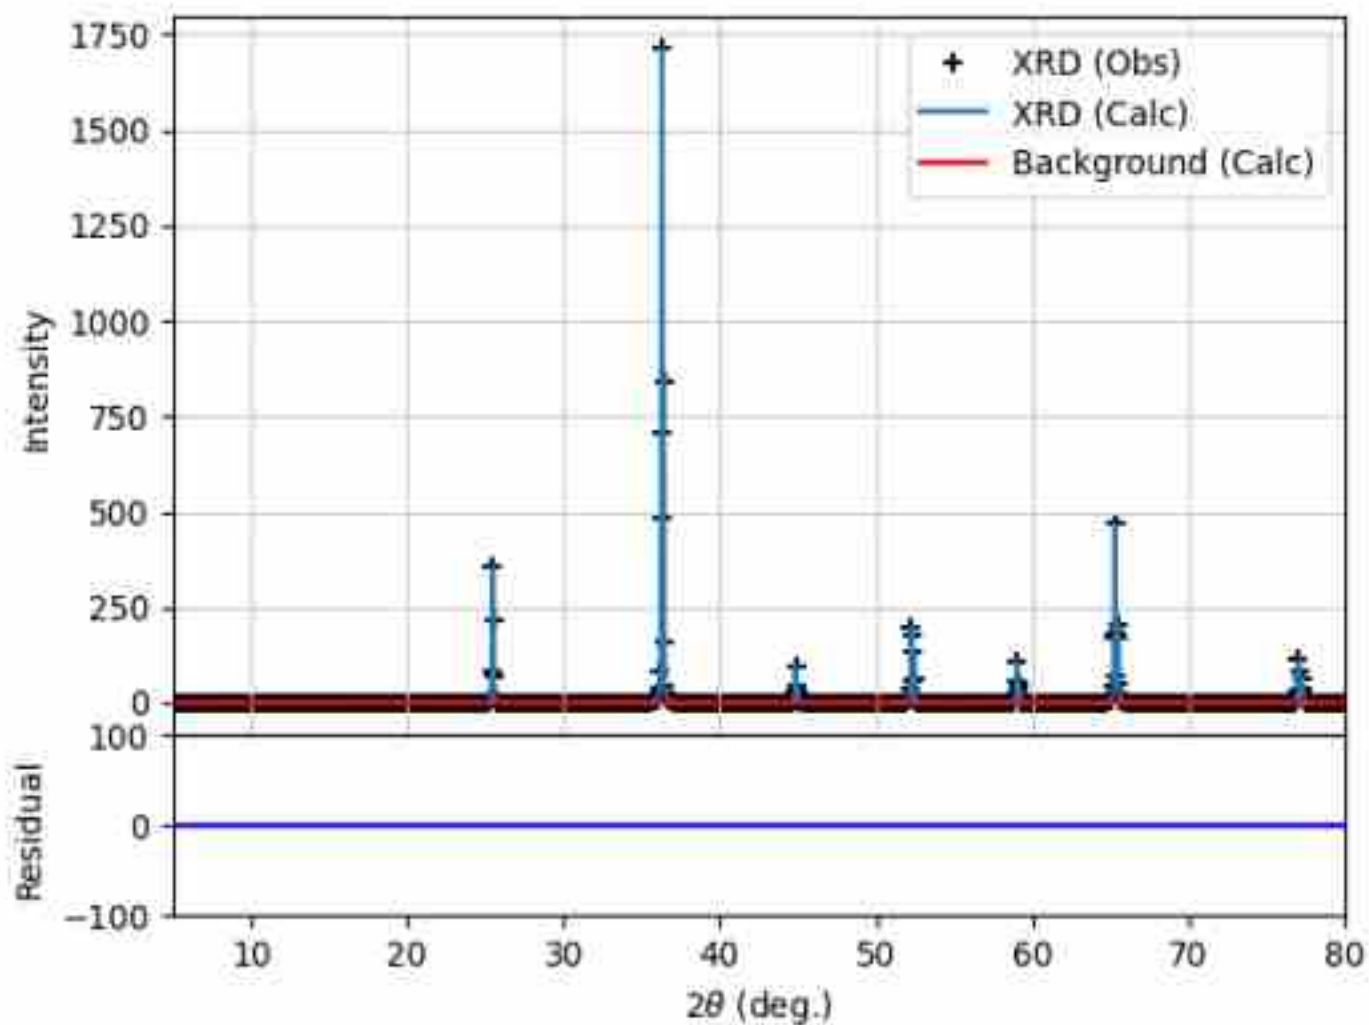

| RMSE before RR | Rwp     | RMSE after RR |
|----------------|---------|---------------|
| 0.002          | 0.02534 | 0.00421       |

# TmMg2

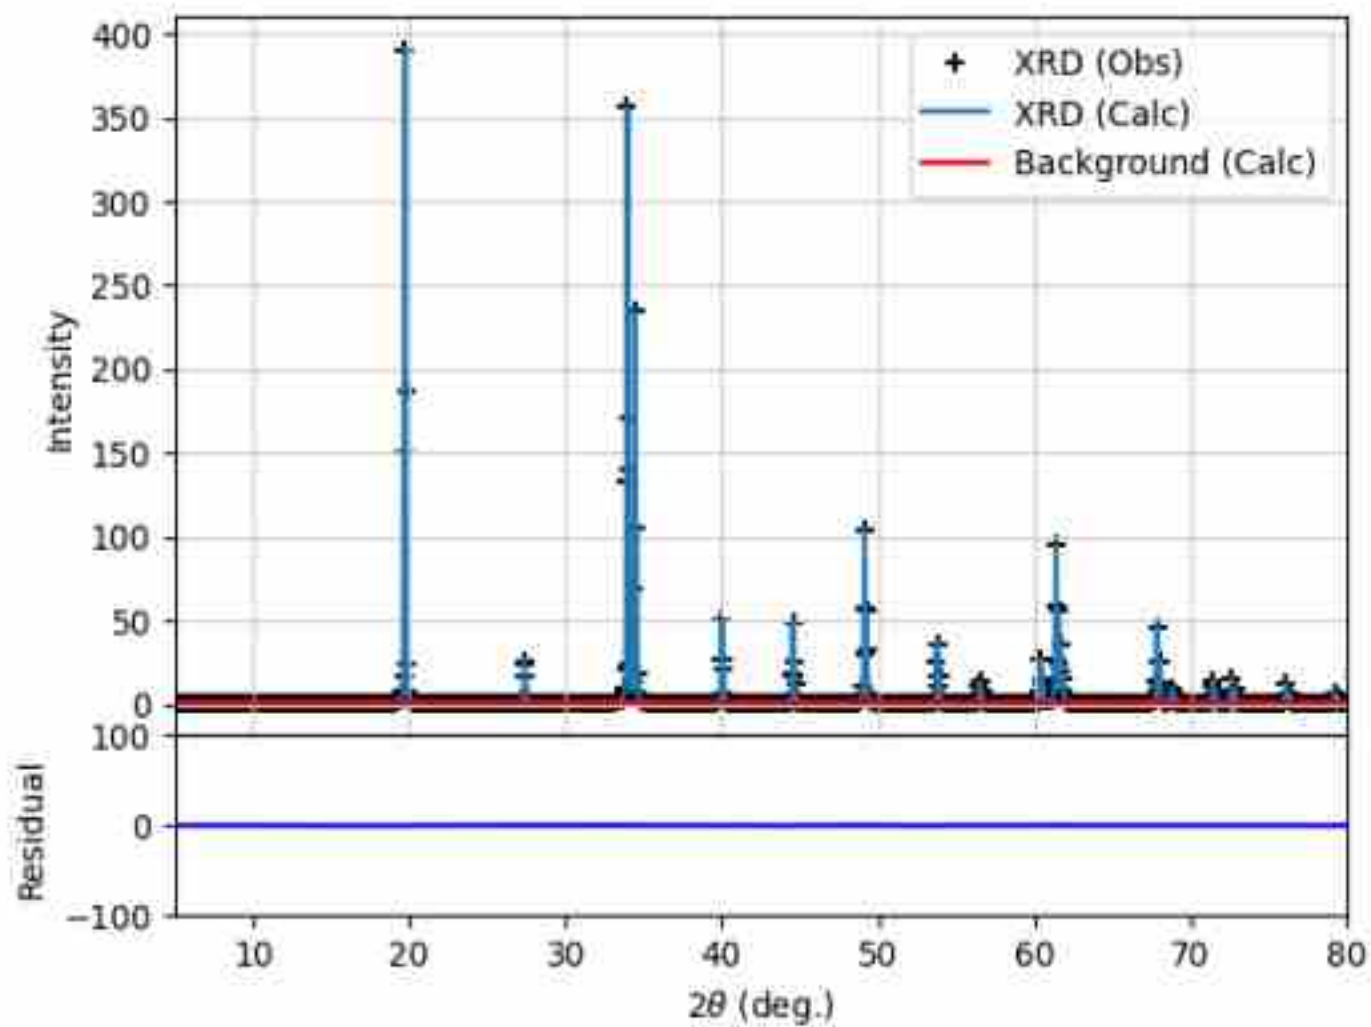

| RMSE before RR | Rwp     | RMSE after RR |
|----------------|---------|---------------|
| 0.002          | 0.60072 | 0.00377       |

# Tm1Pt3

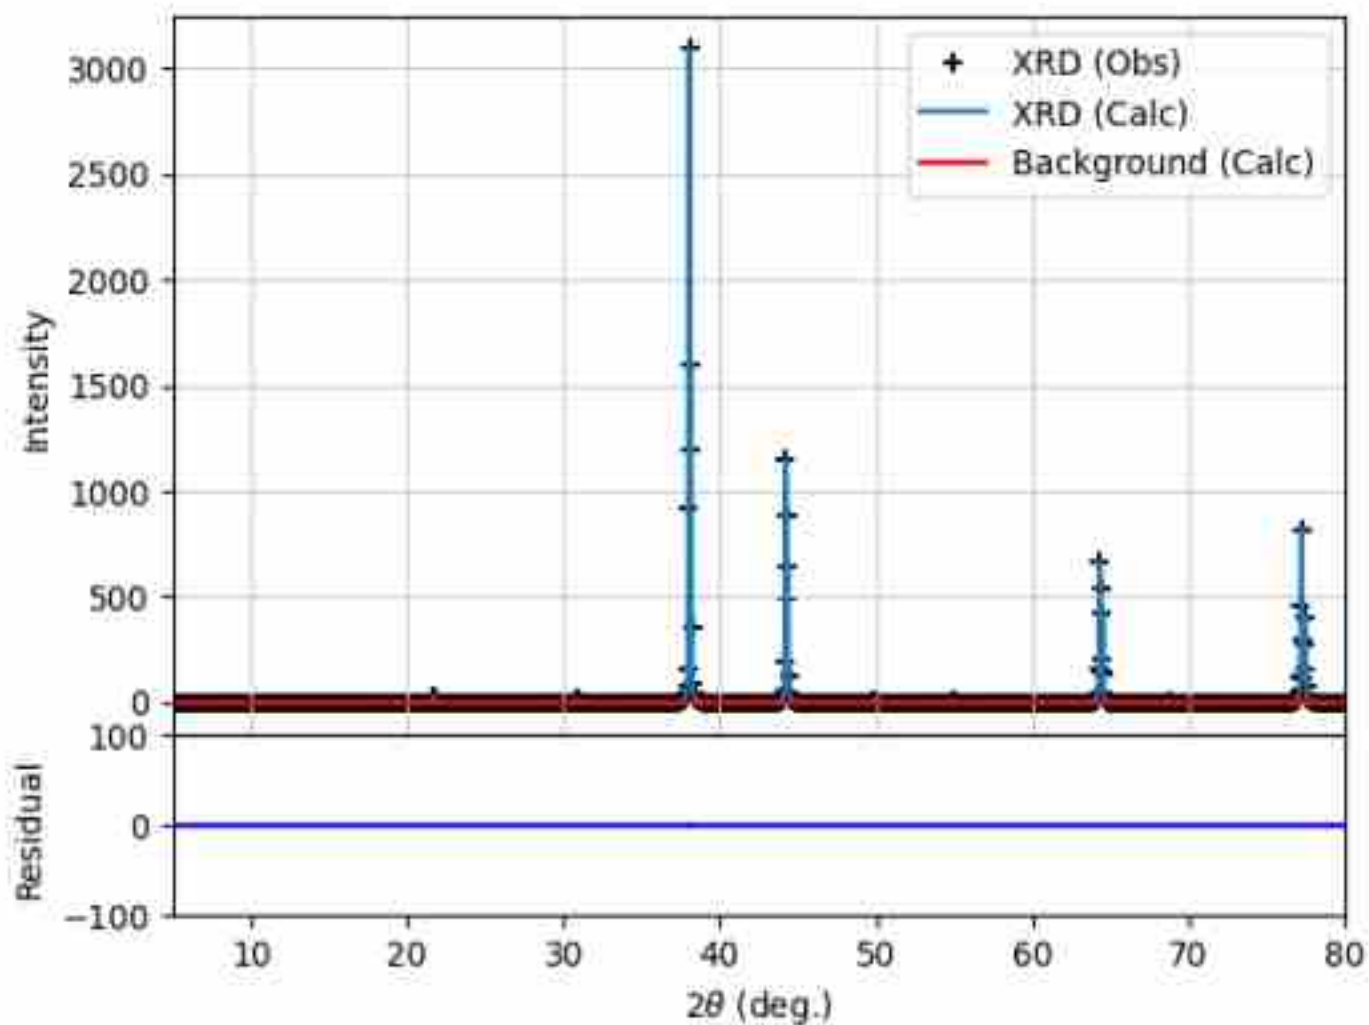

| RMSE before RR | Rwp     | RMSE after RR |
|----------------|---------|---------------|
| 0.002          | 0.01647 | 0.00073       |



# Tm1Sc1Hg2

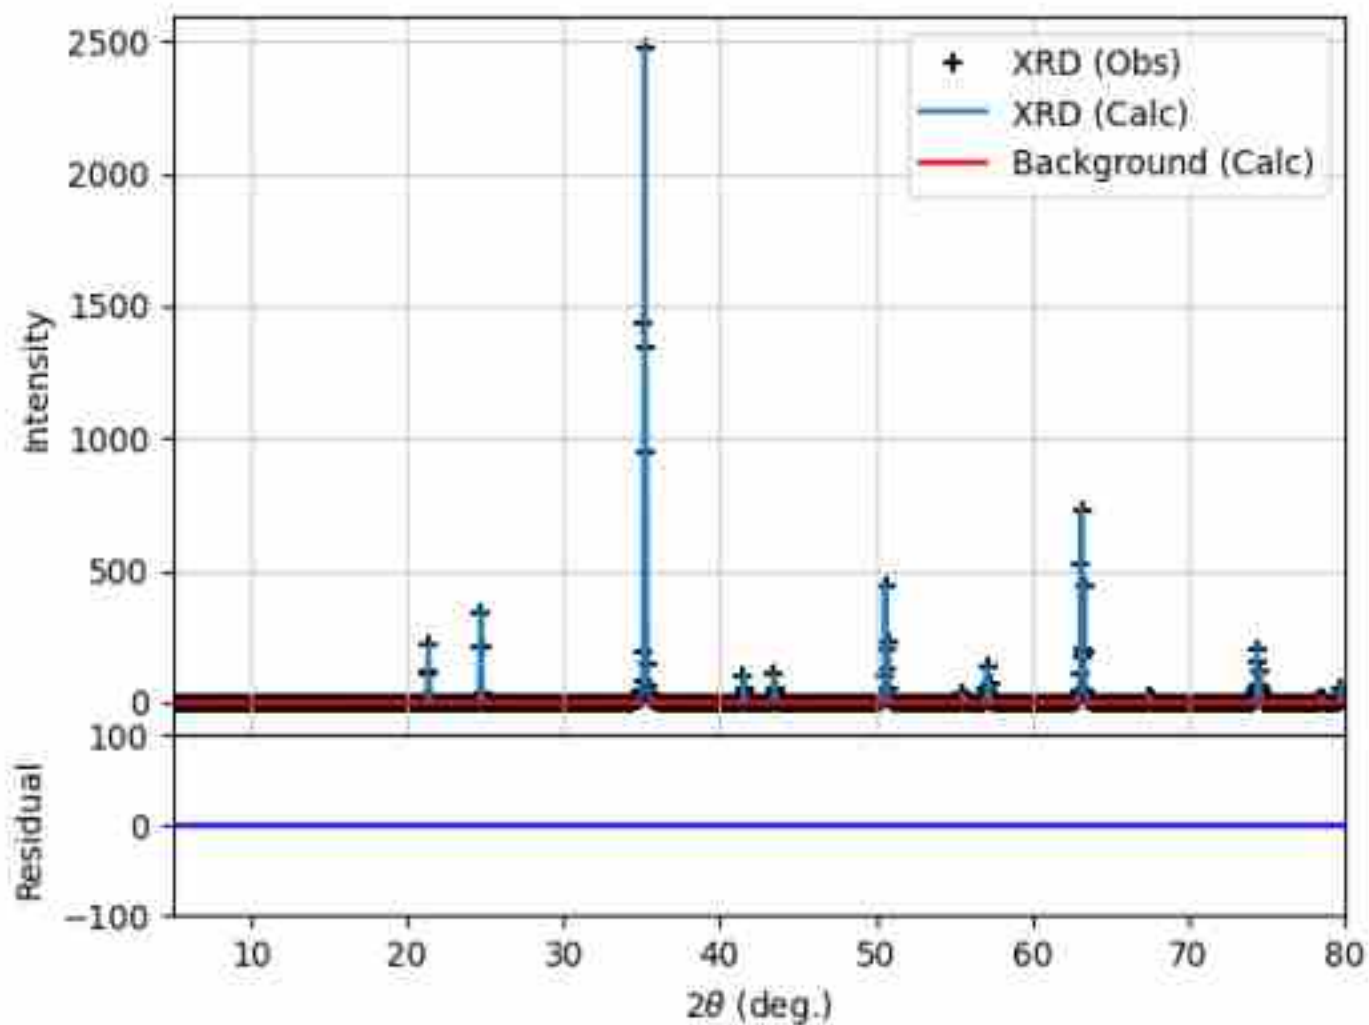

| RMSE before RR | Rwp     | RMSE after RR |
|----------------|---------|---------------|
| 0.002          | 0.00373 | 0.00043       |

# Tm1Se1

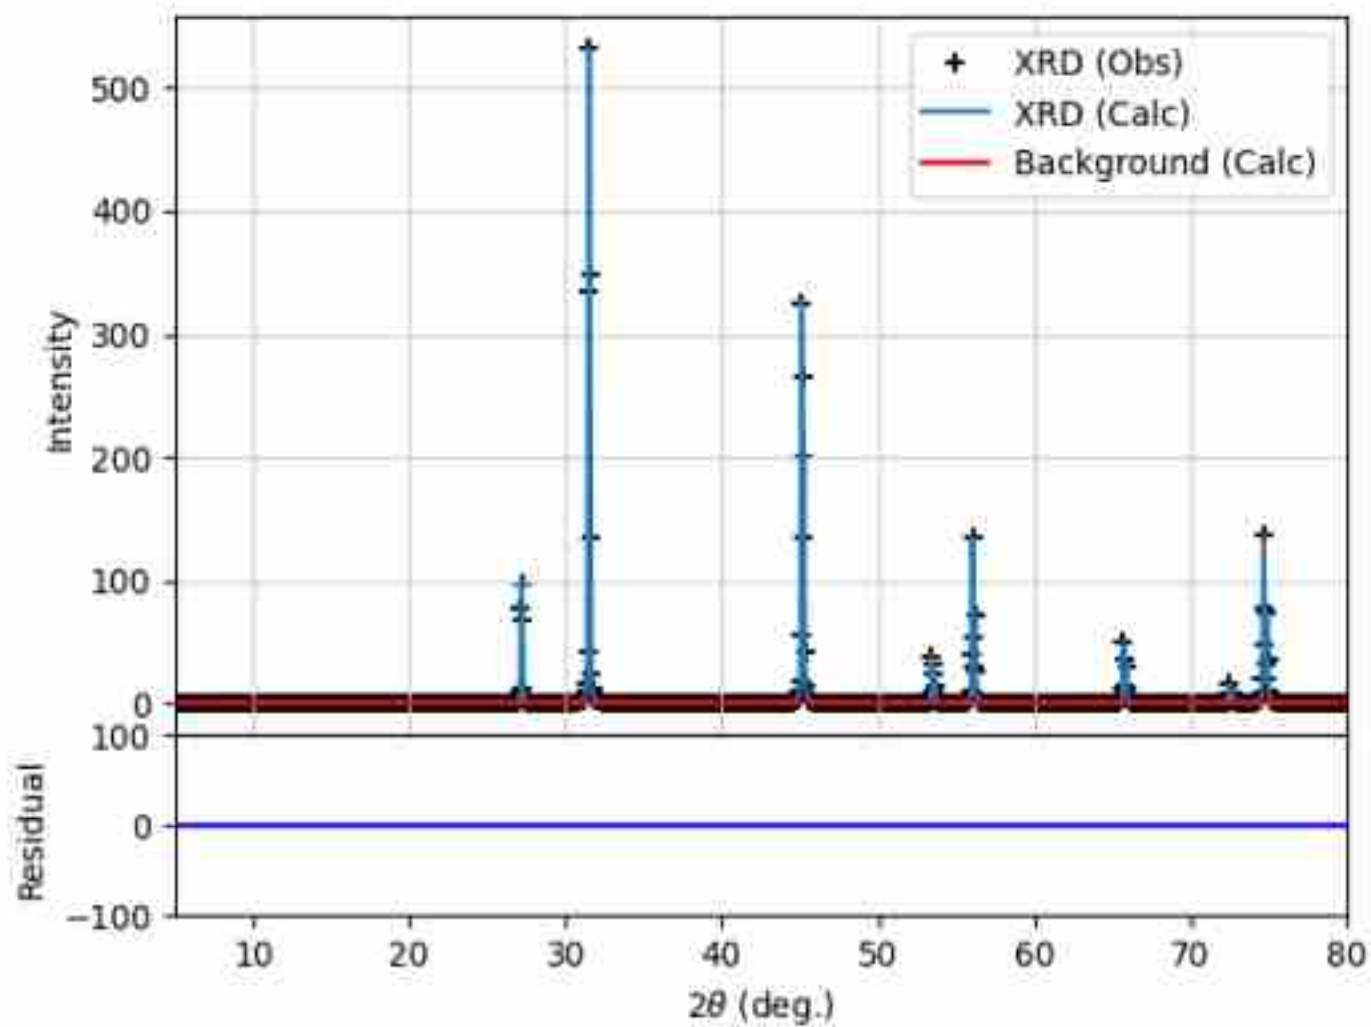

| RMSE before RR | Rwp     | RMSE after RR |
|----------------|---------|---------------|
| 0.002          | 0.00881 | 0.00085       |

# Tm1Sn1Ru2

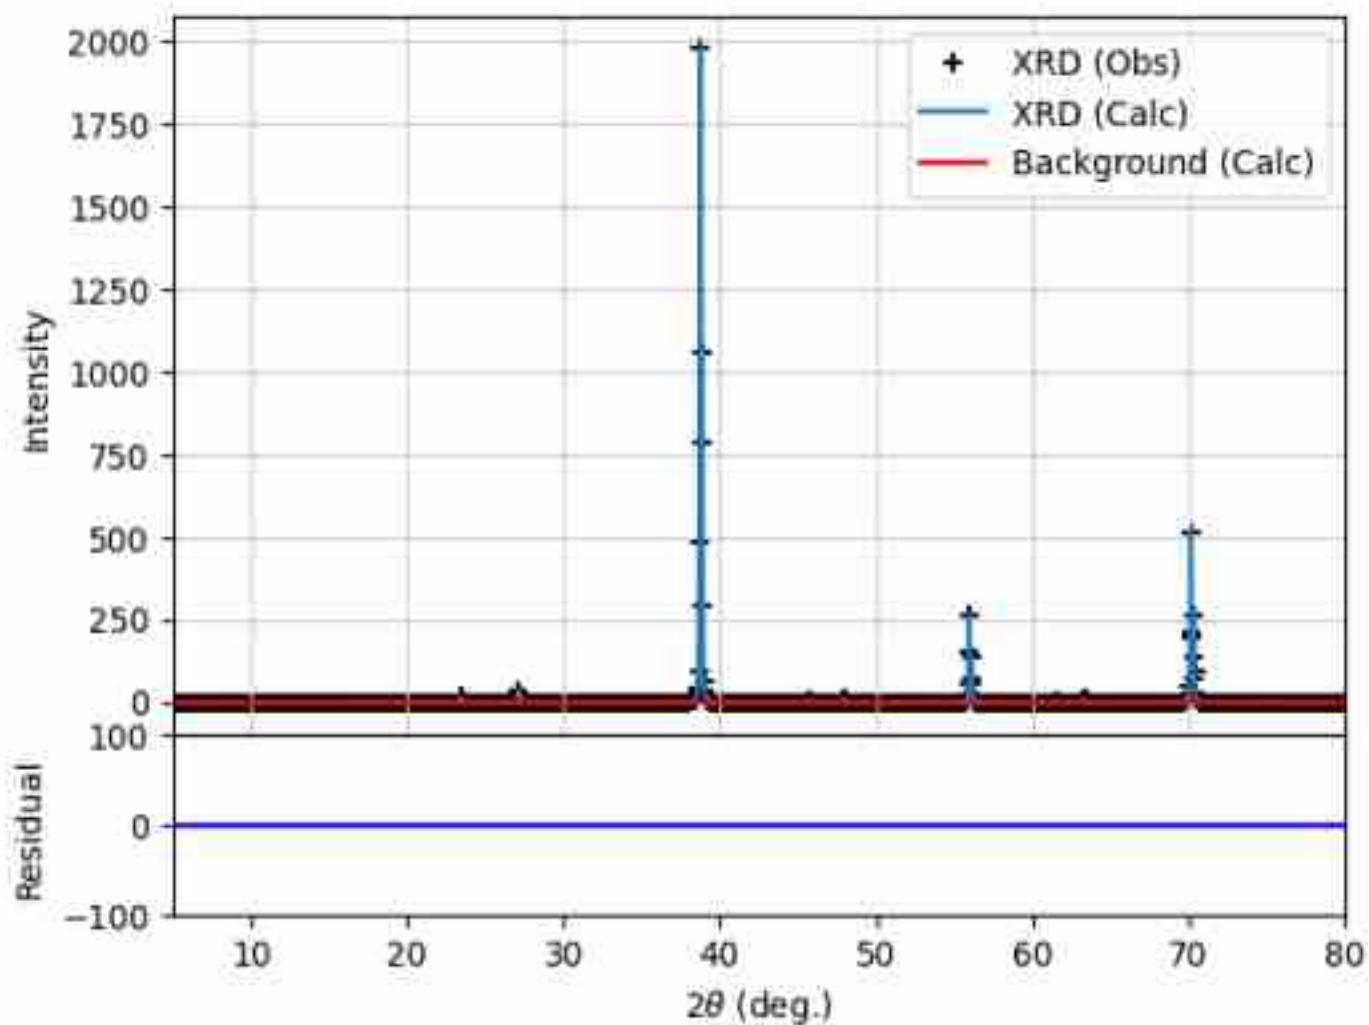

| RMSE before RR | Rwp     | RMSE after RR |
|----------------|---------|---------------|
| 0.002          | 0.00173 | 0.0006        |

# Tm1Te1

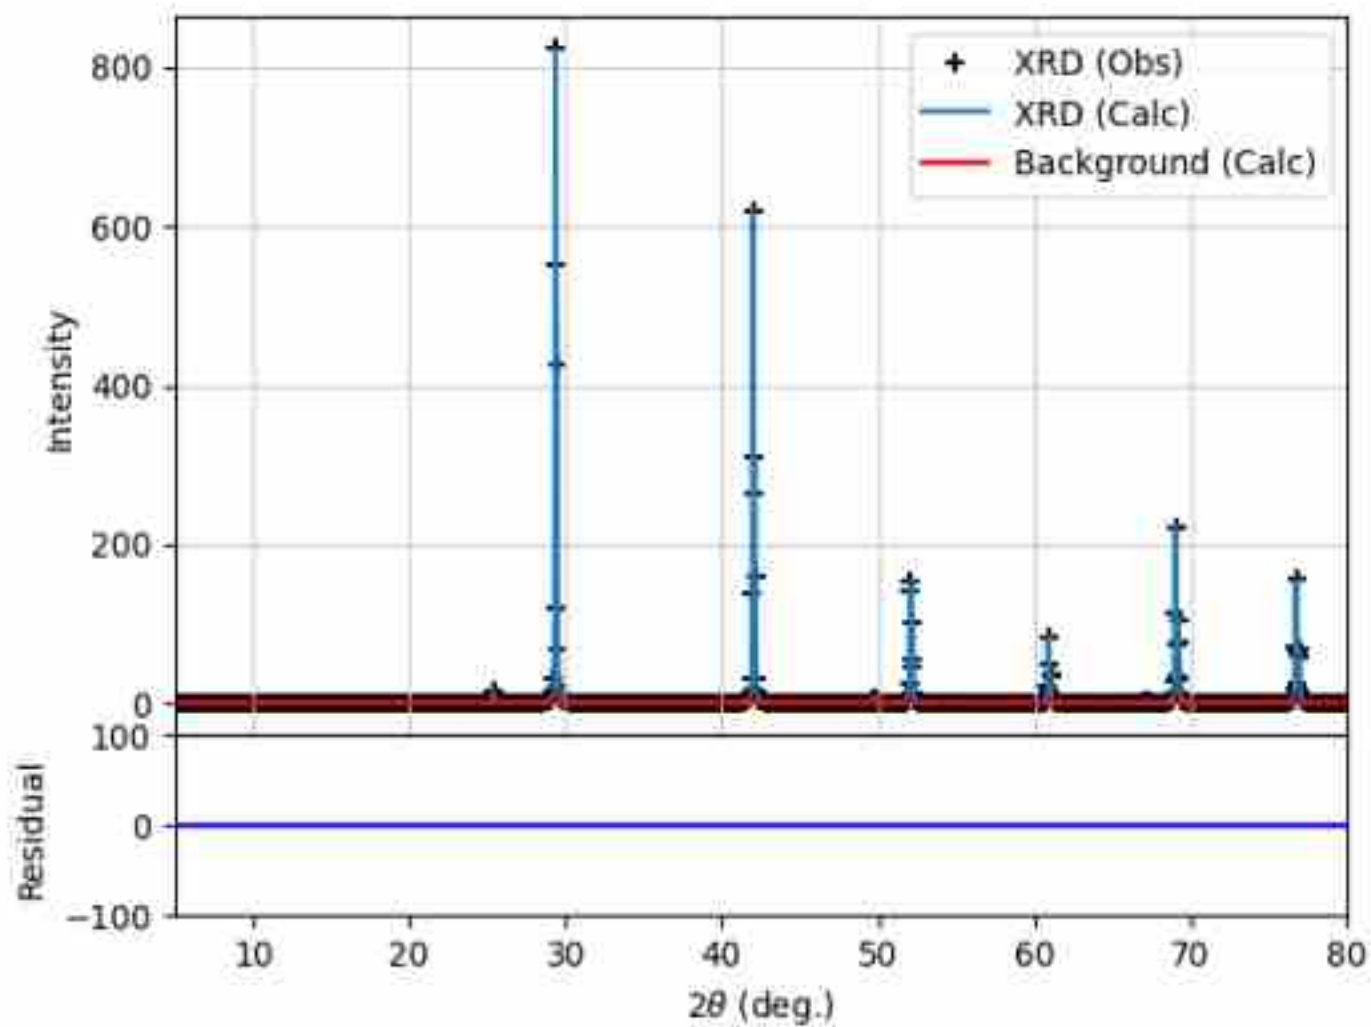

| RMSE before RR | Rwp     | RMSE after RR |
|----------------|---------|---------------|
| 0.002          | 0.23882 | 0.00122       |

# Tm1Tl1Rh2

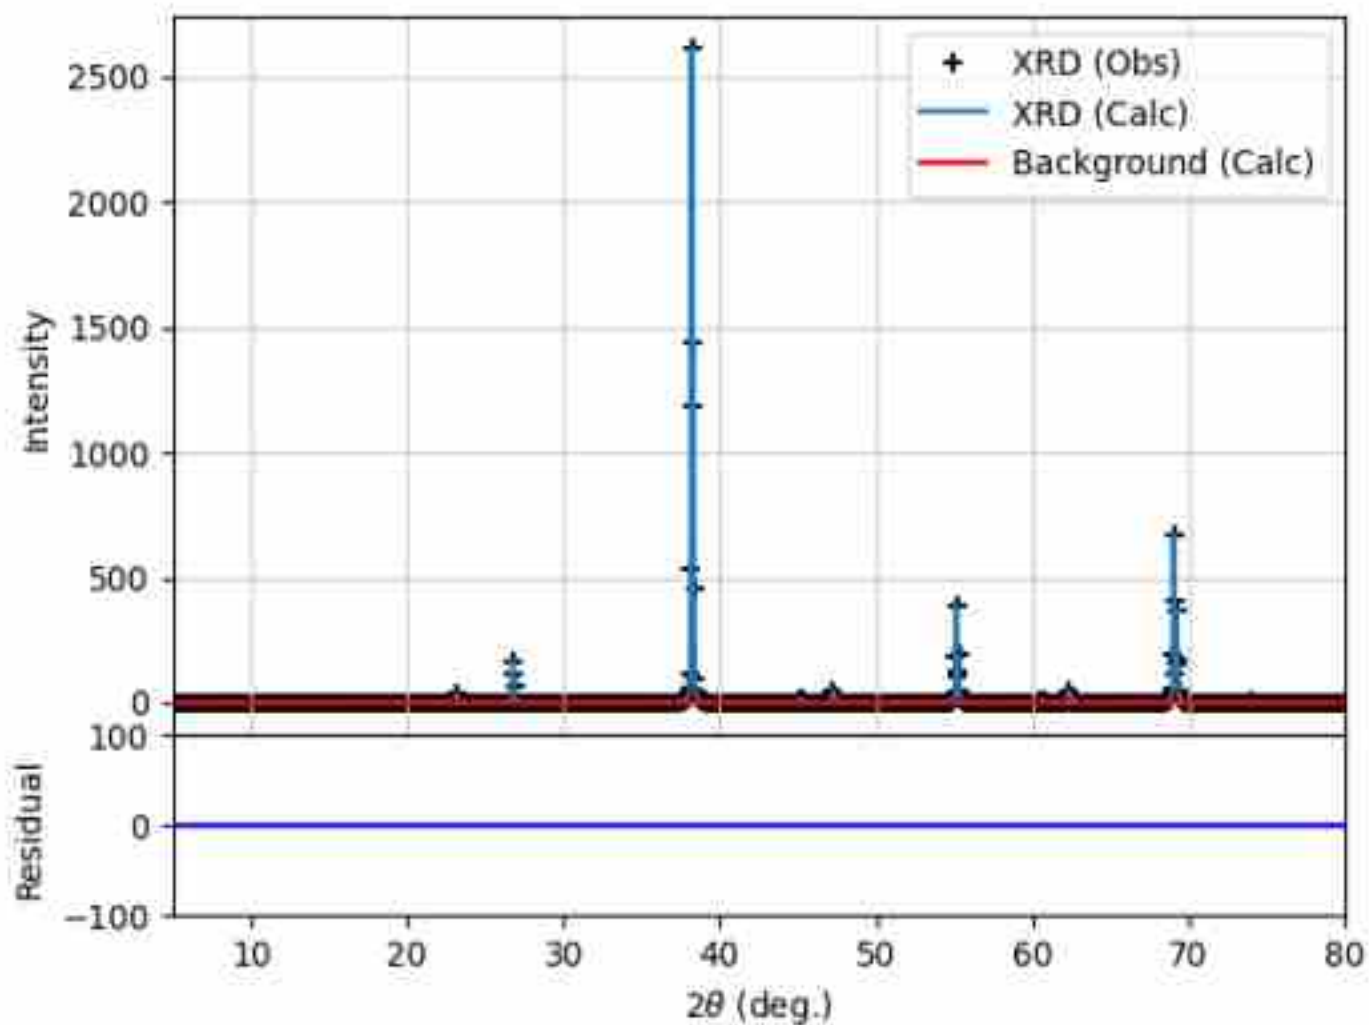

| RMSE before RR | Rwp     | RMSE after RR |
|----------------|---------|---------------|
| 0.002          | 0.00568 | 0.00054       |

# Tm<sub>2</sub>AgI<sub>4</sub>AuI

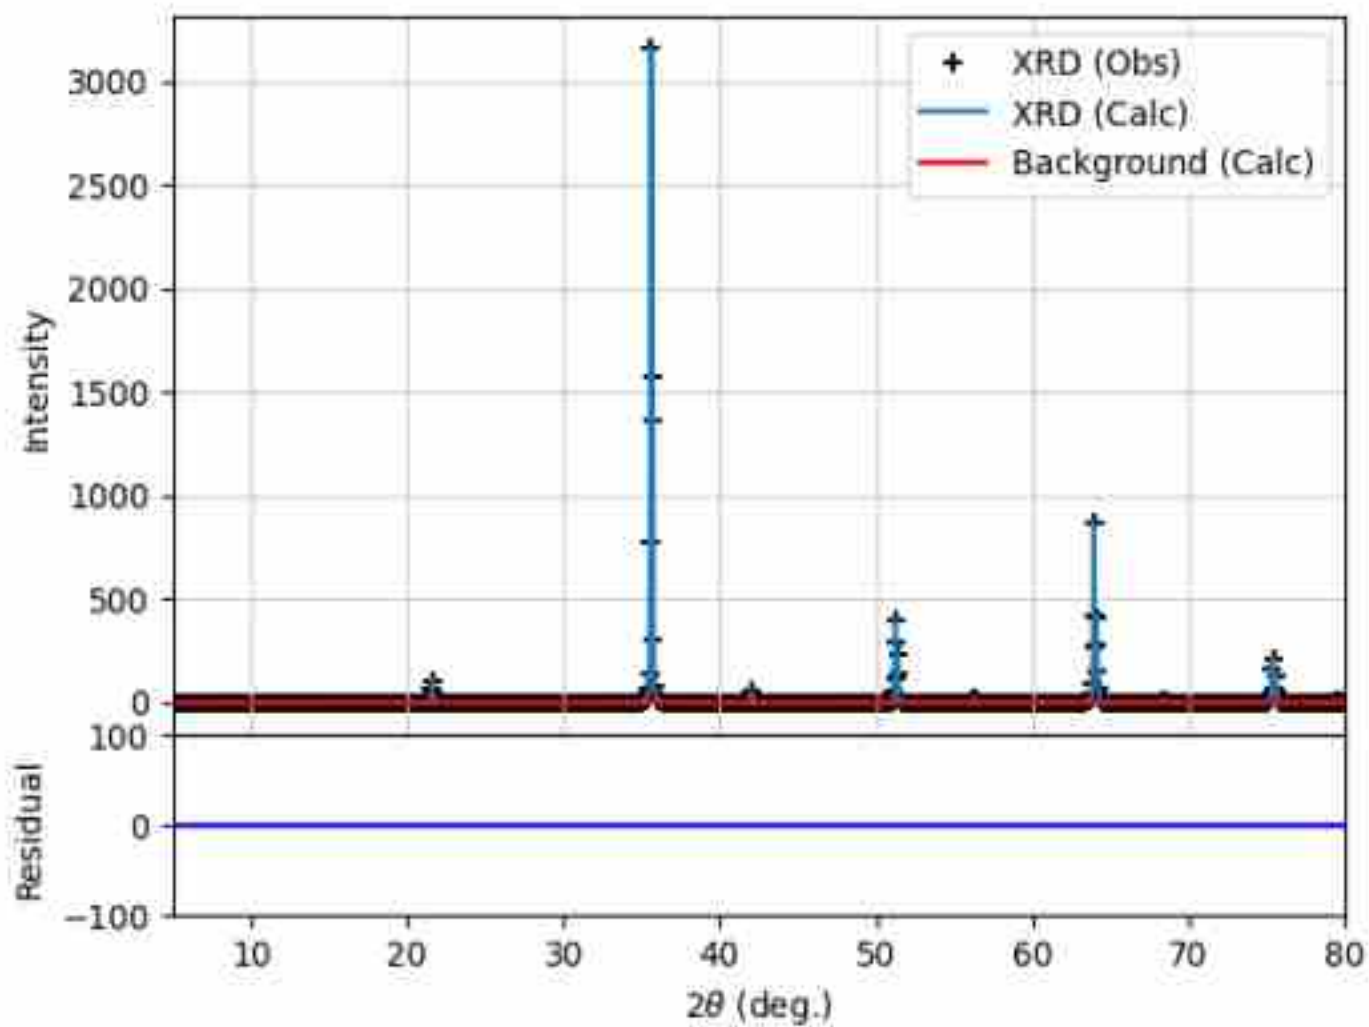

| RMSE before RR | Rwp     | RMSE after RR |
|----------------|---------|---------------|
| 0.002          | 0.00409 | 0.00019       |

# Tm<sub>2</sub>Cd<sub>10</sub>S<sub>1</sub>

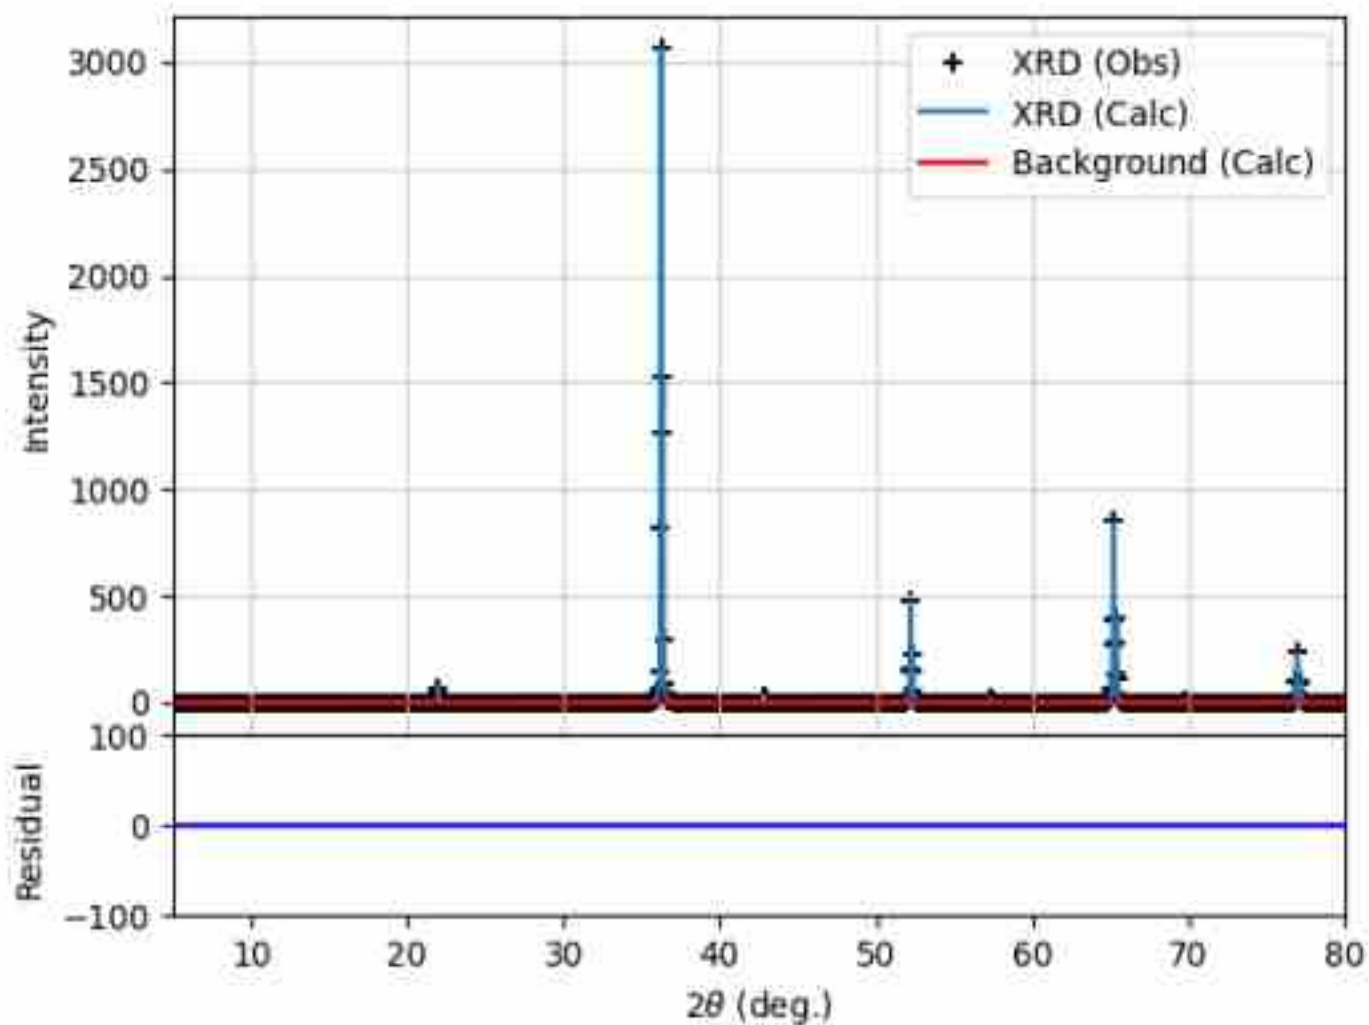

| RMSE before RR | Rwp    | RMSE after RR |
|----------------|--------|---------------|
| 0.002          | 0.2961 | 0.00234       |

# Tm<sub>2</sub>InHg

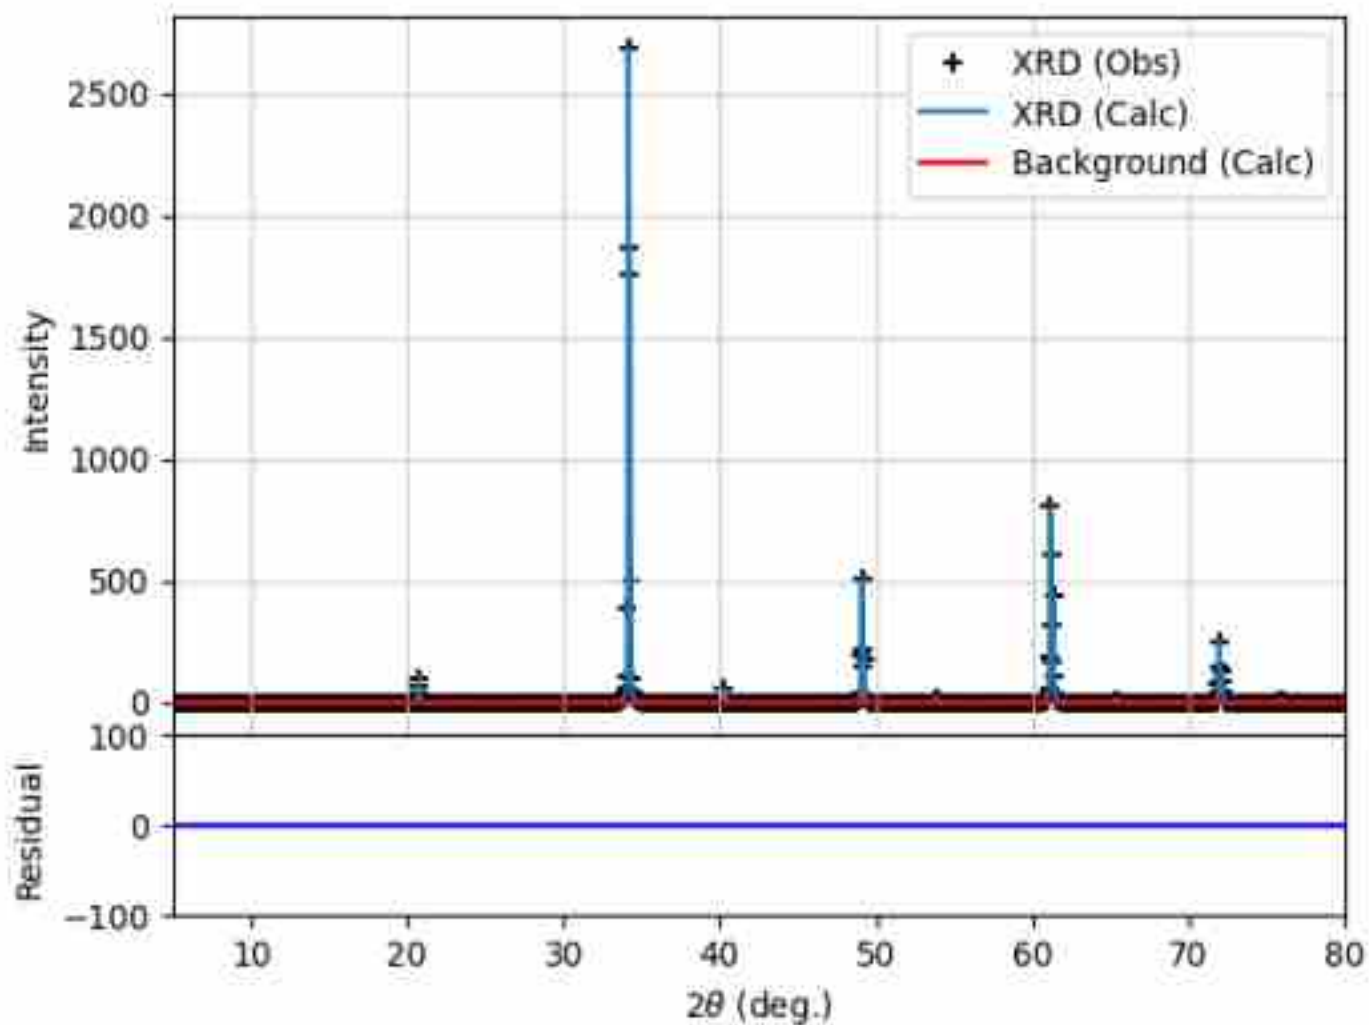

| RMSE before RR | Rwp    | RMSE after RR |
|----------------|--------|---------------|
| 0.002          | 0.0042 | 0.00044       |



# Tm<sub>2</sub>Pd<sub>1</sub>Ru<sub>1</sub>

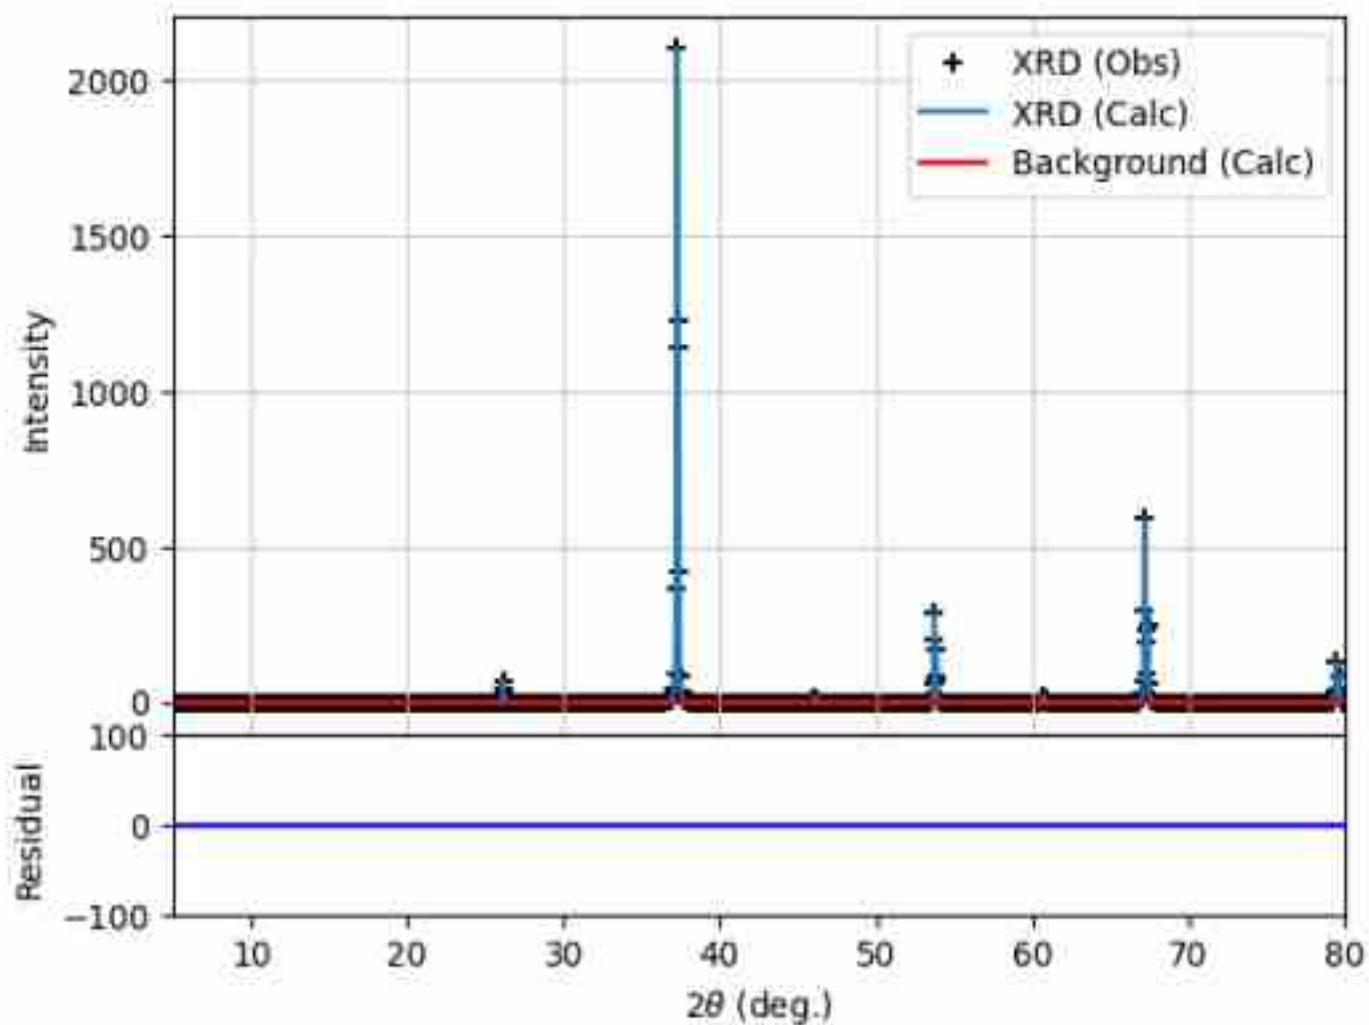

| RMSE before RR | Rwp     | RMSE after RR |
|----------------|---------|---------------|
| 0.002          | 0.00404 | 0.0003        |

# Tm2Ru1Pt1

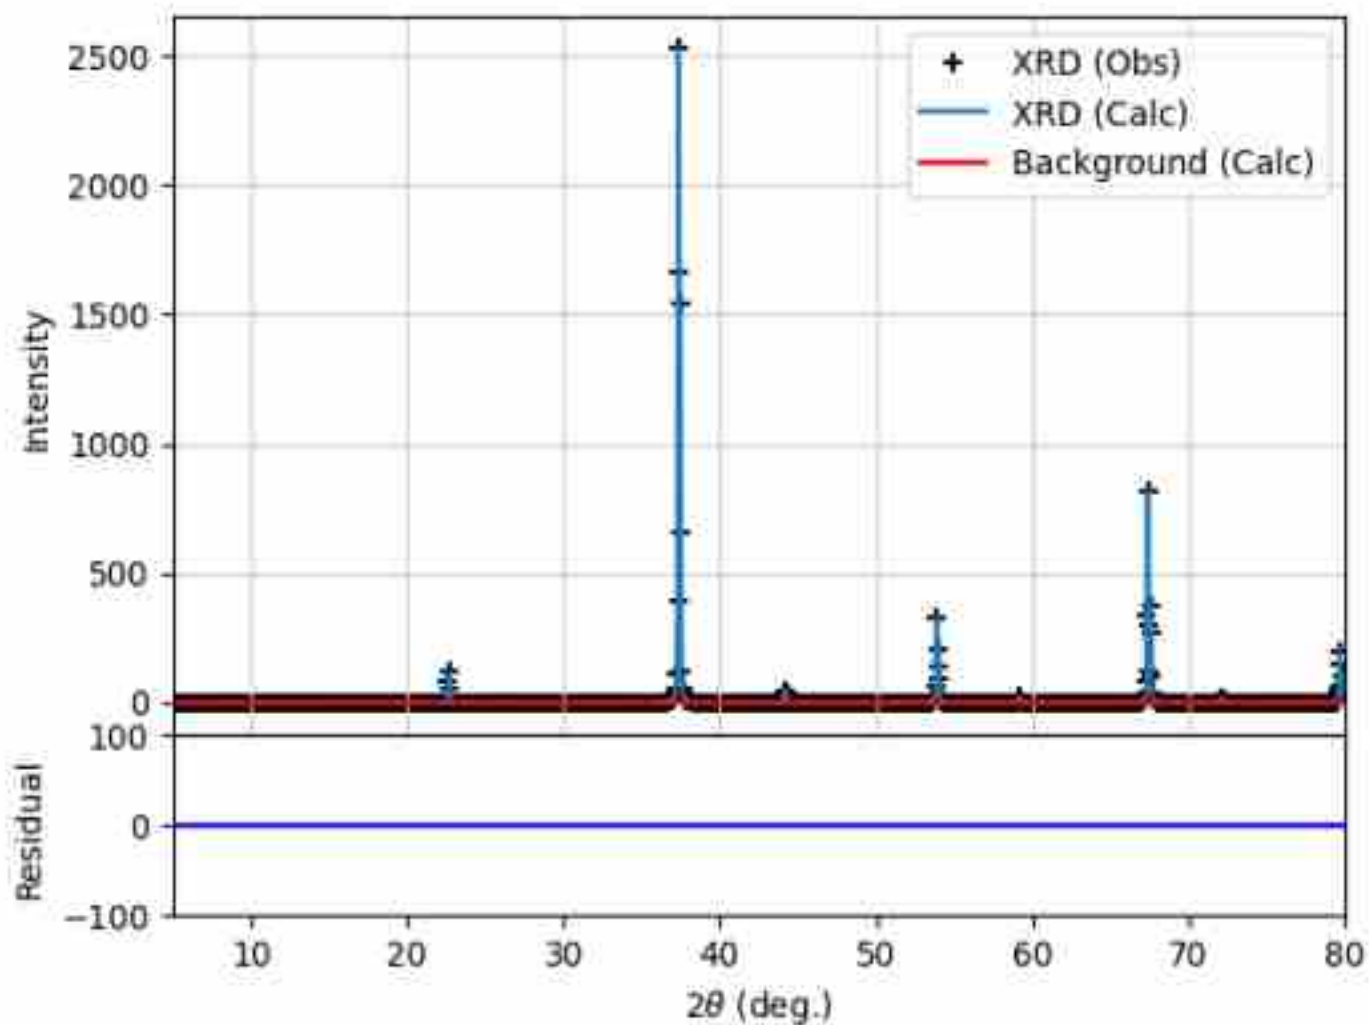

| RMSE before RR | Rwp     | RMSE after RR |
|----------------|---------|---------------|
| 0.002          | 0.00629 | 0.00032       |

# Tm<sub>2</sub>ZnAg

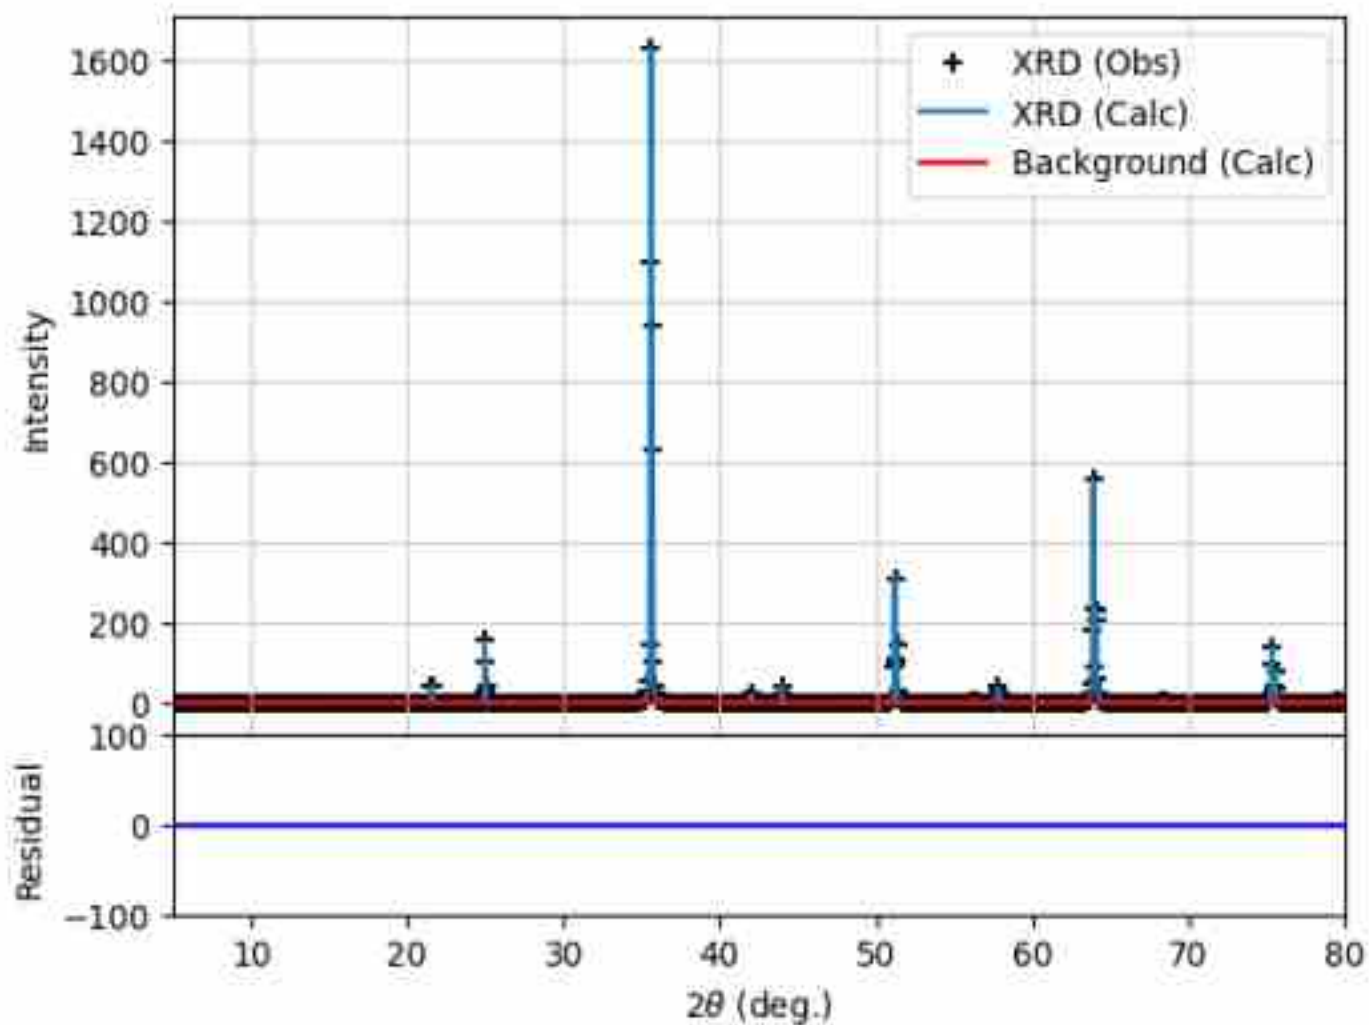

| RMSE before RR | Rwp     | RMSE after RR |
|----------------|---------|---------------|
| 0.002          | 0.00021 | 0.0001        |

# Tm<sub>2</sub>ZnRh

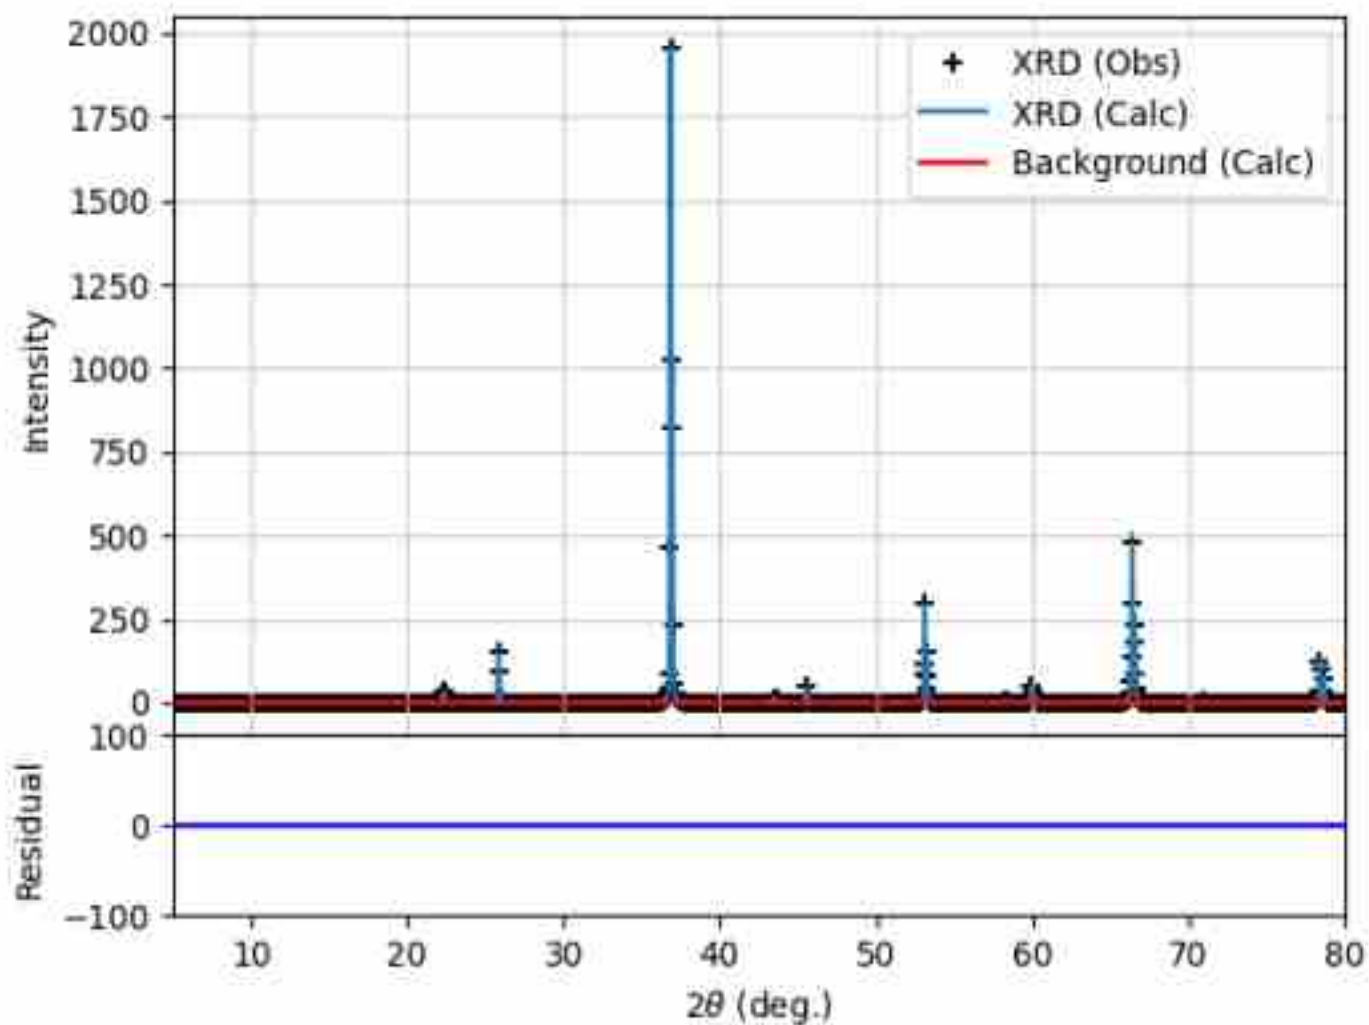

| RMSE before RR | Rwp     | RMSE after RR |
|----------------|---------|---------------|
| 0.002          | 0.00508 | 0.00062       |

# U<sub>2</sub>As<sub>2</sub>S<sub>2</sub>

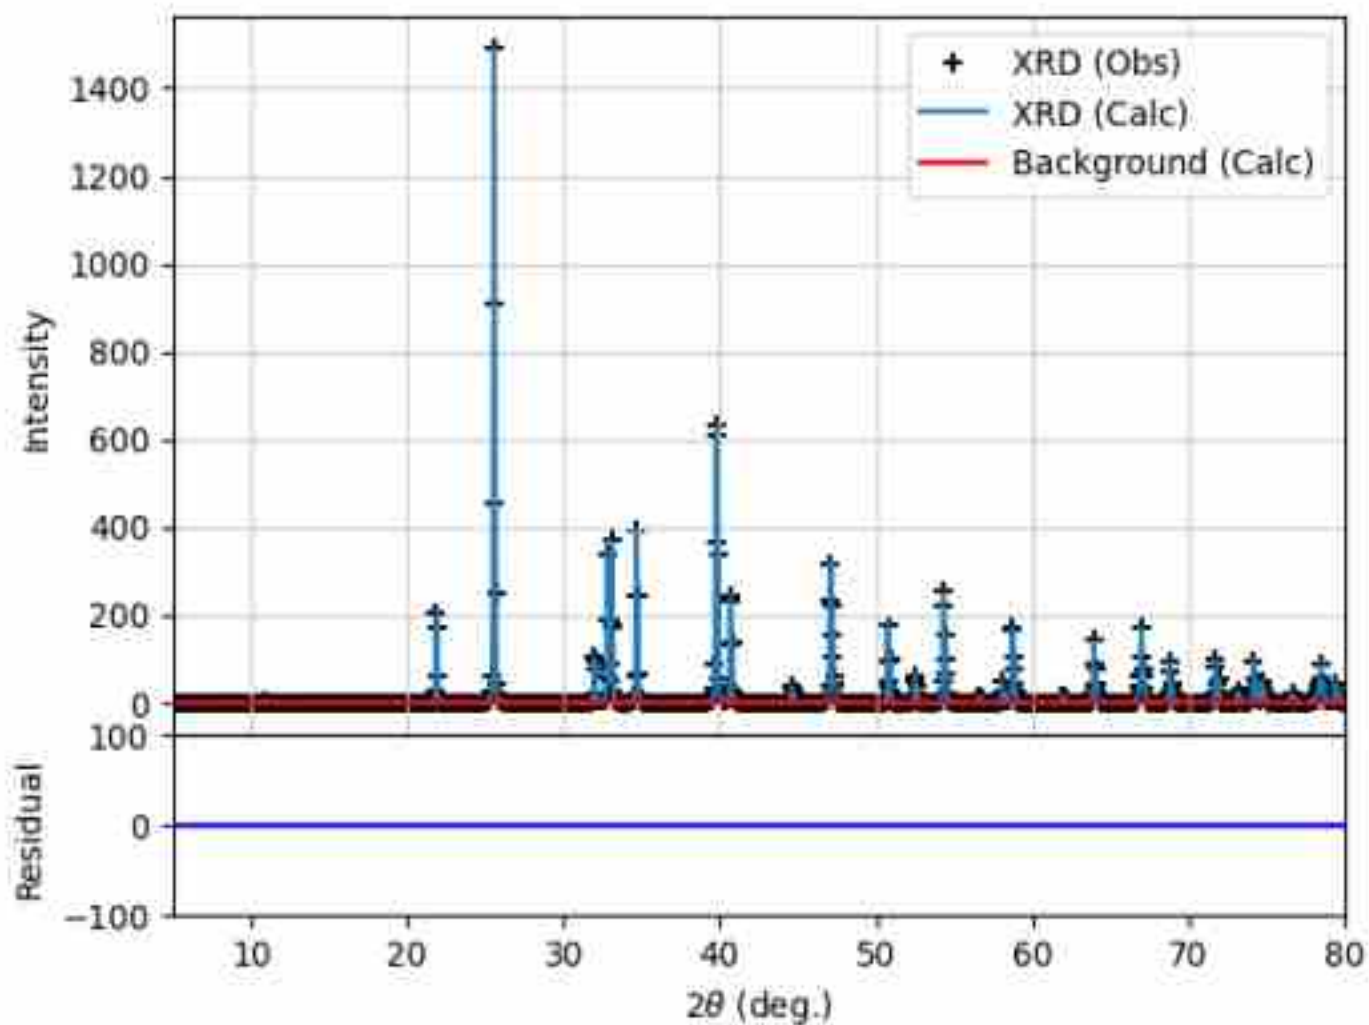

| RMSE before RR | Rwp     | RMSE after RR |
|----------------|---------|---------------|
| 0.02           | 0.00715 | 0.00126       |

# U<sub>2</sub>Co<sub>2</sub>Ni<sub>2</sub>Ge<sub>4</sub>

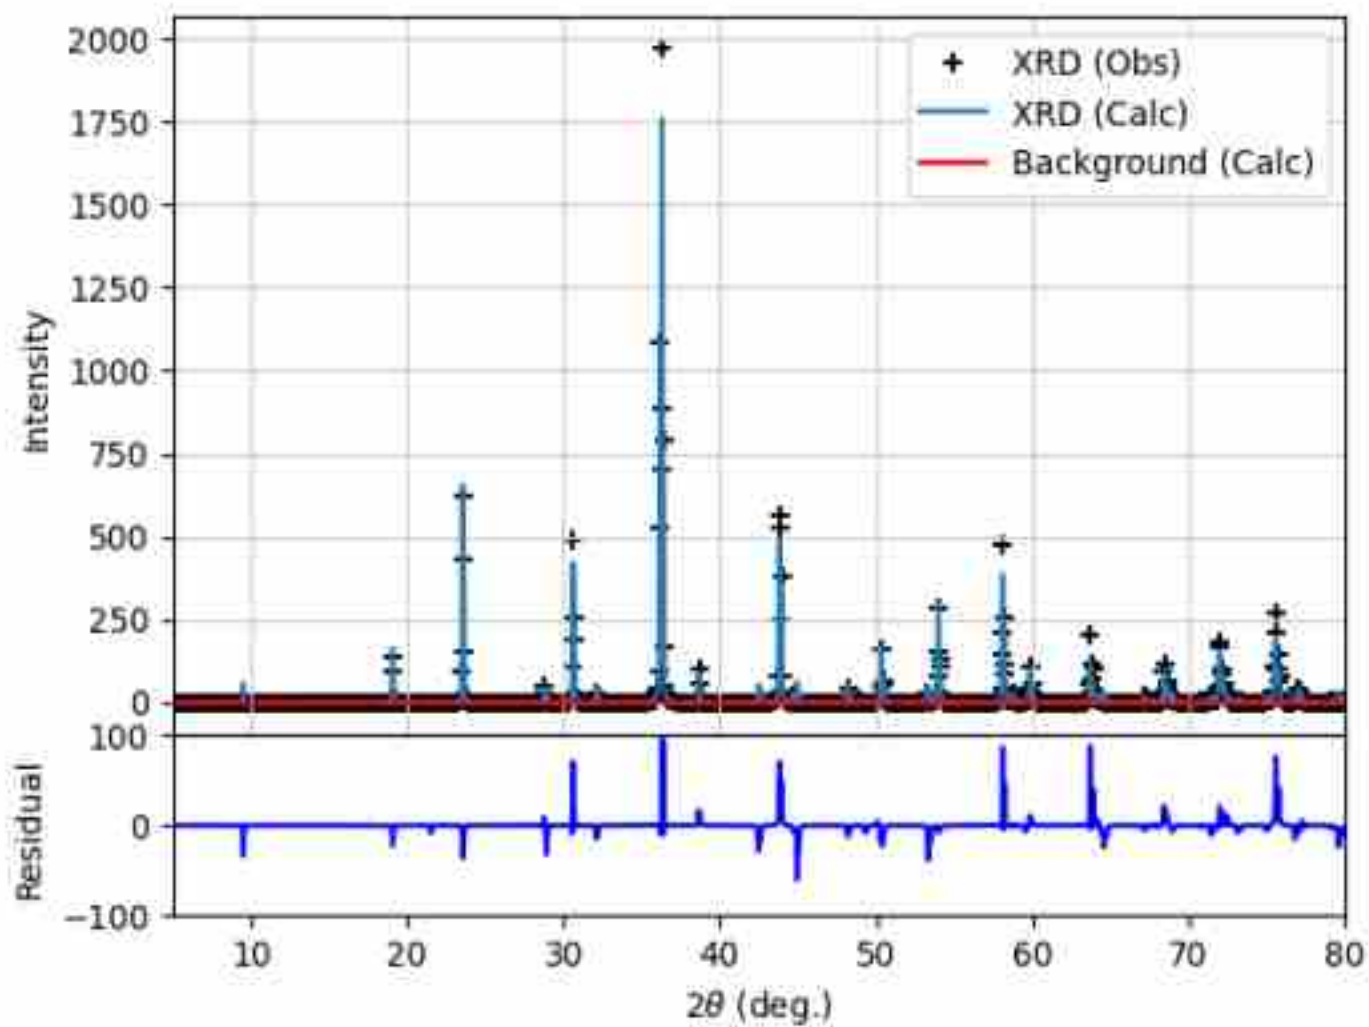

| RMSE before RR | Rwp      | RMSE after RR |
|----------------|----------|---------------|
| 0.02           | 42.10248 | 0.03908       |

# U<sub>2</sub>Sb<sub>2</sub>S<sub>2</sub>

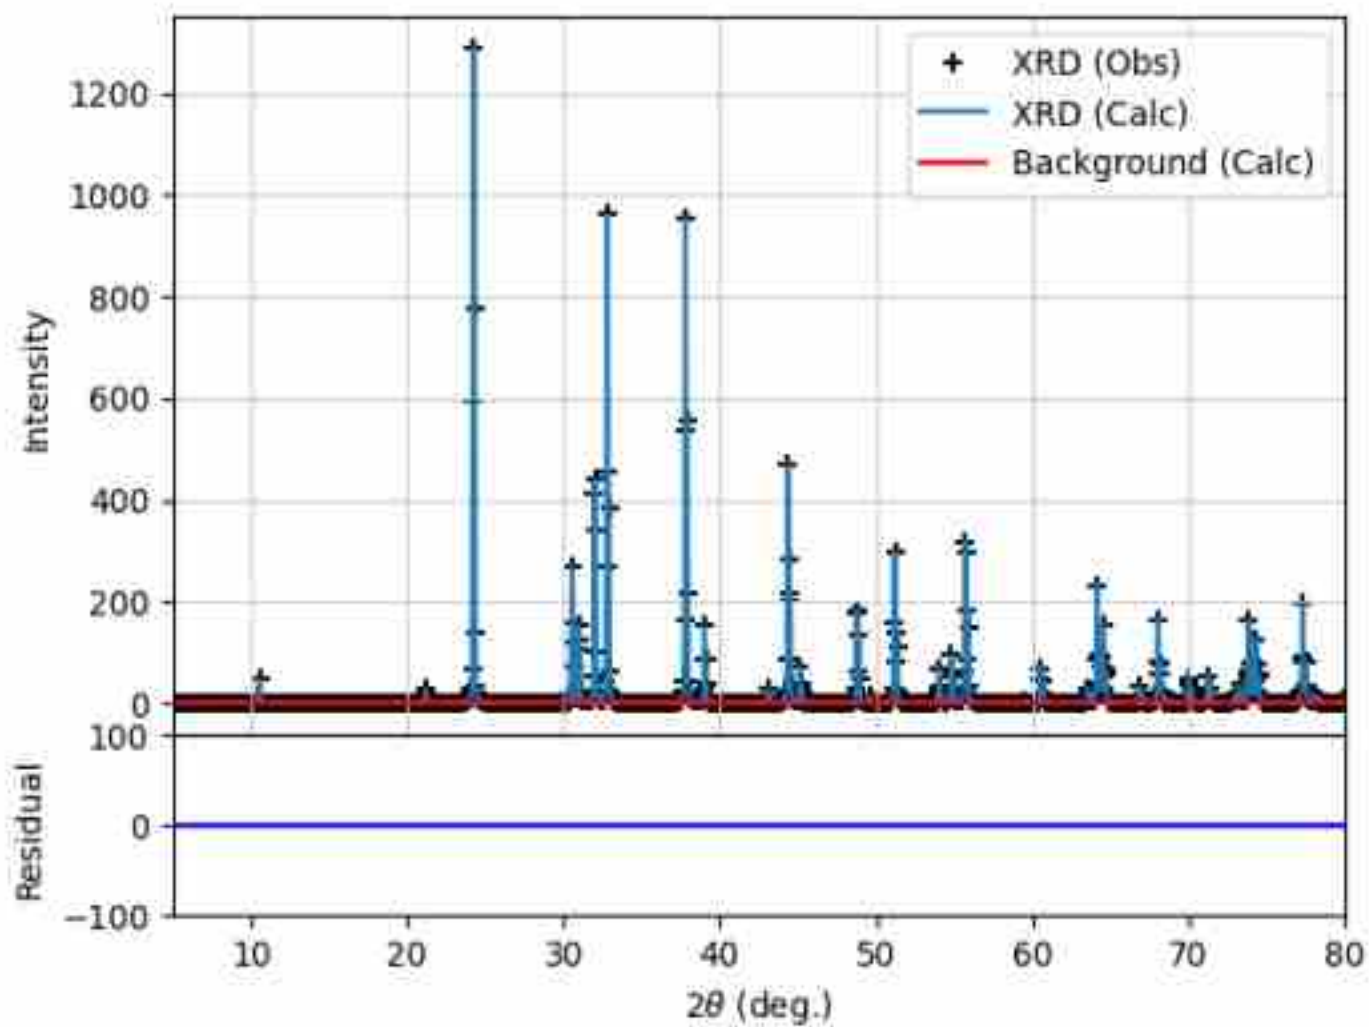

| RMSE before RR | Rwp     | RMSE after RR |
|----------------|---------|---------------|
| 0.02           | 0.01018 | 0.00082       |

# U<sub>4</sub>Si<sub>8</sub>W<sub>6</sub>

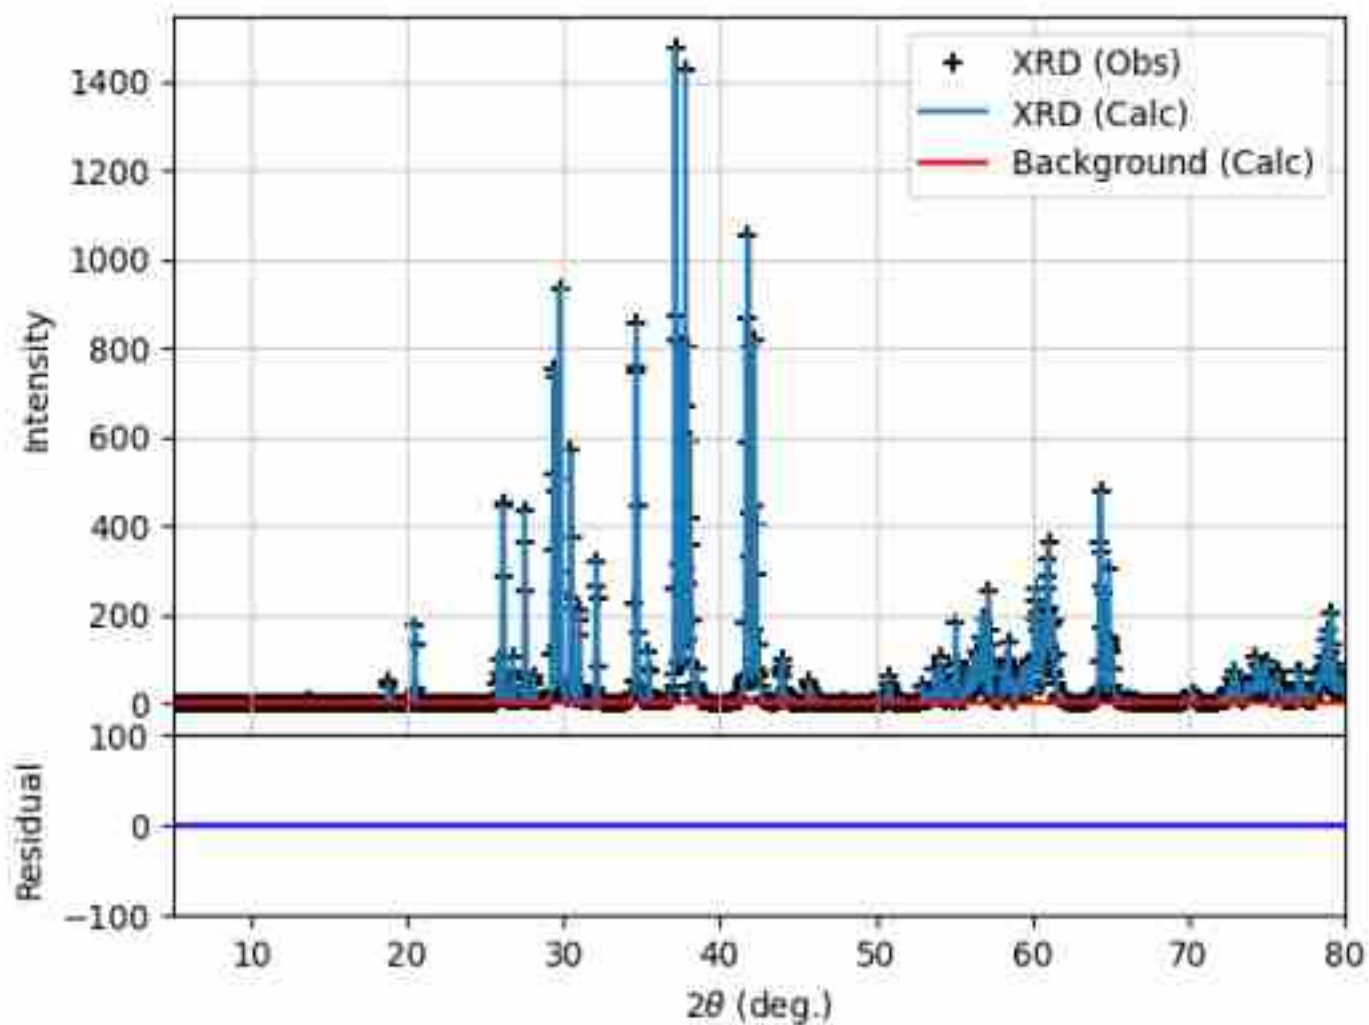

| RMSE before RR | Rwp     | RMSE after RR |
|----------------|---------|---------------|
| 0.02           | 0.00417 | 0.00063       |



# V1Co2Si1

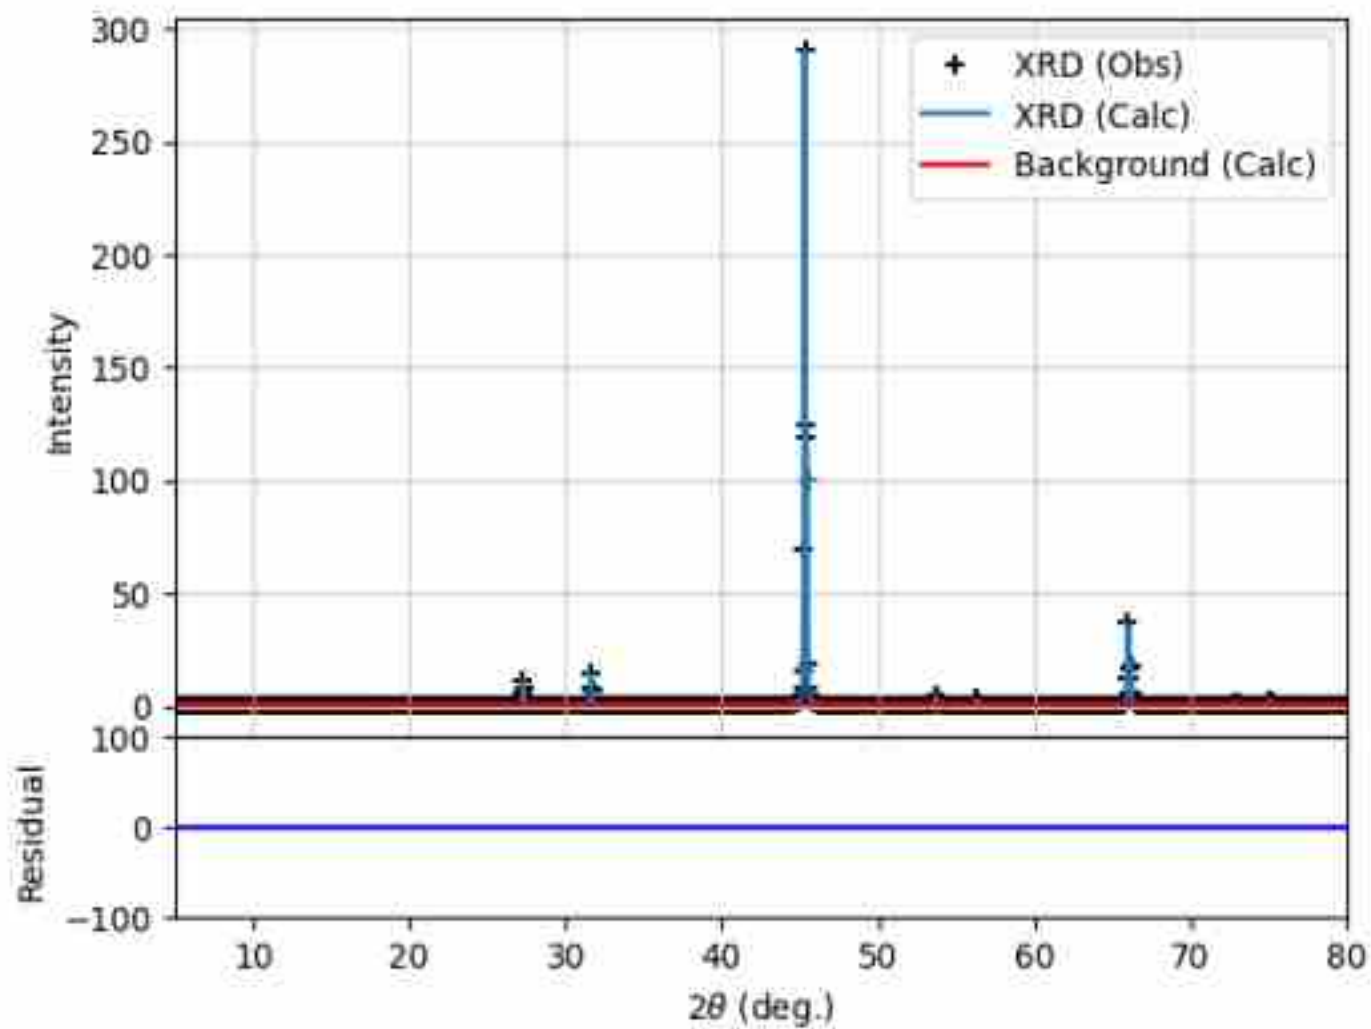

| RMSE before RR | Rwp     | RMSE after RR |
|----------------|---------|---------------|
| 0.002          | 0.00327 | 0.00022       |

# V1Co2Sn1

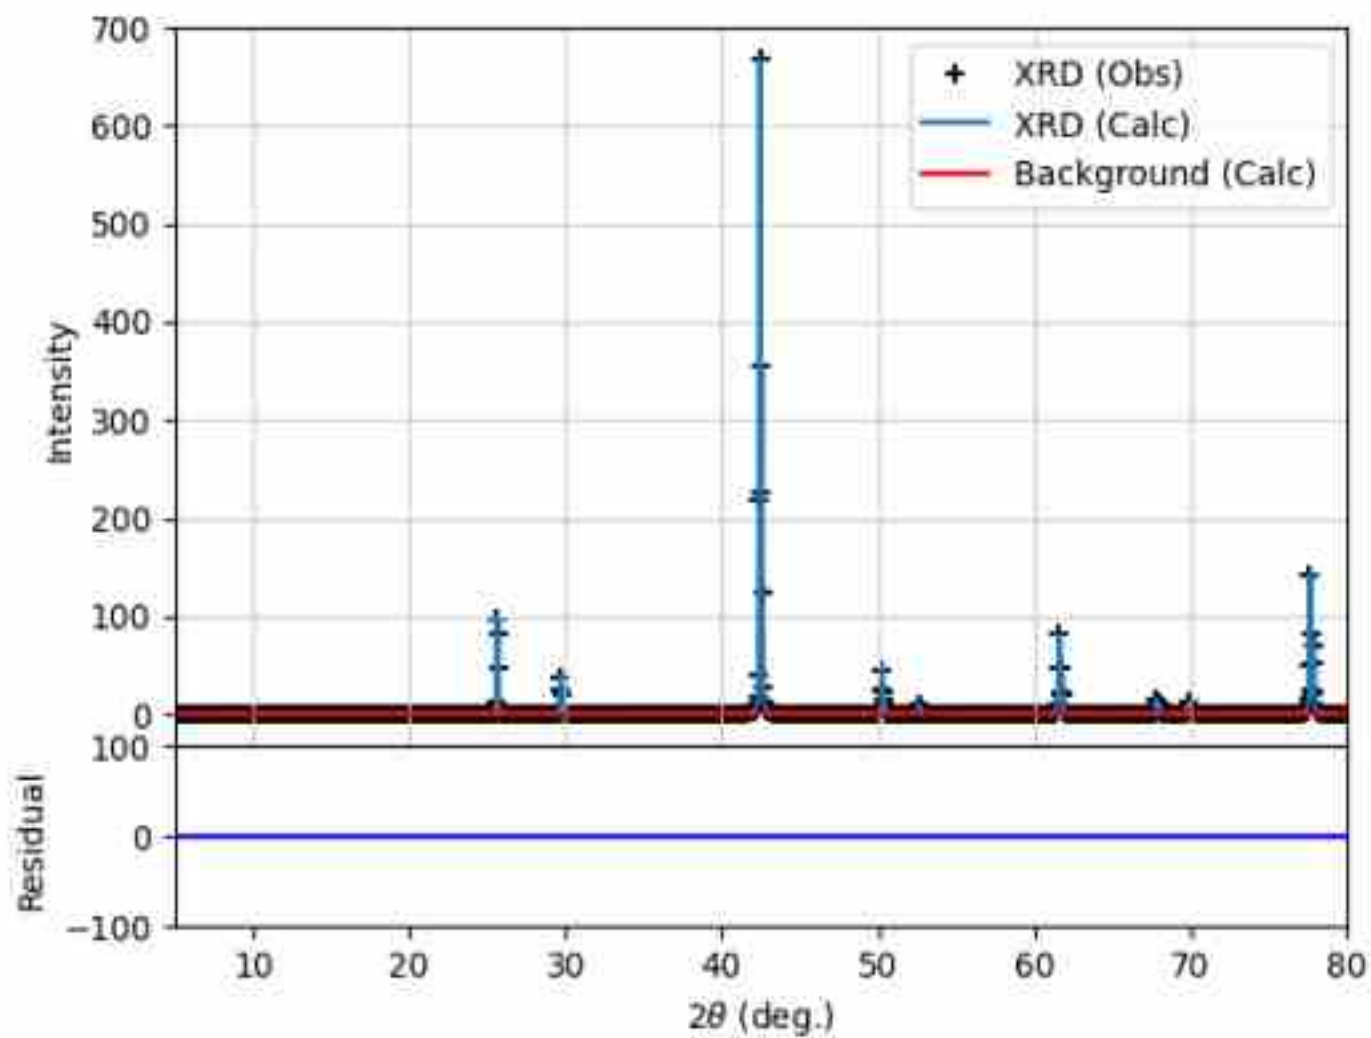

| RMSE before RR | Rwp     | RMSE after RR |
|----------------|---------|---------------|
| 0.002          | 0.00053 | 0.00017       |

# V1Co3

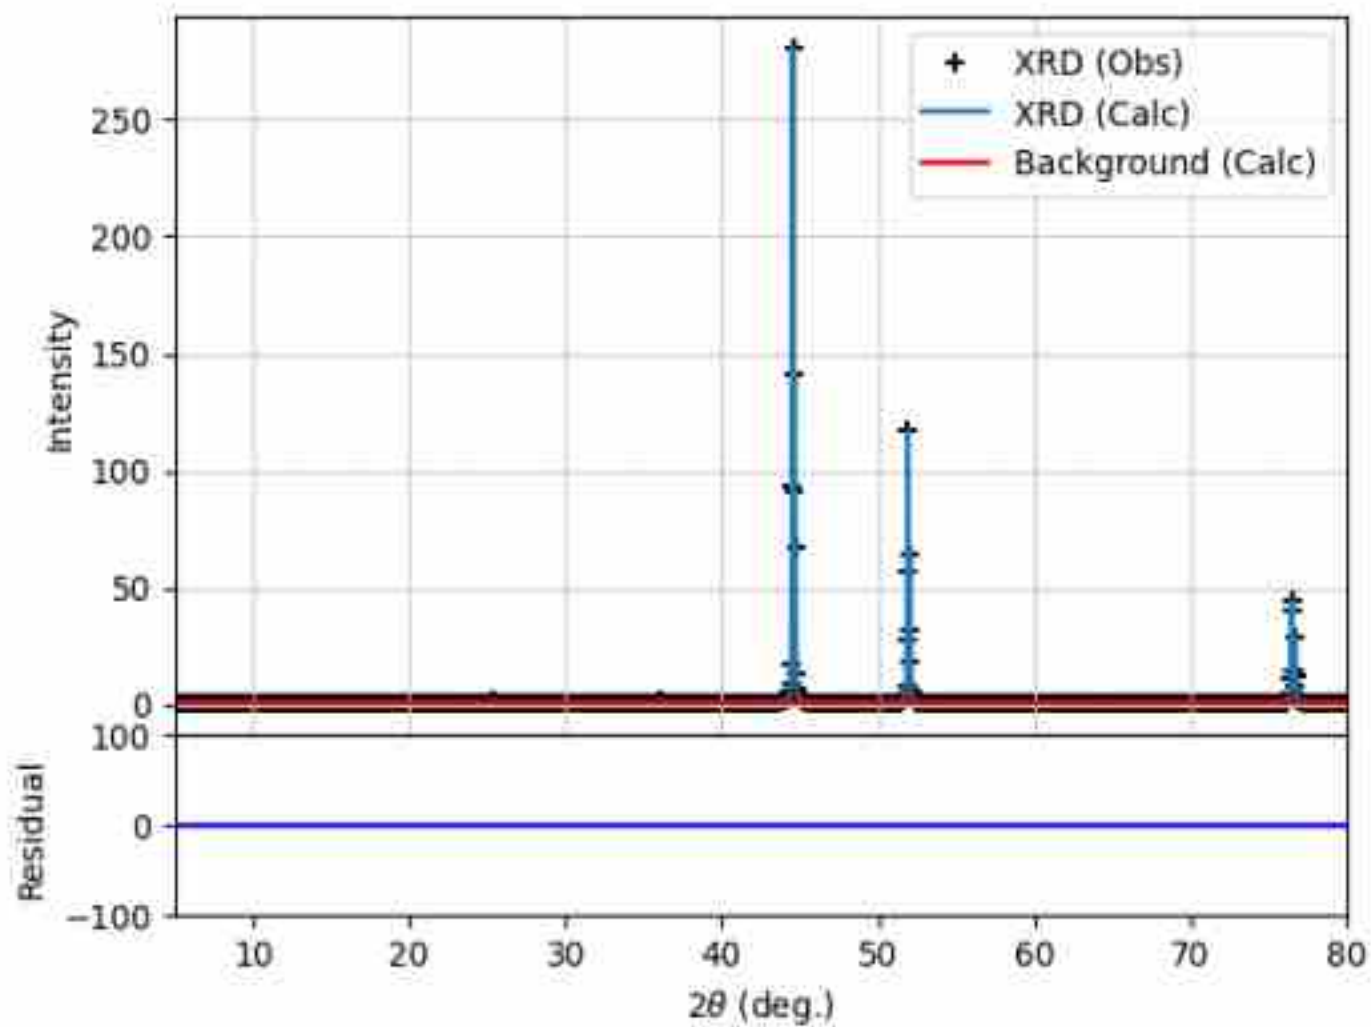

| RMSE before RR | Rwp     | RMSE after RR |
|----------------|---------|---------------|
| 0.002          | 0.02296 | 0.00361       |

# V1F4

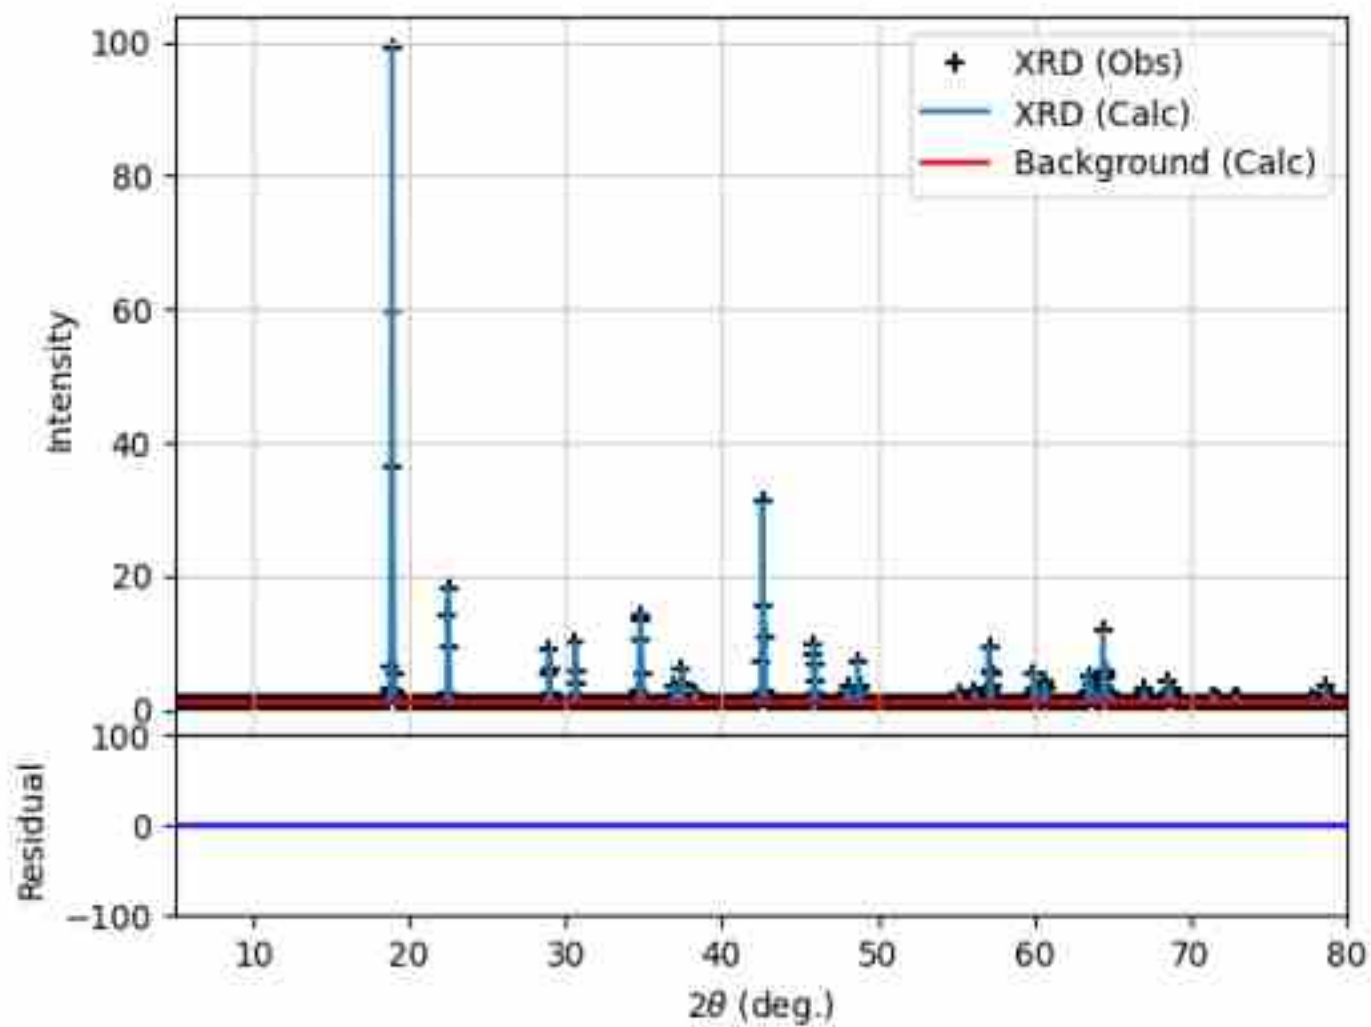

| RMSE before RR | Rwp     | RMSE after RR |
|----------------|---------|---------------|
| 0.02           | 0.00147 | 0.00039       |

# V2Os1Ru1

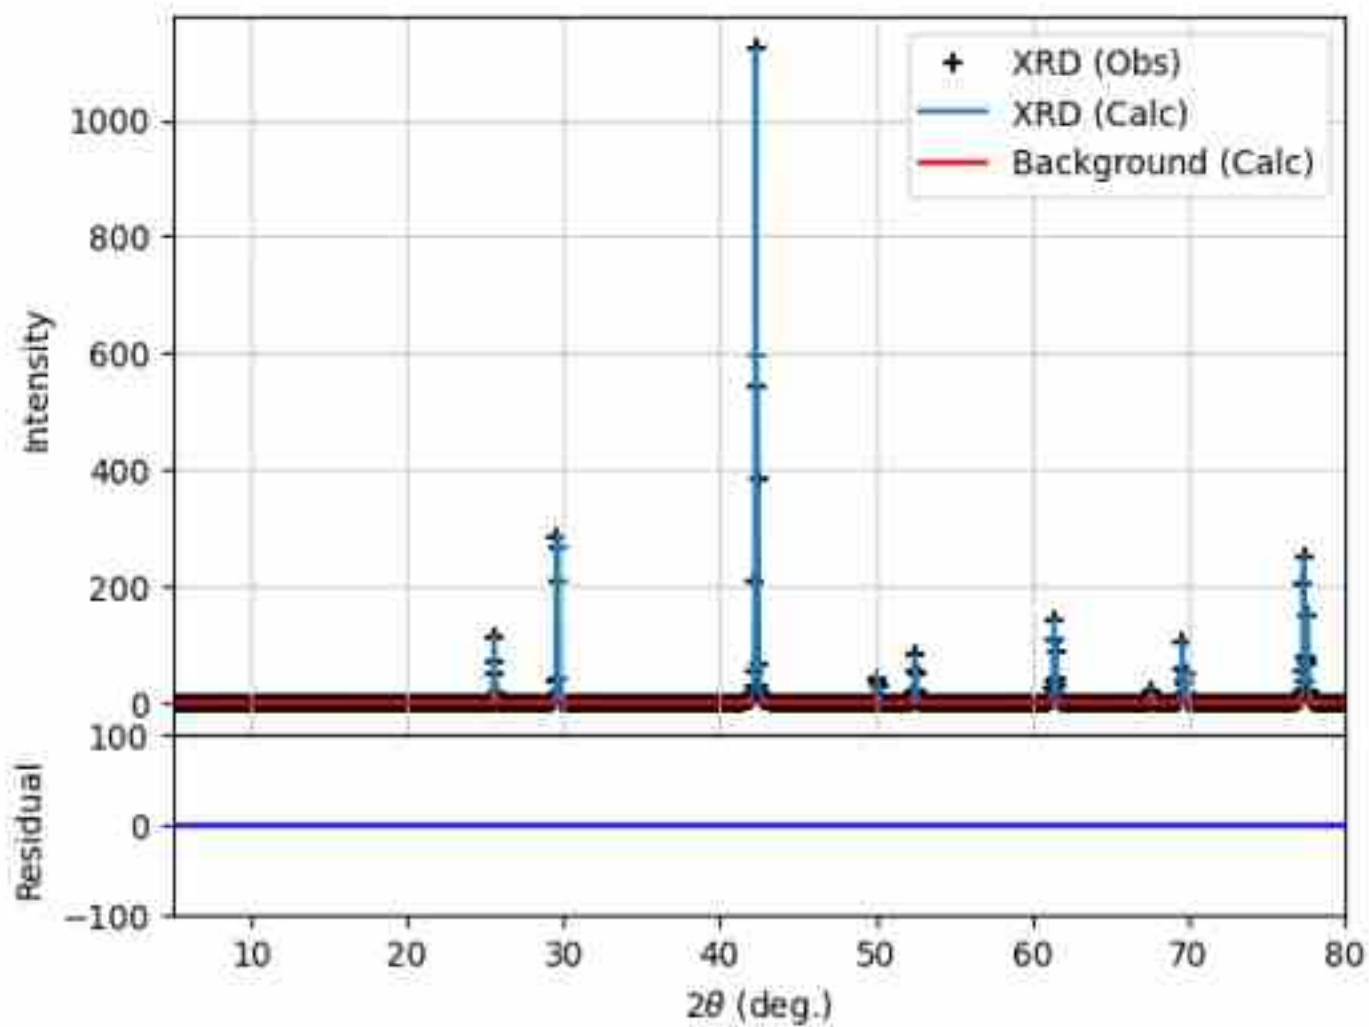

| RMSE before RR | Rwp     | RMSE after RR |
|----------------|---------|---------------|
| 0.002          | 0.00417 | 0.00083       |

# V4O4

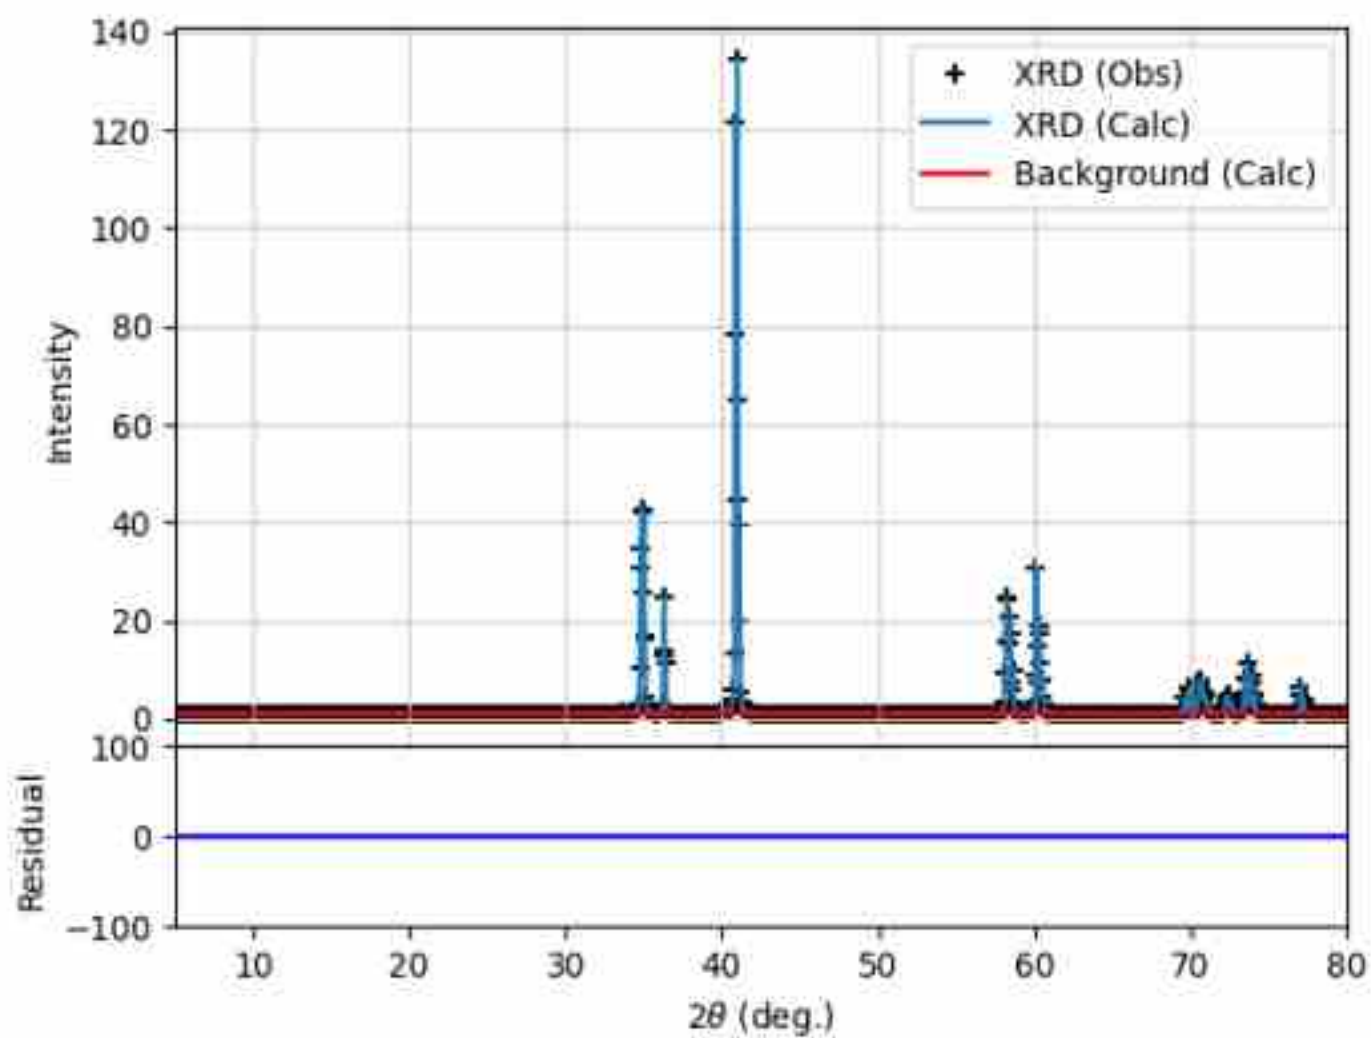

| RMSE before RR | Rwp     | RMSE after RR |
|----------------|---------|---------------|
| 0.002          | 0.00109 | 0.00021       |

# V4P2O10

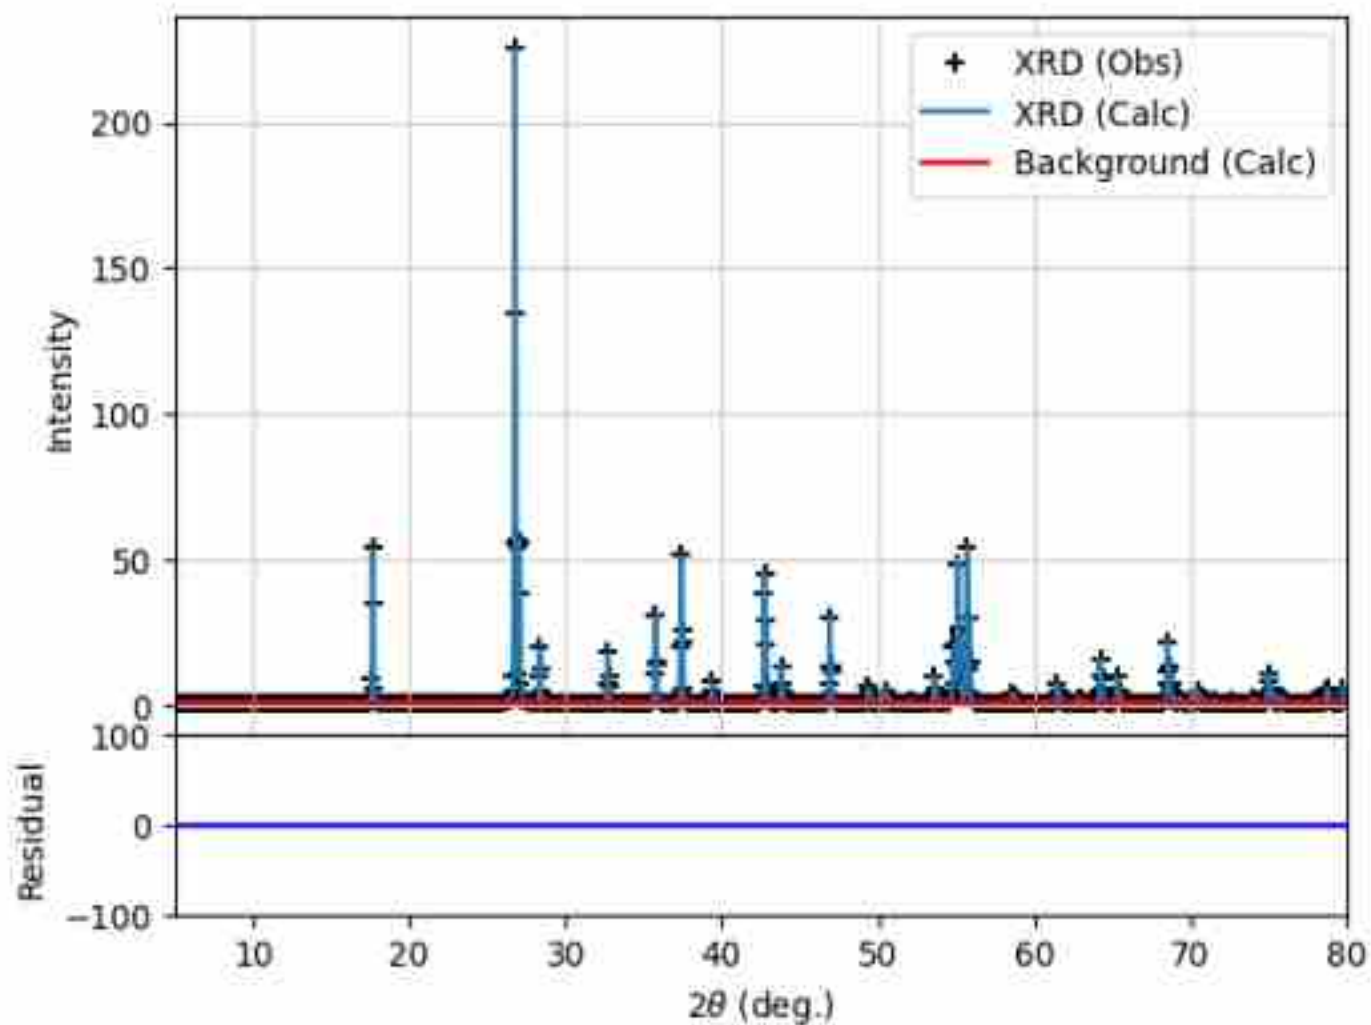

| RMSE before RR | Rwp     | RMSE after RR |
|----------------|---------|---------------|
| 0.02           | 0.00337 | 0.00076       |

# Y1Er1Tl2

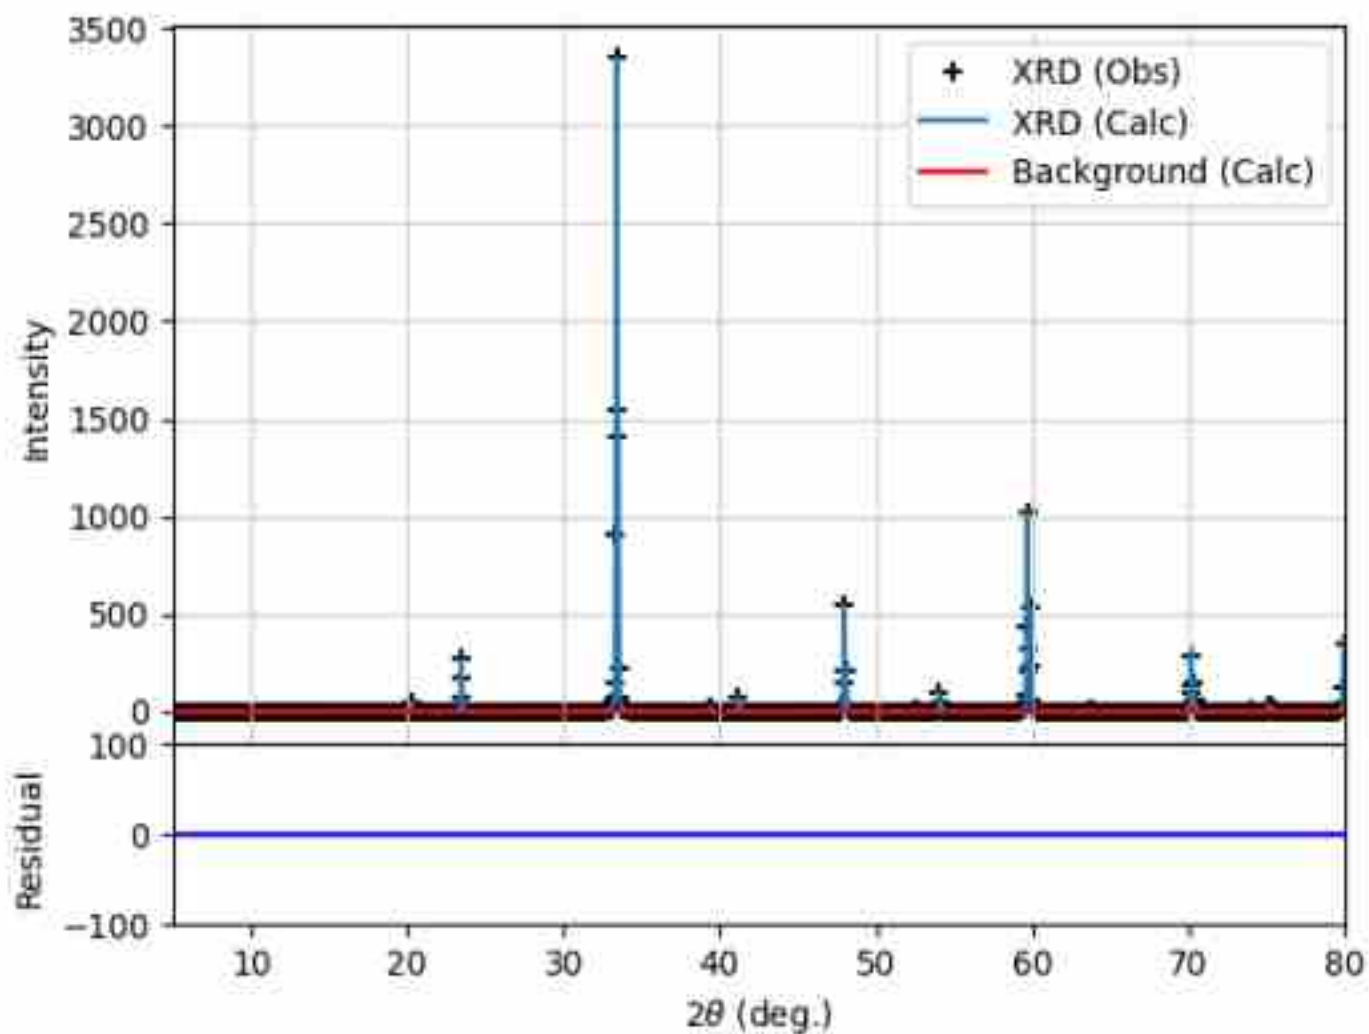

| RMSE before RR | Rwp     | RMSE after RR |
|----------------|---------|---------------|
| 0.002          | 0.00303 | 0.00017       |



# Y1Fe10Re2

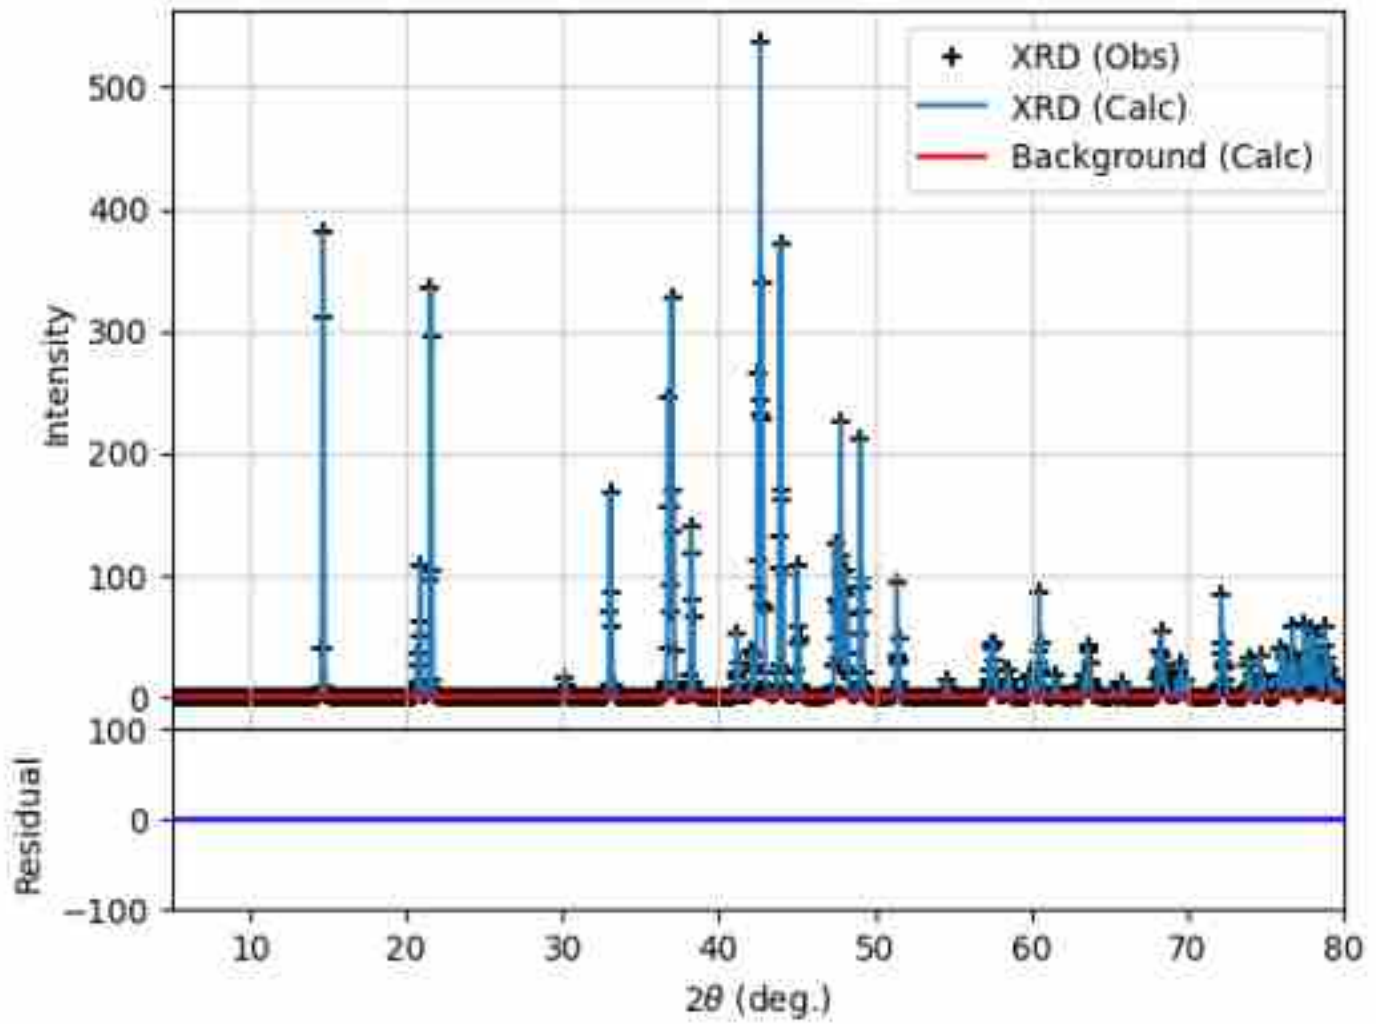

| RMSE before RR | Rwp     | RMSE after RR |
|----------------|---------|---------------|
| 0.02           | 0.00333 | 0.00053       |

# Y1Ho1Rh2

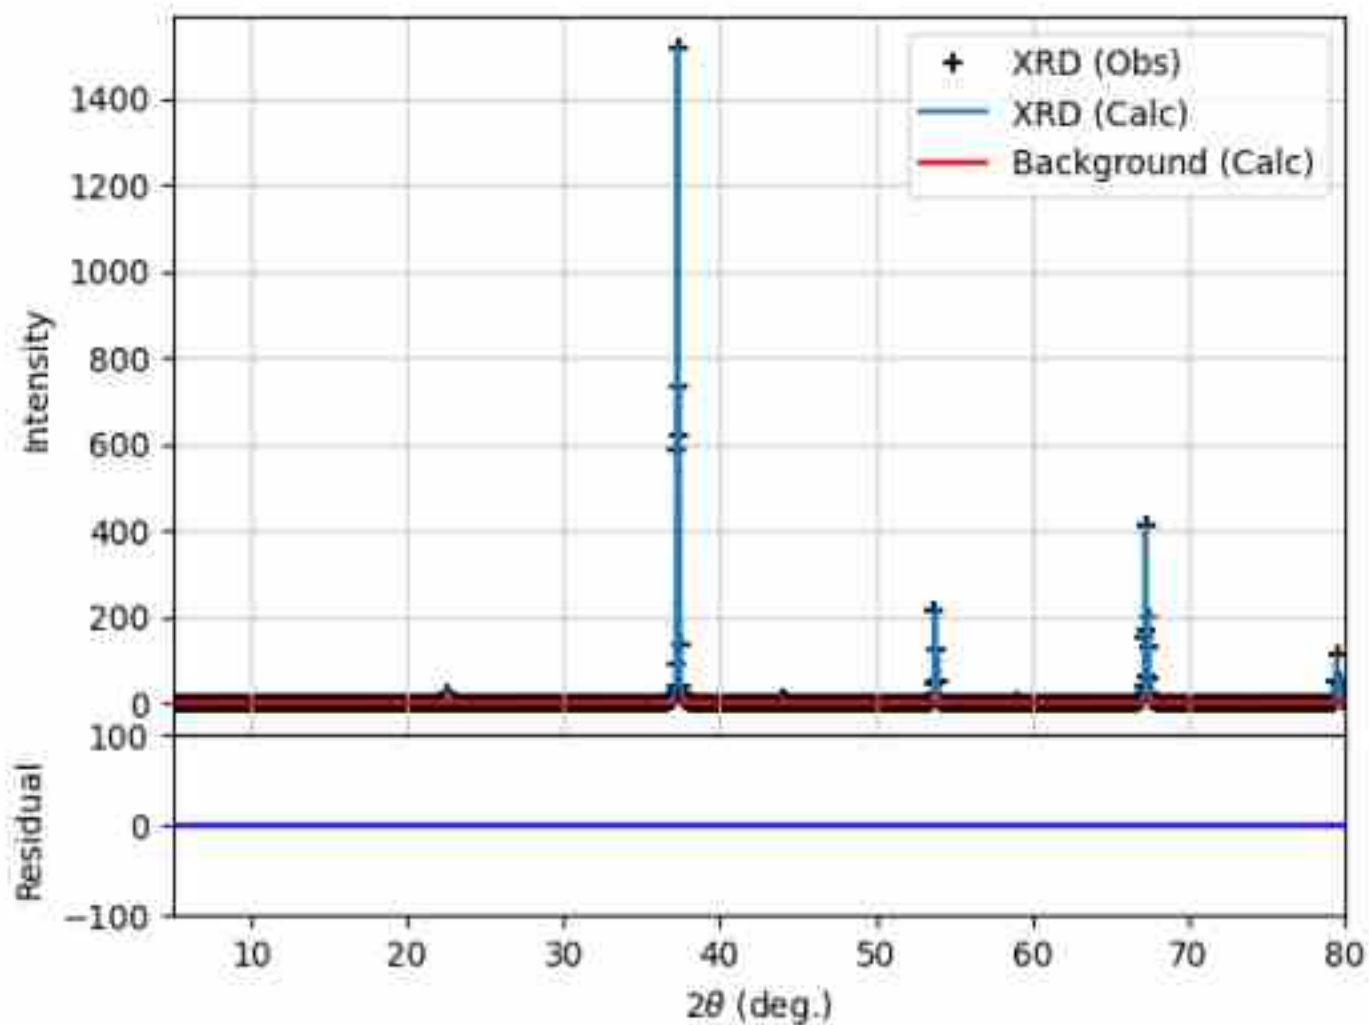

| RMSE before RR | Rwp     | RMSE after RR |
|----------------|---------|---------------|
| 0.002          | 0.01707 | 0.00063       |

# Y1Lu1Hg2

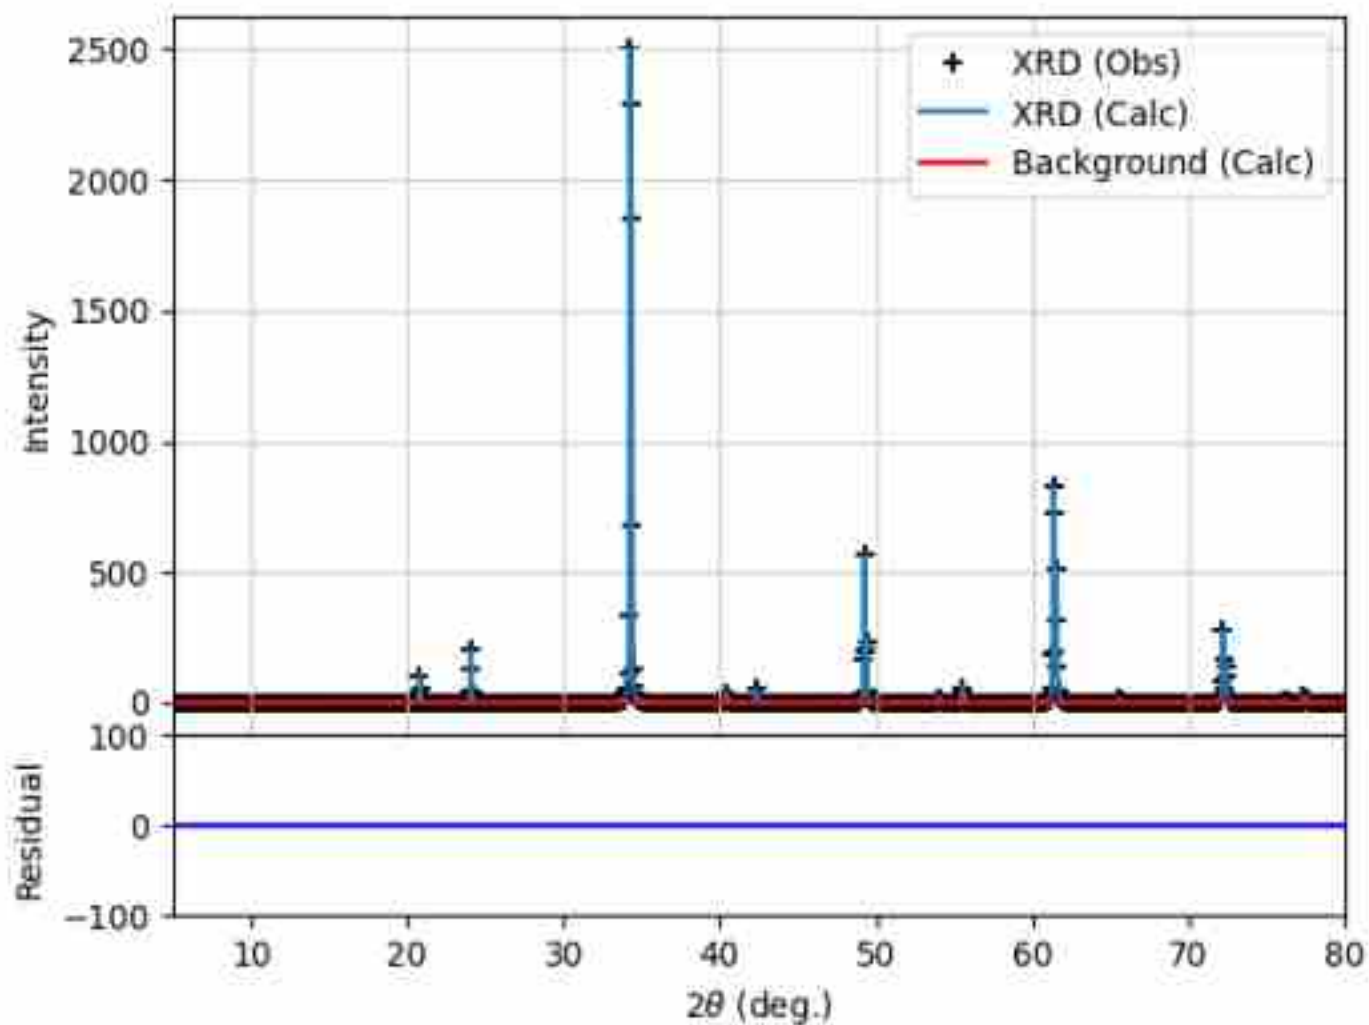

| RMSE before RR | Rwp   | RMSE after RR |
|----------------|-------|---------------|
| 0.002          | 5e-05 | 8e-05         |

# Y1Mg3

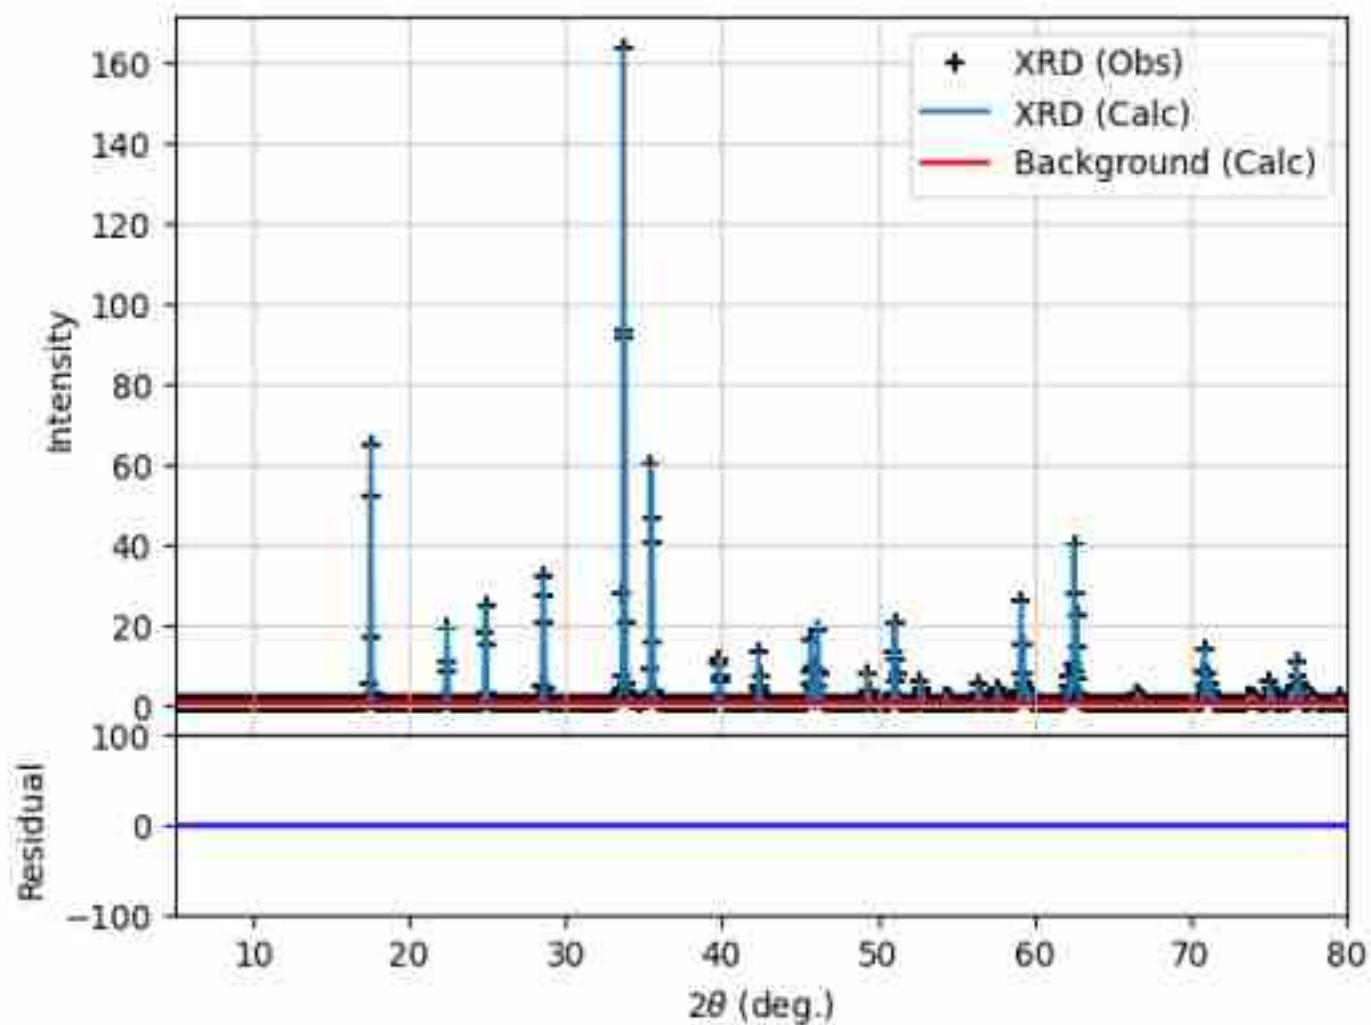

| RMSE before RR | Rwp     | RMSE after RR |
|----------------|---------|---------------|
| 0.002          | 0.00267 | 0.00058       |

# Y1Nb1Ru2

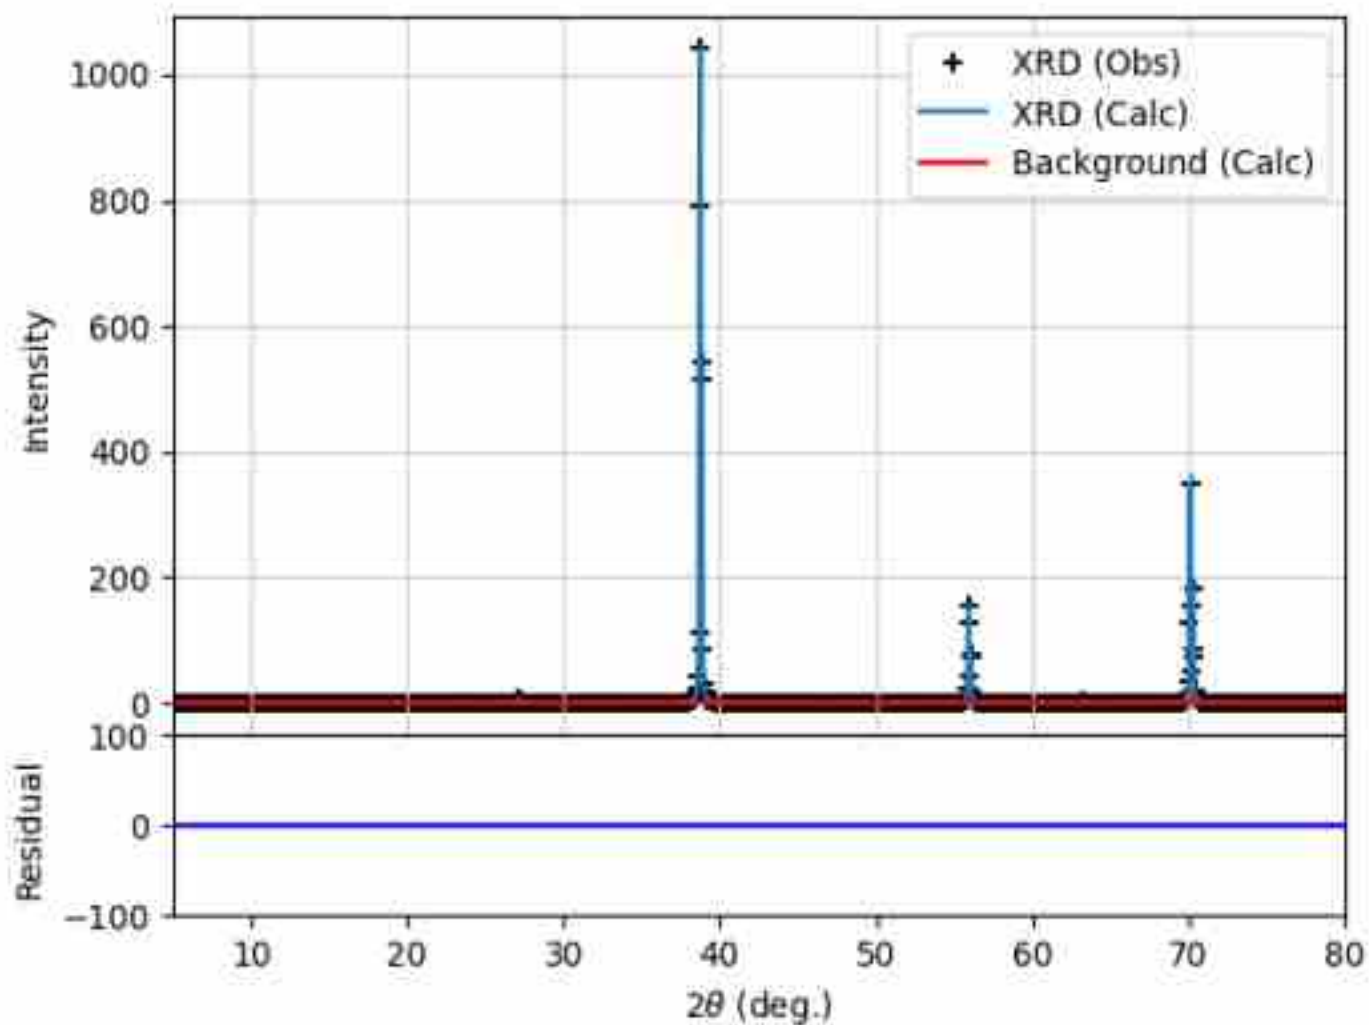

| RMSE before RR | Rwp     | RMSE after RR |
|----------------|---------|---------------|
| 0.002          | 0.00656 | 0.00027       |

# Y1Pt3

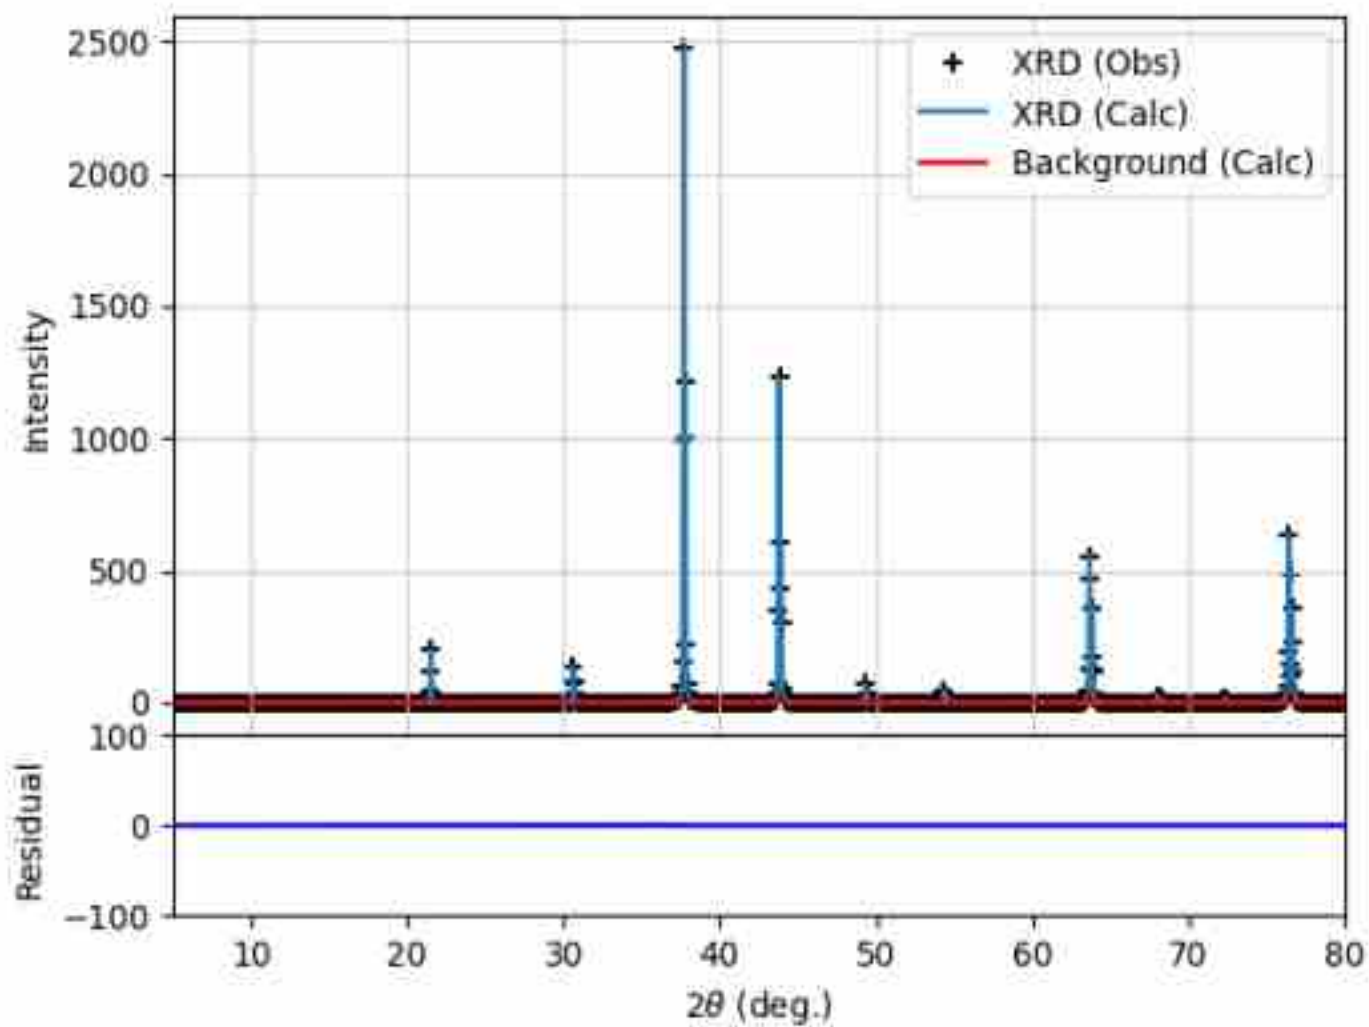

| RMSE before RR | Rwp     | RMSE after RR |
|----------------|---------|---------------|
| 0.002          | 0.01538 | 0.00051       |

# Y1Sb1

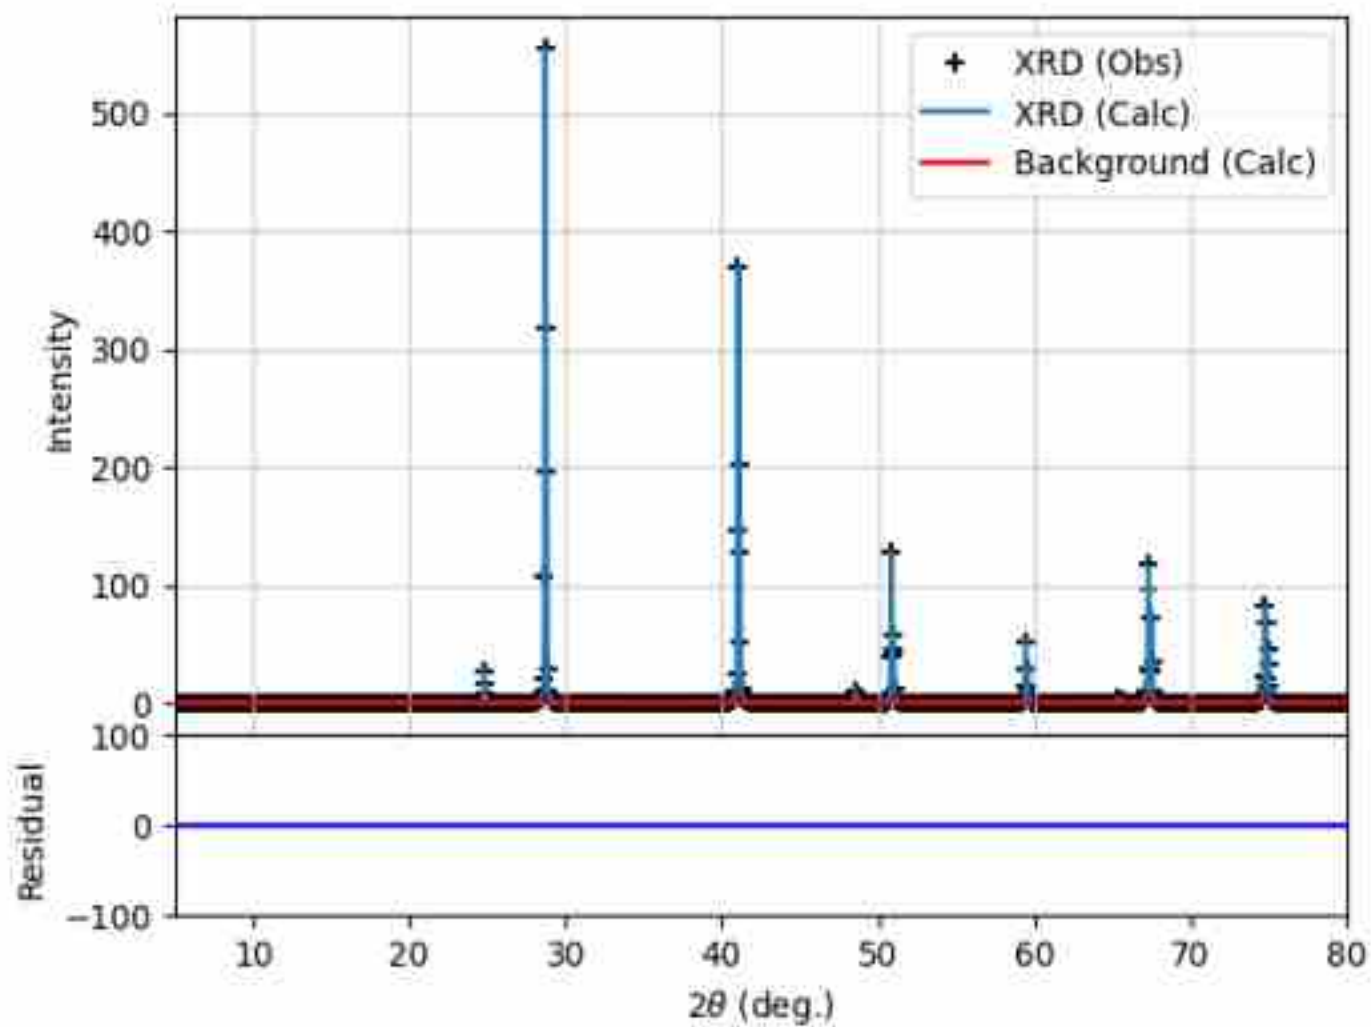

| RMSE before RR | Rwp     | RMSE after RR |
|----------------|---------|---------------|
| 0.002          | 0.05172 | 0.00116       |

# Y1Sn1Pd2

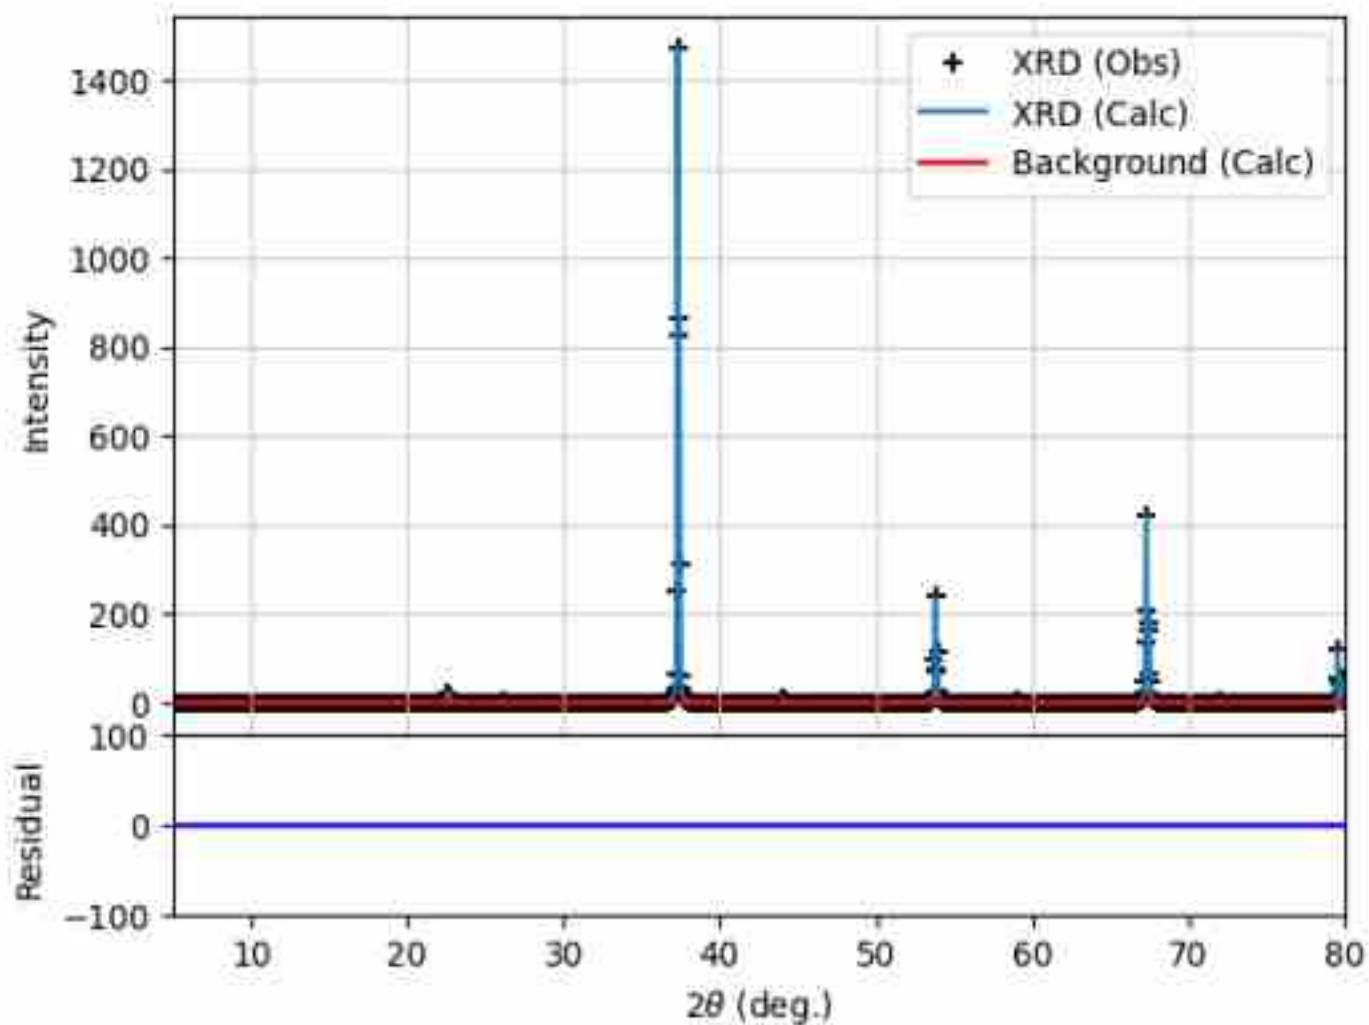

| RMSE before RR | Rwp     | RMSE after RR |
|----------------|---------|---------------|
| 0.002          | 0.00555 | 0.0006        |



# Y1Ta1Ru2

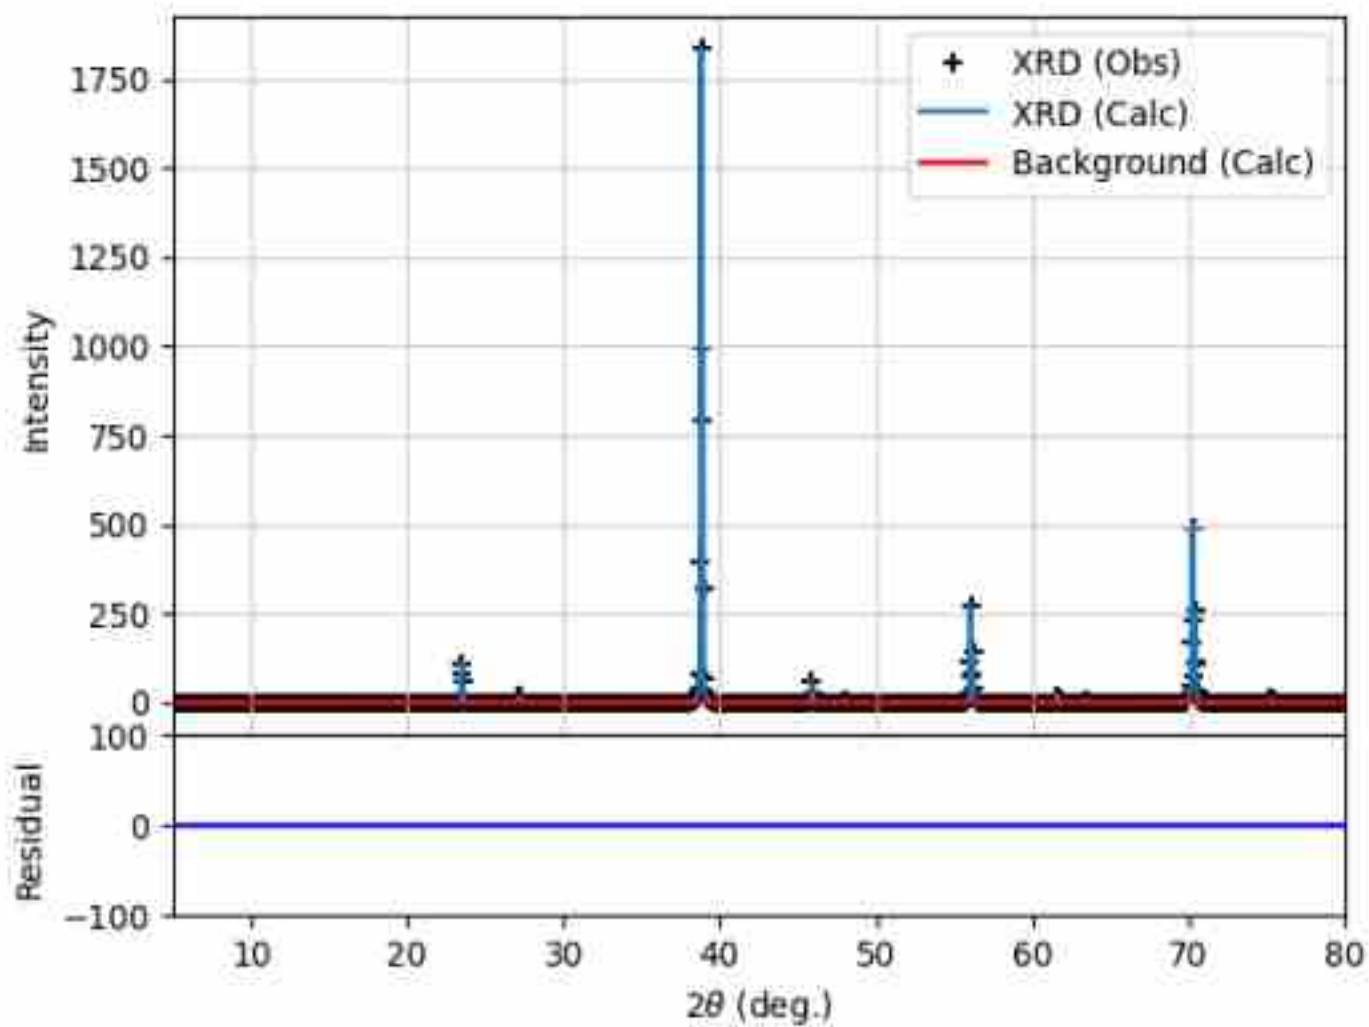

| RMSE before RR | Rwp     | RMSE after RR |
|----------------|---------|---------------|
| 0.002          | 0.00372 | 0.00048       |

# Y1Tl3

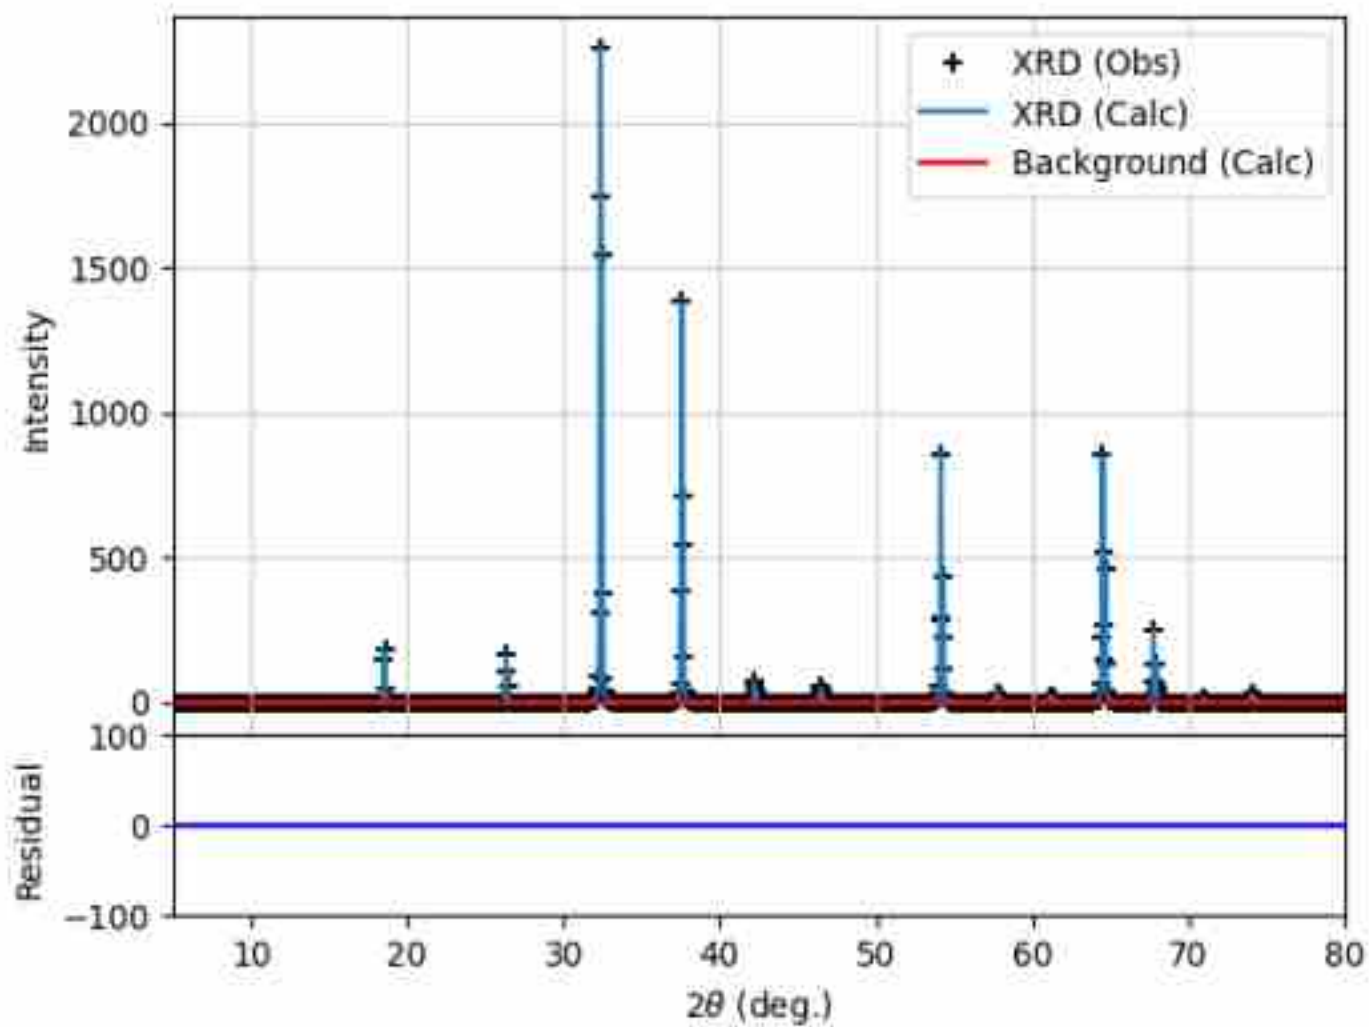

| RMSE before RR | Rwp     | RMSE after RR |
|----------------|---------|---------------|
| 0.002          | 0.04527 | 0.00225       |

# Y1Tm1Al2

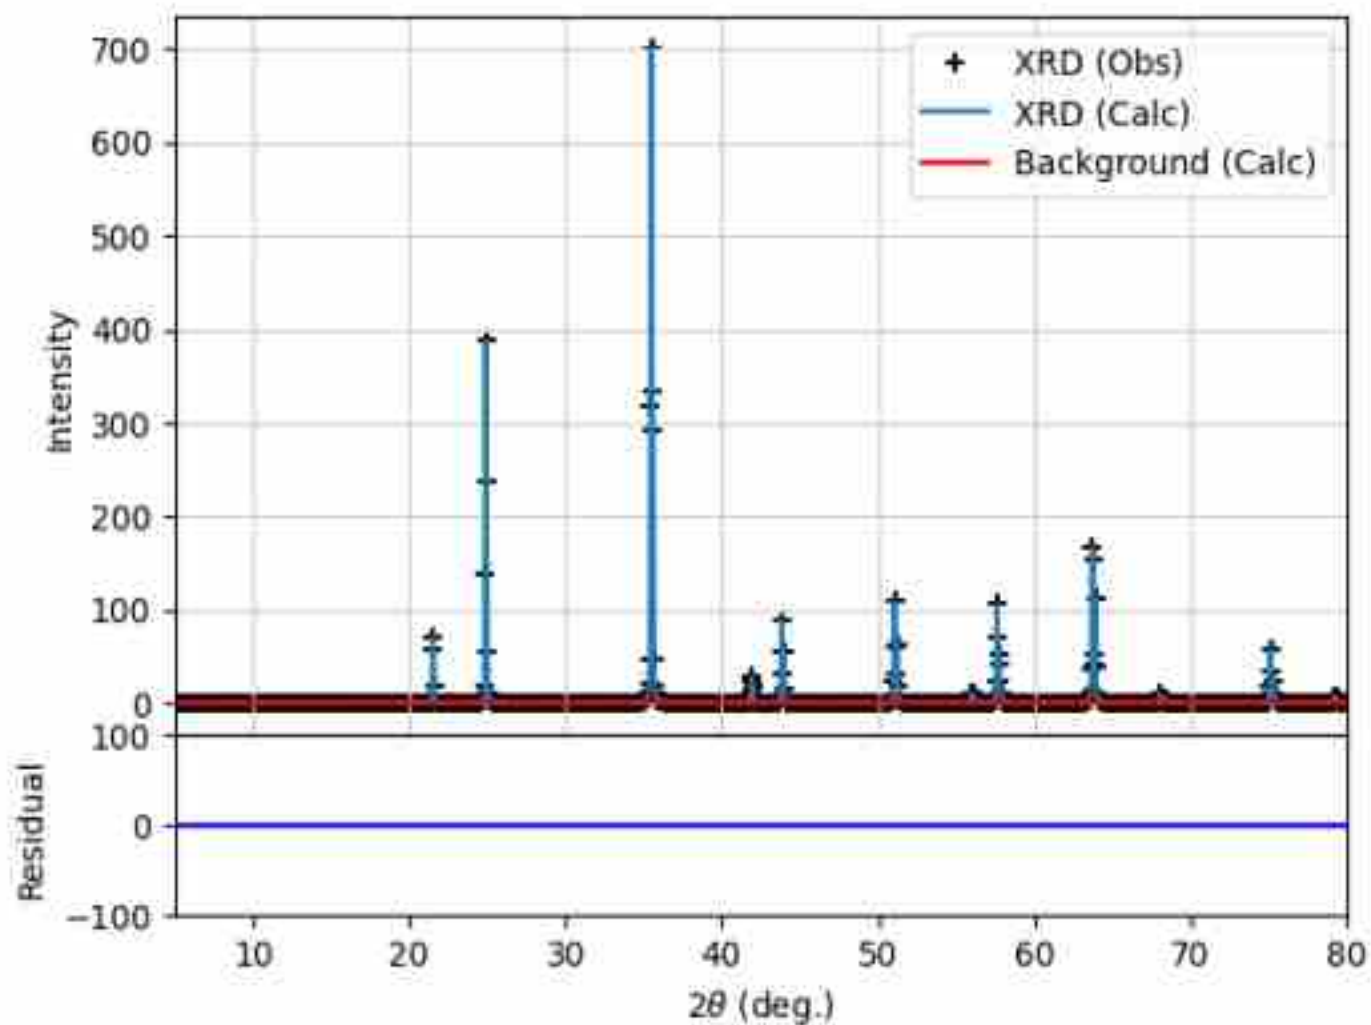

| RMSE before RR | Rwp     | RMSE after RR |
|----------------|---------|---------------|
| 0.002          | 0.00289 | 0.00079       |

# Y1Tm1Ti2

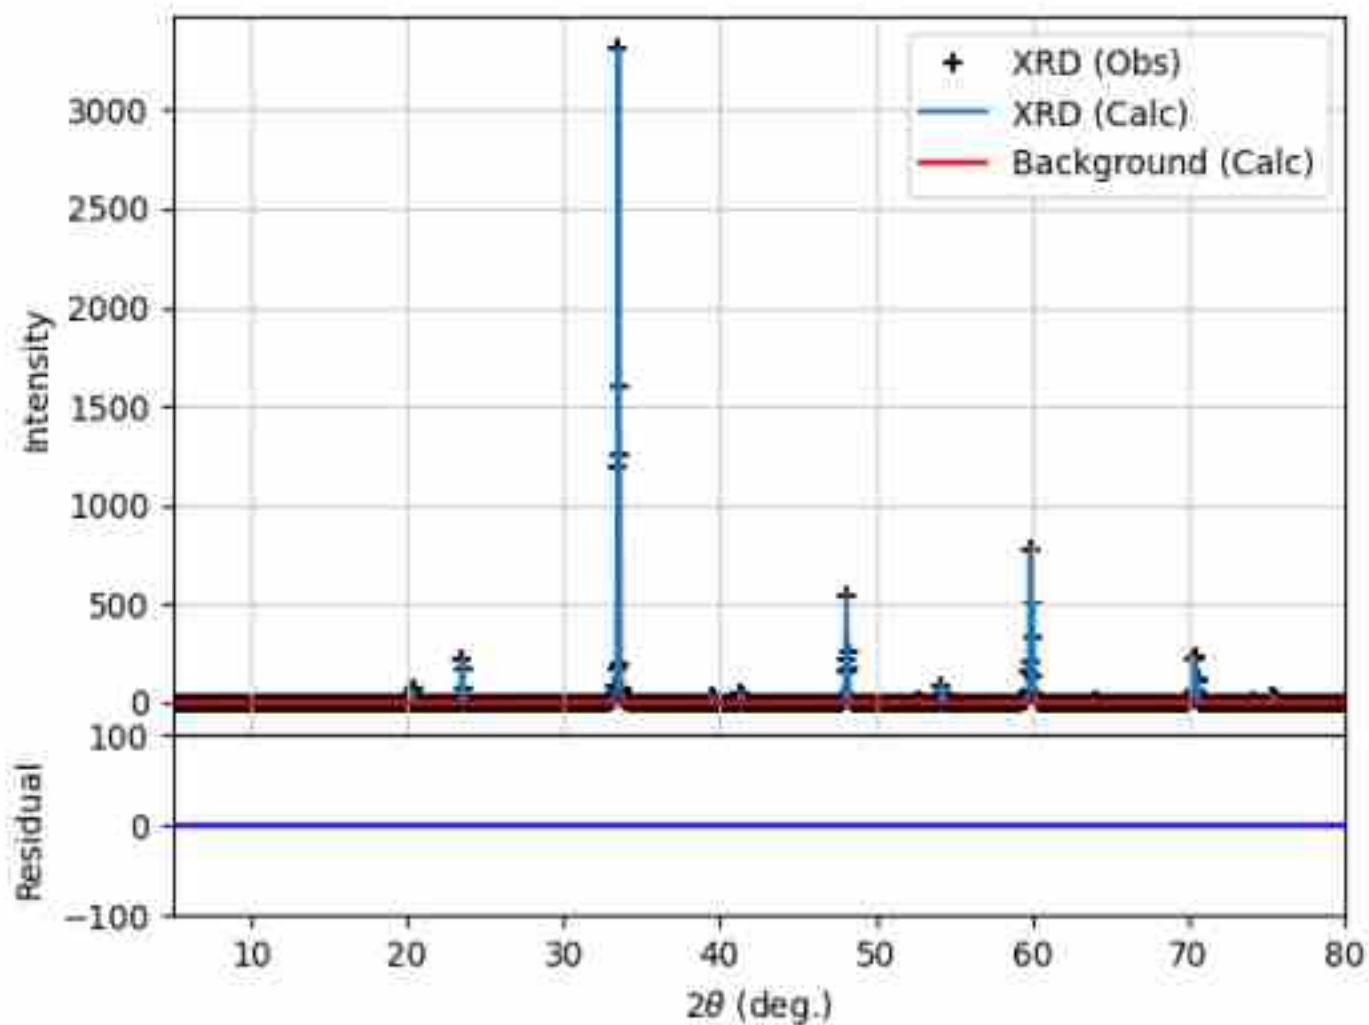

| RMSE before RR | Rwp     | RMSE after RR |
|----------------|---------|---------------|
| 0.002          | 0.00359 | 0.00012       |

# Y1Zn1Pd2

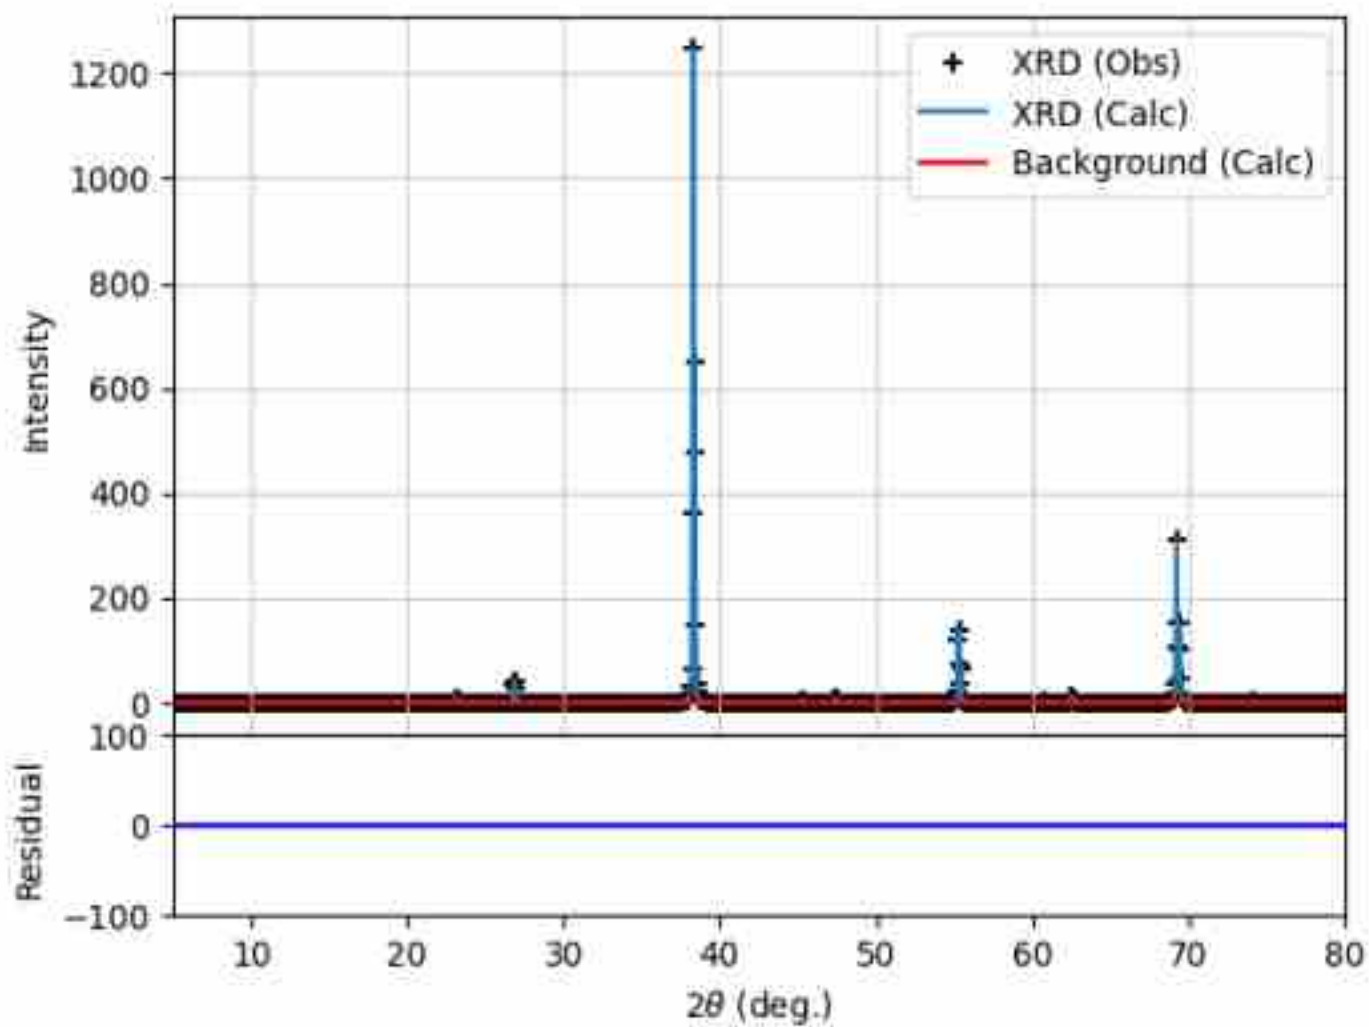

| RMSE before RR | Rwp    | RMSE after RR |
|----------------|--------|---------------|
| 0.002          | 0.0059 | 0.00048       |

# Y2Ag1Ir1

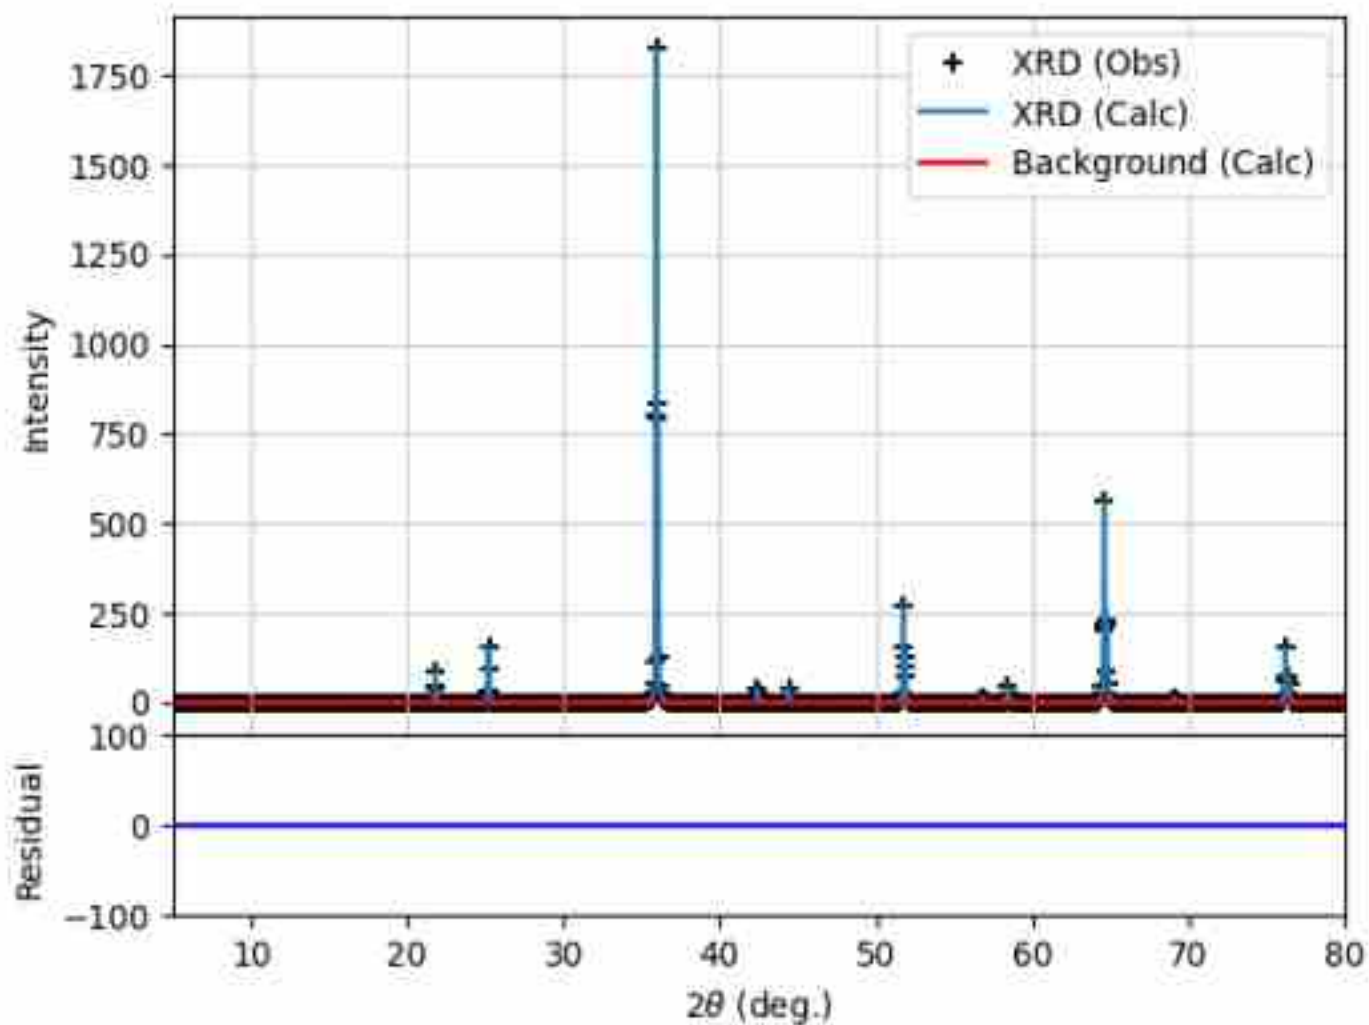

| RMSE before RR | Rwp     | RMSE after RR |
|----------------|---------|---------------|
| 0.002          | 0.00843 | 0.00219       |

# Y2Cu1Ir1

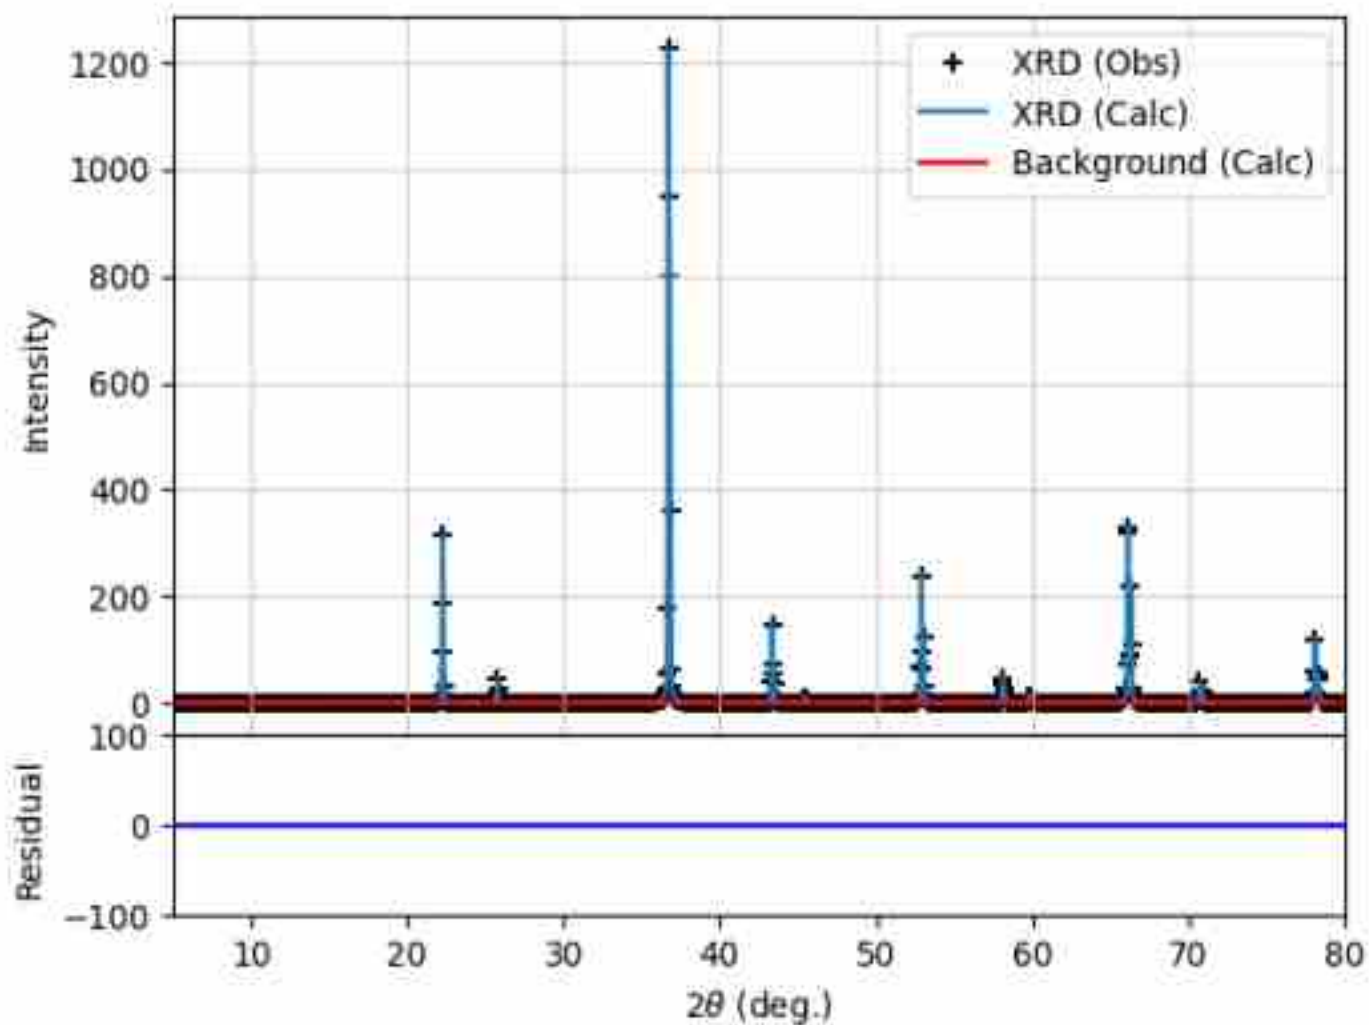

| RMSE before RR | Rwp   | RMSE after RR |
|----------------|-------|---------------|
| 0.002          | 0.003 | 0.00091       |

# Y2Cu1Ru1

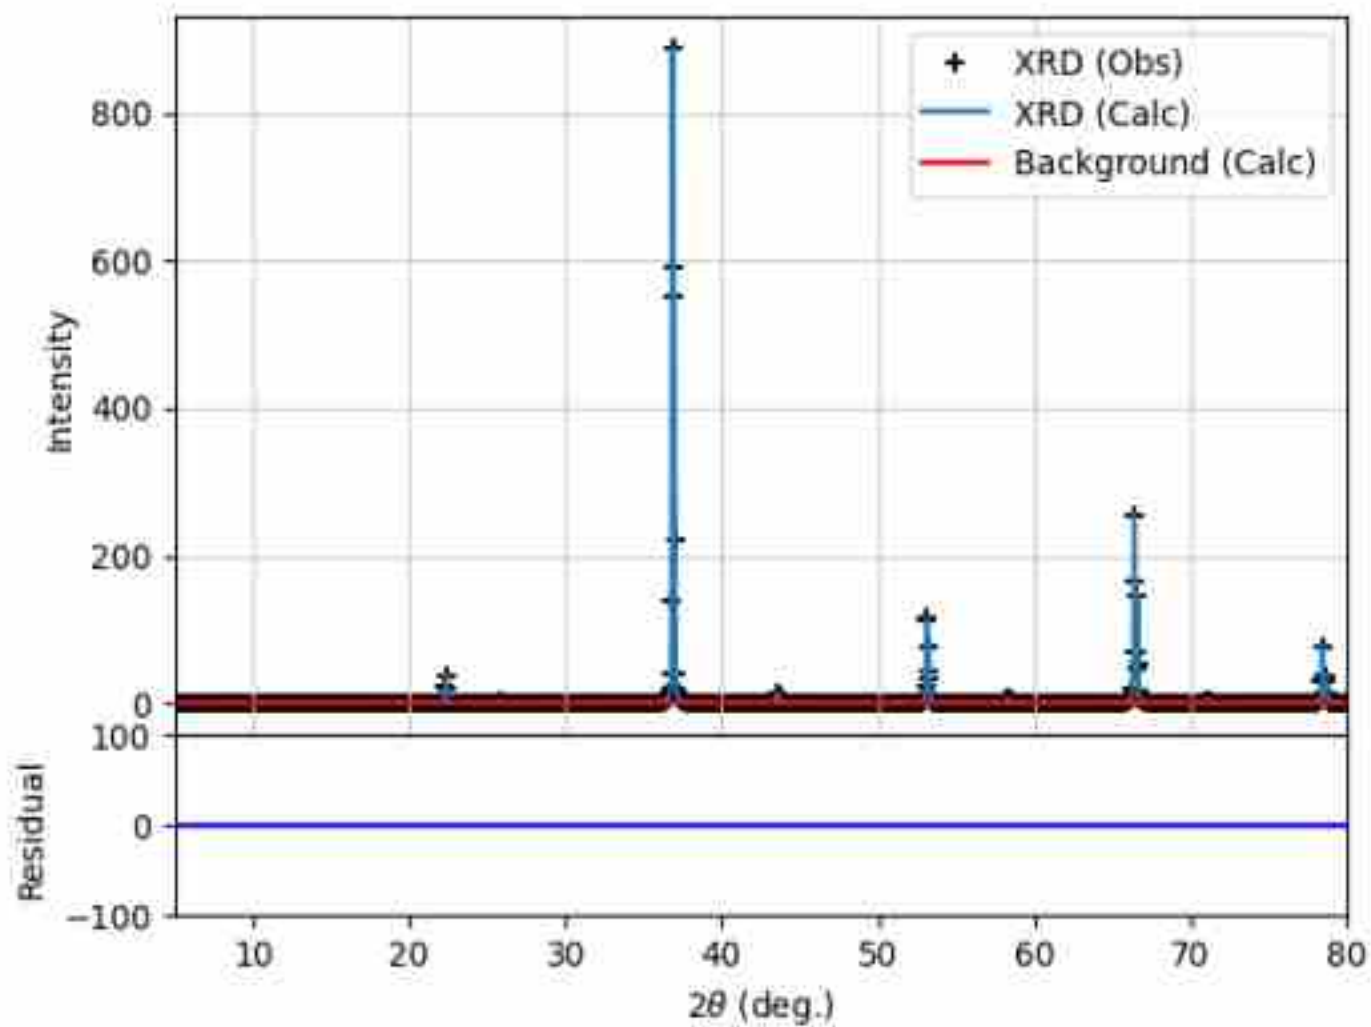

| RMSE before RR | Rwp     | RMSE after RR |
|----------------|---------|---------------|
| 0.002          | 0.00451 | 0.00271       |



# Y2Ga1Ag1

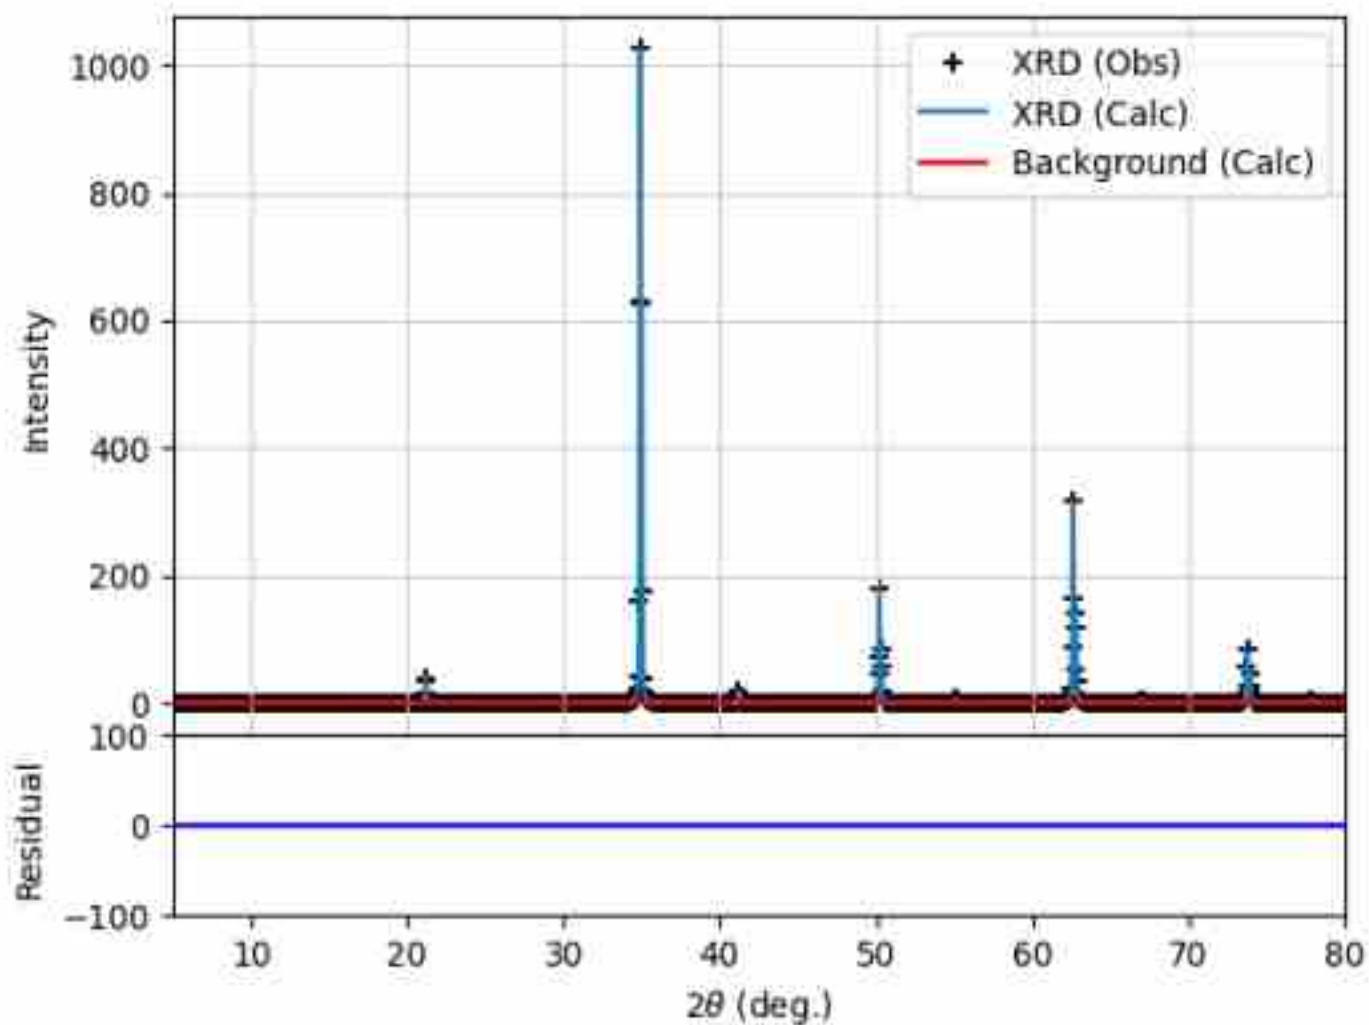

| RMSE before RR | Rwp     | RMSE after RR |
|----------------|---------|---------------|
| 0.002          | 0.10941 | 0.00194       |

# Y<sub>2</sub>Ni<sub>1</sub>Ir<sub>1</sub>

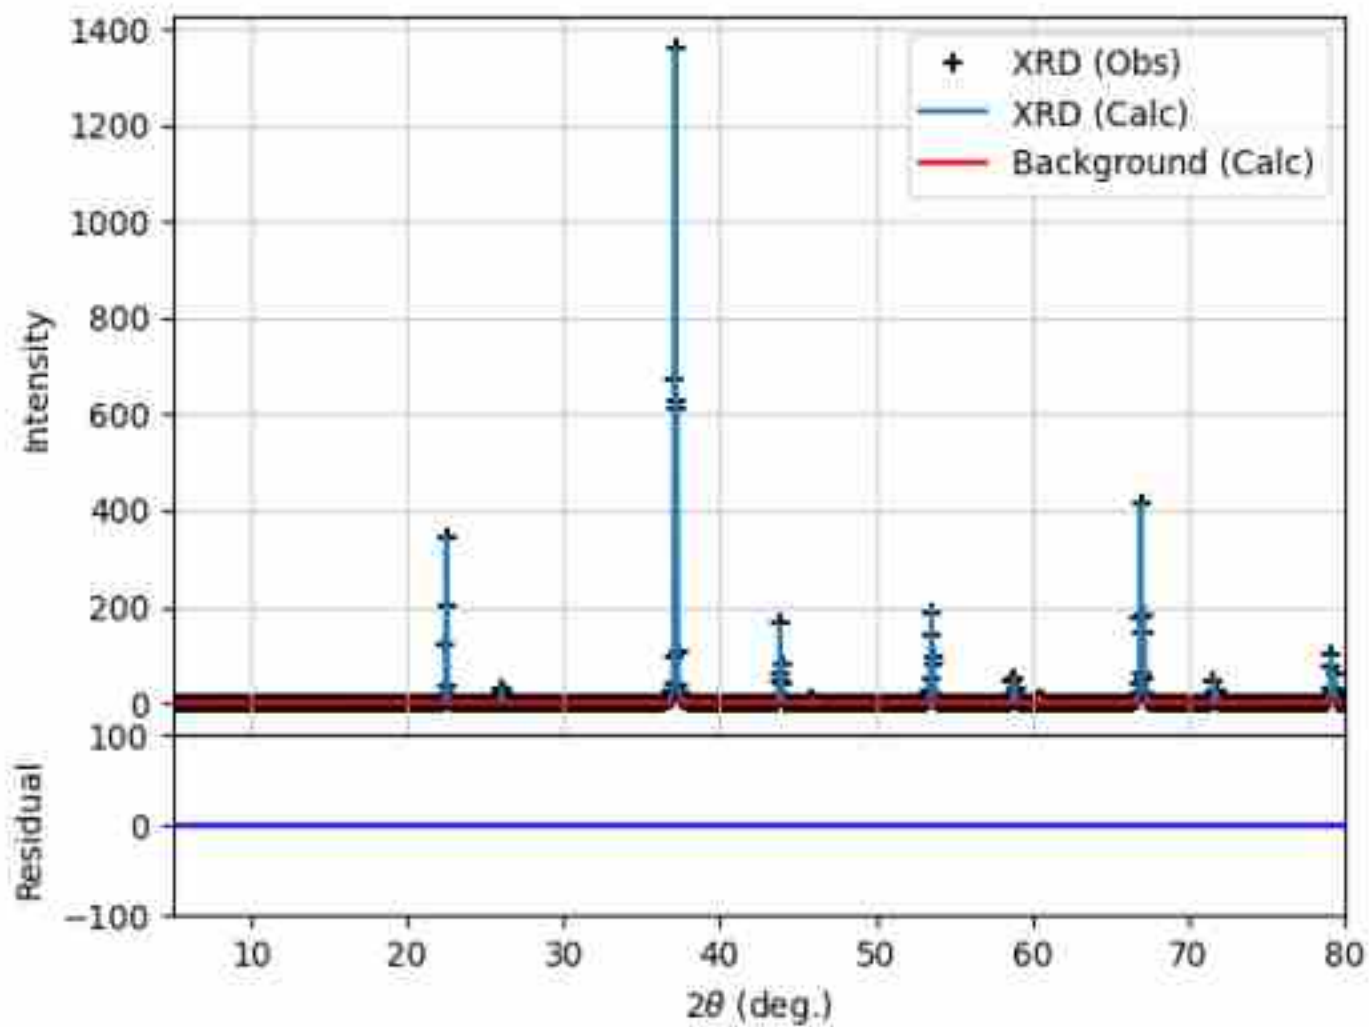

| RMSE before RR | Rwp     | RMSE after RR |
|----------------|---------|---------------|
| 0.002          | 0.03567 | 0.00123       |

# Y<sub>2</sub>Zn<sub>1</sub>Ir<sub>1</sub>

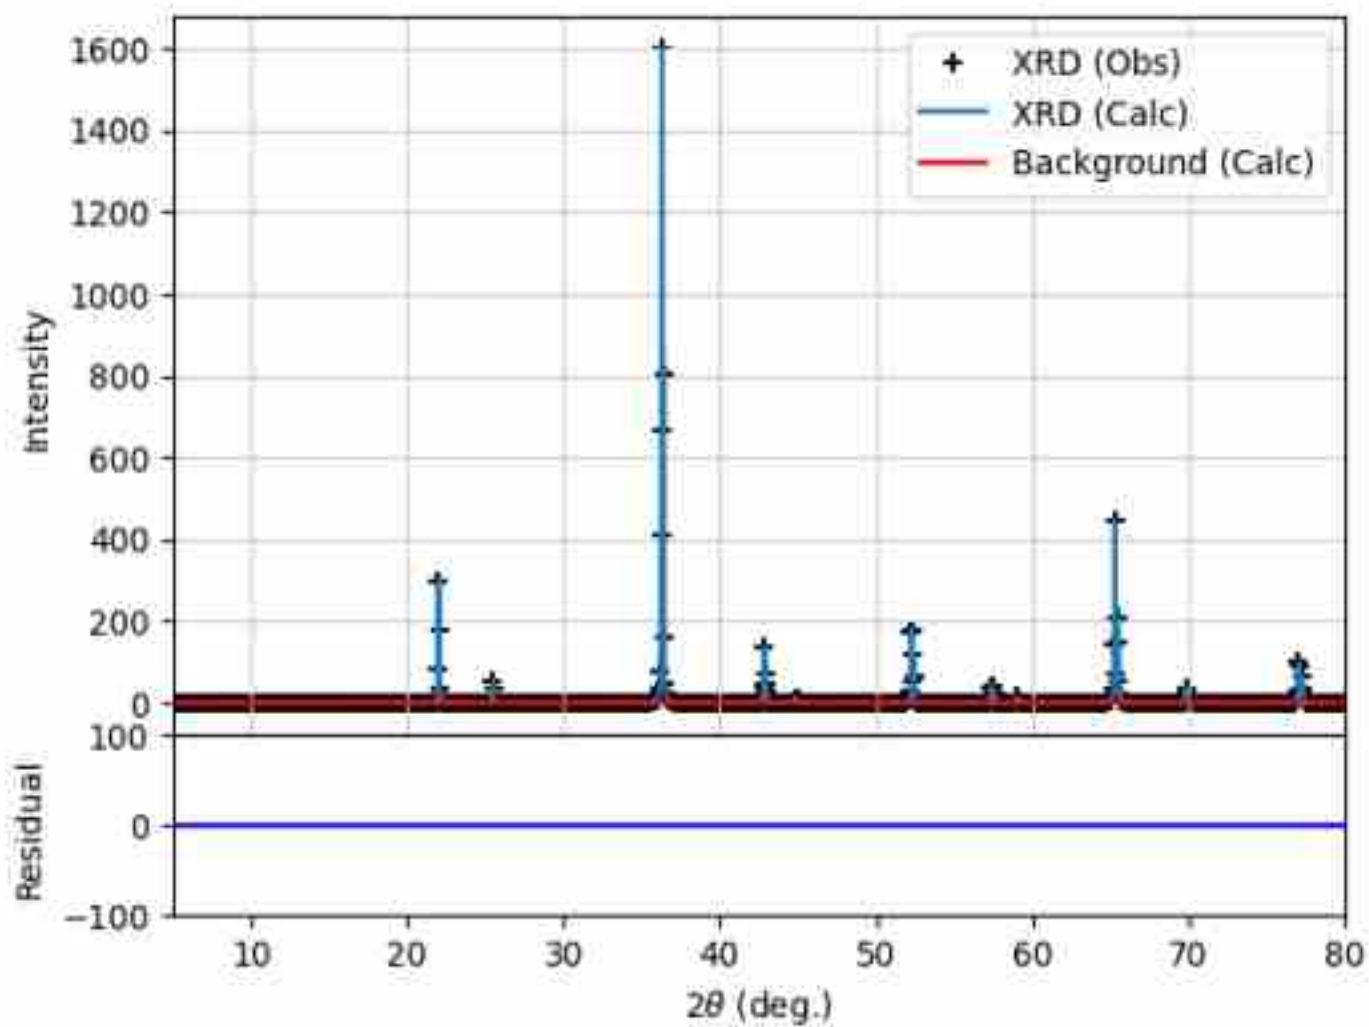

| RMSE before RR | Rwp    | RMSE after RR |
|----------------|--------|---------------|
| 0.002          | 0.0032 | 0.00157       |

# Y<sub>4</sub>Mn<sub>2</sub>Cr<sub>2</sub>O<sub>12</sub>

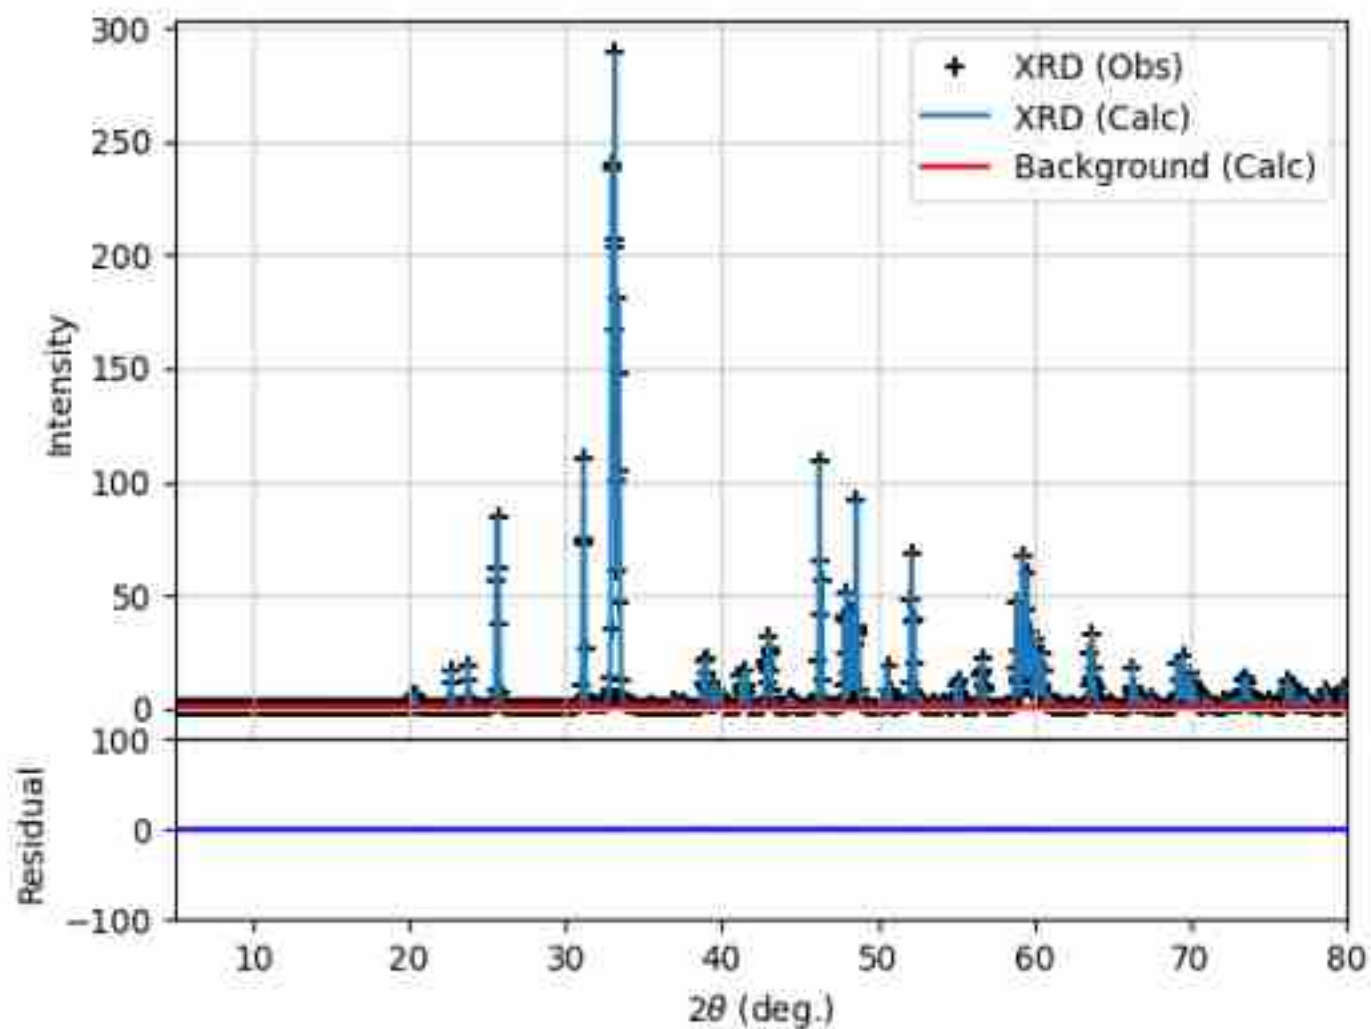

| RMSE before RR | Rwp     | RMSE after RR |
|----------------|---------|---------------|
| 0.02           | 1.05728 | 0.03378       |

# Y4Ni4O12

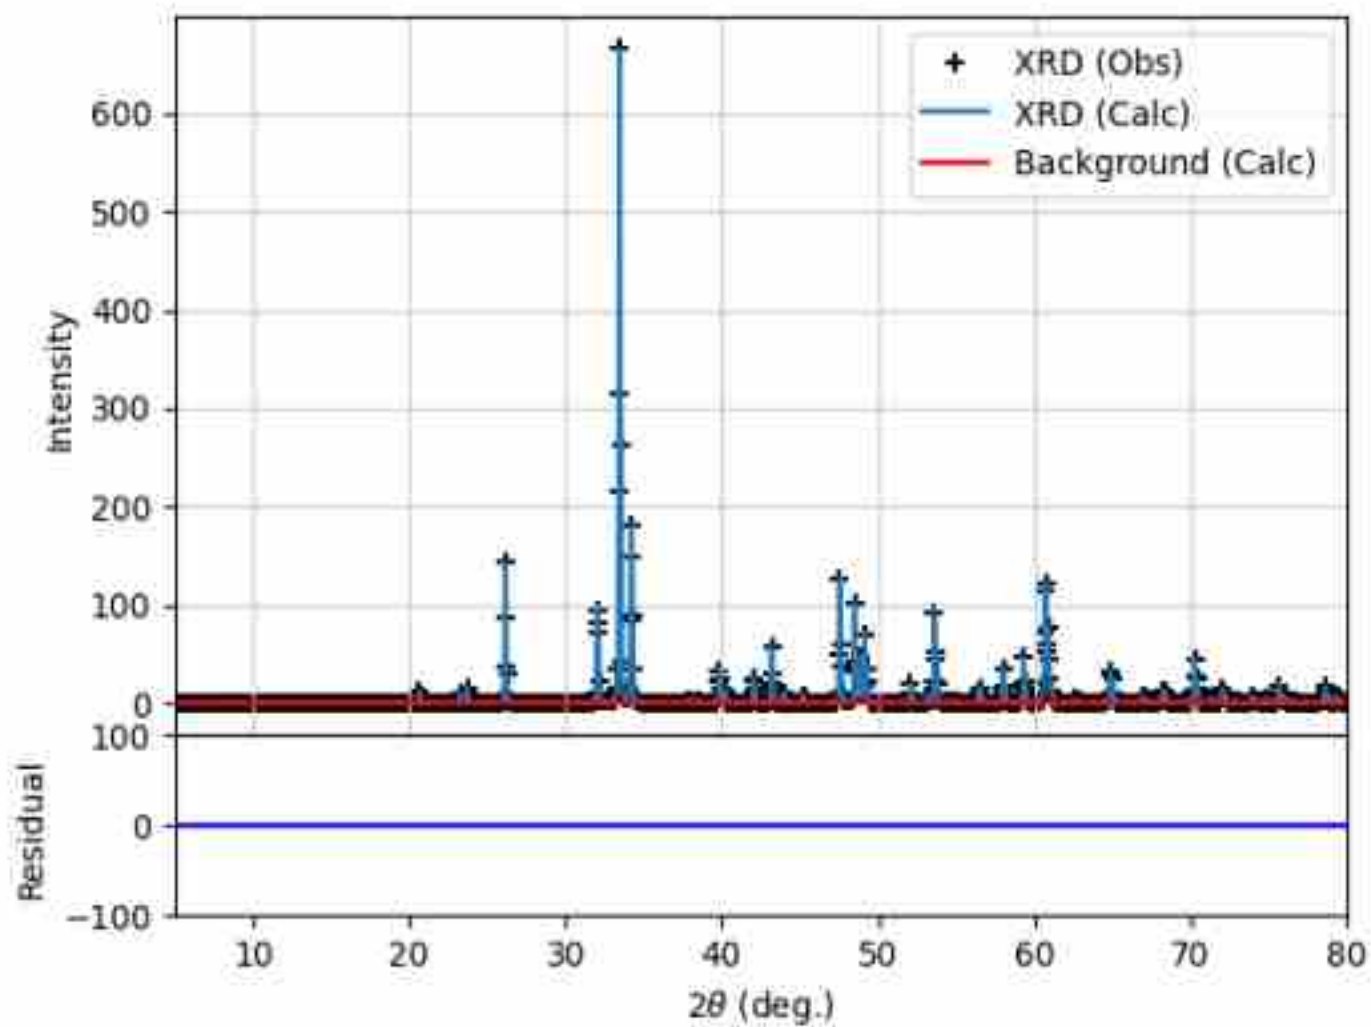

| RMSE before RR | Rwp     | RMSE after RR |
|----------------|---------|---------------|
| 0.02           | 0.00352 | 0.00134       |

# Y4V4O12

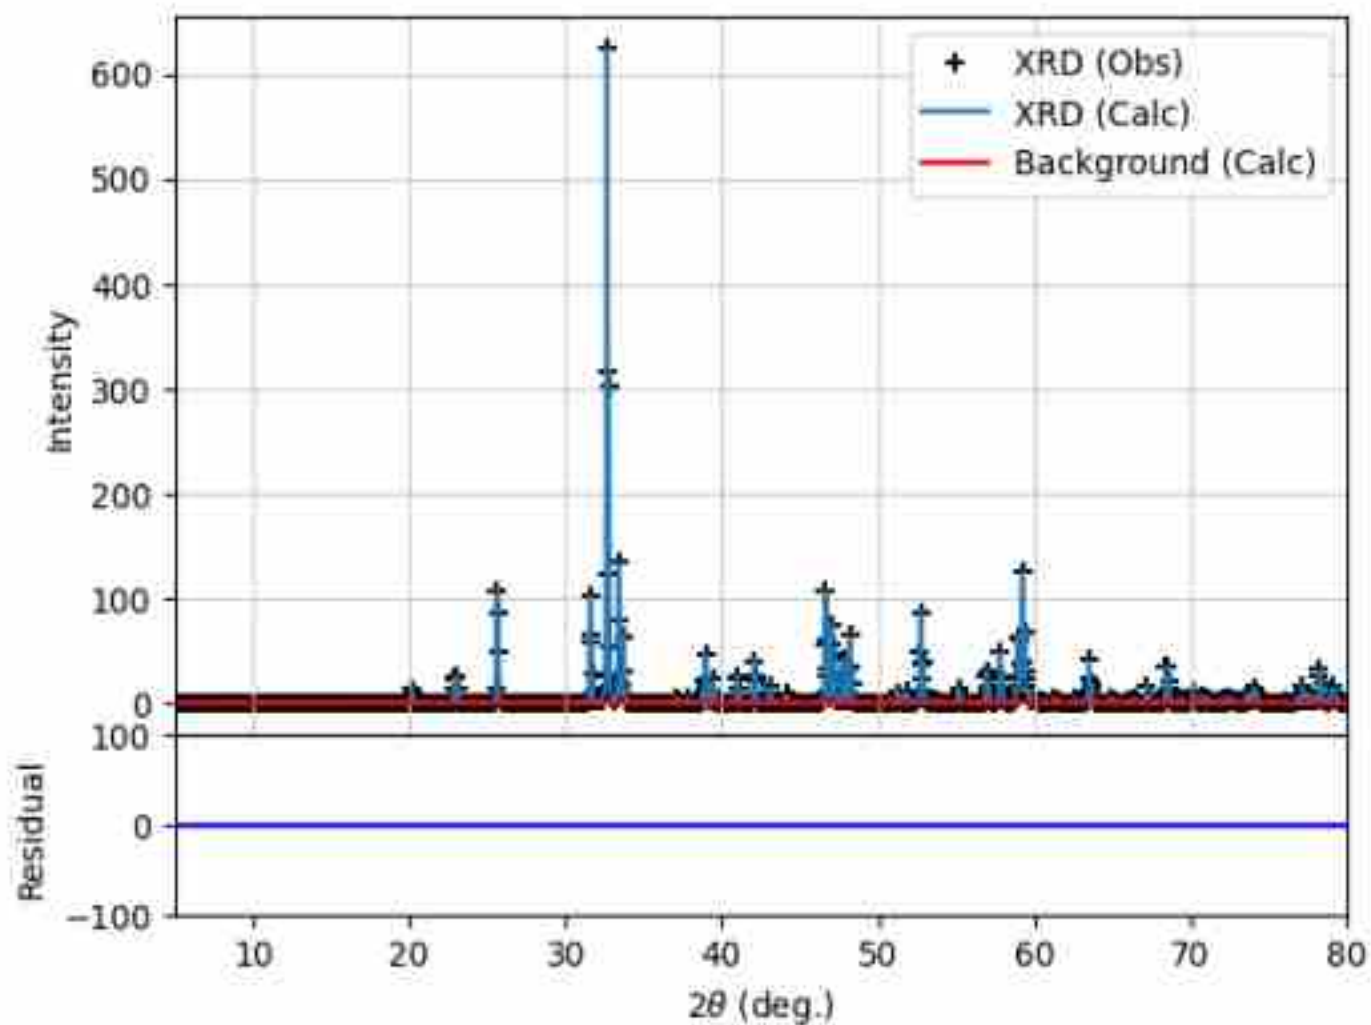

| RMSE before RR | Rwp     | RMSE after RR |
|----------------|---------|---------------|
| 0.02           | 0.00296 | 0.00062       |

# Y6S2O2F10

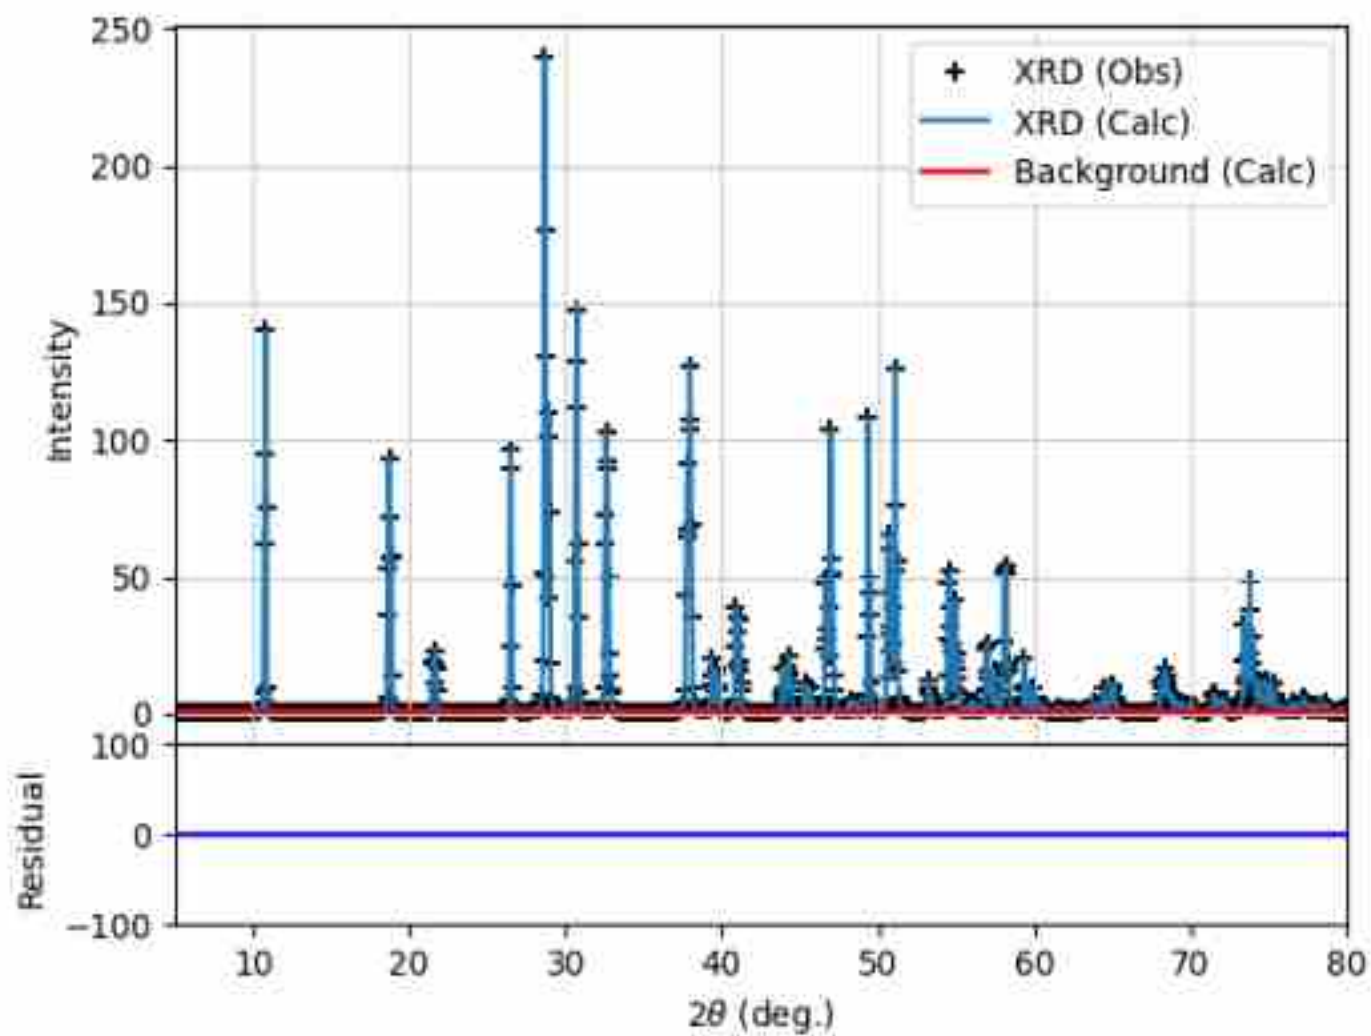

| RMSE before RR | Rwp     | RMSE after RR |
|----------------|---------|---------------|
| 0.02           | 0.00268 | 0.00076       |

# Yb1Bi1Rh2

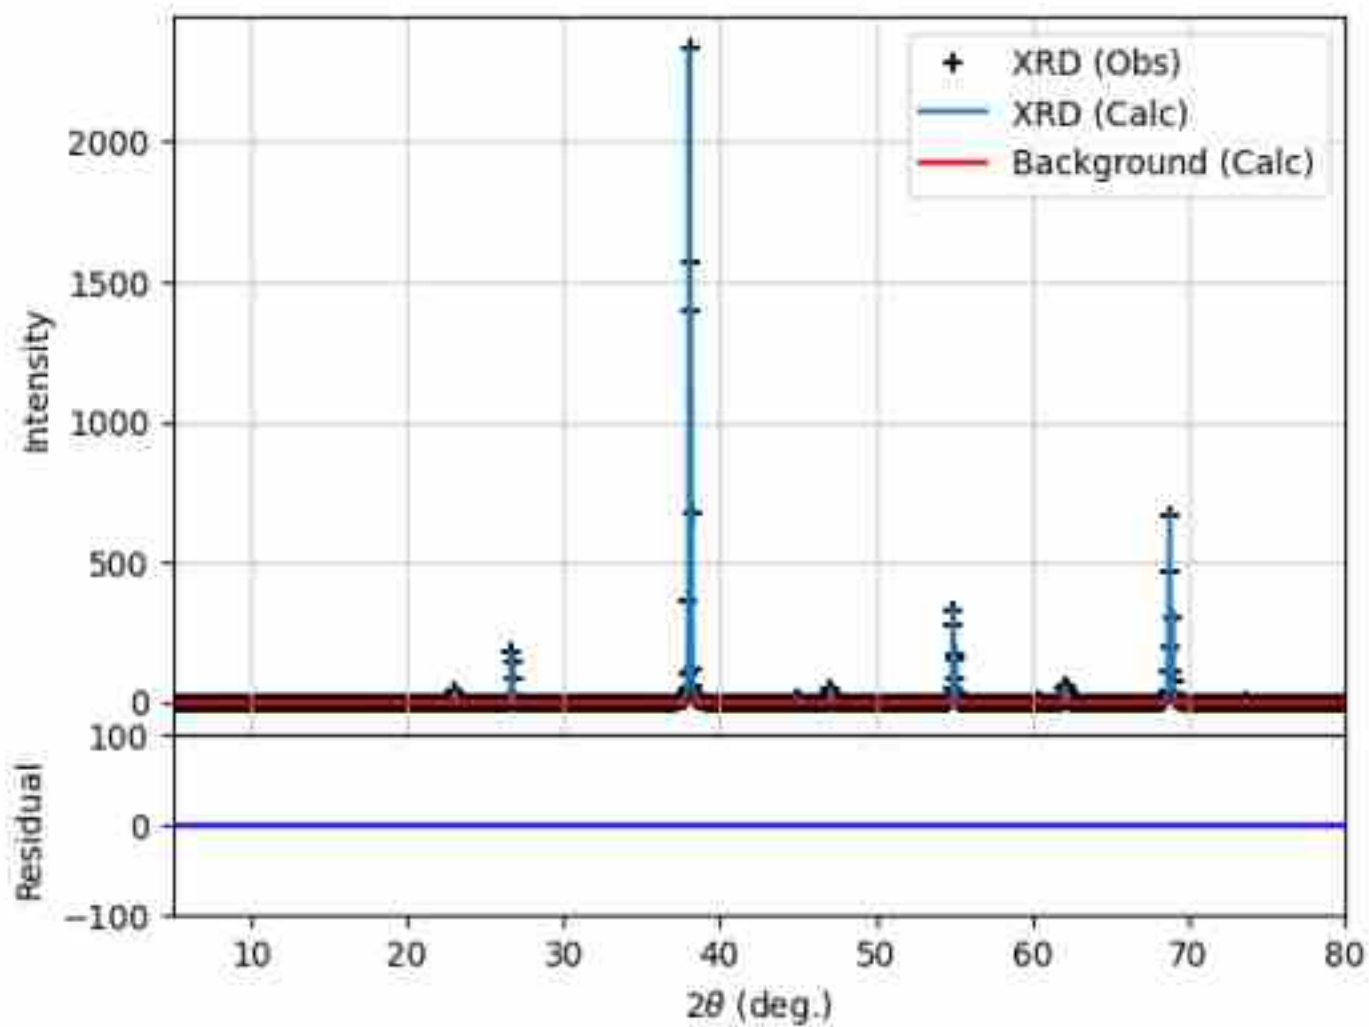

| RMSE before RR | Rwp     | RMSE after RR |
|----------------|---------|---------------|
| 0.002          | 0.00377 | 0.00062       |



# Yb1Cd1

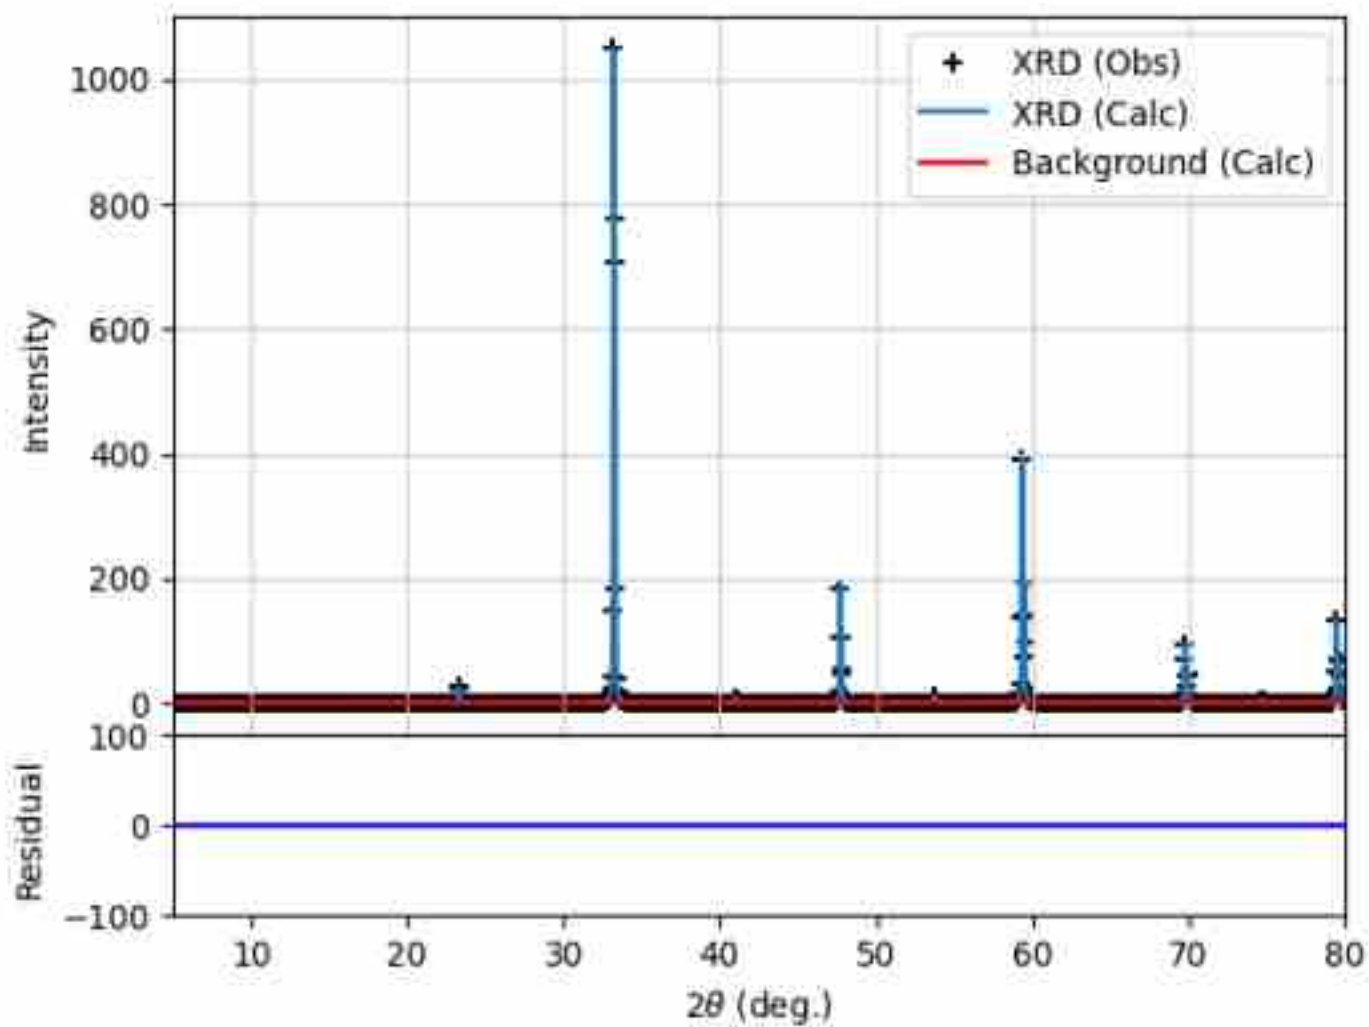

| RMSE before RR | Rwp     | RMSE after RR |
|----------------|---------|---------------|
| 0.002          | 0.07327 | 0.00194       |

# Yb1Ce1Zn2

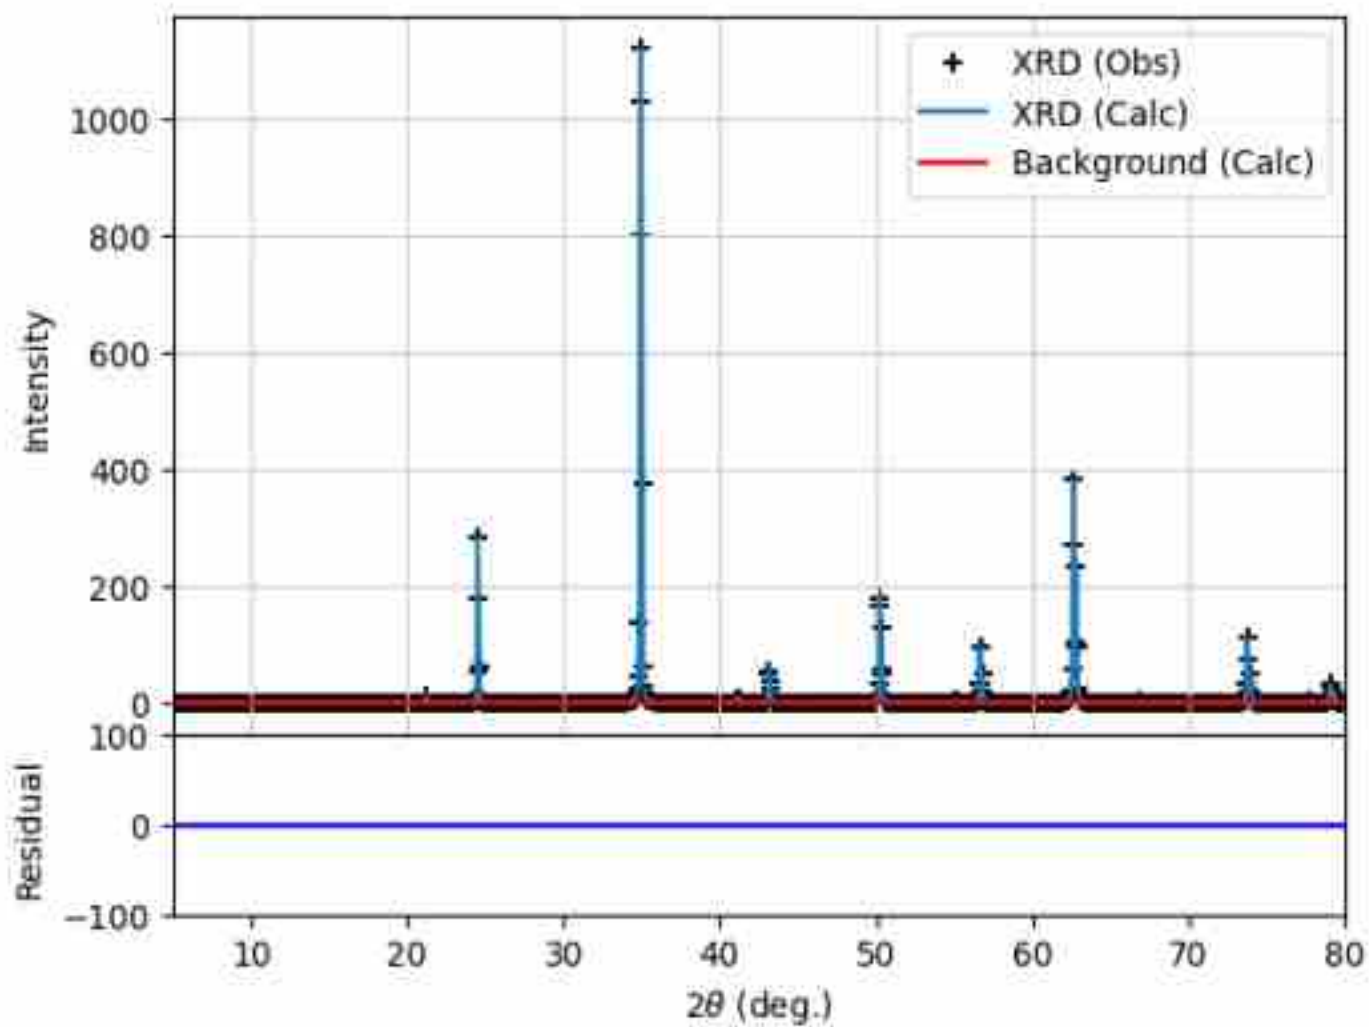

| RMSE before RR | Rwp     | RMSE after RR |
|----------------|---------|---------------|
| 0.002          | 0.00405 | 0.00044       |

# Yb1Eu1Cd2

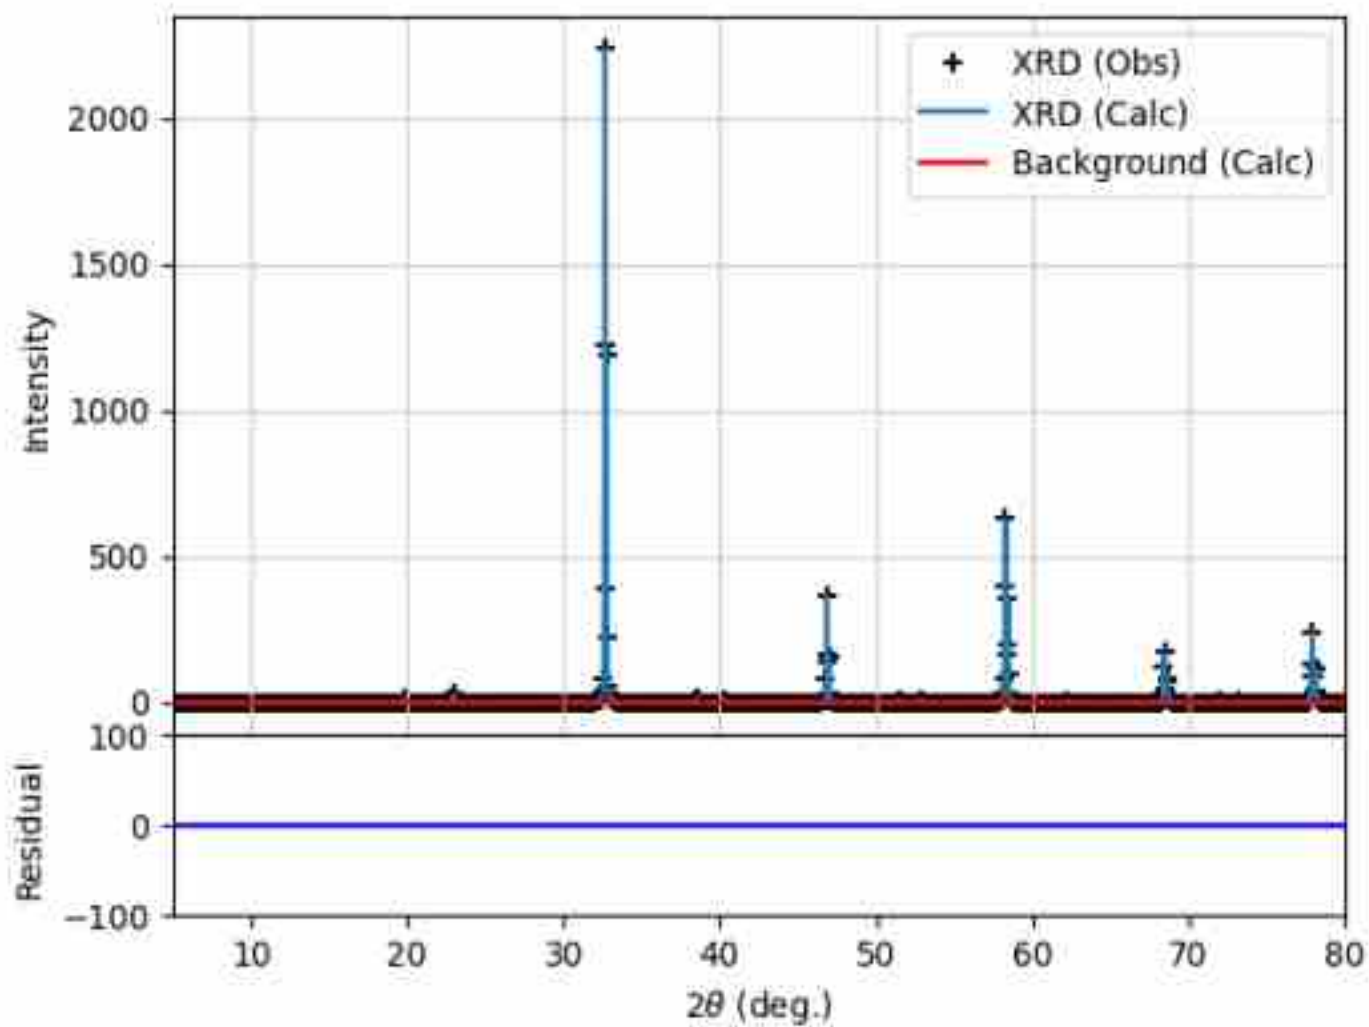

| RMSE before RR | Rwp     | RMSE after RR |
|----------------|---------|---------------|
| 0.002          | 0.00314 | 0.00017       |

# Yb1Eu1Ti2

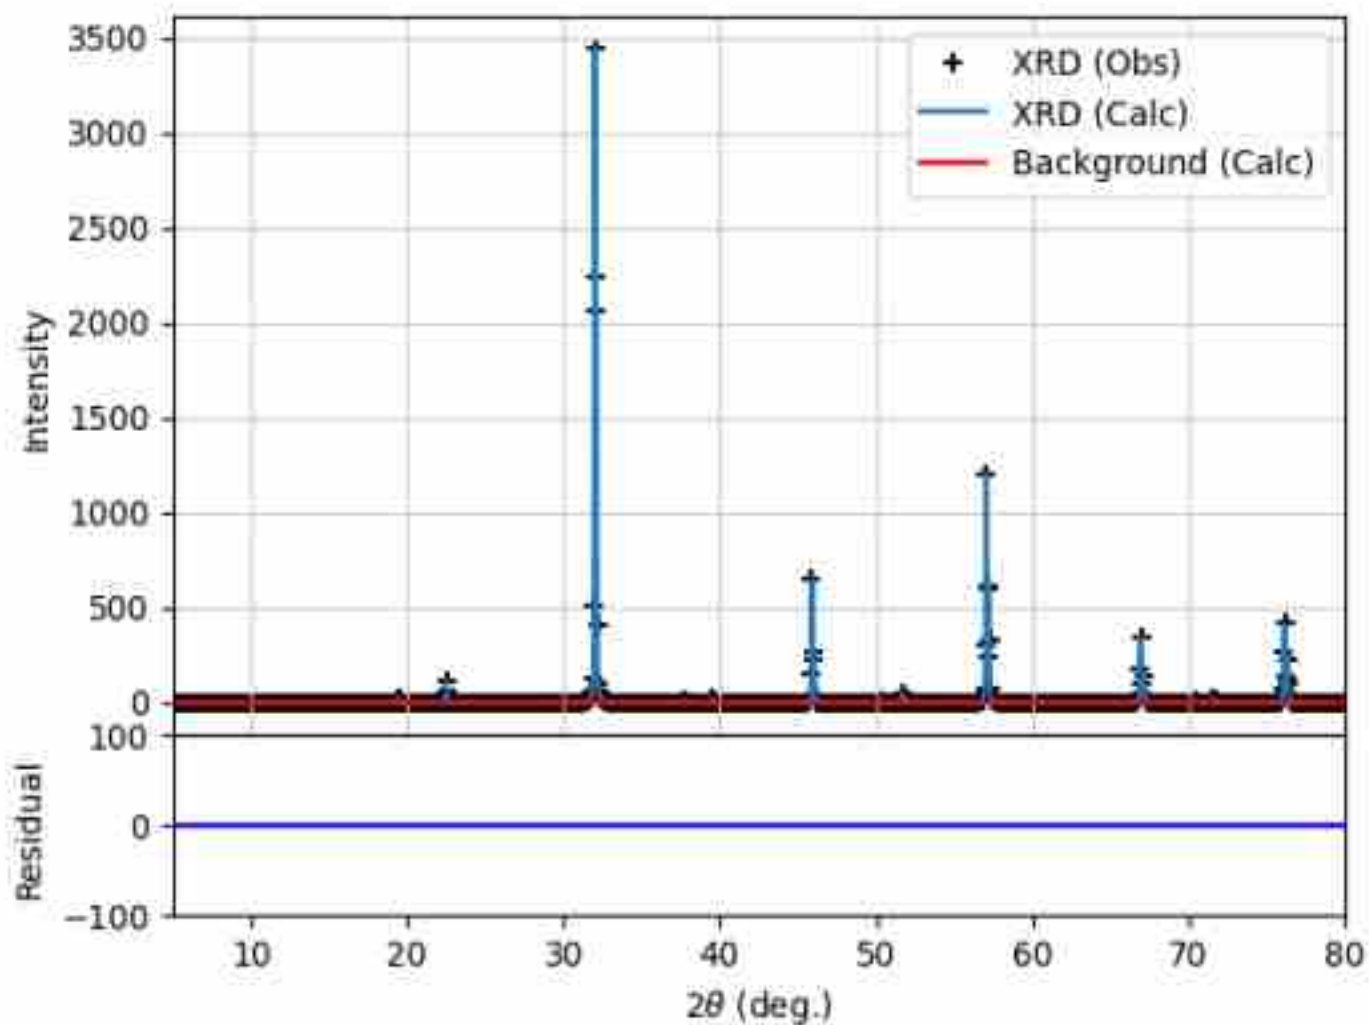

| RMSE before RR | Rwp     | RMSE after RR |
|----------------|---------|---------------|
| 0.002          | 0.00433 | 0.0003        |

# Yb1Ga1Pd2

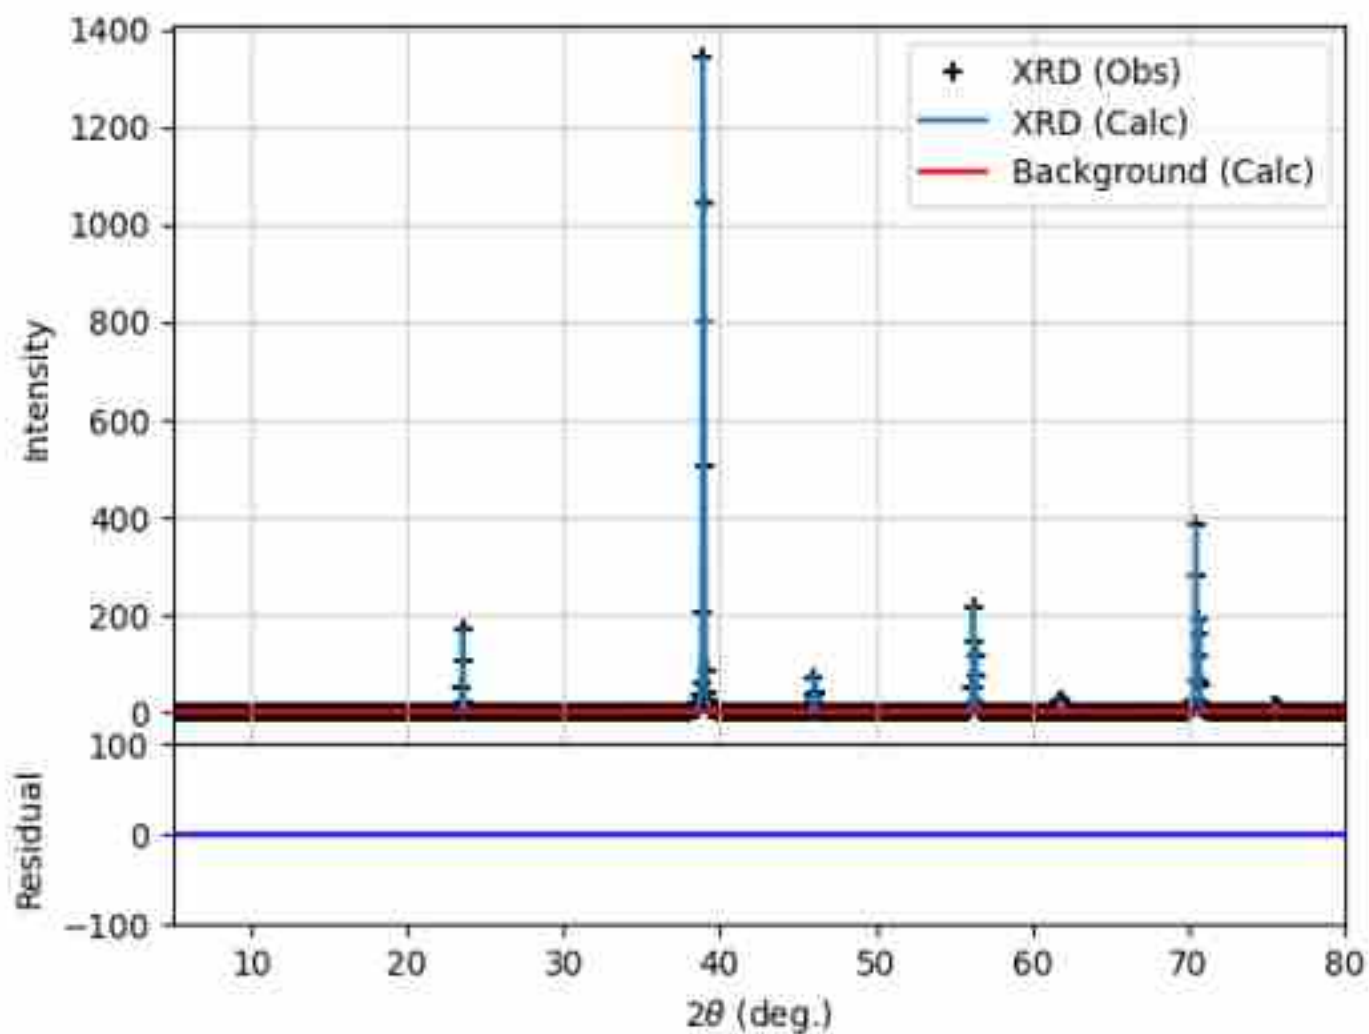

| RMSE before RR | Rwp     | RMSE after RR |
|----------------|---------|---------------|
| 0.002          | 0.01102 | 0.00077       |

# Yb1Ho1Pd2

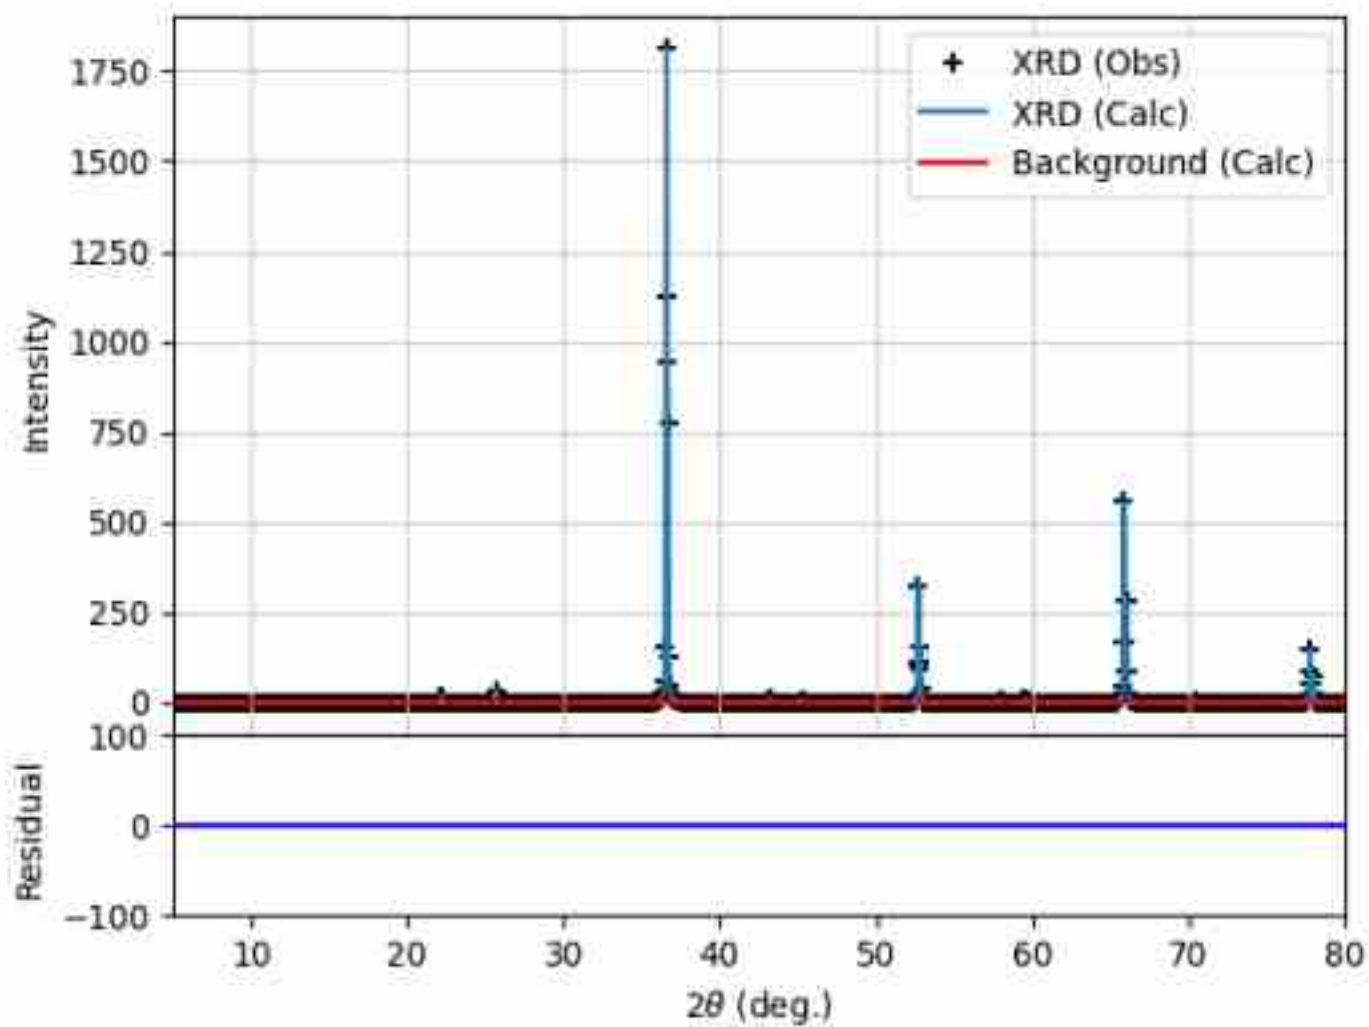

| RMSE before RR | Rwp    | RMSE after RR |
|----------------|--------|---------------|
| 0.002          | 0.0293 | 0.00092       |

# Yb1In1Ag2

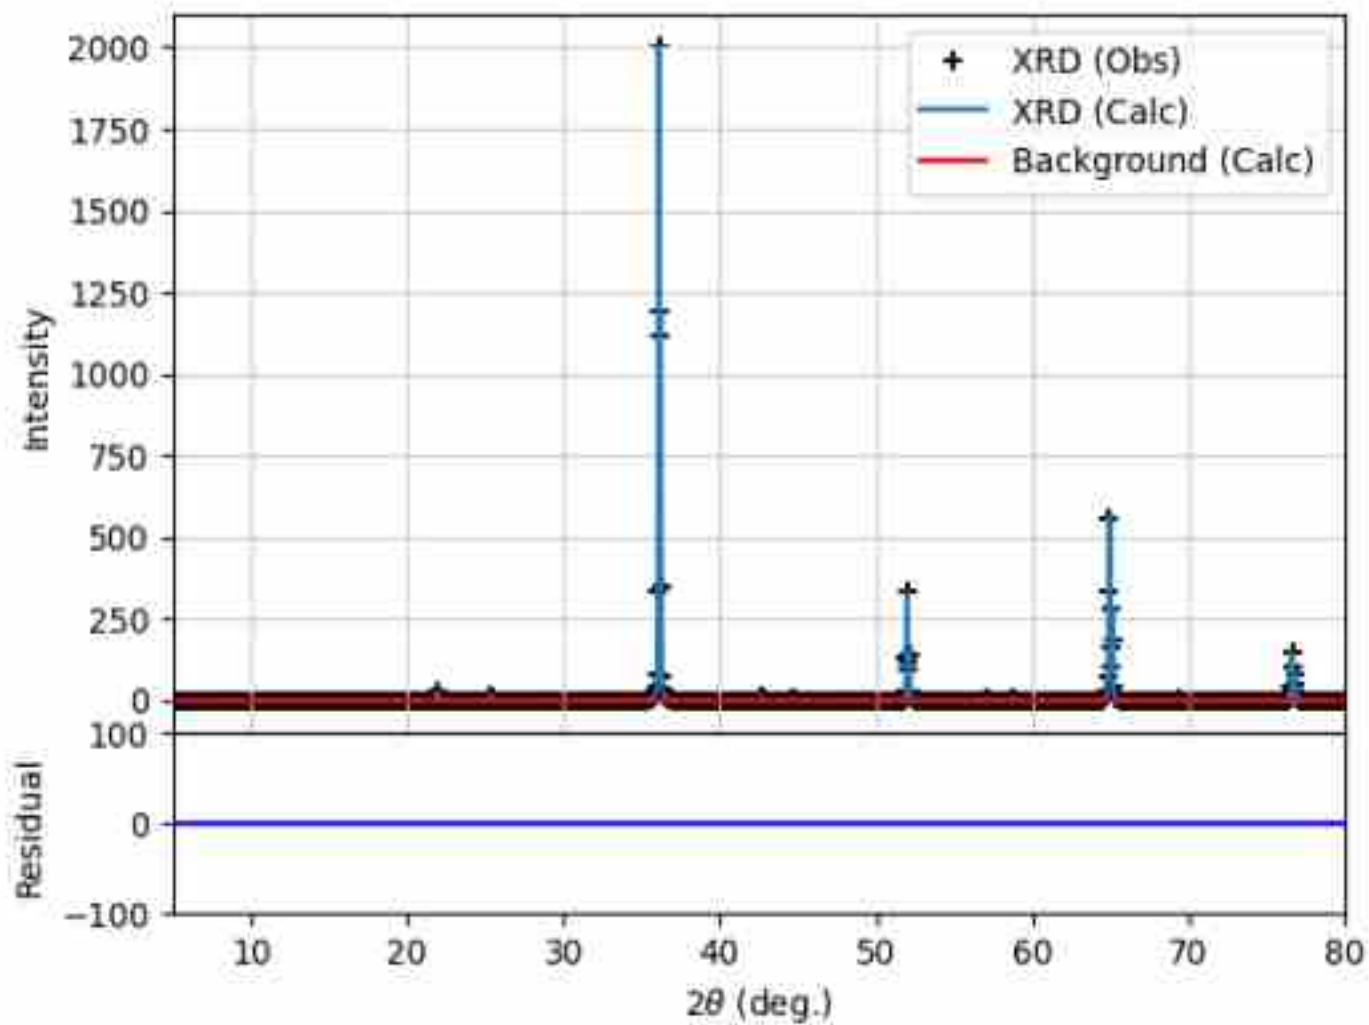

| RMSE before RR | Rwp     | RMSE after RR |
|----------------|---------|---------------|
| 0.002          | 0.00391 | 0.00035       |

# Yb1Lu1Pd2

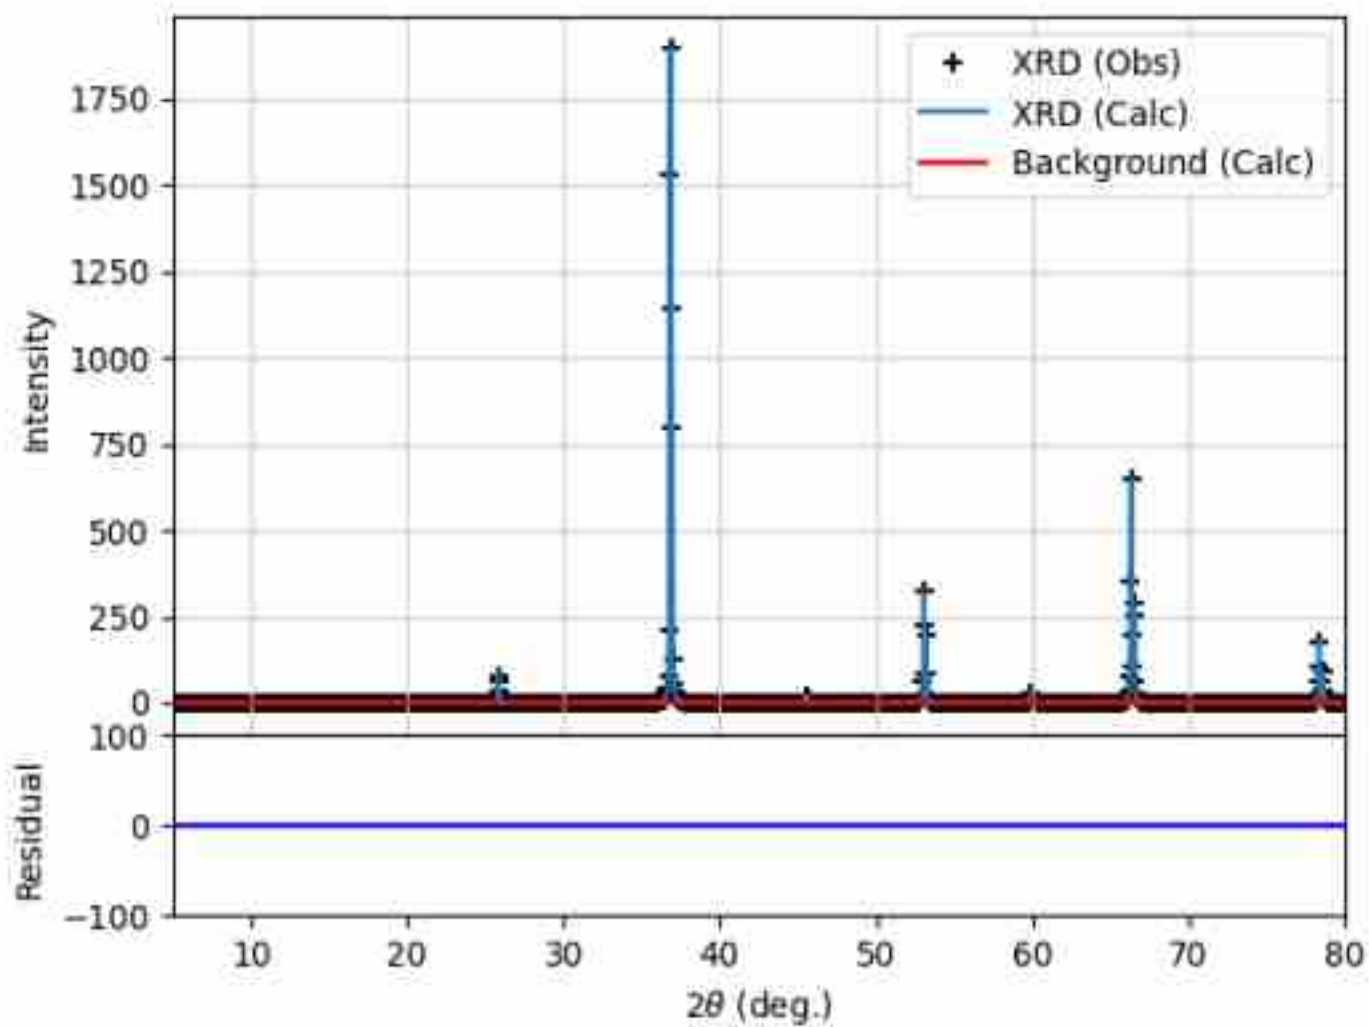

| RMSE before RR | Rwp     | RMSE after RR |
|----------------|---------|---------------|
| 0.002          | 0.05972 | 0.00129       |



# Yb1Nb1Ru2

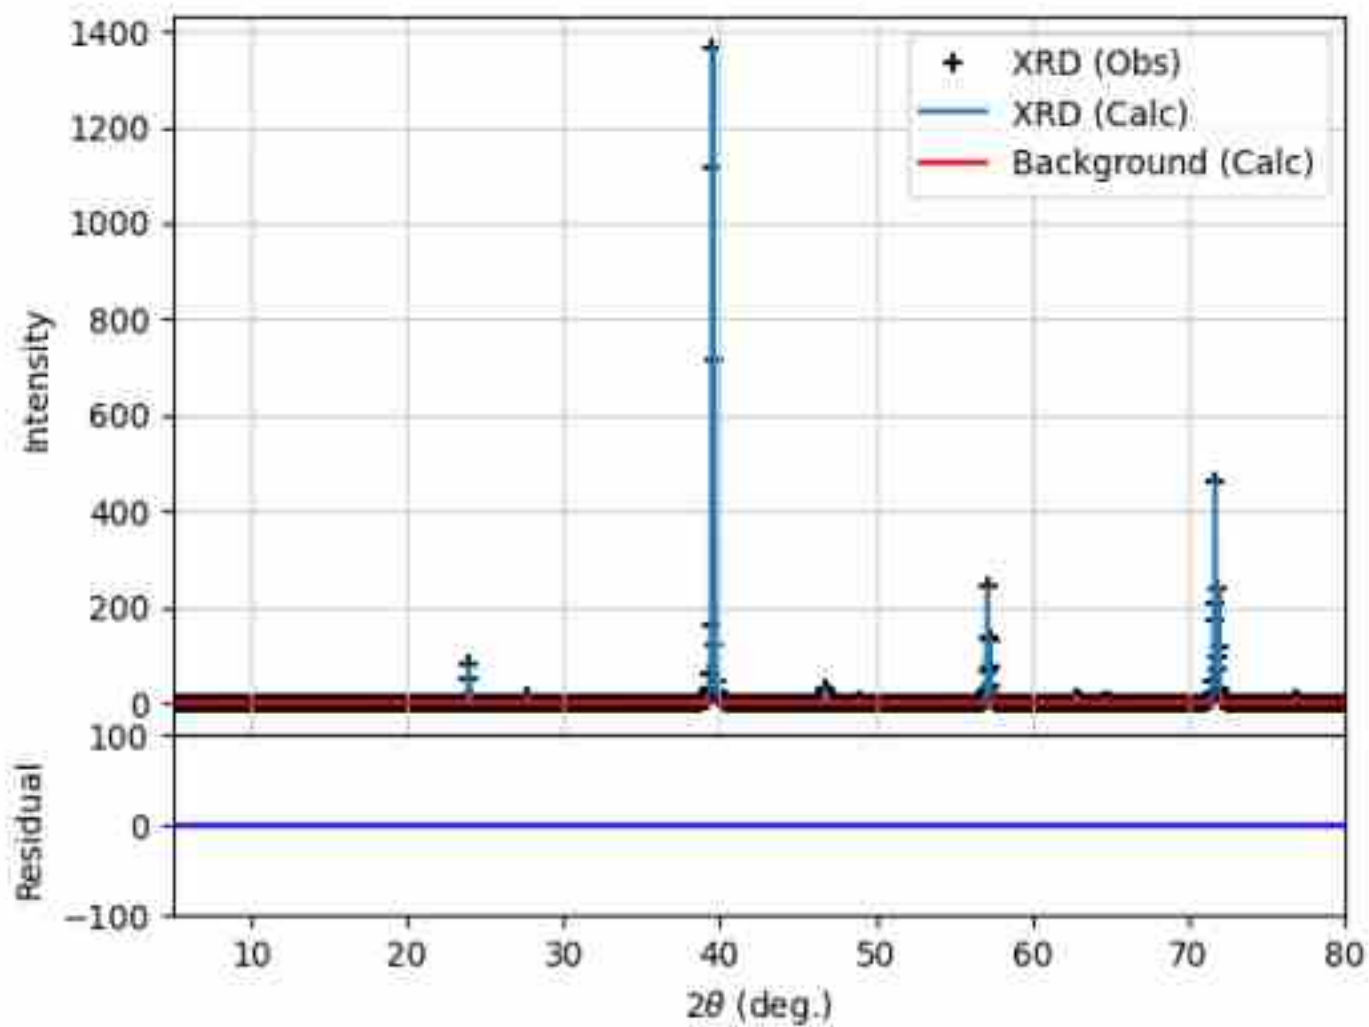

| RMSE before RR | Rwp     | RMSE after RR |
|----------------|---------|---------------|
| 0.002          | 0.00542 | 0.00024       |

# Yb1Nd1Pd2

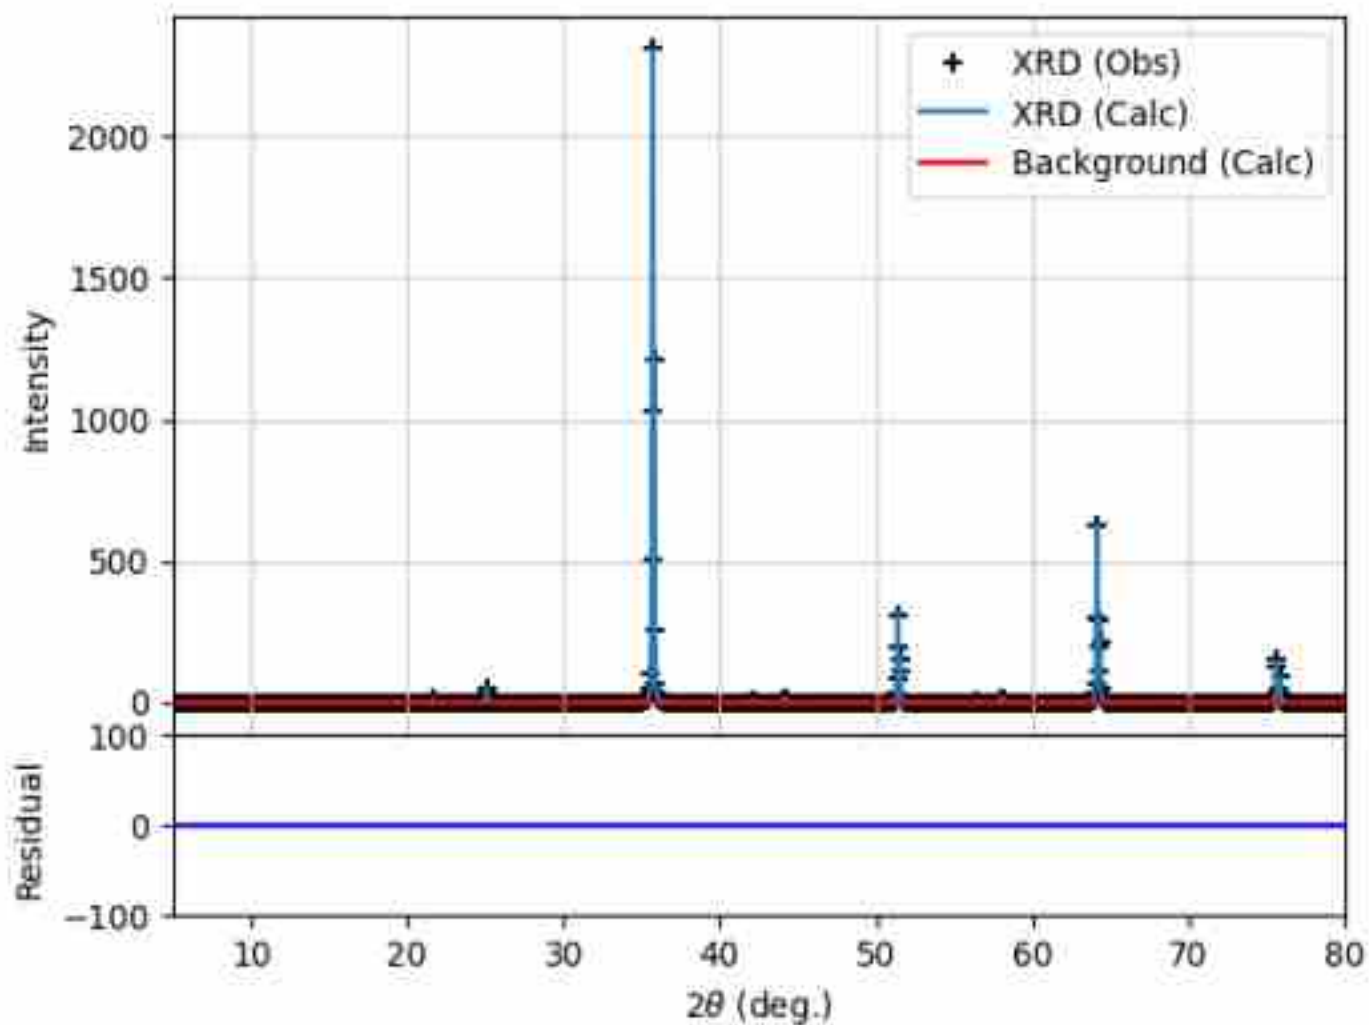

| RMSE before RR | Rwp     | RMSE after RR |
|----------------|---------|---------------|
| 0.002          | 0.01113 | 0.00068       |

# Yb1Pb1

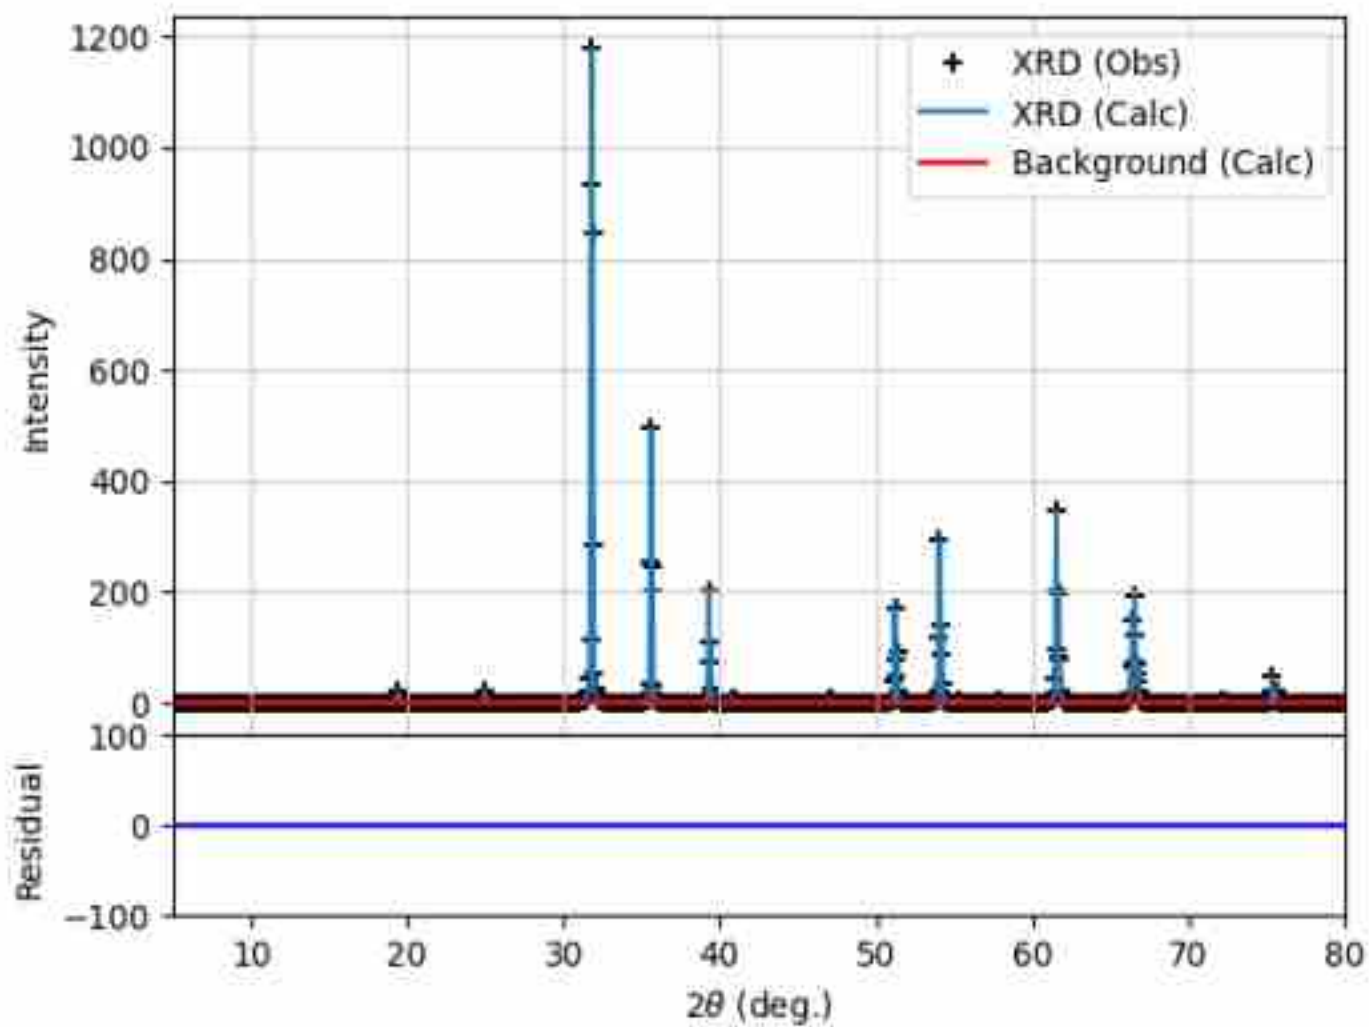

| RMSE before RR | Rwp     | RMSE after RR |
|----------------|---------|---------------|
| 0.002          | 0.02815 | 0.00088       |

Yb1Pd3

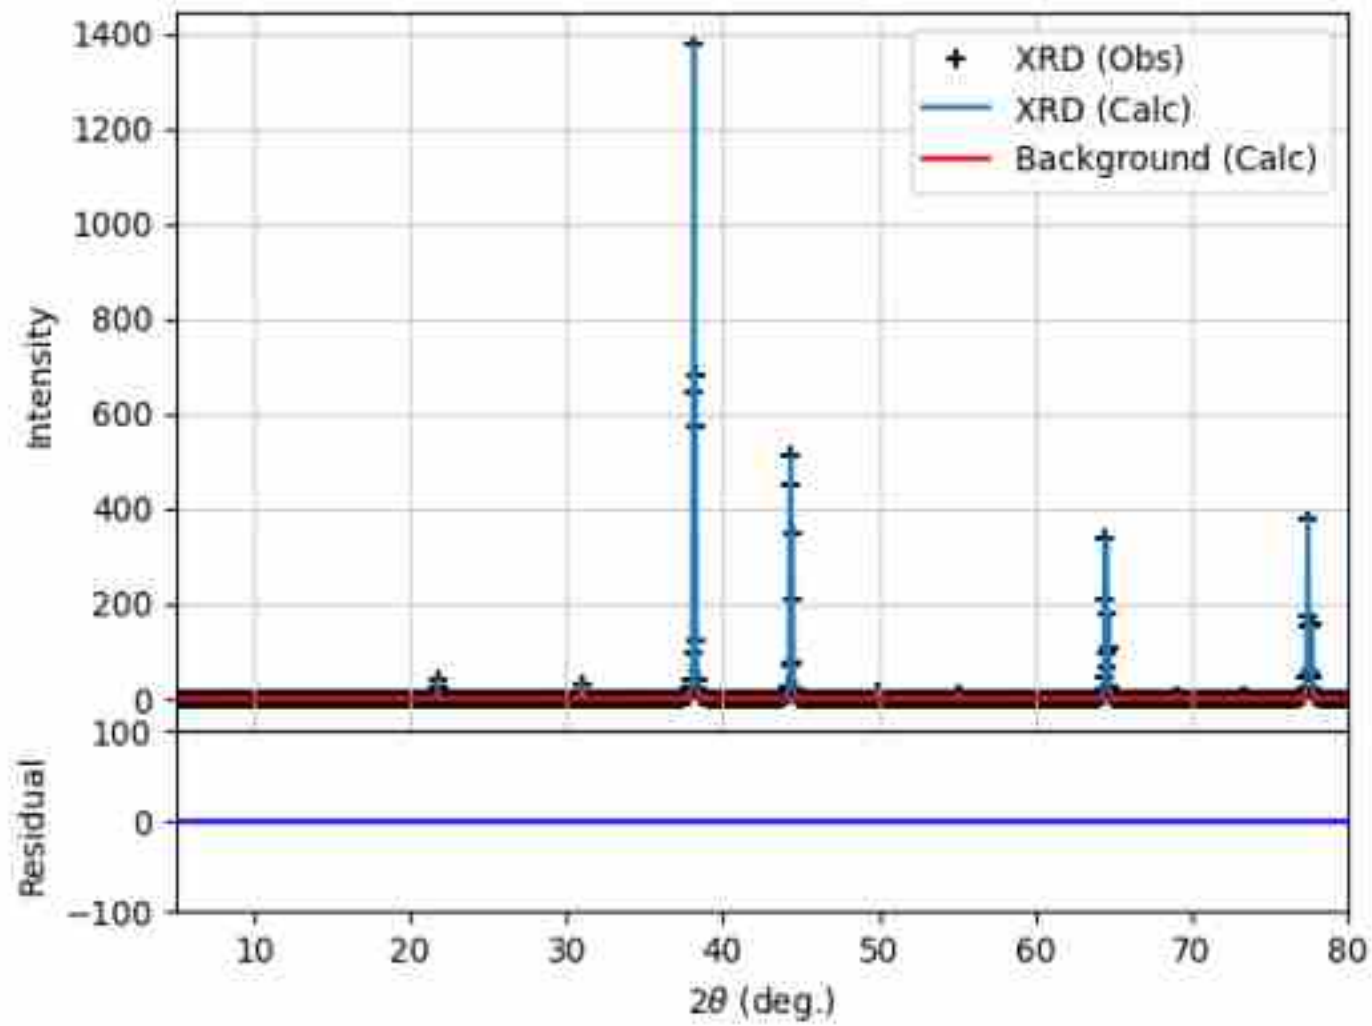

| RMSE before RR | Rwp     | RMSE after RR |
|----------------|---------|---------------|
| 0.002          | 0.02855 | 0.00143       |

# Yb1Pr3

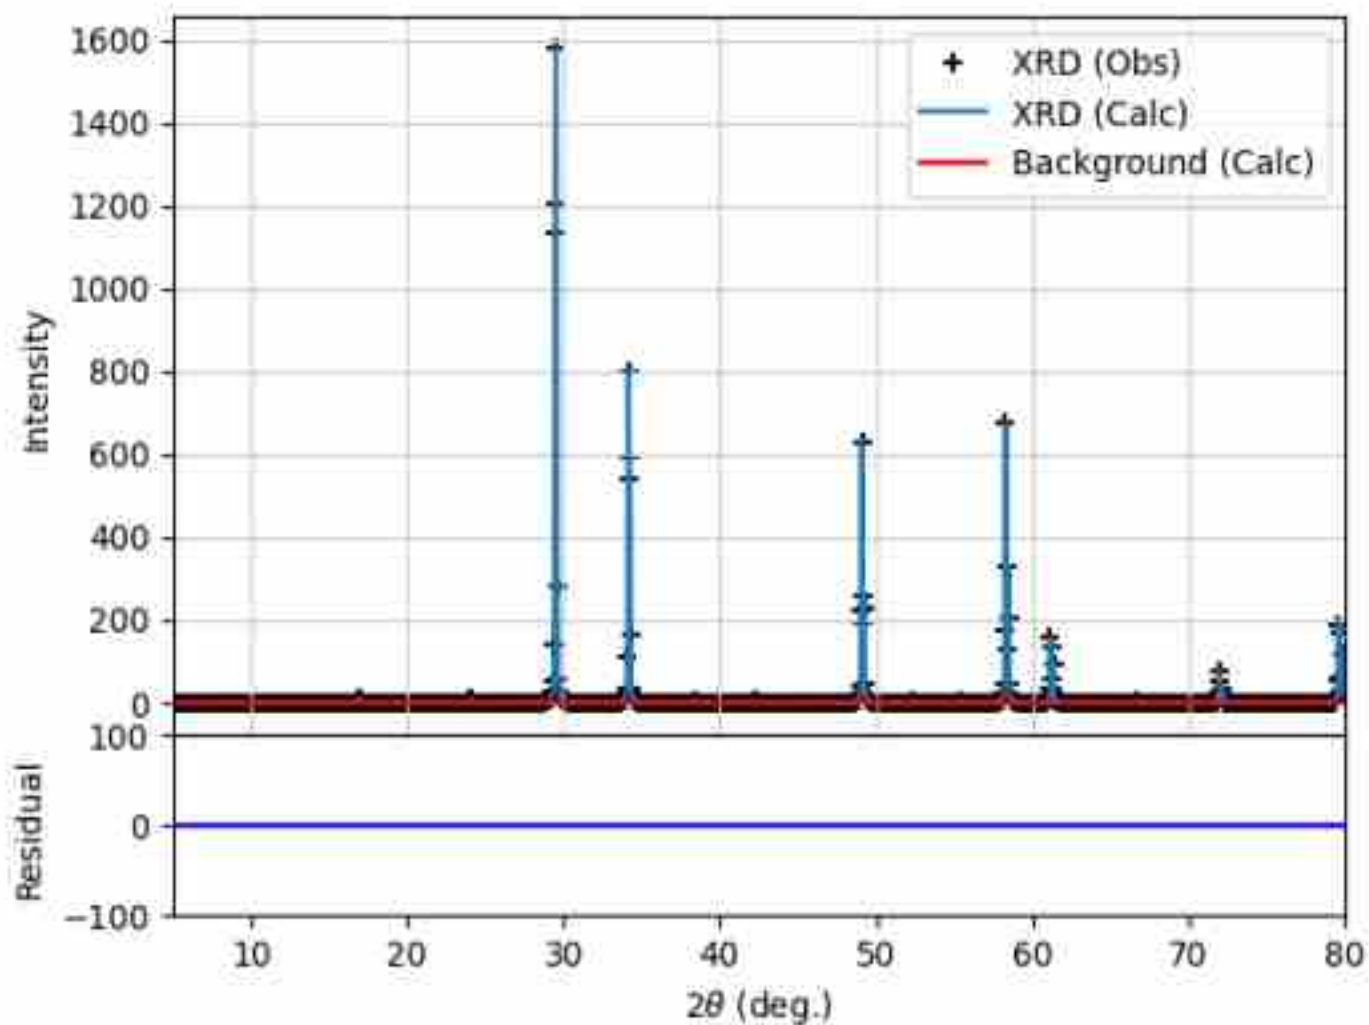

| RMSE before RR | Rwp     | RMSE after RR |
|----------------|---------|---------------|
| 0.002          | 0.00835 | 0.00048       |

# Yb1Sm3

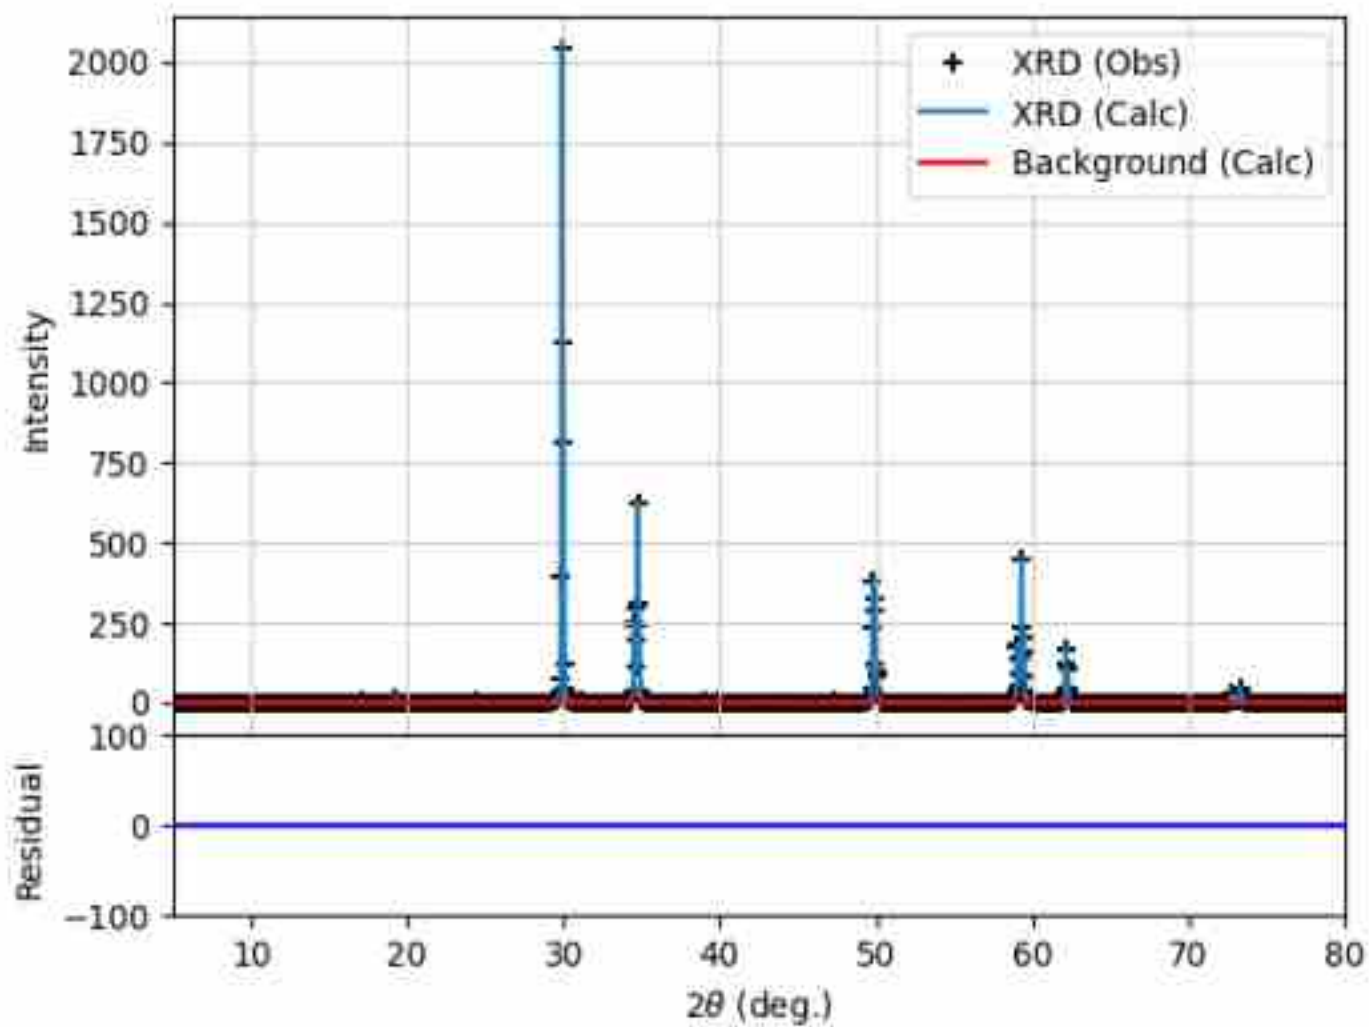

| RMSE before RR | Rwp     | RMSE after RR |
|----------------|---------|---------------|
| 0.002          | 0.00205 | 0.00015       |

# Yb1Ta1Ru2

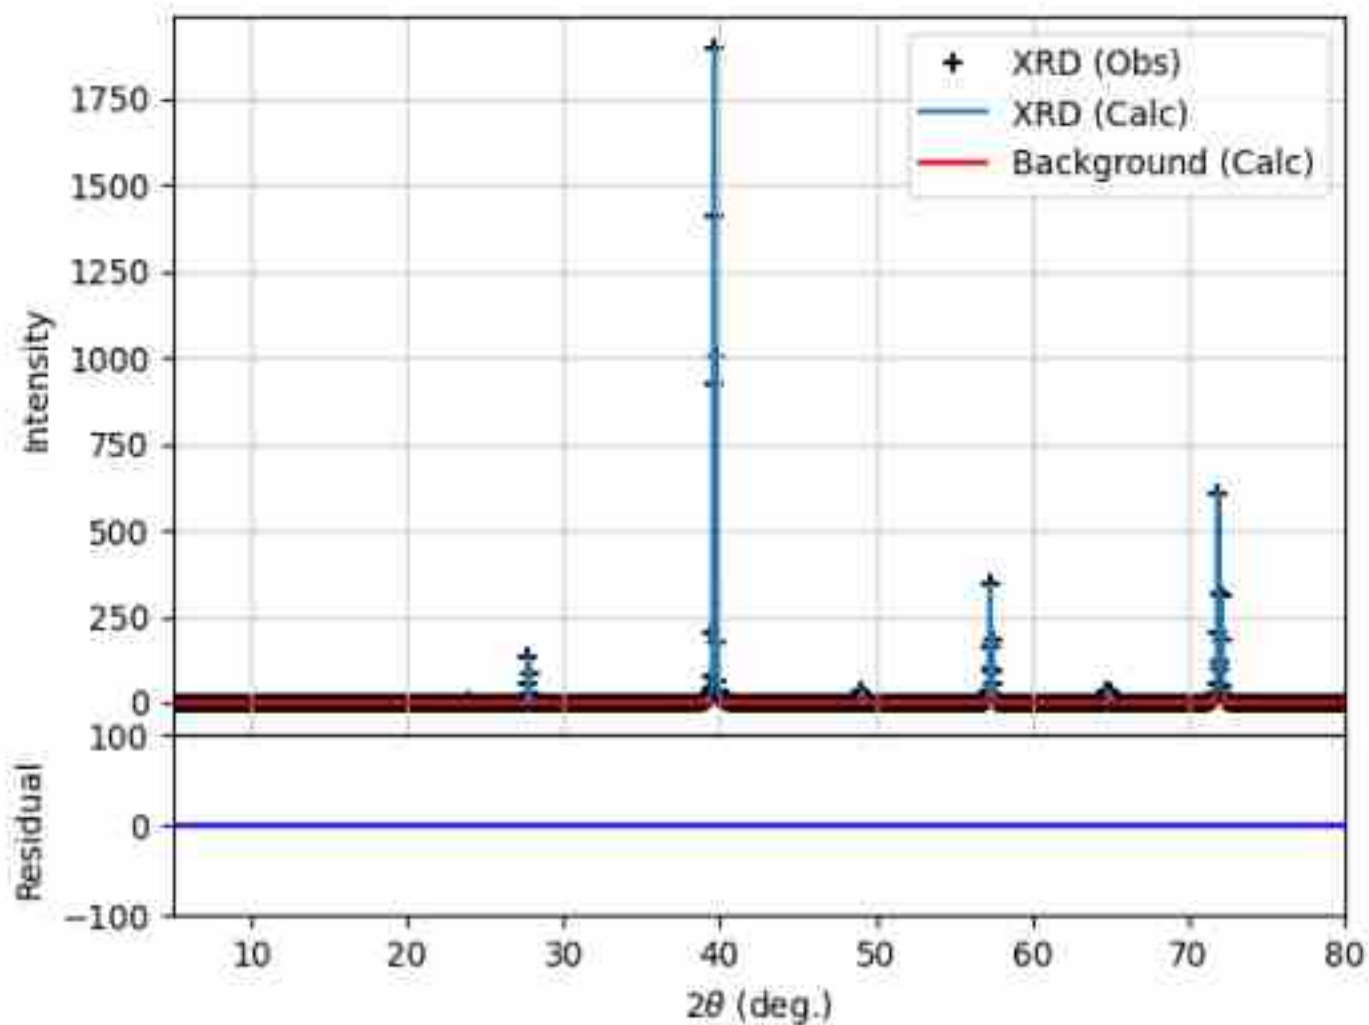

| RMSE before RR | Rwp     | RMSE after RR |
|----------------|---------|---------------|
| 0.002          | 0.00429 | 0.00028       |

# Yb1Te1

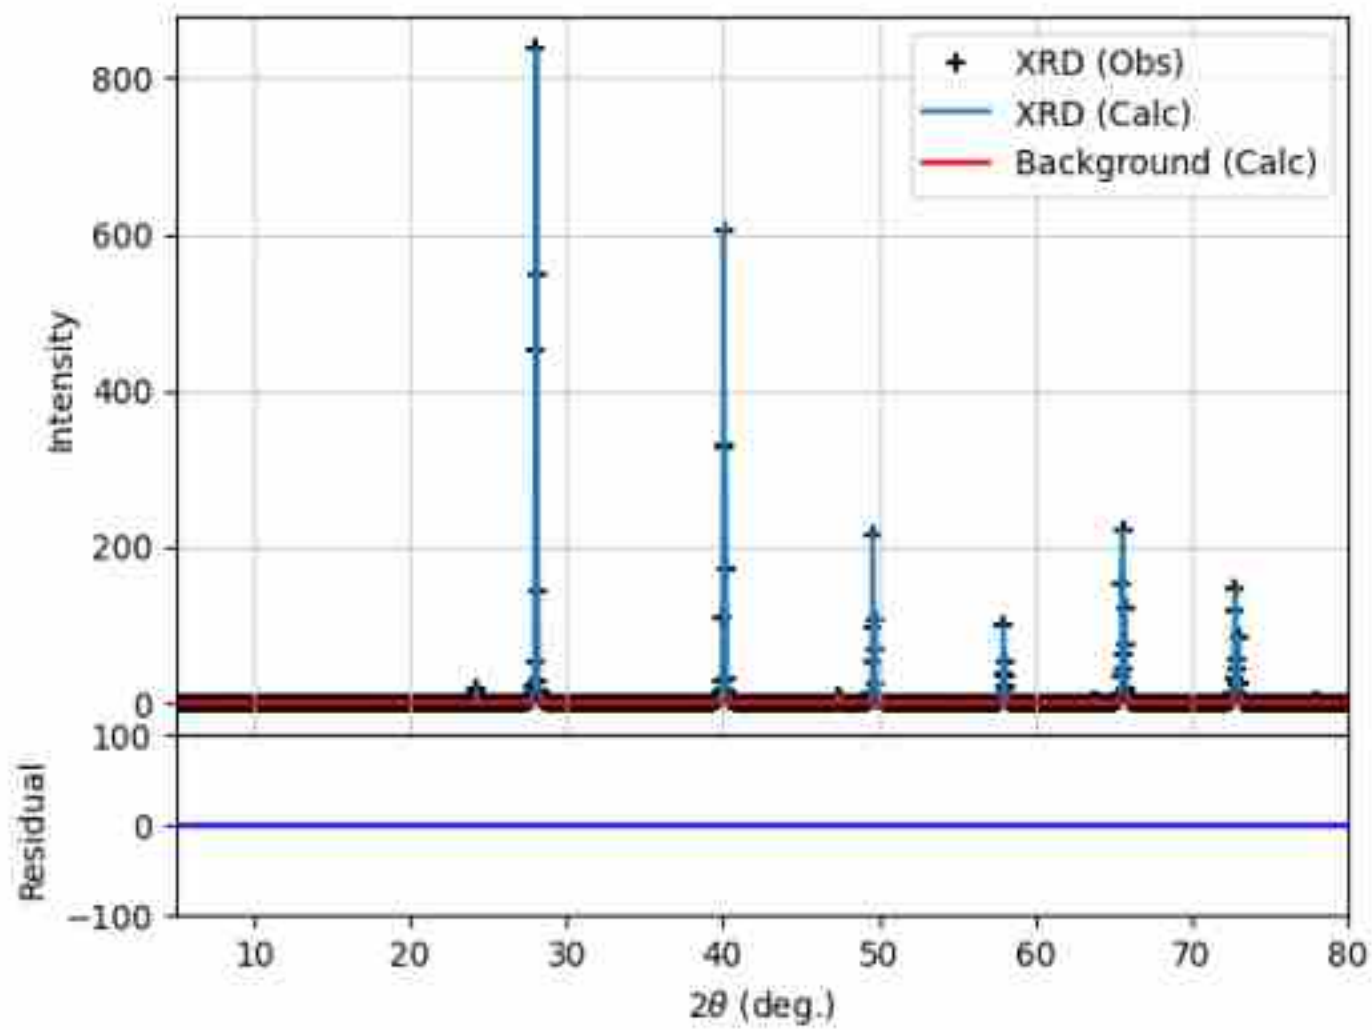

| RMSE before RR | Rwp     | RMSE after RR |
|----------------|---------|---------------|
| 0.002          | 0.01018 | 0.00059       |



# Yb1Tl1Hg2

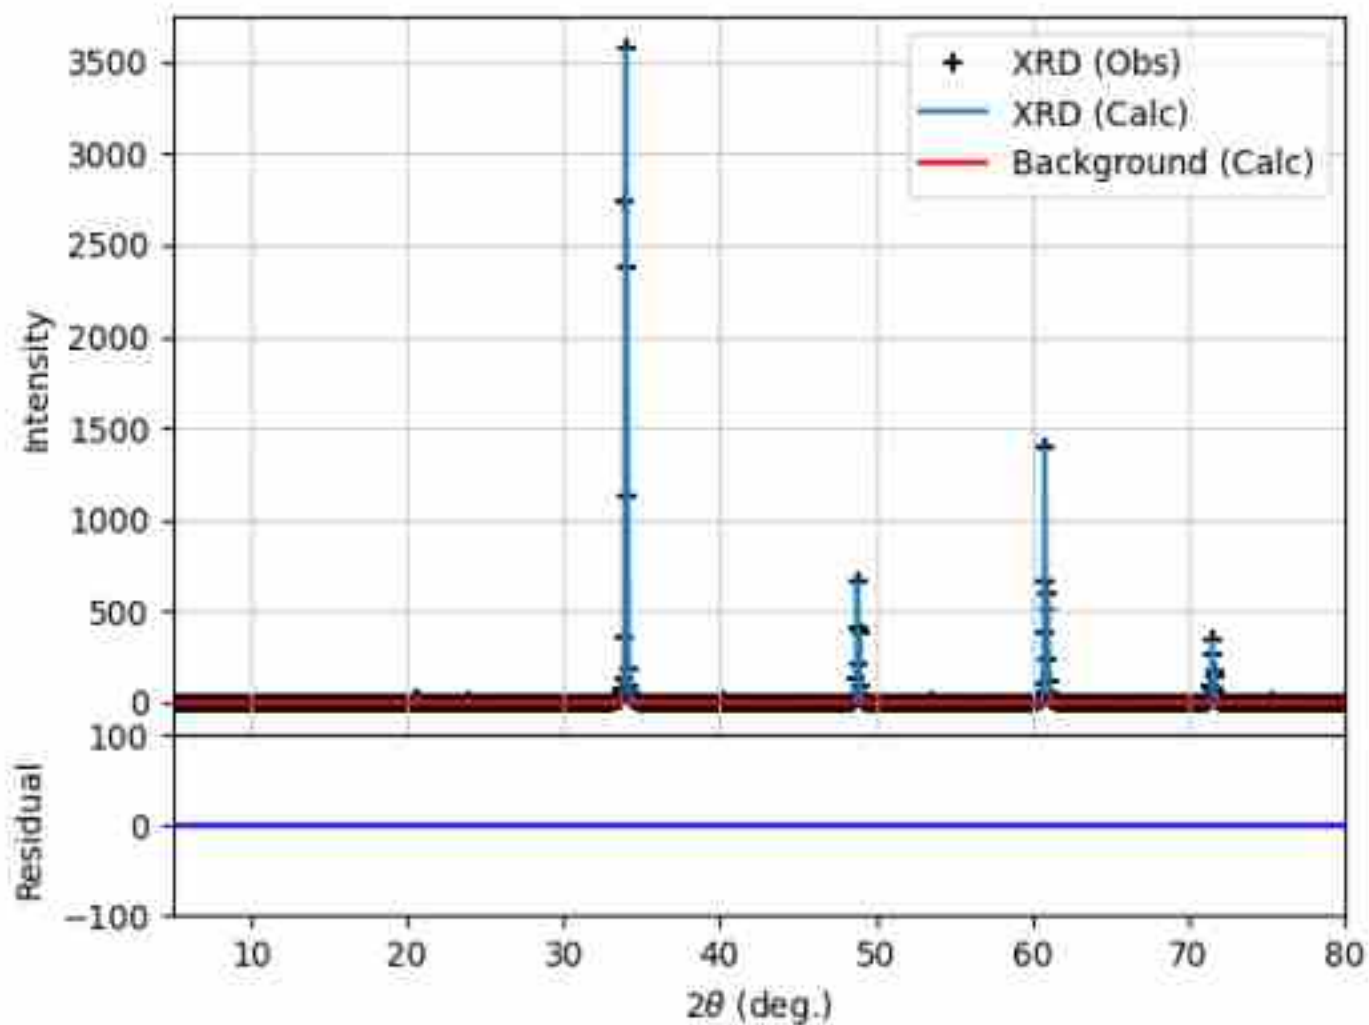

| RMSE before RR | Rwp     | RMSE after RR |
|----------------|---------|---------------|
| 0.002          | 0.00601 | 0.00049       |

# Yb1Tl1Pd2

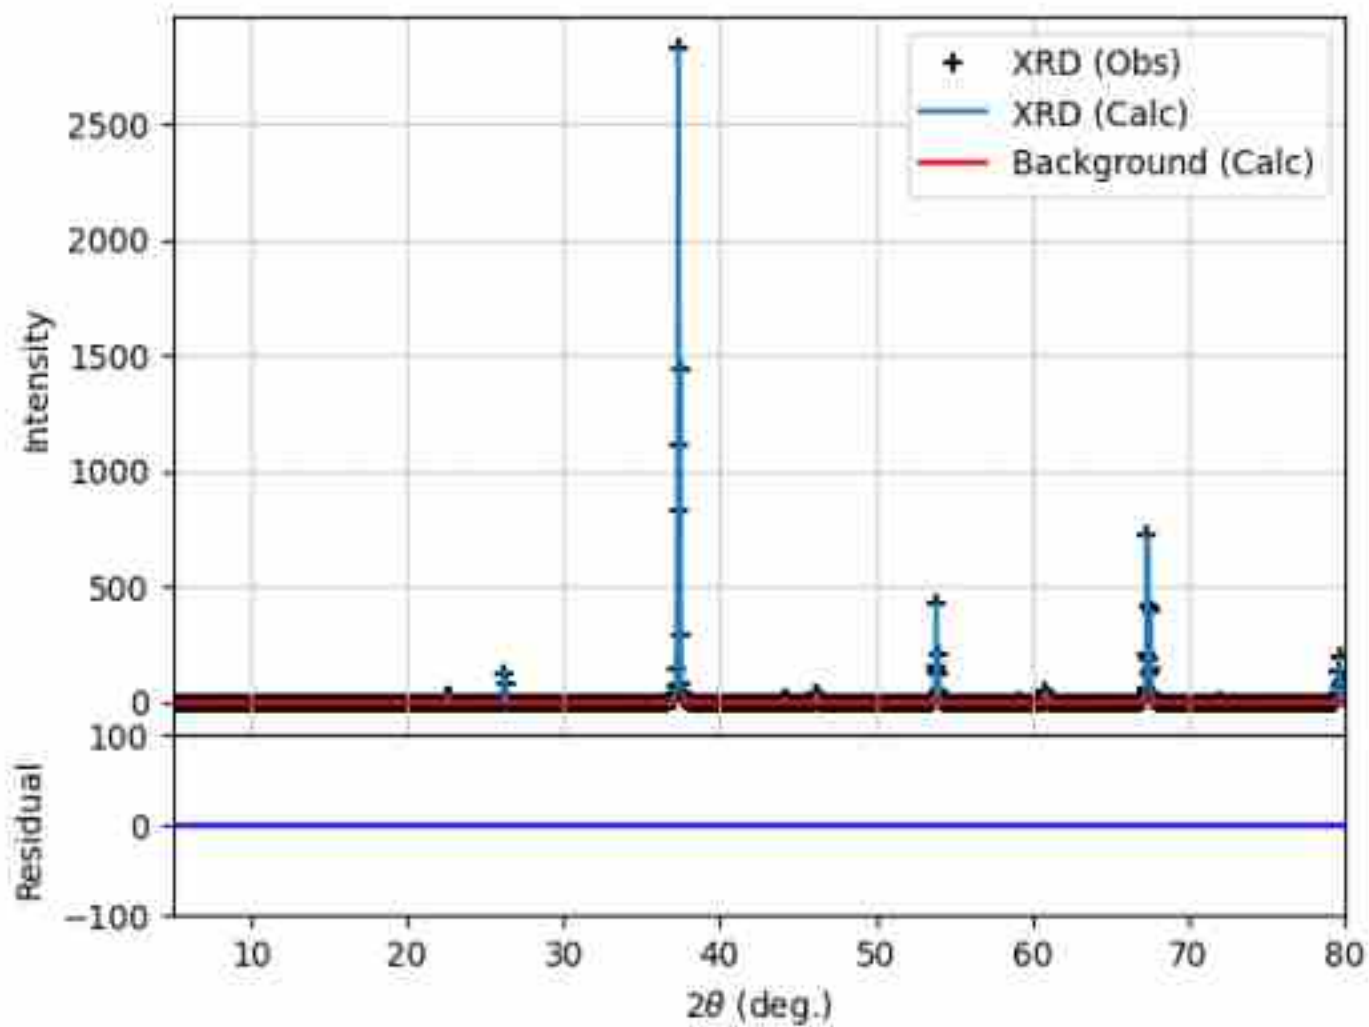

| RMSE before RR | Rwp     | RMSE after RR |
|----------------|---------|---------------|
| 0.002          | 0.01374 | 0.00073       |

# Yb1Y1Hg2

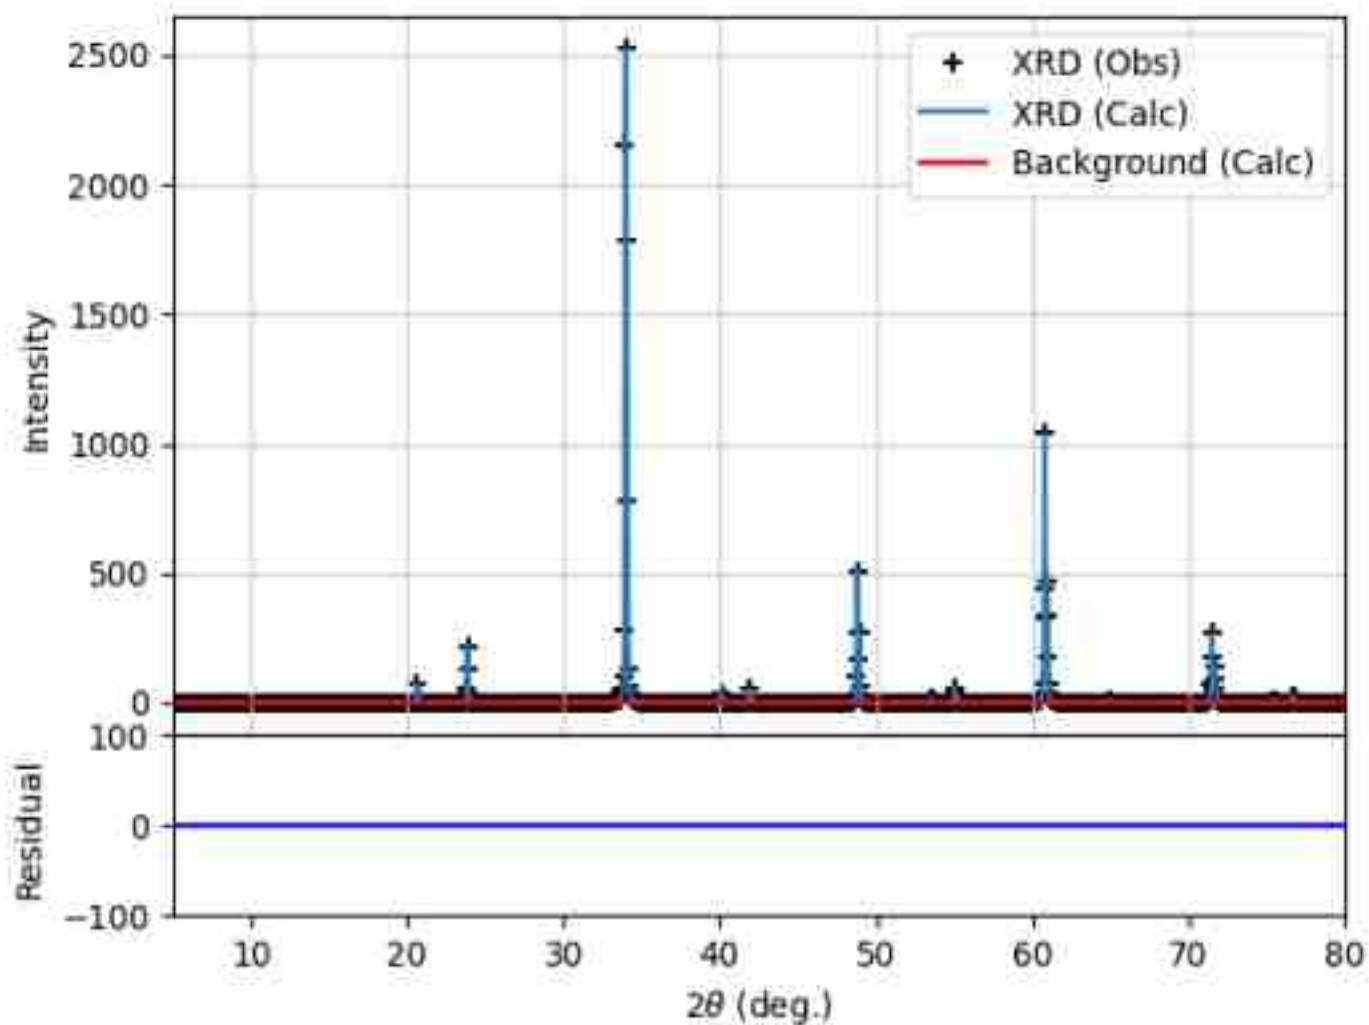

| RMSE before RR | Rwp     | RMSE after RR |
|----------------|---------|---------------|
| 0.002          | 0.08399 | 0.00066       |

# Yb1Y1Pd2

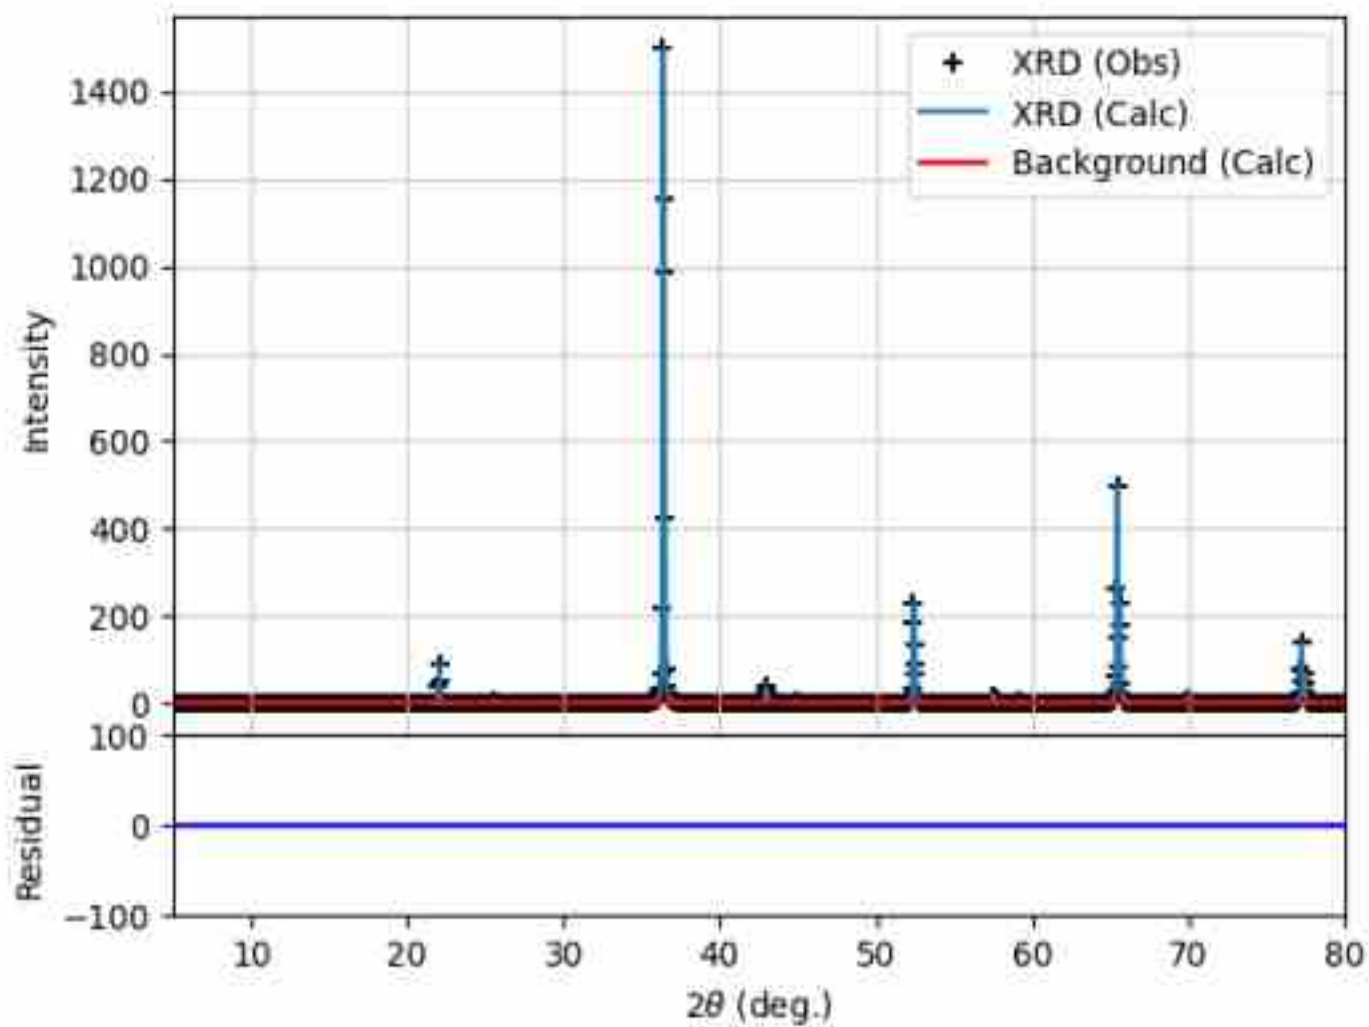

| RMSE before RR | Rwp     | RMSE after RR |
|----------------|---------|---------------|
| 0.002          | 0.09091 | 0.00132       |

# Yb<sub>2</sub>Ag<sub>1</sub>Au<sub>1</sub>

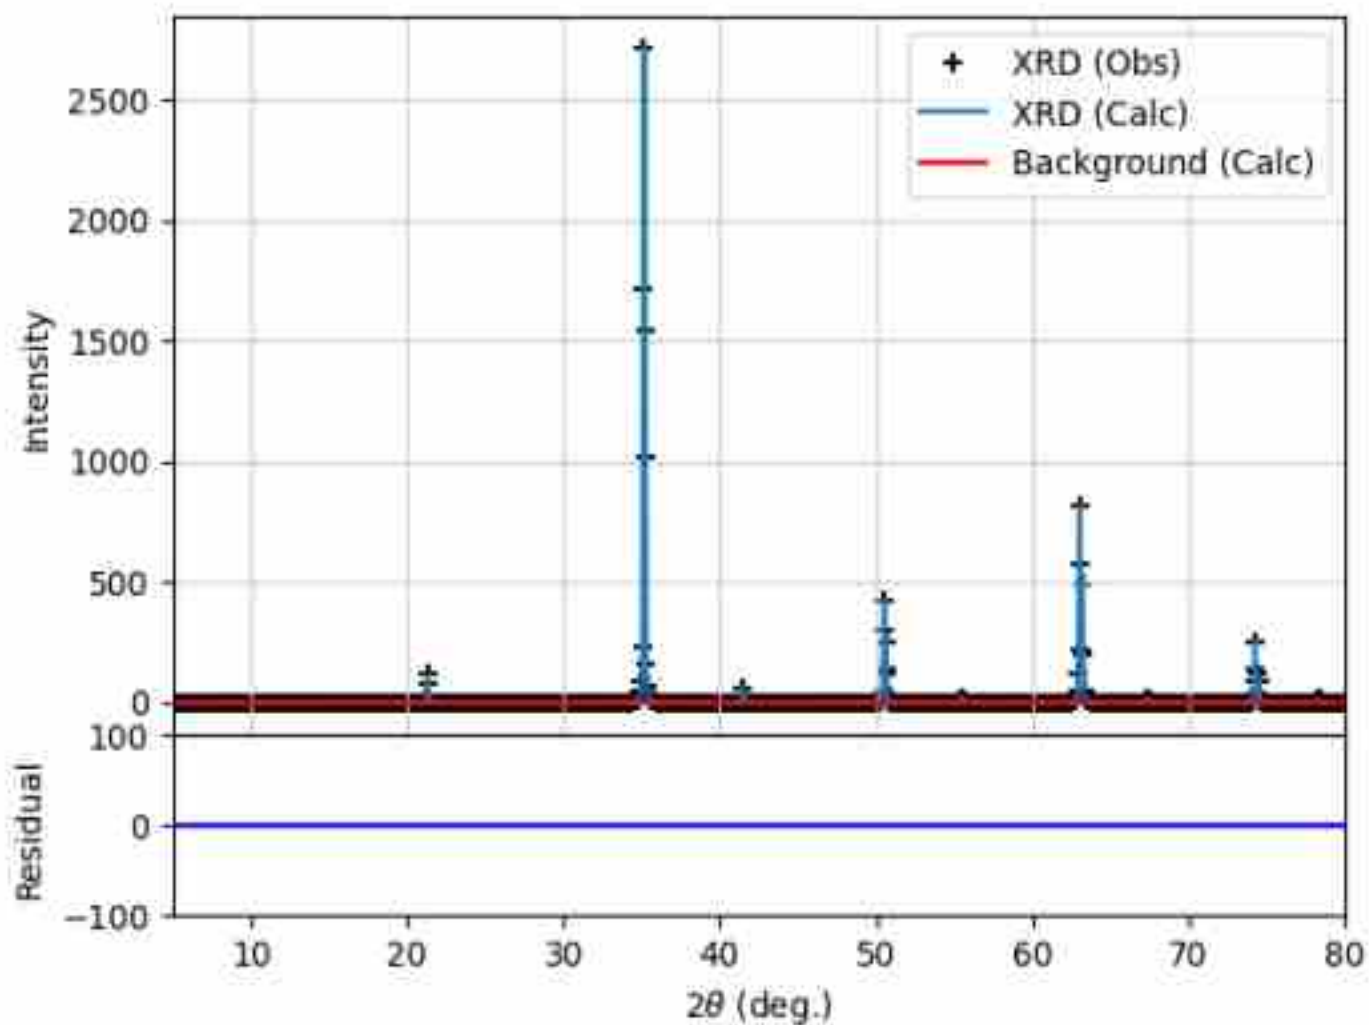

| RMSE before RR | Rwp     | RMSE after RR |
|----------------|---------|---------------|
| 0.002          | 0.07745 | 0.00102       |

# Yb<sub>2</sub>Ag<sub>1</sub>Pb<sub>1</sub>

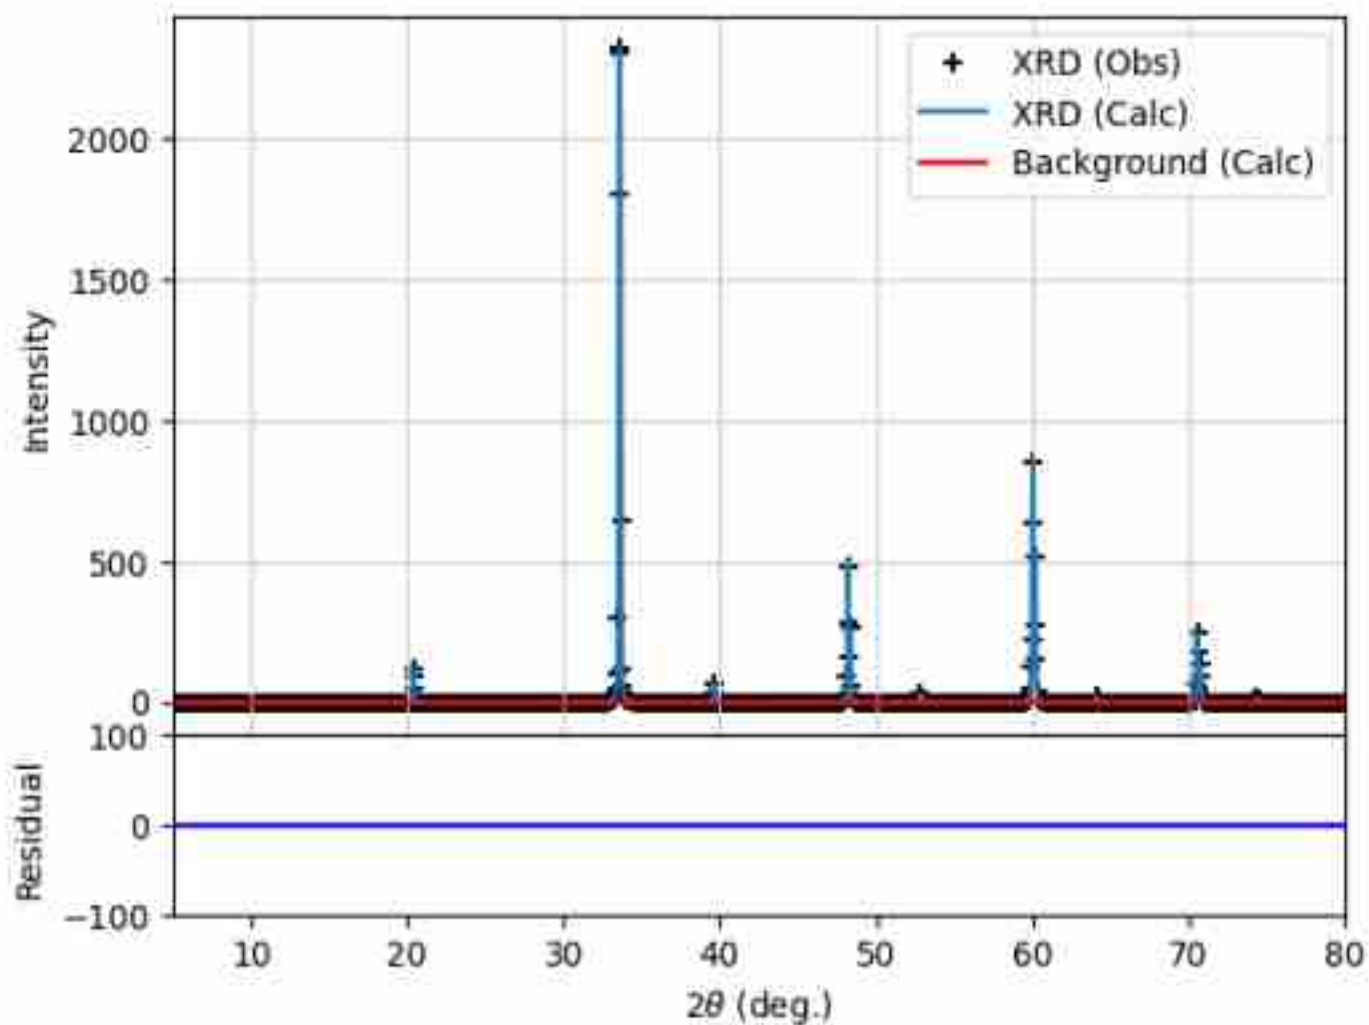

| RMSE before RR | Rwp     | RMSE after RR |
|----------------|---------|---------------|
| 0.002          | 0.00084 | 0.00016       |

# Yb<sub>2</sub>AgPd<sub>1</sub>

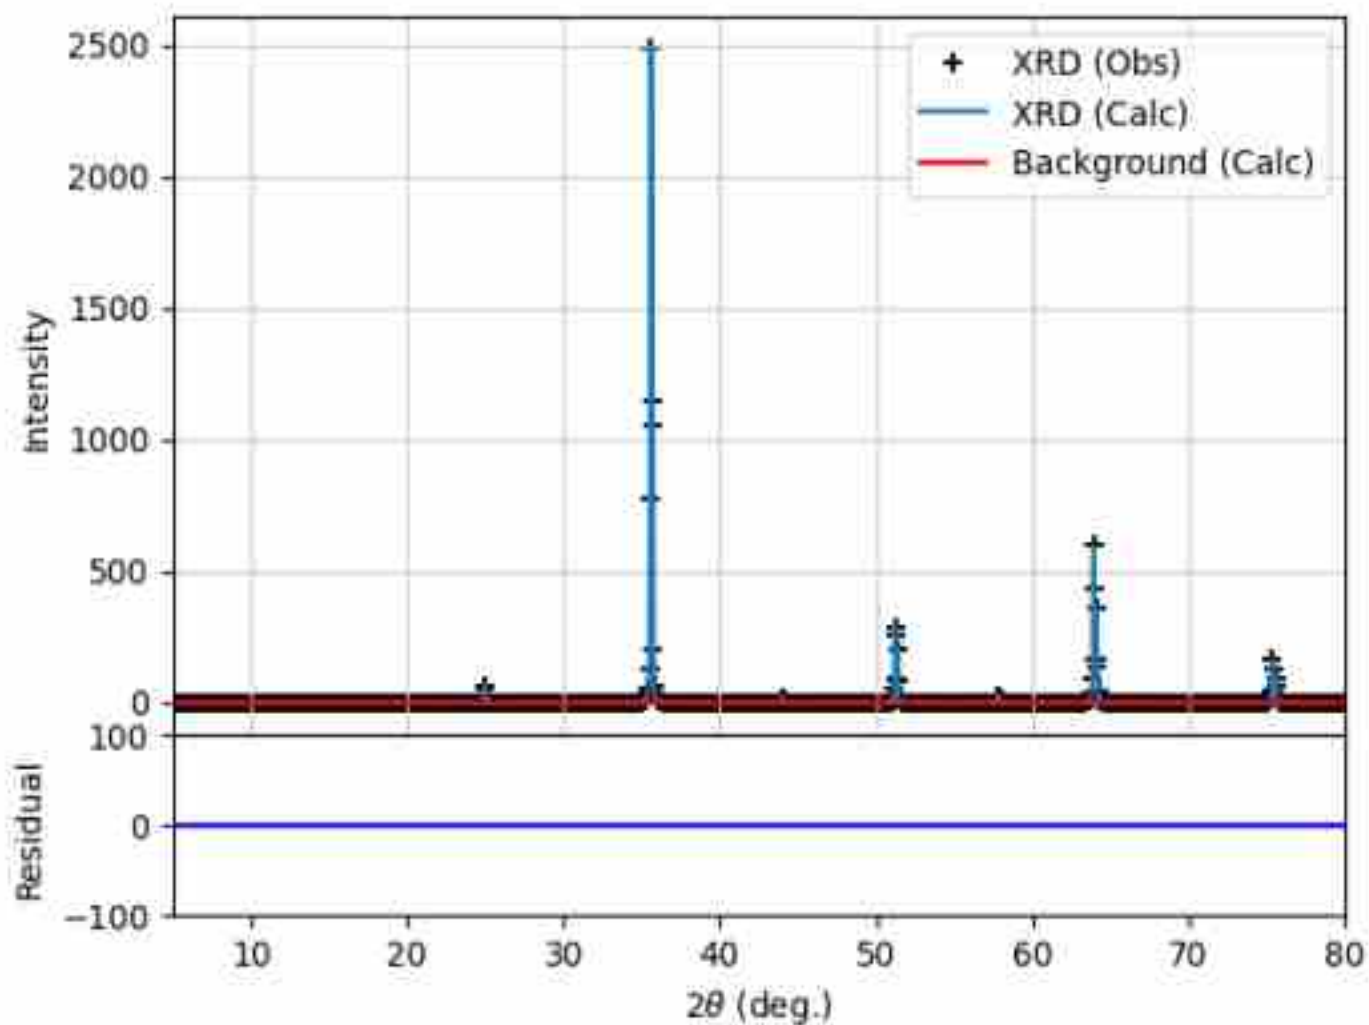

| RMSE before RR | Rwp     | RMSE after RR |
|----------------|---------|---------------|
| 0.002          | 0.03973 | 0.00082       |

# Yb2Cu1Rh1

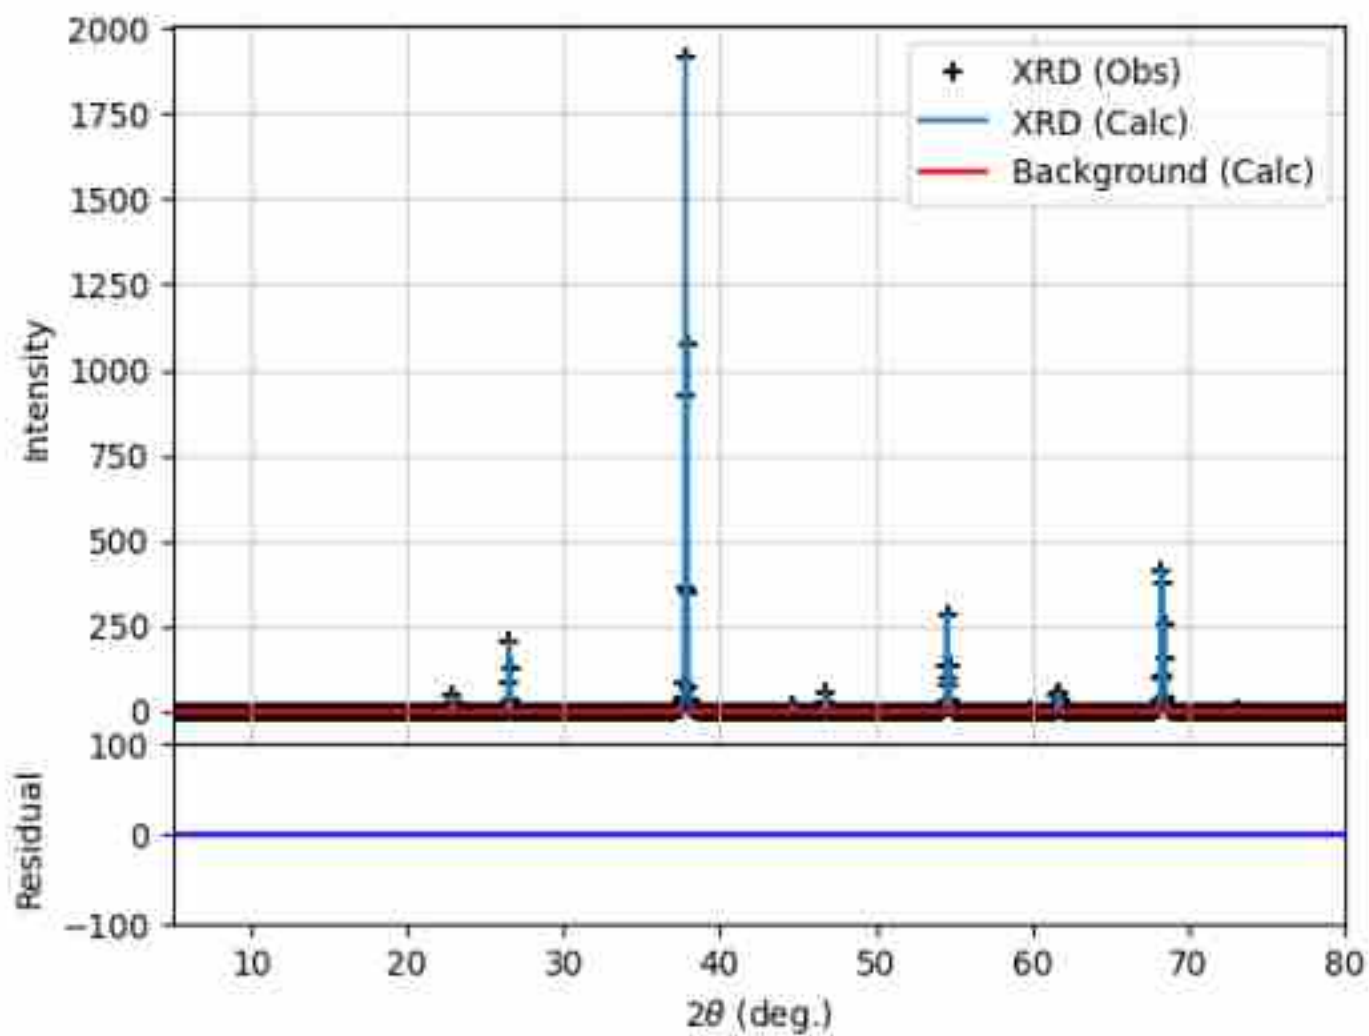

| RMSE before RR | Rwp    | RMSE after RR |
|----------------|--------|---------------|
| 0.002          | 0.0053 | 0.00064       |



# Yb<sub>2</sub>Ge<sub>1</sub>Au<sub>1</sub>

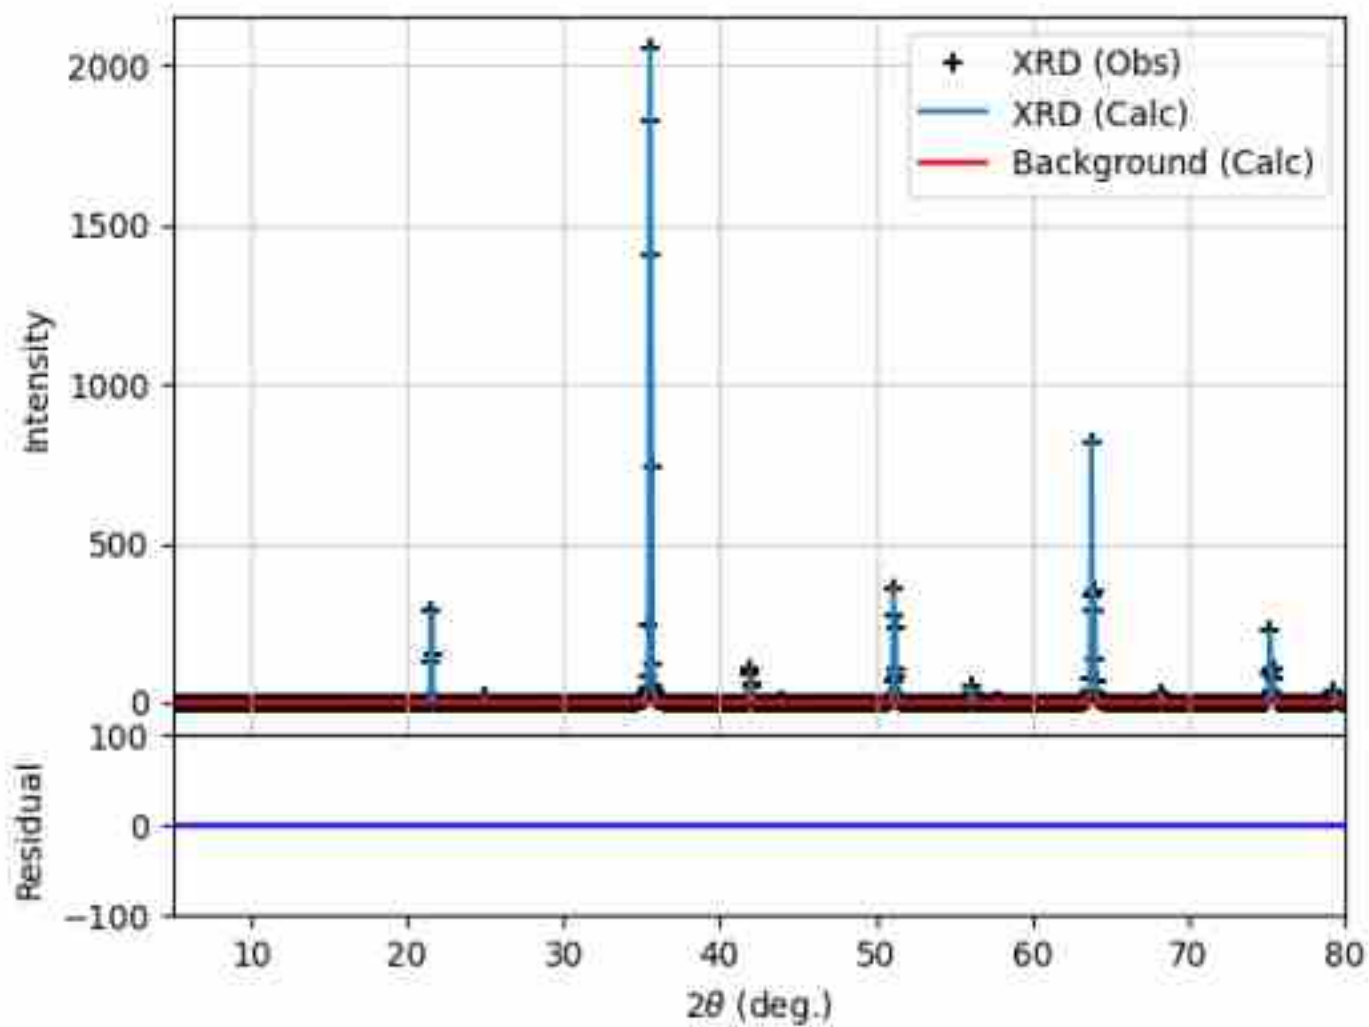

| RMSE before RR | Rwp     | RMSE after RR |
|----------------|---------|---------------|
| 0.002          | 0.00403 | 0.0004        |

# Yb<sub>2</sub>In<sub>1</sub>Hg<sub>1</sub>

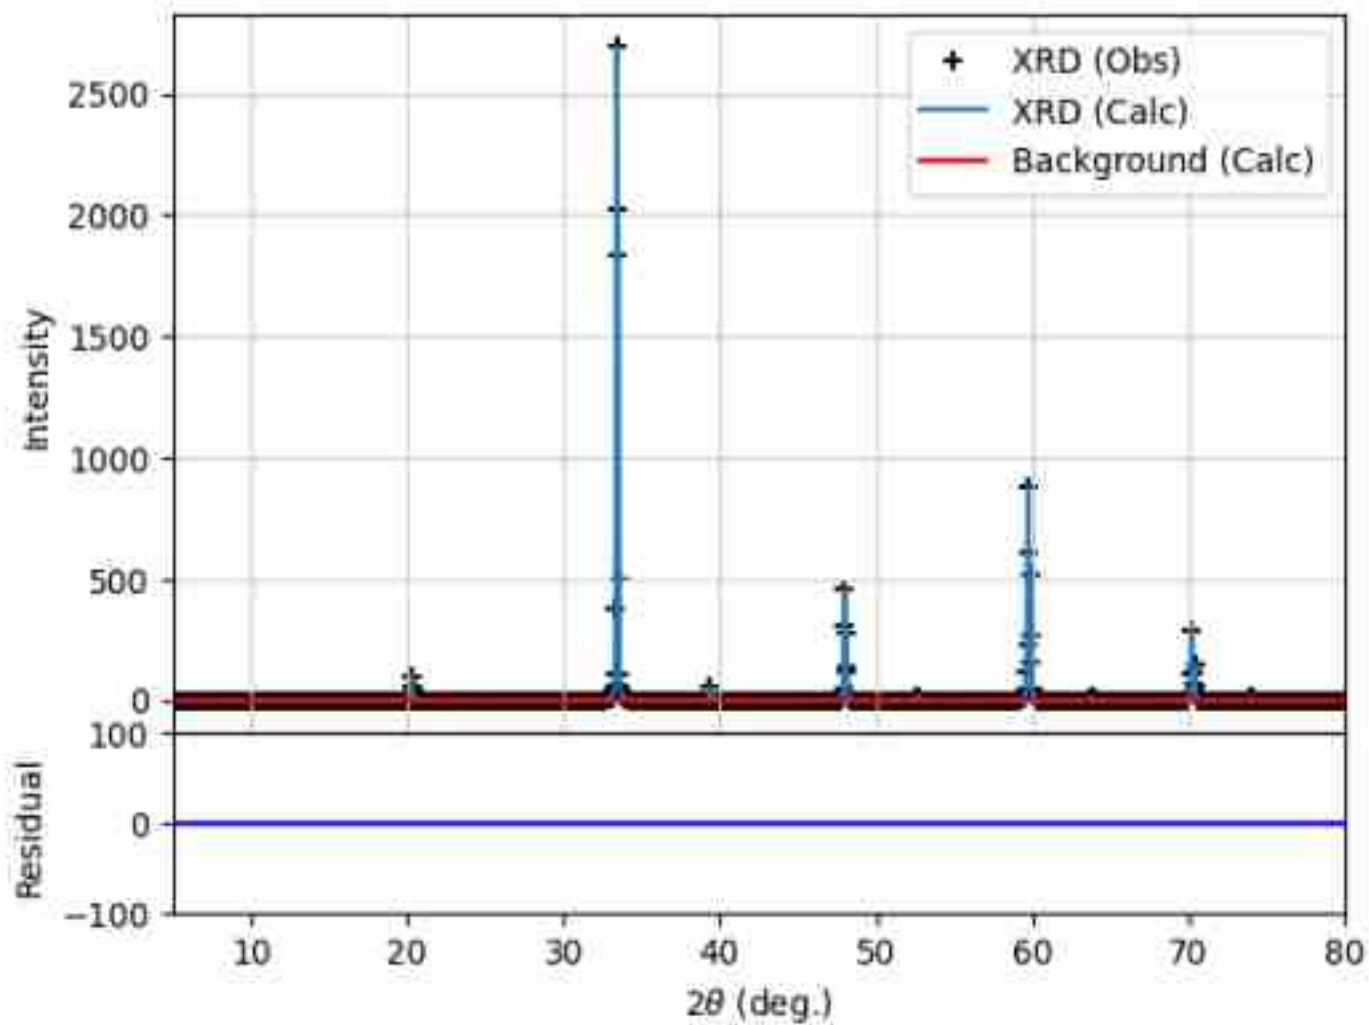

| RMSE before RR | Rwp     | RMSE after RR |
|----------------|---------|---------------|
| 0.002          | 0.01322 | 0.00083       |

# Yb<sub>2</sub>Mg<sub>1</sub>Tl<sub>1</sub>

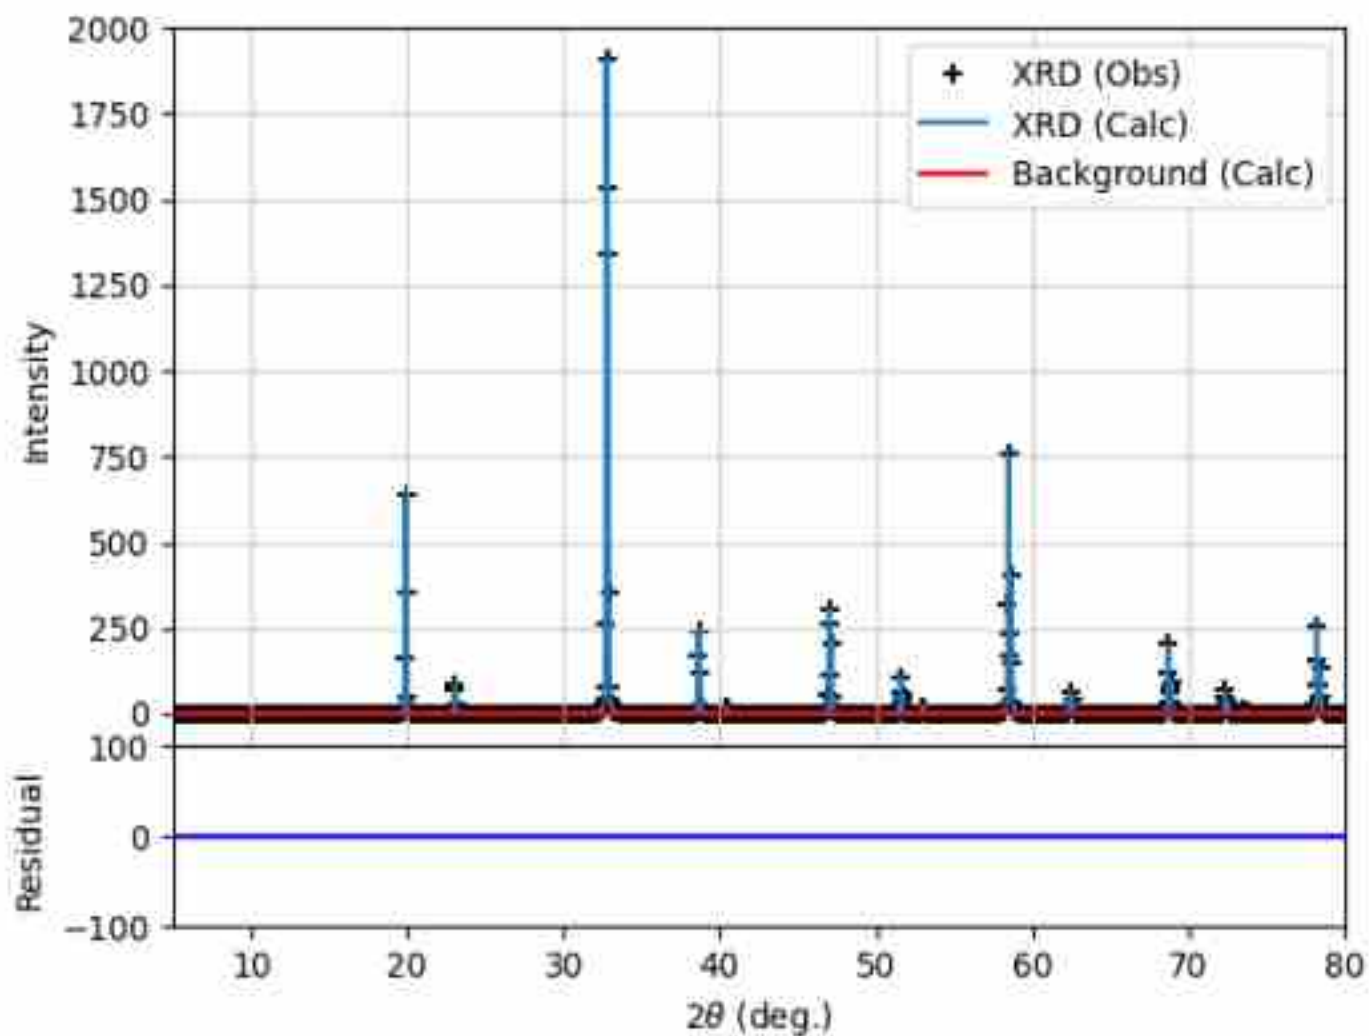

| RMSE before RR | Rwp     | RMSE after RR |
|----------------|---------|---------------|
| 0.002          | 0.01577 | 0.00379       |

# Yb<sub>2</sub>Tl<sub>11</sub>Hg<sub>1</sub>

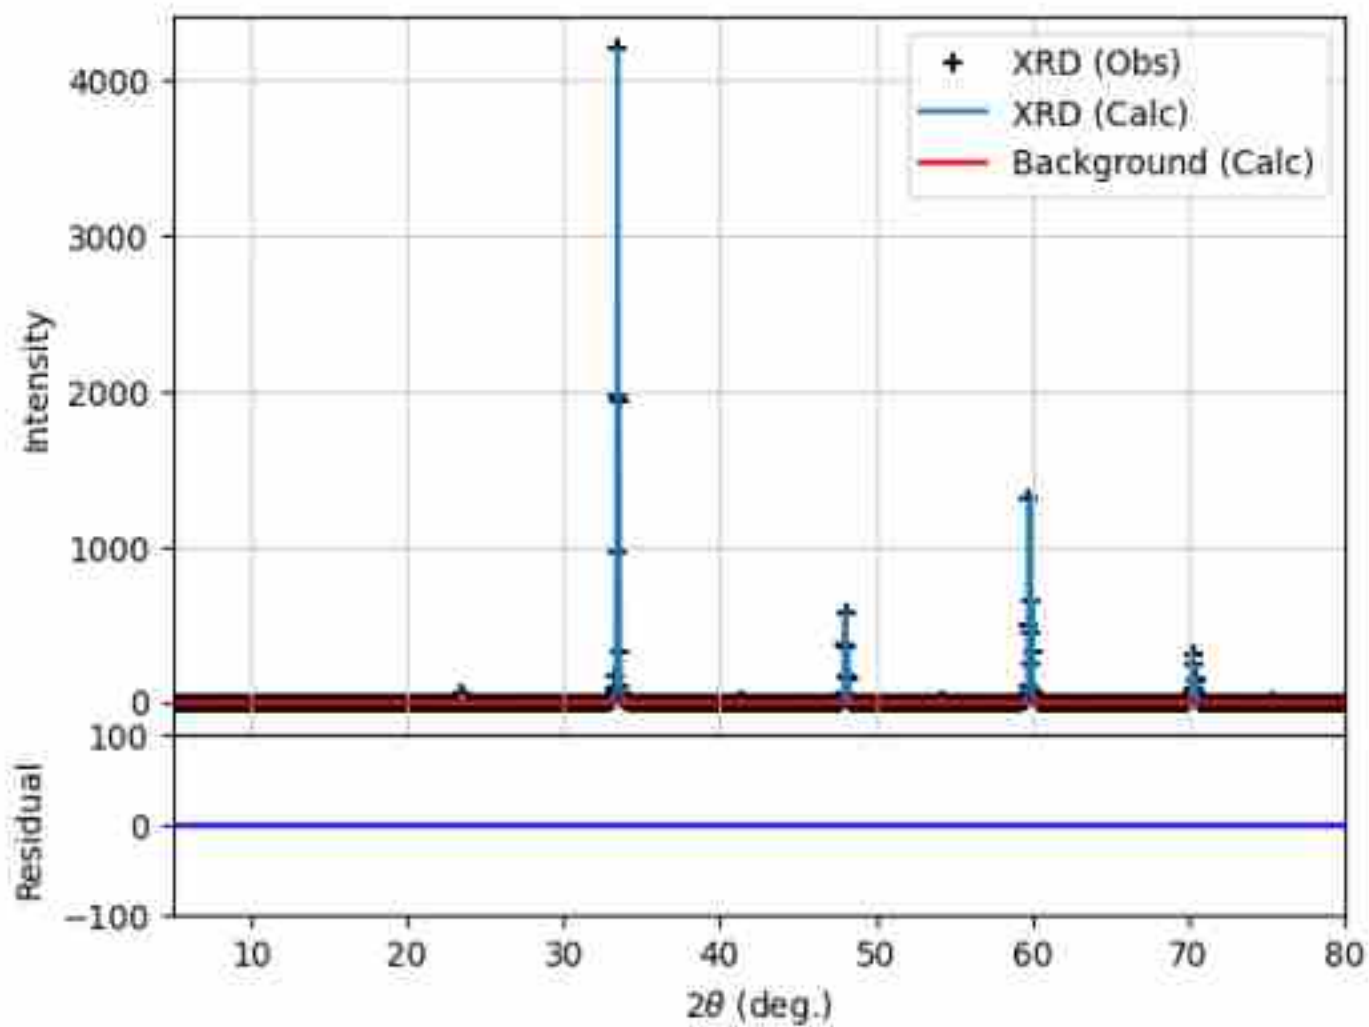

| RMSE before RR | Rwp     | RMSE after RR |
|----------------|---------|---------------|
| 0.002          | 0.00899 | 0.00067       |

# Yb2Tl1In1

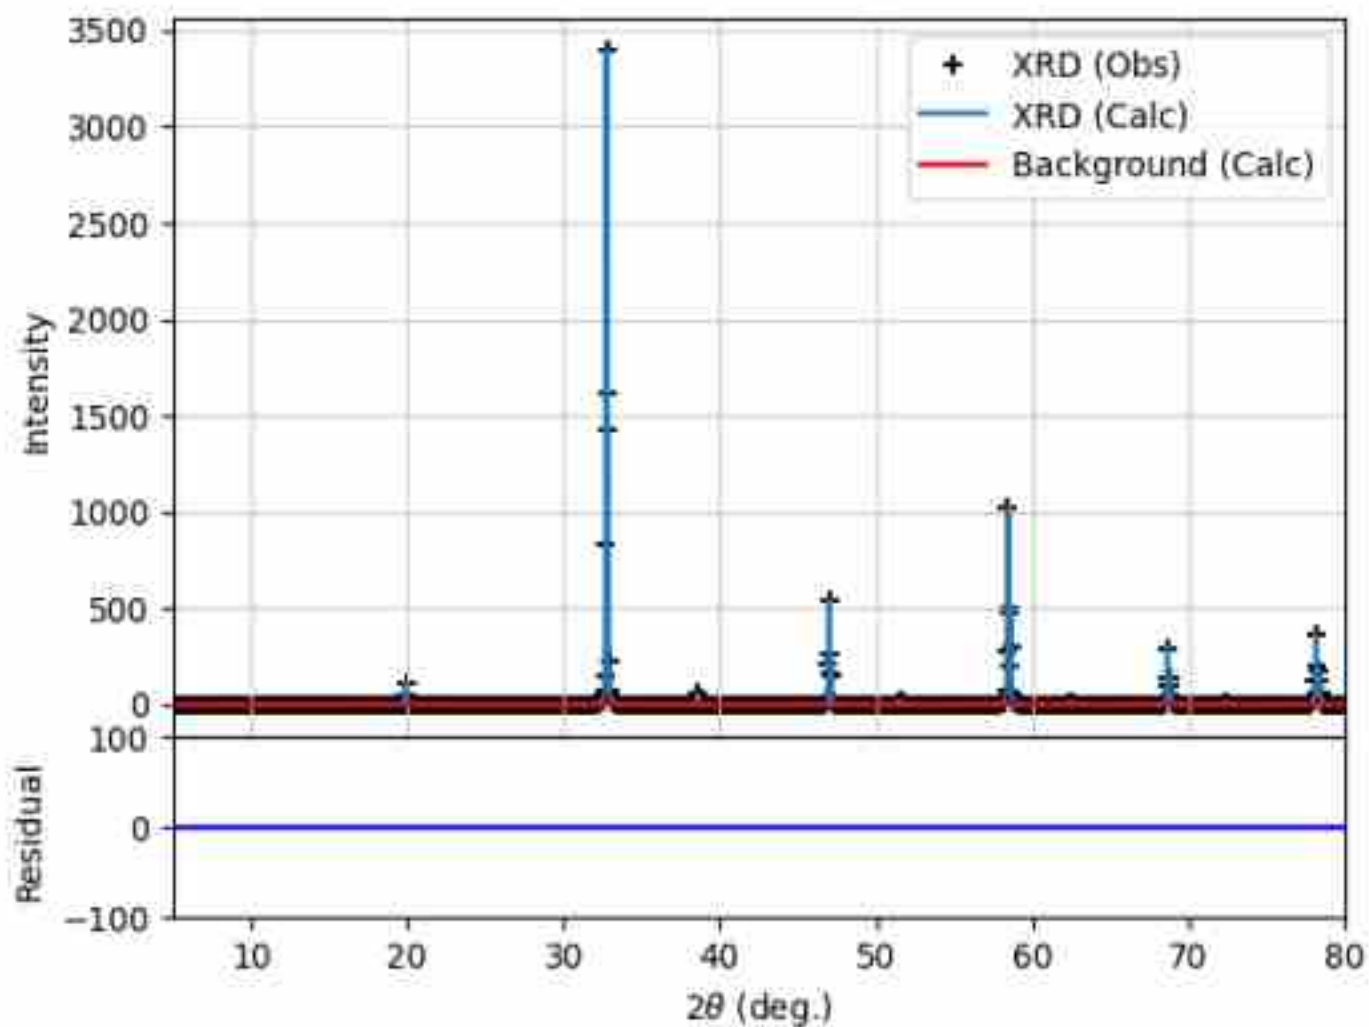

| RMSE before RR | Rwp    | RMSE after RR |
|----------------|--------|---------------|
| 0.002          | 0.0043 | 0.00023       |

# Yb<sub>2</sub>ZnGa<sub>1</sub>

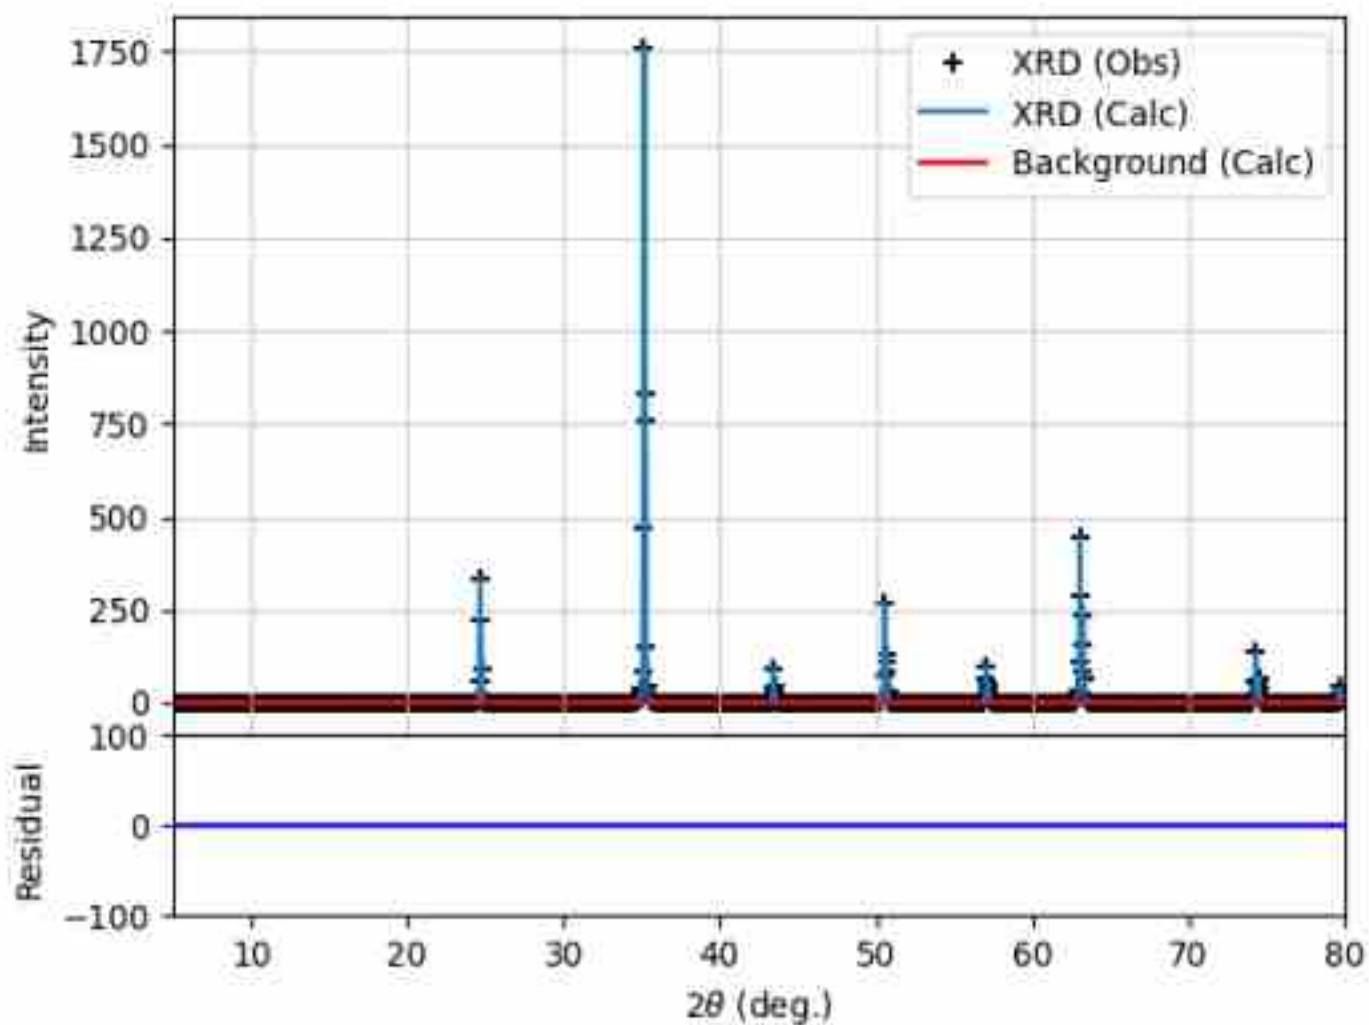

| RMSE before RR | Rwp     | RMSE after RR |
|----------------|---------|---------------|
| 0.002          | 0.06198 | 0.00157       |

# Yb<sub>2</sub>ZnSn

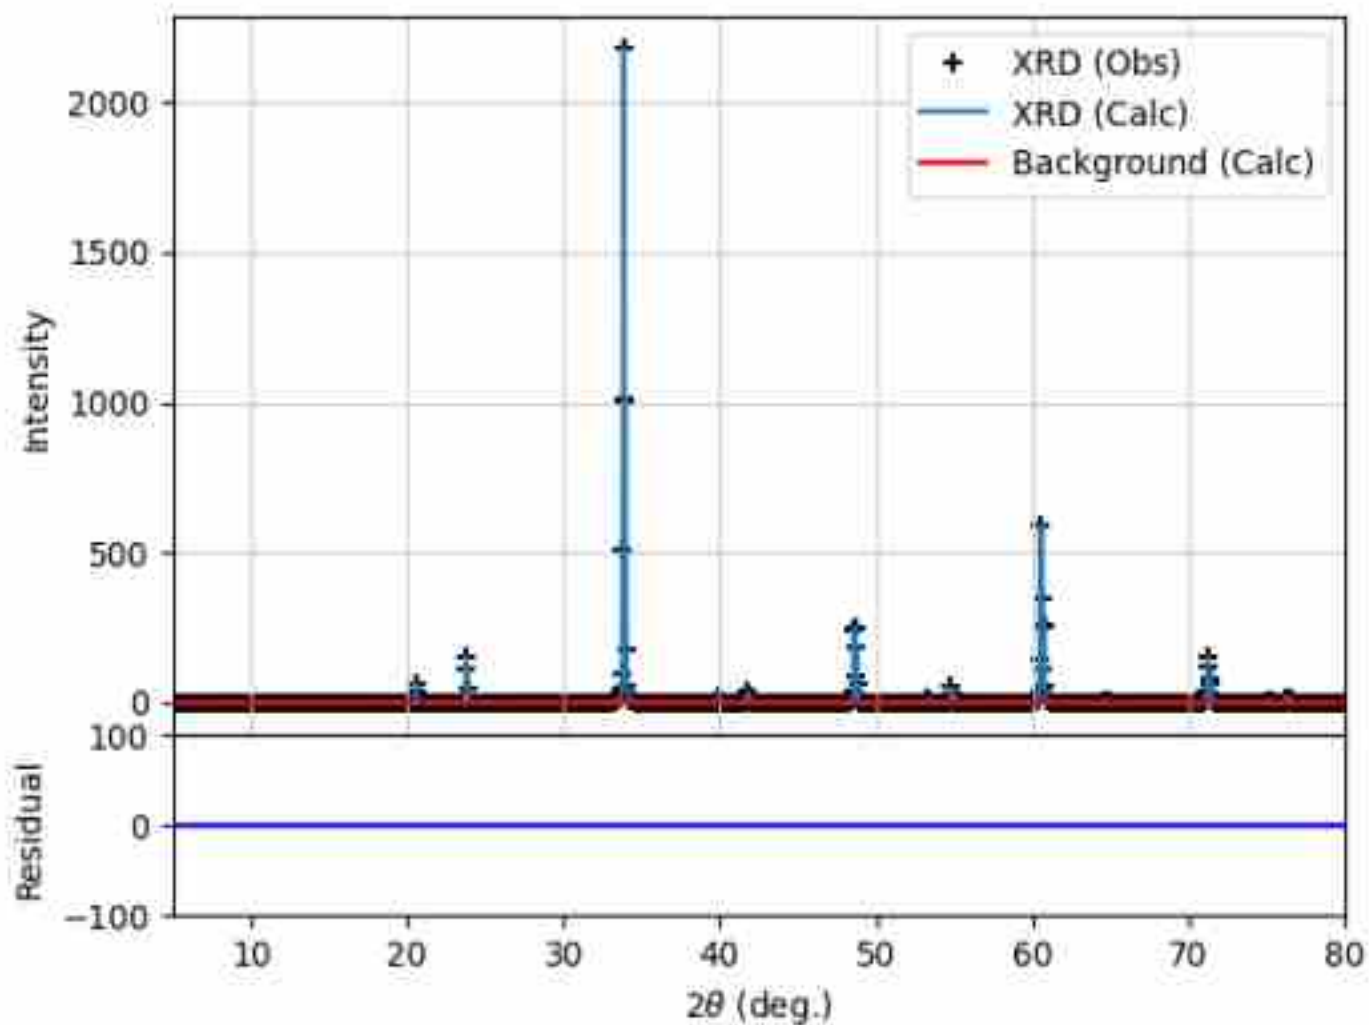

| RMSE before RR | Rwp    | RMSE after RR |
|----------------|--------|---------------|
| 0.002          | 0.0038 | 0.00039       |

# Yb3Mg1

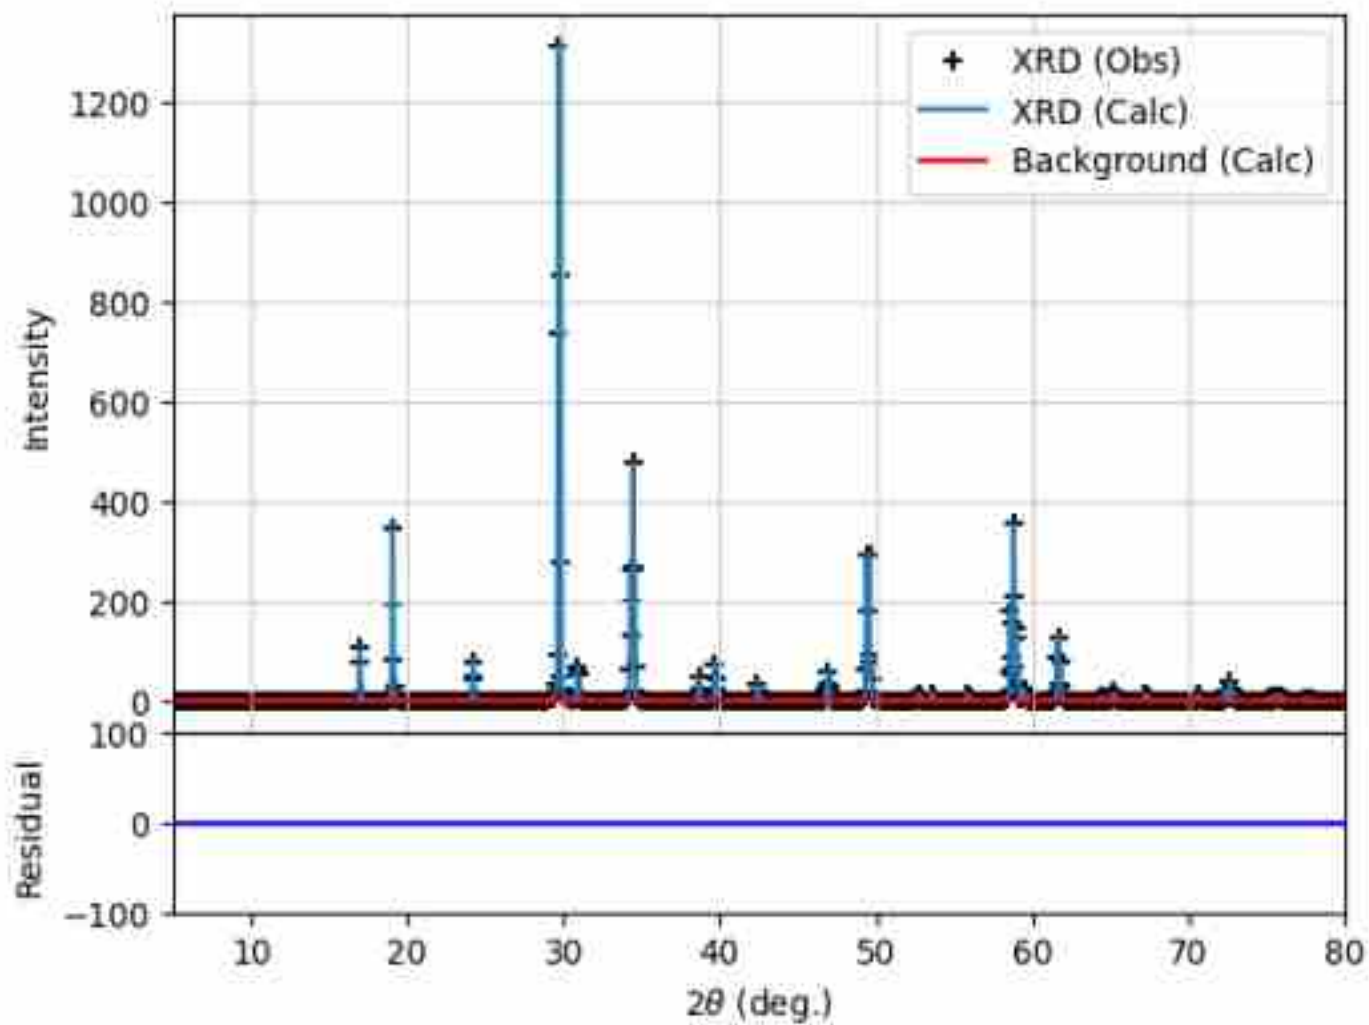

| RMSE before RR | Rwp     | RMSE after RR |
|----------------|---------|---------------|
| 0.002          | 0.00601 | 0.0009        |



# Yb3Pb1

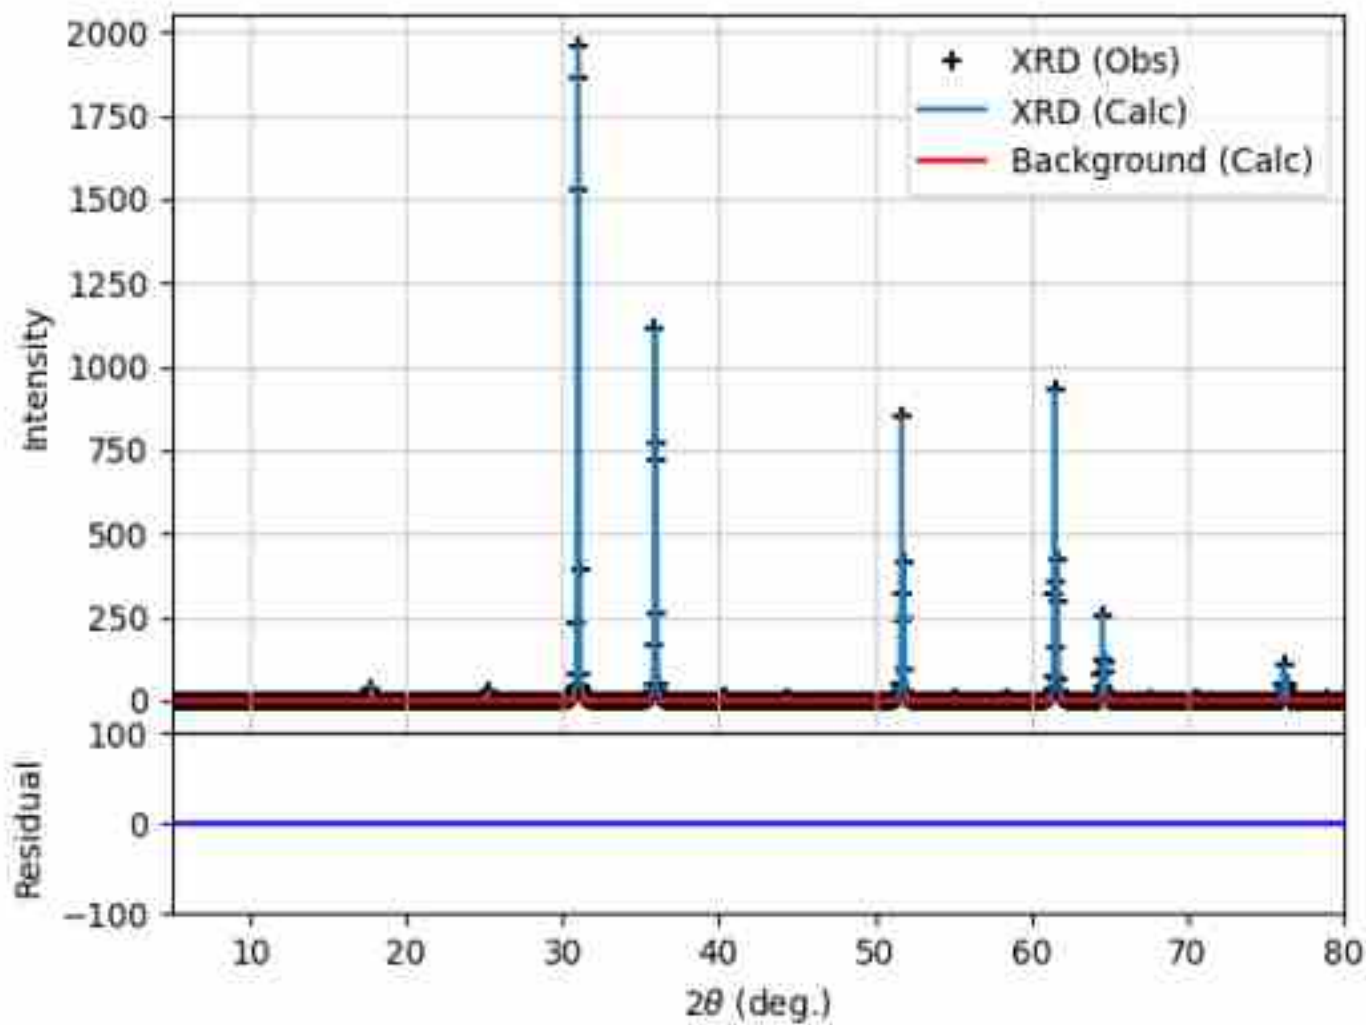

| RMSE before RR | Rwp     | RMSE after RR |
|----------------|---------|---------------|
| 0.002          | 0.07452 | 0.00151       |

# Yb<sub>4</sub>Mg<sub>2</sub>

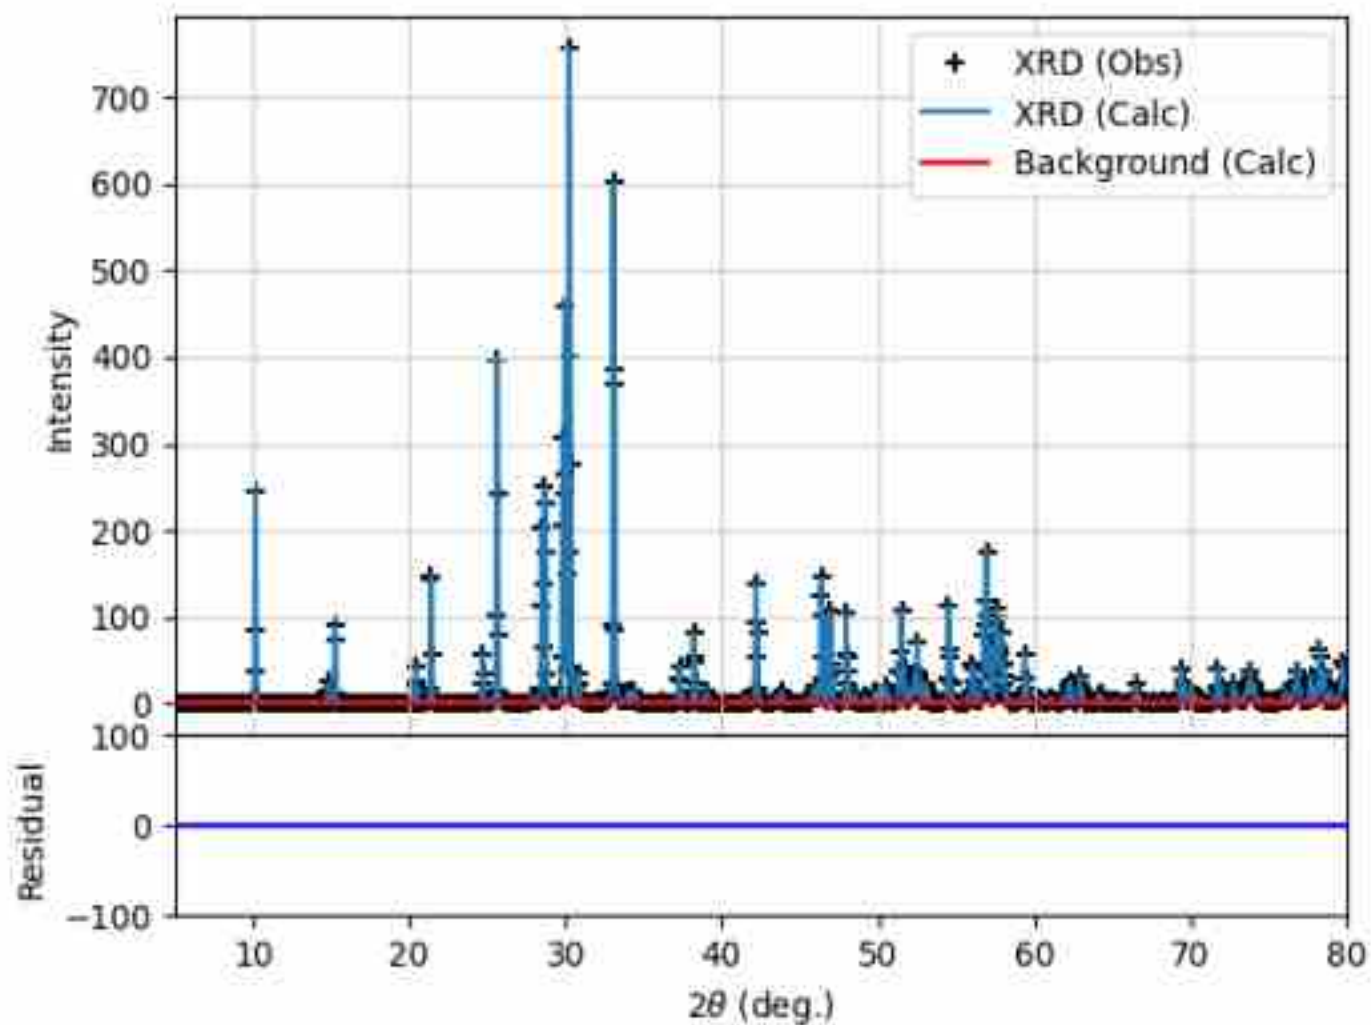

| RMSE before RR | Rwp     | RMSE after RR |
|----------------|---------|---------------|
| 0.02           | 0.00276 | 0.00015       |

# Yb4Sb4Ir4

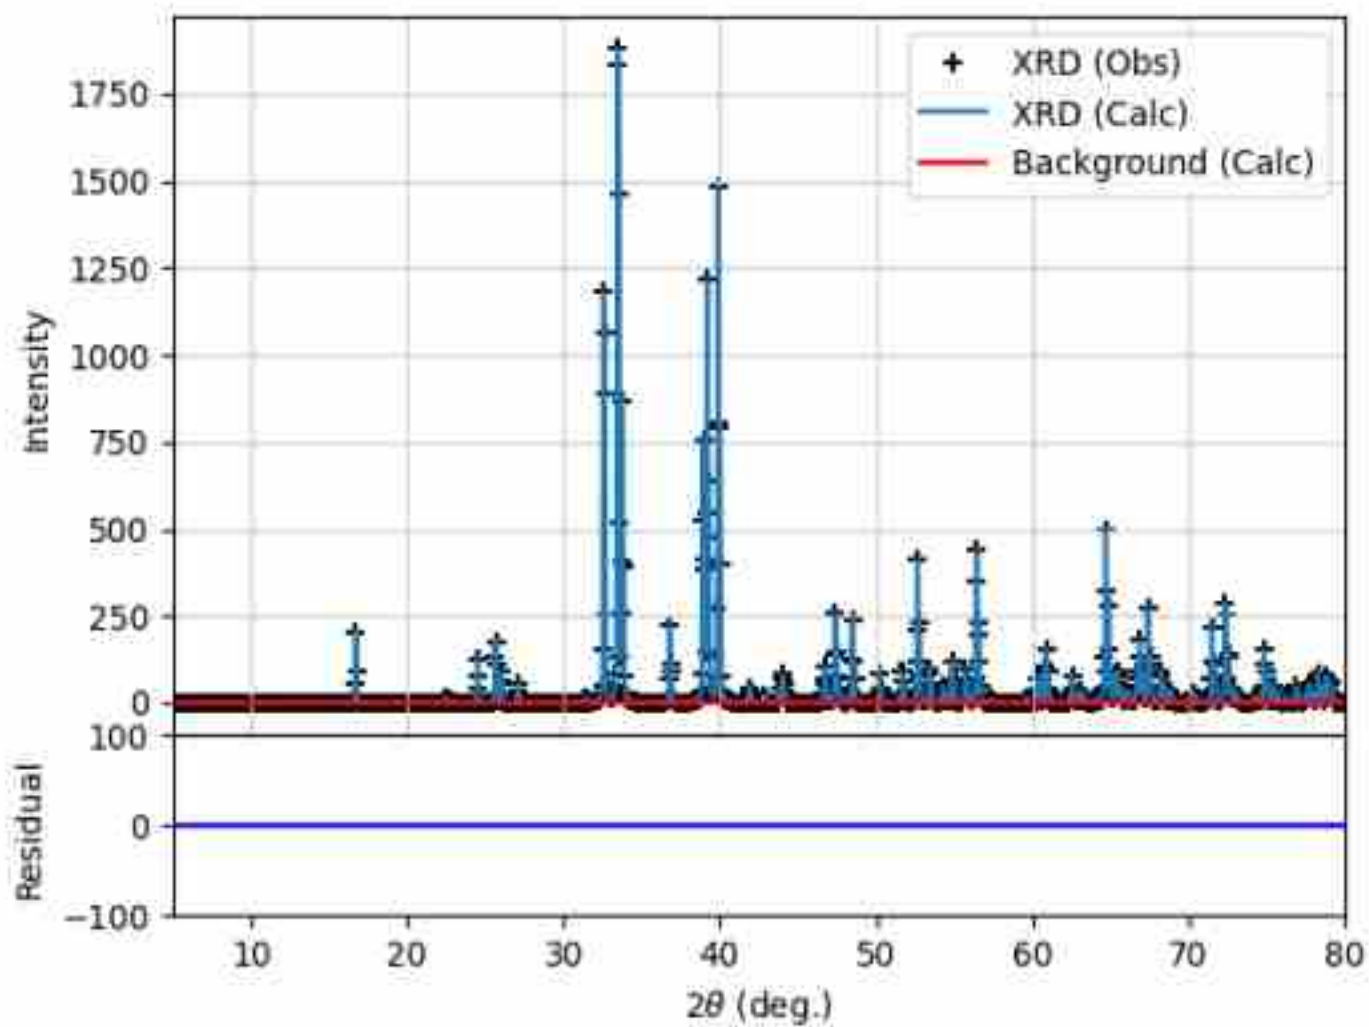

| RMSE before RR | Rwp     | RMSE after RR |
|----------------|---------|---------------|
| 0.02           | 0.00497 | 0.00029       |

# Zn1Cr1F6

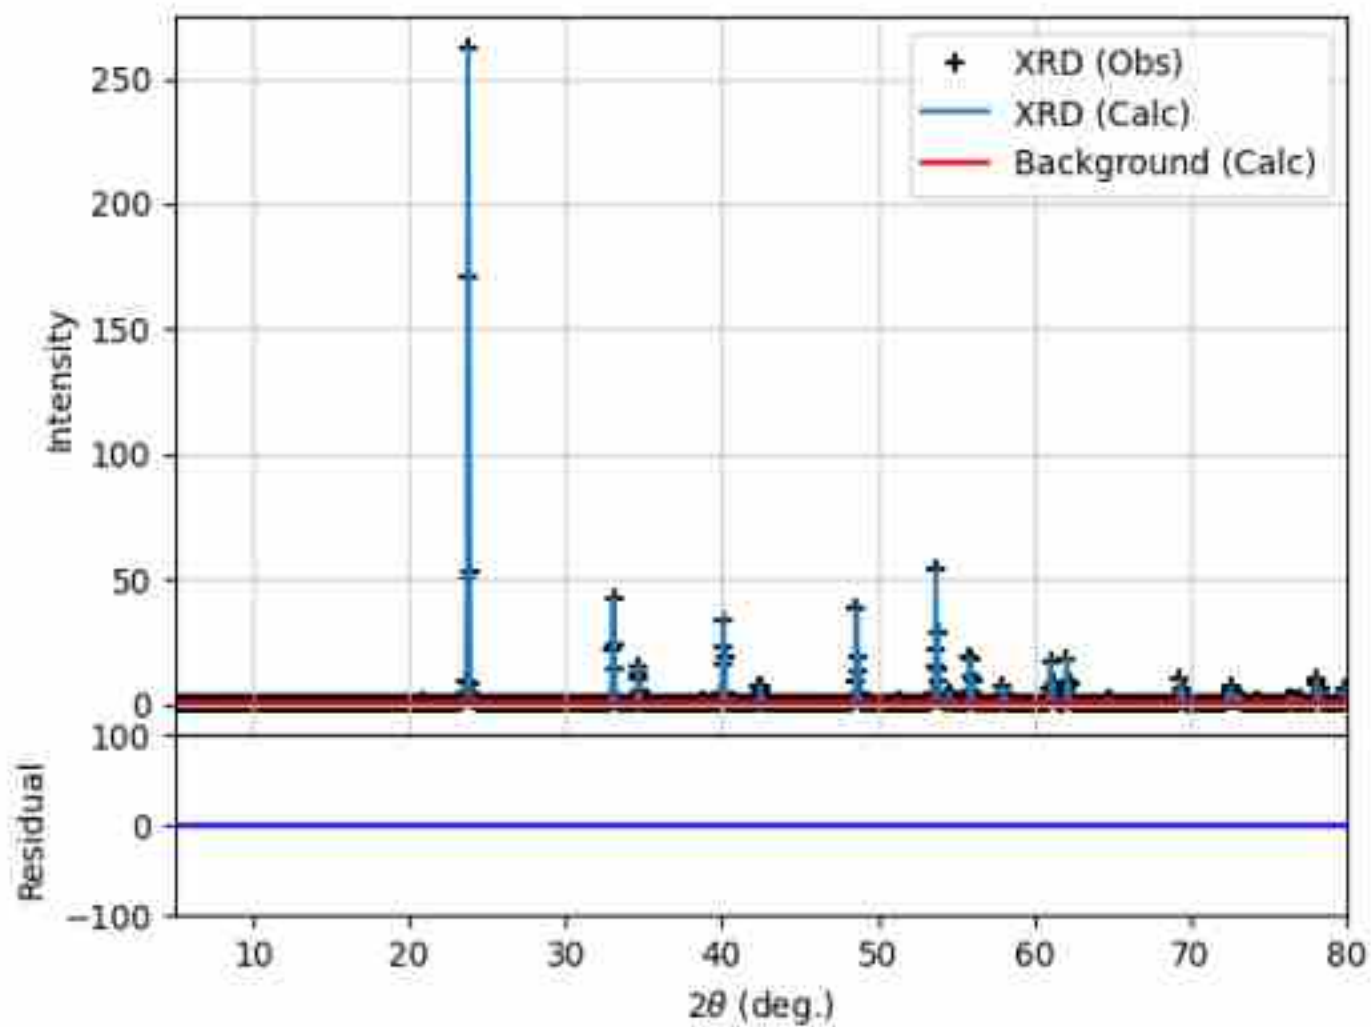

| RMSE before RR | Rwp   | RMSE after RR |
|----------------|-------|---------------|
| 0.02           | 0.003 | 0.00097       |

Zn1Cu1Ni2

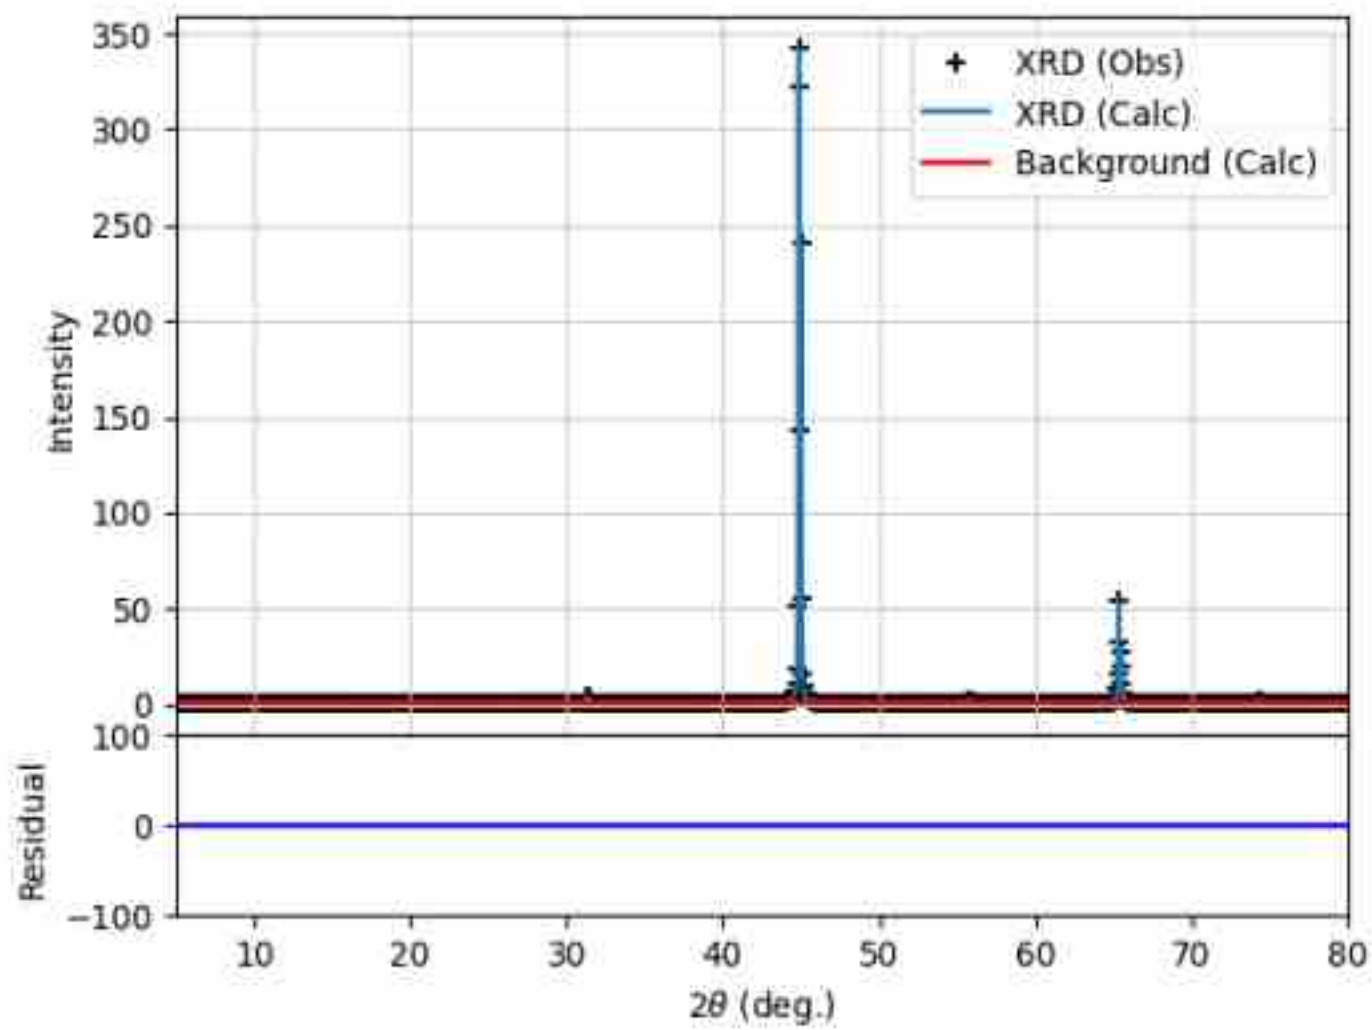

| RMSE before RR | Rwp     | RMSE after RR |
|----------------|---------|---------------|
| 0.002          | 0.00323 | 0.00036       |

# Zn1Cu1Pd2

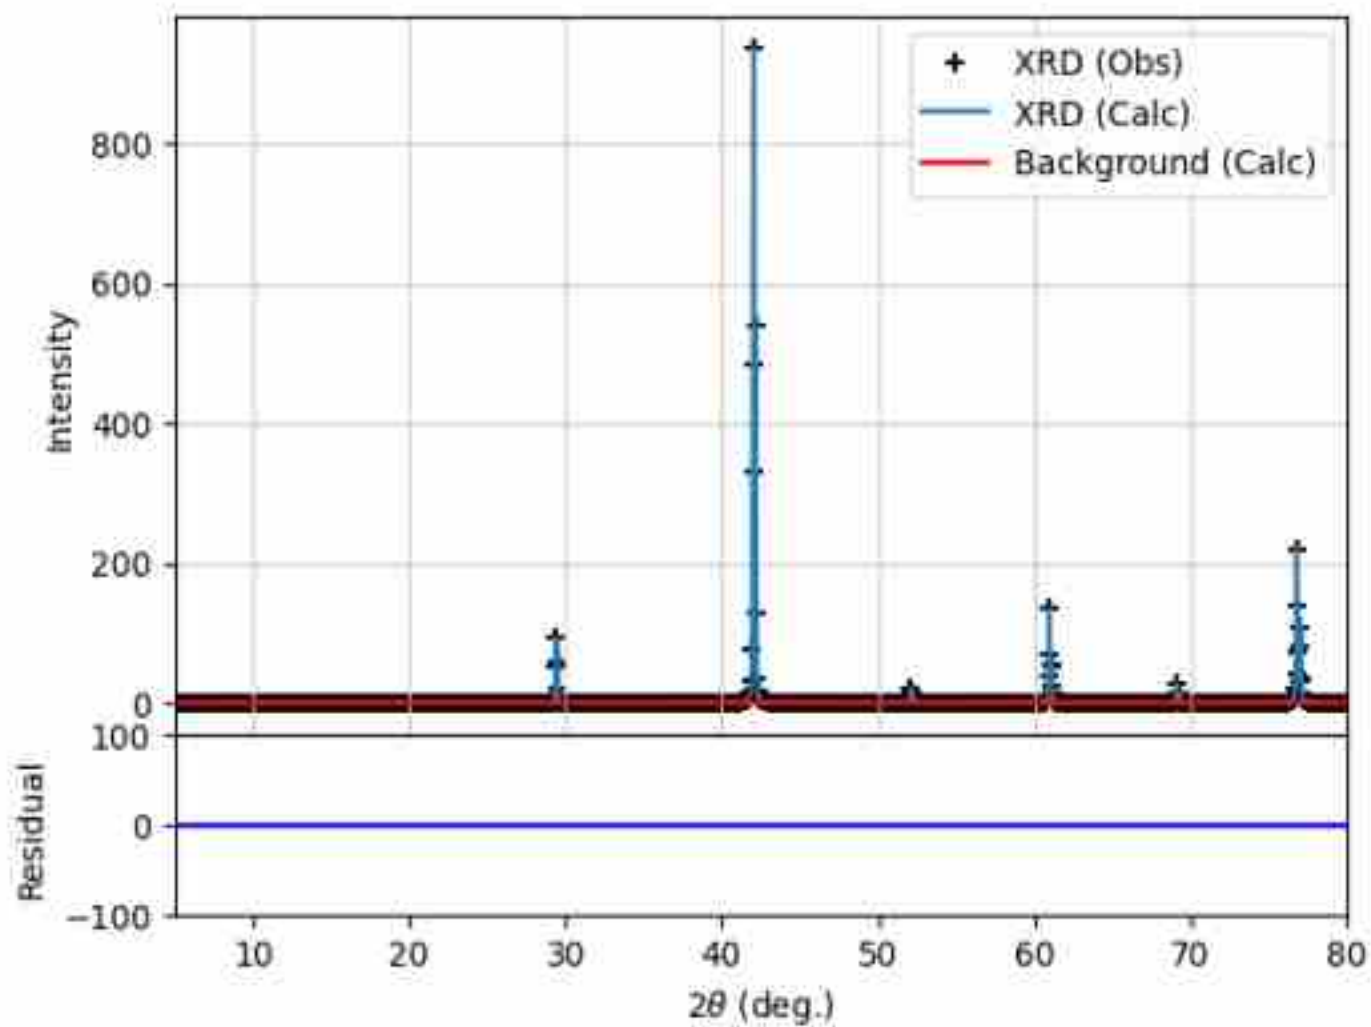

| RMSE before RR | Rwp     | RMSE after RR |
|----------------|---------|---------------|
| 0.002          | 0.00535 | 0.00063       |

# Zn1Cu3

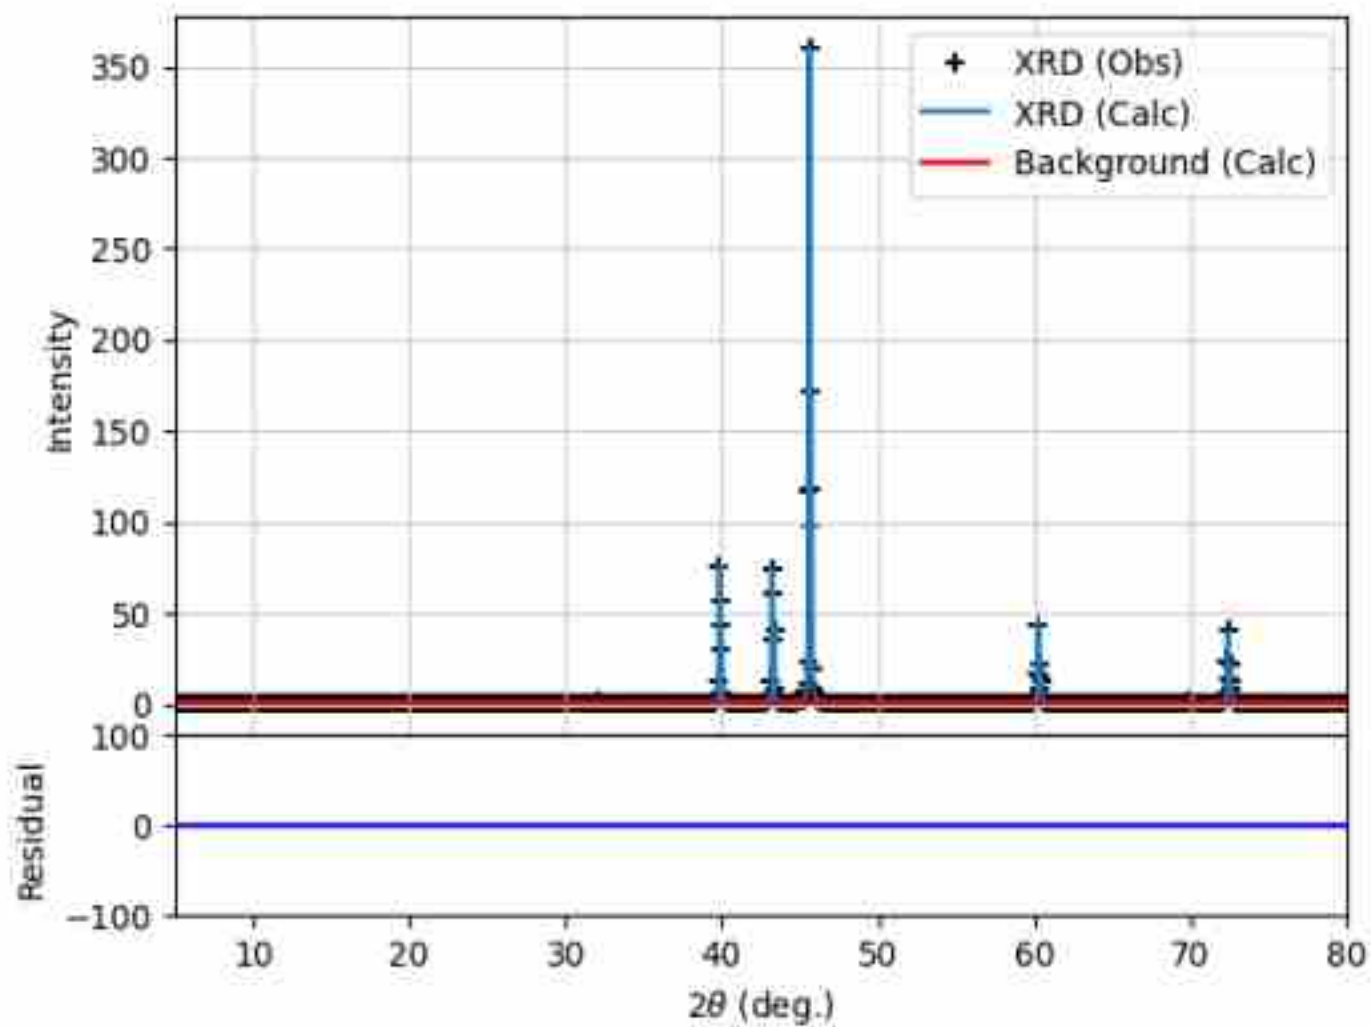

| RMSE before RR | Rwp     | RMSE after RR |
|----------------|---------|---------------|
| 0.02           | 0.00377 | 0.00031       |

# Zn1Ga1Rh2

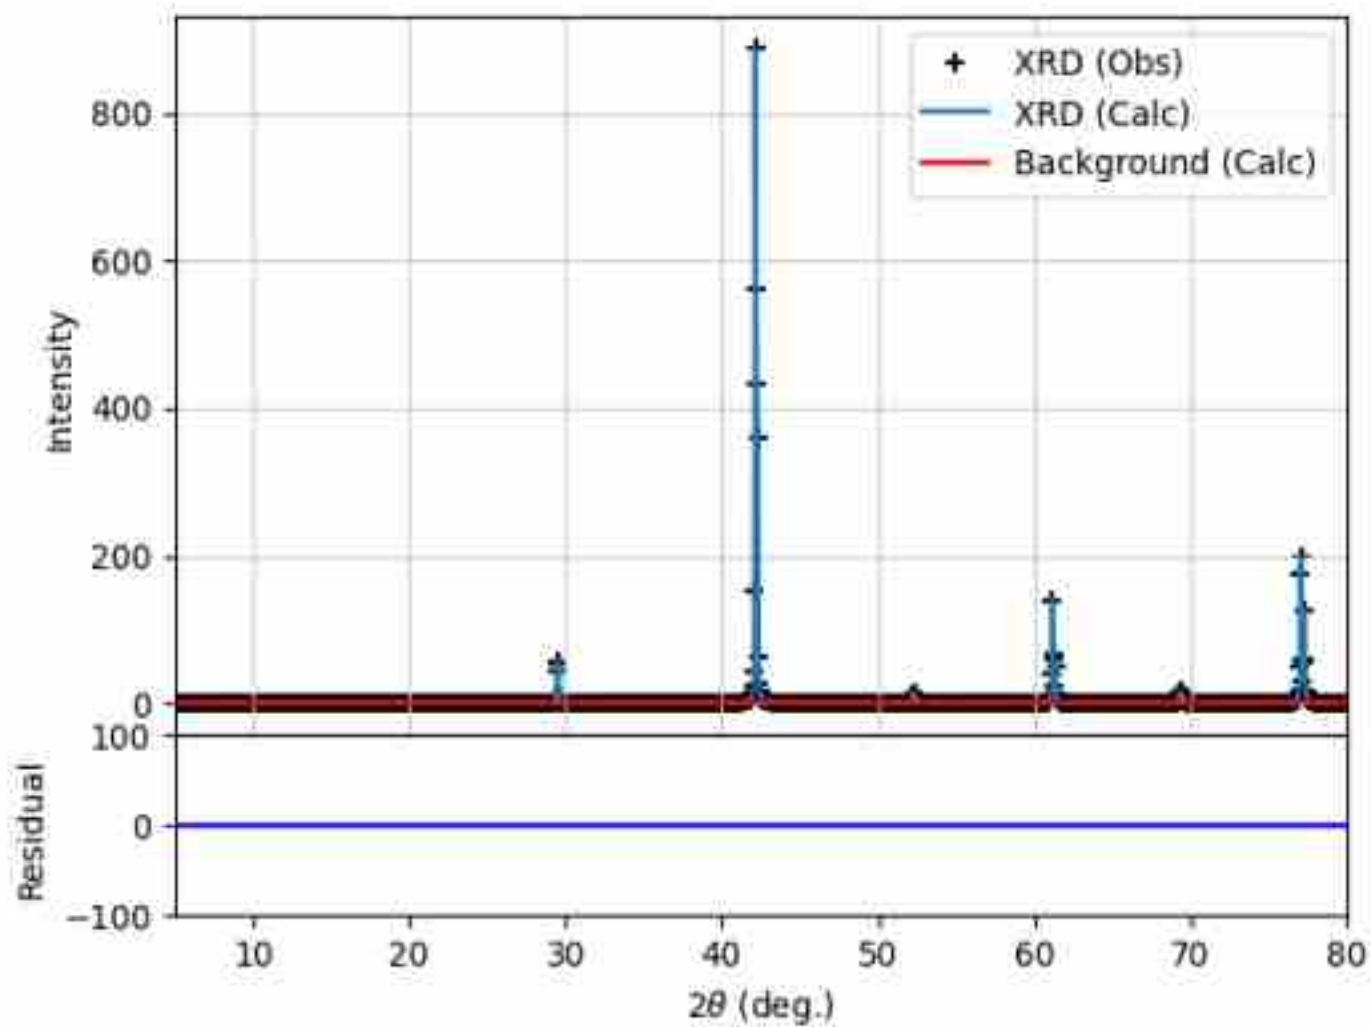

| RMSE before RR | Rwp     | RMSE after RR |
|----------------|---------|---------------|
| 0.002          | 0.00398 | 0.00042       |



# Zr1Al1Cu2

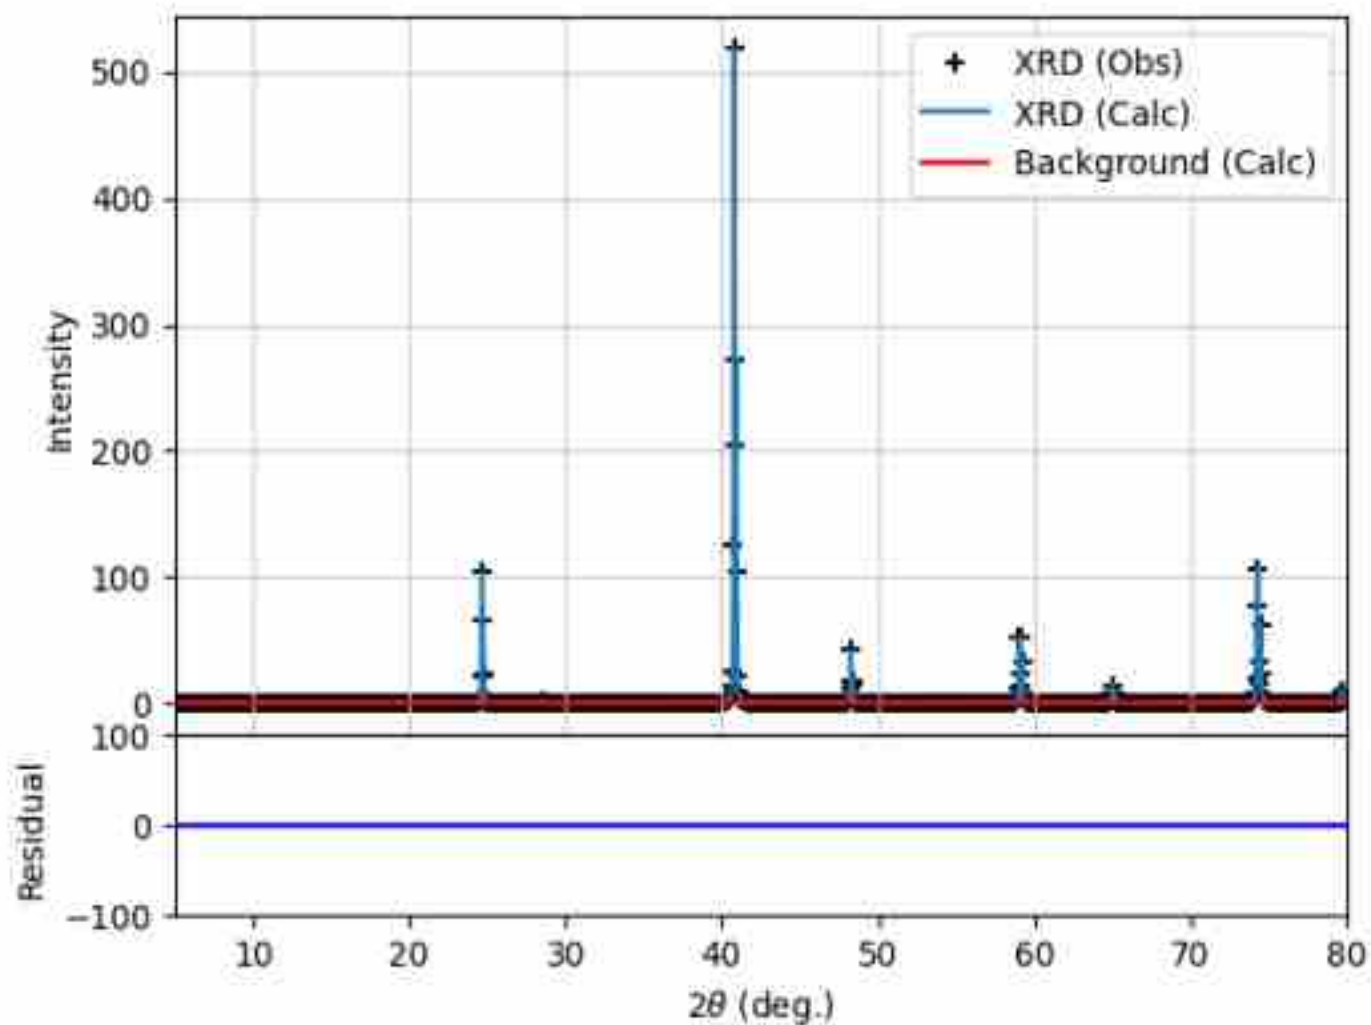

| RMSE before RR | Rwp     | RMSE after RR |
|----------------|---------|---------------|
| 0.002          | 0.00304 | 0.0006        |

# Zr1Al1Ni2

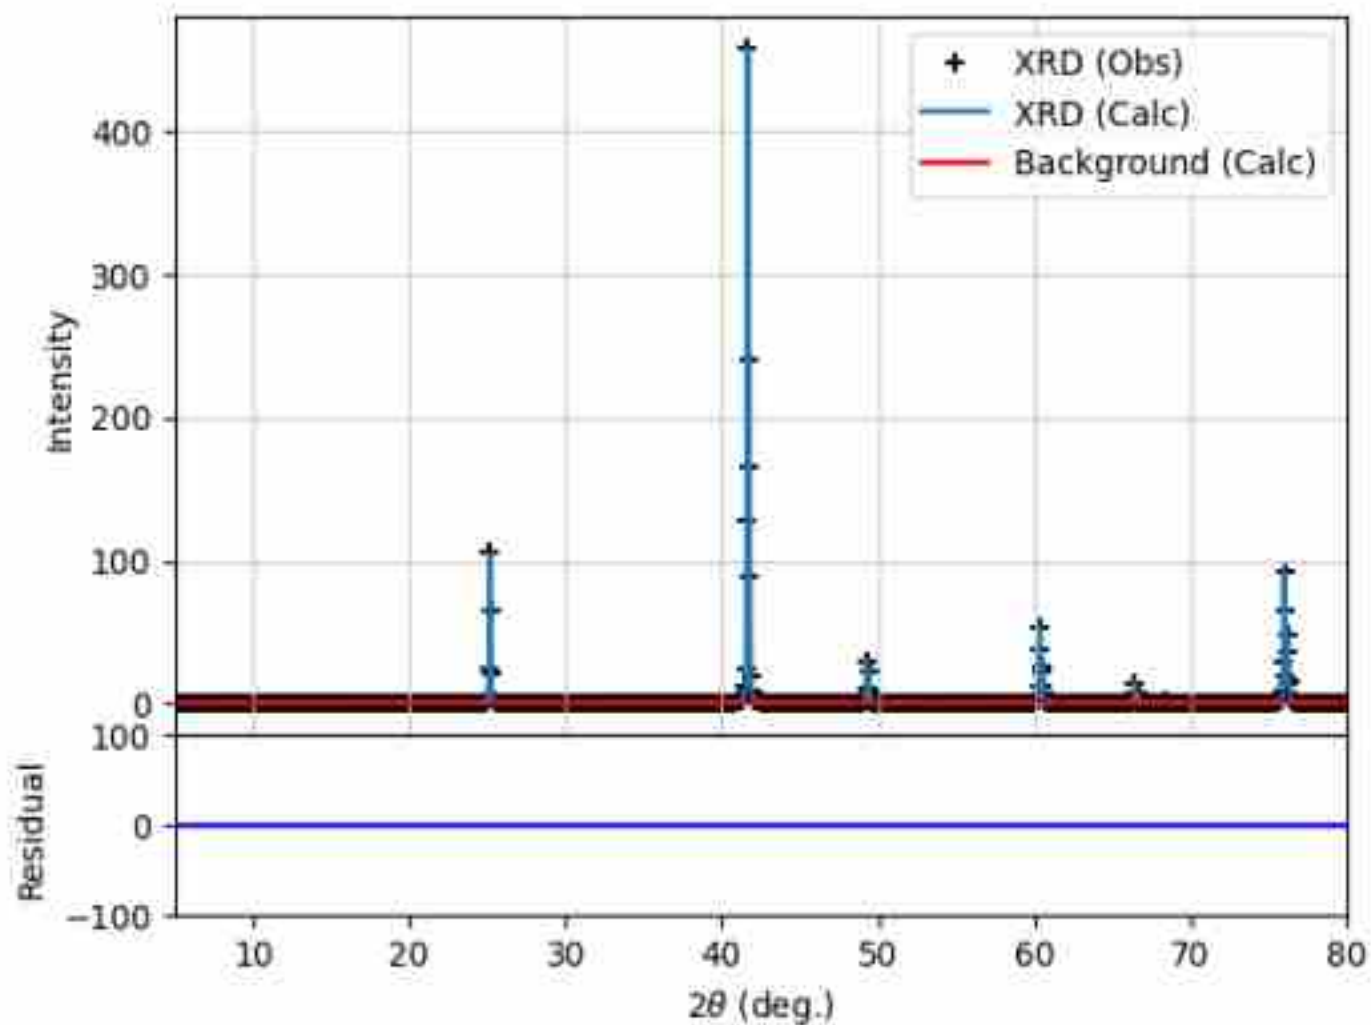

| RMSE before RR | Rwp     | RMSE after RR |
|----------------|---------|---------------|
| 0.002          | 0.00261 | 0.00045       |

# Zr1Ti1Co4

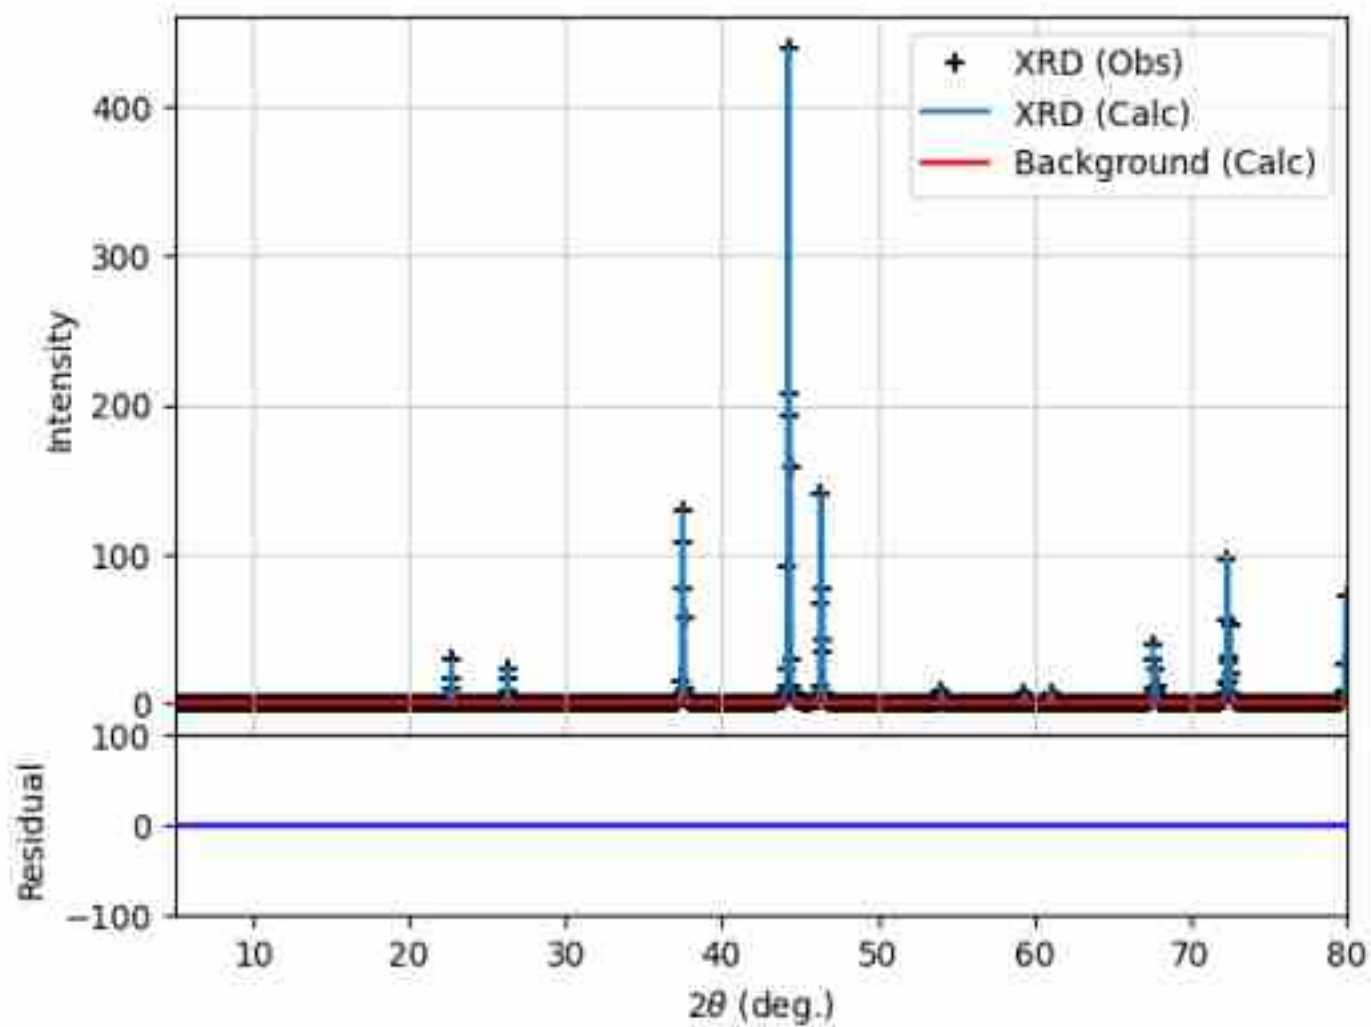

| RMSE before RR | Rwp     | RMSE after RR |
|----------------|---------|---------------|
| 0.02           | 0.01369 | 0.00208       |

# Zr1Zn1Cu2

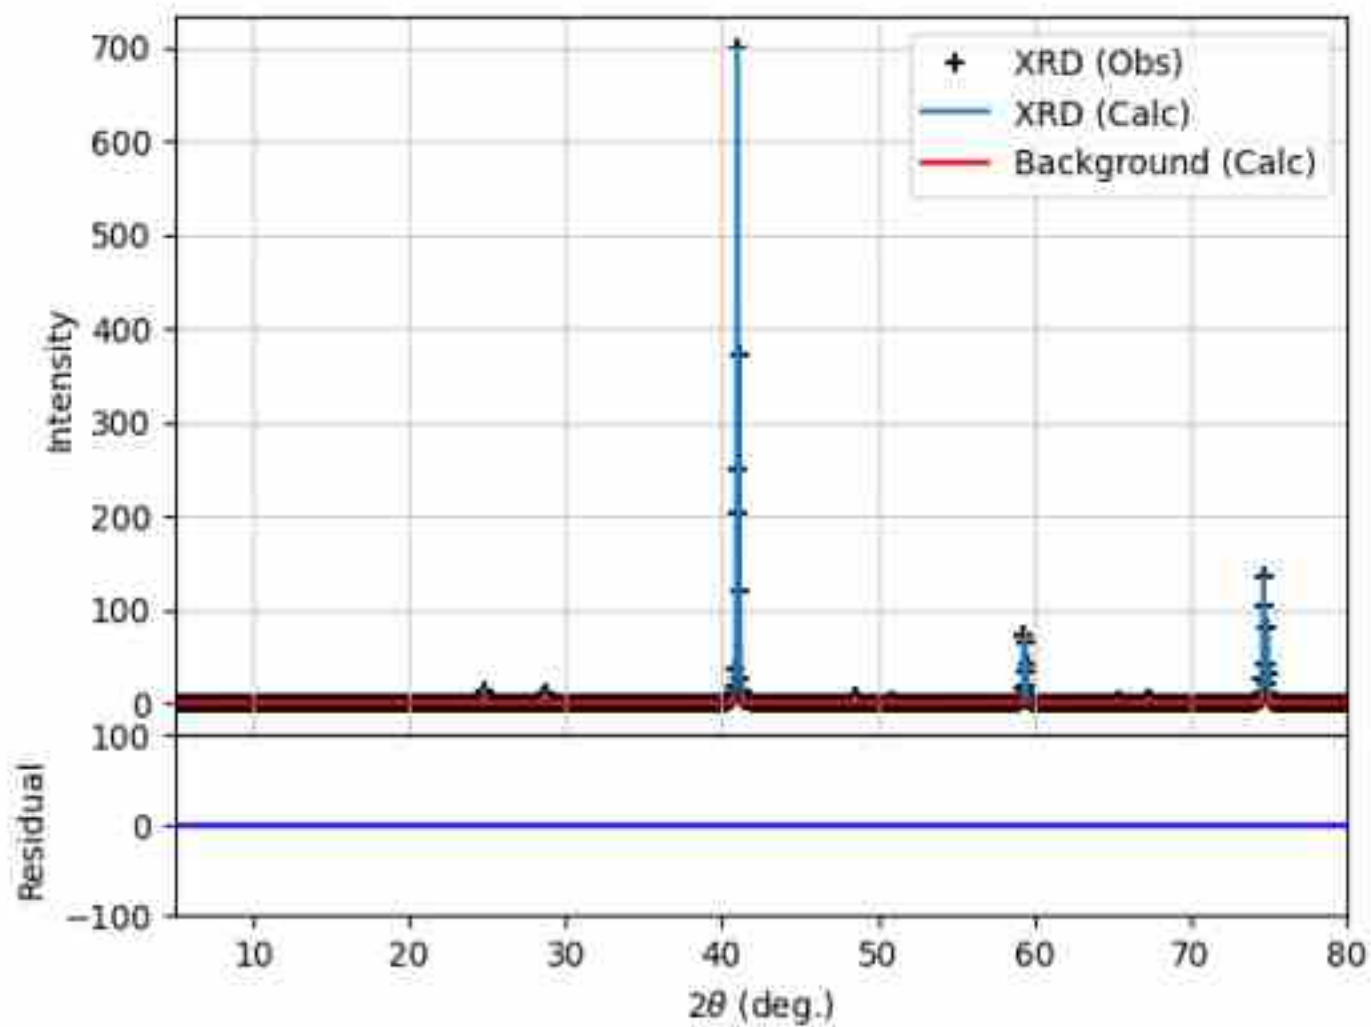

| RMSE before RR | Rwp     | RMSE after RR |
|----------------|---------|---------------|
| 0.002          | 0.04178 | 0.00071       |

# Zr1Zn1Pd2

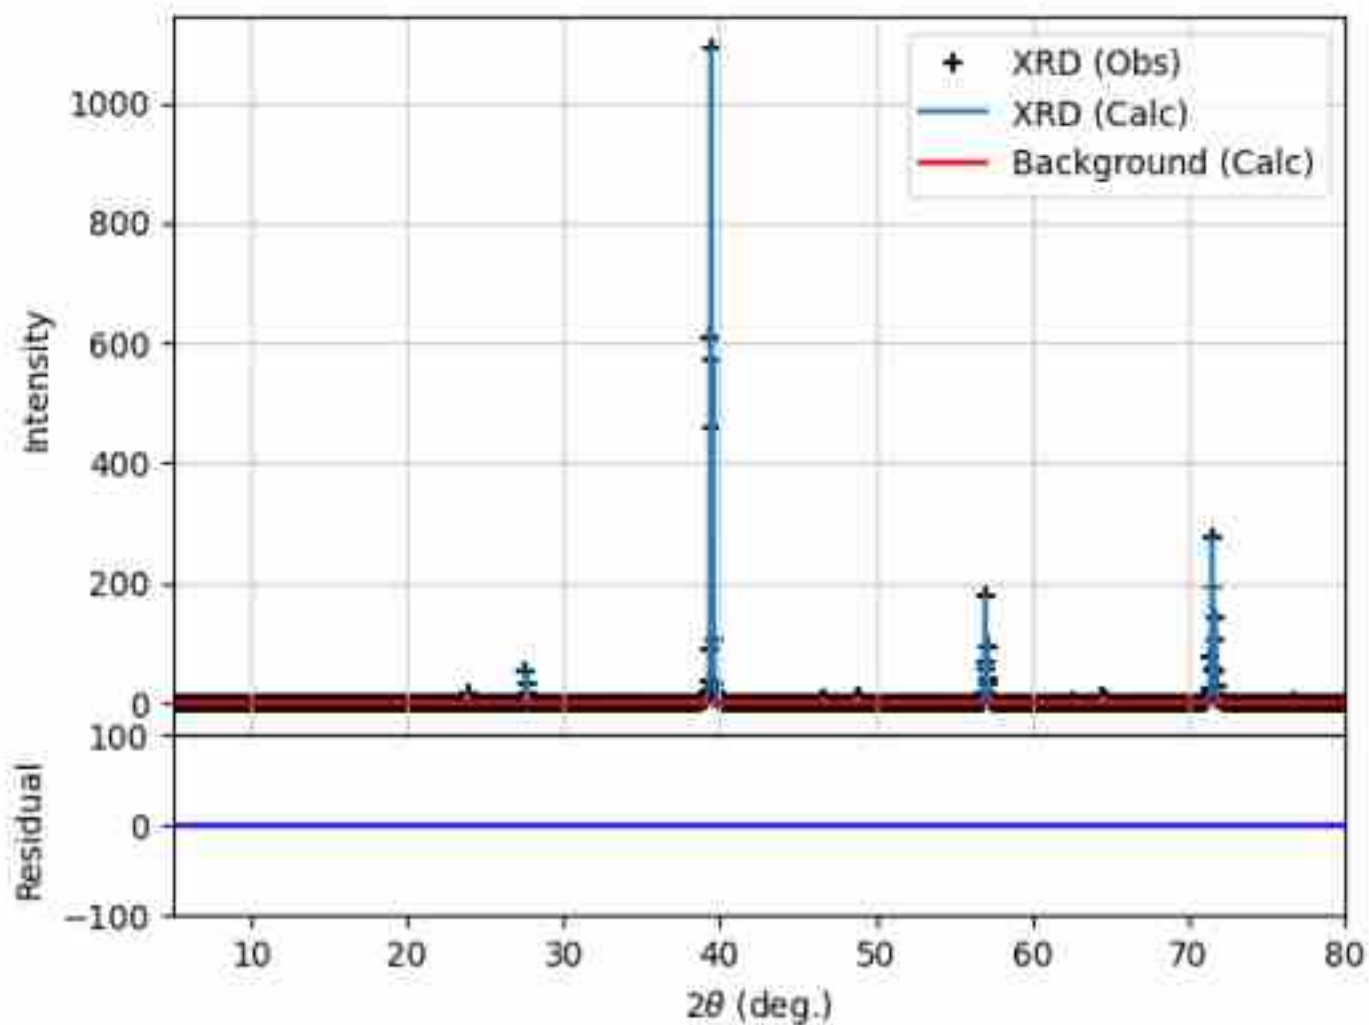

| RMSE before RR | Rwp     | RMSE after RR |
|----------------|---------|---------------|
| 0.002          | 0.00352 | 0.00039       |

# Zr<sub>2</sub>In<sub>6</sub>

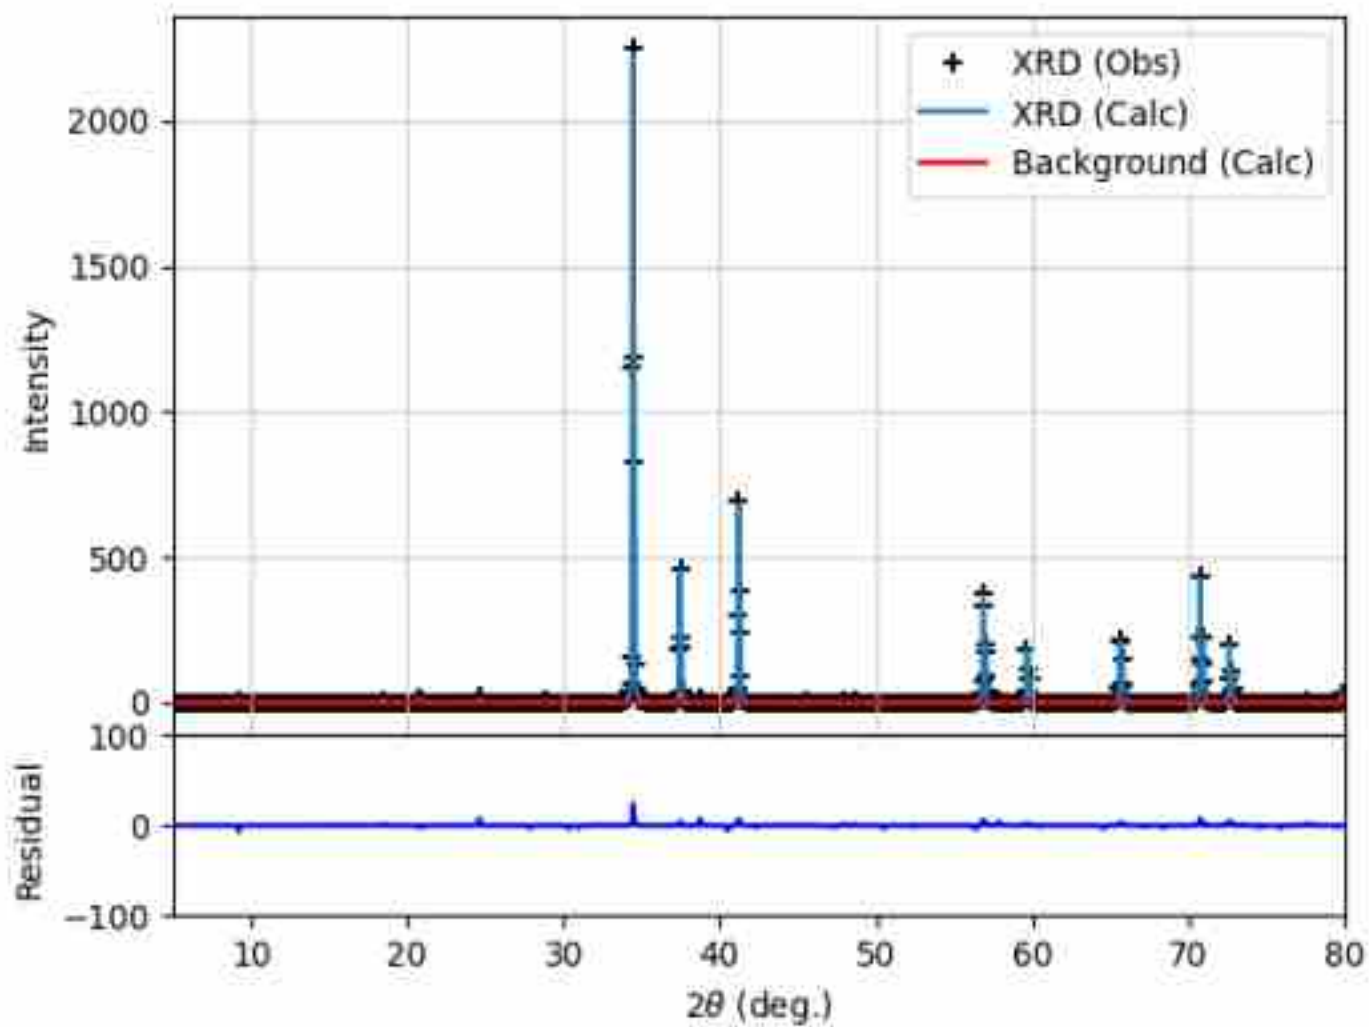

| RMSE before RR | Rwp     | RMSE after RR |
|----------------|---------|---------------|
| 0.02           | 9.08577 | 0.06302       |

# Zr<sub>2</sub>TcRh

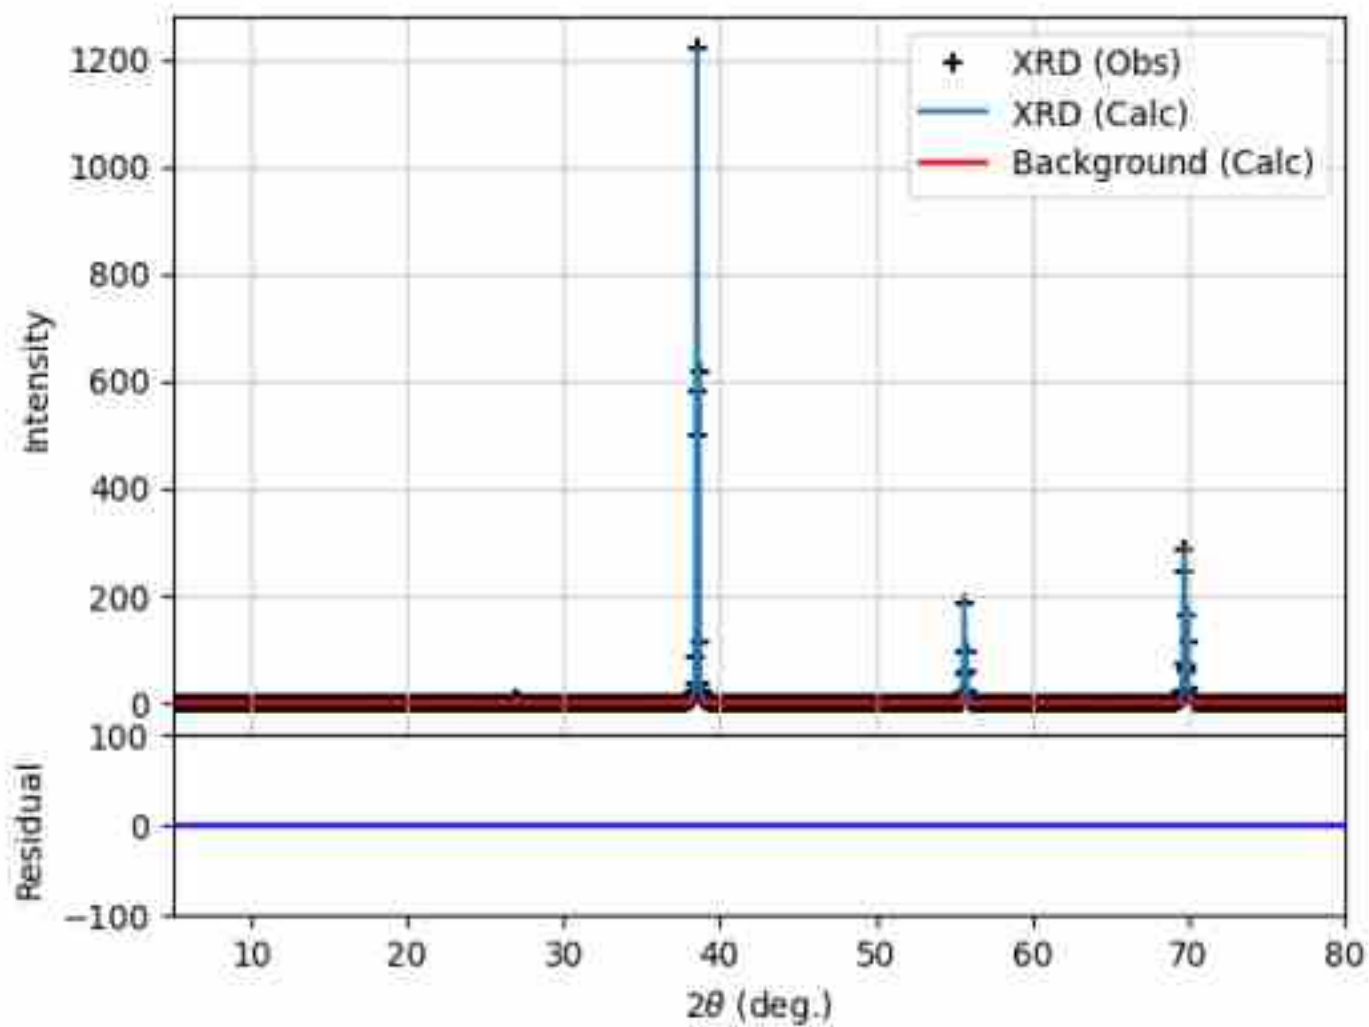

| RMSE before RR | Rwp     | RMSE after RR |
|----------------|---------|---------------|
| 0.002          | 0.00418 | 0.00233       |

# Zr<sub>3</sub>As<sub>3</sub>Ru<sub>3</sub>

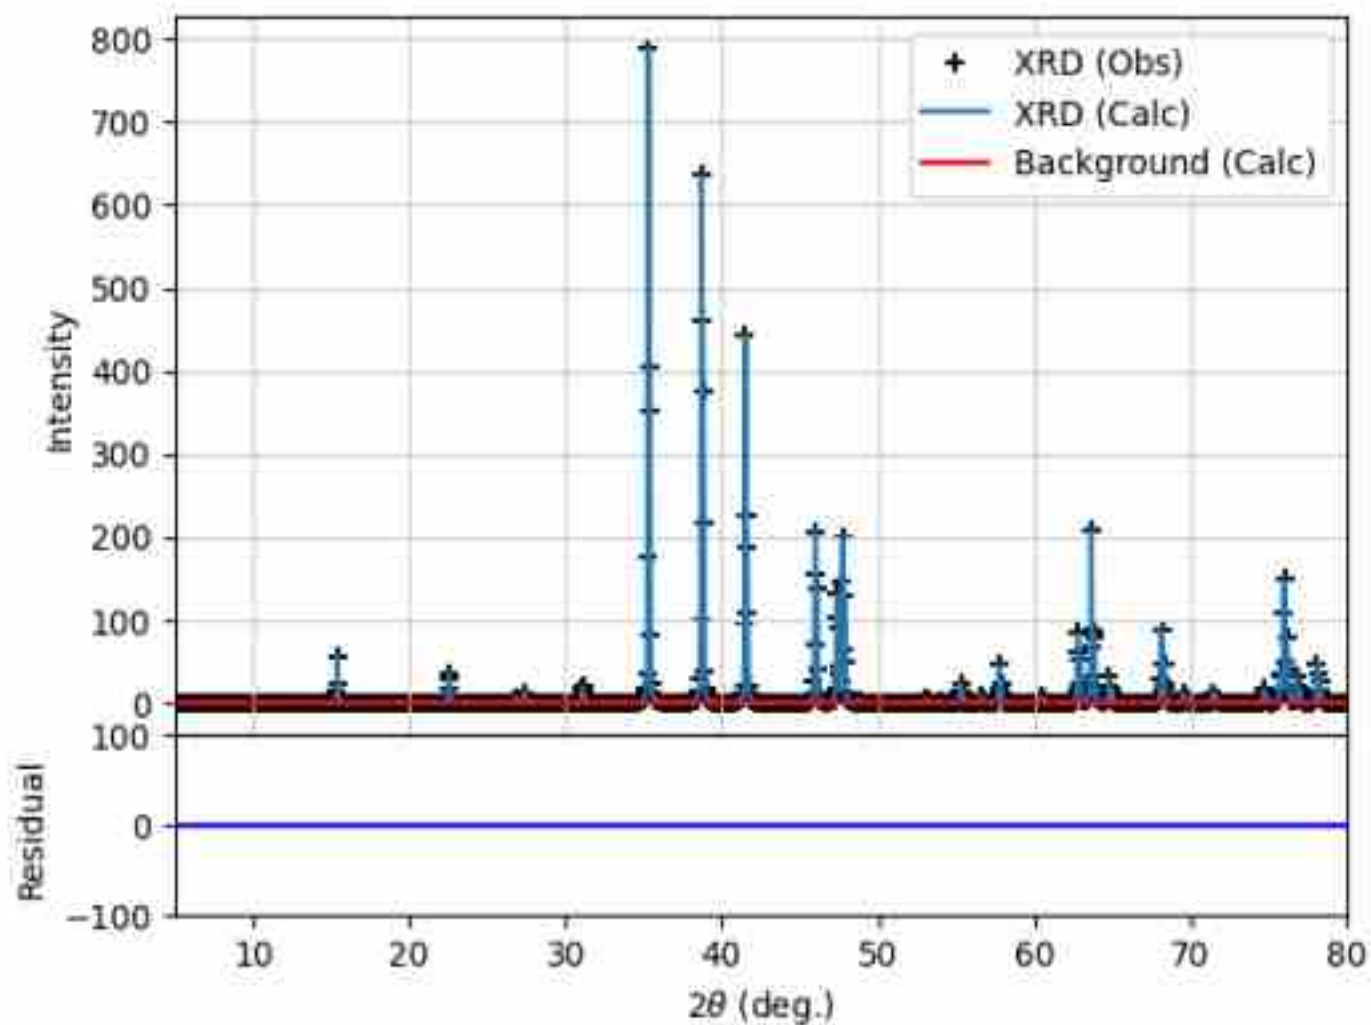

| RMSE before RR | Rwp     | RMSE after RR |
|----------------|---------|---------------|
| 0.02           | 0.00648 | 0.00061       |



# Zr3Tl1

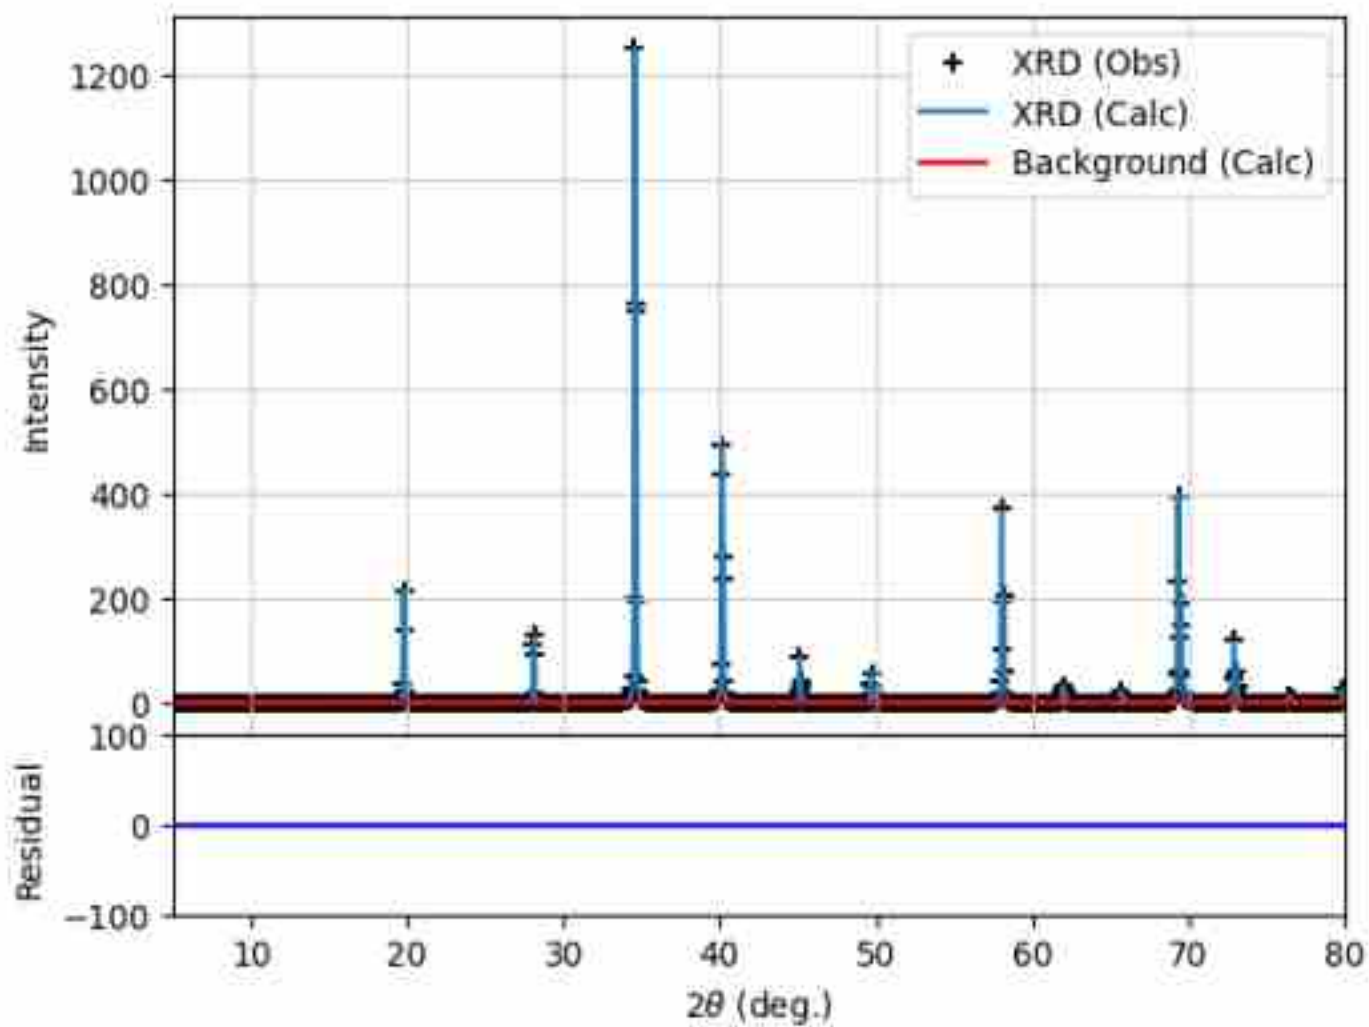

| RMSE before RR | Rwp     | RMSE after RR |
|----------------|---------|---------------|
| 0.002          | 0.00886 | 0.00352       |

# Zr<sub>4</sub>Al<sub>2</sub>C<sub>2</sub>

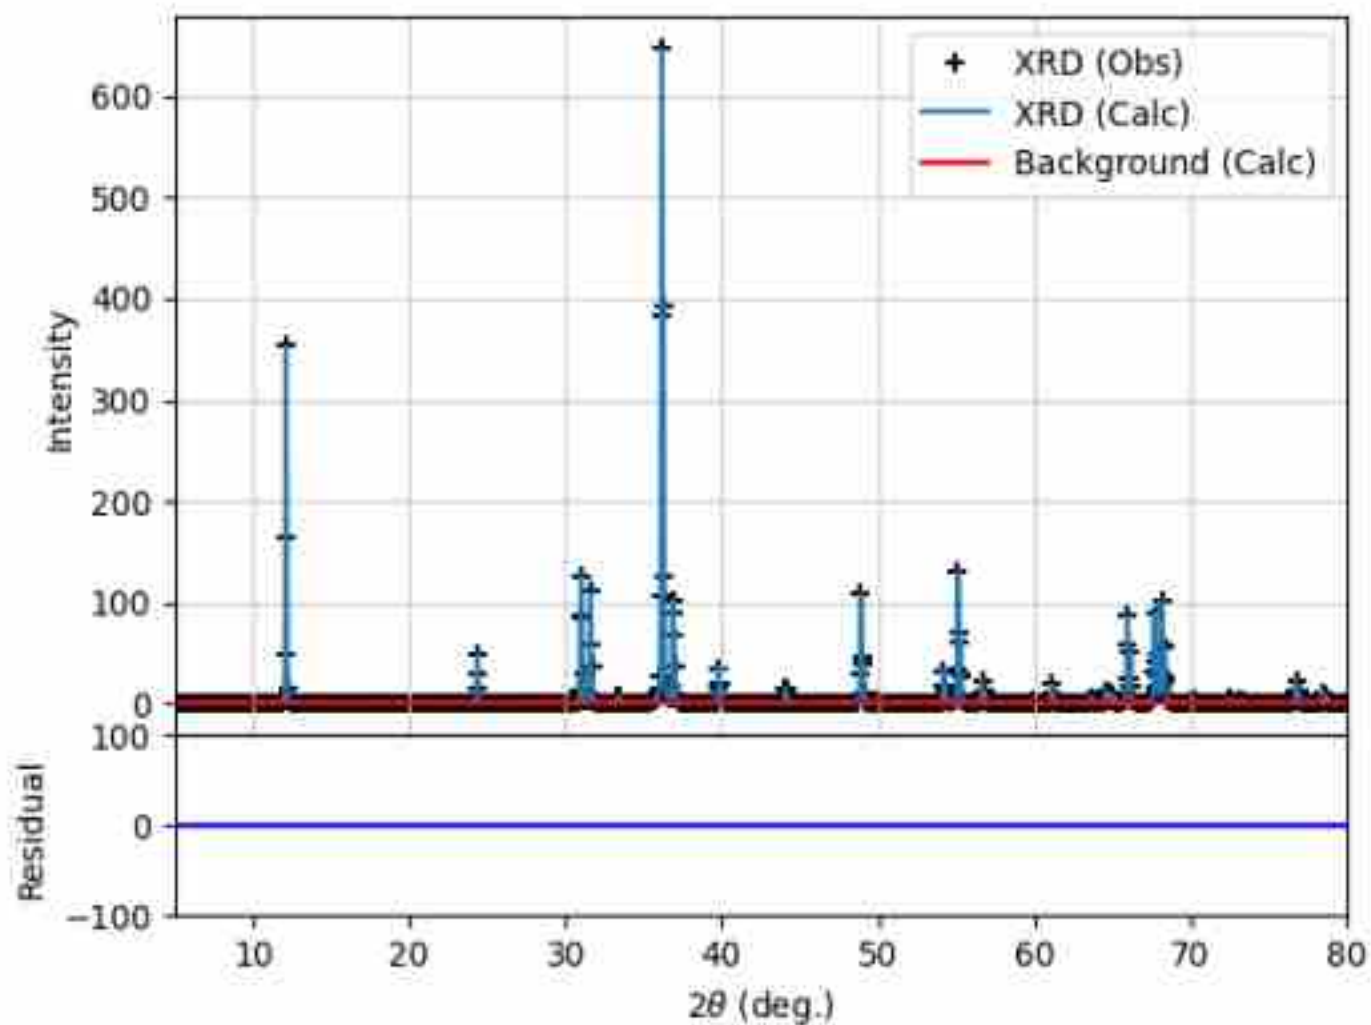

| RMSE before RR | Rwp     | RMSE after RR |
|----------------|---------|---------------|
| 0.02           | 0.00261 | 0.00065       |

# Zr<sub>4</sub>Sb<sub>2</sub>P<sub>2</sub>

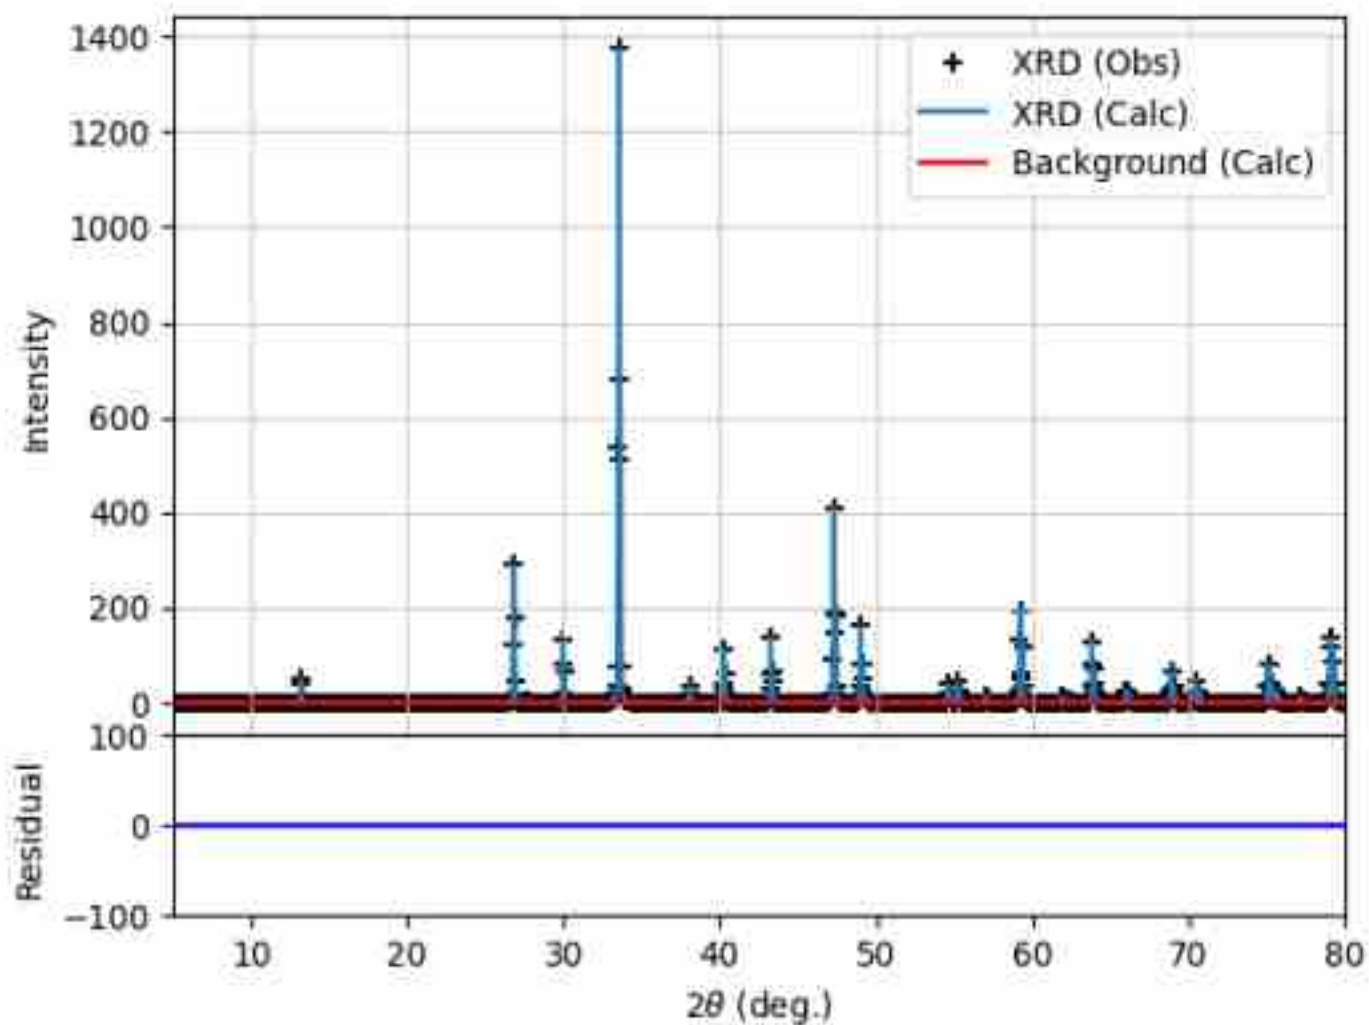

| RMSE before RR | Rwp     | RMSE after RR |
|----------------|---------|---------------|
| 0.02           | 0.00259 | 0.00043       |

# Zr4Sb4

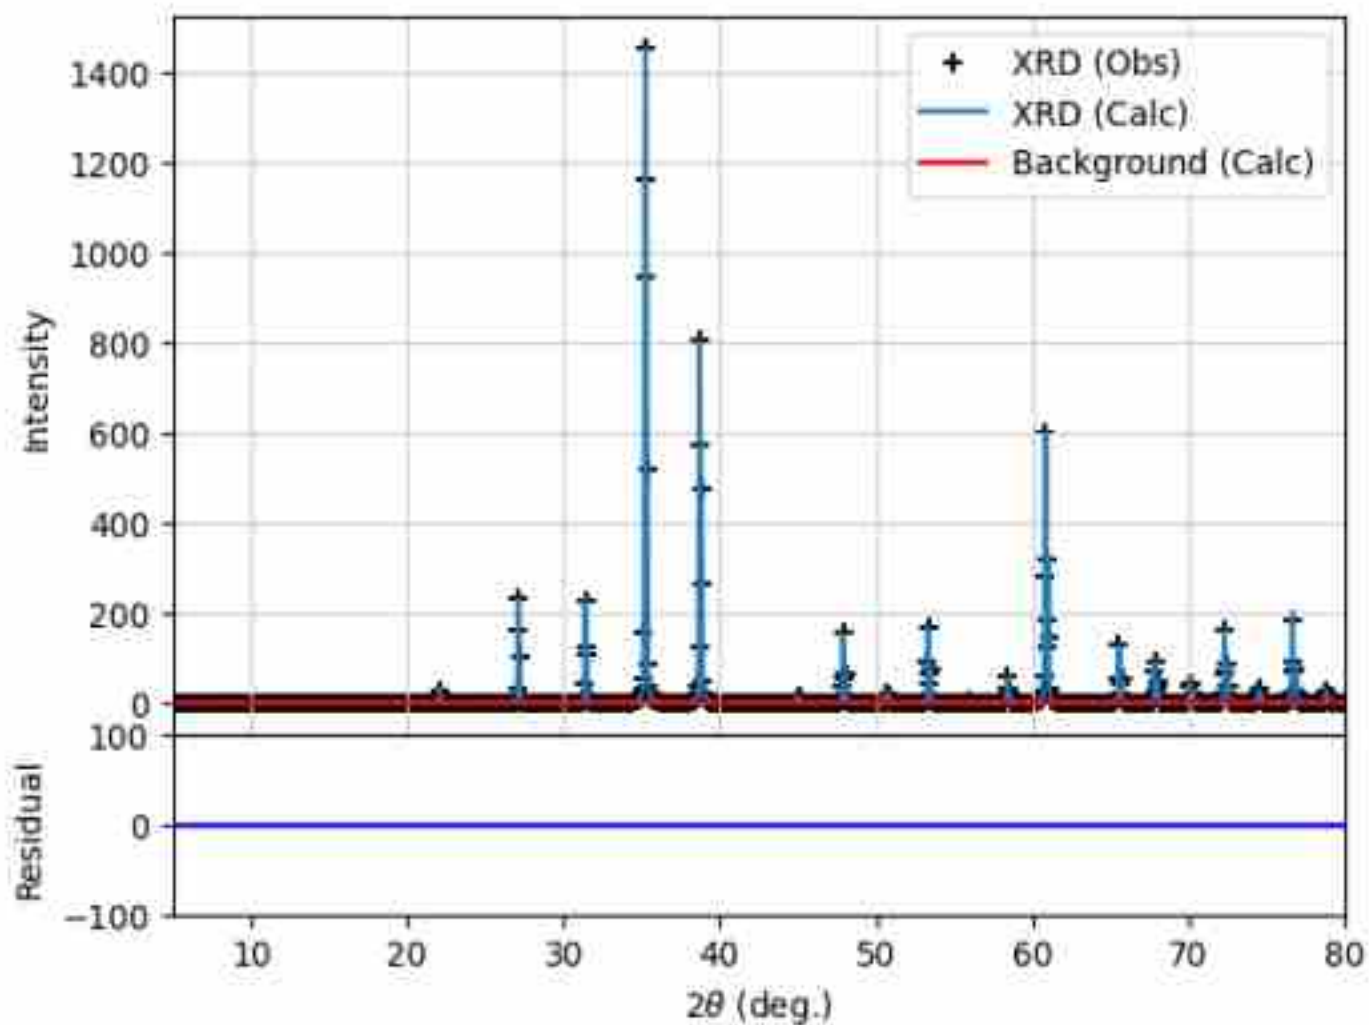

| RMSE before RR | Rwp     | RMSE after RR |
|----------------|---------|---------------|
| 0.02           | 0.00483 | 0.00027       |

# Zr<sub>4</sub>Tc<sub>8</sub>

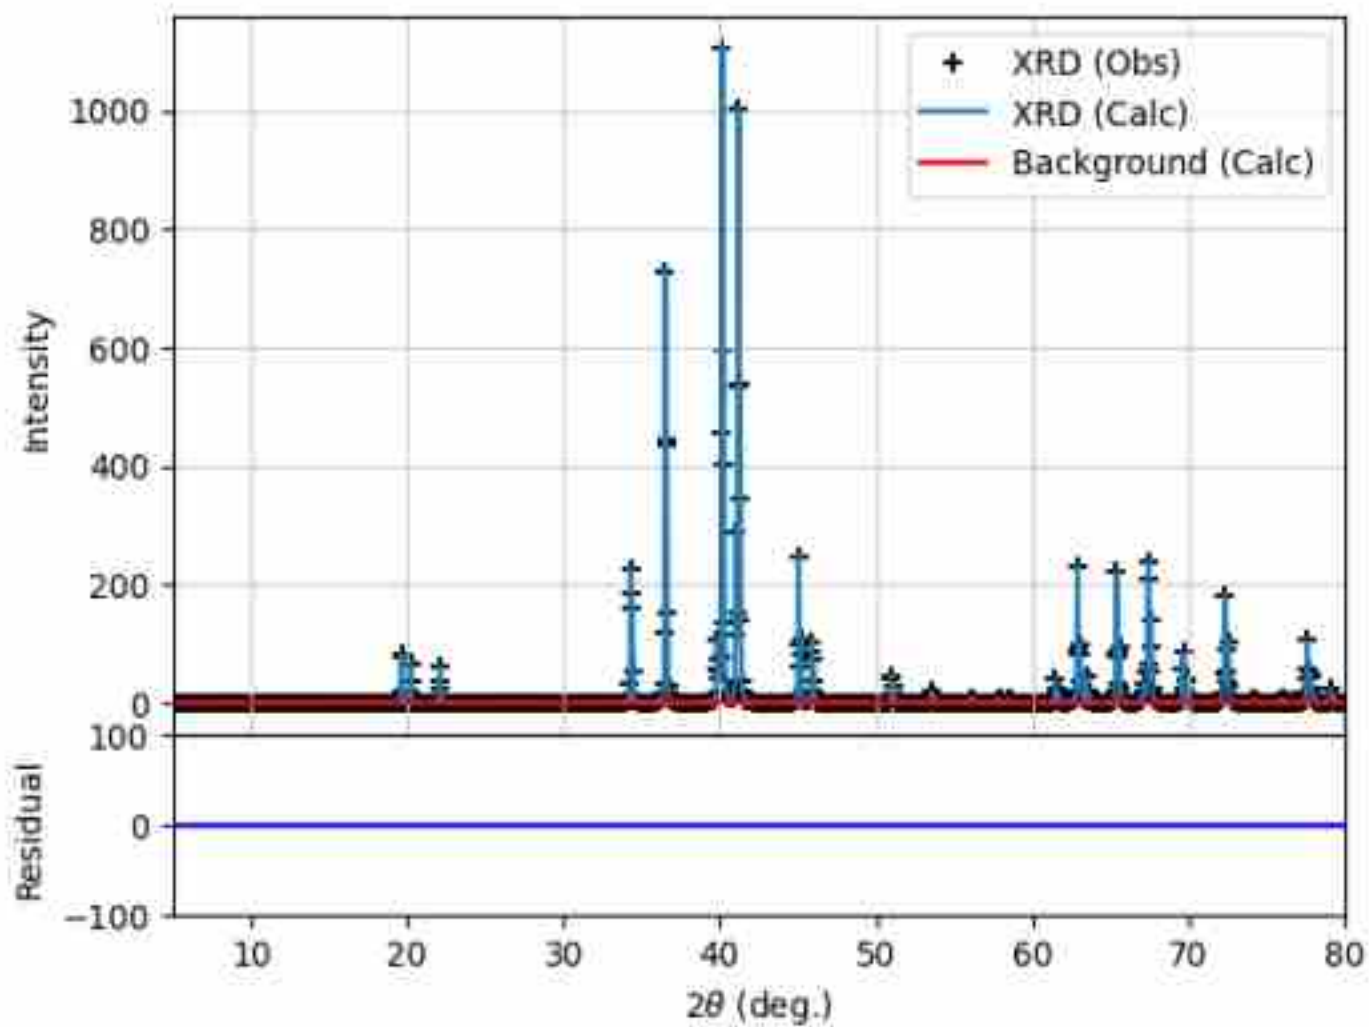

| RMSE before RR | Rwp     | RMSE after RR |
|----------------|---------|---------------|
| 0.02           | 0.00975 | 0.00077       |

# Zr<sub>4</sub>Te<sub>4</sub>

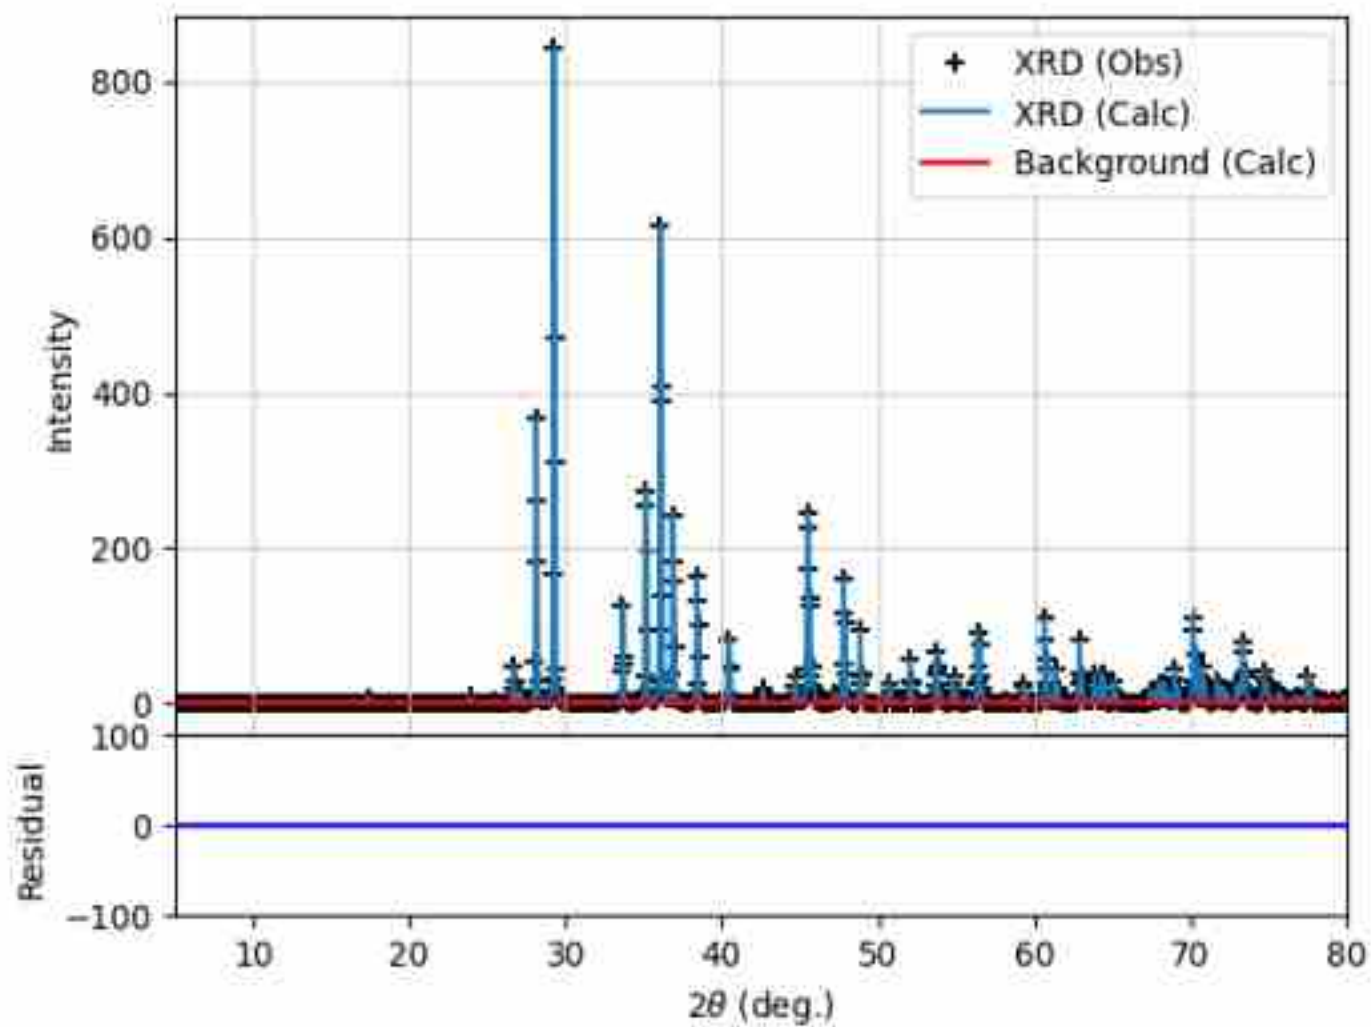

| RMSE before RR | Rwp     | RMSE after RR |
|----------------|---------|---------------|
| 0.02           | 0.00461 | 0.00039       |

# Zr<sub>6</sub>Fe<sub>4</sub>Si<sub>6</sub>

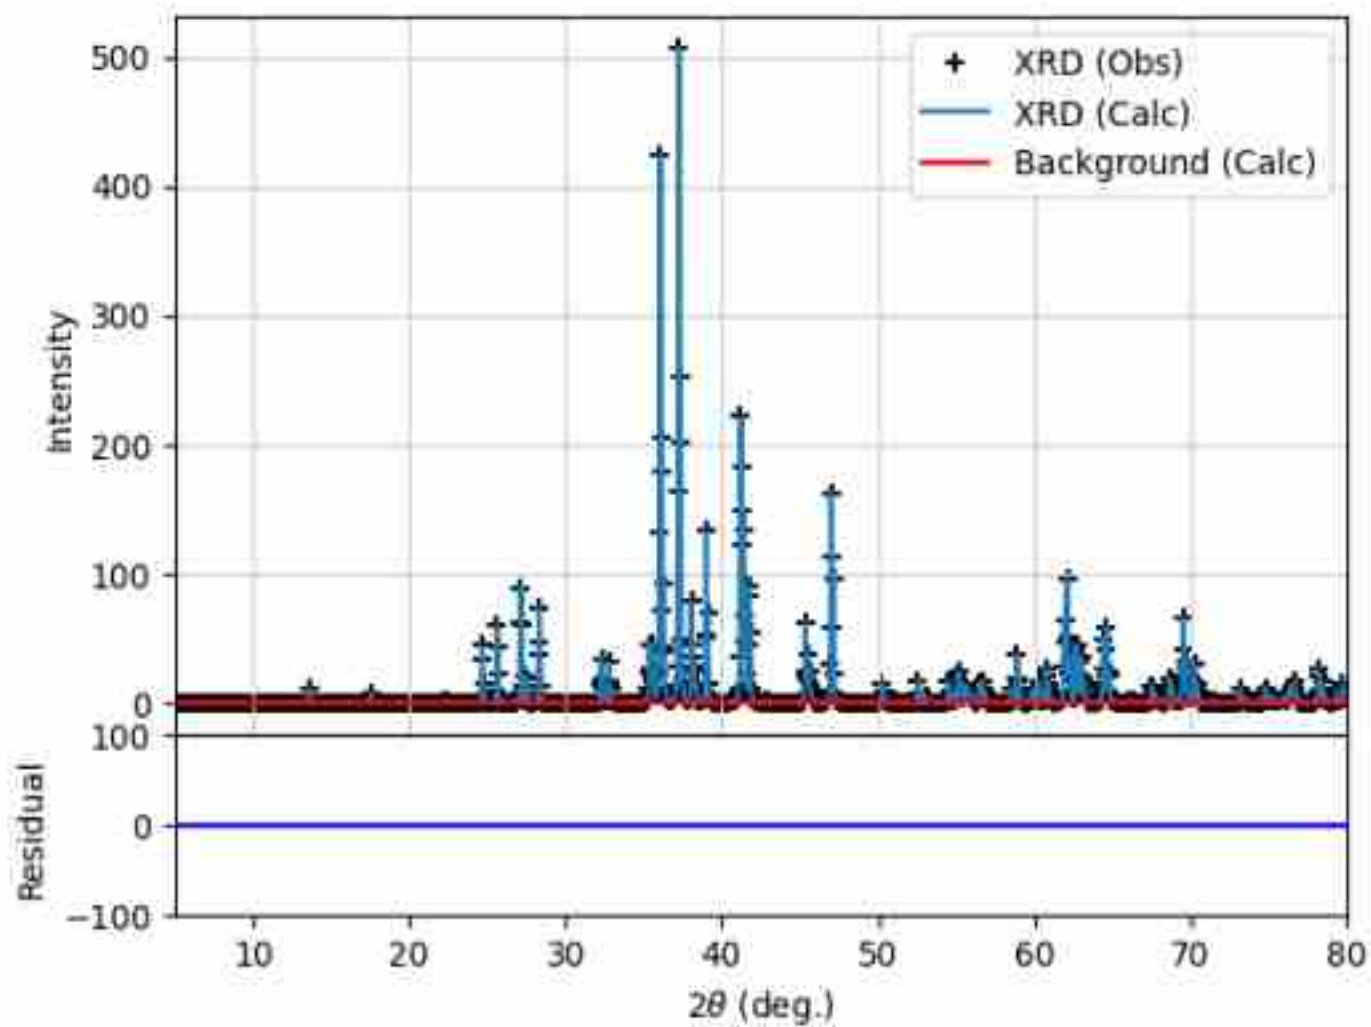

| RMSE before RR | Rwp     | RMSE after RR |
|----------------|---------|---------------|
| 0.02           | 0.00397 | 0.00075       |

# Zr10Ge6

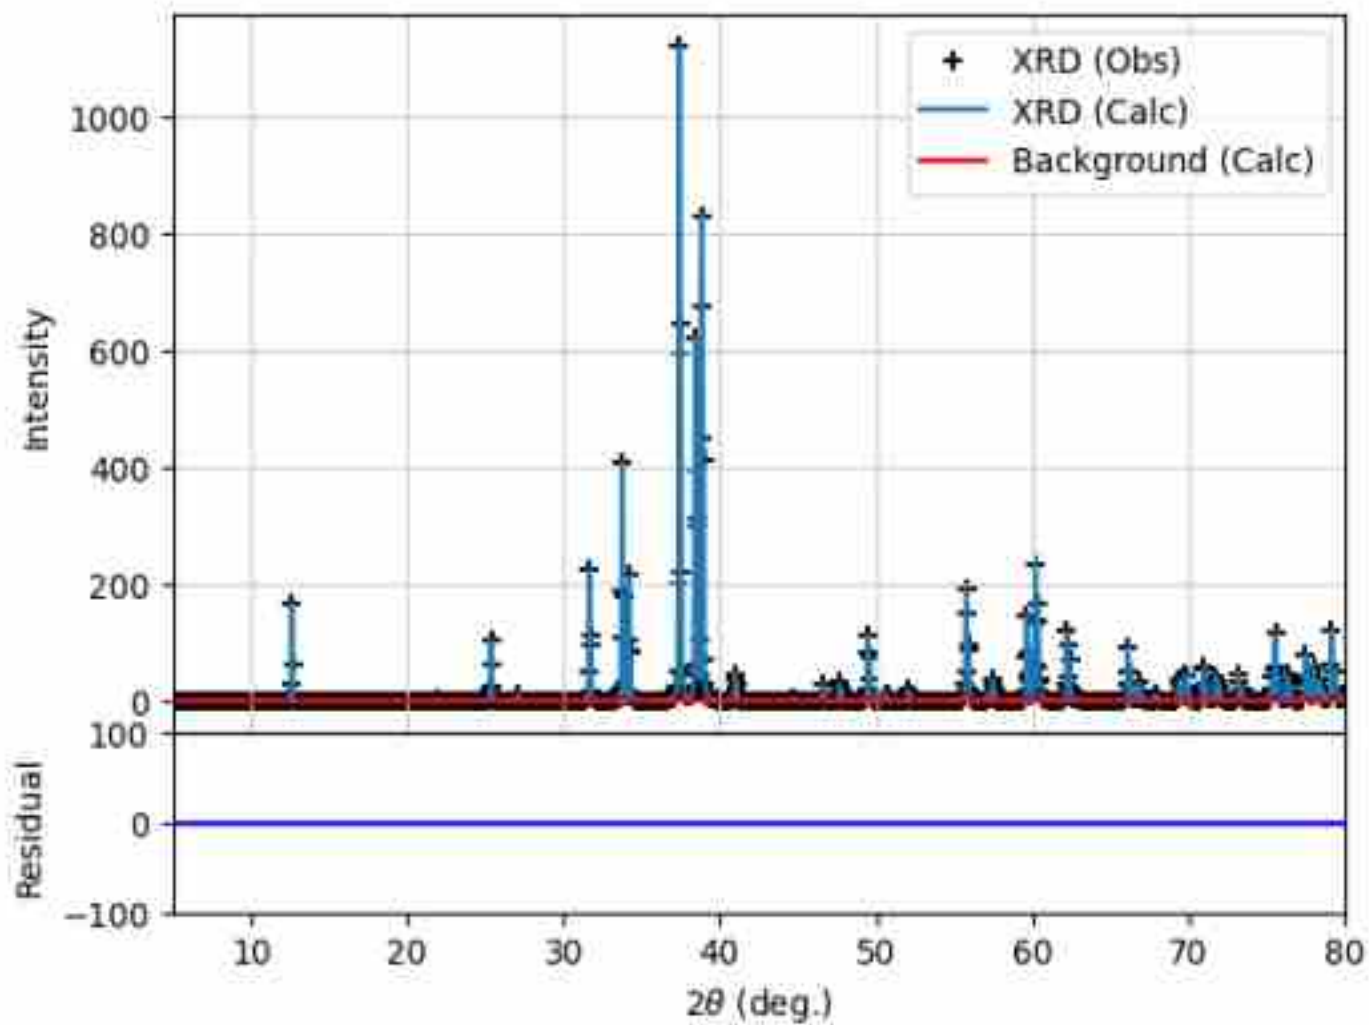

| RMSE before RR | Rwp     | RMSE after RR |
|----------------|---------|---------------|
| 0.02           | 0.00317 | 0.00042       |



# Ac<sub>3</sub>Cd<sub>1</sub>

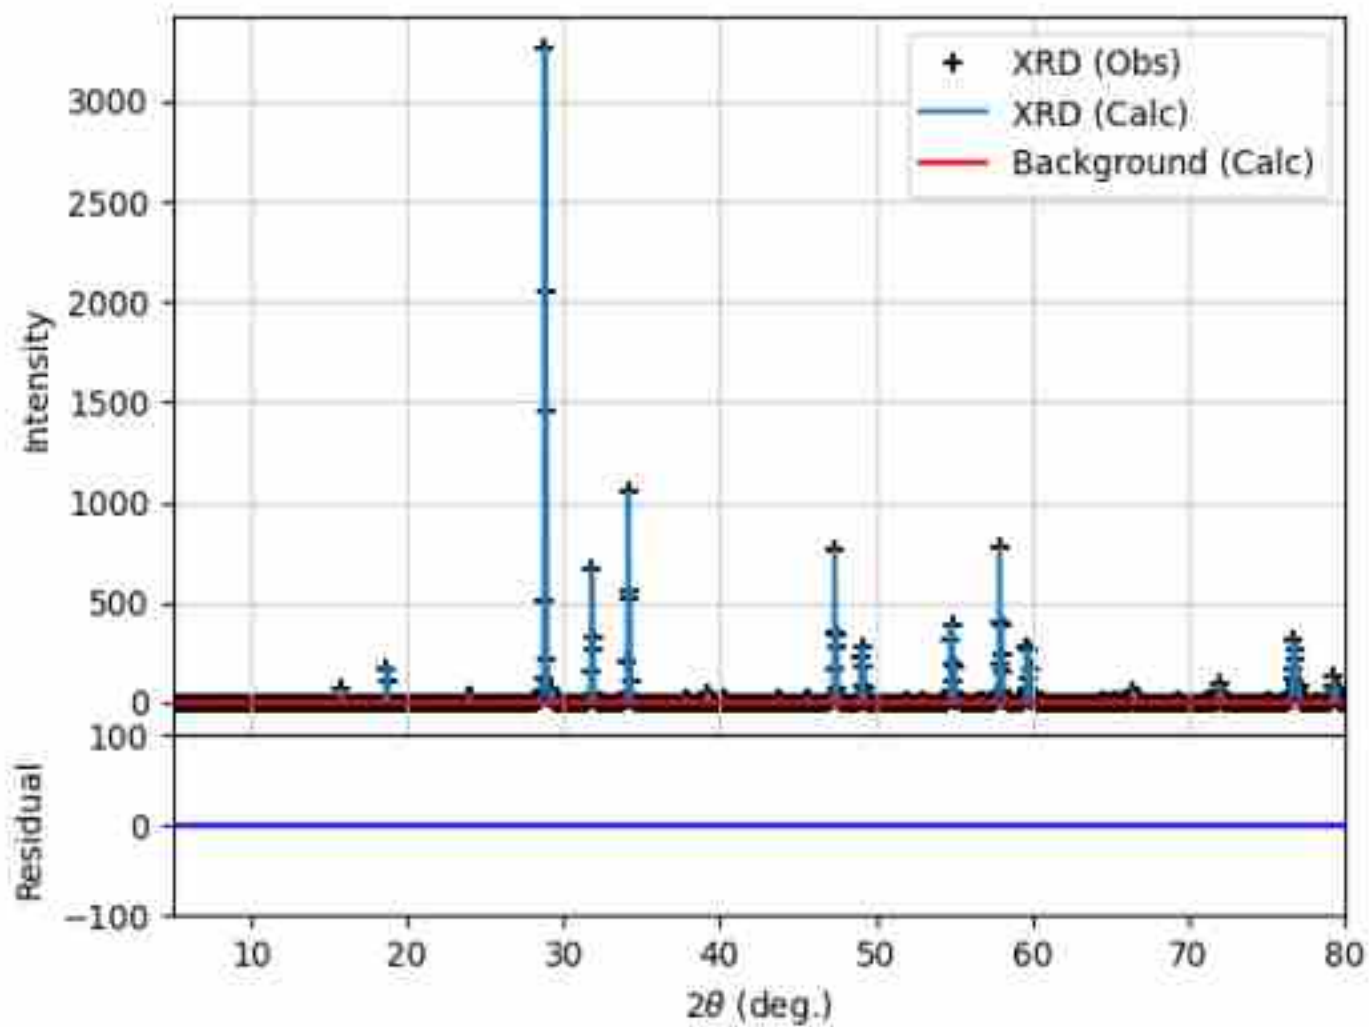

| RMSE before RR | Rwp     | RMSE after RR |
|----------------|---------|---------------|
| 0.003          | 0.00421 | 0.00038       |

# Ag<sub>2</sub>Bi<sub>2</sub>S<sub>2</sub>Cl<sub>4</sub>

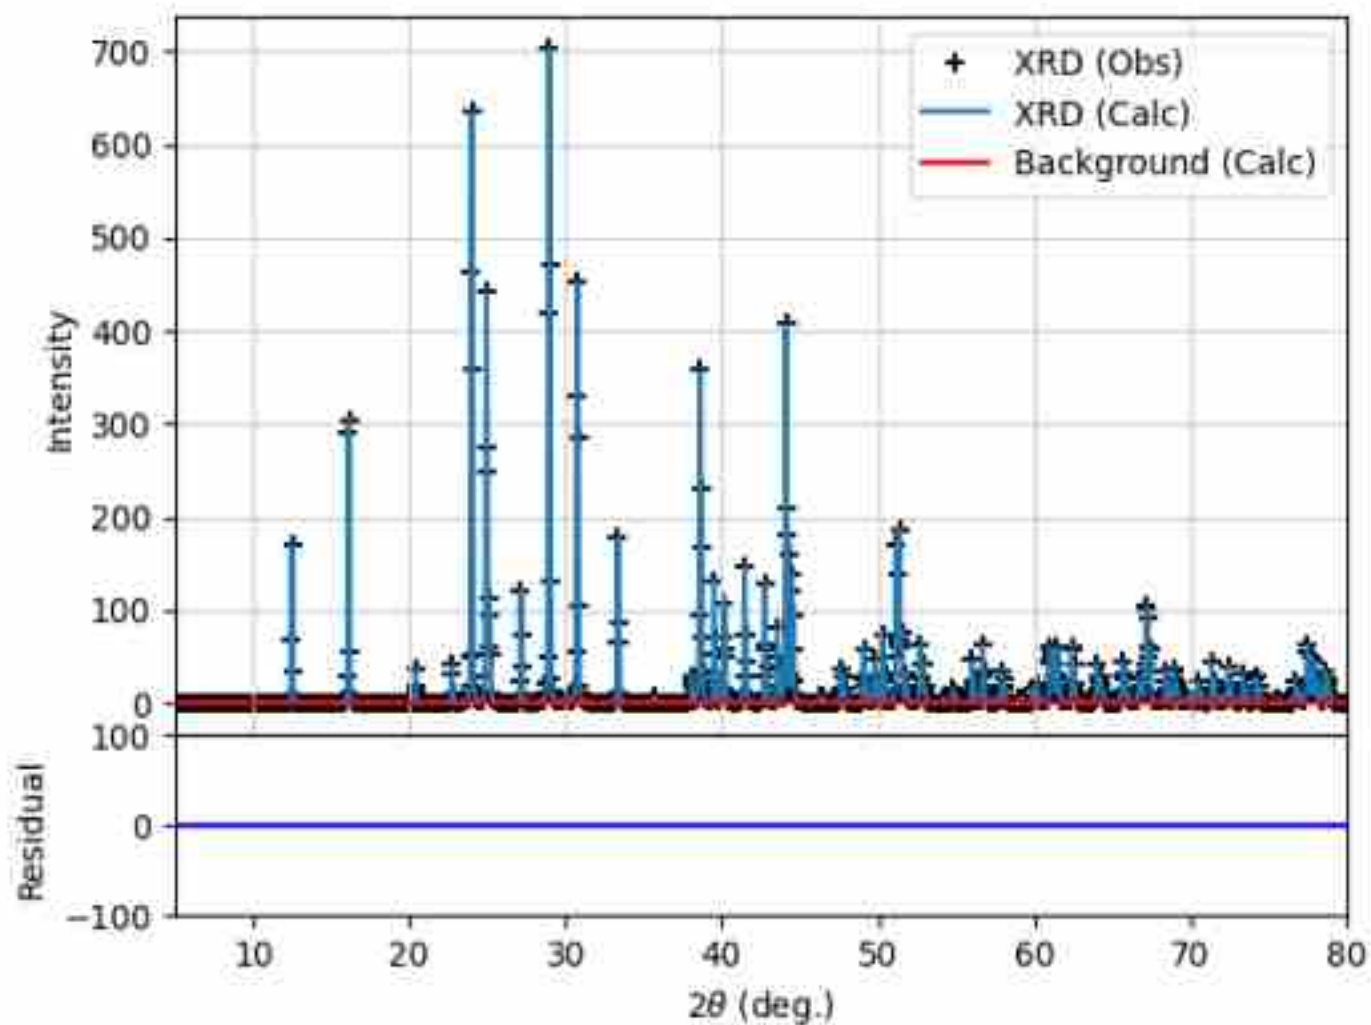

| RMSE before RR | Rwp     | RMSE after RR |
|----------------|---------|---------------|
| 0.03           | 0.00374 | 0.0006        |

# Ag<sub>2</sub>Se1

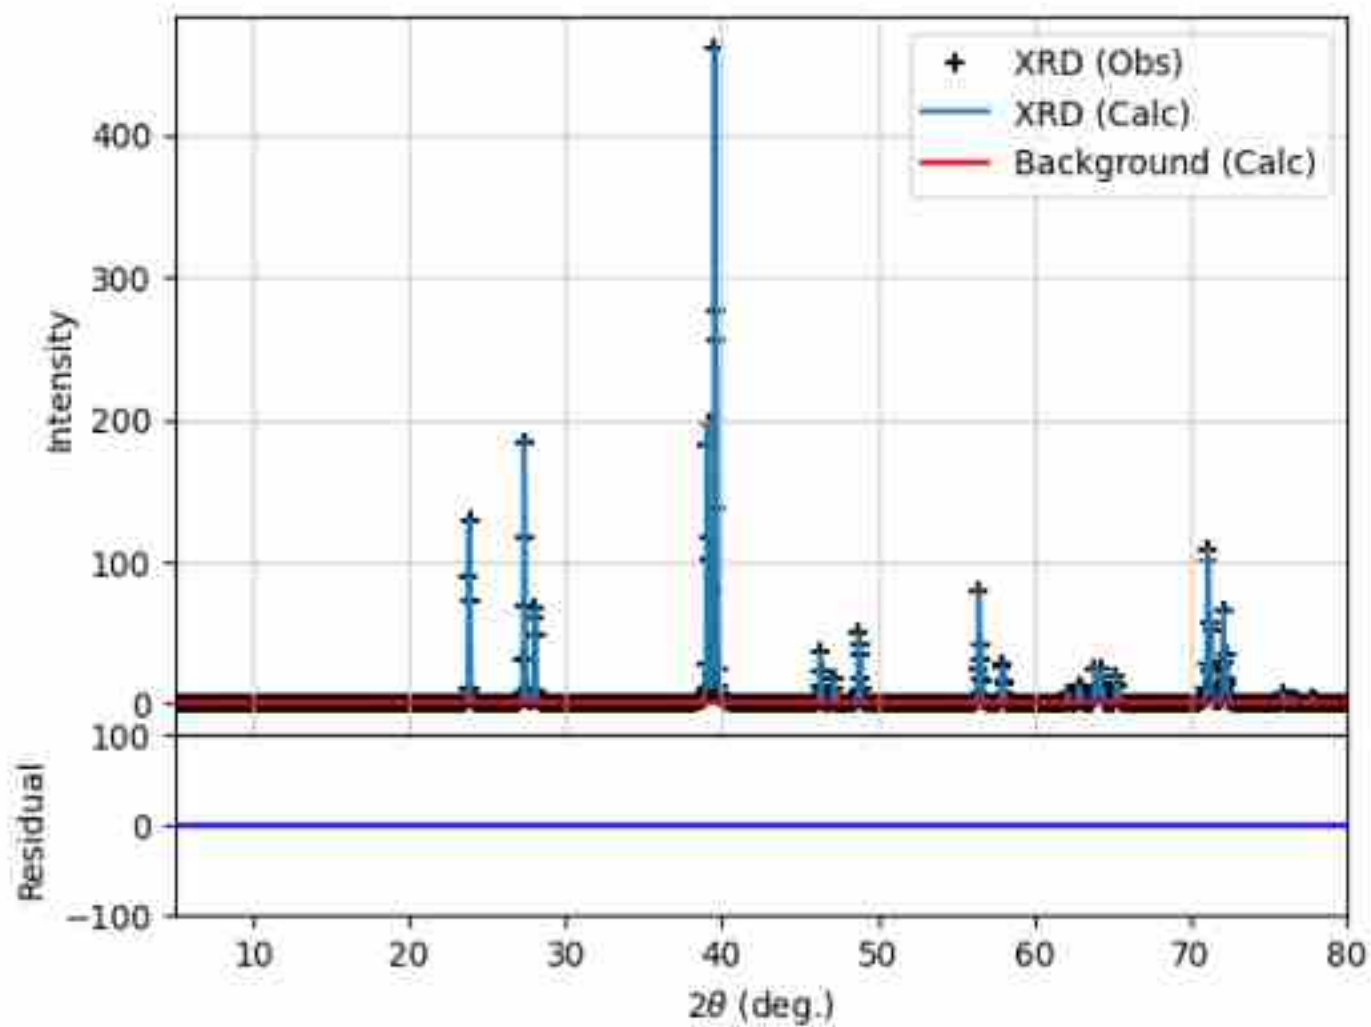

| RMSE before RR | Rwp     | RMSE after RR |
|----------------|---------|---------------|
| 0.003          | 0.00378 | 0.00074       |

# Al1Ag1

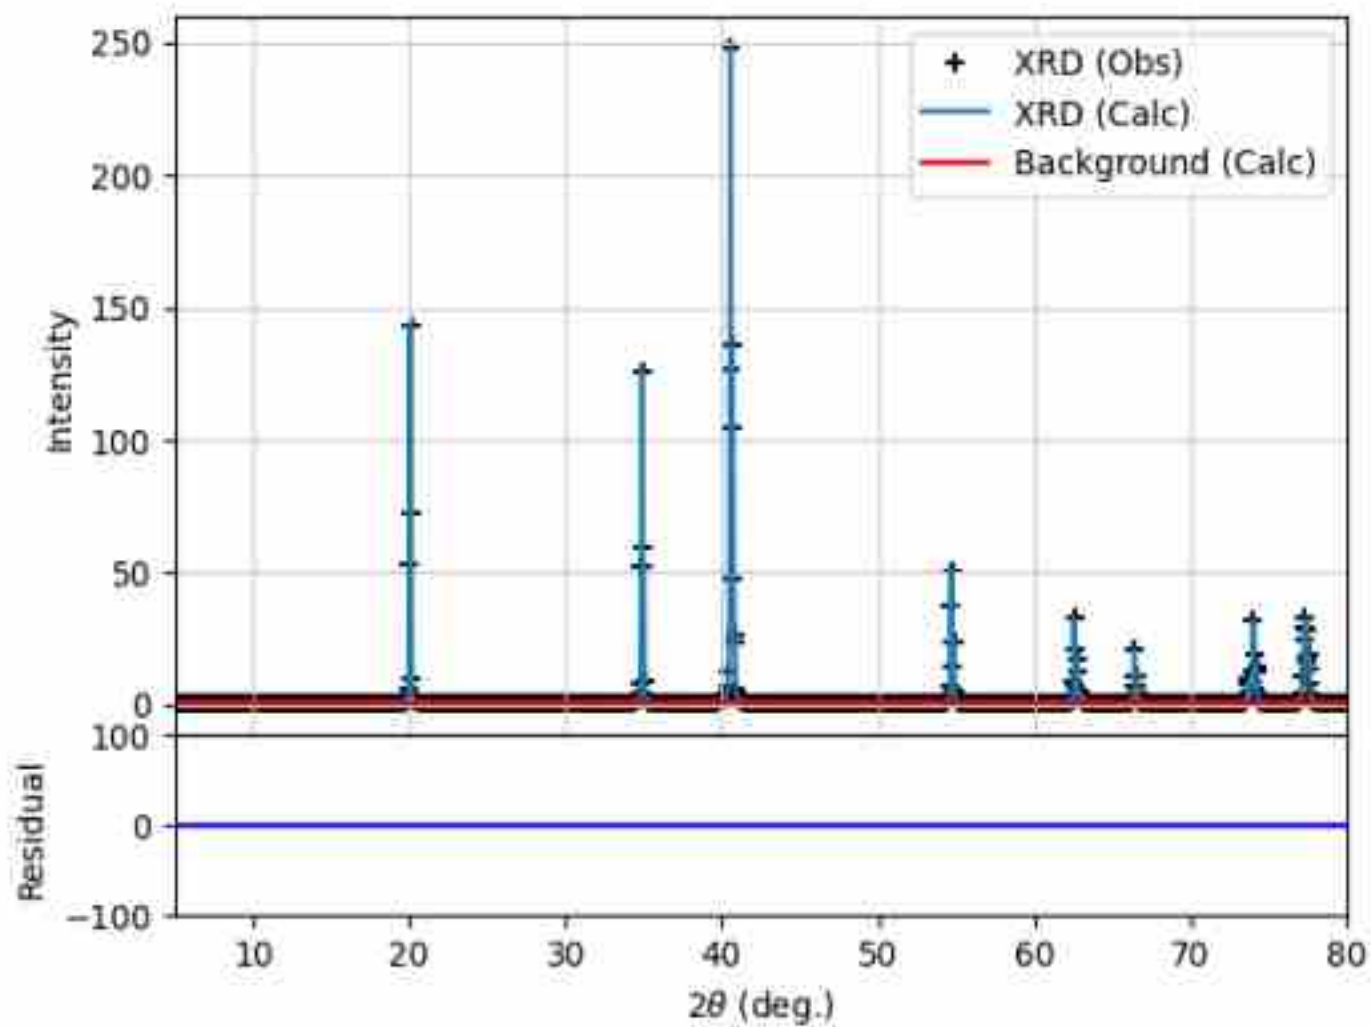

| RMSE before RR | Rwp     | RMSE after RR |
|----------------|---------|---------------|
| 0.003          | 0.01705 | 0.00068       |

# Al1Ni1Ge1

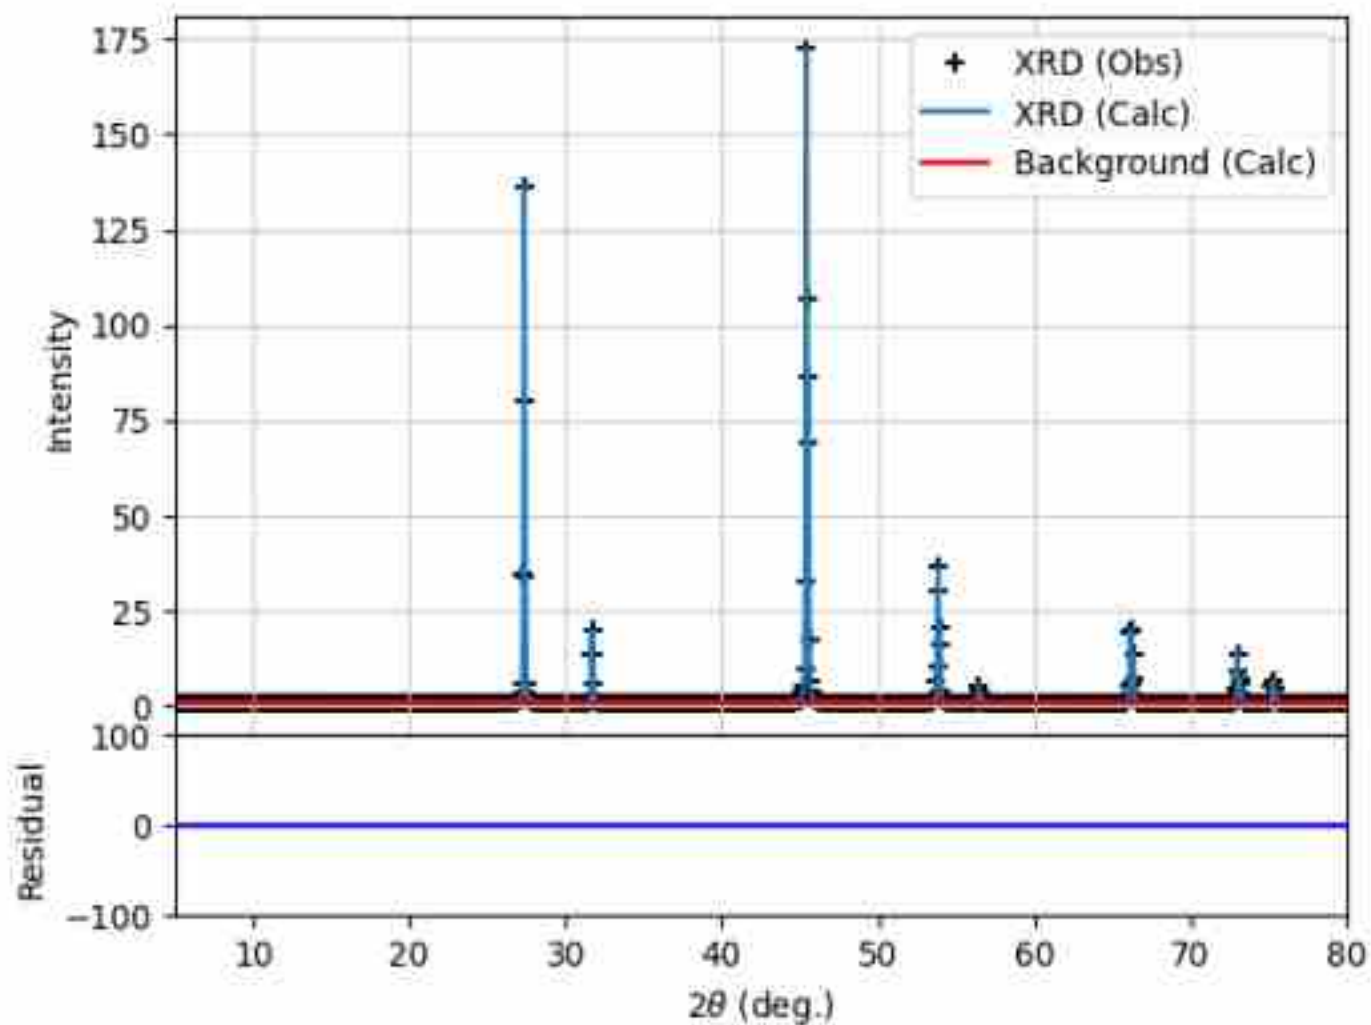

| RMSE before RR | Rwp     | RMSE after RR |
|----------------|---------|---------------|
| 0.003          | 0.00233 | 0.00029       |

# As1Rh2

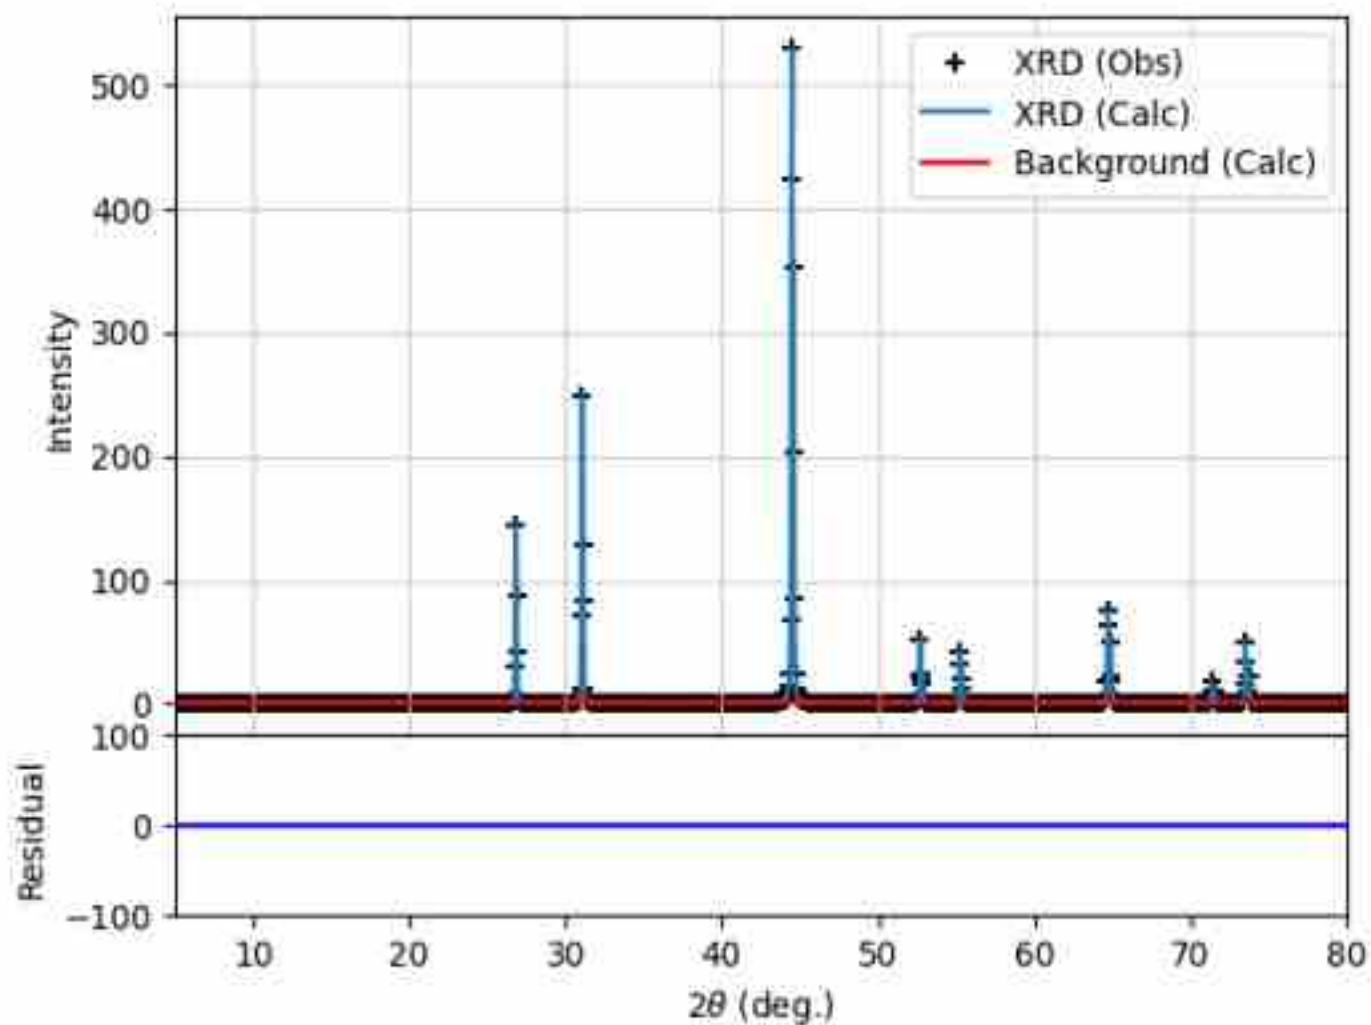

| RMSE before RR | Rwp     | RMSE after RR |
|----------------|---------|---------------|
| 0.003          | 0.00579 | 0.001         |

# Ba1Pb3

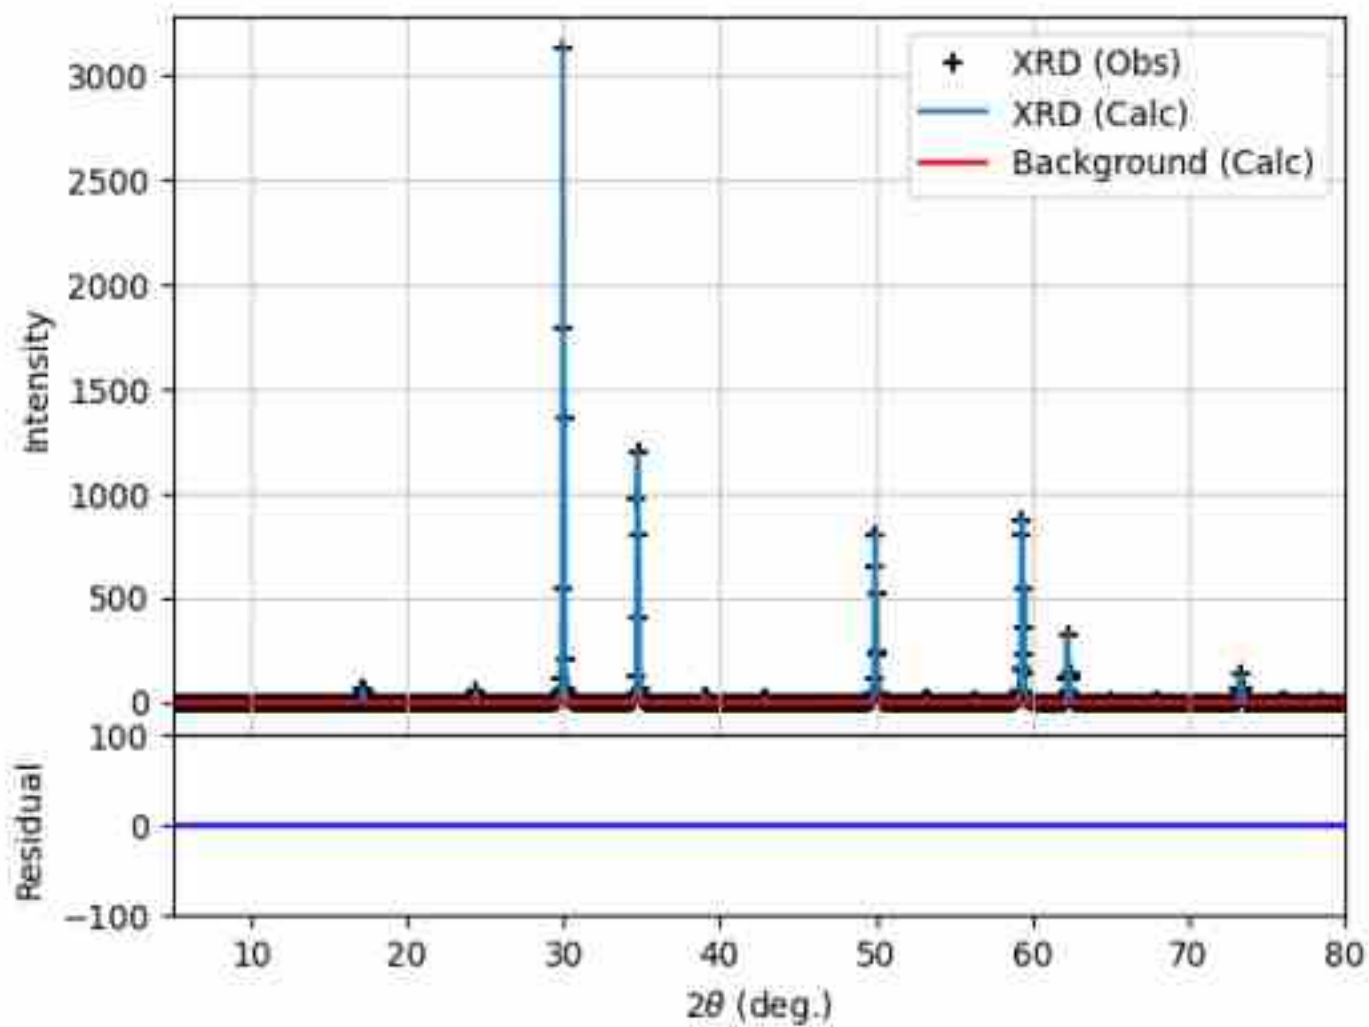

| RMSE before RR | Rwp     | RMSE after RR |
|----------------|---------|---------------|
| 0.003          | 0.00363 | 0.0002        |

# Ba<sub>2</sub>Ag<sub>1</sub>Bi<sub>1</sub>

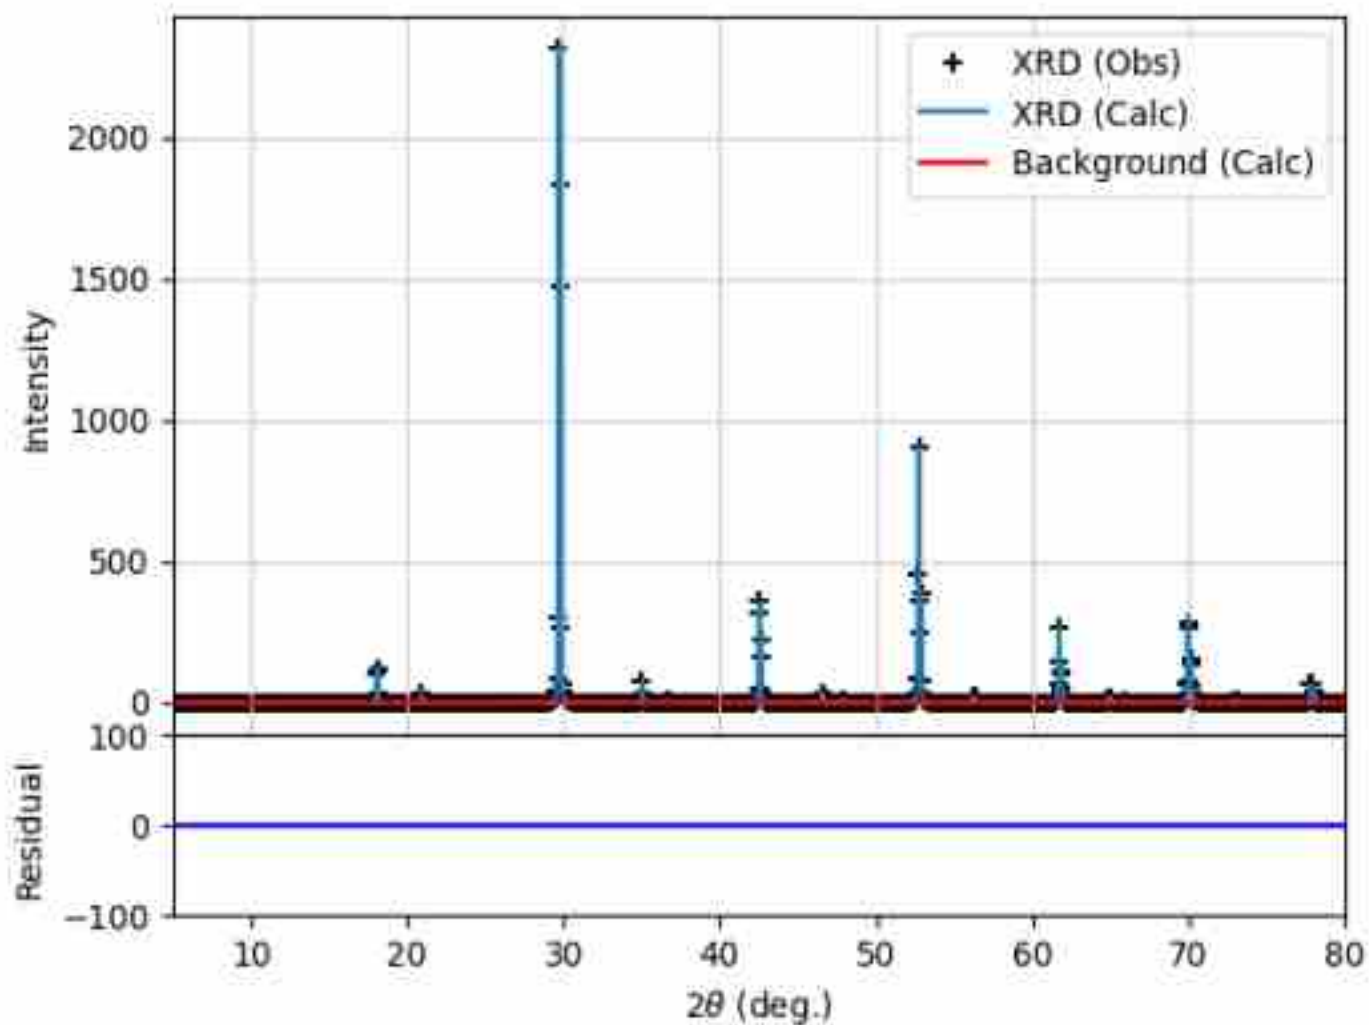

| RMSE before RR | Rwp     | RMSE after RR |
|----------------|---------|---------------|
| 0.003          | 0.00504 | 0.00056       |



# Ba<sub>2</sub>Ag<sub>2</sub>Sb<sub>2</sub>

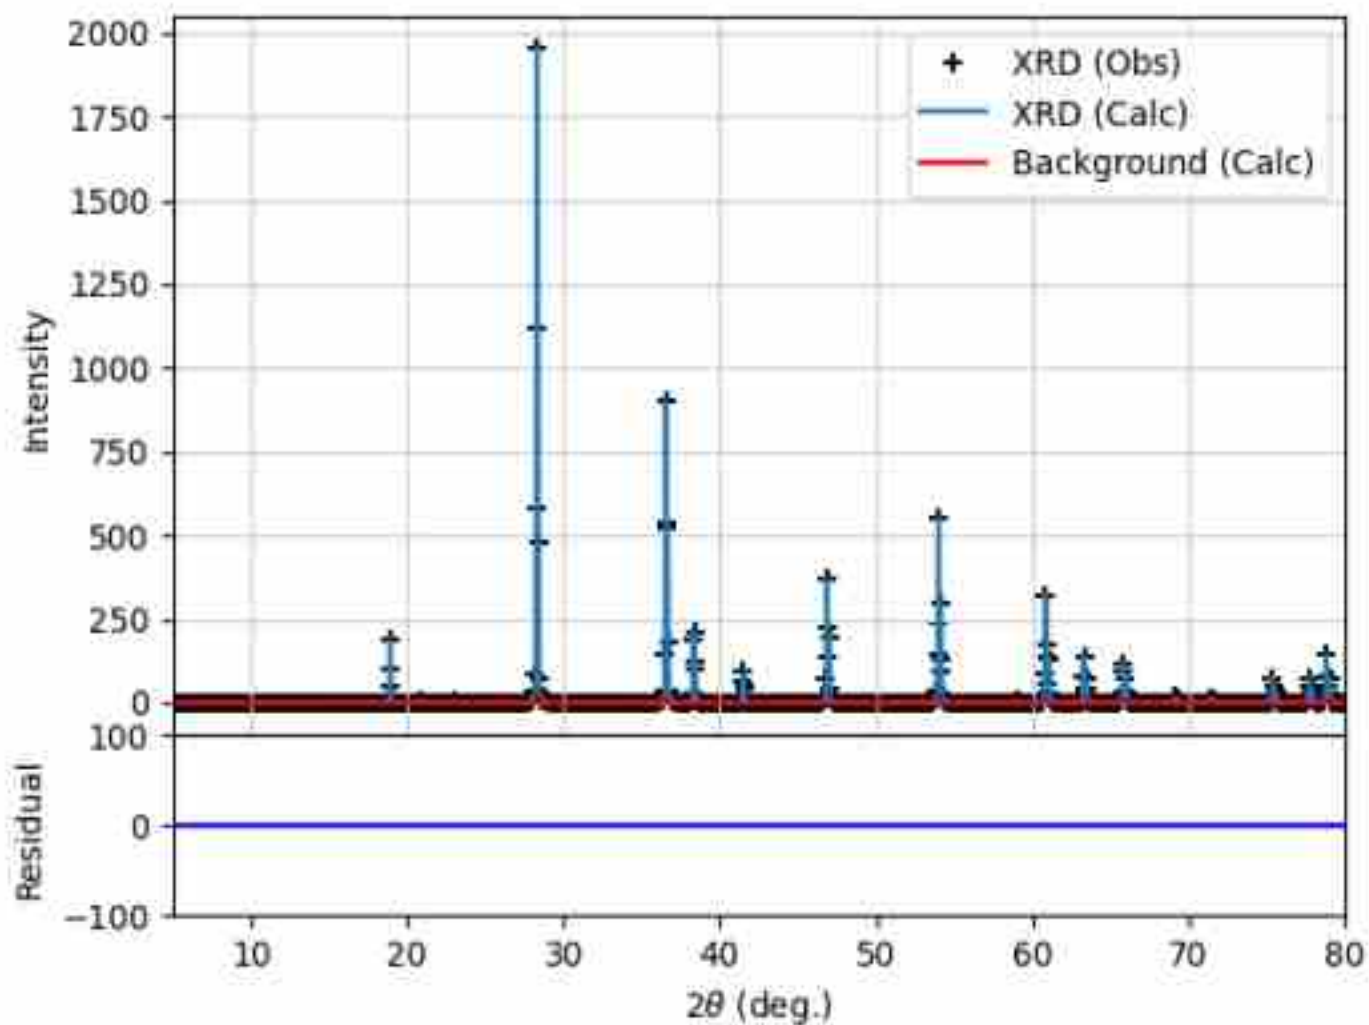

| RMSE before RR | Rwp     | RMSE after RR |
|----------------|---------|---------------|
| 0.003          | 0.00431 | 0.00024       |

# Ba<sub>2</sub>Ni<sub>2</sub>O<sub>6</sub>

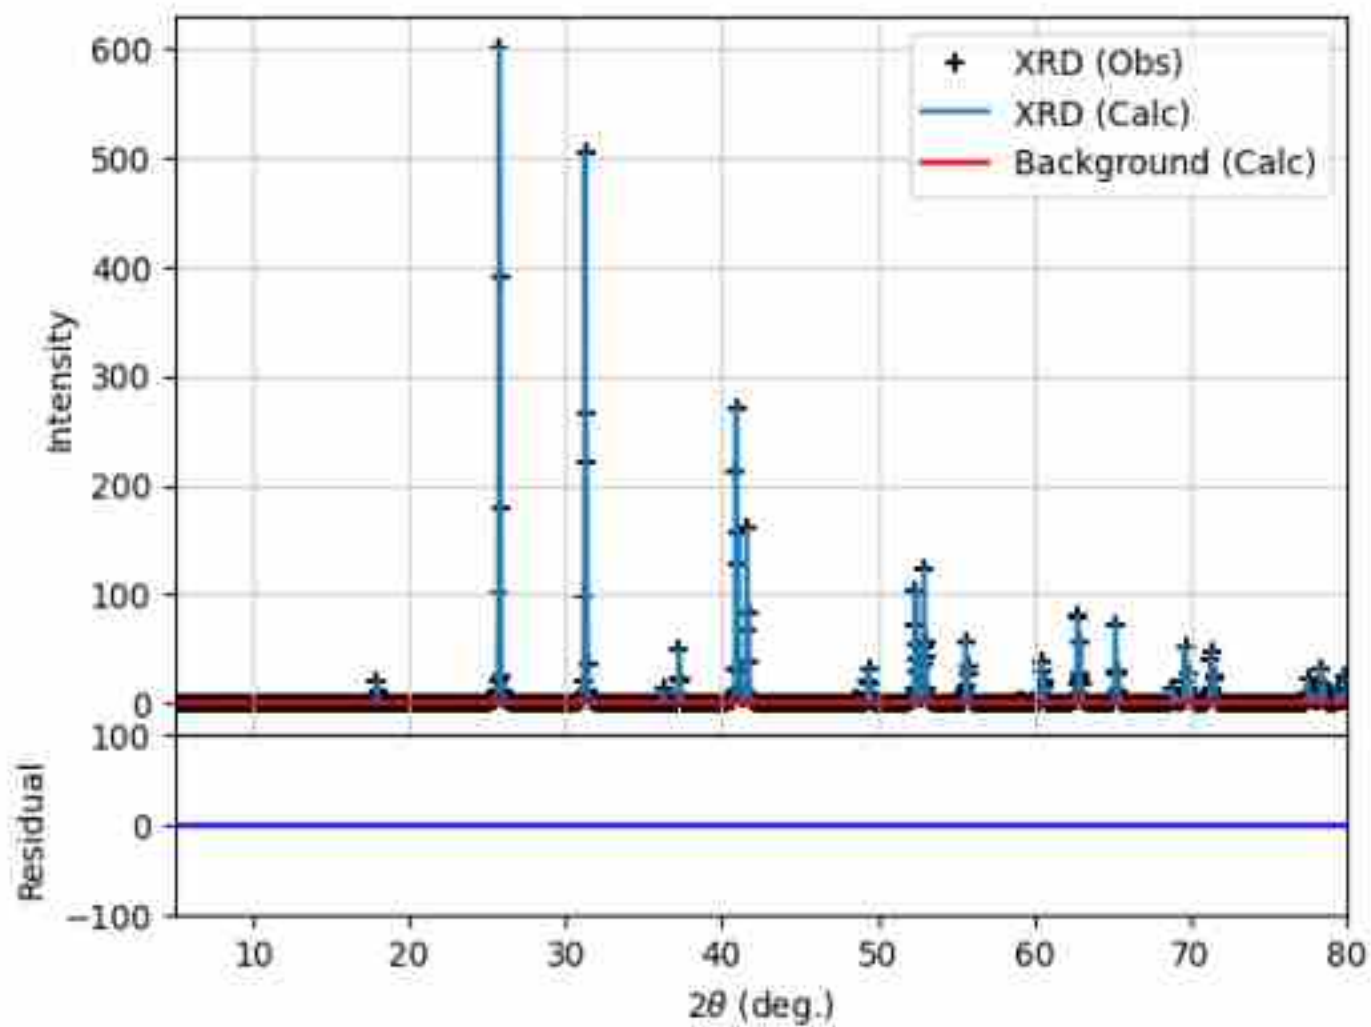

| RMSE before RR | Rwp     | RMSE after RR |
|----------------|---------|---------------|
| 0.03           | 0.00995 | 0.00377       |

# Ba2Rh4

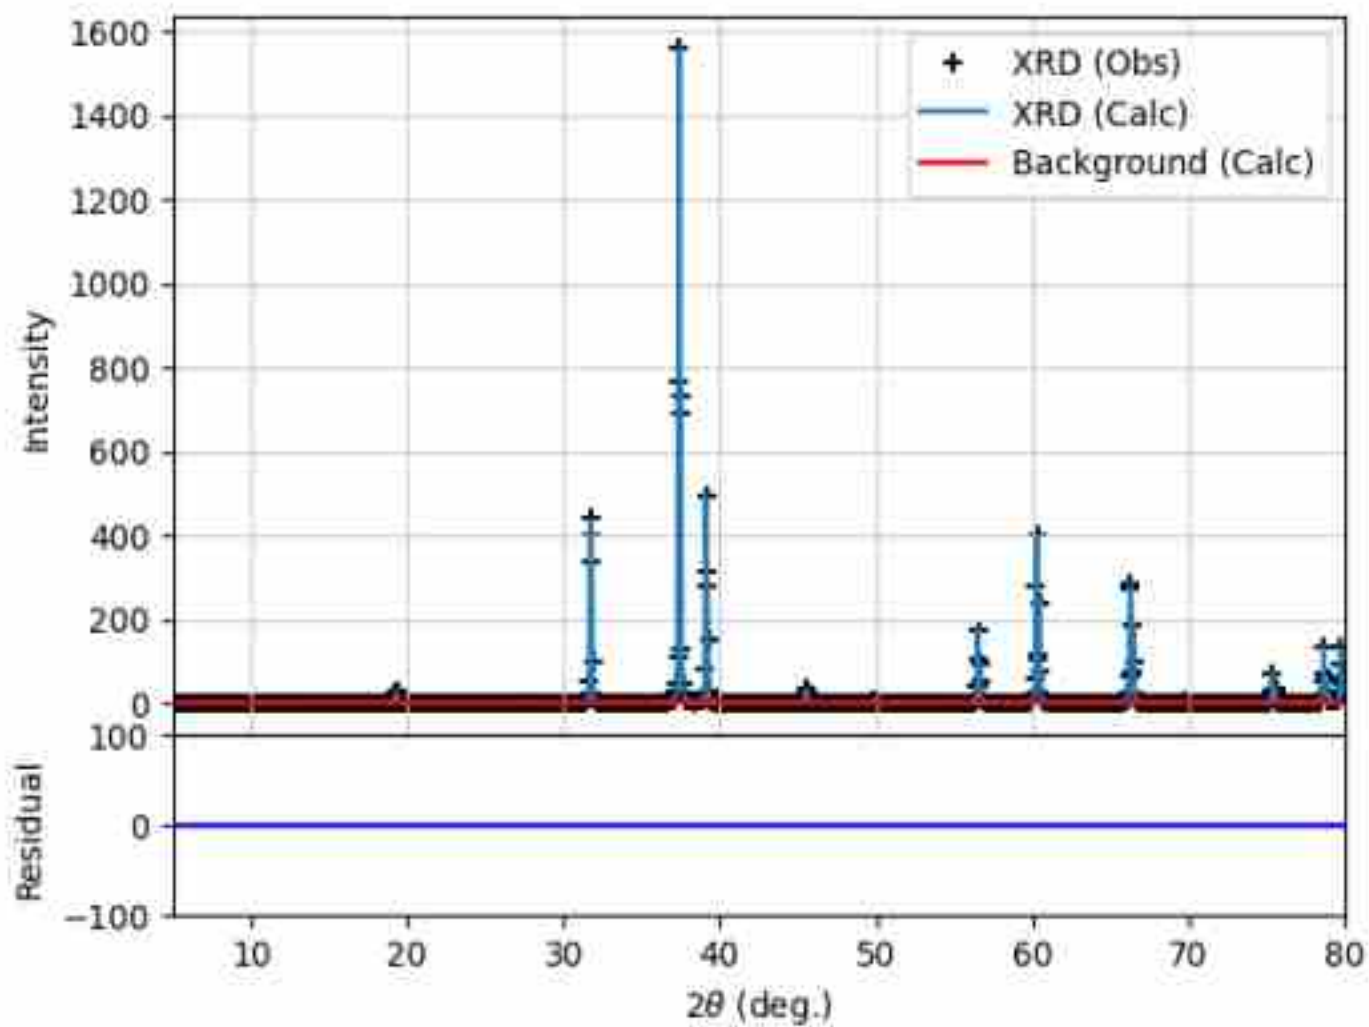

| RMSE before RR | Rwp     | RMSE after RR |
|----------------|---------|---------------|
| 0.03           | 0.02132 | 0.0025        |

# Ba2Sr2I8

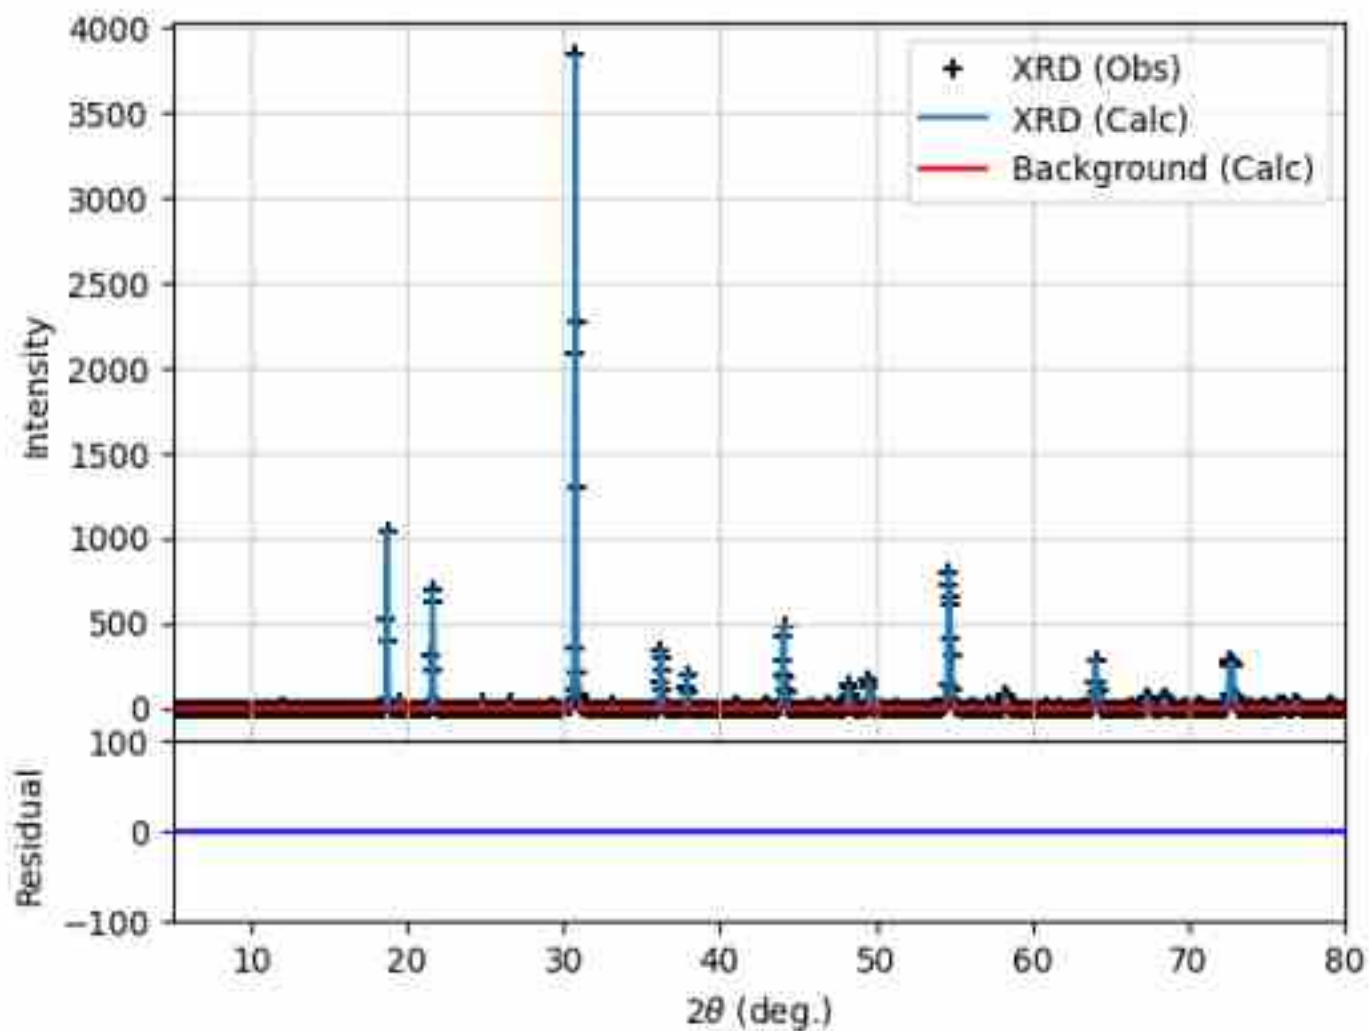

| RMSE before RR | Rwp     | RMSE after RR |
|----------------|---------|---------------|
| 0.03           | 0.00259 | 0.00024       |

# Ba<sub>2</sub>Tl<sub>1</sub>Cd<sub>1</sub>

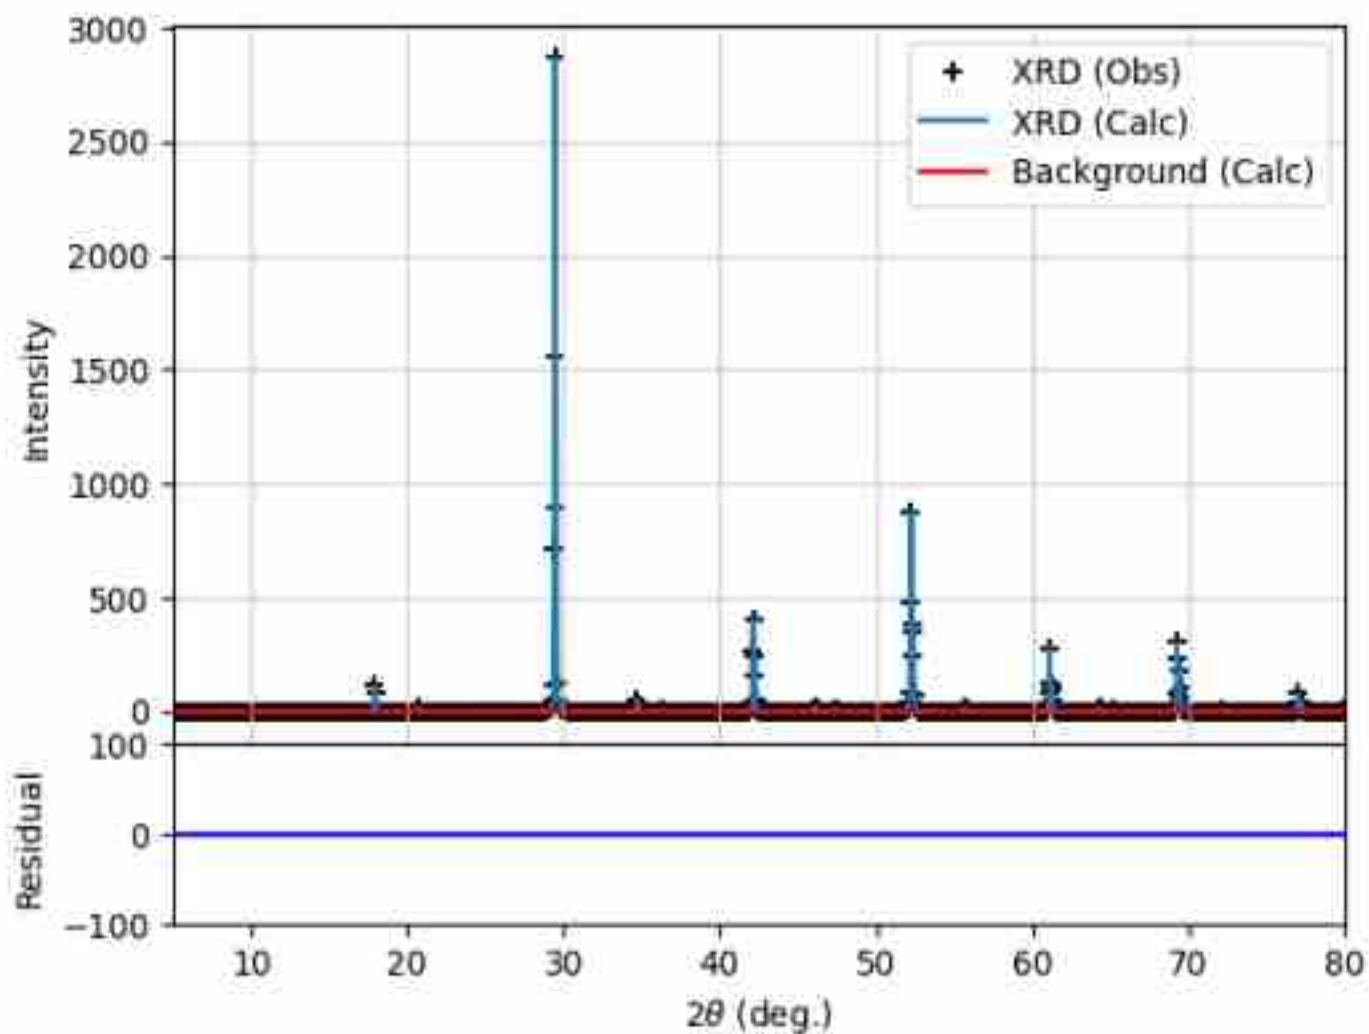

| RMSE before RR | Rwp    | RMSE after RR |
|----------------|--------|---------------|
| 0.003          | 0.0764 | 0.0014        |

# Ba<sub>2</sub>Y<sub>2</sub>F<sub>10</sub>

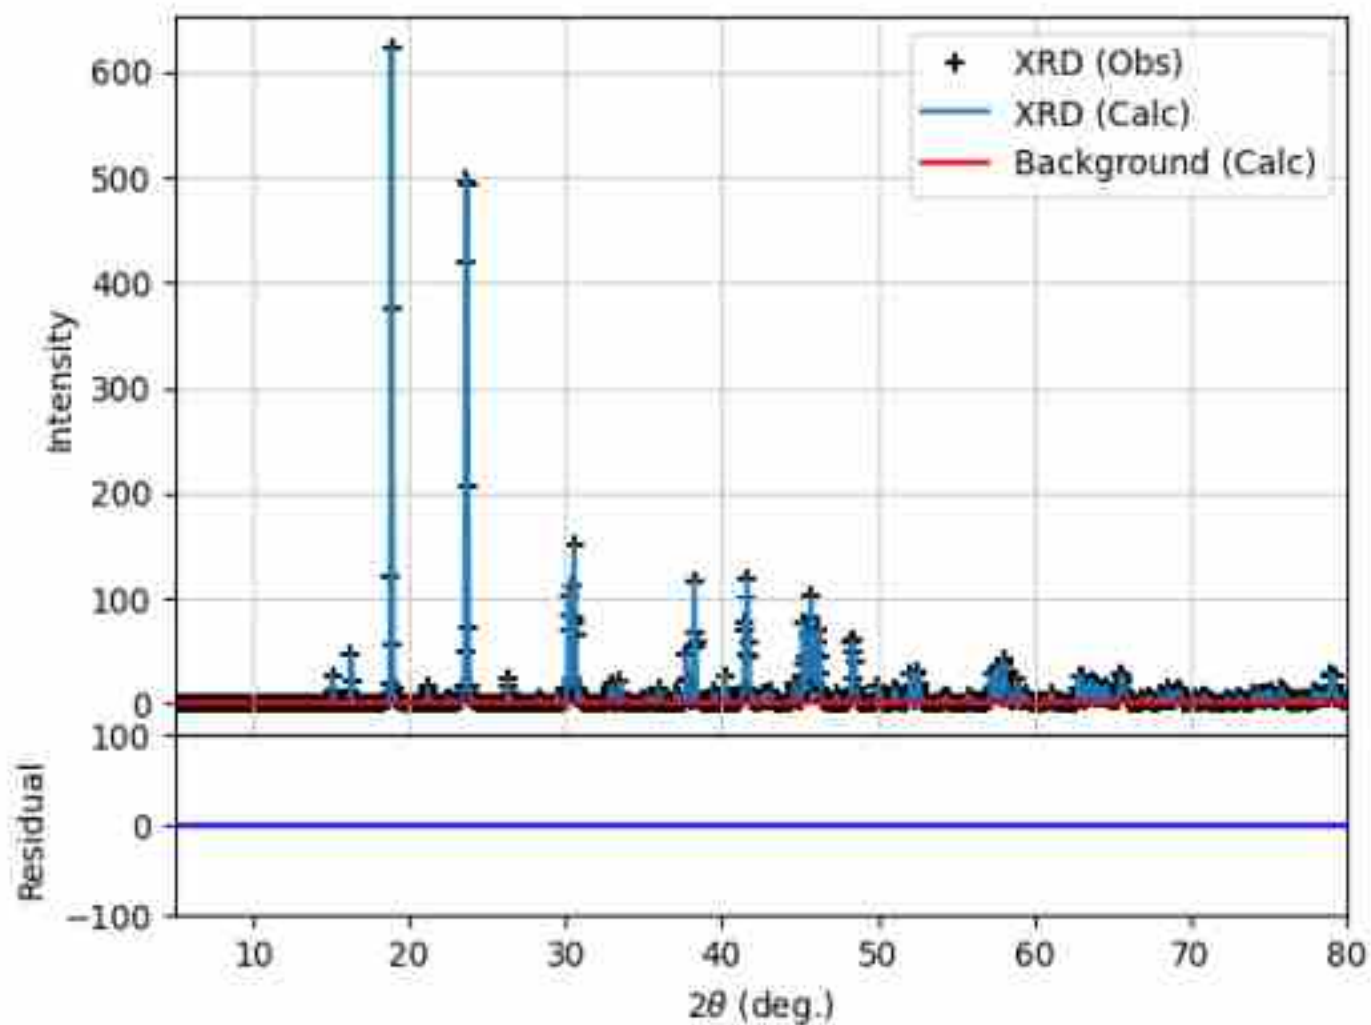

| RMSE before RR | Rwp   | RMSE after RR |
|----------------|-------|---------------|
| 0.03           | 0.003 | 0.00061       |

# Ba<sub>3</sub>Fe<sub>2</sub>Te<sub>1</sub>O<sub>5</sub>

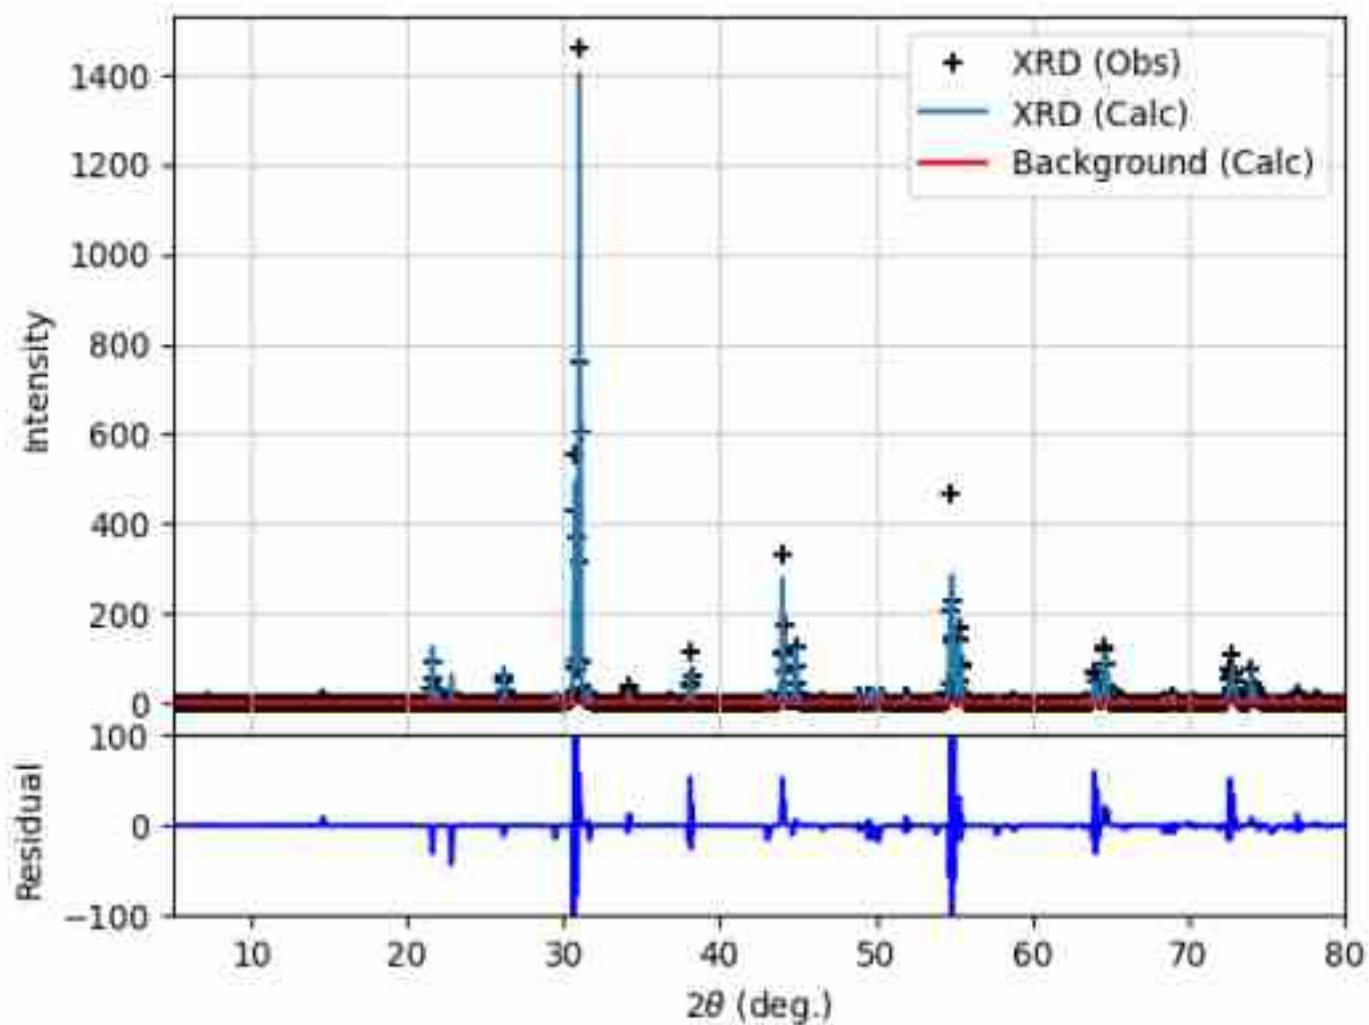

| RMSE before RR | Rwp      | RMSE after RR |
|----------------|----------|---------------|
| 0.03           | 48.15422 | None          |

# Ba<sub>4</sub>Ca<sub>2</sub>I<sub>12</sub>

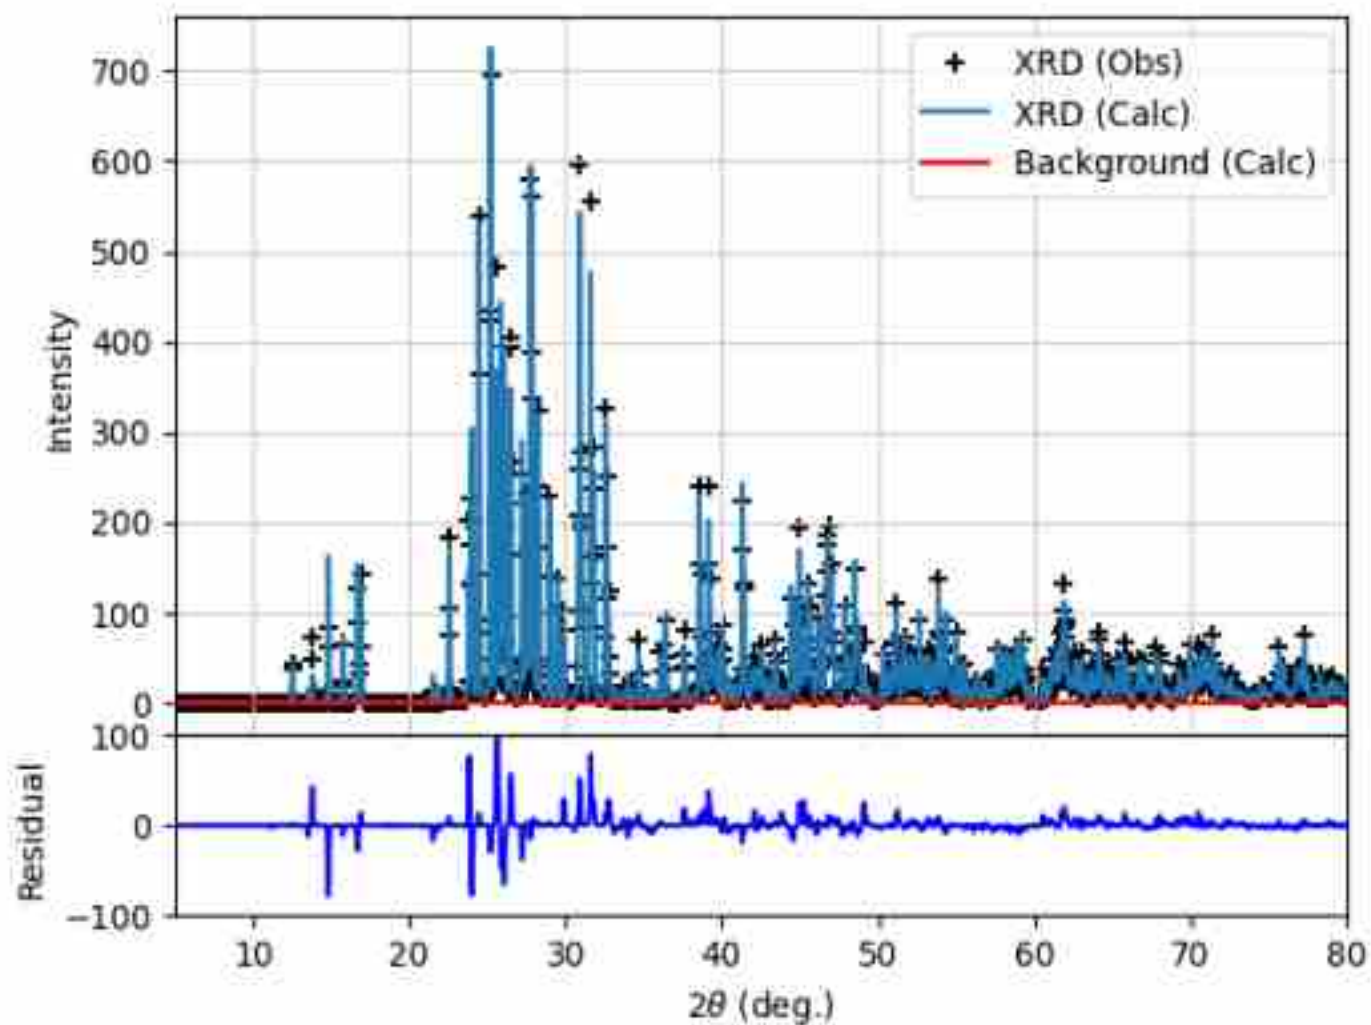

| RMSE before RR | Rwp      | RMSE after RR |
|----------------|----------|---------------|
| 0.03           | 16.74659 | 0.17069       |



# Be1Ni3

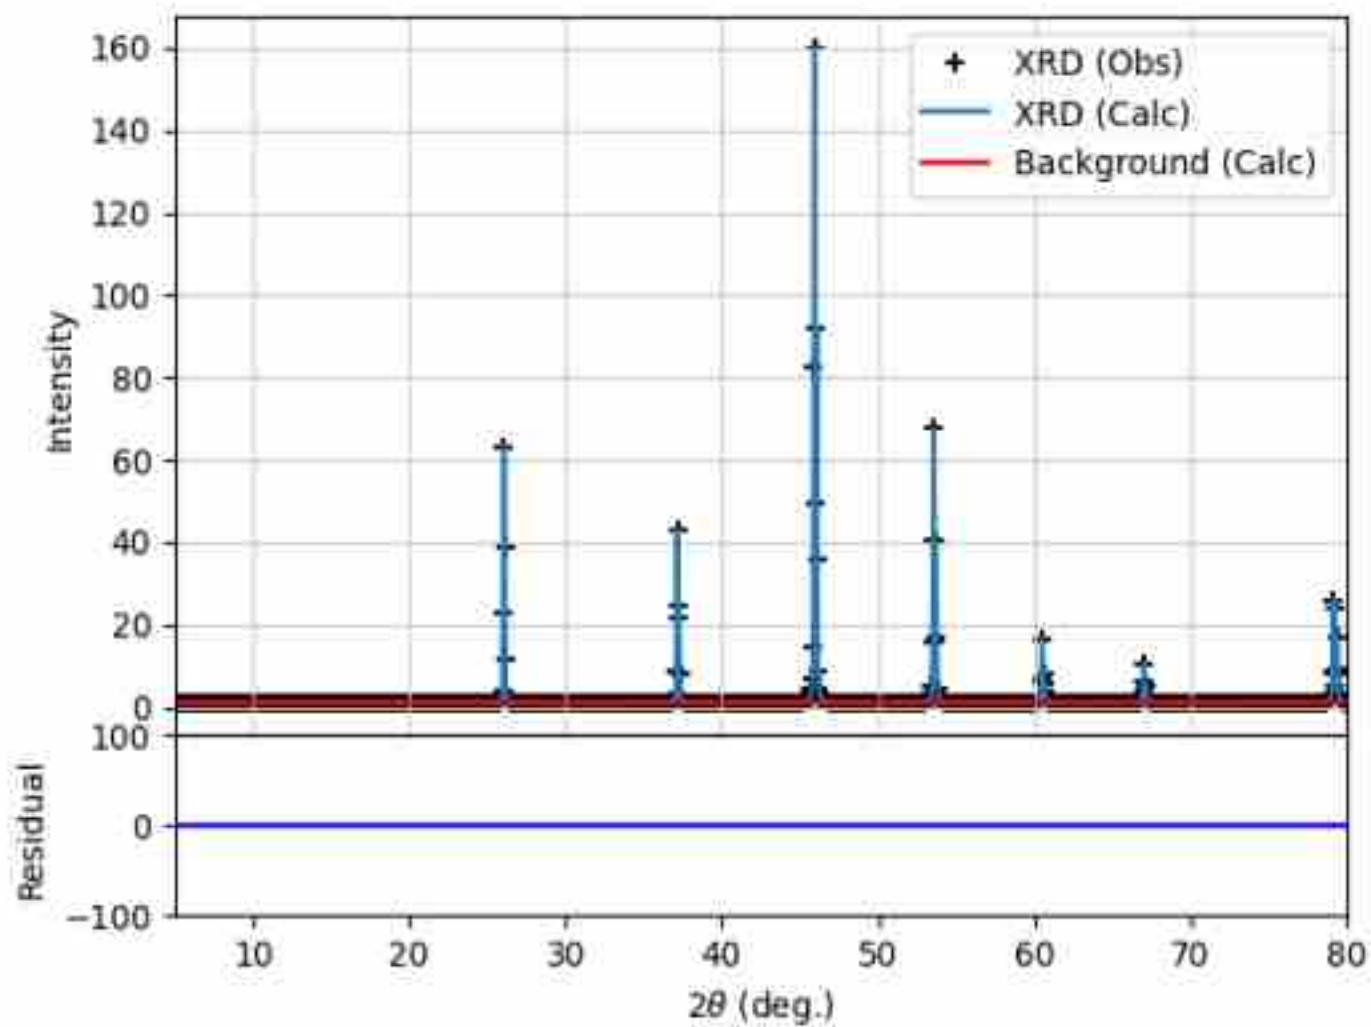

| RMSE before RR | Rwp     | RMSE after RR |
|----------------|---------|---------------|
| 0.003          | 0.01705 | 0.00372       |

# Ca<sub>2</sub>Ag<sub>1</sub>Sn<sub>1</sub>

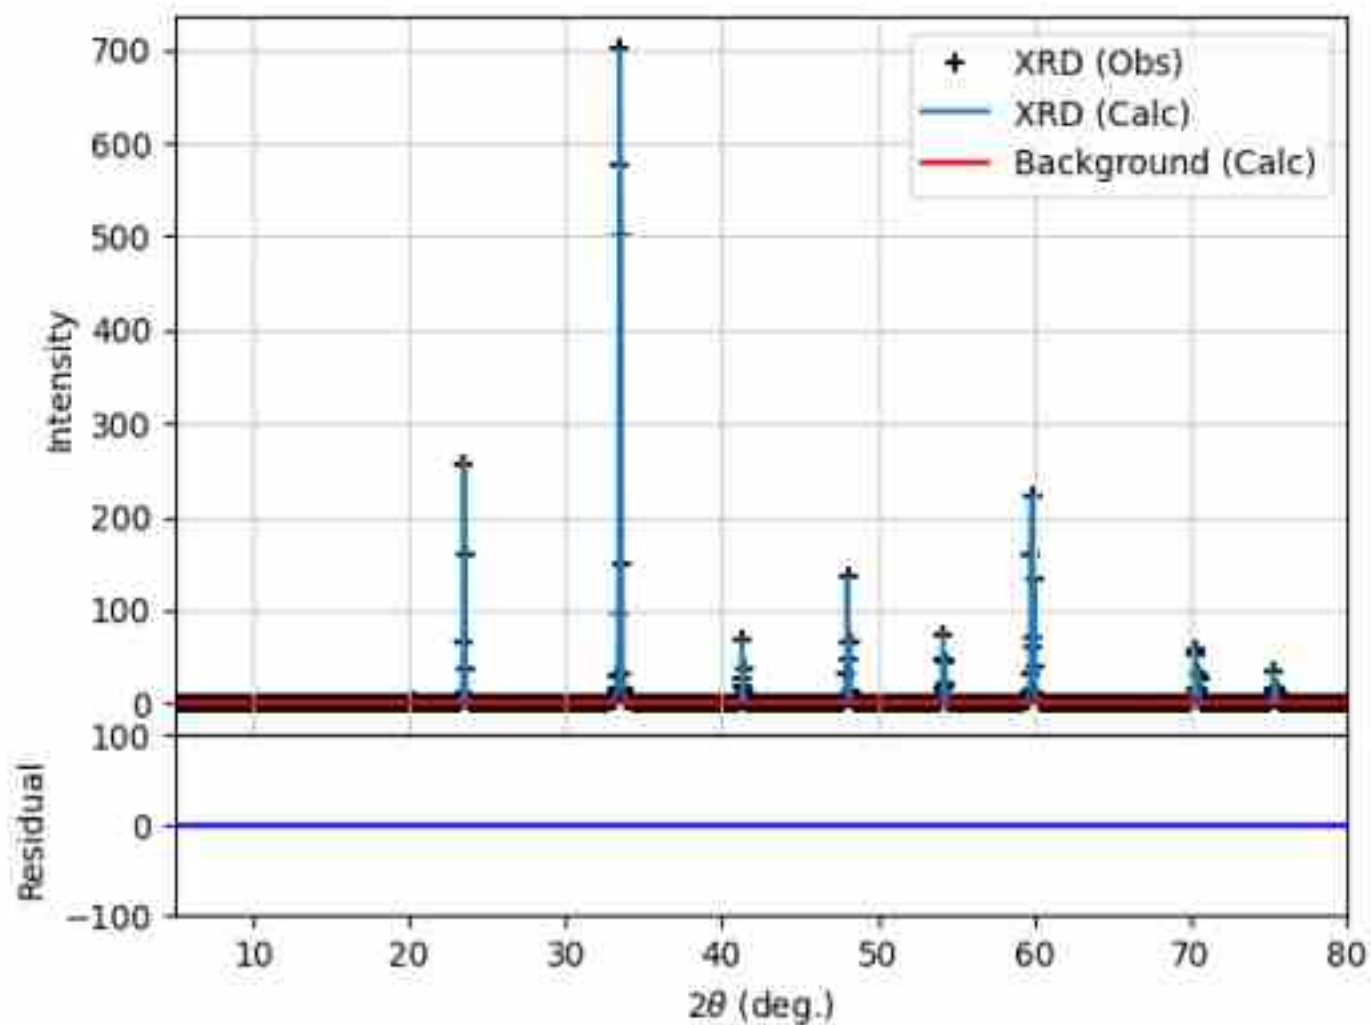

| RMSE before RR | Rwp     | RMSE after RR |
|----------------|---------|---------------|
| 0.003          | 0.05269 | 0.0028        |

# Ca2Pb1

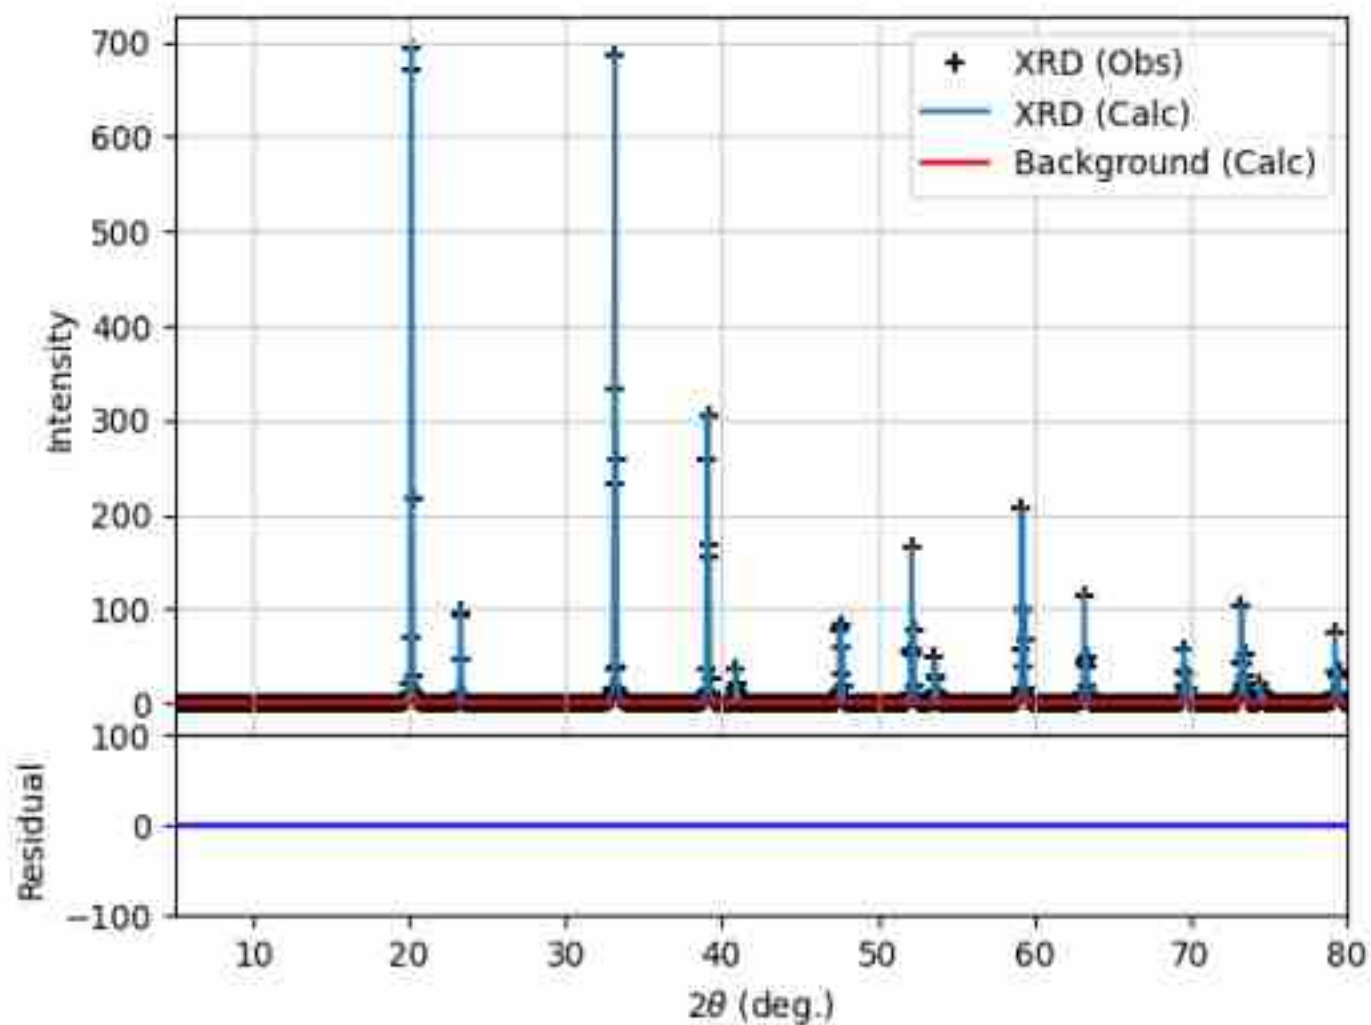

| RMSE before RR | Rwp     | RMSE after RR |
|----------------|---------|---------------|
| 0.003          | 0.05368 | 0.00321       |

# Ca<sub>2</sub>ZnRh

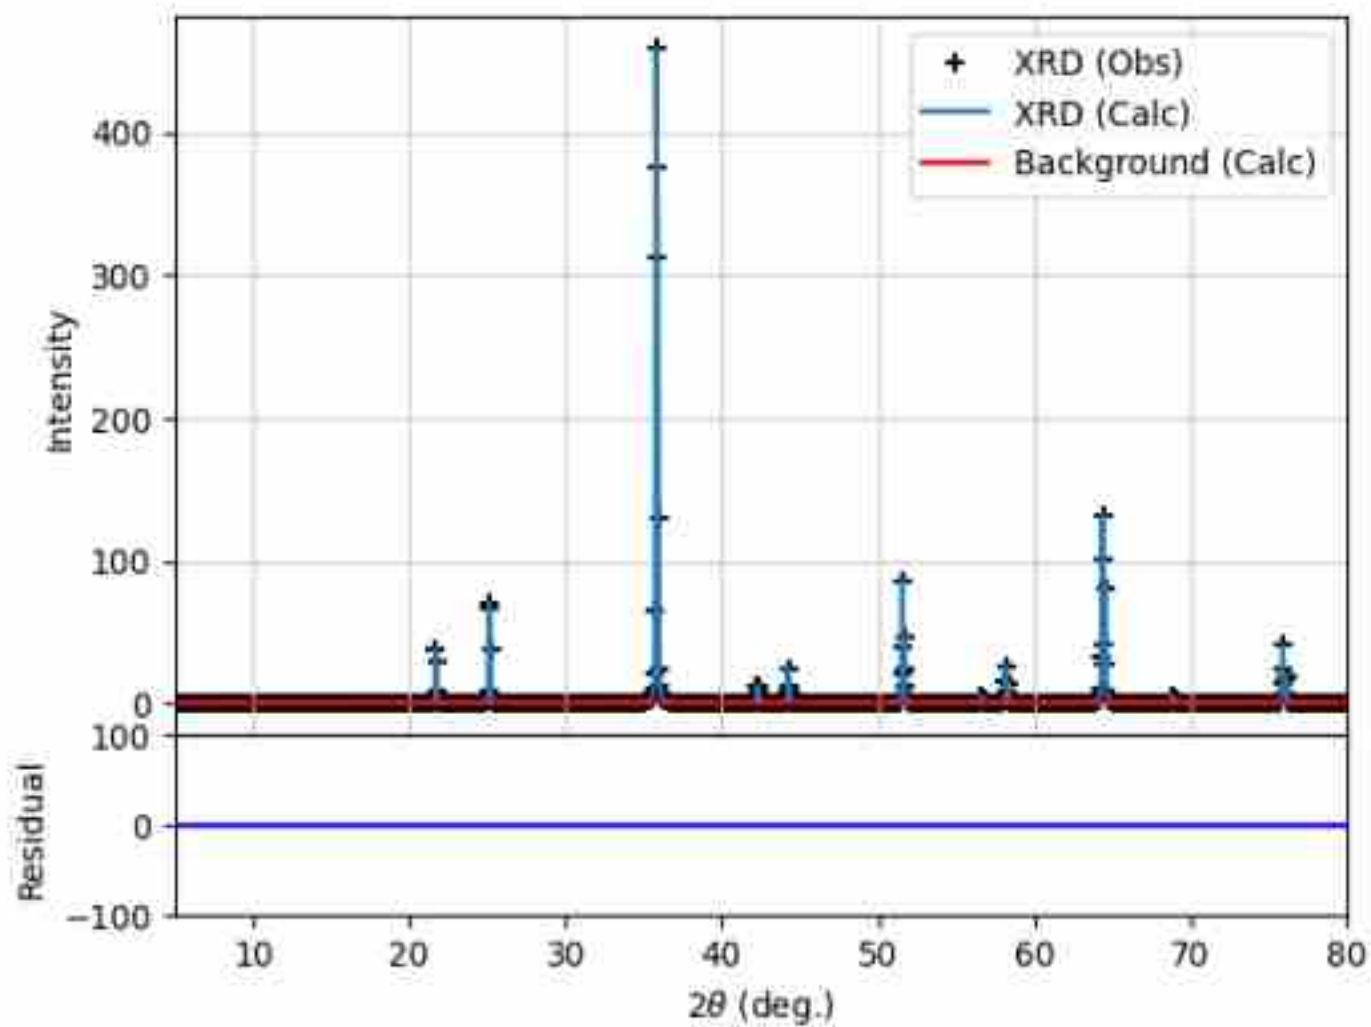

| RMSE before RR | Rwp     | RMSE after RR |
|----------------|---------|---------------|
| 0.003          | 0.00247 | 0.00024       |

# Cd<sub>2</sub>Ag<sub>4</sub>O<sub>8</sub>

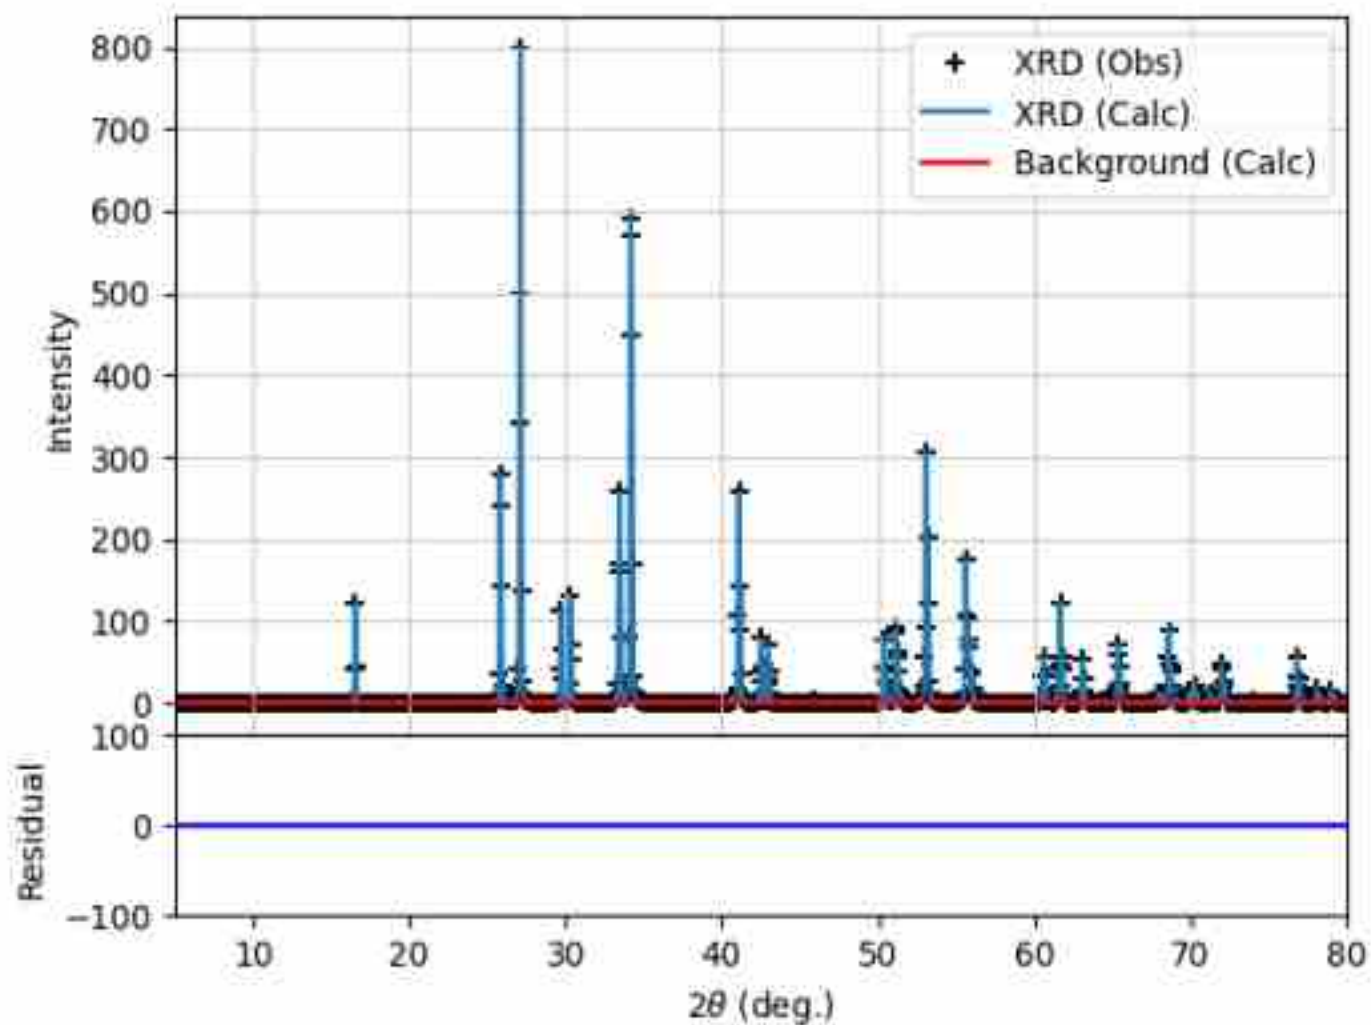

| RMSE before RR | Rwp     | RMSE after RR |
|----------------|---------|---------------|
| 0.03           | 0.00295 | 0.00162       |

# Cd<sub>3</sub>In<sub>2</sub>Te<sub>6</sub>

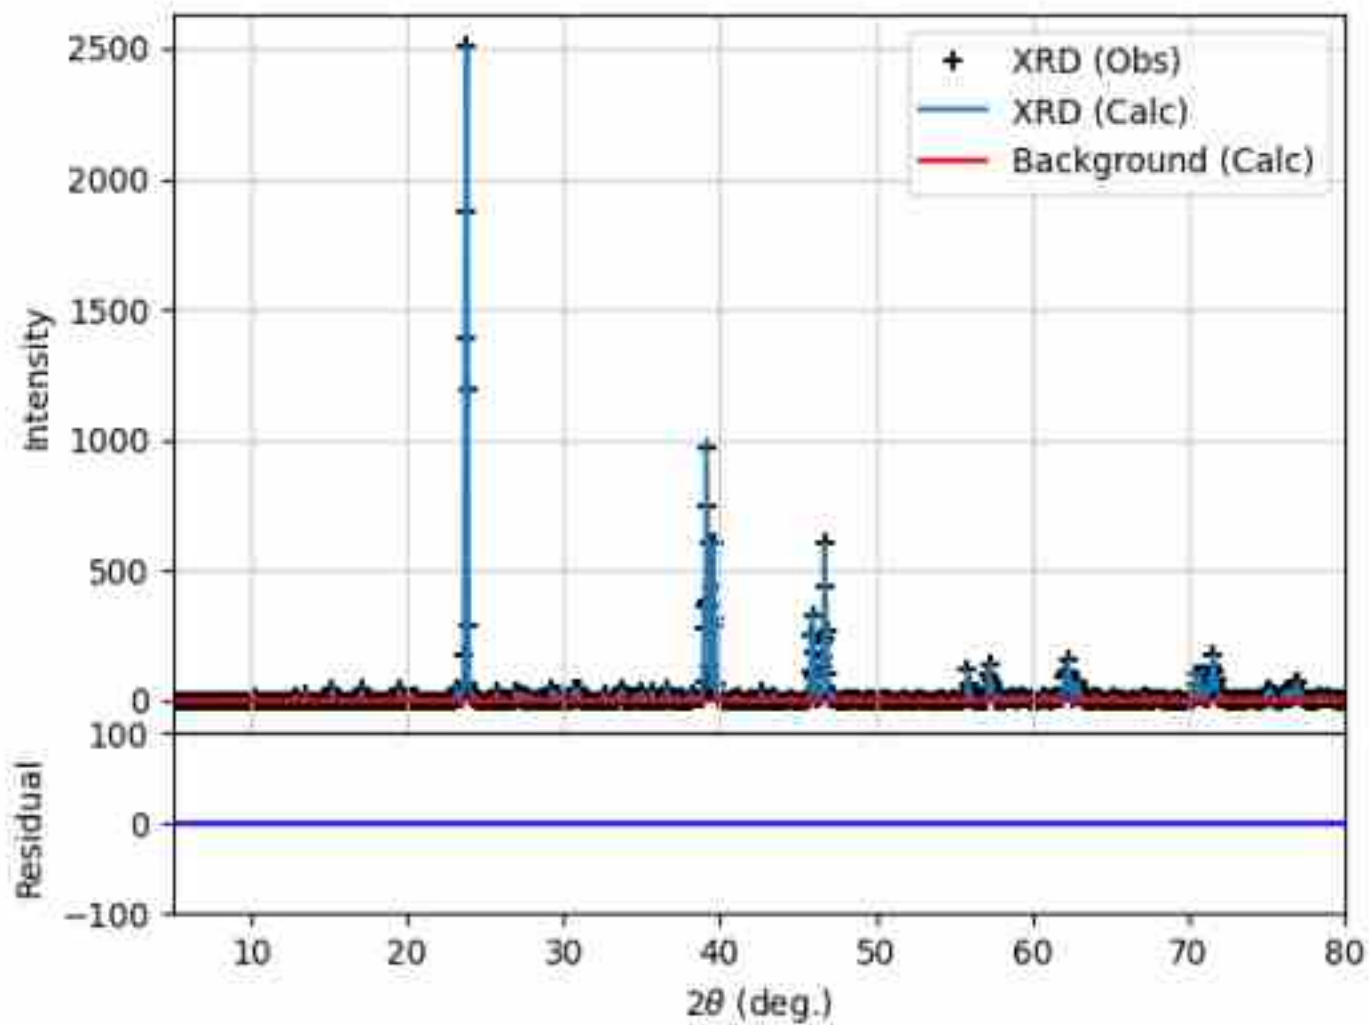

| RMSE before RR | Rwp     | RMSE after RR |
|----------------|---------|---------------|
| 0.03           | 0.00396 | 0.00019       |

# Ce1Bi1

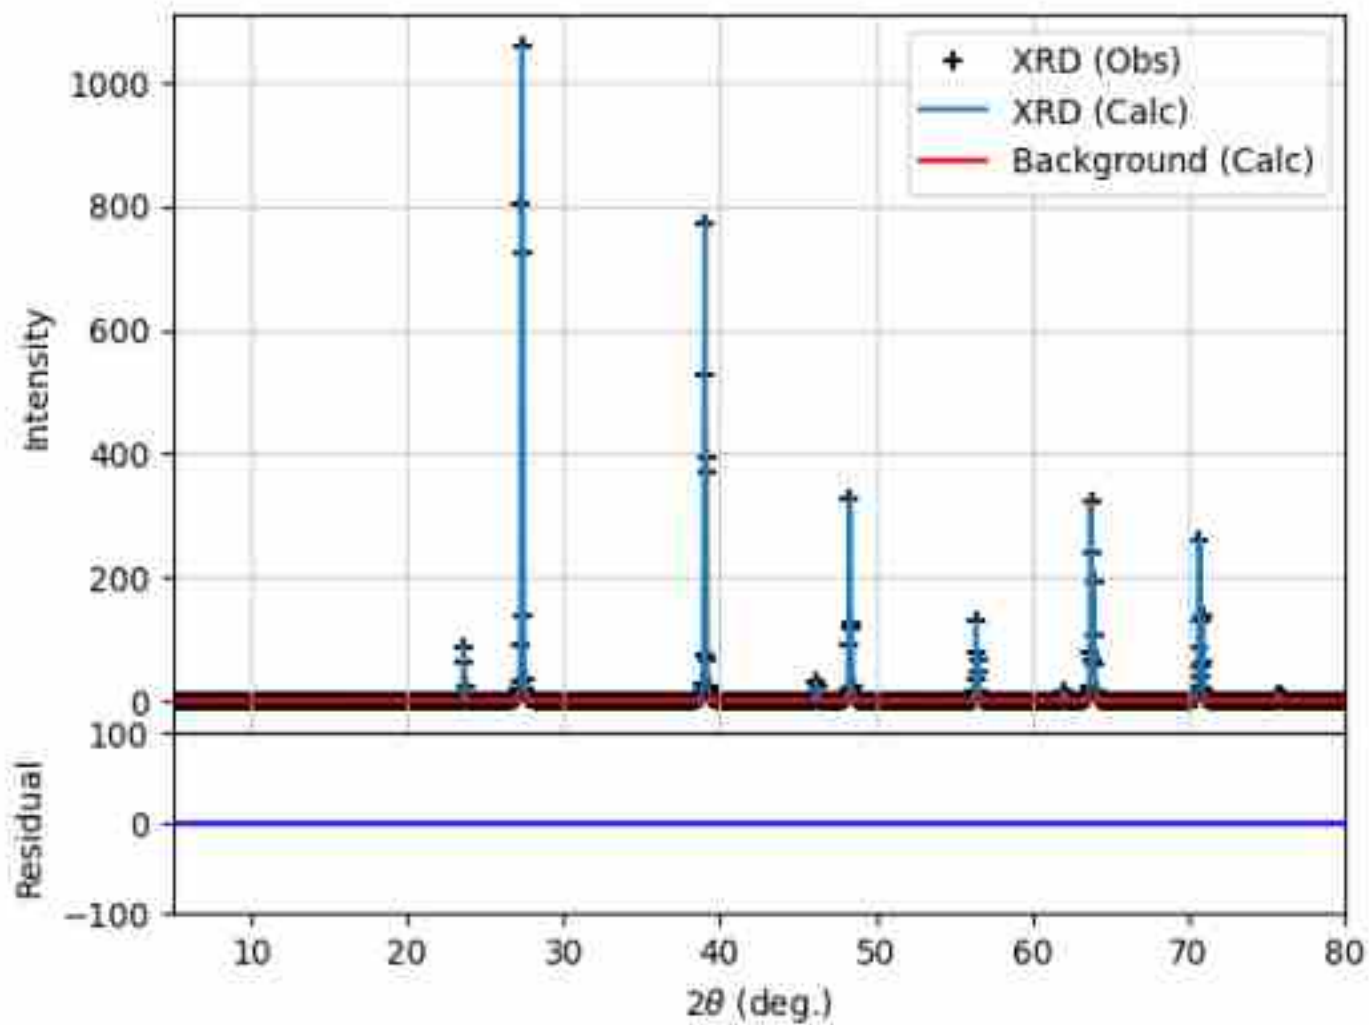

| RMSE before RR | Rwp    | RMSE after RR |
|----------------|--------|---------------|
| 0.003          | 0.0223 | 0.00092       |

# Ce1Rh3

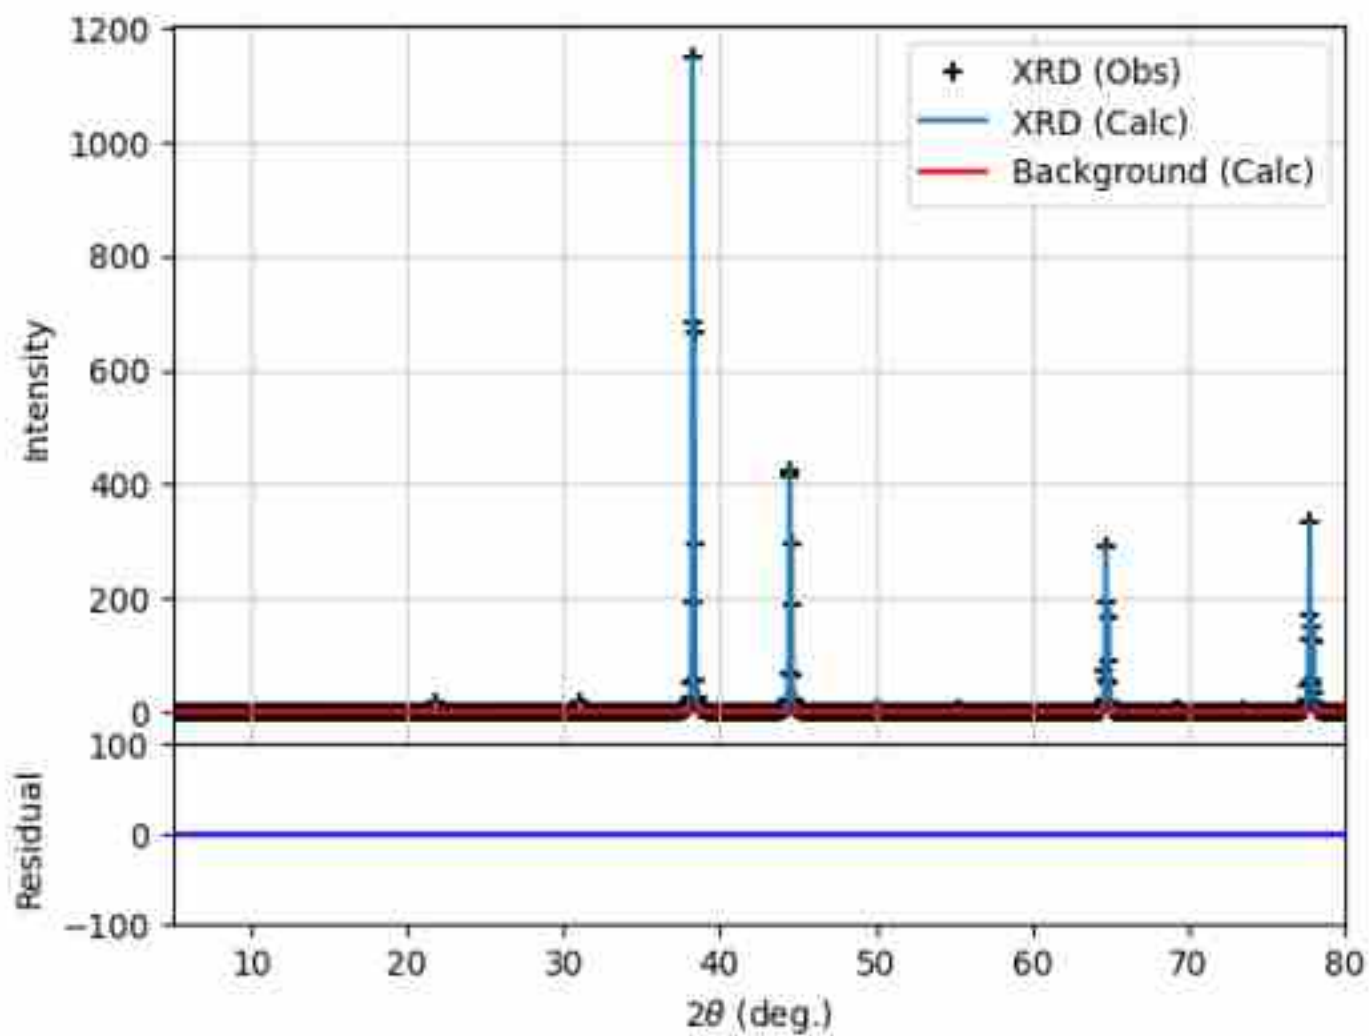

| RMSE before RR | Rwp     | RMSE after RR |
|----------------|---------|---------------|
| 0.003          | 0.07146 | 0.00101       |



# Ce1Sn3

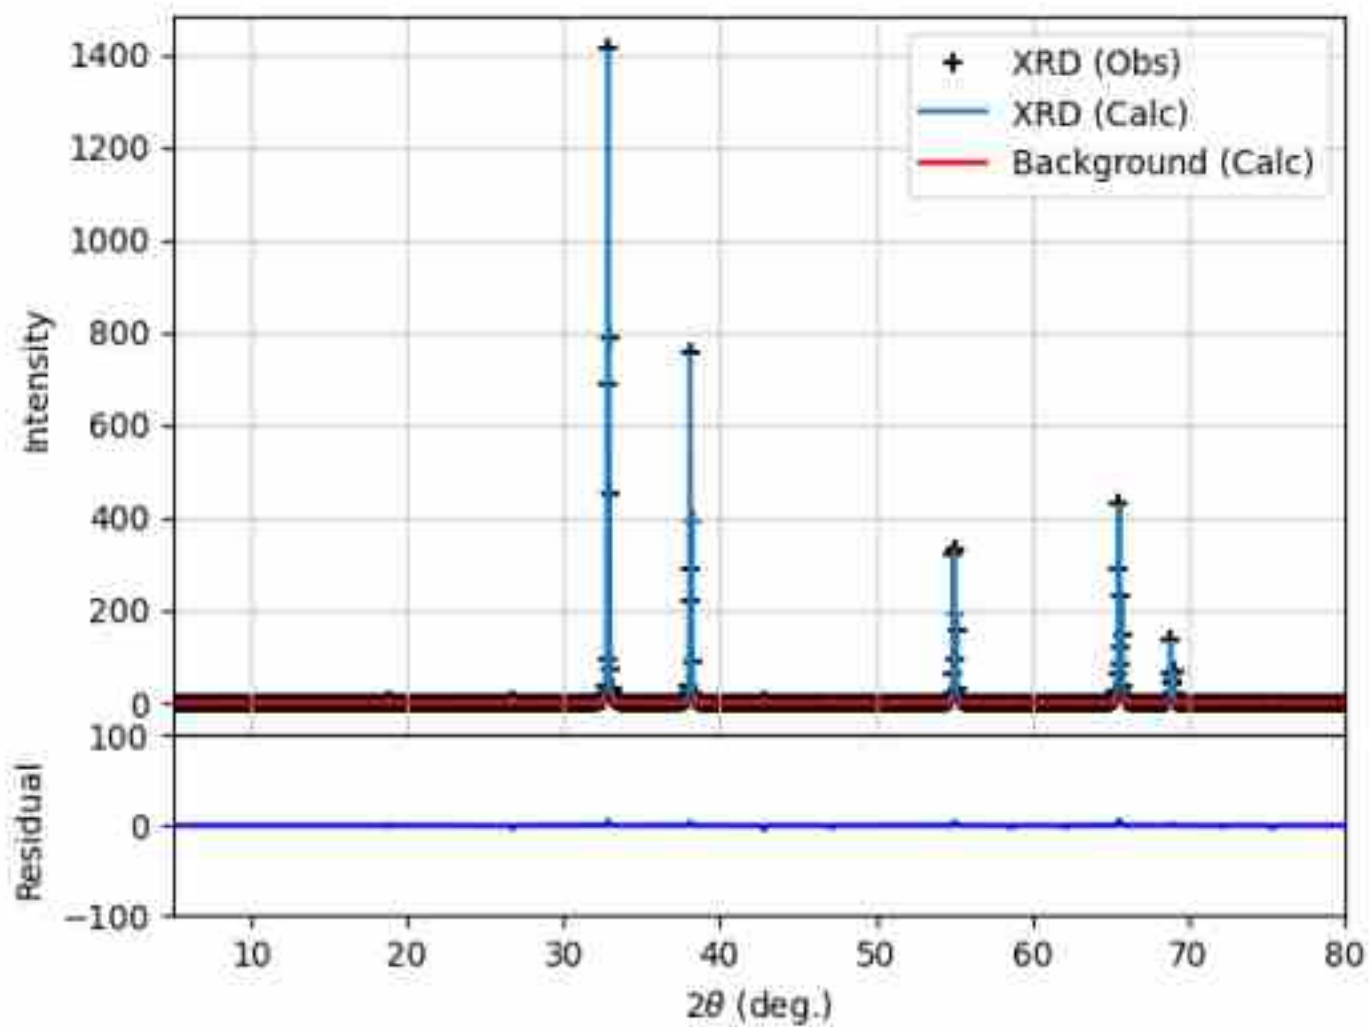

| RMSE before RR | Rwp     | RMSE after RR |
|----------------|---------|---------------|
| 0.003          | 7.57292 | 0.0033        |

# Co<sub>2</sub>F<sub>6</sub>

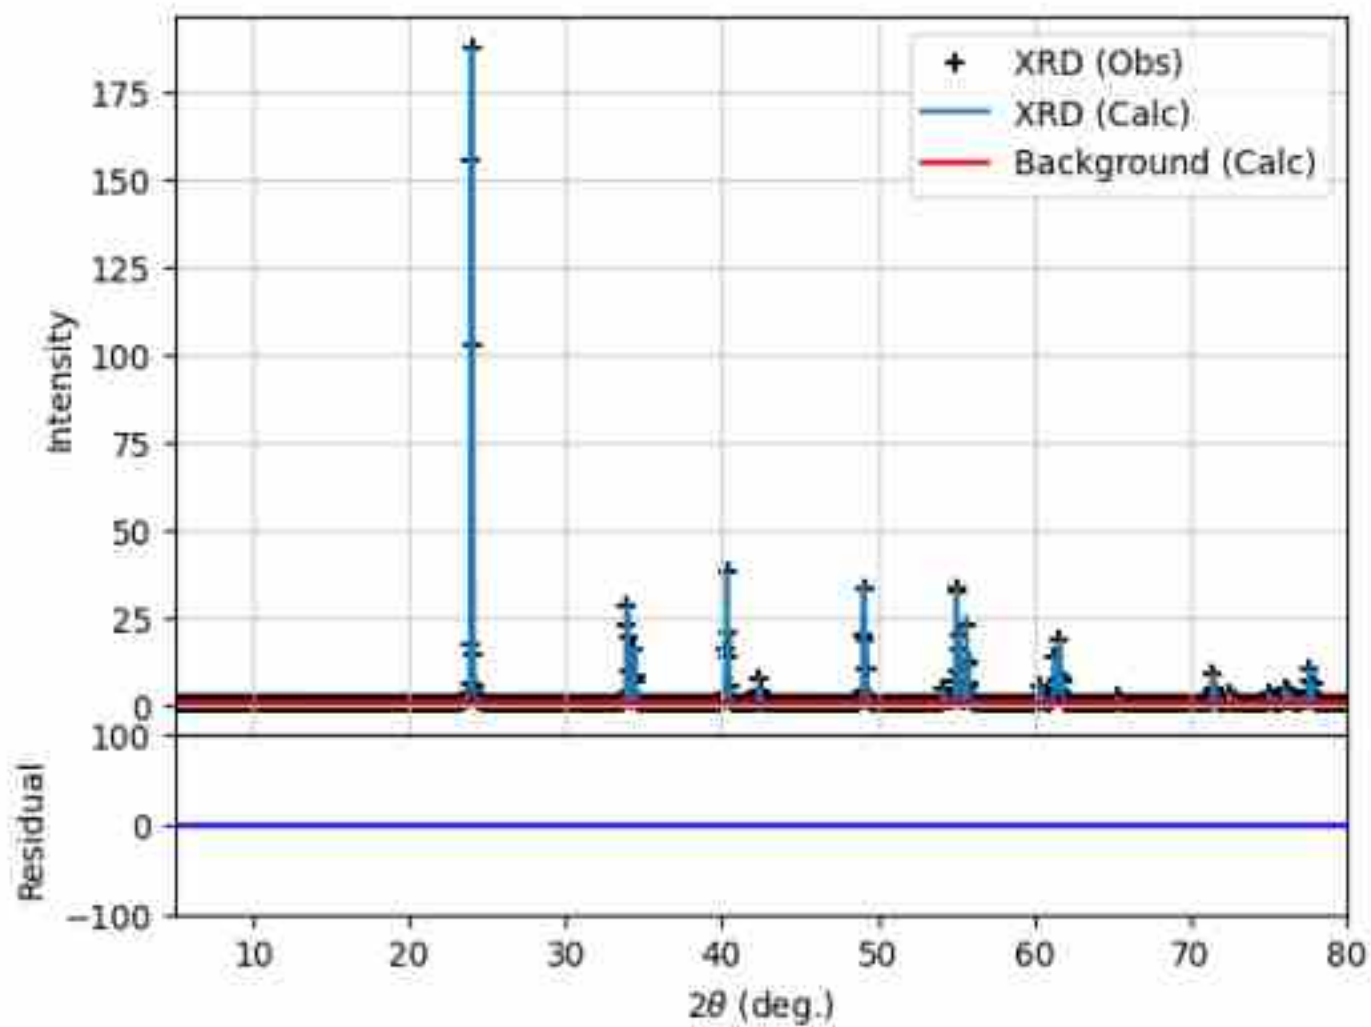

| RMSE before RR | Rwp     | RMSE after RR |
|----------------|---------|---------------|
| 0.03           | 0.00228 | 0.00051       |

# Co6O2F10

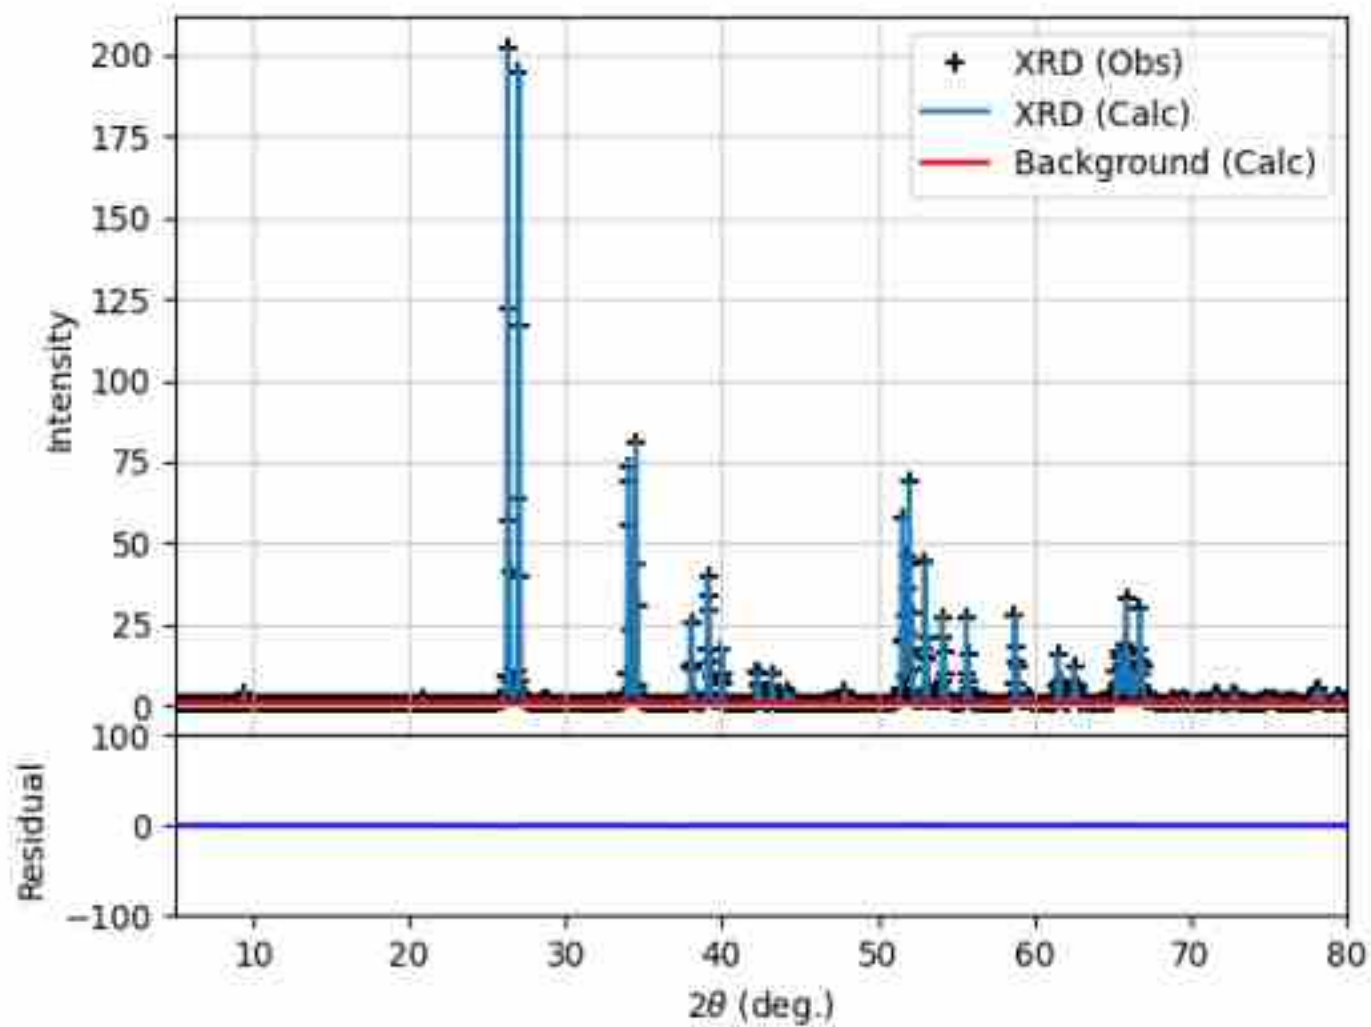

| RMSE before RR | Rwp     | RMSE after RR |
|----------------|---------|---------------|
| 0.03           | 1.40694 | 0.06329       |

# Cr<sub>2</sub>Sb<sub>1</sub>As<sub>1</sub>

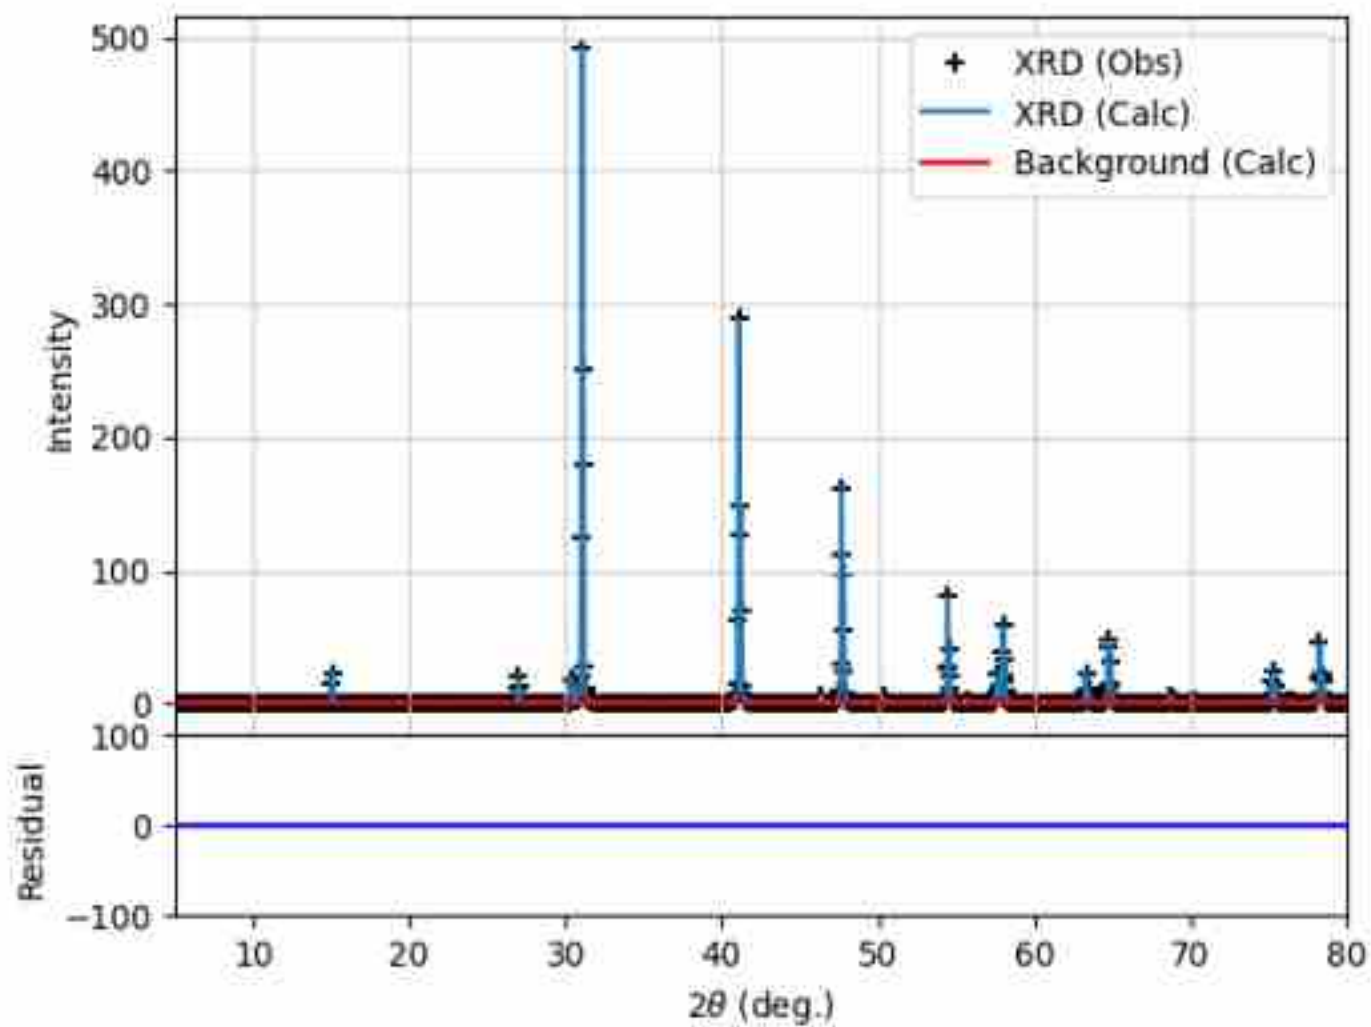

| RMSE before RR | Rwp     | RMSE after RR |
|----------------|---------|---------------|
| 0.003          | 0.00302 | 0.00068       |

# Cs<sub>2</sub>U<sub>2</sub>Te<sub>6</sub>Au<sub>2</sub>

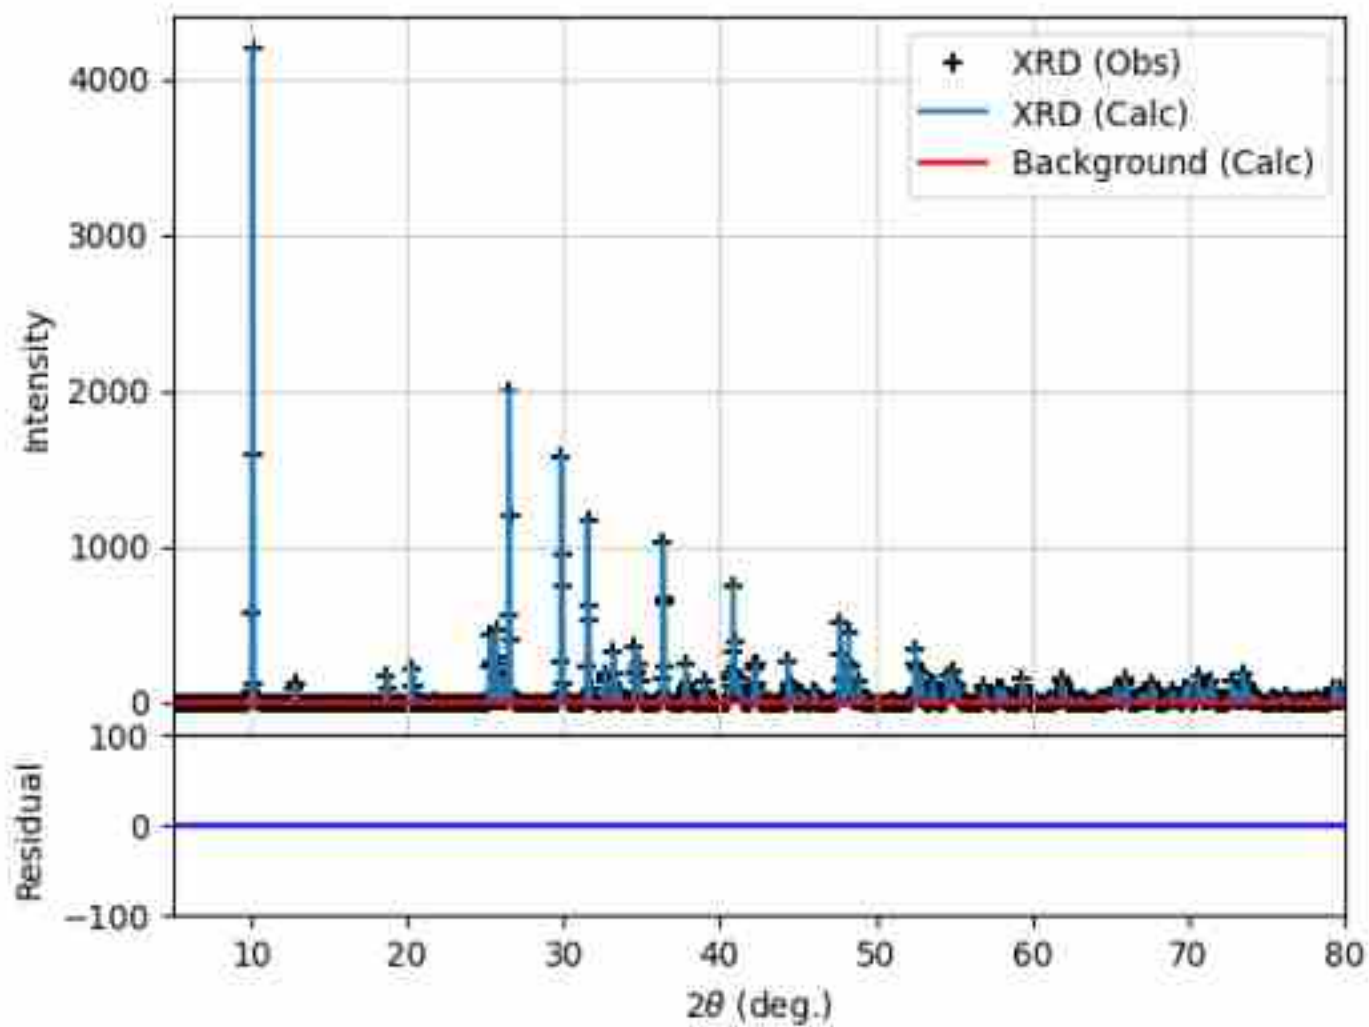

| RMSE before RR | Rwp     | RMSE after RR |
|----------------|---------|---------------|
| 0.03           | 0.00335 | 0.00031       |

# Cs<sub>4</sub>In<sub>1</sub>Sb<sub>1</sub>Cl<sub>12</sub>

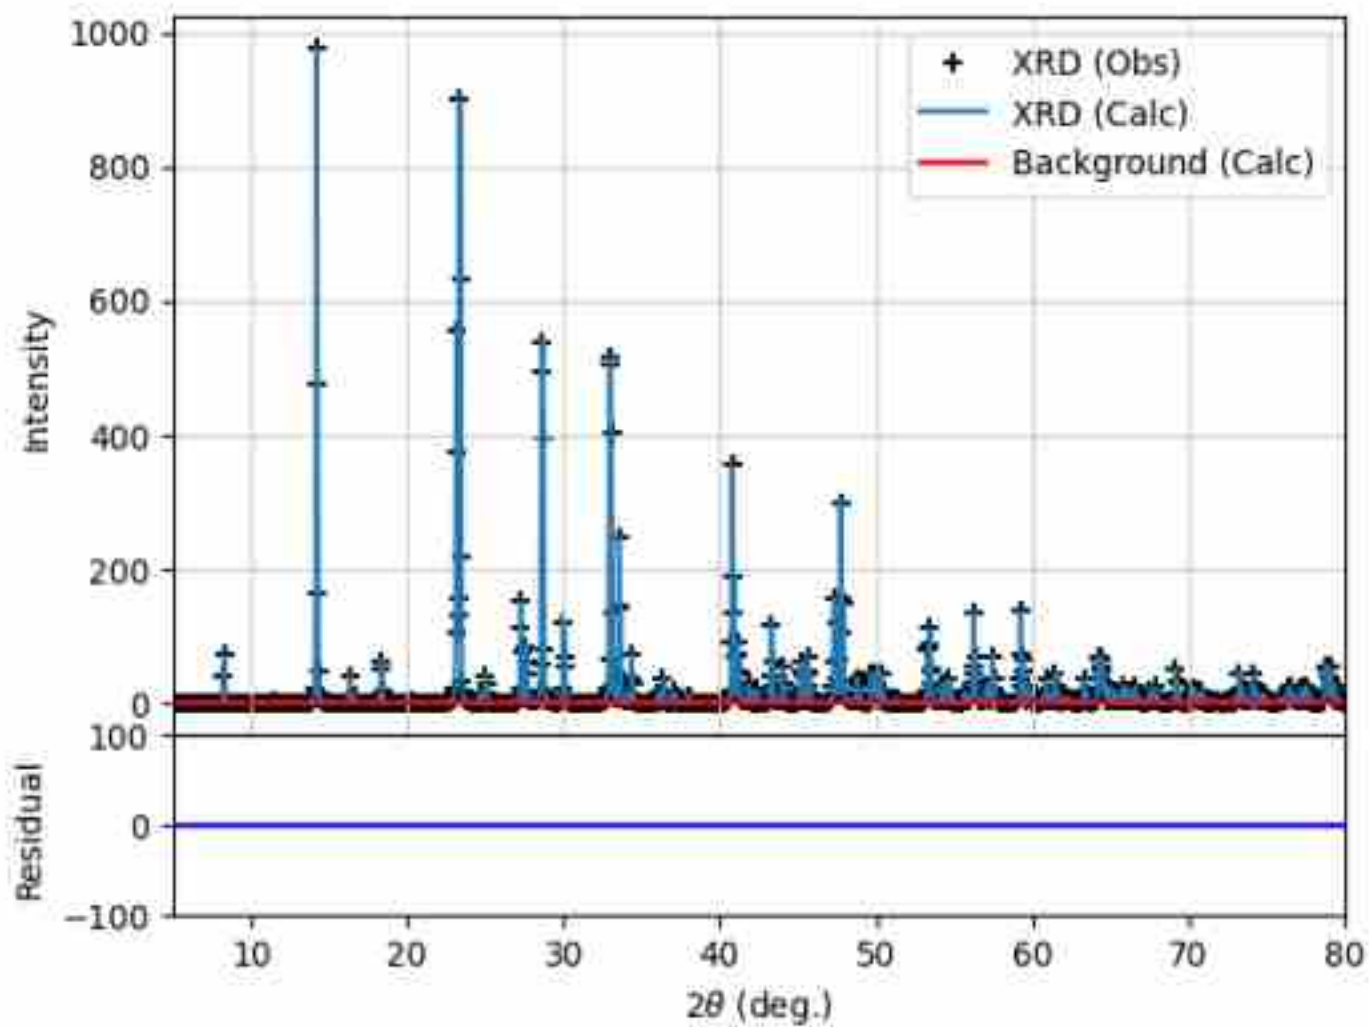

| RMSE before RR | Rwp     | RMSE after RR |
|----------------|---------|---------------|
| 0.03           | 0.00533 | 0.00085       |

# Cs<sub>6</sub>Na<sub>2</sub>Pb<sub>8</sub>

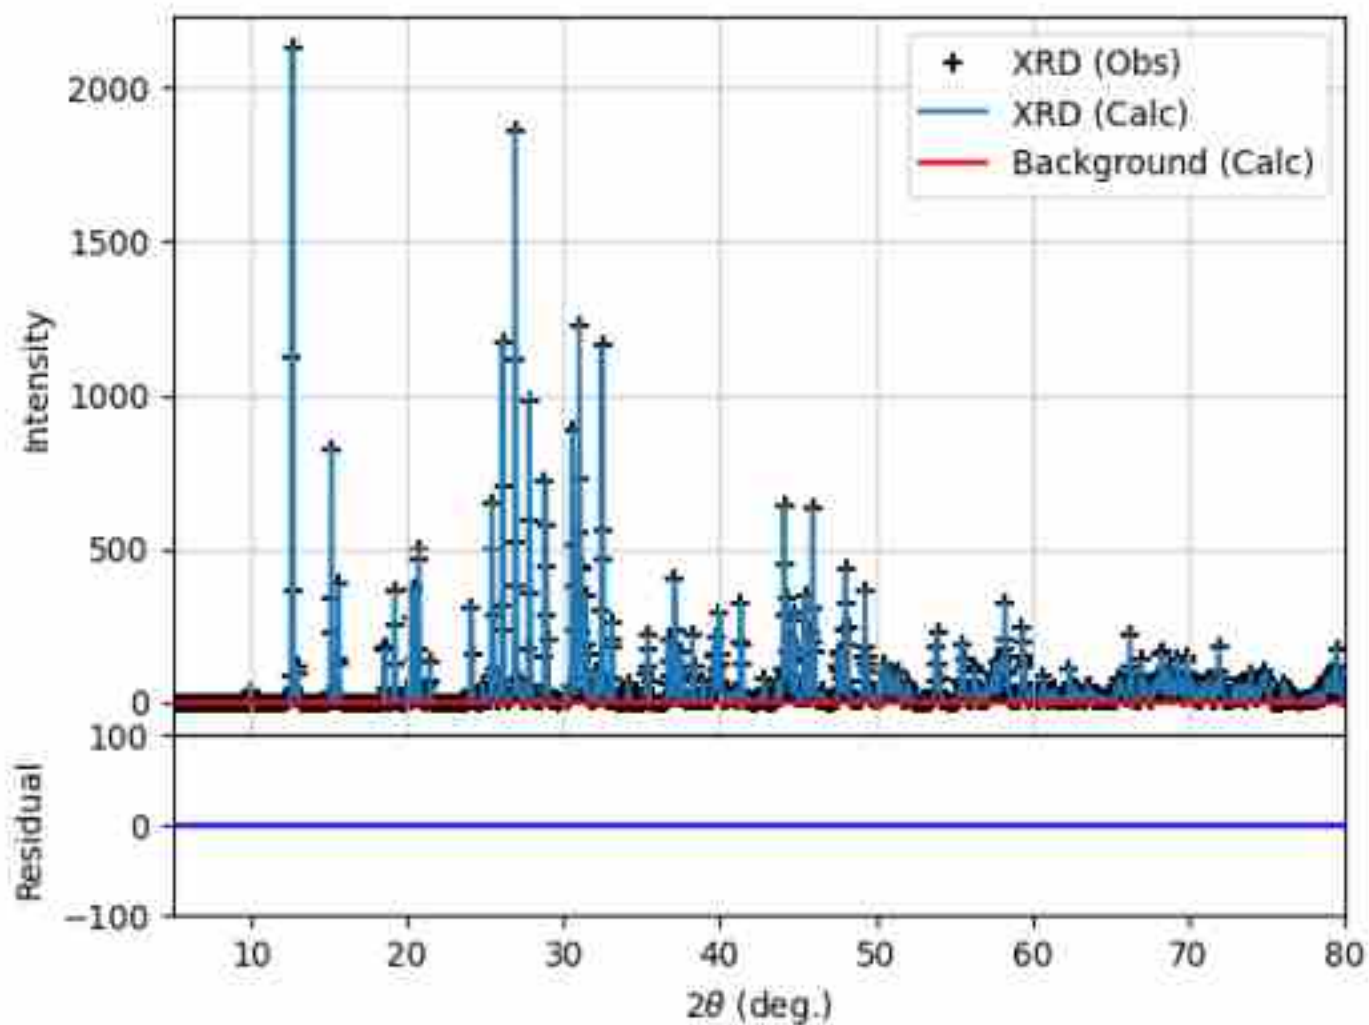

| RMSE before RR | Rwp     | RMSE after RR |
|----------------|---------|---------------|
| 0.03           | 0.00377 | 0.00064       |

# Cu1Ge1Rh2

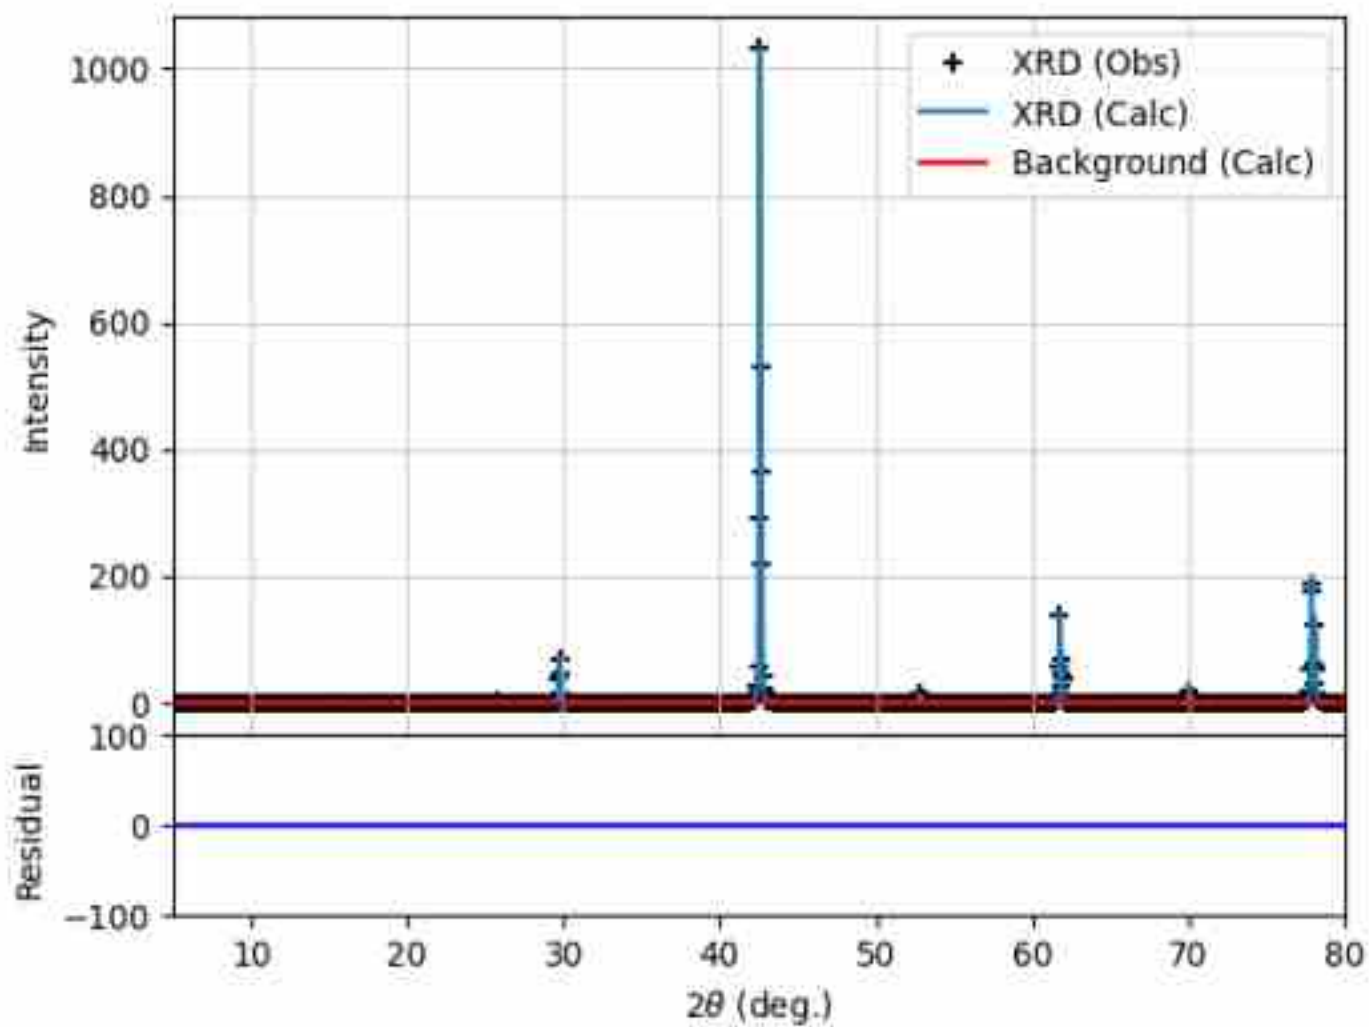

| RMSE before RR | Rwp     | RMSE after RR |
|----------------|---------|---------------|
| 0.003          | 0.00045 | 0.0001        |



# Cu<sub>2</sub>Ag<sub>1</sub>H<sub>1</sub>S<sub>2</sub>O<sub>10</sub>

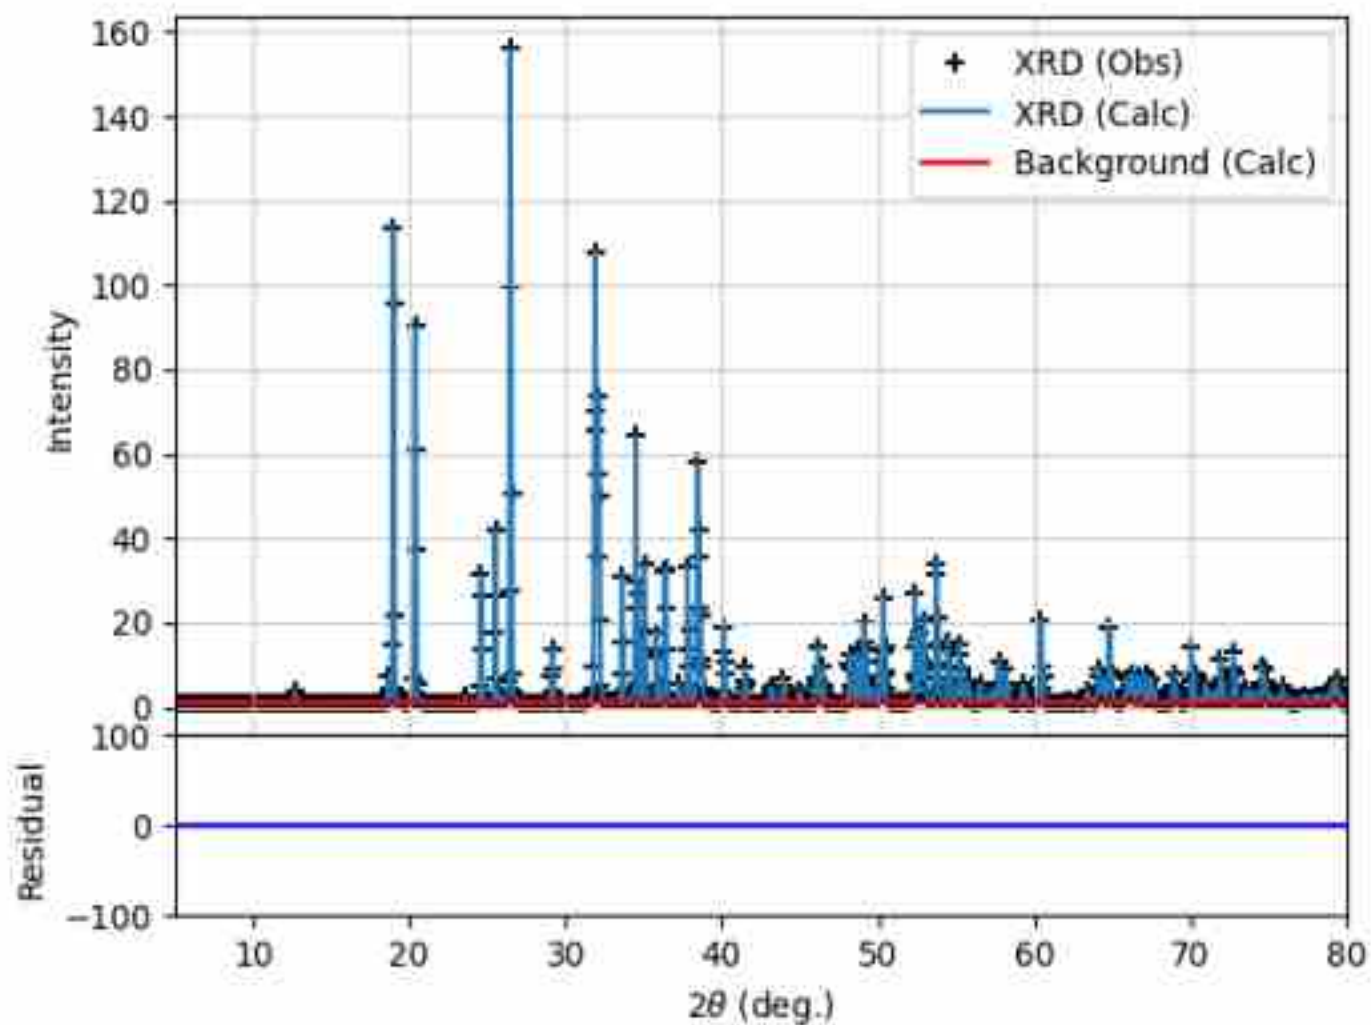

| RMSE before RR | Rwp    | RMSE after RR |
|----------------|--------|---------------|
| 0.03           | 0.0032 | 0.00166       |

# Cu<sub>4</sub>I<sub>4</sub>

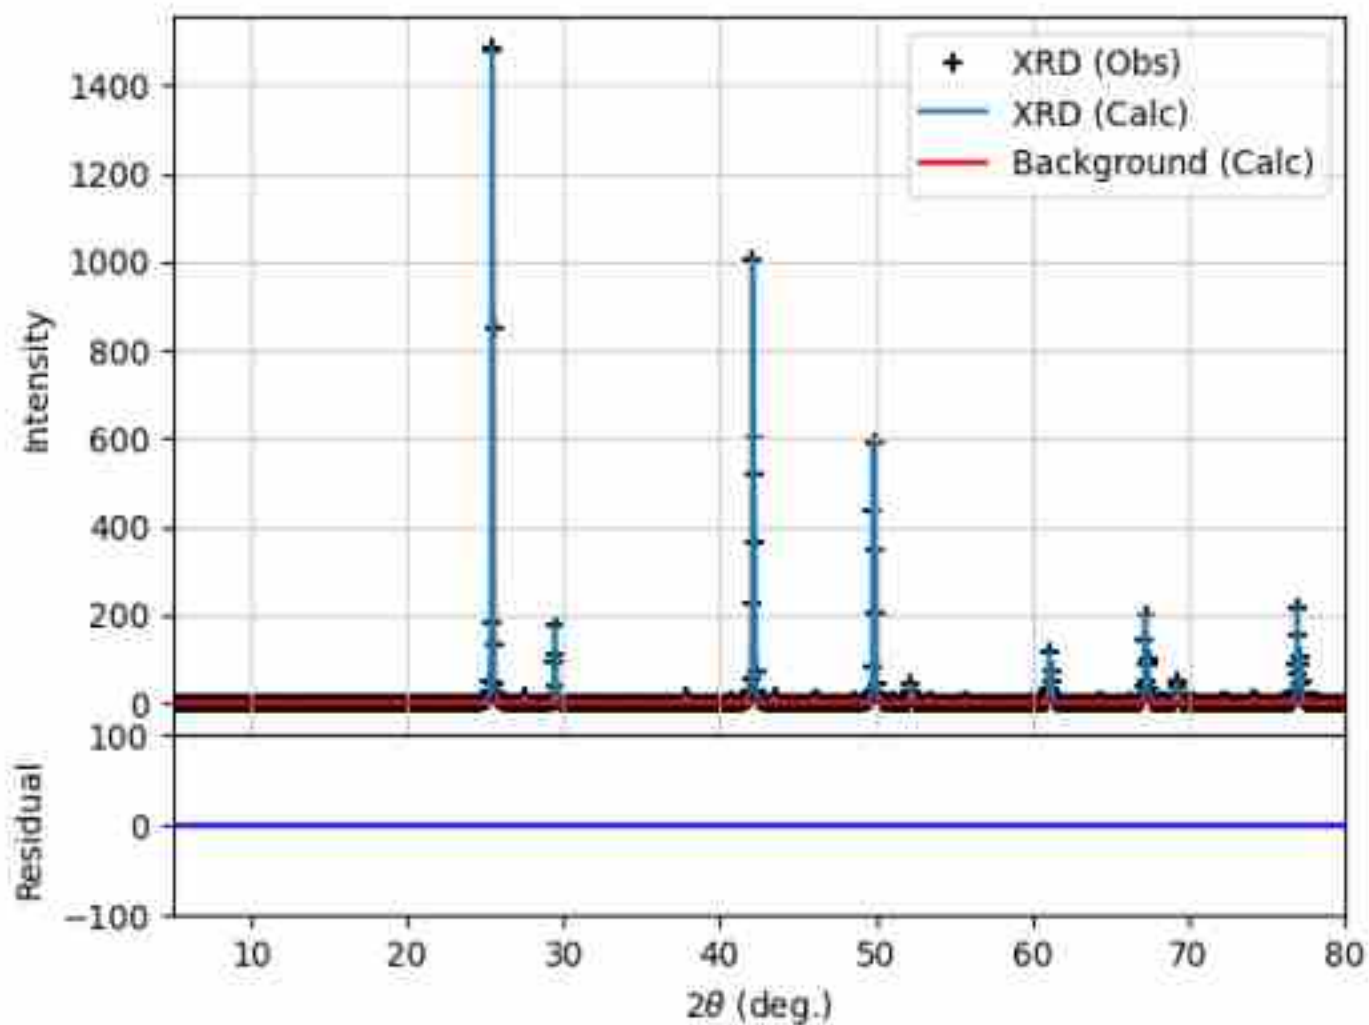

| RMSE before RR | Rwp     | RMSE after RR |
|----------------|---------|---------------|
| 0.003          | 0.00213 | 0.00015       |

# Cu<sub>4</sub>Si<sub>2</sub>S<sub>6</sub>

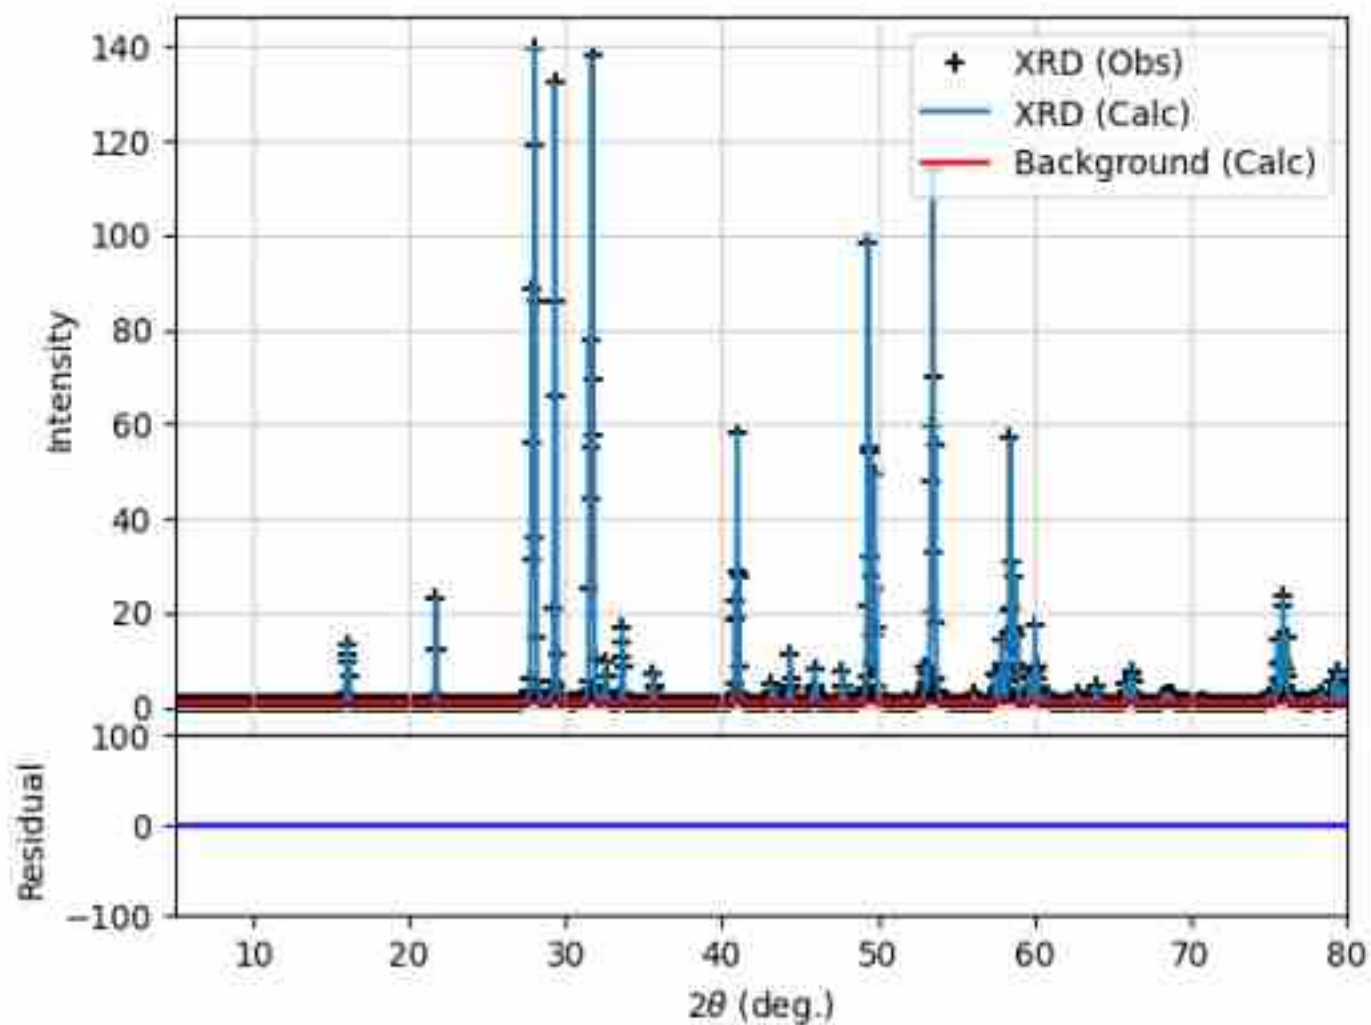

| RMSE before RR | Rwp     | RMSE after RR |
|----------------|---------|---------------|
| 0.03           | 0.00295 | 0.00044       |

# Dy1Cd1Pd2

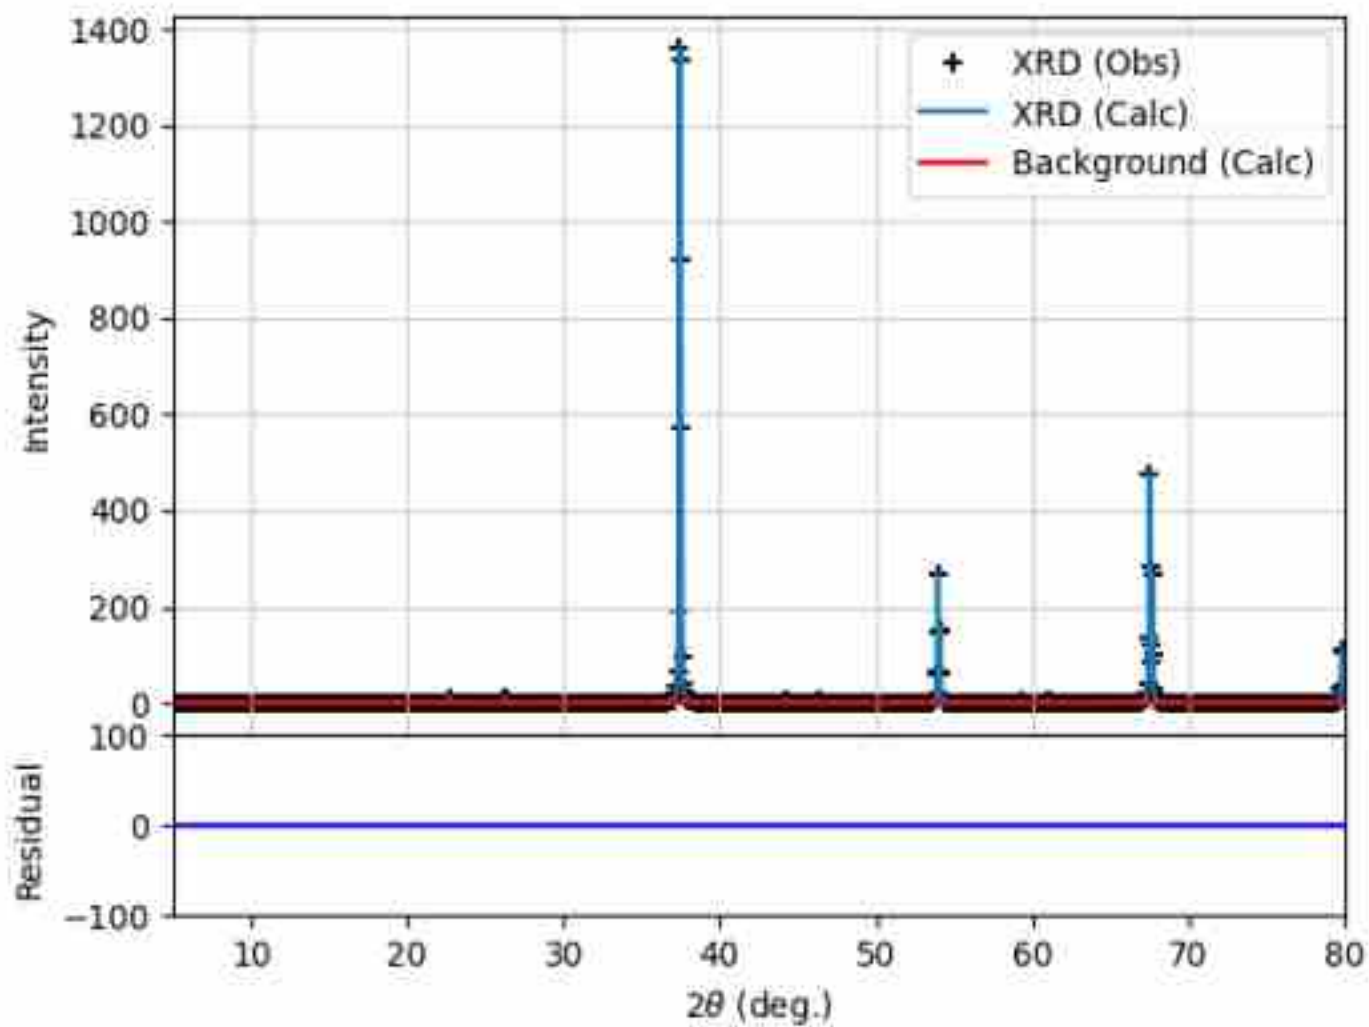

| RMSE before RR | Rwp     | RMSE after RR |
|----------------|---------|---------------|
| 0.003          | 0.01158 | 0.00322       |

# Dy1In1

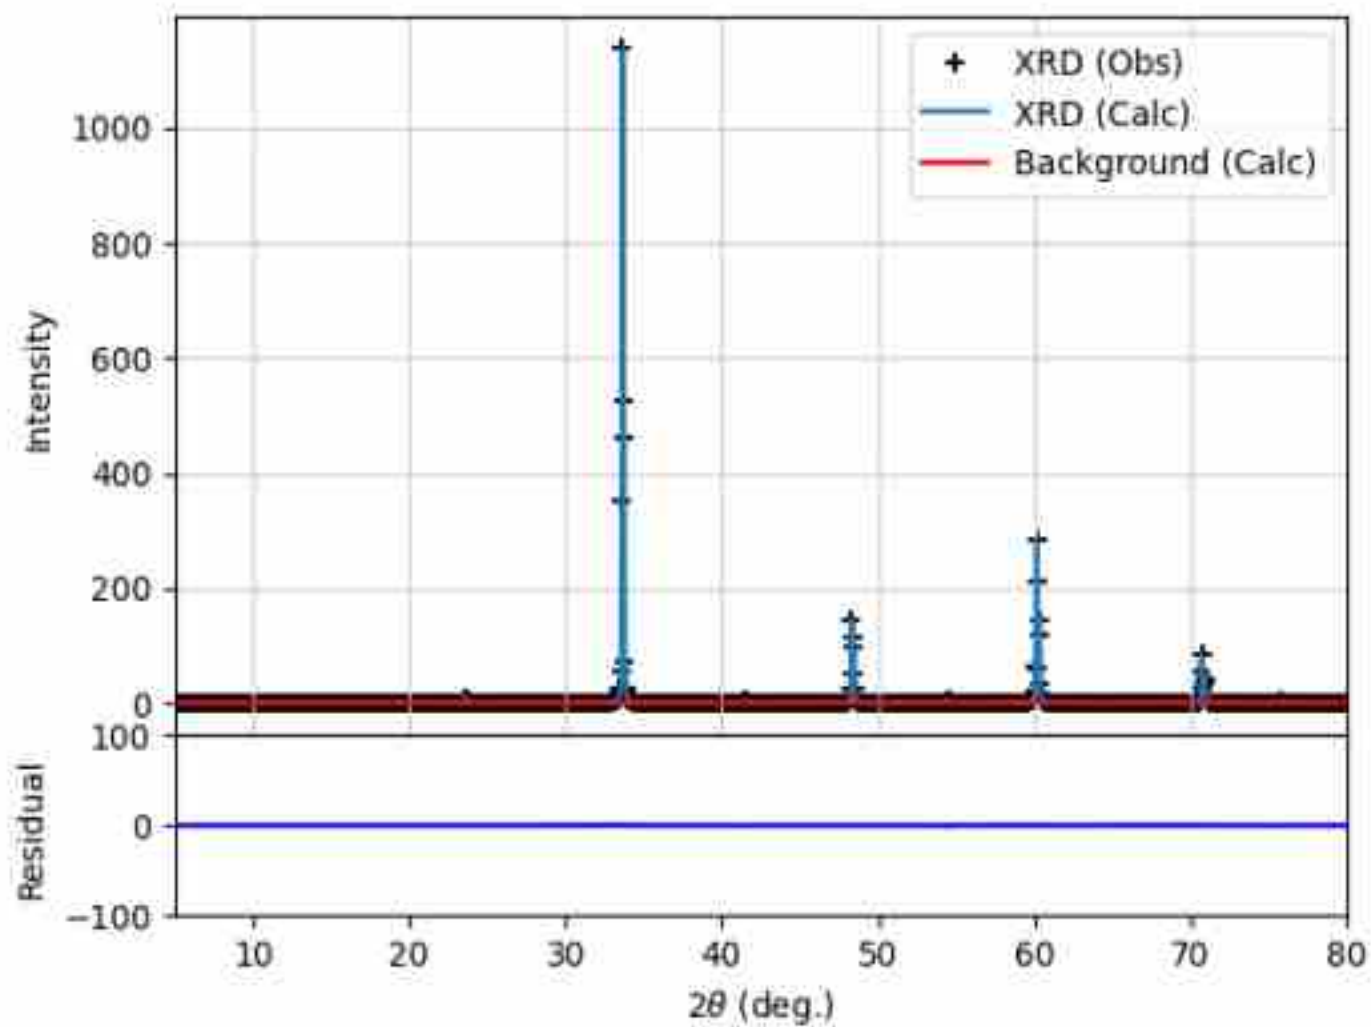

| RMSE before RR | Rwp     | RMSE after RR |
|----------------|---------|---------------|
| 0.003          | 1.41952 | 0.00268       |

# Dy1Zn1Si1

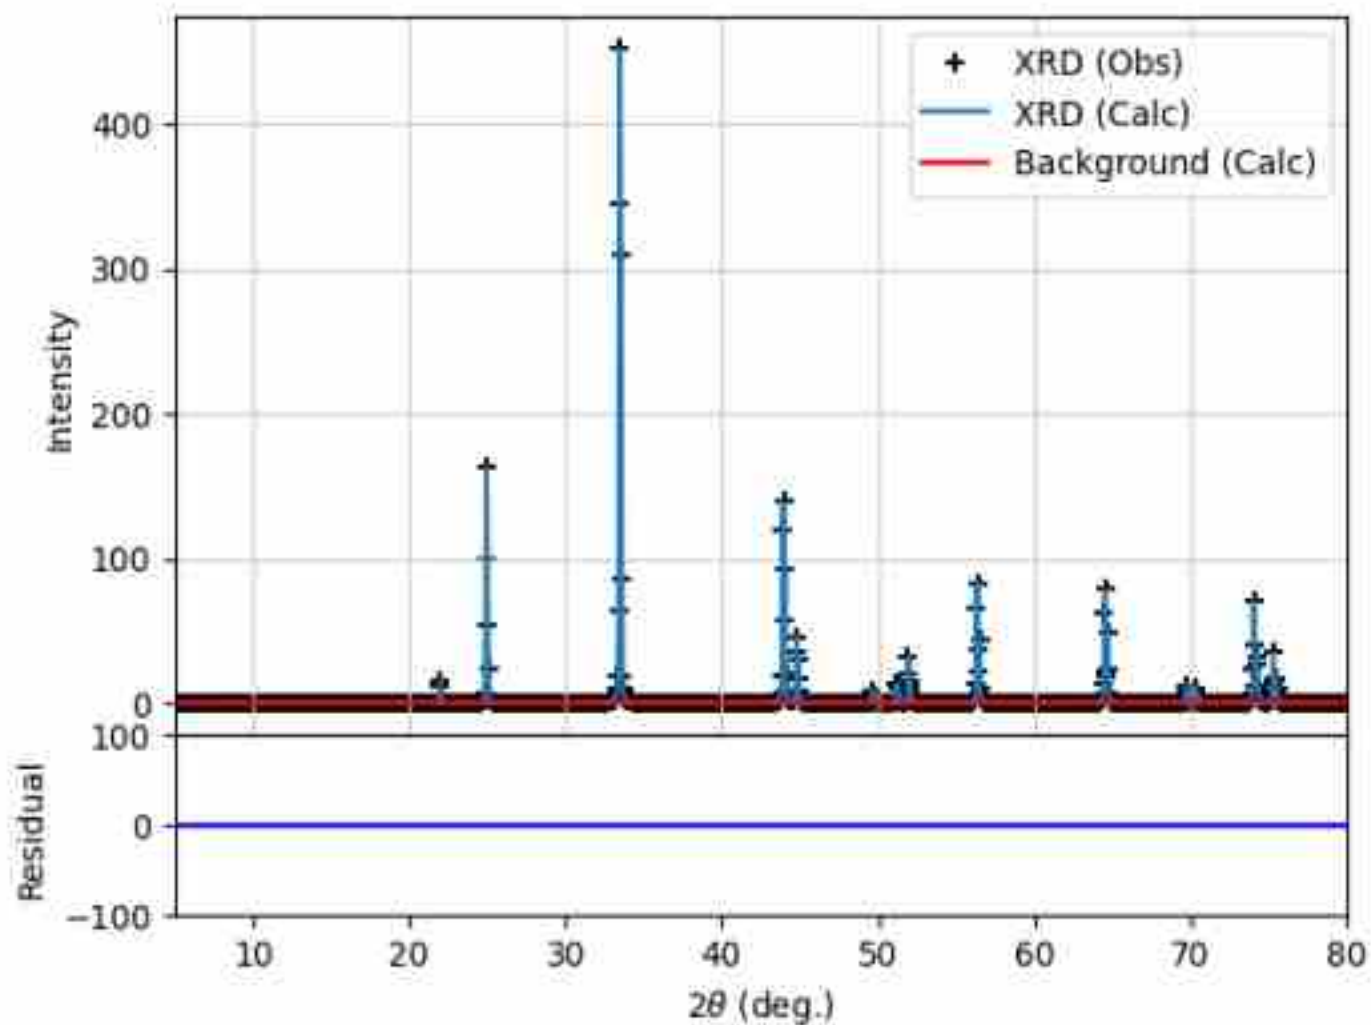

| RMSE before RR | Rwp     | RMSE after RR |
|----------------|---------|---------------|
| 0.003          | 0.03598 | 0.00286       |

# Dy<sub>2</sub>Tl<sub>2</sub>P<sub>4</sub>Se<sub>12</sub>

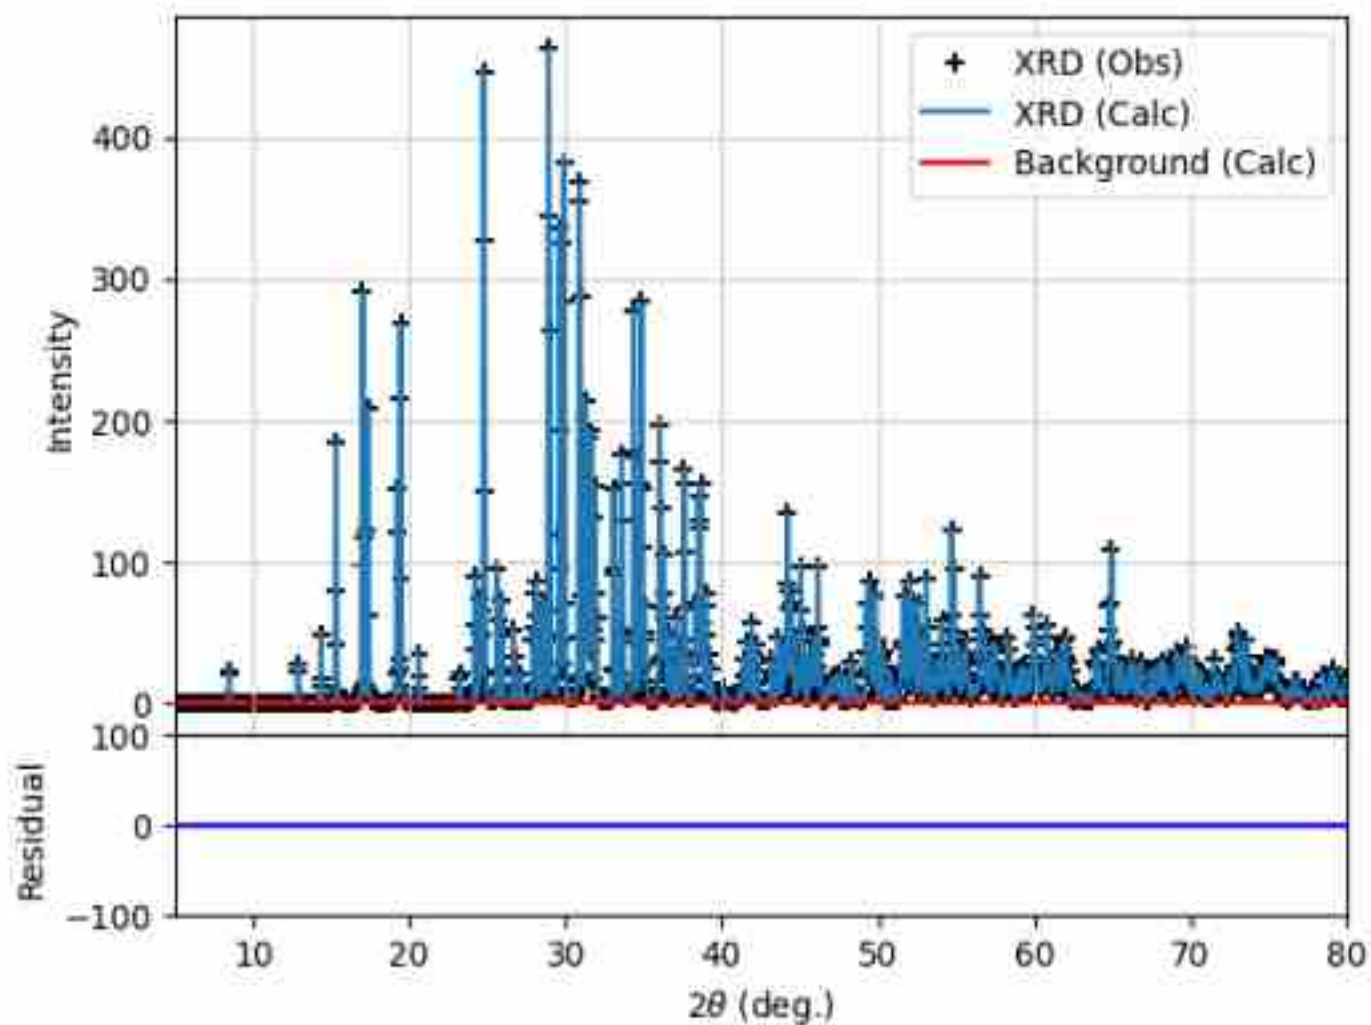

| RMSE before RR | Rwp     | RMSE after RR |
|----------------|---------|---------------|
| 0.03           | 0.00361 | 0.00044       |

# Er1Al3

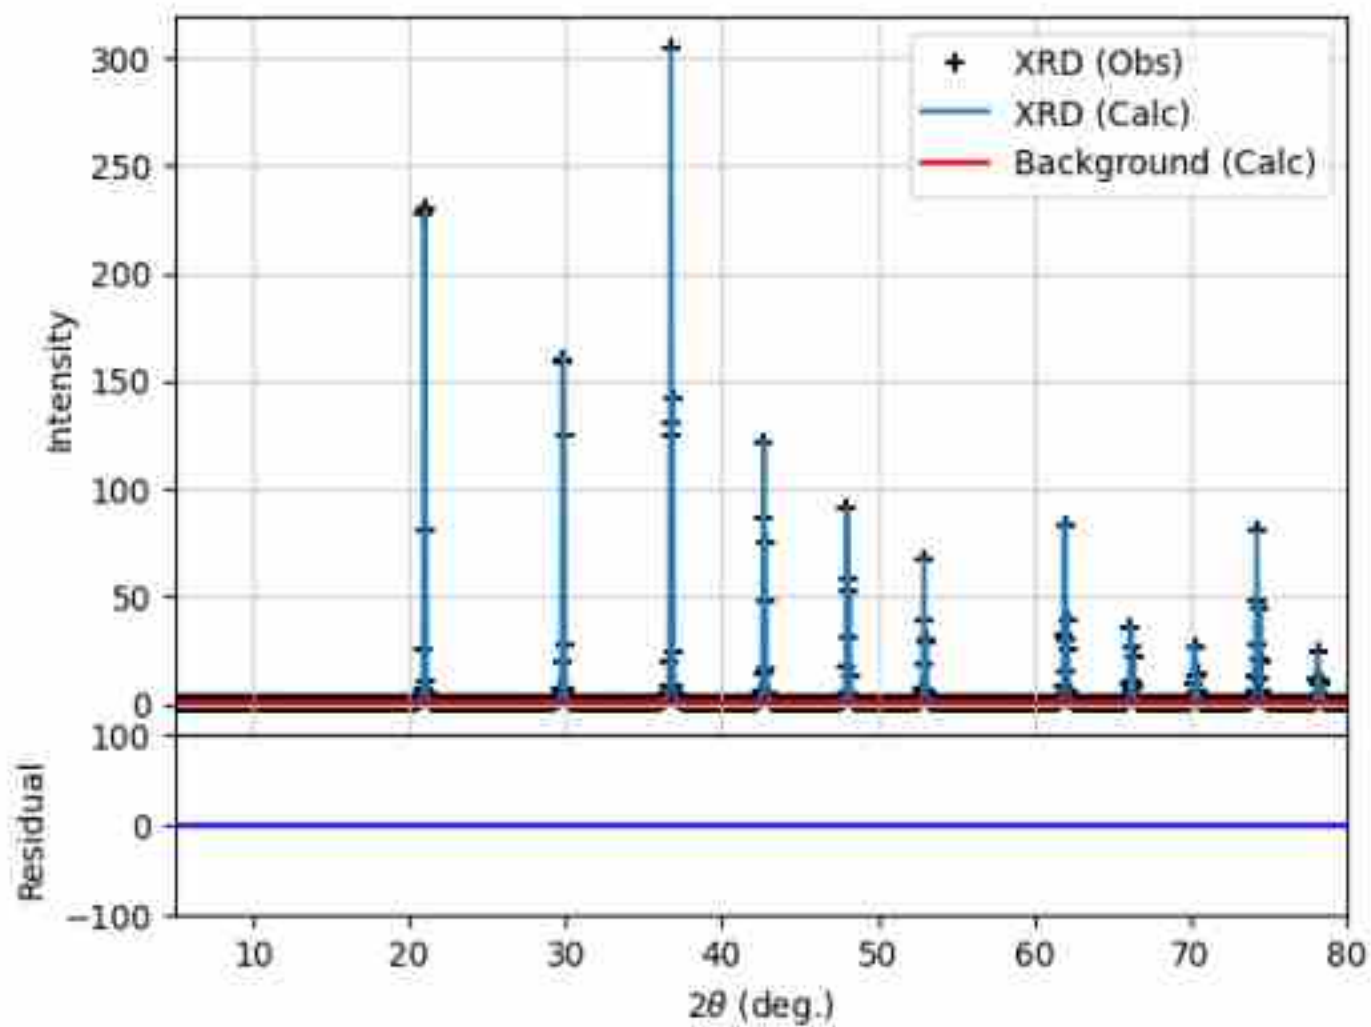

| RMSE before RR | Rwp     | RMSE after RR |
|----------------|---------|---------------|
| 0.003          | 0.01039 | 0.00412       |



# ErIn1

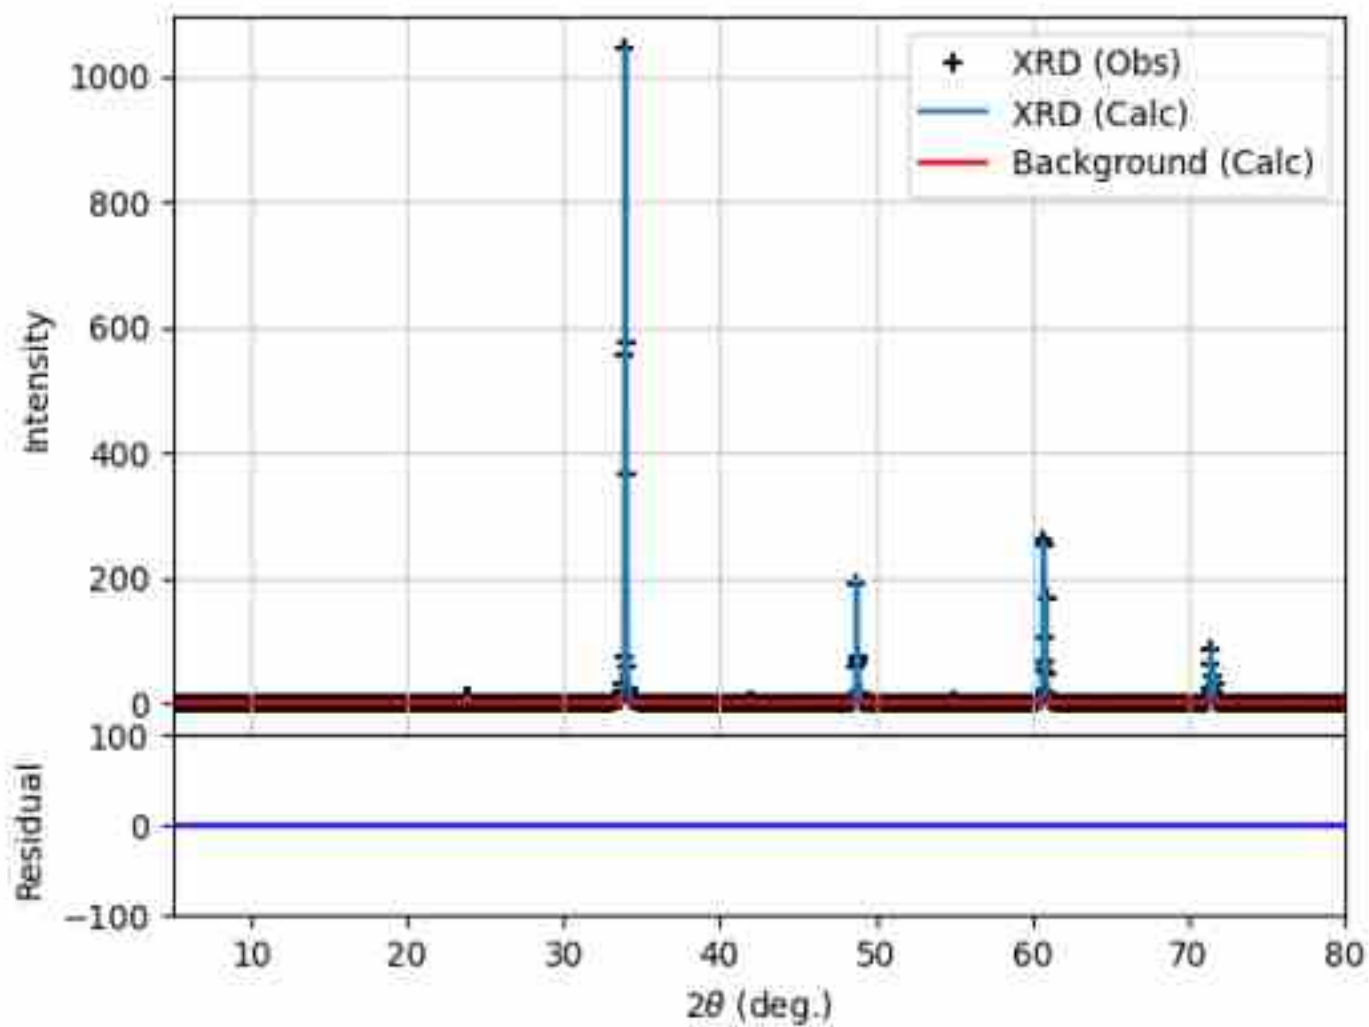

| RMSE before RR | Rwp     | RMSE after RR |
|----------------|---------|---------------|
| 0.003          | 0.01128 | 0.00054       |

# Er1Ni1Sb1

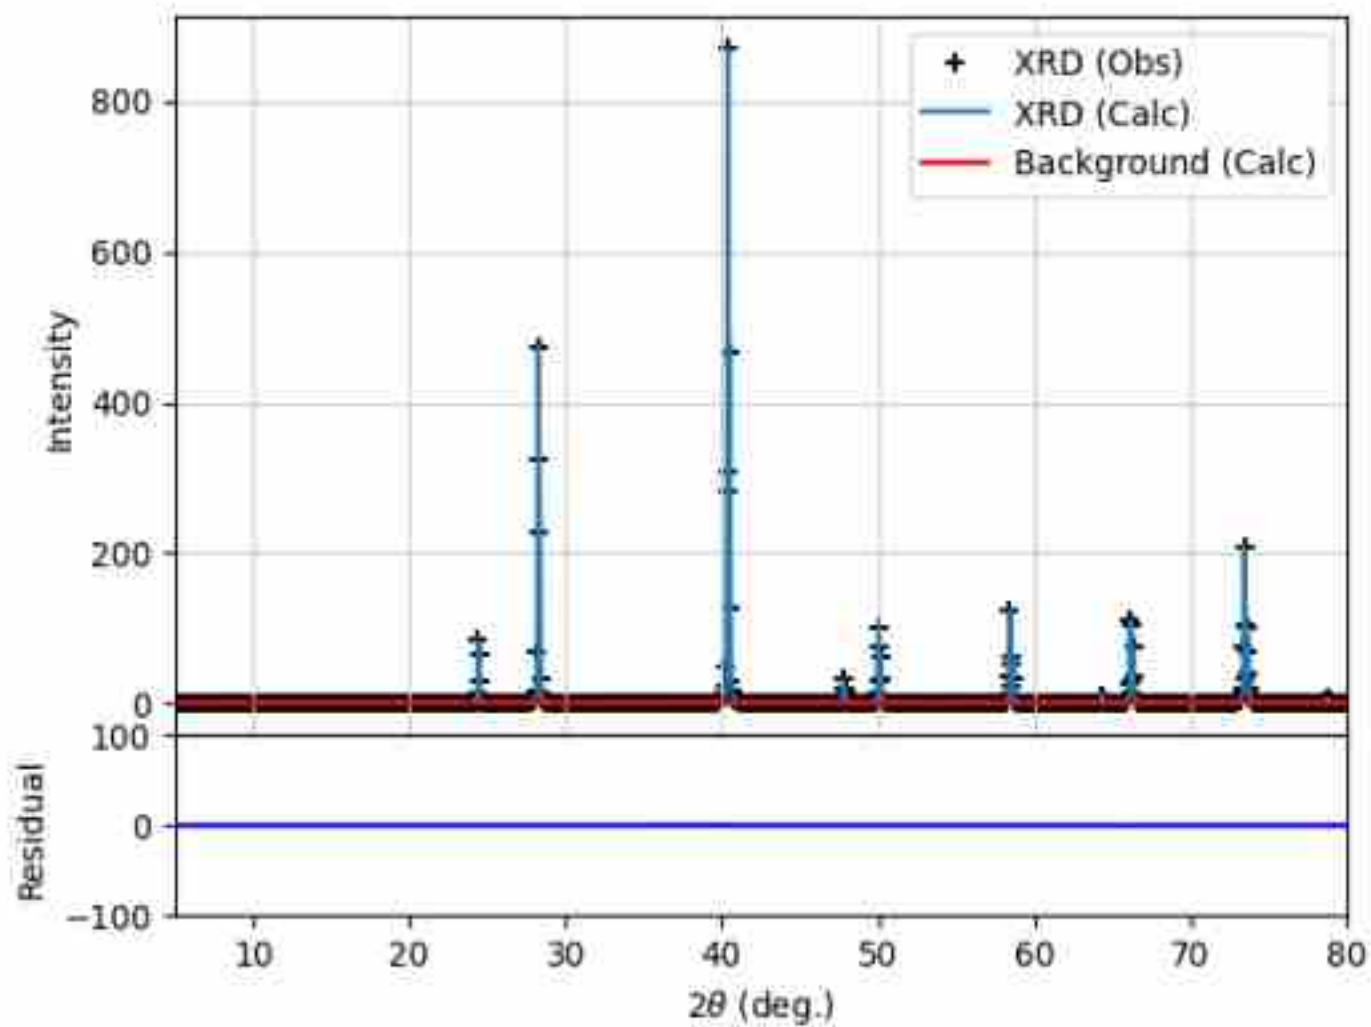

| RMSE before RR | Rwp     | RMSE after RR |
|----------------|---------|---------------|
| 0.003          | 0.12951 | 0.0023        |

# Er<sub>2</sub>Se<sub>10</sub>O<sub>2</sub>

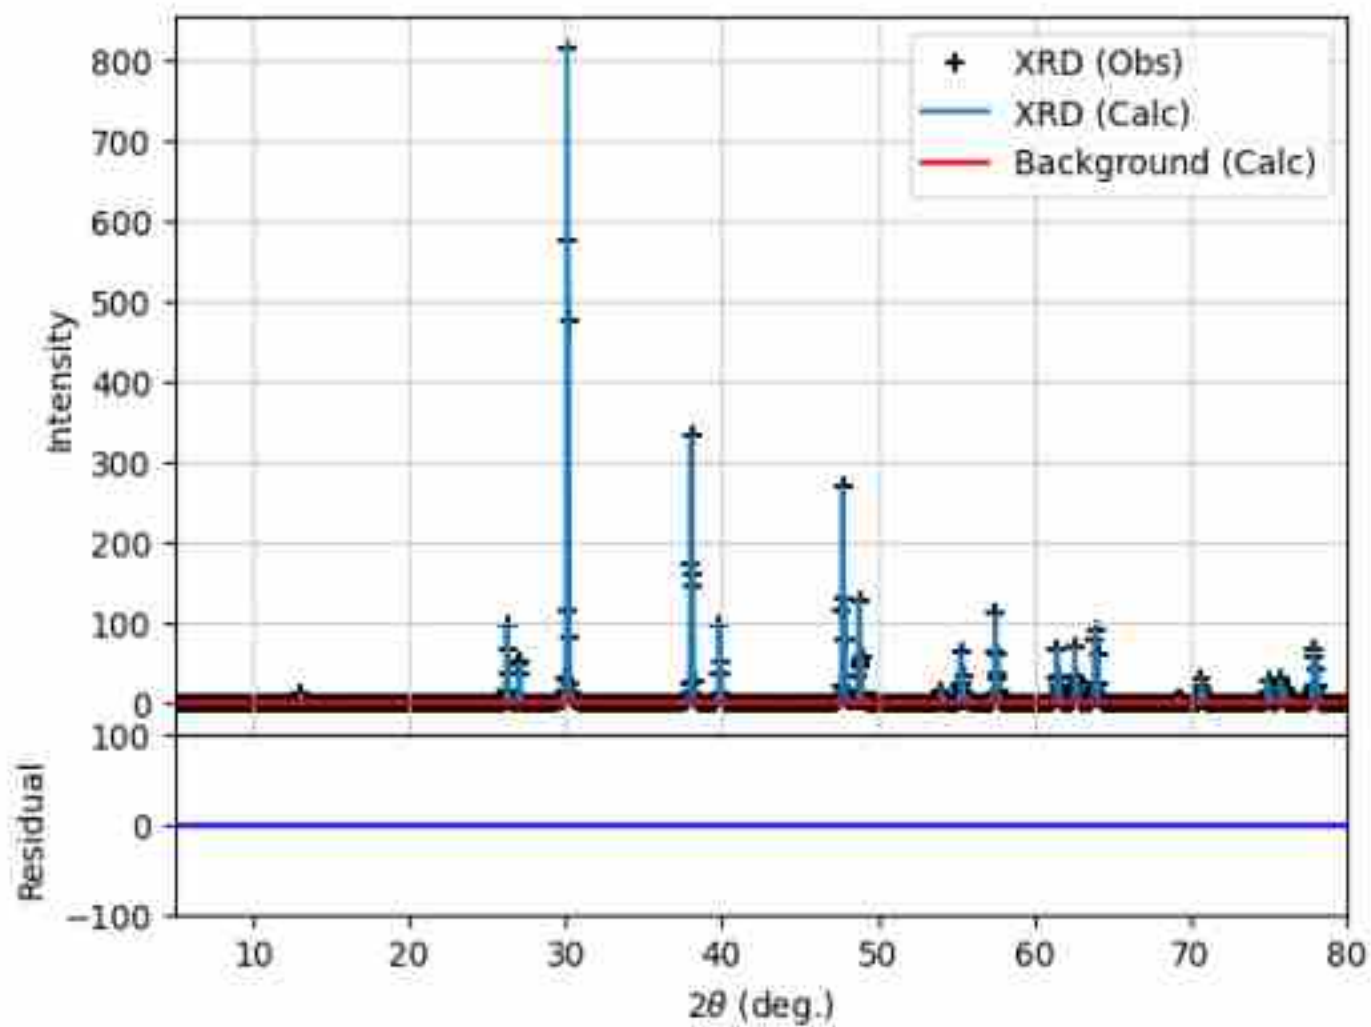

| RMSE before RR | Rwp     | RMSE after RR |
|----------------|---------|---------------|
| 0.003          | 0.00343 | 0.00092       |

# Eu4V4O10

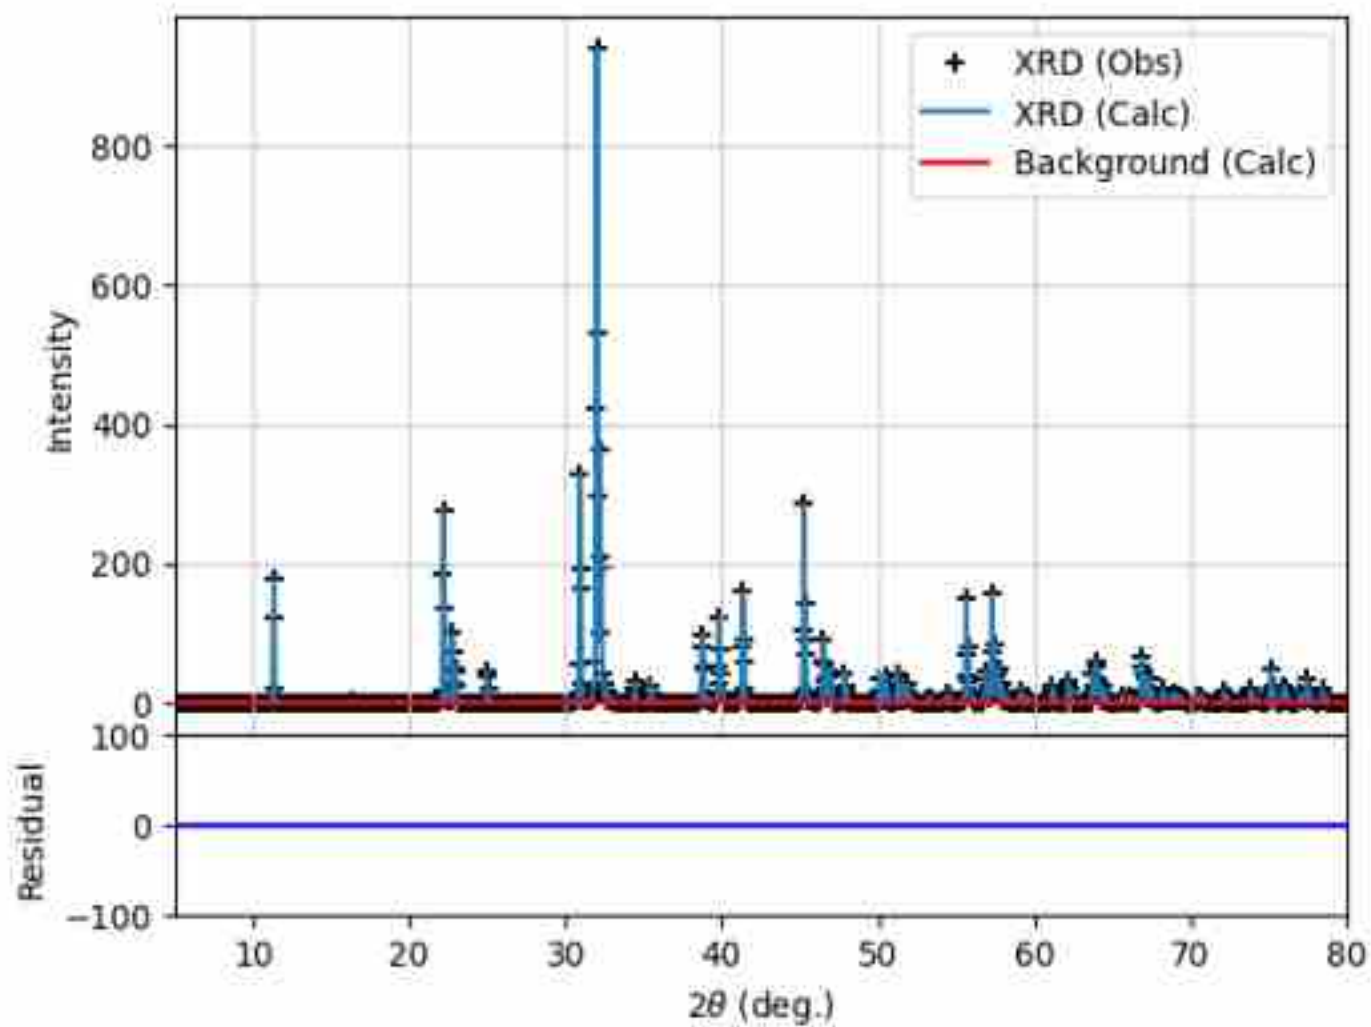

| RMSE before RR | Rwp    | RMSE after RR |
|----------------|--------|---------------|
| 0.03           | 0.0039 | 0.00076       |

# Fe<sub>3</sub>Ni<sub>1</sub>

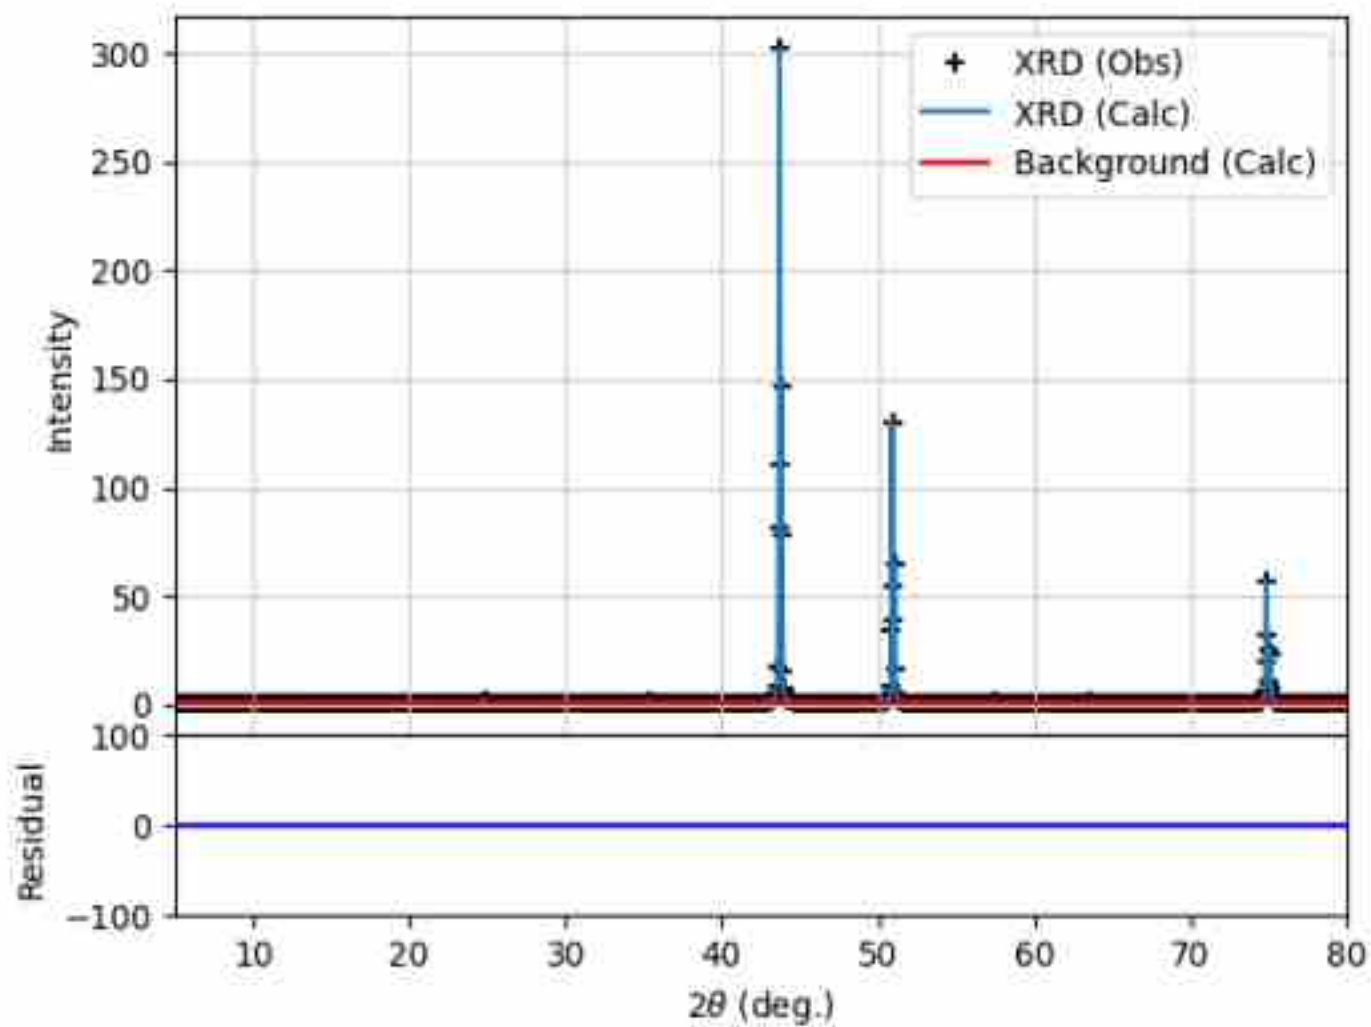

| RMSE before RR | Rwp     | RMSE after RR |
|----------------|---------|---------------|
| 0.003          | 0.01594 | 0.00049       |

# Fe<sub>3</sub>Pt<sub>1</sub>

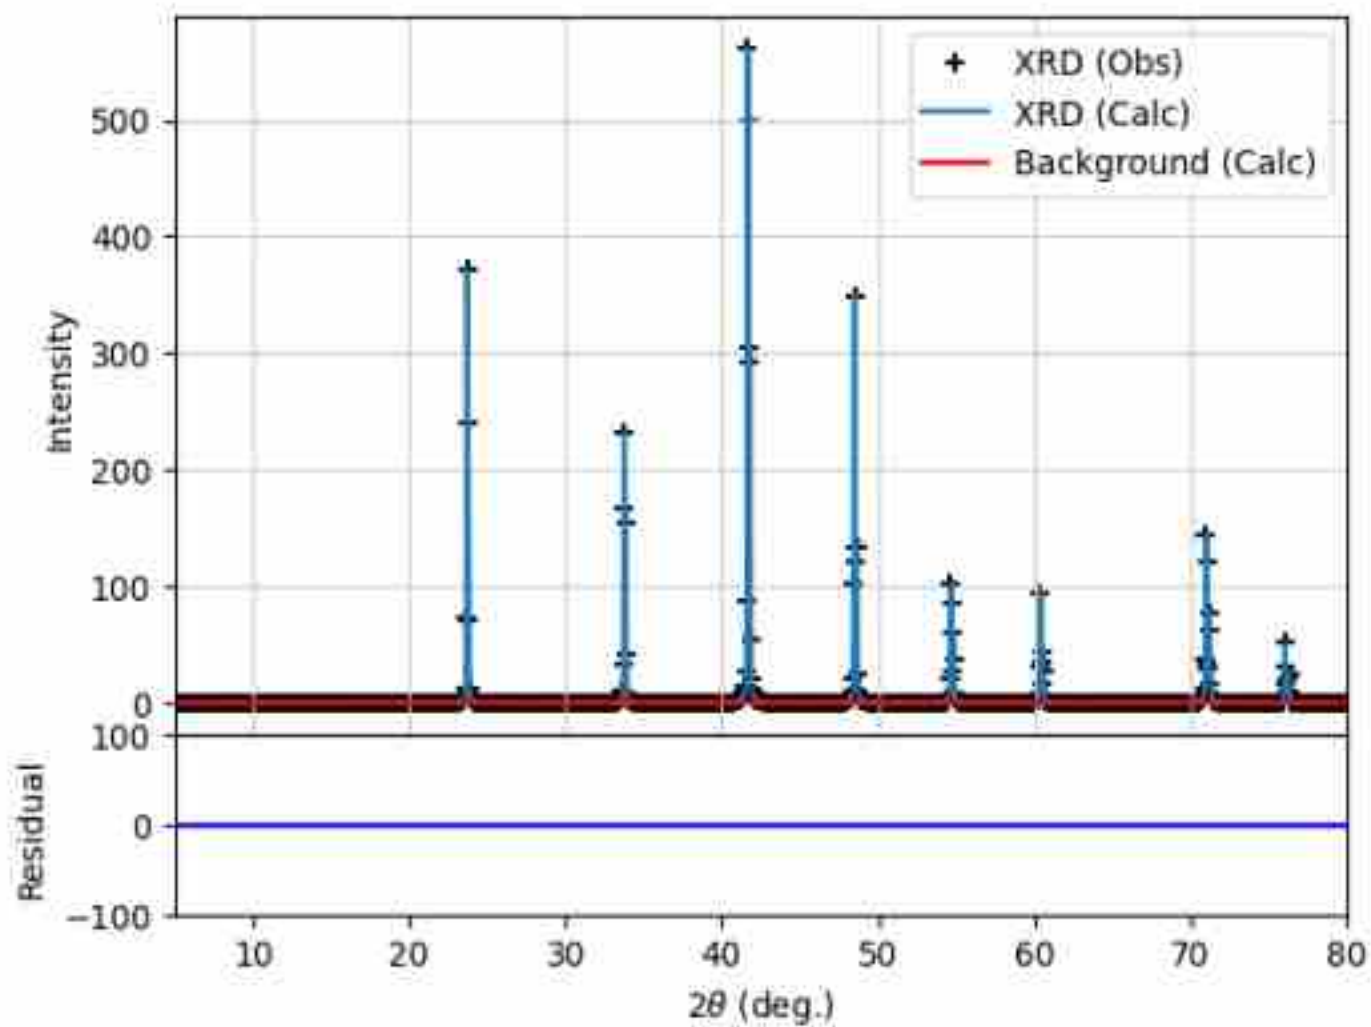

| RMSE before RR | Rwp    | RMSE after RR |
|----------------|--------|---------------|
| 0.003          | 0.0295 | 0.00292       |

# Ga<sub>3</sub>Bi<sub>1</sub>

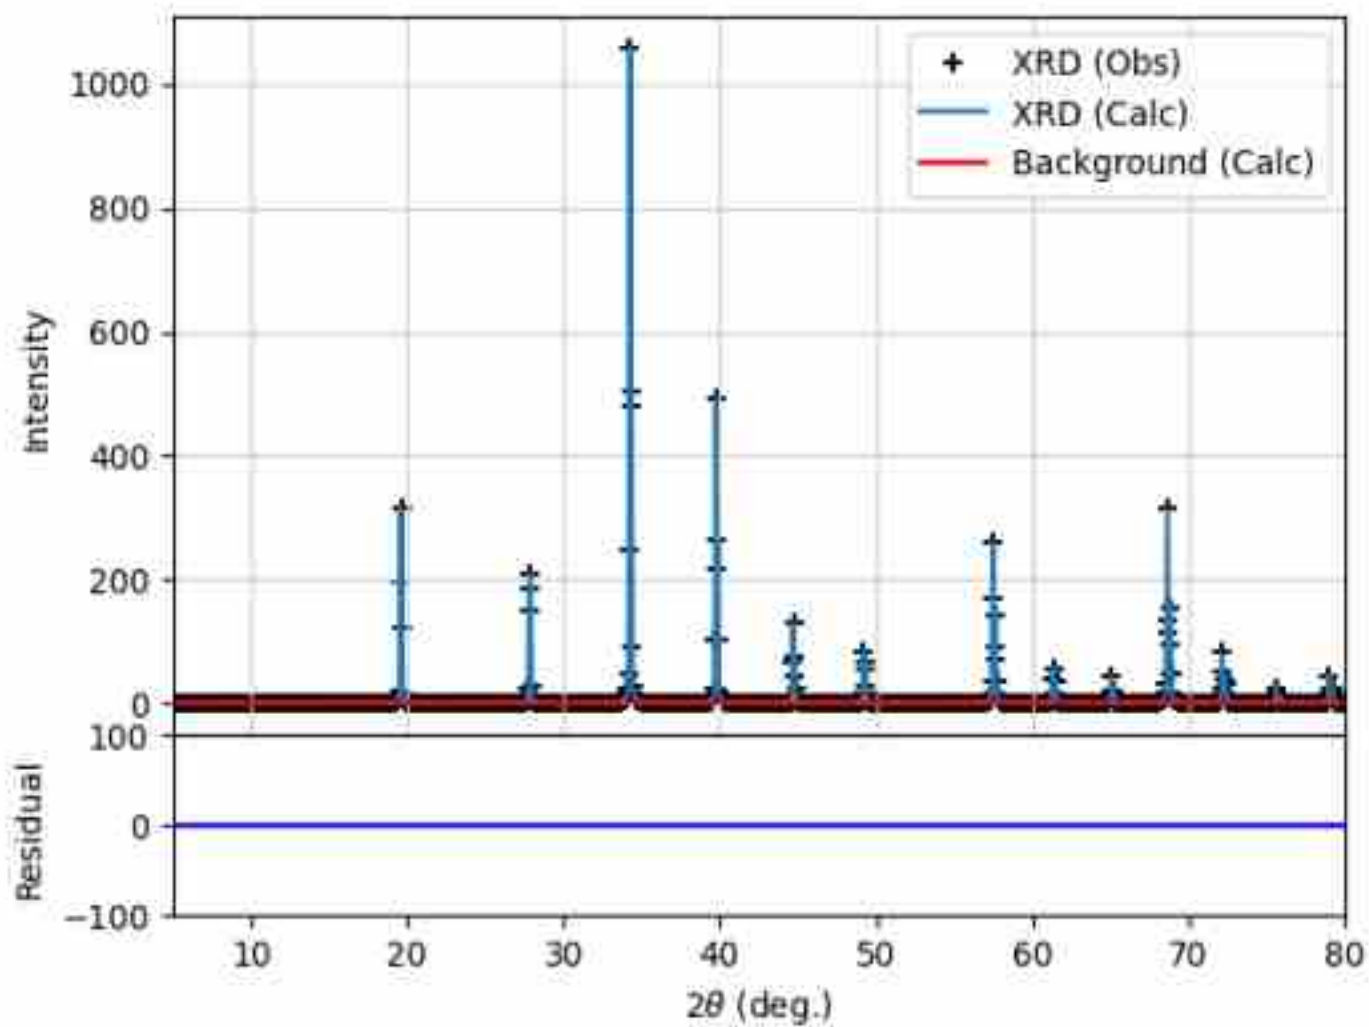

| RMSE before RR | Rwp     | RMSE after RR |
|----------------|---------|---------------|
| 0.003          | 0.00351 | 0.00142       |

# Ga<sub>3</sub>Hg<sub>1</sub>

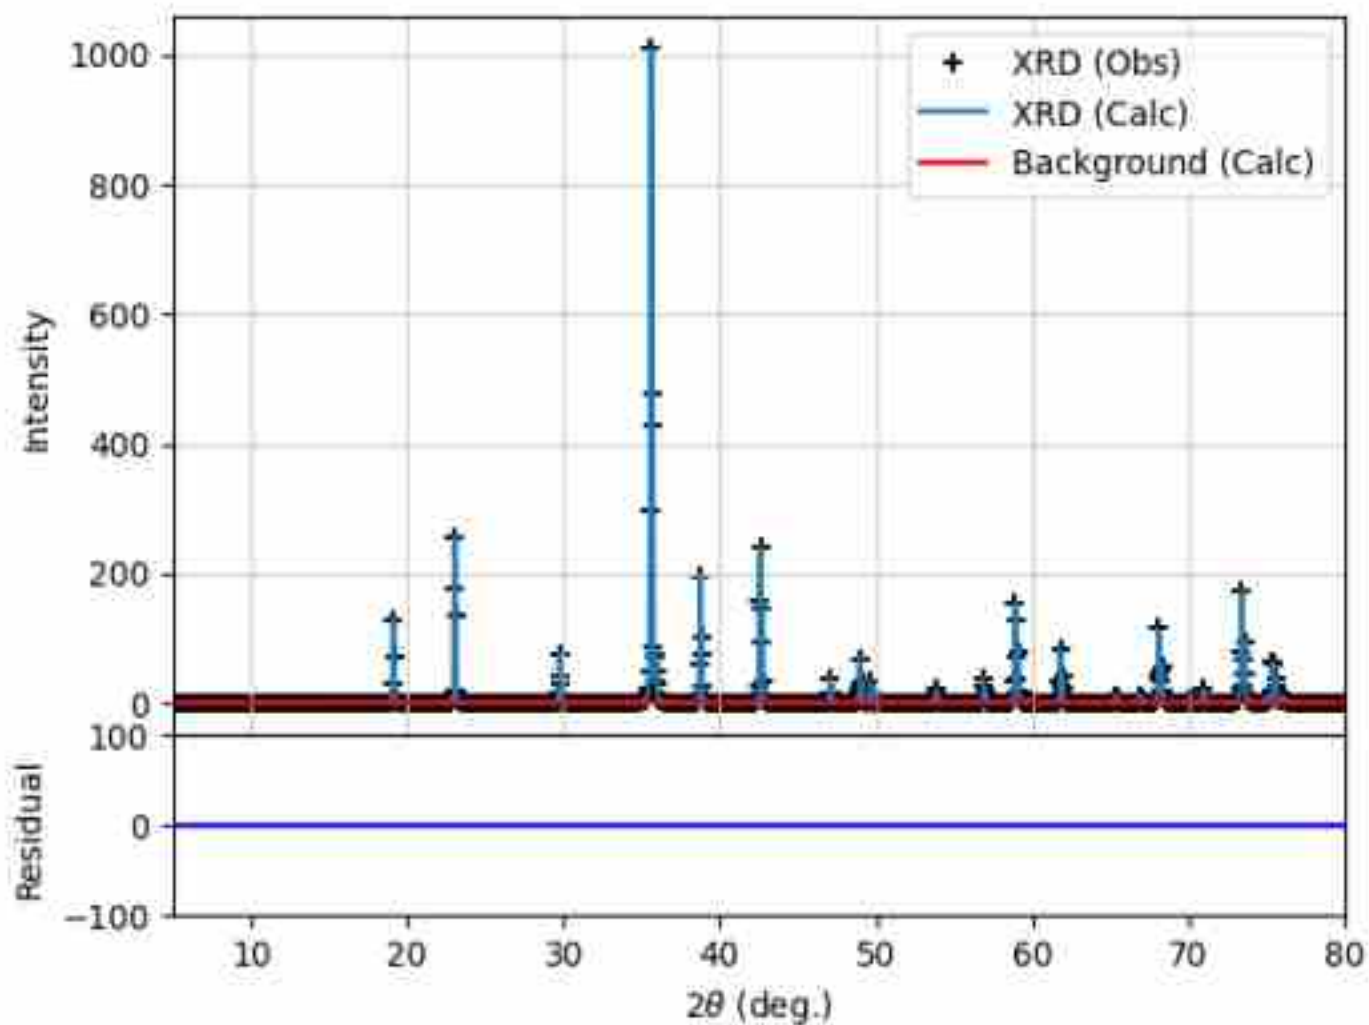

| RMSE before RR | Rwp     | RMSE after RR |
|----------------|---------|---------------|
| 0.003          | 0.00319 | 0.00087       |



# Ga4Au8

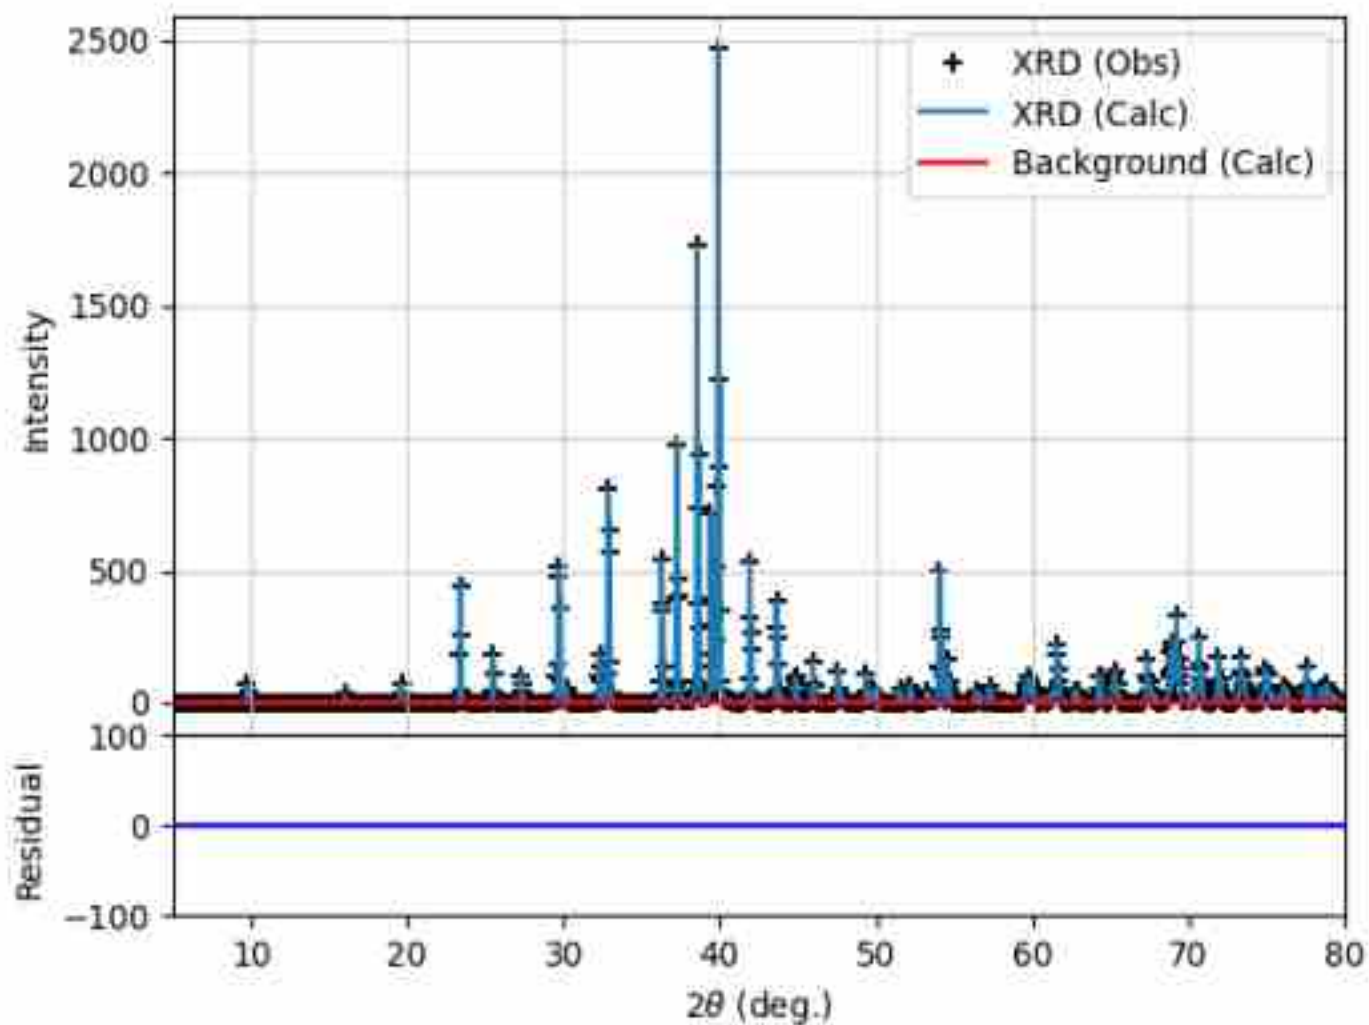

| RMSE before RR | Rwp     | RMSE after RR |
|----------------|---------|---------------|
| 0.03           | 0.00404 | 0.00045       |

# Gd1In1

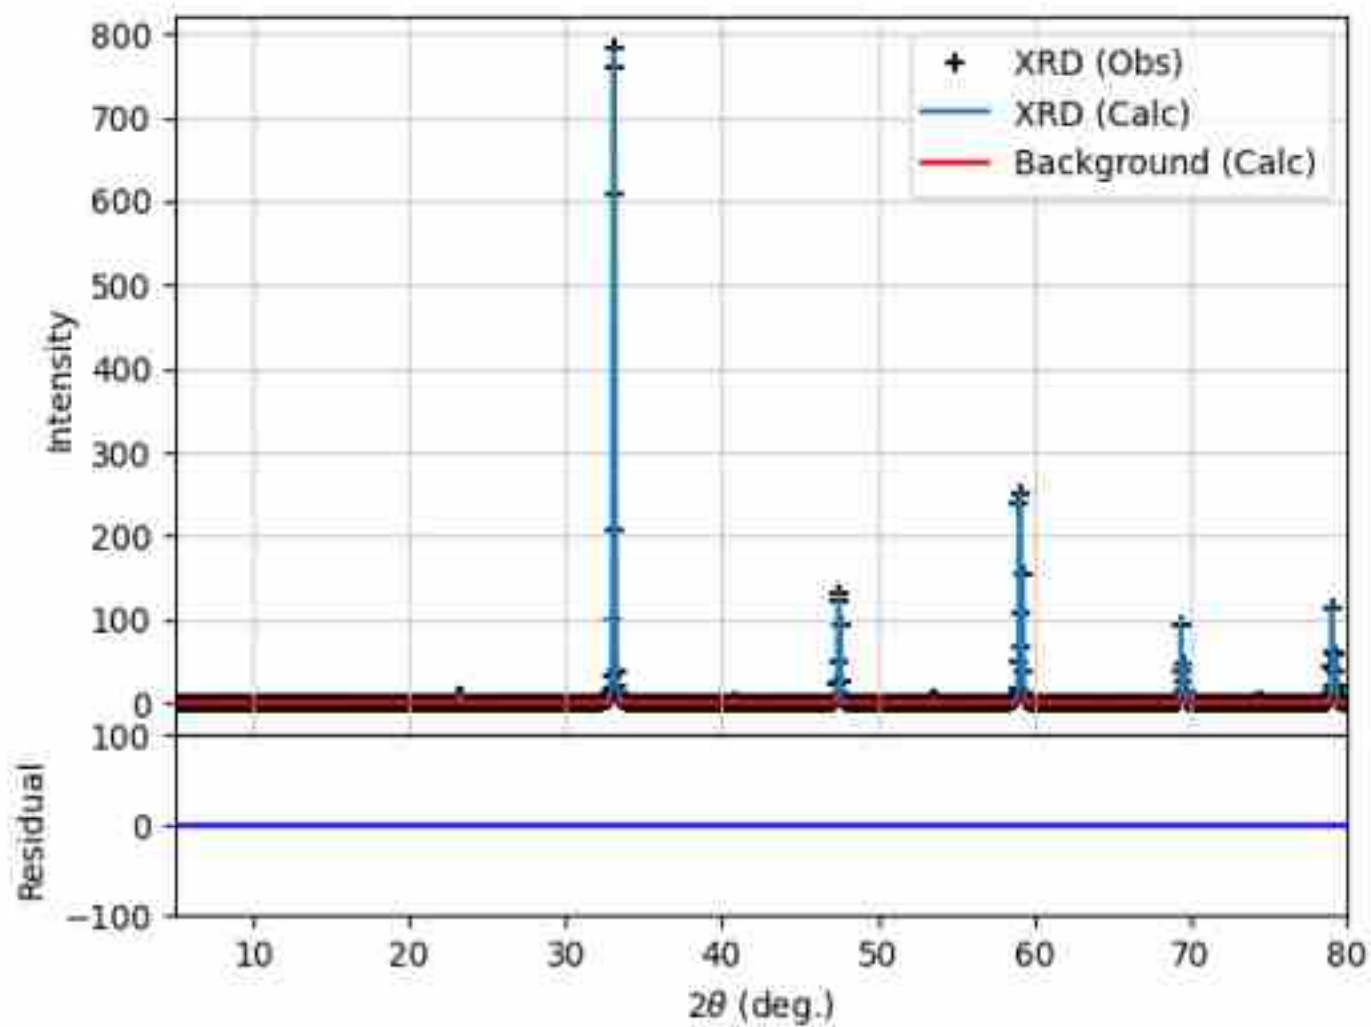

| RMSE before RR | Rwp     | RMSE after RR |
|----------------|---------|---------------|
| 0.003          | 0.15717 | 0.00258       |

# Gd1Sn1Au1

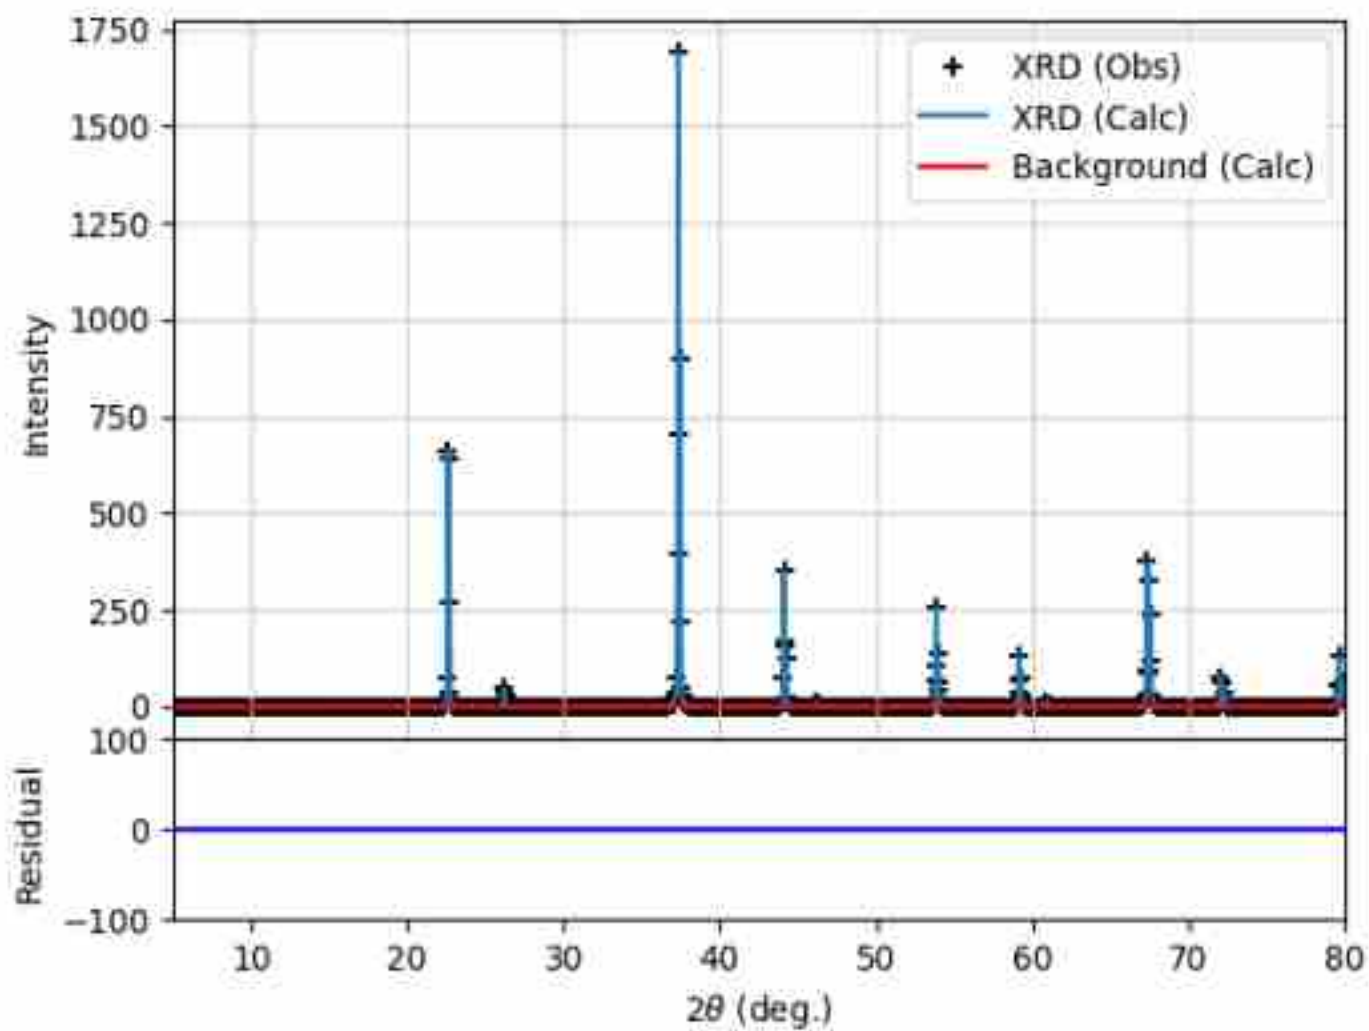

| RMSE before RR | Rwp     | RMSE after RR |
|----------------|---------|---------------|
| 0.003          | 0.00572 | 0.00042       |

# Gd1Tl1

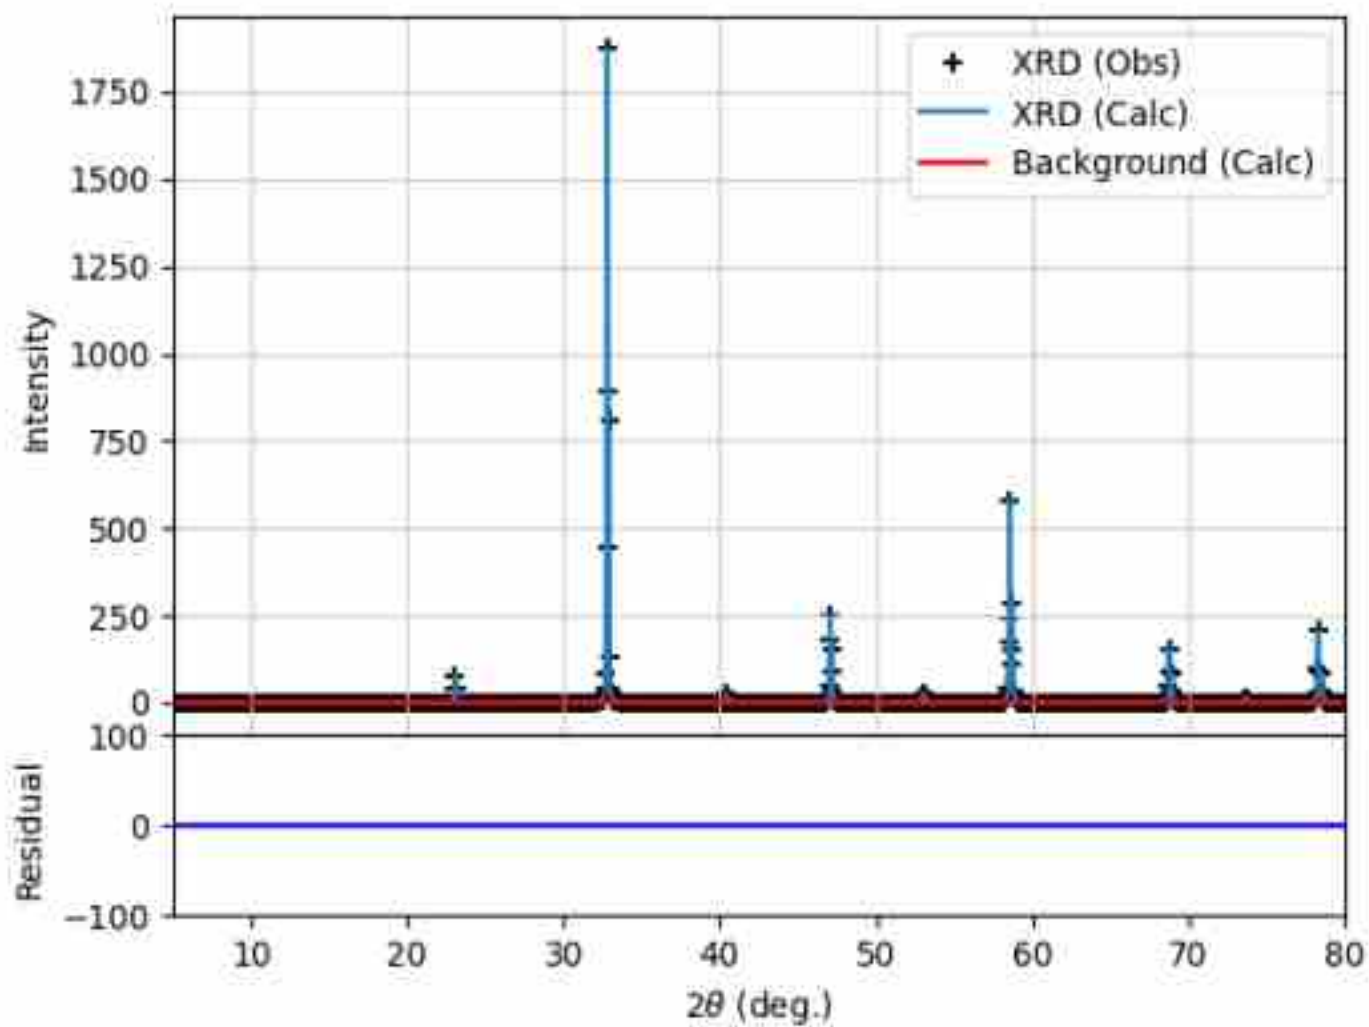

| RMSE before RR | Rwp     | RMSE after RR |
|----------------|---------|---------------|
| 0.003          | 0.05893 | 0.00163       |

# Gd<sub>2</sub>Ga<sub>2</sub>

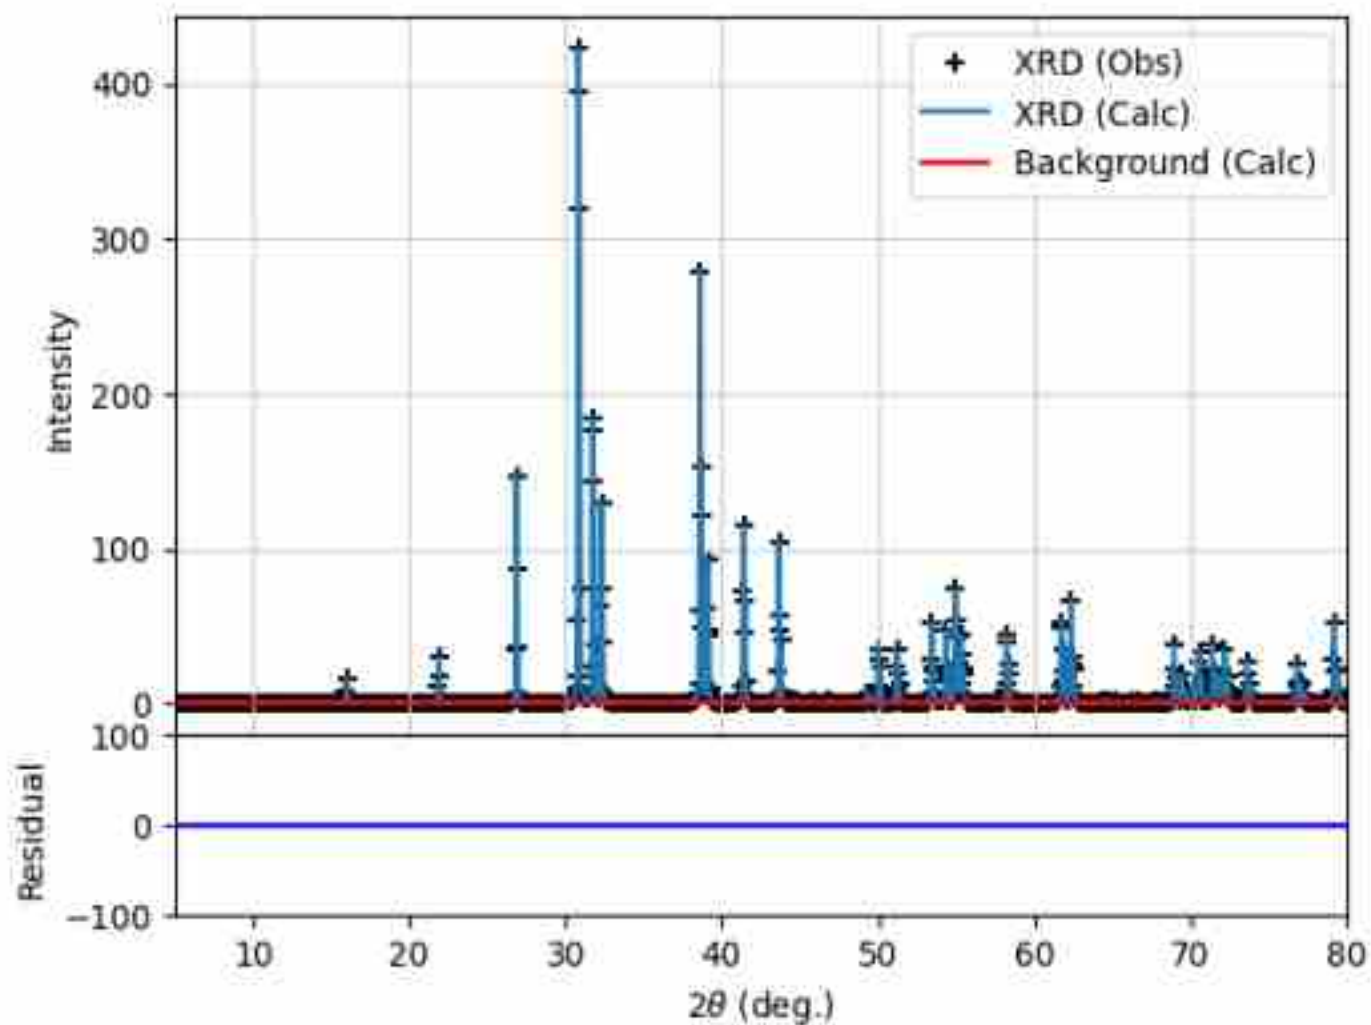

| RMSE before RR | Rwp     | RMSE after RR |
|----------------|---------|---------------|
| 0.003          | 0.00421 | 0.00022       |

# Gd<sub>4</sub>Mn<sub>2</sub>Co<sub>2</sub>O<sub>12</sub>

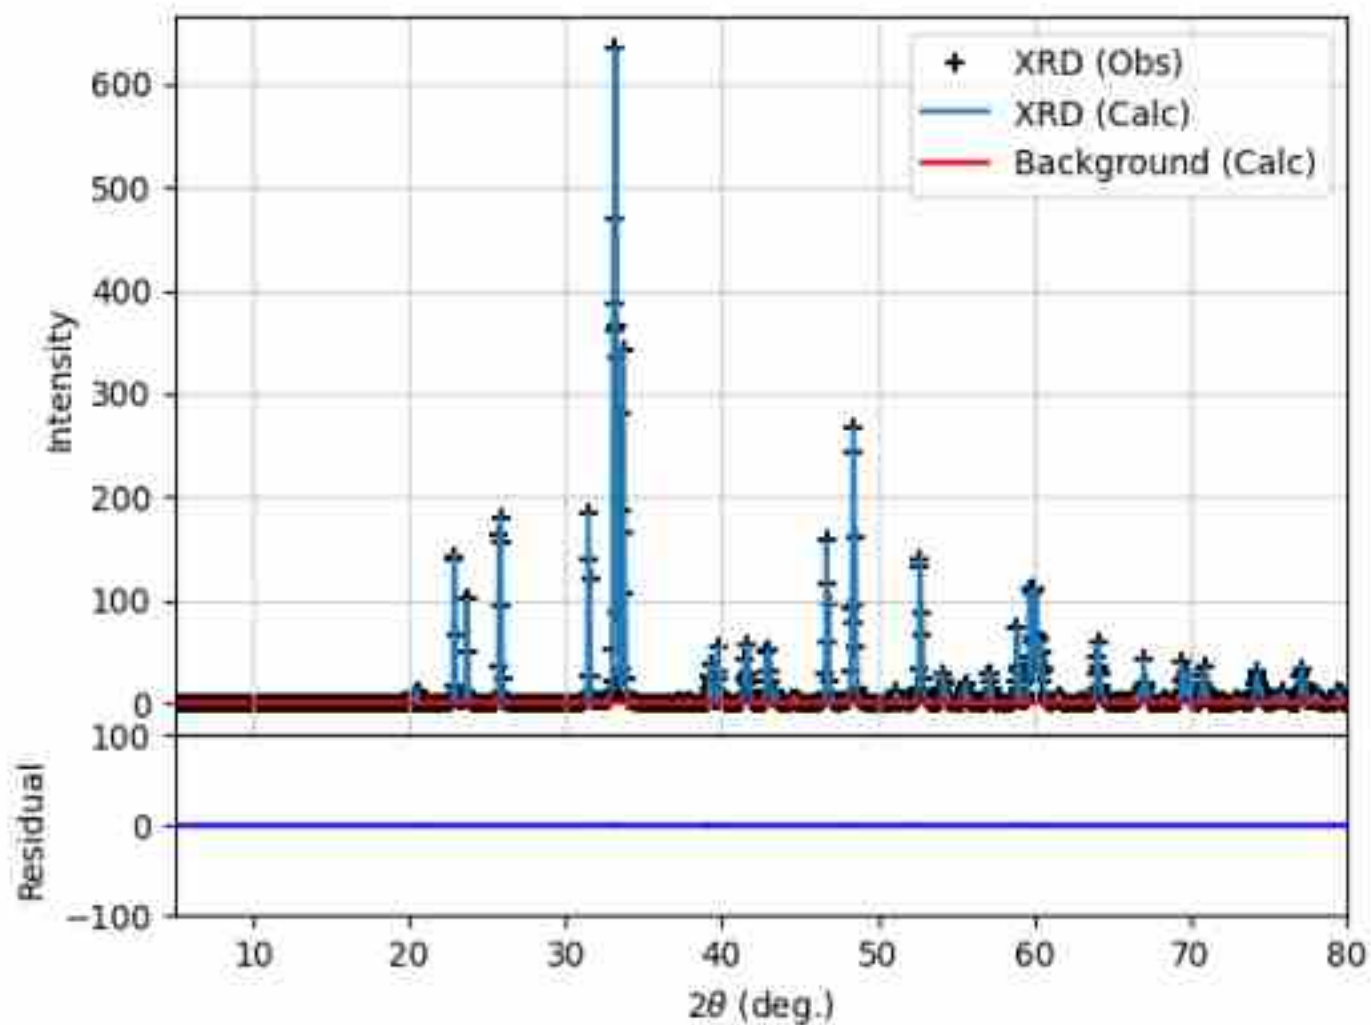

| RMSE before RR | Rwp     | RMSE after RR |
|----------------|---------|---------------|
| 0.03           | 0.62604 | 0.05686       |

# Hf1In1Cu2

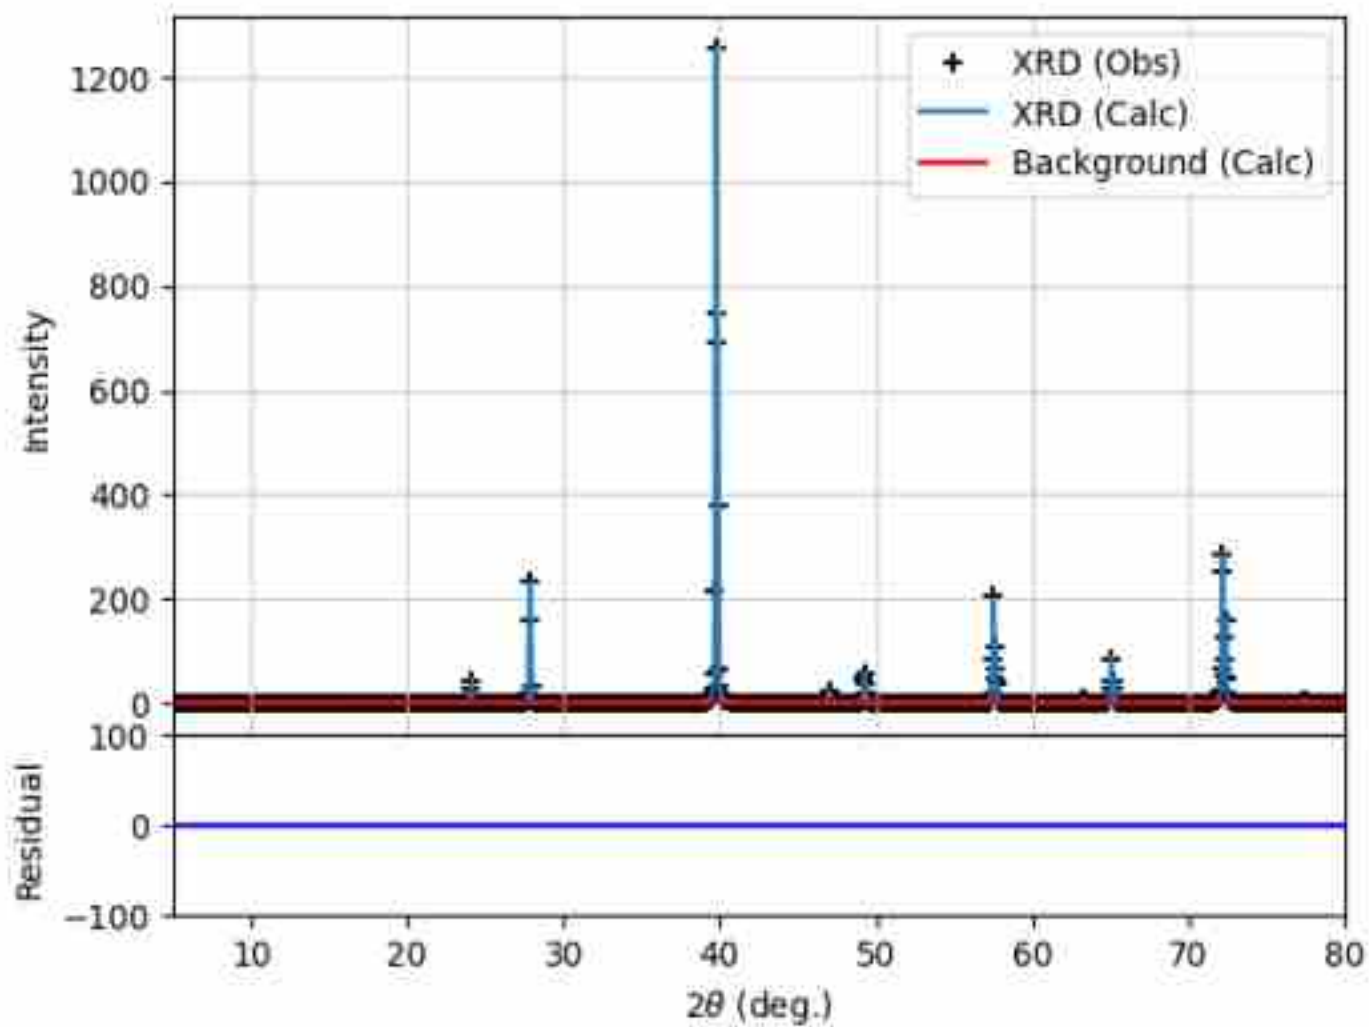

| RMSE before RR | Rwp     | RMSE after RR |
|----------------|---------|---------------|
| 0.003          | 0.00258 | 0.00023       |

# Hf4Co4Ge4

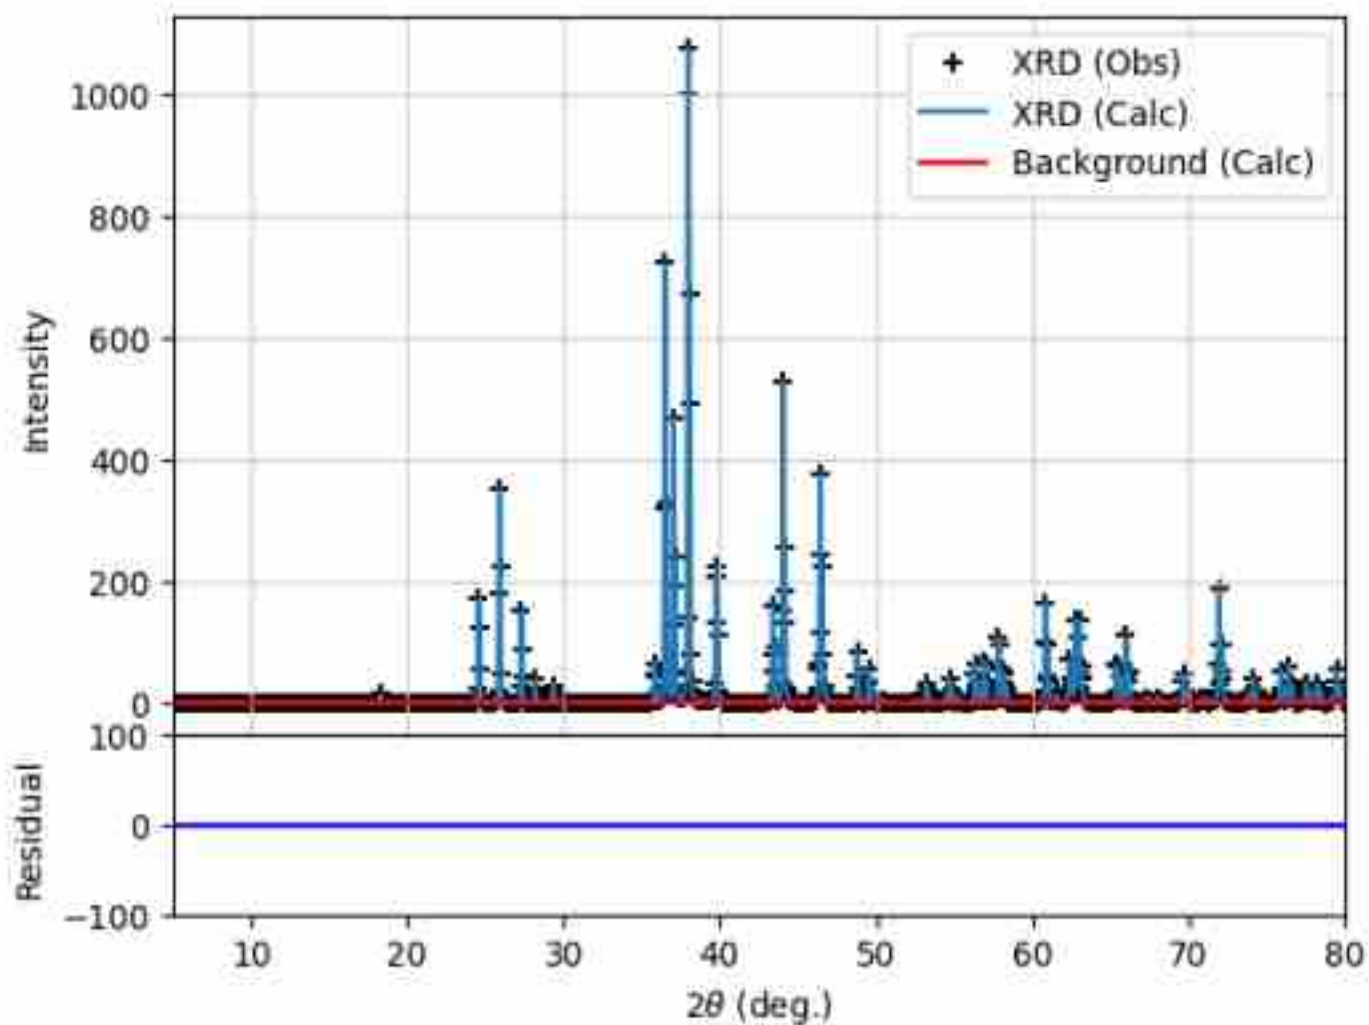

| RMSE before RR | Rwp     | RMSE after RR |
|----------------|---------|---------------|
| 0.03           | 0.00431 | 0.00046       |



# Ho1Hg2

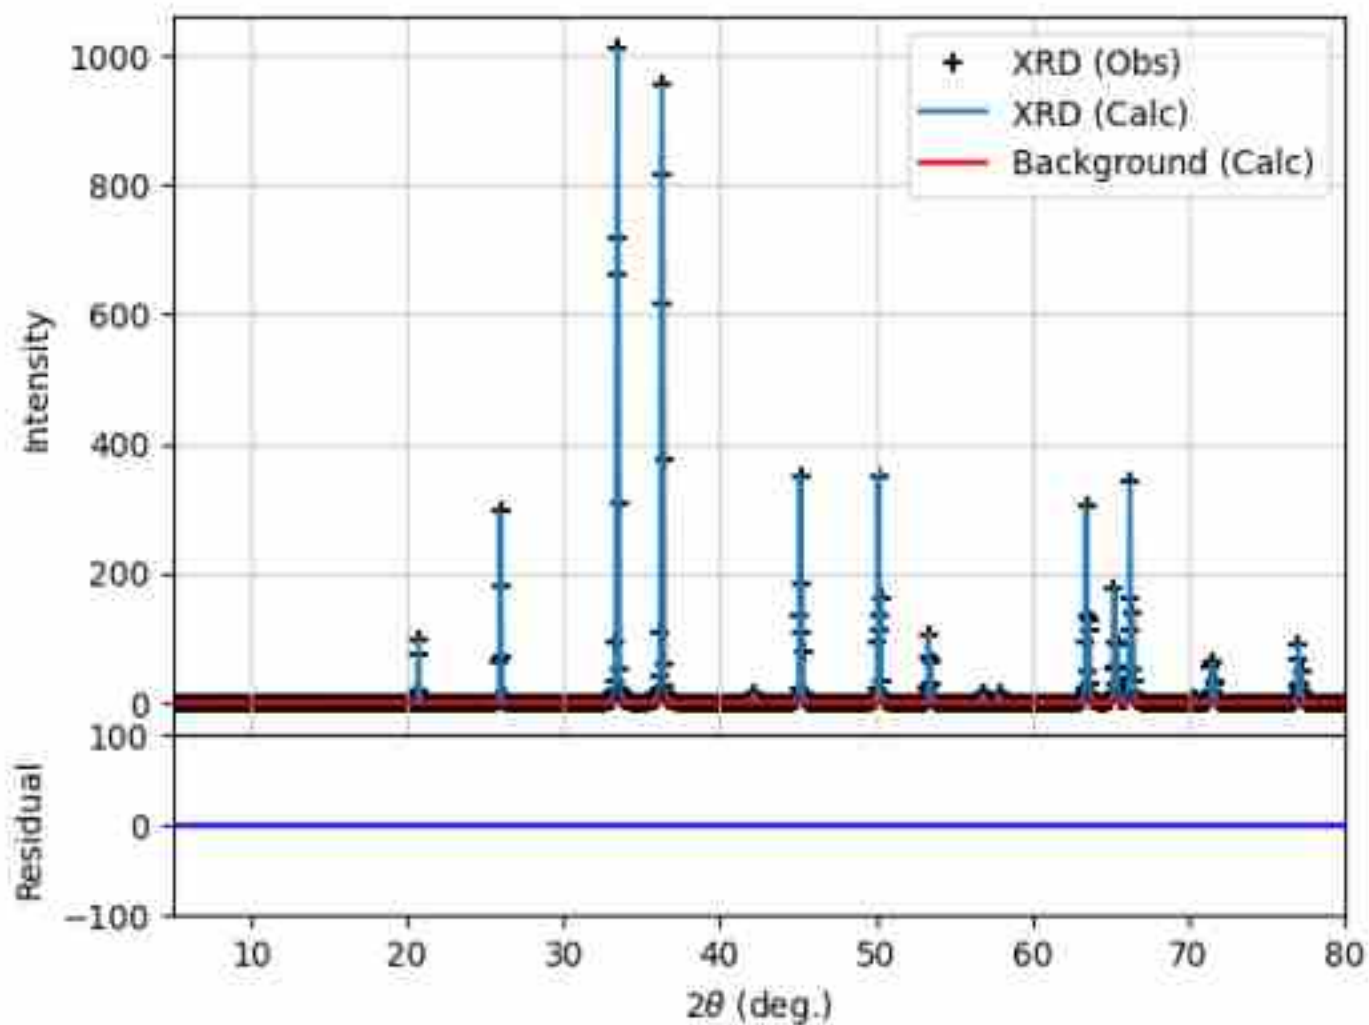

| RMSE before RR | Rwp     | RMSE after RR |
|----------------|---------|---------------|
| 0.003          | 0.00566 | 0.00052       |

# Ho1Rh2Pb1

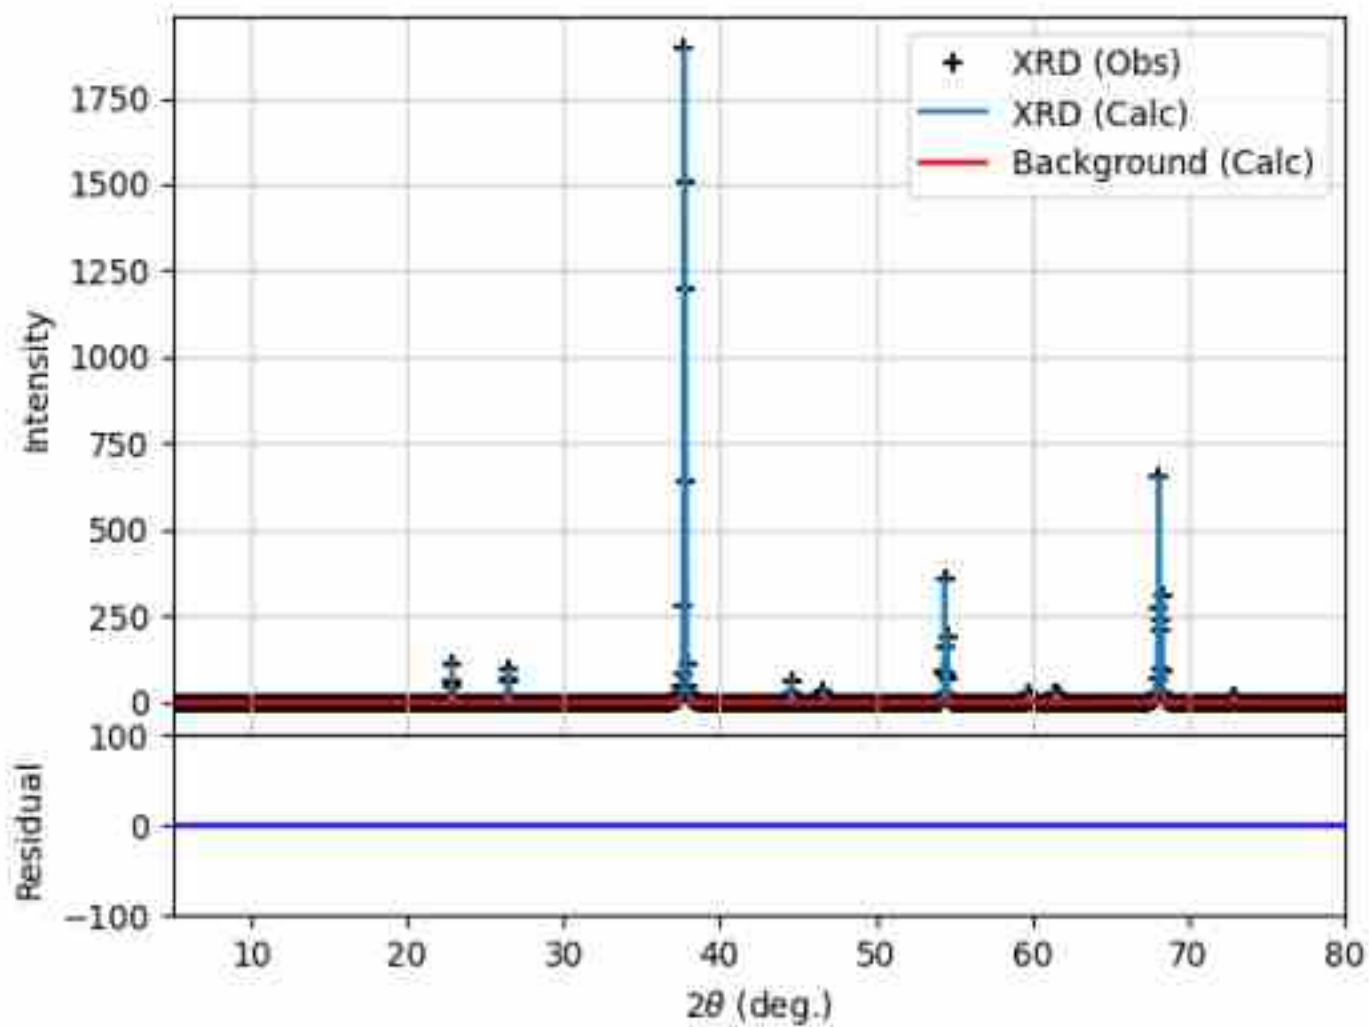

| RMSE before RR | Rwp     | RMSE after RR |
|----------------|---------|---------------|
| 0.003          | 0.01005 | 0.001         |

# Ho2Mg1Ru1

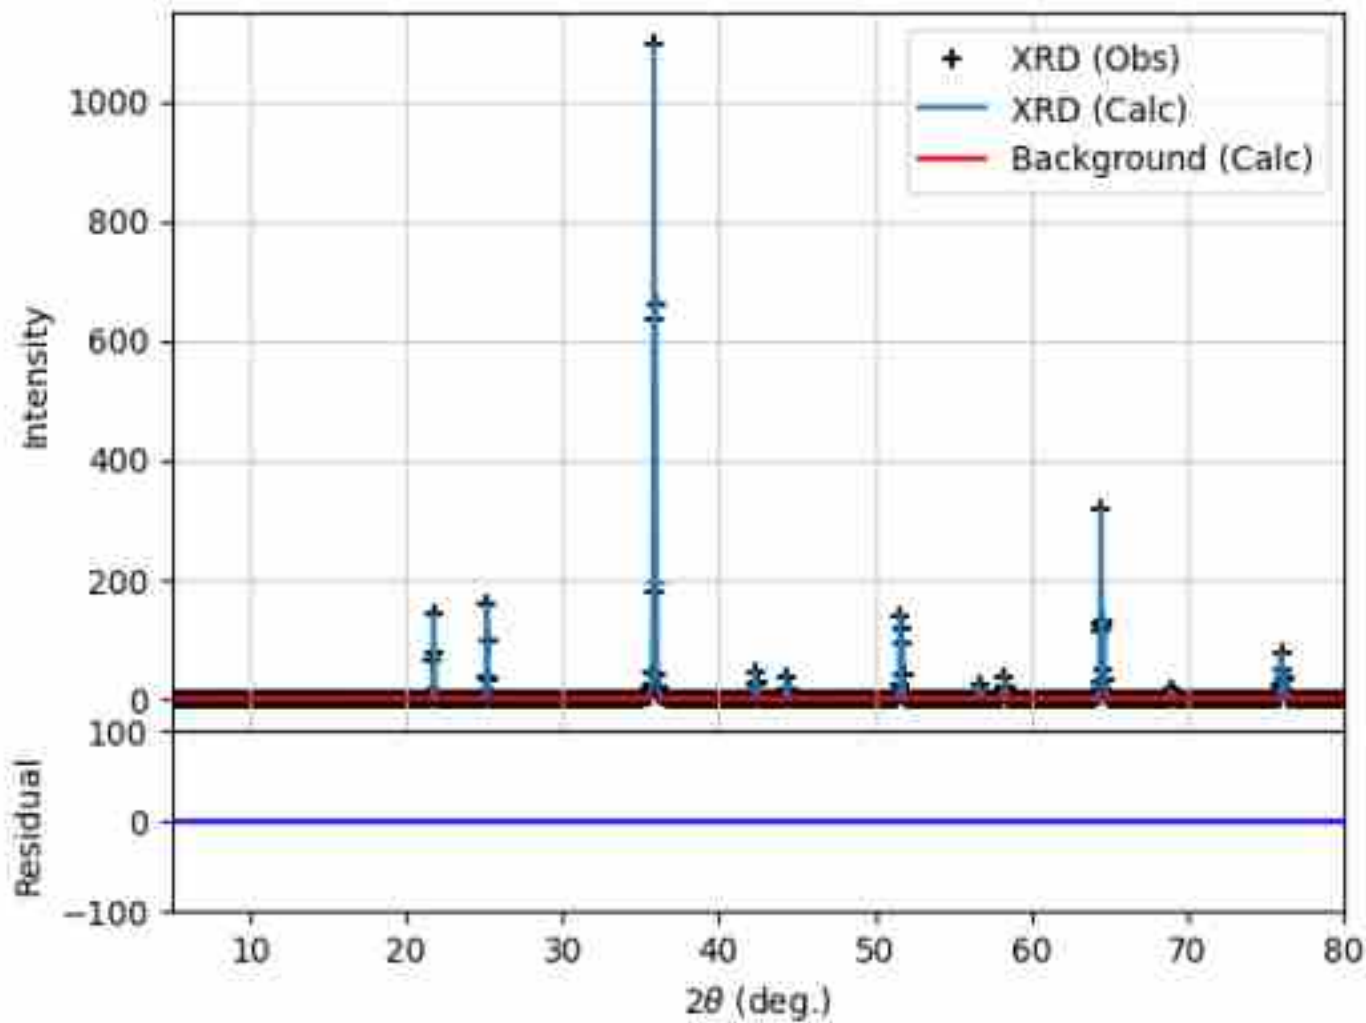

| RMSE before RR | Rwp     | RMSE after RR |
|----------------|---------|---------------|
| 0.003          | 0.04056 | 0.00398       |

# Ho<sub>4</sub>Zn<sub>4</sub>Ge<sub>4</sub>

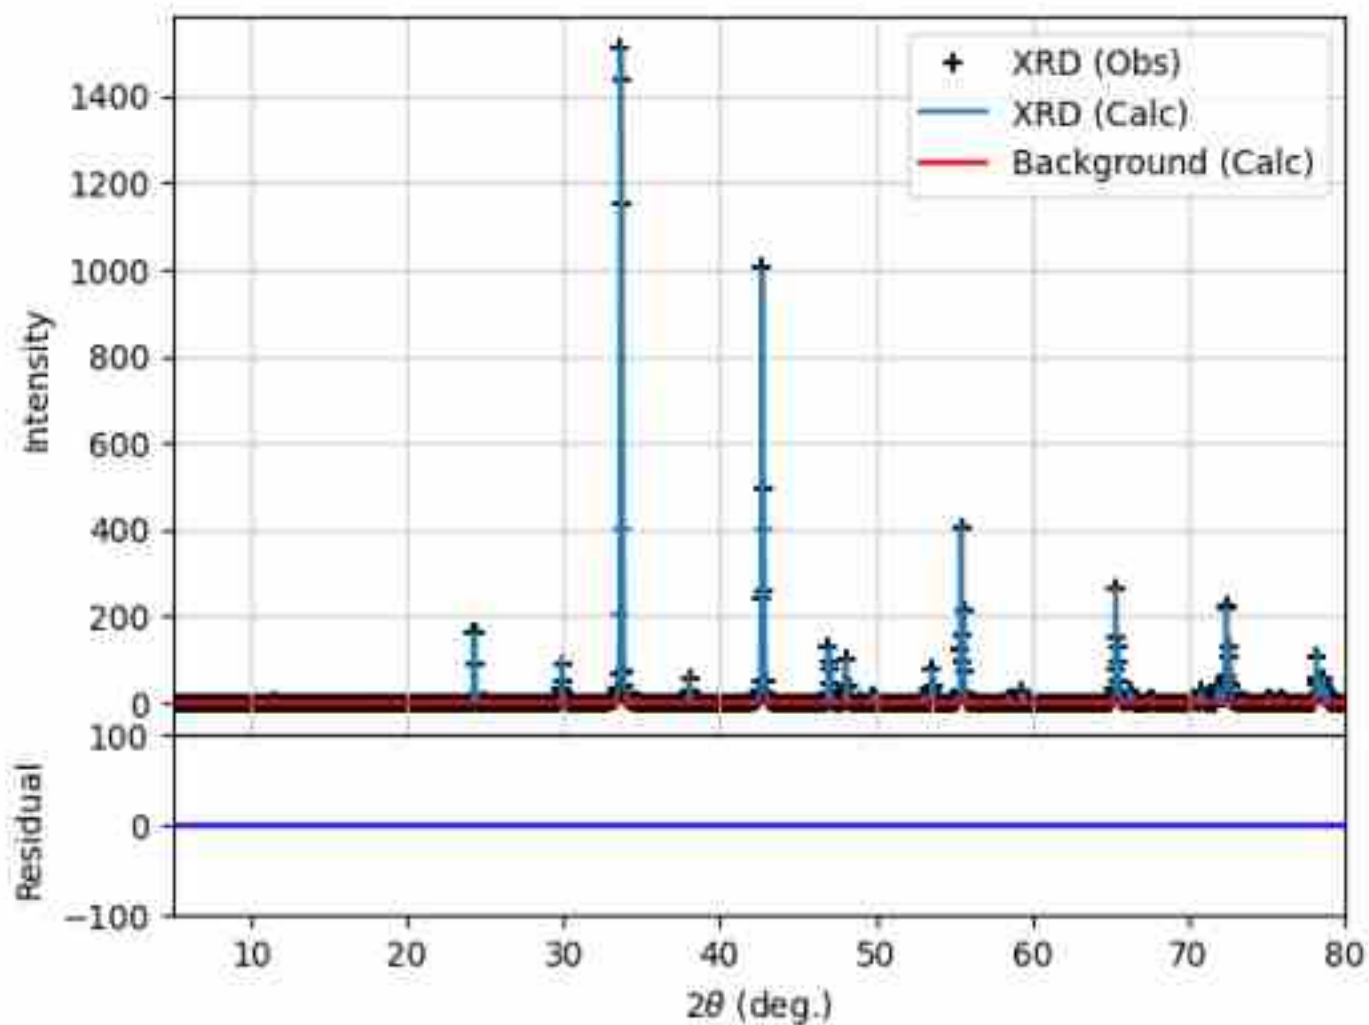

| RMSE before RR | Rwp    | RMSE after RR |
|----------------|--------|---------------|
| 0.03           | 0.0024 | 0.00032       |

# In1Bi1

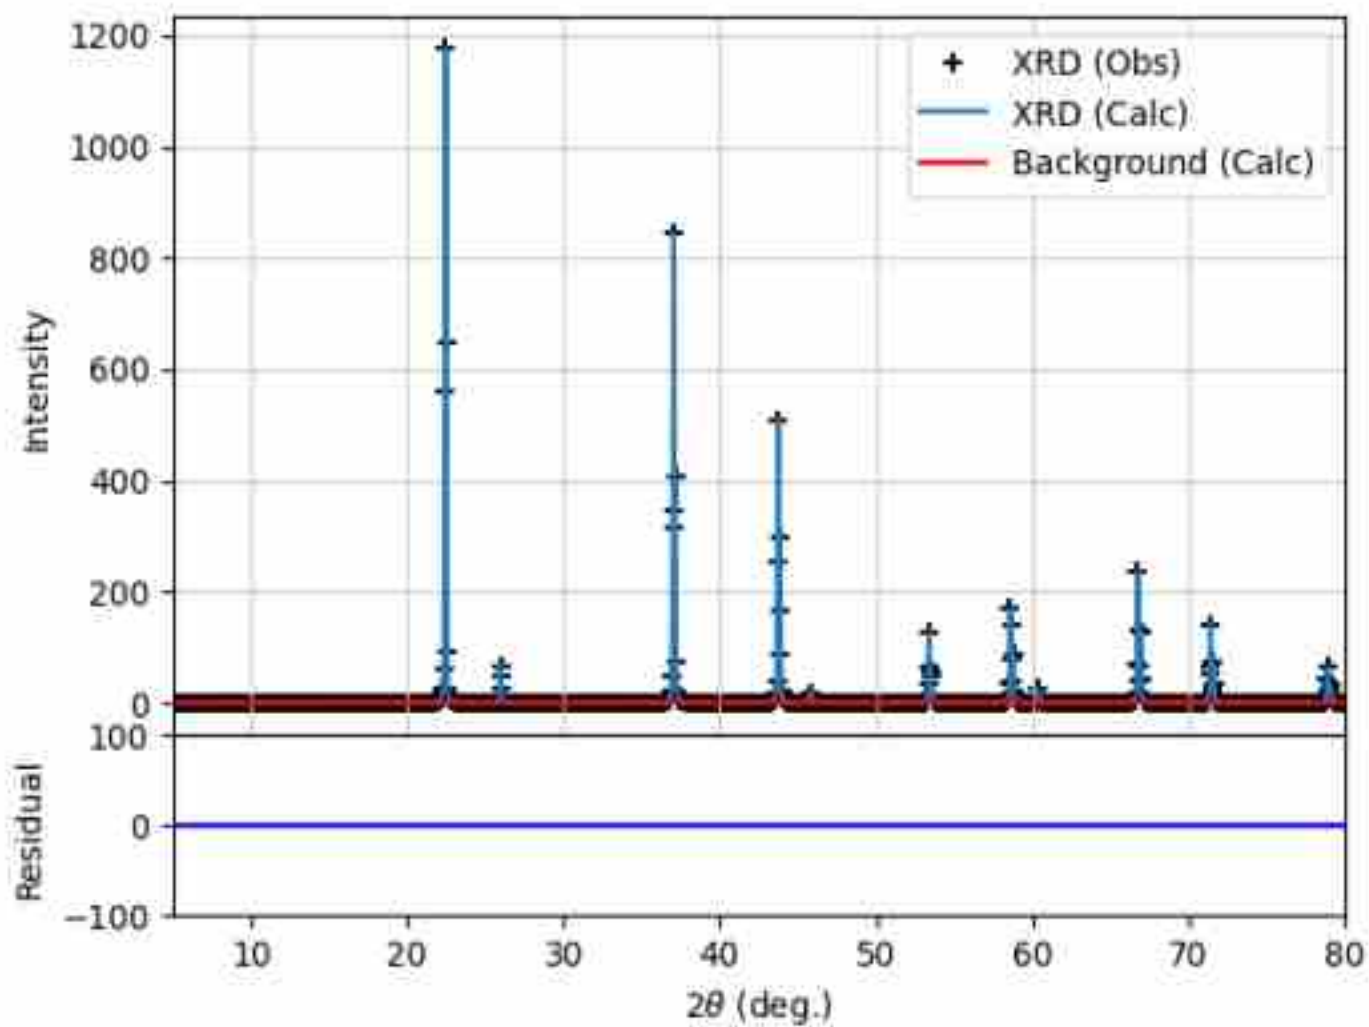

| RMSE before RR | Rwp     | RMSE after RR |
|----------------|---------|---------------|
| 0.003          | 0.07723 | 0.00289       |

# K<sub>2</sub>Ag<sub>2</sub>F<sub>8</sub>

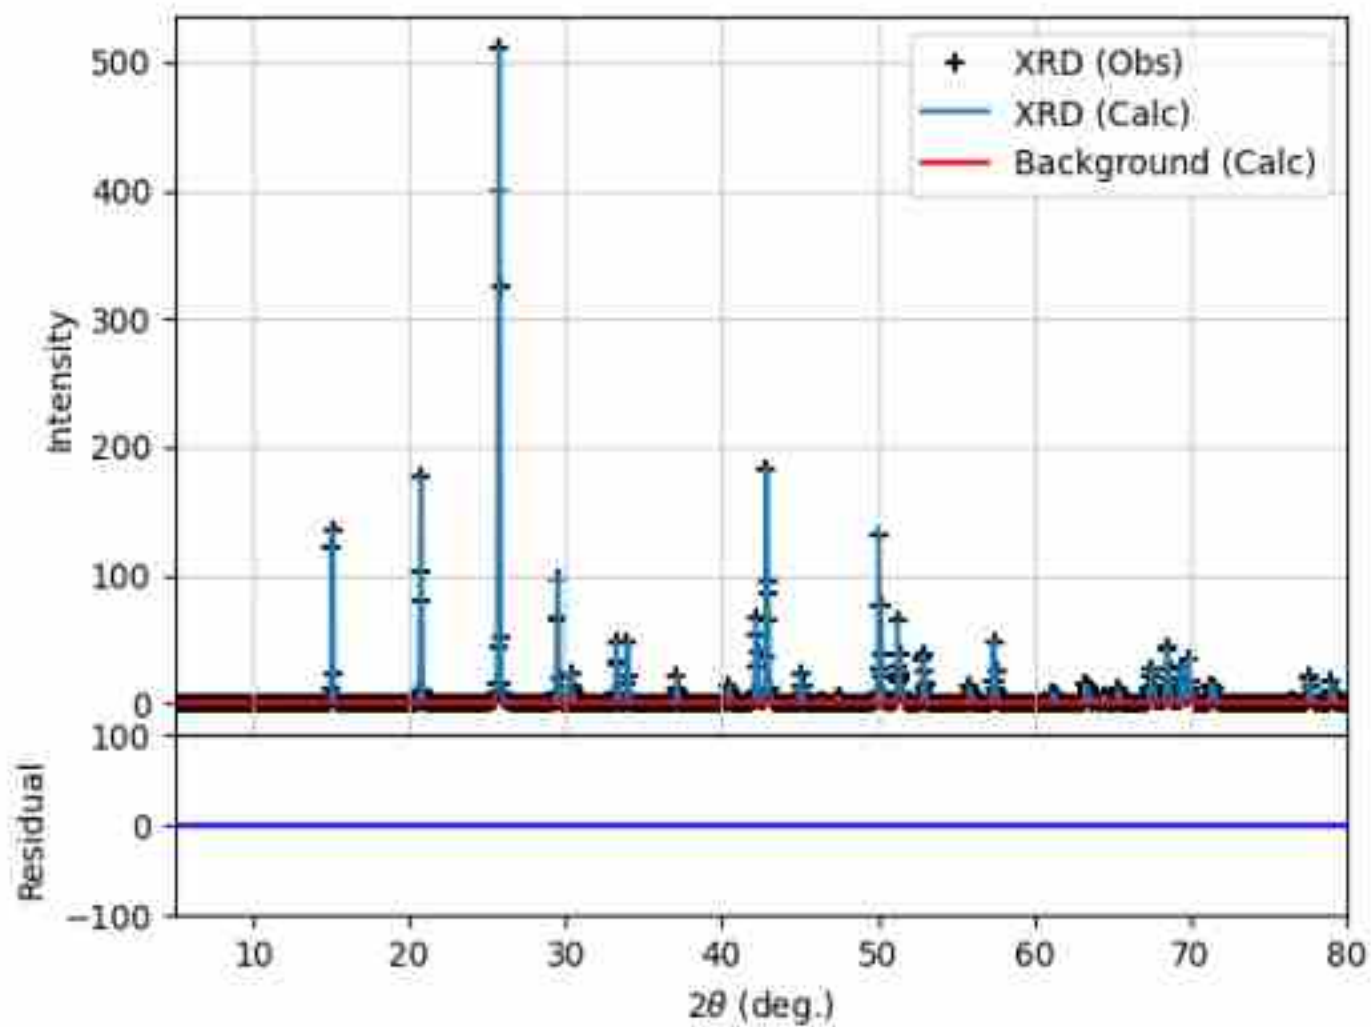

| RMSE before RR | Rwp     | RMSE after RR |
|----------------|---------|---------------|
| 0.03           | 0.00292 | 0.00067       |

# K<sub>2</sub>HgI<sub>3</sub>Au<sub>1</sub>

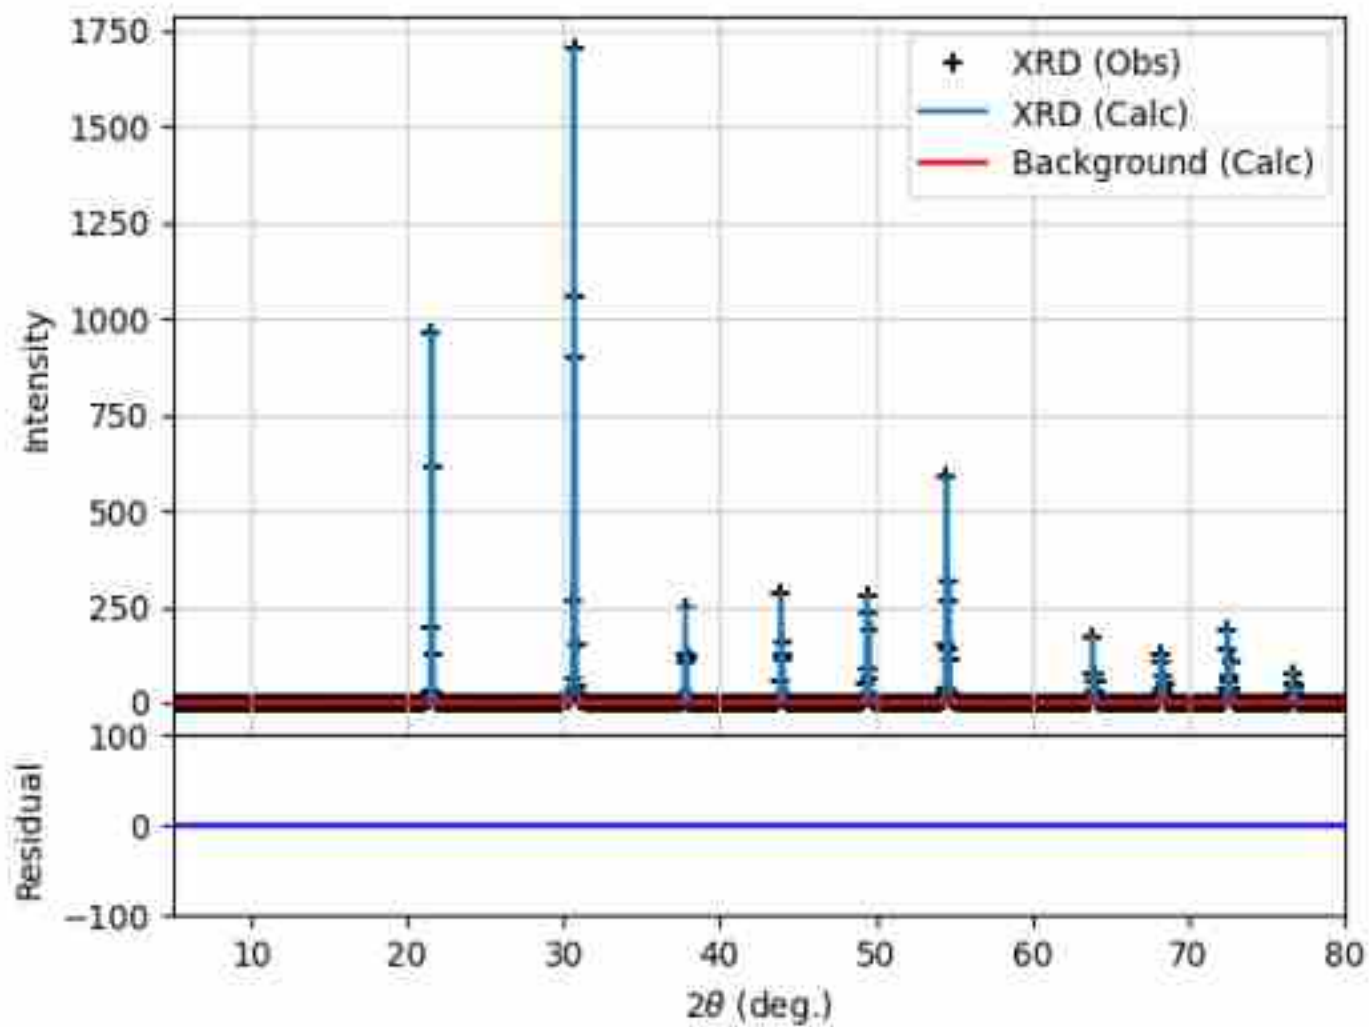

| RMSE before RR | Rwp     | RMSE after RR |
|----------------|---------|---------------|
| 0.003          | 0.01745 | 0.00212       |

# K4Ti2S6

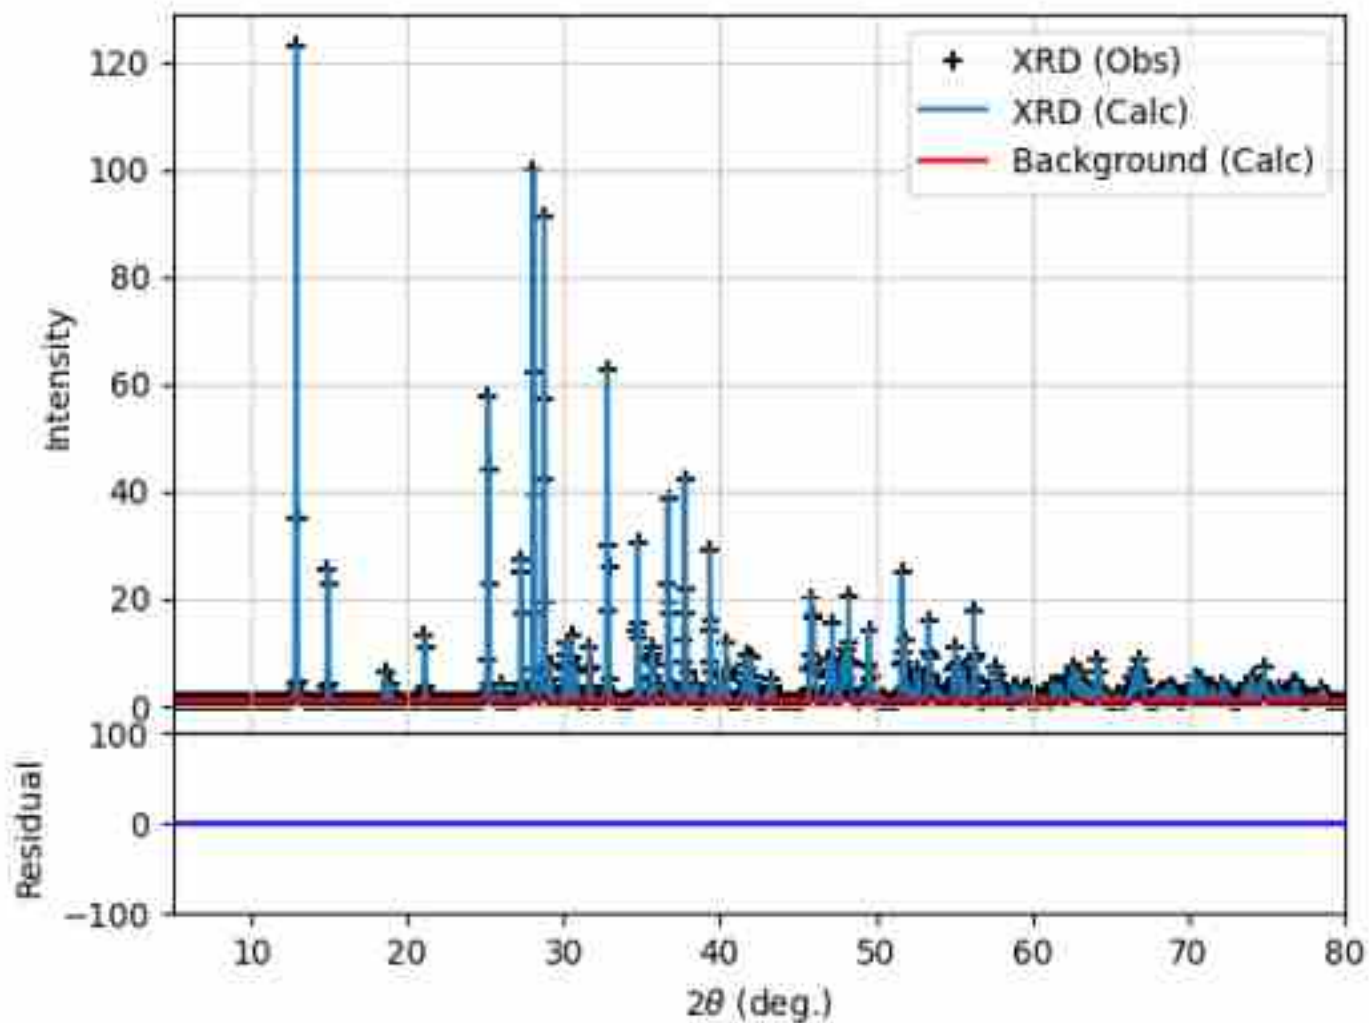

| RMSE before RR | Rwp     | RMSE after RR |
|----------------|---------|---------------|
| 0.03           | 0.00305 | 0.00043       |



# La1Mg3

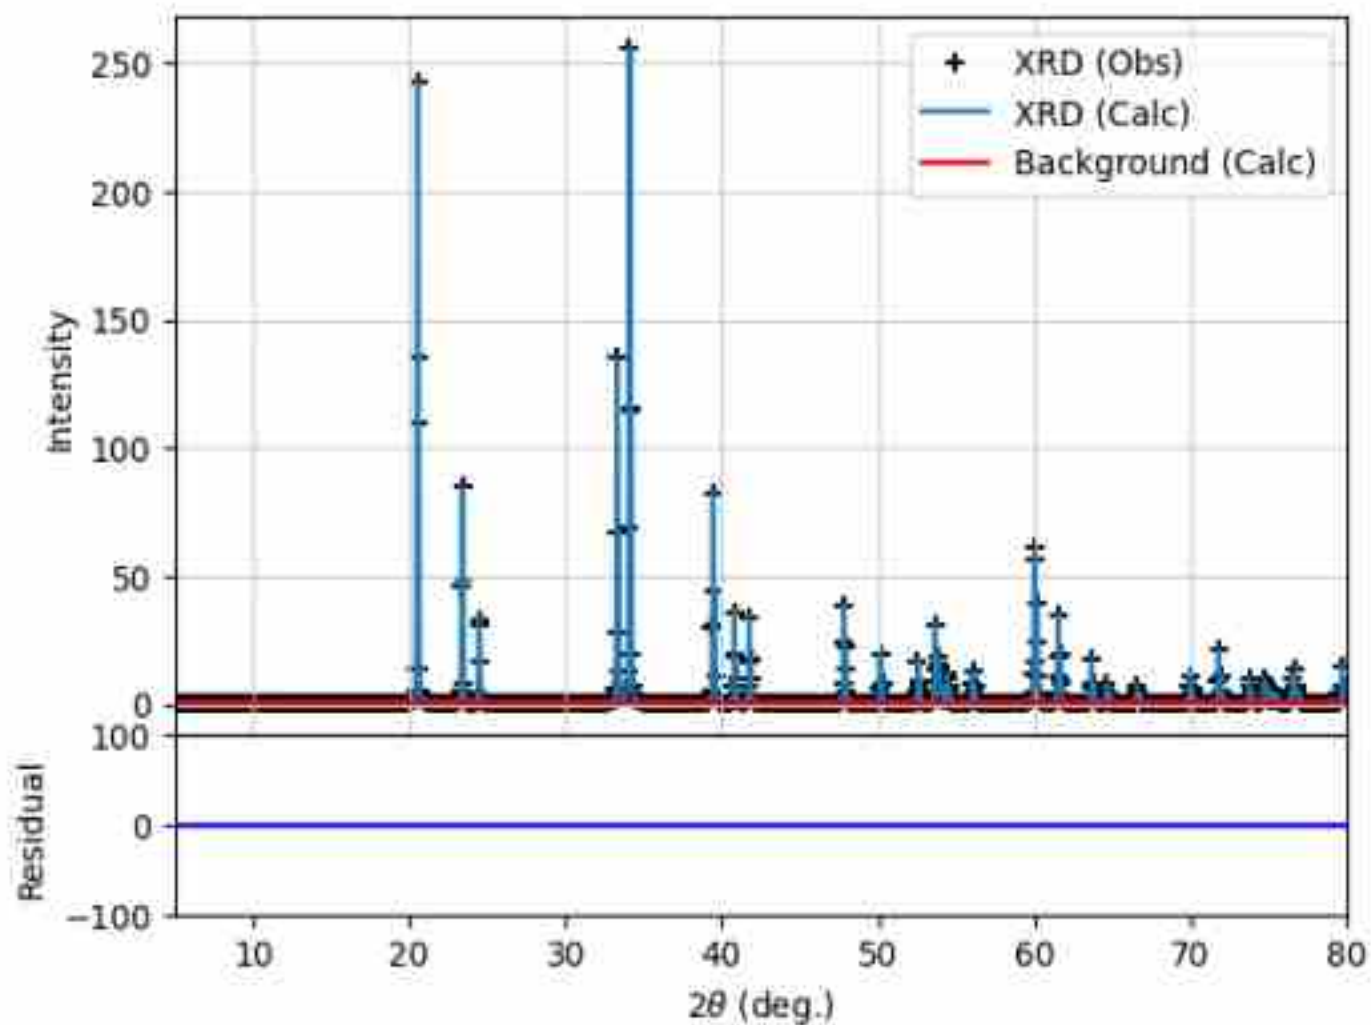

| RMSE before RR | Rwp     | RMSE after RR |
|----------------|---------|---------------|
| 0.003          | 0.00235 | 0.00038       |

# La1Th1

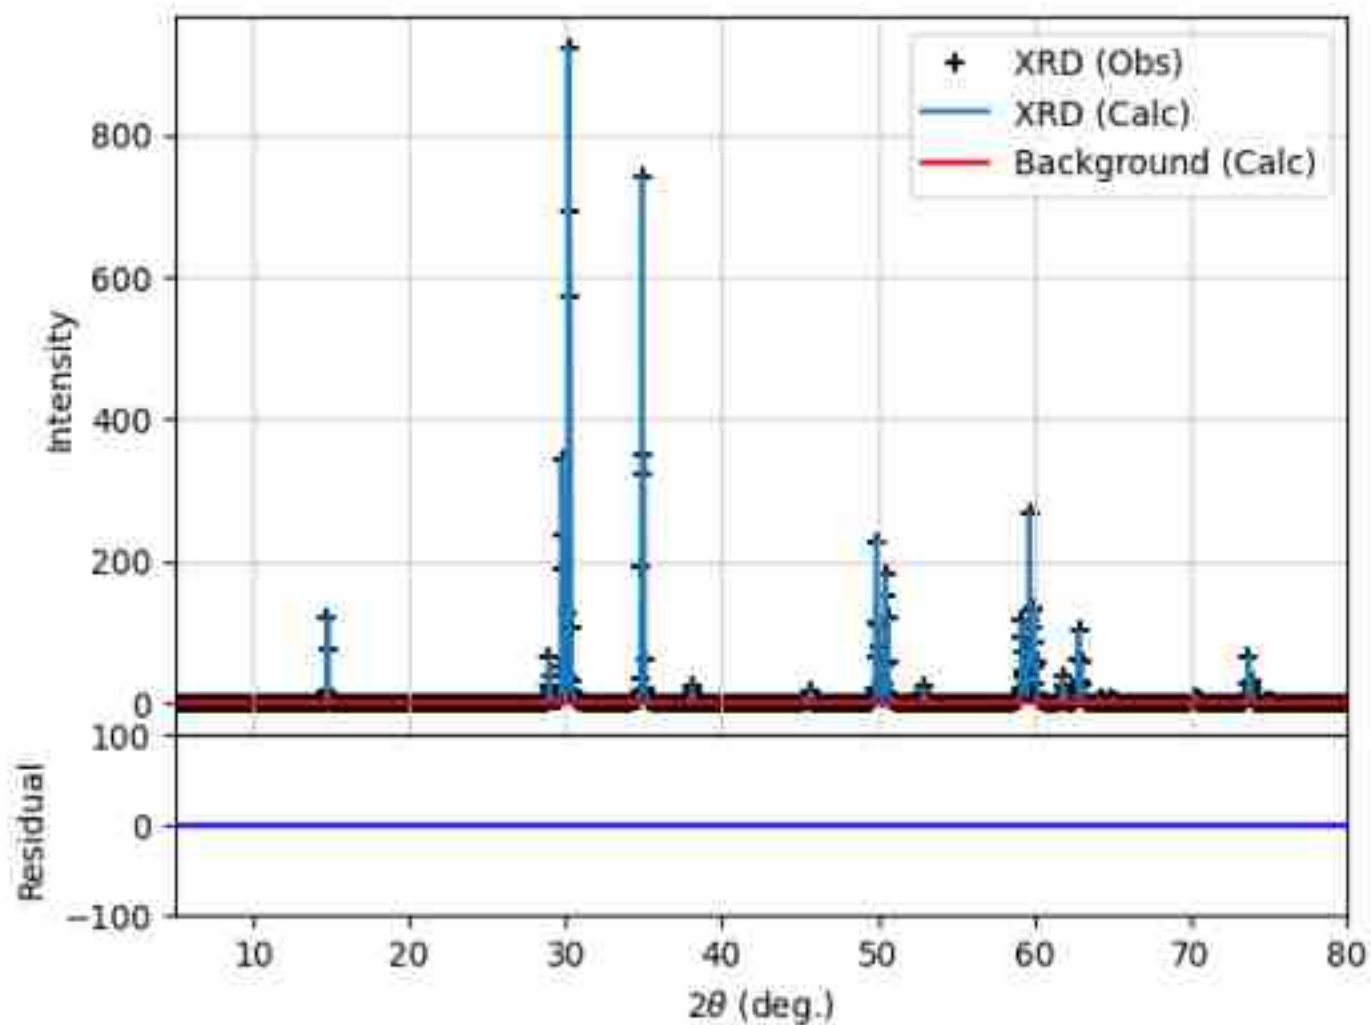

| RMSE before RR | Rwp    | RMSE after RR |
|----------------|--------|---------------|
| 0.003          | 0.0039 | 0.00053       |

# La<sub>1</sub>Y<sub>1</sub>Mn<sub>2</sub>Si<sub>2</sub>

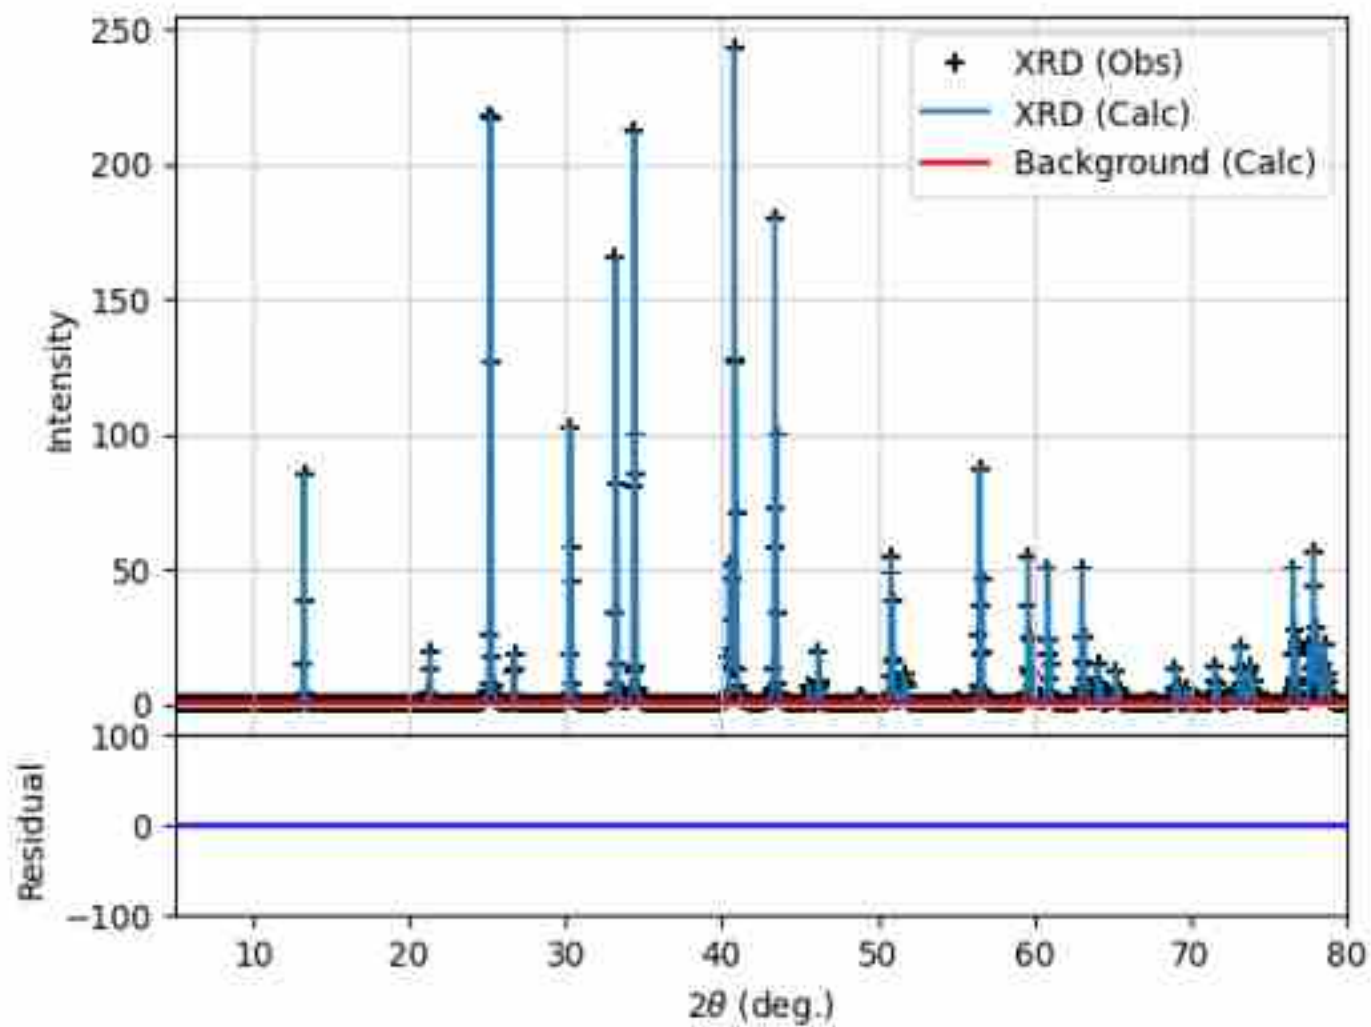

| RMSE before RR | Rwp     | RMSE after RR |
|----------------|---------|---------------|
| 0.03           | 0.02403 | 0.00056       |

# La<sub>2</sub>C<sub>2</sub>N<sub>4</sub>Cl<sub>2</sub>

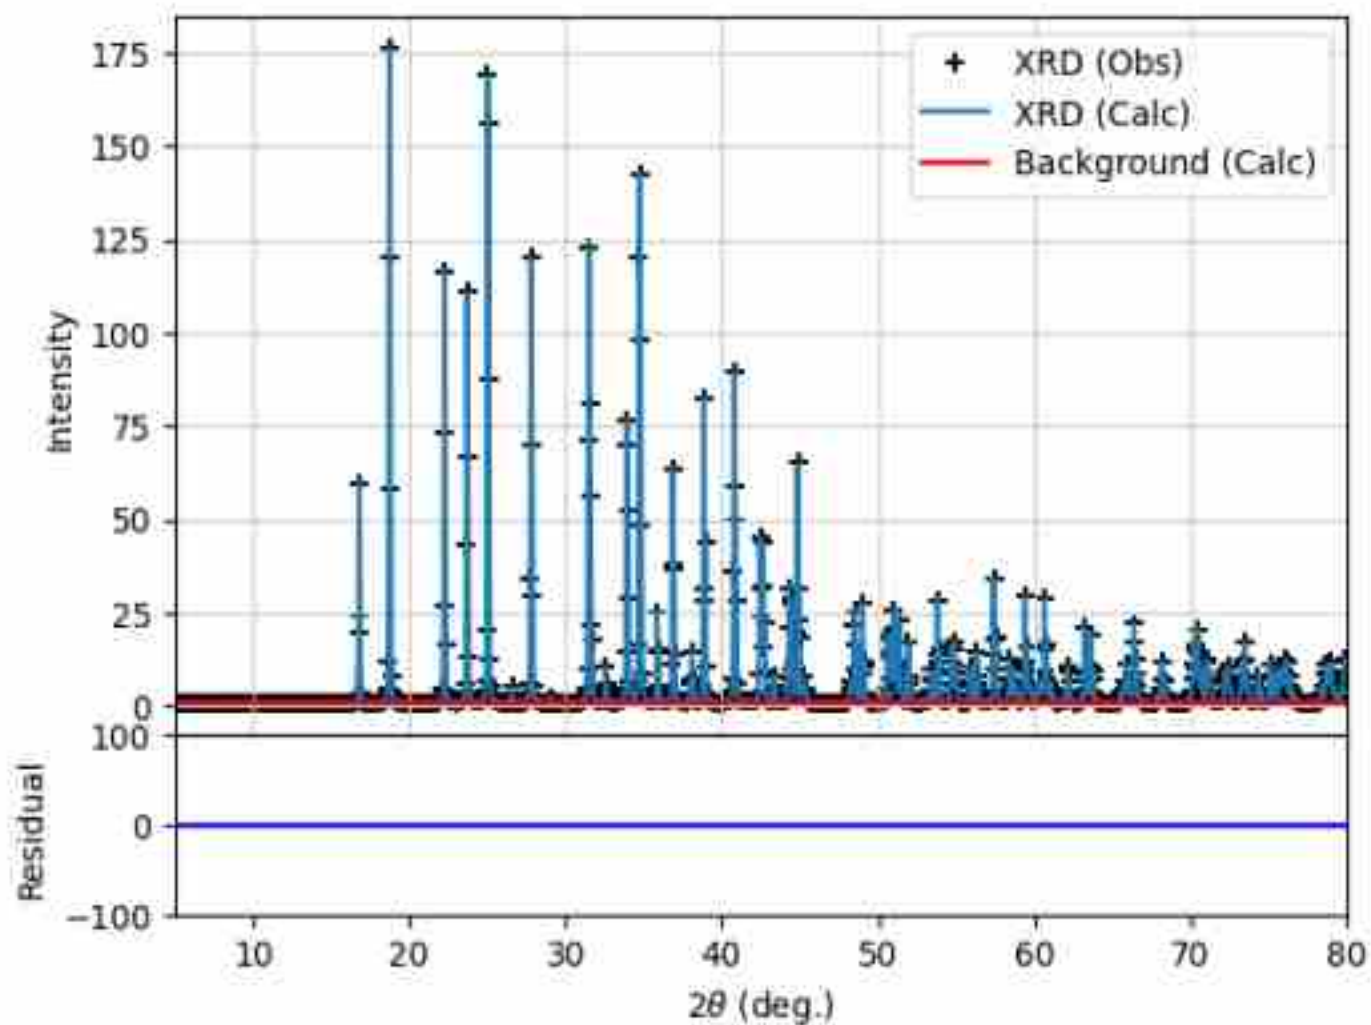

| RMSE before RR | Rwp     | RMSE after RR |
|----------------|---------|---------------|
| 0.03           | 0.00424 | 0.00142       |

# La<sub>4</sub>Ce<sub>2</sub>Te<sub>8</sub>

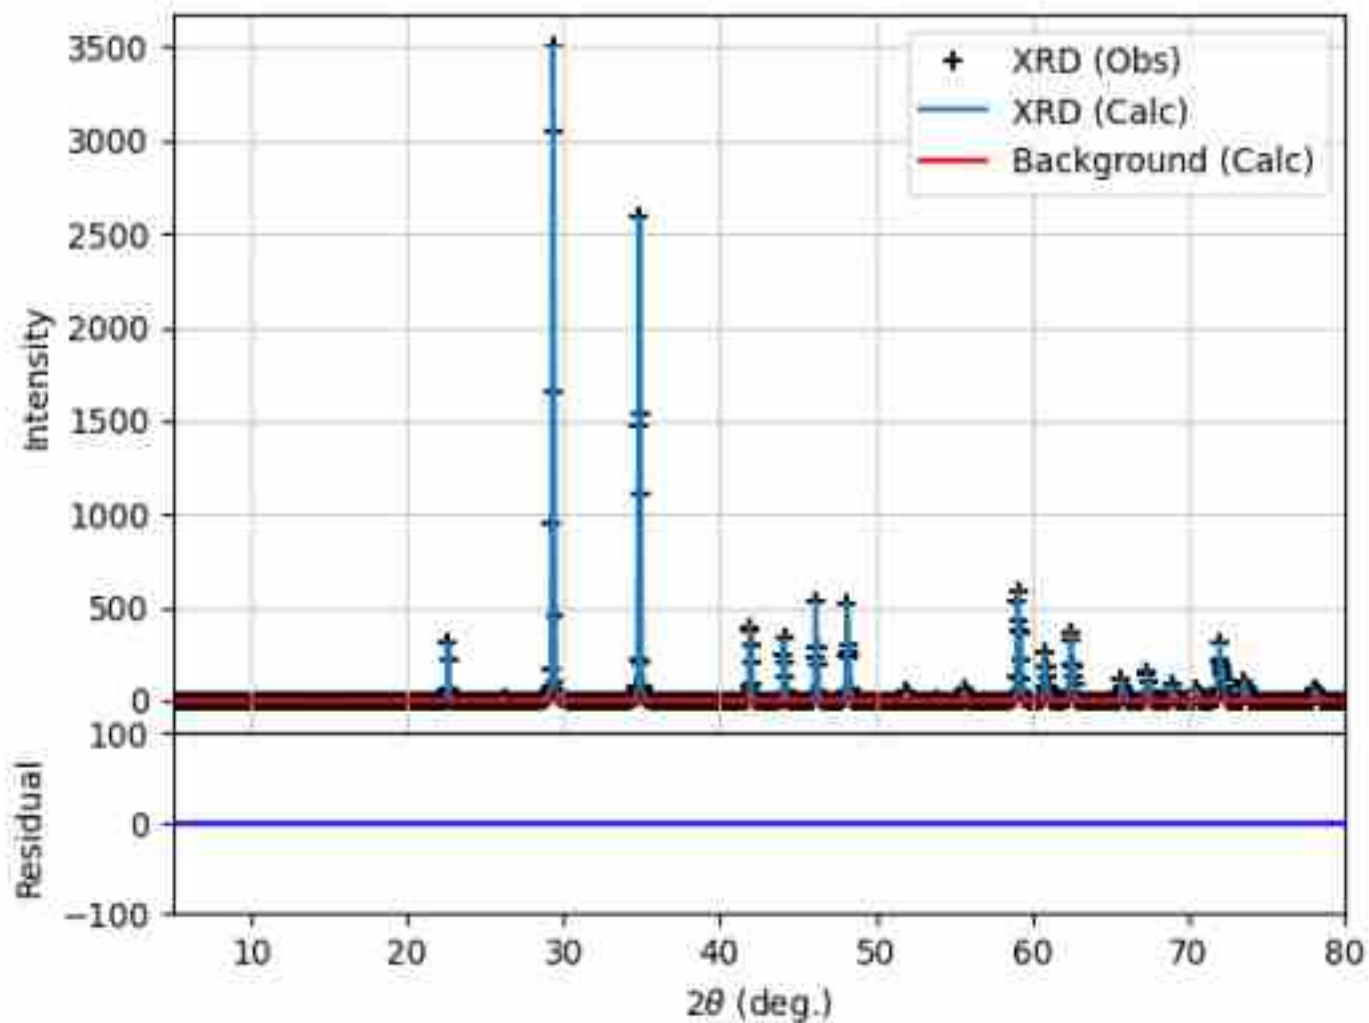

| RMSE before RR | Rwp     | RMSE after RR |
|----------------|---------|---------------|
| 0.03           | 0.00218 | 0.00029       |

# La14Ni6

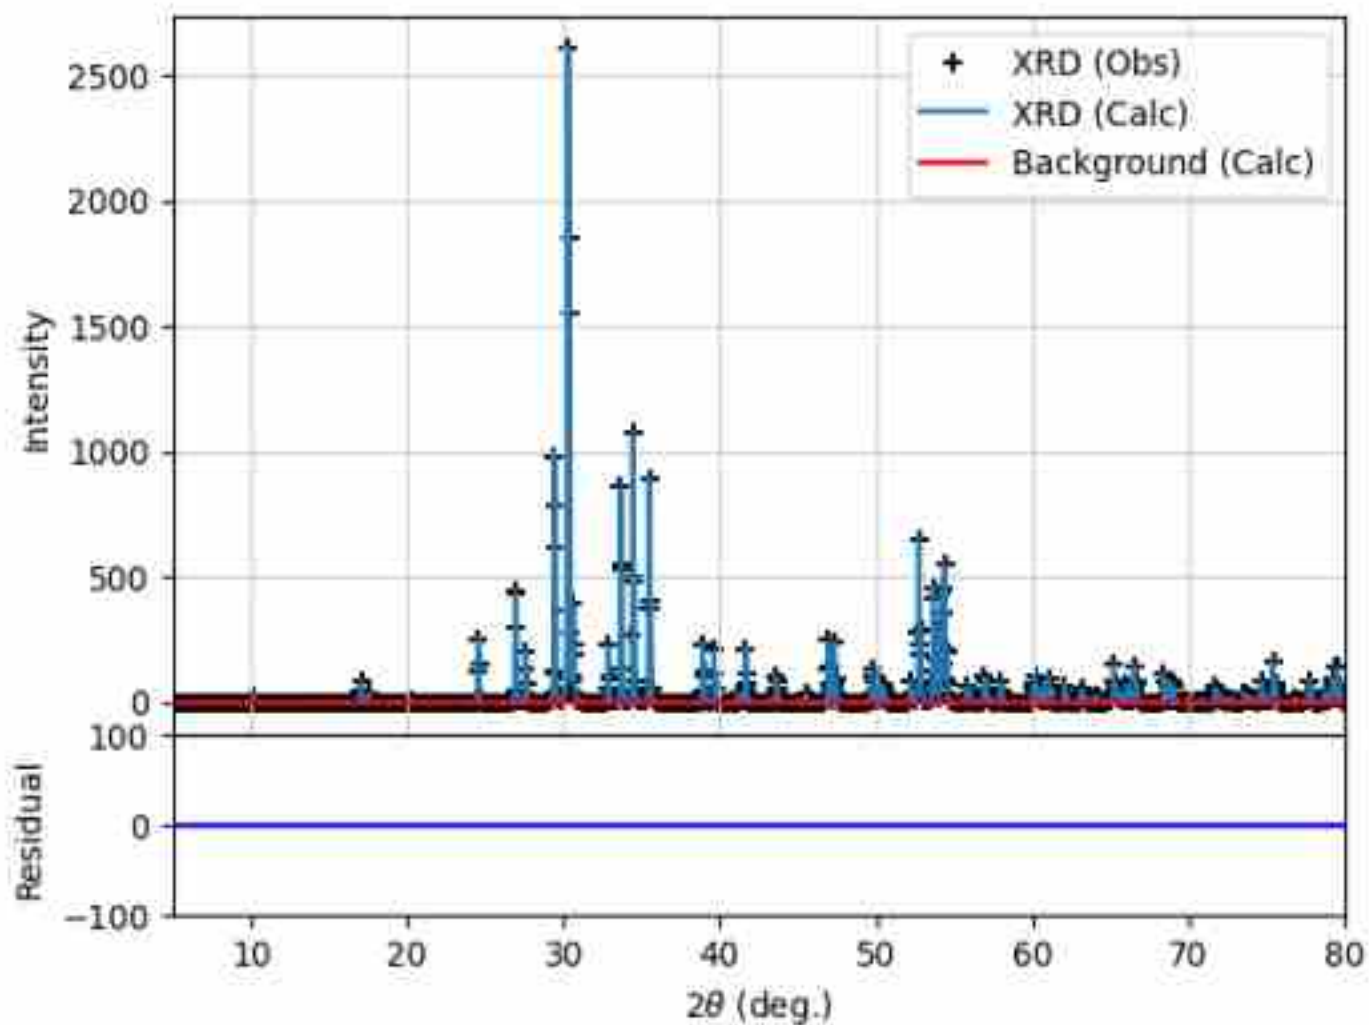

| RMSE before RR | Rwp     | RMSE after RR |
|----------------|---------|---------------|
| 0.03           | 0.00349 | 0.00046       |

# Li1Ca3

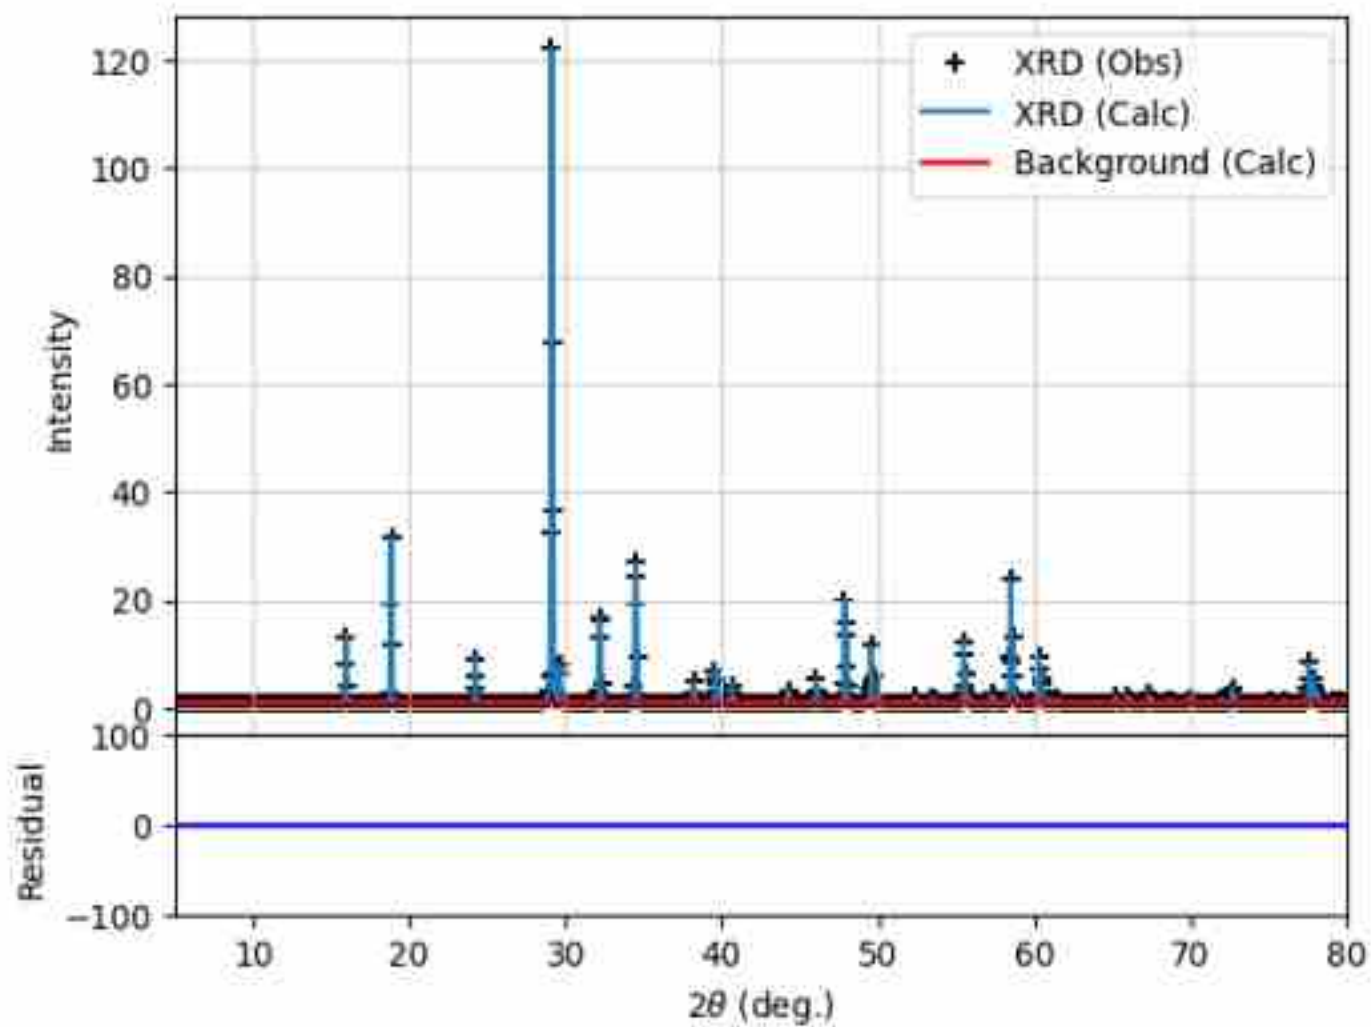

| RMSE before RR | Rwp     | RMSE after RR |
|----------------|---------|---------------|
| 0.003          | 0.09214 | 0.00434       |

# Li1Ce1Zn2

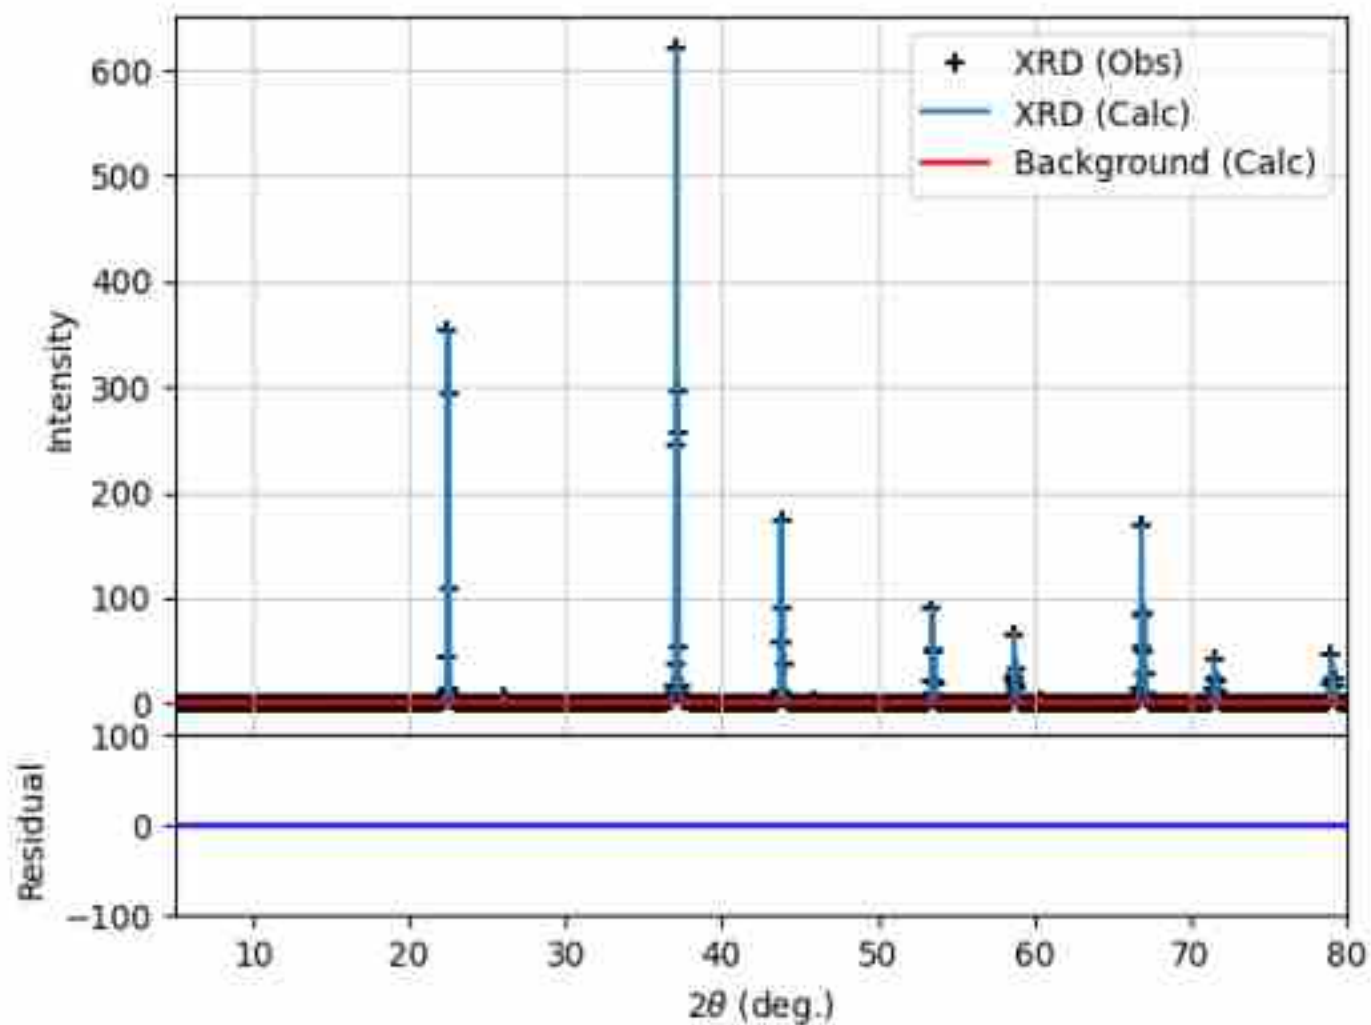

| RMSE before RR | Rwp     | RMSE after RR |
|----------------|---------|---------------|
| 0.003          | 0.01369 | 0.00363       |



# Li1Dy1Hg2

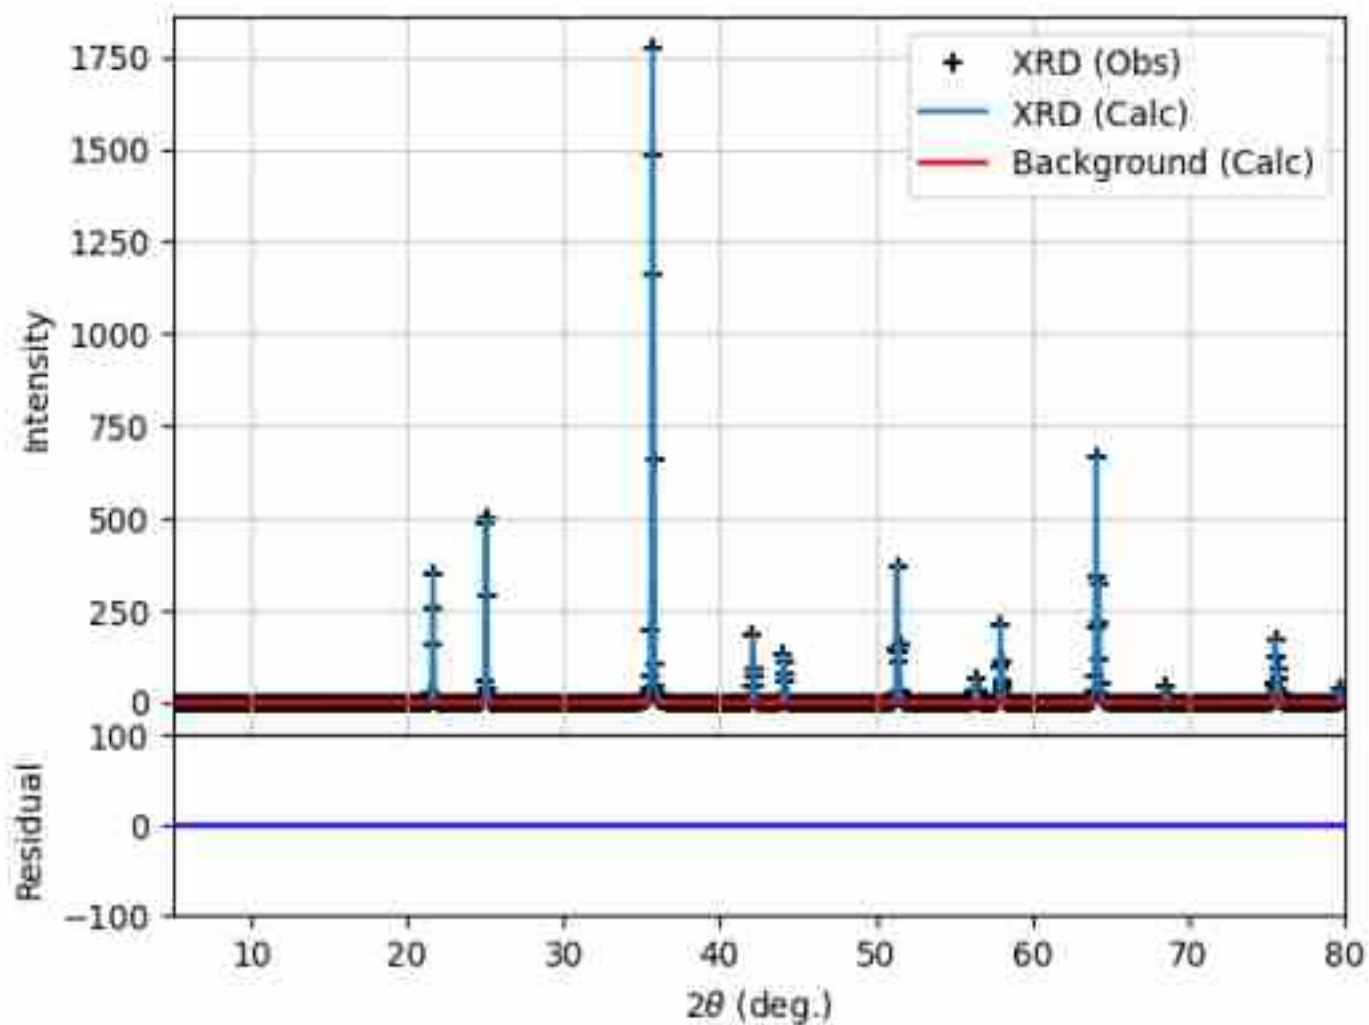

| RMSE before RR | Rwp     | RMSE after RR |
|----------------|---------|---------------|
| 0.003          | 0.00695 | 0.00235       |

# Li1Ho1Hg2

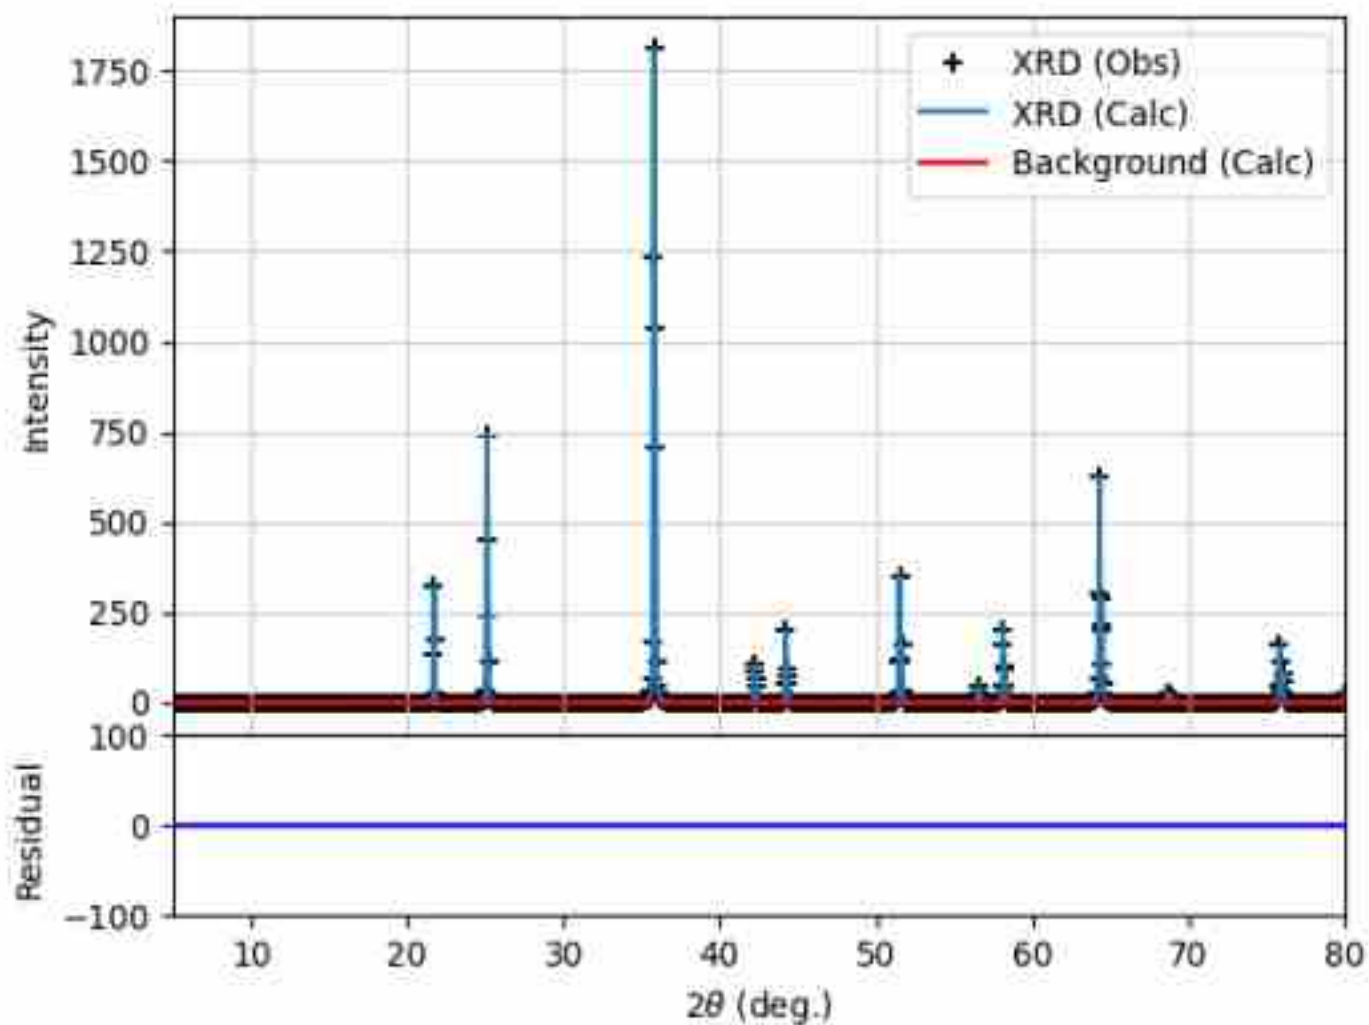

| RMSE before RR | Rwp    | RMSE after RR |
|----------------|--------|---------------|
| 0.003          | 0.0058 | 0.00081       |

# Li1Ho1S2

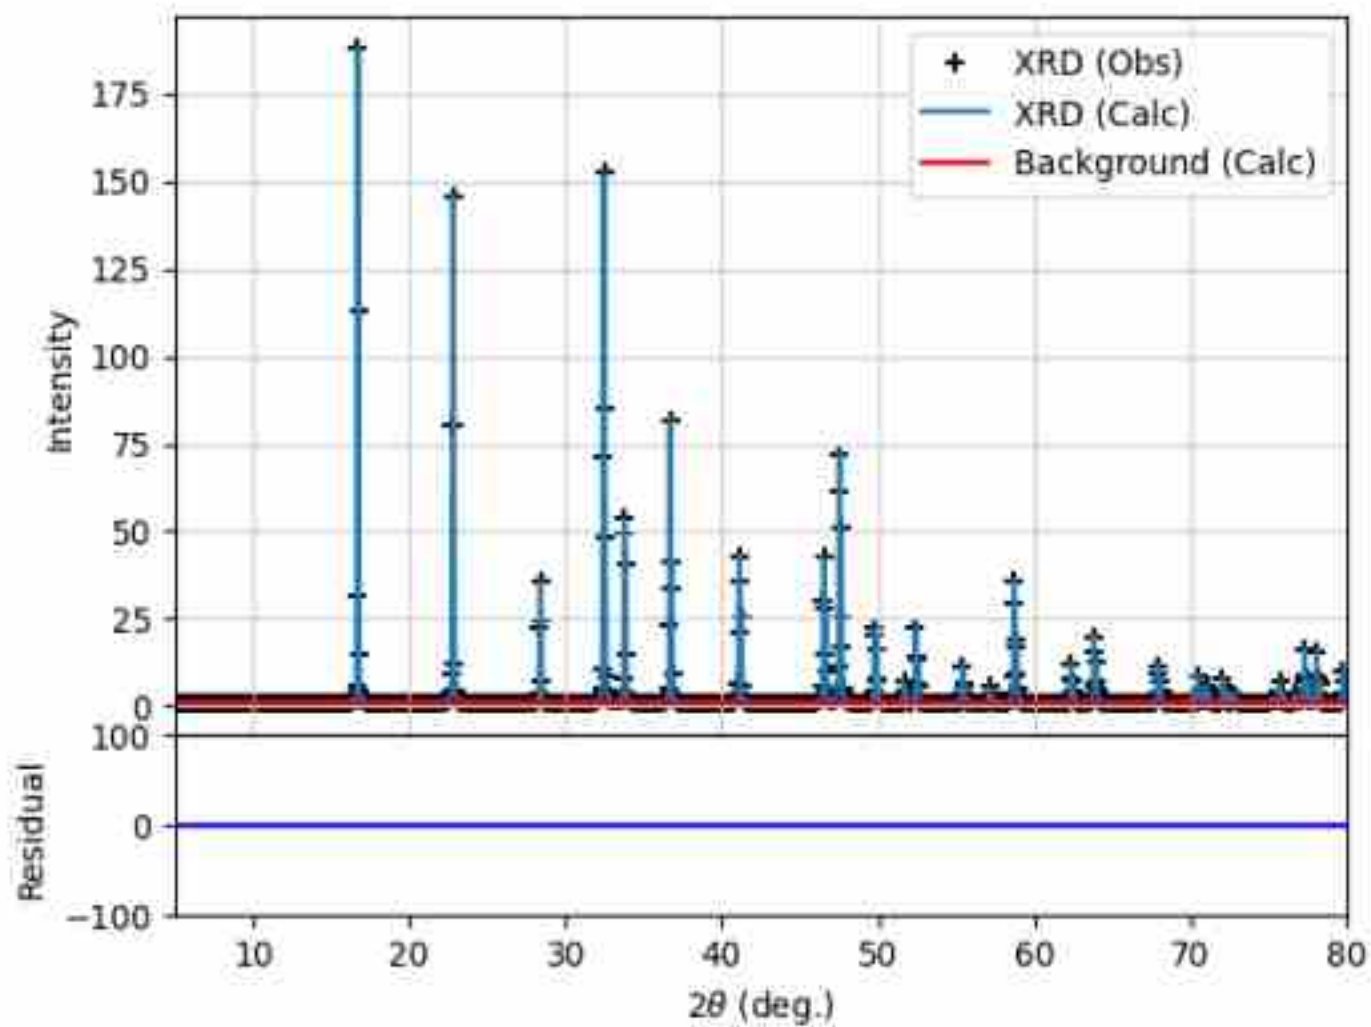

| RMSE before RR | Rwp     | RMSE after RR |
|----------------|---------|---------------|
| 0.003          | 0.00737 | 0.00317       |

# Li1In1Sn1

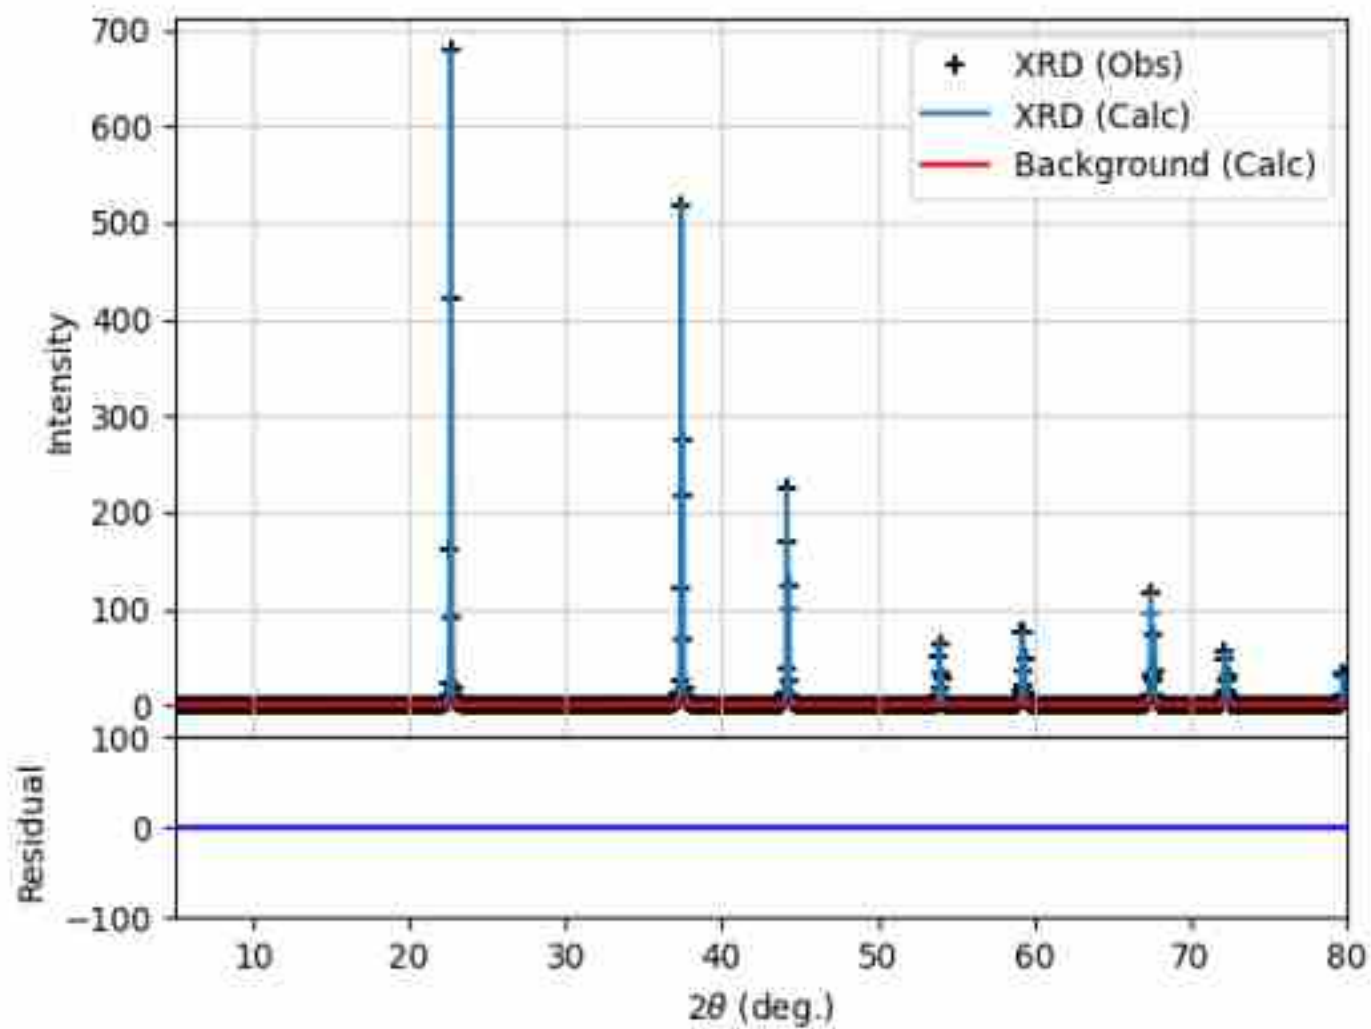

| RMSE before RR | Rwp     | RMSE after RR |
|----------------|---------|---------------|
| 0.003          | 0.09846 | 0.00294       |

# Li1Mg1As1

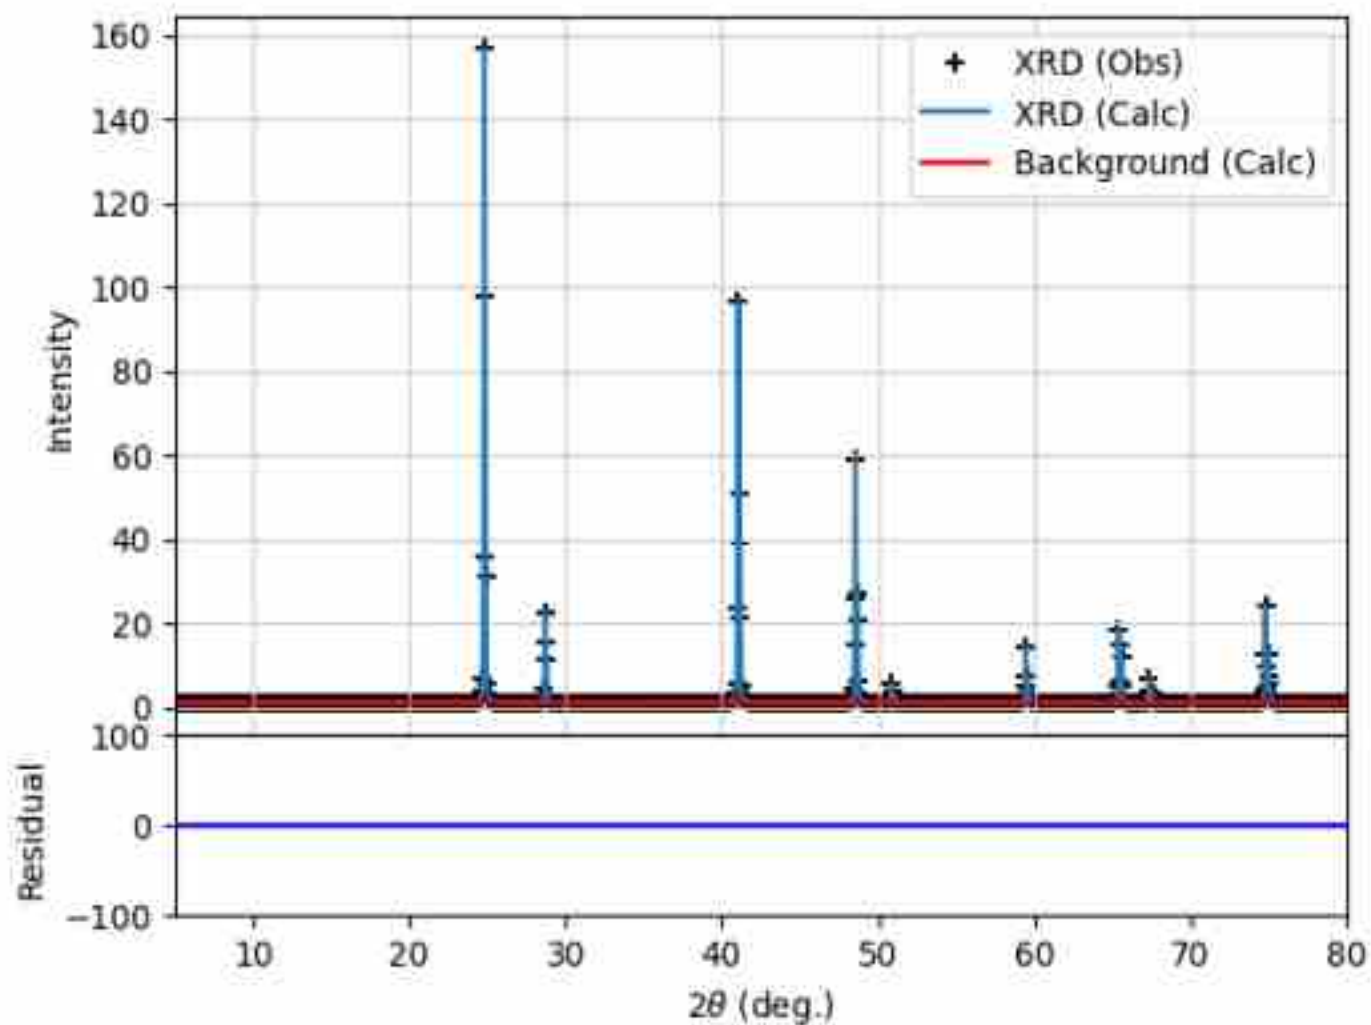

| RMSE before RR | Rwp     | RMSE after RR |
|----------------|---------|---------------|
| 0.003          | 0.01484 | 0.00265       |

# Li1Mg1

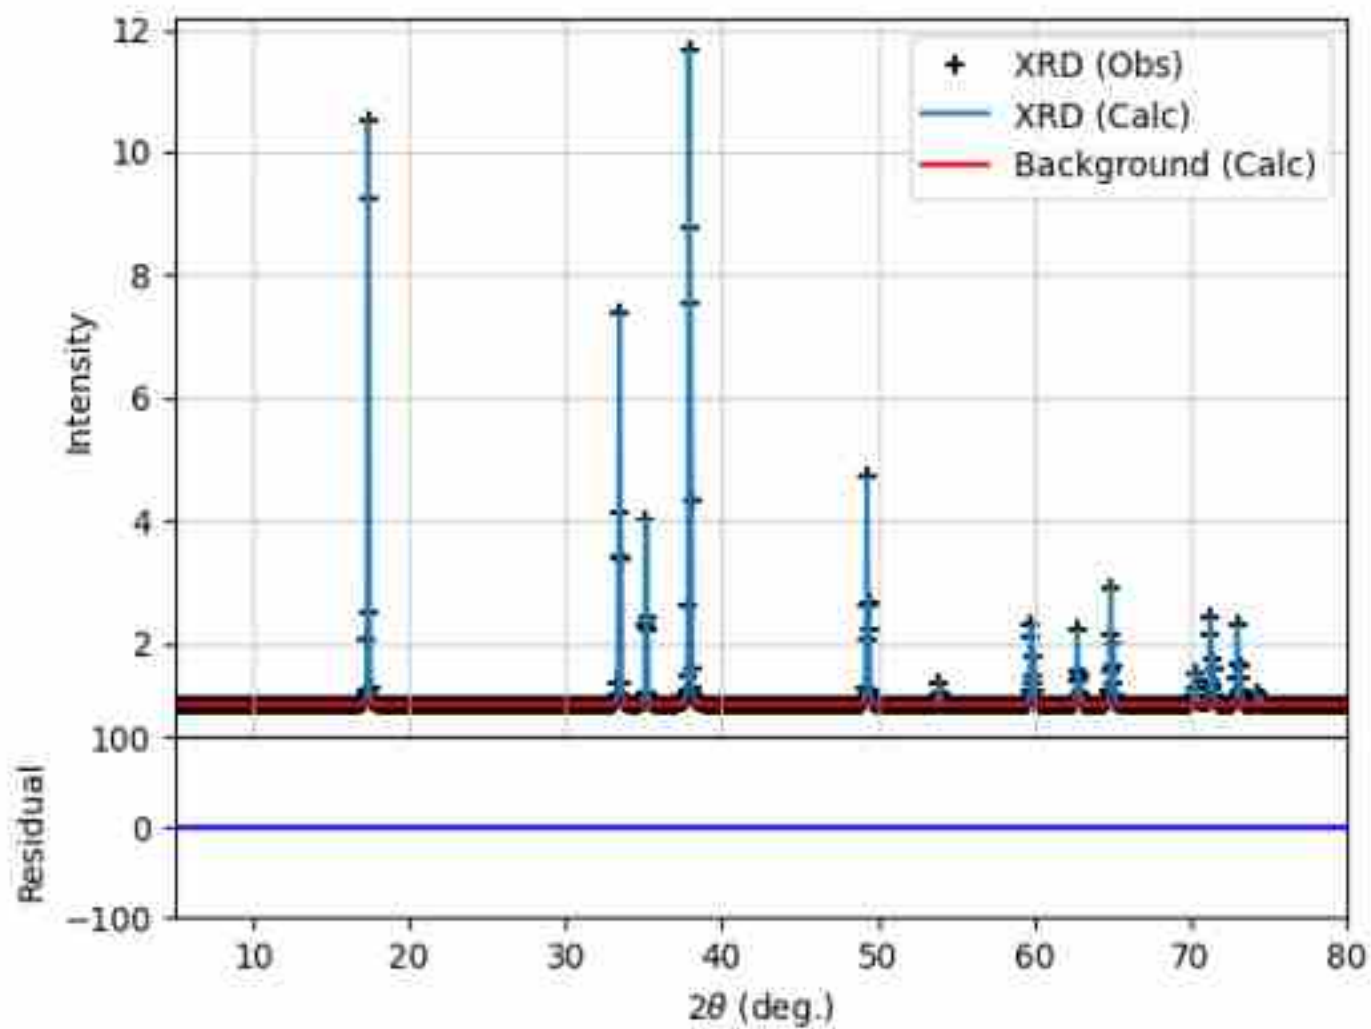

| RMSE before RR | Rwp     | RMSE after RR |
|----------------|---------|---------------|
| 0.003          | 0.00312 | 0.00247       |

# Li1Pt1F6

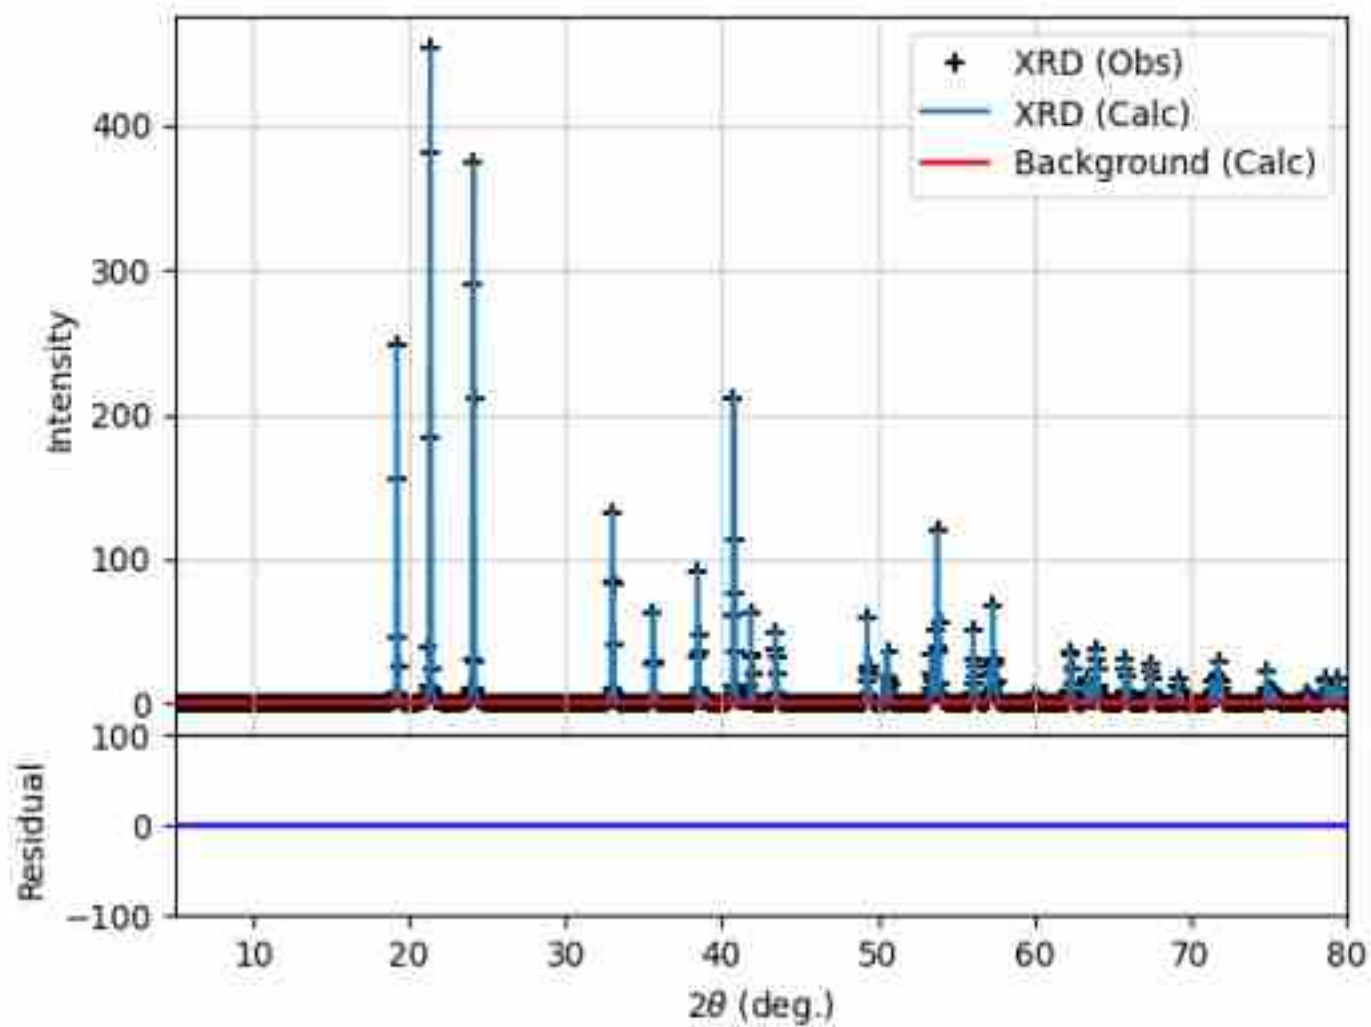

| RMSE before RR | Rwp     | RMSE after RR |
|----------------|---------|---------------|
| 0.03           | 0.00343 | 0.00198       |

# Li1Ta1Ru2

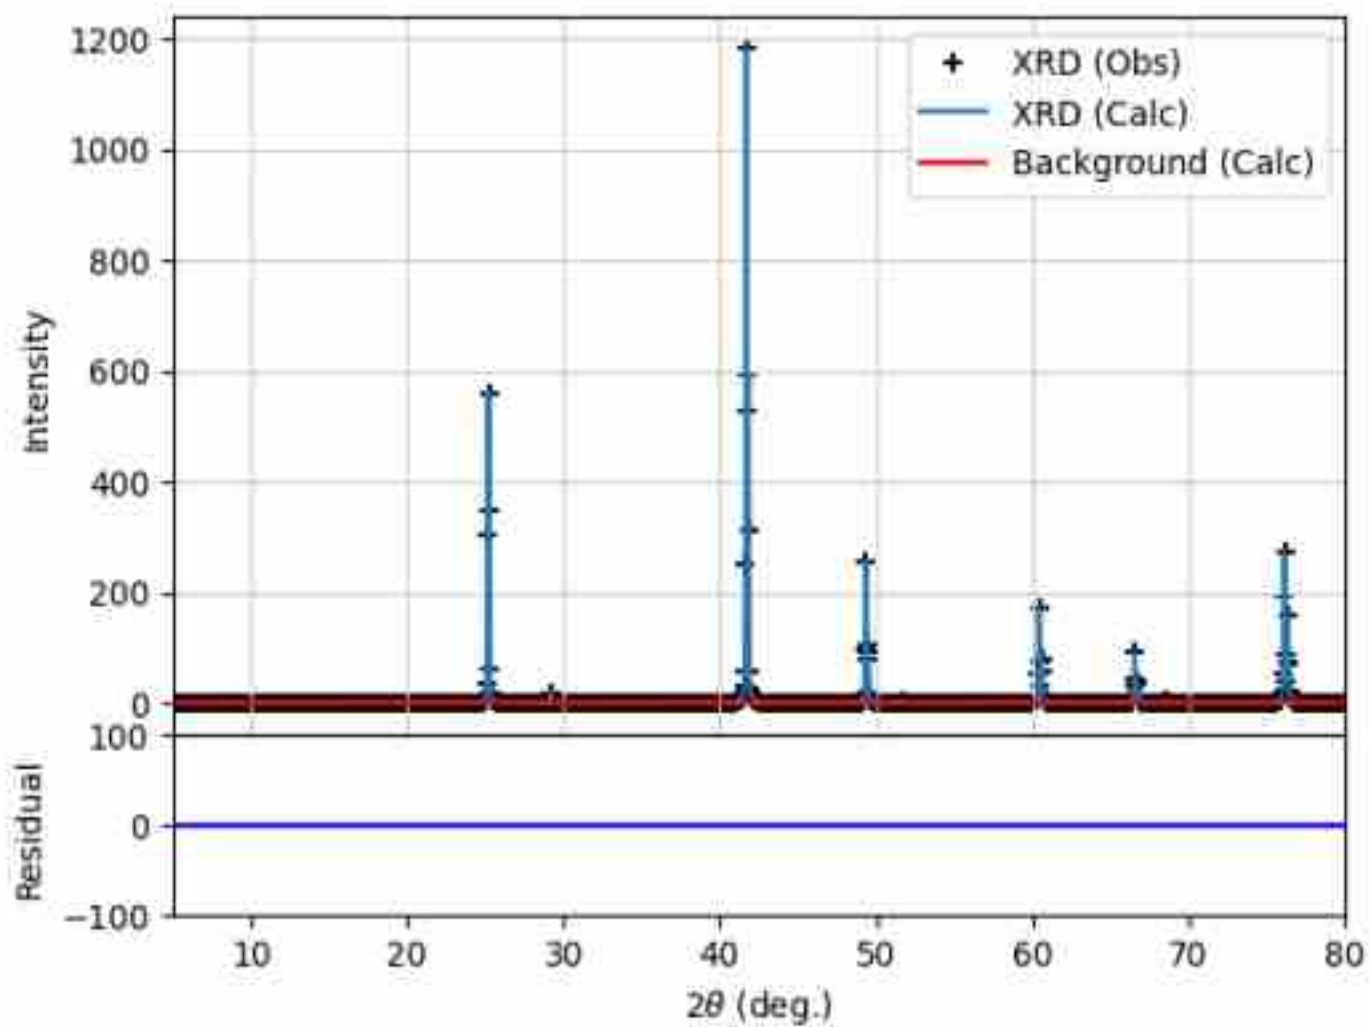

| RMSE before RR | Rwp     | RMSE after RR |
|----------------|---------|---------------|
| 0.003          | 0.00426 | 0.00173       |



# Li1Ti2Rh1

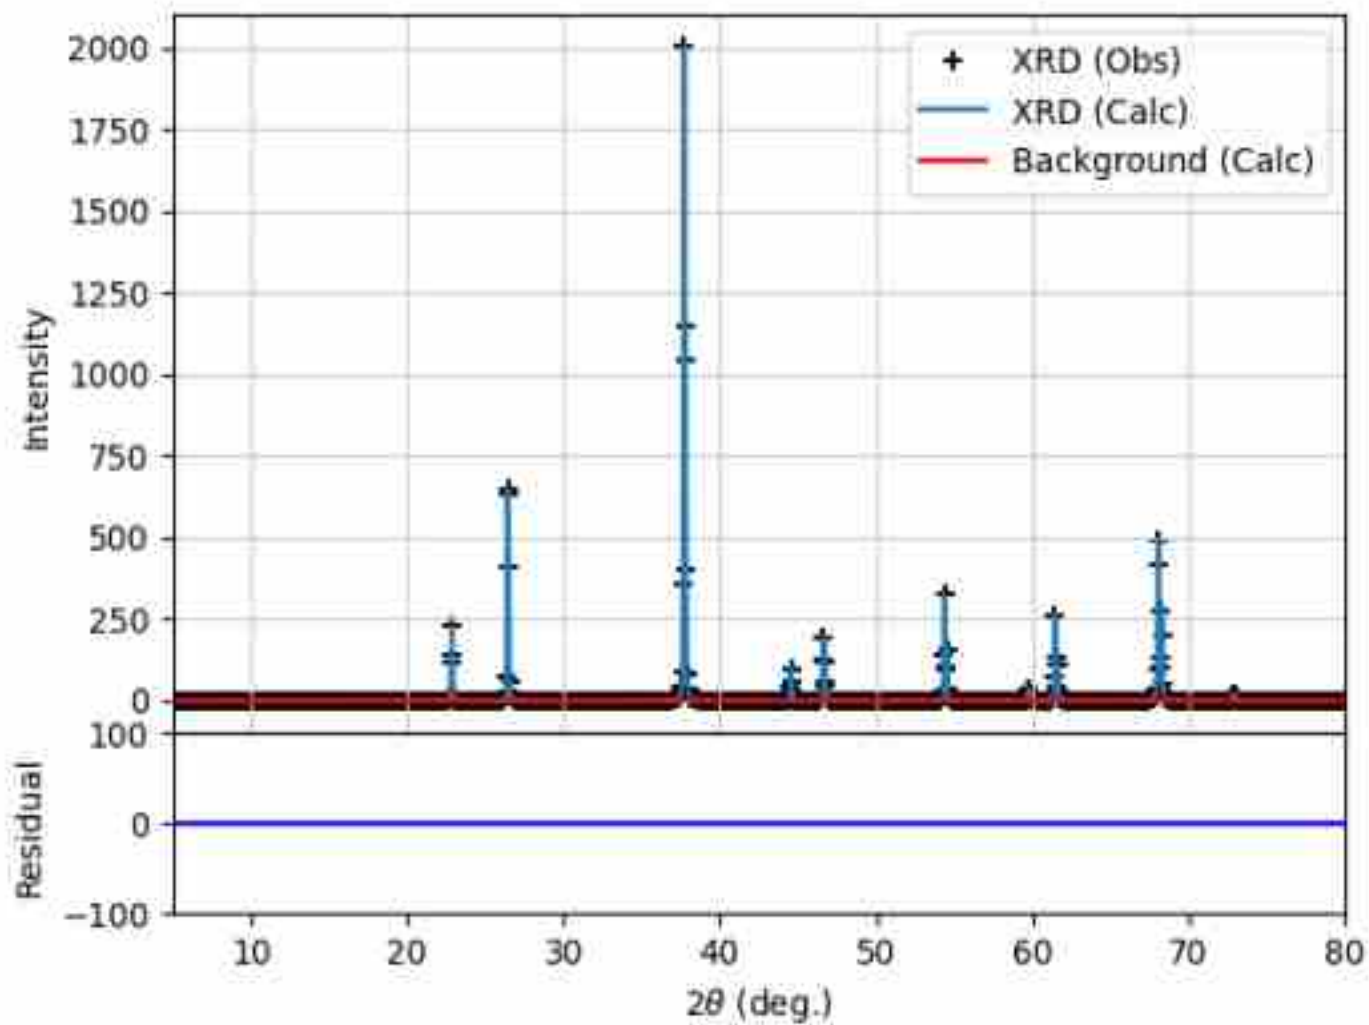

| RMSE before RR | Rwp    | RMSE after RR |
|----------------|--------|---------------|
| 0.003          | 0.0149 | 0.00568       |

# Li<sub>2</sub>Ag<sub>2</sub>F<sub>8</sub>

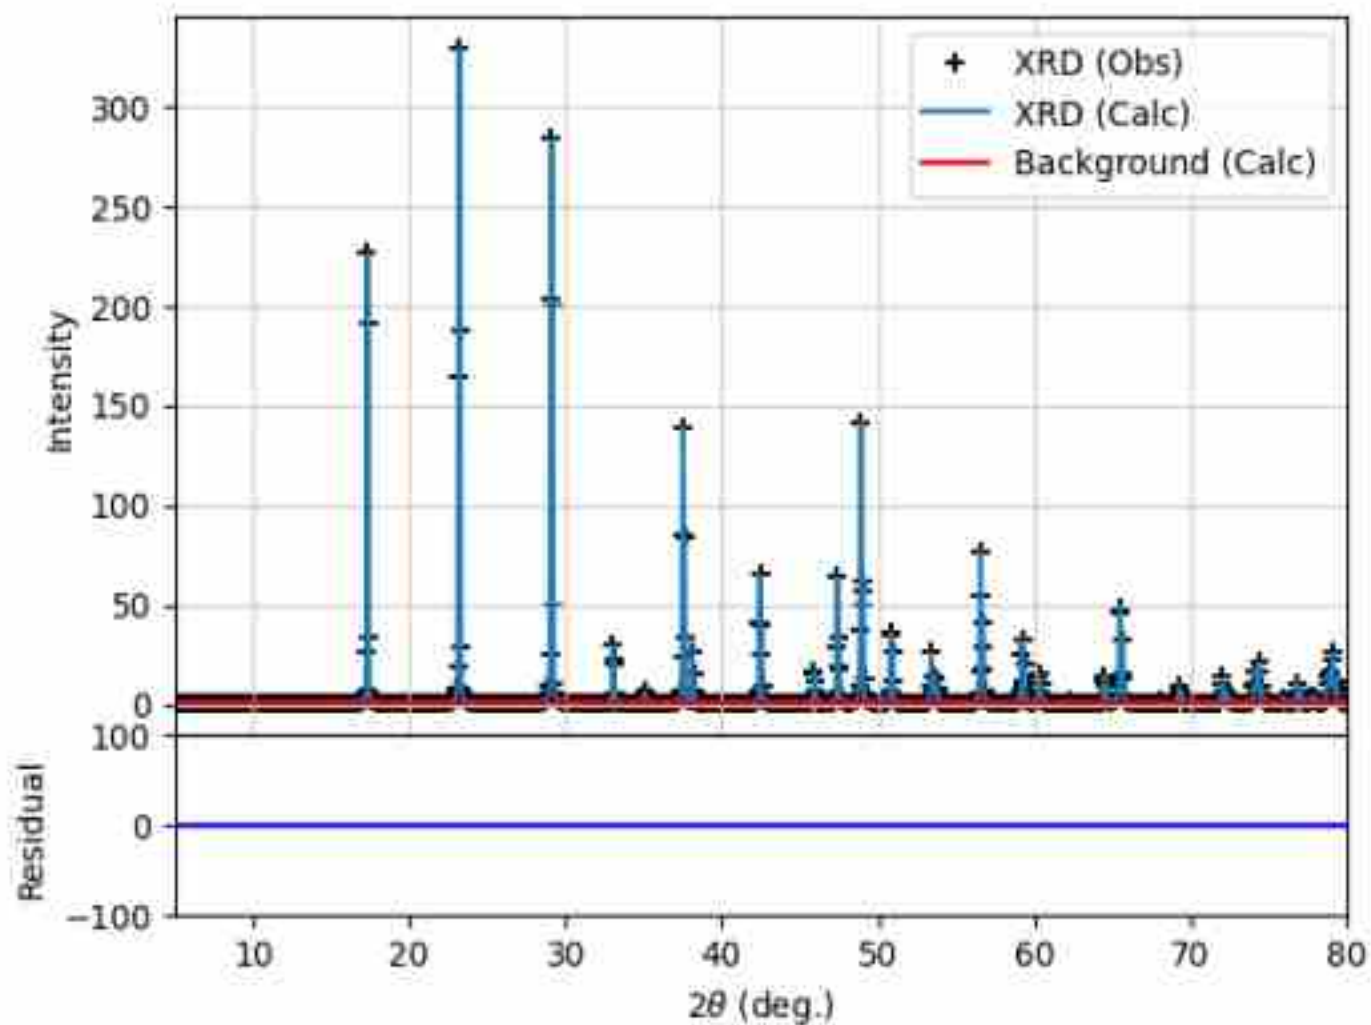

| RMSE before RR | Rwp     | RMSE after RR |
|----------------|---------|---------------|
| 0.03           | 0.00556 | 0.00248       |

# Li<sub>2</sub>Ce<sub>1</sub>Pb<sub>1</sub>

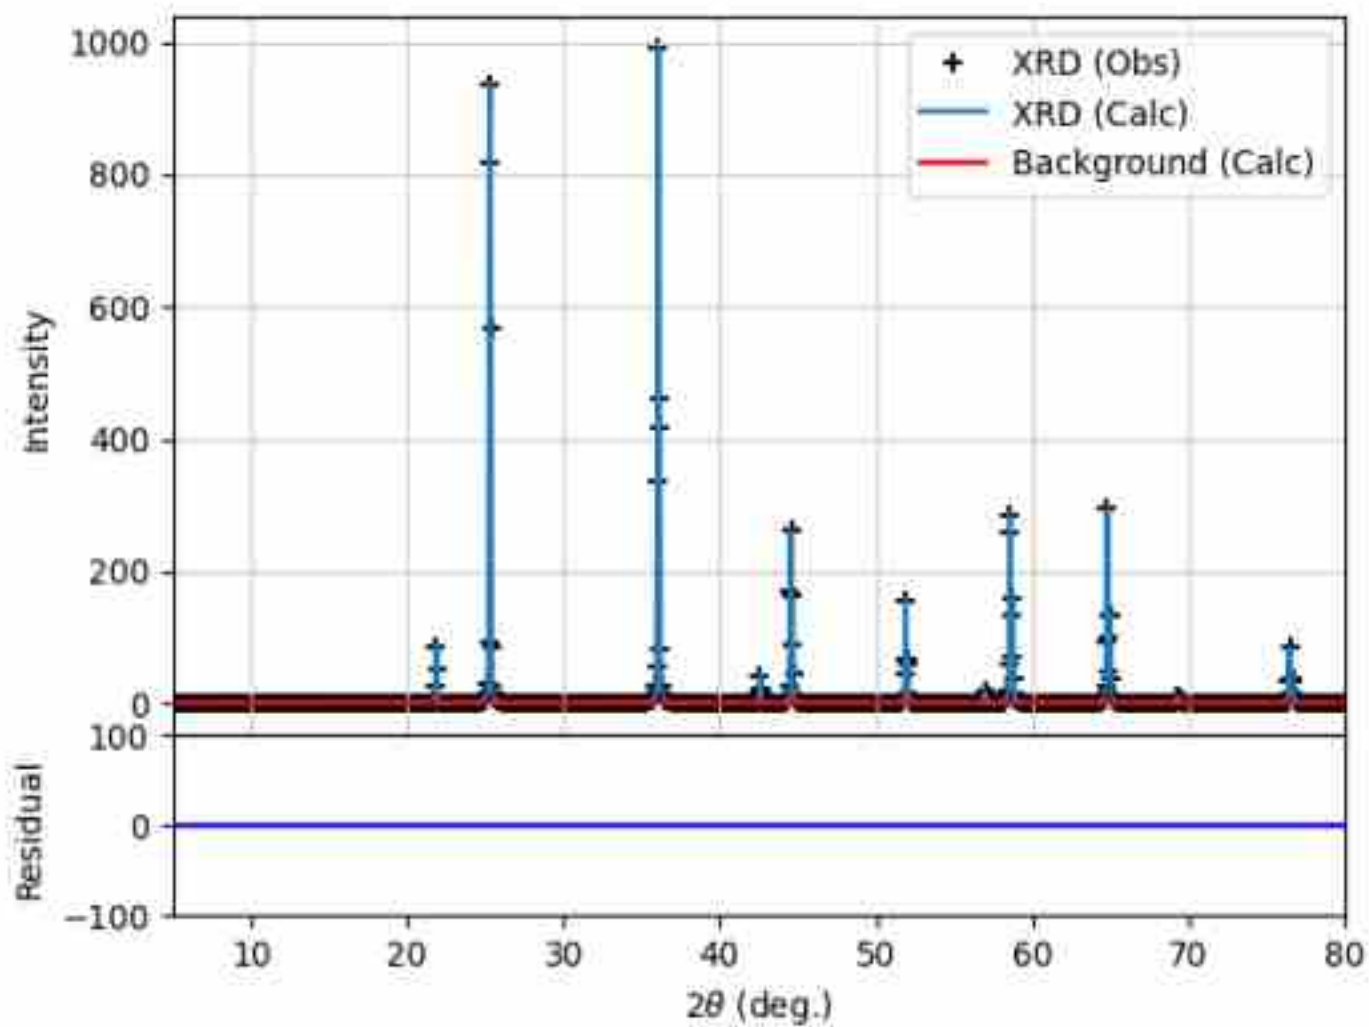

| RMSE before RR | Rwp     | RMSE after RR |
|----------------|---------|---------------|
| 0.003          | 0.00836 | 0.00582       |

# Li<sub>2</sub>Mg<sub>1</sub>Sn<sub>1</sub>

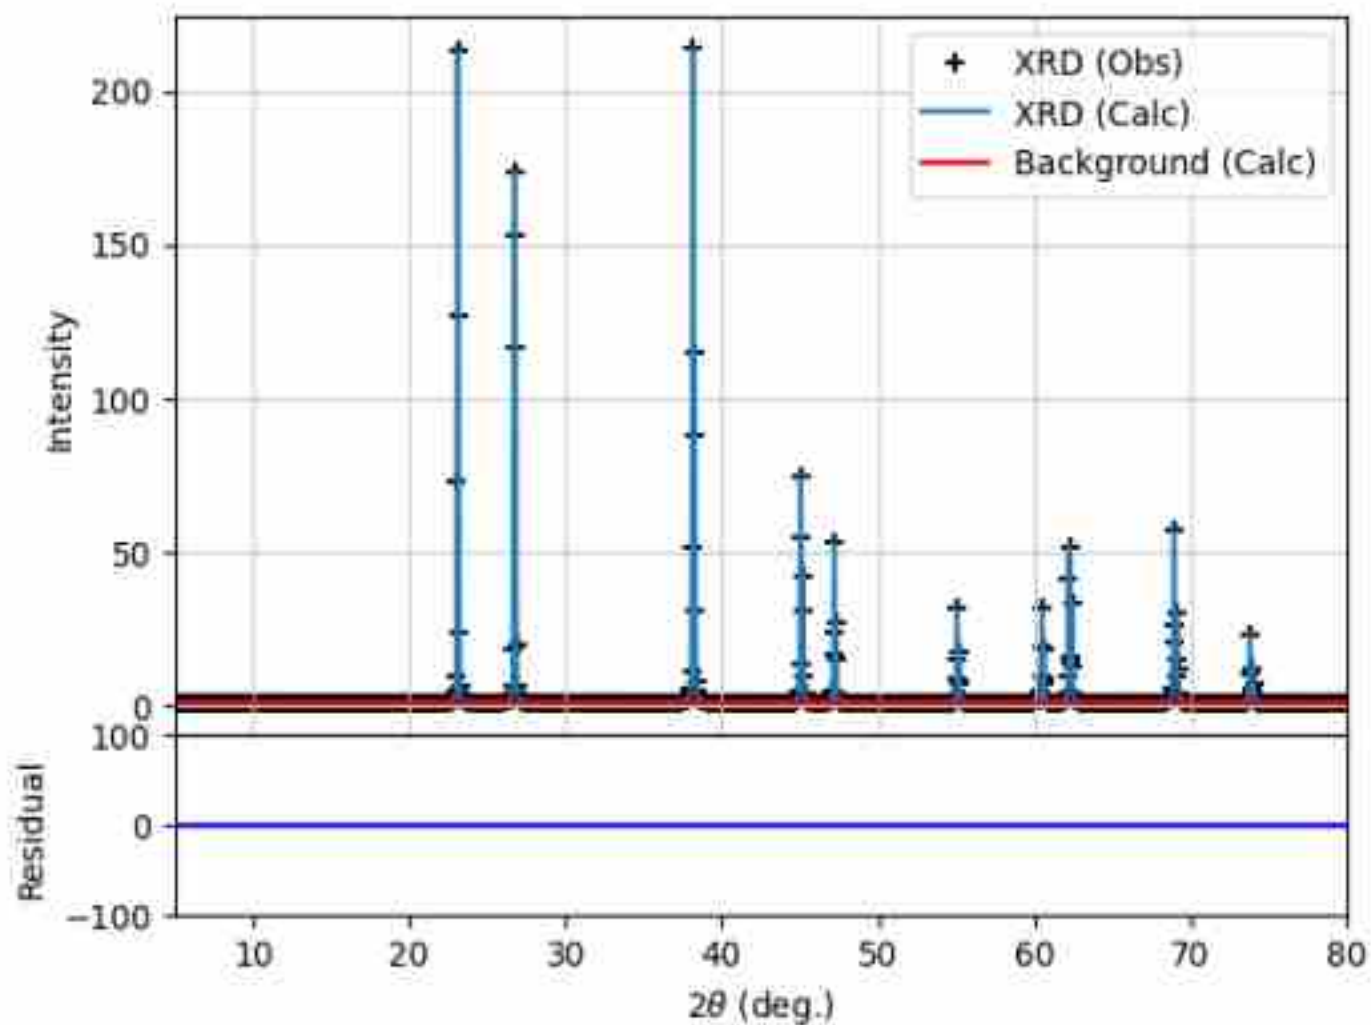

| RMSE before RR | Rwp     | RMSE after RR |
|----------------|---------|---------------|
| 0.003          | 0.00121 | 0.00423       |

# Li<sub>2</sub>Mg<sub>2</sub>

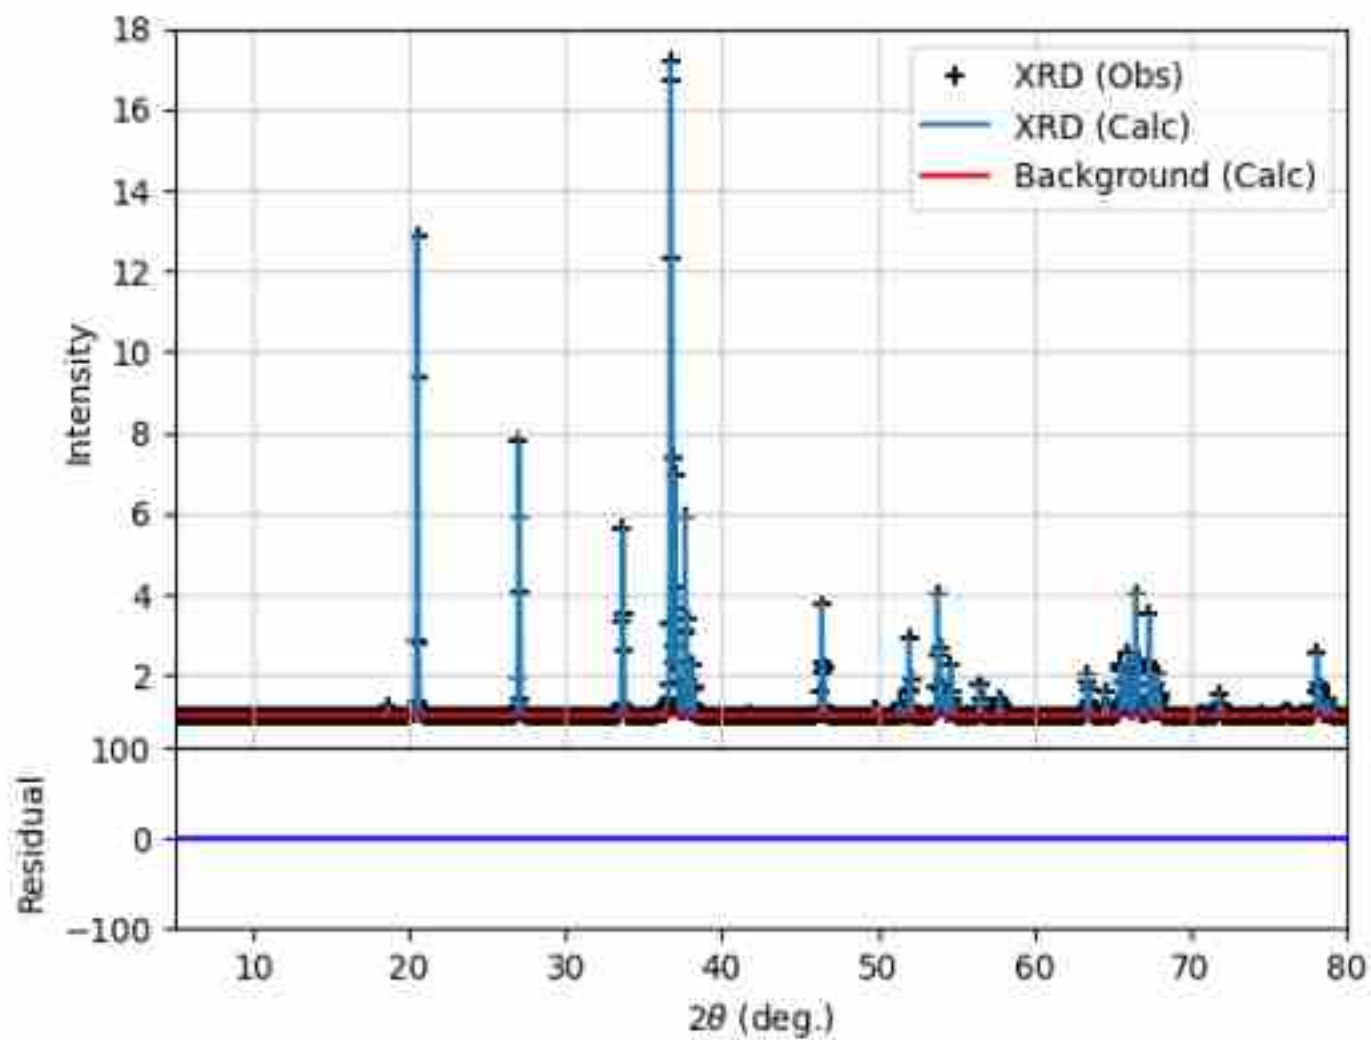

| RMSE before RR | Rwp     | RMSE after RR |
|----------------|---------|---------------|
| 0.03           | 0.00103 | 0.00072       |

# Li<sub>2</sub>Mg<sub>4</sub>

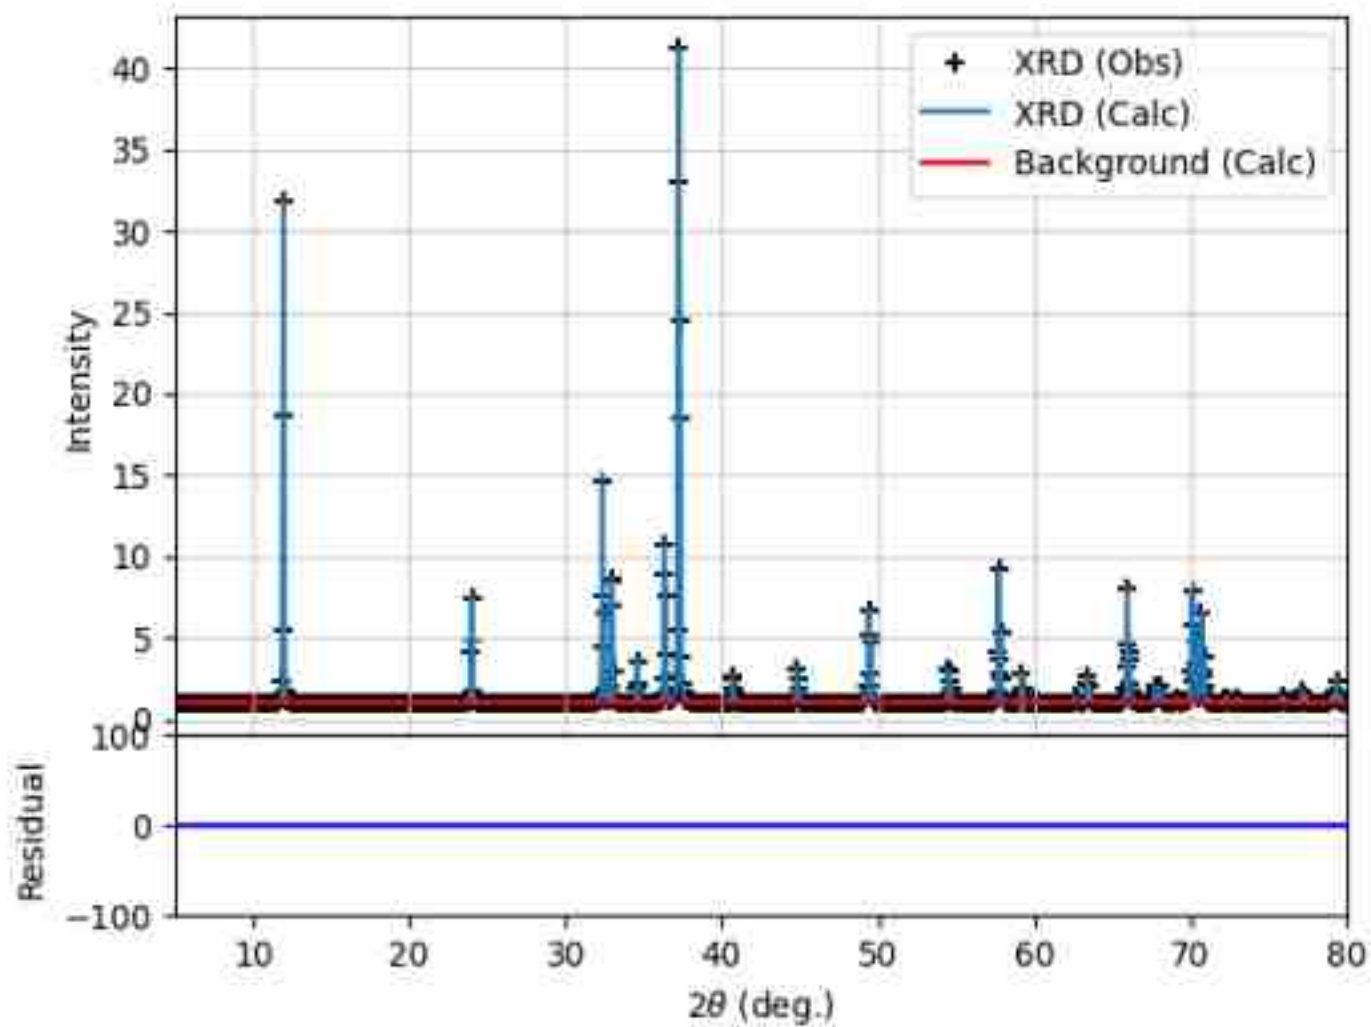

| RMSE before RR | Rwp     | RMSE after RR |
|----------------|---------|---------------|
| 0.003          | 0.00188 | 0.00155       |

# Li<sub>2</sub>TlIn

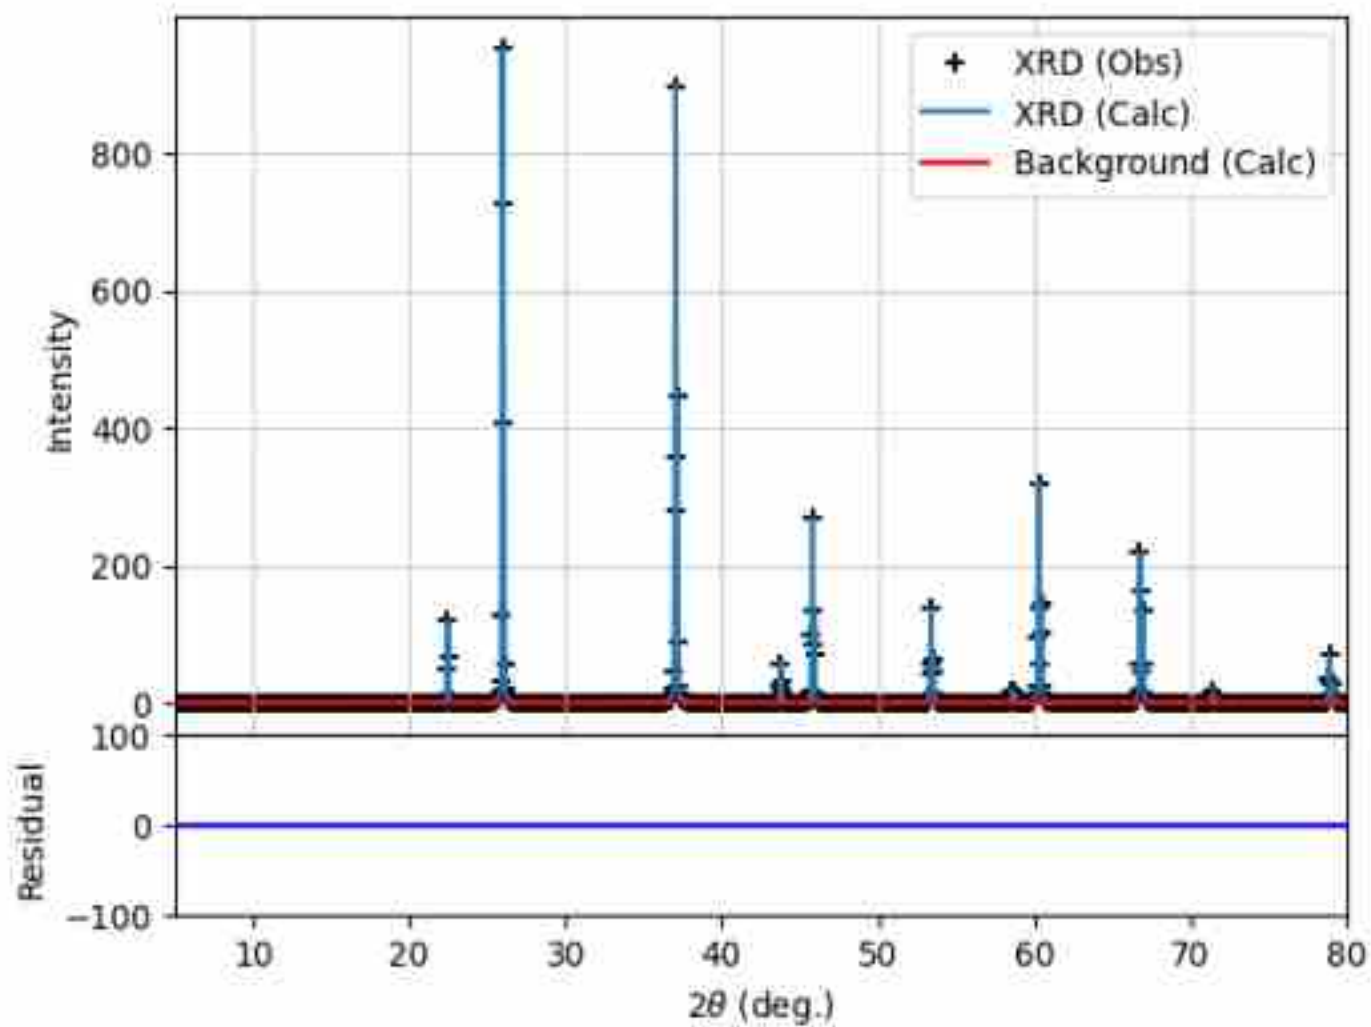

| RMSE before RR | Rwp     | RMSE after RR |
|----------------|---------|---------------|
| 0.003          | 0.01205 | 0.00291       |

# Li<sub>2</sub>V<sub>1</sub>Ga<sub>3</sub>O<sub>8</sub>

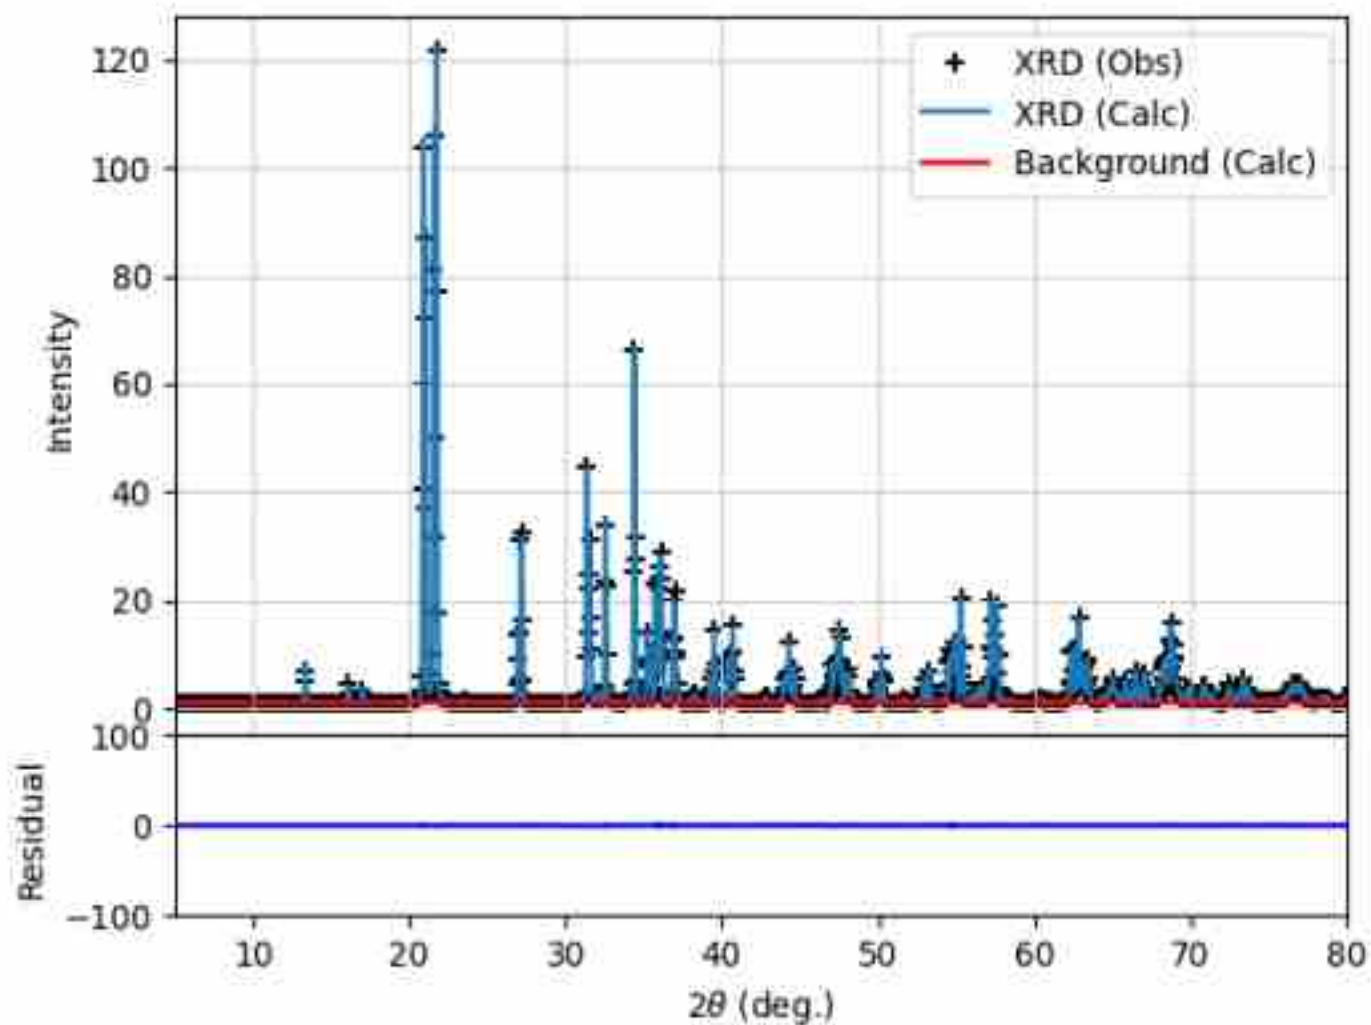

| RMSE before RR | Rwp     | RMSE after RR |
|----------------|---------|---------------|
| 0.03           | 3.46355 | 0.07016       |



# Li<sub>2</sub>V<sub>4</sub>O<sub>2</sub>F<sub>10</sub>

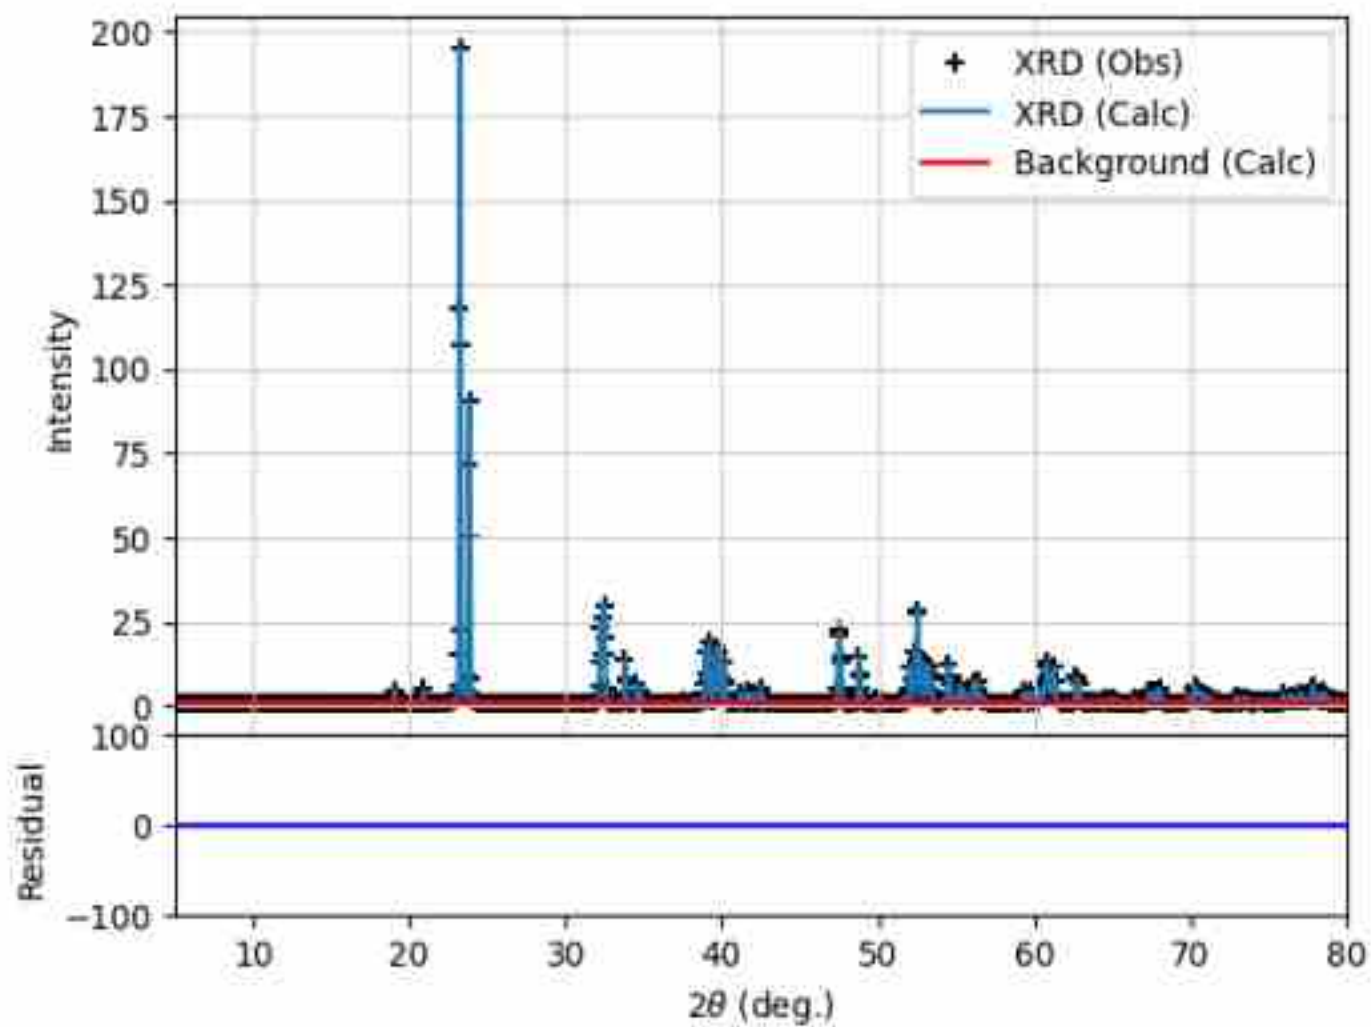

| RMSE before RR | Rwp     | RMSE after RR |
|----------------|---------|---------------|
| 0.03           | 0.00014 | 0.0           |

# Li<sub>2</sub>Yb<sub>1</sub>Pb<sub>1</sub>

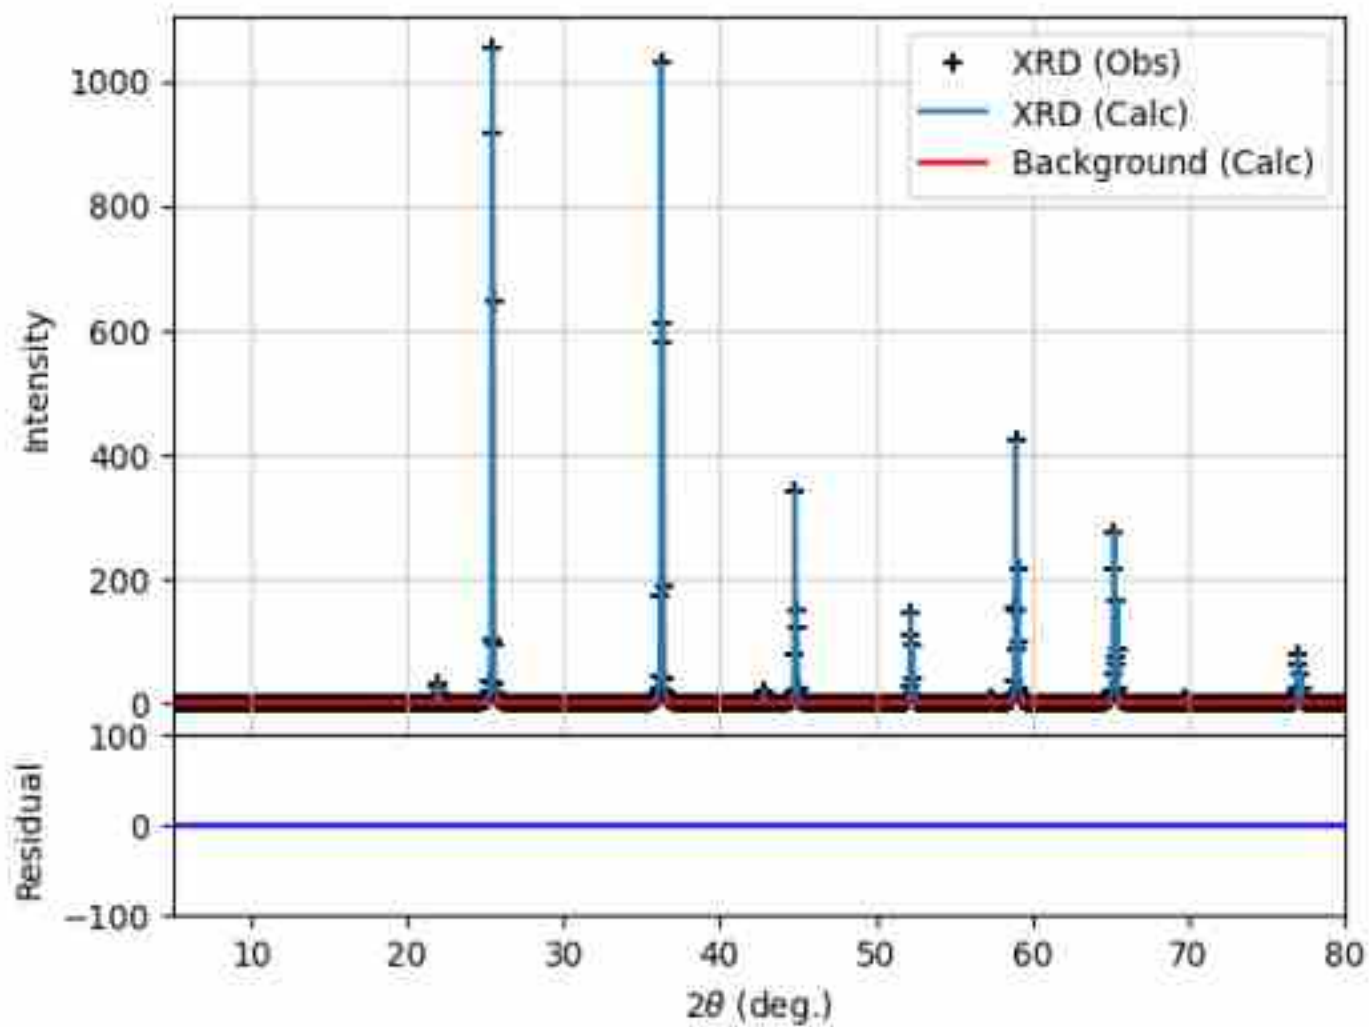

| RMSE before RR | Rwp     | RMSE after RR |
|----------------|---------|---------------|
| 0.003          | 0.05979 | 0.00385       |

# Li<sub>3</sub>Mn<sub>4</sub>Cr<sub>1</sub>O<sub>8</sub>

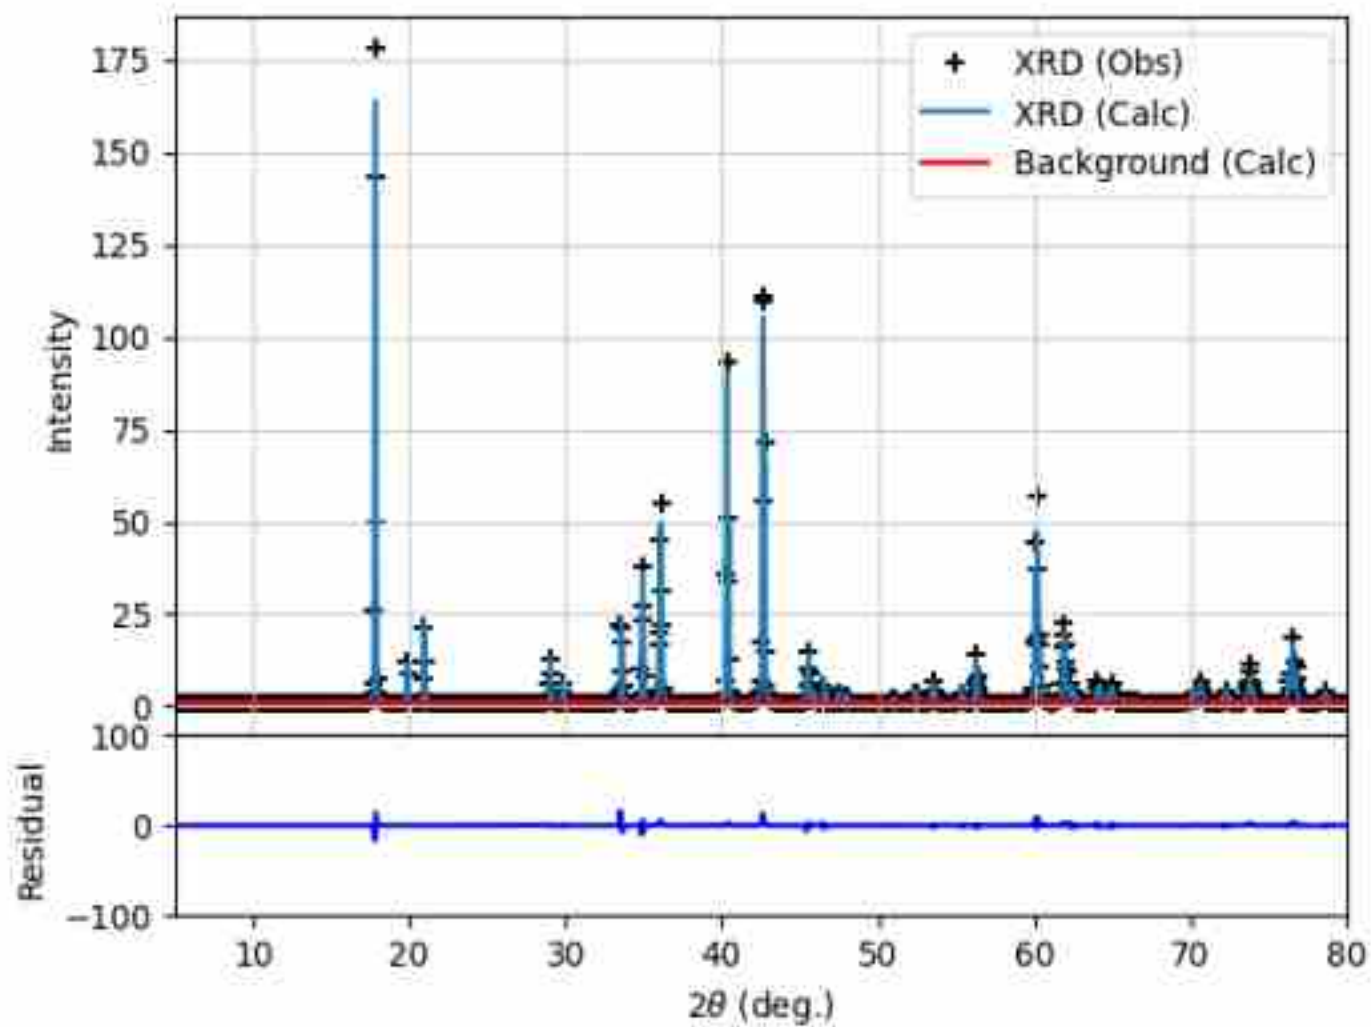

| RMSE before RR | Rwp      | RMSE after RR |
|----------------|----------|---------------|
| 0.03           | 16.92603 | 0.0306        |

# Li<sub>4</sub>Fe<sub>2</sub>F<sub>8</sub>

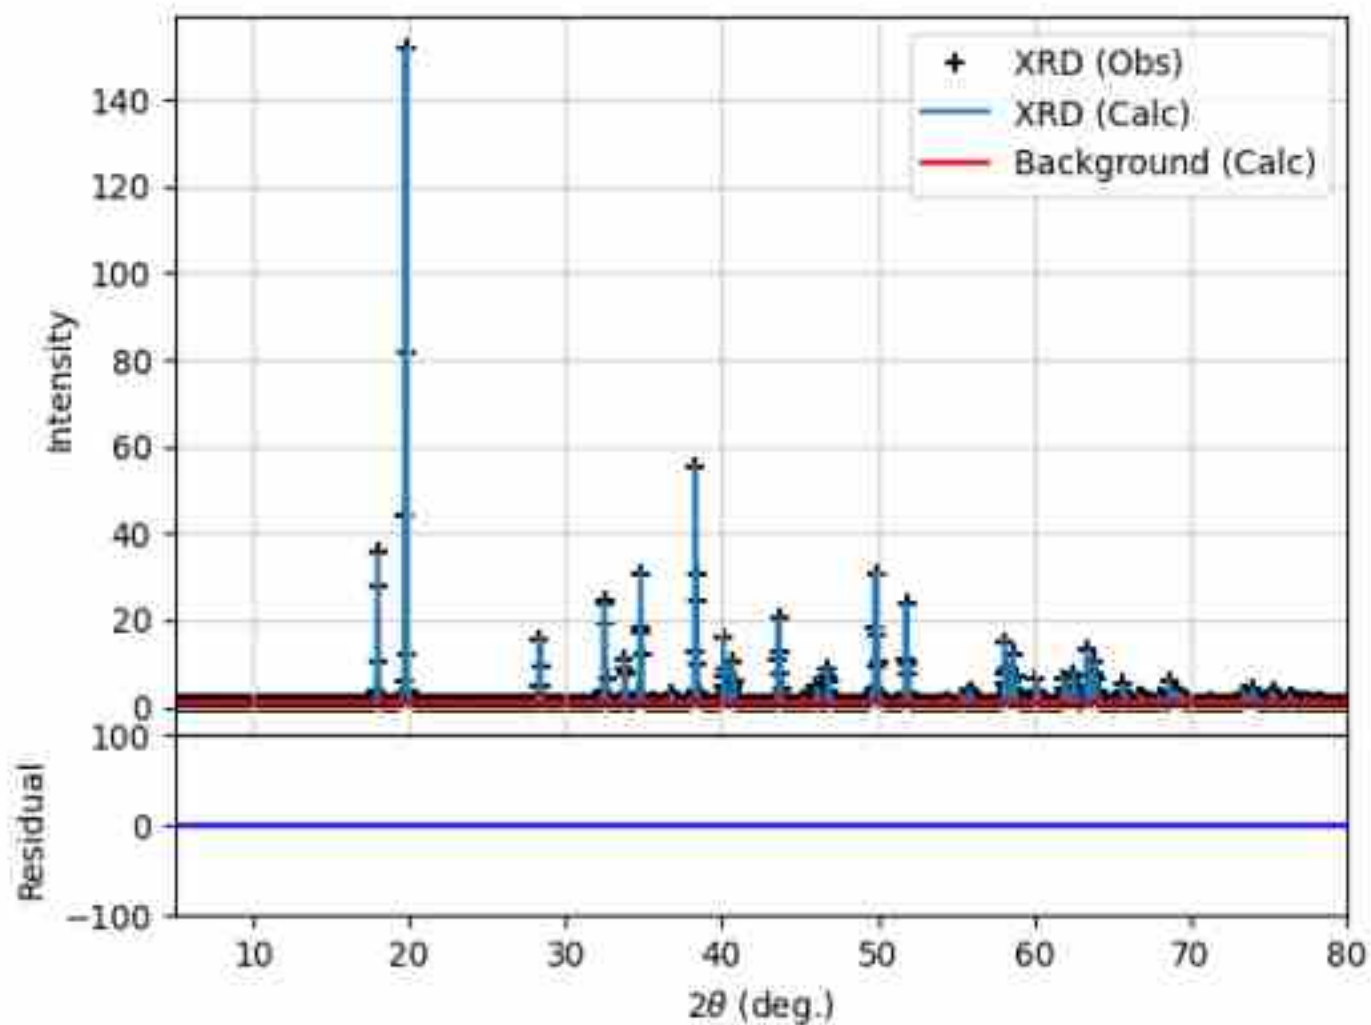

| RMSE before RR | Rwp    | RMSE after RR |
|----------------|--------|---------------|
| 0.03           | 0.0037 | 0.00133       |

# Lu1Al13

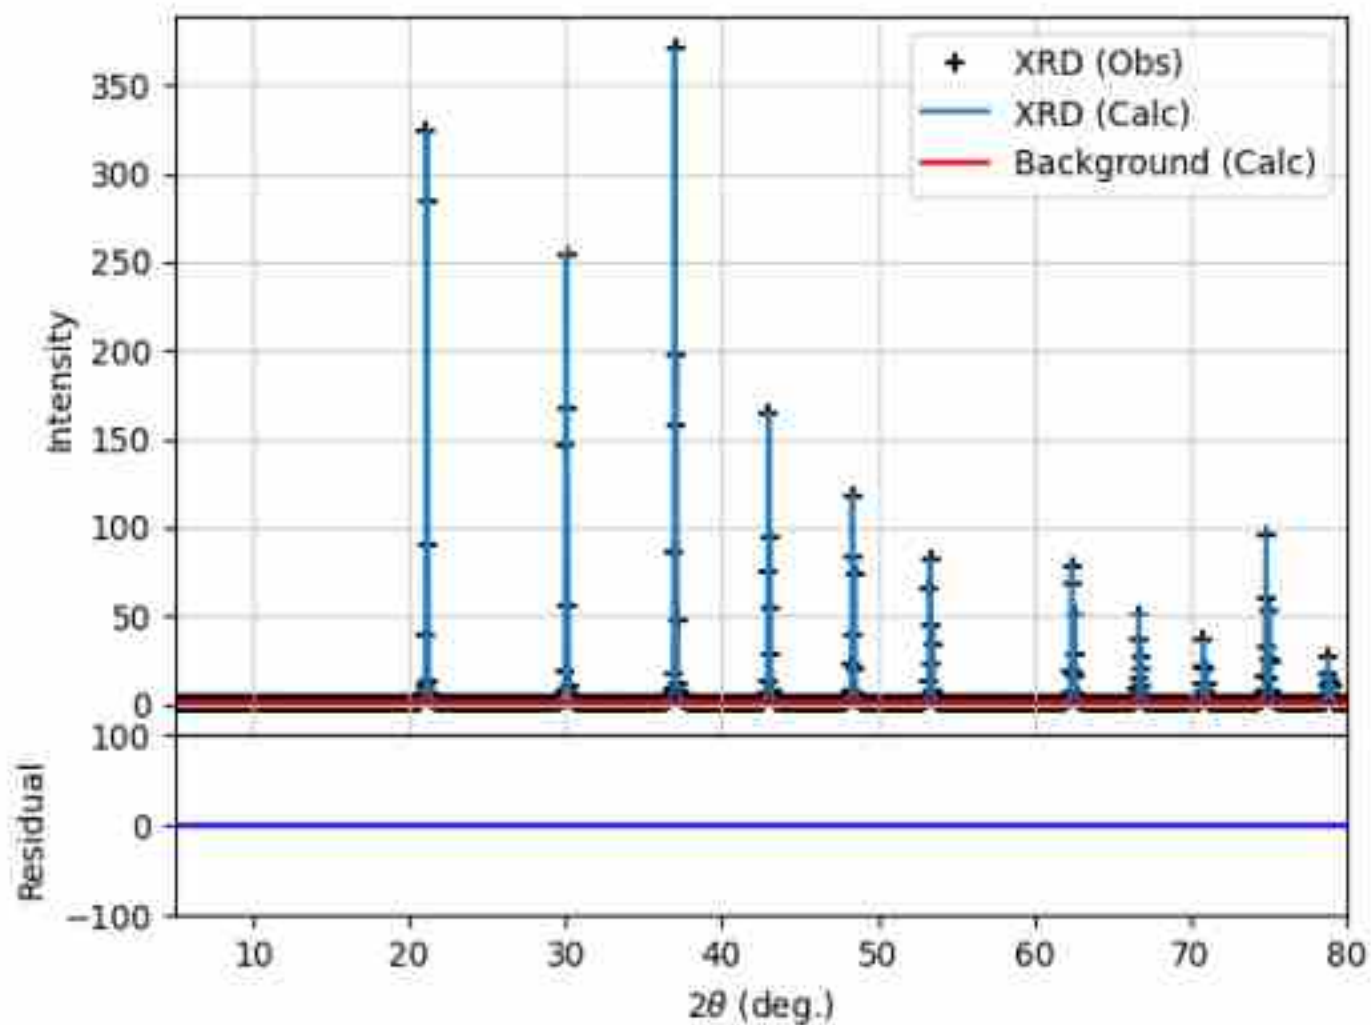

| RMSE before RR | Rwp     | RMSE after RR |
|----------------|---------|---------------|
| 0.003          | 0.00917 | 0.00252       |

# Lu1Hf1Co2

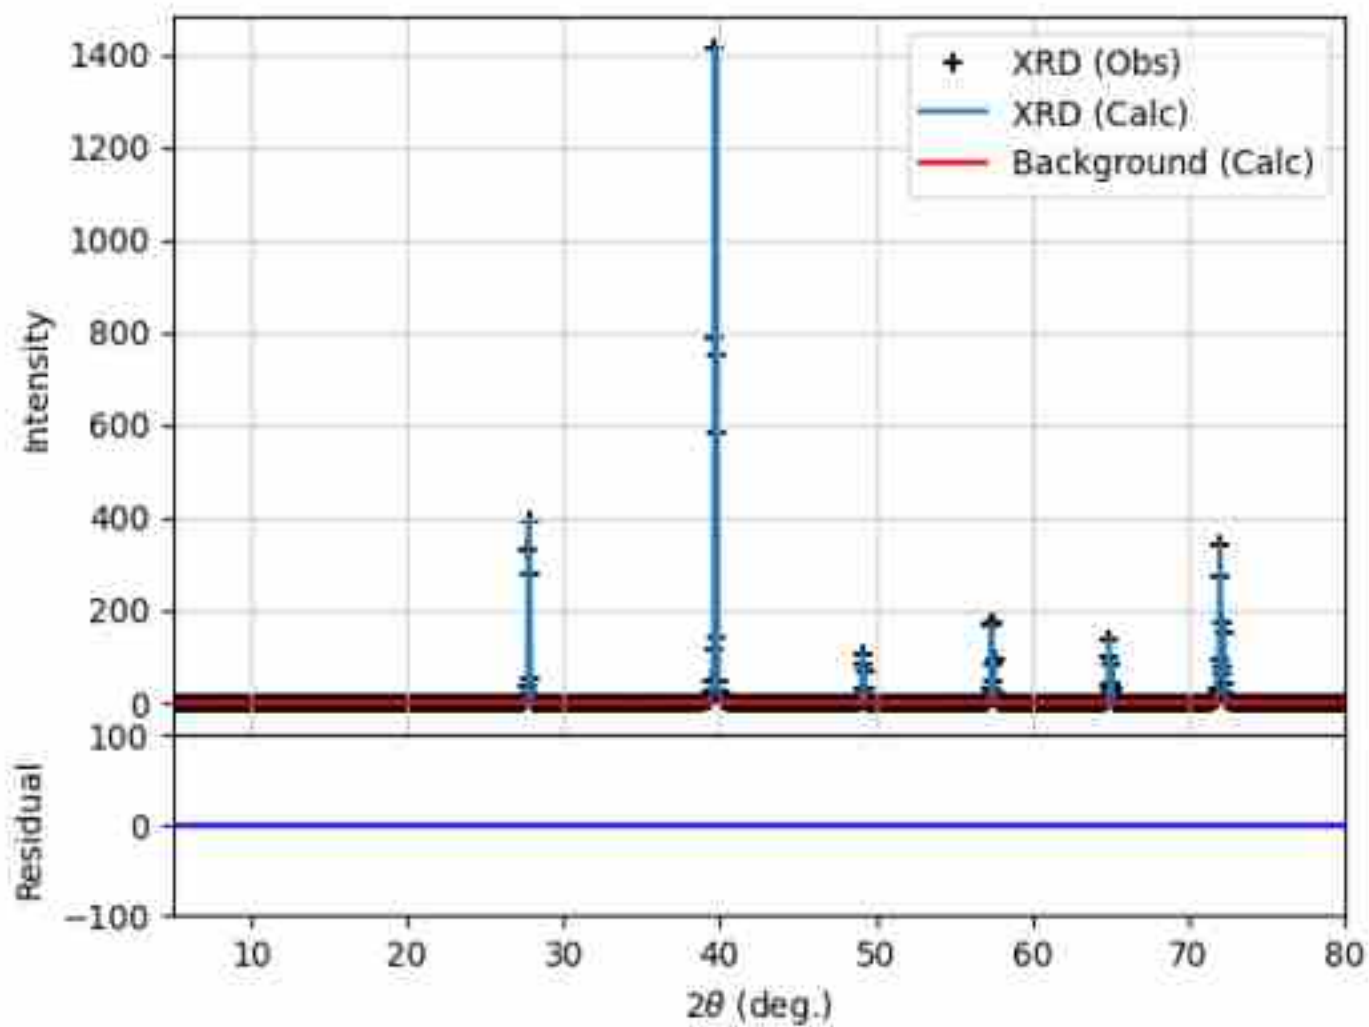

| RMSE before RR | Rwp     | RMSE after RR |
|----------------|---------|---------------|
| 0.003          | 0.00961 | 0.00056       |

# Lu1Sc1Pd2

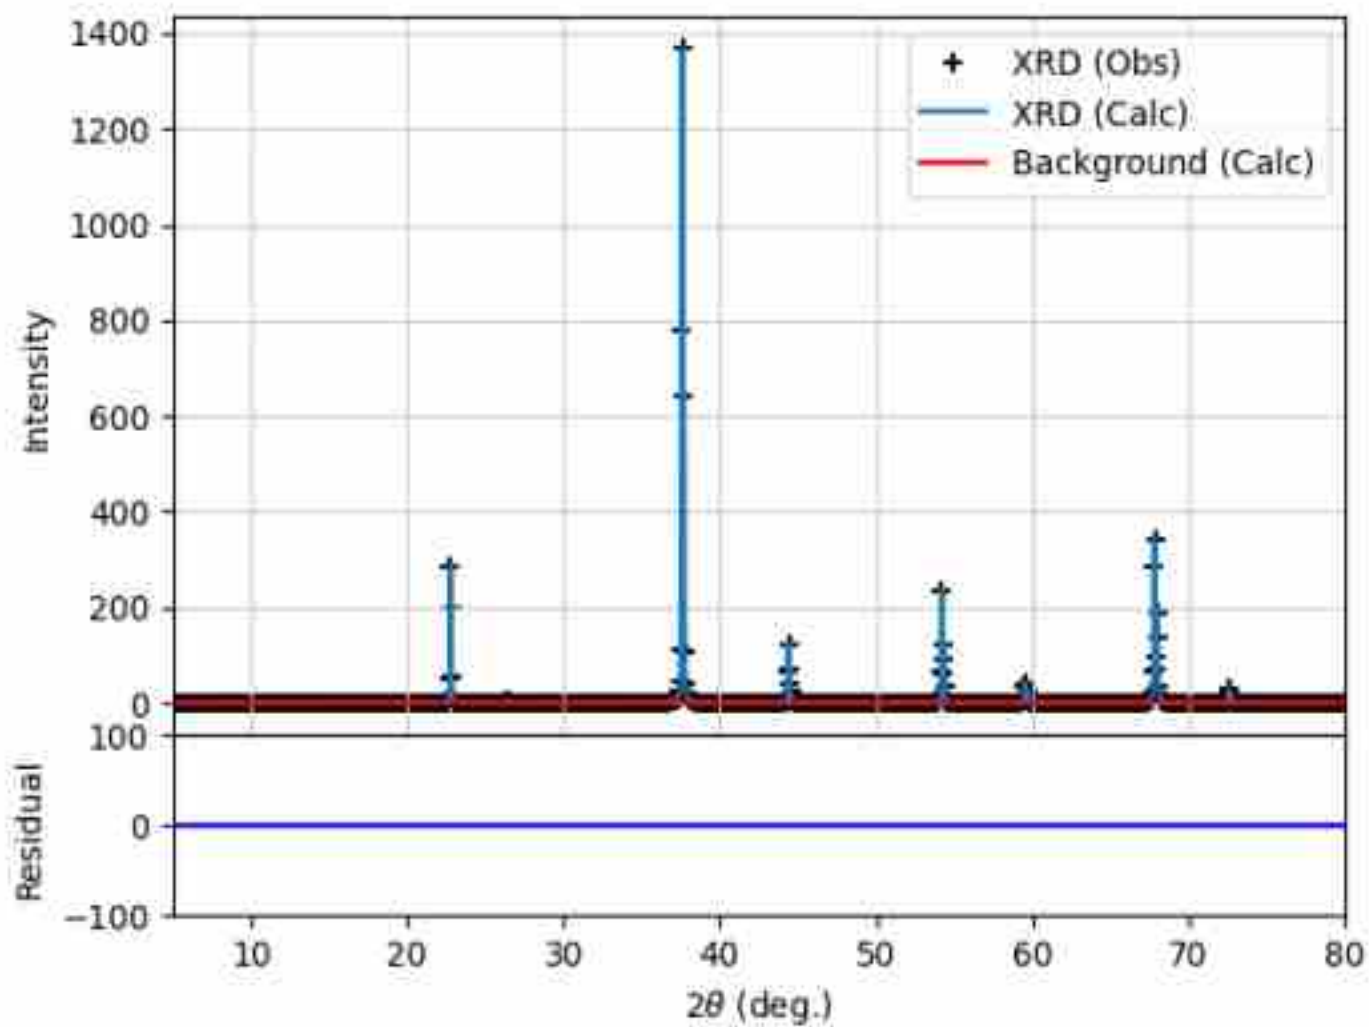

| RMSE before RR | Rwp     | RMSE after RR |
|----------------|---------|---------------|
| 0.003          | 0.13848 | 0.00412       |

# Lu10Sb2Pt4

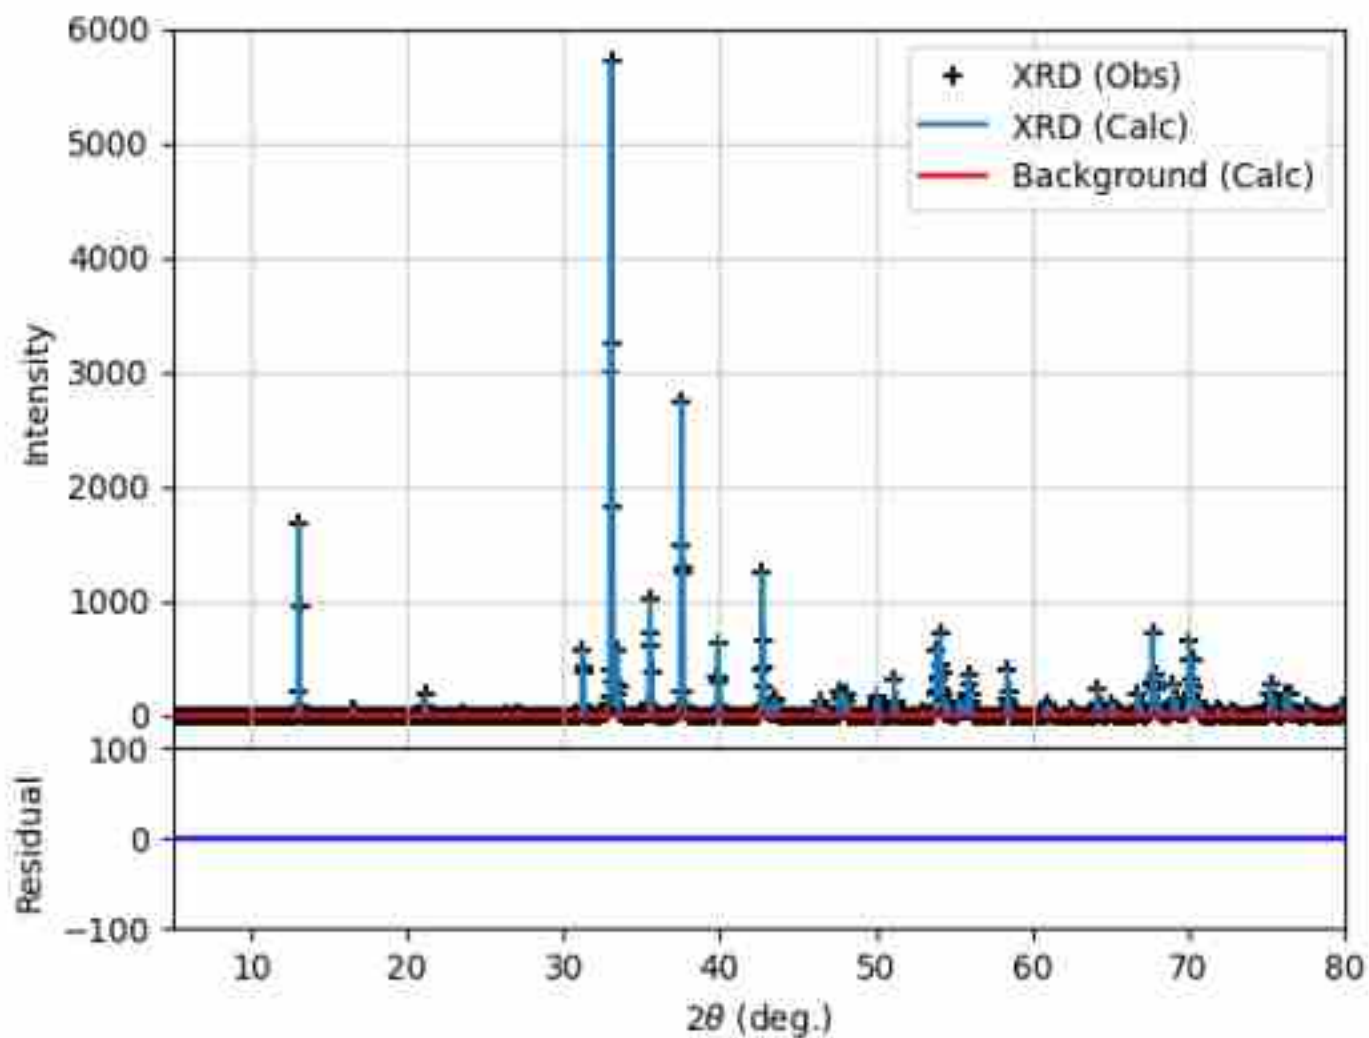

| RMSE before RR | Rwp    | RMSE after RR |
|----------------|--------|---------------|
| 0.03           | 0.0046 | 0.00031       |



# Mg1Cd1

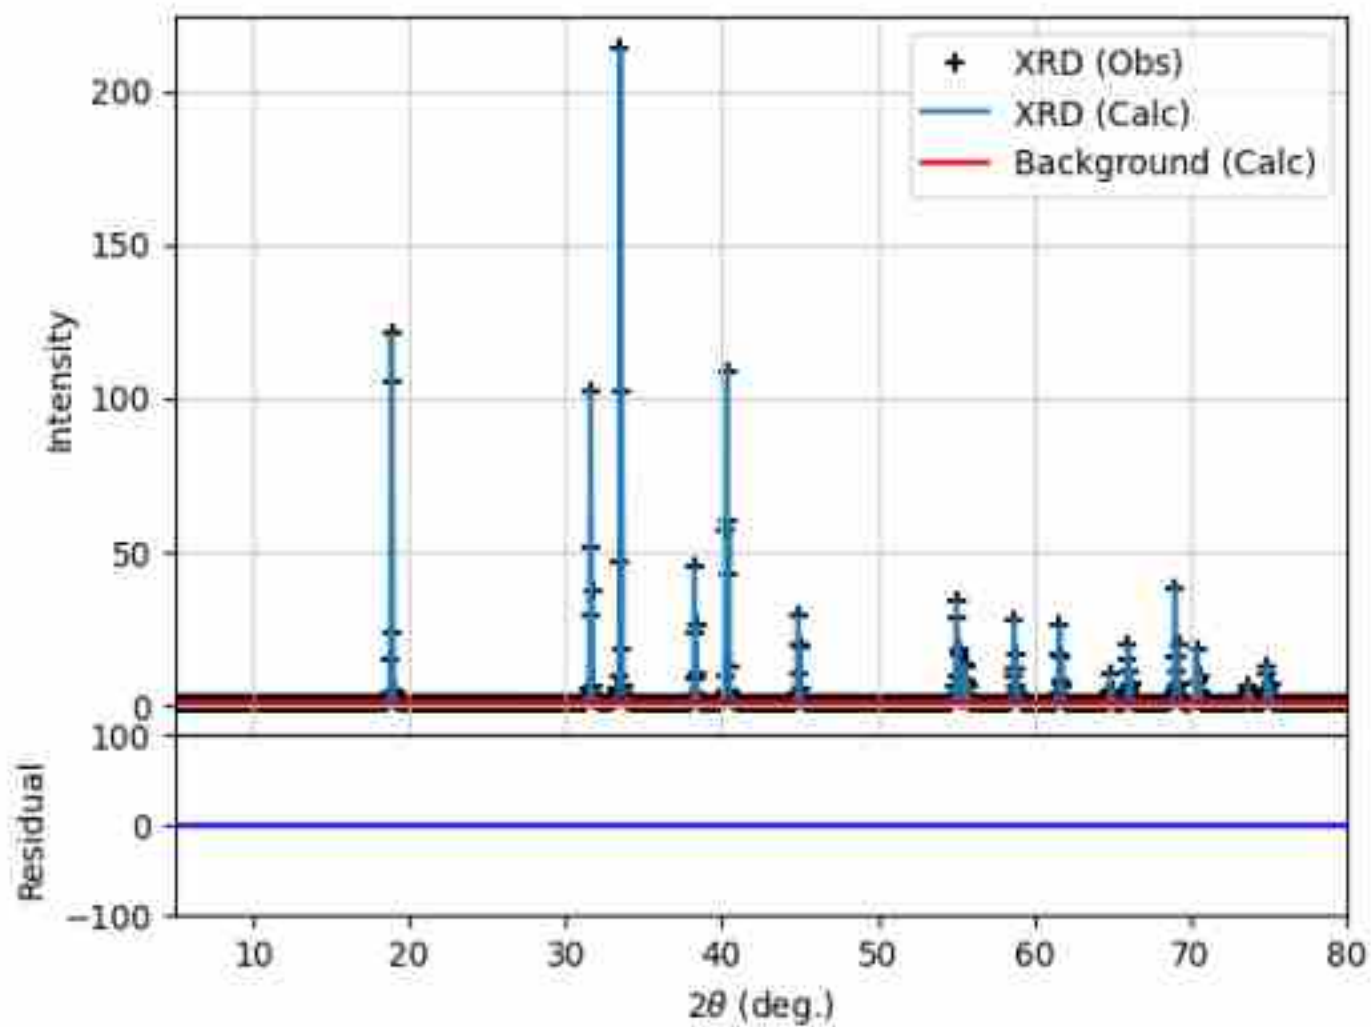

| RMSE before RR | Rwp     | RMSE after RR |
|----------------|---------|---------------|
| 0.003          | 0.00277 | 0.00043       |

# Mg1Pd3

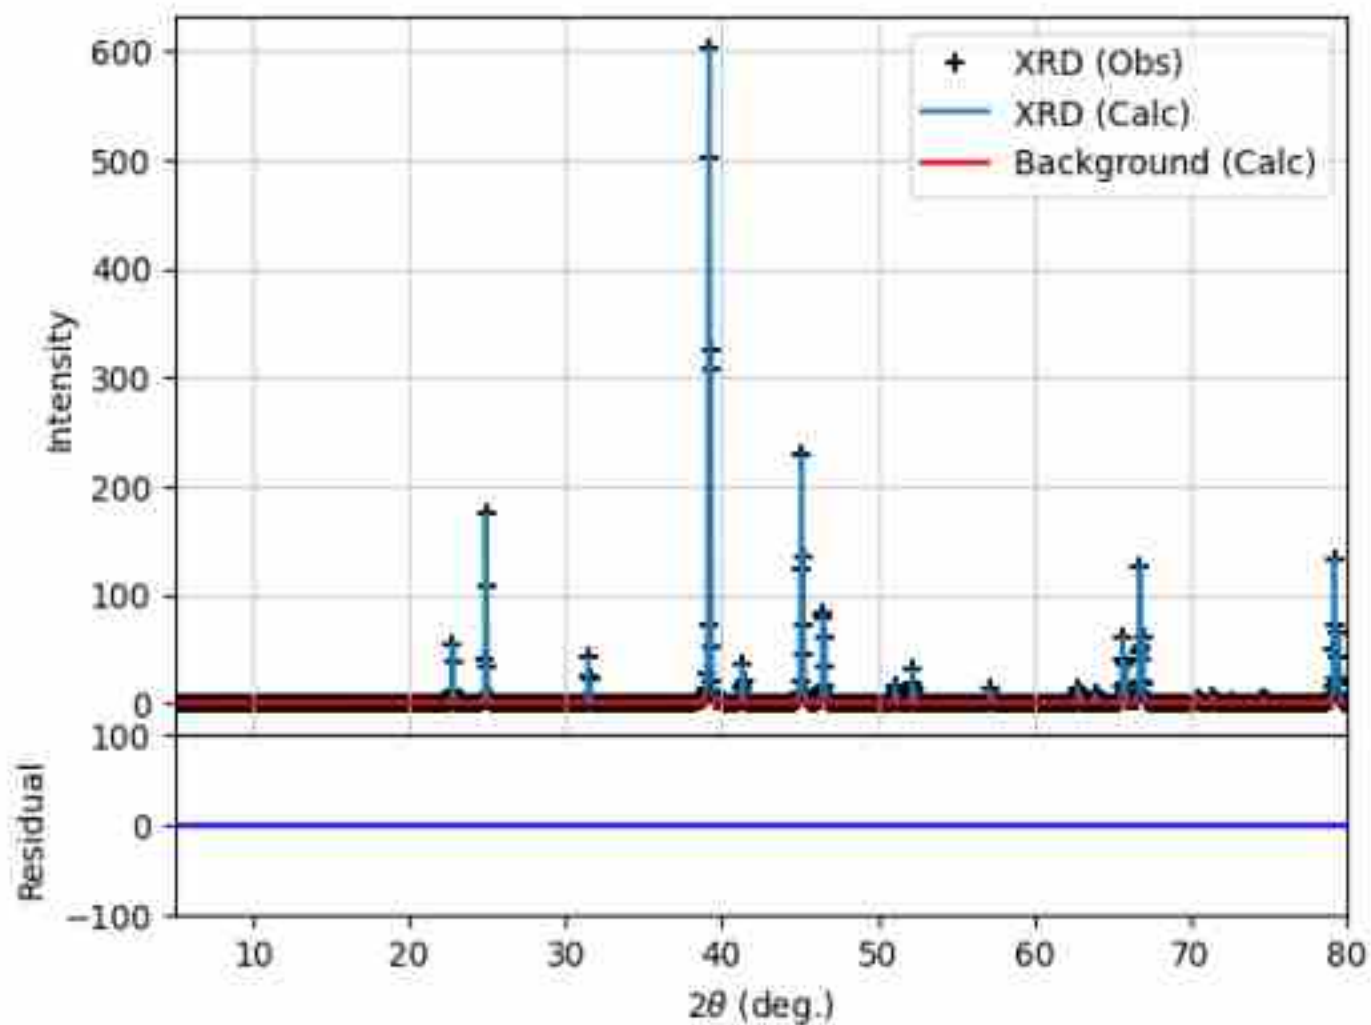

| RMSE before RR | Rwp     | RMSE after RR |
|----------------|---------|---------------|
| 0.003          | 0.00417 | 0.00025       |

# Mg<sub>1</sub>Te<sub>1</sub>Pb<sub>2</sub>O<sub>6</sub>

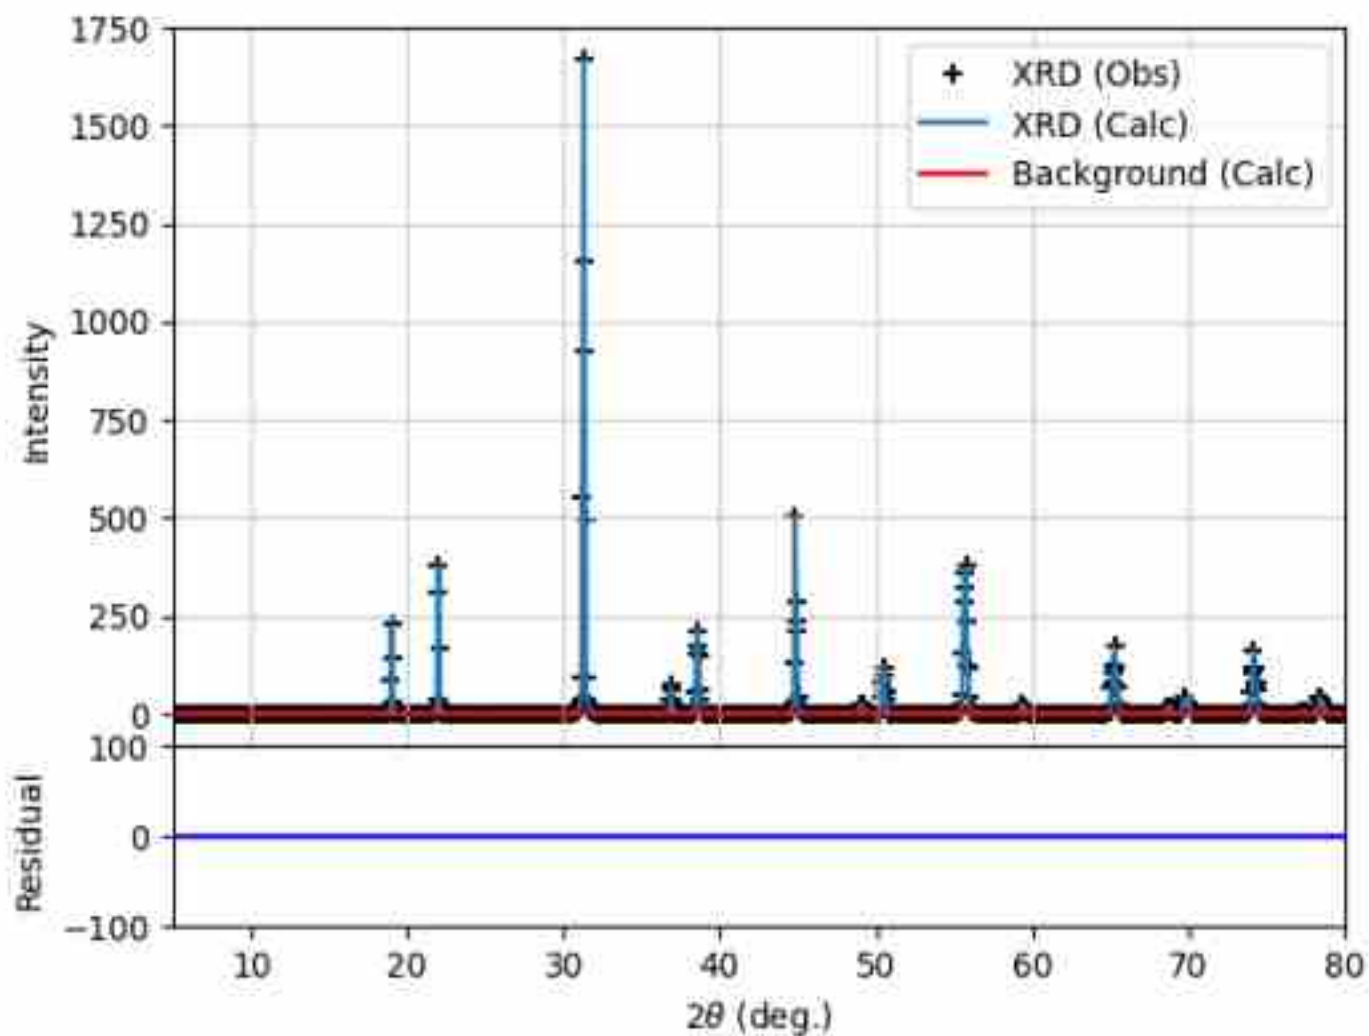

| RMSE before RR | Rwp     | RMSE after RR |
|----------------|---------|---------------|
| 0.03           | 0.00065 | 4e-05         |

# Mg<sub>1</sub>Ti<sub>2</sub>Pb<sub>4</sub>W<sub>1</sub>O<sub>12</sub>

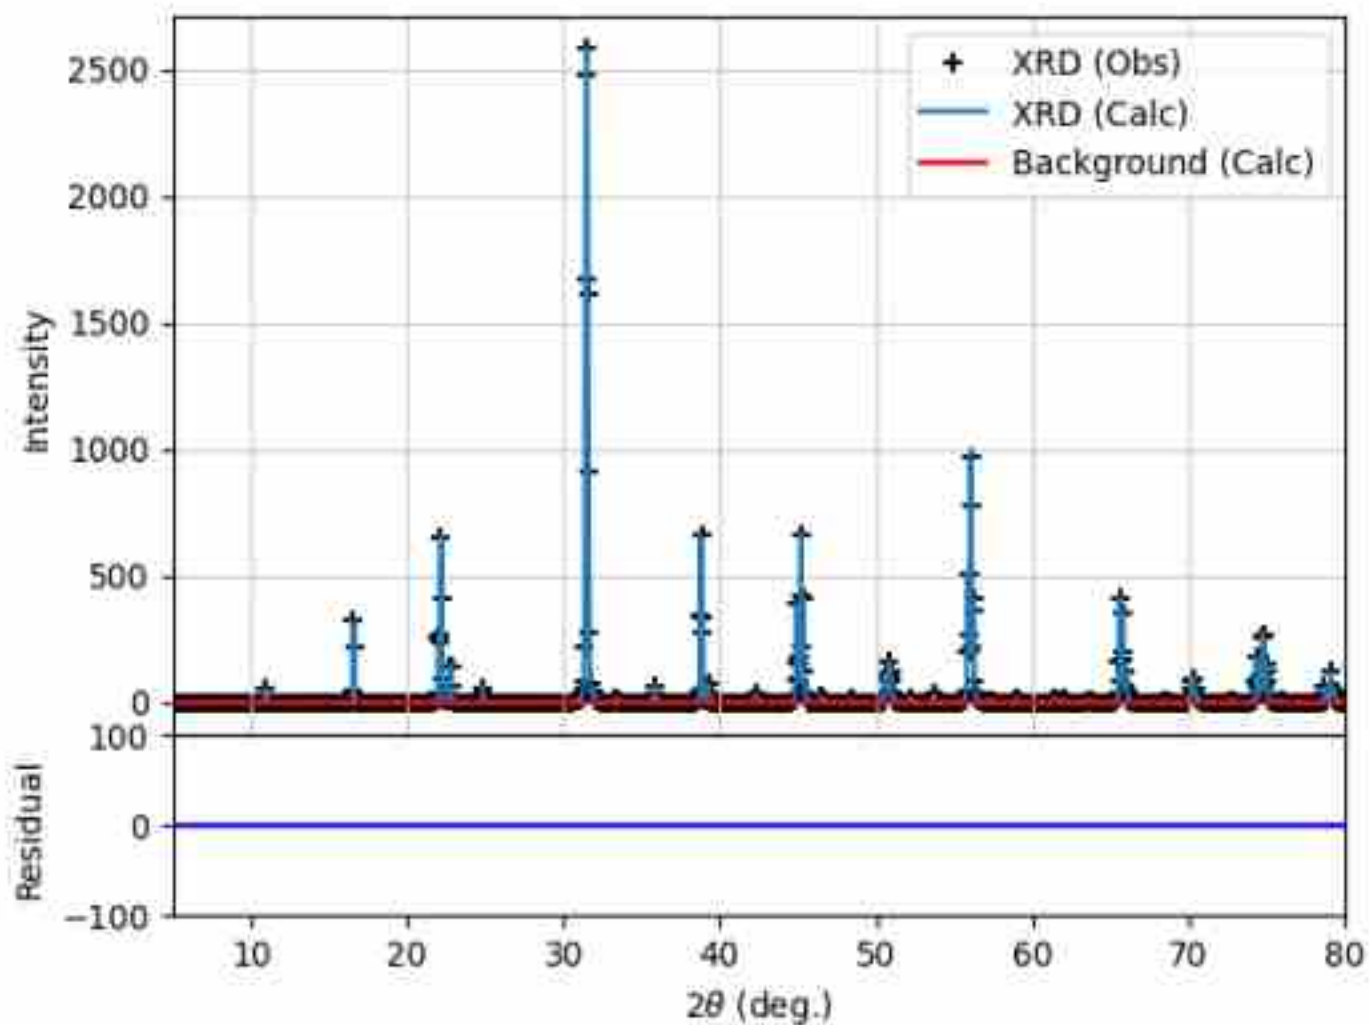

| RMSE before RR | Rwp     | RMSE after RR |
|----------------|---------|---------------|
| 0.03           | 0.00491 | 0.0025        |

# Mg<sub>1</sub>V<sub>2</sub>O<sub>6</sub>

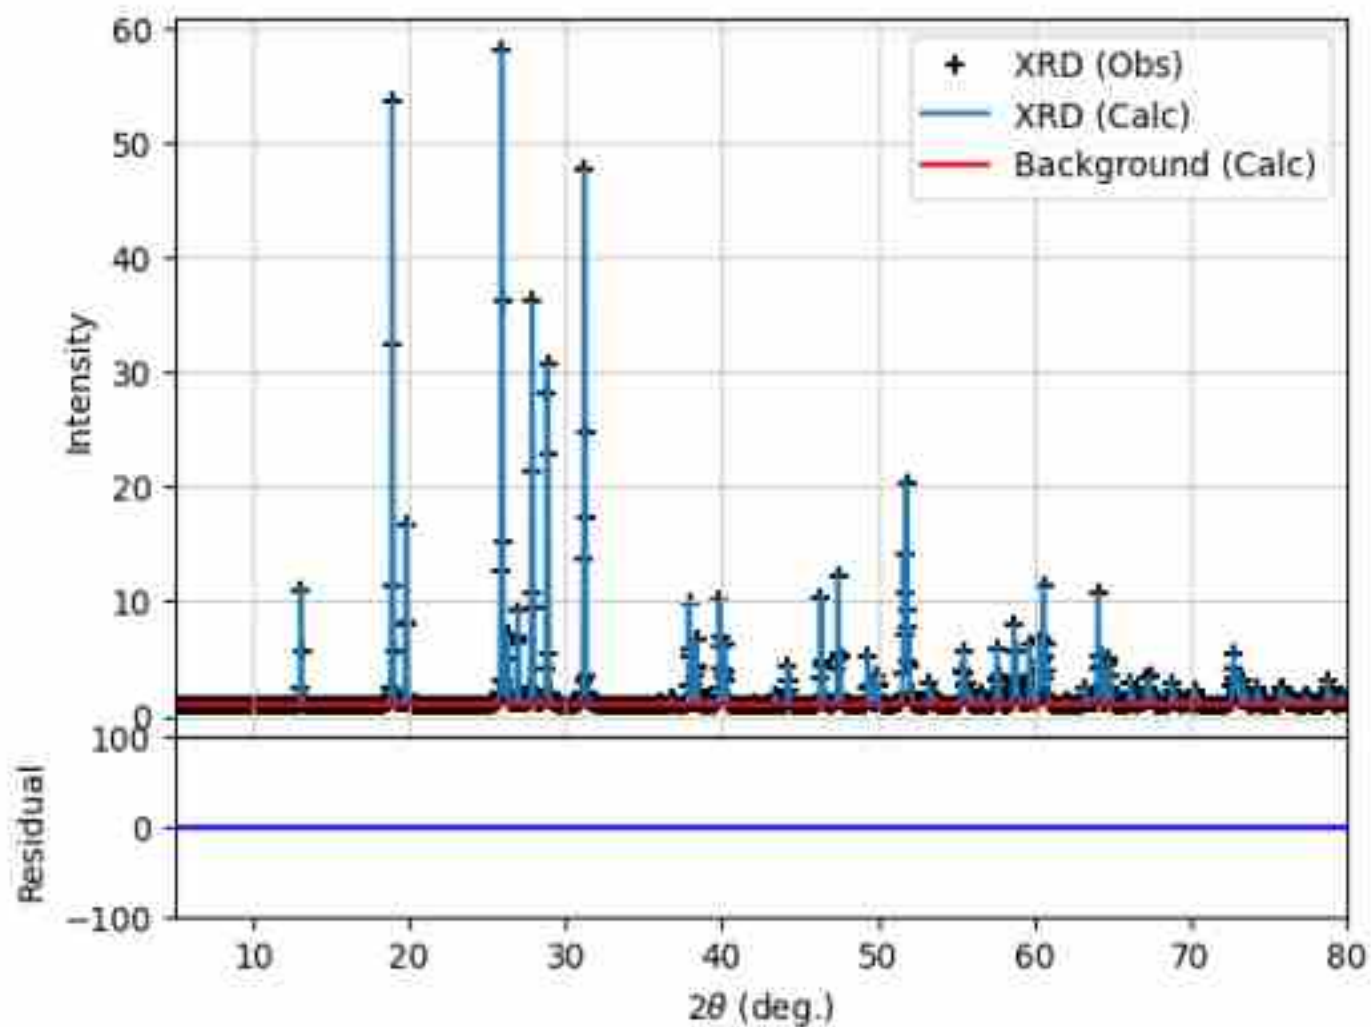

| RMSE before RR | Rwp     | RMSE after RR |
|----------------|---------|---------------|
| 0.03           | 0.00213 | 0.00067       |

# Mg<sub>2</sub>AgPd

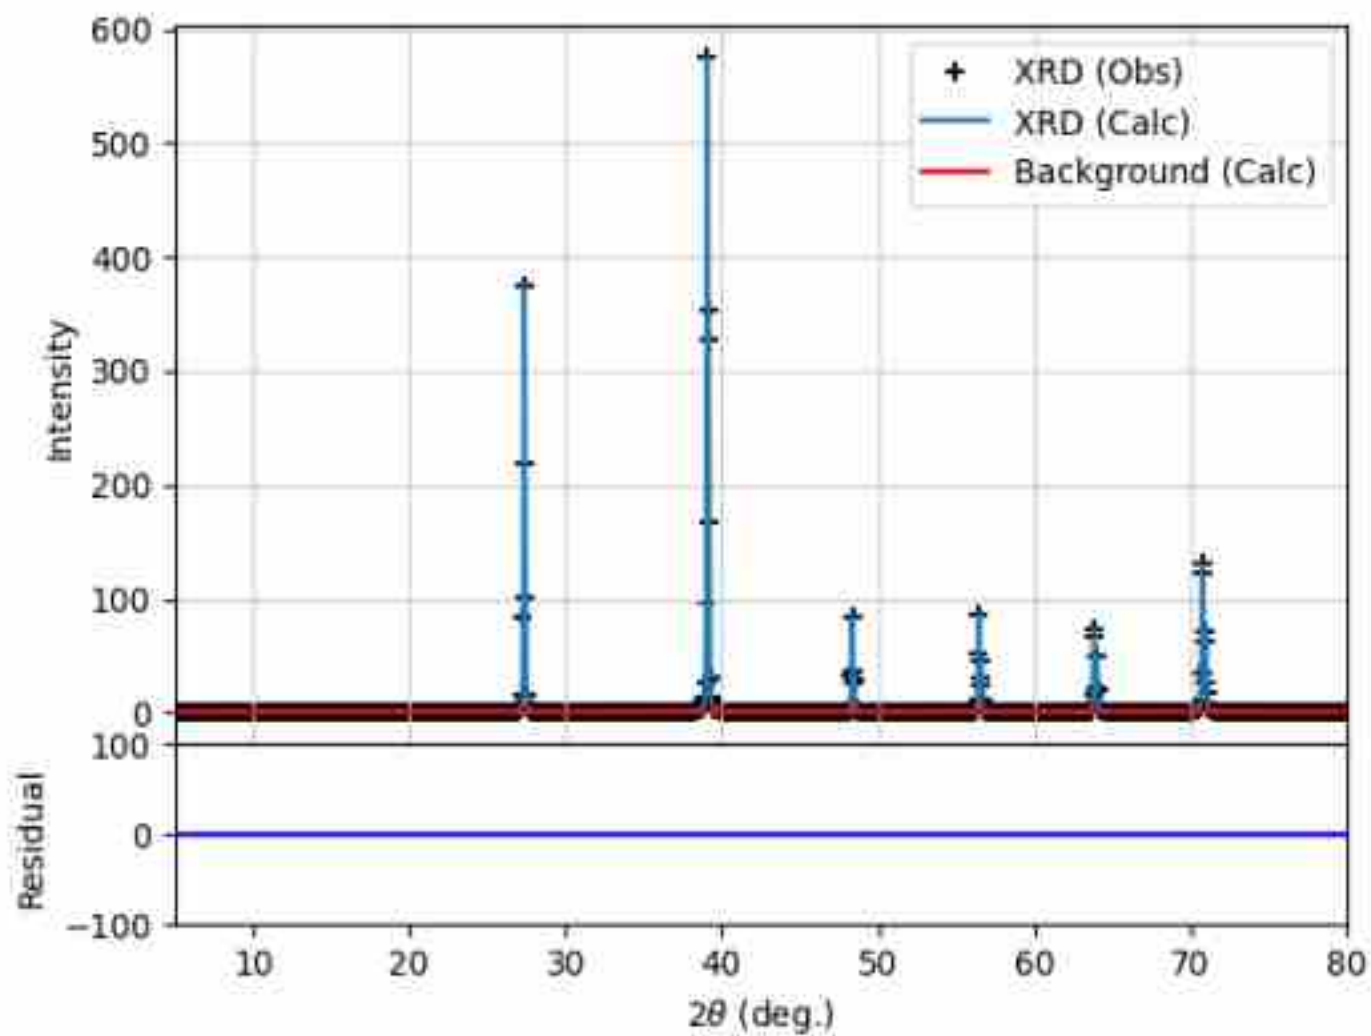

| RMSE before RR | Rwp     | RMSE after RR |
|----------------|---------|---------------|
| 0.003          | 0.01964 | 0.00086       |

# Mg<sub>2</sub>Cu<sub>4</sub>O<sub>8</sub>

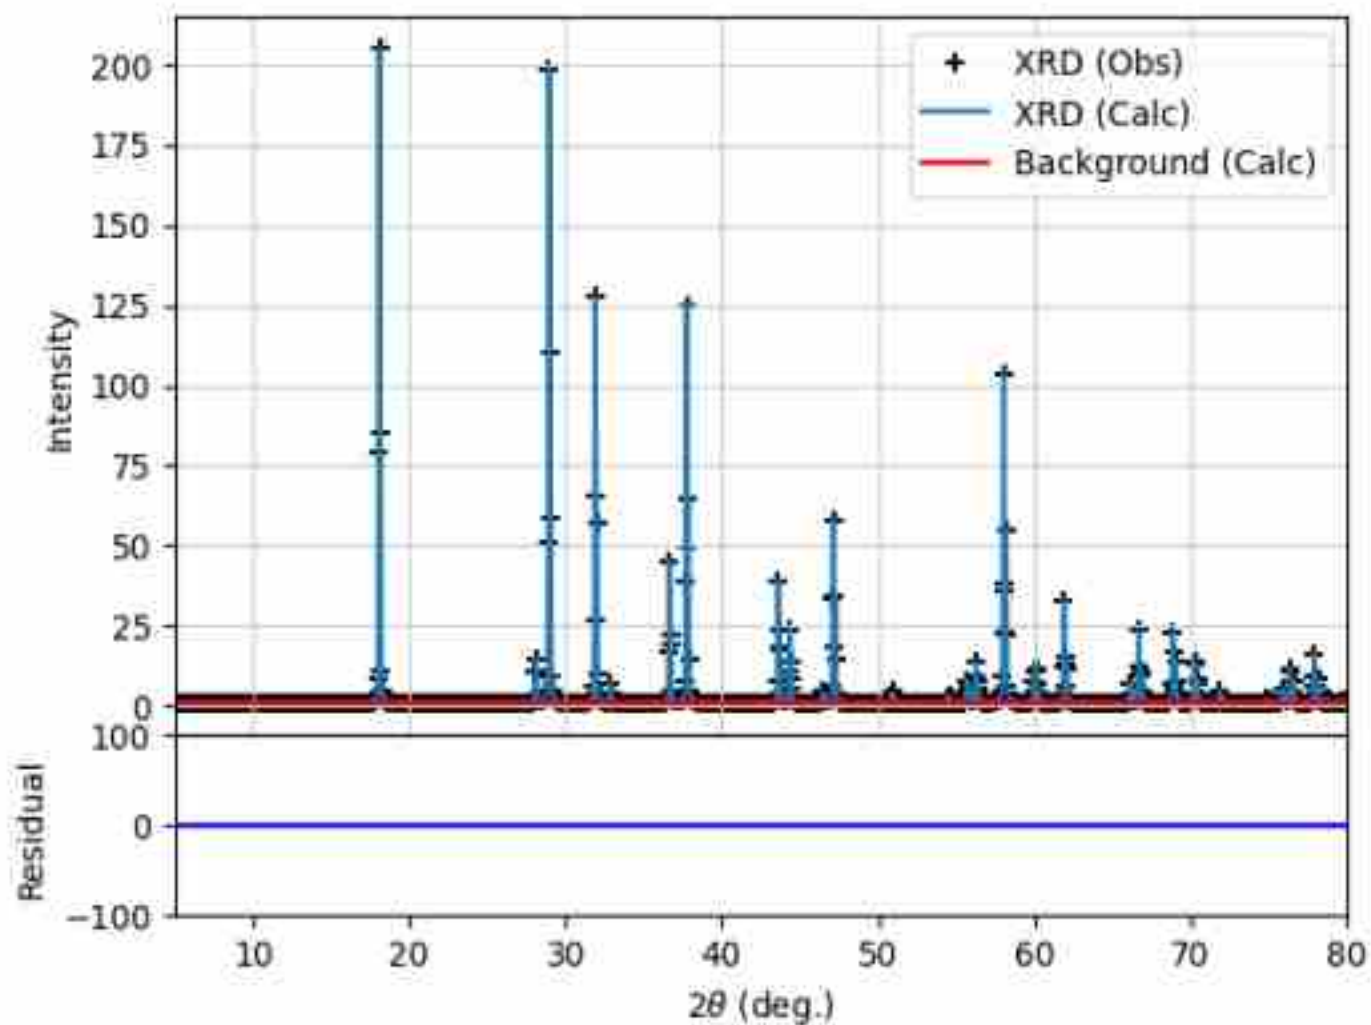

| RMSE before RR | Rwp     | RMSE after RR |
|----------------|---------|---------------|
| 0.03           | 0.00338 | 0.00145       |

# Mg<sub>5</sub>In<sub>1</sub>

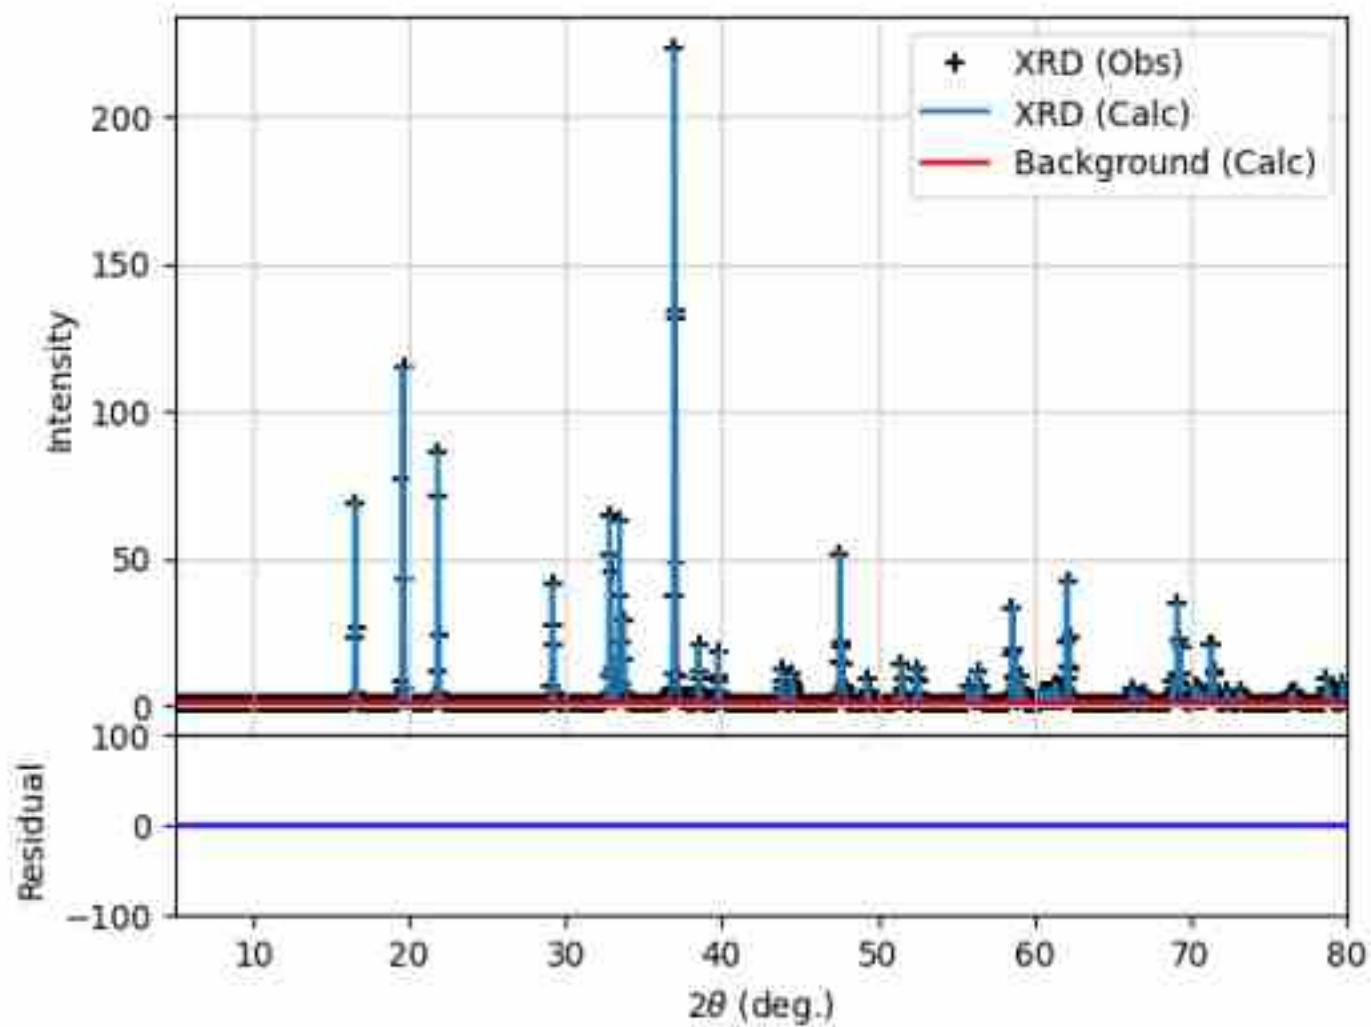

| RMSE before RR | Rwp    | RMSE after RR |
|----------------|--------|---------------|
| 0.003          | 0.0032 | 0.00054       |



# Mn1Be1Ru2

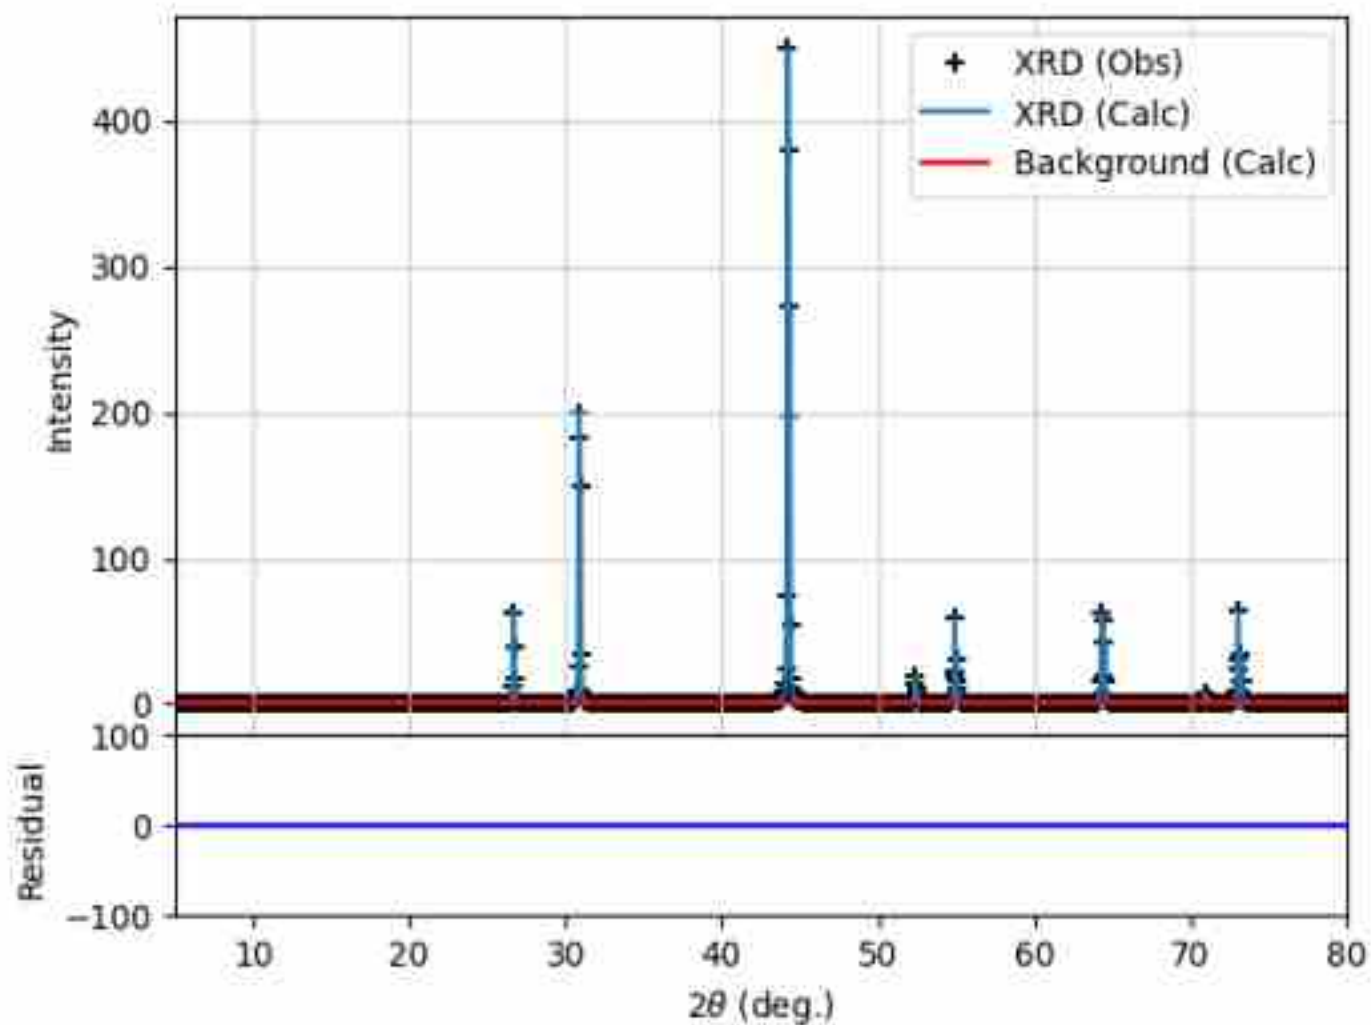

| RMSE before RR | Rwp     | RMSE after RR |
|----------------|---------|---------------|
| 0.003          | 0.00416 | 0.00344       |

# Mn1Be2Rh1

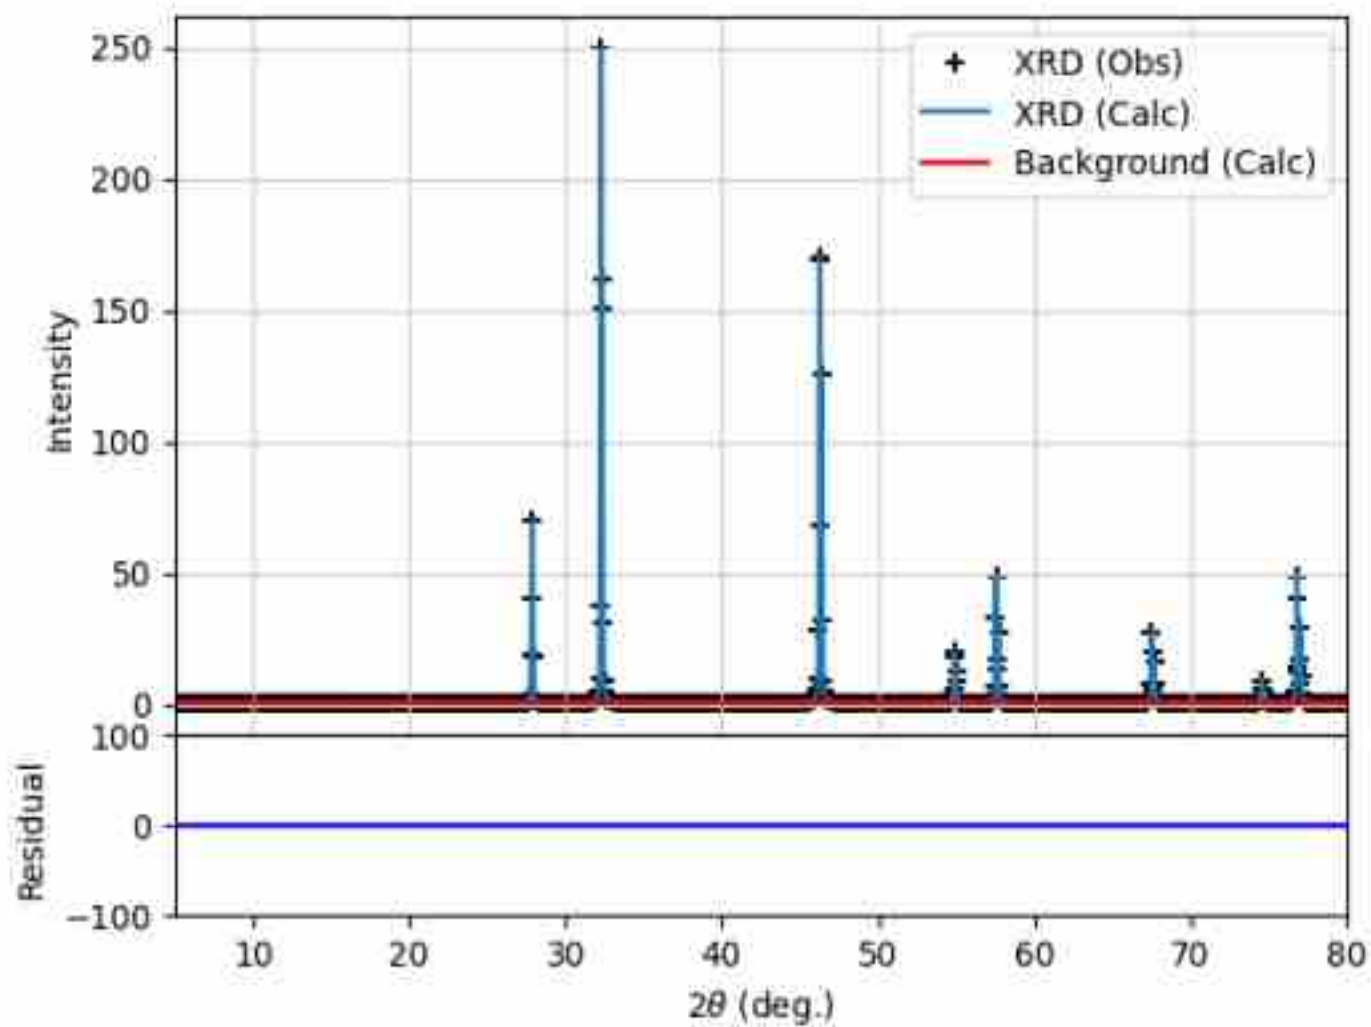

| RMSE before RR | Rwp     | RMSE after RR |
|----------------|---------|---------------|
| 0.003          | 0.00257 | 0.00232       |

# Mn1Cu1F6

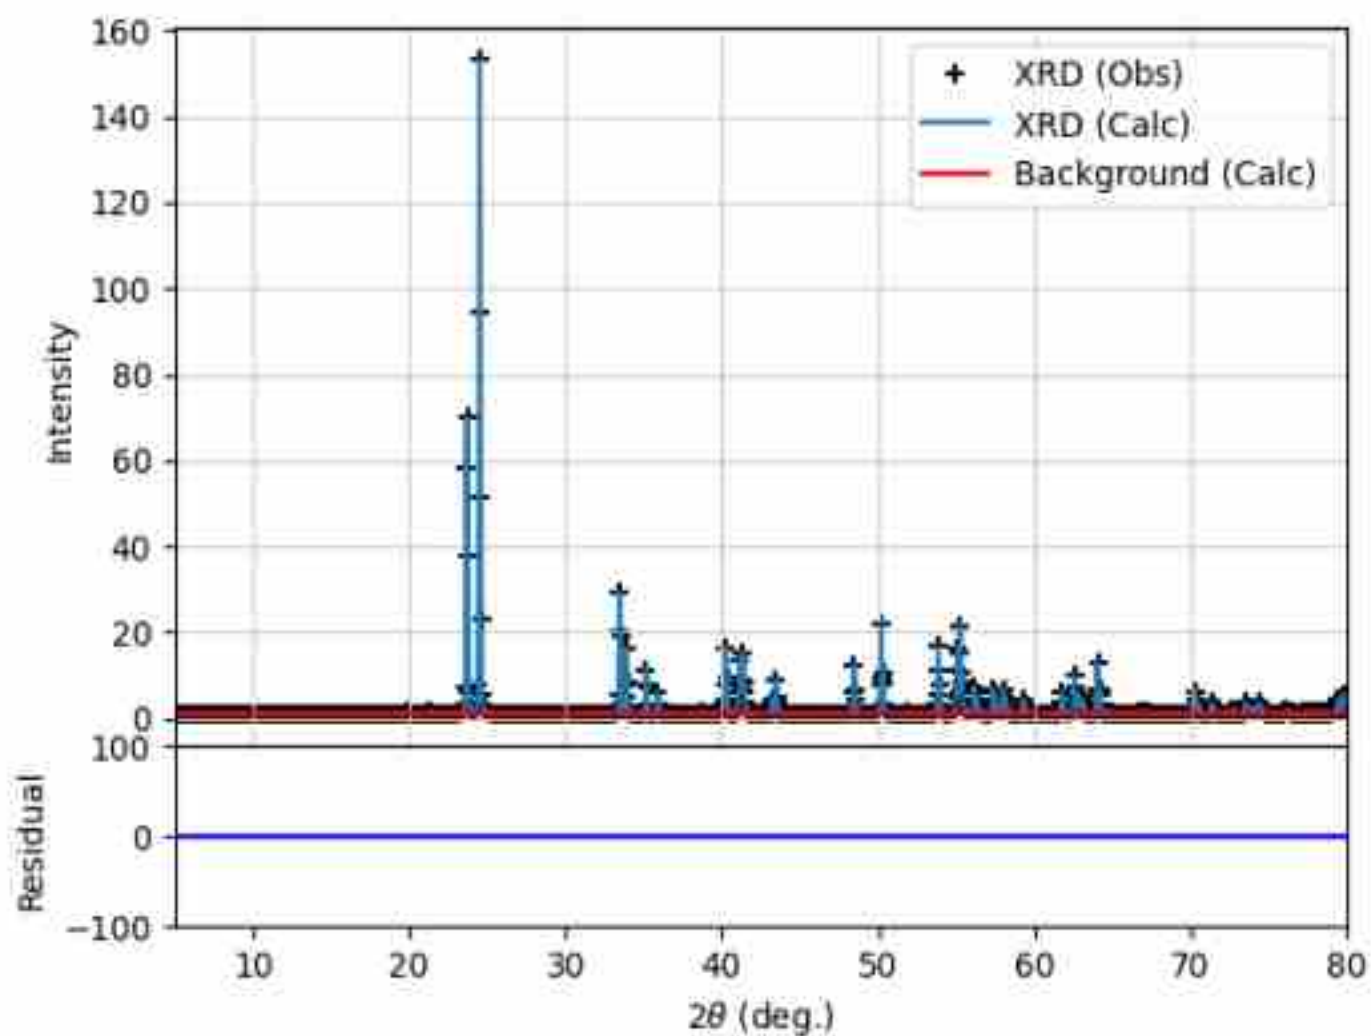

| RMSE before RR | Rwp     | RMSE after RR |
|----------------|---------|---------------|
| 0.03           | 0.00034 | 0.00027       |

# Mn1Cu1Pt6

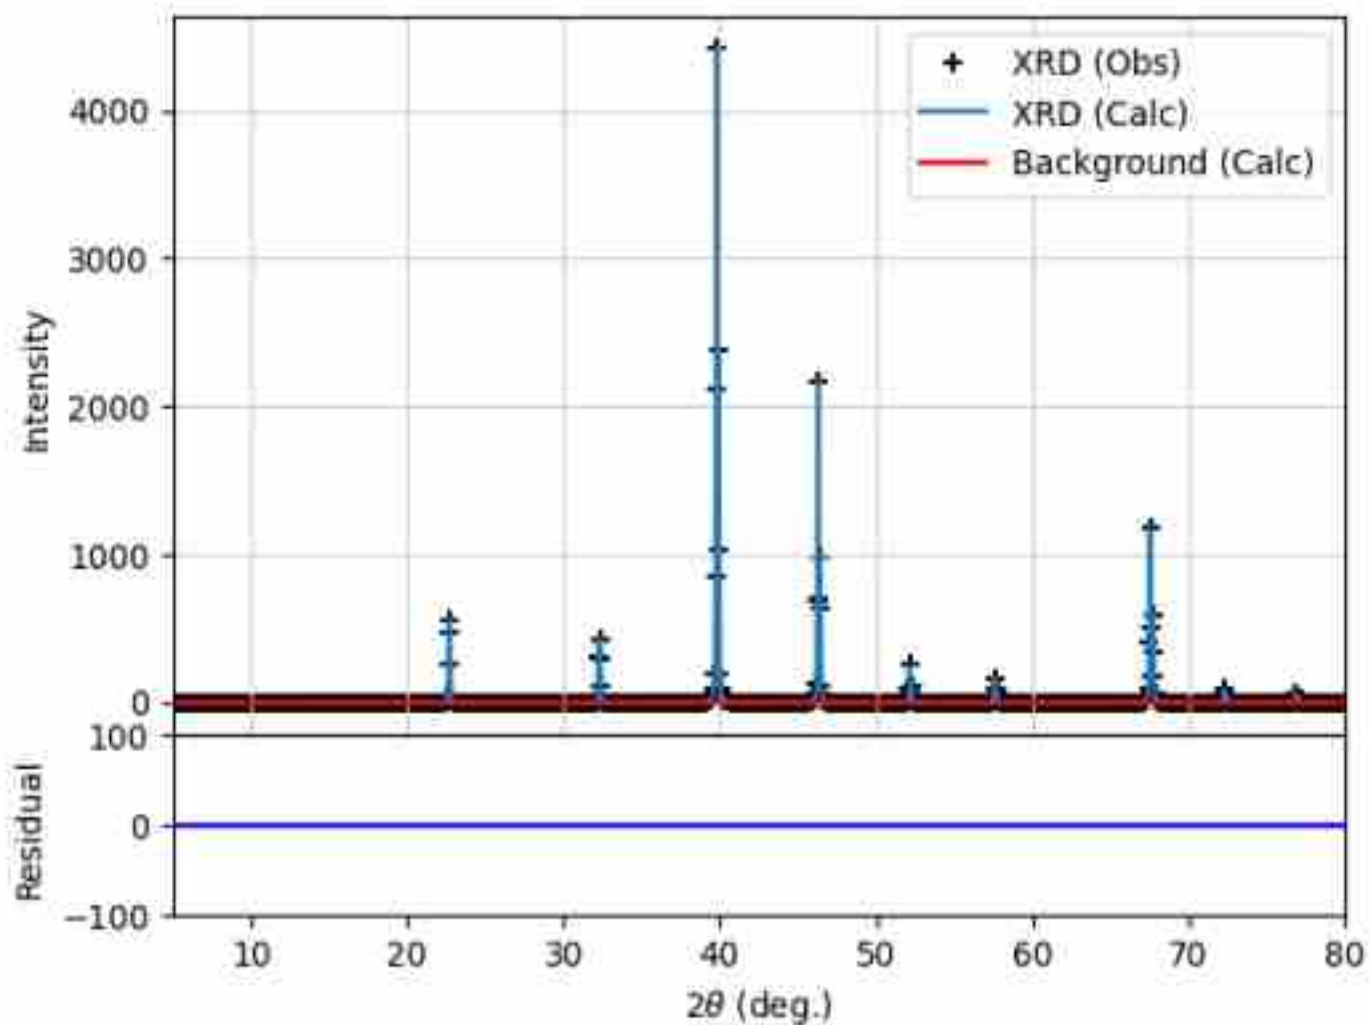

| RMSE before RR | Rwp     | RMSE after RR |
|----------------|---------|---------------|
| 0.003          | 0.00439 | 0.00046       |

# Mn<sub>4</sub>Tl<sub>4</sub>O<sub>12</sub>

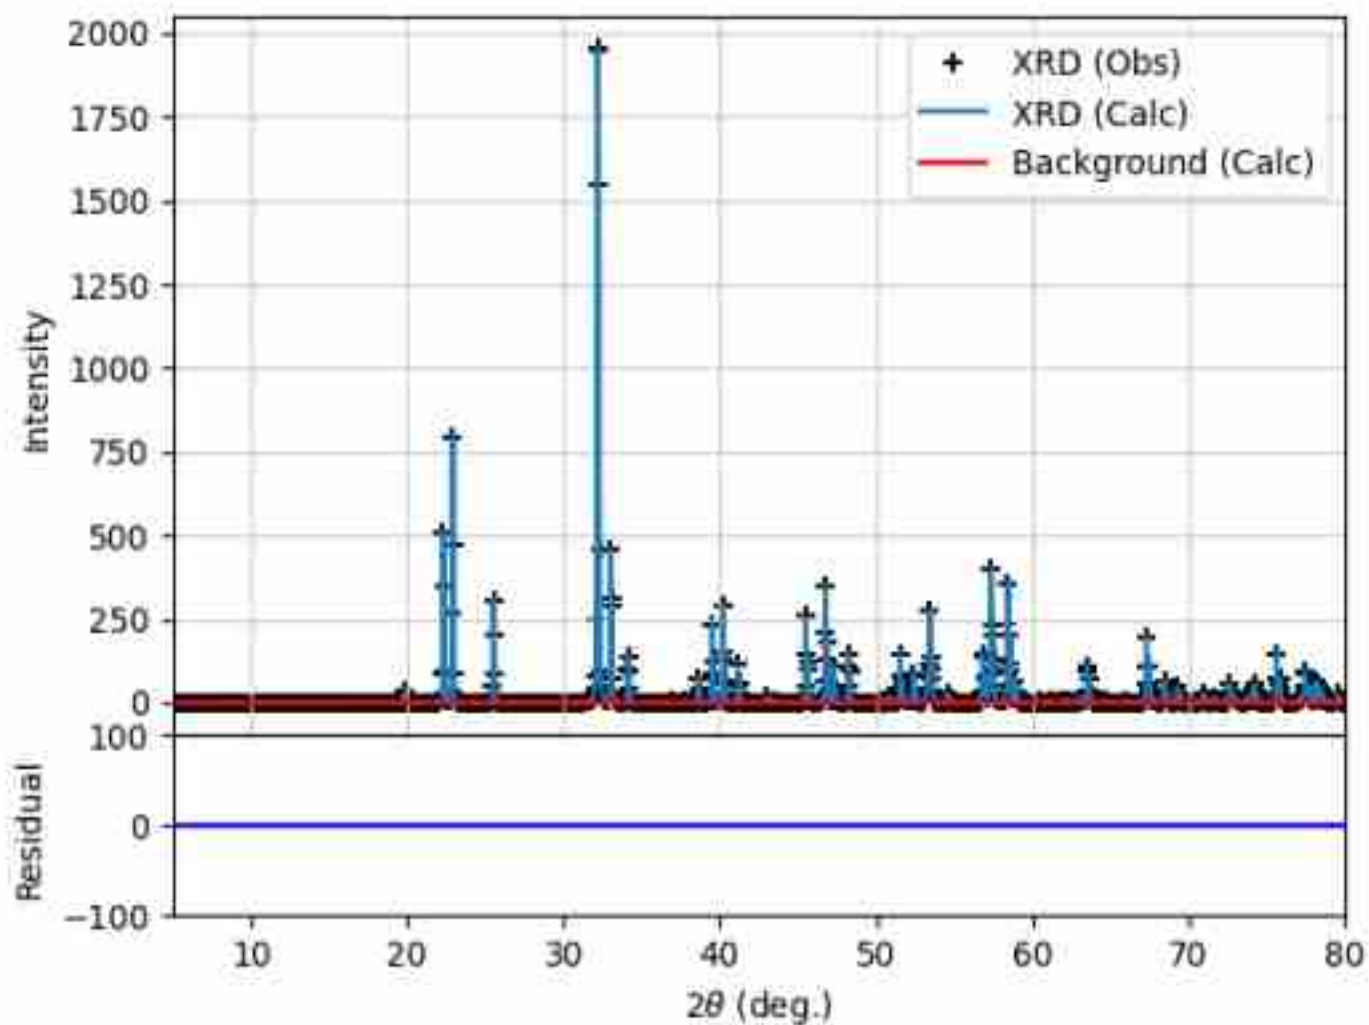

| RMSE before RR | Rwp     | RMSE after RR |
|----------------|---------|---------------|
| 0.03           | 0.00417 | 0.00152       |

# Mo2S4

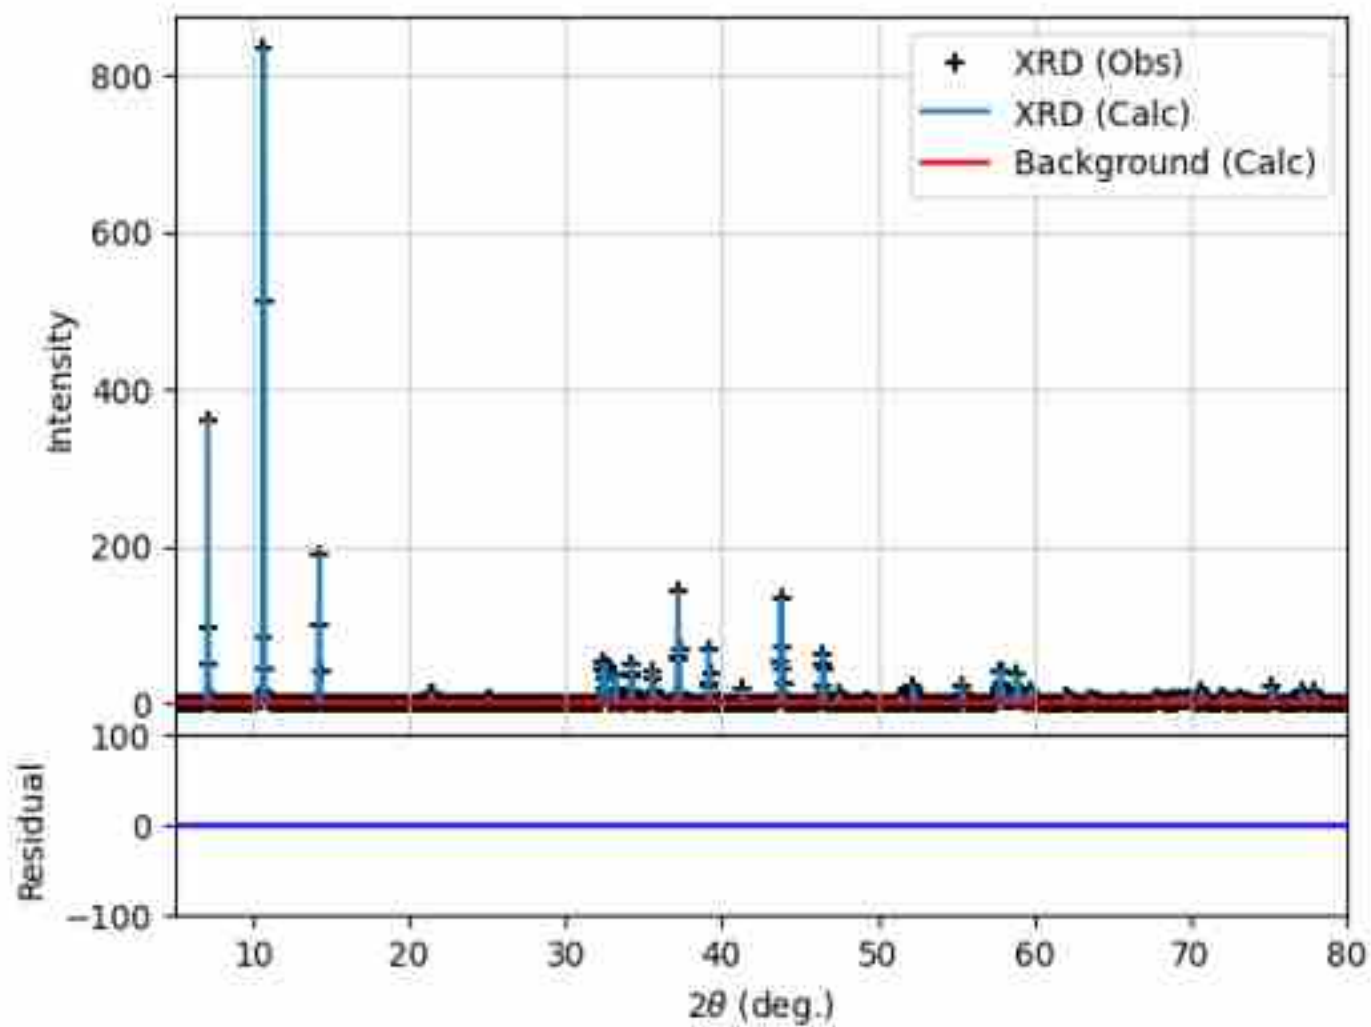

| RMSE before RR | Rwp     | RMSE after RR |
|----------------|---------|---------------|
| 0.03           | 0.00245 | 0.00036       |

# Mo<sub>2</sub>W<sub>1</sub>Se<sub>4</sub>S<sub>2</sub>

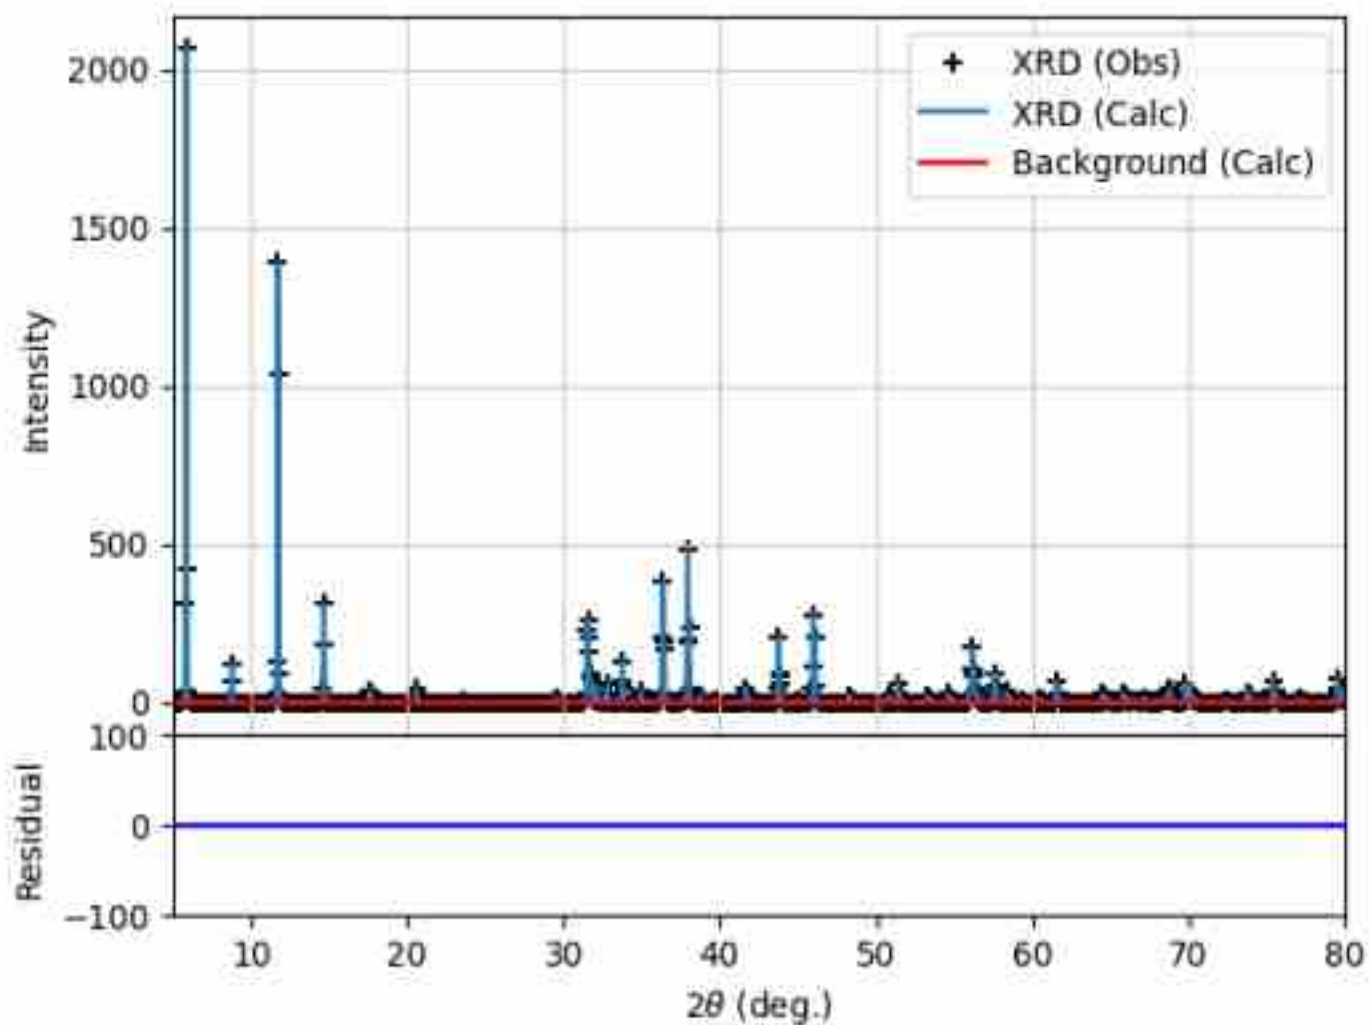

| RMSE before RR | Rwp    | RMSE after RR |
|----------------|--------|---------------|
| 0.03           | 0.0029 | 0.00053       |

# Na<sub>1</sub>Mn<sub>3</sub>V<sub>4</sub>O<sub>12</sub>

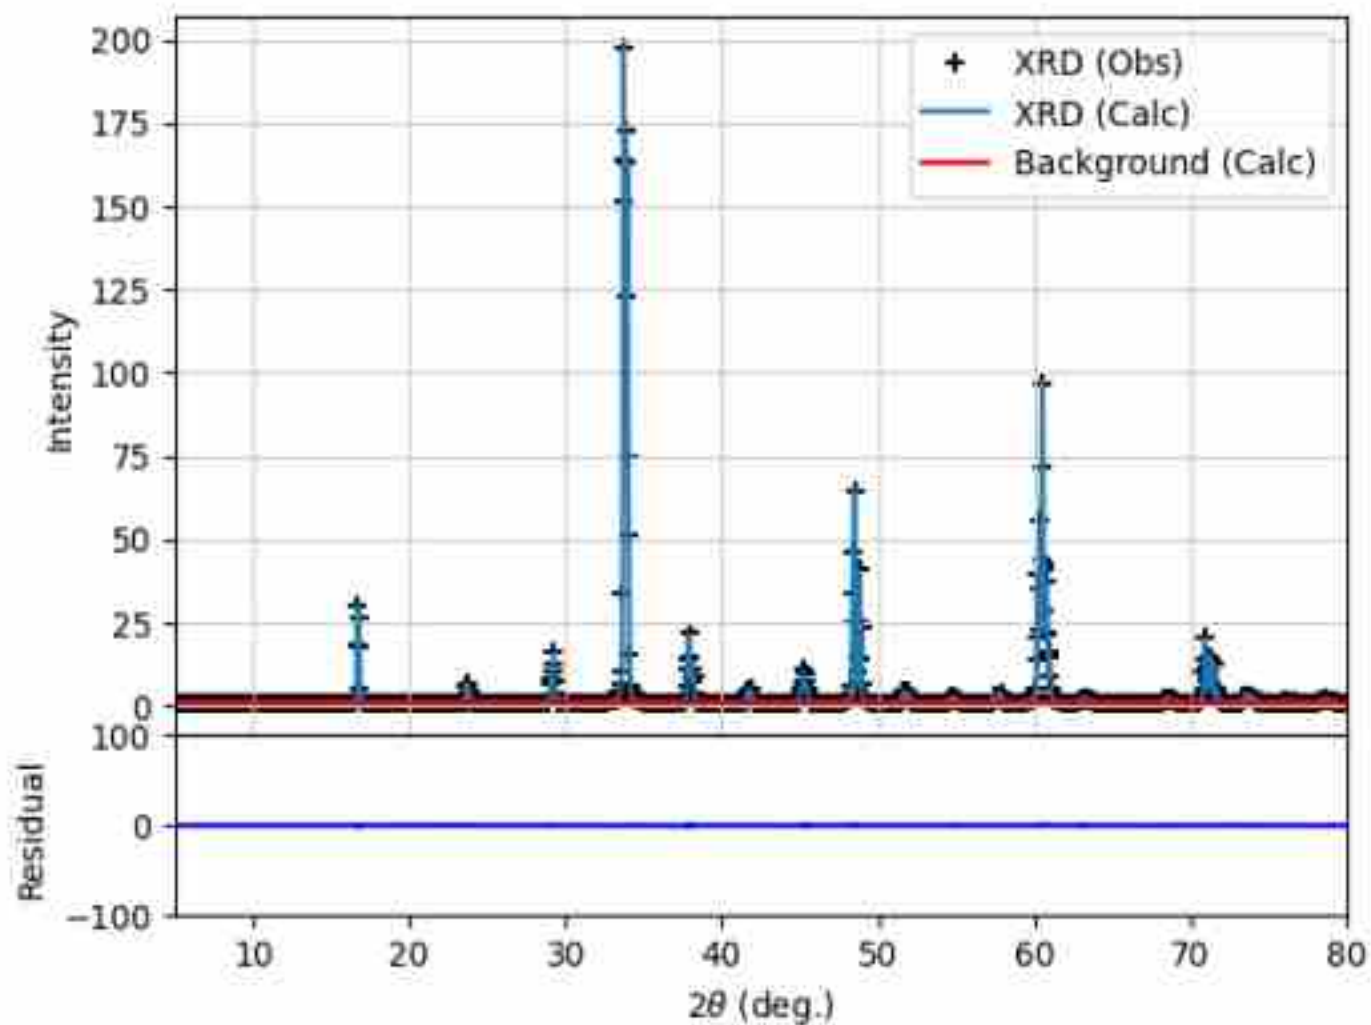

| RMSE before RR | Rwp     | RMSE after RR |
|----------------|---------|---------------|
| 0.03           | 3.54718 | 0.04039       |



# Na<sub>2</sub>Mn<sub>6</sub>O<sub>8</sub>

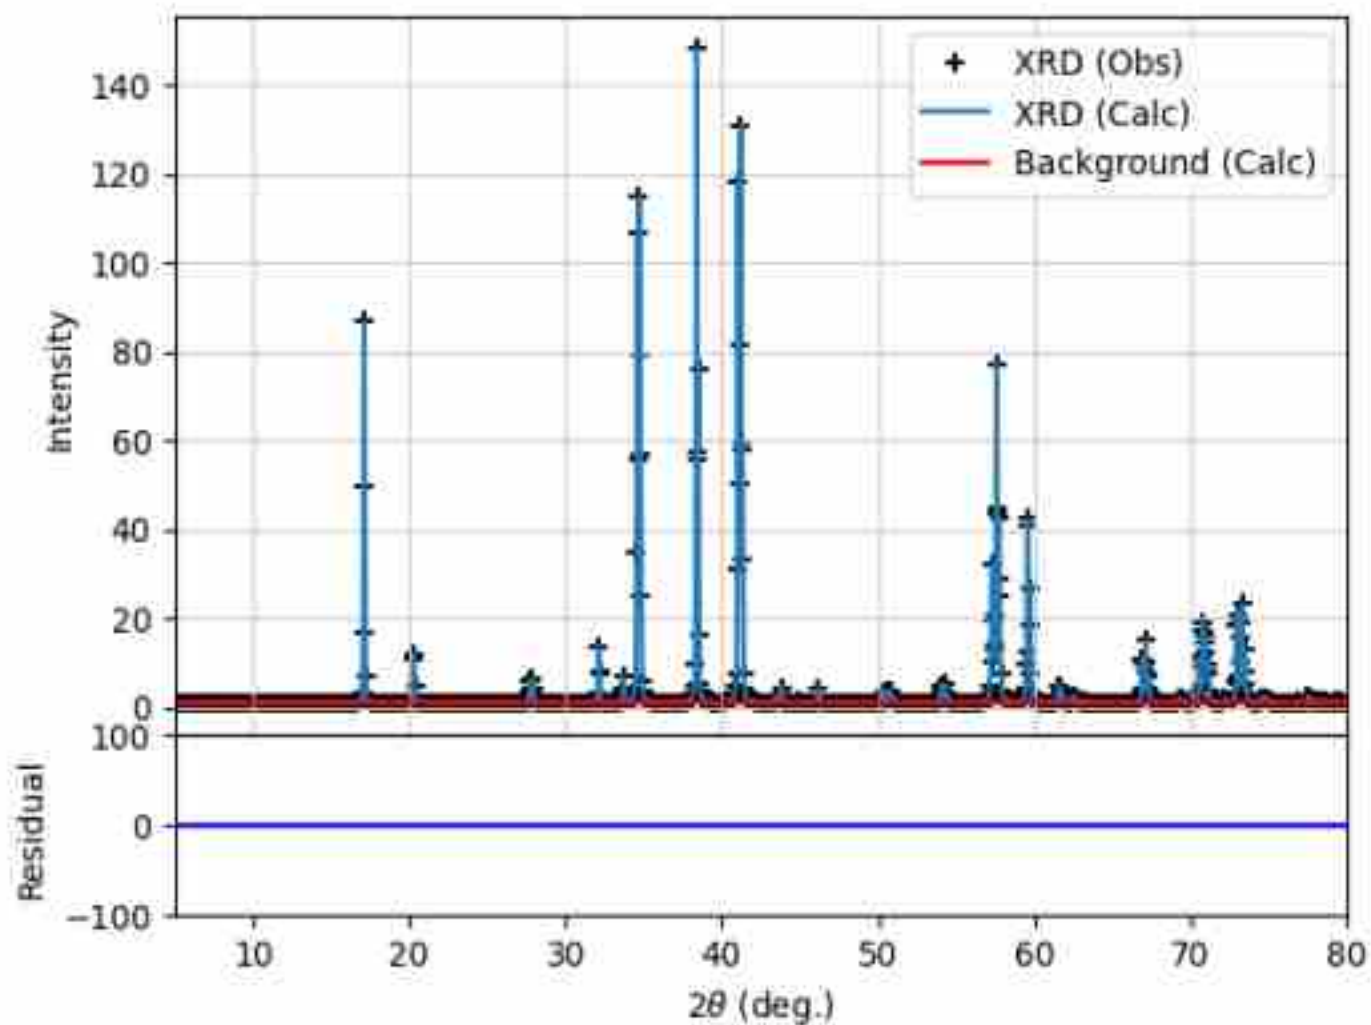

| RMSE before RR | Rwp     | RMSE after RR |
|----------------|---------|---------------|
| 0.03           | 0.00213 | 0.00061       |

# Na<sub>2</sub>Se1

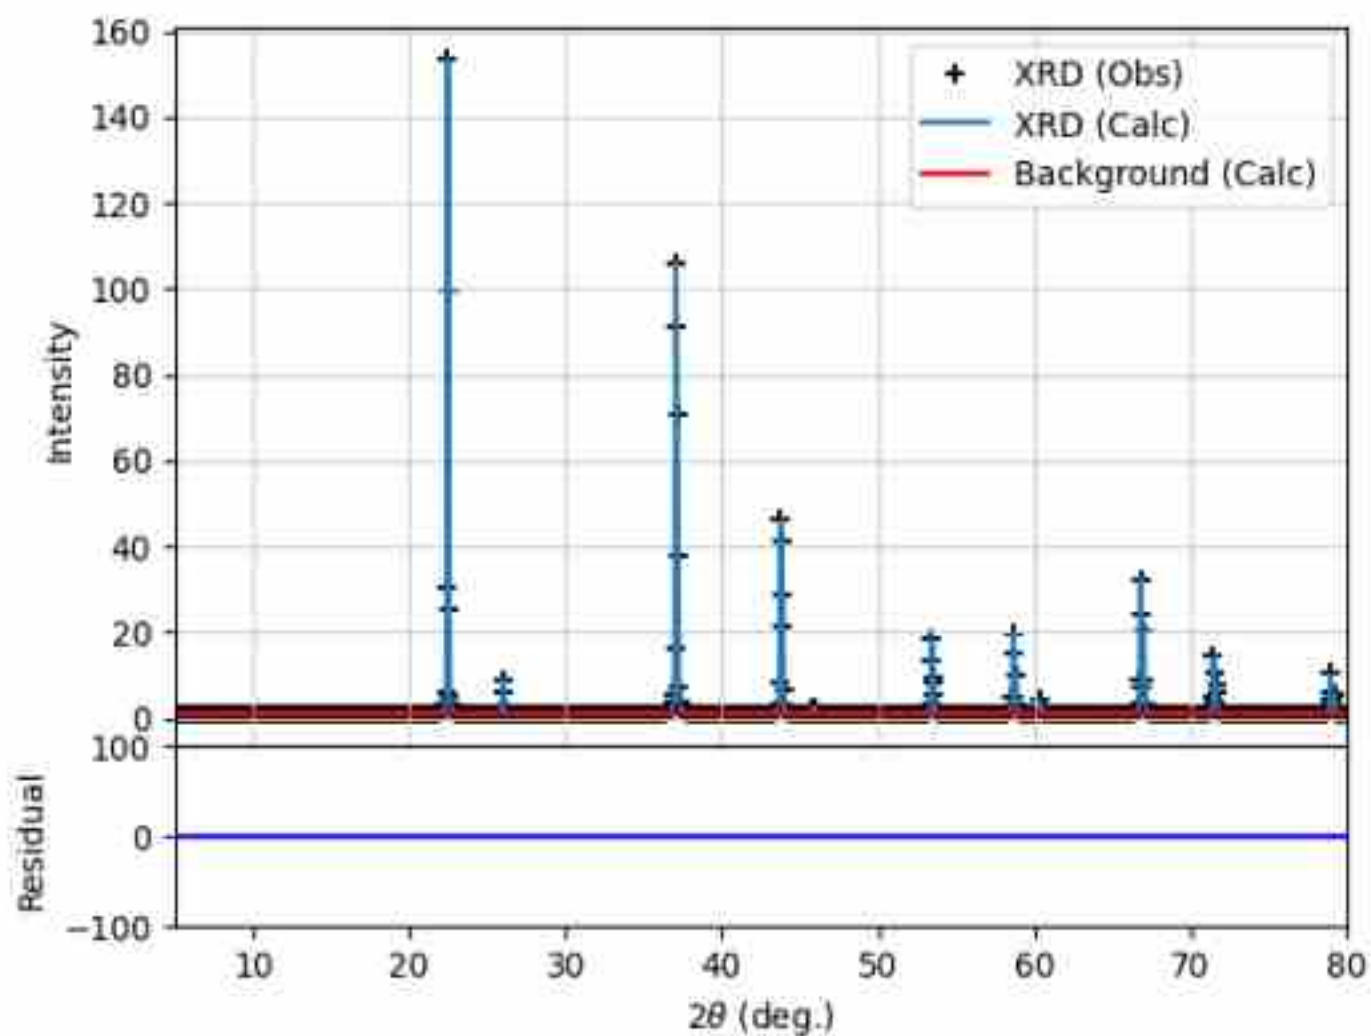

| RMSE before RR | Rwp     | RMSE after RR |
|----------------|---------|---------------|
| 0.003          | 0.00686 | 0.00052       |

Na<sub>2</sub>

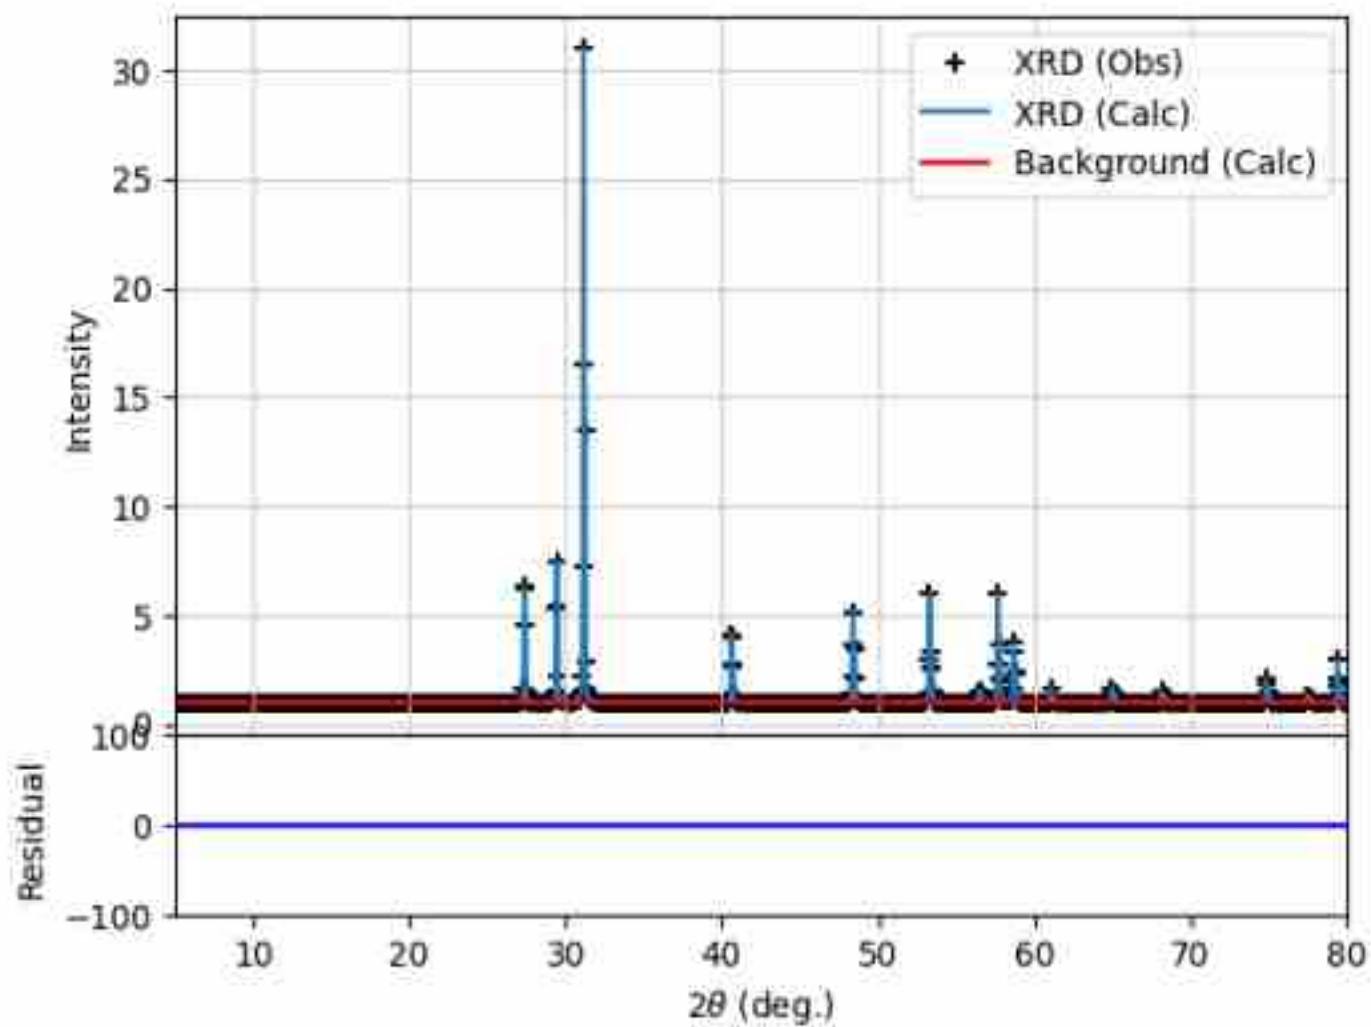

| RMSE before RR | Rwp     | RMSE after RR |
|----------------|---------|---------------|
| 0.003          | 0.00747 | 0.00083       |

# Na4

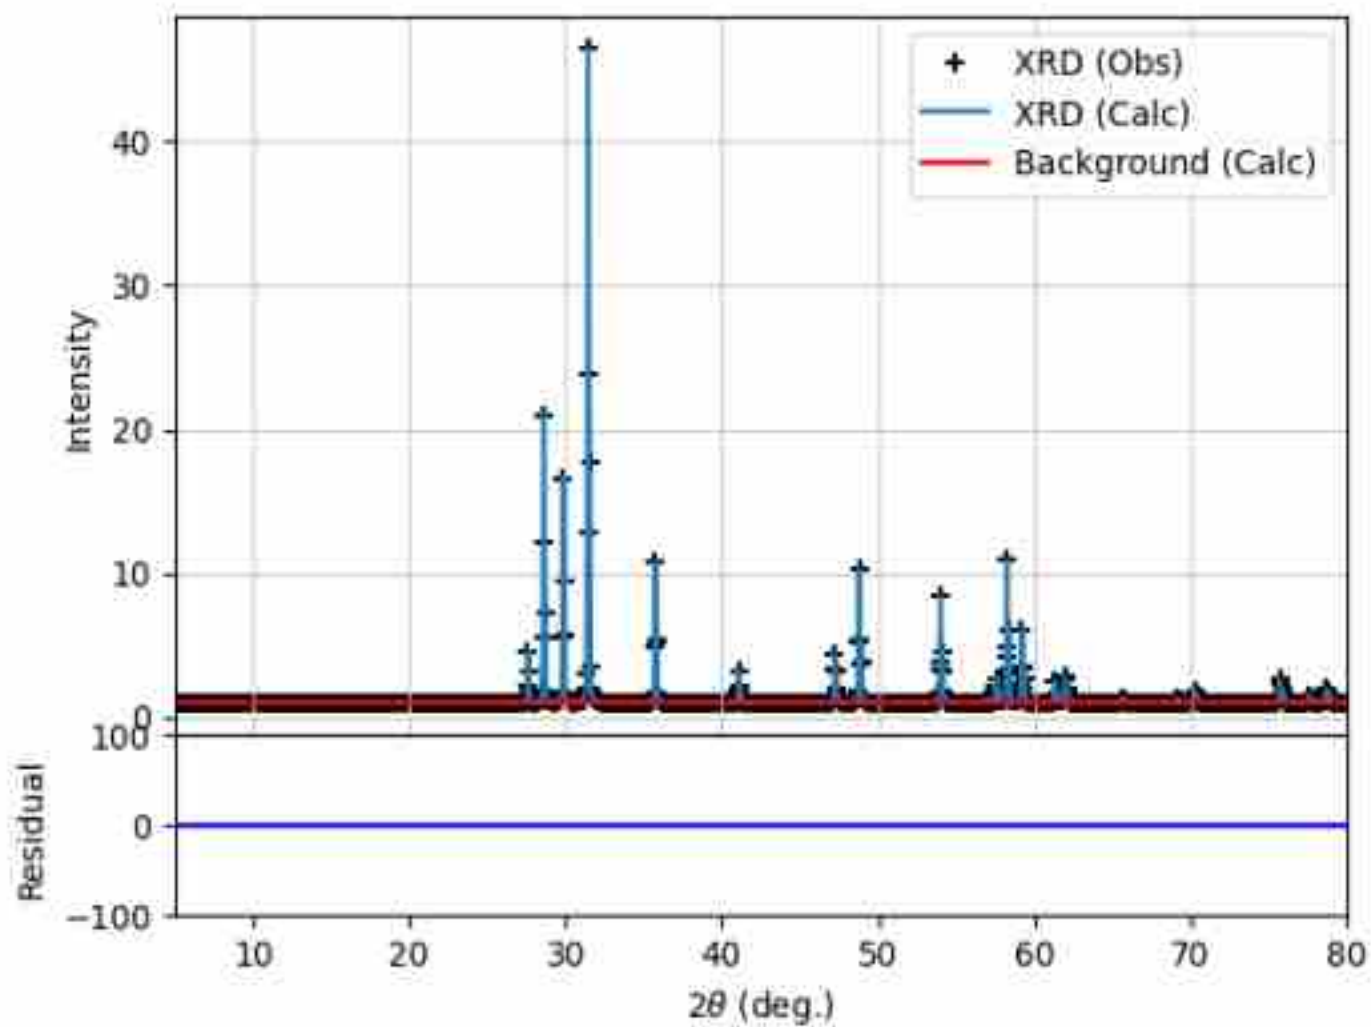

| RMSE before RR | Rwp     | RMSE after RR |
|----------------|---------|---------------|
| 0.003          | 0.00091 | 0.00035       |

# Na6Cr2Cl12

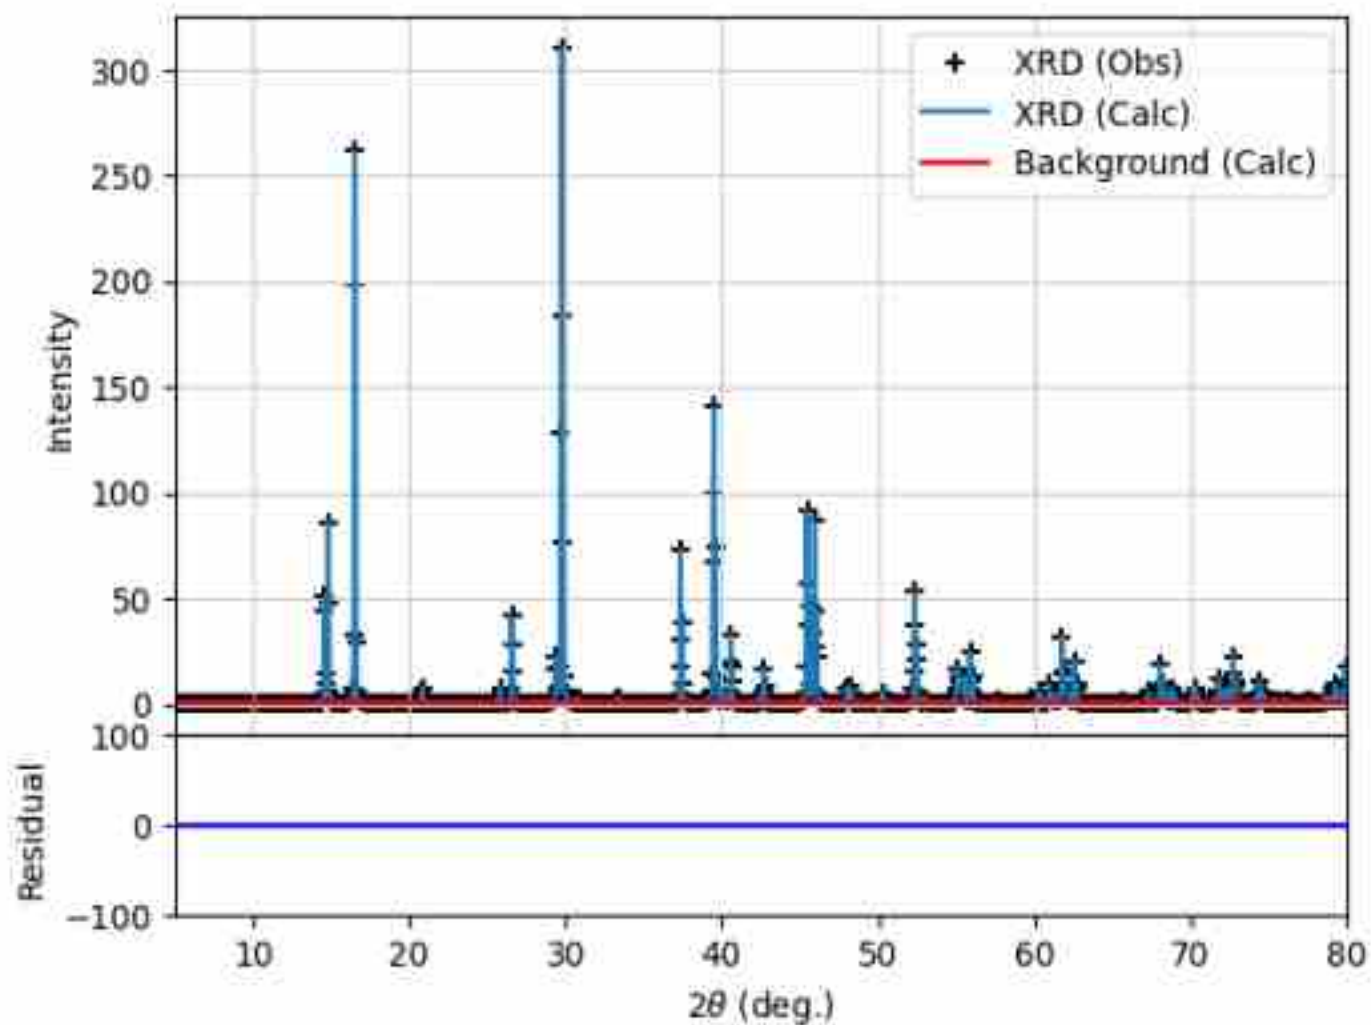

| RMSE before RR | Rwp     | RMSE after RR |
|----------------|---------|---------------|
| 0.03           | 0.00319 | 0.00088       |

# Na<sub>10</sub>La<sub>2</sub>O<sub>8</sub>

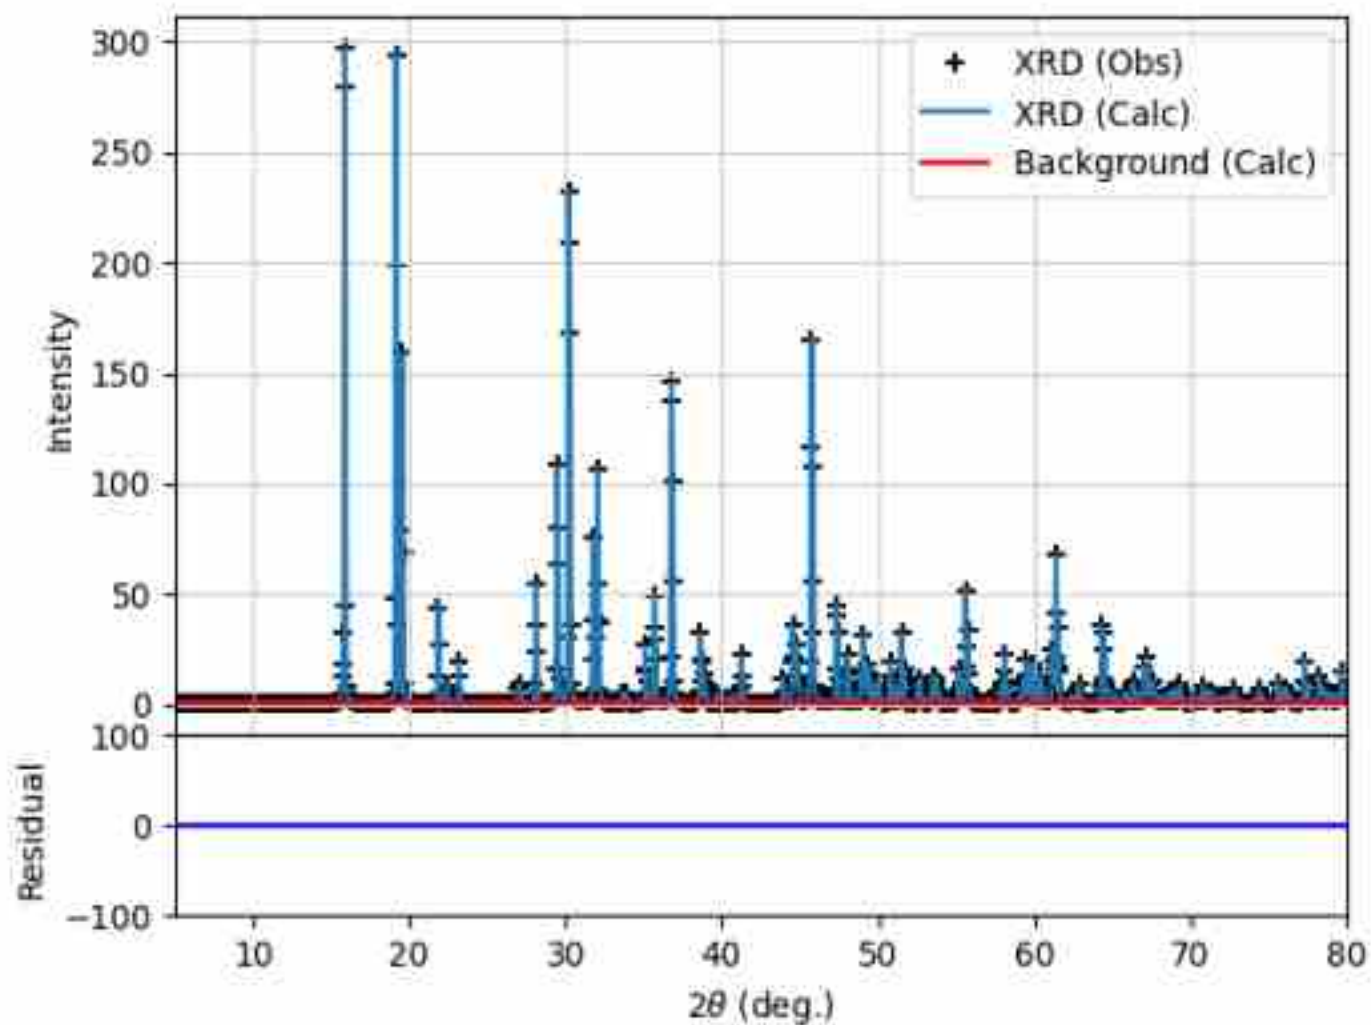

| RMSE before RR | Rwp     | RMSE after RR |
|----------------|---------|---------------|
| 0.03           | 0.00403 | 0.00095       |

# Nb1Co1Sn1

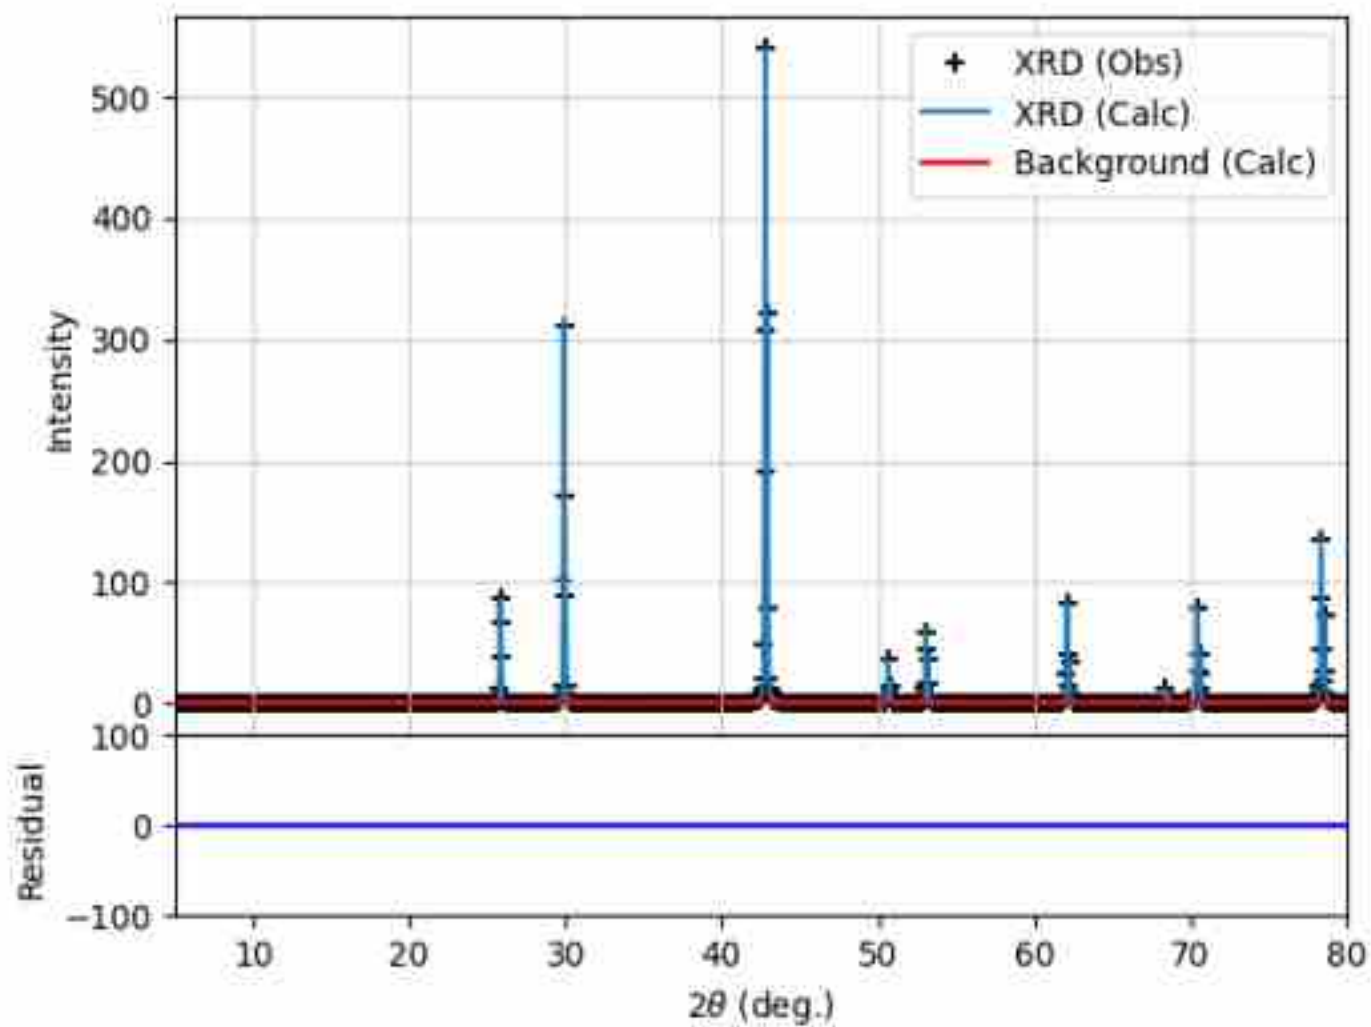

| RMSE before RR | Rwp     | RMSE after RR |
|----------------|---------|---------------|
| 0.003          | 0.01765 | 0.00085       |

# Nb1H2

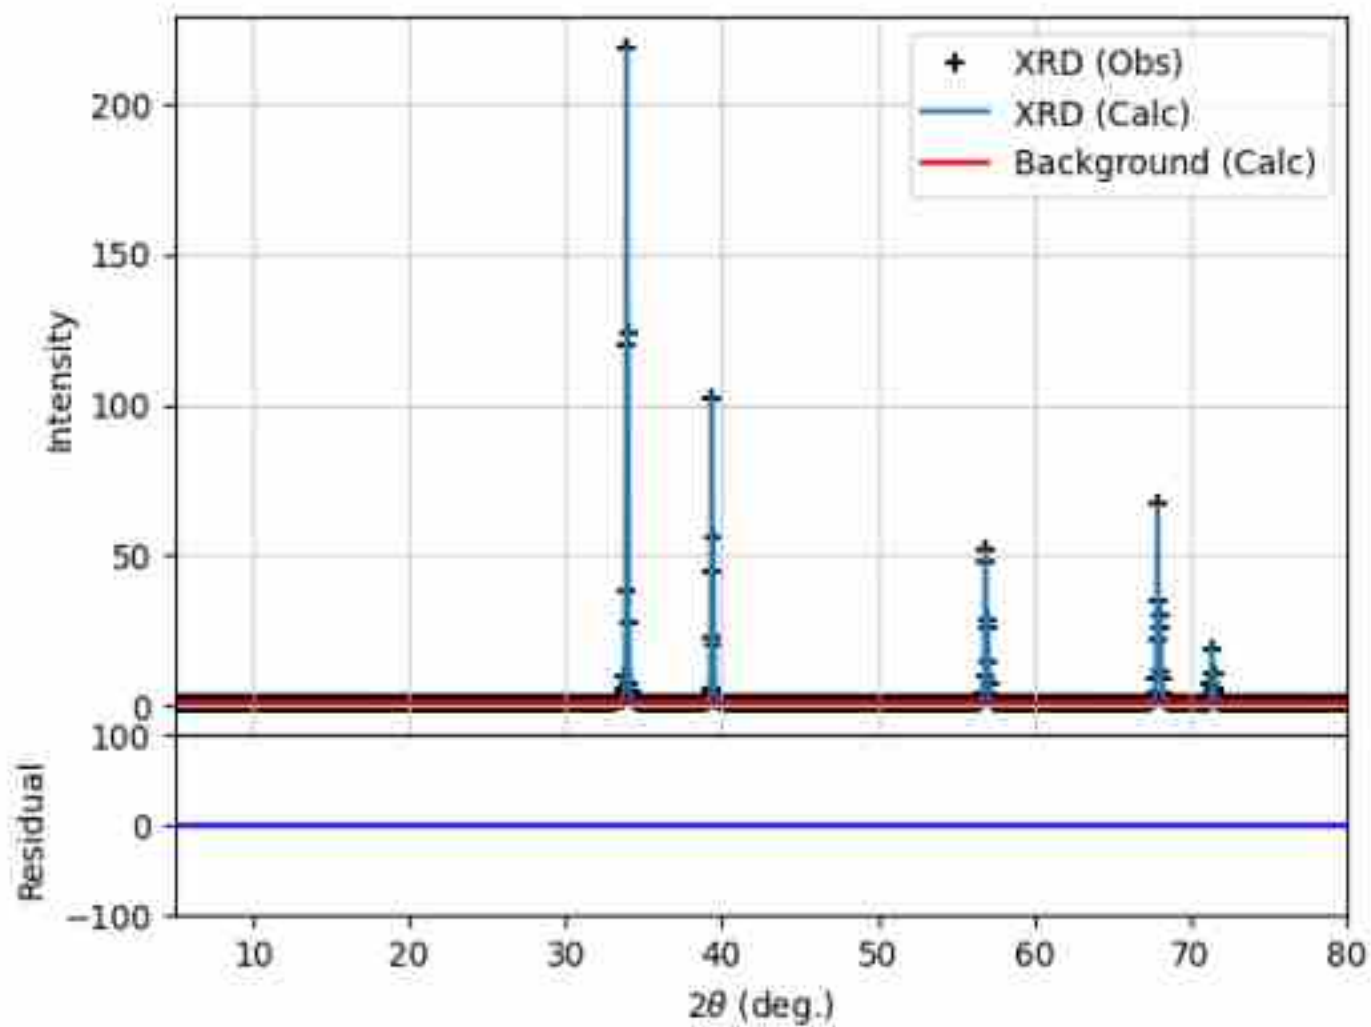

| RMSE before RR | Rwp     | RMSE after RR |
|----------------|---------|---------------|
| 0.003          | 0.00304 | 0.00486       |



# Nb1Ru3

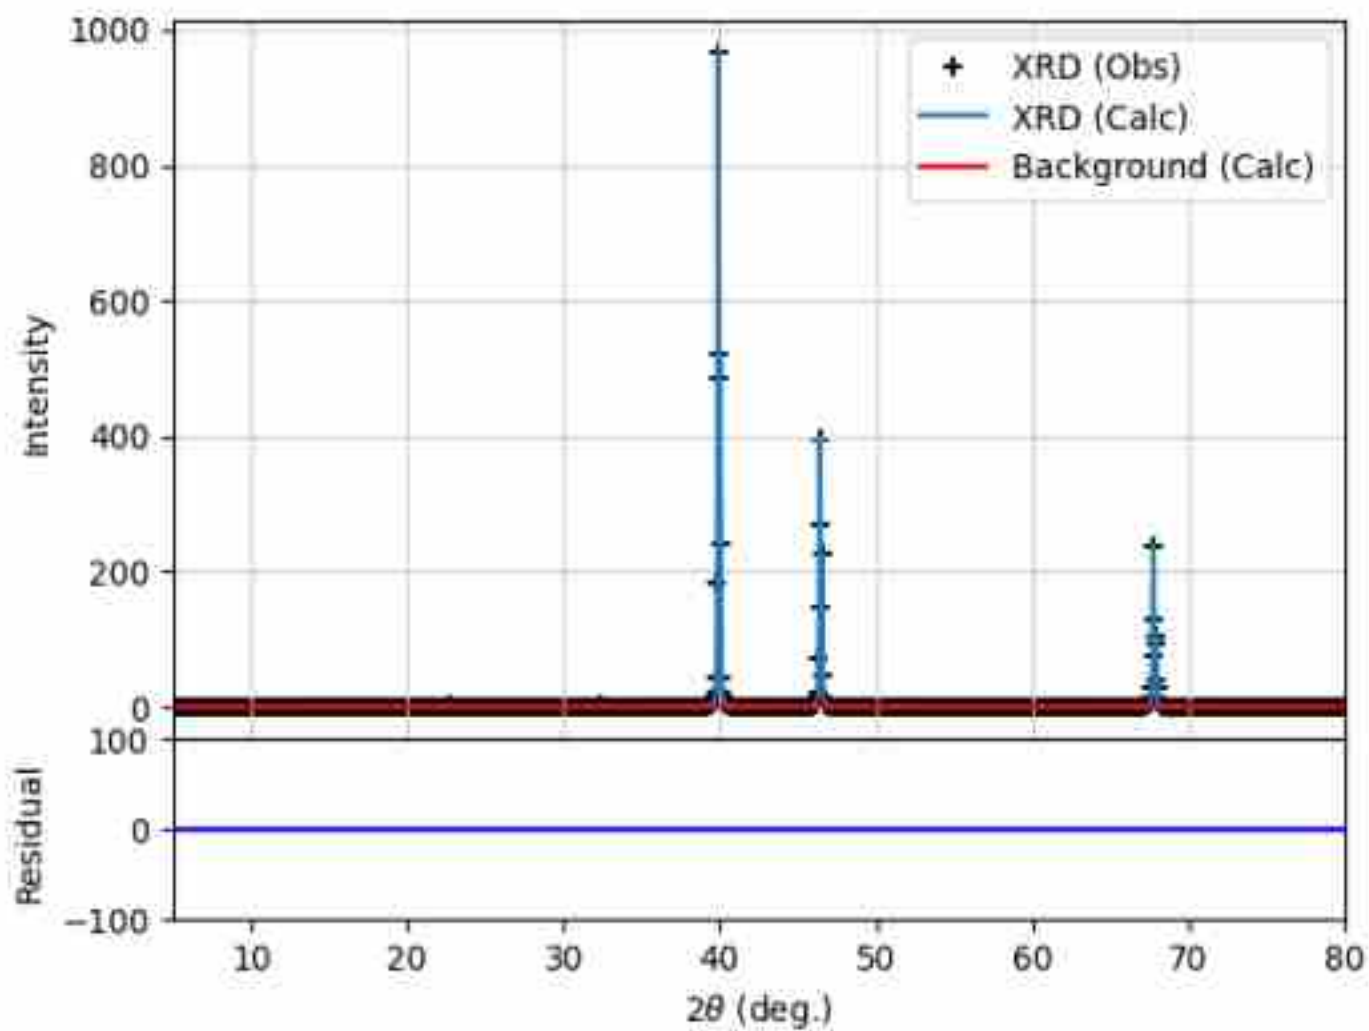

| RMSE before RR | Rwp     | RMSE after RR |
|----------------|---------|---------------|
| 0.003          | 0.22845 | 0.00291       |

# Nb1S2

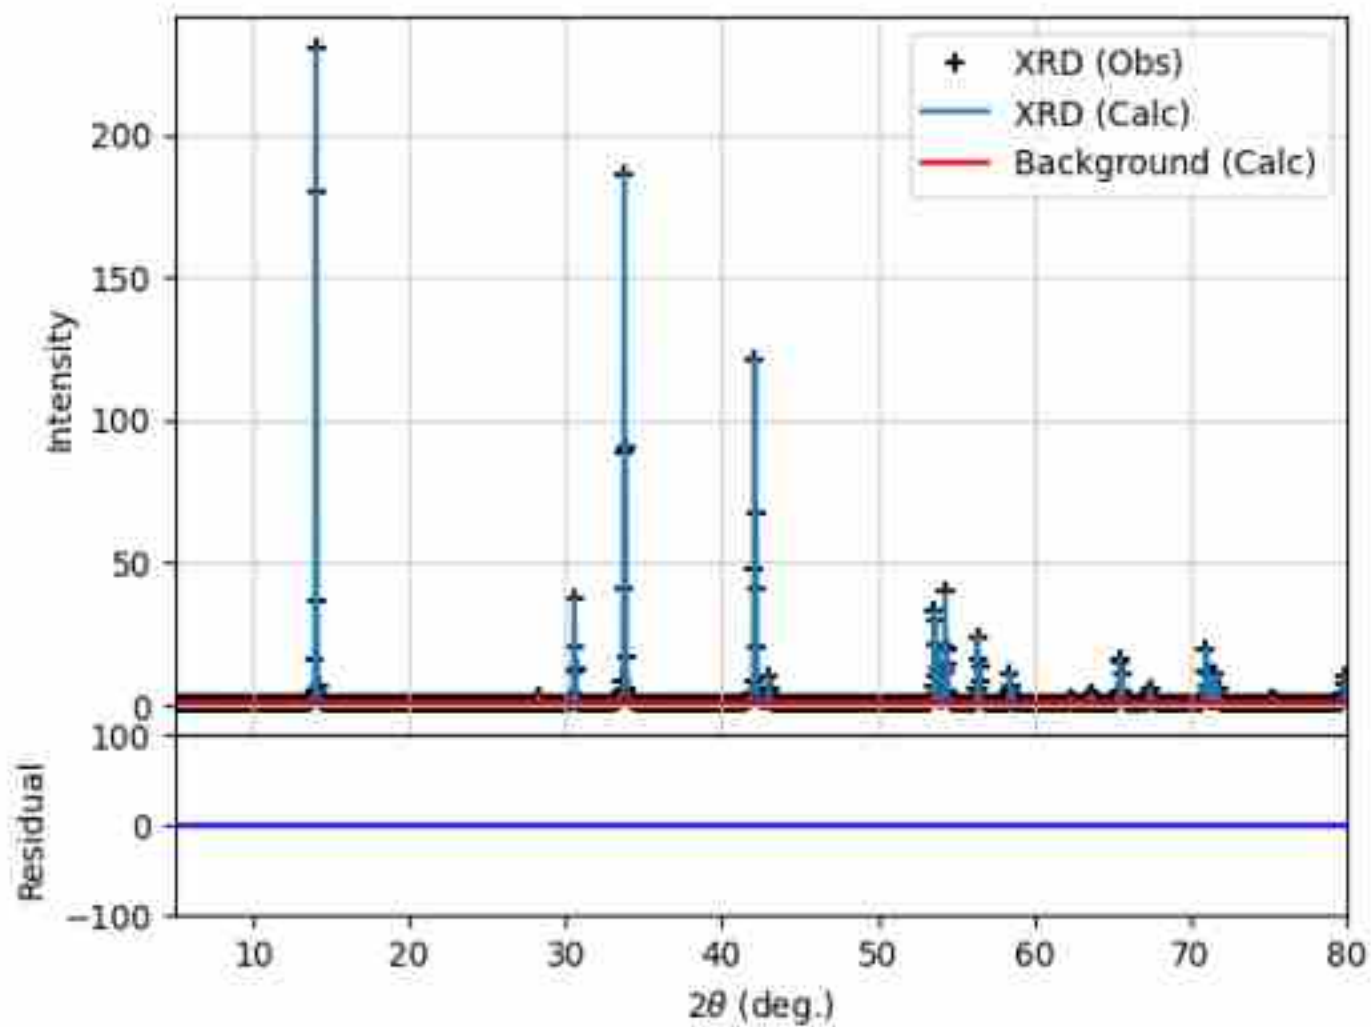

| RMSE before RR | Rwp     | RMSE after RR |
|----------------|---------|---------------|
| 0.003          | 0.00667 | 0.00106       |

# Nb<sub>2</sub>Bi<sub>2</sub>Pb<sub>1</sub>O<sub>9</sub>

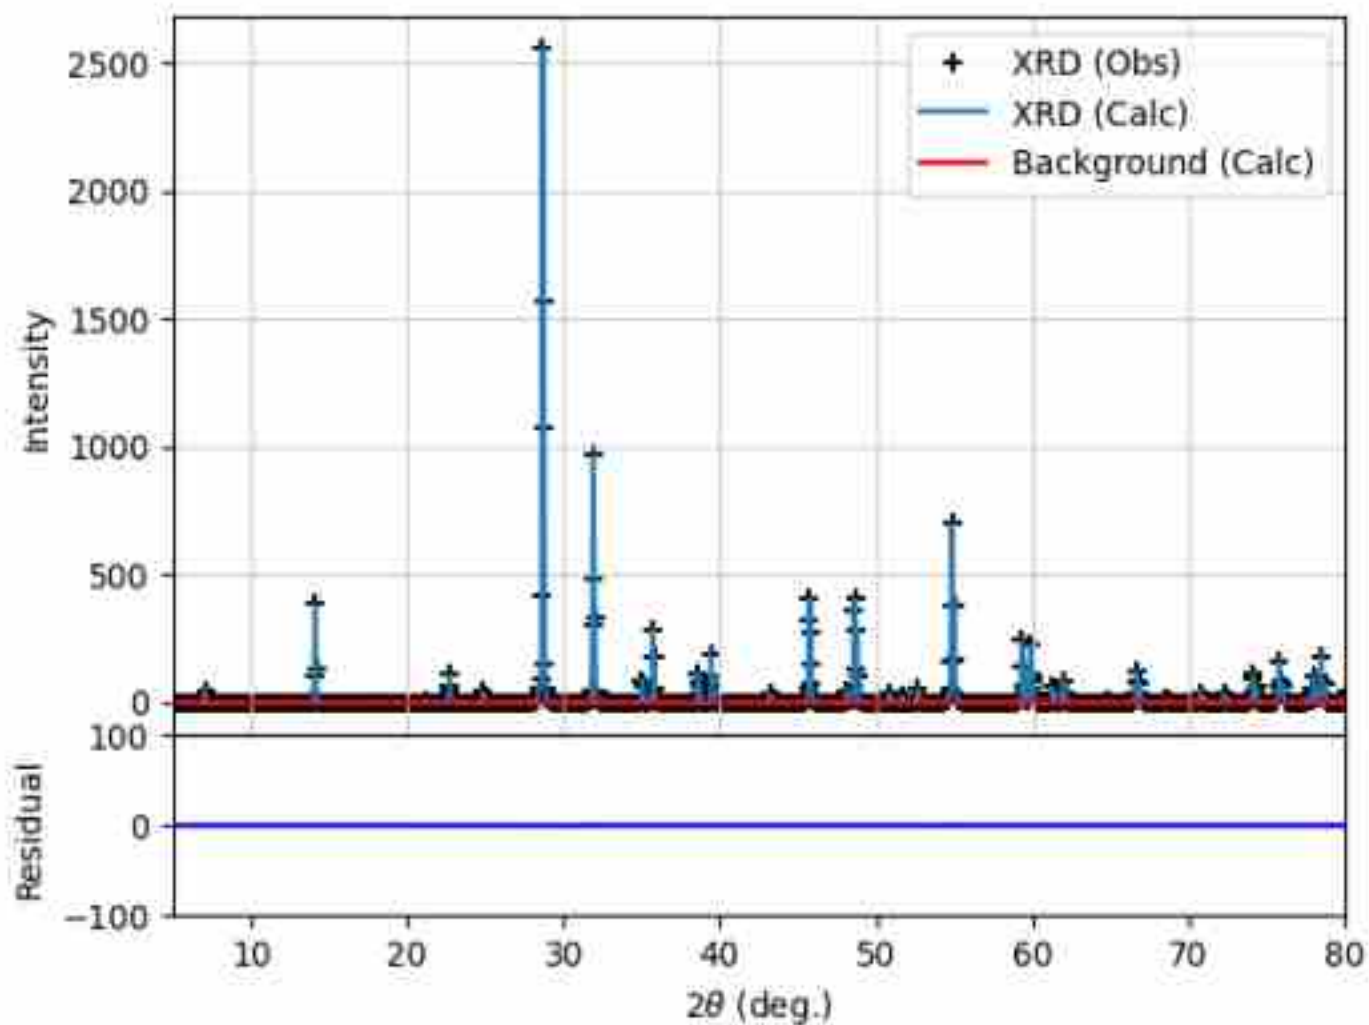

| RMSE before RR | Rwp     | RMSE after RR |
|----------------|---------|---------------|
| 0.03           | 0.03096 | 0.00111       |

# Nd1In1Pd2

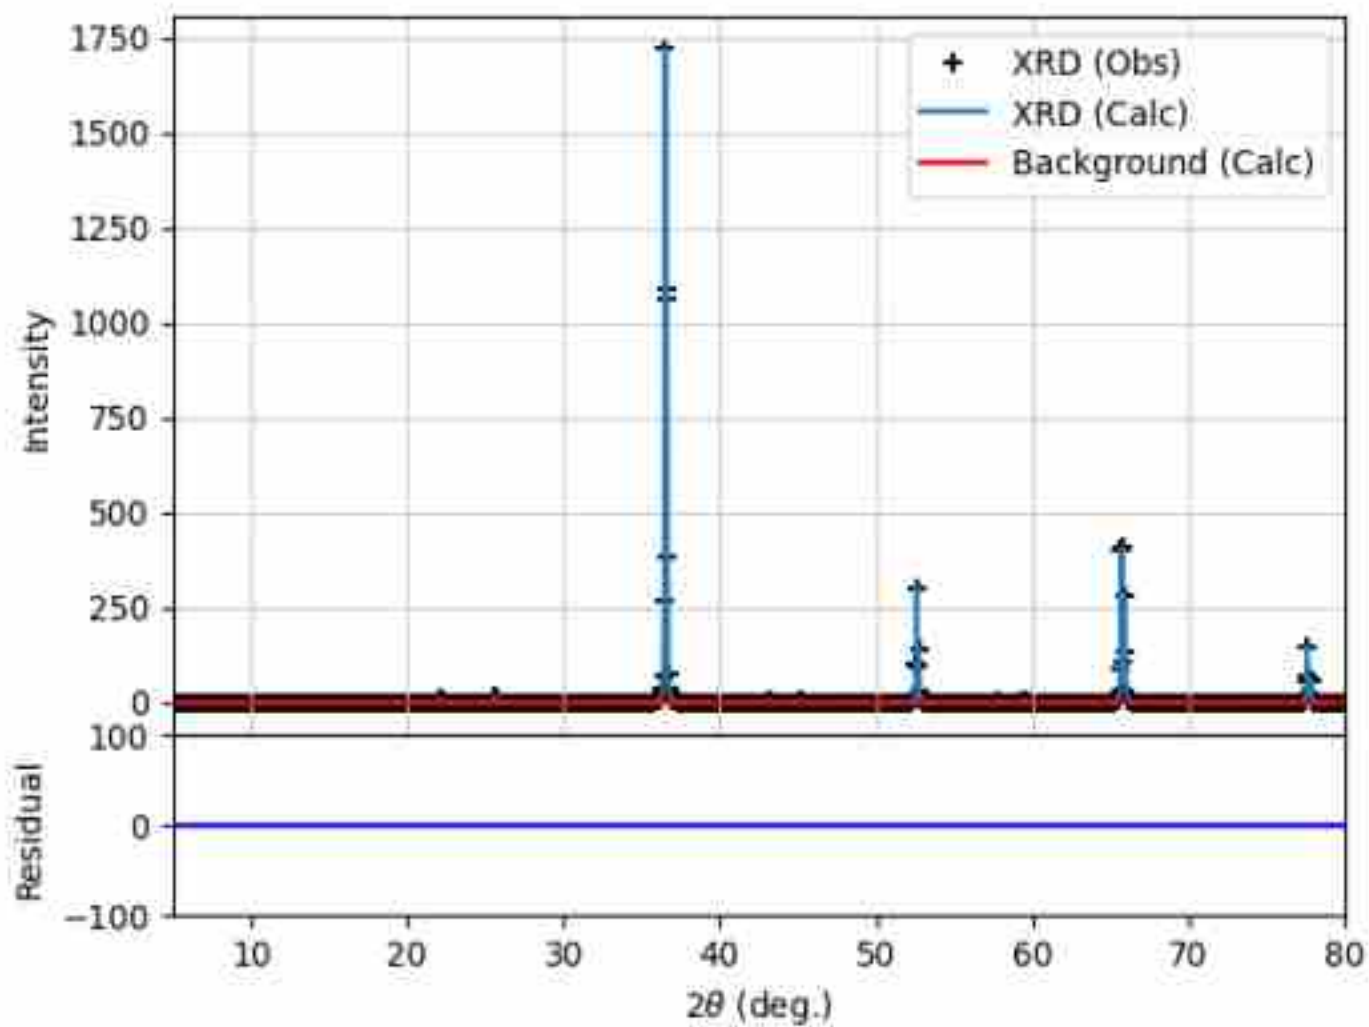

| RMSE before RR | Rwp     | RMSE after RR |
|----------------|---------|---------------|
| 0.003          | 0.00431 | 0.00021       |

# Nd1Ni1Bi1

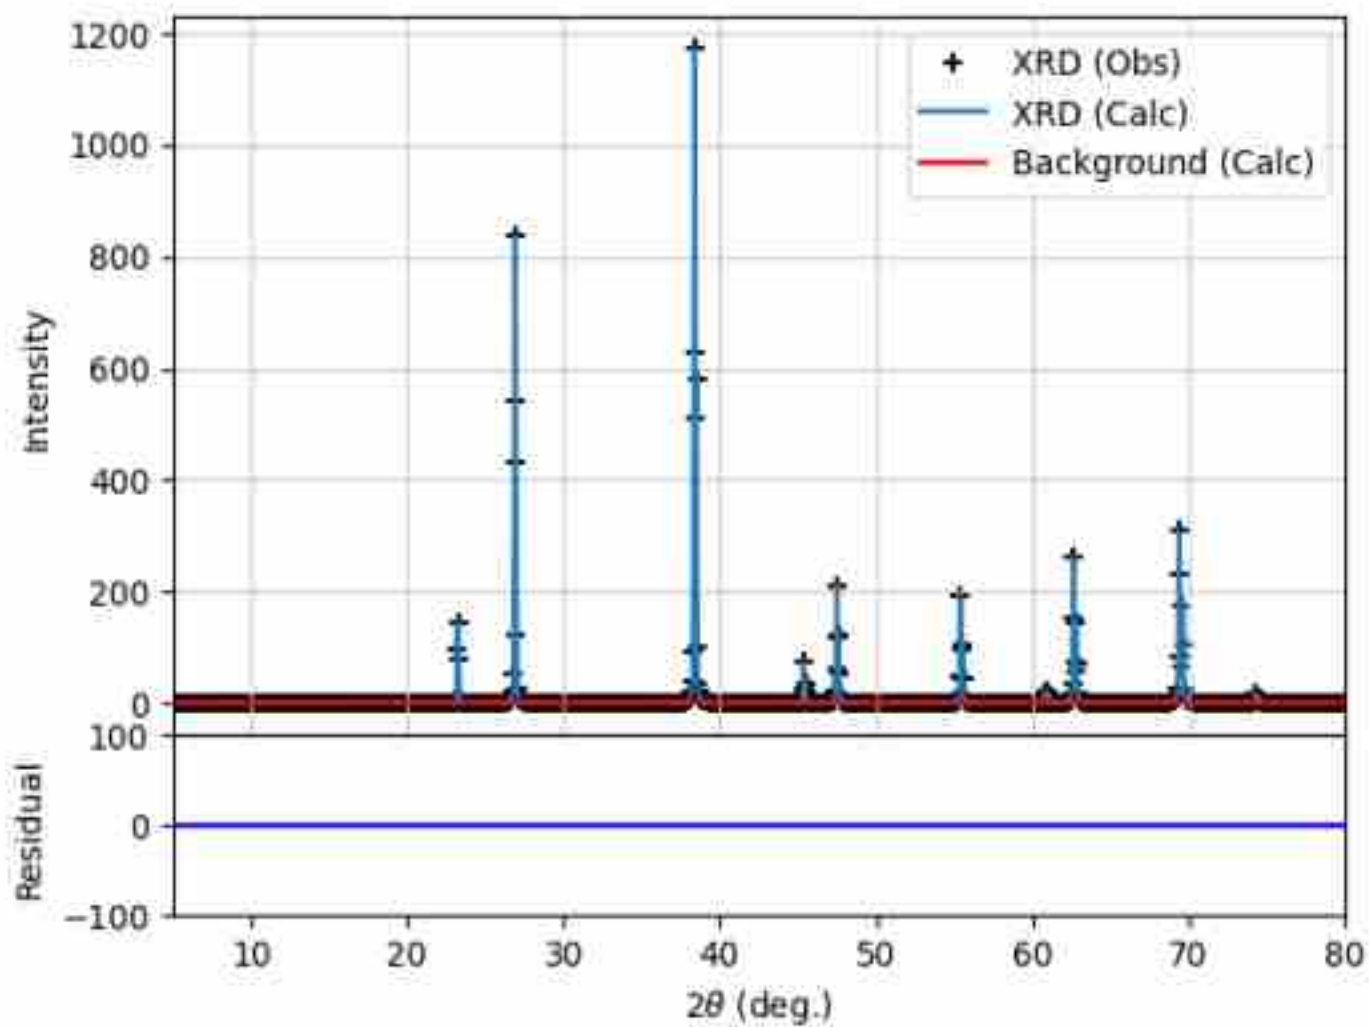

| RMSE before RR | Rwp     | RMSE after RR |
|----------------|---------|---------------|
| 0.003          | 0.00357 | 0.00054       |

# Nd1Pb3

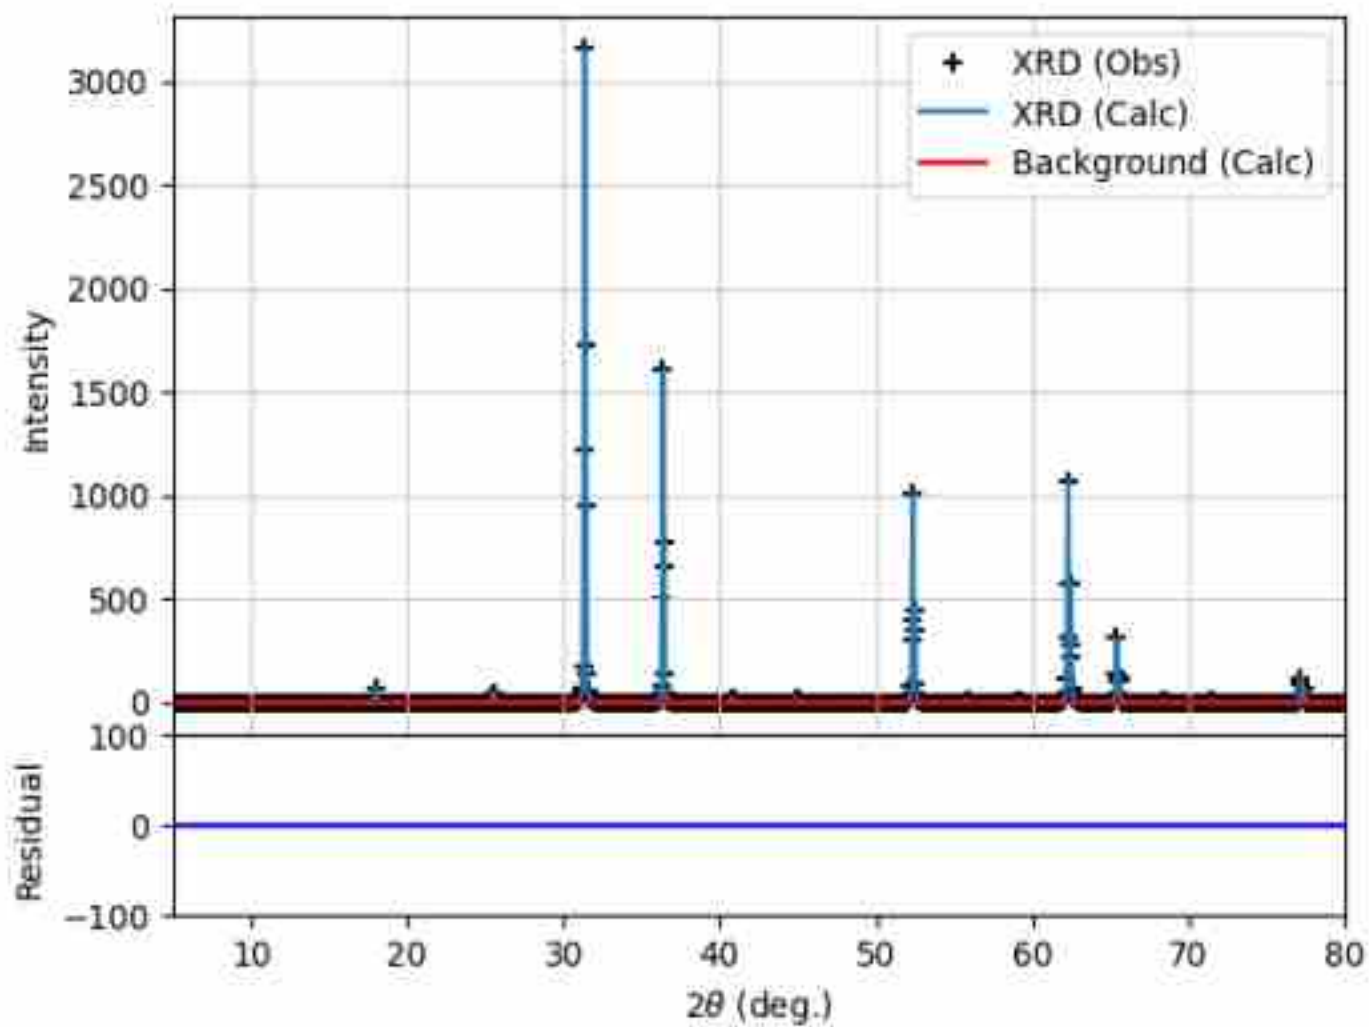

| RMSE before RR | Rwp     | RMSE after RR |
|----------------|---------|---------------|
| 0.003          | 0.02153 | 0.00057       |

# Nd1Tl1

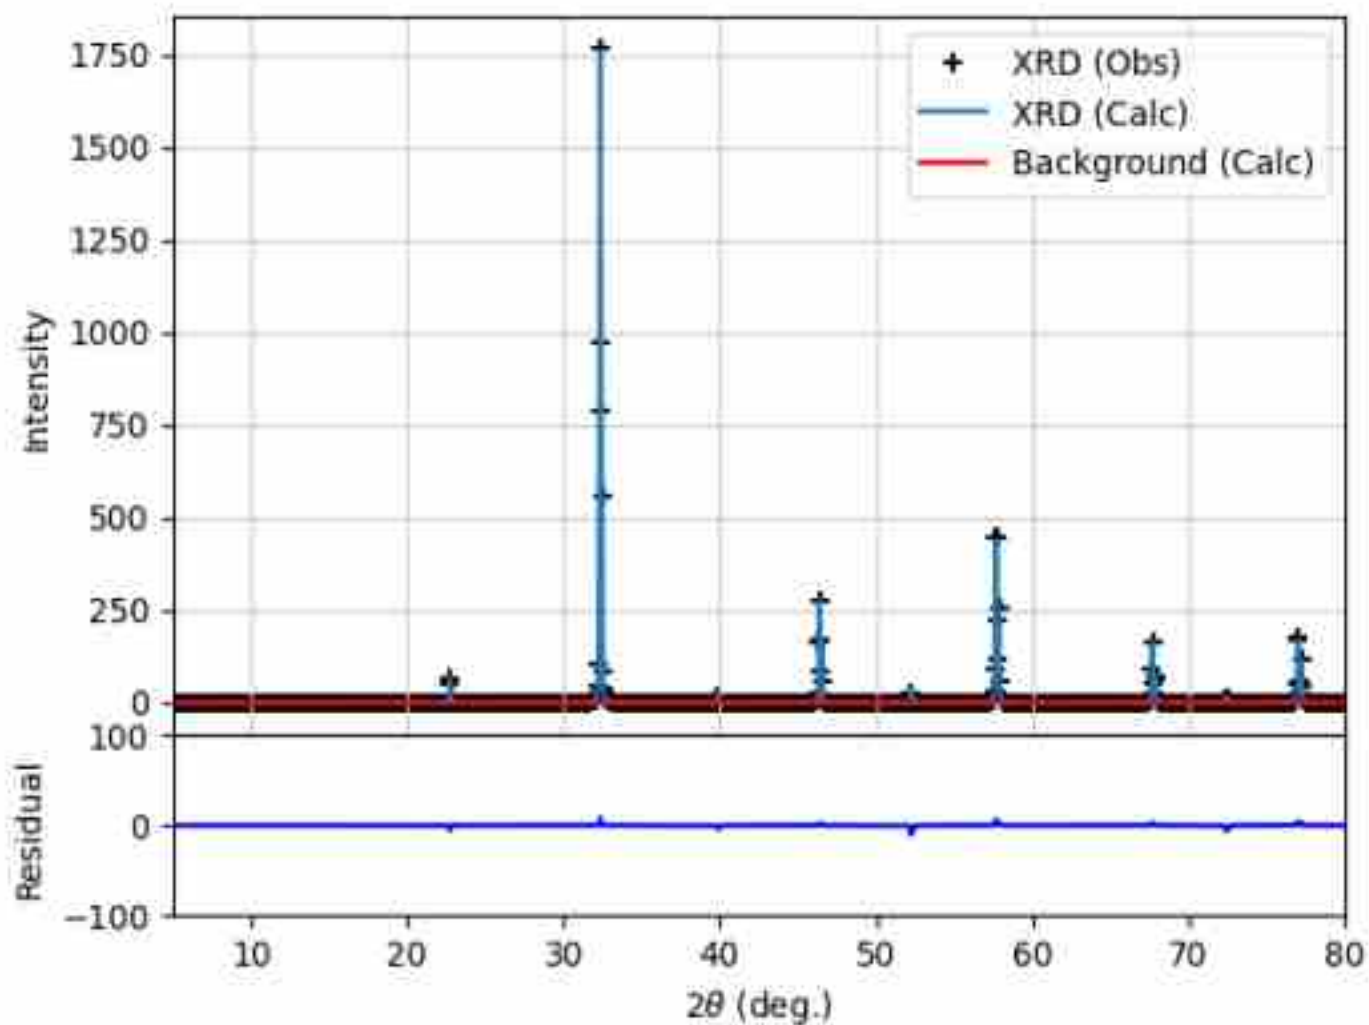

| RMSE before RR | Rwp     | RMSE after RR |
|----------------|---------|---------------|
| 0.003          | 4.82757 | 0.00212       |

# Nd<sub>4</sub>Si<sub>10</sub>Ni<sub>6</sub>

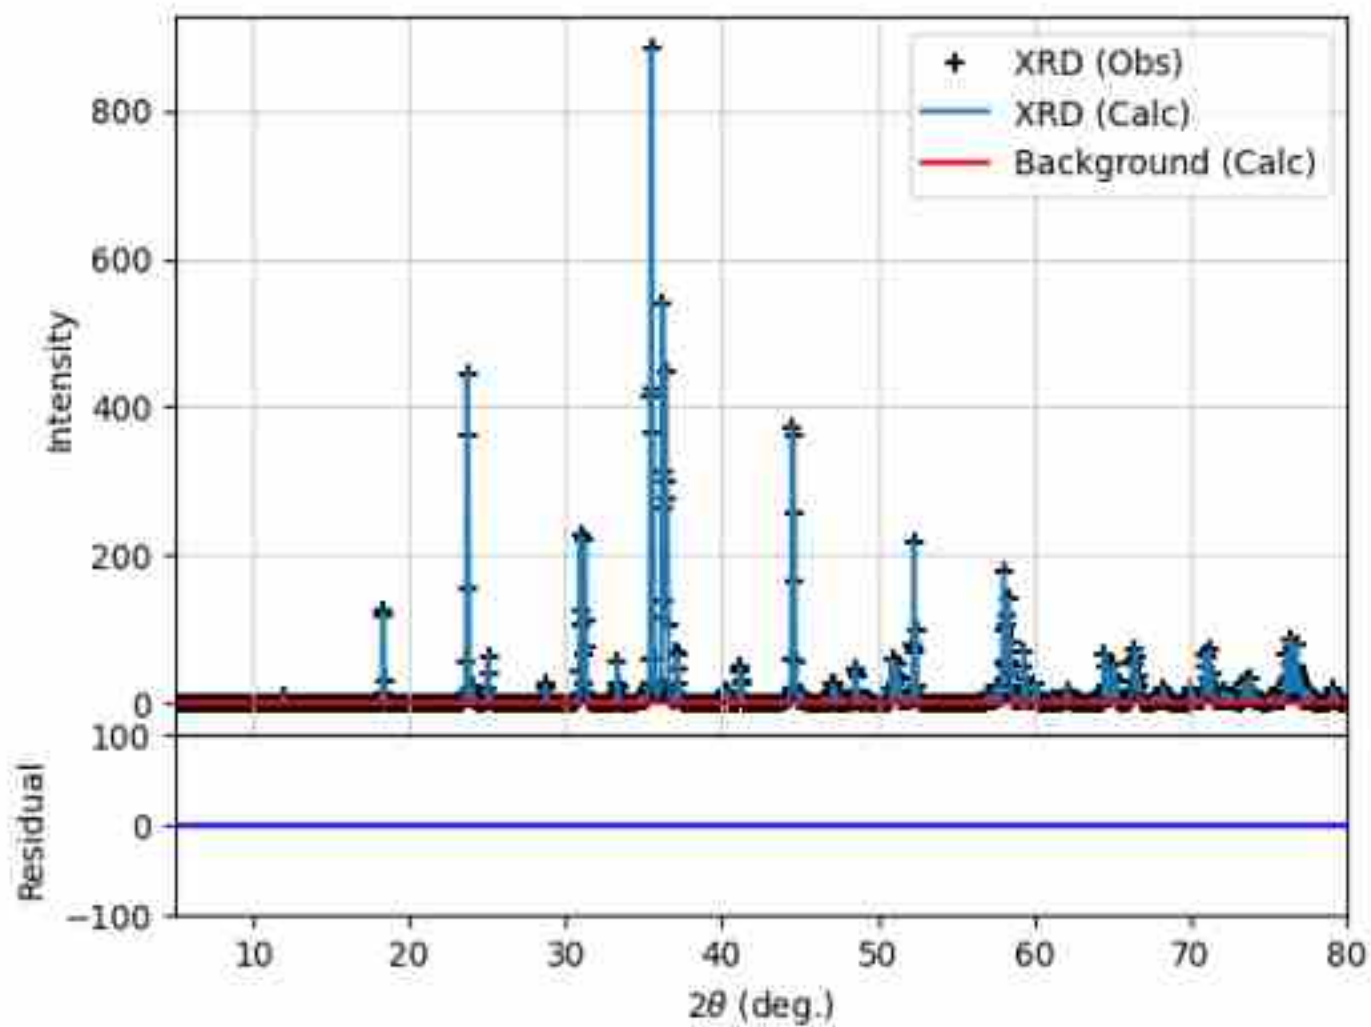

| RMSE before RR | Rwp     | RMSE after RR |
|----------------|---------|---------------|
| 0.03           | 0.00432 | 0.00075       |



Nd4

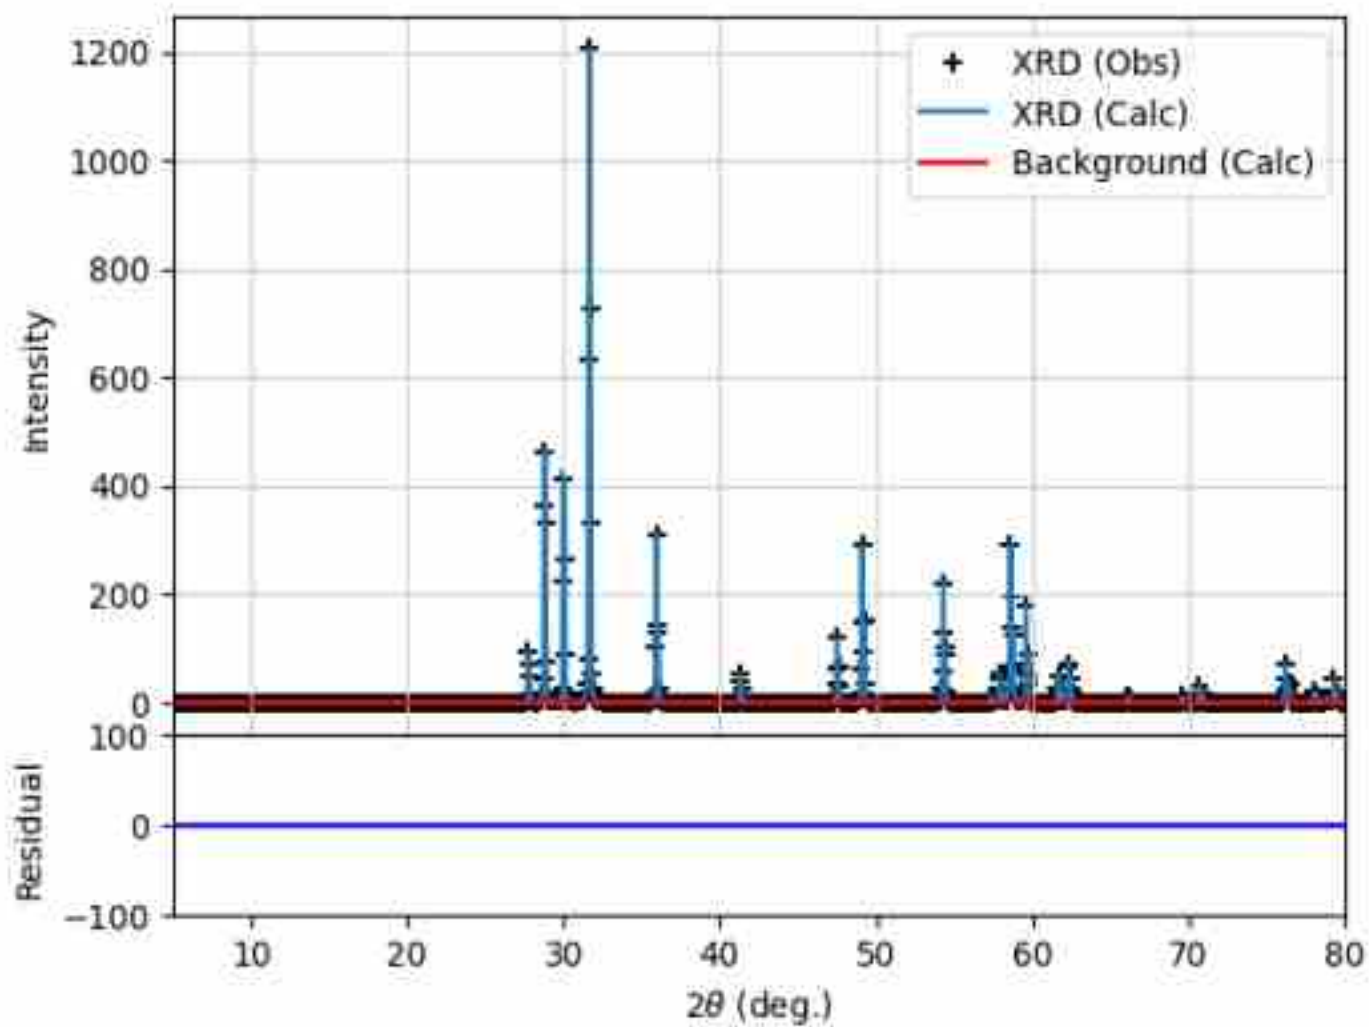

| RMSE before RR | Rwp    | RMSE after RR |
|----------------|--------|---------------|
| 0.003          | 0.0044 | 0.00033       |

# Np1F5

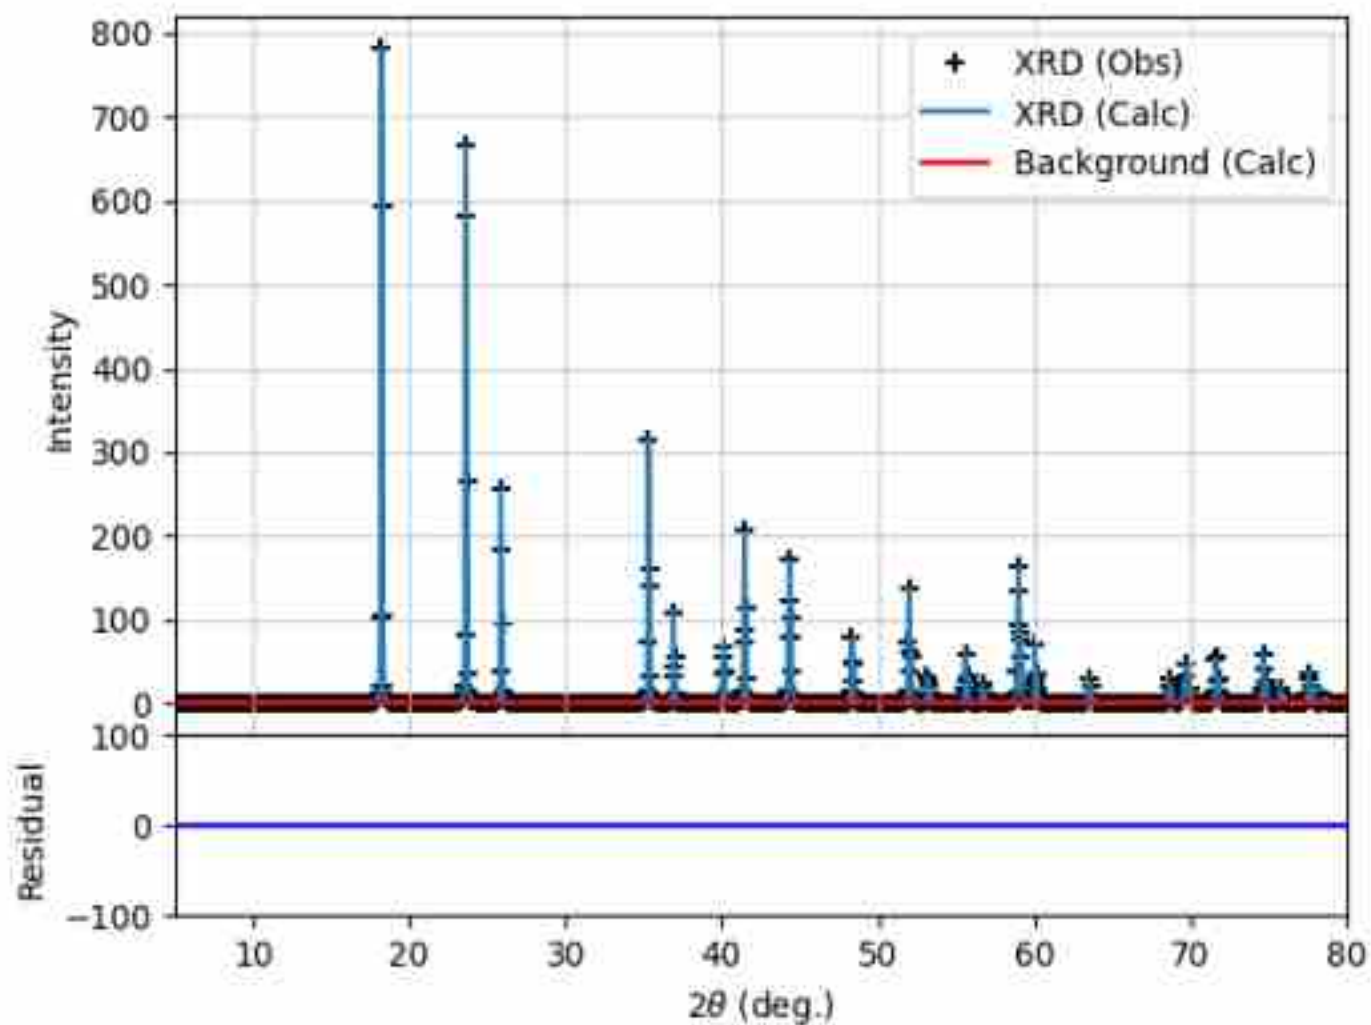

| RMSE before RR | Rwp     | RMSE after RR |
|----------------|---------|---------------|
| 0.03           | 0.00397 | 0.00209       |

# P1Rh2

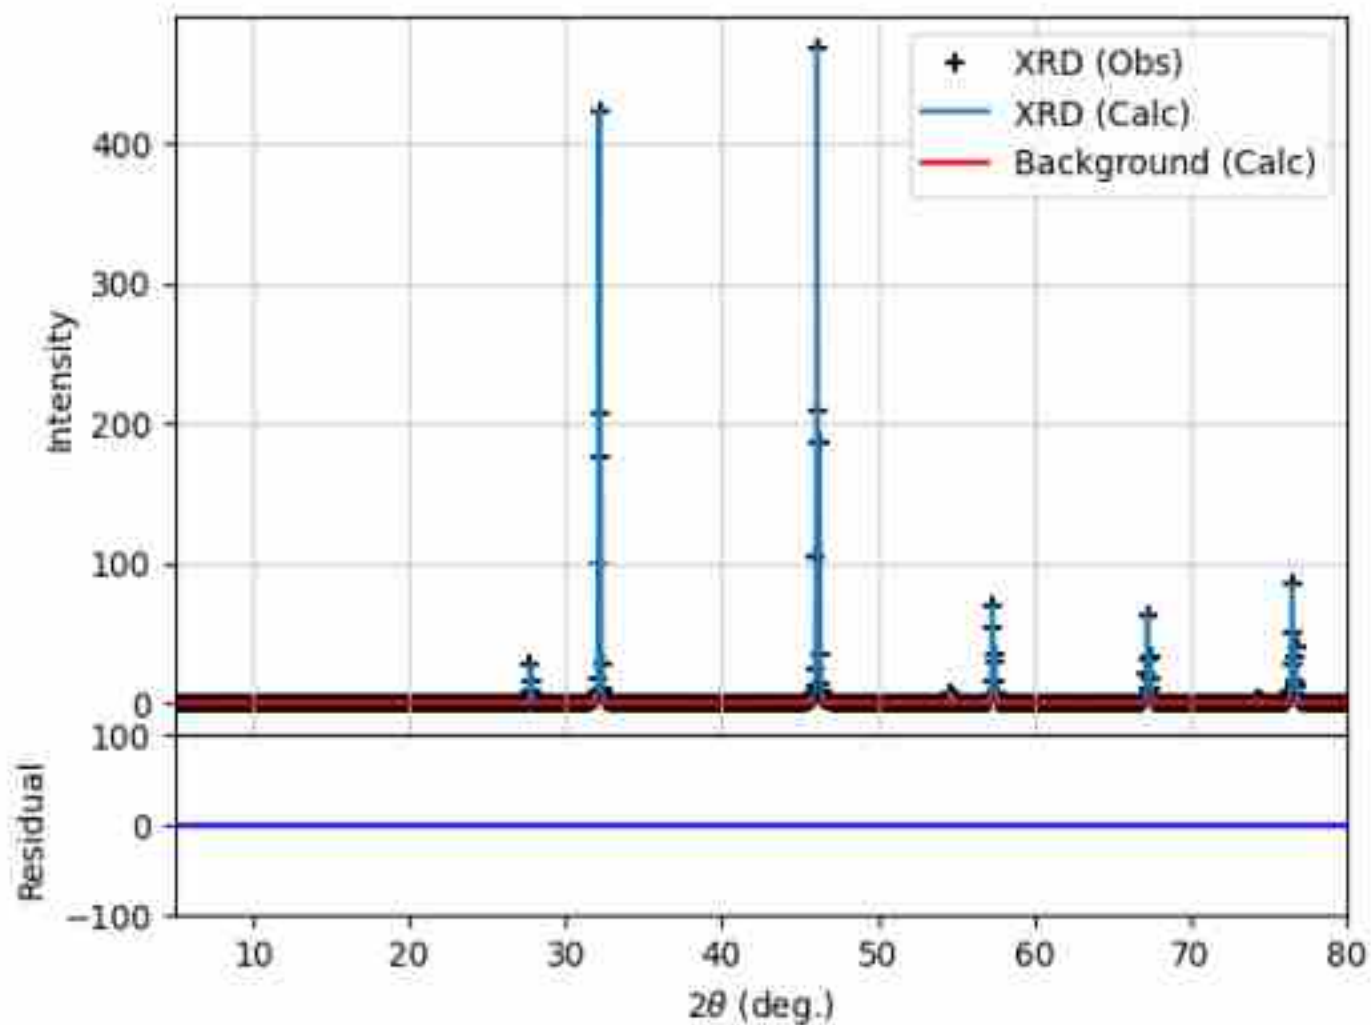

| RMSE before RR | Rwp     | RMSE after RR |
|----------------|---------|---------------|
| 0.003          | 0.00517 | 0.00107       |

# P4W12

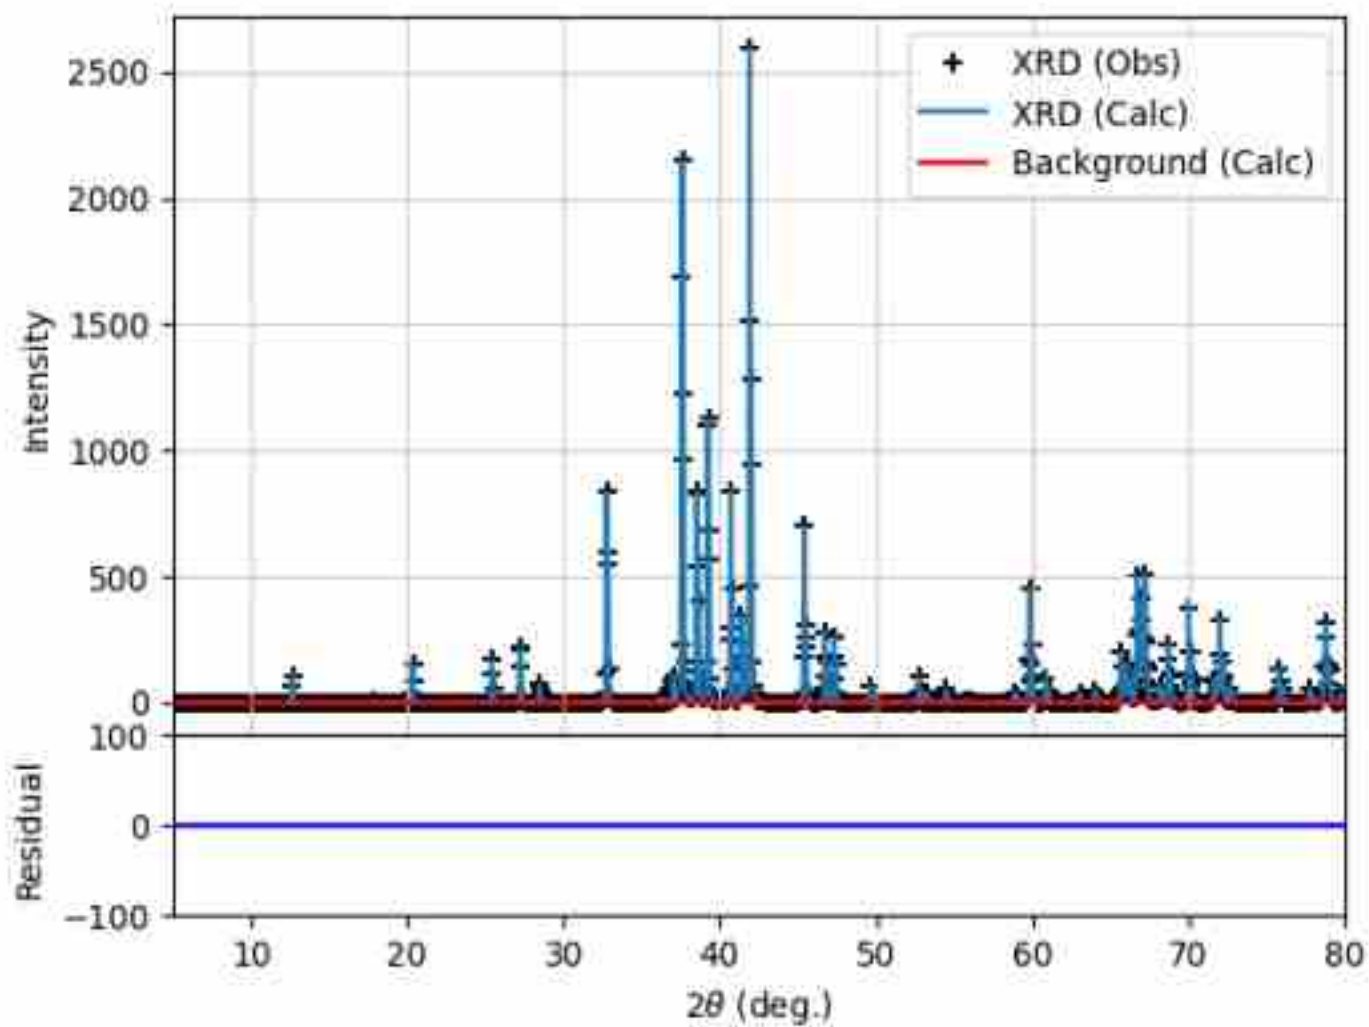

| RMSE before RR | Rwp     | RMSE after RR |
|----------------|---------|---------------|
| 0.03           | 0.00358 | 0.00064       |

# Pb<sub>2</sub>Br<sub>2</sub>F<sub>2</sub>

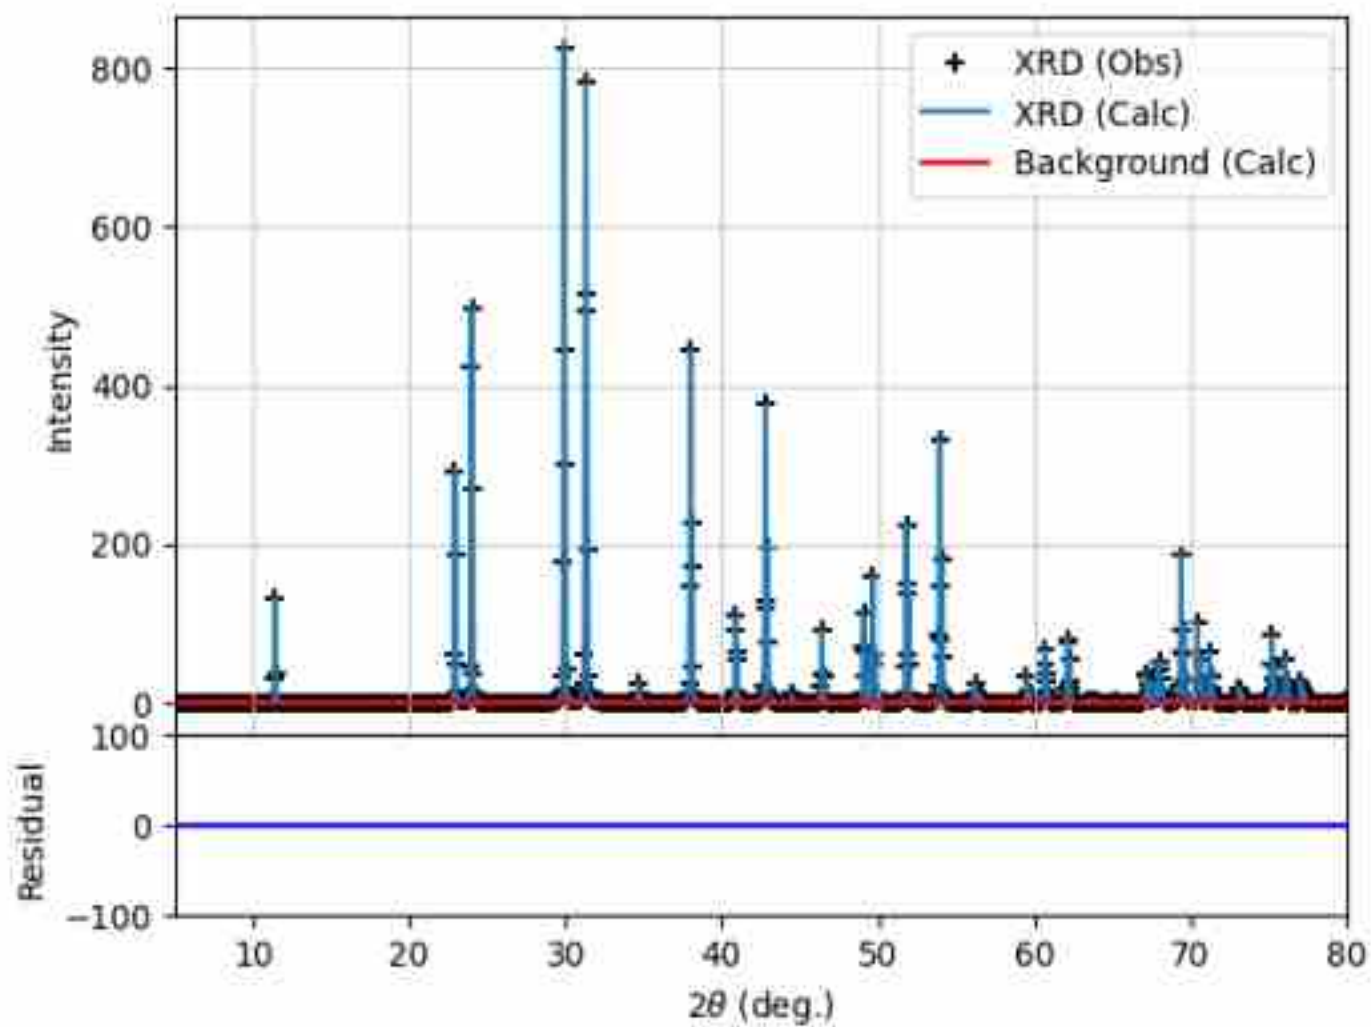

| RMSE before RR | Rwp     | RMSE after RR |
|----------------|---------|---------------|
| 0.03           | 0.02513 | 0.00271       |

# Pm1H3

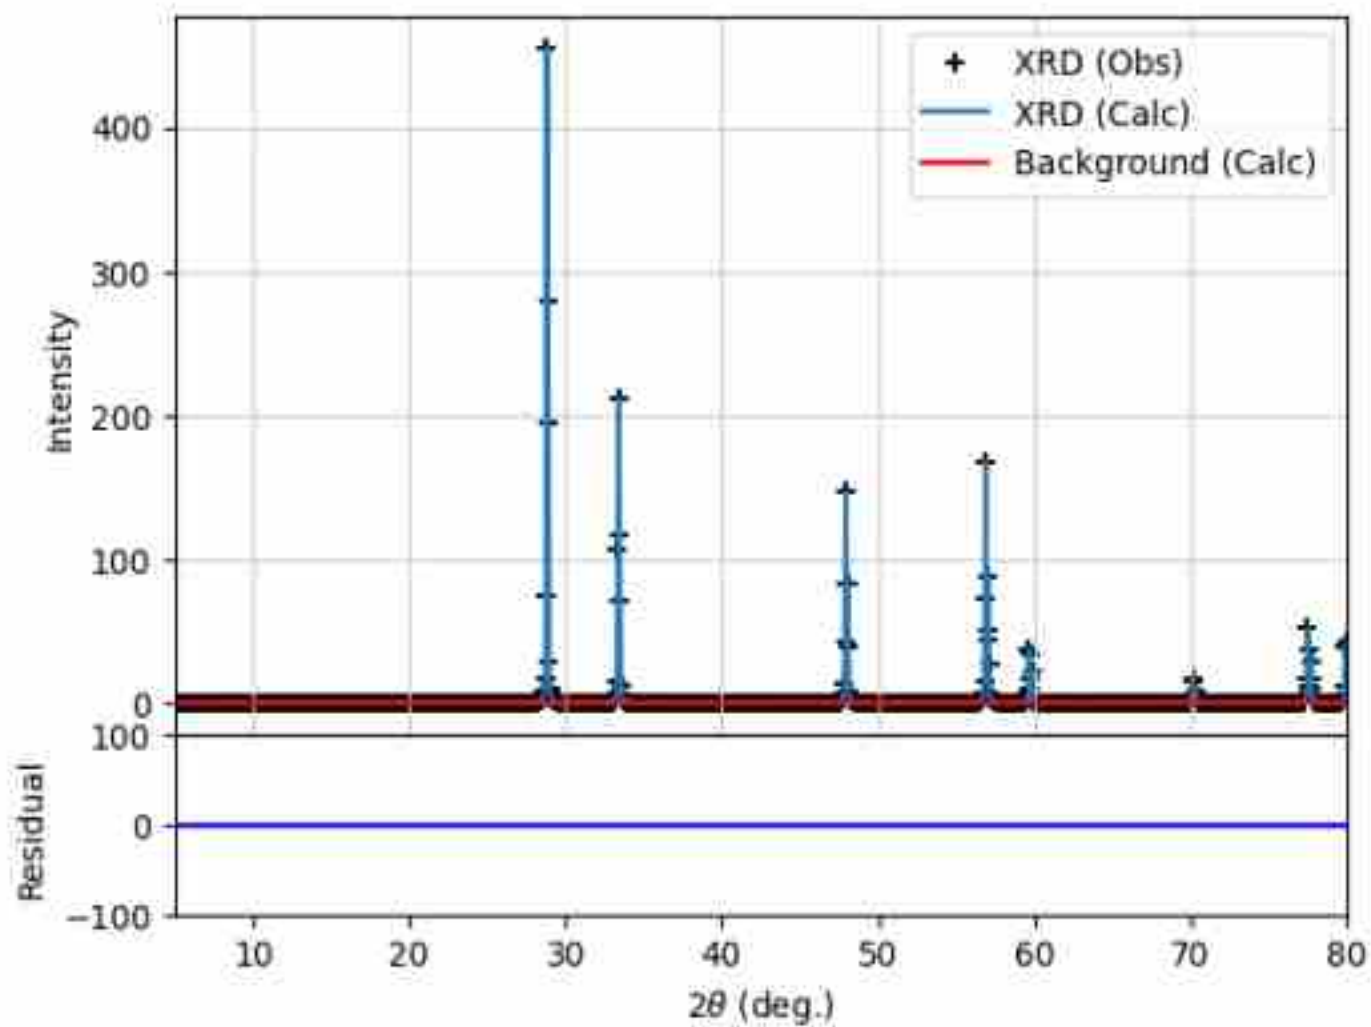

| RMSE before RR | Rwp    | RMSE after RR |
|----------------|--------|---------------|
| 0.003          | 0.0038 | 0.00302       |

# Pr<sub>6</sub>Al<sub>6</sub>Cu<sub>3</sub>Ni<sub>3</sub>

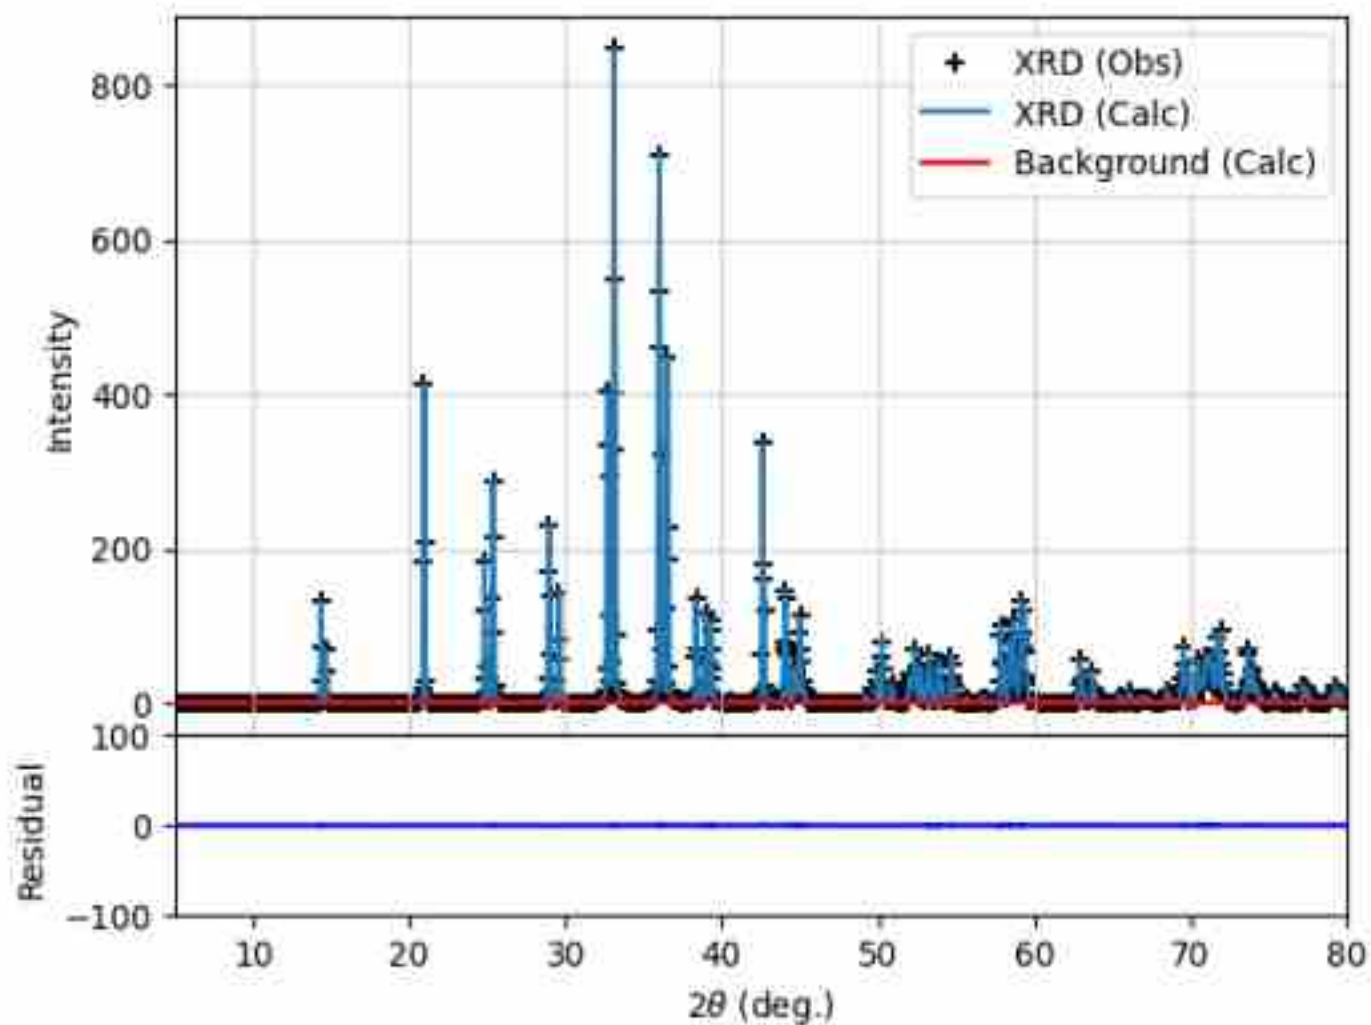

| RMSE before RR | Rwp     | RMSE after RR |
|----------------|---------|---------------|
| 0.03           | 0.99191 | 0.02275       |

# Pt1Rh3

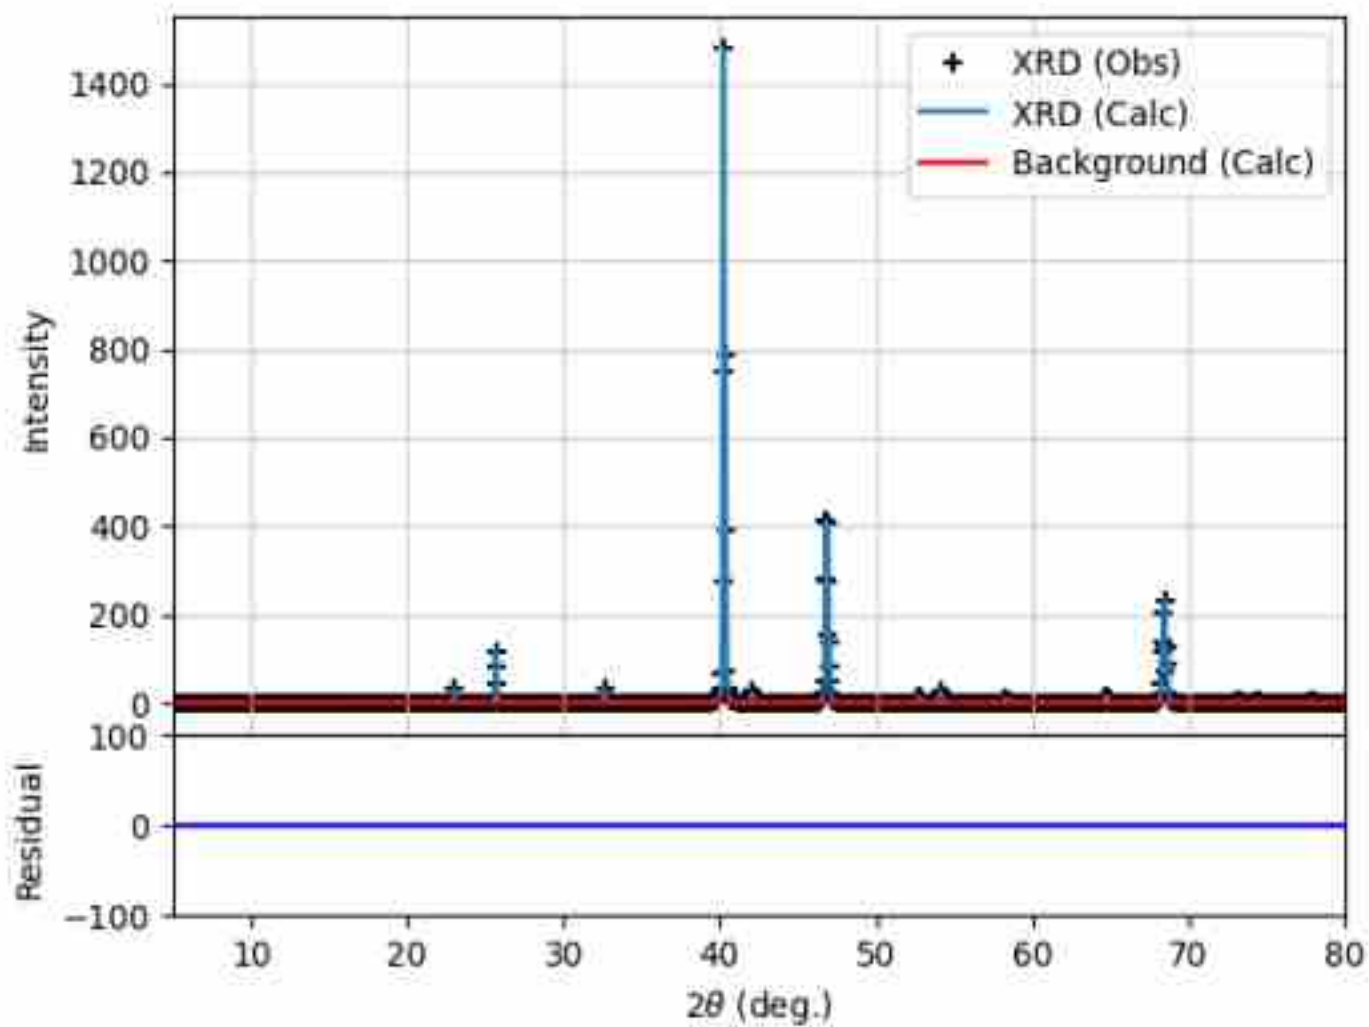

| RMSE before RR | Rwp     | RMSE after RR |
|----------------|---------|---------------|
| 0.003          | 0.00423 | 0.00034       |



# Rb1Br1

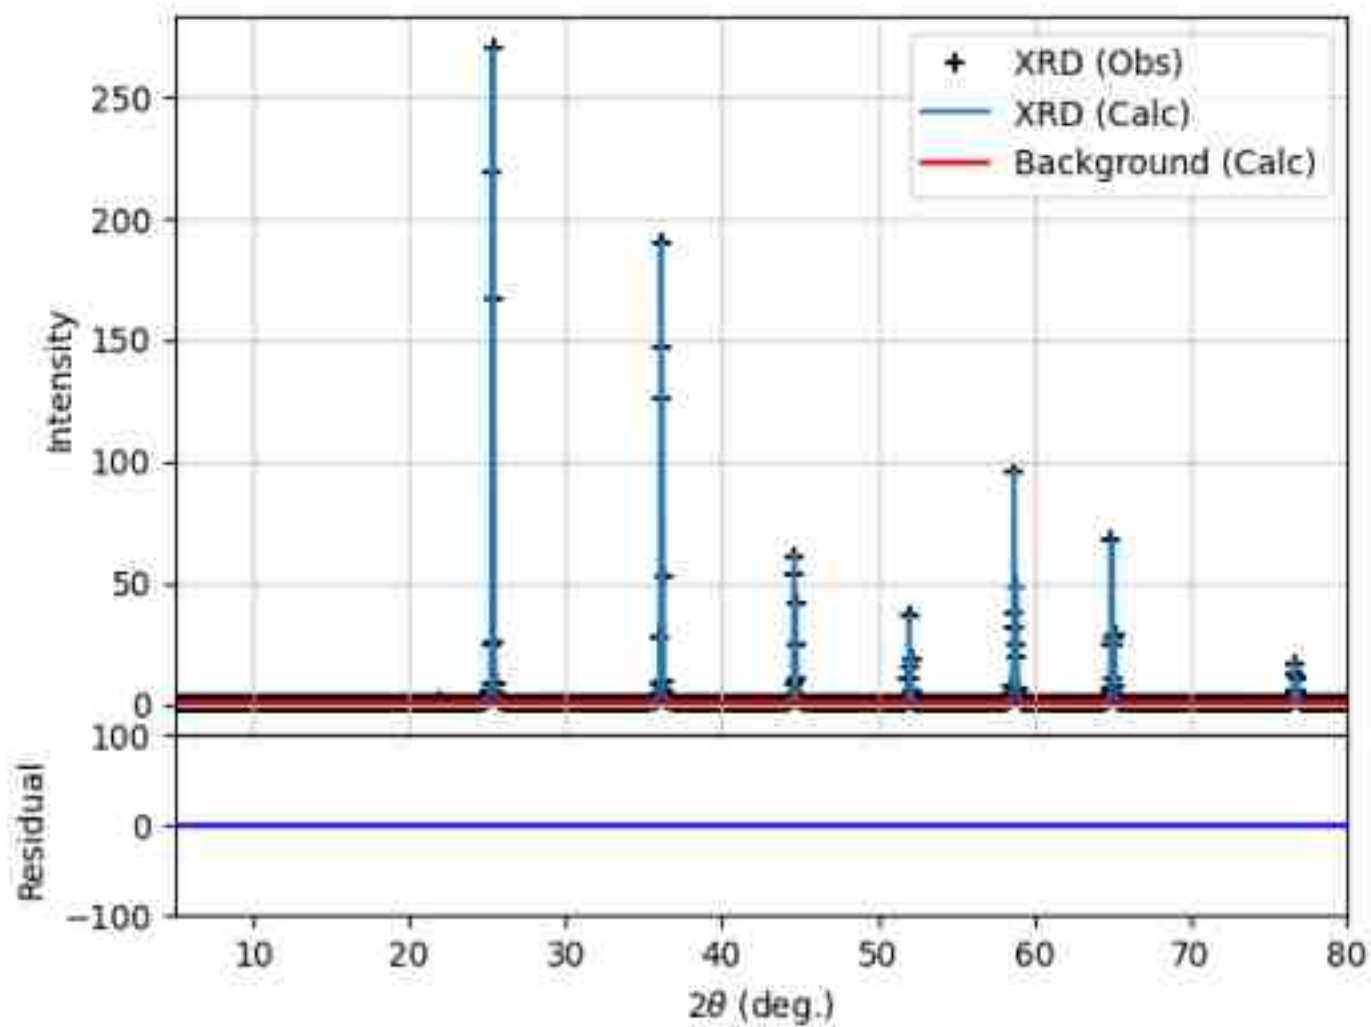

| RMSE before RR | Rwp     | RMSE after RR |
|----------------|---------|---------------|
| 0.003          | 0.07373 | 0.00153       |

# Rb<sub>4</sub>Mg<sub>4</sub>C<sub>112</sub>

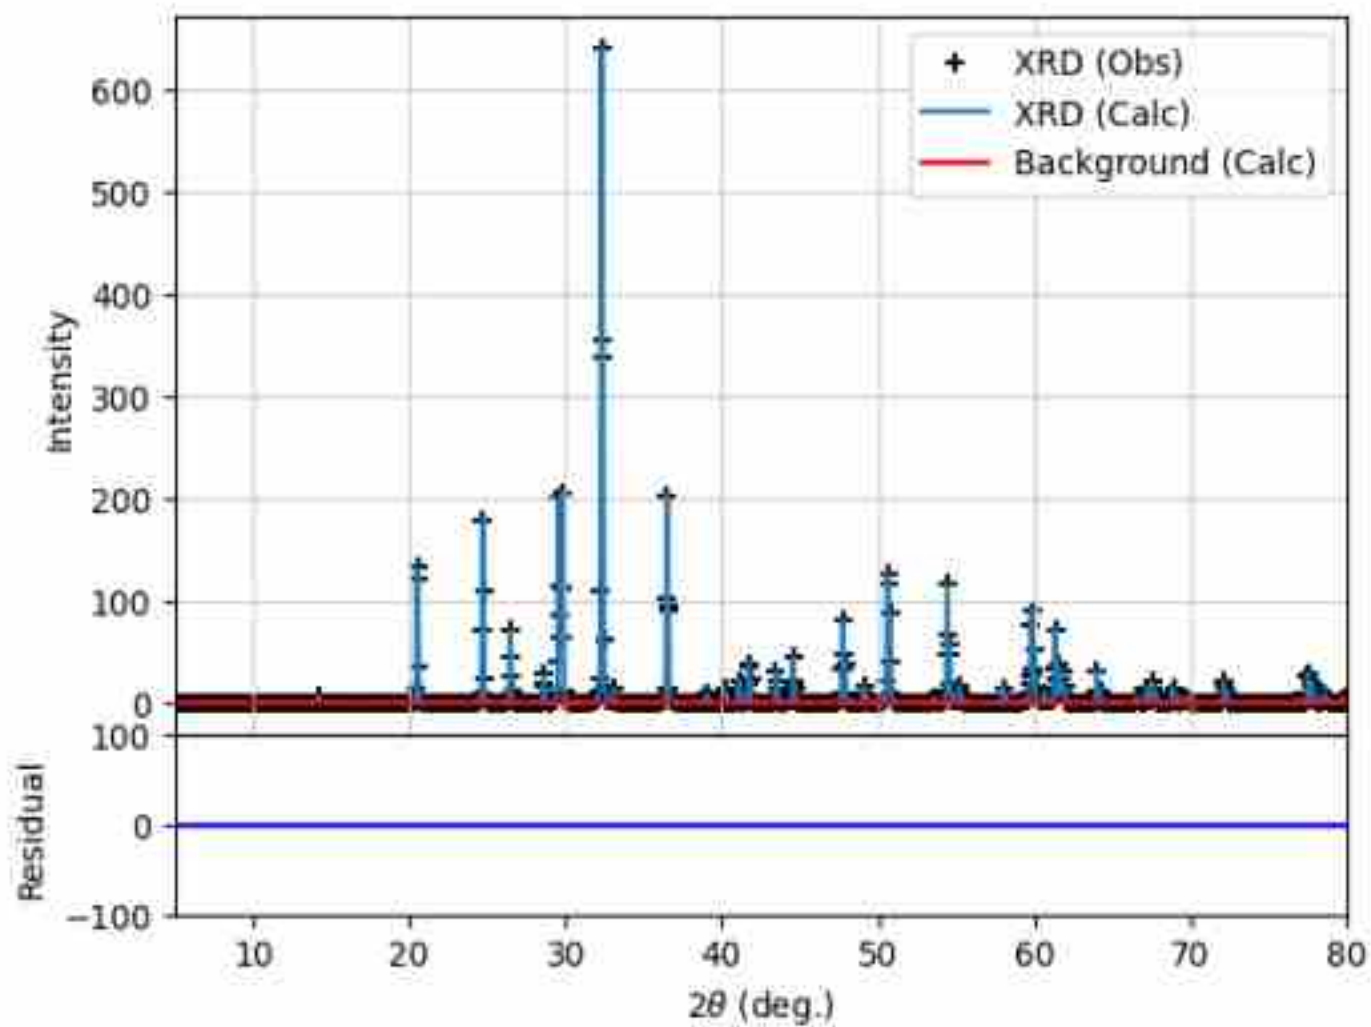

| RMSE before RR | Rwp     | RMSE after RR |
|----------------|---------|---------------|
| 0.03           | 0.00512 | 0.00082       |

# Sc1Co1Te1

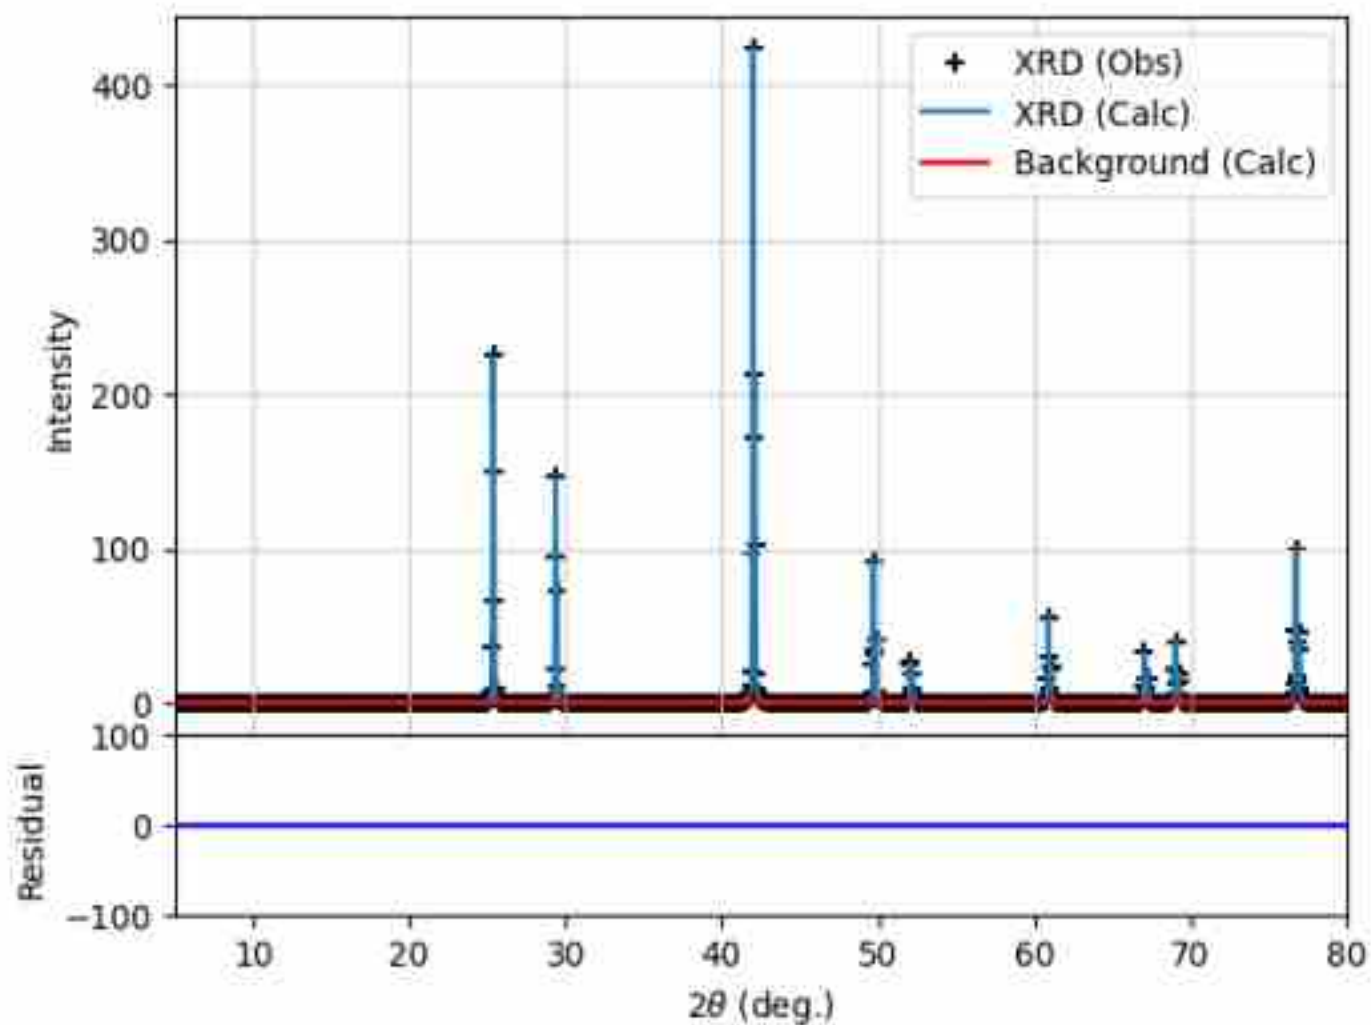

| RMSE before RR | Rwp     | RMSE after RR |
|----------------|---------|---------------|
| 0.003          | 0.00529 | 0.00108       |

# Sc1In1Cu2

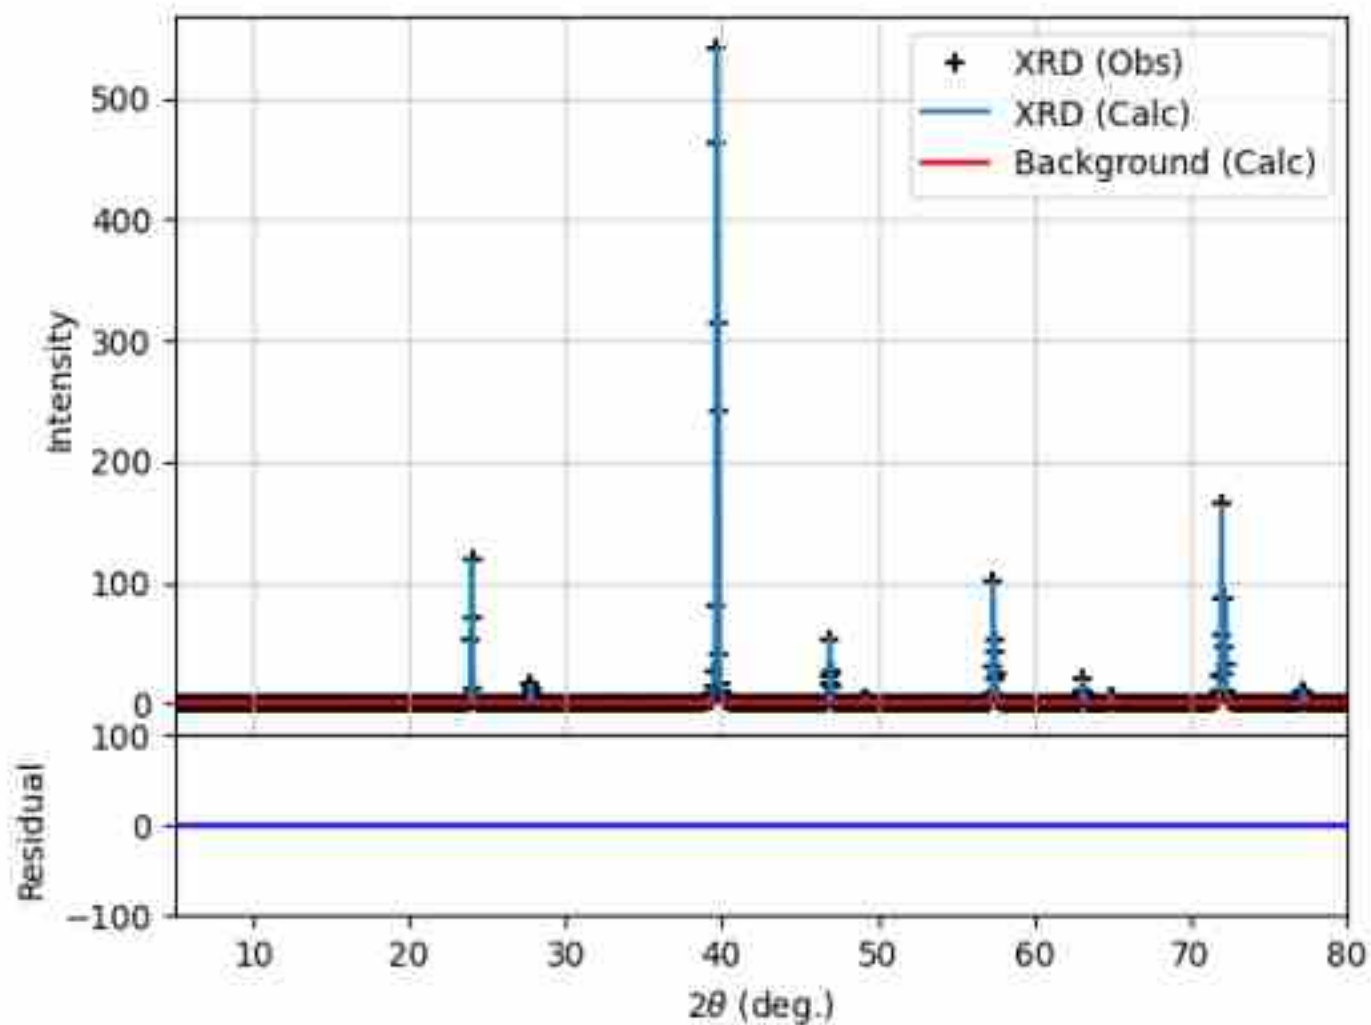

| RMSE before RR | Rwp     | RMSE after RR |
|----------------|---------|---------------|
| 0.003          | 0.00539 | 0.00061       |

Sm1Bi1Pd1

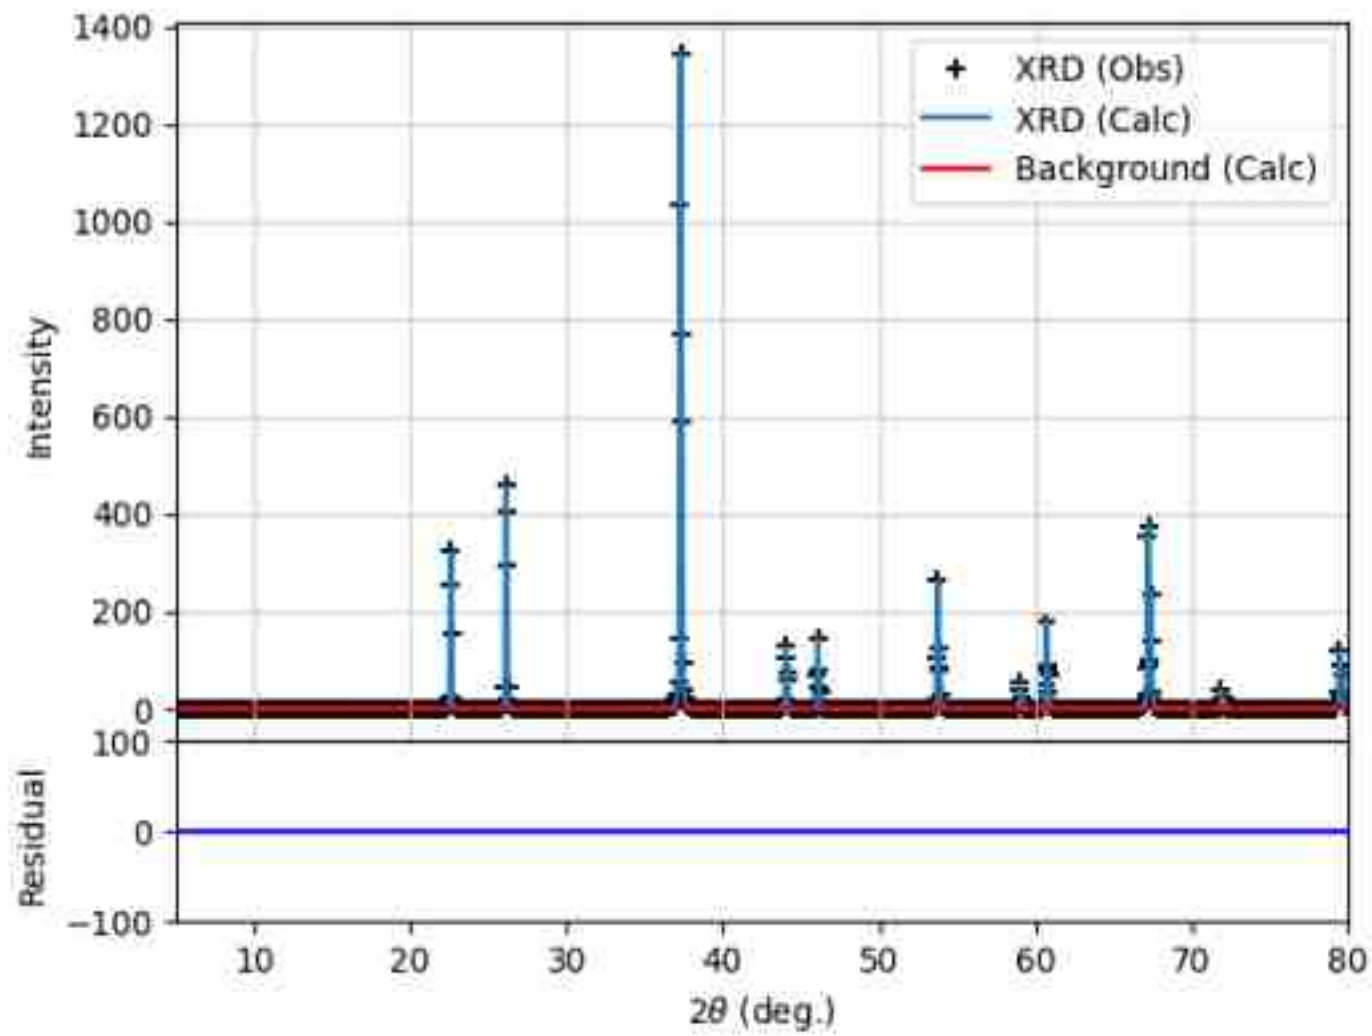

| RMSE before RR | Rwp     | RMSE after RR |
|----------------|---------|---------------|
| 0.003          | 0.00592 | 0.00093       |

# Sm1Ni1Bi1

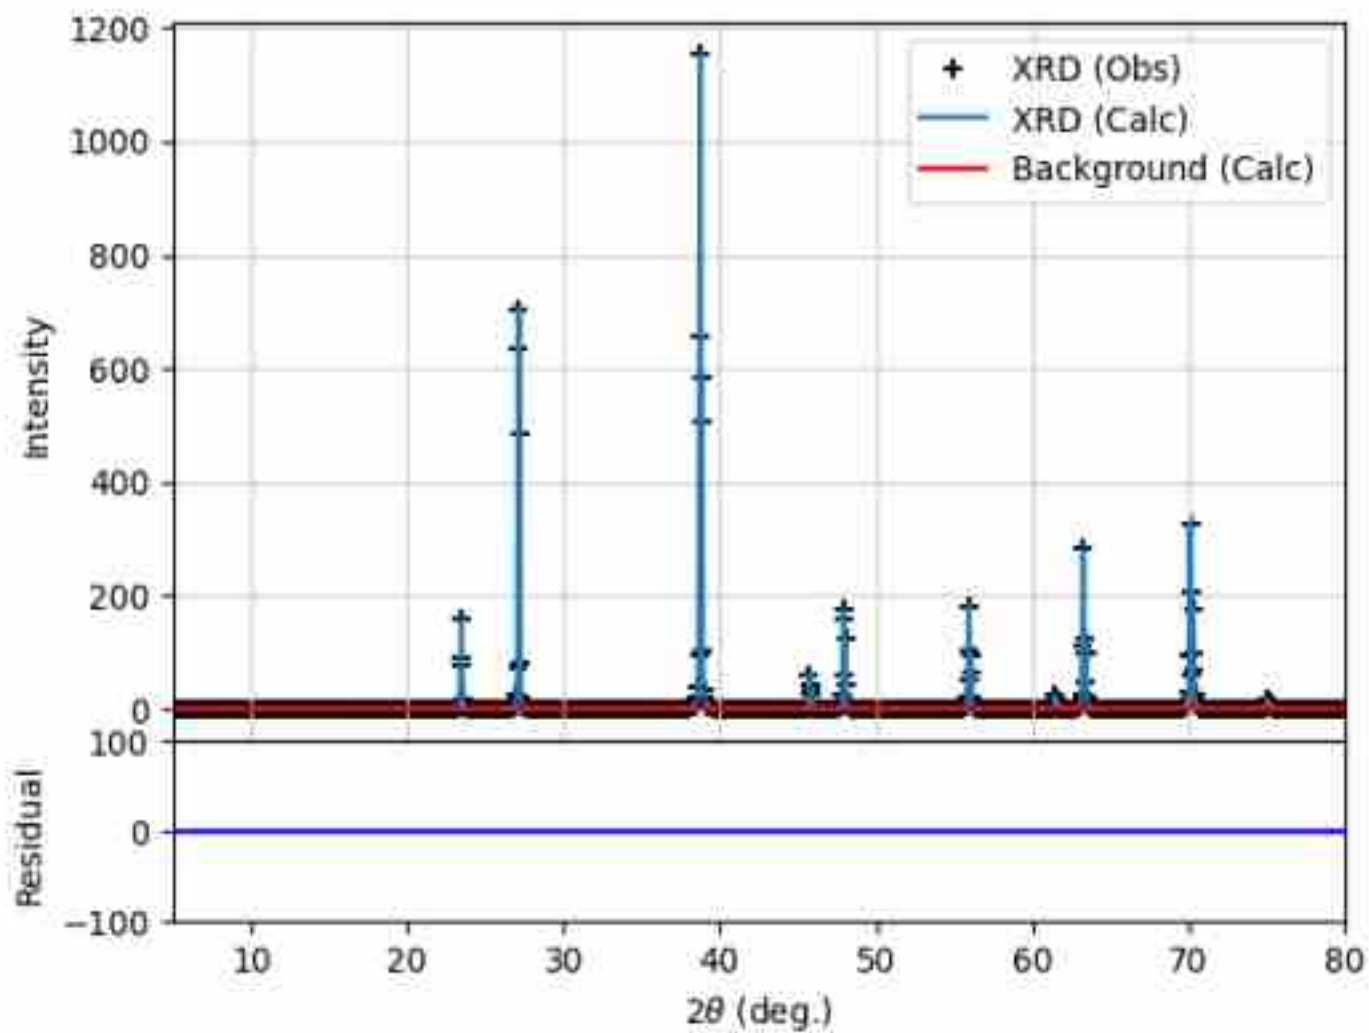

| RMSE before RR | Rwp     | RMSE after RR |
|----------------|---------|---------------|
| 0.003          | 0.00475 | 0.00019       |

# Sm1Pb3

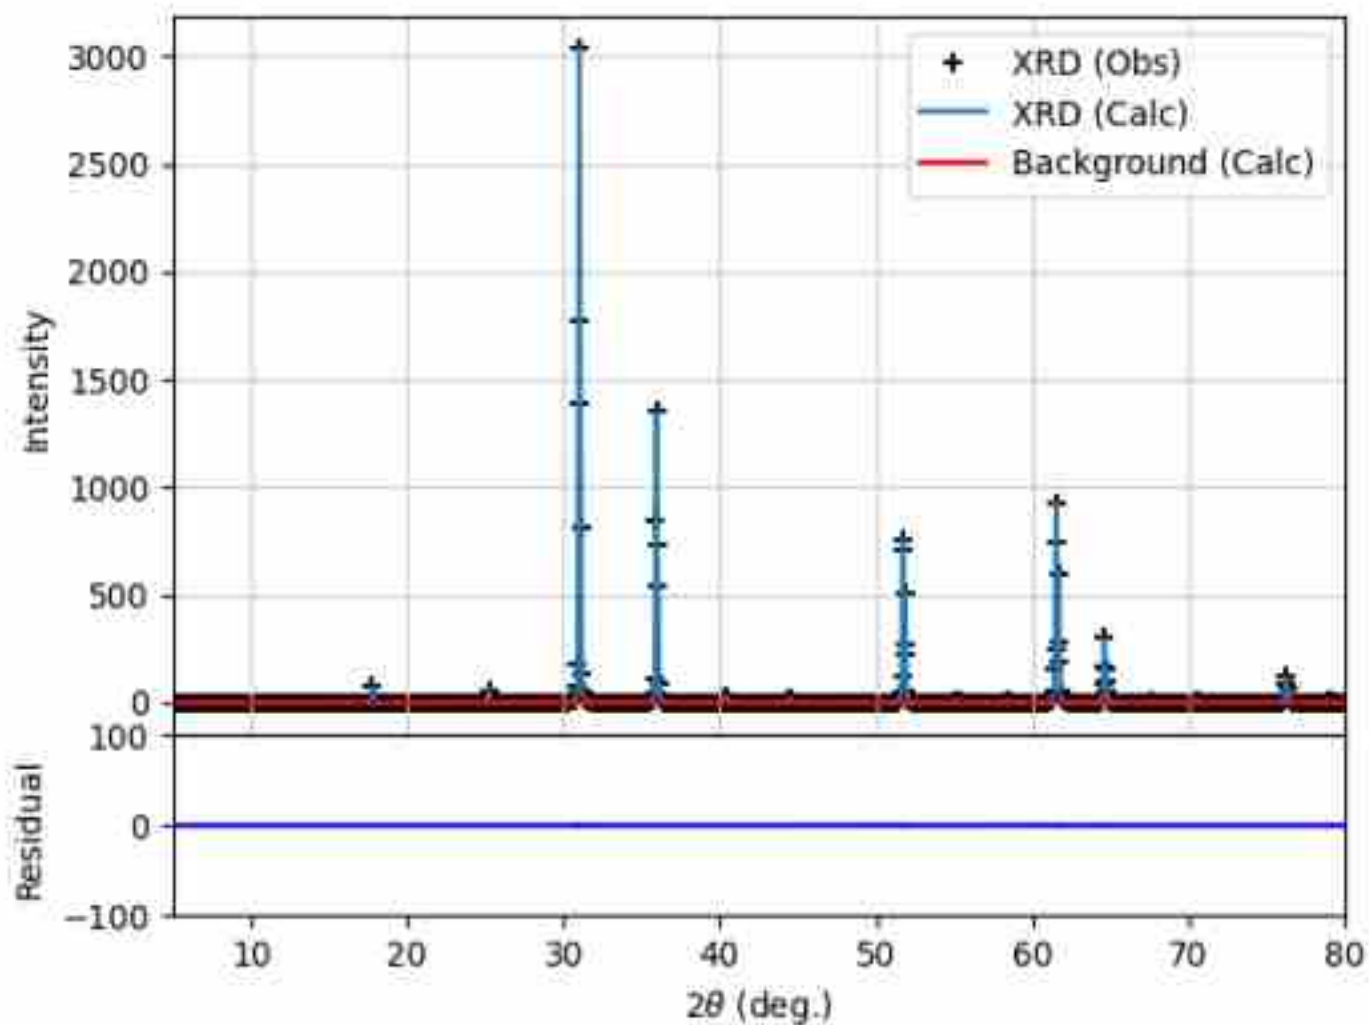

| RMSE before RR | Rwp     | RMSE after RR |
|----------------|---------|---------------|
| 0.003          | 0.10095 | 0.00176       |

# Sm1Th1

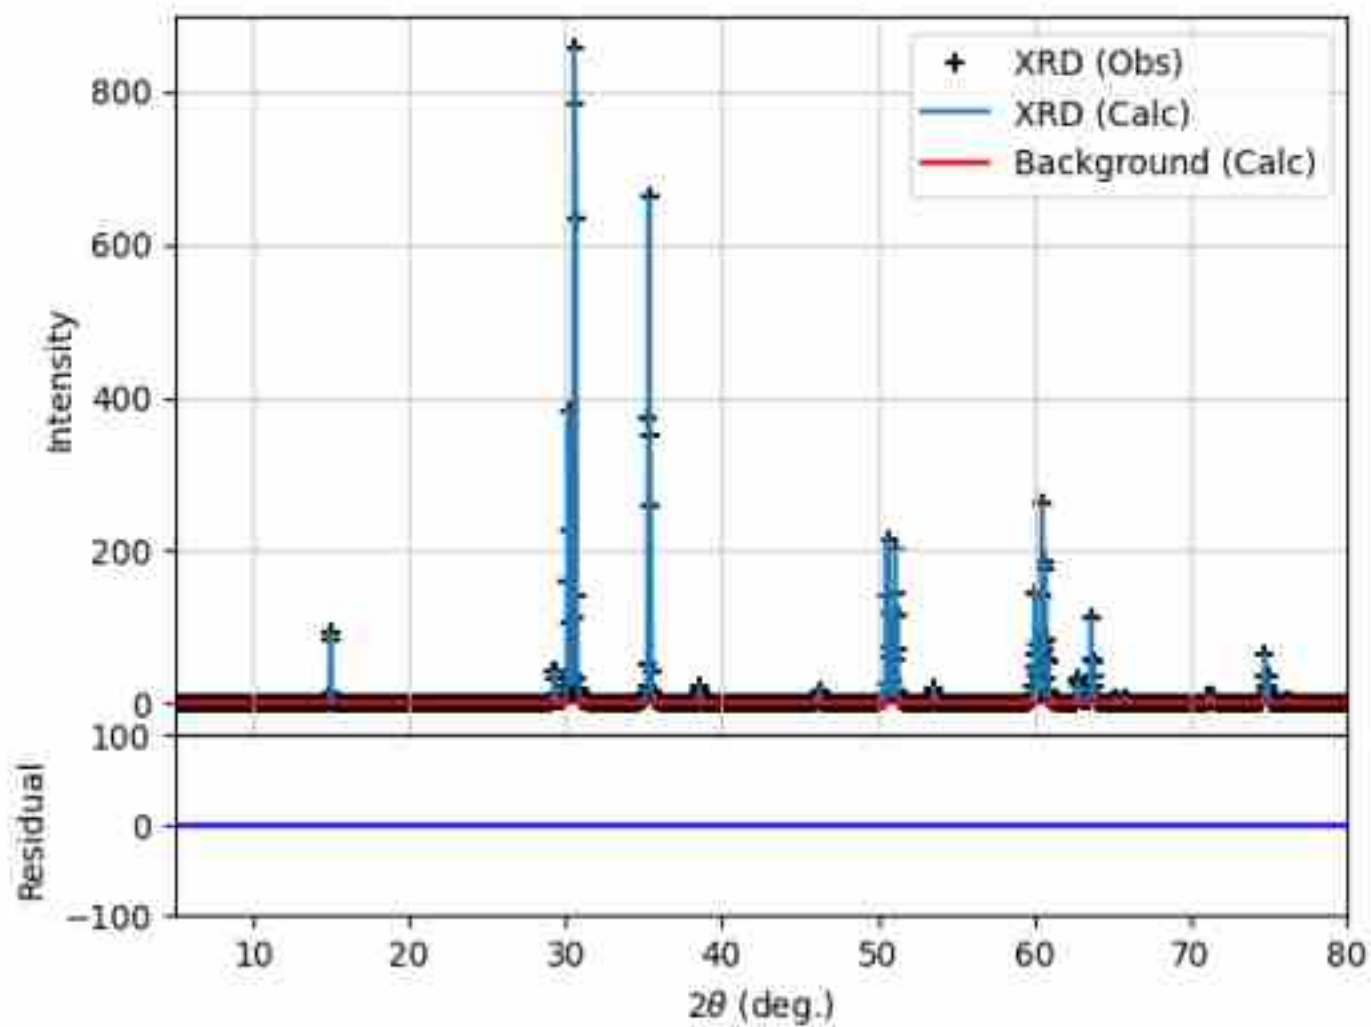

| RMSE before RR | Rwp     | RMSE after RR |
|----------------|---------|---------------|
| 0.003          | 0.14226 | 9e-05         |



# Sm2Ga2

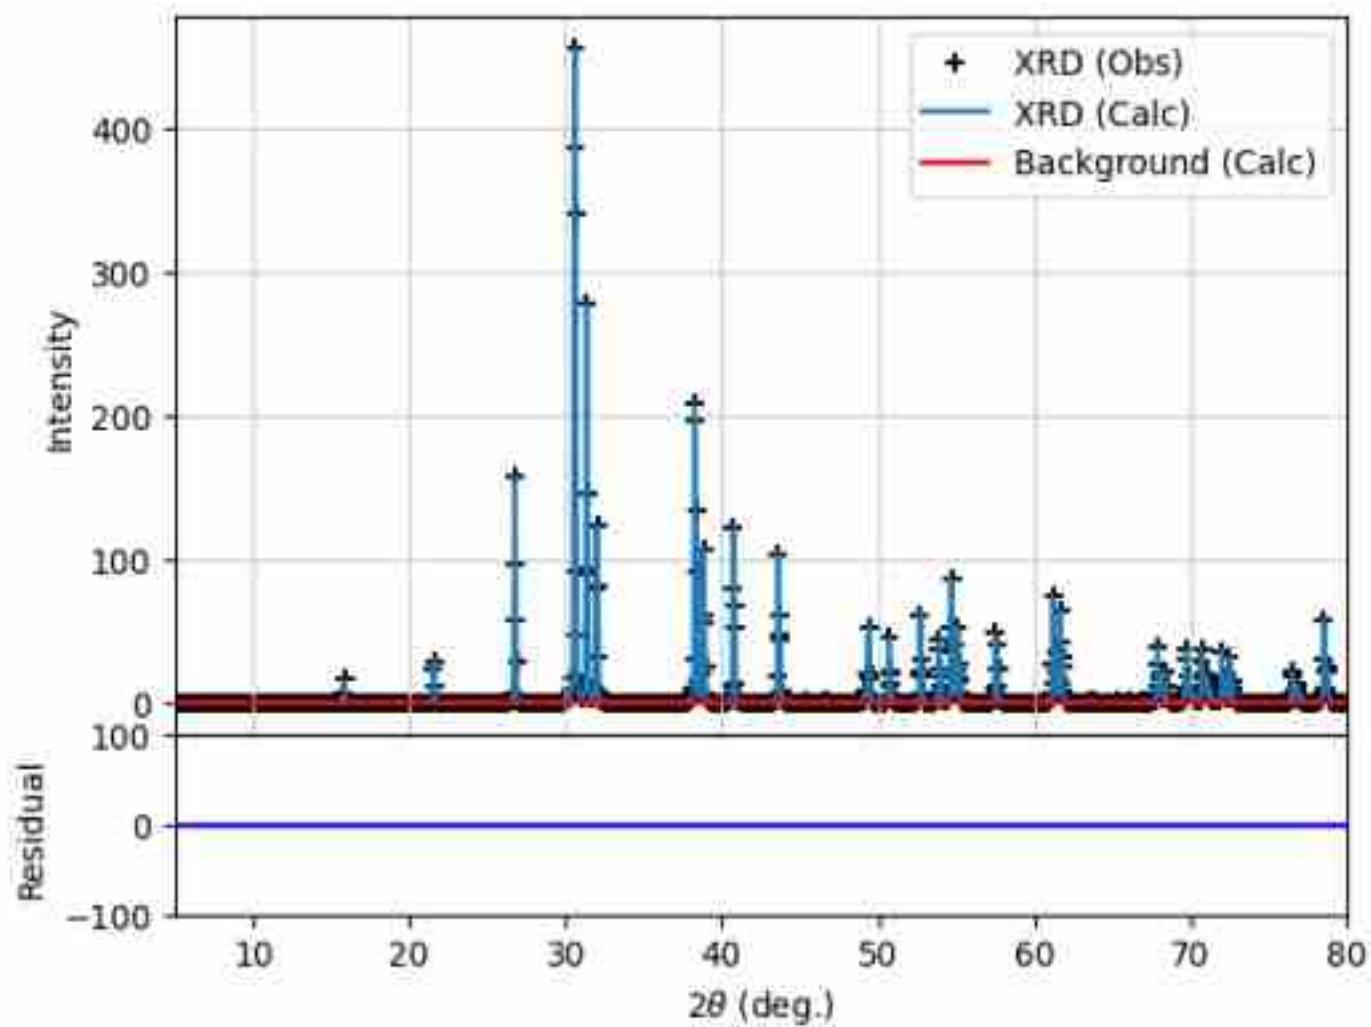

| RMSE before RR | Rwp     | RMSE after RR |
|----------------|---------|---------------|
| 0.003          | 0.00395 | 0.0004        |

# Sr1Nd2Cu2O6

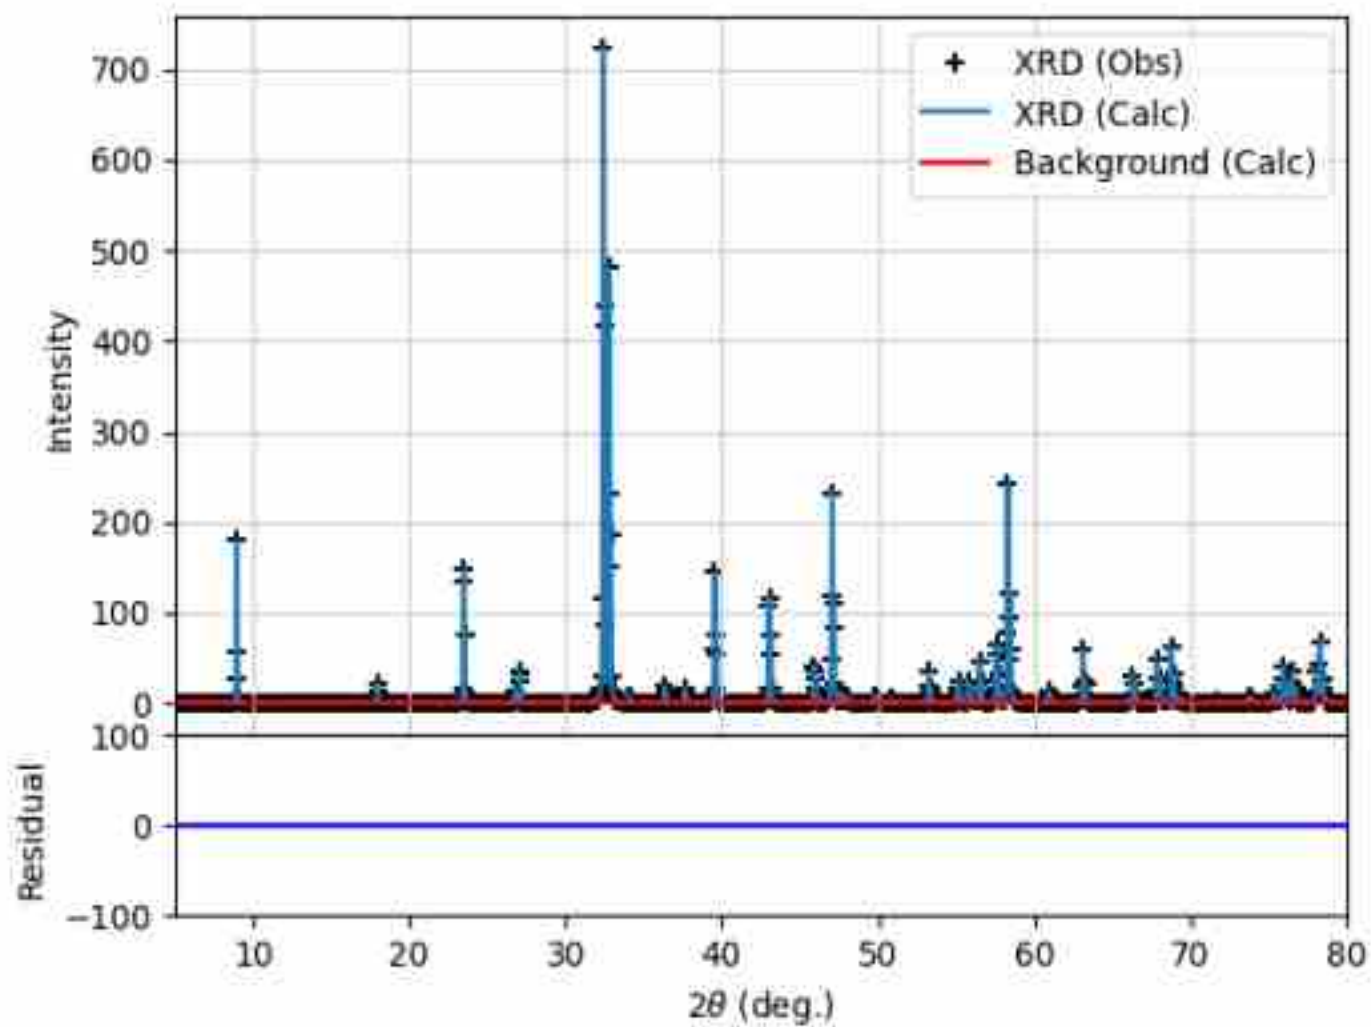

| RMSE before RR | Rwp     | RMSE after RR |
|----------------|---------|---------------|
| 0.03           | 0.00451 | 0.00122       |

# Sr1Sb1Pt1

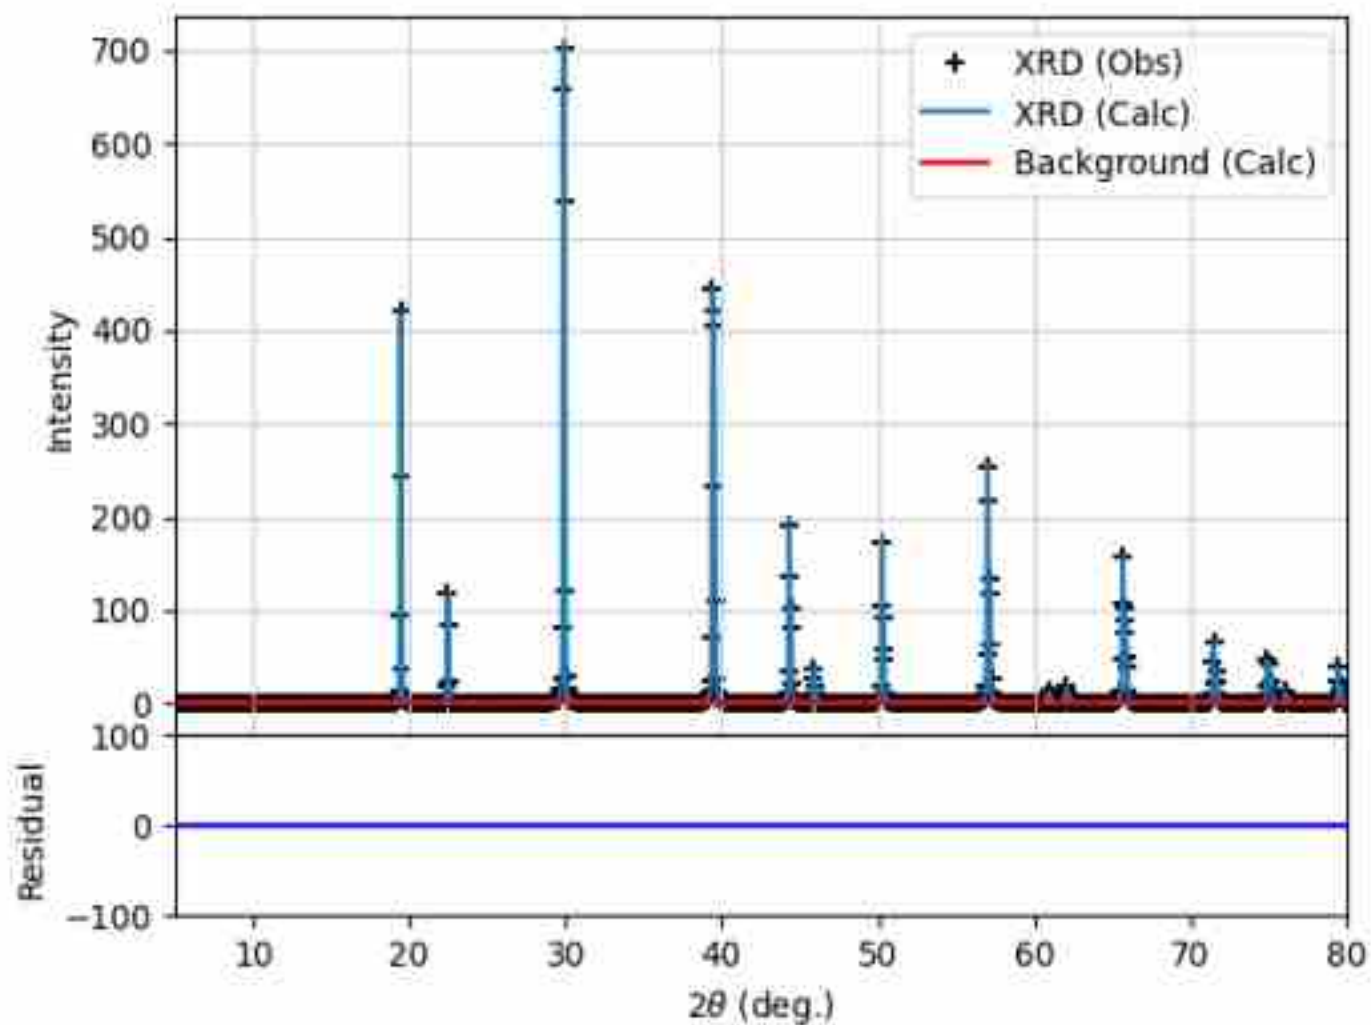

| RMSE before RR | Rwp     | RMSE after RR |
|----------------|---------|---------------|
| 0.003          | 0.00317 | 0.00051       |

# Sr<sub>2</sub>CdIn<sub>1</sub>

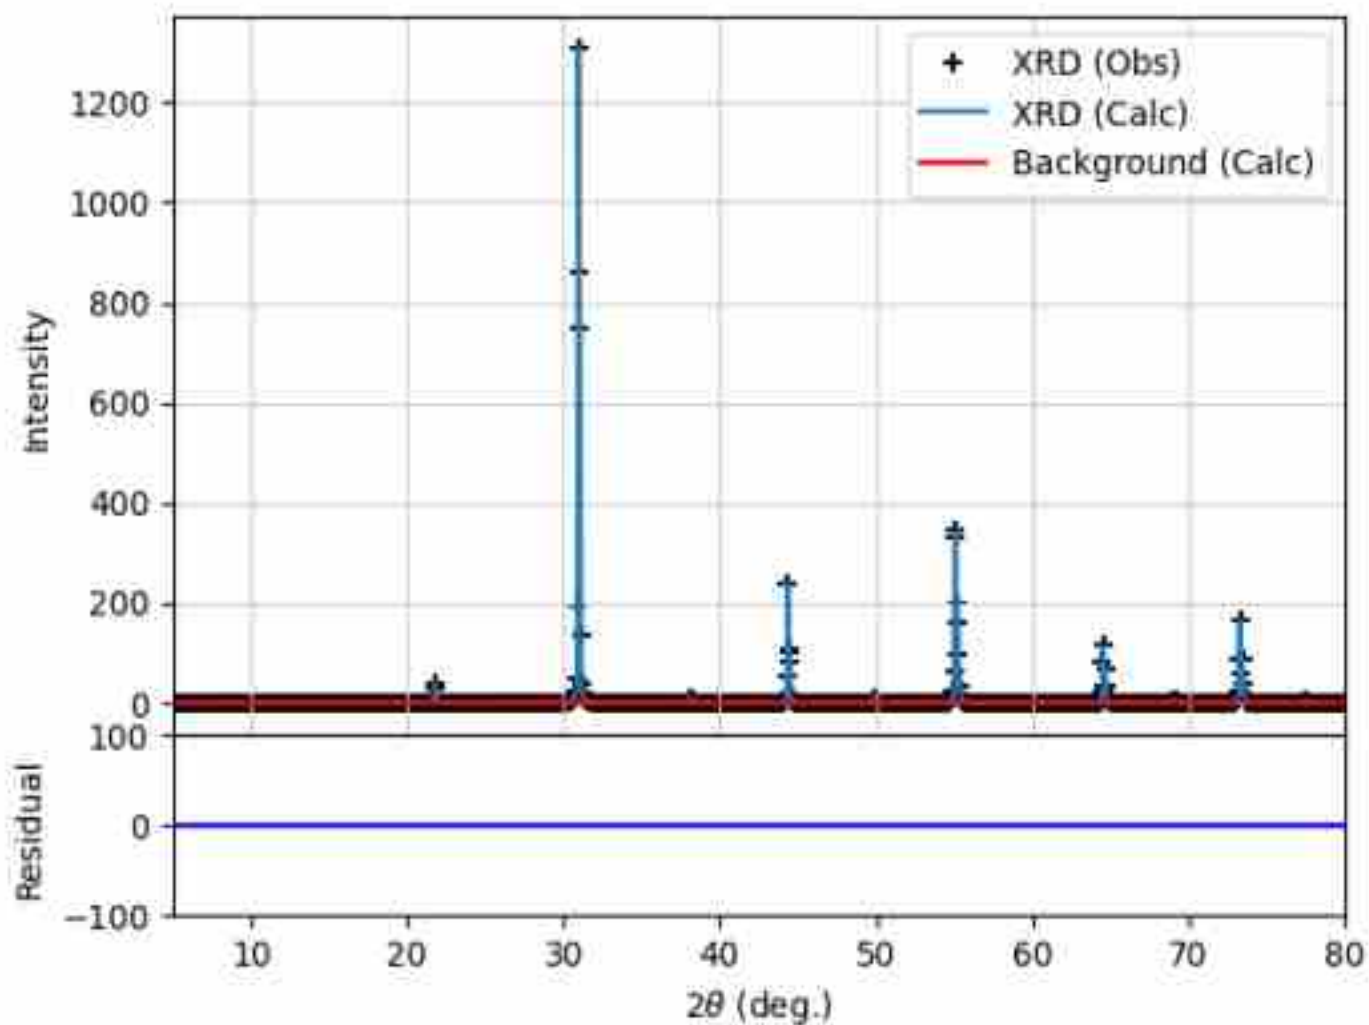

| RMSE before RR | Rwp     | RMSE after RR |
|----------------|---------|---------------|
| 0.003          | 0.00791 | 0.0004        |

# Sr<sub>4</sub>La<sub>2</sub>Ga<sub>2</sub>O<sub>10</sub>

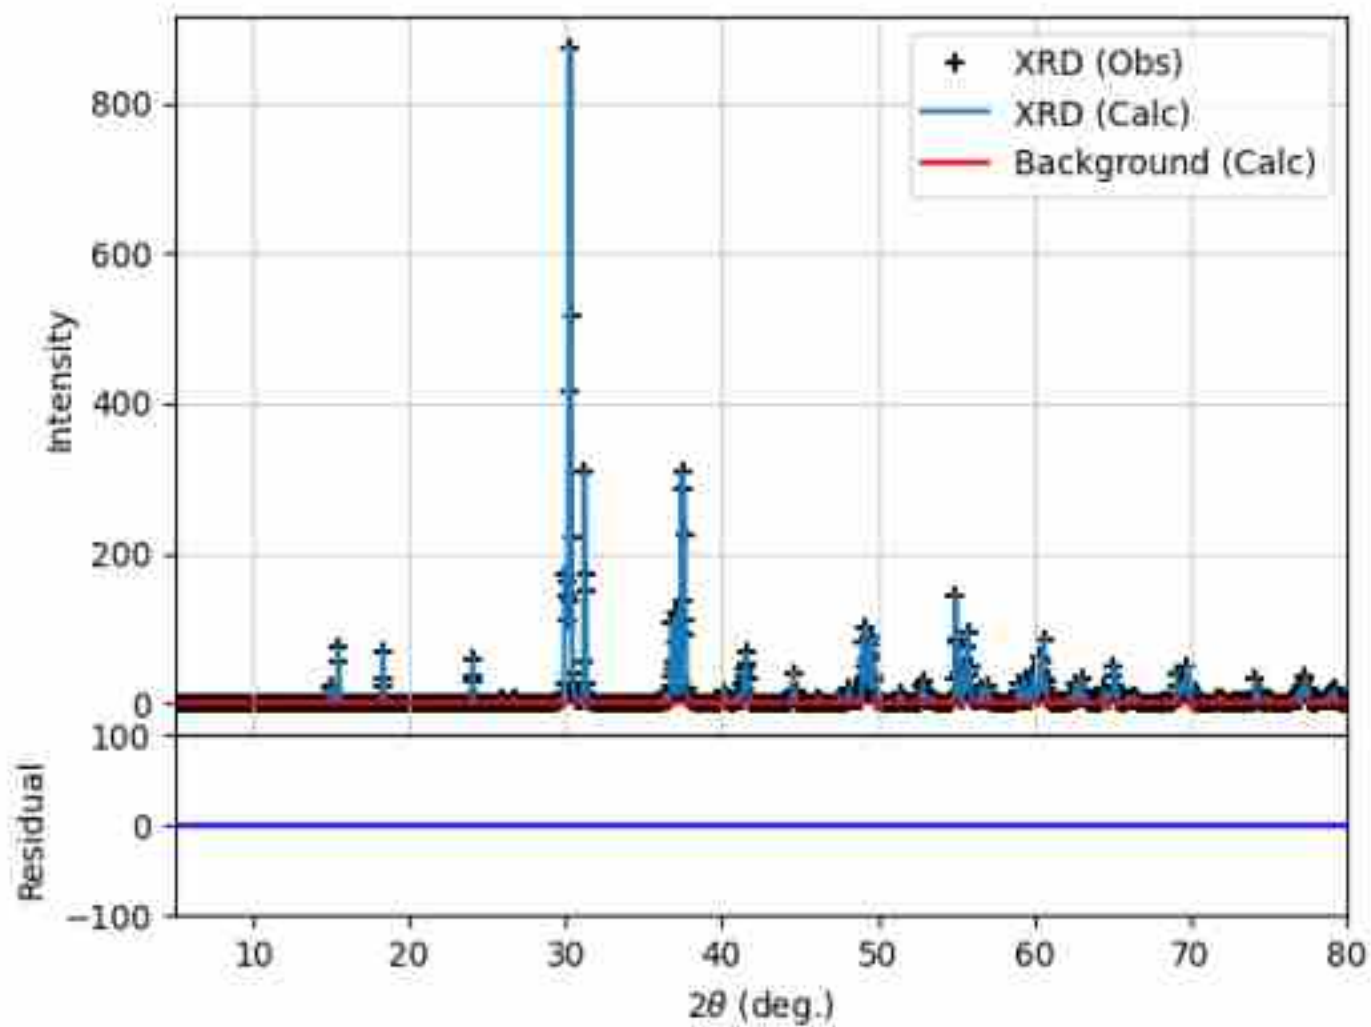

| RMSE before RR | Rwp     | RMSE after RR |
|----------------|---------|---------------|
| 0.03           | 0.00337 | 0.00115       |

Sr<sub>4</sub>Ti<sub>2</sub>Mn<sub>2</sub>O<sub>12</sub>

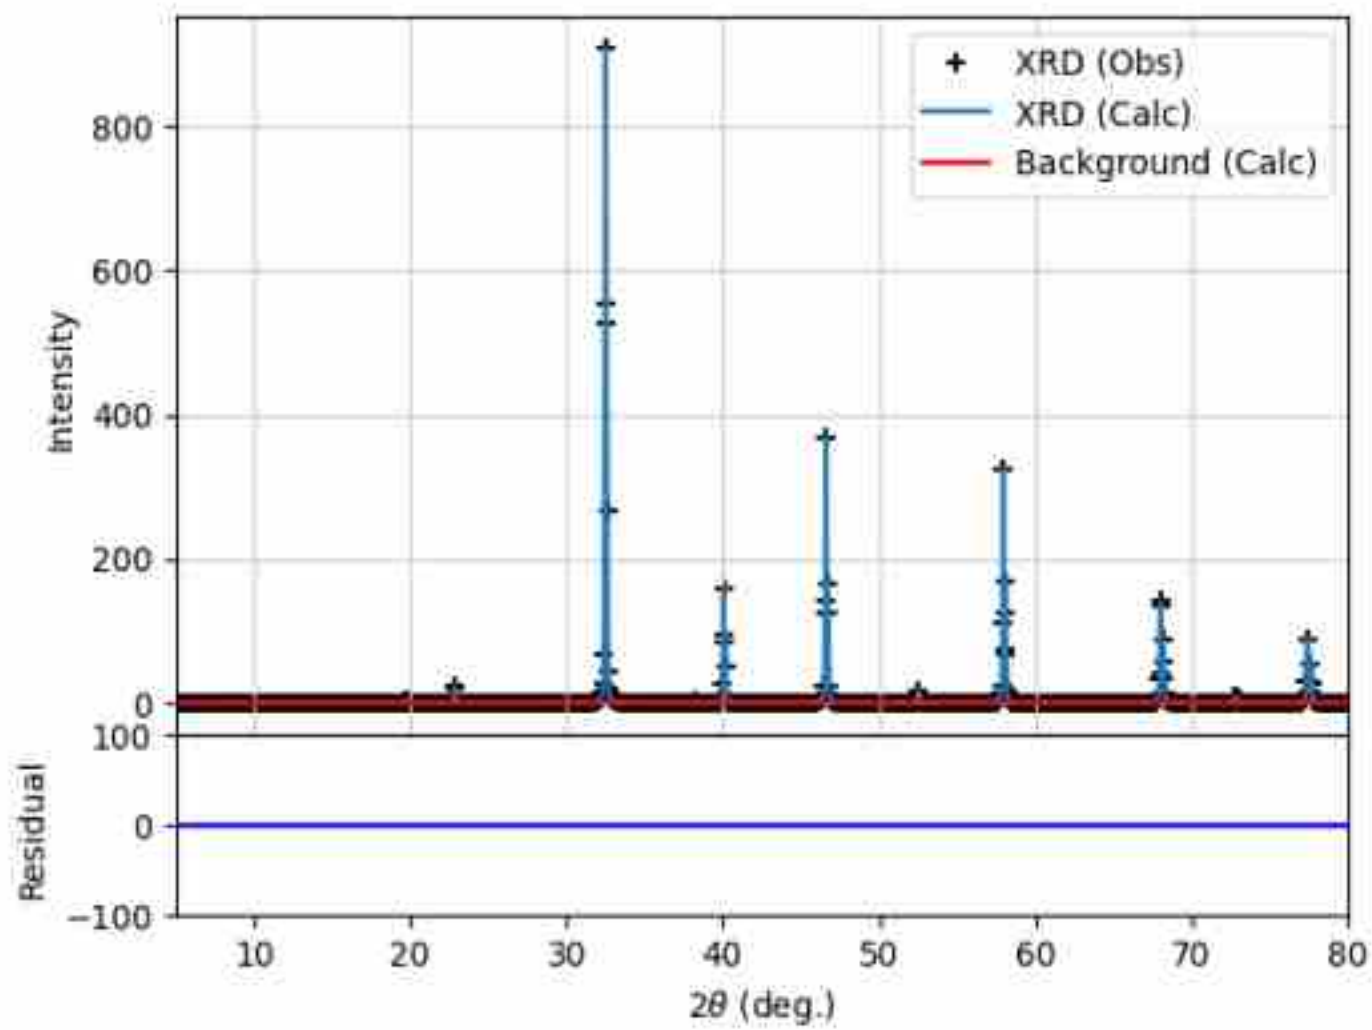

| RMSE before RR | Rwp     | RMSE after RR |
|----------------|---------|---------------|
| 0.03           | 0.01008 | 0.00461       |

# Sr<sub>4</sub>Ti<sub>3</sub>O<sub>10</sub>

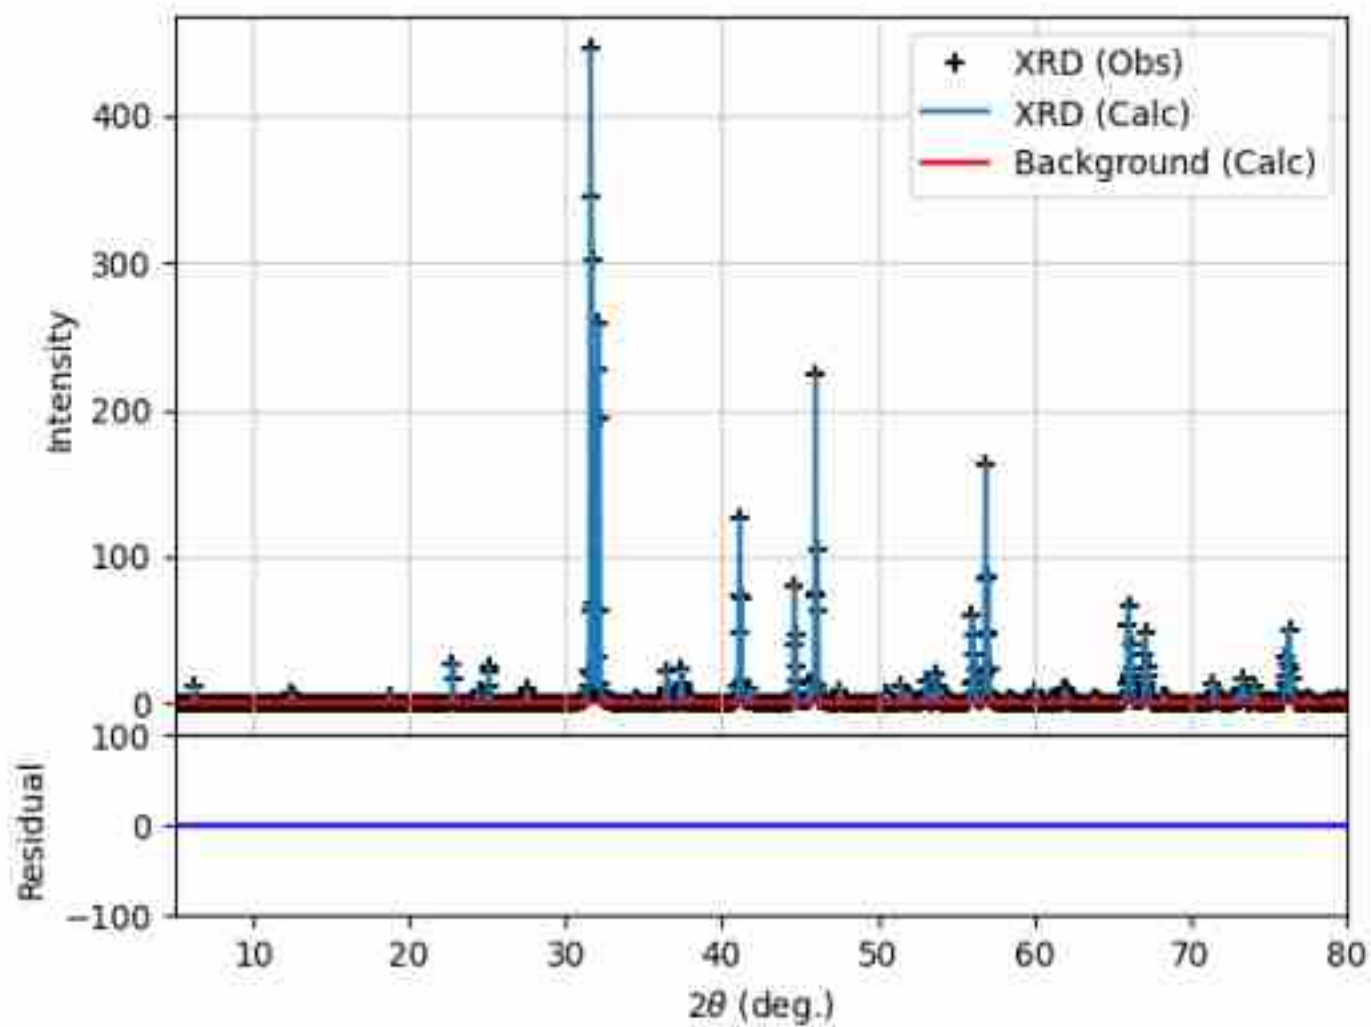

| RMSE before RR | Rwp     | RMSE after RR |
|----------------|---------|---------------|
| 0.03           | 0.01039 | 0.00157       |

# Ta1S2

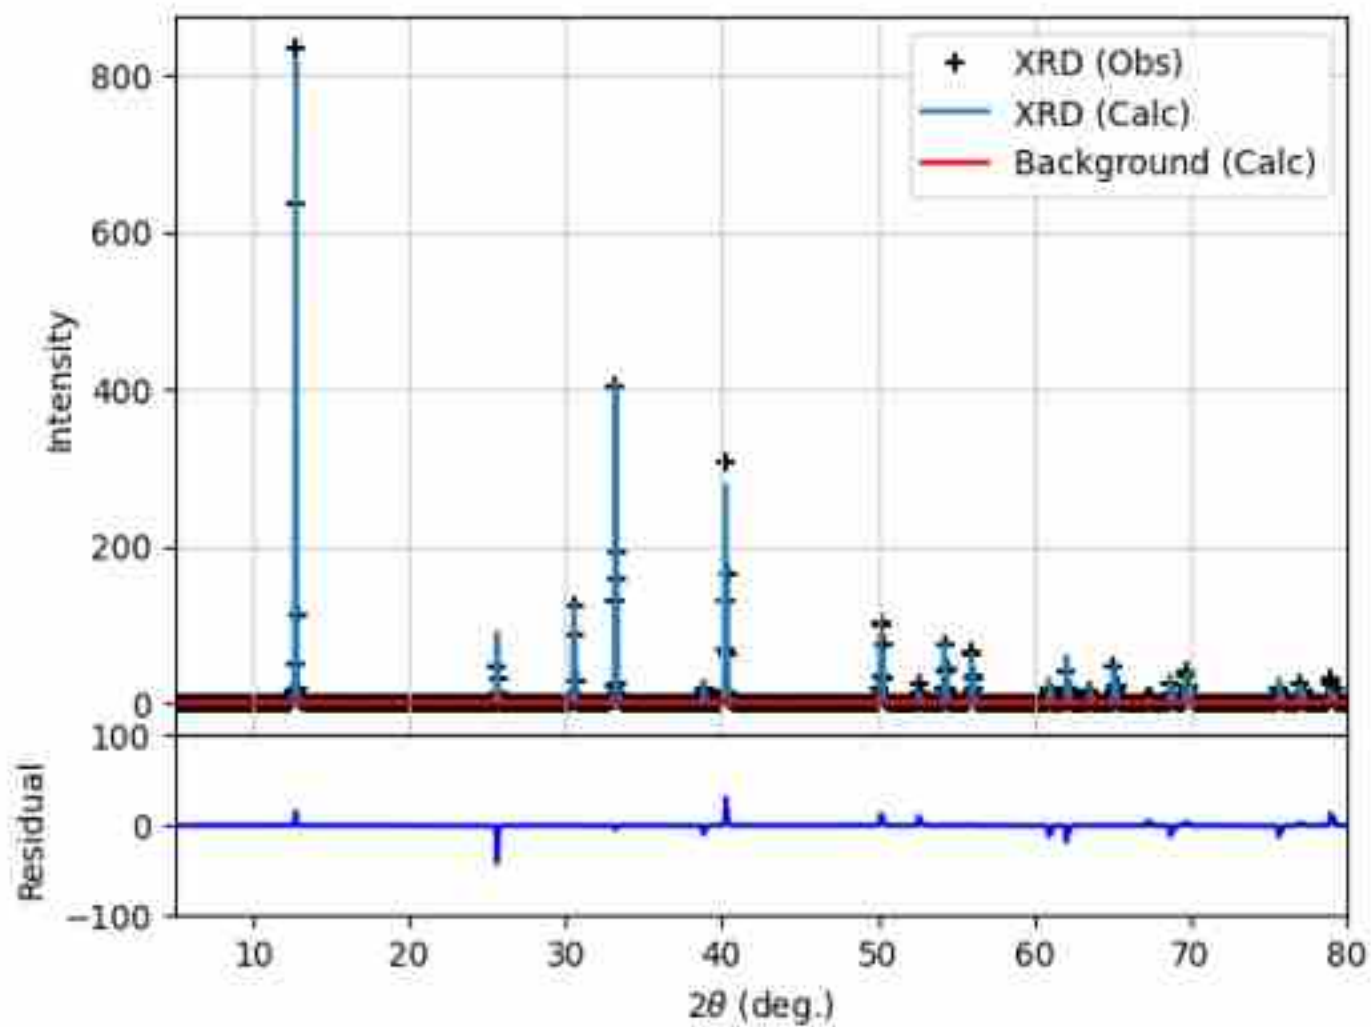

| RMSE before RR | Rwp      | RMSE after RR |
|----------------|----------|---------------|
| 0.003          | 17.88618 | 0.00627       |



# Tb1Al1Ag2

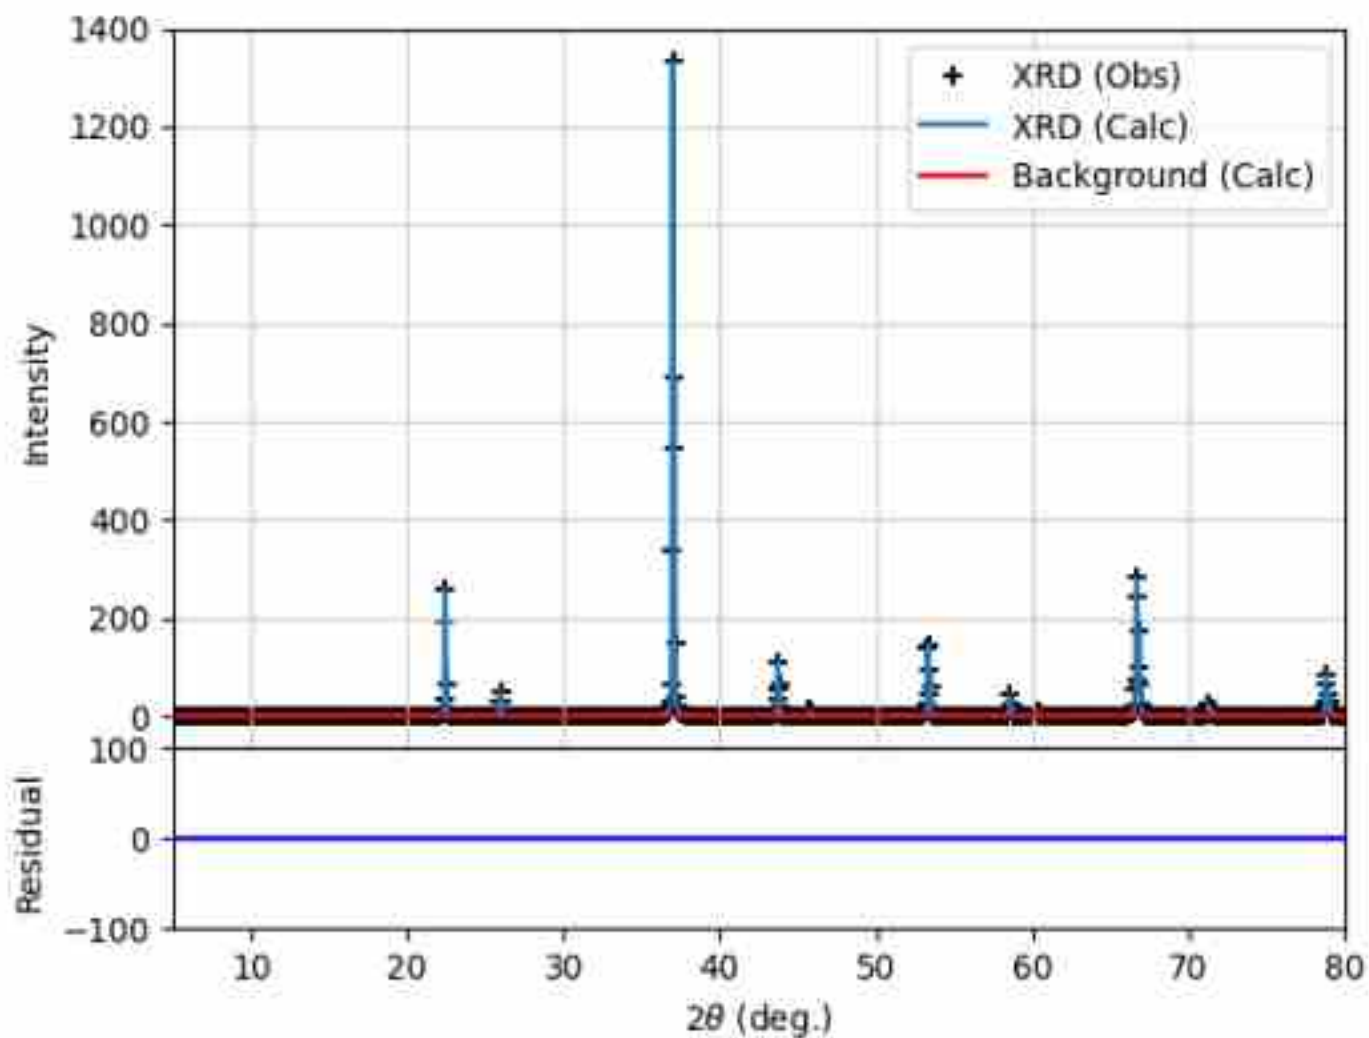

| RMSE before RR | Rwp     | RMSE after RR |
|----------------|---------|---------------|
| 0.003          | 0.01211 | 0.00089       |

# Tb1C2

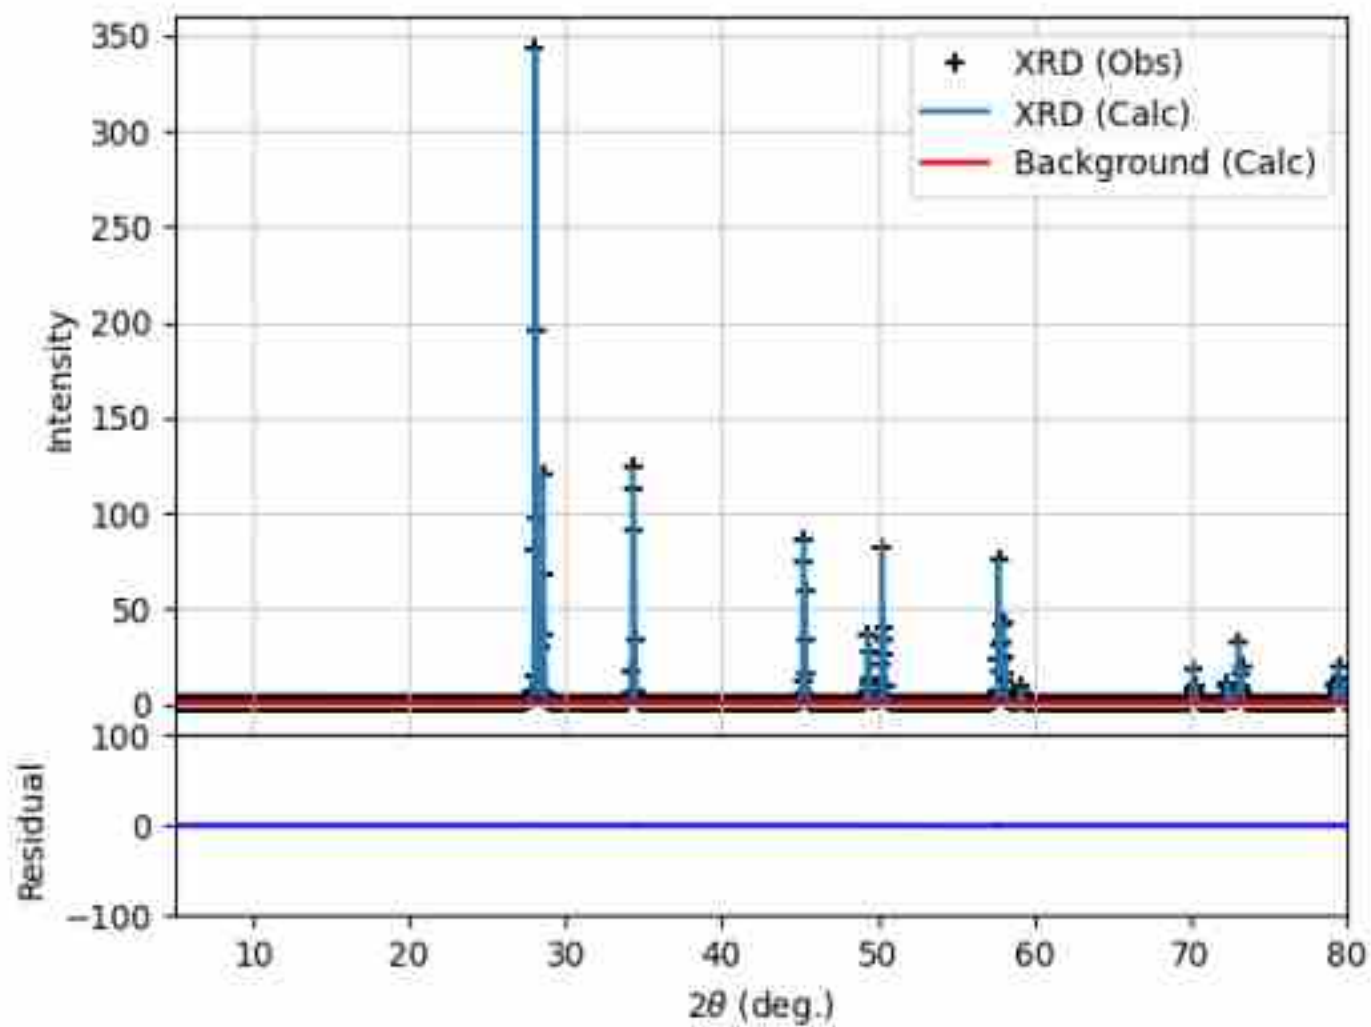

| RMSE before RR | Rwp     | RMSE after RR |
|----------------|---------|---------------|
| 0.003          | 0.35424 | 0.00541       |

# Tb1Er1Te2

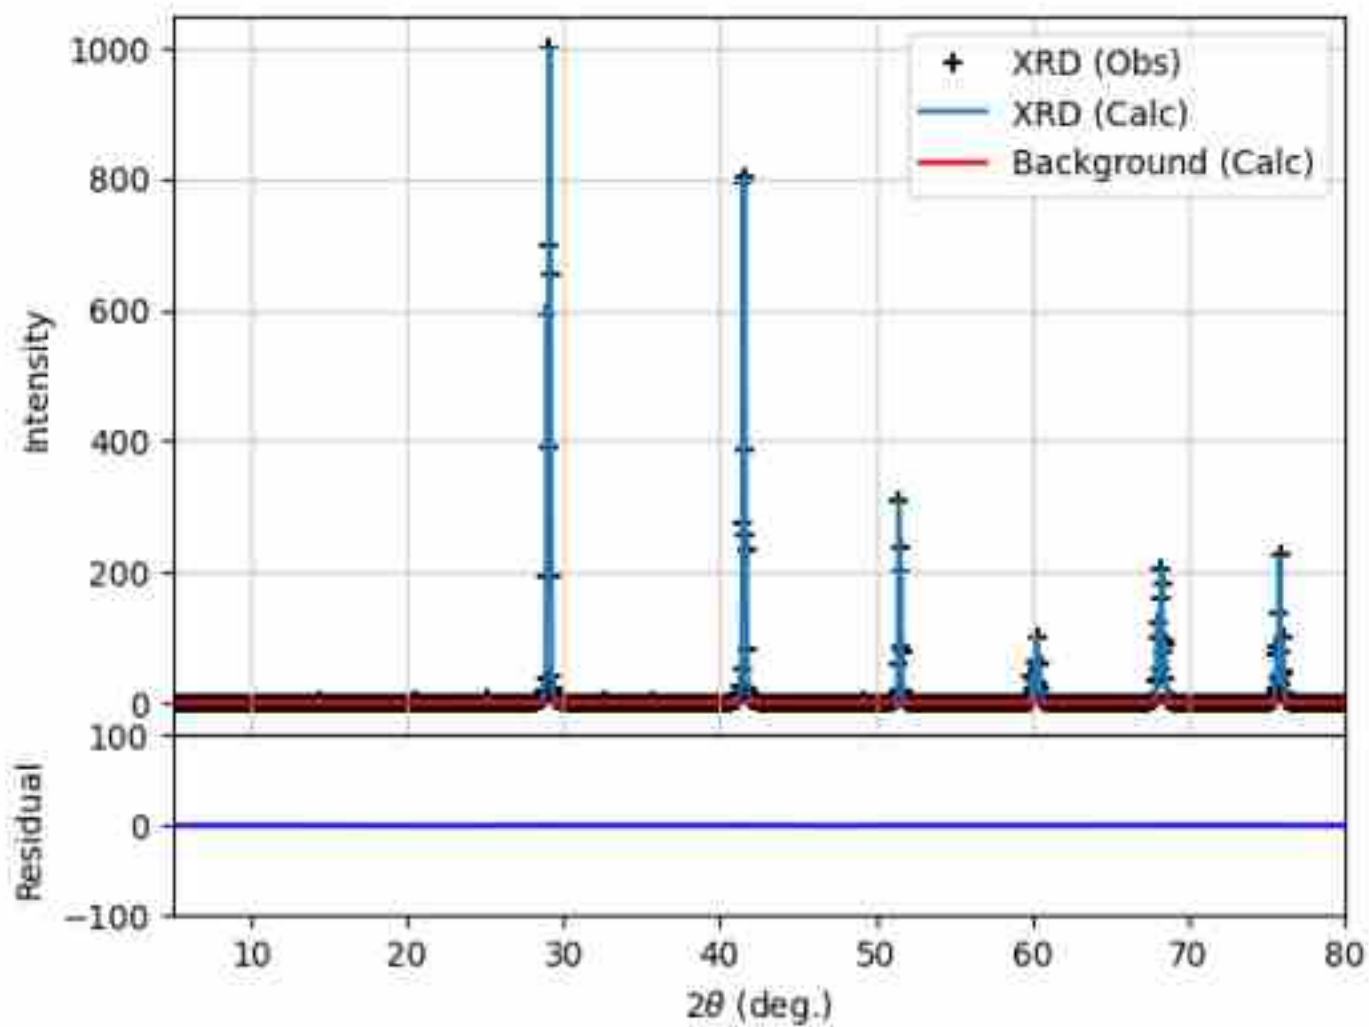

| RMSE before RR | Rwp     | RMSE after RR |
|----------------|---------|---------------|
| 0.003          | 0.49341 | 0.00332       |

# Tb1In1Ag2

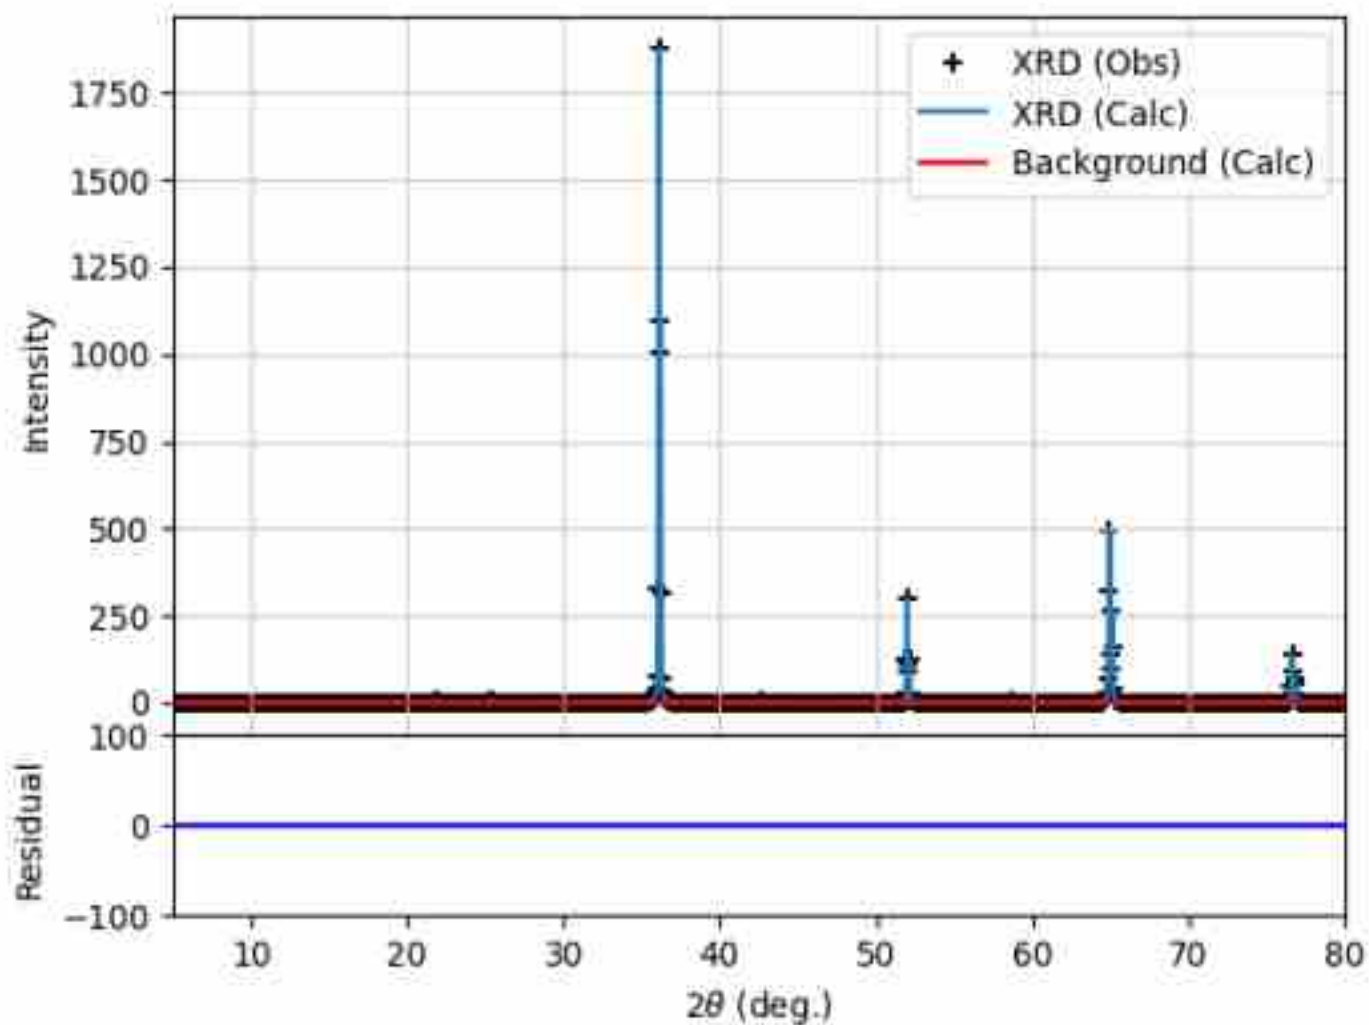

| RMSE before RR | Rwp     | RMSE after RR |
|----------------|---------|---------------|
| 0.003          | 0.00357 | 0.00356       |

# Tb1Tl1Ag2

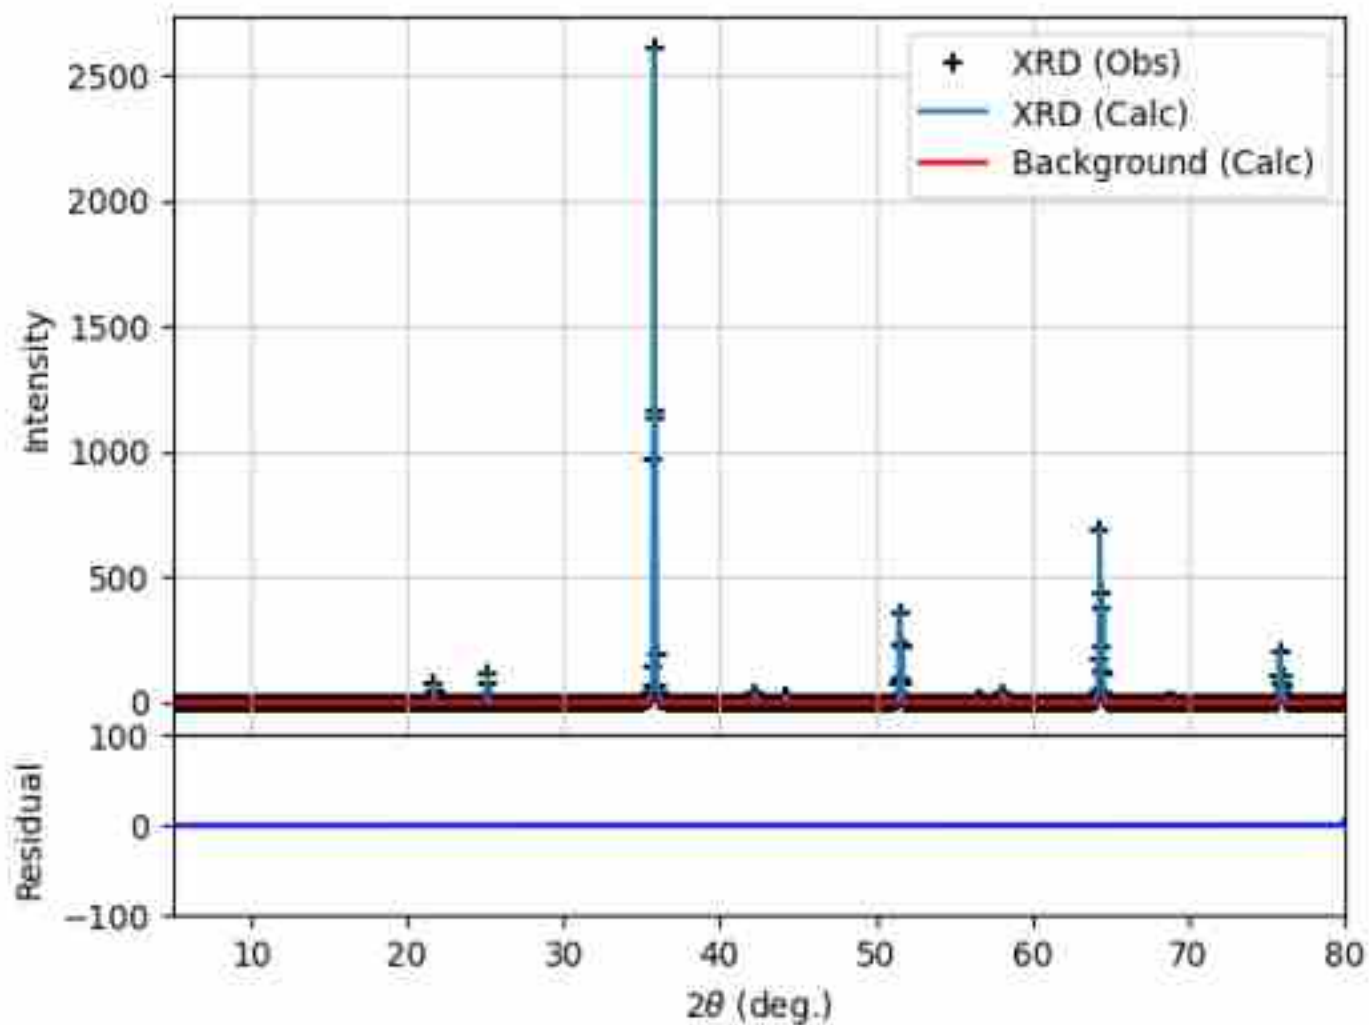

| RMSE before RR | Rwp     | RMSE after RR |
|----------------|---------|---------------|
| 0.003          | 2.93016 | 0.00406       |

# Tb<sub>2</sub>Zn<sub>6</sub>P<sub>6</sub>

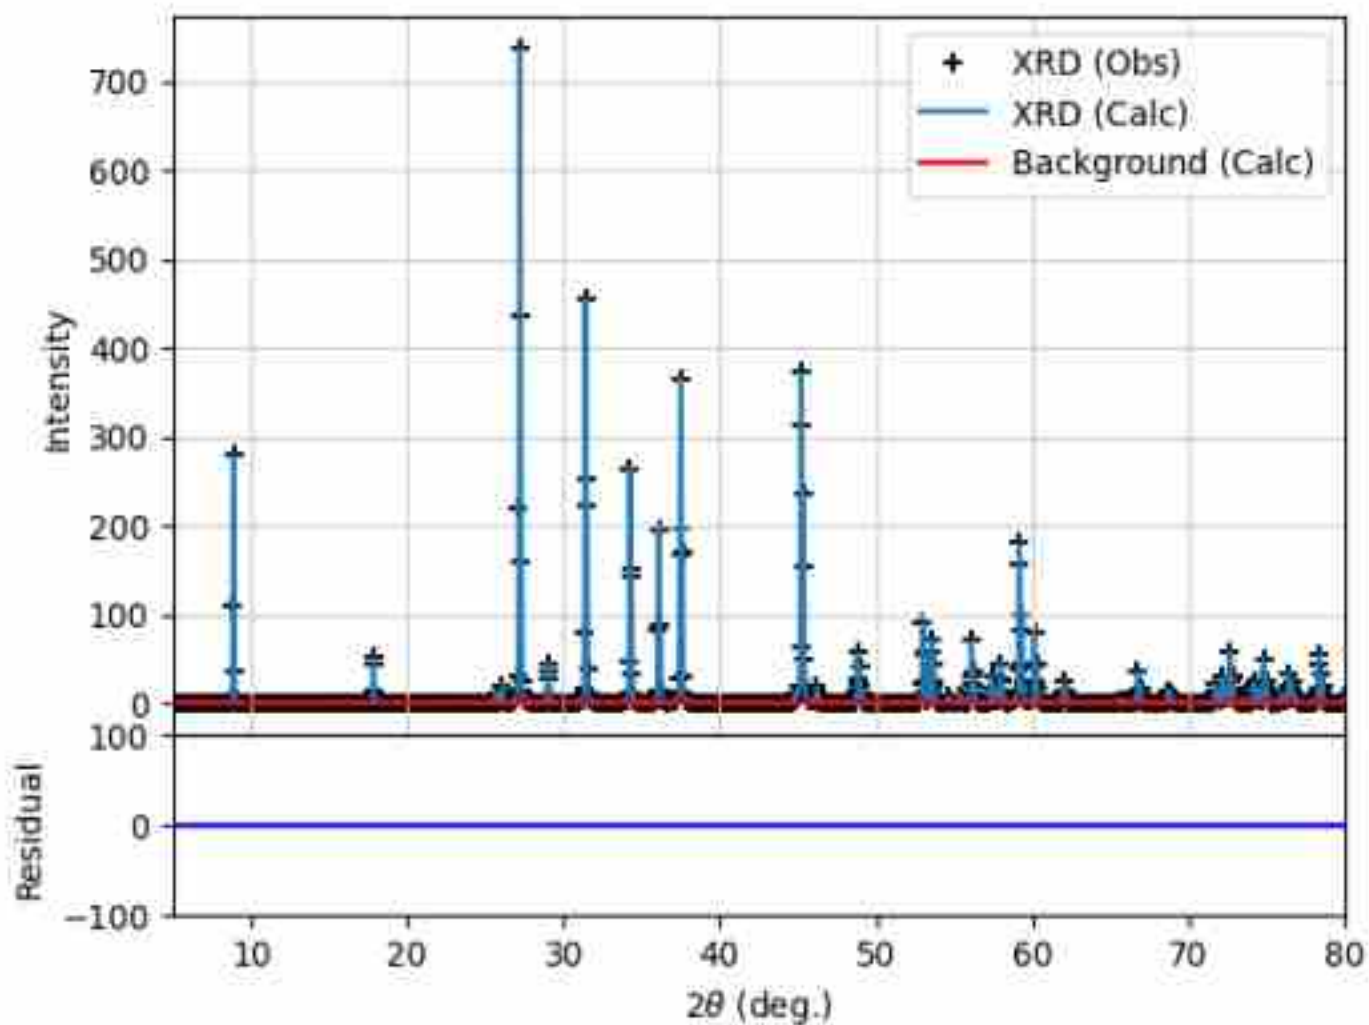

| RMSE before RR | Rwp     | RMSE after RR |
|----------------|---------|---------------|
| 0.03           | 0.00377 | 0.00086       |

# Tb3Sc1

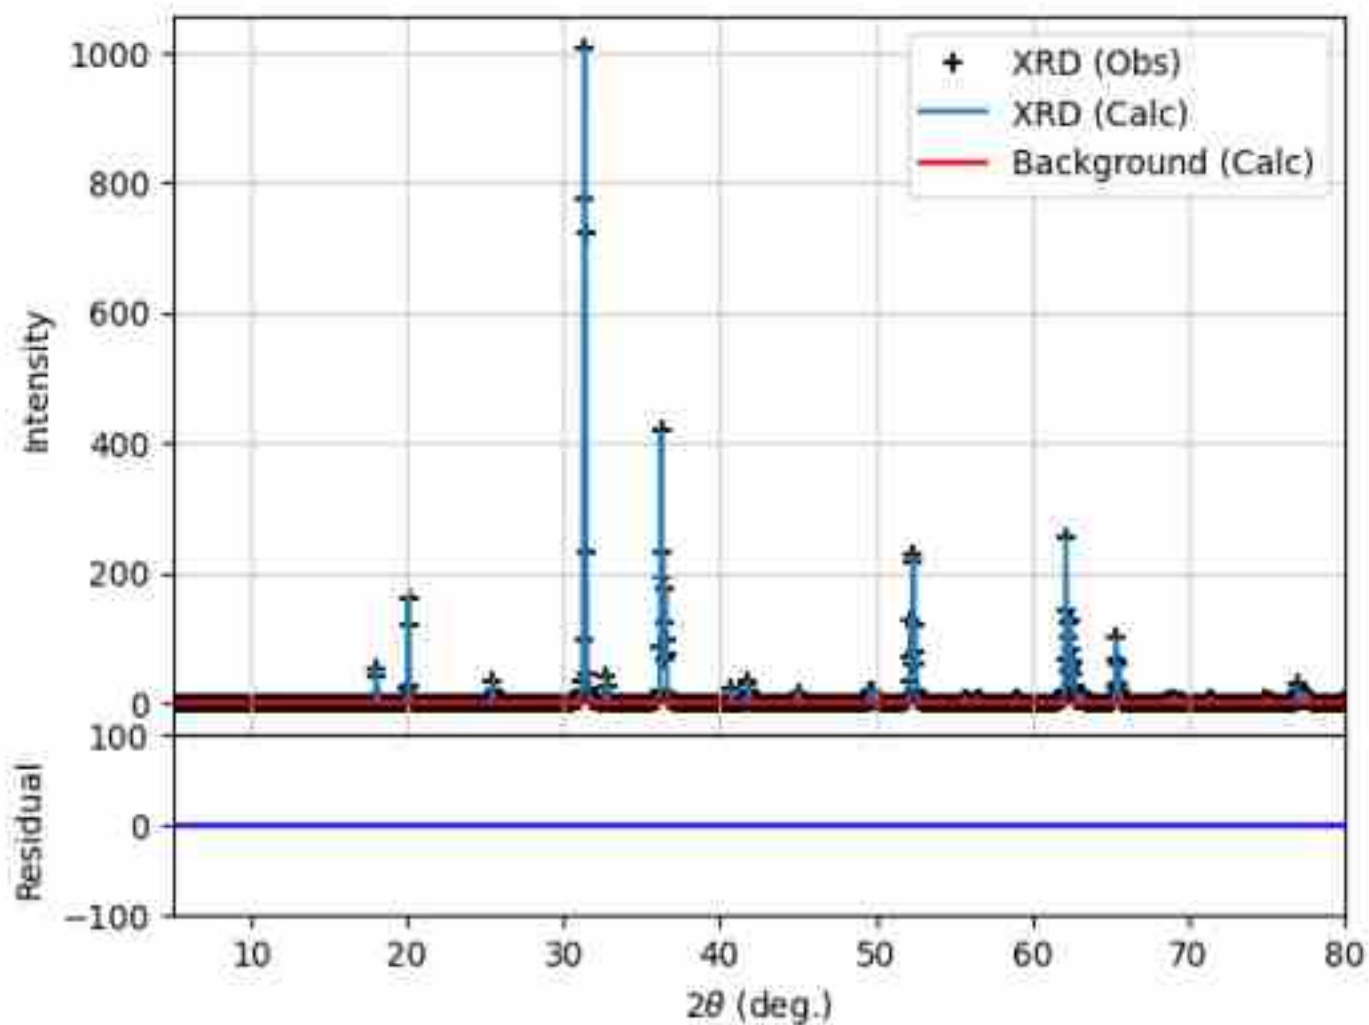

| RMSE before RR | Rwp     | RMSE after RR |
|----------------|---------|---------------|
| 0.003          | 0.00276 | 0.00055       |

# Tb<sub>4</sub>Ga<sub>8</sub>Ag<sub>4</sub>

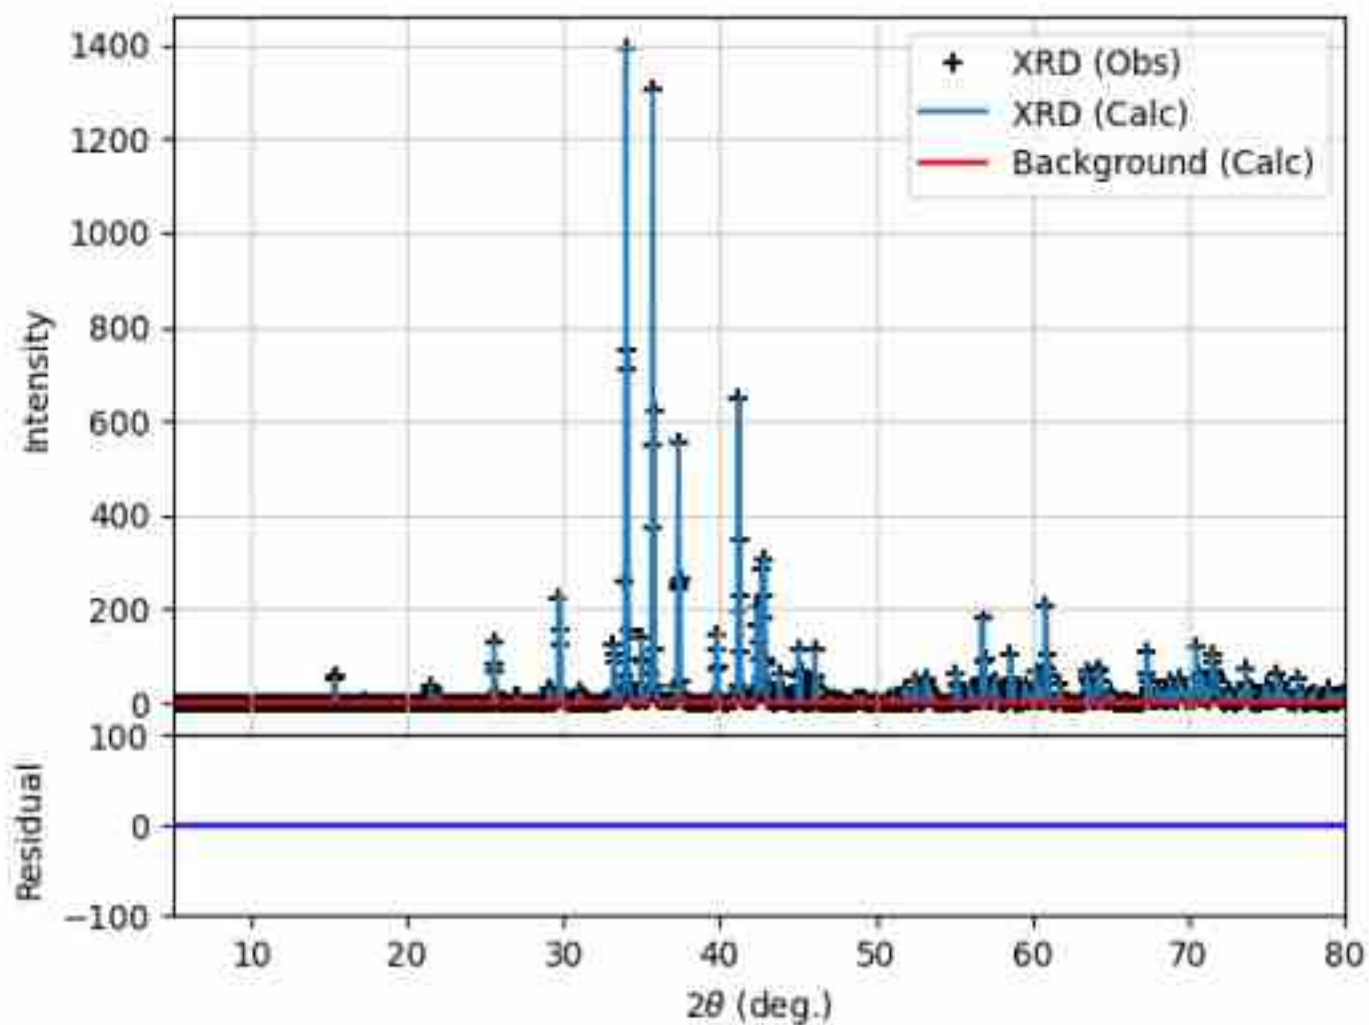

| RMSE before RR | Rwp     | RMSE after RR |
|----------------|---------|---------------|
| 0.03           | 0.00412 | 0.00037       |



# Tc1Rh1

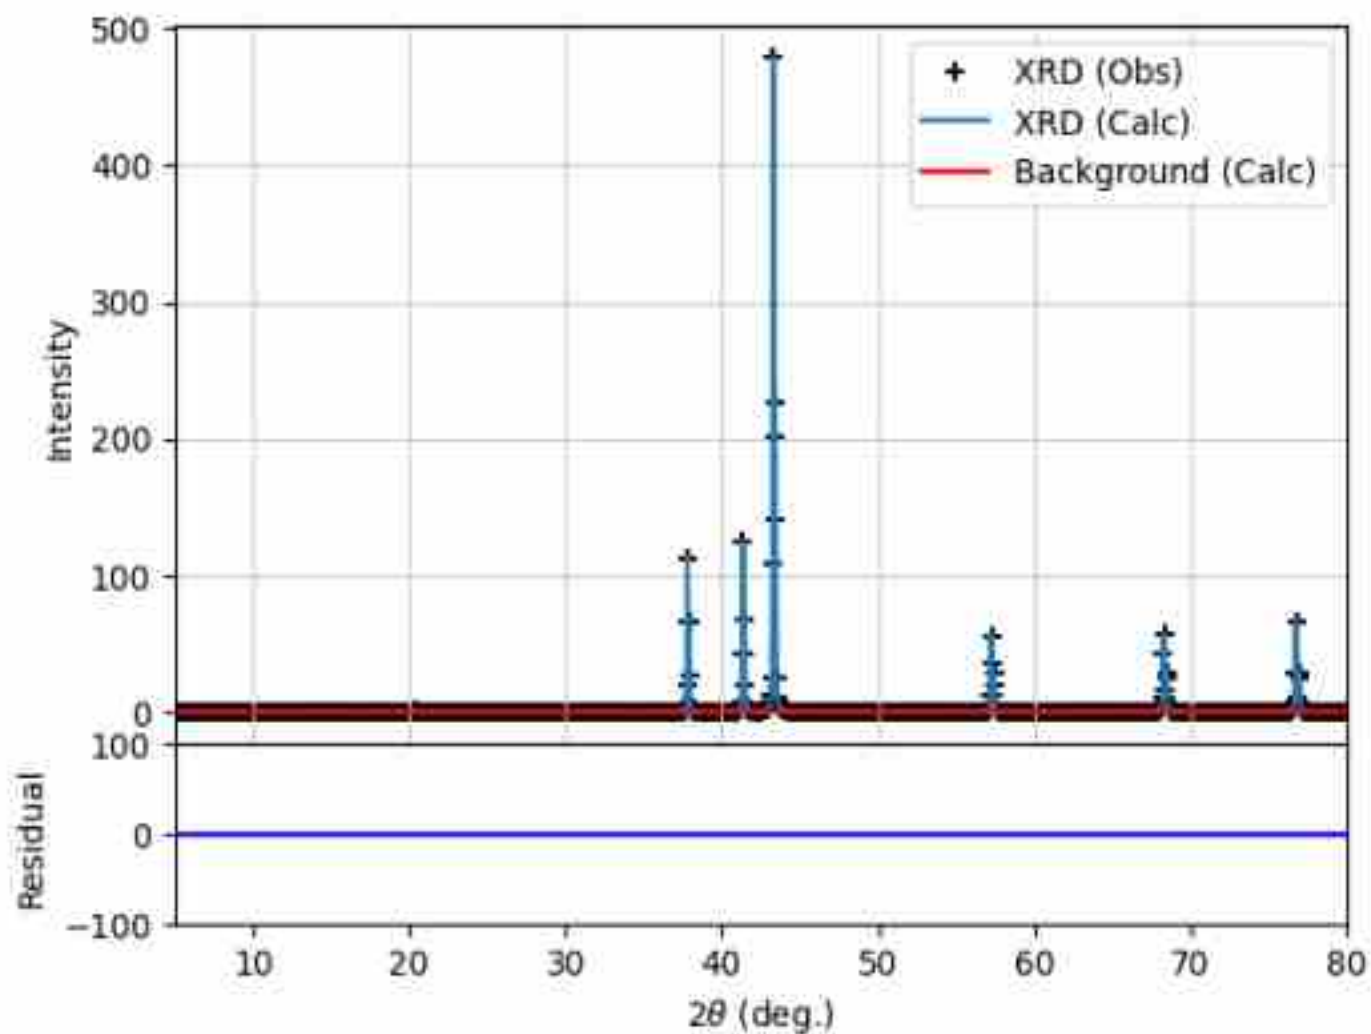

| RMSE before RR | Rwp     | RMSE after RR |
|----------------|---------|---------------|
| 0.003          | 0.00934 | 0.00062       |

# Th1Sb1

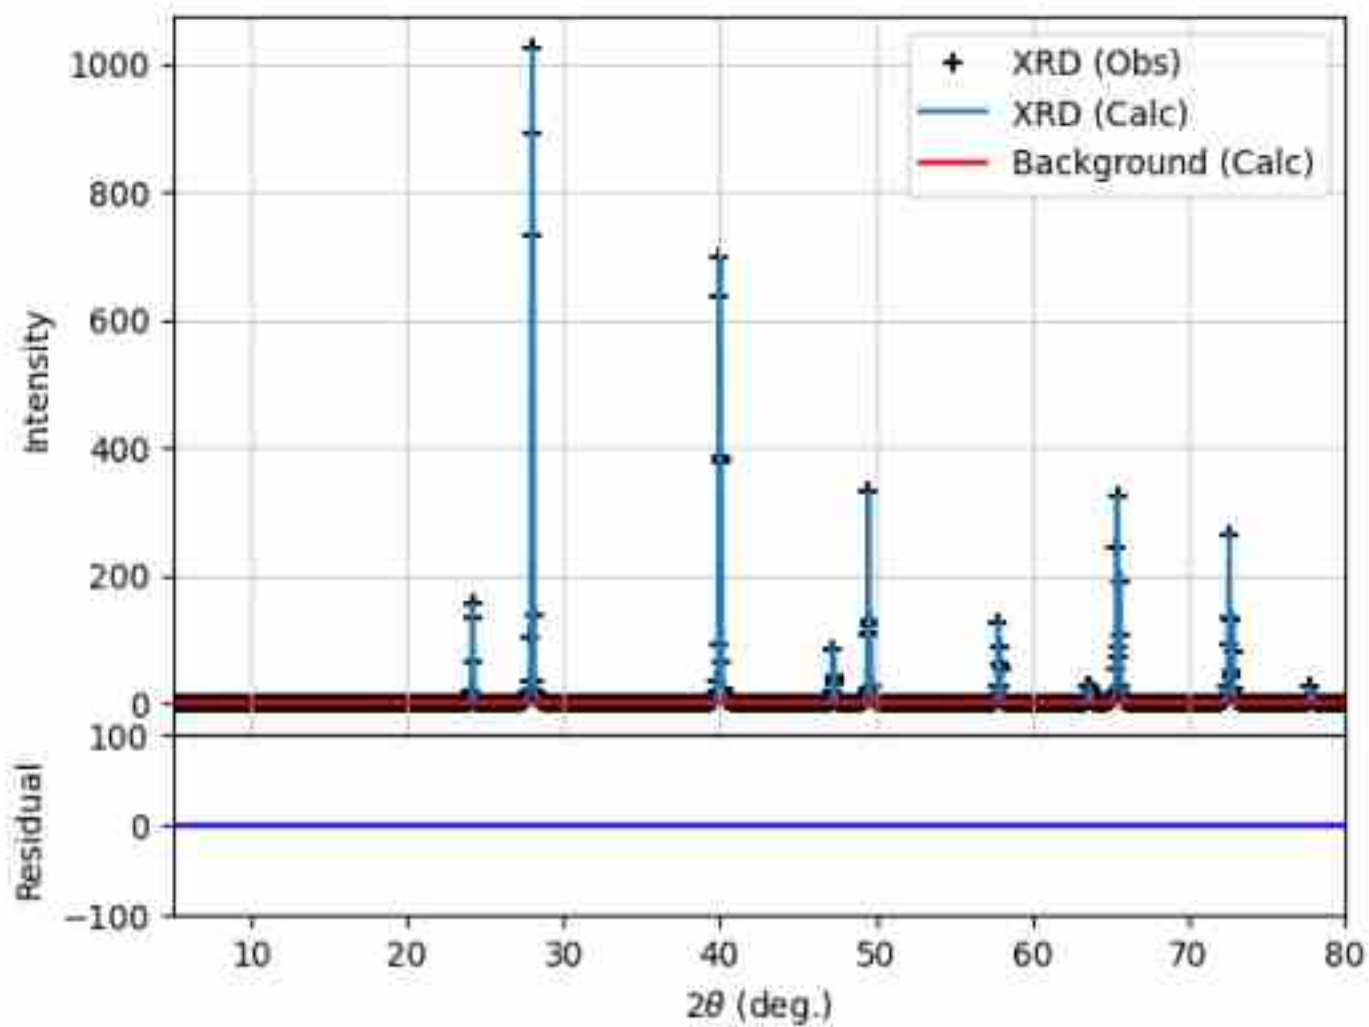

| RMSE before RR | Rwp    | RMSE after RR |
|----------------|--------|---------------|
| 0.003          | 0.0315 | 0.00044       |

# Th1Sc1Tc2

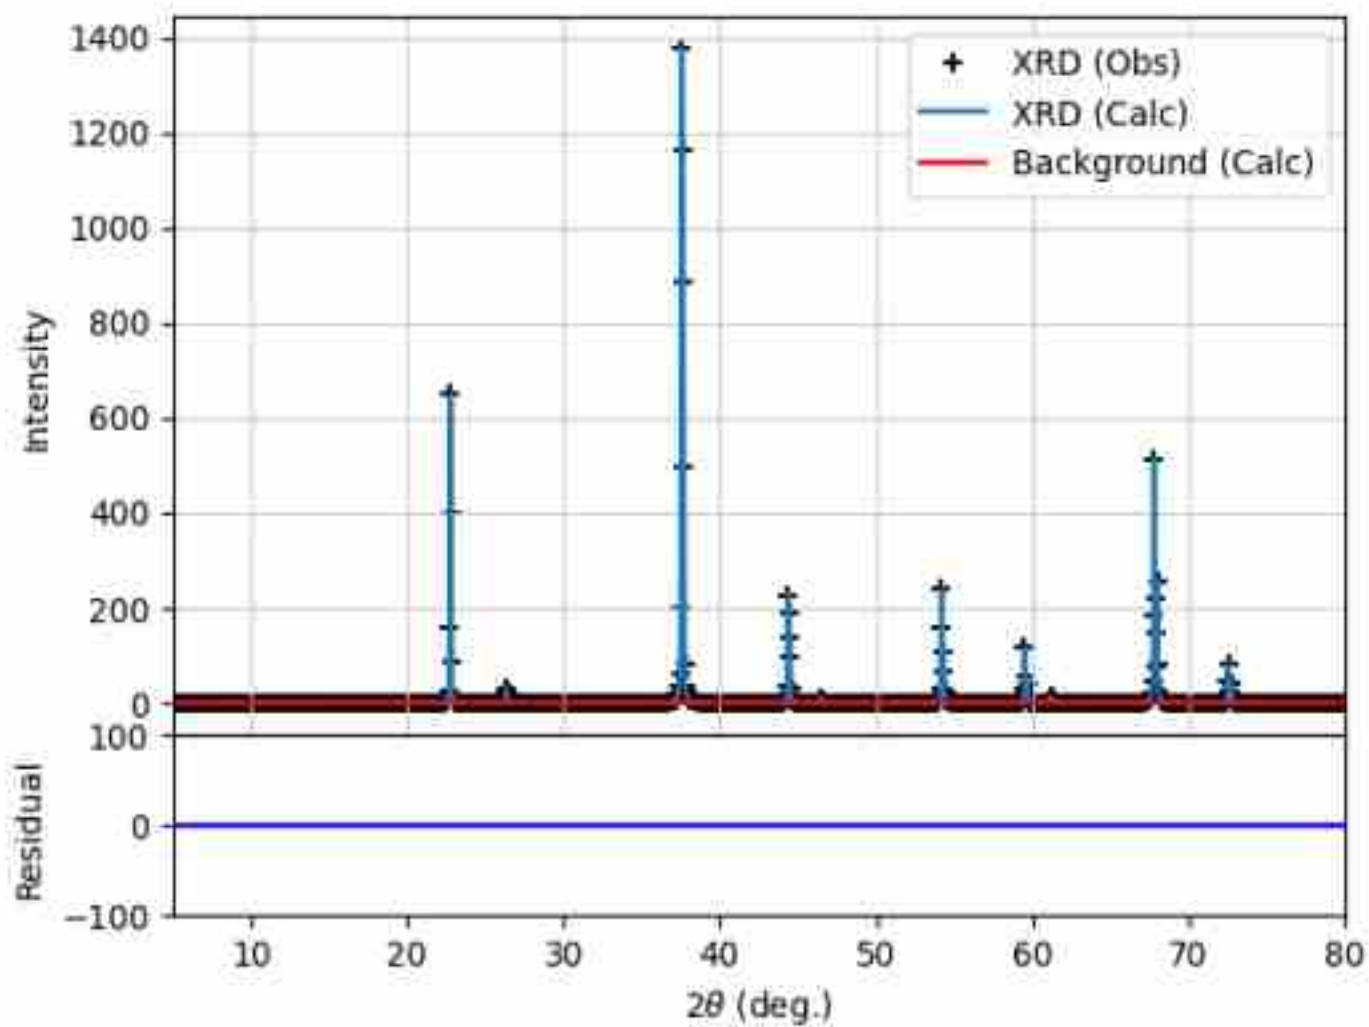

| RMSE before RR | Rwp     | RMSE after RR |
|----------------|---------|---------------|
| 0.003          | 0.00761 | 0.00122       |

# Ti1Al1Pd2

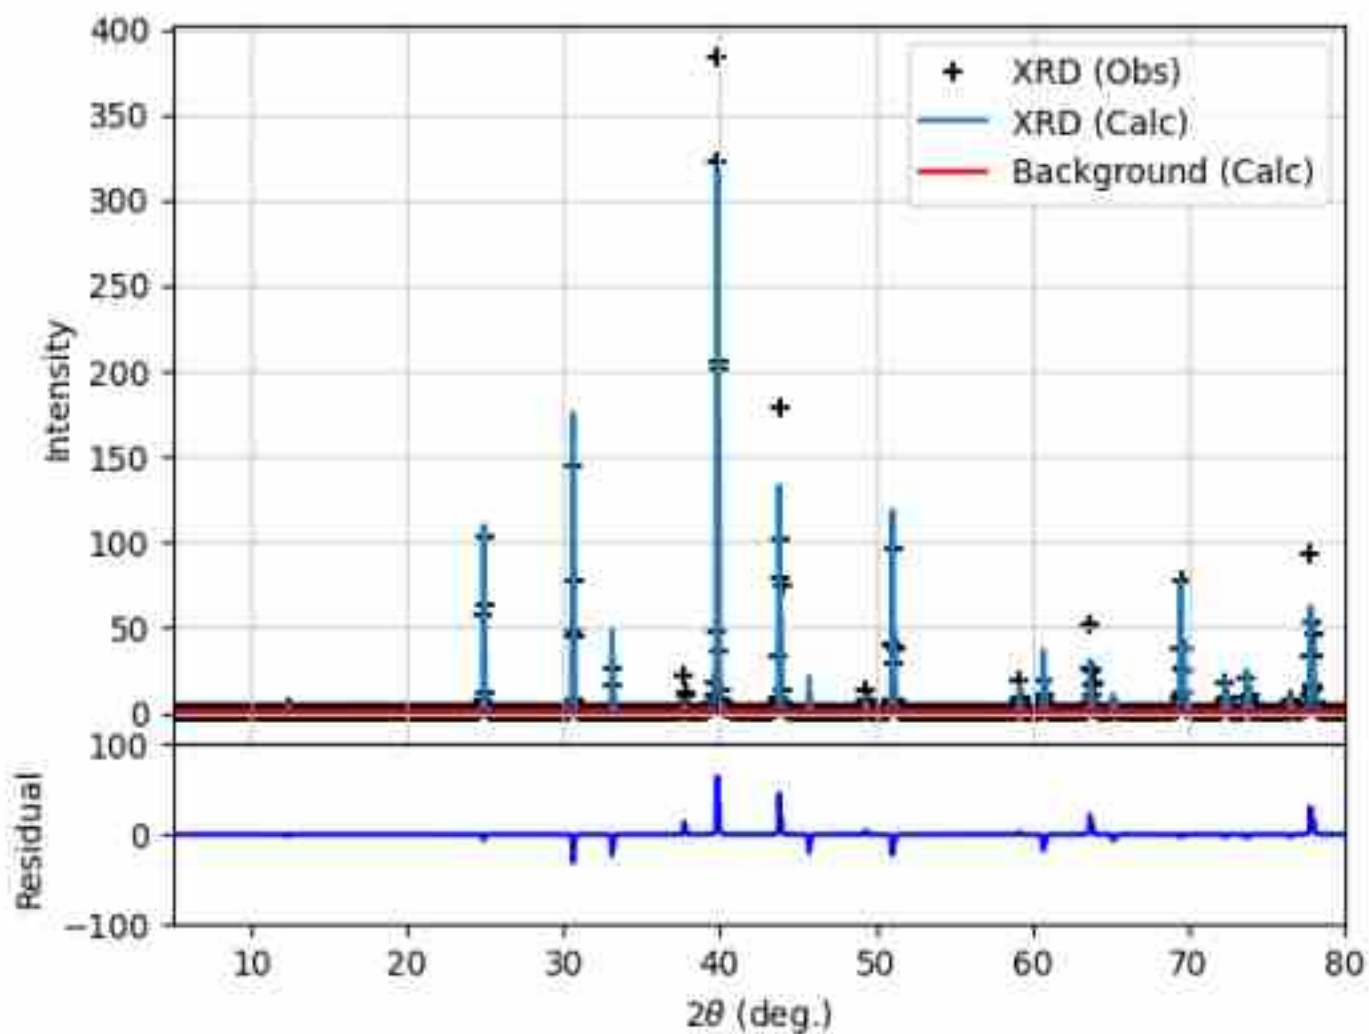

| RMSE before RR | Rwp      | RMSE after RR |
|----------------|----------|---------------|
| 0.03           | 37.15604 | 0.24129       |

# Ti1Sn1Rh1

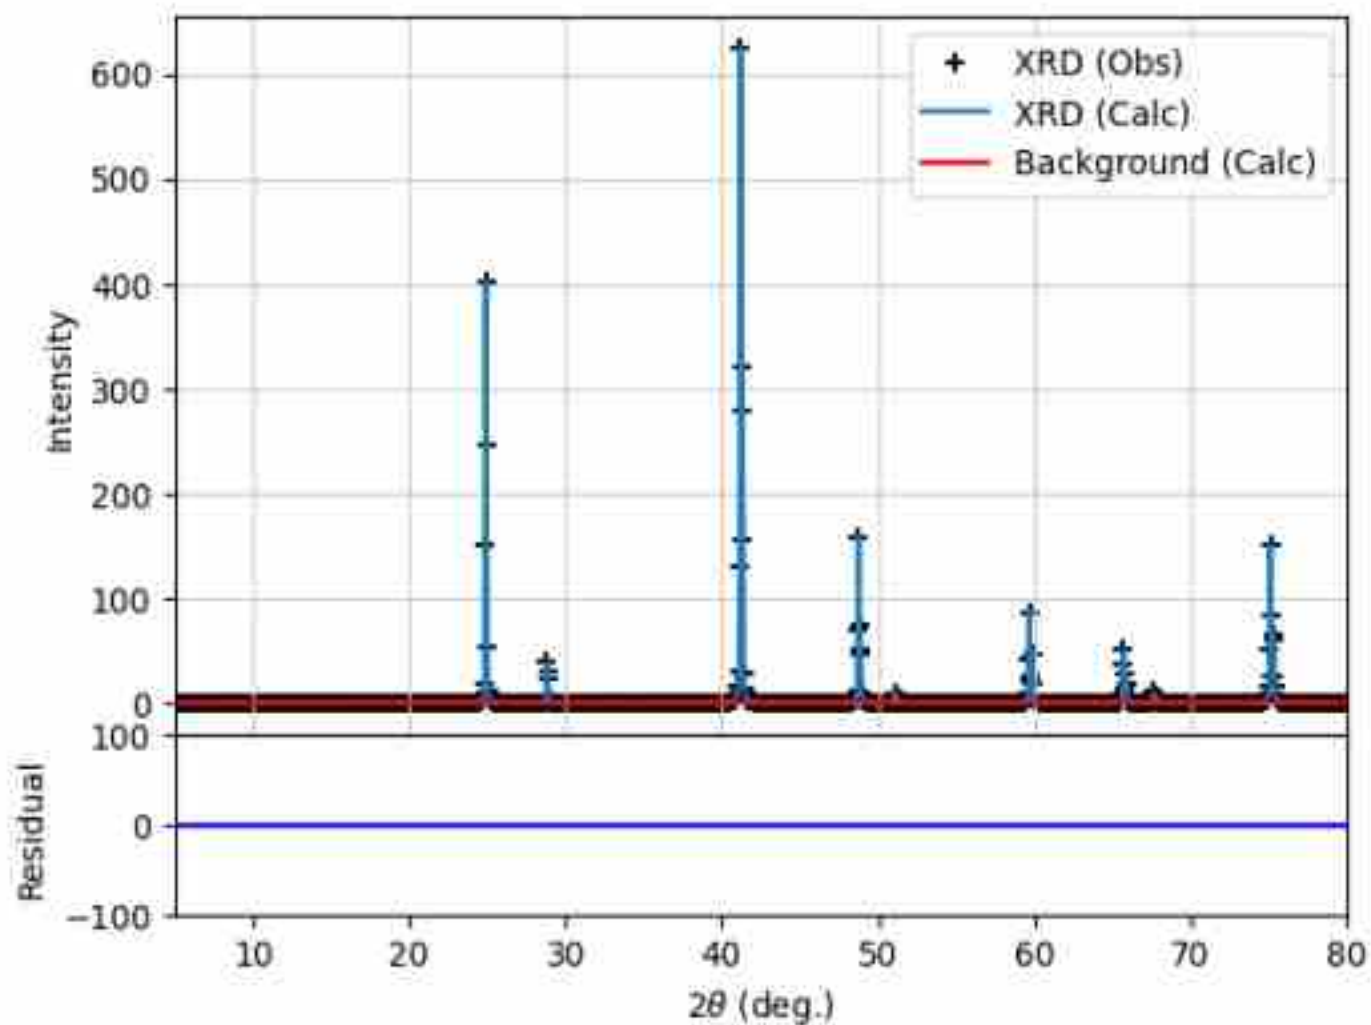

| RMSE before RR | Rwp     | RMSE after RR |
|----------------|---------|---------------|
| 0.003          | 0.00543 | 0.00037       |

# Ti<sub>4</sub>Cd<sub>2</sub>C<sub>2</sub>

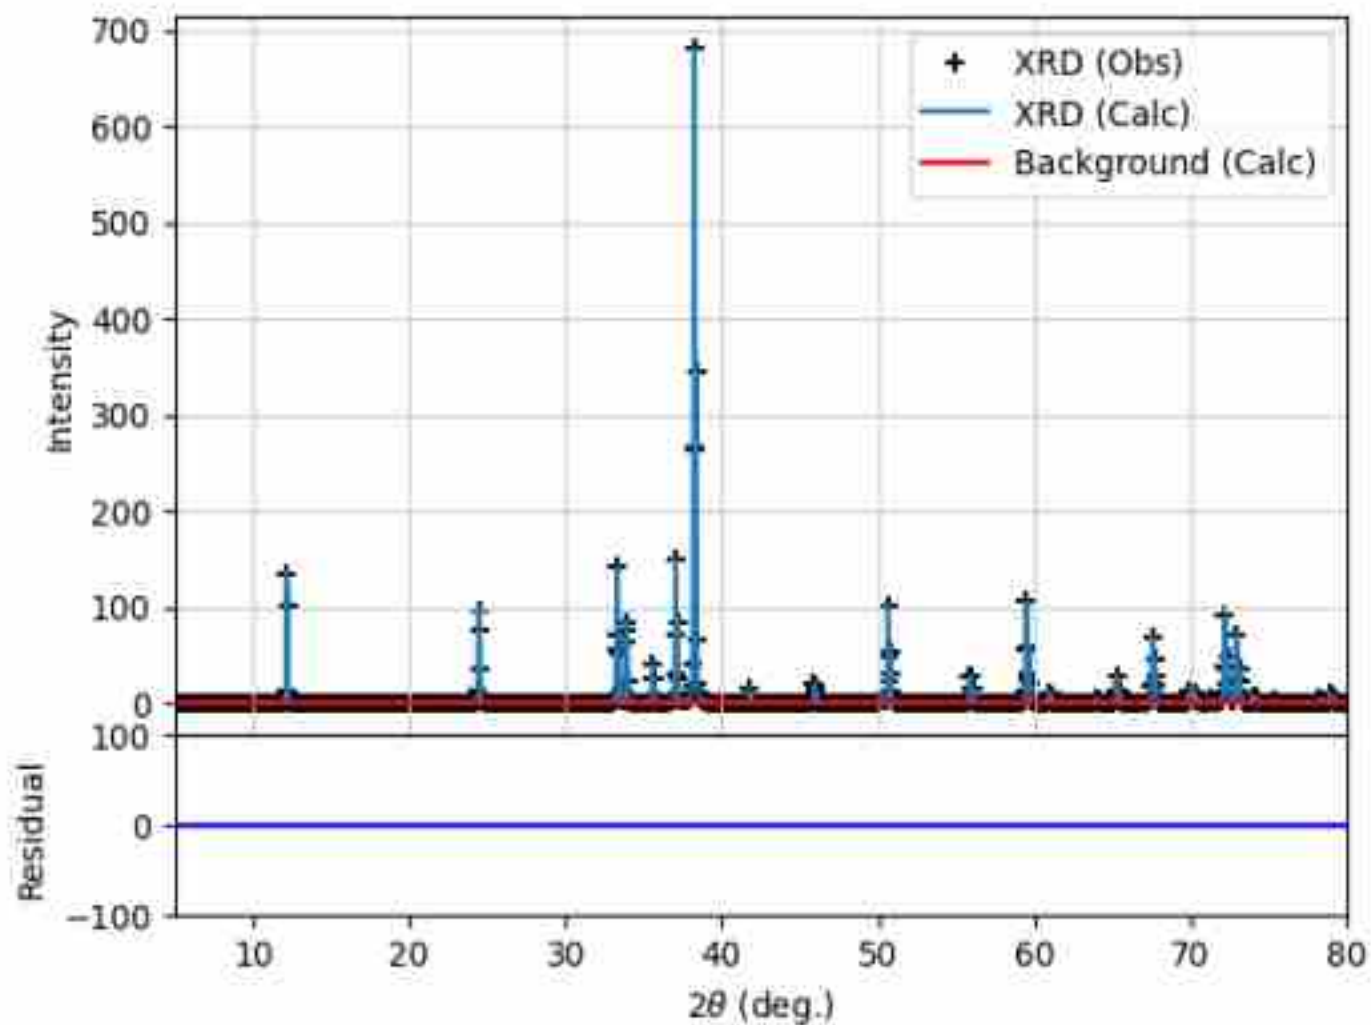

| RMSE before RR | Rwp     | RMSE after RR |
|----------------|---------|---------------|
| 0.03           | 0.00367 | 0.00266       |

# Ti<sub>4</sub>Cu<sub>4</sub>Ge<sub>4</sub>

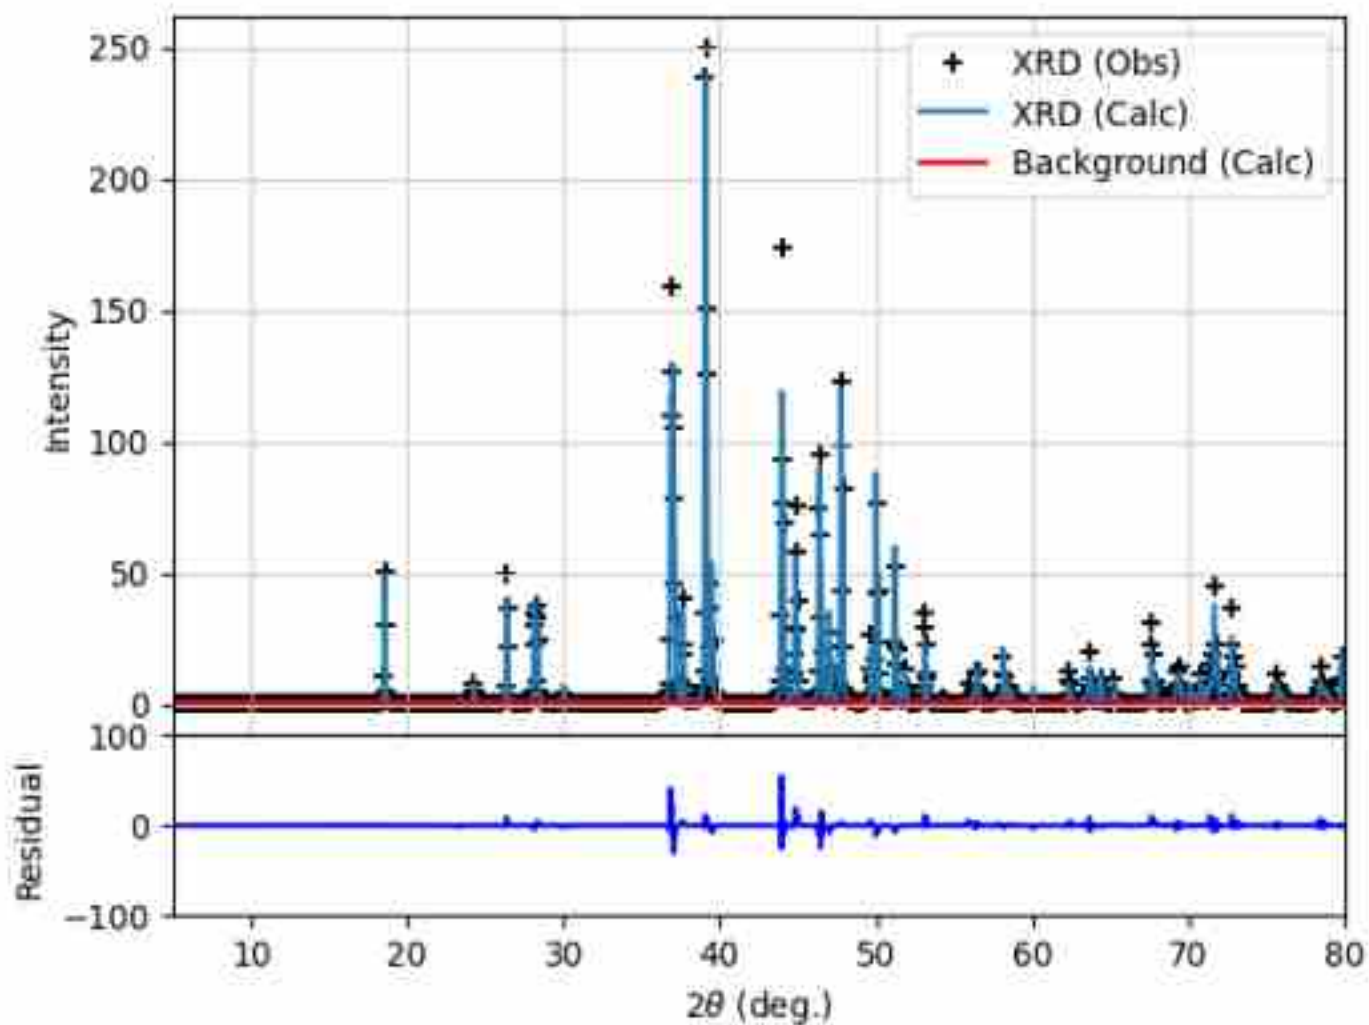

| RMSE before RR | Rwp      | RMSE after RR |
|----------------|----------|---------------|
| 0.03           | 21.55864 | 0.02948       |

# Tl1W3O9

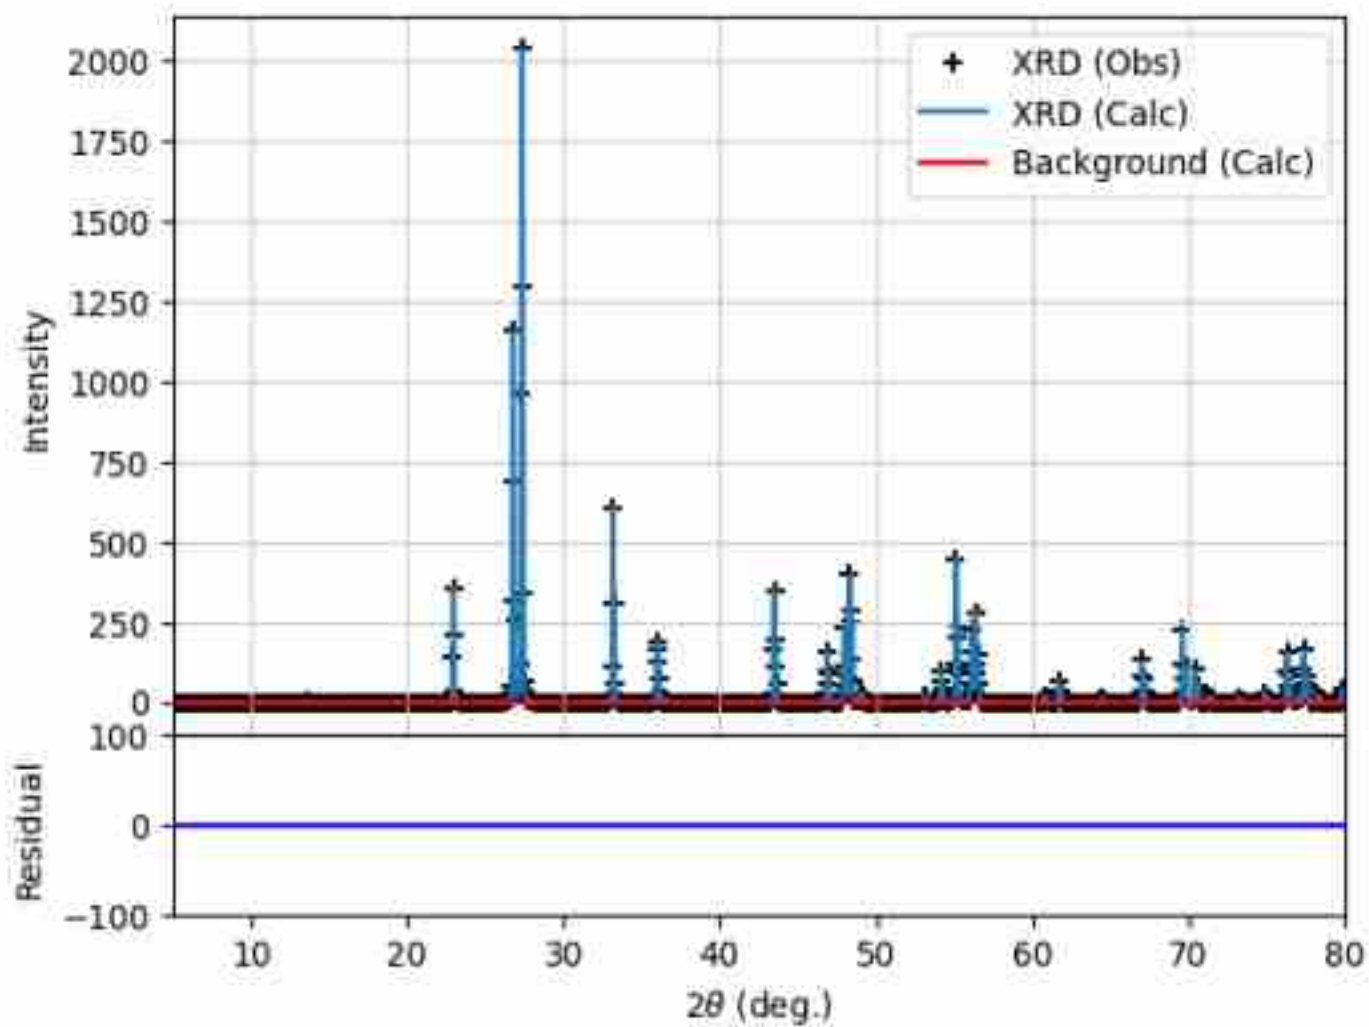

| RMSE before RR | Rwp     | RMSE after RR |
|----------------|---------|---------------|
| 0.03           | 0.00428 | 0.00216       |



# Tm1Al1Ag2

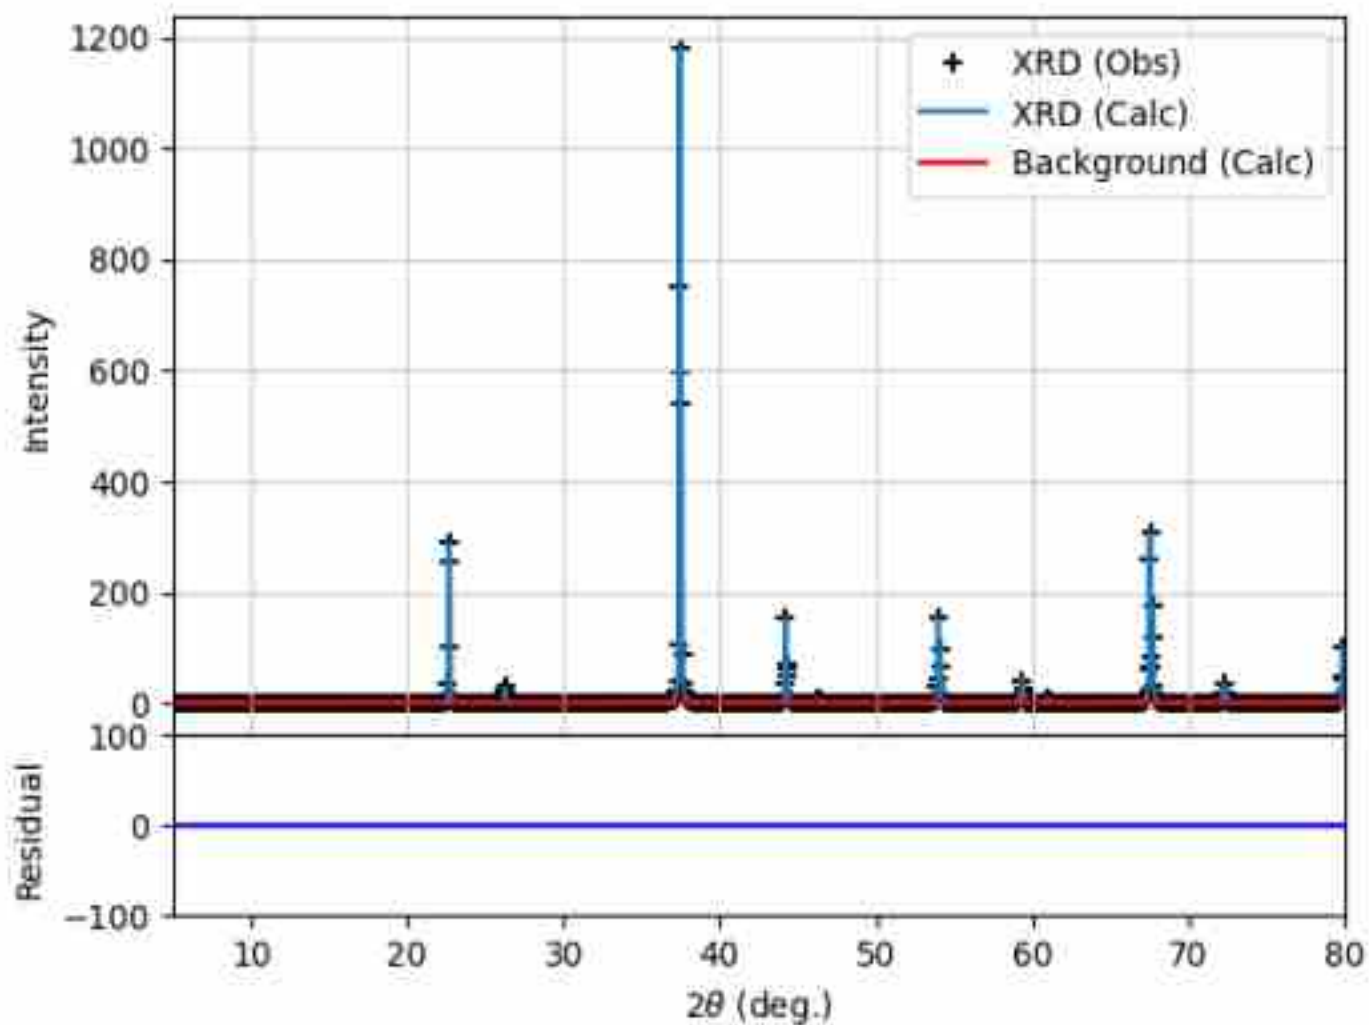

| RMSE before RR | Rwp     | RMSE after RR |
|----------------|---------|---------------|
| 0.003          | 0.00446 | 0.00067       |

# Tm1Bi1Pd1

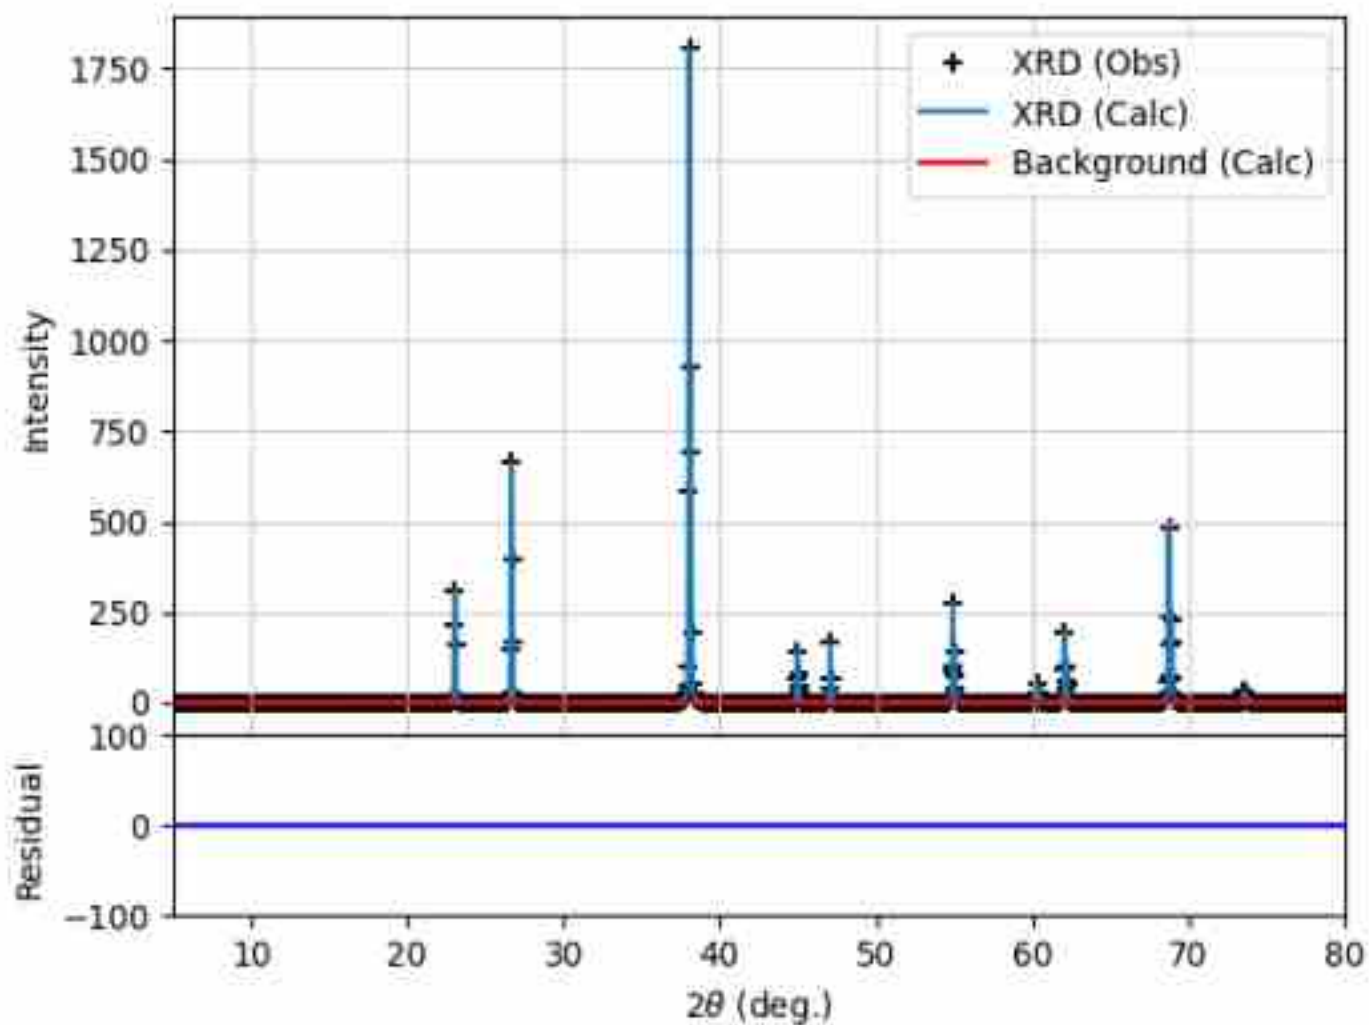

| RMSE before RR | Rwp     | RMSE after RR |
|----------------|---------|---------------|
| 0.003          | 0.02181 | 0.00146       |

# Tm1Cd1Pd2

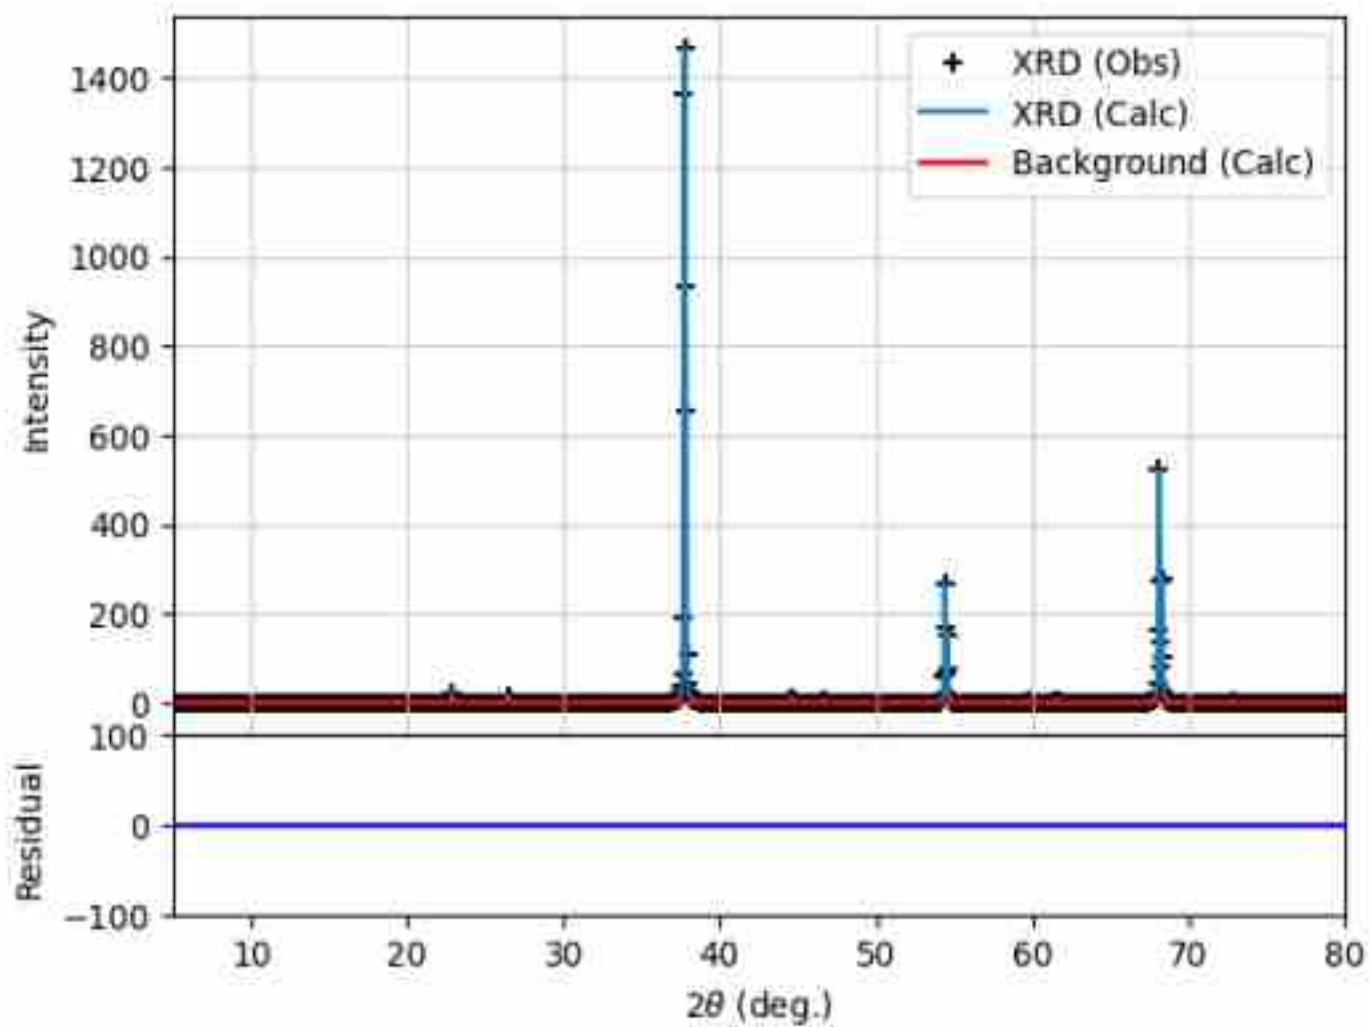

| RMSE before RR | Rwp     | RMSE after RR |
|----------------|---------|---------------|
| 0.003          | 0.04312 | 0.00167       |

# Tm1Sb1Pd2

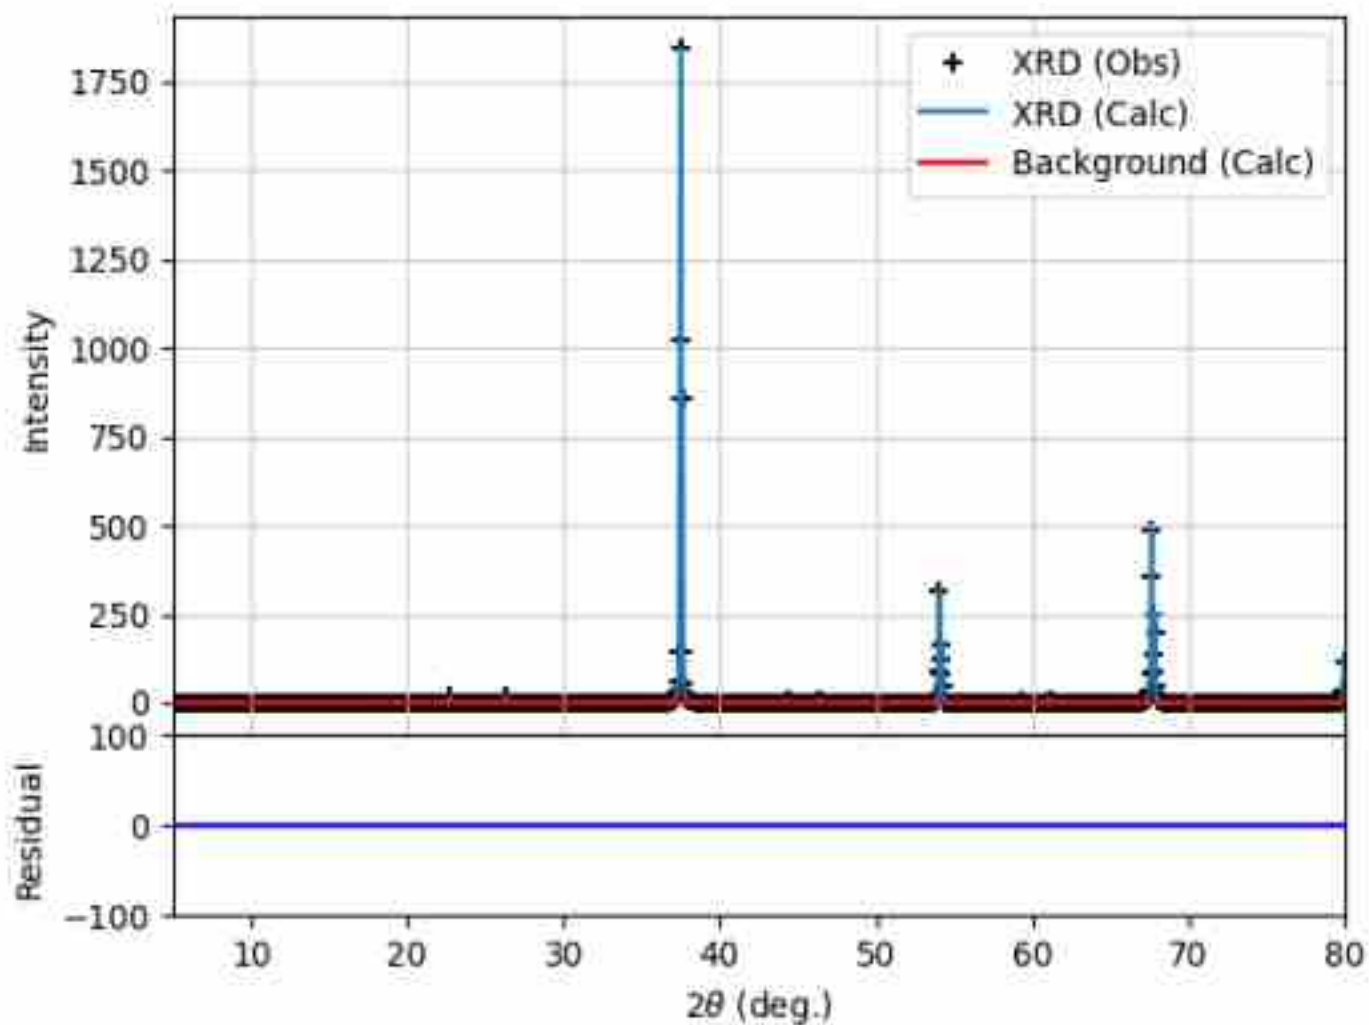

| RMSE before RR | Rwp     | RMSE after RR |
|----------------|---------|---------------|
| 0.003          | 0.00498 | 0.0002        |

# U1Si3

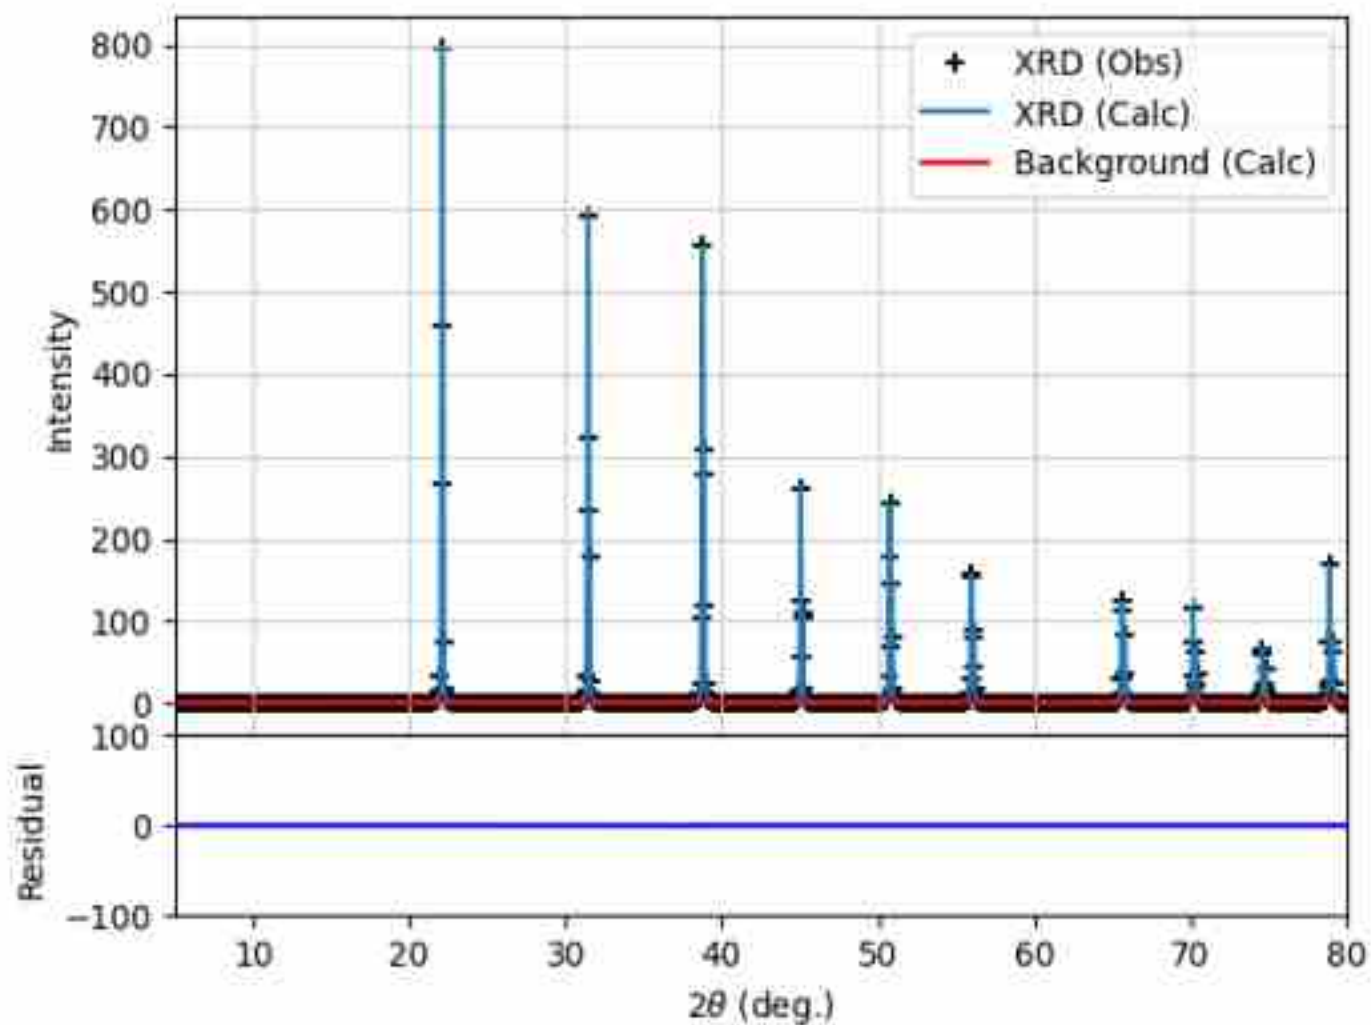

| RMSE before RR | Rwp     | RMSE after RR |
|----------------|---------|---------------|
| 0.003          | 0.06999 | 0.00262       |

# U3Ge1

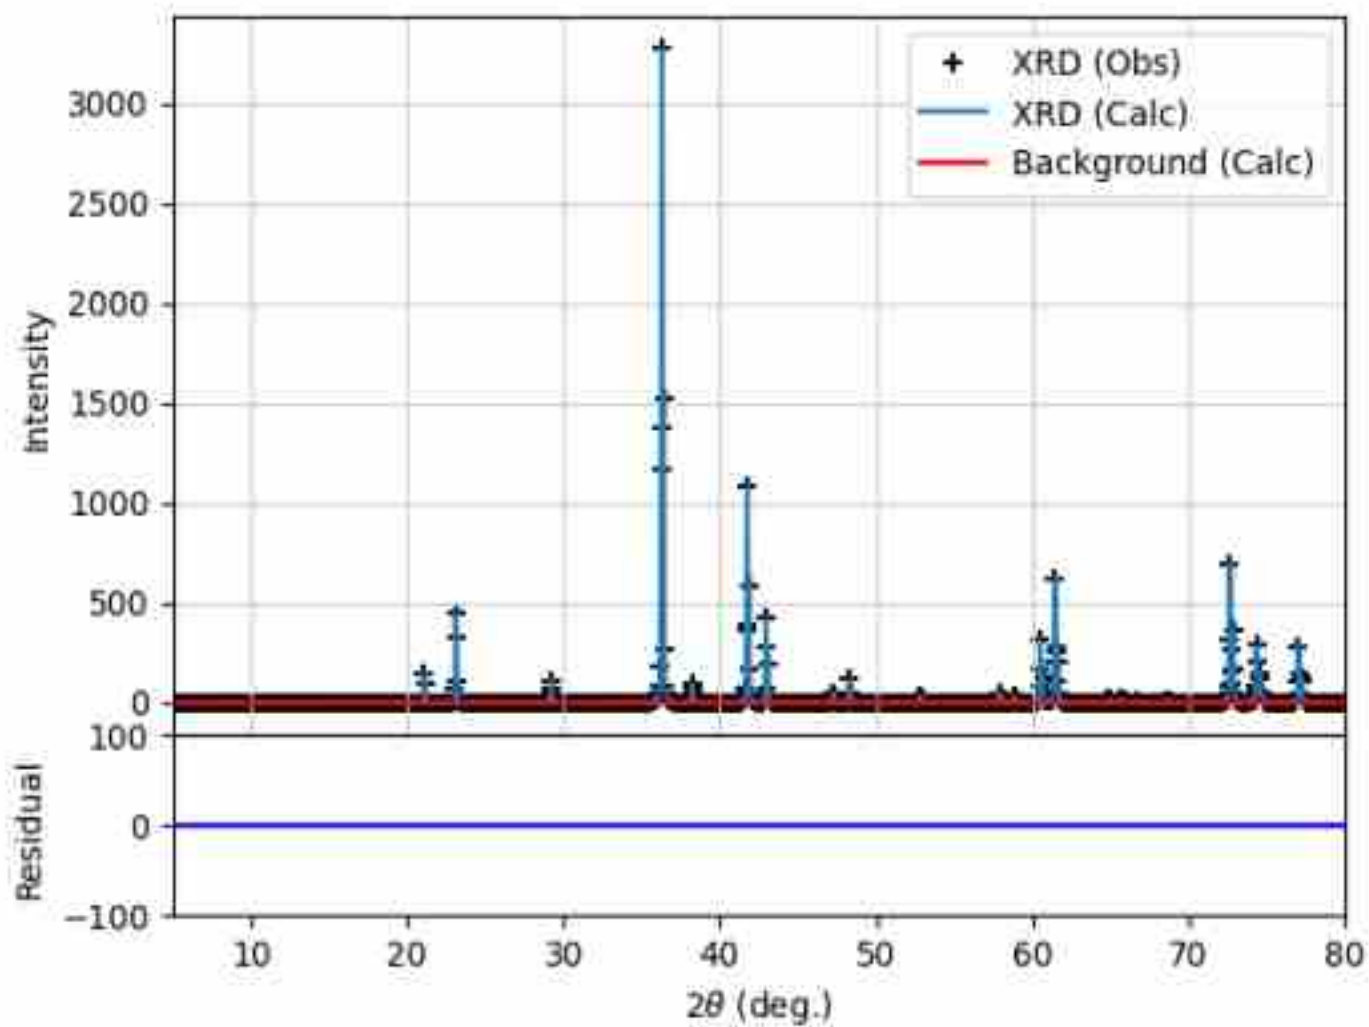

| RMSE before RR | Rwp     | RMSE after RR |
|----------------|---------|---------------|
| 0.003          | 0.00374 | 0.0004        |

# V1Zn3

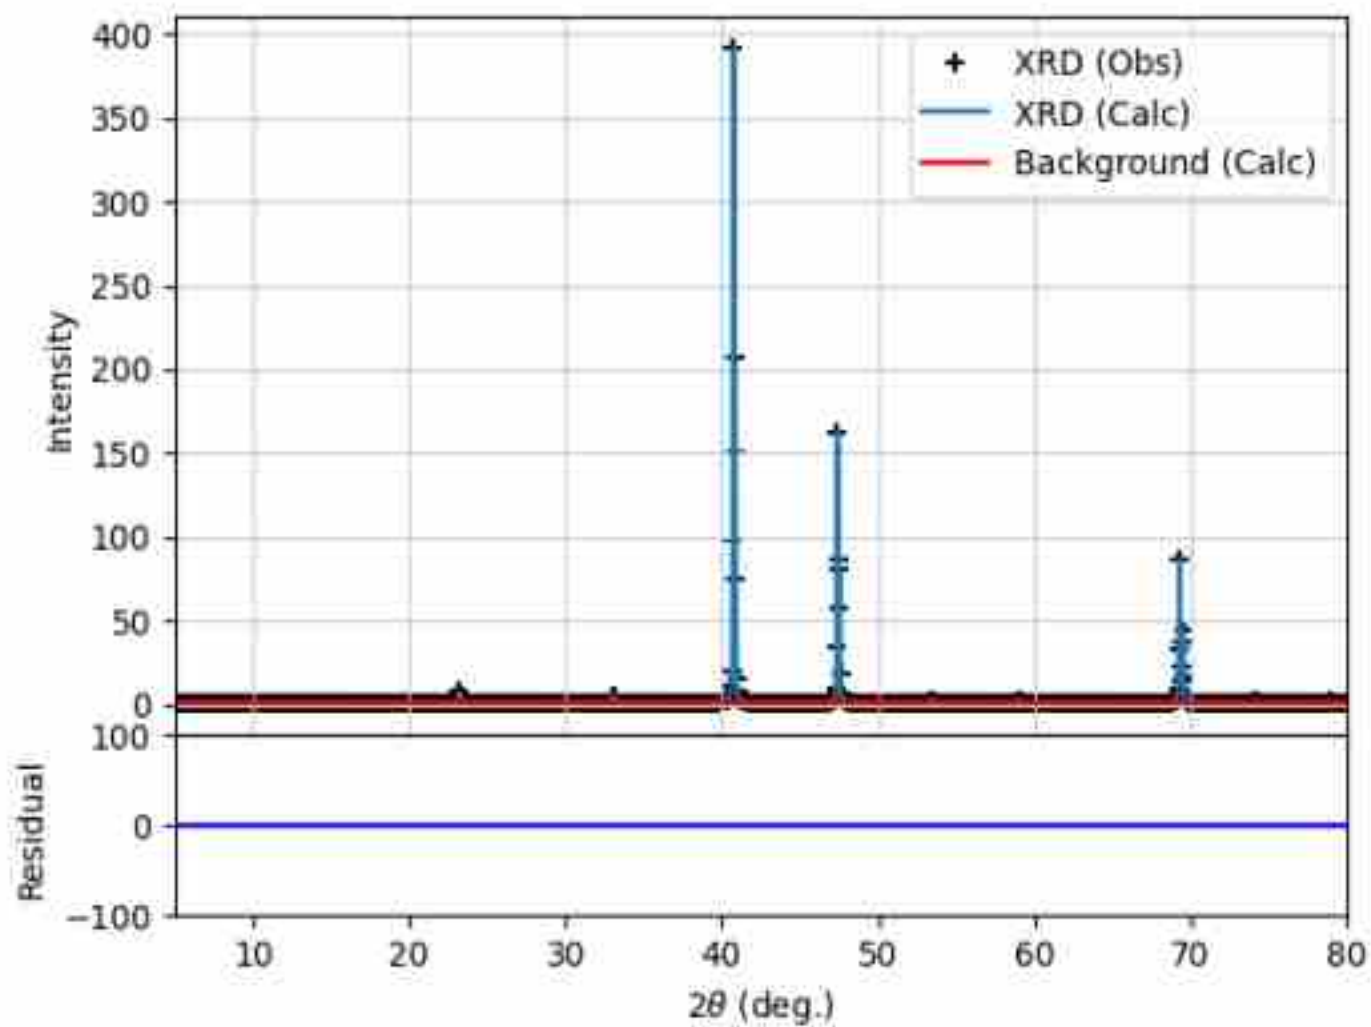

| RMSE before RR | Rwp     | RMSE after RR |
|----------------|---------|---------------|
| 0.003          | 0.06687 | 0.0015        |

# V2S2

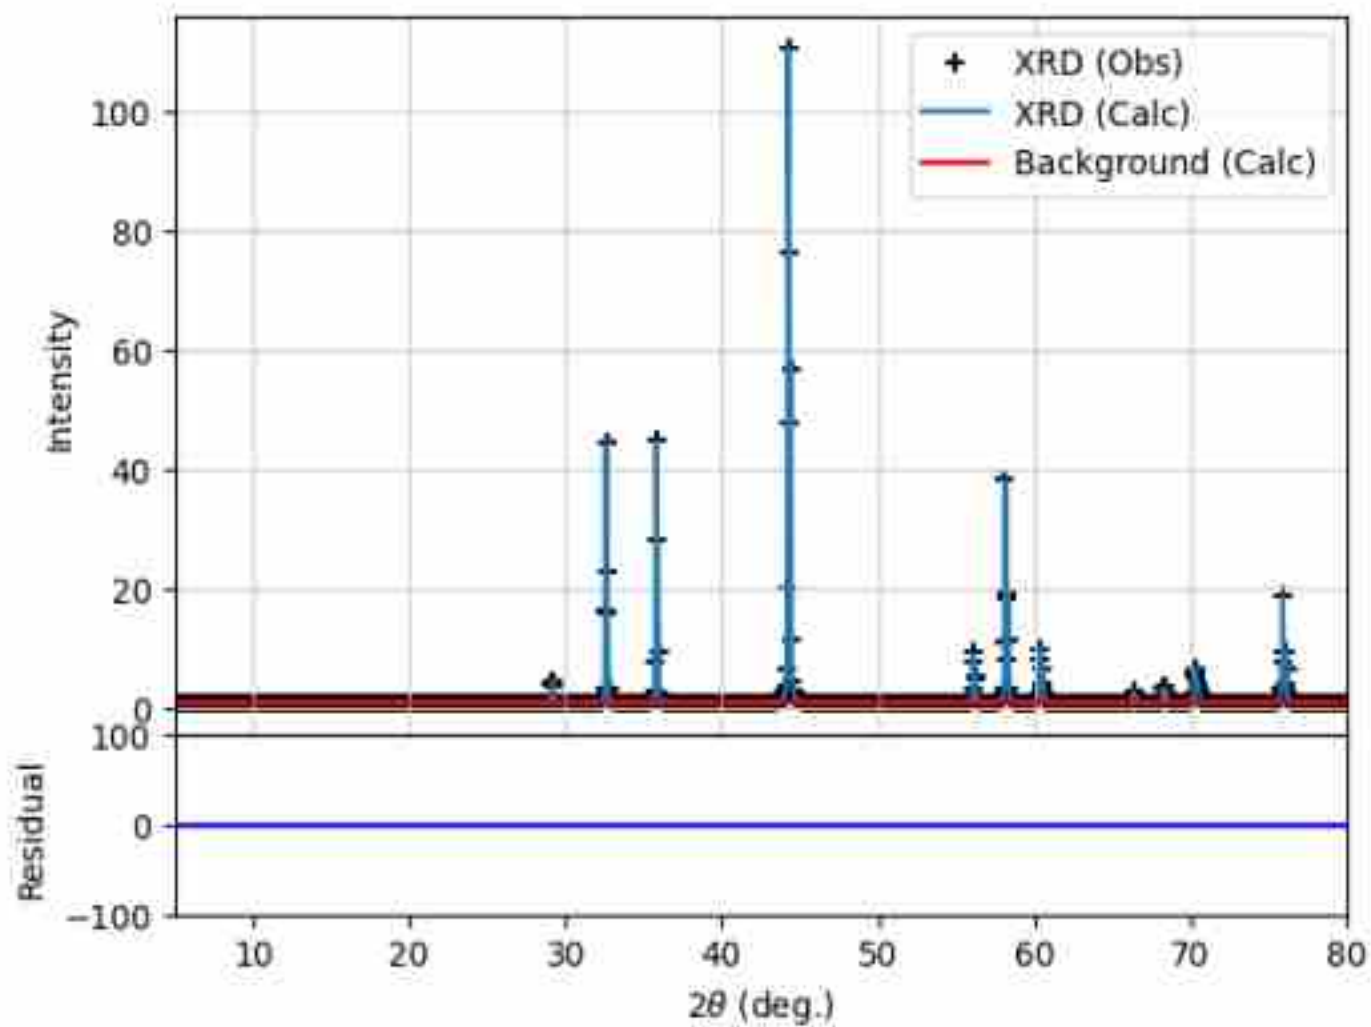

| RMSE before RR | Rwp     | RMSE after RR |
|----------------|---------|---------------|
| 0.003          | 0.00229 | 0.00287       |



# V6O10F2

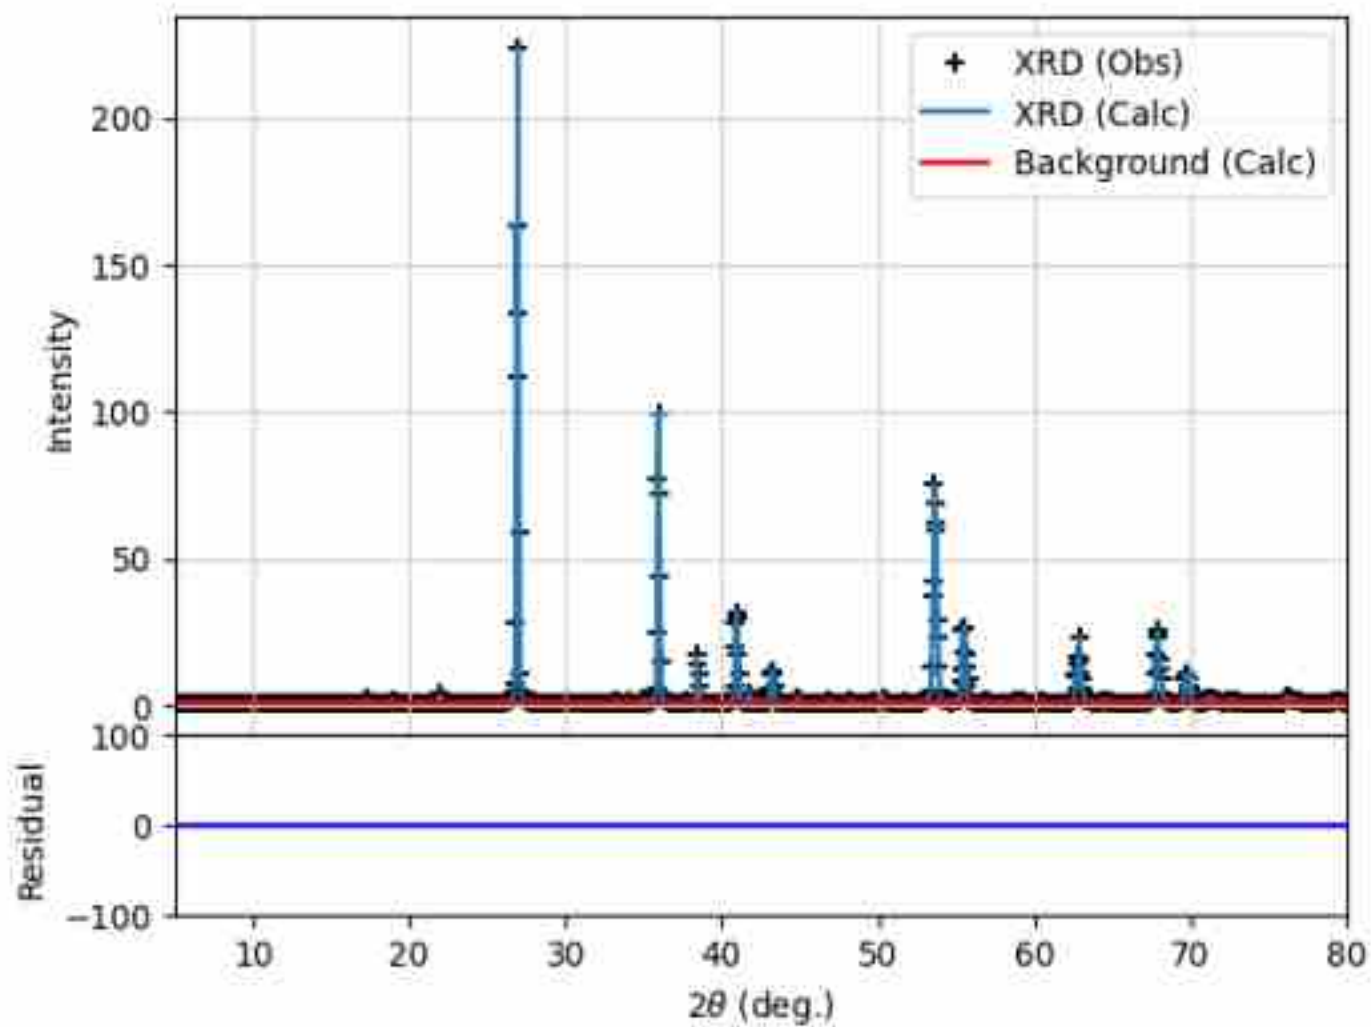

| RMSE before RR | Rwp     | RMSE after RR |
|----------------|---------|---------------|
| 0.03           | 0.00153 | 1e-05         |

# Y1Cd1Pd2

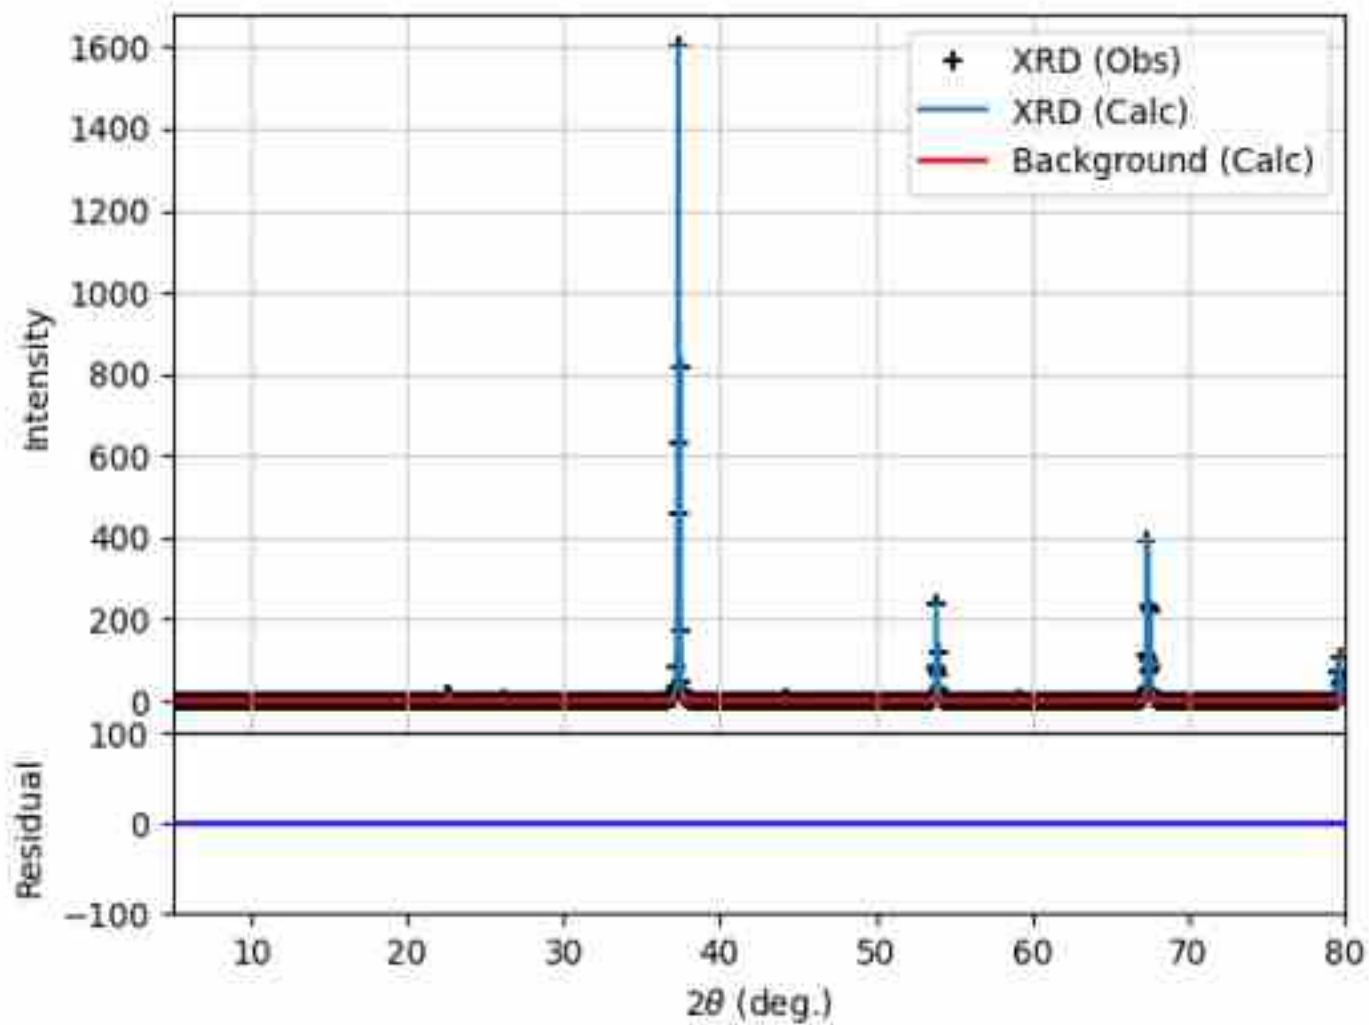

| RMSE before RR | Rwp     | RMSE after RR |
|----------------|---------|---------------|
| 0.003          | 0.00567 | 0.00019       |

# Y1Ni1As1

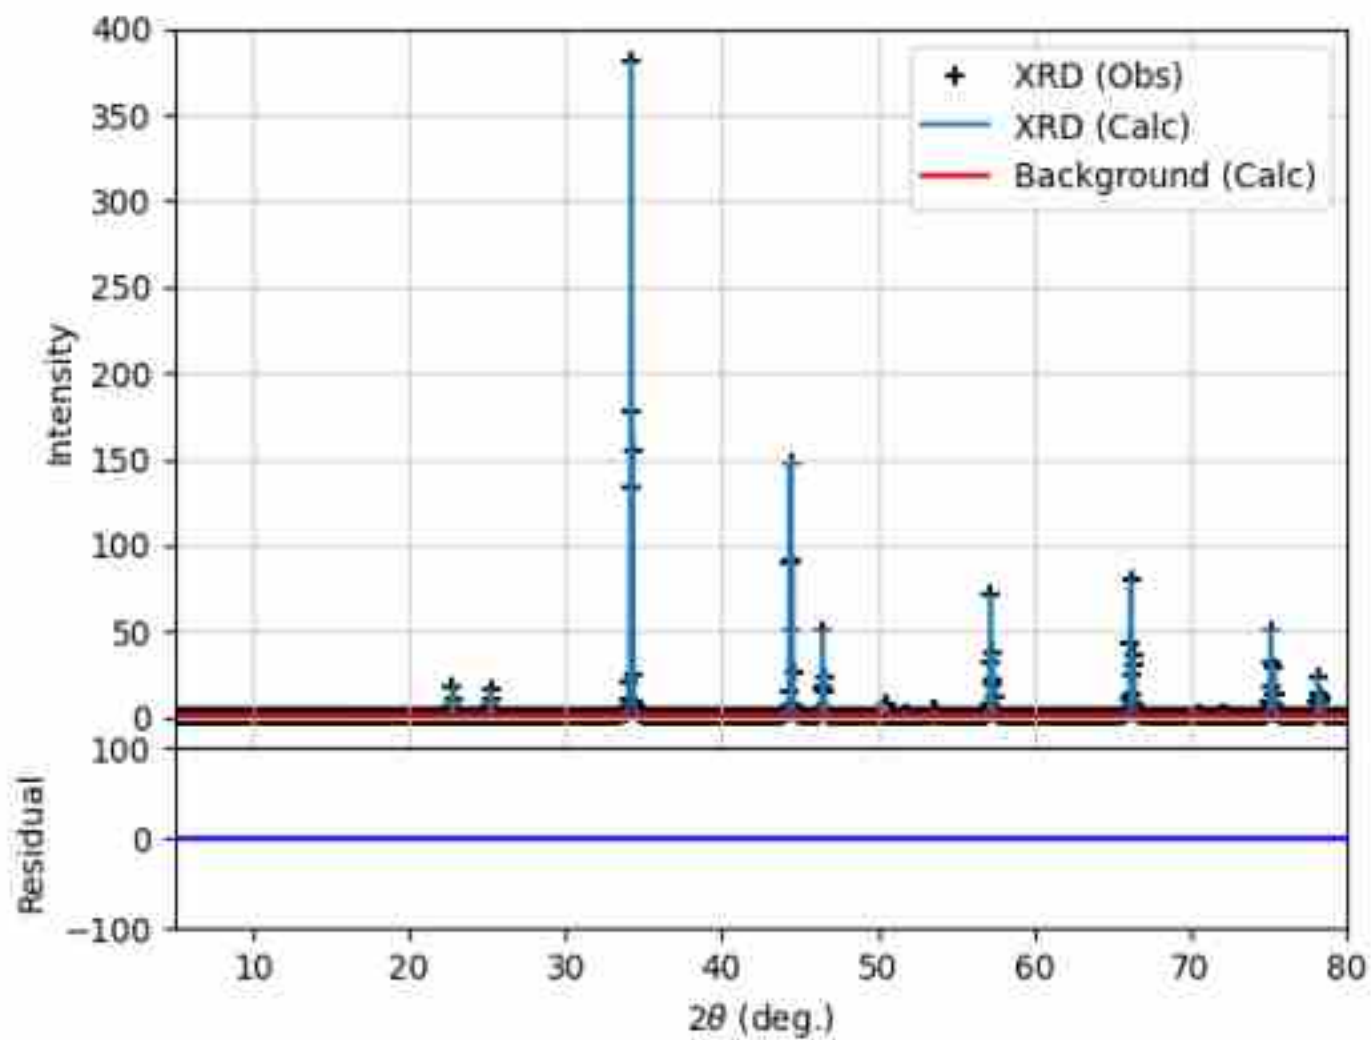

| RMSE before RR | Rwp    | RMSE after RR |
|----------------|--------|---------------|
| 0.003          | 0.0024 | 0.00031       |

# Y1Ni1Bi1

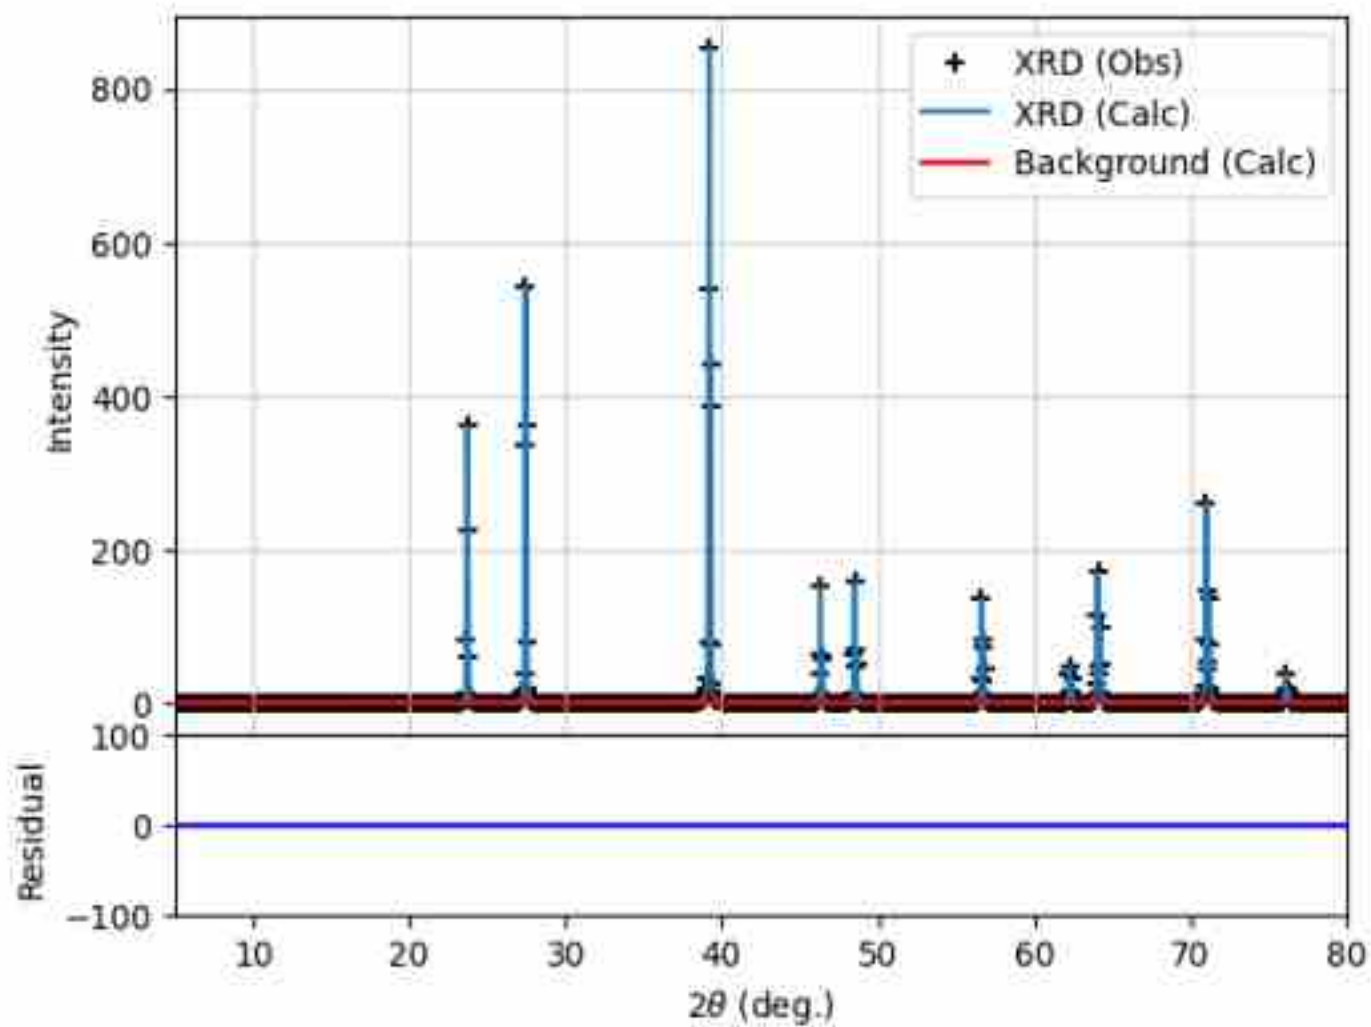

| RMSE before RR | Rwp     | RMSE after RR |
|----------------|---------|---------------|
| 0.003          | 0.01198 | 0.00206       |

# Y1Pb3

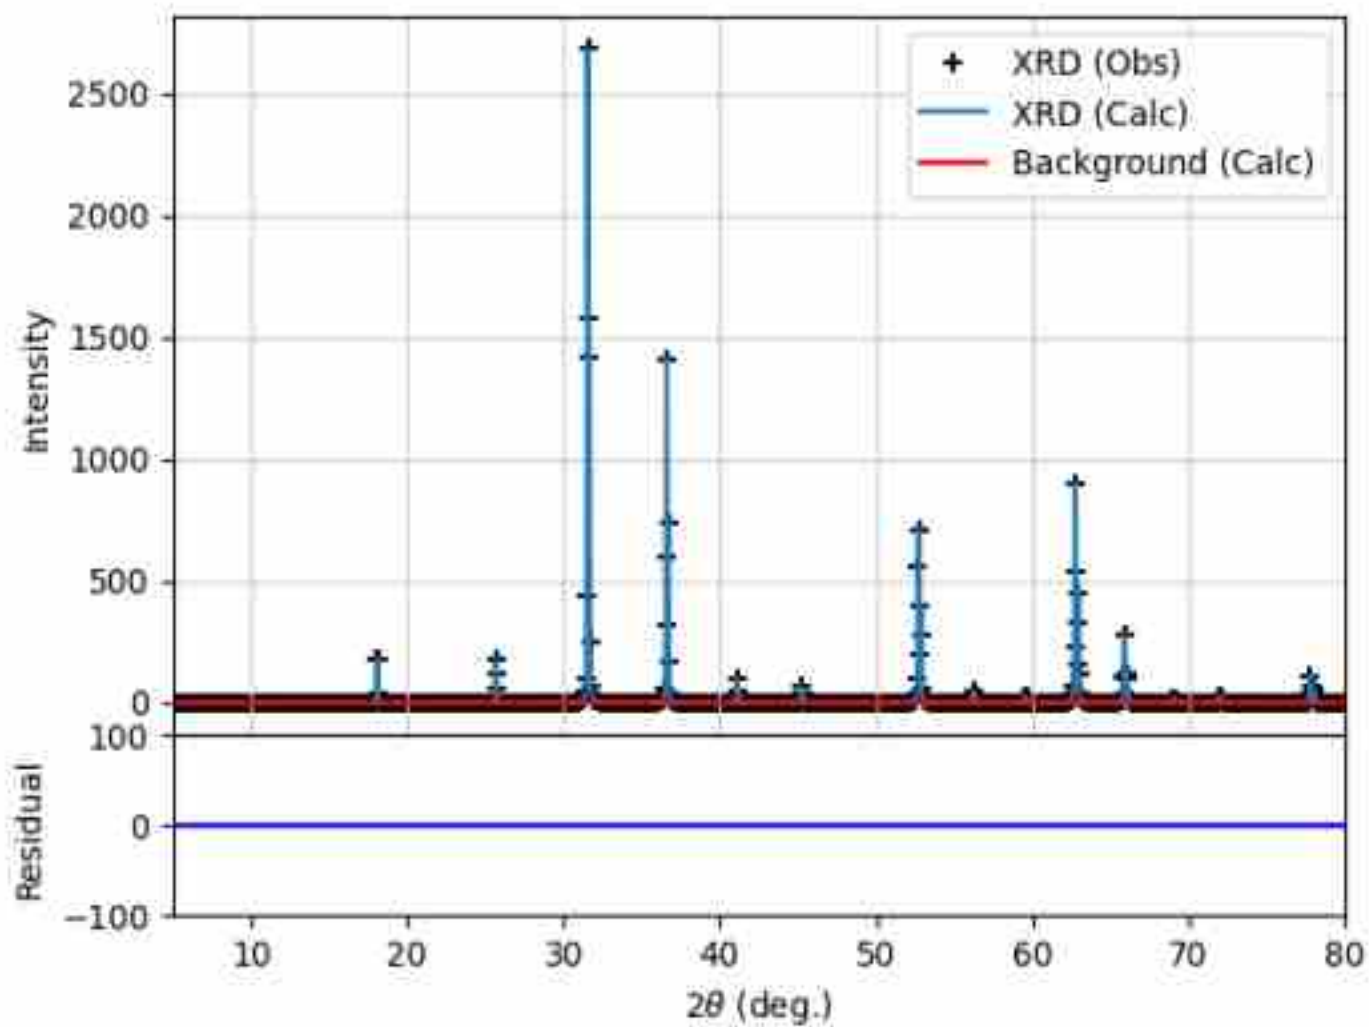

| RMSE before RR | Rwp     | RMSE after RR |
|----------------|---------|---------------|
| 0.003          | 0.06054 | 0.00241       |

# Y1Rh3C1

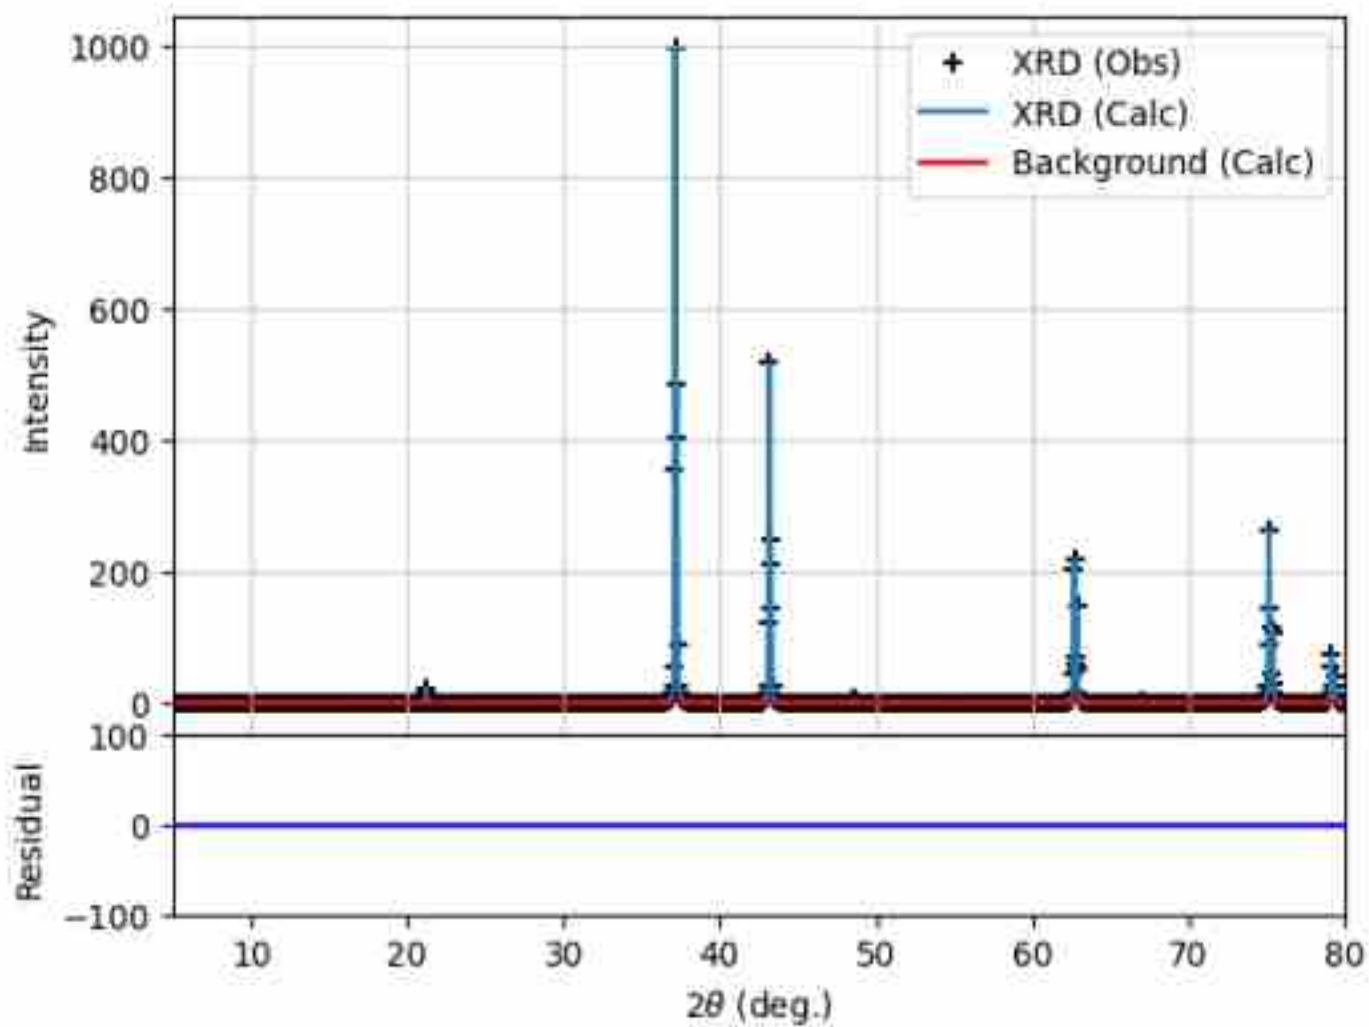

| RMSE before RR | Rwp    | RMSE after RR |
|----------------|--------|---------------|
| 0.003          | 0.0081 | 0.00188       |

Y4

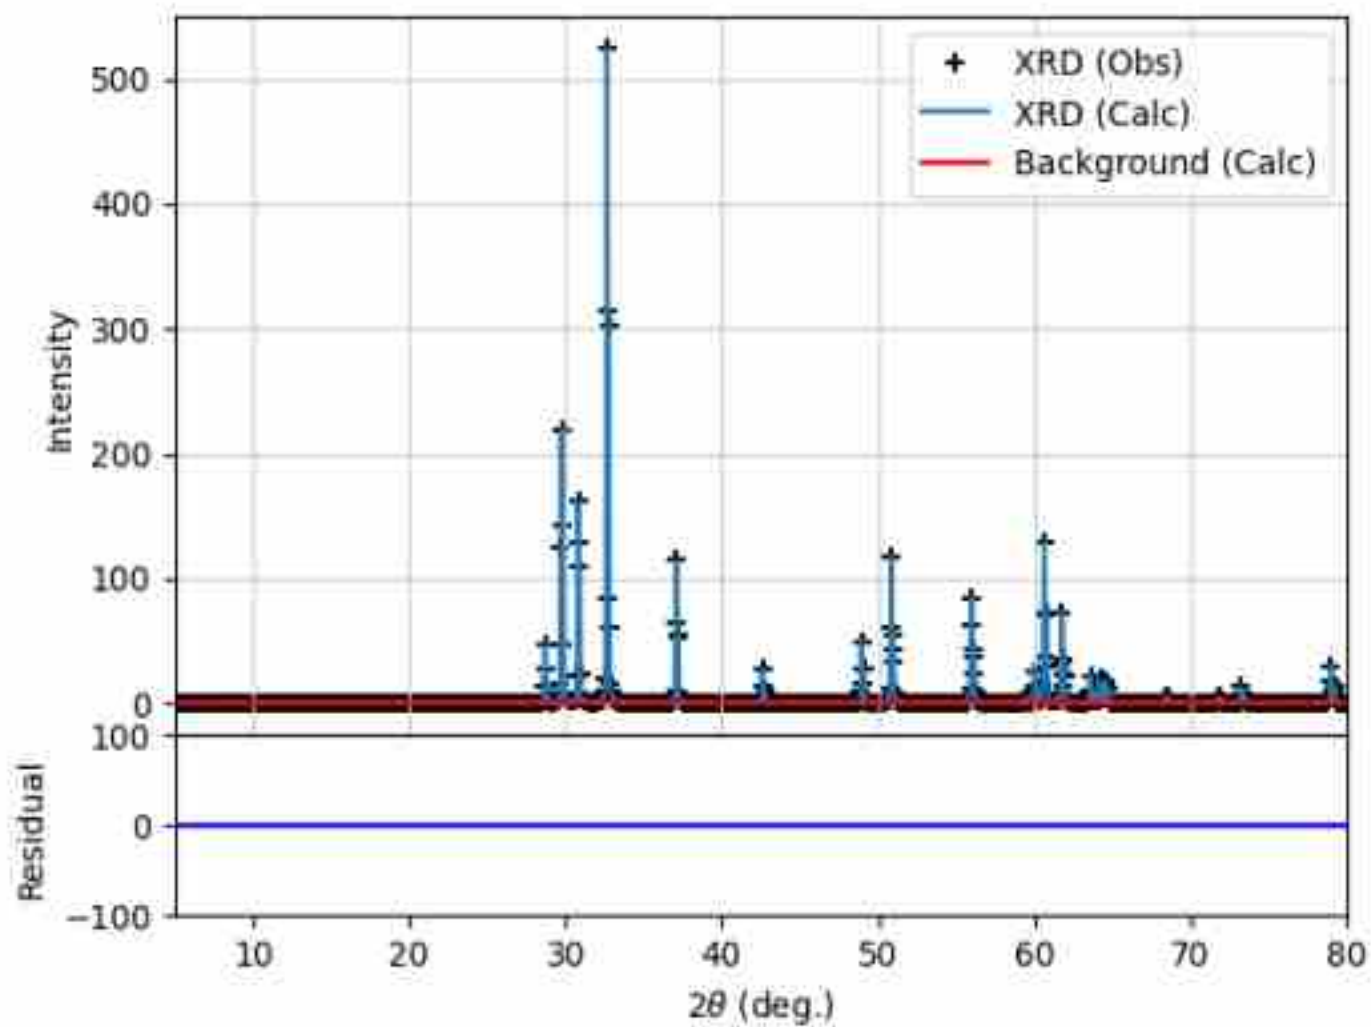

| RMSE before RR | Rwp     | RMSE after RR |
|----------------|---------|---------------|
| 0.003          | 0.02563 | 0.00111       |

# Yb1Ag1Hg2

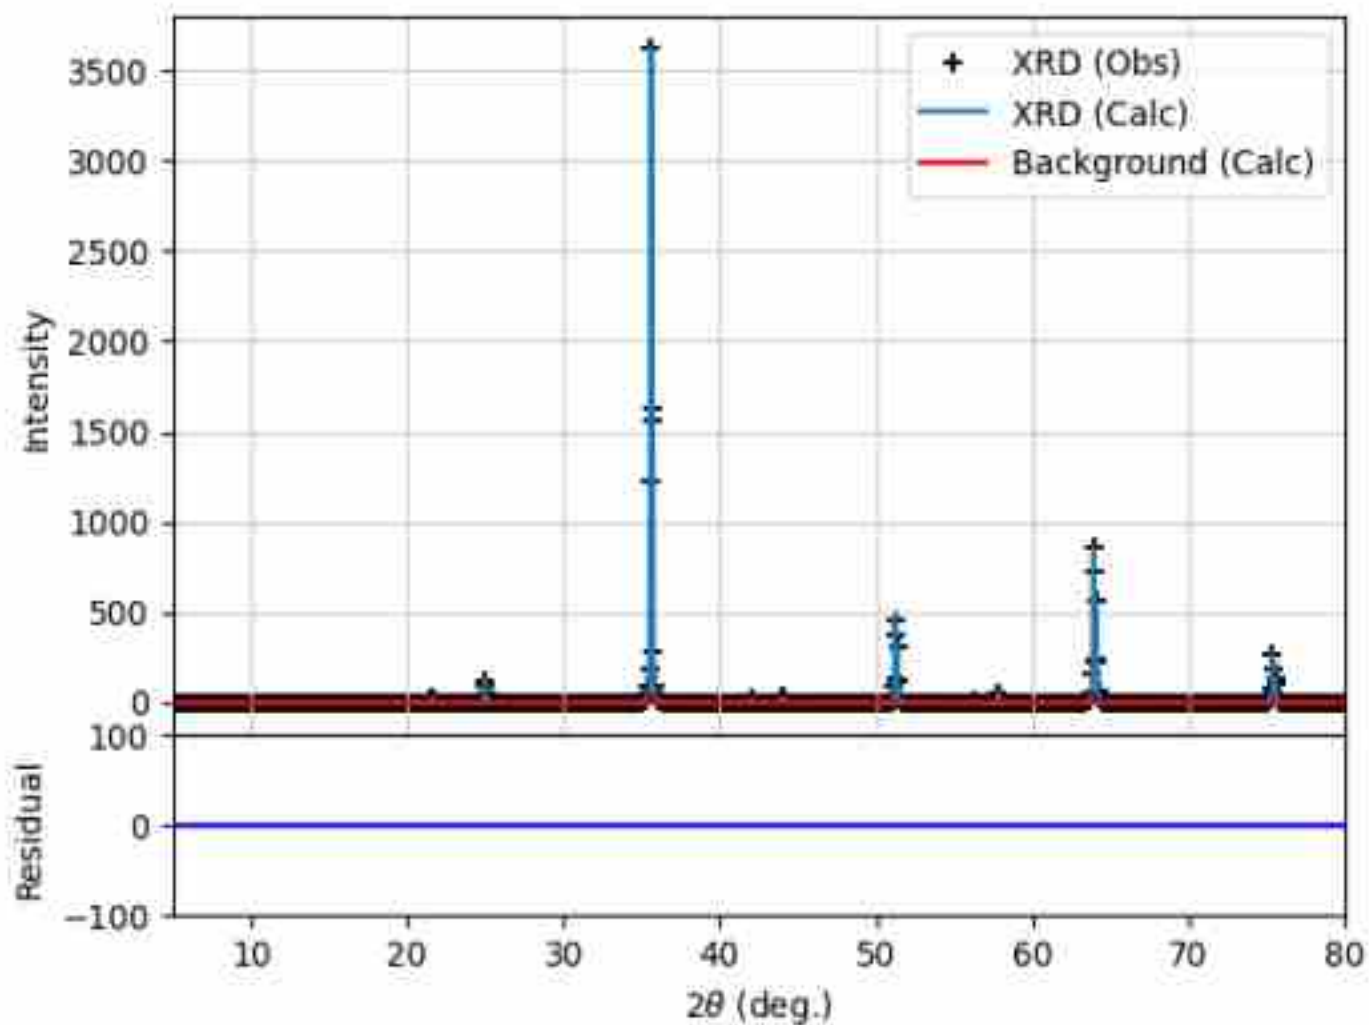

| RMSE before RR | Rwp     | RMSE after RR |
|----------------|---------|---------------|
| 0.003          | 0.00426 | 0.00052       |



# Yb1Al1Ag2

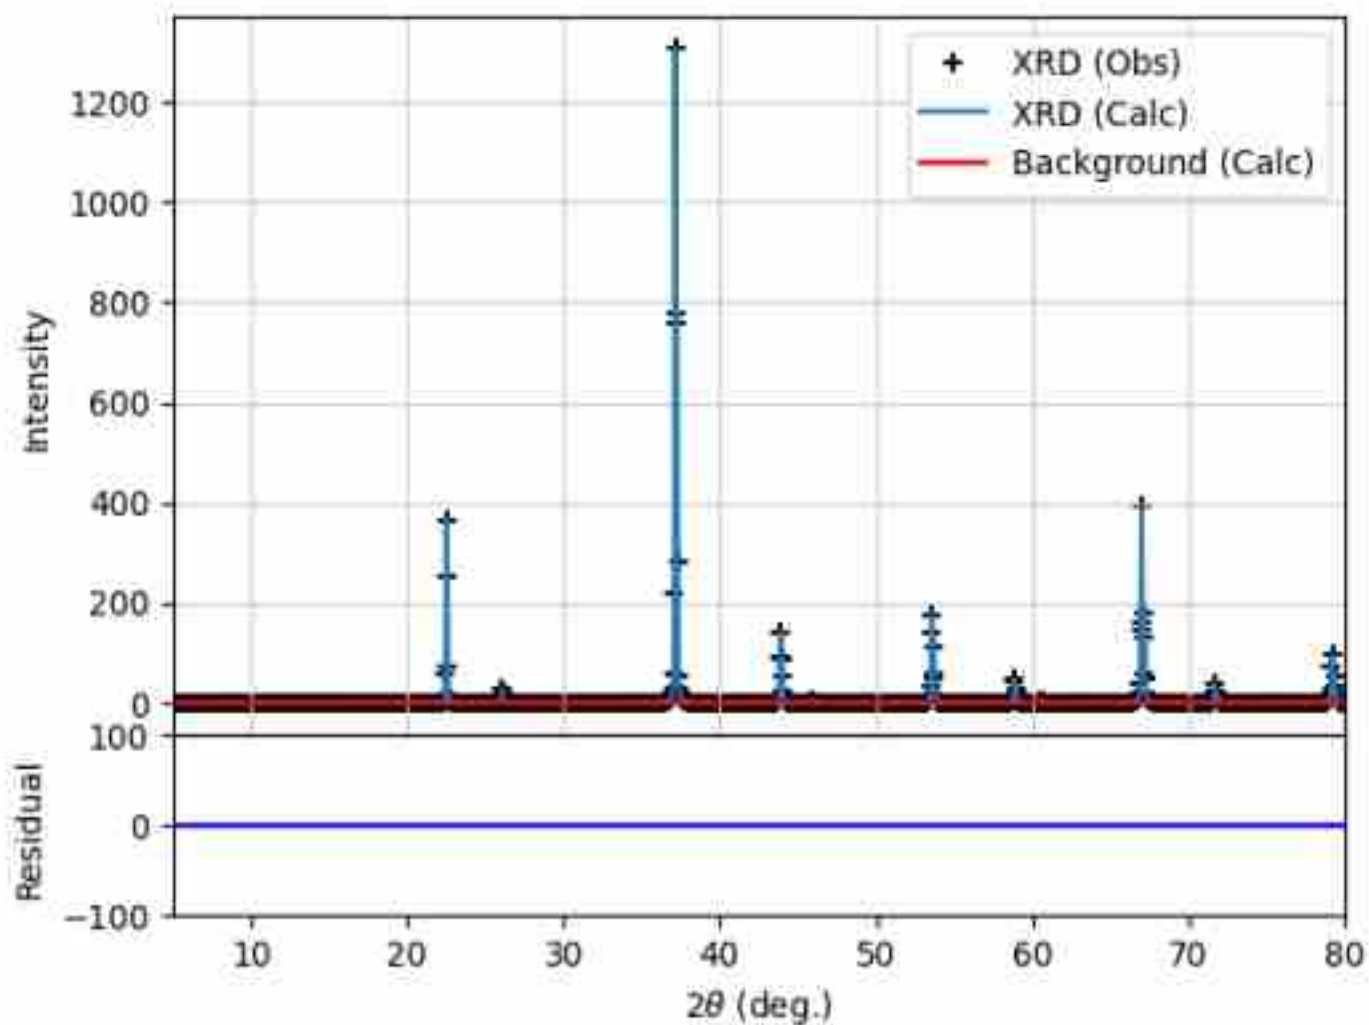

| RMSE before RR | Rwp     | RMSE after RR |
|----------------|---------|---------------|
| 0.003          | 0.01351 | 0.00166       |

# Yb1Bi3

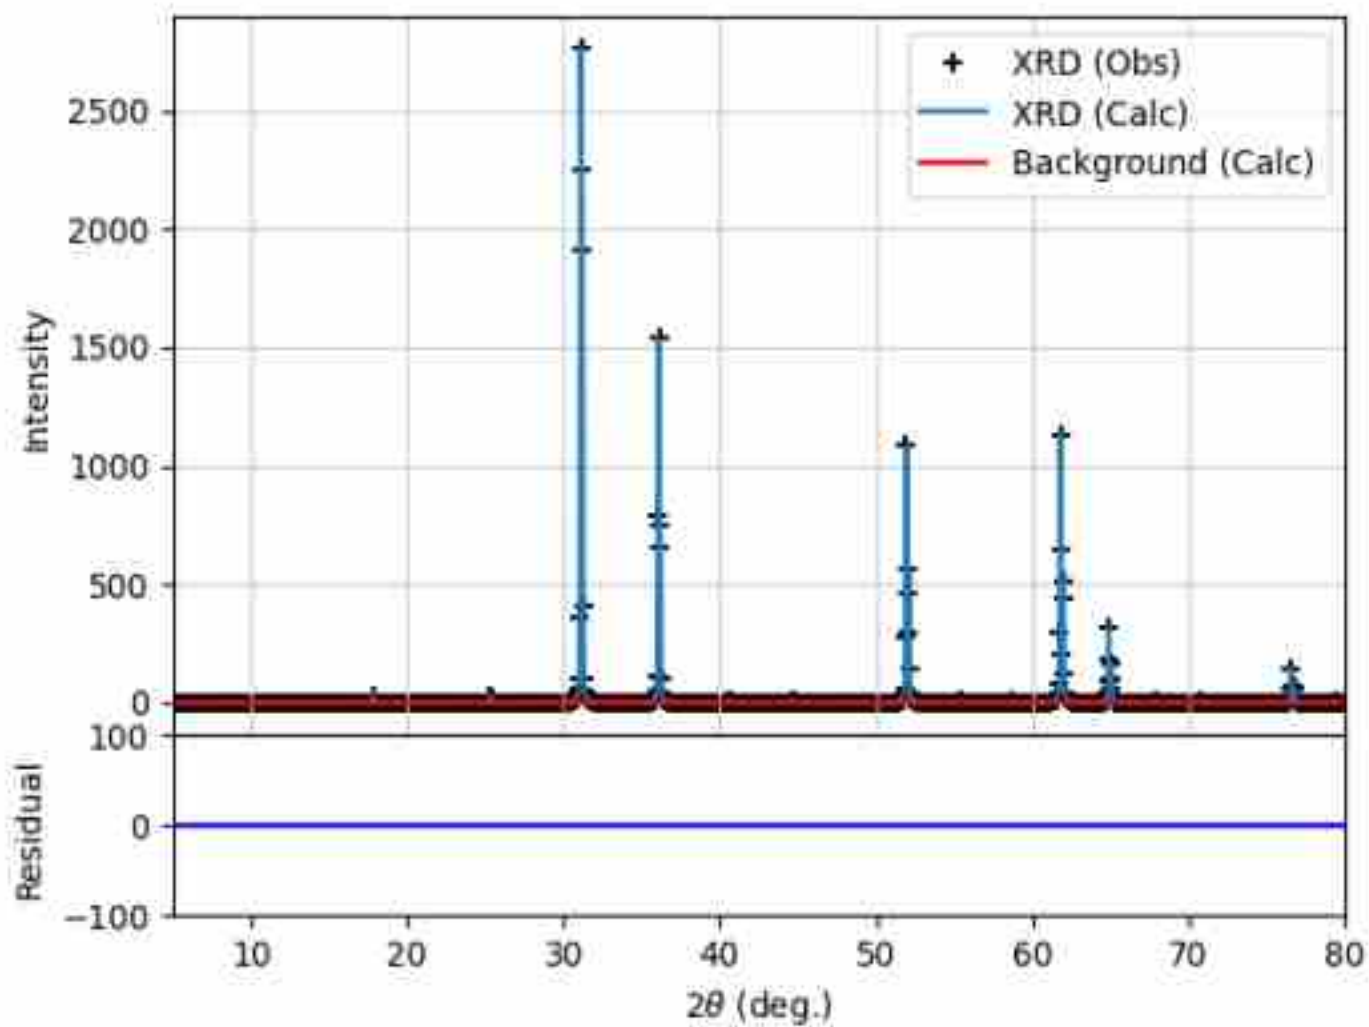

| RMSE before RR | Rwp     | RMSE after RR |
|----------------|---------|---------------|
| 0.003          | 0.02176 | 0.00021       |

# Yb1Hg1Pd2

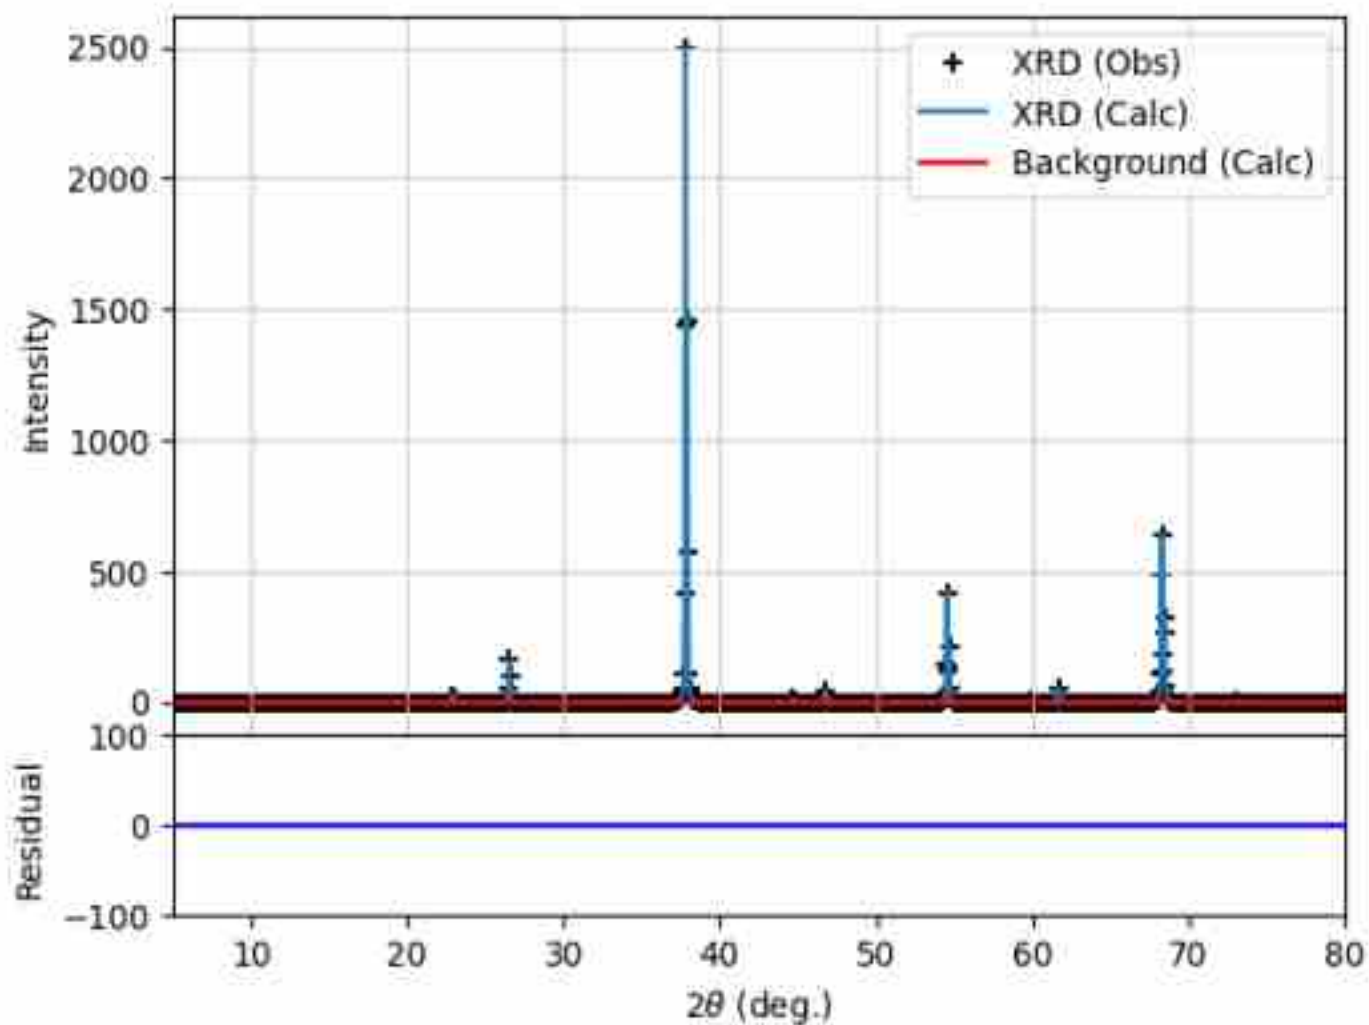

| RMSE before RR | Rwp     | RMSE after RR |
|----------------|---------|---------------|
| 0.003          | 0.00366 | 0.0005        |

# Yb<sub>4</sub>C<sub>4</sub>O<sub>12</sub>

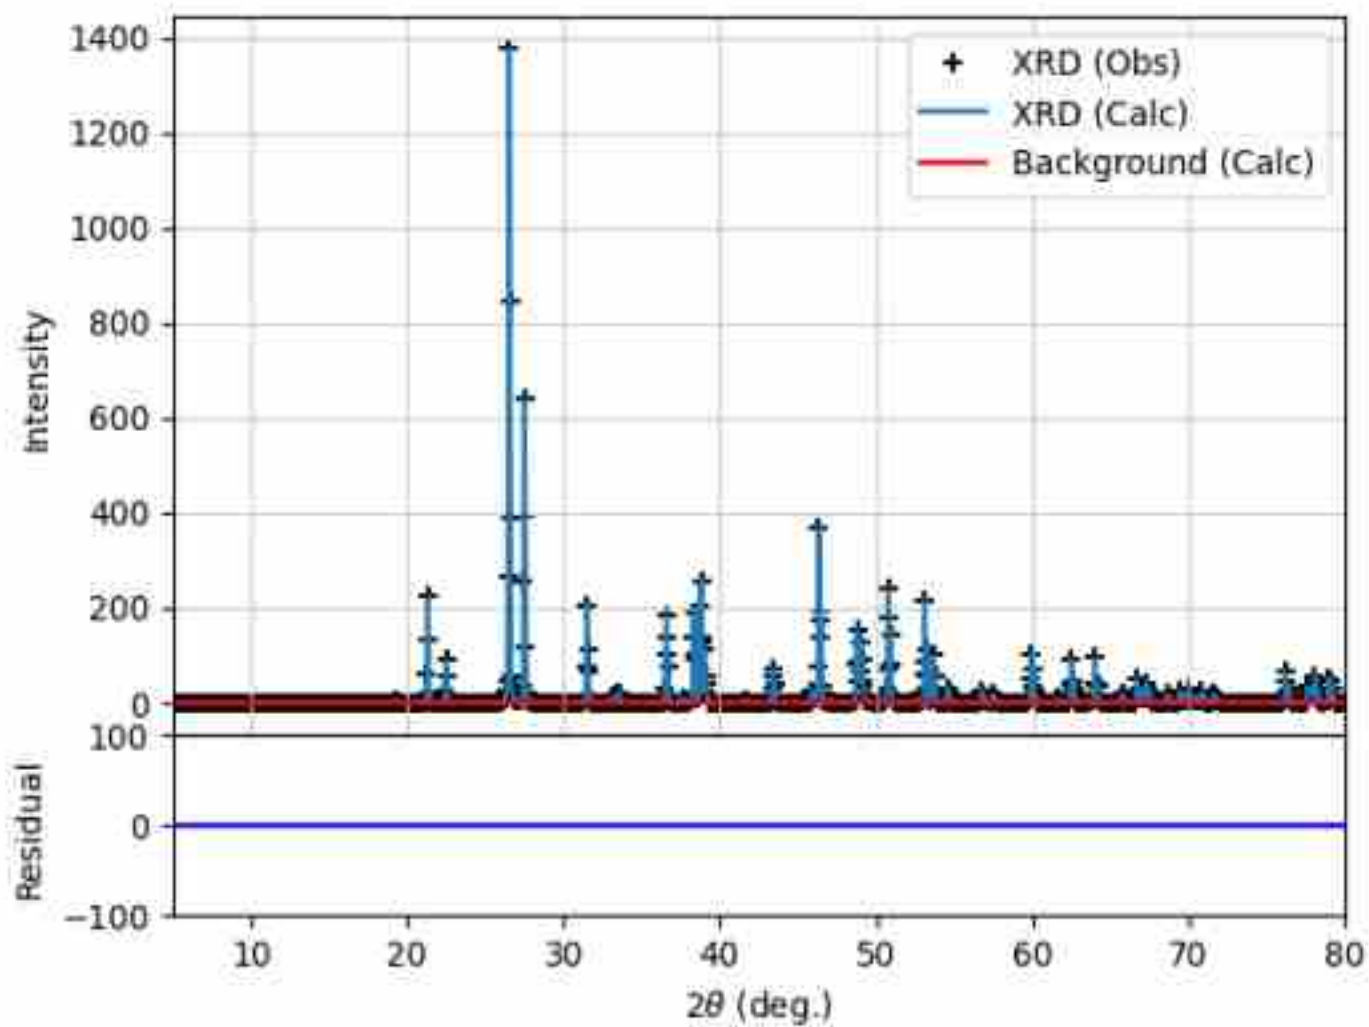

| RMSE before RR | Rwp     | RMSE after RR |
|----------------|---------|---------------|
| 0.03           | 0.00433 | 0.00154       |

# Yb<sub>4</sub>Ga<sub>4</sub>Ni<sub>4</sub>

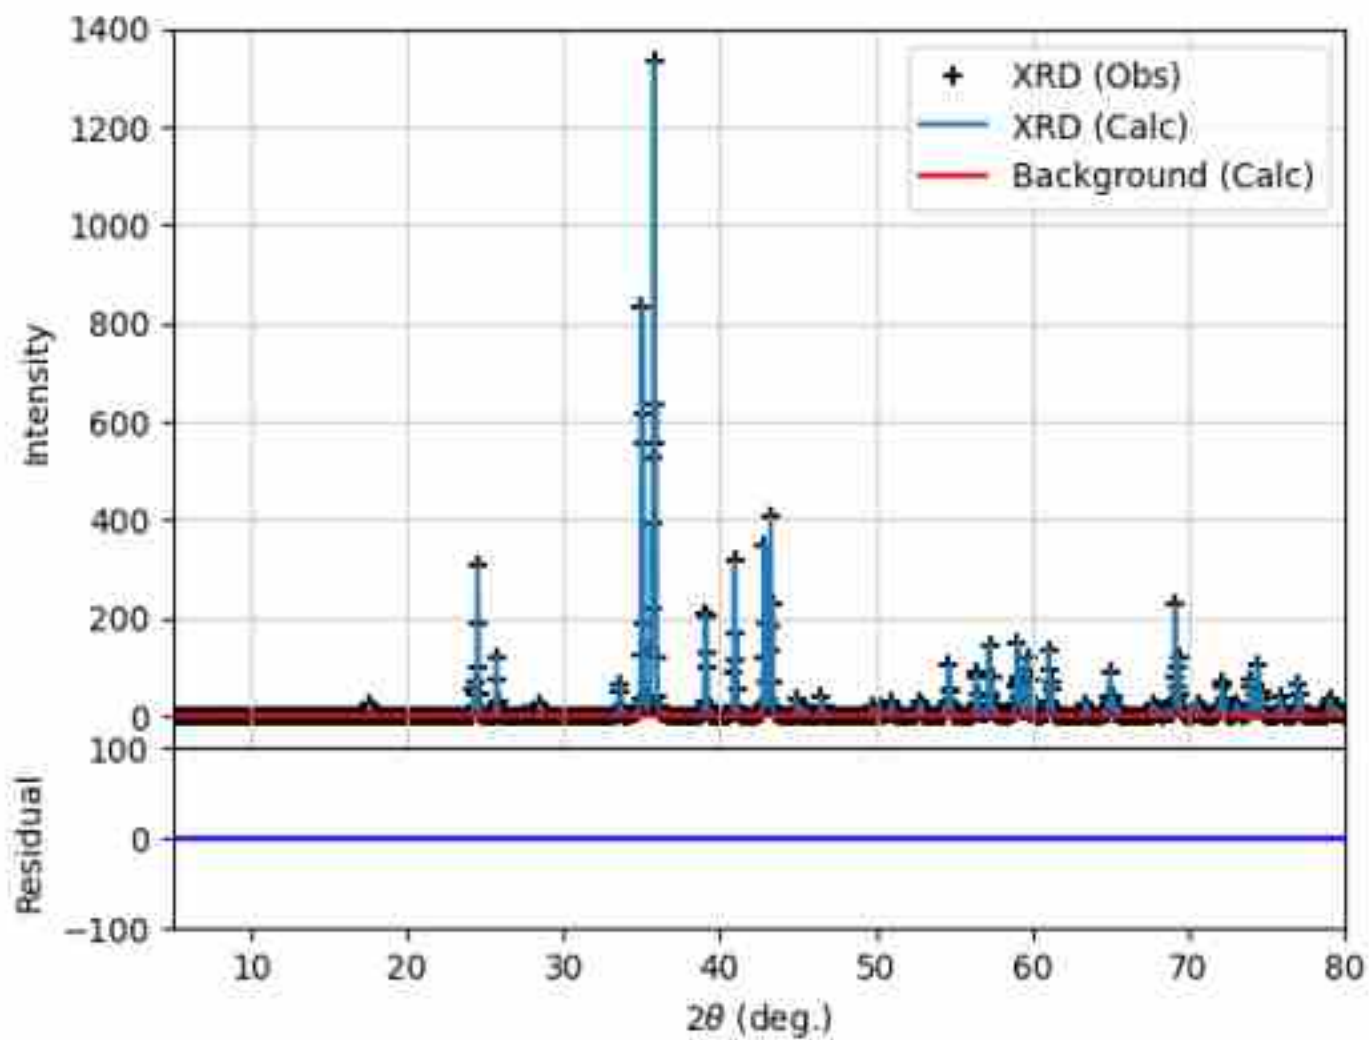

| RMSE before RR | Rwp     | RMSE after RR |
|----------------|---------|---------------|
| 0.03           | 0.00527 | 0.00048       |

Yb4

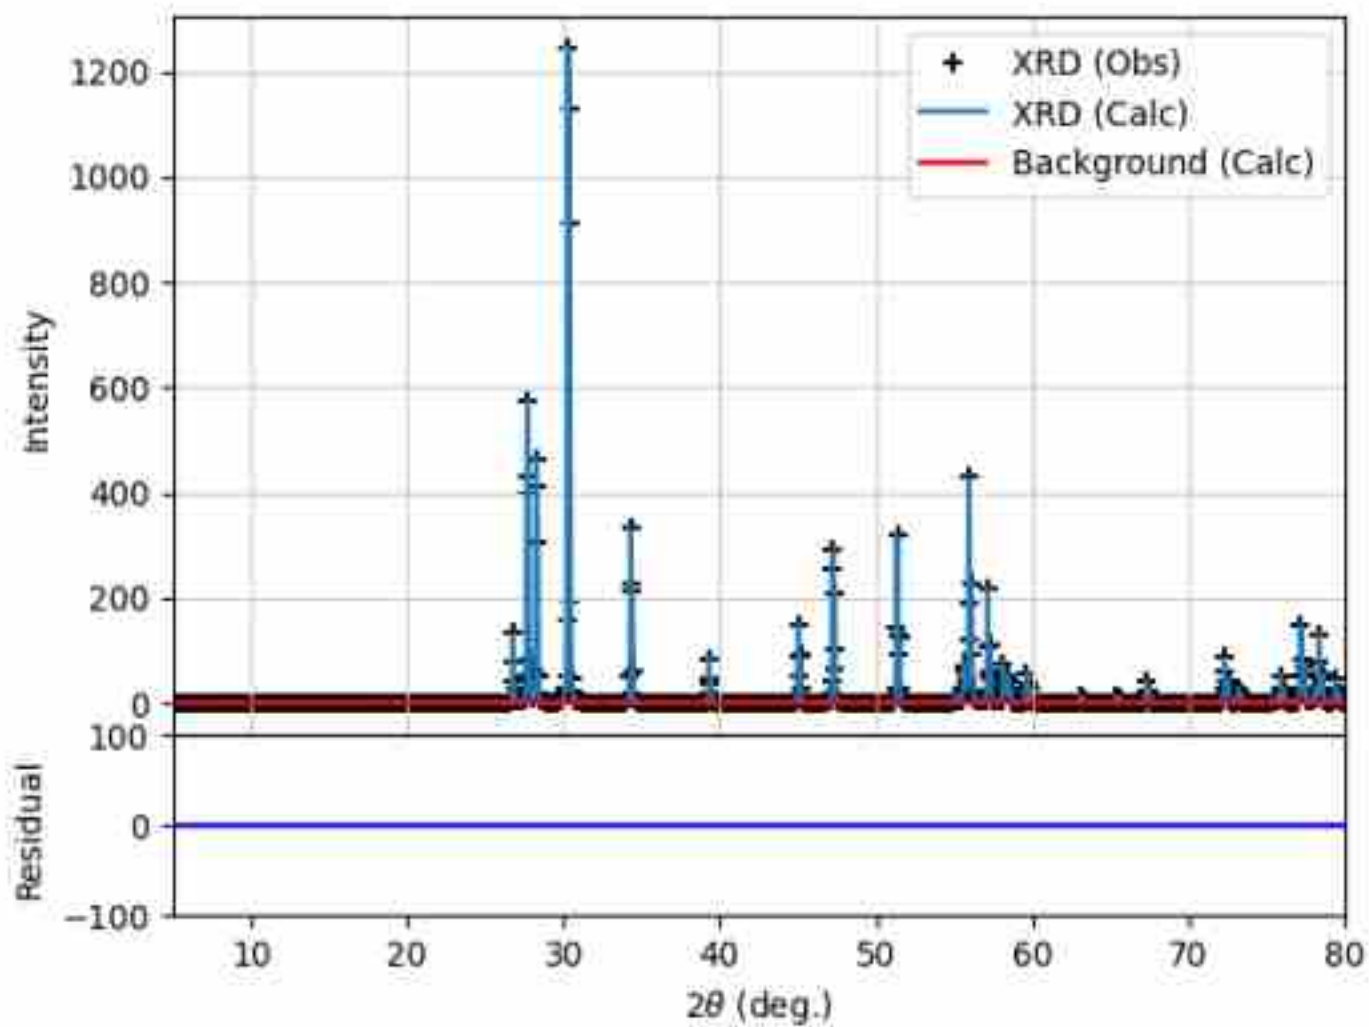

| RMSE before RR | Rwp     | RMSE after RR |
|----------------|---------|---------------|
| 0.003          | 0.00646 | 0.00038       |

# Zn1Te1

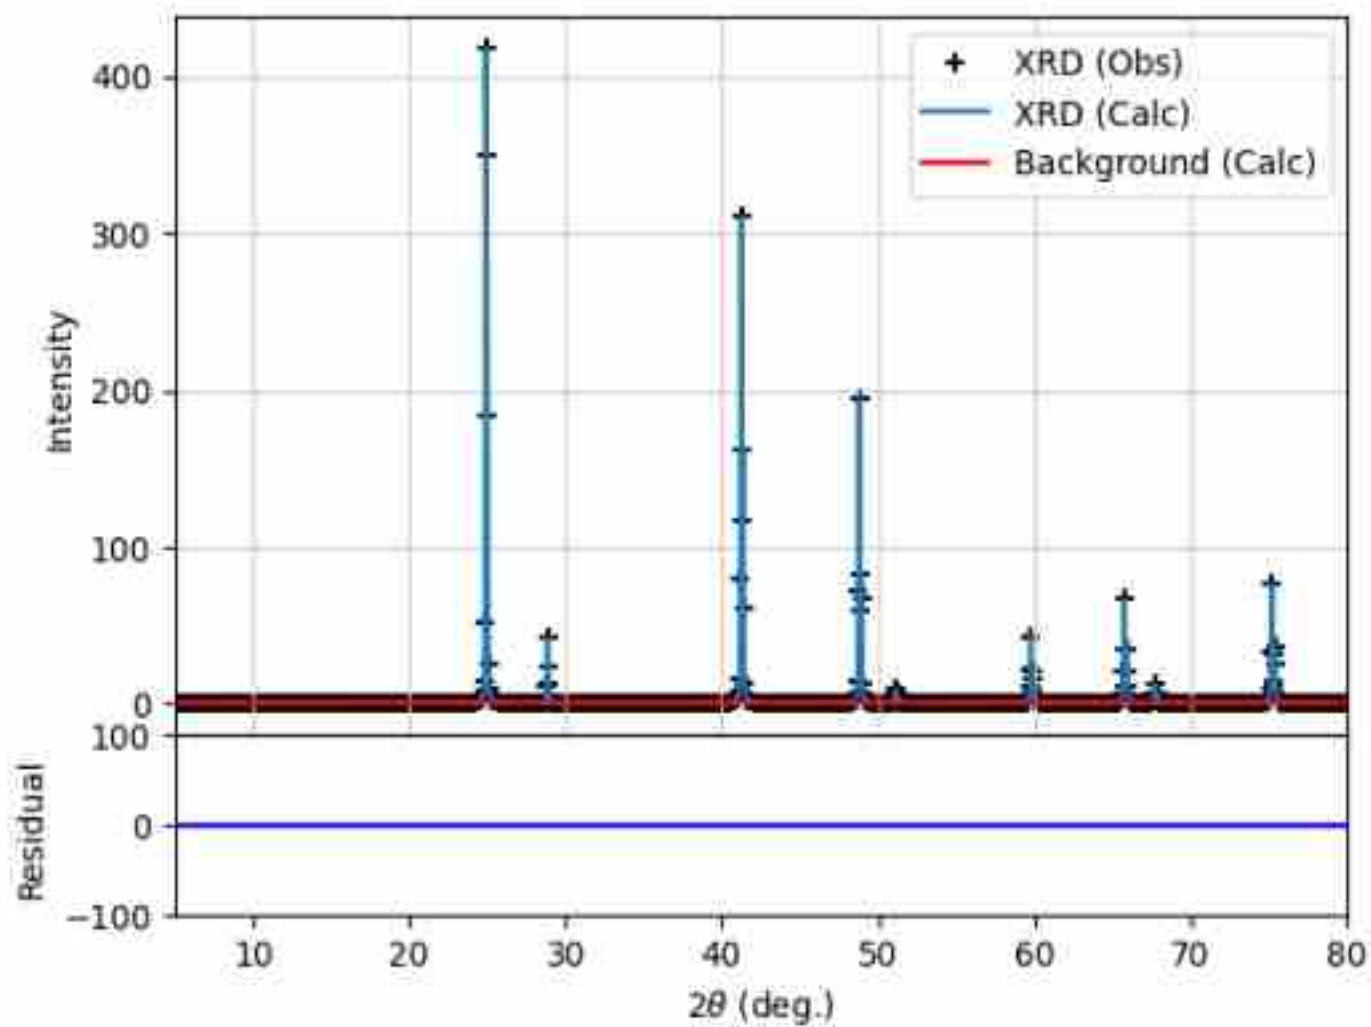

| RMSE before RR | Rwp     | RMSE after RR |
|----------------|---------|---------------|
| 0.003          | 0.03903 | 0.00259       |

# Zn<sub>2</sub>Ag<sub>4</sub>Ge<sub>2</sub>O<sub>8</sub>

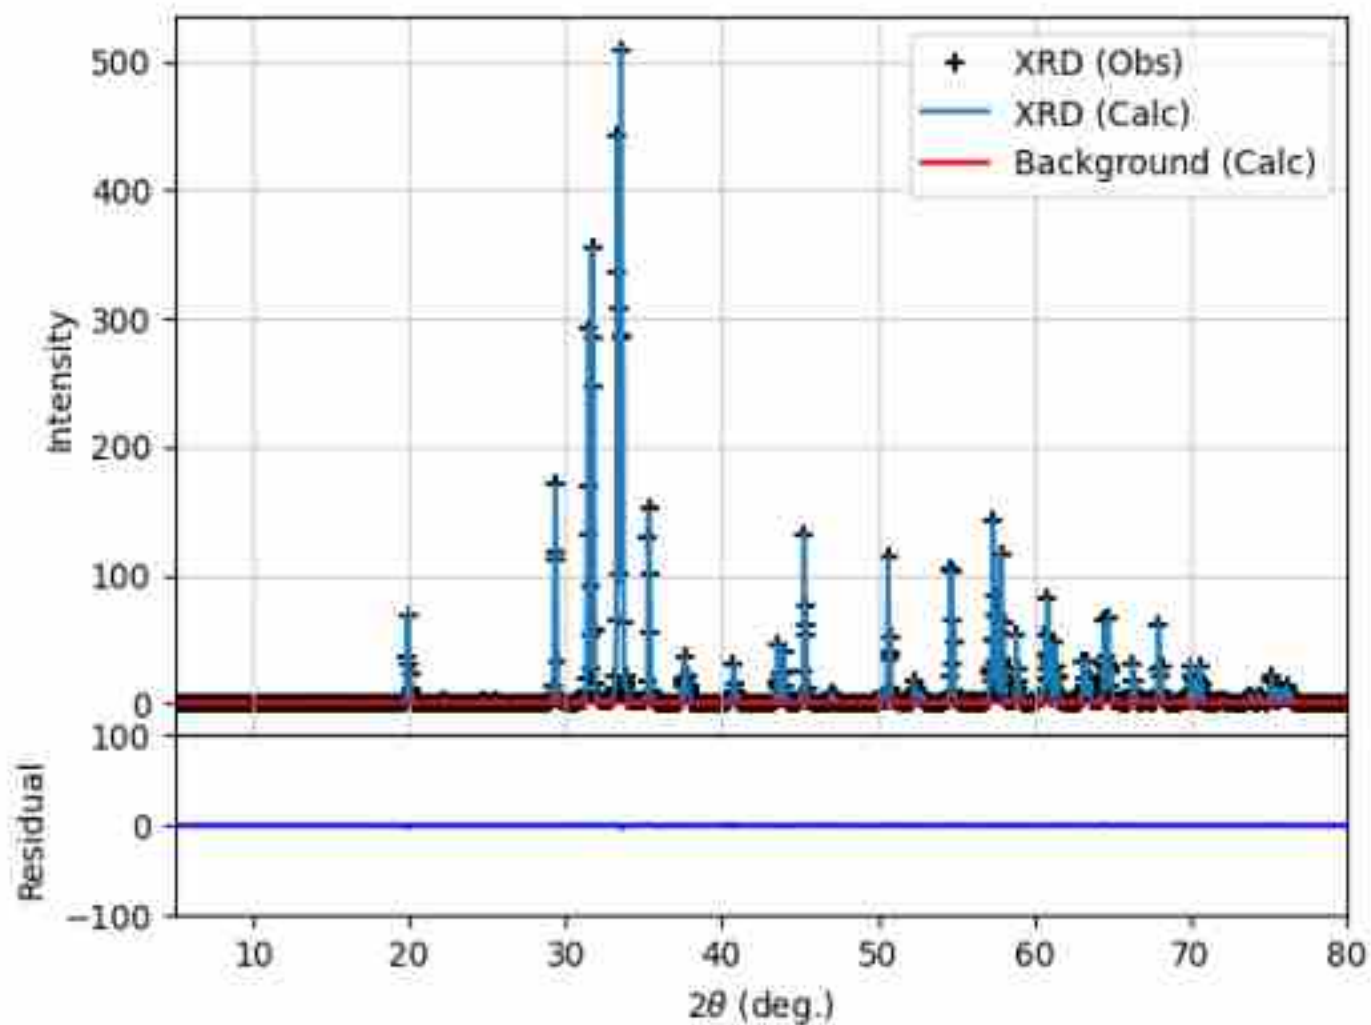

| RMSE before RR | Rwp    | RMSE after RR |
|----------------|--------|---------------|
| 0.03           | 1.6309 | 0.08101       |



# Zn<sub>2</sub>Cu<sub>1</sub>Ni<sub>1</sub>

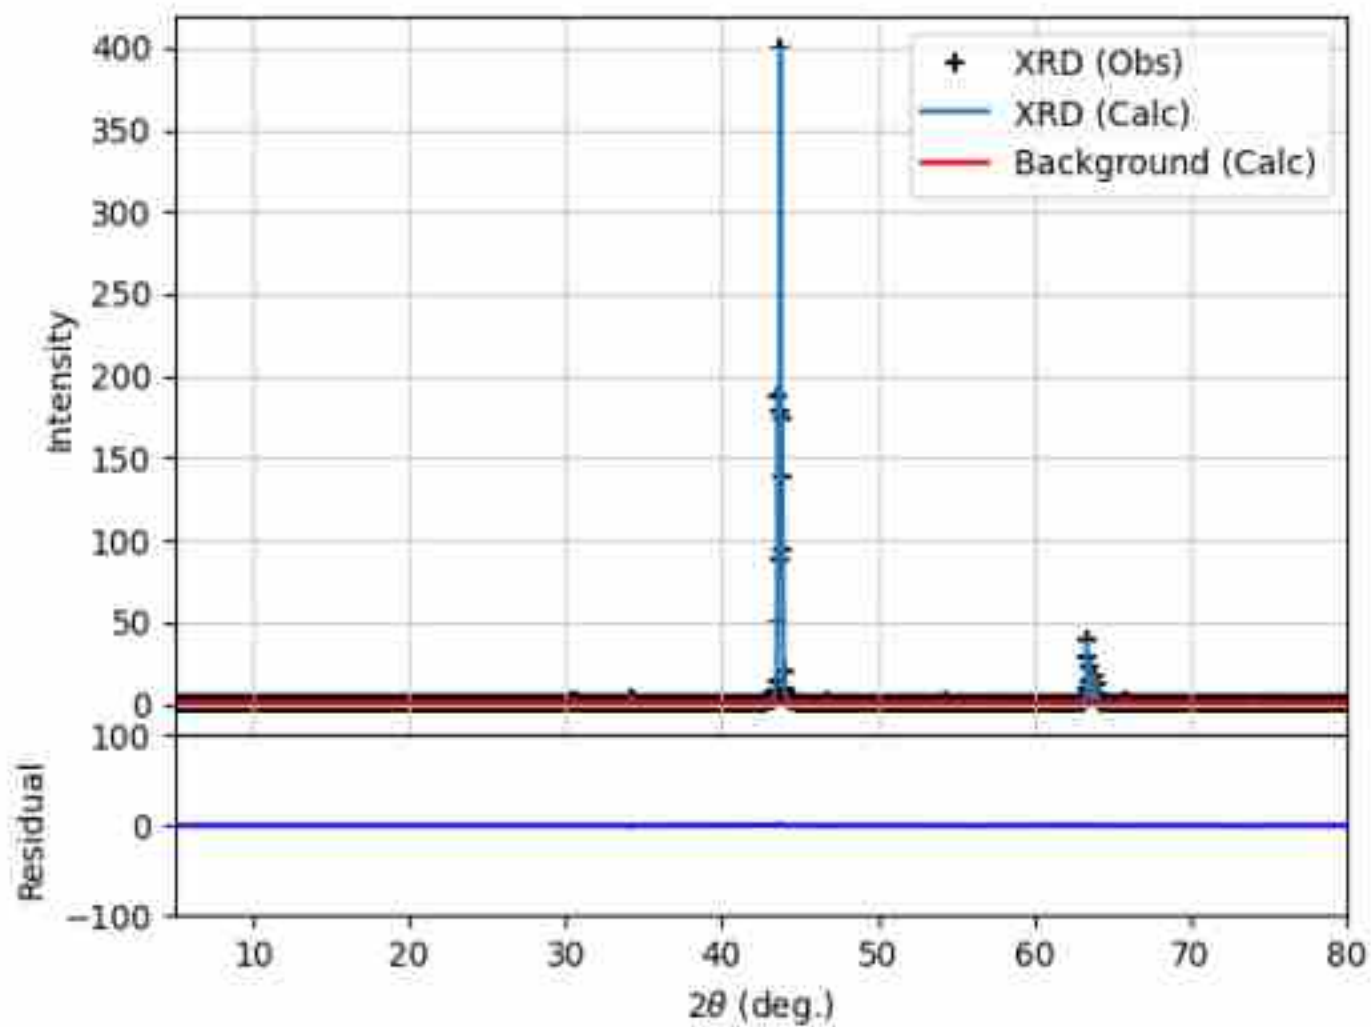

| RMSE before RR | Rwp     | RMSE after RR |
|----------------|---------|---------------|
| 0.003          | 3.95074 | 0.00309       |

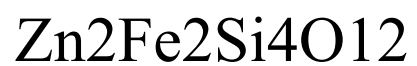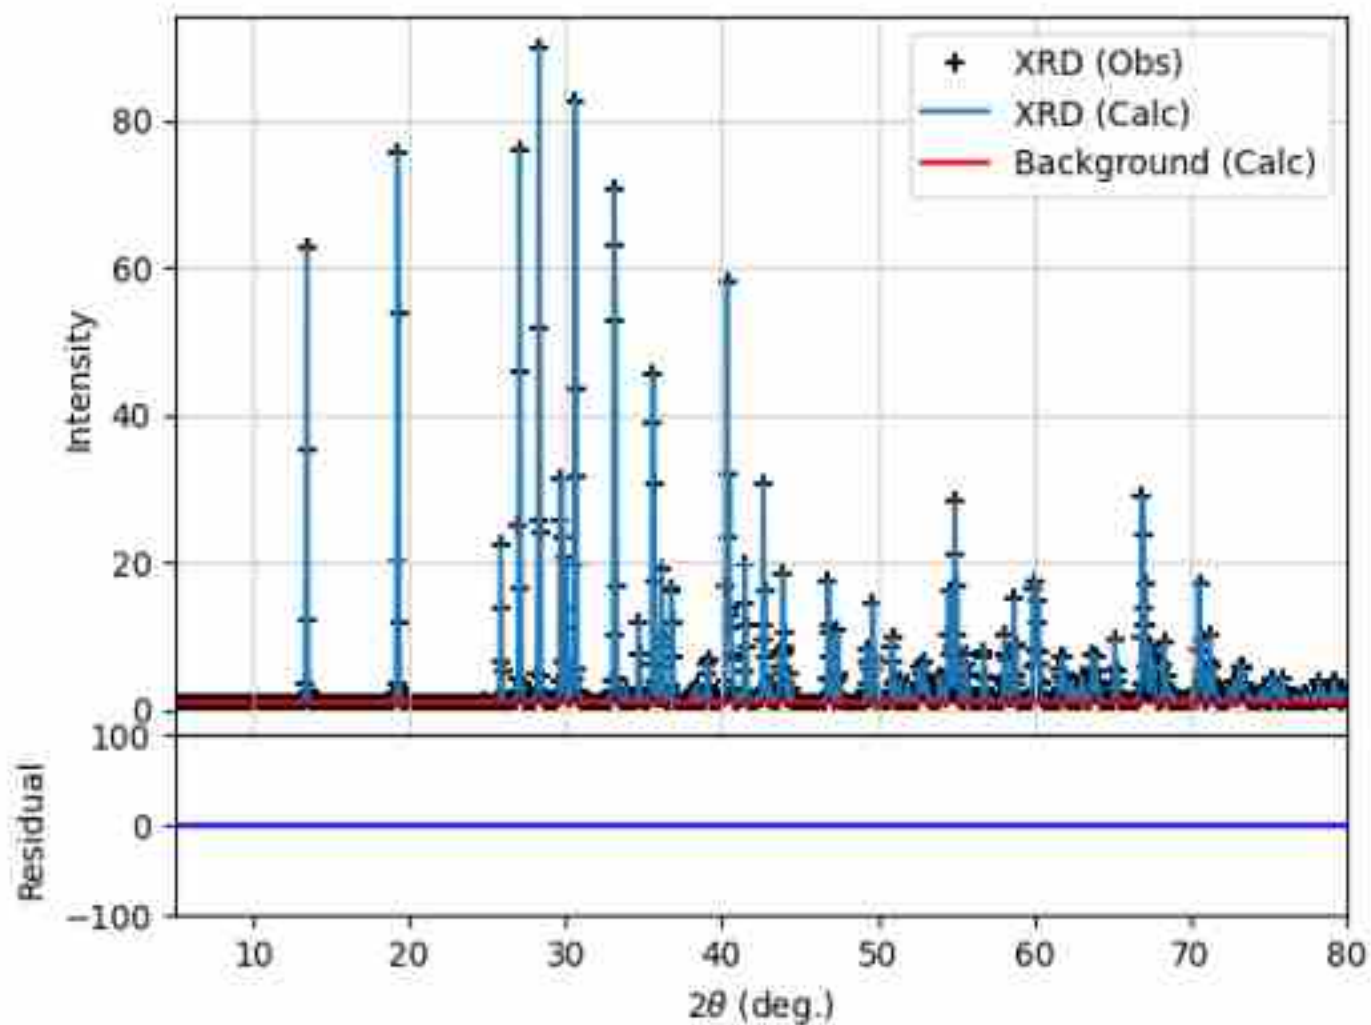

| RMSE before RR | Rwp    | RMSE after RR |
|----------------|--------|---------------|
| 0.03           | 0.0007 | 0.00034       |

# Zr1Ni1Sn1

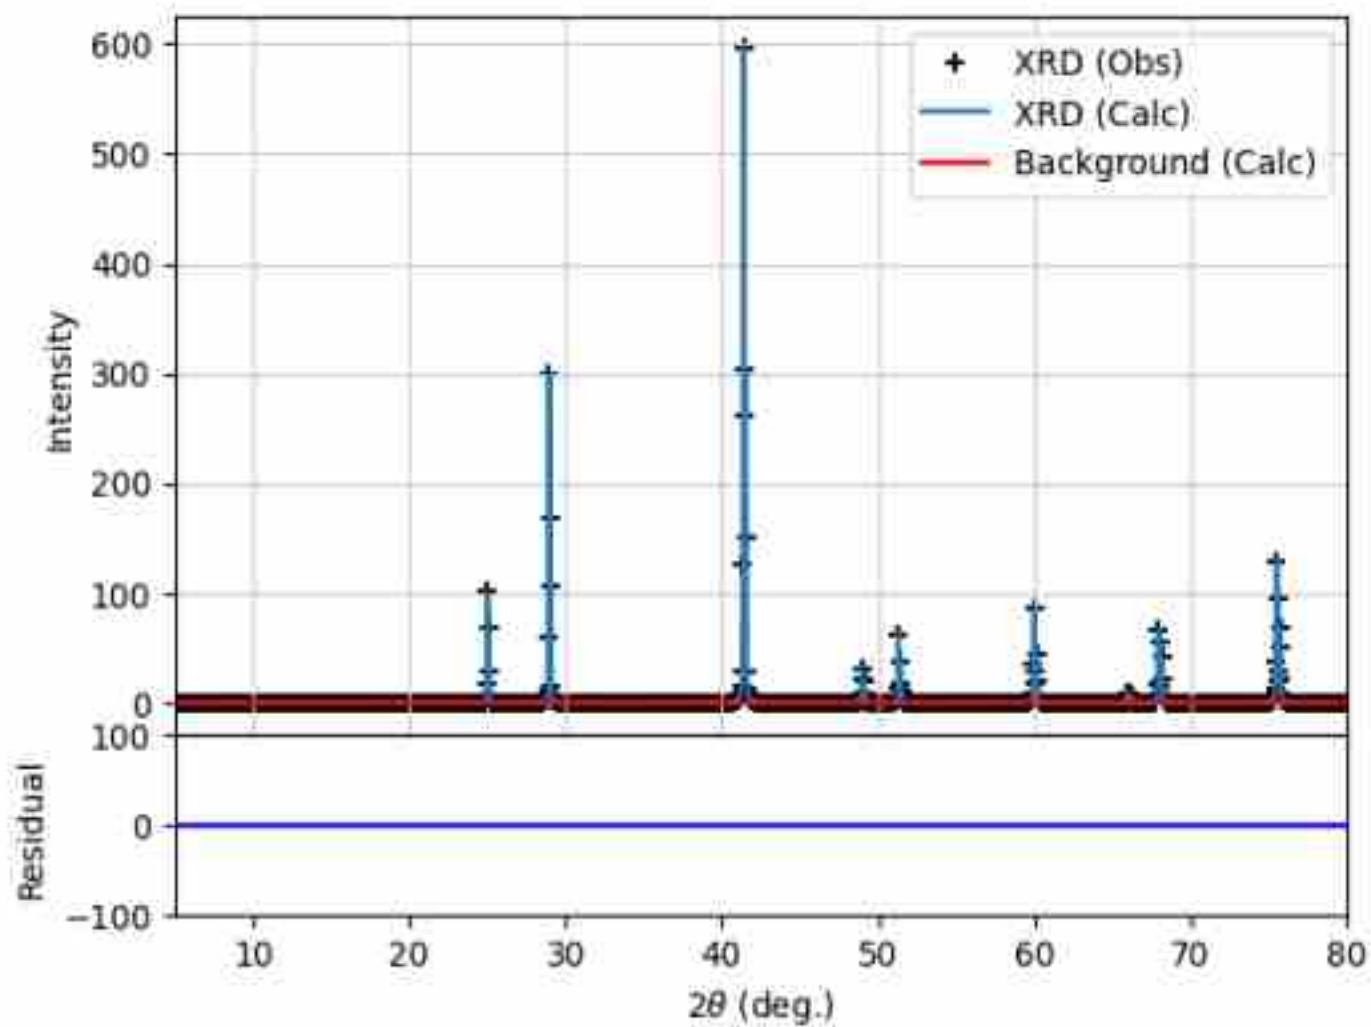

| RMSE before RR | Rwp     | RMSE after RR |
|----------------|---------|---------------|
| 0.003          | 0.00367 | 0.00035       |

# Zr1Sn1Pt1

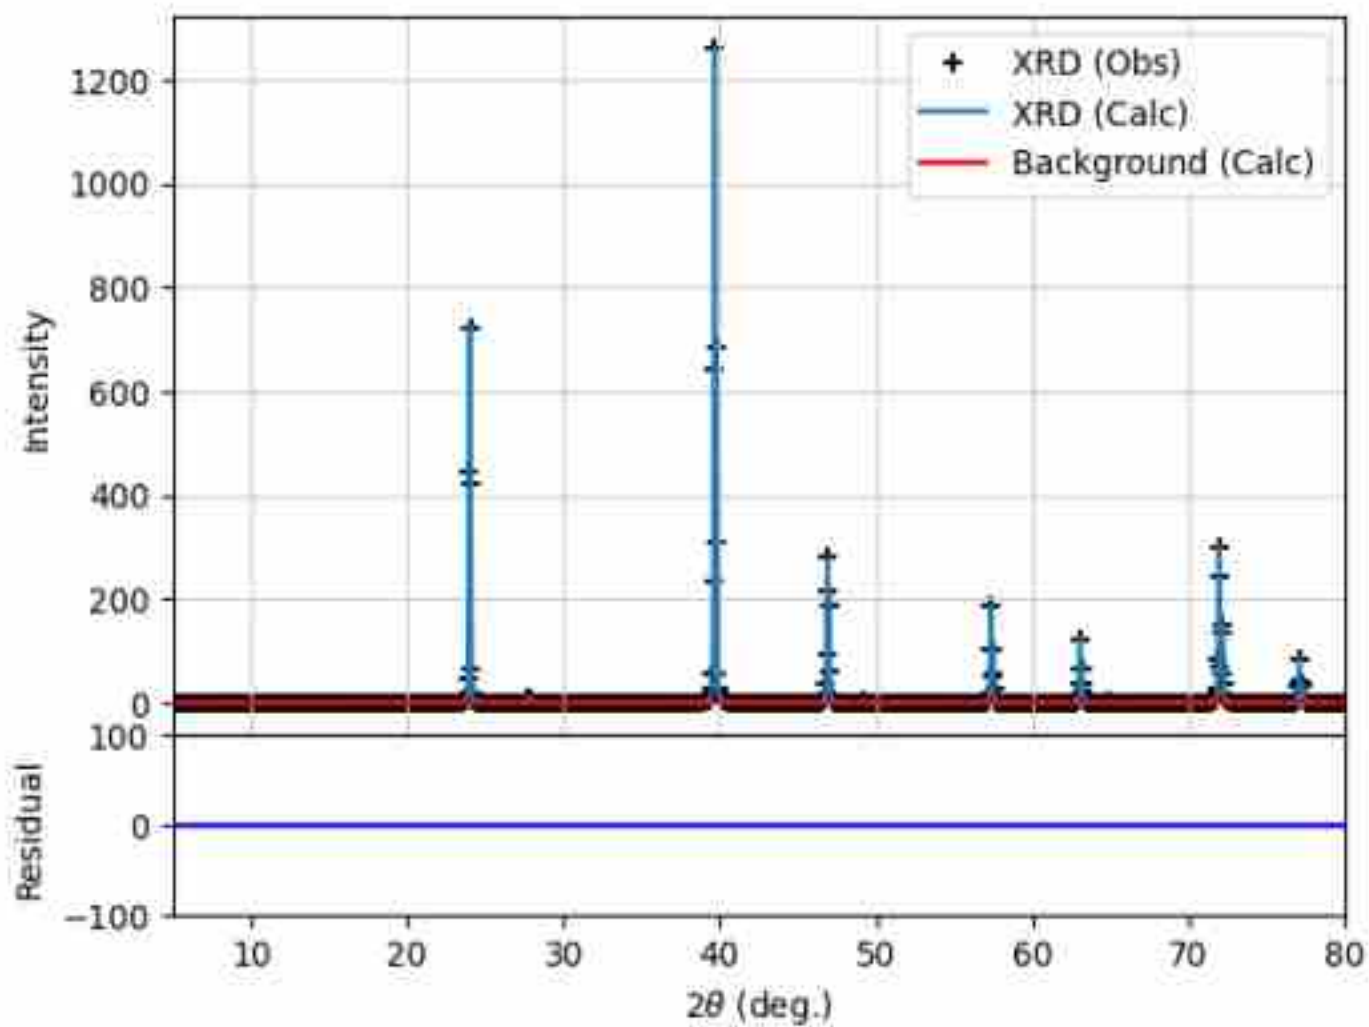

| RMSE before RR | Rwp     | RMSE after RR |
|----------------|---------|---------------|
| 0.003          | 0.00478 | 0.00019       |

# Zr<sub>4</sub>Co<sub>4</sub>Si<sub>4</sub>

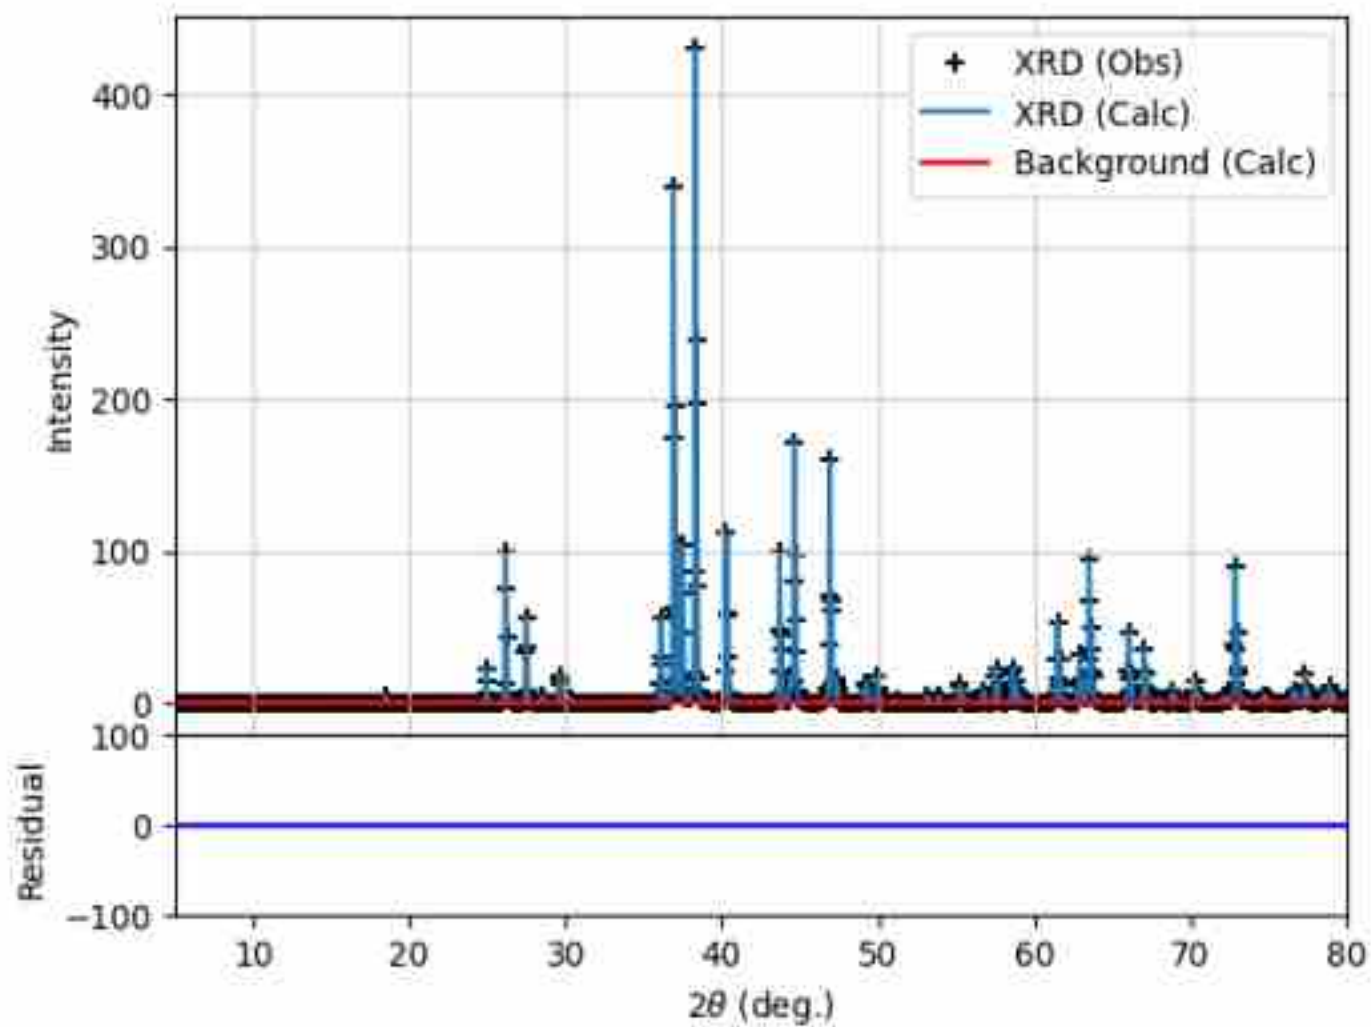

| RMSE before RR | Rwp   | RMSE after RR |
|----------------|-------|---------------|
| 0.03           | 0.005 | 0.00058       |

# Zr10Sb6

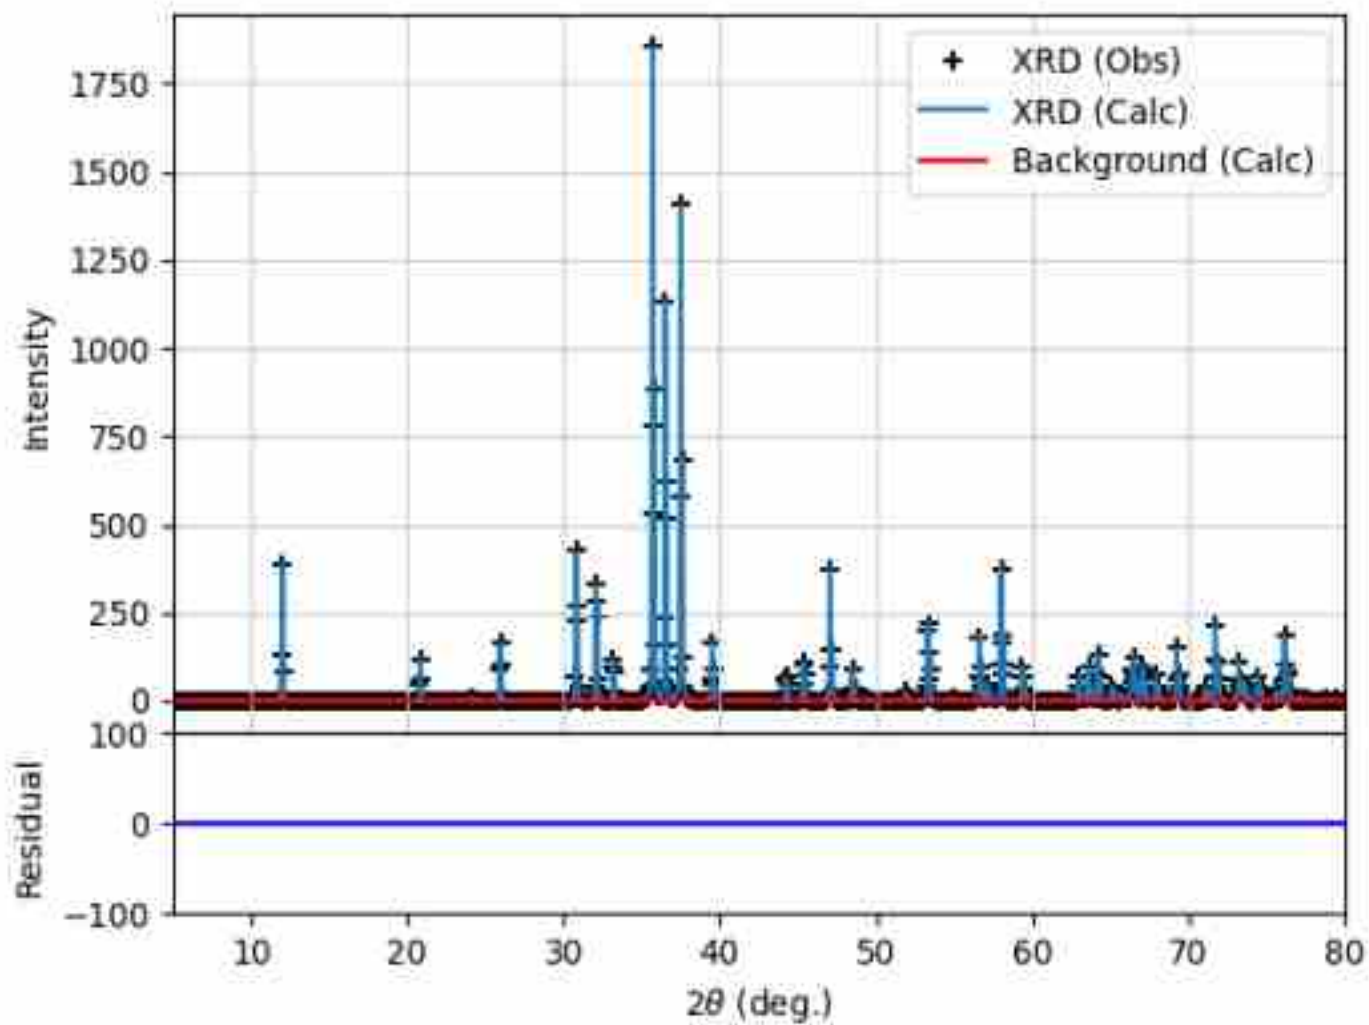

| RMSE before RR | Rwp     | RMSE after RR |
|----------------|---------|---------------|
| 0.03           | 0.05329 | 0.00217       |

# Zr10Sb8

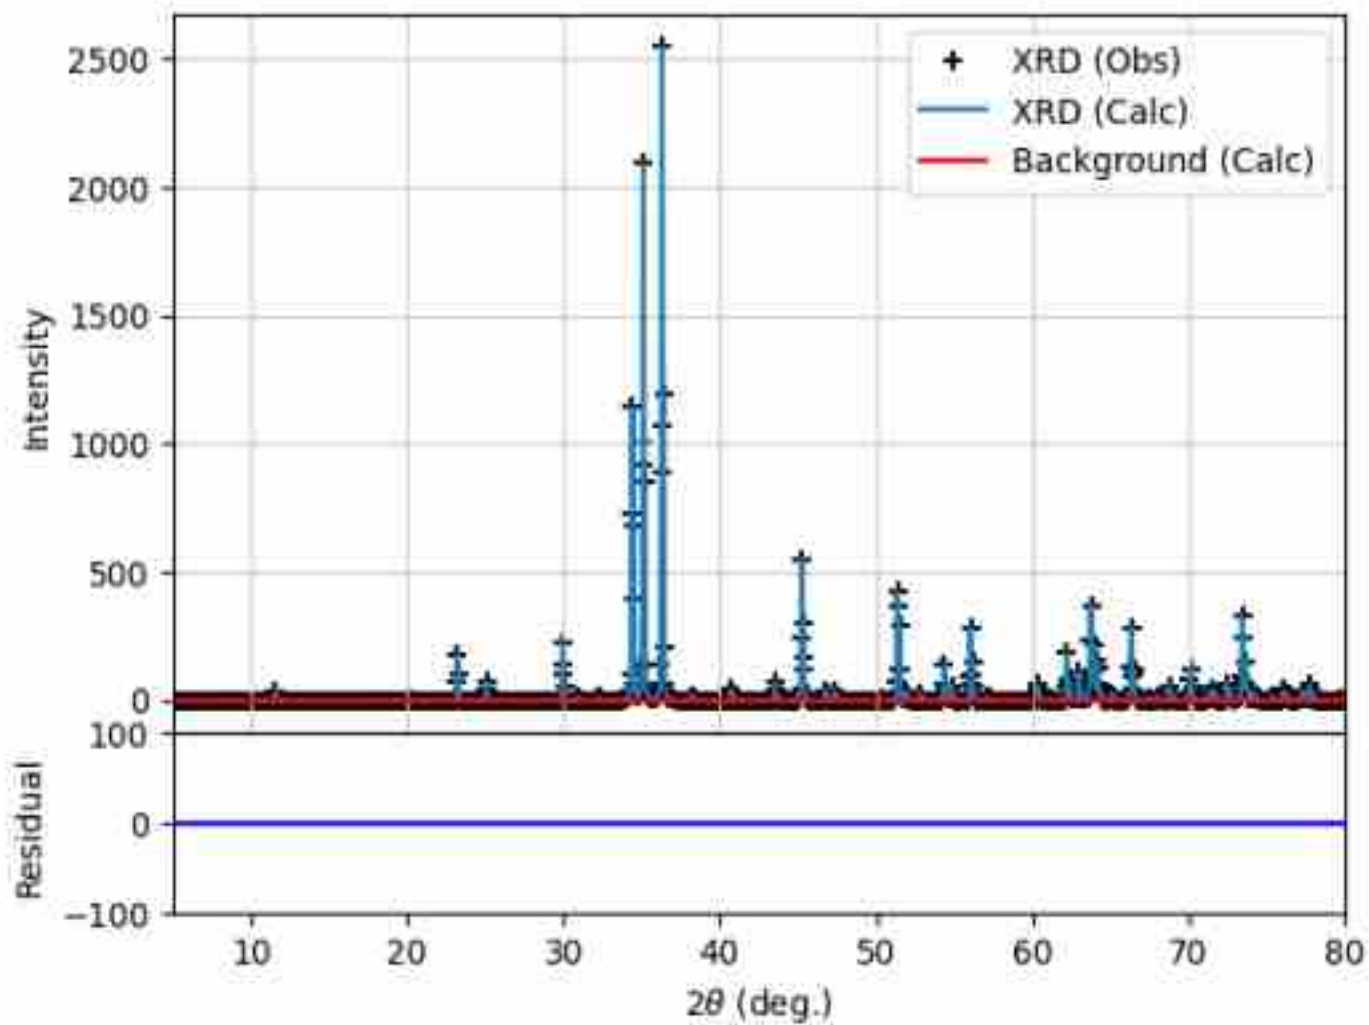

| RMSE before RR | Rwp    | RMSE after RR |
|----------------|--------|---------------|
| 0.03           | 0.0053 | 0.00039       |

# Ac1O1F1

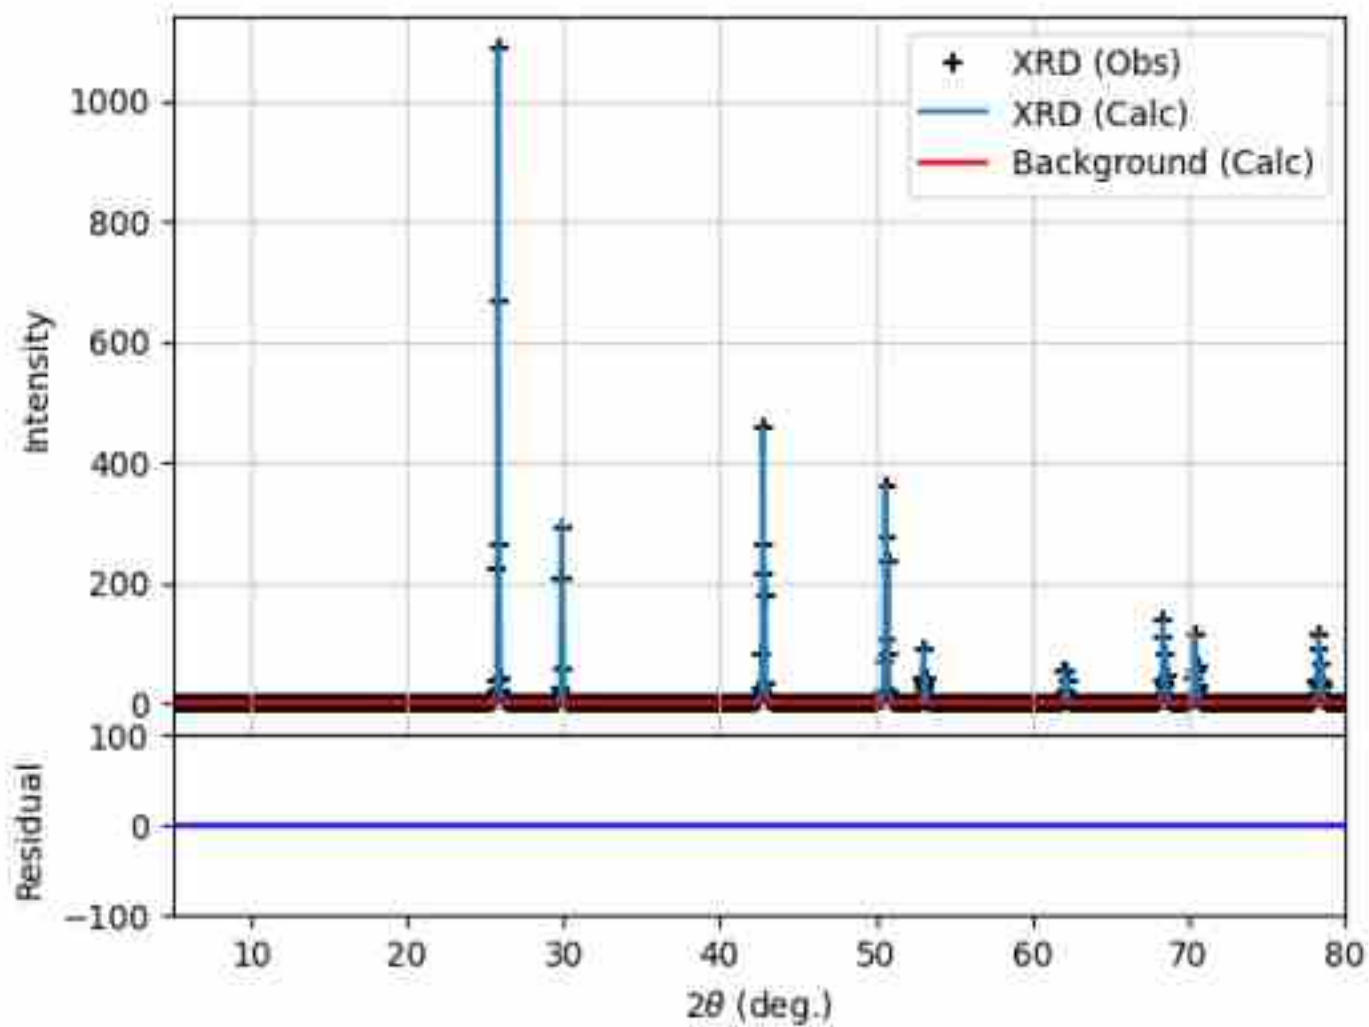

| RMSE before RR | Rwp     | RMSE after RR |
|----------------|---------|---------------|
| 0.004          | 0.00025 | 0.00062       |



# Ac<sub>2</sub>Ag<sub>1</sub>Pb<sub>1</sub>

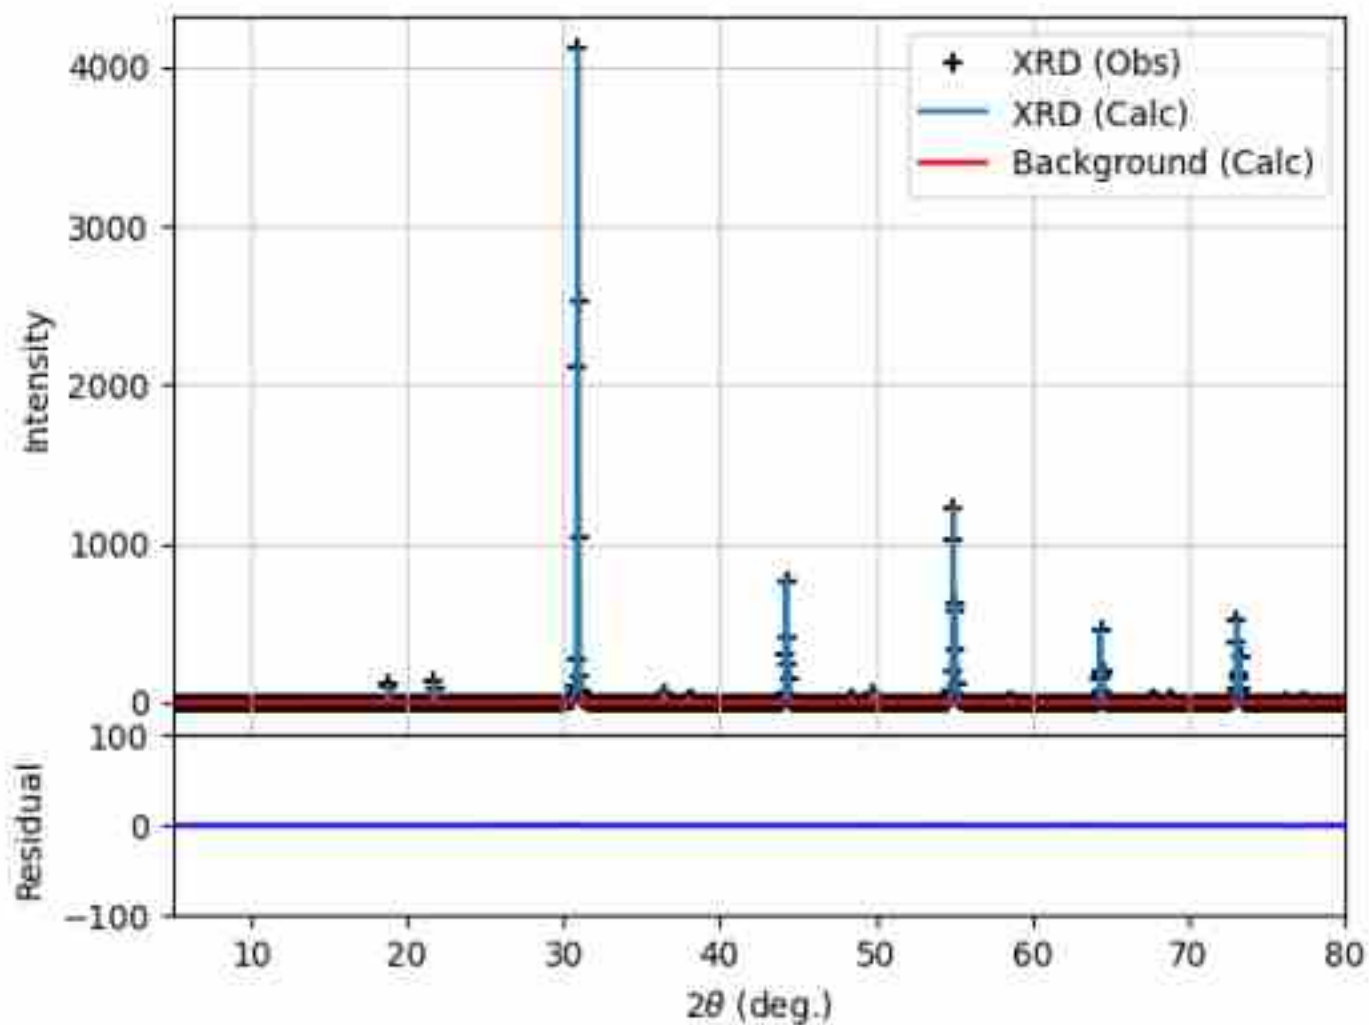

| RMSE before RR | Rwp     | RMSE after RR |
|----------------|---------|---------------|
| 0.004          | 0.22878 | 0.0024        |

# Al<sub>1</sub>Ga<sub>1</sub>P<sub>2</sub>

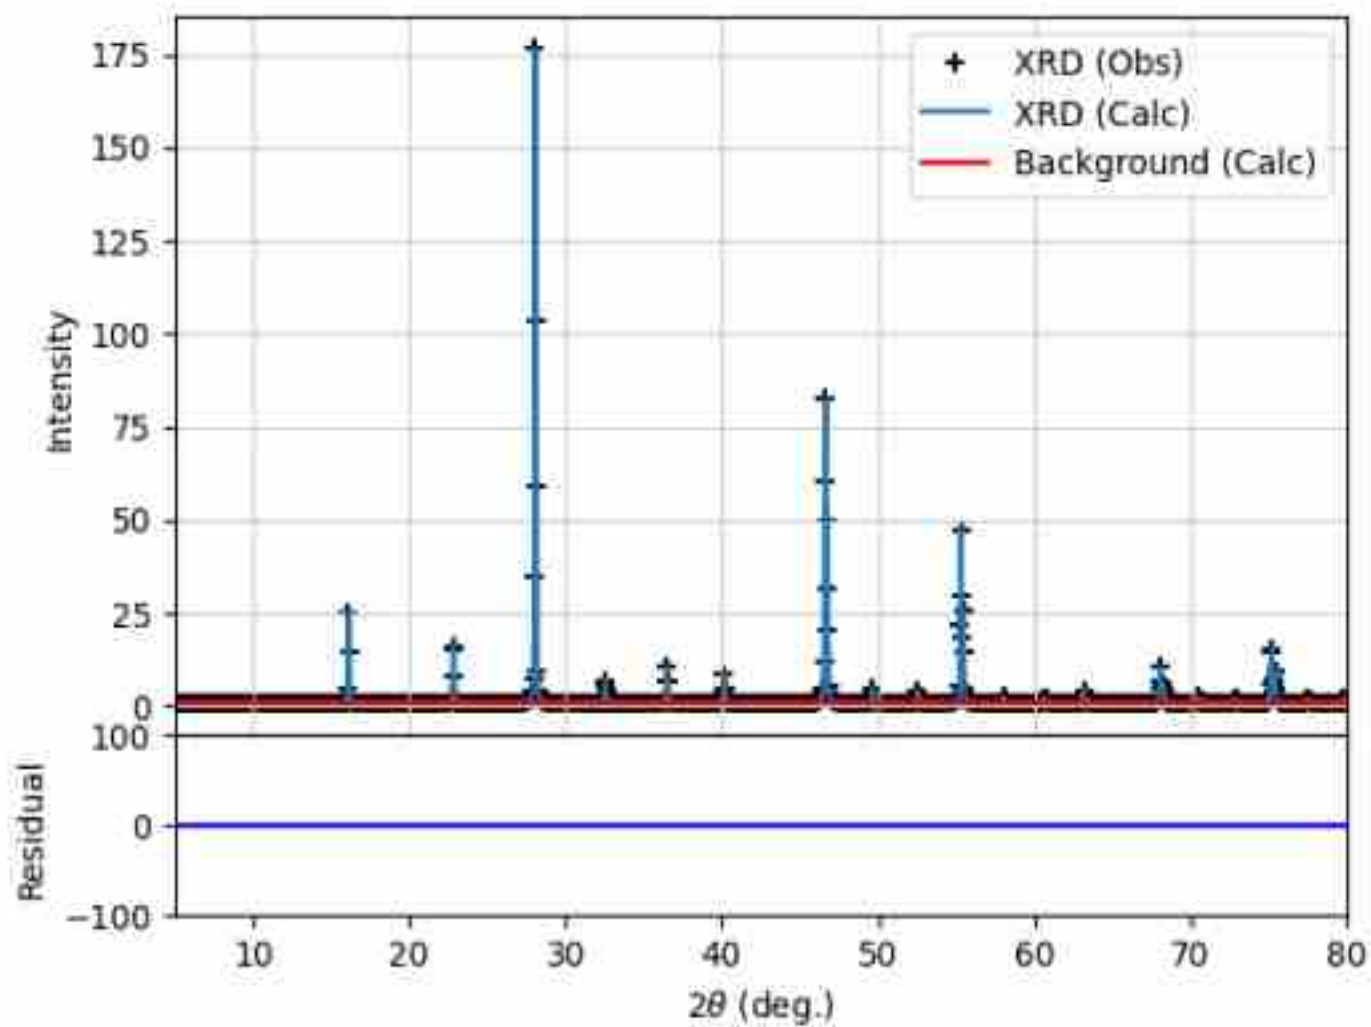

| RMSE before RR | Rwp     | RMSE after RR |
|----------------|---------|---------------|
| 0.004          | 0.00246 | 0.00046       |

# AlSb1

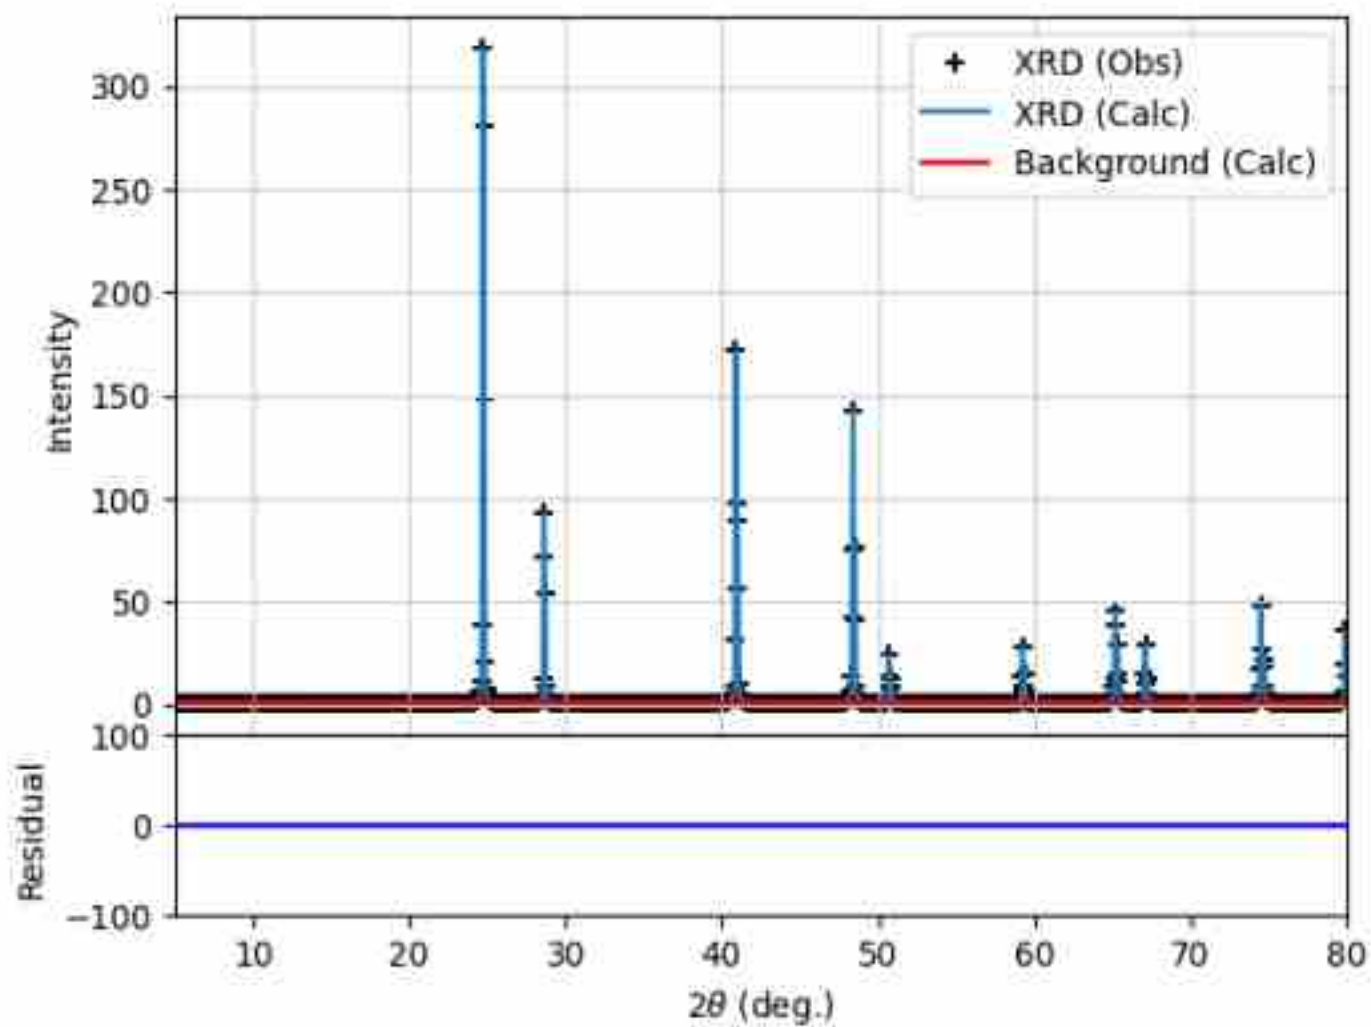

| RMSE before RR | Rwp    | RMSE after RR |
|----------------|--------|---------------|
| 0.004          | 0.0025 | 0.00042       |

# Al<sub>4</sub>Au<sub>4</sub>

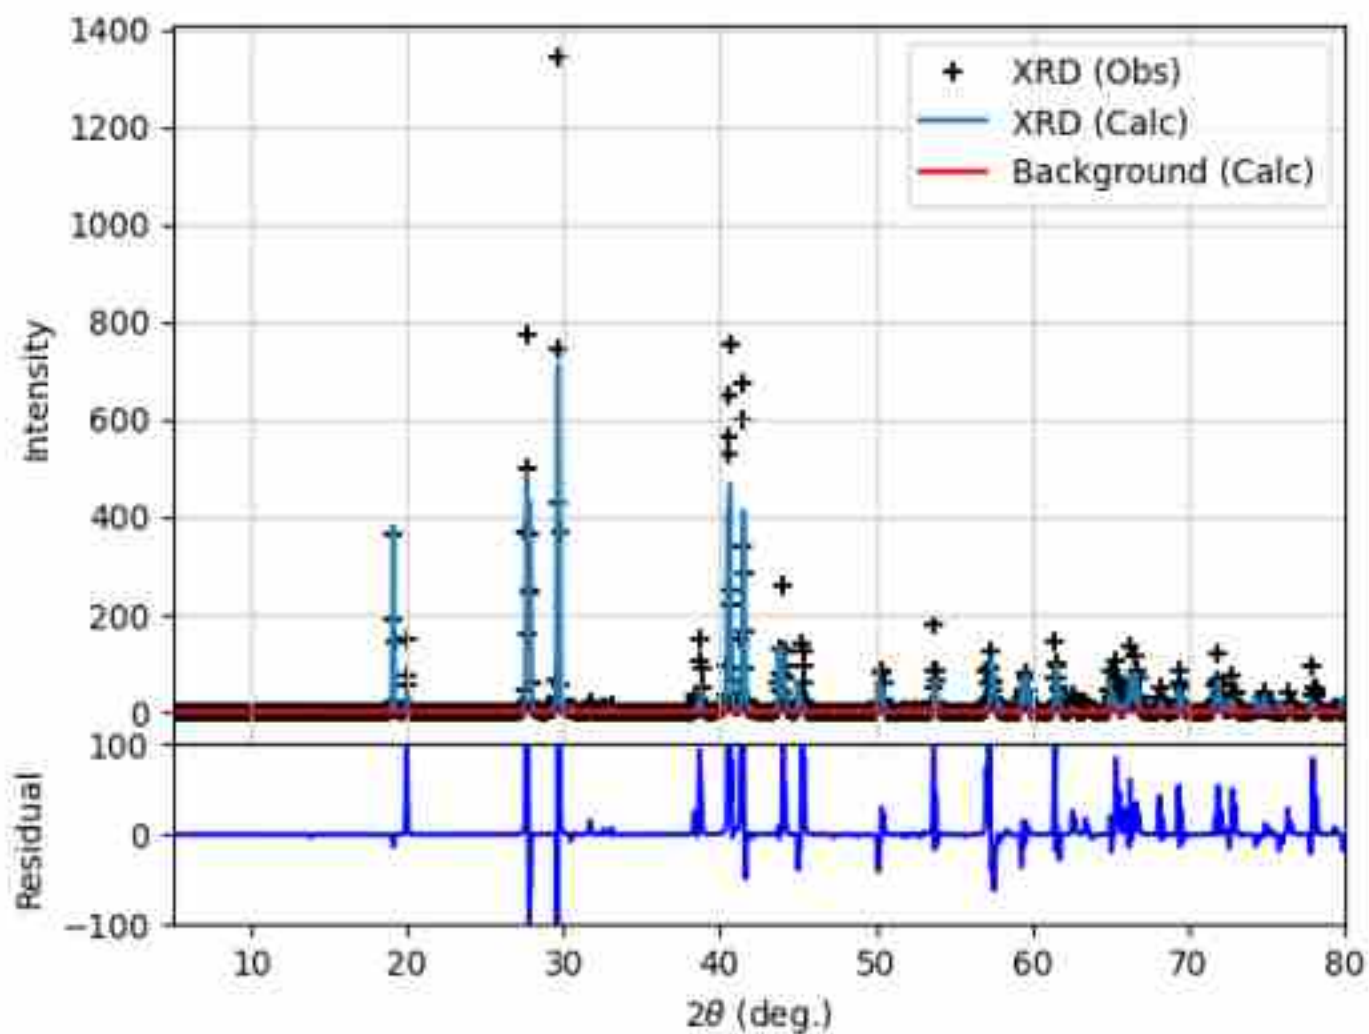

| RMSE before RR | Rwp      | RMSE after RR |
|----------------|----------|---------------|
| 0.04           | 52.54918 | 0.24778       |

# Ba<sub>2</sub>YCu<sub>3</sub>O<sub>8</sub>

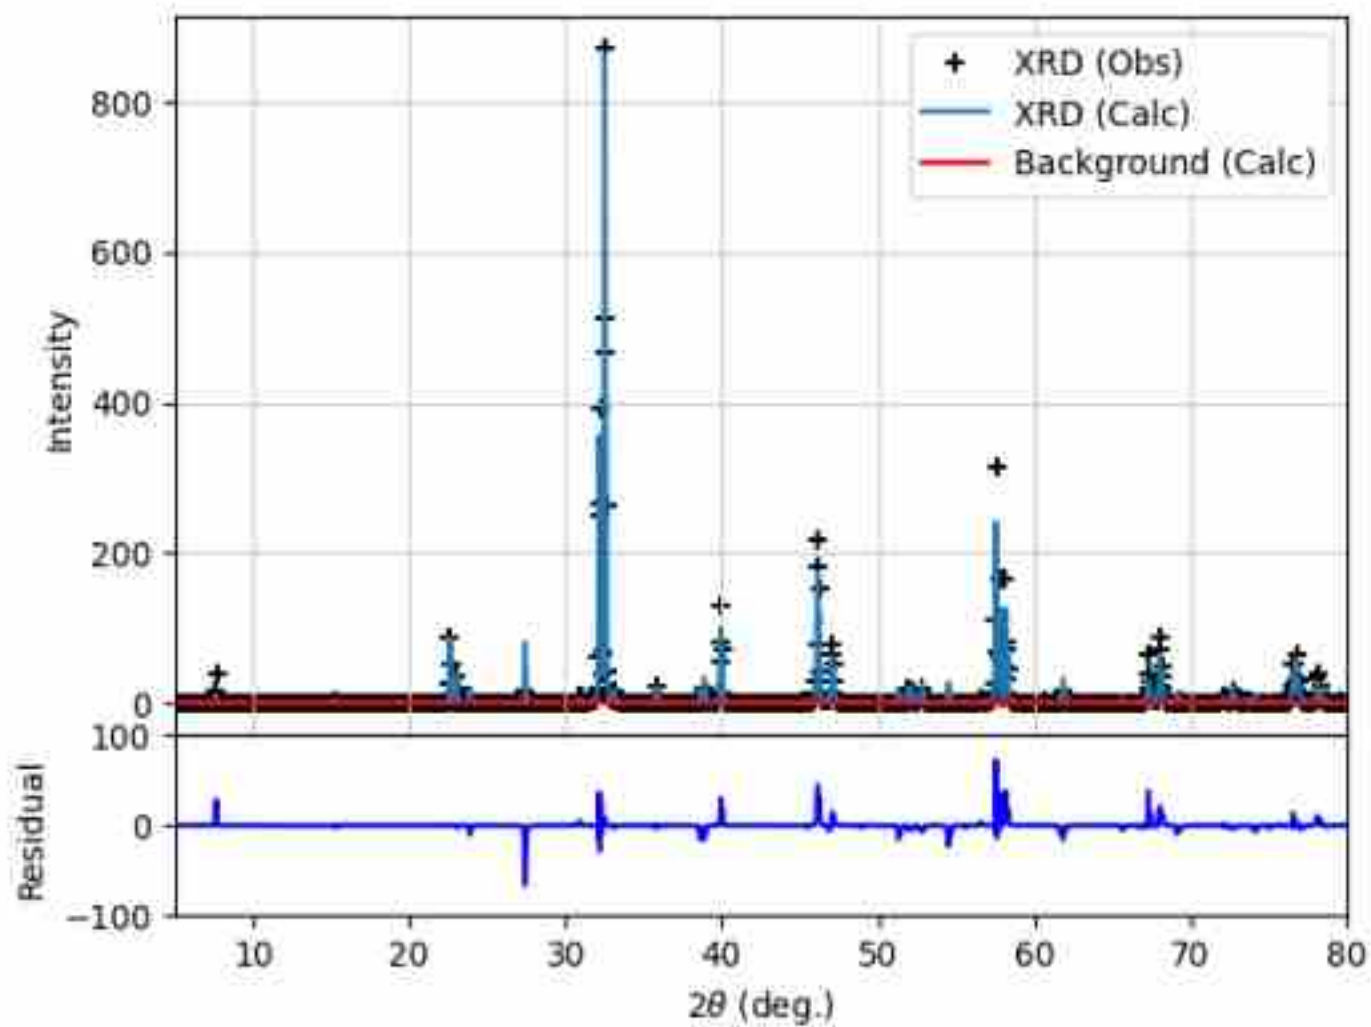

| RMSE before RR | Rwp      | RMSE after RR |
|----------------|----------|---------------|
| 0.04           | 44.15361 | None          |

# Ca1H1F1

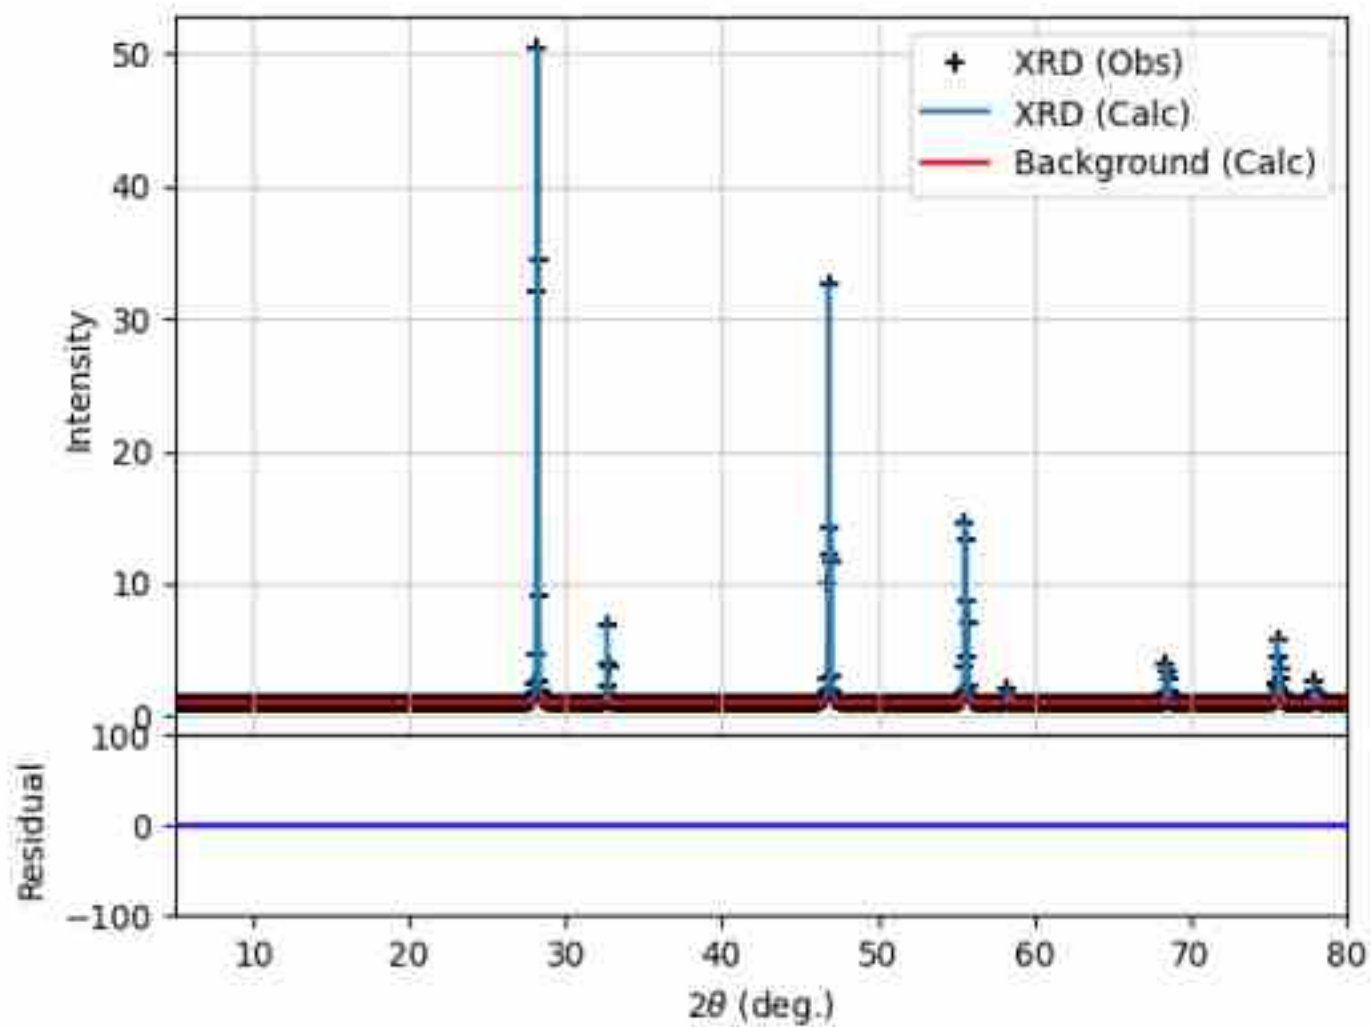

| RMSE before RR | Rwp     | RMSE after RR |
|----------------|---------|---------------|
| 0.004          | 0.00133 | 0.00169       |

# Ca1La1

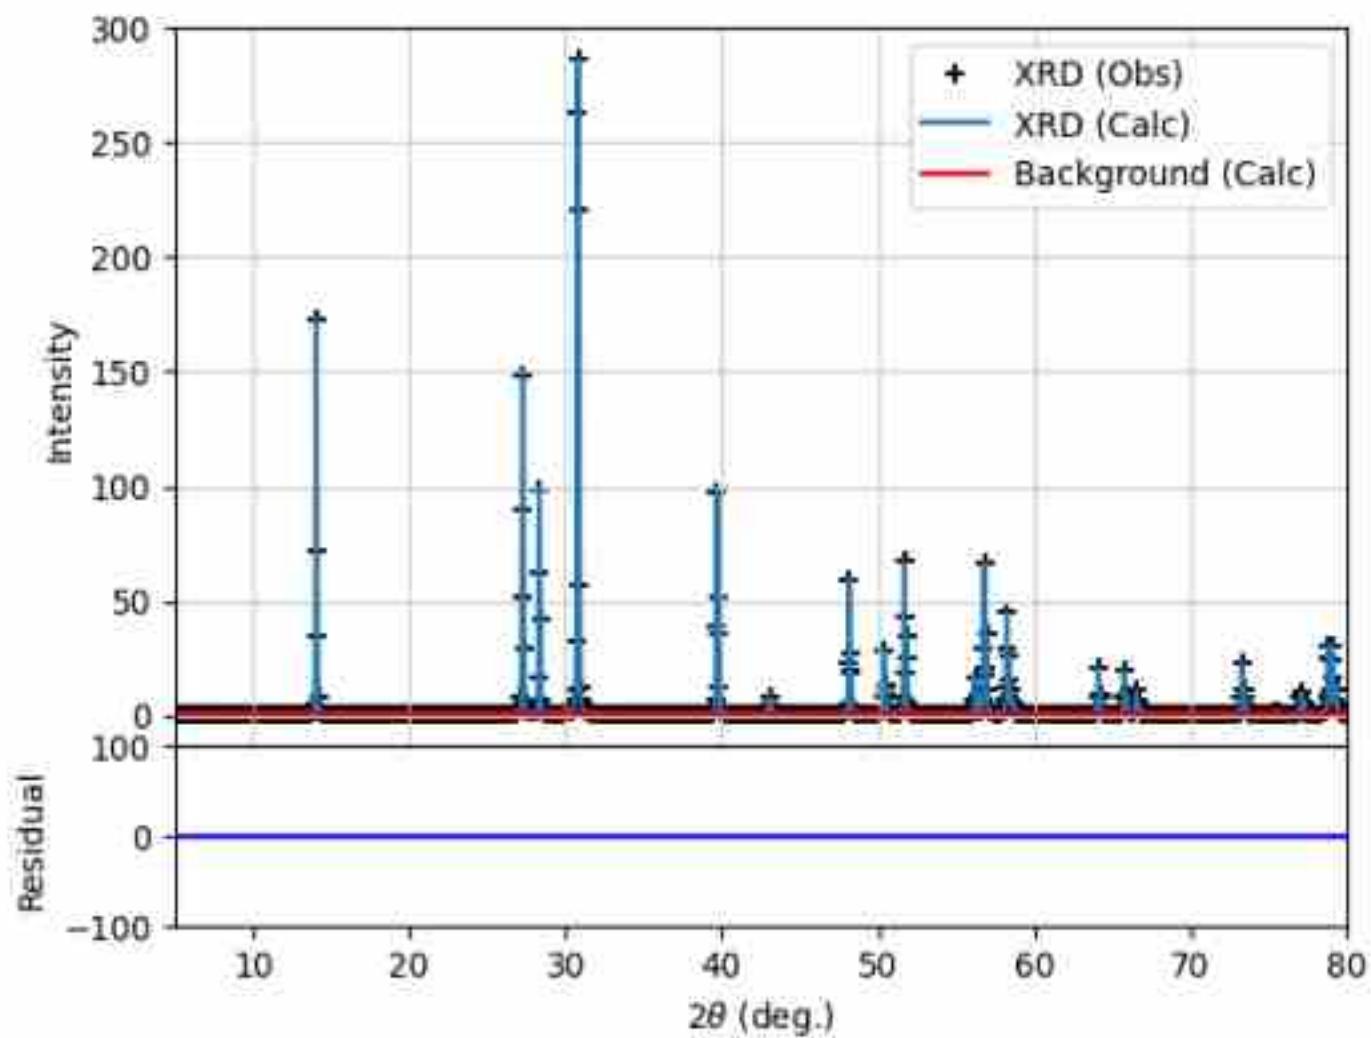

| RMSE before RR | Rwp     | RMSE after RR |
|----------------|---------|---------------|
| 0.004          | 0.01301 | 0.0005        |

# Ca1Yb1Zn2

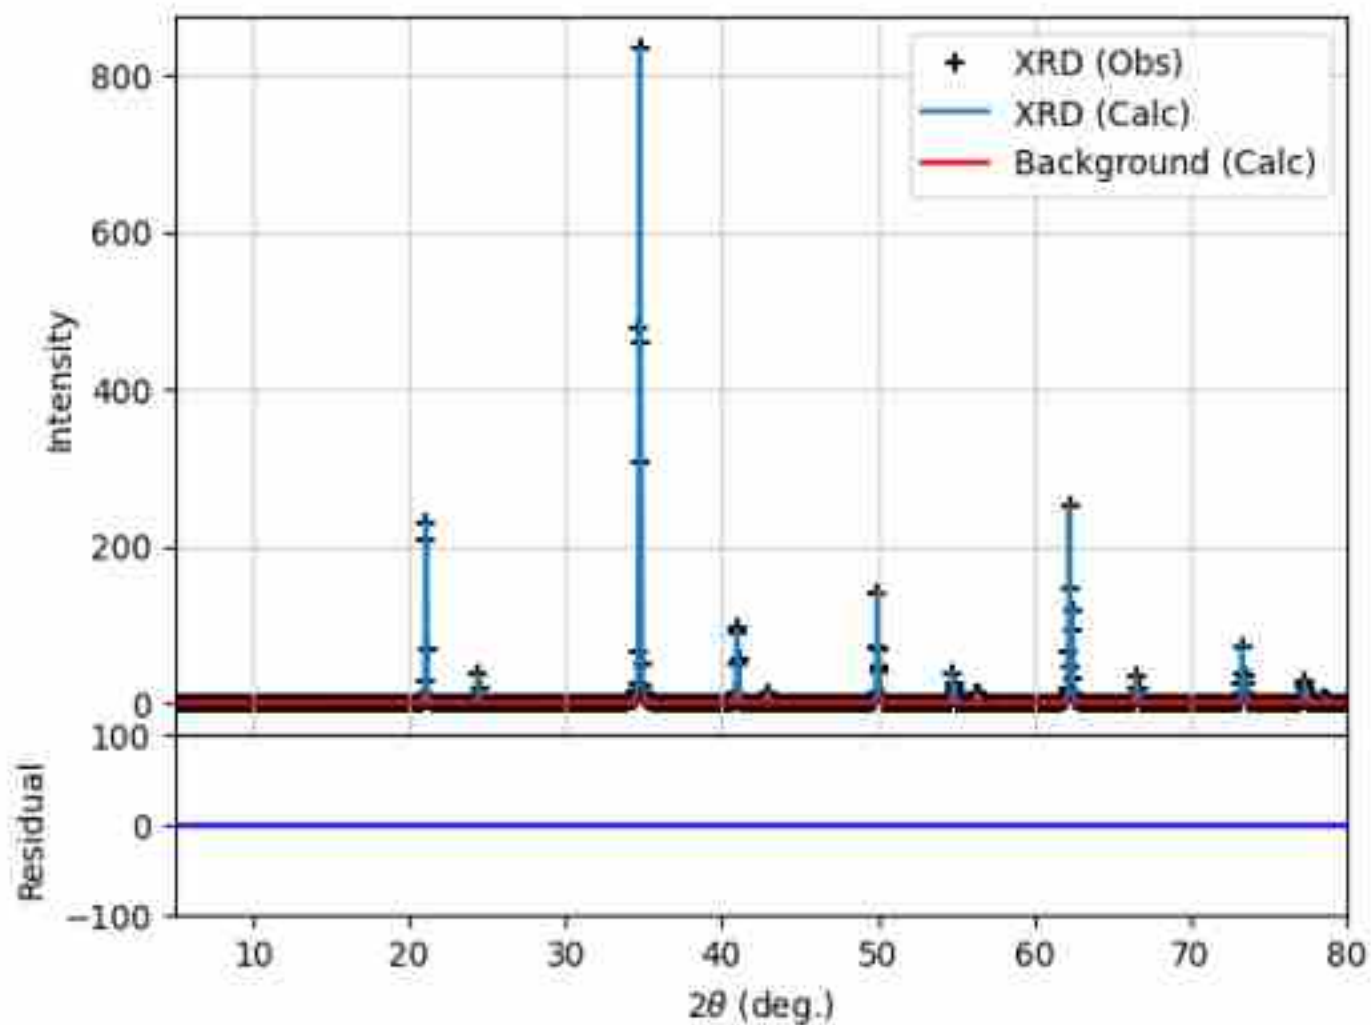

| RMSE before RR | Rwp     | RMSE after RR |
|----------------|---------|---------------|
| 0.004          | 0.00661 | 0.00243       |



# Cd1Hg1Se2

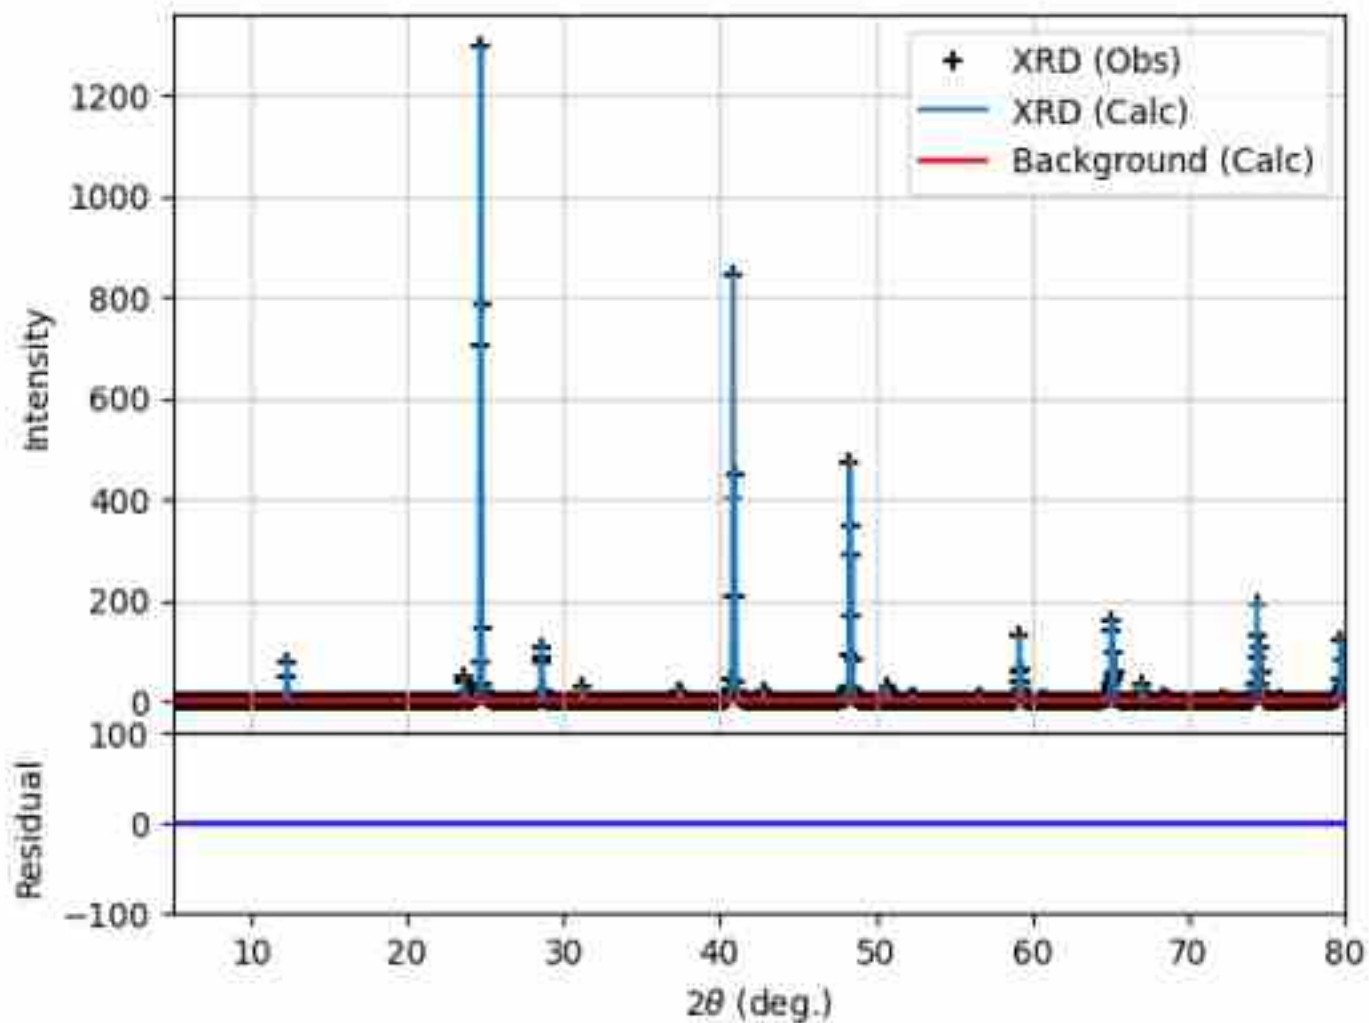

| RMSE before RR | Rwp     | RMSE after RR |
|----------------|---------|---------------|
| 0.004          | 0.00329 | 0.0001        |

# Cd<sub>1</sub>Hg<sub>2</sub>

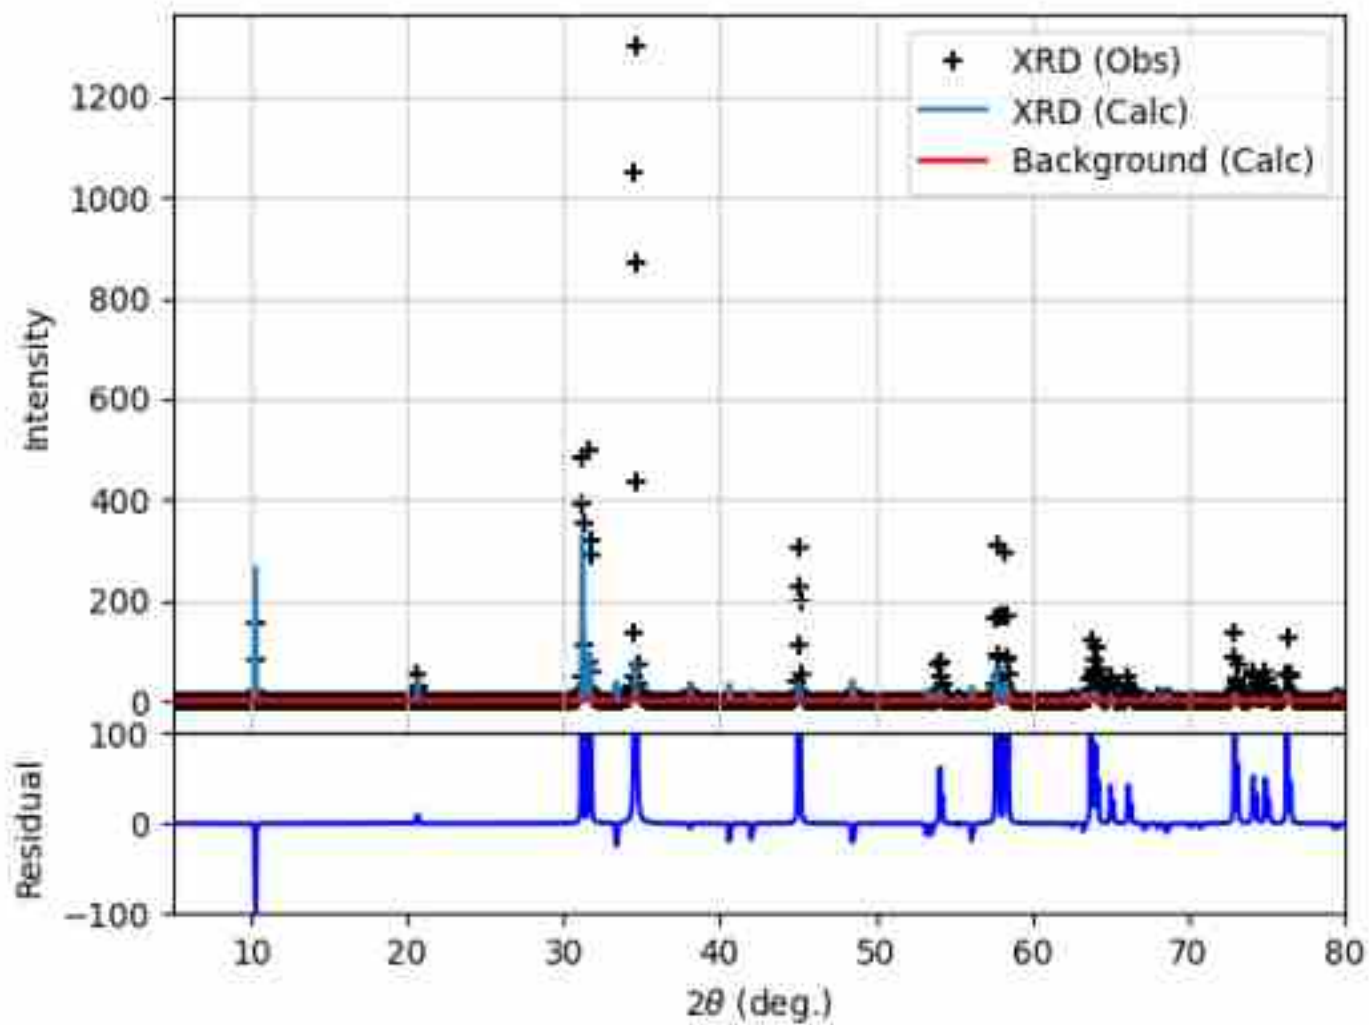

| RMSE before RR | Rwp      | RMSE after RR |
|----------------|----------|---------------|
| 0.004          | 80.76703 | 0.2166        |

# Ce1Al1Co4

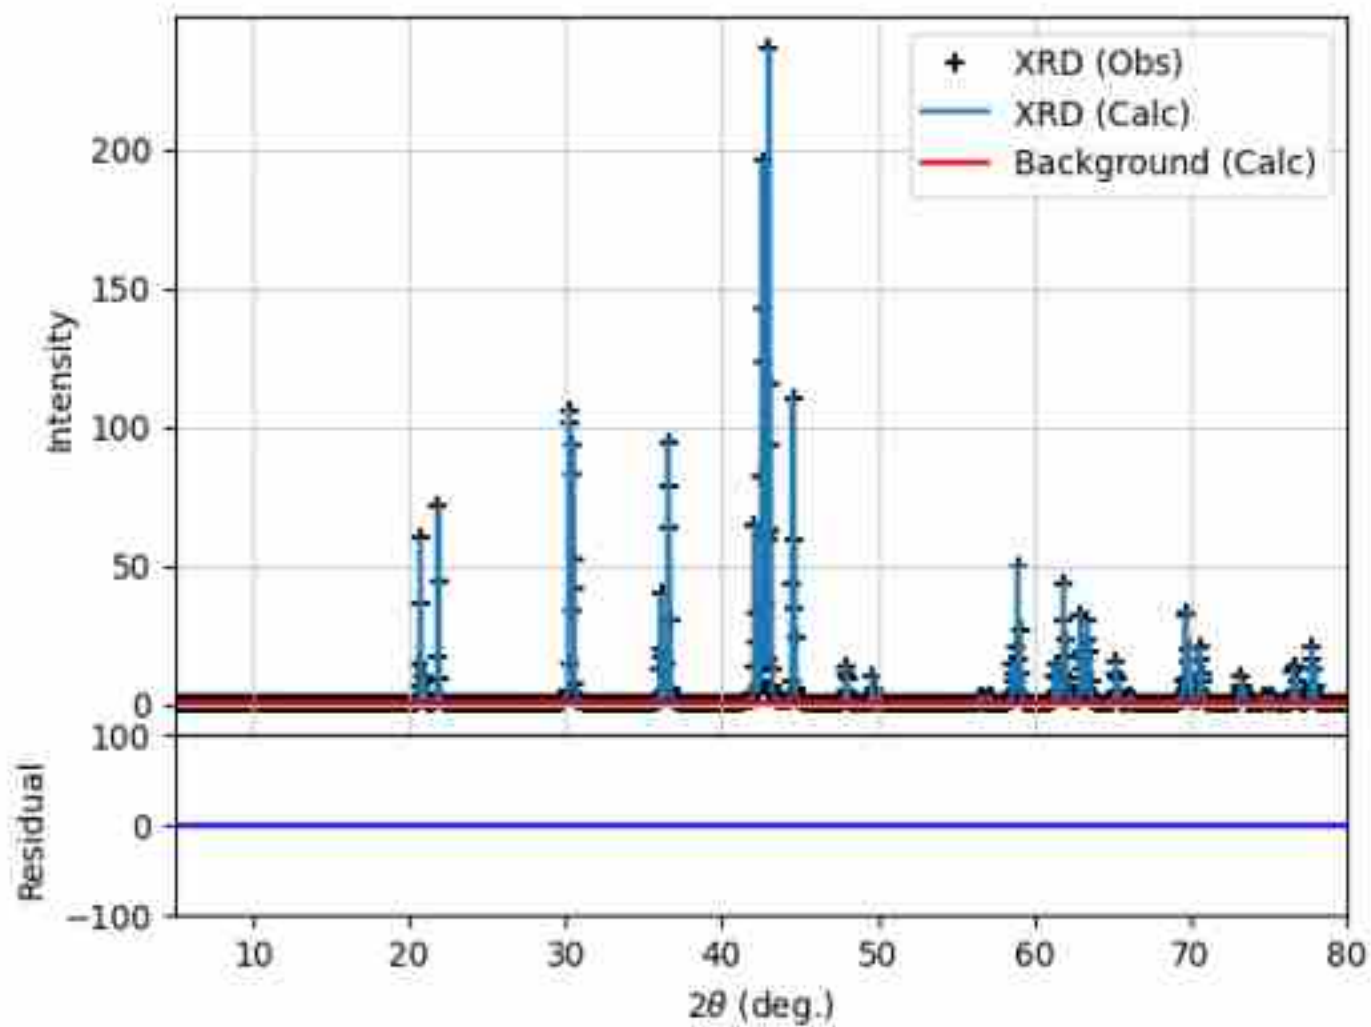

| RMSE before RR | Rwp     | RMSE after RR |
|----------------|---------|---------------|
| 0.04           | 0.00249 | 0.00032       |

# Ce1Th1C1N1

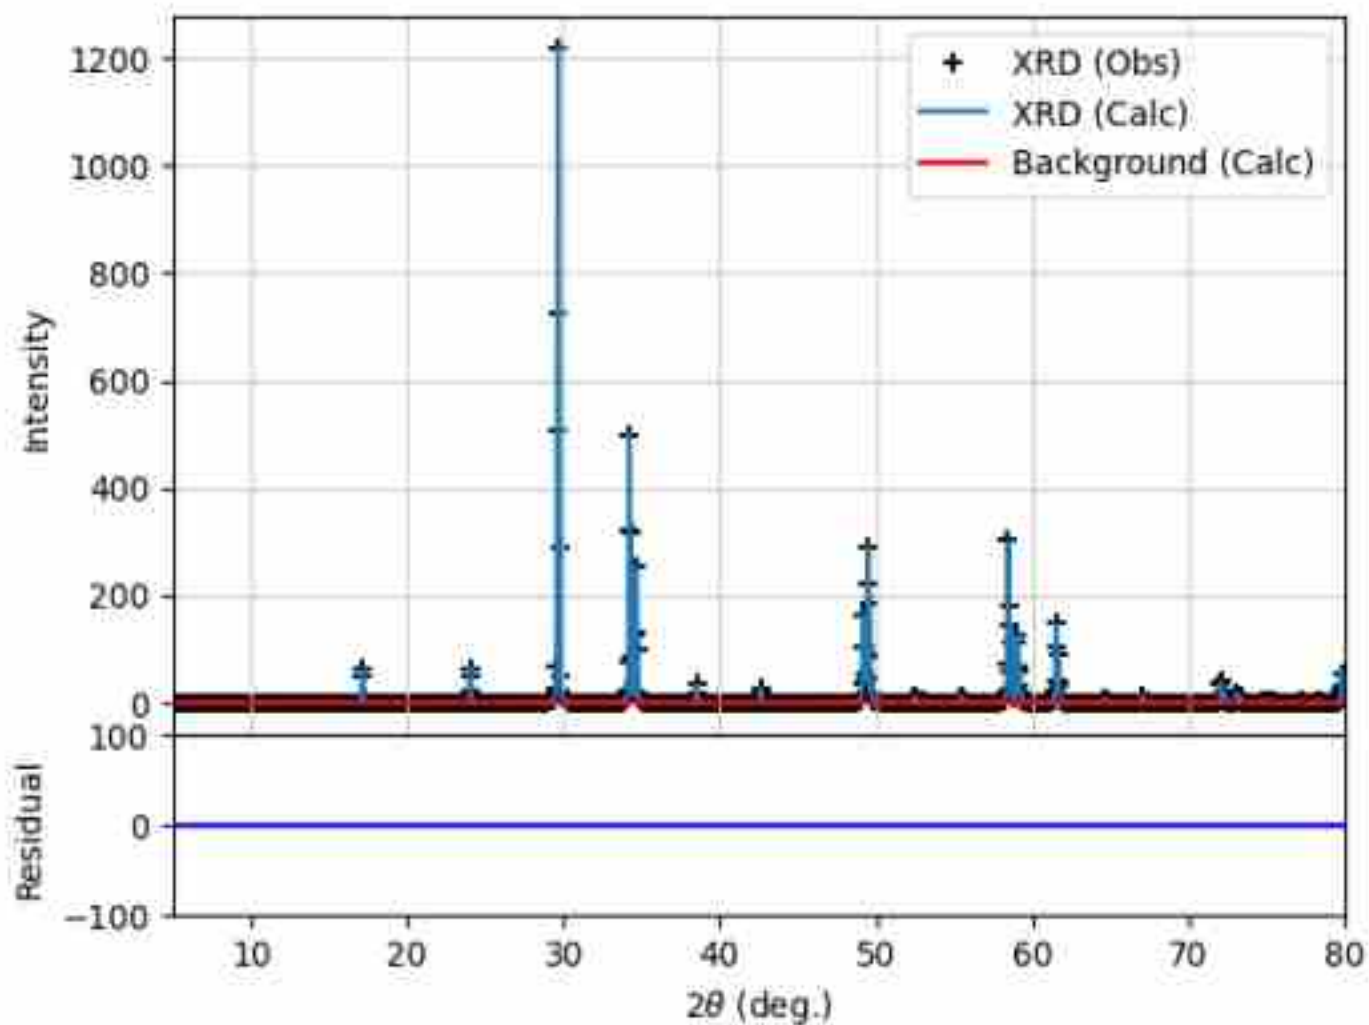

| RMSE before RR | Rwp     | RMSE after RR |
|----------------|---------|---------------|
| 0.004          | 0.05087 | 0.00422       |

# Ce1U1C1N1

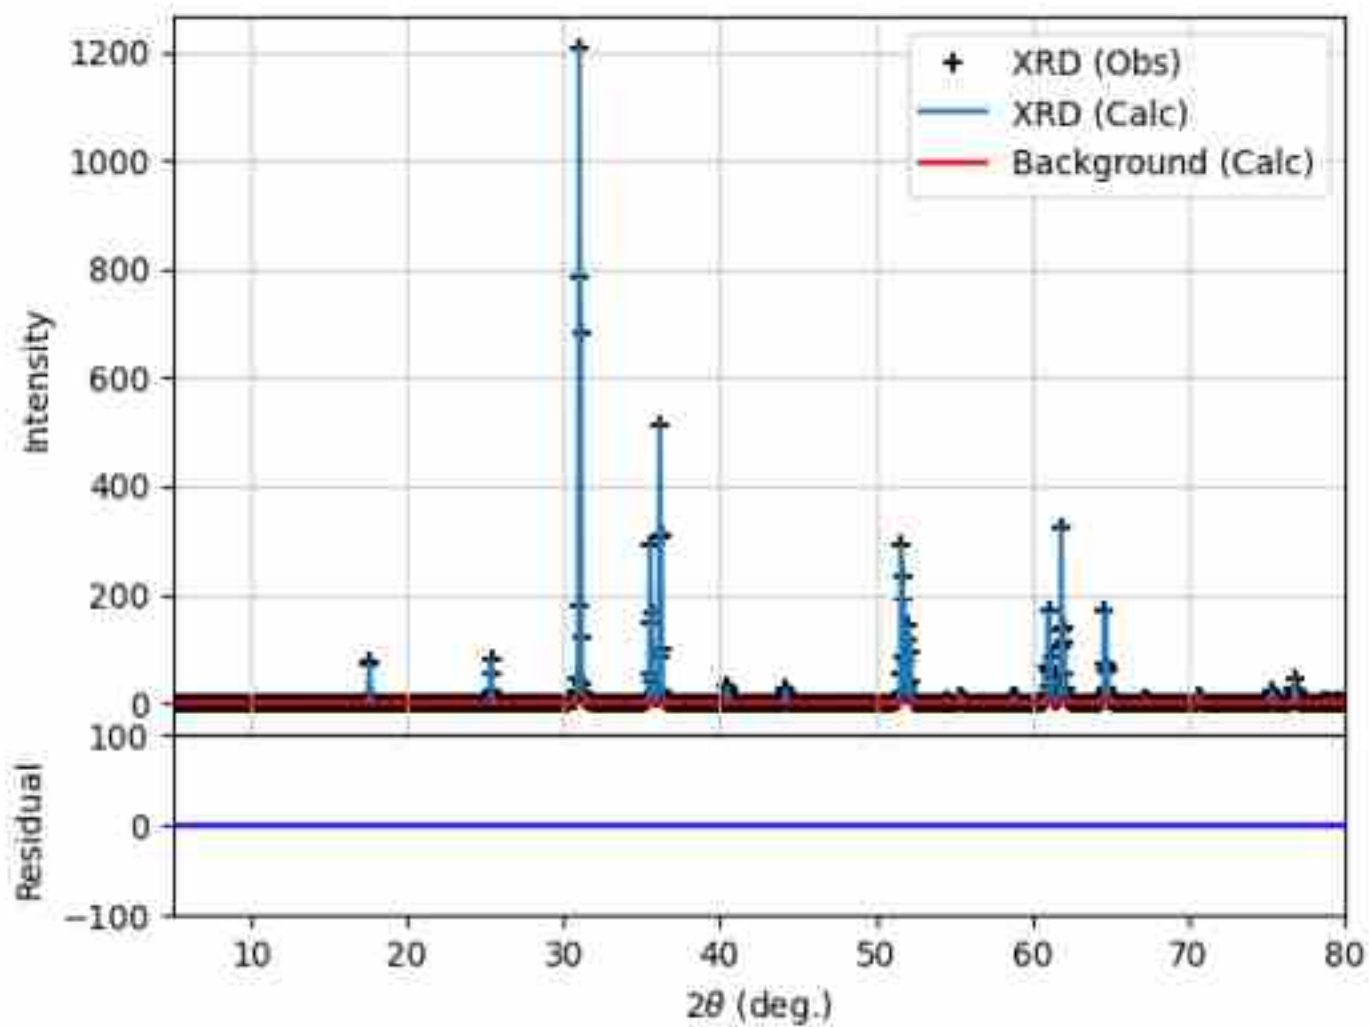

| RMSE before RR | Rwp     | RMSE after RR |
|----------------|---------|---------------|
| 0.004          | 0.00372 | 0.00088       |

# Ce3Sn1

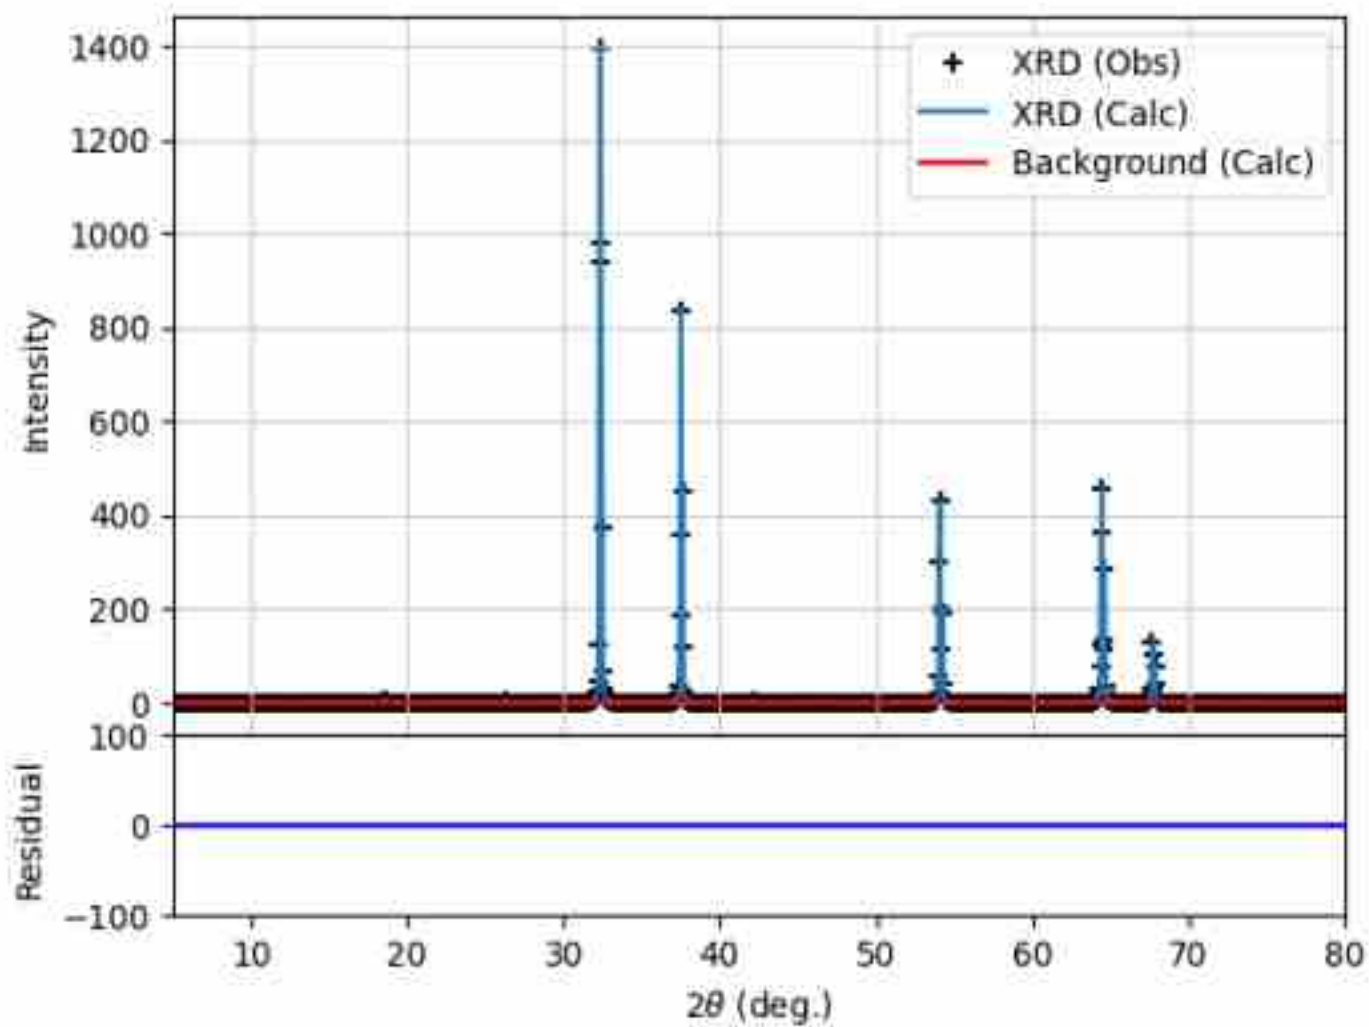

| RMSE before RR | Rwp    | RMSE after RR |
|----------------|--------|---------------|
| 0.004          | 0.0297 | 0.00082       |

# Cs1Cd1Cl3

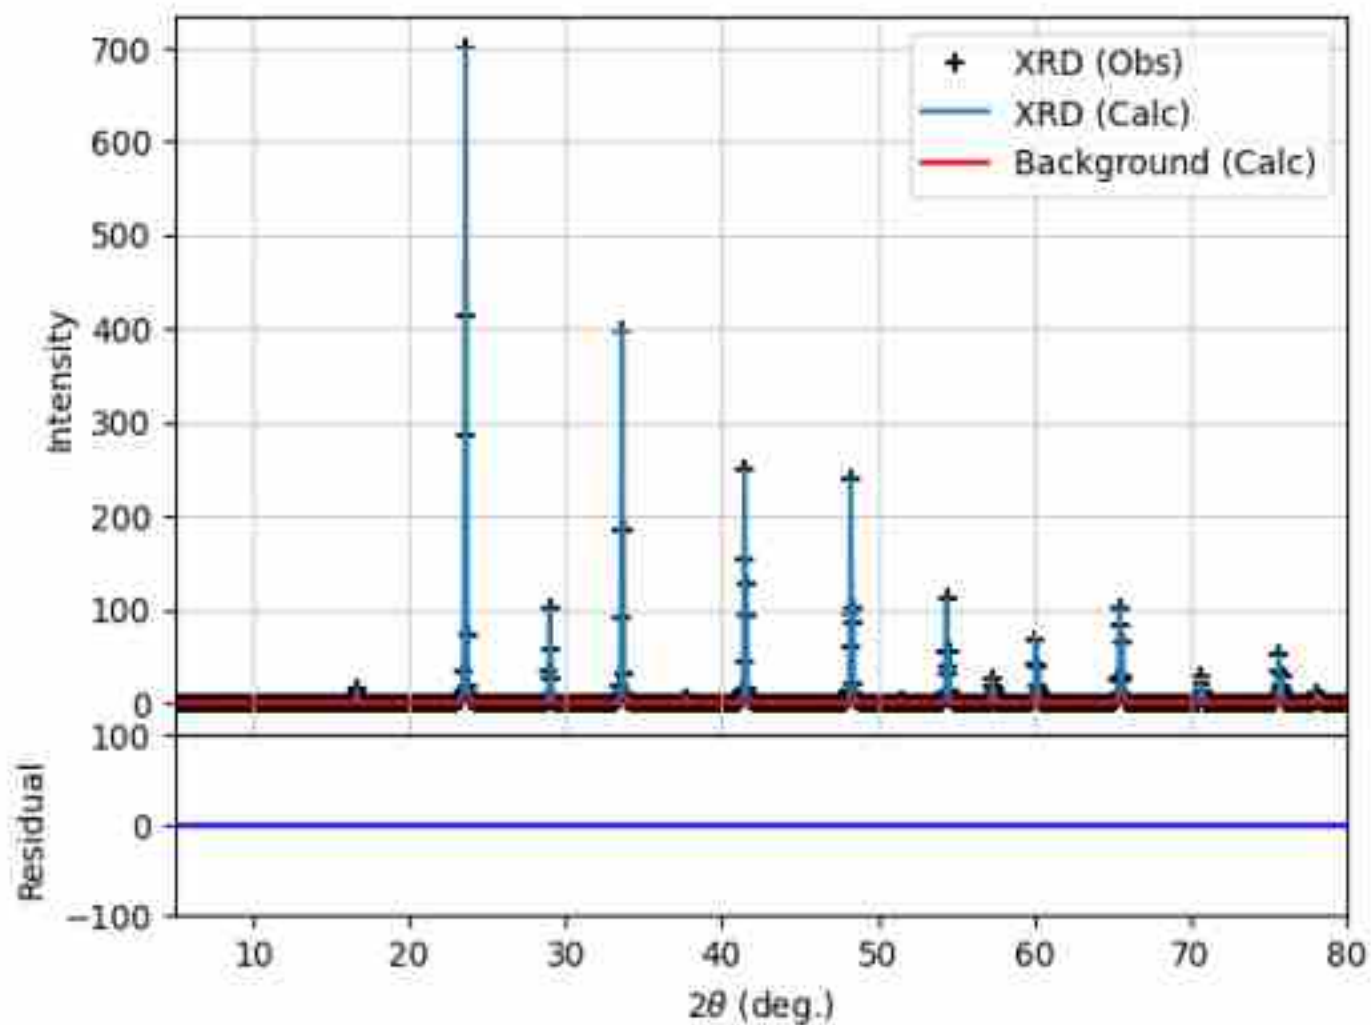

| RMSE before RR | Rwp     | RMSE after RR |
|----------------|---------|---------------|
| 0.004          | 0.01569 | 0.00241       |

# Cs1K1I1C11

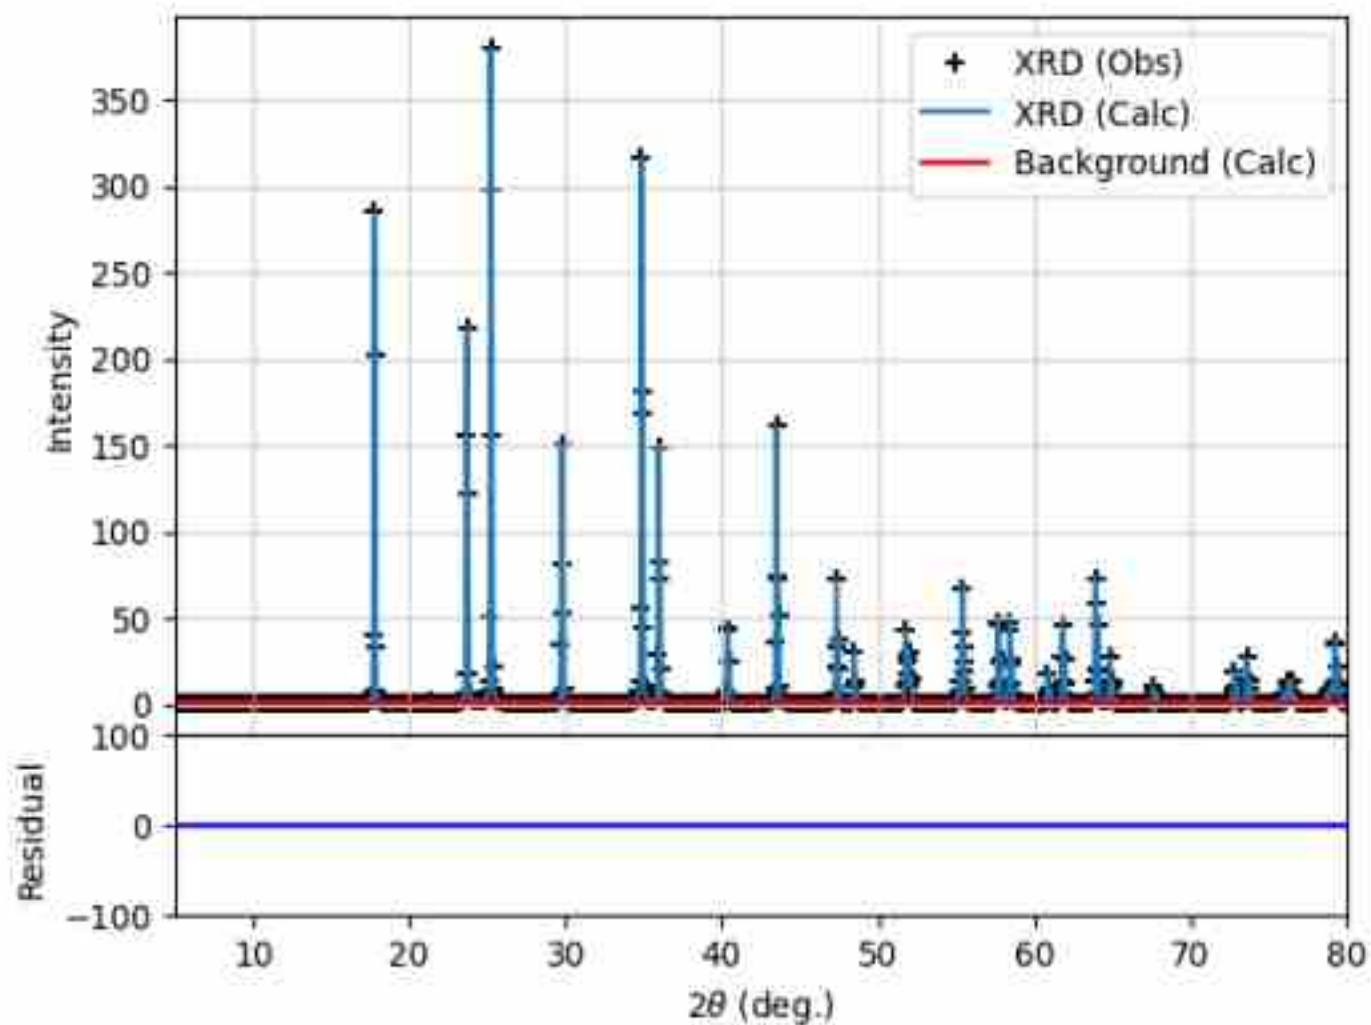

| RMSE before RR | Rwp     | RMSE after RR |
|----------------|---------|---------------|
| 0.004          | 0.00395 | 0.00043       |



# Cs1Yb1Br3

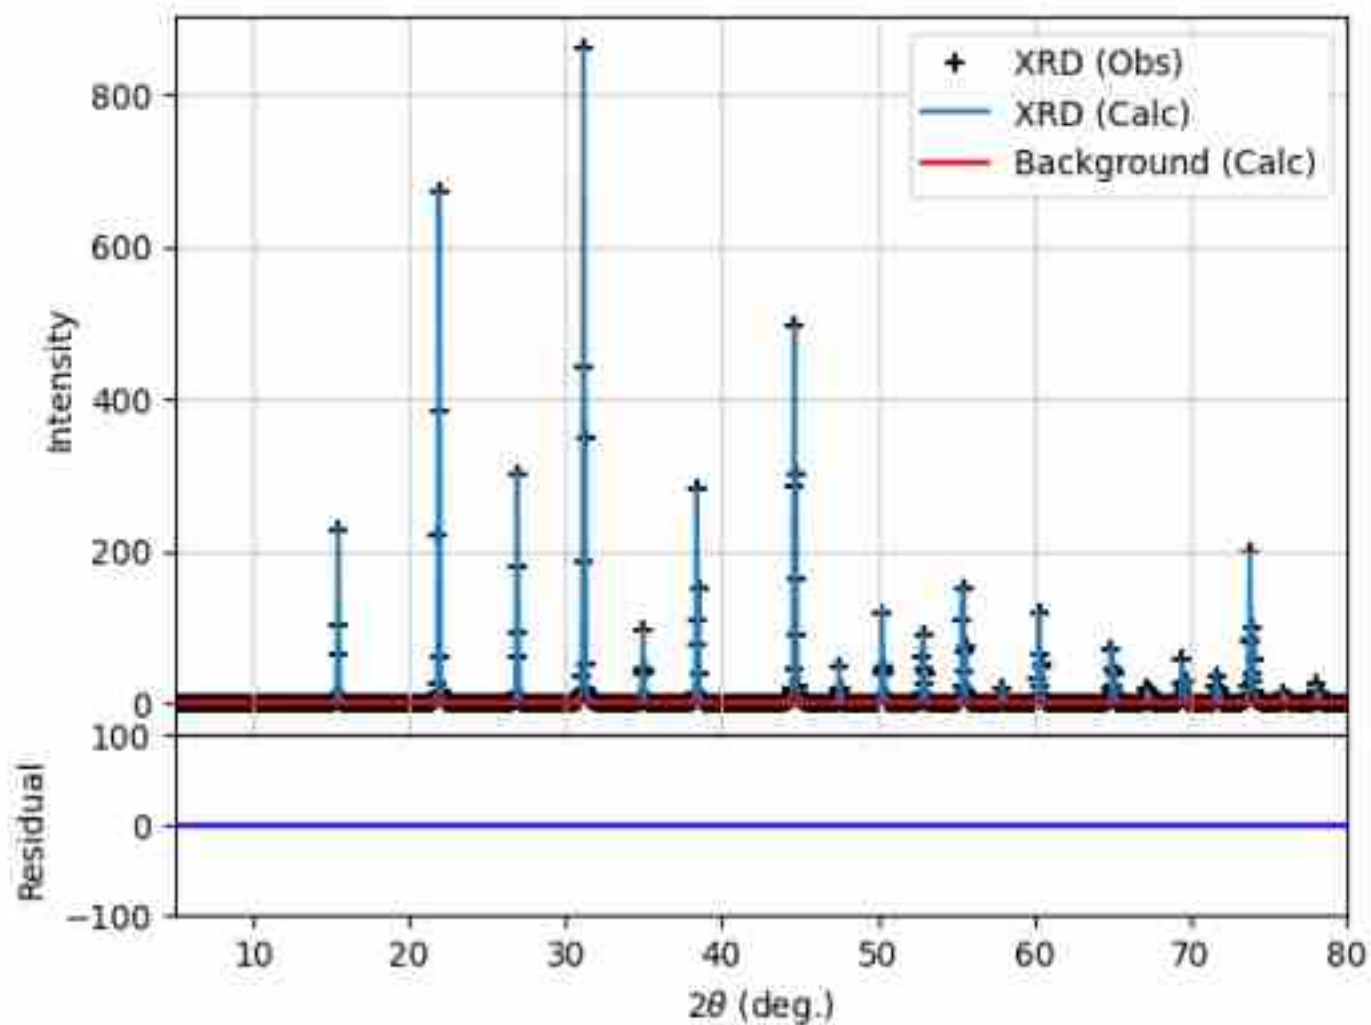

| RMSE before RR | Rwp    | RMSE after RR |
|----------------|--------|---------------|
| 0.004          | 0.0205 | 0.00084       |

# Cu1Ag1F3

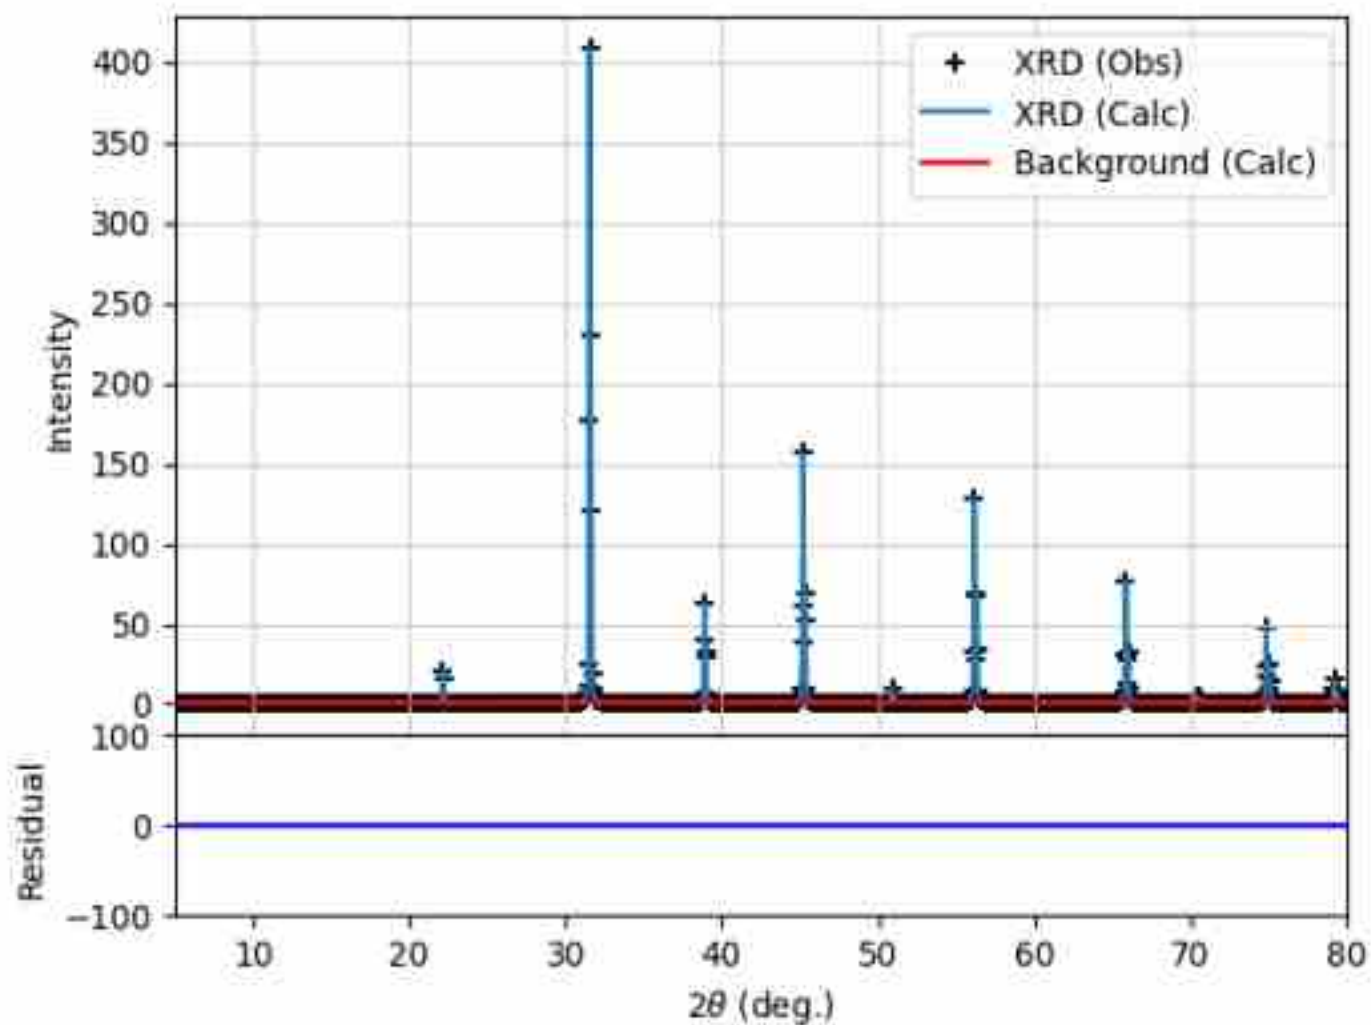

| RMSE before RR | Rwp     | RMSE after RR |
|----------------|---------|---------------|
| 0.004          | 0.00488 | 0.00182       |

# Cu1Ni1

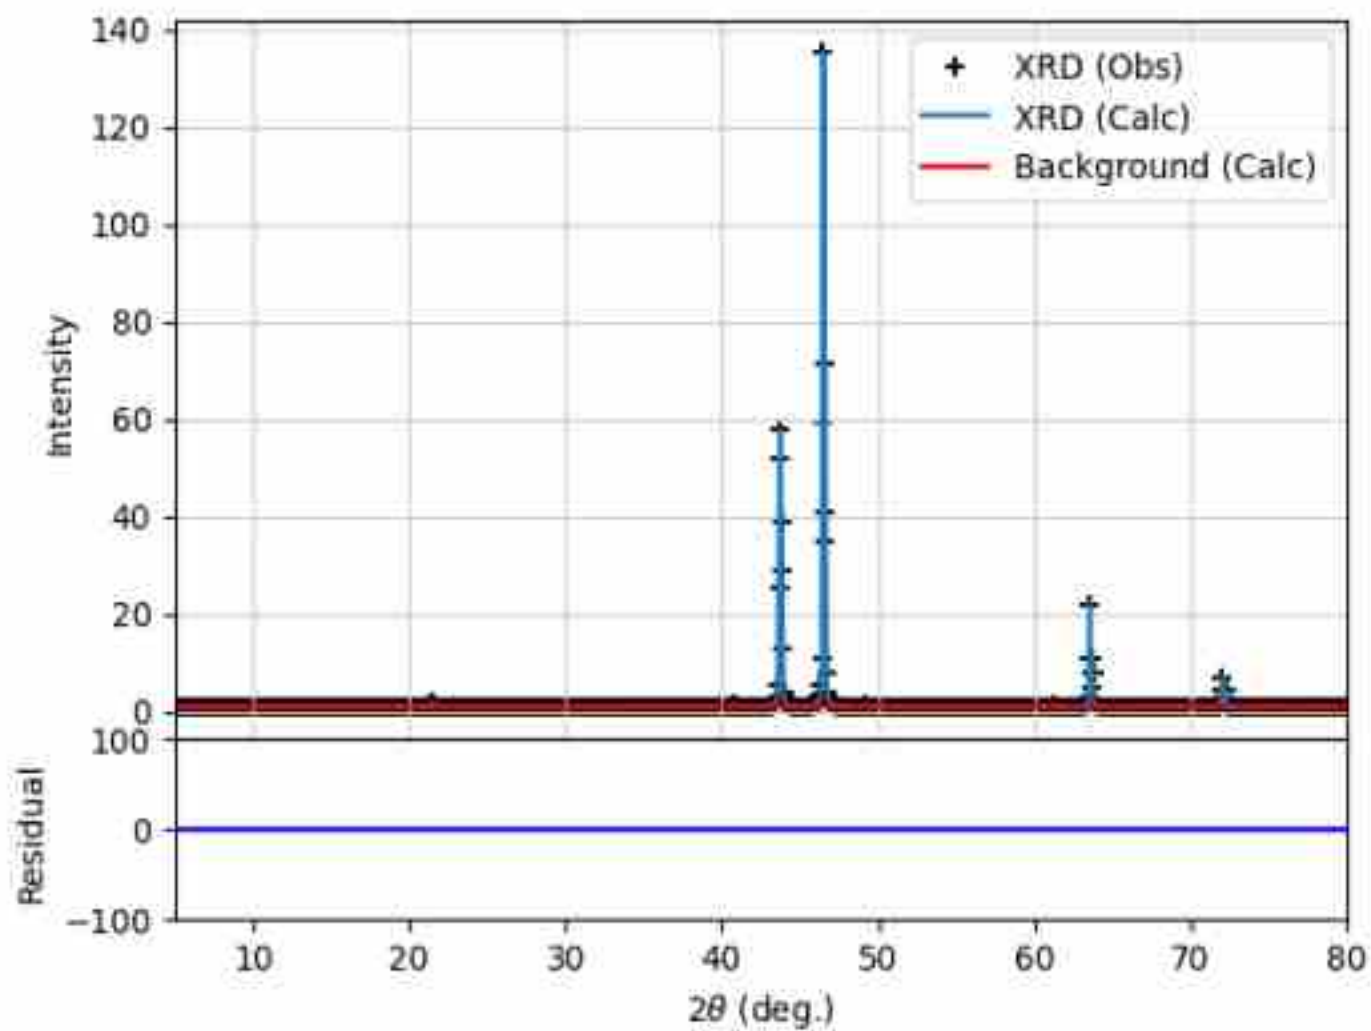

| RMSE before RR | Rwp     | RMSE after RR |
|----------------|---------|---------------|
| 0.004          | 0.00214 | 0.00014       |

# Cu<sub>2</sub>P<sub>4</sub>O<sub>12</sub>

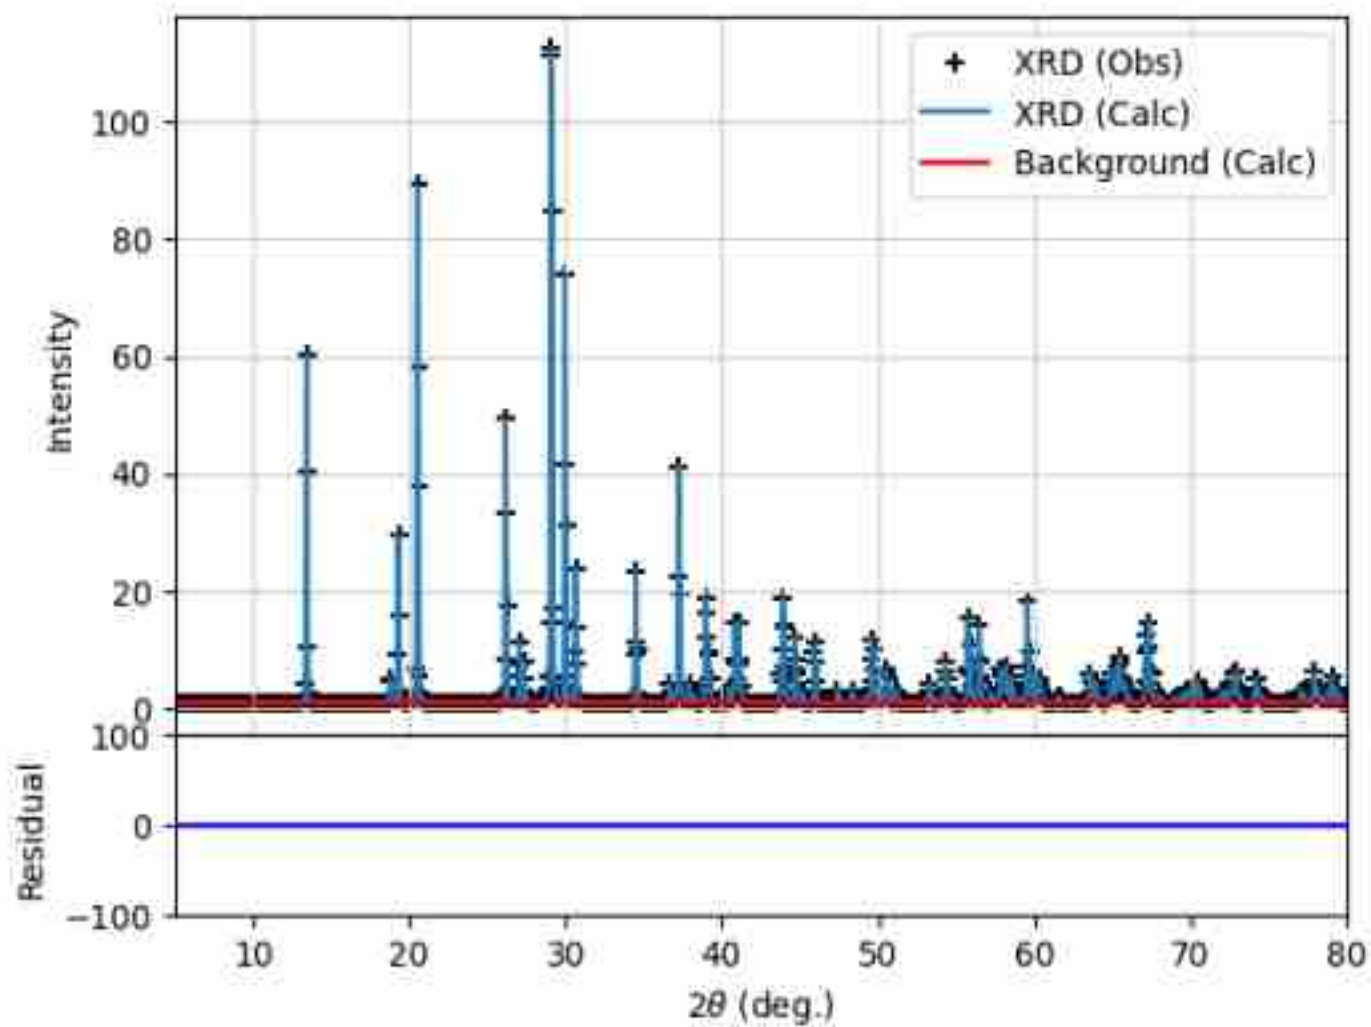

| RMSE before RR | Rwp    | RMSE after RR |
|----------------|--------|---------------|
| 0.04           | 0.0028 | 0.00048       |

# Cu<sub>5</sub>Ge<sub>2</sub>

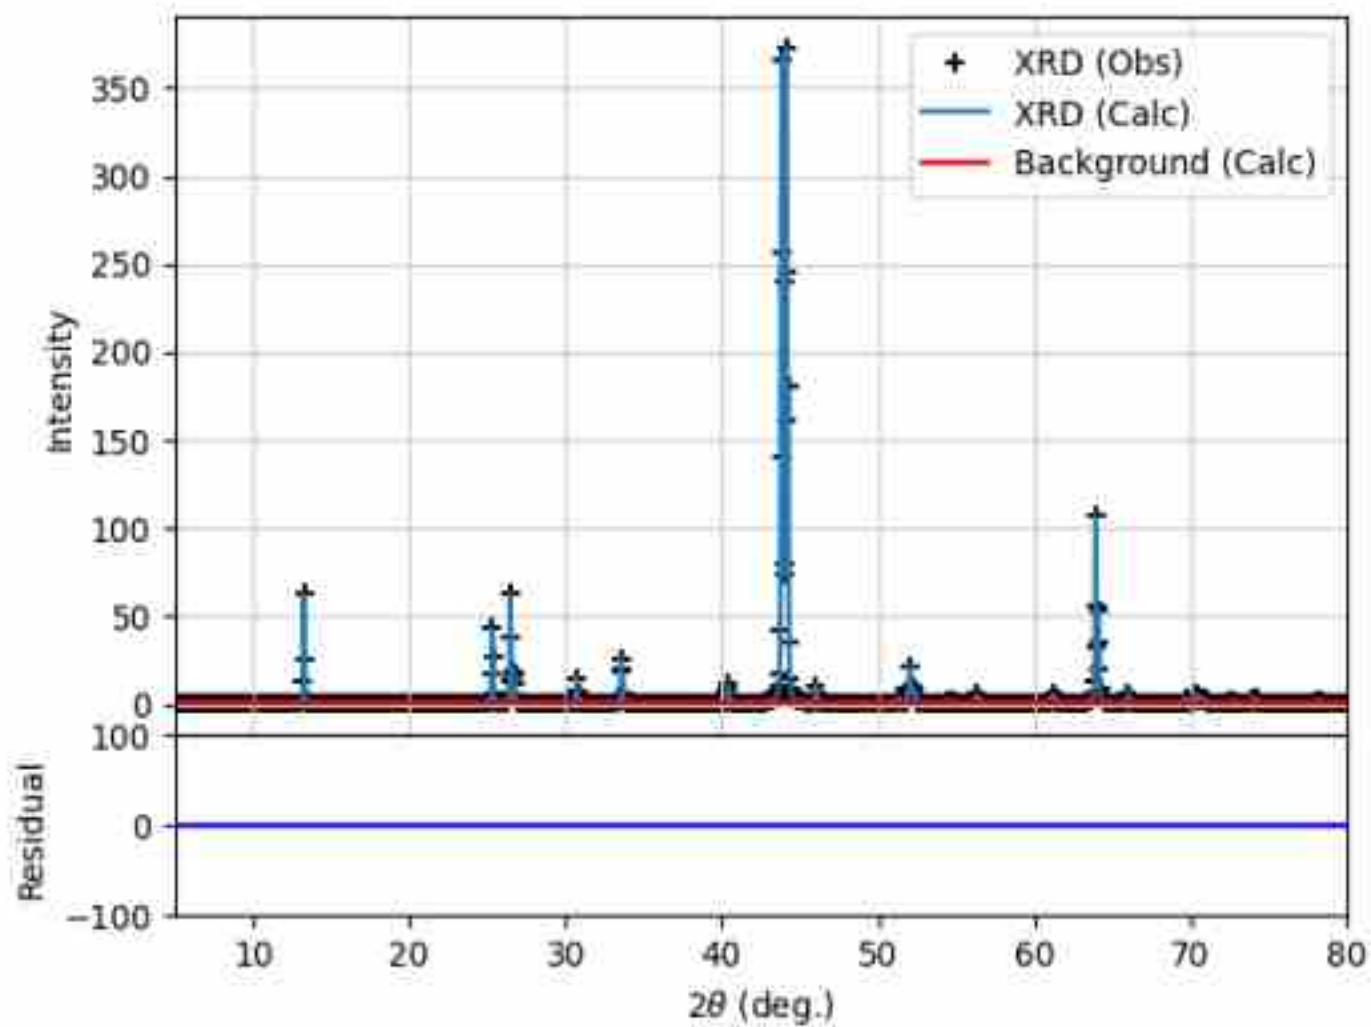

| RMSE before RR | Rwp     | RMSE after RR |
|----------------|---------|---------------|
| 0.04           | 0.00202 | 0.00026       |

# Cu6O1F11

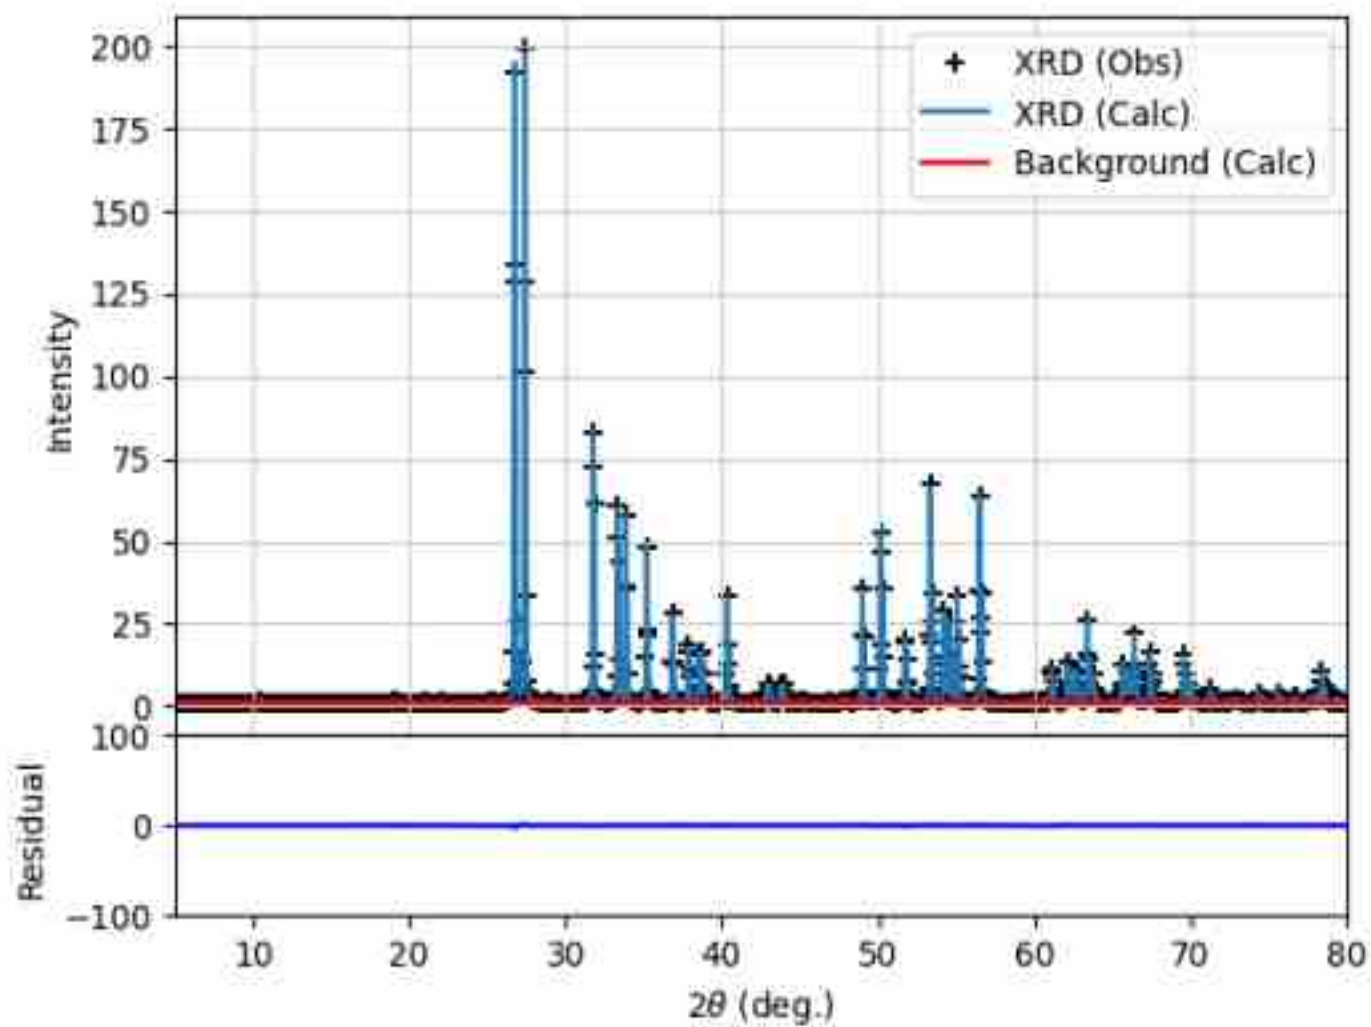

| RMSE before RR | Rwp     | RMSE after RR |
|----------------|---------|---------------|
| 0.04           | 2.01136 | 0.04306       |

# Dy1Bi1Pt1

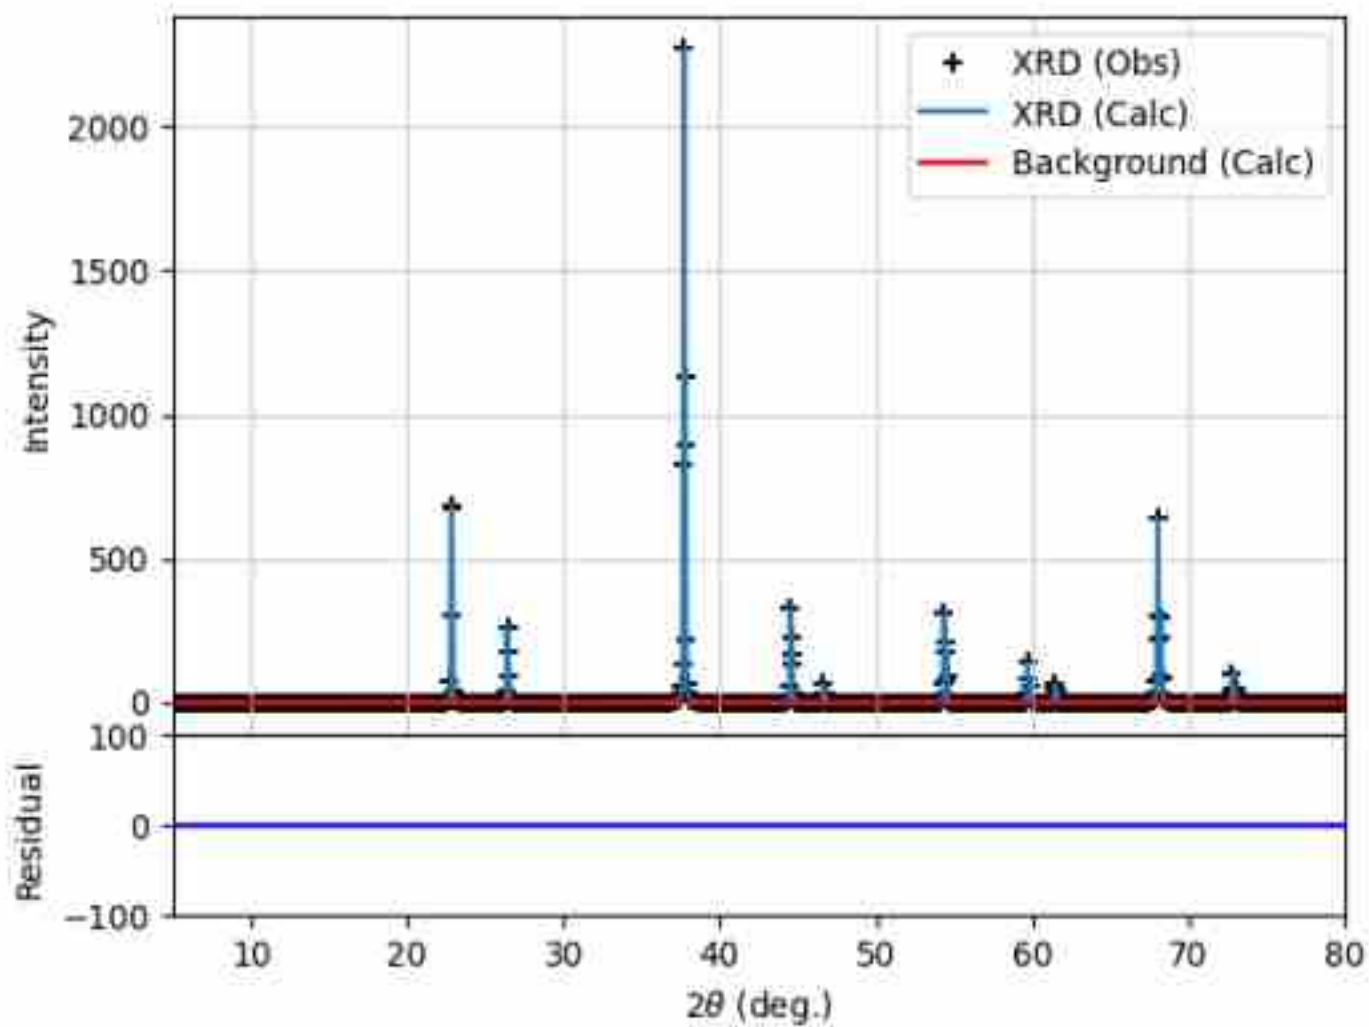

| RMSE before RR | Rwp     | RMSE after RR |
|----------------|---------|---------------|
| 0.004          | 0.00437 | 0.00044       |

# Dy1Er1Te2

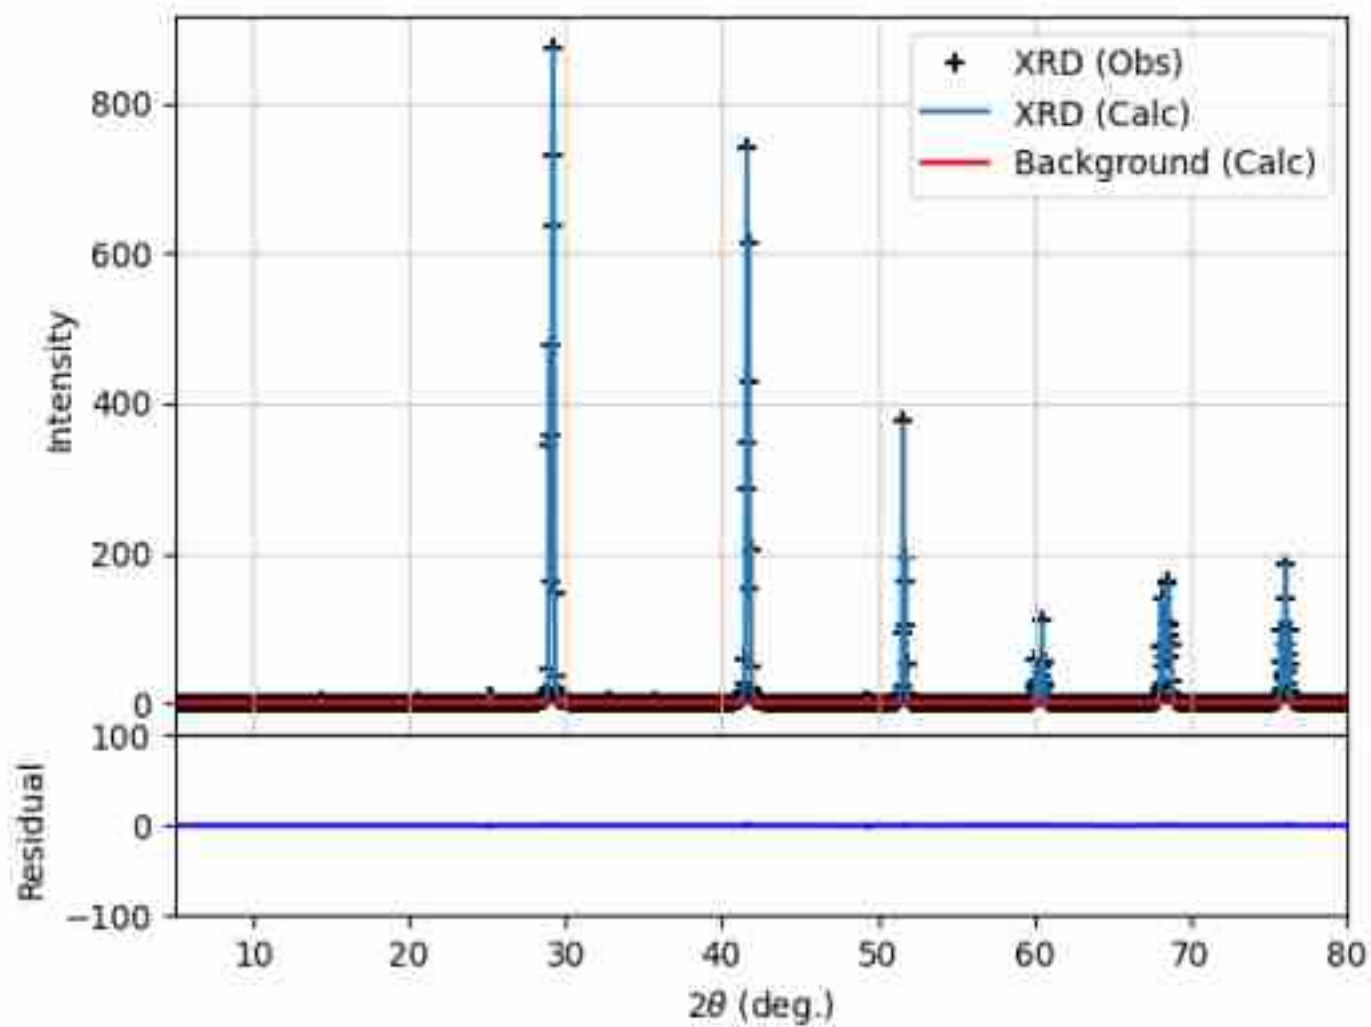

| RMSE before RR | Rwp     | RMSE after RR |
|----------------|---------|---------------|
| 0.004          | 1.78636 | 0.00368       |



# Dy1Er1

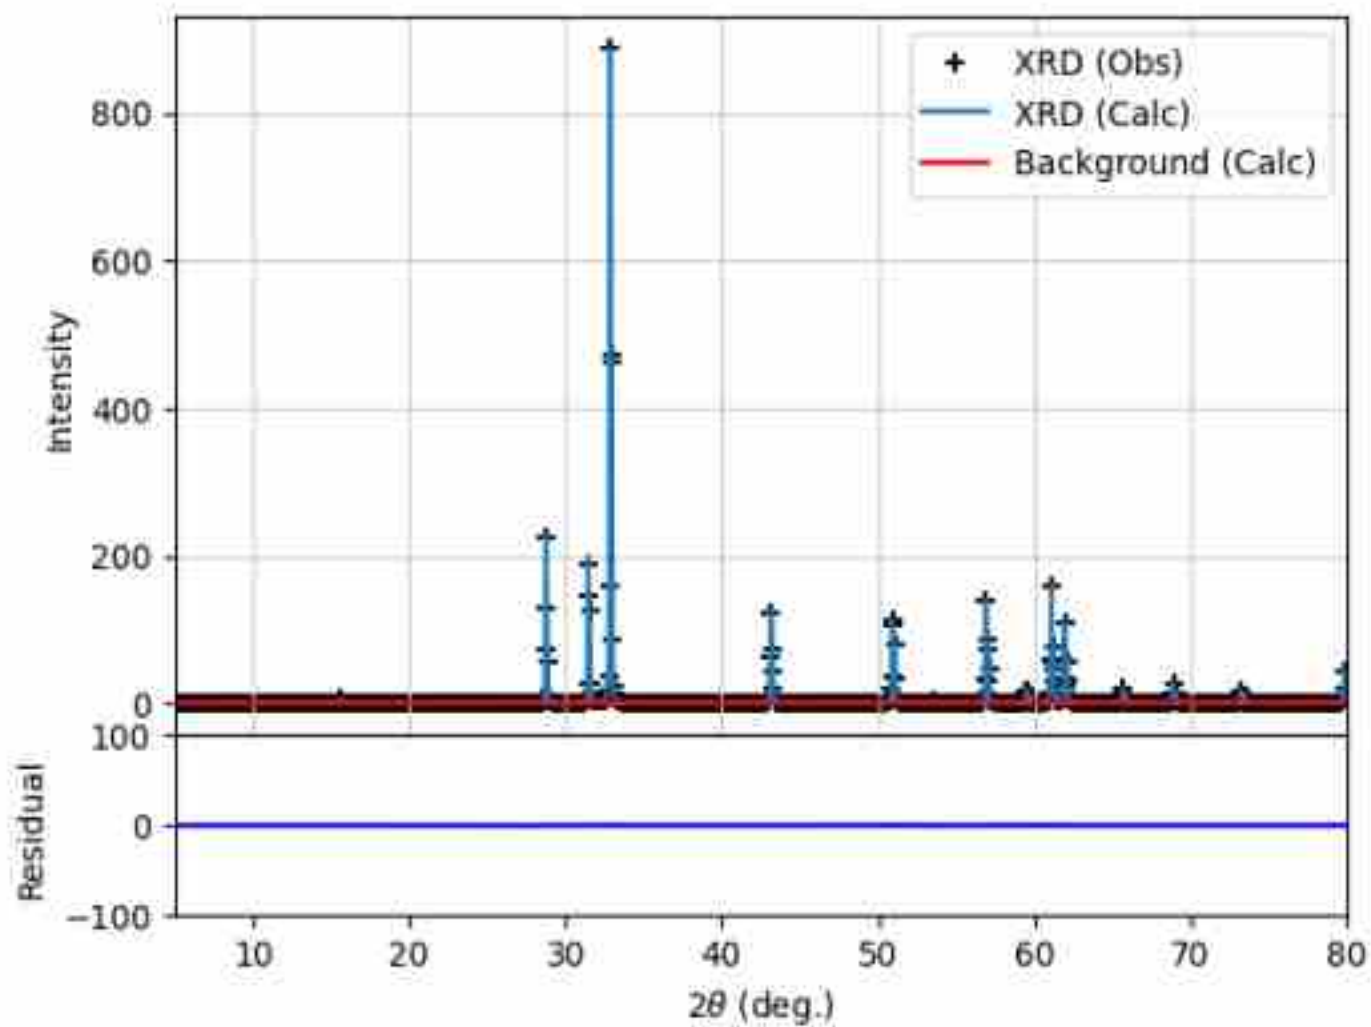

| RMSE before RR | Rwp     | RMSE after RR |
|----------------|---------|---------------|
| 0.004          | 1.00765 | 0.00356       |

# Dy1Ga2Cu3

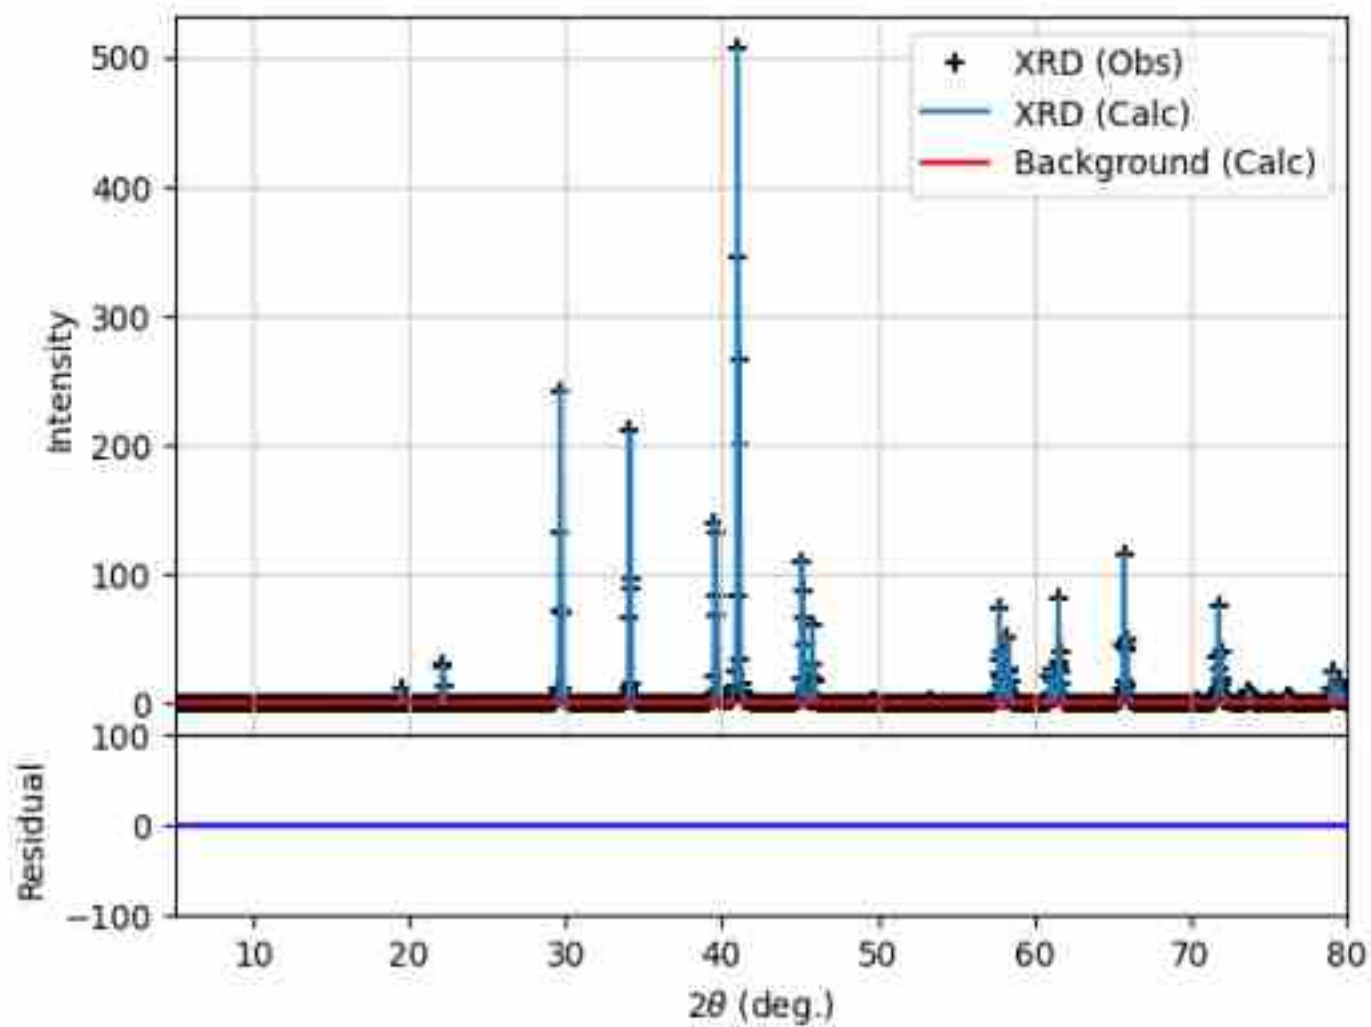

| RMSE before RR | Rwp     | RMSE after RR |
|----------------|---------|---------------|
| 0.004          | 0.00612 | 0.00097       |

# Er1B1Rh3

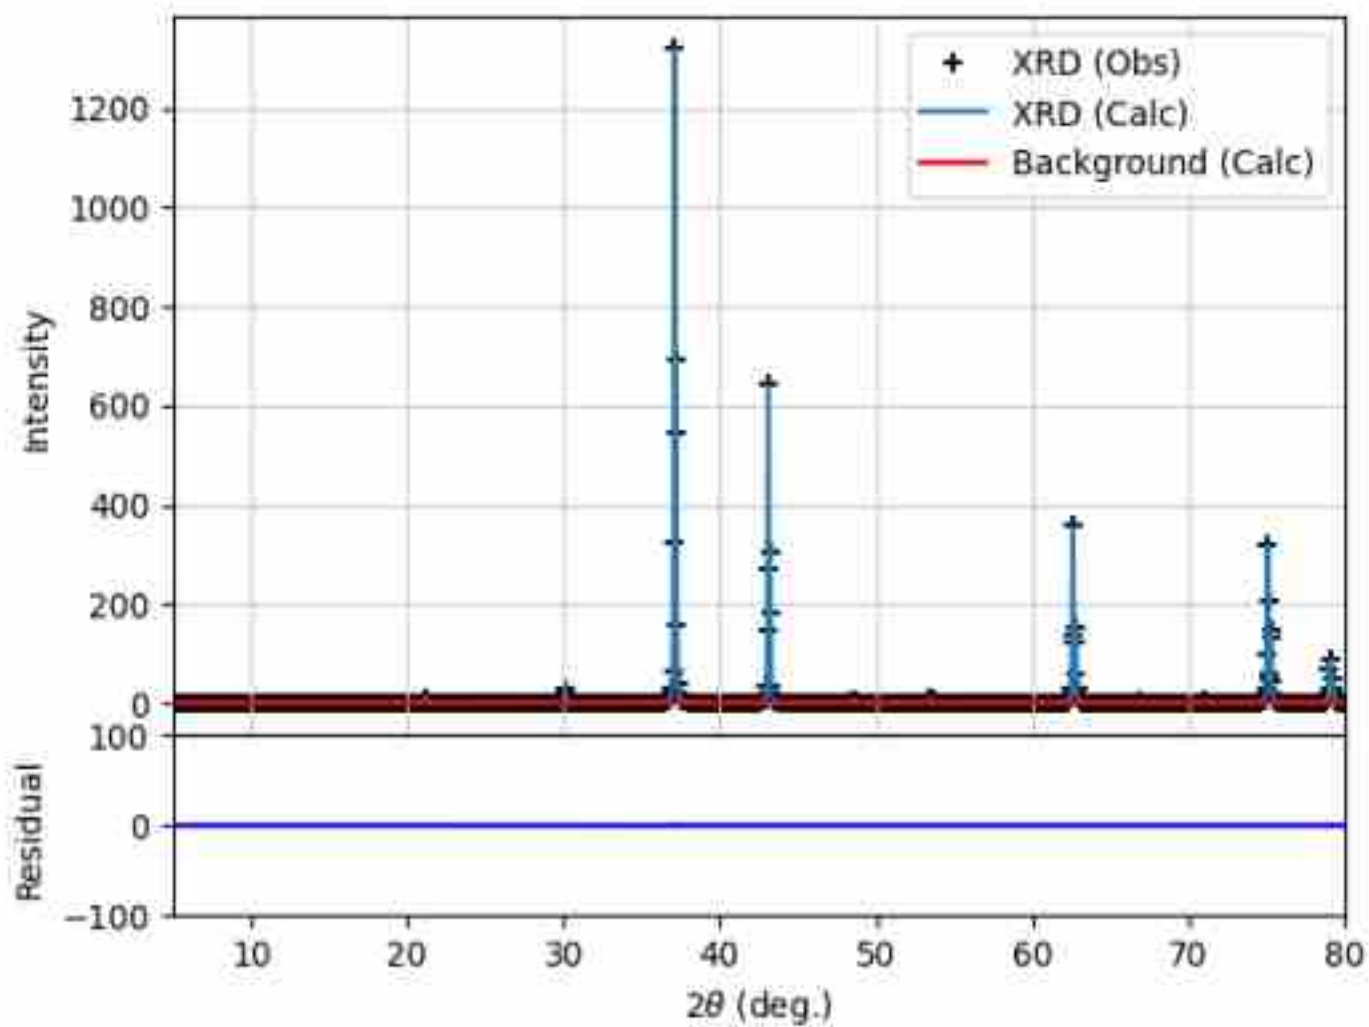

| RMSE before RR | Rwp     | RMSE after RR |
|----------------|---------|---------------|
| 0.004          | 0.02948 | 0.00278       |

# Er1Th1C1N1

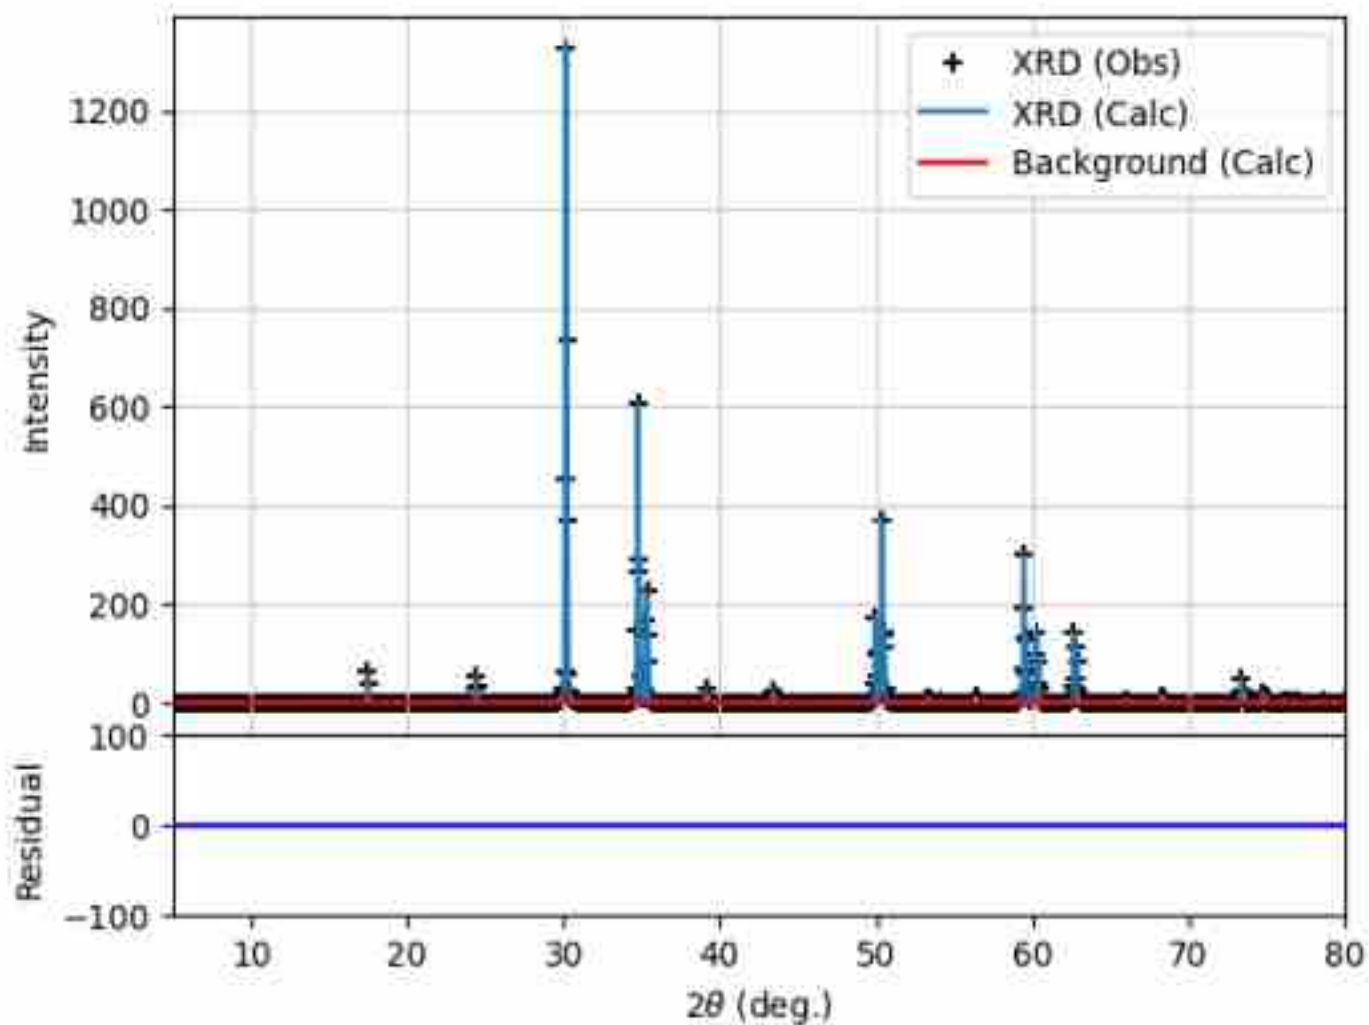

| RMSE before RR | Rwp     | RMSE after RR |
|----------------|---------|---------------|
| 0.004          | 0.01268 | 0.00229       |

# Eu1Al1Si1

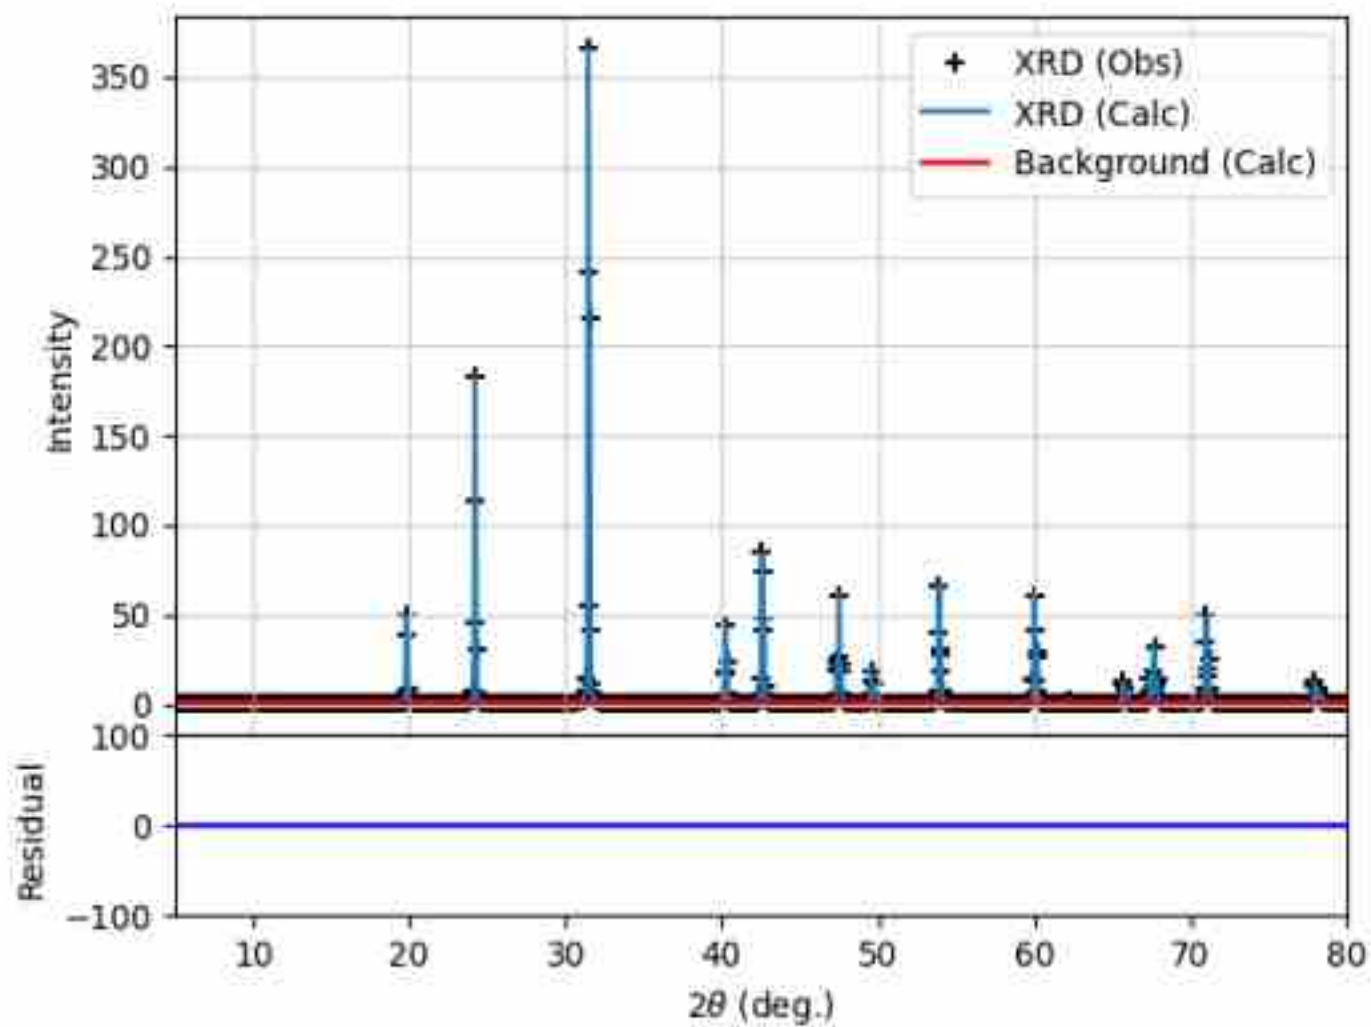

| RMSE before RR | Rwp     | RMSE after RR |
|----------------|---------|---------------|
| 0.004          | 0.00909 | 0.0017        |

# Eu1B1Rh3

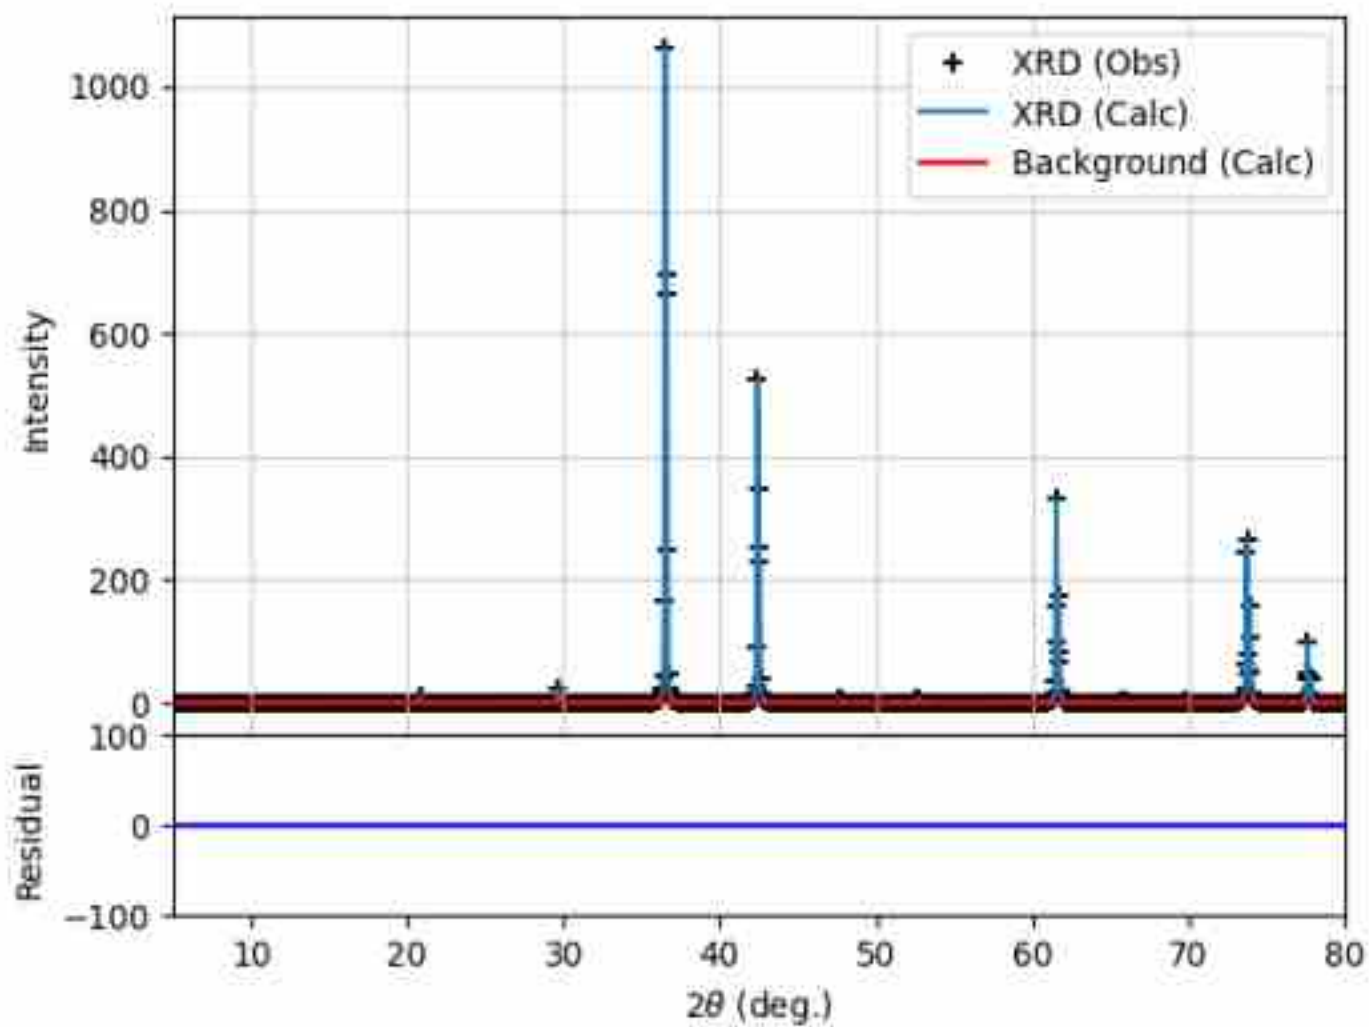

| RMSE before RR | Rwp     | RMSE after RR |
|----------------|---------|---------------|
| 0.004          | 0.11721 | 0.00352       |

# Eu1F2

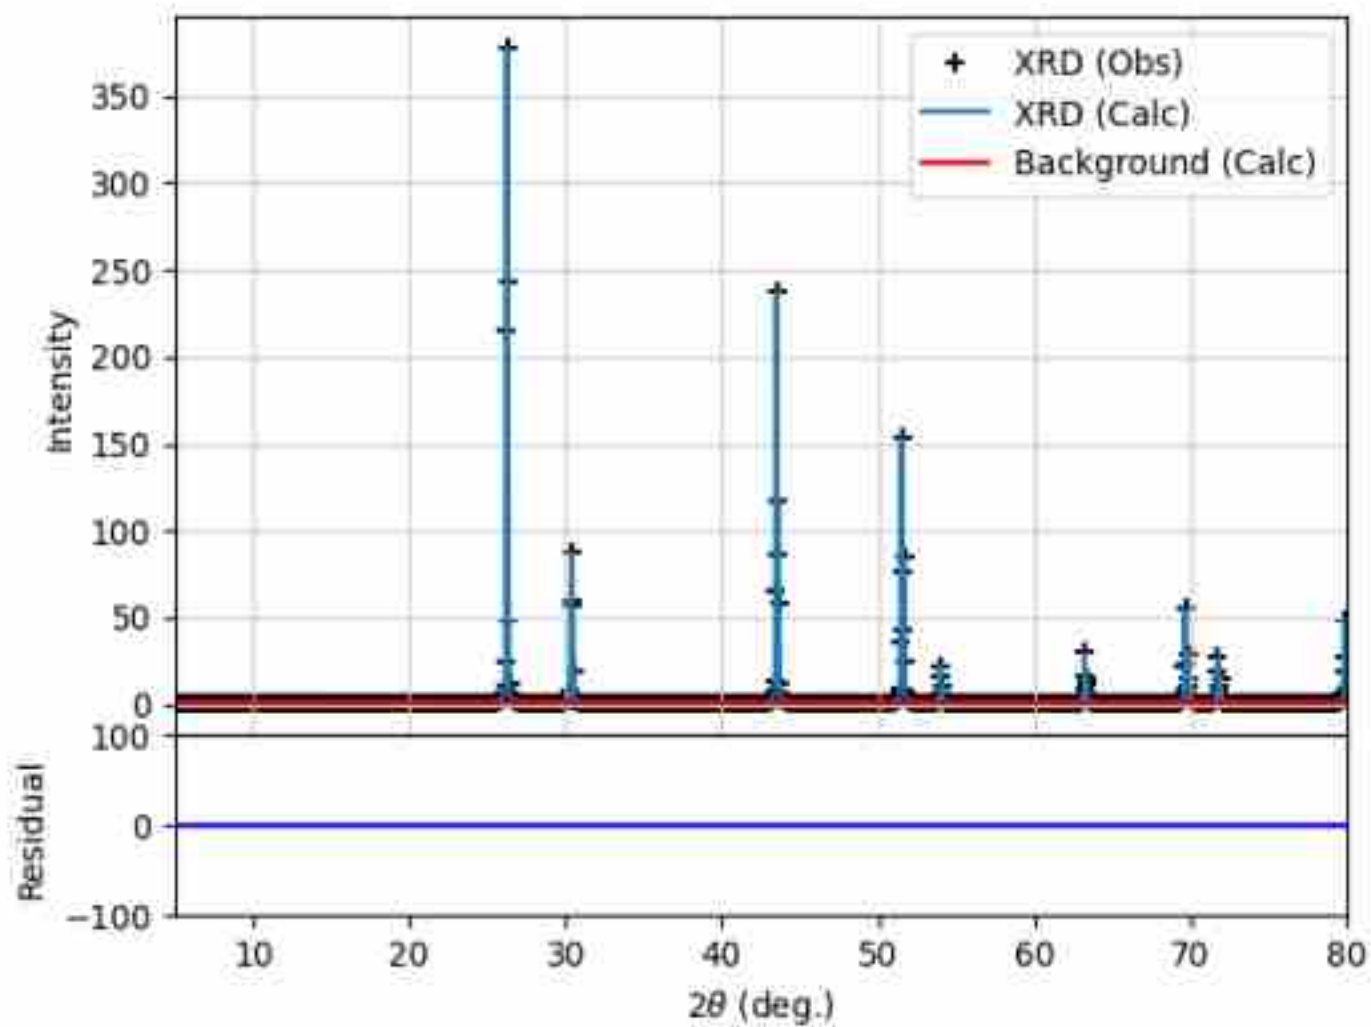

| RMSE before RR | Rwp     | RMSE after RR |
|----------------|---------|---------------|
| 0.004          | 0.00263 | 0.00064       |

# Eu2Ge2

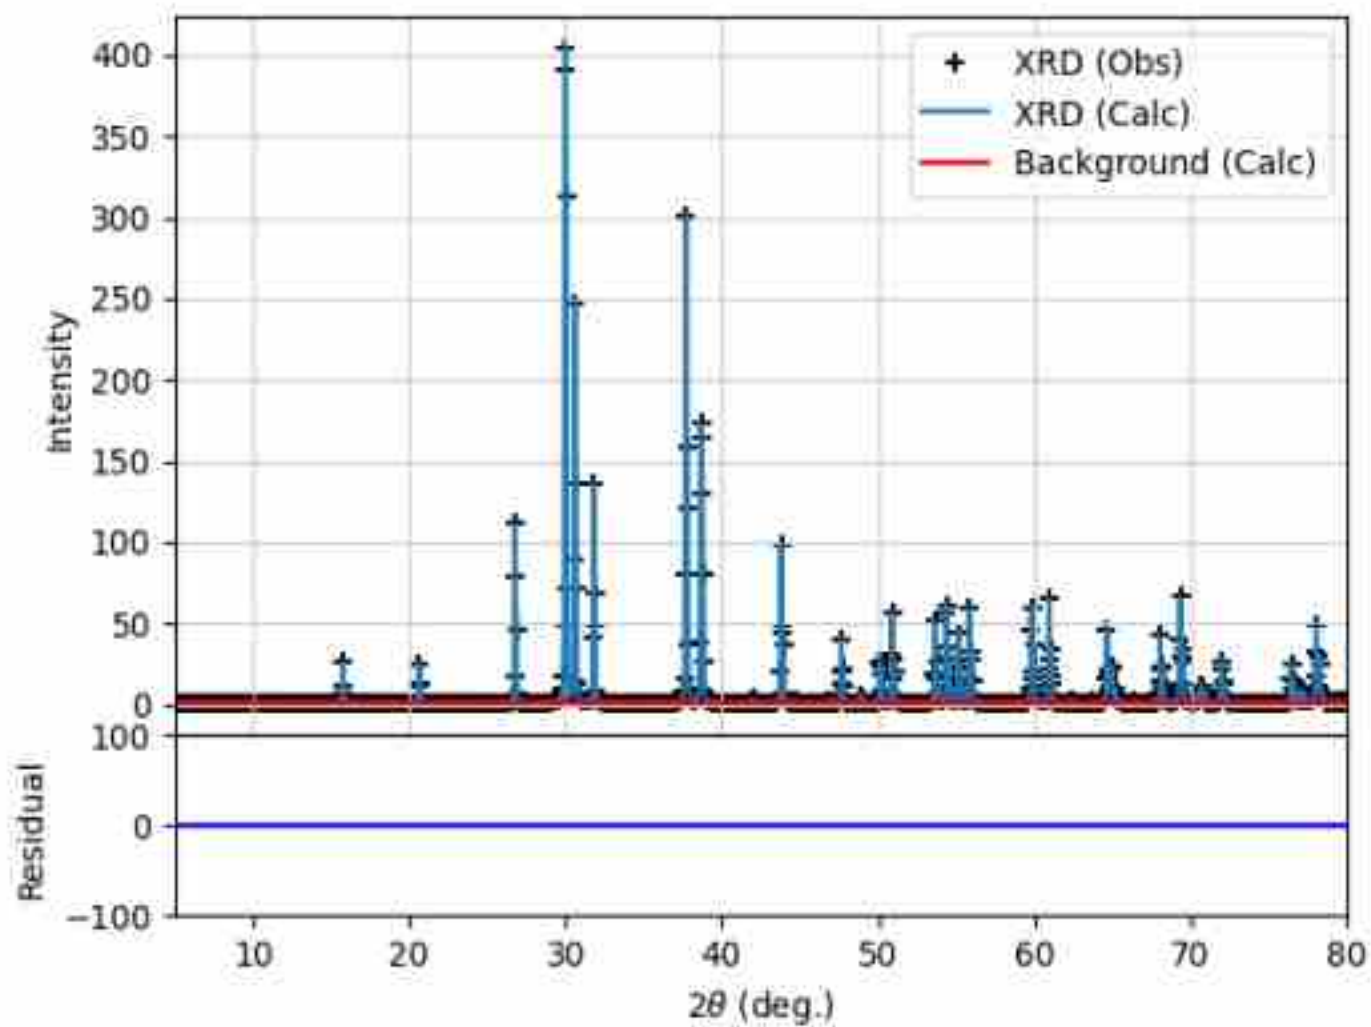

| RMSE before RR | Rwp     | RMSE after RR |
|----------------|---------|---------------|
| 0.004          | 0.00437 | 0.00018       |



# Eu2P1C11

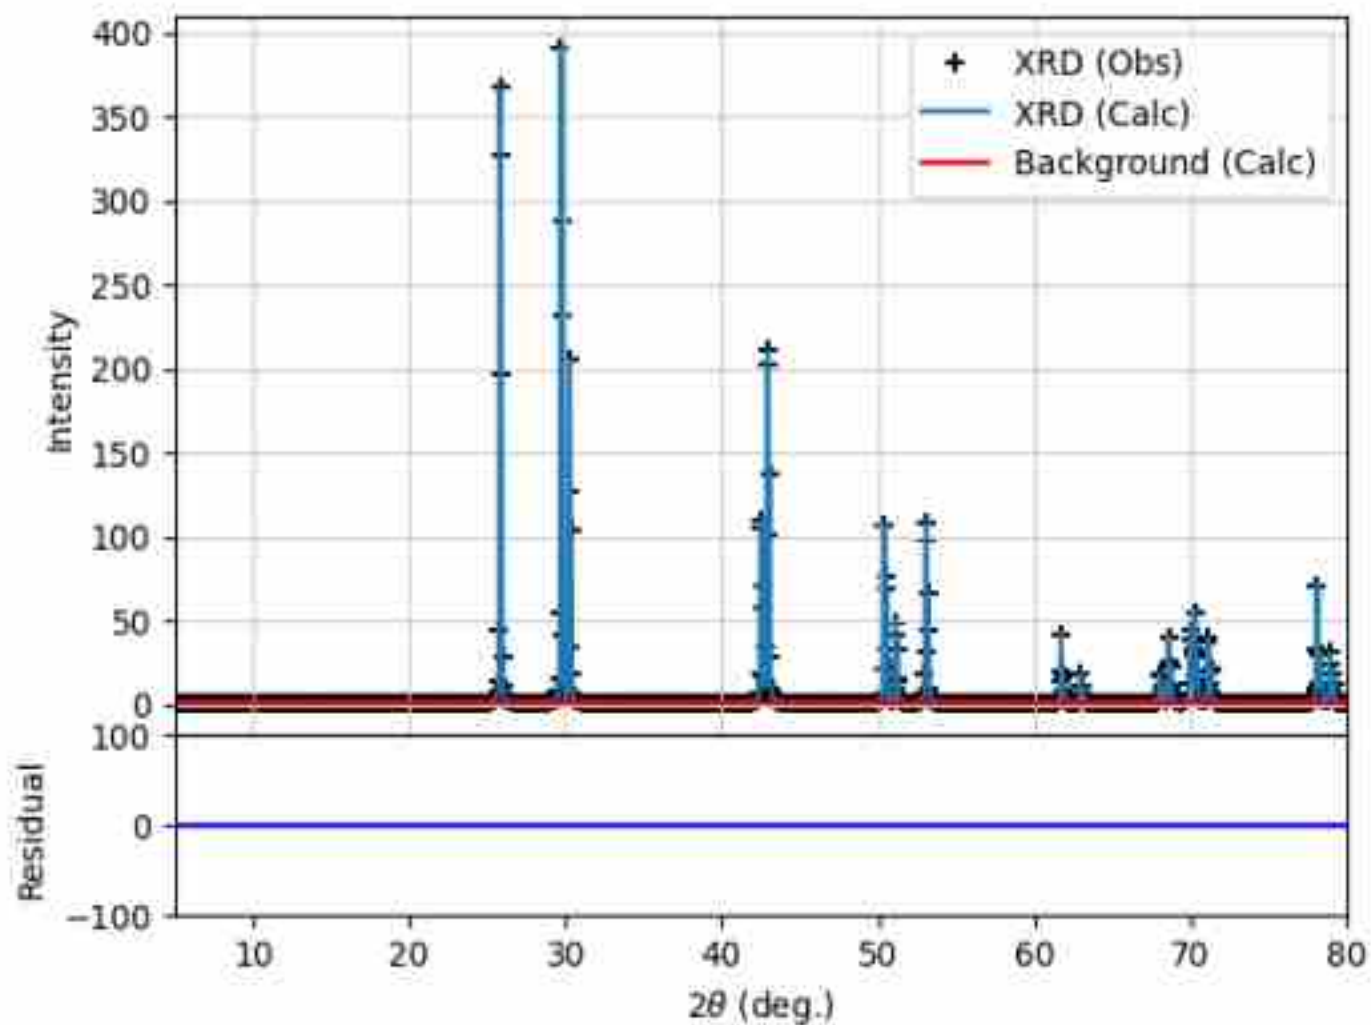

| RMSE before RR | Rwp    | RMSE after RR |
|----------------|--------|---------------|
| 0.004          | 0.0127 | 0.00071       |

# Ga1Ni3

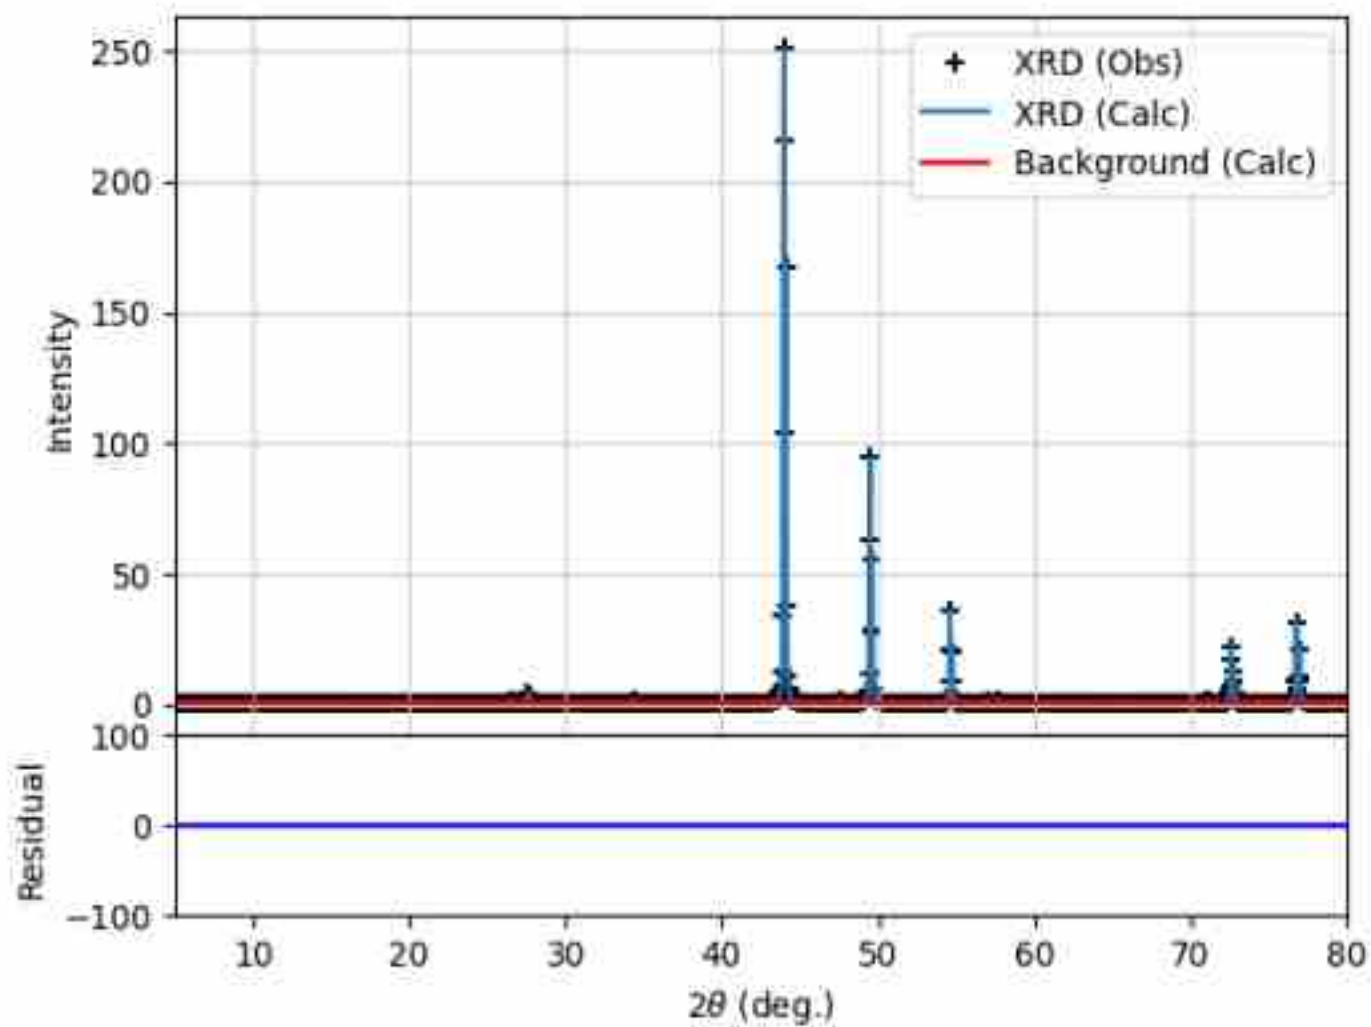

| RMSE before RR | Rwp     | RMSE after RR |
|----------------|---------|---------------|
| 0.004          | 0.00235 | 0.00018       |

# Gd1B1Rh3

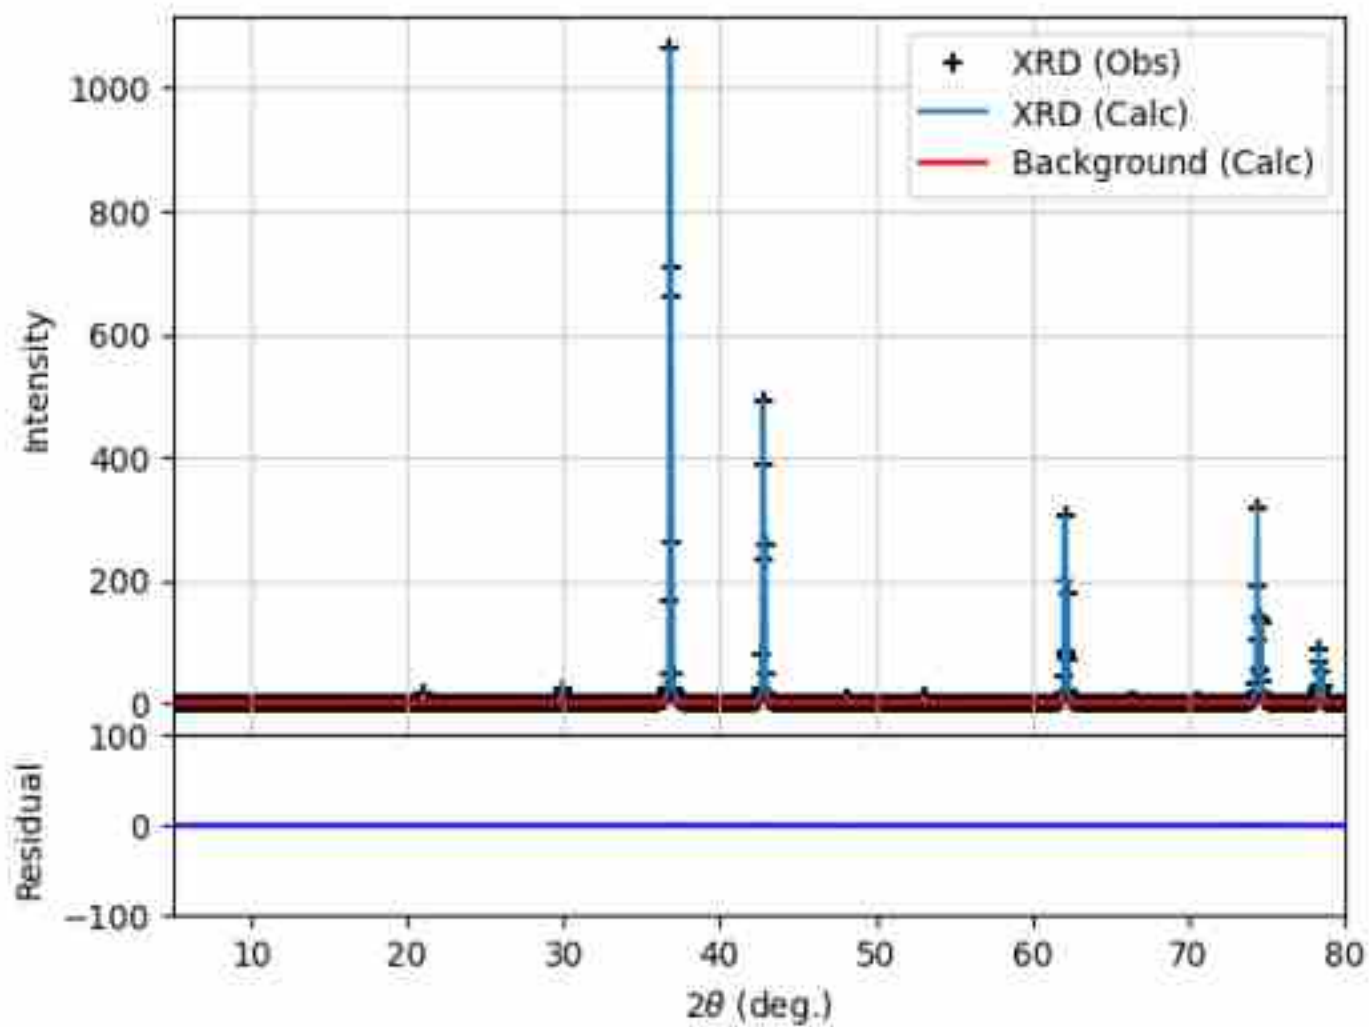

| RMSE before RR | Rwp     | RMSE after RR |
|----------------|---------|---------------|
| 0.004          | 0.62906 | 0.00534       |

# Gd1Bi1Pd1

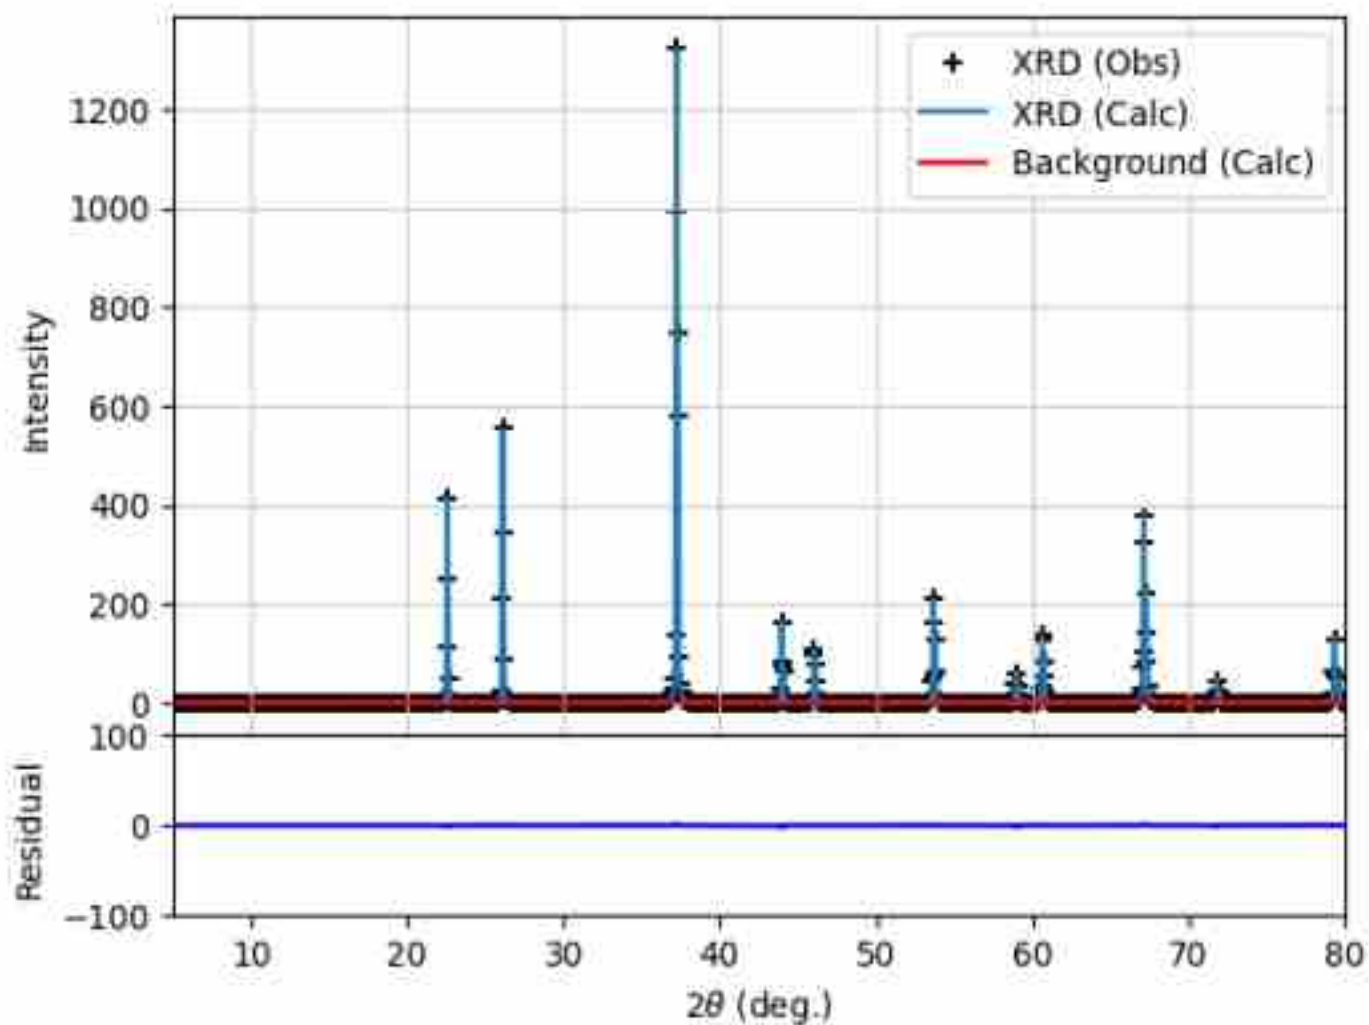

| RMSE before RR | Rwp     | RMSE after RR |
|----------------|---------|---------------|
| 0.004          | 0.61222 | 0.0068        |

# Gd1Tl1S2

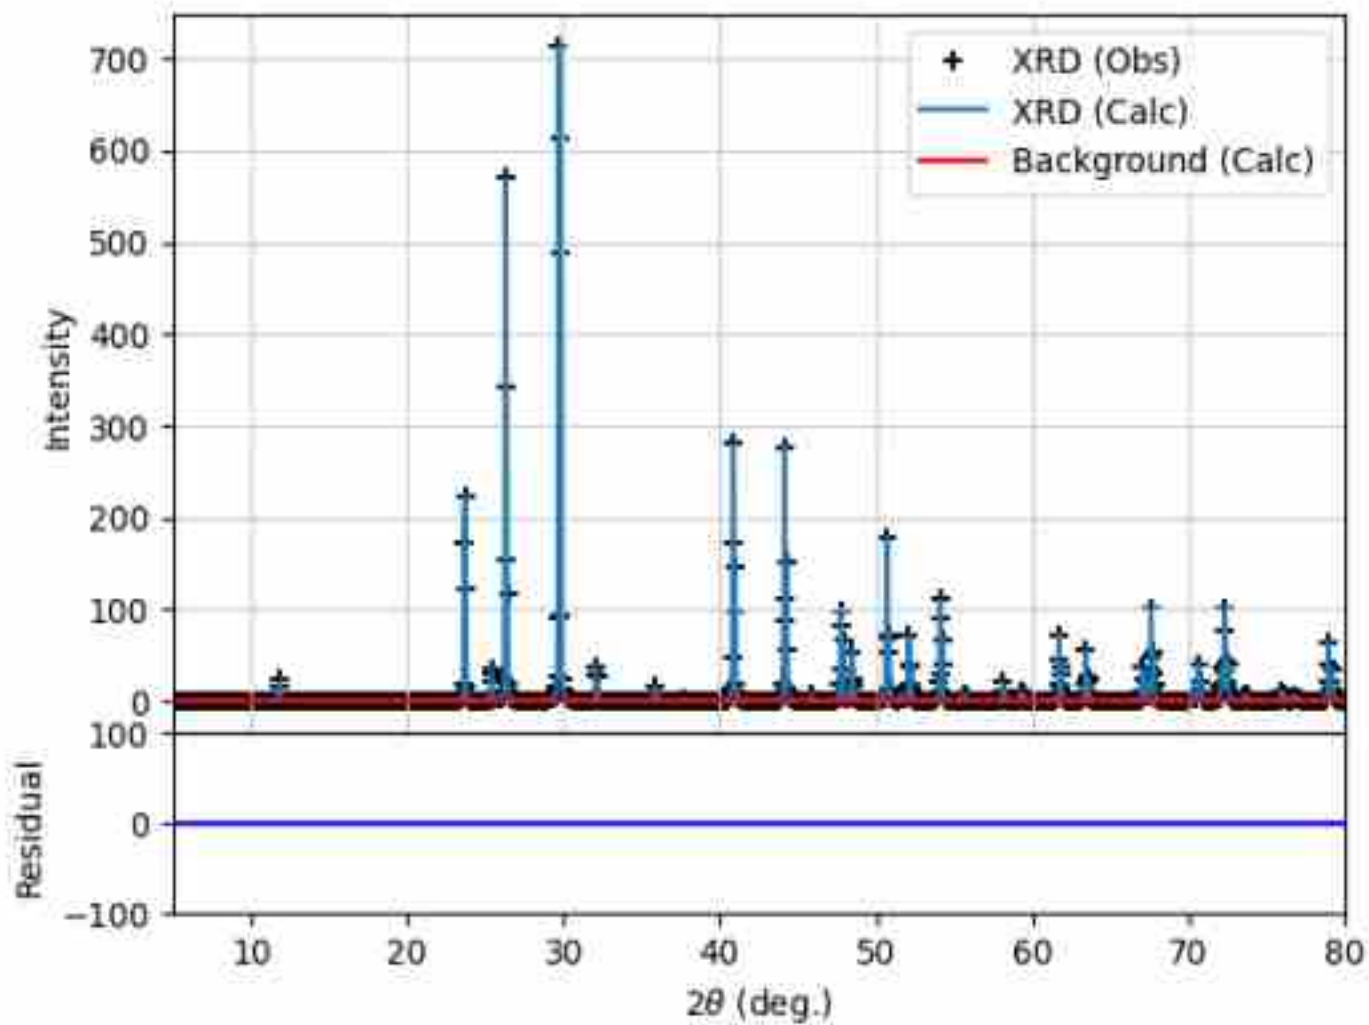

| RMSE before RR | Rwp     | RMSE after RR |
|----------------|---------|---------------|
| 0.004          | 0.00291 | 0.00021       |

# Gd<sub>2</sub>Co<sub>1</sub>Ni<sub>3</sub>

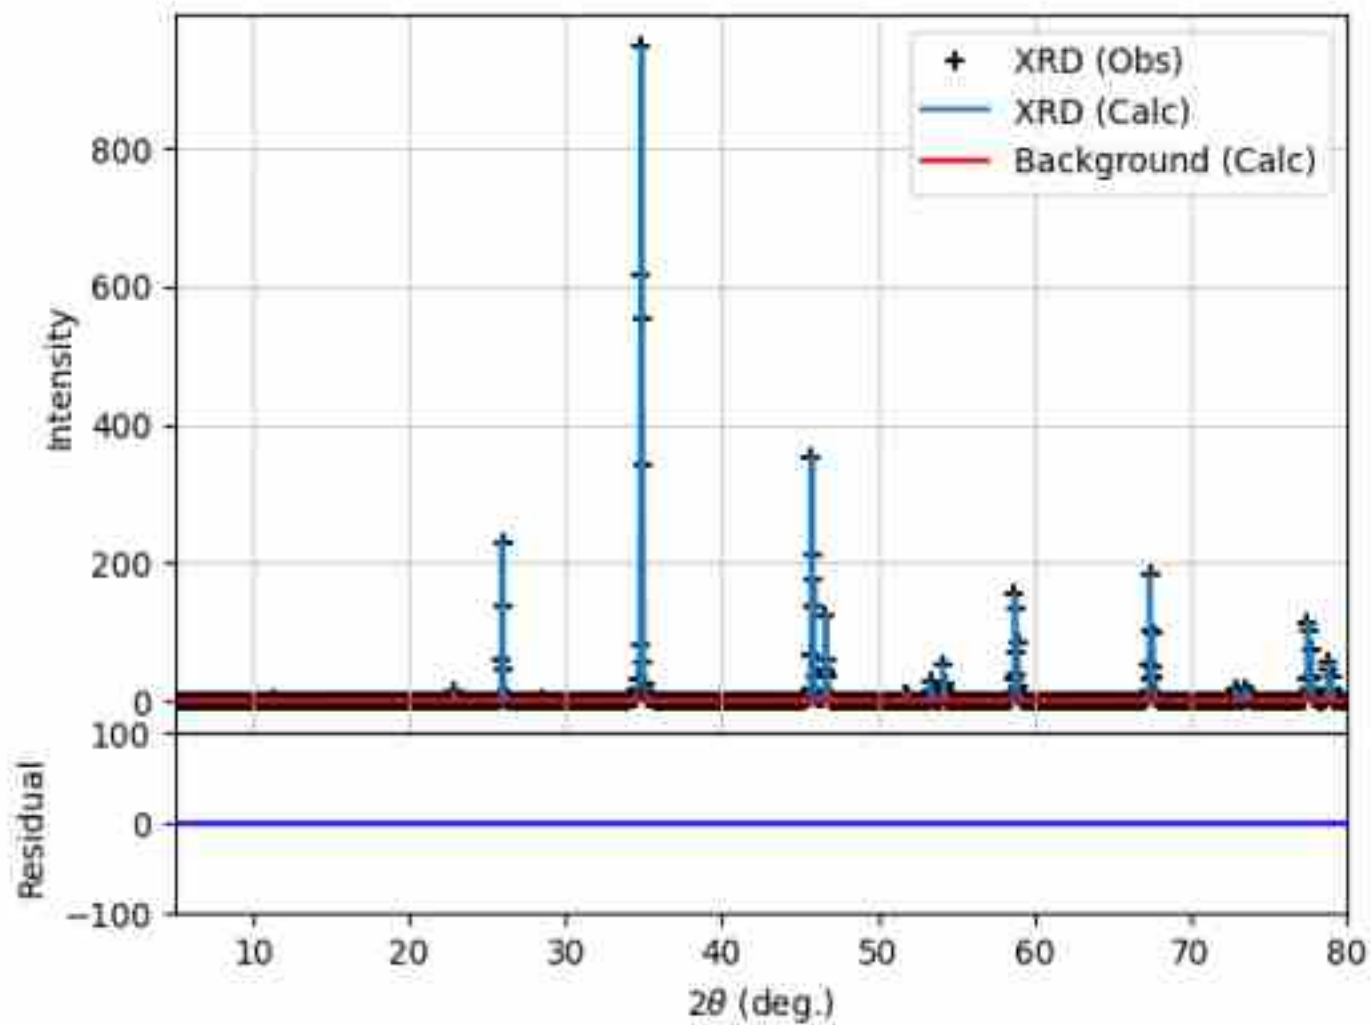

| RMSE before RR | Rwp     | RMSE after RR |
|----------------|---------|---------------|
| 0.004          | 0.00518 | 0.00054       |

# Gd<sub>2</sub>Ni<sub>4</sub>

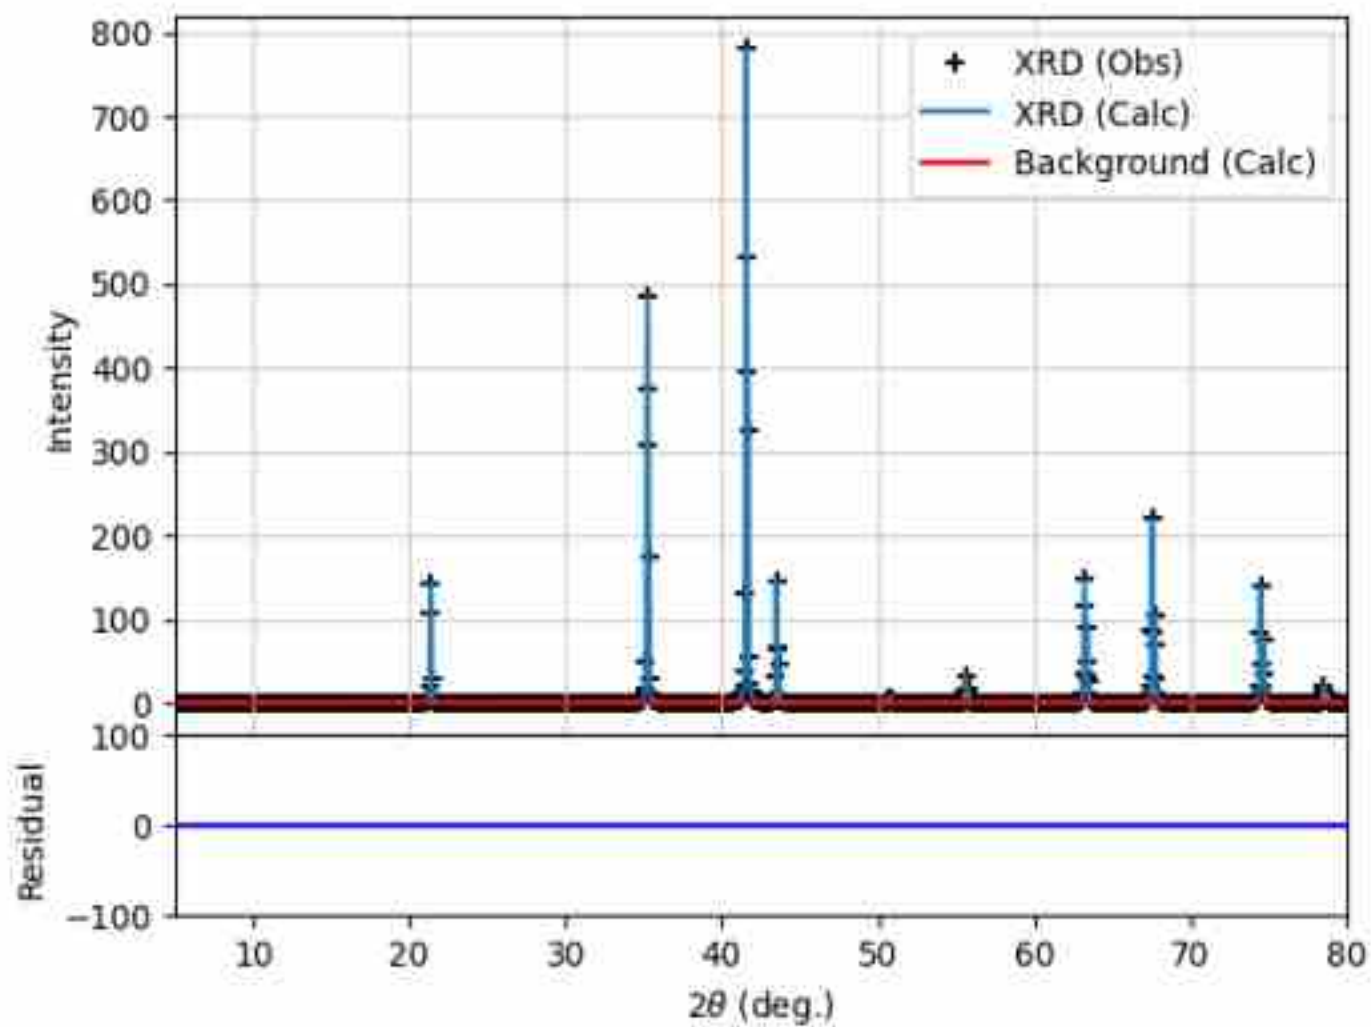

| RMSE before RR | Rwp     | RMSE after RR |
|----------------|---------|---------------|
| 0.004          | 0.00475 | 0.00061       |

# Gd<sub>2</sub>Zn<sub>2</sub>Ga<sub>2</sub>

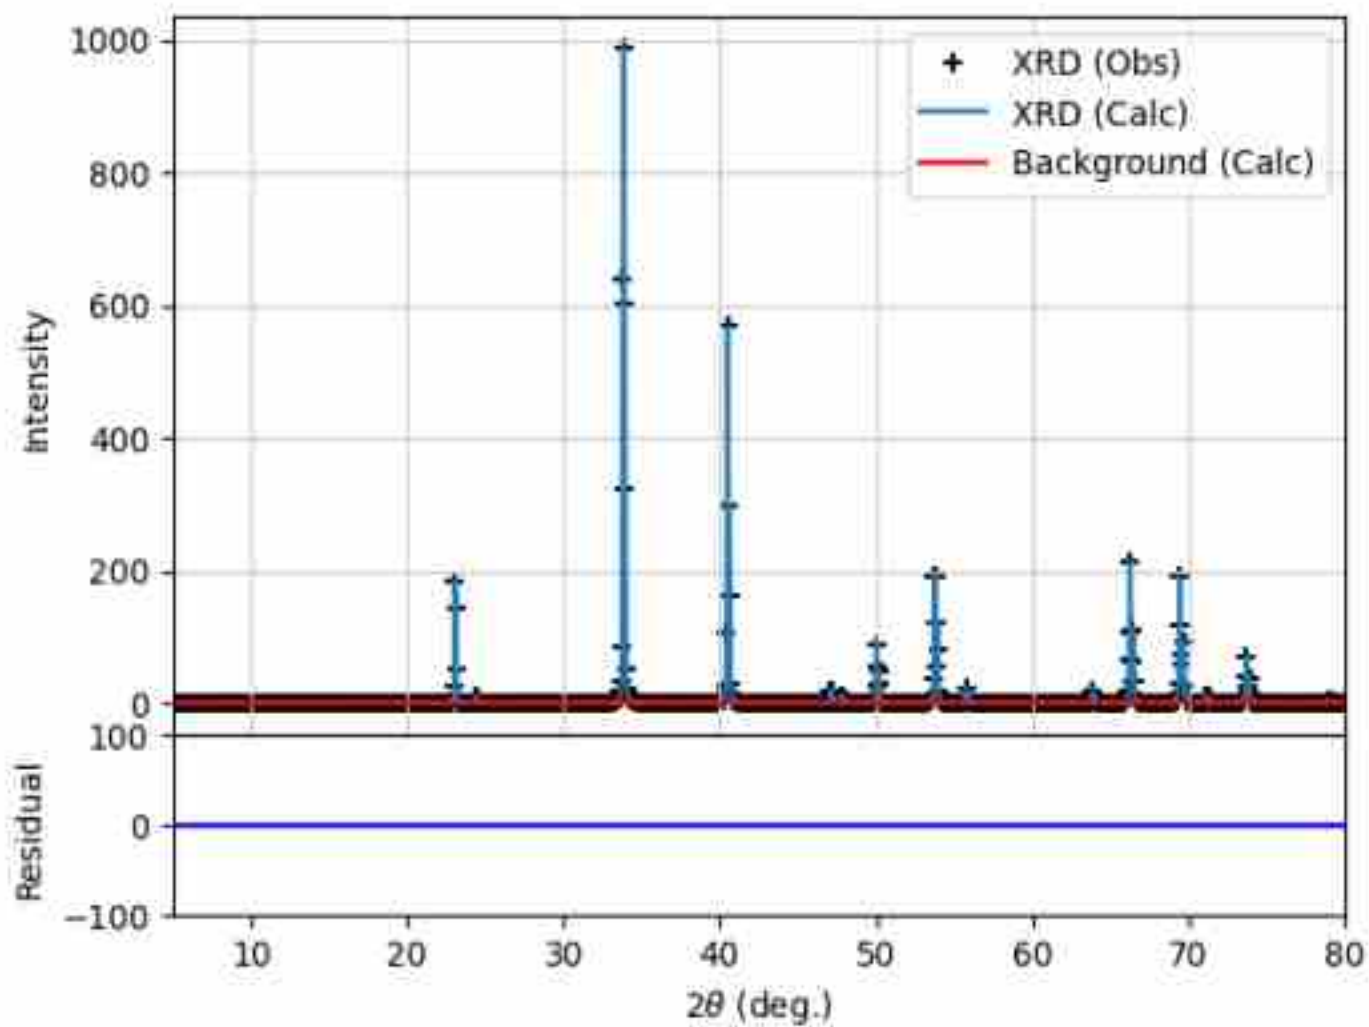

| RMSE before RR | Rwp     | RMSE after RR |
|----------------|---------|---------------|
| 0.004          | 0.00643 | 0.0003        |



# Hf1Sn1Pd1

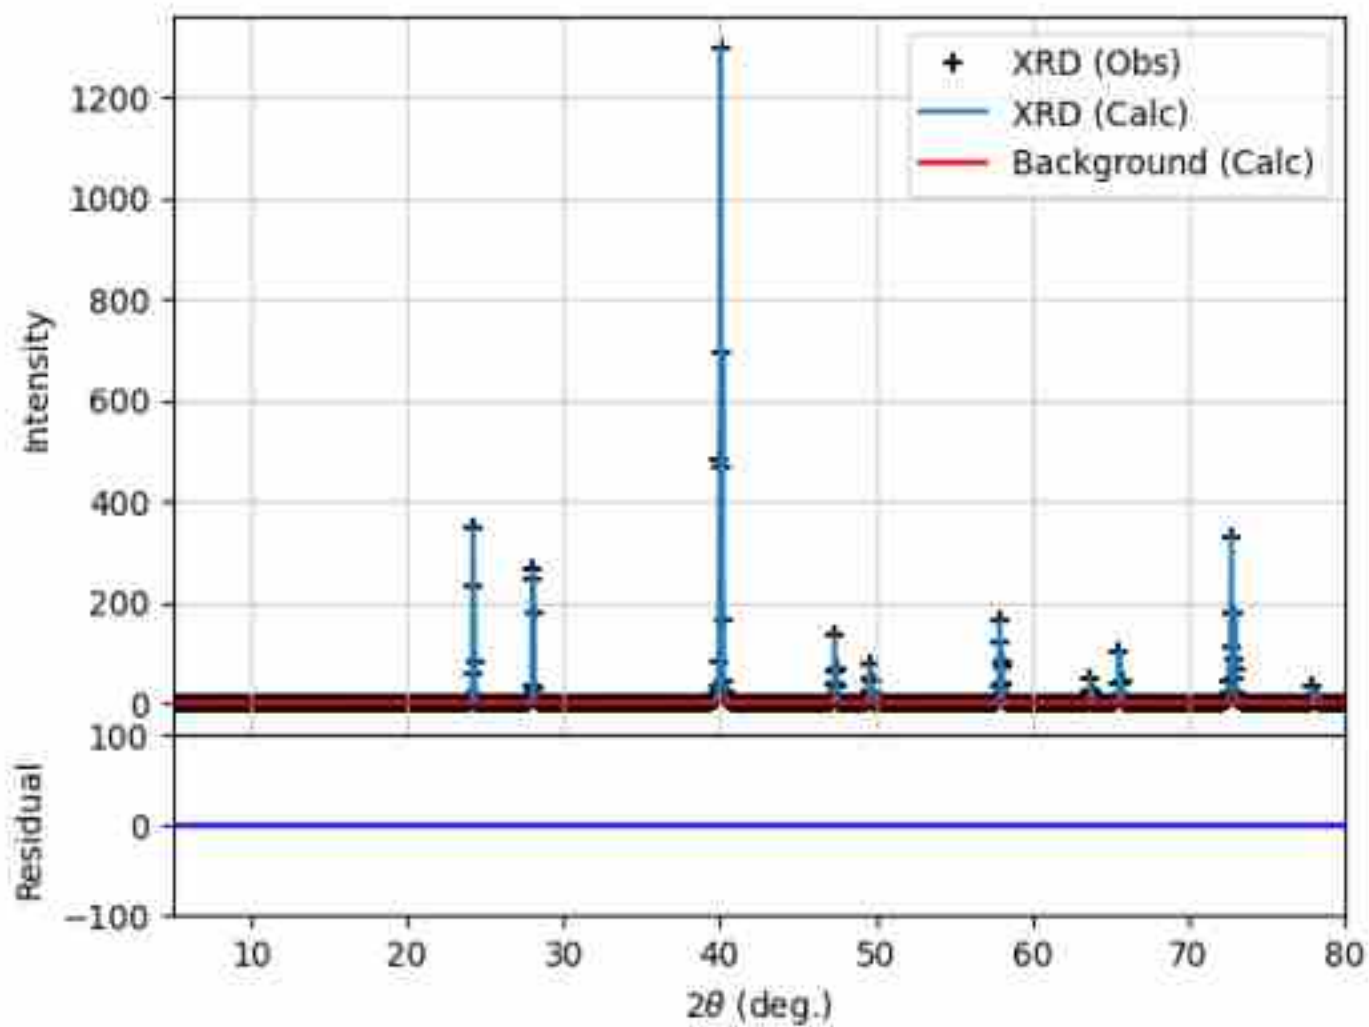

| RMSE before RR | Rwp     | RMSE after RR |
|----------------|---------|---------------|
| 0.004          | 0.04417 | 0.0017        |

# Hf1Te1Se1

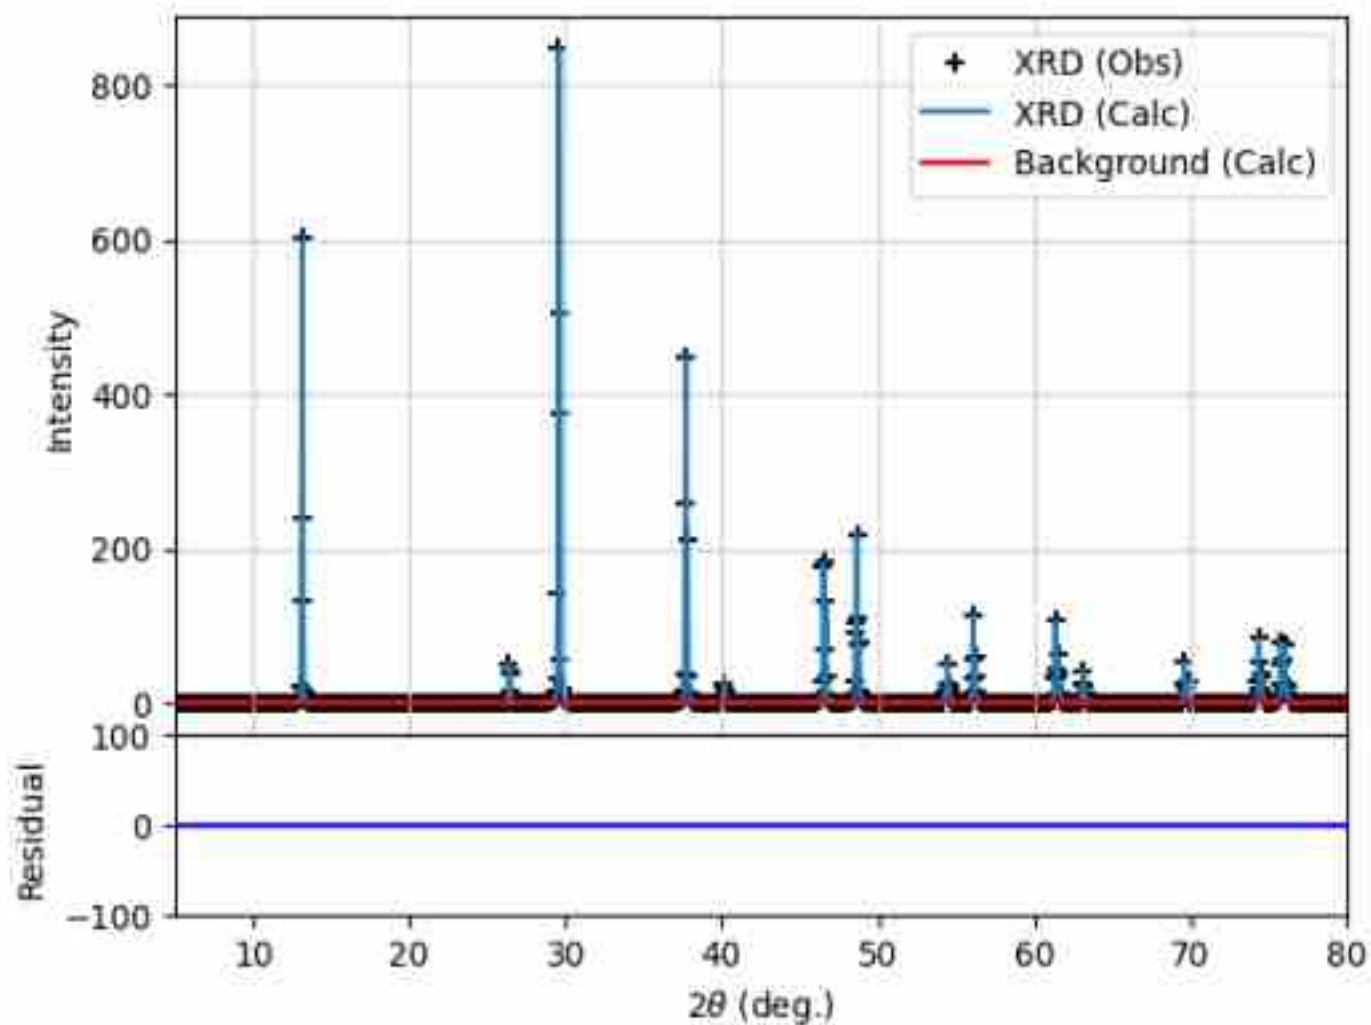

| RMSE before RR | Rwp     | RMSE after RR |
|----------------|---------|---------------|
| 0.004          | 0.00425 | 0.00032       |

# Hf1Zr1C2

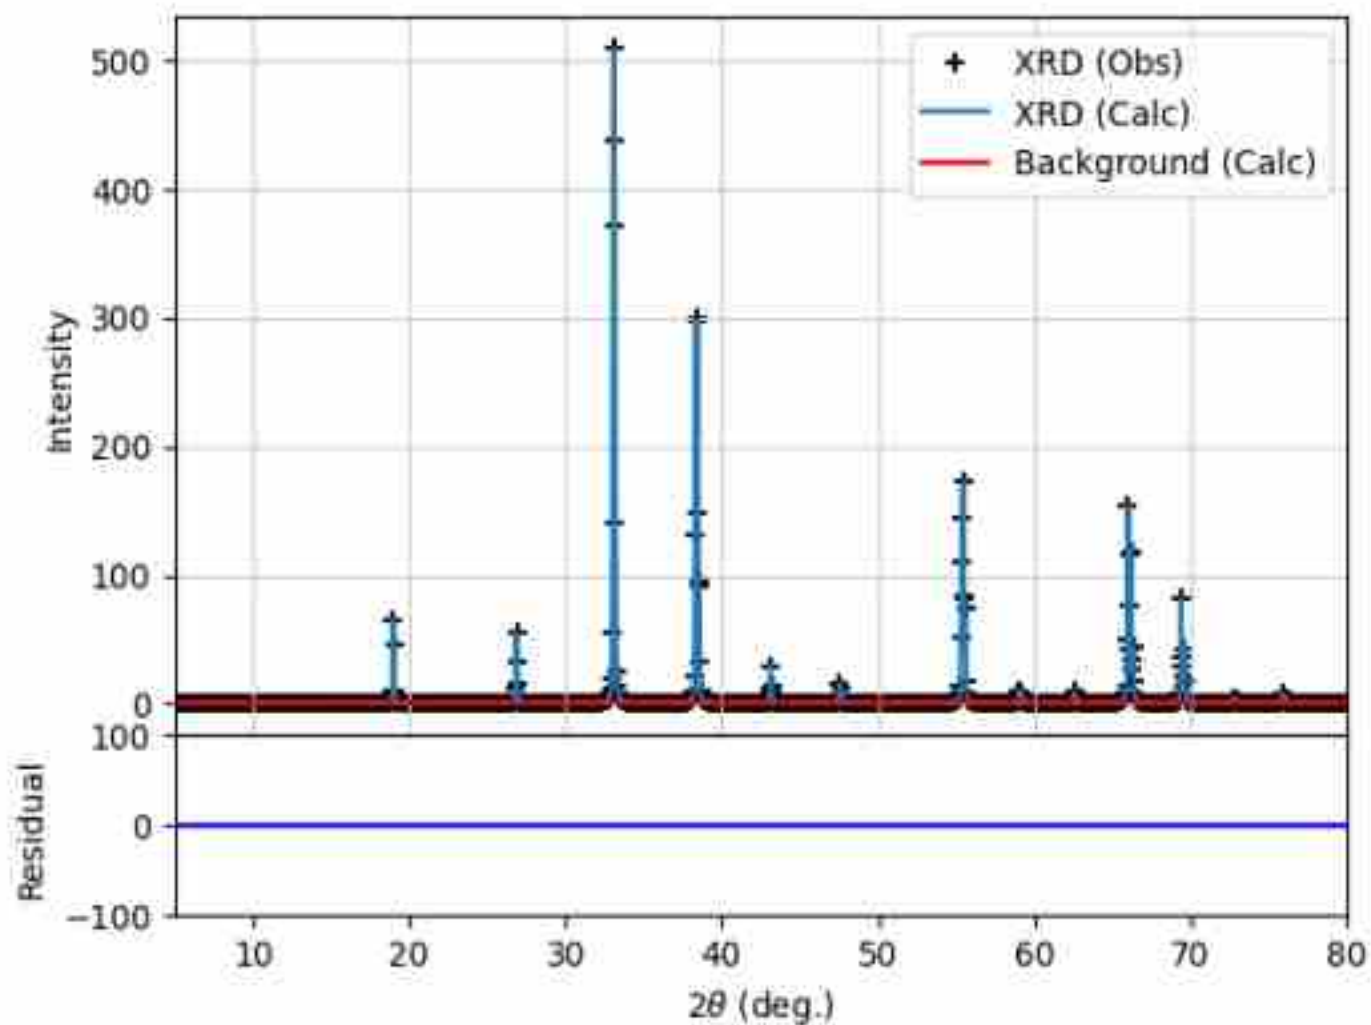

| RMSE before RR | Rwp     | RMSE after RR |
|----------------|---------|---------------|
| 0.004          | 0.01298 | 0.00446       |

# Hf2Ag1

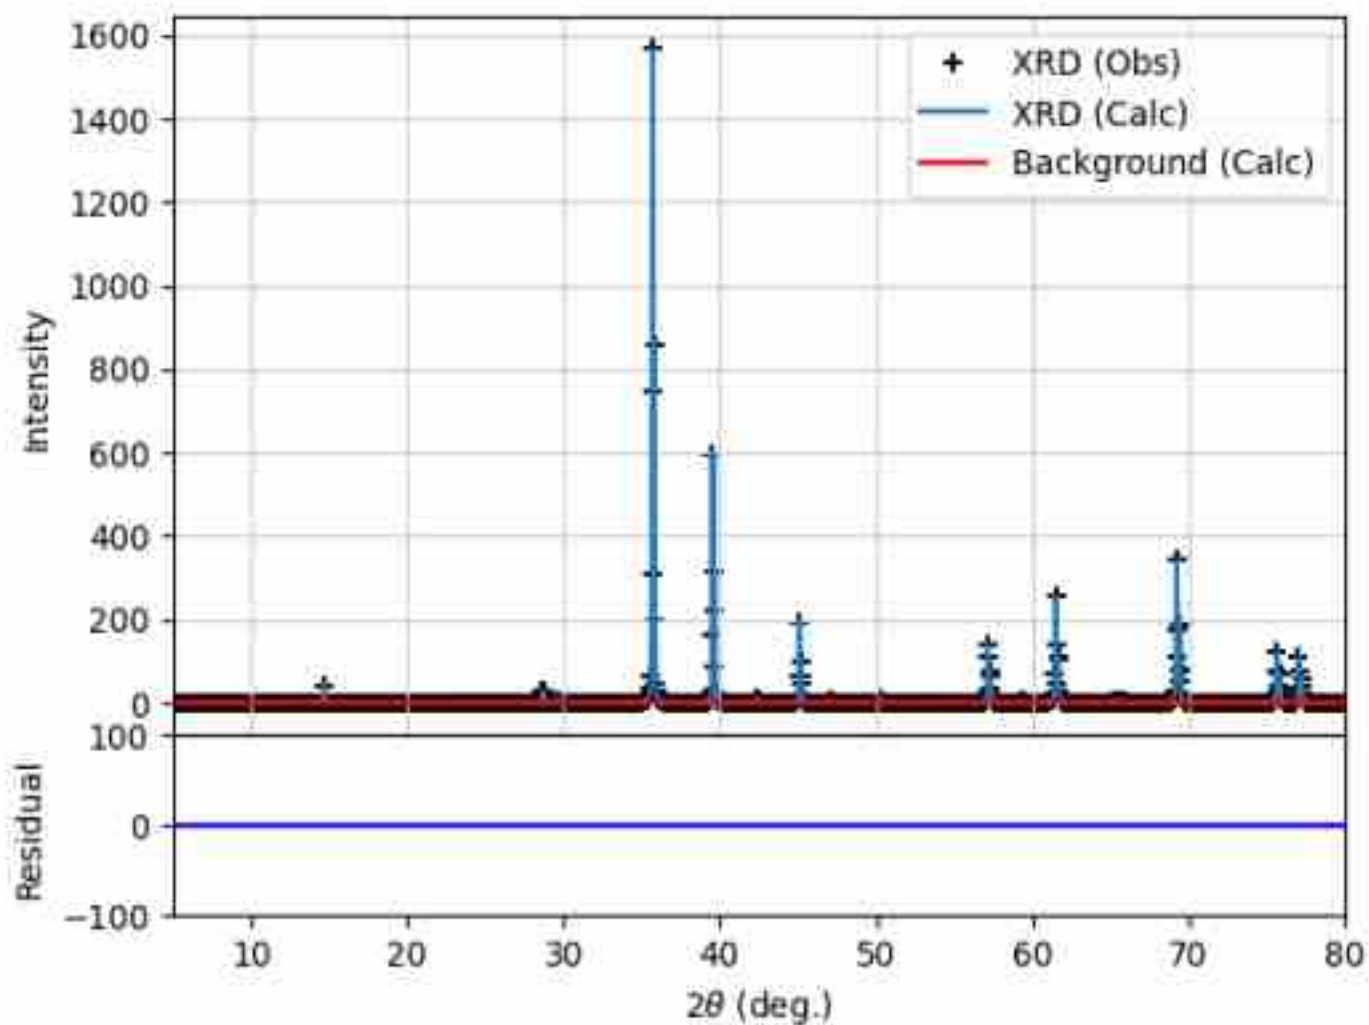

| RMSE before RR | Rwp     | RMSE after RR |
|----------------|---------|---------------|
| 0.004          | 0.02035 | 0.00054       |

# Hf2Au1

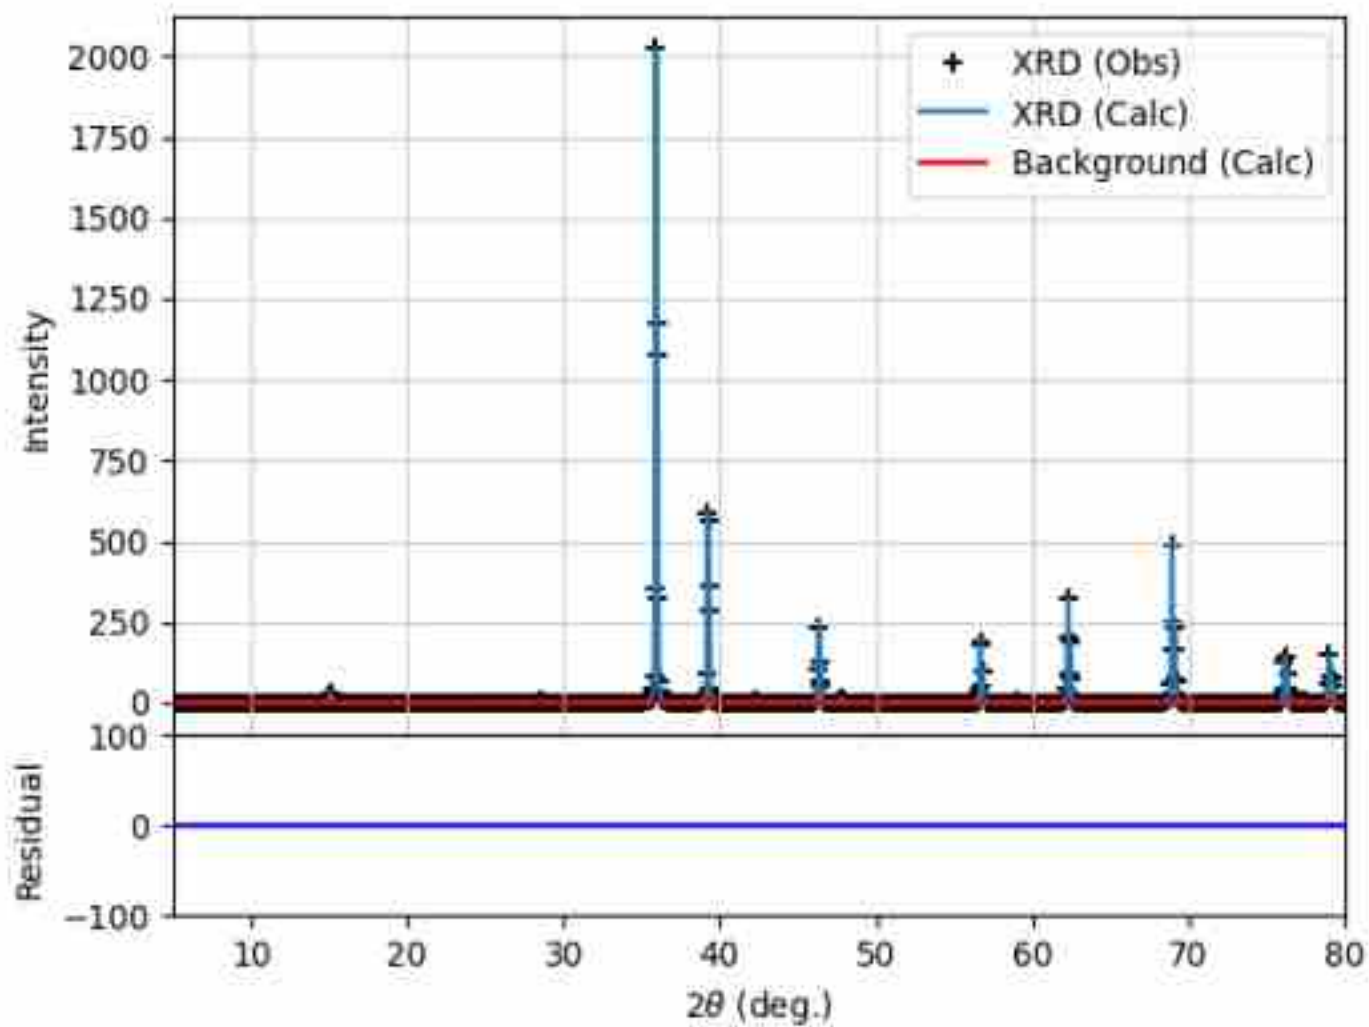

| RMSE before RR | Rwp     | RMSE after RR |
|----------------|---------|---------------|
| 0.004          | 0.06221 | 0.00046       |

# Hg4Pd4

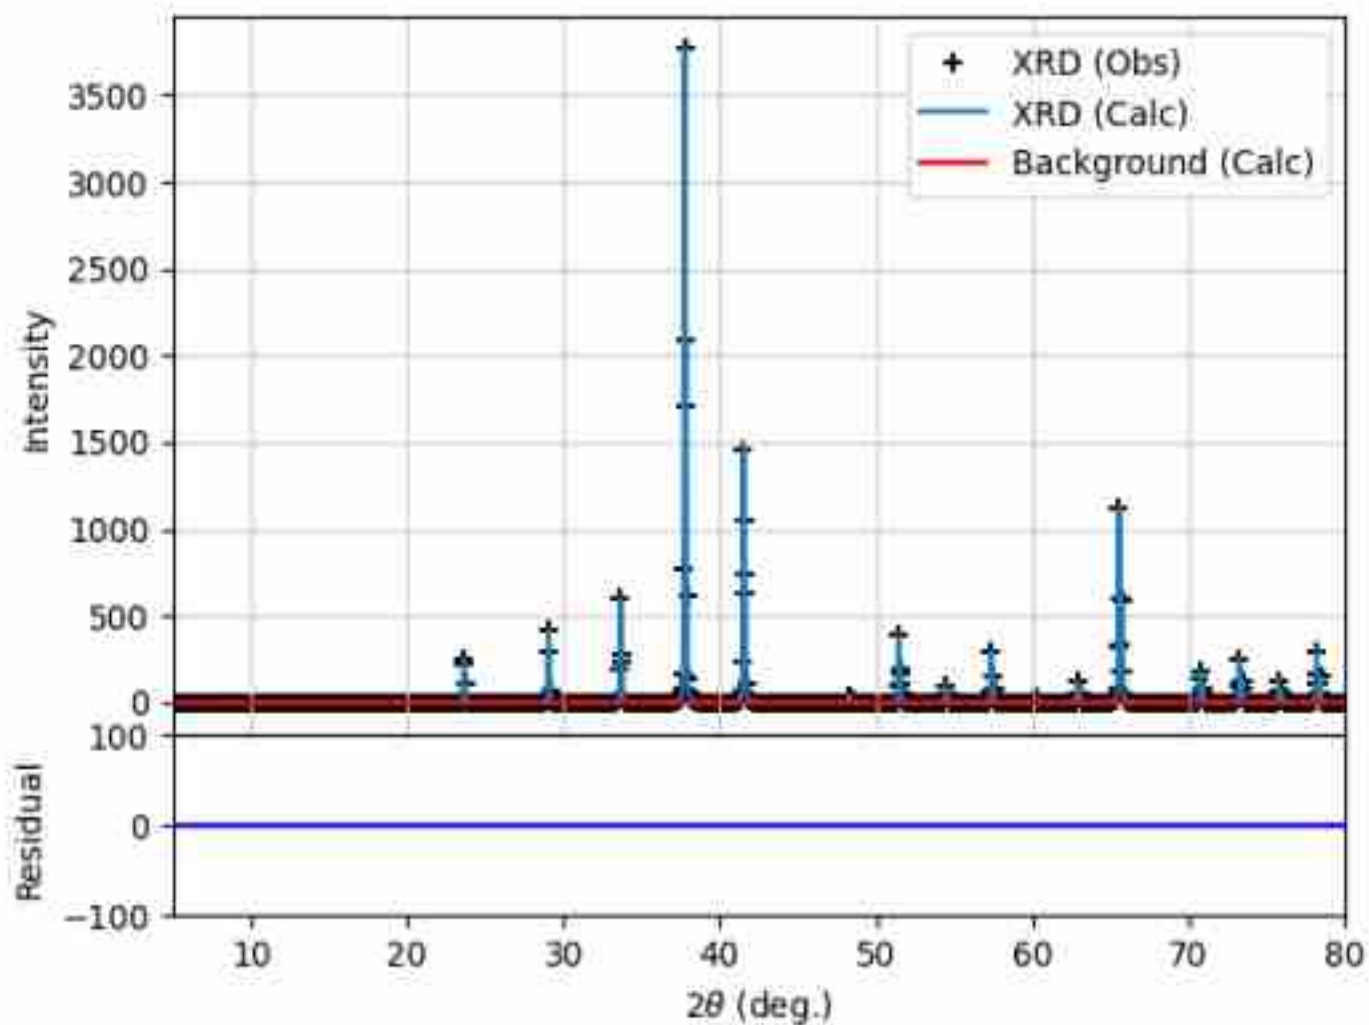

| RMSE before RR | Rwp     | RMSE after RR |
|----------------|---------|---------------|
| 0.04           | 0.00594 | 0.00062       |

# Ho1Mg2

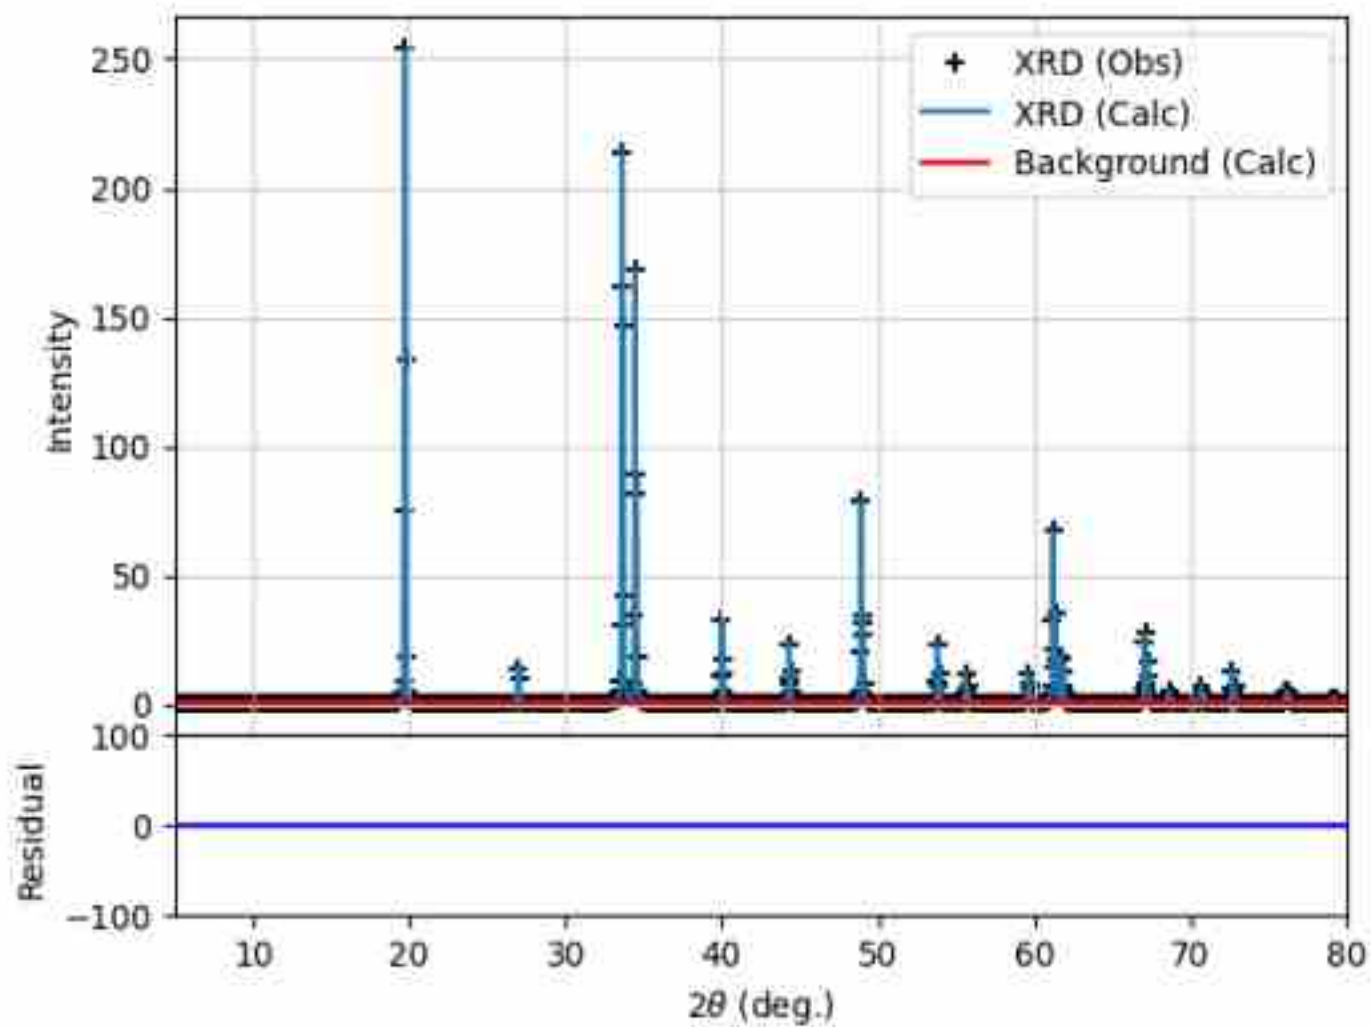

| RMSE before RR | Rwp     | RMSE after RR |
|----------------|---------|---------------|
| 0.004          | 0.00214 | 0.00053       |

# Ho1Pb1Au1

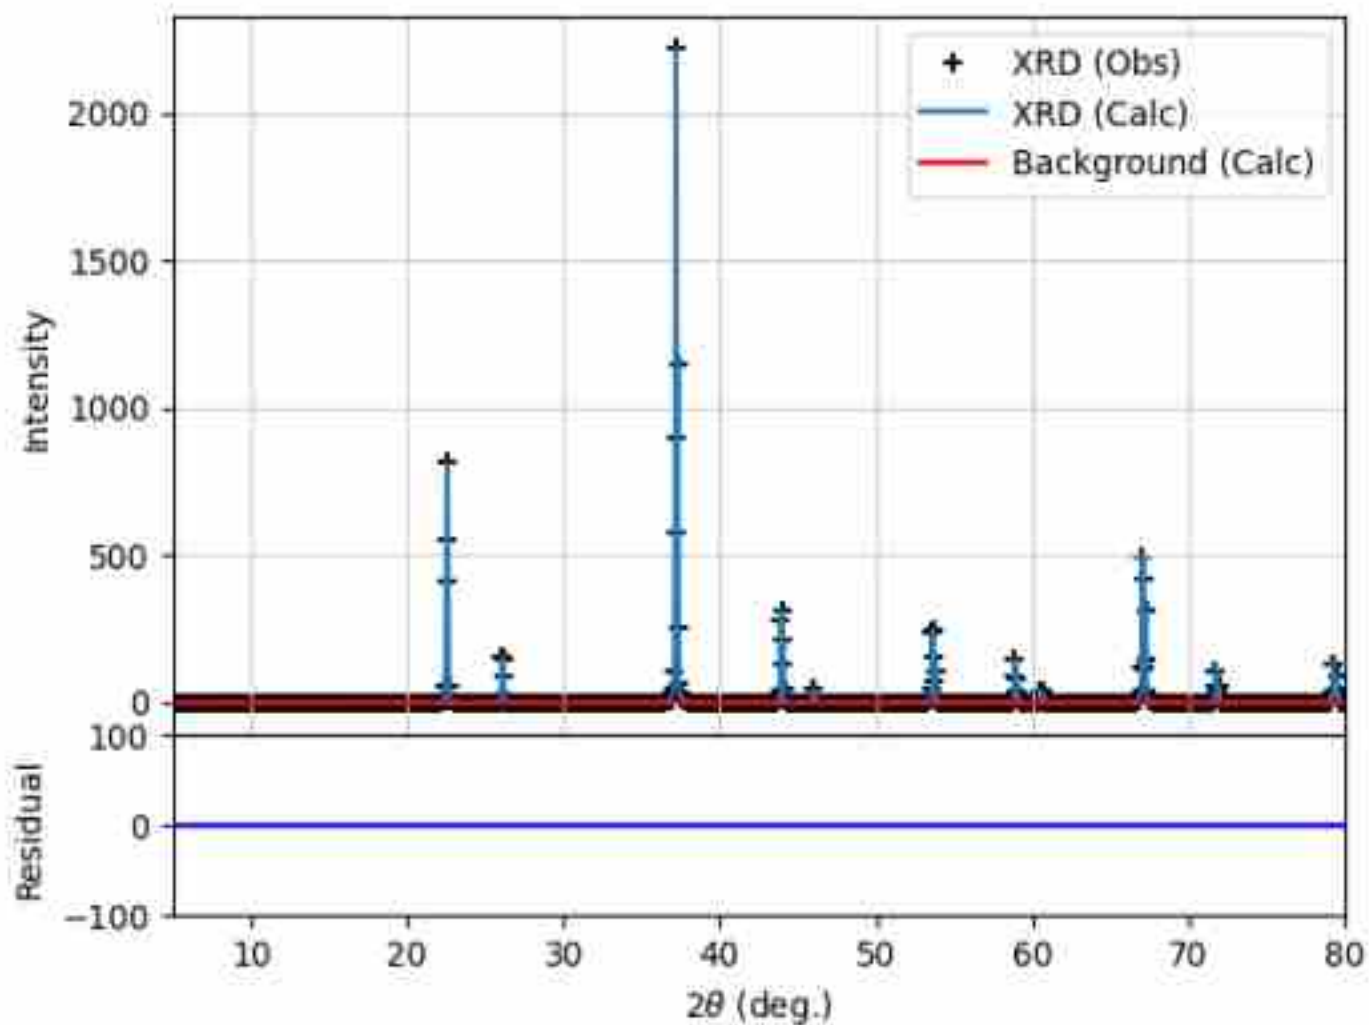

| RMSE before RR | Rwp    | RMSE after RR |
|----------------|--------|---------------|
| 0.004          | 0.0534 | 0.00119       |



# Ho<sub>2</sub>Zr<sub>2</sub>Sb<sub>2</sub>

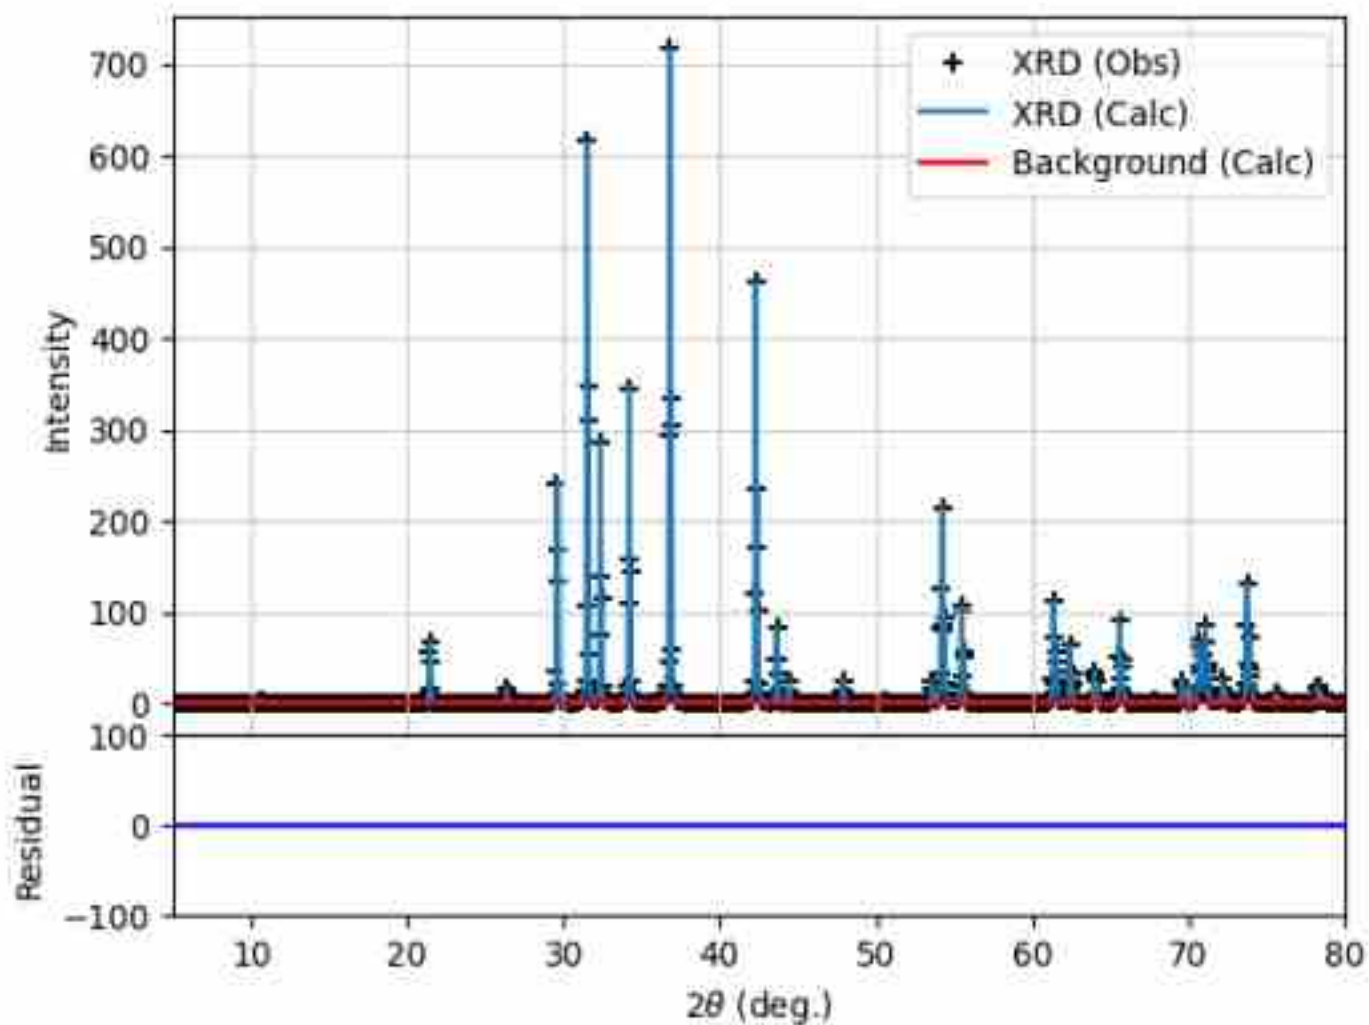

| RMSE before RR | Rwp     | RMSE after RR |
|----------------|---------|---------------|
| 0.004          | 0.00321 | 0.00025       |

# In1Sn1Te2

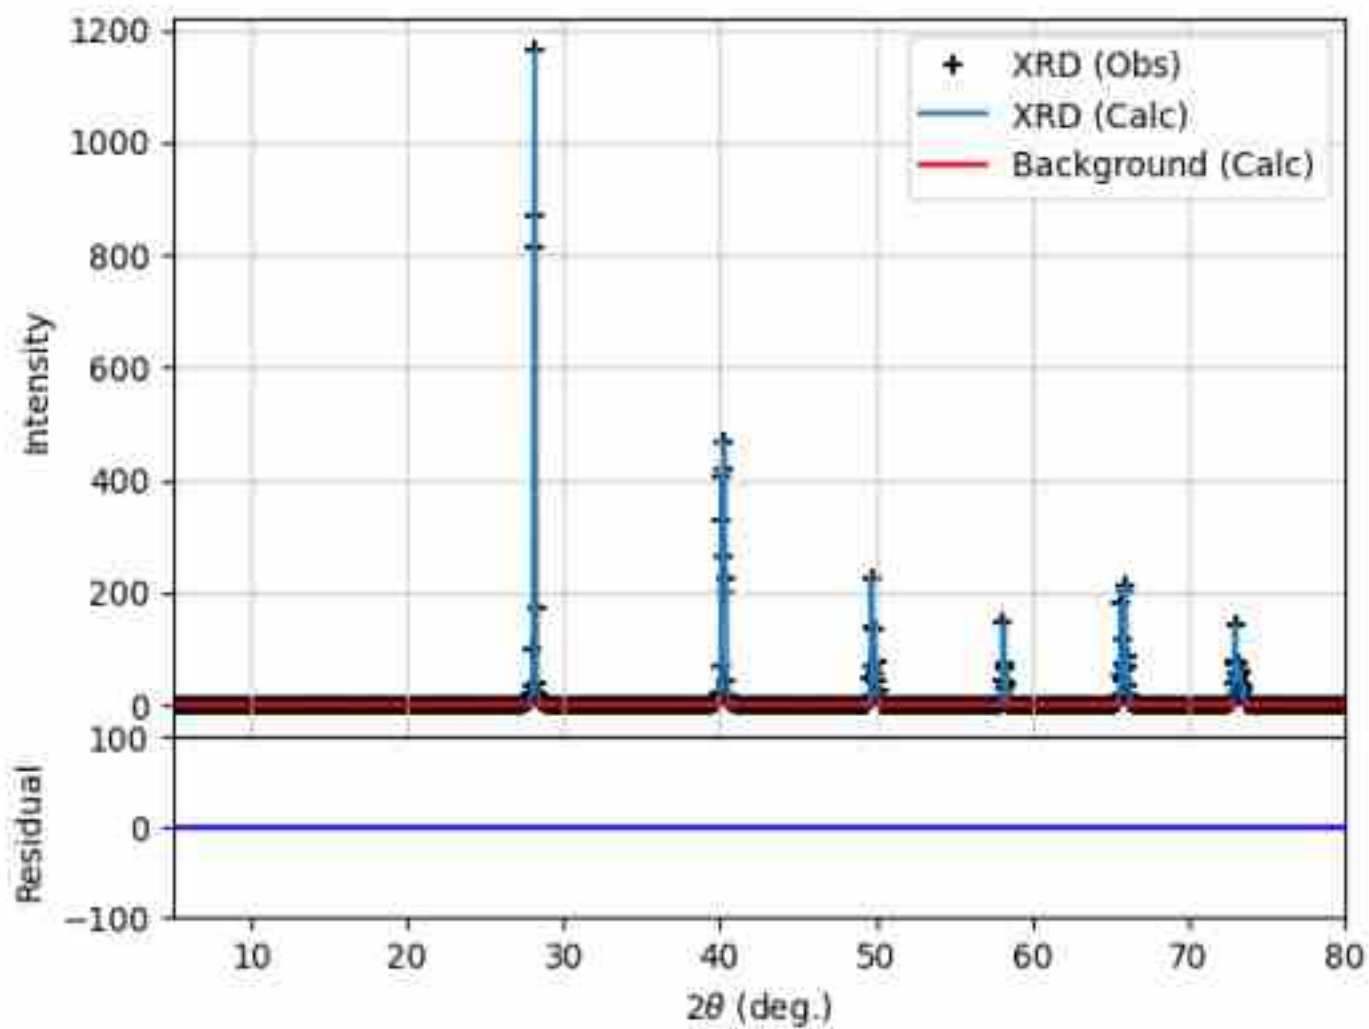

| RMSE before RR | Rwp     | RMSE after RR |
|----------------|---------|---------------|
| 0.004          | 0.00247 | 0.0001        |

# In<sub>2</sub>As<sub>1</sub>P<sub>1</sub>

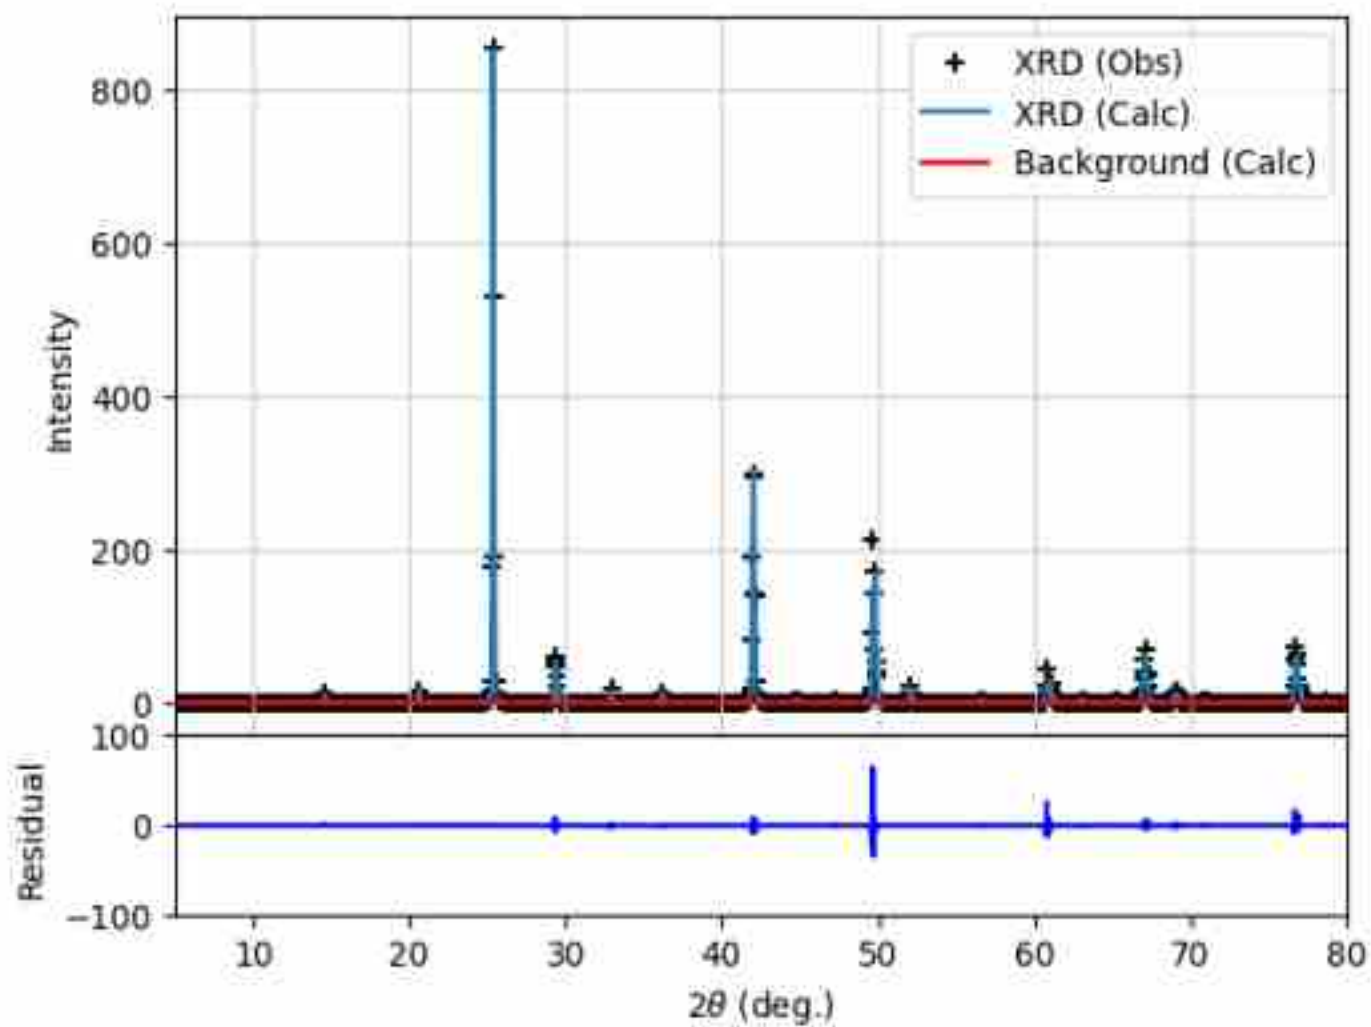

| RMSE before RR | Rwp      | RMSE after RR |
|----------------|----------|---------------|
| 0.004          | 13.29455 | 0.00499       |

# K<sub>2</sub>La<sub>2</sub>Si<sub>2</sub>S<sub>8</sub>

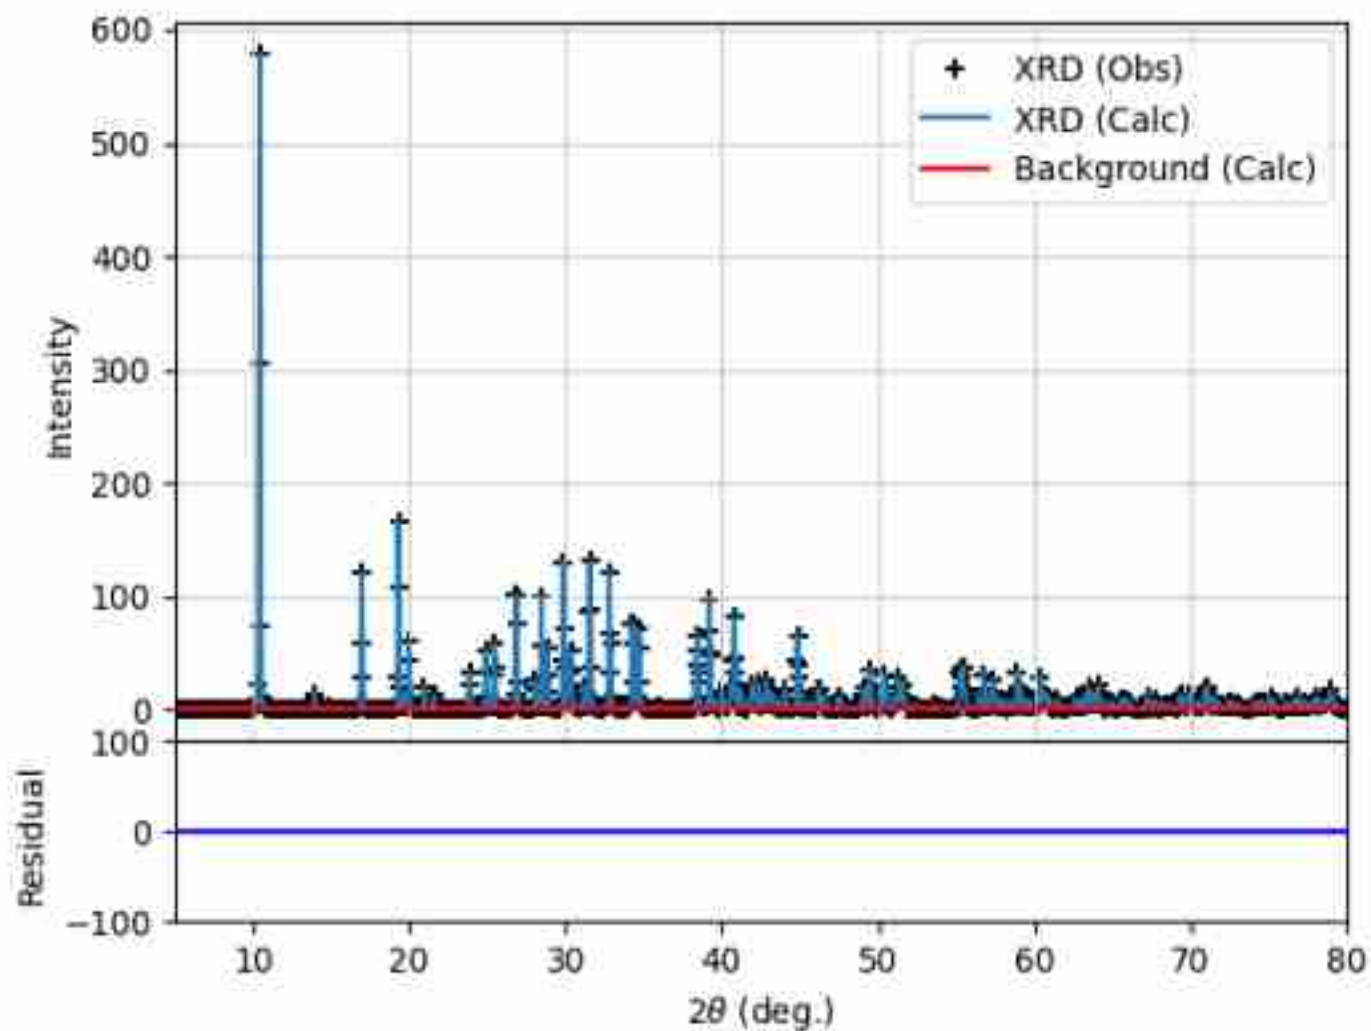

| RMSE before RR | Rwp    | RMSE after RR |
|----------------|--------|---------------|
| 0.04           | 0.0029 | 0.00045       |

# K<sub>2</sub>P<sub>2</sub>H<sub>4</sub>O<sub>8</sub>

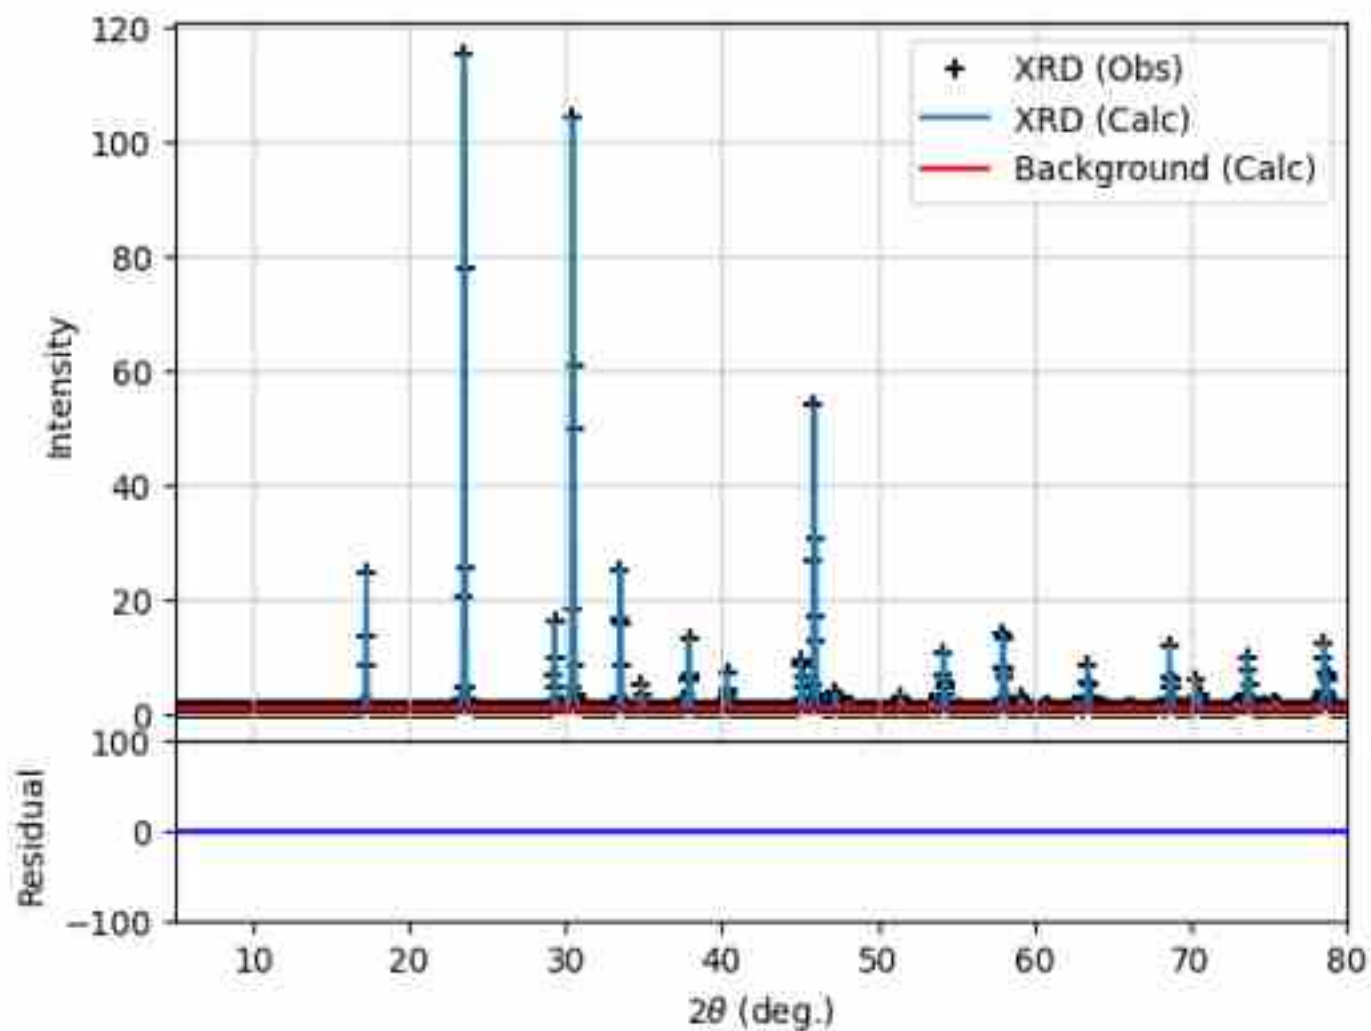

| RMSE before RR | Rwp     | RMSE after RR |
|----------------|---------|---------------|
| 0.04           | 0.08987 | None          |

# La1Al1Cu1Ni3

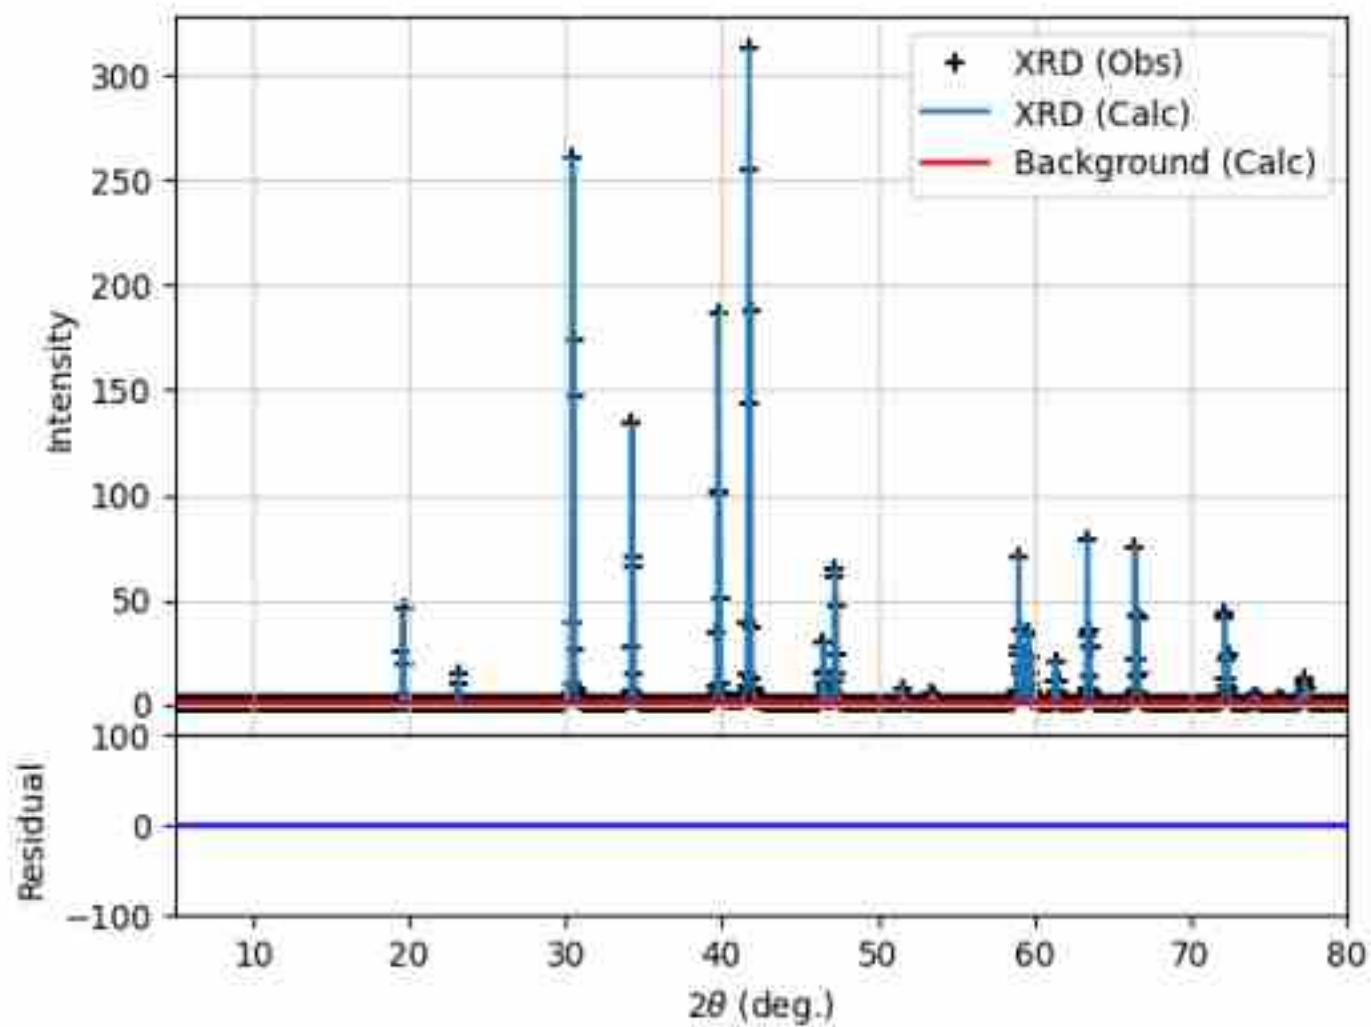

| RMSE before RR | Rwp    | RMSE after RR |
|----------------|--------|---------------|
| 0.004          | 0.0027 | 0.00048       |

# La<sub>2</sub>Ge<sub>2</sub>I<sub>2</sub>

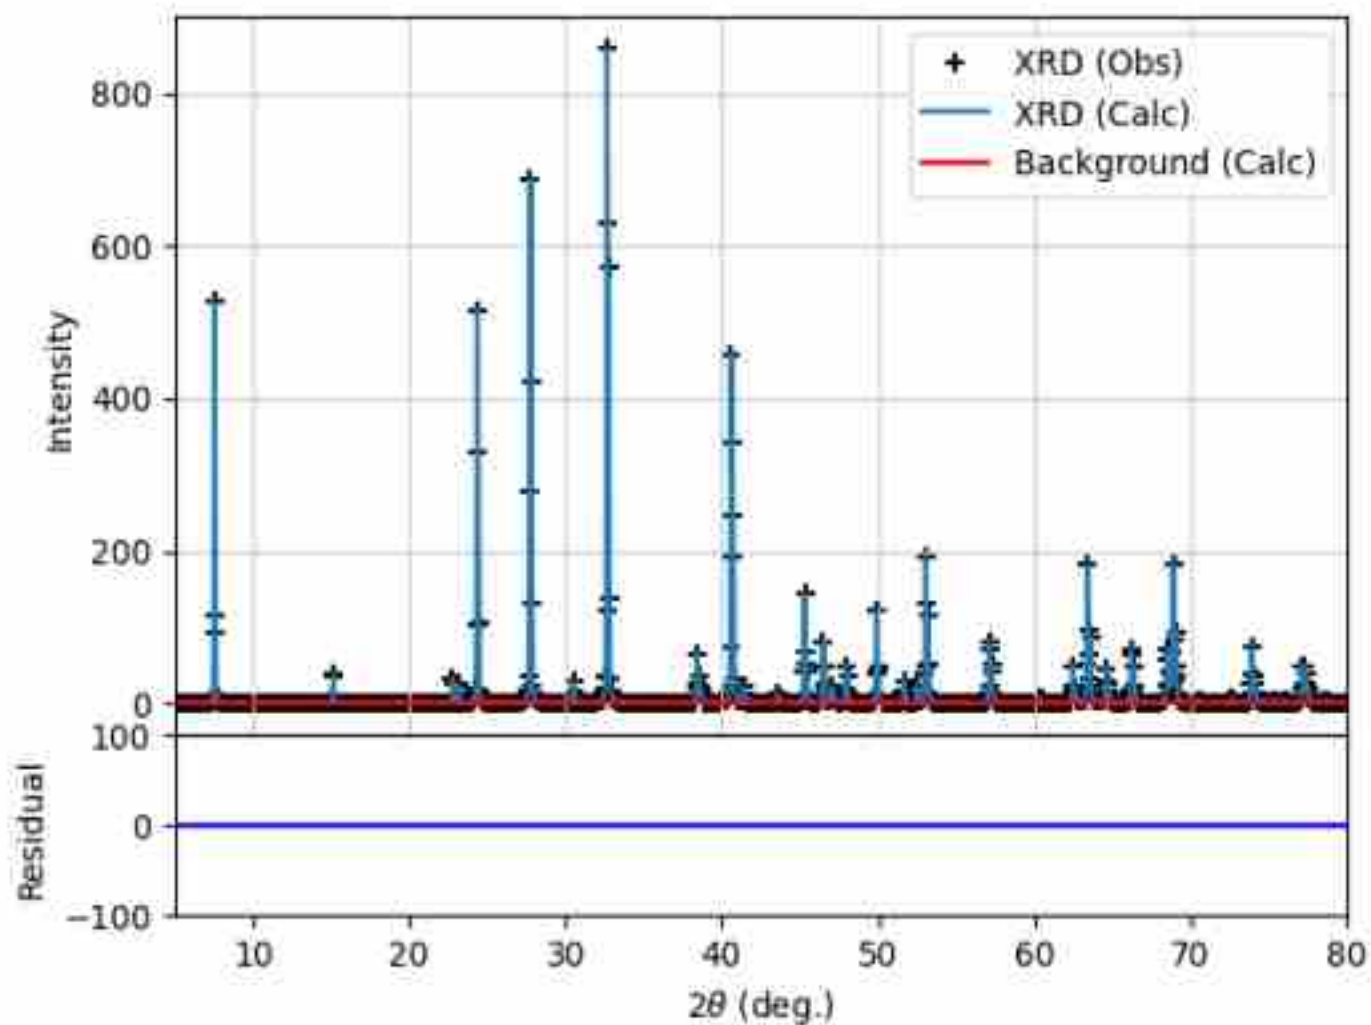

| RMSE before RR | Rwp    | RMSE after RR |
|----------------|--------|---------------|
| 0.04           | 0.0041 | 0.00046       |

# La<sub>2</sub>Tl<sub>2</sub>Zn<sub>2</sub>

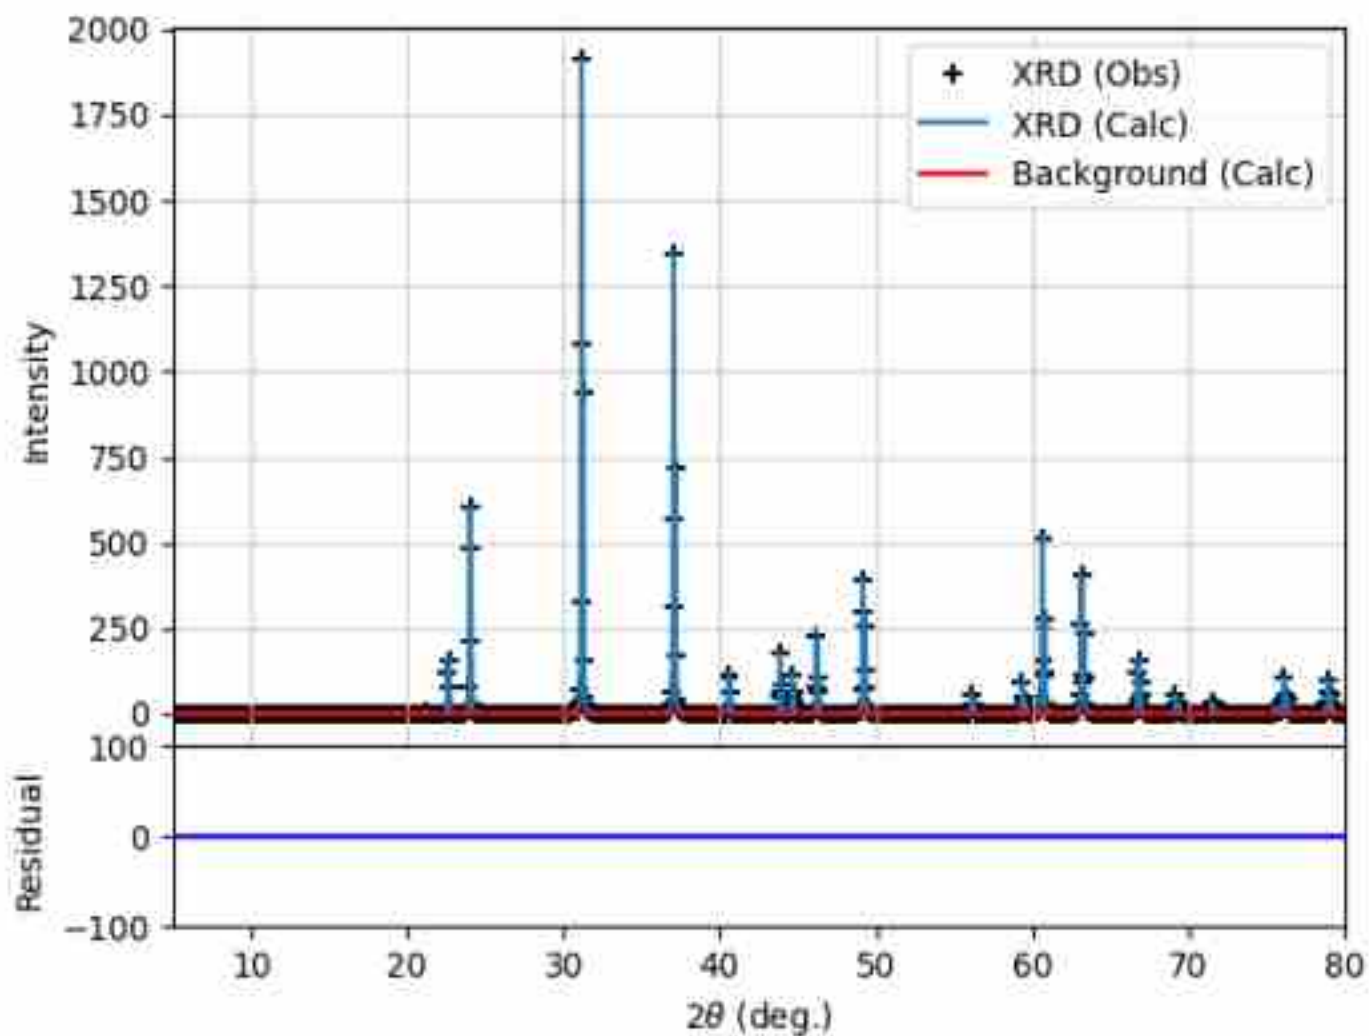

| RMSE before RR | Rwp     | RMSE after RR |
|----------------|---------|---------------|
| 0.004          | 0.00521 | 0.00046       |



# La4

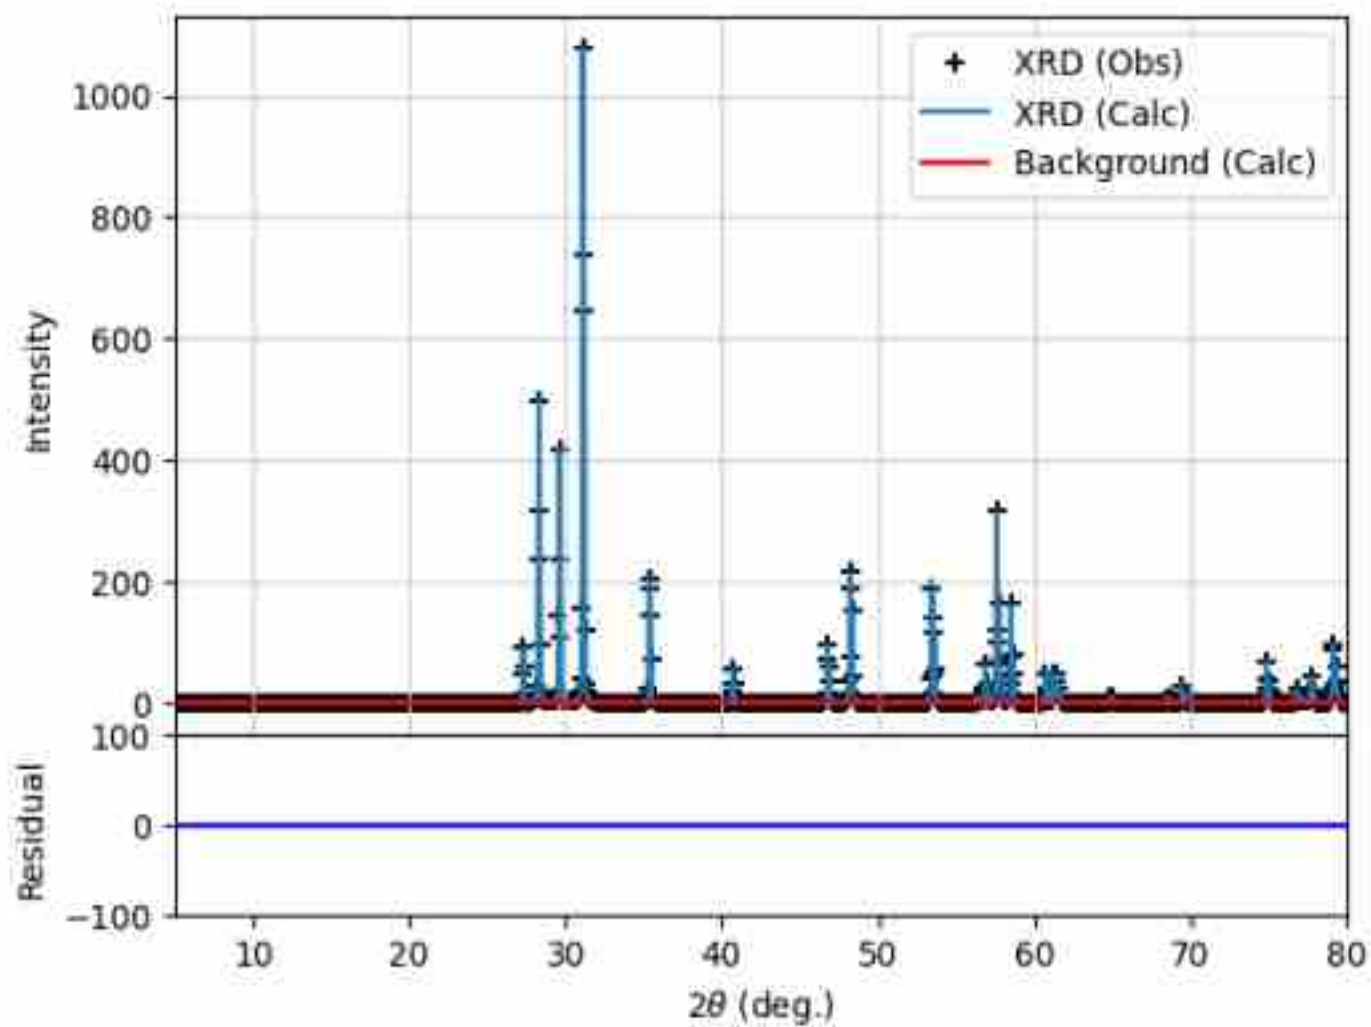

| RMSE before RR | Rwp     | RMSE after RR |
|----------------|---------|---------------|
| 0.004          | 0.00342 | 0.0002        |

# Li1F1

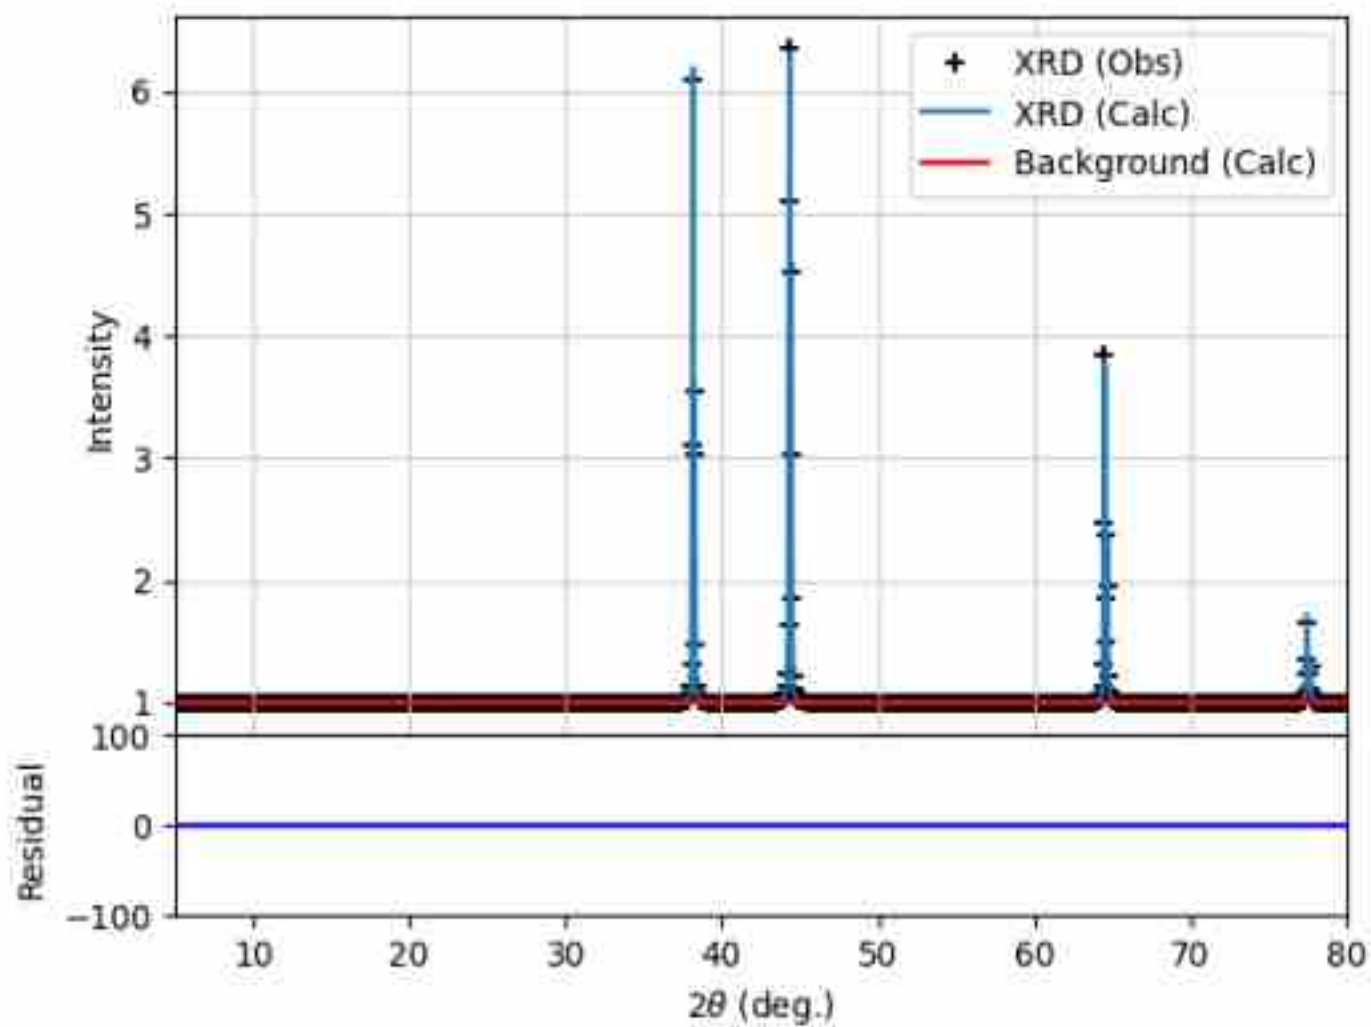

| RMSE before RR | Rwp     | RMSE after RR |
|----------------|---------|---------------|
| 0.004          | 0.25948 | 0.0018        |

# Li1Gd1S2

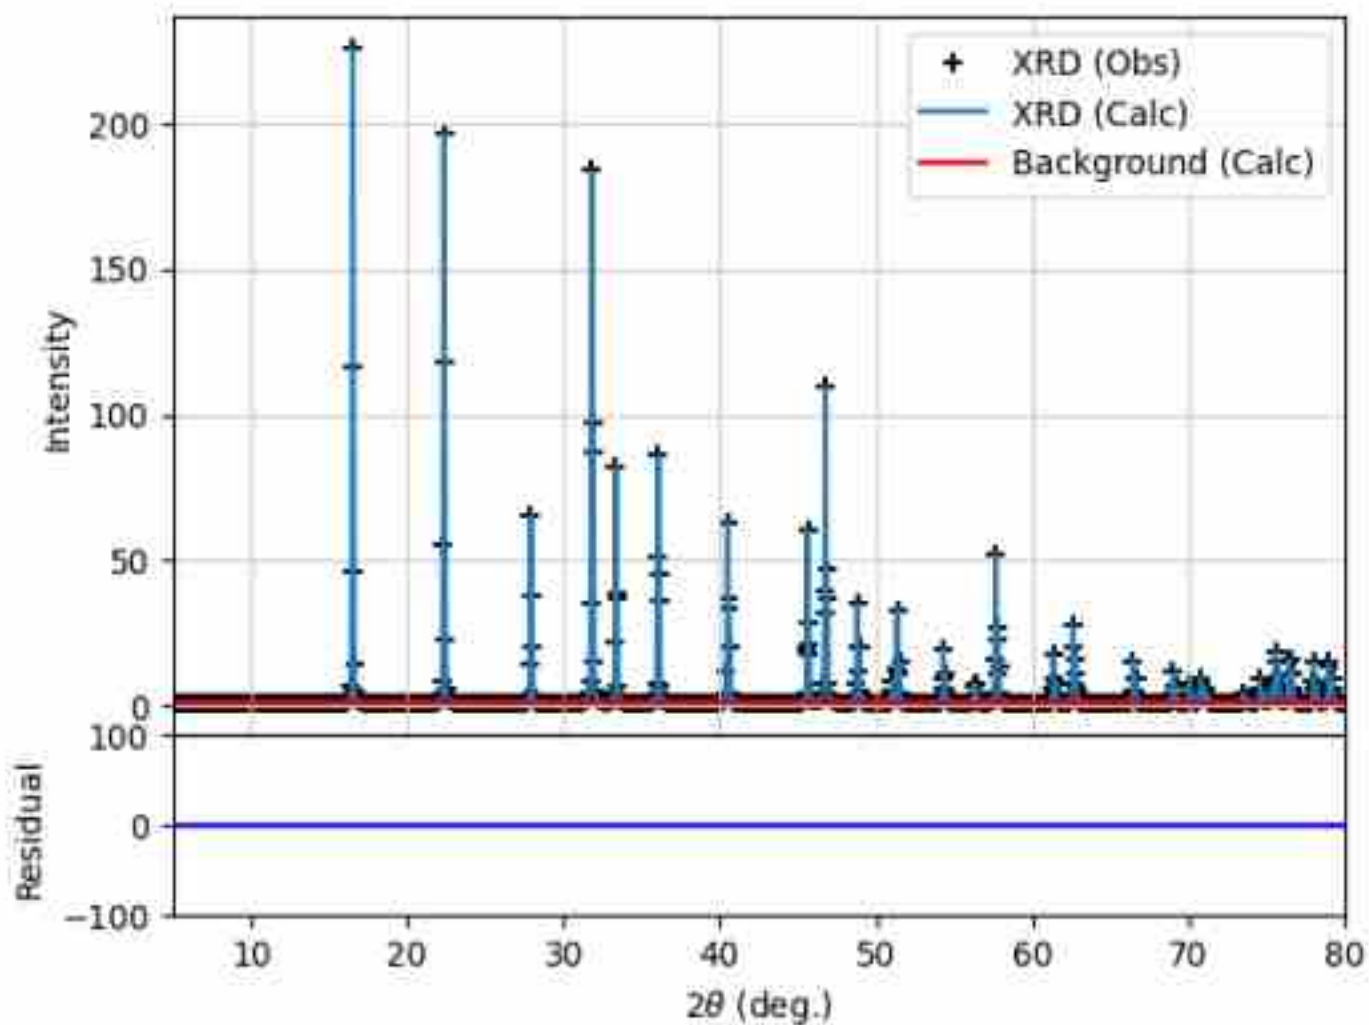

| RMSE before RR | Rwp    | RMSE after RR |
|----------------|--------|---------------|
| 0.004          | 0.0769 | 0.00559       |

# Li1Rh1

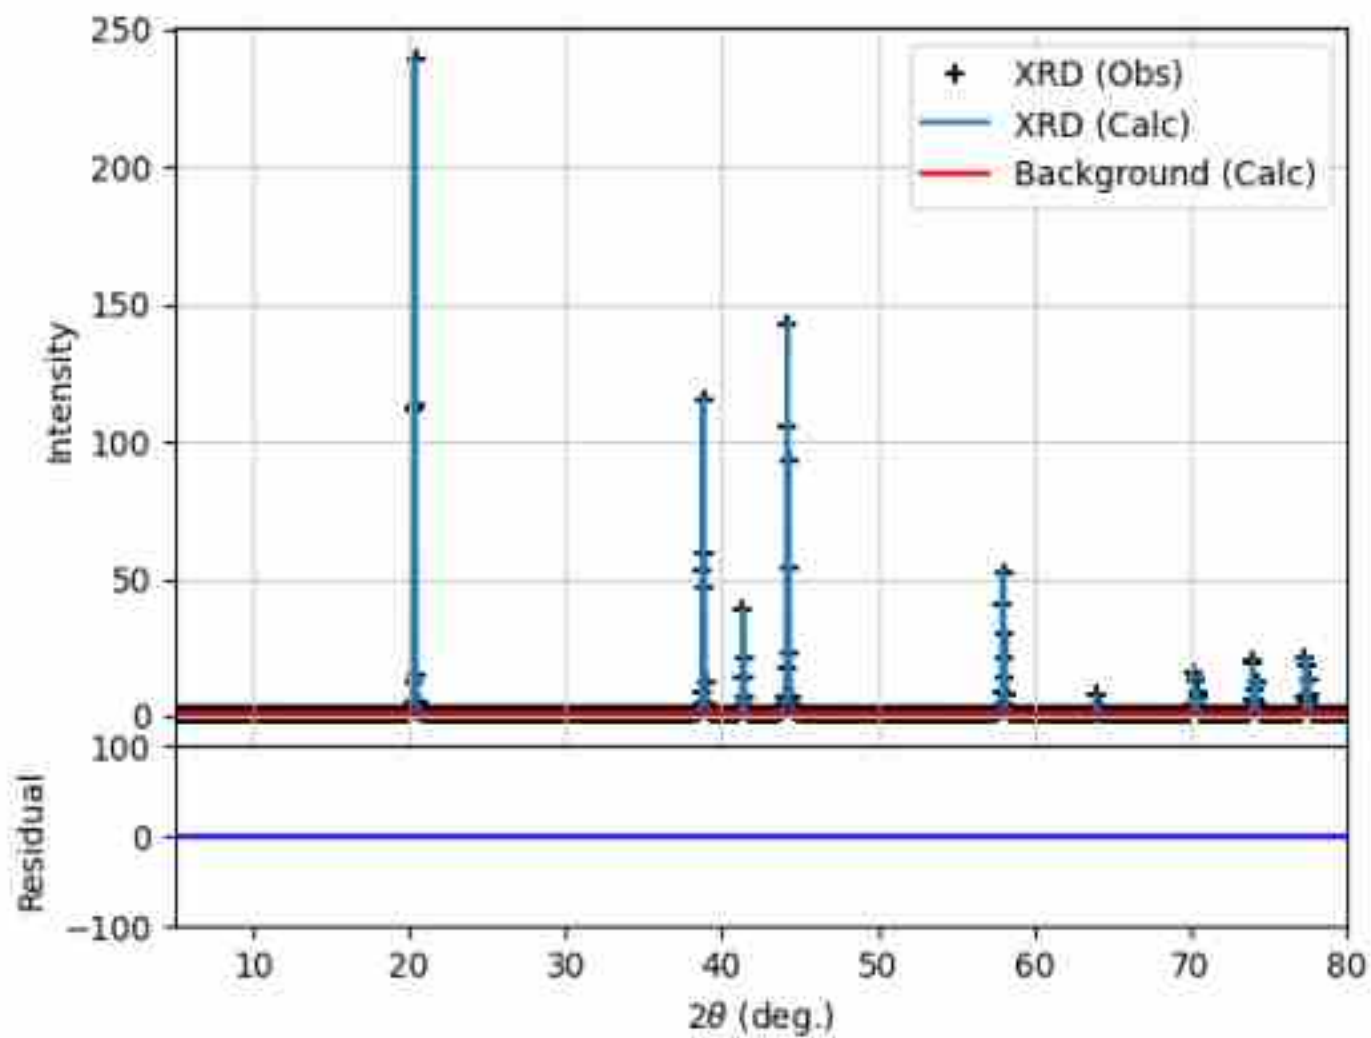

| RMSE before RR | Rwp     | RMSE after RR |
|----------------|---------|---------------|
| 0.004          | 0.00196 | 0.00228       |

# Li<sub>2</sub>Nb<sub>2</sub>Fe<sub>2</sub>O<sub>8</sub>

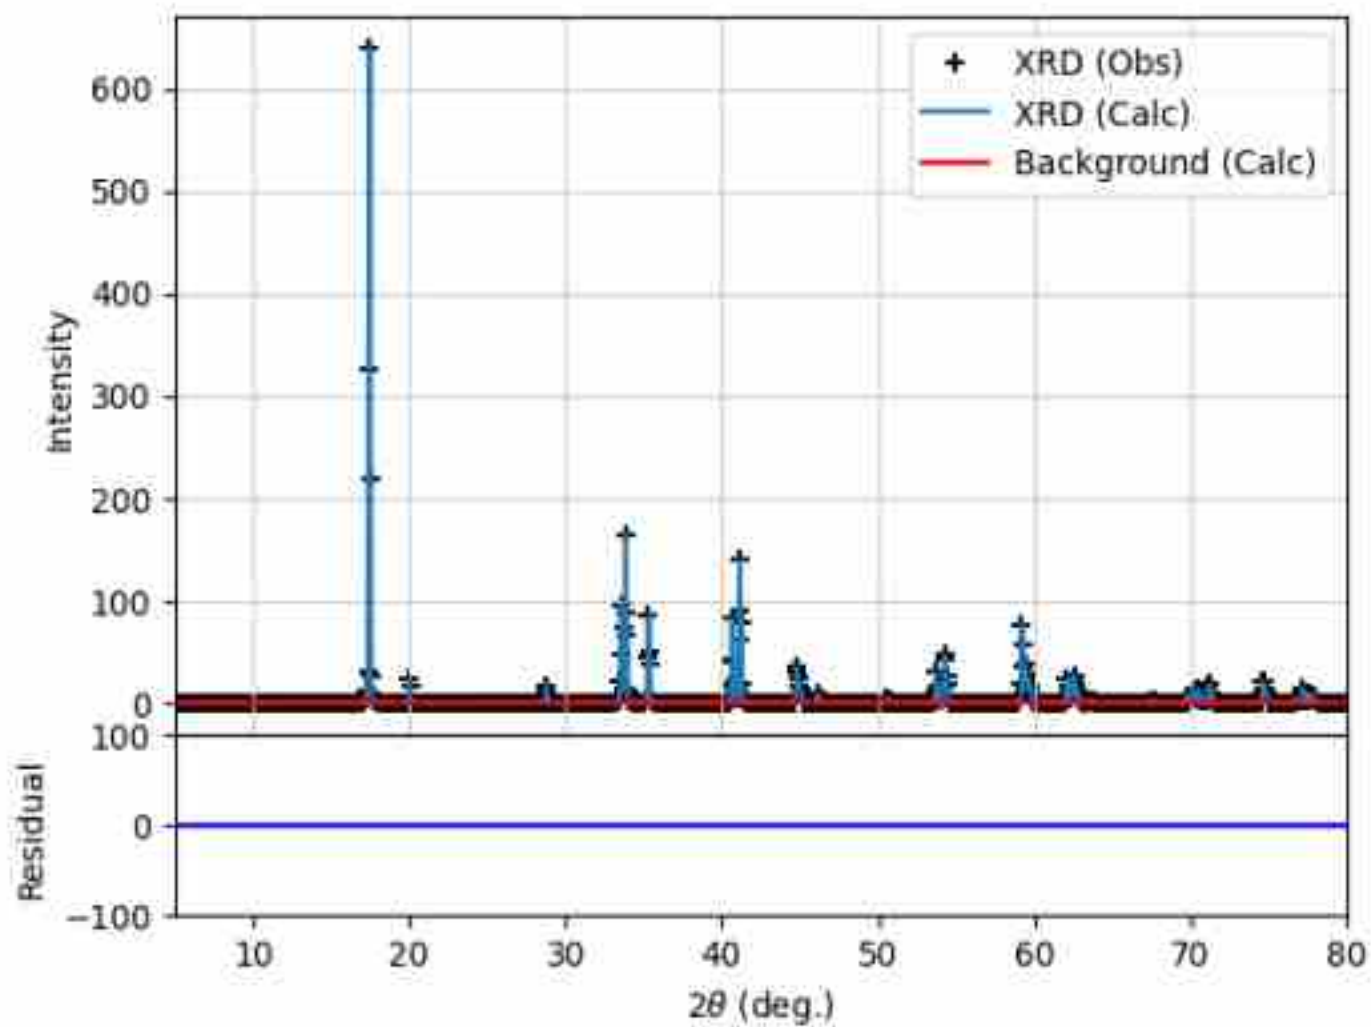

| RMSE before RR | Rwp     | RMSE after RR |
|----------------|---------|---------------|
| 0.04           | 0.00202 | 0.00085       |

# Li<sub>2</sub>Se1

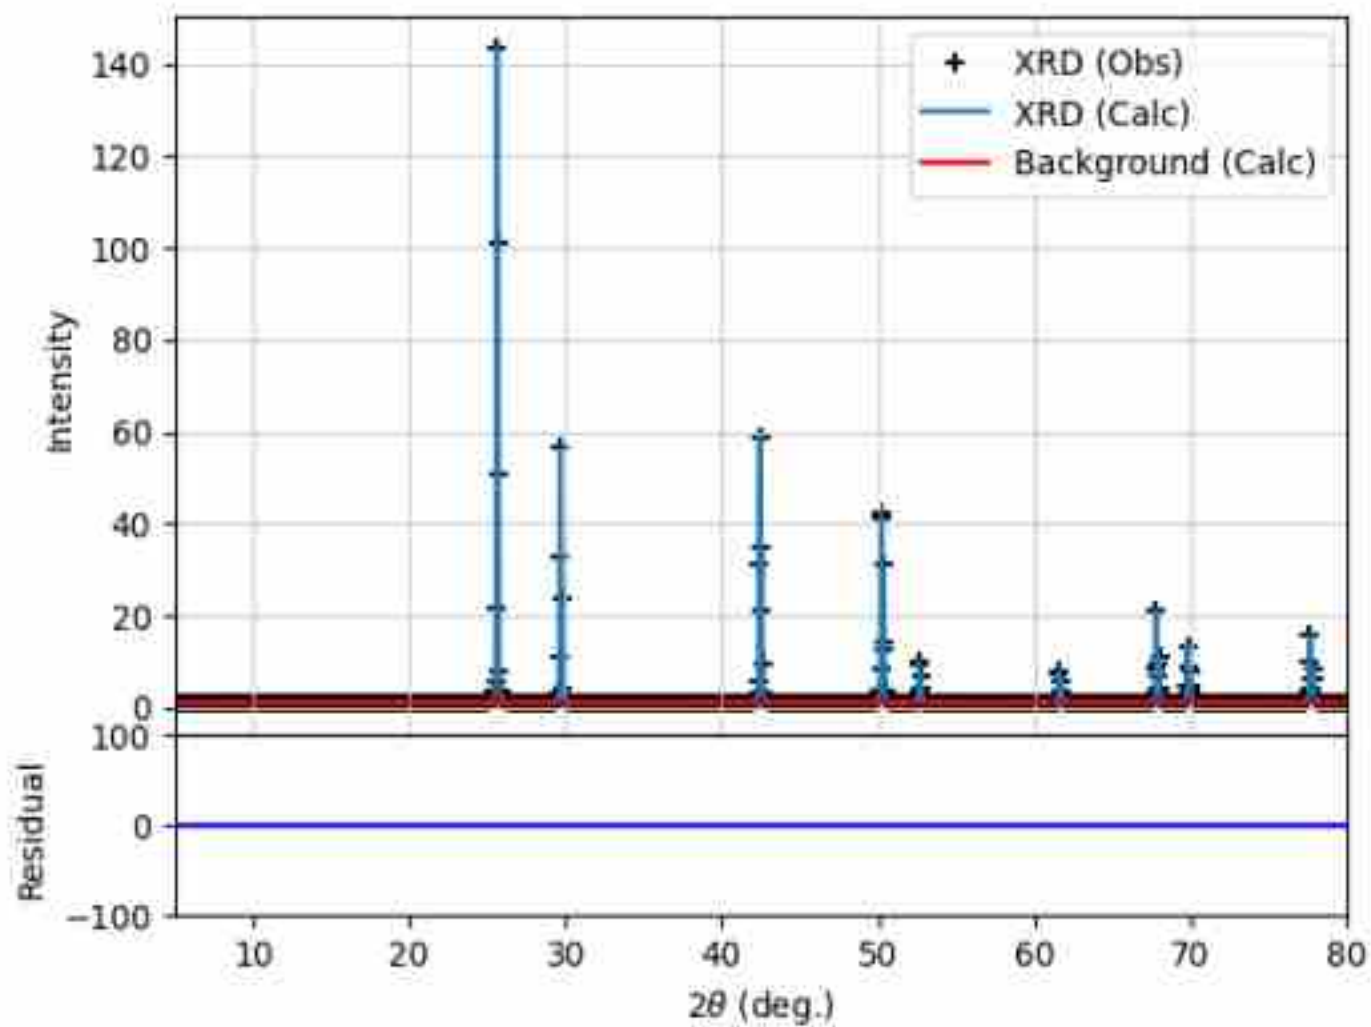

| RMSE before RR | Rwp     | RMSE after RR |
|----------------|---------|---------------|
| 0.004          | 0.00042 | 0.00113       |

# Li<sub>3</sub>Cu<sub>1</sub>Ni<sub>3</sub>O<sub>8</sub>

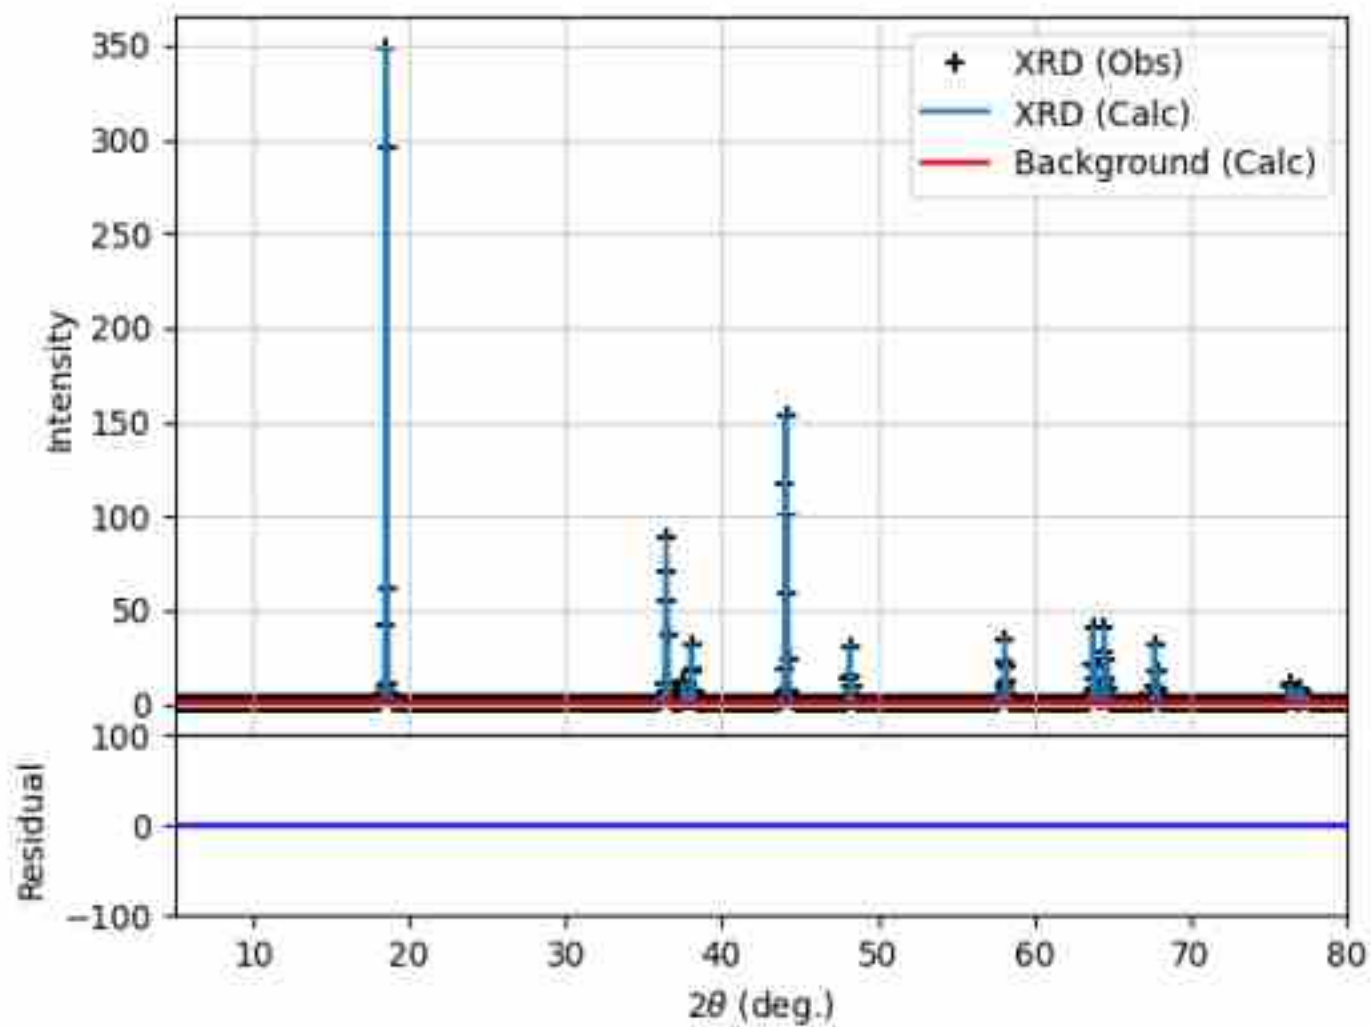

| RMSE before RR | Rwp     | RMSE after RR |
|----------------|---------|---------------|
| 0.04           | 0.00377 | 0.00194       |

# Li<sub>3</sub>MgI

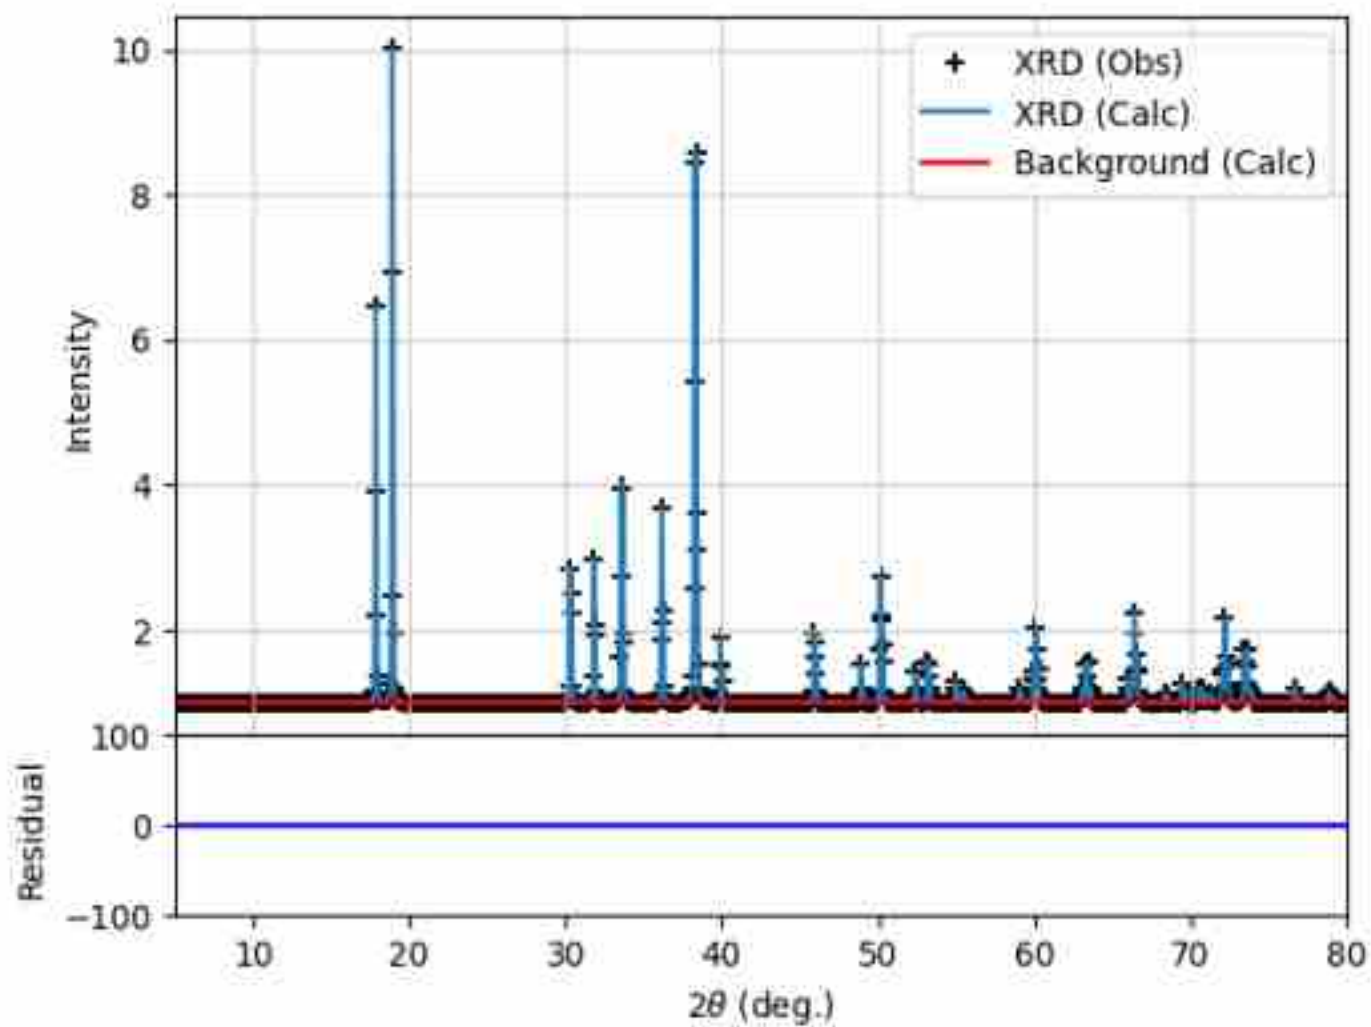

| RMSE before RR | Rwp     | RMSE after RR |
|----------------|---------|---------------|
| 0.004          | 0.00058 | 0.00218       |



# Li<sub>3</sub>Mg<sub>3</sub>

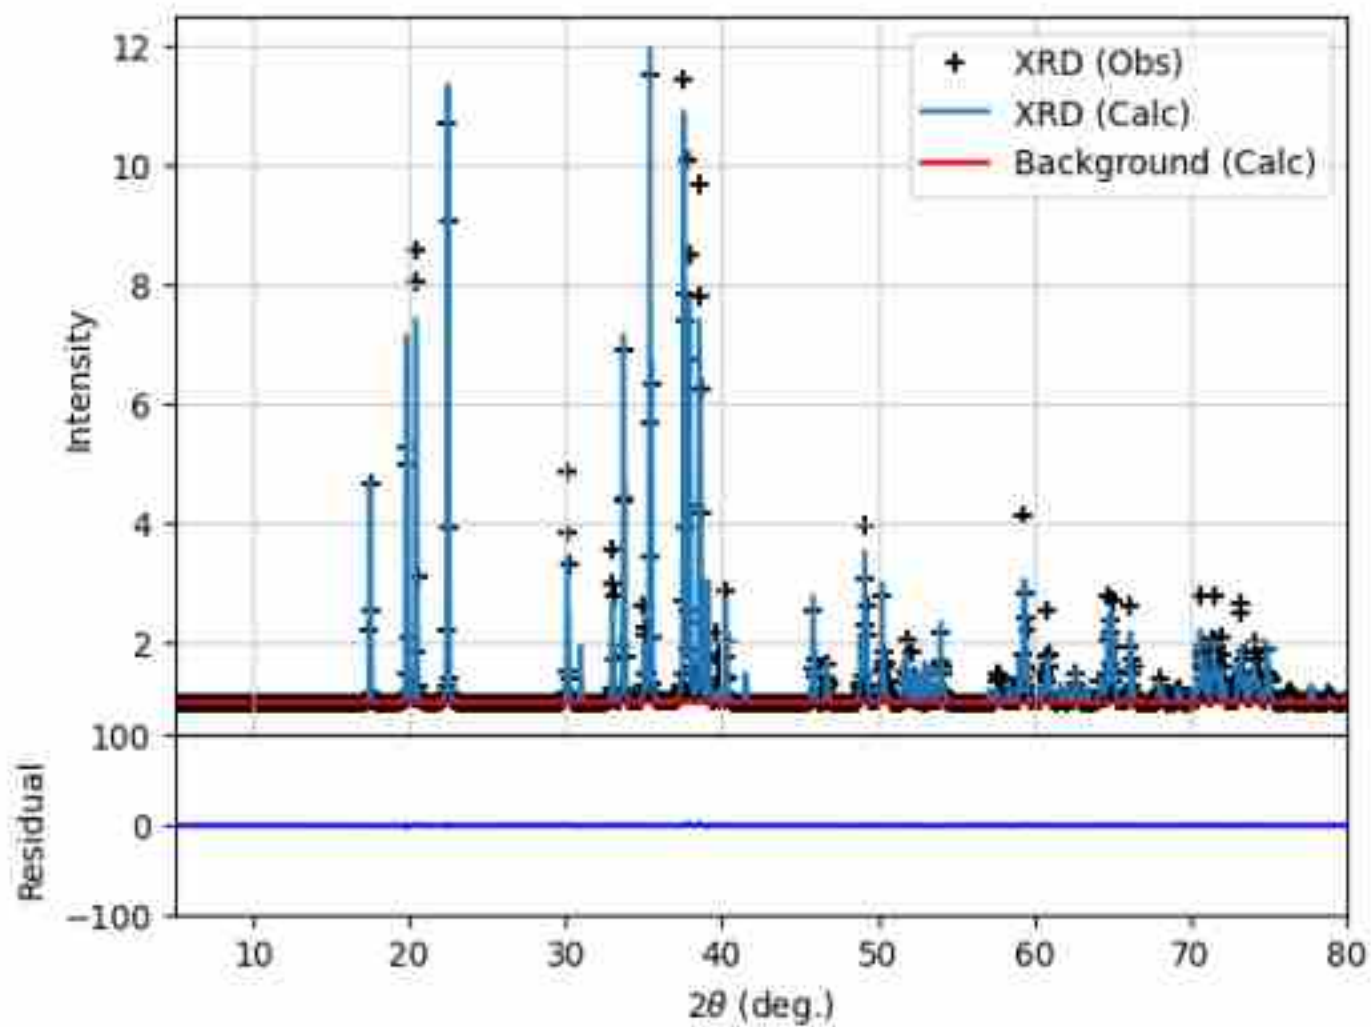

| RMSE before RR | Rwp      | RMSE after RR |
|----------------|----------|---------------|
| 0.004          | 10.43819 | 0.07776       |

# Li<sub>3</sub>ZrNbTe<sub>2</sub>O<sub>12</sub>

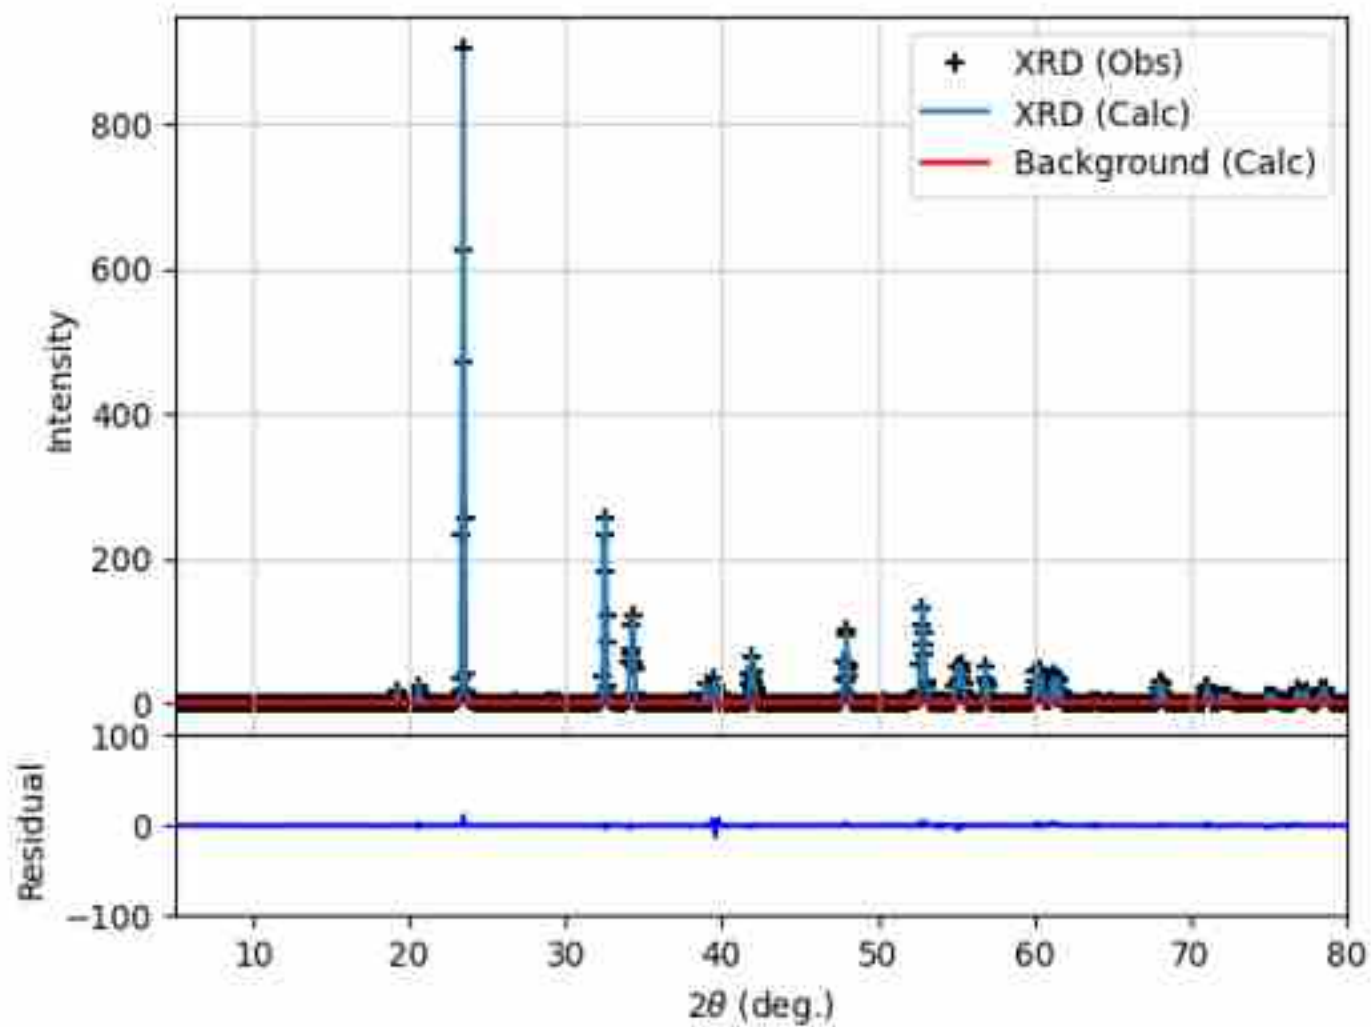

| RMSE before RR | Rwp     | RMSE after RR |
|----------------|---------|---------------|
| 0.04           | 6.62957 | 0.09635       |

# Li<sub>4</sub>MnF<sub>8</sub>

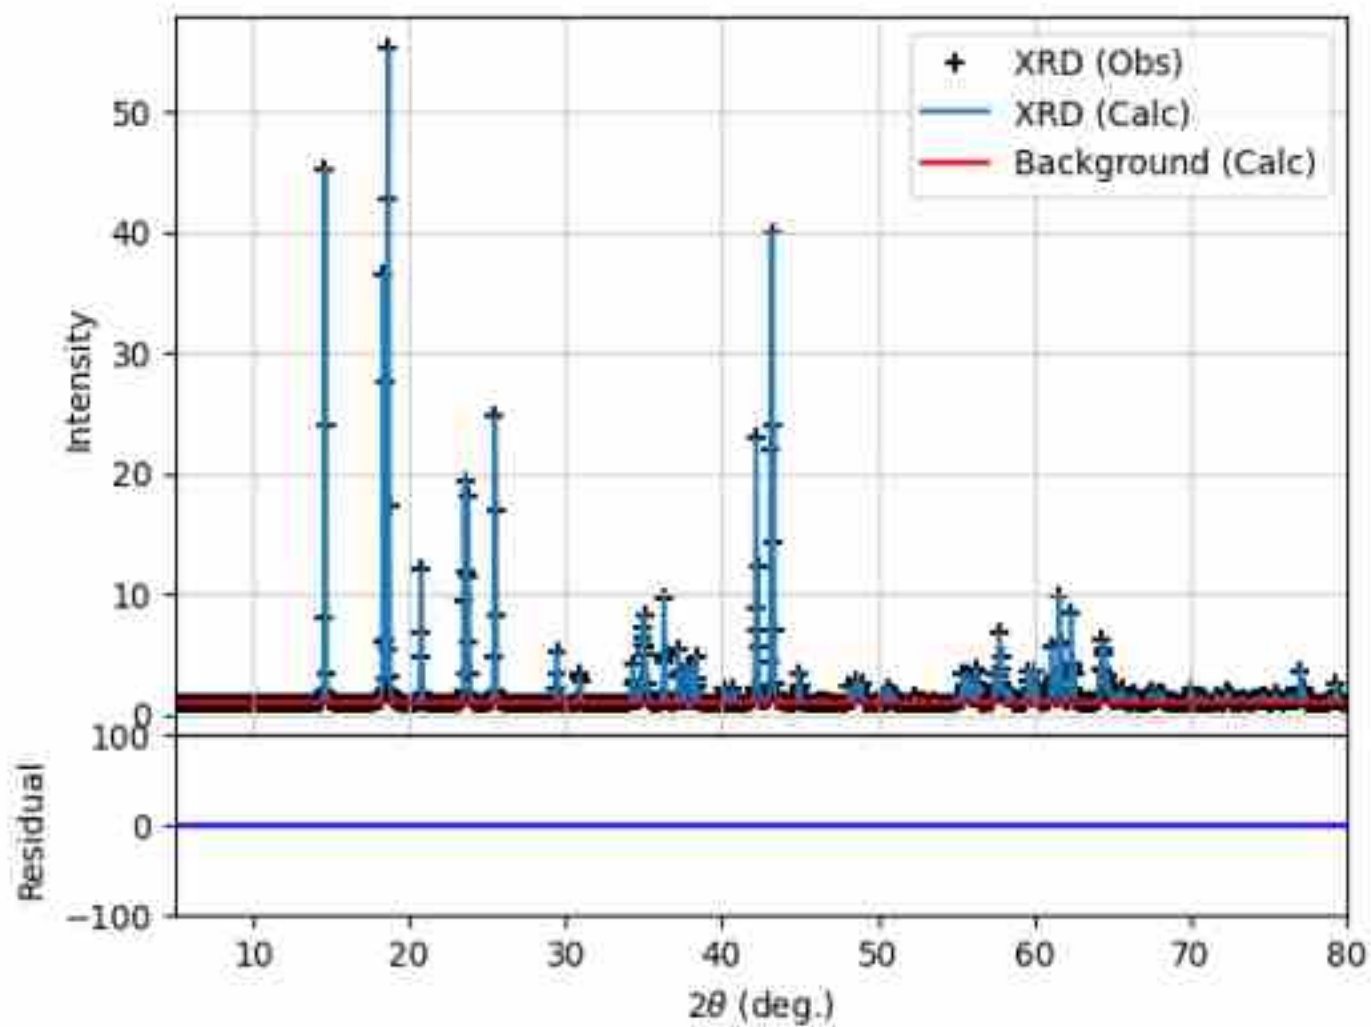

| RMSE before RR | Rwp     | RMSE after RR |
|----------------|---------|---------------|
| 0.04           | 0.00168 | 0.00092       |

# Mg1Al1

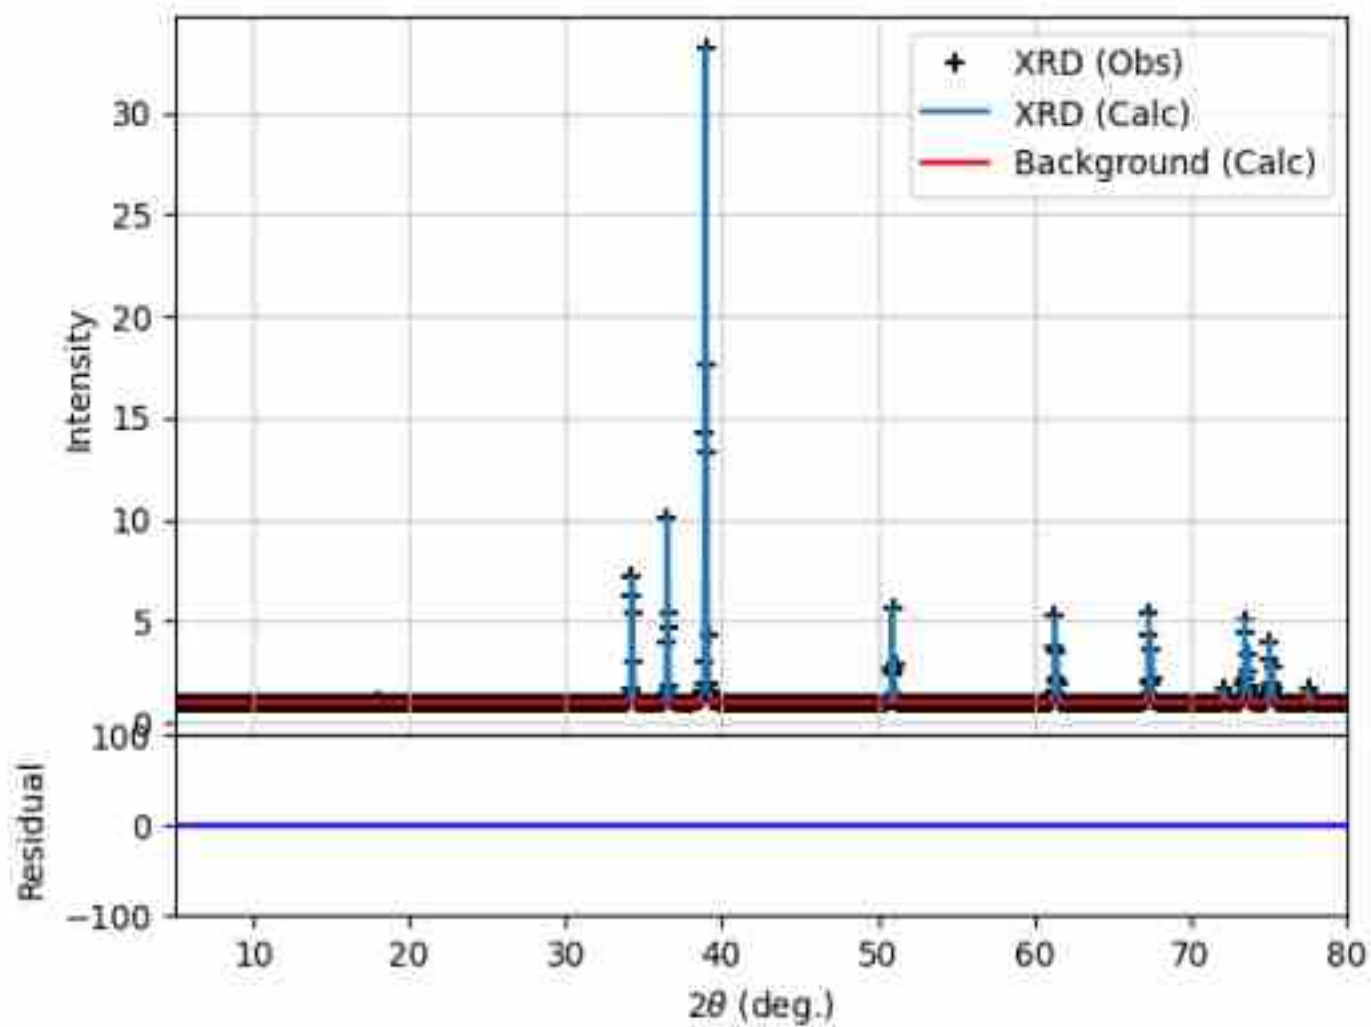

| RMSE before RR | Rwp     | RMSE after RR |
|----------------|---------|---------------|
| 0.004          | 0.00097 | 0.00031       |

# Mg1Cu1Bi1

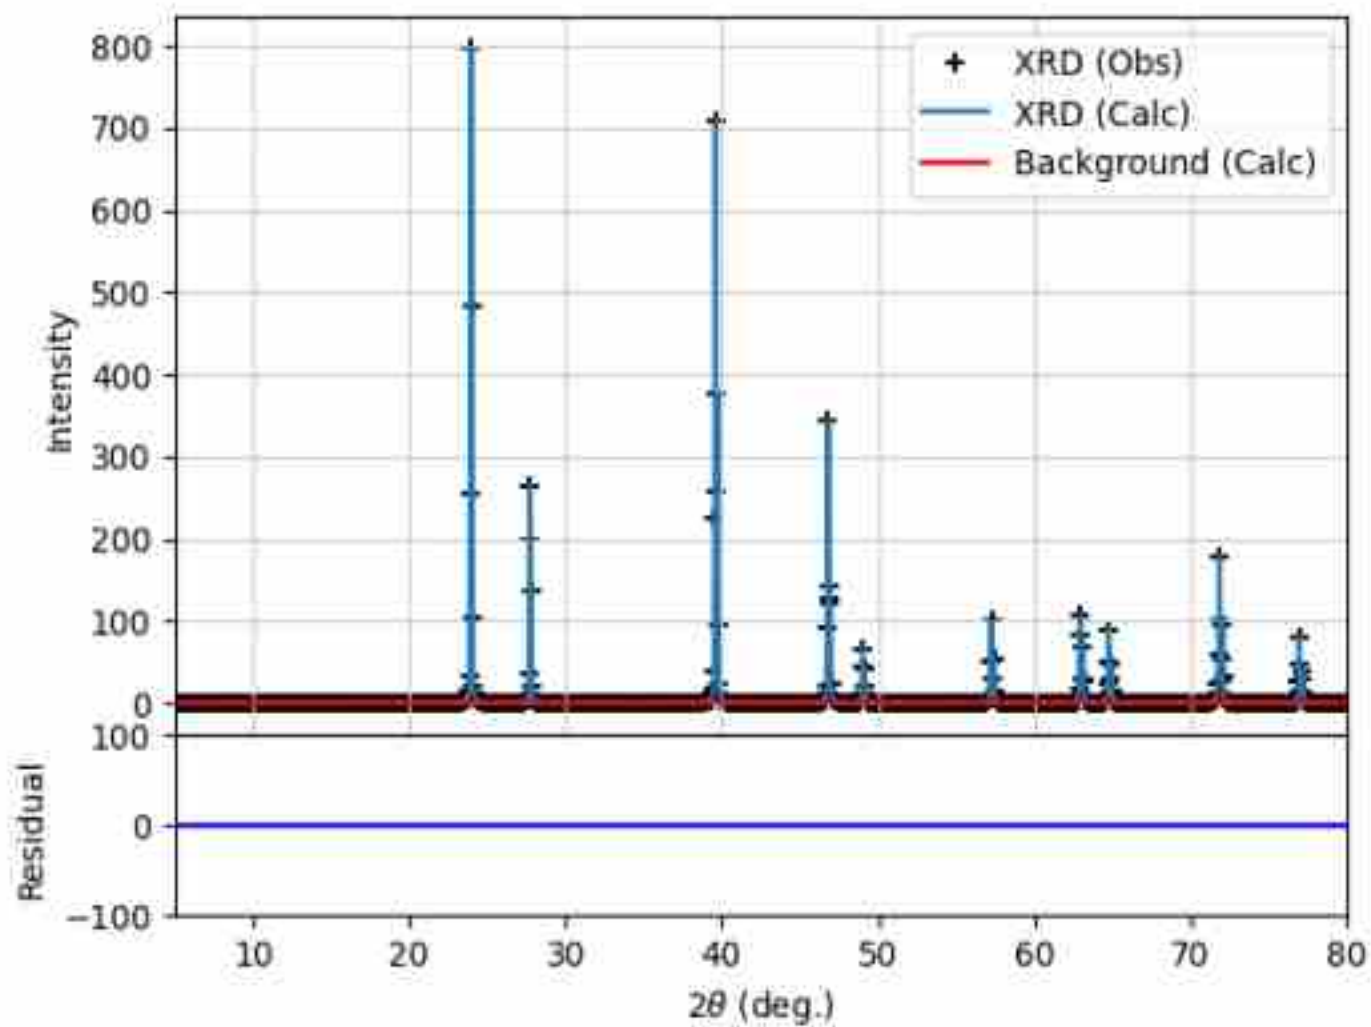

| RMSE before RR | Rwp     | RMSE after RR |
|----------------|---------|---------------|
| 0.004          | 0.00606 | 0.00076       |

# Mg<sub>2</sub>Te<sub>2</sub>

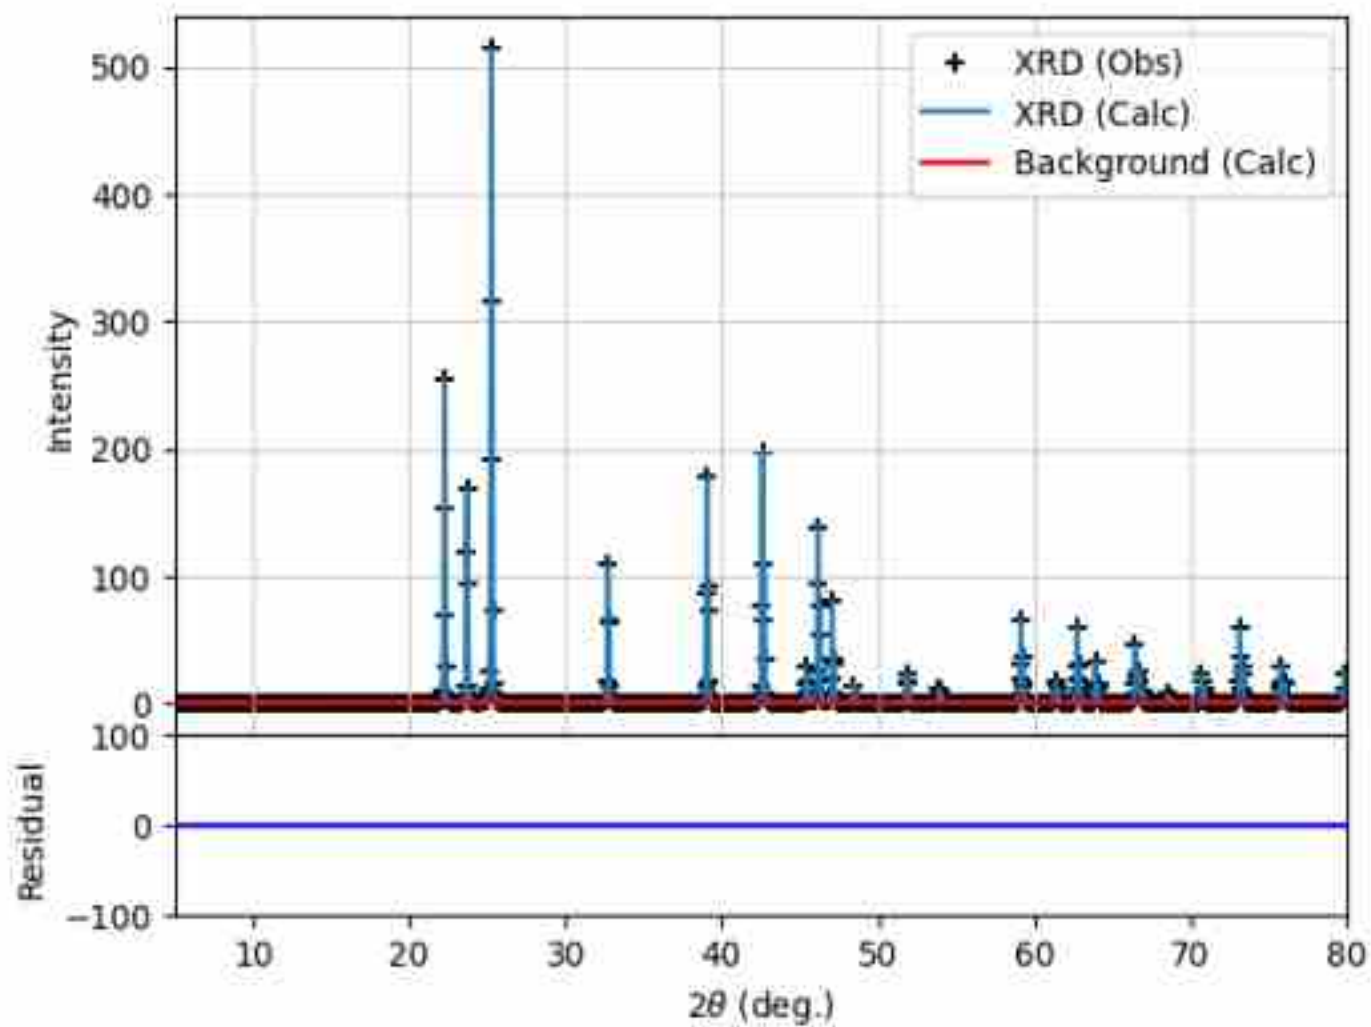

| RMSE before RR | Rwp     | RMSE after RR |
|----------------|---------|---------------|
| 0.004          | 0.00332 | 0.0006        |

# Mg5Pb1

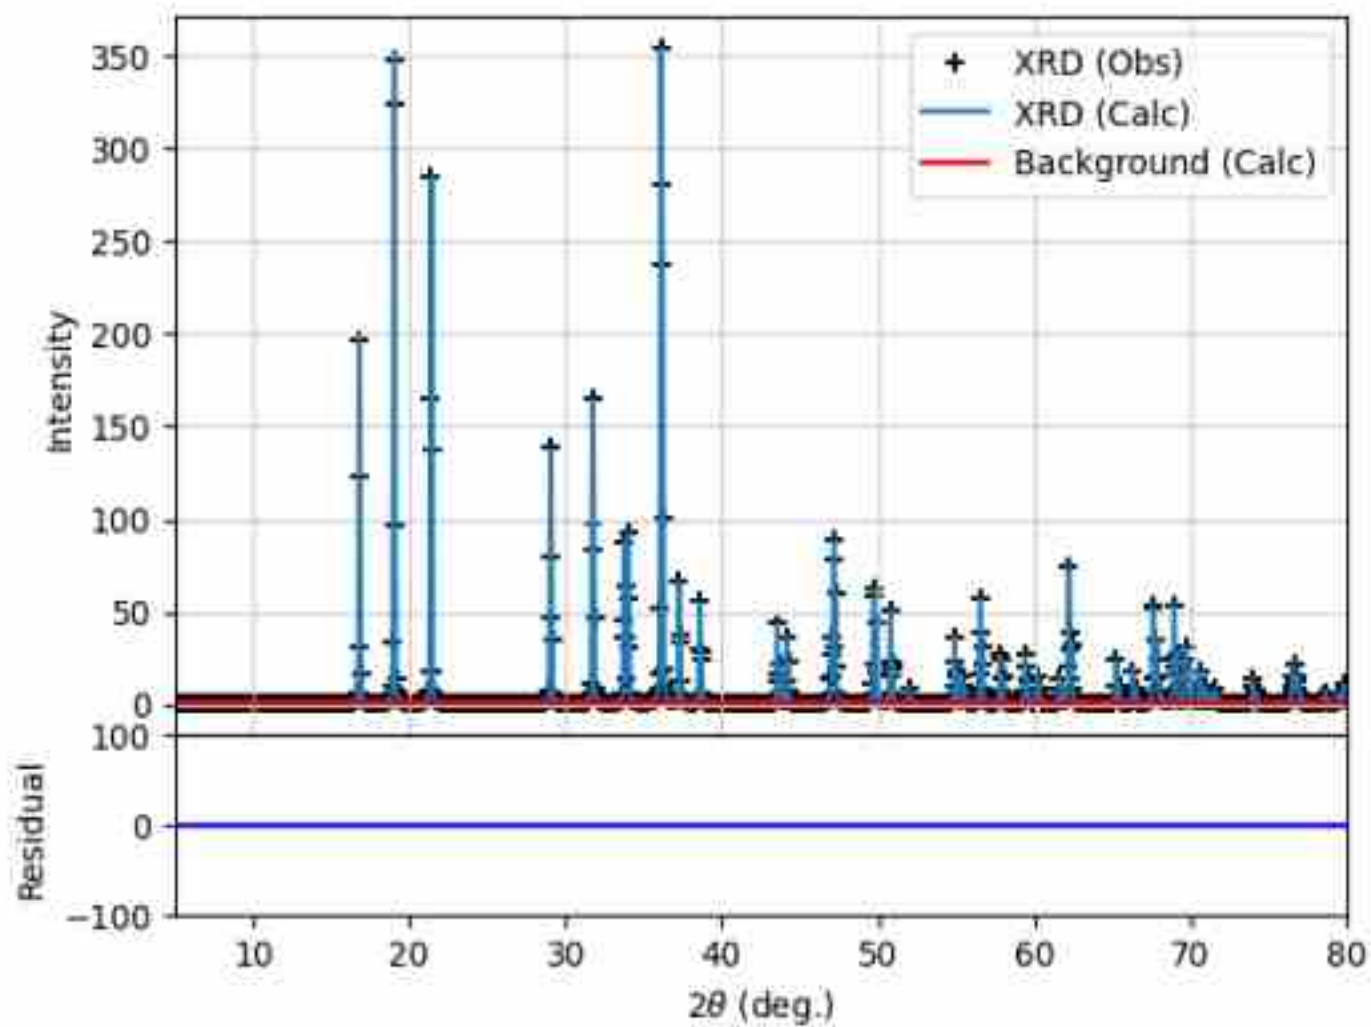

| RMSE before RR | Rwp     | RMSE after RR |
|----------------|---------|---------------|
| 0.004          | 0.00395 | 0.00177       |

# Mn<sub>2</sub>Se<sub>2</sub>O<sub>8</sub>

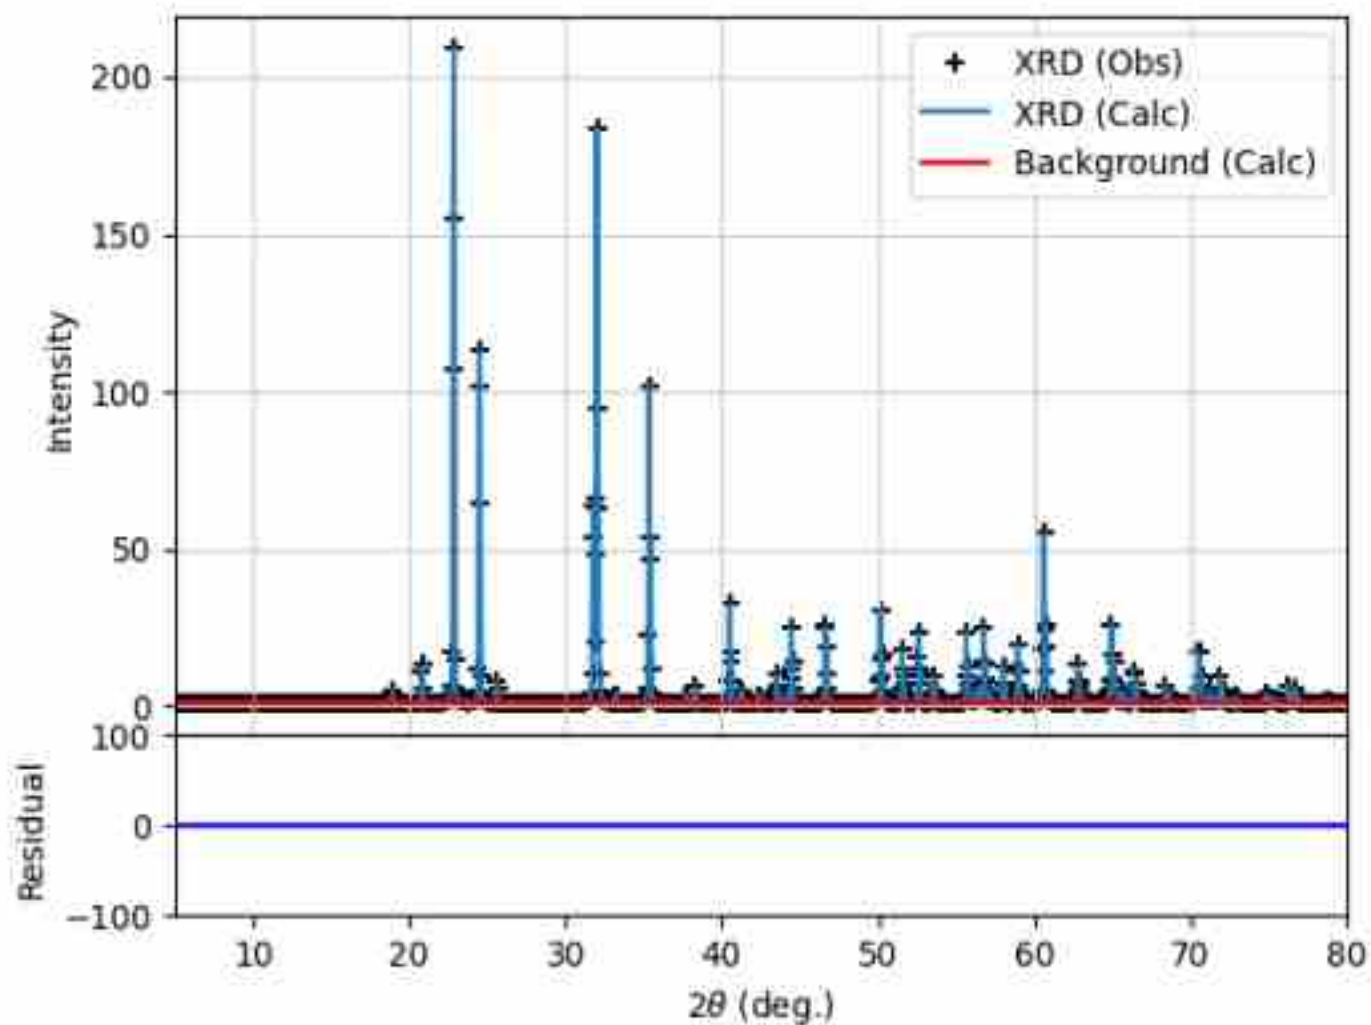

| RMSE before RR | Rwp     | RMSE after RR |
|----------------|---------|---------------|
| 0.04           | 0.00277 | 0.00114       |



# Mn<sub>3</sub>O<sub>6</sub>

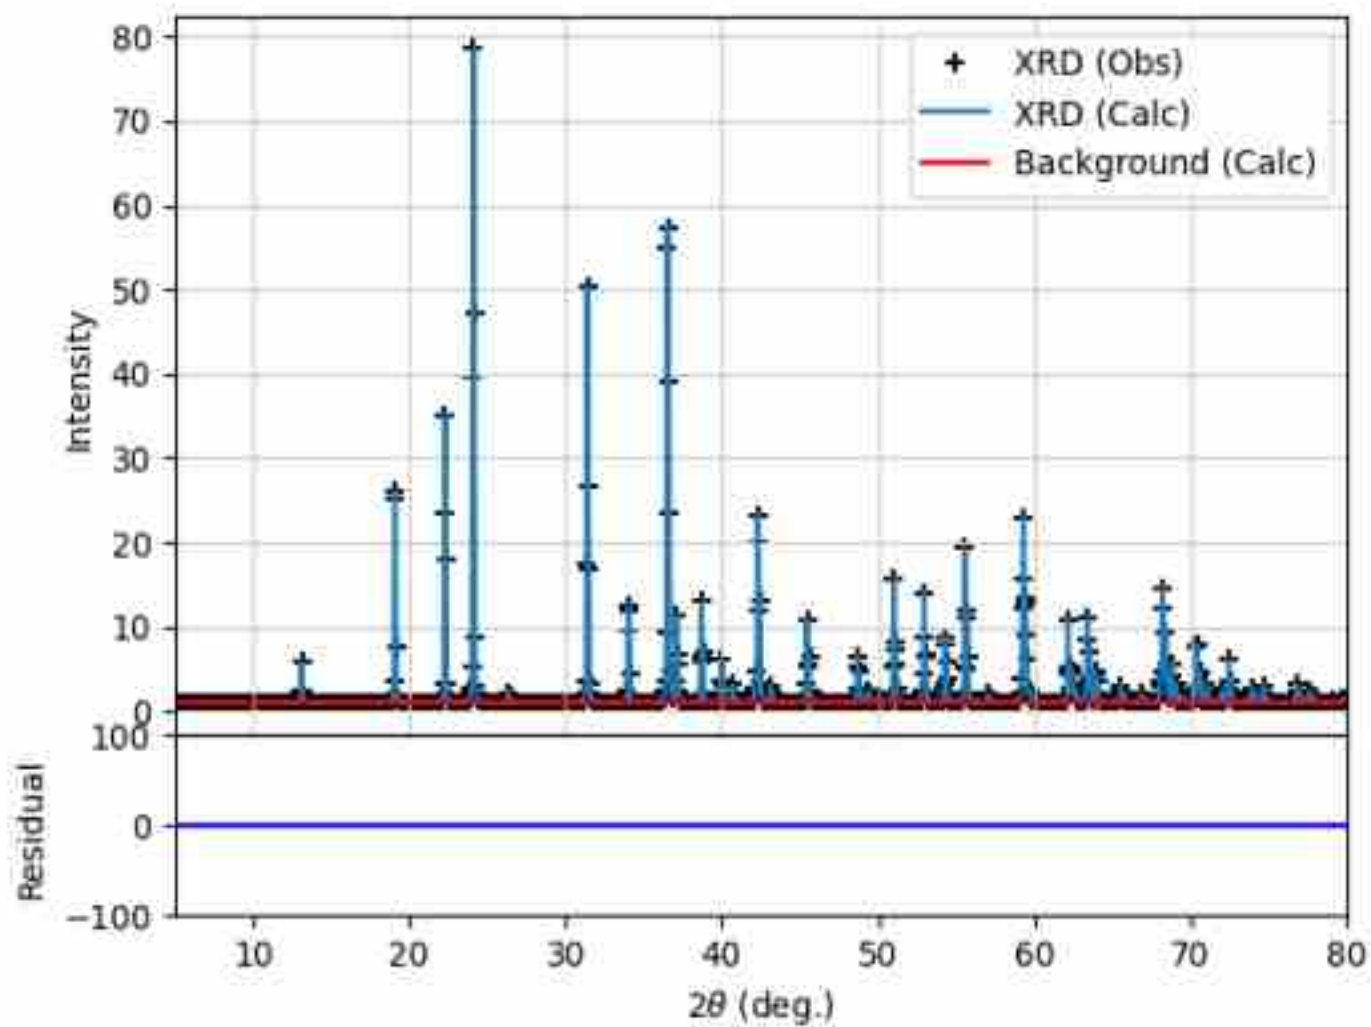

| RMSE before RR | Rwp     | RMSE after RR |
|----------------|---------|---------------|
| 0.04           | 0.00274 | 0.00119       |

# Mo2C1

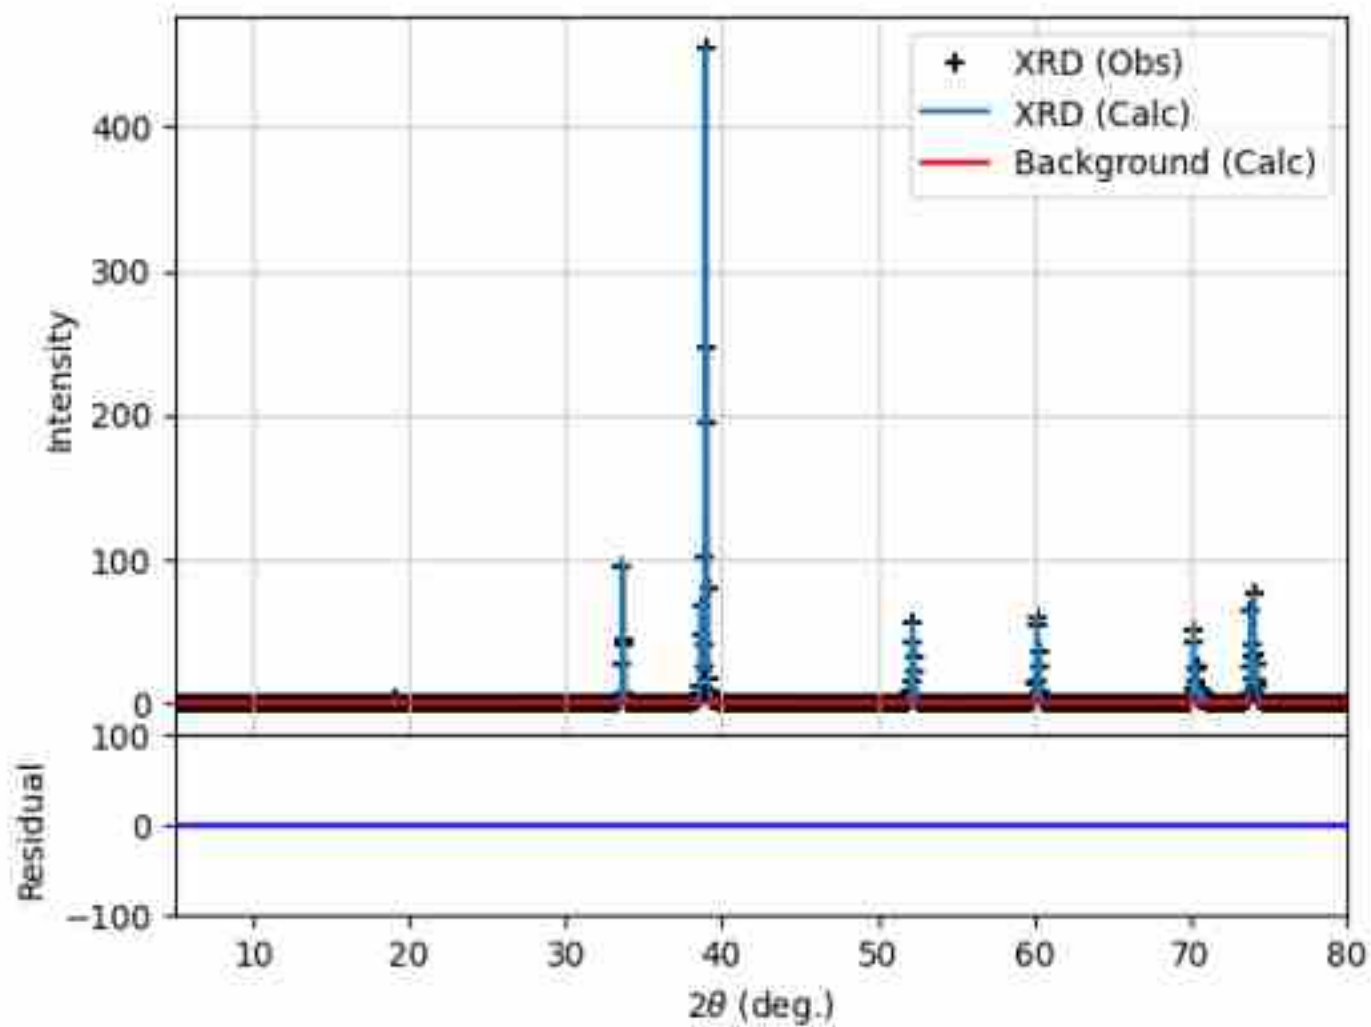

| RMSE before RR | Rwp     | RMSE after RR |
|----------------|---------|---------------|
| 0.004          | 0.01345 | 0.00375       |

# Na1Gd1S2

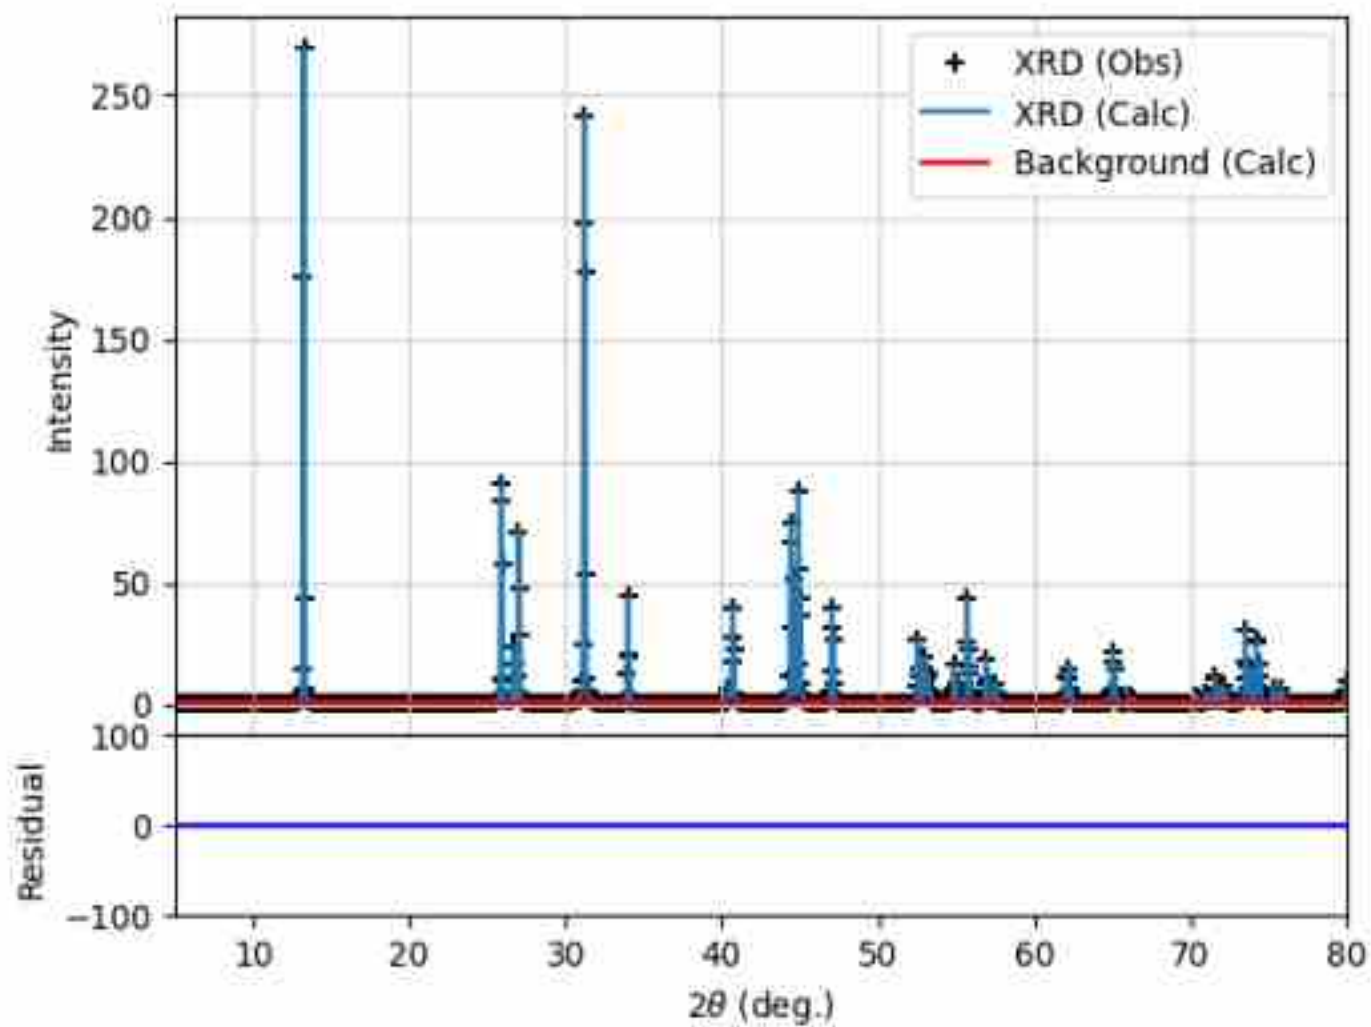

| RMSE before RR | Rwp     | RMSE after RR |
|----------------|---------|---------------|
| 0.004          | 0.00285 | 0.00065       |

# Na1Sb1Te2

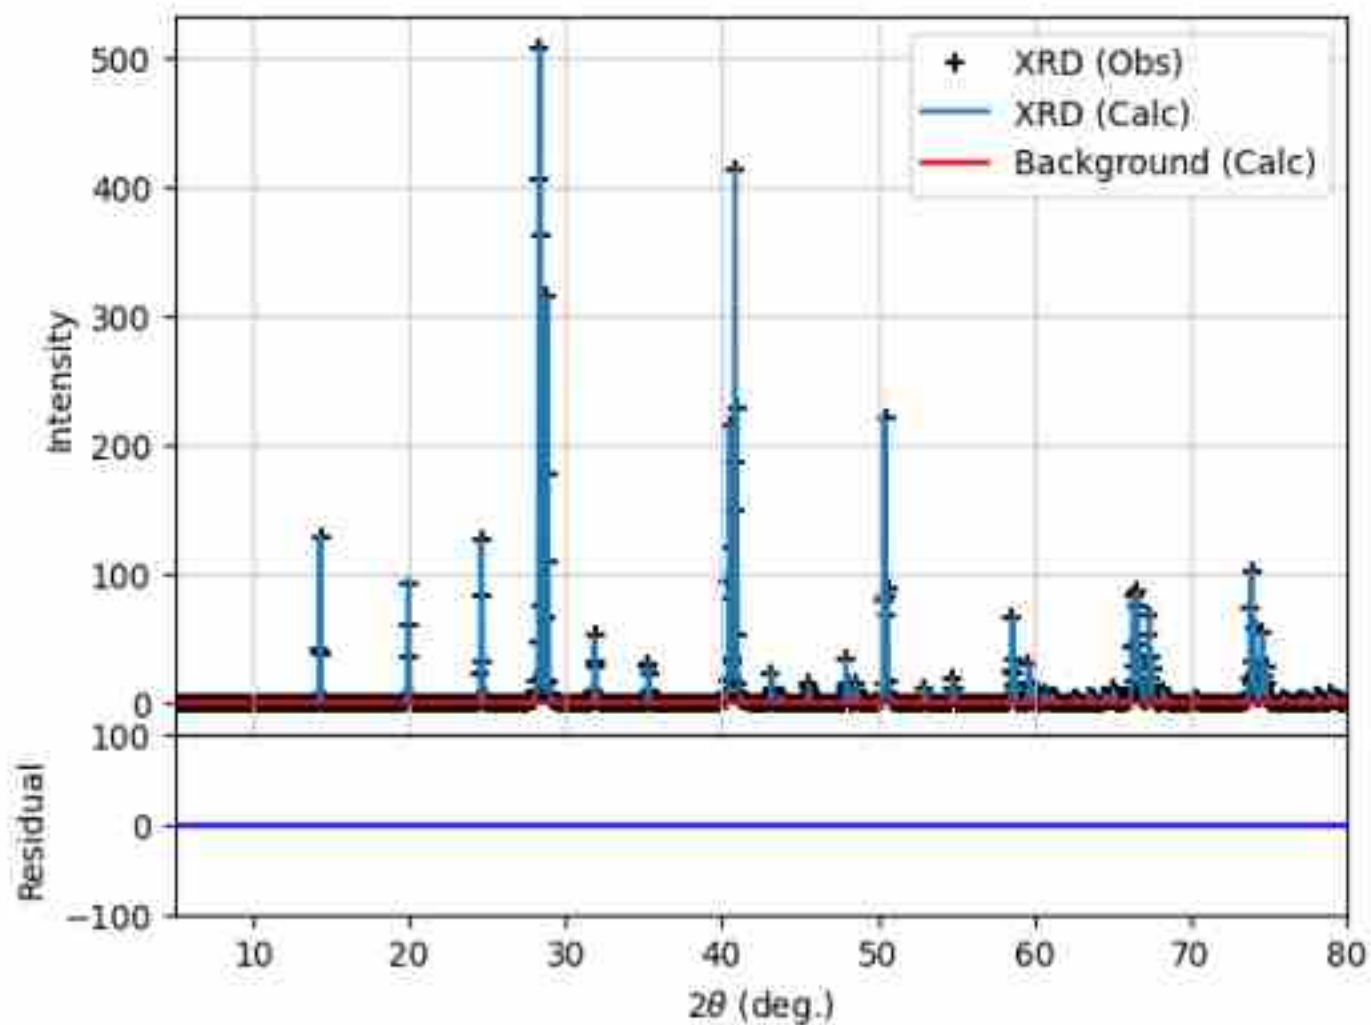

| RMSE before RR | Rwp     | RMSE after RR |
|----------------|---------|---------------|
| 0.004          | 0.00579 | 0.00055       |

# Na<sub>3</sub>La<sub>3</sub>F<sub>12</sub>

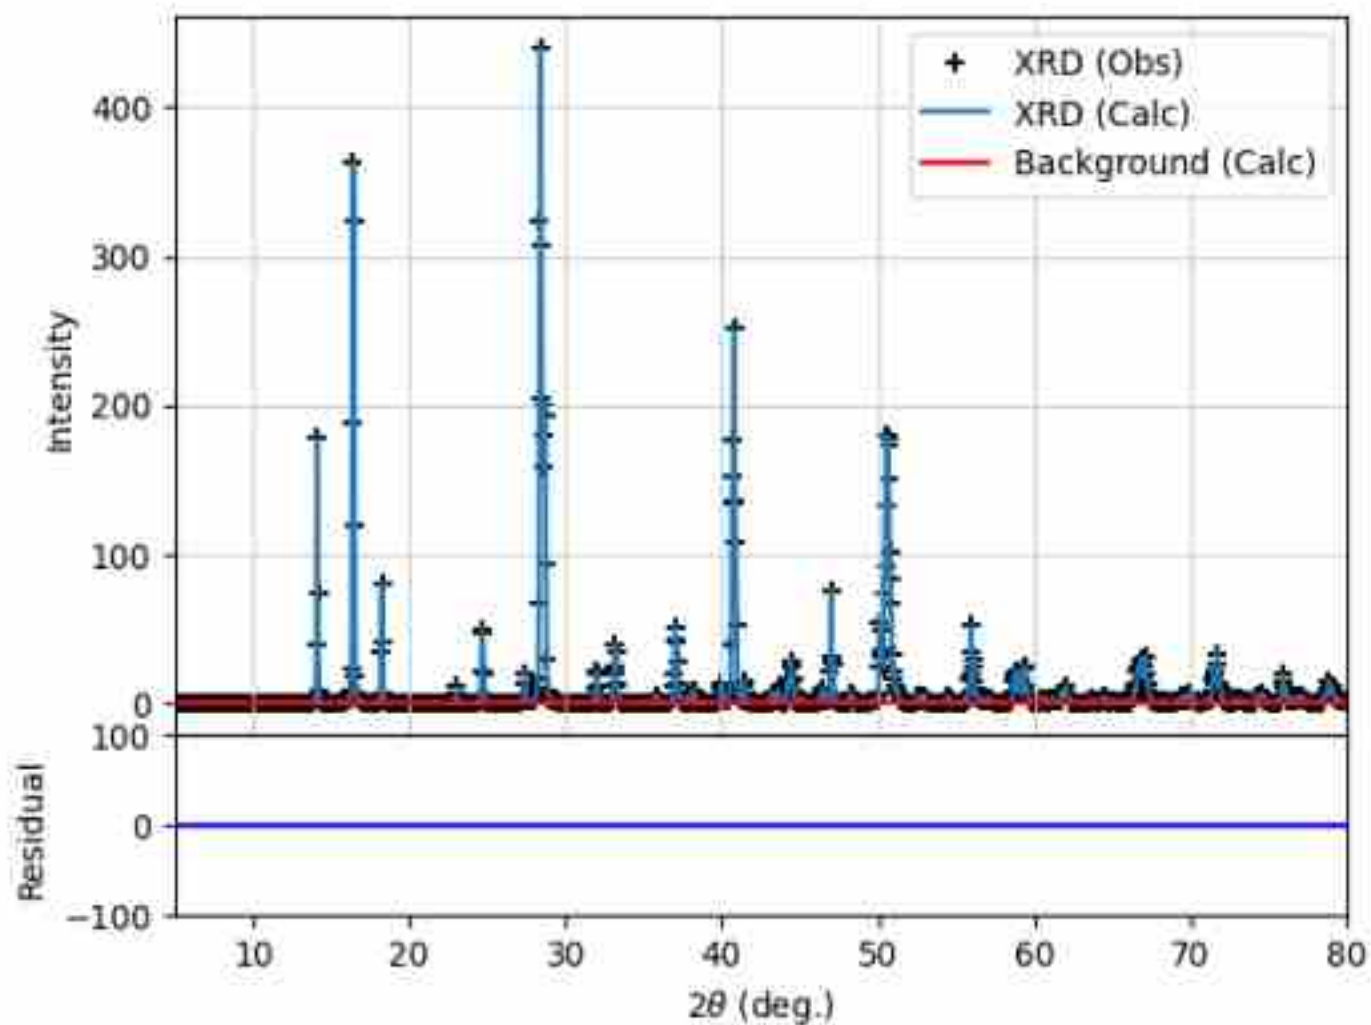

| RMSE before RR | Rwp     | RMSE after RR |
|----------------|---------|---------------|
| 0.04           | 0.00017 | 0.0           |

# Na<sub>4</sub>Mg<sub>2</sub>Cl<sub>8</sub>

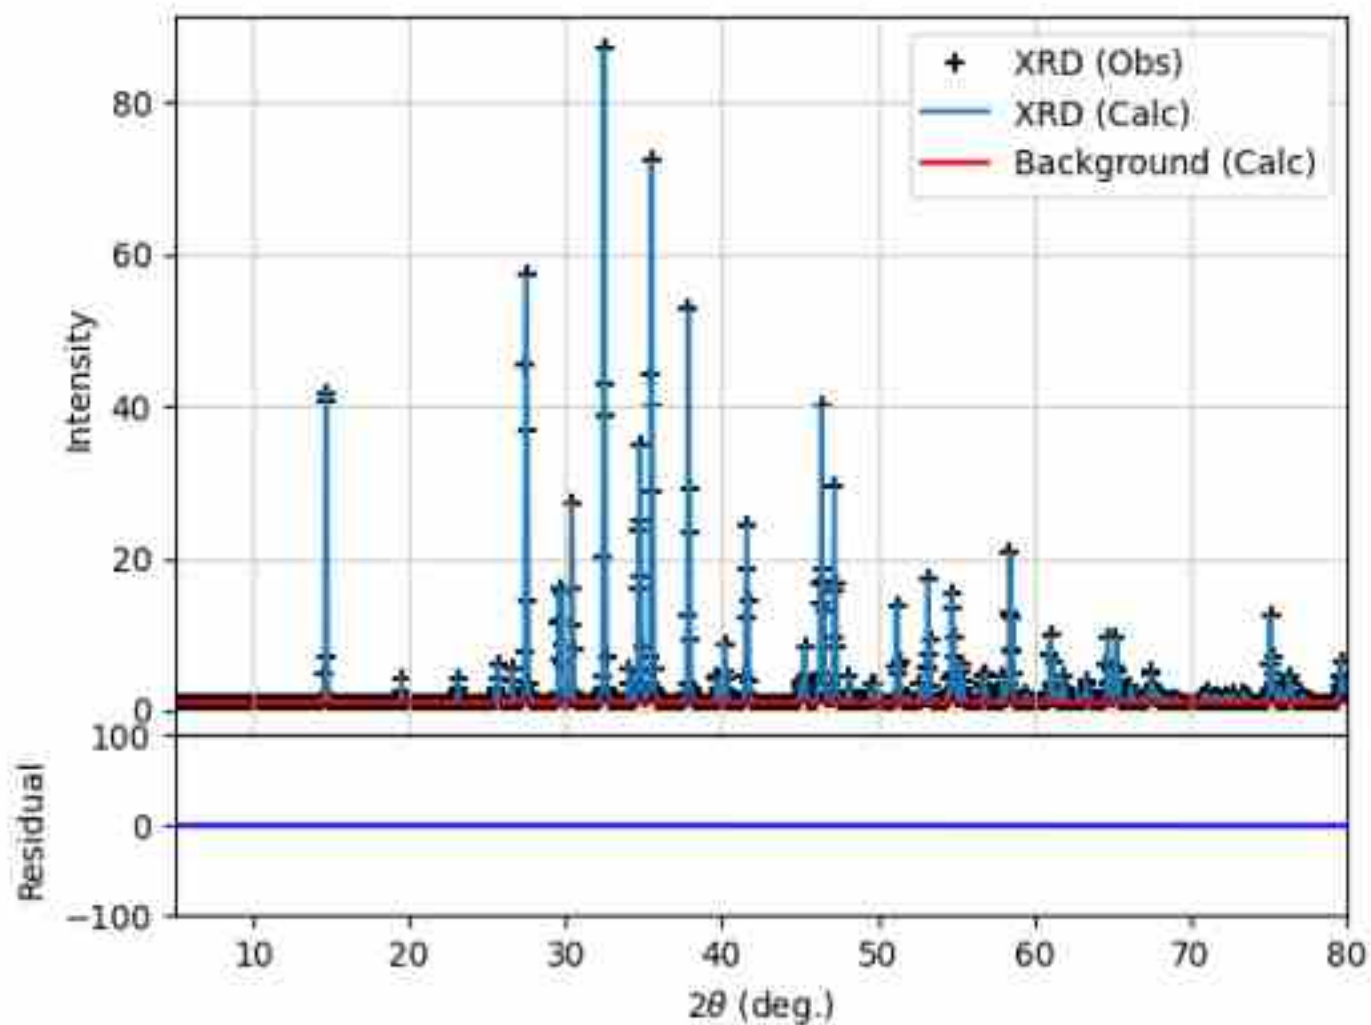

| RMSE before RR | Rwp     | RMSE after RR |
|----------------|---------|---------------|
| 0.04           | 0.55837 | 0.00721       |

# Na<sub>8</sub>Zn<sub>2</sub>Se<sub>6</sub>

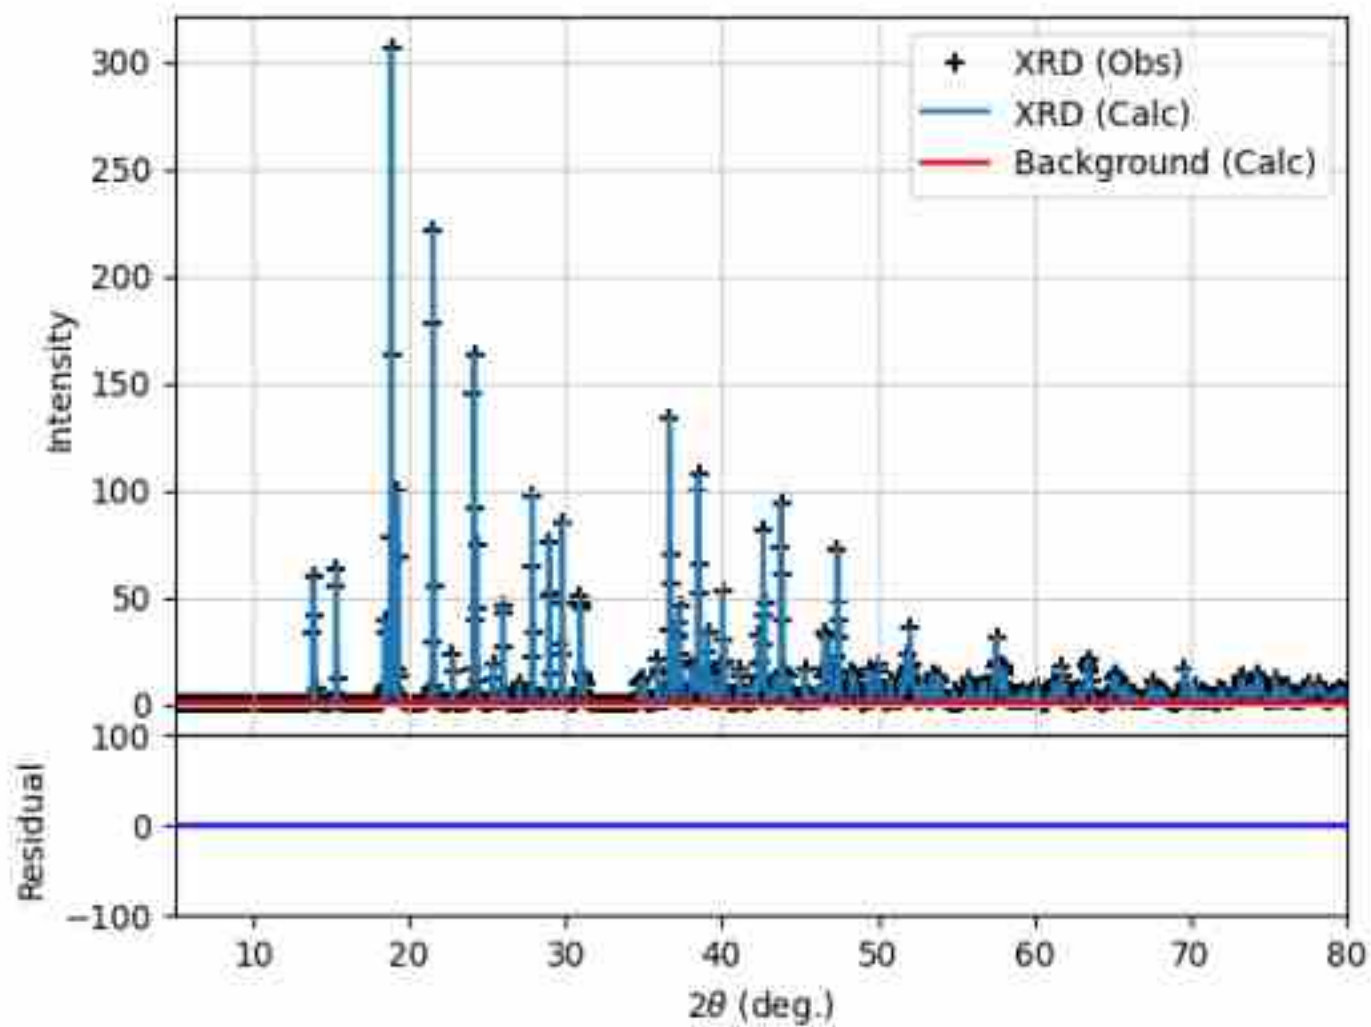

| RMSE before RR | Rwp     | RMSE after RR |
|----------------|---------|---------------|
| 0.04           | 0.00277 | 0.00036       |

# Nb1In1S2

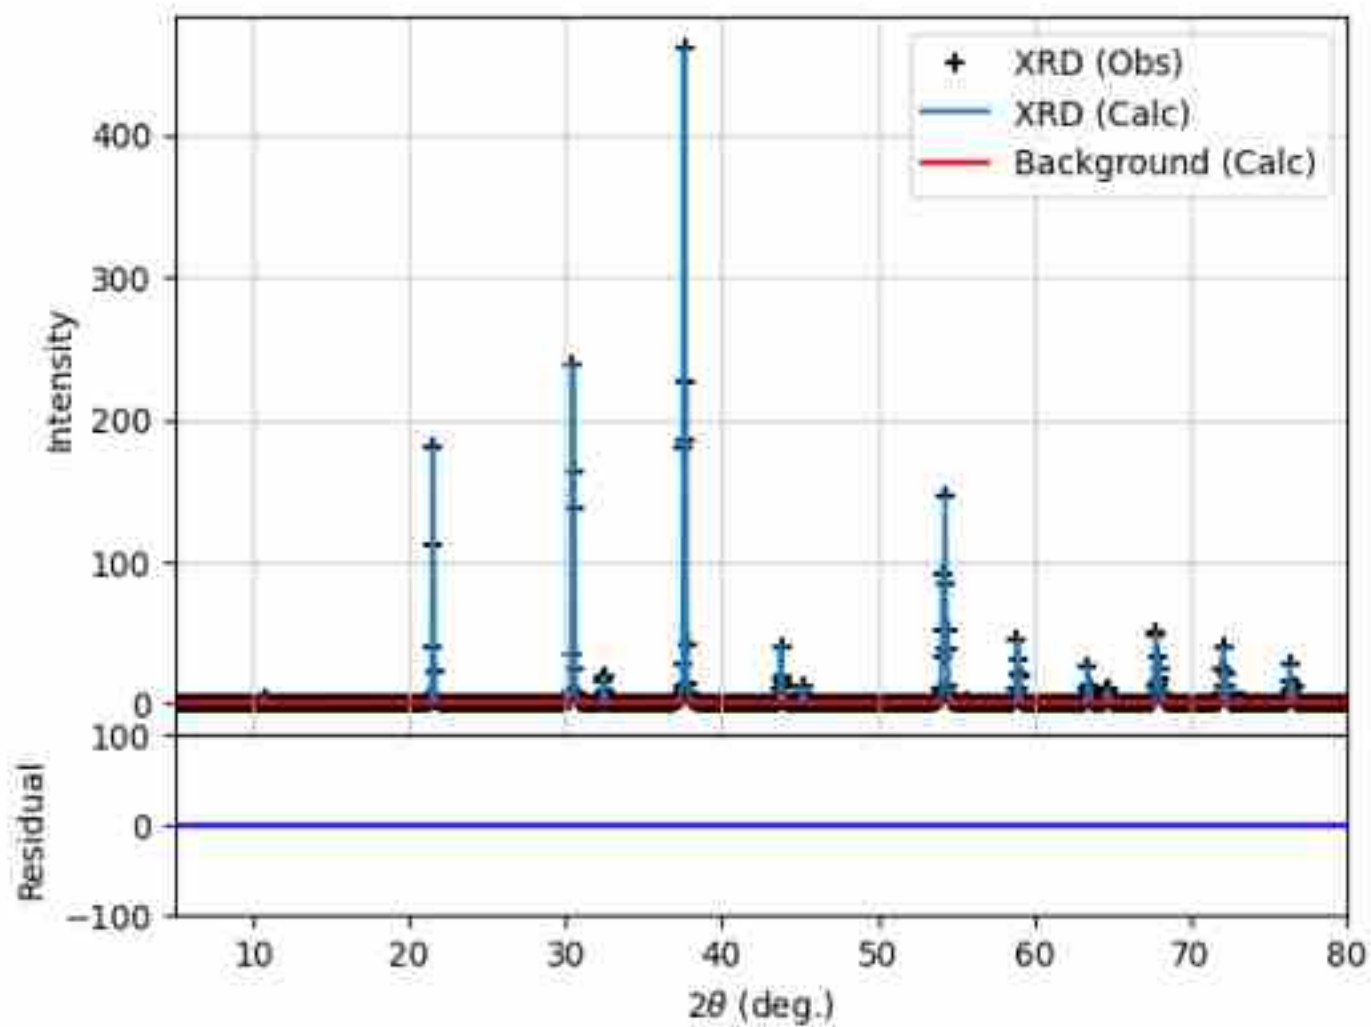

| RMSE before RR | Rwp     | RMSE after RR |
|----------------|---------|---------------|
| 0.04           | 0.00433 | 0.00136       |



# Nb6Ga1Sb1

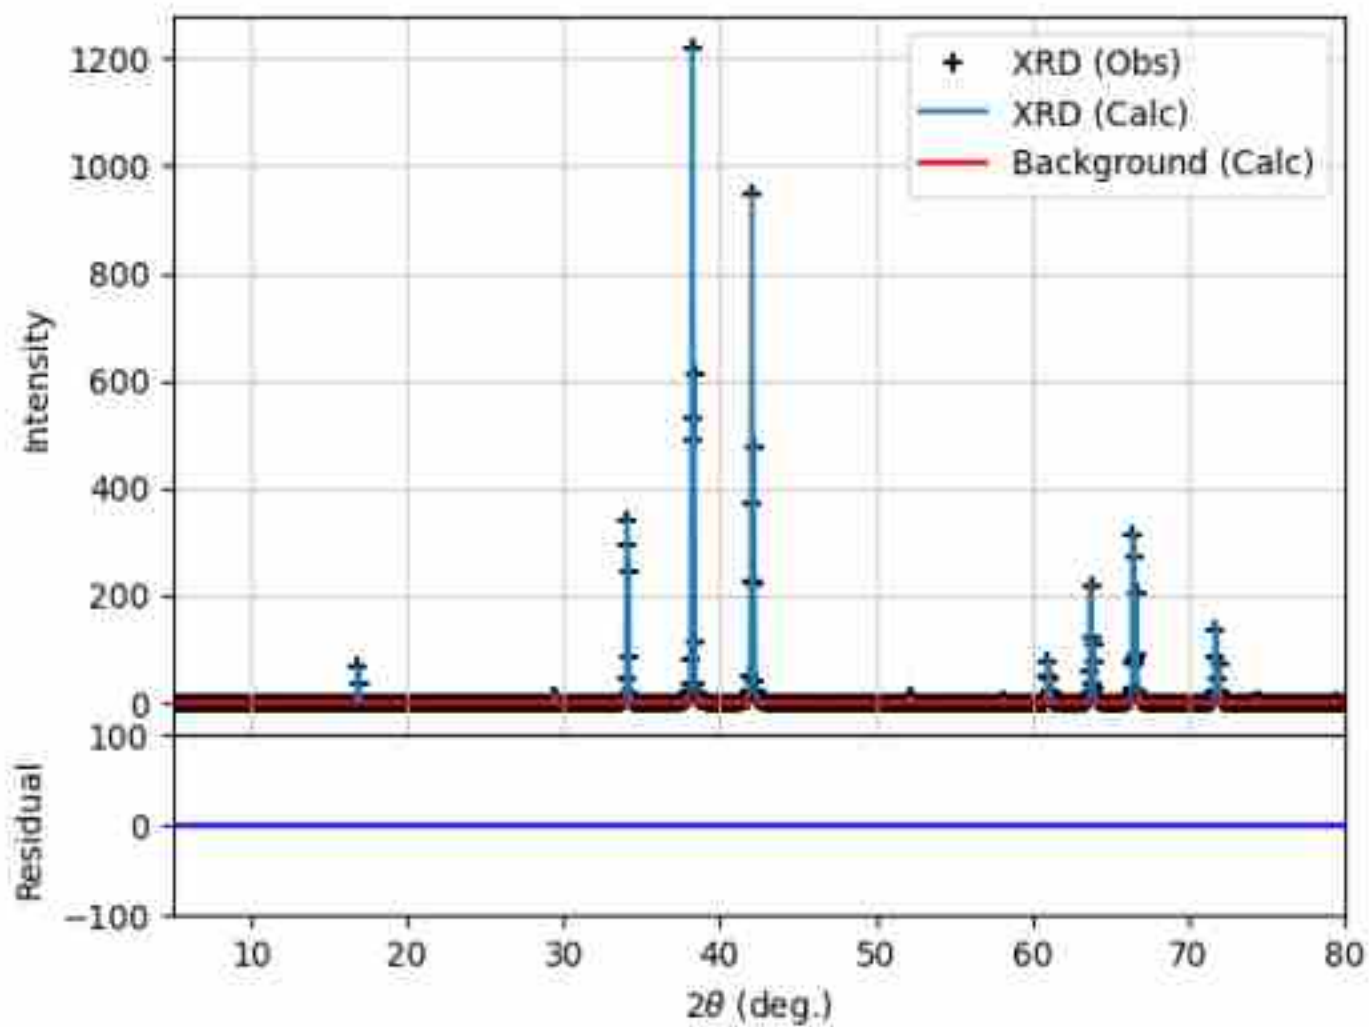

| RMSE before RR | Rwp     | RMSE after RR |
|----------------|---------|---------------|
| 0.004          | 0.00577 | 0.00063       |

# Nd1Al2Si2

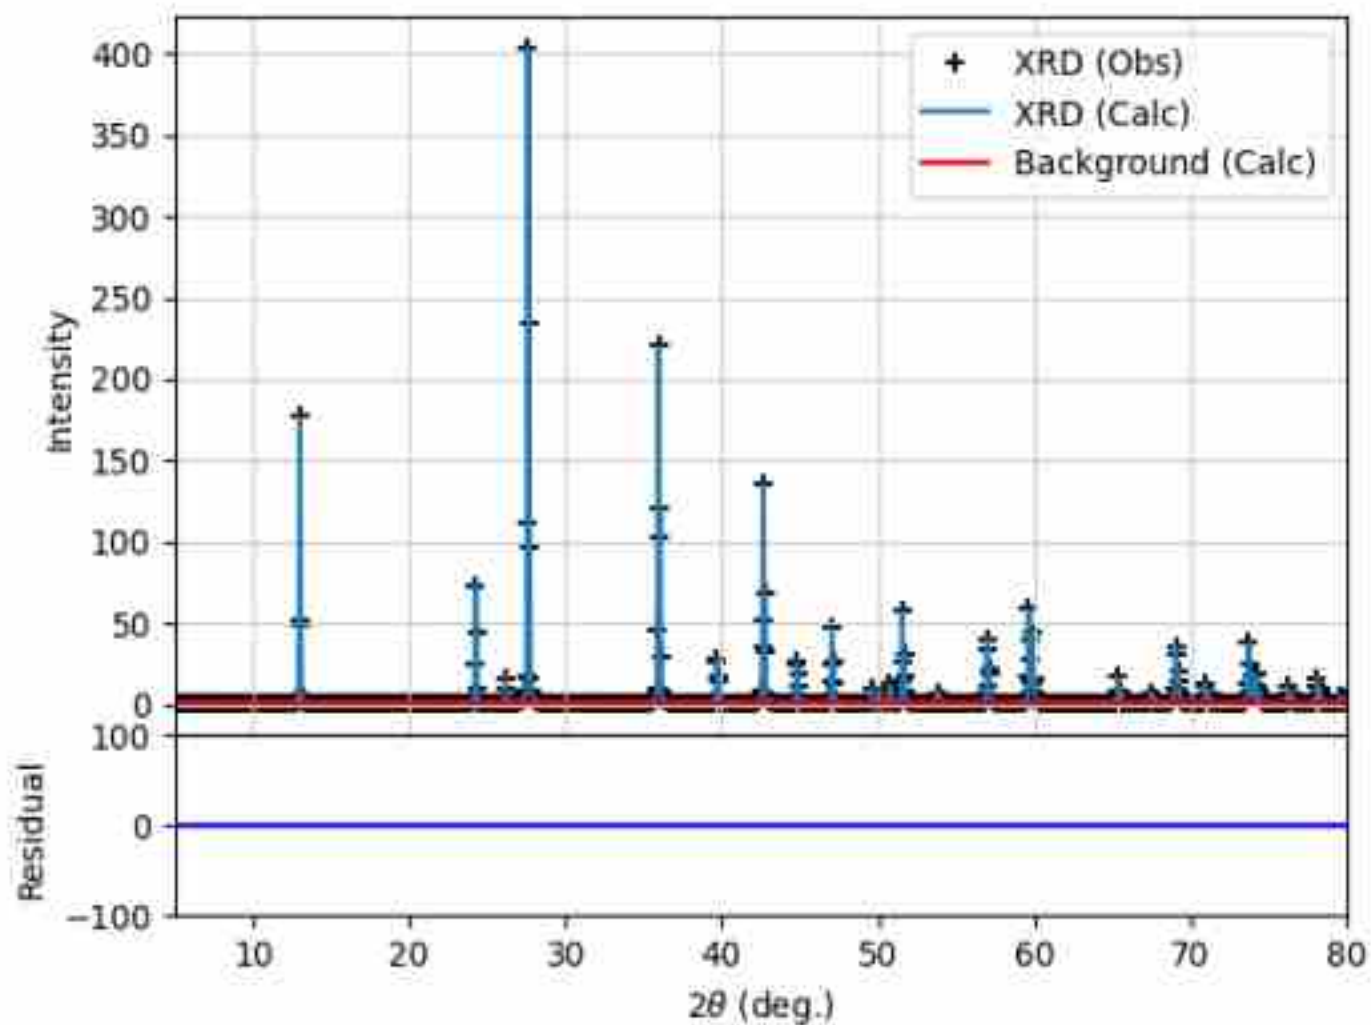

| RMSE before RR | Rwp     | RMSE after RR |
|----------------|---------|---------------|
| 0.004          | 0.00362 | 0.00117       |

# Nd1H2

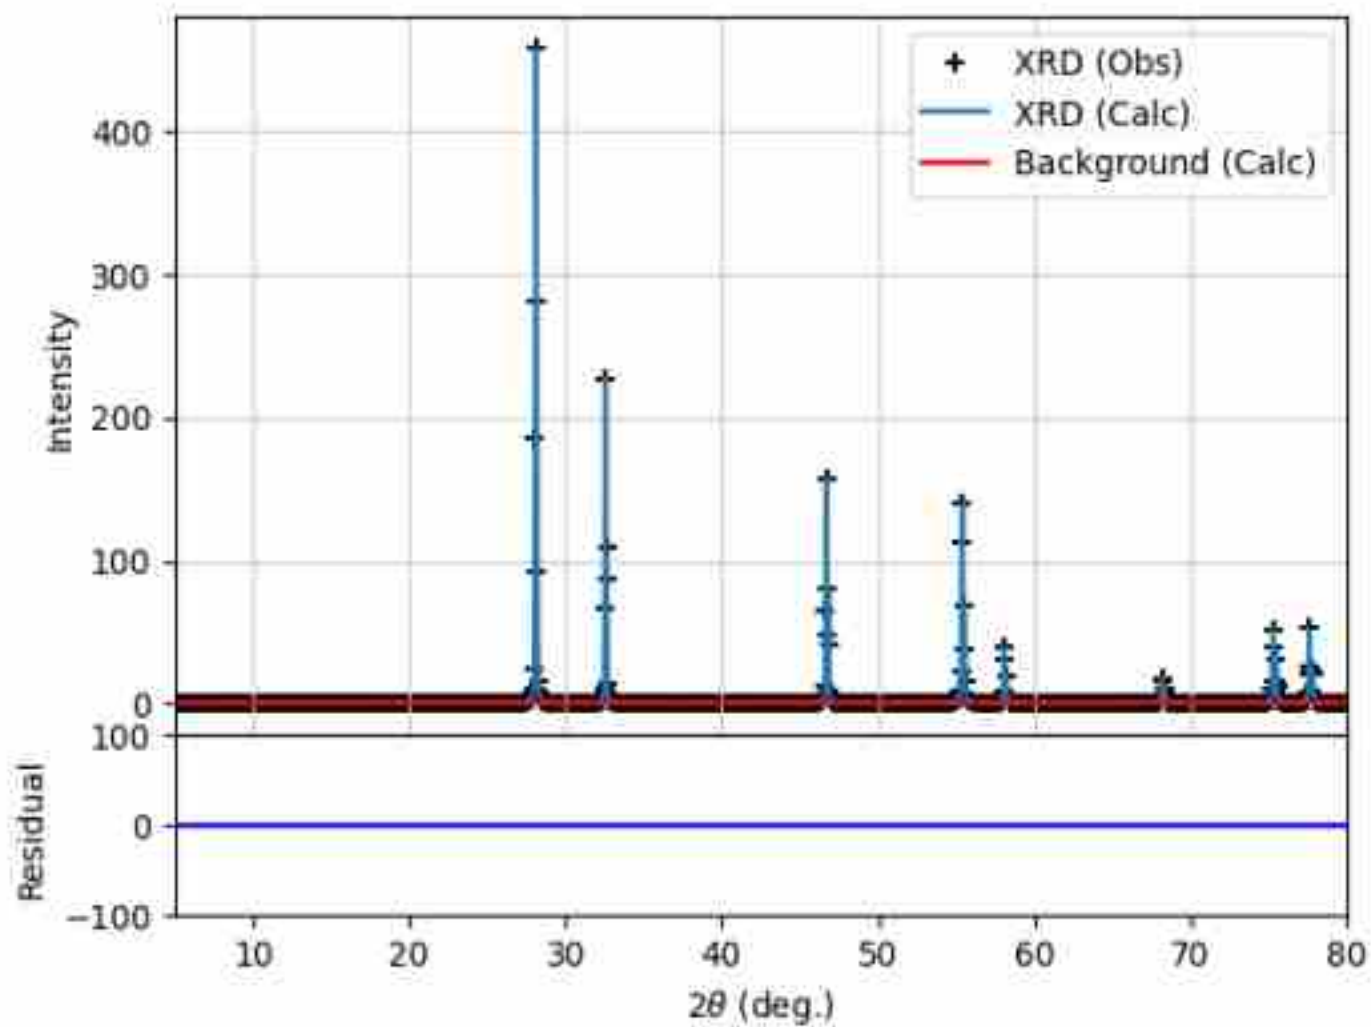

| RMSE before RR | Rwp     | RMSE after RR |
|----------------|---------|---------------|
| 0.004          | 0.00266 | 0.00435       |

# Nd1O1F1

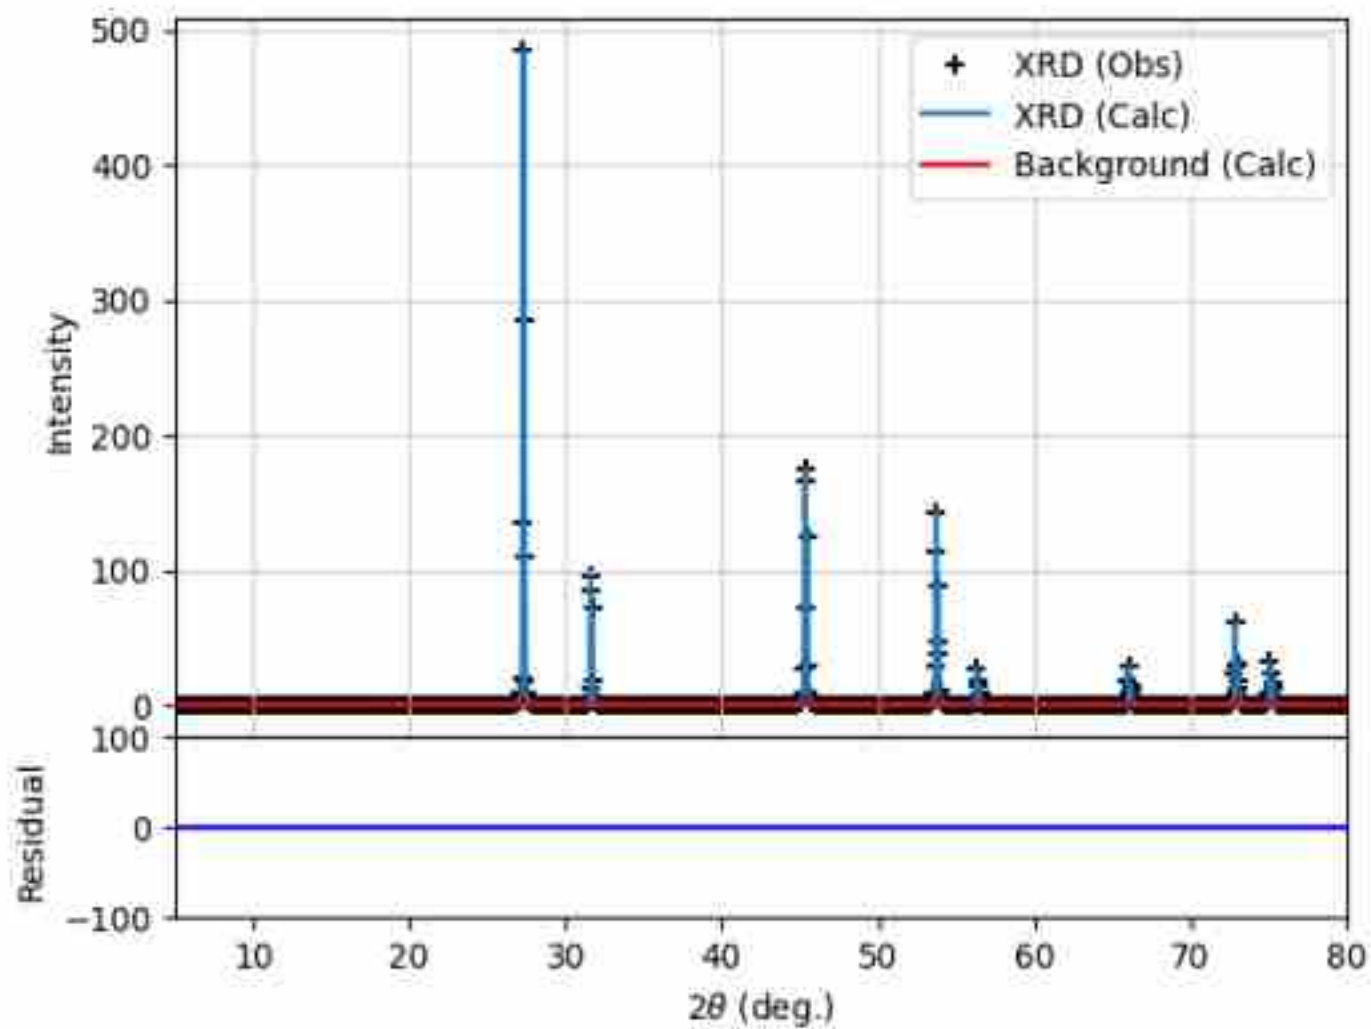

| RMSE before RR | Rwp     | RMSE after RR |
|----------------|---------|---------------|
| 0.004          | 0.00261 | 0.00095       |

# Nd<sub>2</sub>Mn<sub>2</sub>Fe<sub>2</sub>Bi<sub>2</sub>O<sub>12</sub>

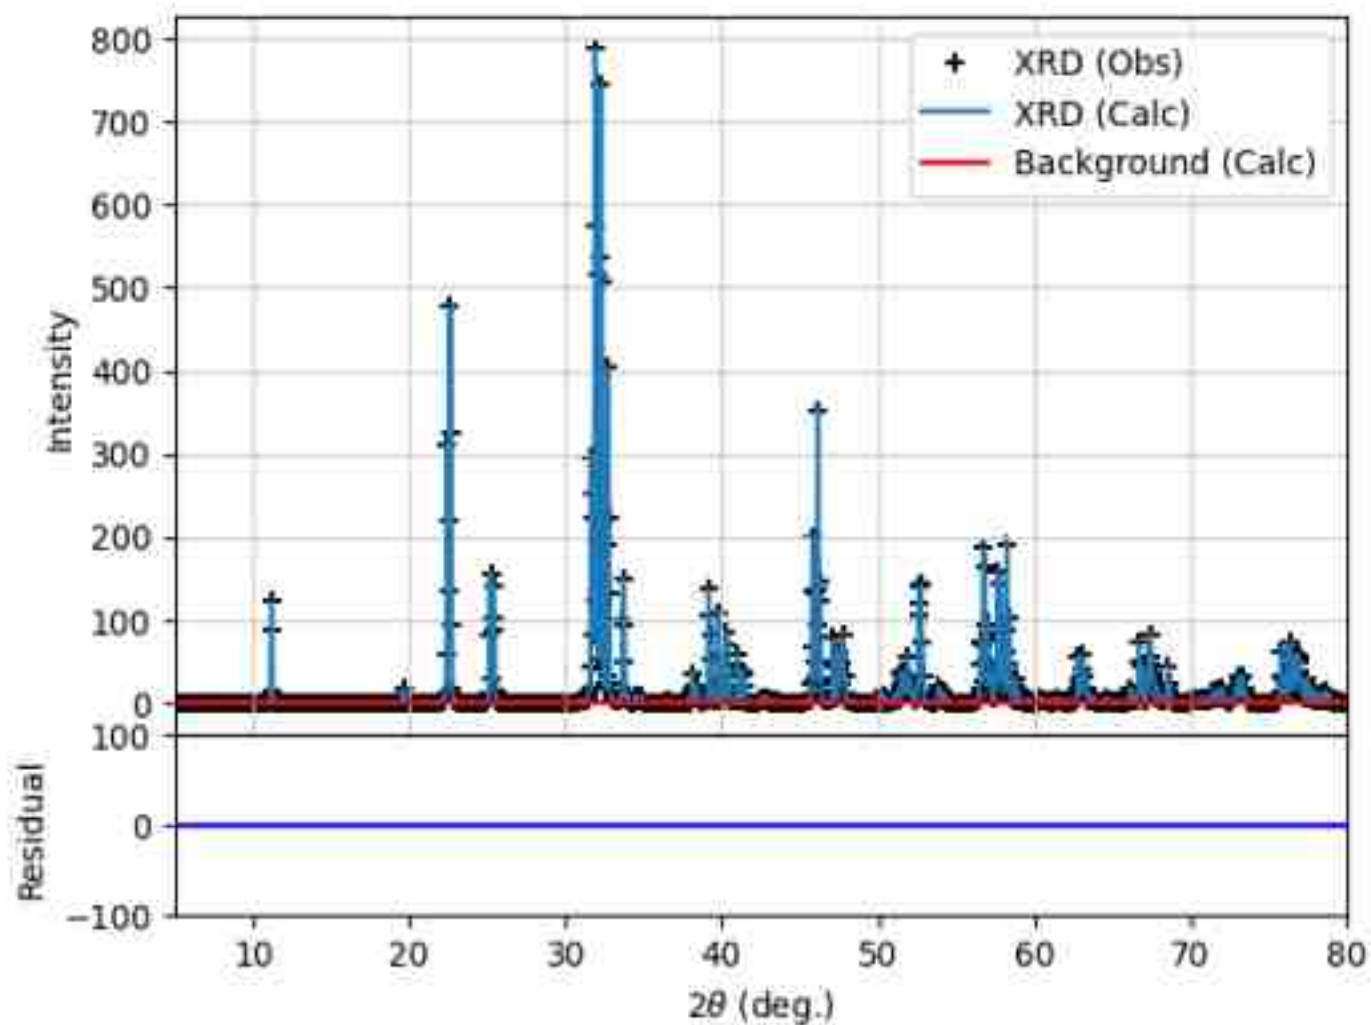

| RMSE before RR | Rwp     | RMSE after RR |
|----------------|---------|---------------|
| 0.04           | 0.00512 | 0.00106       |

# Nd<sub>2</sub>Tm<sub>1</sub>

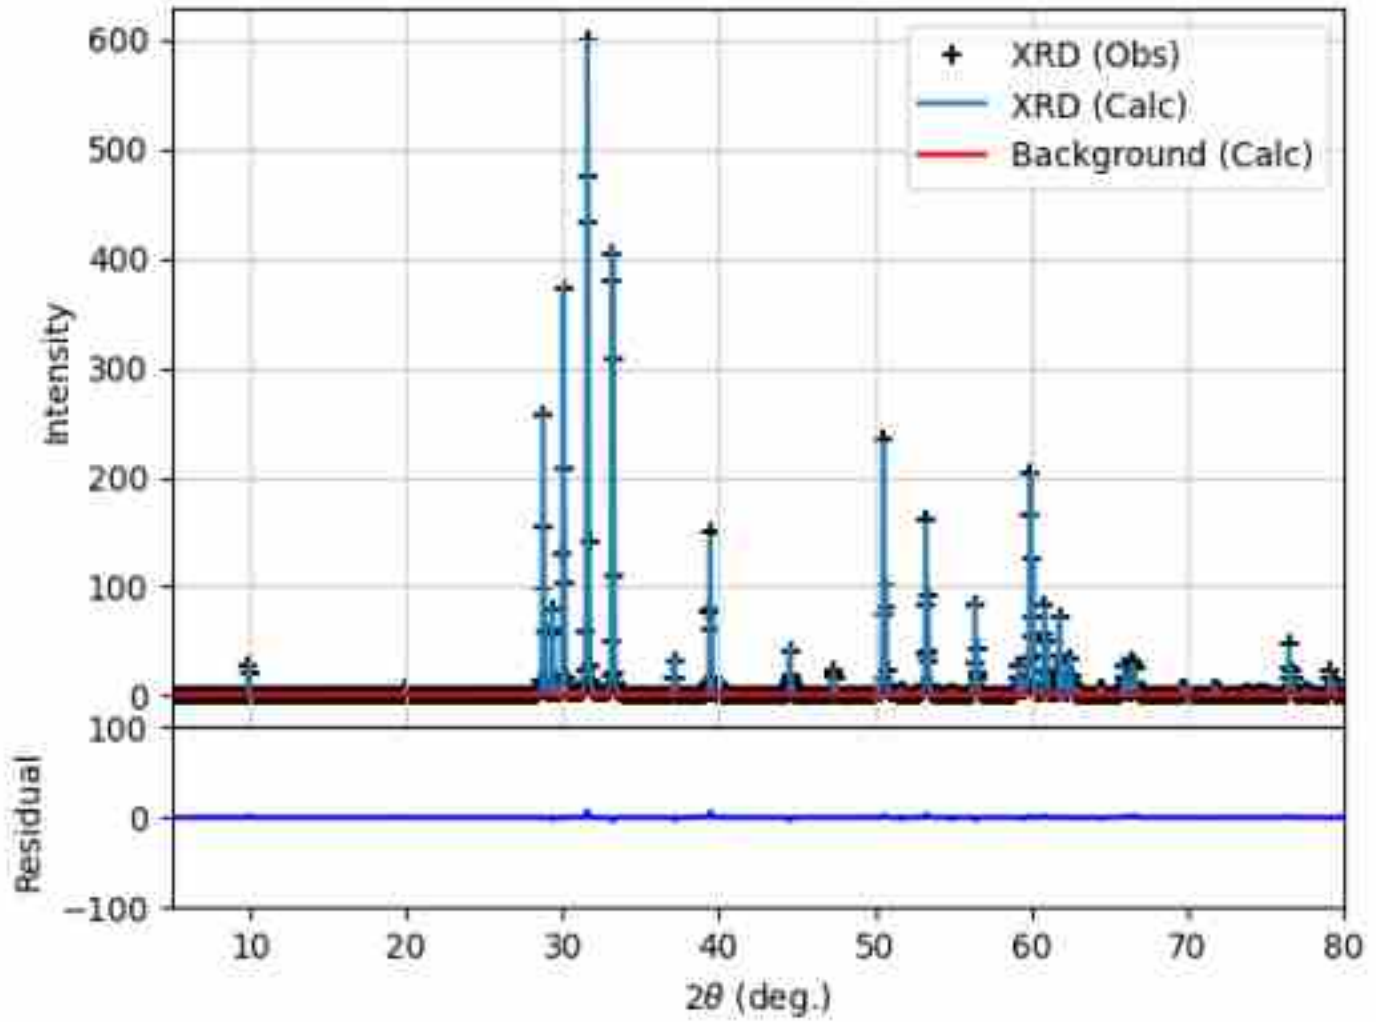

| RMSE before RR | Rwp     | RMSE after RR |
|----------------|---------|---------------|
| 0.004          | 3.38065 | 0.00454       |

# Ni2

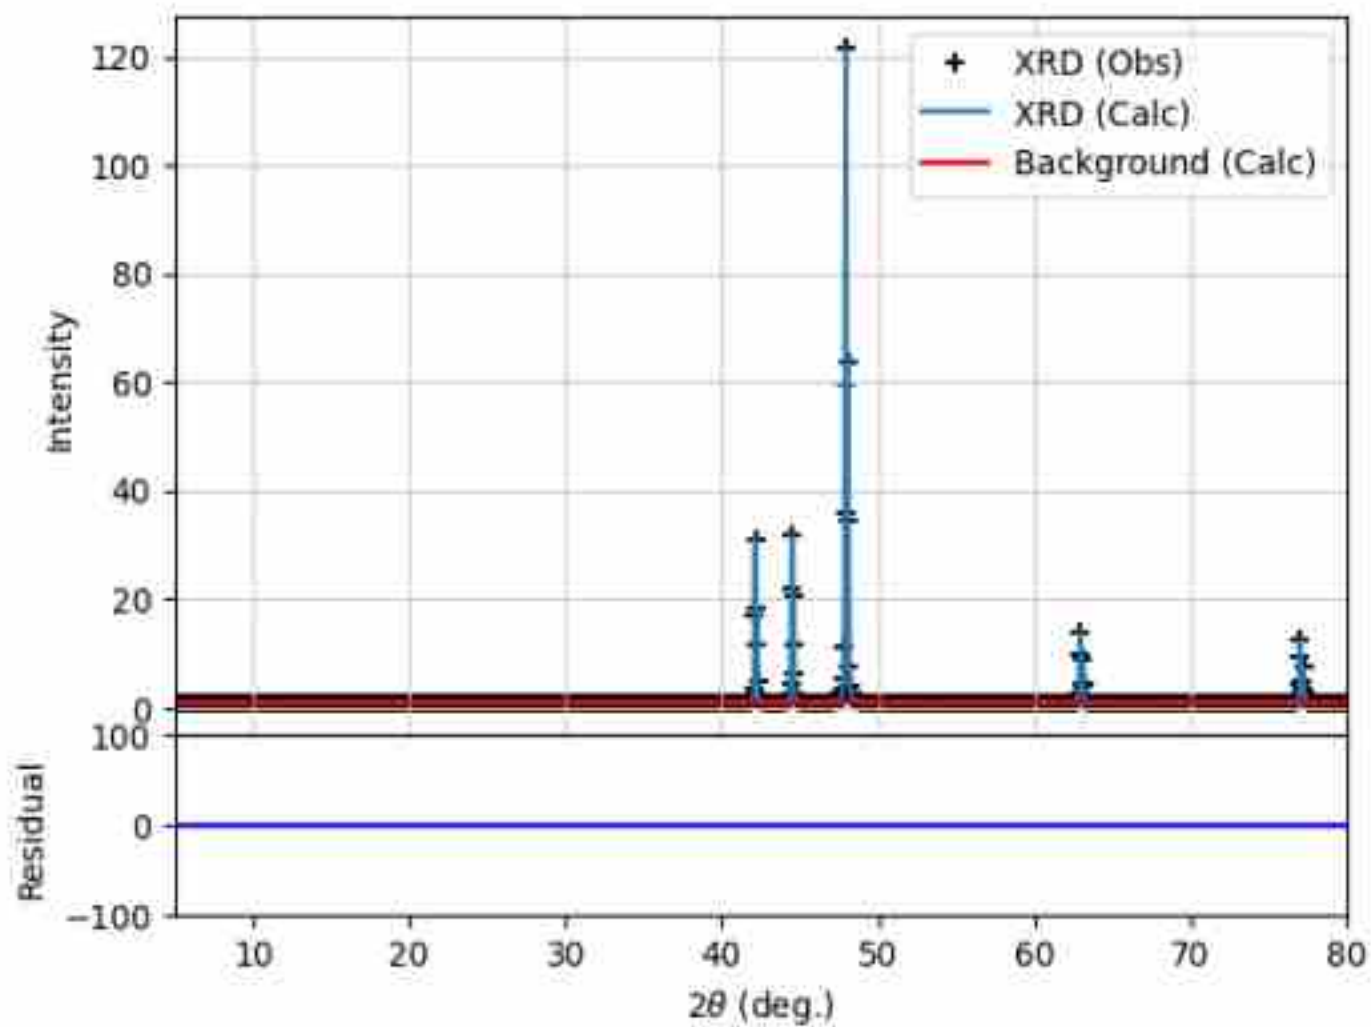

| RMSE before RR | Rwp     | RMSE after RR |
|----------------|---------|---------------|
| 0.004          | 0.00172 | 0.00053       |

# Np1Ga5Ni1

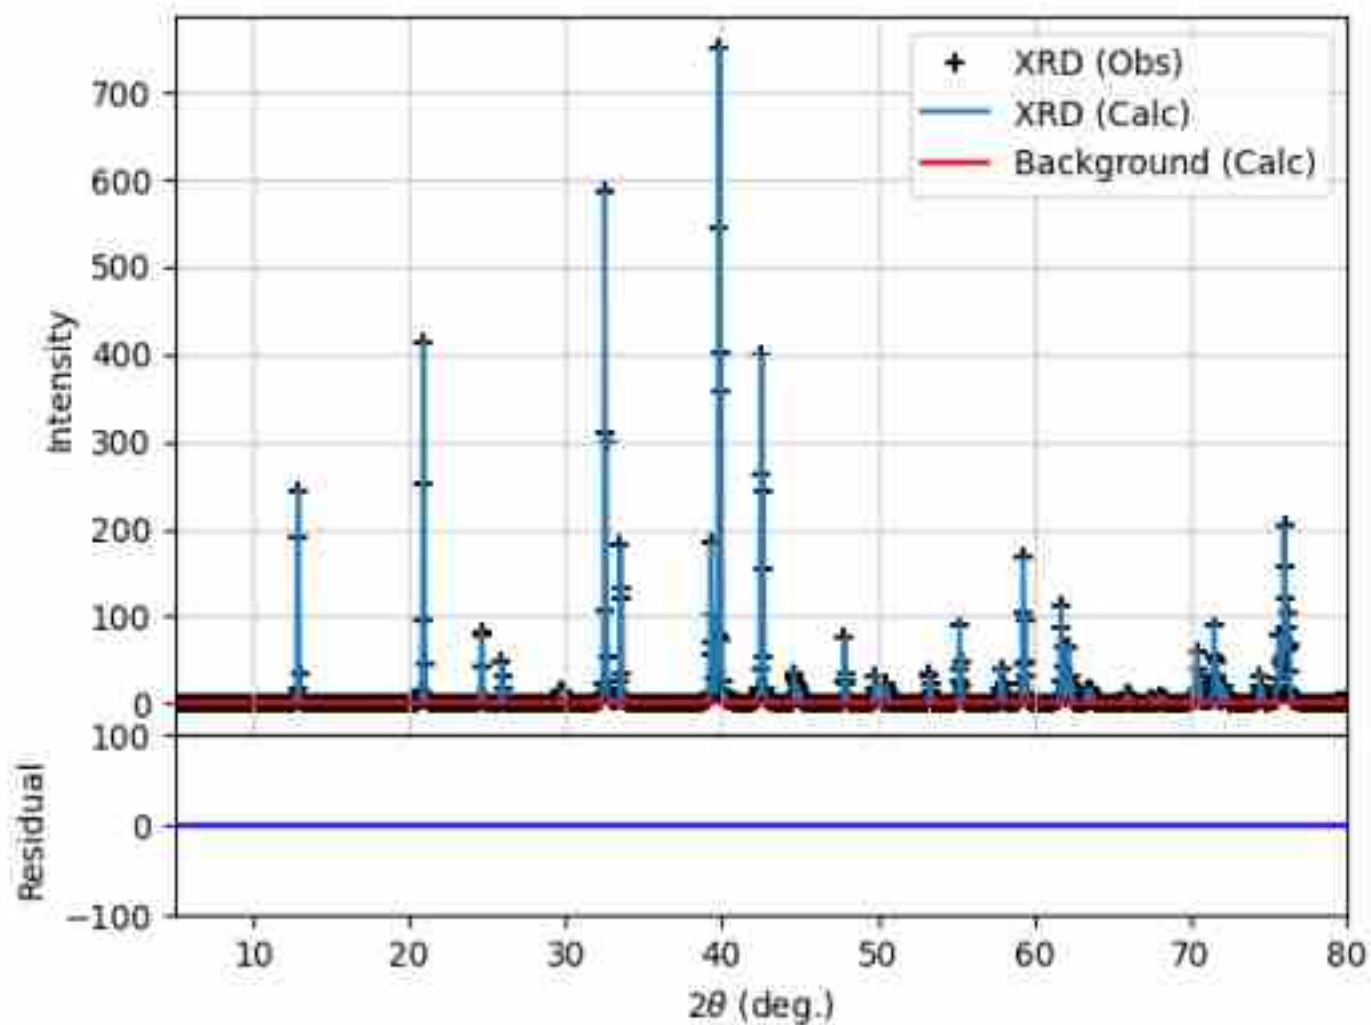

| RMSE before RR | Rwp     | RMSE after RR |
|----------------|---------|---------------|
| 0.004          | 0.00465 | 0.00083       |



# Pa1Ge3

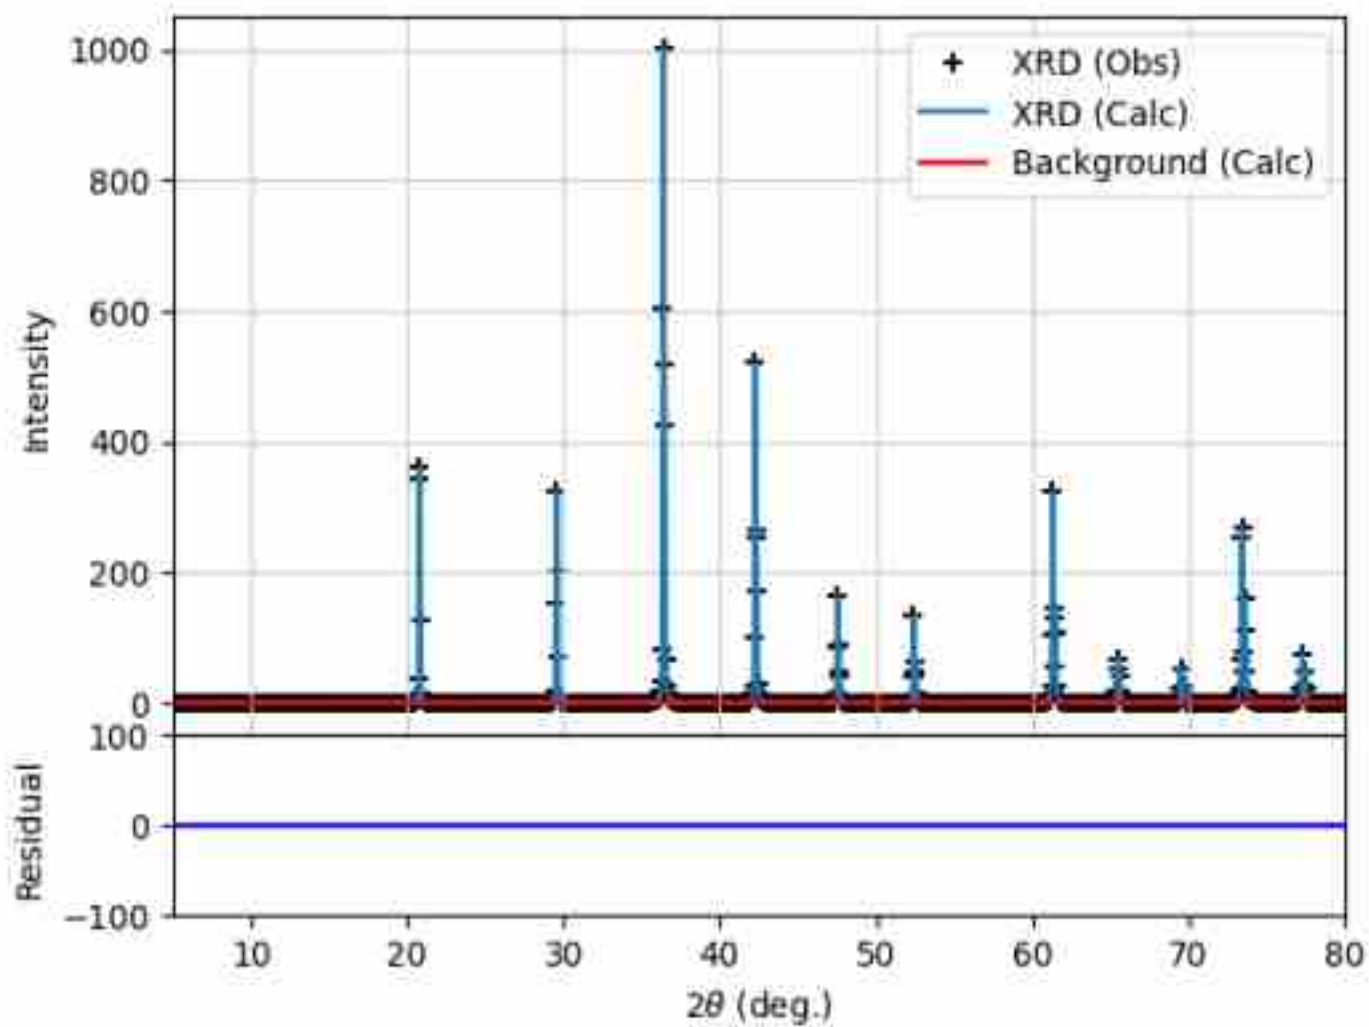

| RMSE before RR | Rwp     | RMSE after RR |
|----------------|---------|---------------|
| 0.004          | 0.03329 | 0.00221       |

# Pd4

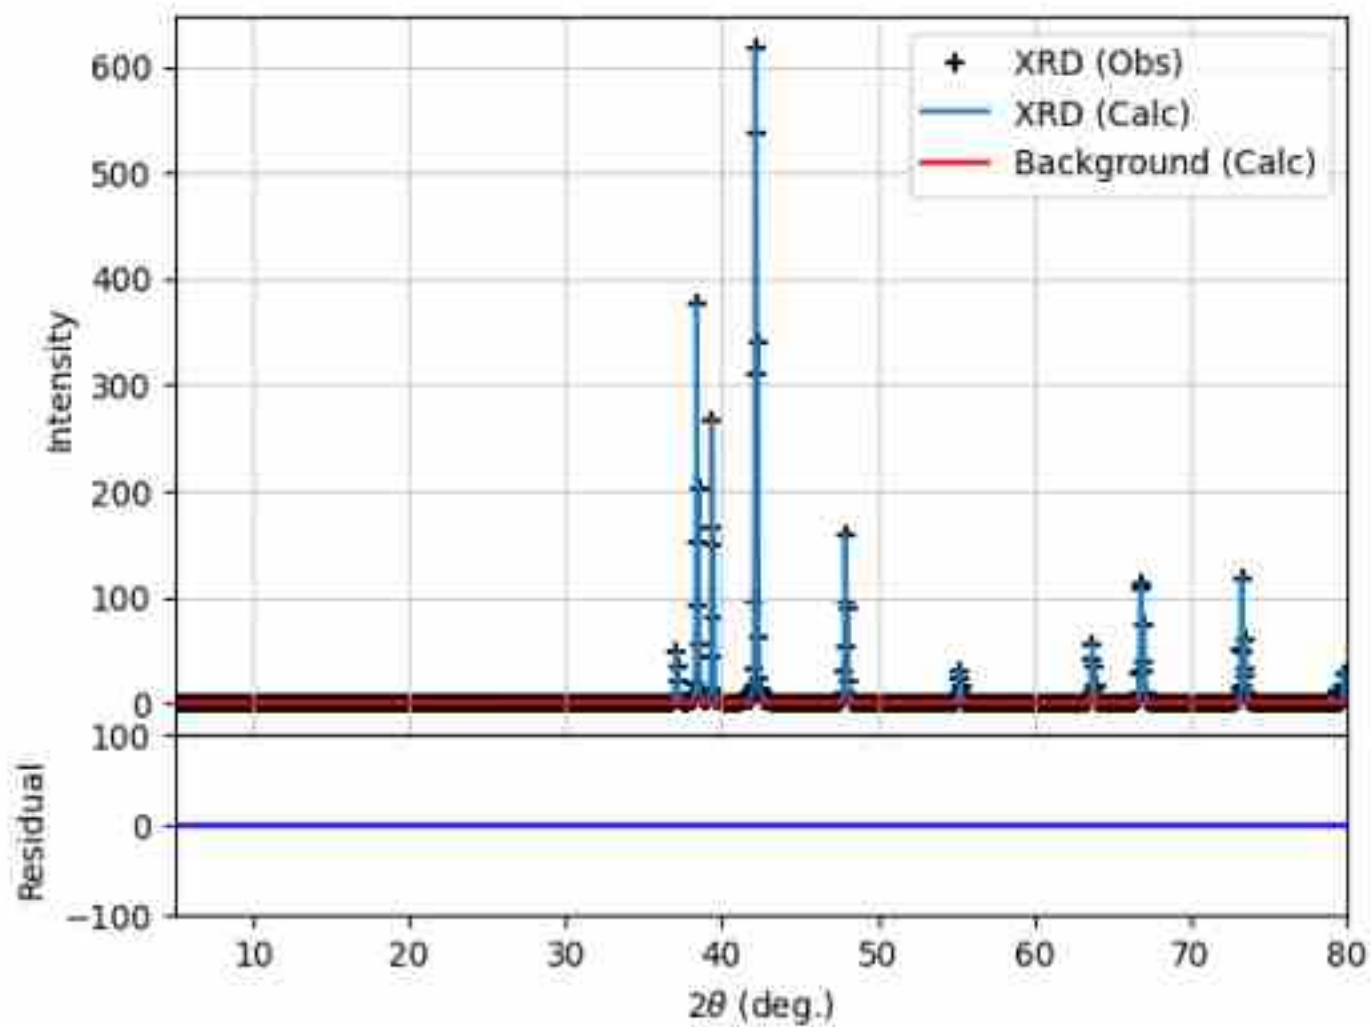

| RMSE before RR | Rwp     | RMSE after RR |
|----------------|---------|---------------|
| 0.004          | 0.00224 | 0.00015       |

# Pr1H2

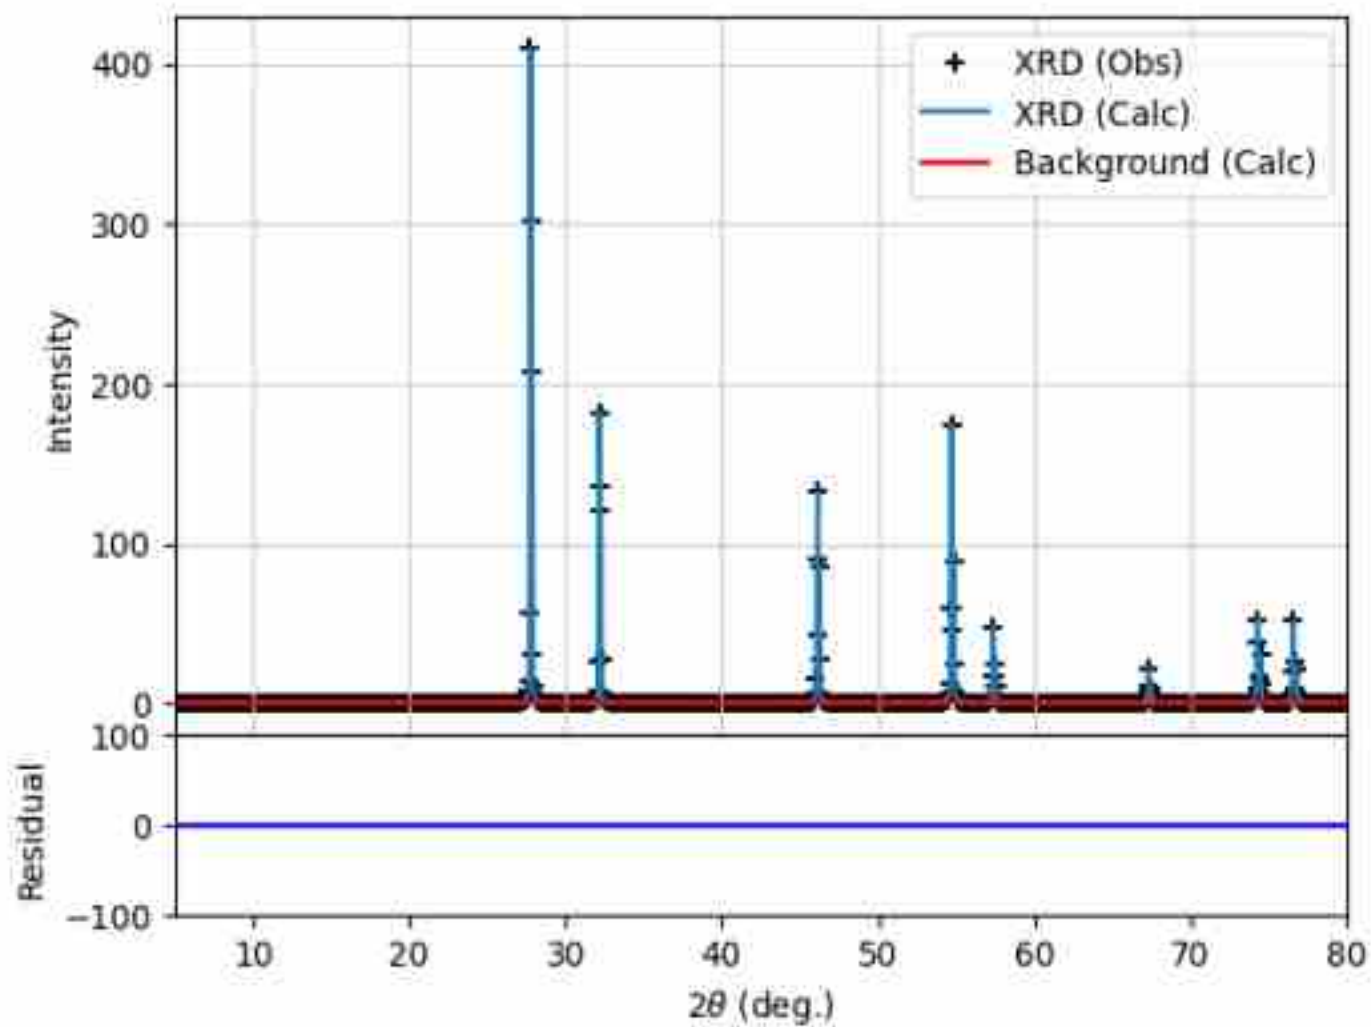

| RMSE before RR | Rwp     | RMSE after RR |
|----------------|---------|---------------|
| 0.004          | 0.00317 | 0.0235        |

# Rb<sub>3</sub>BiF<sub>6</sub>

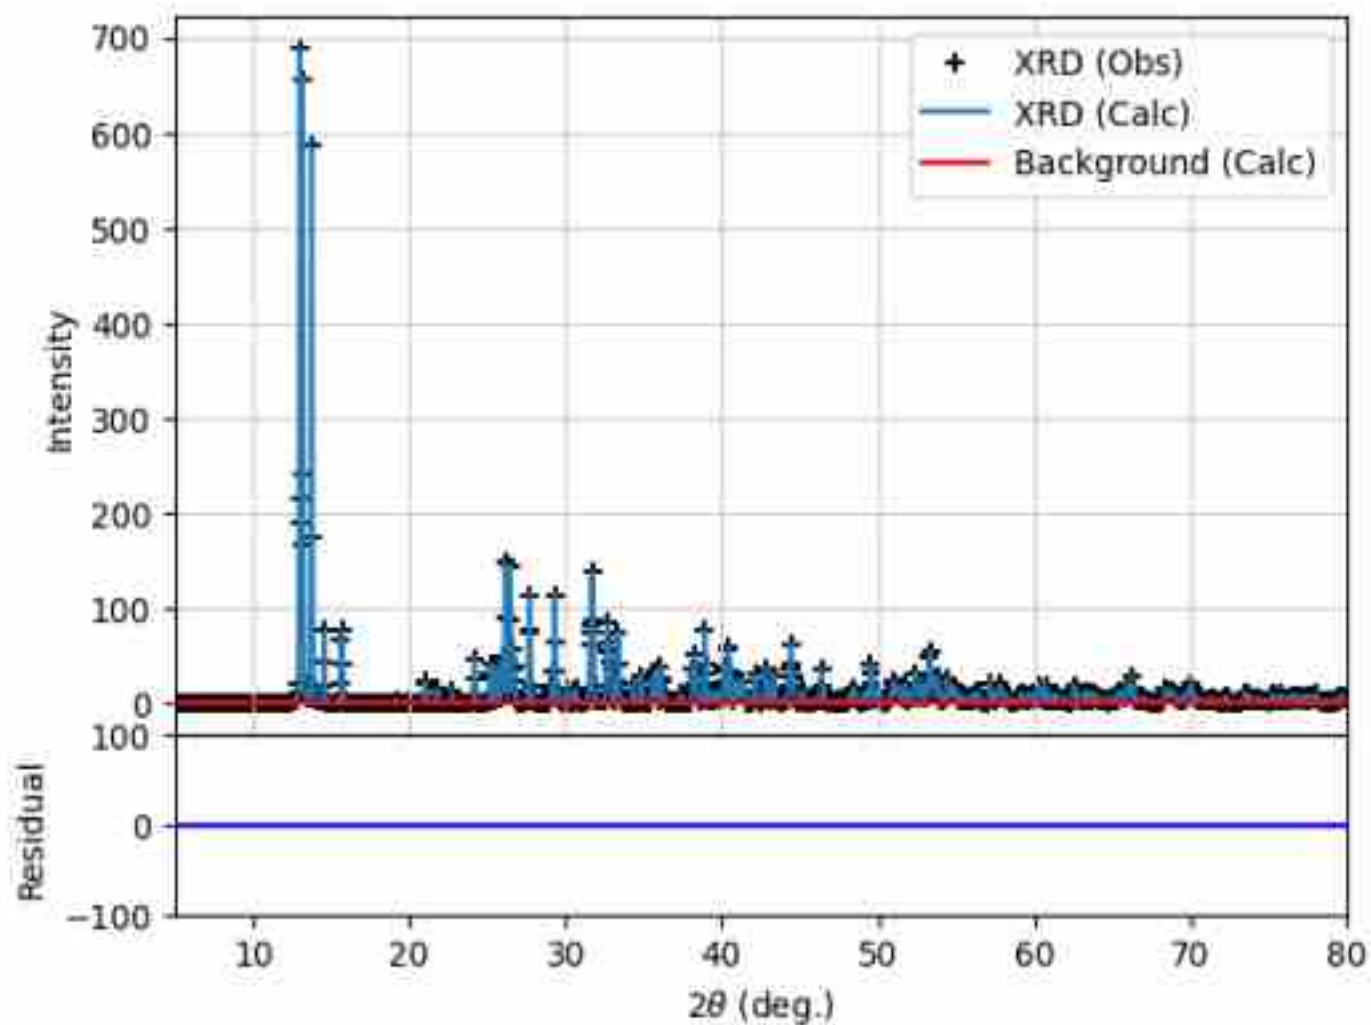

| RMSE before RR | Rwp     | RMSE after RR |
|----------------|---------|---------------|
| 0.04           | 0.00031 | 0.00017       |

# Sc<sub>2</sub>Si<sub>2</sub>Pt<sub>4</sub>

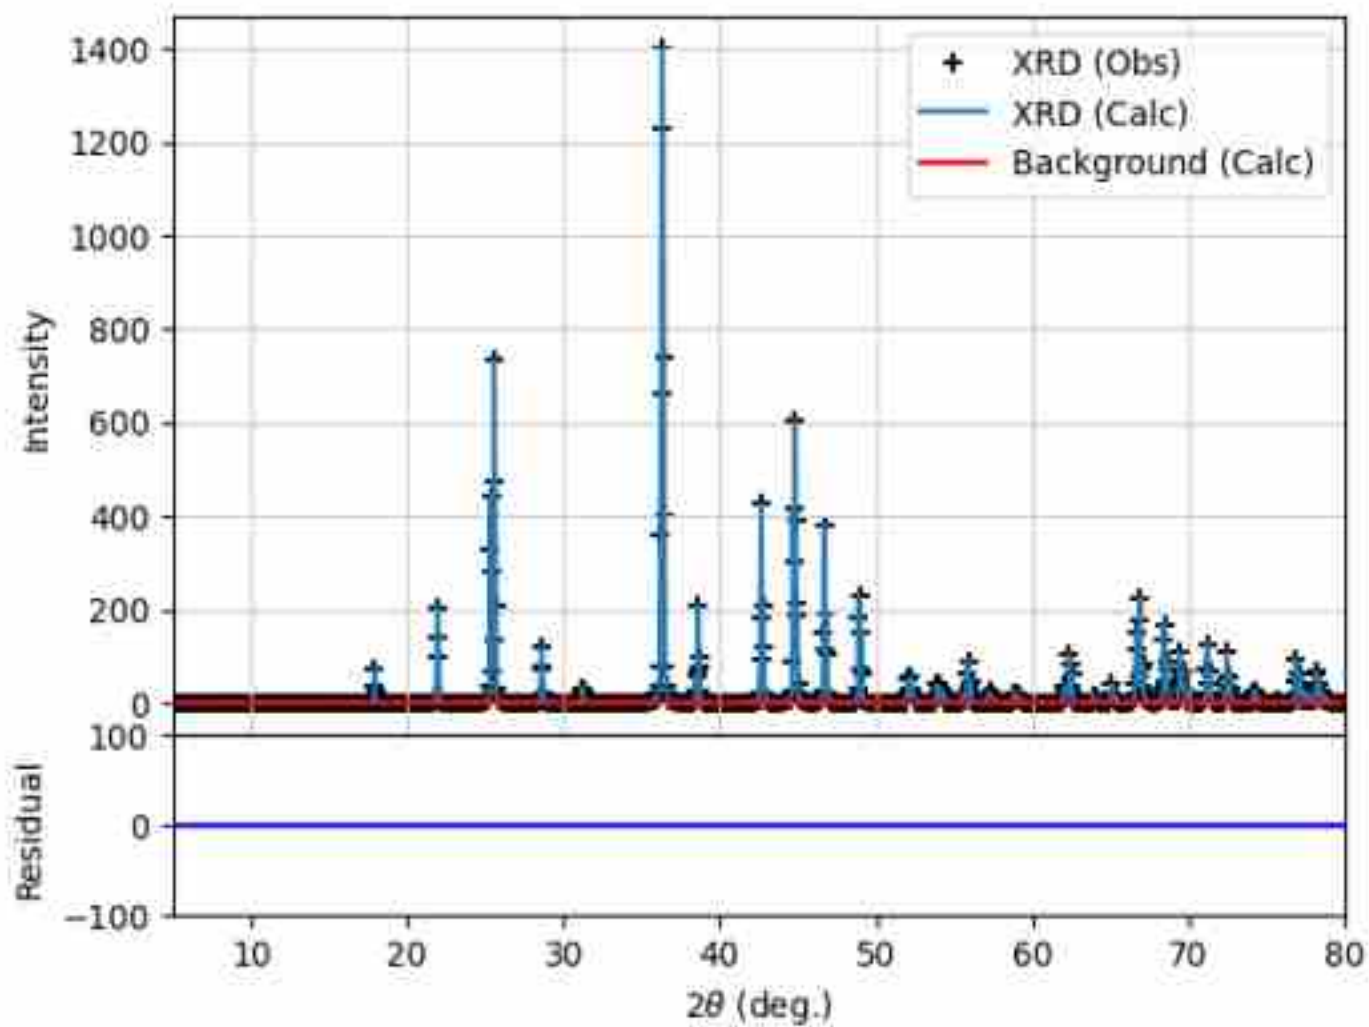

| RMSE before RR | Rwp     | RMSE after RR |
|----------------|---------|---------------|
| 0.04           | 0.00387 | 0.00087       |

# Si<sub>2</sub>Bi<sub>4</sub>O<sub>10</sub>

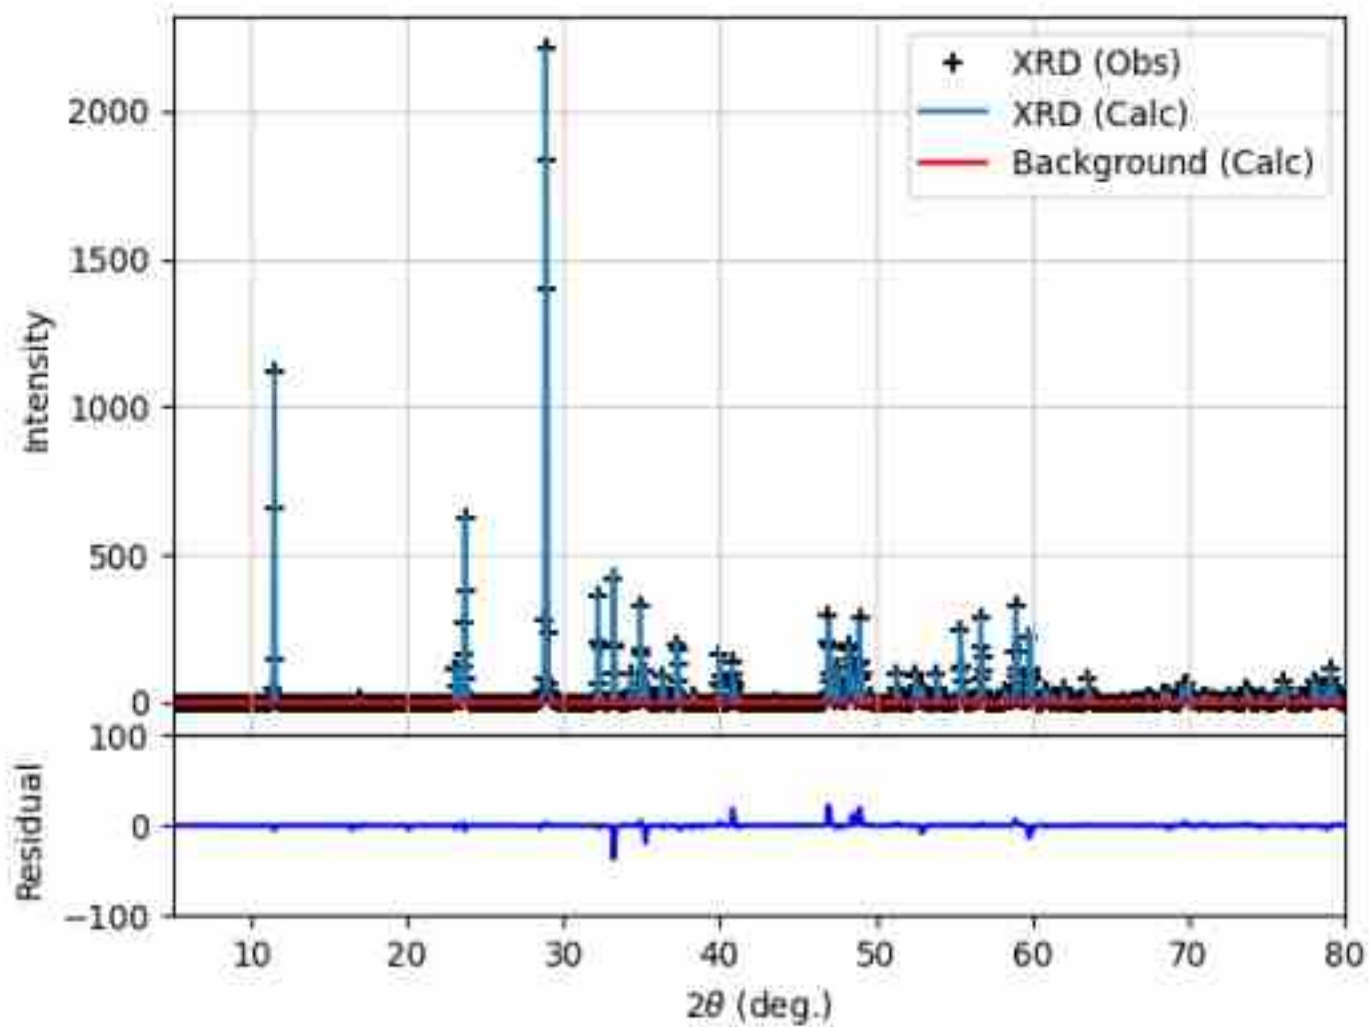

| RMSE before RR | Rwp     | RMSE after RR |
|----------------|---------|---------------|
| 0.04           | 6.64969 | 0.19789       |

# Sm1H2

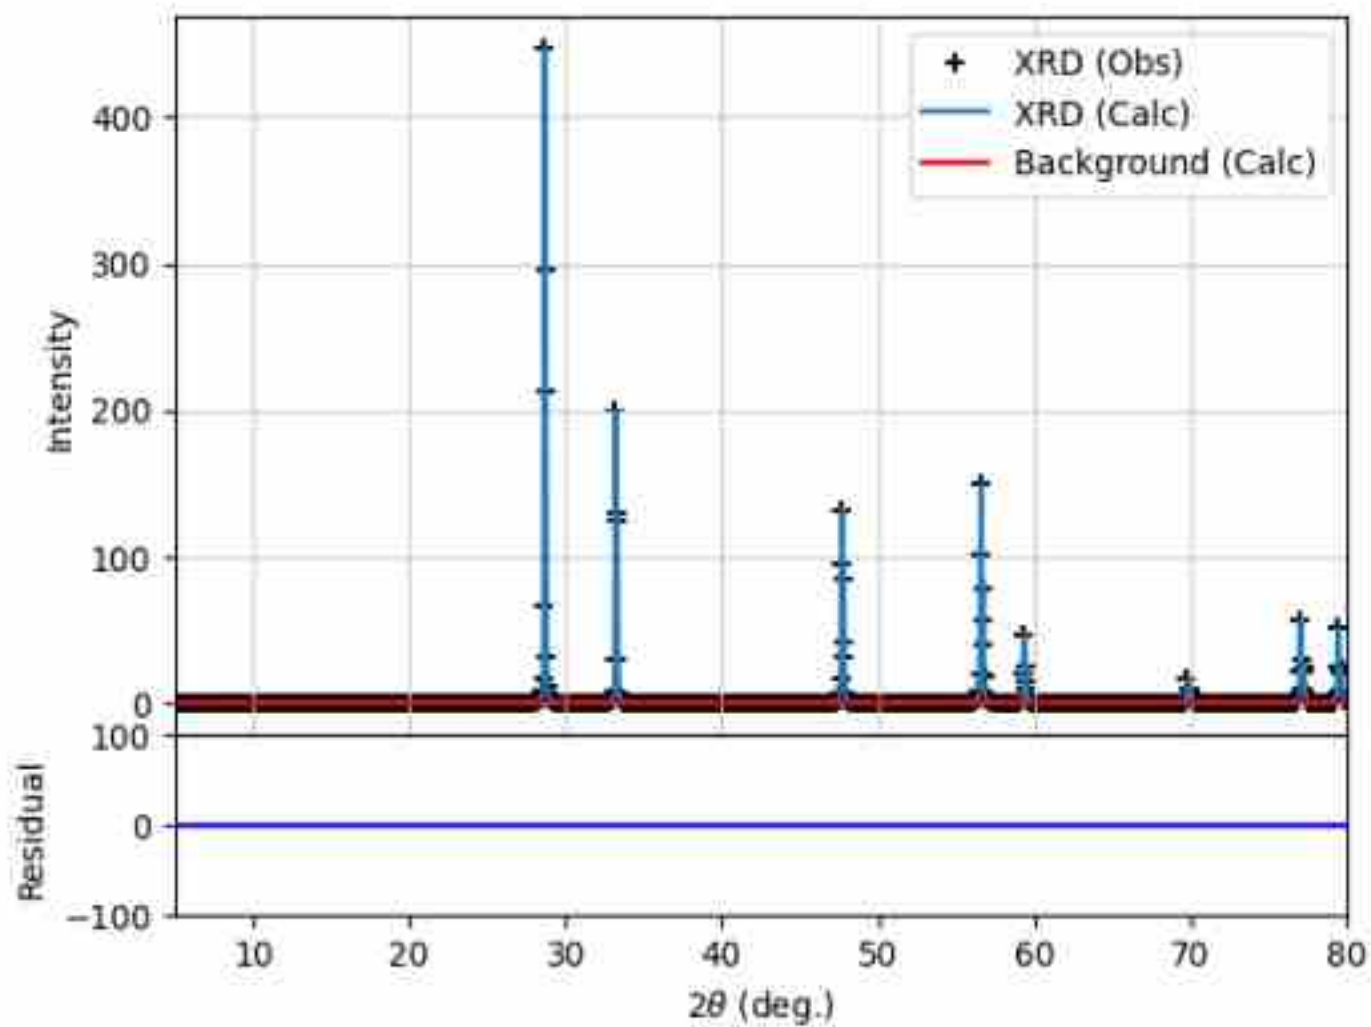

| RMSE before RR | Rwp   | RMSE after RR |
|----------------|-------|---------------|
| 0.004          | 0.003 | 0.00268       |

# Sm<sub>2</sub>Zn<sub>2</sub>In<sub>2</sub>

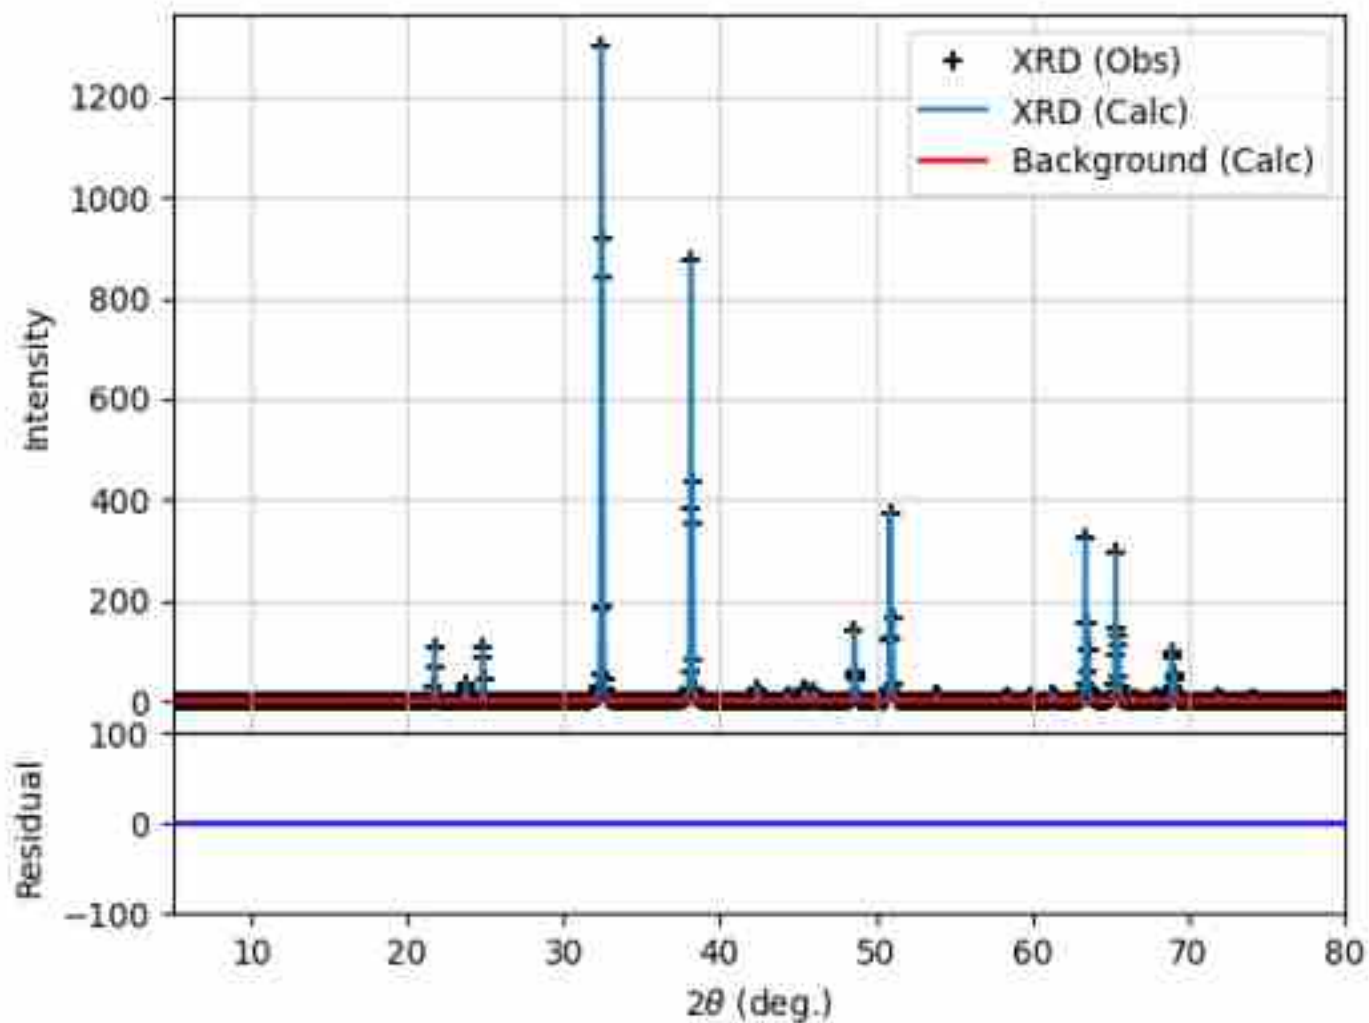

| RMSE before RR | Rwp    | RMSE after RR |
|----------------|--------|---------------|
| 0.004          | 0.0028 | 0.00022       |



# Sm4

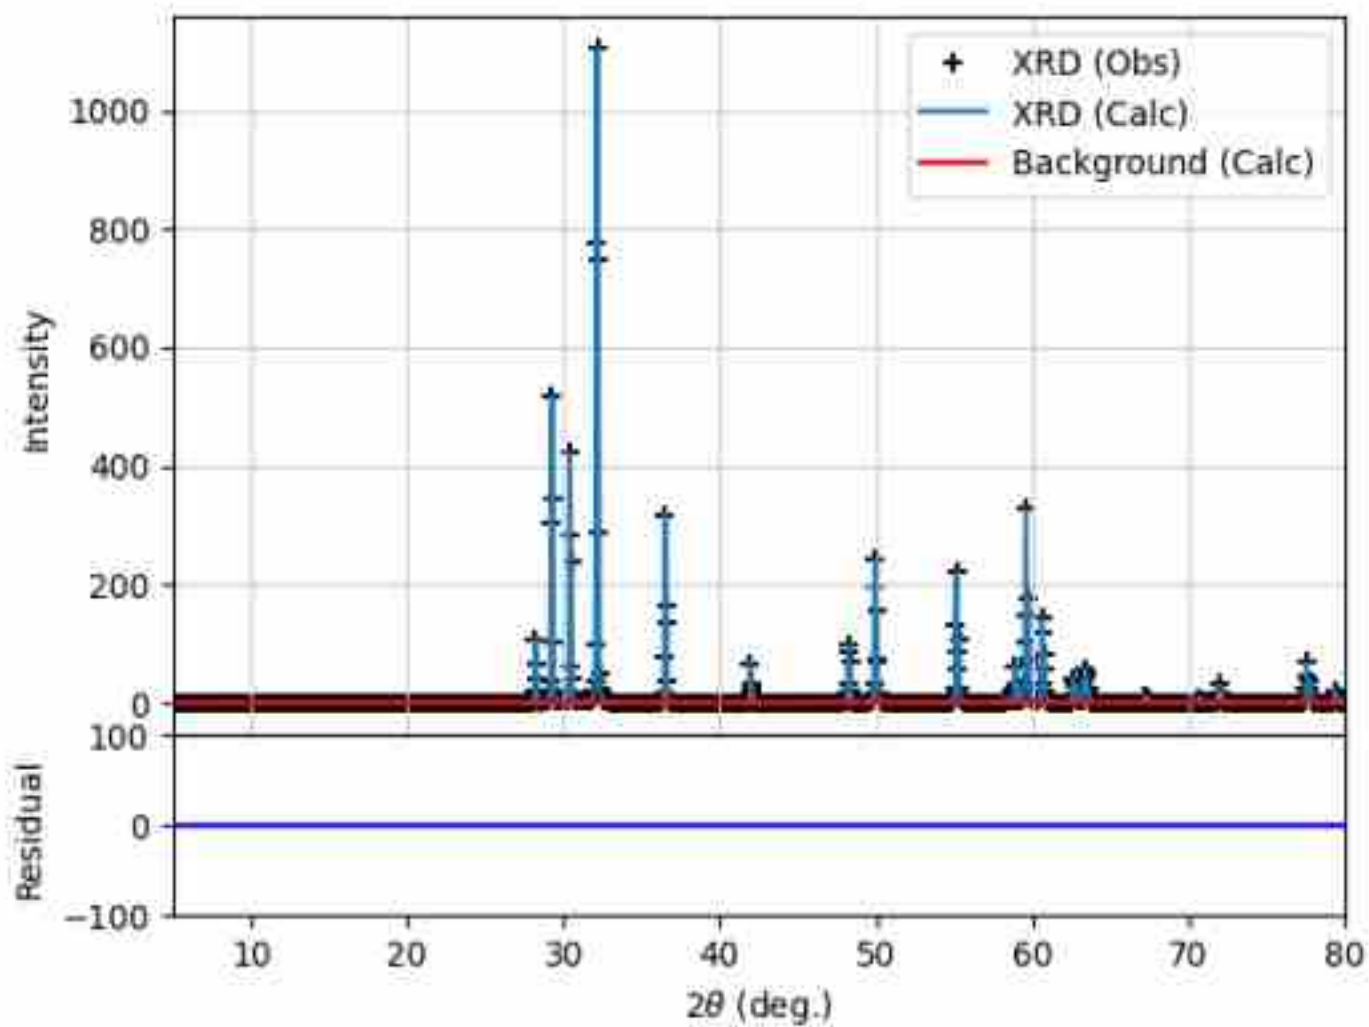

| RMSE before RR | Rwp     | RMSE after RR |
|----------------|---------|---------------|
| 0.004          | 0.00395 | 0.00038       |

# Sn1Te1Pb1Se1

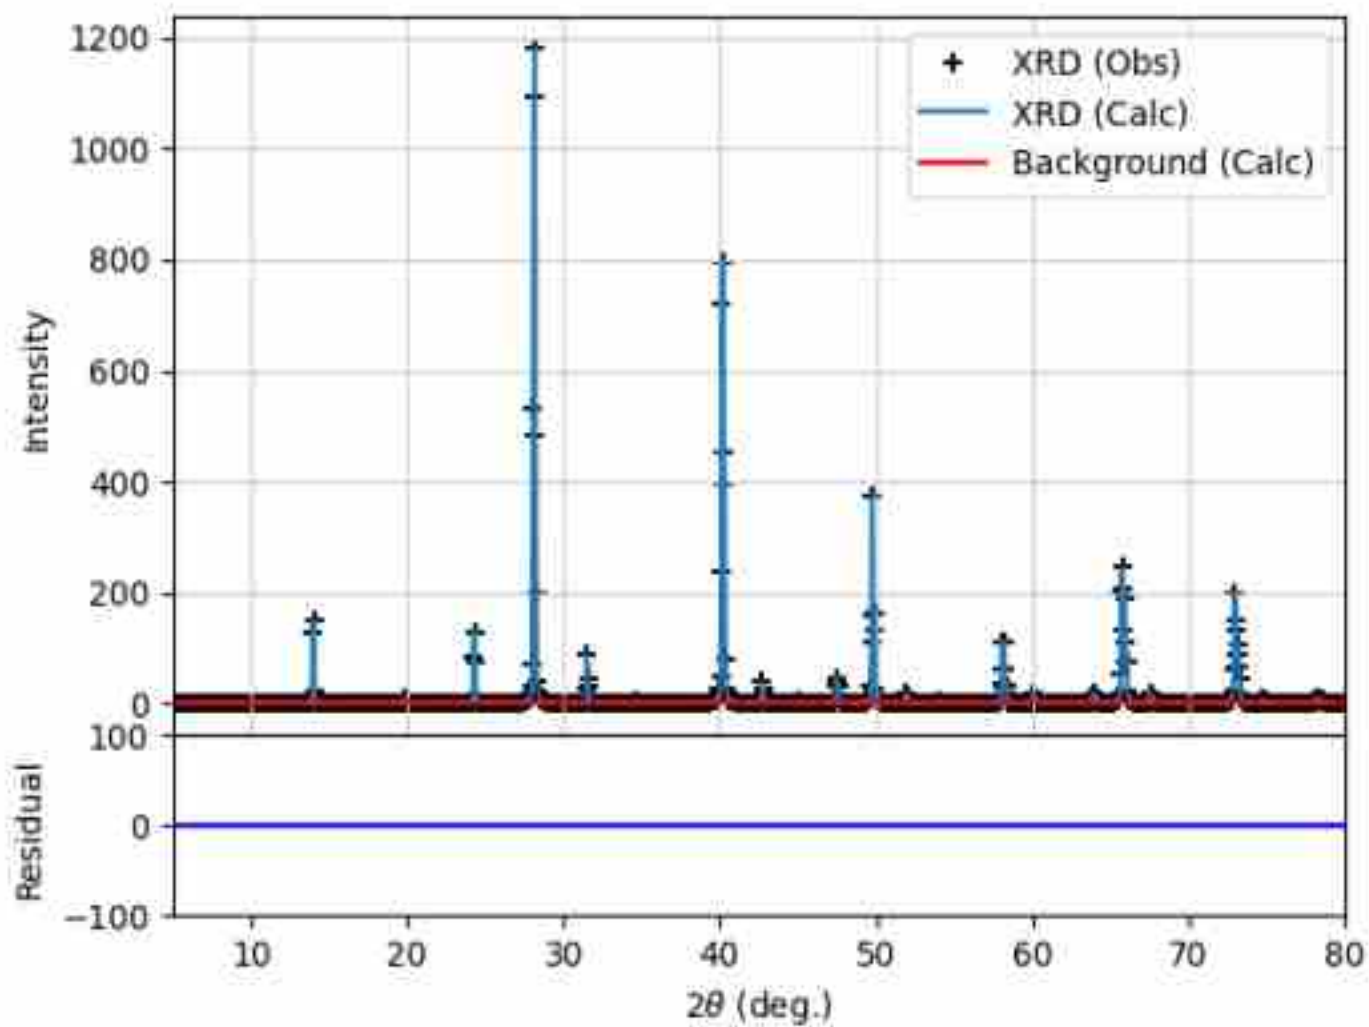

| RMSE before RR | Rwp     | RMSE after RR |
|----------------|---------|---------------|
| 0.004          | 0.00377 | 0.00024       |

# Sr1Cd1O2

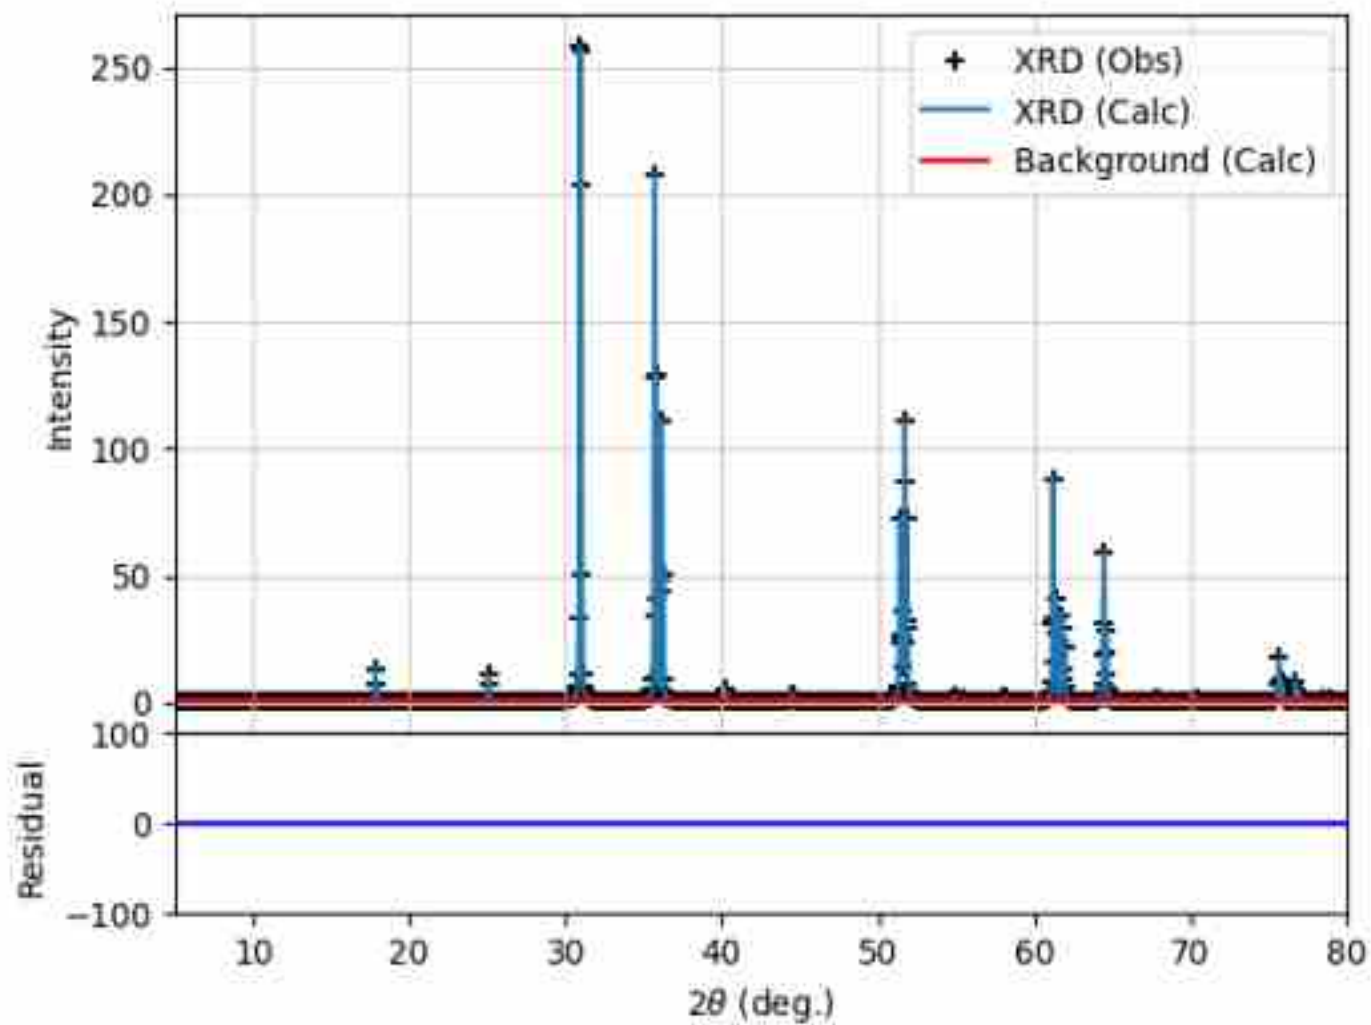

| RMSE before RR | Rwp     | RMSE after RR |
|----------------|---------|---------------|
| 0.004          | 0.00322 | 0.00048       |

# Sr3Pb1O1

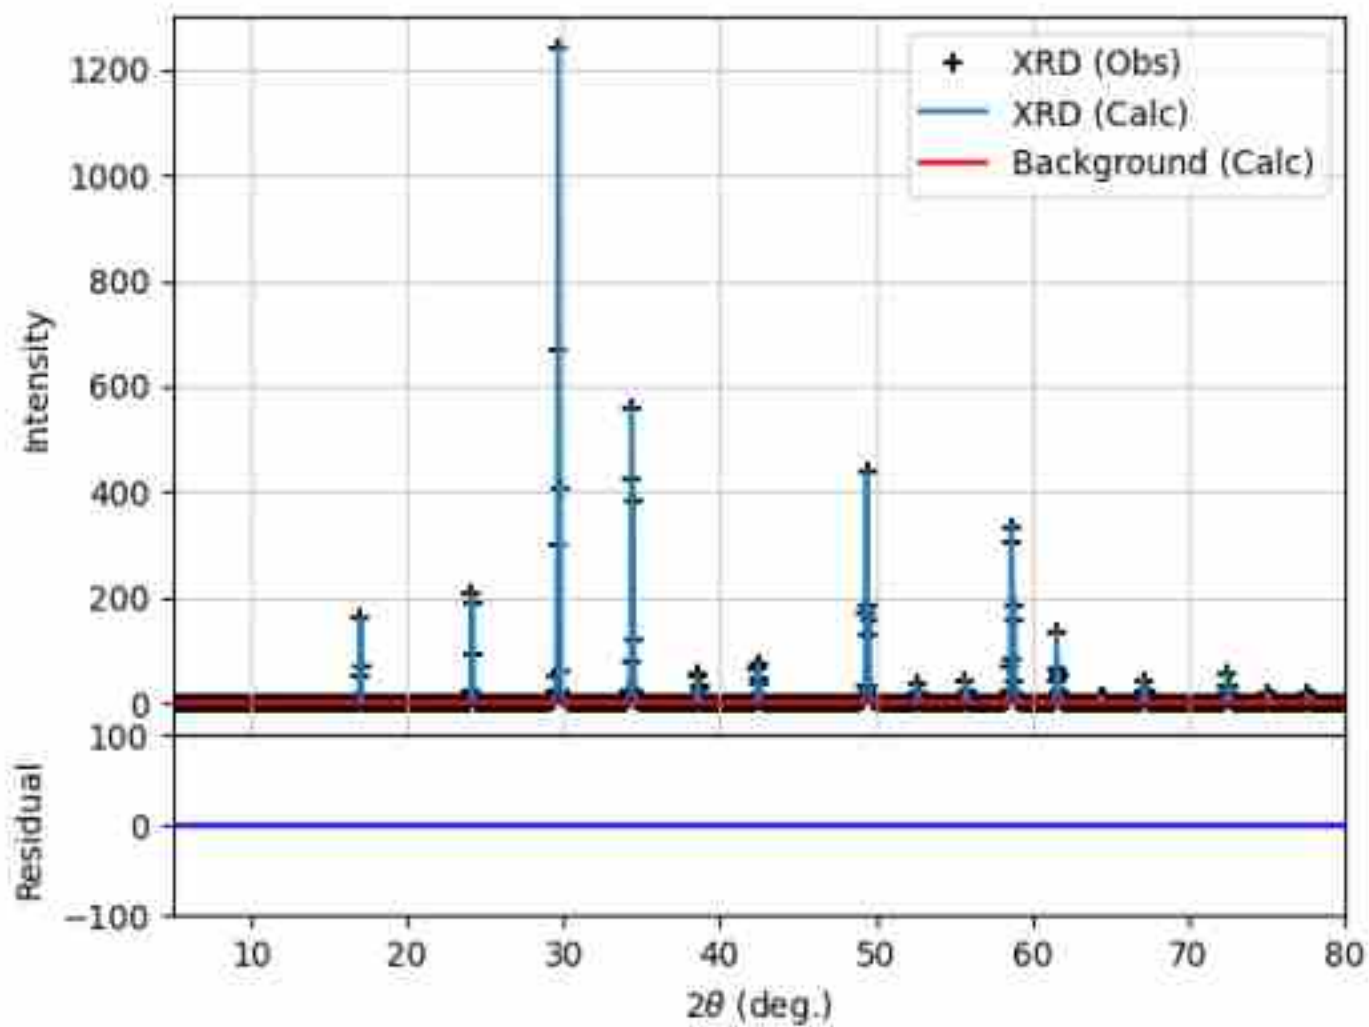

| RMSE before RR | Rwp     | RMSE after RR |
|----------------|---------|---------------|
| 0.004          | 0.01643 | 0.00123       |

# Tb1Sm1

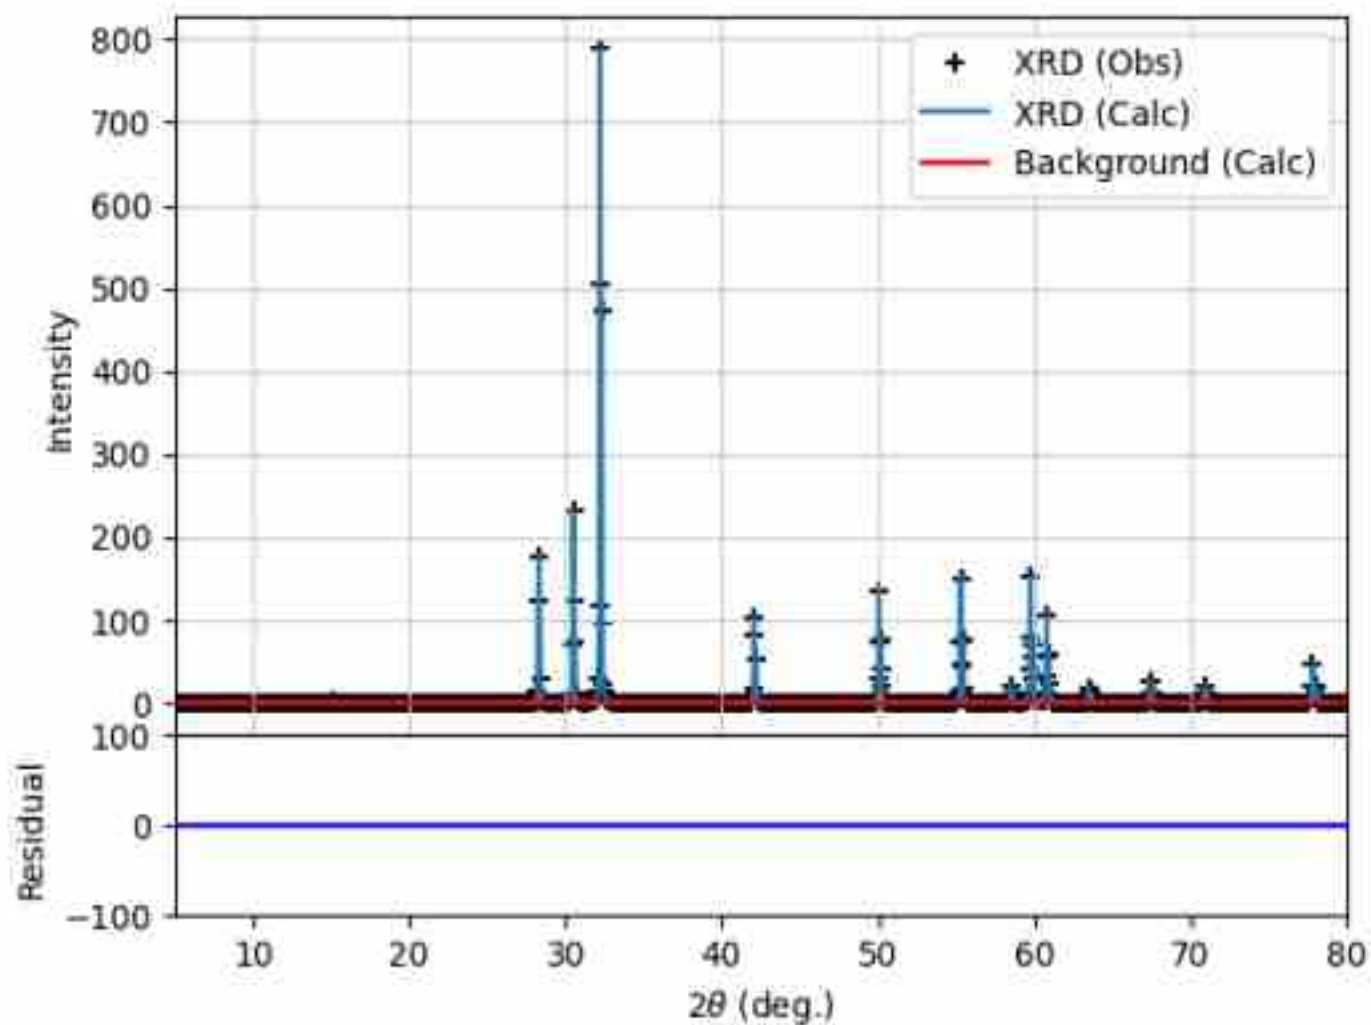

| RMSE before RR | Rwp     | RMSE after RR |
|----------------|---------|---------------|
| 0.004          | 0.00544 | 0.00035       |

# Tb<sub>2</sub>Mg<sub>2</sub>Sn<sub>2</sub>

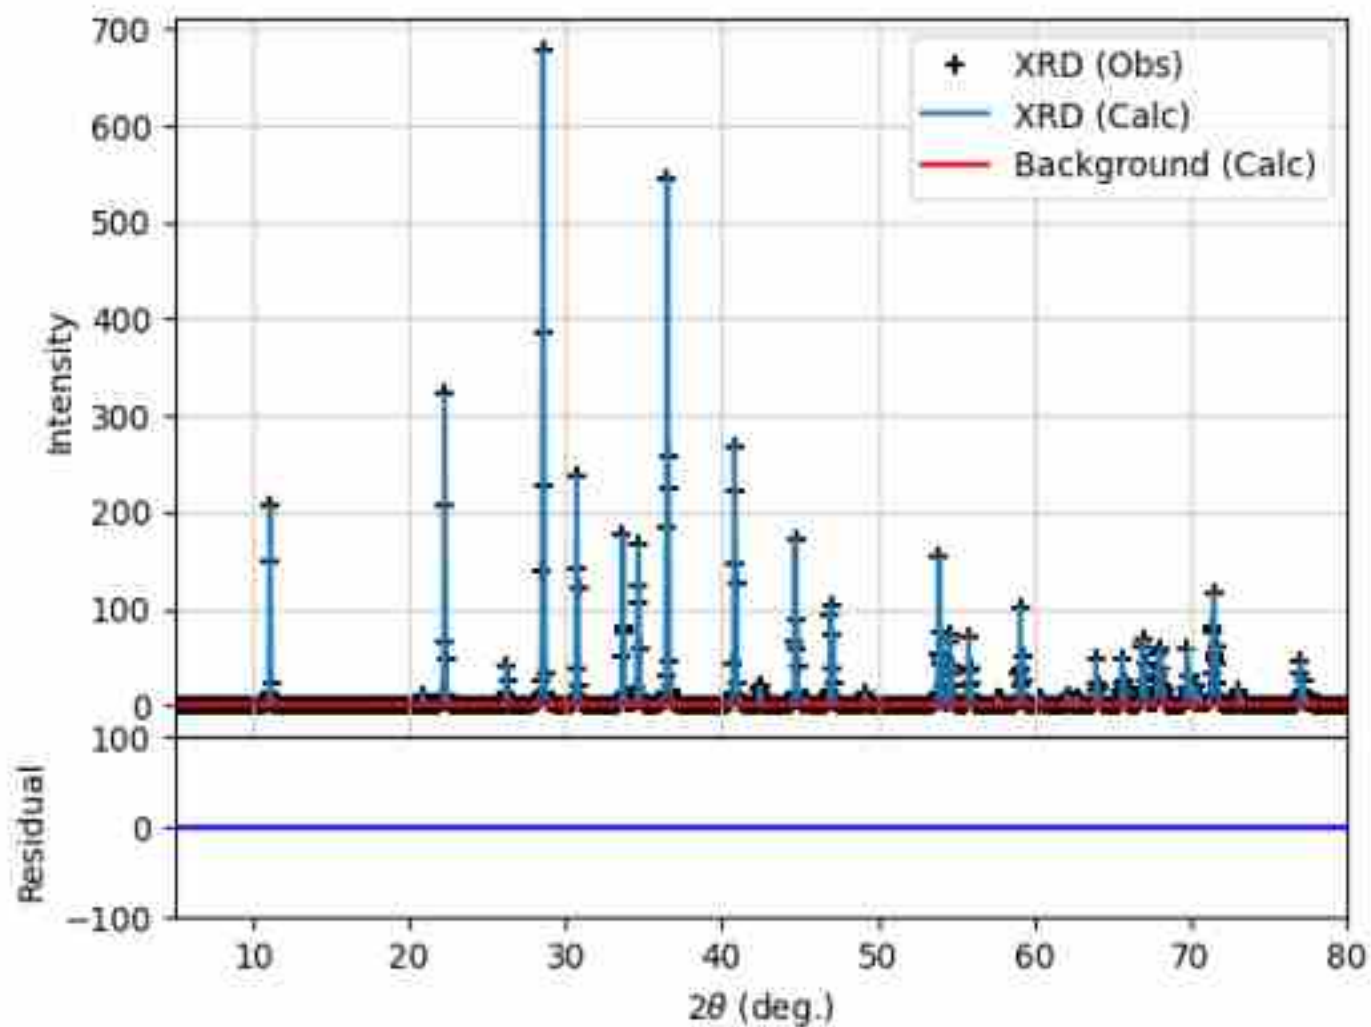

| RMSE before RR | Rwp     | RMSE after RR |
|----------------|---------|---------------|
| 0.004          | 0.00344 | 0.00032       |

# Tb2O3

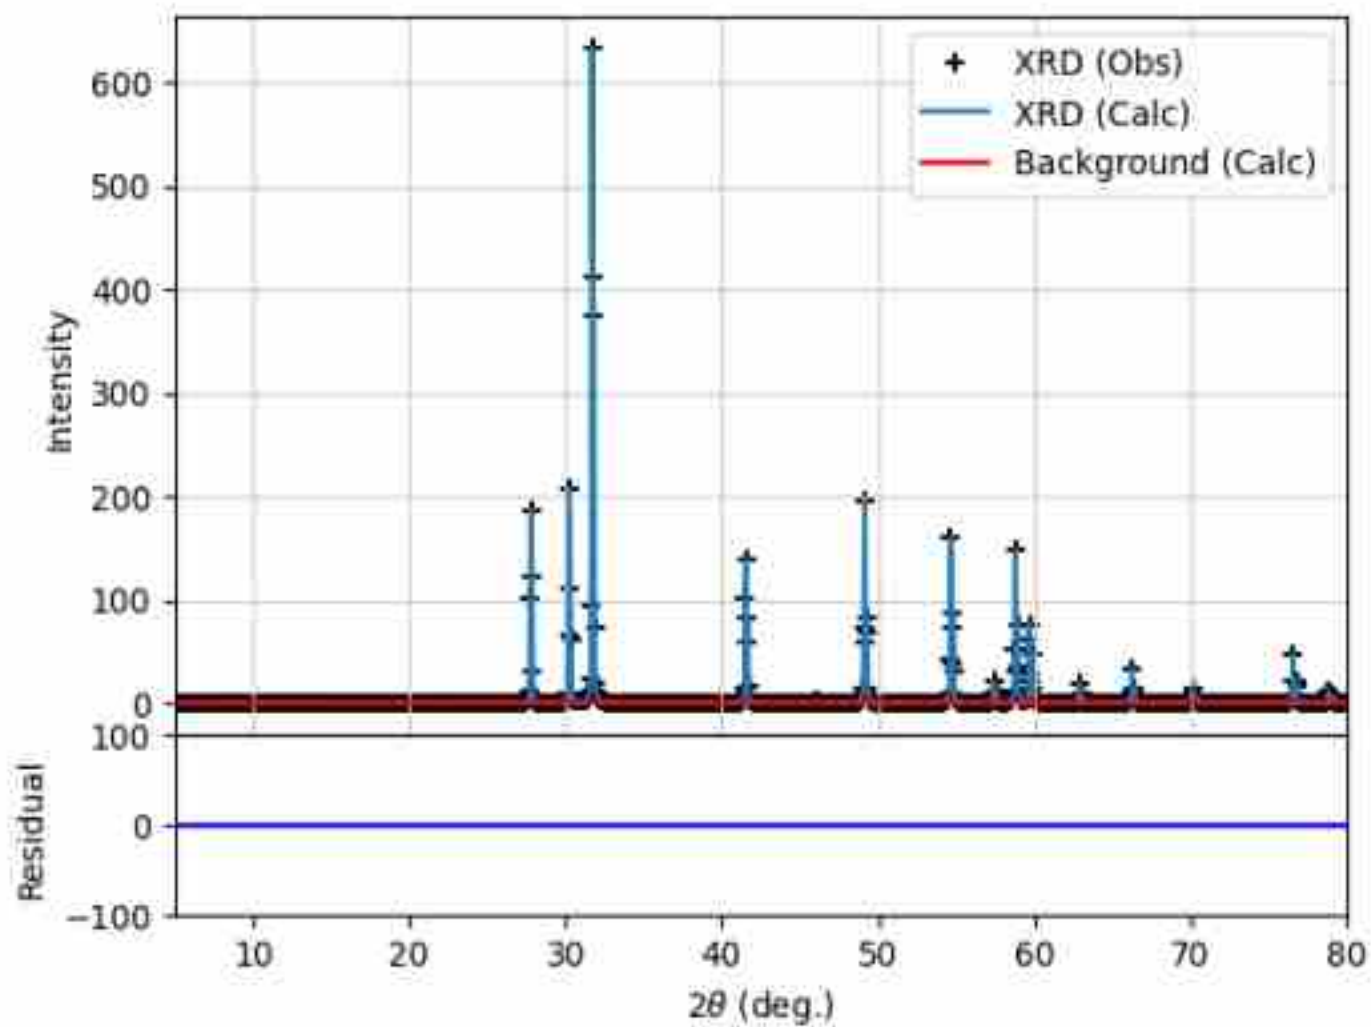

| RMSE before RR | Rwp     | RMSE after RR |
|----------------|---------|---------------|
| 0.004          | 0.00339 | 0.00177       |

# Tb<sub>3</sub>Al<sub>11</sub>C<sub>1</sub>

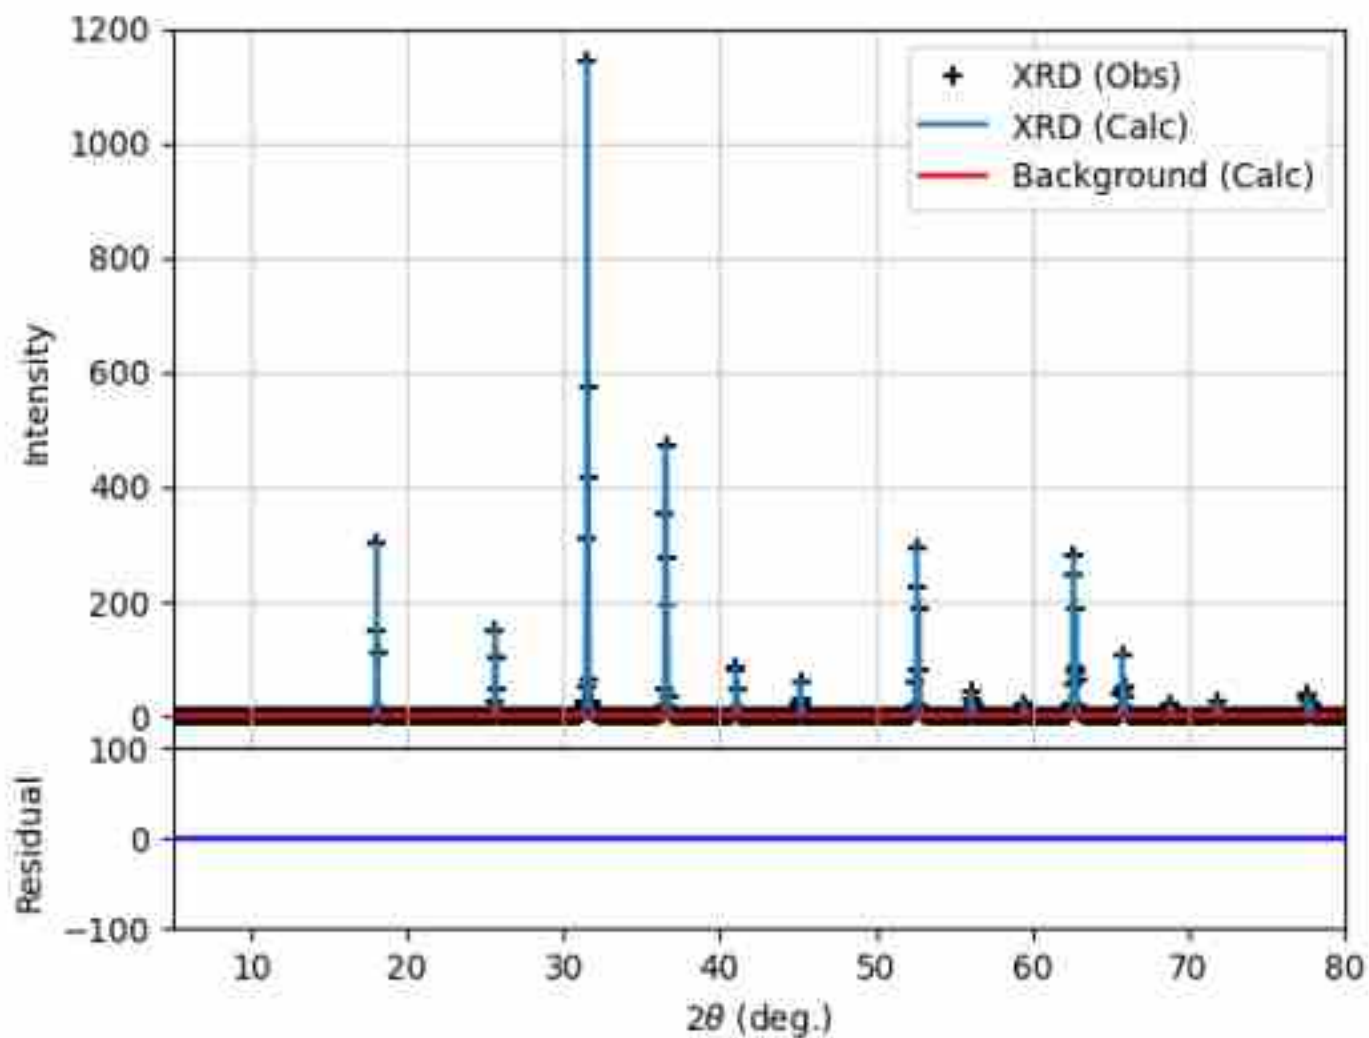

| RMSE before RR | Rwp     | RMSE after RR |
|----------------|---------|---------------|
| 0.004          | 0.09129 | 0.00503       |



# Te<sub>2</sub>Pb<sub>4</sub>O<sub>10</sub>

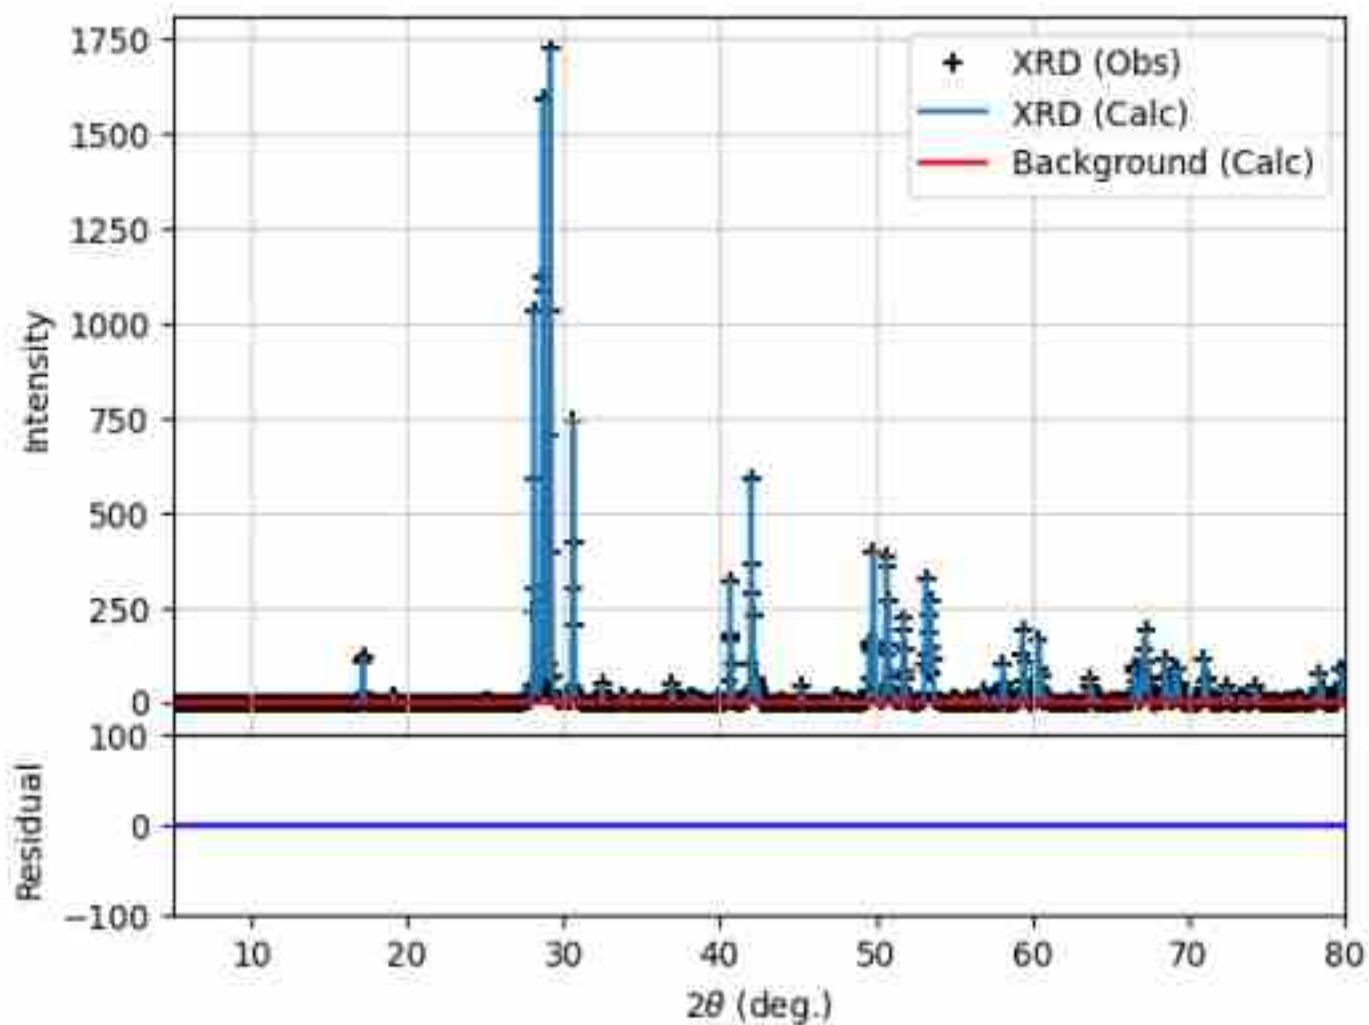

| RMSE before RR | Rwp     | RMSE after RR |
|----------------|---------|---------------|
| 0.04           | 0.00305 | 0.00087       |

# Th1B1Rh3

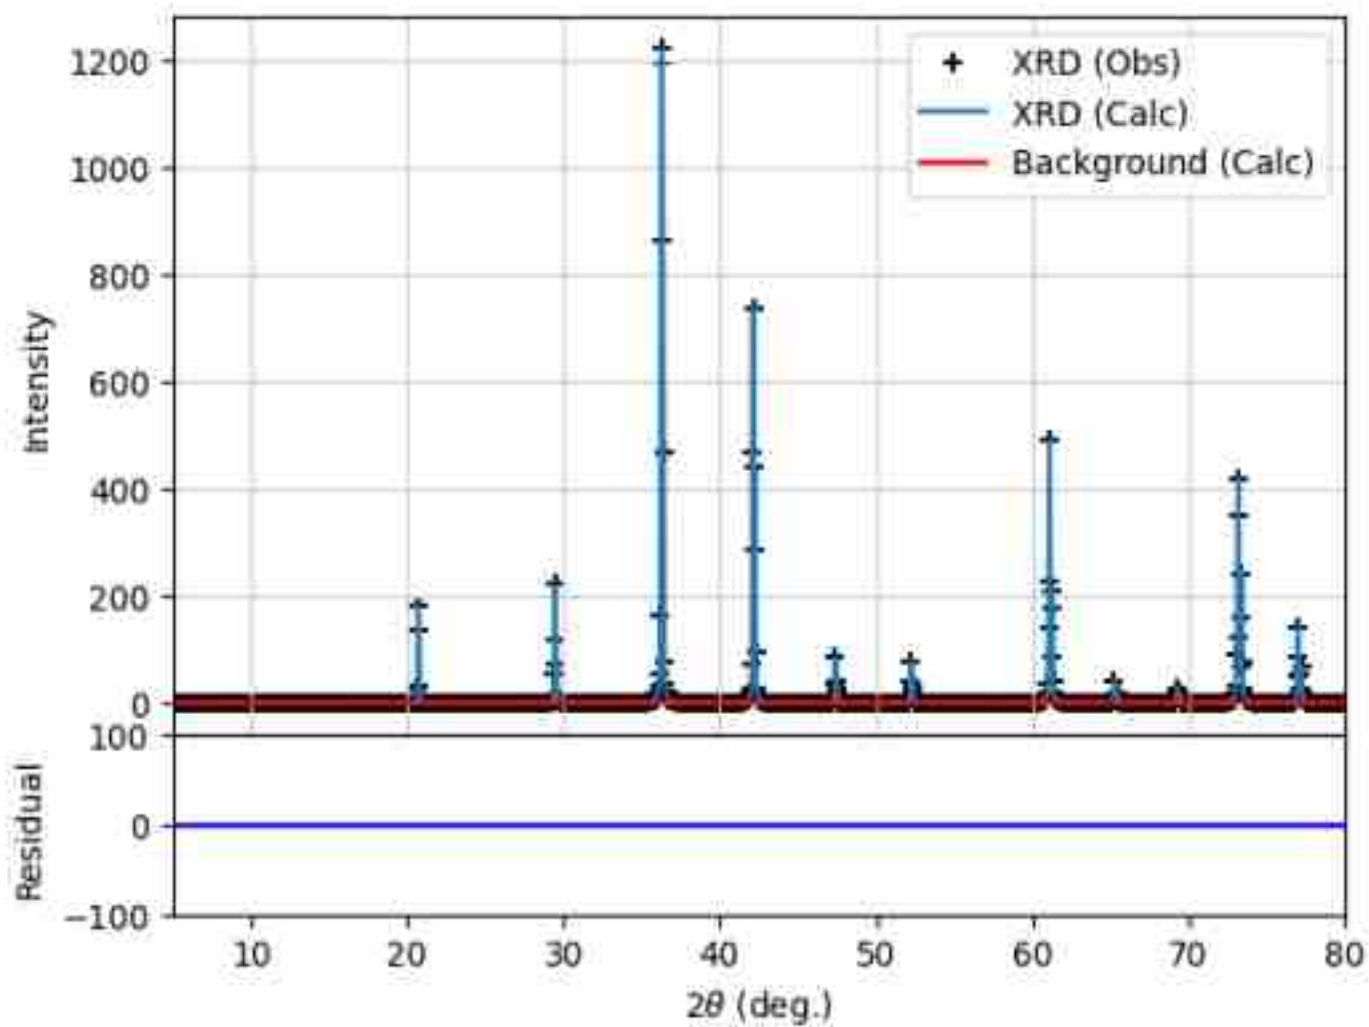

| RMSE before RR | Rwp     | RMSE after RR |
|----------------|---------|---------------|
| 0.004          | 0.00434 | 0.00407       |

# Th1H2

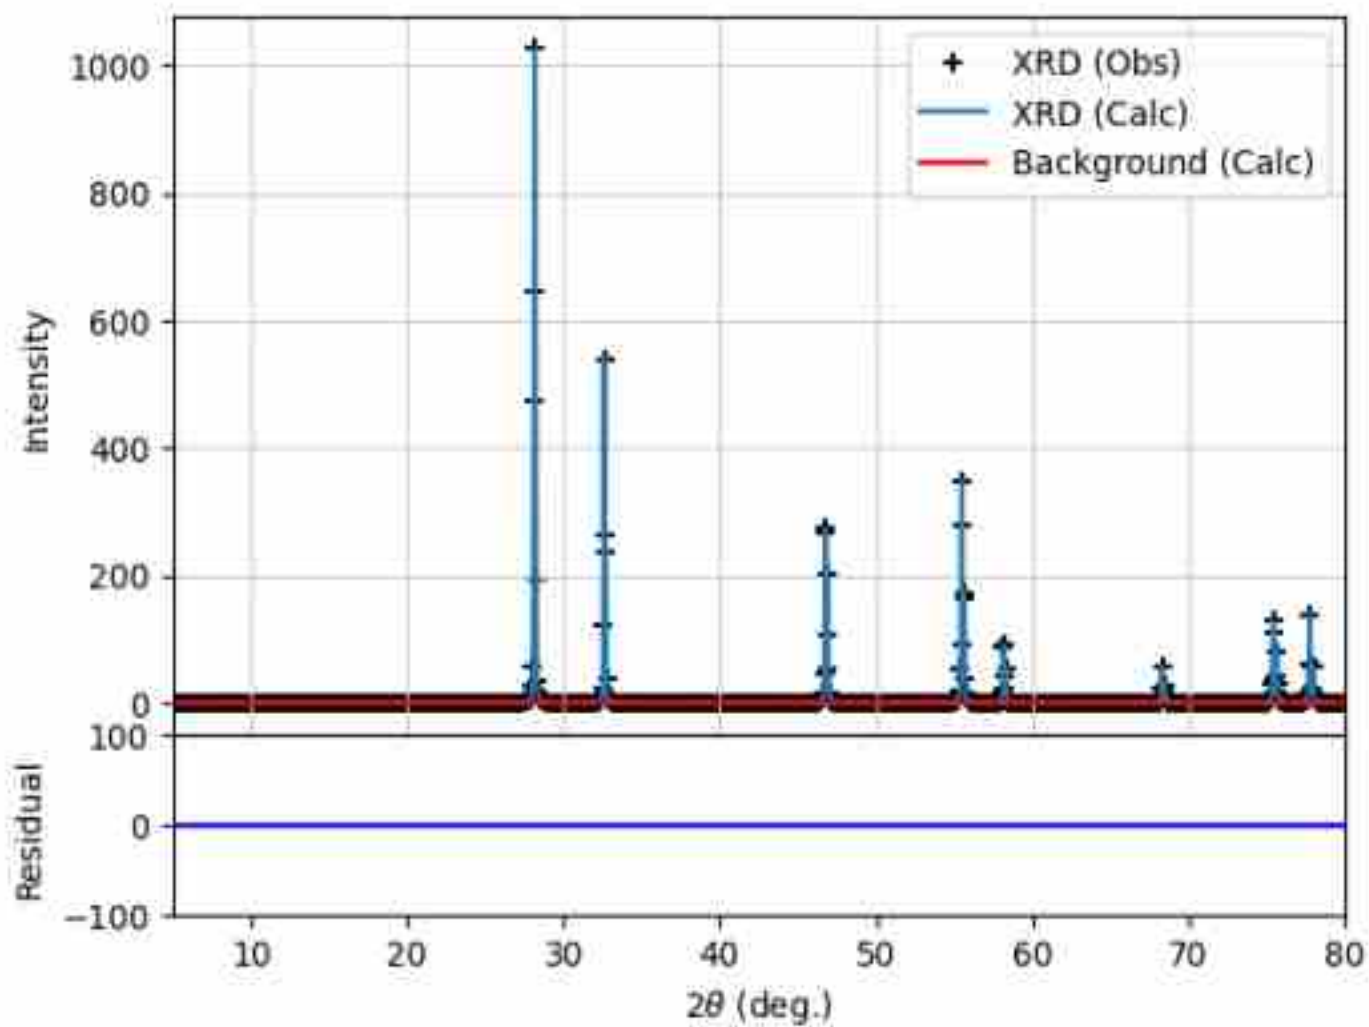

| RMSE before RR | Rwp     | RMSE after RR |
|----------------|---------|---------------|
| 0.004          | 0.00376 | 0.00656       |

# Th1Ni1Sn1

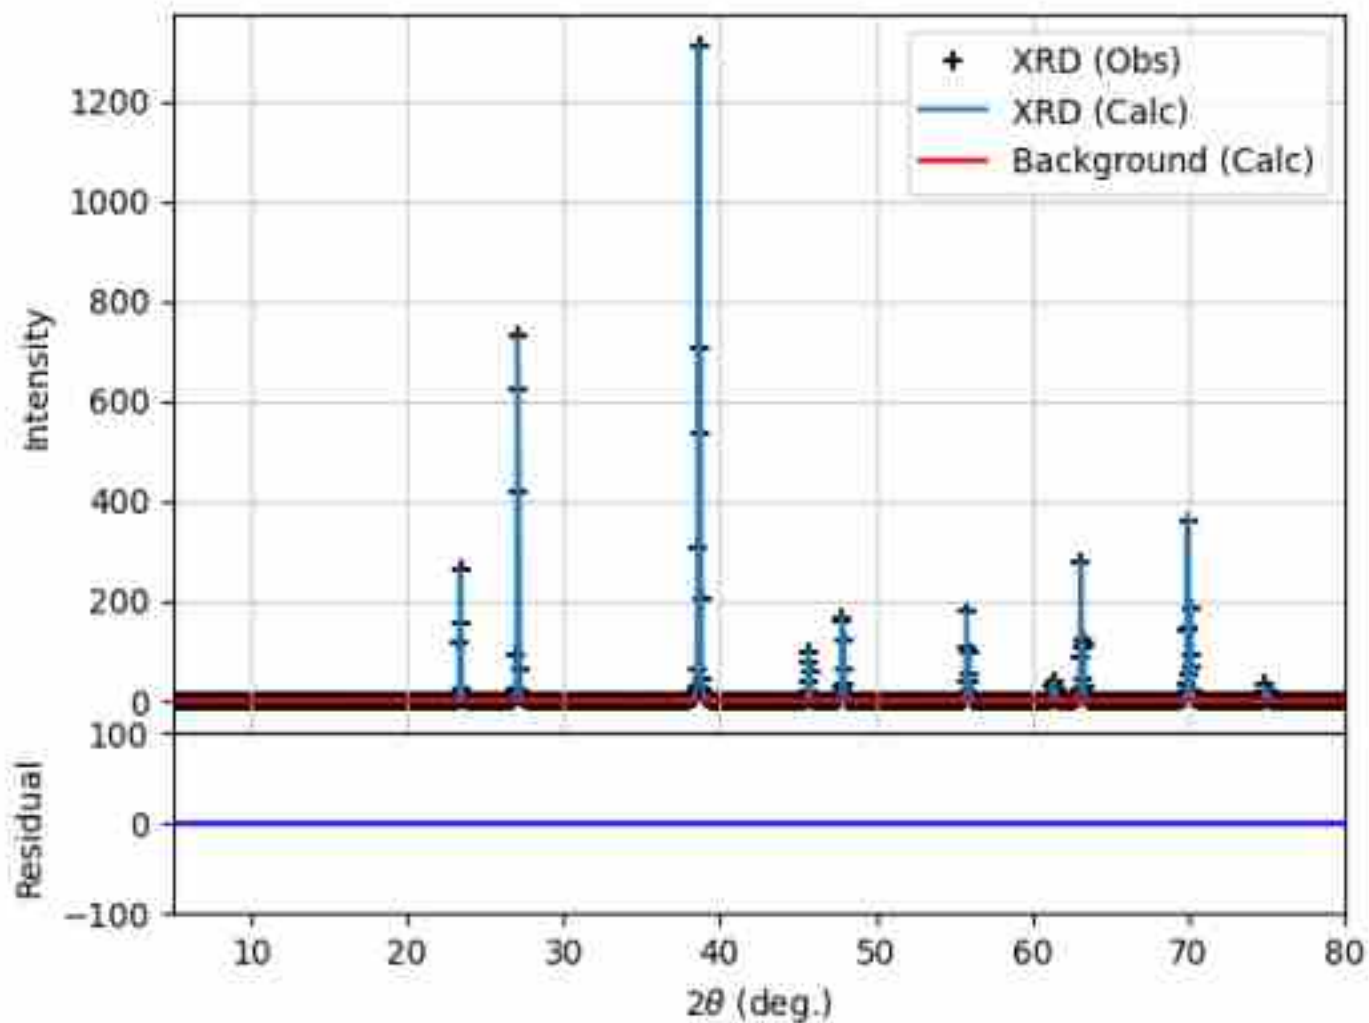

| RMSE before RR | Rwp     | RMSE after RR |
|----------------|---------|---------------|
| 0.004          | 0.02802 | 0.0021        |

# Th<sub>2</sub>Bi<sub>4</sub>

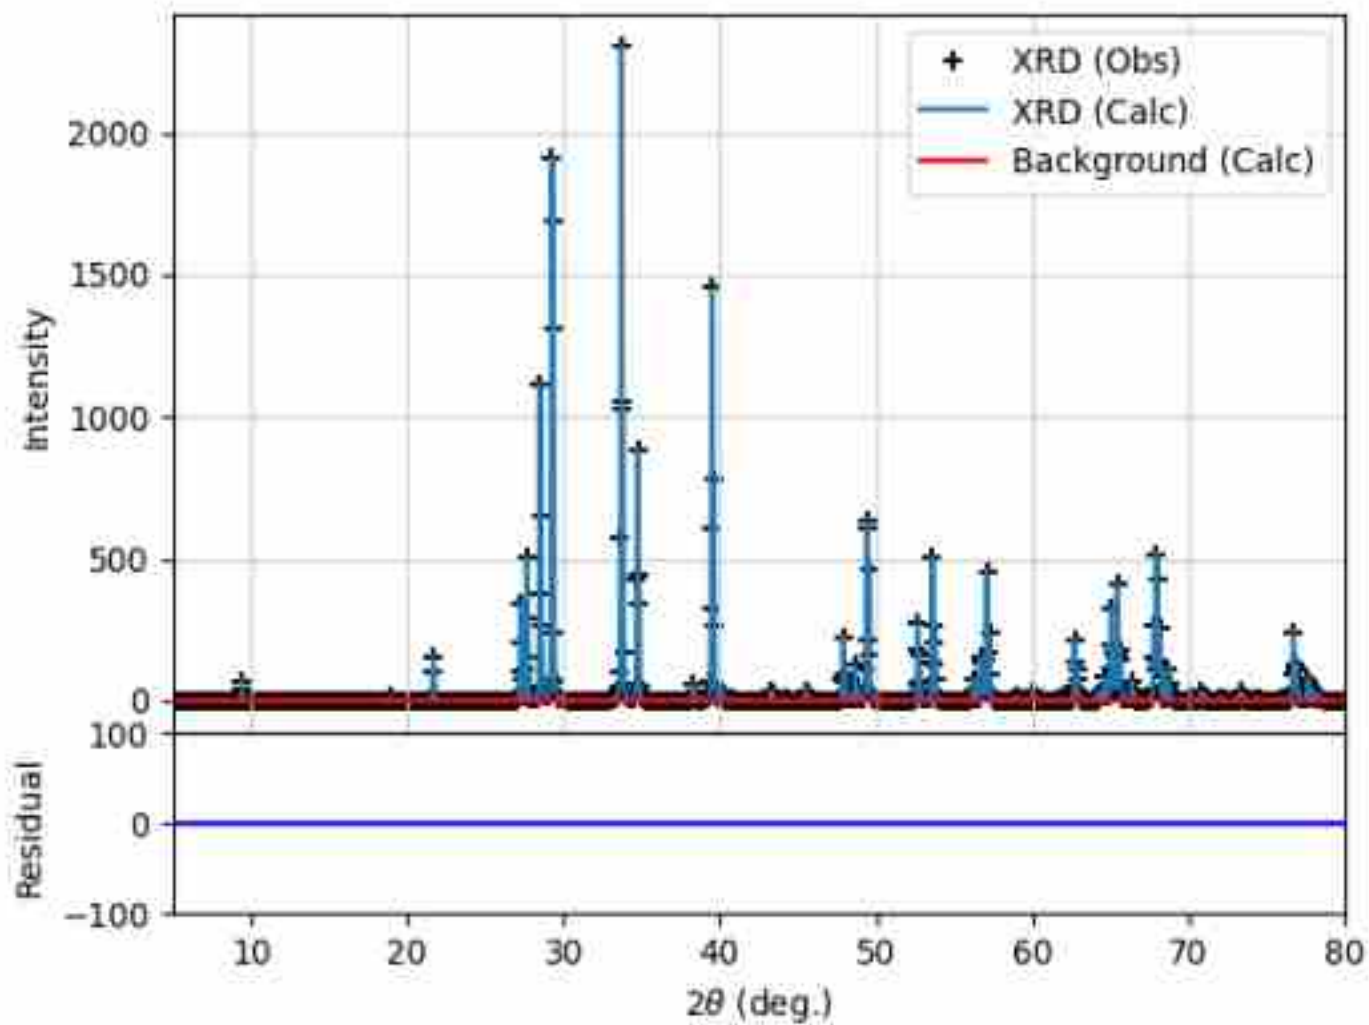

| RMSE before RR | Rwp    | RMSE after RR |
|----------------|--------|---------------|
| 0.004          | 0.0044 | 0.00019       |

# Th<sub>2</sub>P<sub>2</sub>Se<sub>2</sub>

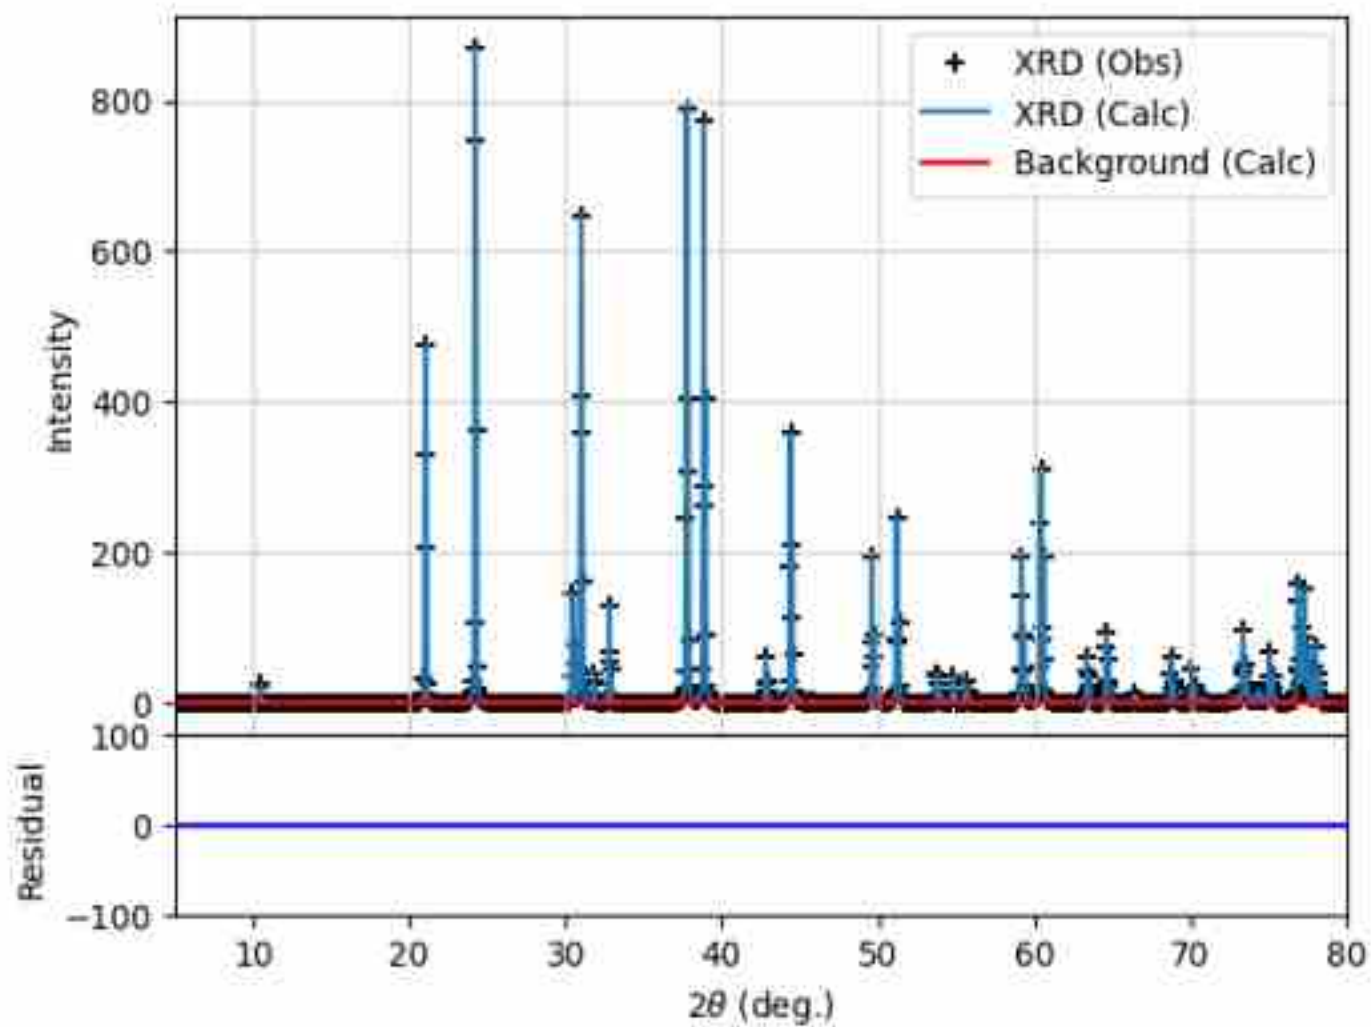

| RMSE before RR | Rwp     | RMSE after RR |
|----------------|---------|---------------|
| 0.004          | 0.00434 | 0.00052       |

# Ti1Ga5Co1

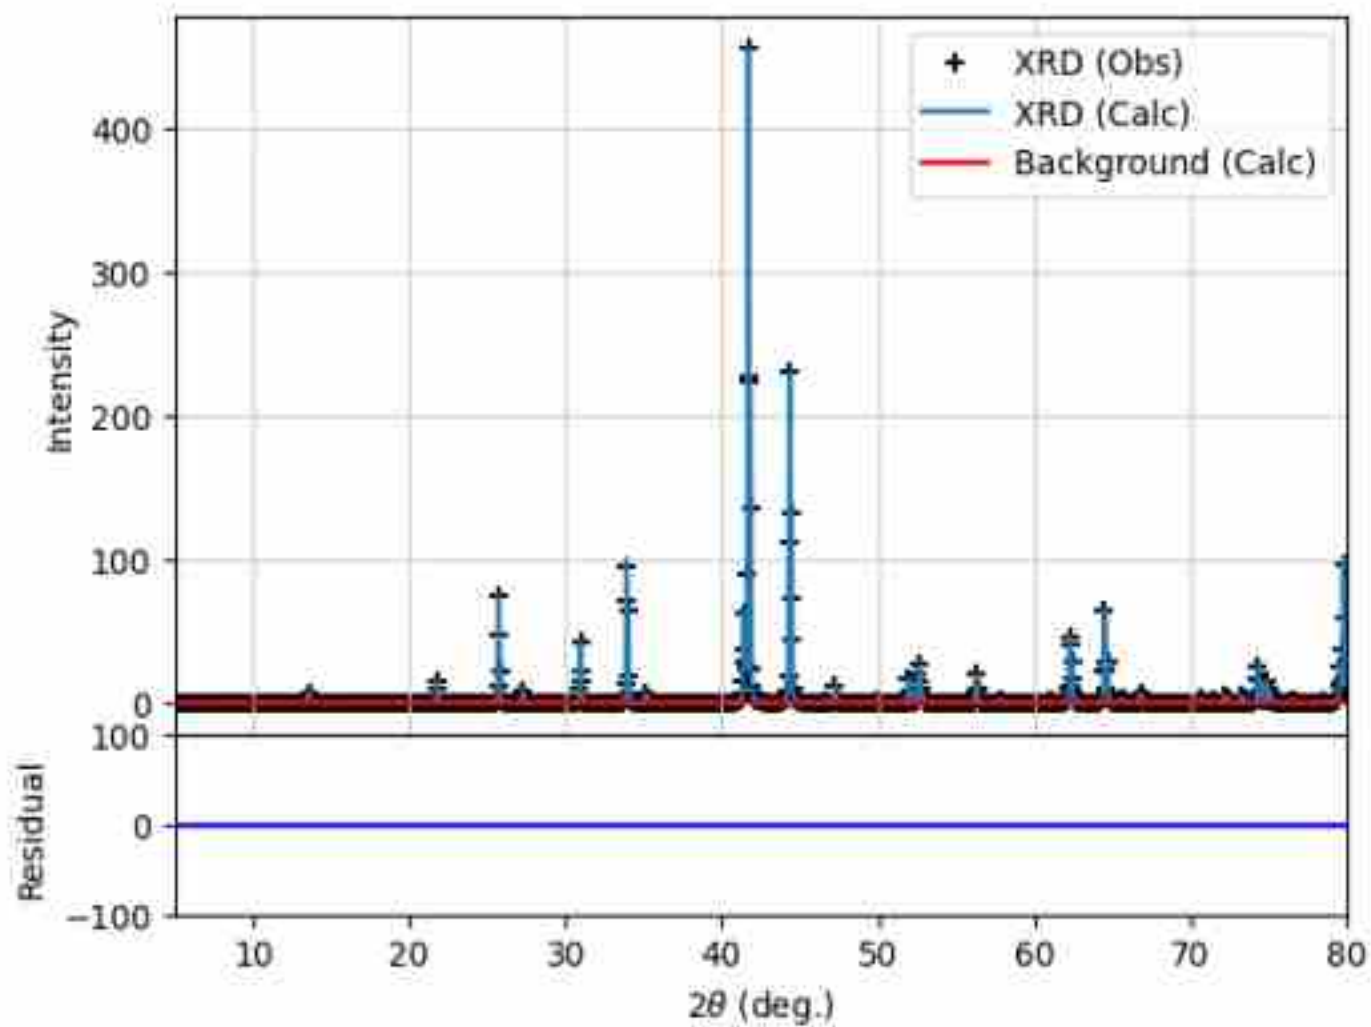

| RMSE before RR | Rwp     | RMSE after RR |
|----------------|---------|---------------|
| 0.004          | 0.00404 | 0.0003        |

# Ti6Sn2

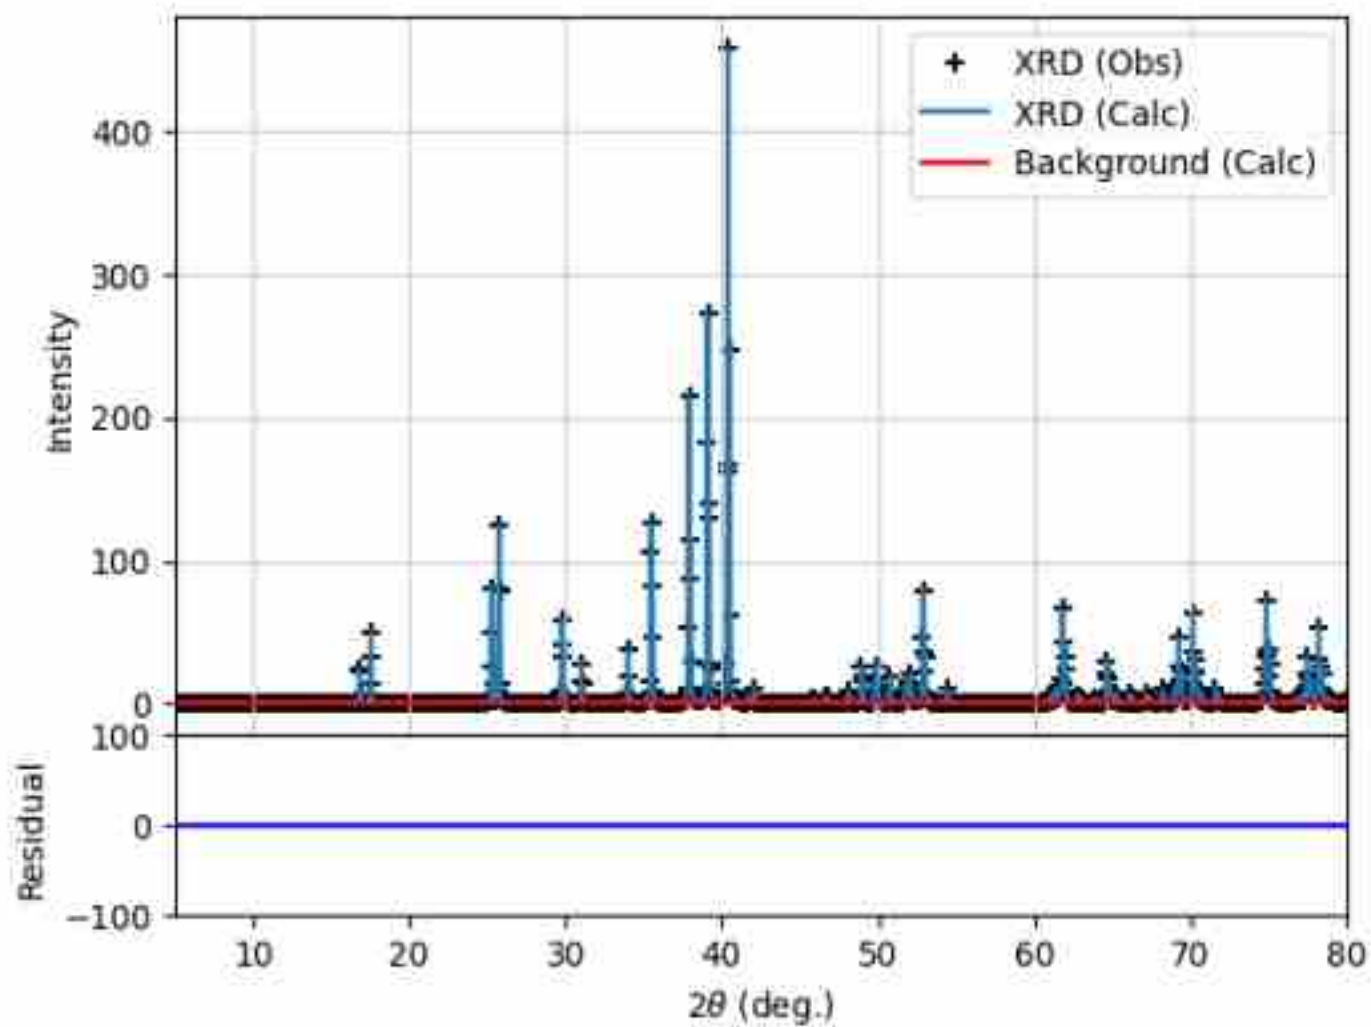

| RMSE before RR | Rwp     | RMSE after RR |
|----------------|---------|---------------|
| 0.04           | 0.00433 | 0.00046       |



# Tl<sub>2</sub>Hg<sub>2</sub>Pd<sub>1</sub>C<sub>18</sub>

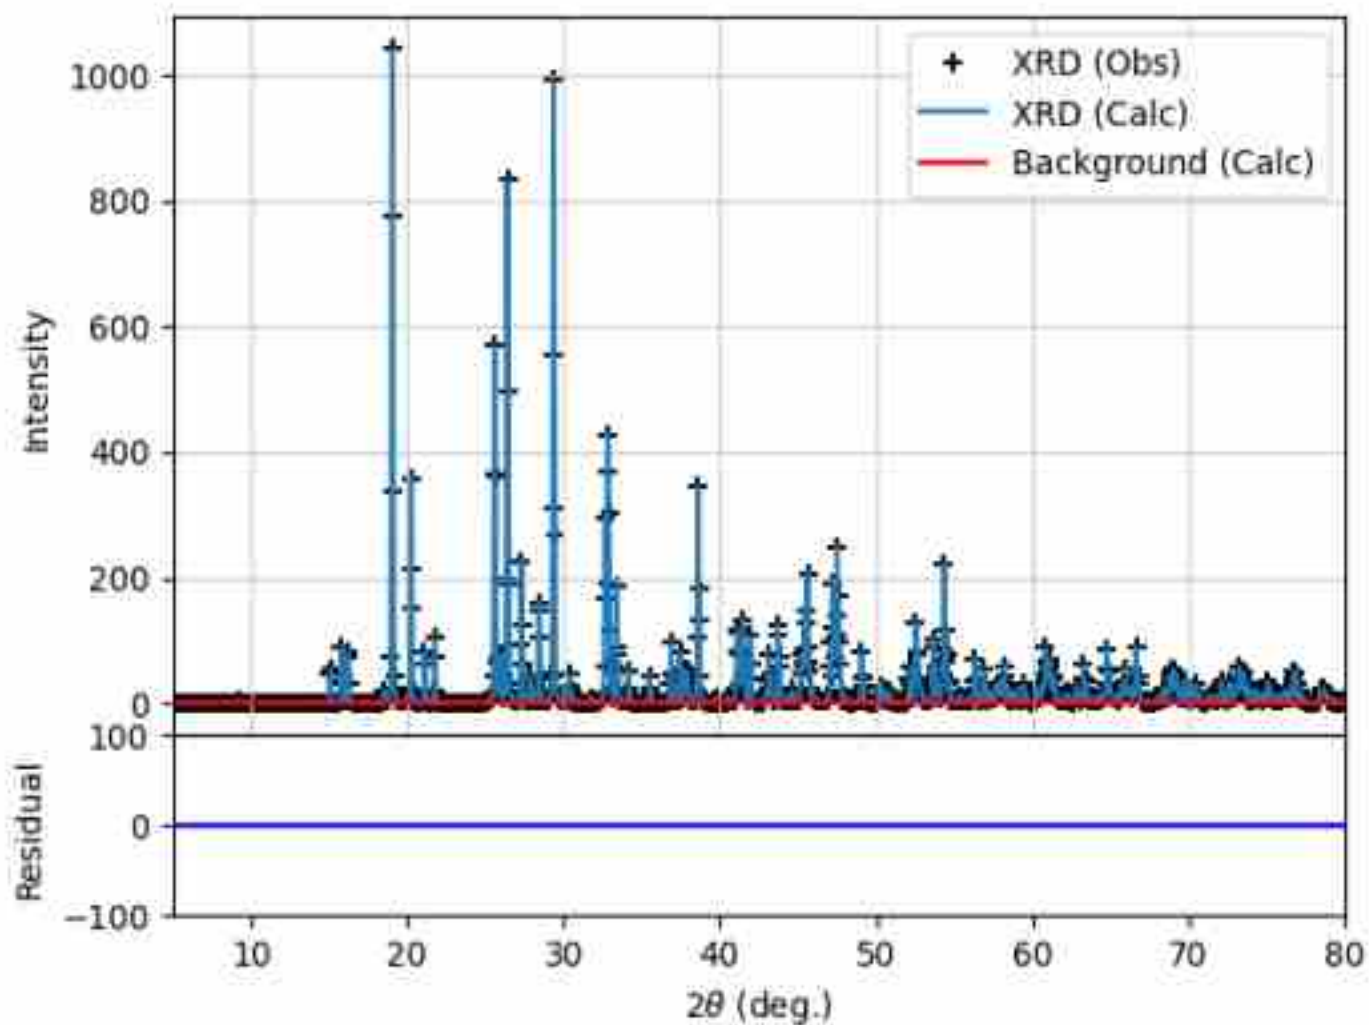

| RMSE before RR | Rwp    | RMSE after RR |
|----------------|--------|---------------|
| 0.04           | 0.0038 | 0.00054       |

# Tm1Bi1Pt1

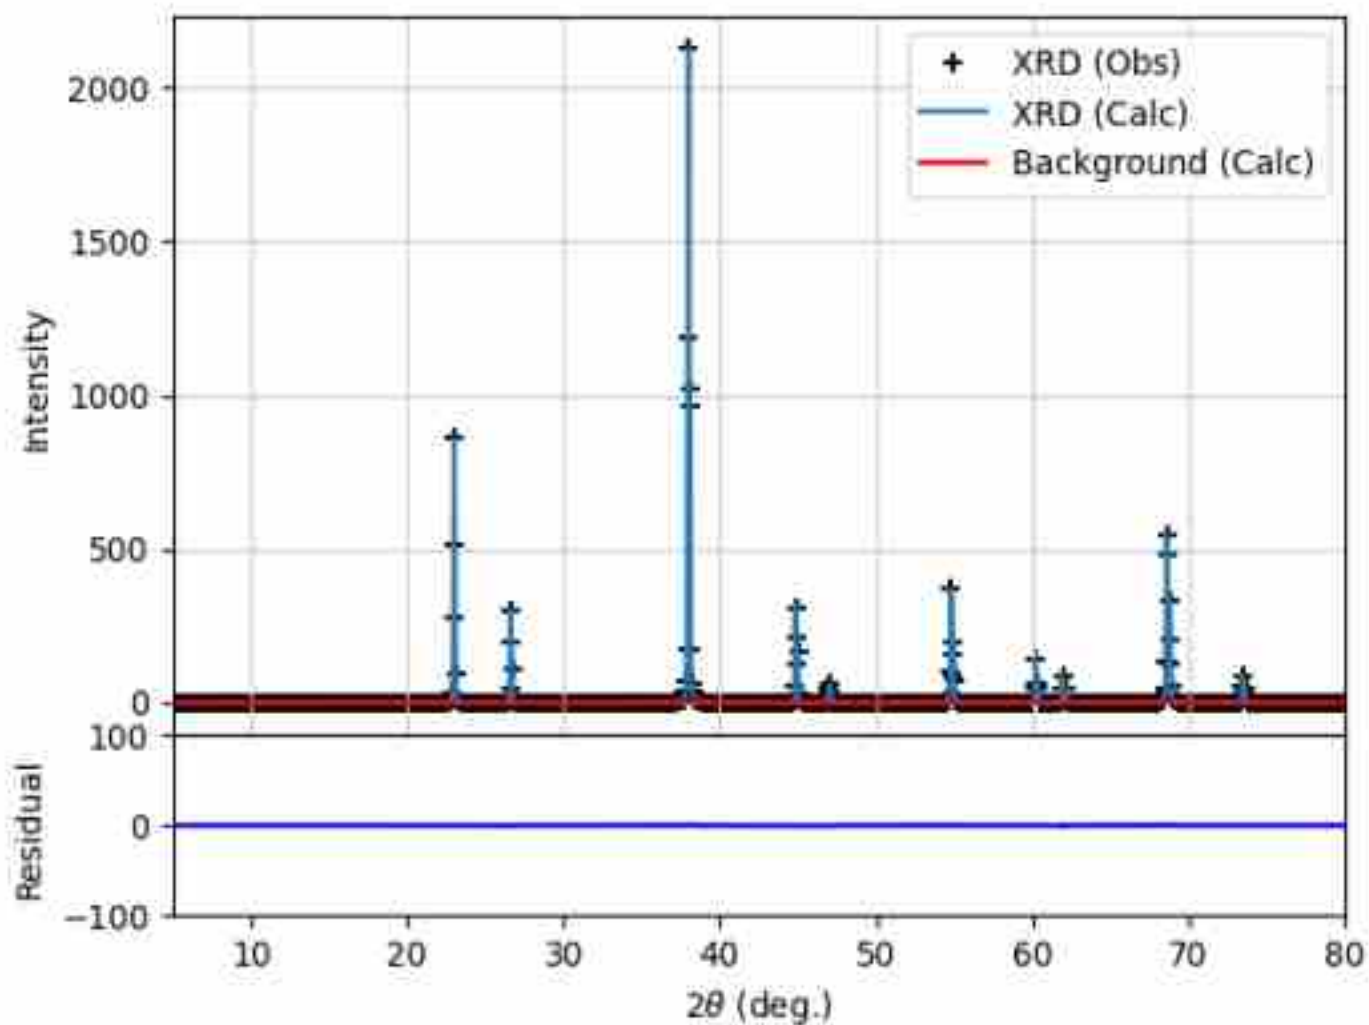

| RMSE before RR | Rwp     | RMSE after RR |
|----------------|---------|---------------|
| 0.004          | 0.26921 | 0.00203       |

# U<sub>2</sub>Al<sub>4</sub>Au<sub>4</sub>

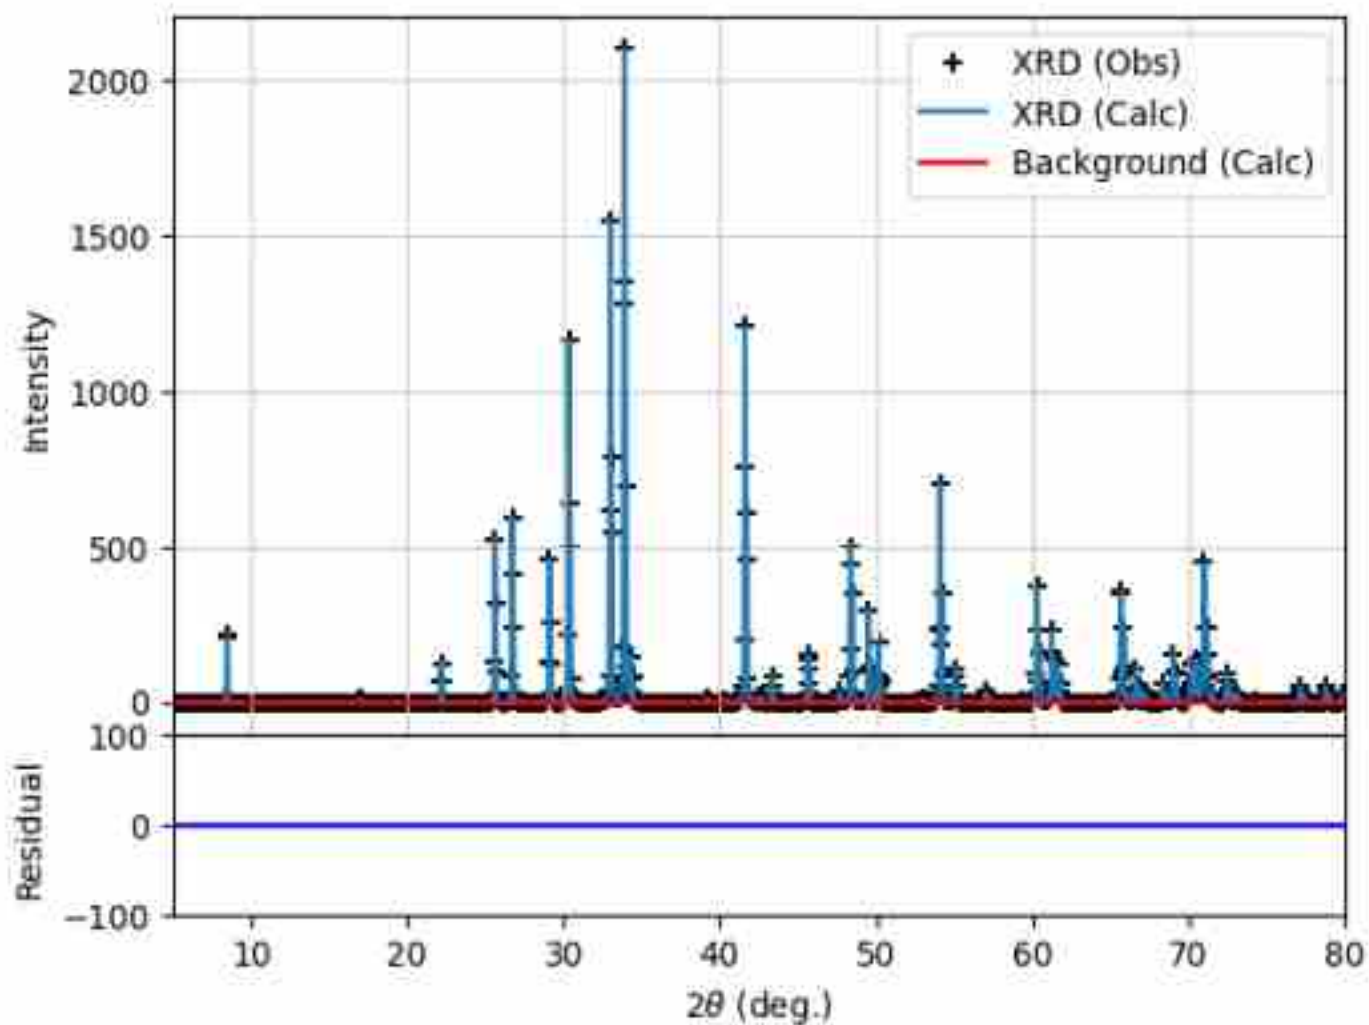

| RMSE before RR | Rwp     | RMSE after RR |
|----------------|---------|---------------|
| 0.004          | 0.00436 | 0.0008        |

# V6O10F2

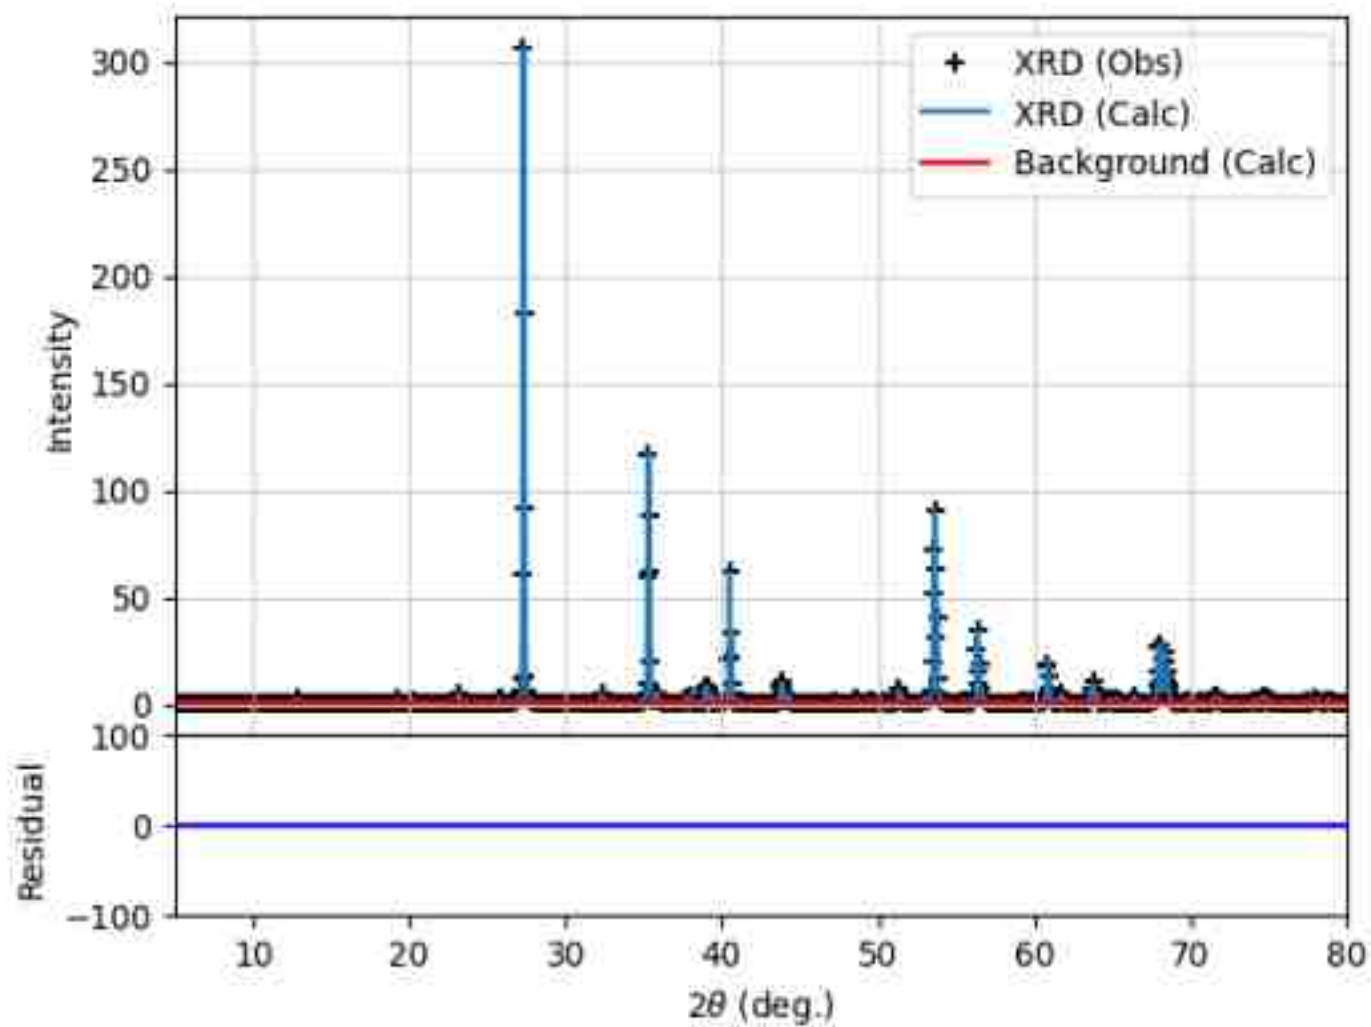

| RMSE before RR | Rwp     | RMSE after RR |
|----------------|---------|---------------|
| 0.04           | 0.00324 | 0.0007        |

# Y1Cu1O2

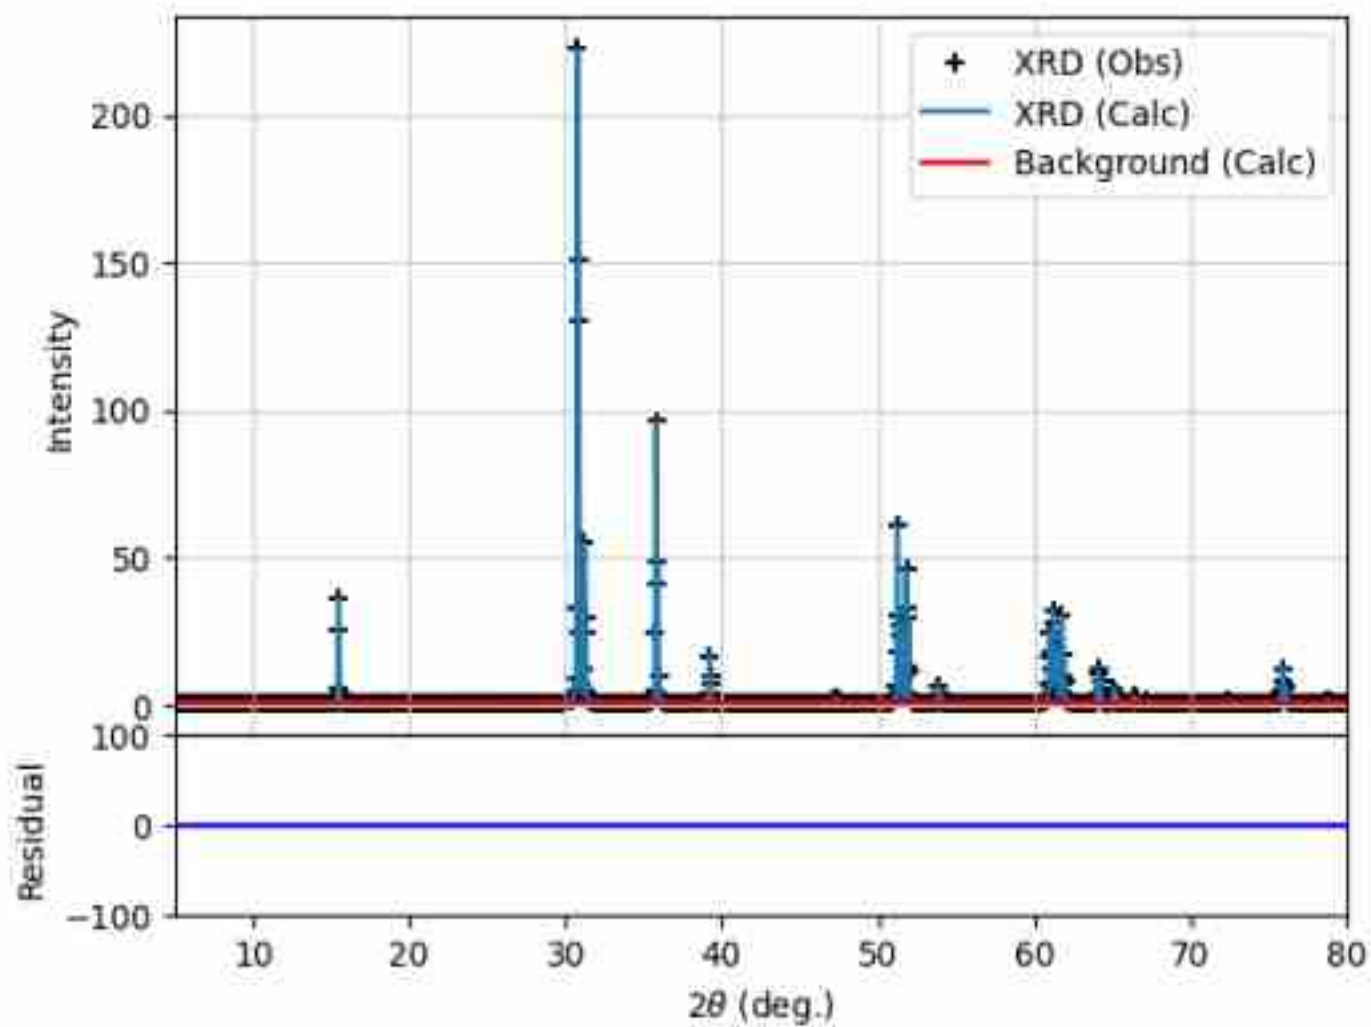

| RMSE before RR | Rwp     | RMSE after RR |
|----------------|---------|---------------|
| 0.004          | 0.08197 | 0.00193       |

# Y1Ga2

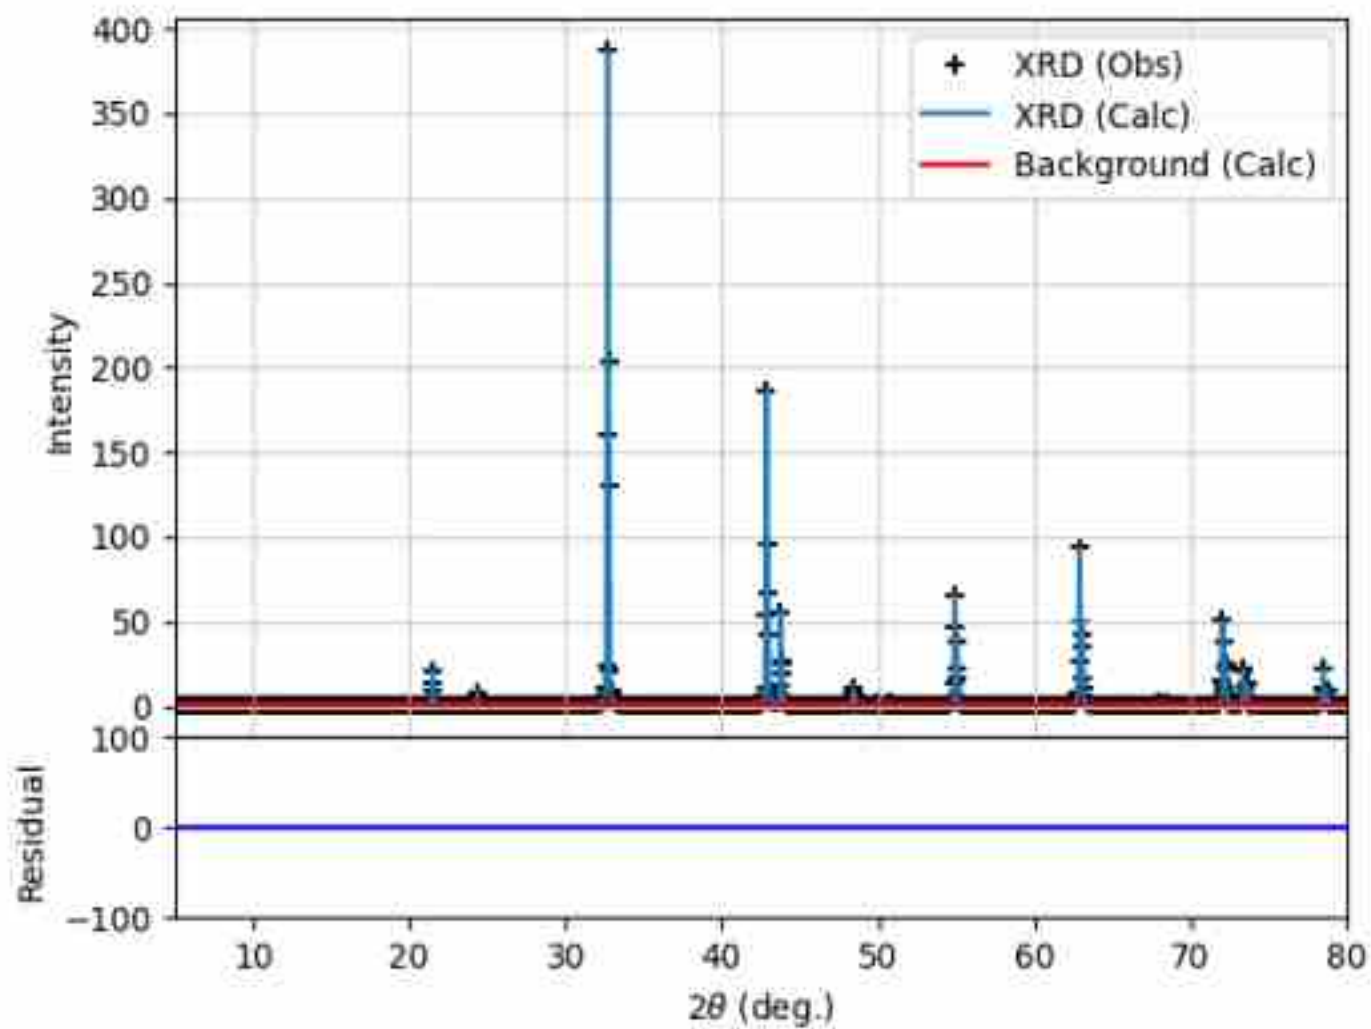

| RMSE before RR | Rwp     | RMSE after RR |
|----------------|---------|---------------|
| 0.004          | 0.00304 | 0.00056       |

# Y1Ho1

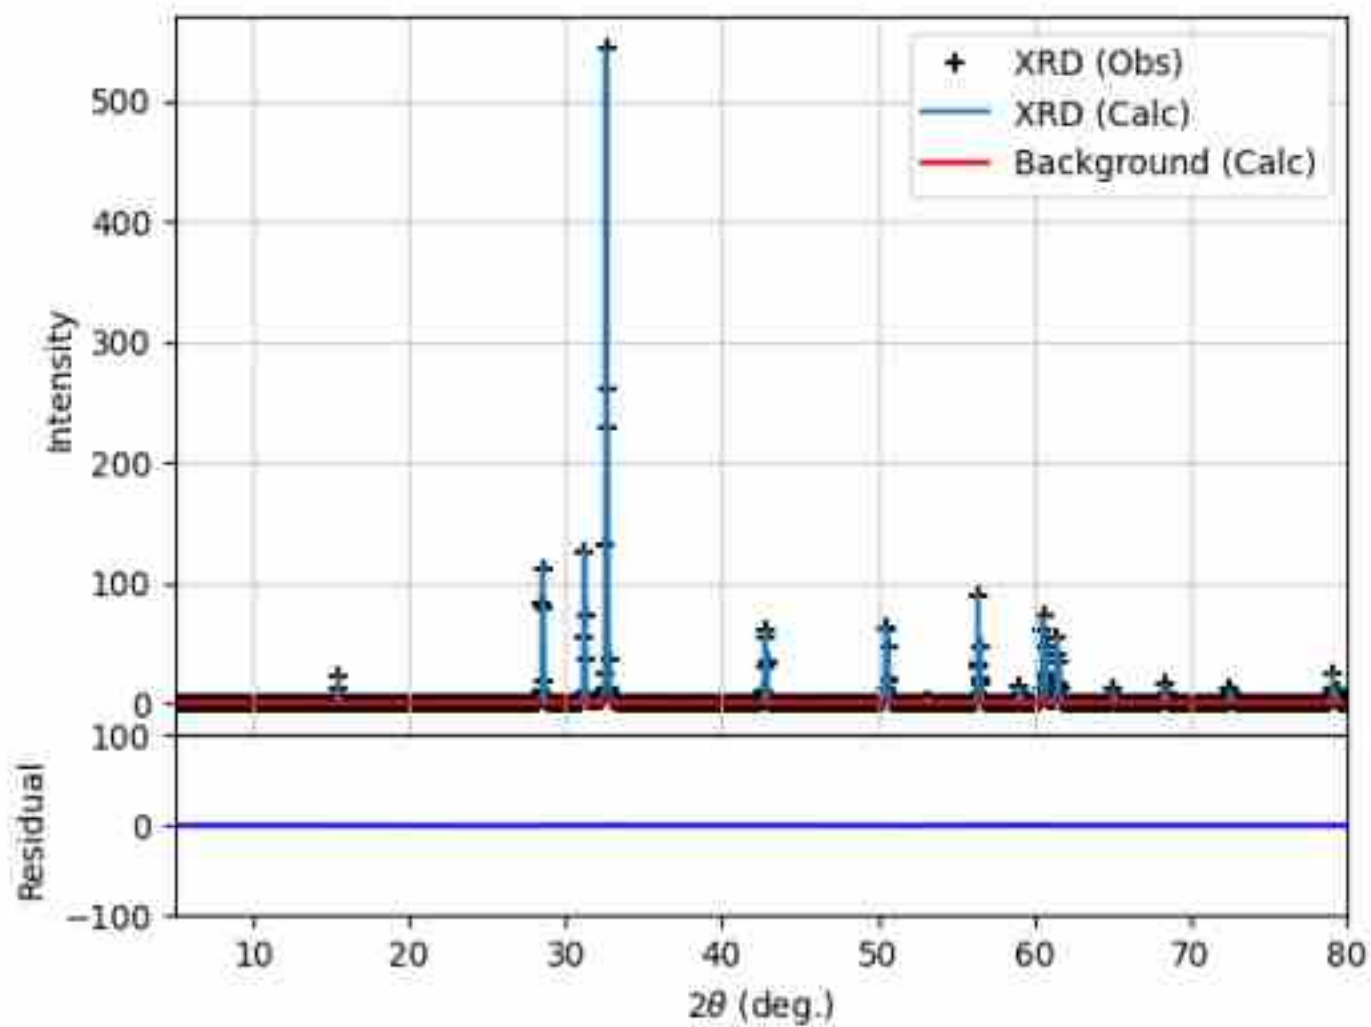

| RMSE before RR | Rwp     | RMSE after RR |
|----------------|---------|---------------|
| 0.004          | 0.83847 | 0.00369       |

# Yb1Bi1Pd1

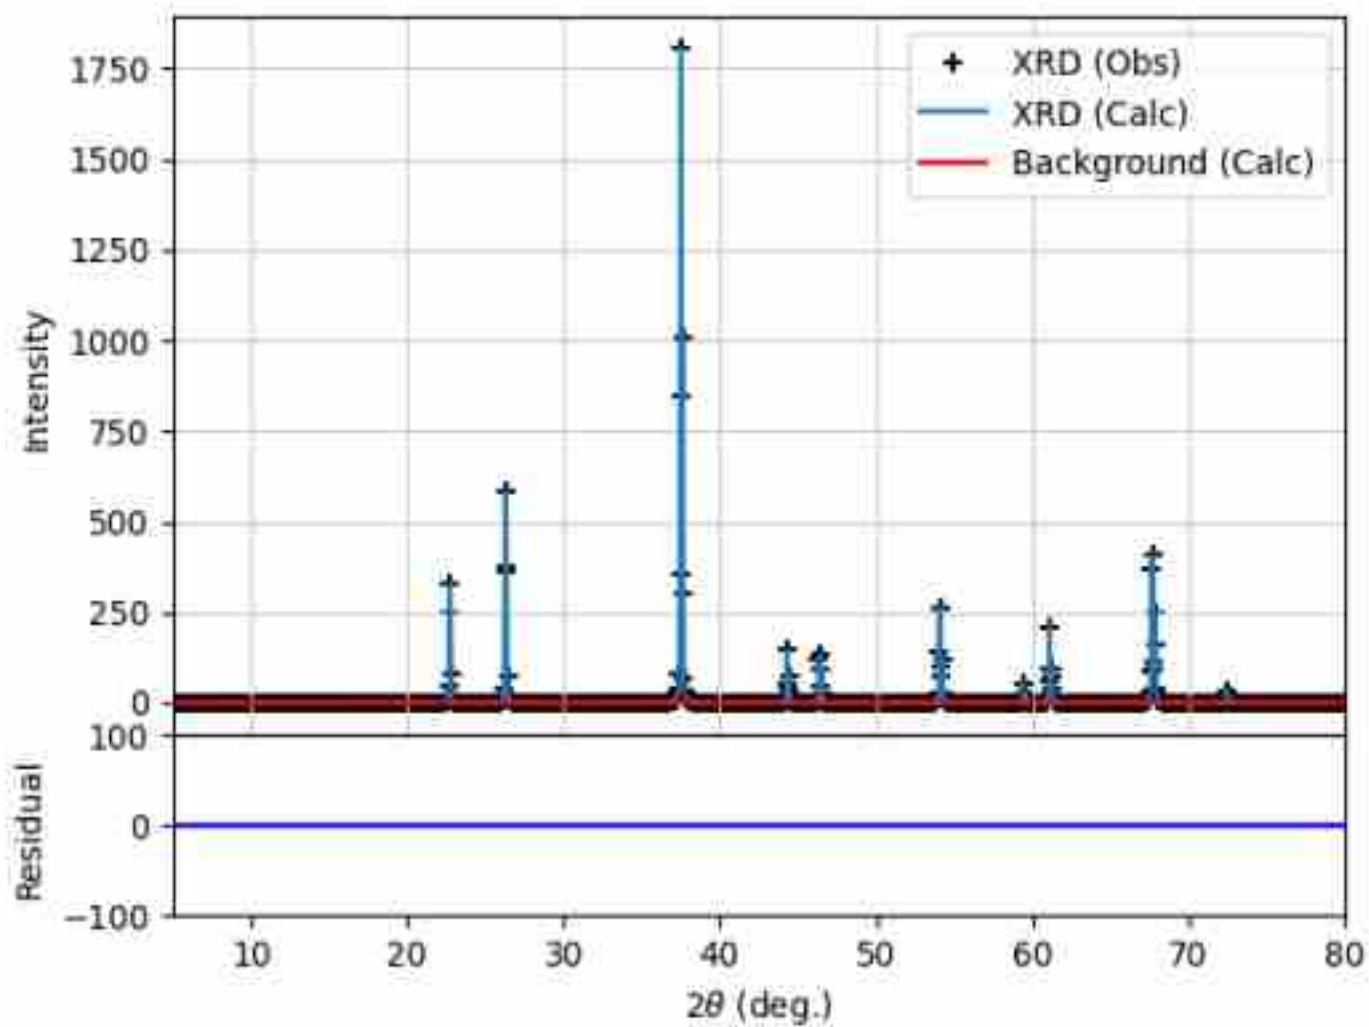

| RMSE before RR | Rwp     | RMSE after RR |
|----------------|---------|---------------|
| 0.004          | 0.00172 | 0.00039       |



# Yb1Ga2

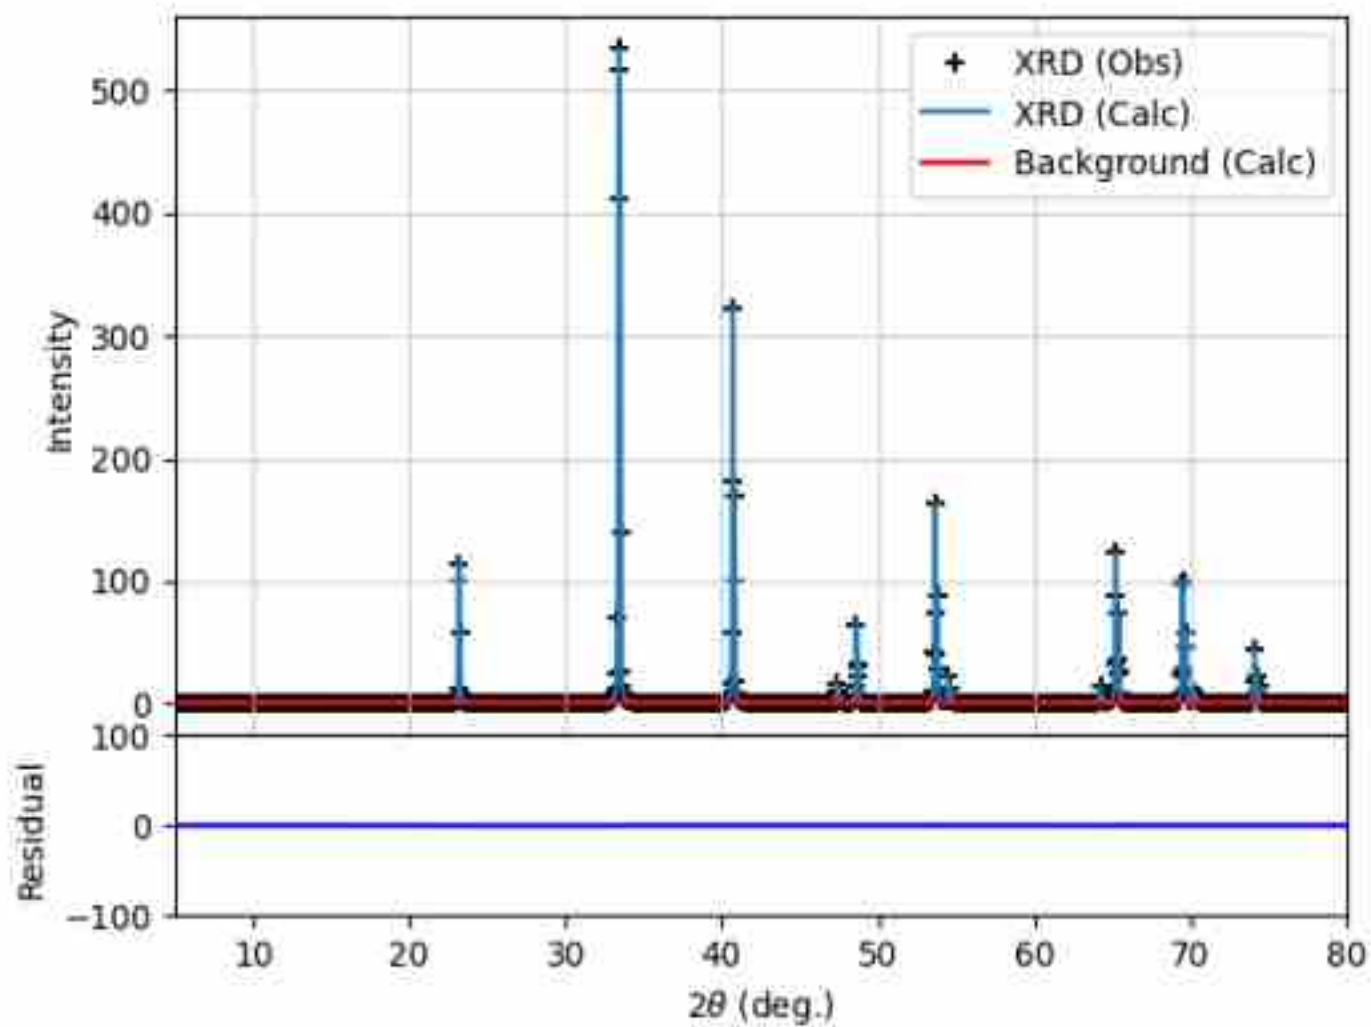

| RMSE before RR | Rwp     | RMSE after RR |
|----------------|---------|---------------|
| 0.004          | 0.14279 | 0.0013        |

# Yb1Tl1Cd1

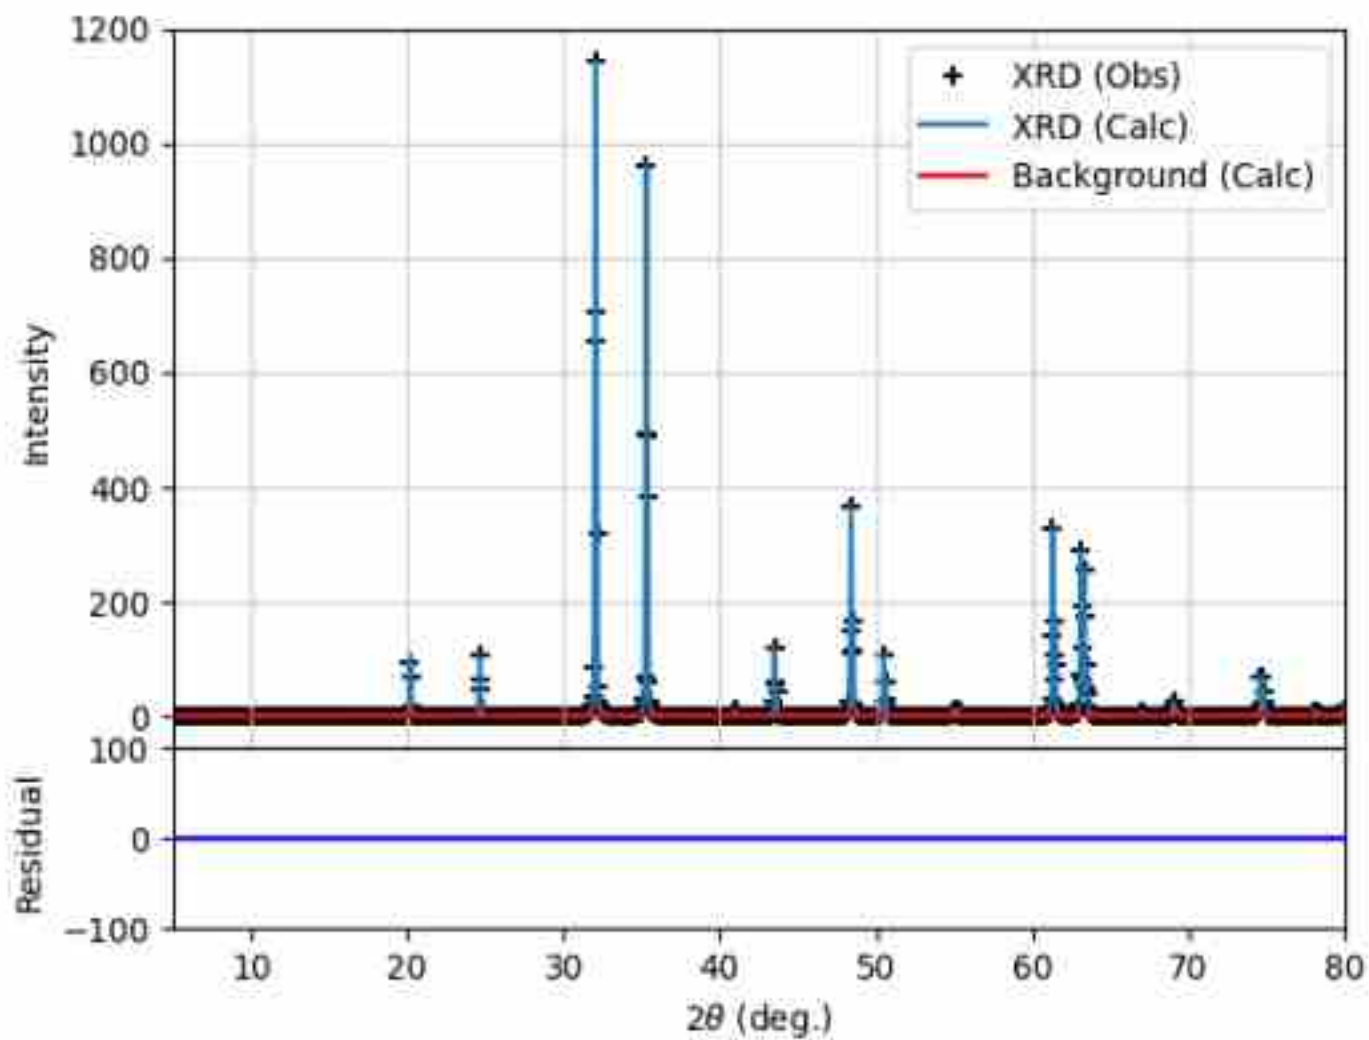

| RMSE before RR | Rwp     | RMSE after RR |
|----------------|---------|---------------|
| 0.004          | 0.00277 | 0.00016       |

# Yb<sub>2</sub>Cu<sub>2</sub>Bi<sub>2</sub>

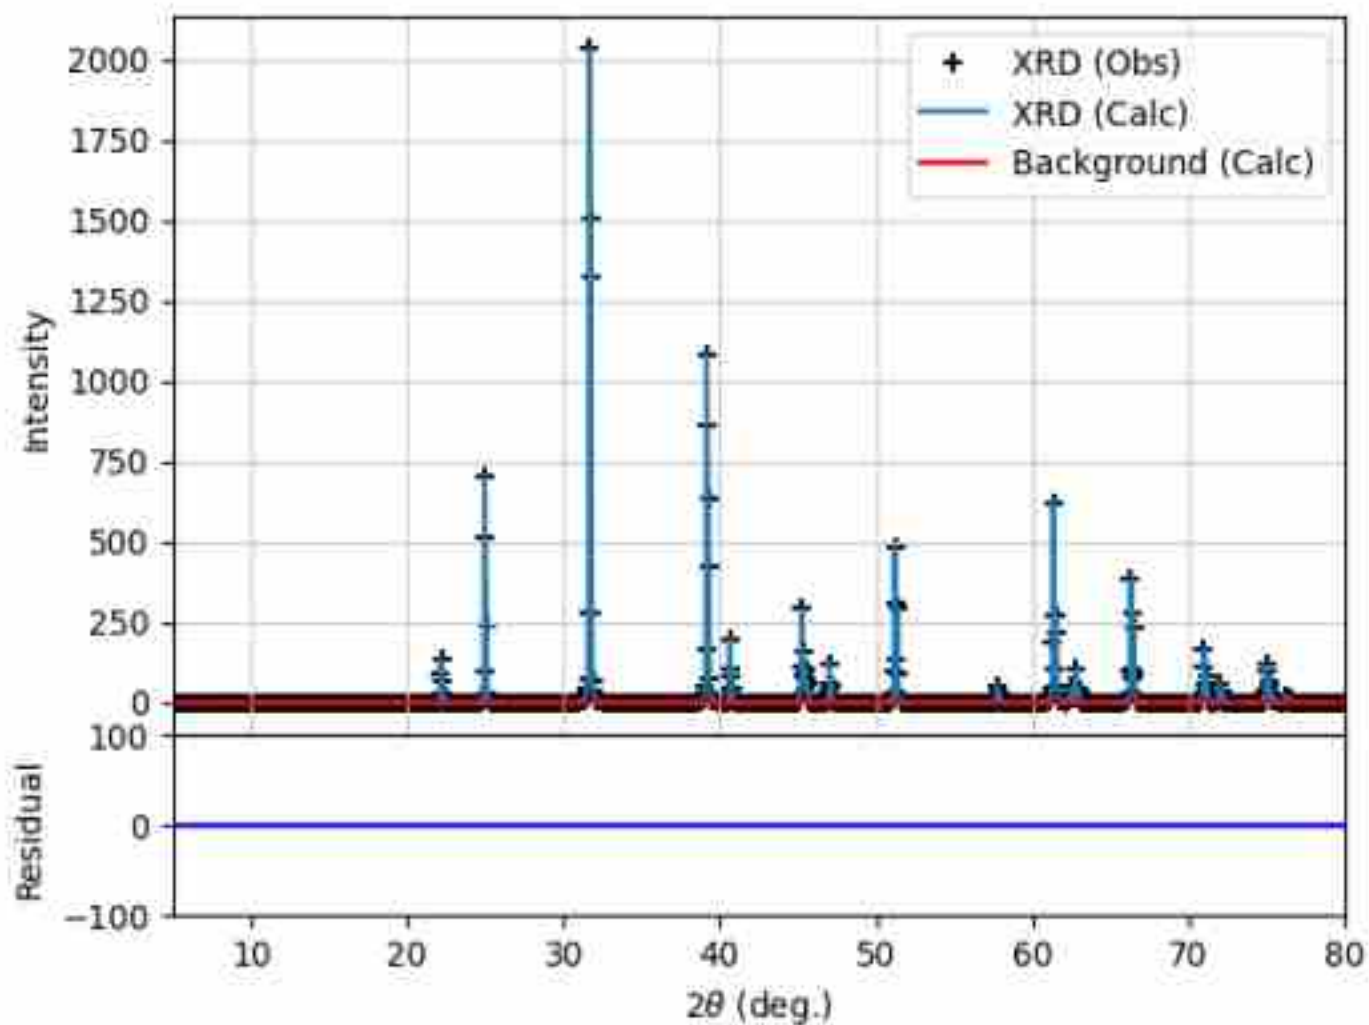

| RMSE before RR | Rwp     | RMSE after RR |
|----------------|---------|---------------|
| 0.004          | 0.00398 | 0.00069       |

# Zr1B1Rh3

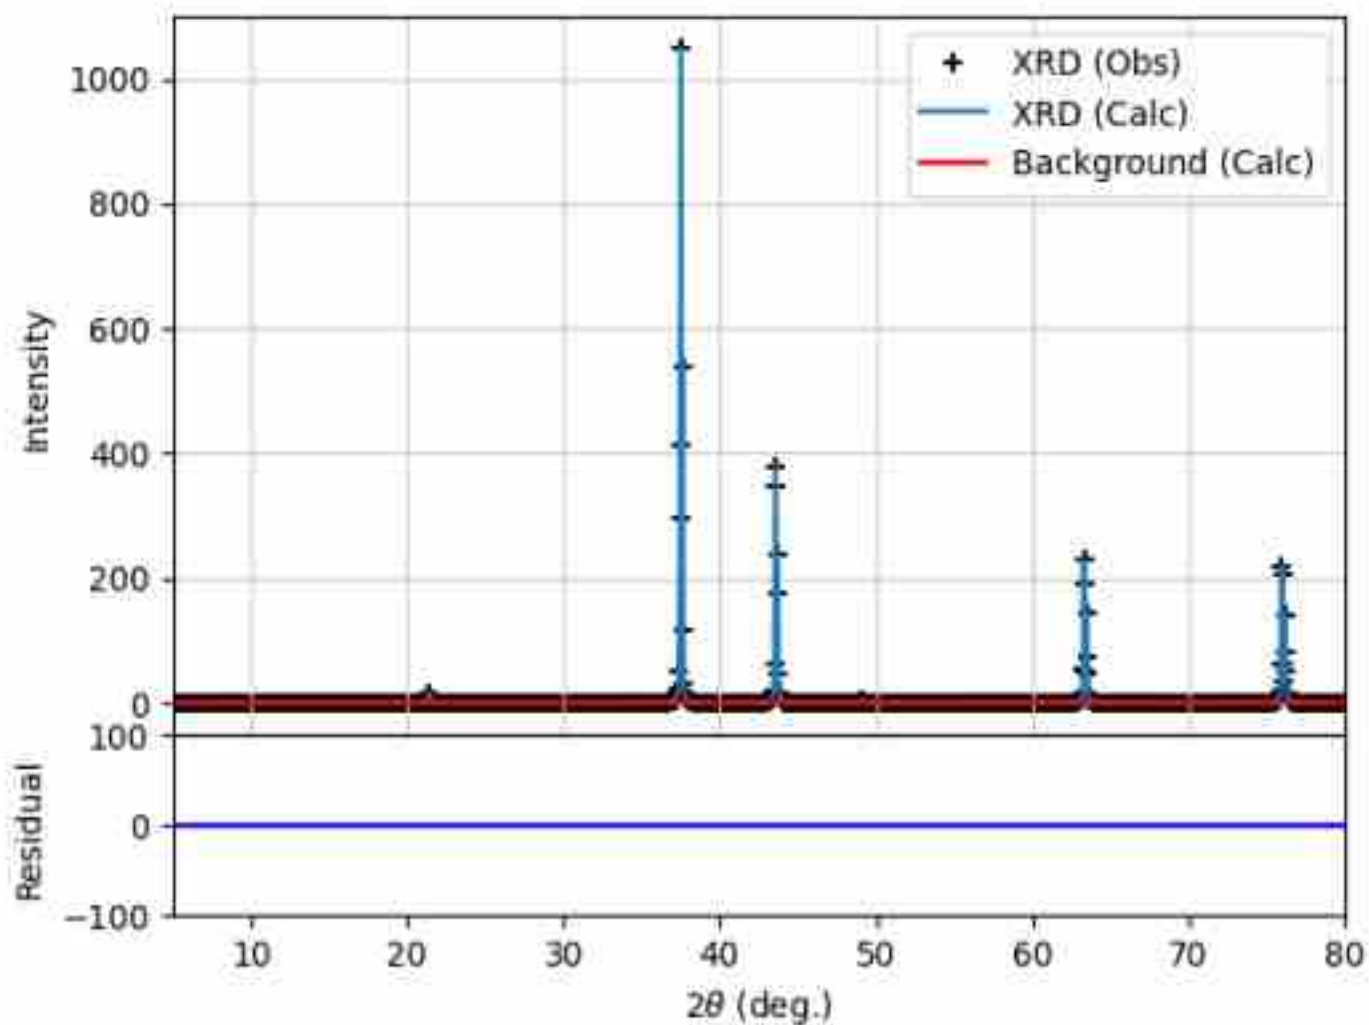

| RMSE before RR | Rwp     | RMSE after RR |
|----------------|---------|---------------|
| 0.004          | 0.00566 | 0.00078       |

# Zr<sub>2</sub>Mn<sub>2</sub>O<sub>6</sub>

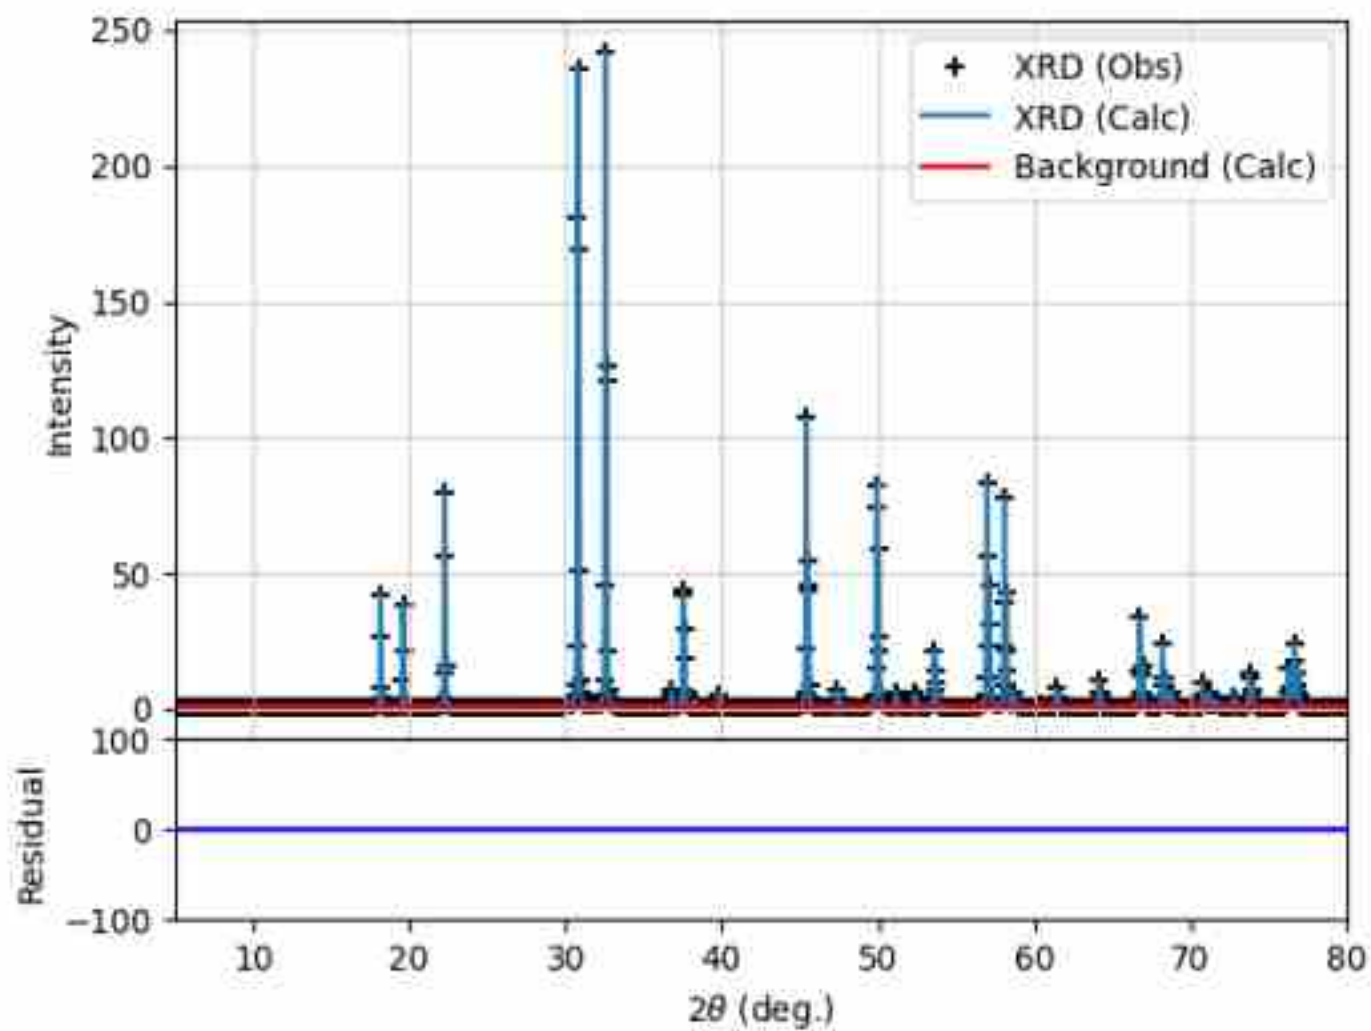

| RMSE before RR | Rwp     | RMSE after RR |
|----------------|---------|---------------|
| 0.04           | 0.00279 | 0.00114       |

# Ag1Br1

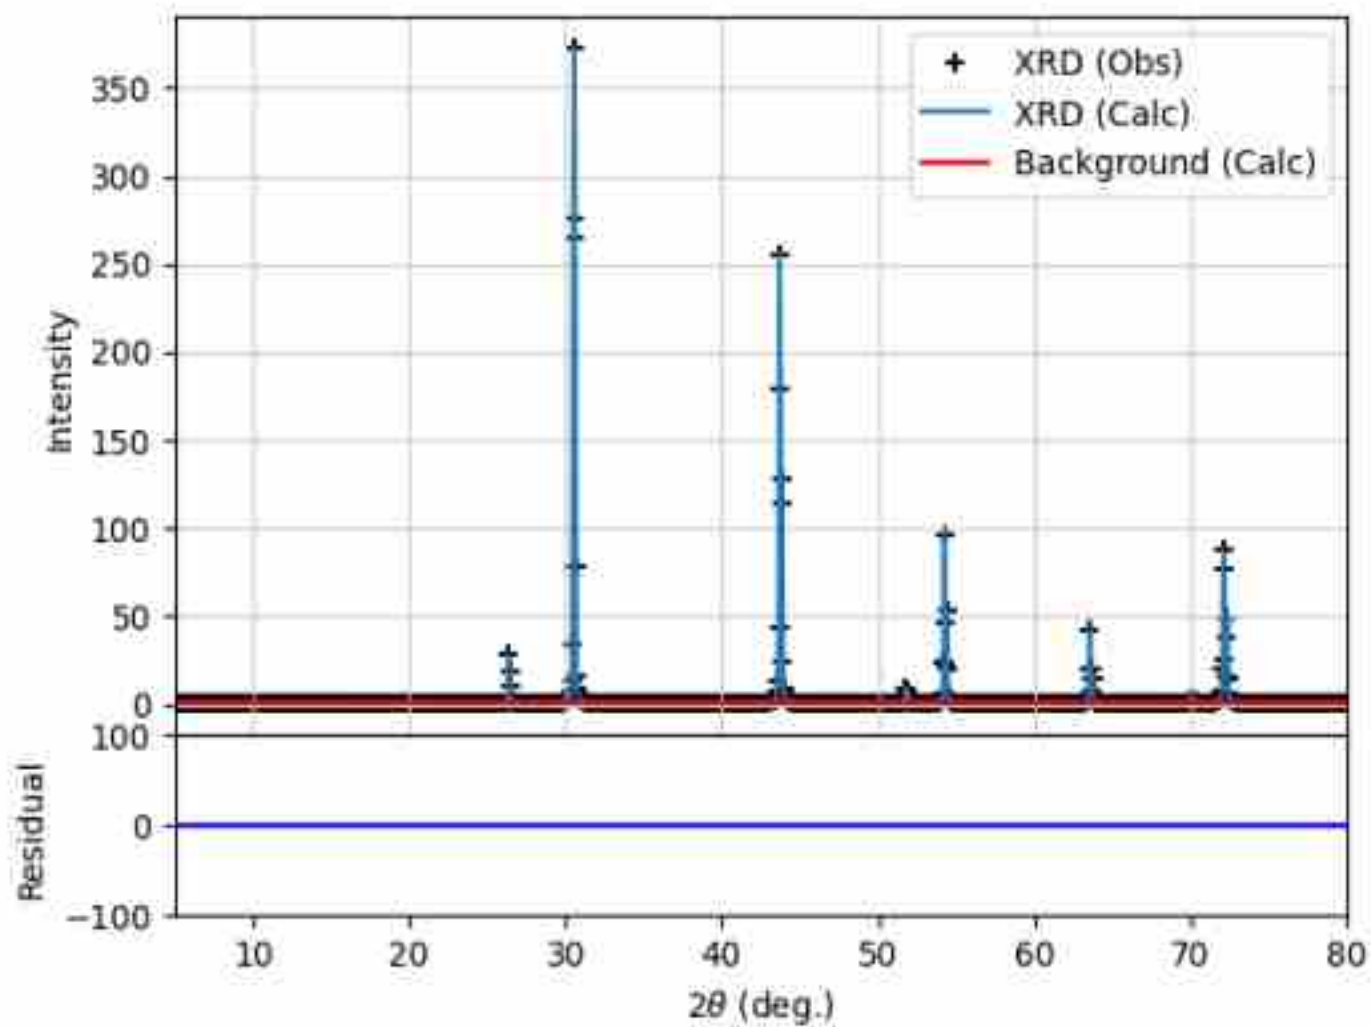

| RMSE before RR | Rwp     | RMSE after RR |
|----------------|---------|---------------|
| 0.005          | 0.22908 | 0.00343       |

# BaLiP1

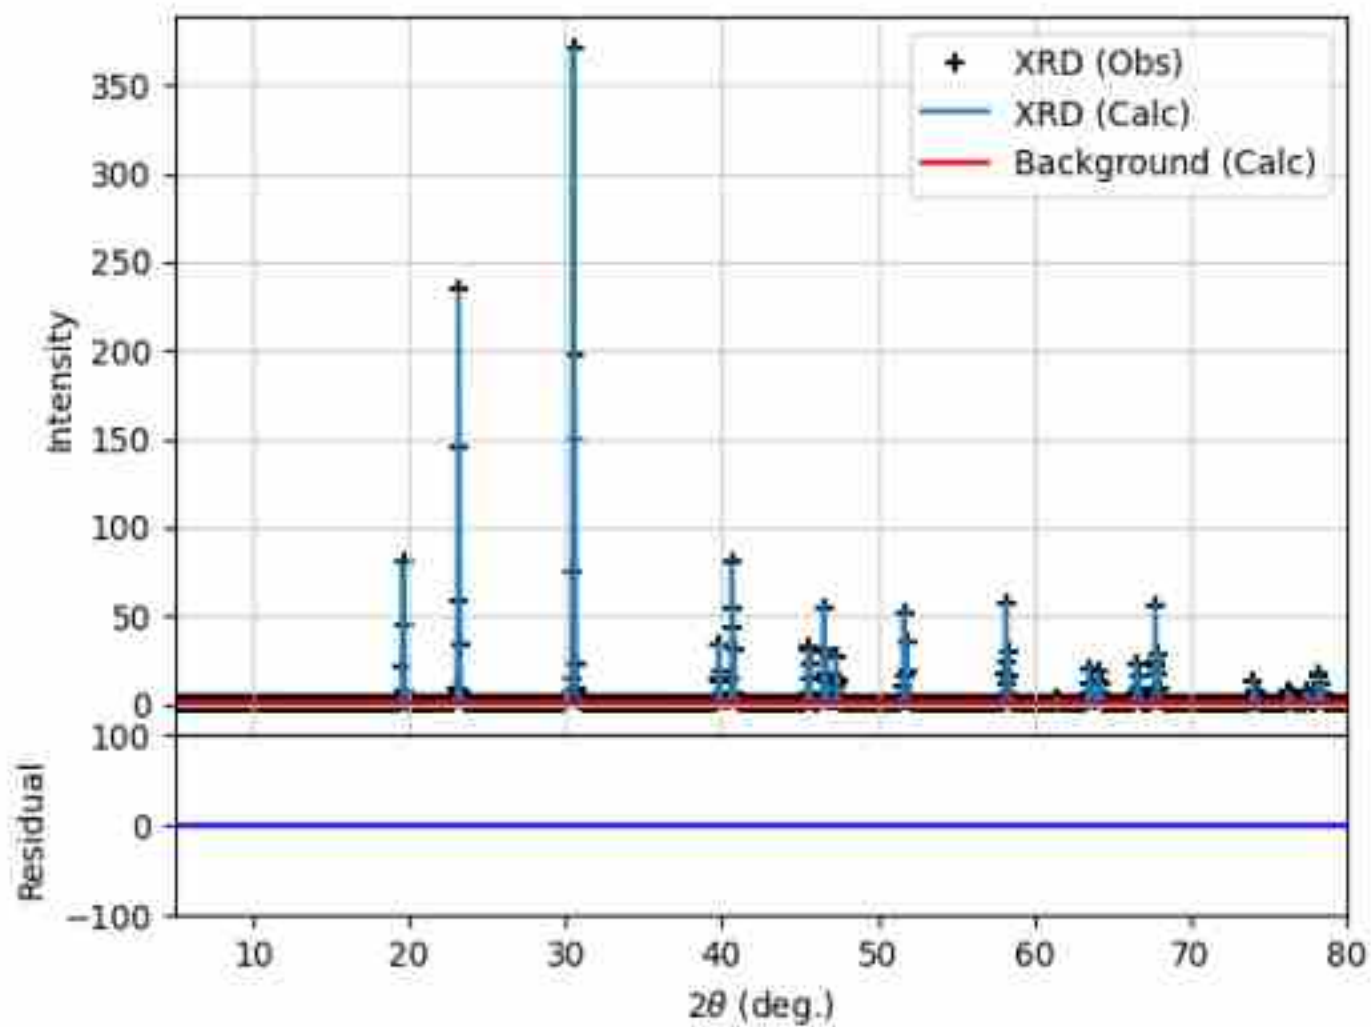

| RMSE before RR | Rwp     | RMSE after RR |
|----------------|---------|---------------|
| 0.005          | 0.04709 | 0.00507       |

# Ba<sub>1</sub>Pb<sub>2</sub>C<sub>2</sub>O<sub>6</sub>F<sub>2</sub>

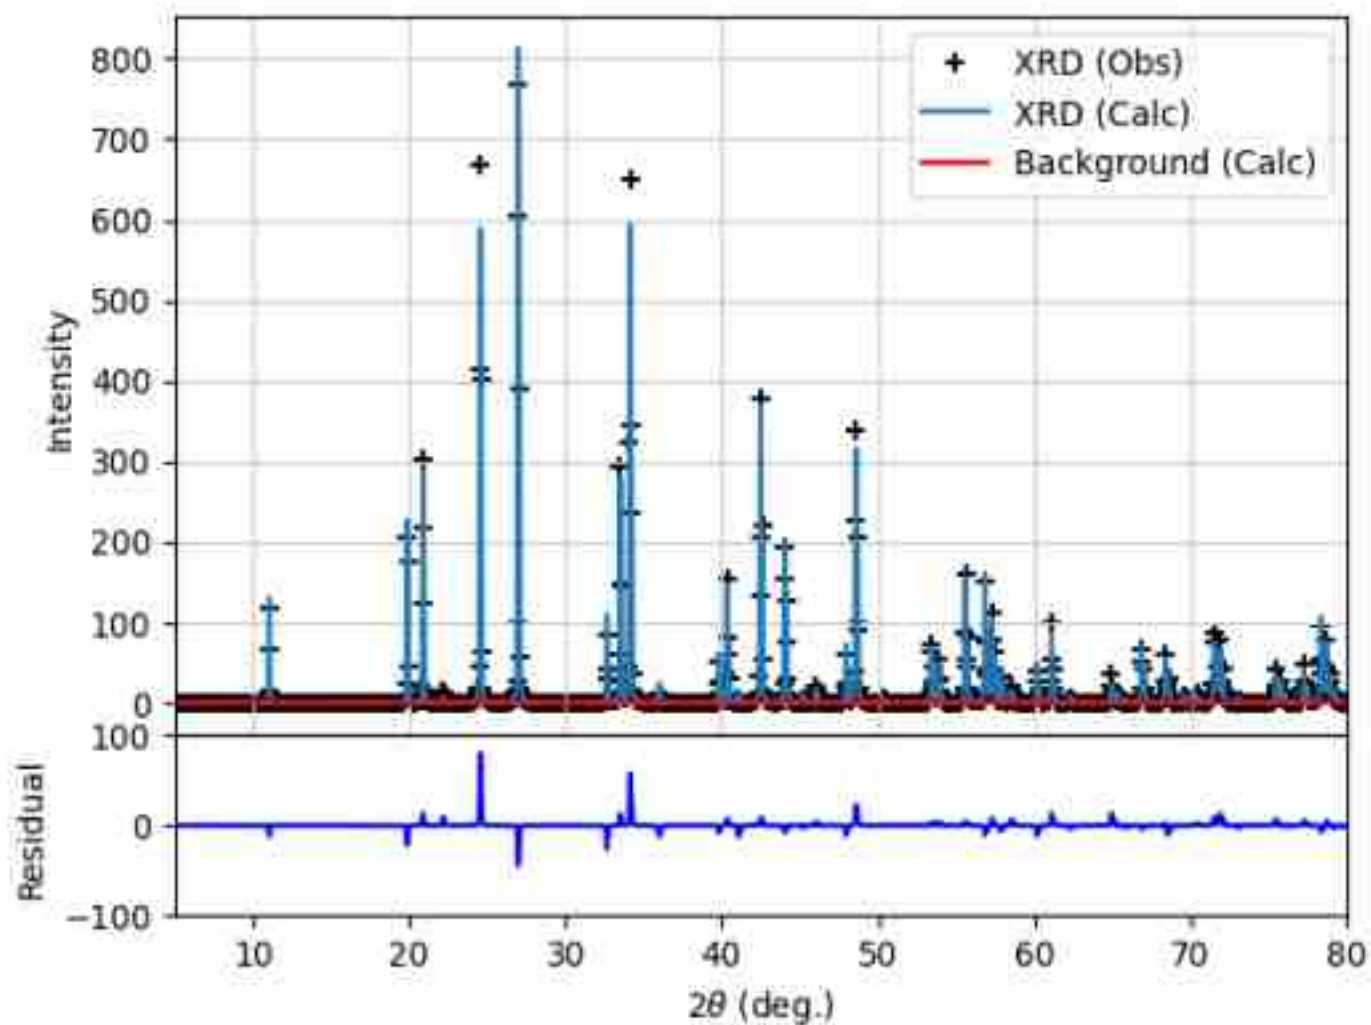

| RMSE before RR | Rwp      | RMSE after RR |
|----------------|----------|---------------|
| 0.05           | 13.90926 | 0.05671       |



# Ba<sub>2</sub>Pt<sub>4</sub>

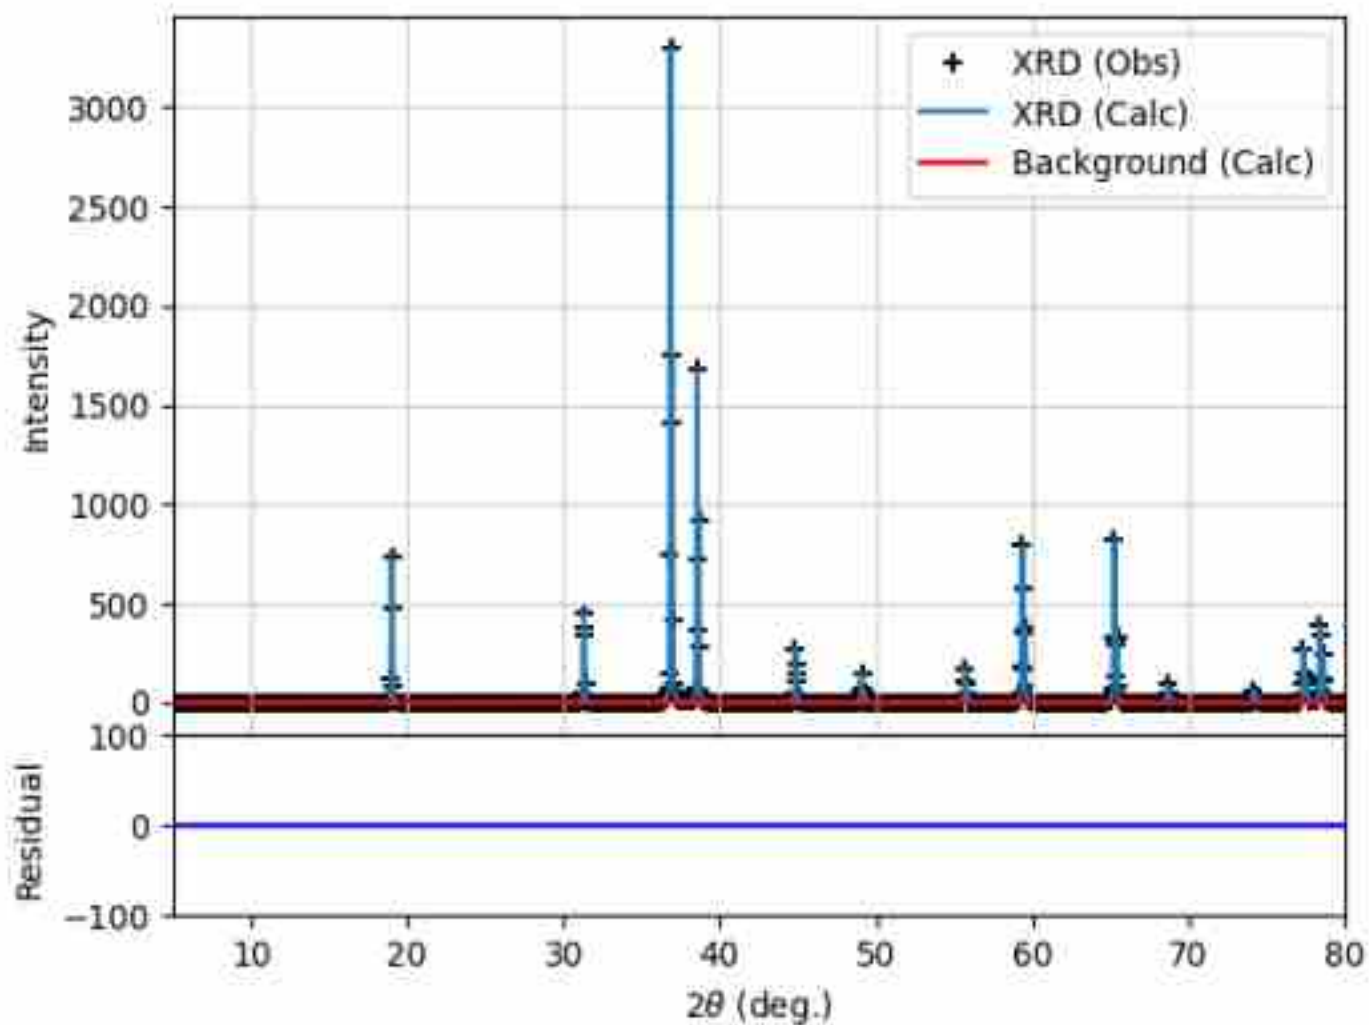

| RMSE before RR | Rwp     | RMSE after RR |
|----------------|---------|---------------|
| 0.005          | 0.13687 | 0.00233       |

# Ba<sub>2</sub>Zn<sub>2</sub>Sn<sub>2</sub>

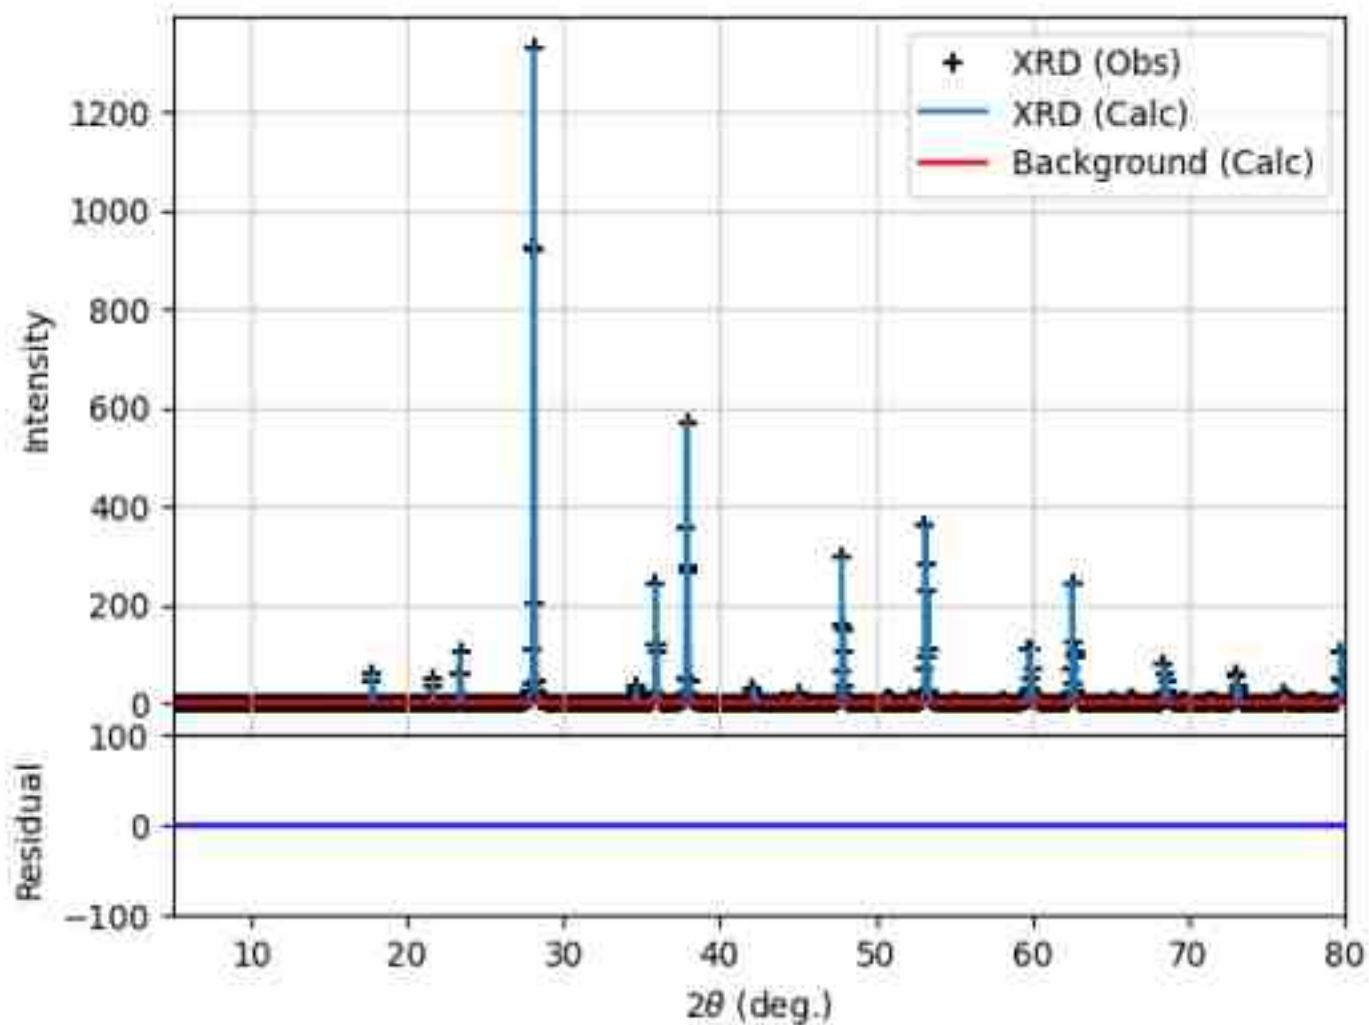

| RMSE before RR | Rwp     | RMSE after RR |
|----------------|---------|---------------|
| 0.005          | 0.00436 | 0.0006        |

# Ca1Ge2Pd2

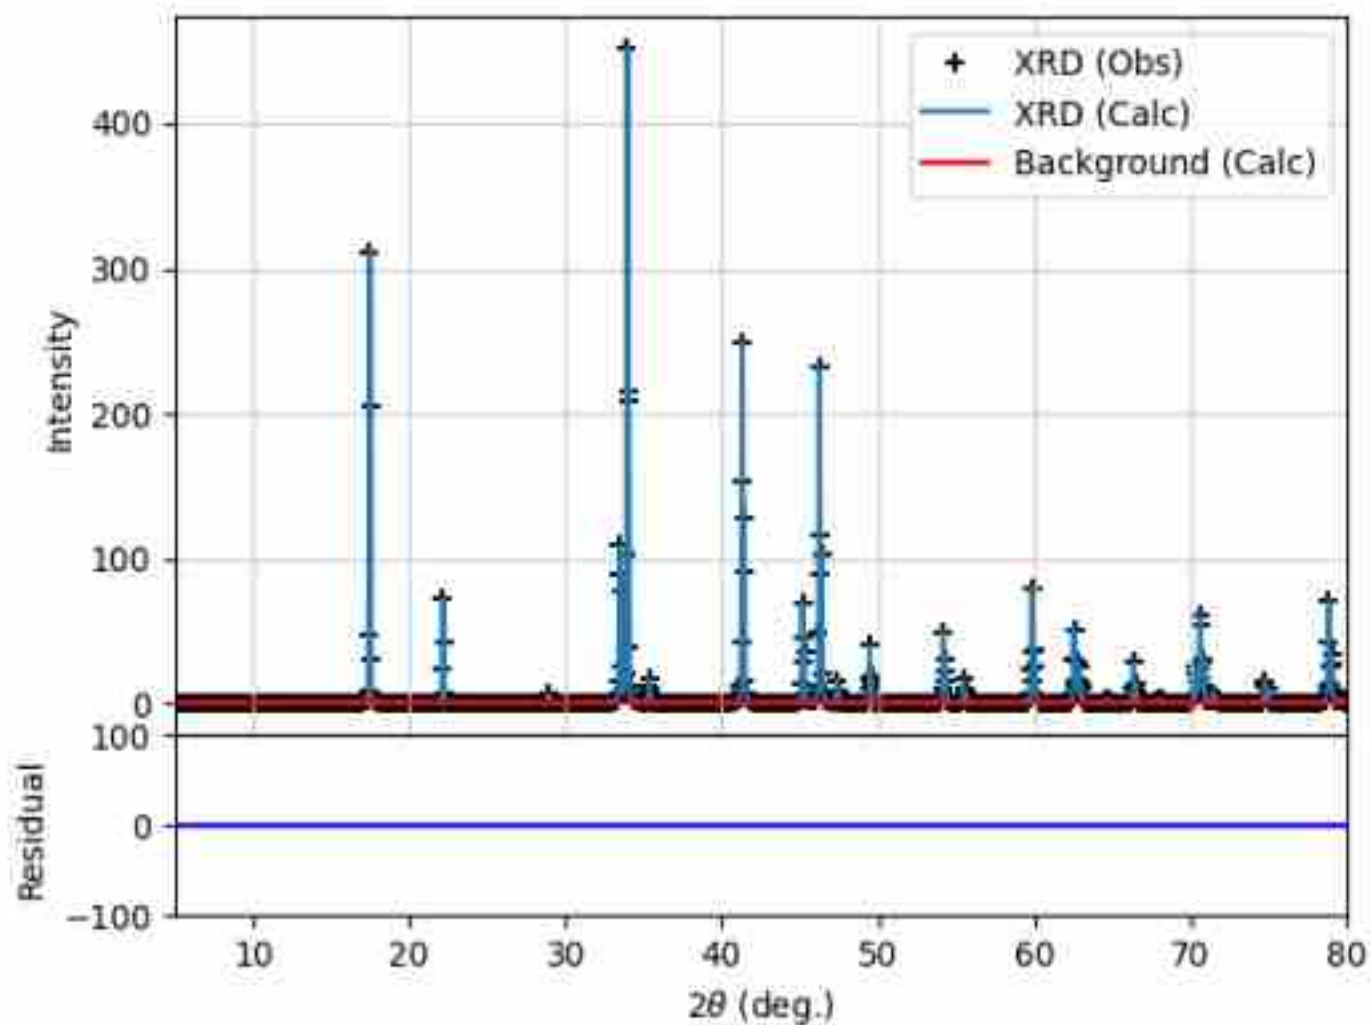

| RMSE before RR | Rwp     | RMSE after RR |
|----------------|---------|---------------|
| 0.005          | 0.00475 | 0.00061       |

# CaI2

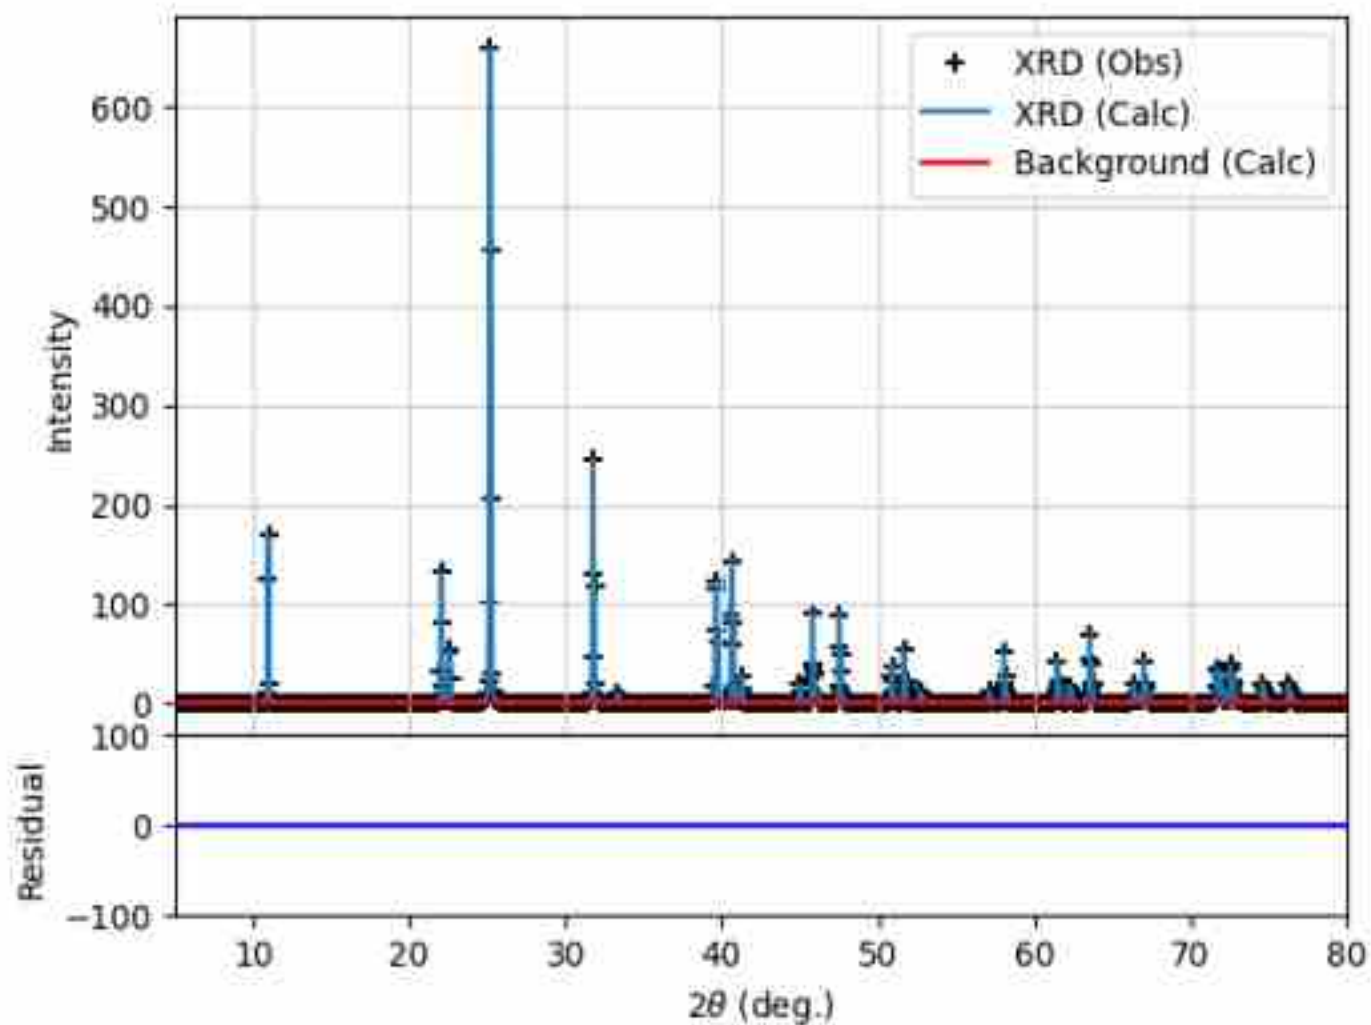

| RMSE before RR | Rwp     | RMSE after RR |
|----------------|---------|---------------|
| 0.005          | 0.00231 | 0.0004        |

# Ca<sub>2</sub>GaAg<sub>1</sub>

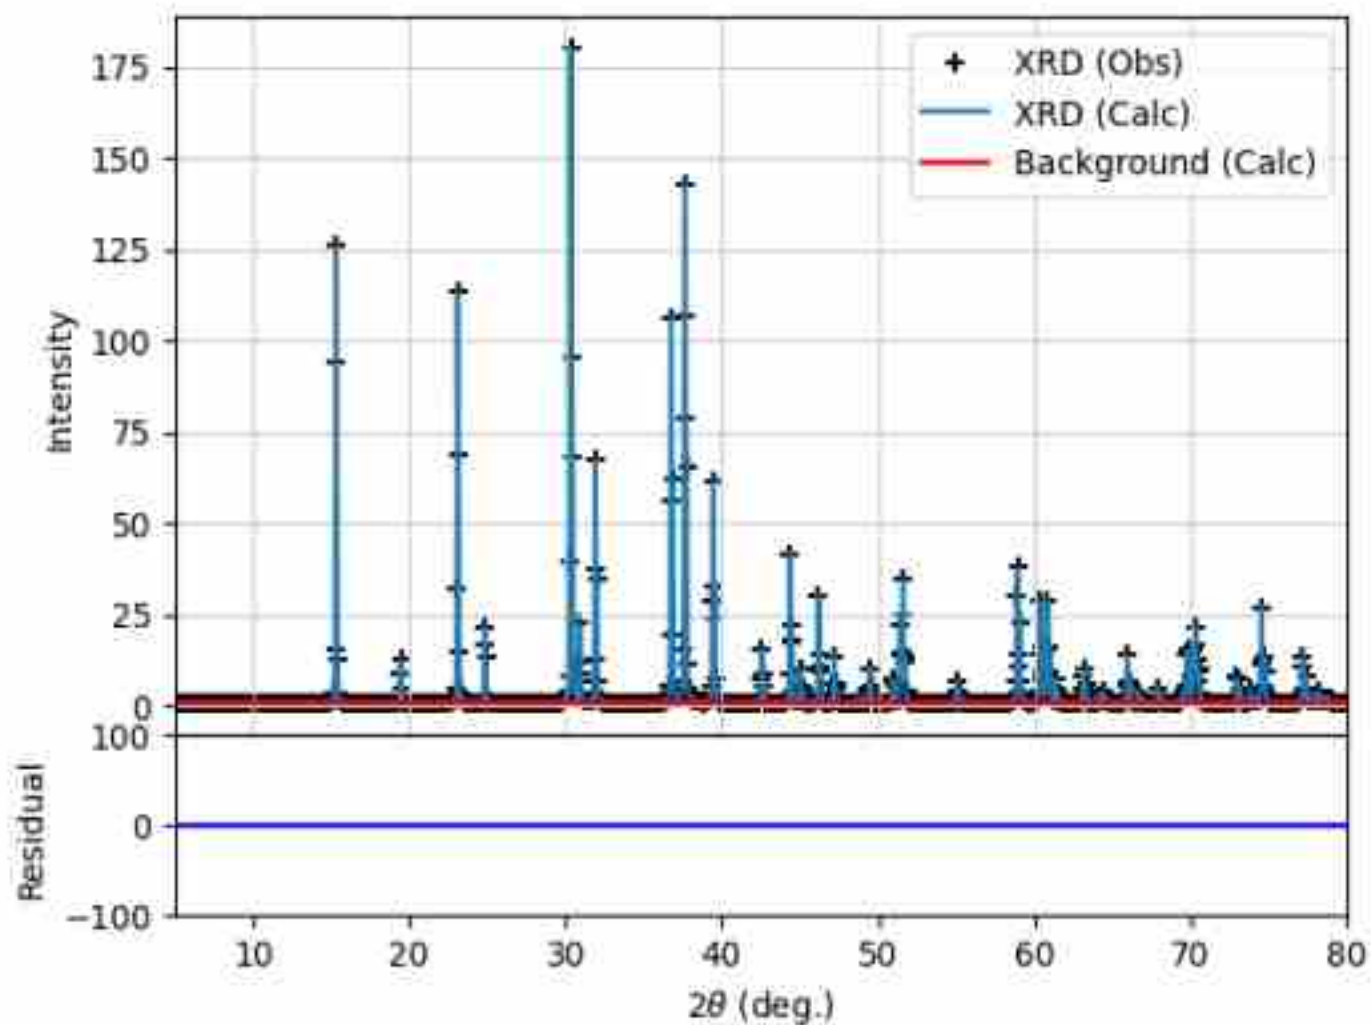

| RMSE before RR | Rwp     | RMSE after RR |
|----------------|---------|---------------|
| 0.005          | 0.00344 | 0.00053       |

# Cd1Cl2

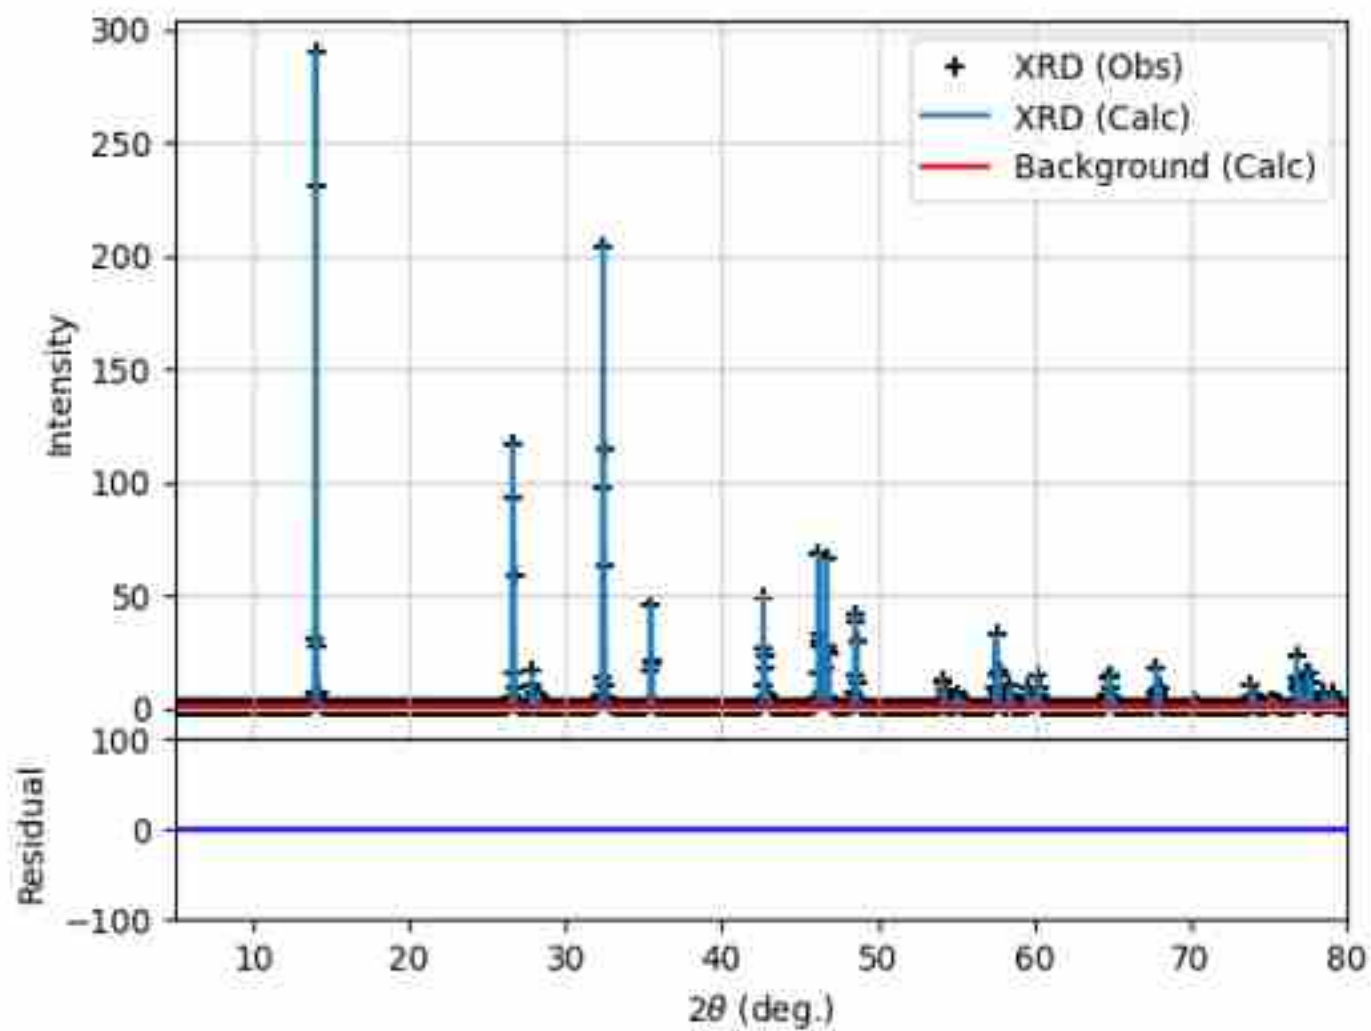

| RMSE before RR | Rwp    | RMSE after RR |
|----------------|--------|---------------|
| 0.005          | 0.0031 | 0.00045       |

# Cd<sub>3</sub>In<sub>2</sub>Se<sub>6</sub>

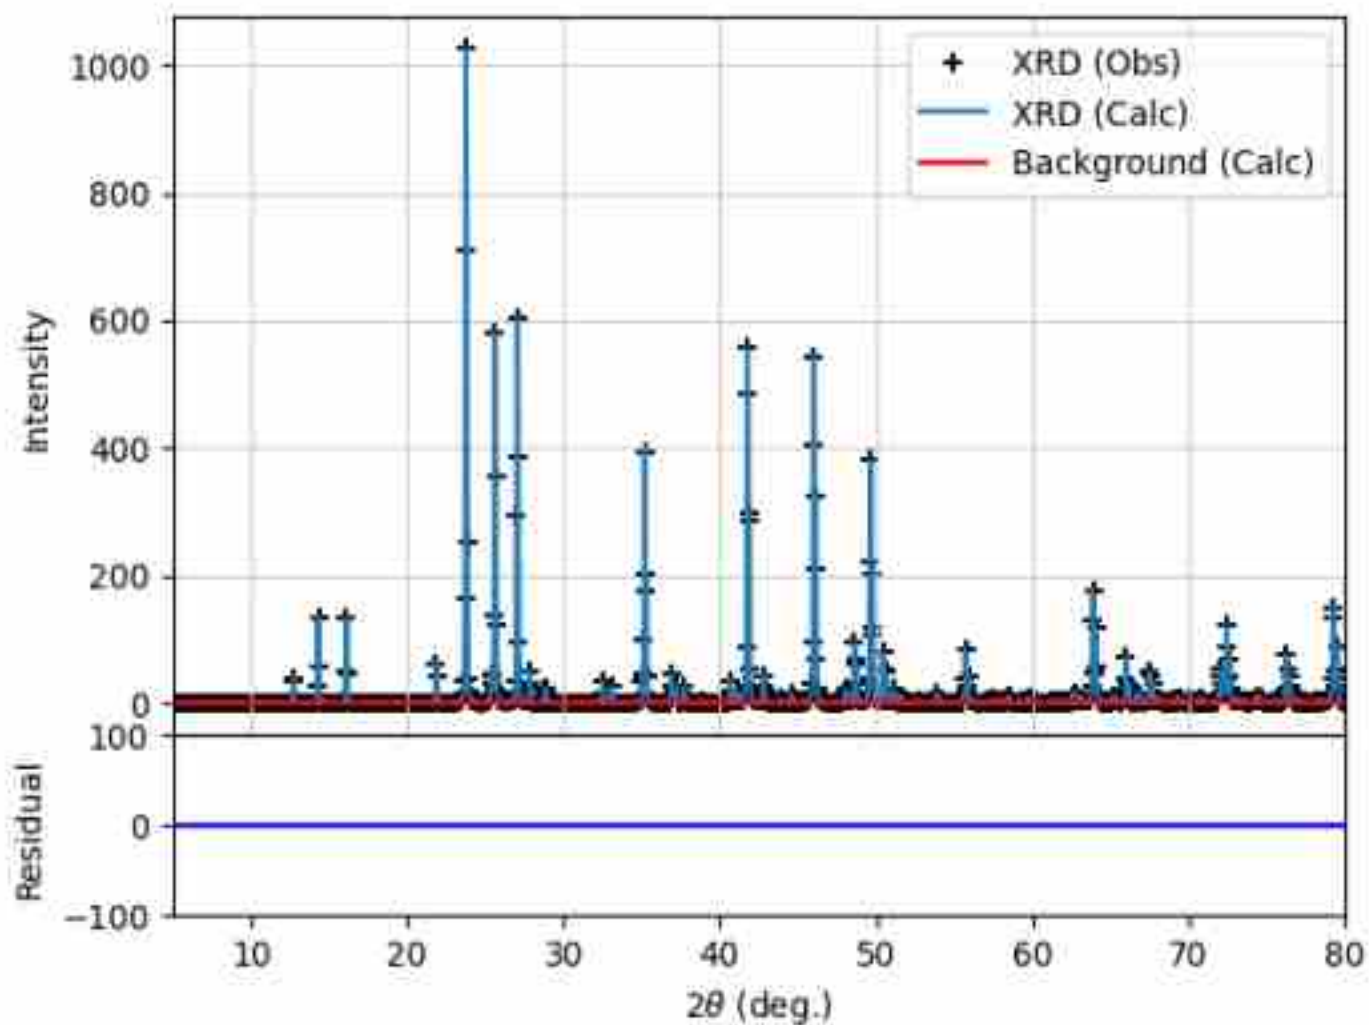

| RMSE before RR | Rwp     | RMSE after RR |
|----------------|---------|---------------|
| 0.05           | 0.00325 | 0.0003        |

# Ce1Ga3Pt1

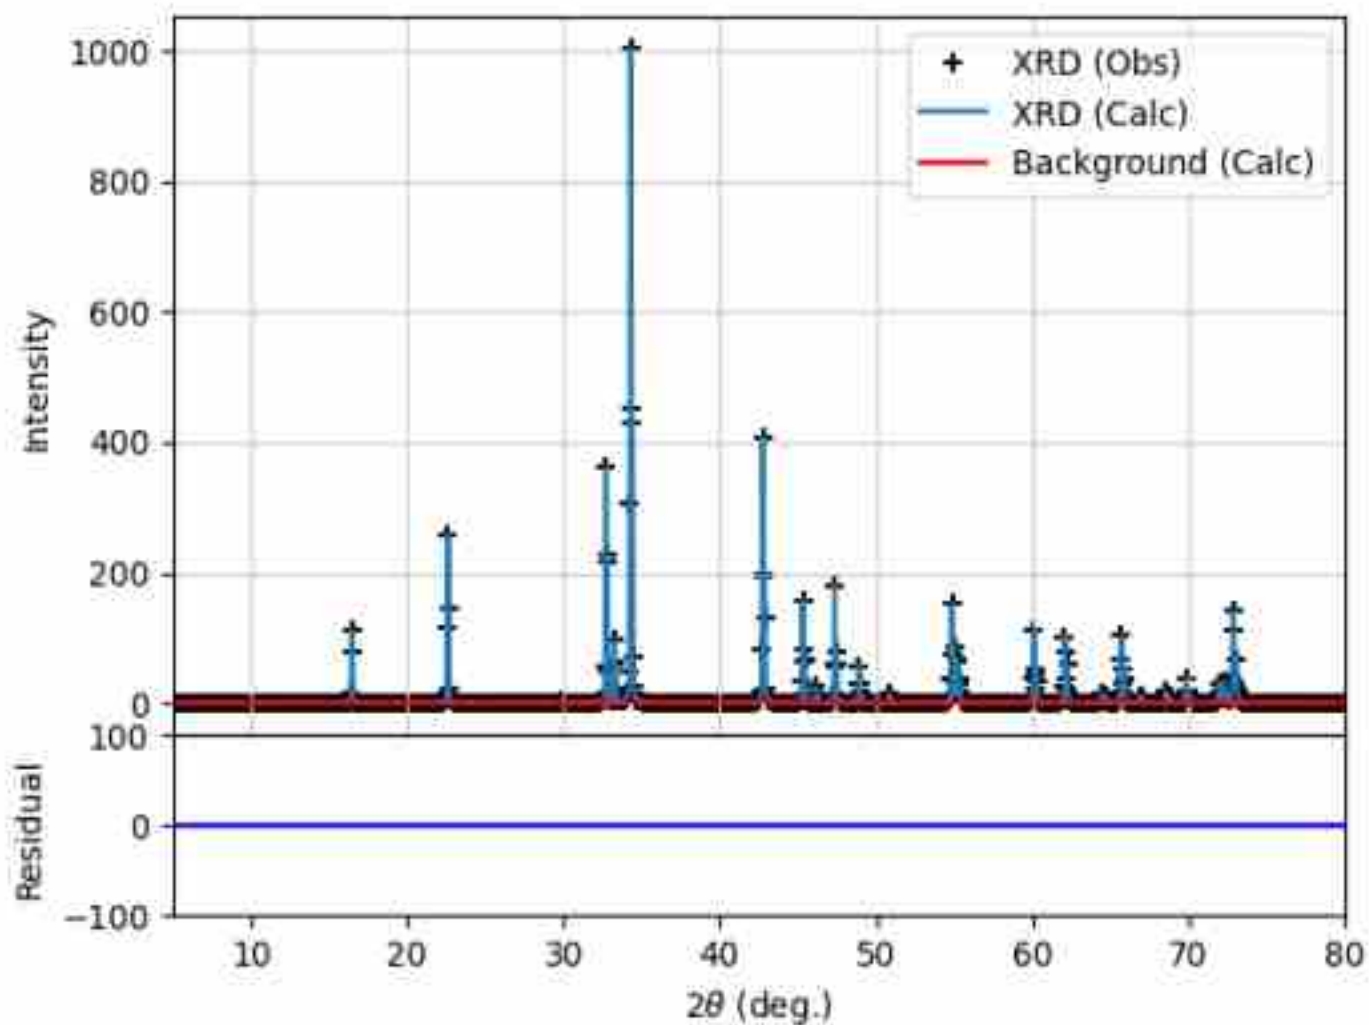

| RMSE before RR | Rwp     | RMSE after RR |
|----------------|---------|---------------|
| 0.005          | 0.00278 | 0.00039       |



# Ce<sub>4</sub>Mg<sub>4</sub>Sn<sub>4</sub>

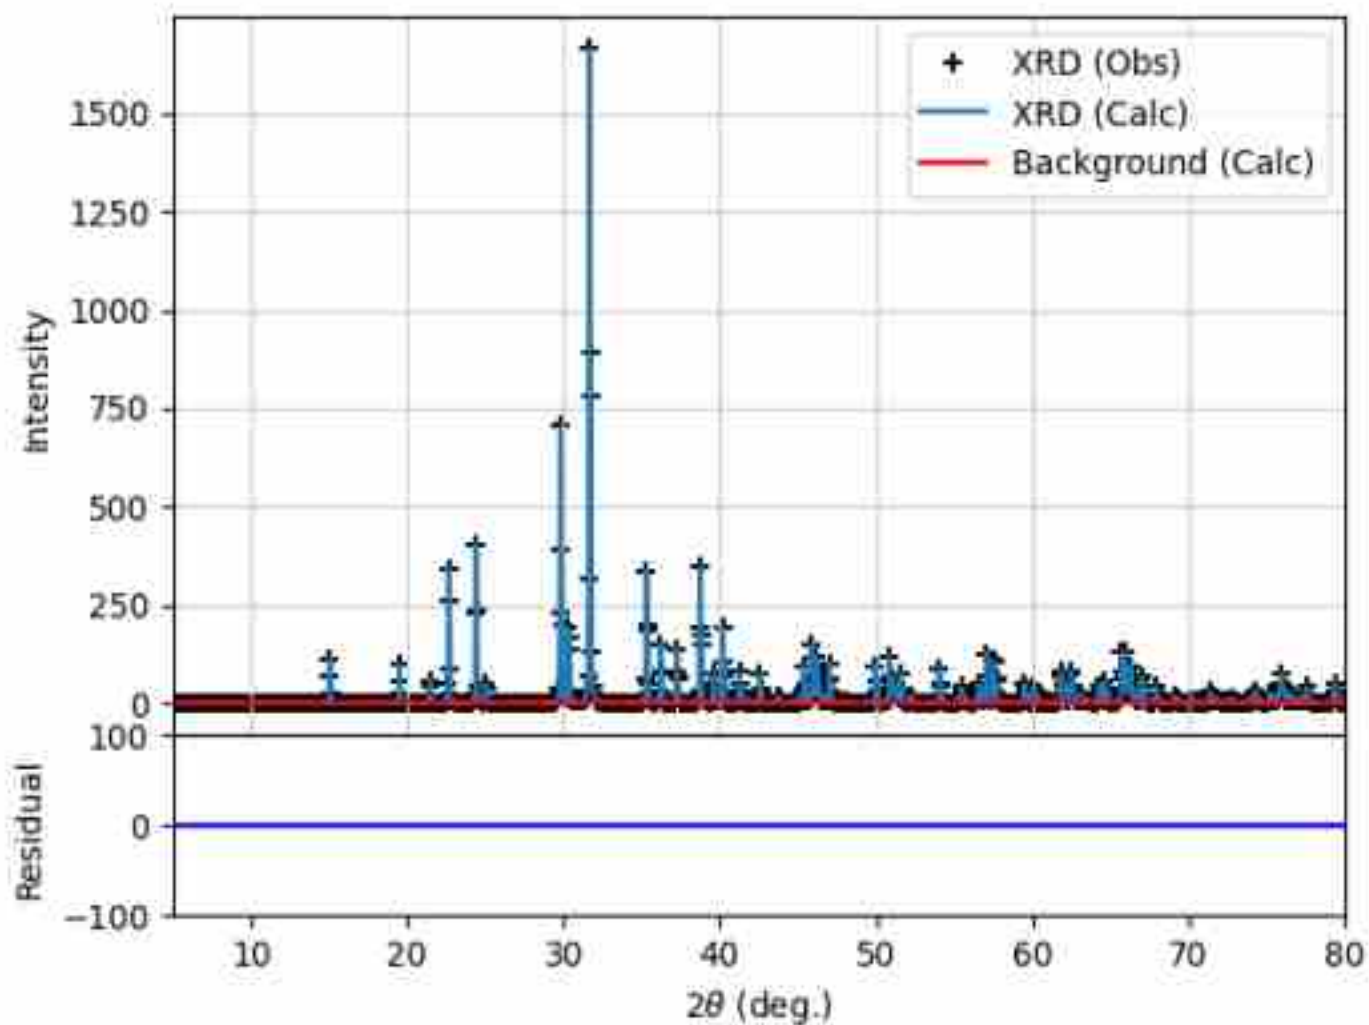

| RMSE before RR | Rwp     | RMSE after RR |
|----------------|---------|---------------|
| 0.05           | 0.00407 | 0.00055       |

# Cs1Ca1Cl3

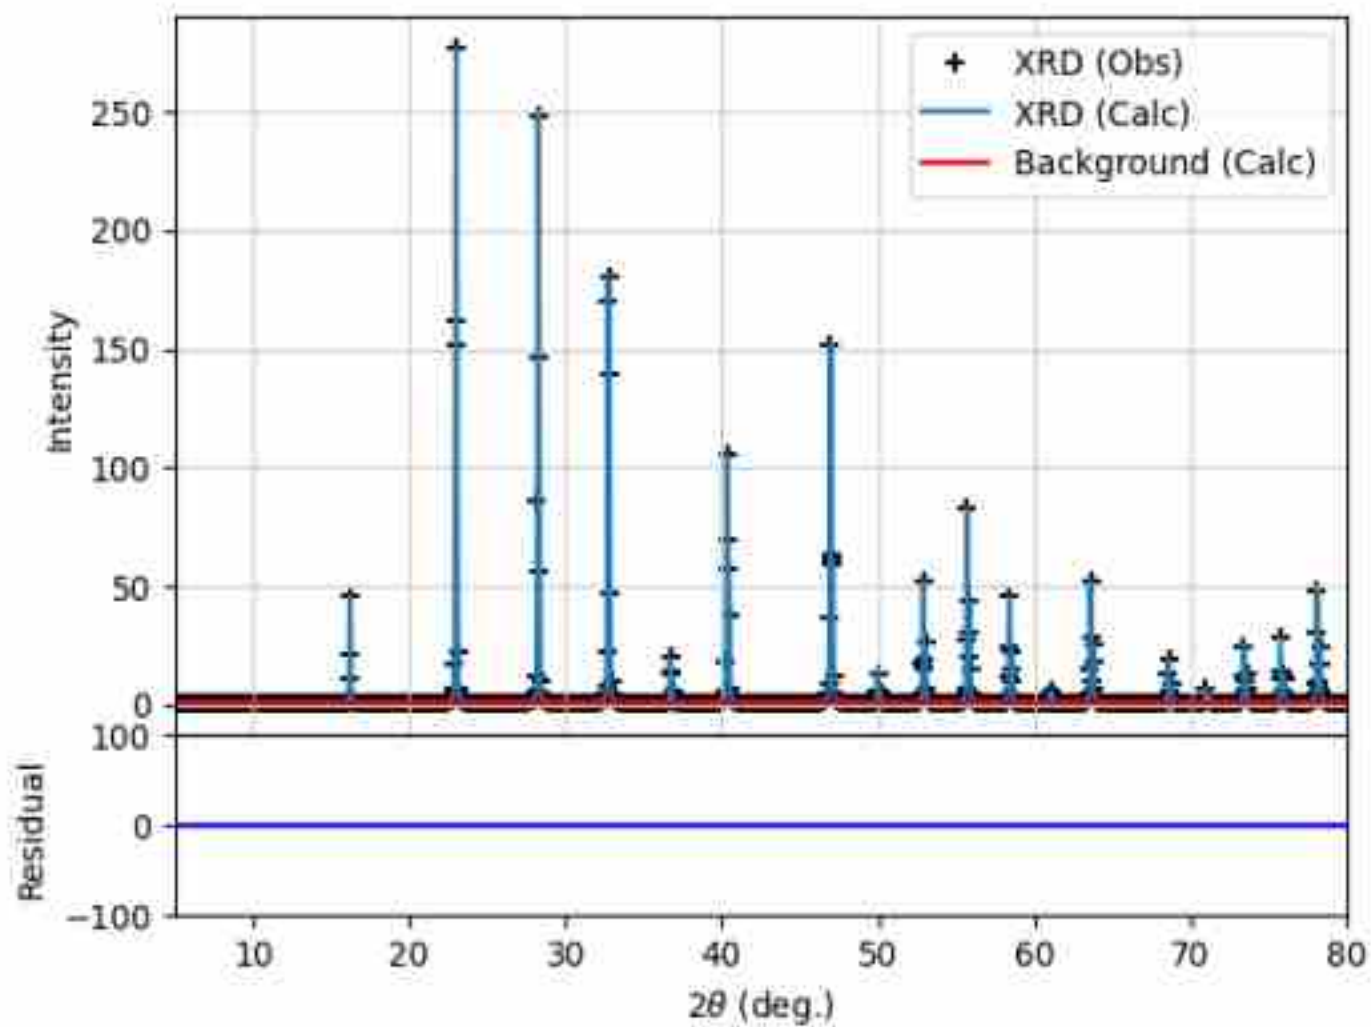

| RMSE before RR | Rwp    | RMSE after RR |
|----------------|--------|---------------|
| 0.005          | 0.0039 | 0.00051       |

Cs1Hg1Br3

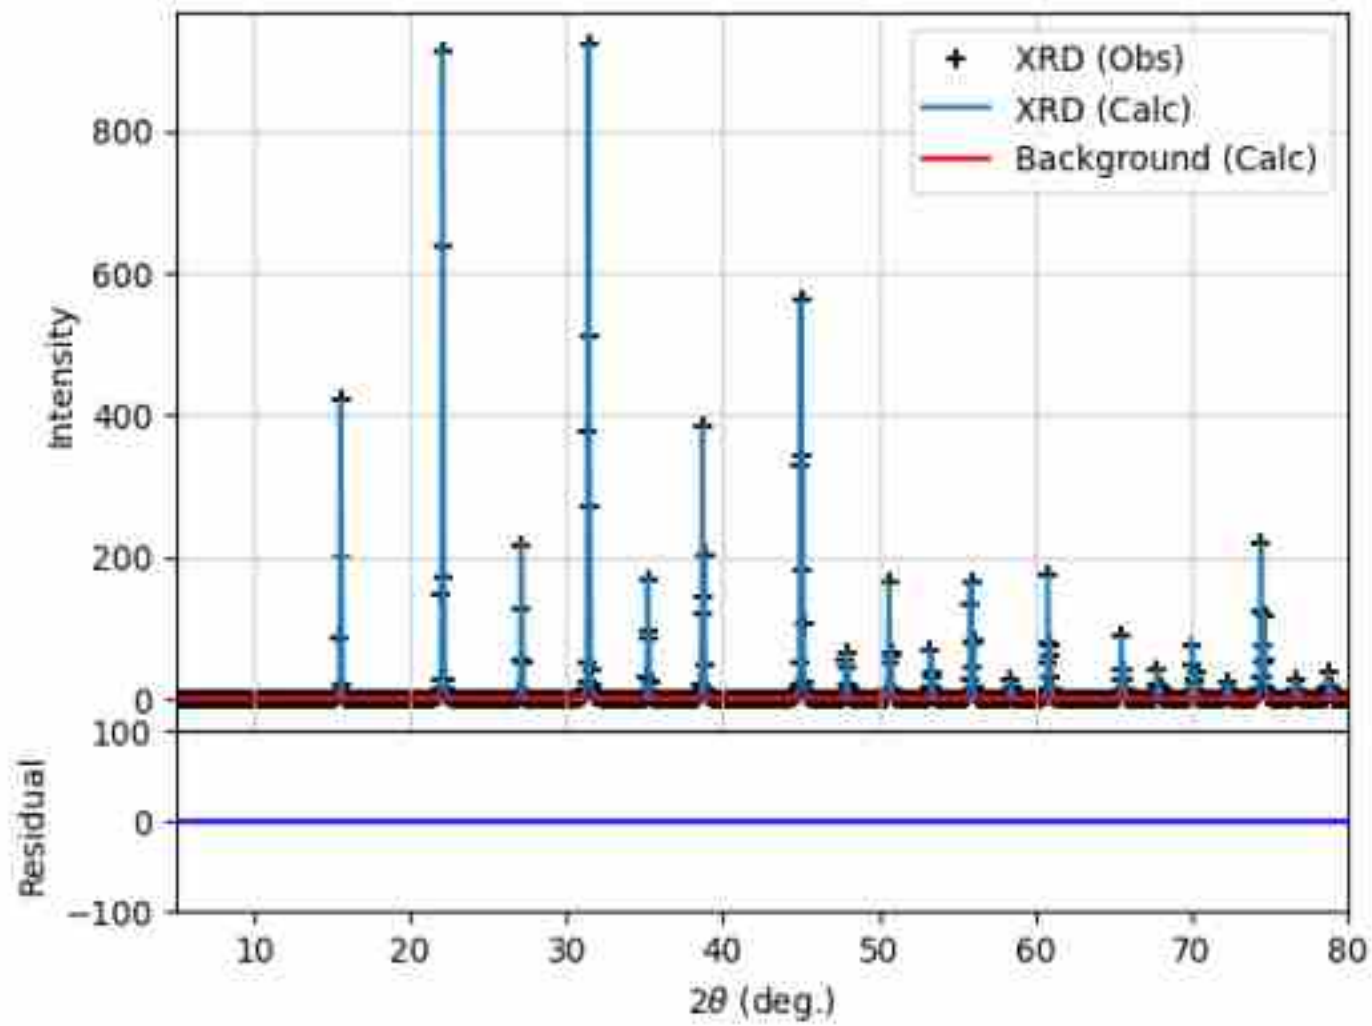

| RMSE before RR | Rwp     | RMSE after RR |
|----------------|---------|---------------|
| 0.005          | 0.00475 | 0.00094       |

# Cs1I1

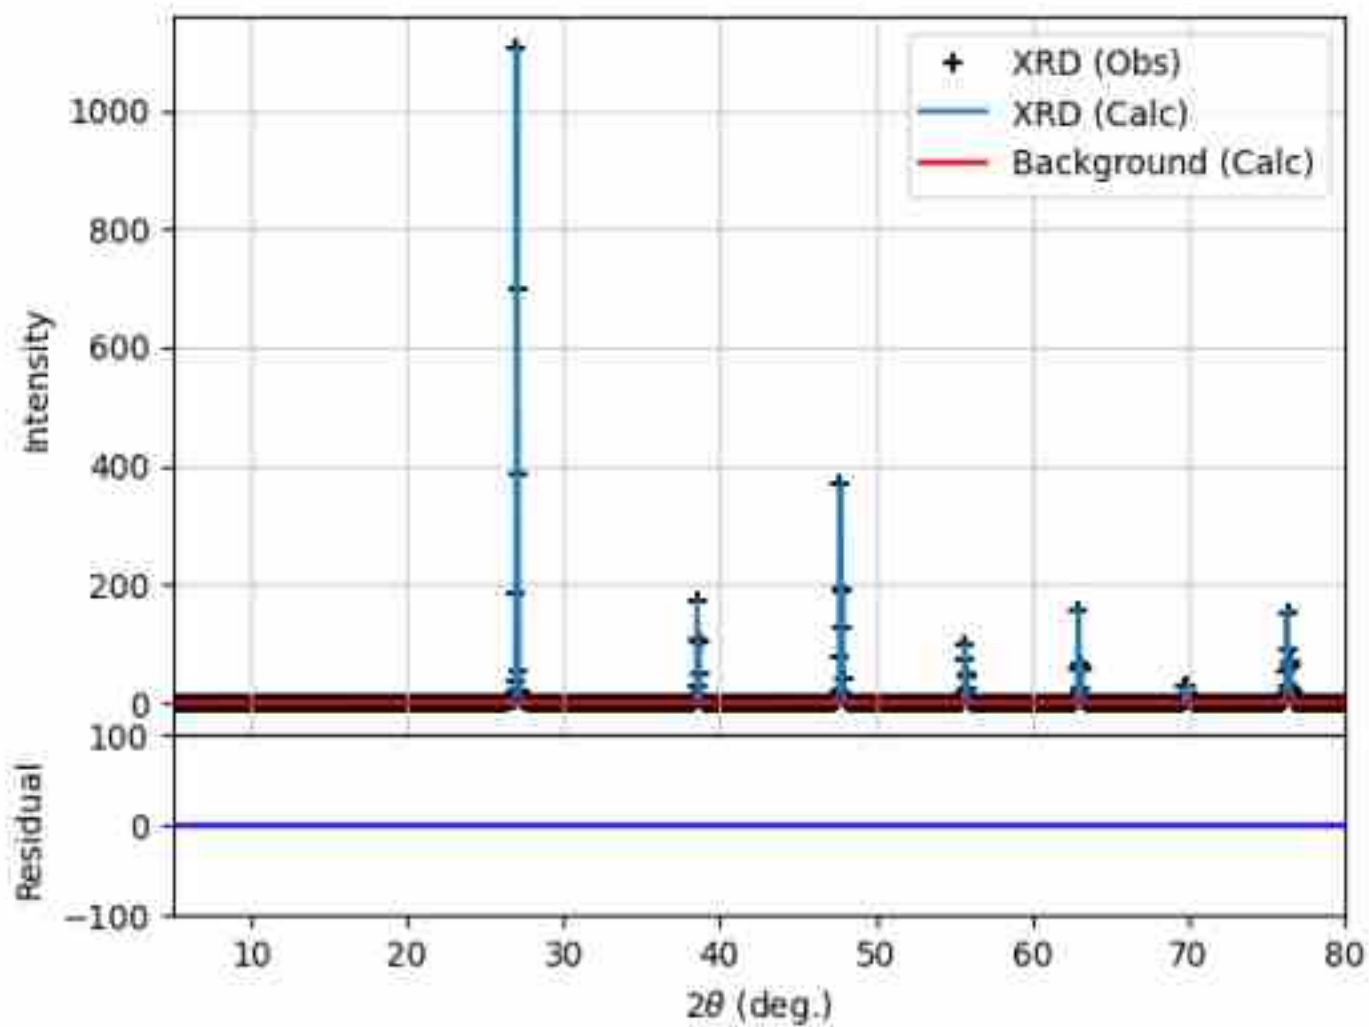

| RMSE before RR | Rwp     | RMSE after RR |
|----------------|---------|---------------|
| 0.005          | 0.05089 | 0.00079       |

# Cs<sub>2</sub>Cu<sub>4</sub>I<sub>6</sub>

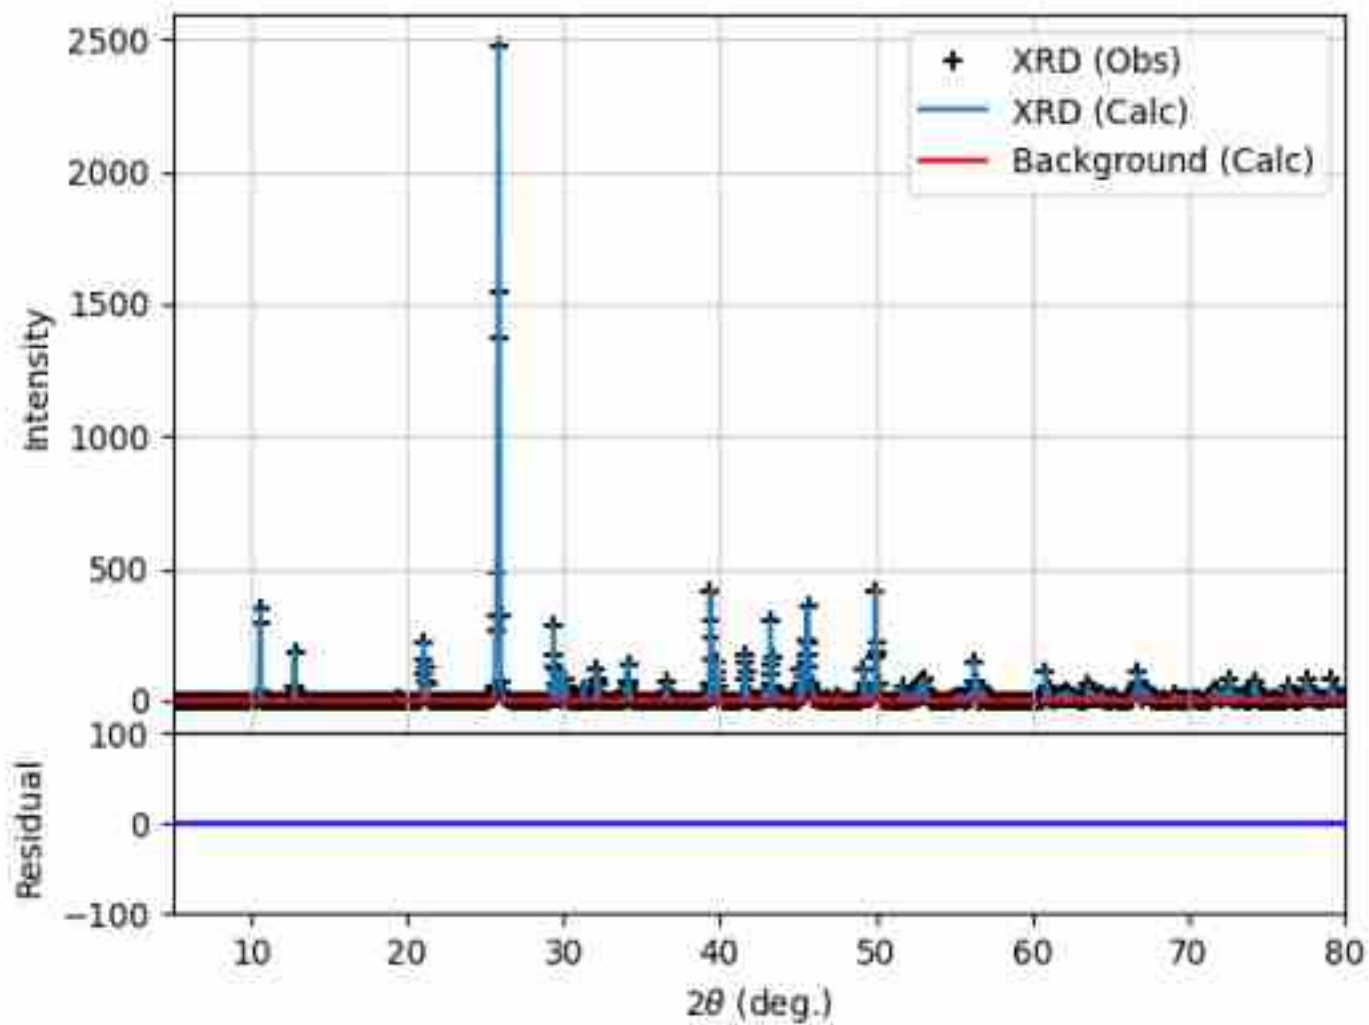

| RMSE before RR | Rwp     | RMSE after RR |
|----------------|---------|---------------|
| 0.05           | 0.00422 | 0.00035       |

# Dy<sub>2</sub>Co<sub>2</sub>Si<sub>4</sub>

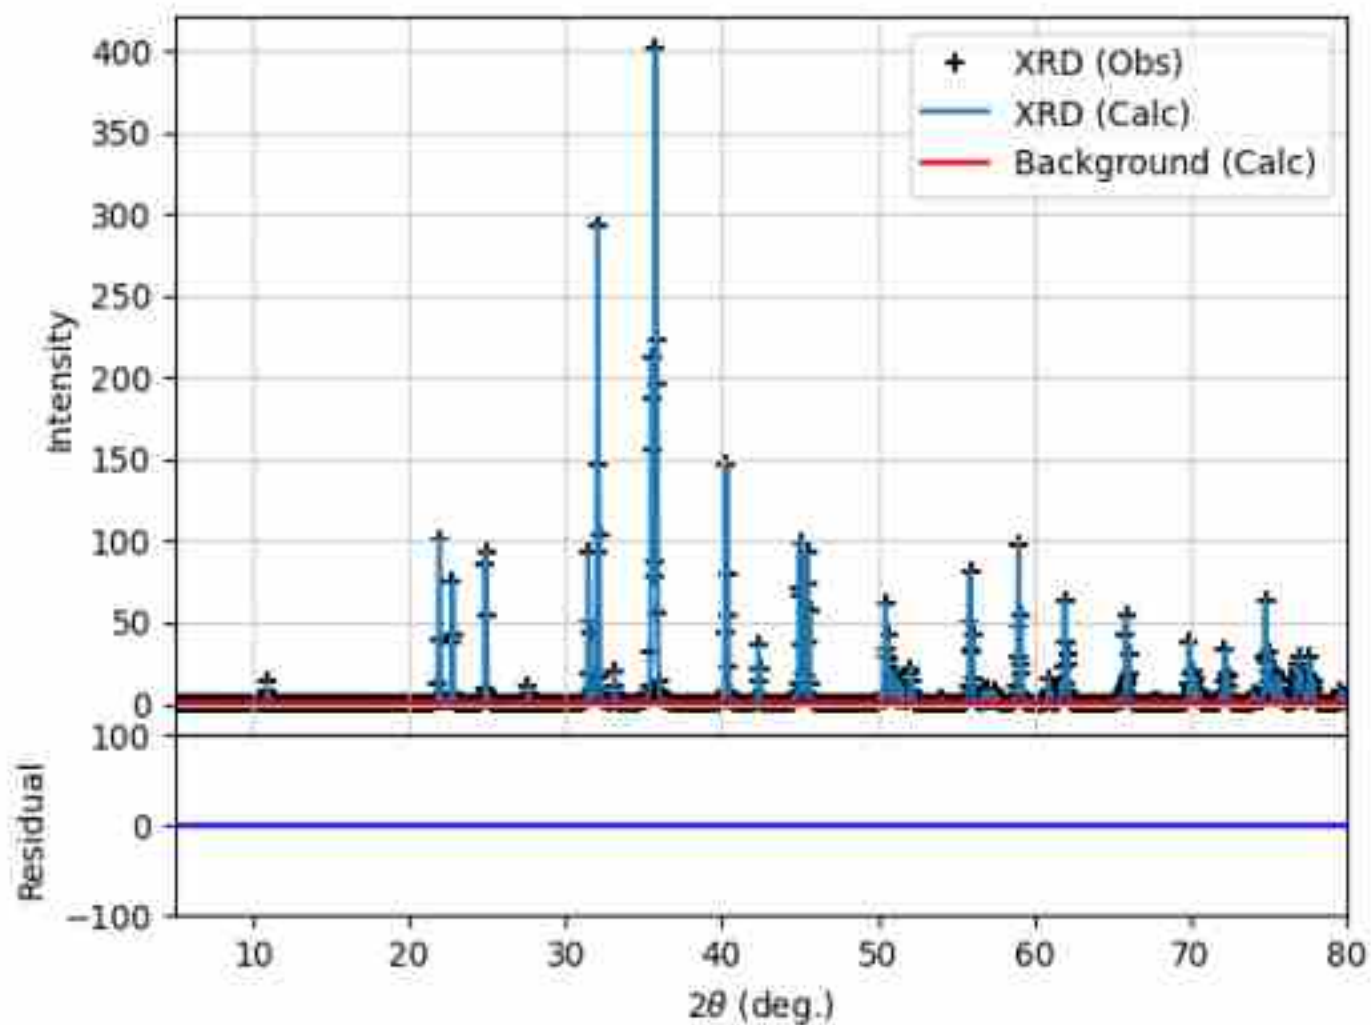

| RMSE before RR | Rwp     | RMSE after RR |
|----------------|---------|---------------|
| 0.005          | 0.00371 | 0.00062       |

# Dy<sub>2</sub>Ga<sub>2</sub>Ni<sub>2</sub>

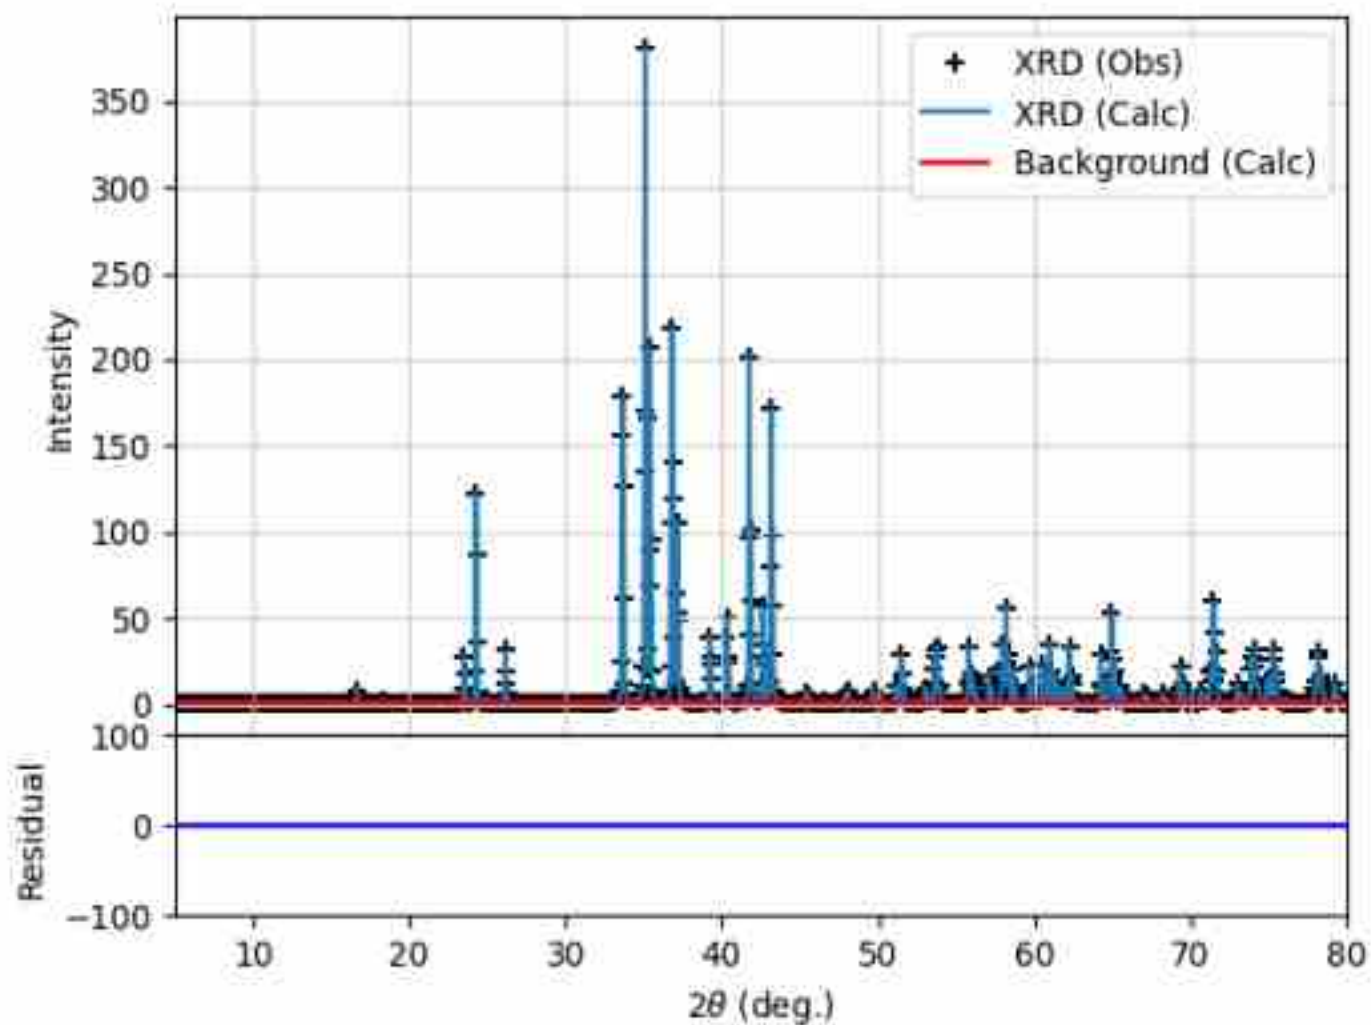

| RMSE before RR | Rwp     | RMSE after RR |
|----------------|---------|---------------|
| 0.005          | 0.00389 | 0.00031       |

# Dy<sub>2</sub>Ga<sub>2</sub>

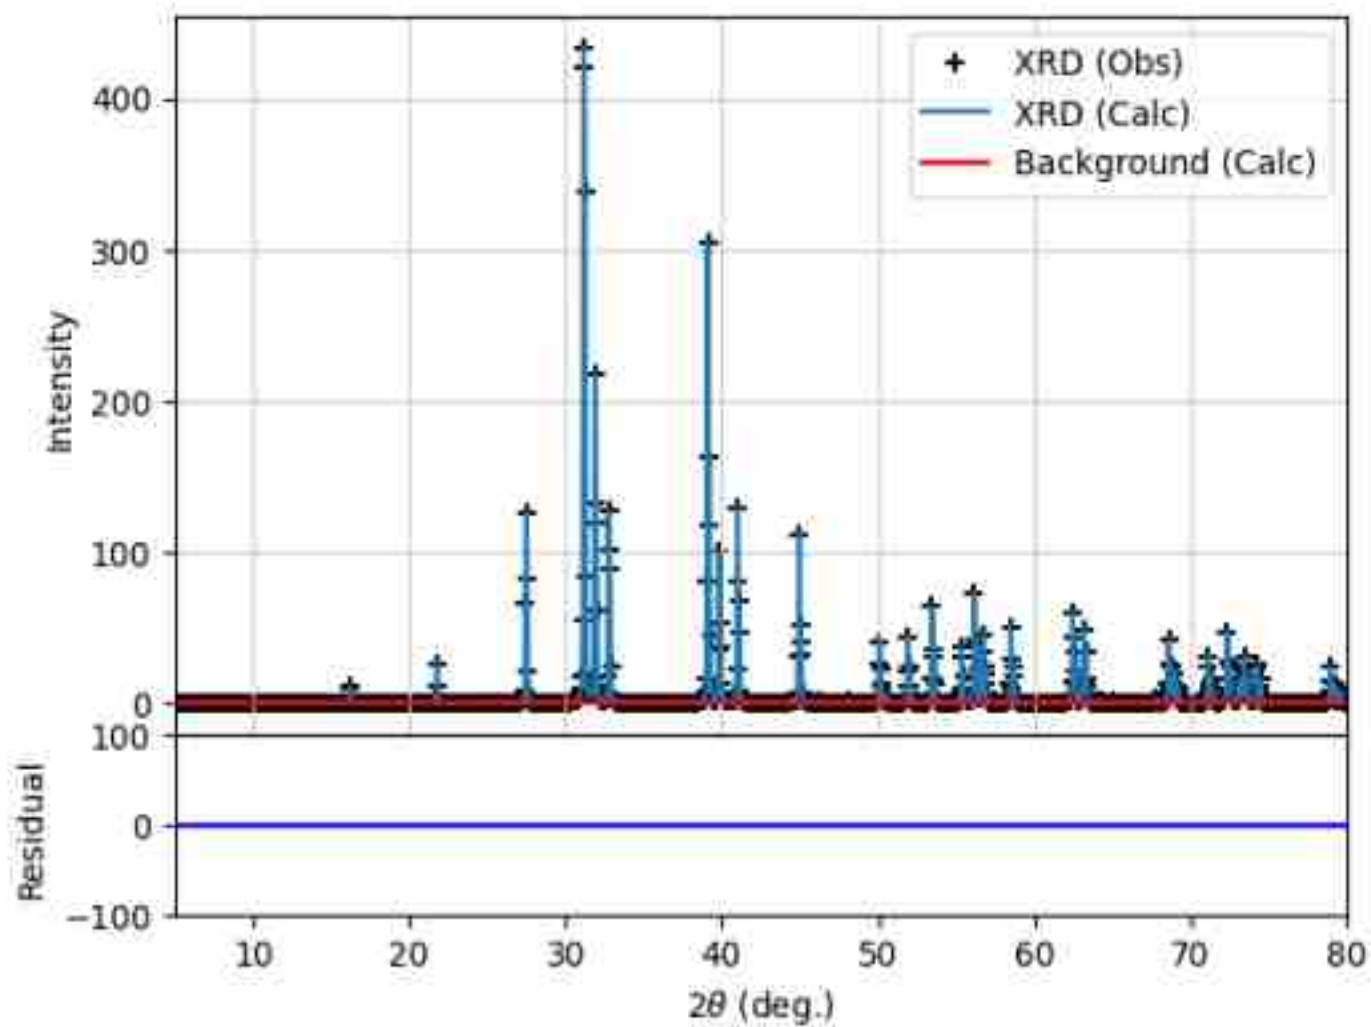

| RMSE before RR | Rwp     | RMSE after RR |
|----------------|---------|---------------|
| 0.005          | 0.00352 | 0.00046       |



# Dy<sub>2</sub>Ho<sub>6</sub>

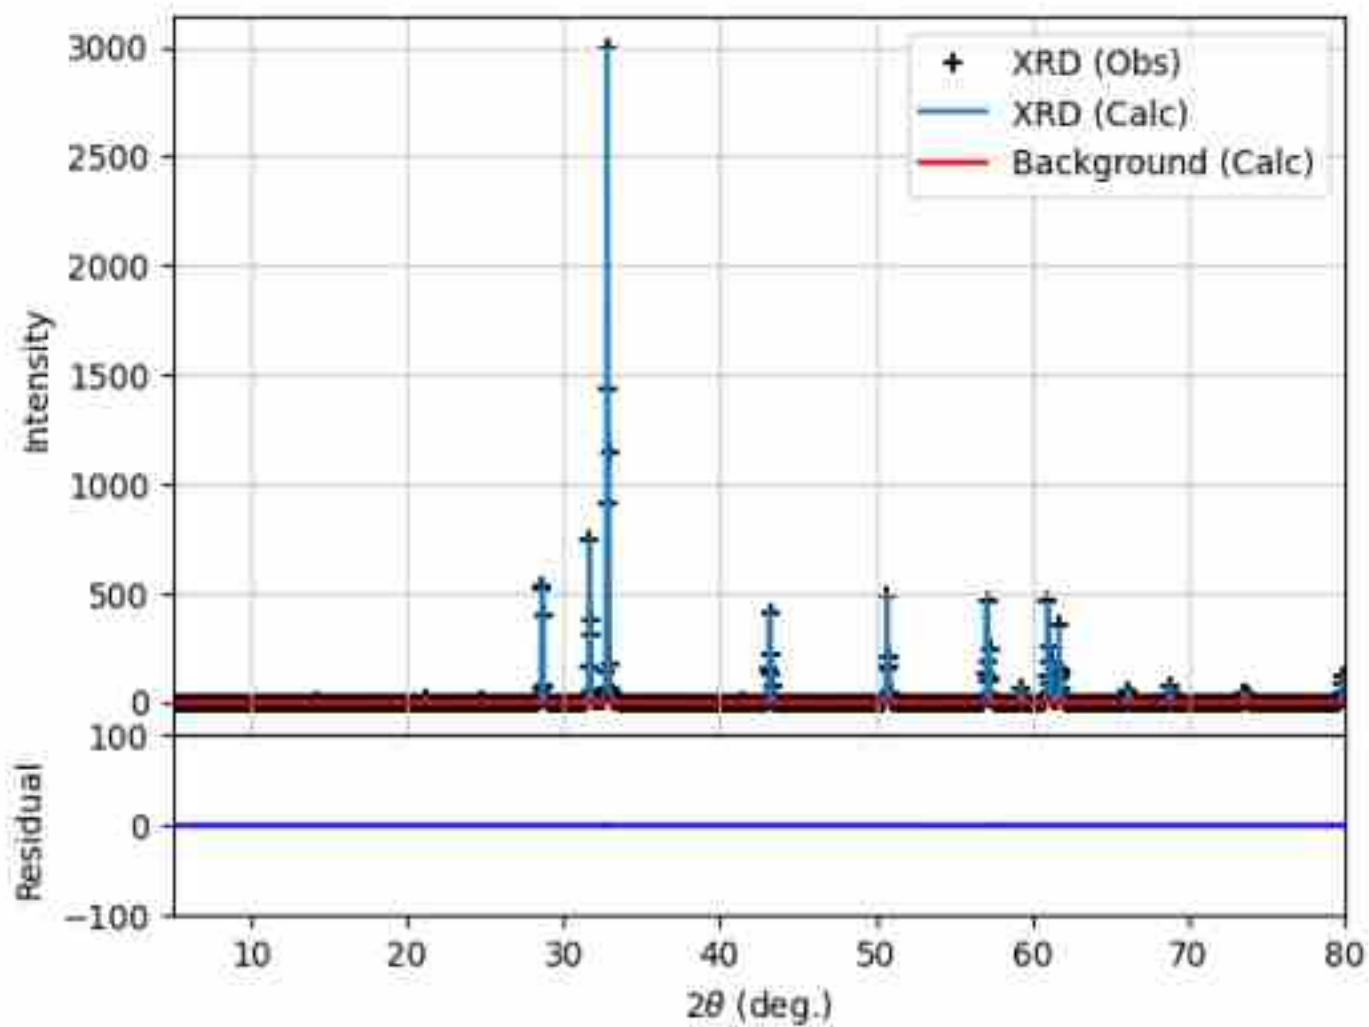

| RMSE before RR | Rwp     | RMSE after RR |
|----------------|---------|---------------|
| 0.005          | 0.03805 | 0.00051       |

# Dy<sub>2</sub>O<sub>3</sub>

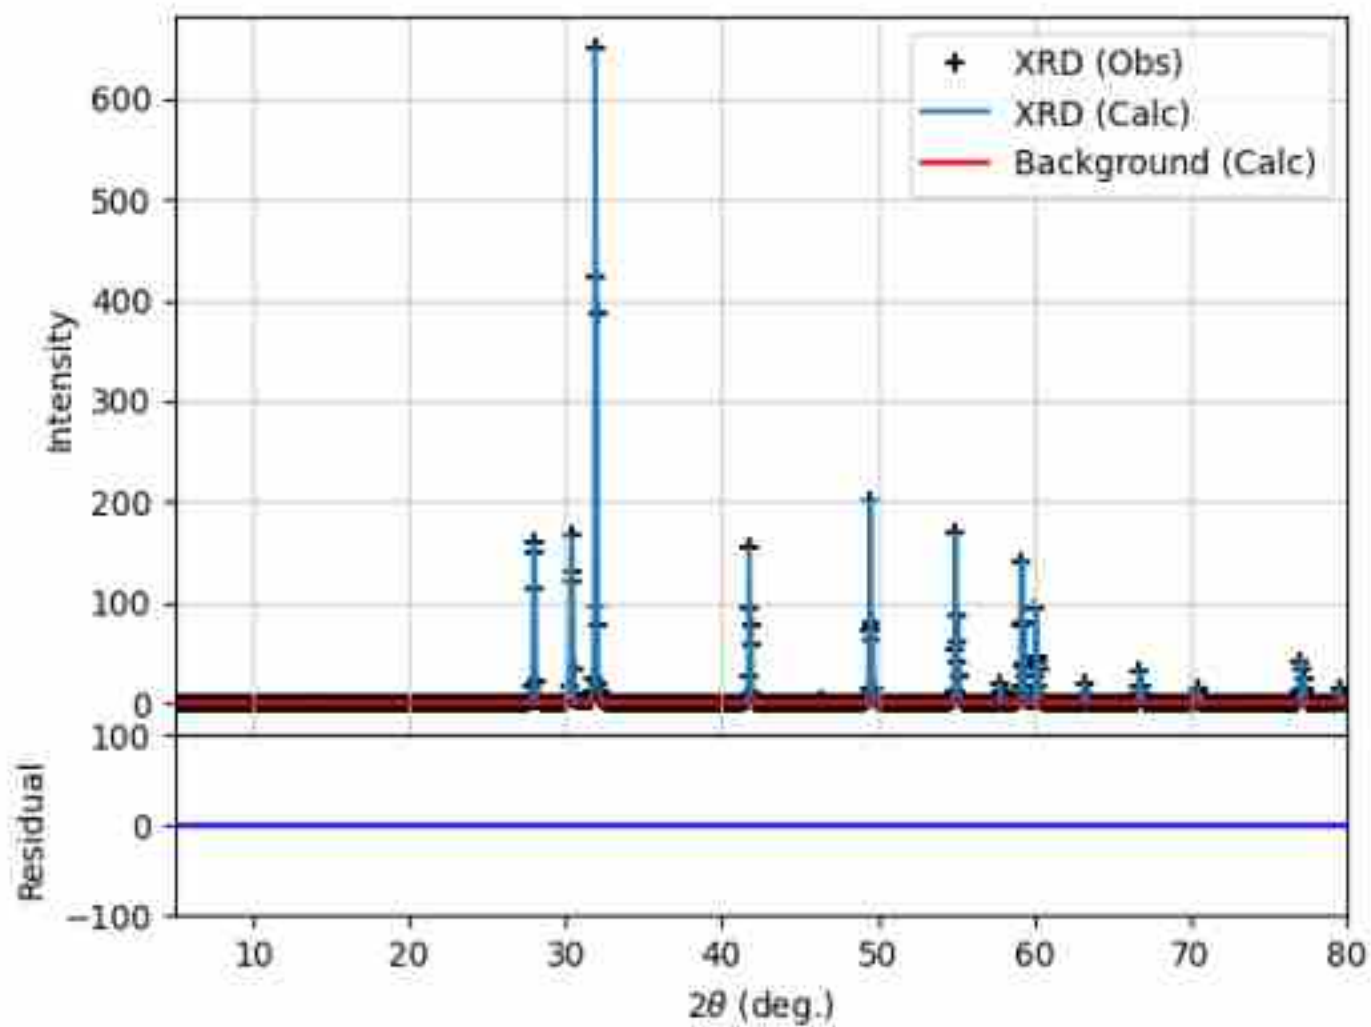

| RMSE before RR | Rwp     | RMSE after RR |
|----------------|---------|---------------|
| 0.005          | 0.00496 | 0.0015        |

# Er1In5Co1

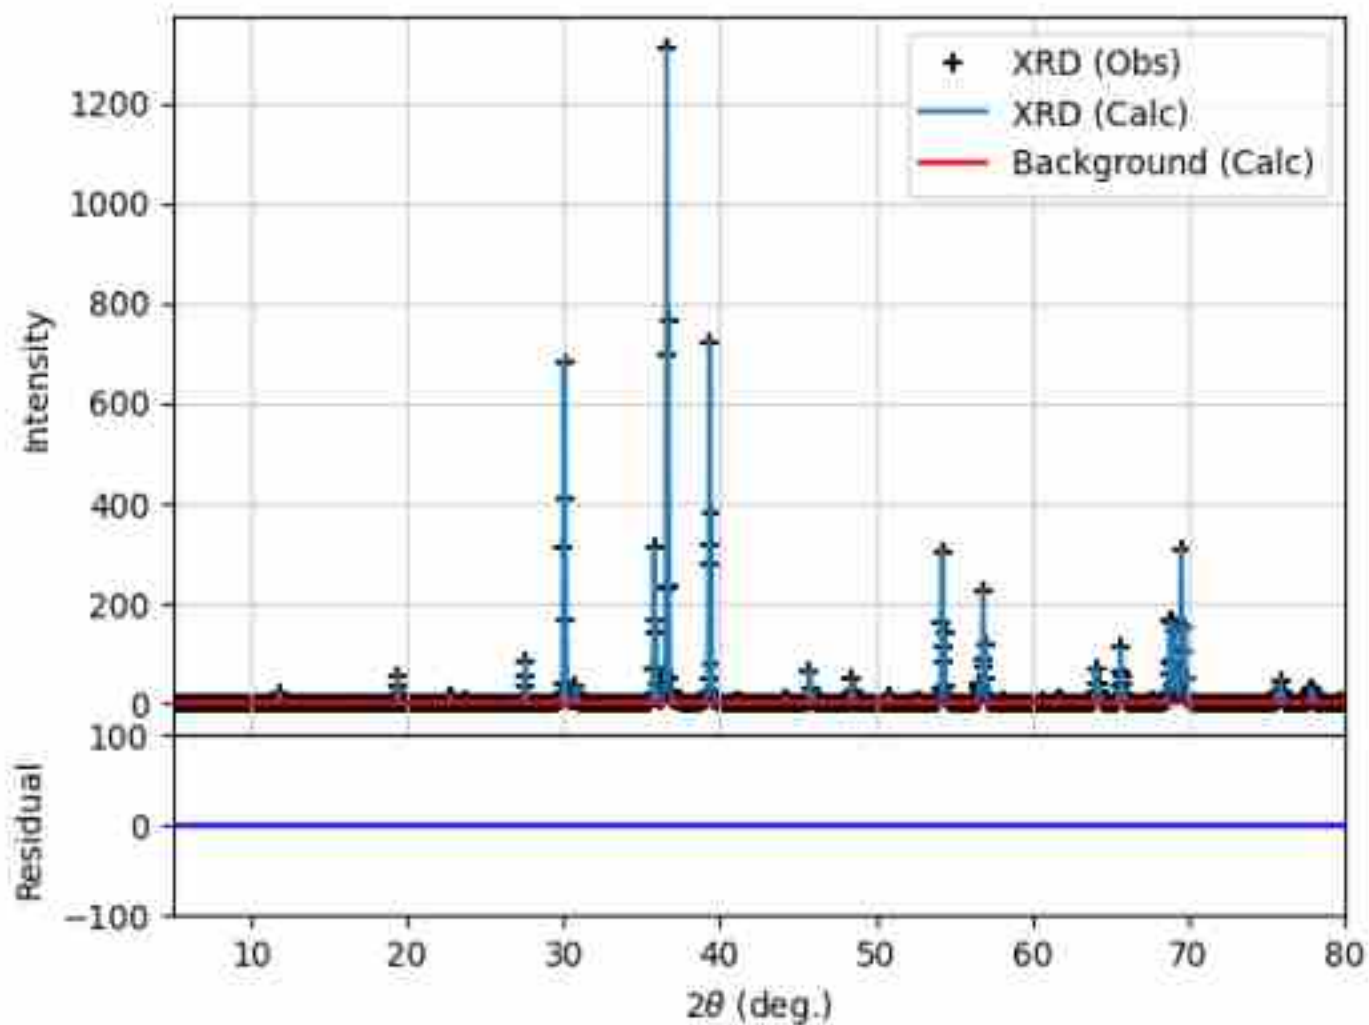

| RMSE before RR | Rwp     | RMSE after RR |
|----------------|---------|---------------|
| 0.005          | 0.01708 | 0.00067       |

# Er<sub>2</sub>Cd<sub>6</sub>

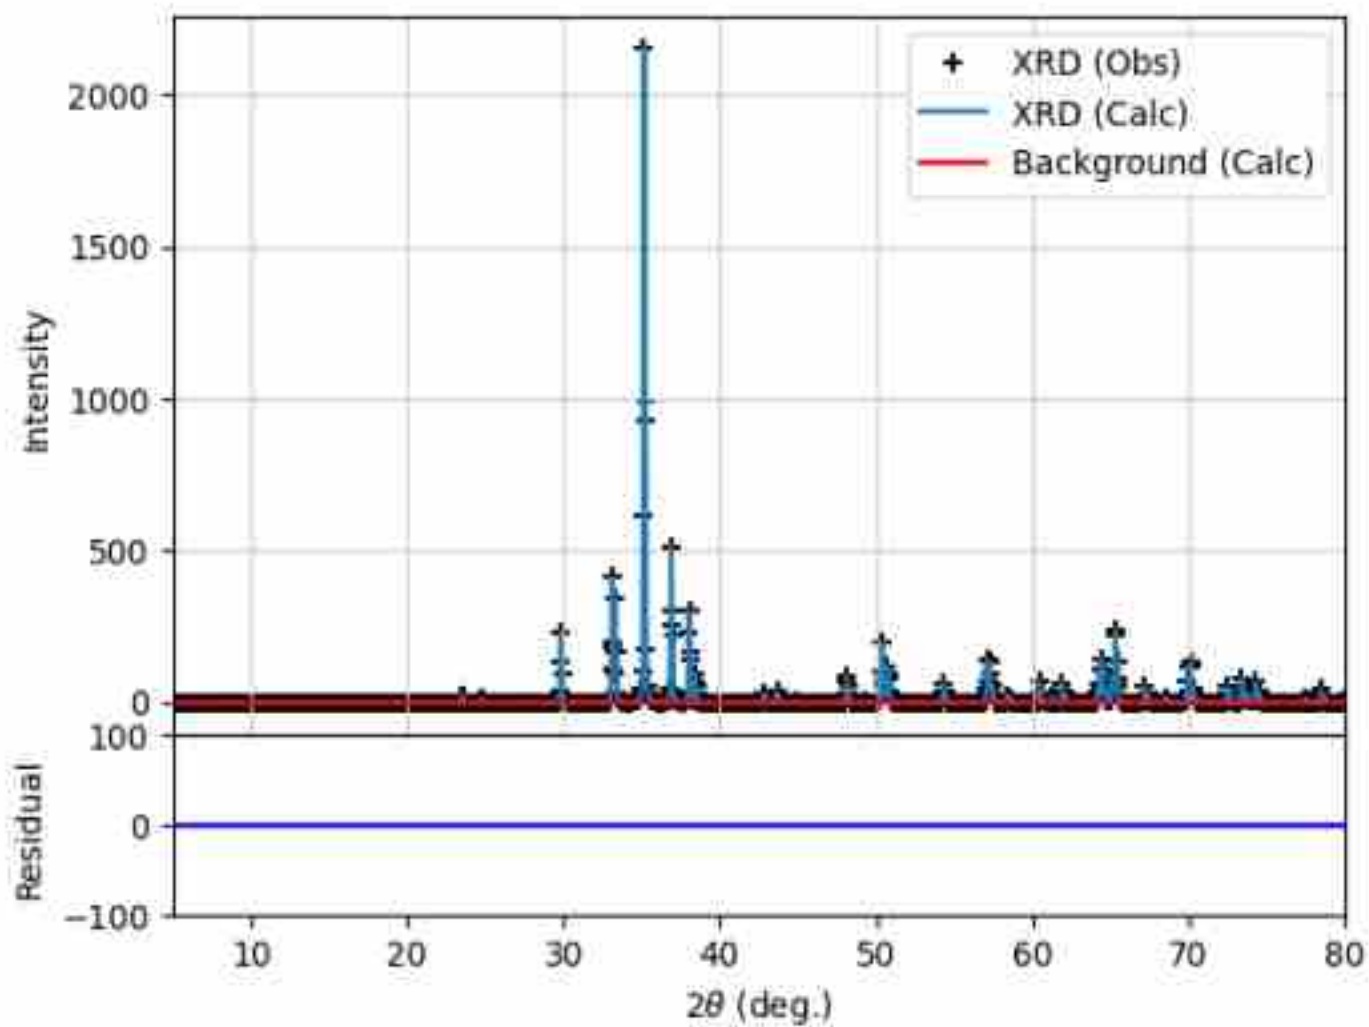

| RMSE before RR | Rwp     | RMSE after RR |
|----------------|---------|---------------|
| 0.005          | 0.00482 | 0.00022       |

# Er<sub>2</sub>Si<sub>4</sub>Pt<sub>4</sub>

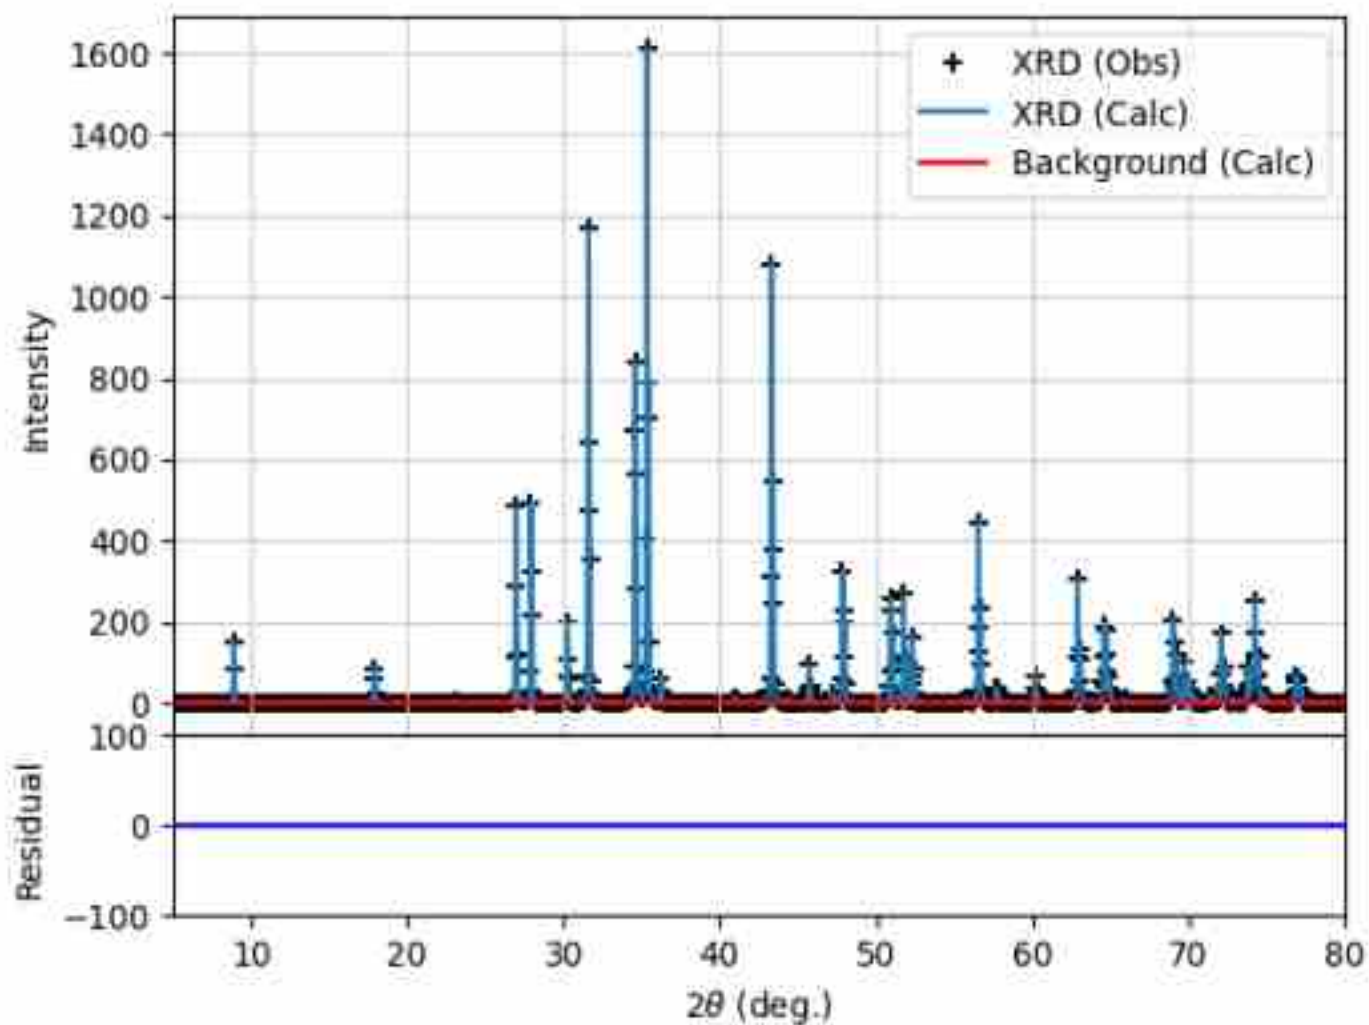

| RMSE before RR | Rwp     | RMSE after RR |
|----------------|---------|---------------|
| 0.005          | 0.00477 | 0.00081       |

# Eu<sub>2</sub>P<sub>2</sub>Pt<sub>2</sub>

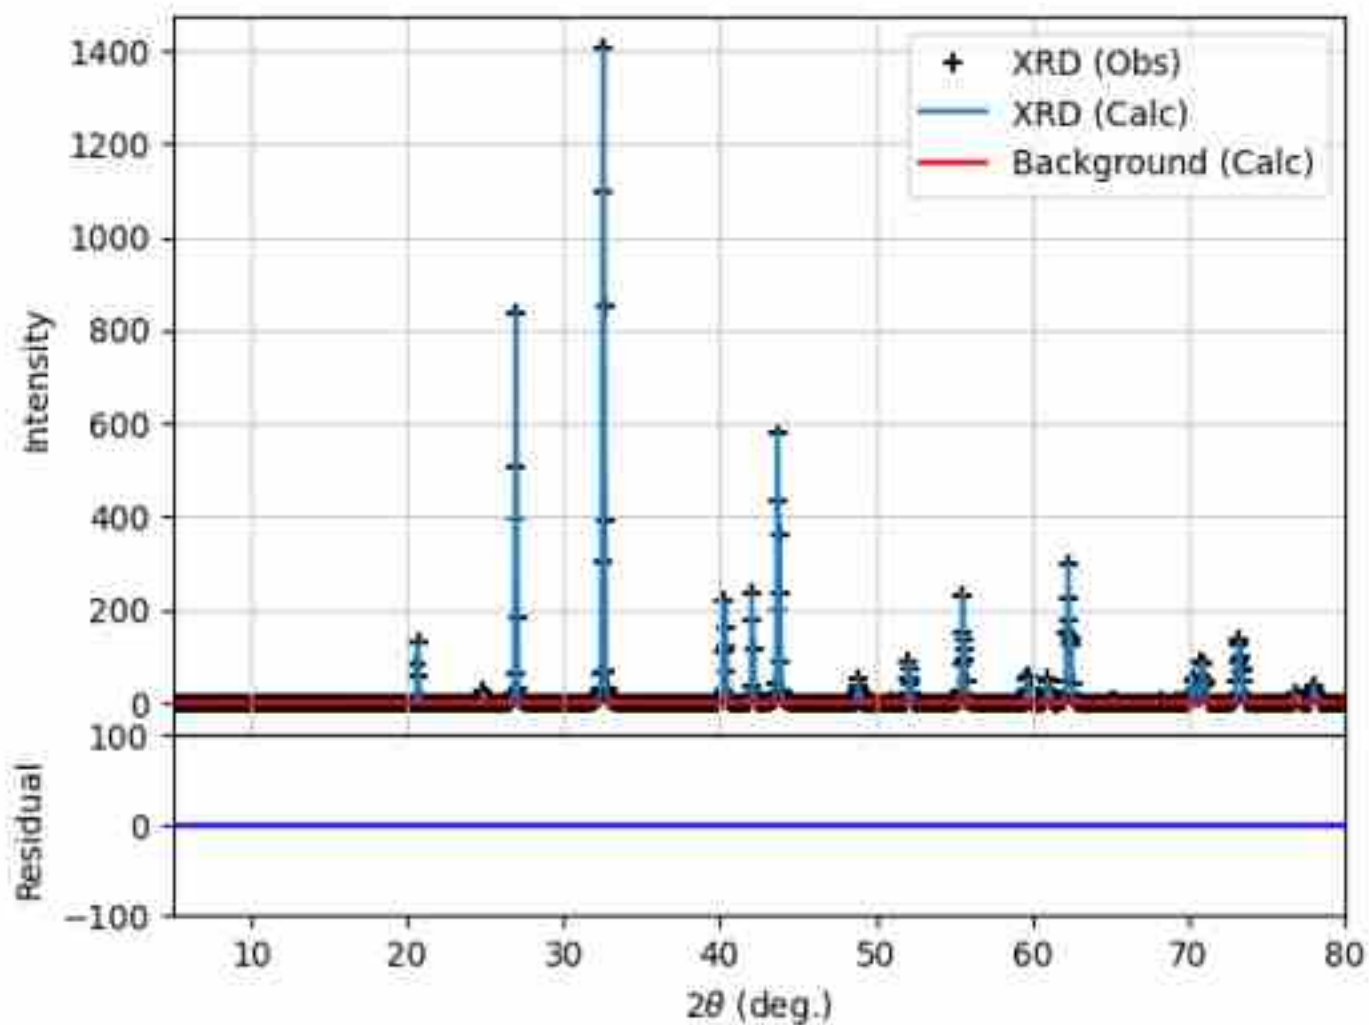

| RMSE before RR | Rwp     | RMSE after RR |
|----------------|---------|---------------|
| 0.005          | 0.00094 | 0.00012       |

# Eu4Br4Cl4

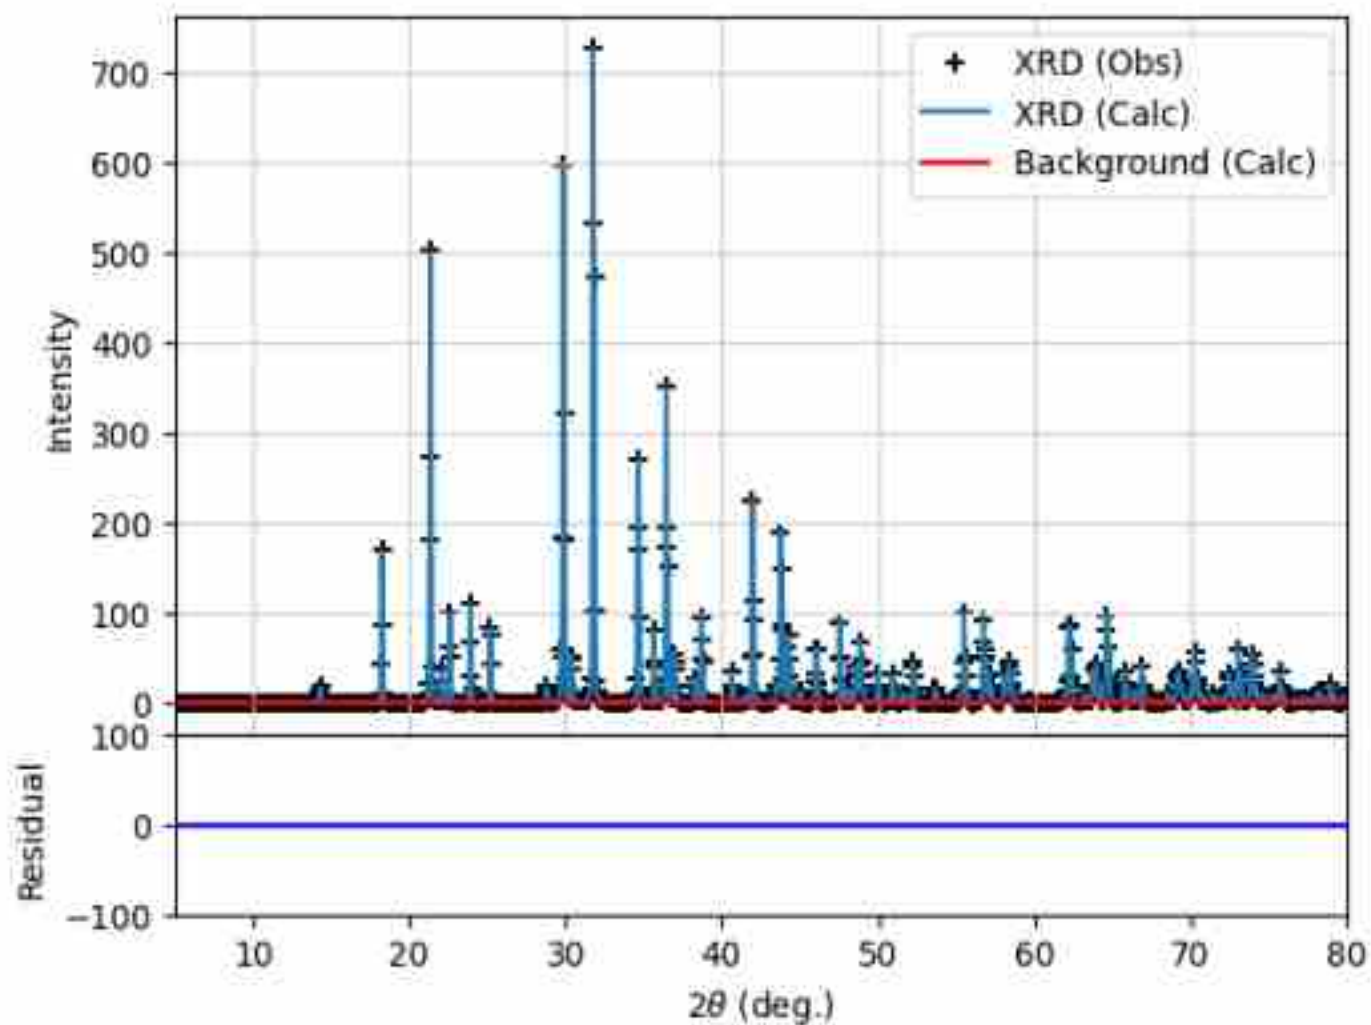

| RMSE before RR | Rwp     | RMSE after RR |
|----------------|---------|---------------|
| 0.05           | 0.00407 | 0.00049       |

# Ga1Cu1O2

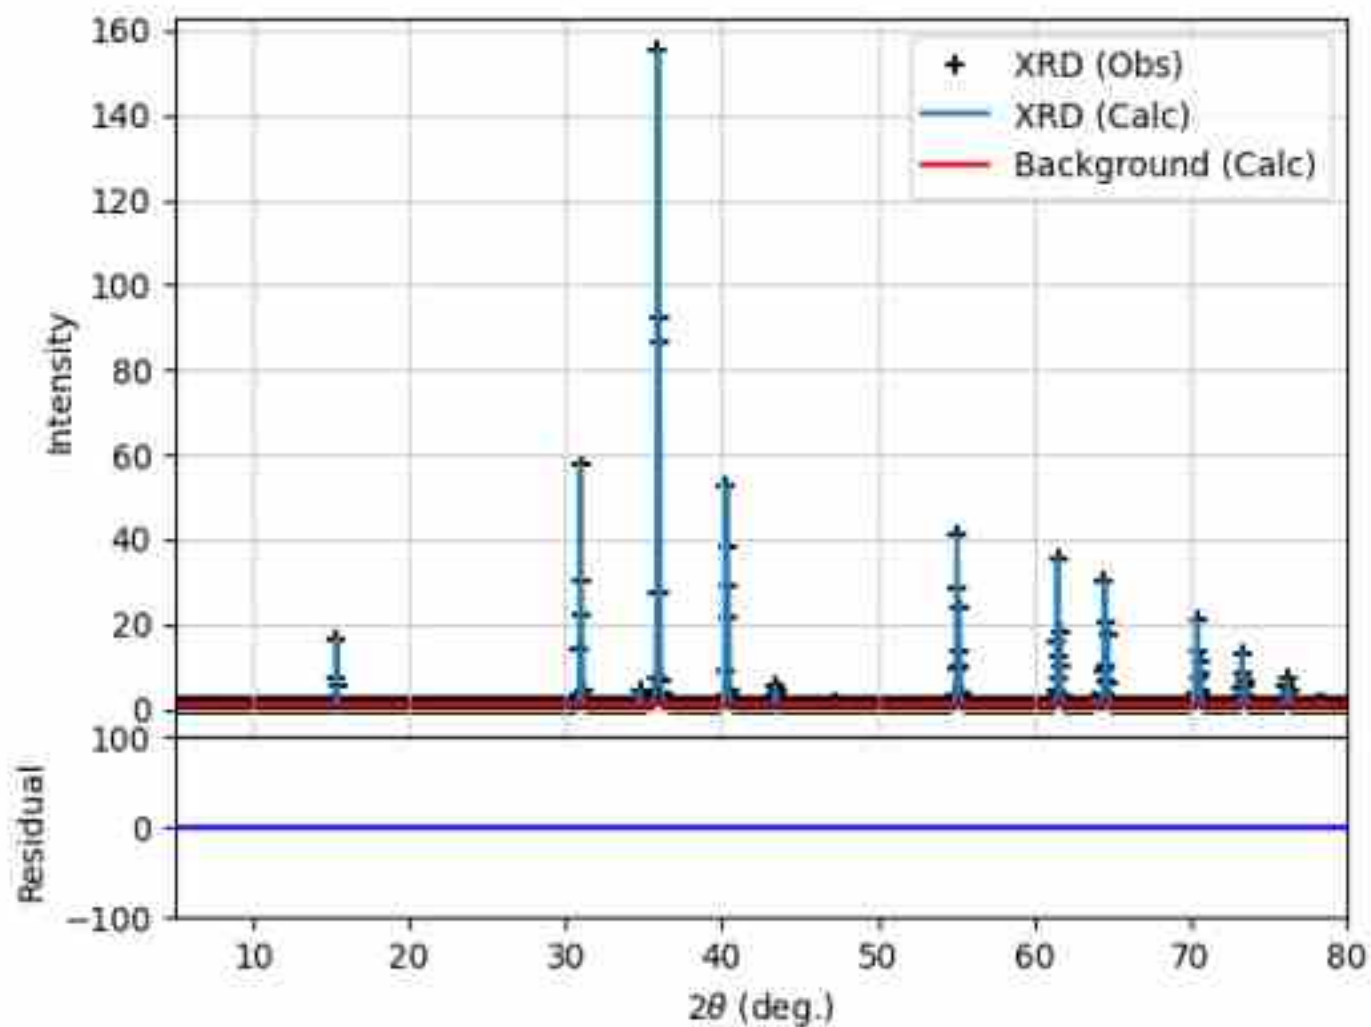

| RMSE before RR | Rwp     | RMSE after RR |
|----------------|---------|---------------|
| 0.005          | 0.00219 | 0.00056       |



# Ga1Hg3

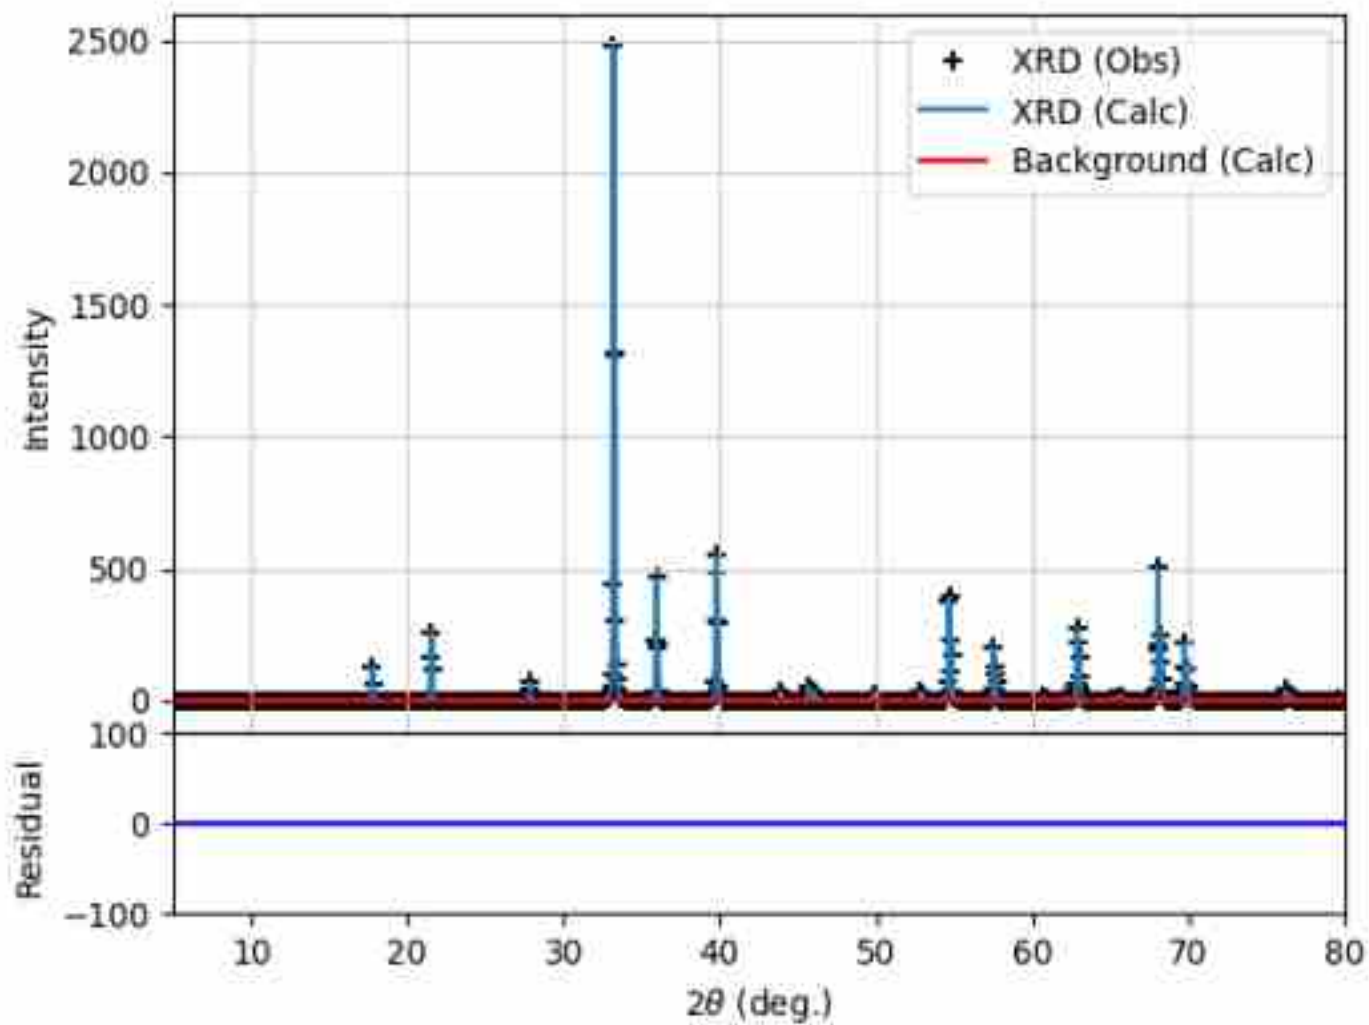

| RMSE before RR | Rwp     | RMSE after RR |
|----------------|---------|---------------|
| 0.005          | 0.00547 | 0.00052       |

# Gd1Te1

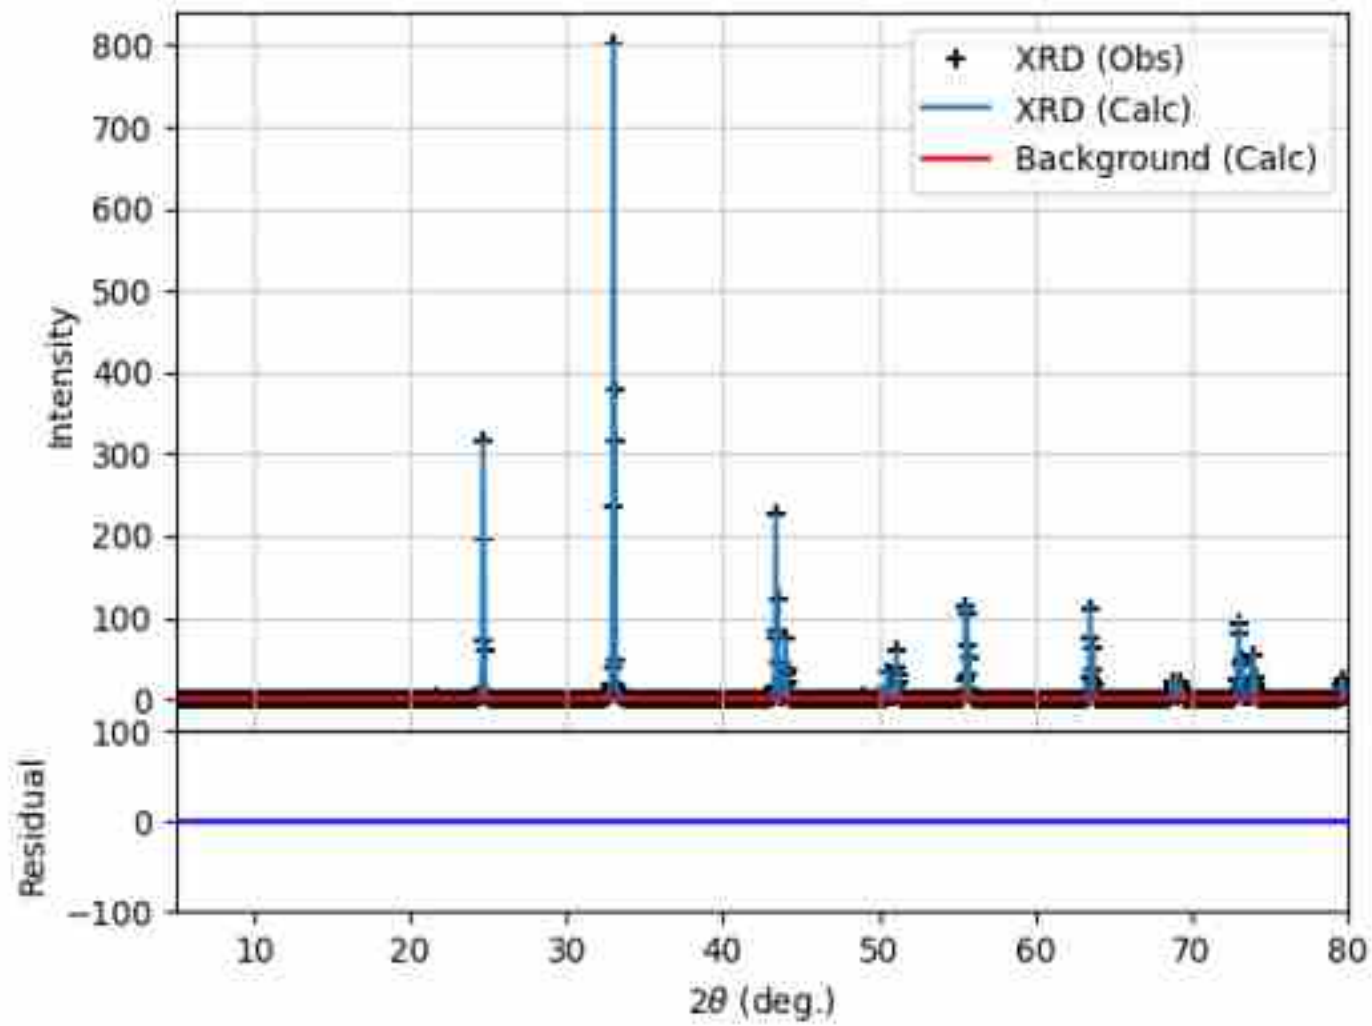

| RMSE before RR | Rwp    | RMSE after RR |
|----------------|--------|---------------|
| 0.005          | 0.1897 | 0.00087       |

# Gd<sub>2</sub>Cu<sub>2</sub>Sb<sub>4</sub>

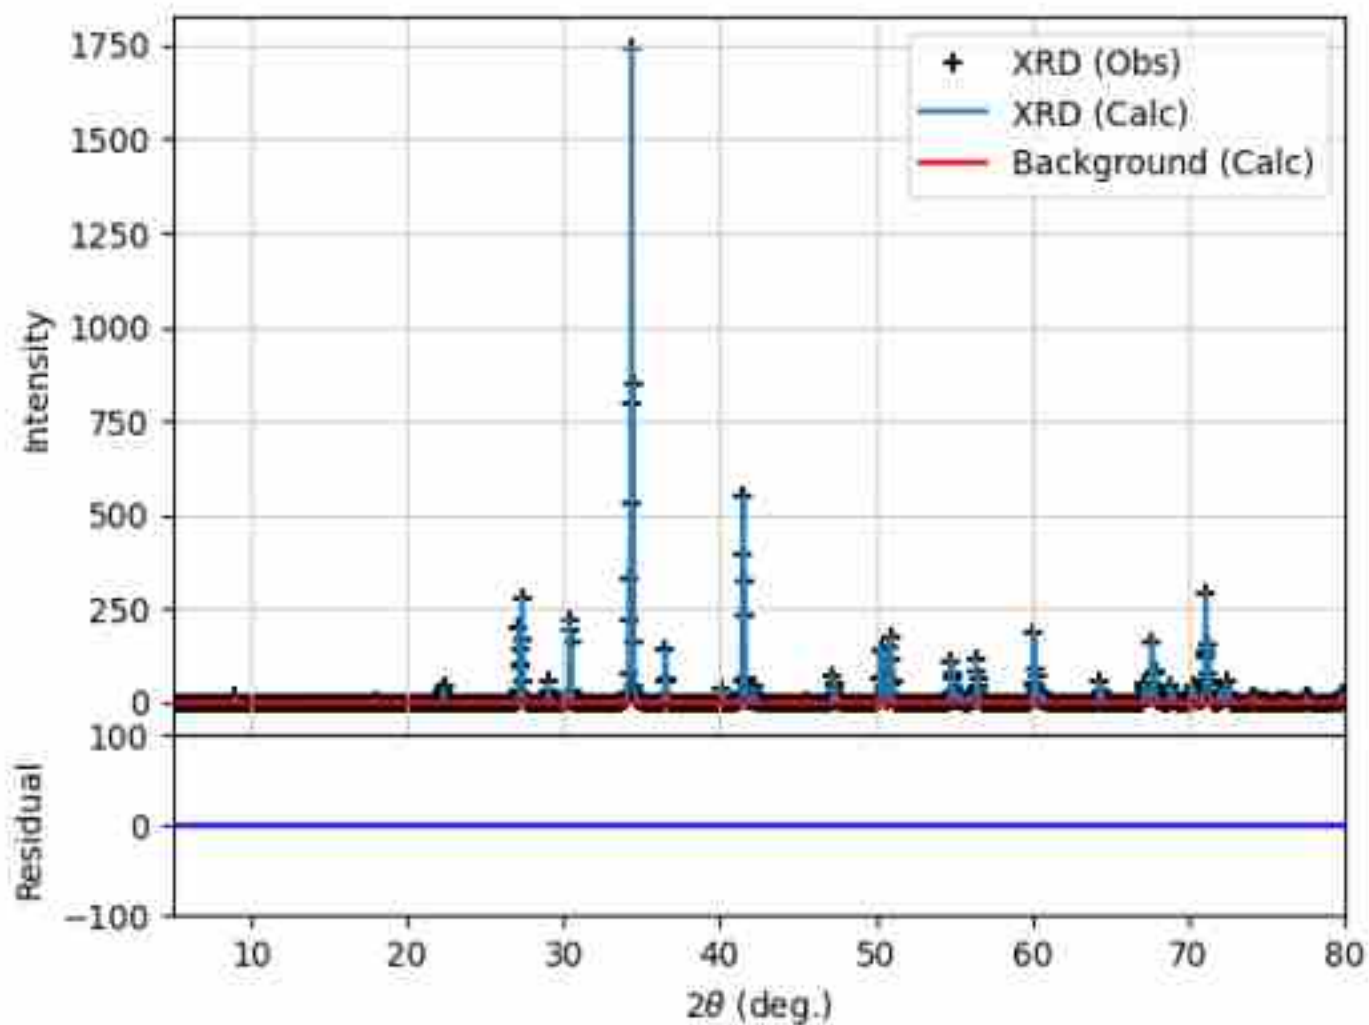

| RMSE before RR | Rwp     | RMSE after RR |
|----------------|---------|---------------|
| 0.005          | 0.00379 | 0.00028       |

# Gd<sub>2</sub>Ge<sub>2</sub>

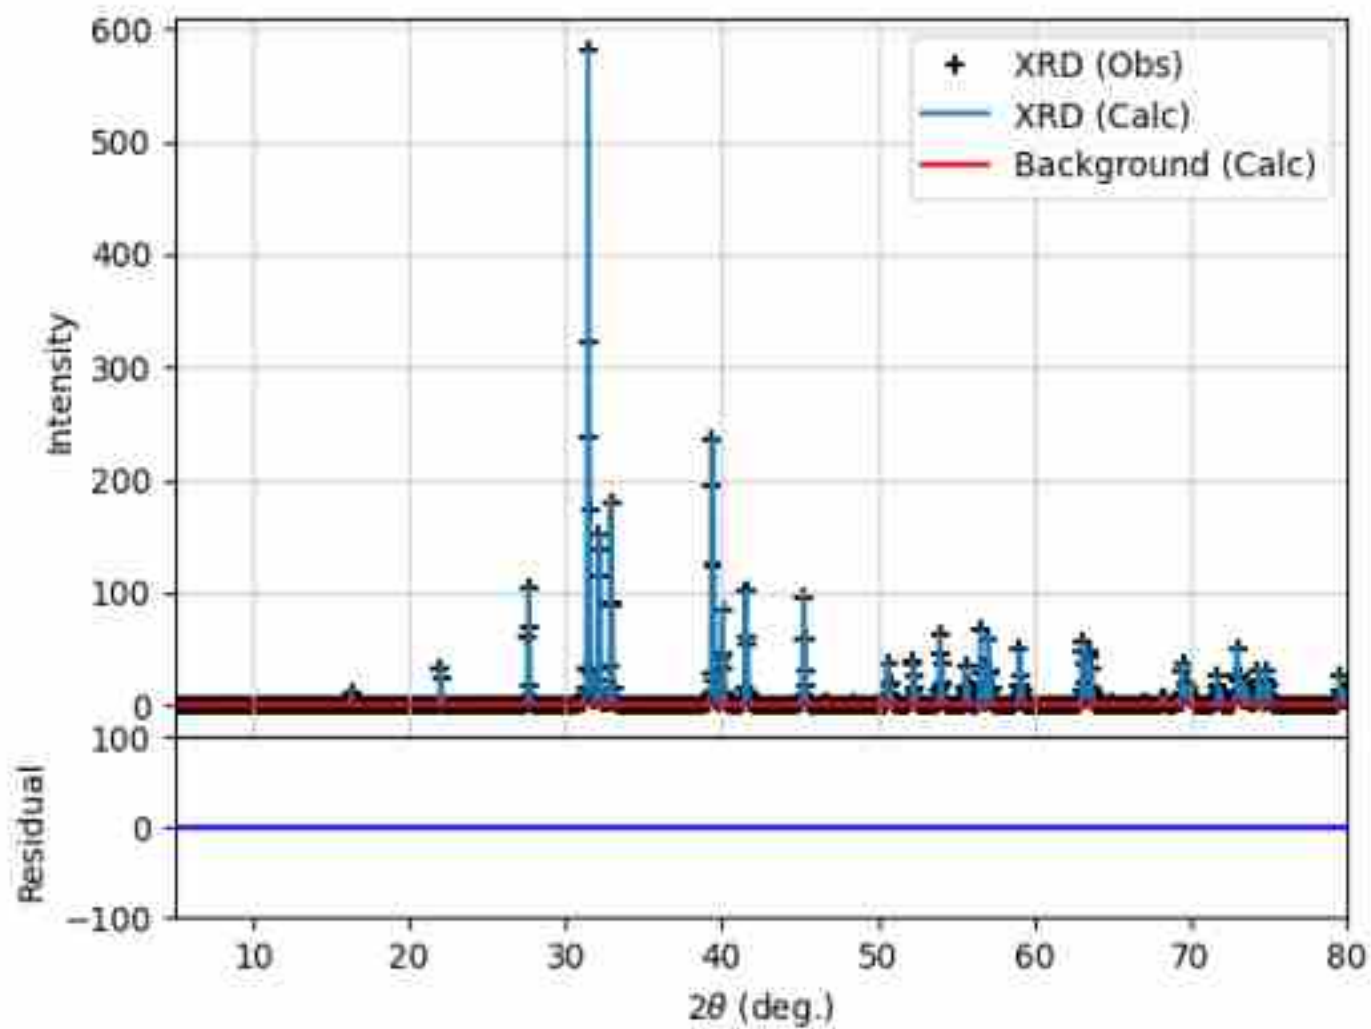

| RMSE before RR | Rwp     | RMSE after RR |
|----------------|---------|---------------|
| 0.005          | 0.00364 | 0.00037       |

Gd<sub>2</sub>InAg<sub>1</sub>

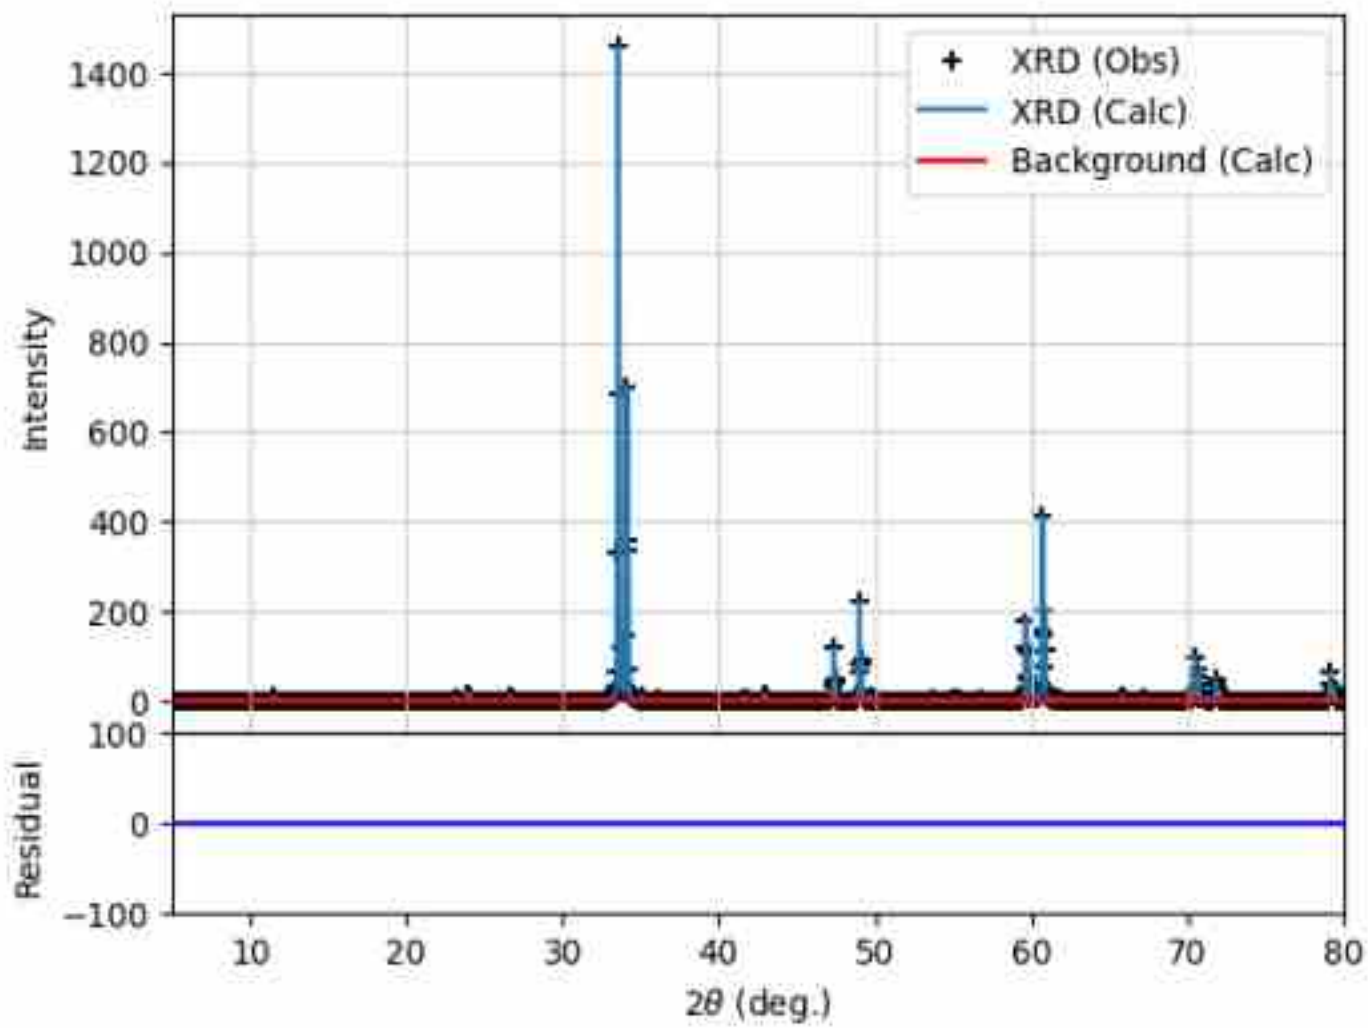

| RMSE before RR | Rwp     | RMSE after RR |
|----------------|---------|---------------|
| 0.005          | 0.01528 | 0.0009        |

# Hf1Ni1Sn1

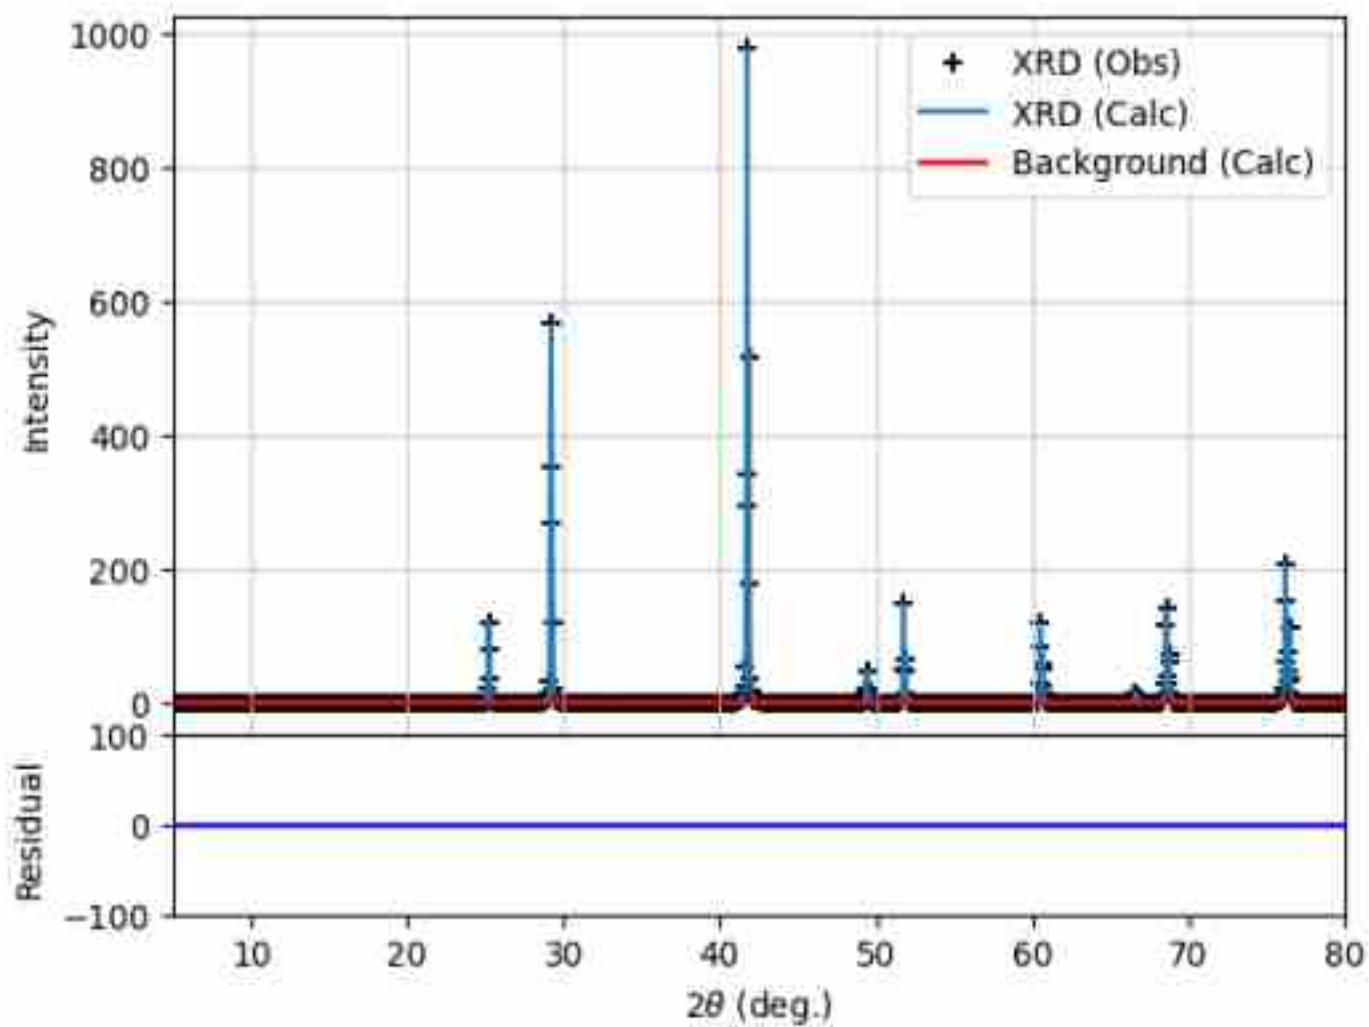

| RMSE before RR | Rwp     | RMSE after RR |
|----------------|---------|---------------|
| 0.005          | 0.00863 | 0.00176       |

# Ho1Tl1Se2

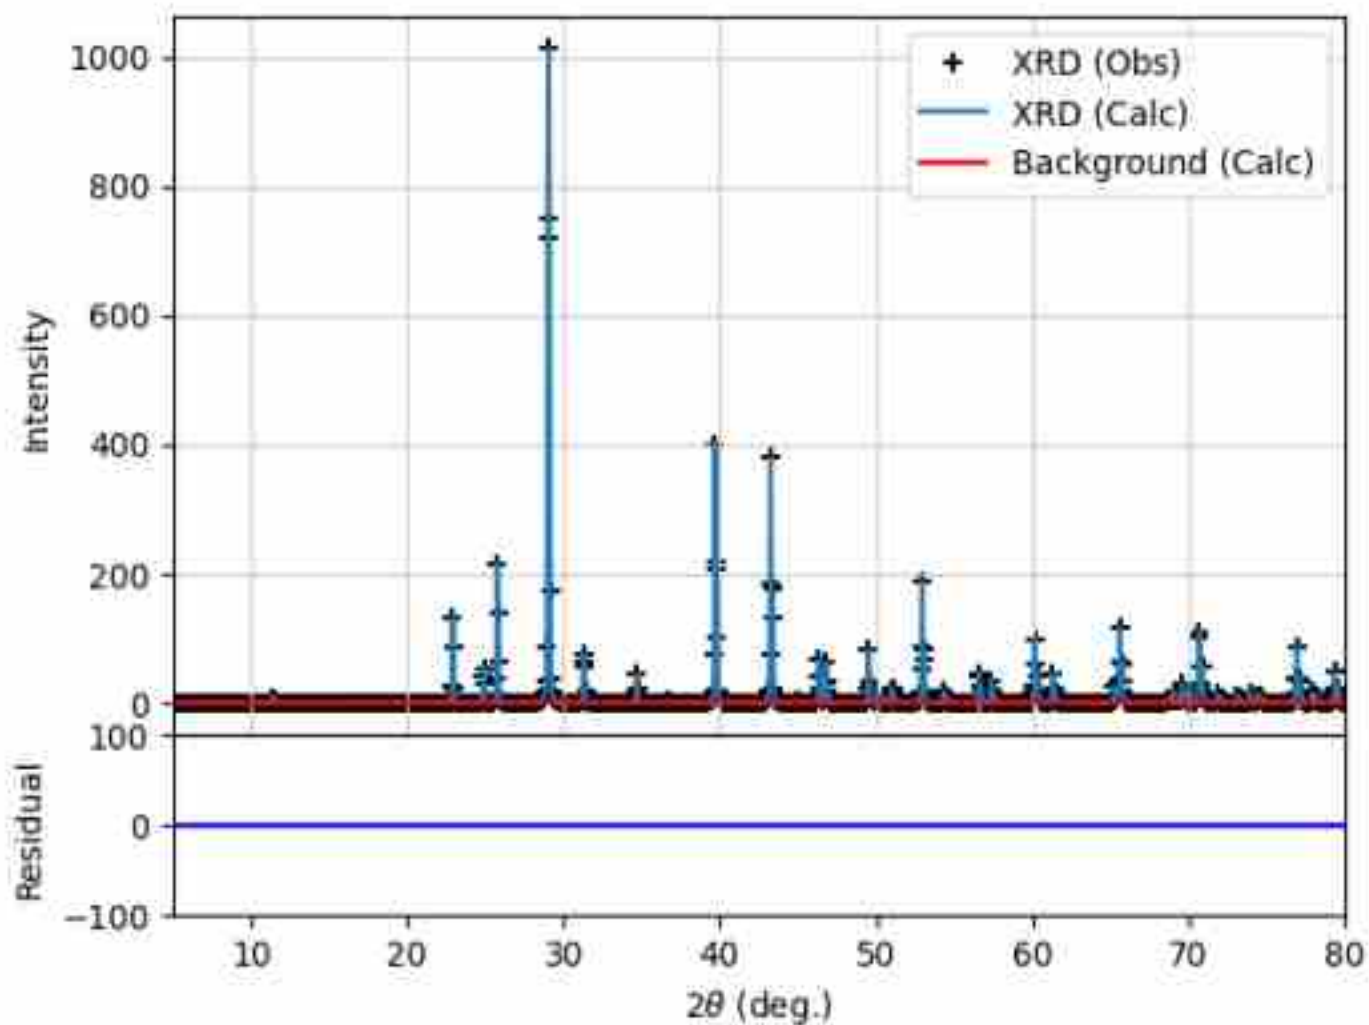

| RMSE before RR | Rwp     | RMSE after RR |
|----------------|---------|---------------|
| 0.005          | 0.00252 | 0.00014       |

# Ho2Sn4

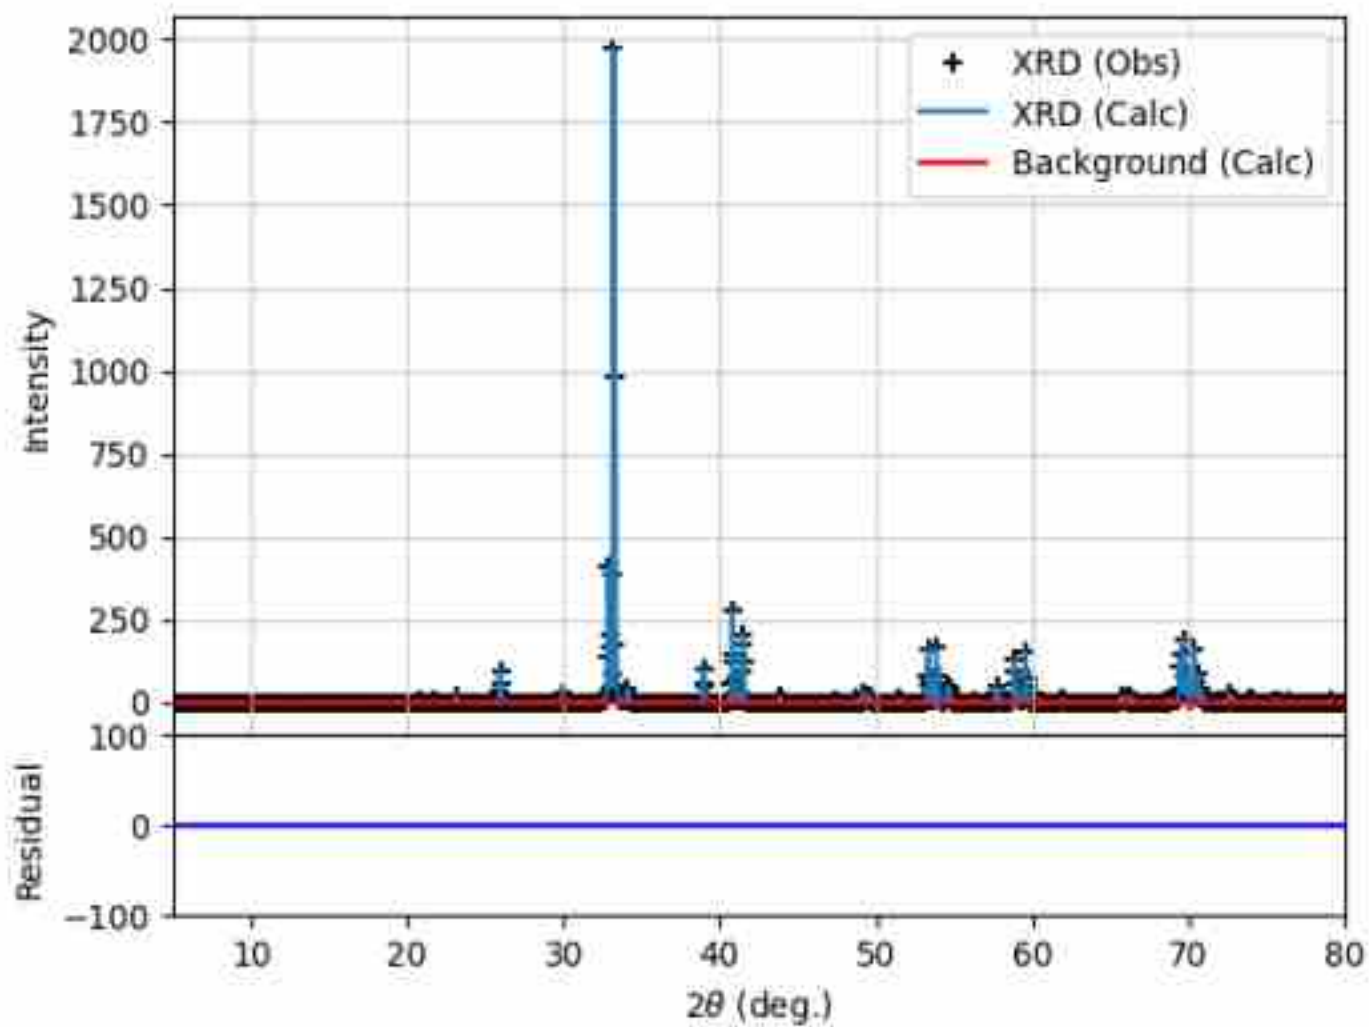

| RMSE before RR | Rwp     | RMSE after RR |
|----------------|---------|---------------|
| 0.005          | 0.00391 | 0.00022       |



# K1Dy1S2

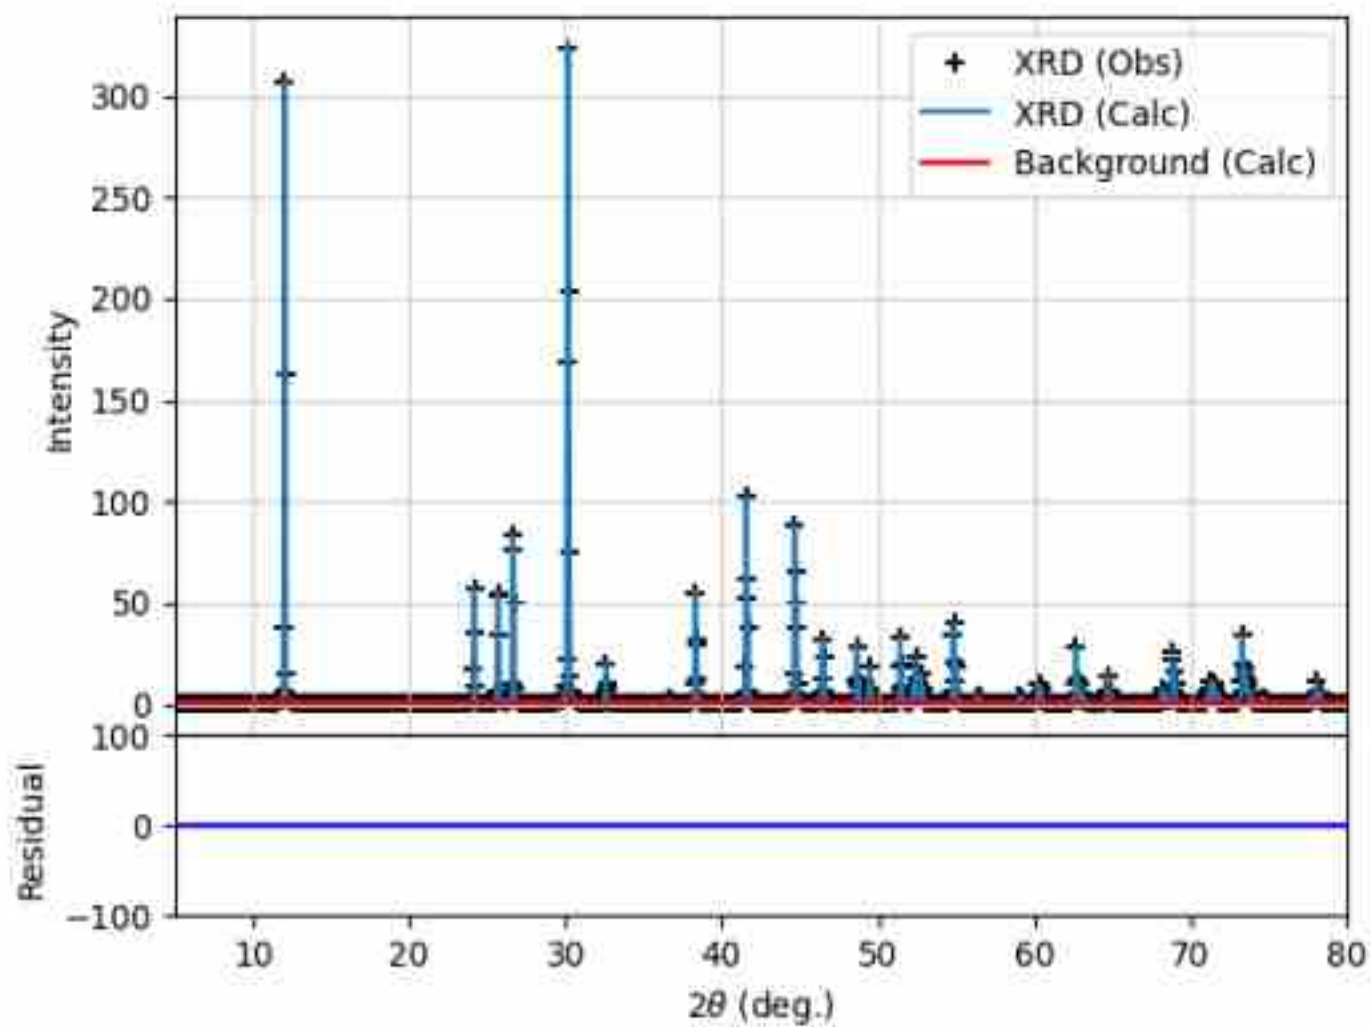

| RMSE before RR | Rwp    | RMSE after RR |
|----------------|--------|---------------|
| 0.005          | 0.0024 | 0.00053       |

# K1Zn1F3

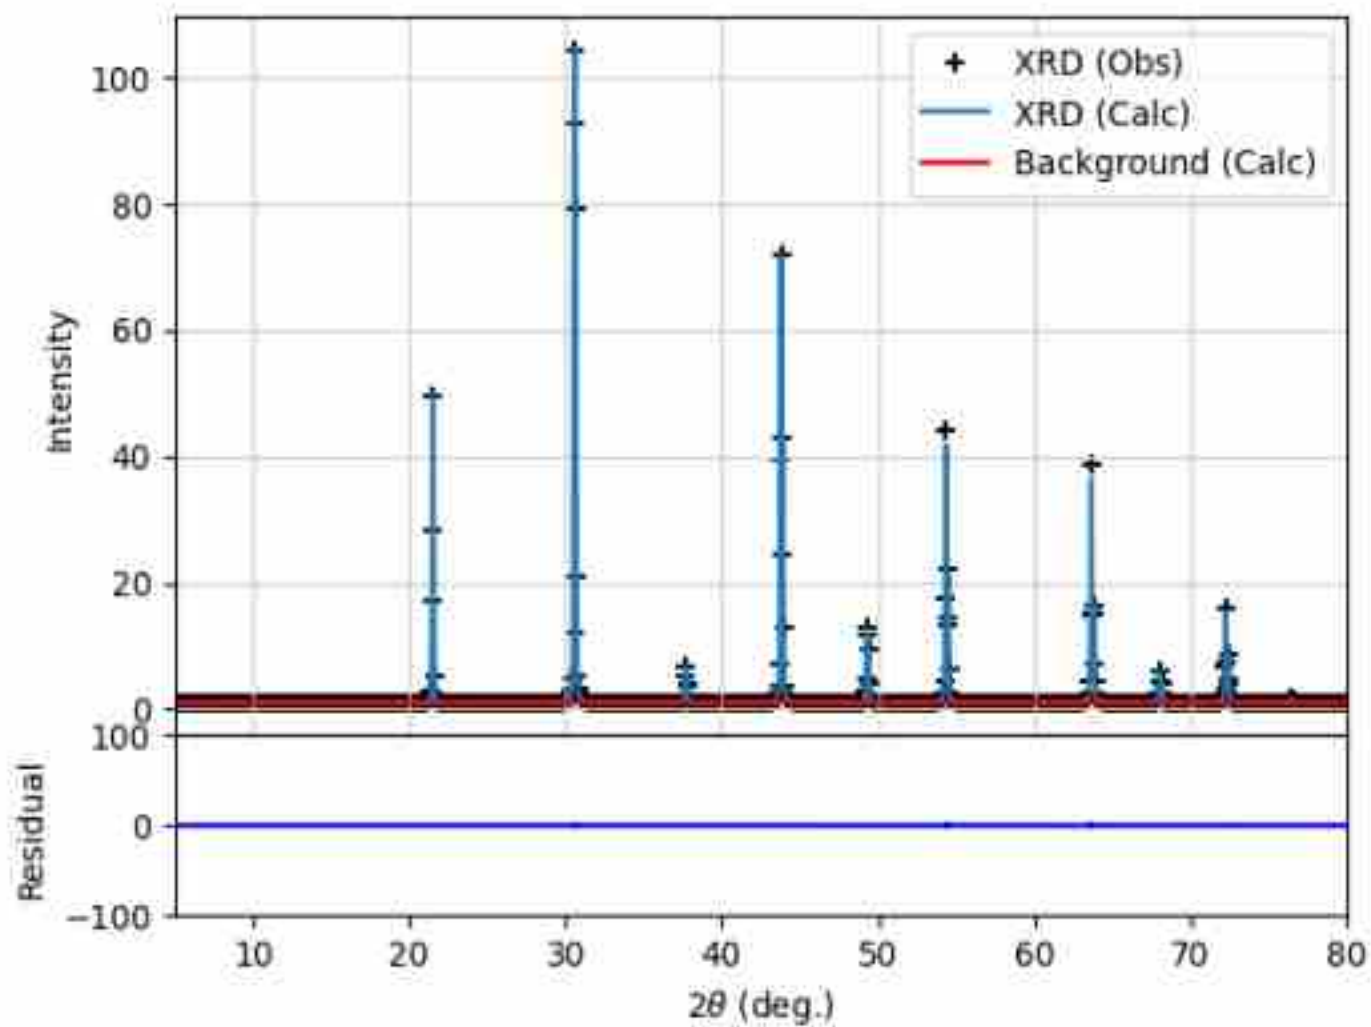

| RMSE before RR | Rwp     | RMSE after RR |
|----------------|---------|---------------|
| 0.005          | 1.48746 | 0.00496       |

# K<sub>2</sub>Hg<sub>2</sub>Sb<sub>2</sub>

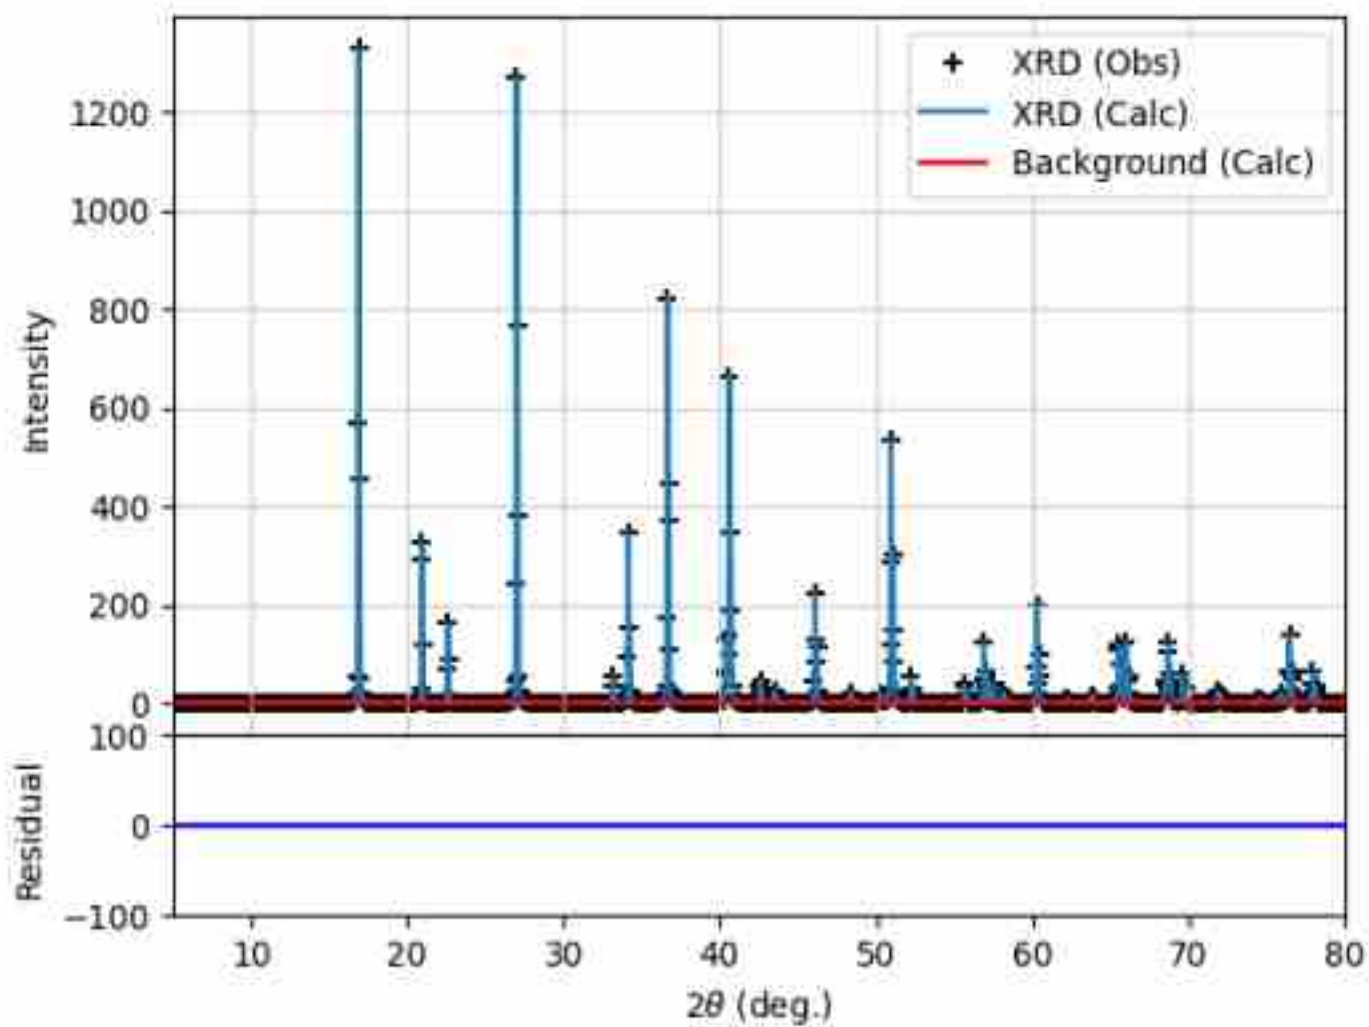

| RMSE before RR | Rwp     | RMSE after RR |
|----------------|---------|---------------|
| 0.005          | 0.00816 | 0.00214       |

# K<sub>2</sub>Mg<sub>2</sub>Sb<sub>2</sub>

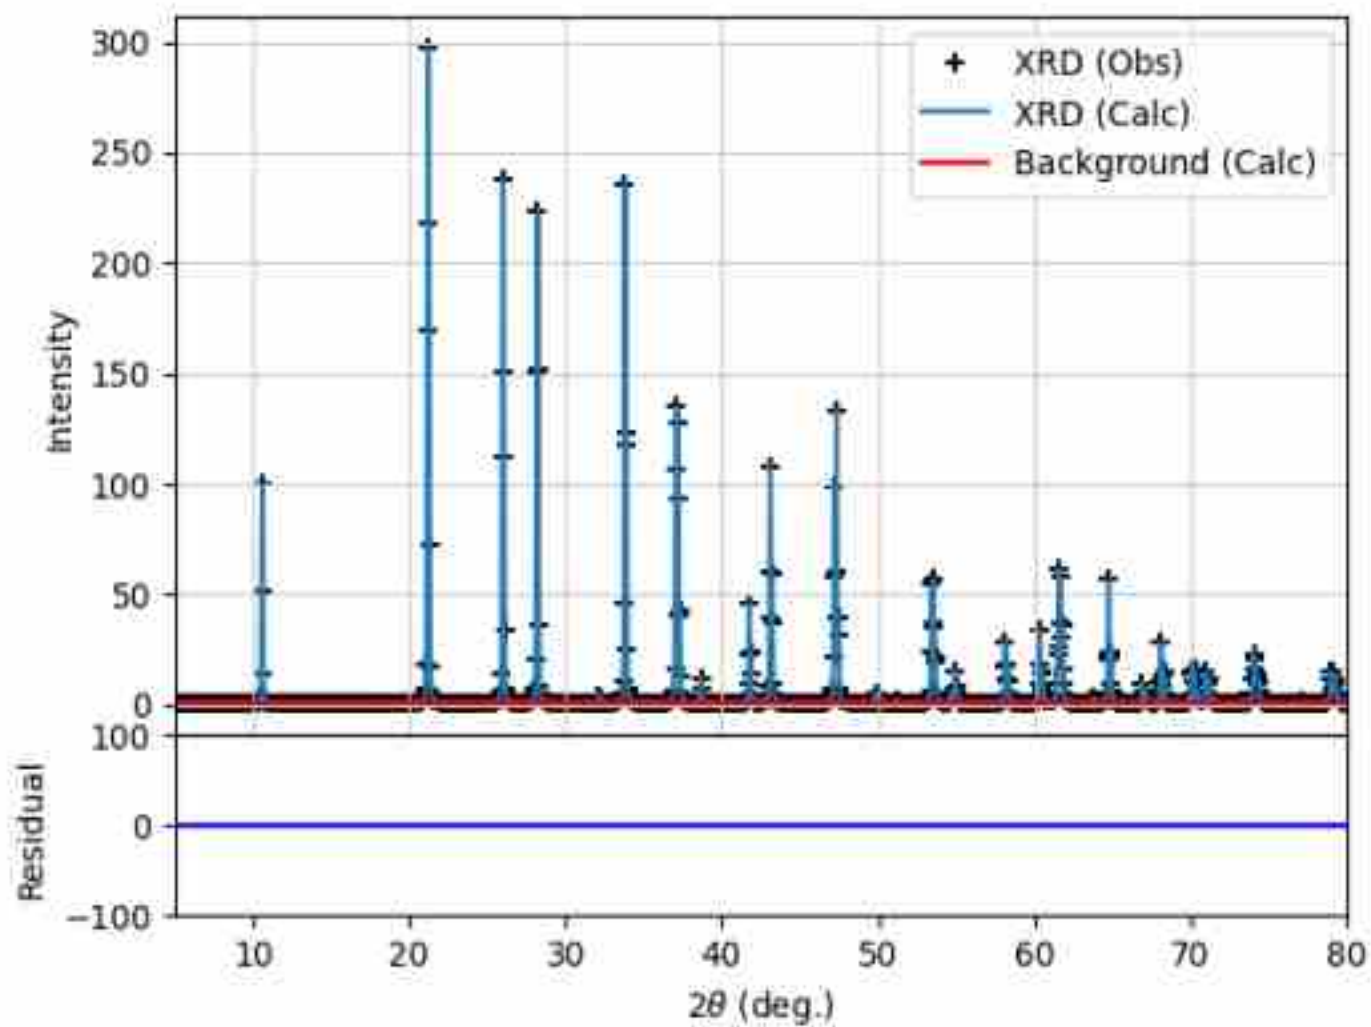

| RMSE before RR | Rwp    | RMSE after RR |
|----------------|--------|---------------|
| 0.005          | 0.0036 | 0.001         |

# K2O1

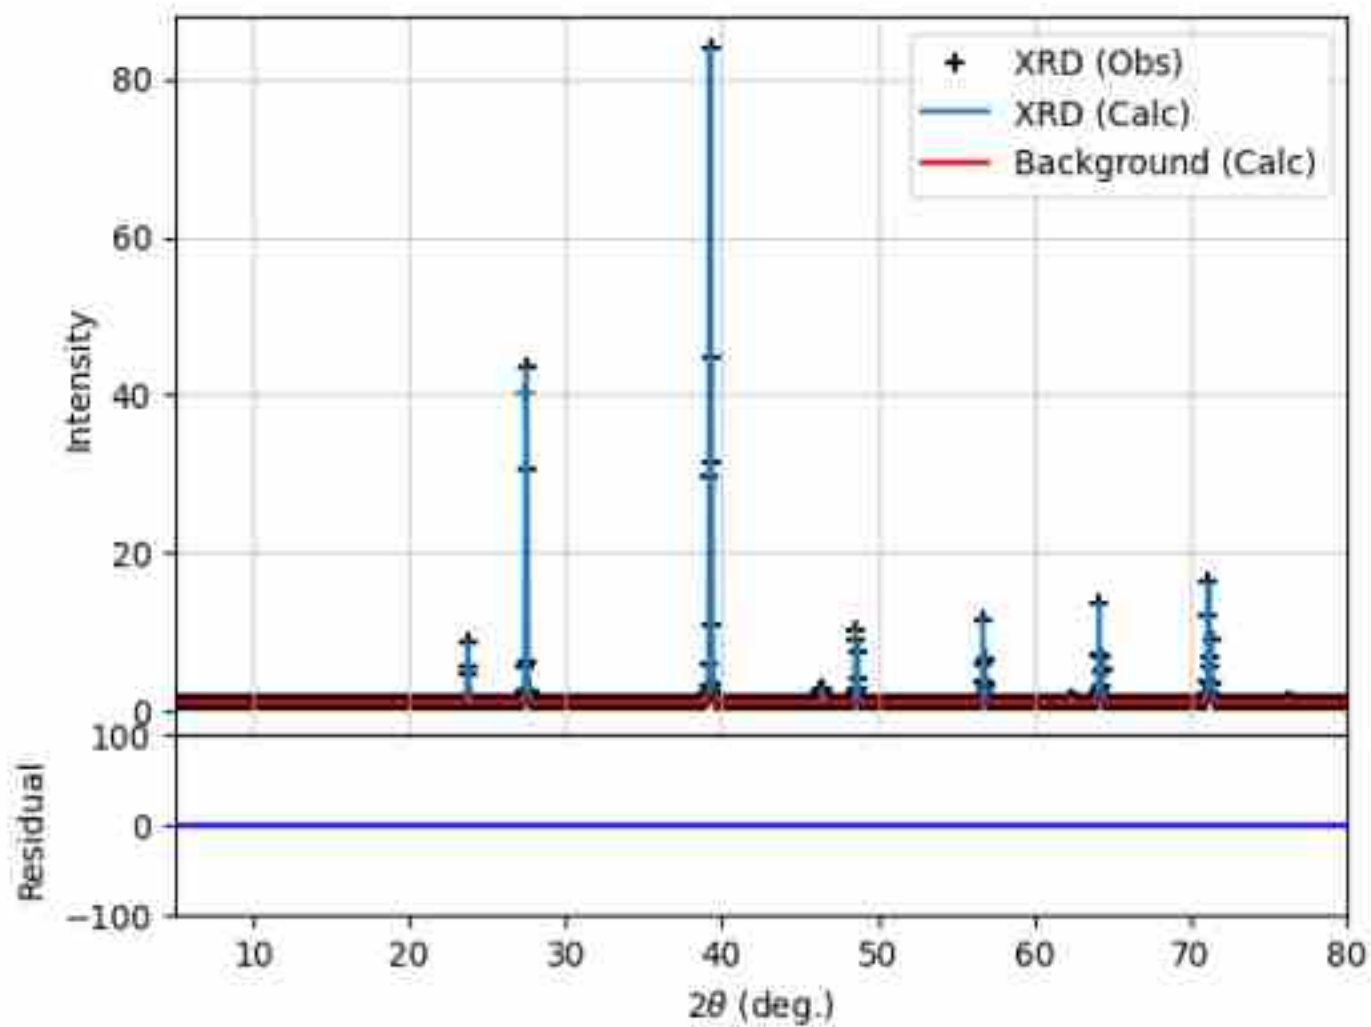

| RMSE before RR | Rwp     | RMSE after RR |
|----------------|---------|---------------|
| 0.005          | 0.02005 | 0.00216       |

# La1Er1Se2

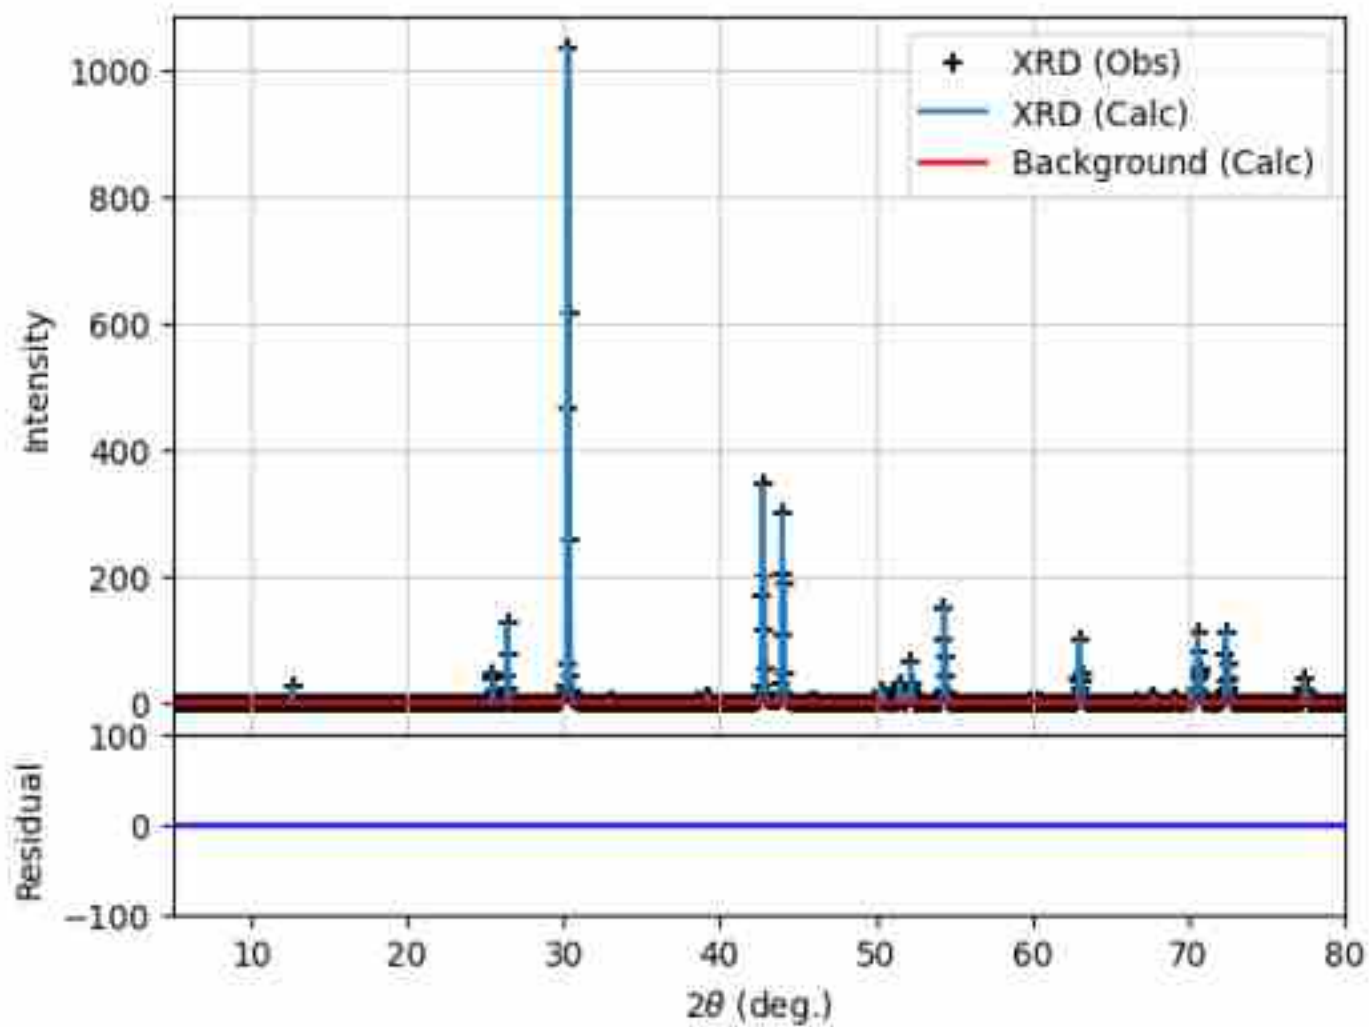

| RMSE before RR | Rwp     | RMSE after RR |
|----------------|---------|---------------|
| 0.005          | 0.00462 | 0.00302       |

# La<sub>2</sub>Se<sub>2</sub>F<sub>2</sub>

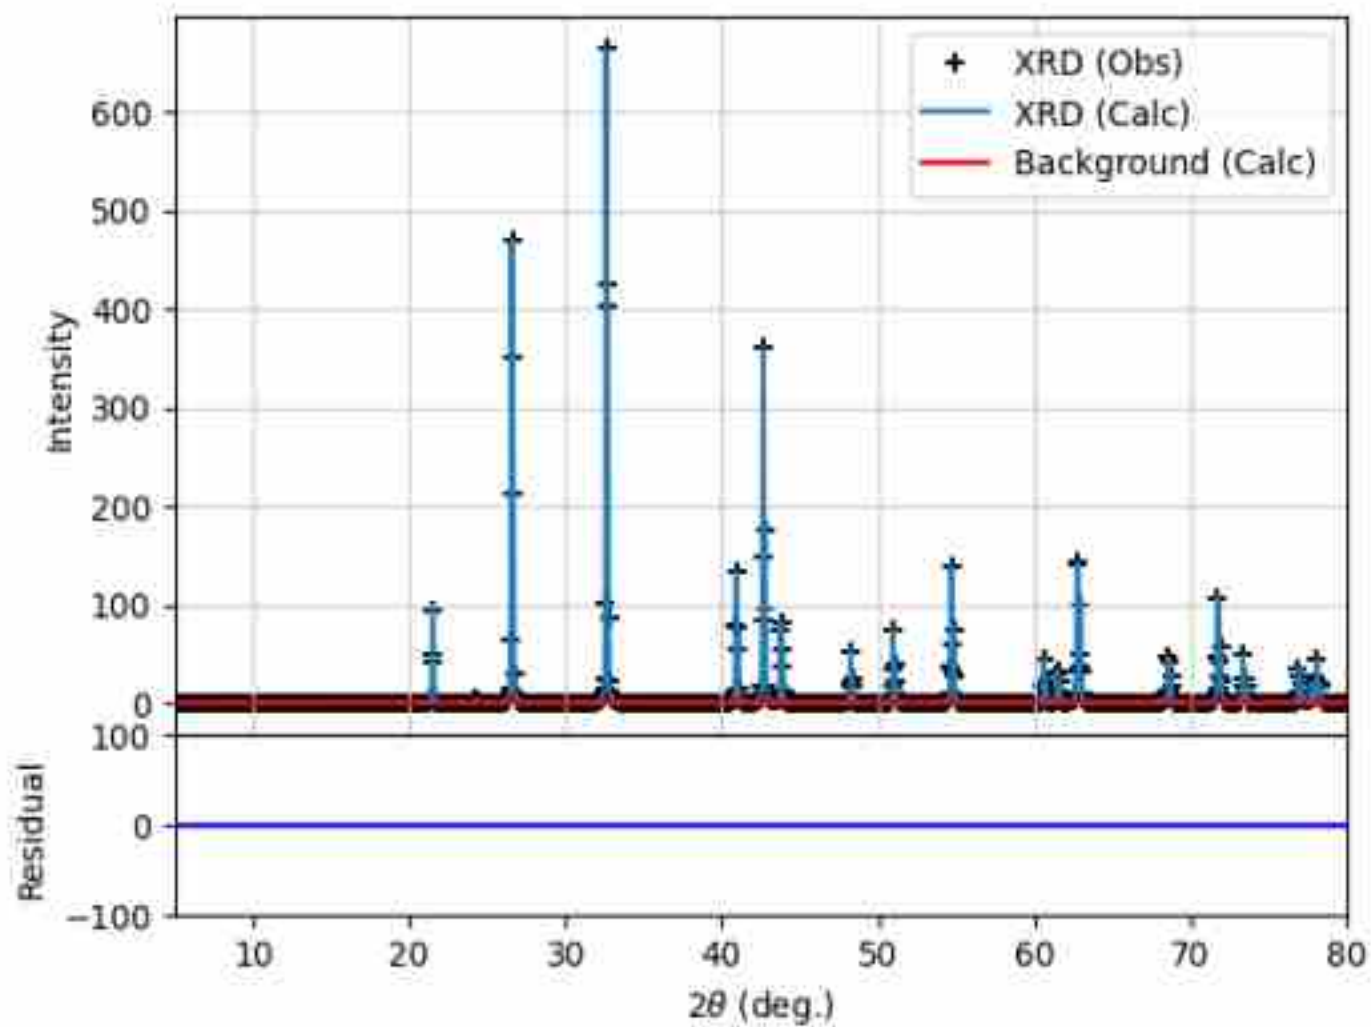

| RMSE before RR | Rwp     | RMSE after RR |
|----------------|---------|---------------|
| 0.005          | 0.00678 | 0.00084       |

# La<sub>2</sub>Tl<sub>3</sub>Sn<sub>3</sub>

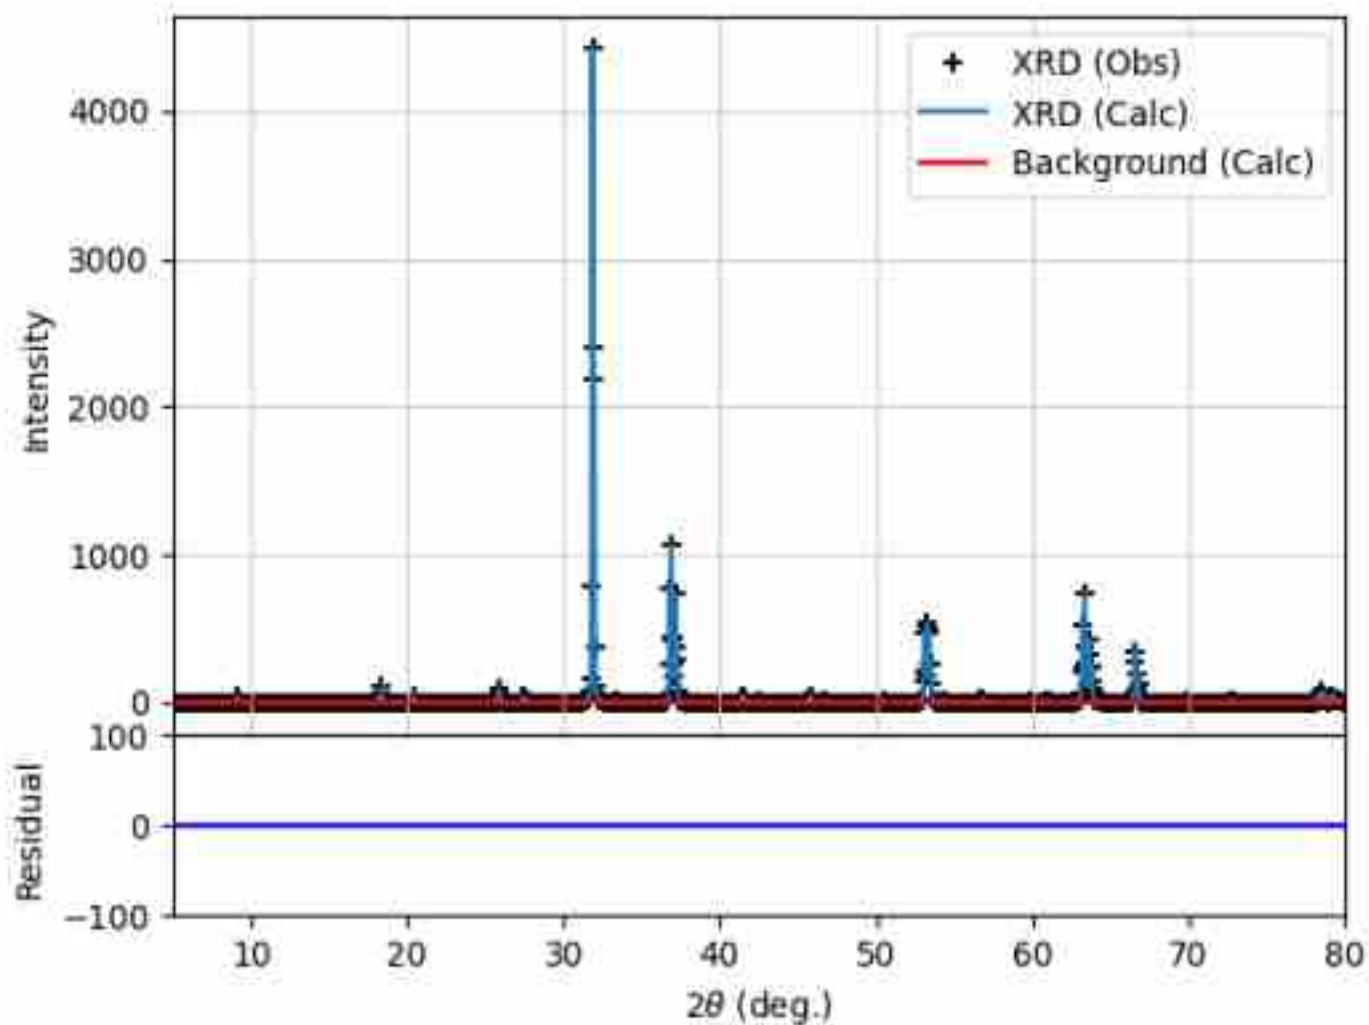

| RMSE before RR | Rwp     | RMSE after RR |
|----------------|---------|---------------|
| 0.005          | 0.00341 | 0.00021       |



# La<sub>3</sub>Sn<sub>1</sub>C<sub>1</sub>

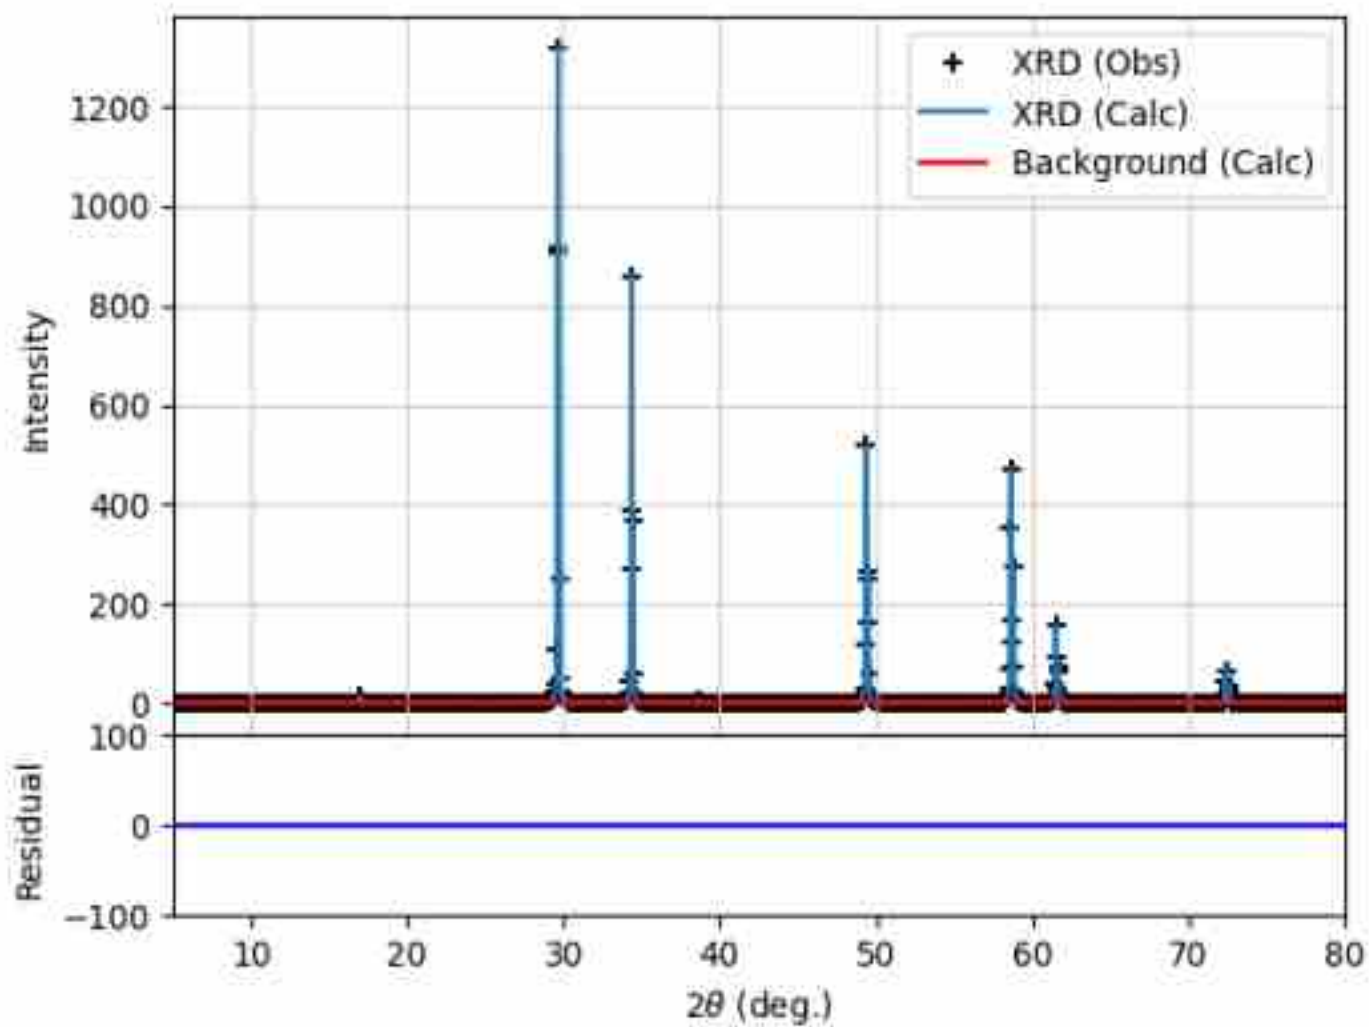

| RMSE before RR | Rwp     | RMSE after RR |
|----------------|---------|---------------|
| 0.005          | 0.01213 | 0.00374       |

# Li1Er1Se2

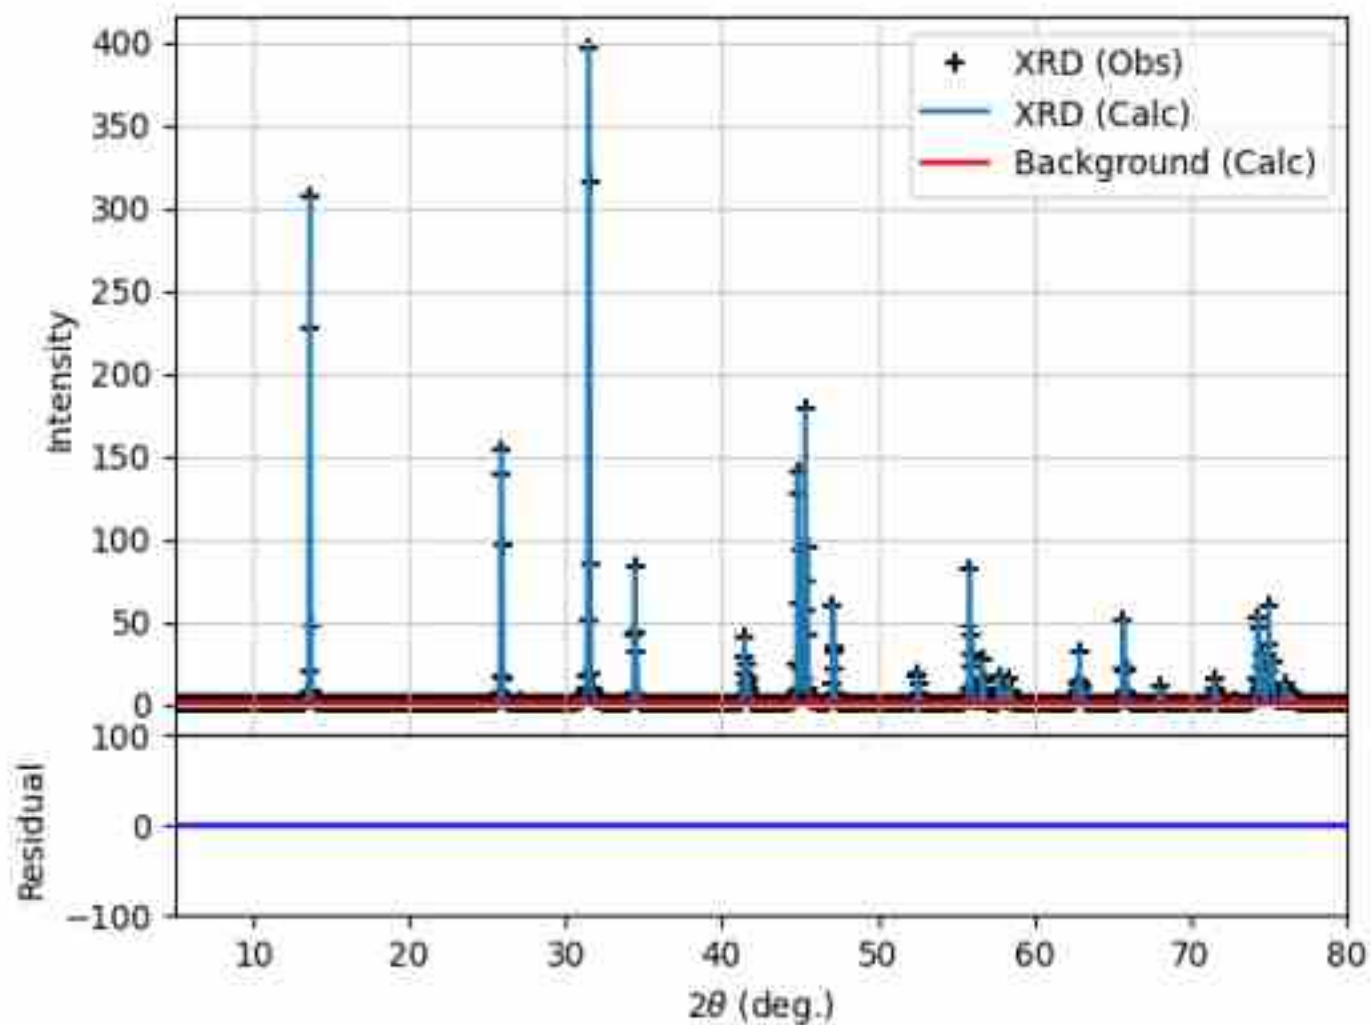

| RMSE before RR | Rwp    | RMSE after RR |
|----------------|--------|---------------|
| 0.005          | 0.0032 | 0.00226       |

# Lu1Au4

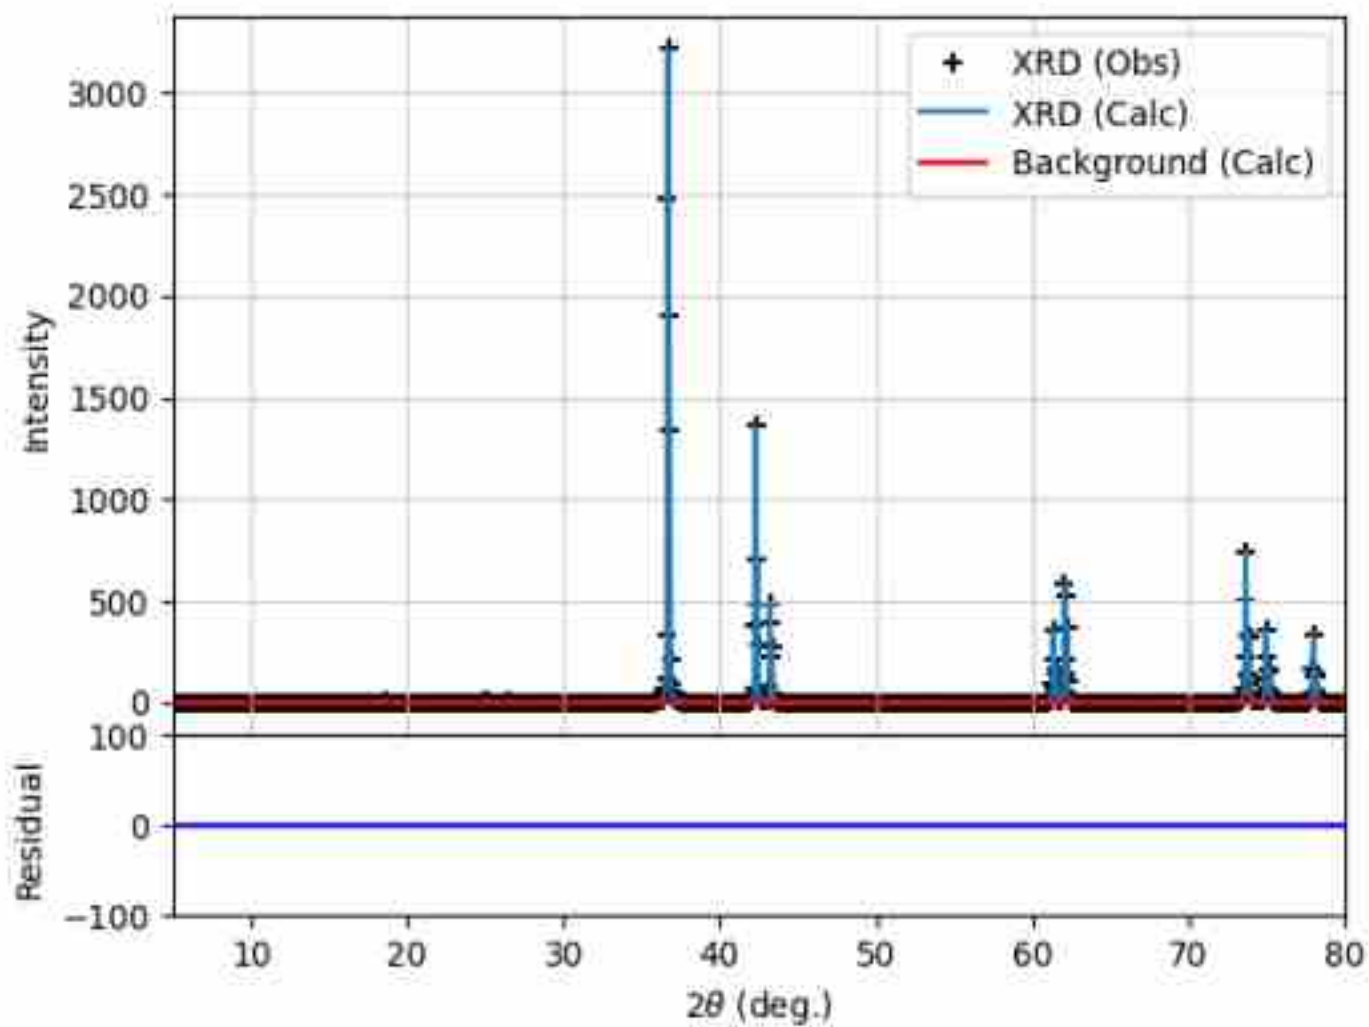

| RMSE before RR | Rwp     | RMSE after RR |
|----------------|---------|---------------|
| 0.005          | 0.02804 | 0.00104       |

# Mg1Ag5

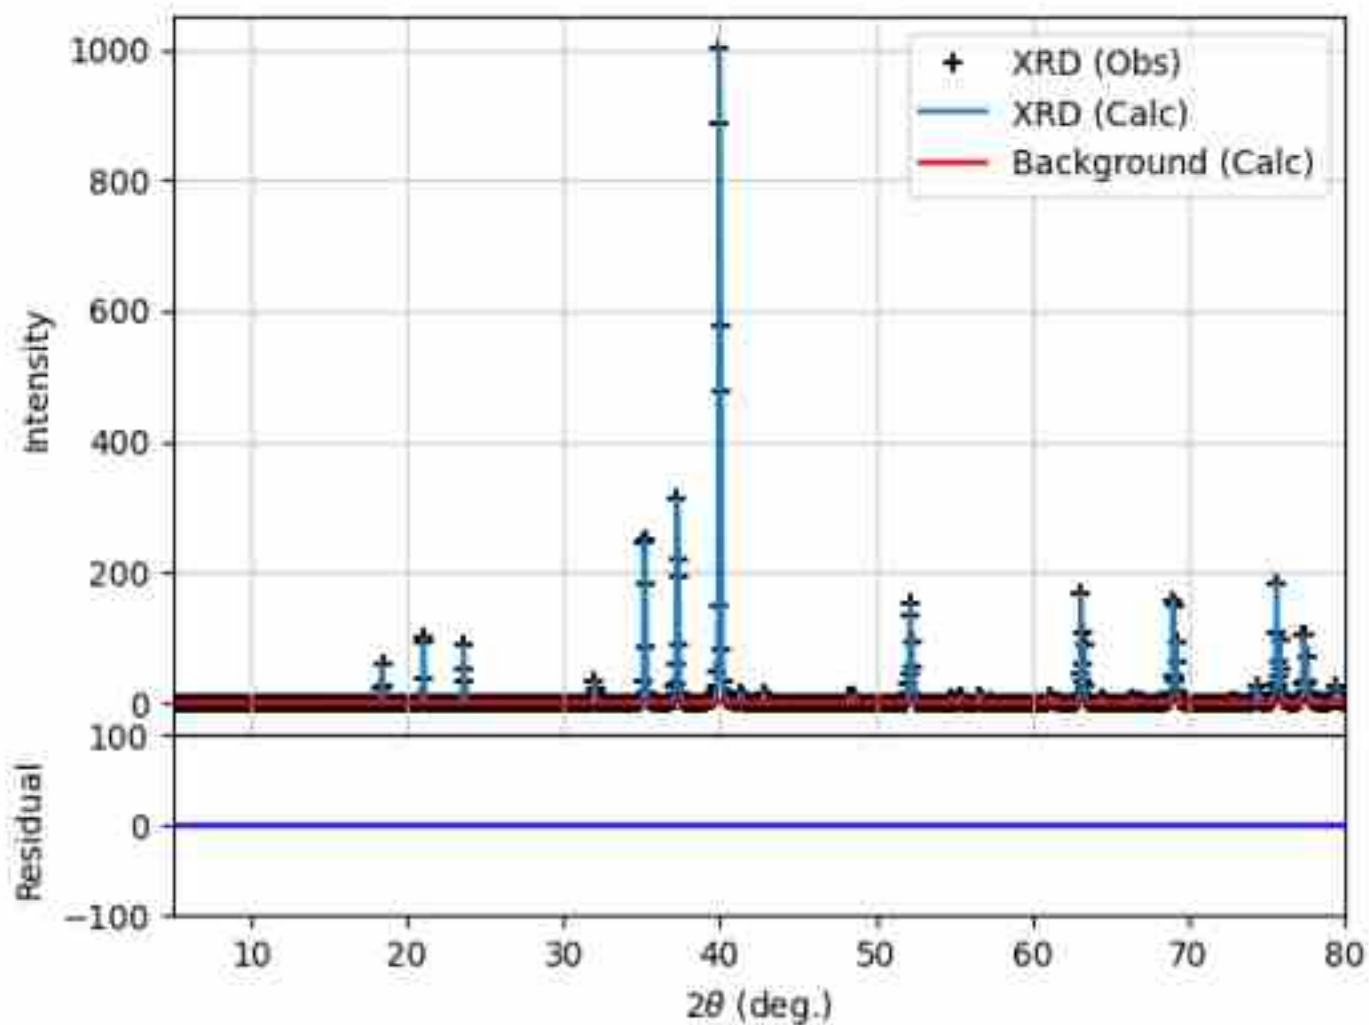

| RMSE before RR | Rwp     | RMSE after RR |
|----------------|---------|---------------|
| 0.005          | 0.00932 | 0.00112       |

# Mg1Cu1Pb1

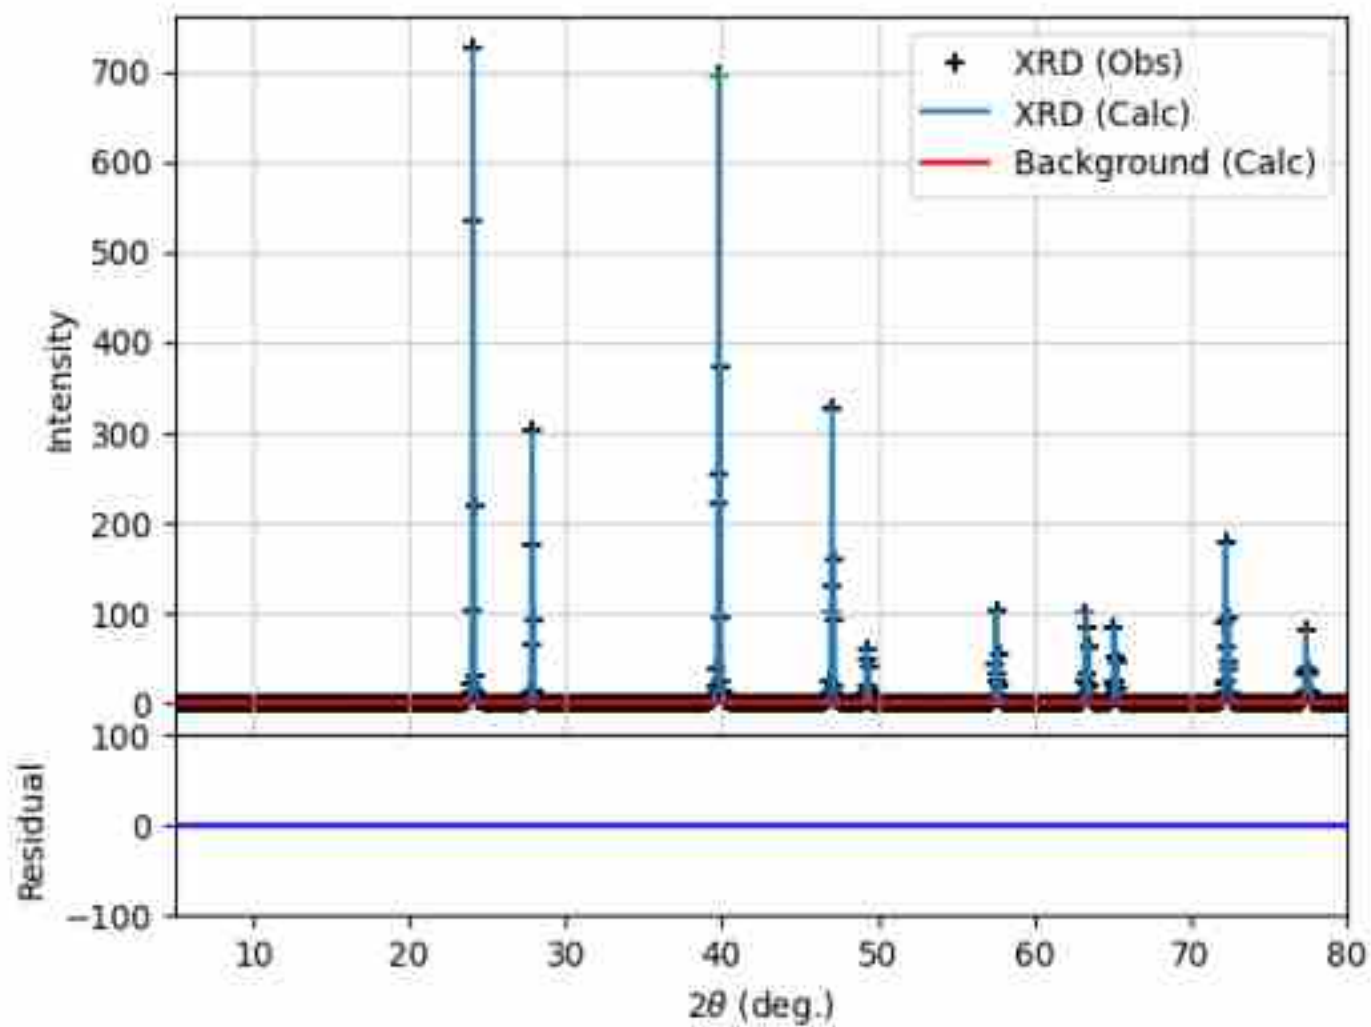

| RMSE before RR | Rwp     | RMSE after RR |
|----------------|---------|---------------|
| 0.005          | 0.00447 | 0.00109       |

# Mg1Pb3

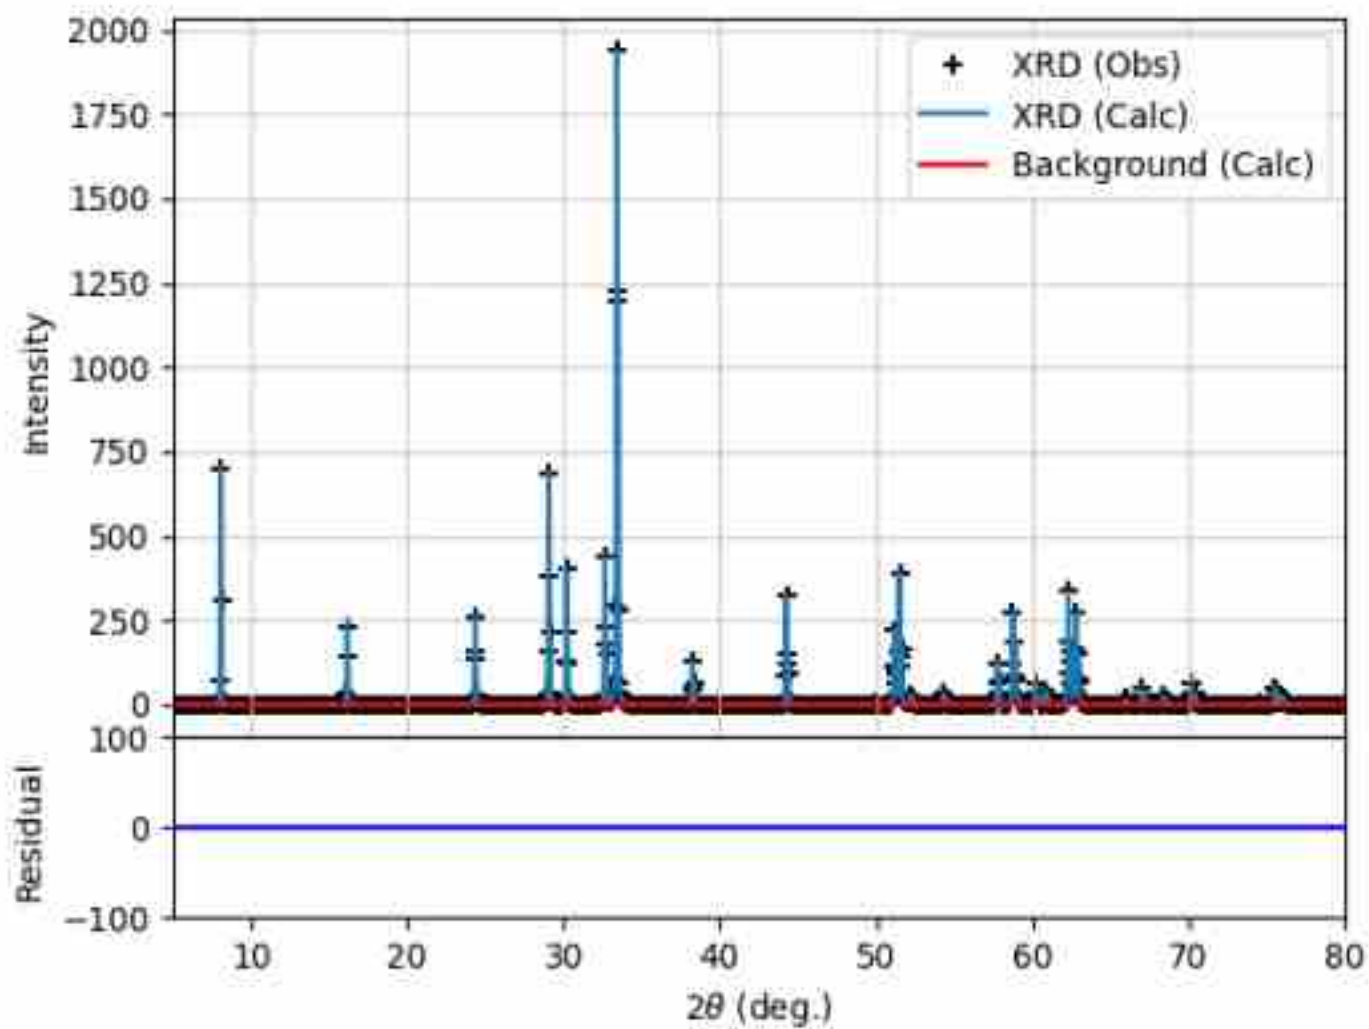

| RMSE before RR | Rwp    | RMSE after RR |
|----------------|--------|---------------|
| 0.005          | 0.0028 | 0.00033       |

# Mg<sub>2</sub>In<sub>4</sub>

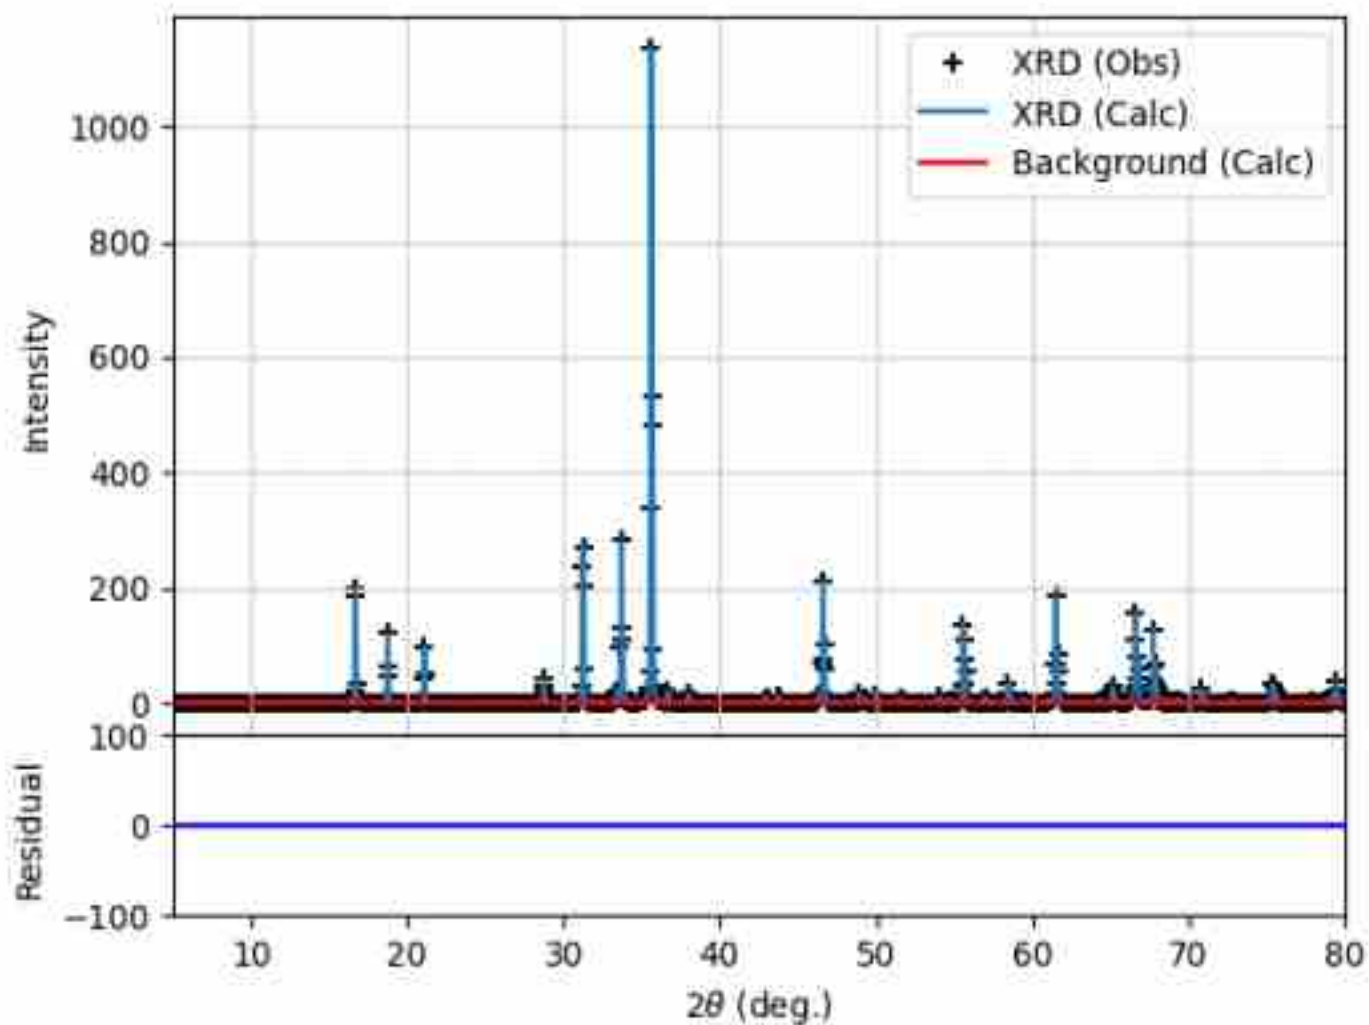

| RMSE before RR | Rwp     | RMSE after RR |
|----------------|---------|---------------|
| 0.005          | 0.00916 | 0.00131       |

# Mg4Cd2

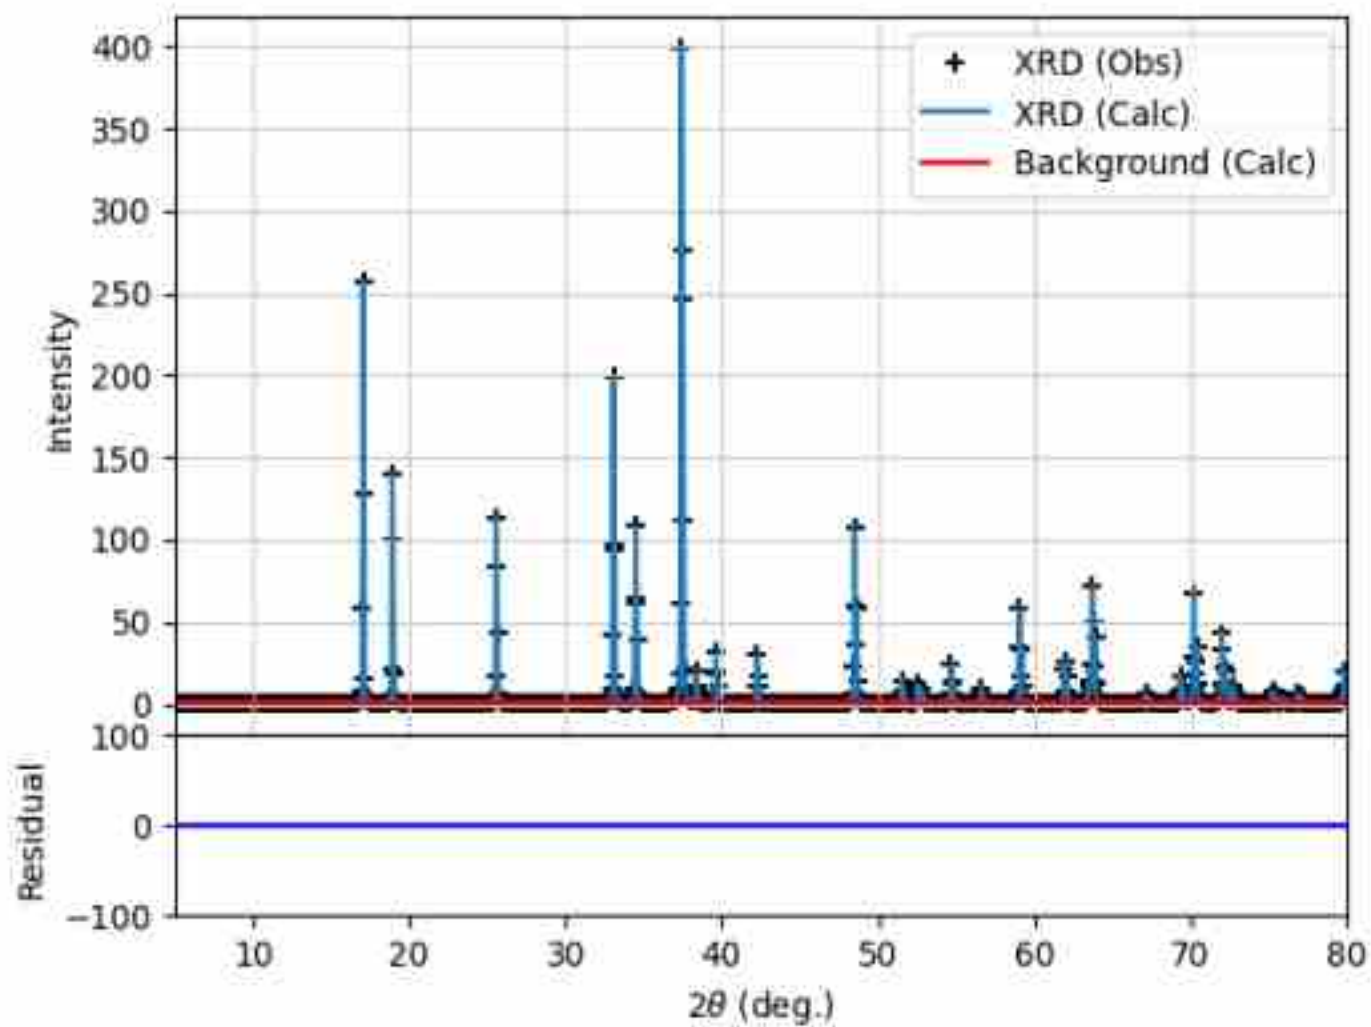

| RMSE before RR | Rwp     | RMSE after RR |
|----------------|---------|---------------|
| 0.005          | 0.00699 | 0.00197       |



# Mg5Cd1

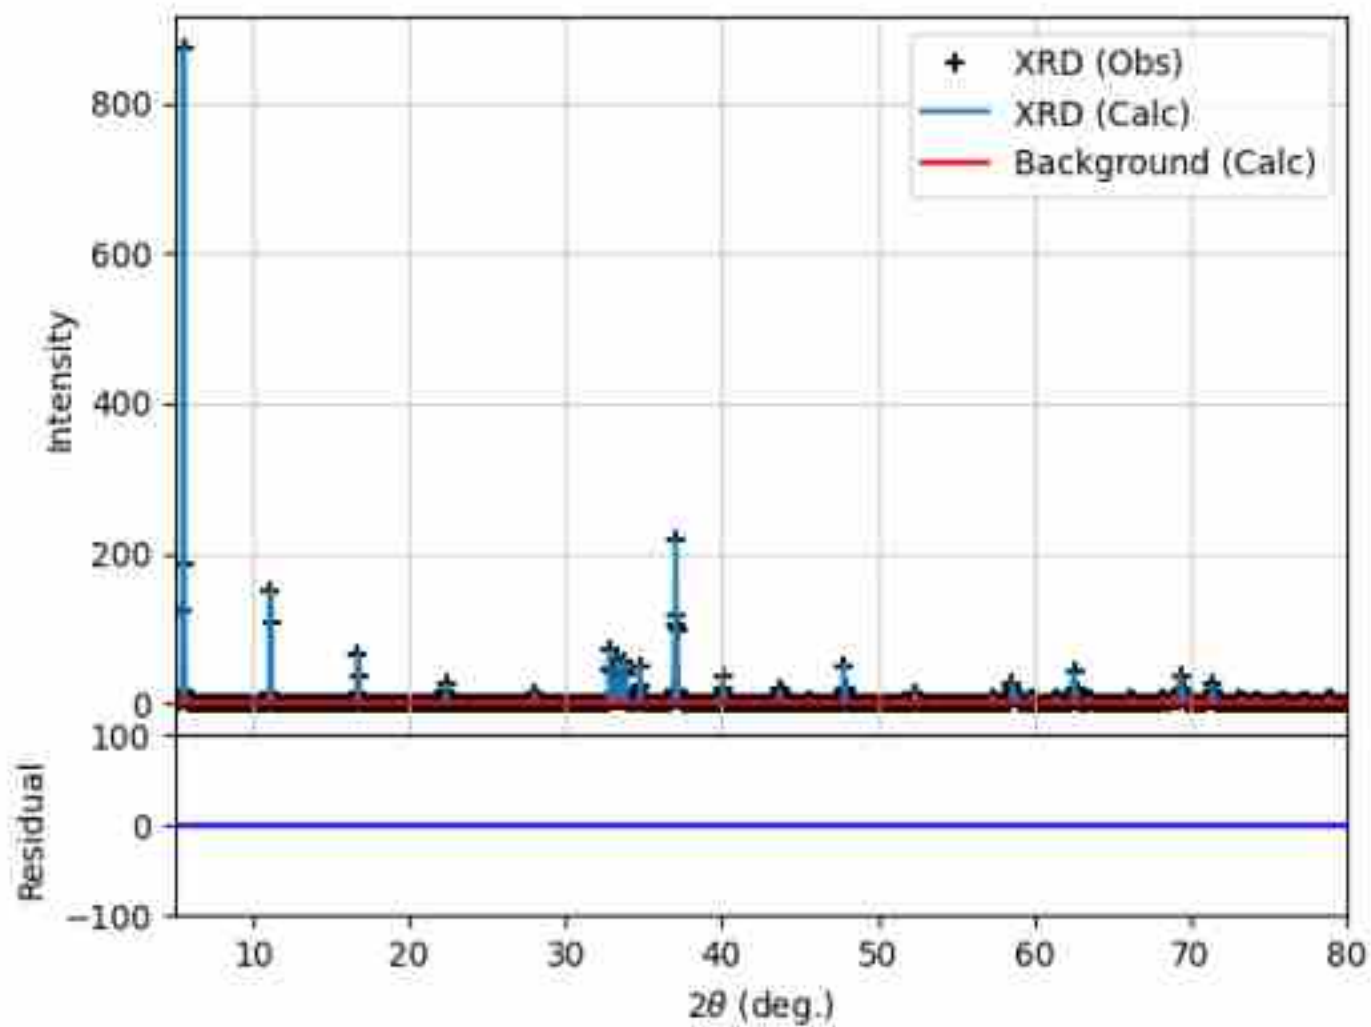

| RMSE before RR | Rwp     | RMSE after RR |
|----------------|---------|---------------|
| 0.005          | 0.00279 | 0.00072       |

# Mn<sub>3</sub>Ga1

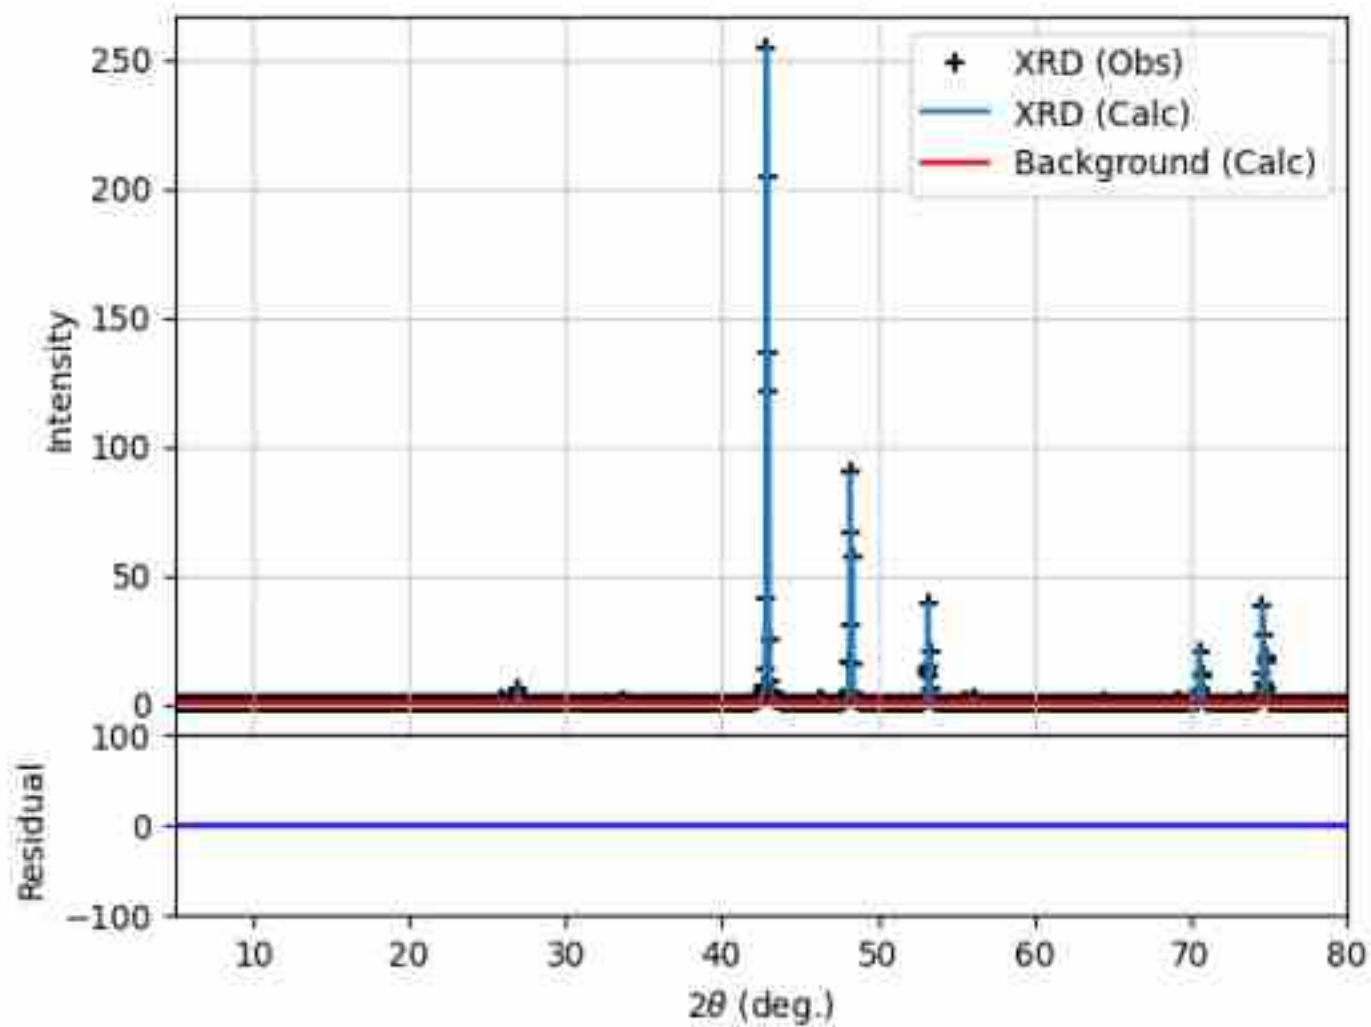

| RMSE before RR | Rwp     | RMSE after RR |
|----------------|---------|---------------|
| 0.005          | 0.00313 | 0.0005        |

# Mn<sub>4</sub>Ge<sub>2</sub>

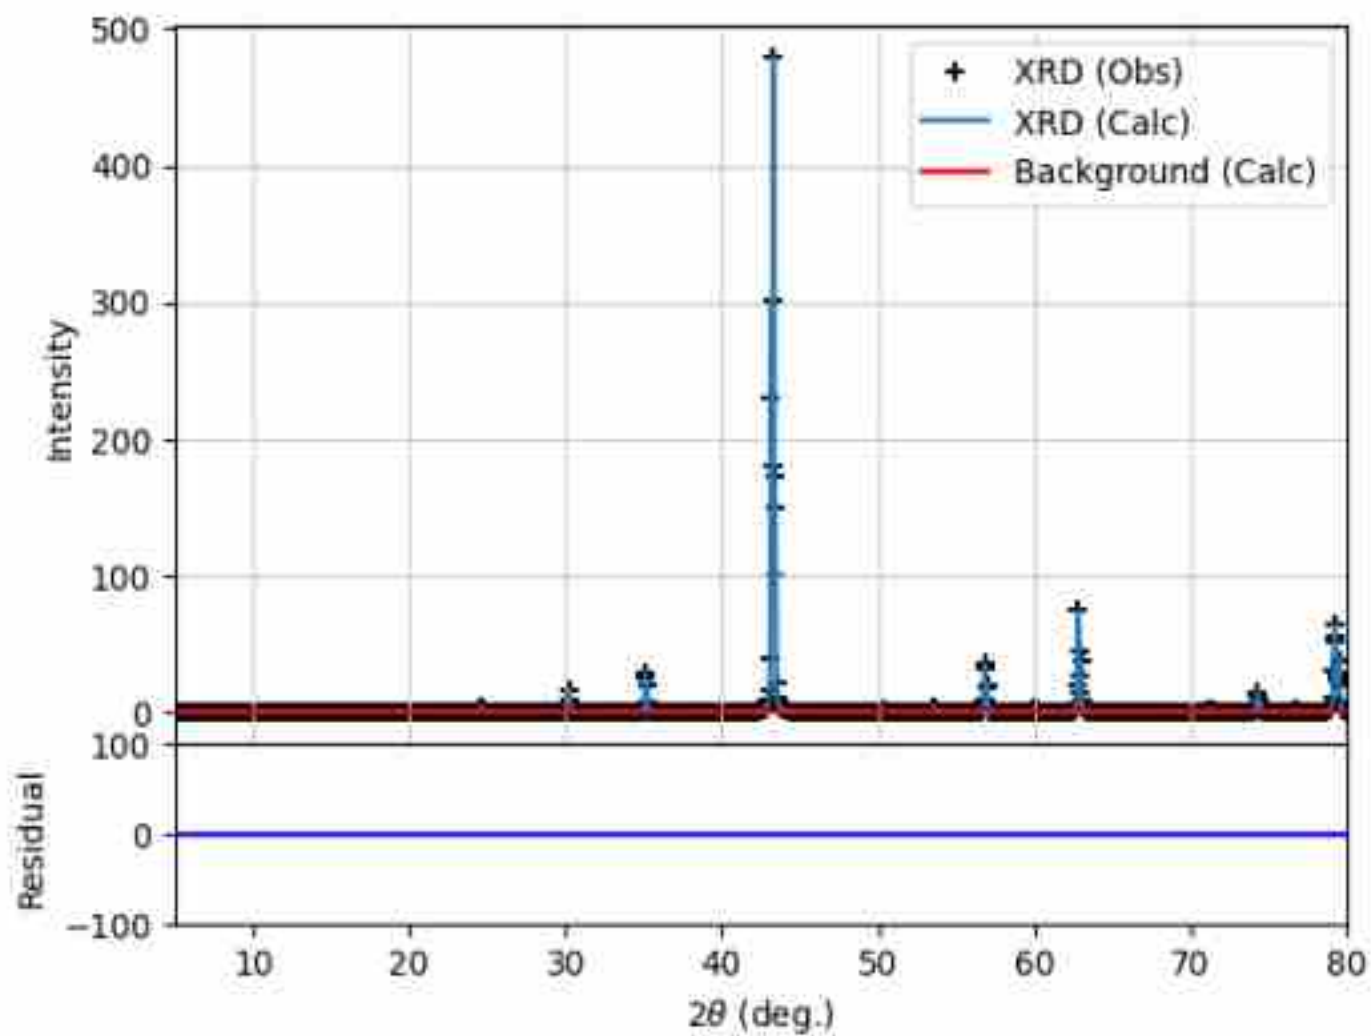

| RMSE before RR | Rwp     | RMSE after RR |
|----------------|---------|---------------|
| 0.005          | 0.00156 | 0.00035       |

# Mn<sub>4</sub>H<sub>4</sub>O<sub>8</sub>

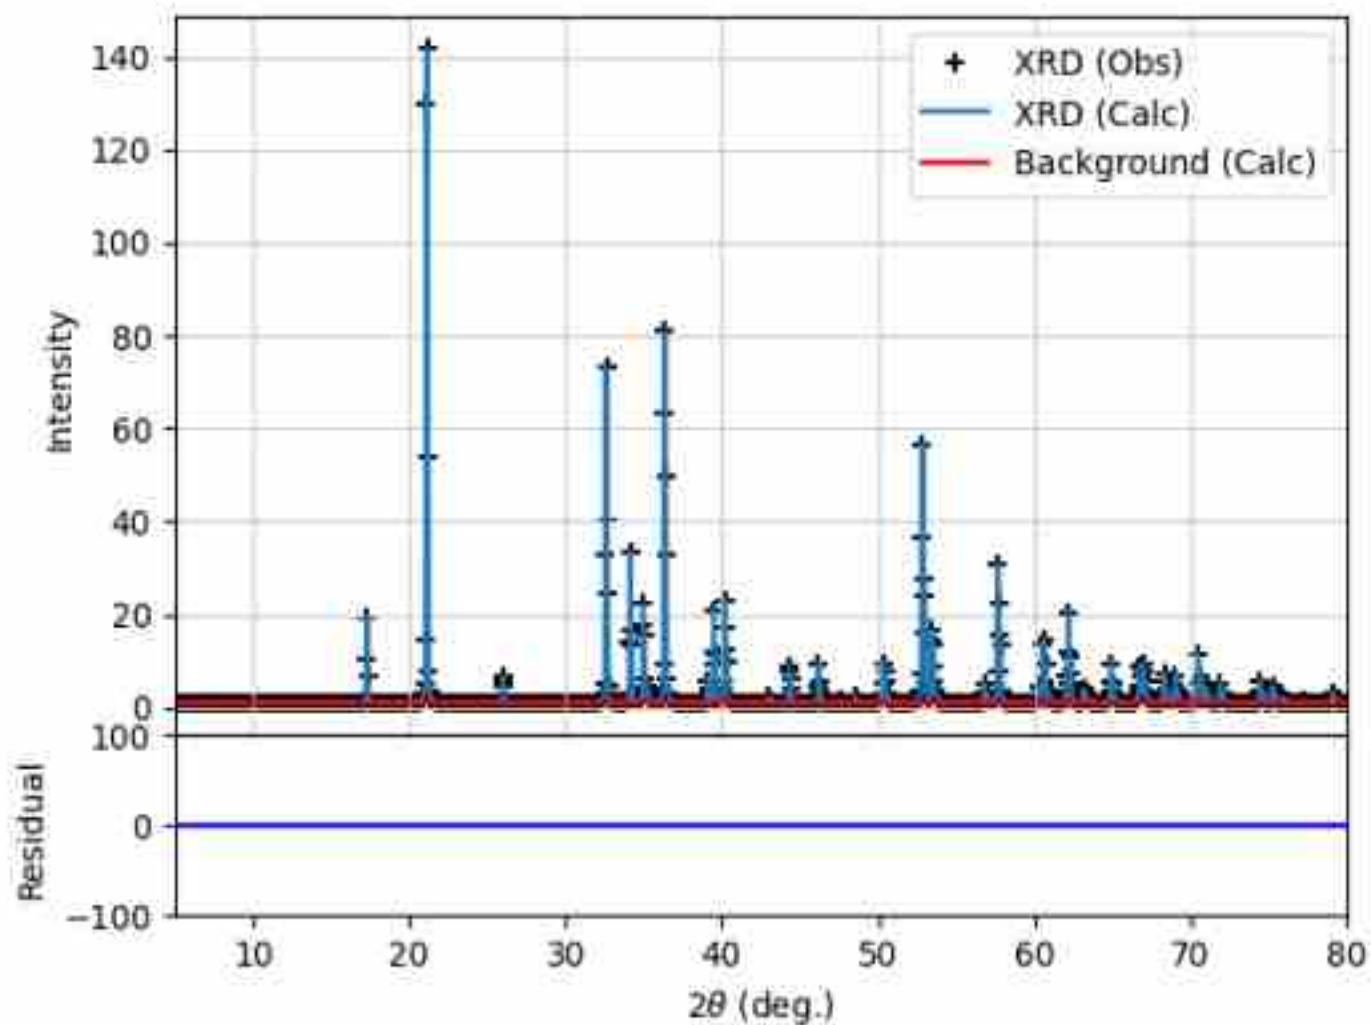

| RMSE before RR | Rwp     | RMSE after RR |
|----------------|---------|---------------|
| 0.05           | 0.00263 | 0.00341       |

# Mo<sub>4</sub>Se<sub>4</sub>S<sub>4</sub>

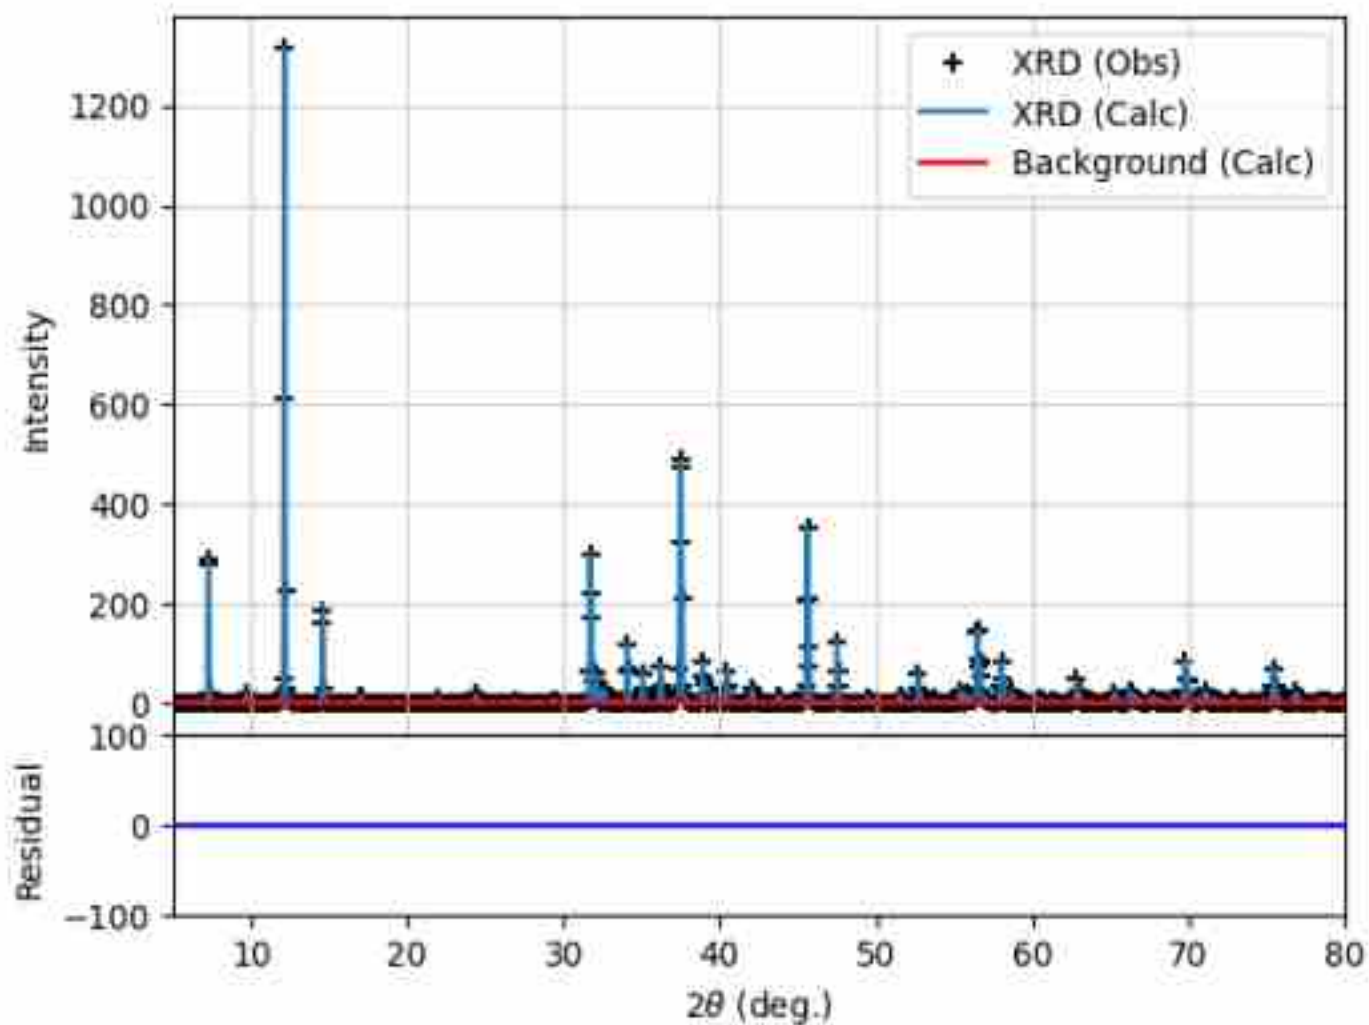

| RMSE before RR | Rwp     | RMSE after RR |
|----------------|---------|---------------|
| 0.05           | 0.00357 | 0.00044       |

# Na1Er1S2

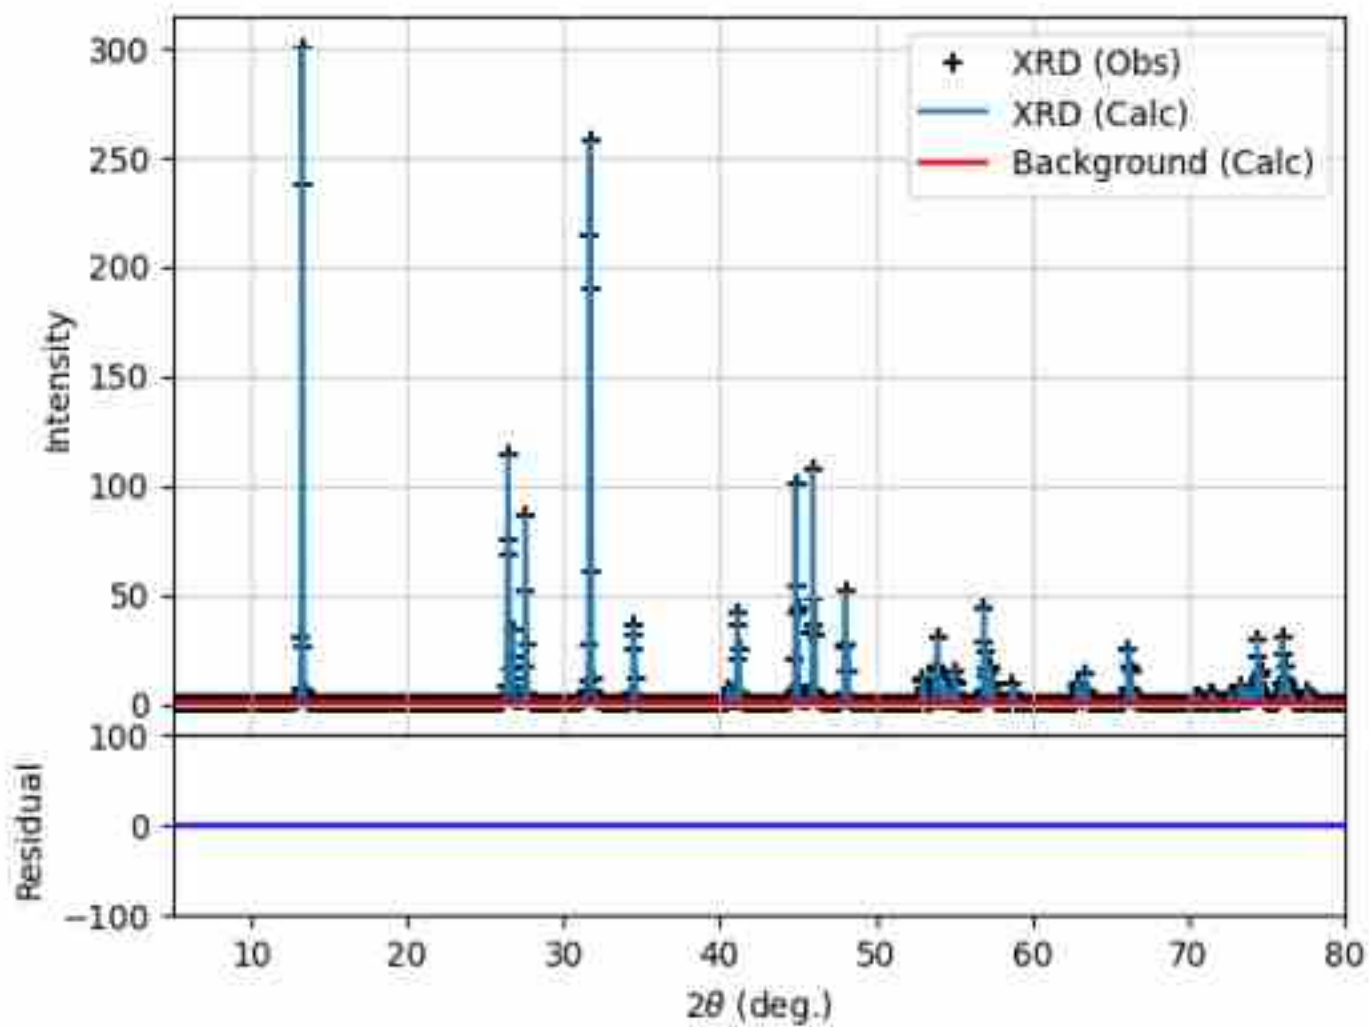

| RMSE before RR | Rwp     | RMSE after RR |
|----------------|---------|---------------|
| 0.005          | 0.00285 | 0.0025        |

# Na1Ho1O2

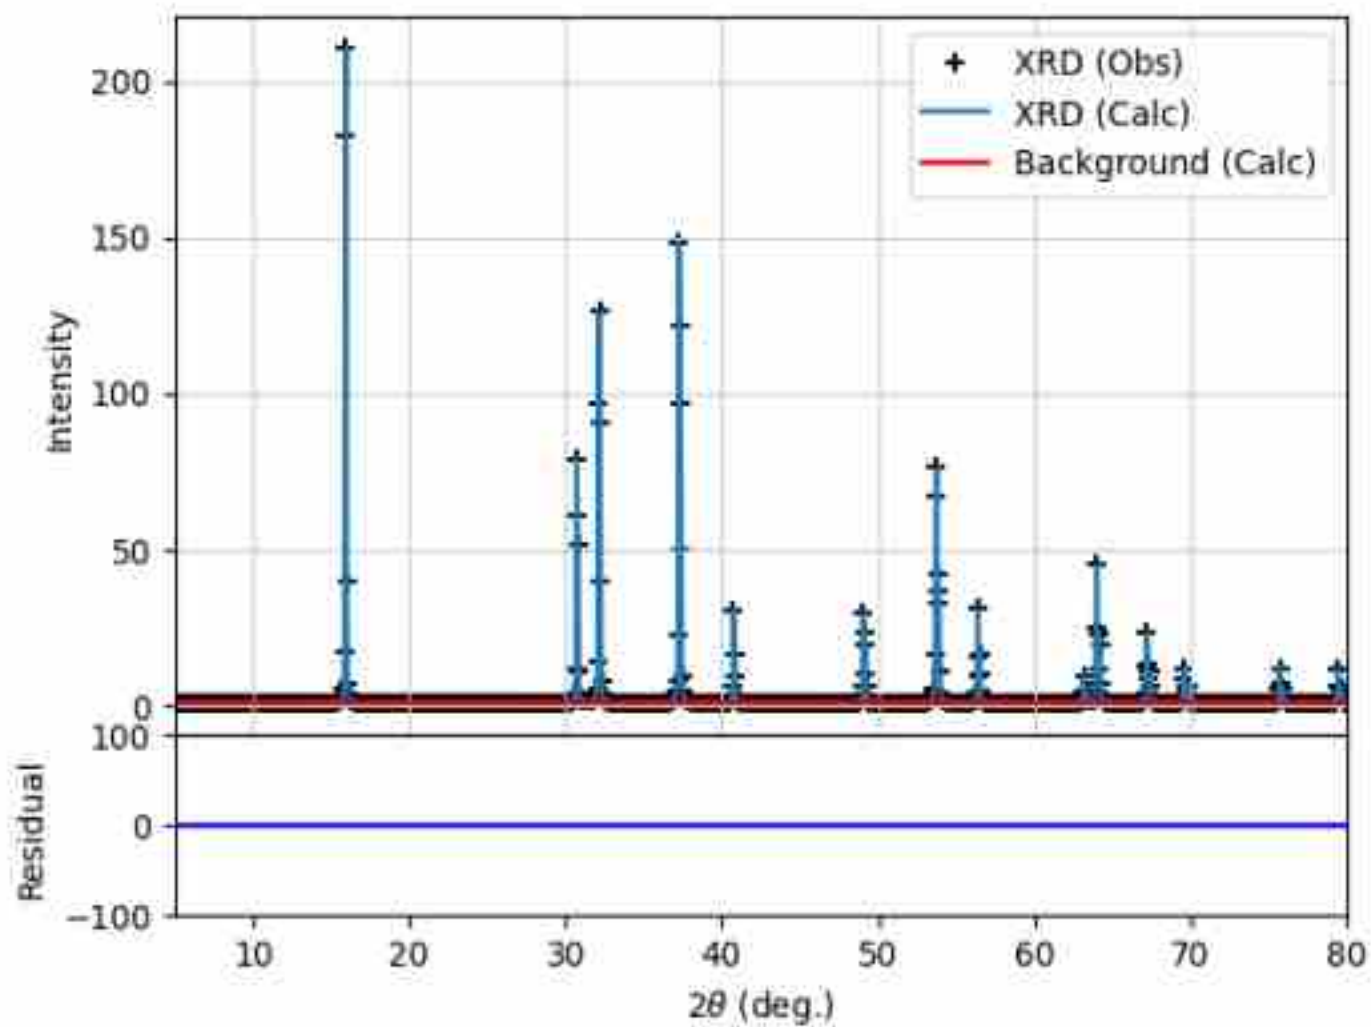

| RMSE before RR | Rwp     | RMSE after RR |
|----------------|---------|---------------|
| 0.005          | 0.00382 | 0.00178       |

# Na1Sc1O2

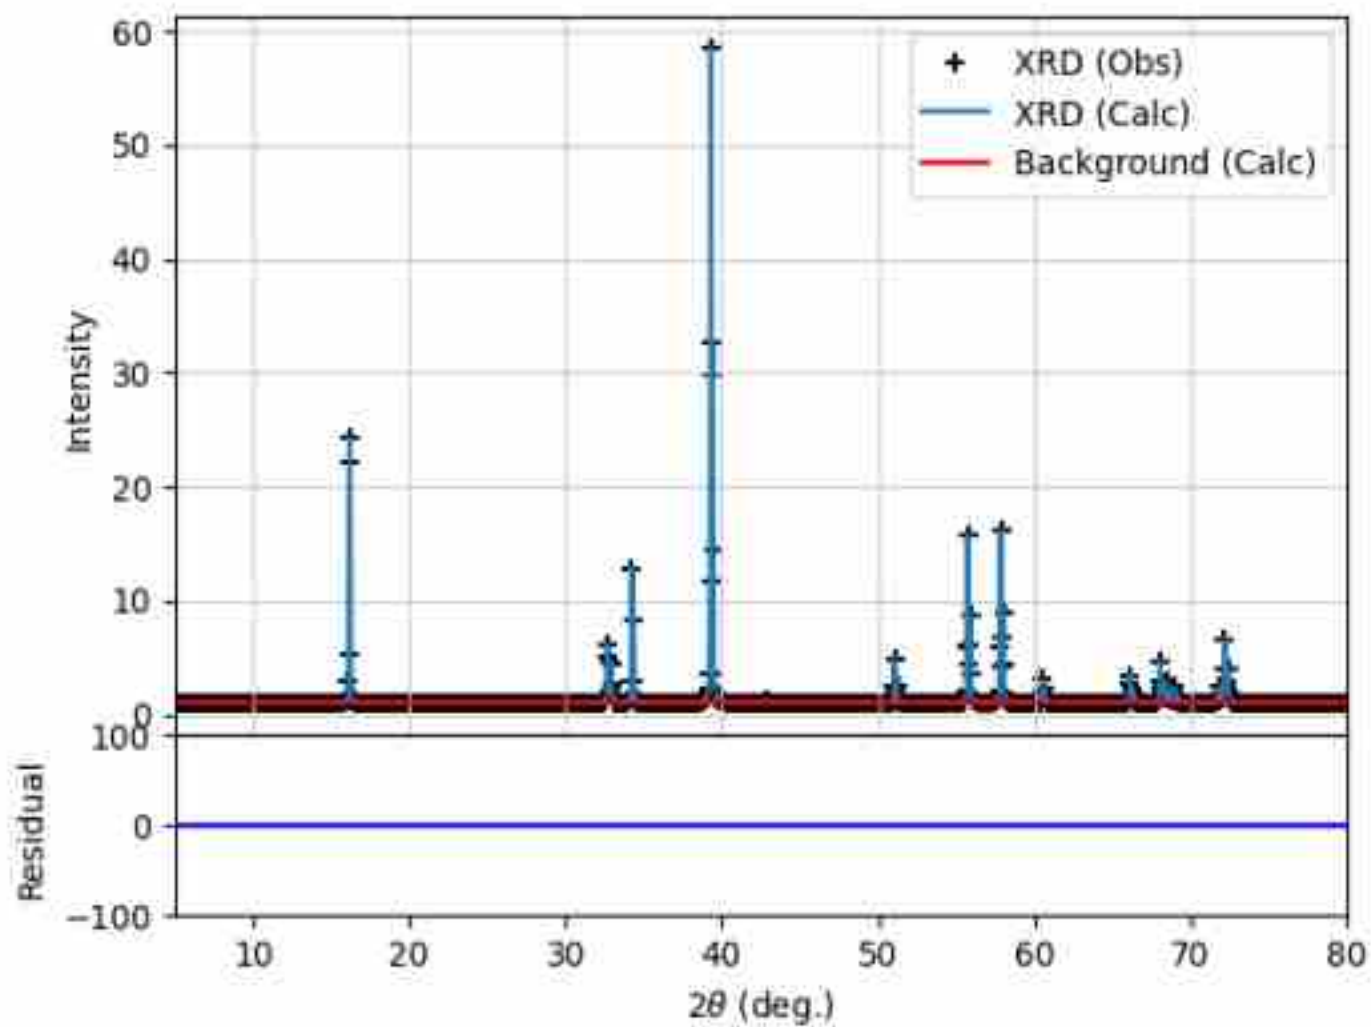

| RMSE before RR | Rwp     | RMSE after RR |
|----------------|---------|---------------|
| 0.005          | 0.00256 | 0.00049       |



# Na1Tb1S2

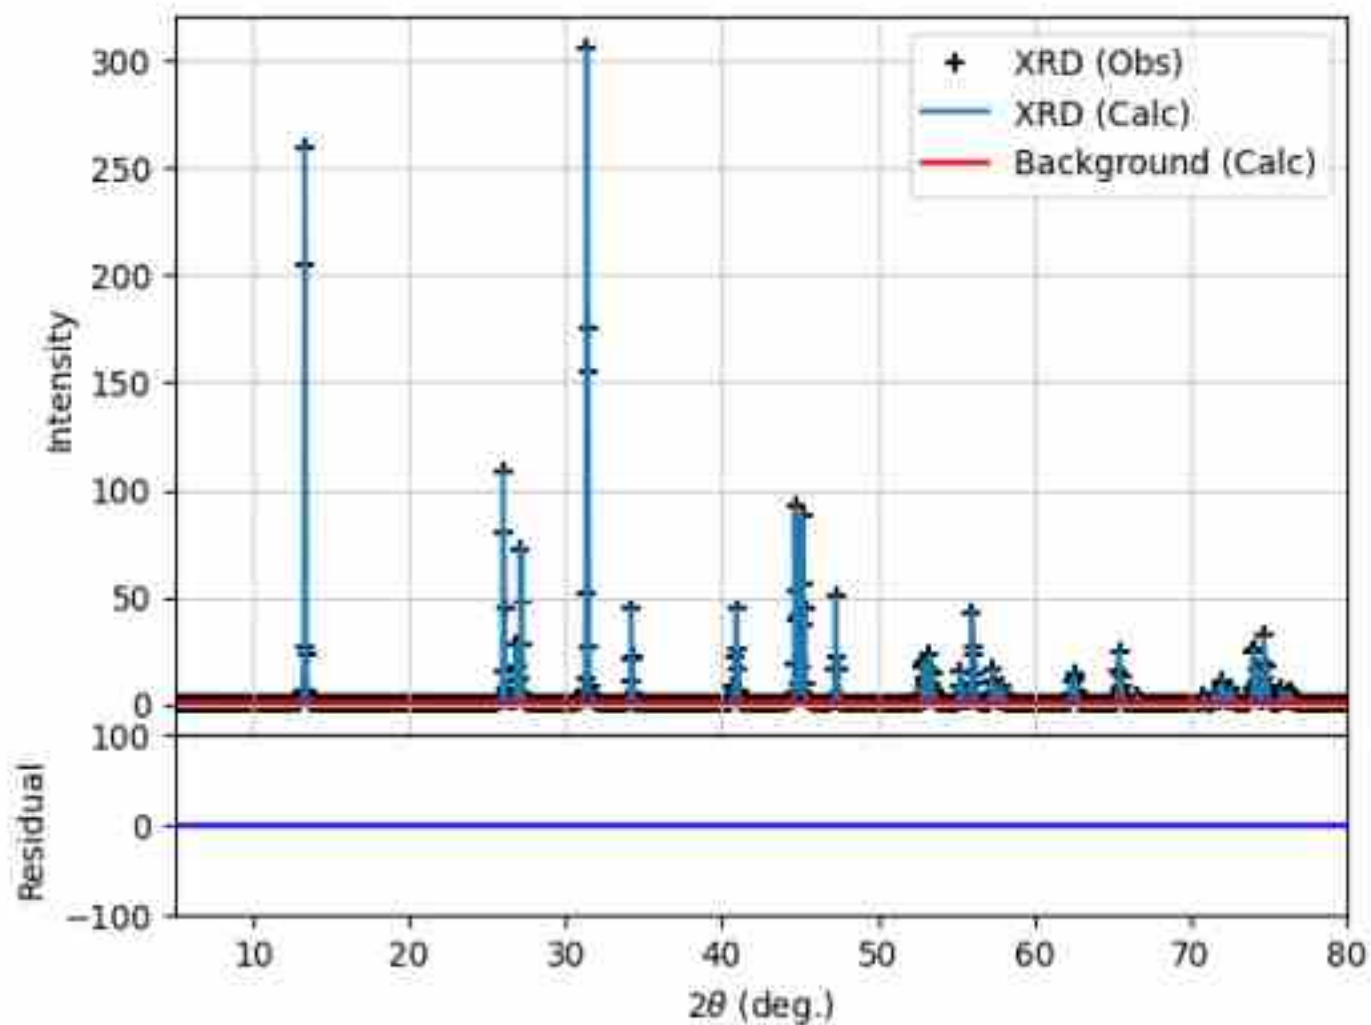

| RMSE before RR | Rwp     | RMSE after RR |
|----------------|---------|---------------|
| 0.005          | 0.00218 | 0.00387       |

# Na<sub>2</sub>S<sub>1</sub>

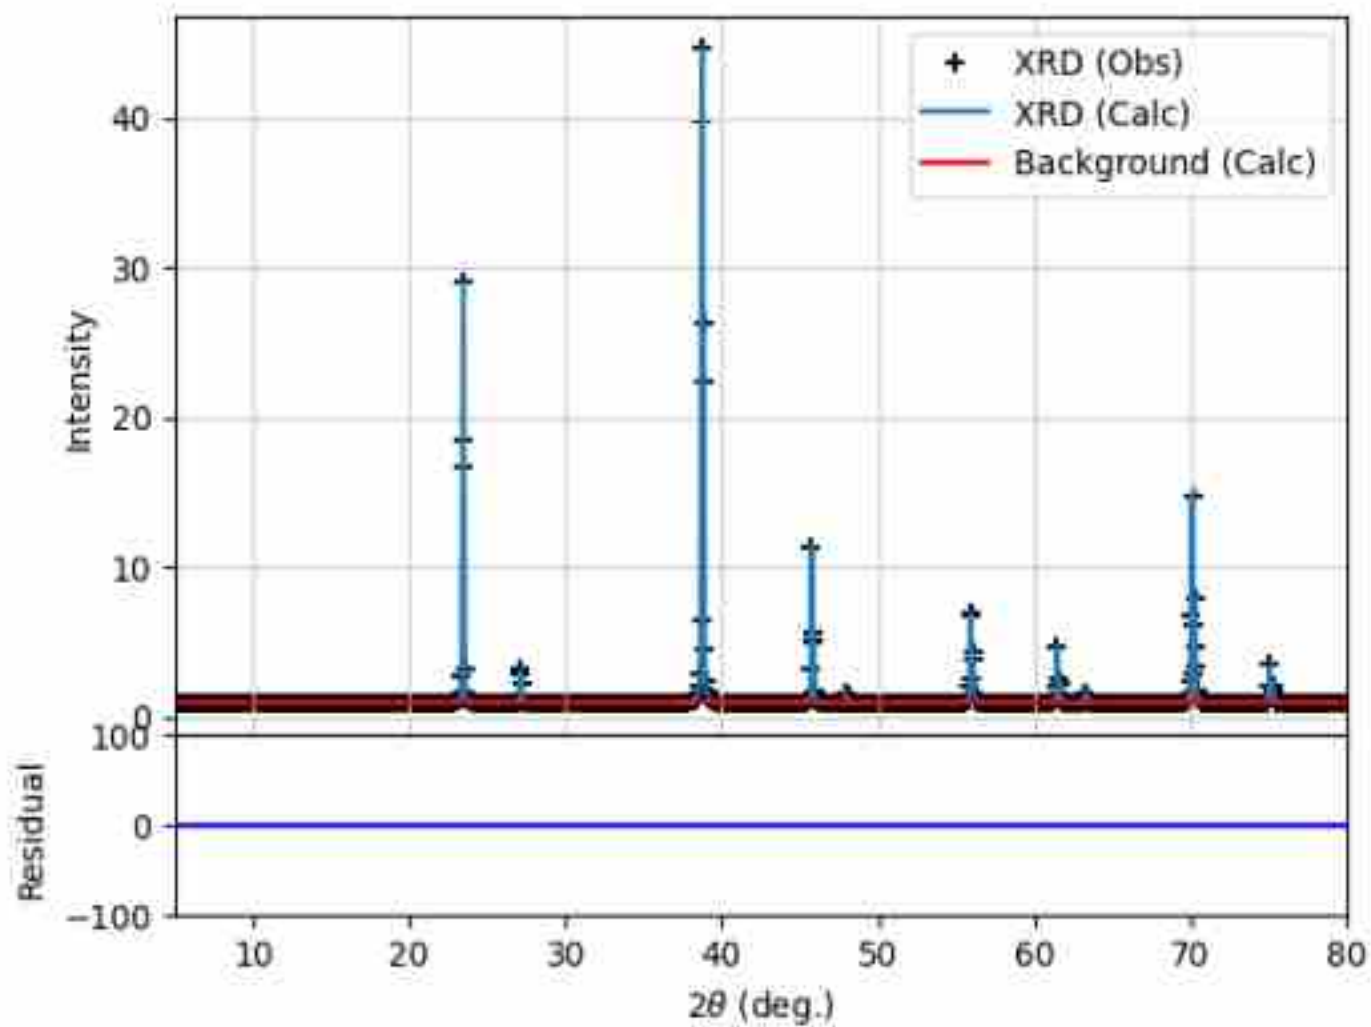

| RMSE before RR | Rwp     | RMSE after RR |
|----------------|---------|---------------|
| 0.005          | 0.00219 | 0.00092       |

# Na<sub>4</sub>P<sub>2</sub>H<sub>2</sub>O<sub>8</sub>

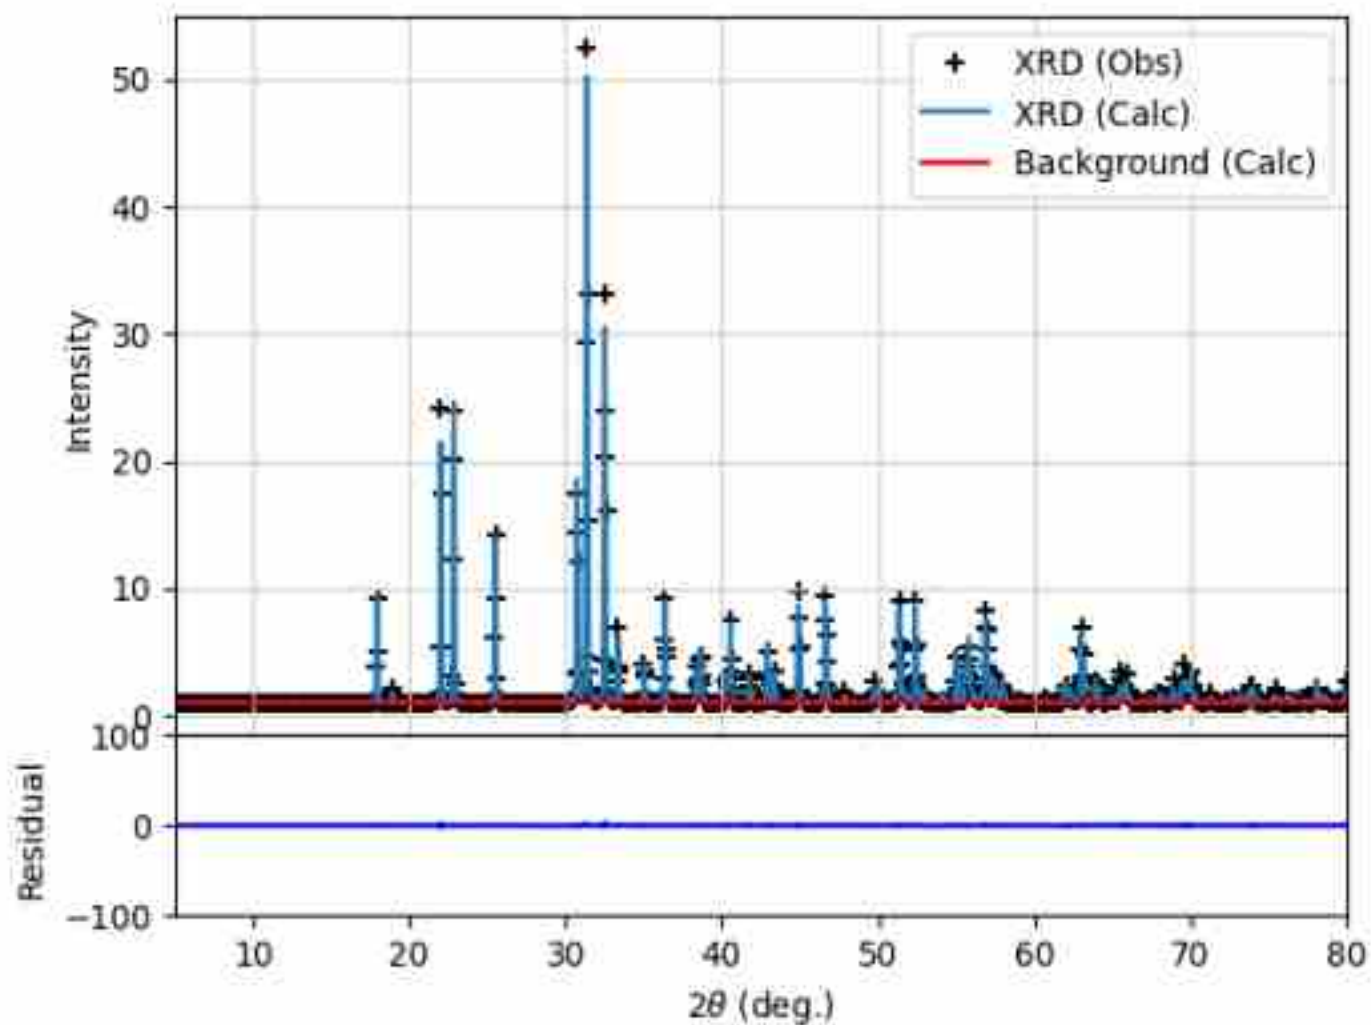

| RMSE before RR | Rwp    | RMSE after RR |
|----------------|--------|---------------|
| 0.05           | 9.2008 | 0.30249       |

# Na<sub>6</sub>Bi<sub>2</sub>

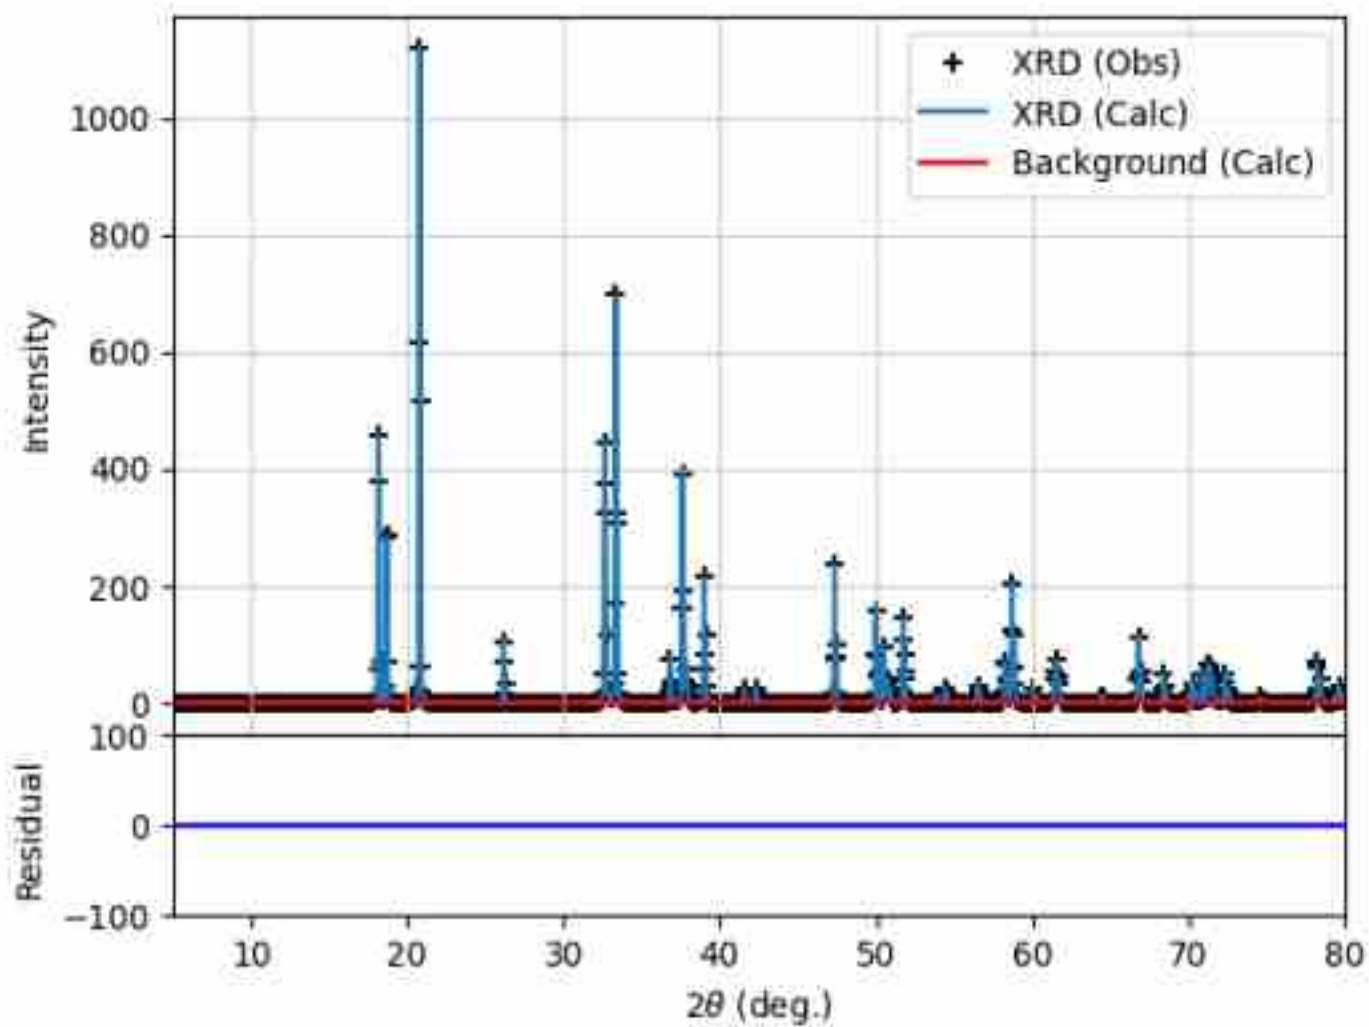

| RMSE before RR | Rwp     | RMSE after RR |
|----------------|---------|---------------|
| 0.005          | 0.00308 | 0.00114       |

# Pa1Bi3

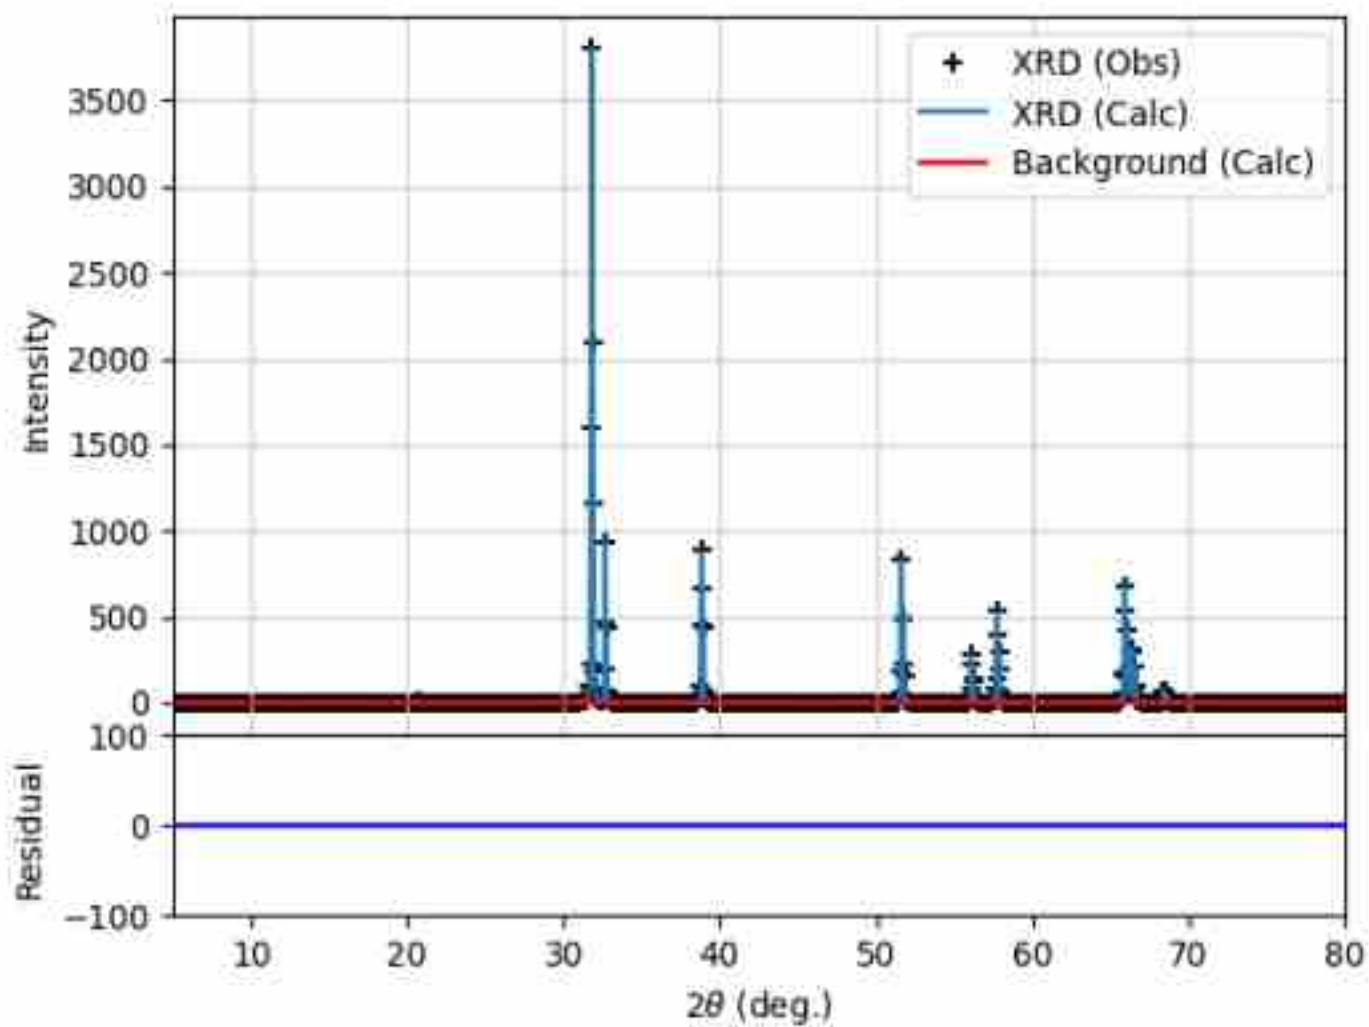

| RMSE before RR | Rwp     | RMSE after RR |
|----------------|---------|---------------|
| 0.005          | 0.00292 | 0.00011       |

# Pb2S2

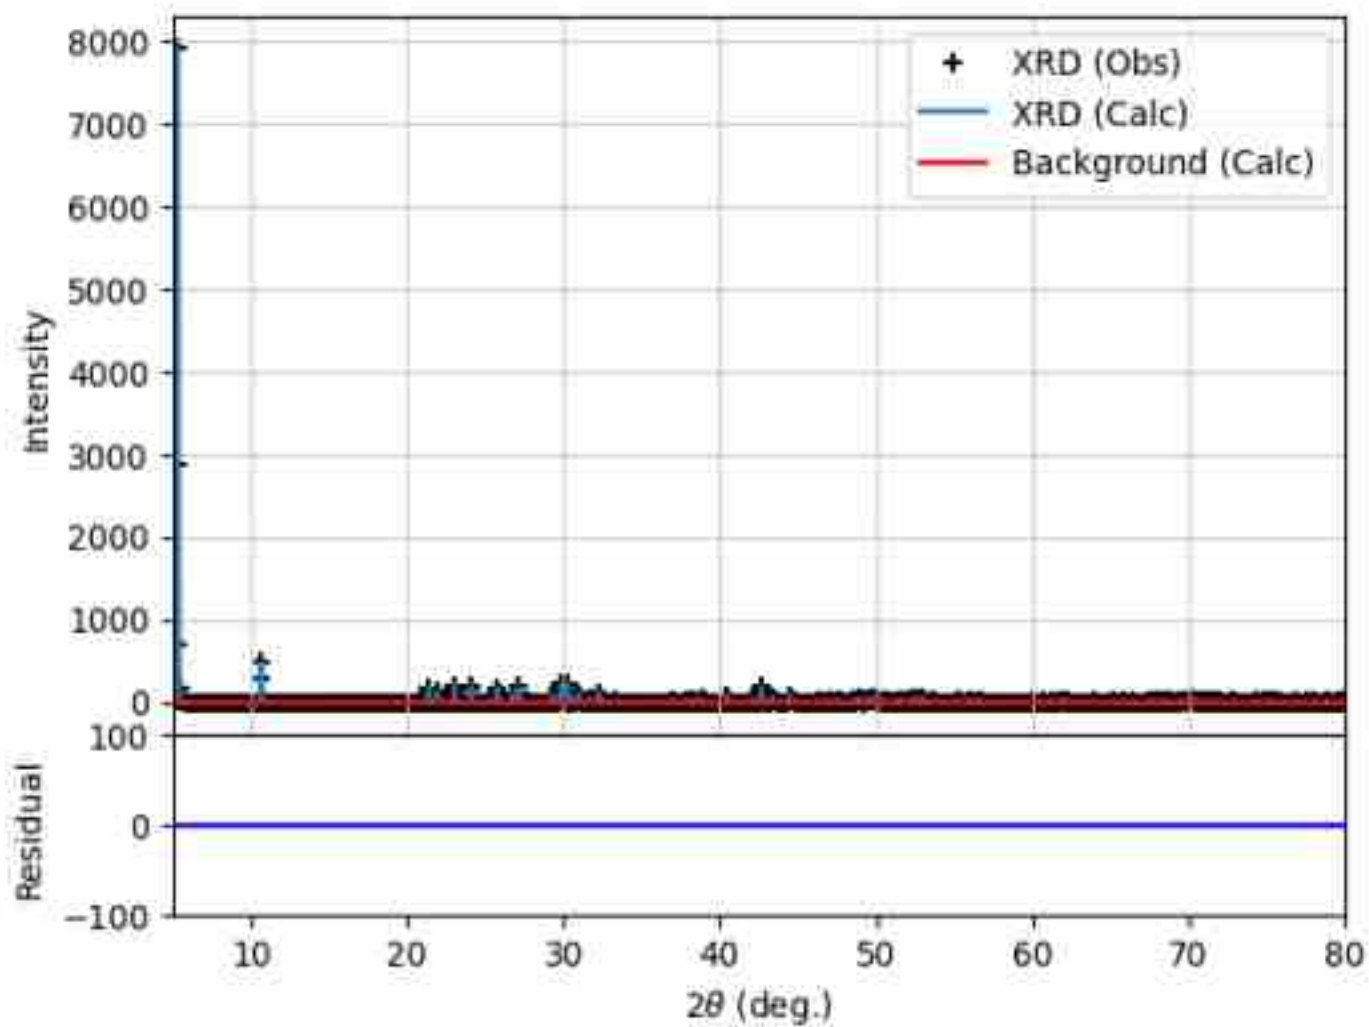

| RMSE before RR | Rwp     | RMSE after RR |
|----------------|---------|---------------|
| 0.05           | 0.00209 | 0.00014       |

# Pr1Ge2Ru2

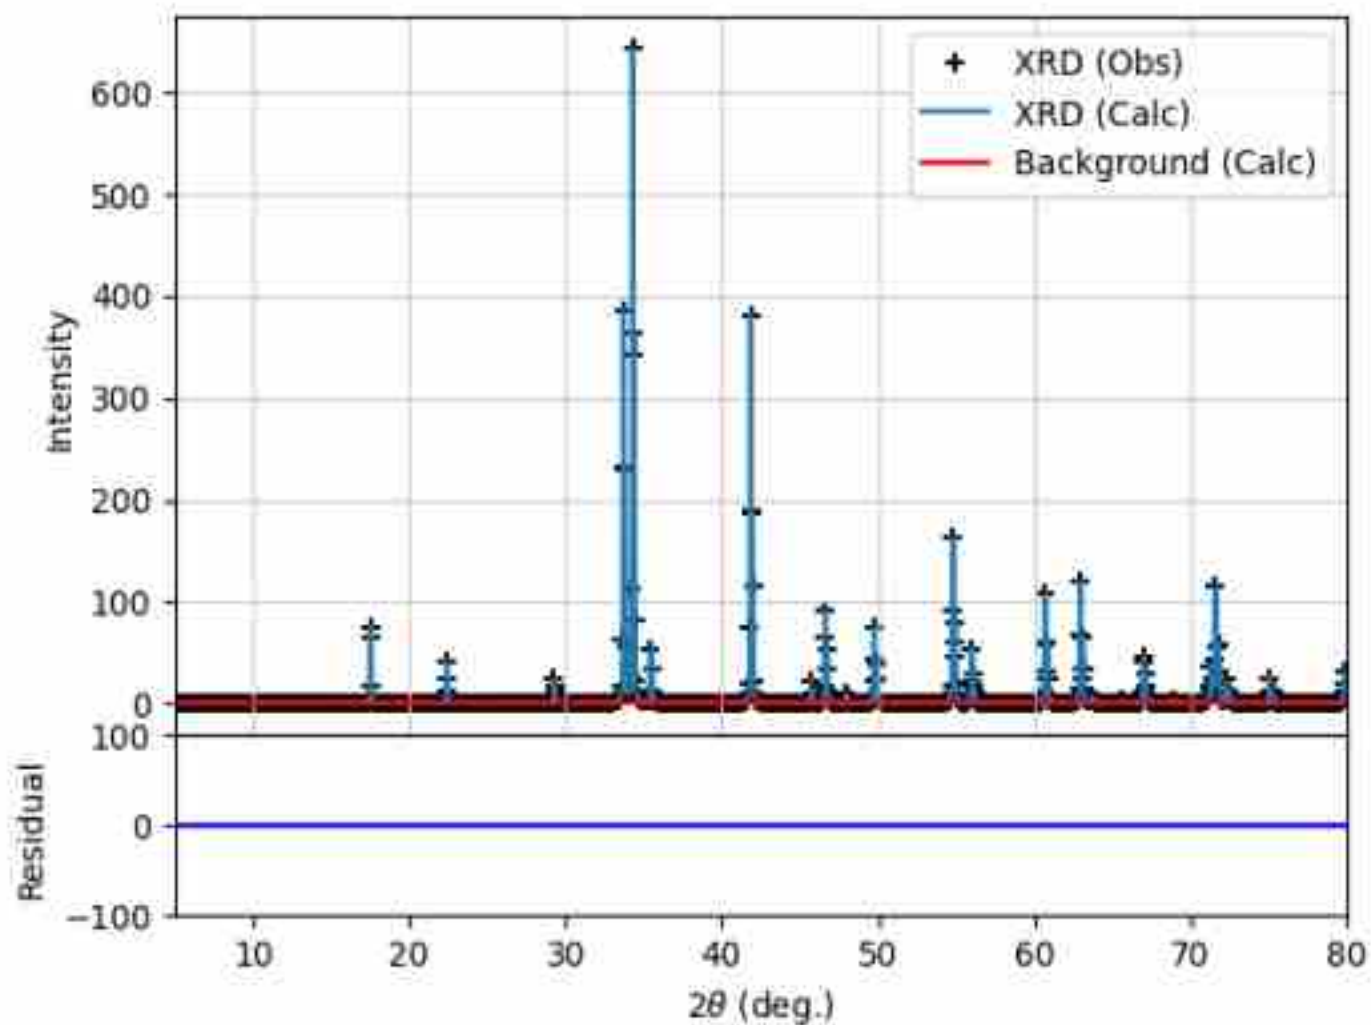

| RMSE before RR | Rwp     | RMSE after RR |
|----------------|---------|---------------|
| 0.005          | 0.00365 | 0.0004        |

# Pr<sub>2</sub>Tl<sub>2</sub>Cd<sub>2</sub>

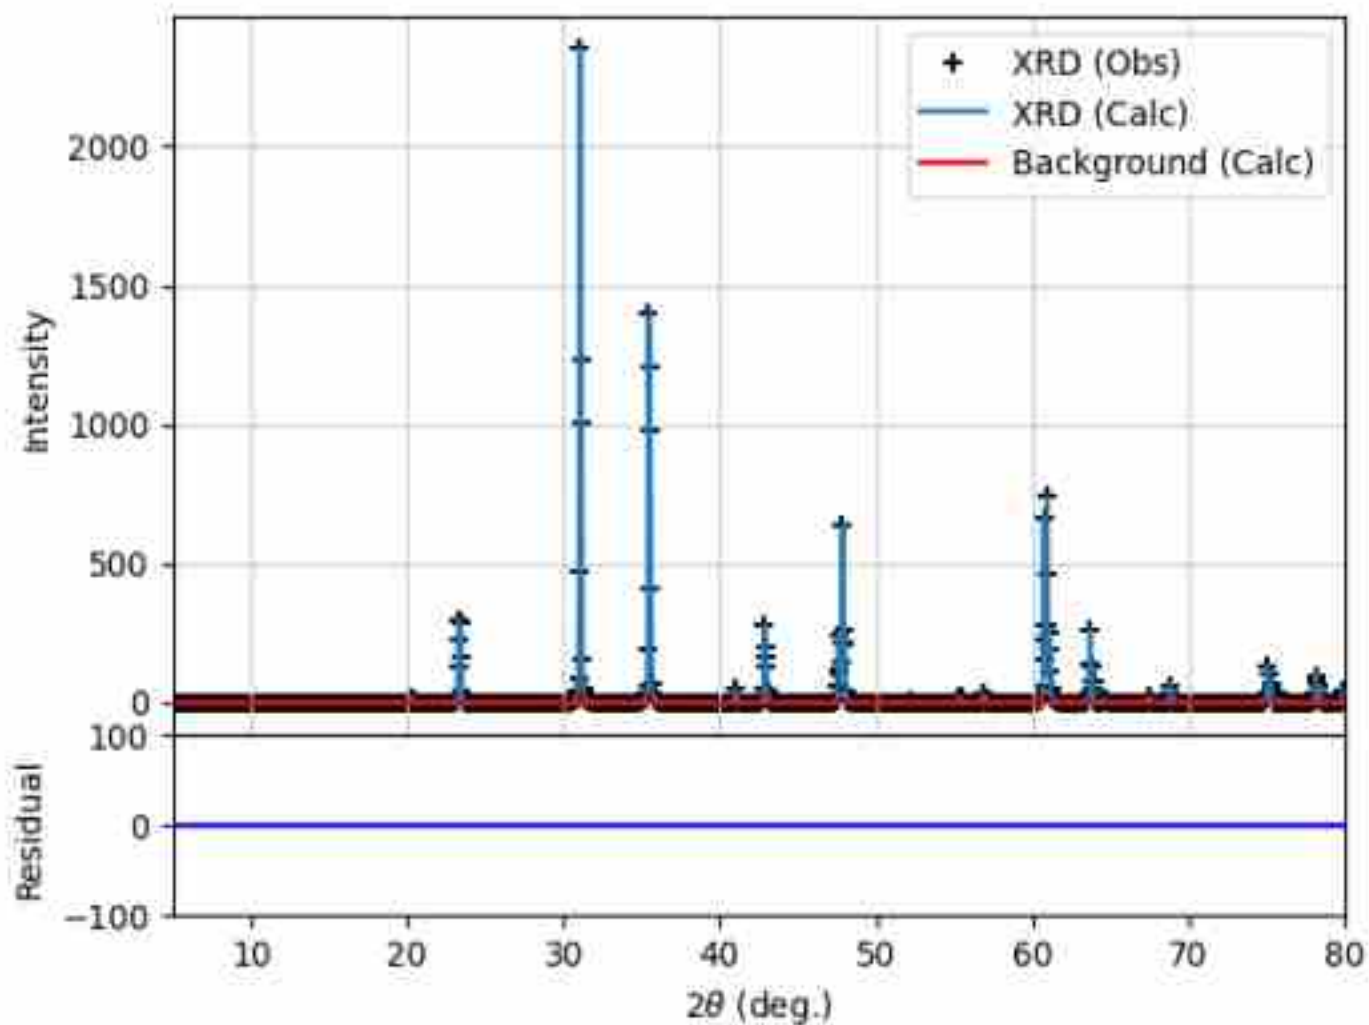

| RMSE before RR | Rwp     | RMSE after RR |
|----------------|---------|---------------|
| 0.005          | 0.00518 | 0.0004        |



# Pr4Tl2

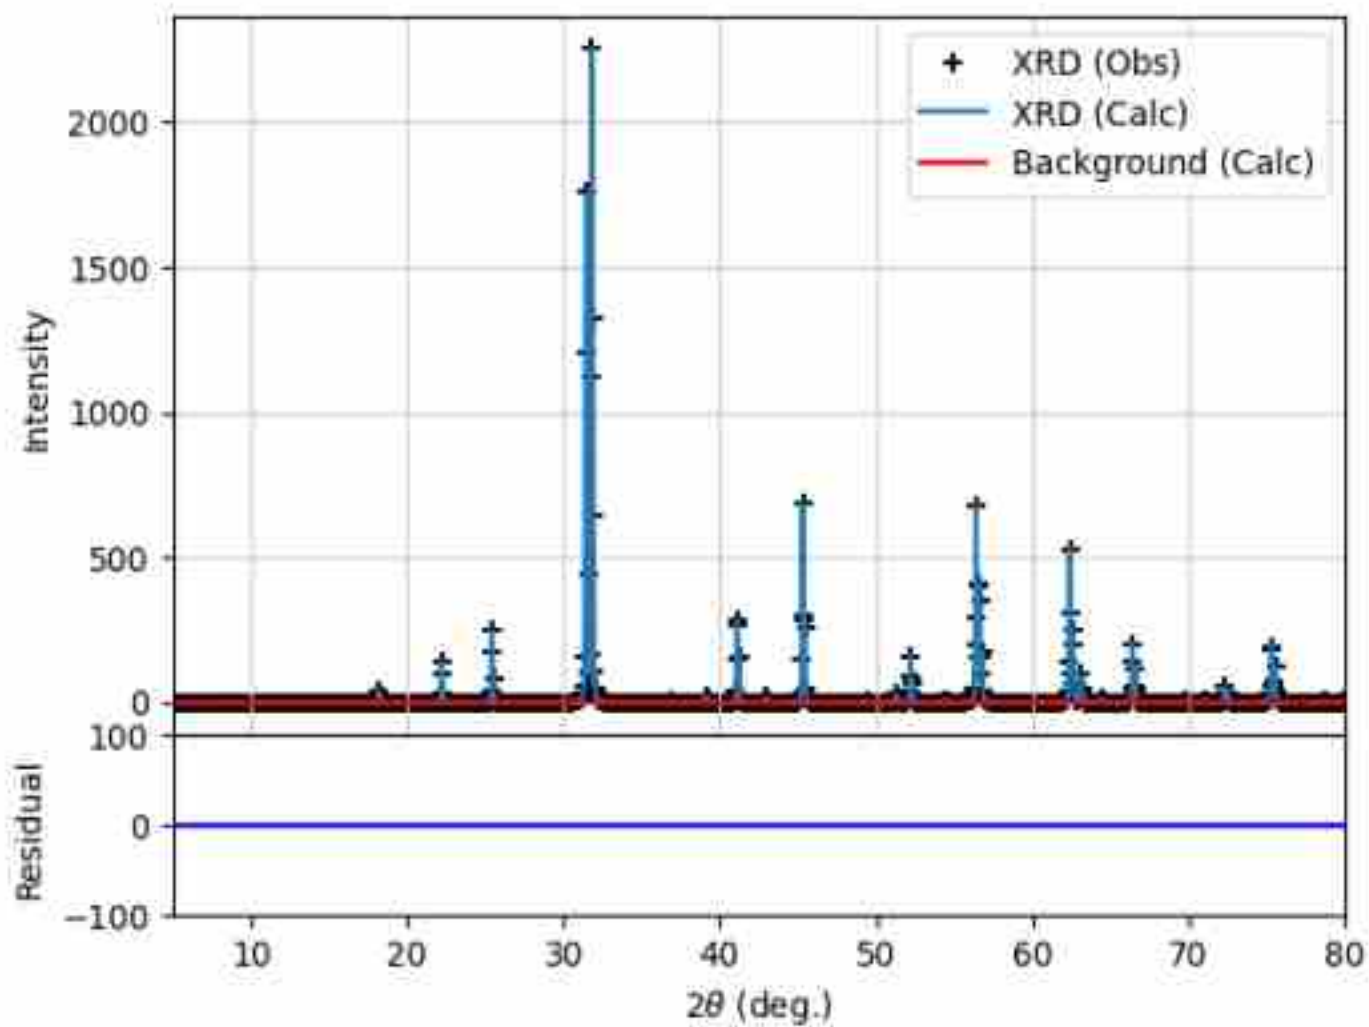

| RMSE before RR | Rwp   | RMSE after RR |
|----------------|-------|---------------|
| 0.005          | 0.006 | 0.00046       |

# Pr6Lu2

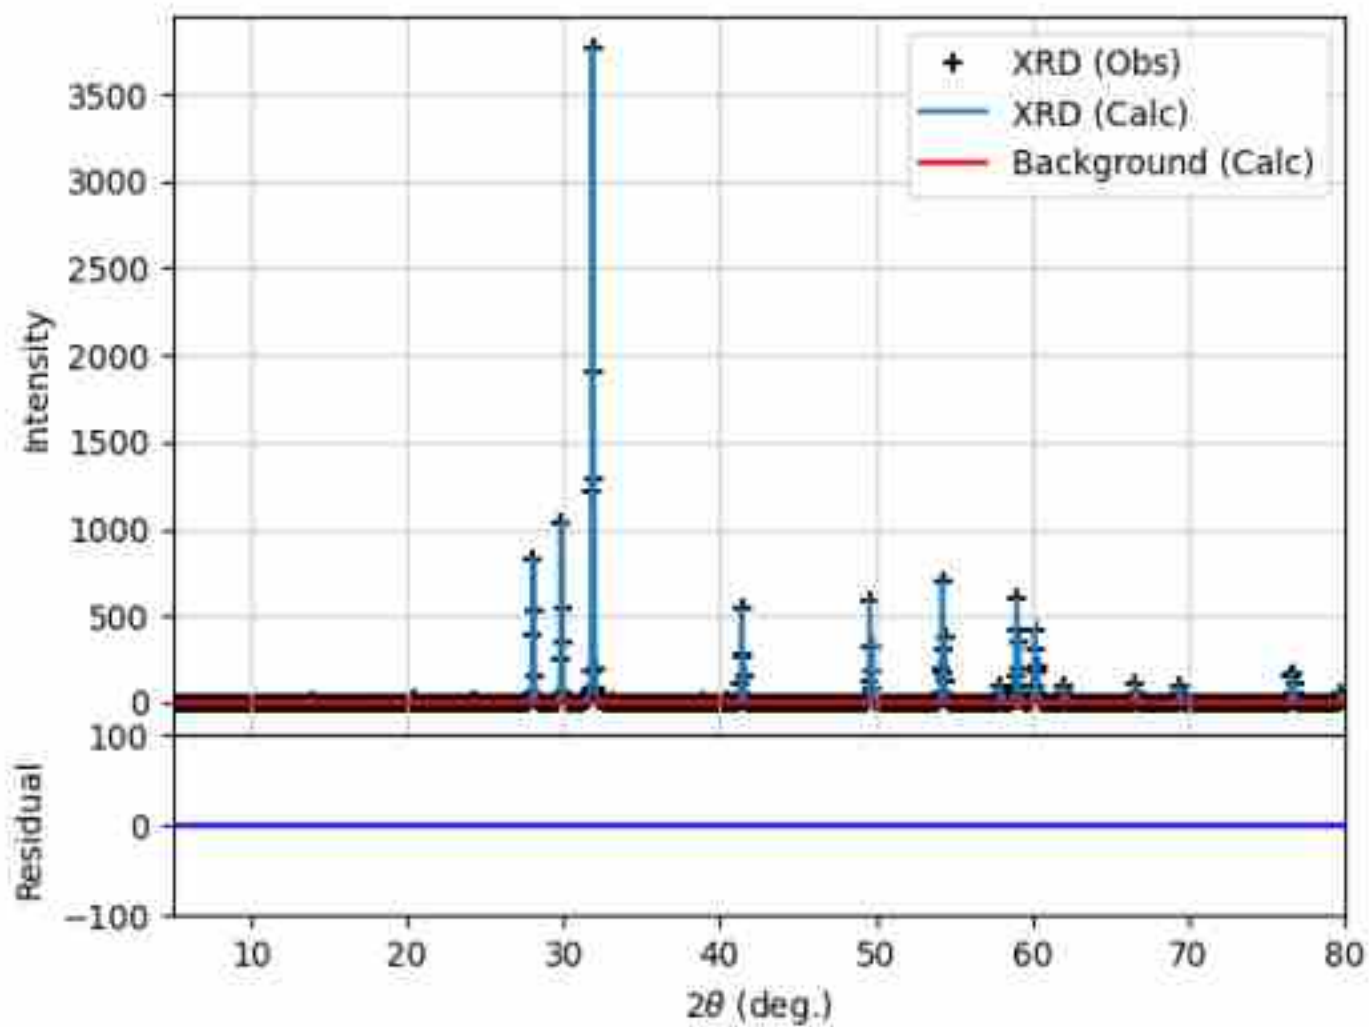

| RMSE before RR | Rwp     | RMSE after RR |
|----------------|---------|---------------|
| 0.005          | 0.06372 | 0.00378       |

# Pu<sub>3</sub>Ge<sub>1</sub>

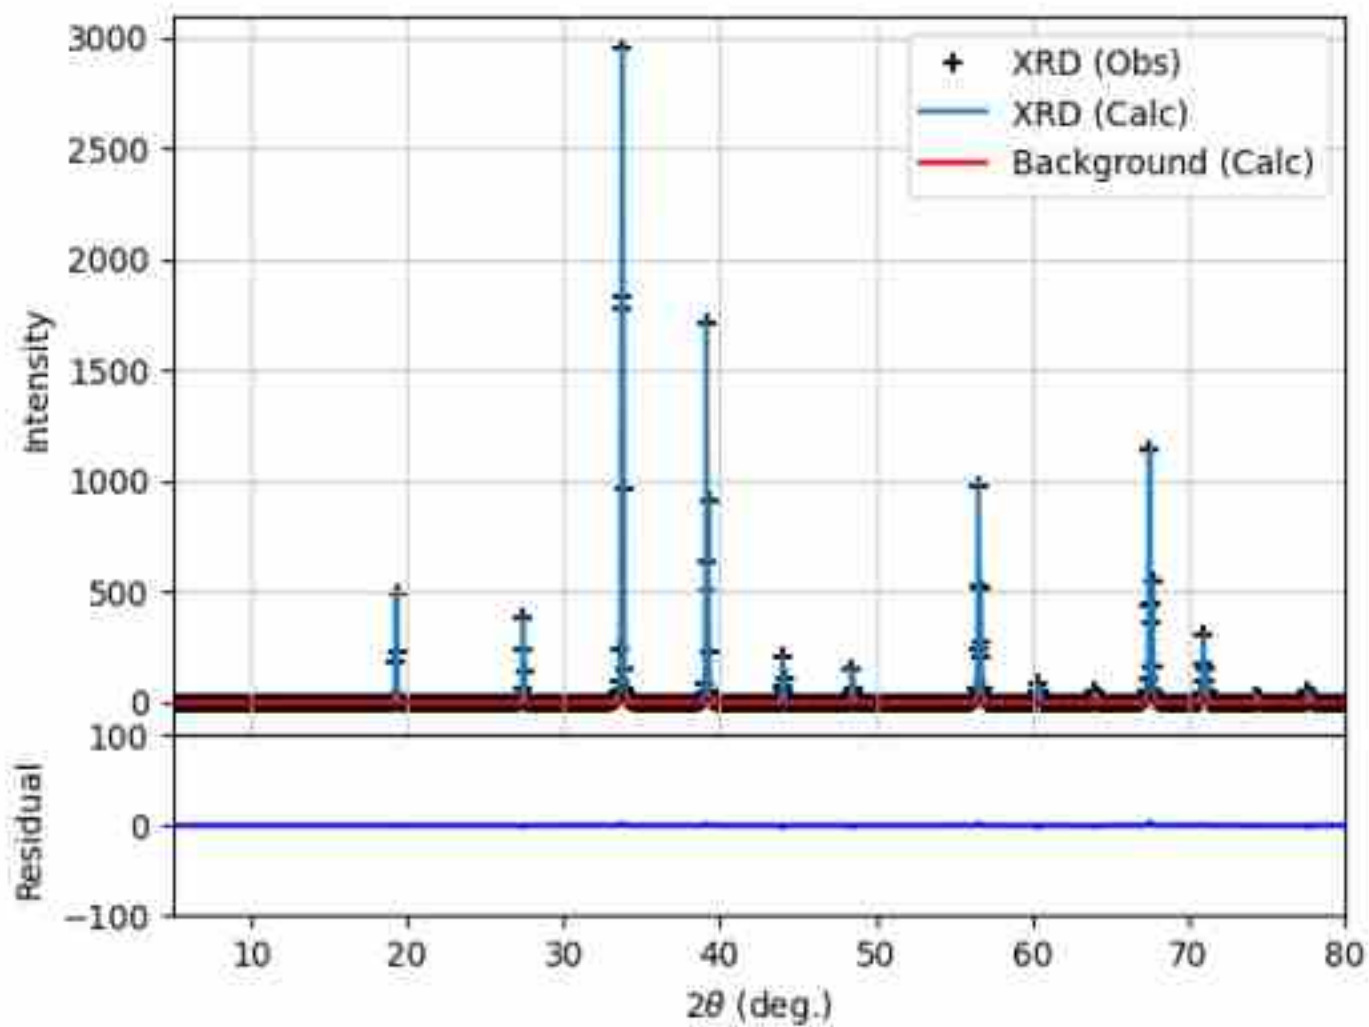

| RMSE before RR | Rwp    | RMSE after RR |
|----------------|--------|---------------|
| 0.005          | 0.5446 | 0.00675       |

# Sb2Pt2

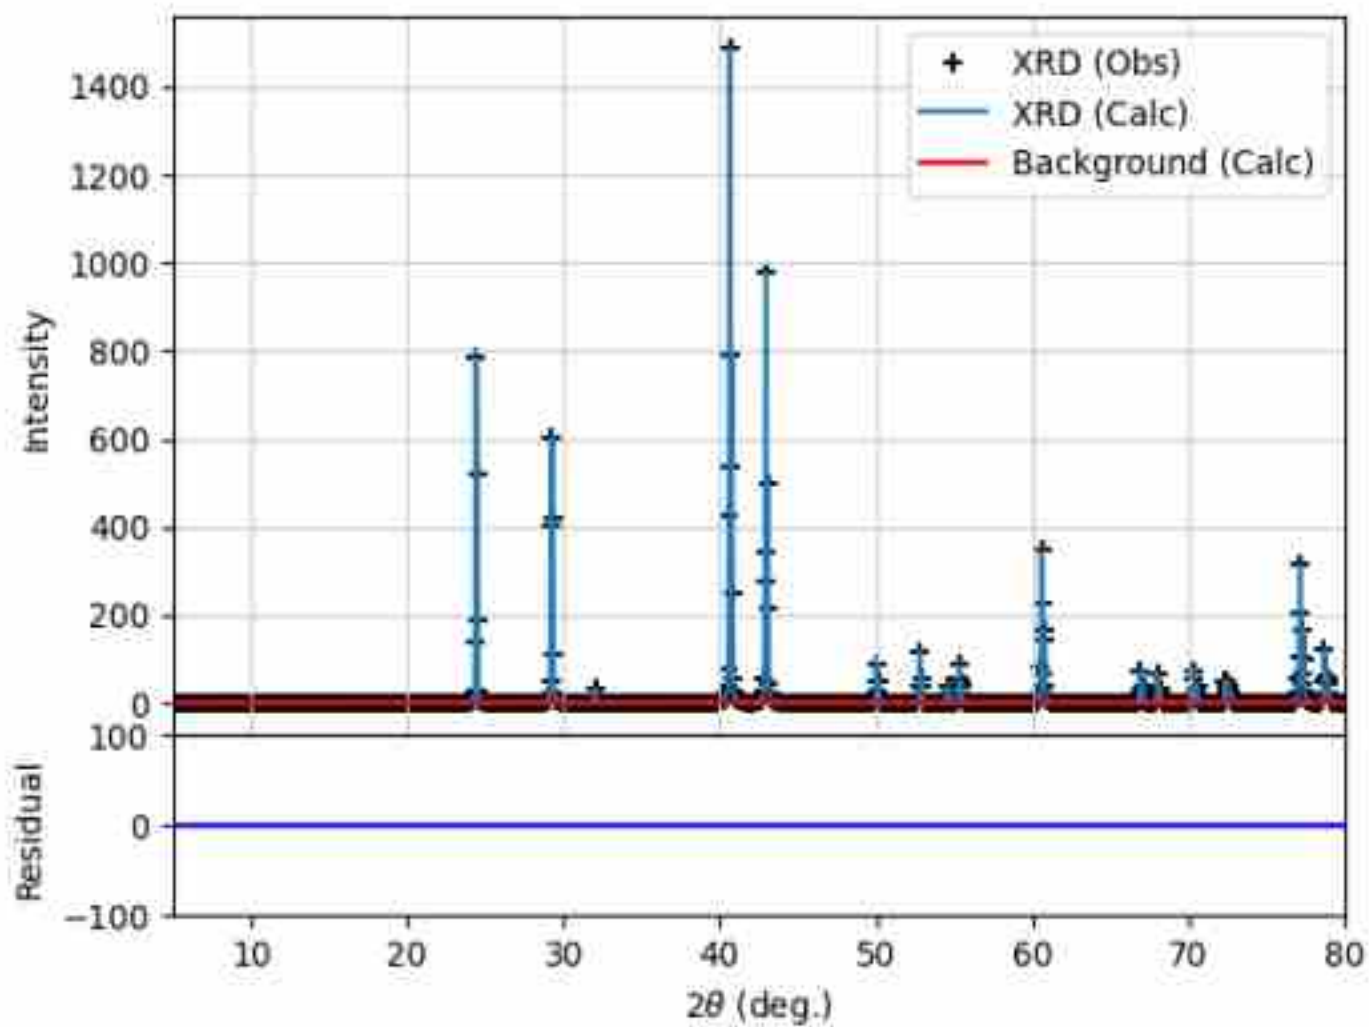

| RMSE before RR | Rwp     | RMSE after RR |
|----------------|---------|---------------|
| 0.005          | 0.00472 | 0.00019       |

# Sc1Ga5Fe1

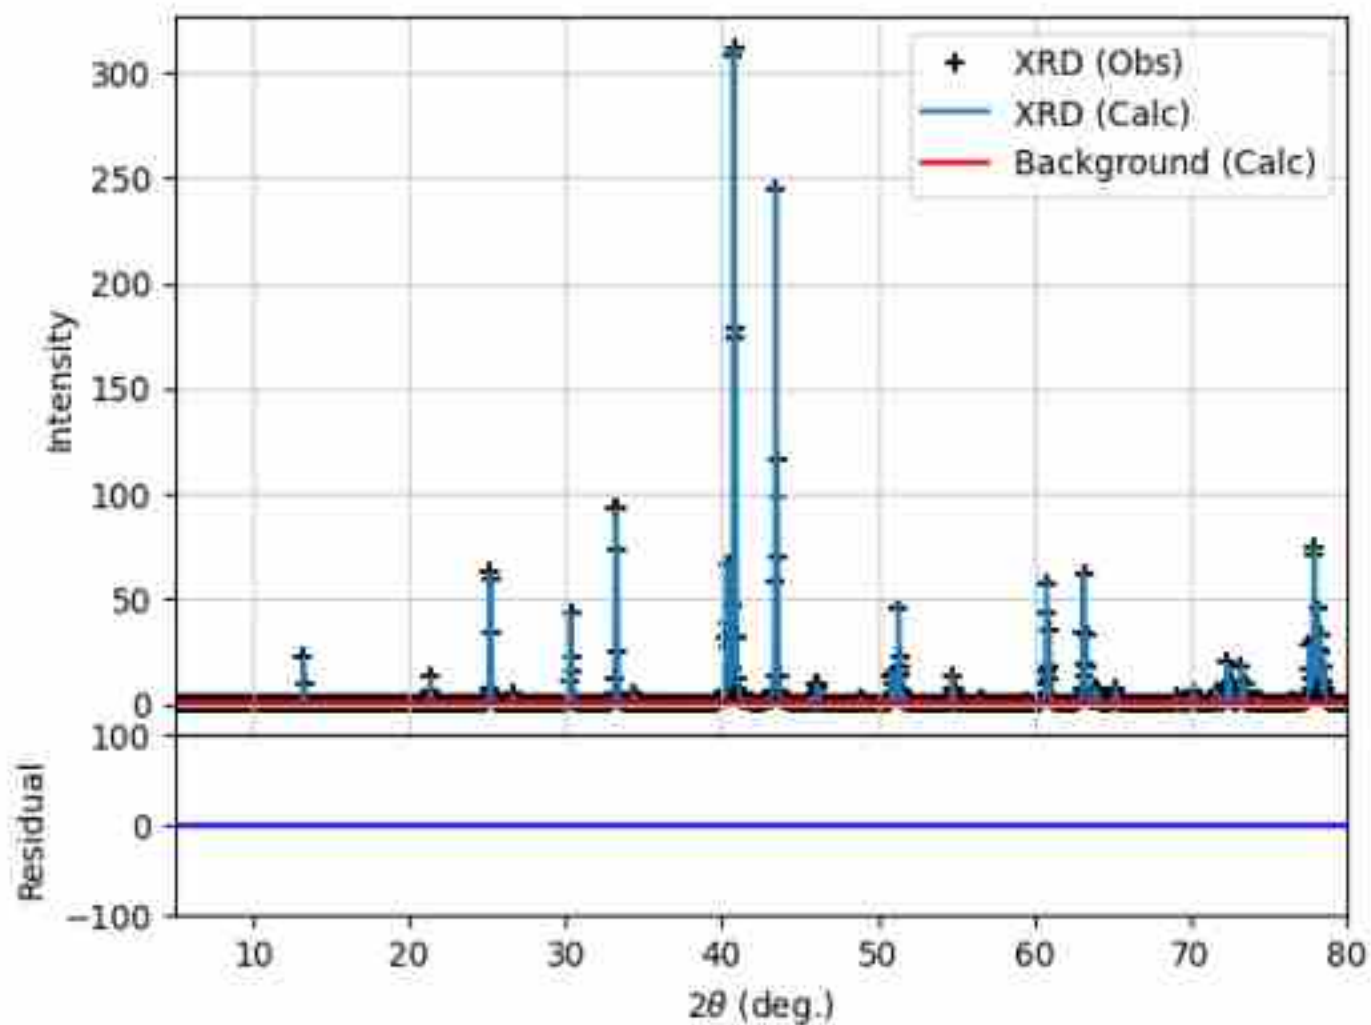

| RMSE before RR | Rwp     | RMSE after RR |
|----------------|---------|---------------|
| 0.005          | 0.00375 | 0.00039       |

# Sc3Tl1C1

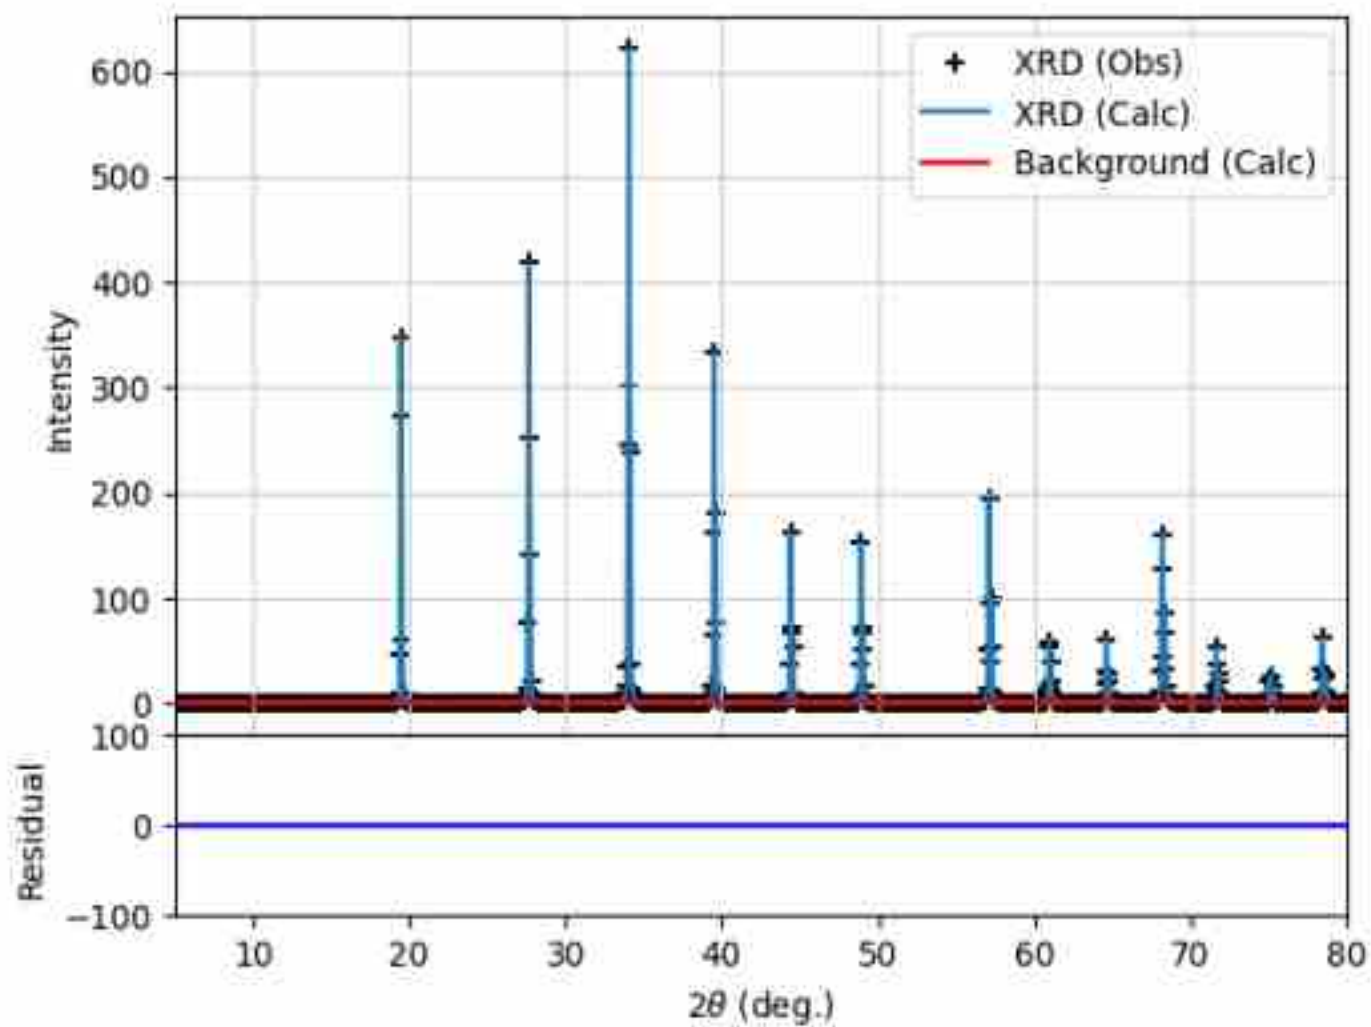

| RMSE before RR | Rwp     | RMSE after RR |
|----------------|---------|---------------|
| 0.005          | 0.08426 | 0.00573       |

# Si1Sn1Pt5

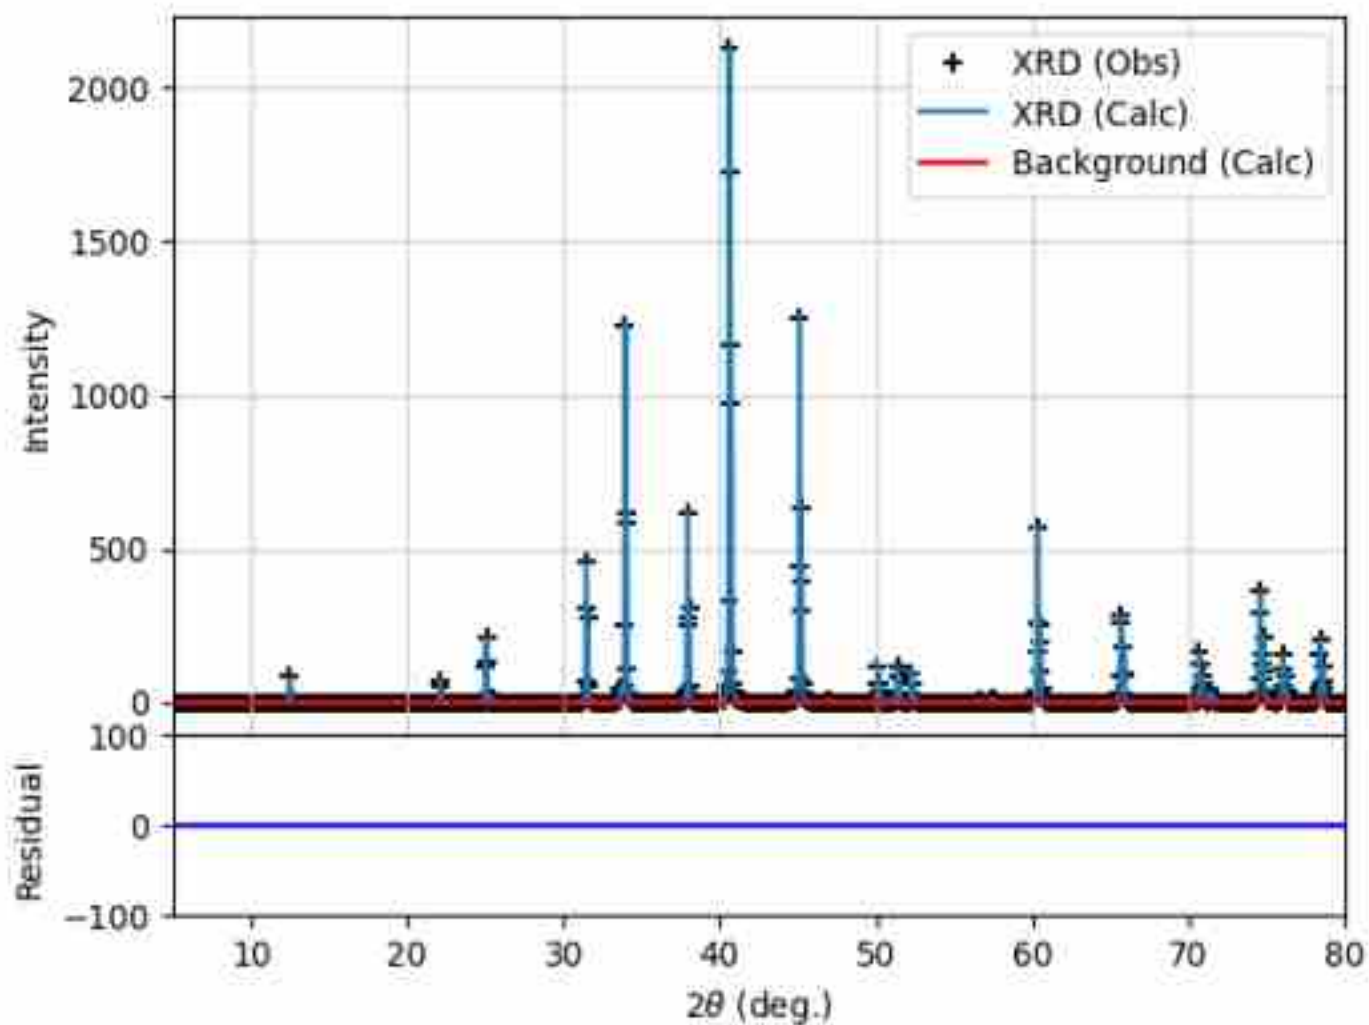

| RMSE before RR | Rwp     | RMSE after RR |
|----------------|---------|---------------|
| 0.005          | 0.00714 | 0.00056       |

# Sm1Si2Os2

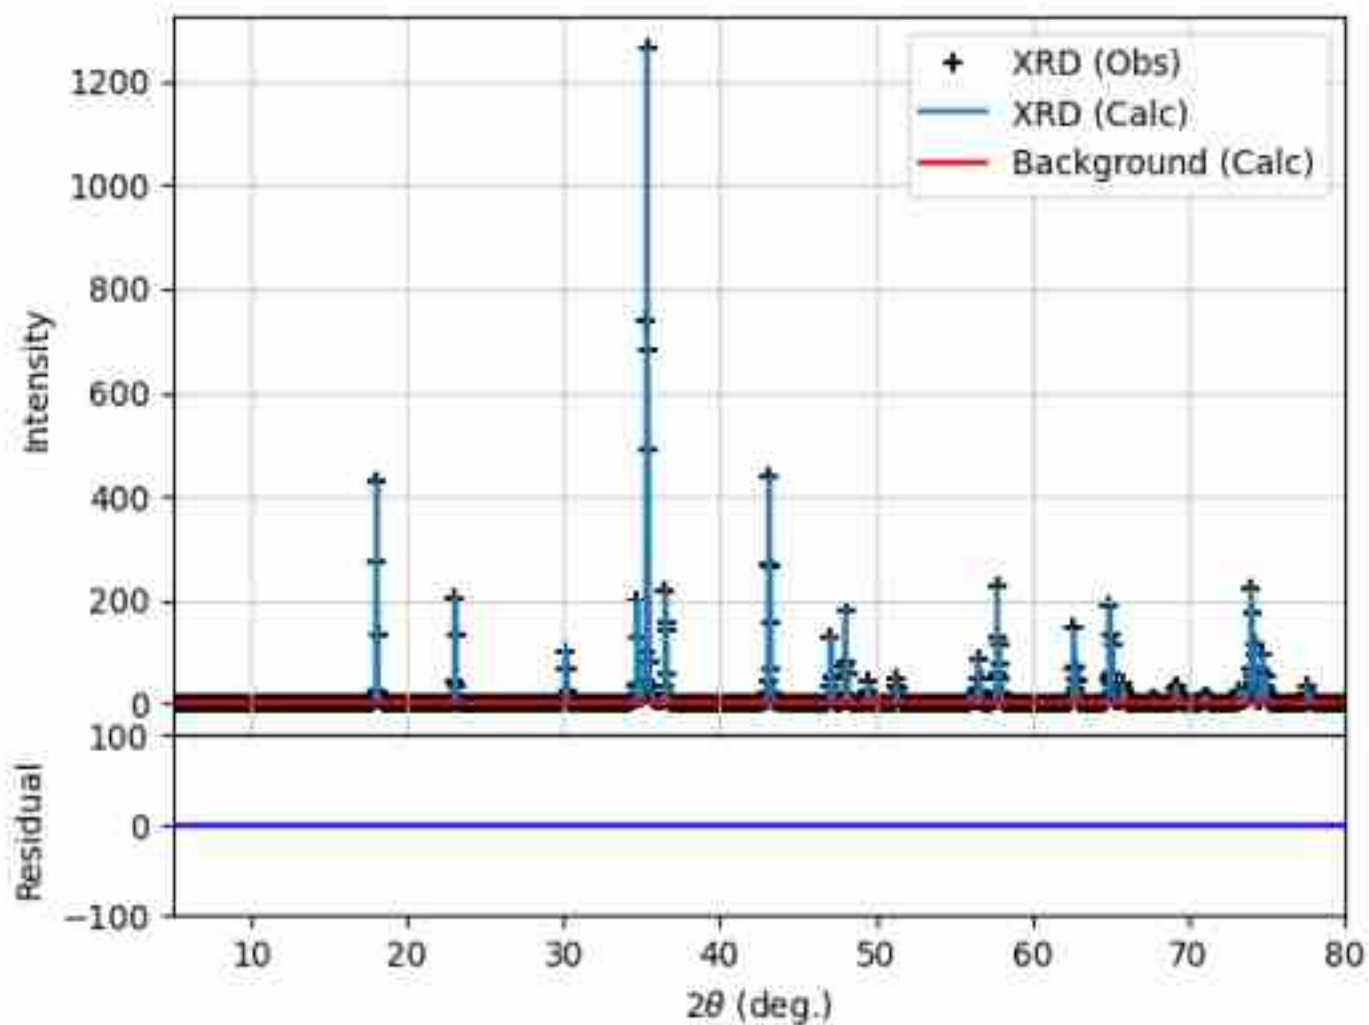

| RMSE before RR | Rwp     | RMSE after RR |
|----------------|---------|---------------|
| 0.005          | 0.00312 | 0.00112       |



# Sm2O3

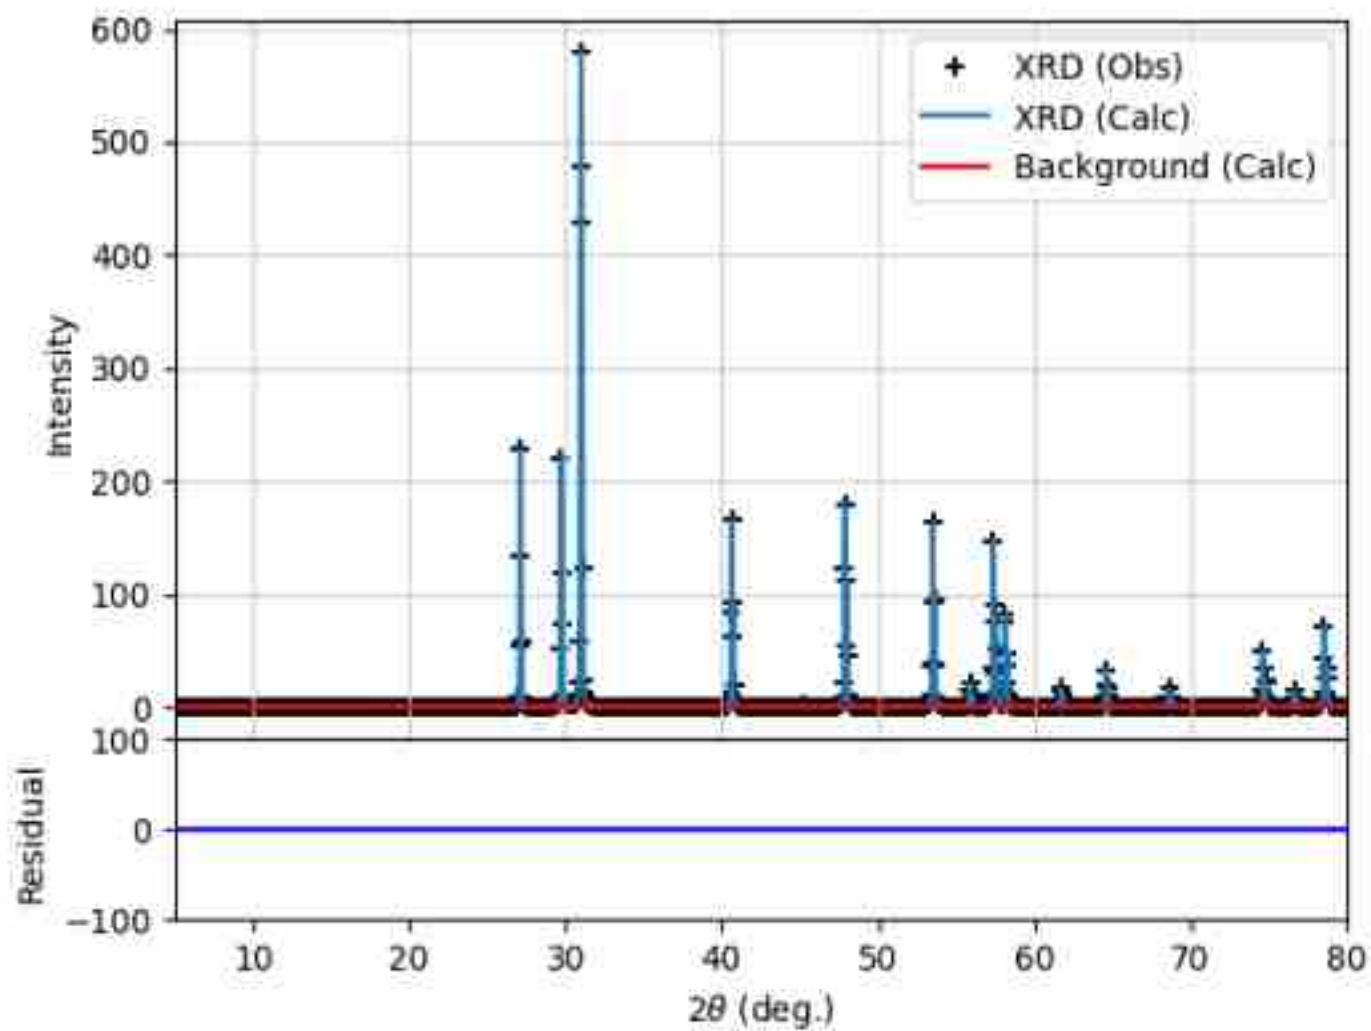

| RMSE before RR | Rwp     | RMSE after RR |
|----------------|---------|---------------|
| 0.005          | 0.00288 | 0.00173       |

# Sm<sub>2</sub>S<sub>1</sub>O<sub>2</sub>

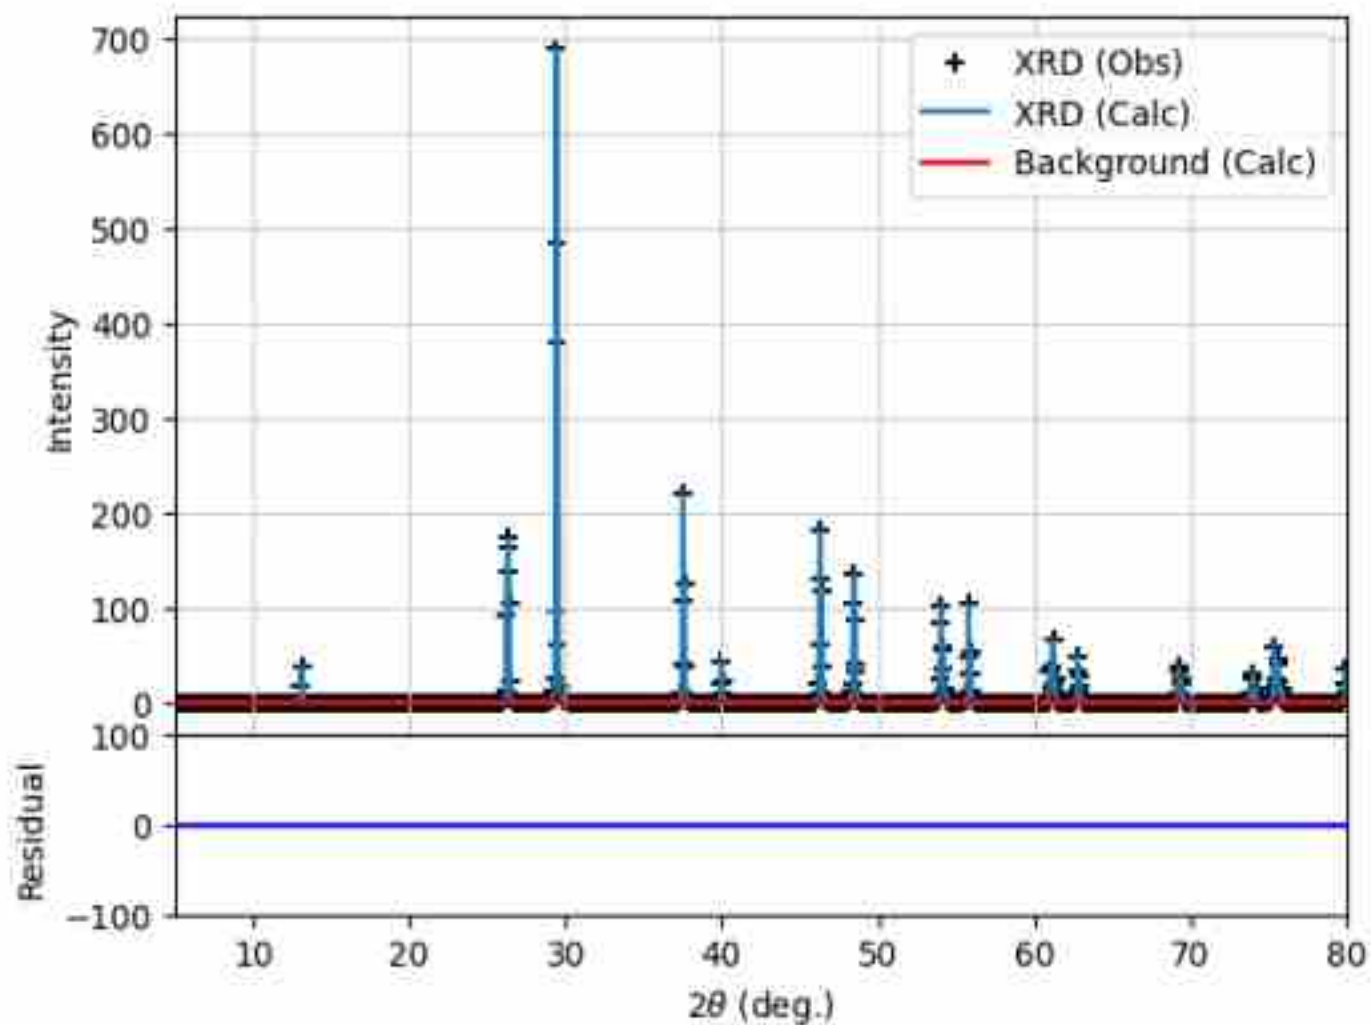

| RMSE before RR | Rwp     | RMSE after RR |
|----------------|---------|---------------|
| 0.005          | 0.00867 | 0.00284       |

# Sm<sub>2</sub>Tl<sub>2</sub>Zn<sub>2</sub>

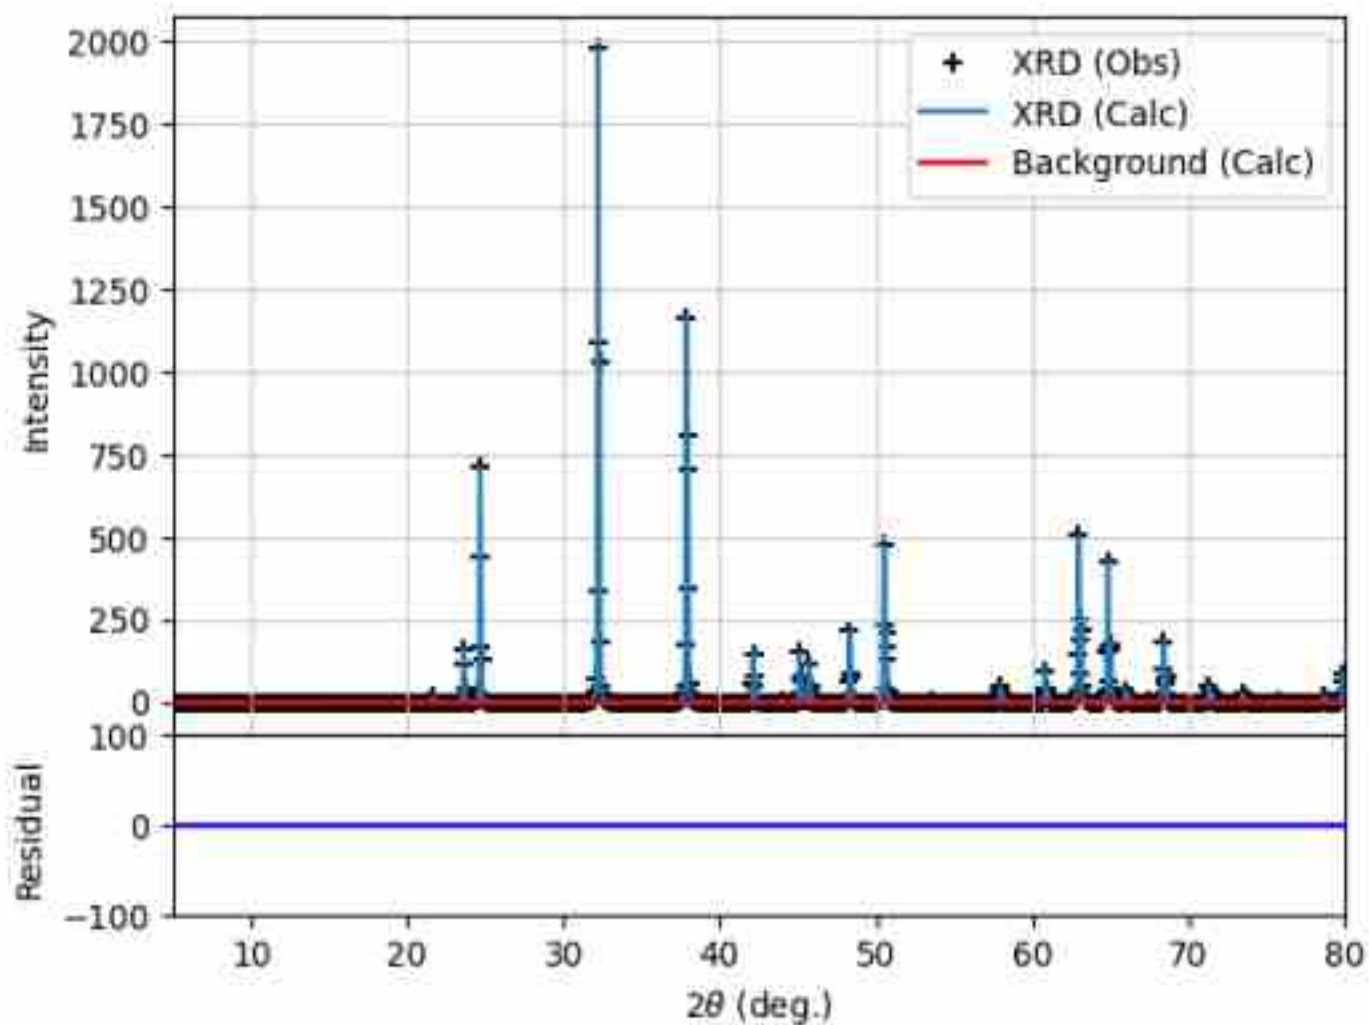

| RMSE before RR | Rwp     | RMSE after RR |
|----------------|---------|---------------|
| 0.005          | 0.00425 | 0.00039       |

# Sr1Zn1Si1

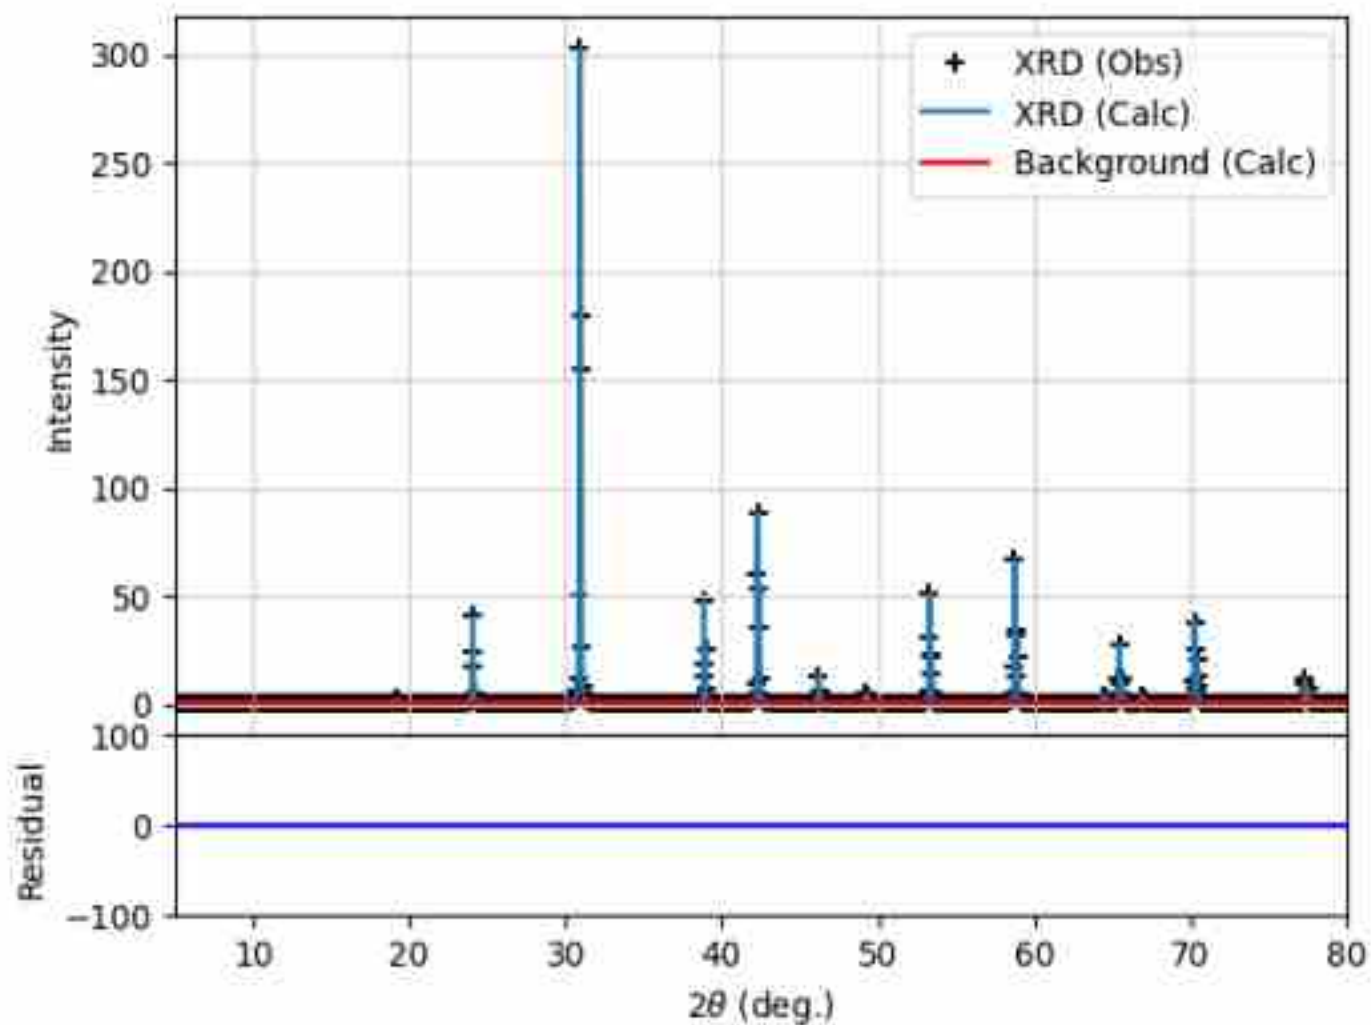

| RMSE before RR | Rwp     | RMSE after RR |
|----------------|---------|---------------|
| 0.005          | 0.00411 | 0.00062       |

# Sr<sub>2</sub>Al<sub>3</sub>Ge<sub>1</sub>

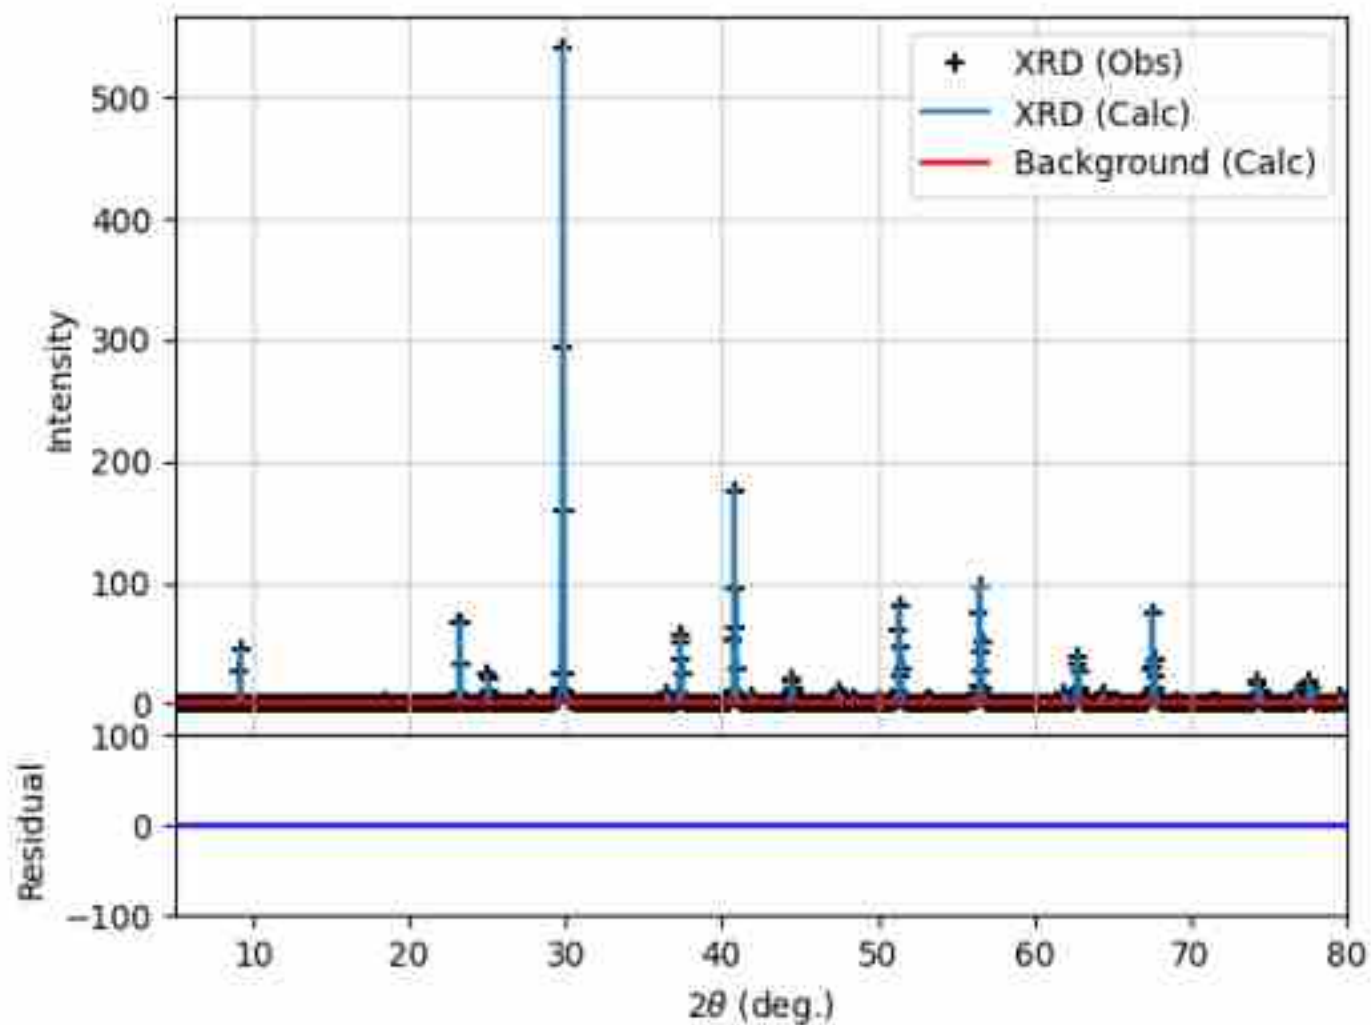

| RMSE before RR | Rwp     | RMSE after RR |
|----------------|---------|---------------|
| 0.005          | 0.00298 | 0.00047       |

# Sr<sub>2</sub>Ca<sub>2</sub>V<sub>4</sub>O<sub>12</sub>

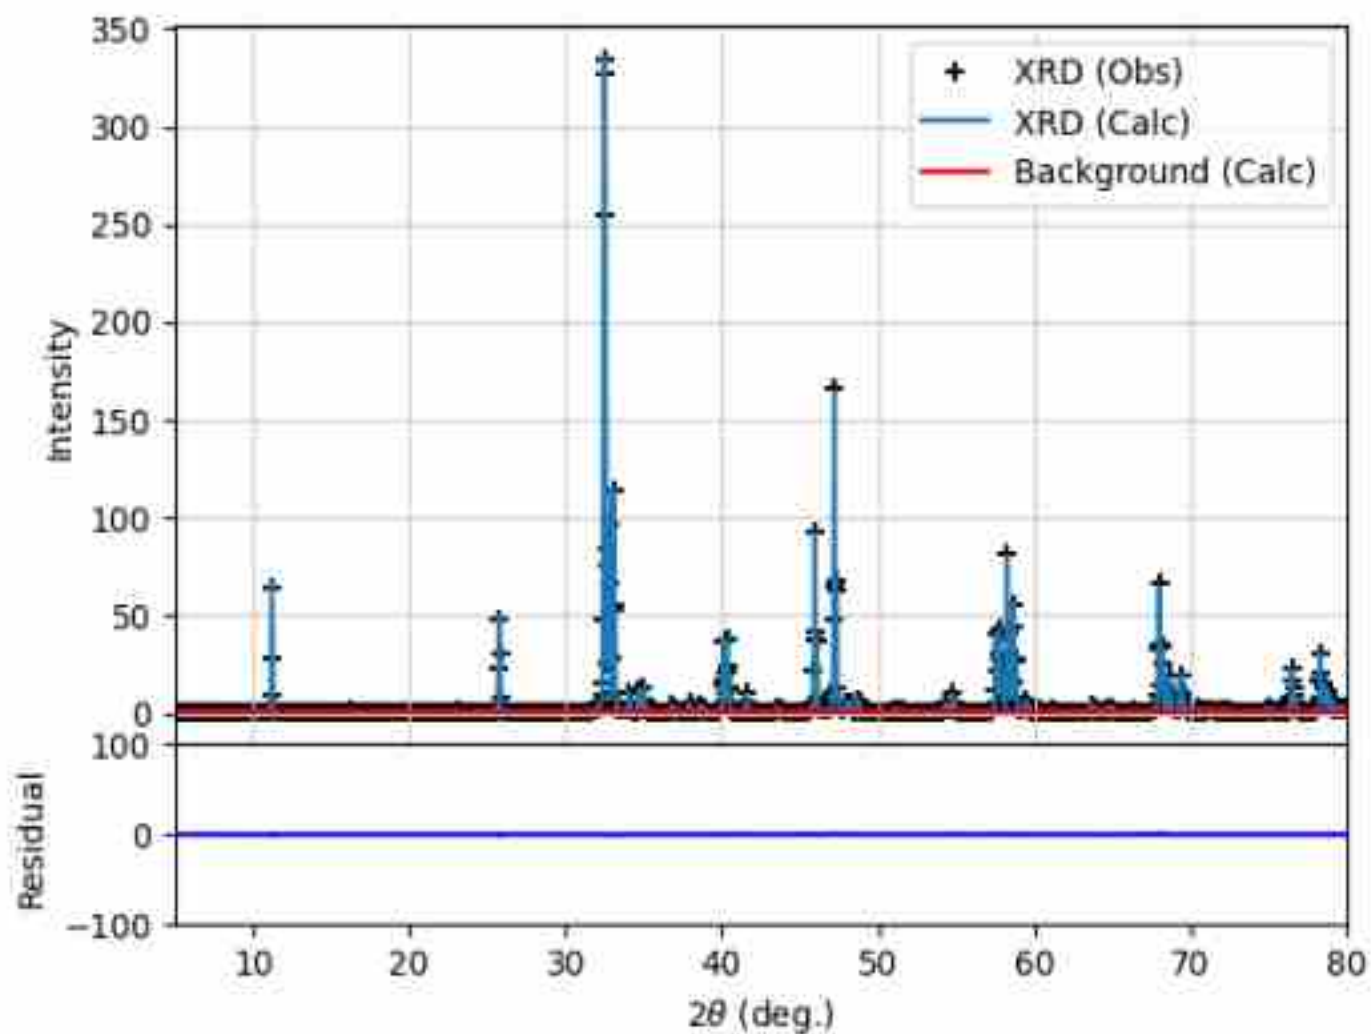

| RMSE before RR | Rwp     | RMSE after RR |
|----------------|---------|---------------|
| 0.05           | 1.83625 | 0.07462       |

# Sr<sub>2</sub>Ce<sub>2</sub>Eu<sub>2</sub>Sb<sub>2</sub>O<sub>12</sub>

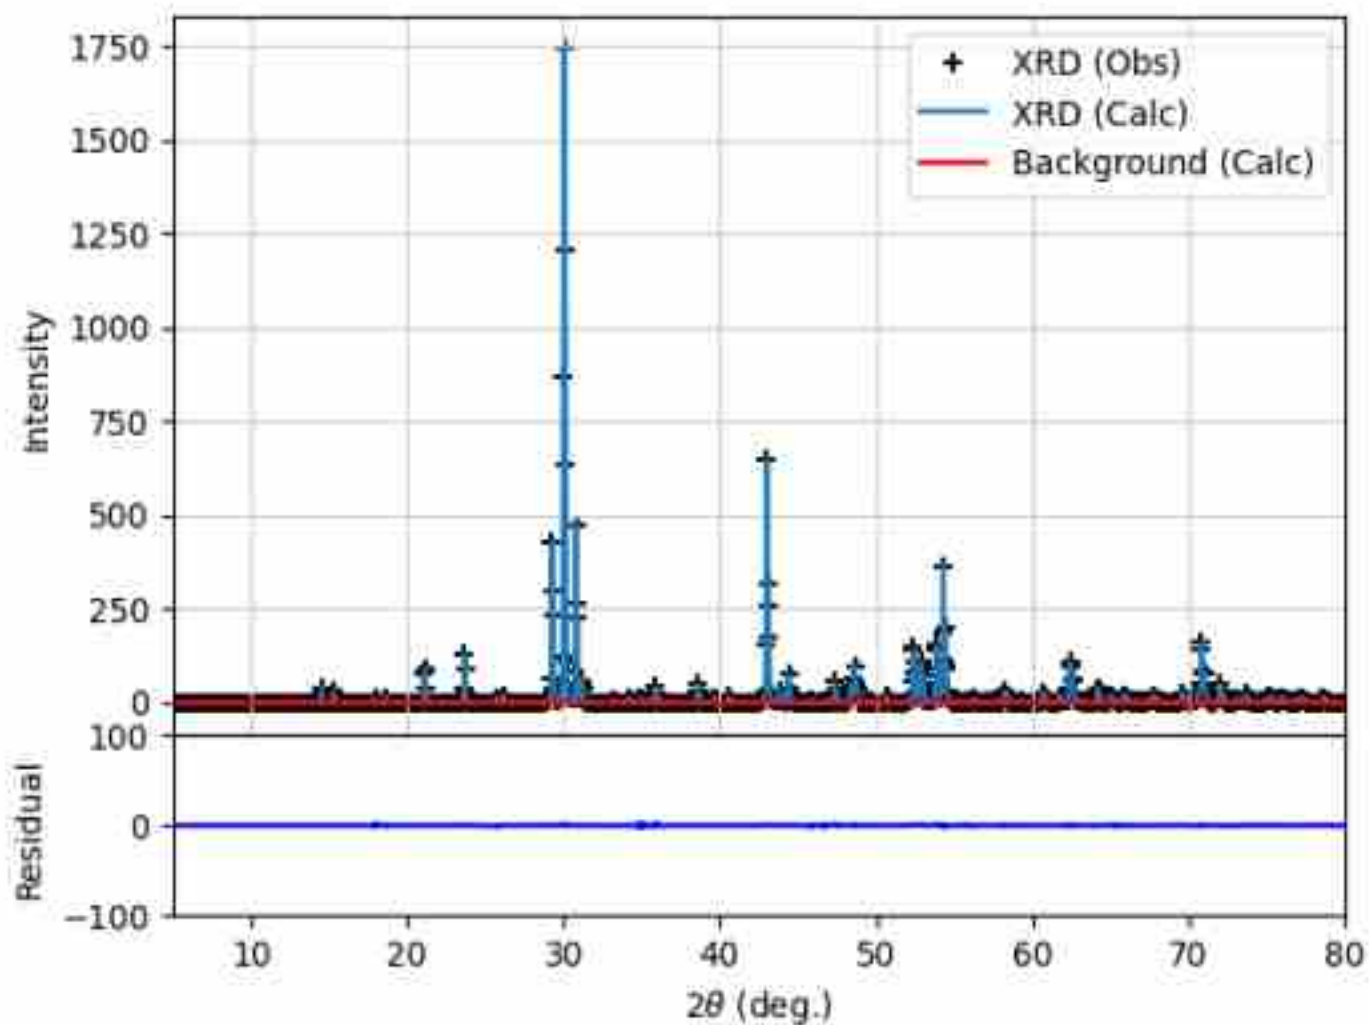

| RMSE before RR | Rwp     | RMSE after RR |
|----------------|---------|---------------|
| 0.05           | 2.88214 | 0.0604        |

# Sr<sub>2</sub>Cr<sub>10</sub>S<sub>10</sub>O<sub>6</sub>

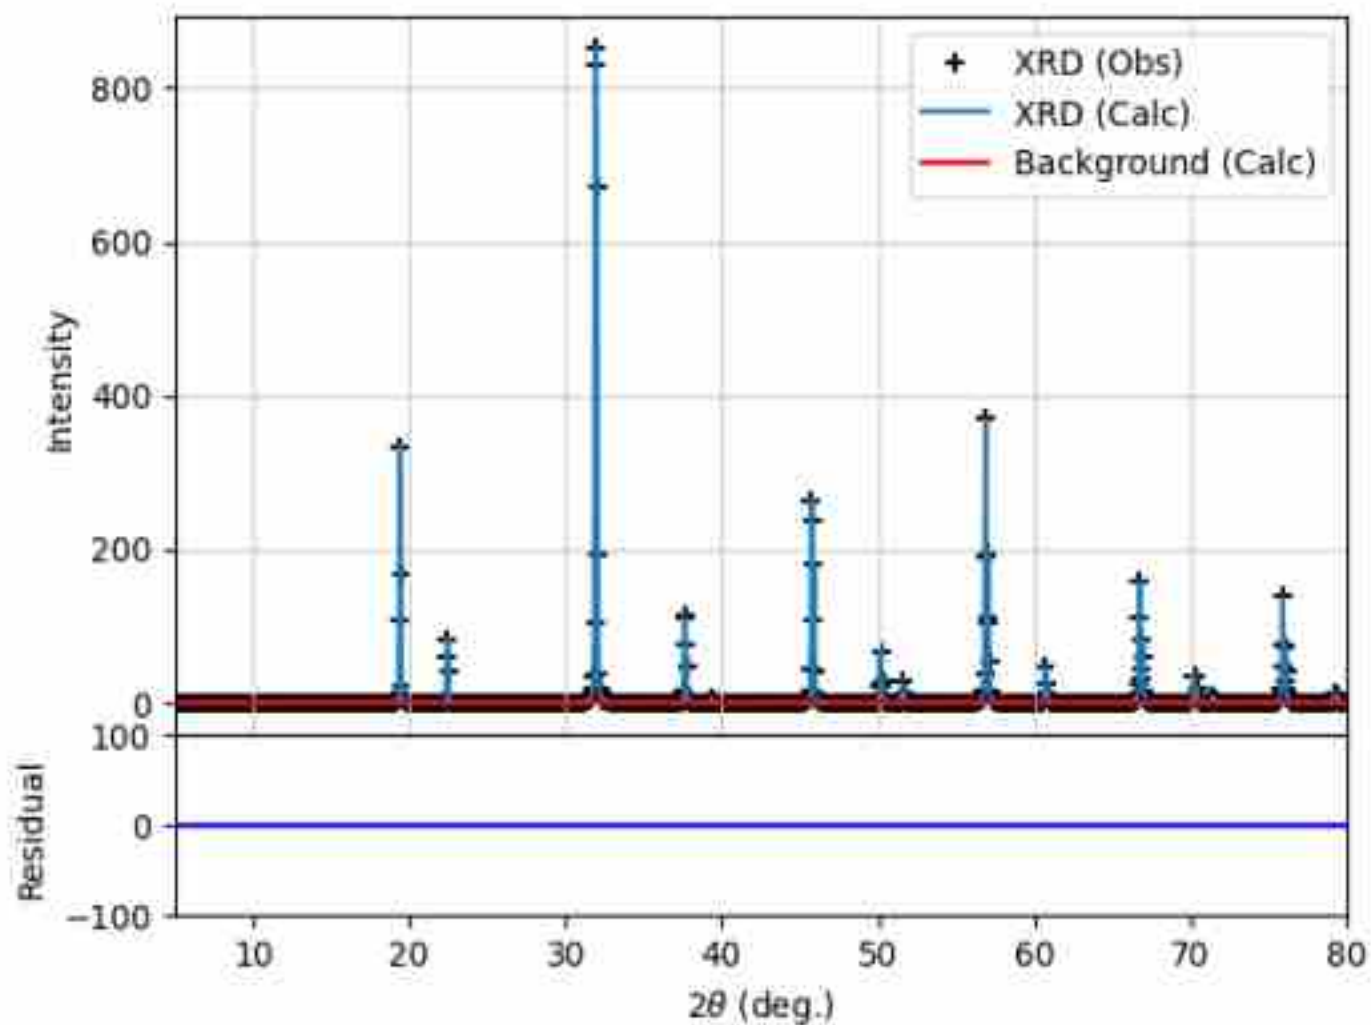

| RMSE before RR | Rwp     | RMSE after RR |
|----------------|---------|---------------|
| 0.005          | 0.00284 | 0.00129       |



# Sr<sub>2</sub>MnNb<sub>10</sub>O<sub>6</sub>

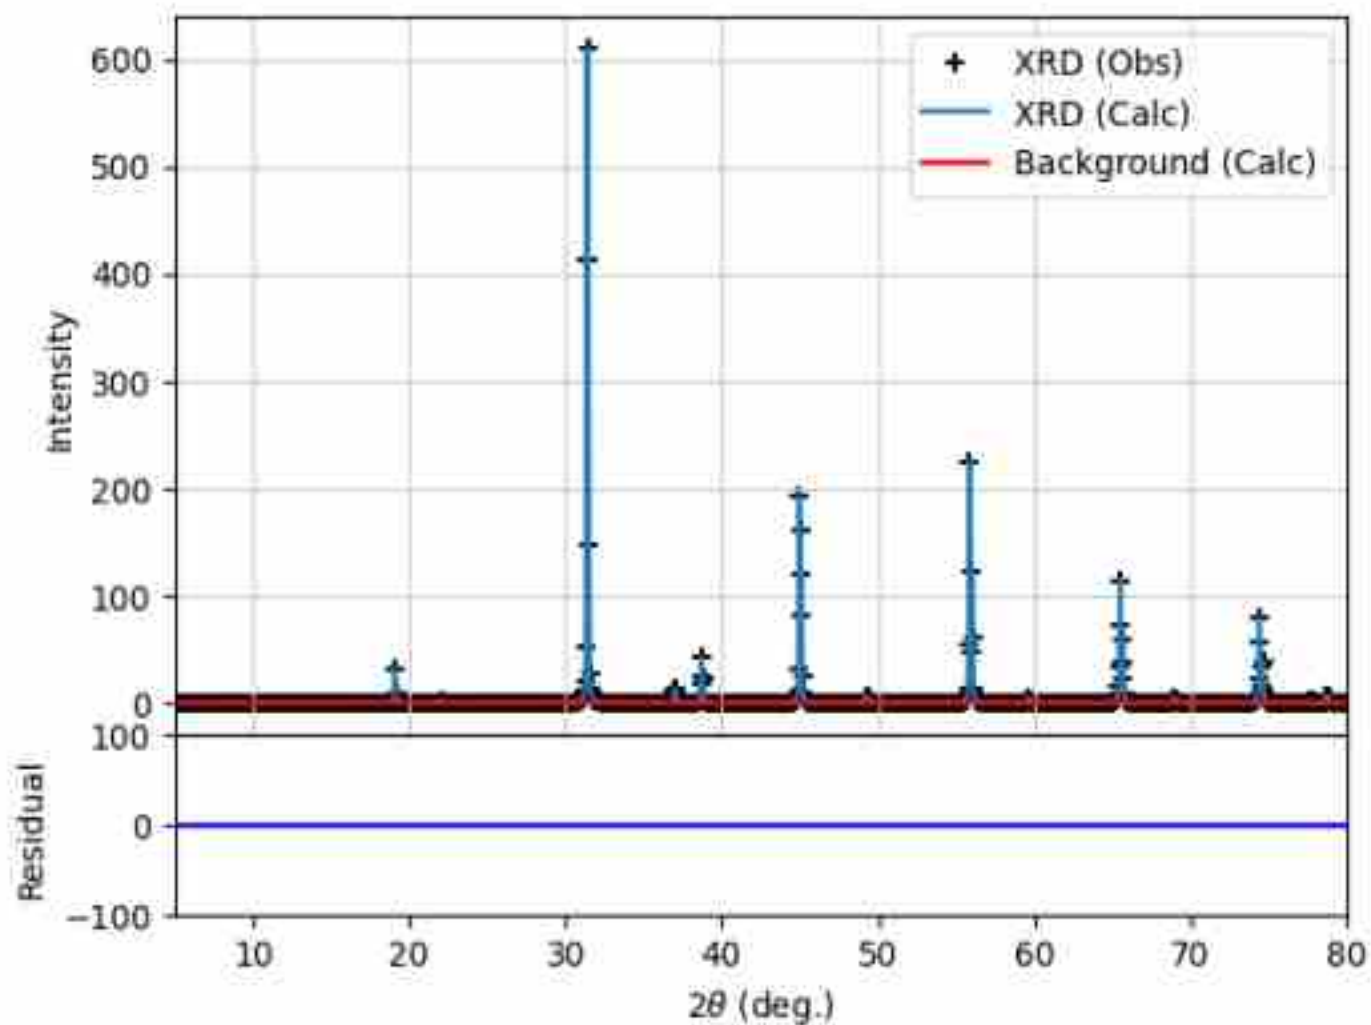

| RMSE before RR | Rwp     | RMSE after RR |
|----------------|---------|---------------|
| 0.005          | 0.00496 | 0.00168       |

# Sr<sub>3</sub>As<sub>1</sub>N<sub>1</sub>

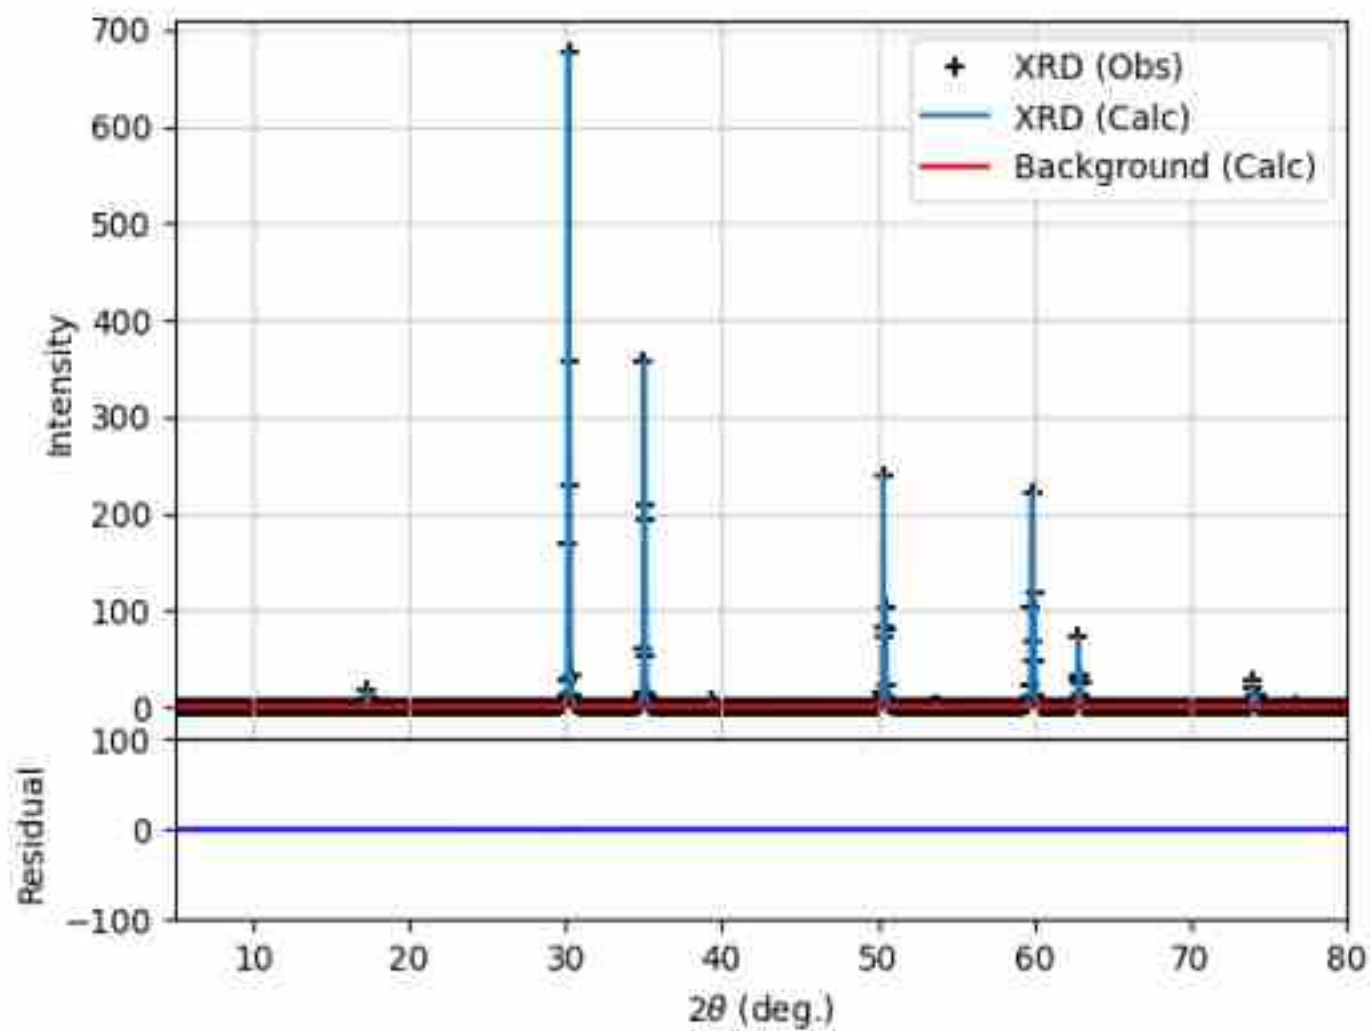

| RMSE before RR | Rwp     | RMSE after RR |
|----------------|---------|---------------|
| 0.005          | 0.05695 | 0.00062       |

# Tb<sub>2</sub>Ti<sub>2</sub>Ge<sub>2</sub>

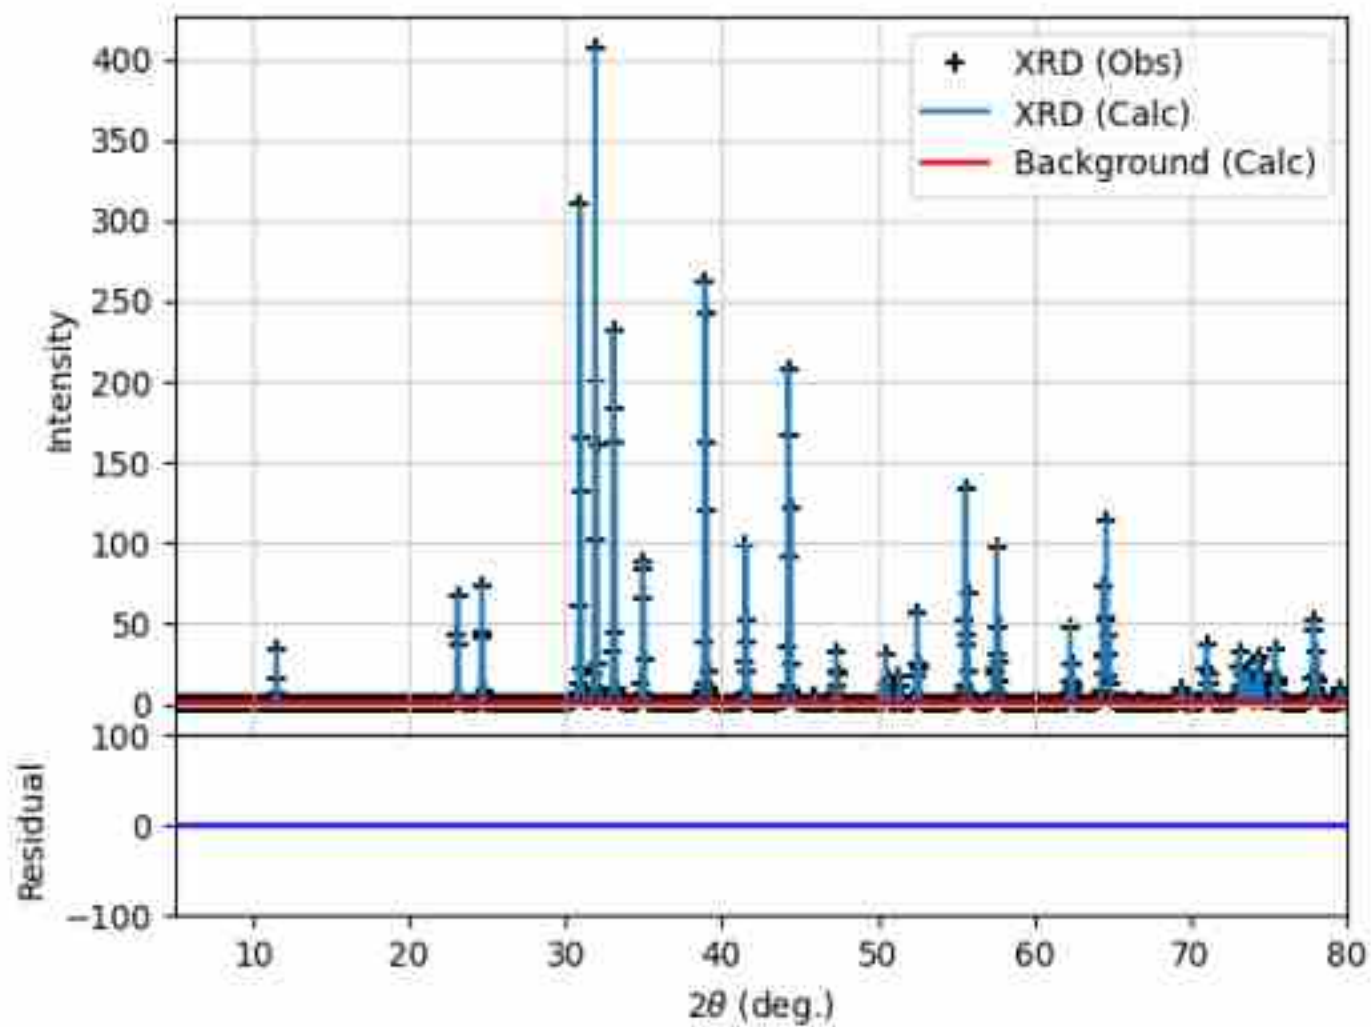

| RMSE before RR | Rwp    | RMSE after RR |
|----------------|--------|---------------|
| 0.005          | 0.0041 | 0.00056       |

# Tb<sub>2</sub>Zr<sub>2</sub>Sb<sub>2</sub>

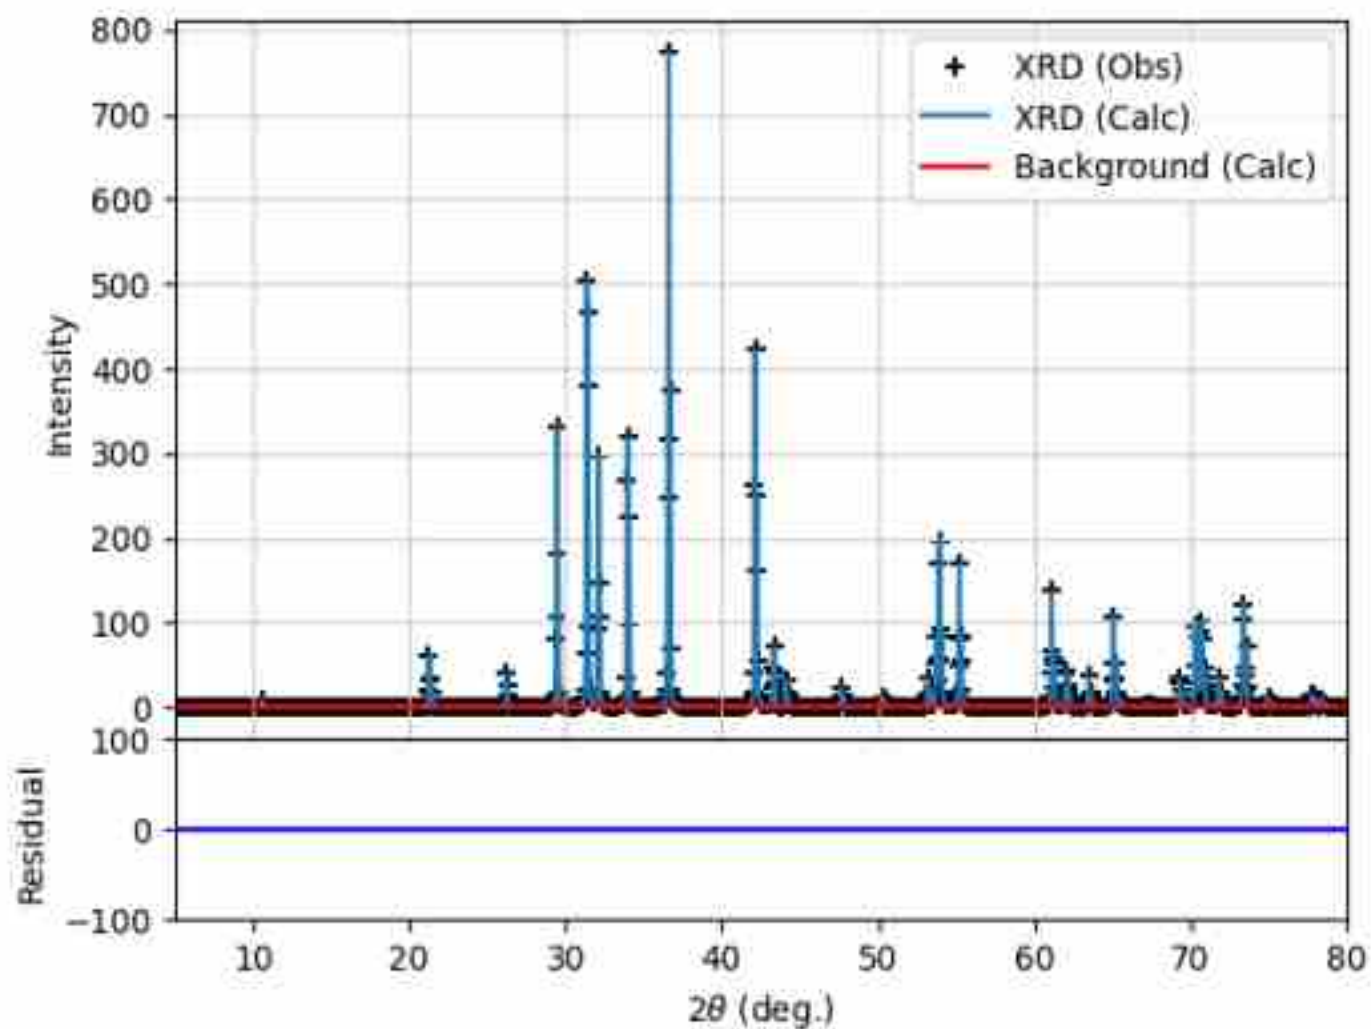

| RMSE before RR | Rwp     | RMSE after RR |
|----------------|---------|---------------|
| 0.005          | 0.00492 | 0.00056       |

# Tb<sub>4</sub>In<sub>2</sub>Au<sub>4</sub>

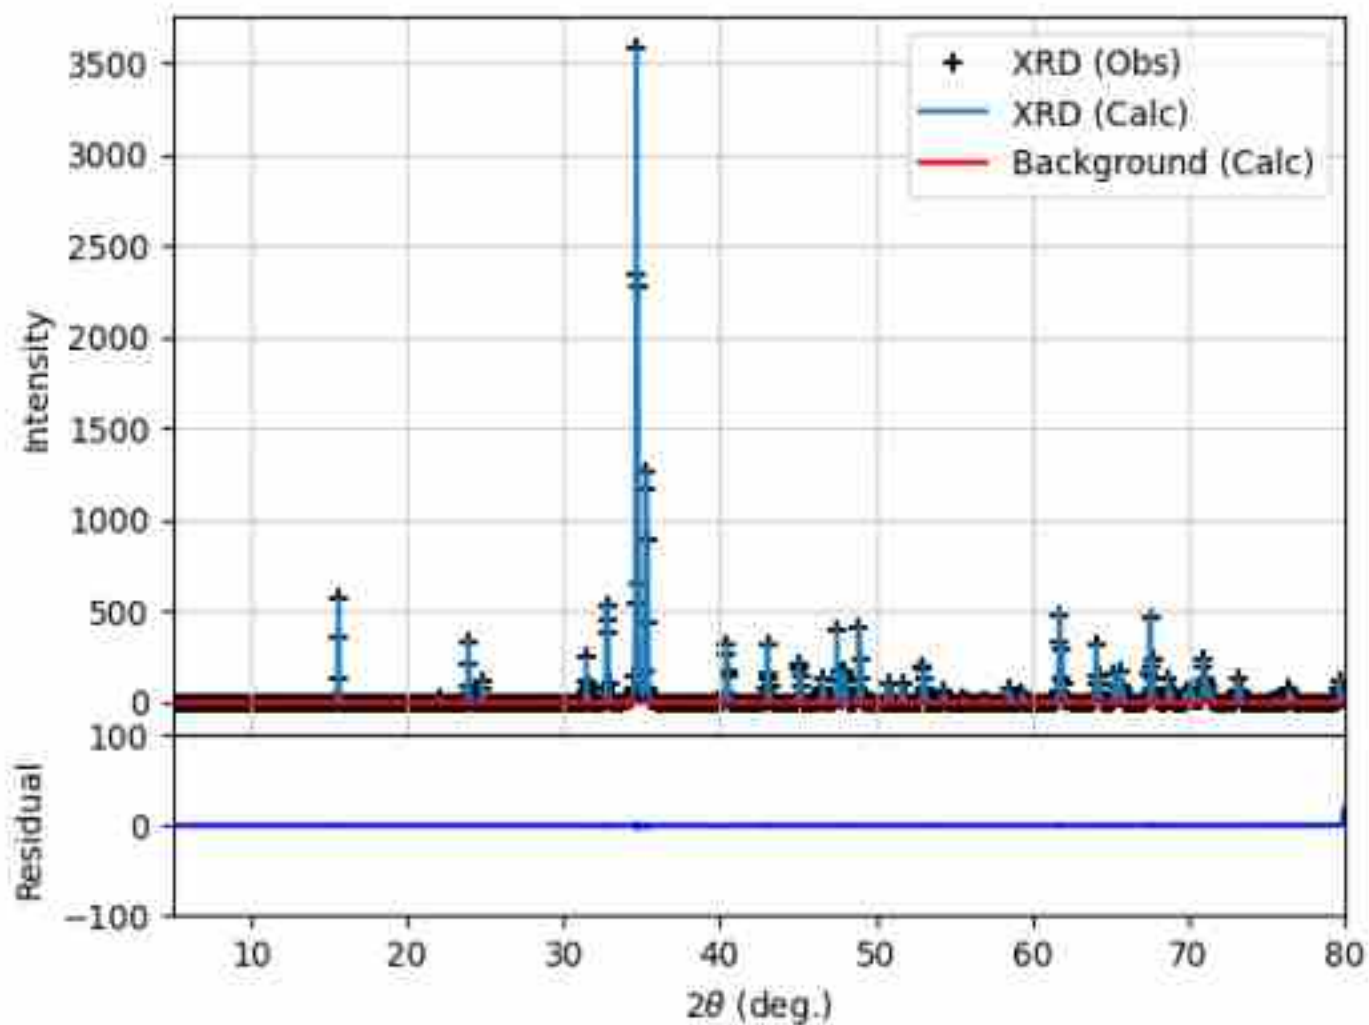

| RMSE before RR | Rwp     | RMSE after RR |
|----------------|---------|---------------|
| 0.005          | 2.45762 | 0.00556       |

Ti1Al6Mo1

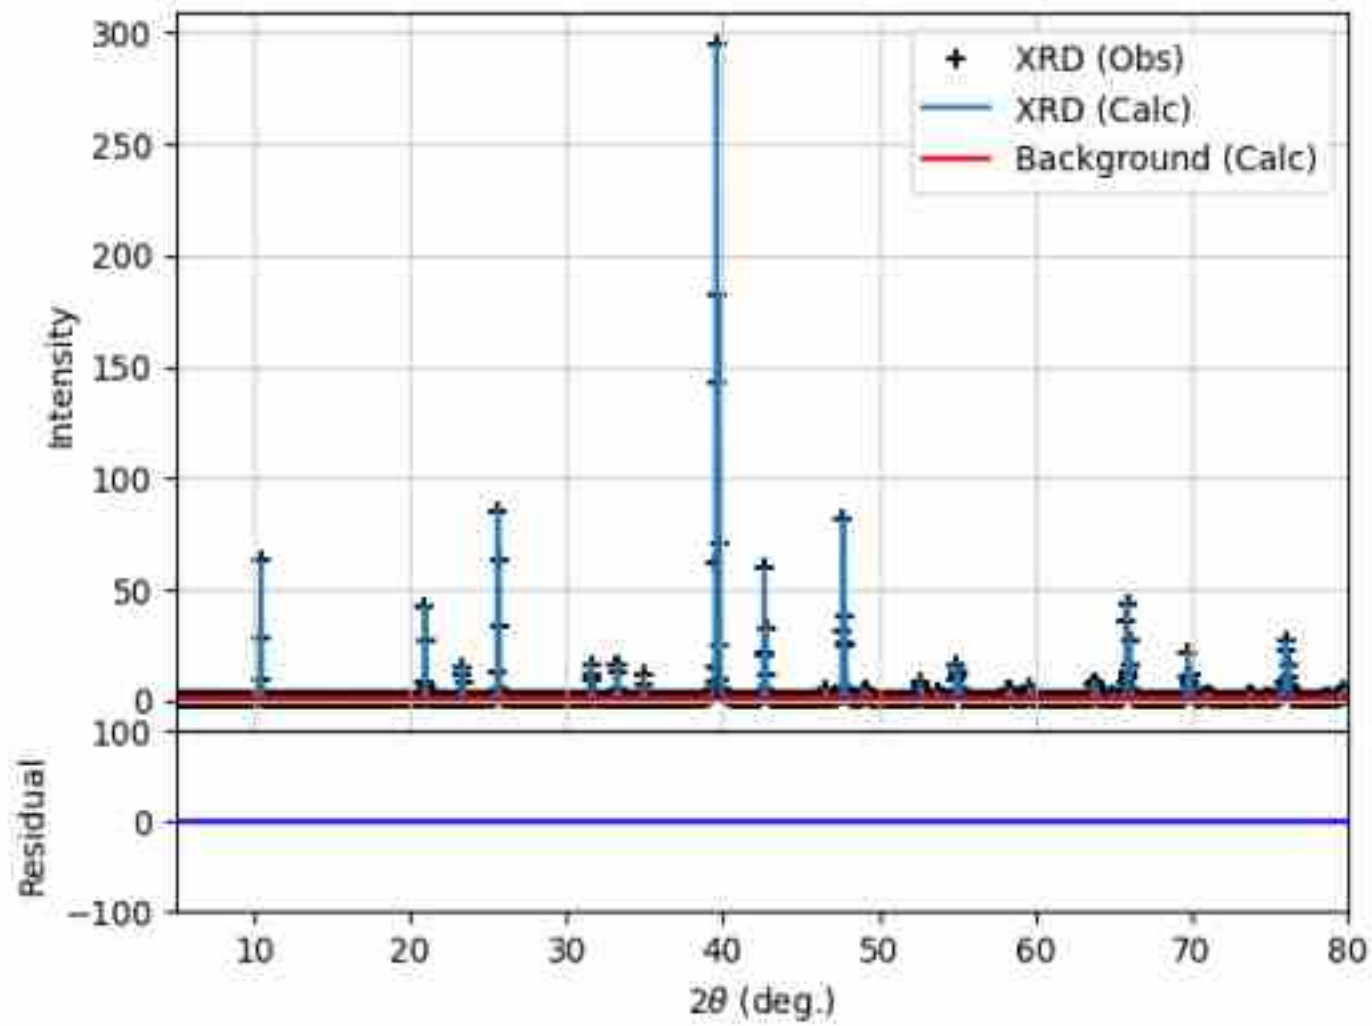

| RMSE before RR | Rwp     | RMSE after RR |
|----------------|---------|---------------|
| 0.005          | 0.00774 | 0.00151       |

# Ti1Sn1Pd1

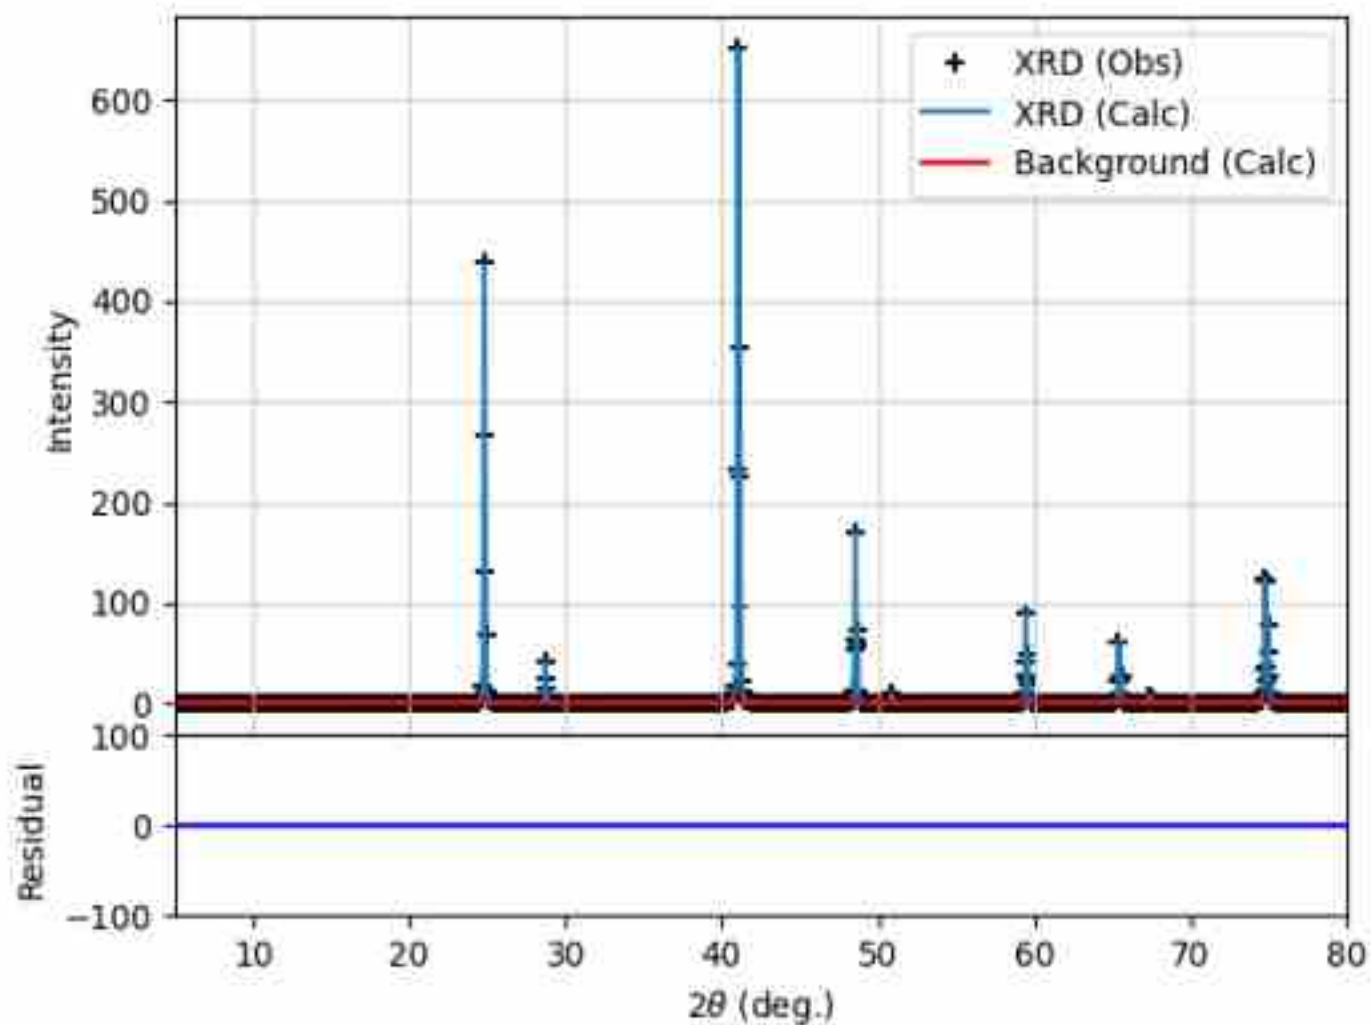

| RMSE before RR | Rwp     | RMSE after RR |
|----------------|---------|---------------|
| 0.005          | 0.00318 | 0.00036       |

# Ti2Br6

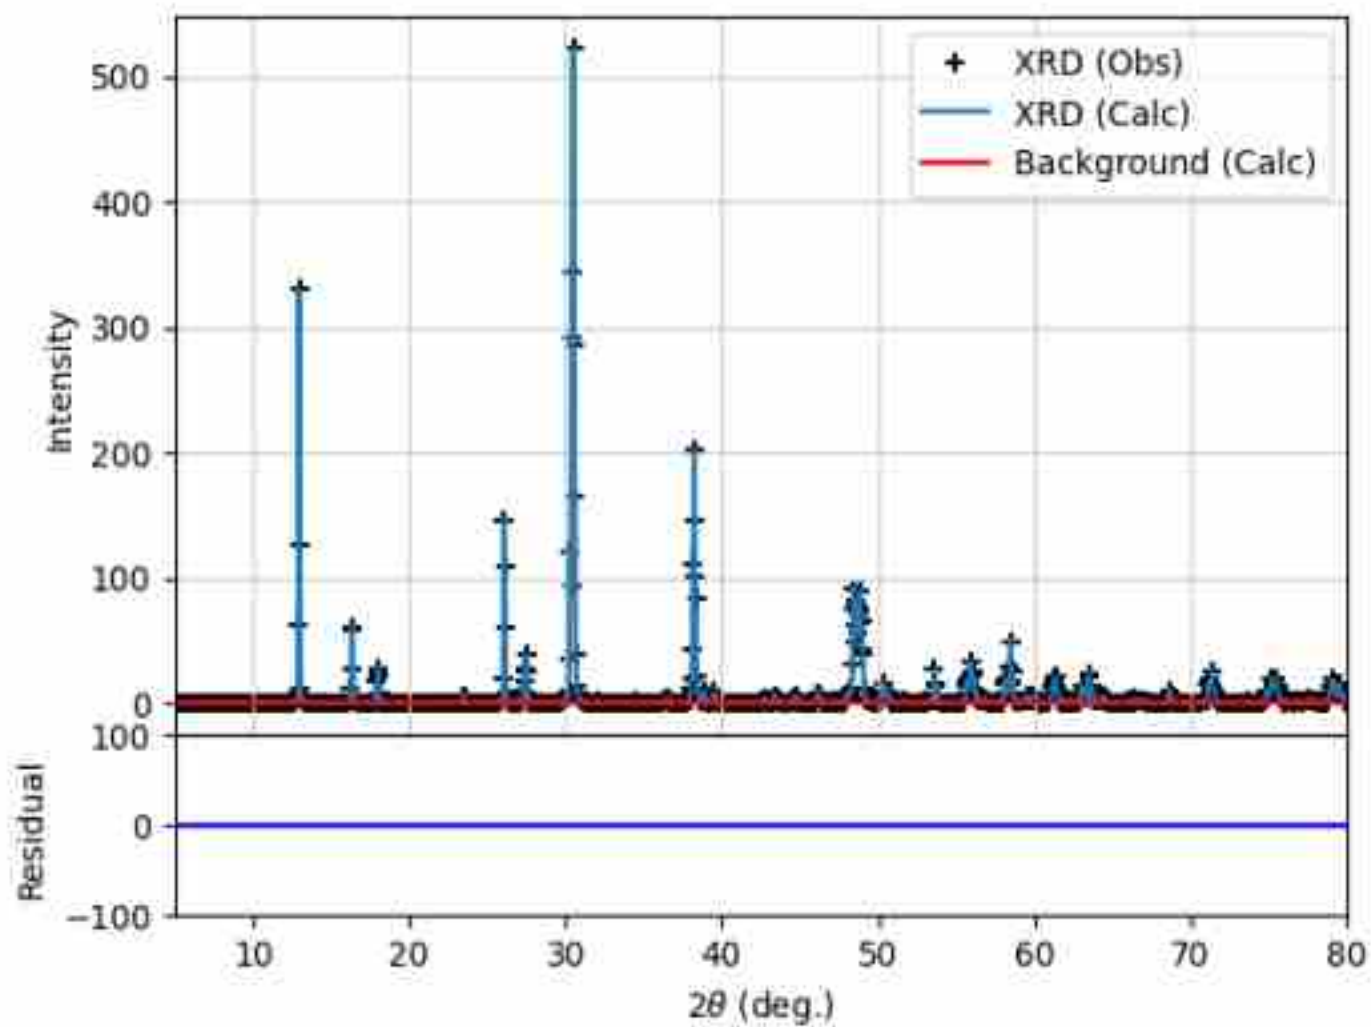

| RMSE before RR | Rwp     | RMSE after RR |
|----------------|---------|---------------|
| 0.05           | 0.00023 | 5e-05         |



# Ti<sub>2</sub>CuSb<sub>3</sub>

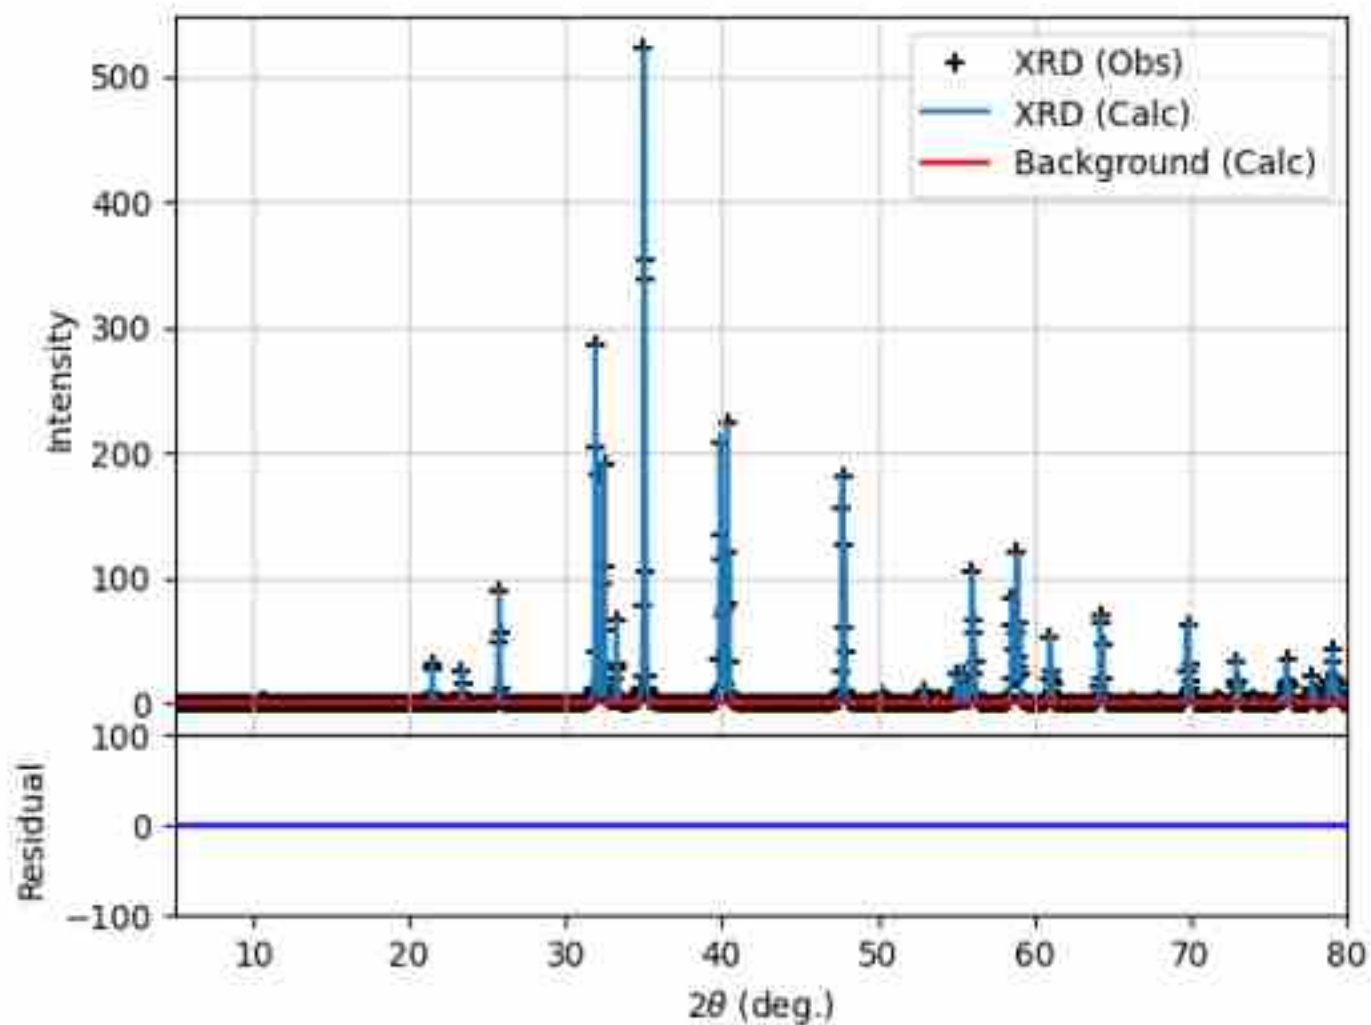

| RMSE before RR | Rwp    | RMSE after RR |
|----------------|--------|---------------|
| 0.005          | 0.0045 | 0.0006        |

# Ti2Zn1

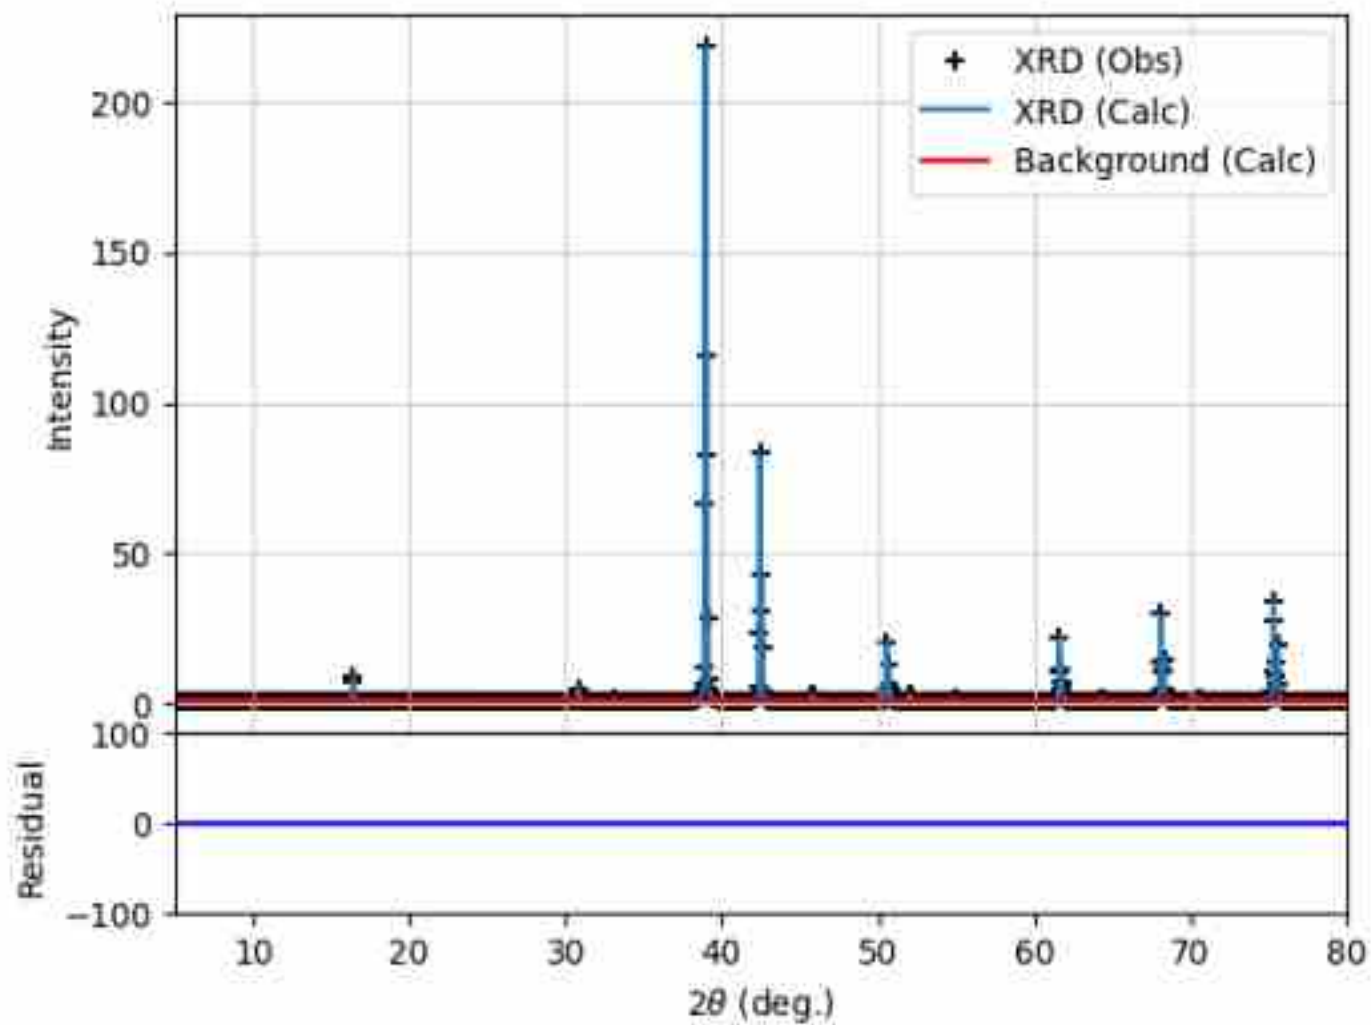

| RMSE before RR | Rwp     | RMSE after RR |
|----------------|---------|---------------|
| 0.005          | 0.19748 | 0.00261       |

# U1Al3Pd2

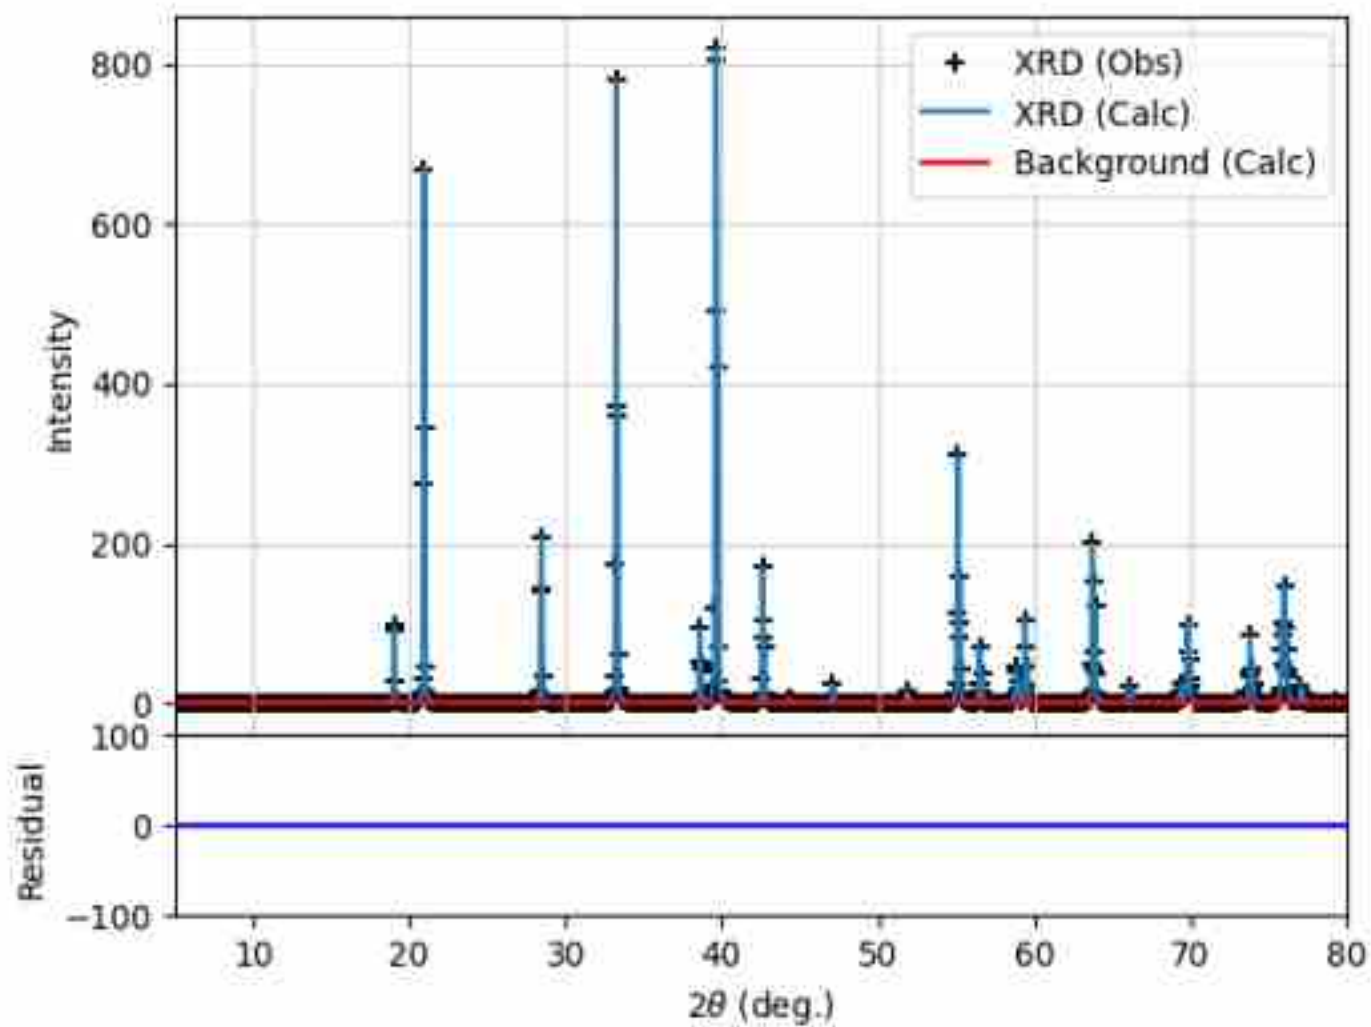

| RMSE before RR | Rwp     | RMSE after RR |
|----------------|---------|---------------|
| 0.005          | 0.00327 | 0.00097       |

# U1Ga5Os1

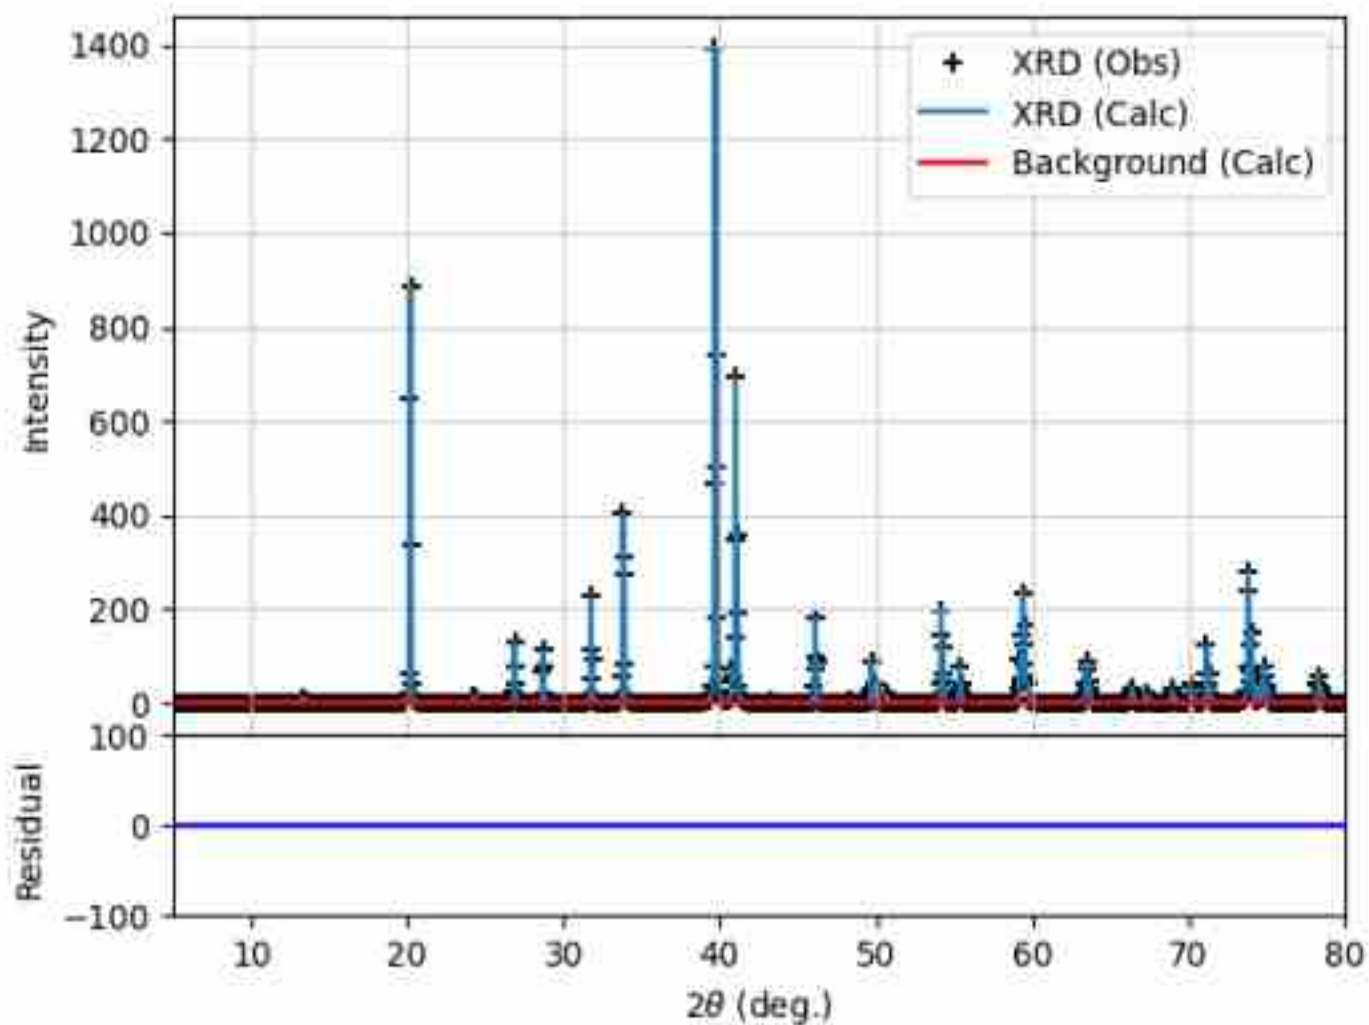

| RMSE before RR | Rwp     | RMSE after RR |
|----------------|---------|---------------|
| 0.005          | 0.00467 | 0.00088       |

# U1N2

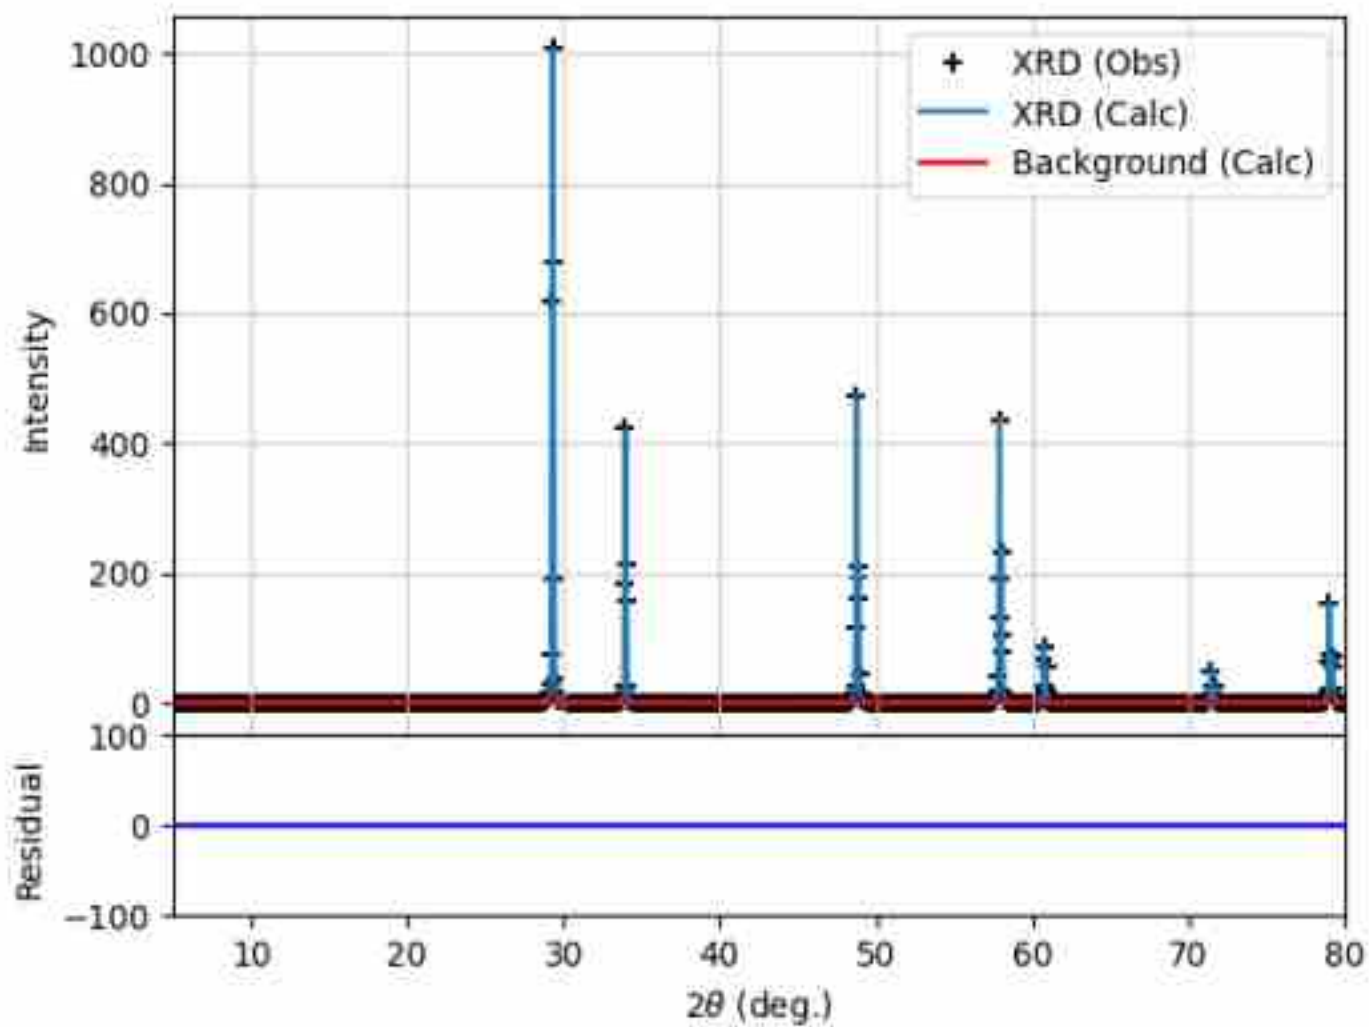

| RMSE before RR | Rwp     | RMSE after RR |
|----------------|---------|---------------|
| 0.005          | 0.01434 | 0.0039        |

# U1Si2Ir2

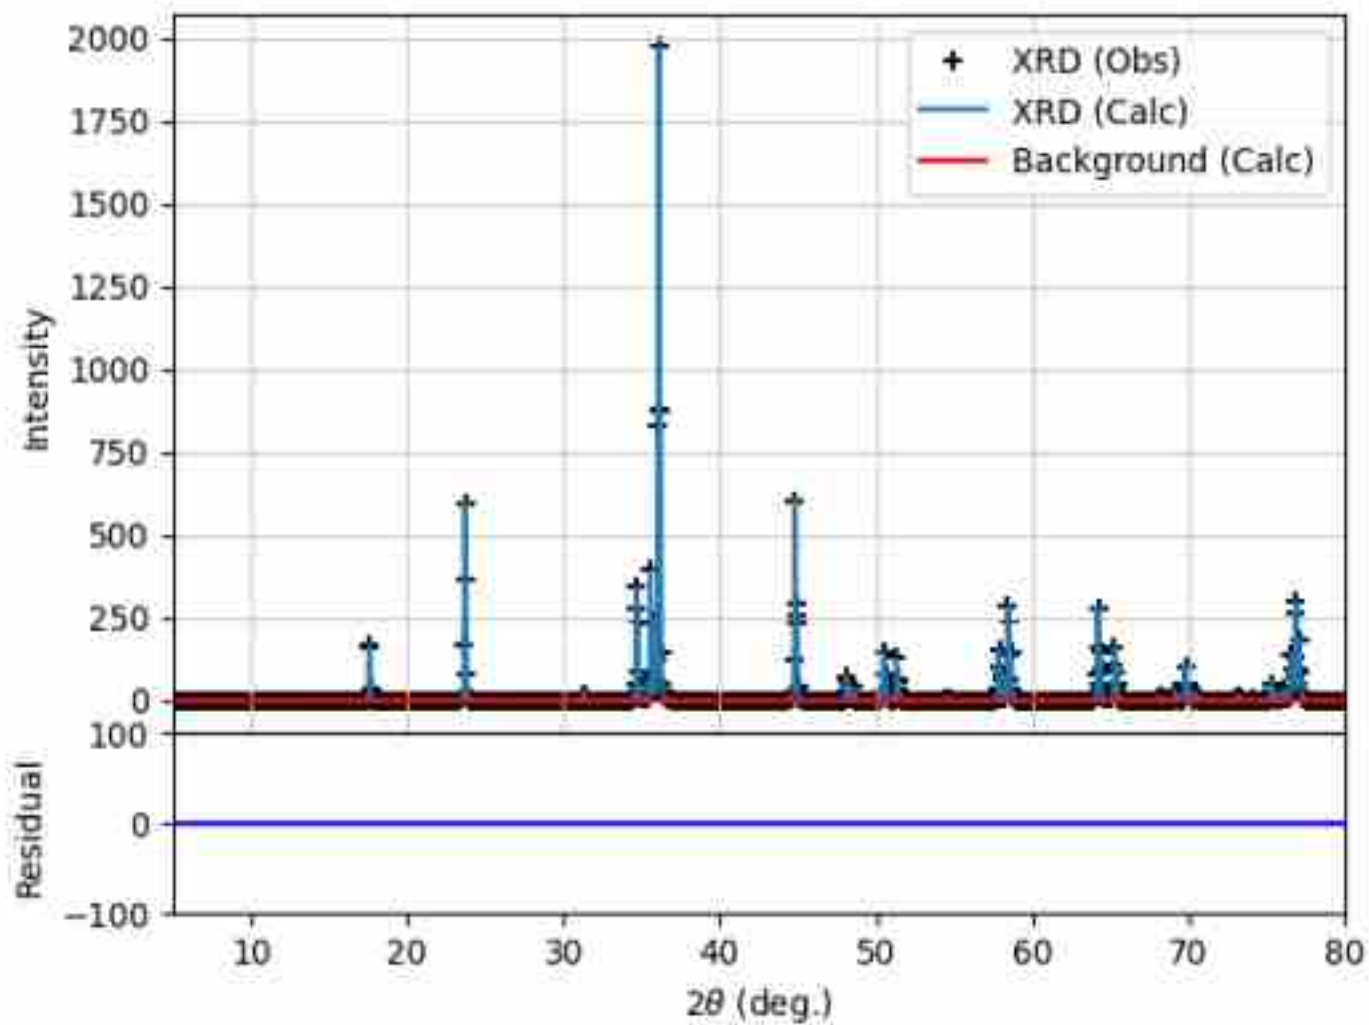

| RMSE before RR | Rwp     | RMSE after RR |
|----------------|---------|---------------|
| 0.005          | 0.00469 | 0.00242       |

# Y1Bi1Te3

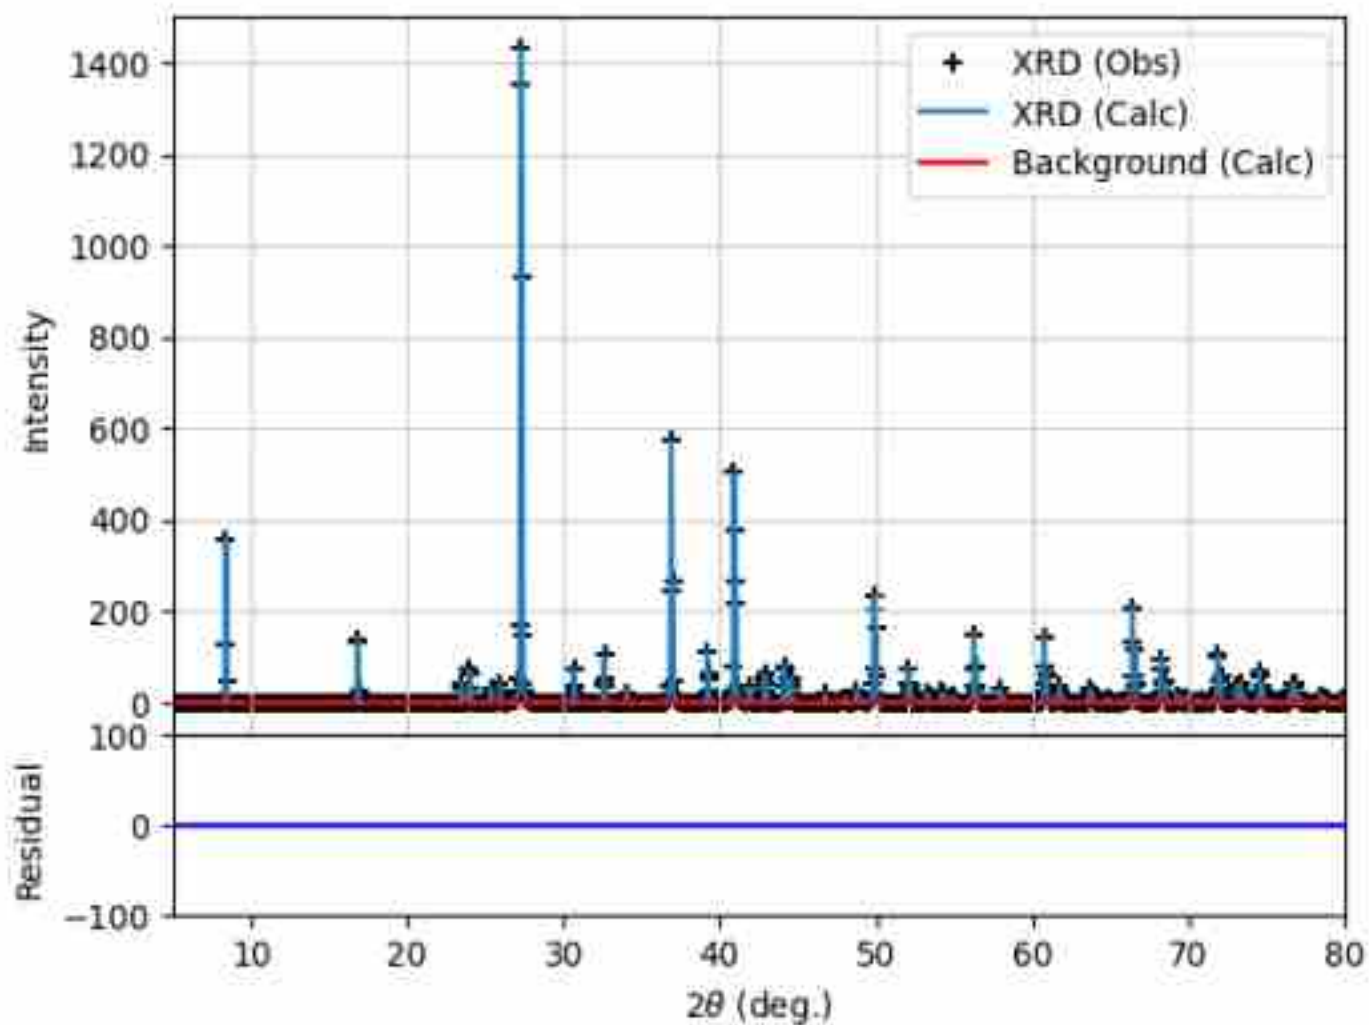

| RMSE before RR | Rwp     | RMSE after RR |
|----------------|---------|---------------|
| 0.005          | 0.00318 | 0.00022       |

# Y2Er6

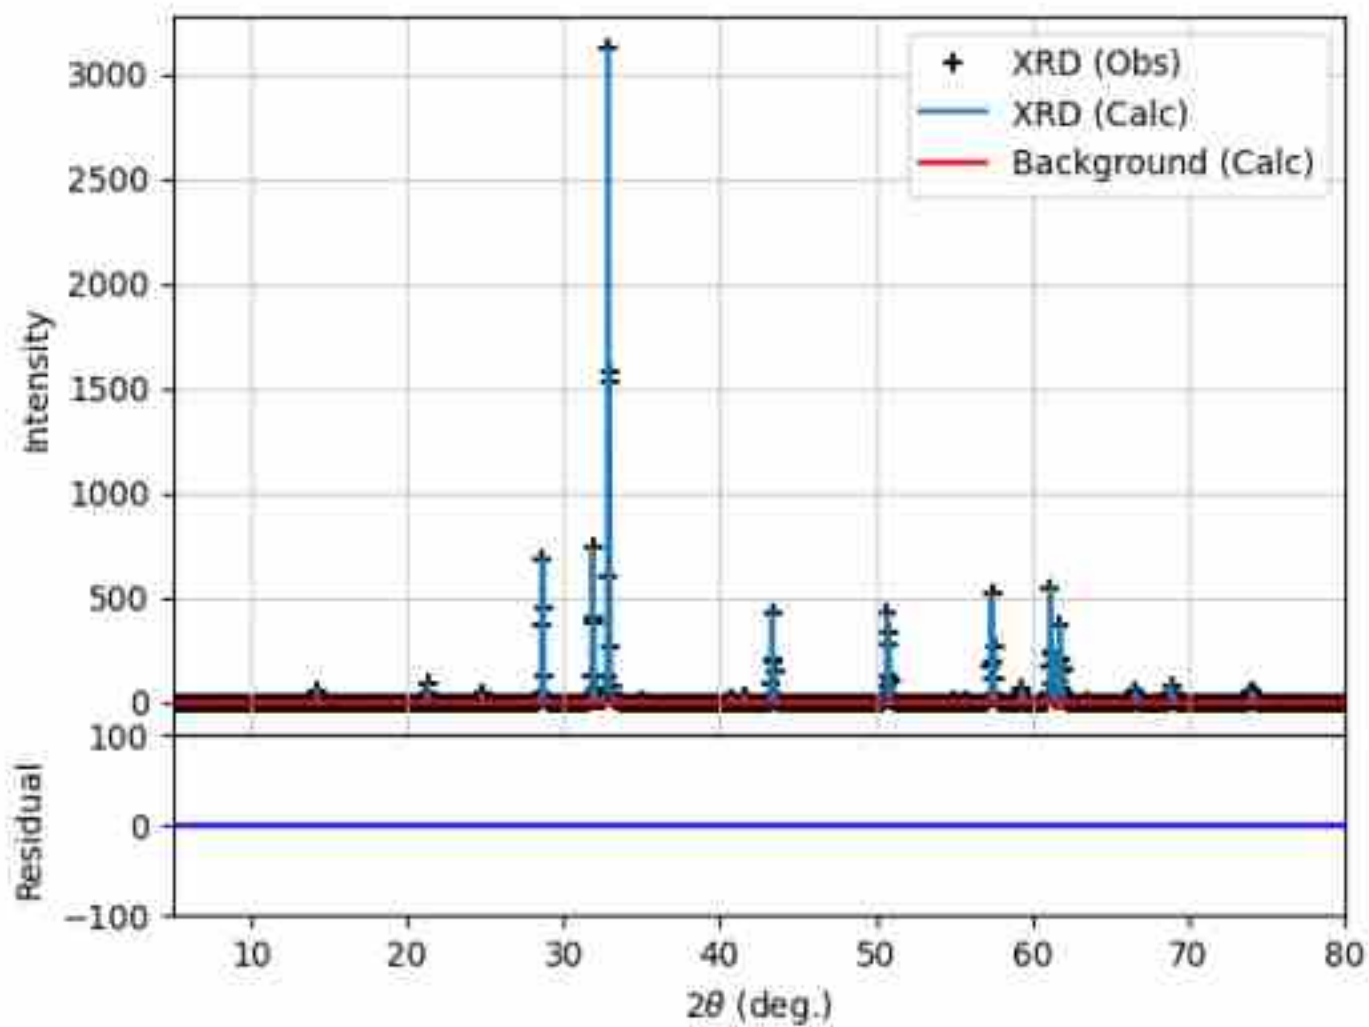

| RMSE before RR | Rwp     | RMSE after RR |
|----------------|---------|---------------|
| 0.005          | 0.01184 | 0.00067       |



# Y3In1C1

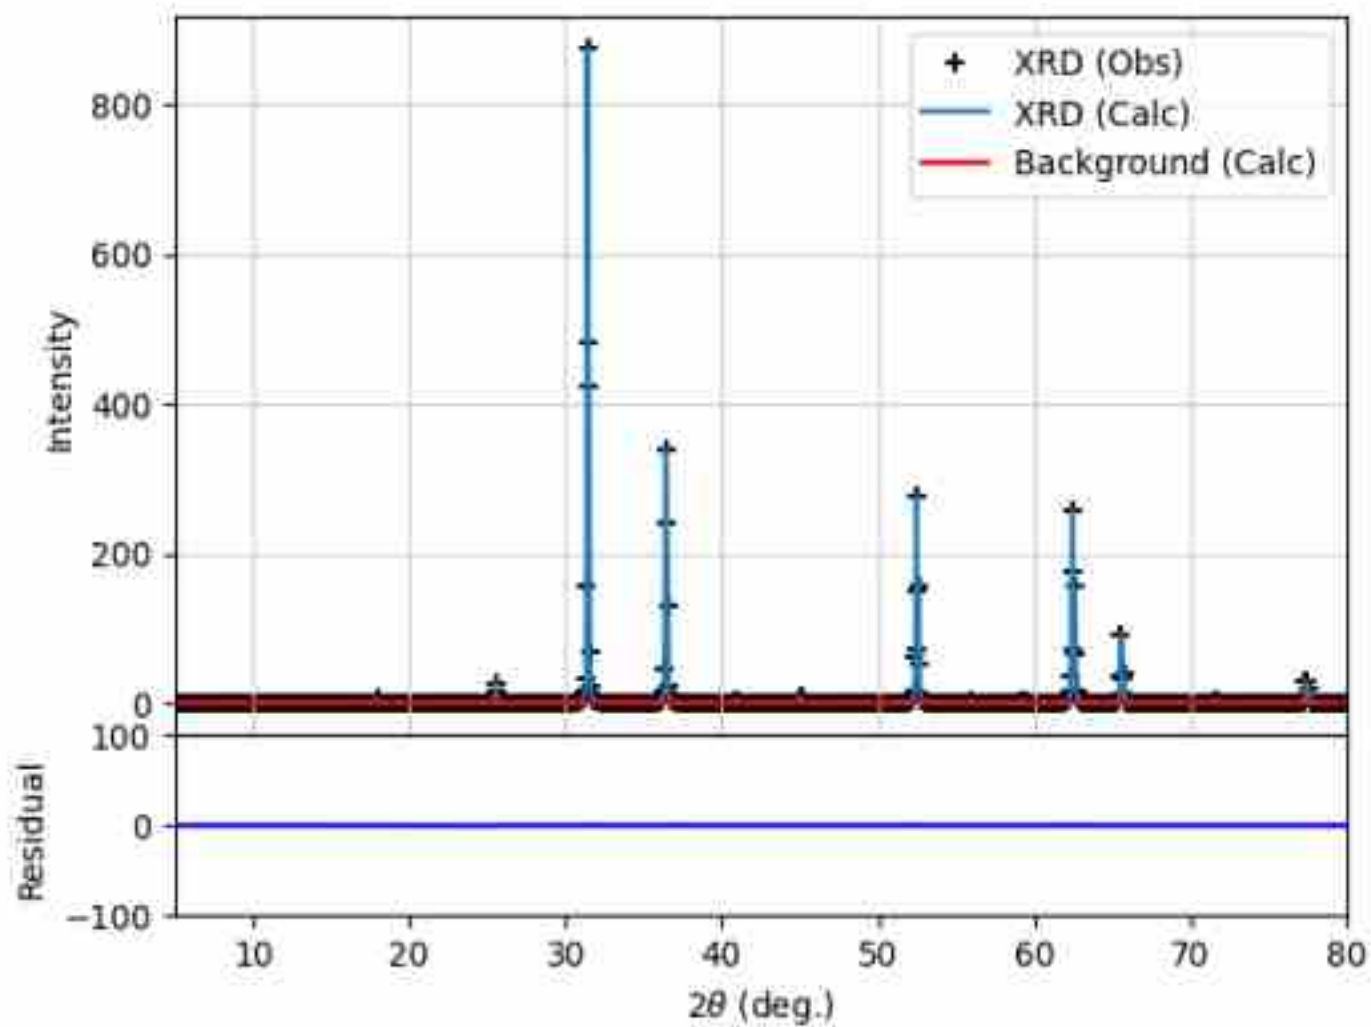

| RMSE before RR | Rwp     | RMSE after RR |
|----------------|---------|---------------|
| 0.005          | 0.74219 | 0.00587       |

# Yb1C2

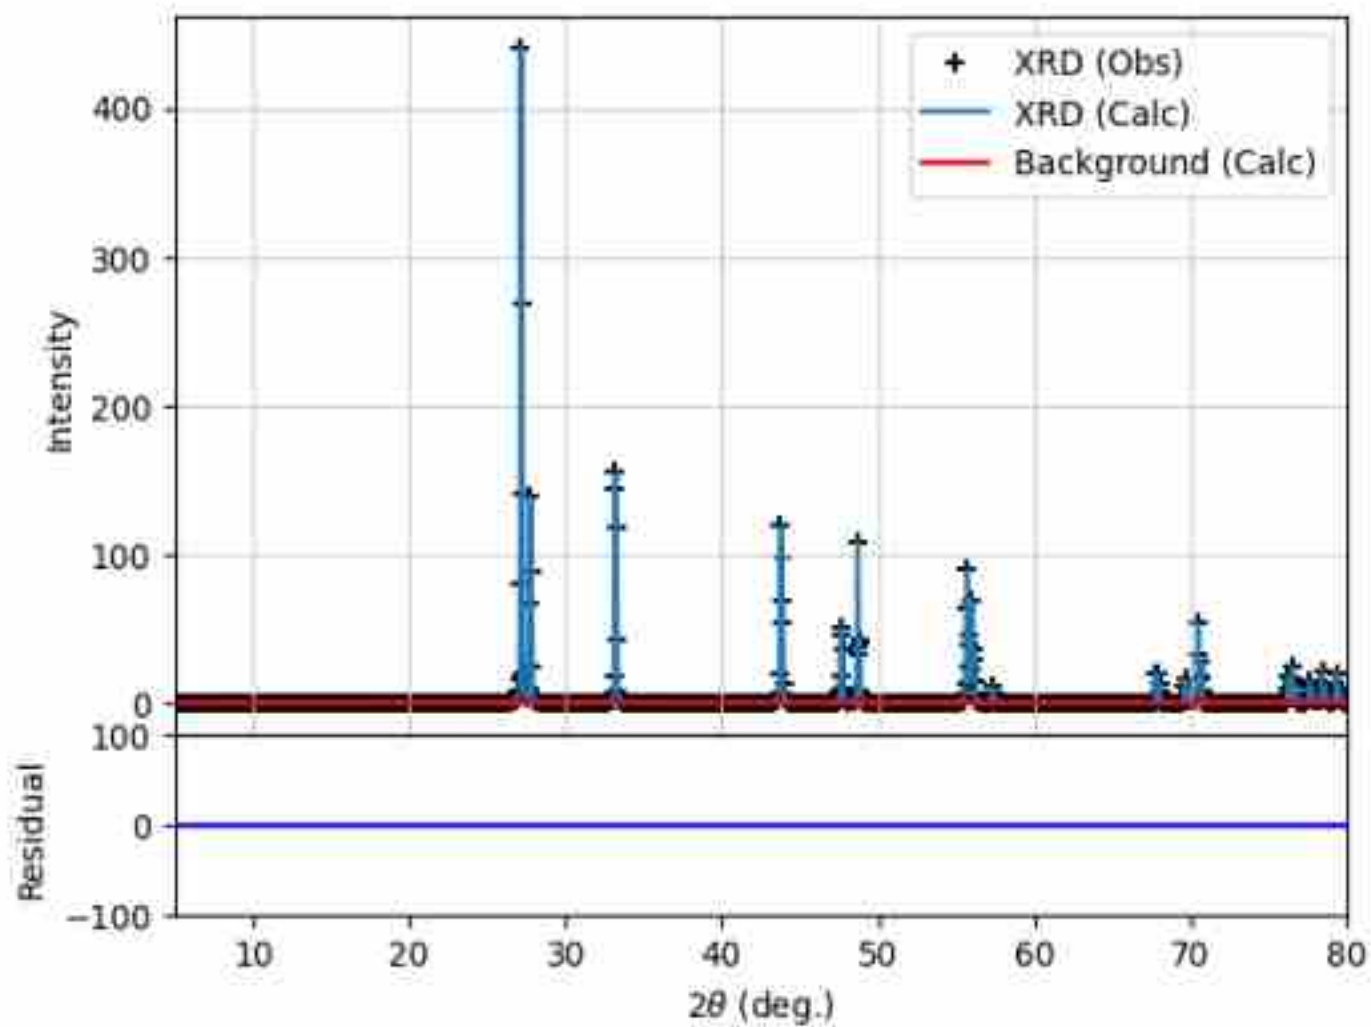

| RMSE before RR | Rwp     | RMSE after RR |
|----------------|---------|---------------|
| 0.005          | 0.01078 | 0.0037        |

# Yb<sub>2</sub>Zn<sub>2</sub>In<sub>2</sub>

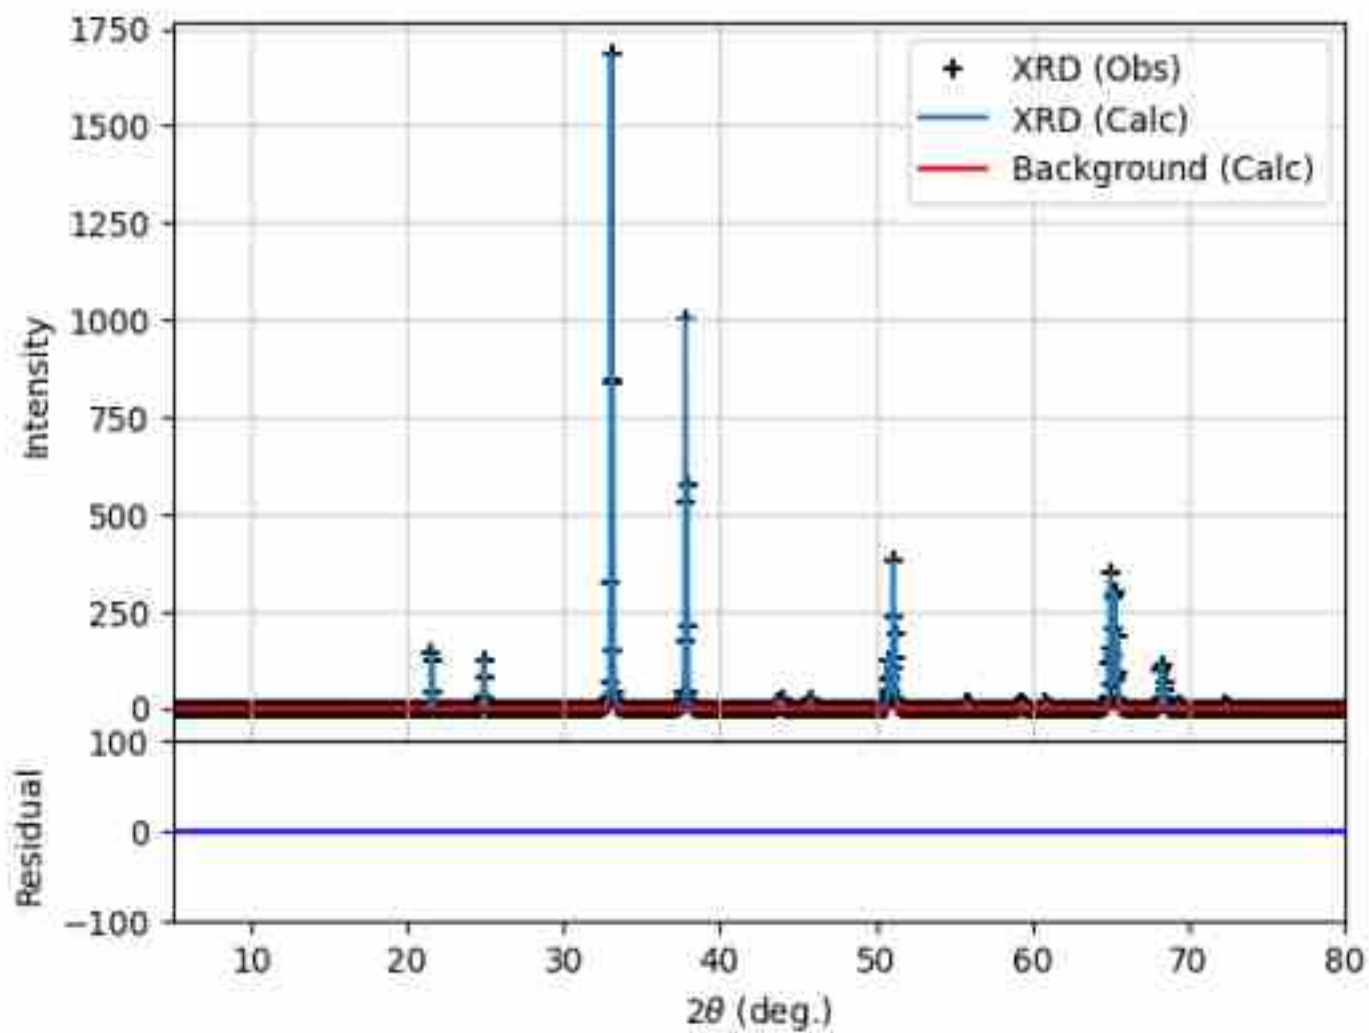

| RMSE before RR | Rwp    | RMSE after RR |
|----------------|--------|---------------|
| 0.005          | 0.0055 | 0.00049       |

# Zn1Ni1Sb1

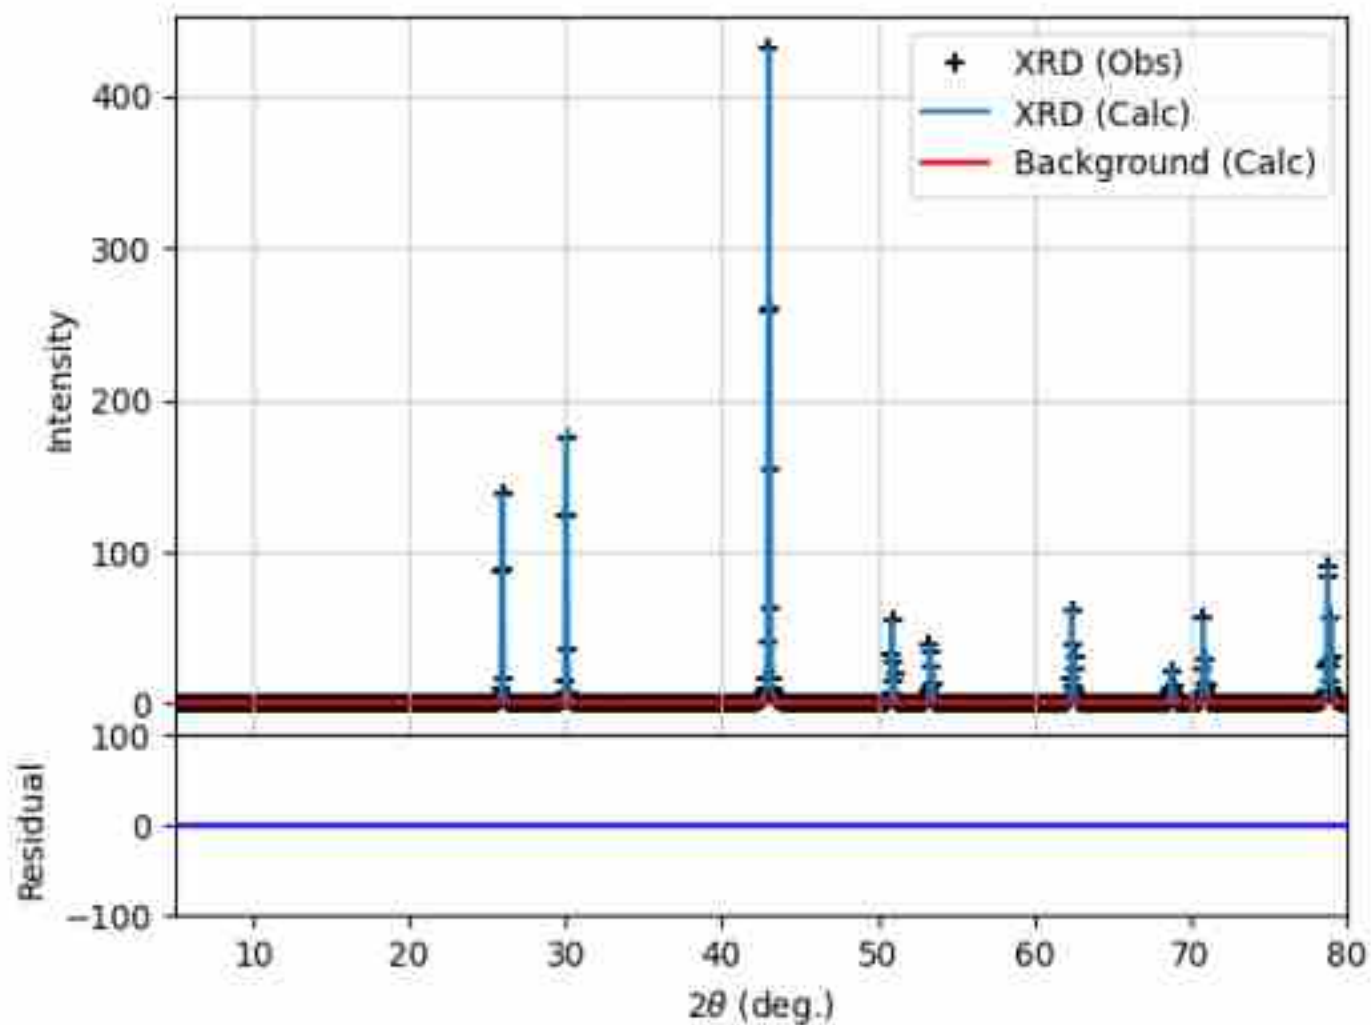

| RMSE before RR | Rwp     | RMSE after RR |
|----------------|---------|---------------|
| 0.005          | 0.00311 | 0.0004        |

# Zr<sub>2</sub>V<sub>2</sub>Mo<sub>2</sub>

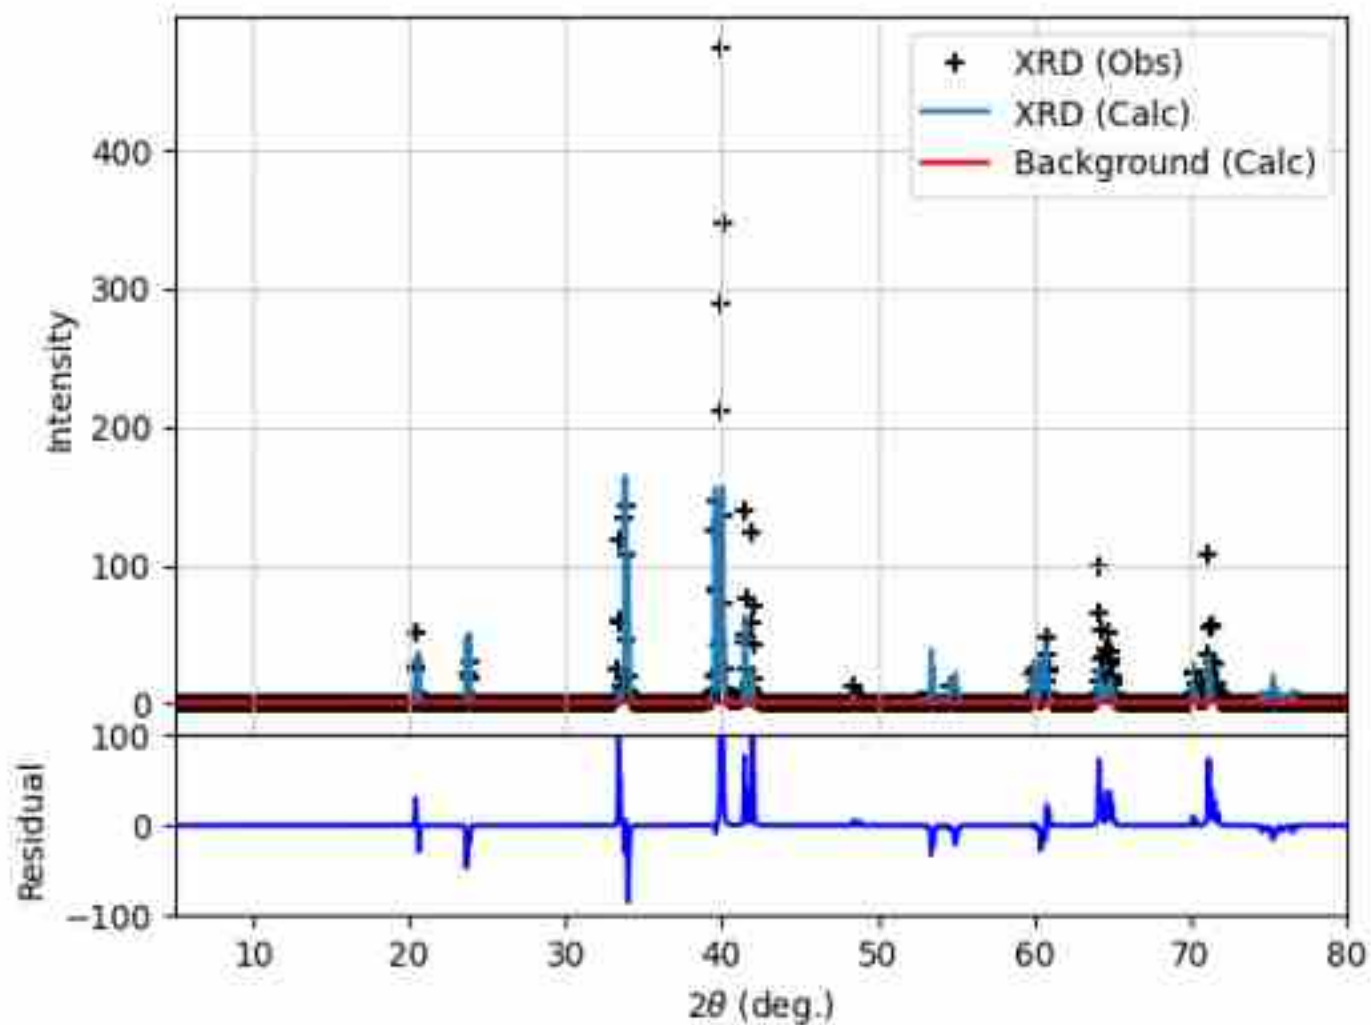

| RMSE before RR | Rwp   | RMSE after RR |
|----------------|-------|---------------|
| 0.005          | 100.0 | 0.00954       |

# Zr<sub>2</sub>V<sub>3</sub>Fe<sub>1</sub>

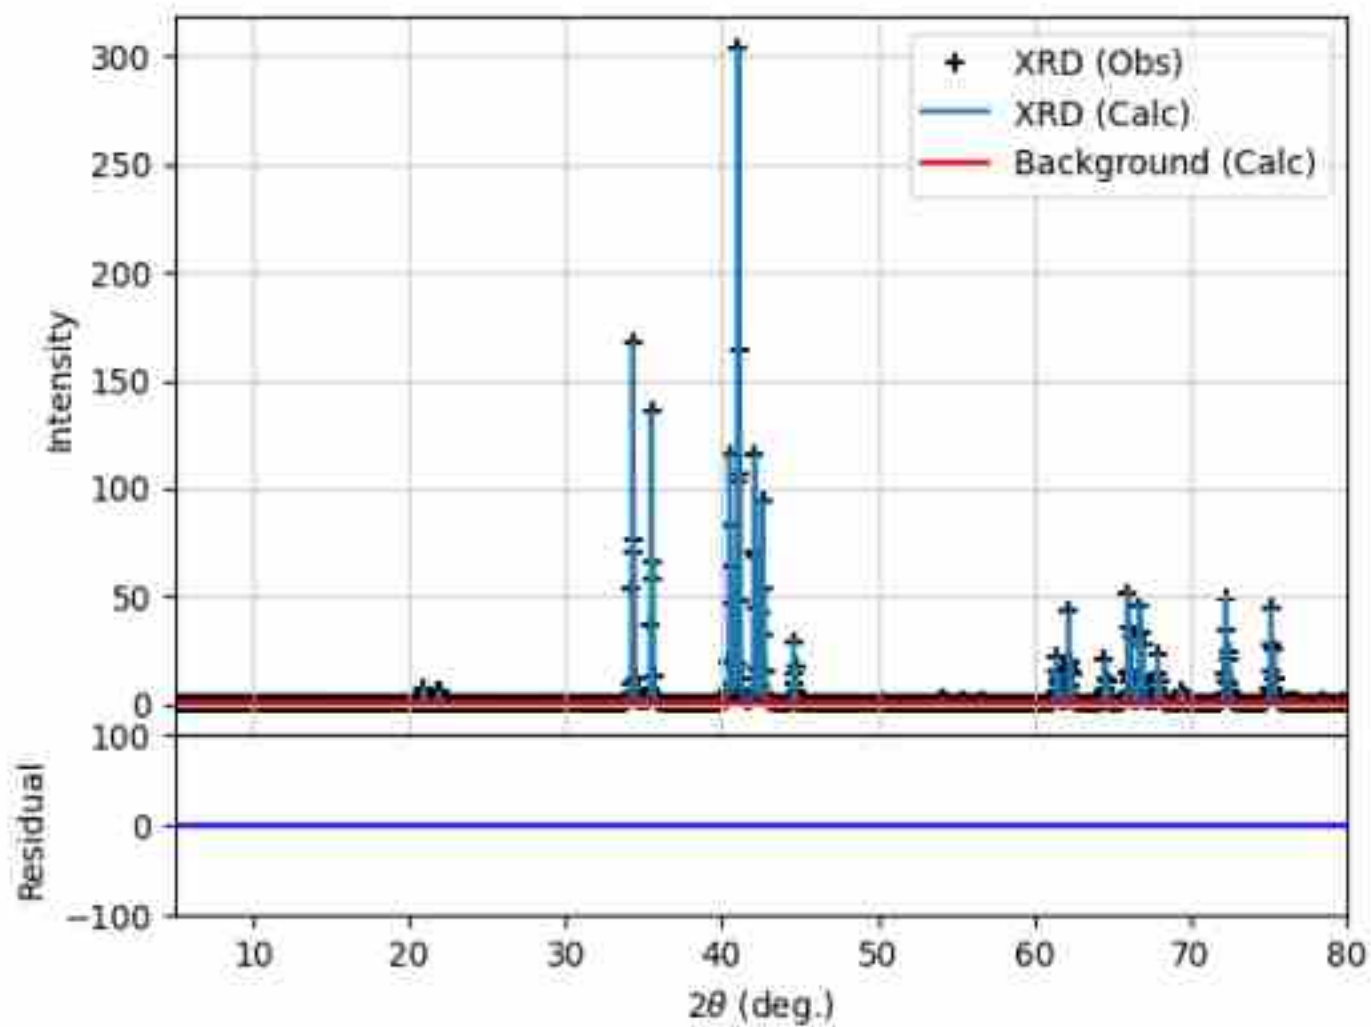

| RMSE before RR | Rwp     | RMSE after RR |
|----------------|---------|---------------|
| 0.005          | 0.00231 | 0.00014       |

# Ac1Ga1O3

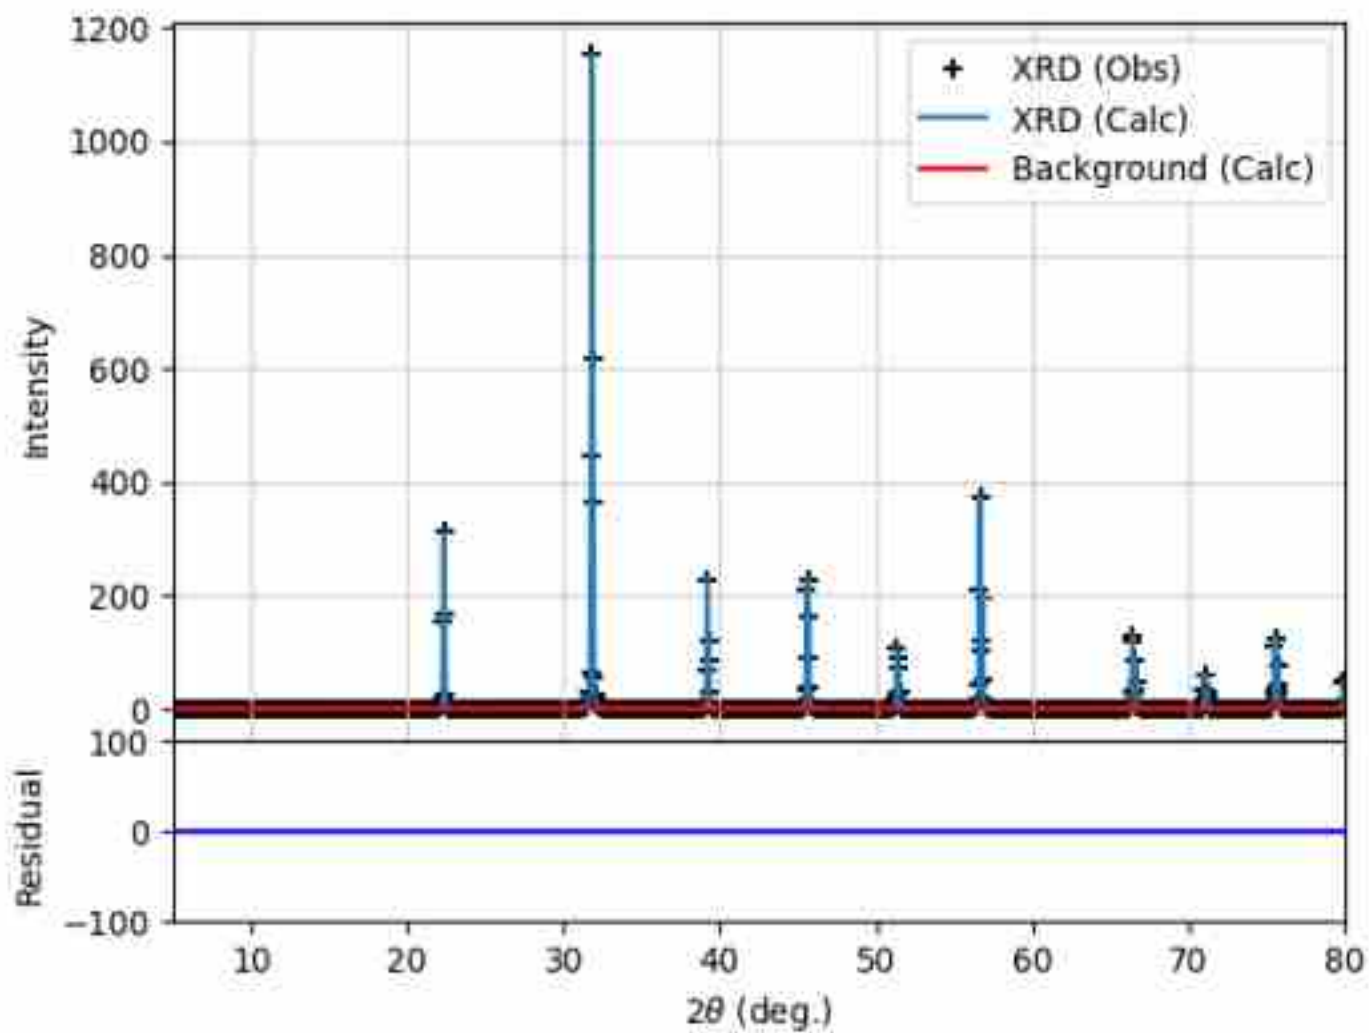

| RMSE before RR | Rwp     | RMSE after RR |
|----------------|---------|---------------|
| 0.006          | 0.05095 | 0.0048        |

# AgI1

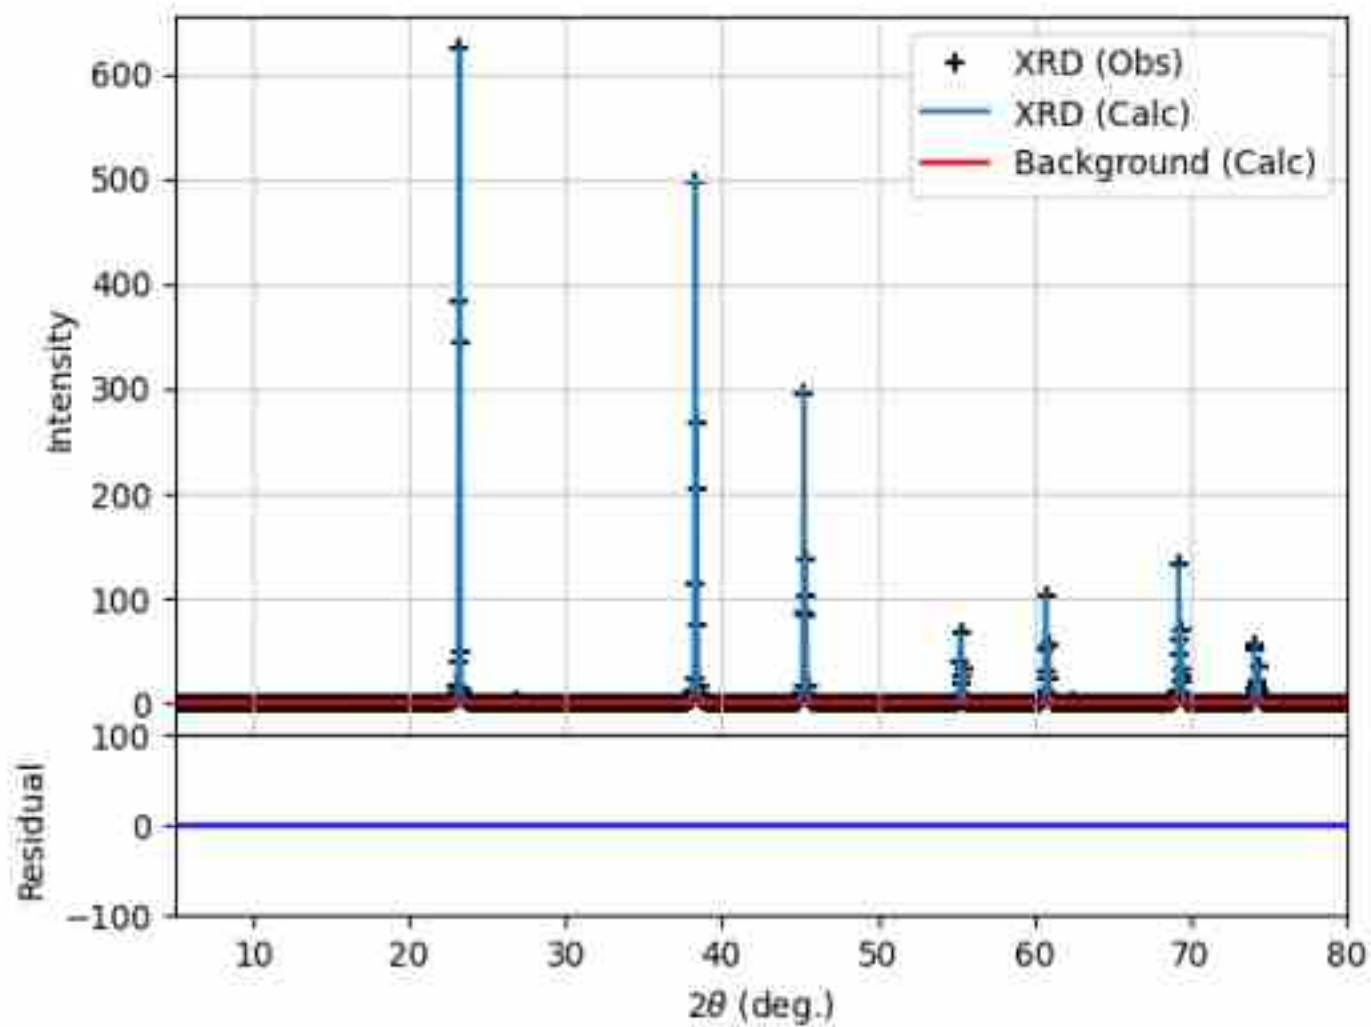

| RMSE before RR | Rwp     | RMSE after RR |
|----------------|---------|---------------|
| 0.006          | 0.17002 | 0.00078       |



# AgI<sub>2</sub>

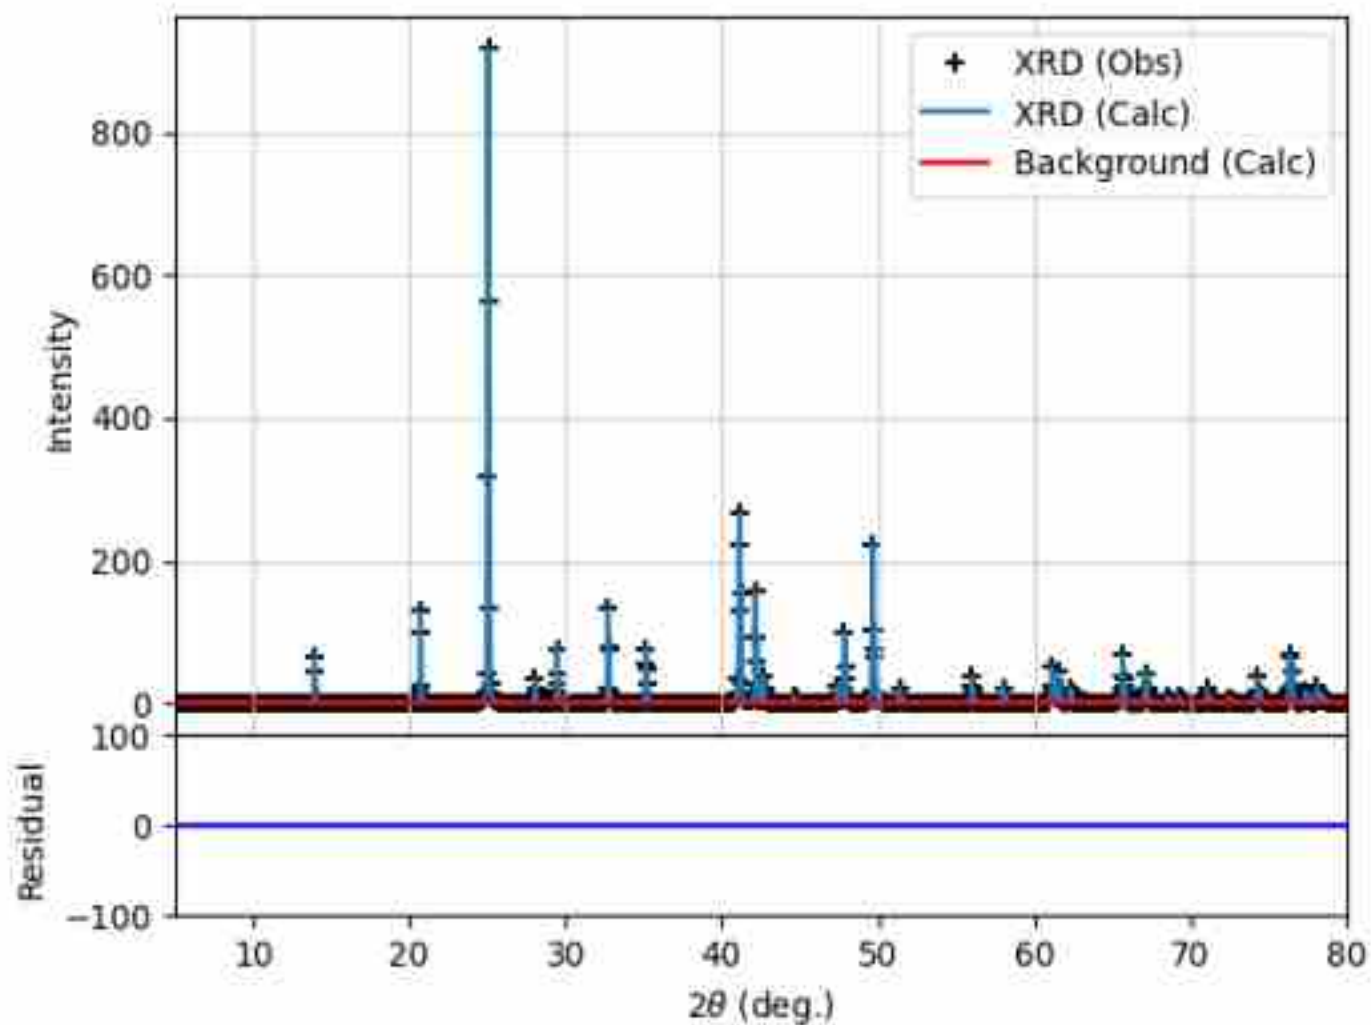

| RMSE before RR | Rwp     | RMSE after RR |
|----------------|---------|---------------|
| 0.006          | 0.00414 | 0.00033       |

# Ba<sub>2</sub>C<sub>2</sub>O<sub>6</sub>

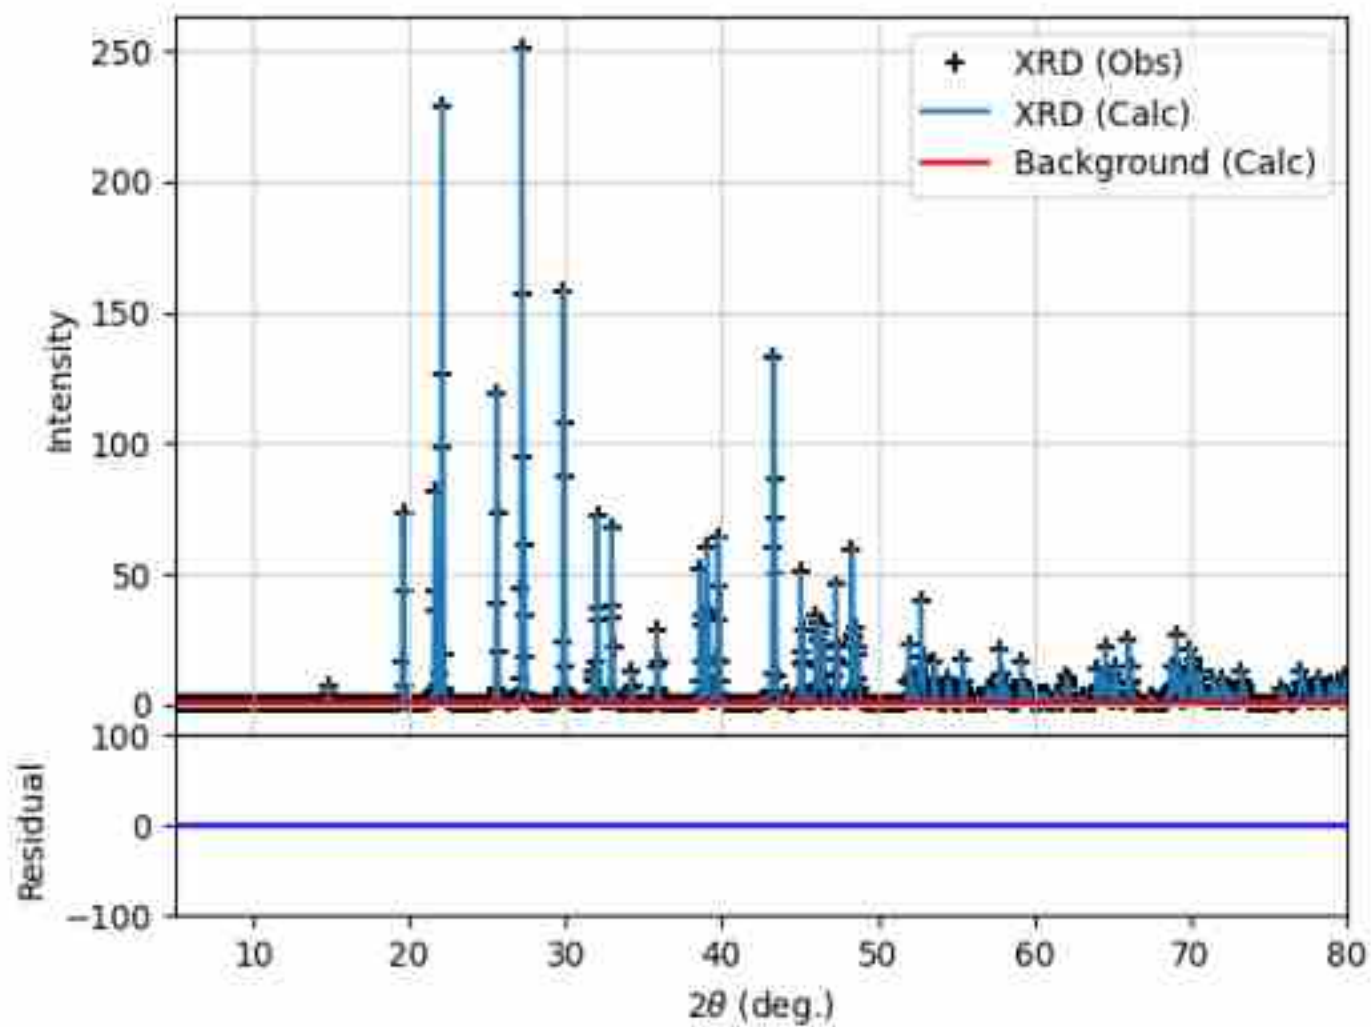

| RMSE before RR | Rwp     | RMSE after RR |
|----------------|---------|---------------|
| 0.06           | 0.00362 | 0.00077       |

# Ba<sub>2</sub>Cu<sub>2</sub>Bi<sub>2</sub>

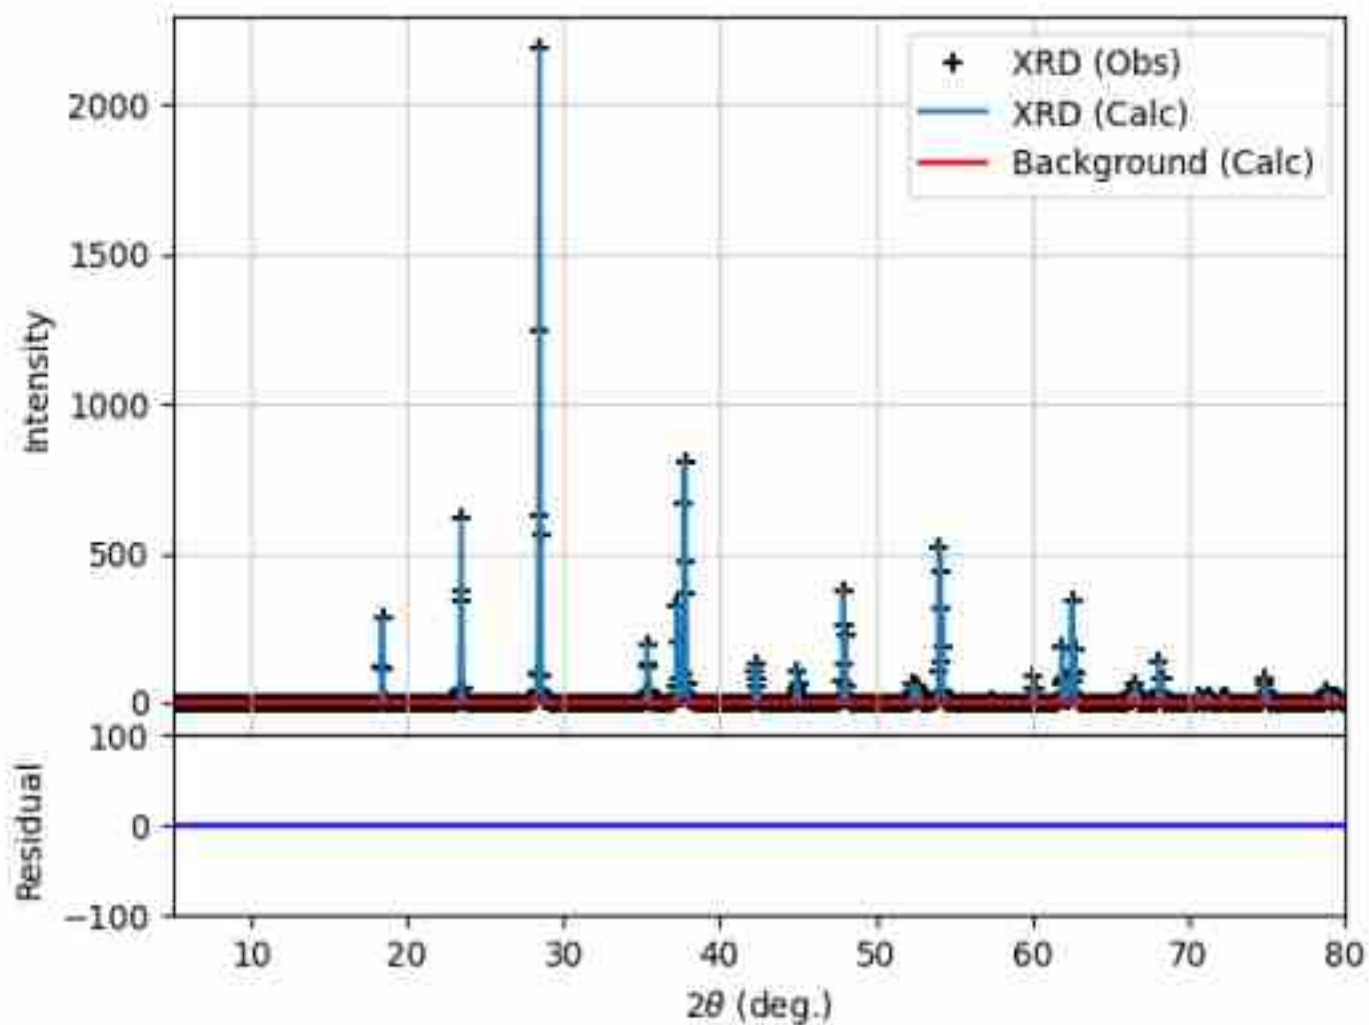

| RMSE before RR | Rwp     | RMSE after RR |
|----------------|---------|---------------|
| 0.006          | 0.00332 | 0.00047       |

# Ca1Ag2Ge2

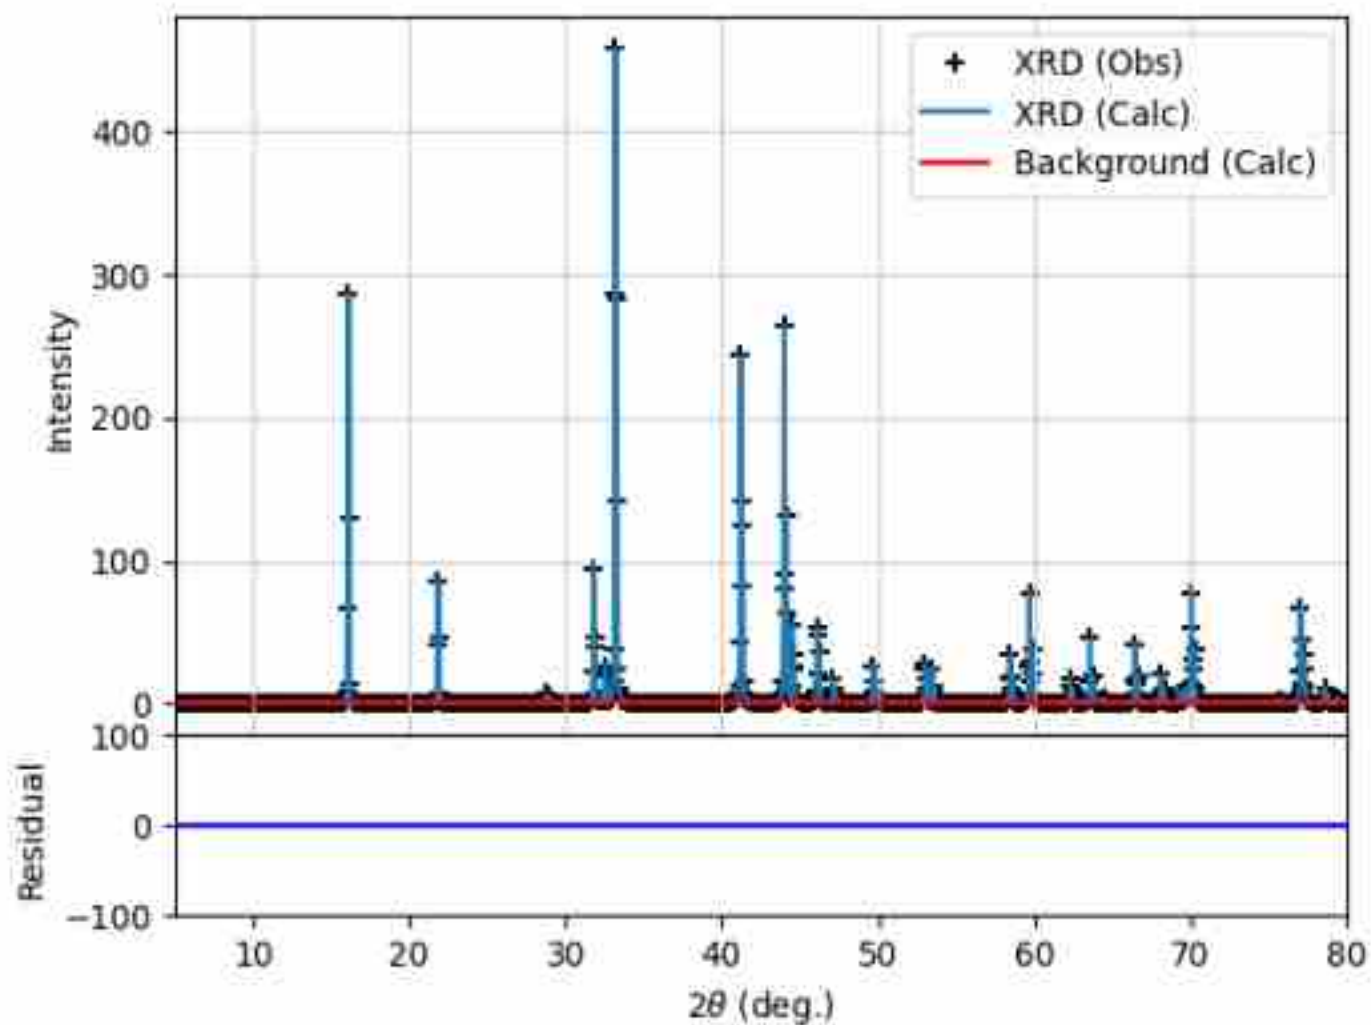

| RMSE before RR | Rwp     | RMSE after RR |
|----------------|---------|---------------|
| 0.006          | 0.00332 | 0.00023       |

# Ca1Er1Al4

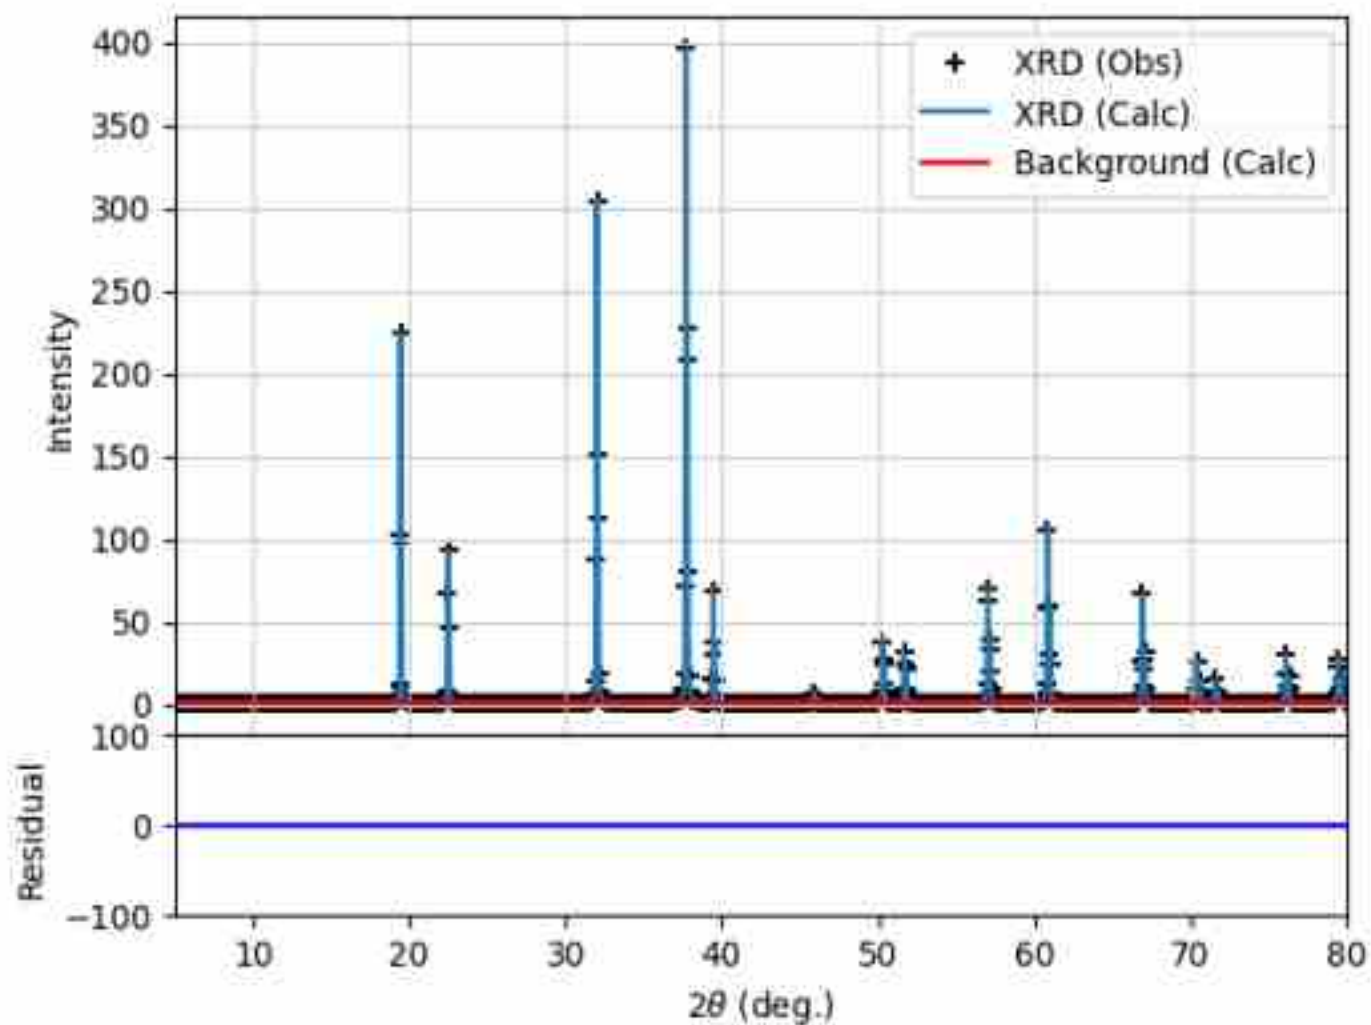

| RMSE before RR | Rwp     | RMSE after RR |
|----------------|---------|---------------|
| 0.006          | 0.00666 | 0.00179       |

# Ca1Ga2

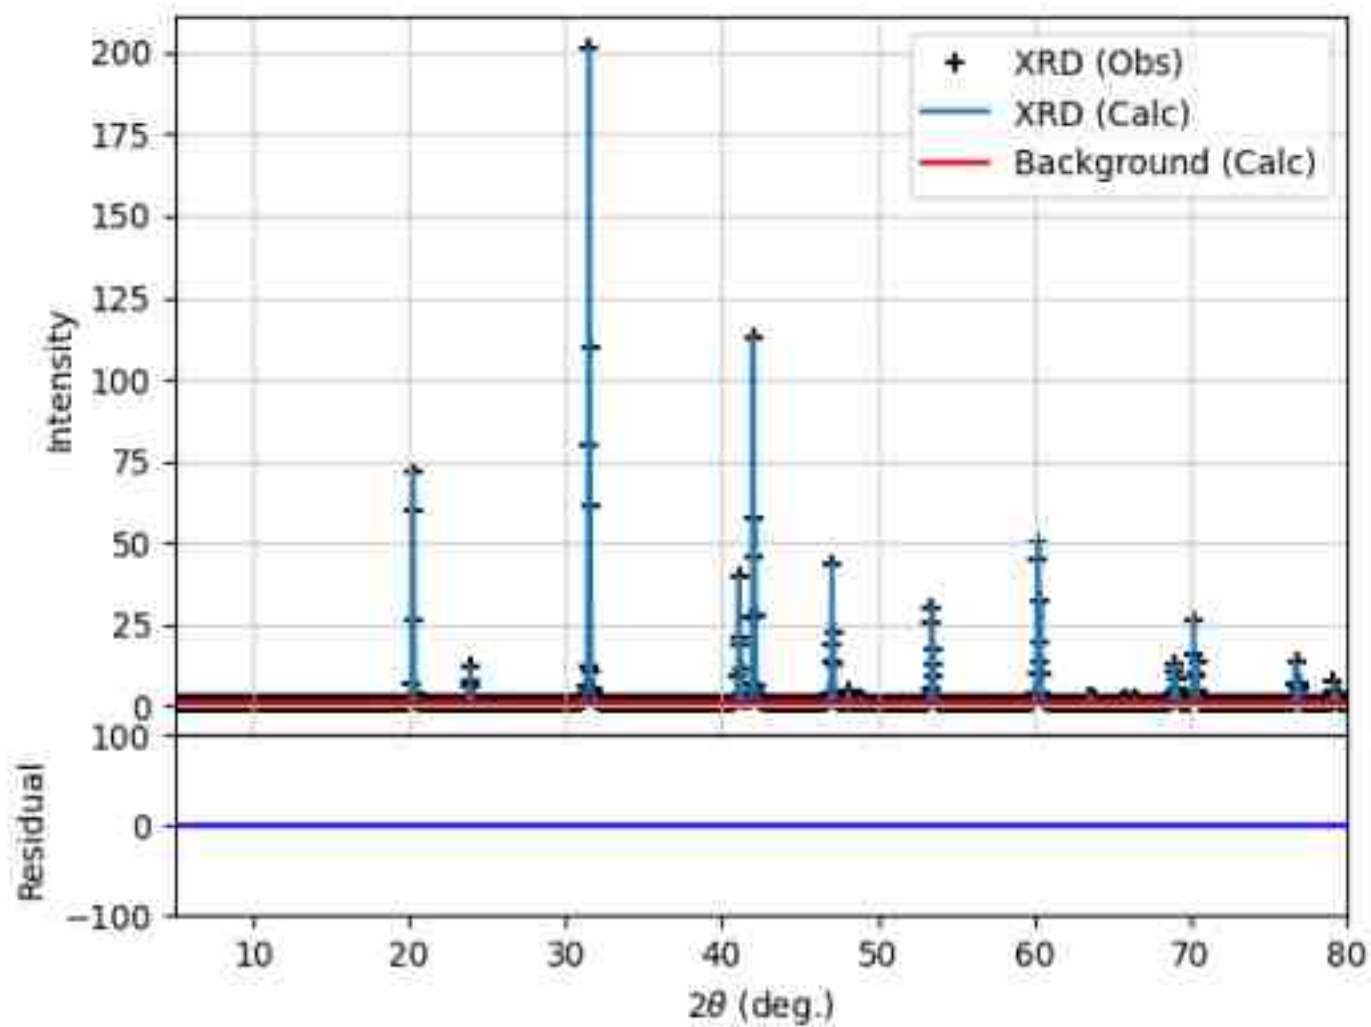

| RMSE before RR | Rwp     | RMSE after RR |
|----------------|---------|---------------|
| 0.006          | 0.00549 | 0.00199       |

# Ca<sub>2</sub>C<sub>4</sub>

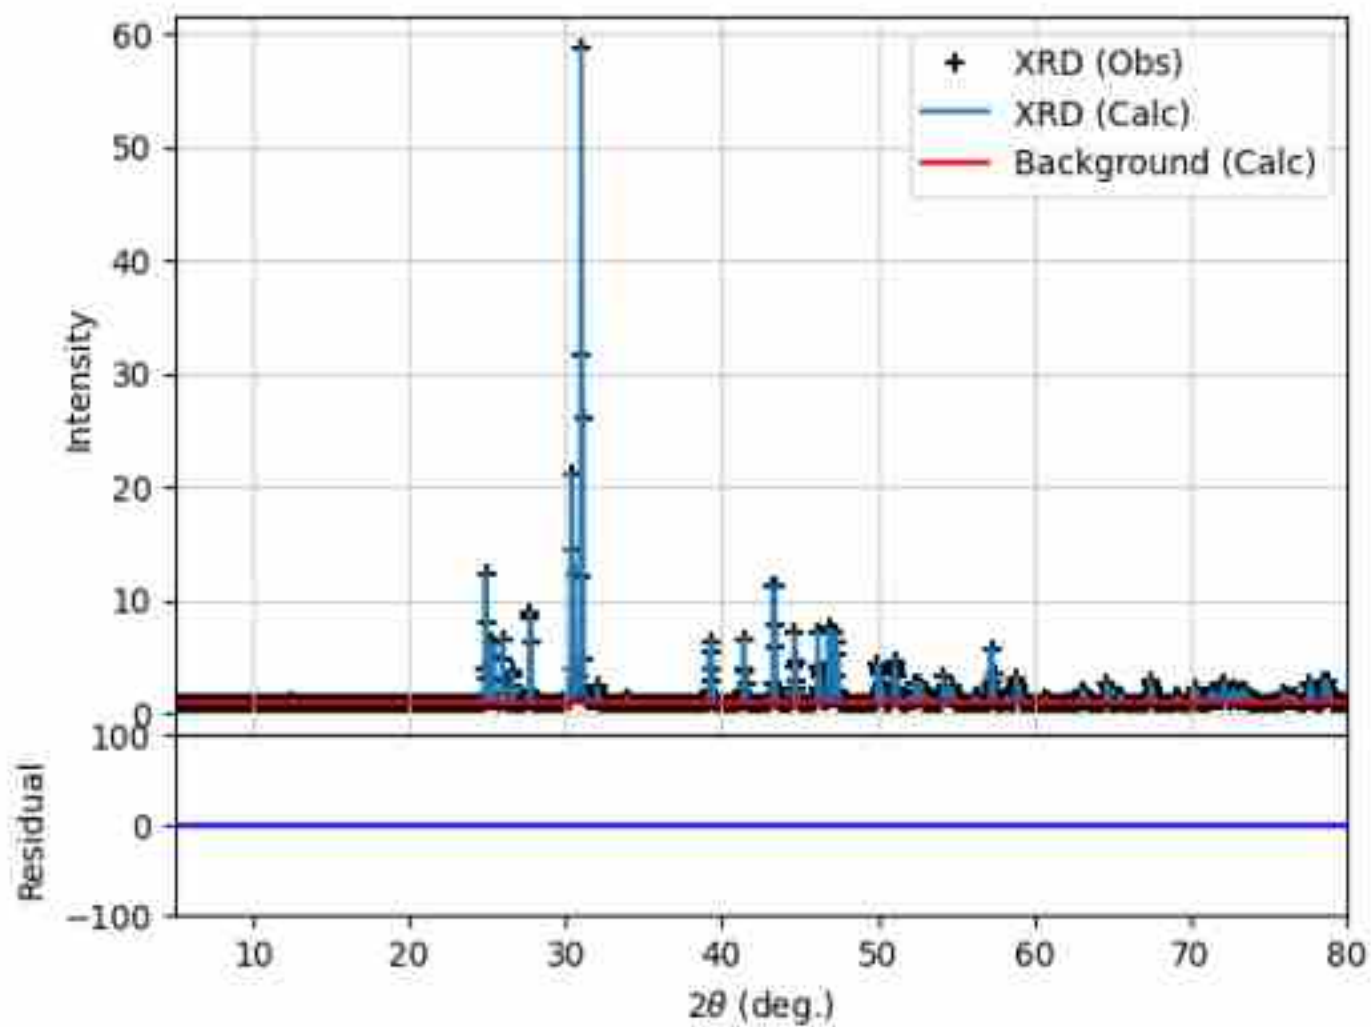

| RMSE before RR | Rwp     | RMSE after RR |
|----------------|---------|---------------|
| 0.06           | 0.00207 | 0.0011        |

# Ca<sub>2</sub>Cu<sub>2</sub>Bi<sub>2</sub>

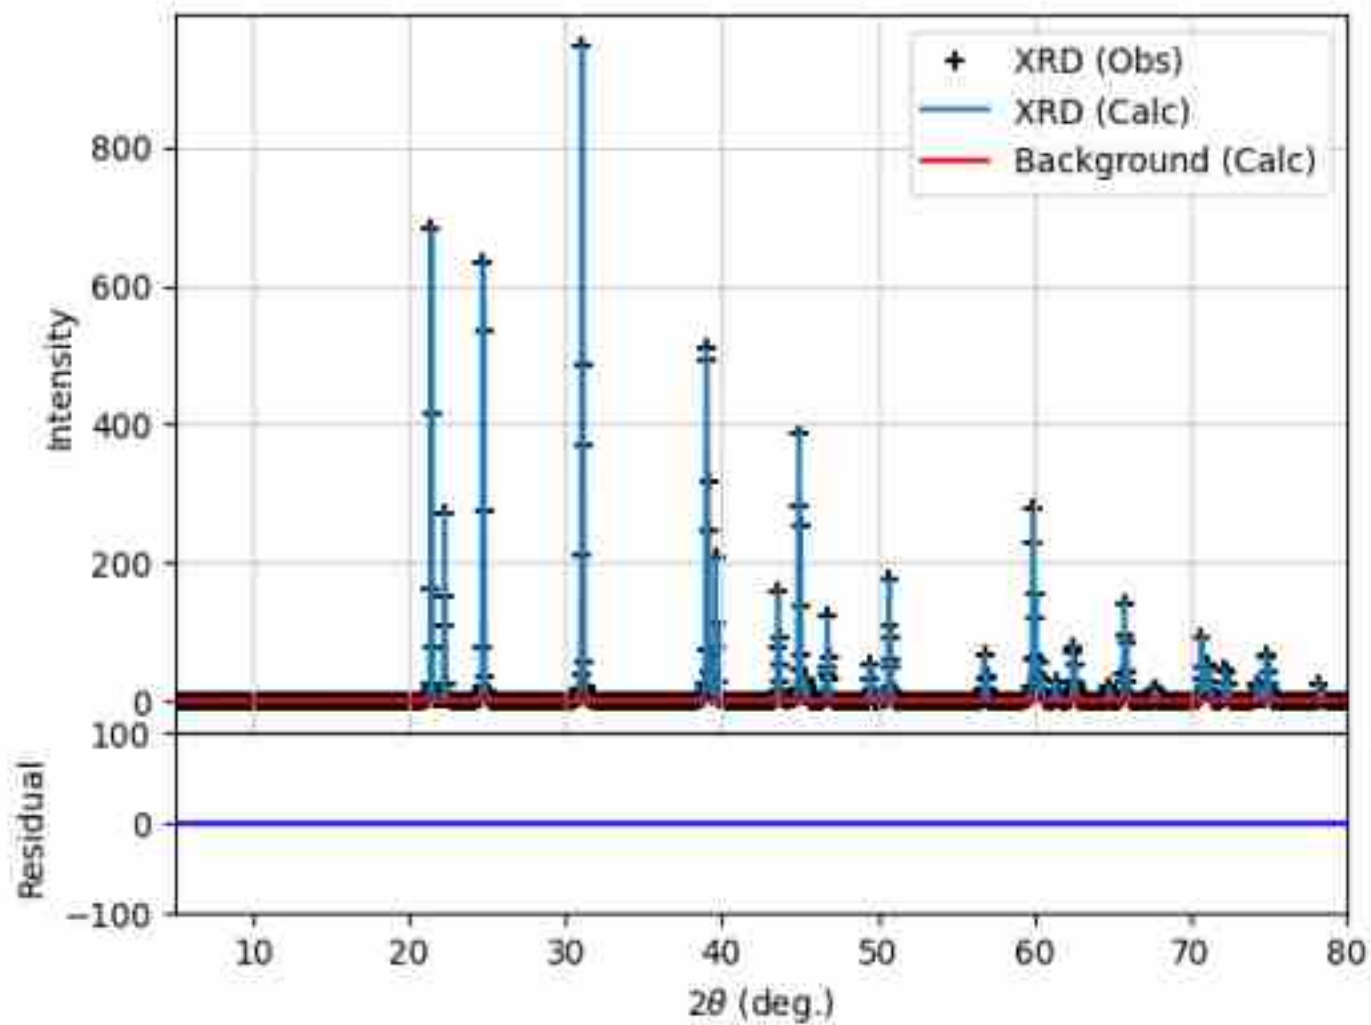

| RMSE before RR | Rwp     | RMSE after RR |
|----------------|---------|---------------|
| 0.006          | 0.00357 | 0.00055       |



# Ca<sub>2</sub>Sb<sub>2</sub>Au<sub>2</sub>

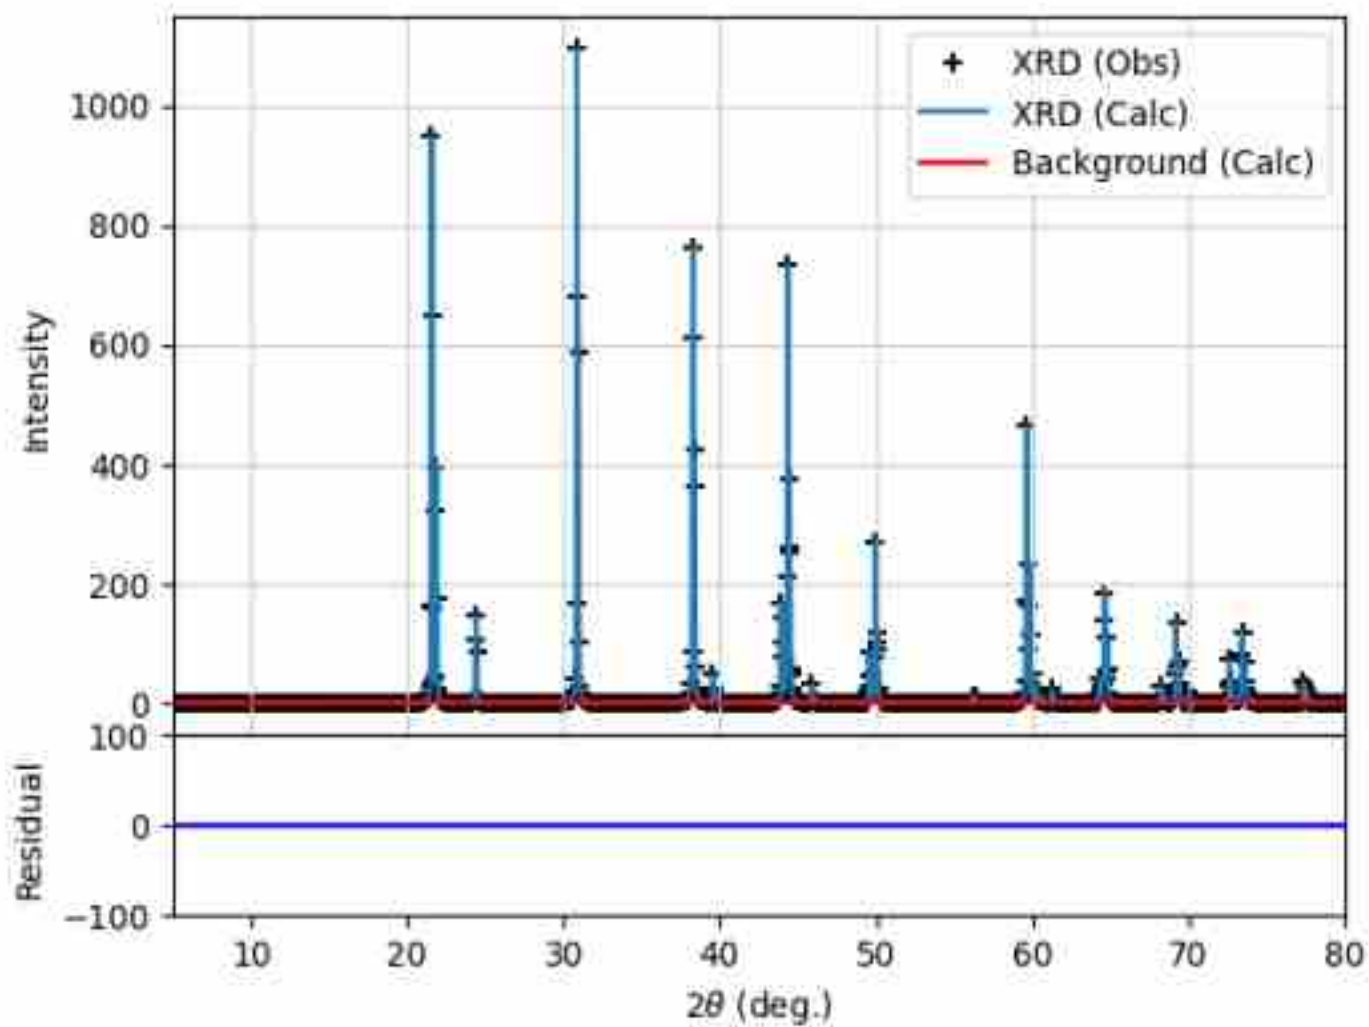

| RMSE before RR | Rwp     | RMSE after RR |
|----------------|---------|---------------|
| 0.006          | 0.00424 | 0.00031       |

Ca<sub>2</sub>Zn<sub>2</sub>Pb<sub>2</sub>

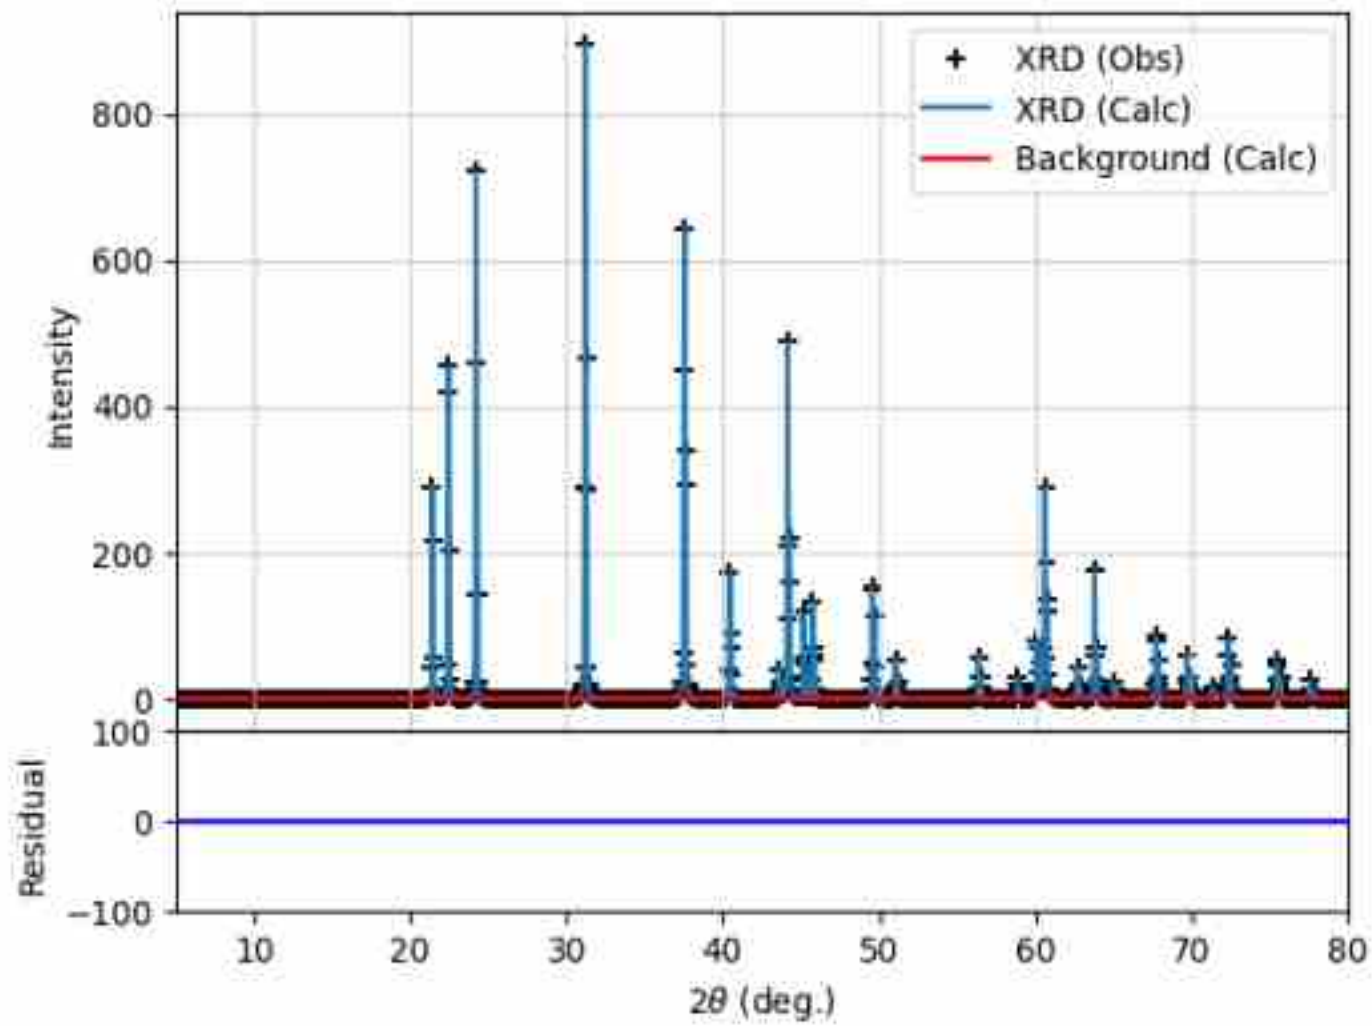

| RMSE before RR | Rwp     | RMSE after RR |
|----------------|---------|---------------|
| 0.006          | 0.00705 | 0.00069       |

# Ca<sub>3</sub>Sn<sub>1</sub>O<sub>1</sub>

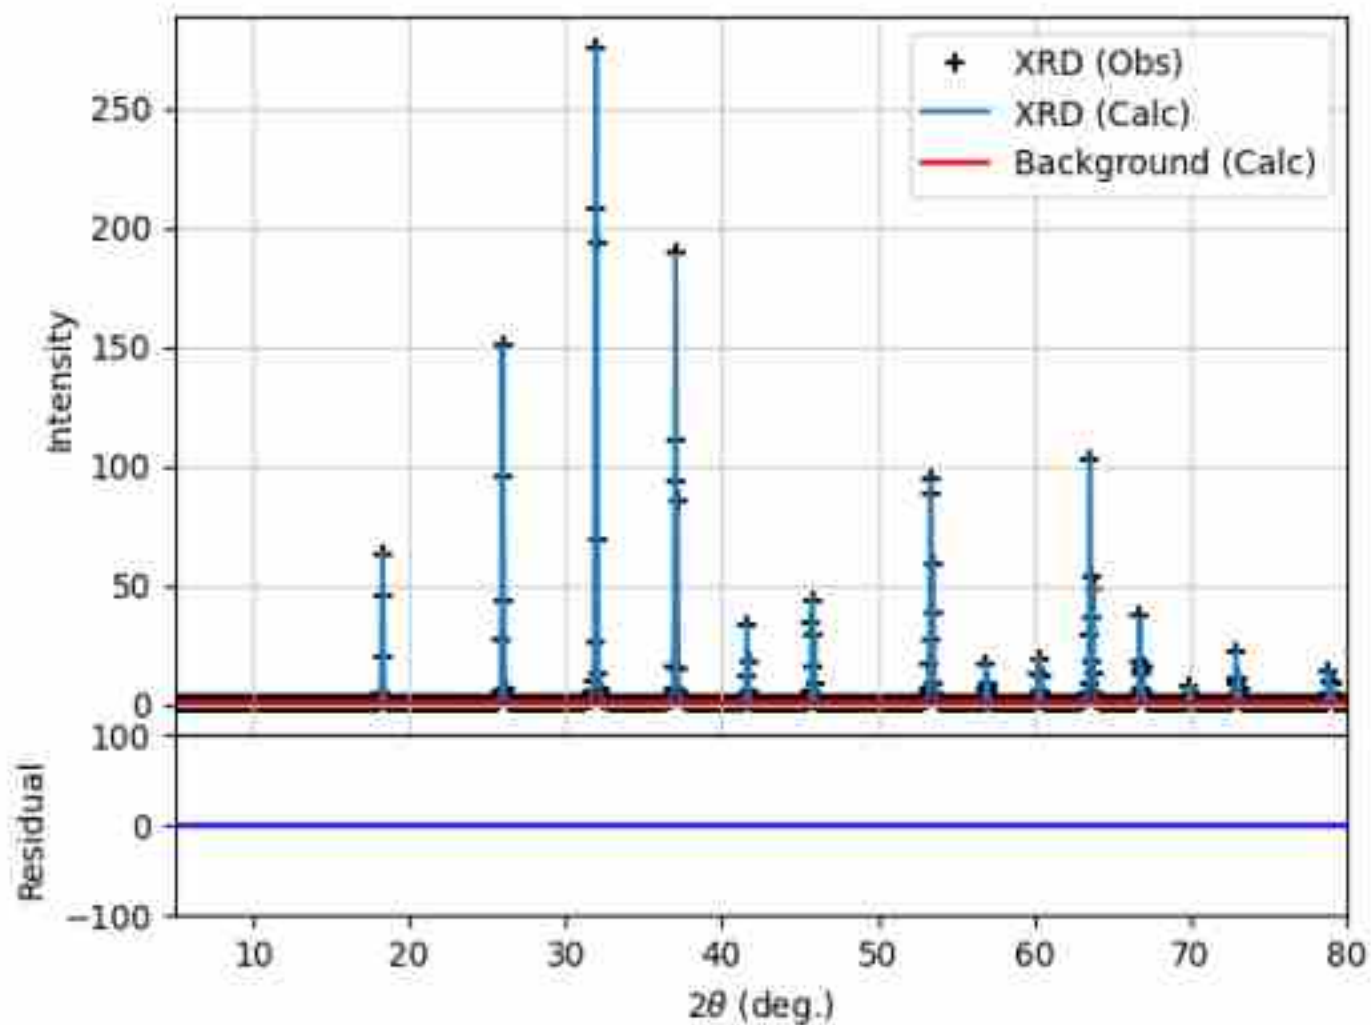

| RMSE before RR | Rwp     | RMSE after RR |
|----------------|---------|---------------|
| 0.006          | 0.09401 | 0.00596       |

# Ce1Al1Ni4

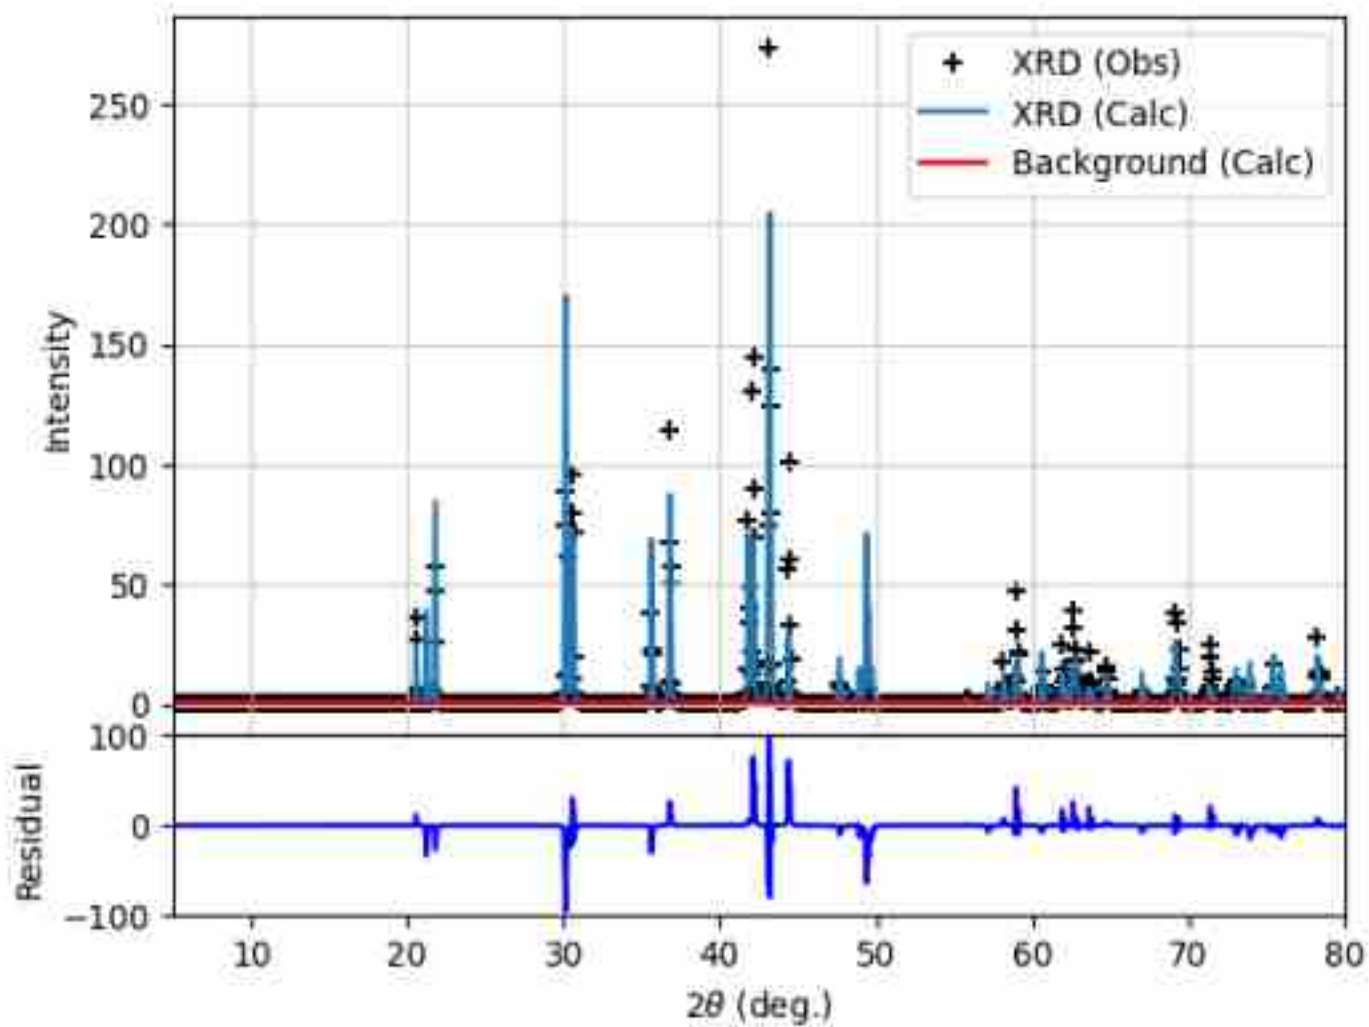

| RMSE before RR | Rwp   | RMSE after RR |
|----------------|-------|---------------|
| 0.006          | 100.0 | 0.0152        |

# Ce1Ga6Ni1

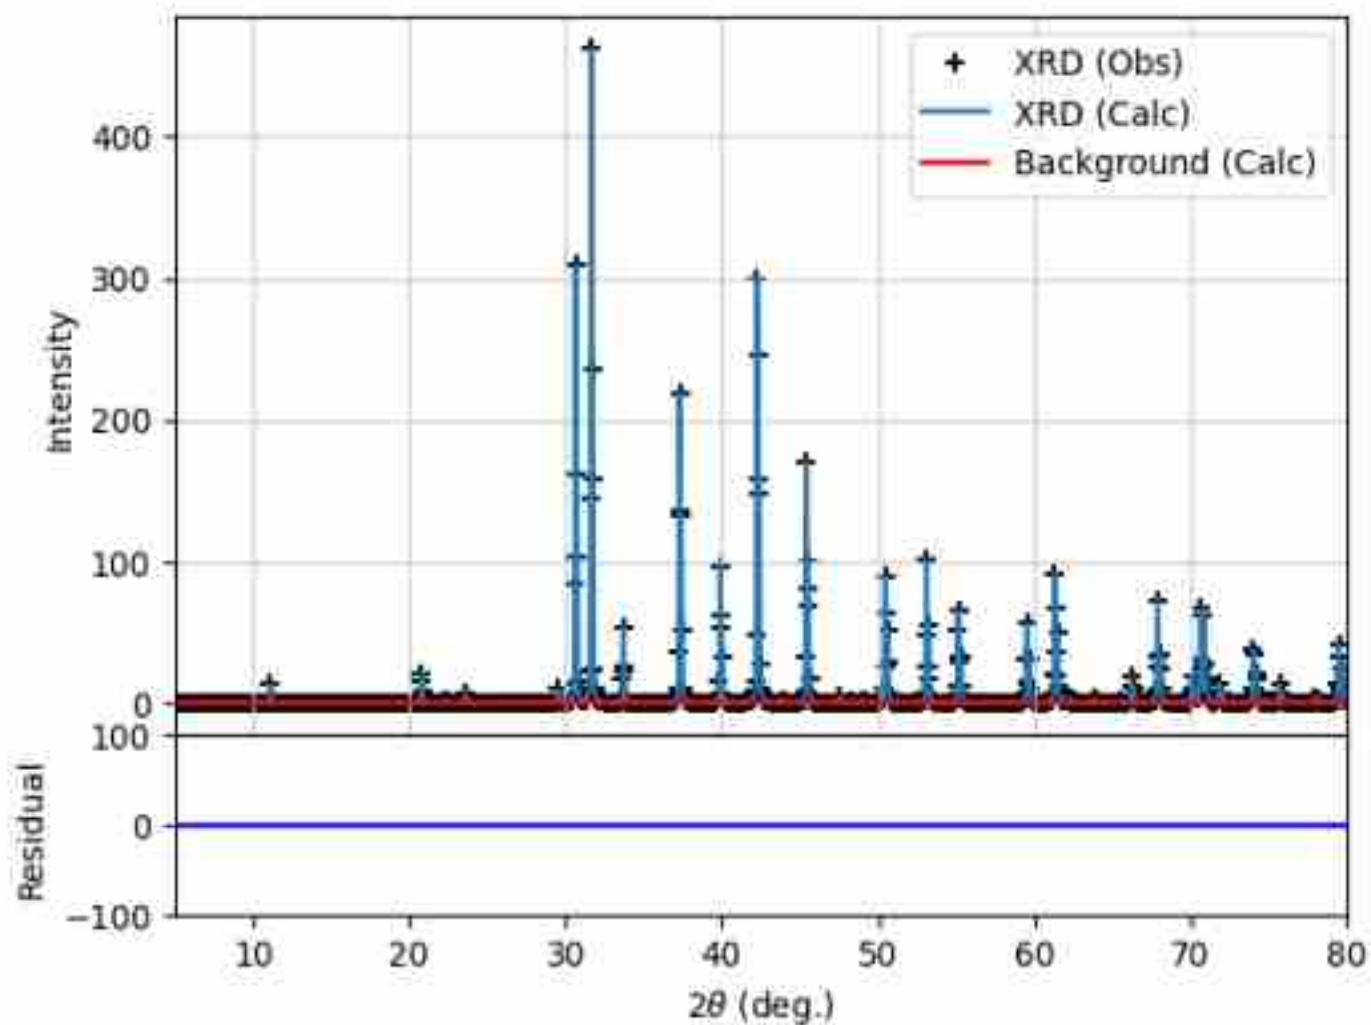

| RMSE before RR | Rwp    | RMSE after RR |
|----------------|--------|---------------|
| 0.006          | 0.0042 | 0.00031       |

# Ce1Mg5

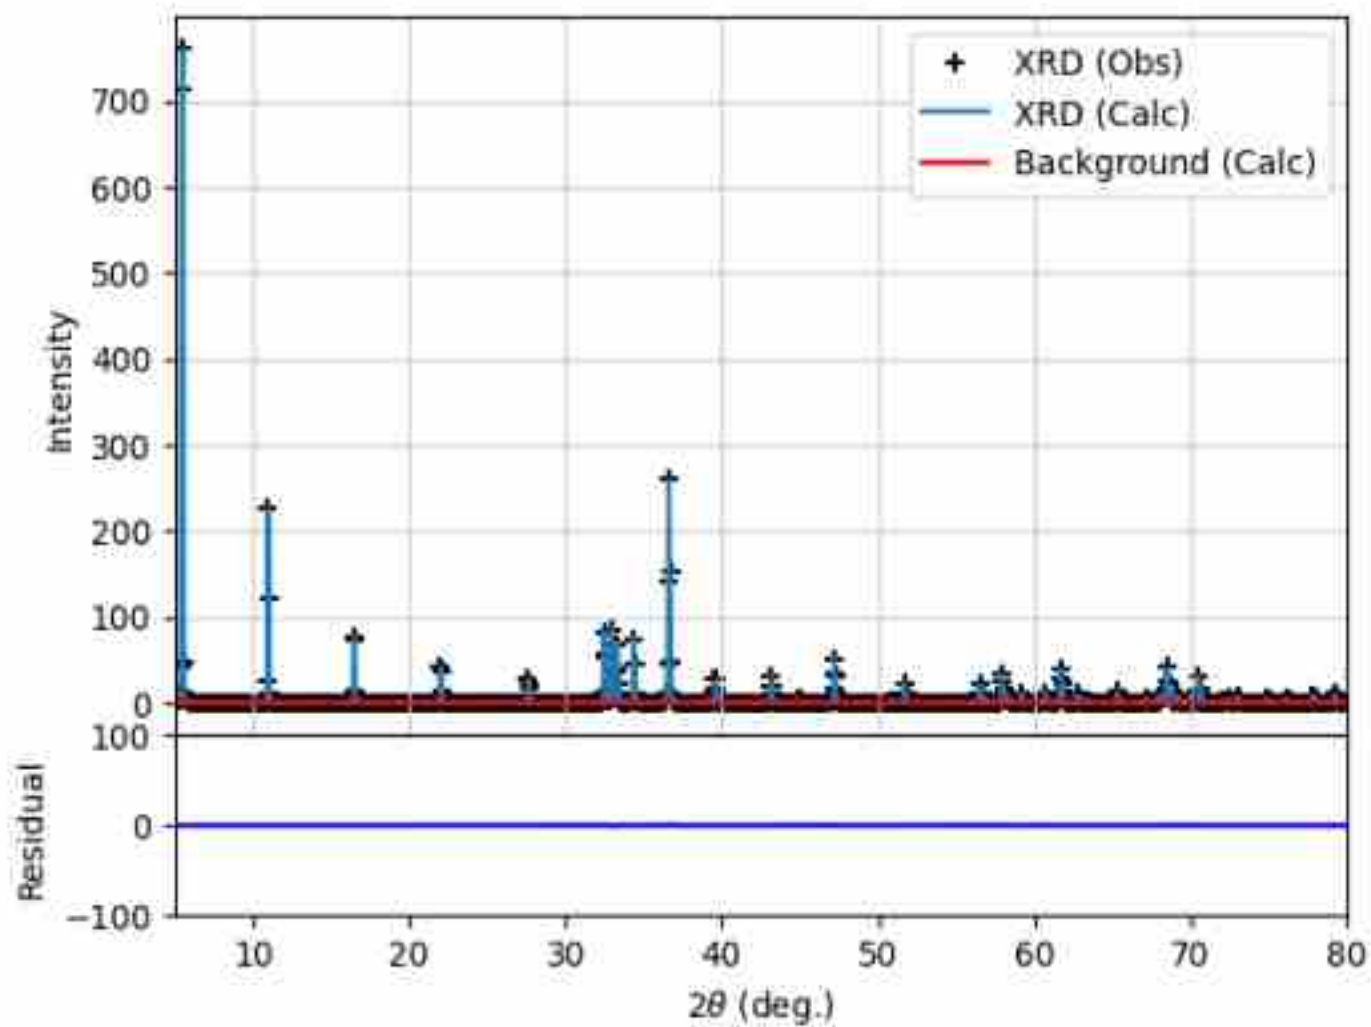

| RMSE before RR | Rwp    | RMSE after RR |
|----------------|--------|---------------|
| 0.006          | 0.8678 | 0.01644       |

# Ce<sub>2</sub>Au<sub>4</sub>

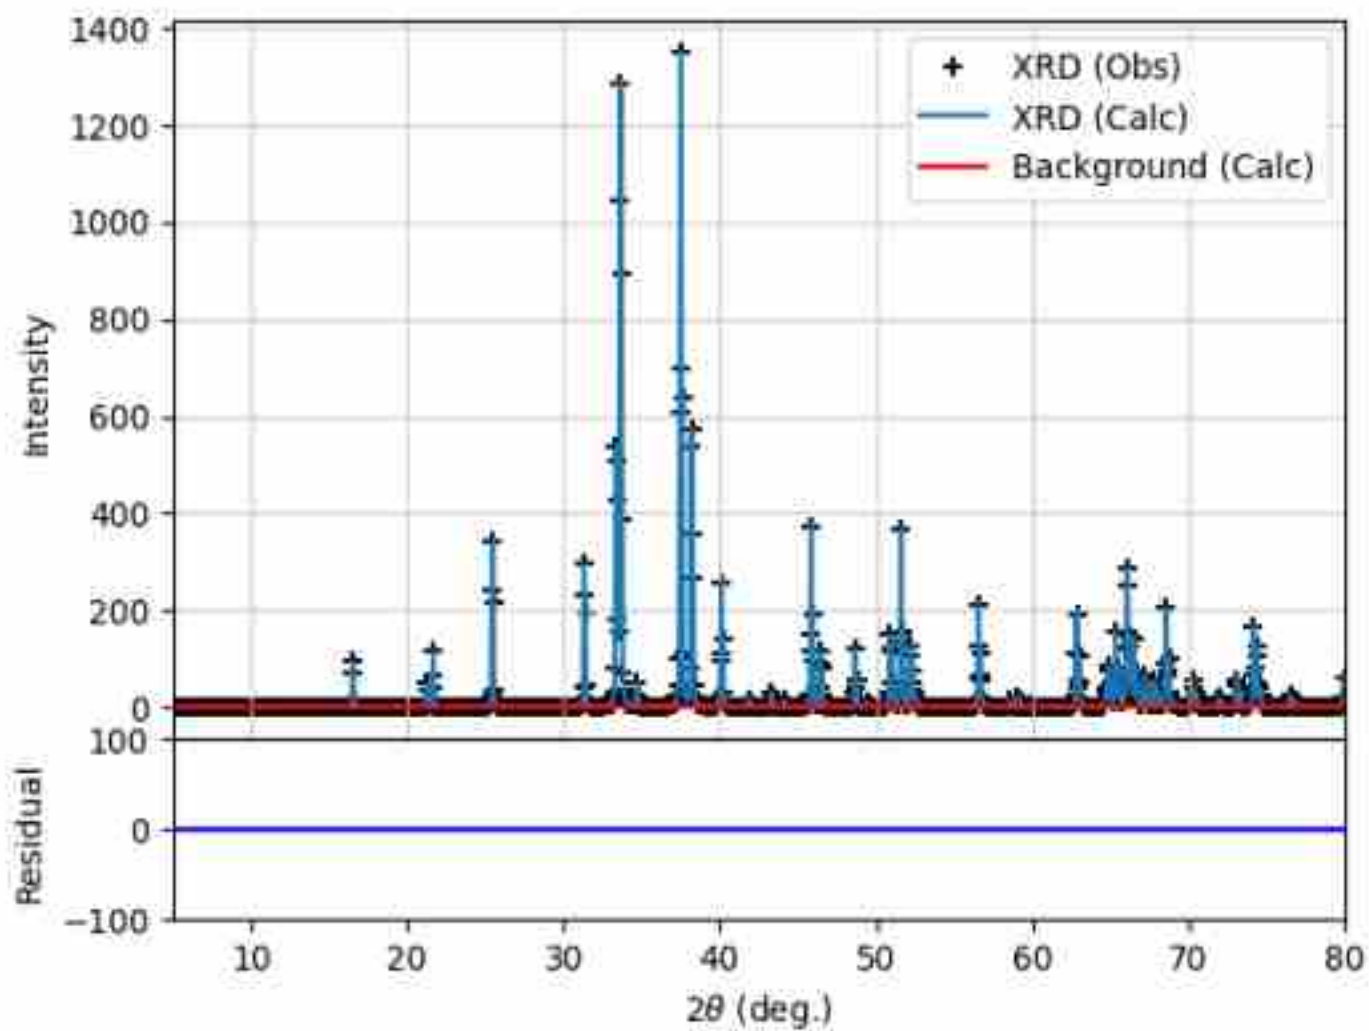

| RMSE before RR | Rwp     | RMSE after RR |
|----------------|---------|---------------|
| 0.006          | 0.00278 | 0.00021       |

# Ce<sub>2</sub>Si<sub>3</sub>Ni<sub>1</sub>

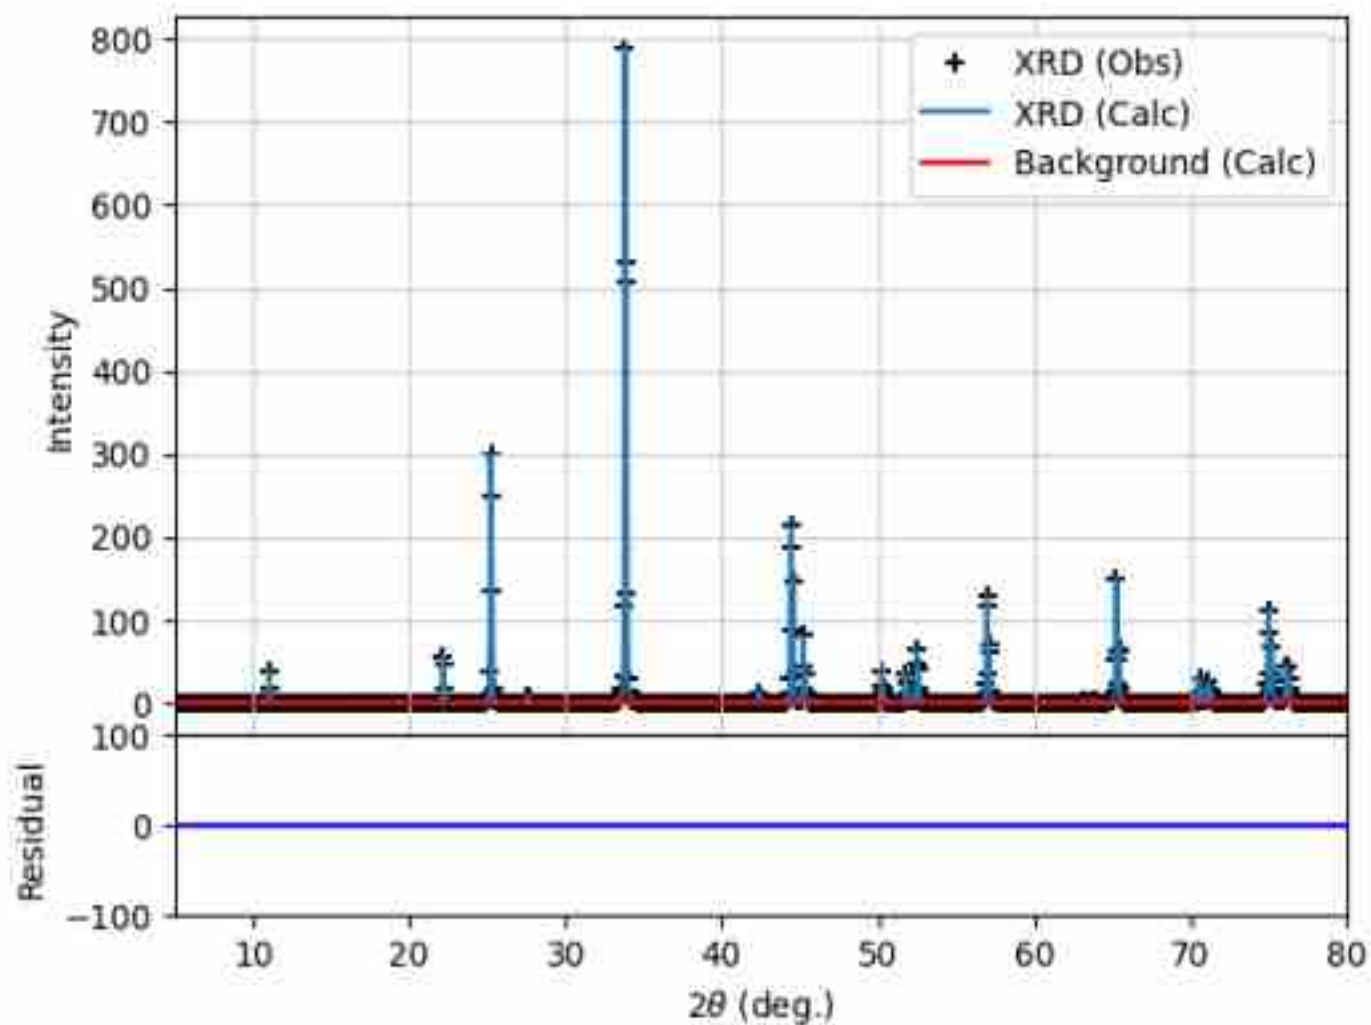

| RMSE before RR | Rwp     | RMSE after RR |
|----------------|---------|---------------|
| 0.006          | 0.00315 | 0.00064       |



Ce4

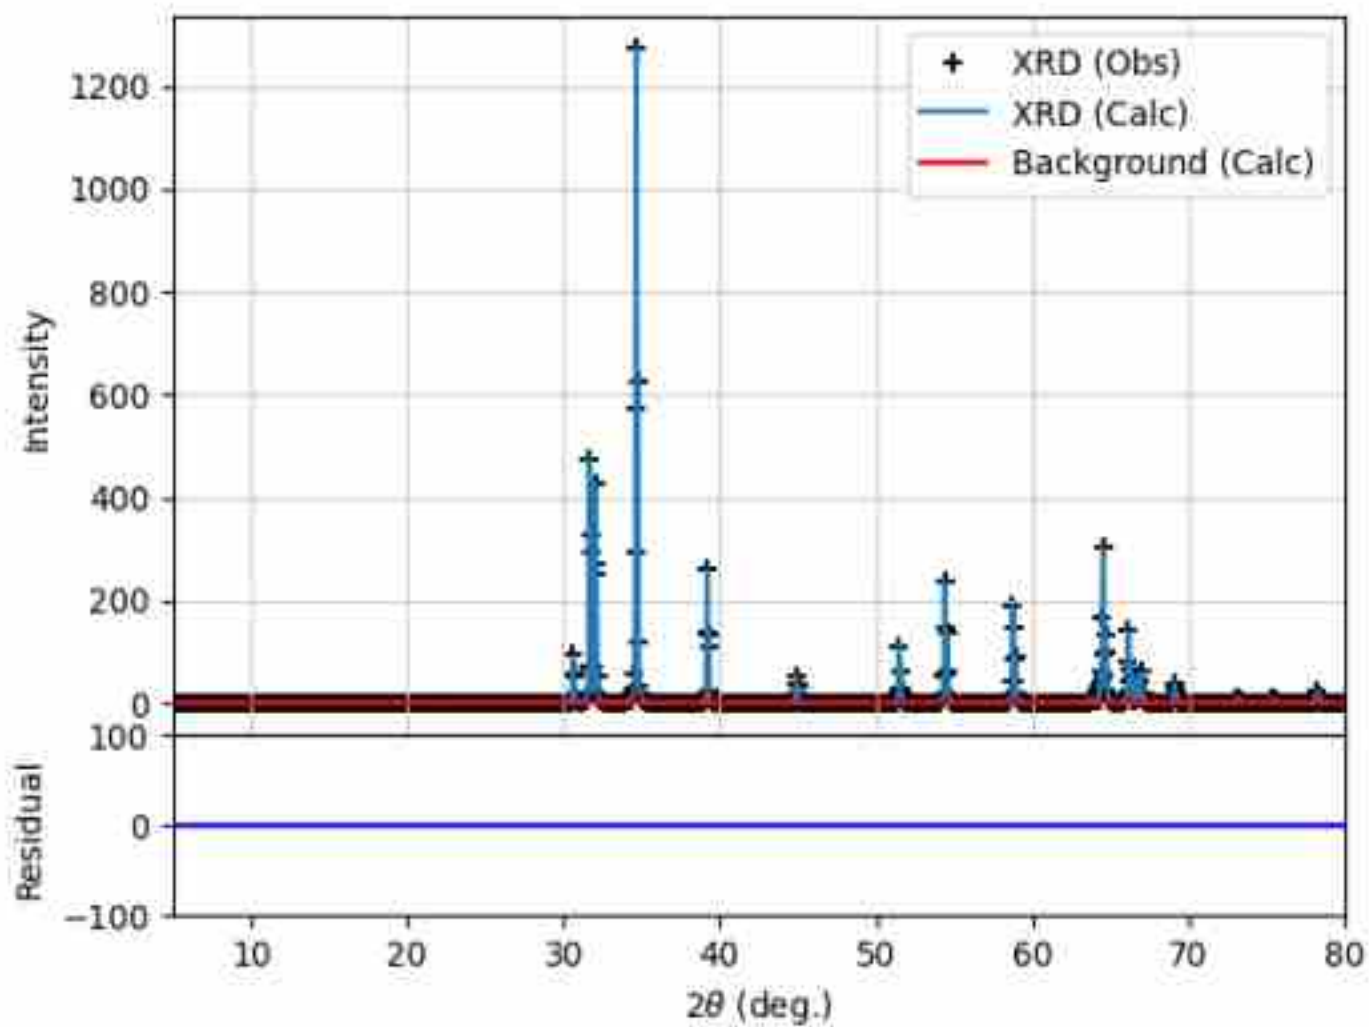

| RMSE before RR | Rwp     | RMSE after RR |
|----------------|---------|---------------|
| 0.006          | 0.00287 | 0.00038       |

# Co1H2O2

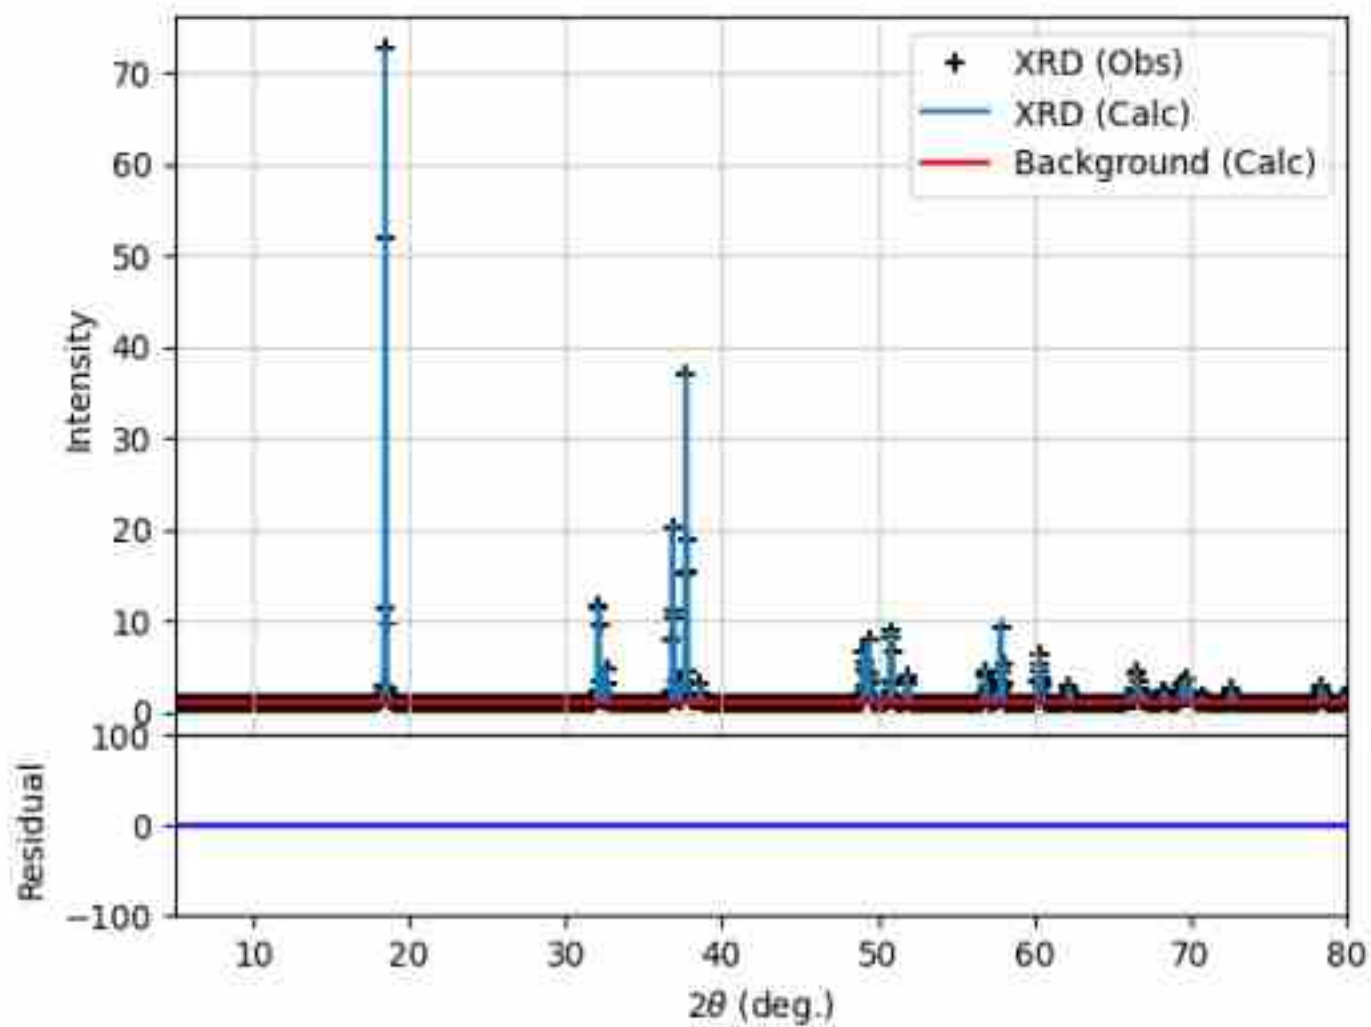

| RMSE before RR | Rwp    | RMSE after RR |
|----------------|--------|---------------|
| 0.06           | 0.0489 | 0.28838       |

# Cs1Hg1Cl3

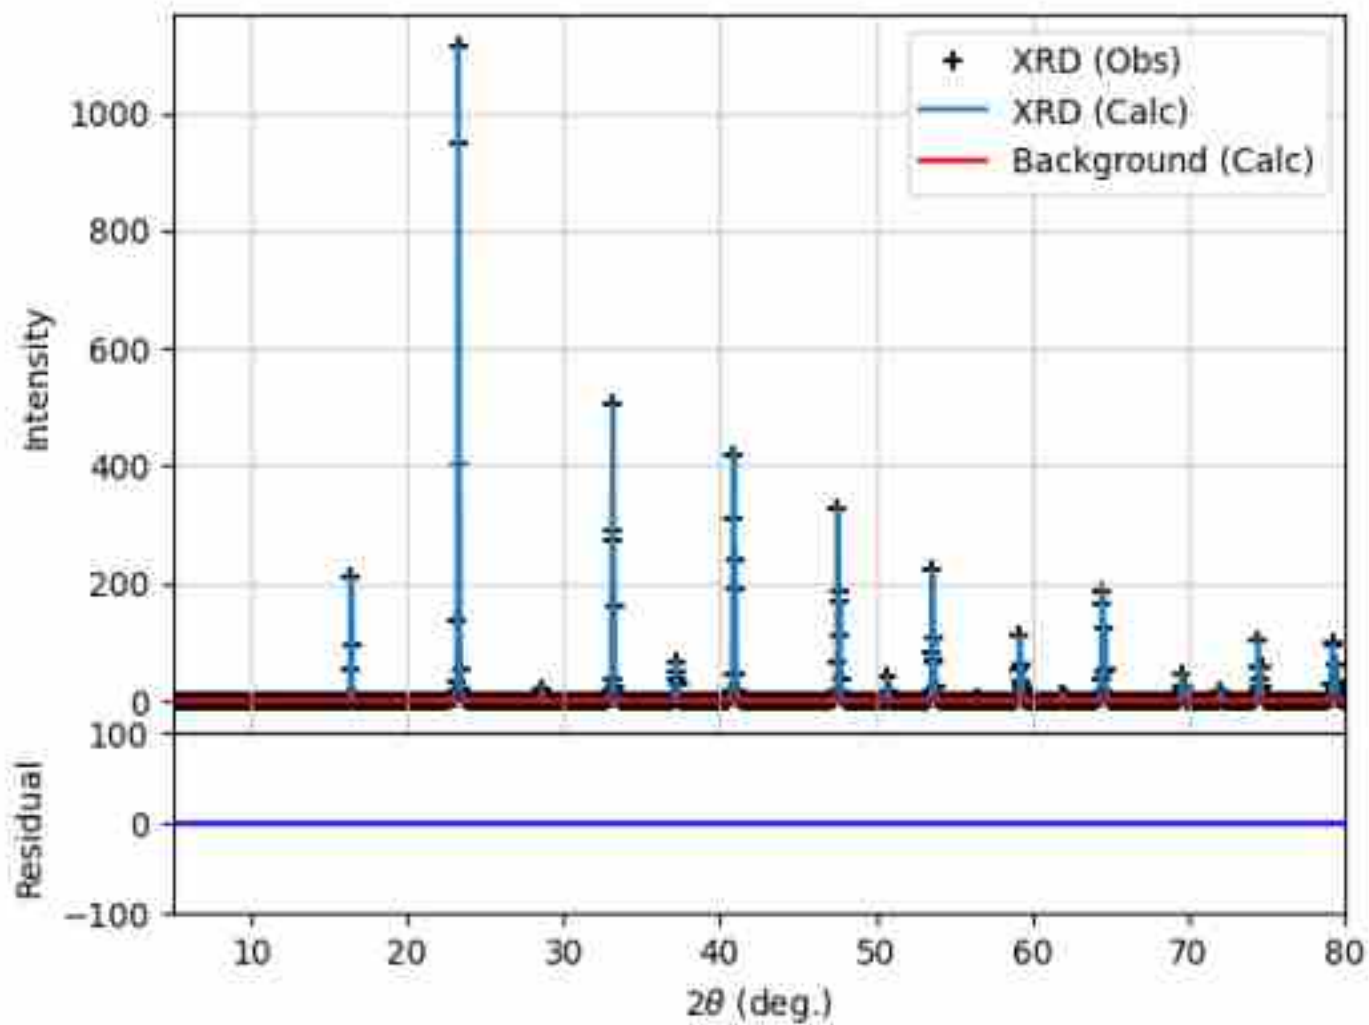

| RMSE before RR | Rwp     | RMSE after RR |
|----------------|---------|---------------|
| 0.006          | 0.00337 | 0.00215       |

# Cs1Pd1Br3

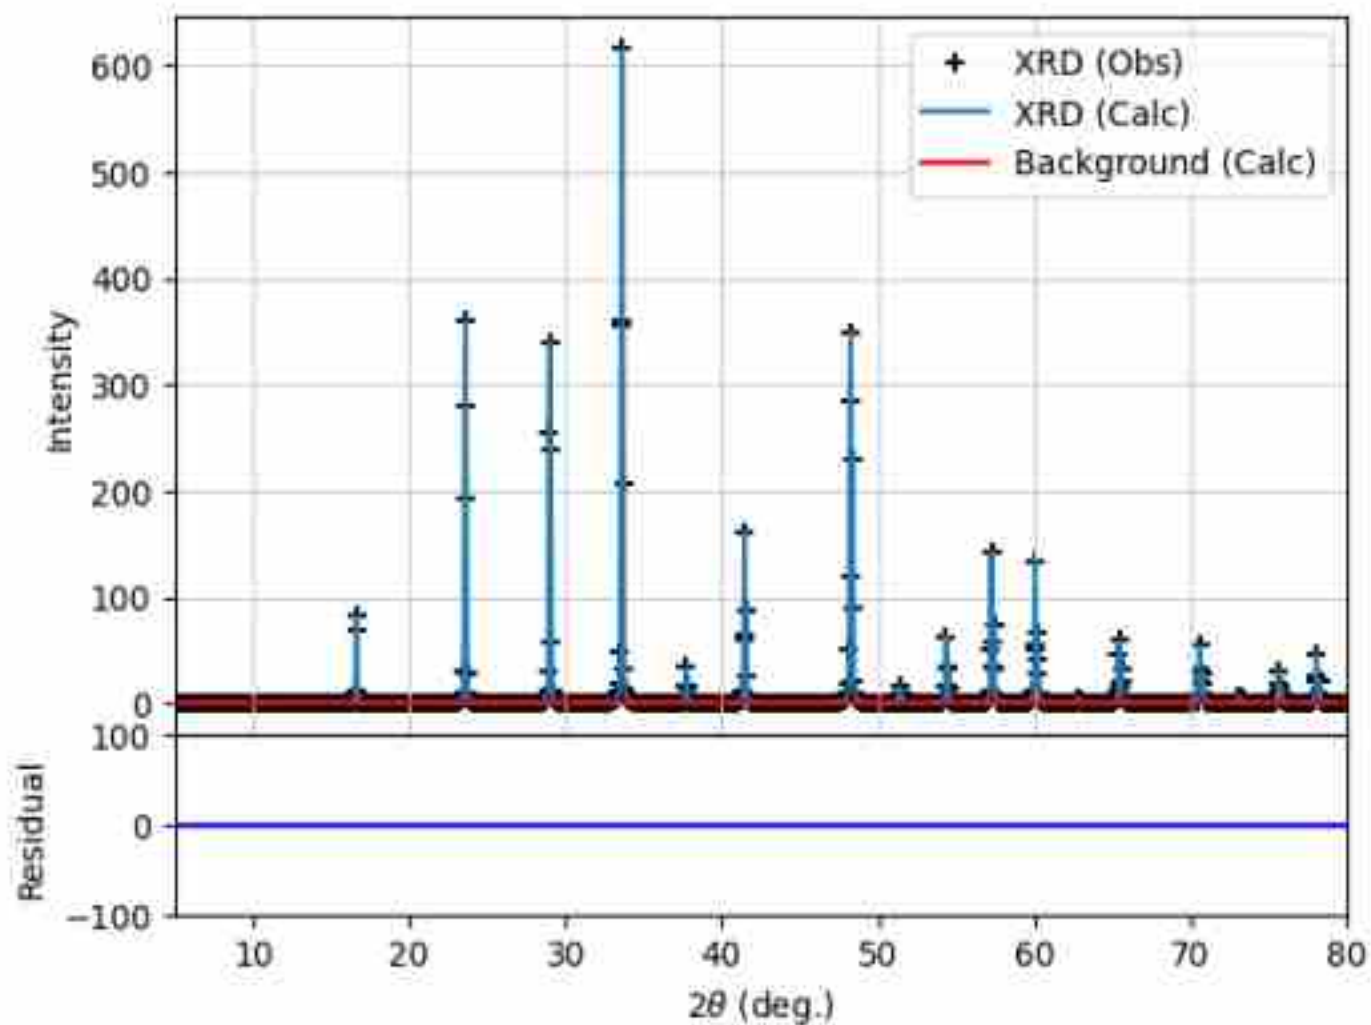

| RMSE before RR | Rwp     | RMSE after RR |
|----------------|---------|---------------|
| 0.006          | 0.00133 | 8e-05         |

# Cs1Pr1S2

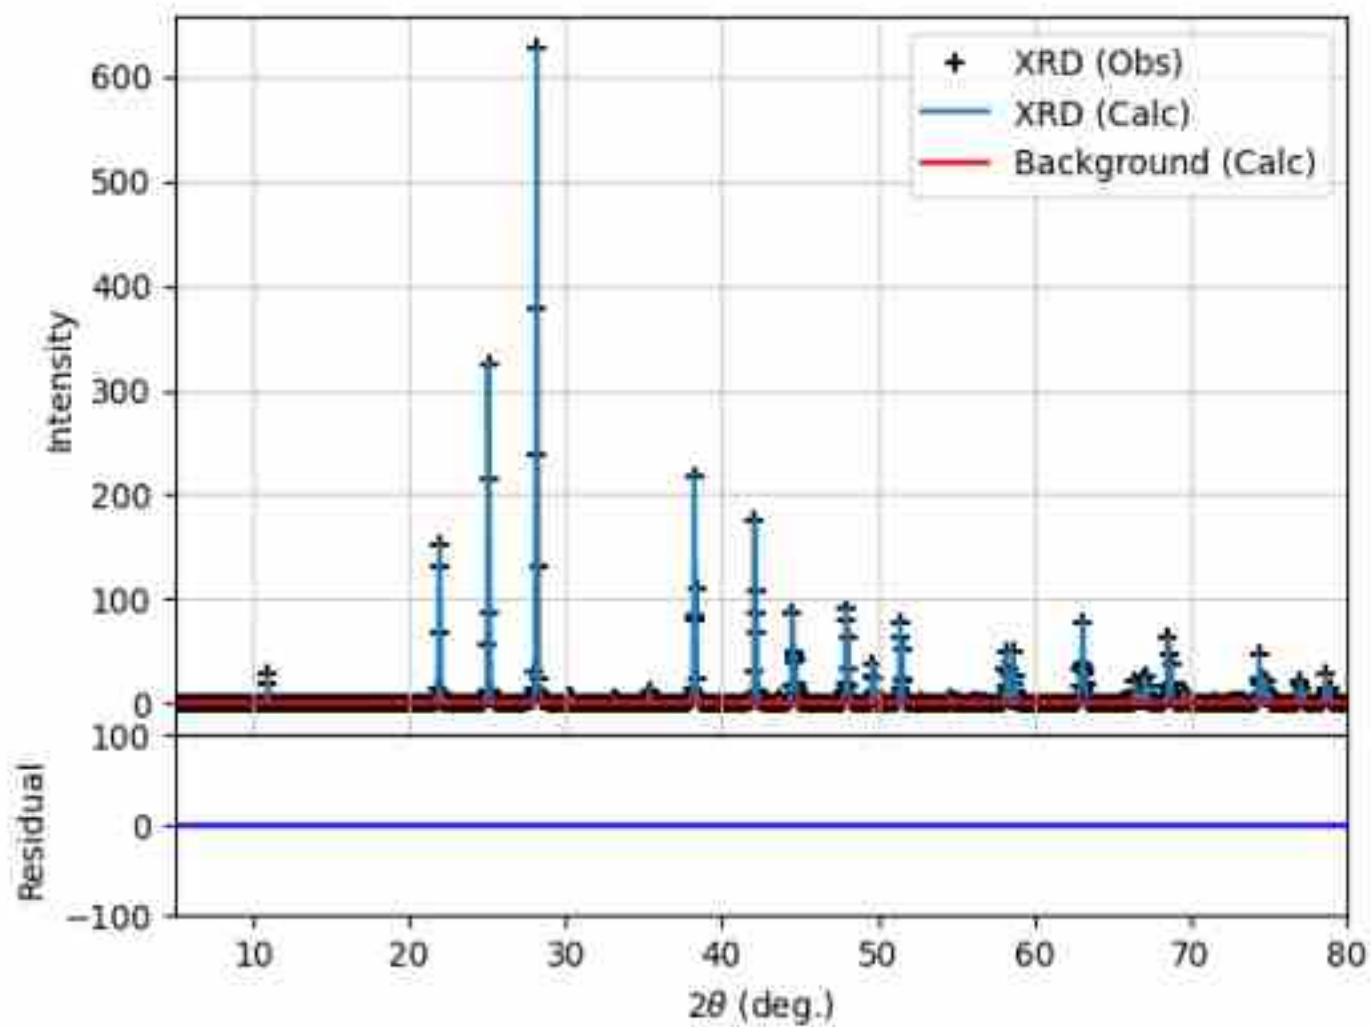

| RMSE before RR | Rwp     | RMSE after RR |
|----------------|---------|---------------|
| 0.006          | 0.00294 | 0.00035       |

# Cs1Sc1W2O8

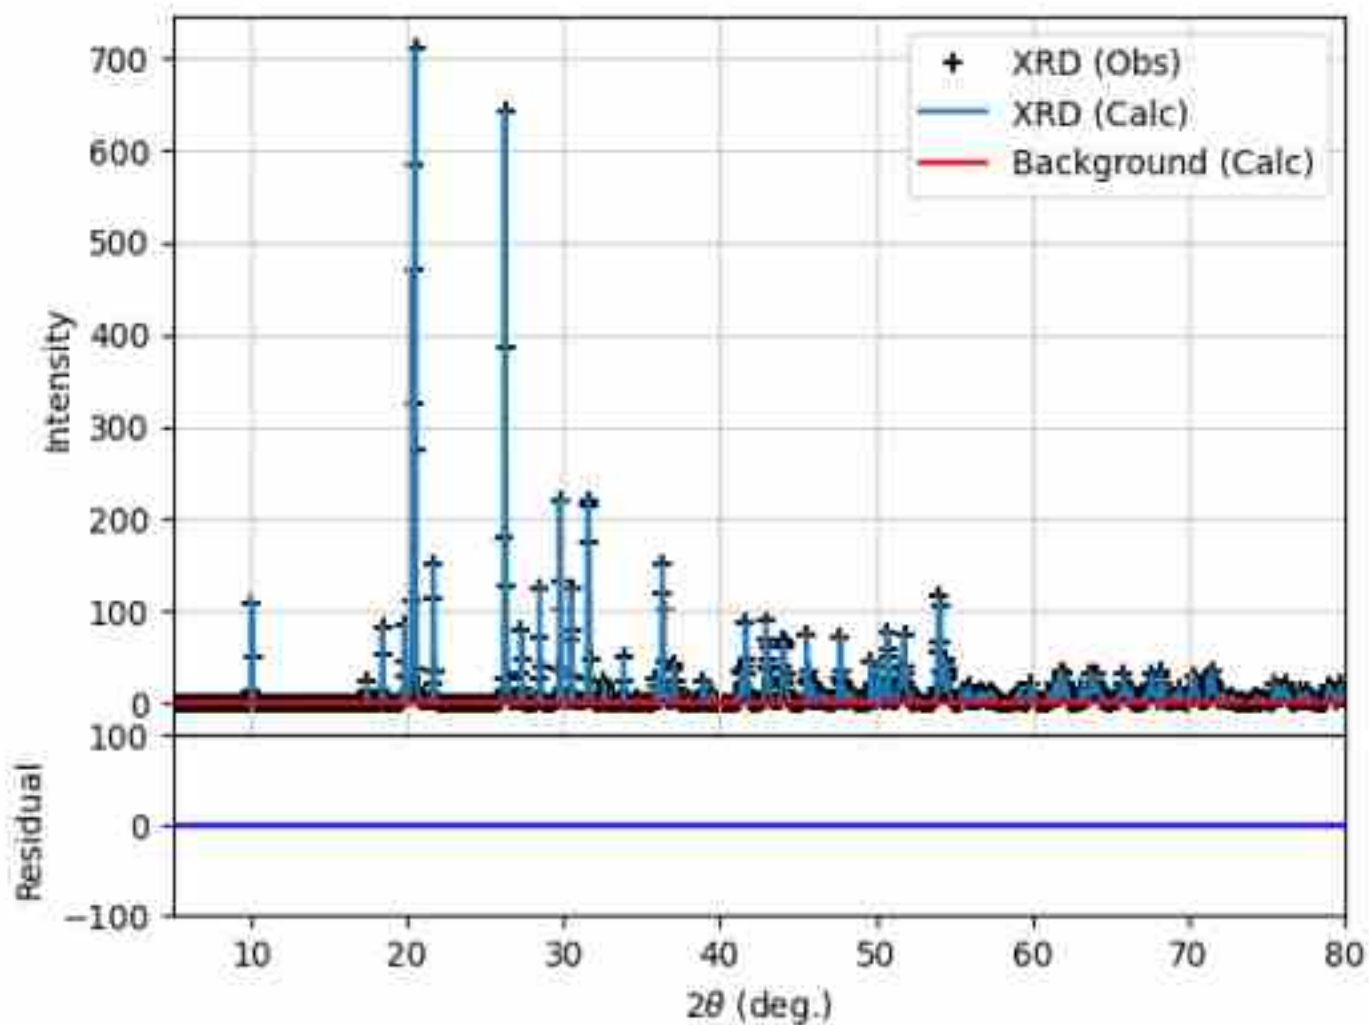

| RMSE before RR | Rwp     | RMSE after RR |
|----------------|---------|---------------|
| 0.06           | 0.00358 | 0.0009        |

# Cs<sub>2</sub>Na<sub>1</sub>Mo<sub>1</sub>Cl<sub>6</sub>

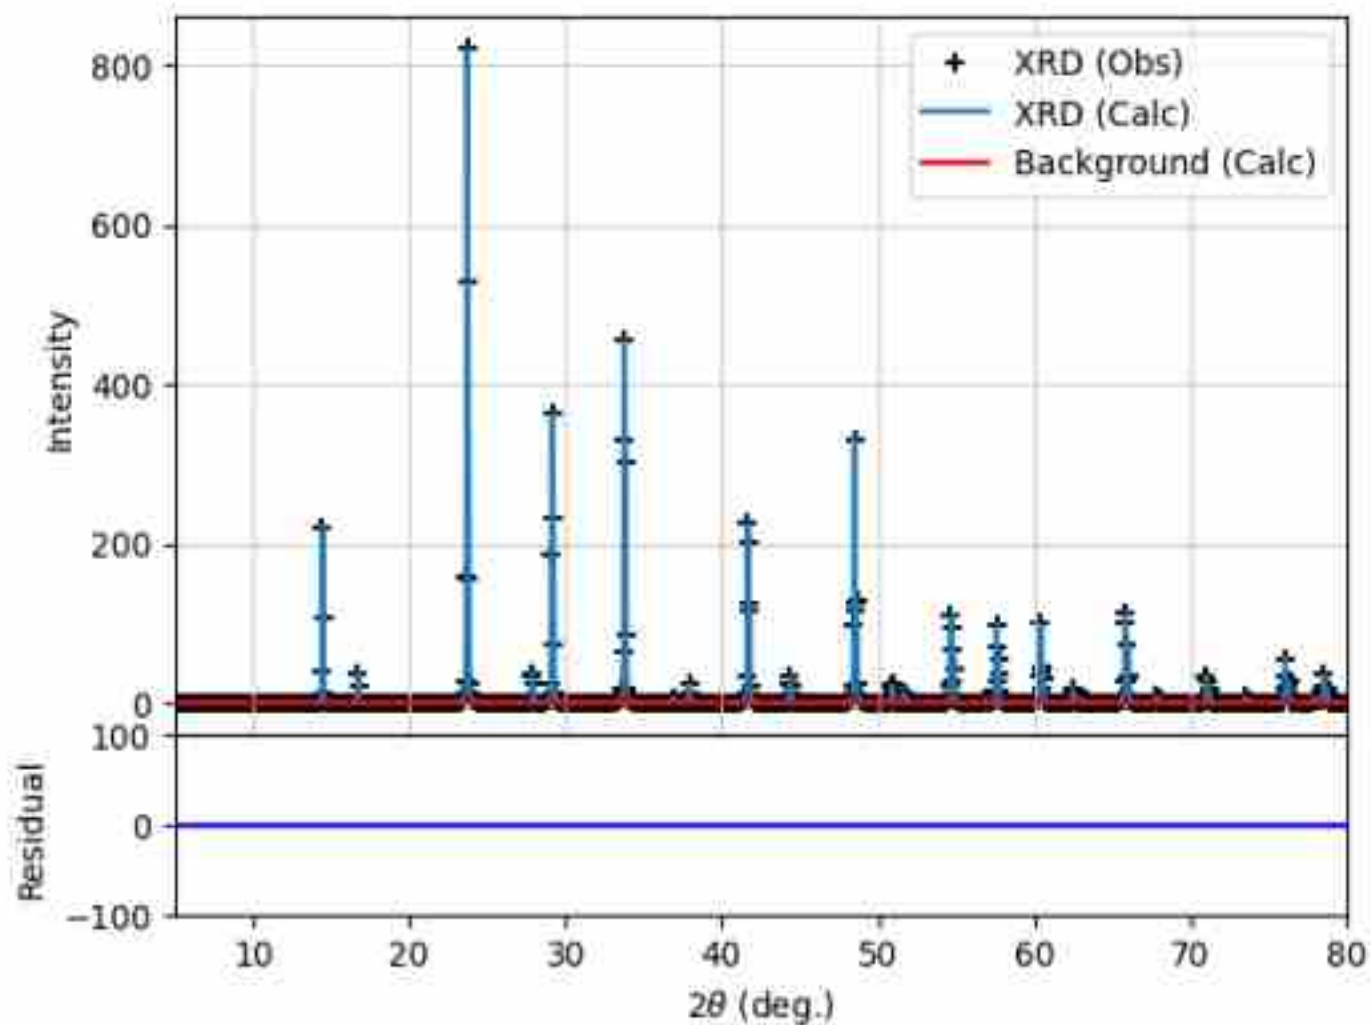

| RMSE before RR | Rwp     | RMSE after RR |
|----------------|---------|---------------|
| 0.006          | 0.01771 | 0.00235       |

# Cs<sub>2</sub>SnI<sub>6</sub>

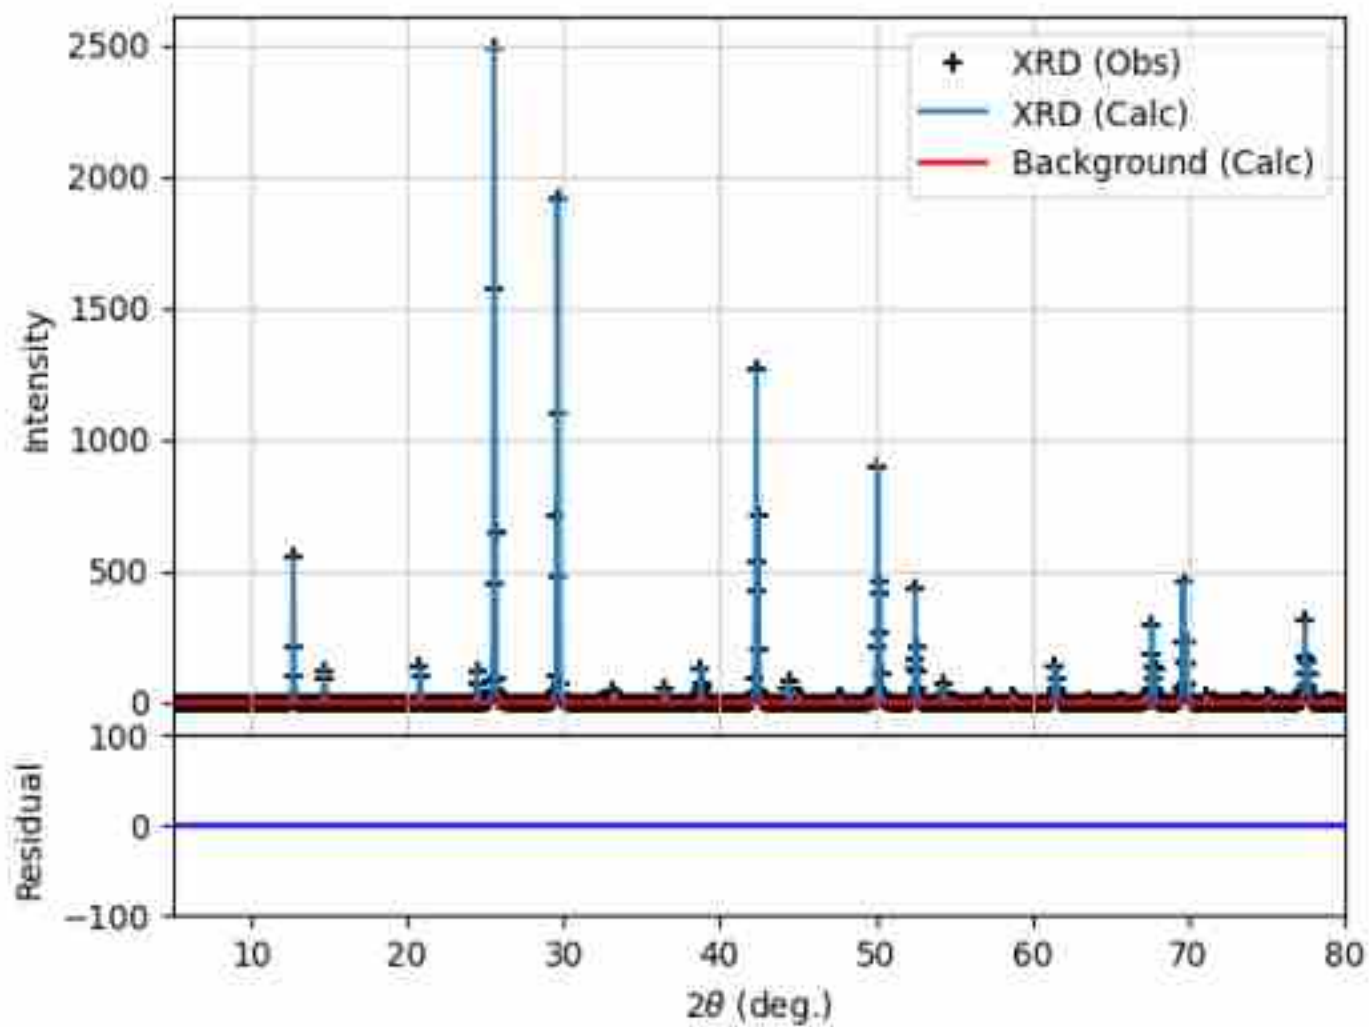

| RMSE before RR | Rwp     | RMSE after RR |
|----------------|---------|---------------|
| 0.006          | 0.05337 | 0.00199       |



# Cu<sub>1</sub>S<sub>1</sub>

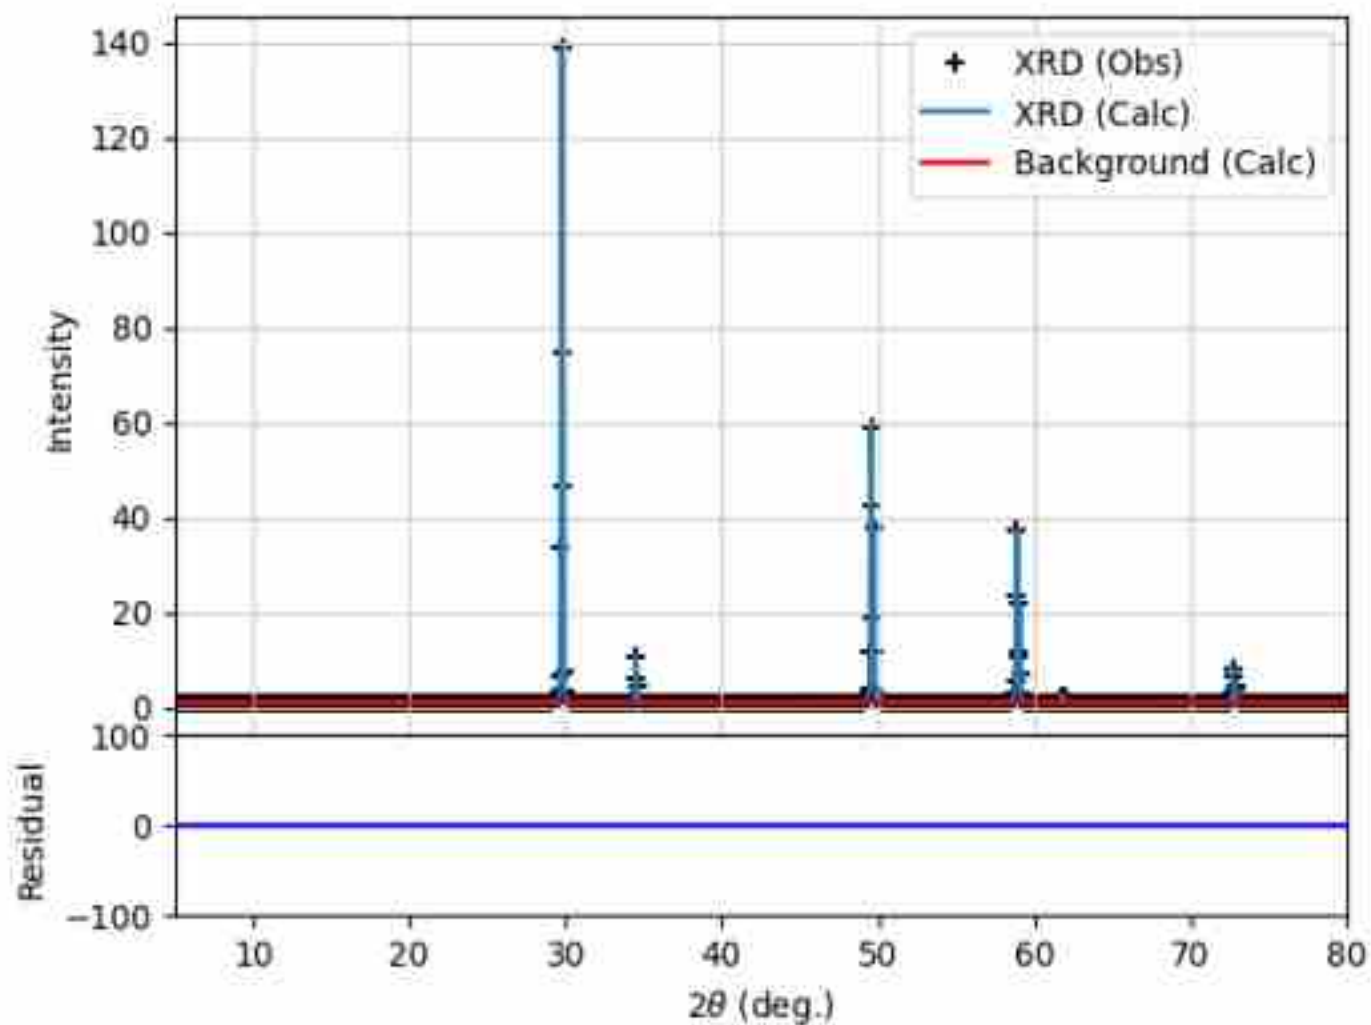

| RMSE before RR | Rwp     | RMSE after RR |
|----------------|---------|---------------|
| 0.006          | 0.02443 | 0.00321       |

# Cu<sub>3</sub>Sb1

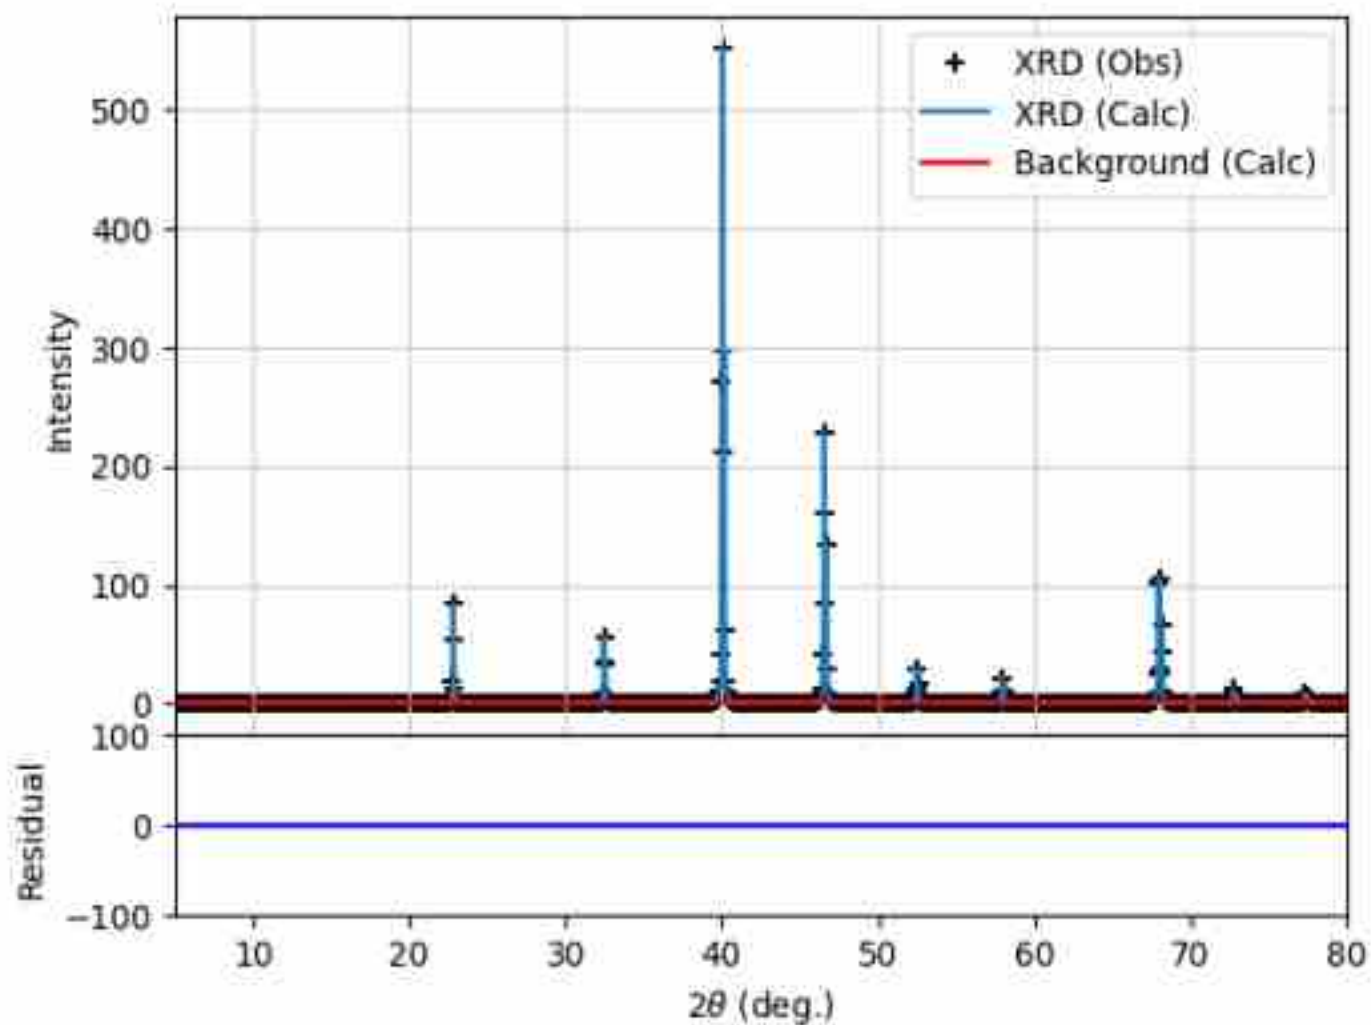

| RMSE before RR | Rwp     | RMSE after RR |
|----------------|---------|---------------|
| 0.006          | 0.02268 | 0.00135       |

# Dy1Co1C2

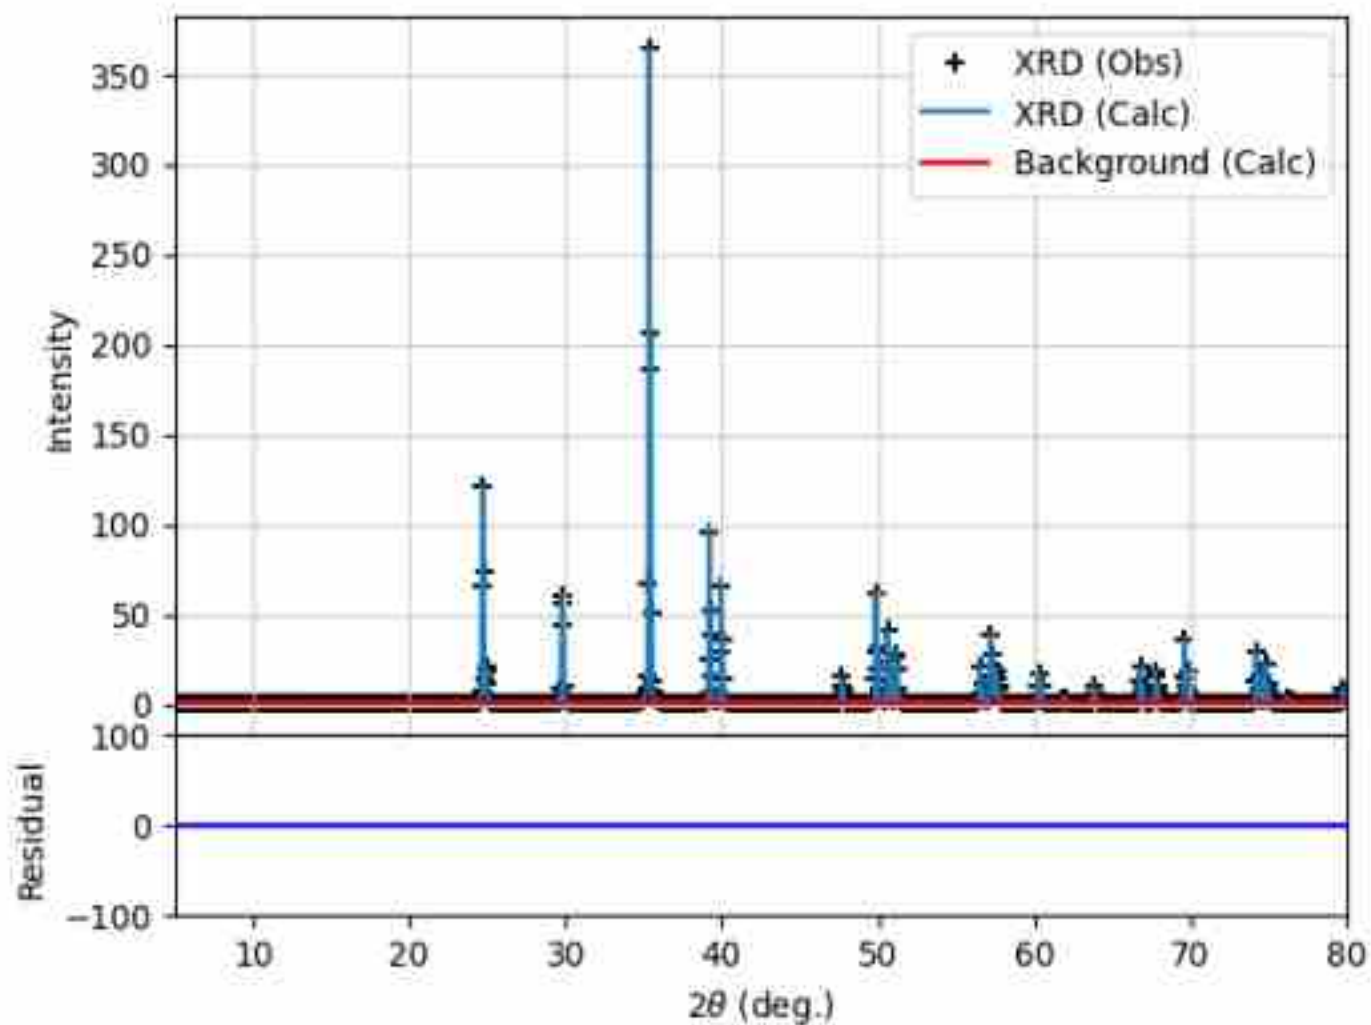

| RMSE before RR | Rwp     | RMSE after RR |
|----------------|---------|---------------|
| 0.006          | 0.00438 | 0.00144       |

# Dy<sub>1</sub>Fe<sub>2</sub>Si<sub>2</sub>

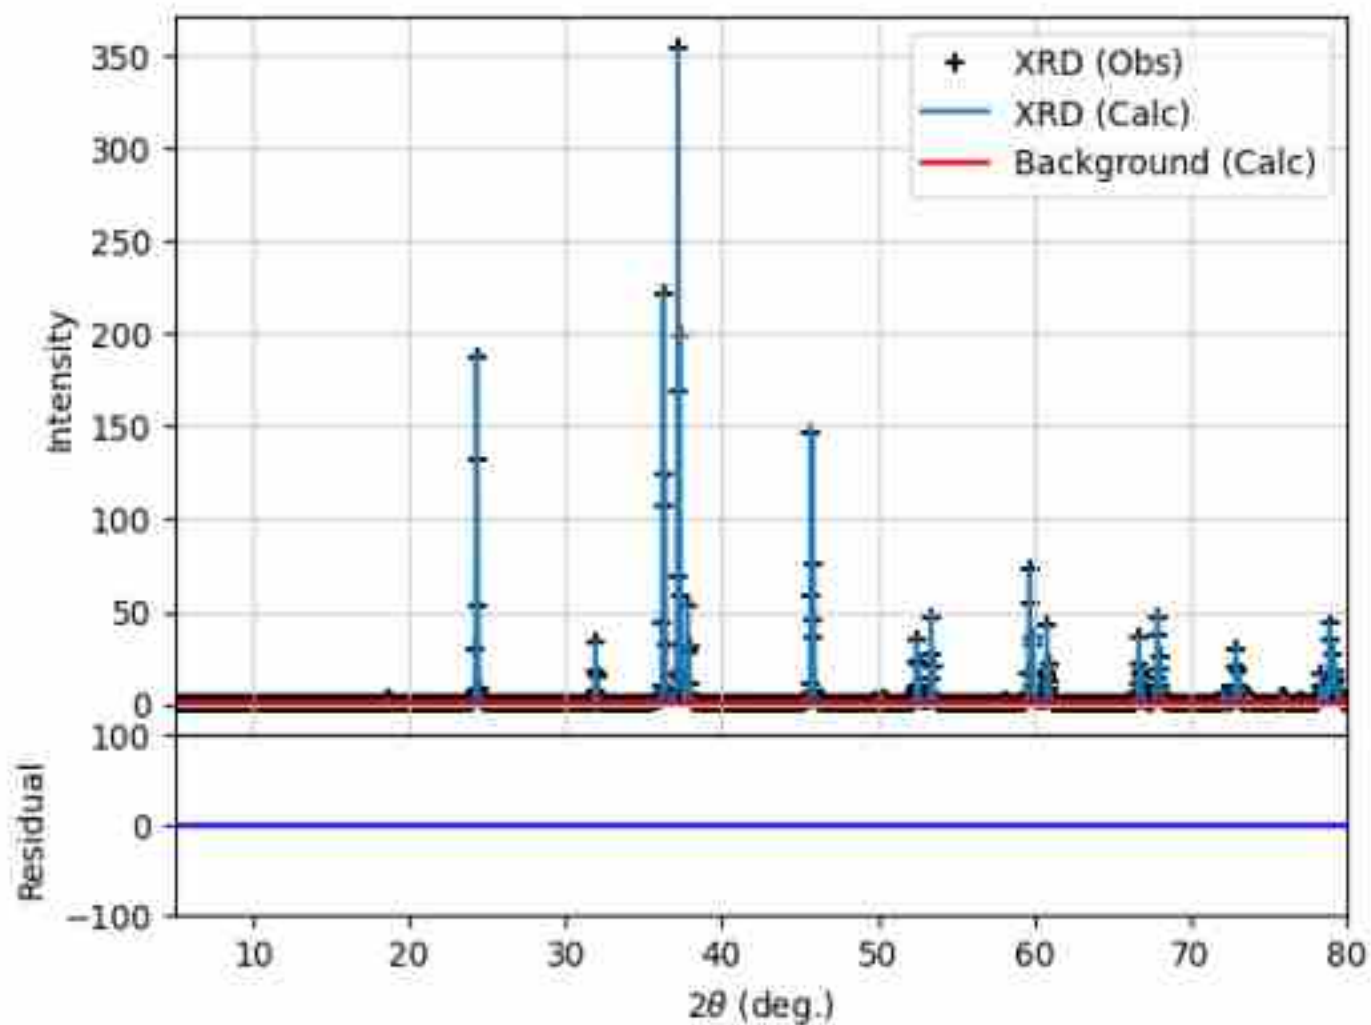

| RMSE before RR | Rwp     | RMSE after RR |
|----------------|---------|---------------|
| 0.006          | 0.03678 | 0.00238       |

# Dy<sub>2</sub>InAg<sub>1</sub>

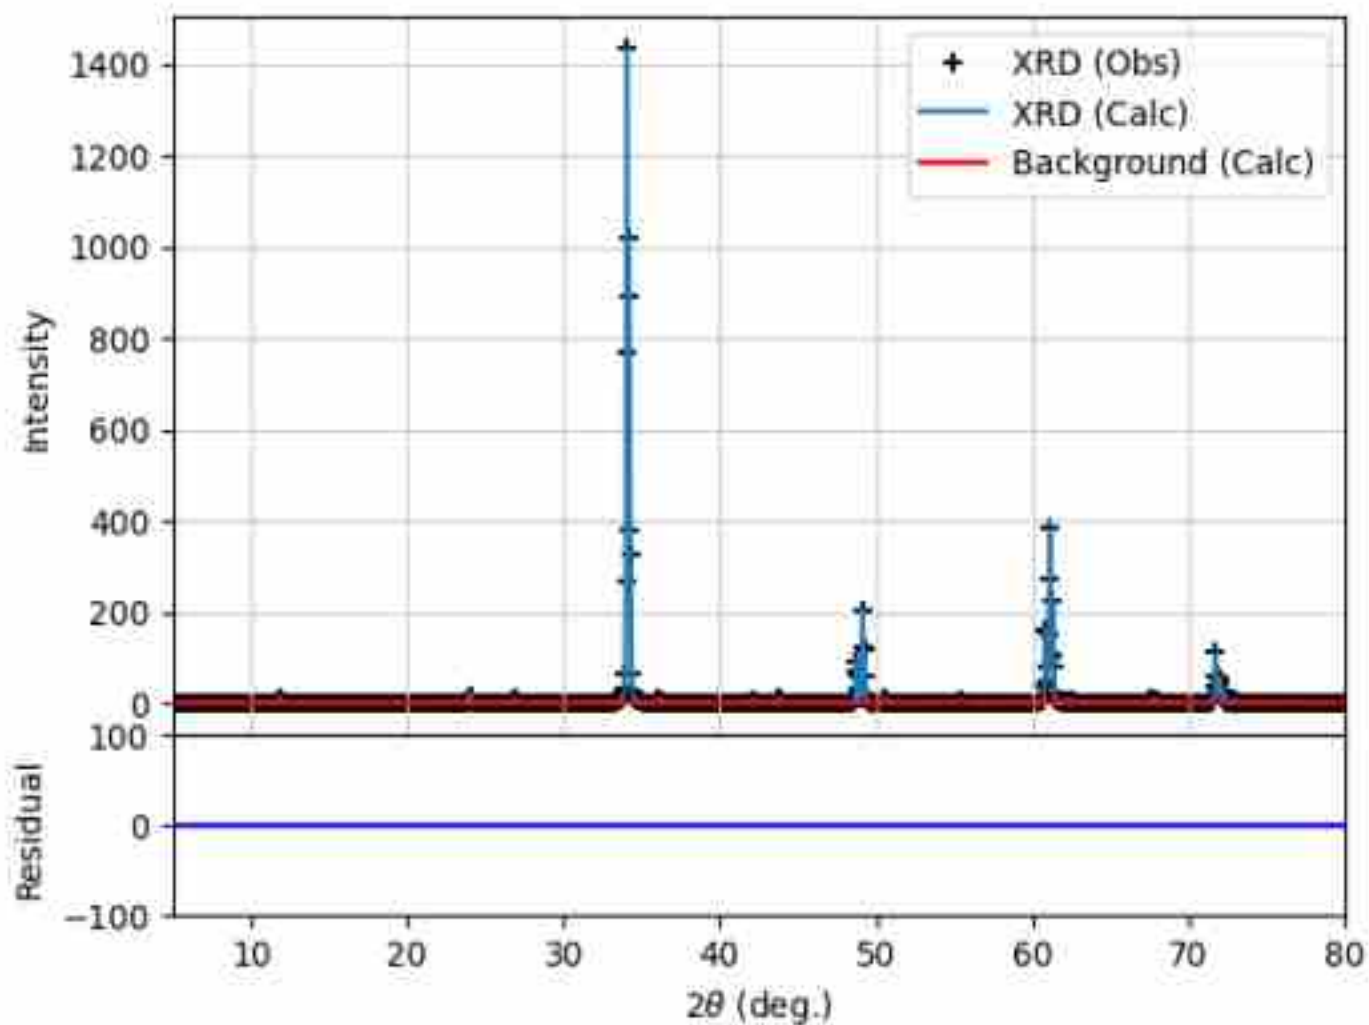

| RMSE before RR | Rwp     | RMSE after RR |
|----------------|---------|---------------|
| 0.006          | 0.00317 | 0.00019       |

# Dy<sub>2</sub>Tl<sub>2</sub>Zn<sub>2</sub>

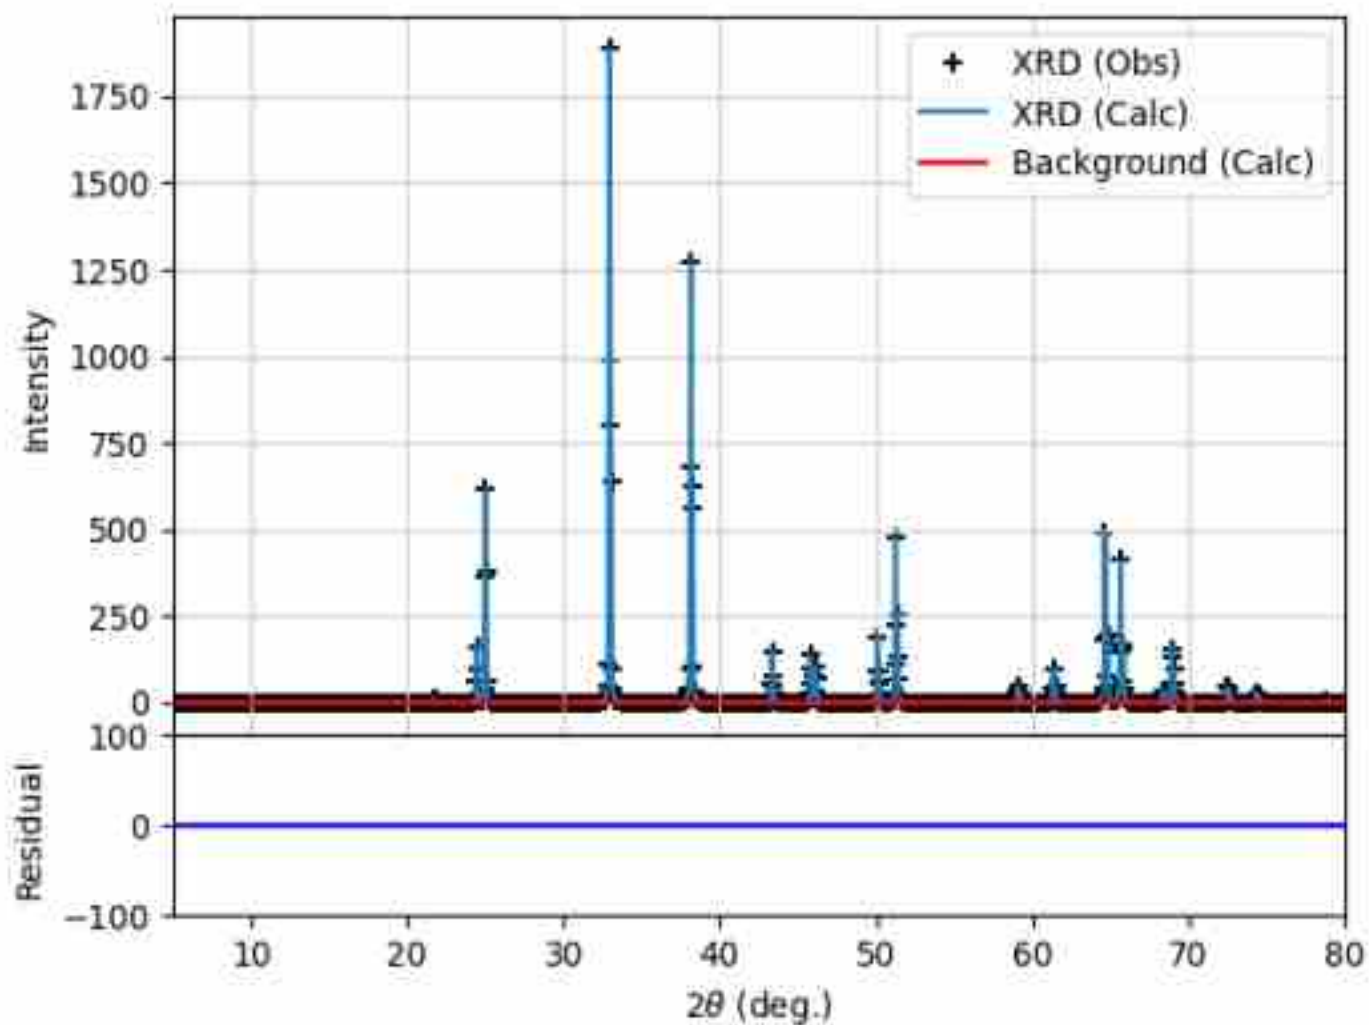

| RMSE before RR | Rwp     | RMSE after RR |
|----------------|---------|---------------|
| 0.006          | 0.00743 | 0.00055       |

# Dy<sub>2</sub>Zn<sub>4</sub>

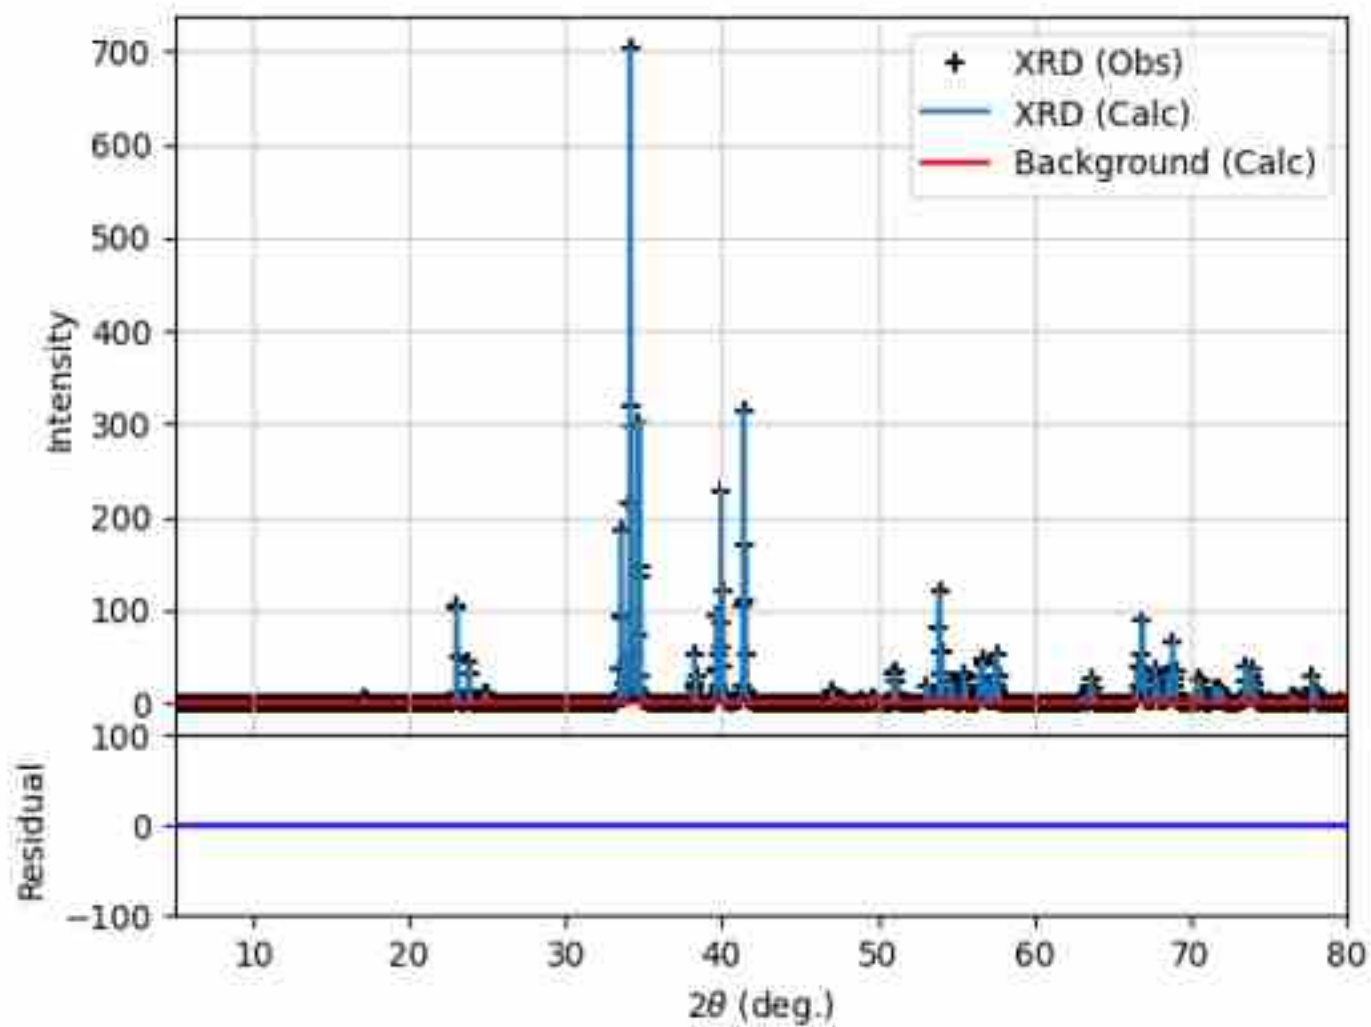

| RMSE before RR | Rwp     | RMSE after RR |
|----------------|---------|---------------|
| 0.006          | 0.00386 | 0.00034       |

# Dy<sub>3</sub>Sn<sub>3</sub>Pt<sub>3</sub>

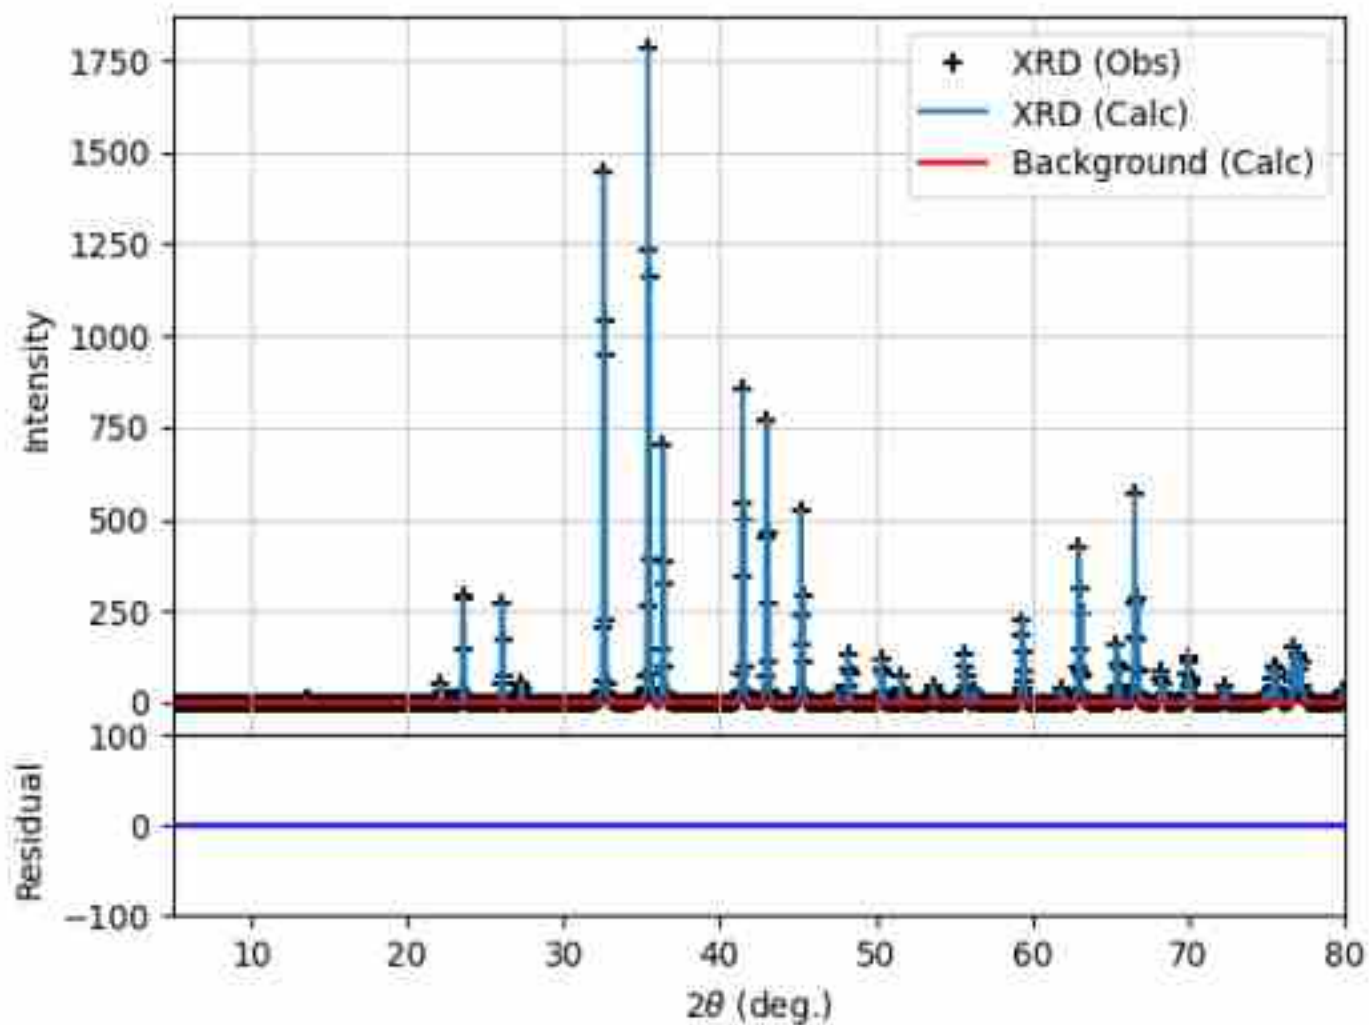

| RMSE before RR | Rwp     | RMSE after RR |
|----------------|---------|---------------|
| 0.006          | 0.00431 | 0.00053       |



# Dy6Ge8

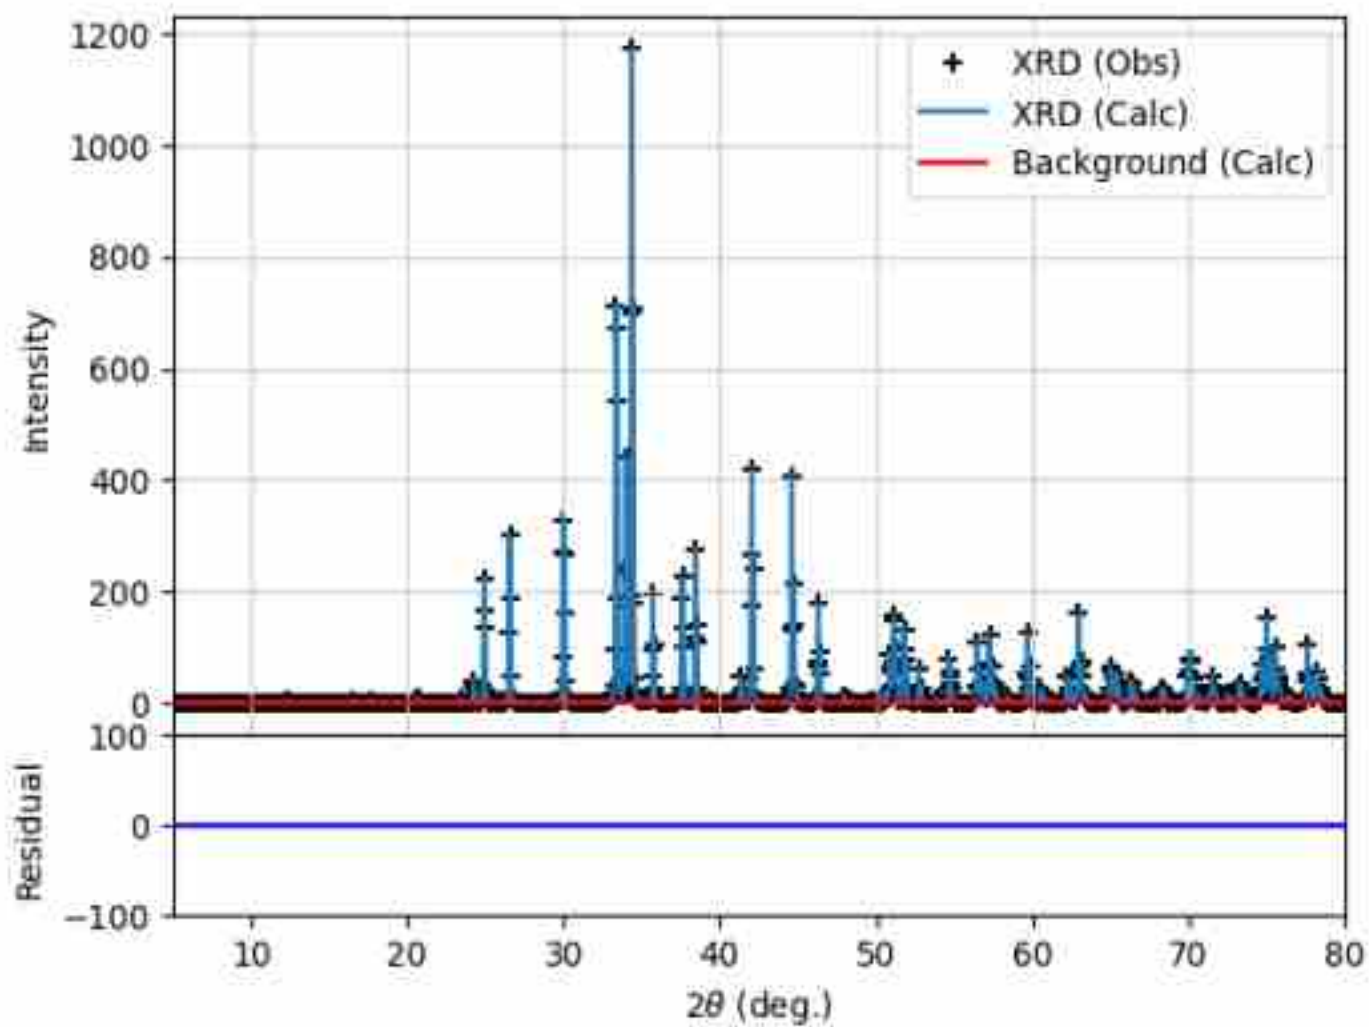

| RMSE before RR | Rwp     | RMSE after RR |
|----------------|---------|---------------|
| 0.06           | 0.00347 | 0.00031       |

# Er<sub>1</sub>Ga<sub>2</sub>Cu<sub>3</sub>

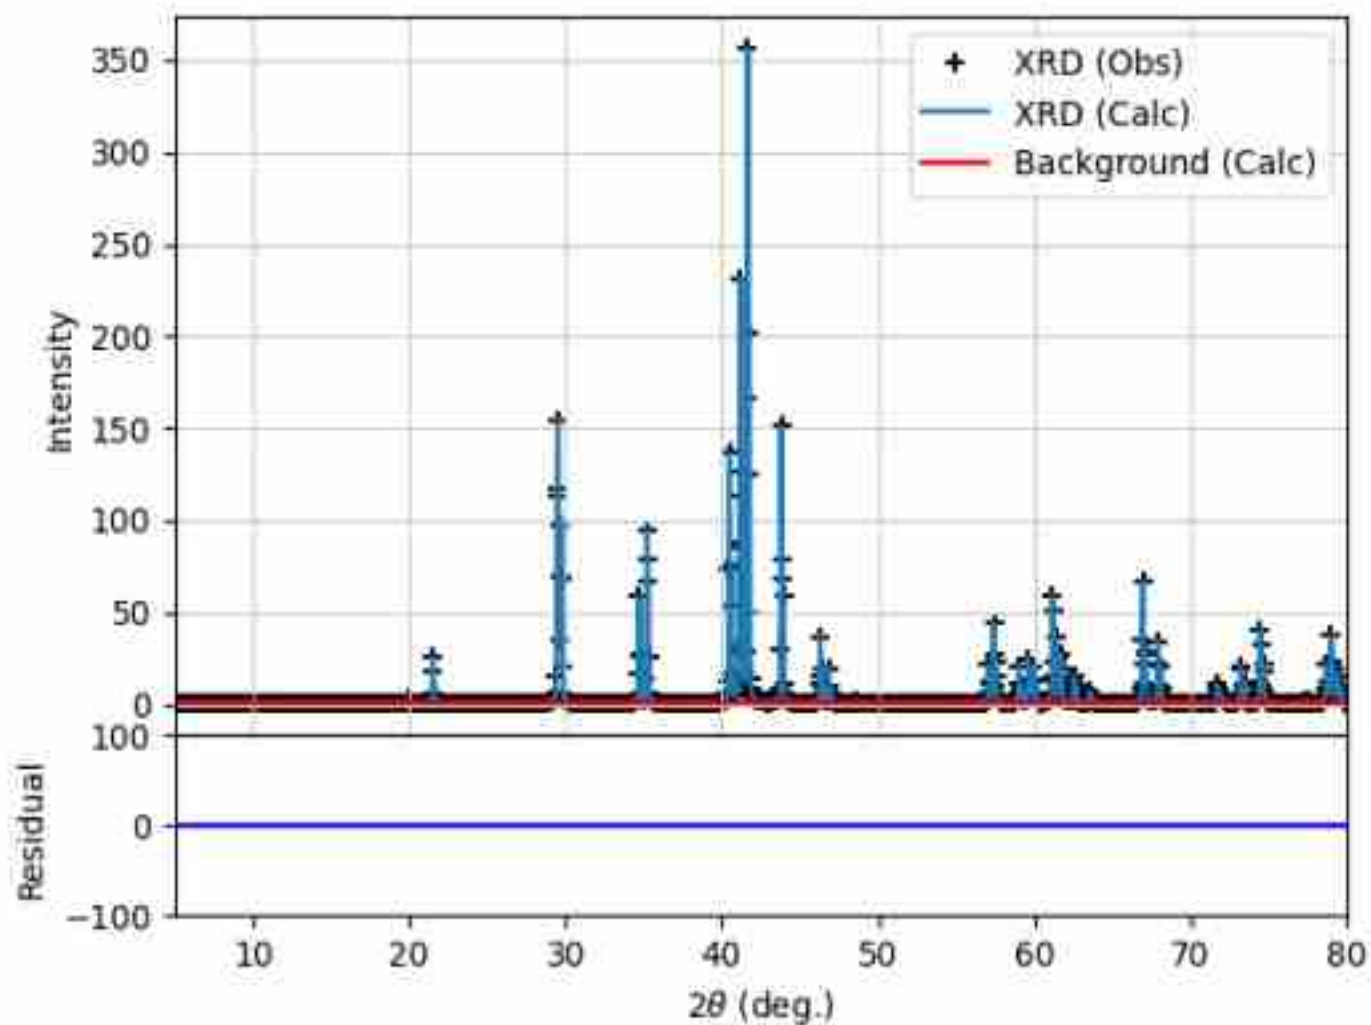

| RMSE before RR | Rwp    | RMSE after RR |
|----------------|--------|---------------|
| 0.006          | 0.0033 | 0.00022       |

# Er1Ni2P2

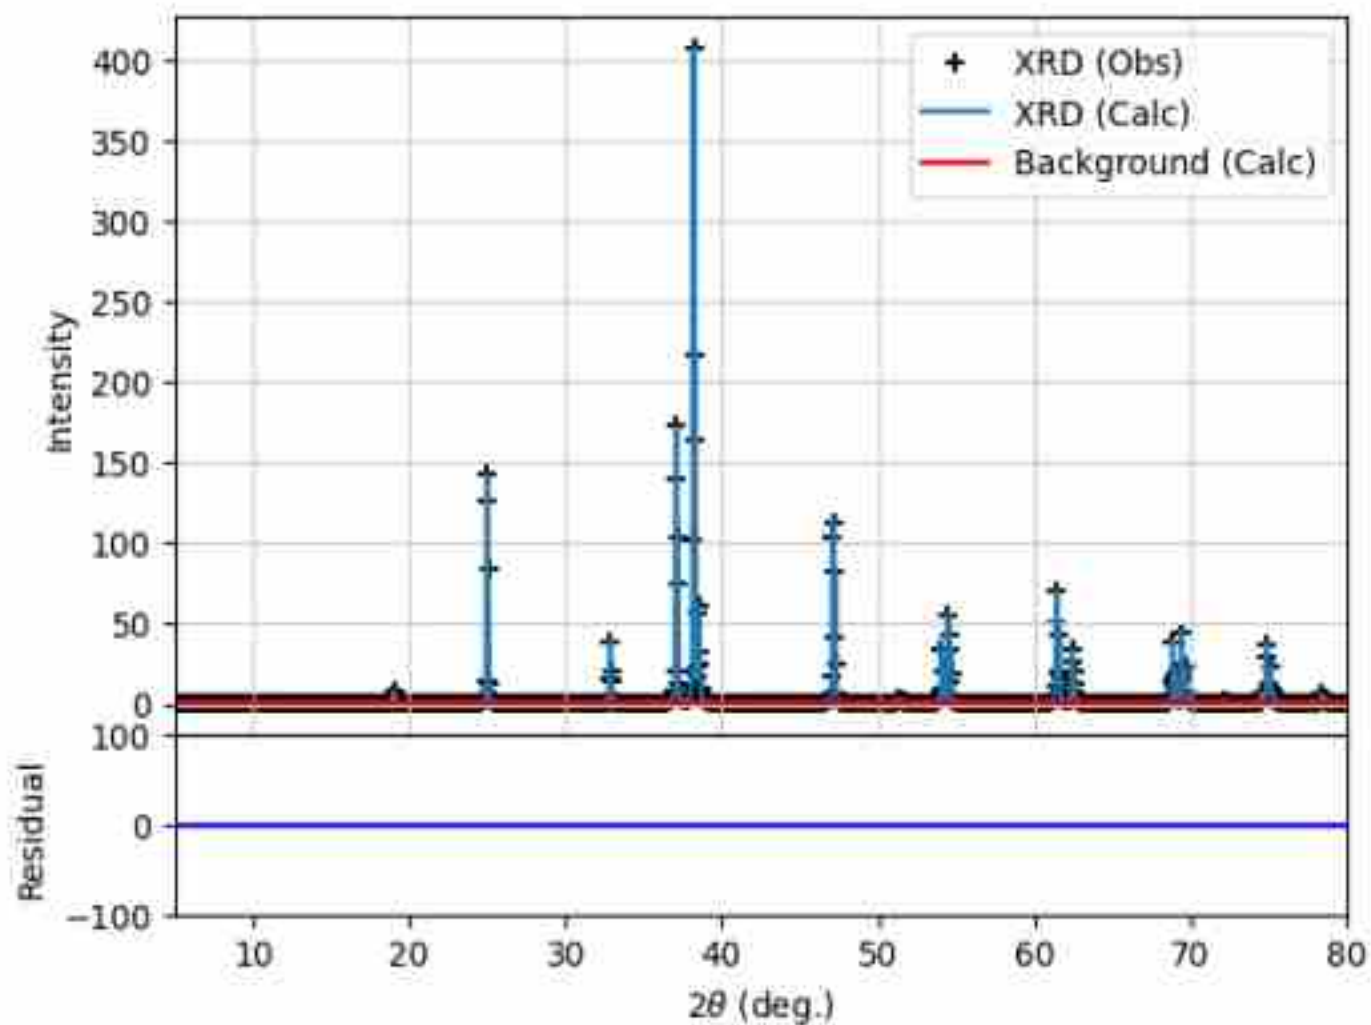

| RMSE before RR | Rwp     | RMSE after RR |
|----------------|---------|---------------|
| 0.006          | 0.00437 | 0.00083       |

# Er<sub>2</sub>Zn<sub>2</sub>Ga<sub>2</sub>

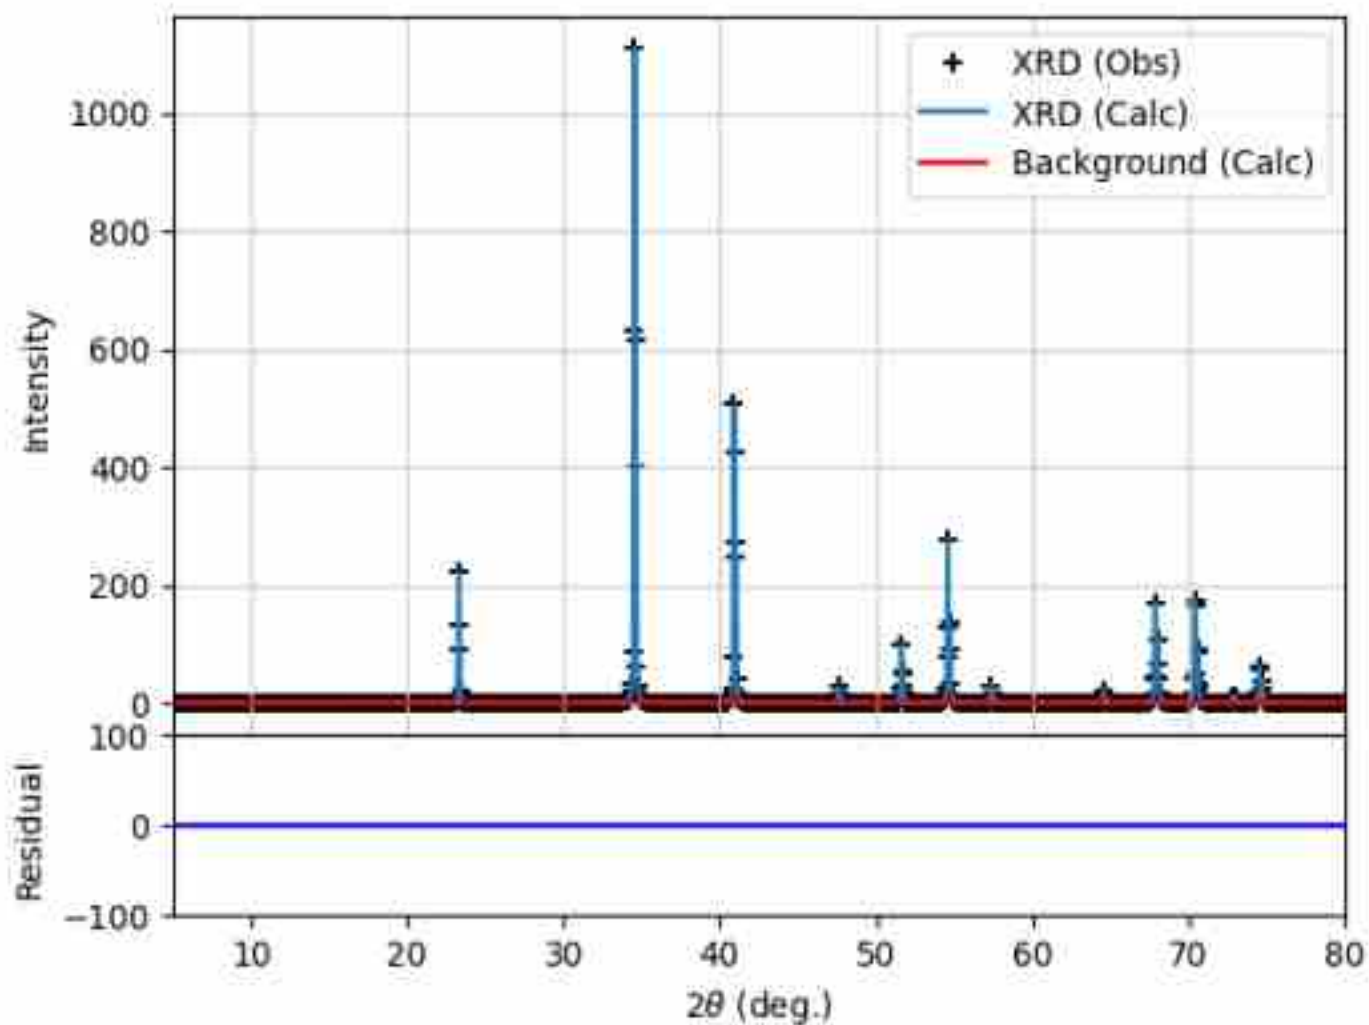

| RMSE before RR | Rwp    | RMSE after RR |
|----------------|--------|---------------|
| 0.006          | 0.0032 | 0.00067       |

# Er6Pd4

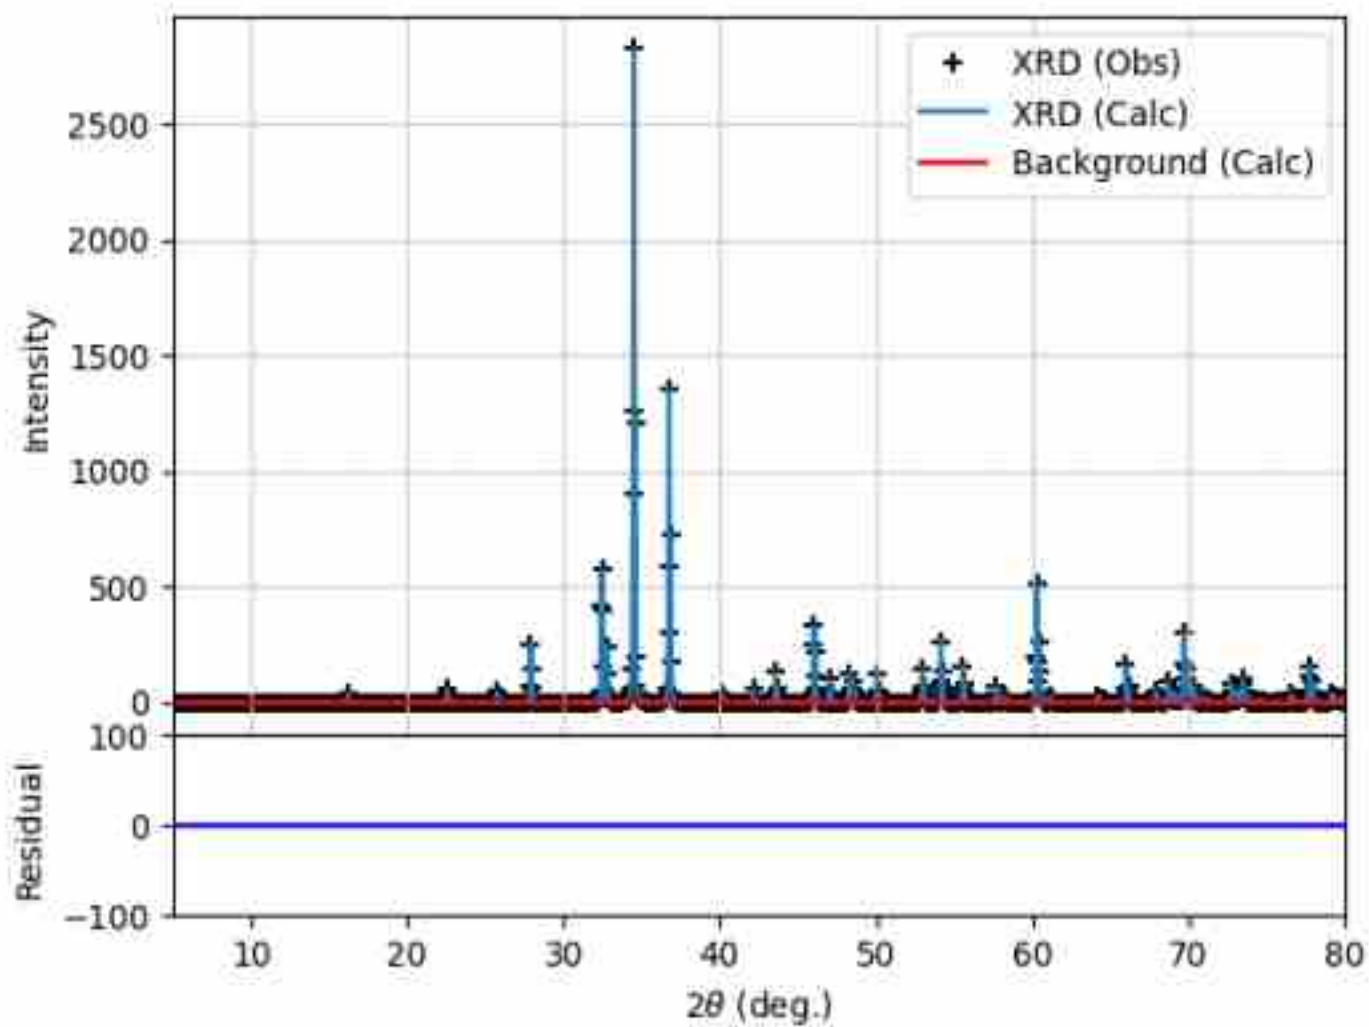

| RMSE before RR | Rwp     | RMSE after RR |
|----------------|---------|---------------|
| 0.006          | 0.00547 | 0.00035       |

# Eu1Cd2P2

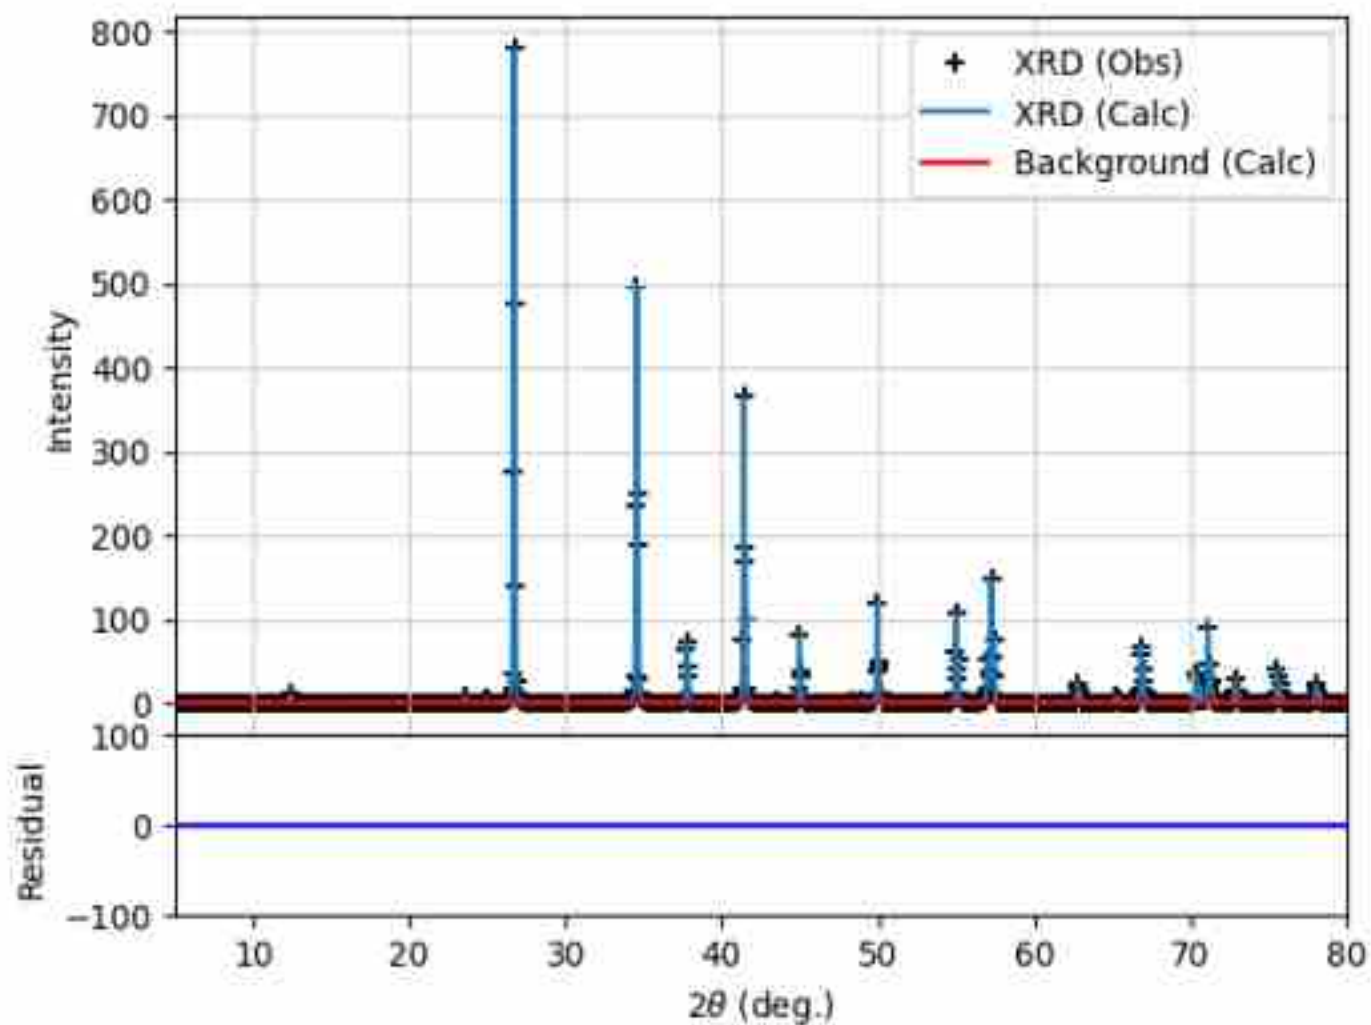

| RMSE before RR | Rwp     | RMSE after RR |
|----------------|---------|---------------|
| 0.006          | 0.00512 | 0.00092       |

# Eu1Cu2Sn2

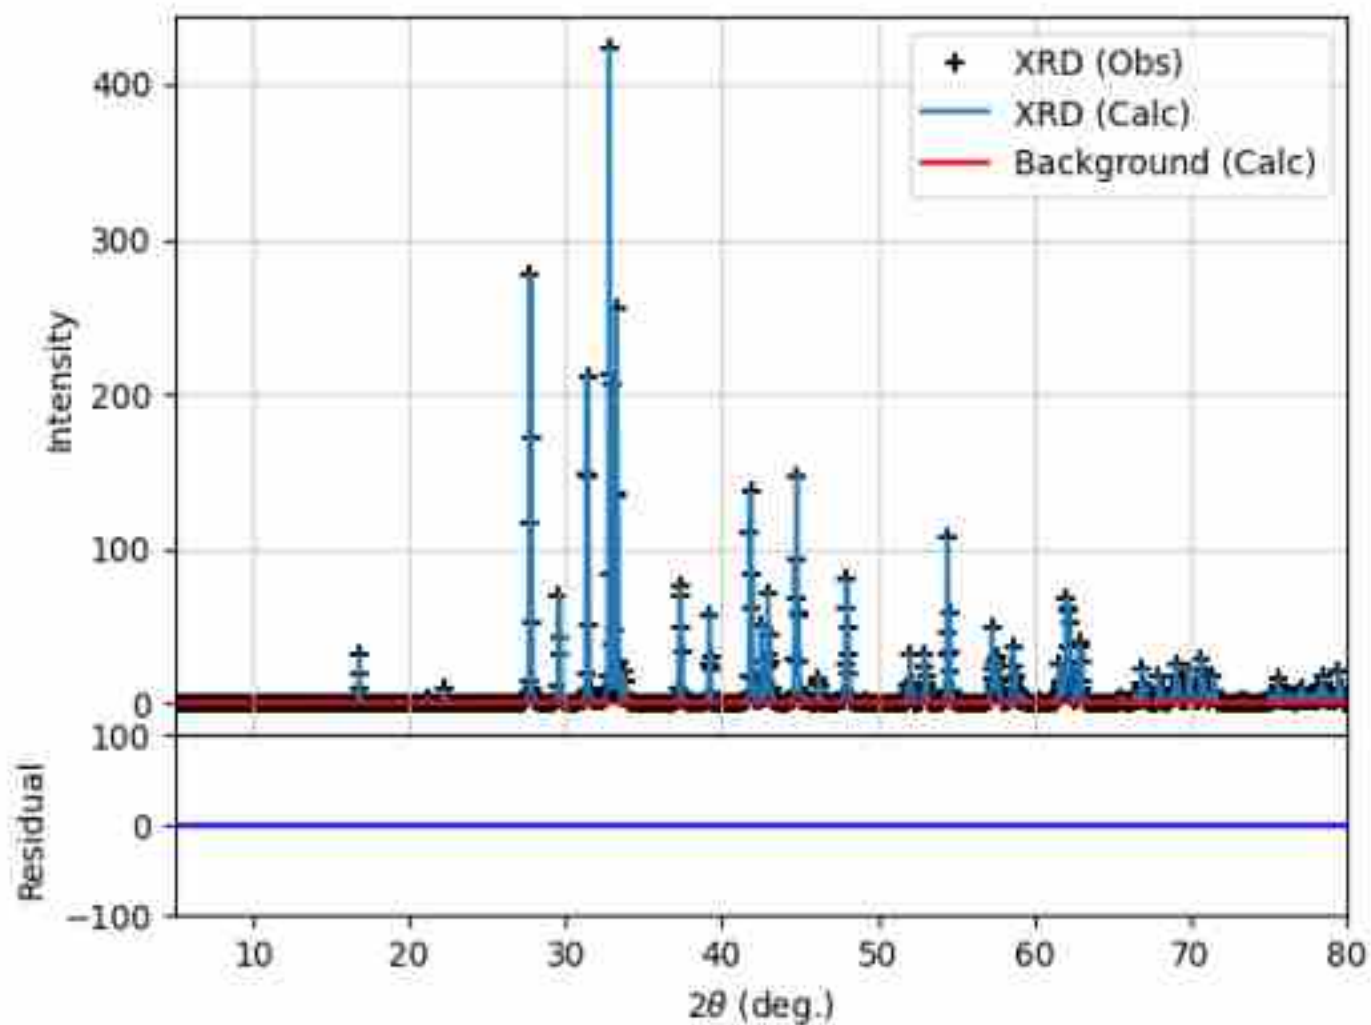

| RMSE before RR | Rwp     | RMSE after RR |
|----------------|---------|---------------|
| 0.006          | 0.00298 | 0.00013       |

# Fe1Ni1Pt6

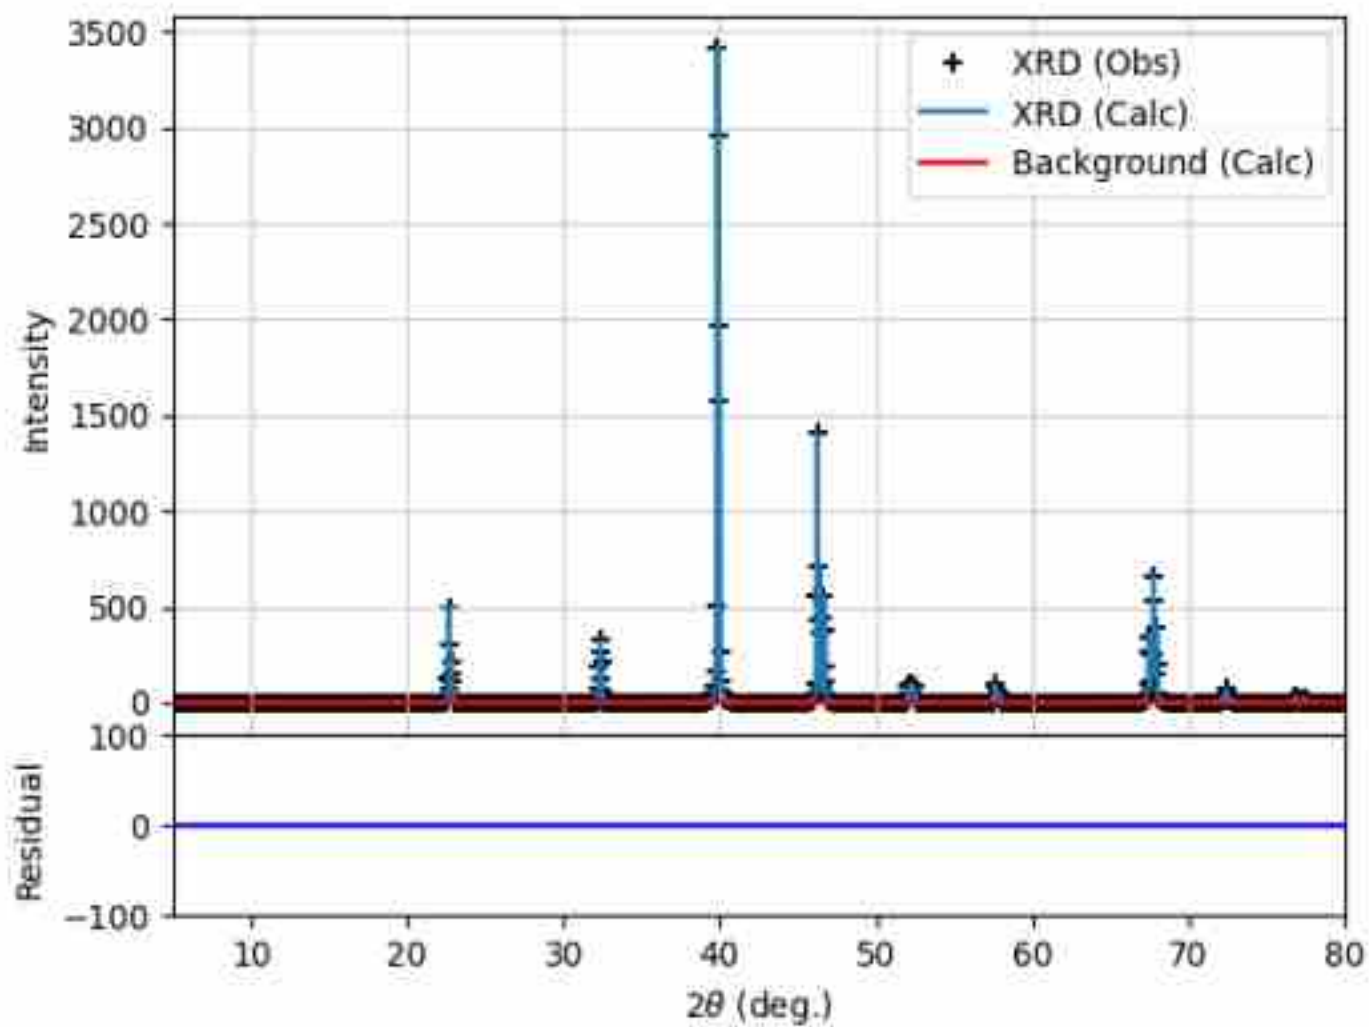

| RMSE before RR | Rwp     | RMSE after RR |
|----------------|---------|---------------|
| 0.006          | 0.00642 | 0.00048       |



# Fe<sub>2</sub>Ni<sub>6</sub>

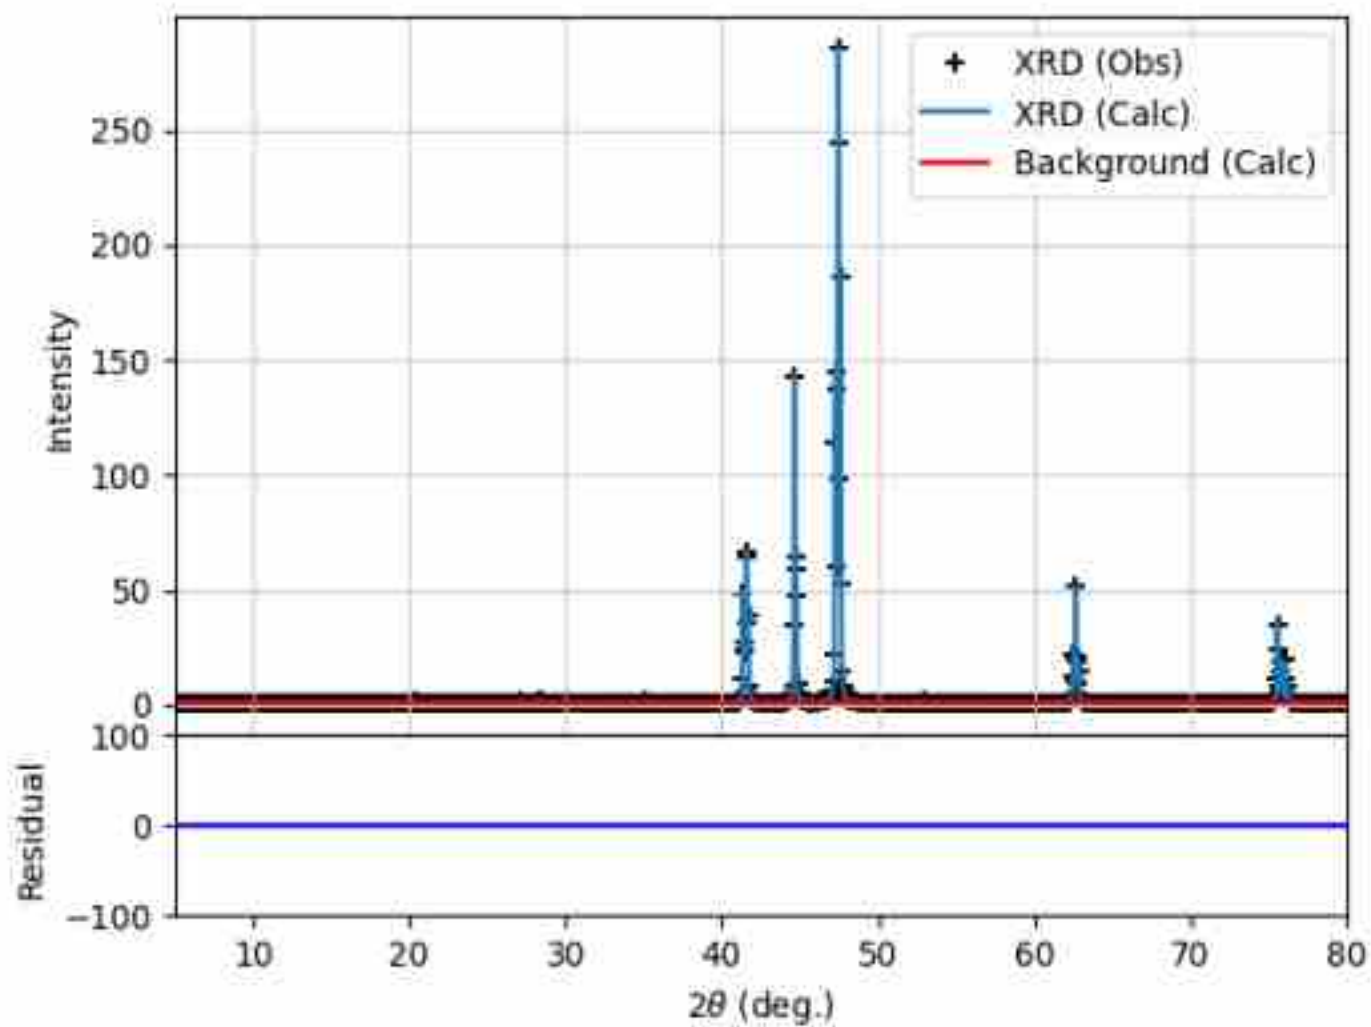

| RMSE before RR | Rwp     | RMSE after RR |
|----------------|---------|---------------|
| 0.006          | 0.00371 | 0.0003        |

# Ga1Pb3

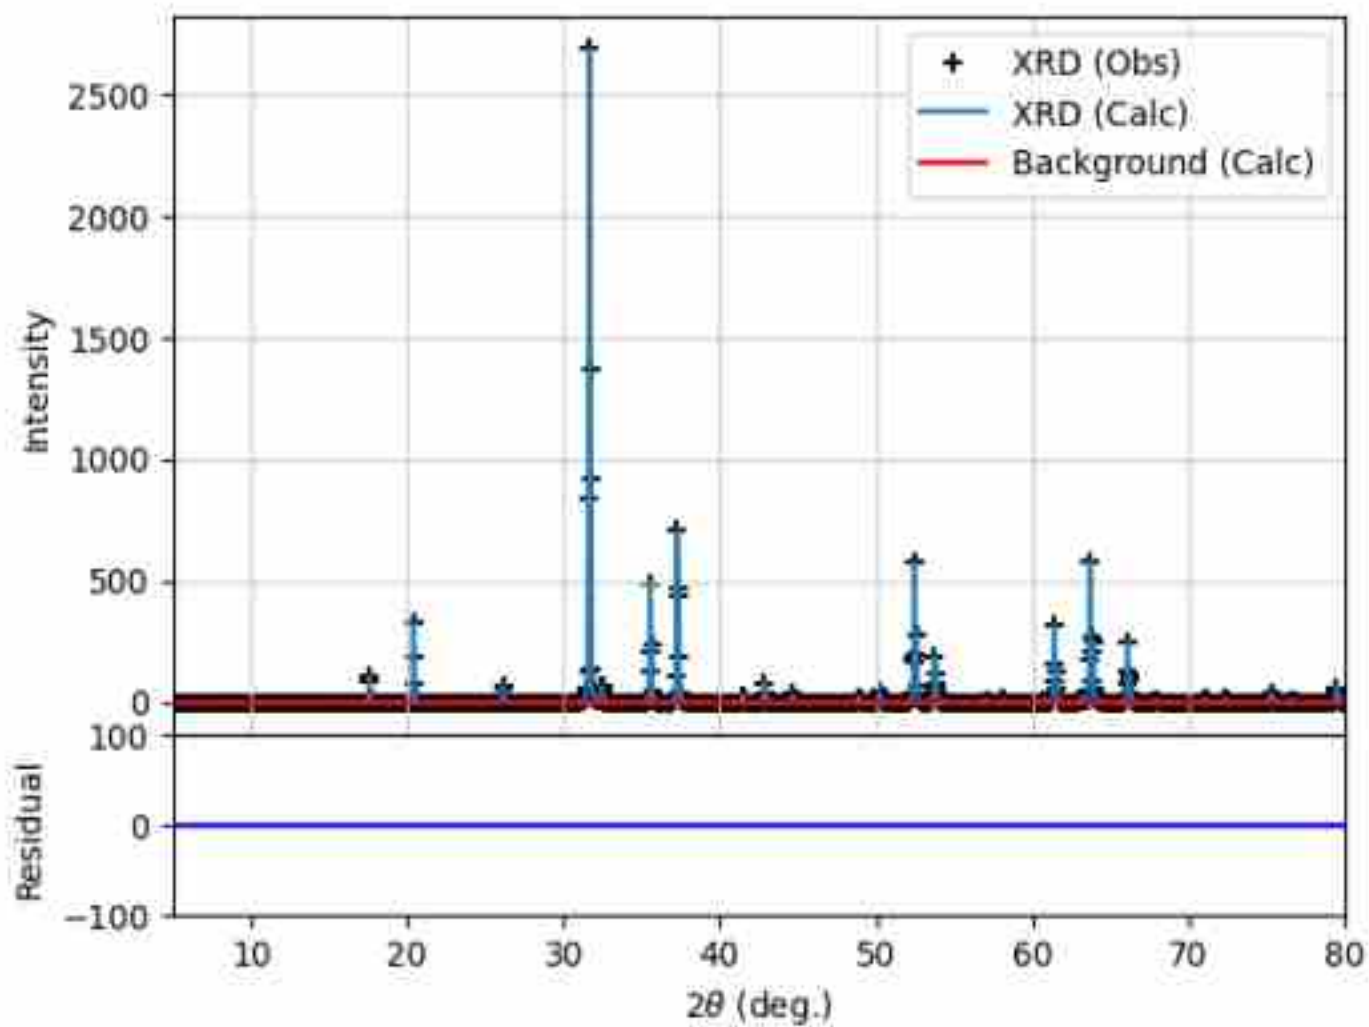

| RMSE before RR | Rwp     | RMSE after RR |
|----------------|---------|---------------|
| 0.006          | 0.00485 | 0.00054       |

# Gd1B2Rh2C1

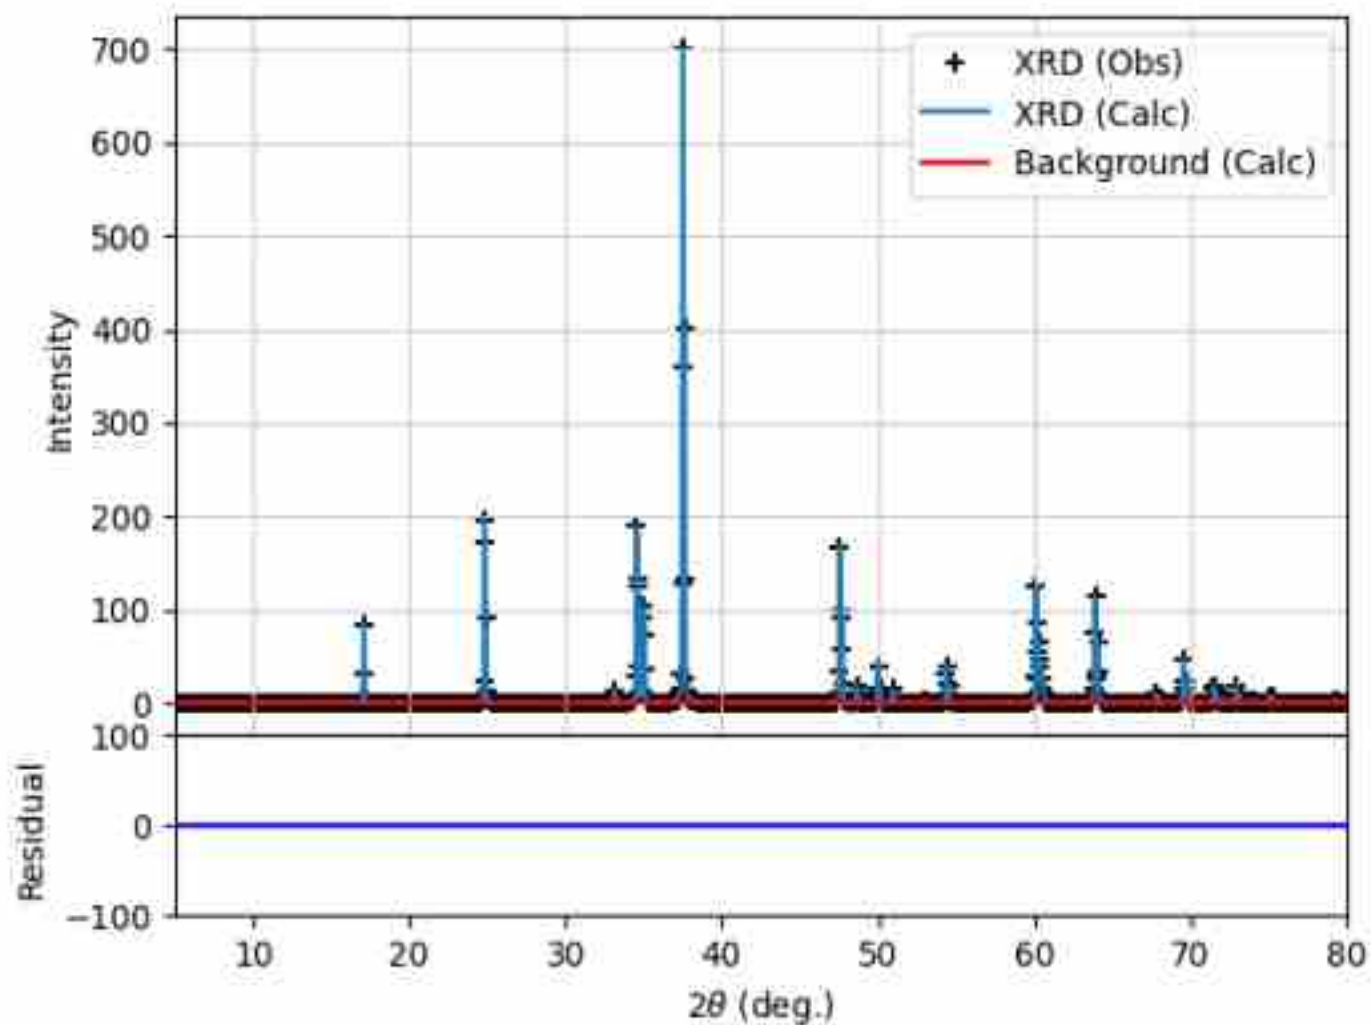

| RMSE before RR | Rwp     | RMSE after RR |
|----------------|---------|---------------|
| 0.006          | 0.00347 | 0.00146       |

Gd<sub>2</sub>Ni<sub>2</sub>Sn<sub>1</sub>

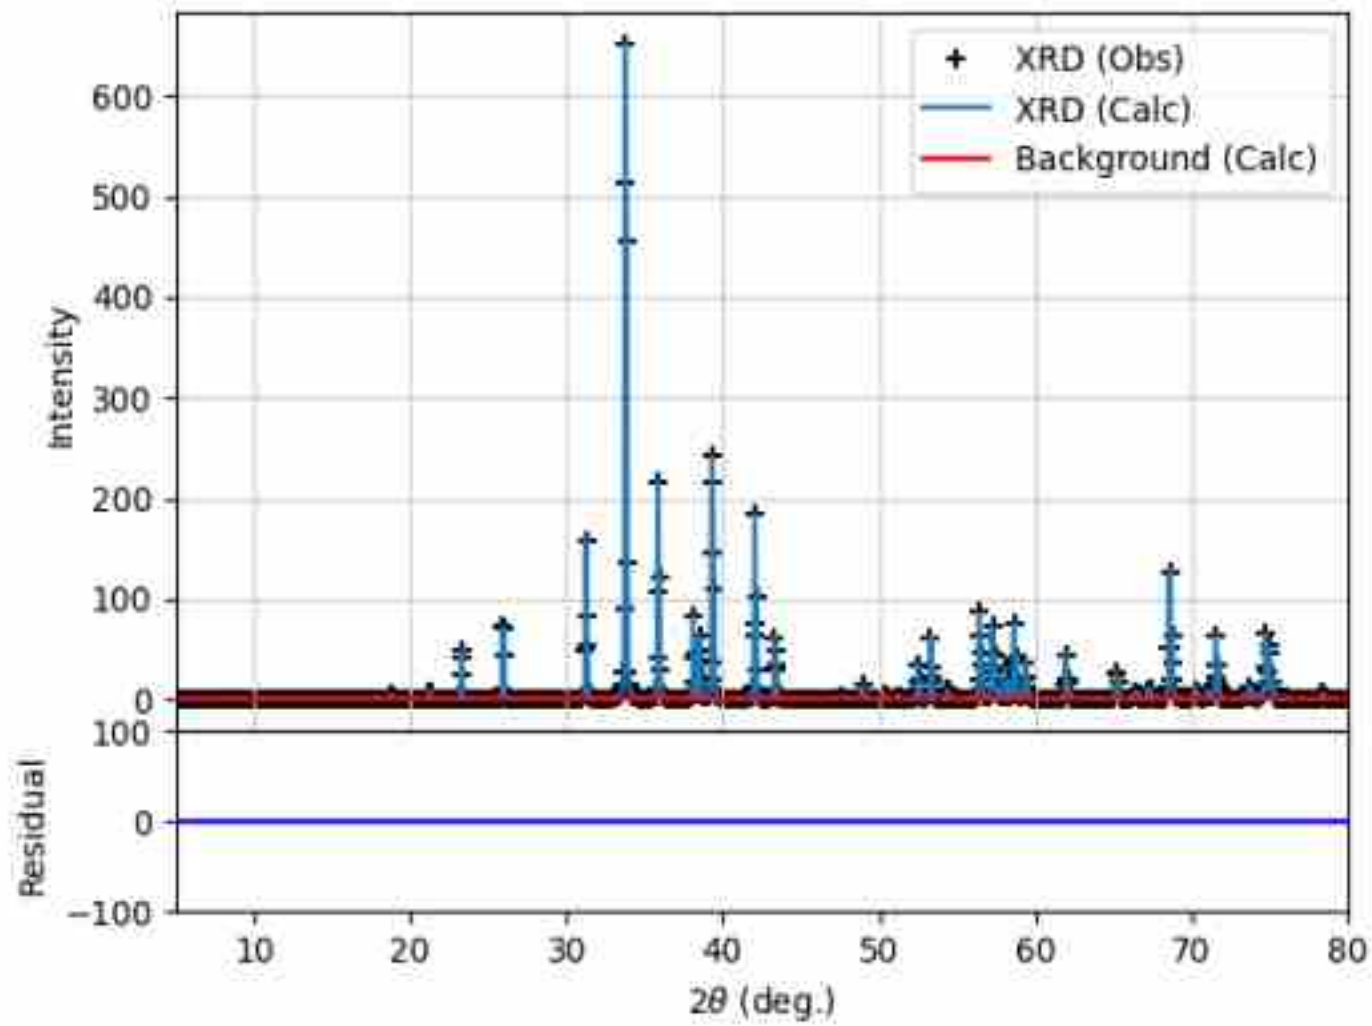

| RMSE before RR | Rwp     | RMSE after RR |
|----------------|---------|---------------|
| 0.006          | 0.00344 | 0.00017       |

# Ge<sub>2</sub>Te<sub>1</sub>Se<sub>1</sub>

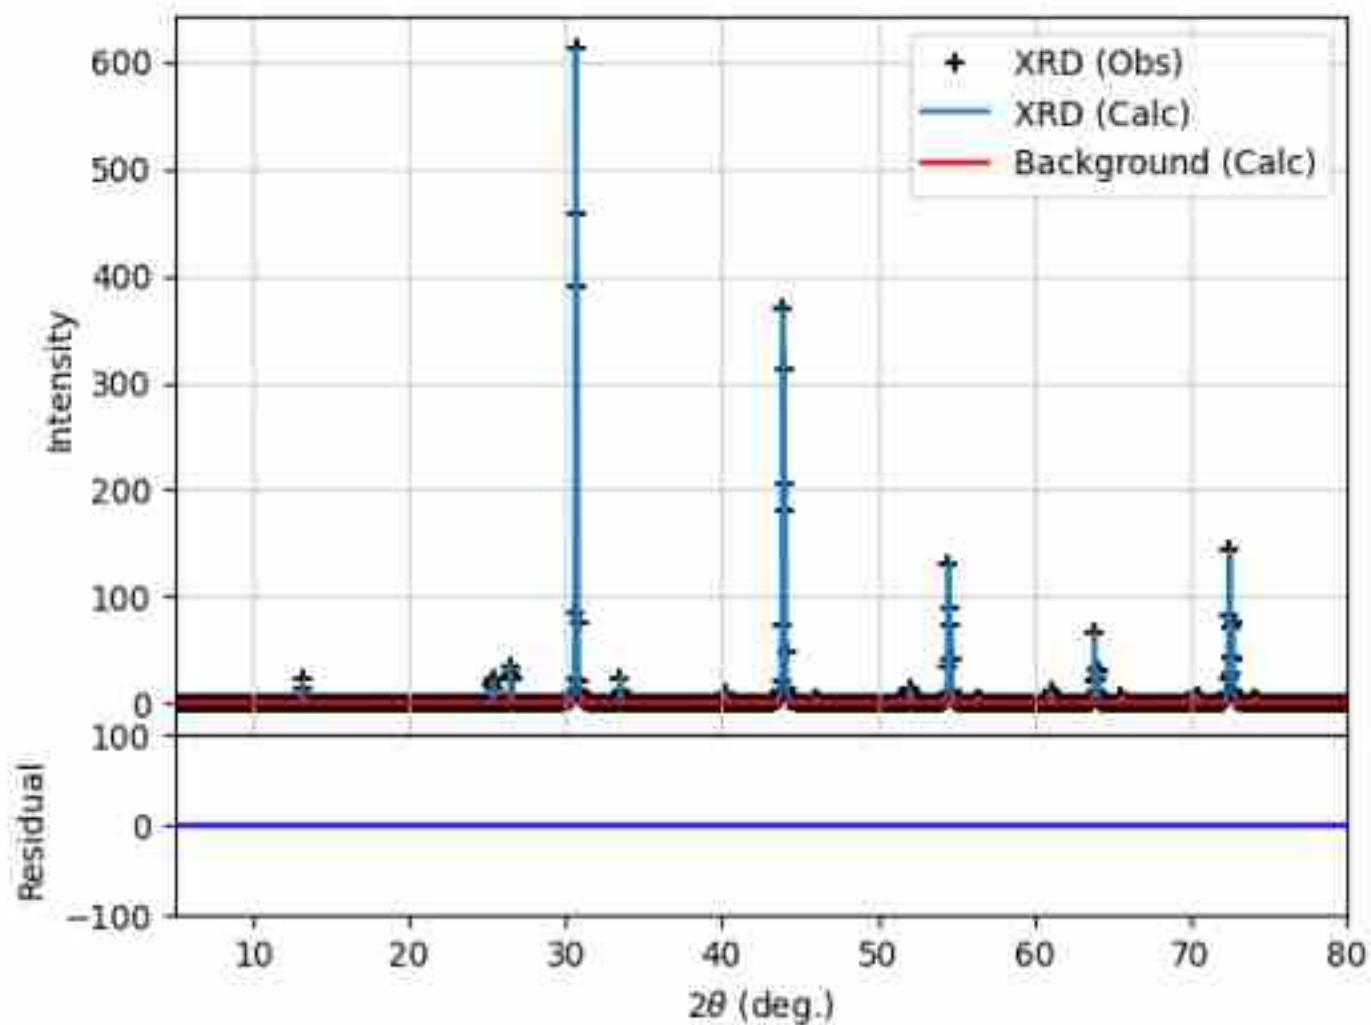

| RMSE before RR | Rwp     | RMSE after RR |
|----------------|---------|---------------|
| 0.006          | 0.22235 | 0.00057       |

# Hf1Si2Ni2

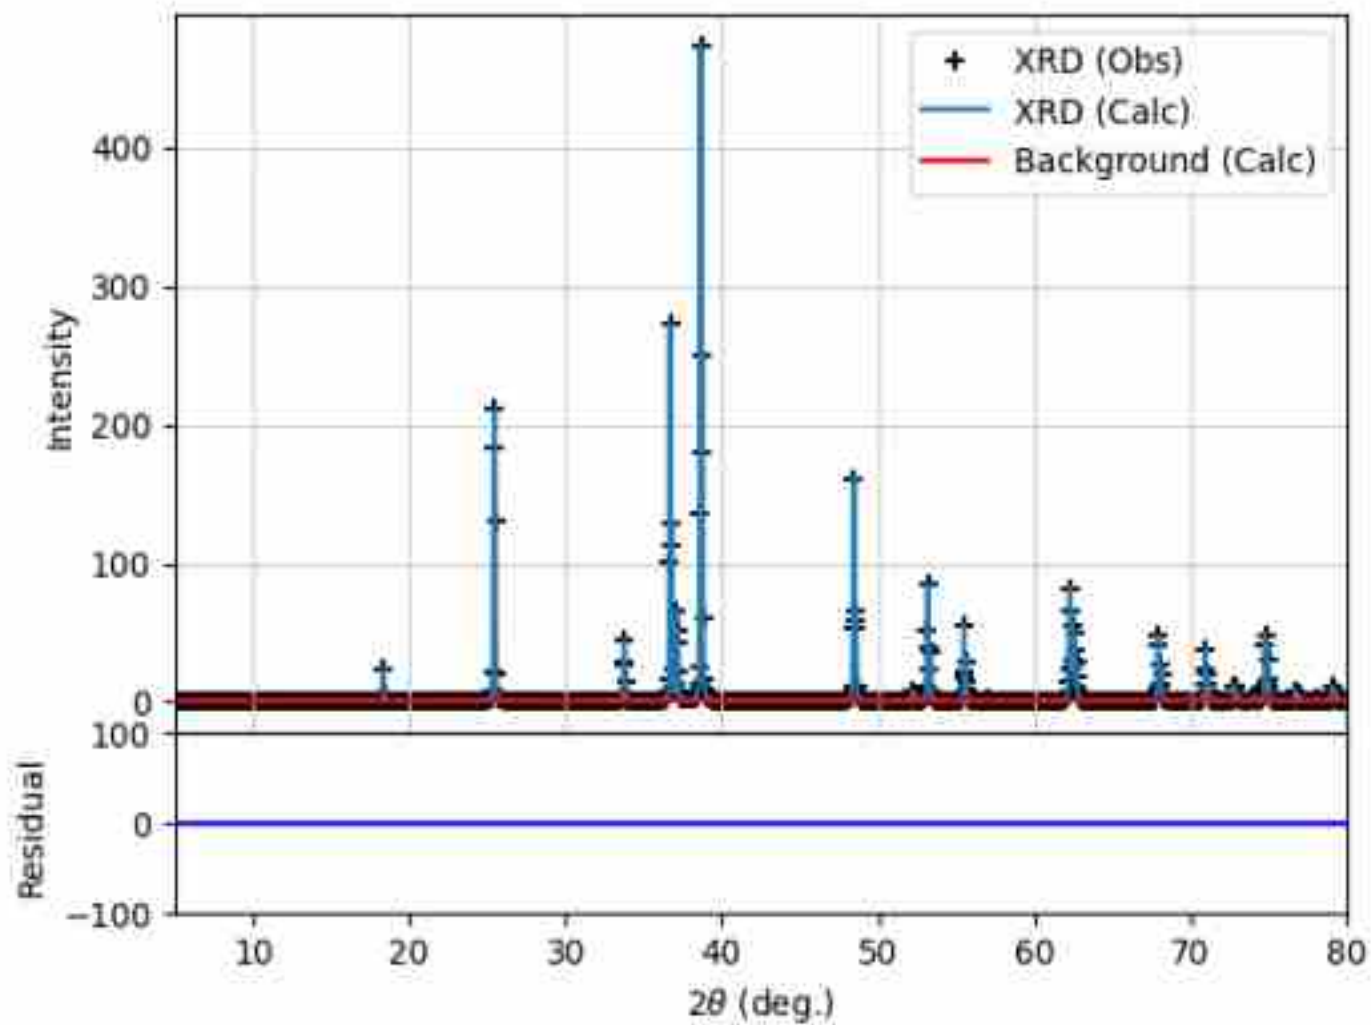

| RMSE before RR | Rwp     | RMSE after RR |
|----------------|---------|---------------|
| 0.006          | 0.00355 | 0.00096       |

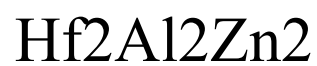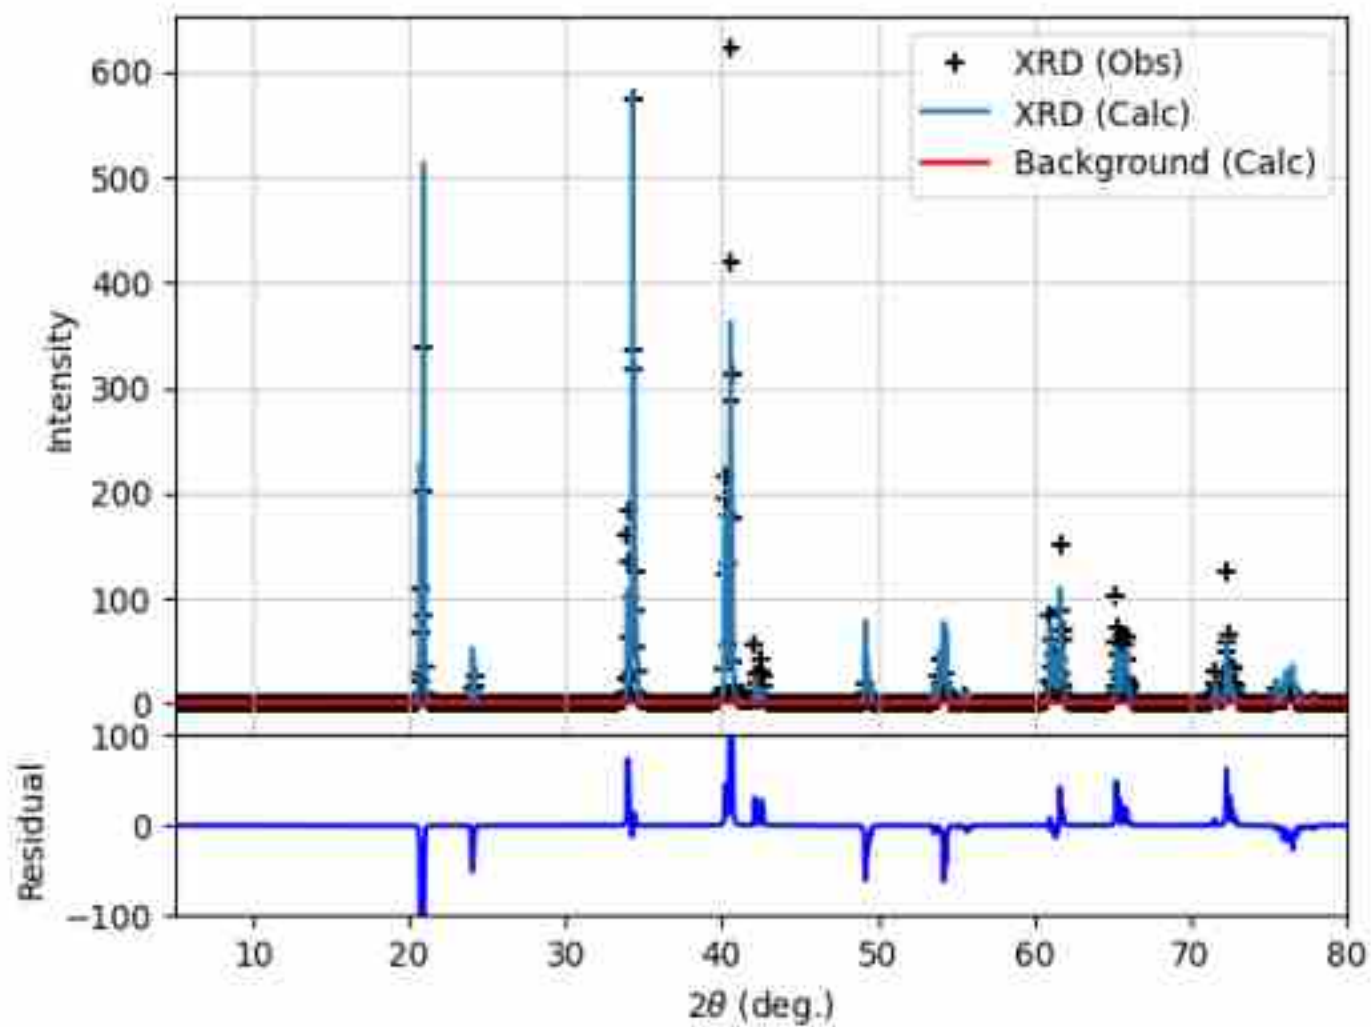

| RMSE before RR | Rwp      | RMSE after RR |
|----------------|----------|---------------|
| 0.006          | 74.58276 | 0.01321       |

# Hf2Co2

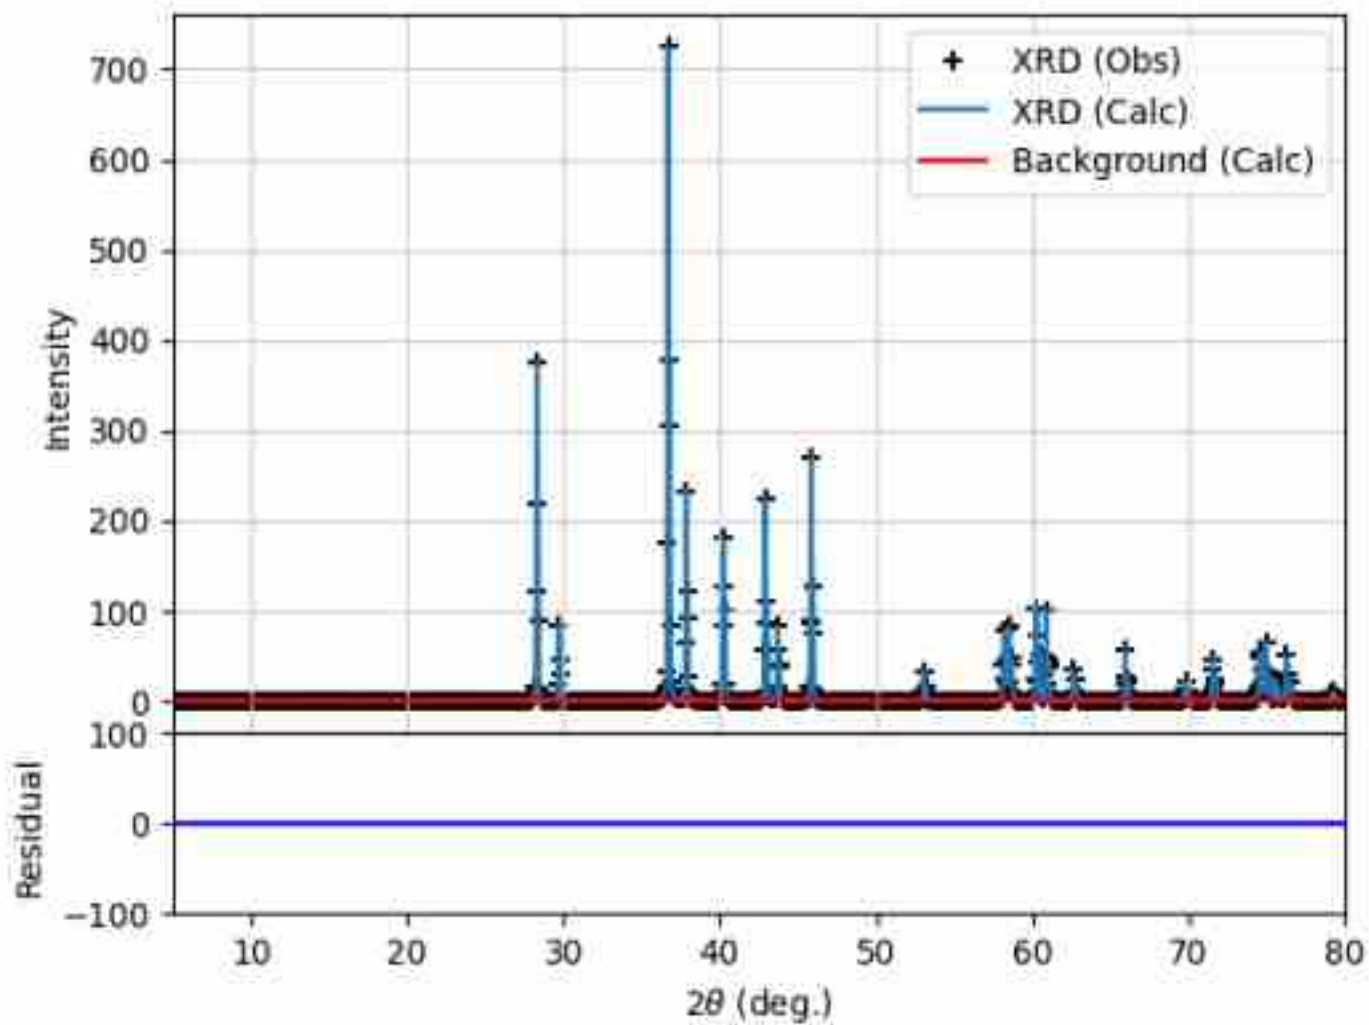

| RMSE before RR | Rwp     | RMSE after RR |
|----------------|---------|---------------|
| 0.006          | 0.00393 | 0.00048       |



# Hf<sub>2</sub>Ir<sub>2</sub>

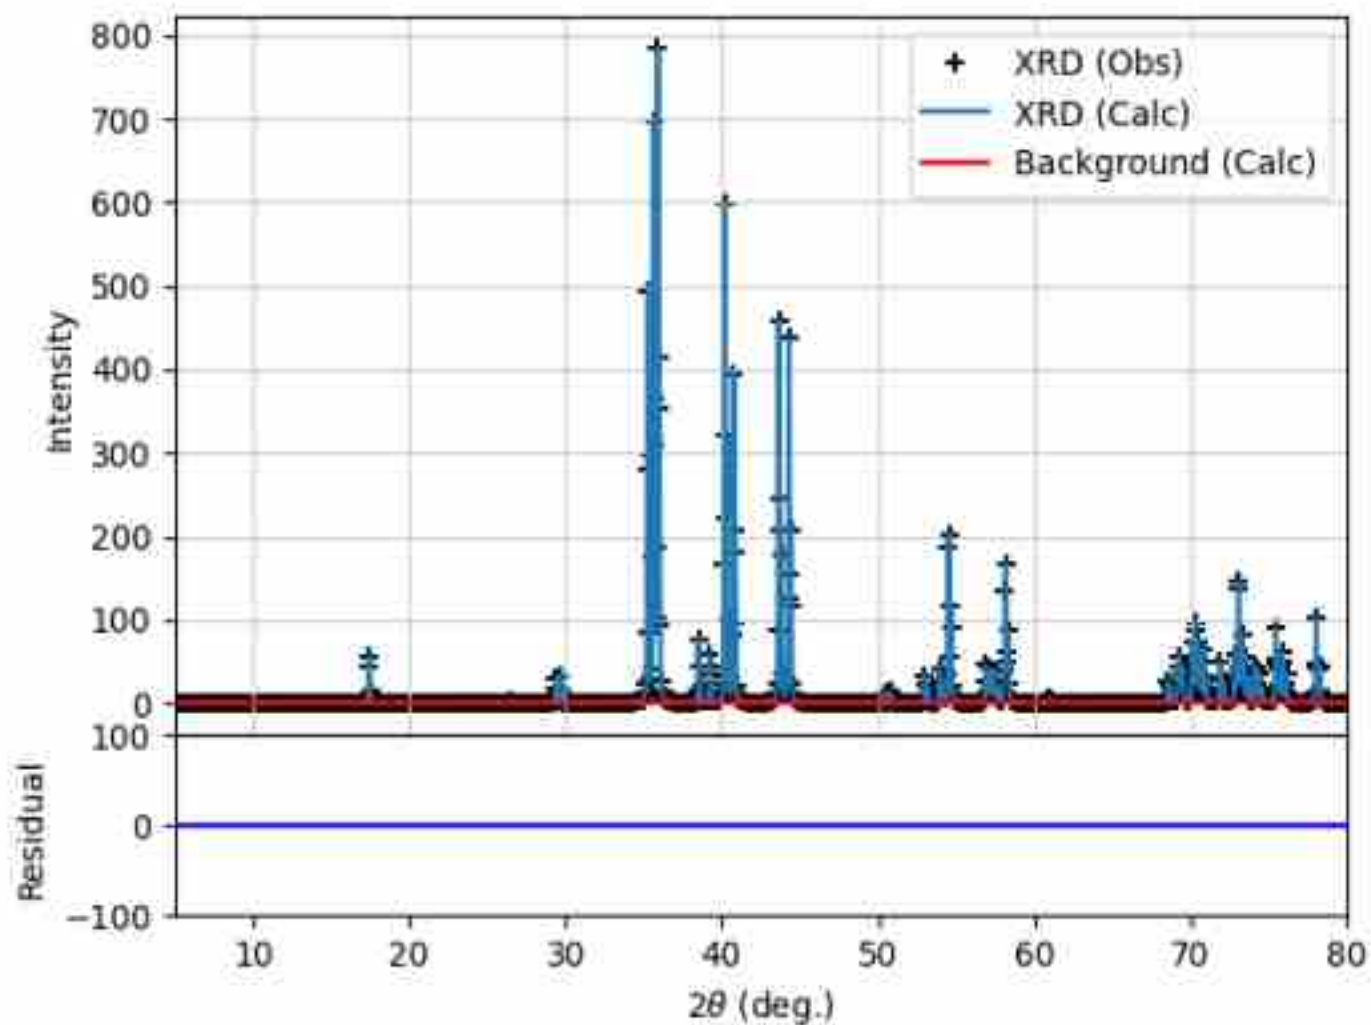

| RMSE before RR | Rwp     | RMSE after RR |
|----------------|---------|---------------|
| 0.006          | 0.00465 | 0.00031       |

# Ho<sub>2</sub>Fe<sub>2</sub>Co<sub>2</sub>

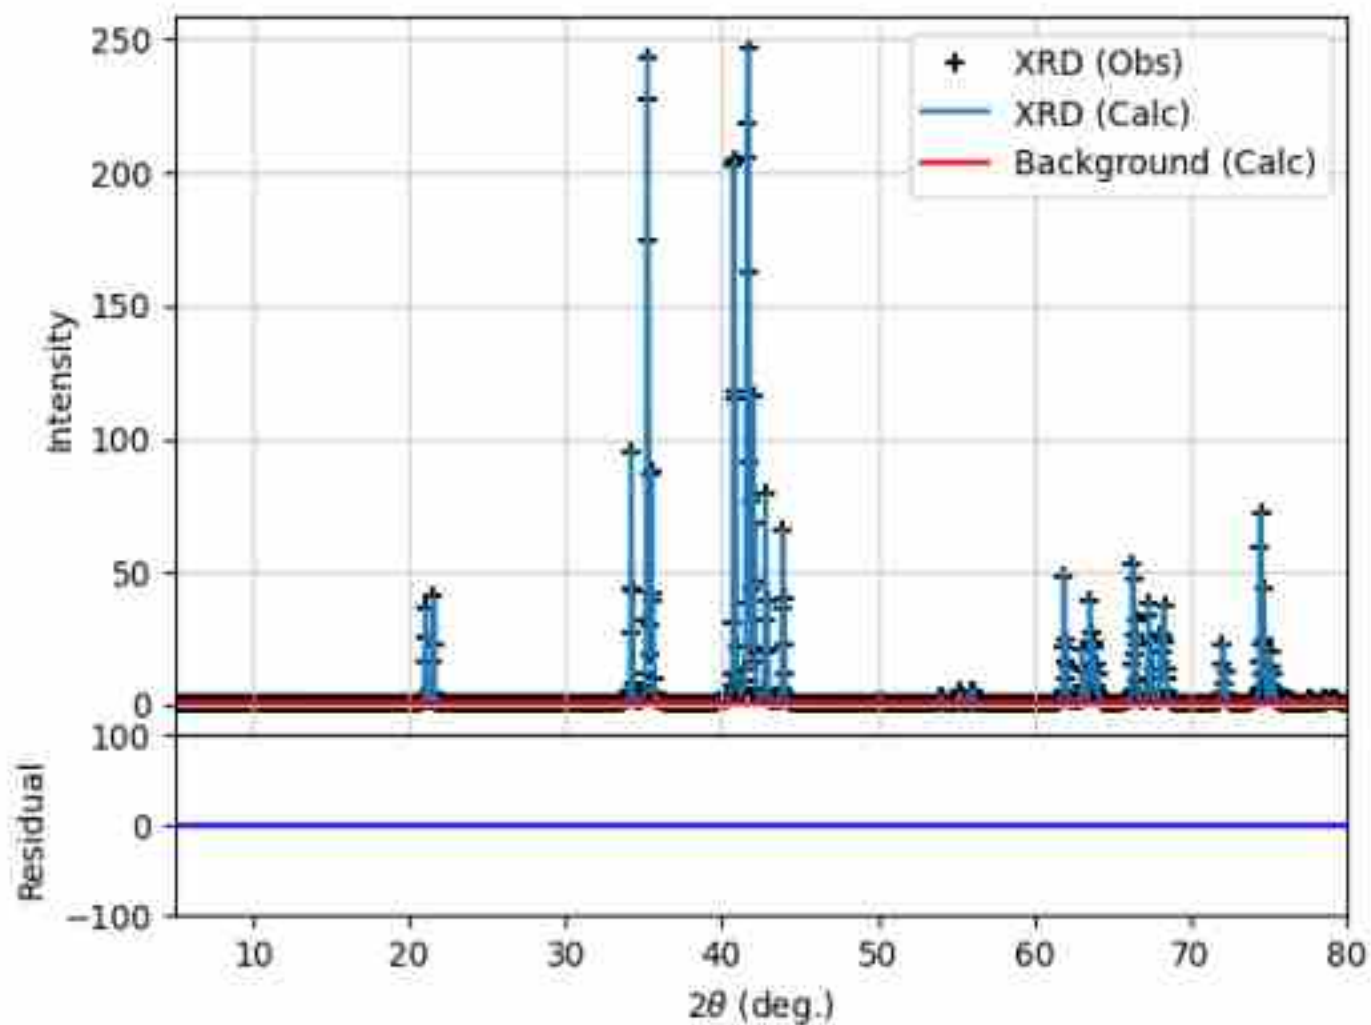

| RMSE before RR | Rwp     | RMSE after RR |
|----------------|---------|---------------|
| 0.006          | 0.00251 | 0.00019       |

# Ho<sub>2</sub>Fe<sub>2</sub>Si<sub>2</sub>

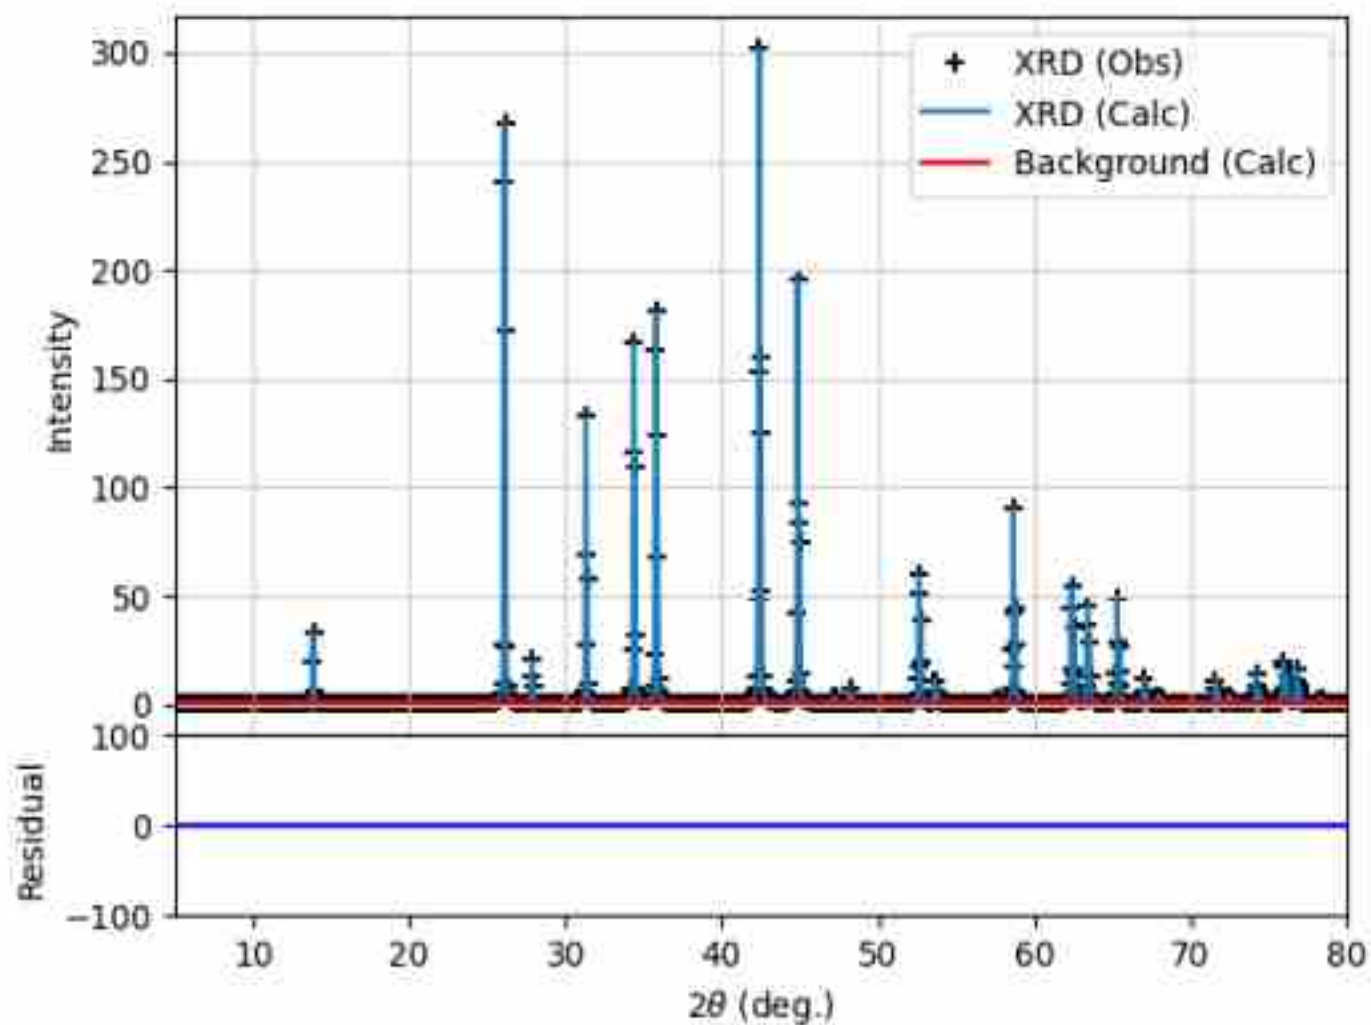

| RMSE before RR | Rwp     | RMSE after RR |
|----------------|---------|---------------|
| 0.006          | 0.00332 | 0.00034       |

# Ho<sub>2</sub>Hg<sub>6</sub>

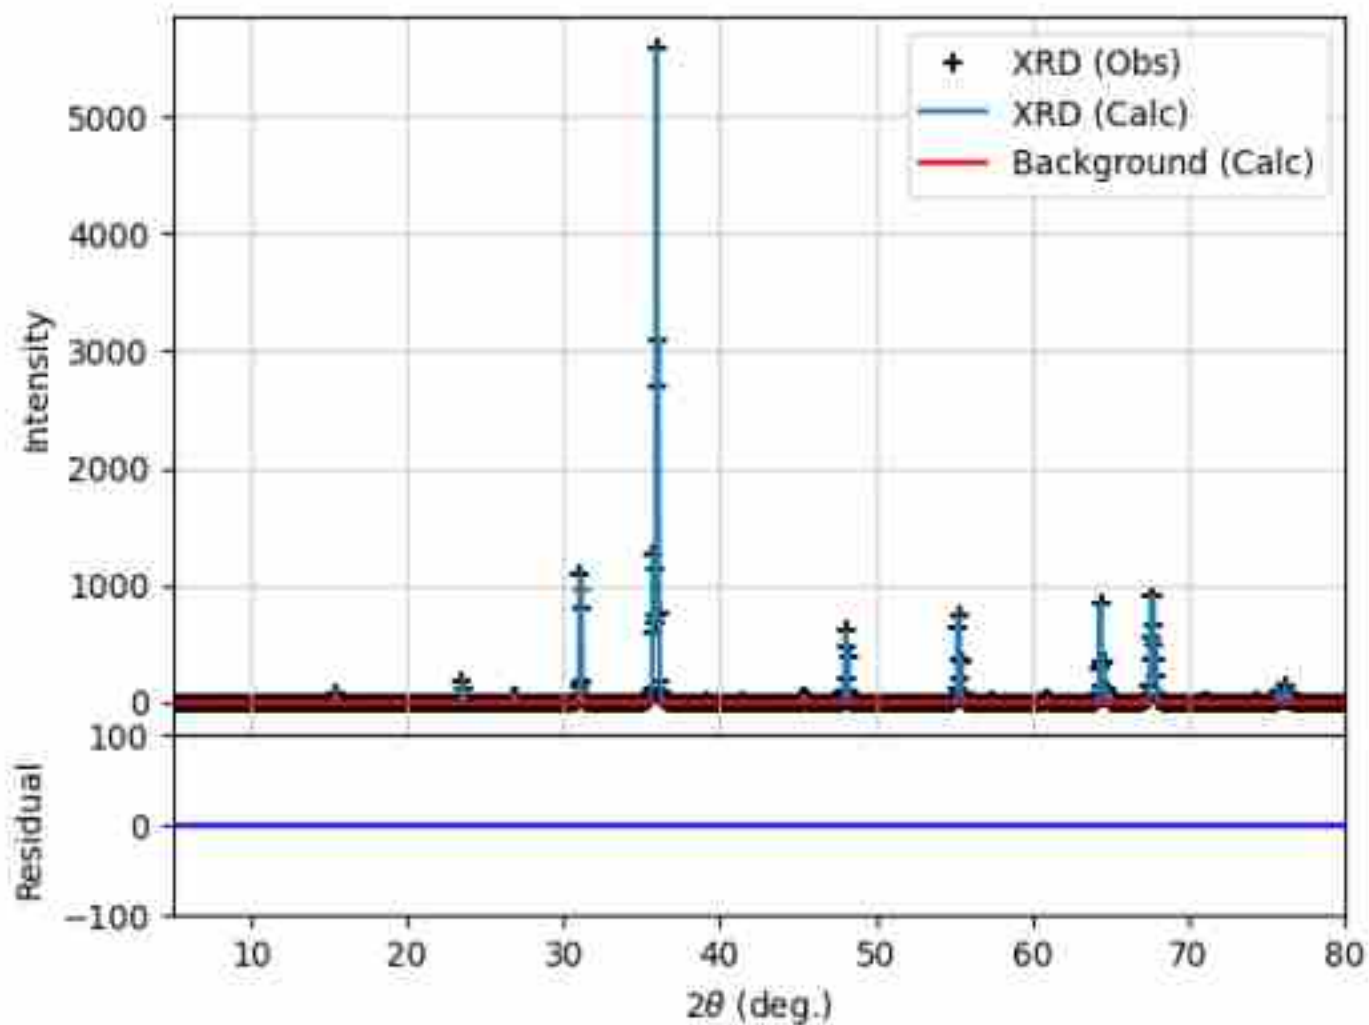

| RMSE before RR | Rwp     | RMSE after RR |
|----------------|---------|---------------|
| 0.006          | 0.02018 | 0.00097       |

# In2As2

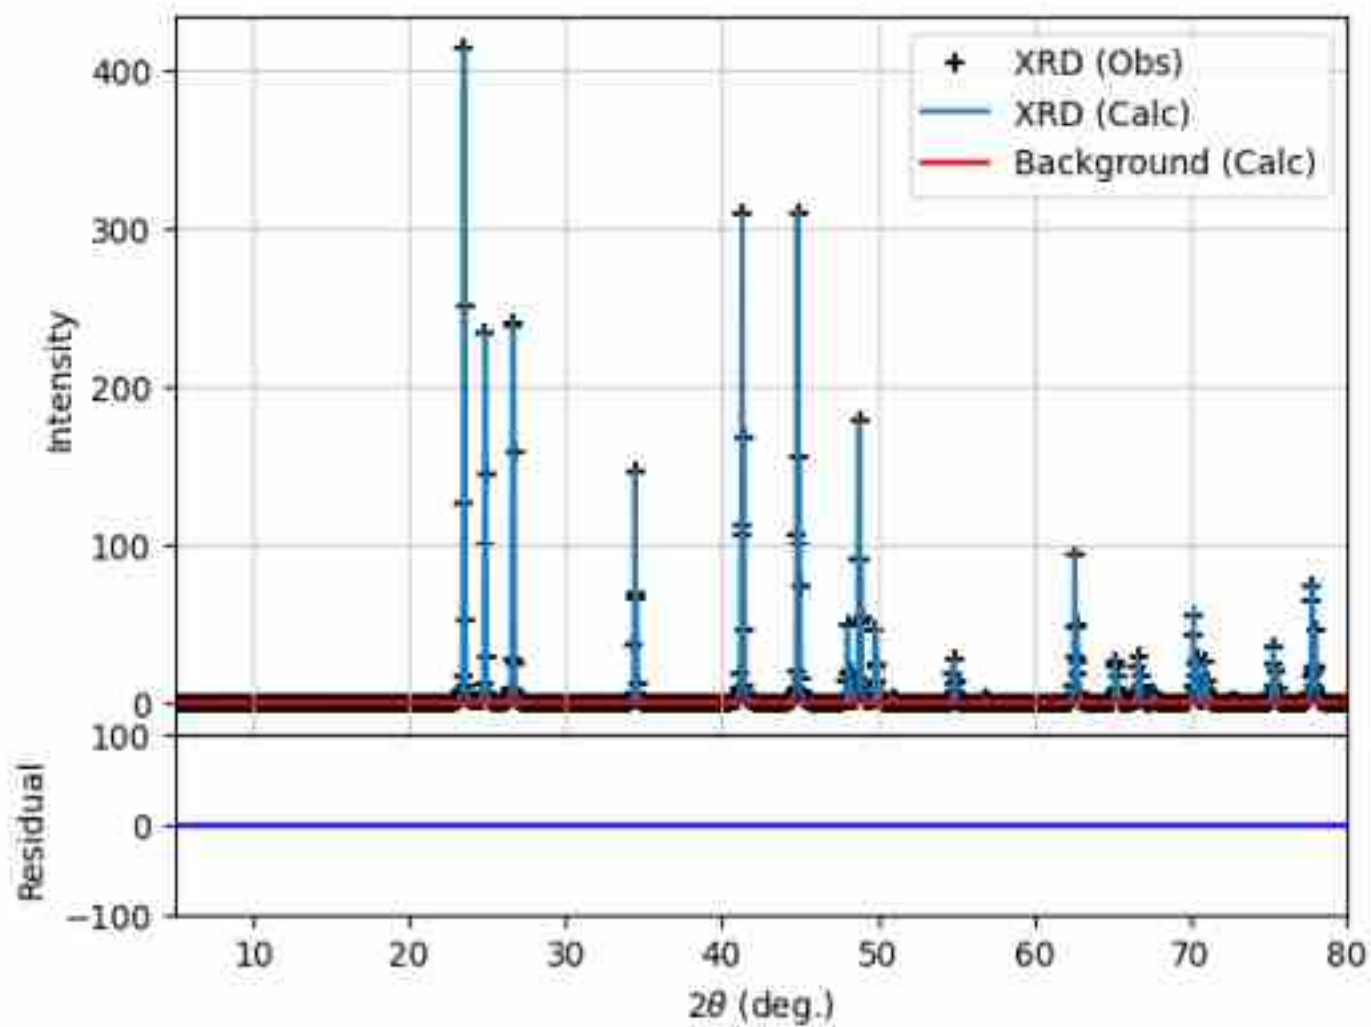

| RMSE before RR | Rwp     | RMSE after RR |
|----------------|---------|---------------|
| 0.006          | 0.00223 | 0.00029       |

# In2N2

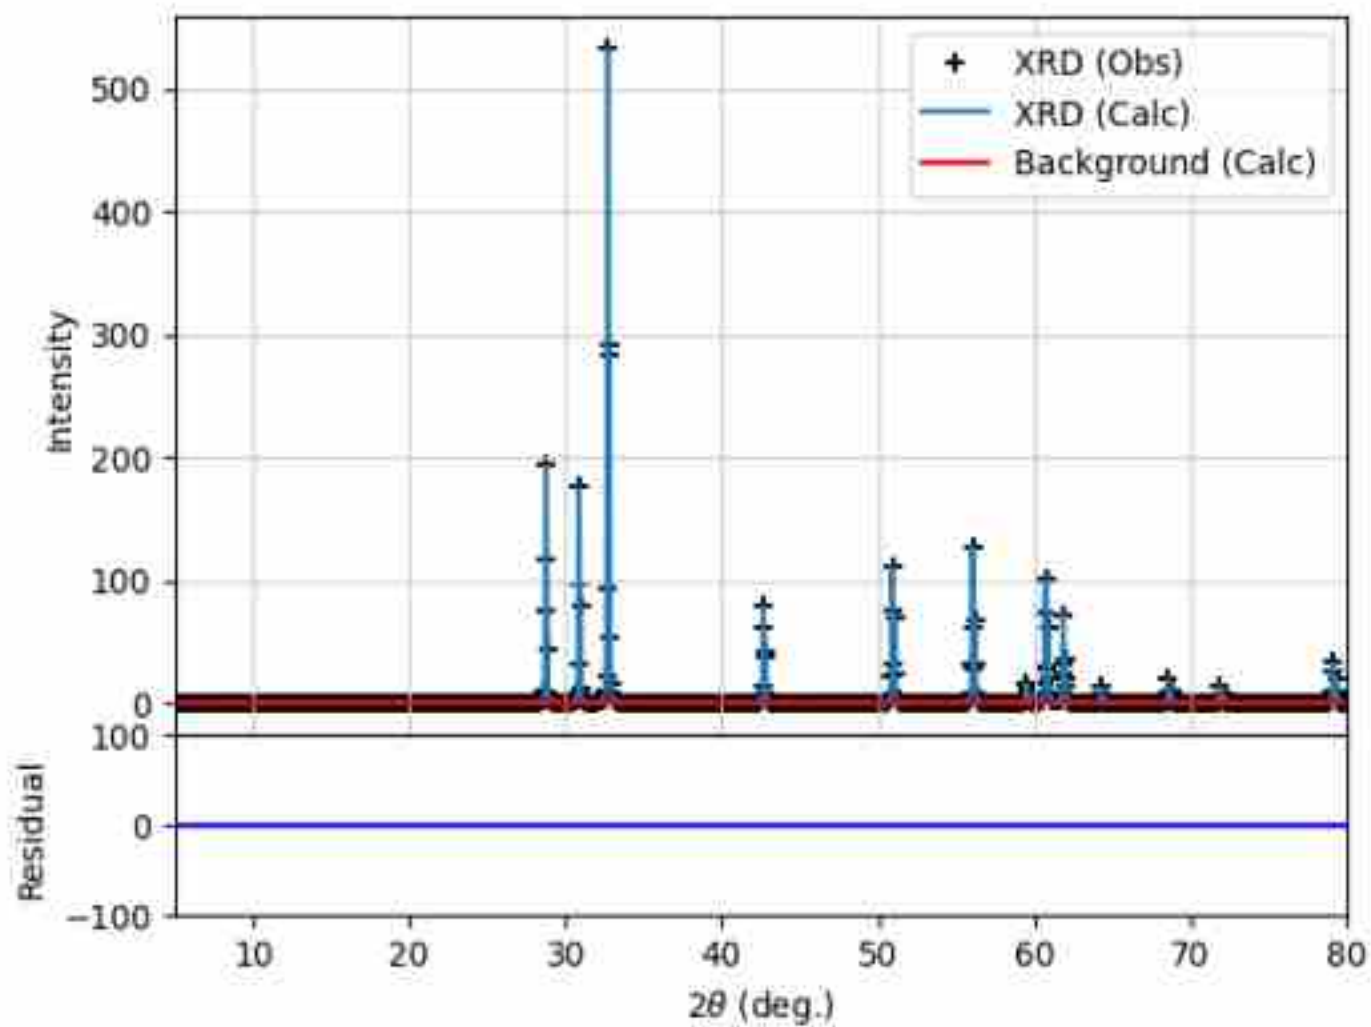

| RMSE before RR | Rwp     | RMSE after RR |
|----------------|---------|---------------|
| 0.006          | 0.00462 | 0.00221       |

# In2Pd6

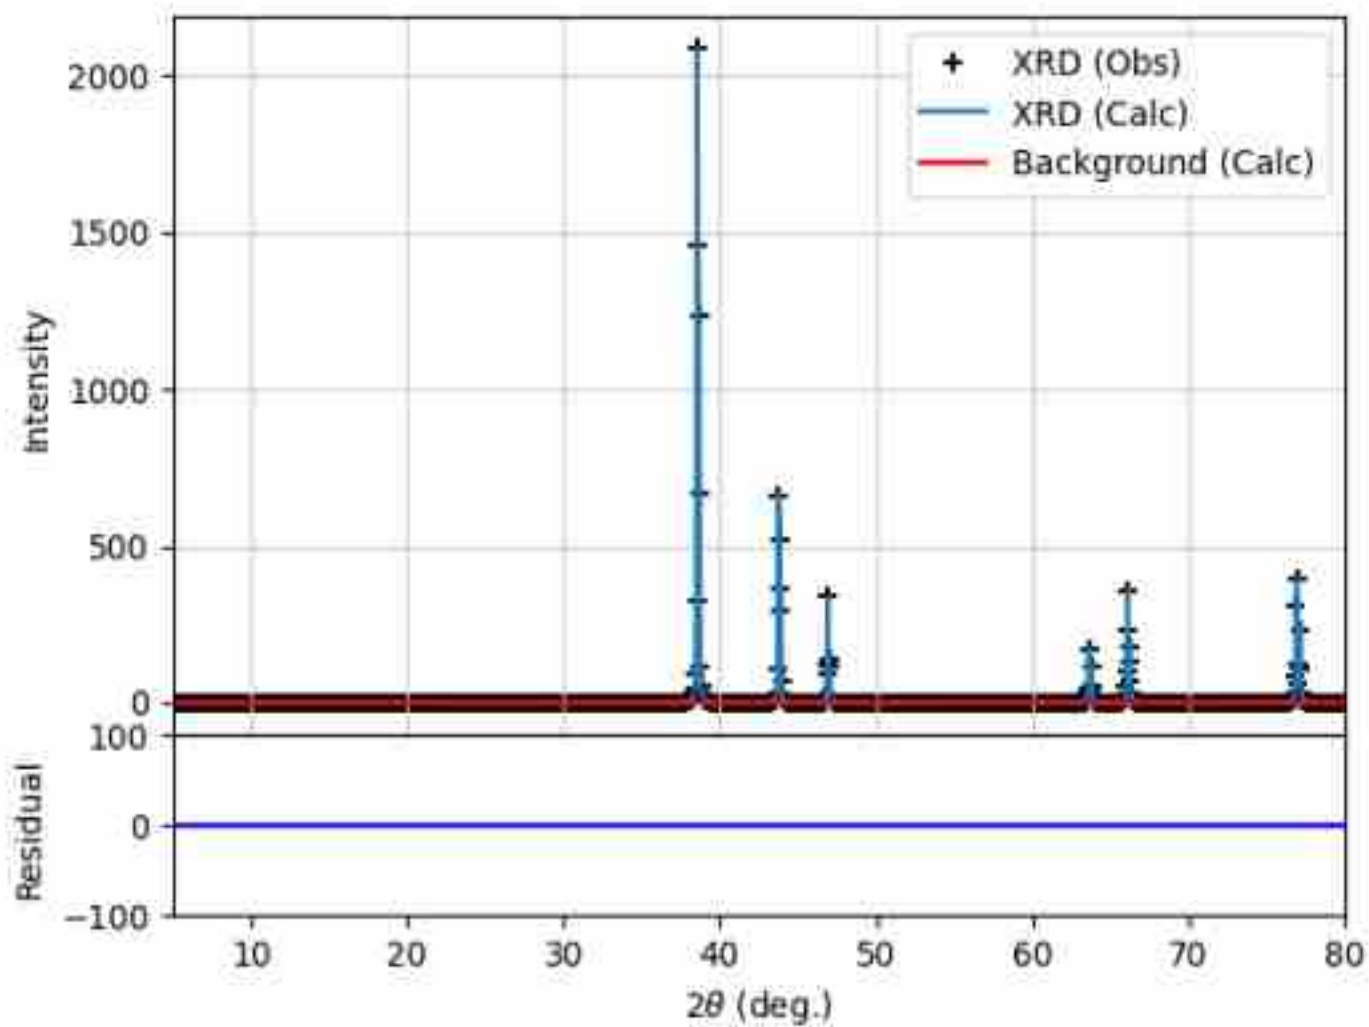

| RMSE before RR | Rwp     | RMSE after RR |
|----------------|---------|---------------|
| 0.006          | 0.00523 | 0.00037       |

# K1Ag1O2

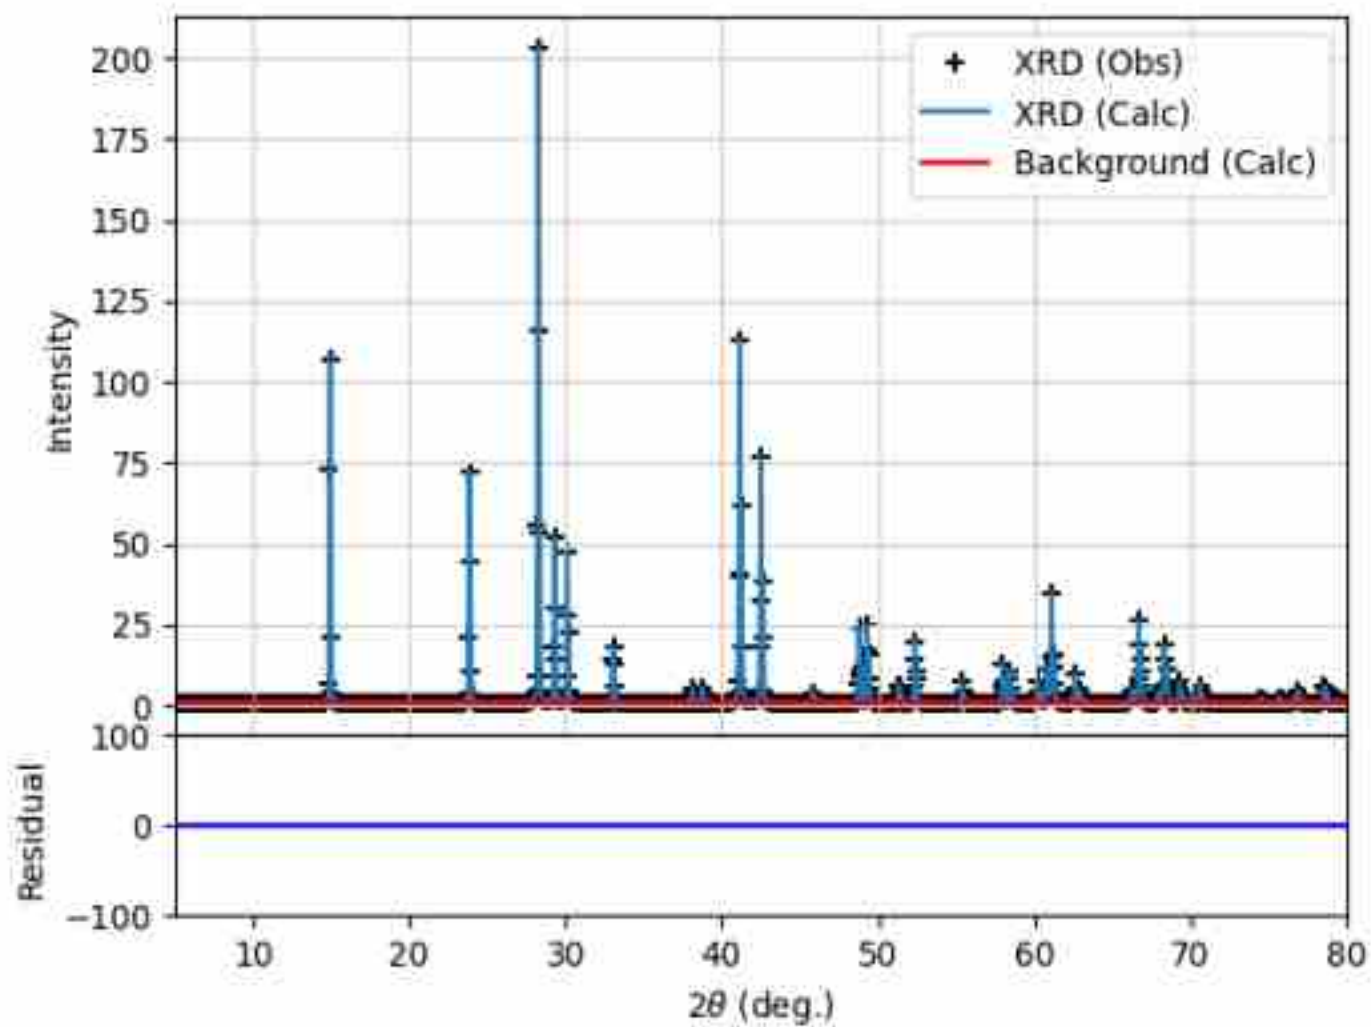

| RMSE before RR | Rwp    | RMSE after RR |
|----------------|--------|---------------|
| 0.006          | 0.0032 | 0.00079       |



# K1Rb2Lu1Cl6

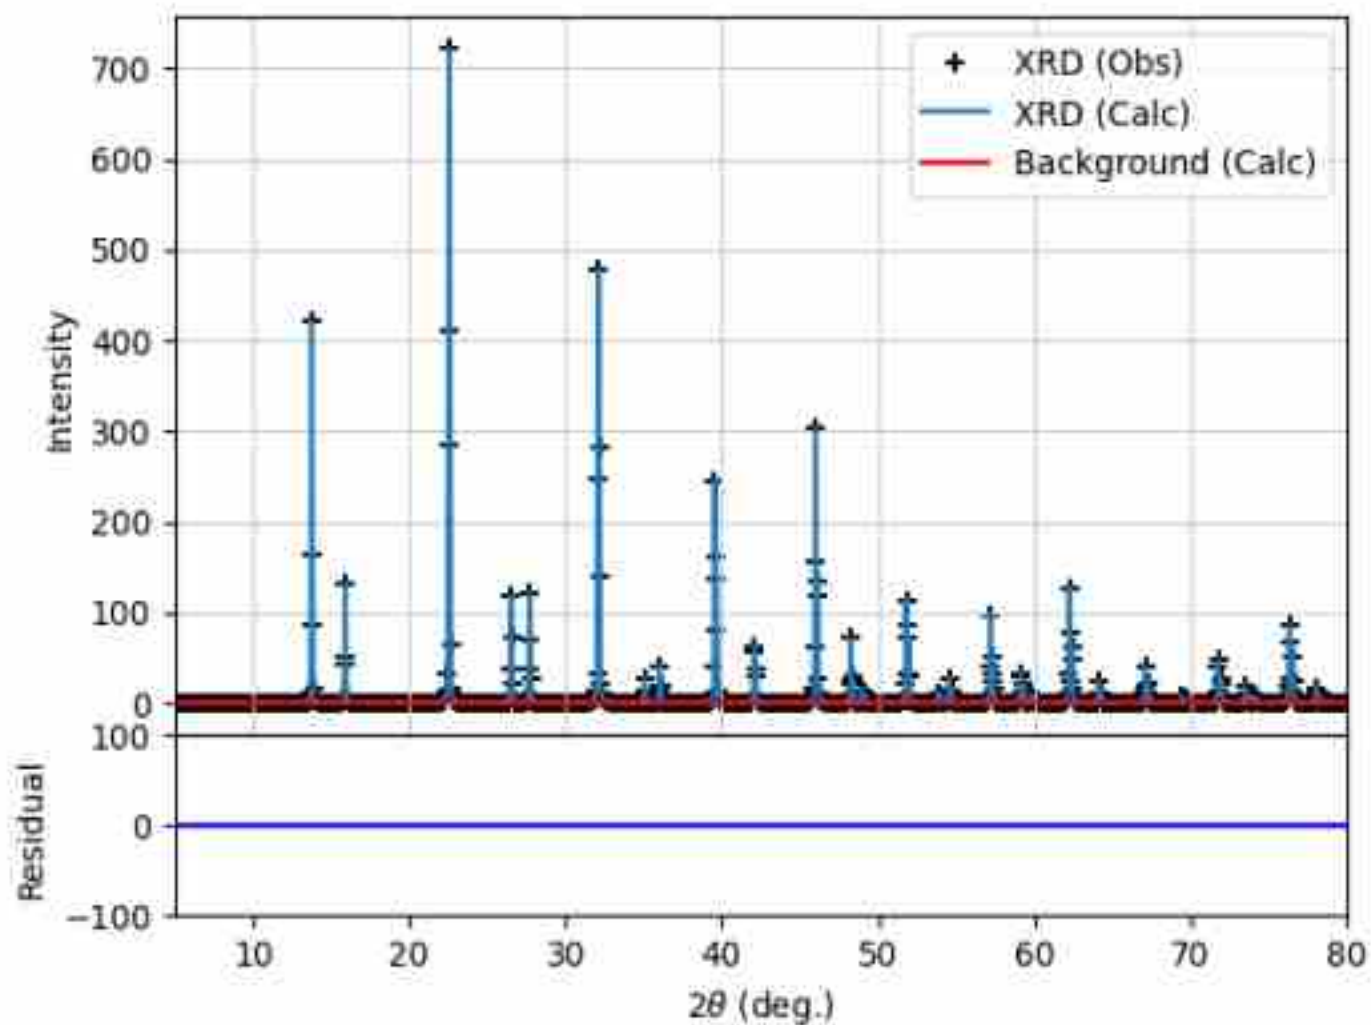

| RMSE before RR | Rwp     | RMSE after RR |
|----------------|---------|---------------|
| 0.006          | 0.01365 | 0.00252       |

# K1Ti1S2

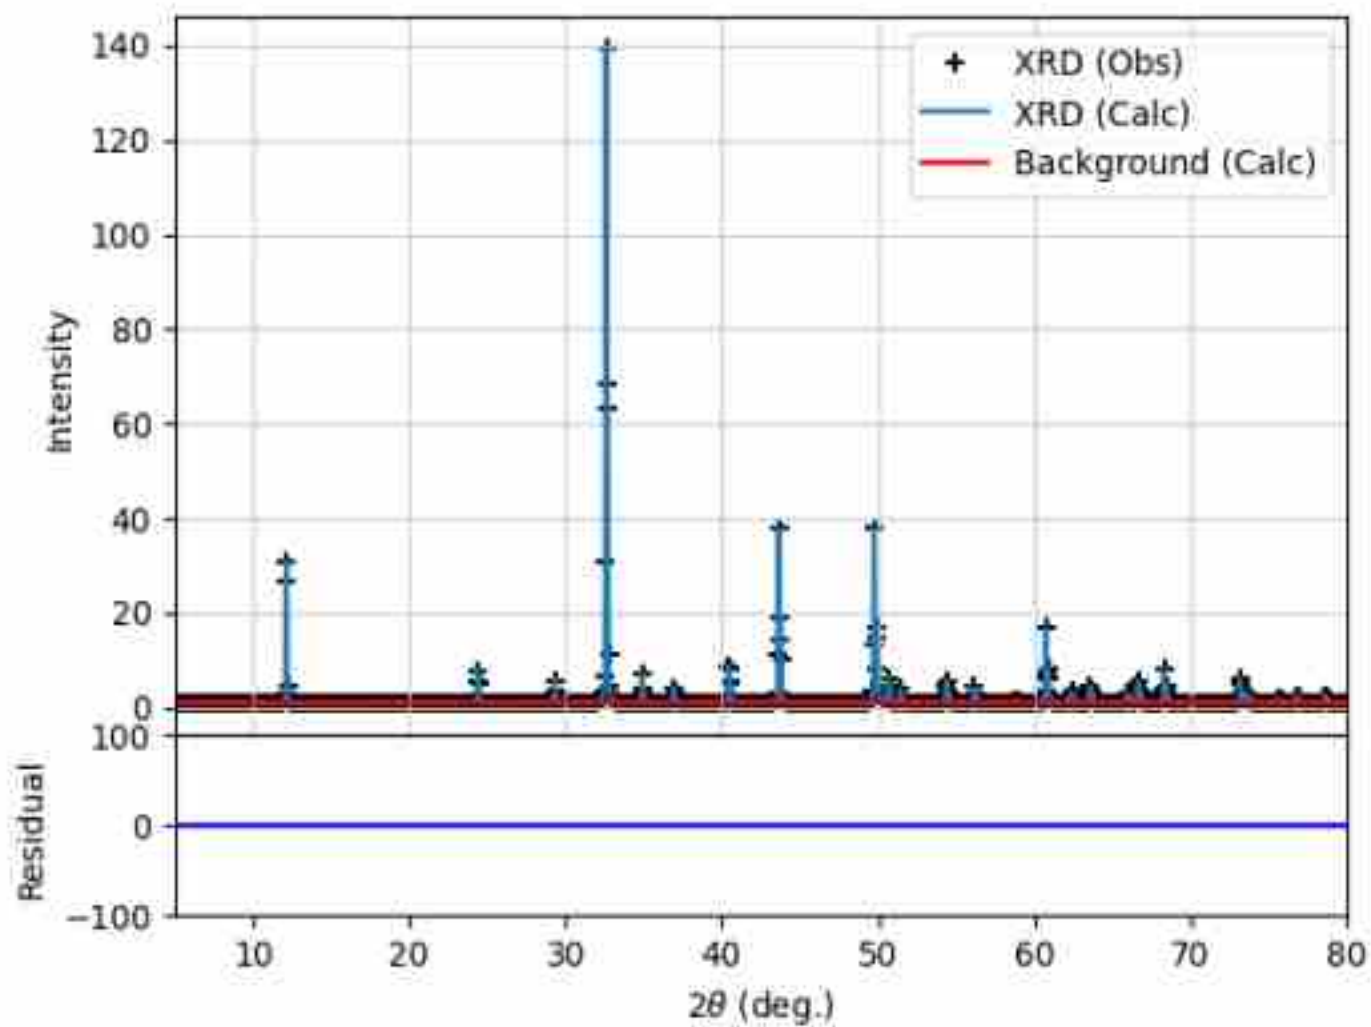

| RMSE before RR | Rwp     | RMSE after RR |
|----------------|---------|---------------|
| 0.006          | 0.00309 | 0.00045       |

# K3Lu1Cl6

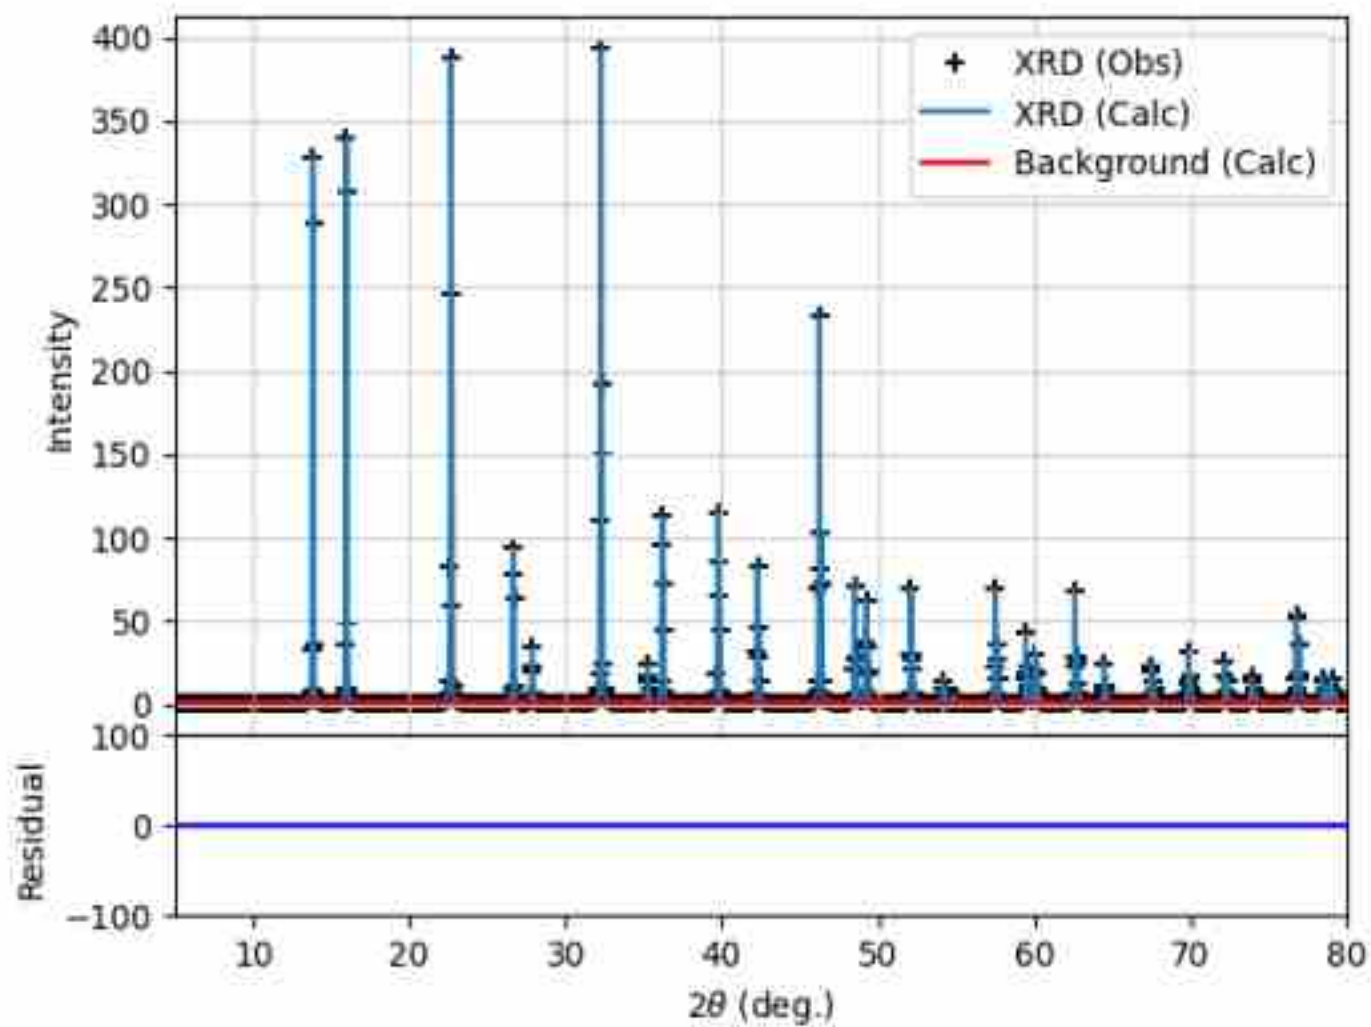

| RMSE before RR | Rwp     | RMSE after RR |
|----------------|---------|---------------|
| 0.006          | 0.00649 | 0.00147       |

# La1Al3Pd2

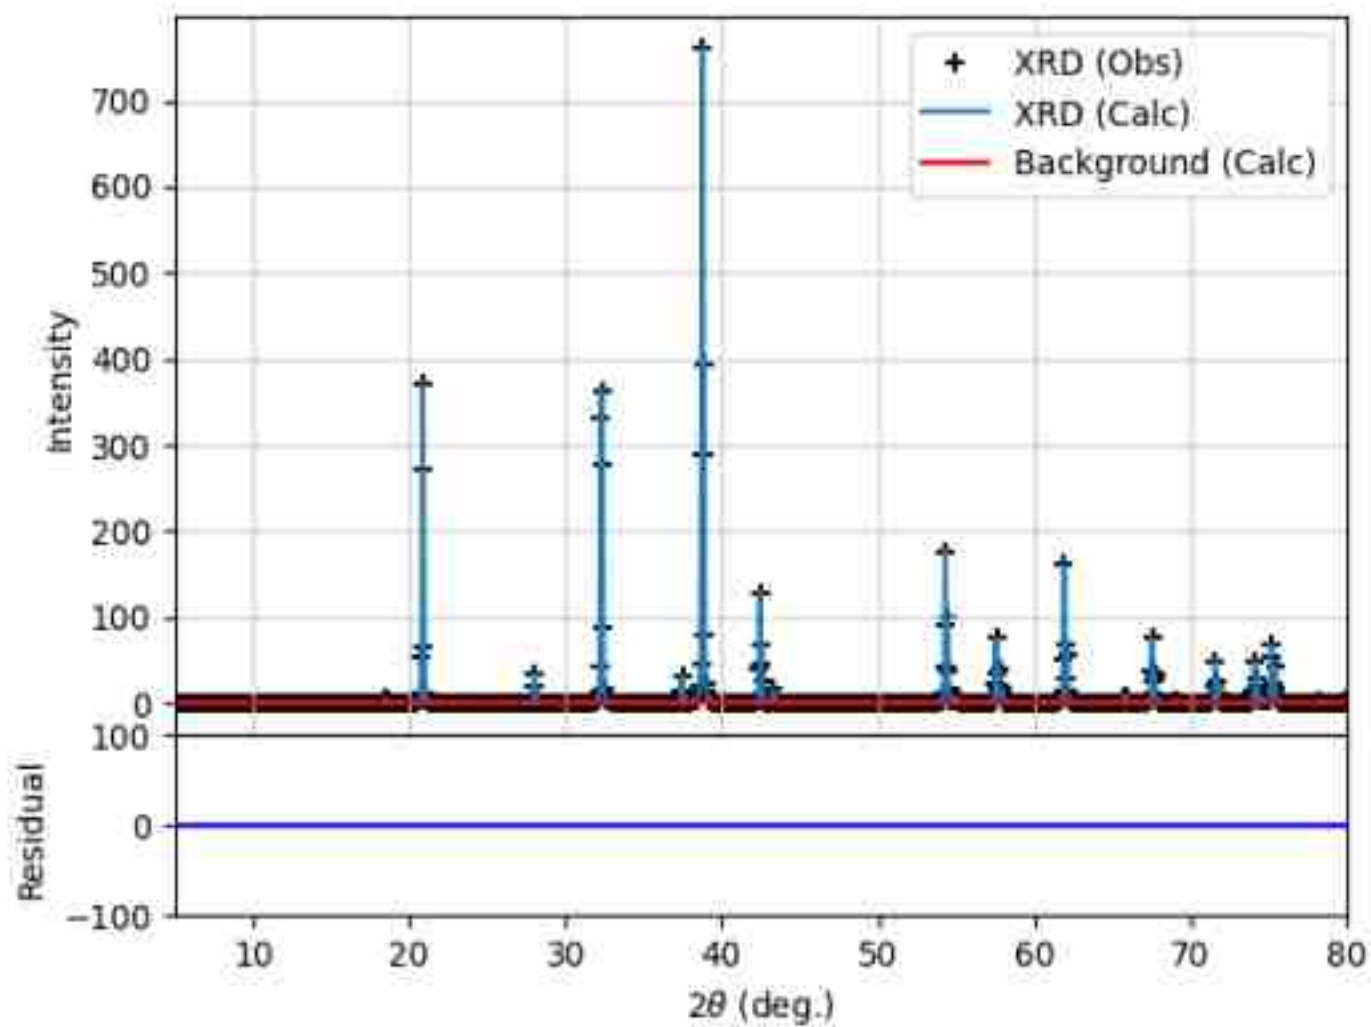

| RMSE before RR | Rwp     | RMSE after RR |
|----------------|---------|---------------|
| 0.006          | 0.00281 | 0.00037       |

# La1Ce1Sn6

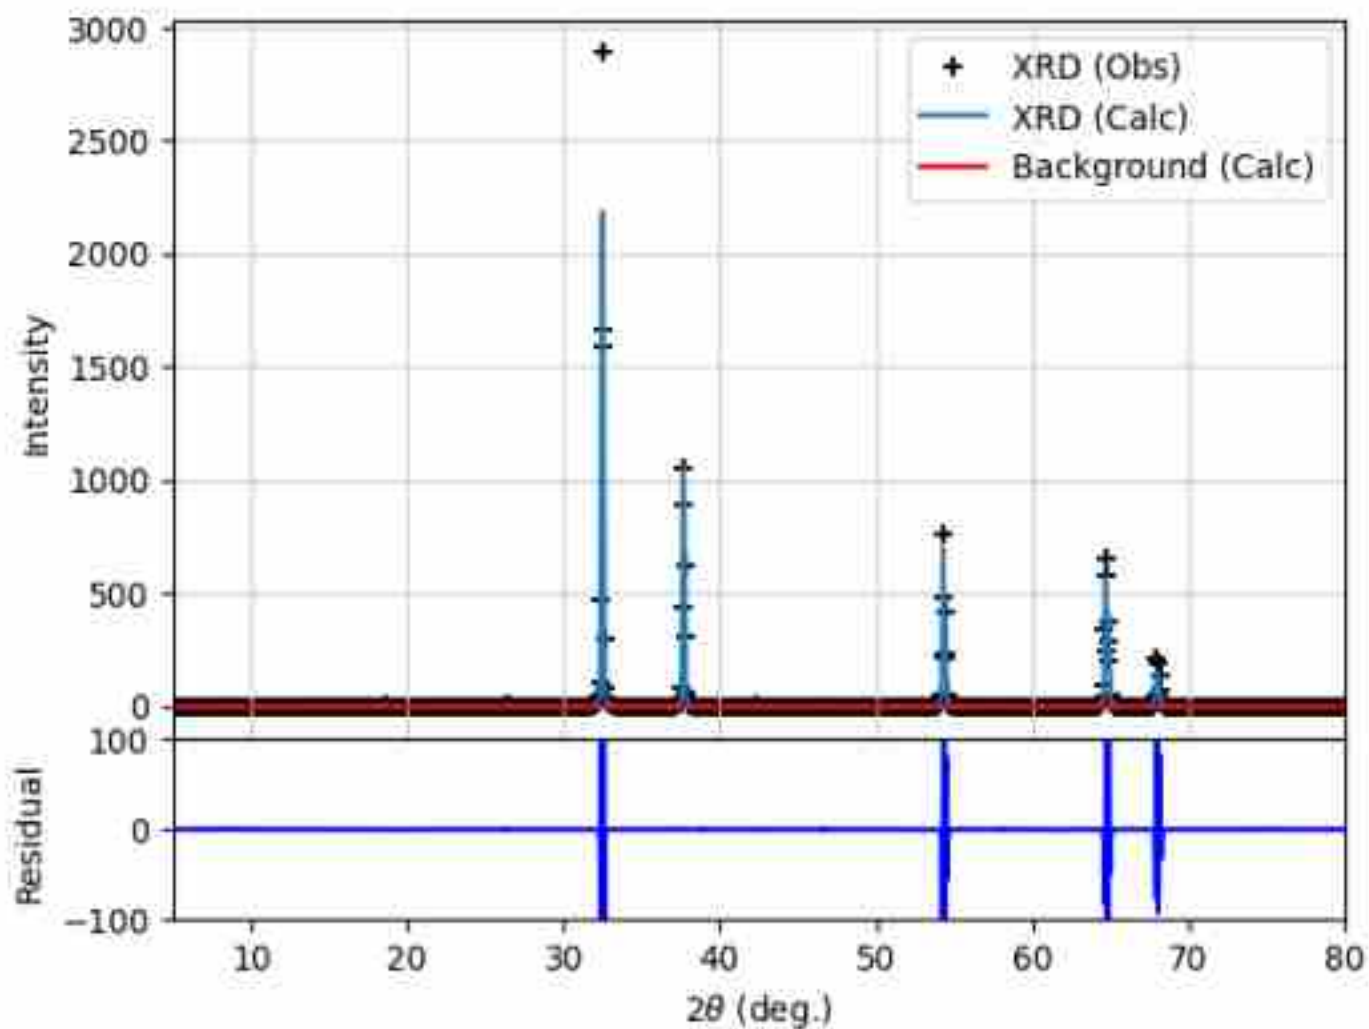

| RMSE before RR | Rwp      | RMSE after RR |
|----------------|----------|---------------|
| 0.006          | 29.96528 | 0.01663       |

# La1Gd1C4

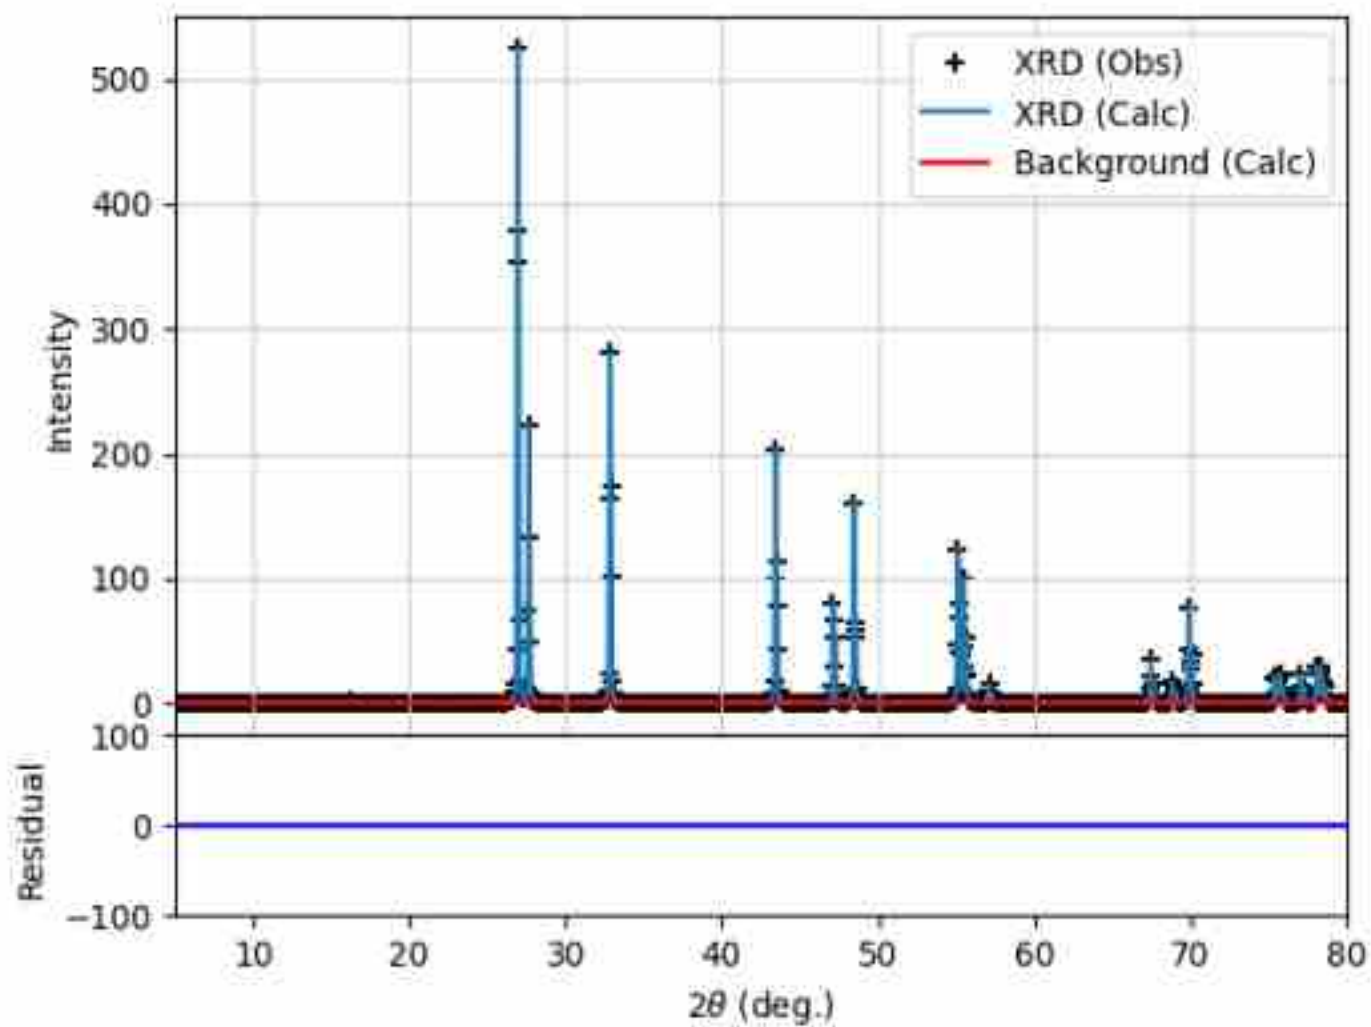

| RMSE before RR | Rwp     | RMSE after RR |
|----------------|---------|---------------|
| 0.006          | 0.00435 | 0.00109       |

# Li1Ir1

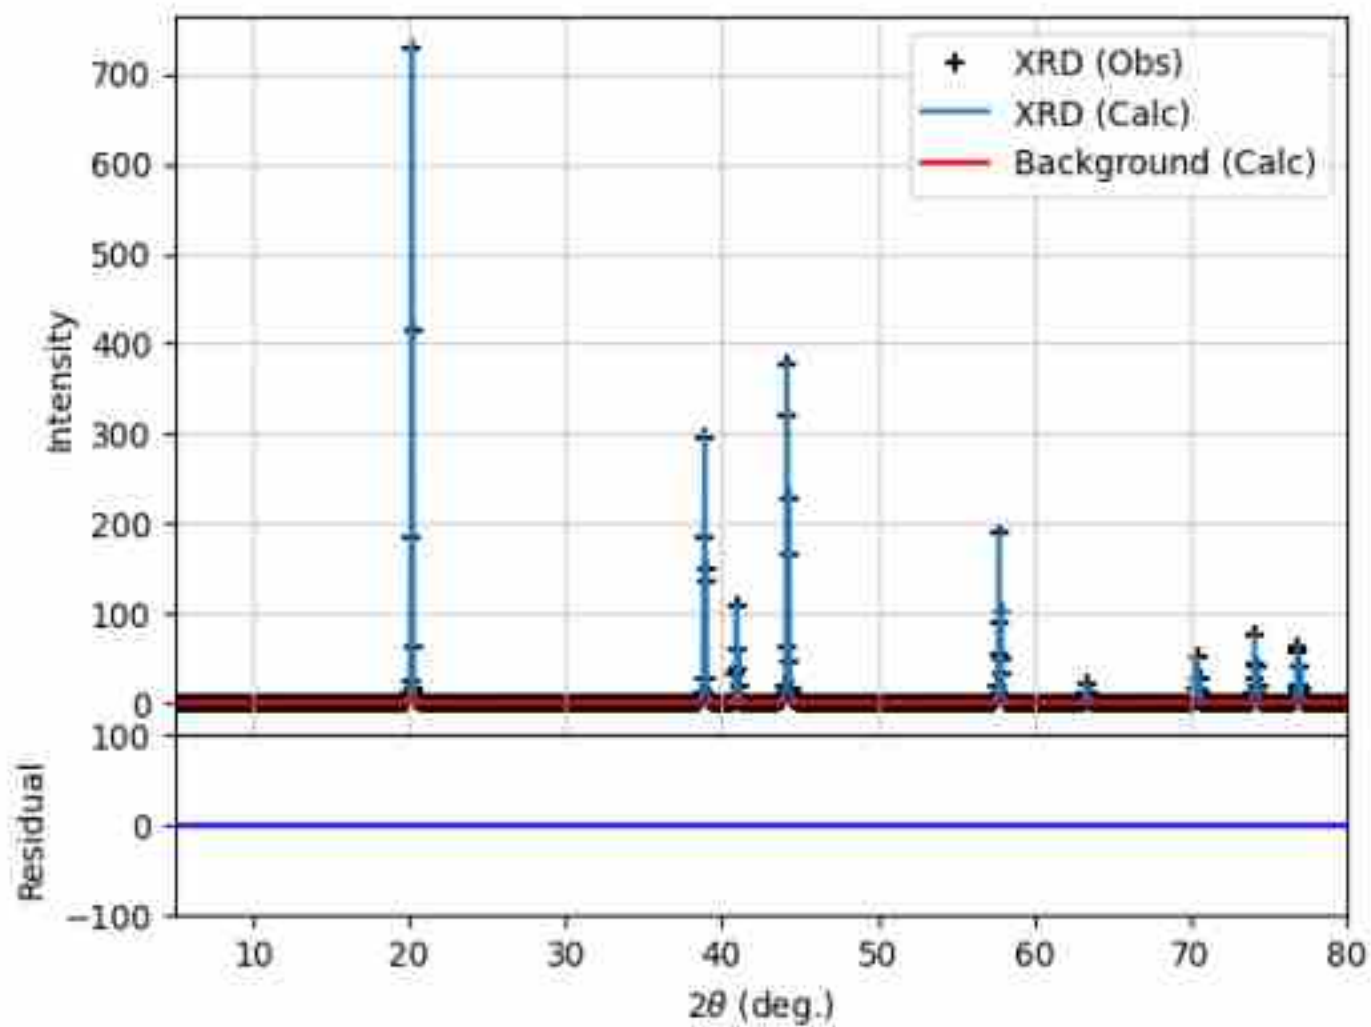

| RMSE before RR | Rwp     | RMSE after RR |
|----------------|---------|---------------|
| 0.006          | 0.00533 | 0.00298       |

# Li1Tl1O2

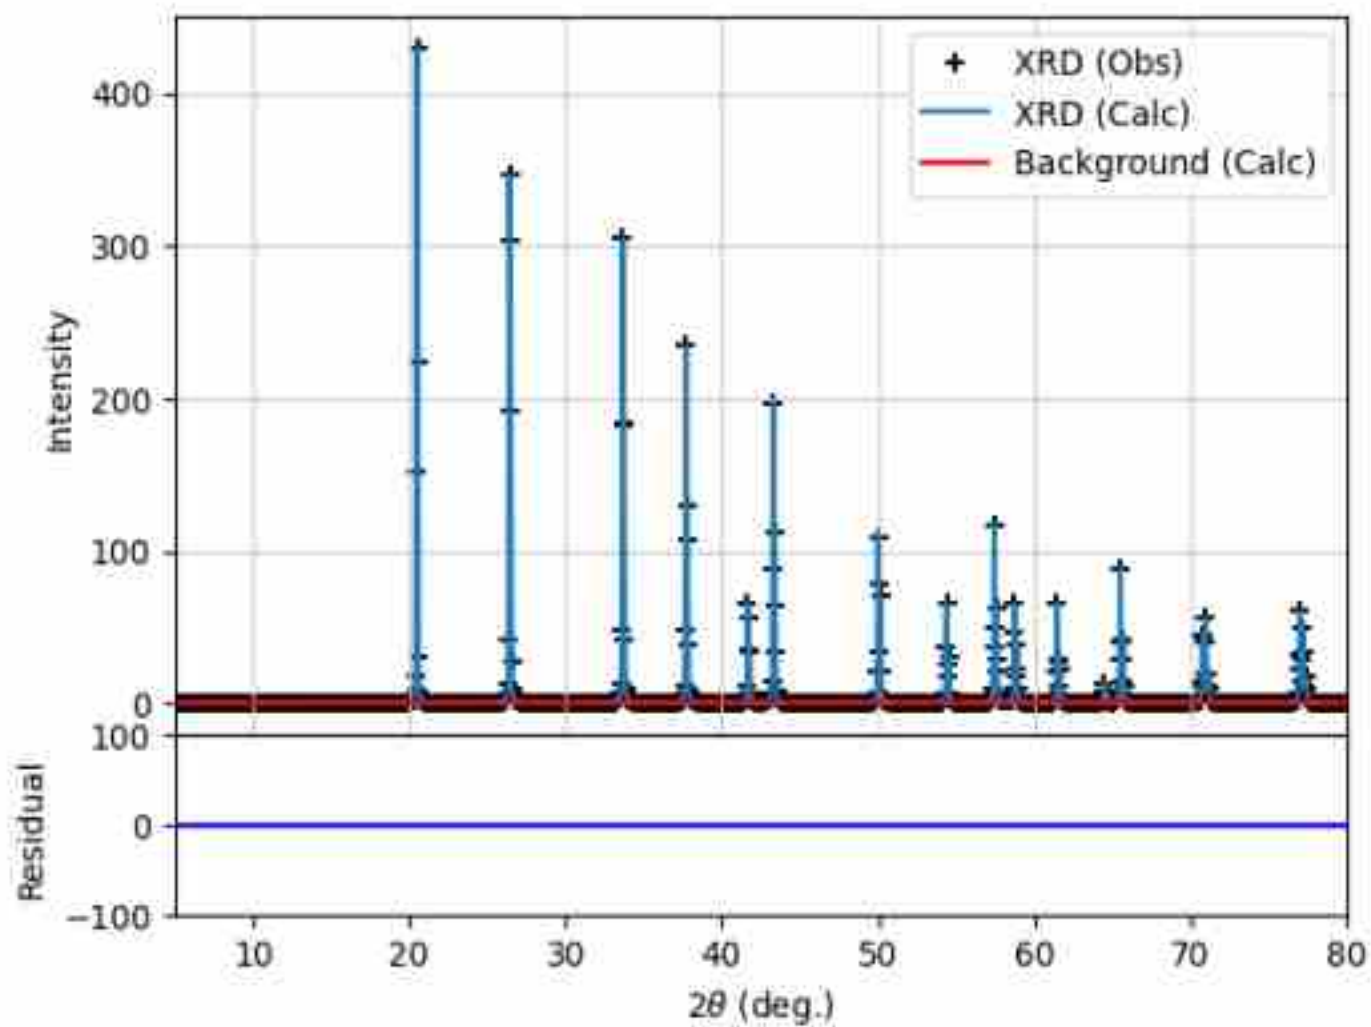

| RMSE before RR | Rwp    | RMSE after RR |
|----------------|--------|---------------|
| 0.006          | 0.0104 | 0.00756       |



# Li<sub>3</sub>Ca1

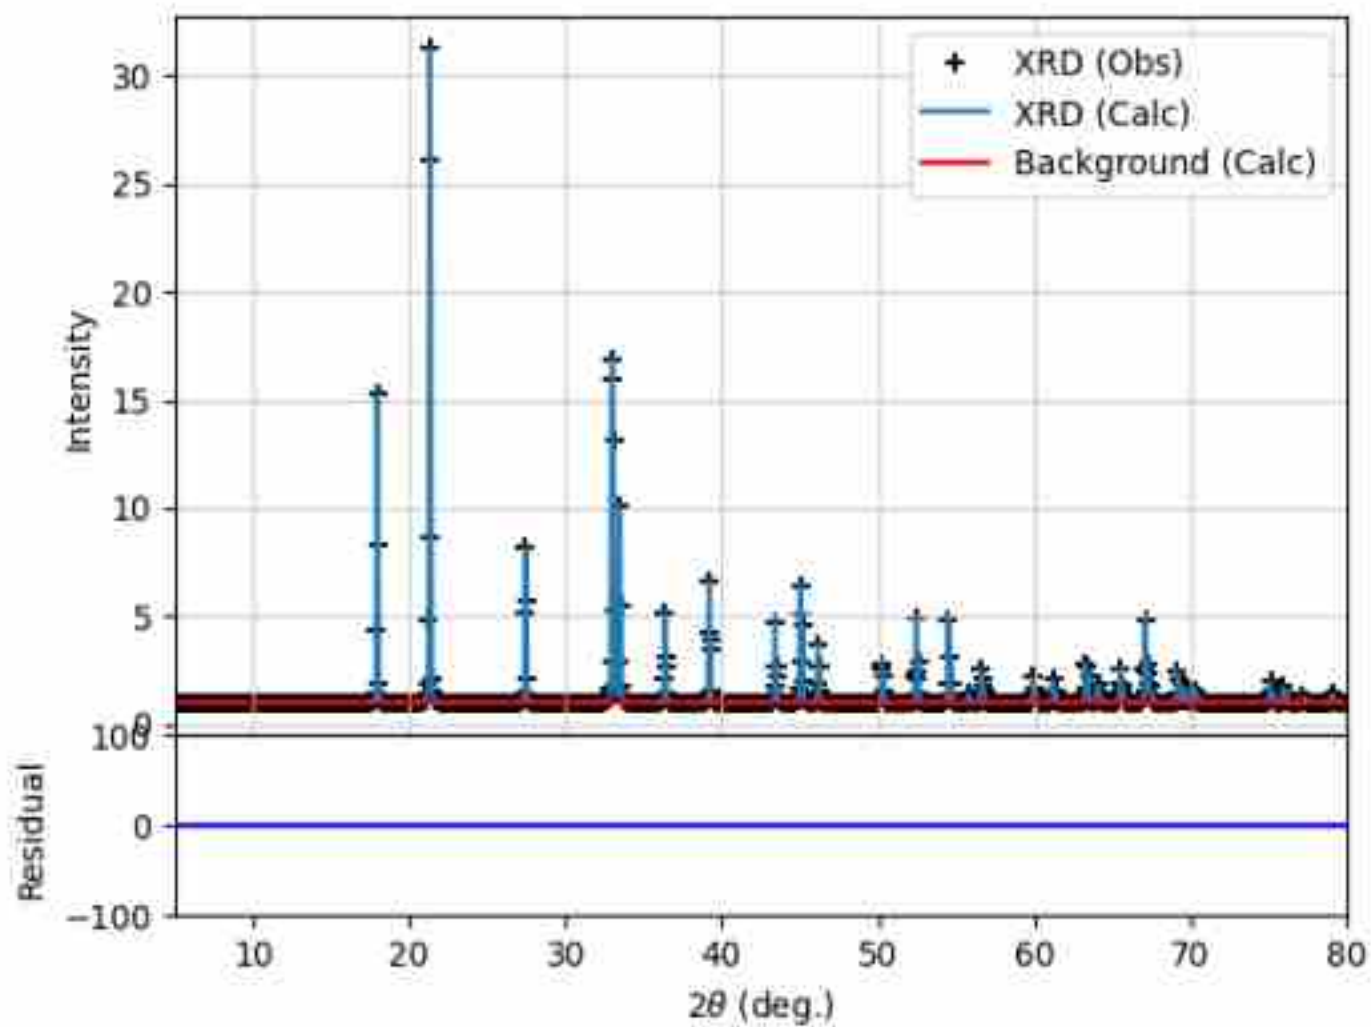

| RMSE before RR | Rwp     | RMSE after RR |
|----------------|---------|---------------|
| 0.006          | 0.00101 | 0.0007        |

# Li<sub>3</sub>Mg<sub>3</sub>

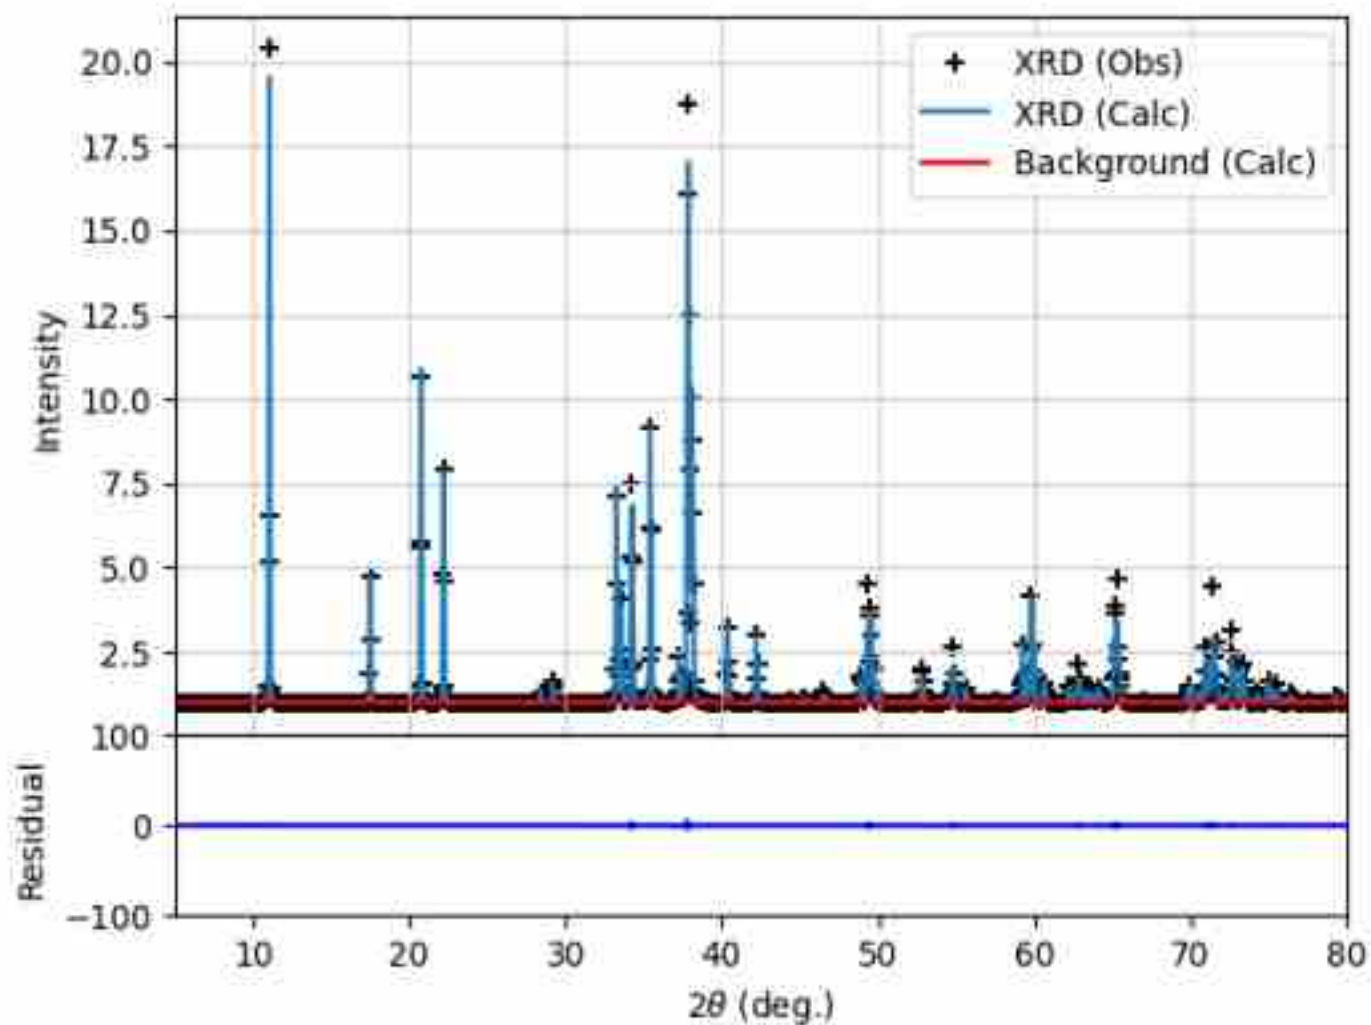

| RMSE before RR | Rwp     | RMSE after RR |
|----------------|---------|---------------|
| 0.006          | 11.8108 | 0.03515       |

# Li<sub>3</sub>Tl<sub>2</sub>Cd<sub>1</sub>

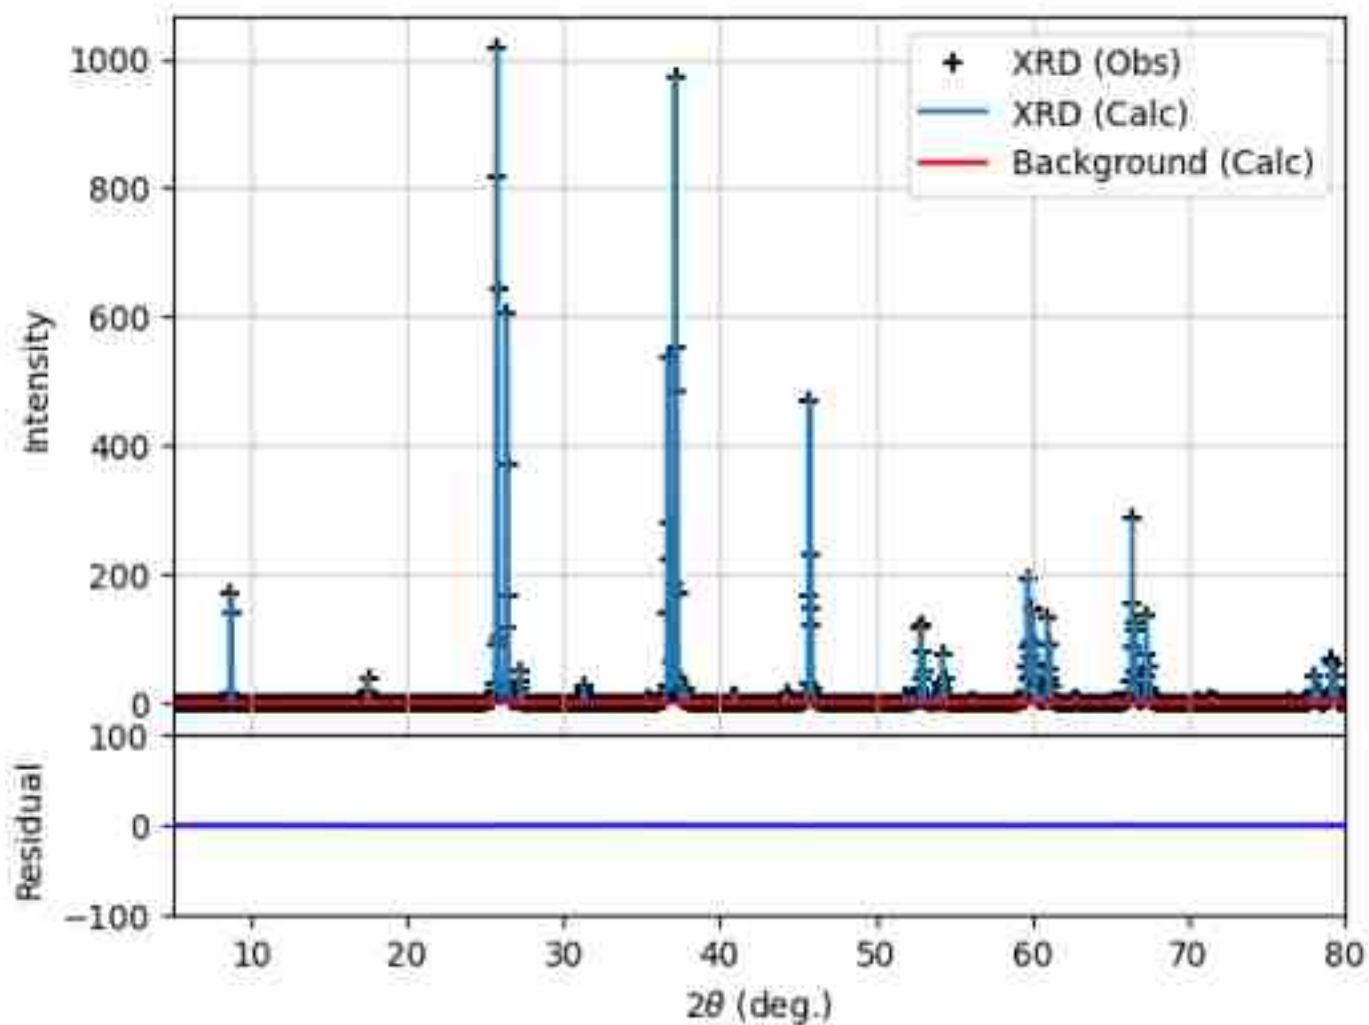

| RMSE before RR | Rwp     | RMSE after RR |
|----------------|---------|---------------|
| 0.006          | 0.08359 | 0.01748       |

# Li3

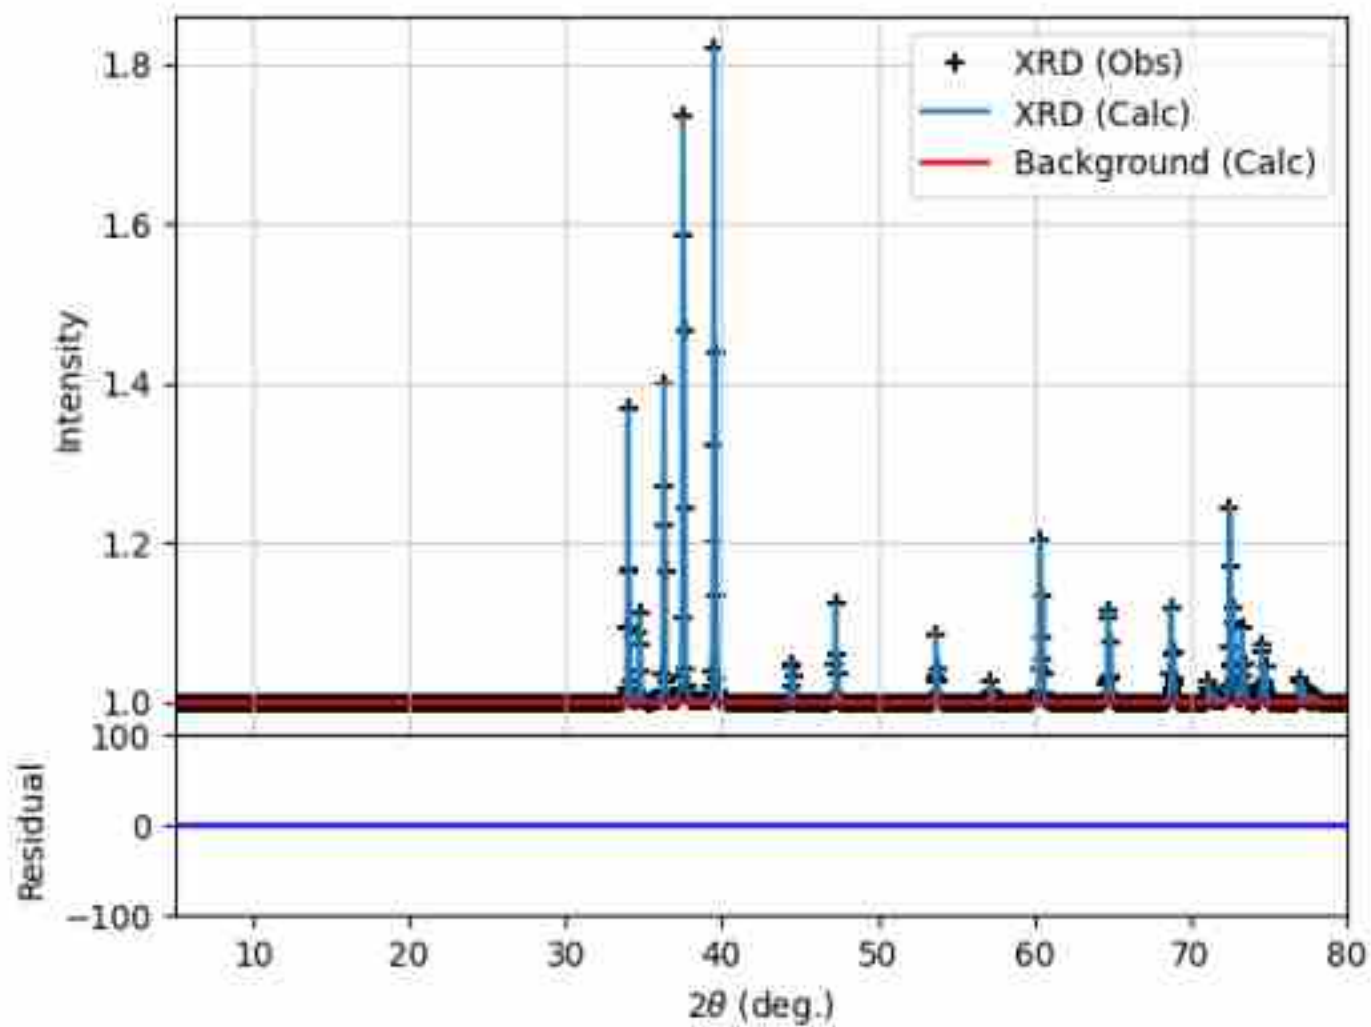

| RMSE before RR | Rwp     | RMSE after RR |
|----------------|---------|---------------|
| 0.006          | 0.00011 | 0.00212       |

# Li<sub>4</sub>Mg<sub>2</sub>

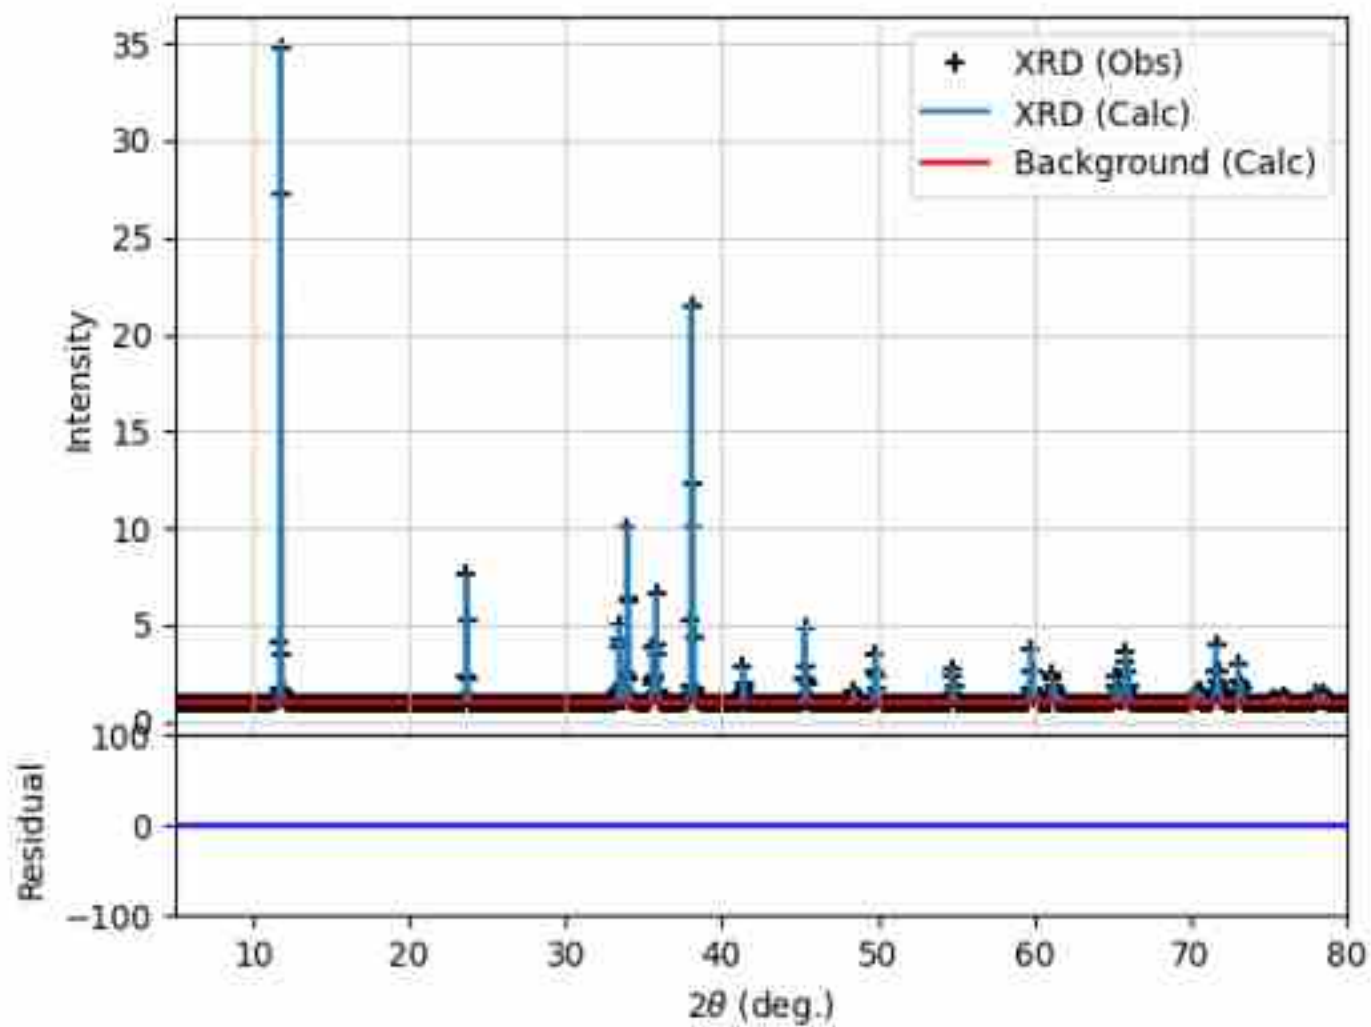

| RMSE before RR | Rwp     | RMSE after RR |
|----------------|---------|---------------|
| 0.006          | 0.00101 | 0.00277       |

# Li4

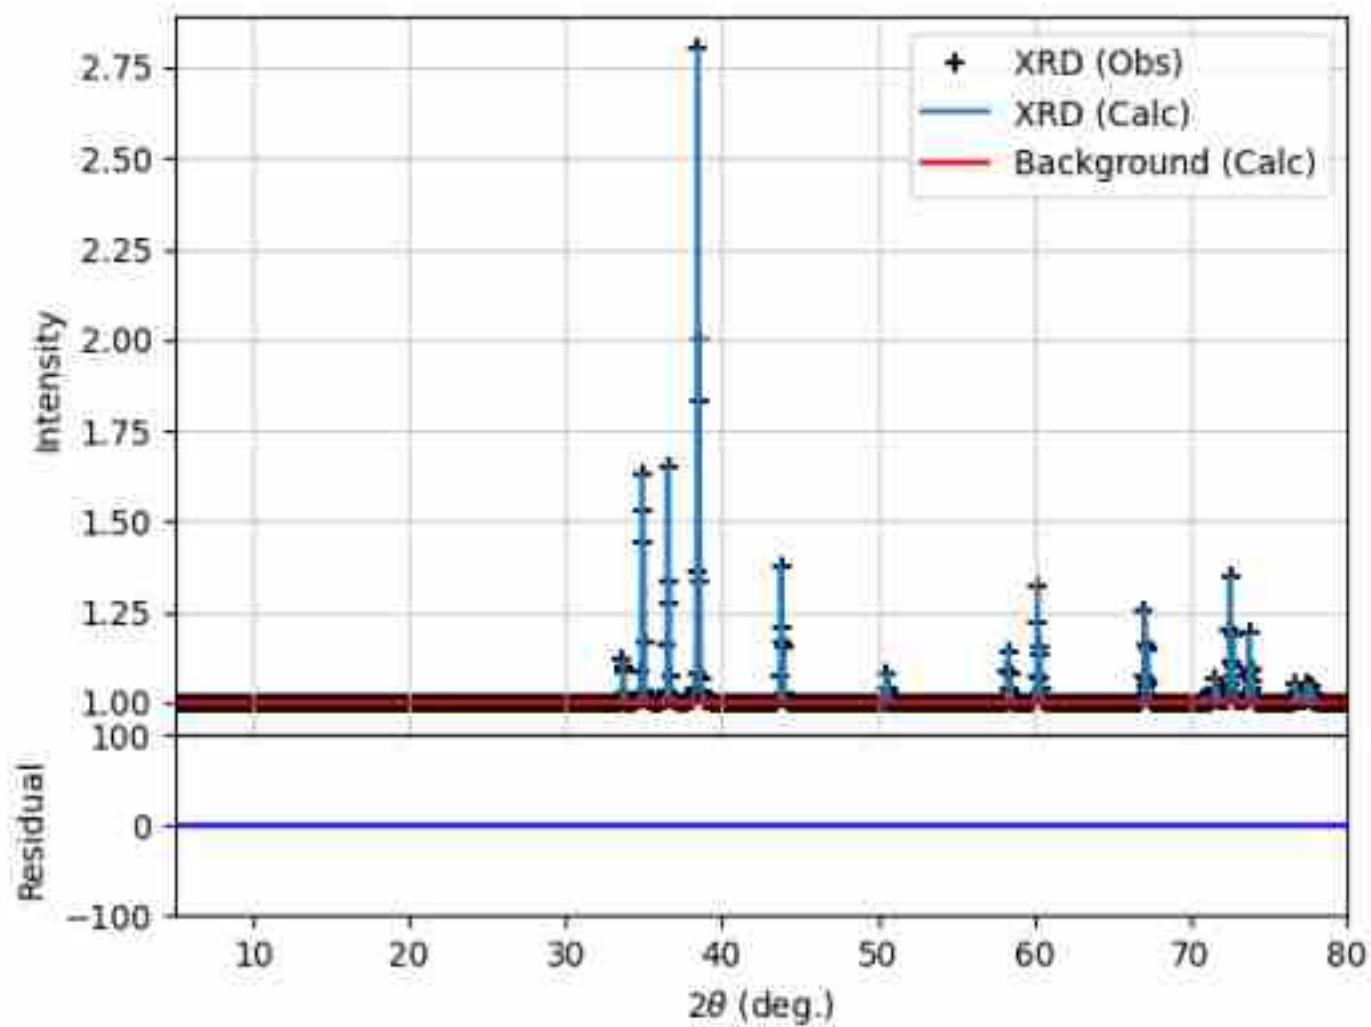

| RMSE before RR | Rwp     | RMSE after RR |
|----------------|---------|---------------|
| 0.006          | 0.00012 | 0.00071       |

# Li<sub>5</sub>Mn<sub>3</sub>O<sub>8</sub>

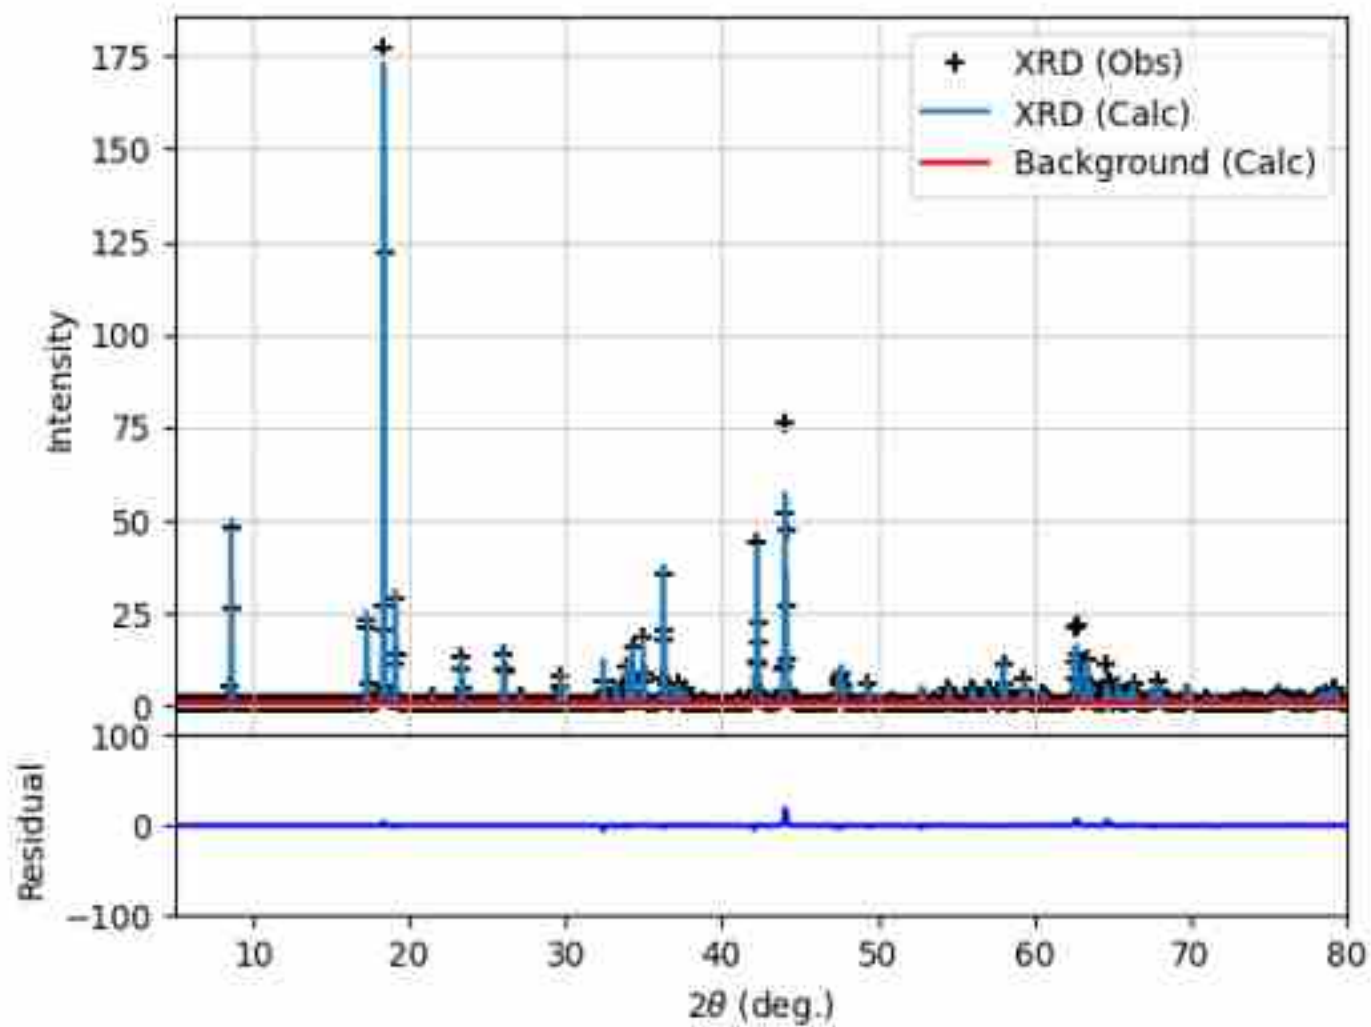

| RMSE before RR | Rwp      | RMSE after RR |
|----------------|----------|---------------|
| 0.06           | 15.51889 | 0.20372       |

# Lu<sub>3</sub>Sn<sub>3</sub>Ir<sub>3</sub>

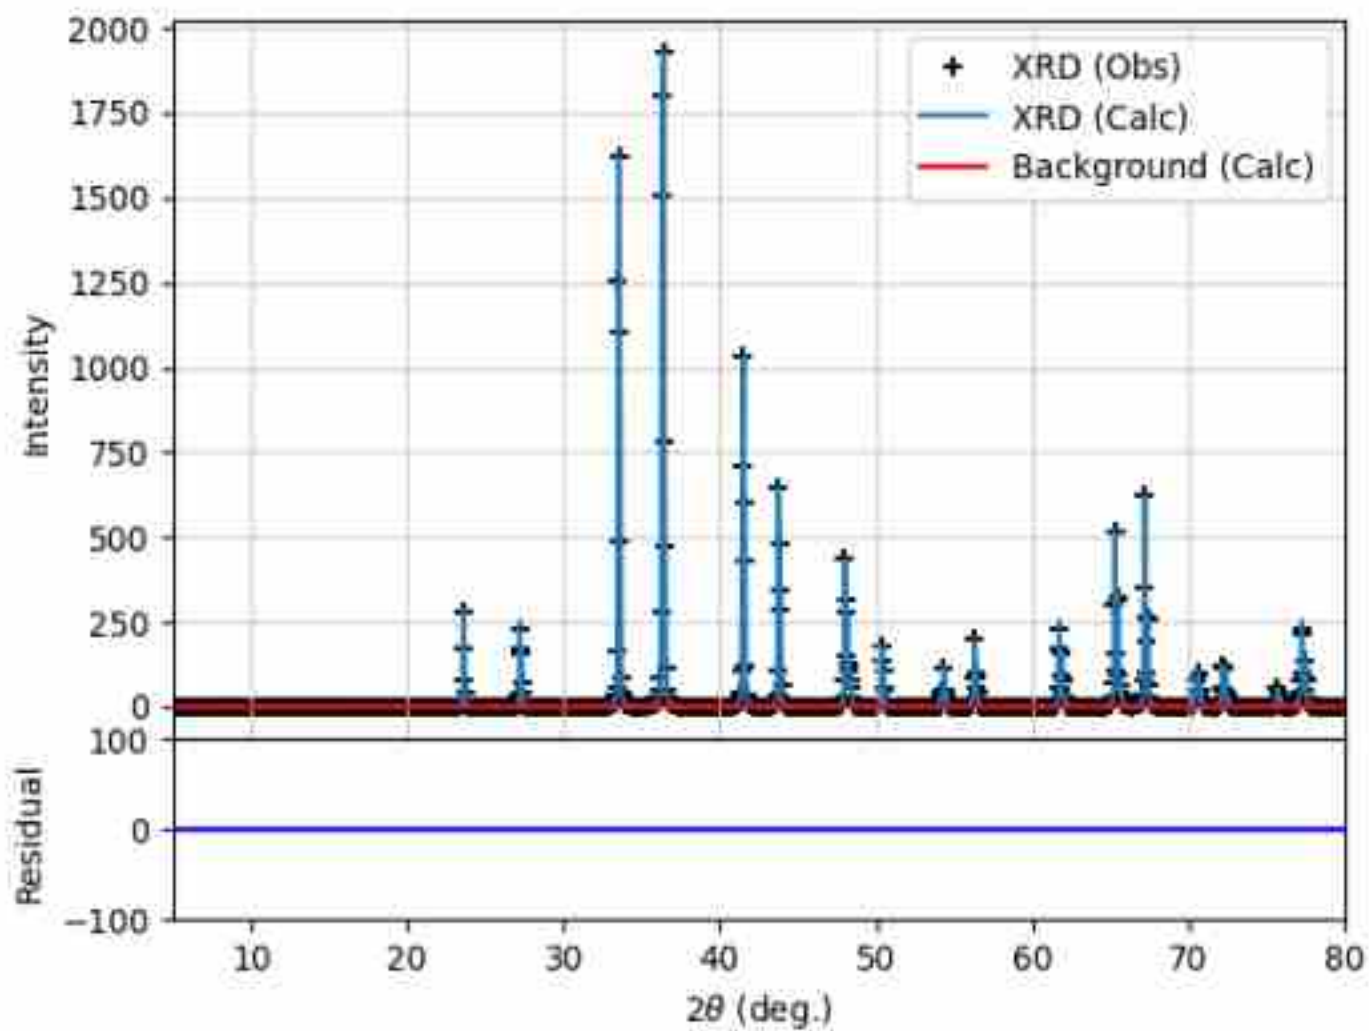

| RMSE before RR | Rwp     | RMSE after RR |
|----------------|---------|---------------|
| 0.006          | 0.00545 | 0.00097       |



# Mg1S1

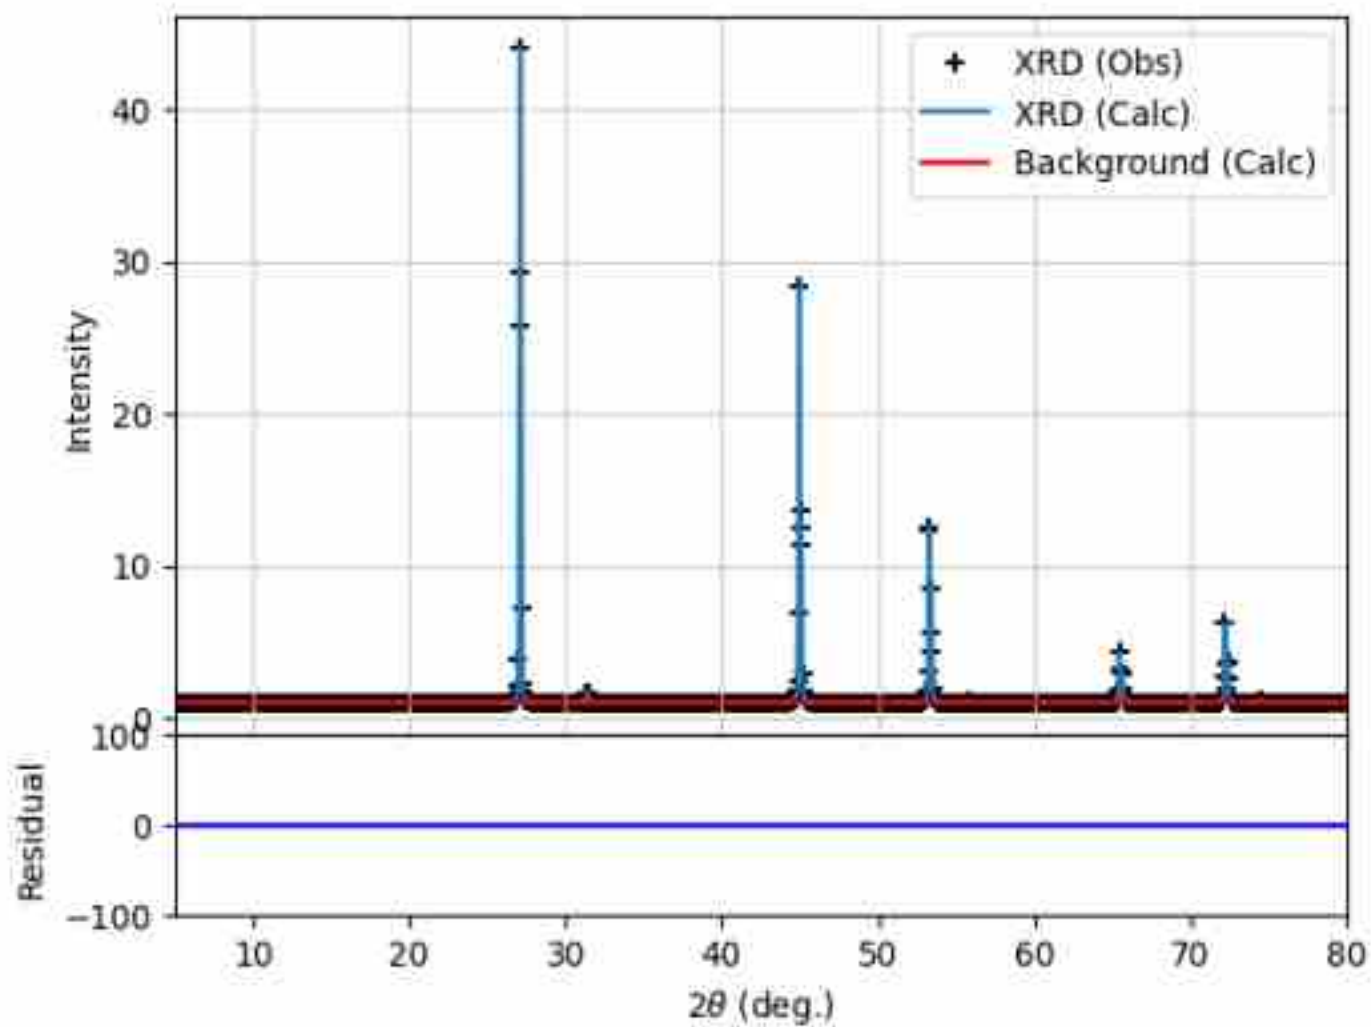

| RMSE before RR | Rwp     | RMSE after RR |
|----------------|---------|---------------|
| 0.006          | 0.01914 | 0.00268       |

# Mg1Tl3

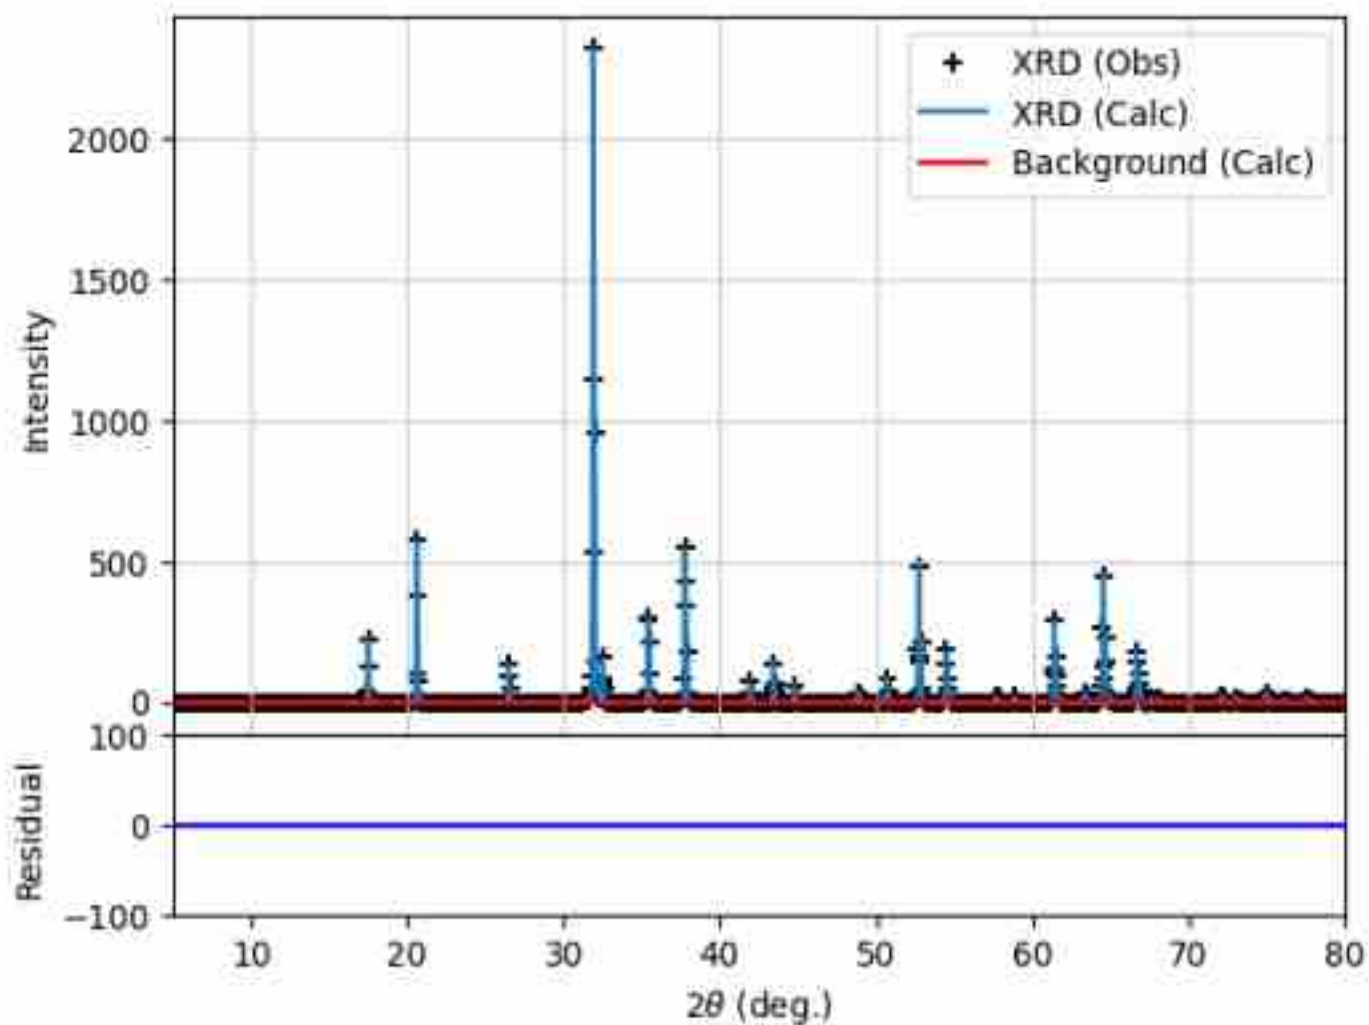

| RMSE before RR | Rwp     | RMSE after RR |
|----------------|---------|---------------|
| 0.006          | 0.00321 | 0.00078       |

# Mg<sub>2</sub>Ga<sub>4</sub>

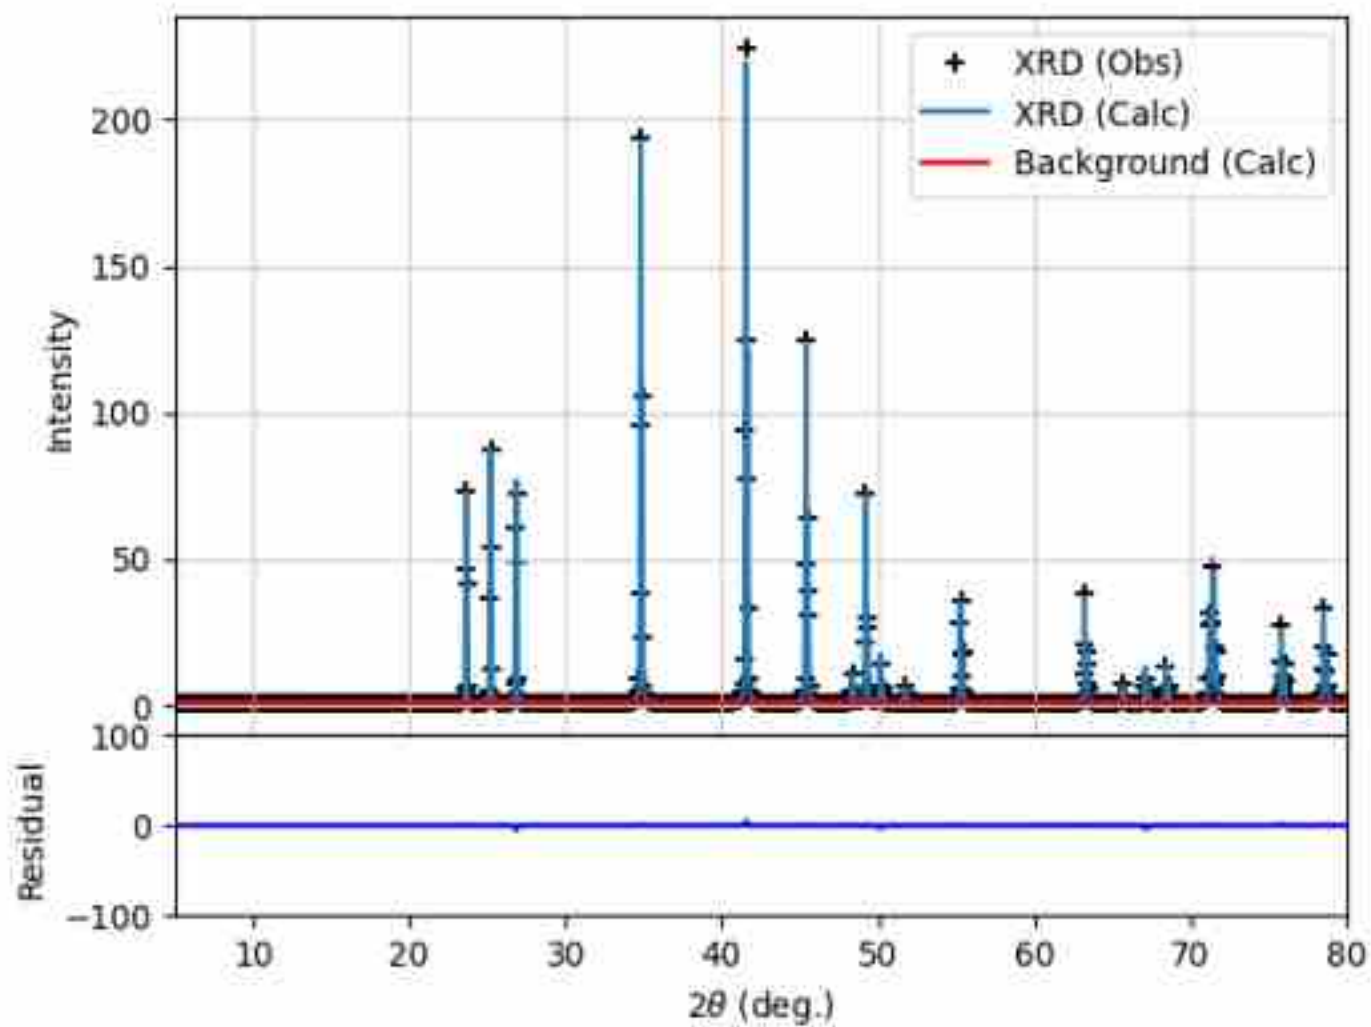

| RMSE before RR | Rwp    | RMSE after RR |
|----------------|--------|---------------|
| 0.006          | 4.2808 | 0.02819       |

# Mg5Cd1

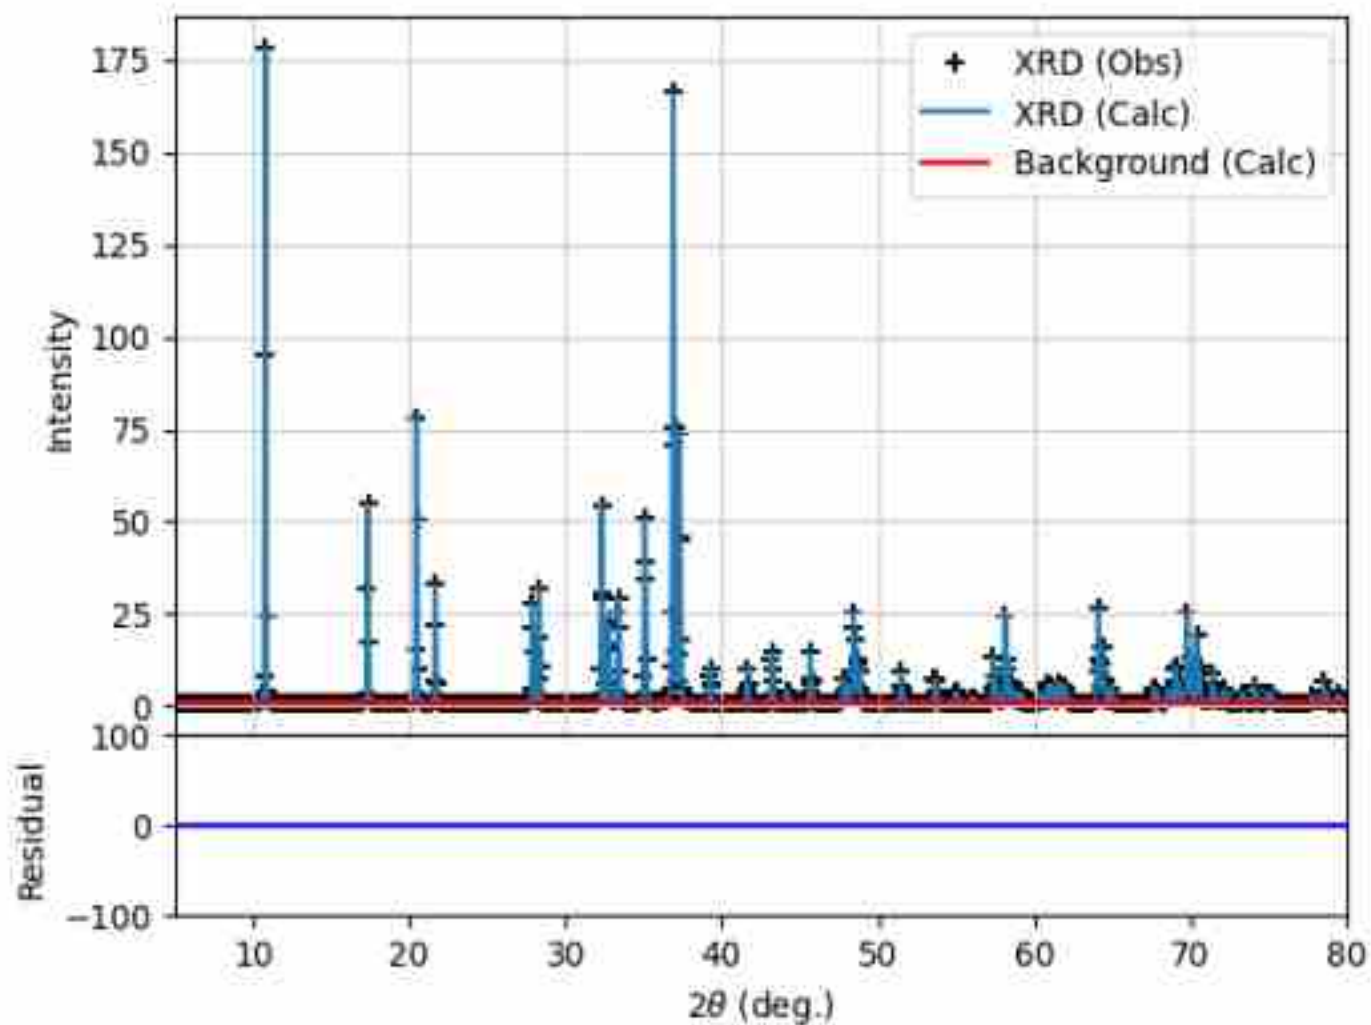

| RMSE before RR | Rwp     | RMSE after RR |
|----------------|---------|---------------|
| 0.006          | 0.00352 | 0.00049       |

# Mn1Al2Co1

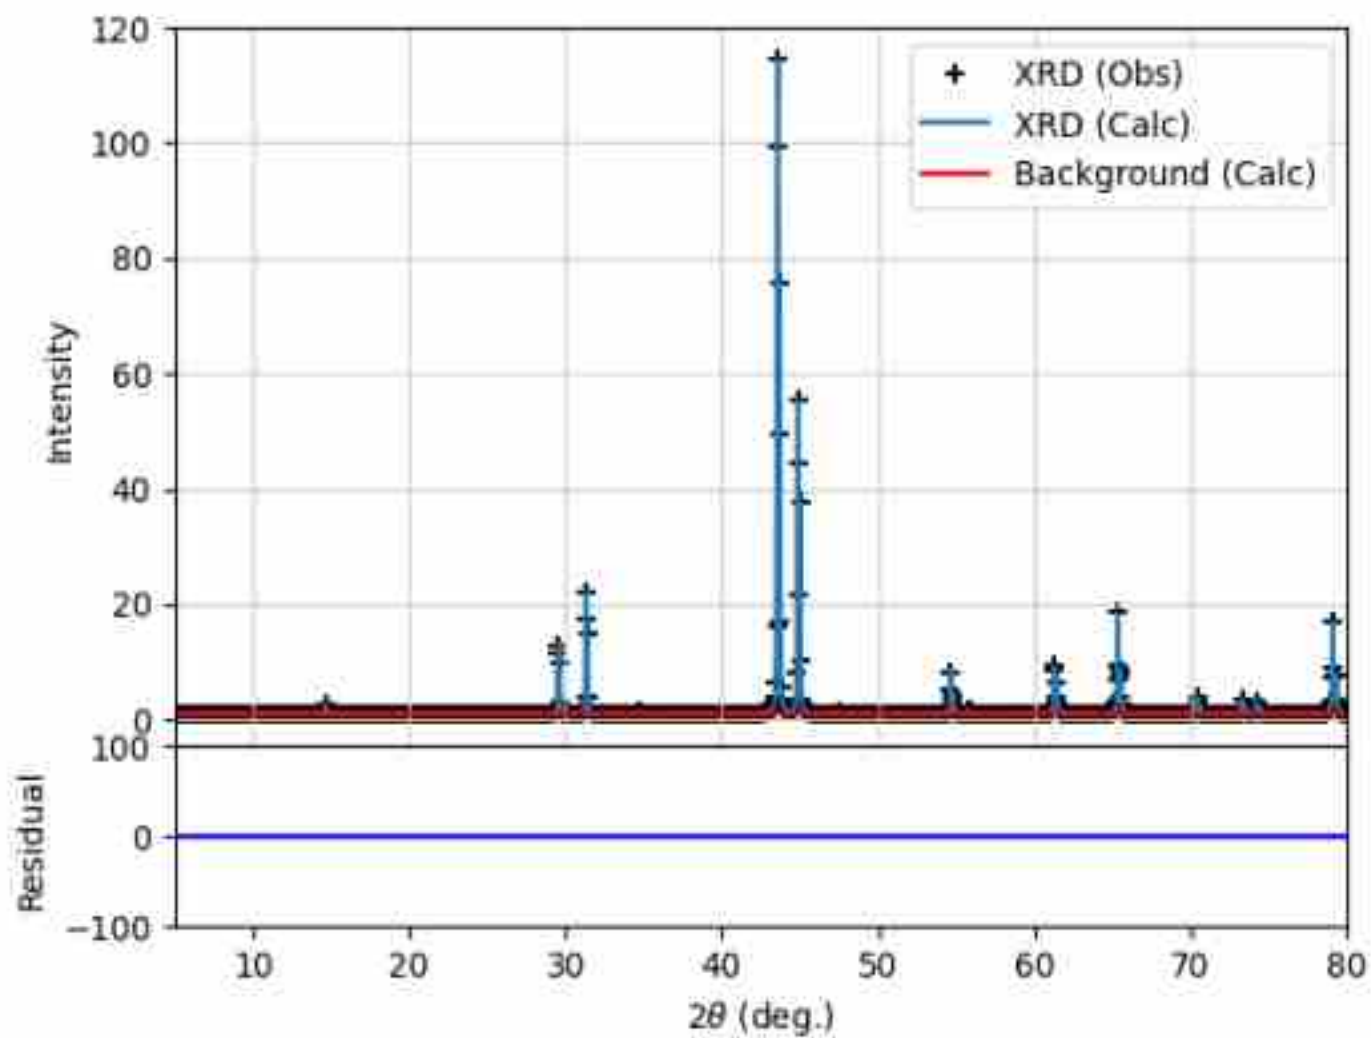

| RMSE before RR | Rwp     | RMSE after RR |
|----------------|---------|---------------|
| 0.006          | 0.00241 | 0.00027       |

# Mn1V4O12

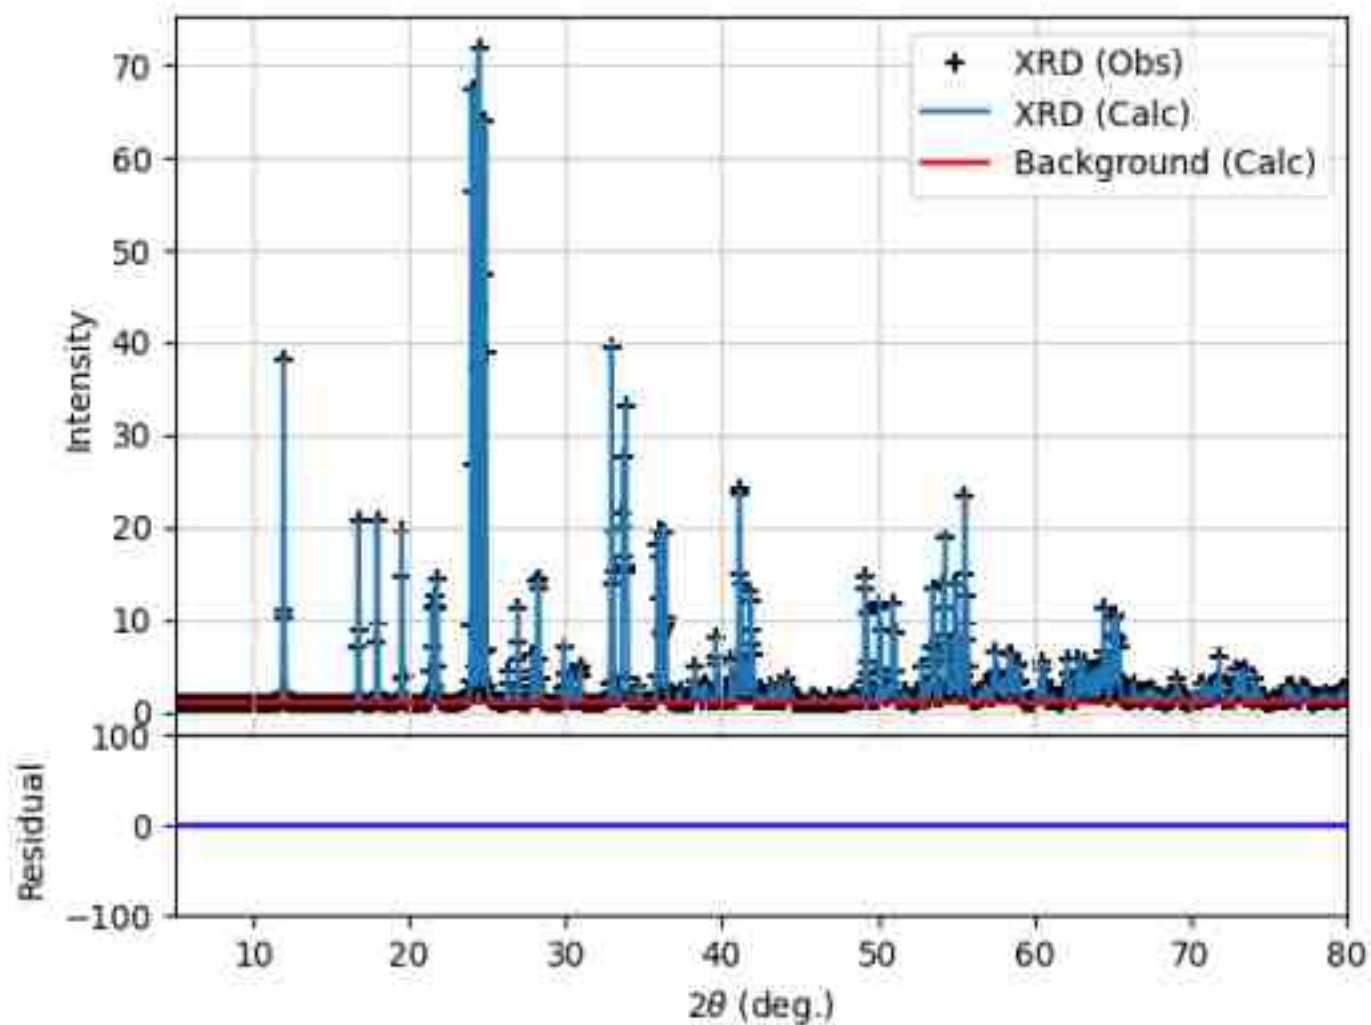

| RMSE before RR | Rwp     | RMSE after RR |
|----------------|---------|---------------|
| 0.06           | 0.00062 | 0.0           |

# Mn1Zn1Se2

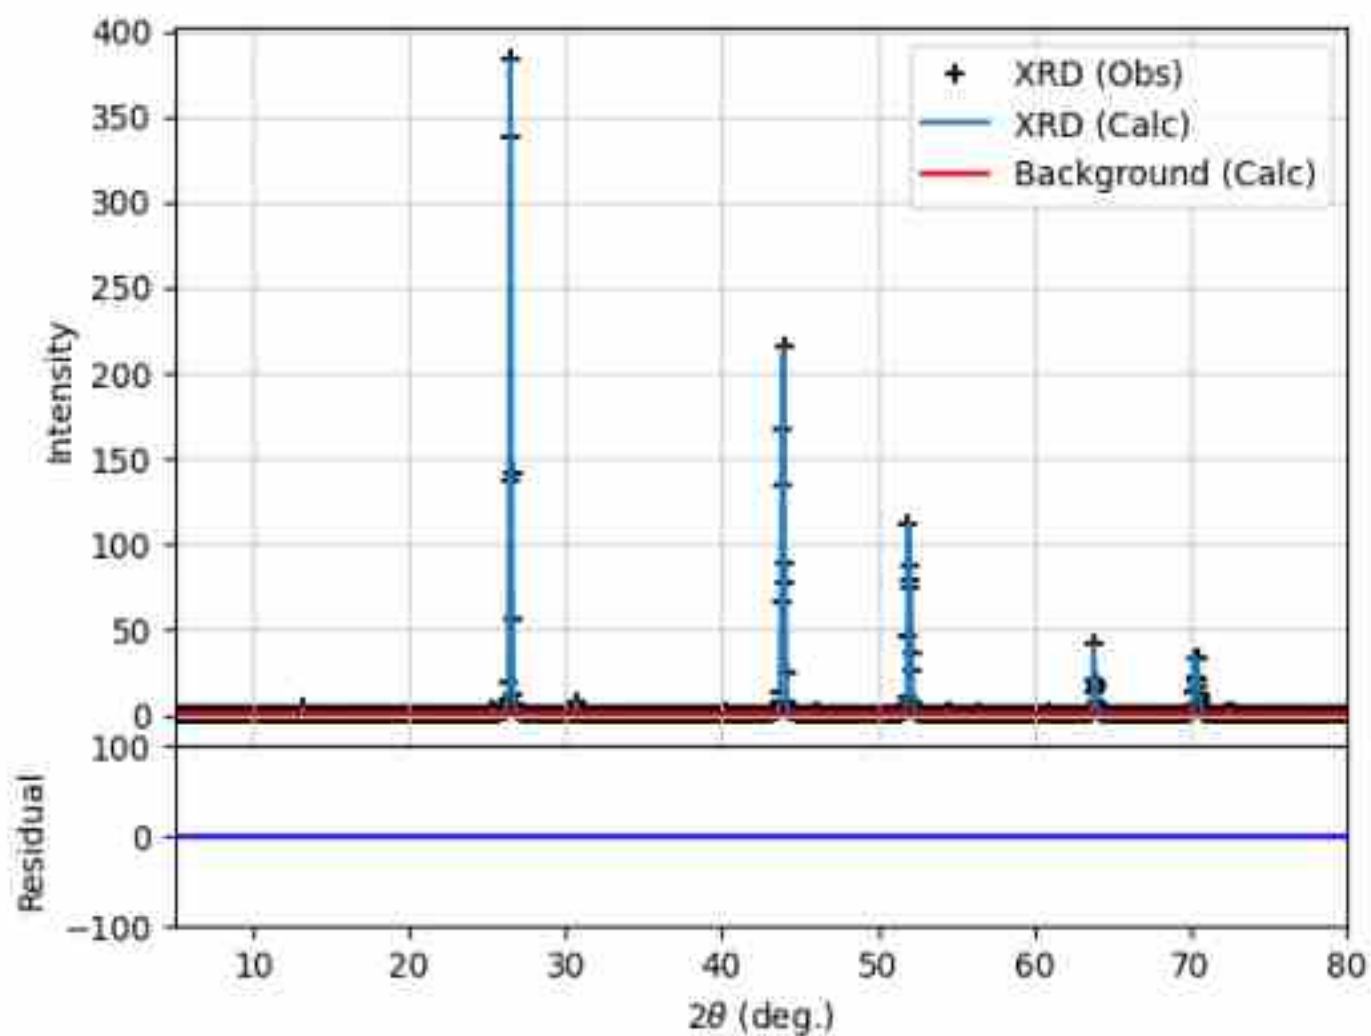

| RMSE before RR | Rwp     | RMSE after RR |
|----------------|---------|---------------|
| 0.006          | 0.00242 | 0.00016       |

# Mn<sub>2</sub>F<sub>8</sub>

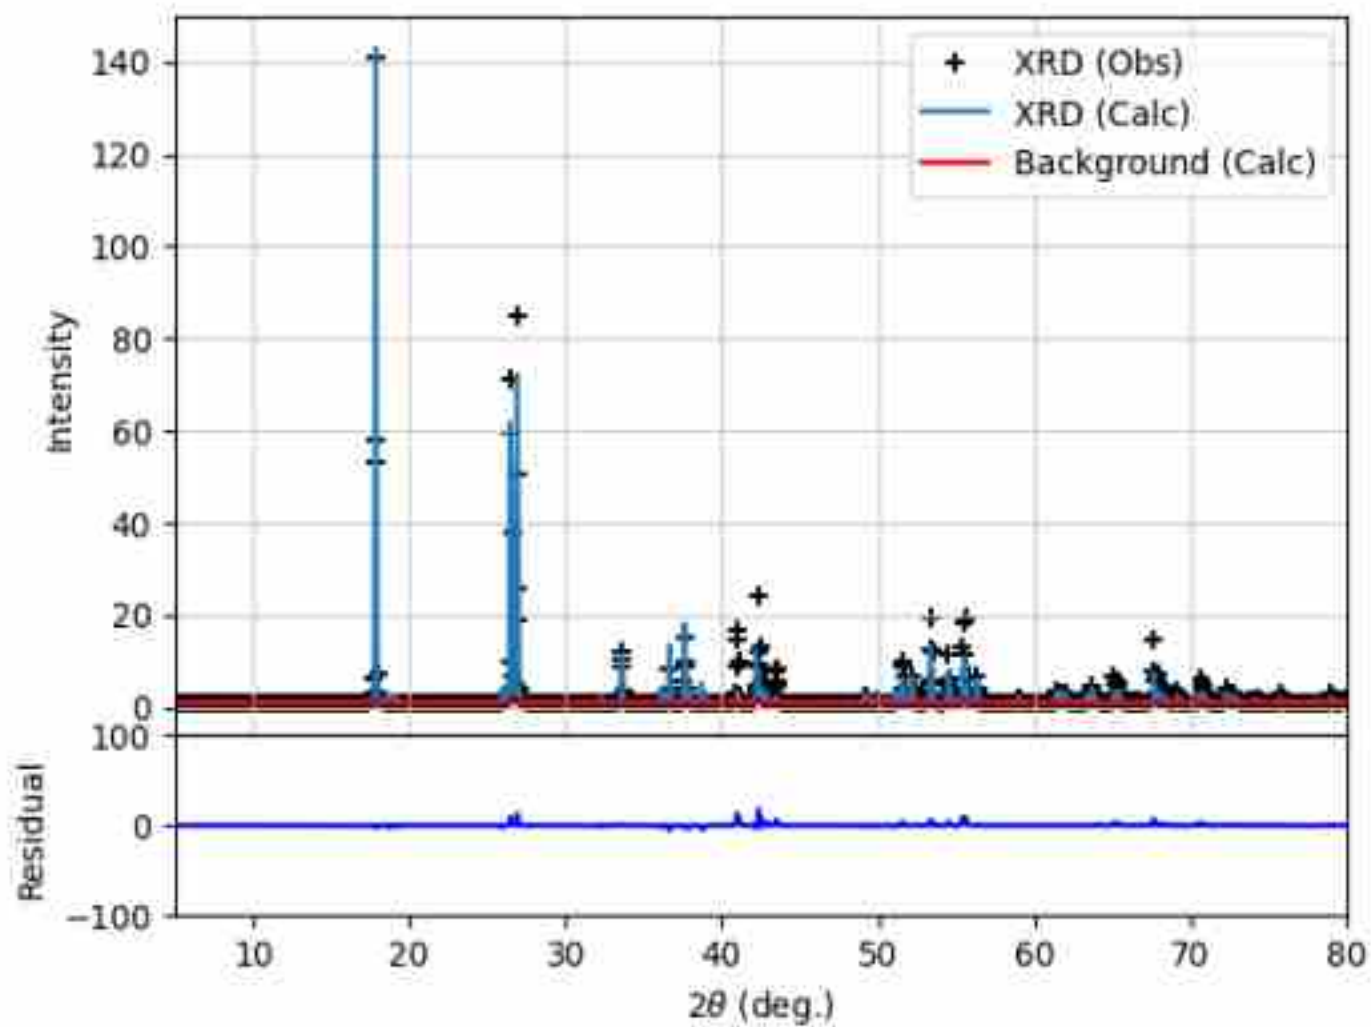

| RMSE before RR | Rwp      | RMSE after RR |
|----------------|----------|---------------|
| 0.06           | 28.26554 | 0.47447       |



# Mn<sub>4</sub>Te<sub>4</sub>

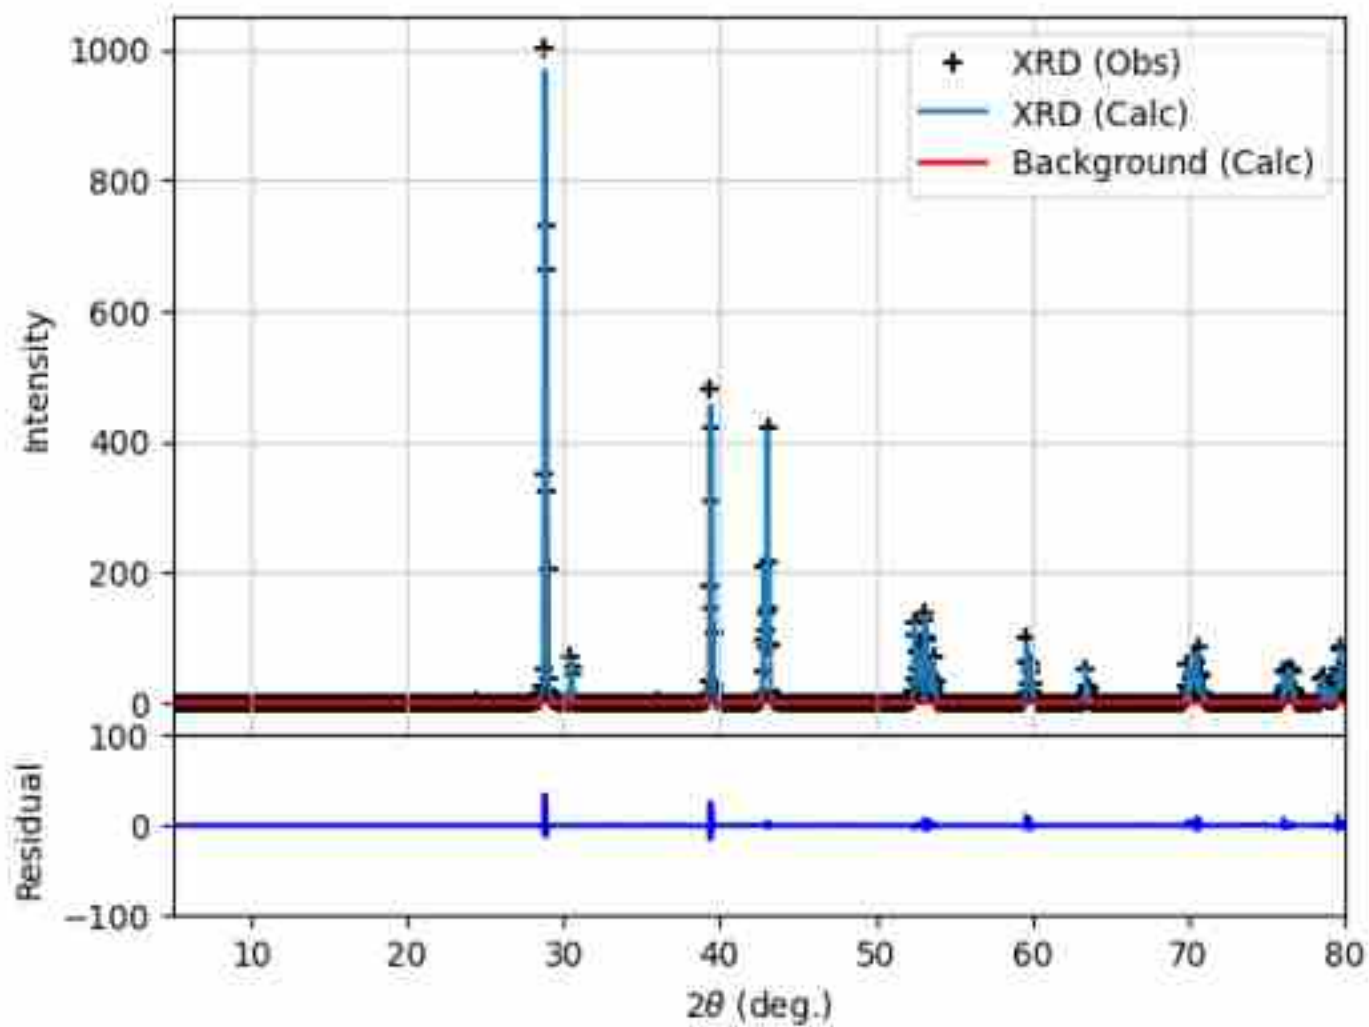

| RMSE before RR | Rwp     | RMSE after RR |
|----------------|---------|---------------|
| 0.006          | 4.62487 | 0.00644       |

# Mo1Pd4

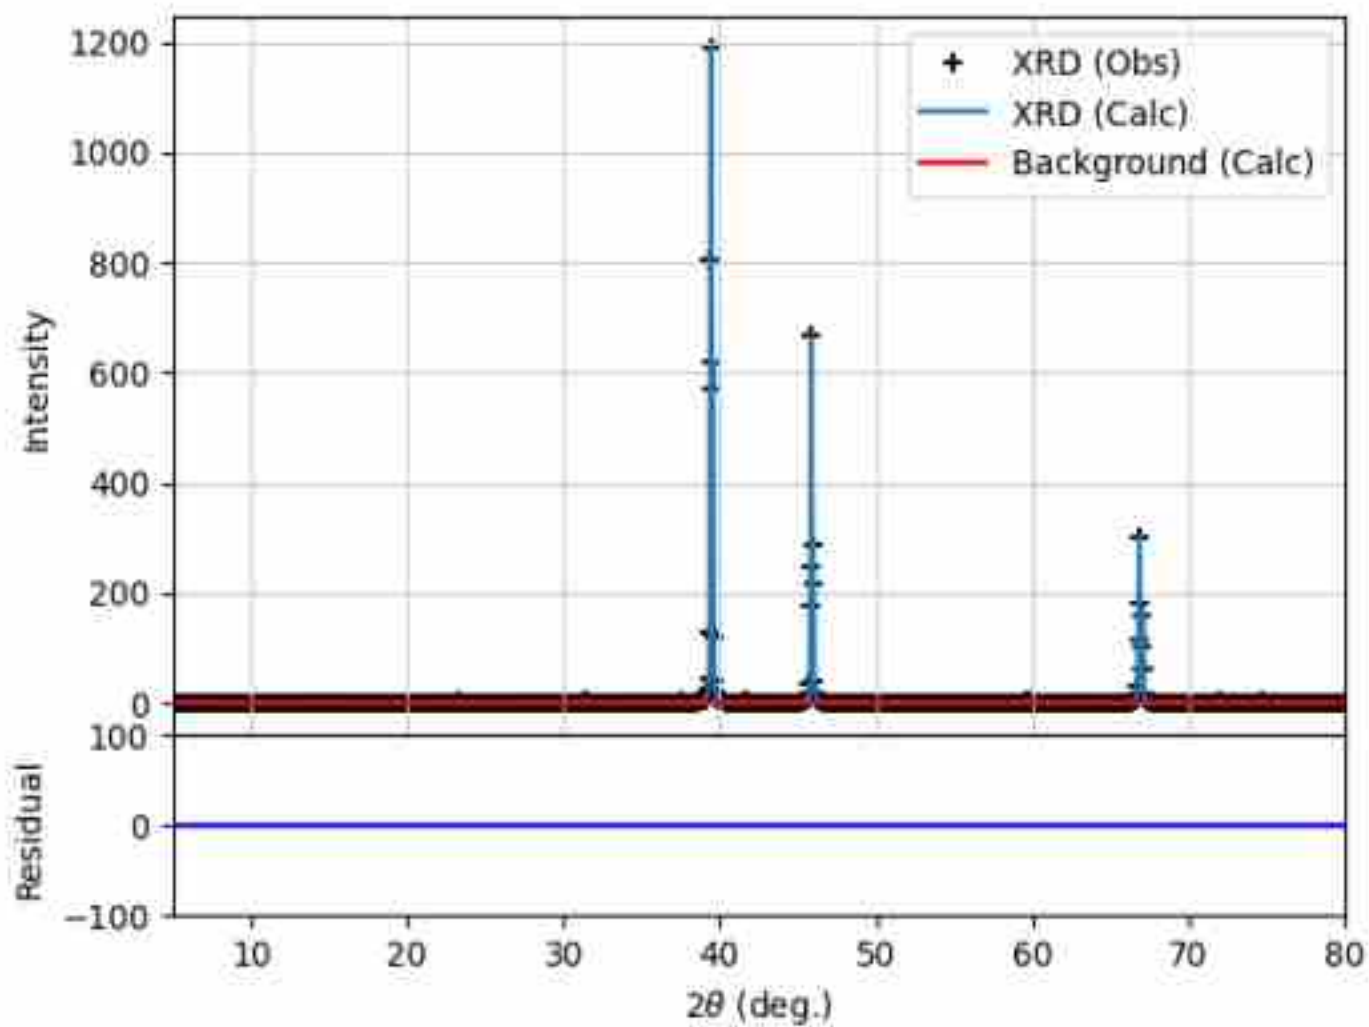

| RMSE before RR | Rwp     | RMSE after RR |
|----------------|---------|---------------|
| 0.006          | 0.00198 | 0.00028       |

# Na1Sm1S2

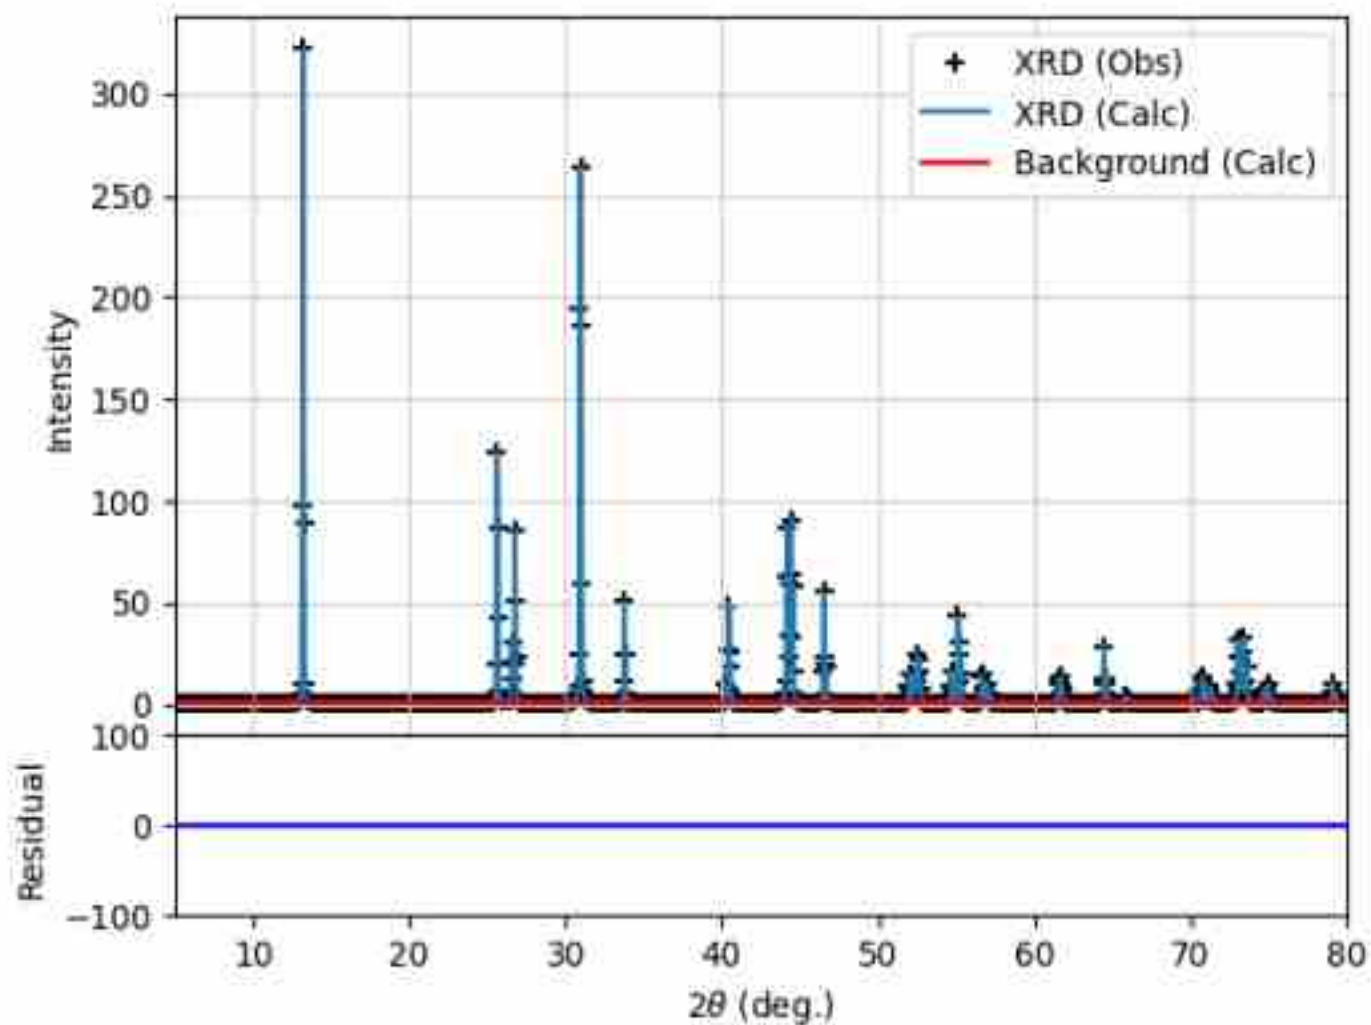

| RMSE before RR | Rwp     | RMSE after RR |
|----------------|---------|---------------|
| 0.006          | 0.00481 | 0.00109       |

# Na<sub>2</sub>Fe<sub>2</sub>As<sub>2</sub>

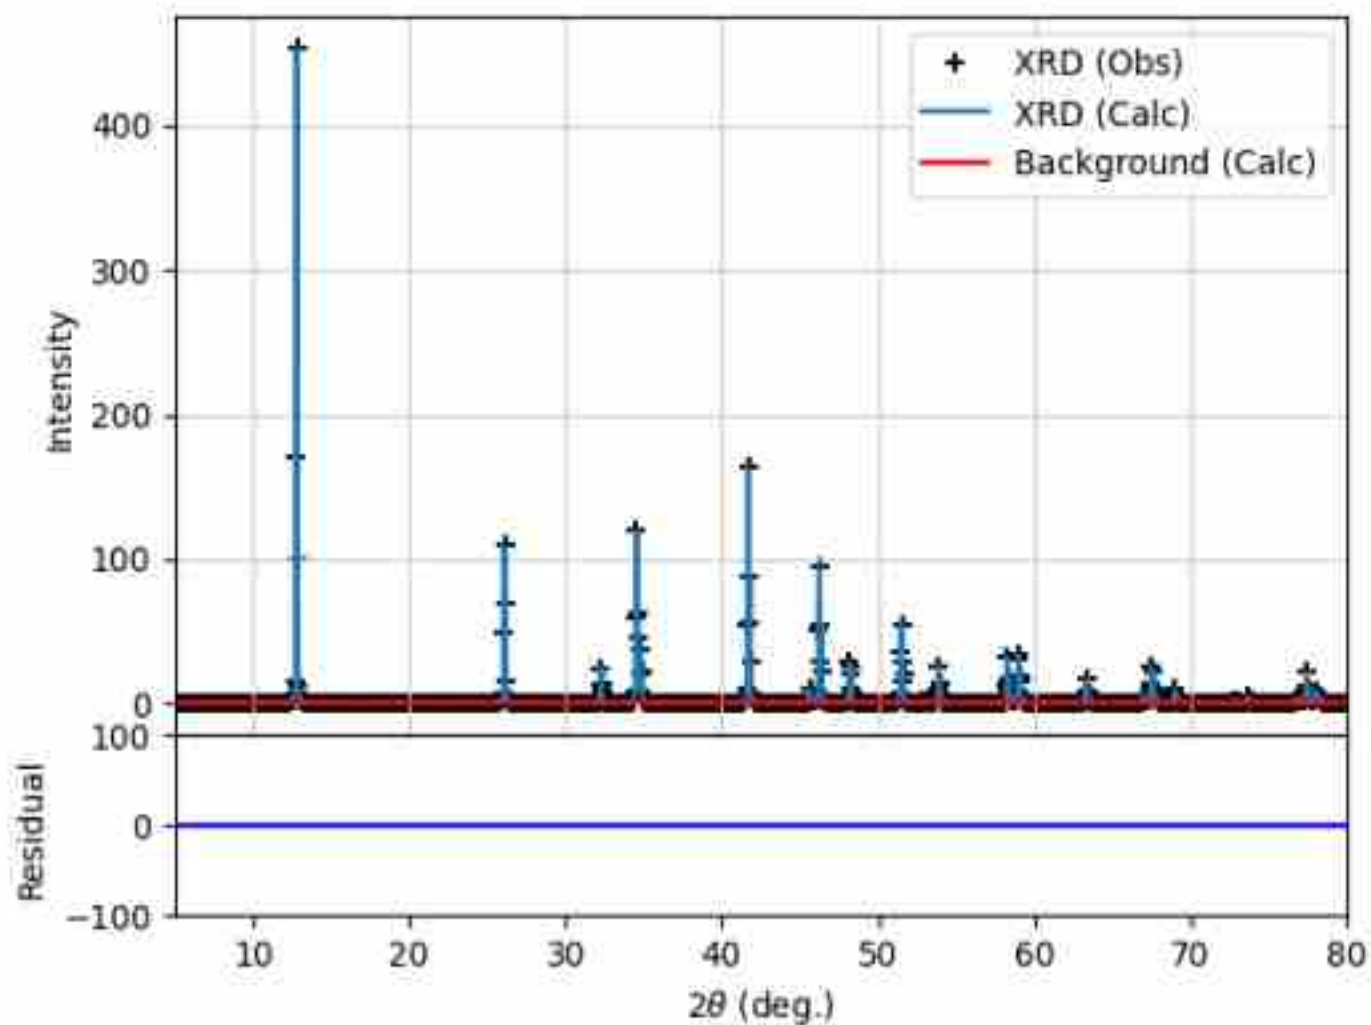

| RMSE before RR | Rwp     | RMSE after RR |
|----------------|---------|---------------|
| 0.006          | 0.00397 | 0.00089       |

# Nb3O3

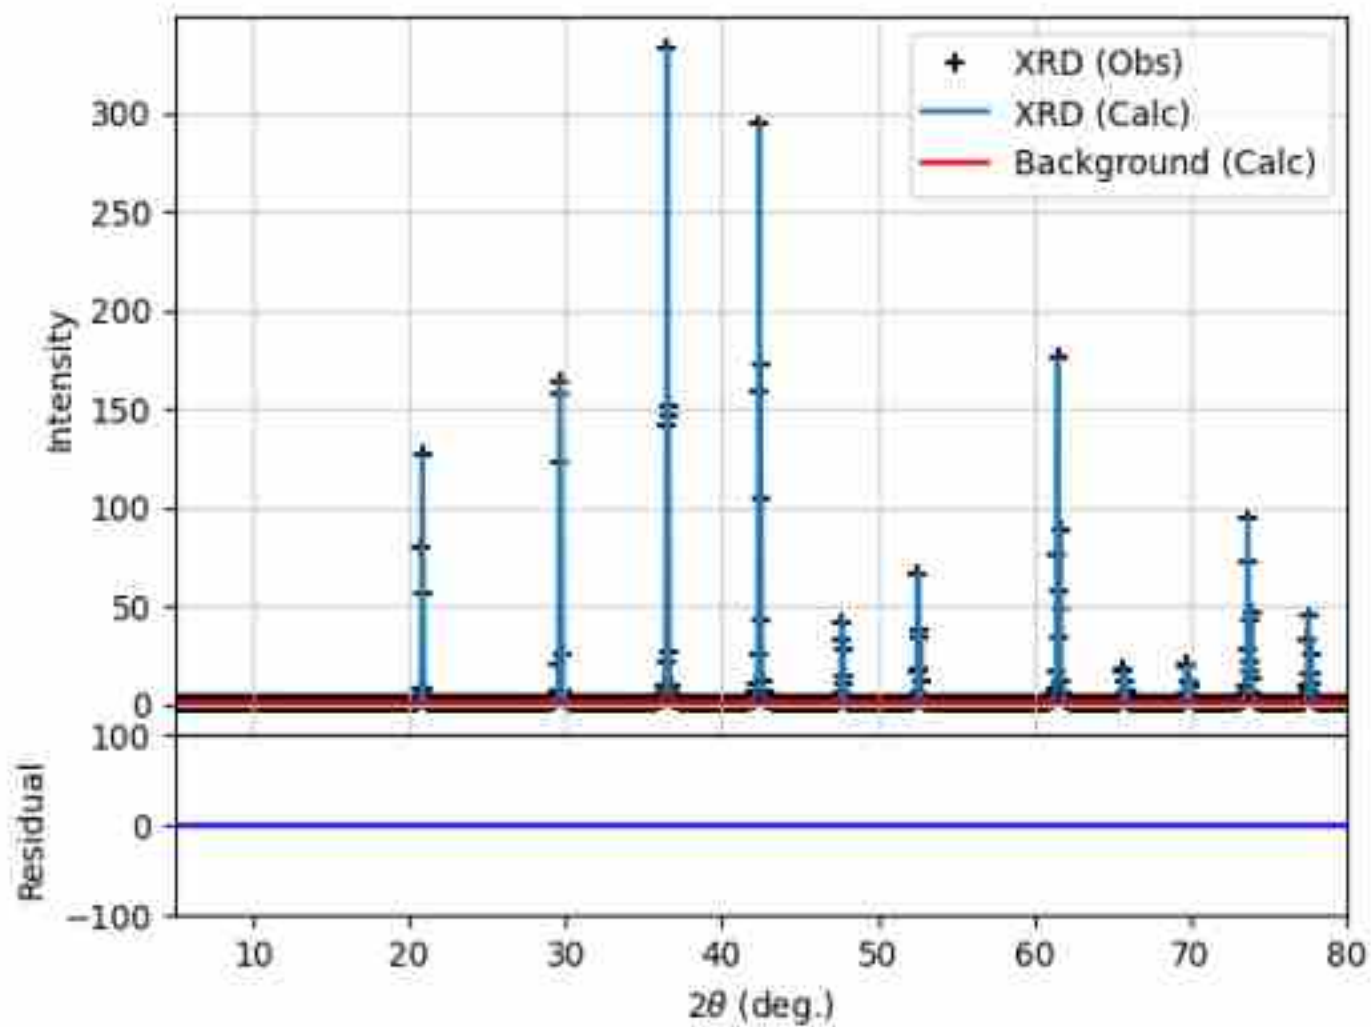

| RMSE before RR | Rwp     | RMSE after RR |
|----------------|---------|---------------|
| 0.006          | 0.00918 | 0.00328       |

# Nb6Ir2

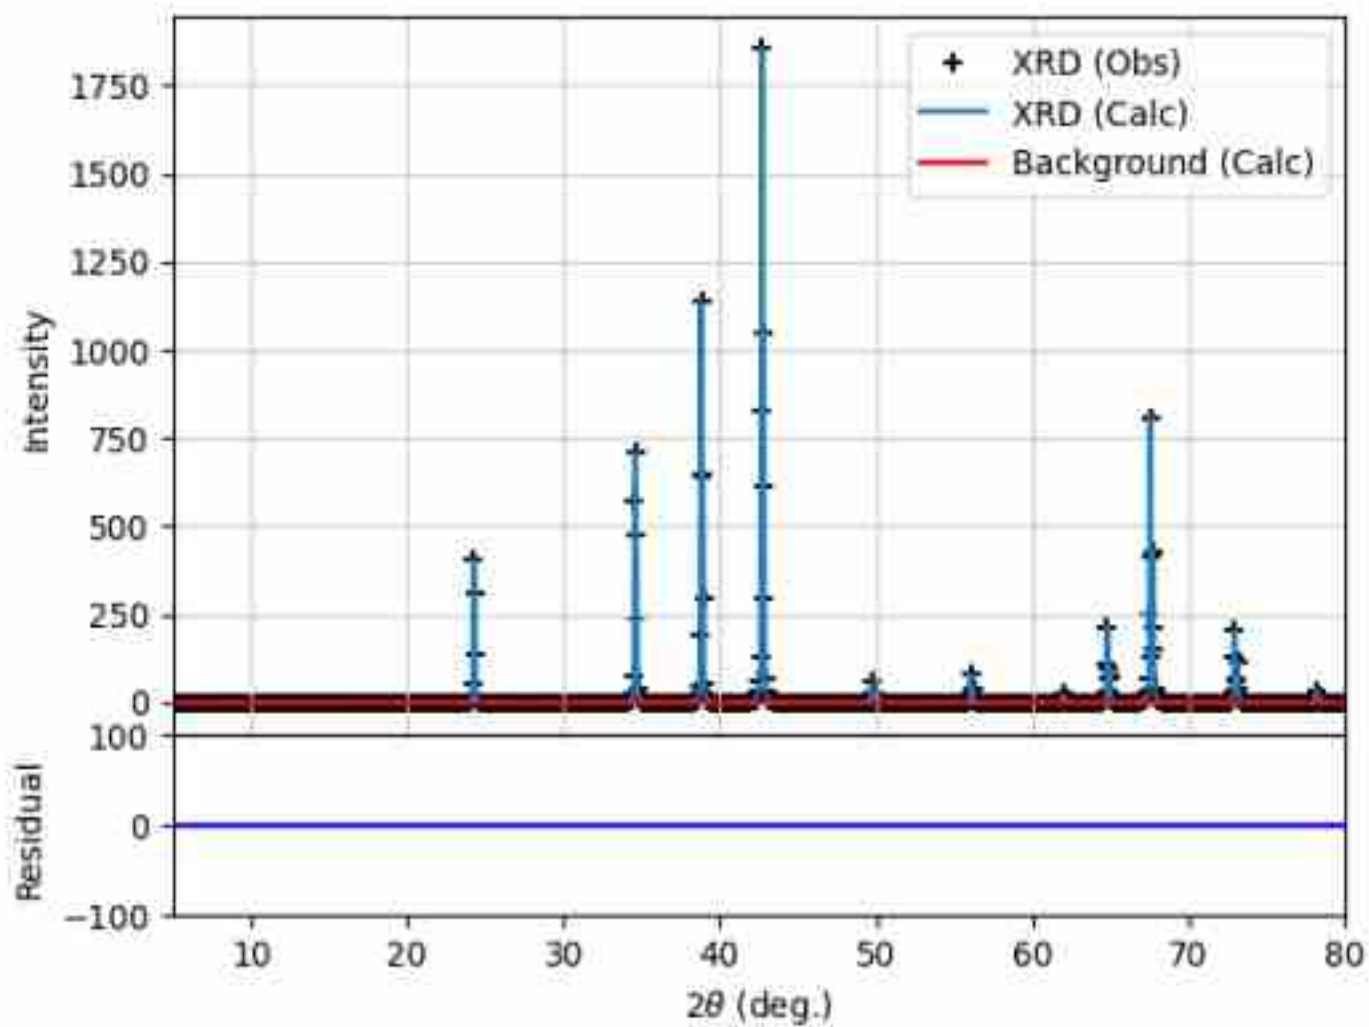

| RMSE before RR | Rwp     | RMSE after RR |
|----------------|---------|---------------|
| 0.006          | 0.00471 | 0.00032       |

# Nd1Ga3Pd1

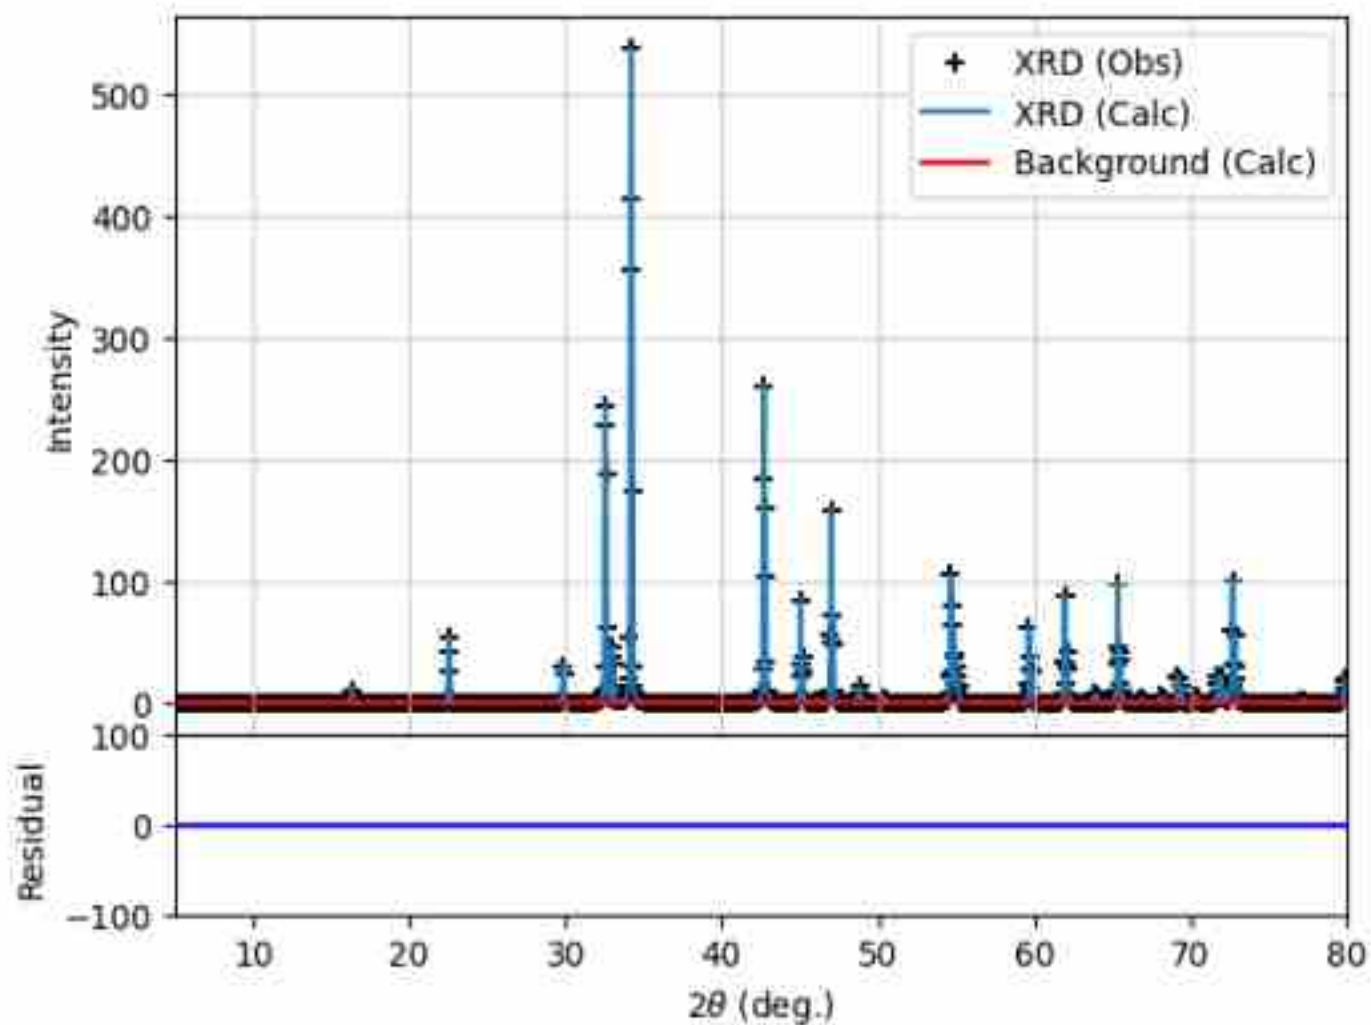

| RMSE before RR | Rwp     | RMSE after RR |
|----------------|---------|---------------|
| 0.006          | 0.00355 | 0.00031       |

# Nd<sub>2</sub>Er<sub>6</sub>

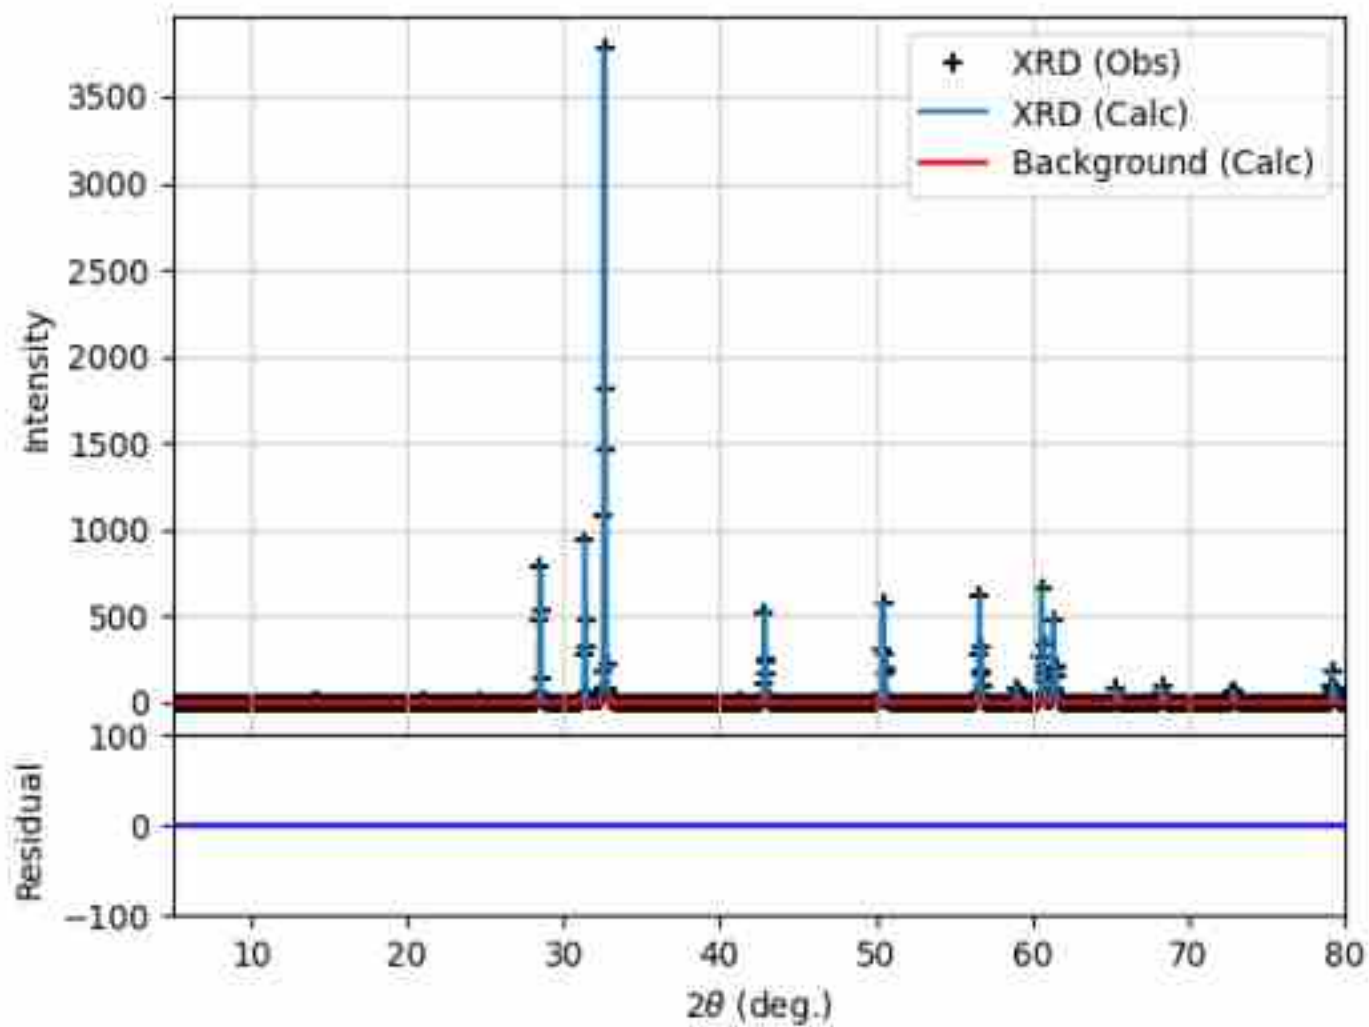

| RMSE before RR | Rwp     | RMSE after RR |
|----------------|---------|---------------|
| 0.006          | 0.01016 | 0.00071       |



# Nd<sub>2</sub>Fe<sub>1</sub>Si<sub>2</sub>Ru<sub>1</sub>

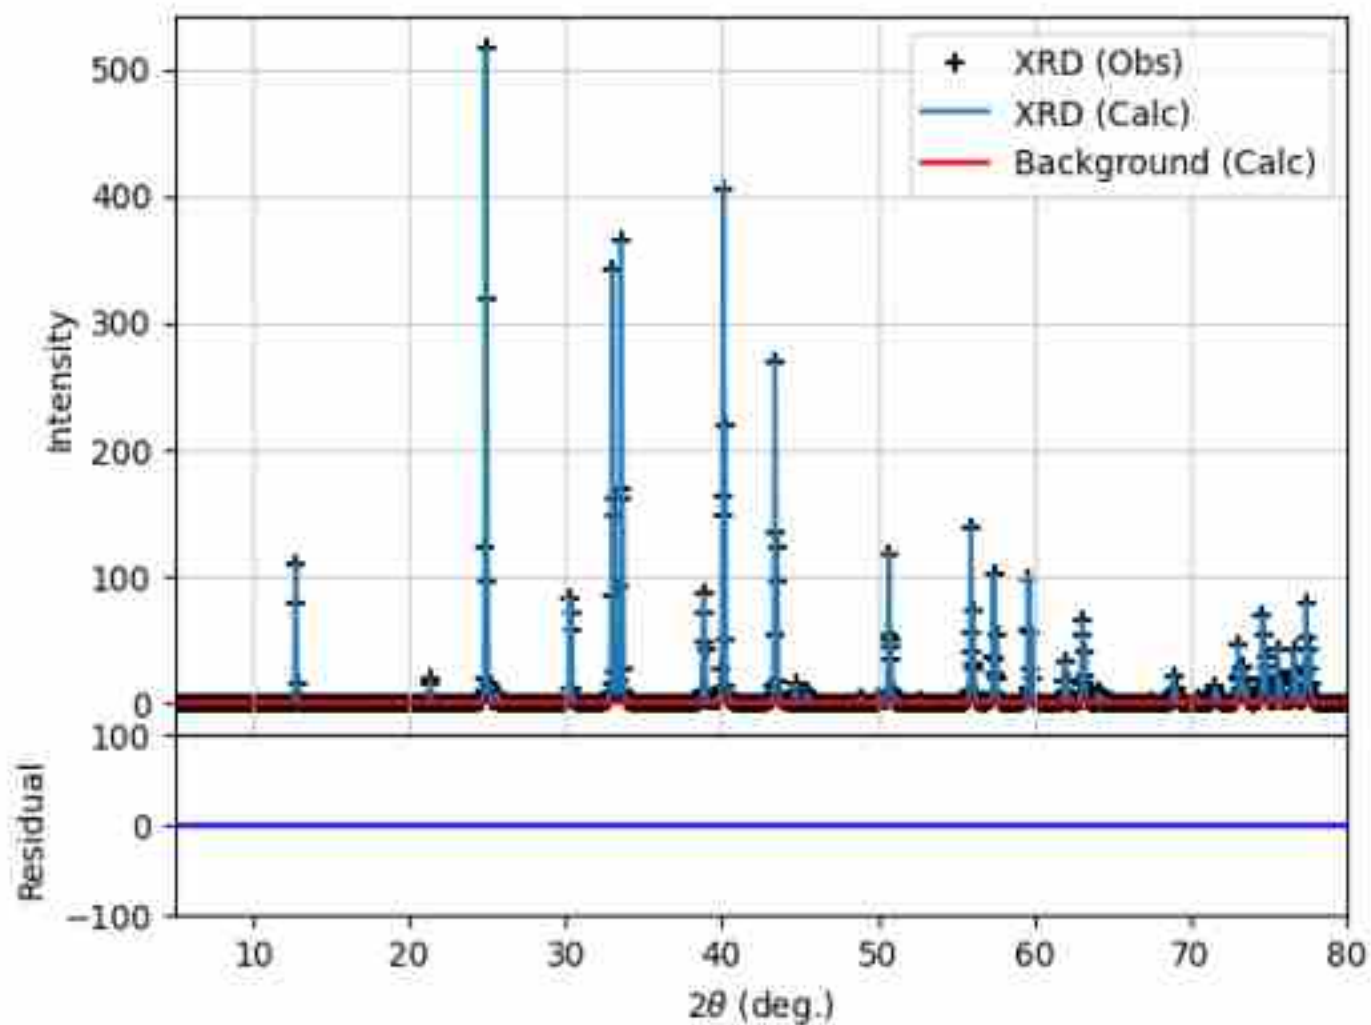

| RMSE before RR | Rwp     | RMSE after RR |
|----------------|---------|---------------|
| 0.006          | 0.00417 | 0.00084       |

# Nd<sub>2</sub>Ga<sub>5</sub>Cu<sub>3</sub>

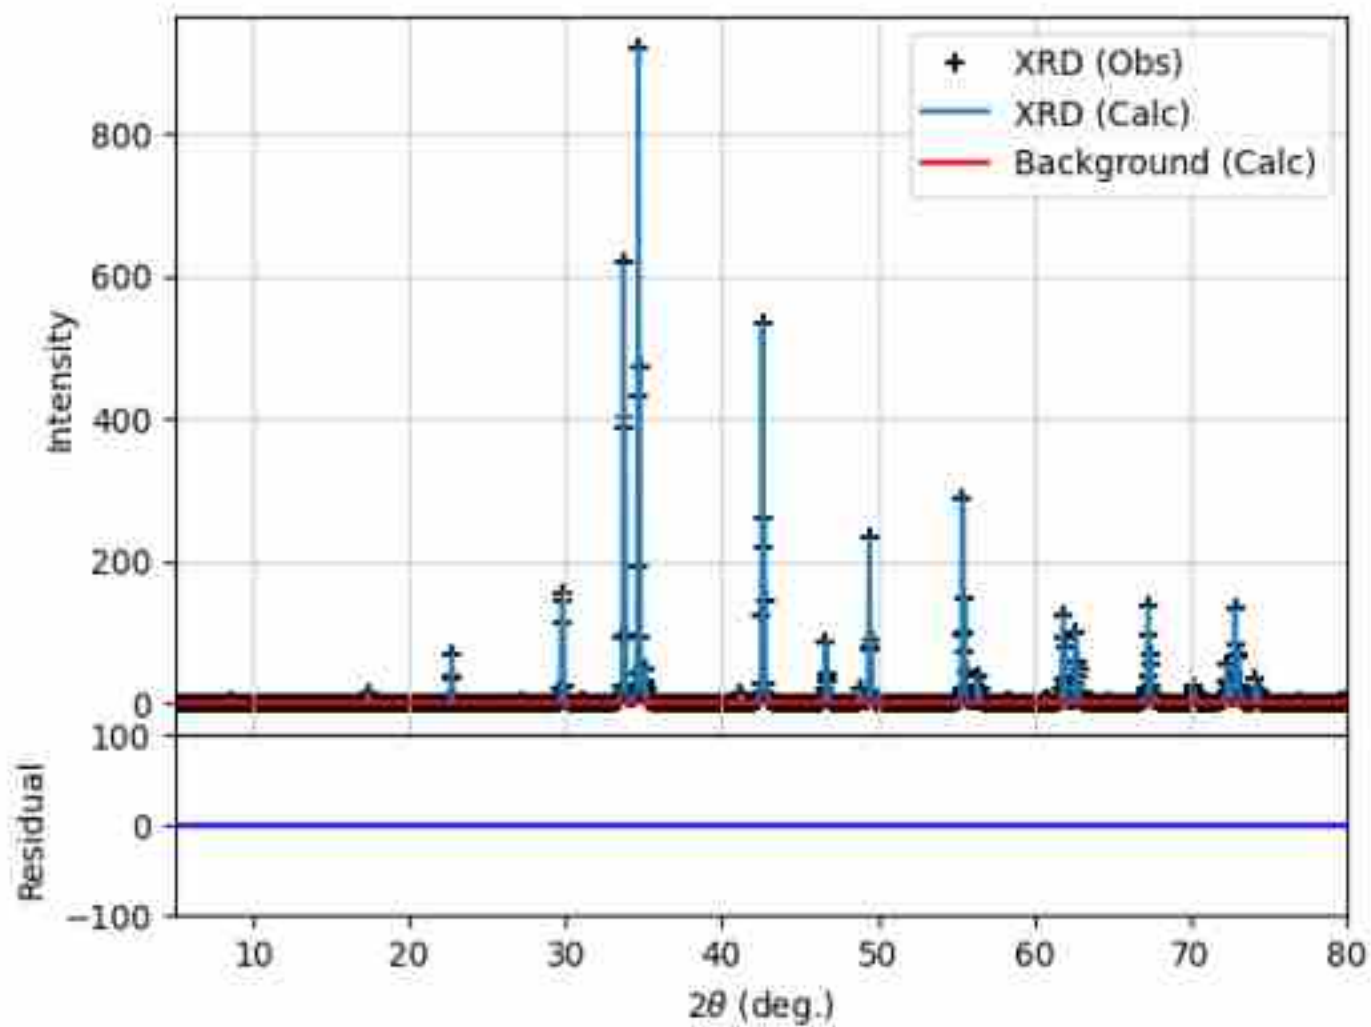

| RMSE before RR | Rwp     | RMSE after RR |
|----------------|---------|---------------|
| 0.006          | 0.00333 | 0.00031       |

# Nd<sub>2</sub>Ge<sub>3</sub>Pt<sub>1</sub>

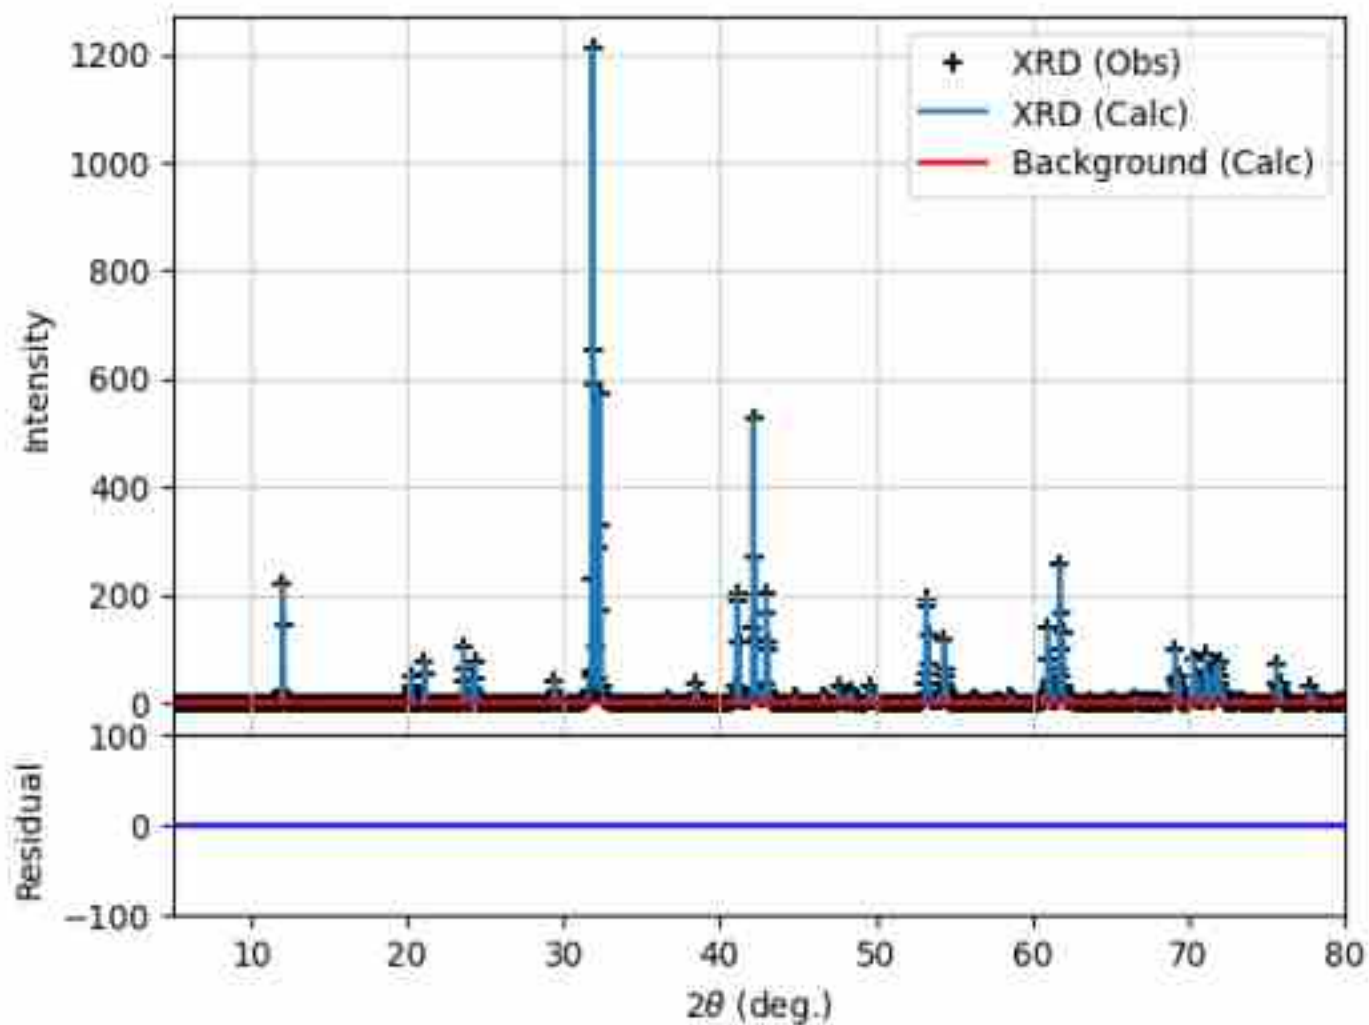

| RMSE before RR | Rwp     | RMSE after RR |
|----------------|---------|---------------|
| 0.006          | 0.00463 | 0.00052       |

Nd<sub>2</sub>Si<sub>2</sub>Ru<sub>2</sub>

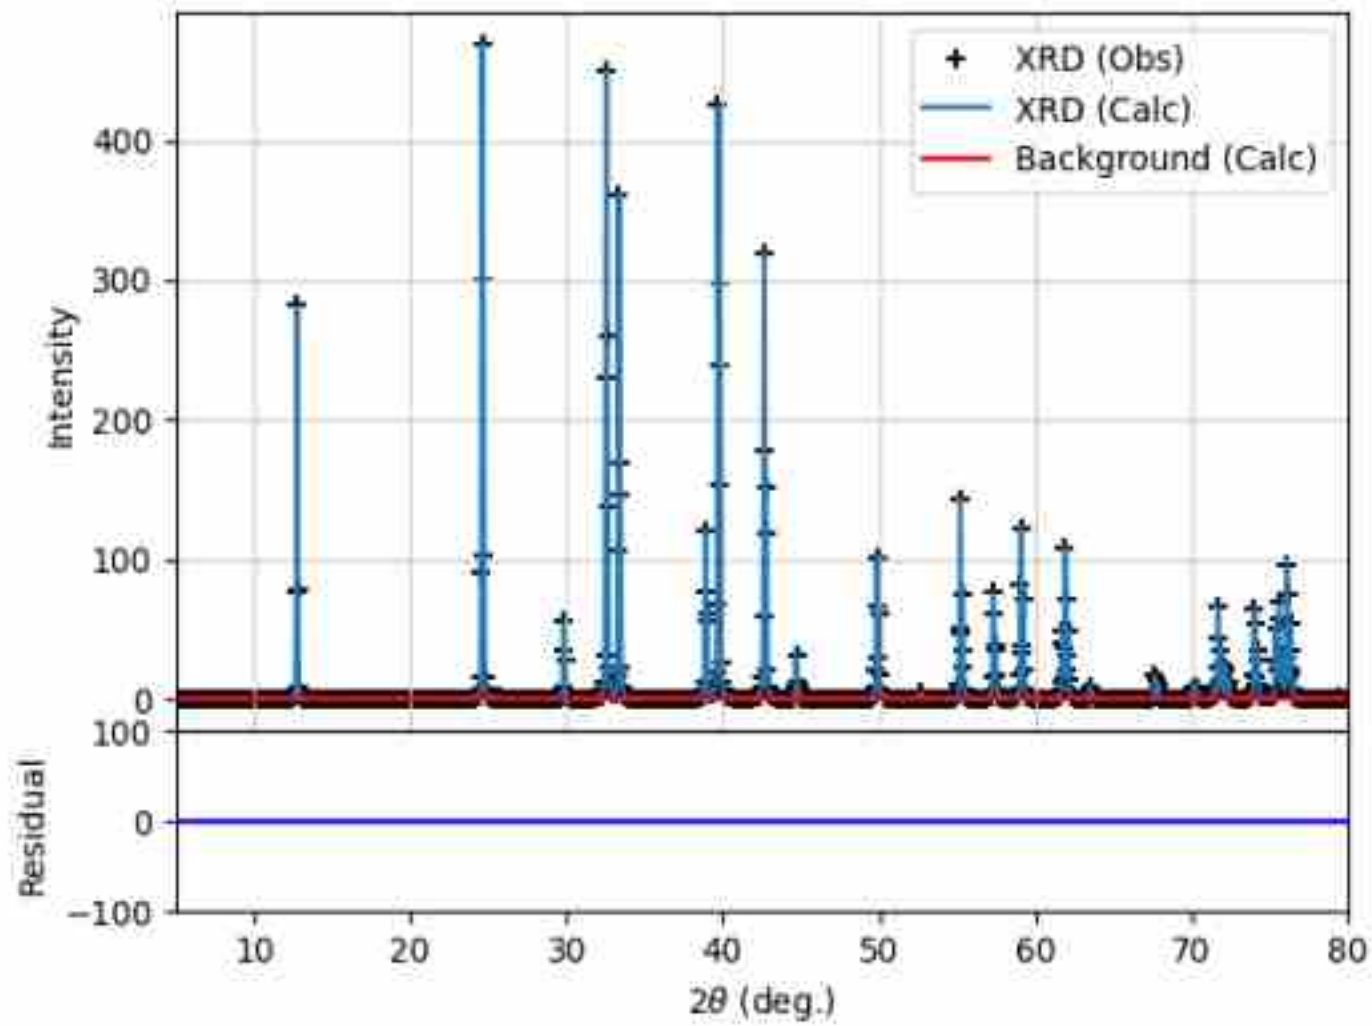

| RMSE before RR | Rwp     | RMSE after RR |
|----------------|---------|---------------|
| 0.006          | 0.00558 | 0.001         |

Nd<sub>2</sub>Tl<sub>2</sub>Zn<sub>2</sub>

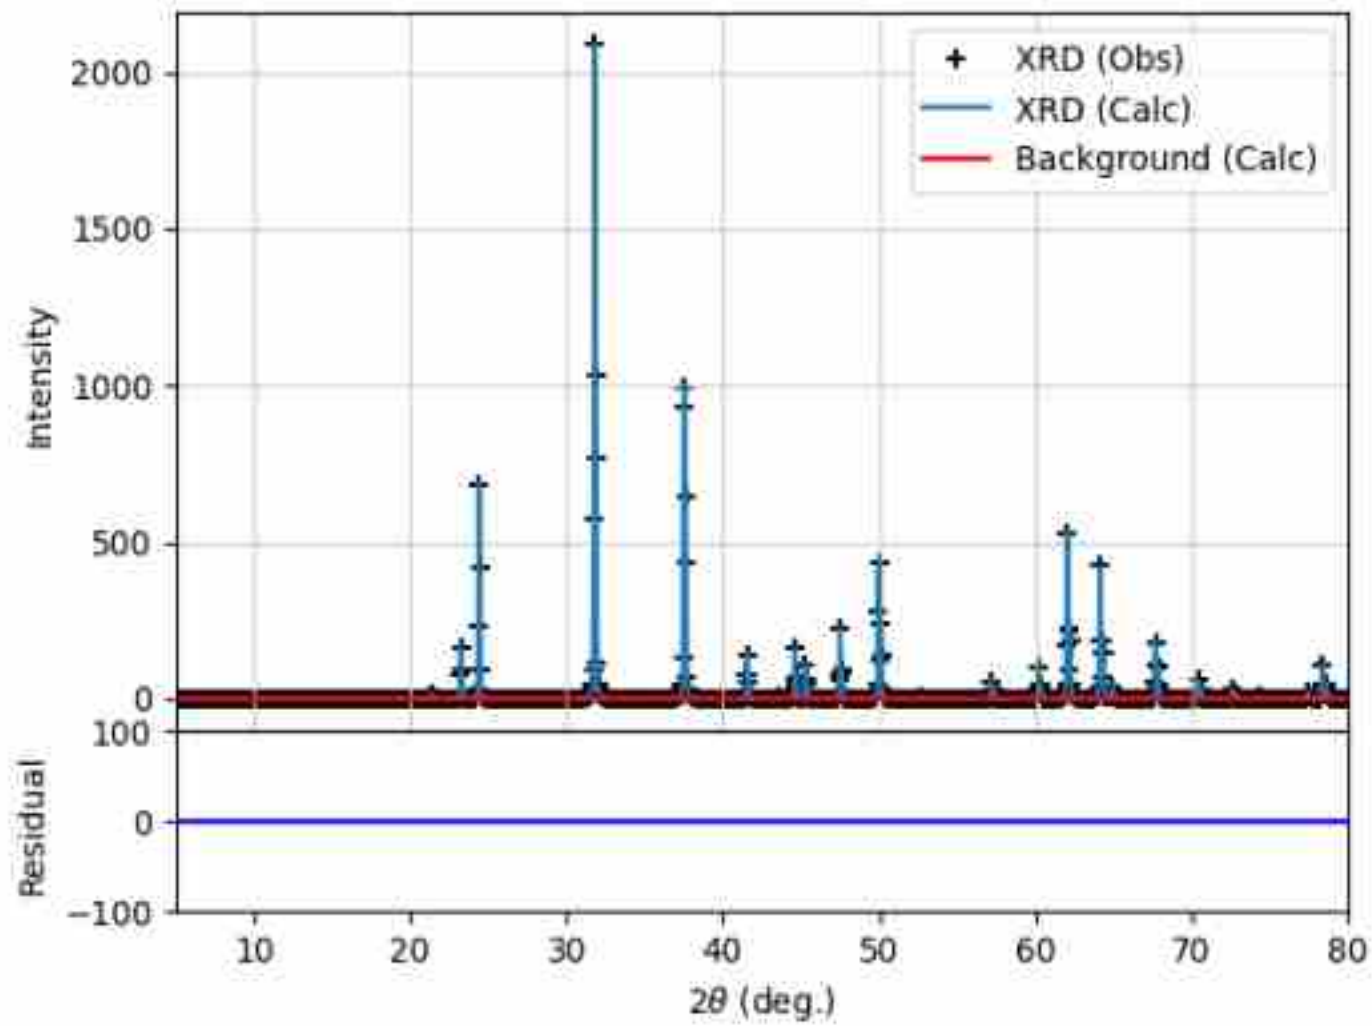

| RMSE before RR | Rwp     | RMSE after RR |
|----------------|---------|---------------|
| 0.006          | 0.00732 | 0.00035       |

# Ni1B2Mo2

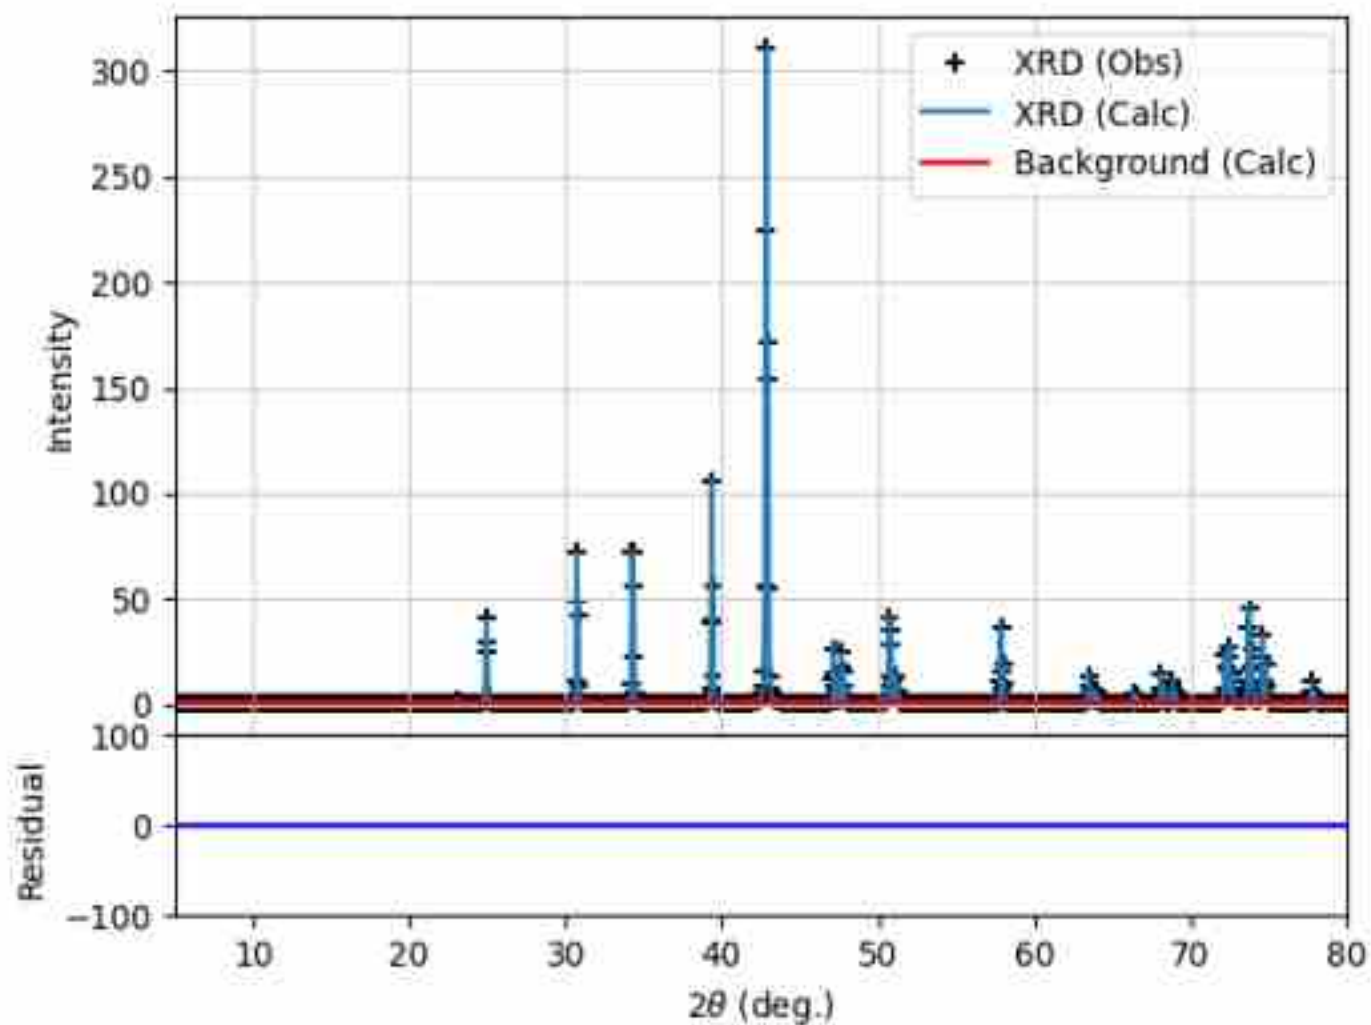

| RMSE before RR | Rwp     | RMSE after RR |
|----------------|---------|---------------|
| 0.006          | 0.00311 | 0.00193       |

# Np1O2

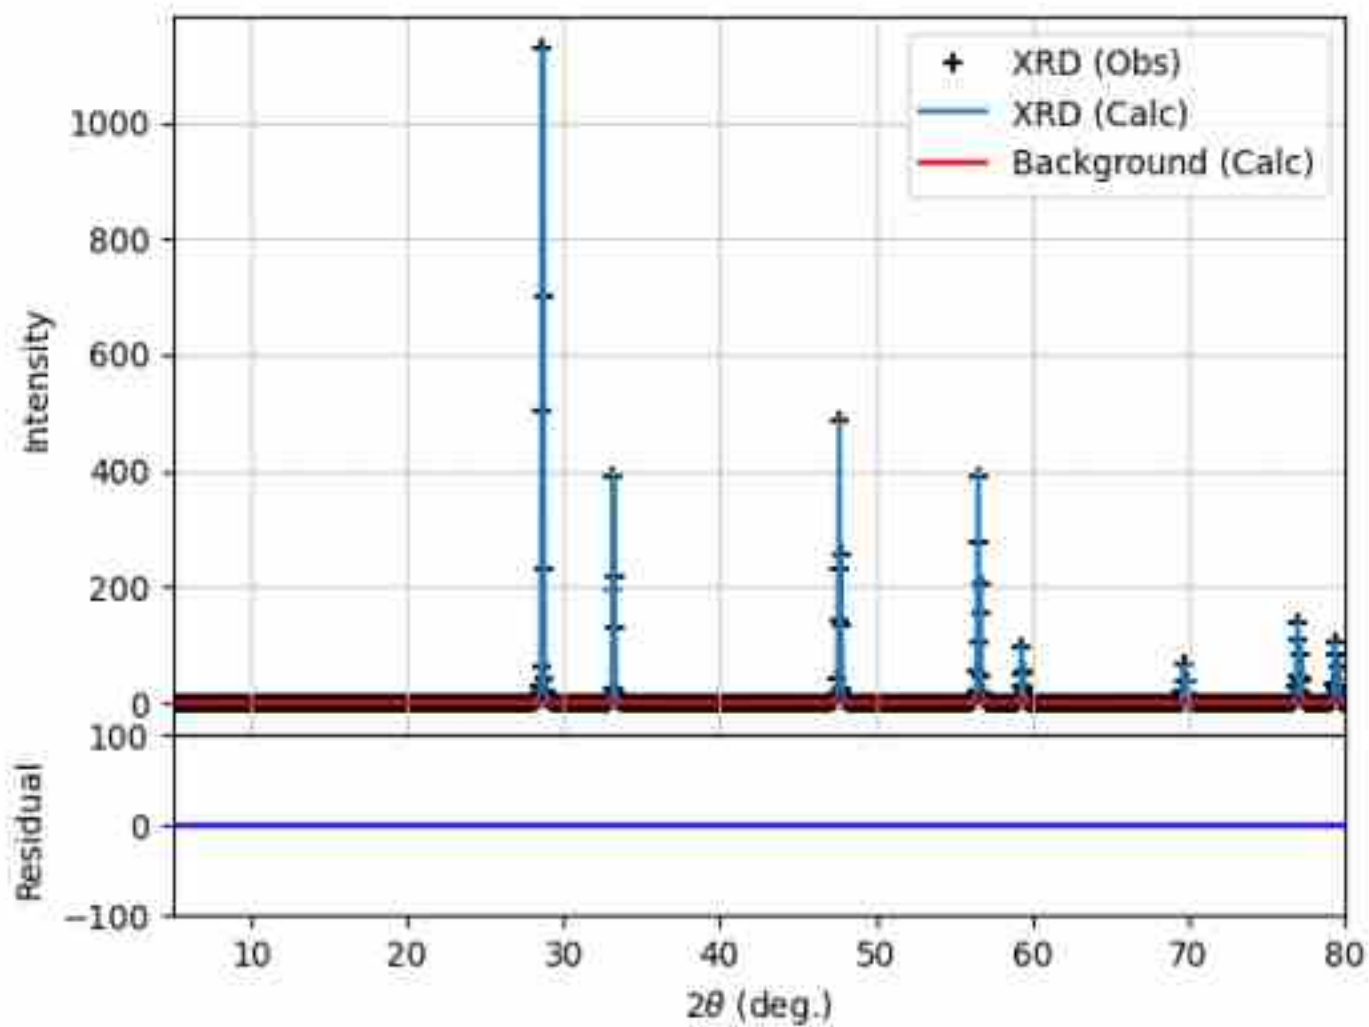

| RMSE before RR | Rwp     | RMSE after RR |
|----------------|---------|---------------|
| 0.006          | 0.00831 | 0.00385       |

# Pr1A14

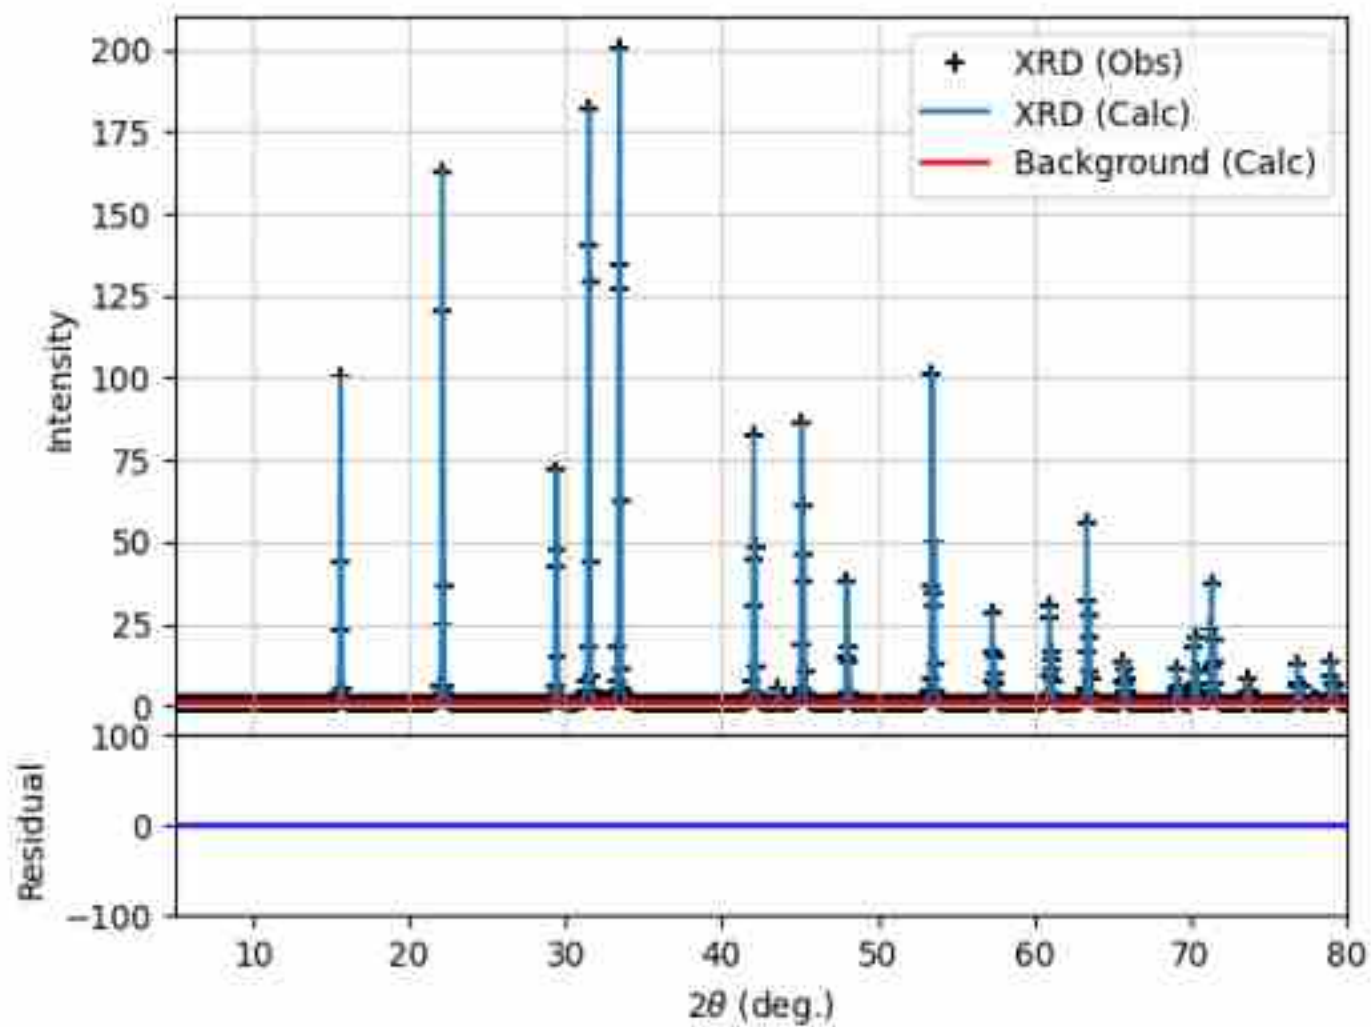

| RMSE before RR | Rwp     | RMSE after RR |
|----------------|---------|---------------|
| 0.006          | 0.00312 | 0.00096       |



# Pr1Co2As2

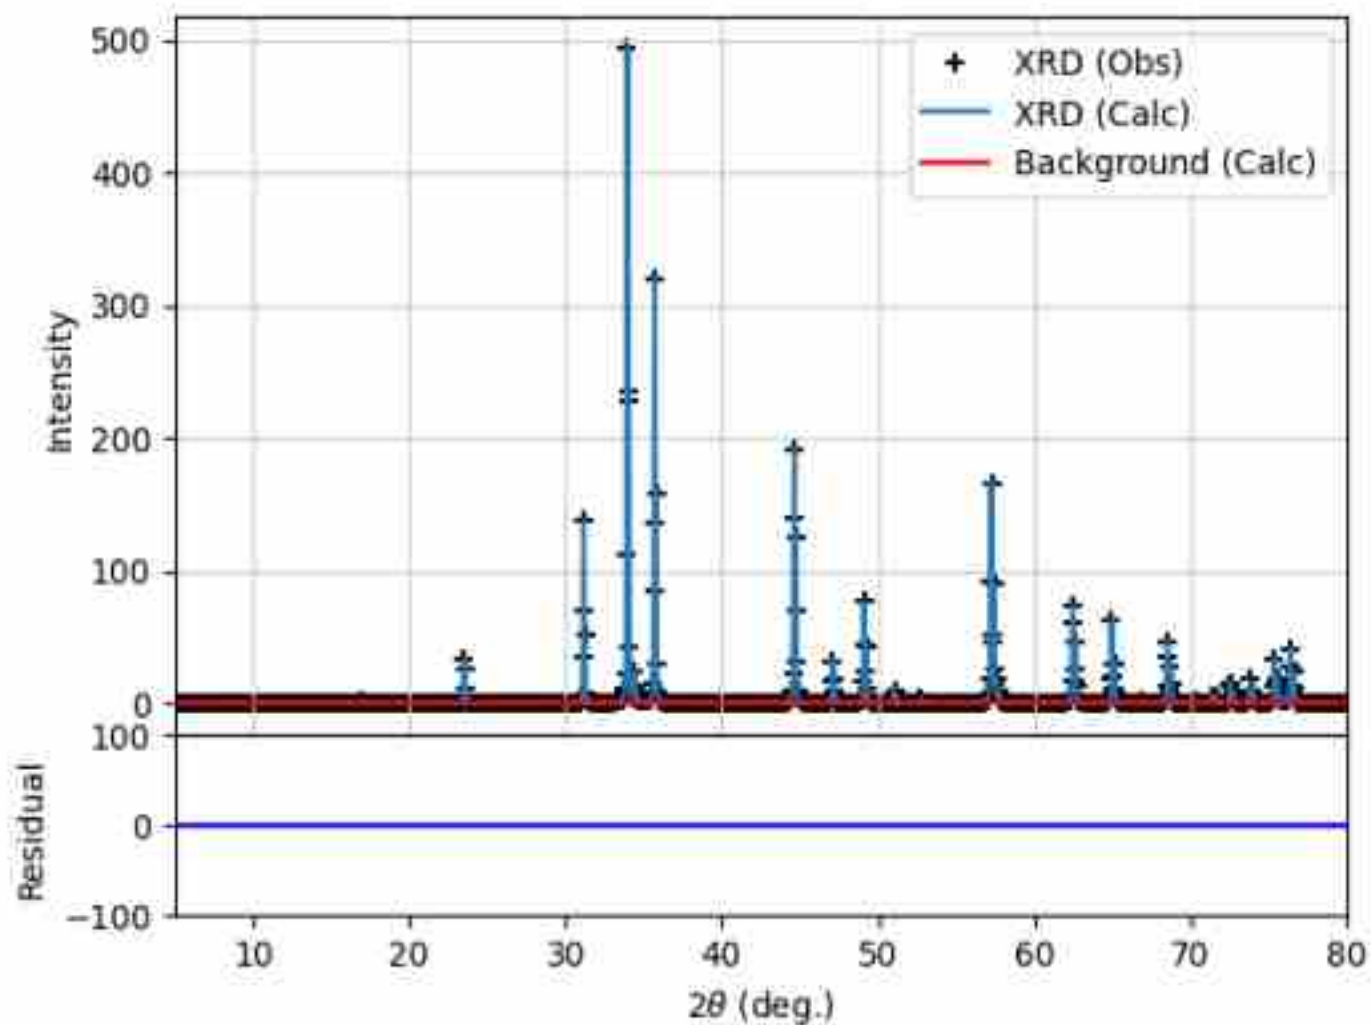

| RMSE before RR | Rwp     | RMSE after RR |
|----------------|---------|---------------|
| 0.006          | 0.00398 | 0.00034       |

# Pr<sub>2</sub>Co<sub>2</sub>Si<sub>2</sub>

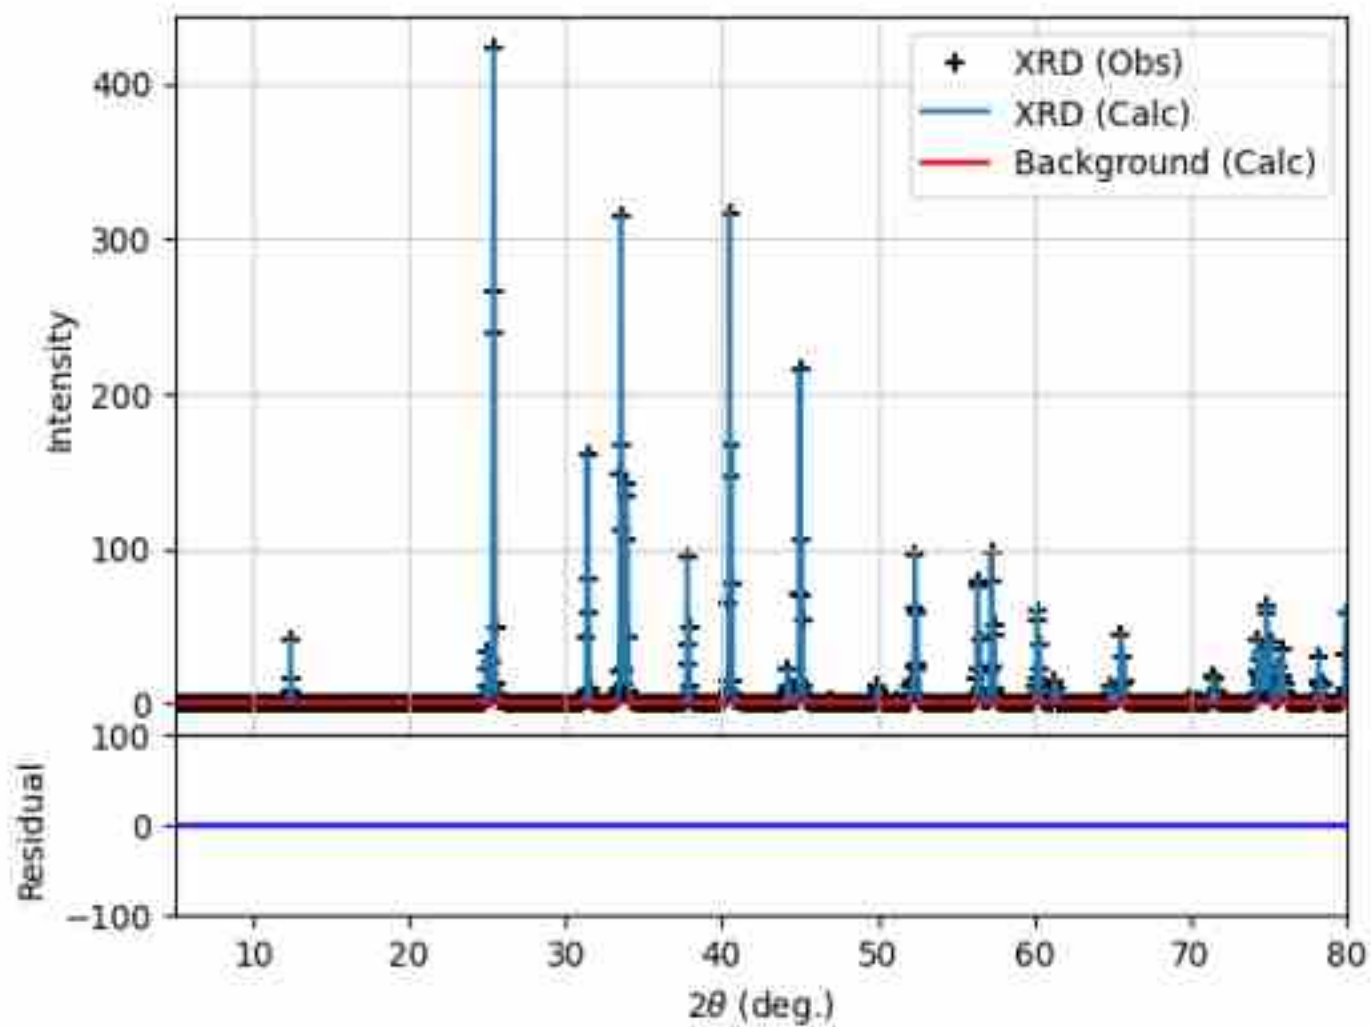

| RMSE before RR | Rwp   | RMSE after RR |
|----------------|-------|---------------|
| 0.006          | 0.004 | 0.0008        |

# Pr<sub>2</sub>Ni<sub>2</sub>Ge<sub>4</sub>

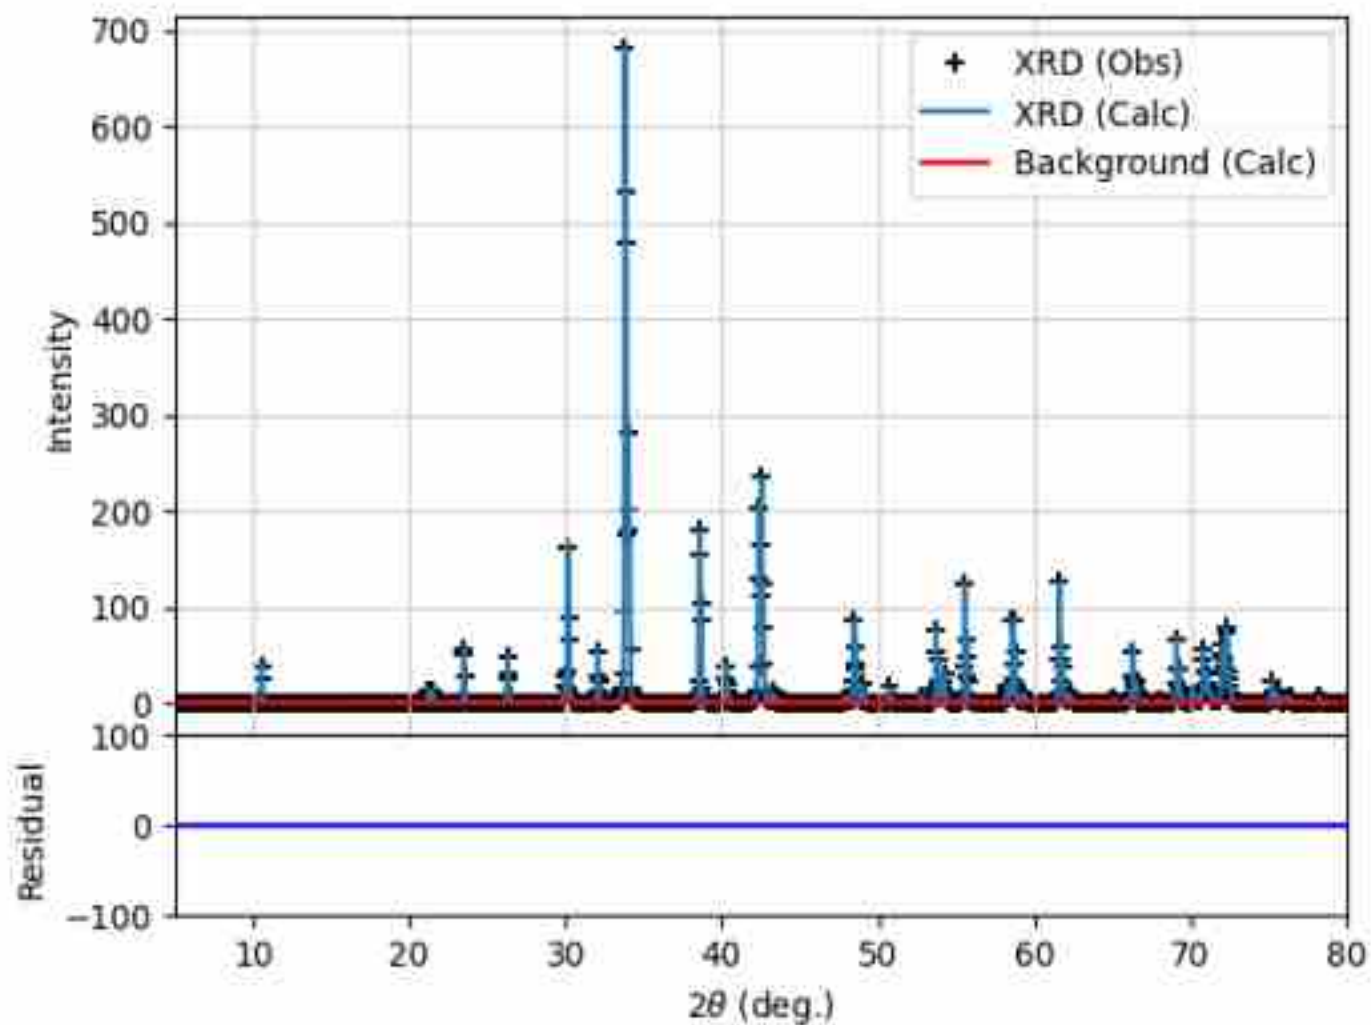

| RMSE before RR | Rwp     | RMSE after RR |
|----------------|---------|---------------|
| 0.006          | 0.00426 | 0.00074       |

# Pr<sub>2</sub>Si<sub>2</sub>Pt<sub>2</sub>

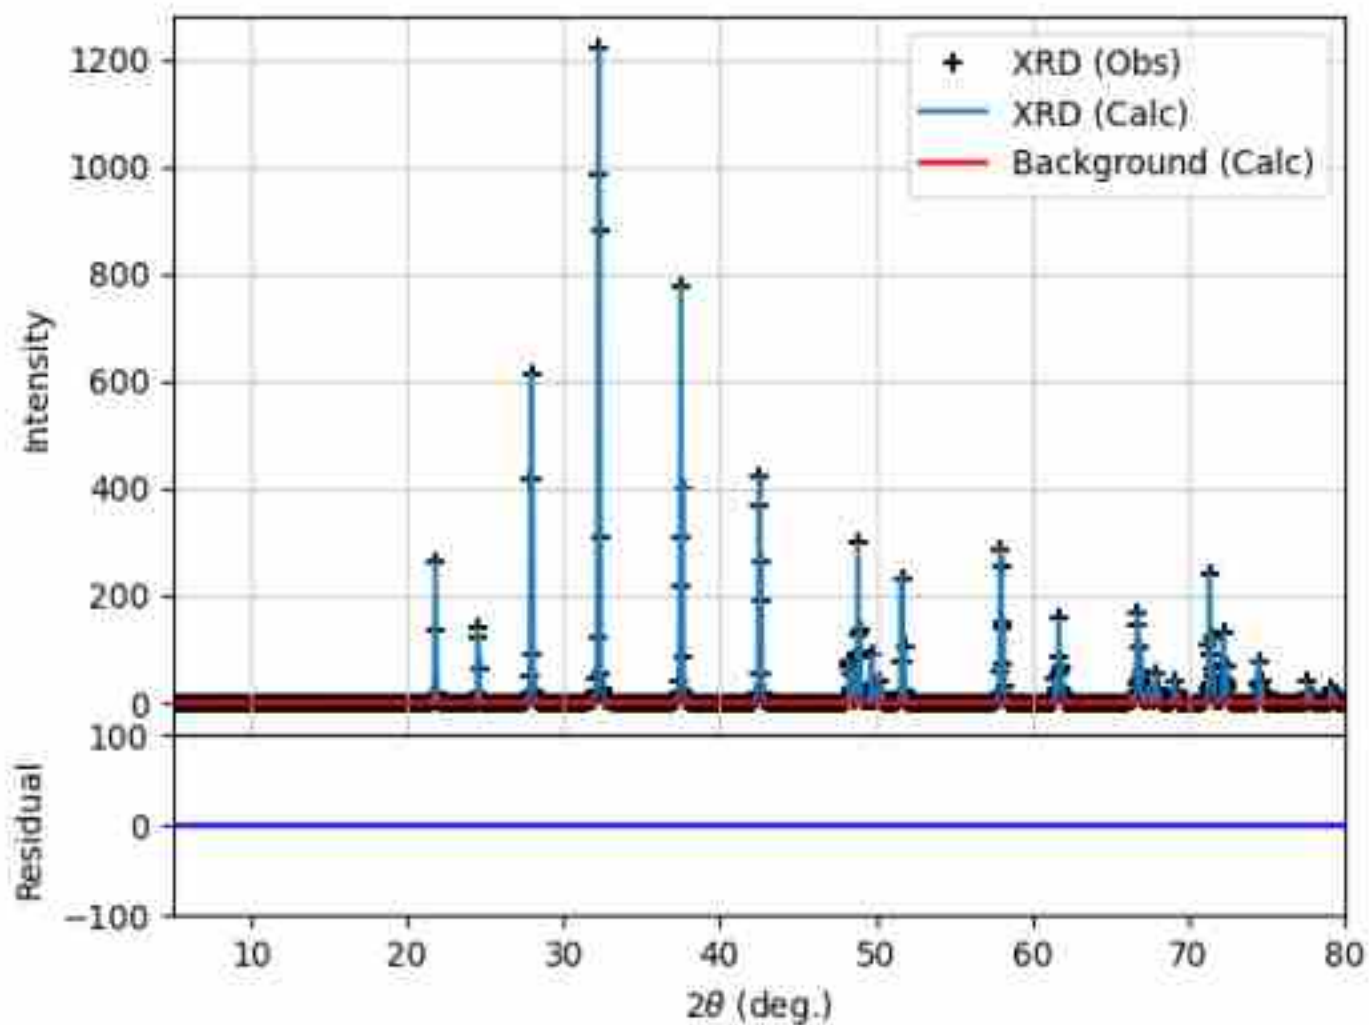

| RMSE before RR | Rwp     | RMSE after RR |
|----------------|---------|---------------|
| 0.006          | 0.00495 | 0.00057       |

# Pt1Se2

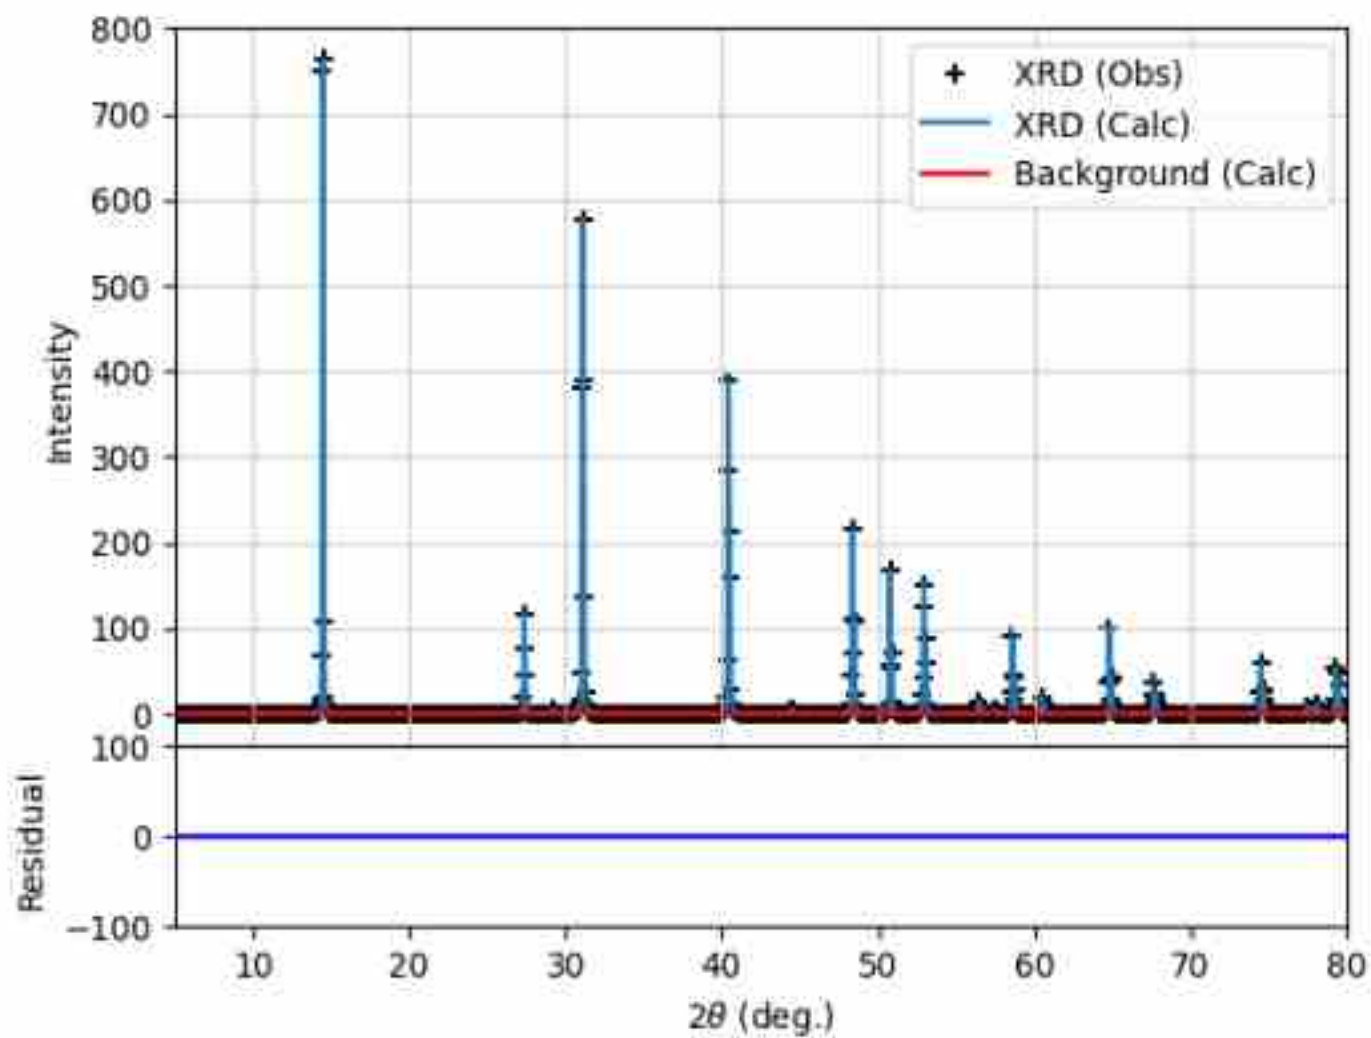

| RMSE before RR | Rwp     | RMSE after RR |
|----------------|---------|---------------|
| 0.006          | 0.00265 | 0.00041       |

# Pu<sub>1</sub>Al<sub>3</sub>Pd<sub>2</sub>

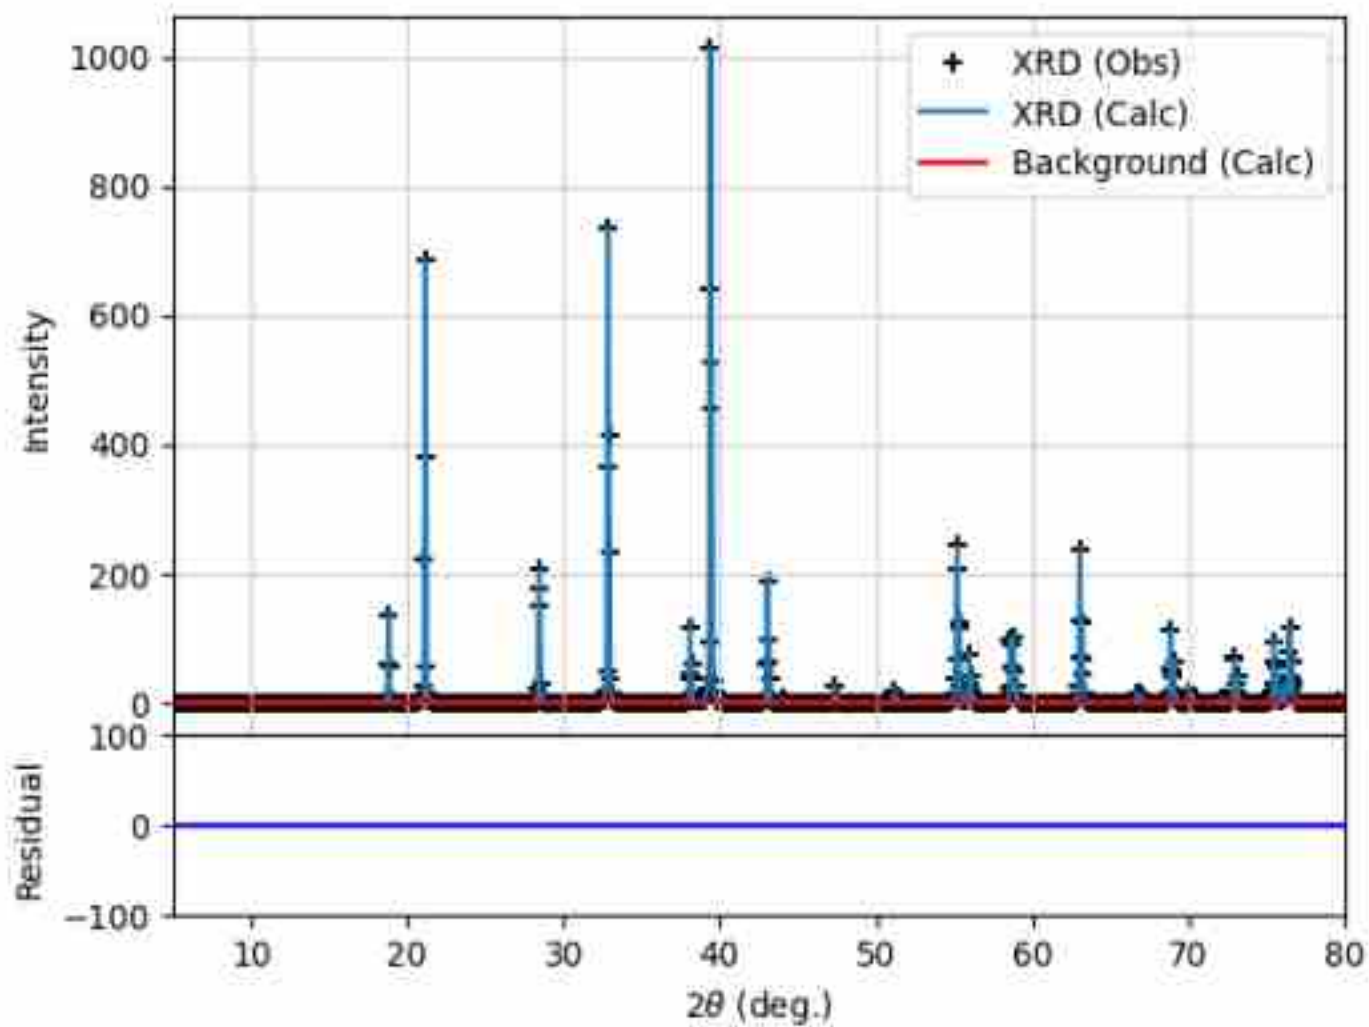

| RMSE before RR | Rwp     | RMSE after RR |
|----------------|---------|---------------|
| 0.006          | 0.00323 | 0.00344       |

# Pu1Pa1O4

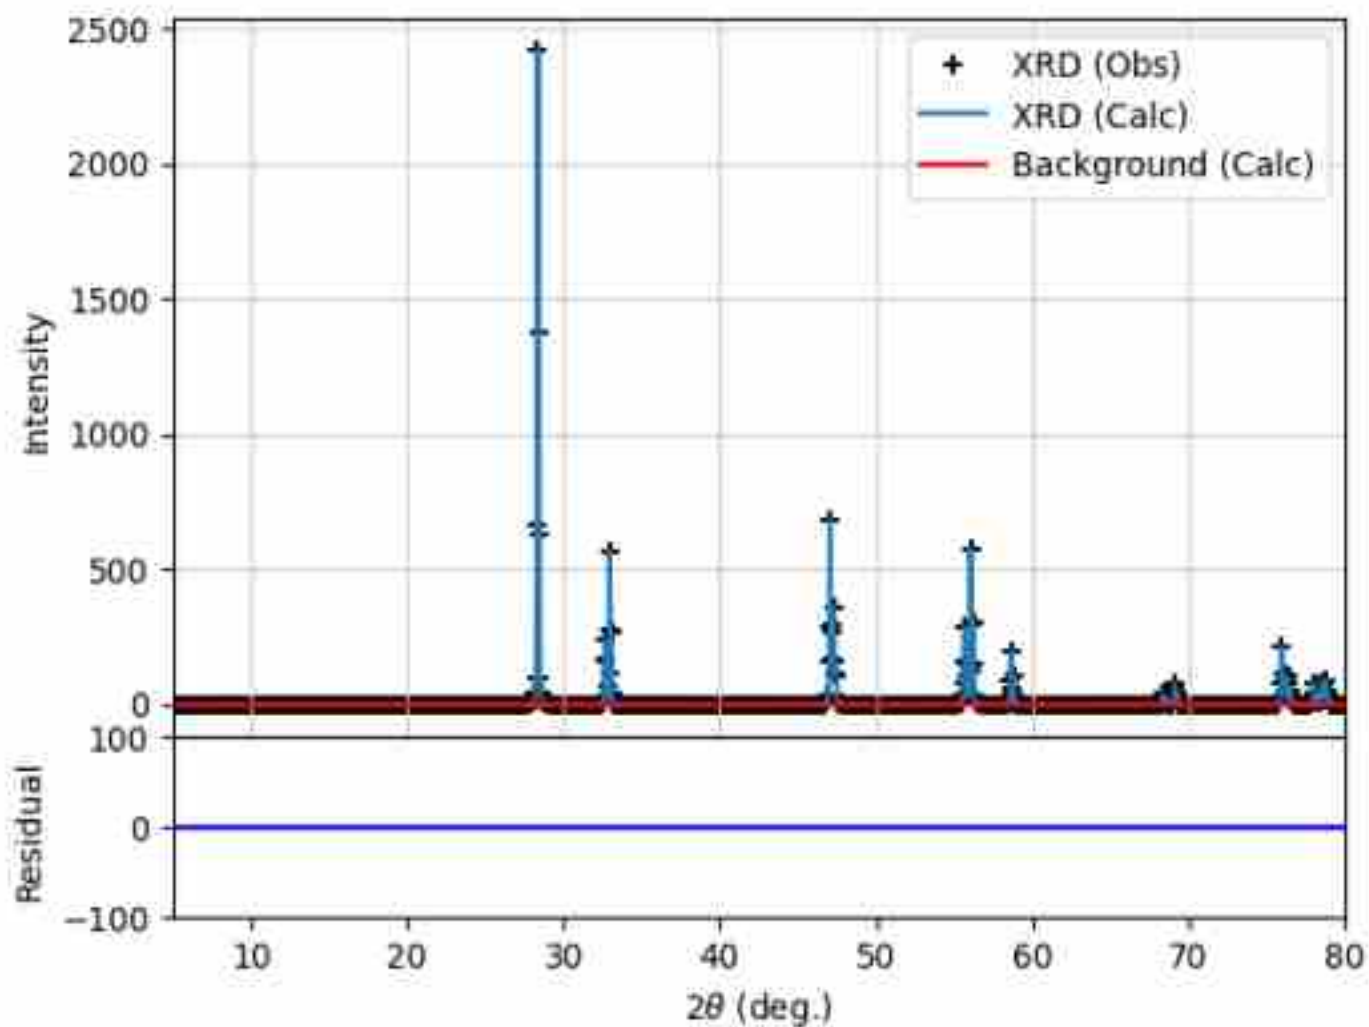

| RMSE before RR | Rwp     | RMSE after RR |
|----------------|---------|---------------|
| 0.006          | 0.00453 | 0.00167       |

# Pu2Pt6

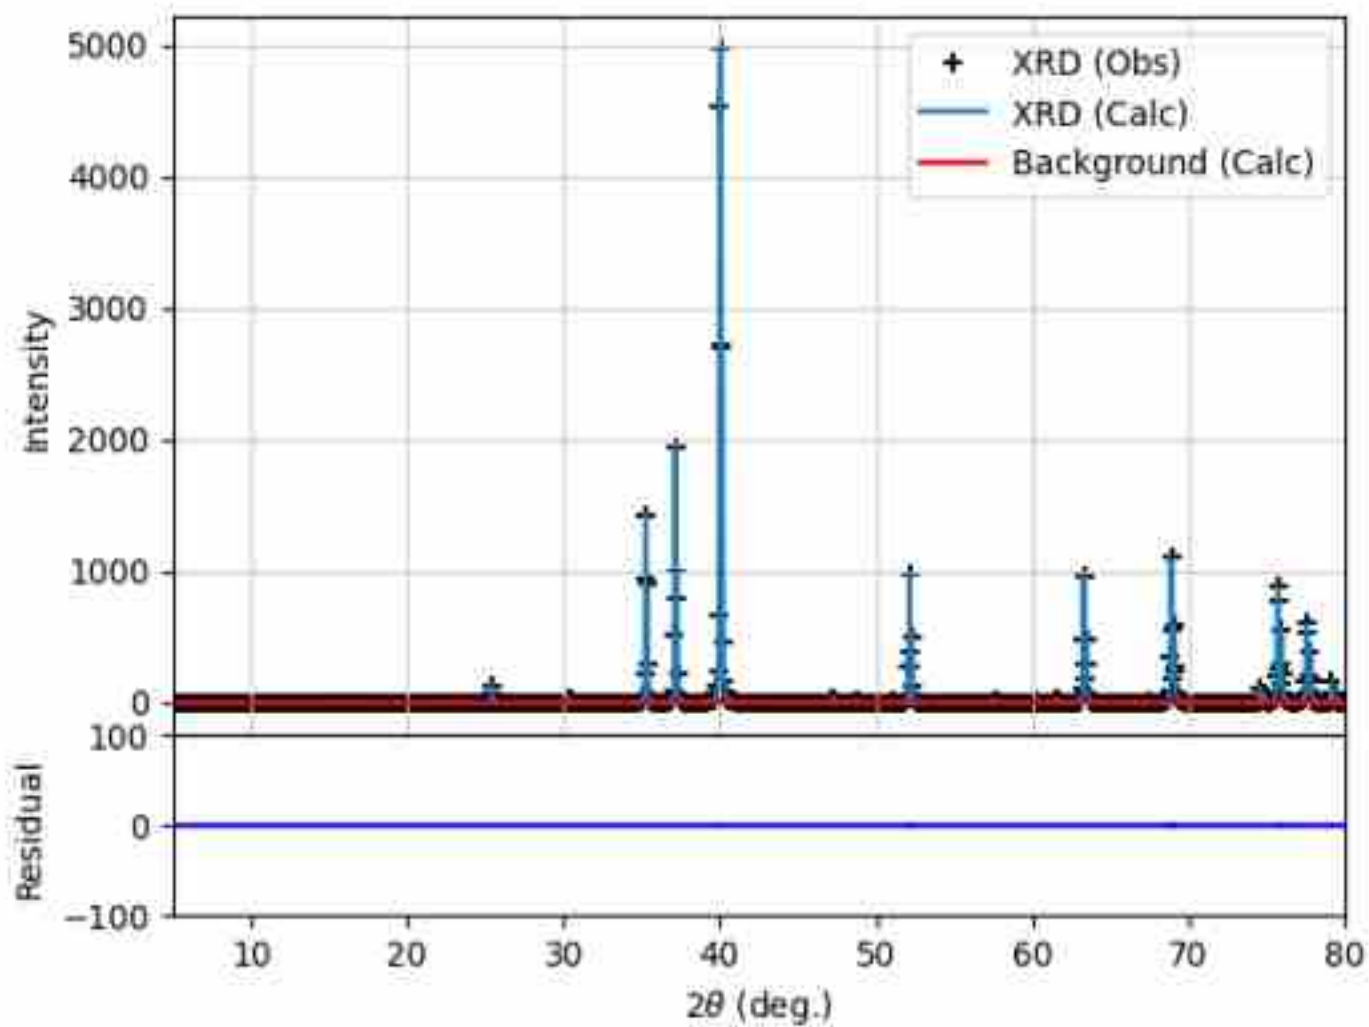

| RMSE before RR | Rwp    | RMSE after RR |
|----------------|--------|---------------|
| 0.006          | 0.0549 | 0.00094       |



# Sc1Co3C1

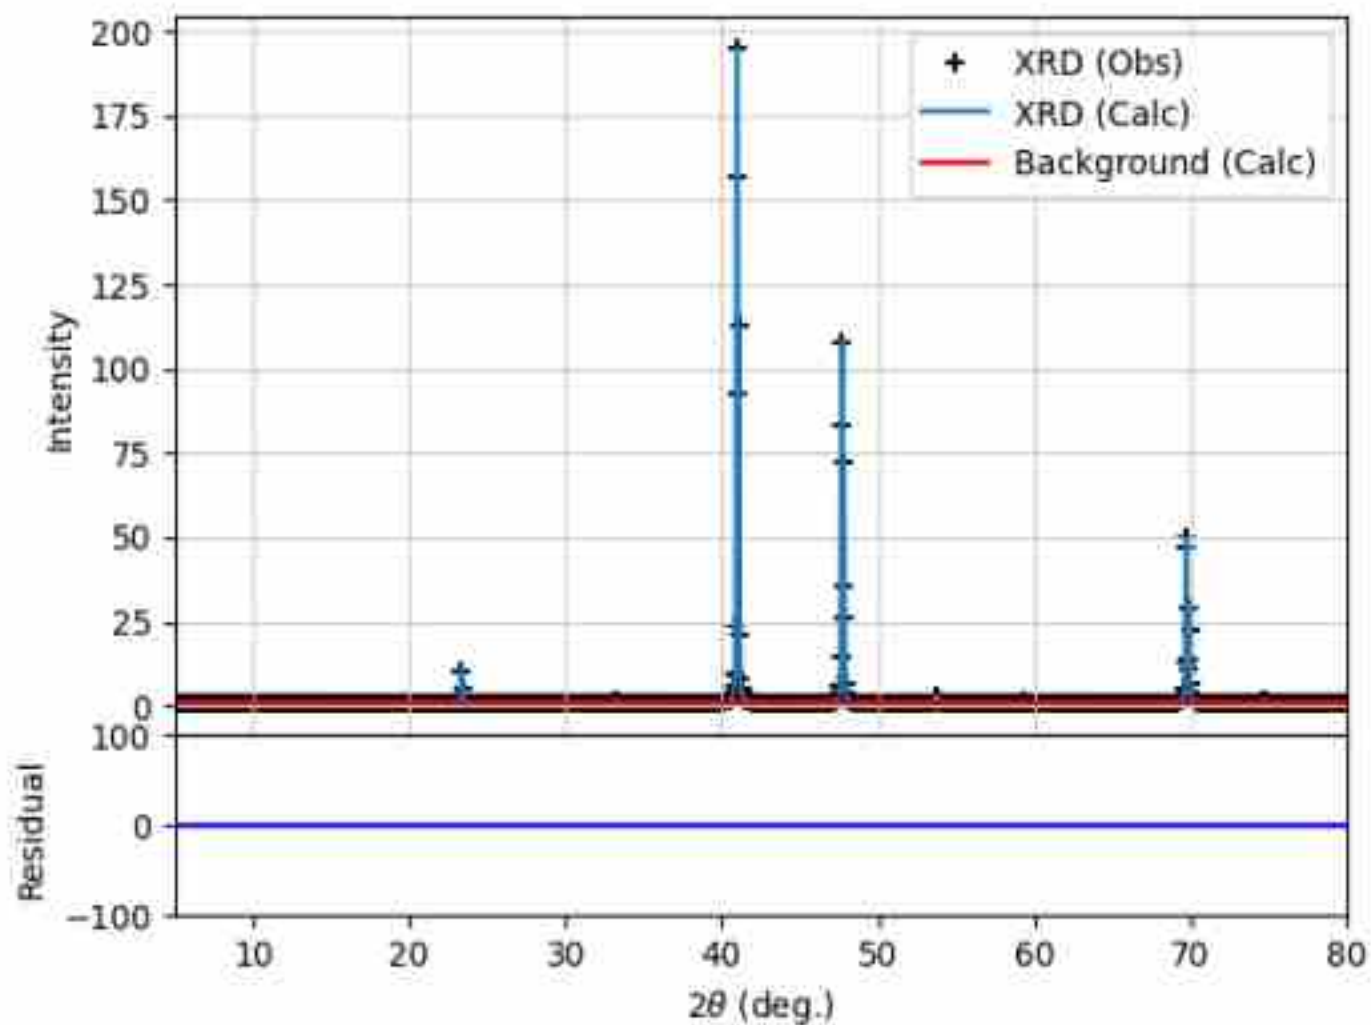

| RMSE before RR | Rwp     | RMSE after RR |
|----------------|---------|---------------|
| 0.006          | 0.03466 | 0.00181       |

# Sc<sub>2</sub>B<sub>2</sub>C<sub>2</sub>

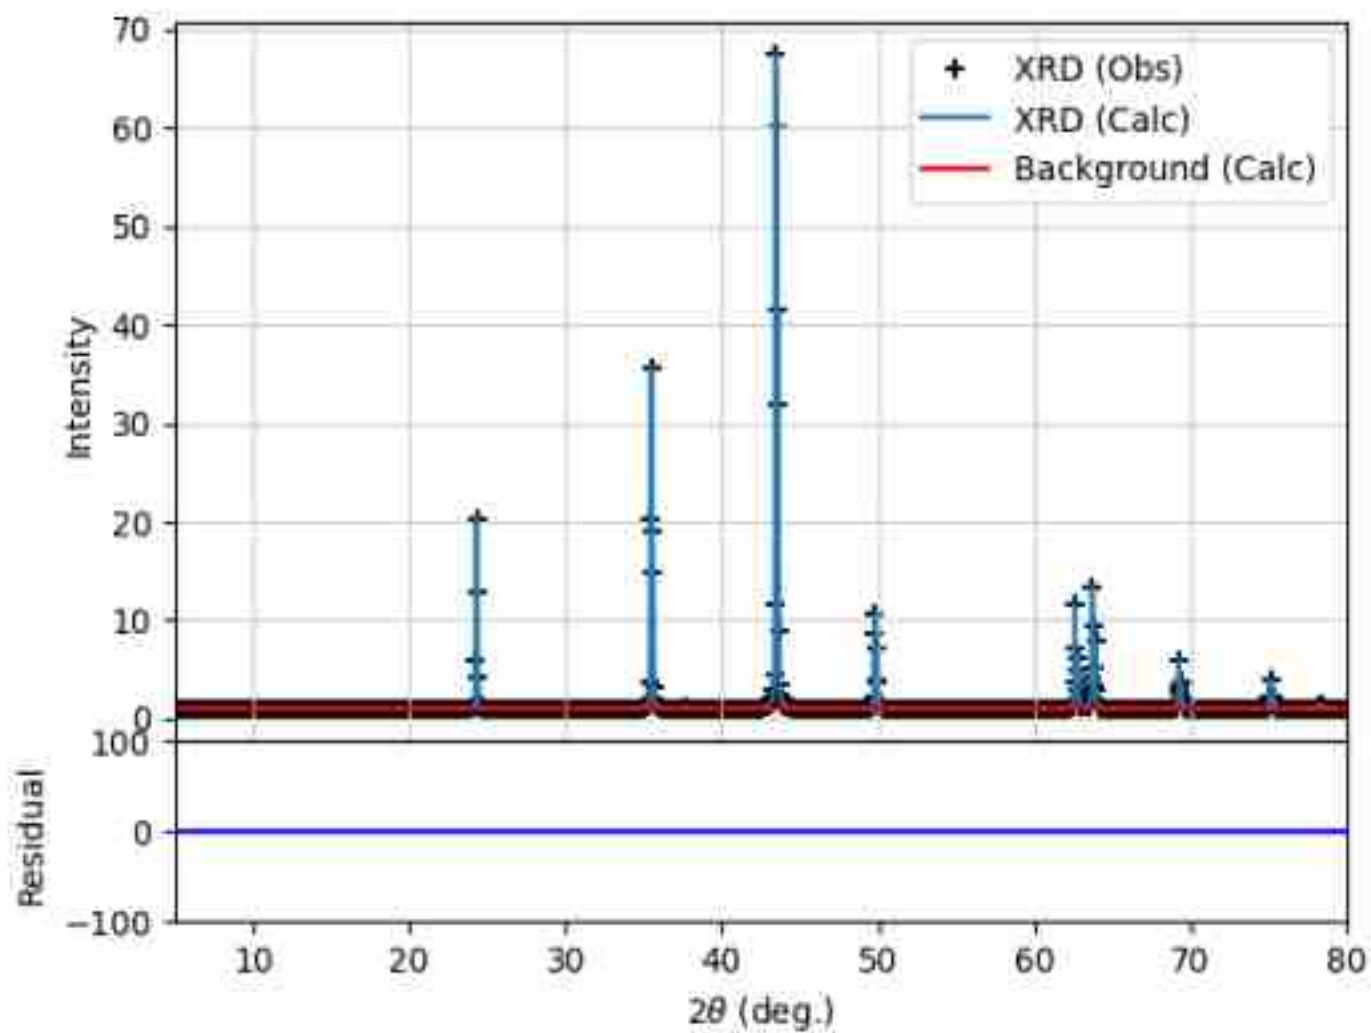

| RMSE before RR | Rwp     | RMSE after RR |
|----------------|---------|---------------|
| 0.006          | 0.01843 | 0.0027        |

# Sm1Al2Si2

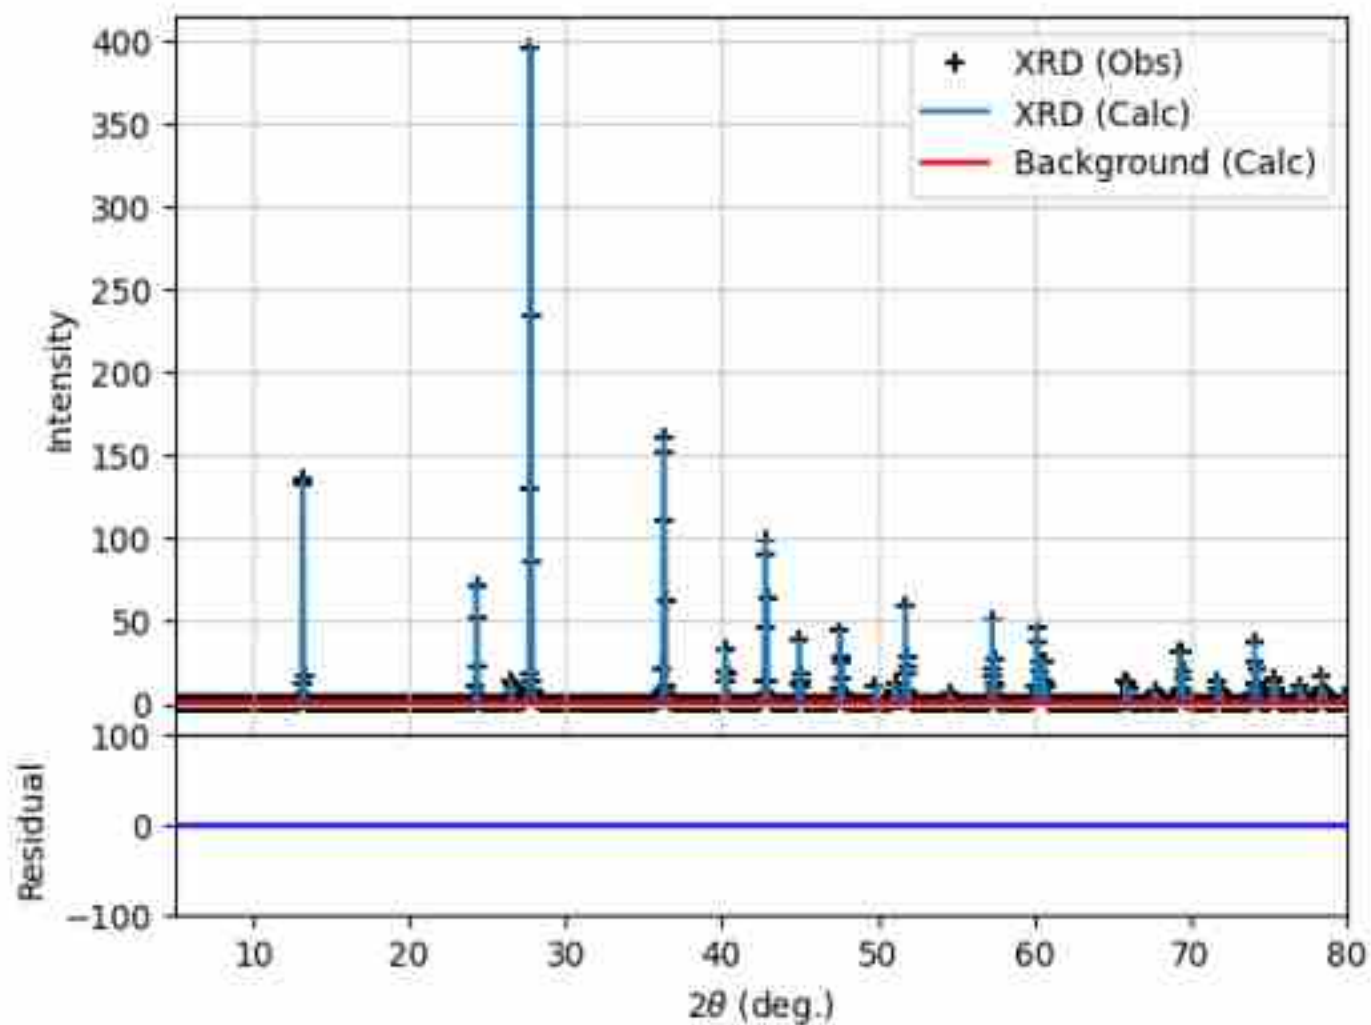

| RMSE before RR | Rwp     | RMSE after RR |
|----------------|---------|---------------|
| 0.006          | 0.00419 | 0.00168       |

# Sm1Cu1O2

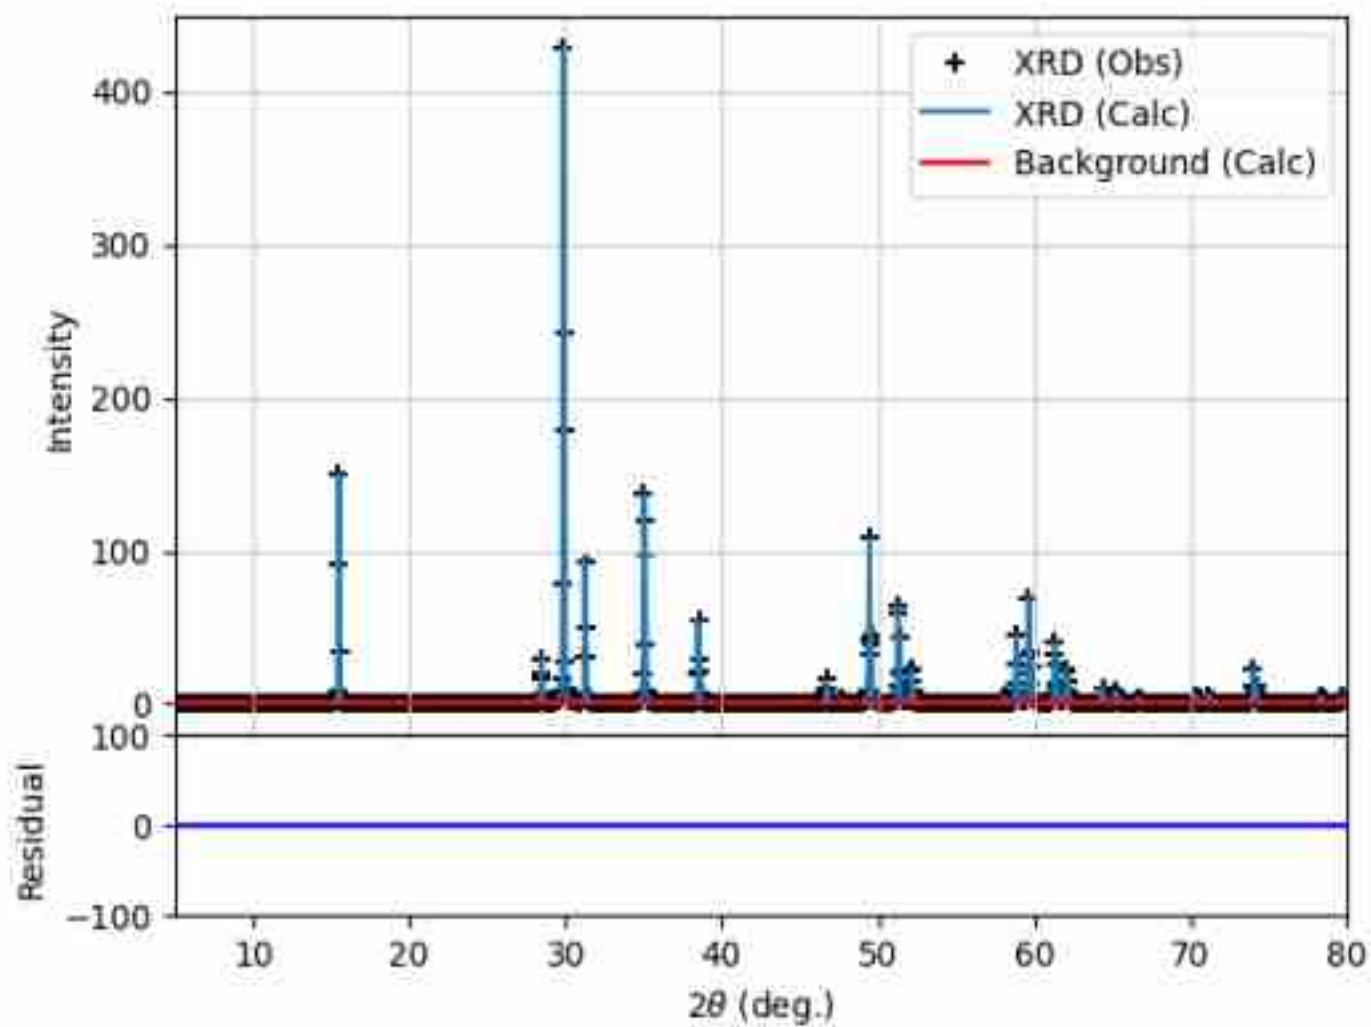

| RMSE before RR | Rwp     | RMSE after RR |
|----------------|---------|---------------|
| 0.006          | 0.00281 | 0.00085       |

# Sm1Ge2Pd2

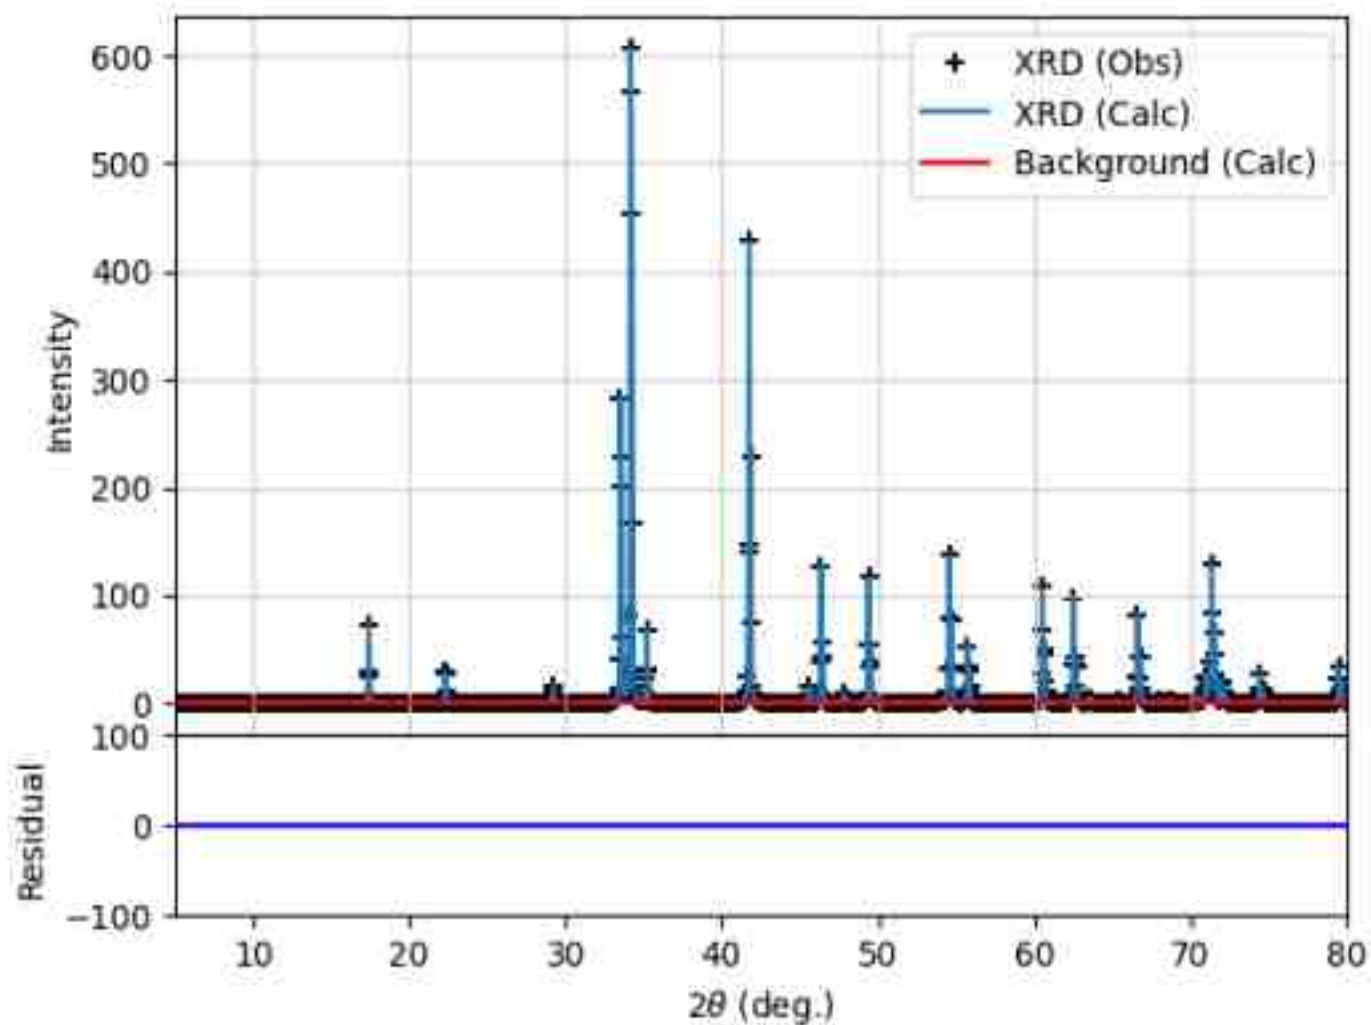

| RMSE before RR | Rwp     | RMSE after RR |
|----------------|---------|---------------|
| 0.006          | 0.00322 | 0.00048       |

# Sm1Th1C1N1

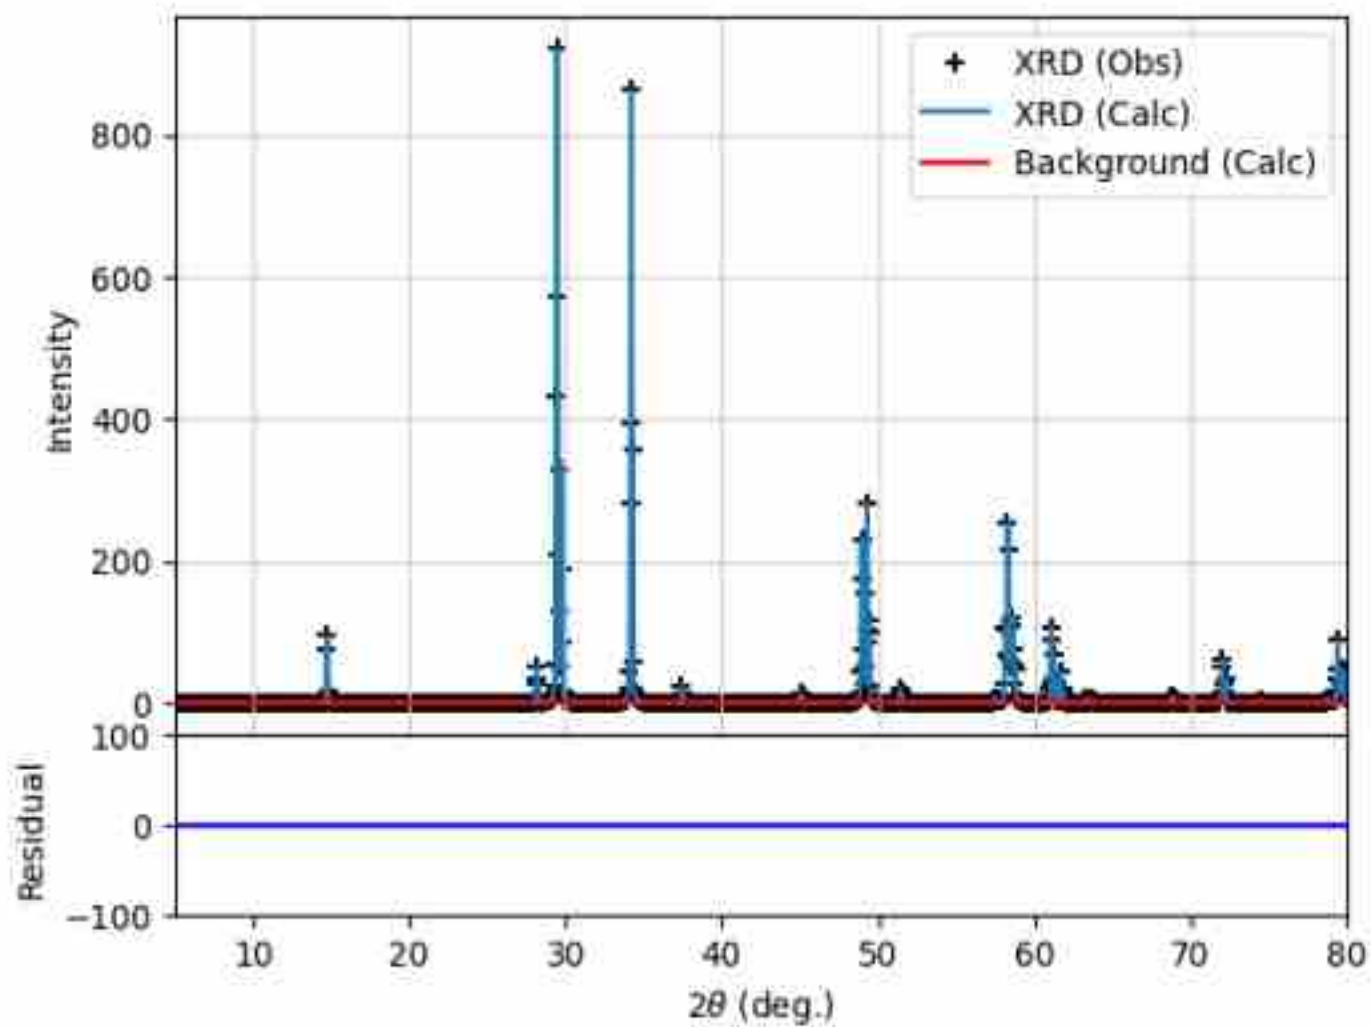

| RMSE before RR | Rwp     | RMSE after RR |
|----------------|---------|---------------|
| 0.006          | 0.02699 | 0.0025        |

# Sm2Au2

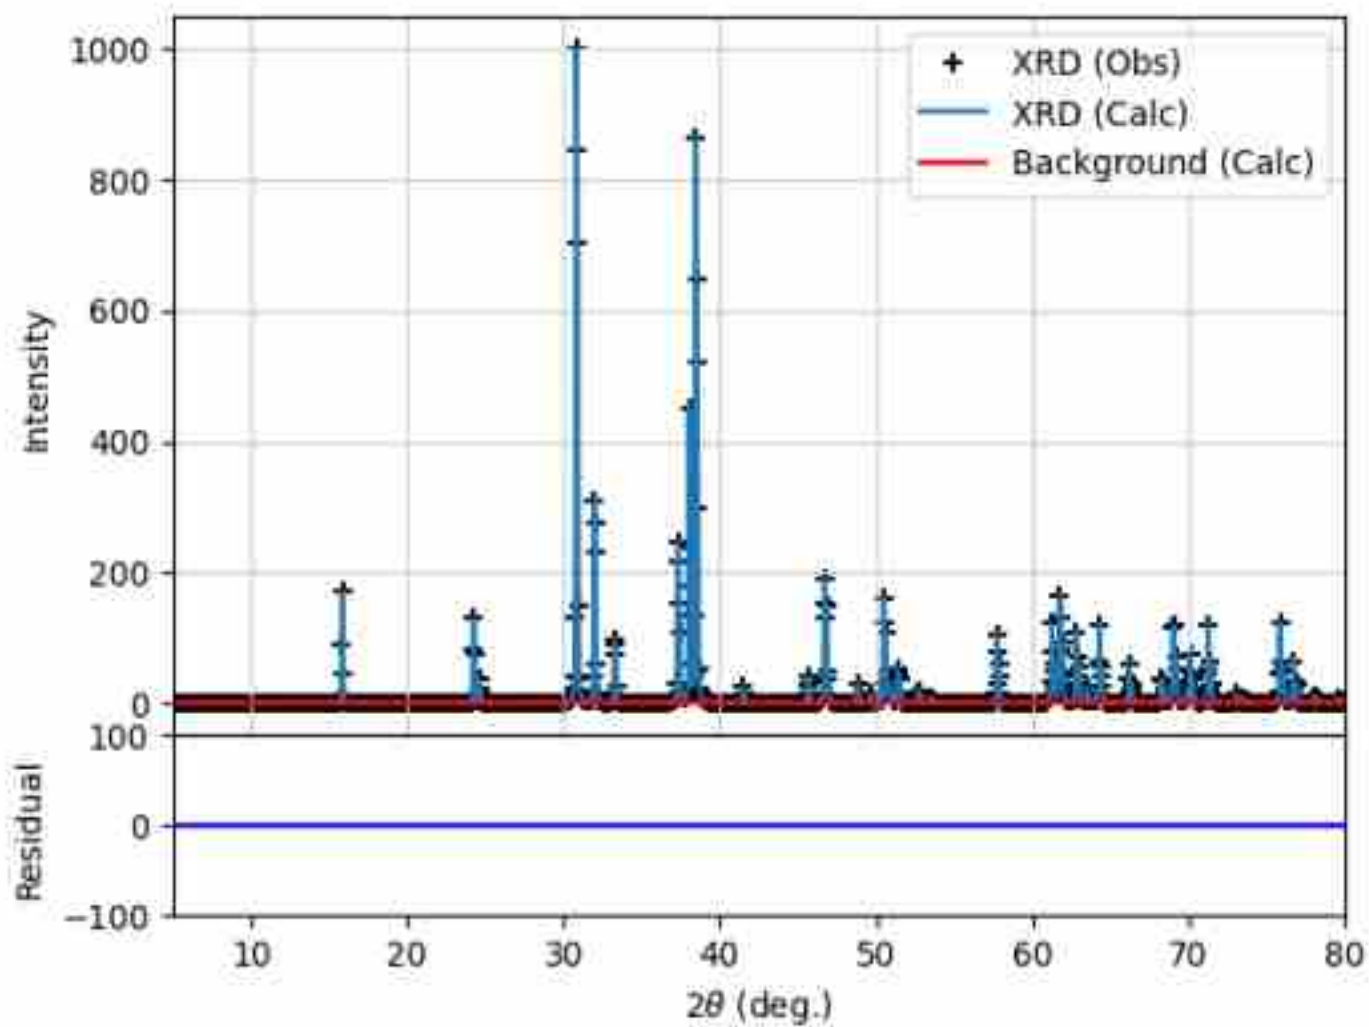

| RMSE before RR | Rwp     | RMSE after RR |
|----------------|---------|---------------|
| 0.006          | 0.00475 | 0.00054       |

# Sm2Co2Si2

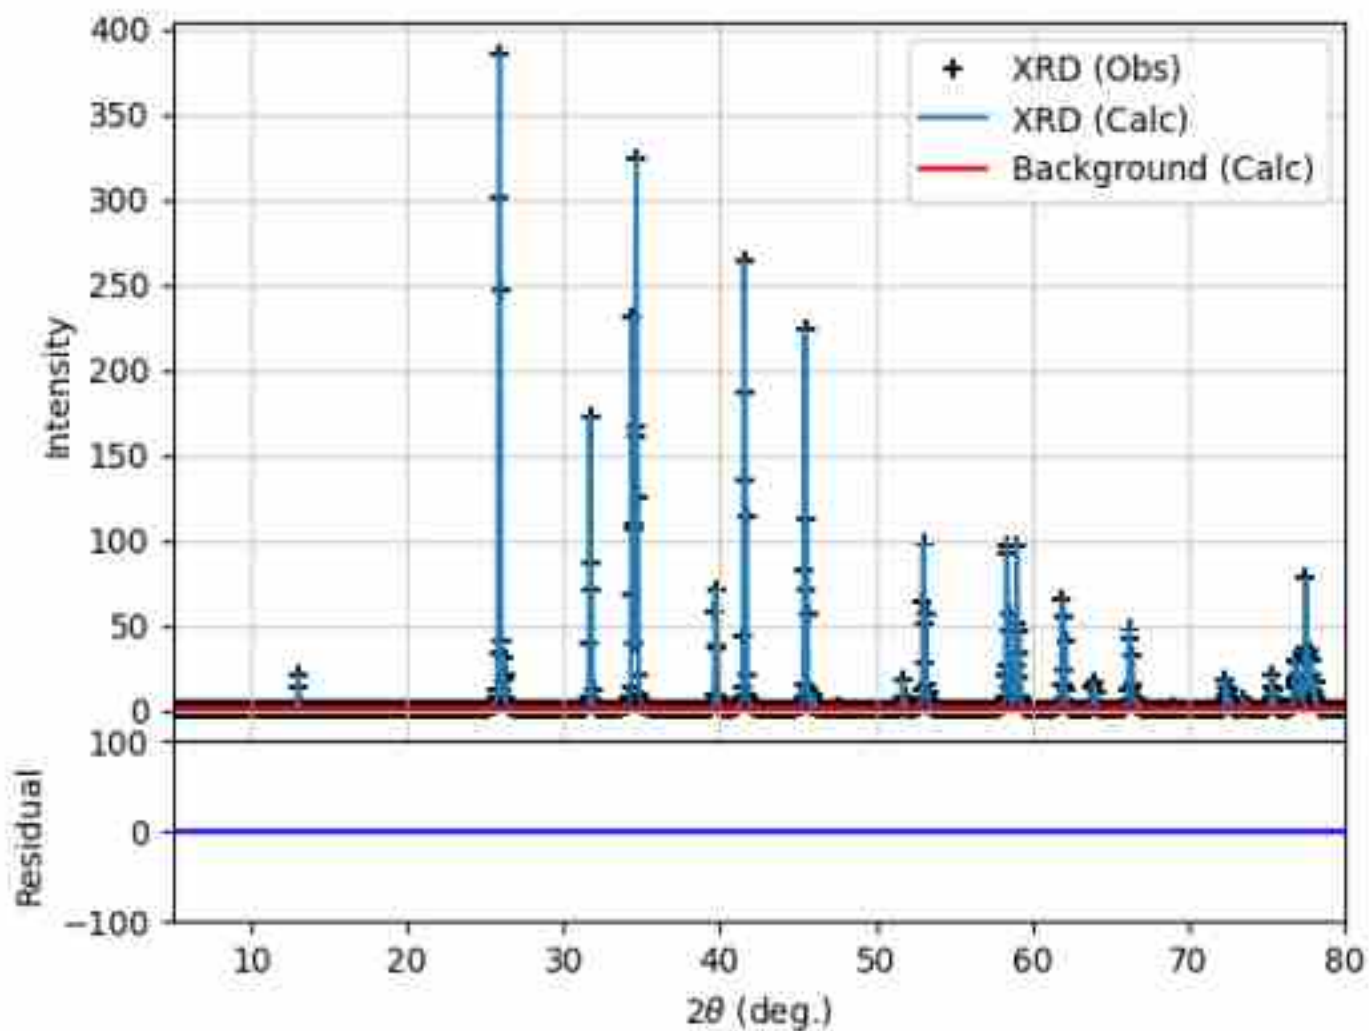

| RMSE before RR | Rwp     | RMSE after RR |
|----------------|---------|---------------|
| 0.006          | 0.00374 | 0.00073       |



# Sm<sub>2</sub>Cu<sub>2</sub>Sn<sub>2</sub>

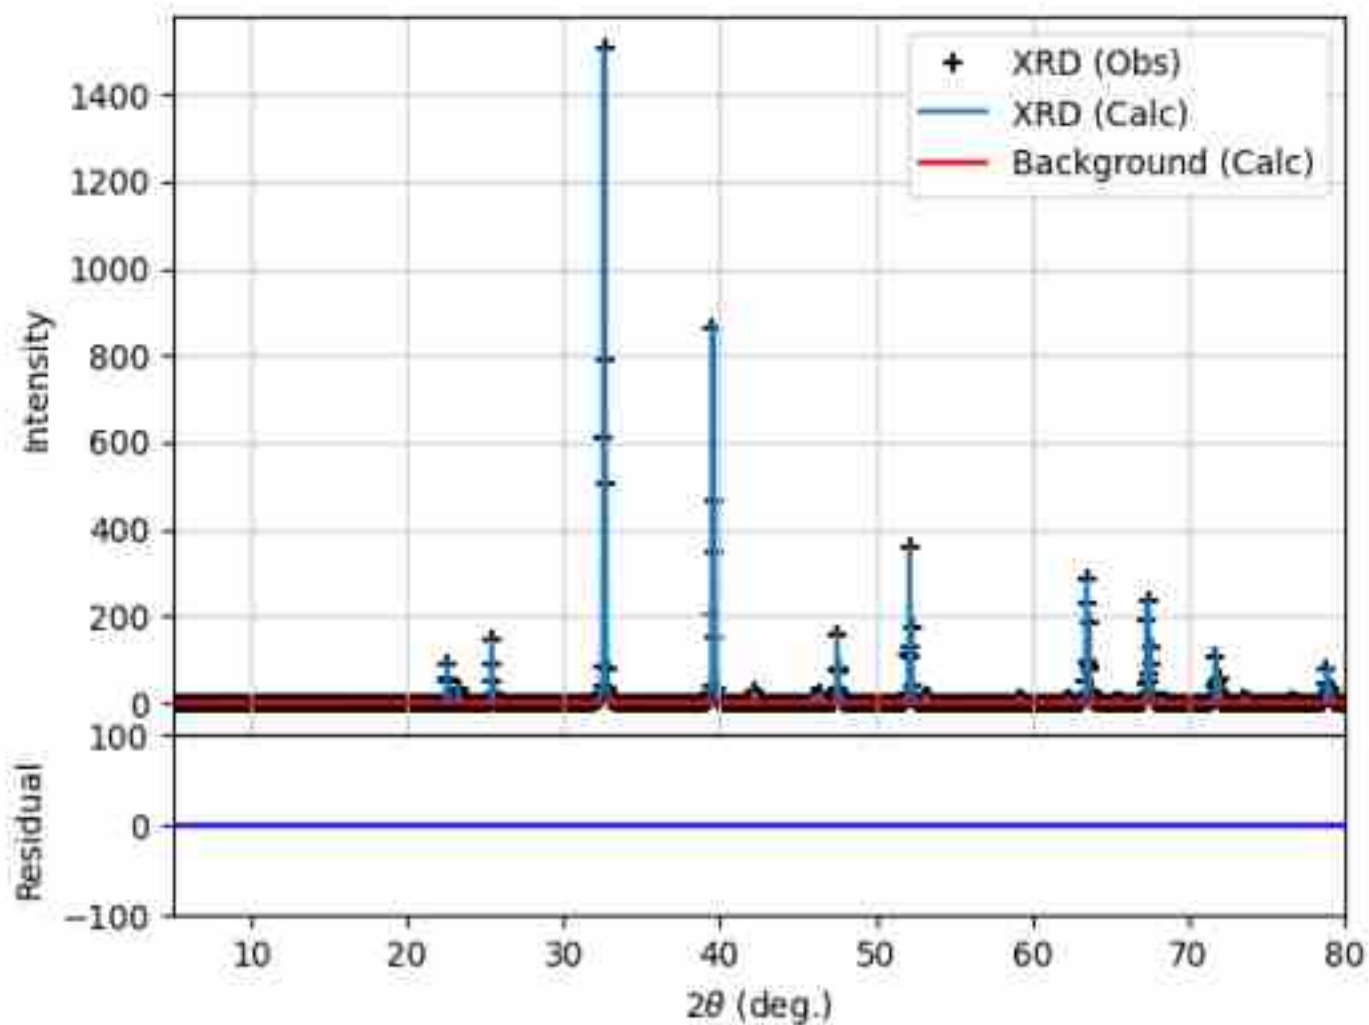

| RMSE before RR | Rwp    | RMSE after RR |
|----------------|--------|---------------|
| 0.006          | 0.0048 | 0.00037       |

# Sm2Cu4

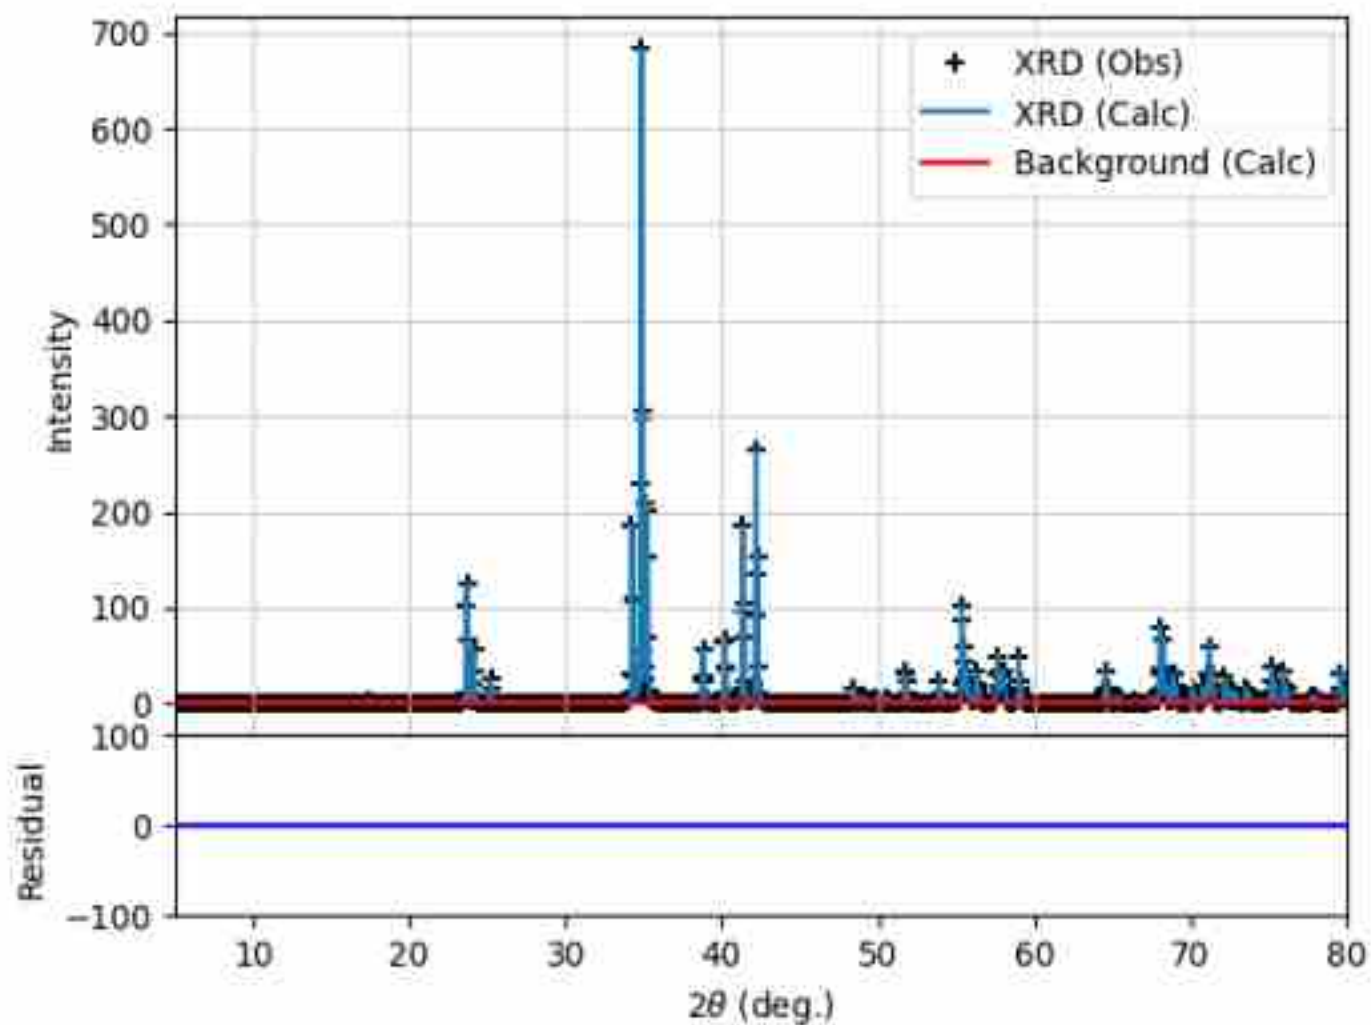

| RMSE before RR | Rwp     | RMSE after RR |
|----------------|---------|---------------|
| 0.006          | 0.00432 | 0.00045       |

# Sm<sub>2</sub>Mn<sub>2</sub>Si<sub>4</sub>

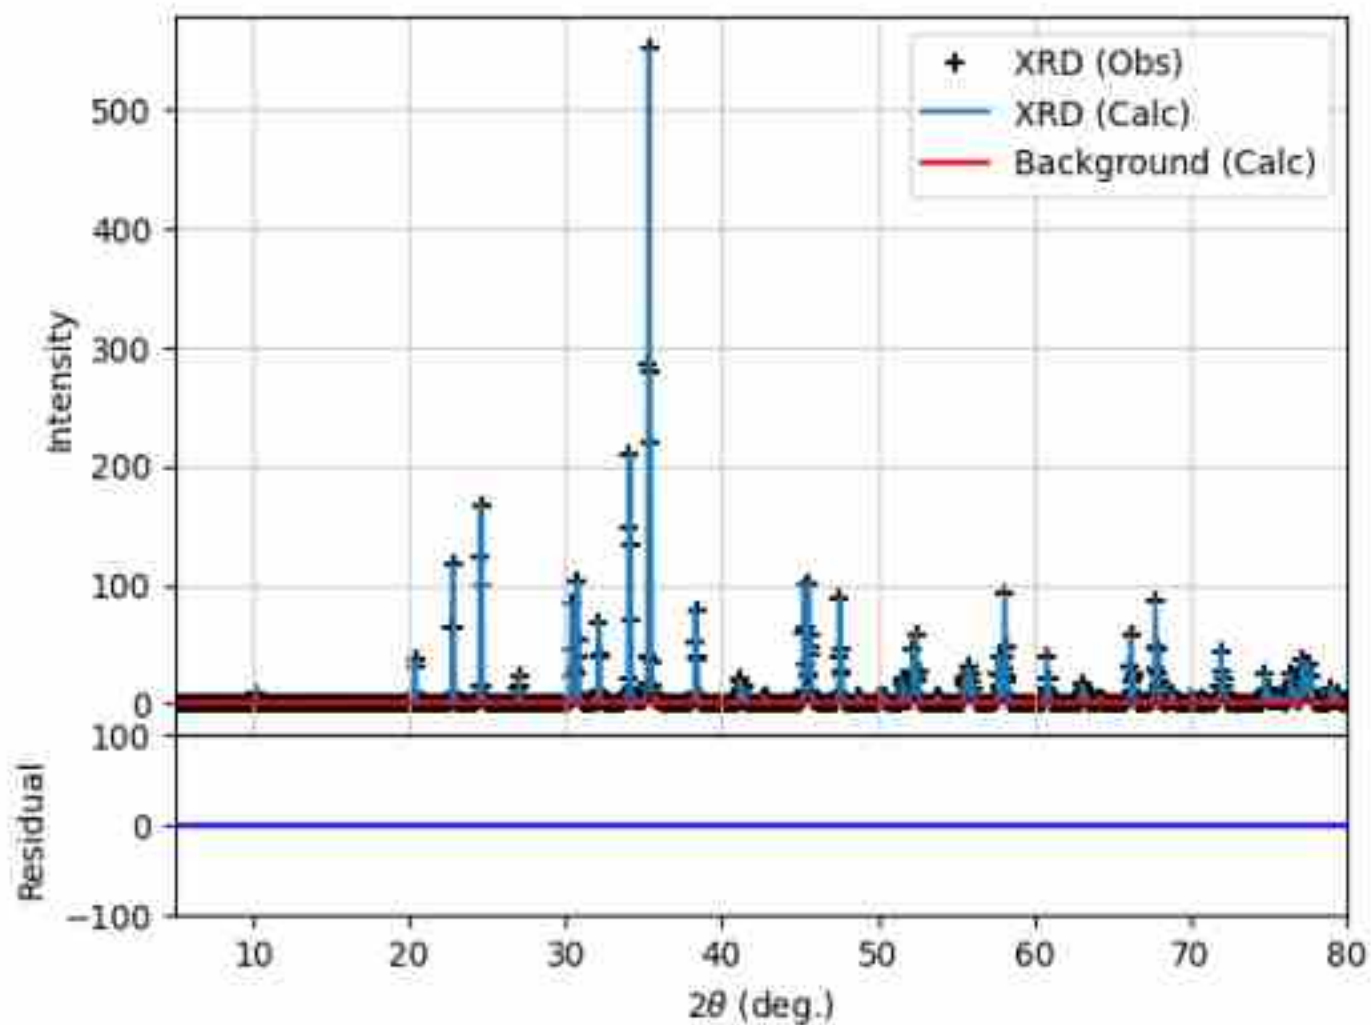

| RMSE before RR | Rwp    | RMSE after RR |
|----------------|--------|---------------|
| 0.006          | 0.0035 | 0.00053       |

# Sm<sub>2</sub>Ni<sub>2</sub>Sb<sub>2</sub>

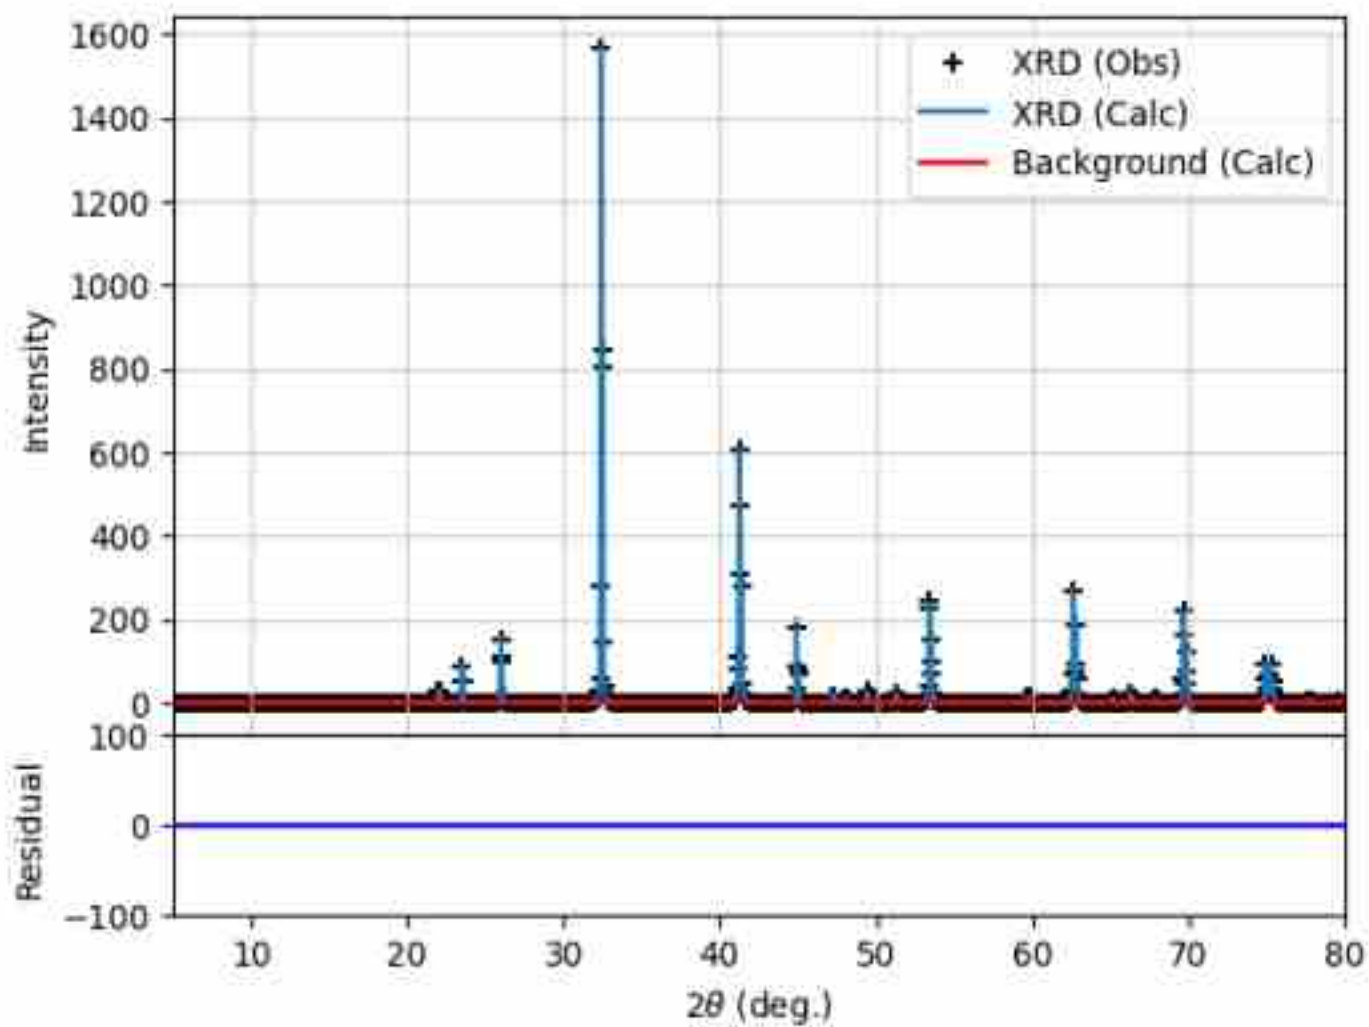

| RMSE before RR | Rwp     | RMSE after RR |
|----------------|---------|---------------|
| 0.006          | 0.00483 | 0.00031       |

# Sm4In2

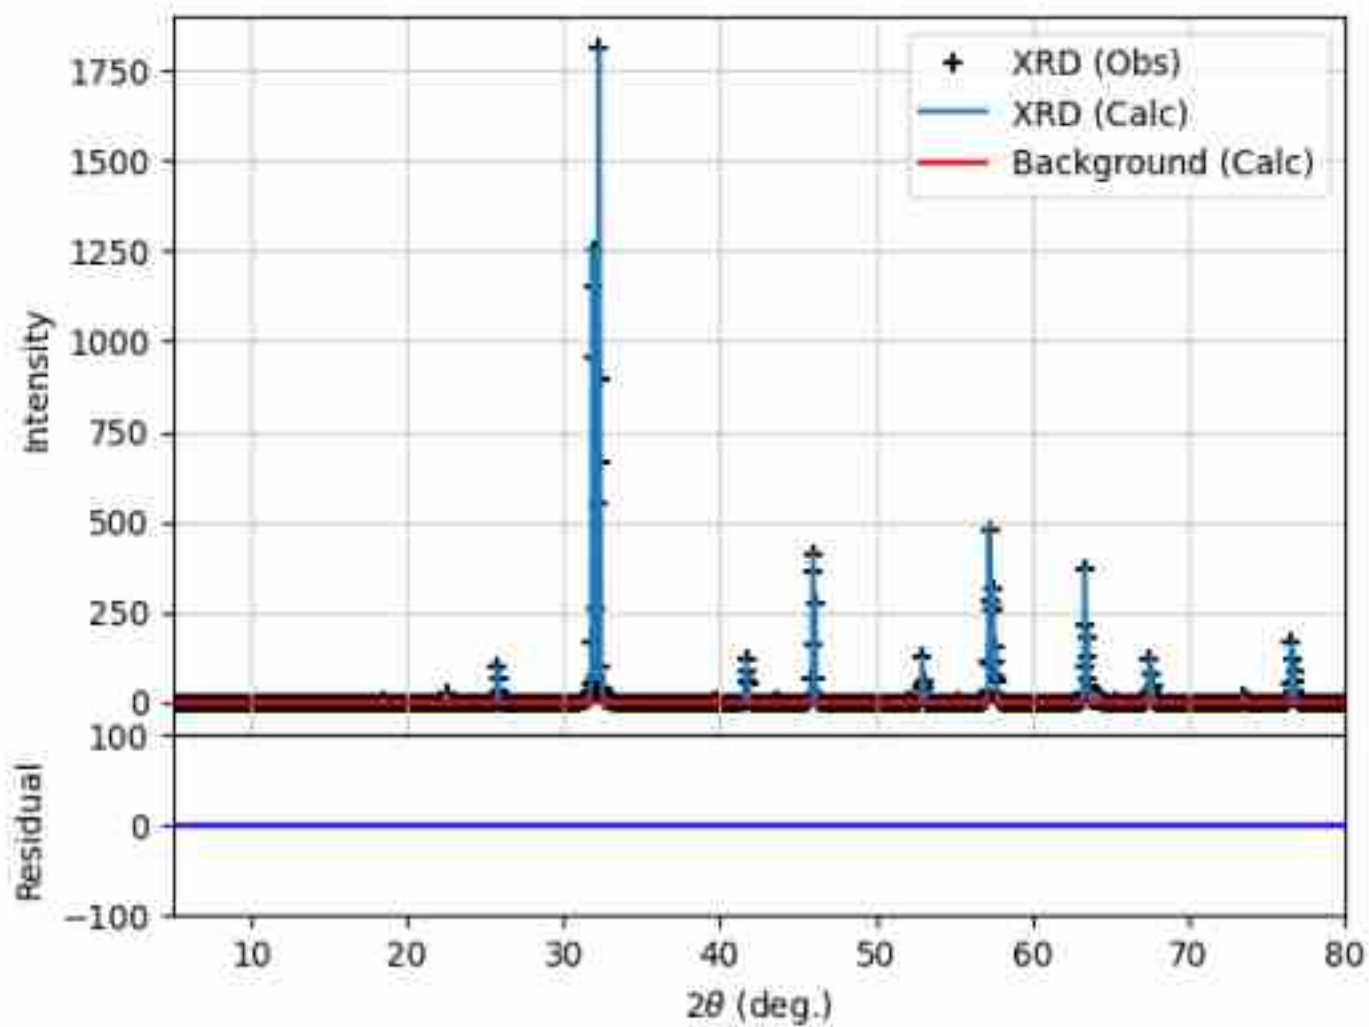

| RMSE before RR | Rwp     | RMSE after RR |
|----------------|---------|---------------|
| 0.006          | 0.00365 | 0.00026       |

# Sn2Au2

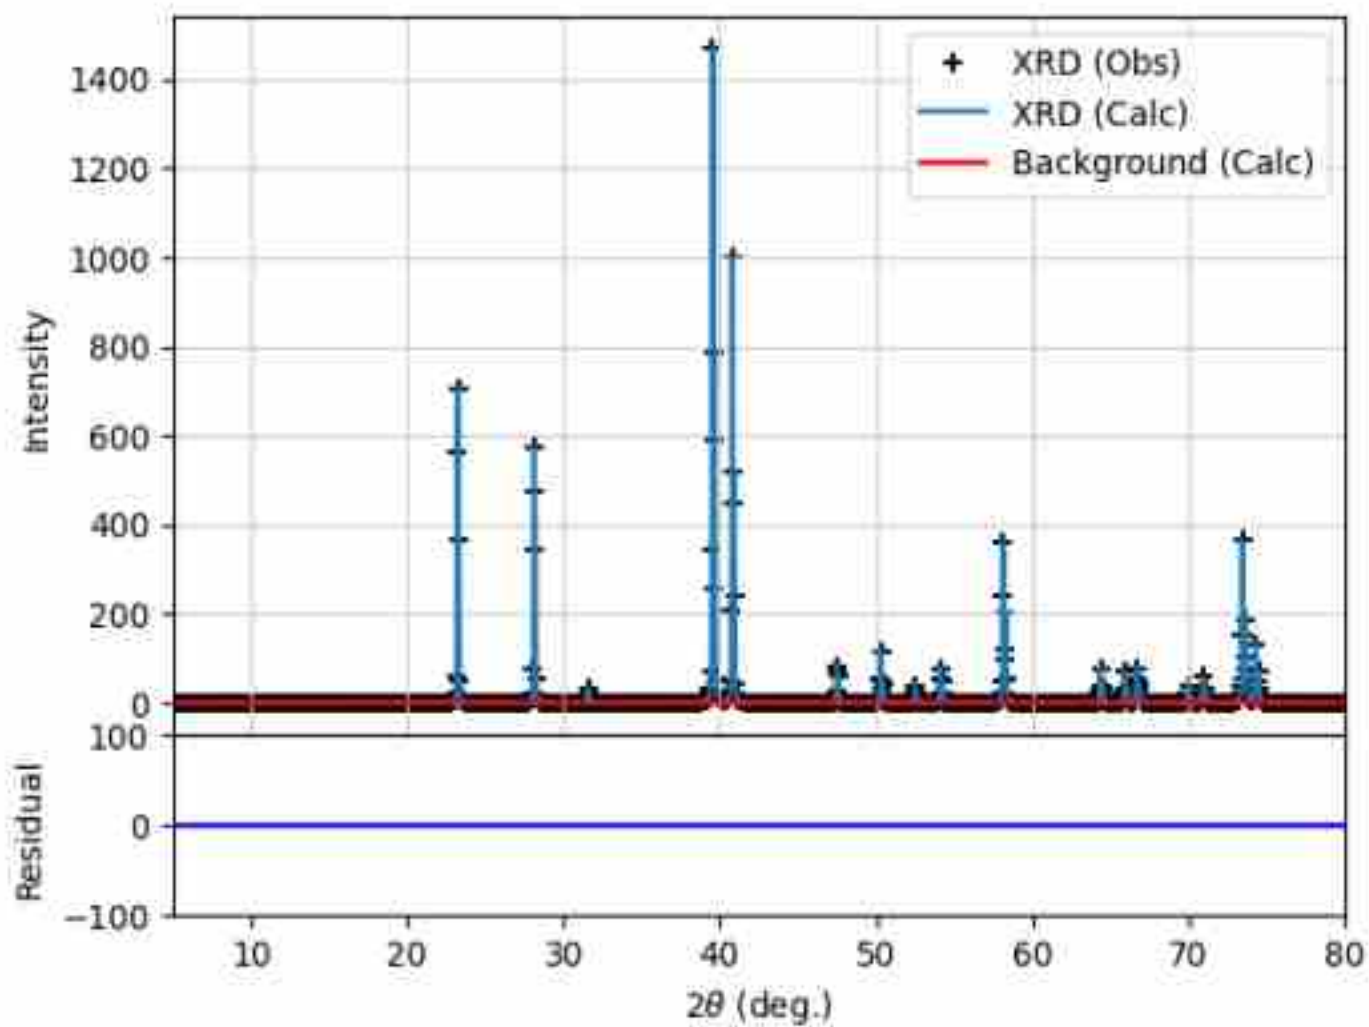

| RMSE before RR | Rwp     | RMSE after RR |
|----------------|---------|---------------|
| 0.006          | 0.00385 | 0.00035       |

# Sr1Ag3Pd2

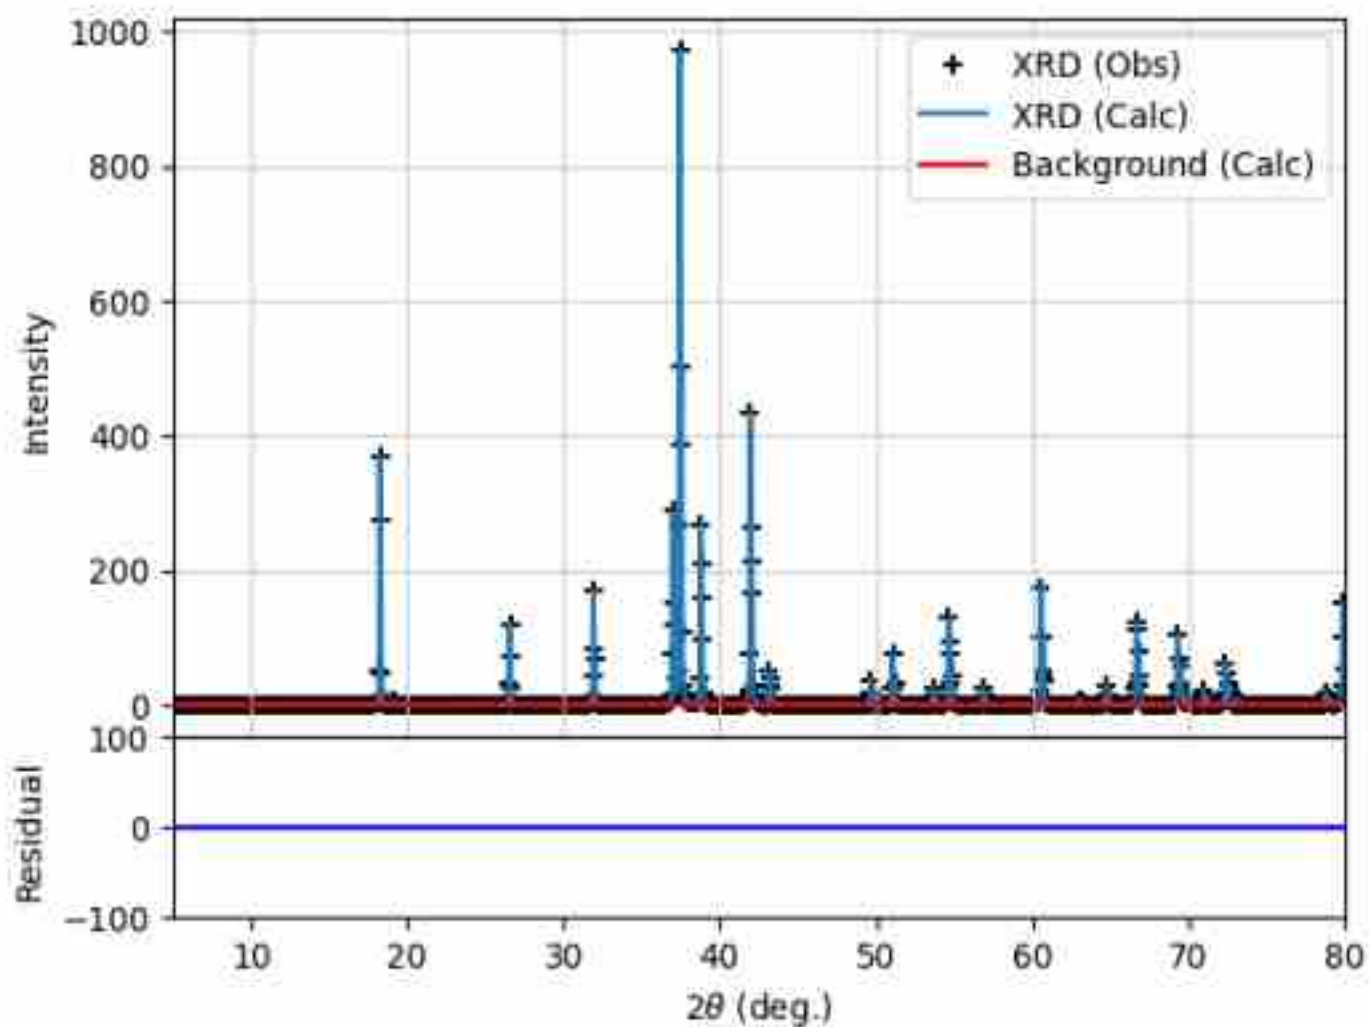

| RMSE before RR | Rwp     | RMSE after RR |
|----------------|---------|---------------|
| 0.006          | 0.00351 | 0.00033       |

# Sr1Cd2Ge2

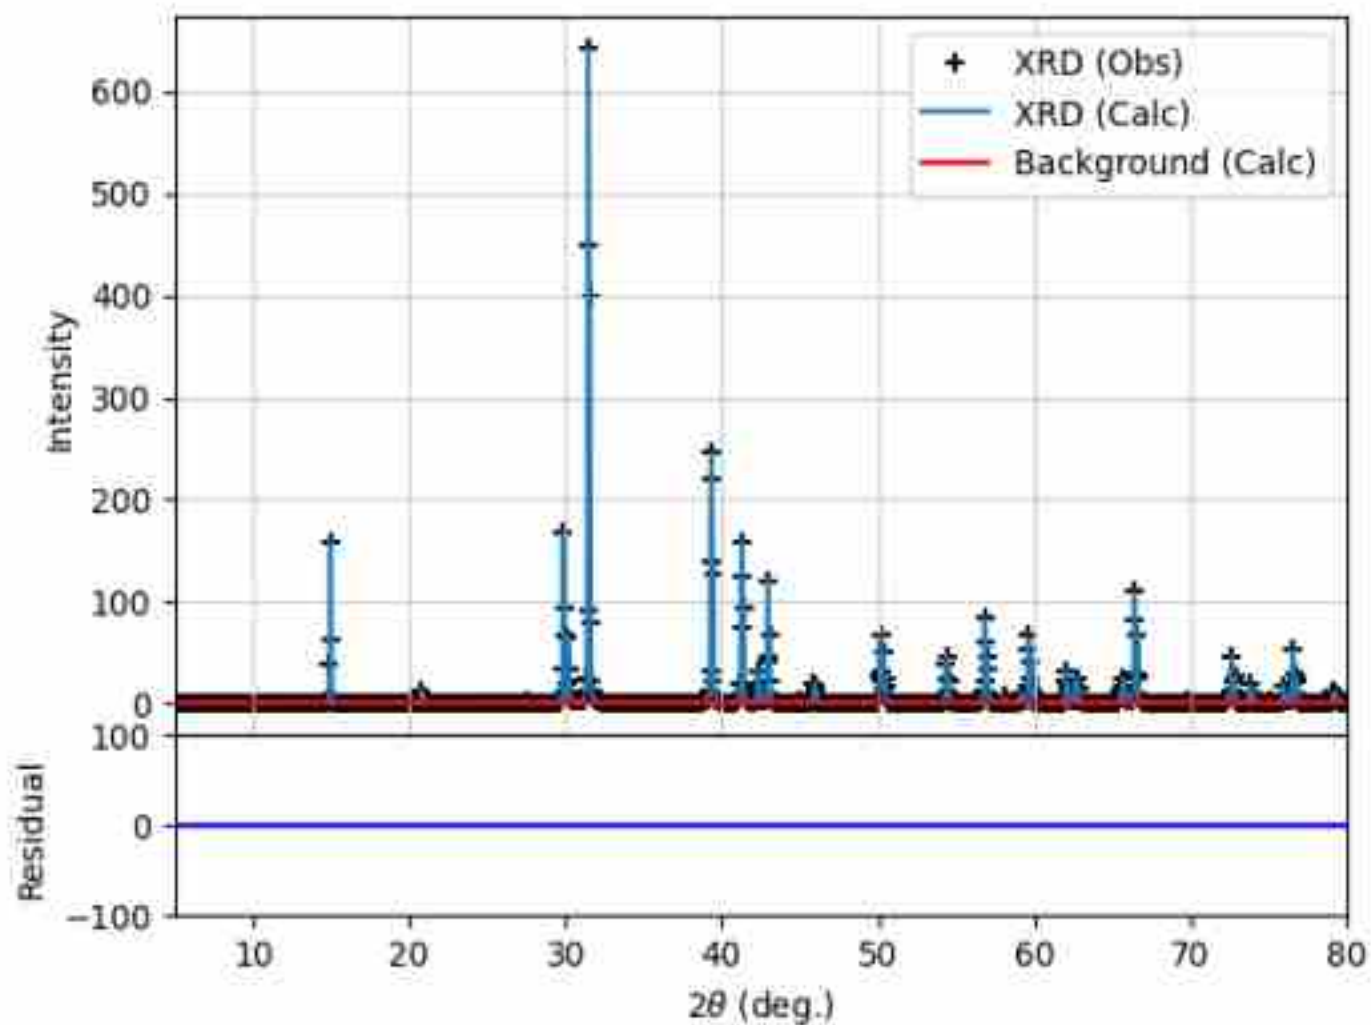

| RMSE before RR | Rwp     | RMSE after RR |
|----------------|---------|---------------|
| 0.006          | 0.00274 | 0.00018       |



# Sr1N2

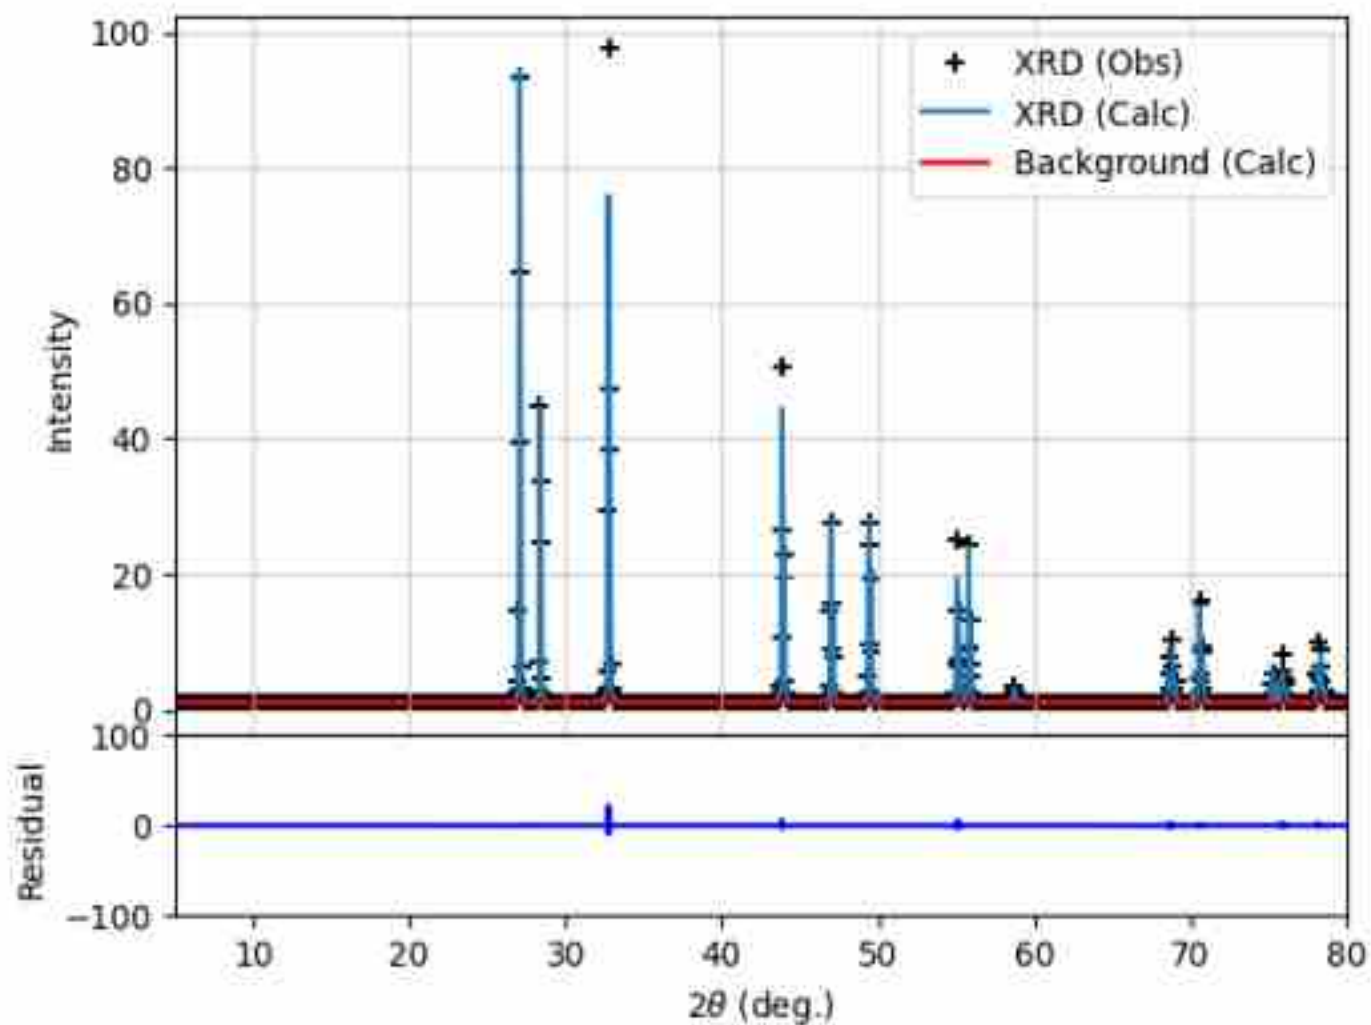

| RMSE before RR | Rwp     | RMSE after RR |
|----------------|---------|---------------|
| 0.006          | 9.71297 | 0.01972       |

# Sr1Zn1Ge1

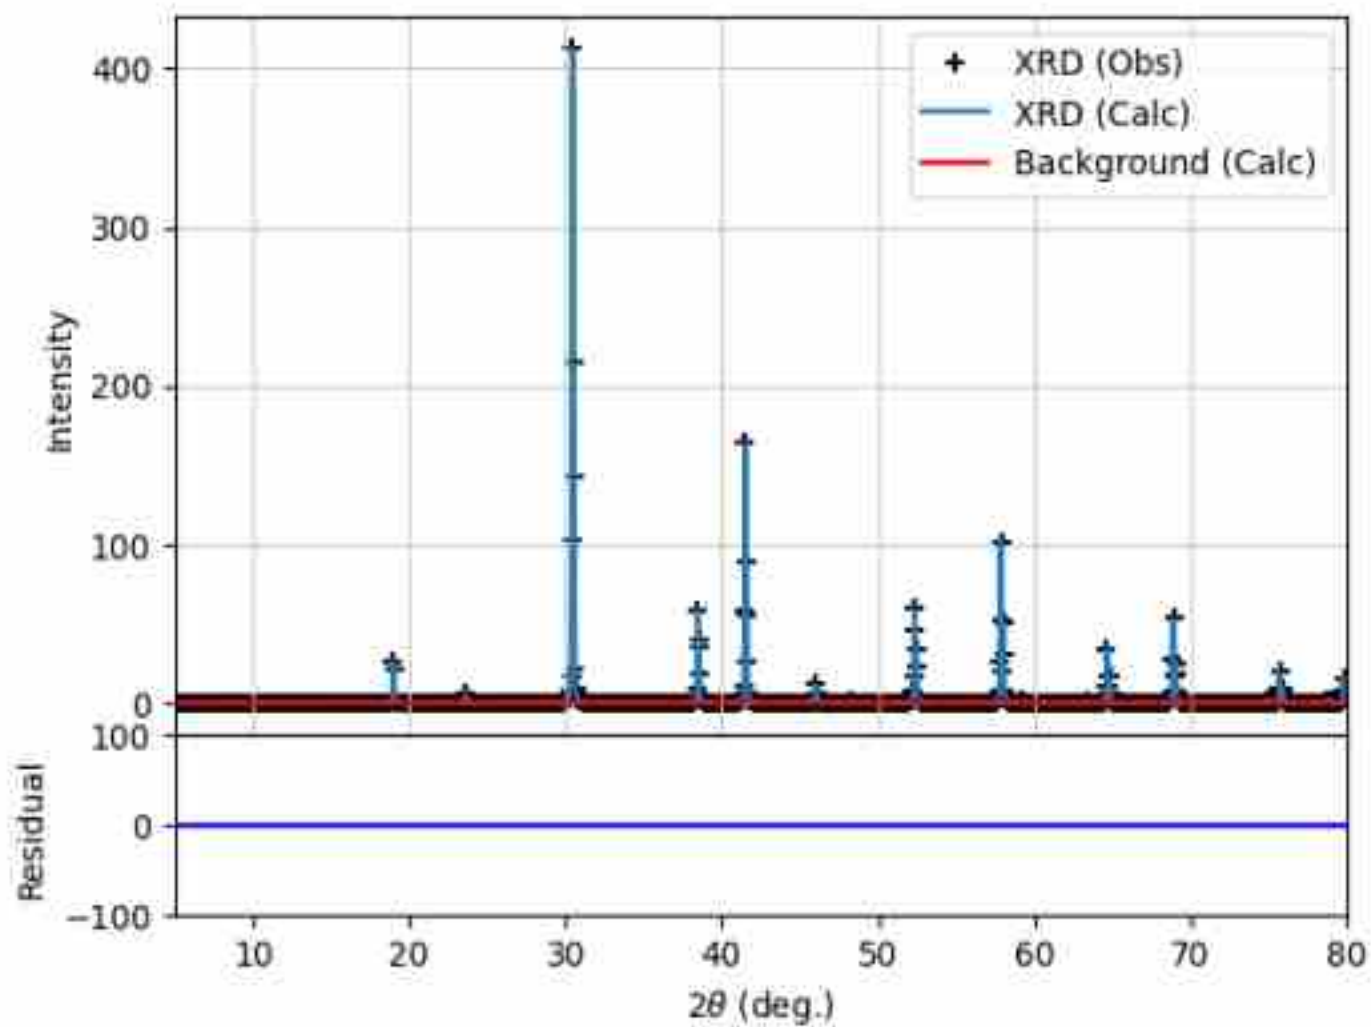

| RMSE before RR | Rwp     | RMSE after RR |
|----------------|---------|---------------|
| 0.006          | 0.00271 | 0.0002        |

# Sr<sub>2</sub>Ag<sub>4</sub>

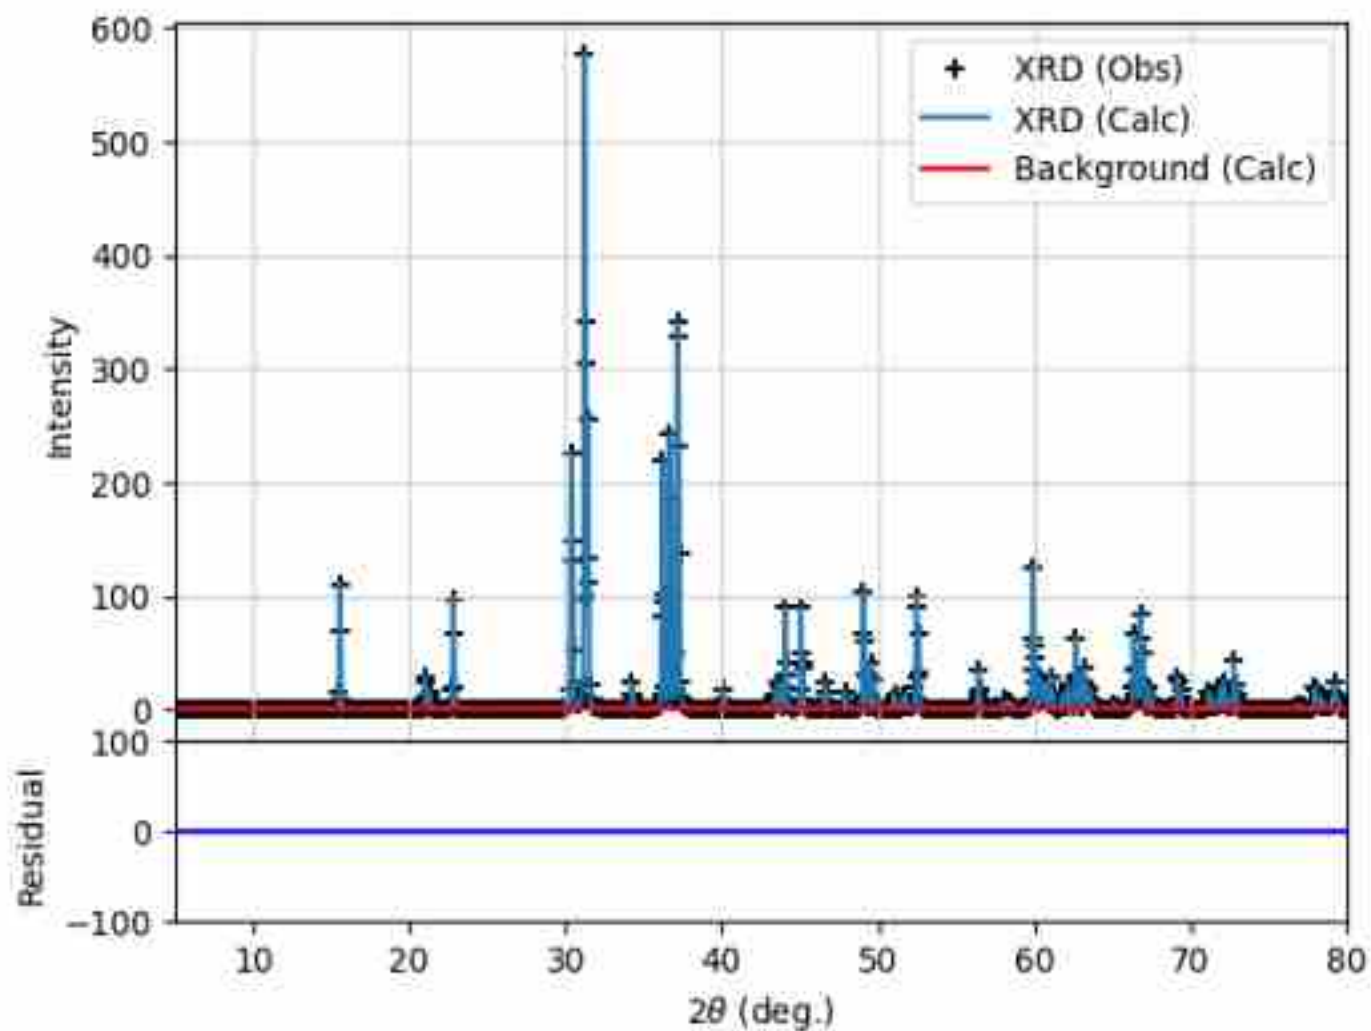

| RMSE before RR | Rwp     | RMSE after RR |
|----------------|---------|---------------|
| 0.006          | 0.00345 | 0.00031       |

# Sr<sub>2</sub>Sn<sub>2</sub>

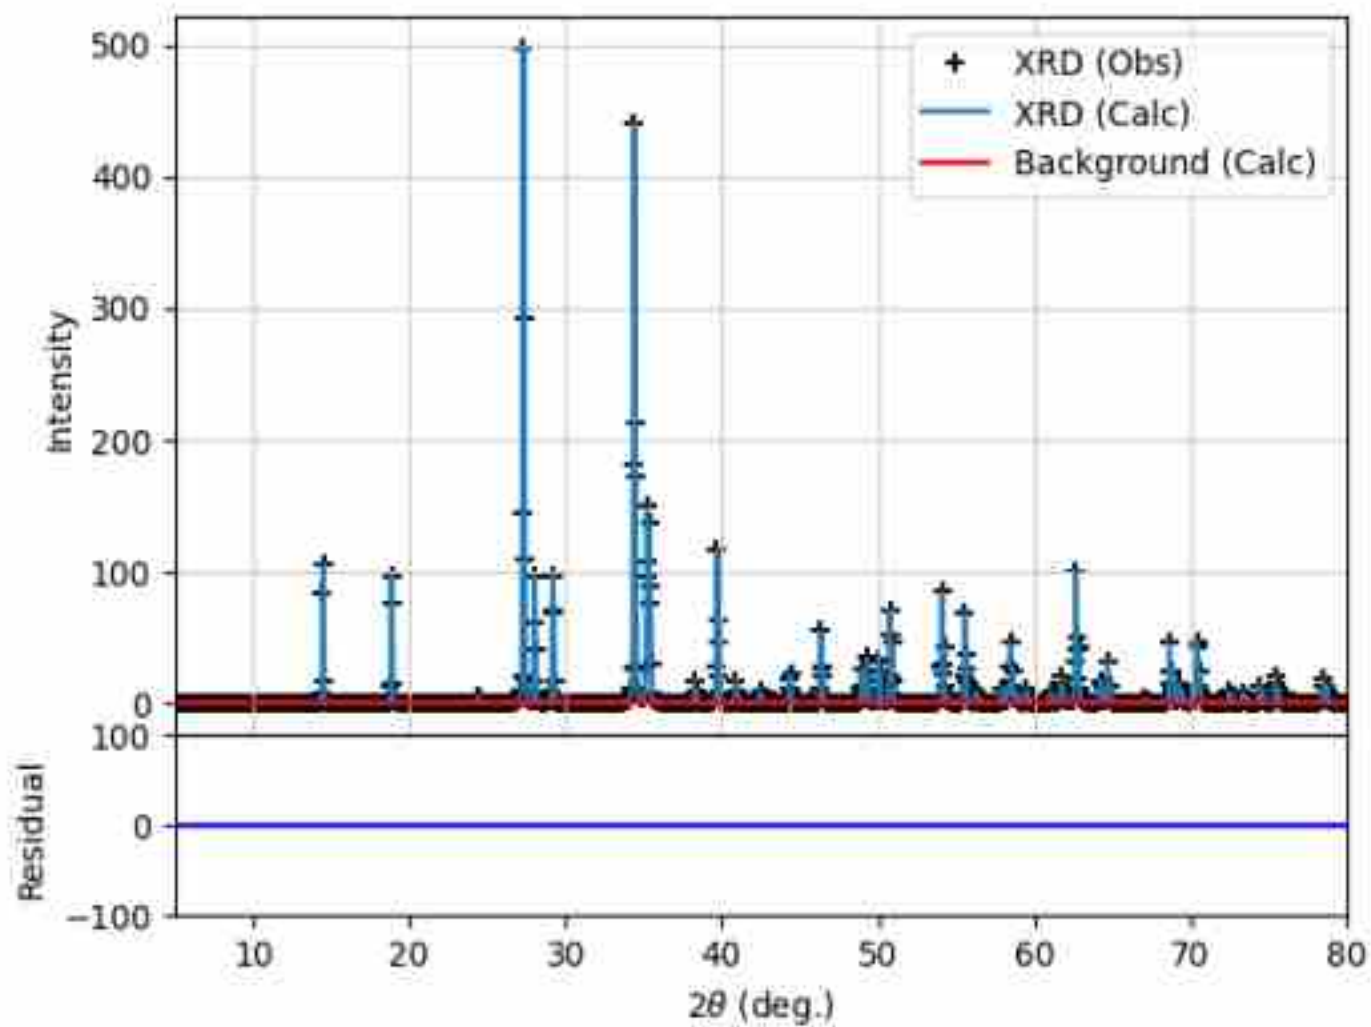

| RMSE before RR | Rwp     | RMSE after RR |
|----------------|---------|---------------|
| 0.006          | 0.00322 | 0.0002        |

# Sr6Ca2

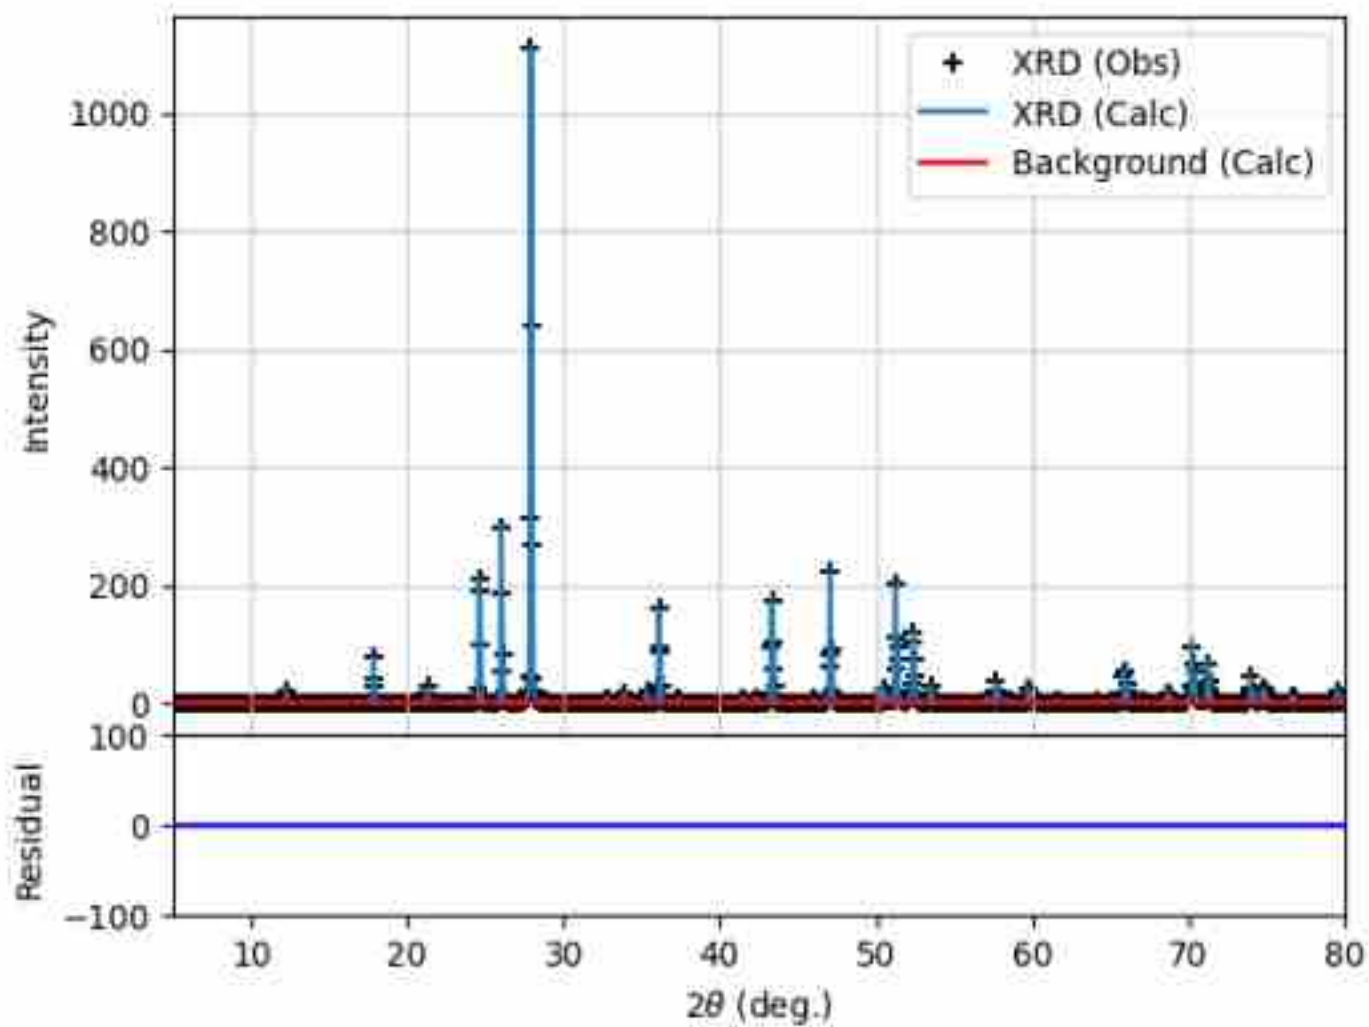

| RMSE before RR | Rwp     | RMSE after RR |
|----------------|---------|---------------|
| 0.006          | 0.00759 | 0.00089       |

# Tb<sub>2</sub>Ni<sub>2</sub>Sb<sub>4</sub>

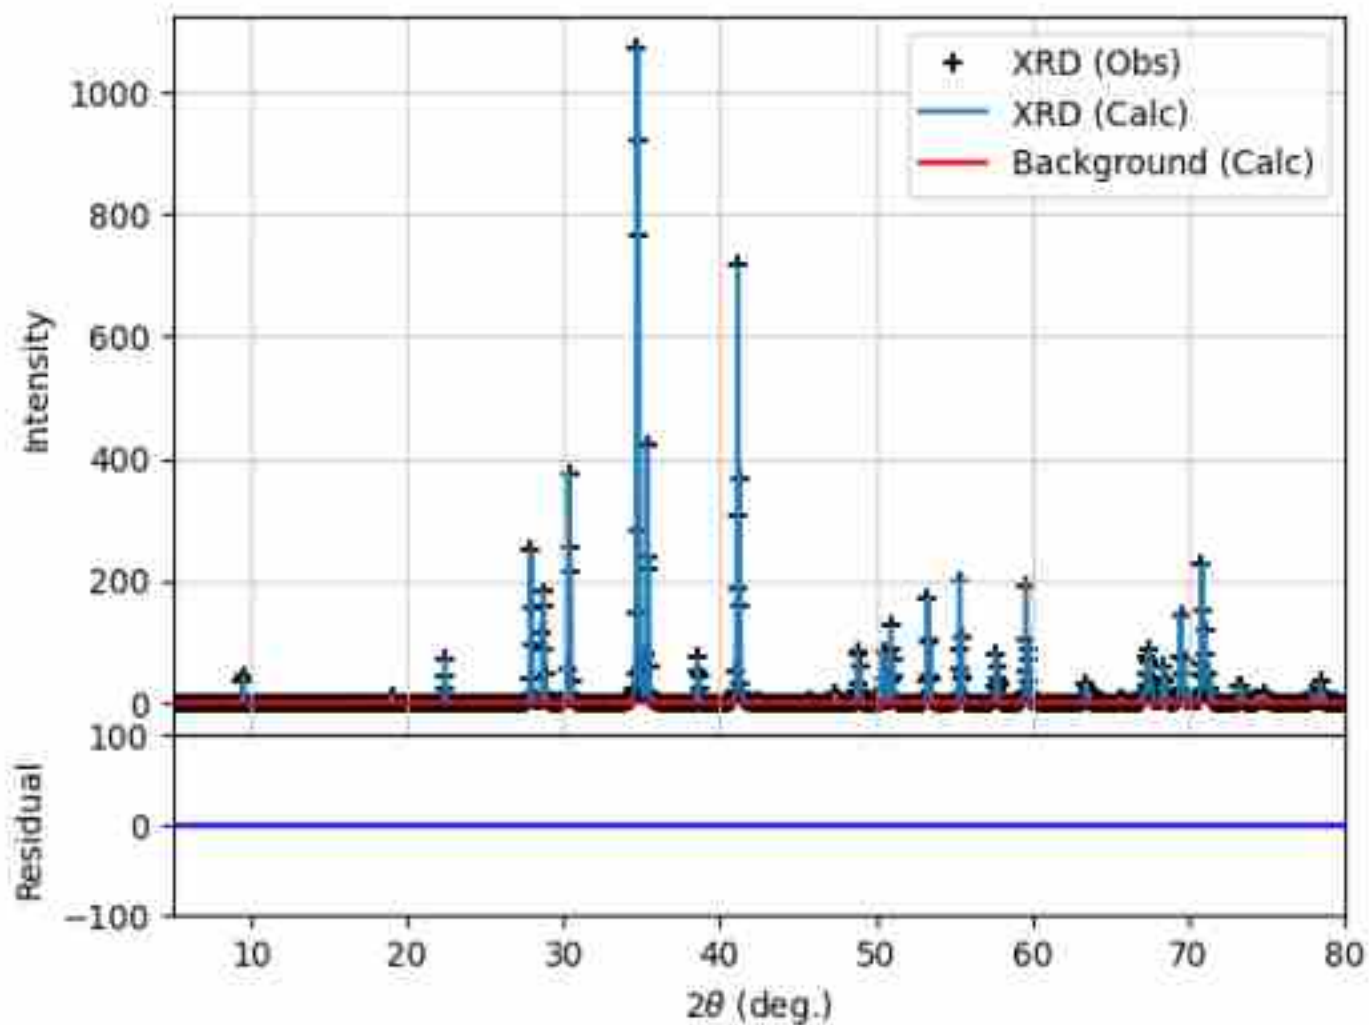

| RMSE before RR | Rwp     | RMSE after RR |
|----------------|---------|---------------|
| 0.006          | 0.01025 | 0.00074       |

# Tb6Pr2

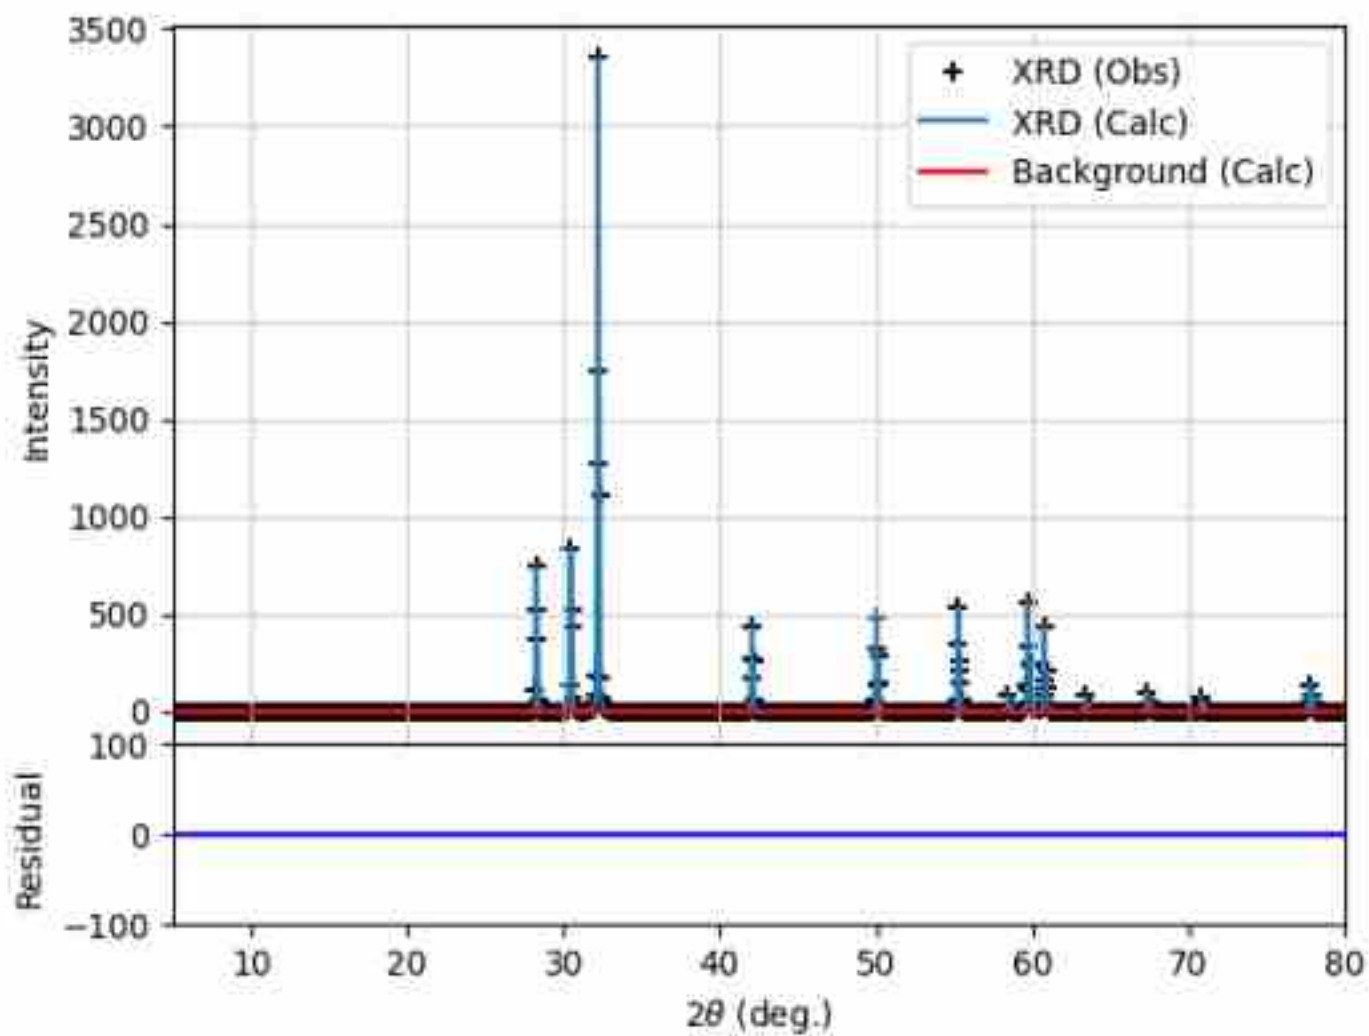

| RMSE before RR | Rwp    | RMSE after RR |
|----------------|--------|---------------|
| 0.006          | 0.0227 | 0.00083       |

# Th<sub>1</sub>Fe<sub>2</sub>Si<sub>2</sub>

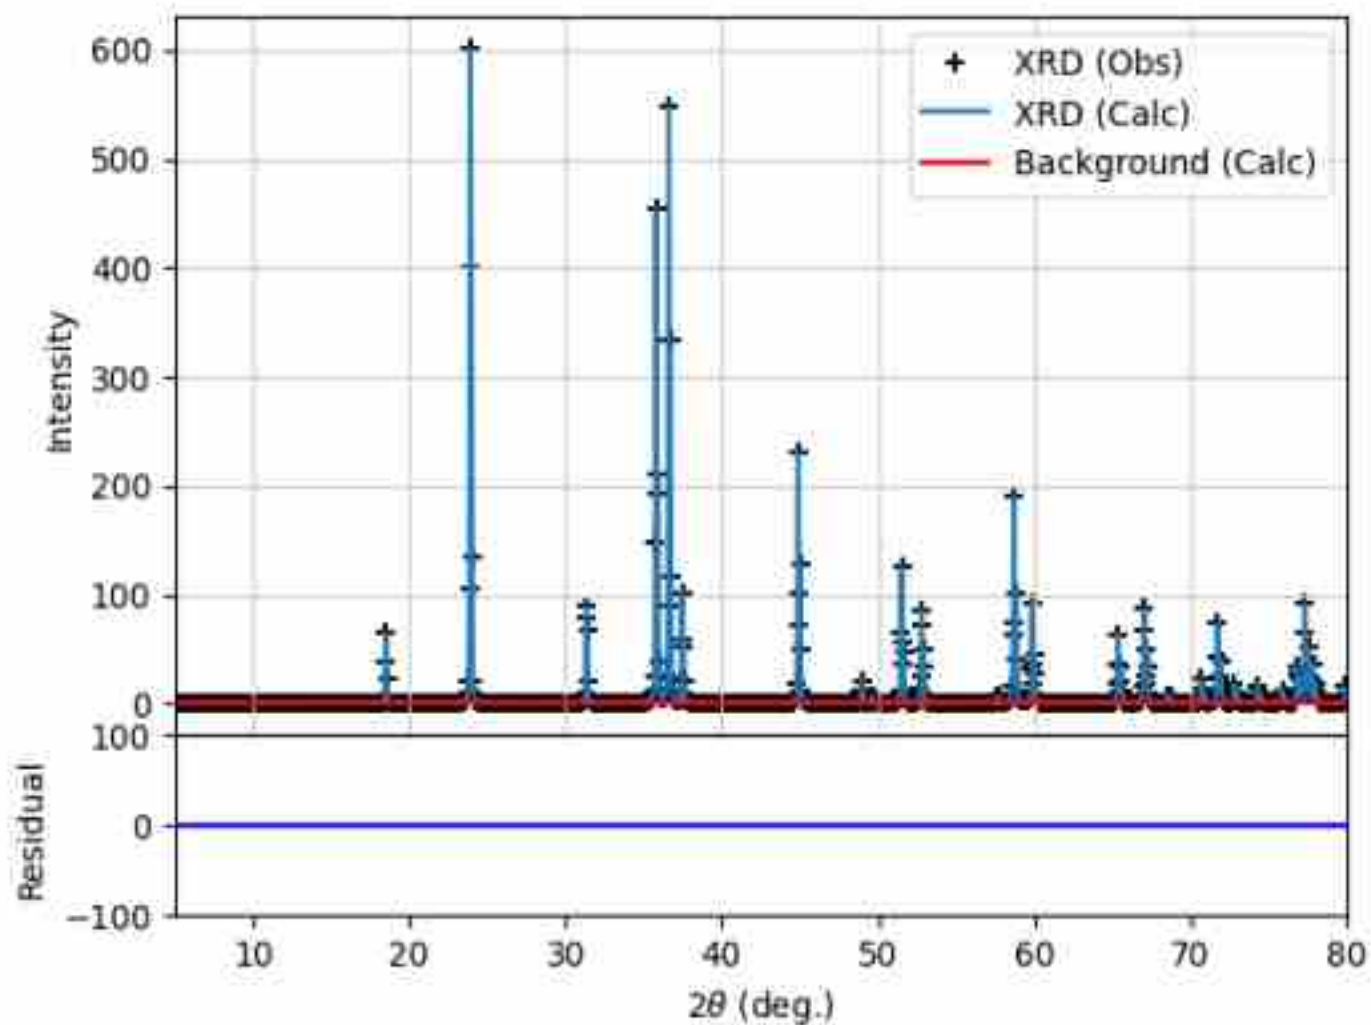

| RMSE before RR | Rwp     | RMSE after RR |
|----------------|---------|---------------|
| 0.006          | 0.00375 | 0.00066       |



# Ti2Sb2

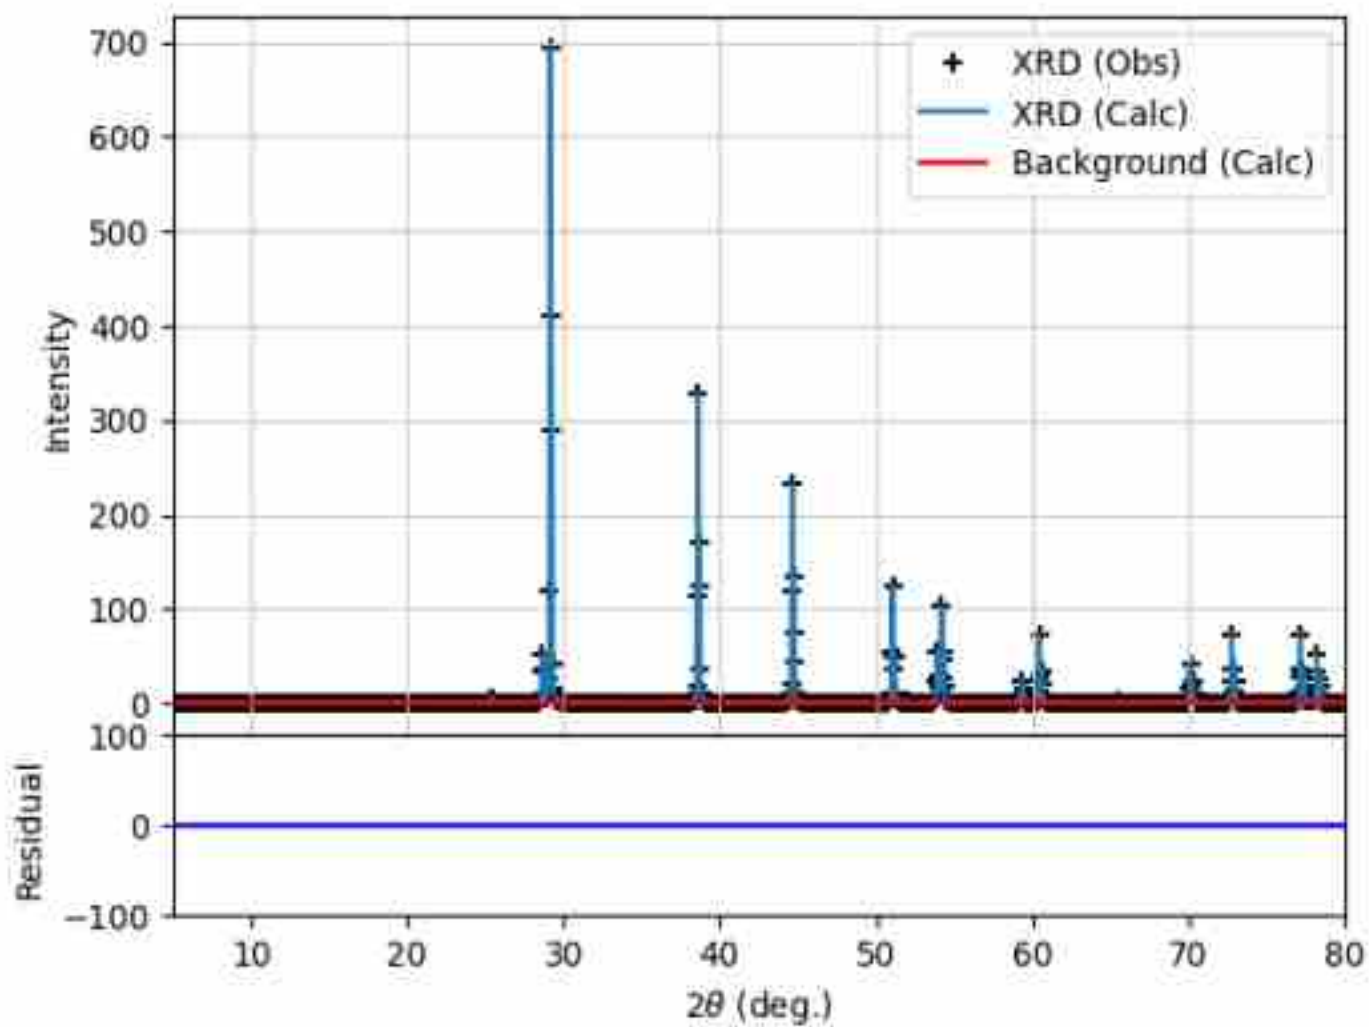

| RMSE before RR | Rwp     | RMSE after RR |
|----------------|---------|---------------|
| 0.006          | 0.00632 | 0.00081       |

# Ti4Ga2

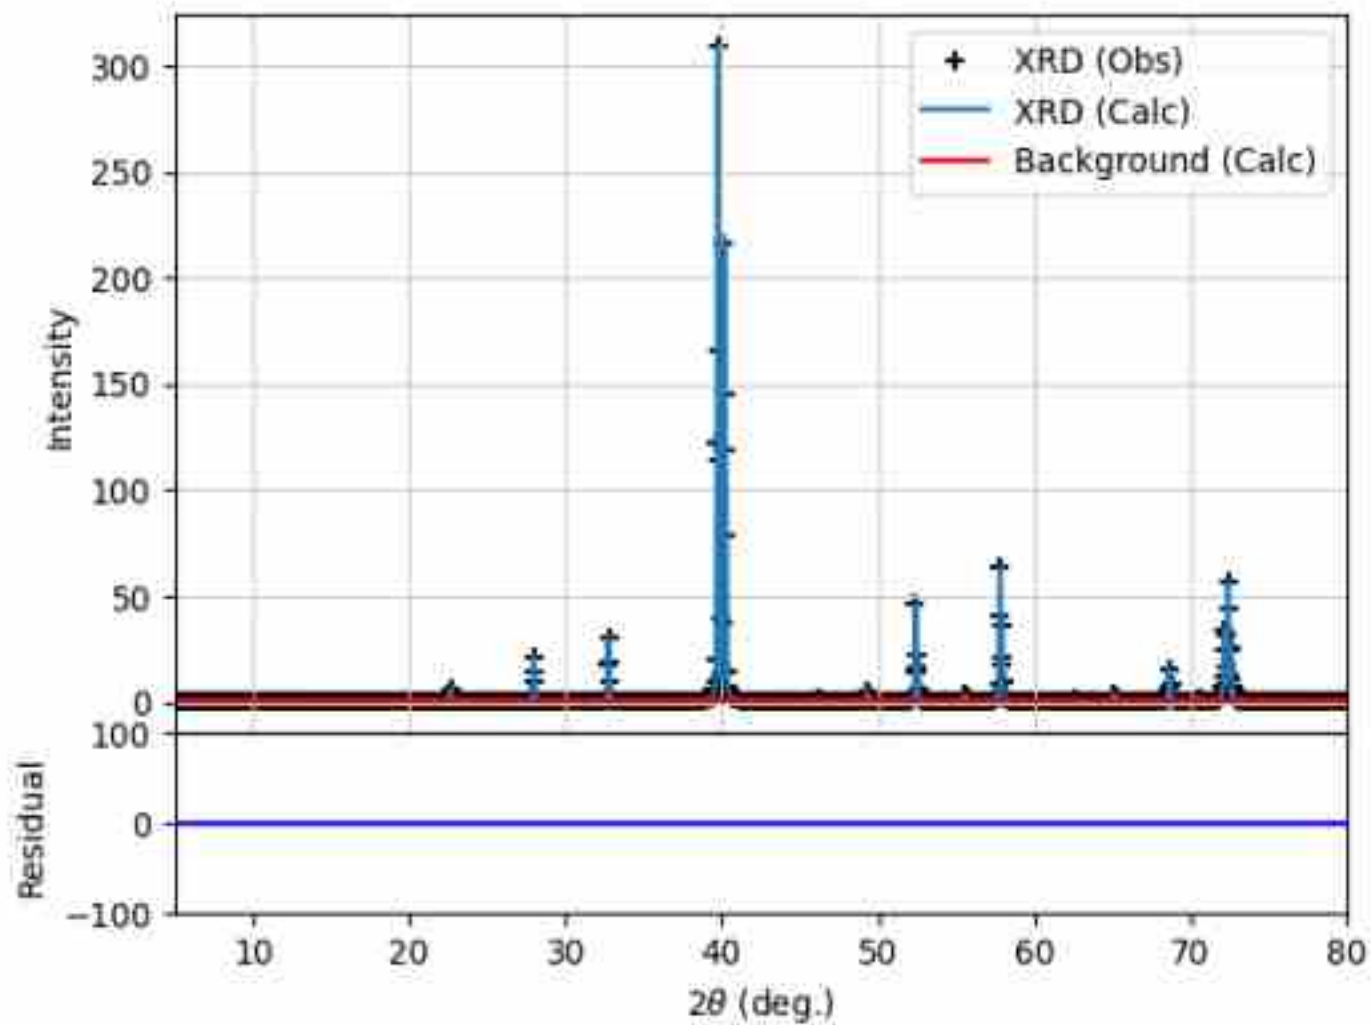

| RMSE before RR | Rwp     | RMSE after RR |
|----------------|---------|---------------|
| 0.006          | 0.00214 | 0.00048       |

# Tm1Ga5Co1

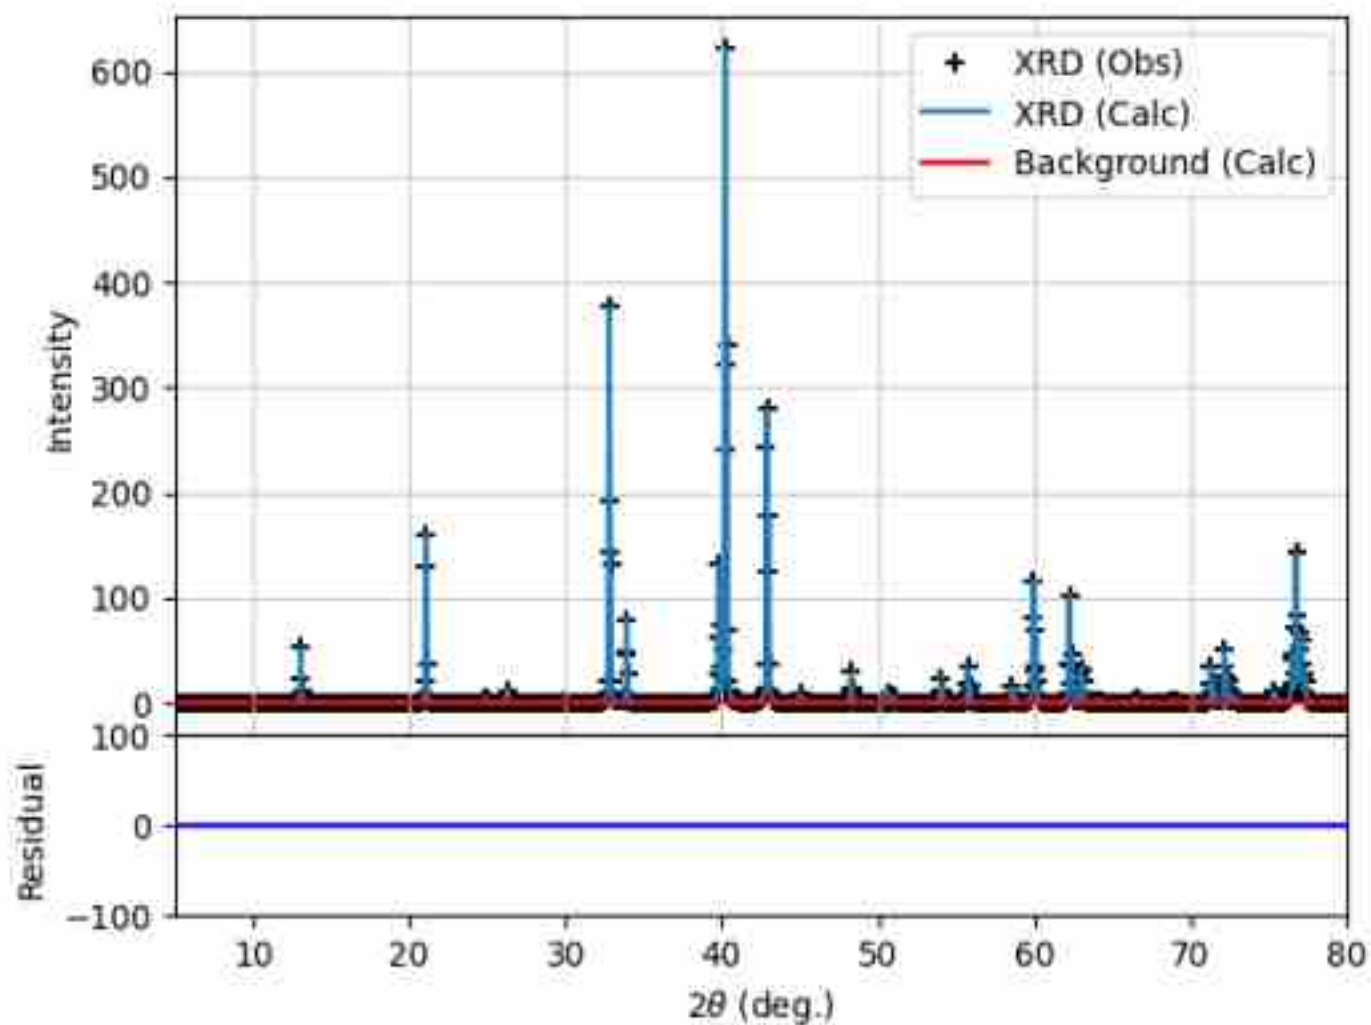

| RMSE before RR | Rwp     | RMSE after RR |
|----------------|---------|---------------|
| 0.006          | 0.02781 | 0.00161       |

# Tm<sub>2</sub>Ga<sub>2</sub>Ag<sub>2</sub>

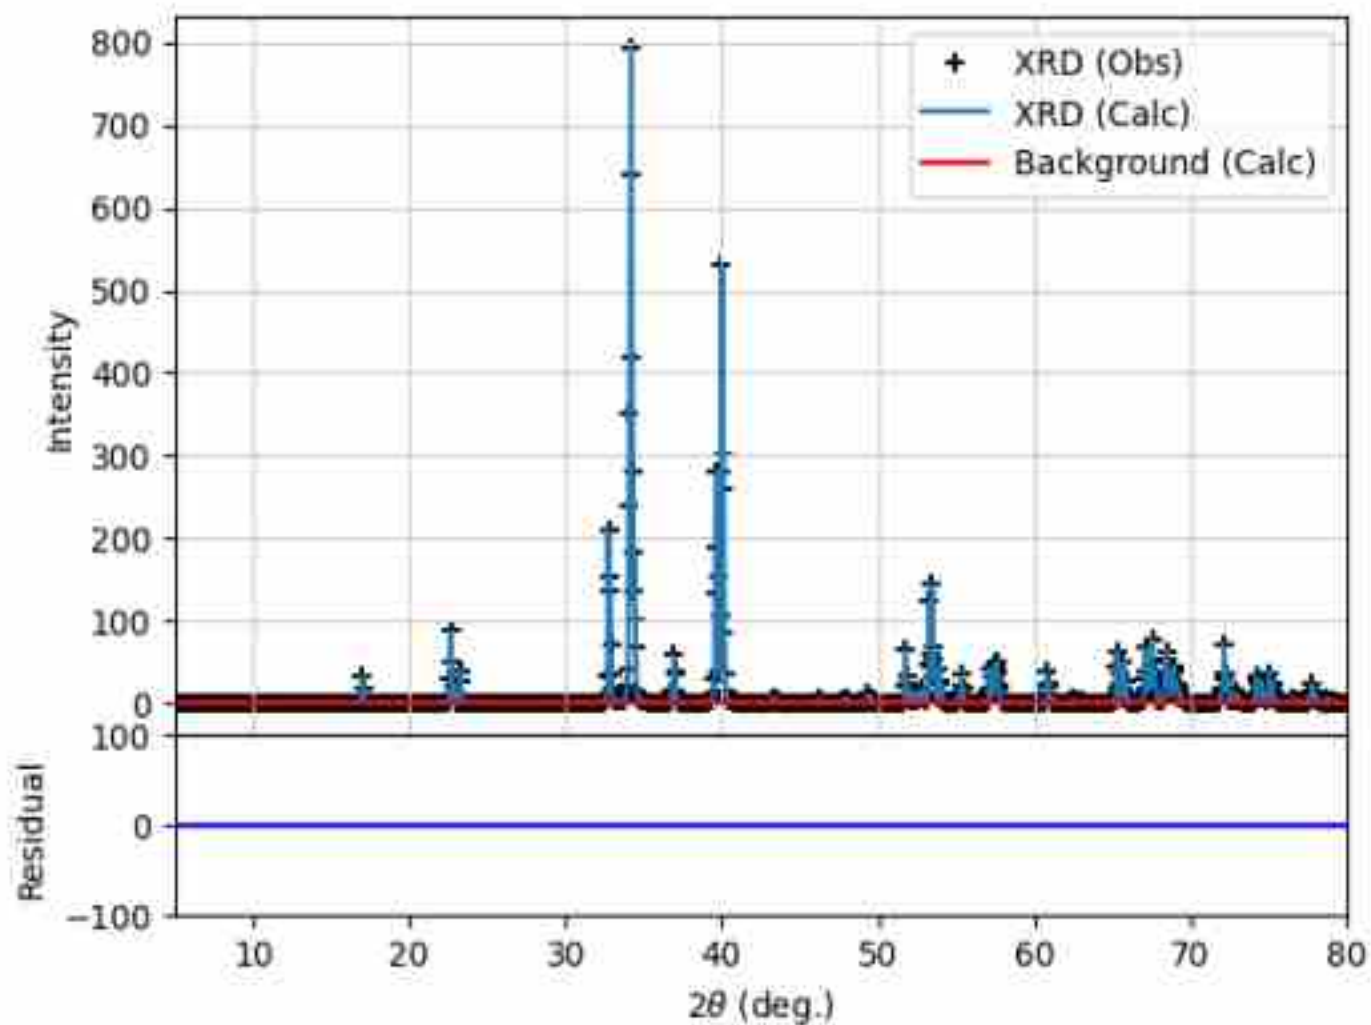

| RMSE before RR | Rwp    | RMSE after RR |
|----------------|--------|---------------|
| 0.006          | 0.0025 | 0.00015       |

# V1Br2

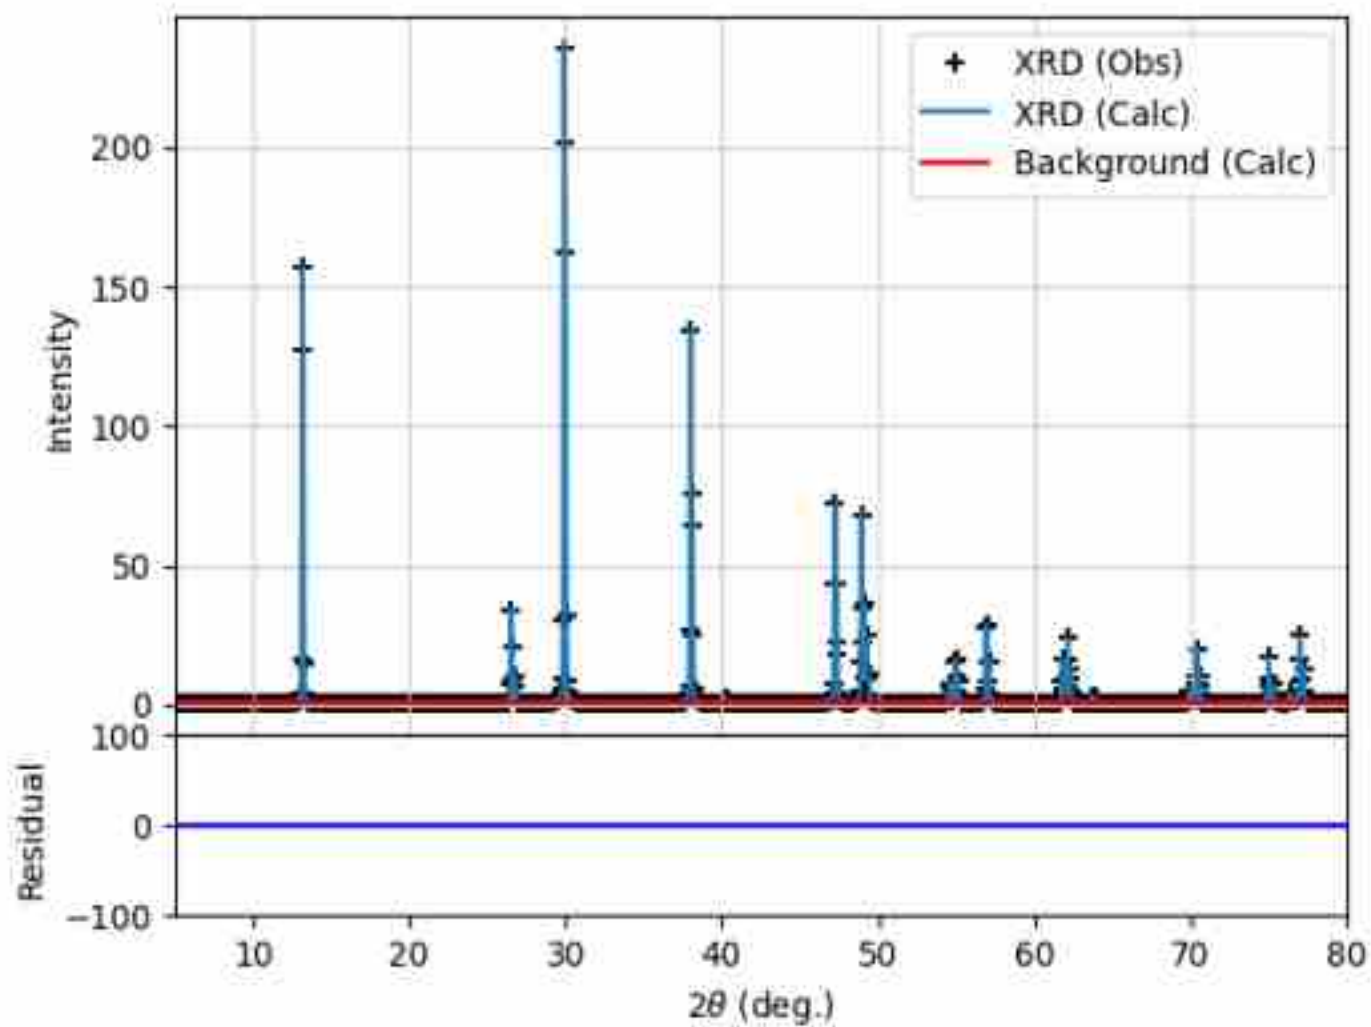

| RMSE before RR | Rwp     | RMSE after RR |
|----------------|---------|---------------|
| 0.006          | 0.00223 | 0.0016        |

# V4O4

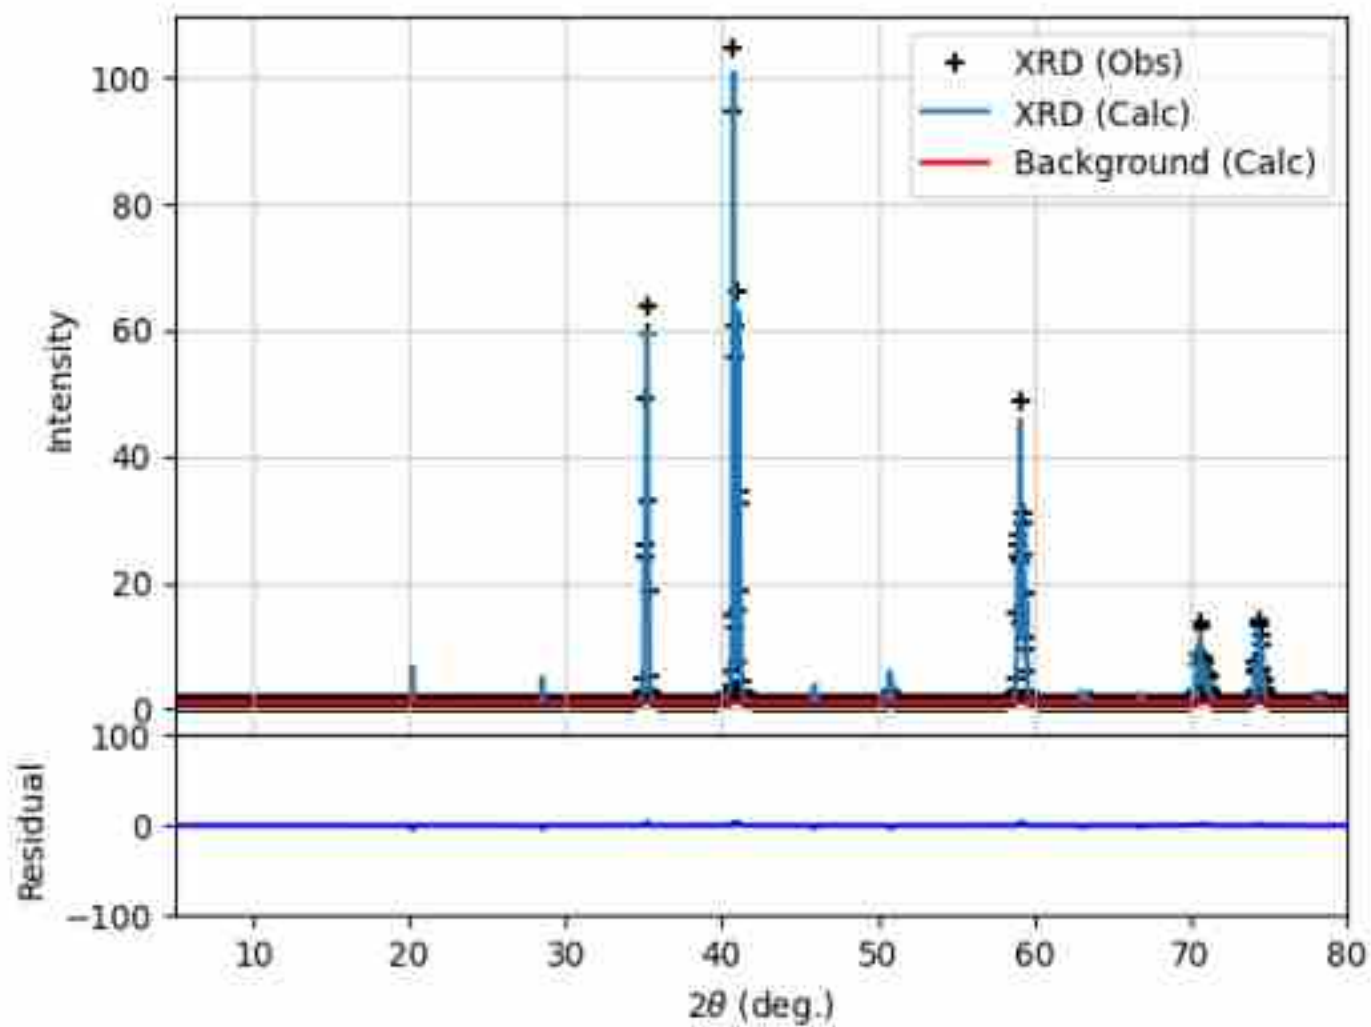

| RMSE before RR | Rwp      | RMSE after RR |
|----------------|----------|---------------|
| 0.006          | 17.34252 | None          |

# W1S2

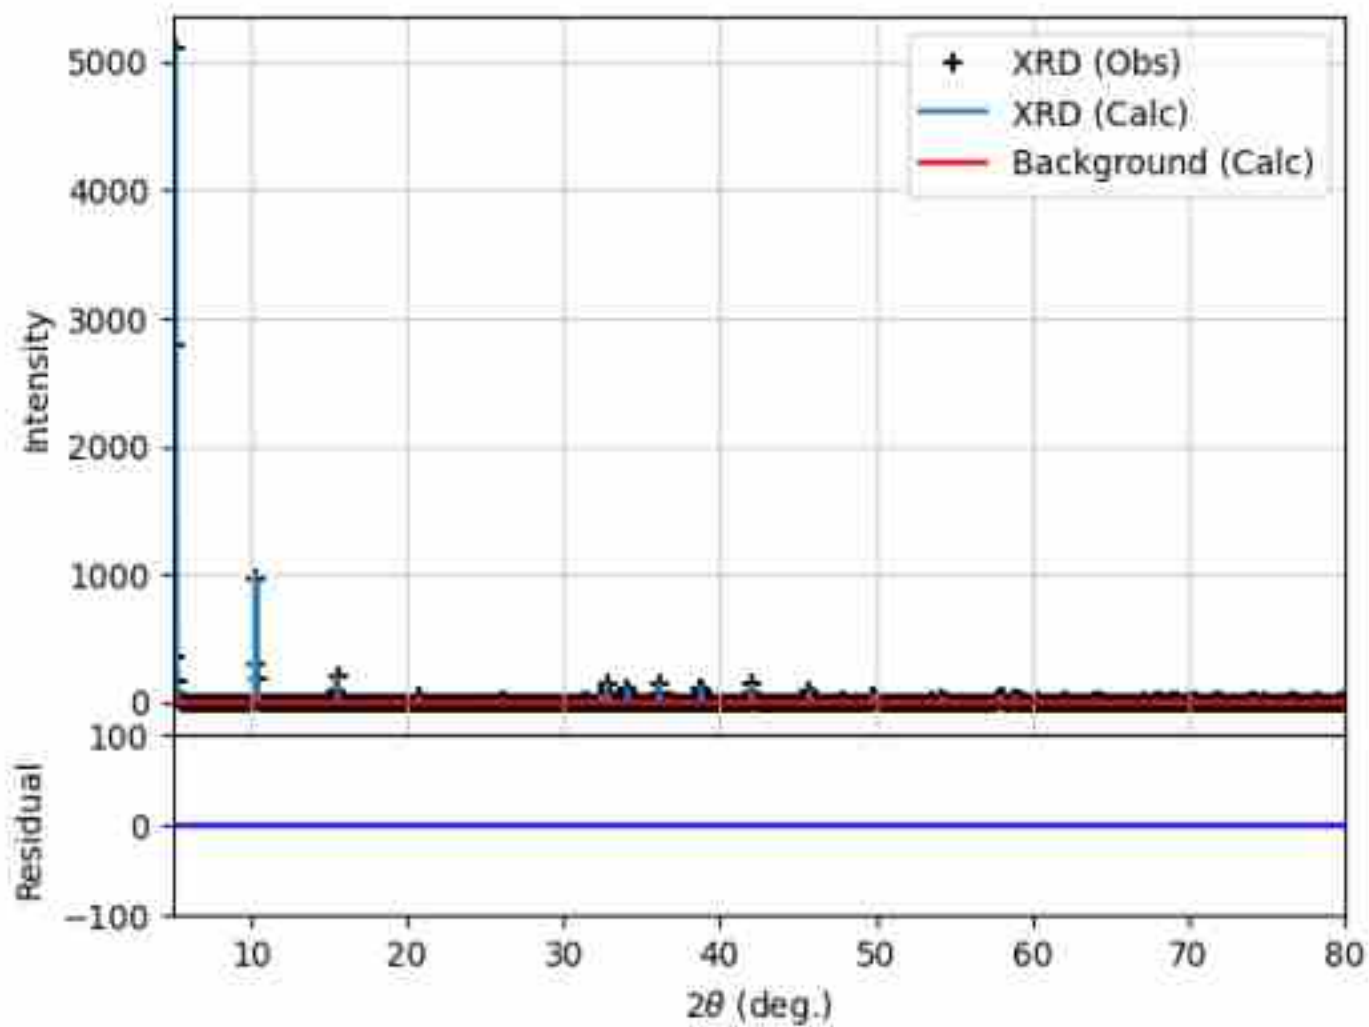

| RMSE before RR | Rwp     | RMSE after RR |
|----------------|---------|---------------|
| 0.006          | 0.00159 | 0.00051       |

# Y1Au2

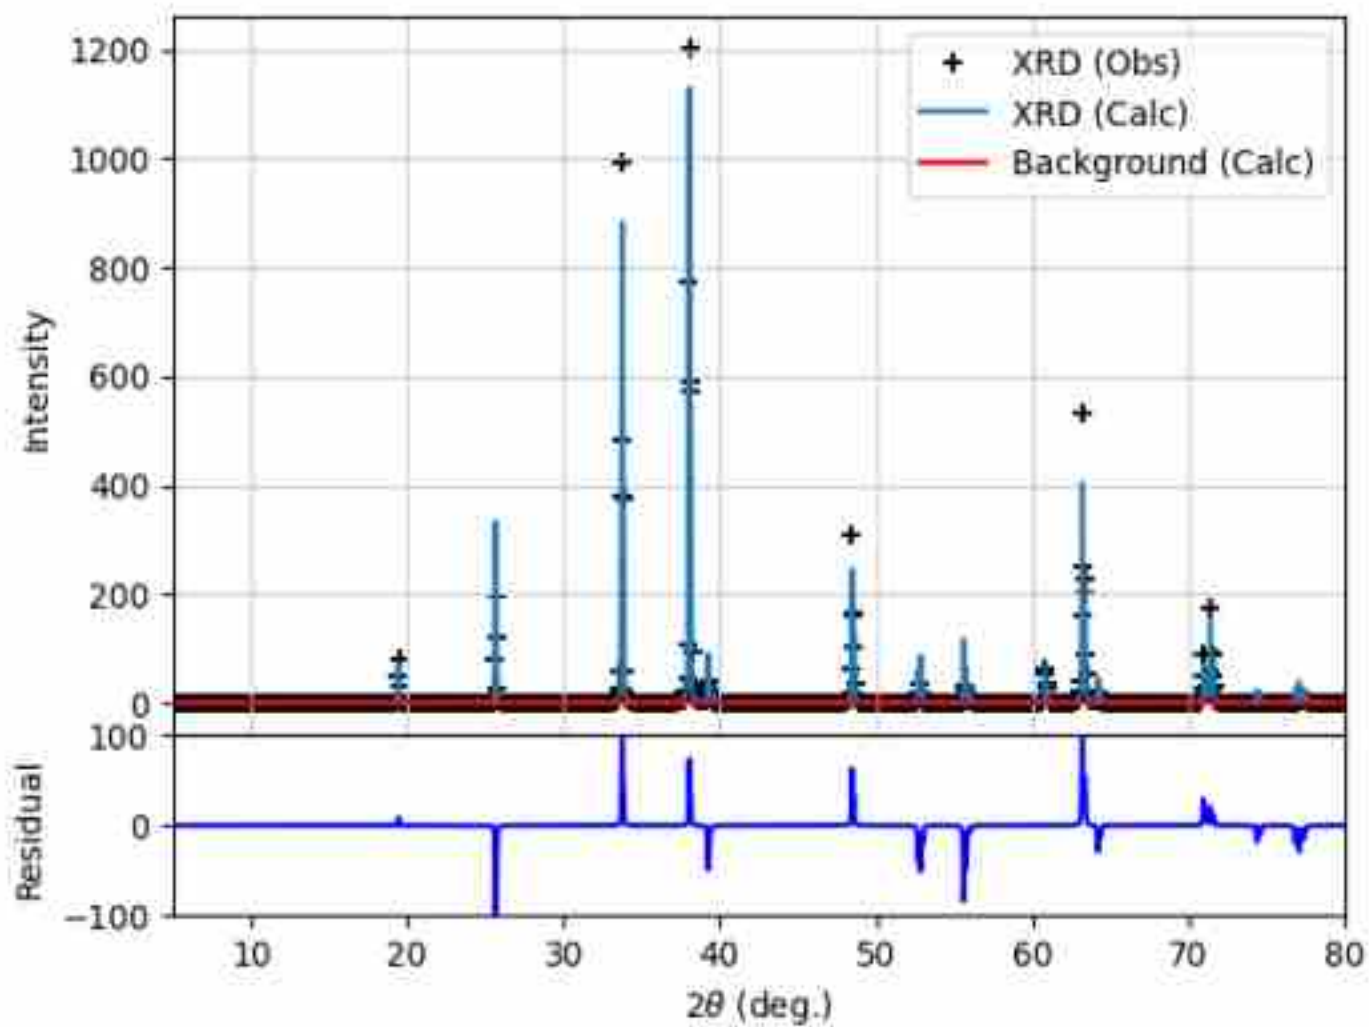

| RMSE before RR | Rwp     | RMSE after RR |
|----------------|---------|---------------|
| 0.006          | 43.4726 | 0.0073        |



# Y2C1I2

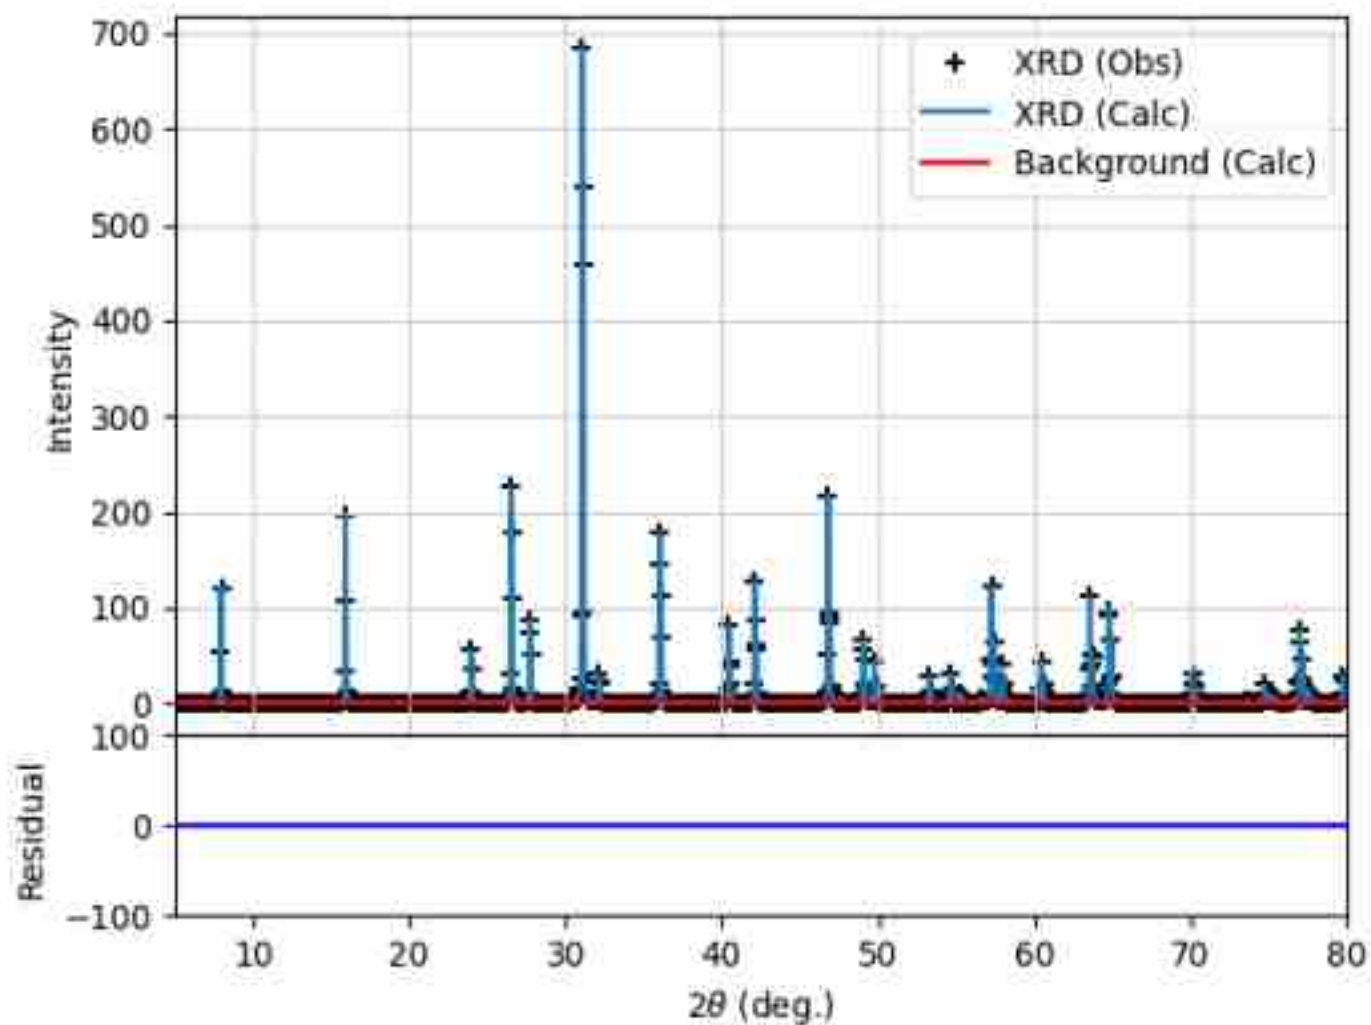

| RMSE before RR | Rwp     | RMSE after RR |
|----------------|---------|---------------|
| 0.006          | 0.00264 | 0.00229       |

# Y<sub>2</sub>Cu<sub>4</sub>

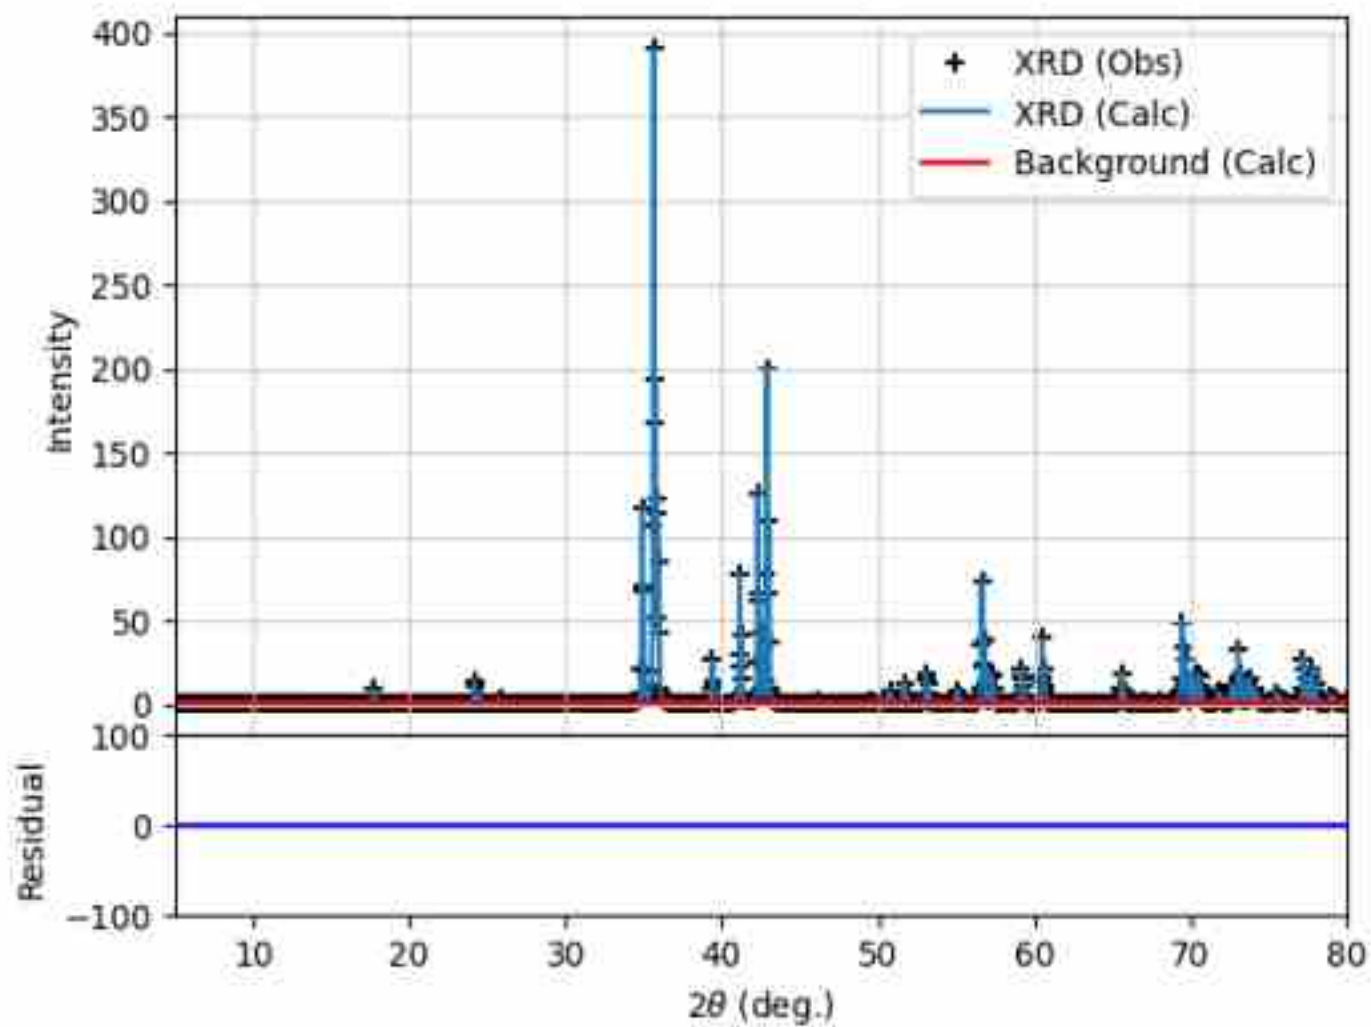

| RMSE before RR | Rwp     | RMSE after RR |
|----------------|---------|---------------|
| 0.006          | 0.00393 | 0.00034       |

# Y<sub>2</sub>Ga<sub>2</sub>Ag<sub>2</sub>

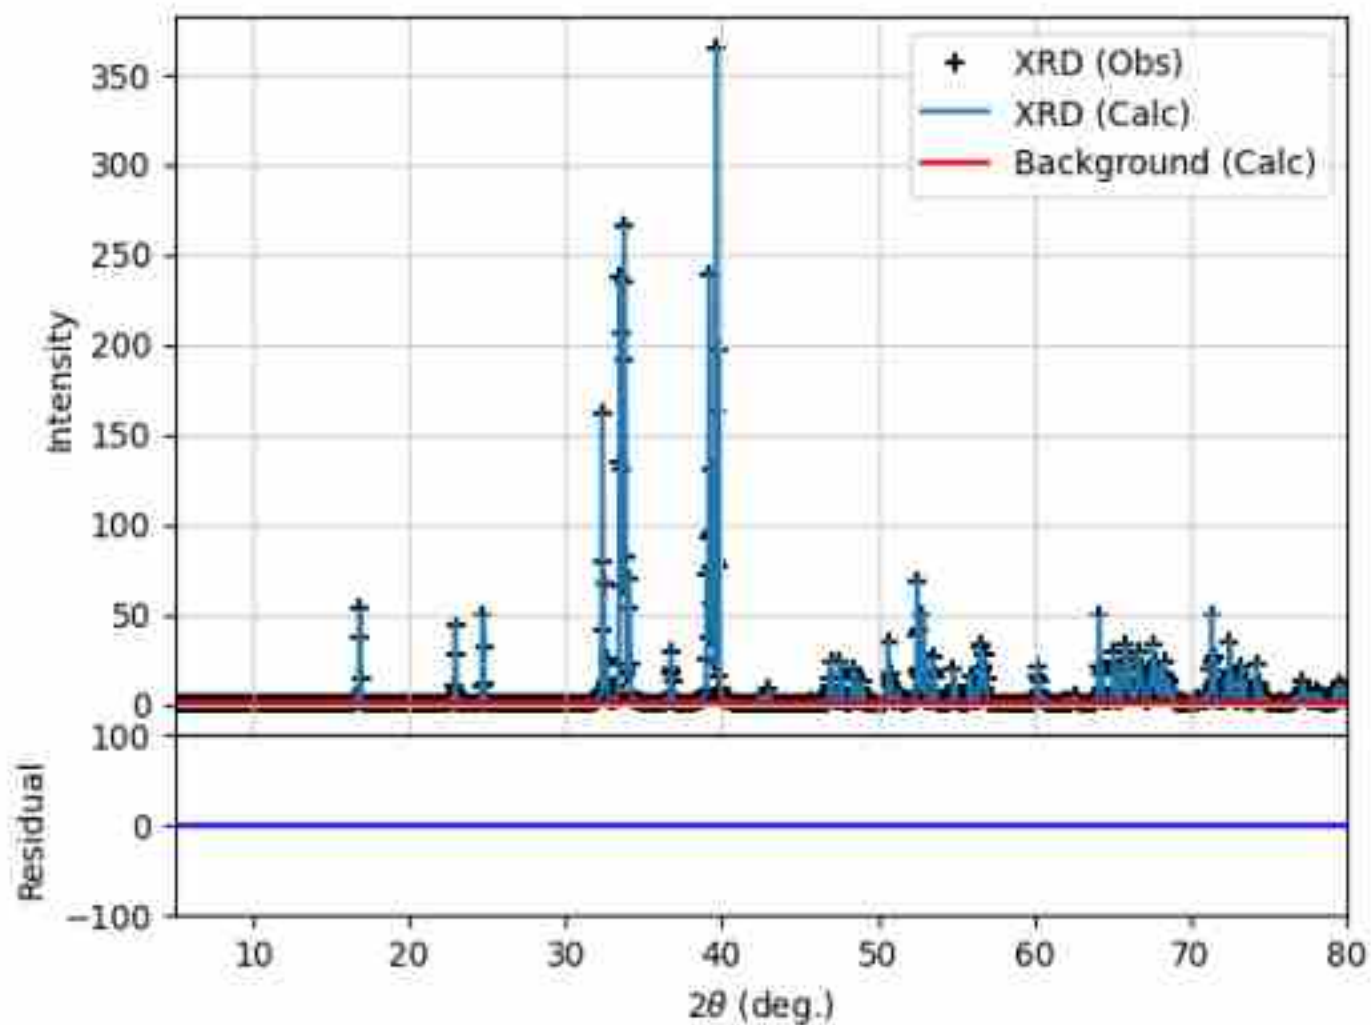

| RMSE before RR | Rwp     | RMSE after RR |
|----------------|---------|---------------|
| 0.006          | 0.00341 | 0.0003        |

# Y6Lu2

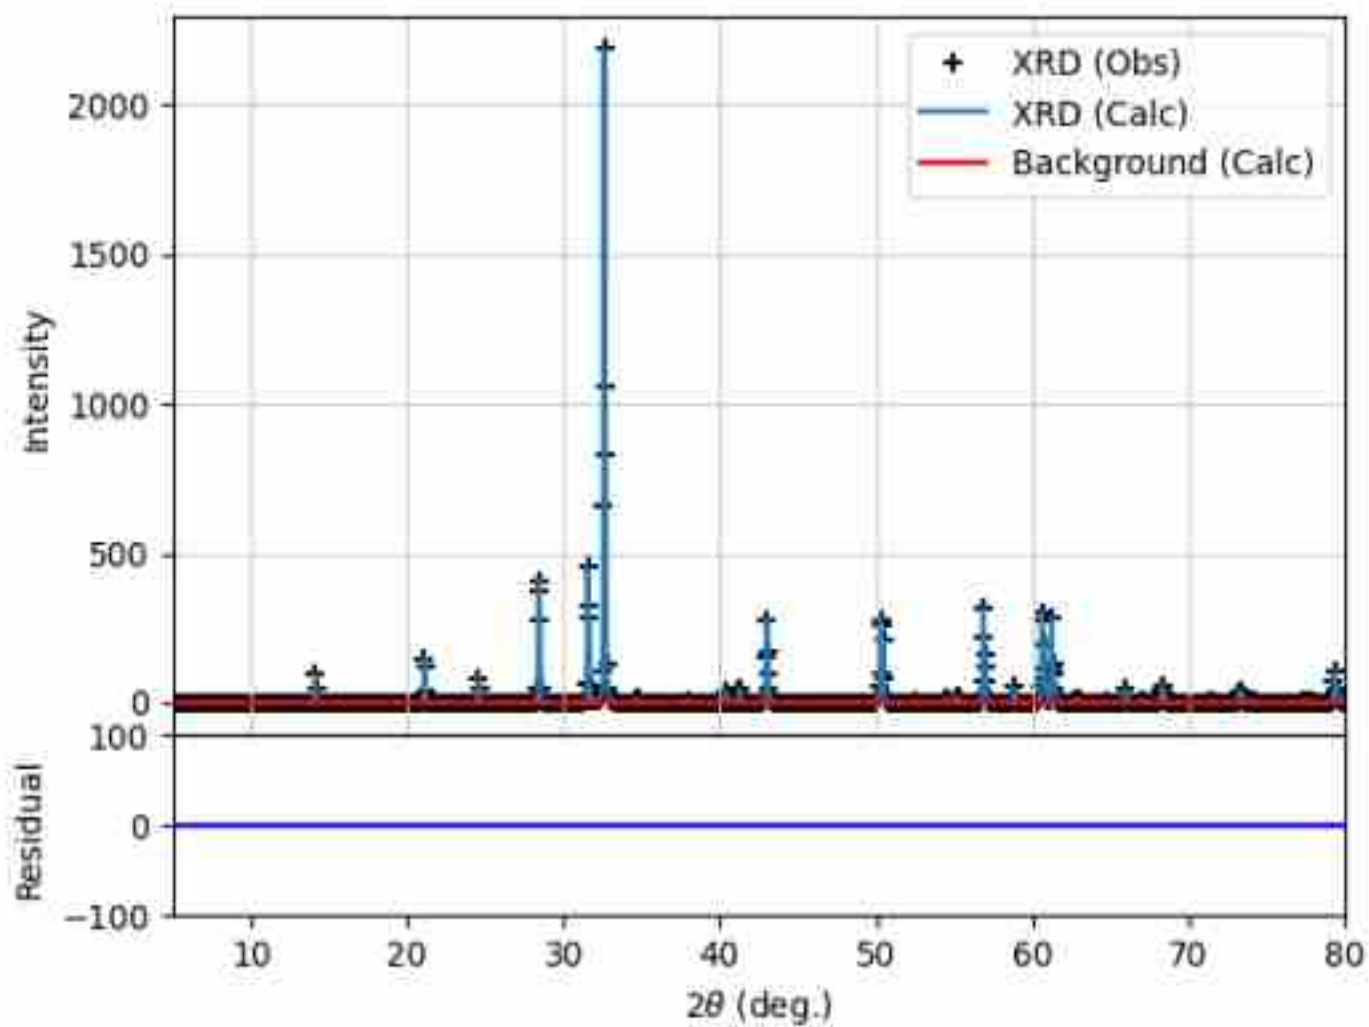

| RMSE before RR | Rwp     | RMSE after RR |
|----------------|---------|---------------|
| 0.006          | 0.04999 | 0.00186       |

# Yb<sub>2</sub>Al<sub>3</sub>Ga<sub>1</sub>

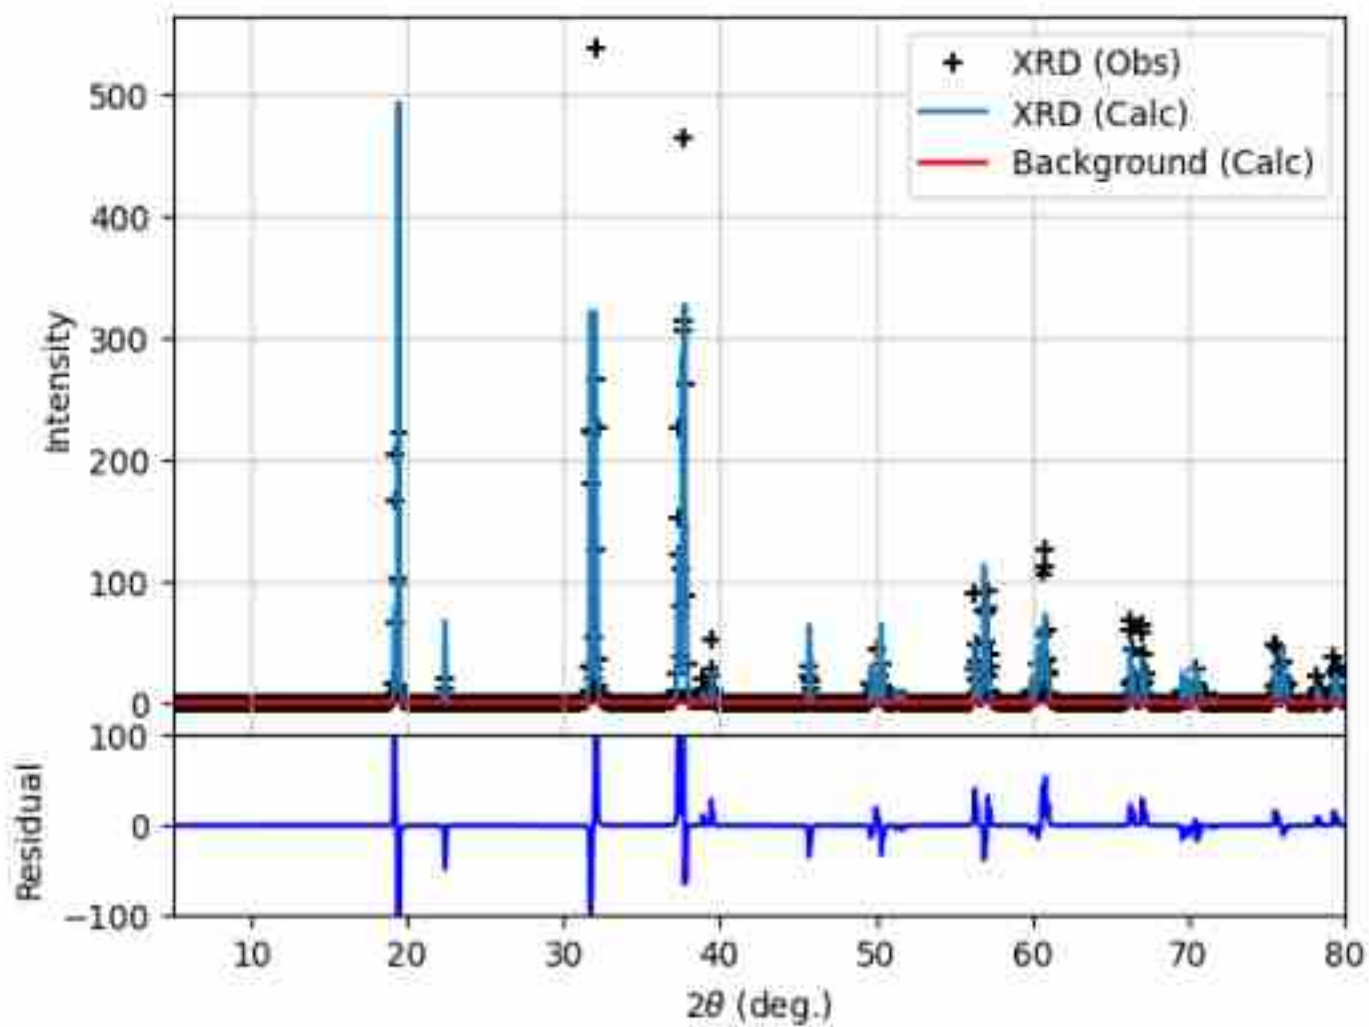

| RMSE before RR | Rwp      | RMSE after RR |
|----------------|----------|---------------|
| 0.006          | 50.23568 | 0.03923       |

# Zn<sub>2</sub>Ag<sub>1</sub>Au<sub>1</sub>

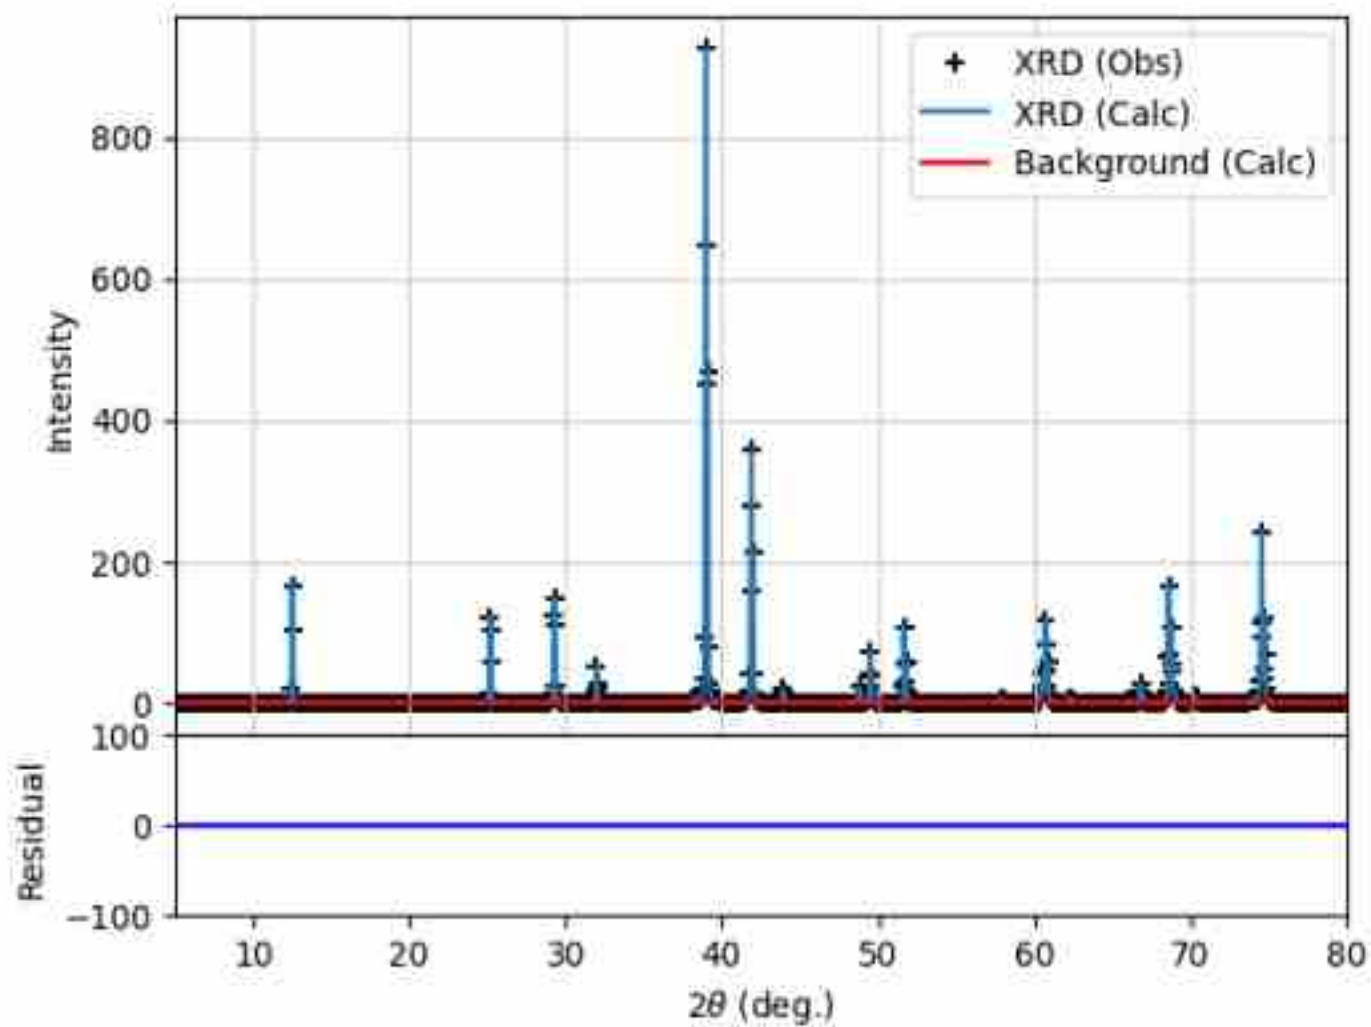

| RMSE before RR | Rwp     | RMSE after RR |
|----------------|---------|---------------|
| 0.006          | 0.01153 | 0.0011        |

# Zn<sub>2</sub>Te<sub>2</sub>

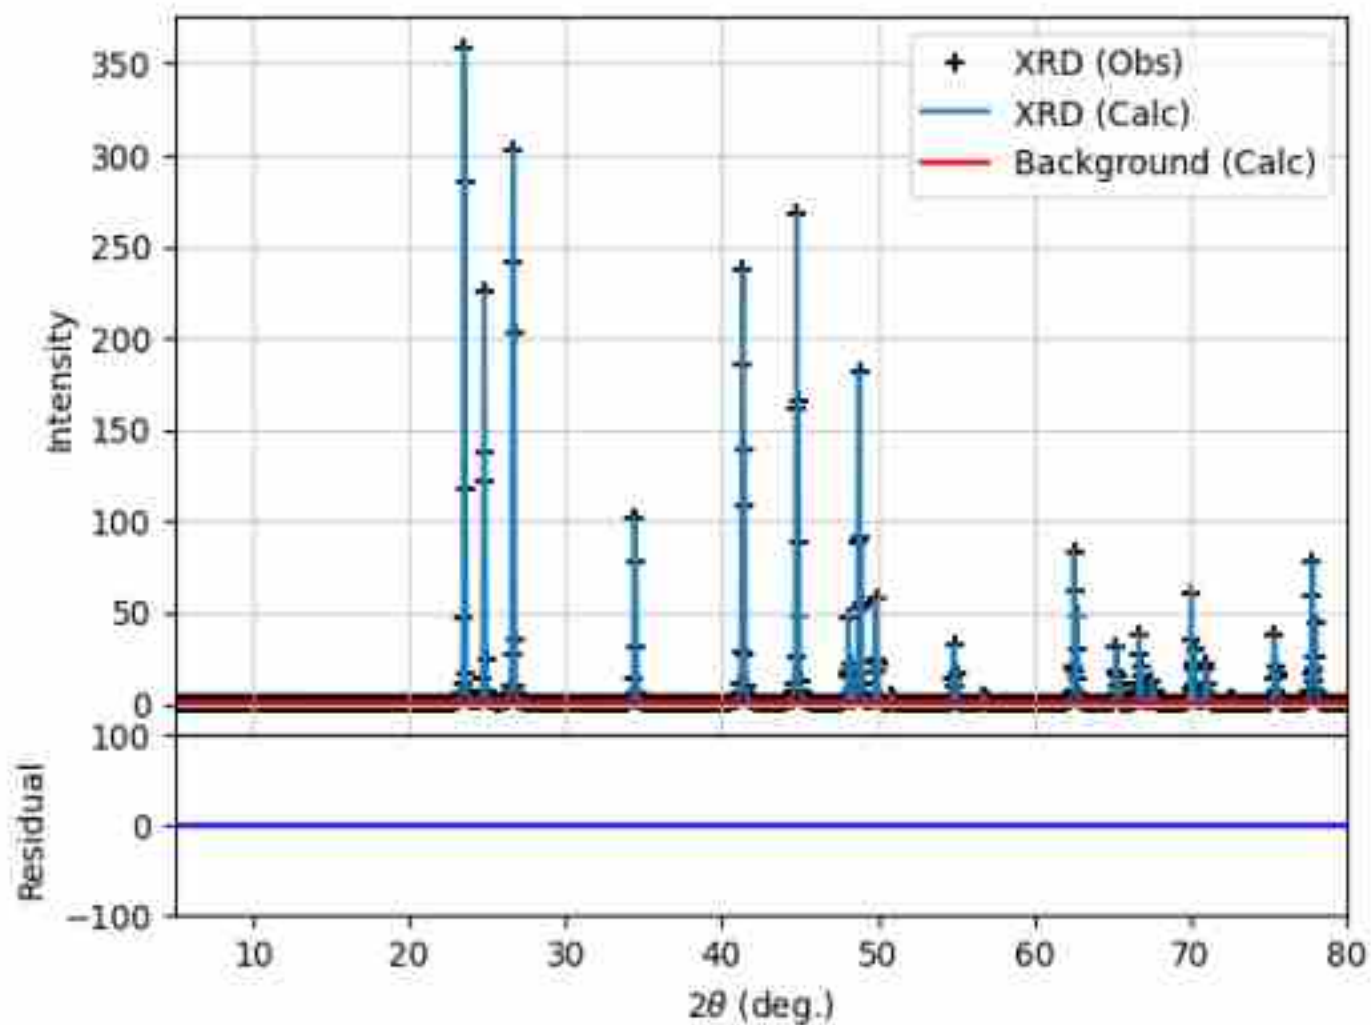

| RMSE before RR | Rwp     | RMSE after RR |
|----------------|---------|---------------|
| 0.006          | 0.00277 | 0.00038       |

Zr<sub>2</sub>CoOs<sub>1</sub>

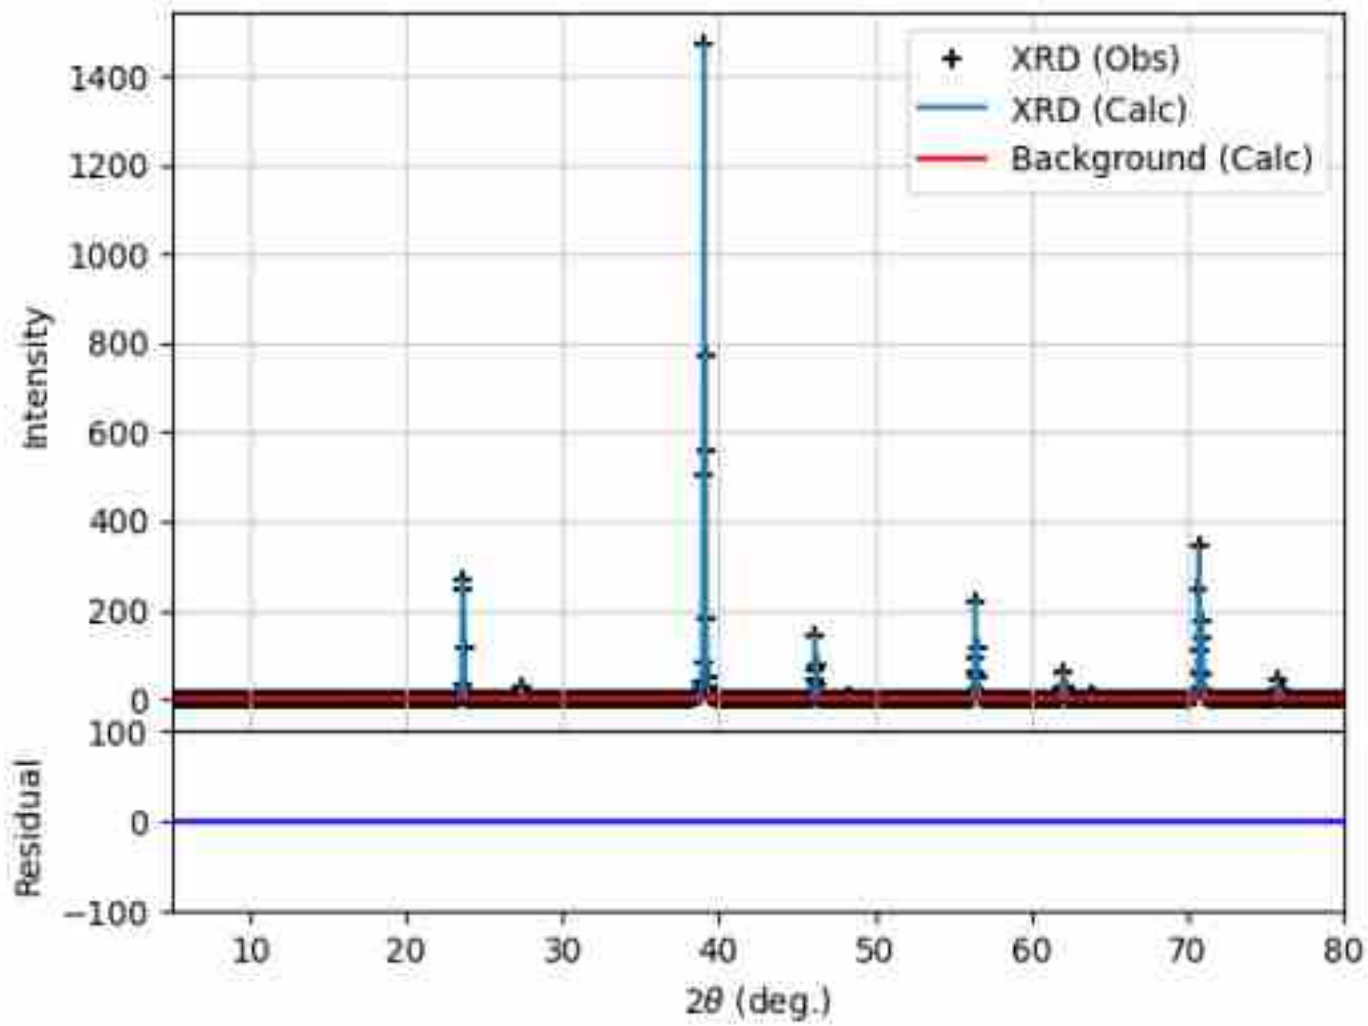

| RMSE before RR | Rwp     | RMSE after RR |
|----------------|---------|---------------|
| 0.006          | 0.00468 | 0.0004        |



# Zr<sub>2</sub>Ga<sub>2</sub>Cu<sub>2</sub>

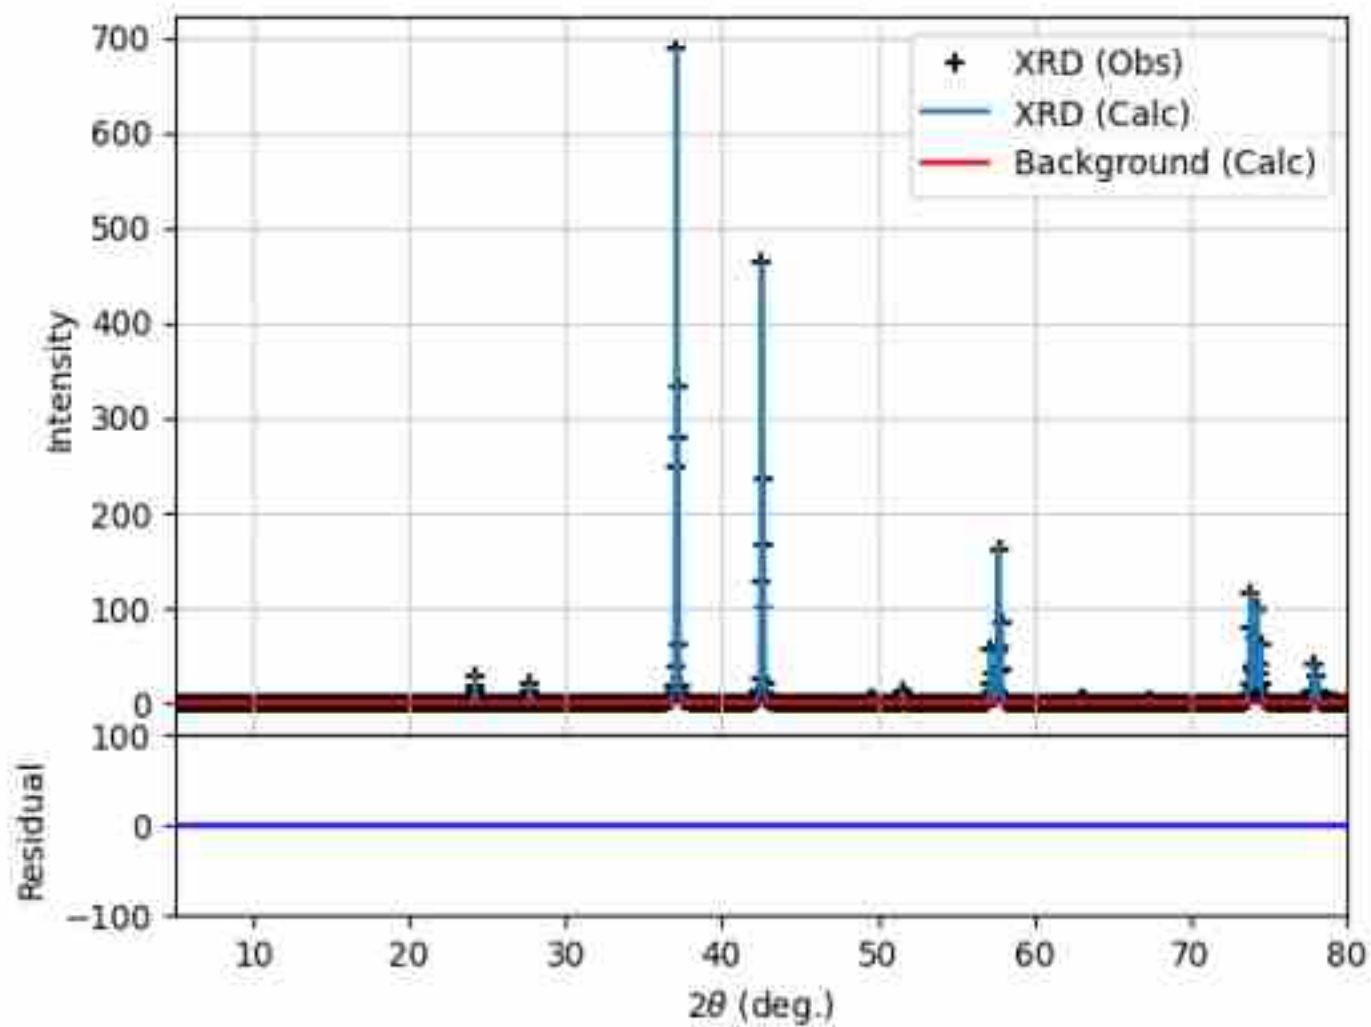

| RMSE before RR | Rwp     | RMSE after RR |
|----------------|---------|---------------|
| 0.006          | 0.00418 | 0.00039       |

# Zr2Pd2

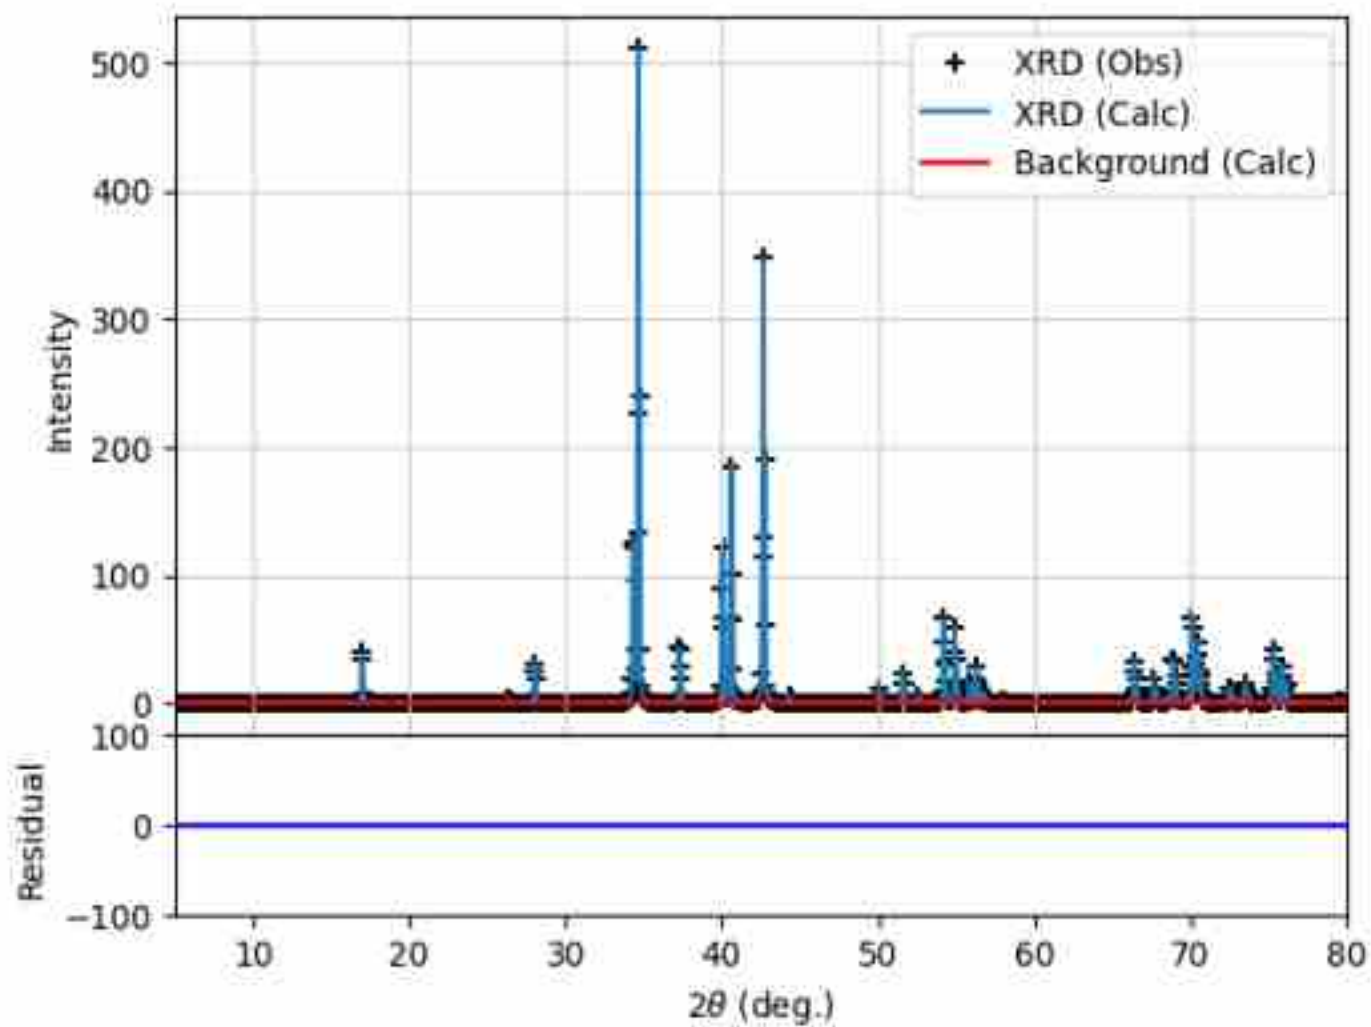

| RMSE before RR | Rwp     | RMSE after RR |
|----------------|---------|---------------|
| 0.006          | 0.00321 | 0.0002        |

# Ag1Sb1S2

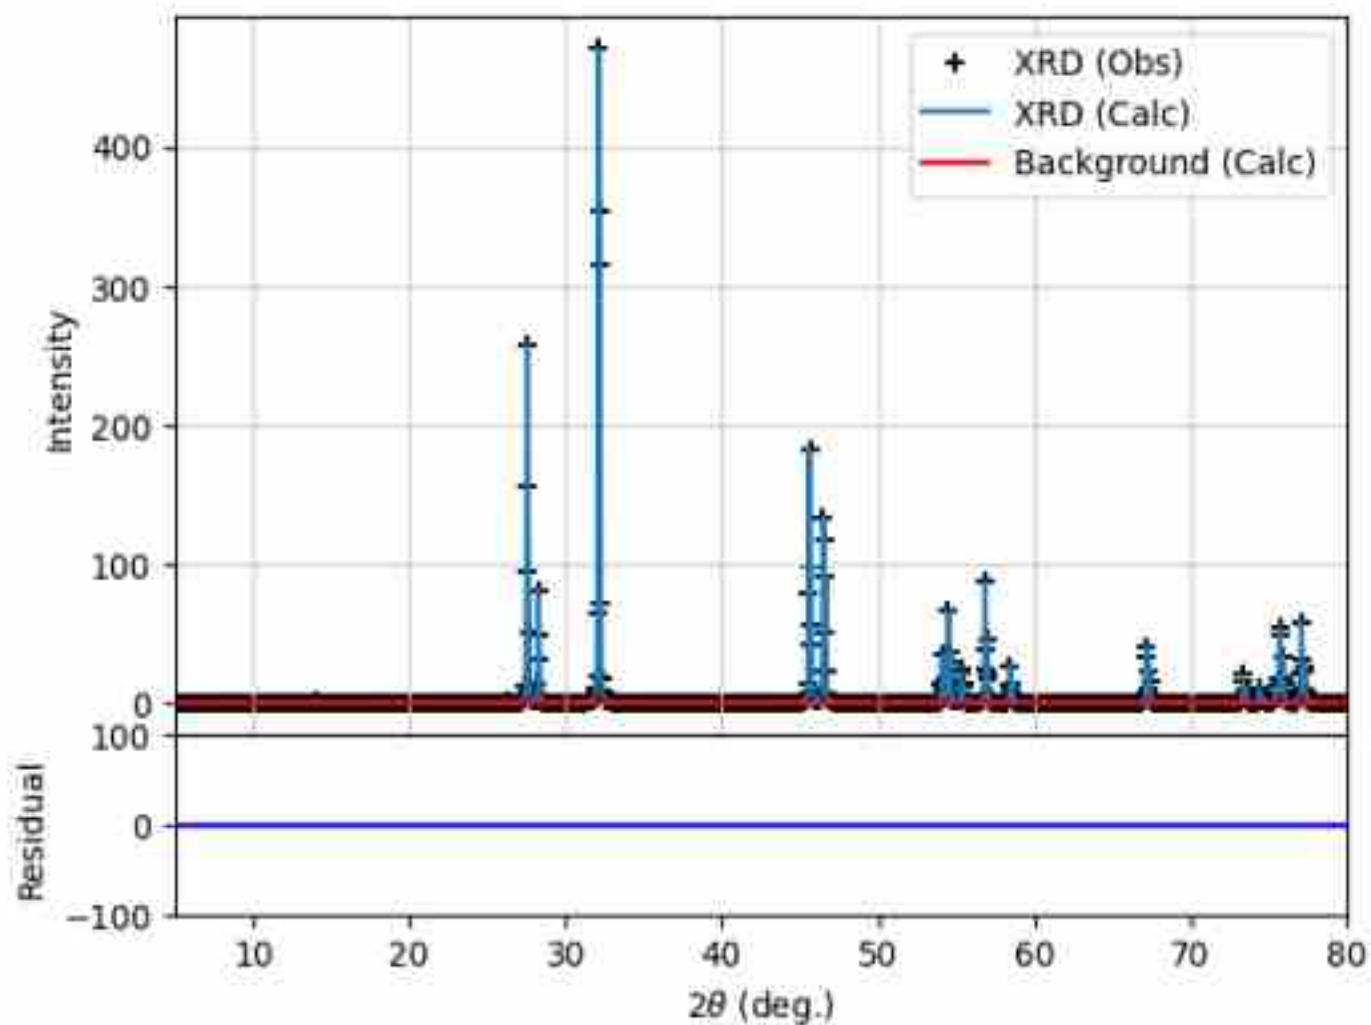

| RMSE before RR | Rwp     | RMSE after RR |
|----------------|---------|---------------|
| 0.007          | 0.00284 | 0.00064       |

# Ag<sub>4</sub>As<sub>4</sub>S<sub>4</sub>

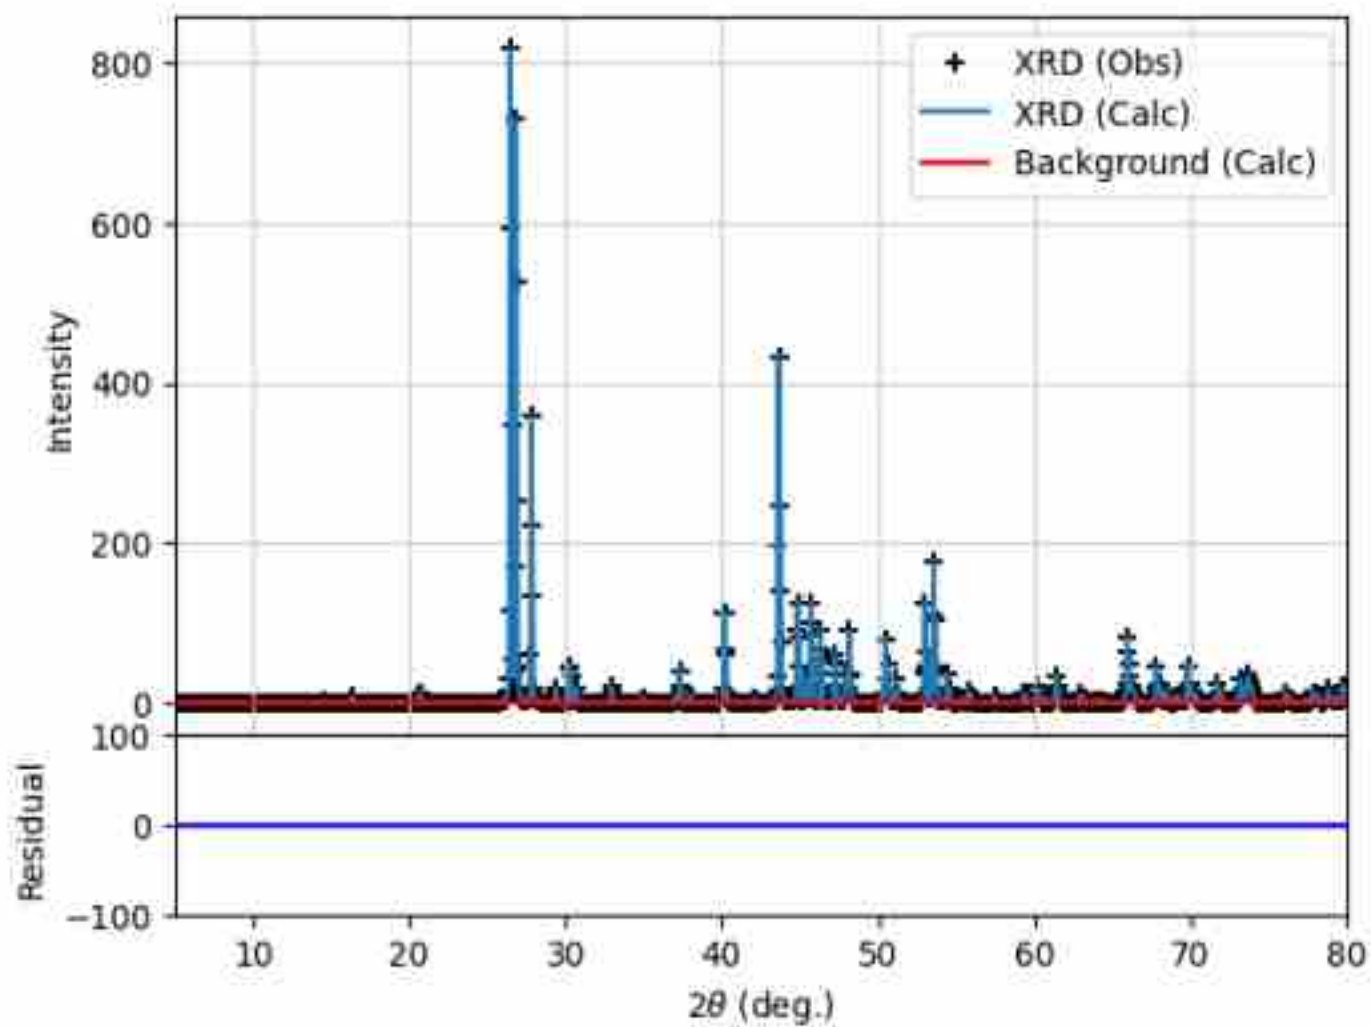

| RMSE before RR | Rwp     | RMSE after RR |
|----------------|---------|---------------|
| 0.07           | 0.00403 | 0.00067       |

# Al1Cu1O2

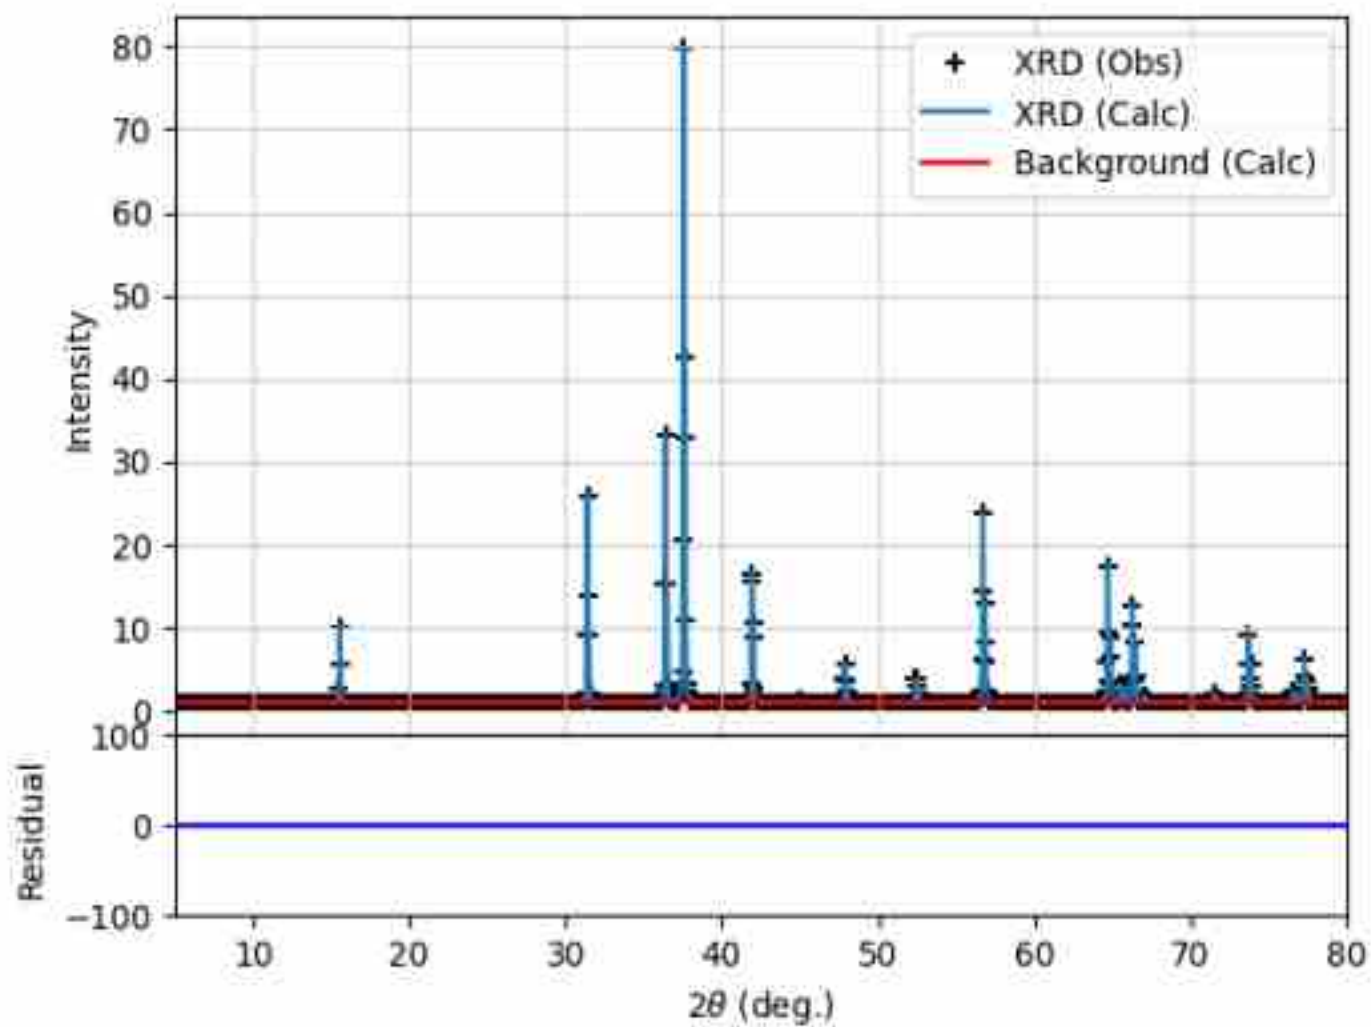

| RMSE before RR | Rwp     | RMSE after RR |
|----------------|---------|---------------|
| 0.007          | 0.00276 | 0.00102       |

# A11In1Sb2

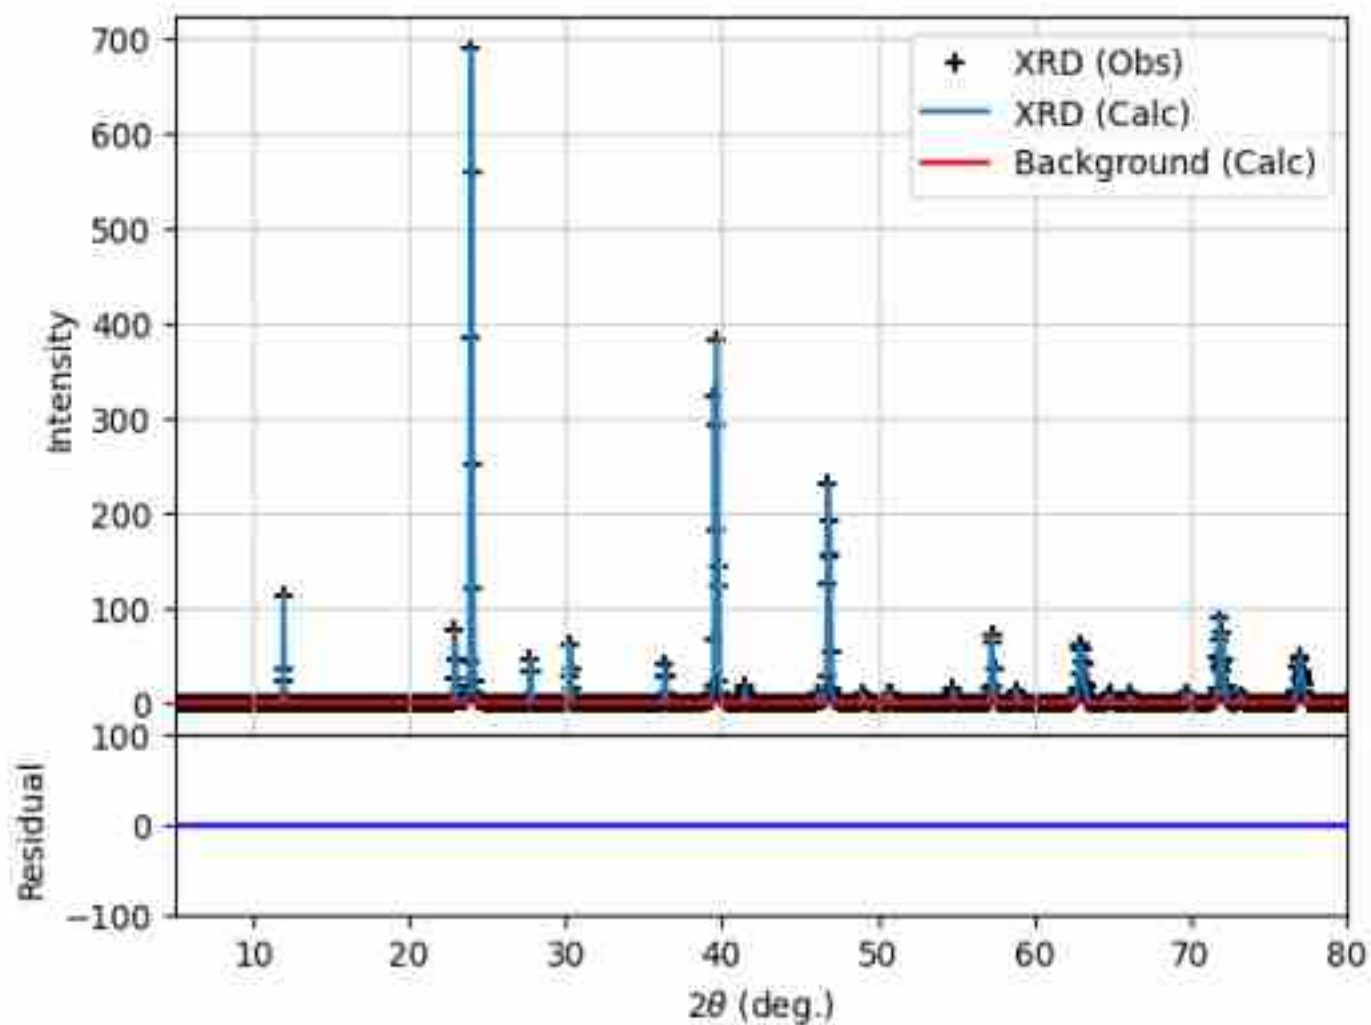

| RMSE before RR | Rwp    | RMSE after RR |
|----------------|--------|---------------|
| 0.007          | 0.0031 | 0.00014       |

Ar2

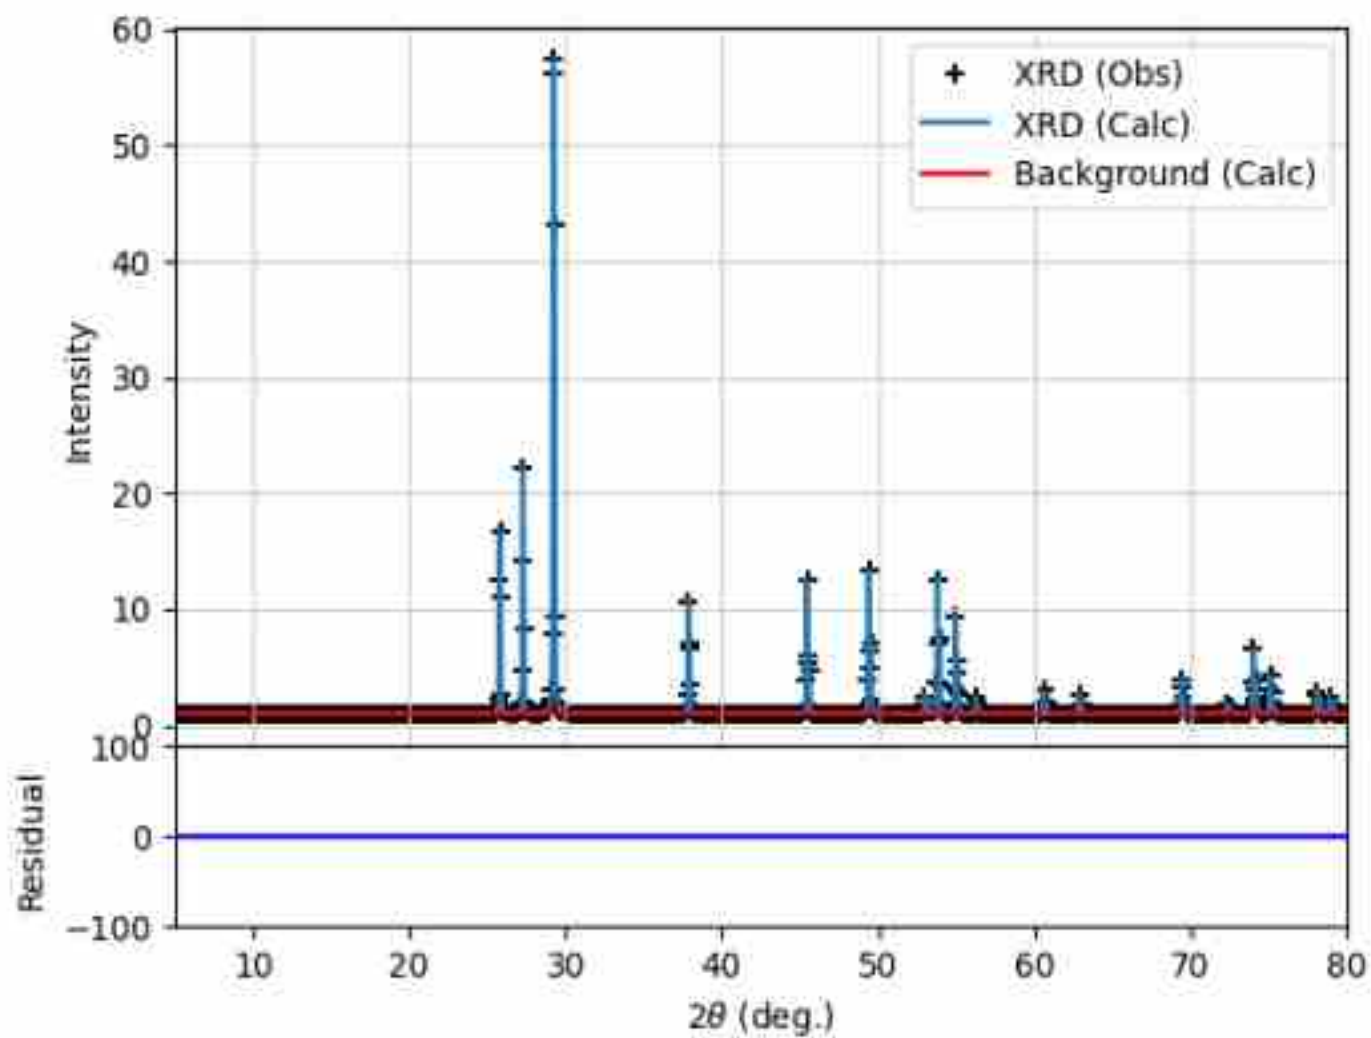

| RMSE before RR | Rwp     | RMSE after RR |
|----------------|---------|---------------|
| 0.007          | 0.00152 | 0.00016       |

# Ba1Eu1Gd1Sb1O6

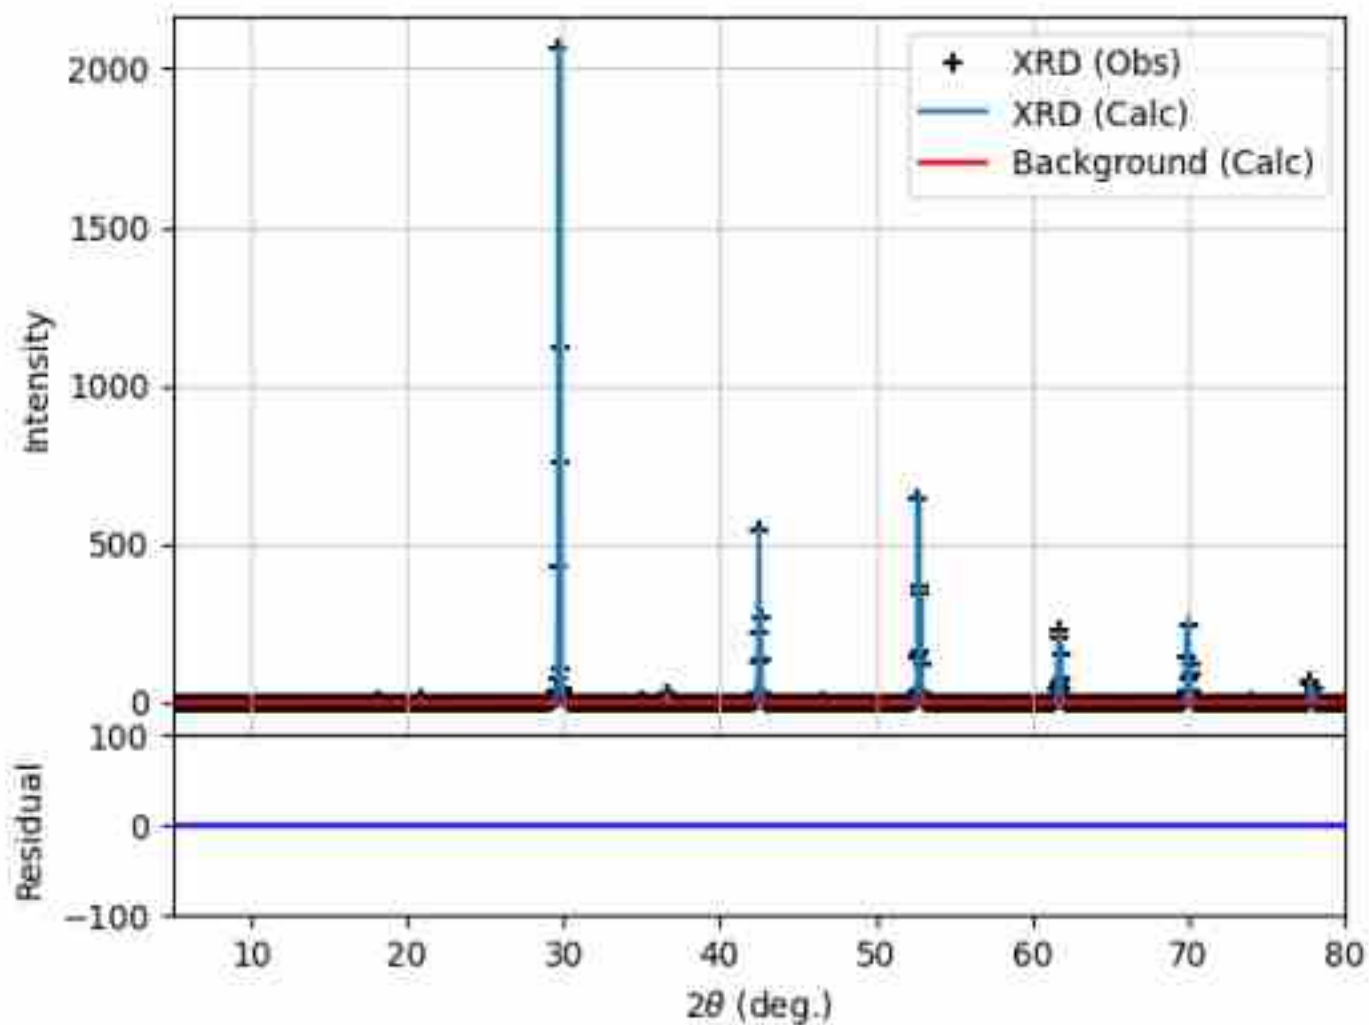

| RMSE before RR | Rwp    | RMSE after RR |
|----------------|--------|---------------|
| 0.007          | 0.0533 | 0.00959       |



# Ba1Ga1Cu2

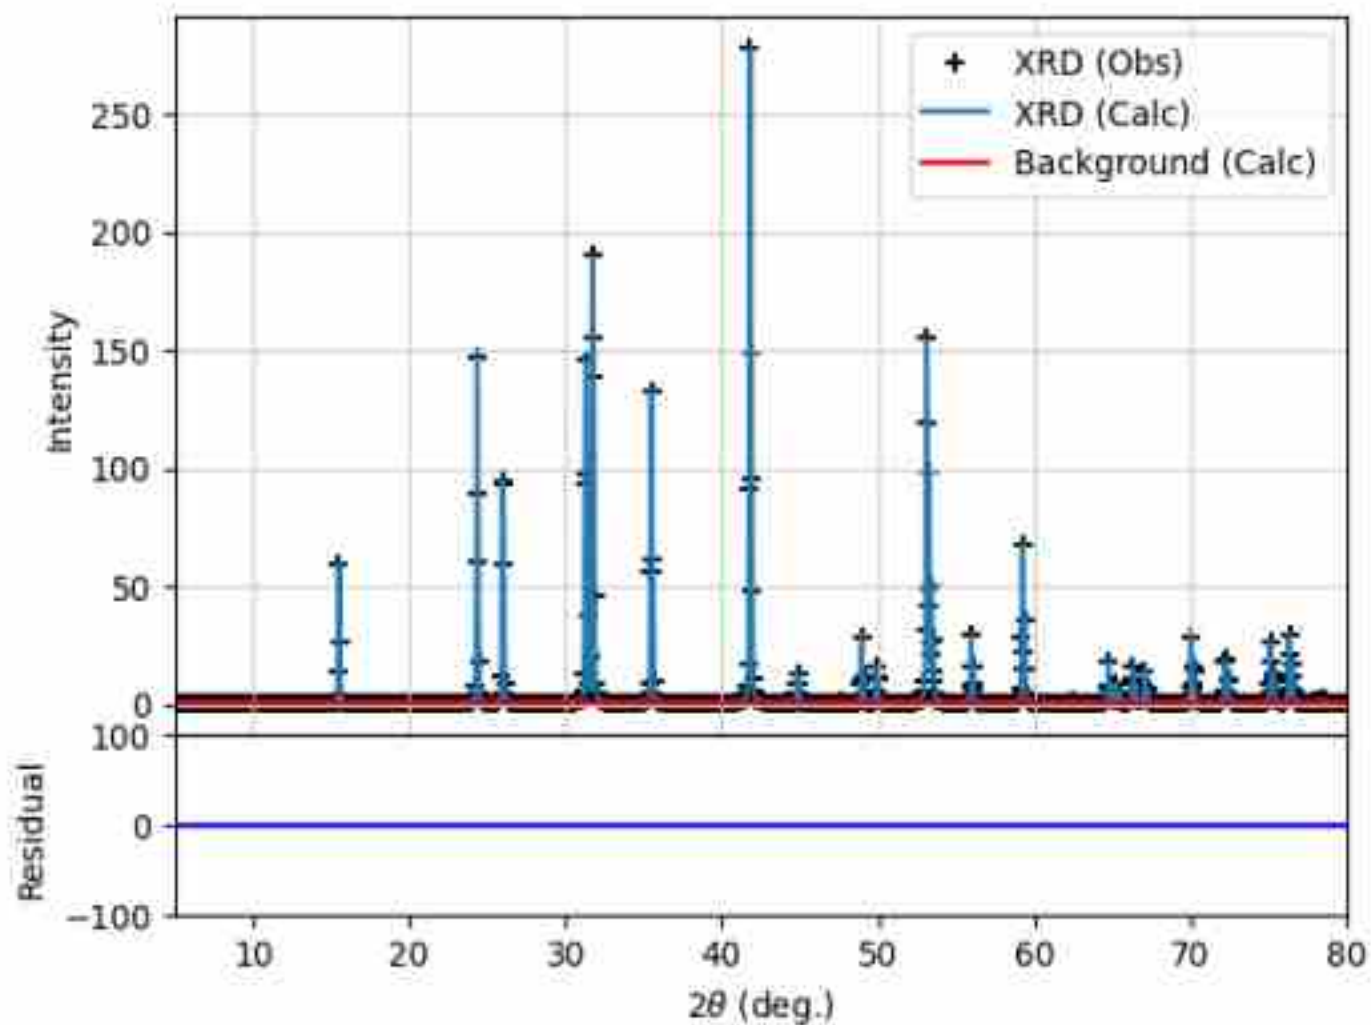

| RMSE before RR | Rwp    | RMSE after RR |
|----------------|--------|---------------|
| 0.007          | 0.0028 | 0.00031       |

# Ba1Mg2Bi2

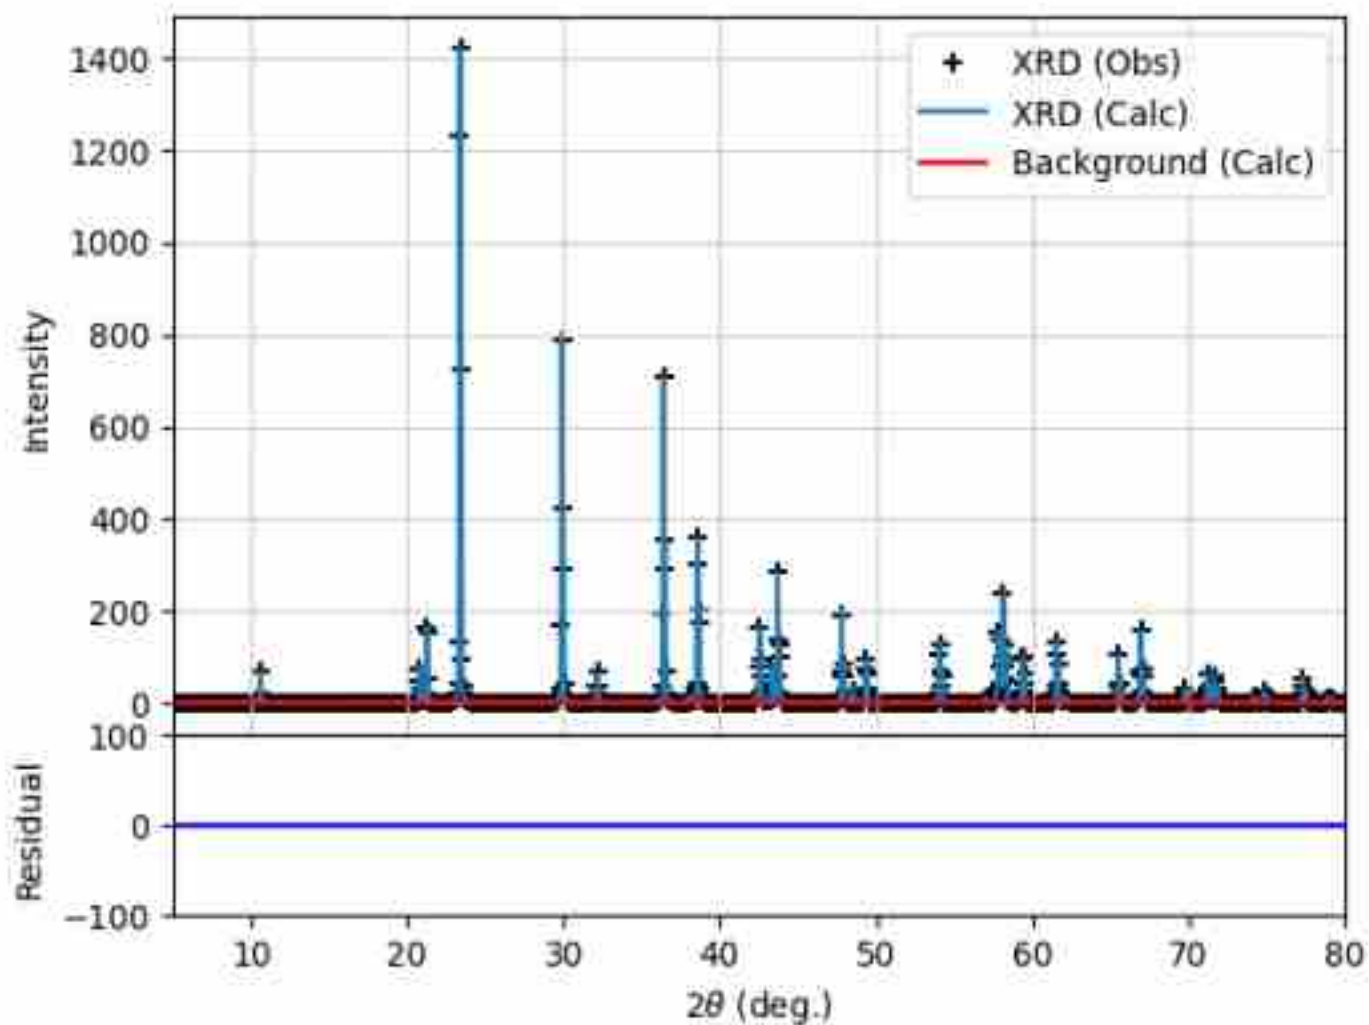

| RMSE before RR | Rwp     | RMSE after RR |
|----------------|---------|---------------|
| 0.007          | 0.00377 | 0.00038       |

Ba1Sr1Eu1Sb1O6

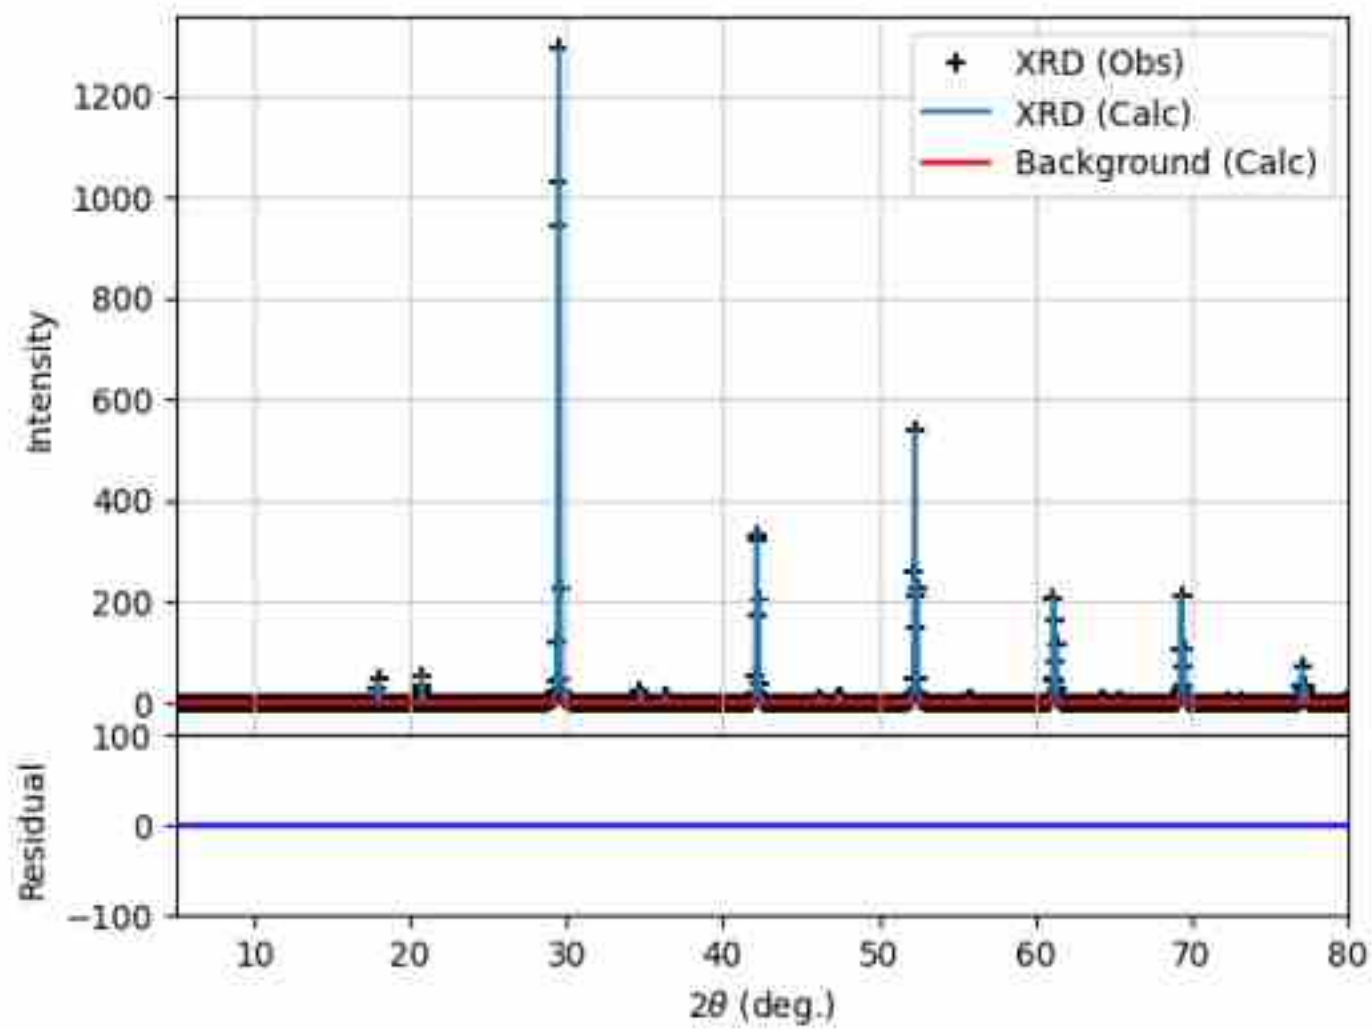

| RMSE before RR | Rwp     | RMSE after RR |
|----------------|---------|---------------|
| 0.007          | 0.00569 | 0.00311       |

# Ba1Ti2As2O1

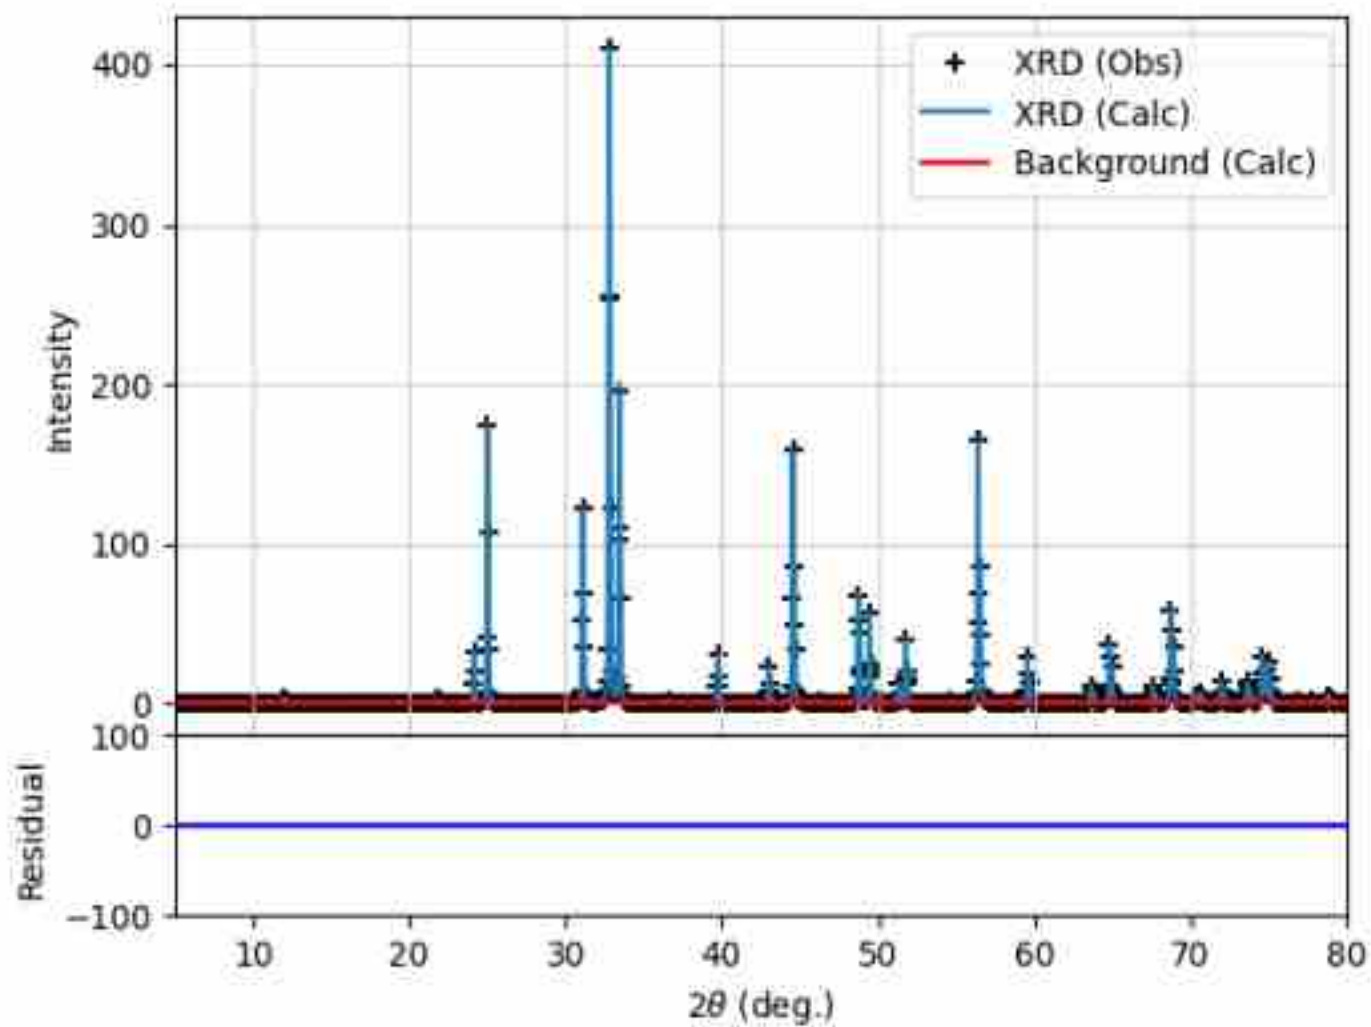

| RMSE before RR | Rwp     | RMSE after RR |
|----------------|---------|---------------|
| 0.007          | 0.00394 | 0.00155       |

# Ba2Bi2O6

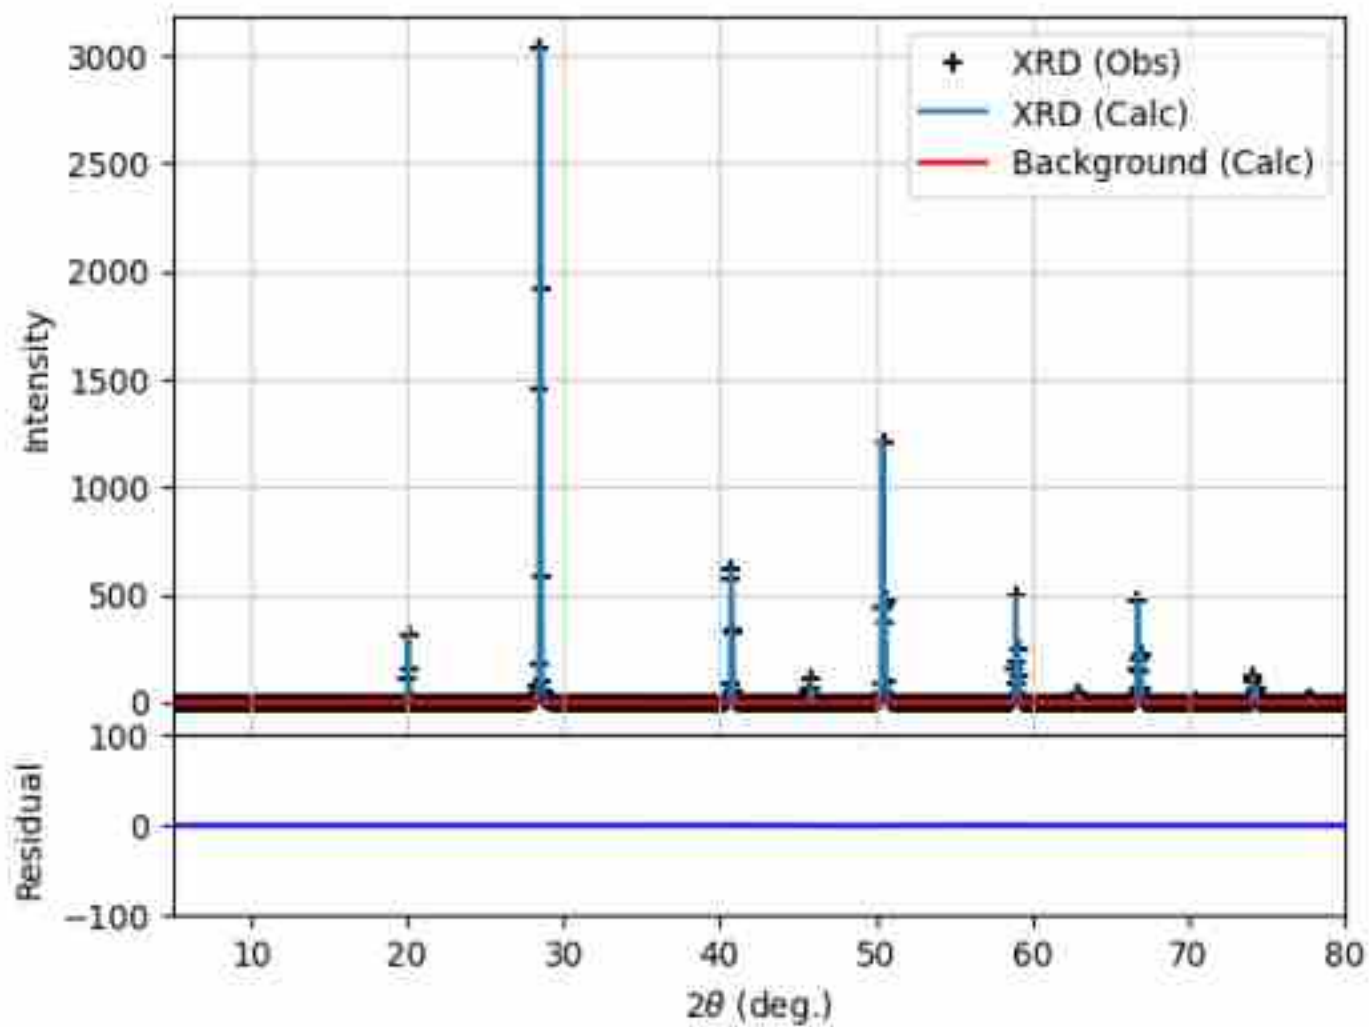

| RMSE before RR | Rwp     | RMSE after RR |
|----------------|---------|---------------|
| 0.007          | 0.16651 | 0.00446       |

# Ba<sub>2</sub>DyTaO<sub>6</sub>

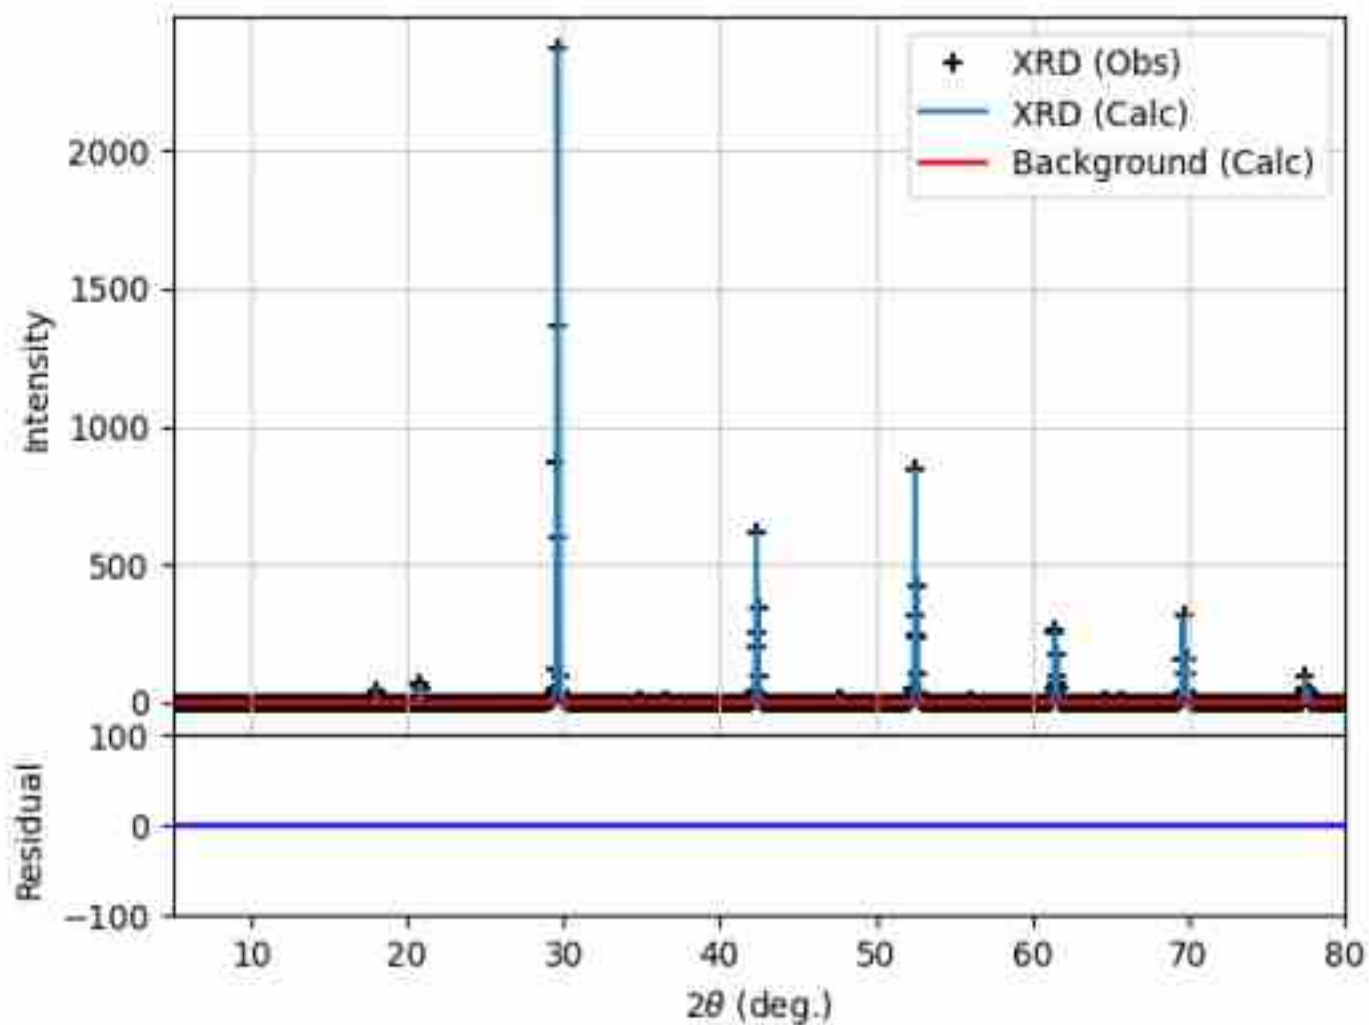

| RMSE before RR | Rwp     | RMSE after RR |
|----------------|---------|---------------|
| 0.007          | 0.00854 | 0.00389       |

# Ba<sub>2</sub>Eu<sub>1</sub>Bi<sub>1</sub>O<sub>6</sub>

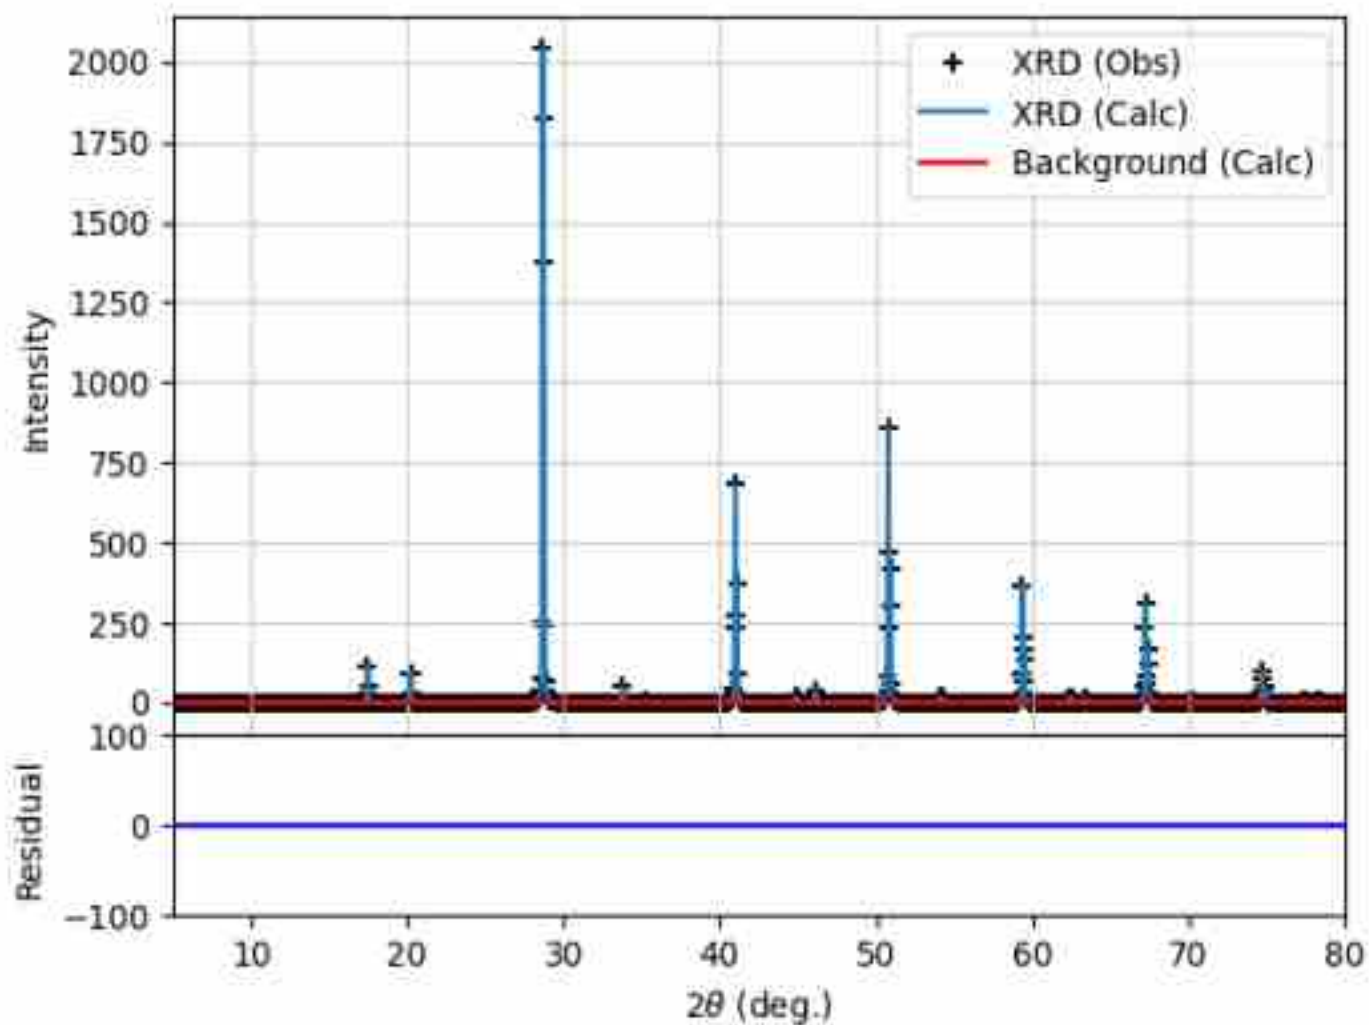

| RMSE before RR | Rwp     | RMSE after RR |
|----------------|---------|---------------|
| 0.007          | 0.00412 | 0.00209       |

# Ba<sub>2</sub>Pr<sub>1</sub>Pb<sub>1</sub>O<sub>6</sub>

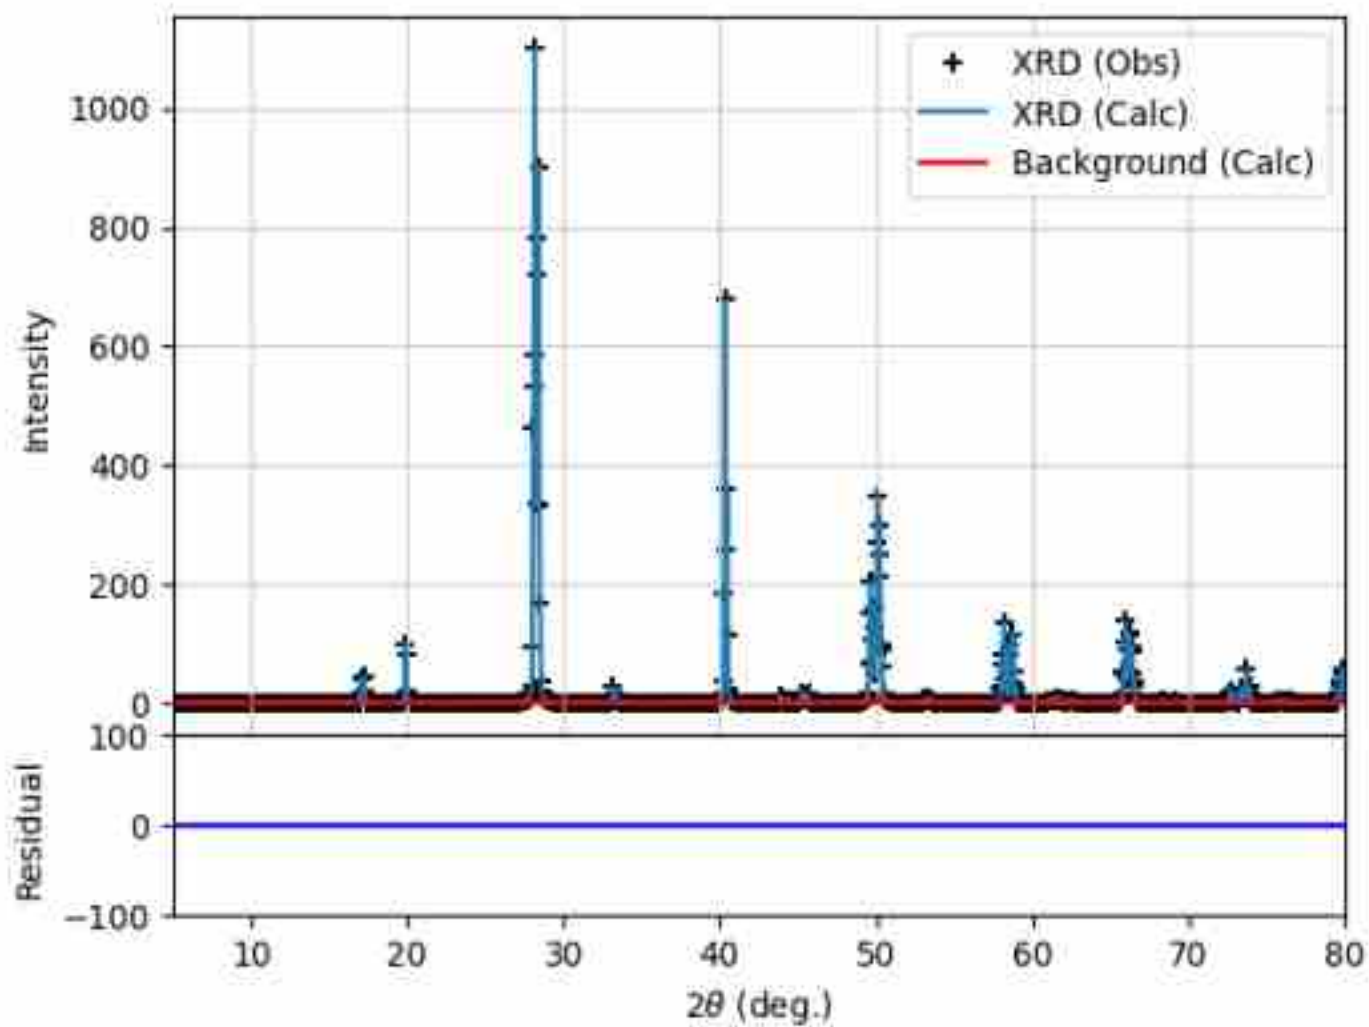

| RMSE before RR | Rwp     | RMSE after RR |
|----------------|---------|---------------|
| 0.07           | 0.00292 | 0.00075       |



# Ba<sub>2</sub>Y<sub>1</sub>Ta<sub>1</sub>O<sub>6</sub>

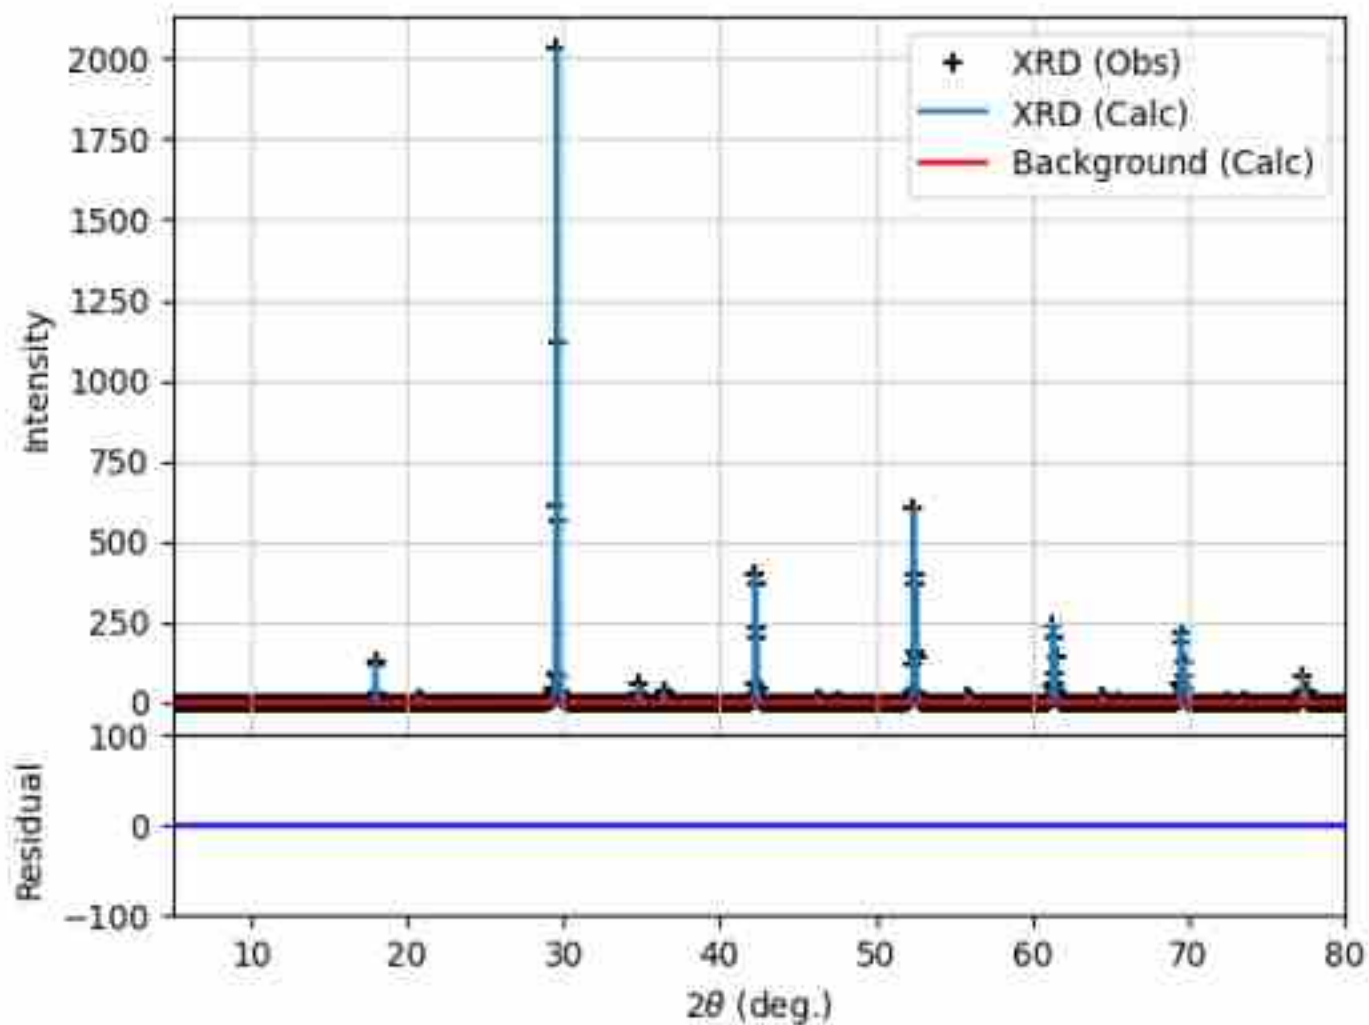

| RMSE before RR | Rwp     | RMSE after RR |
|----------------|---------|---------------|
| 0.007          | 0.00546 | 0.00276       |

# Ba<sub>2</sub>YbTaO<sub>6</sub>

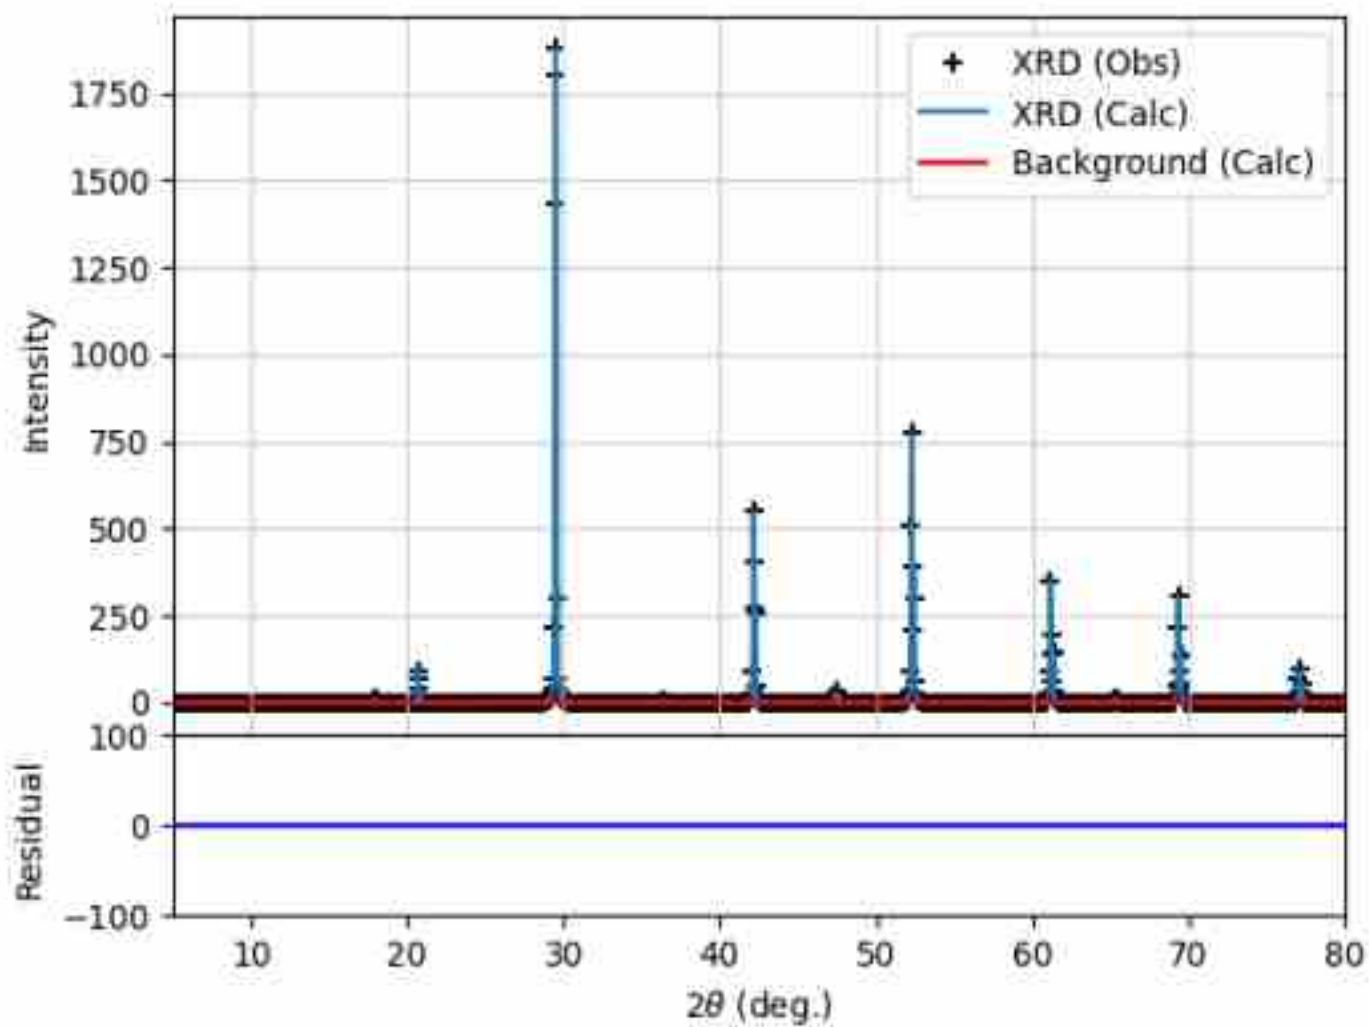

| RMSE before RR | Rwp     | RMSE after RR |
|----------------|---------|---------------|
| 0.007          | 0.01168 | 0.00416       |

# Ba3Pb1O1

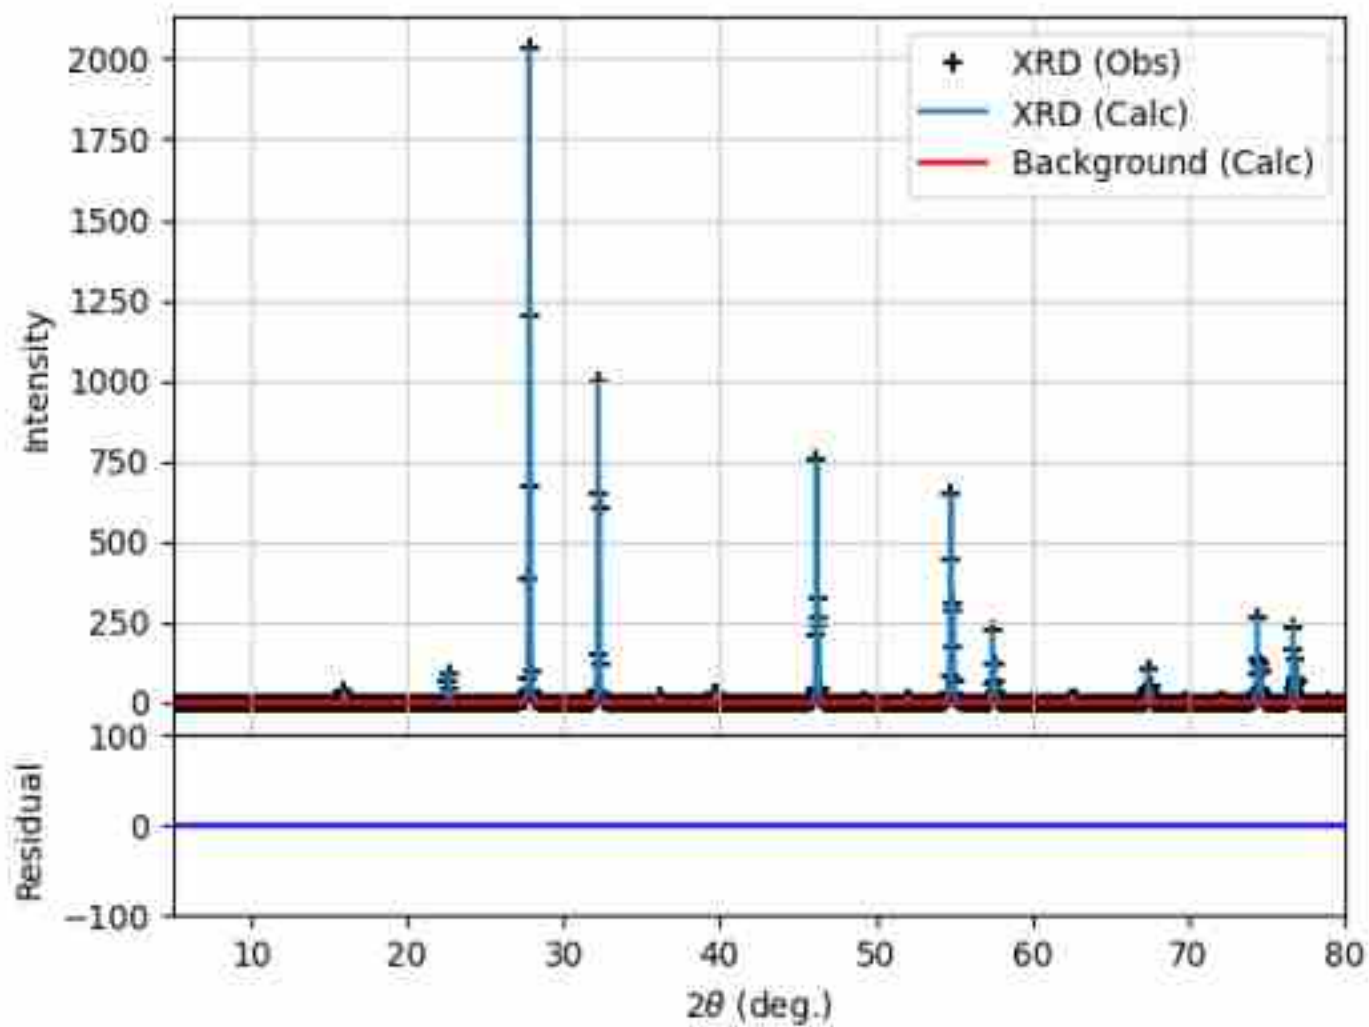

| RMSE before RR | Rwp     | RMSE after RR |
|----------------|---------|---------------|
| 0.007          | 0.09956 | 0.00461       |

C2

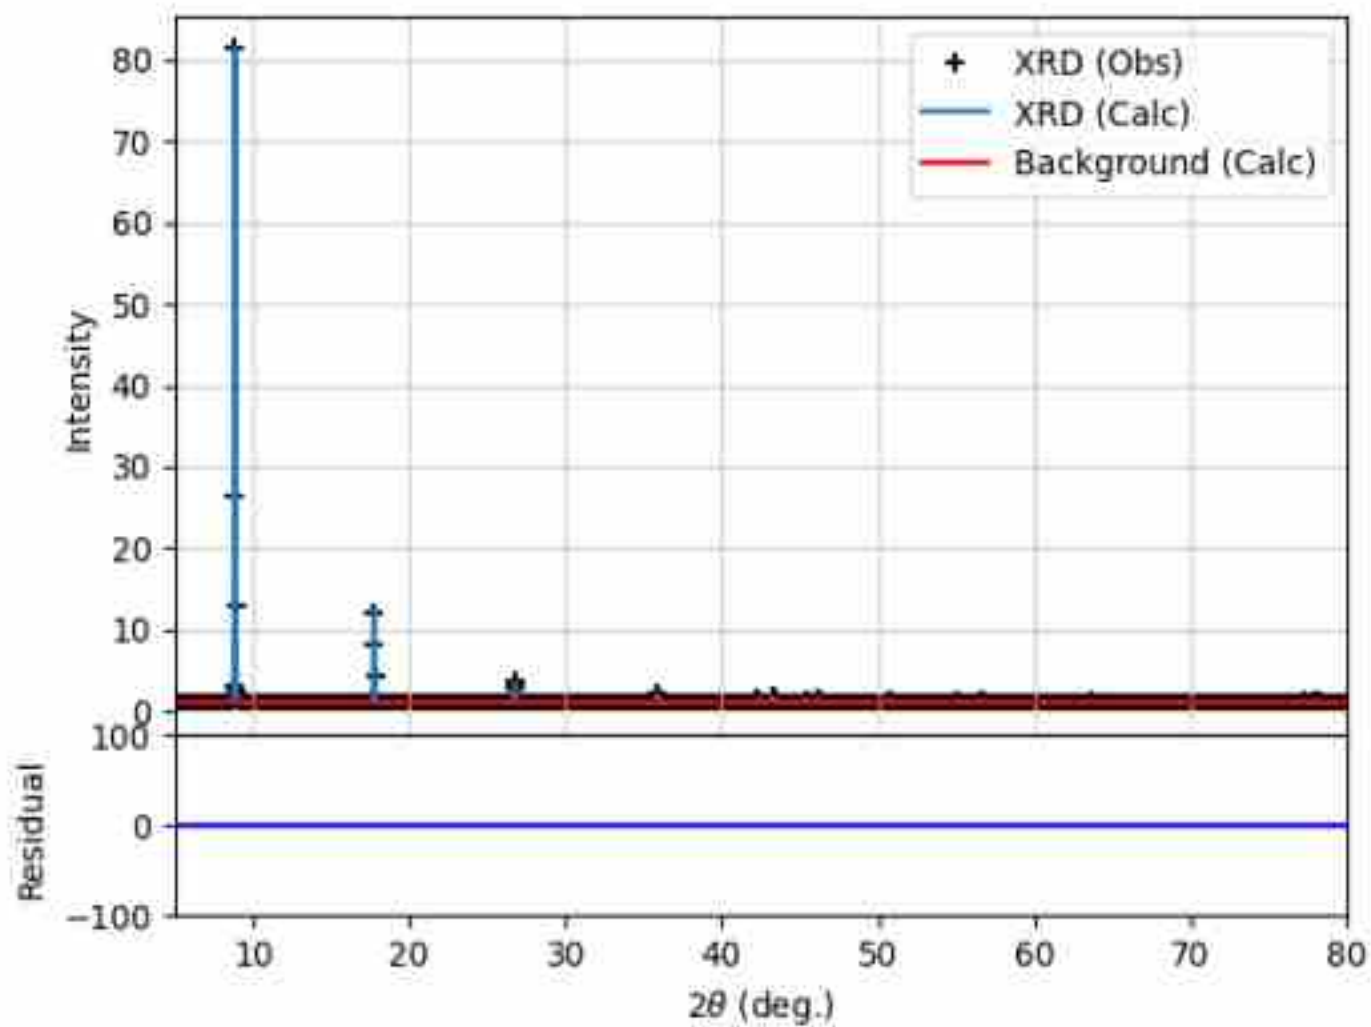

| RMSE before RR | Rwp     | RMSE after RR |
|----------------|---------|---------------|
| 0.007          | 0.00013 | 0.0003        |

# Ca1Ge2Rh2

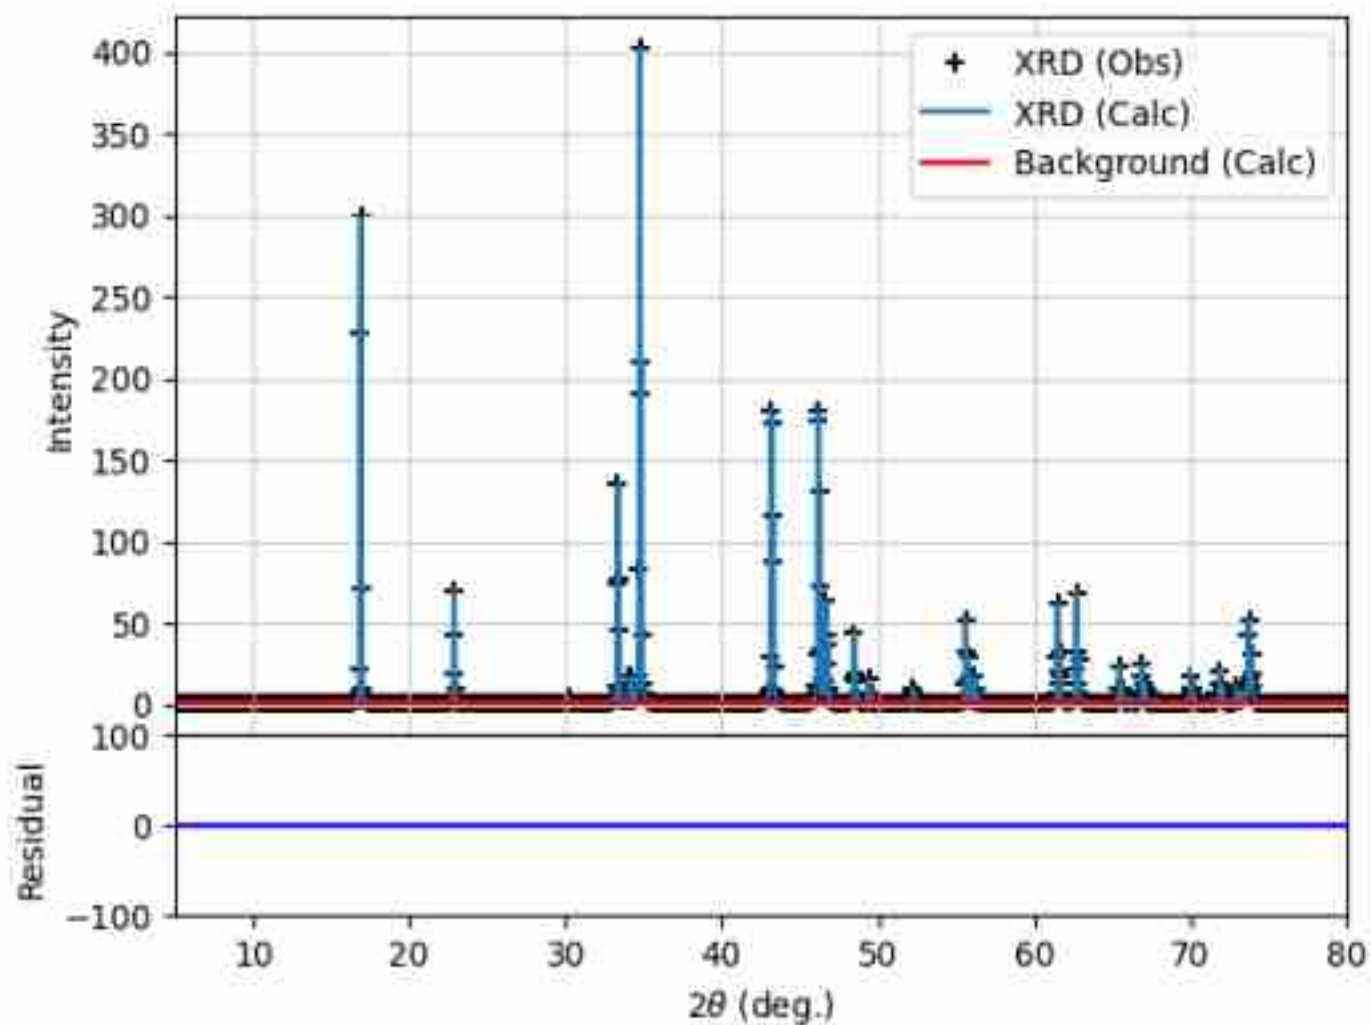

| RMSE before RR | Rwp     | RMSE after RR |
|----------------|---------|---------------|
| 0.007          | 0.00291 | 0.0005        |

# Ca<sub>2</sub>Au<sub>2</sub>

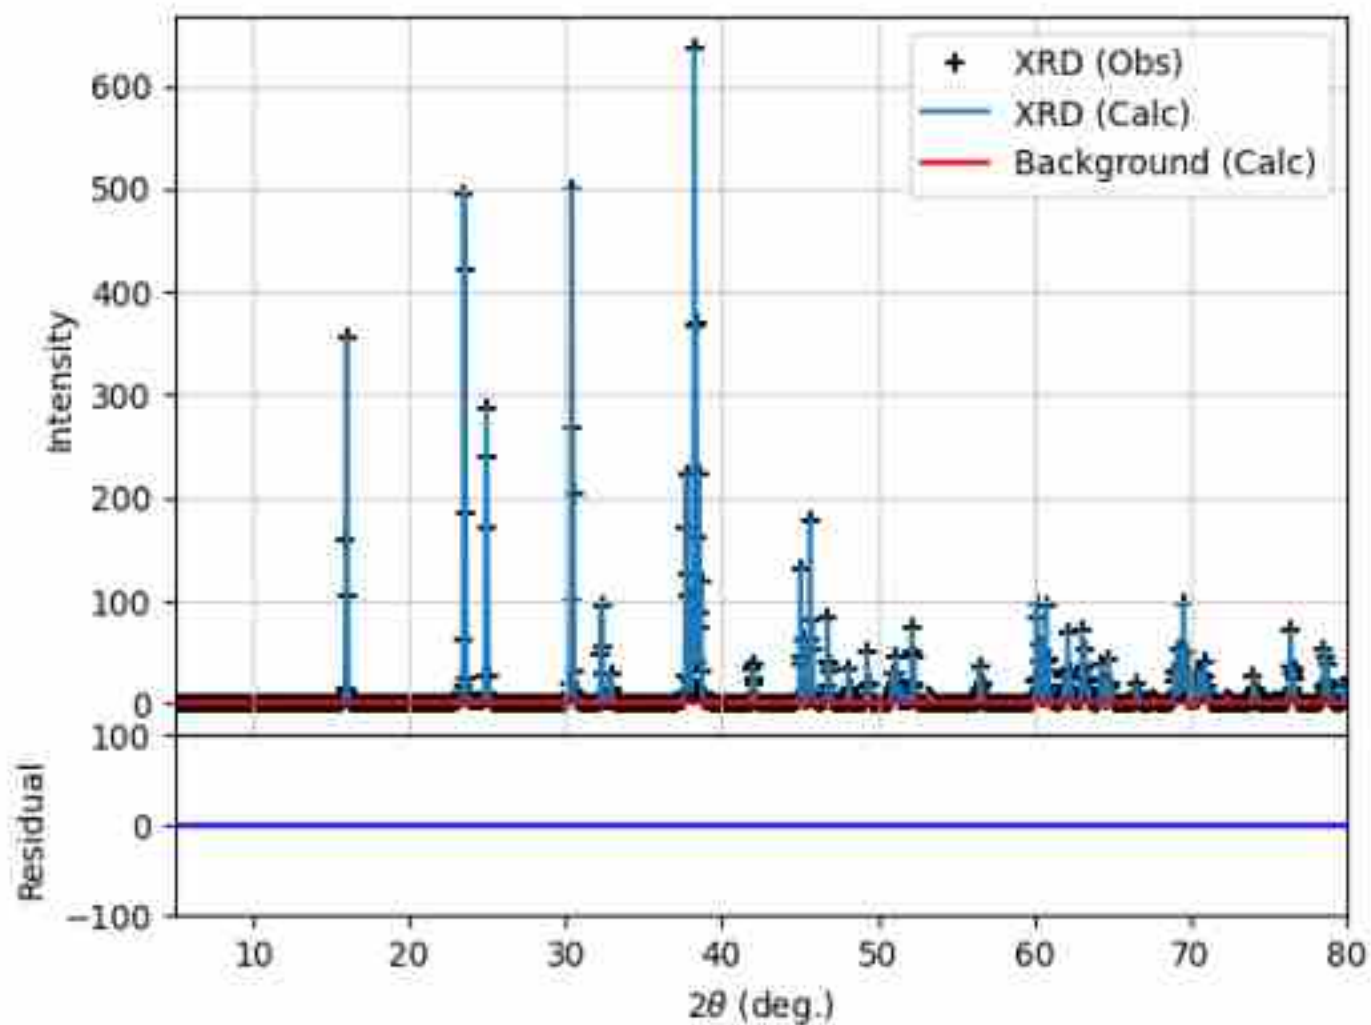

| RMSE before RR | Rwp     | RMSE after RR |
|----------------|---------|---------------|
| 0.007          | 0.00479 | 0.0006        |

# Ce1Y1Ni4

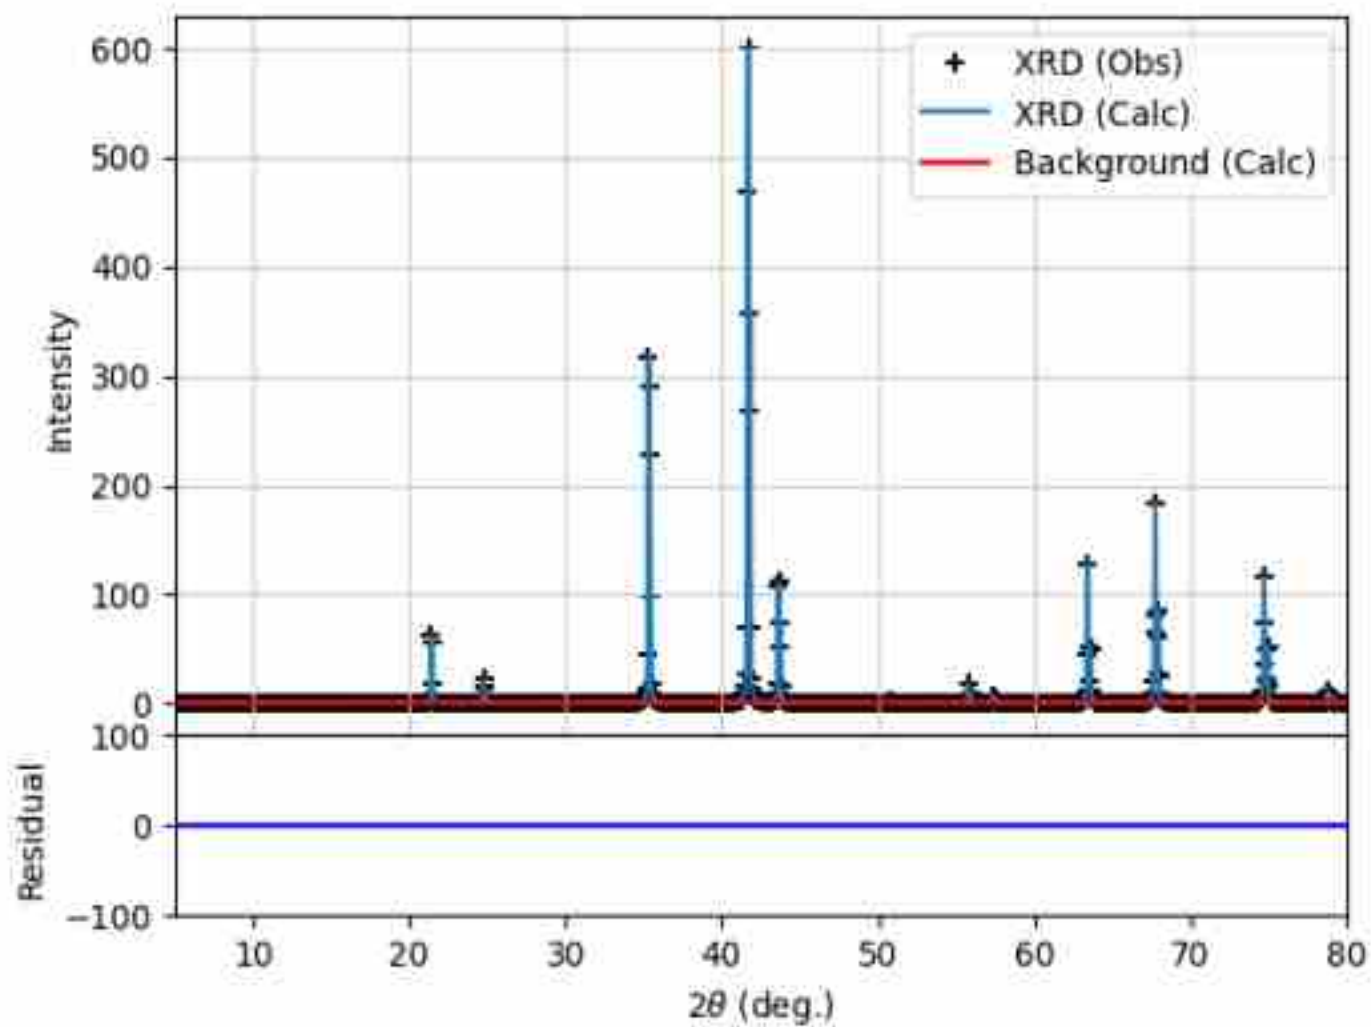

| RMSE before RR | Rwp     | RMSE after RR |
|----------------|---------|---------------|
| 0.007          | 0.00518 | 0.00087       |

# Ce<sub>2</sub>Ge<sub>3</sub>Rh<sub>1</sub>

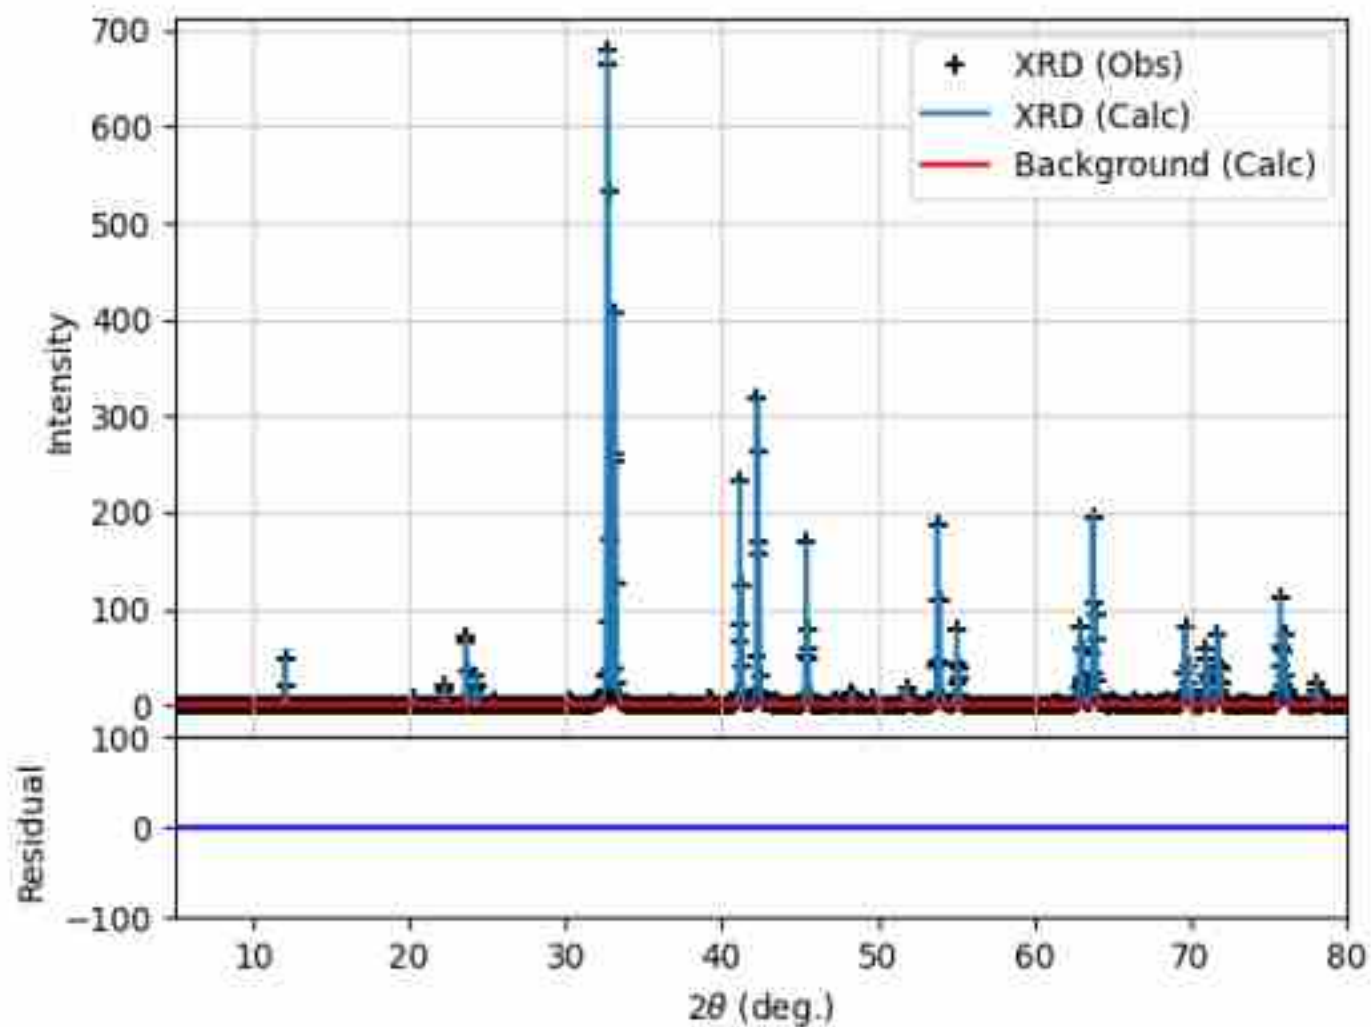

| RMSE before RR | Rwp     | RMSE after RR |
|----------------|---------|---------------|
| 0.007          | 0.00431 | 0.00015       |



# Ce<sub>2</sub>S<sub>10</sub>O<sub>2</sub>

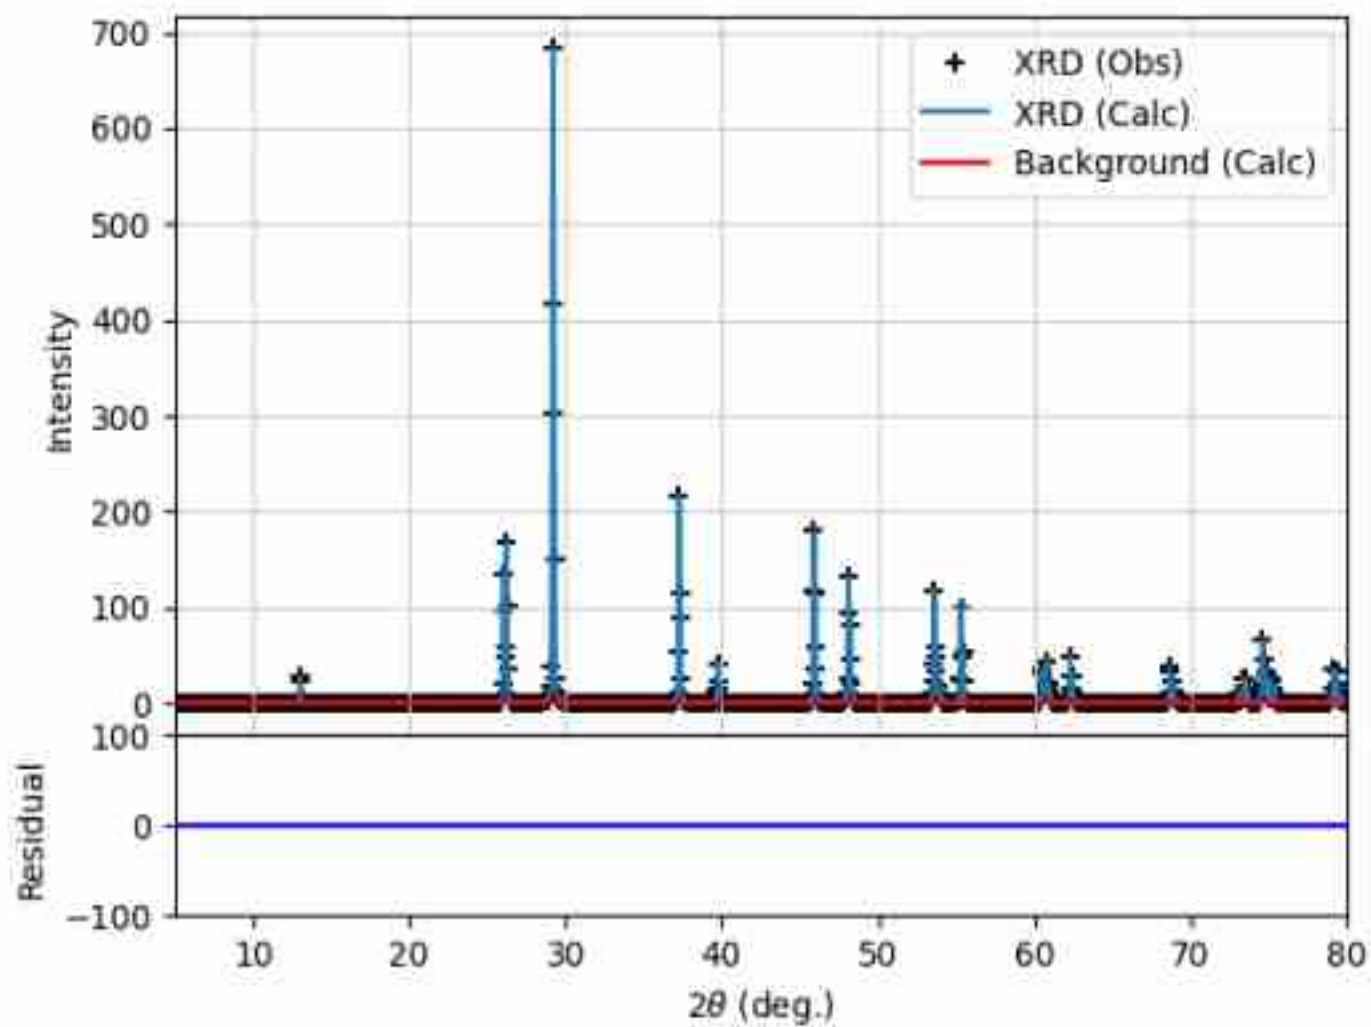

| RMSE before RR | Rwp     | RMSE after RR |
|----------------|---------|---------------|
| 0.007          | 0.00384 | 0.00153       |

# Ce<sub>4</sub>Sc<sub>2</sub>Si<sub>4</sub>

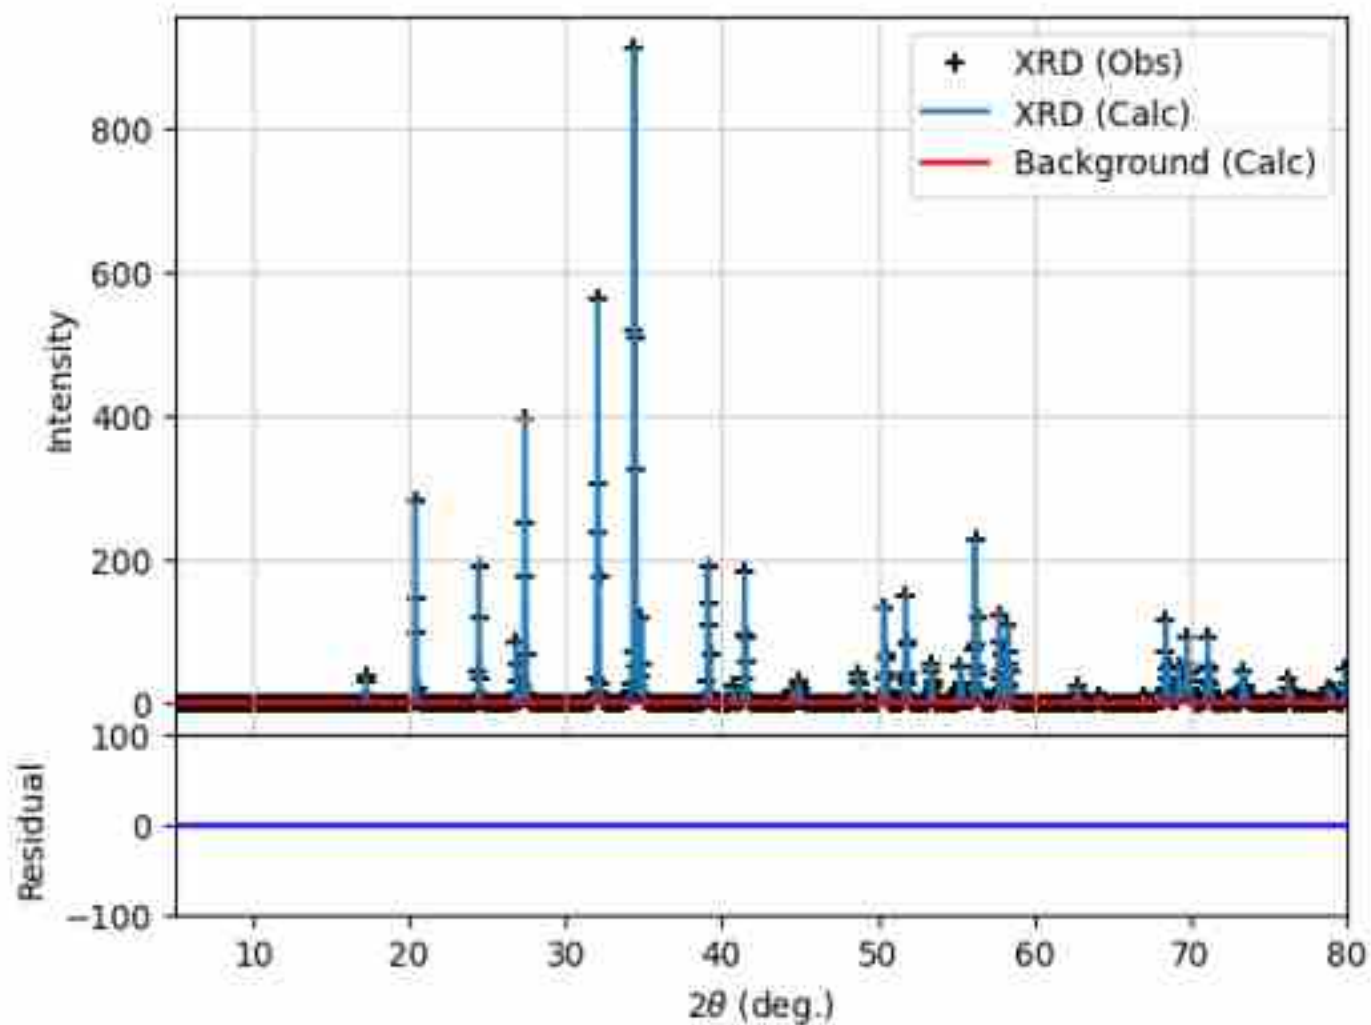

| RMSE before RR | Rwp     | RMSE after RR |
|----------------|---------|---------------|
| 0.007          | 0.00477 | 0.00068       |

# Co<sub>2</sub>F<sub>6</sub>

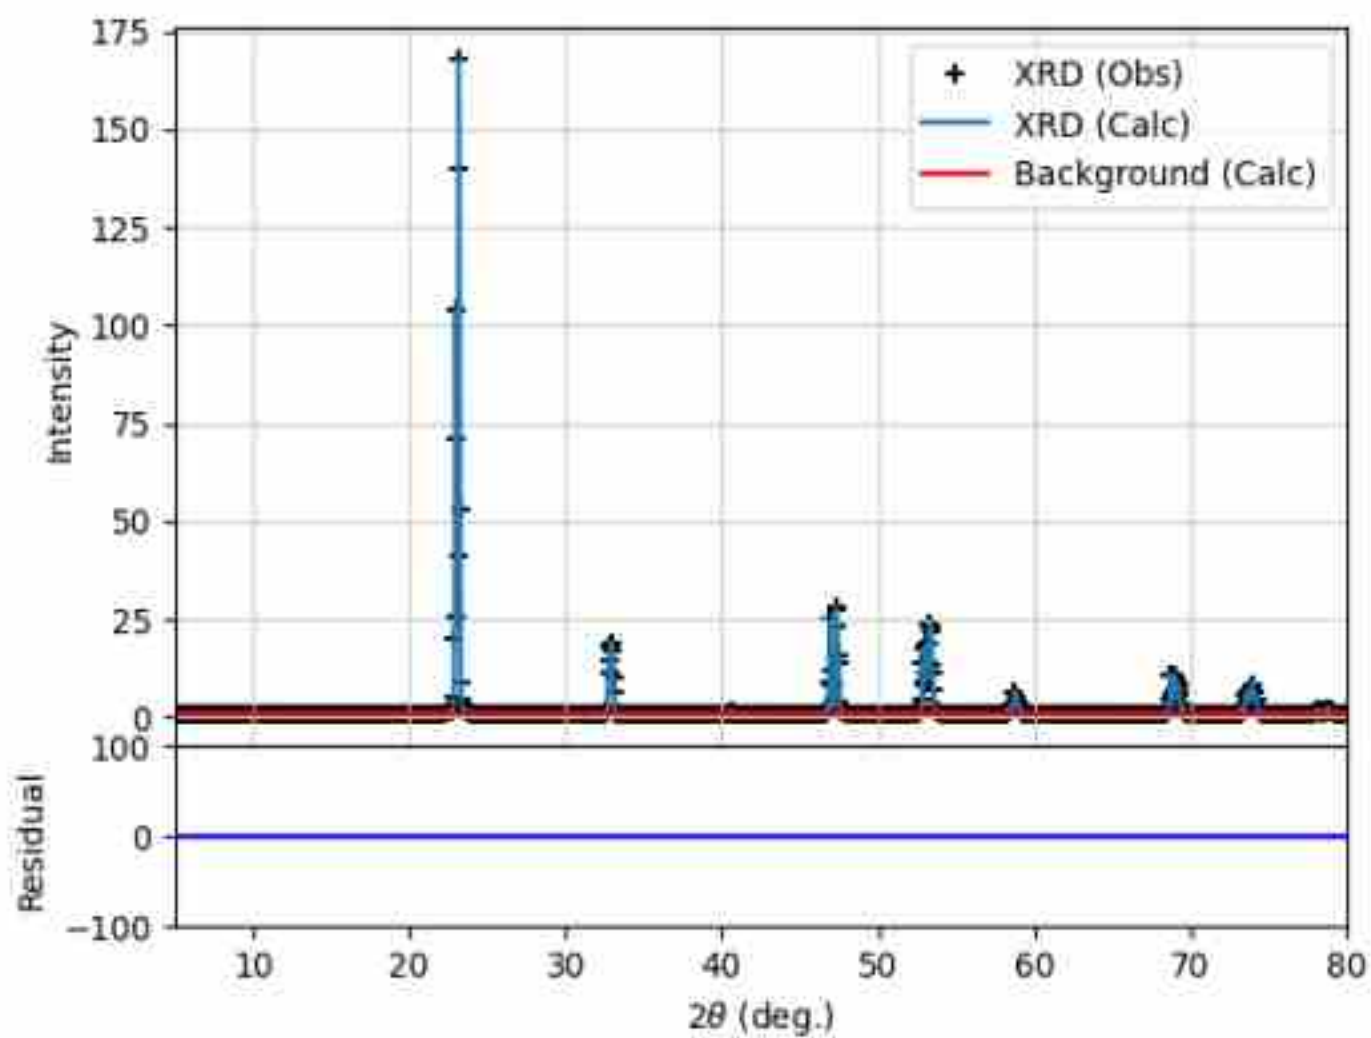

| RMSE before RR | Rwp     | RMSE after RR |
|----------------|---------|---------------|
| 0.007          | 0.00018 | 0.00014       |

# Co<sub>2</sub>Ni<sub>2</sub>Ge<sub>2</sub>

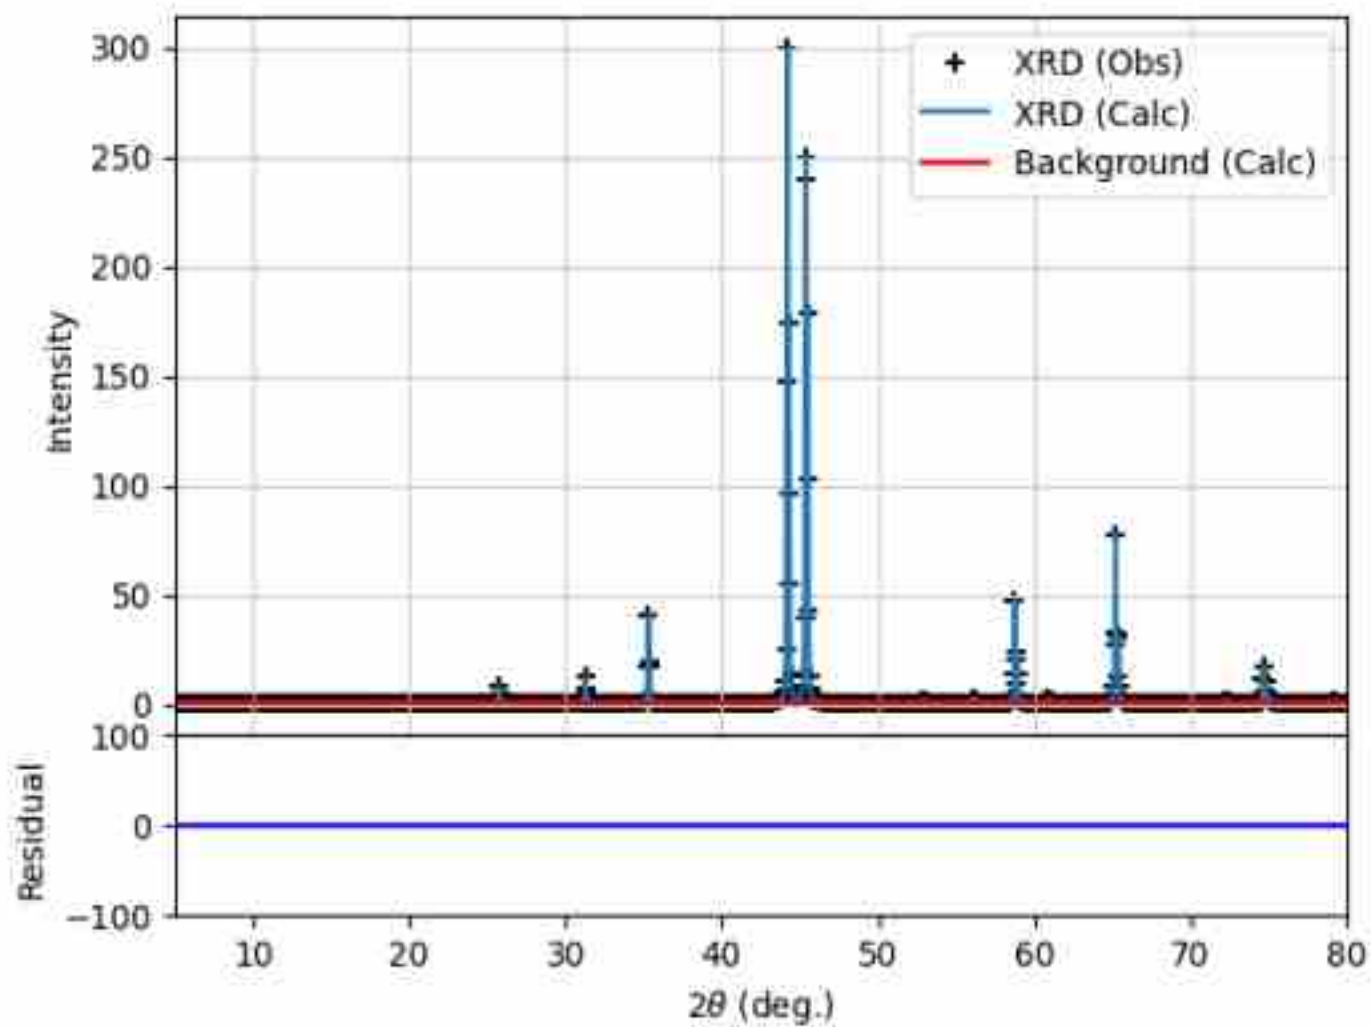

| RMSE before RR | Rwp     | RMSE after RR |
|----------------|---------|---------------|
| 0.007          | 0.00334 | 0.00071       |

# Cr<sub>2</sub>O<sub>4</sub>

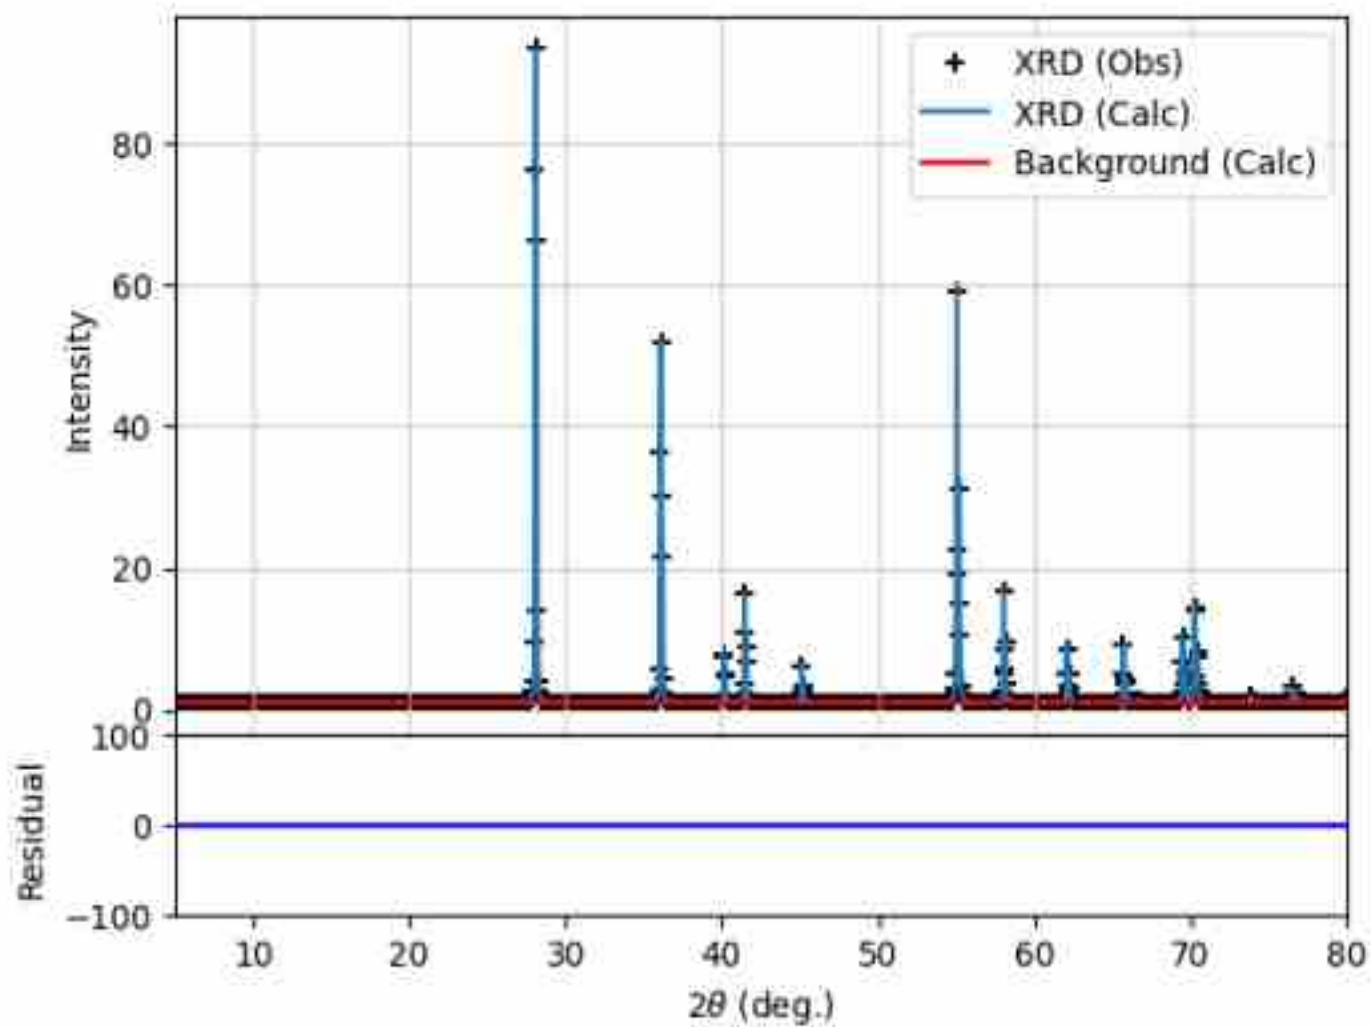

| RMSE before RR | Rwp     | RMSE after RR |
|----------------|---------|---------------|
| 0.007          | 0.00206 | 0.00083       |

# Cs1K1Cl2O8

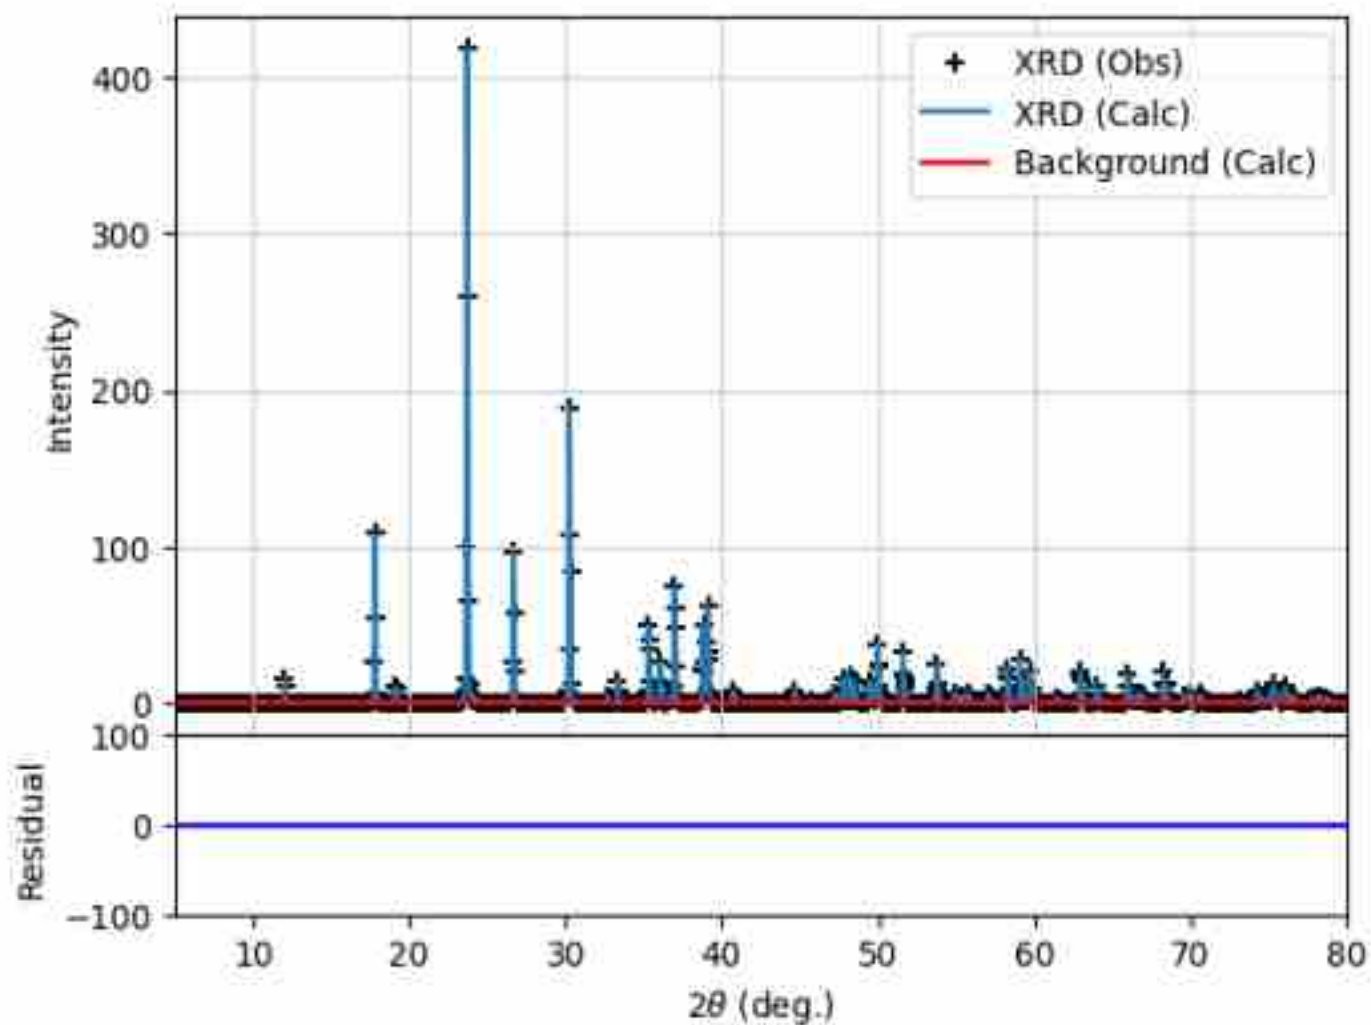

| RMSE before RR | Rwp     | RMSE after RR |
|----------------|---------|---------------|
| 0.07           | 0.00393 | 0.00154       |

# Cs<sub>2</sub>Na<sub>1</sub>La<sub>1</sub>Br<sub>6</sub>

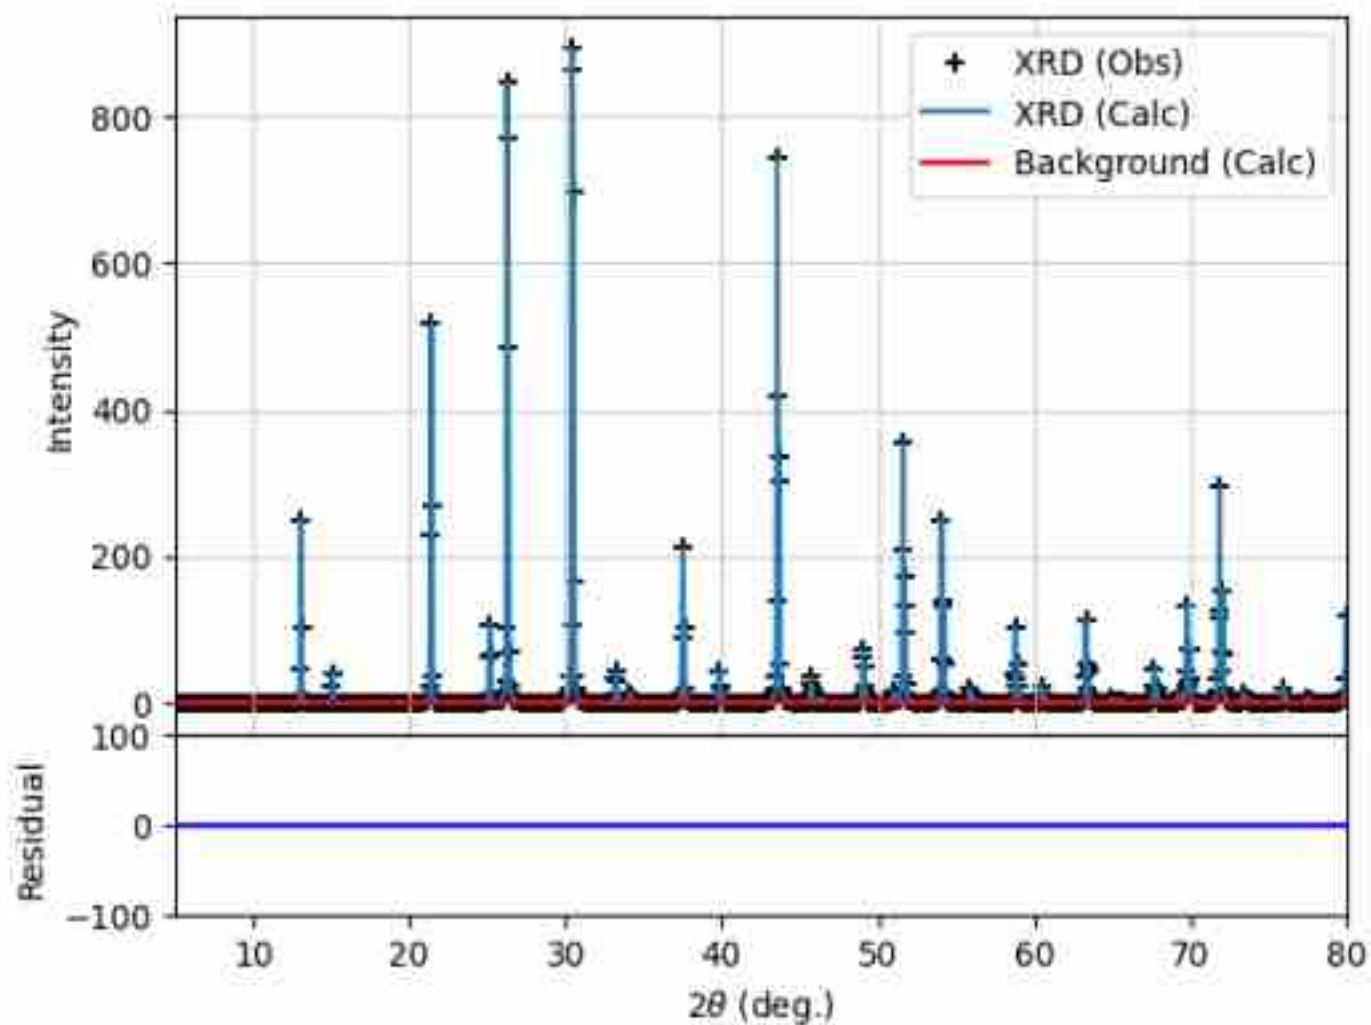

| RMSE before RR | Rwp     | RMSE after RR |
|----------------|---------|---------------|
| 0.007          | 0.02243 | 0.00188       |

# Cs<sub>2</sub>RbInBr<sub>6</sub>

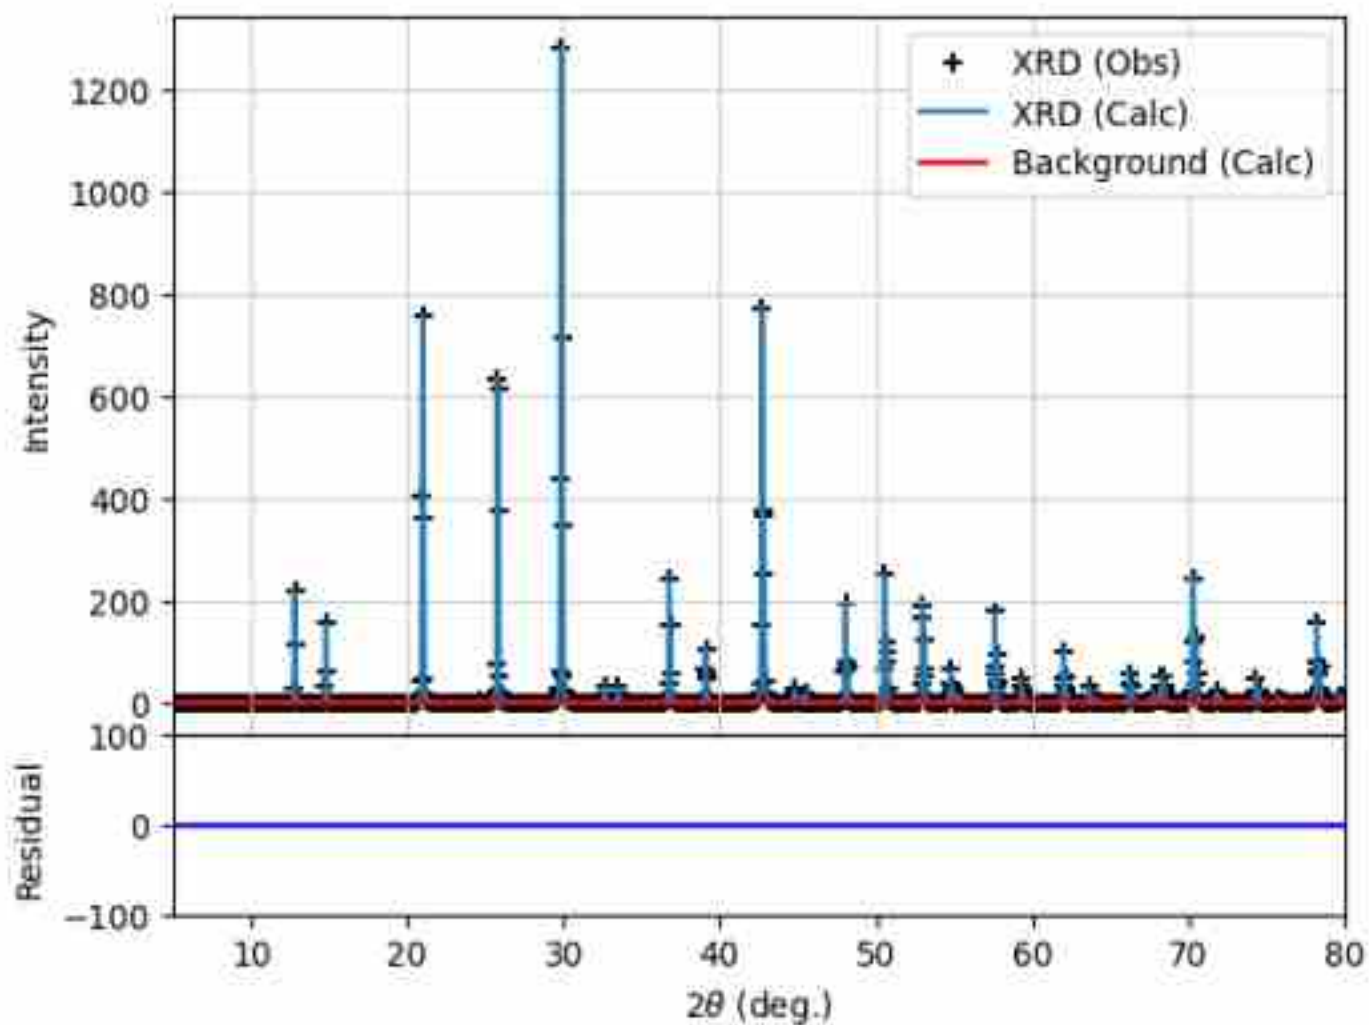

| RMSE before RR | Rwp     | RMSE after RR |
|----------------|---------|---------------|
| 0.007          | 0.01799 | 0.00205       |



# Dy<sub>1</sub>Si<sub>2</sub>Ru<sub>2</sub>

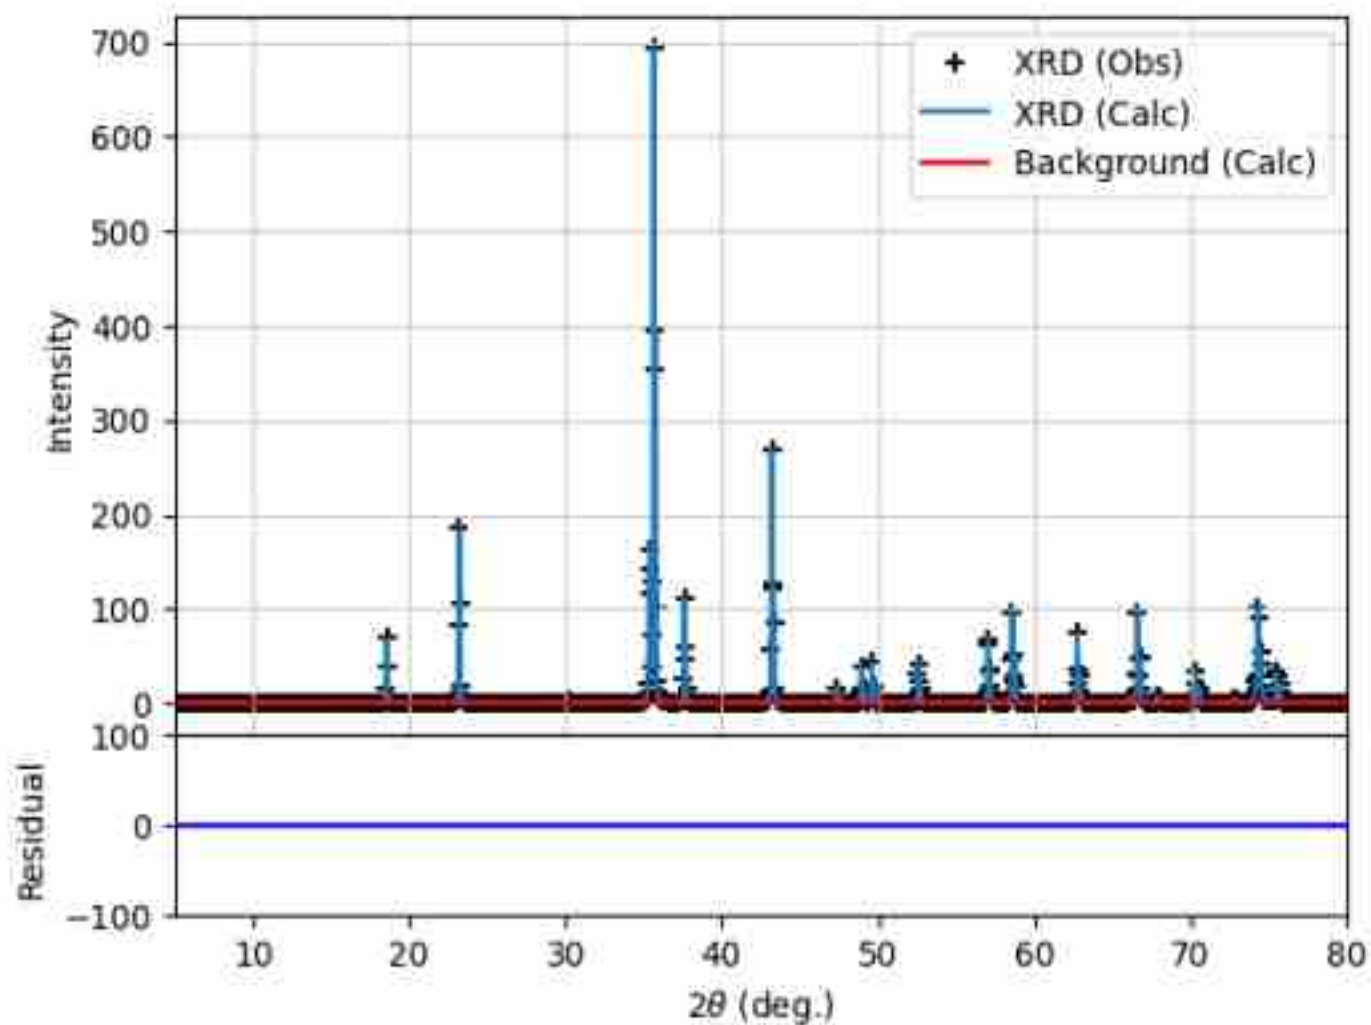

| RMSE before RR | Rwp     | RMSE after RR |
|----------------|---------|---------------|
| 0.007          | 0.00407 | 0.00082       |

# Dy<sub>2</sub>Al<sub>3</sub>Fe<sub>1</sub>

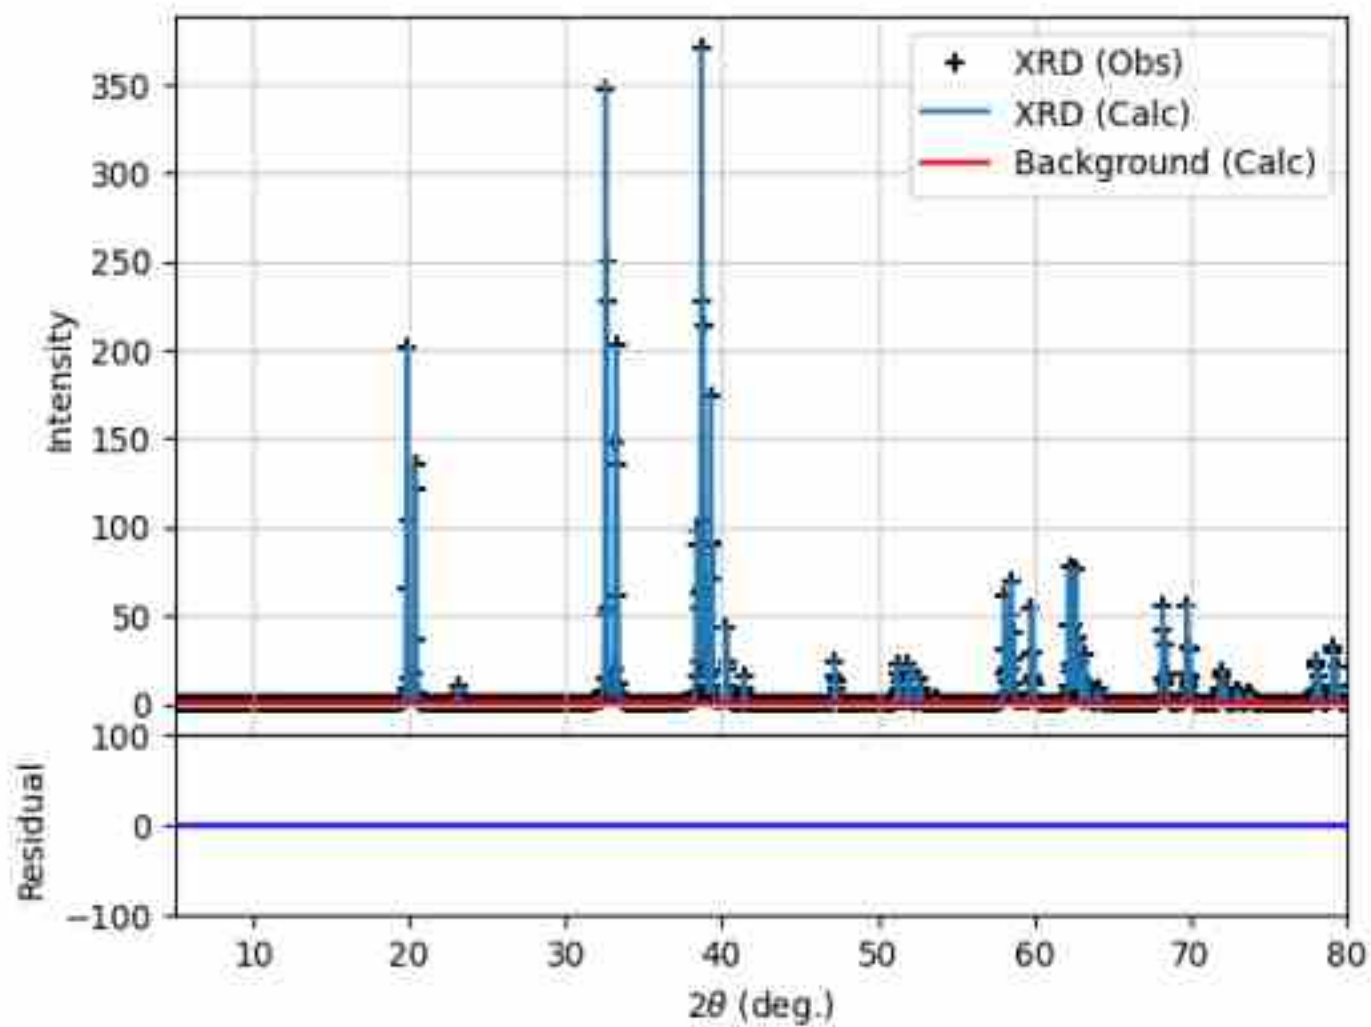

| RMSE before RR | Rwp    | RMSE after RR |
|----------------|--------|---------------|
| 0.007          | 0.0033 | 0.00047       |

# Dy<sub>2</sub>Sc<sub>2</sub>Sb<sub>2</sub>

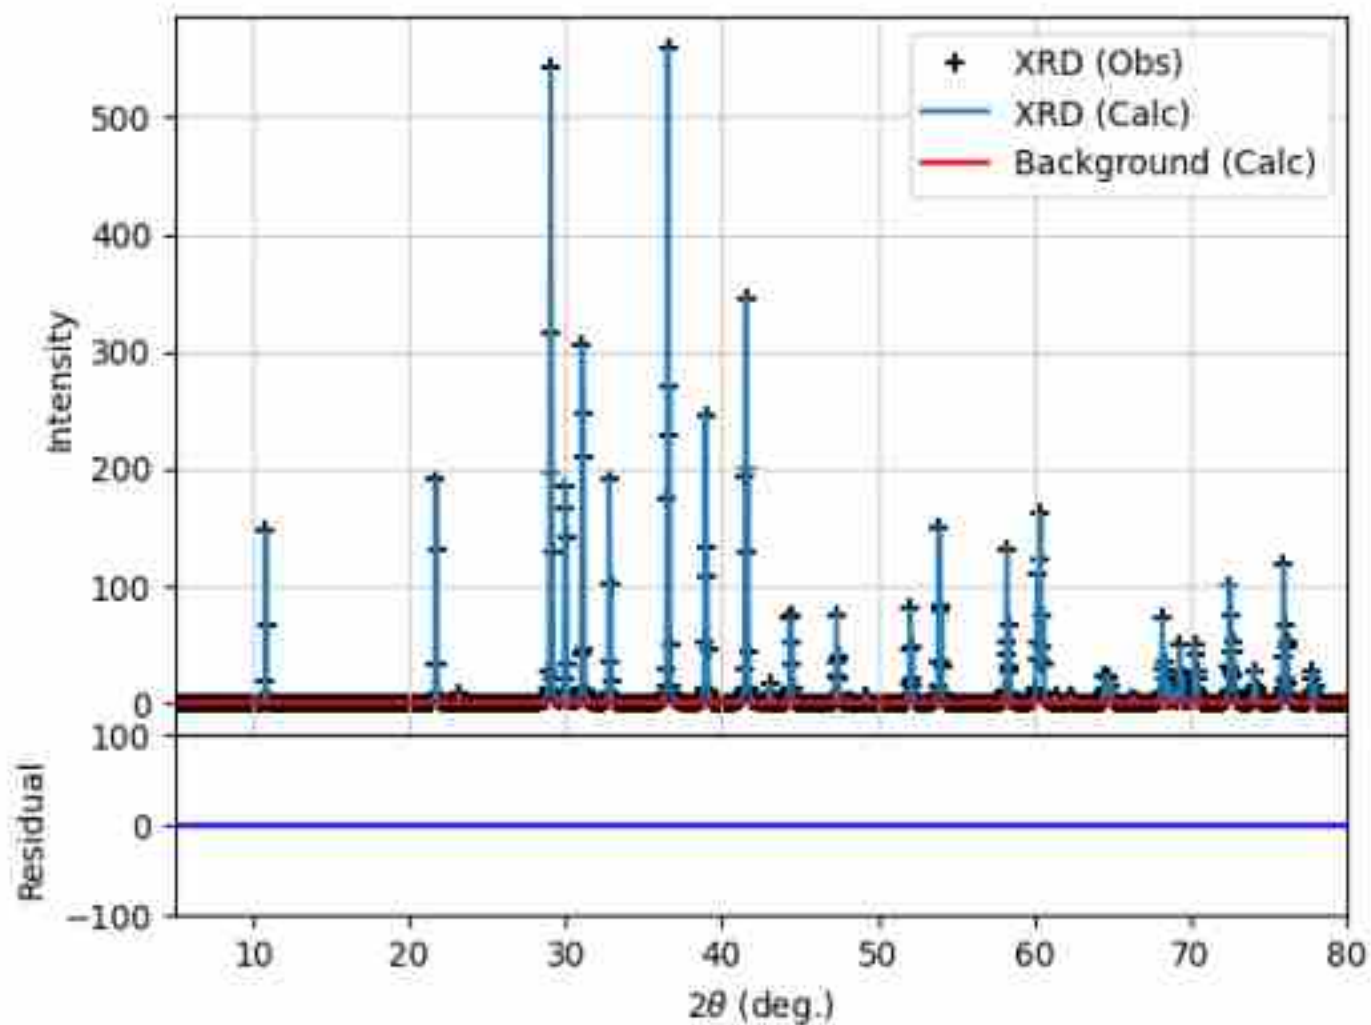

| RMSE before RR | Rwp     | RMSE after RR |
|----------------|---------|---------------|
| 0.007          | 0.00496 | 0.00076       |

# Er1Ge2Ru2

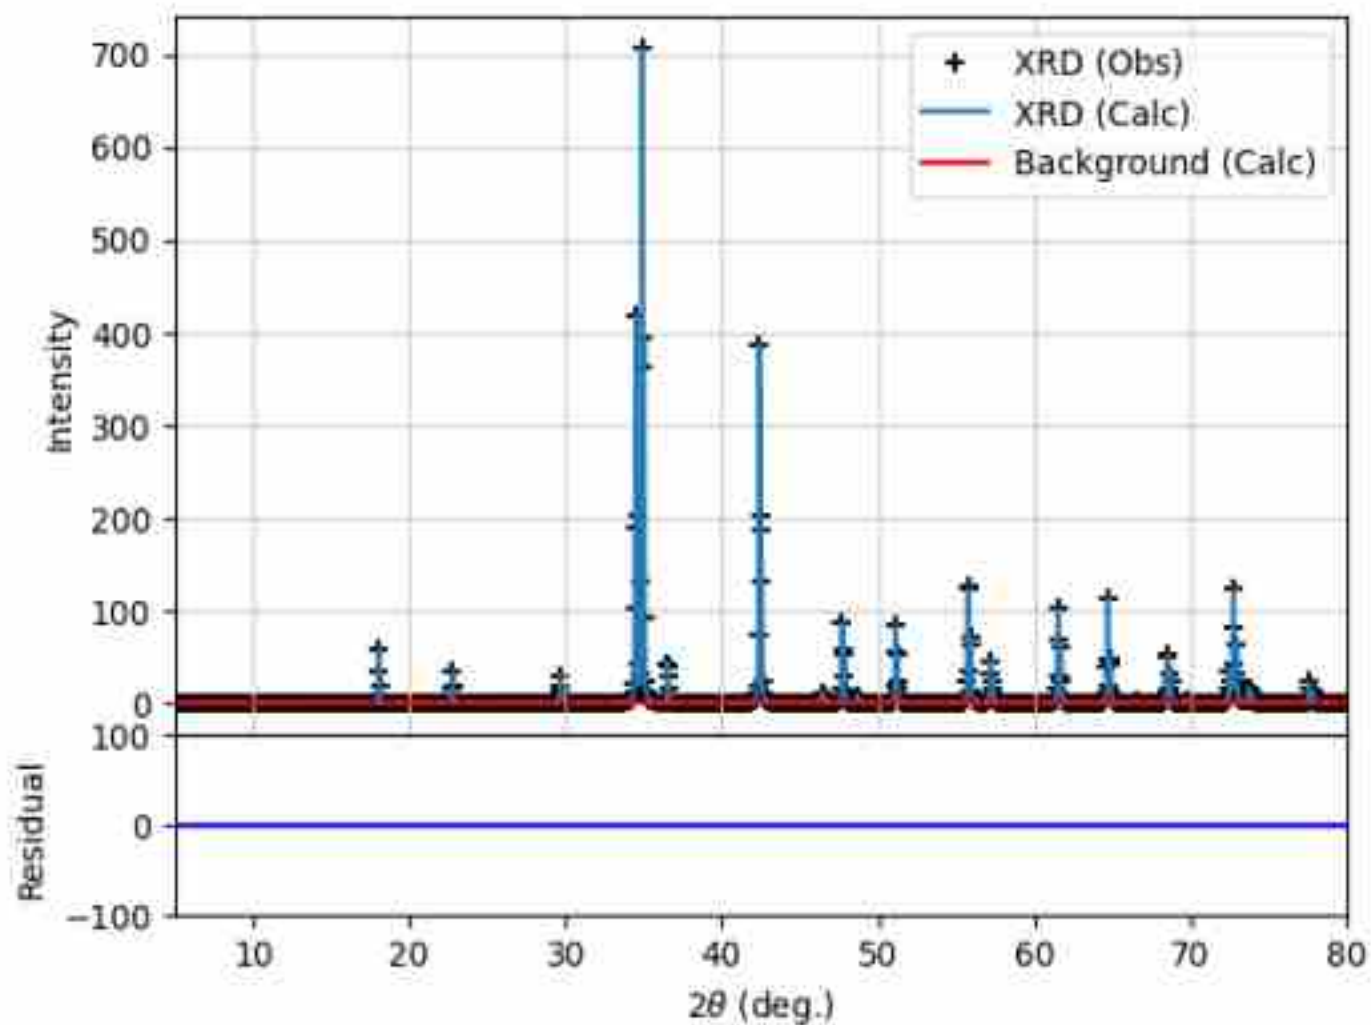

| RMSE before RR | Rwp     | RMSE after RR |
|----------------|---------|---------------|
| 0.007          | 0.00389 | 0.00042       |

# Er1Ni1C2

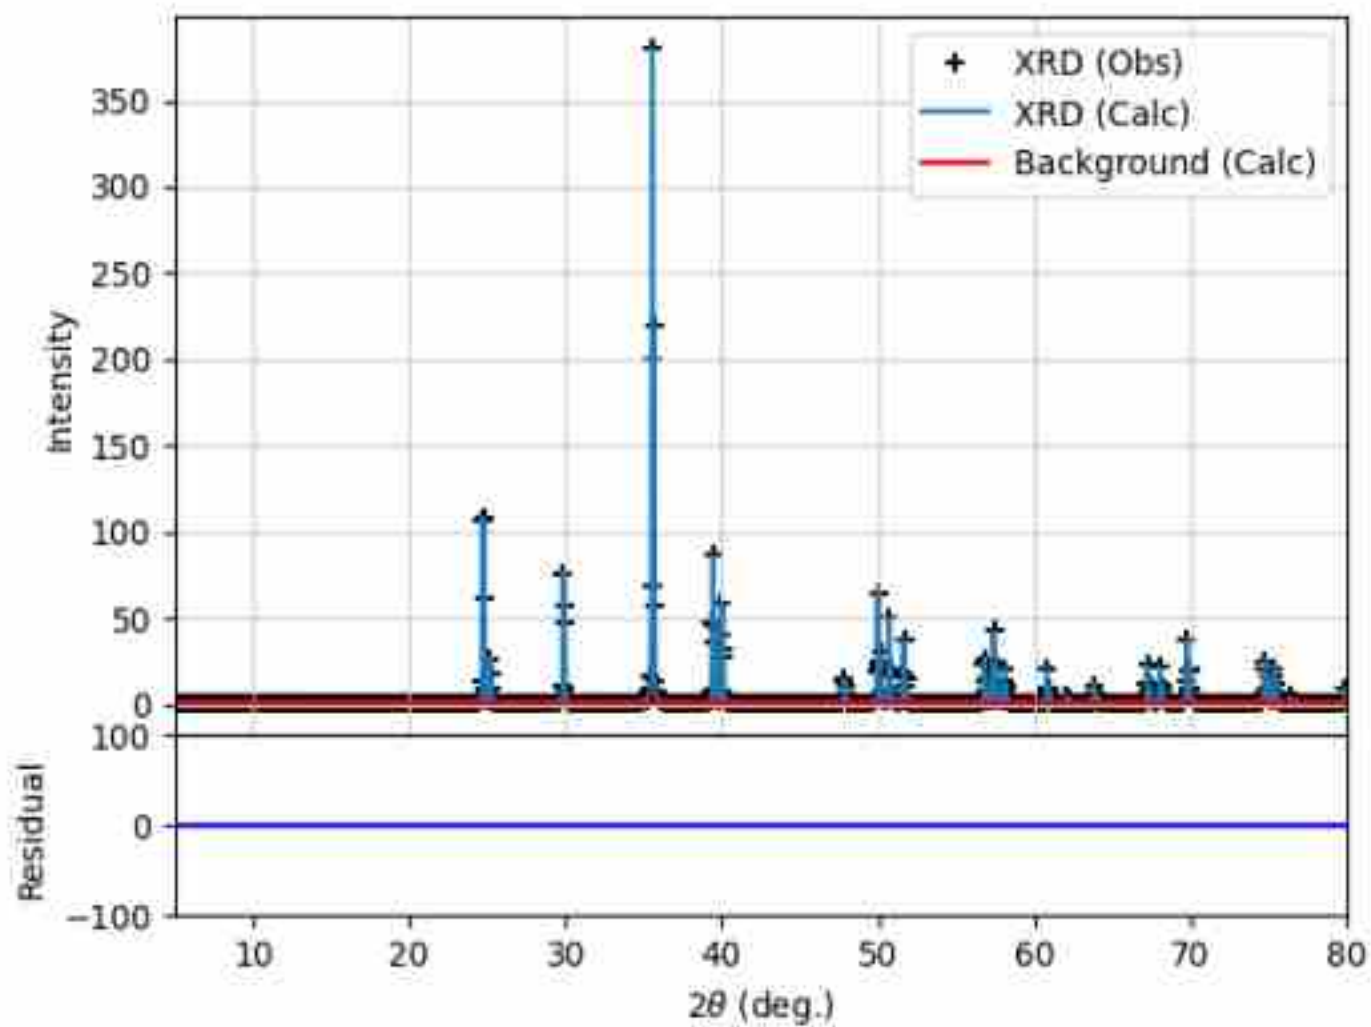

| RMSE before RR | Rwp     | RMSE after RR |
|----------------|---------|---------------|
| 0.007          | 0.00686 | 0.0052        |

# Er<sub>2</sub>Al<sub>11</sub>Ni<sub>2</sub>

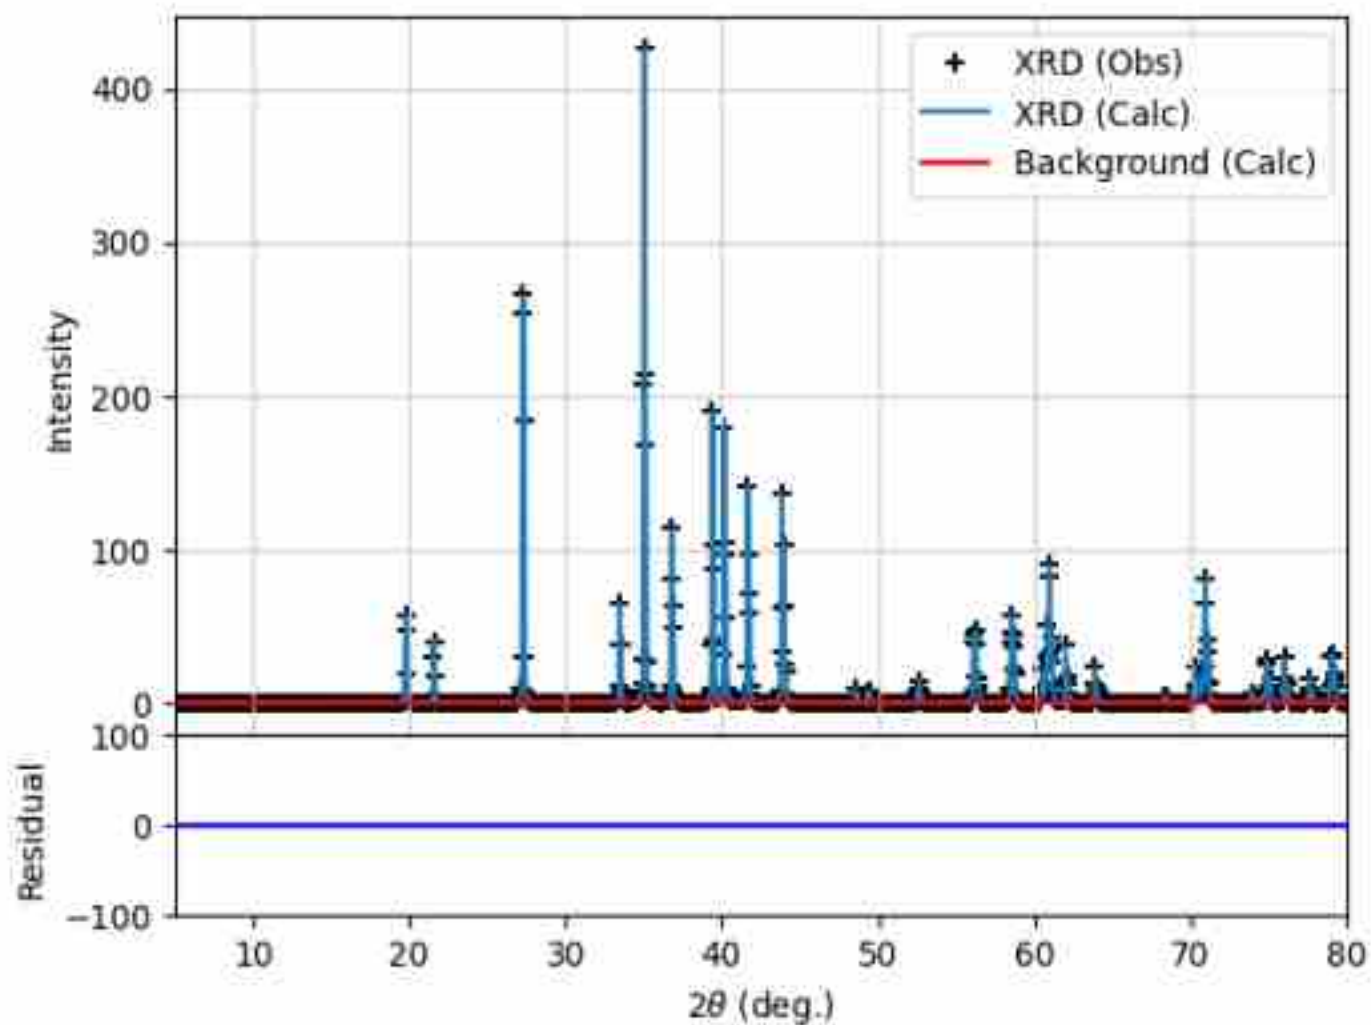

| RMSE before RR | Rwp     | RMSE after RR |
|----------------|---------|---------------|
| 0.007          | 0.00366 | 0.00053       |

# Er<sub>2</sub>Si<sub>1</sub>Ge<sub>1</sub>

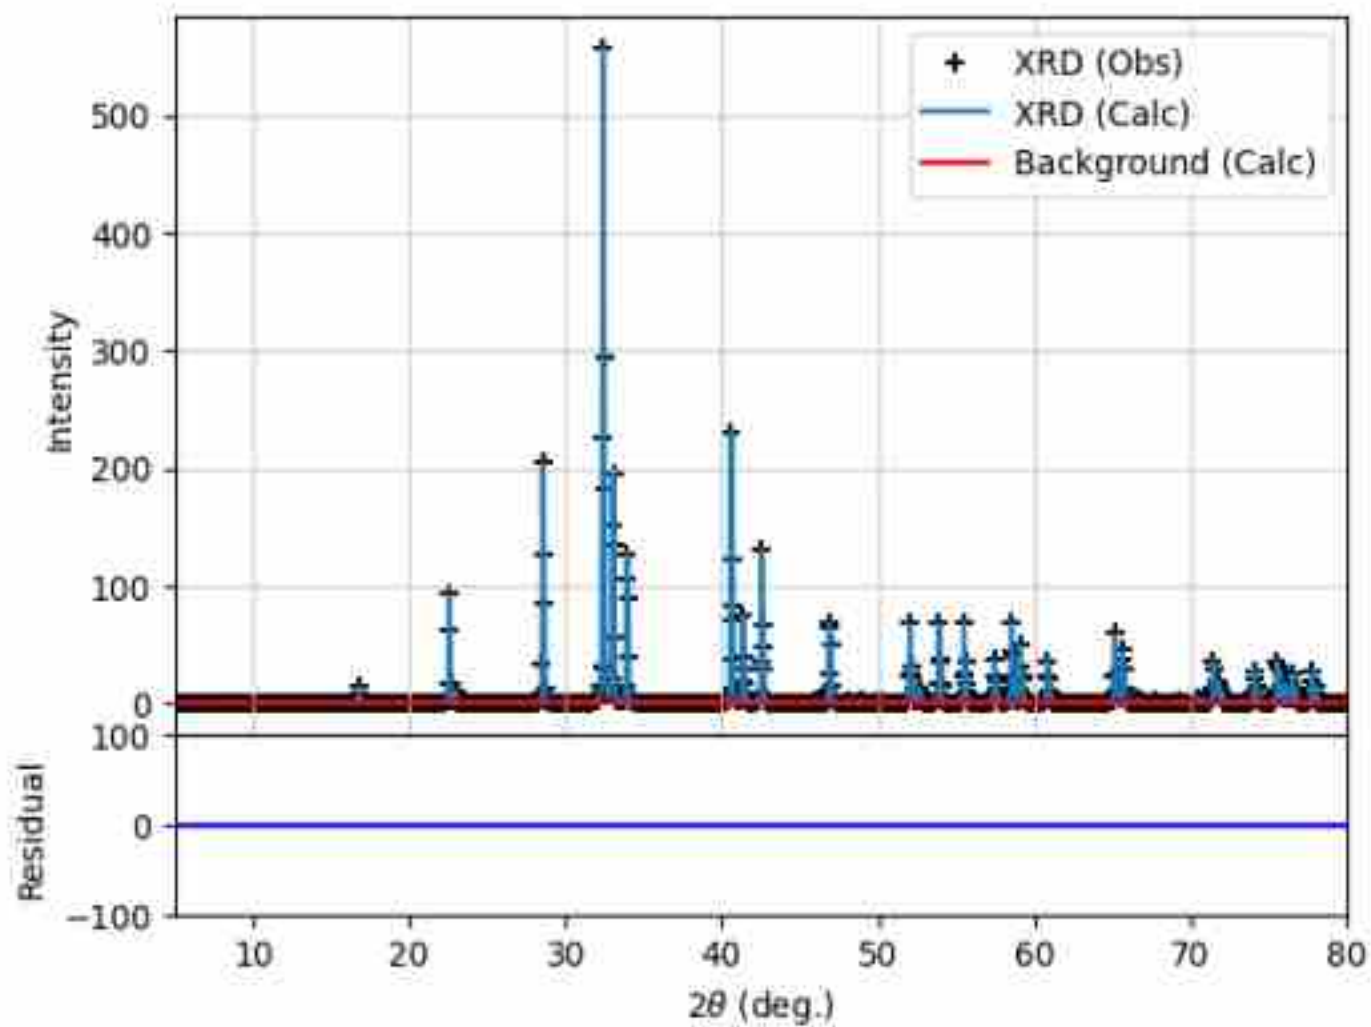

| RMSE before RR | Rwp     | RMSE after RR |
|----------------|---------|---------------|
| 0.007          | 0.00493 | 0.00035       |

# Er<sub>3</sub>Mg<sub>1</sub>

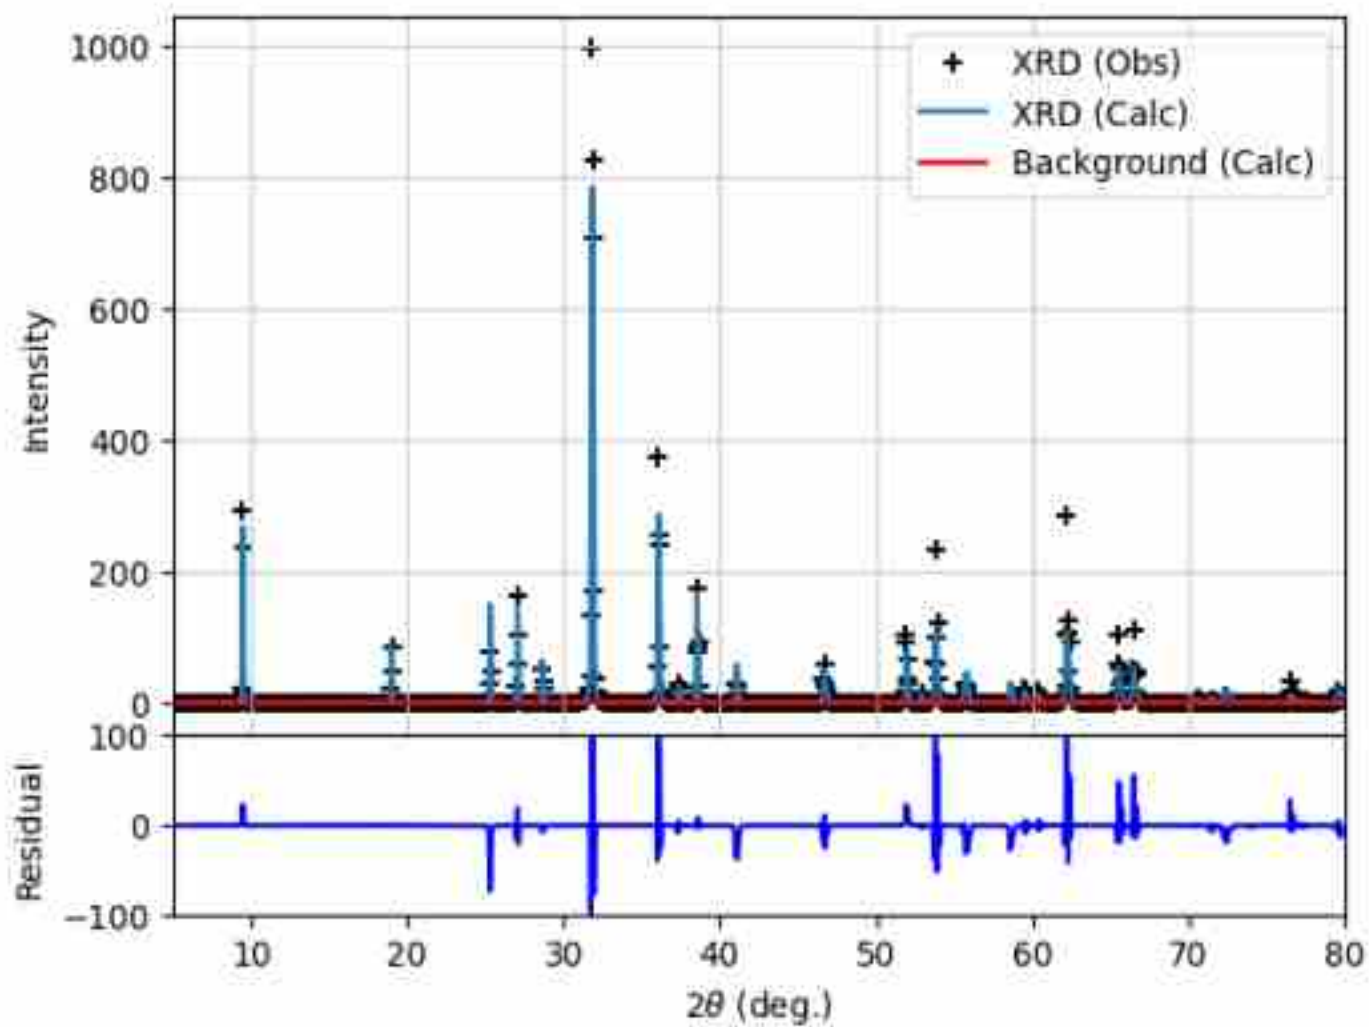

| RMSE before RR | Rwp      | RMSE after RR |
|----------------|----------|---------------|
| 0.007          | 57.43536 | 0.17866       |



# Er<sub>3</sub>Sn<sub>3</sub>Ir<sub>3</sub>

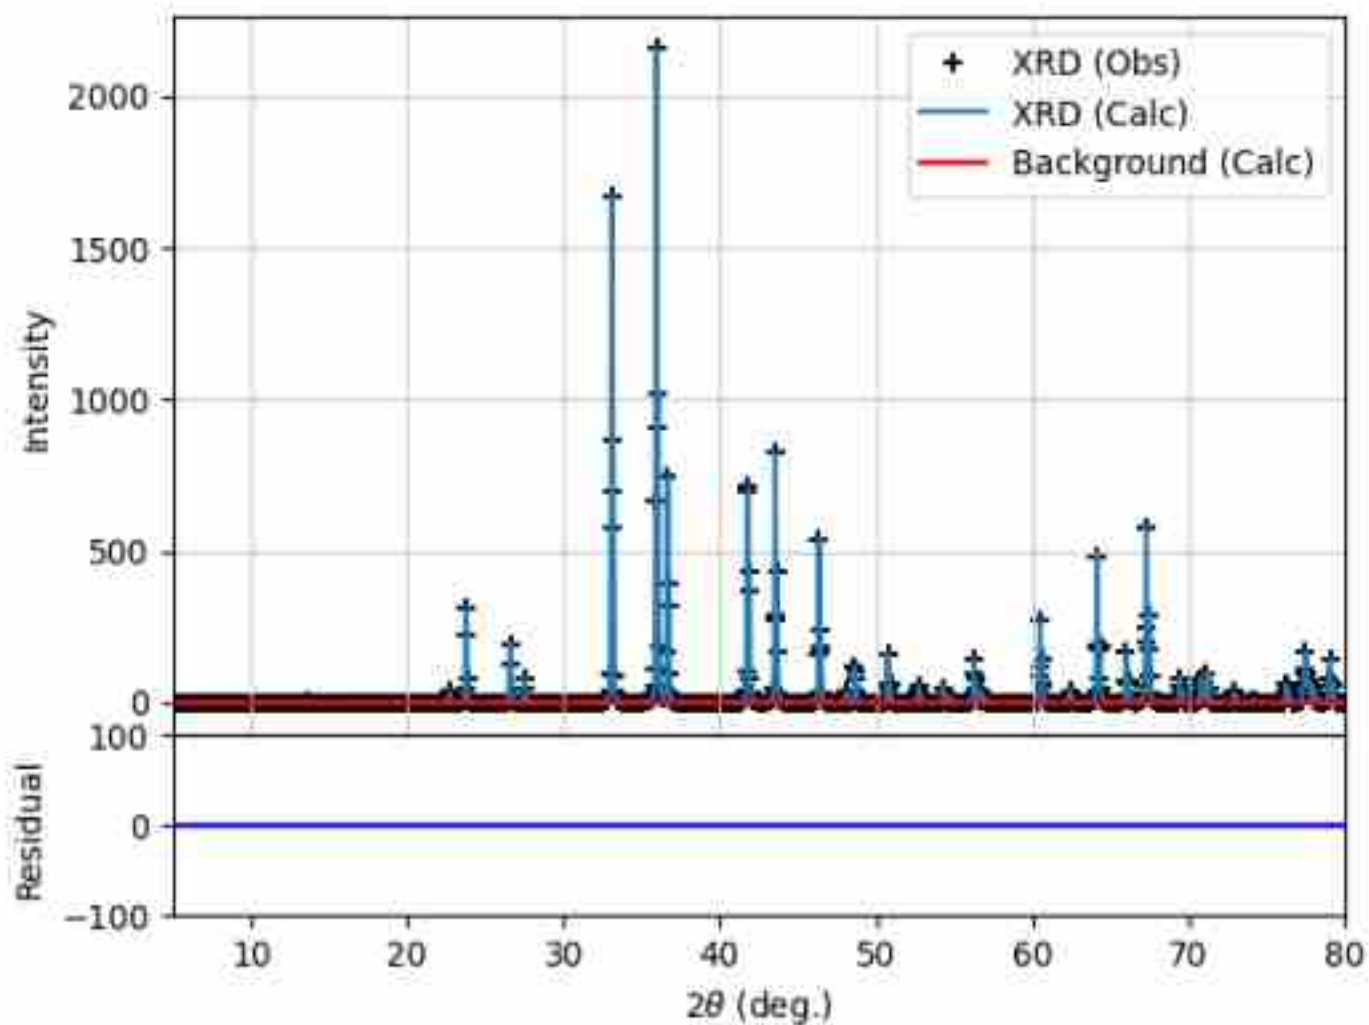

| RMSE before RR | Rwp     | RMSE after RR |
|----------------|---------|---------------|
| 0.007          | 0.00344 | 0.00085       |

# Er6Mg2

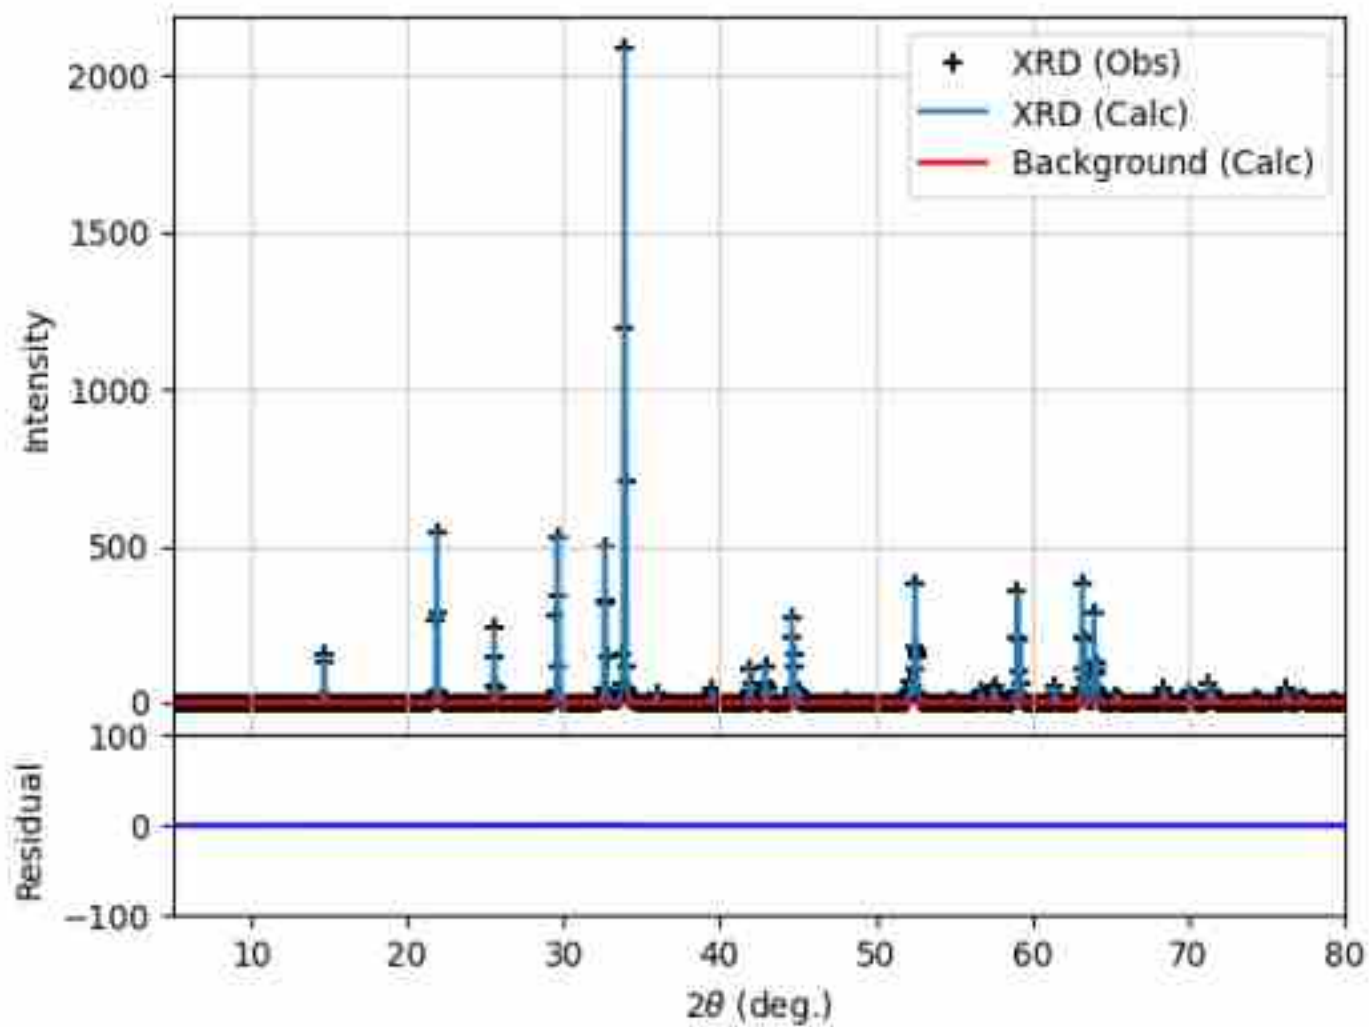

| RMSE before RR | Rwp    | RMSE after RR |
|----------------|--------|---------------|
| 0.007          | 0.0979 | 0.0041        |

# Eu1Mn2As2

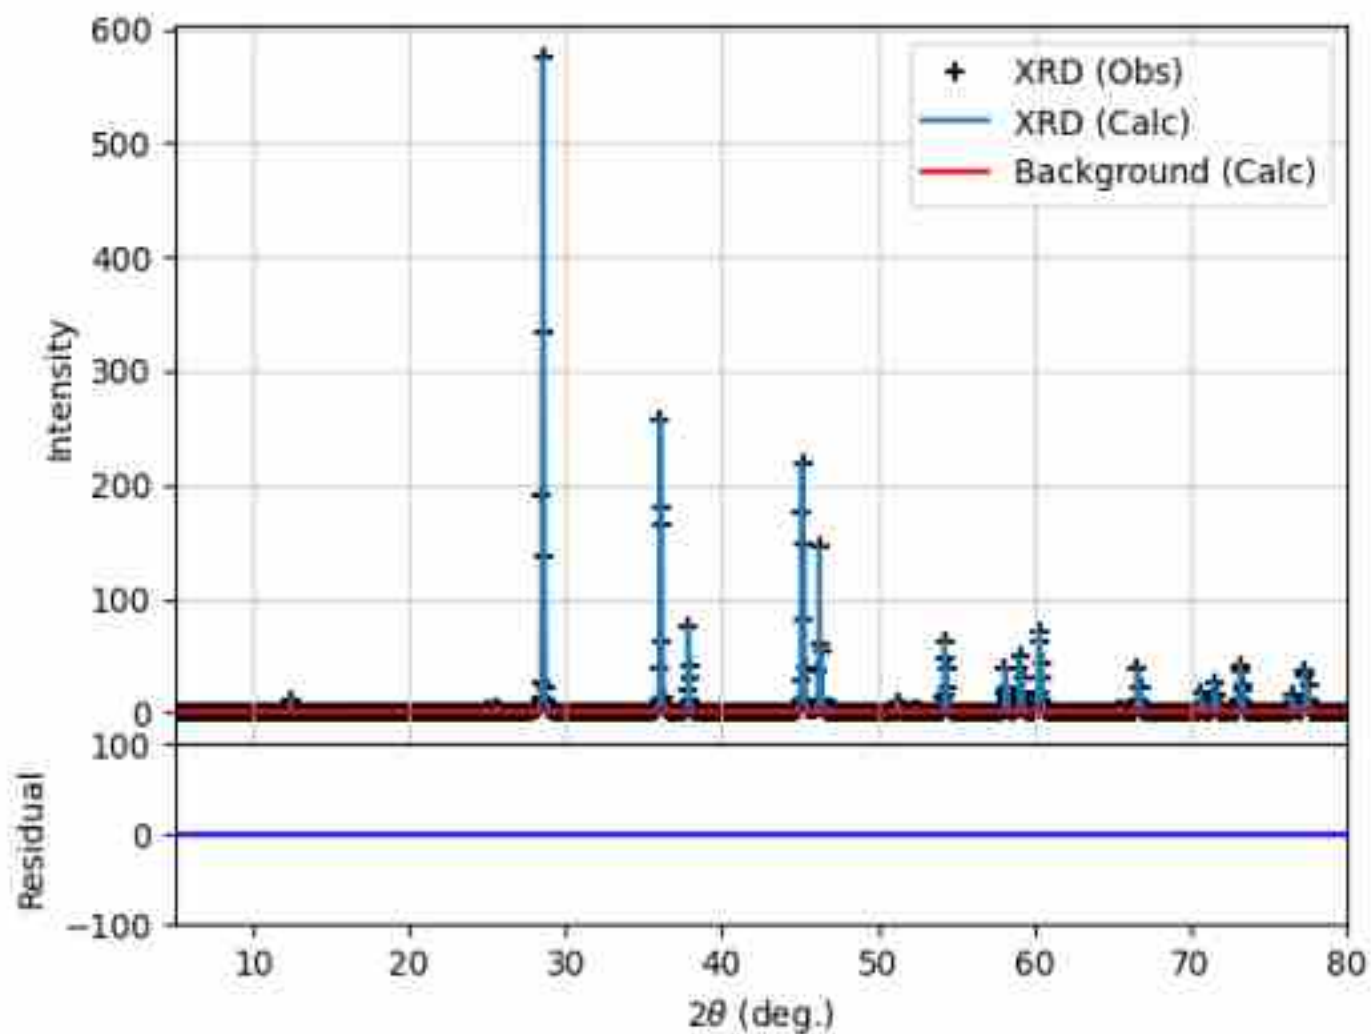

| RMSE before RR | Rwp     | RMSE after RR |
|----------------|---------|---------------|
| 0.007          | 0.00296 | 0.00063       |

Eu2Ag2Bi2

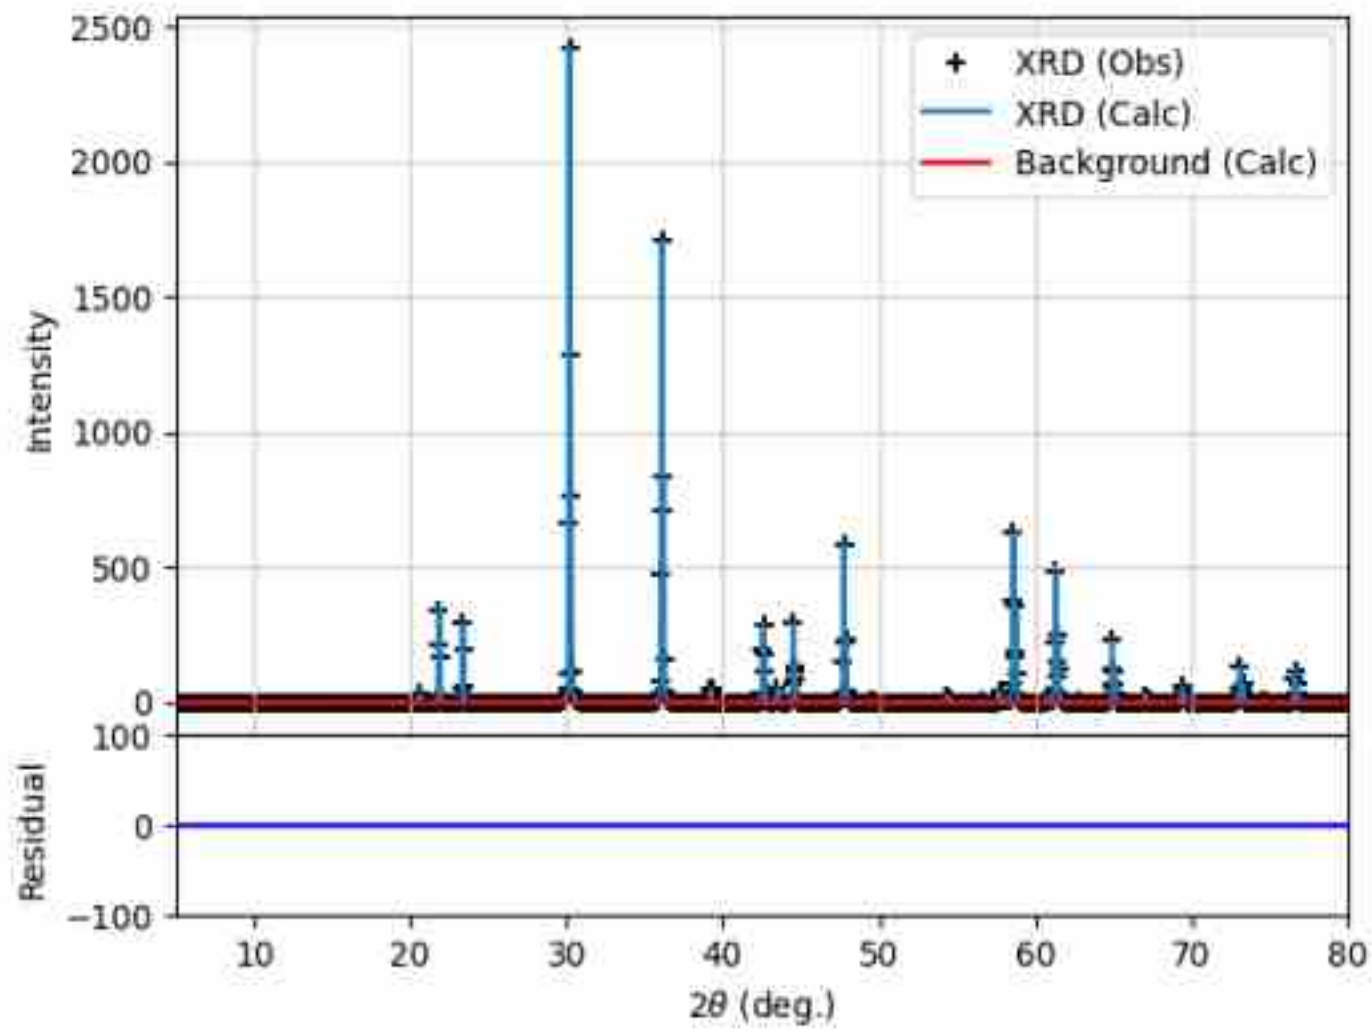

| RMSE before RR | Rwp     | RMSE after RR |
|----------------|---------|---------------|
| 0.007          | 0.00427 | 0.00032       |

# Eu<sub>2</sub>HfNb<sub>10</sub>O<sub>6</sub>

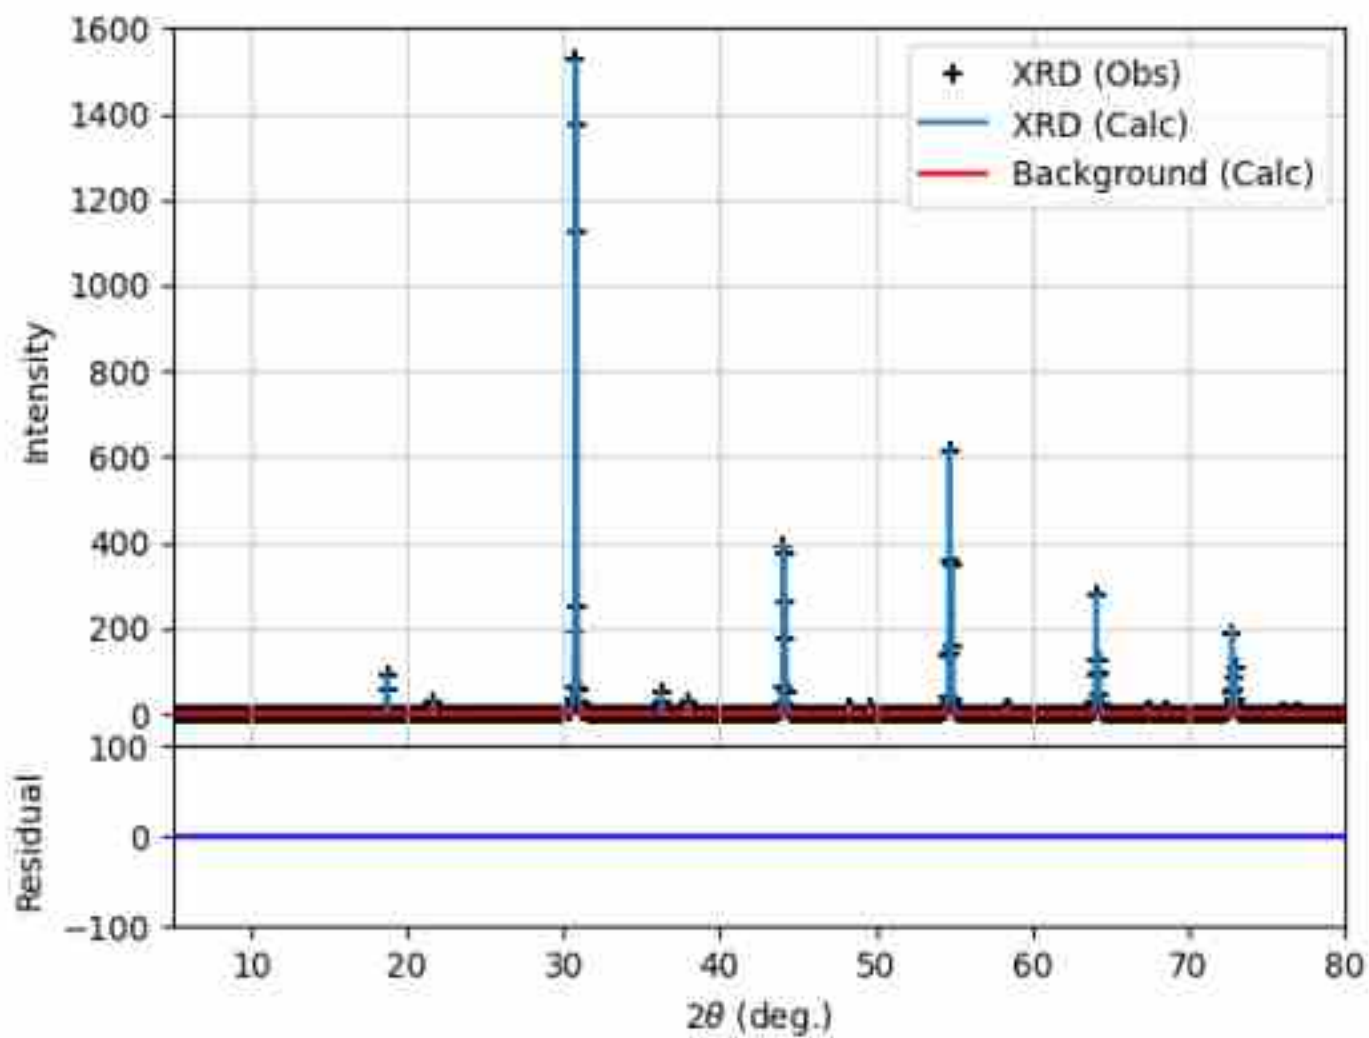

| RMSE before RR | Rwp     | RMSE after RR |
|----------------|---------|---------------|
| 0.007          | 0.02068 | 0.00371       |

# Eu2Ti4

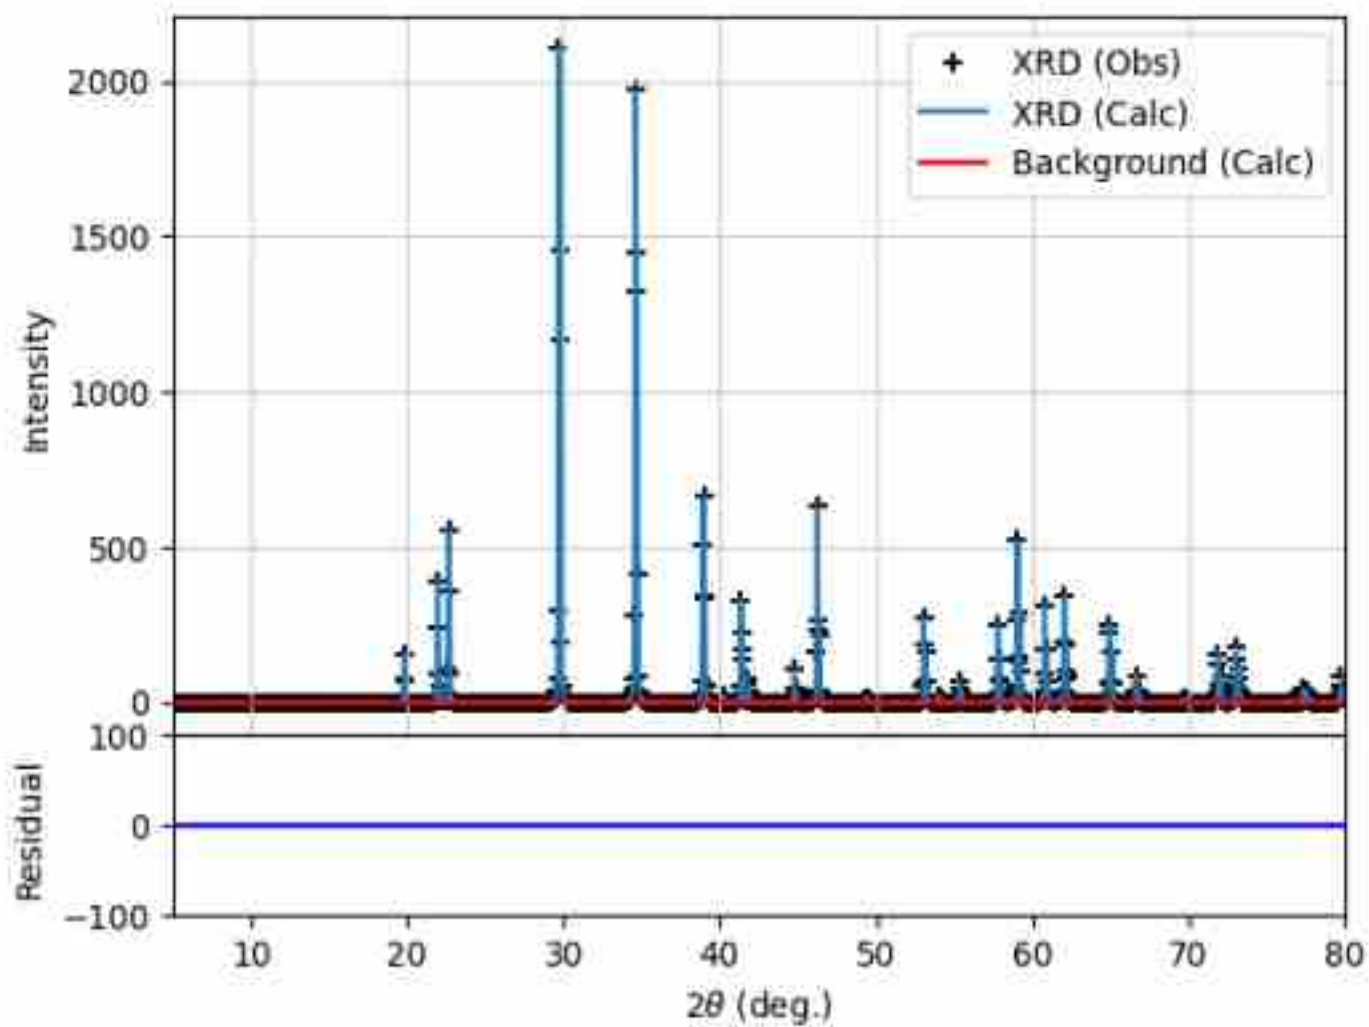

| RMSE before RR | Rwp     | RMSE after RR |
|----------------|---------|---------------|
| 0.007          | 0.00294 | 0.00026       |

# Ga2Sb2

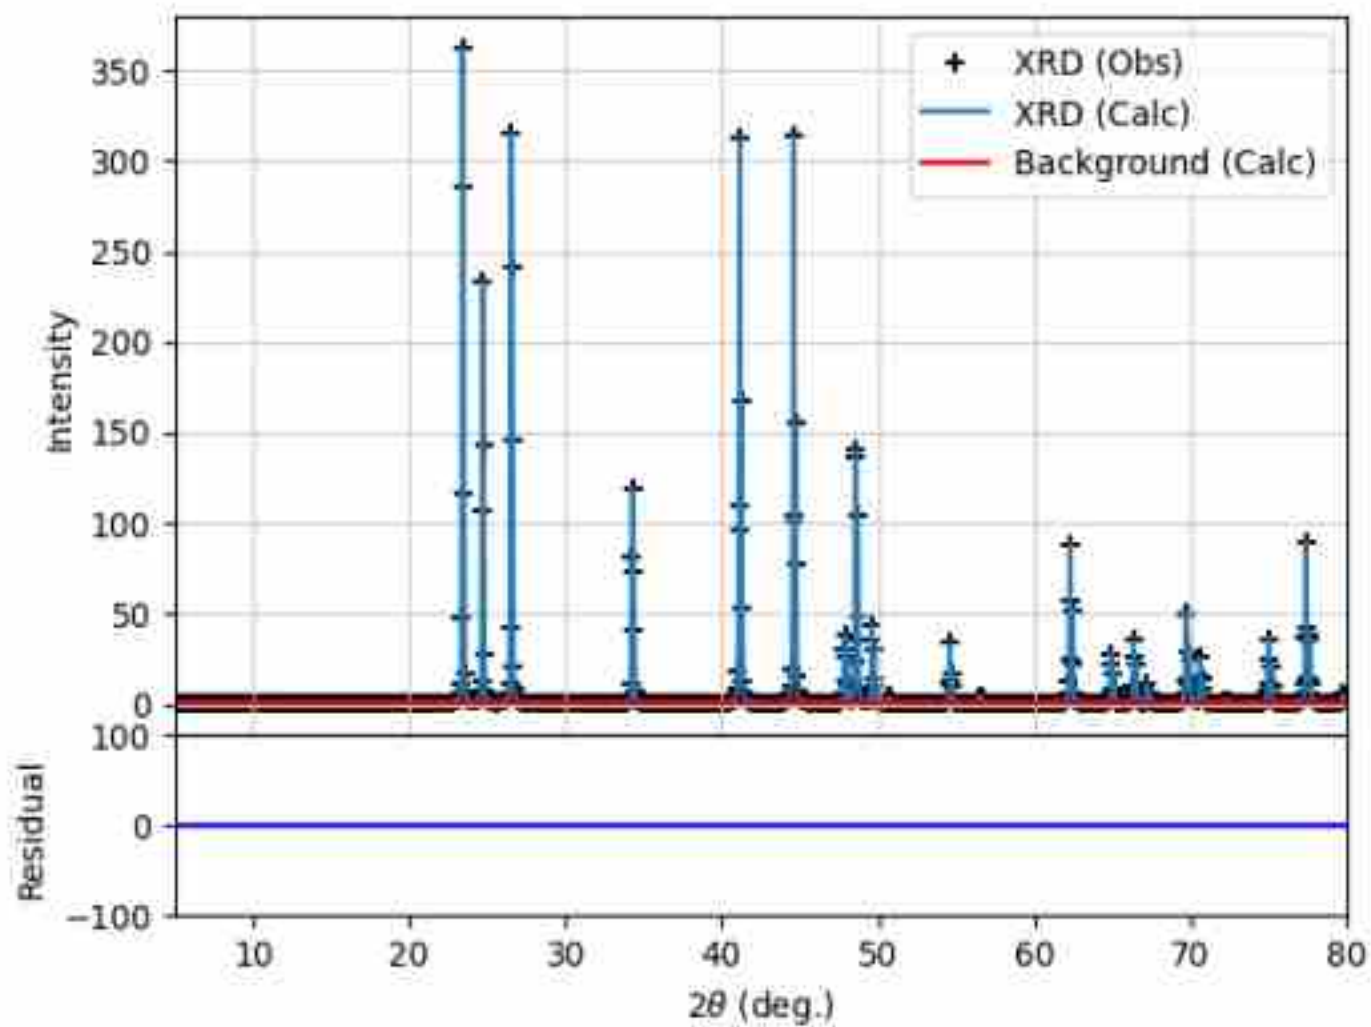

| RMSE before RR | Rwp     | RMSE after RR |
|----------------|---------|---------------|
| 0.007          | 0.00284 | 0.00024       |

# Gd1Bi2Br1O4

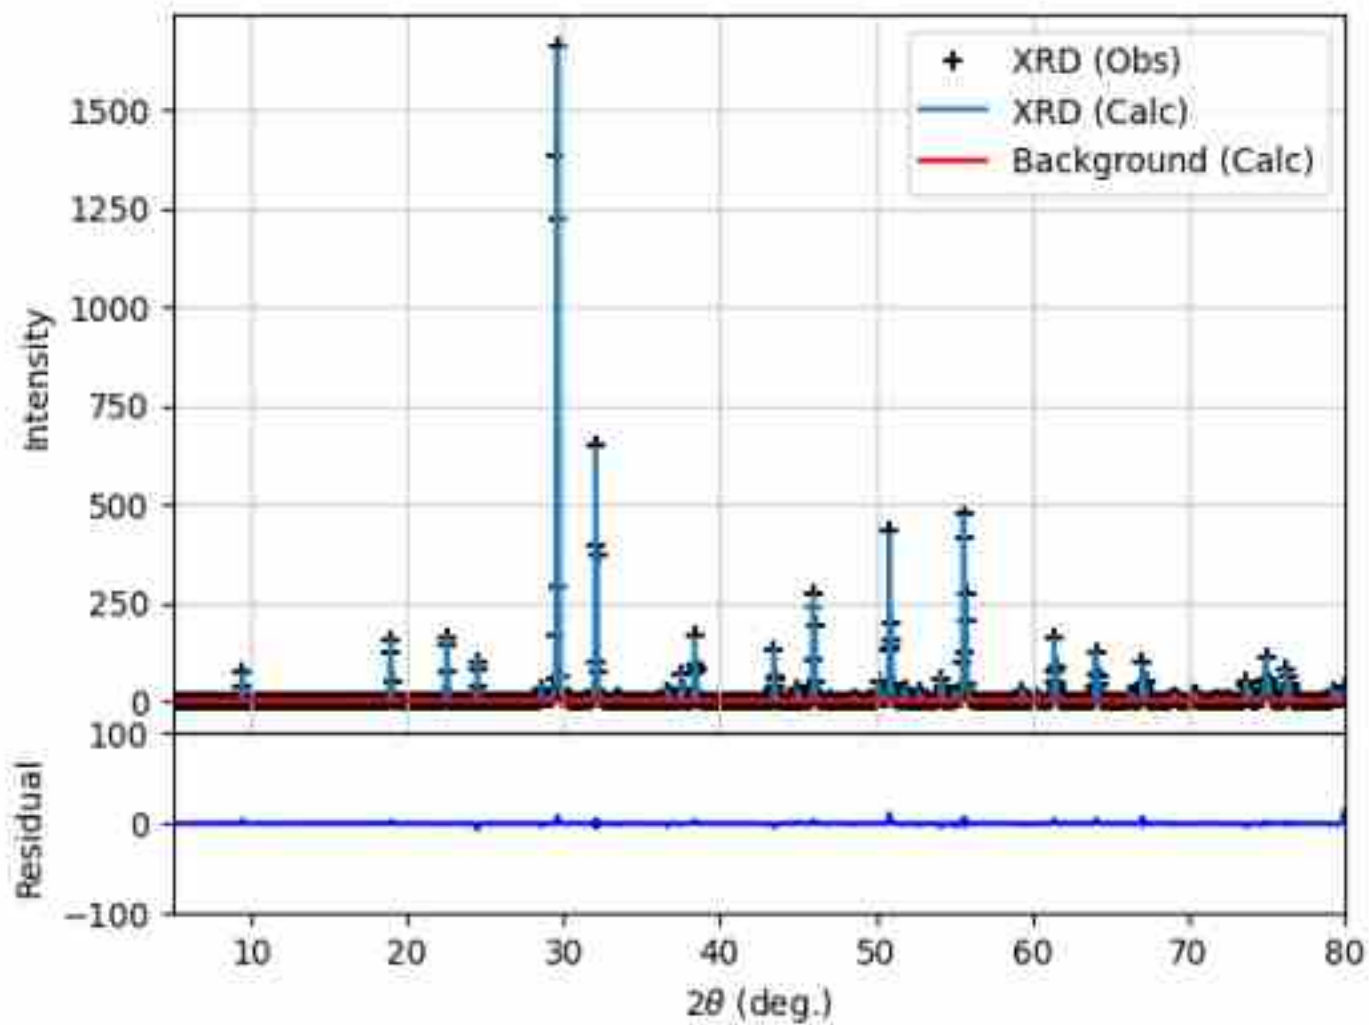

| RMSE before RR | Rwp     | RMSE after RR |
|----------------|---------|---------------|
| 0.007          | 3.82577 | 0.04799       |



# Gd1Dy1Ni2

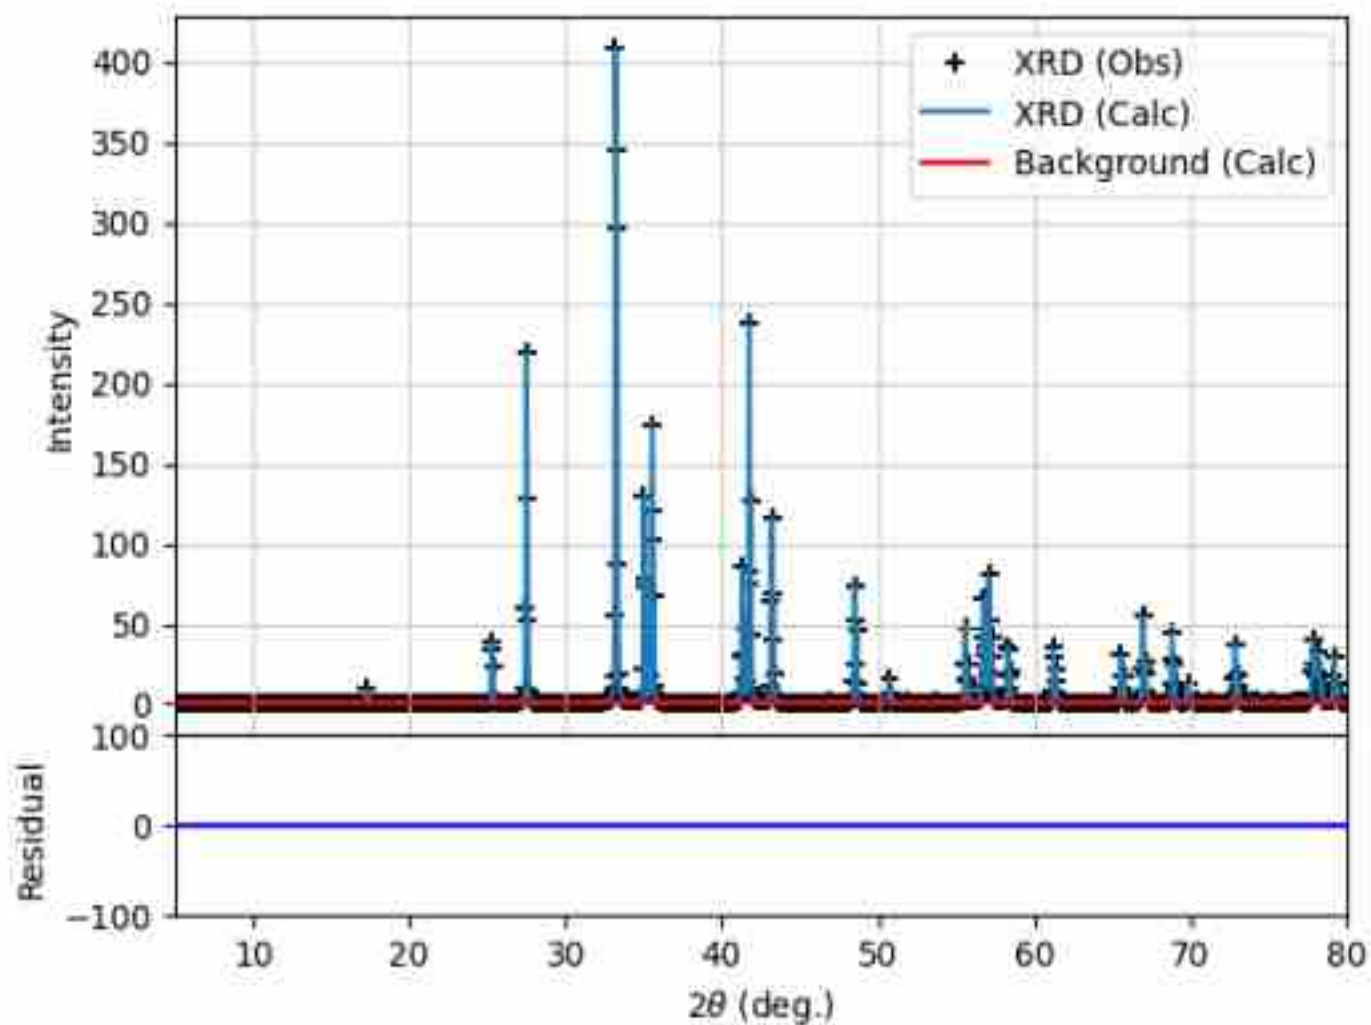

| RMSE before RR | Rwp    | RMSE after RR |
|----------------|--------|---------------|
| 0.007          | 0.0027 | 0.00015       |

# Gd<sub>2</sub>Si<sub>2</sub>Pt<sub>2</sub>

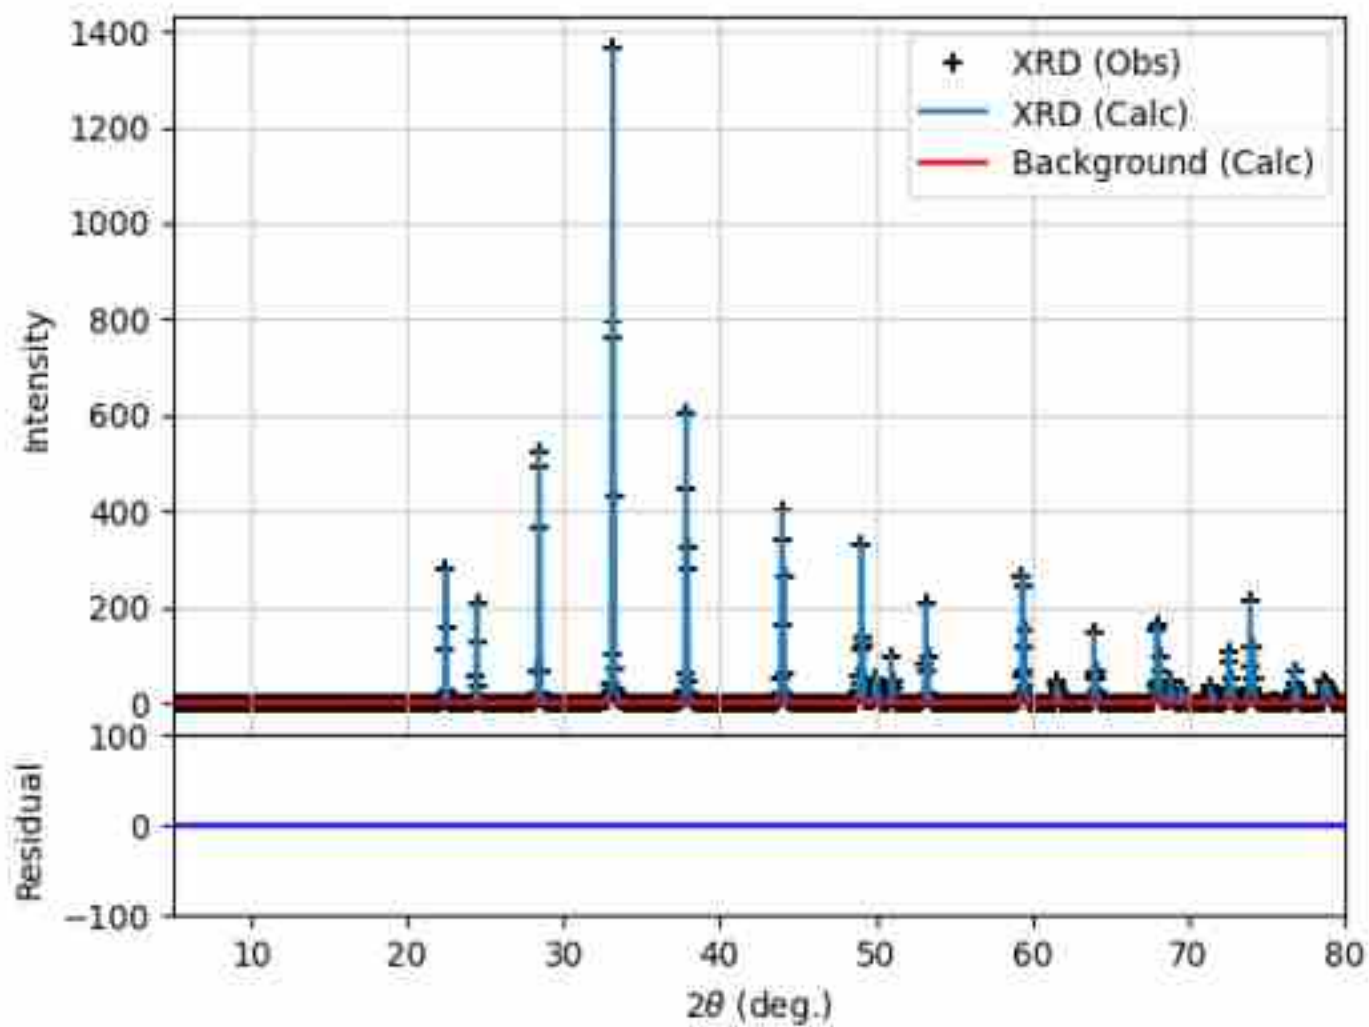

| RMSE before RR | Rwp     | RMSE after RR |
|----------------|---------|---------------|
| 0.007          | 0.00515 | 0.00068       |

# Hf2

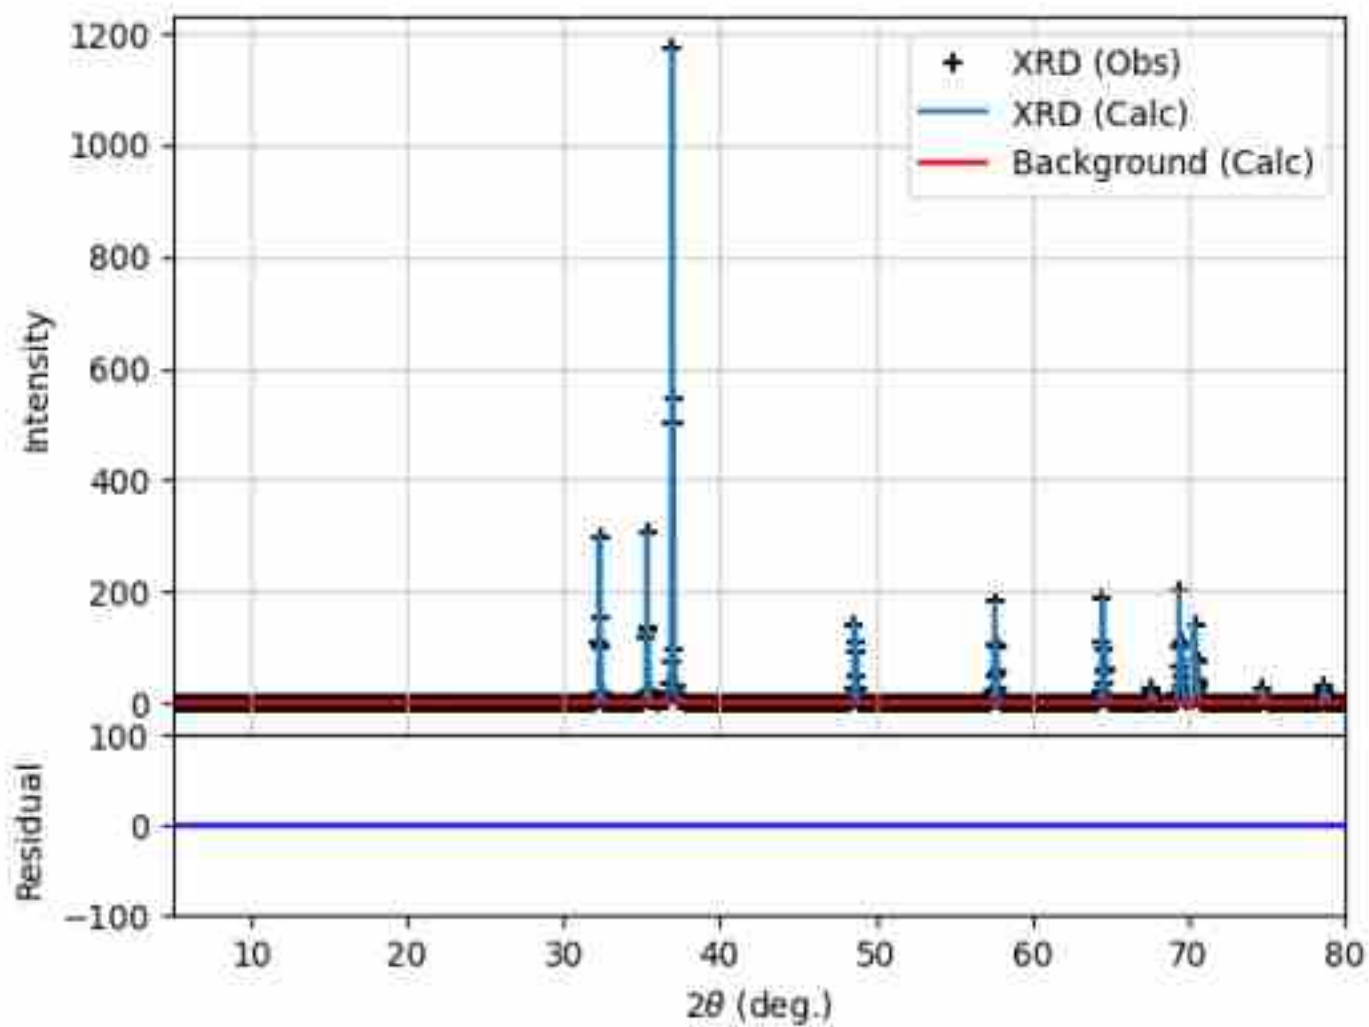

| RMSE before RR | Rwp     | RMSE after RR |
|----------------|---------|---------------|
| 0.007          | 0.00368 | 0.0001        |

# Ho1Al3Cu1

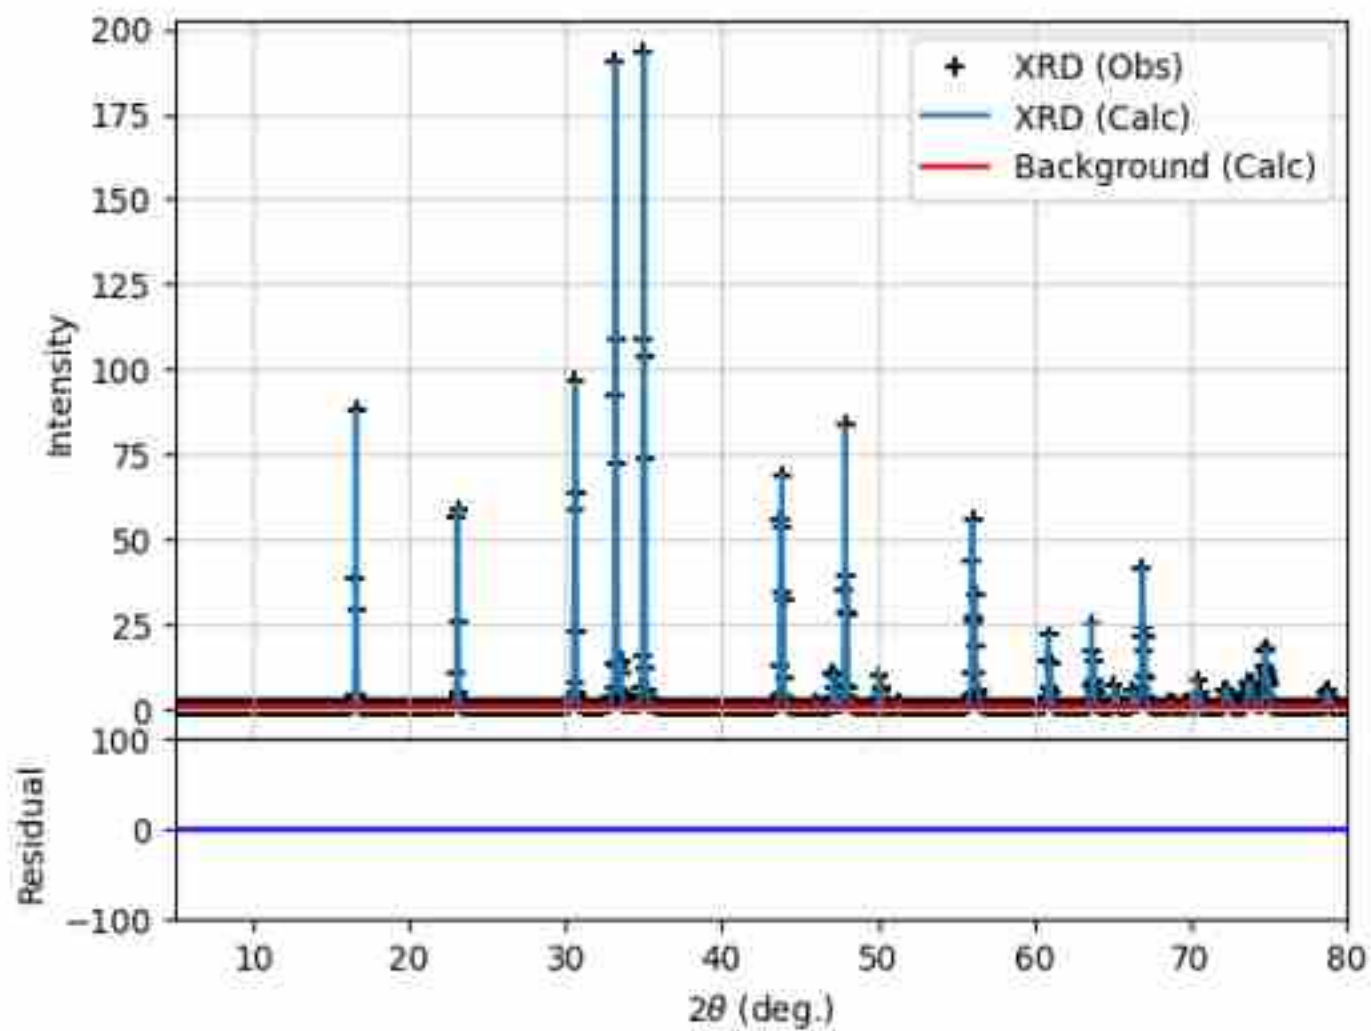

| RMSE before RR | Rwp     | RMSE after RR |
|----------------|---------|---------------|
| 0.007          | 0.00399 | 0.00051       |

# Ho1Cu1Ge1

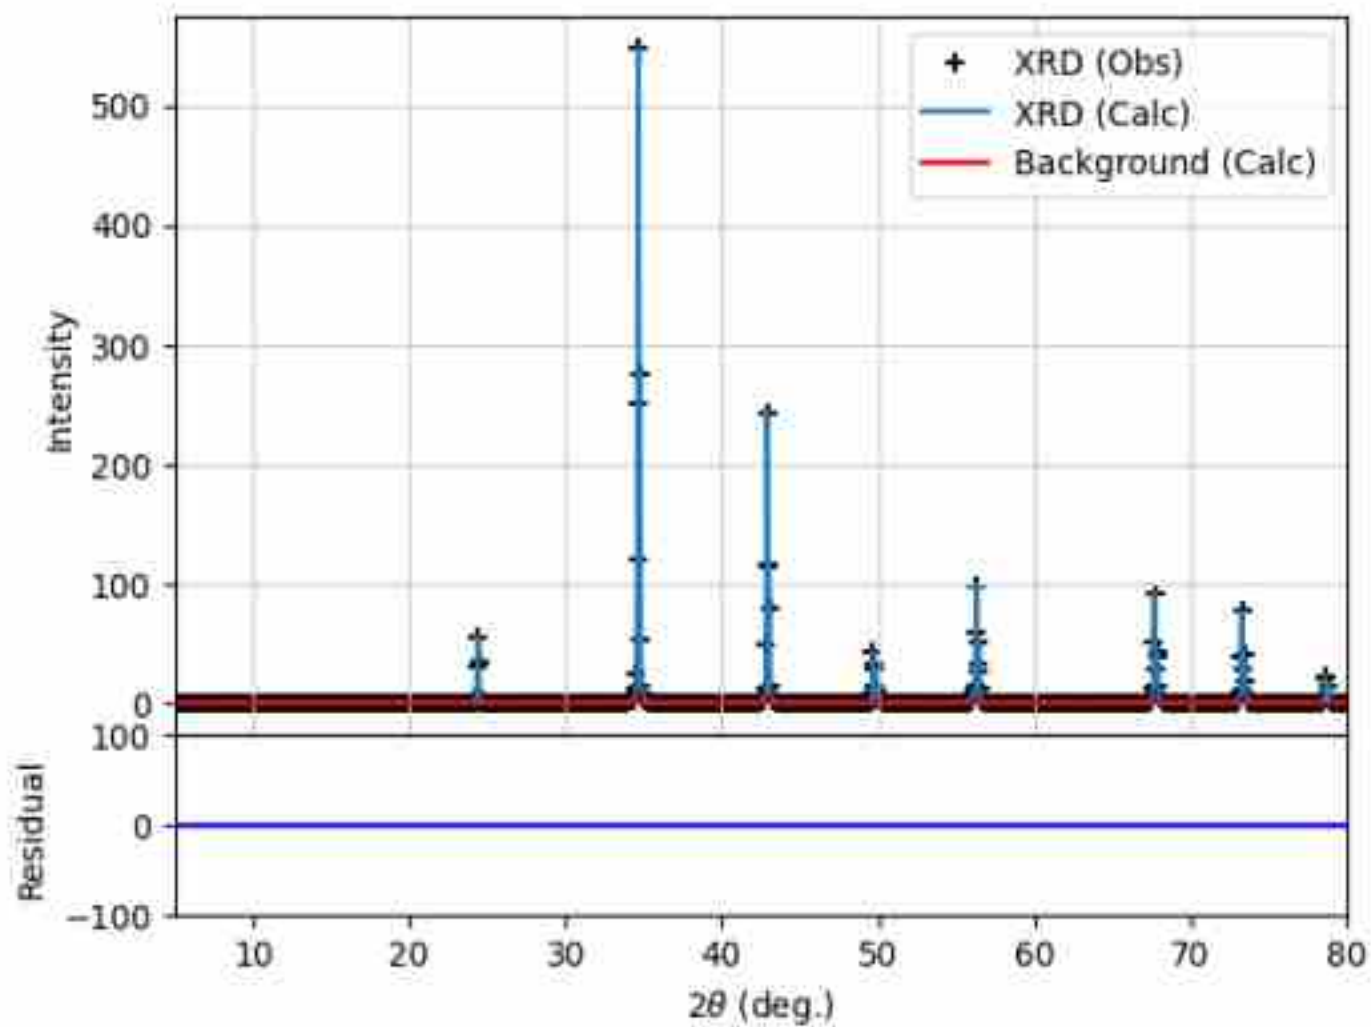

| RMSE before RR | Rwp     | RMSE after RR |
|----------------|---------|---------------|
| 0.007          | 0.00348 | 0.00081       |

# Ho<sub>2</sub>AlSi<sub>2</sub>

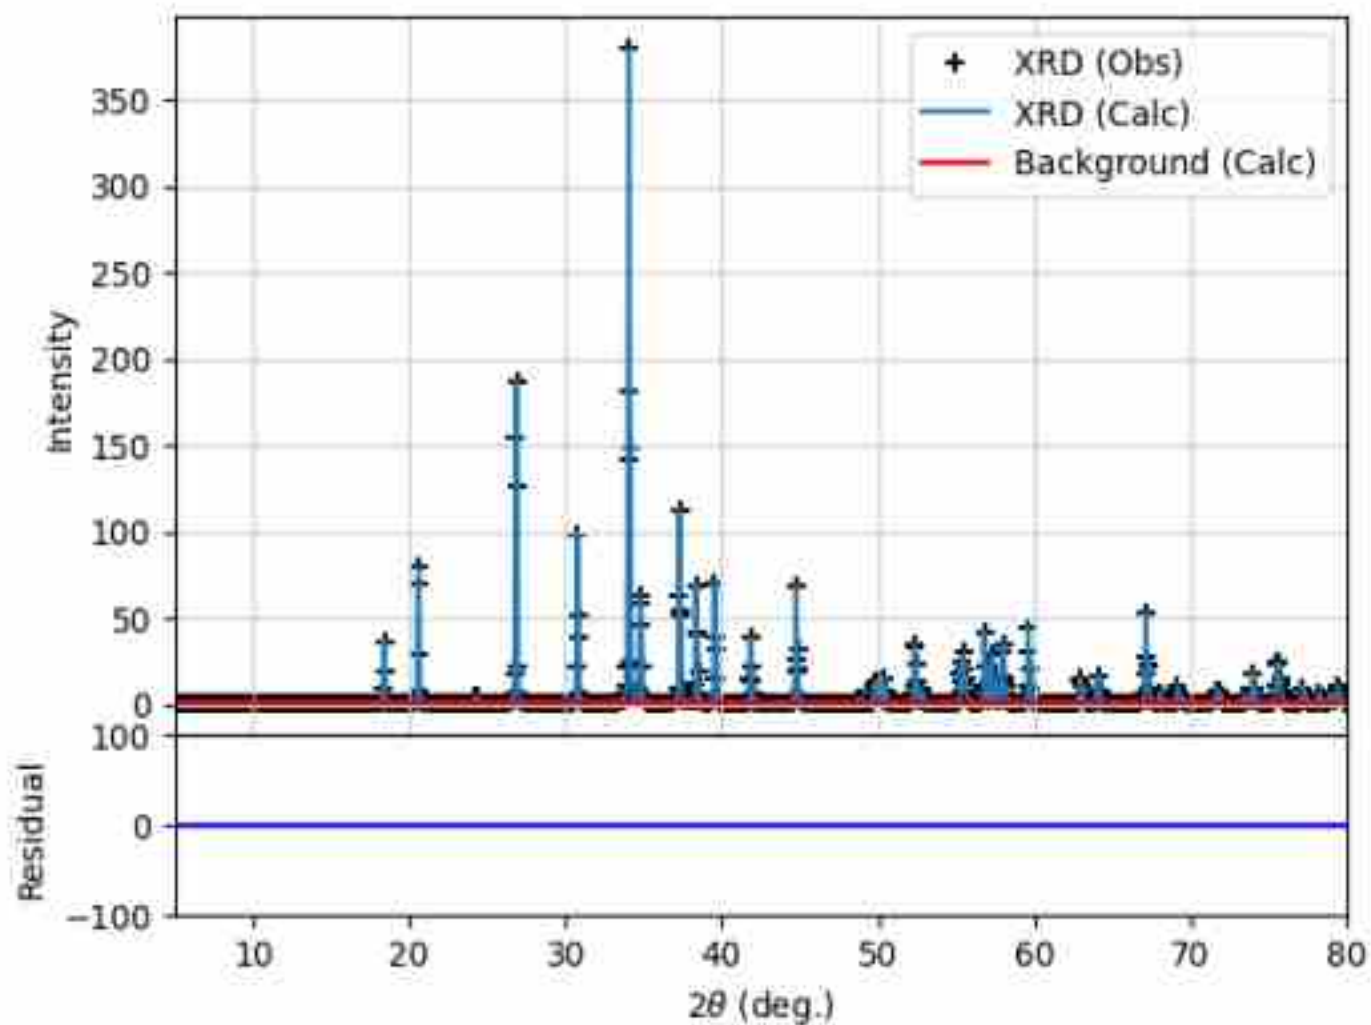

| RMSE before RR | Rwp     | RMSE after RR |
|----------------|---------|---------------|
| 0.007          | 0.00492 | 0.00044       |

# Ho2Ga1Co2

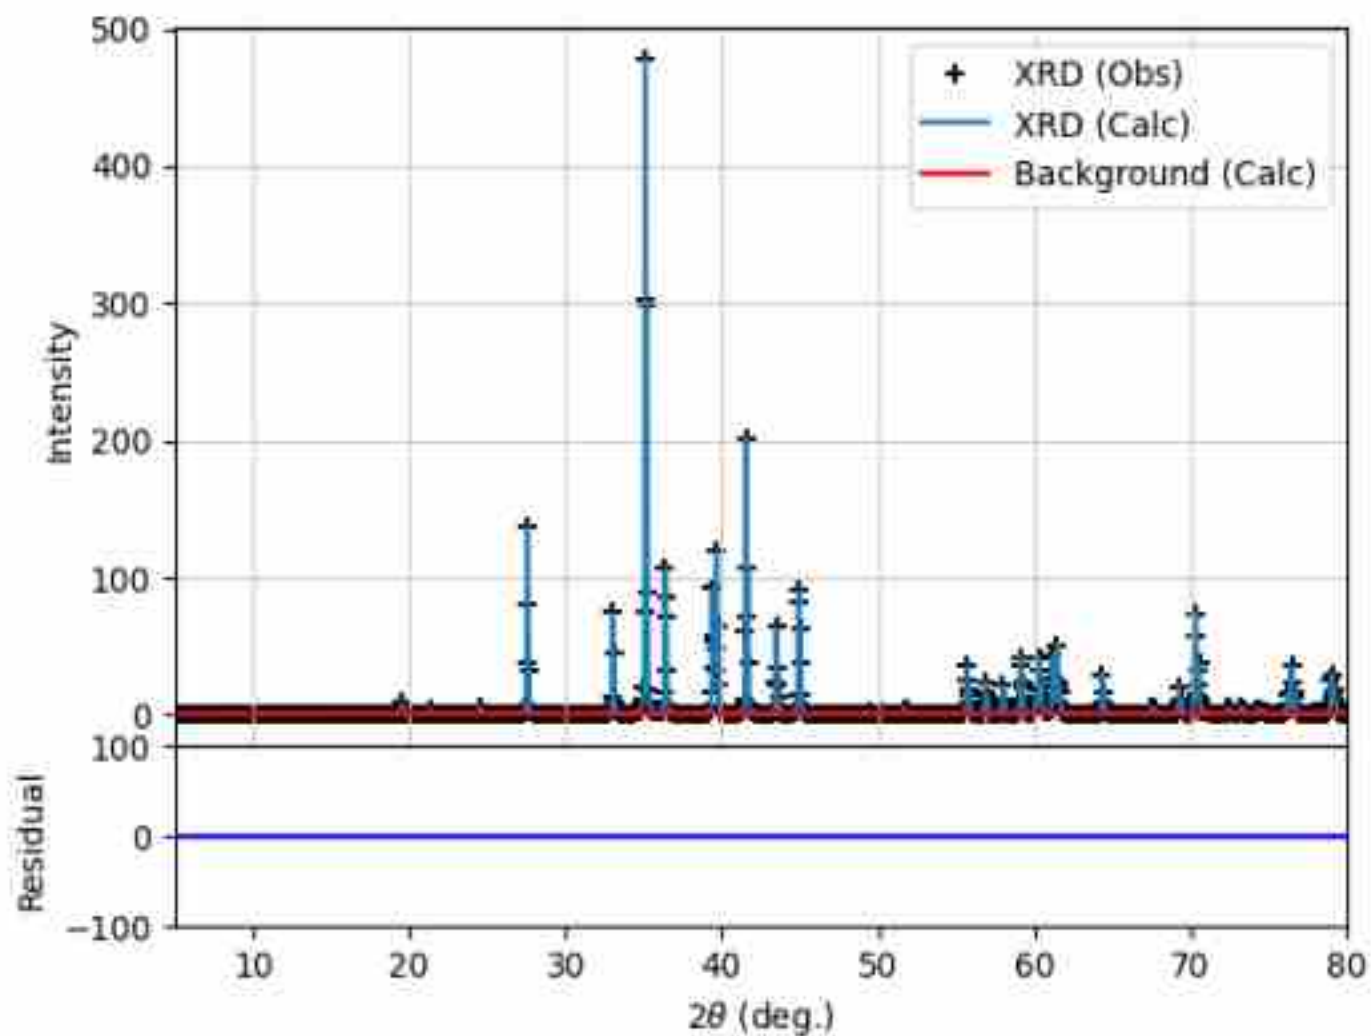

| RMSE before RR | Rwp     | RMSE after RR |
|----------------|---------|---------------|
| 0.007          | 0.00347 | 0.00045       |

# Ho<sub>4</sub>In<sub>2</sub>Au<sub>4</sub>

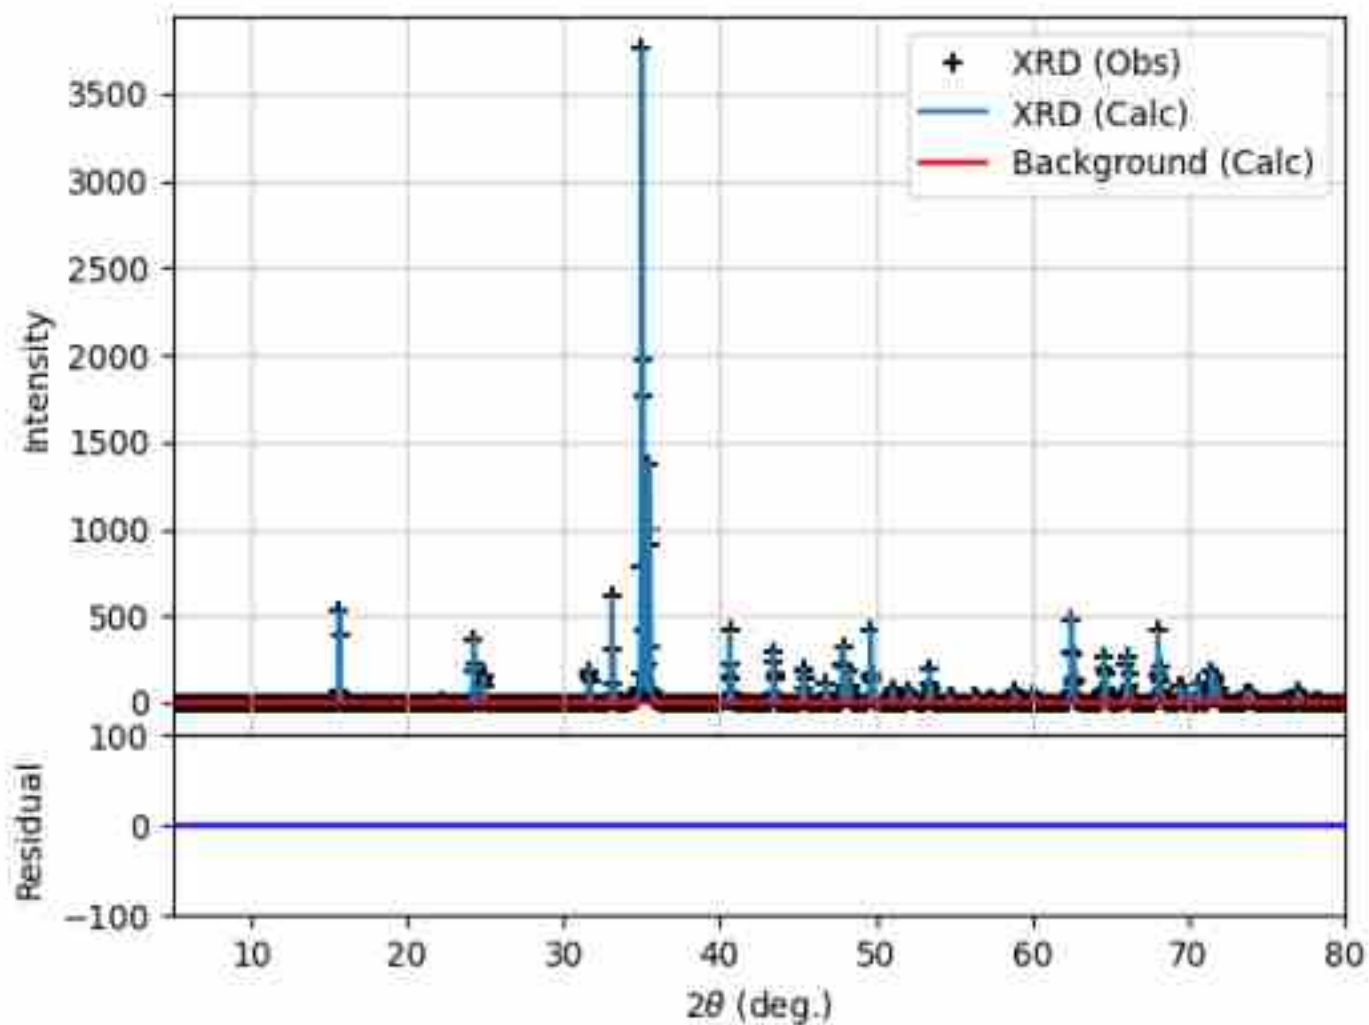

| RMSE before RR | Rwp     | RMSE after RR |
|----------------|---------|---------------|
| 0.007          | 0.00558 | 0.00047       |



# Ho6Mg2

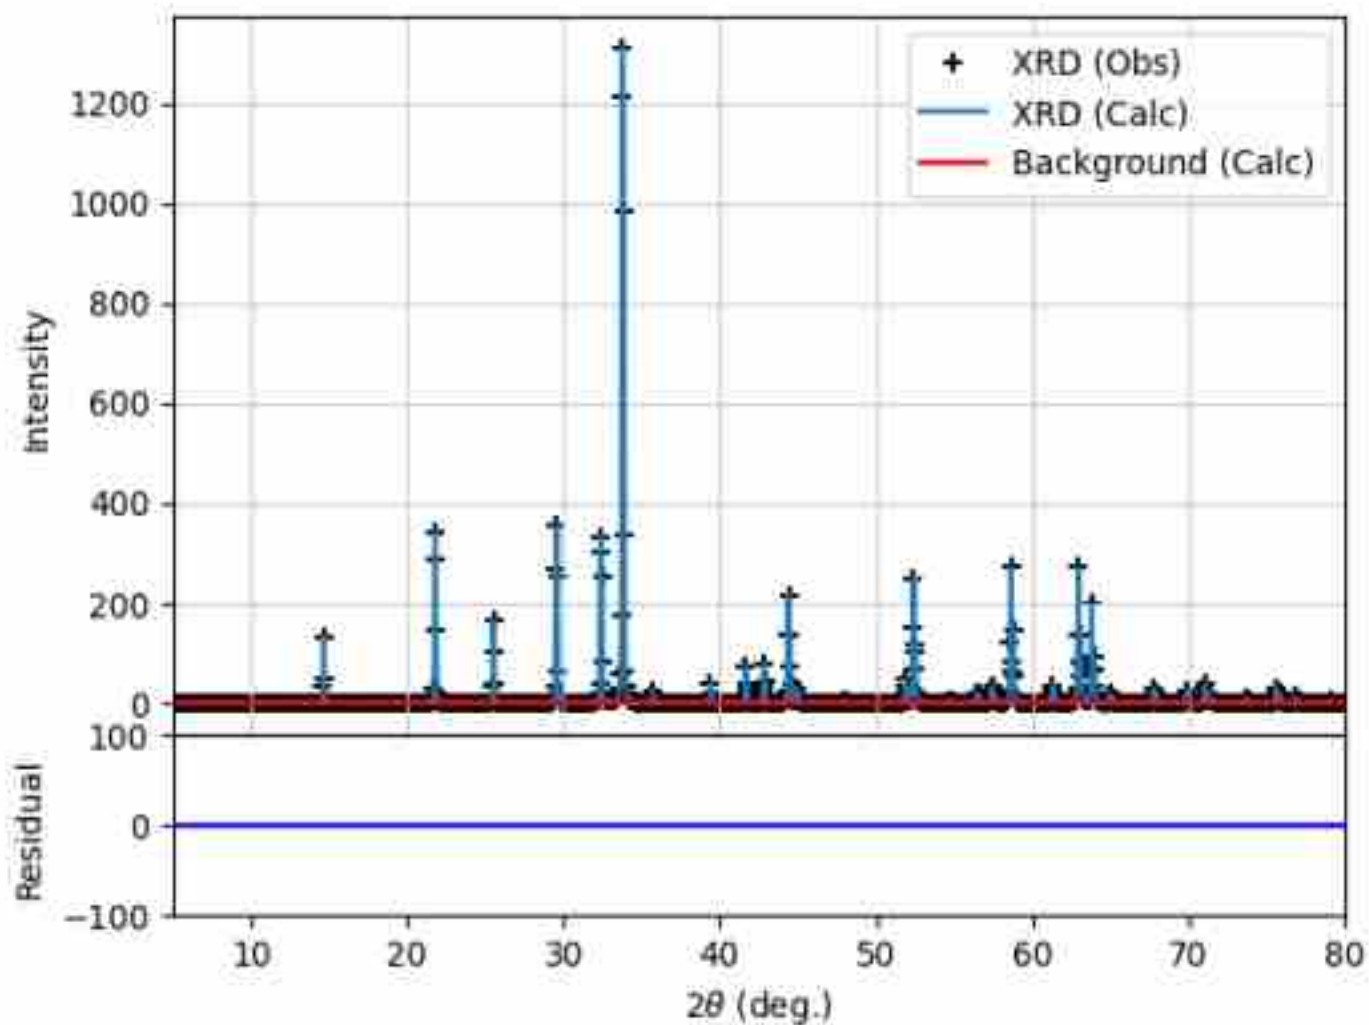

| RMSE before RR | Rwp     | RMSE after RR |
|----------------|---------|---------------|
| 0.007          | 0.07771 | 0.00397       |

# K1La1S2

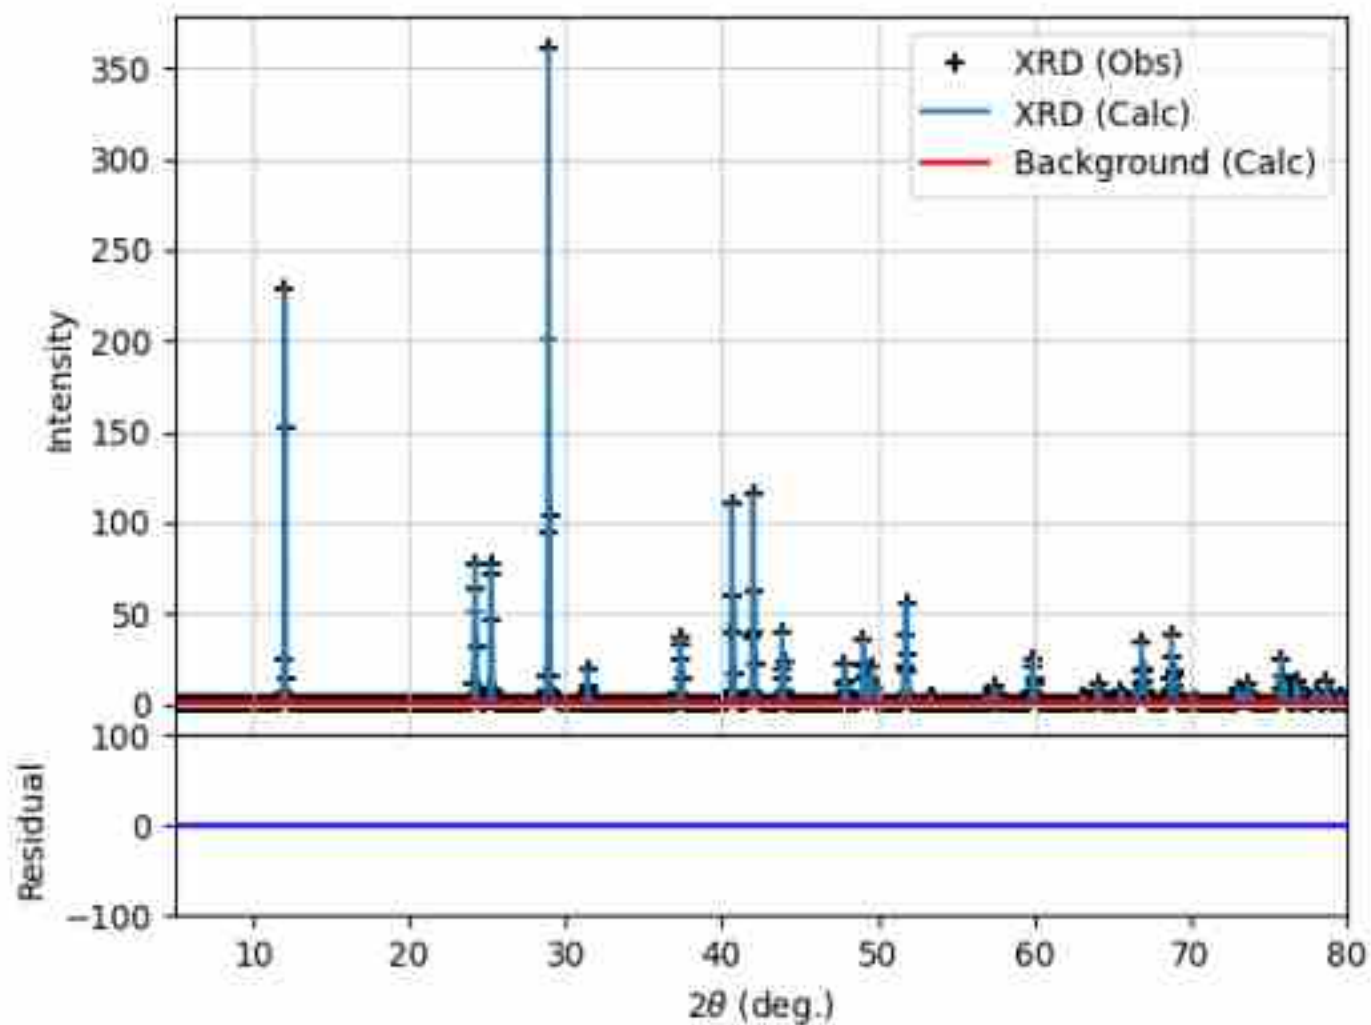

| RMSE before RR | Rwp     | RMSE after RR |
|----------------|---------|---------------|
| 0.007          | 0.00366 | 0.00177       |

# K1Rb2Gd1C16

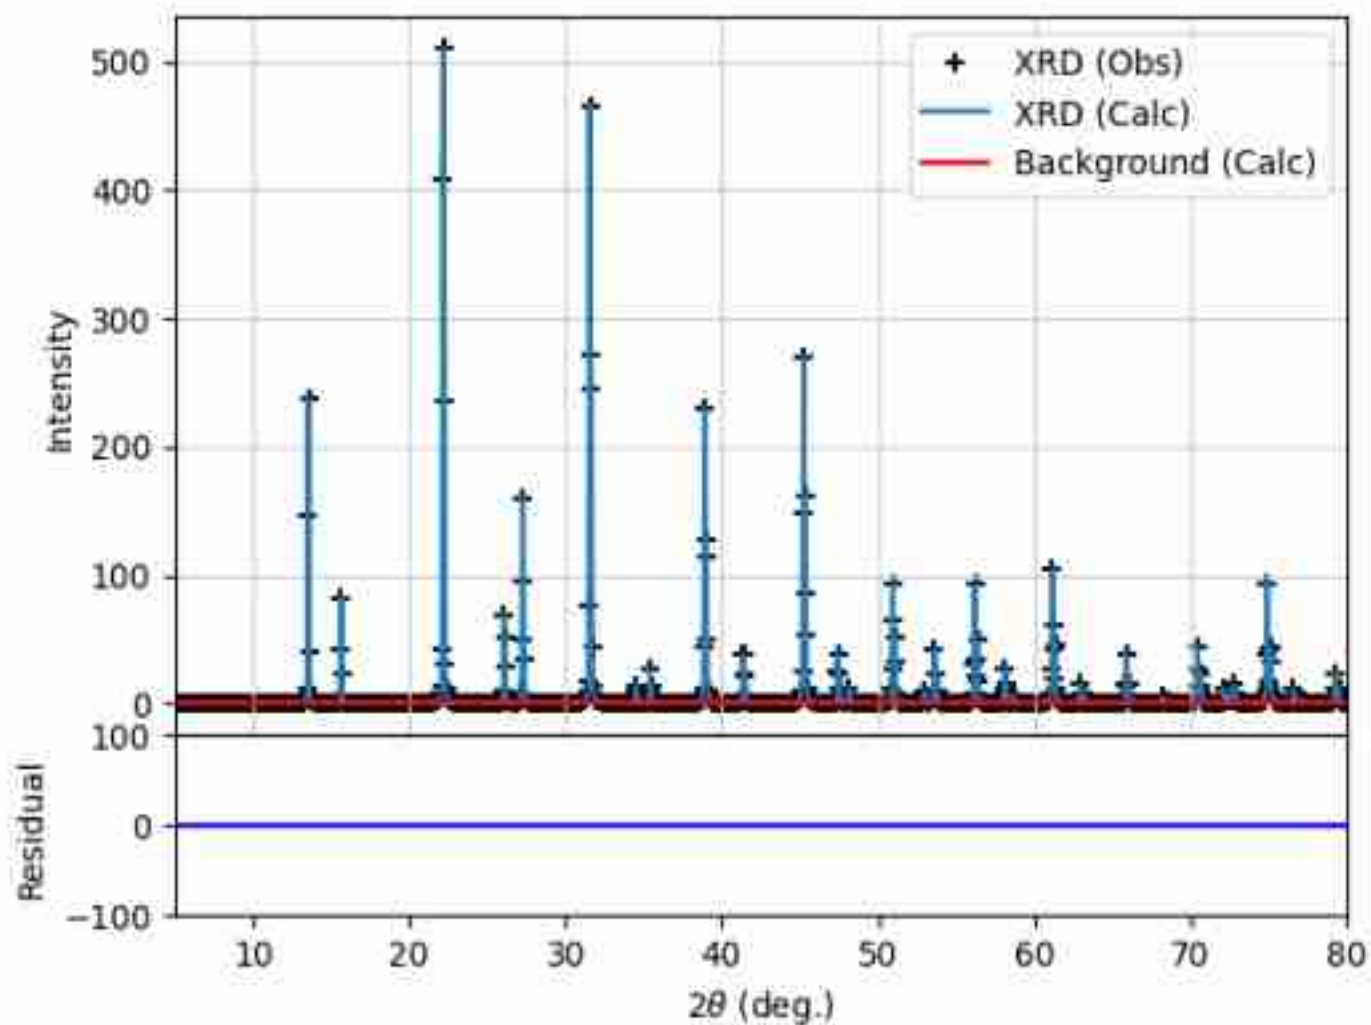

| RMSE before RR | Rwp     | RMSE after RR |
|----------------|---------|---------------|
| 0.007          | 0.02173 | 0.00285       |

# K1Rb2Sm1Cl6

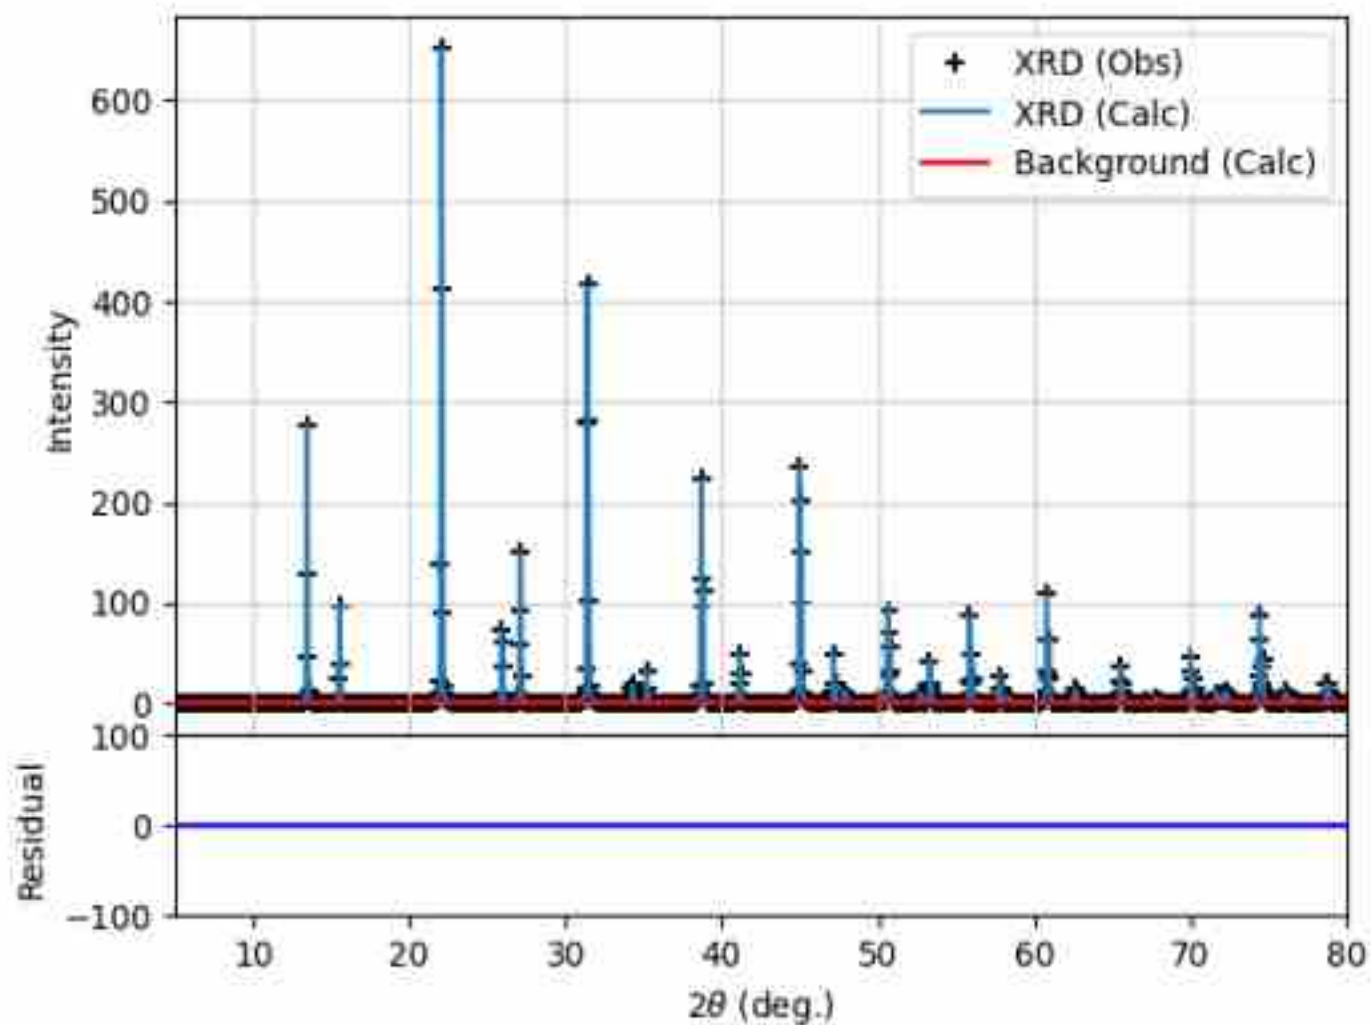

| RMSE before RR | Rwp     | RMSE after RR |
|----------------|---------|---------------|
| 0.007          | 0.01245 | 0.00207       |

# K<sub>2</sub>LiInF<sub>6</sub>

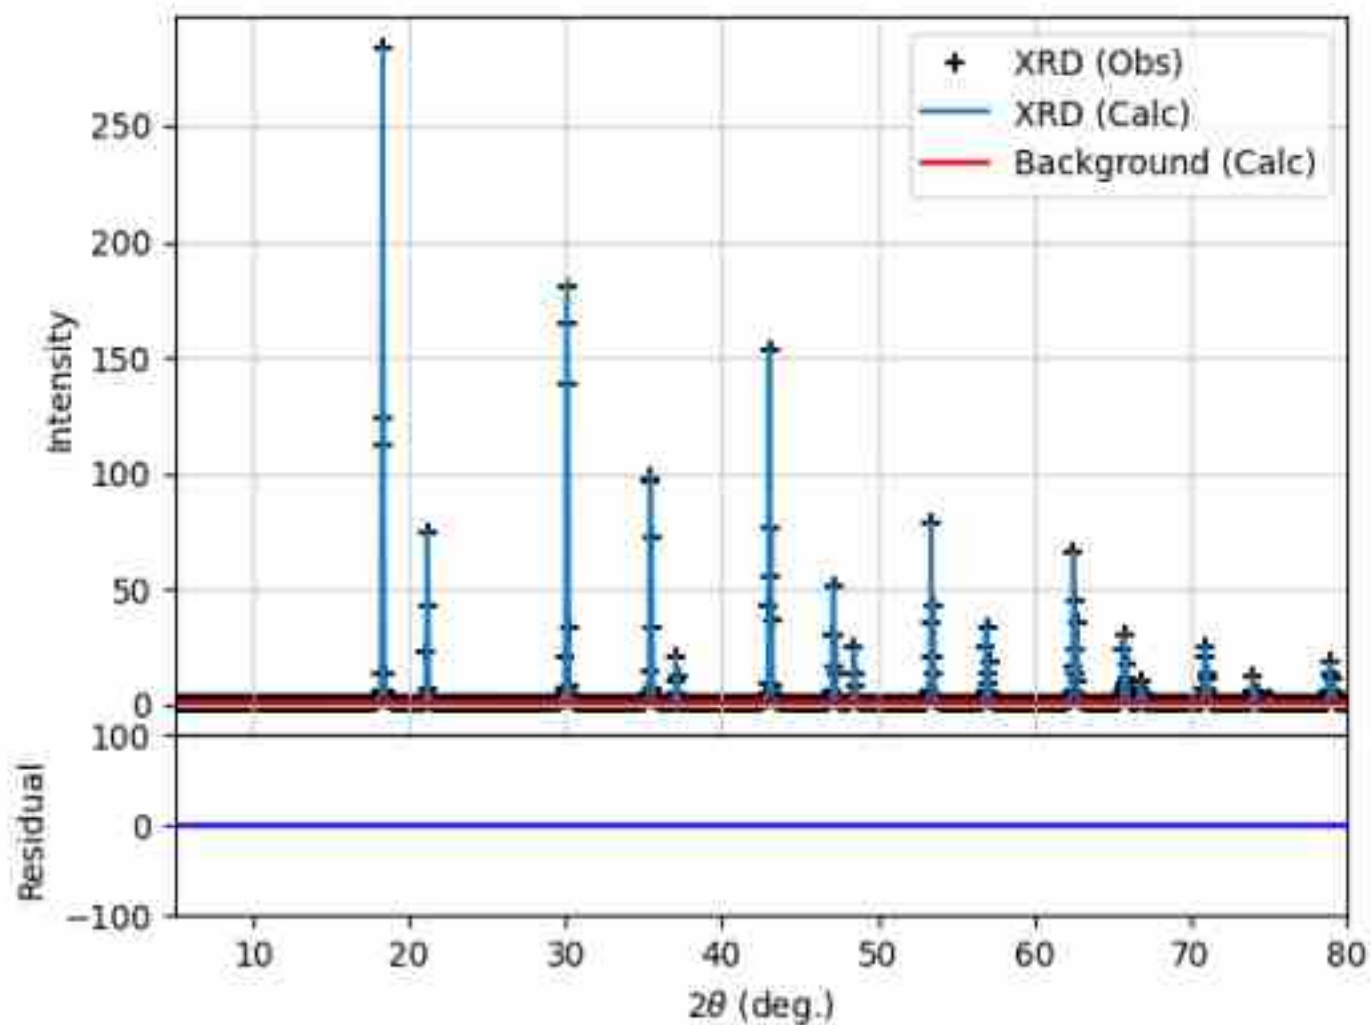

| RMSE before RR | Rwp    | RMSE after RR |
|----------------|--------|---------------|
| 0.007          | 0.0085 | 0.00609       |

# K<sub>2</sub>Mg<sub>2</sub>P<sub>2</sub>

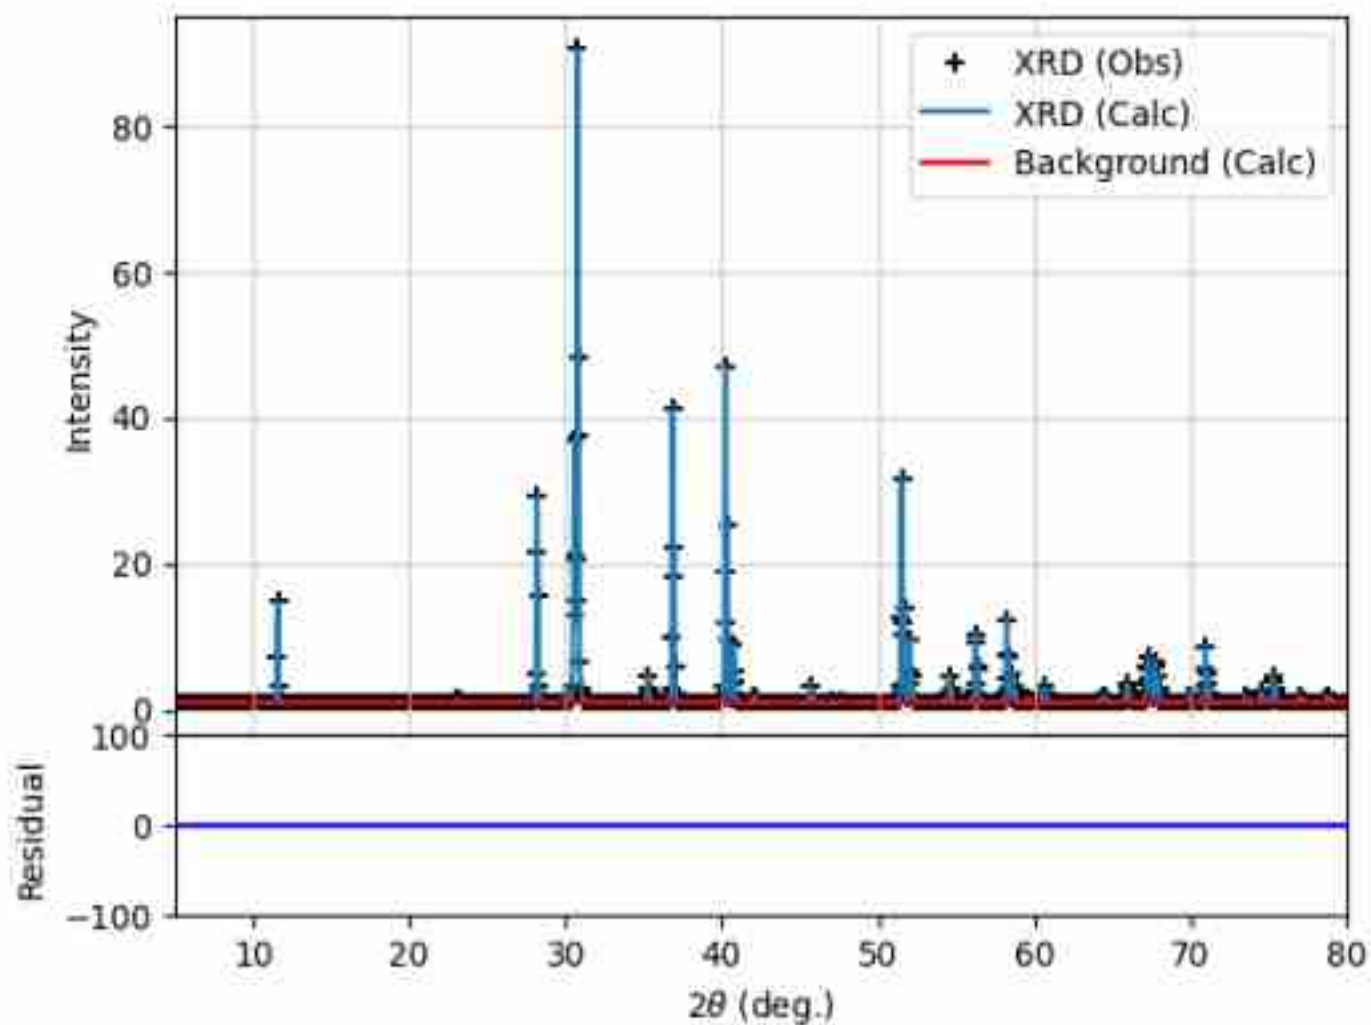

| RMSE before RR | Rwp     | RMSE after RR |
|----------------|---------|---------------|
| 0.007          | 0.00336 | 0.00067       |

# K2Na1Fe1F6

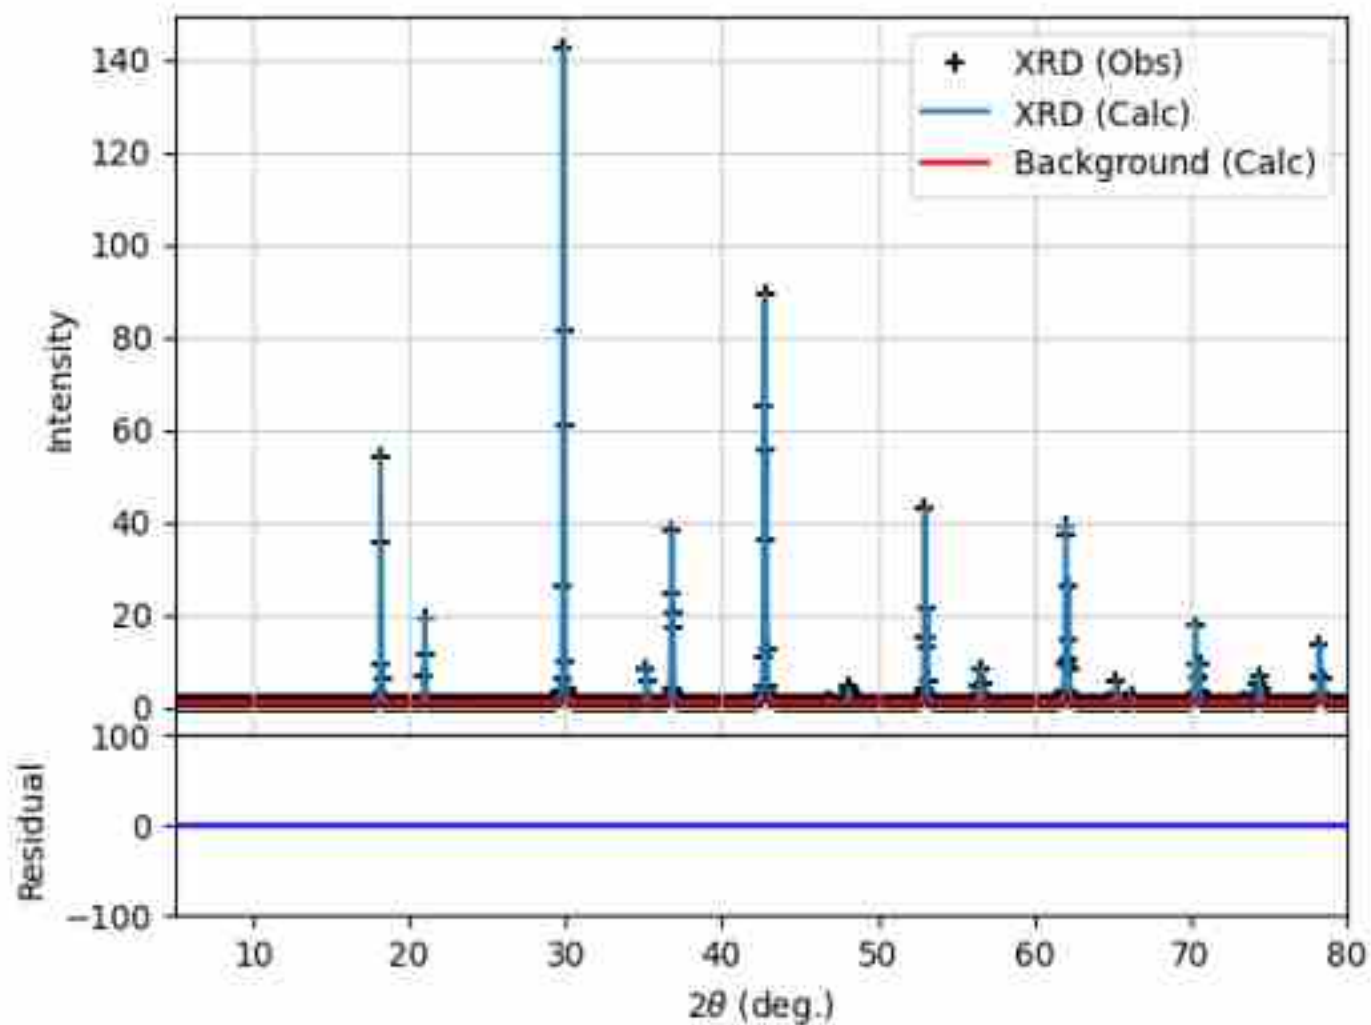

| RMSE before RR | Rwp     | RMSE after RR |
|----------------|---------|---------------|
| 0.007          | 0.02609 | 0.0041        |

# K<sub>2</sub>Na<sub>1</sub>La<sub>1</sub>Cl<sub>6</sub>

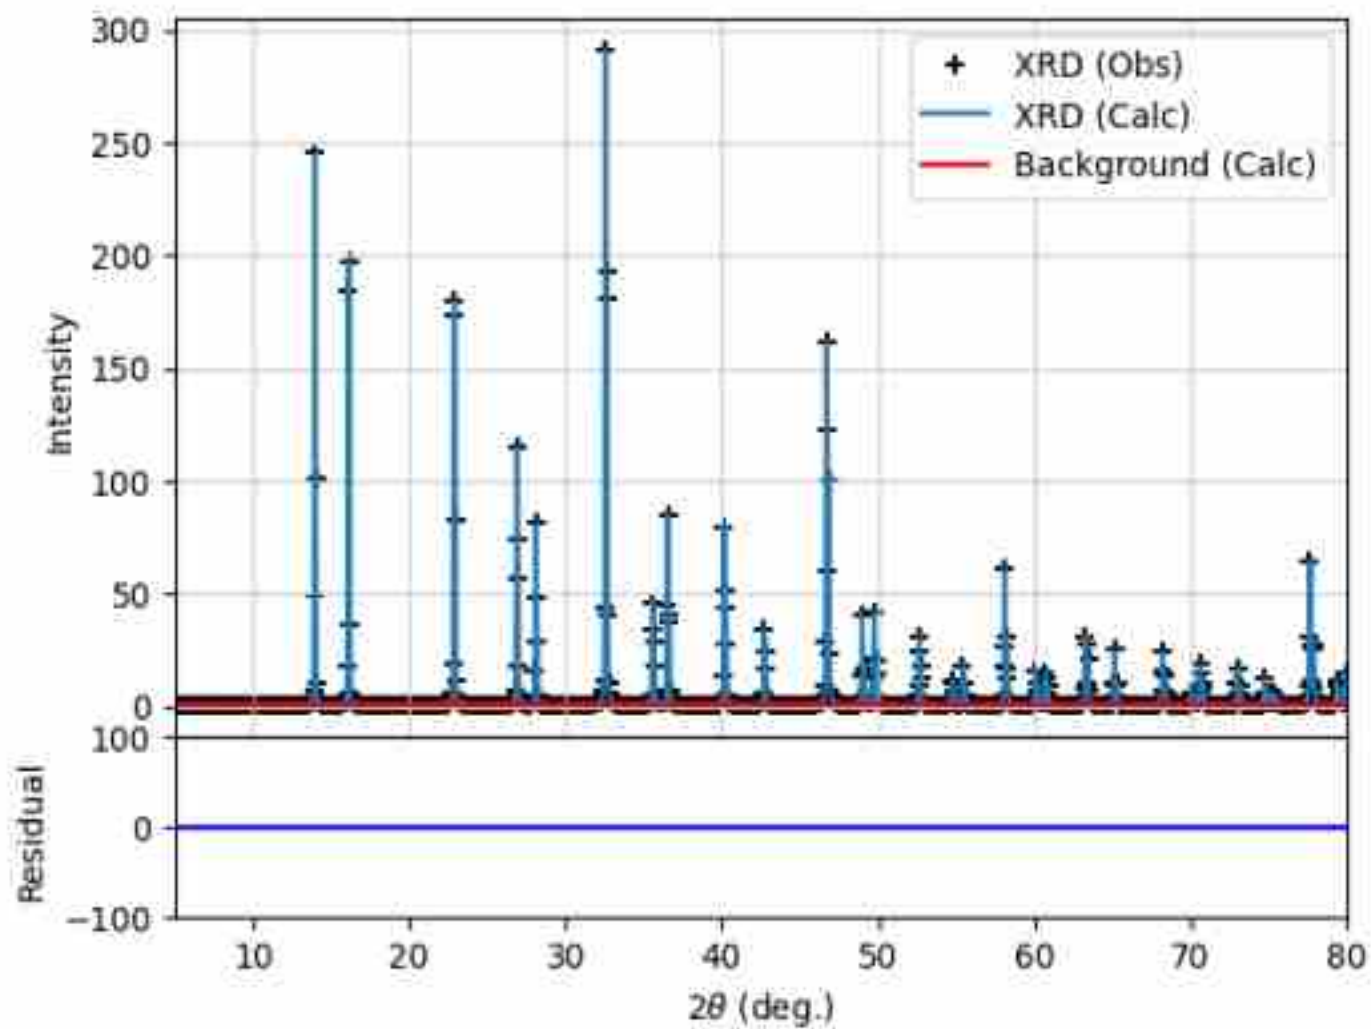

| RMSE before RR | Rwp     | RMSE after RR |
|----------------|---------|---------------|
| 0.007          | 0.00651 | 0.00154       |



# K<sub>2</sub>Na<sub>1</sub>V<sub>1</sub>F<sub>6</sub>

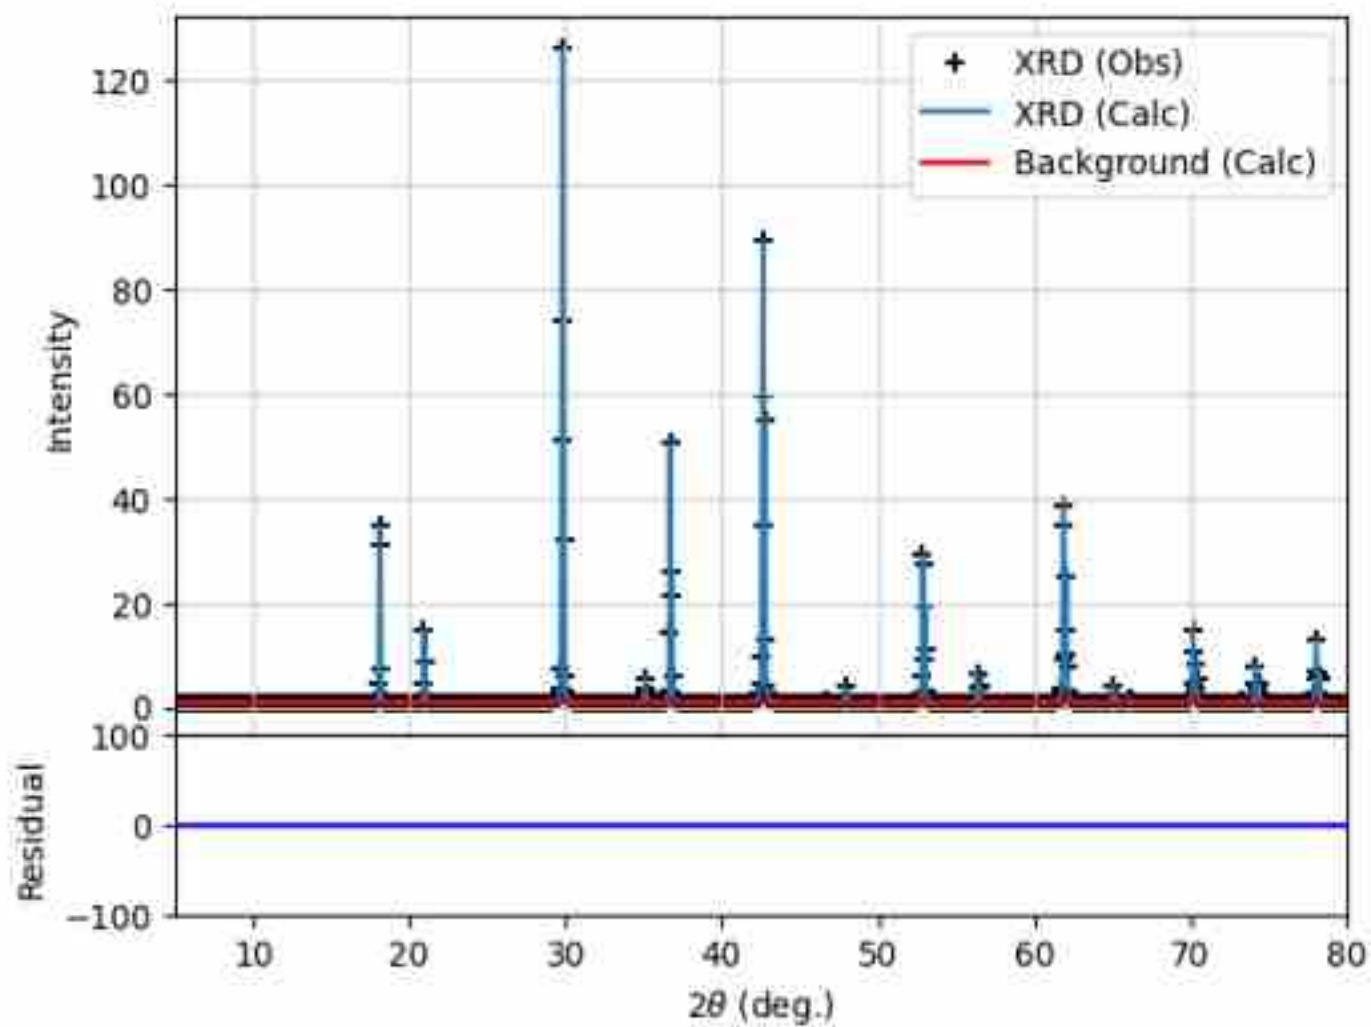

| RMSE before RR | Rwp     | RMSE after RR |
|----------------|---------|---------------|
| 0.007          | 0.01791 | 0.00324       |

# K<sub>2</sub>Zn<sub>2</sub>As<sub>2</sub>

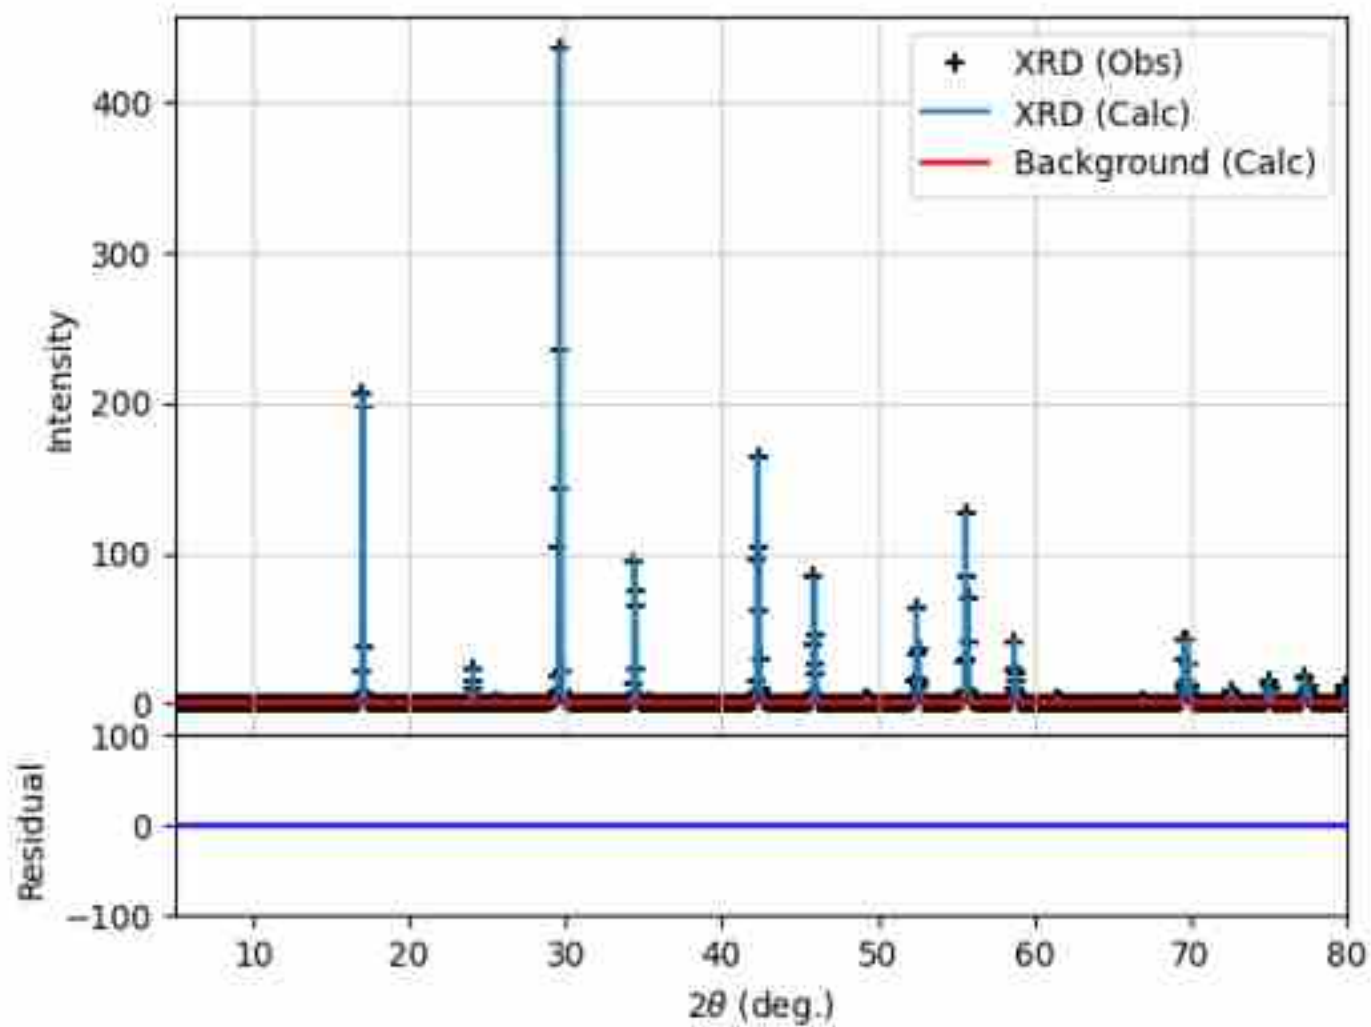

| RMSE before RR | Rwp     | RMSE after RR |
|----------------|---------|---------------|
| 0.007          | 0.00394 | 0.00054       |

# K3Y1F6

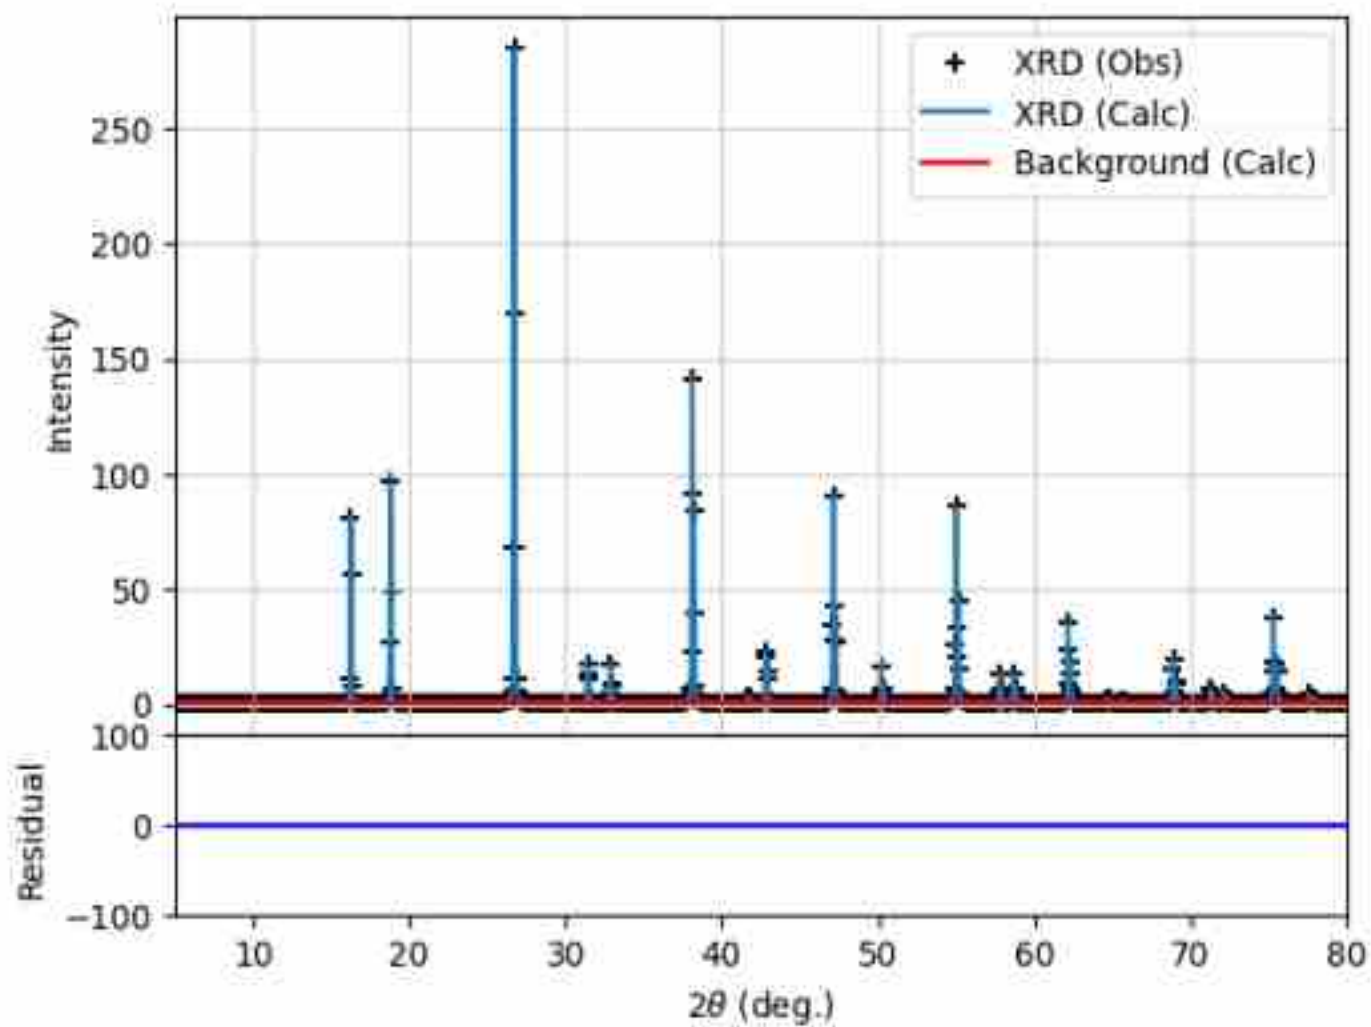

| RMSE before RR | Rwp     | RMSE after RR |
|----------------|---------|---------------|
| 0.007          | 0.00457 | 0.00179       |

# La1Al2Pt3

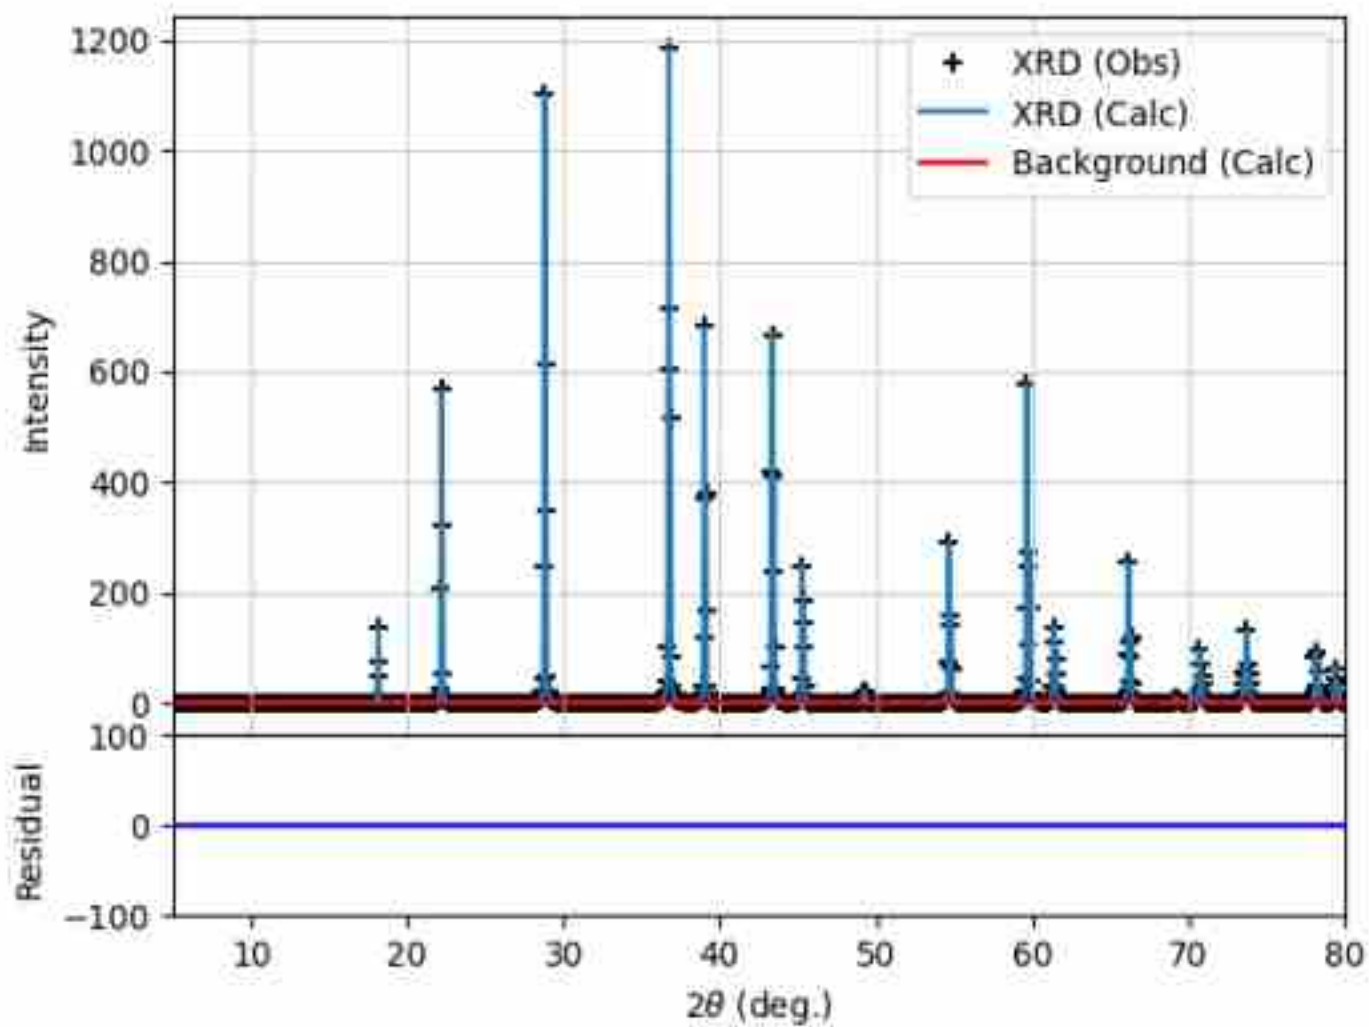

| RMSE before RR | Rwp     | RMSE after RR |
|----------------|---------|---------------|
| 0.007          | 0.00331 | 0.00056       |

# La1Ge2Ru1Rh1

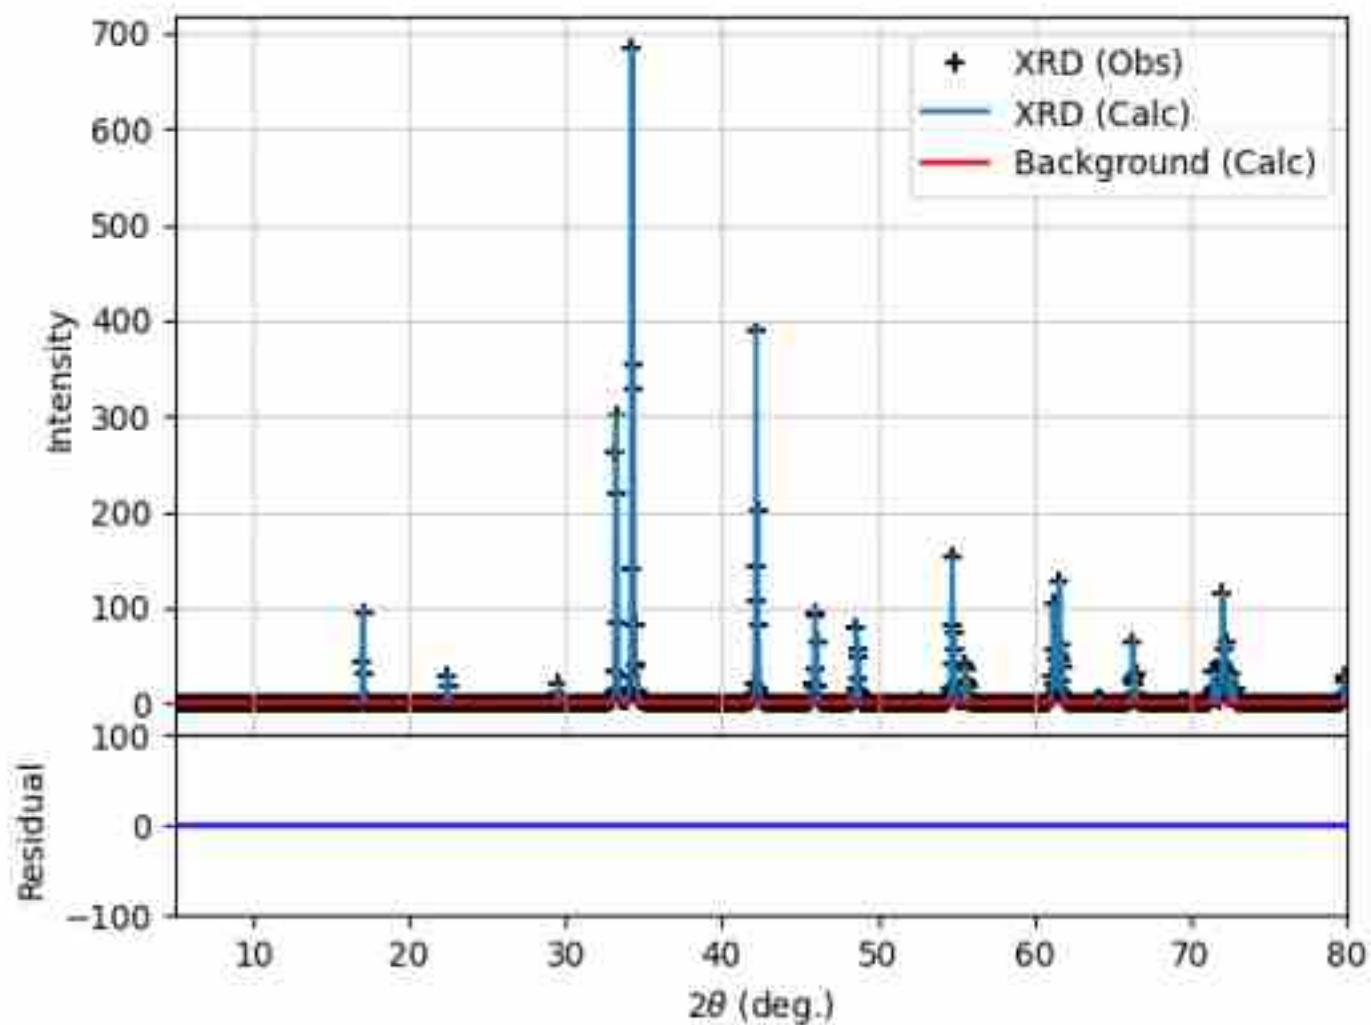

| RMSE before RR | Rwp     | RMSE after RR |
|----------------|---------|---------------|
| 0.007          | 0.00506 | 0.00061       |

# La1Ni1C2

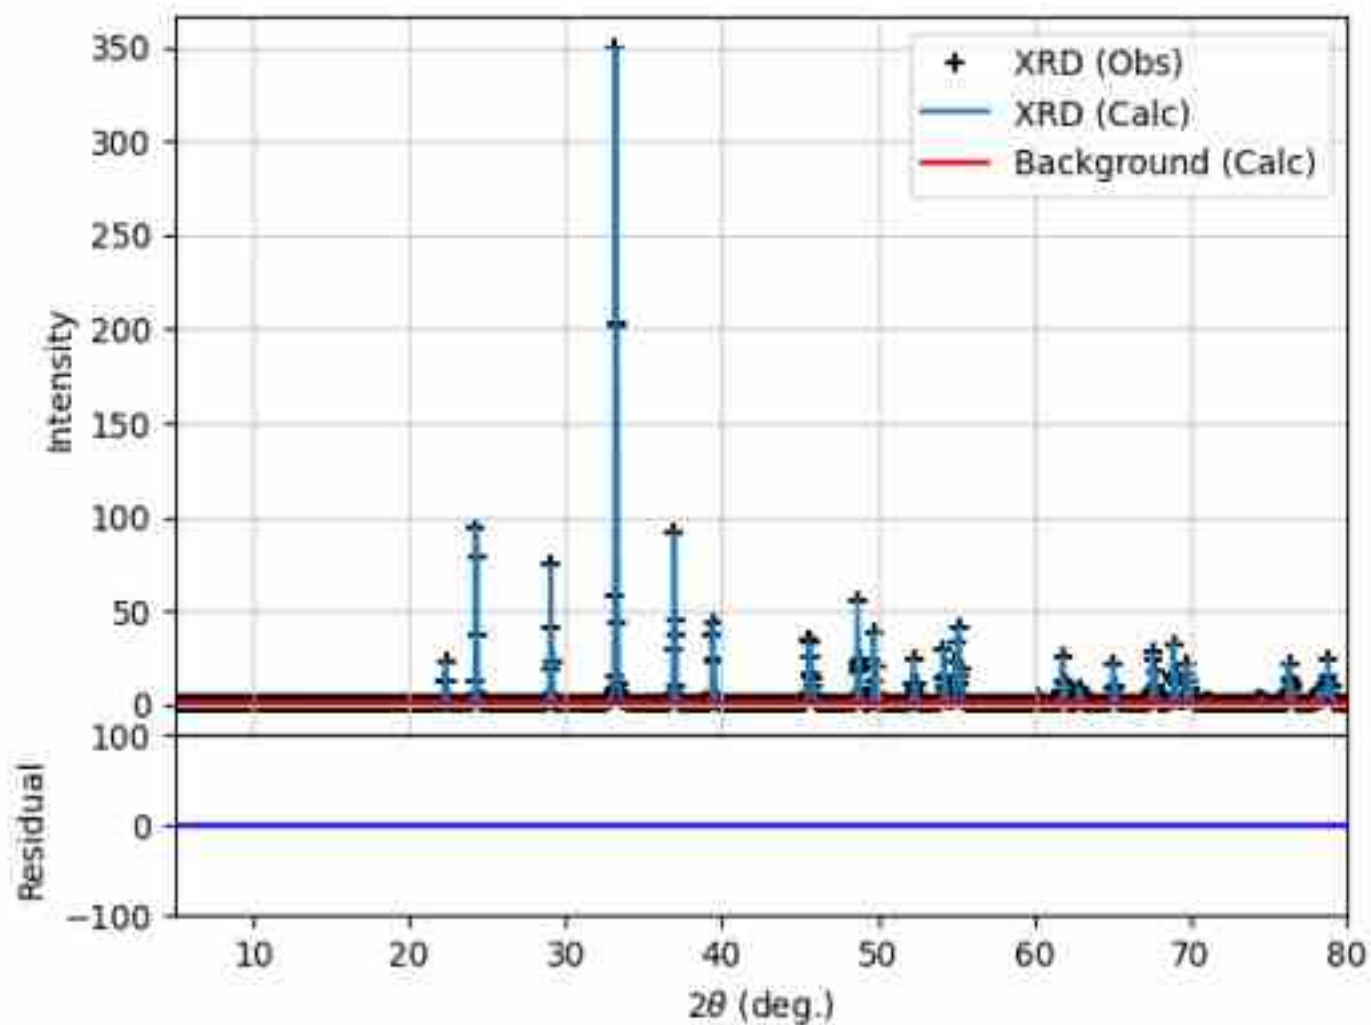

| RMSE before RR | Rwp     | RMSE after RR |
|----------------|---------|---------------|
| 0.007          | 0.00383 | 0.00168       |

# La<sub>2</sub>Se<sub>1</sub>O<sub>2</sub>

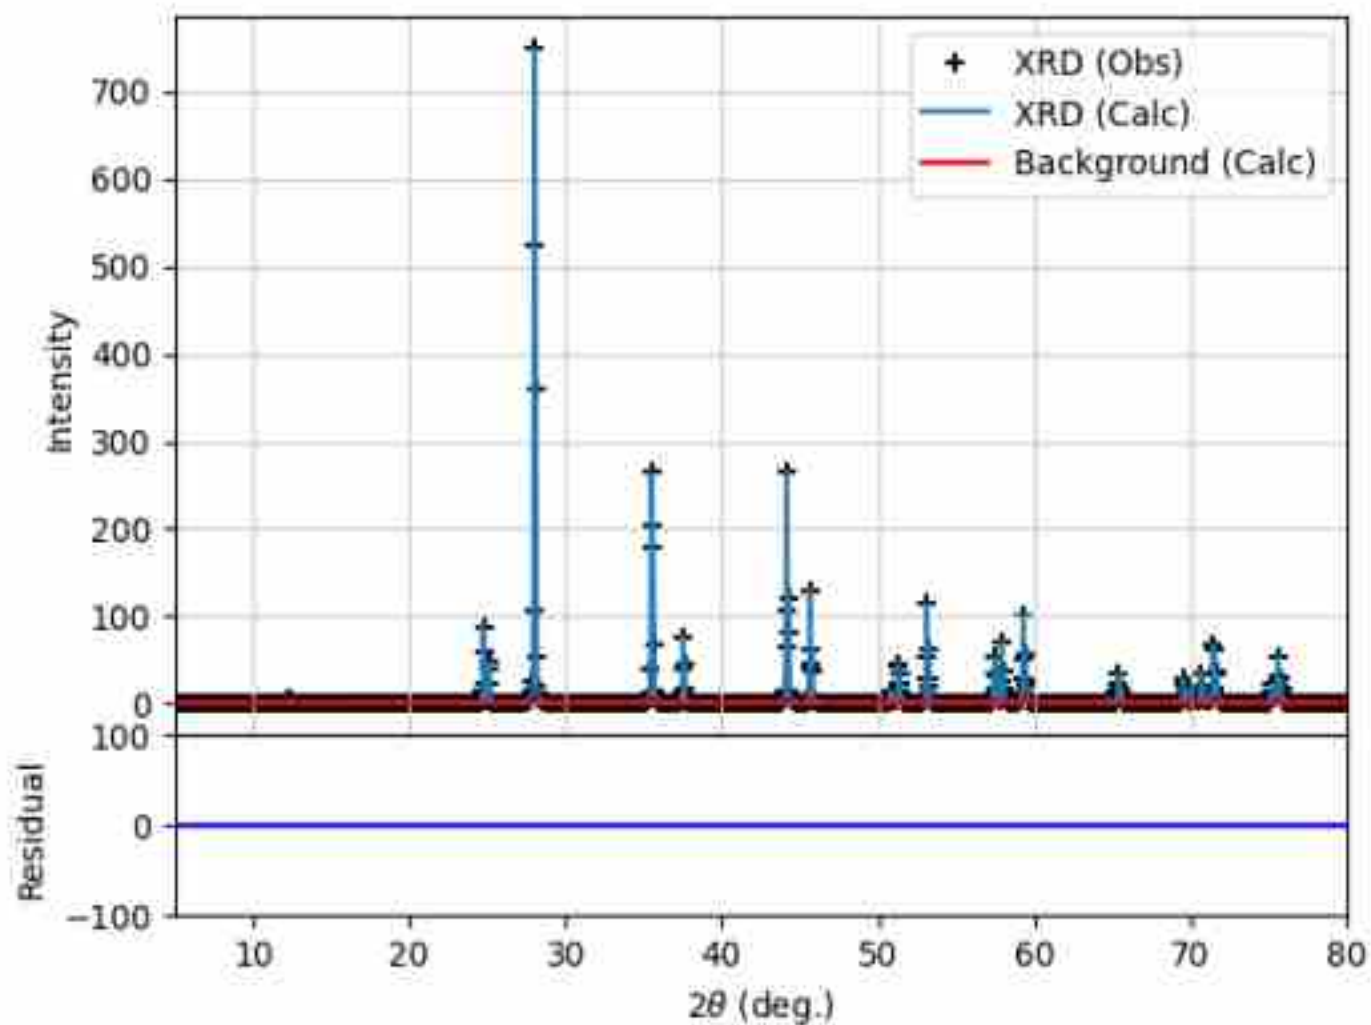

| RMSE before RR | Rwp     | RMSE after RR |
|----------------|---------|---------------|
| 0.007          | 0.06568 | 0.00269       |

# La<sub>2</sub>Si<sub>4</sub>Pt<sub>4</sub>

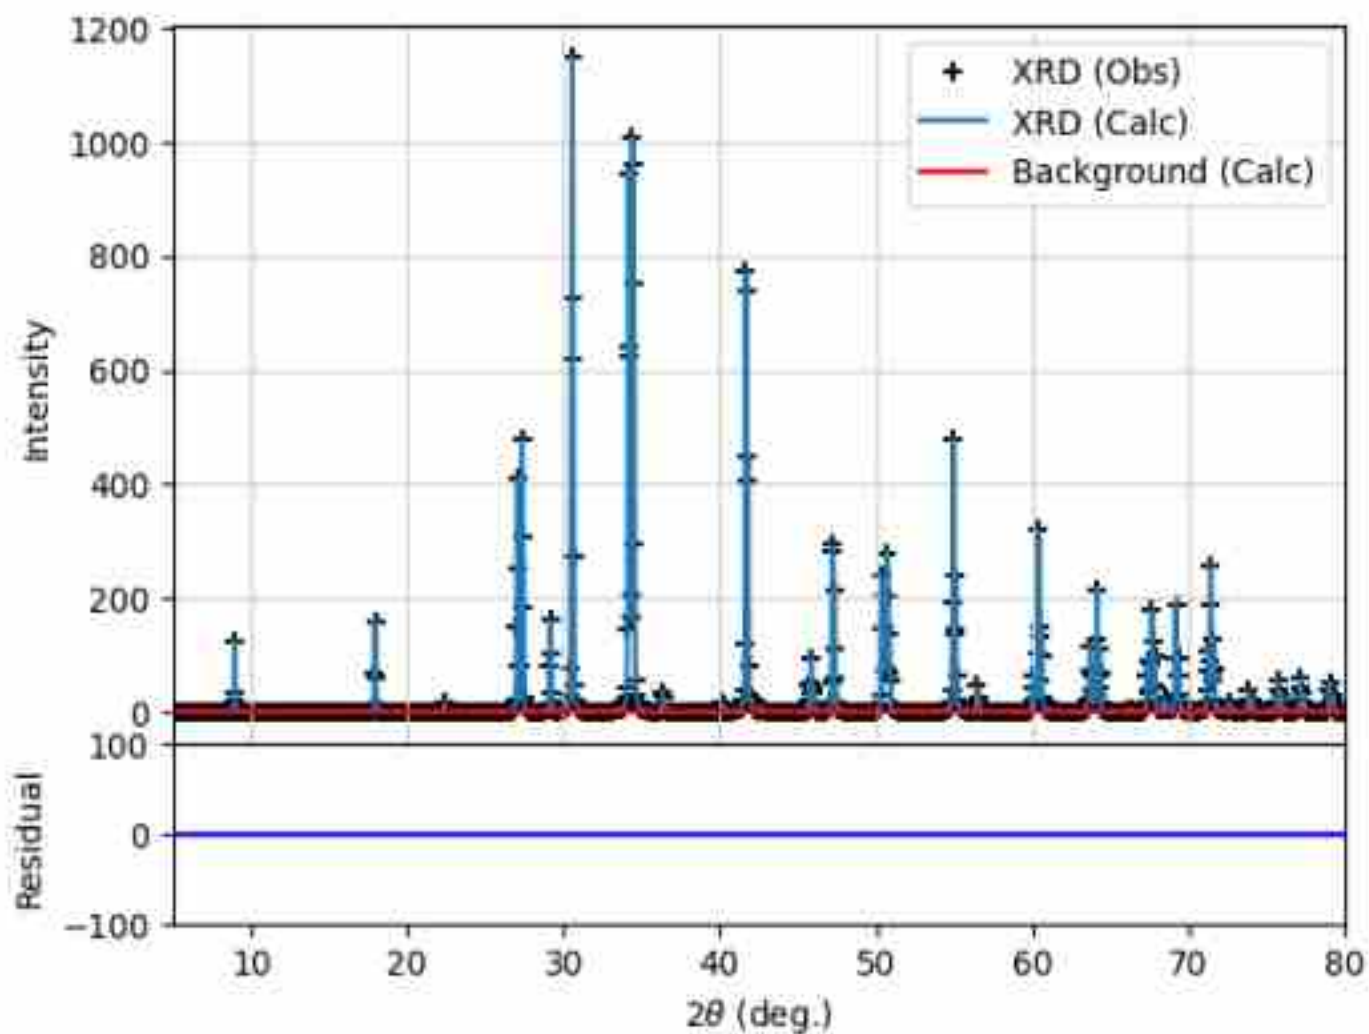

| RMSE before RR | Rwp     | RMSE after RR |
|----------------|---------|---------------|
| 0.007          | 0.00398 | 0.00071       |



# La<sub>4</sub>Mg<sub>2</sub>Ni<sub>4</sub>

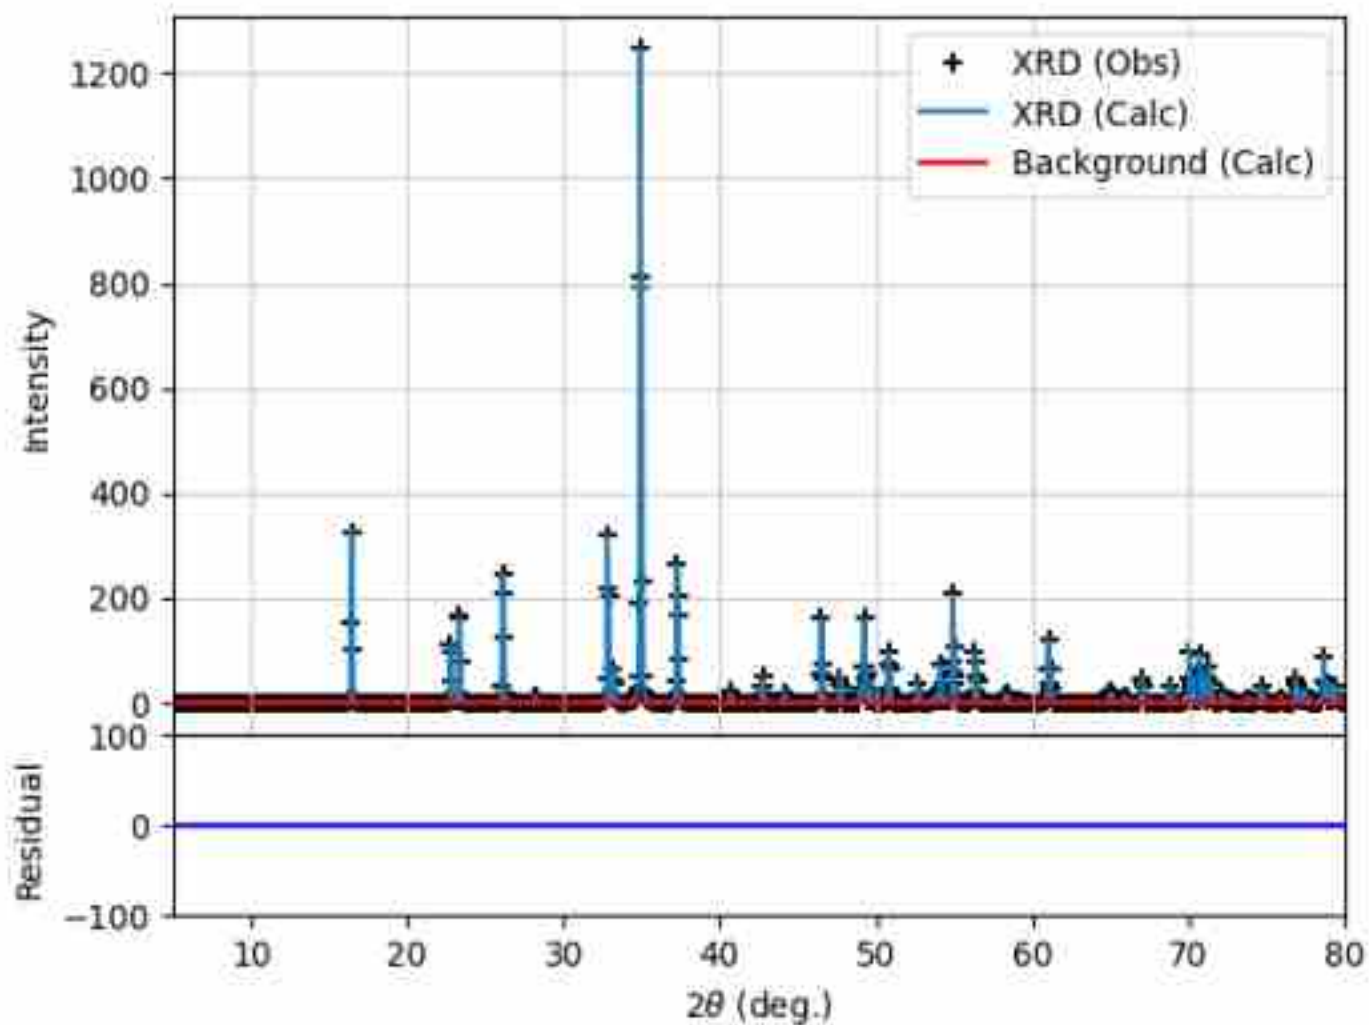

| RMSE before RR | Rwp    | RMSE after RR |
|----------------|--------|---------------|
| 0.007          | 0.0057 | 0.00059       |

# Li1Gd1S2

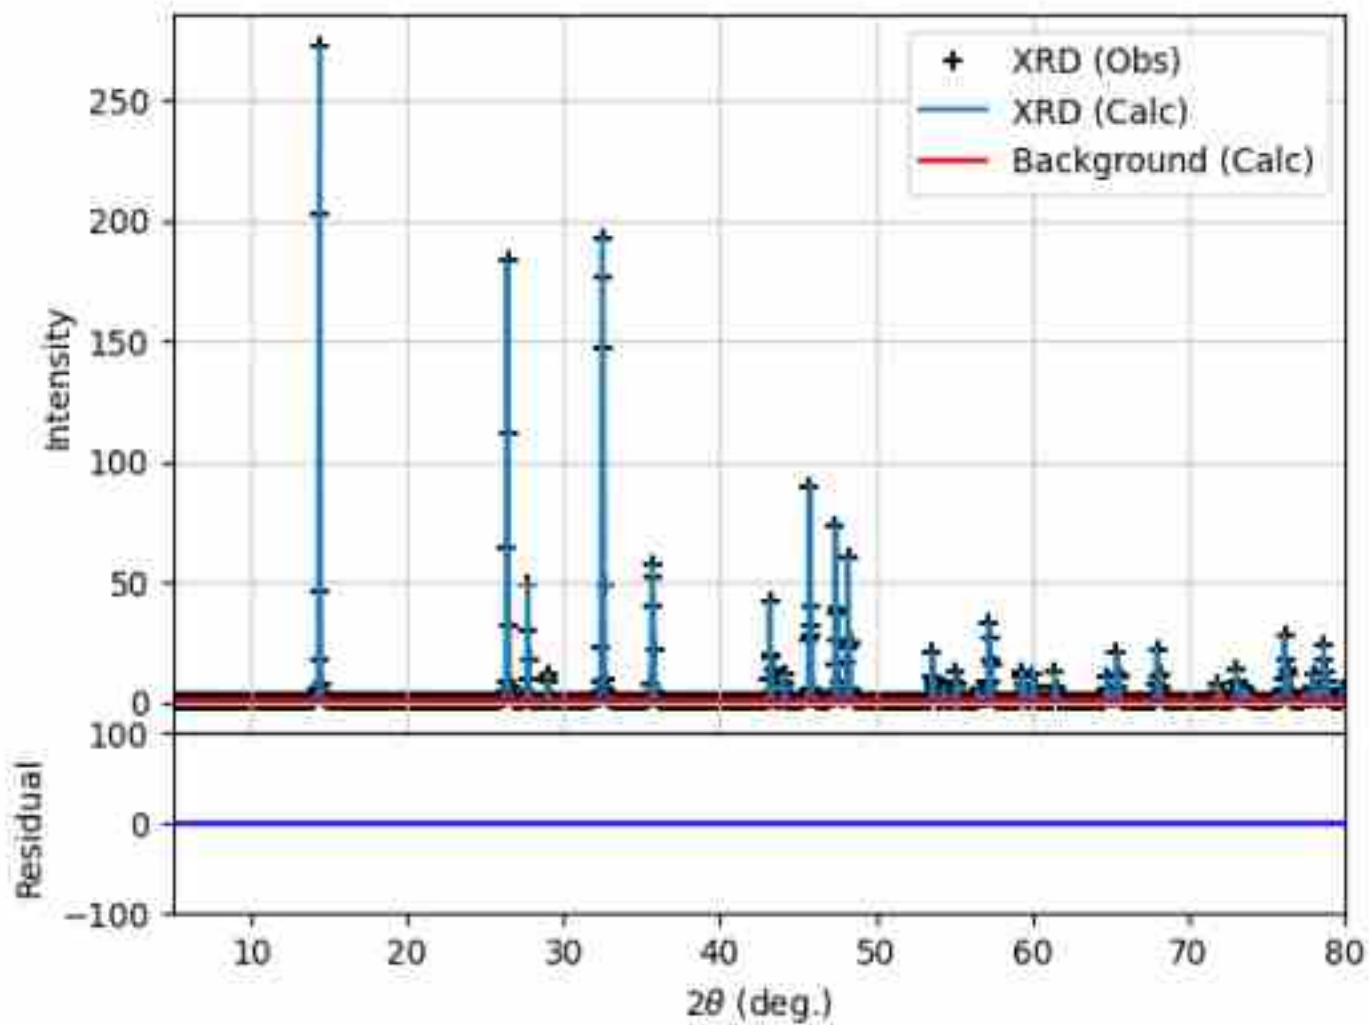

| RMSE before RR | Rwp    | RMSE after RR |
|----------------|--------|---------------|
| 0.007          | 0.0048 | 0.00206       |

# Li1Hf1Se2

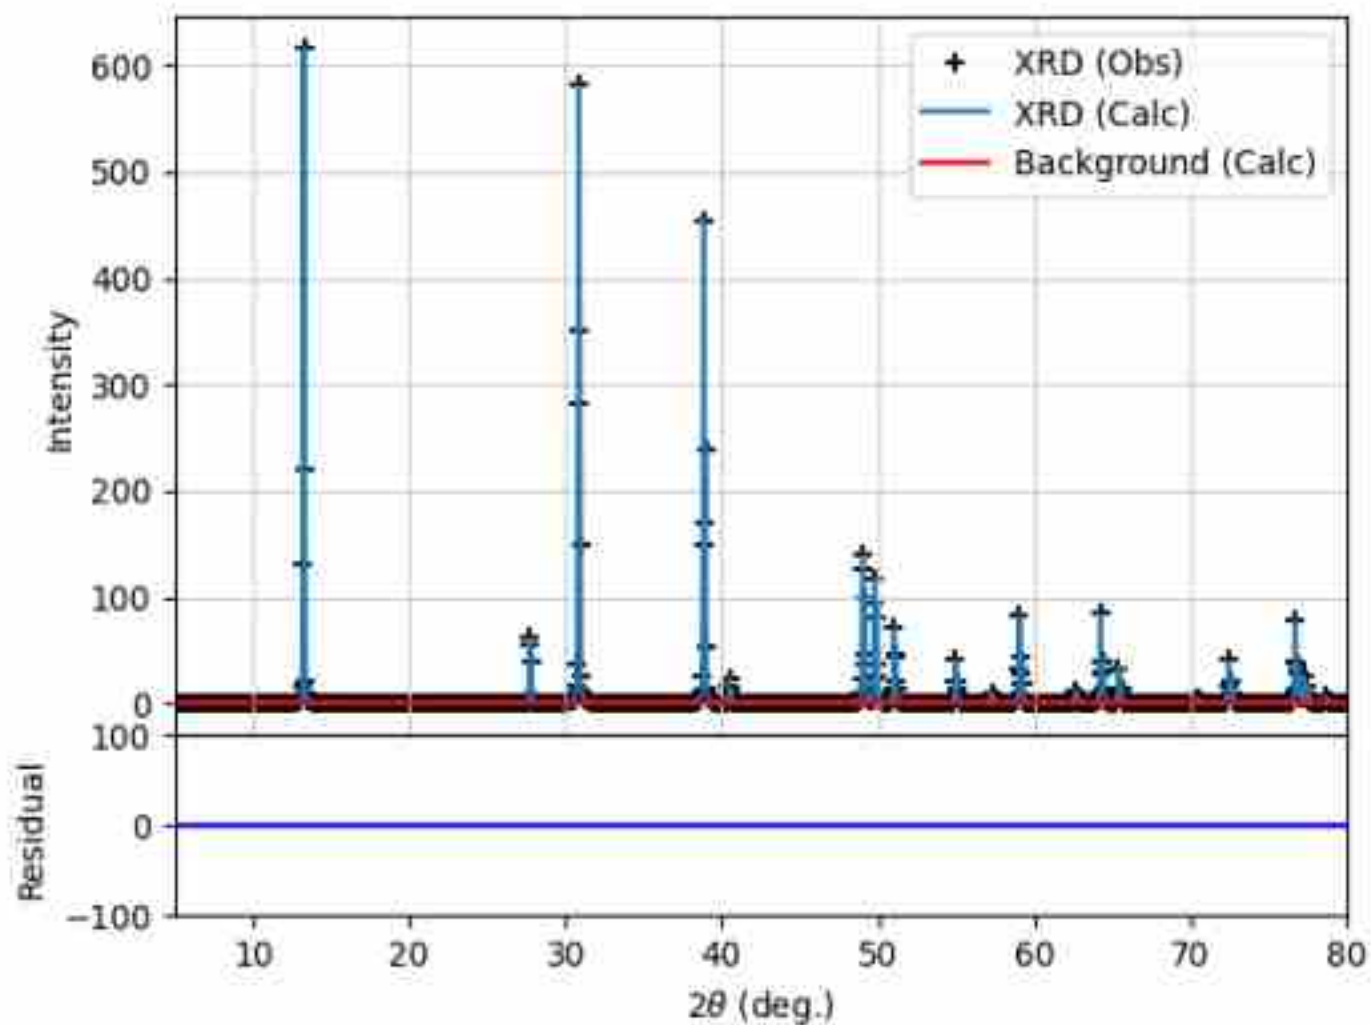

| RMSE before RR | Rwp     | RMSE after RR |
|----------------|---------|---------------|
| 0.007          | 0.00256 | 0.00101       |

# Li1Mg2

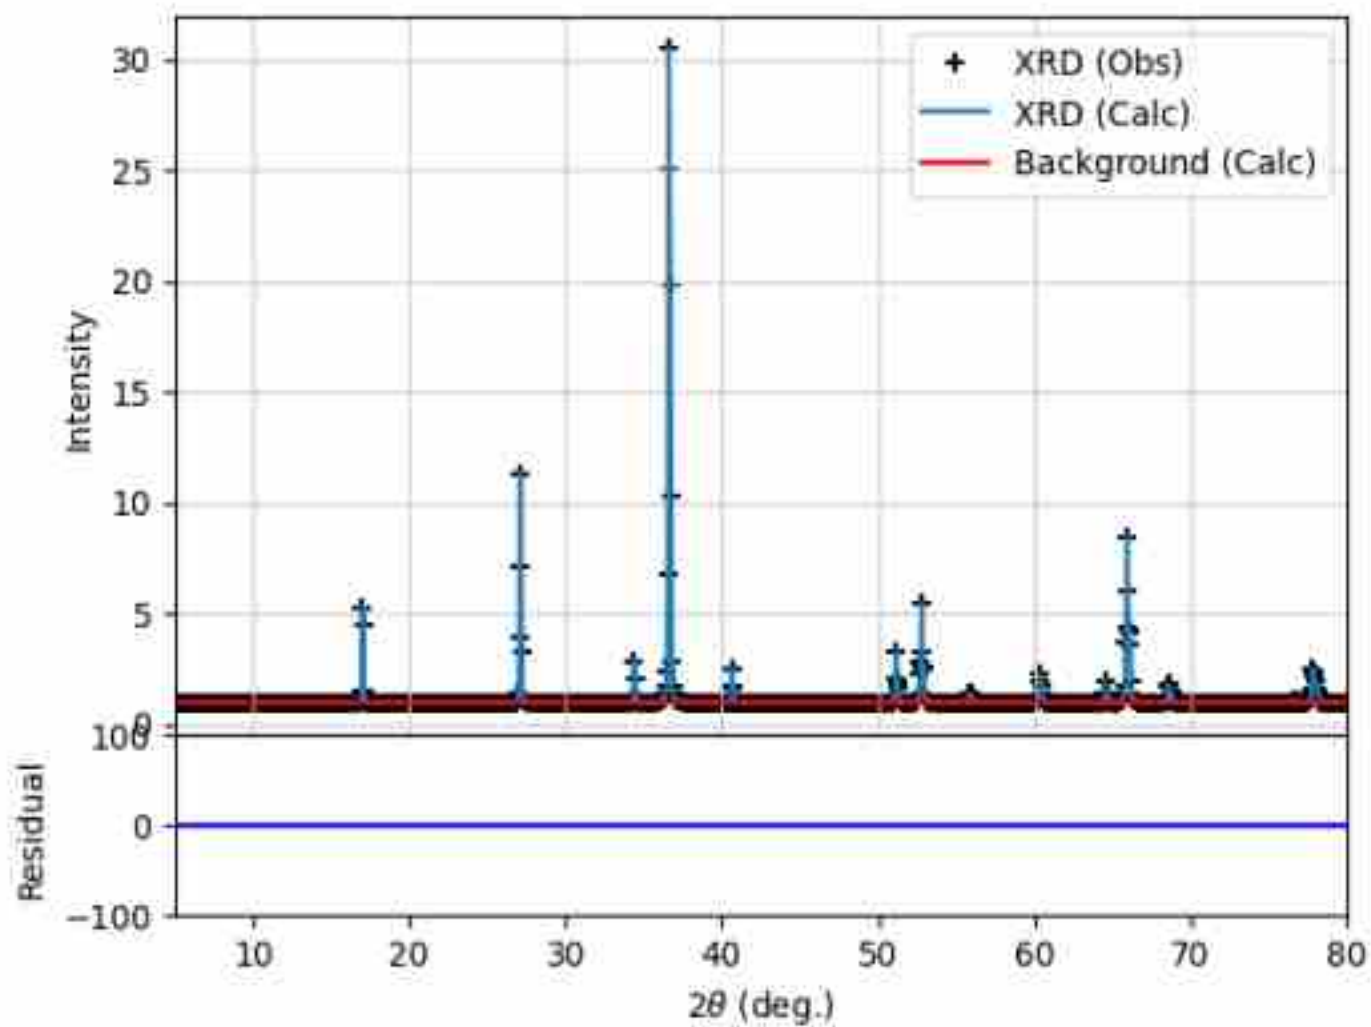

| RMSE before RR | Rwp     | RMSE after RR |
|----------------|---------|---------------|
| 0.007          | 0.00551 | 0.00136       |

# Li<sub>2</sub>Cu<sub>2</sub>O<sub>4</sub>

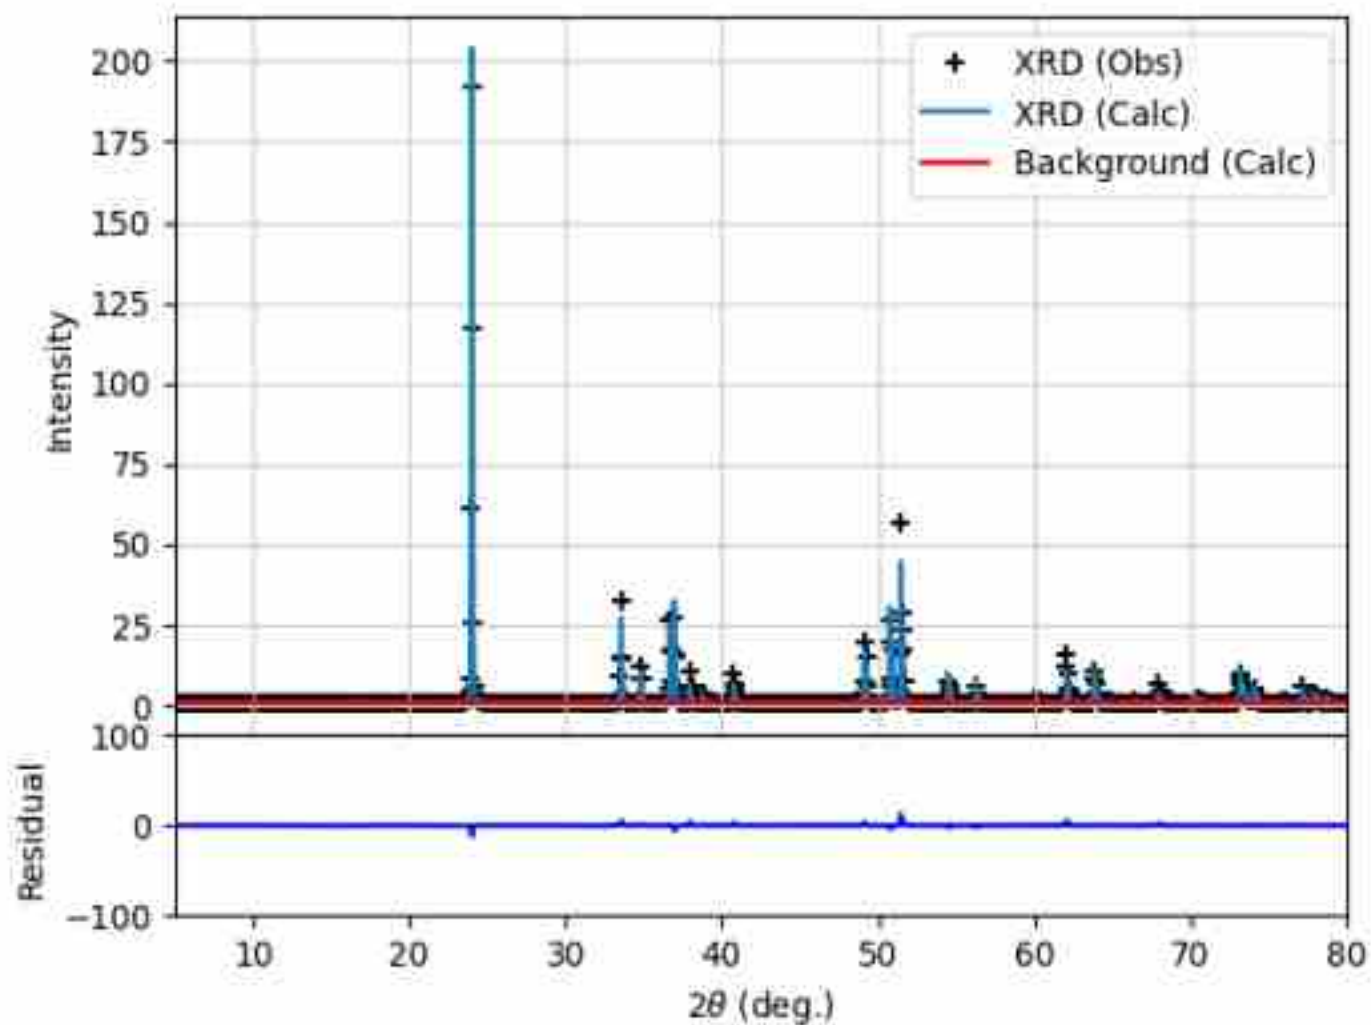

| RMSE before RR | Rwp      | RMSE after RR |
|----------------|----------|---------------|
| 0.07           | 11.70525 | None          |

# Li2Mg4

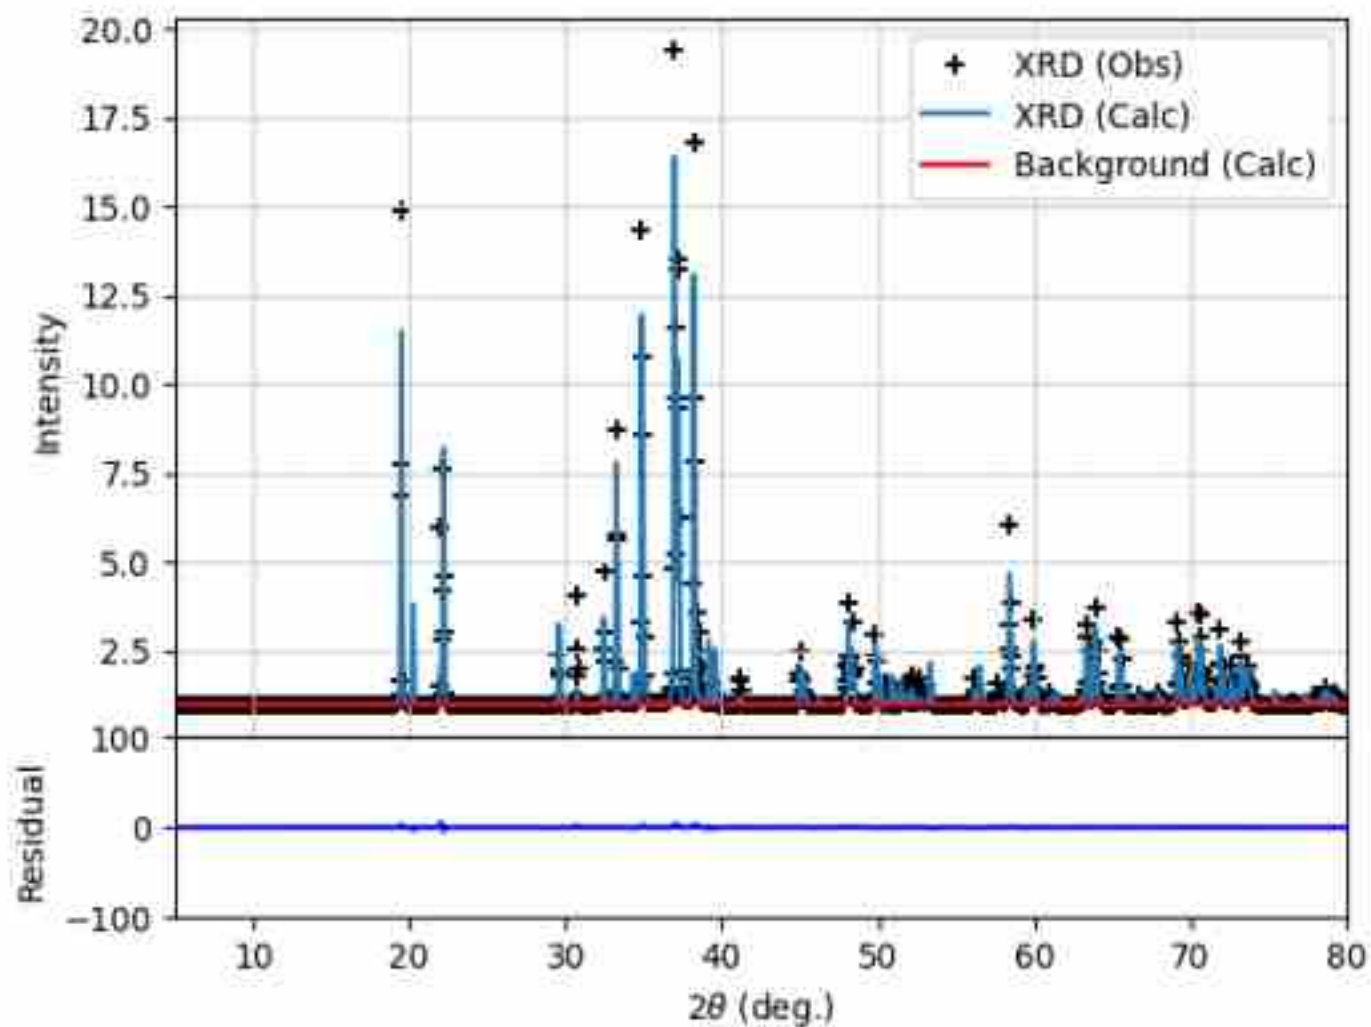

| RMSE before RR | Rwp      | RMSE after RR |
|----------------|----------|---------------|
| 0.007          | 17.87555 | 0.05207       |

# Li<sub>3</sub>Ce<sub>1</sub>Bi<sub>2</sub>

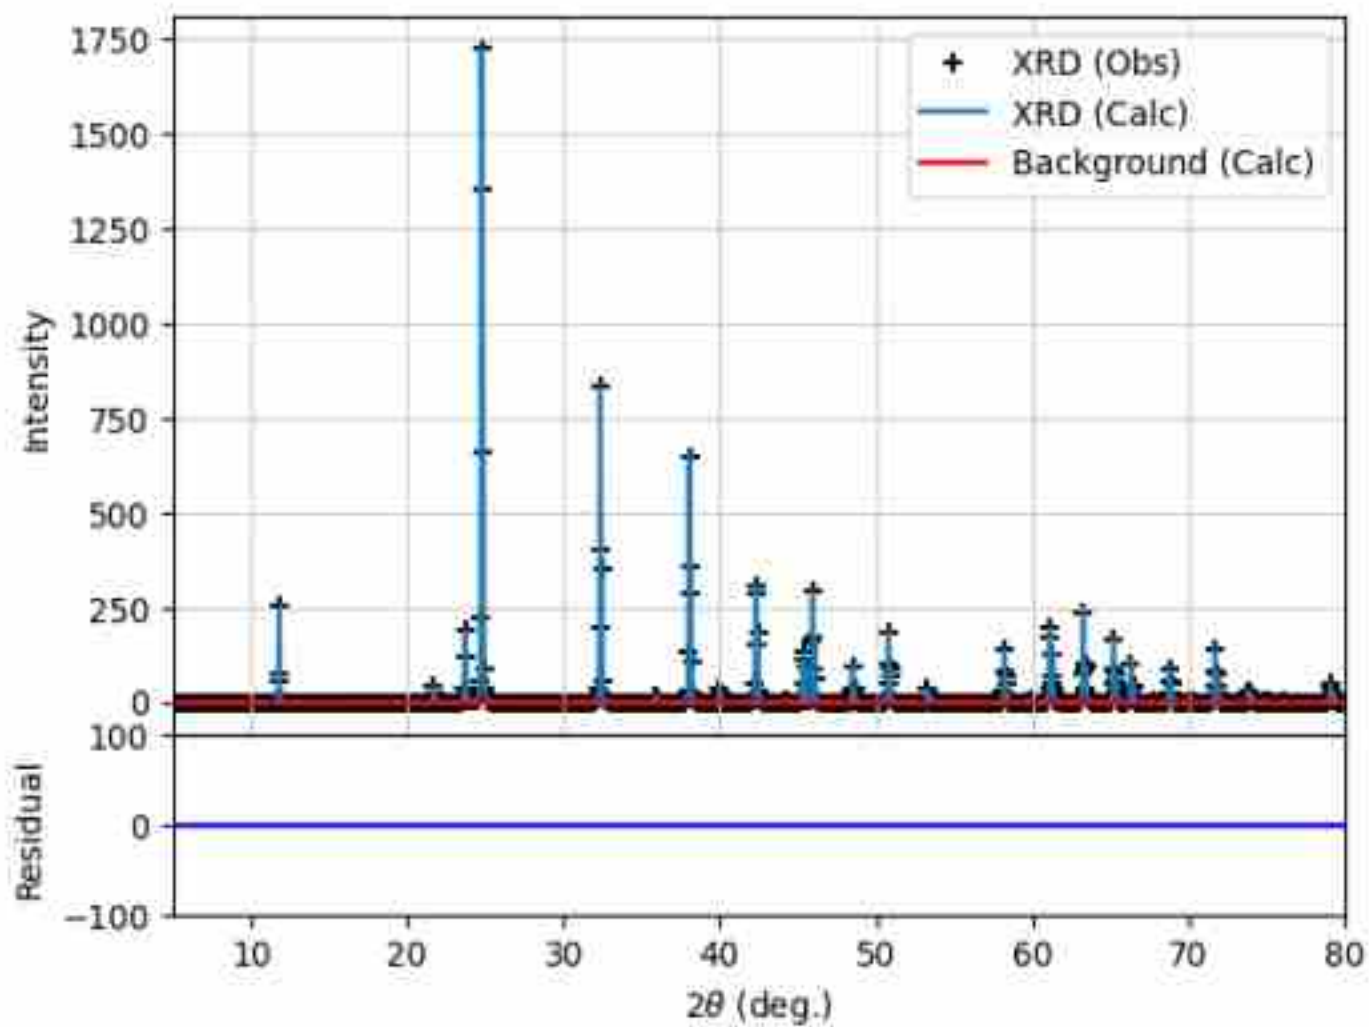

| RMSE before RR | Rwp     | RMSE after RR |
|----------------|---------|---------------|
| 0.007          | 0.00447 | 0.00521       |

# Li<sub>3</sub>C11O1

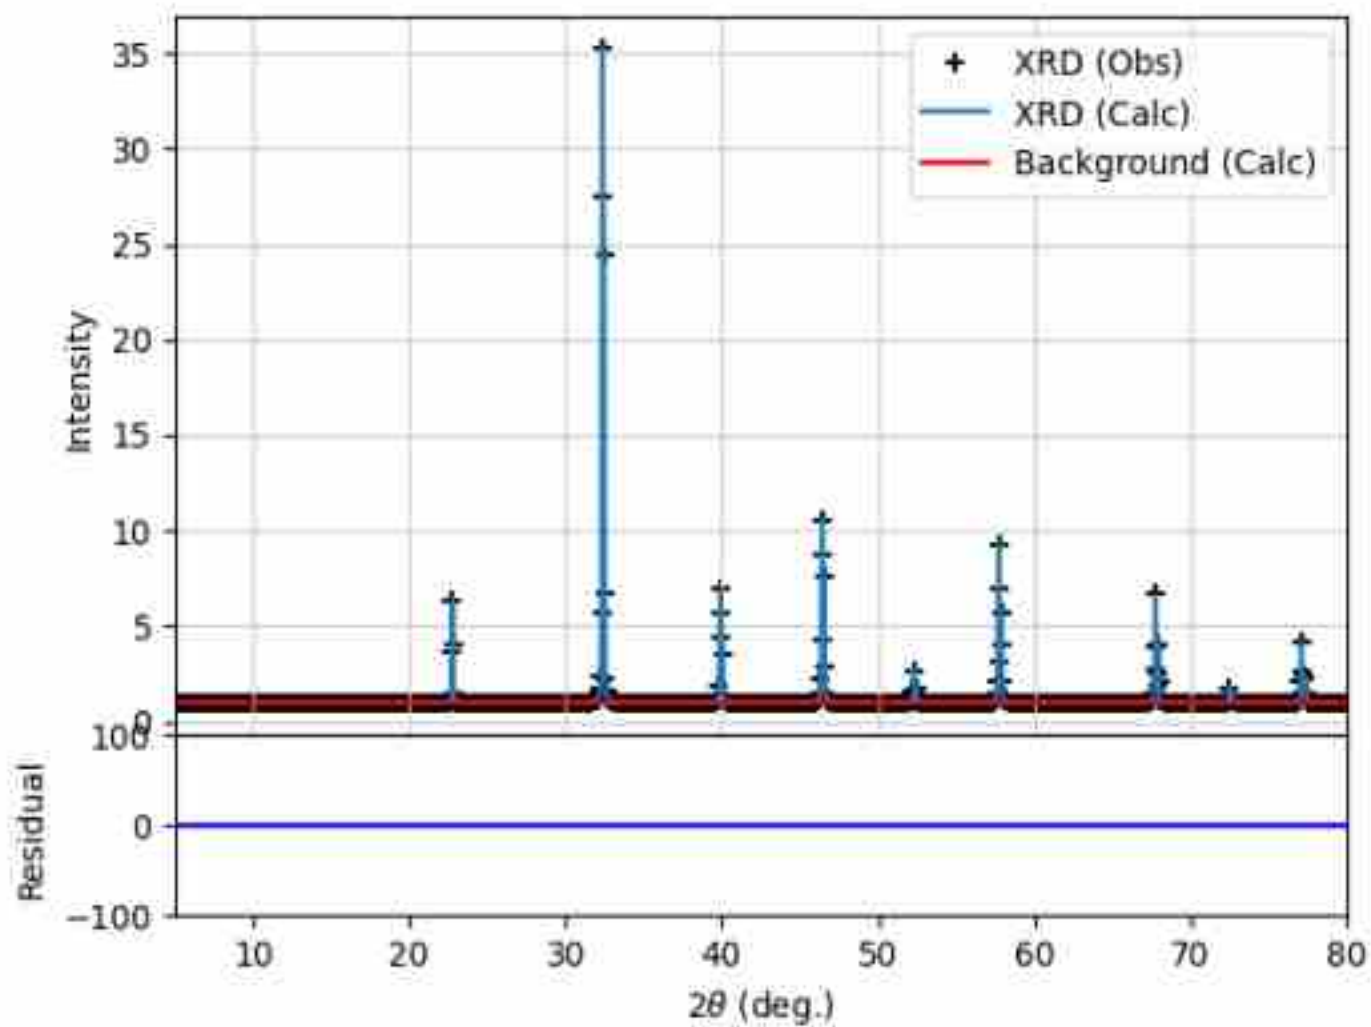

| RMSE before RR | Rwp     | RMSE after RR |
|----------------|---------|---------------|
| 0.007          | 0.08927 | 0.02211       |



# Lu1Ag1Te2

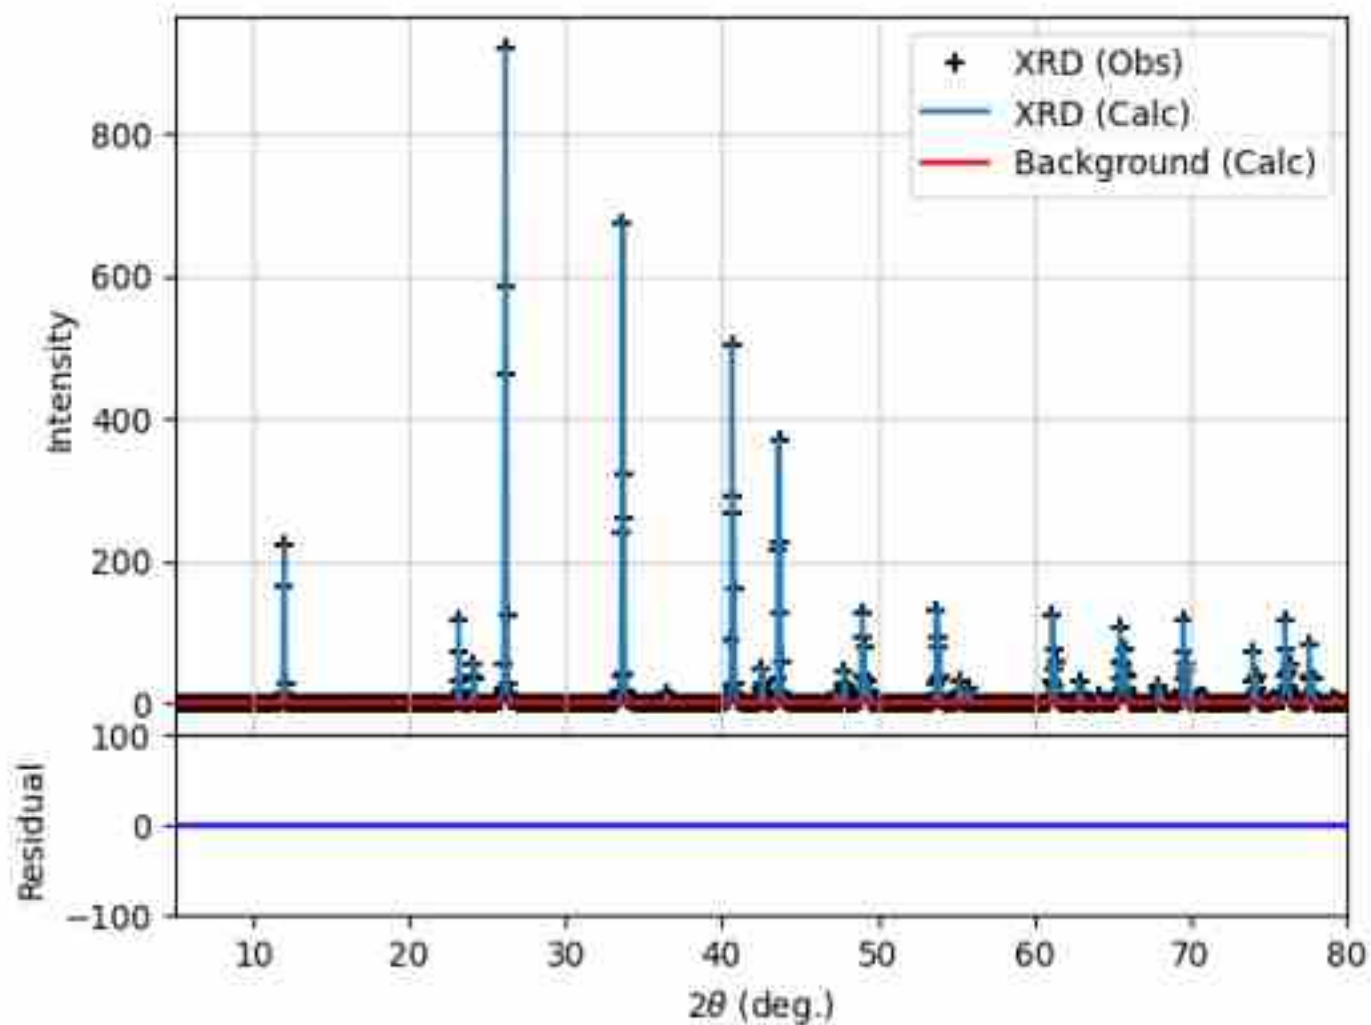

| RMSE before RR | Rwp     | RMSE after RR |
|----------------|---------|---------------|
| 0.007          | 0.00303 | 0.00048       |

# Lu1Cd1Ni4

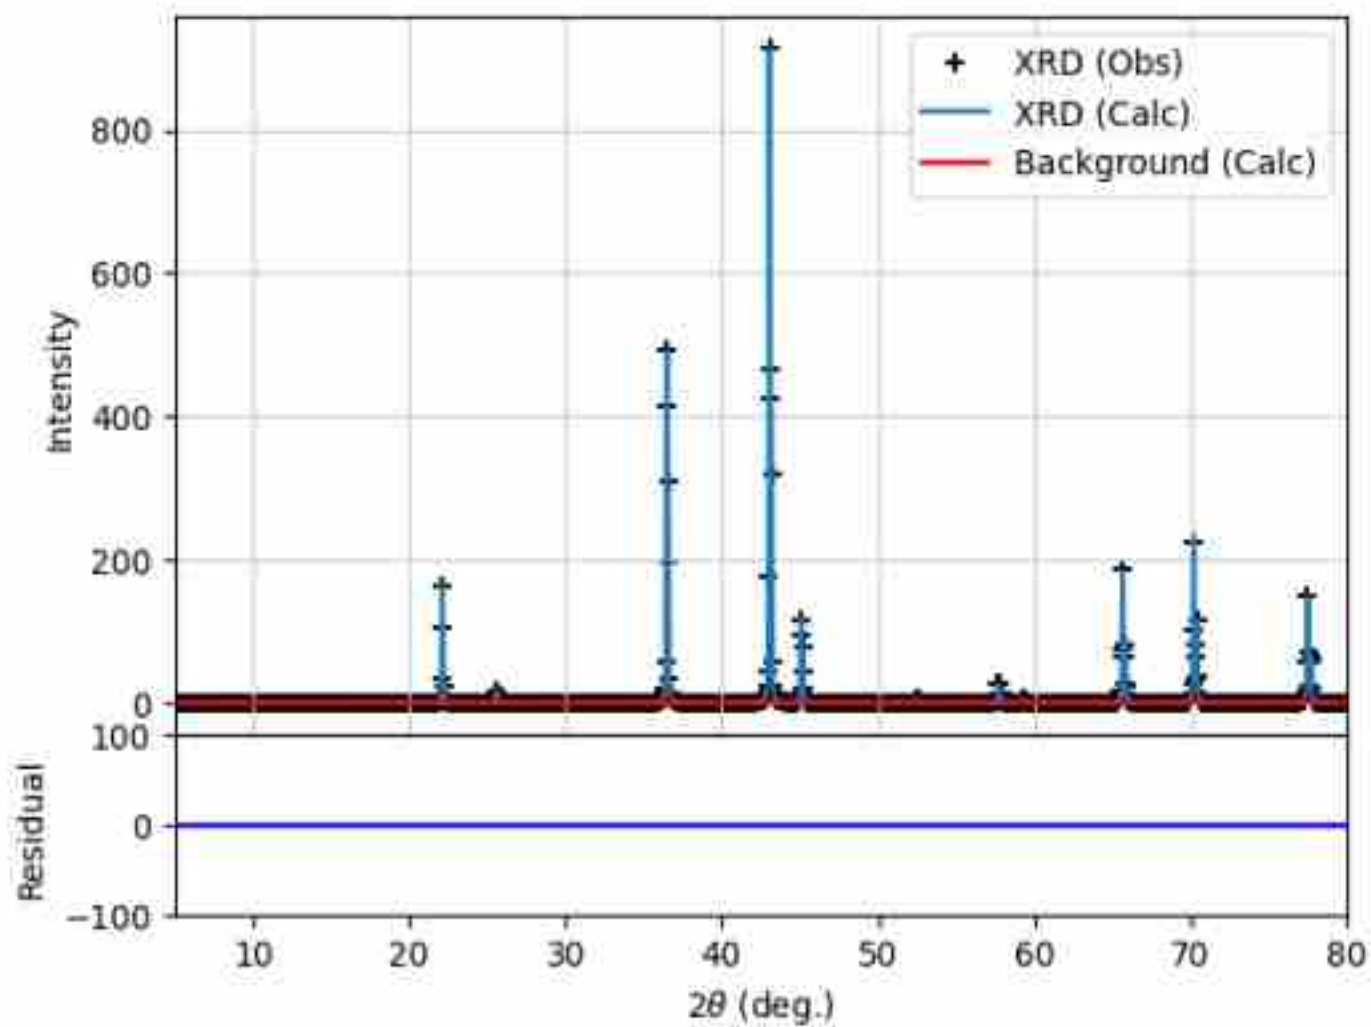

| RMSE before RR | Rwp     | RMSE after RR |
|----------------|---------|---------------|
| 0.007          | 0.00934 | 0.00137       |

# Lu<sub>2</sub>Ga<sub>2</sub>Au<sub>2</sub>

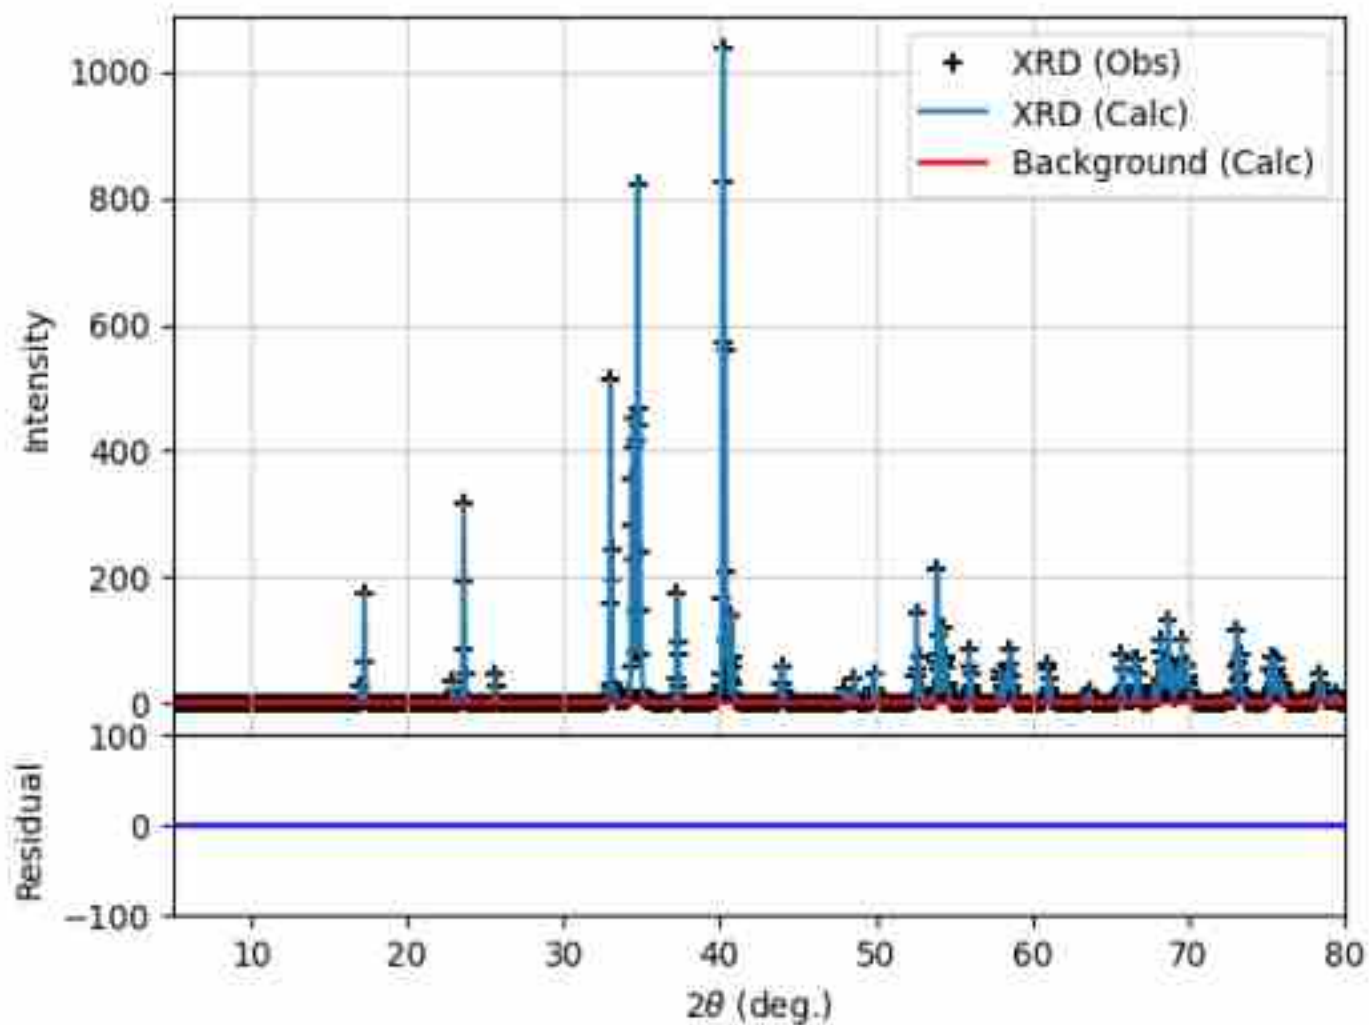

| RMSE before RR | Rwp     | RMSE after RR |
|----------------|---------|---------------|
| 0.007          | 0.00496 | 0.00034       |

# Mg1Sc2Ru1

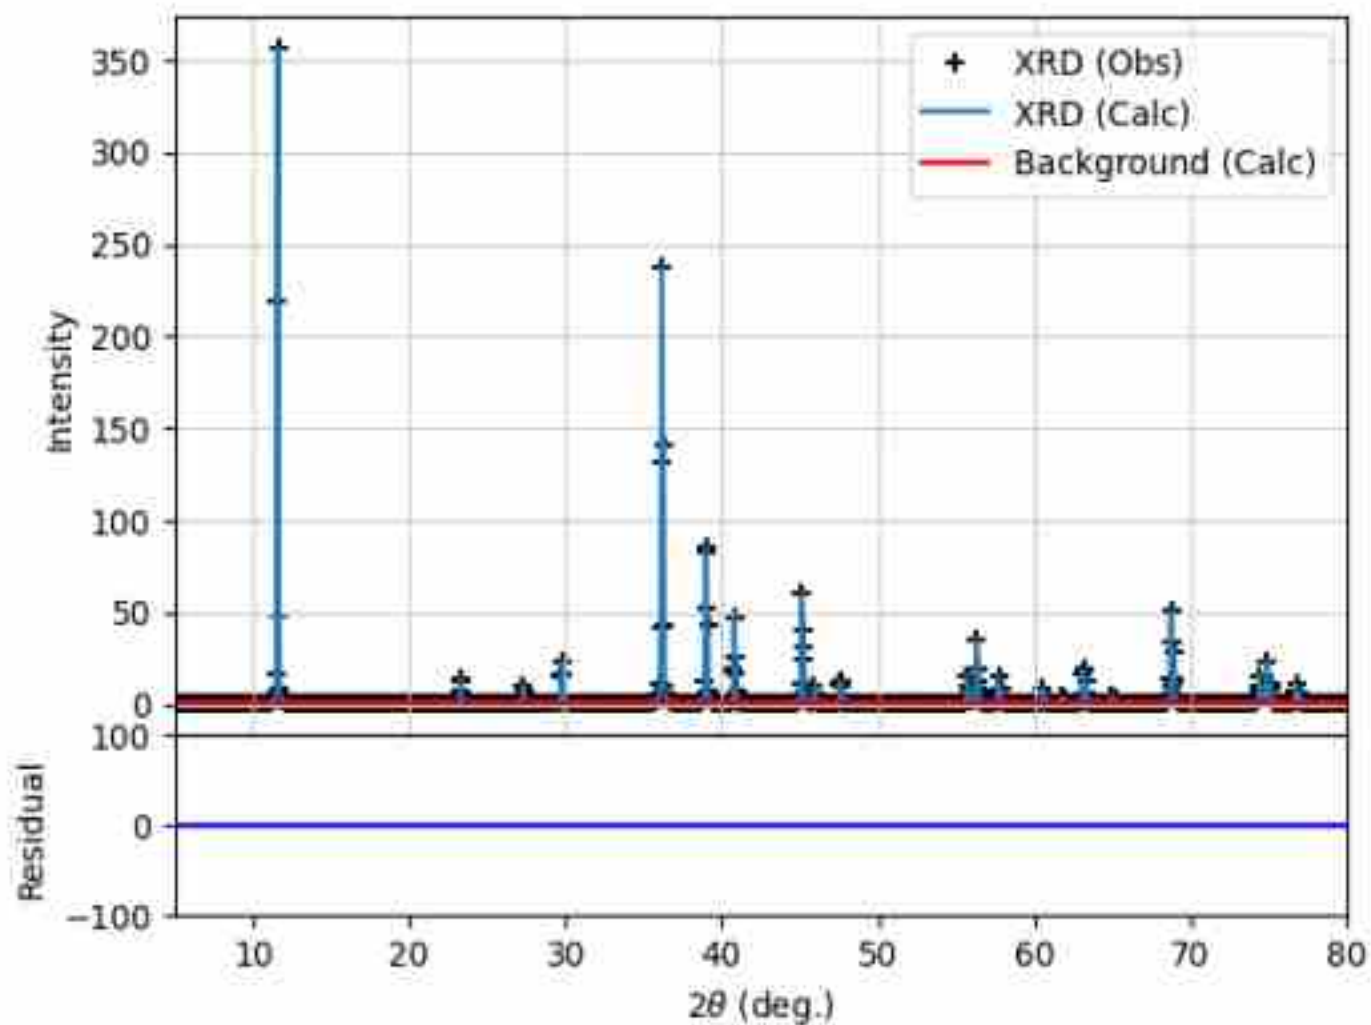

| RMSE before RR | Rwp     | RMSE after RR |
|----------------|---------|---------------|
| 0.007          | 0.00322 | 0.0005        |

# Mg<sub>2</sub>Sn<sub>2</sub>

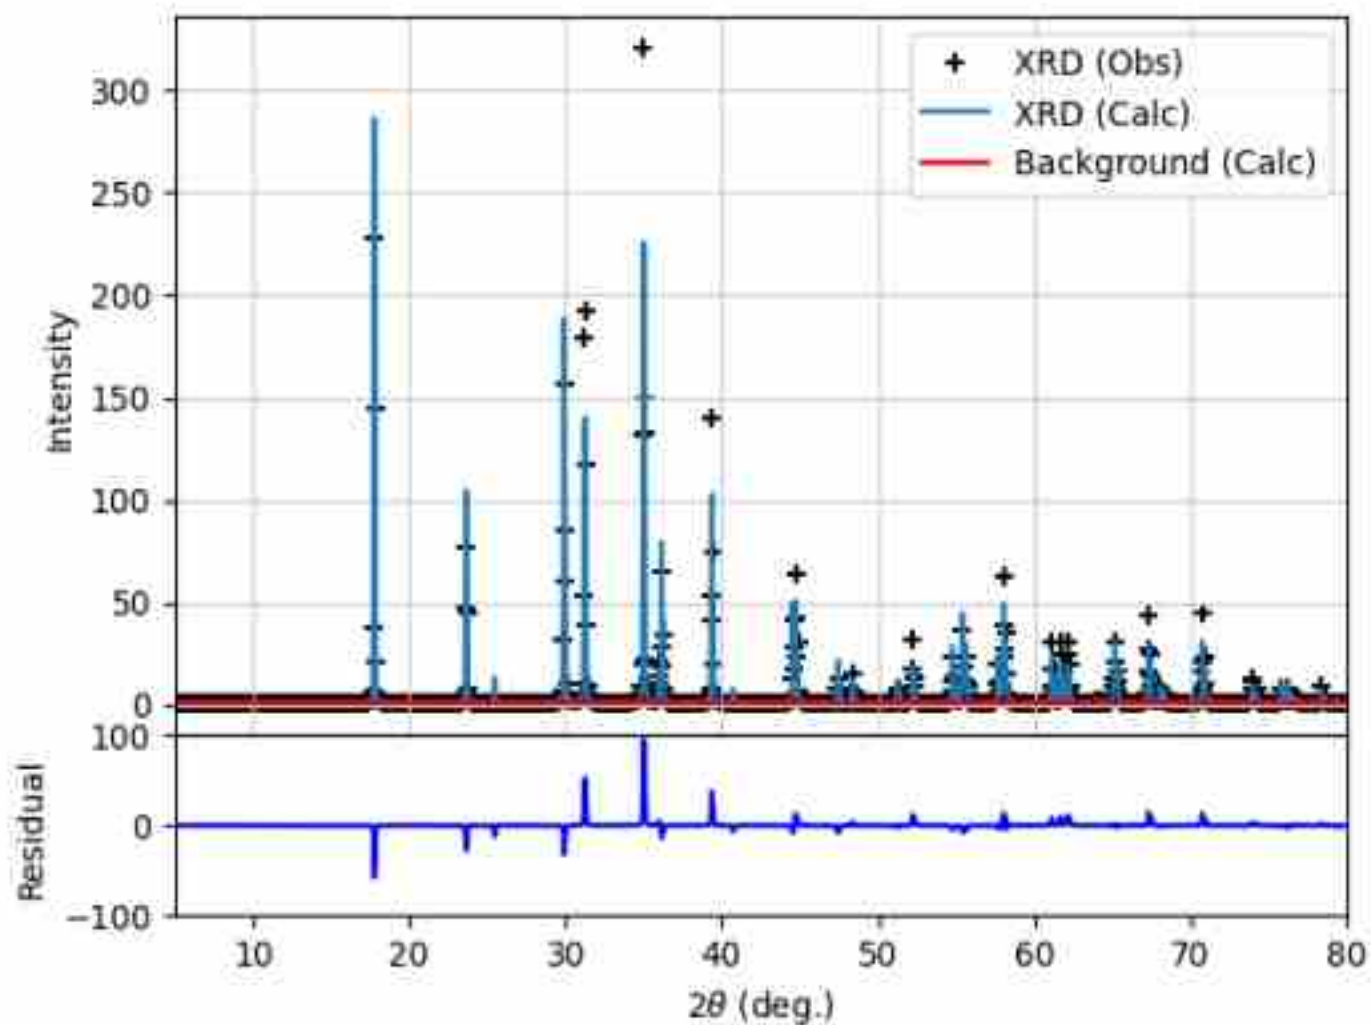

| RMSE before RR | Rwp      | RMSE after RR |
|----------------|----------|---------------|
| 0.007          | 32.38965 | 0.40118       |

# Mg<sub>4</sub>Cd<sub>1</sub>Ag<sub>5</sub>

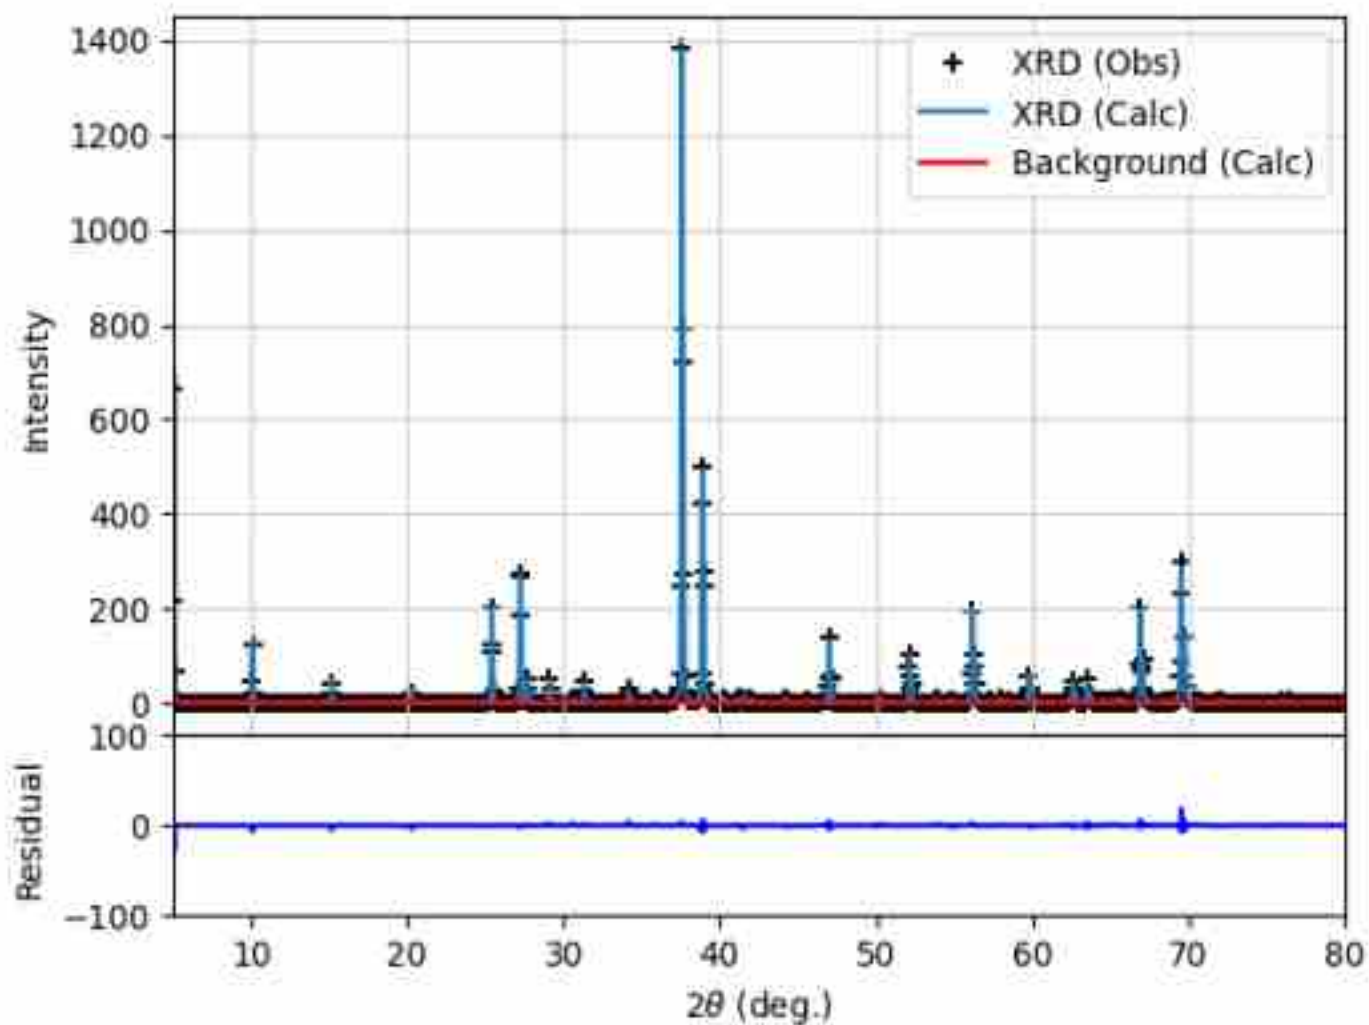

| RMSE before RR | Rwp     | RMSE after RR |
|----------------|---------|---------------|
| 0.007          | 5.05638 | 0.27238       |

# Mg<sub>4</sub>Zn<sub>2</sub>

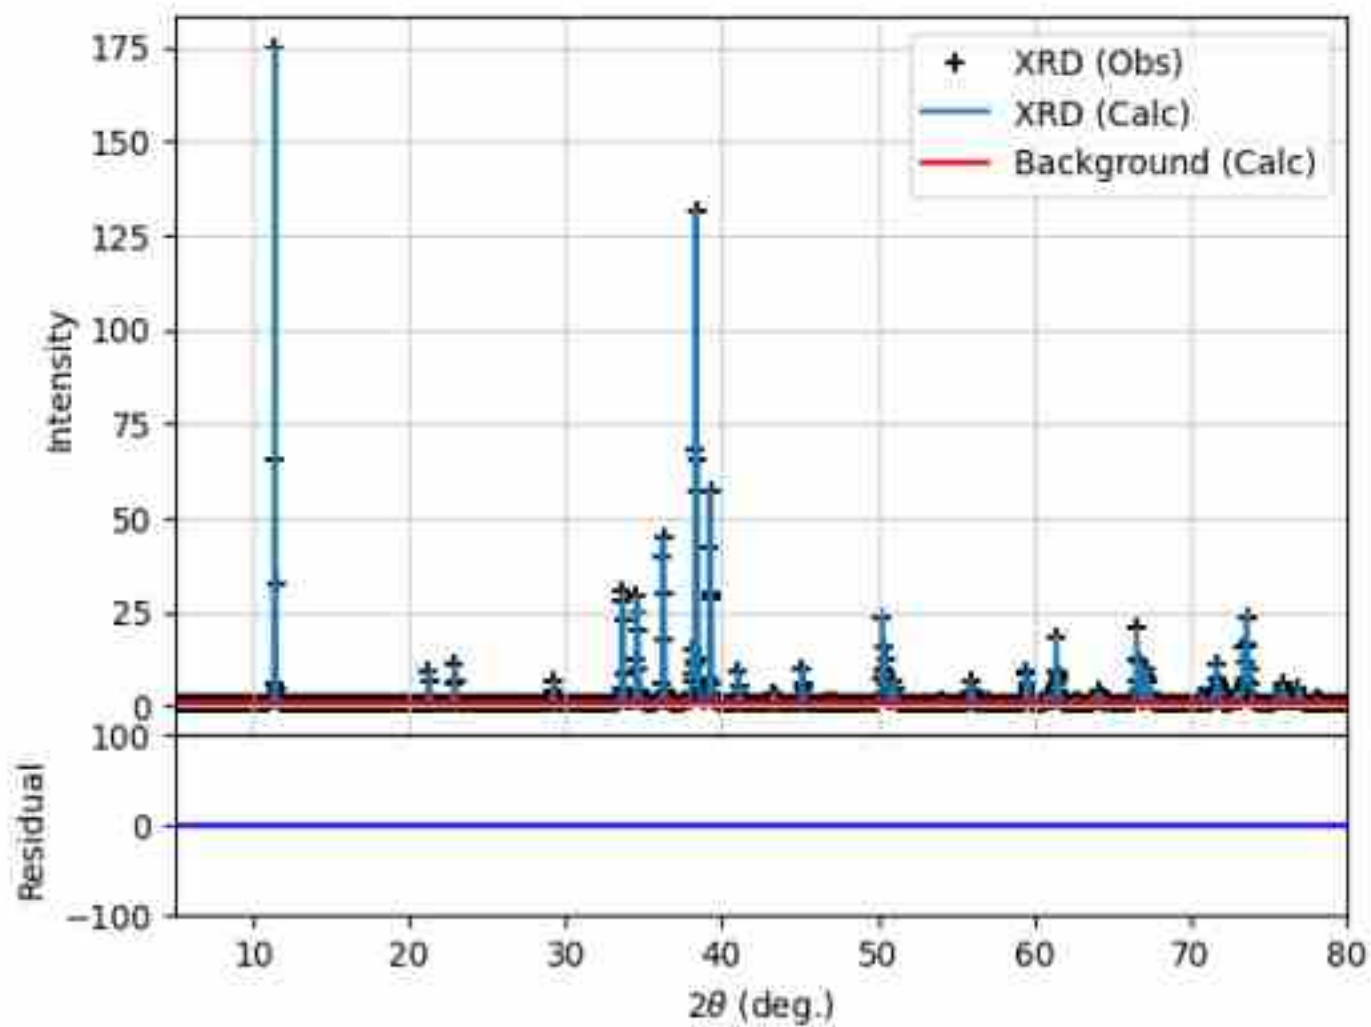

| RMSE before RR | Rwp     | RMSE after RR |
|----------------|---------|---------------|
| 0.007          | 0.00265 | 0.00056       |

# Mn1Ga1Ir2

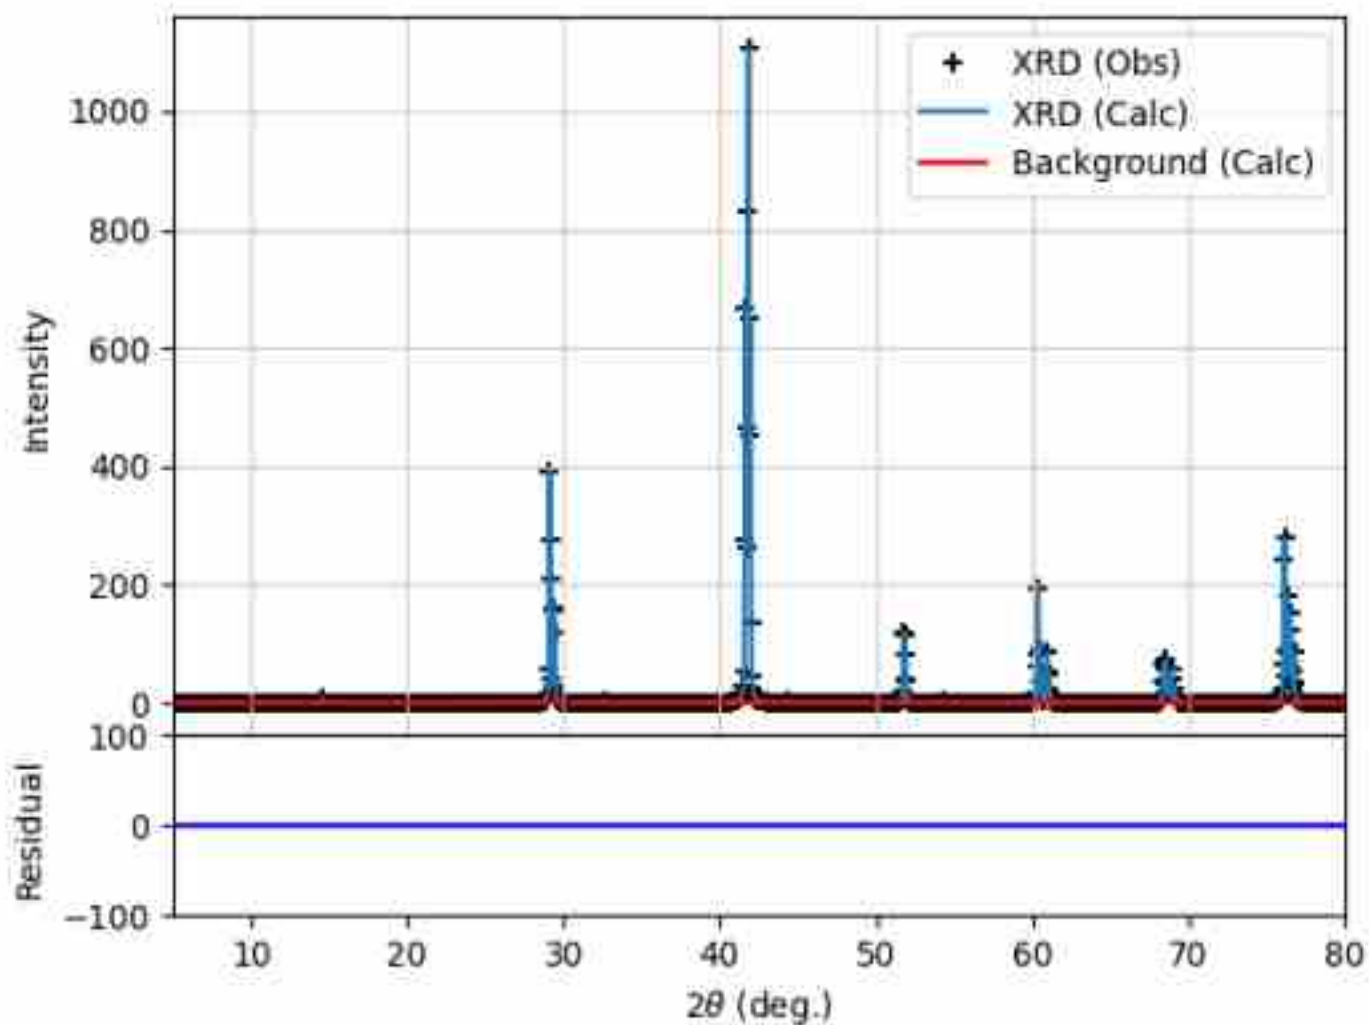

| RMSE before RR | Rwp    | RMSE after RR |
|----------------|--------|---------------|
| 0.007          | 0.0049 | 0.0003        |



# Mn1Ni1Te2

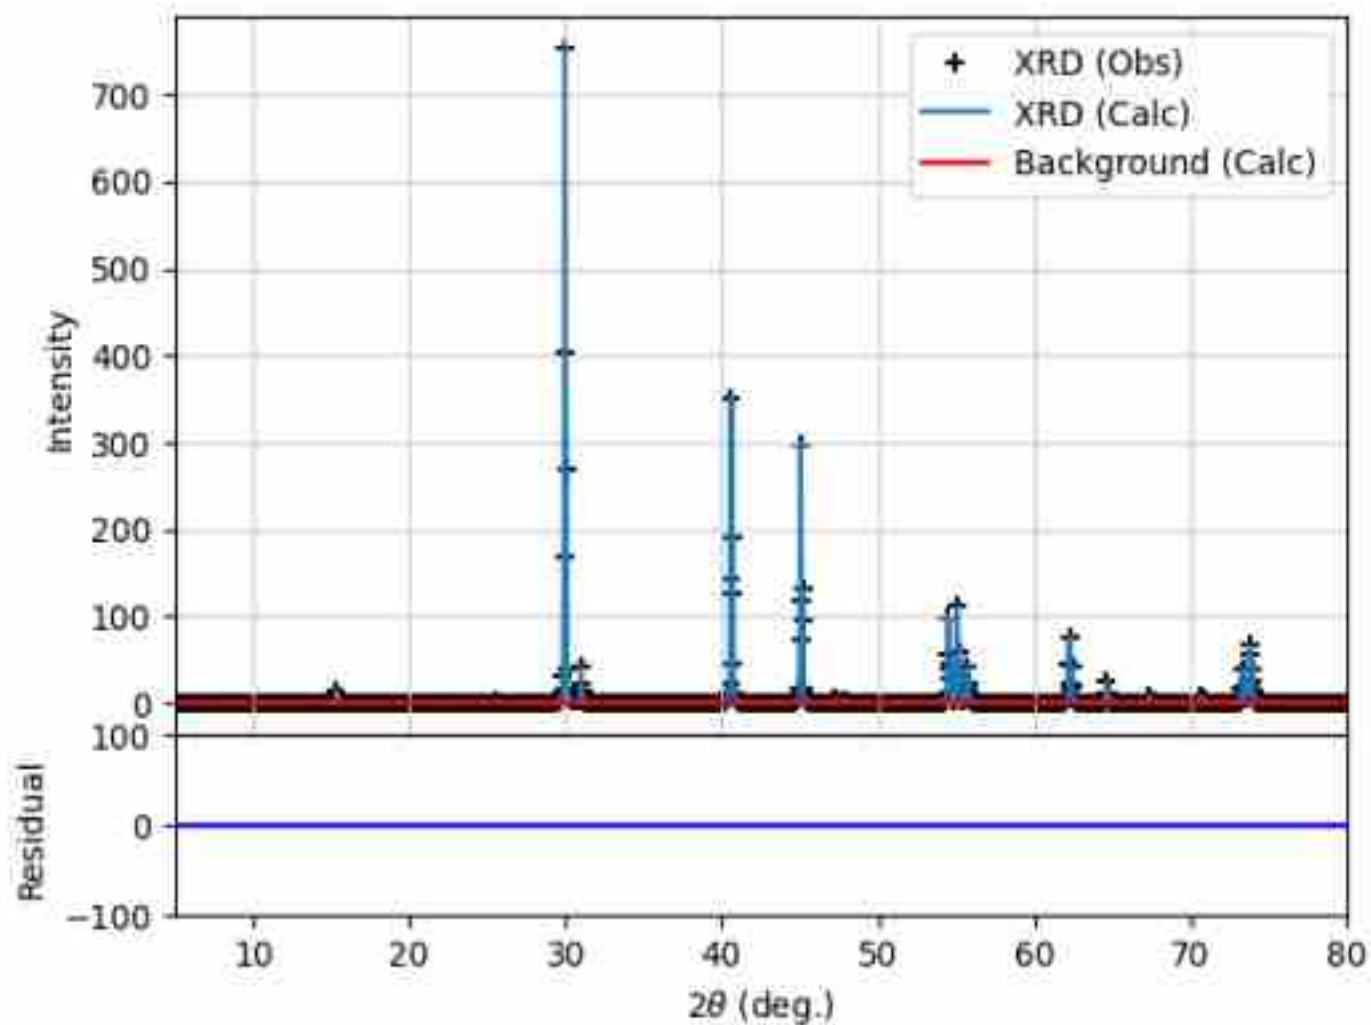

| RMSE before RR | Rwp     | RMSE after RR |
|----------------|---------|---------------|
| 0.007          | 0.00307 | 0.0005        |

# Mo1Se2

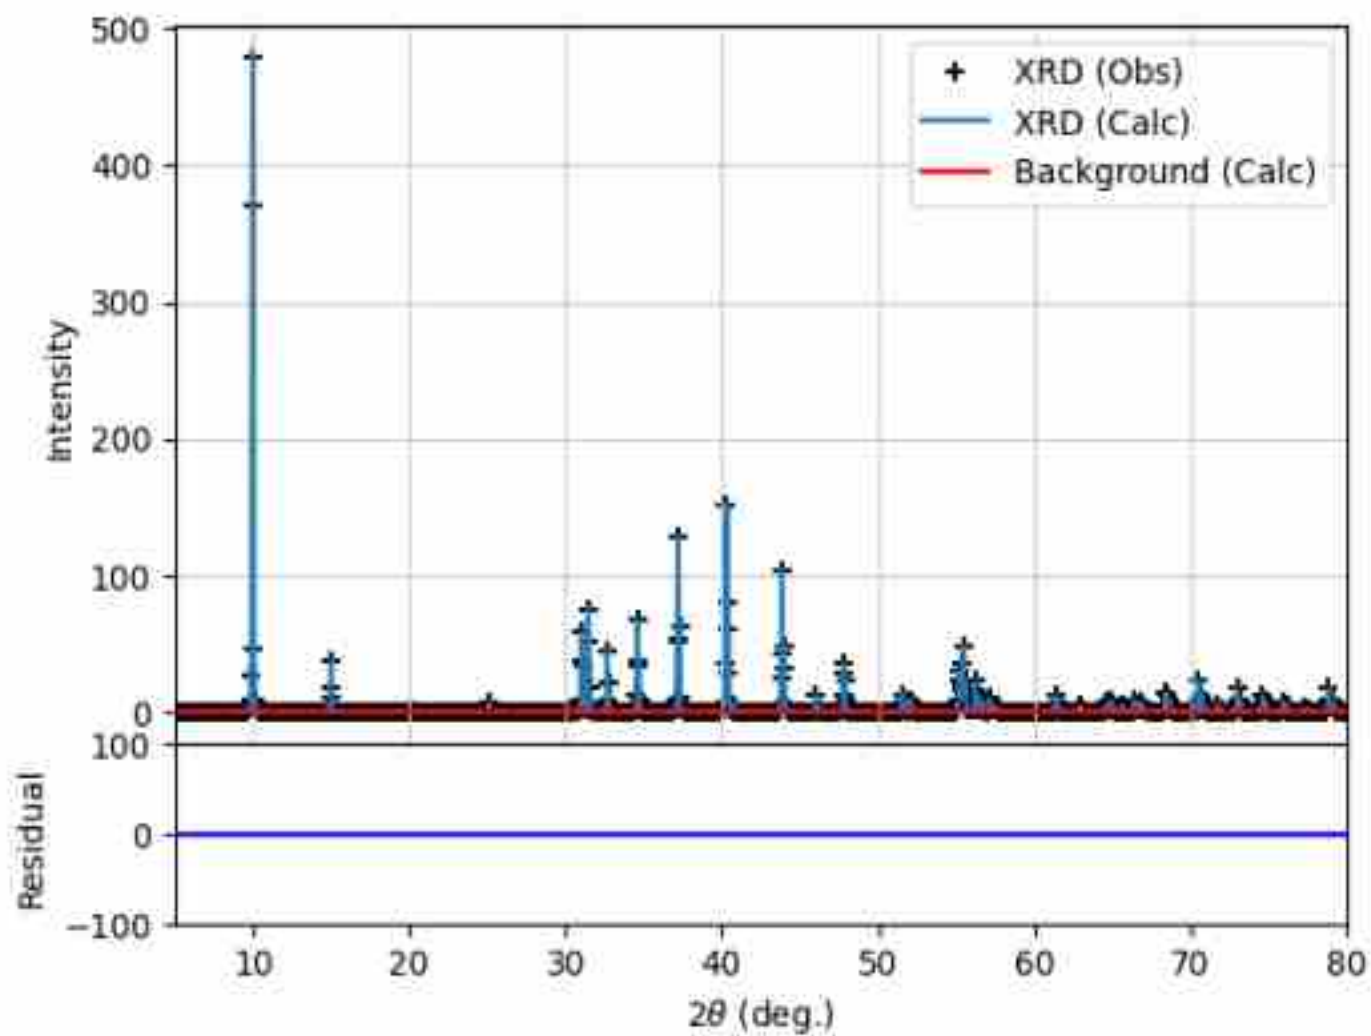

| RMSE before RR | Rwp     | RMSE after RR |
|----------------|---------|---------------|
| 0.007          | 0.00231 | 0.00019       |

# Mo6Ir1Ru1

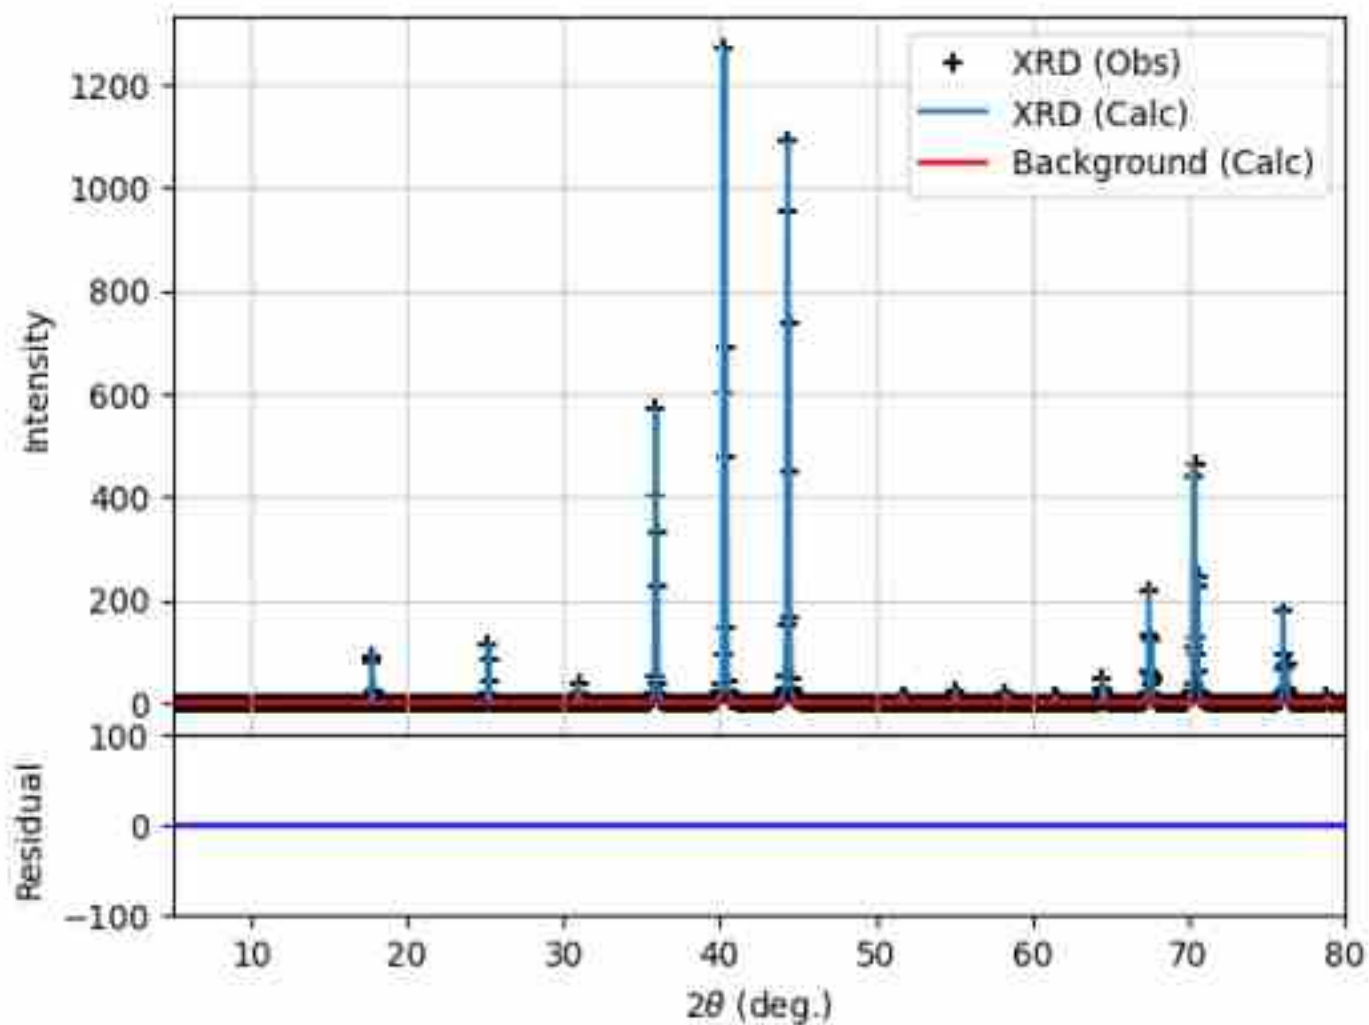

| RMSE before RR | Rwp     | RMSE after RR |
|----------------|---------|---------------|
| 0.007          | 0.00654 | 0.00076       |

# Na1Pr1Hf2O6

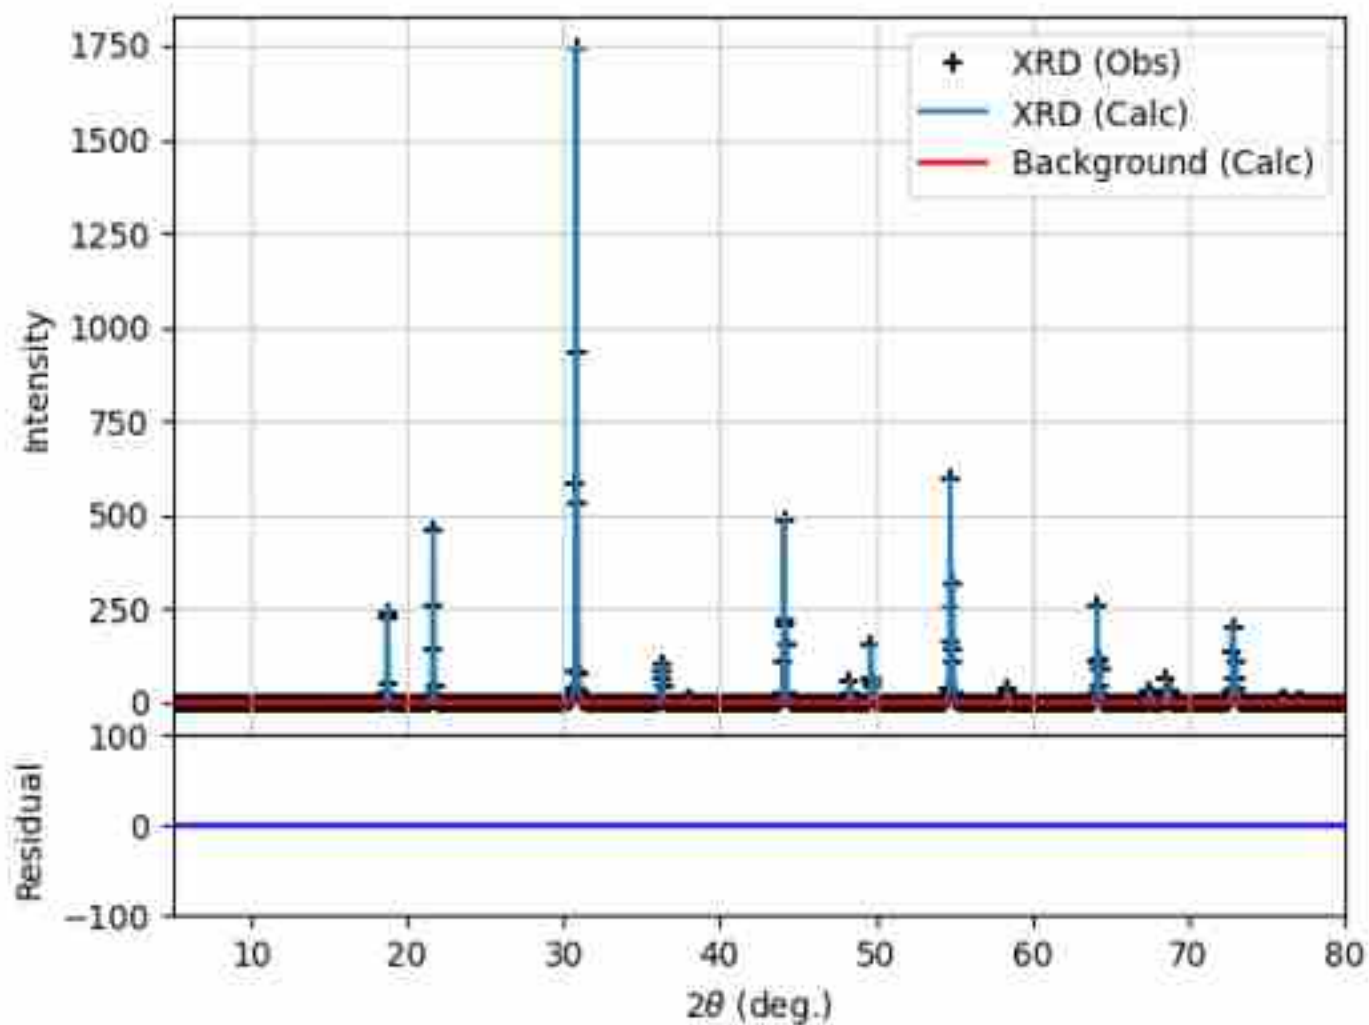

| RMSE before RR | Rwp     | RMSE after RR |
|----------------|---------|---------------|
| 0.007          | 0.00329 | 0.00711       |

Na1Sr1Dy1W1O6

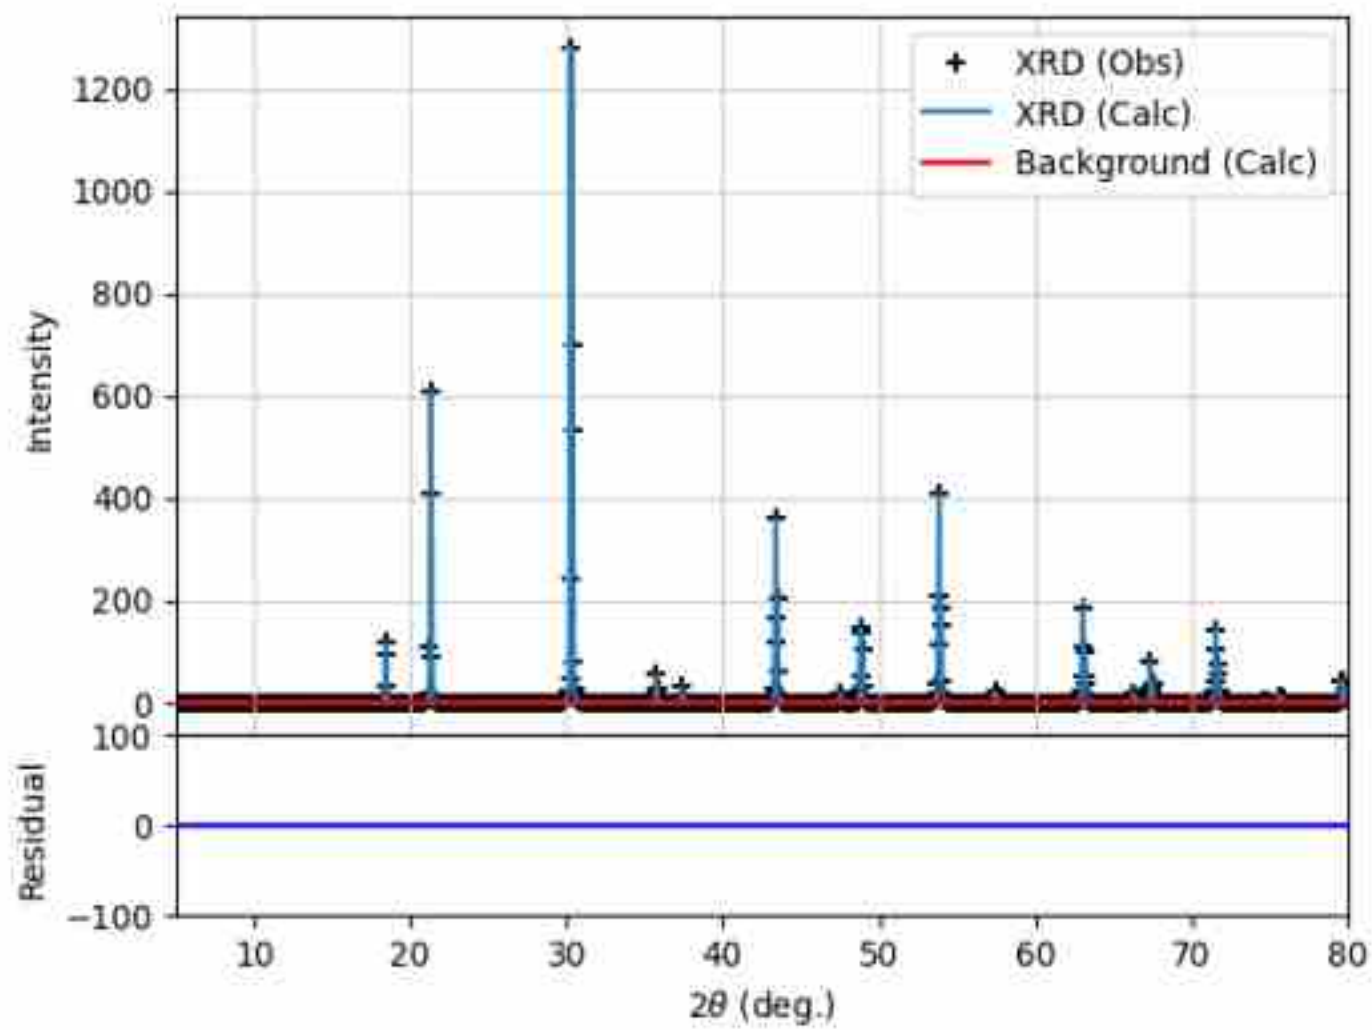

| RMSE before RR | Rwp     | RMSE after RR |
|----------------|---------|---------------|
| 0.007          | 0.00487 | 0.0025        |

# Na<sub>2</sub>LiRhF<sub>6</sub>

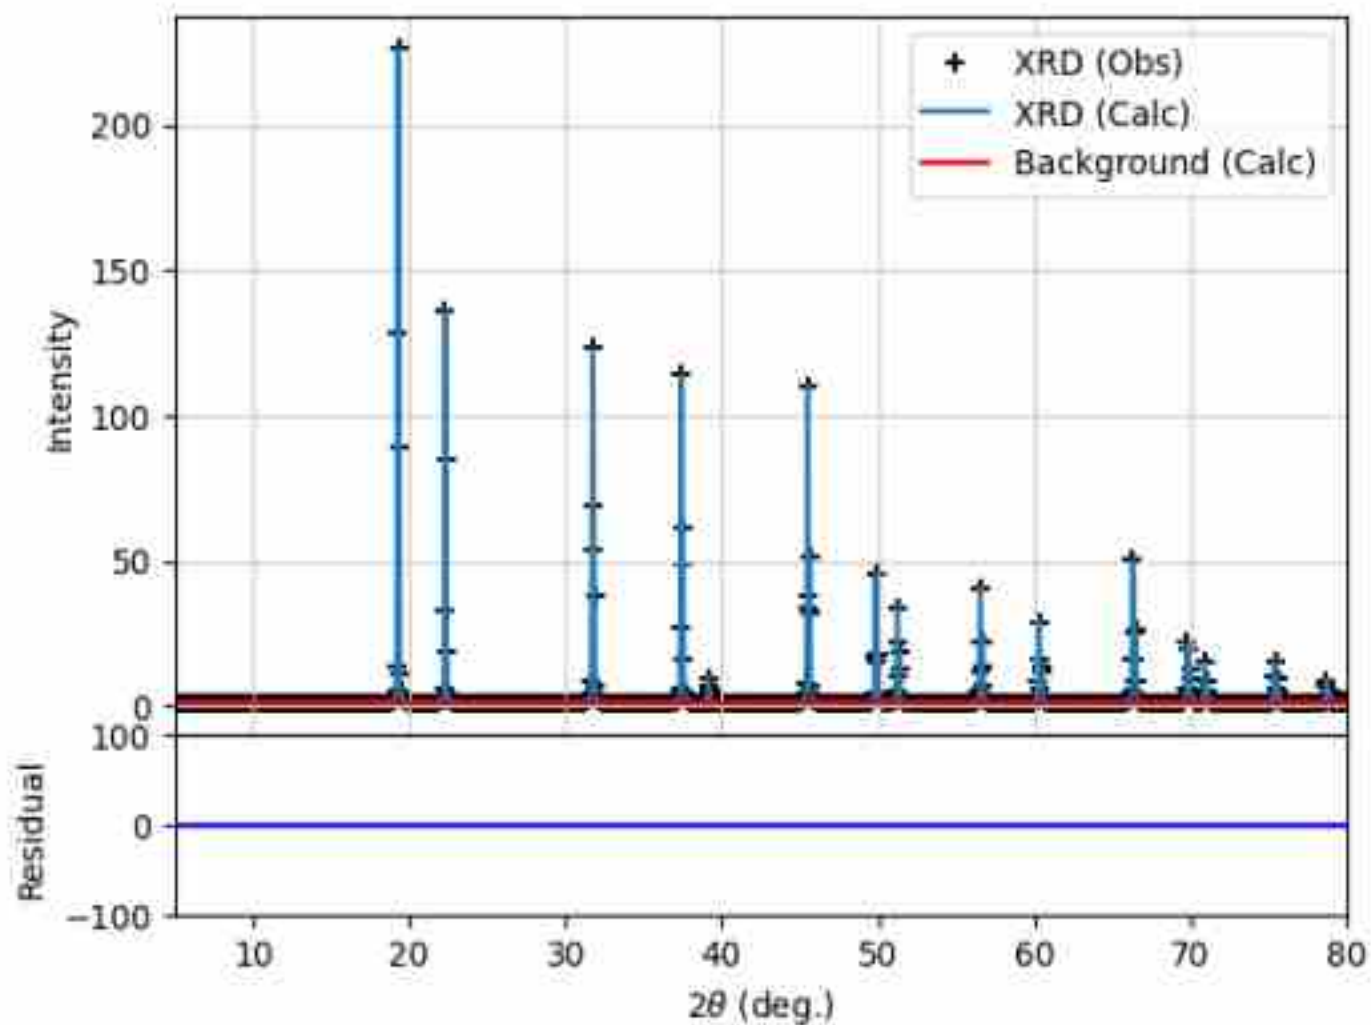

| RMSE before RR | Rwp     | RMSE after RR |
|----------------|---------|---------------|
| 0.007          | 0.01186 | 0.00451       |

# Na<sub>2</sub>Zn<sub>2</sub>As<sub>2</sub>

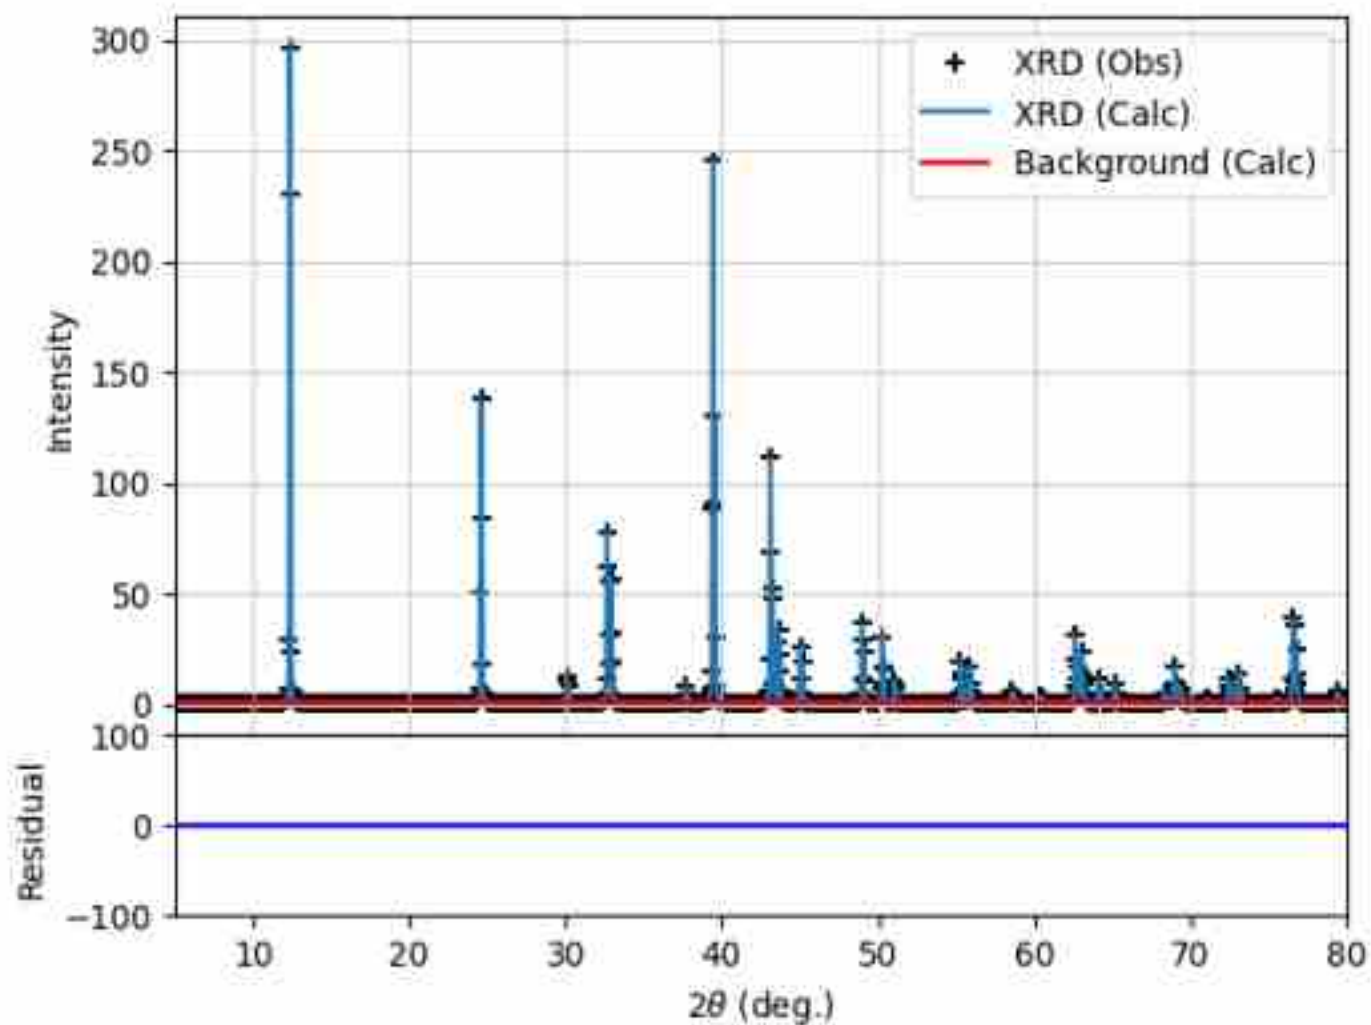

| RMSE before RR | Rwp     | RMSE after RR |
|----------------|---------|---------------|
| 0.007          | 0.00398 | 0.00127       |

# Na<sub>2</sub>Zn<sub>2</sub>Sb<sub>2</sub>

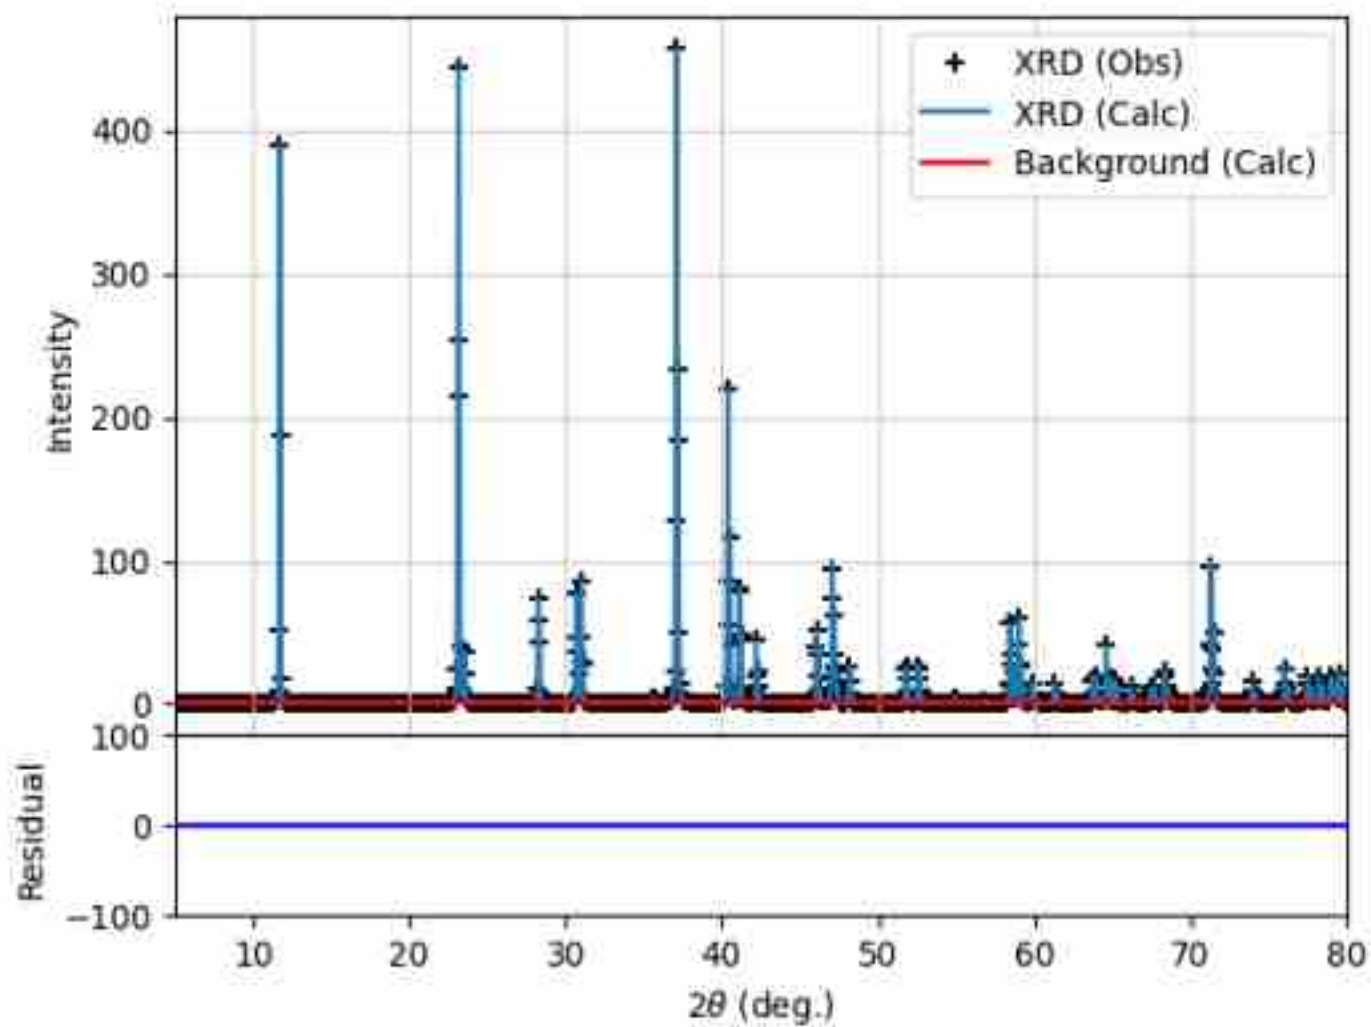

| RMSE before RR | Rwp     | RMSE after RR |
|----------------|---------|---------------|
| 0.007          | 0.00387 | 0.00053       |



# Nb1Mo1W1

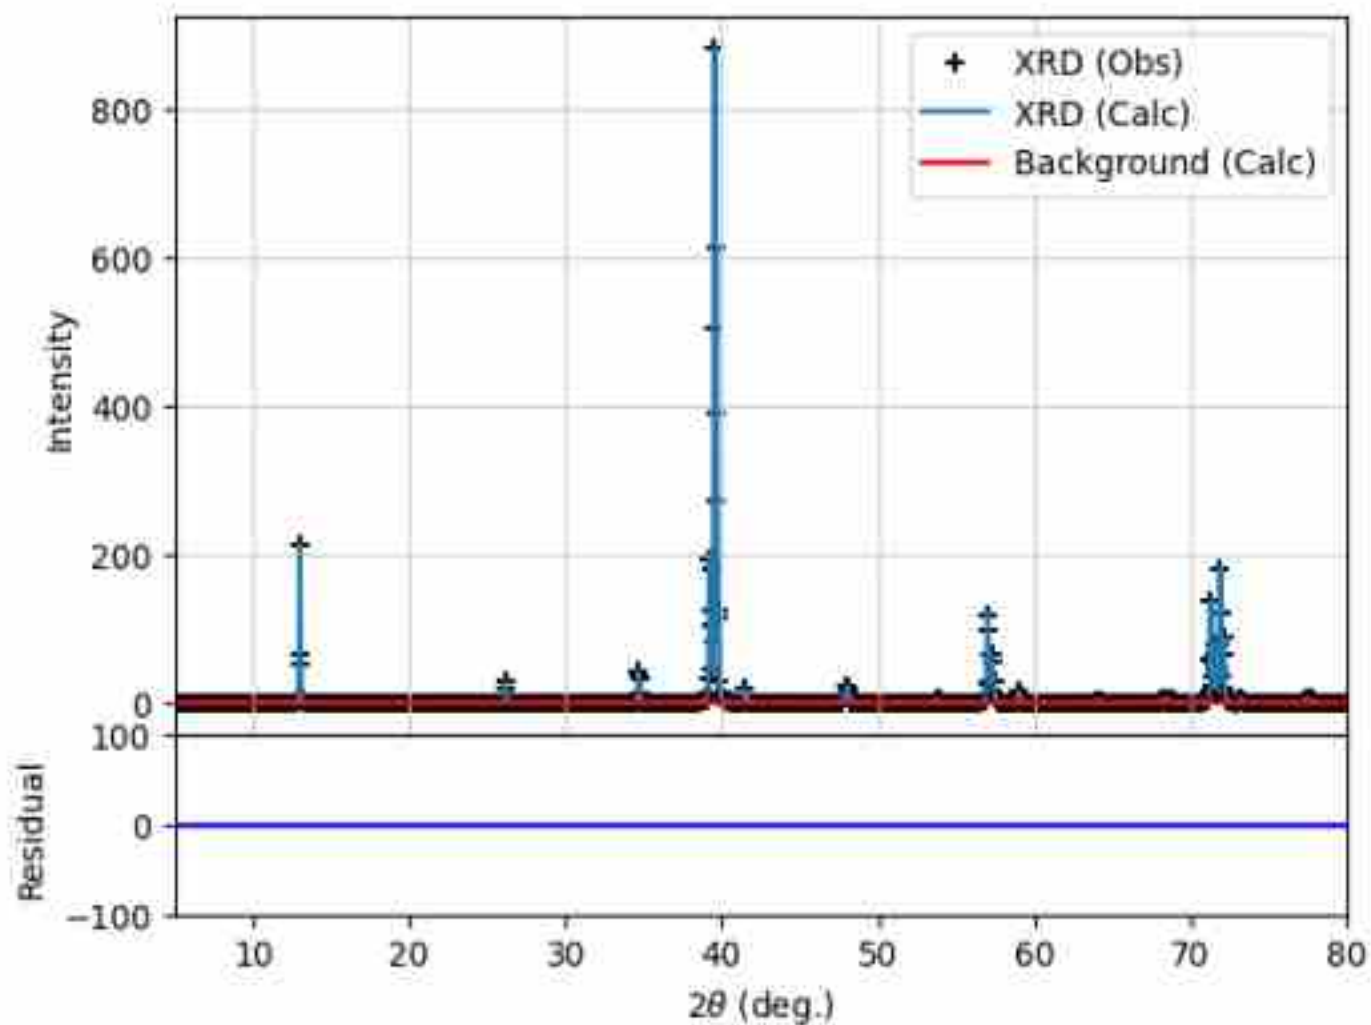

| RMSE before RR | Rwp     | RMSE after RR |
|----------------|---------|---------------|
| 0.007          | 0.00467 | 0.00014       |

# Nd1Ga1Co4

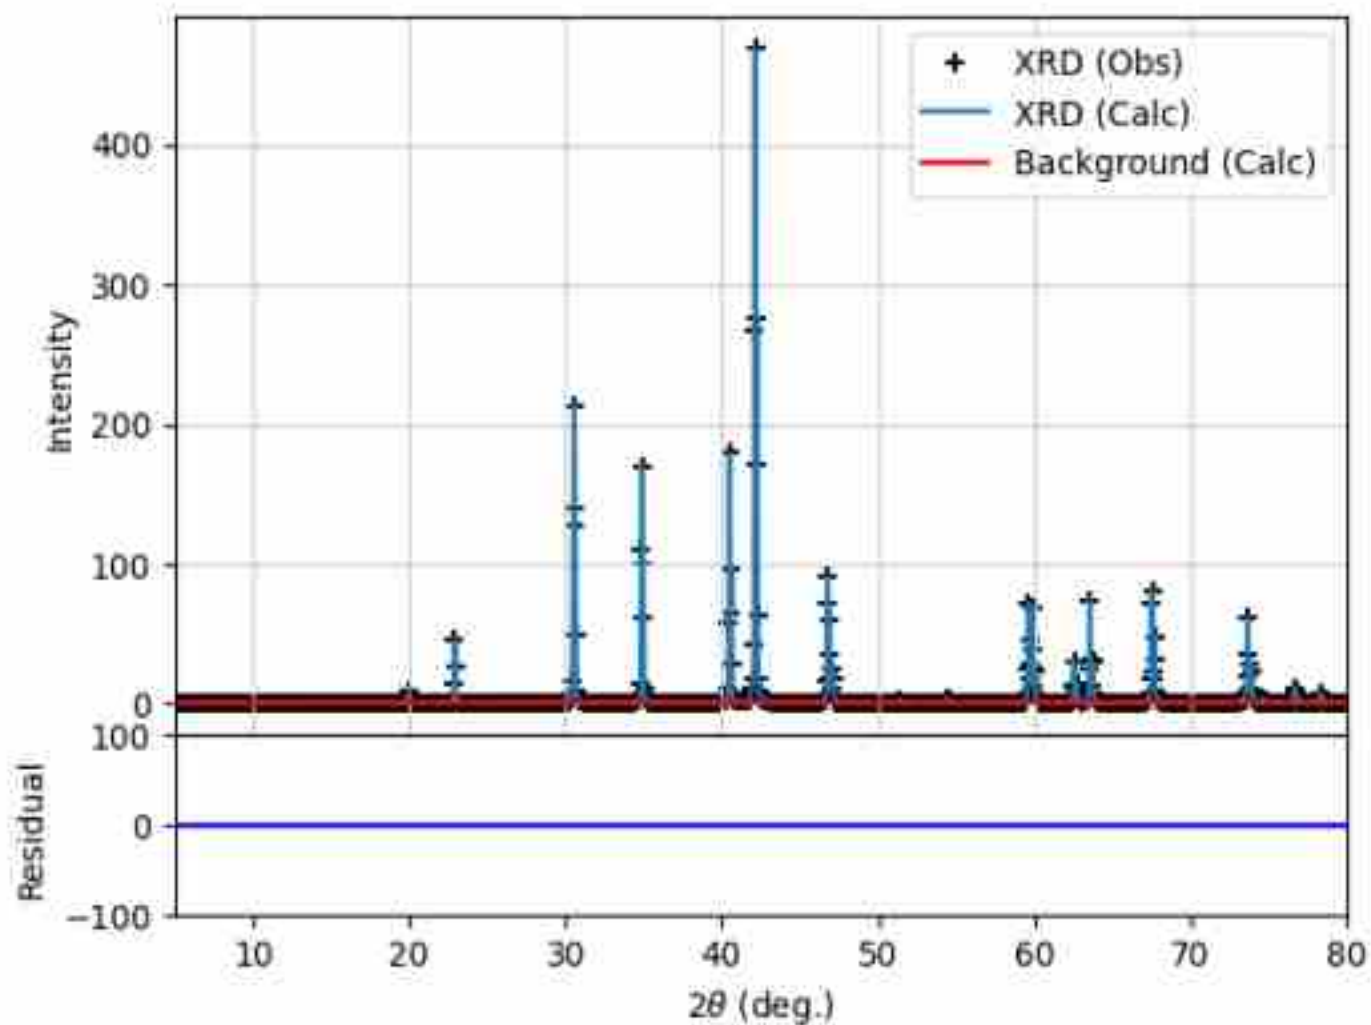

| RMSE before RR | Rwp     | RMSE after RR |
|----------------|---------|---------------|
| 0.007          | 0.00268 | 0.00055       |

# Nd1Ga3Ni1

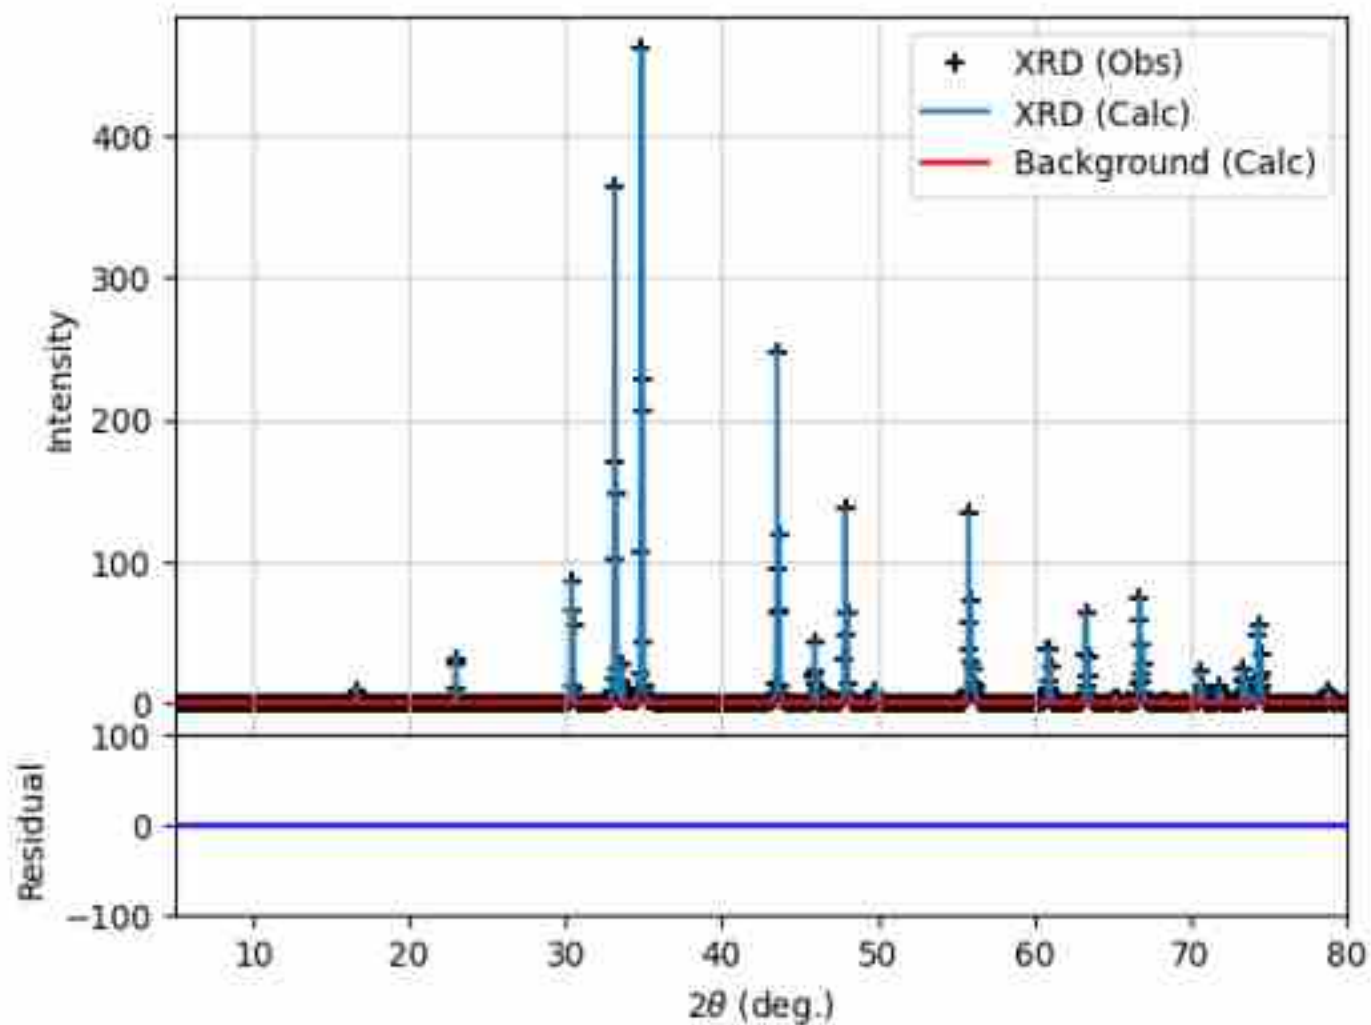

| RMSE before RR | Rwp     | RMSE after RR |
|----------------|---------|---------------|
| 0.007          | 0.00279 | 0.00051       |

# Nd<sub>2</sub>Al<sub>3</sub>Ge<sub>1</sub>

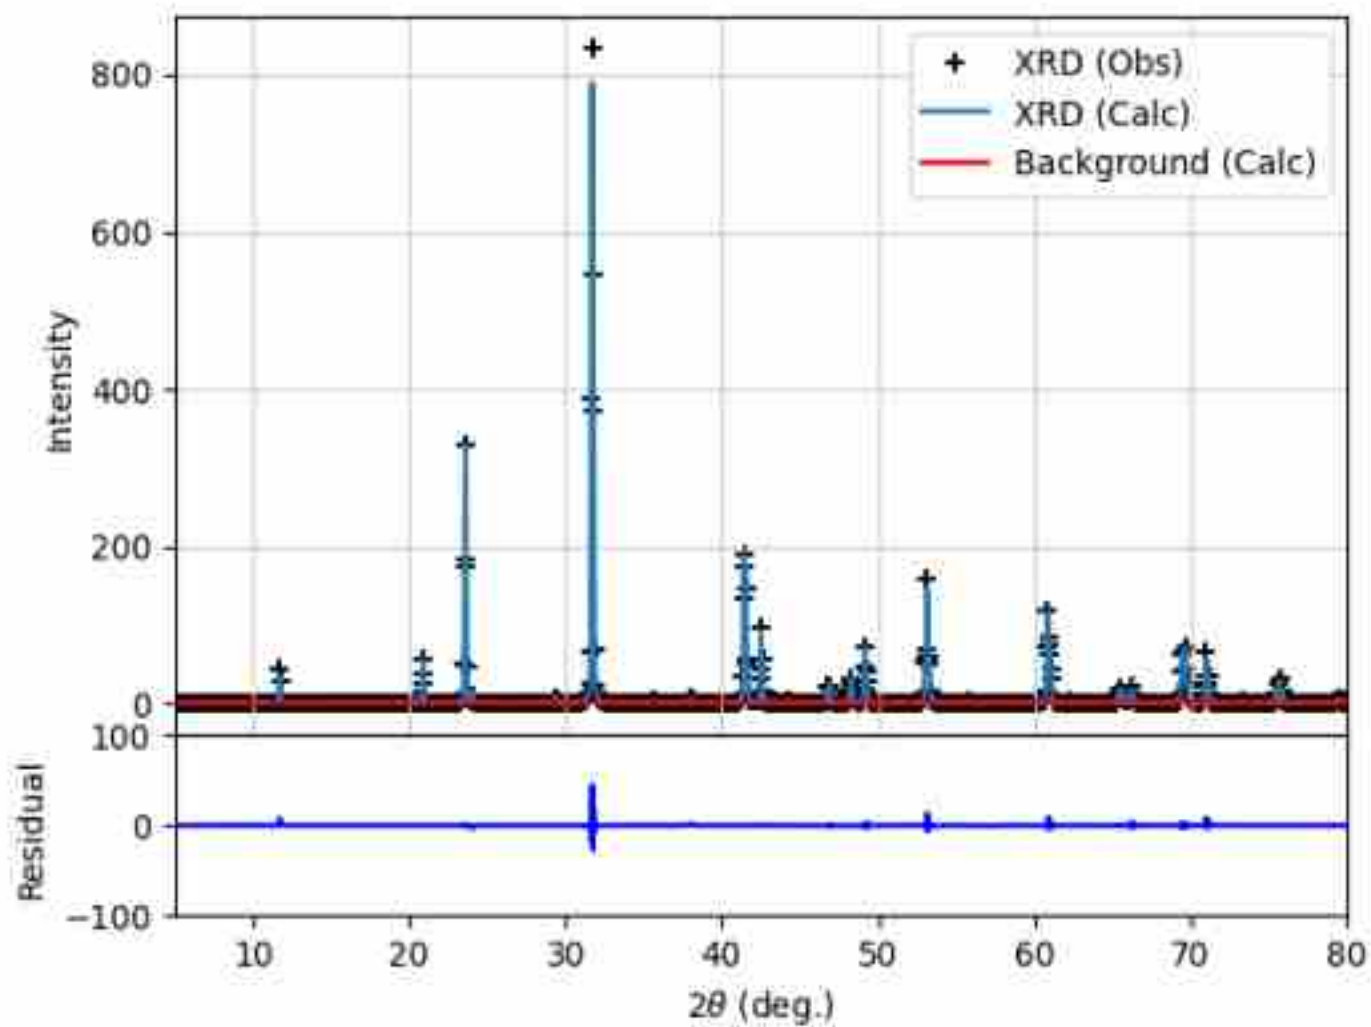

| RMSE before RR | Rwp     | RMSE after RR |
|----------------|---------|---------------|
| 0.007          | 5.73015 | 0.00742       |

# Nd<sub>2</sub>Cd<sub>1</sub>Sb<sub>4</sub>

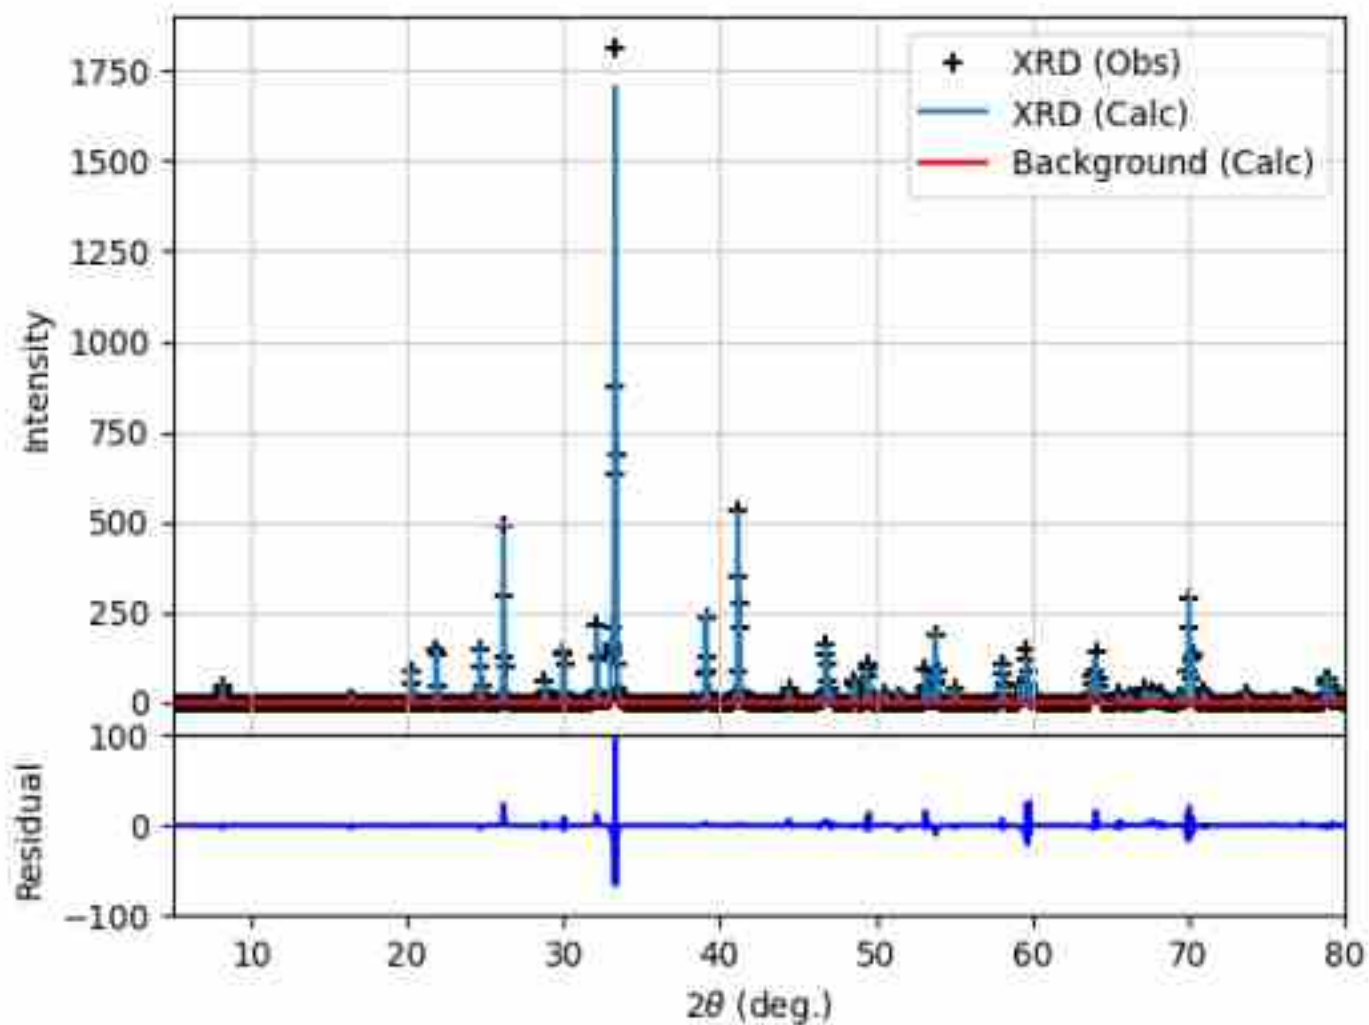

| RMSE before RR | Rwp     | RMSE after RR |
|----------------|---------|---------------|
| 0.007          | 8.43279 | 0.00895       |

# Nd<sub>2</sub>Cu<sub>4</sub>

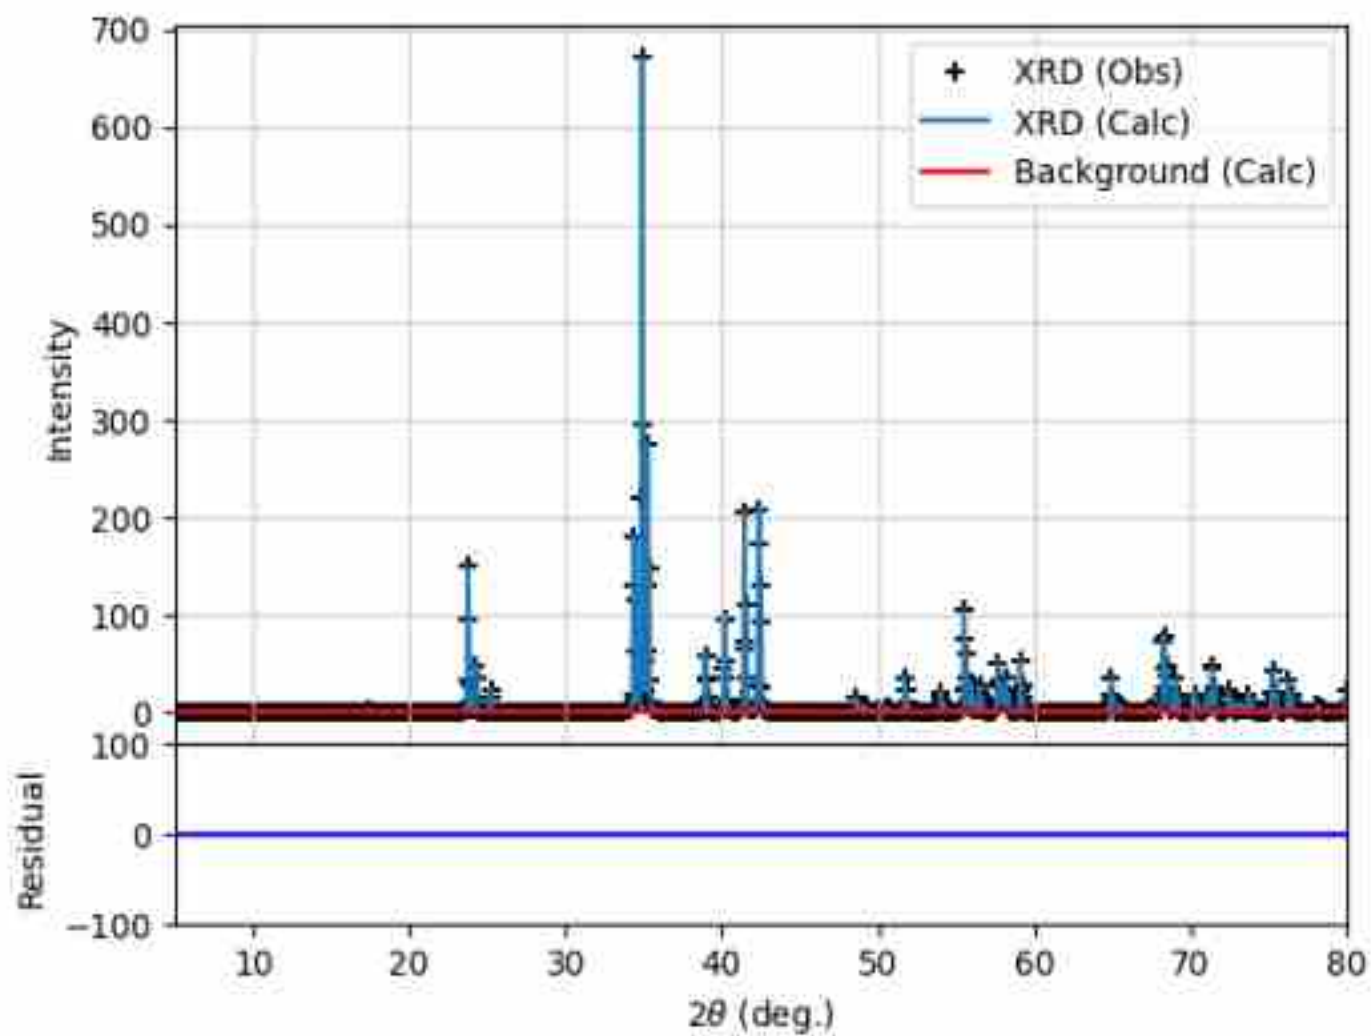

| RMSE before RR | Rwp     | RMSE after RR |
|----------------|---------|---------------|
| 0.007          | 0.00364 | 0.00037       |

Nd<sub>2</sub>Ga<sub>2</sub>Si<sub>2</sub>

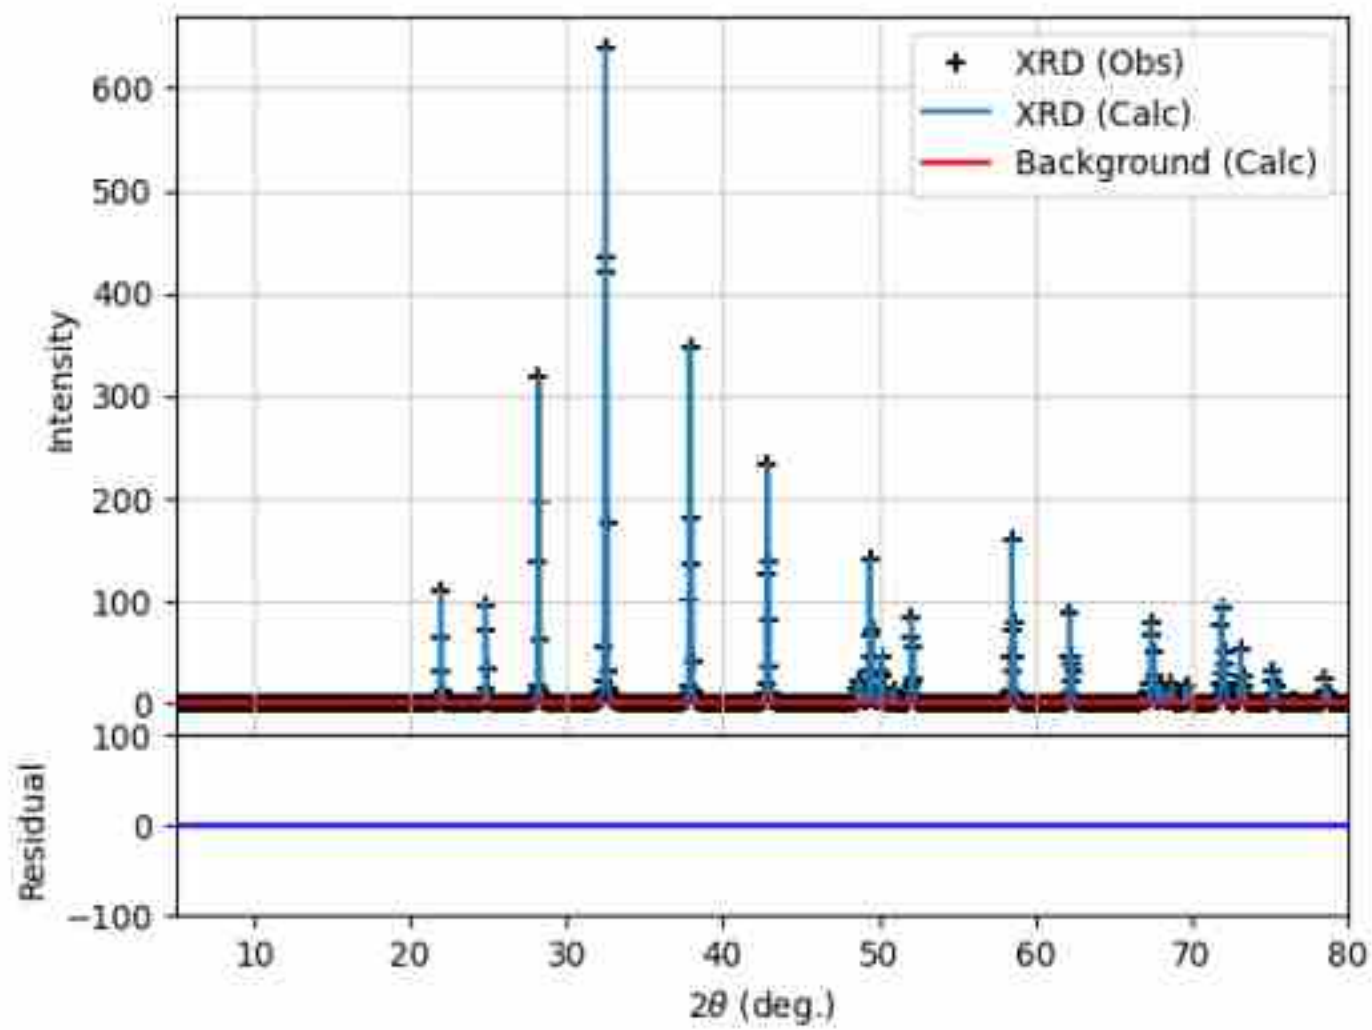

| RMSE before RR | Rwp     | RMSE after RR |
|----------------|---------|---------------|
| 0.007          | 0.00304 | 0.00057       |

# Nd<sub>2</sub>Ga<sub>4</sub>Ni<sub>2</sub>

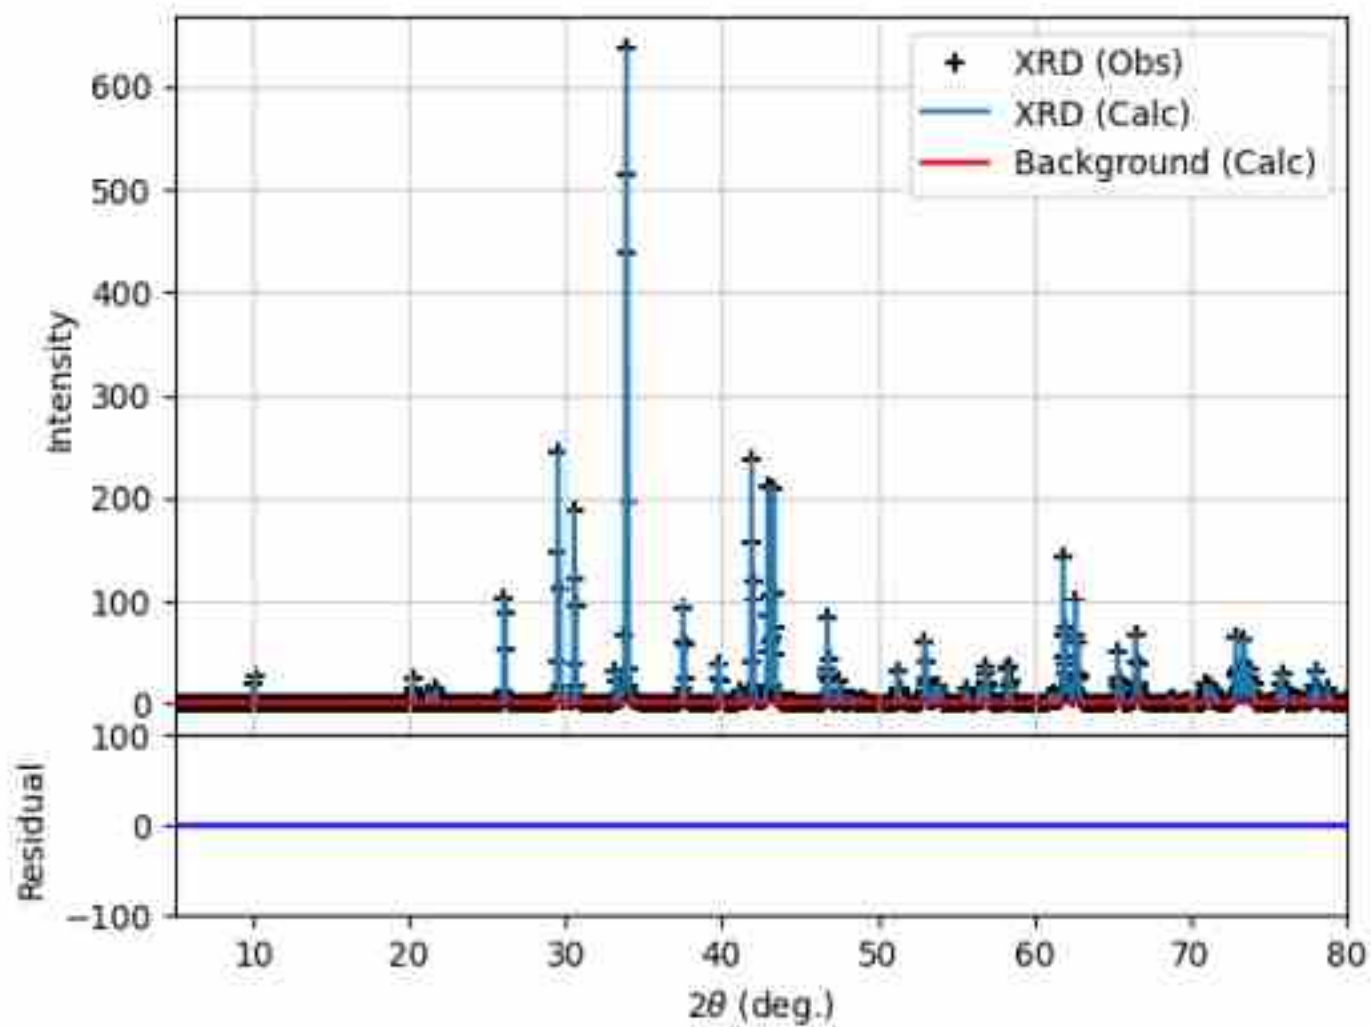

| RMSE before RR | Rwp     | RMSE after RR |
|----------------|---------|---------------|
| 0.007          | 0.00299 | 0.00031       |



# Np1Al1O3

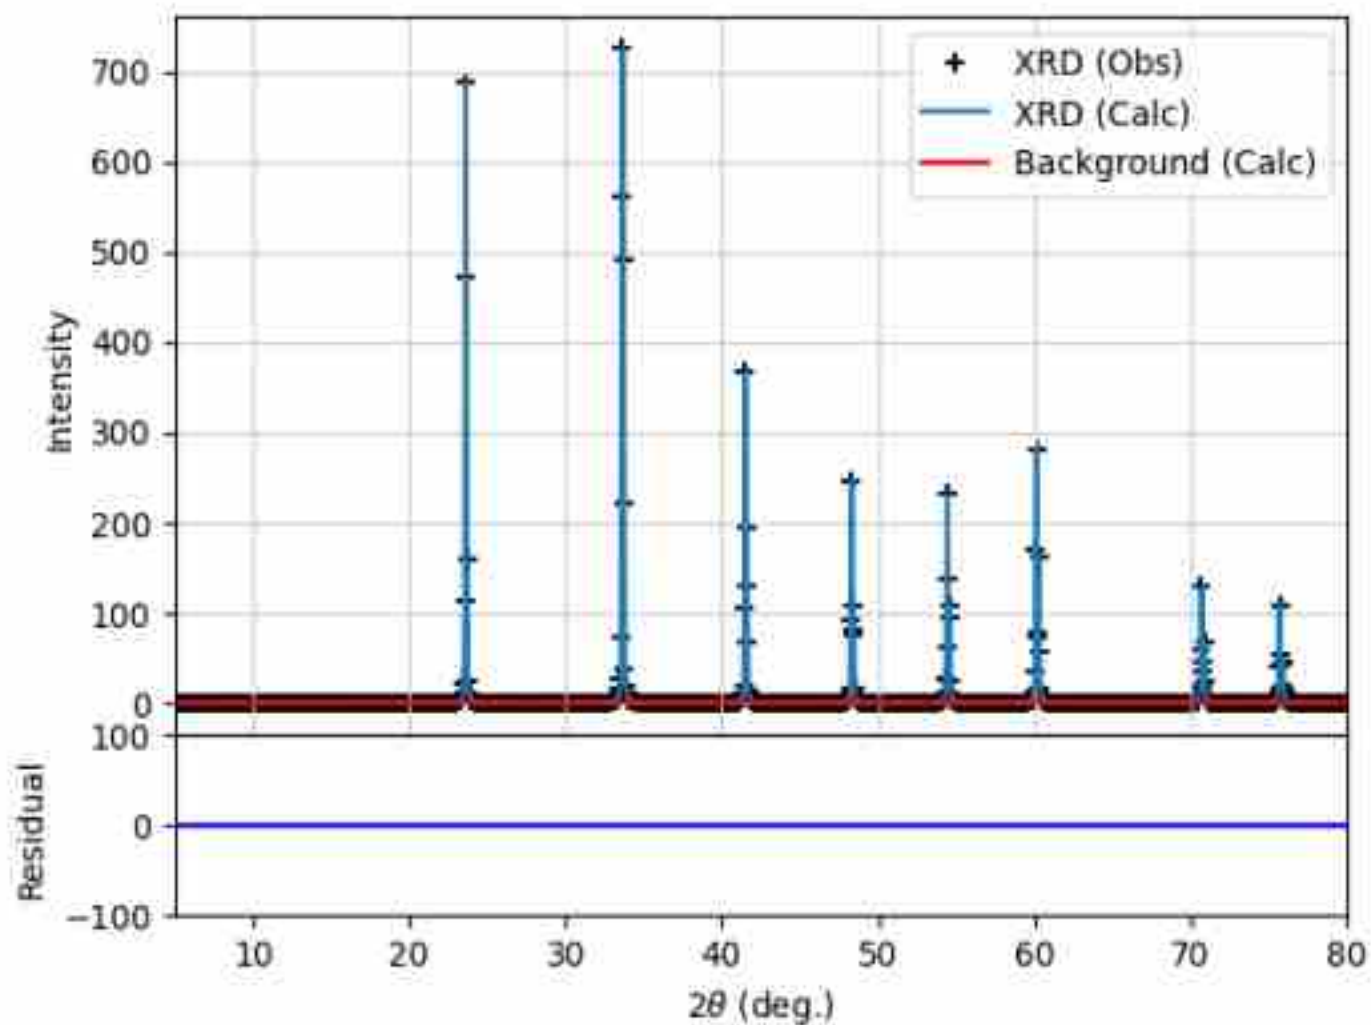

| RMSE before RR | Rwp    | RMSE after RR |
|----------------|--------|---------------|
| 0.007          | 0.0164 | 0.00607       |

# Pr<sub>2</sub>Cu<sub>4</sub>Sn<sub>4</sub>

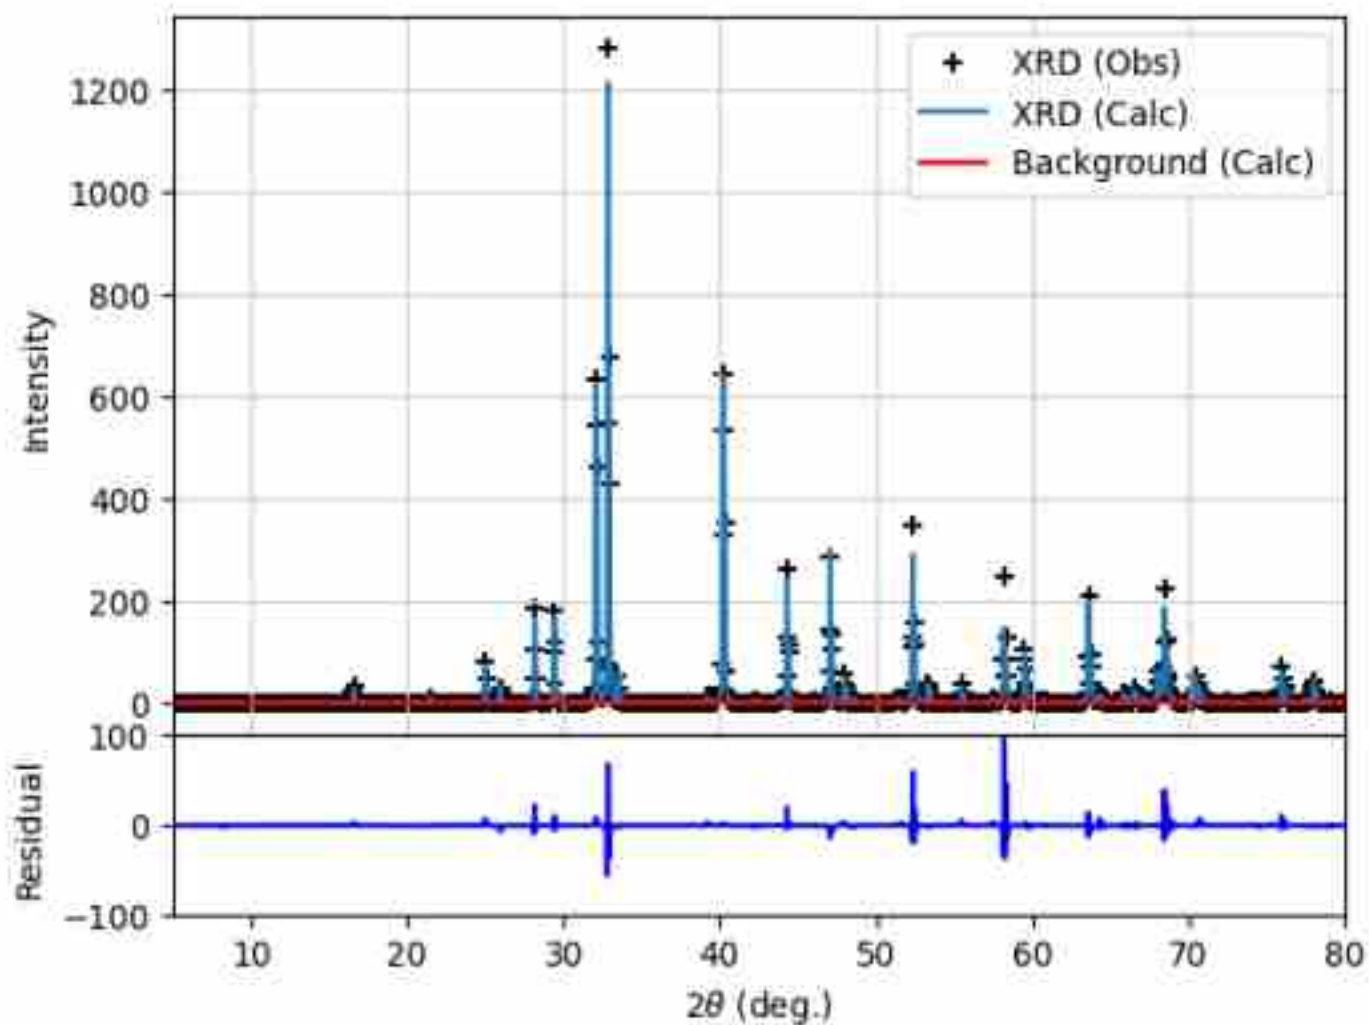

| RMSE before RR | Rwp      | RMSE after RR |
|----------------|----------|---------------|
| 0.007          | 10.98585 | 0.06197       |

# Pr<sub>2</sub>S<sub>1</sub>O<sub>2</sub>

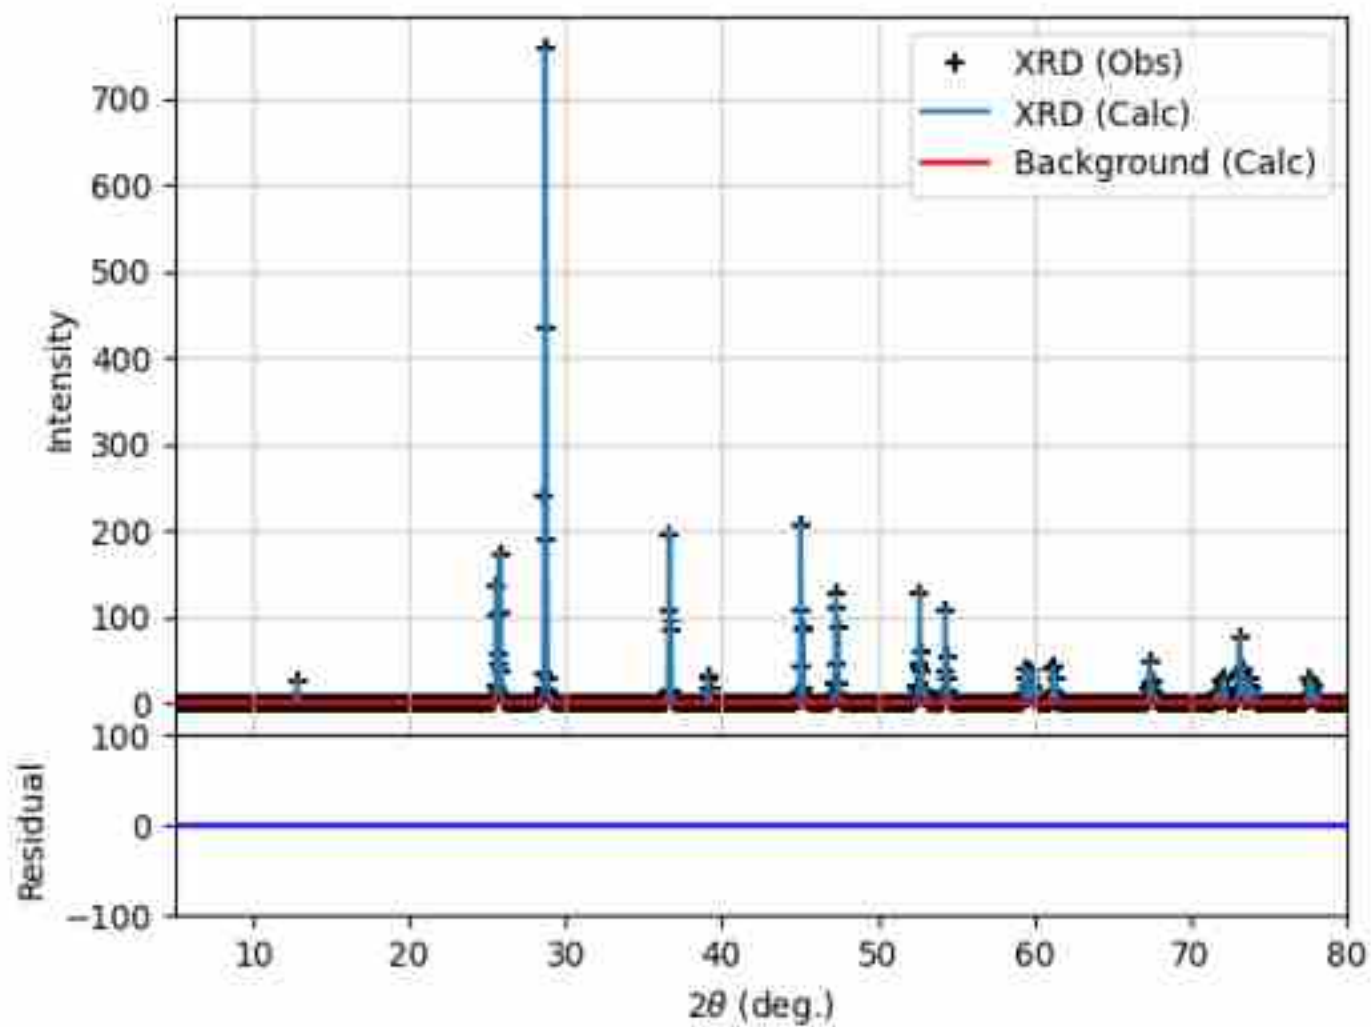

| RMSE before RR | Rwp     | RMSE after RR |
|----------------|---------|---------------|
| 0.007          | 0.00363 | 0.00176       |

# Pr<sub>2</sub>Y<sub>6</sub>

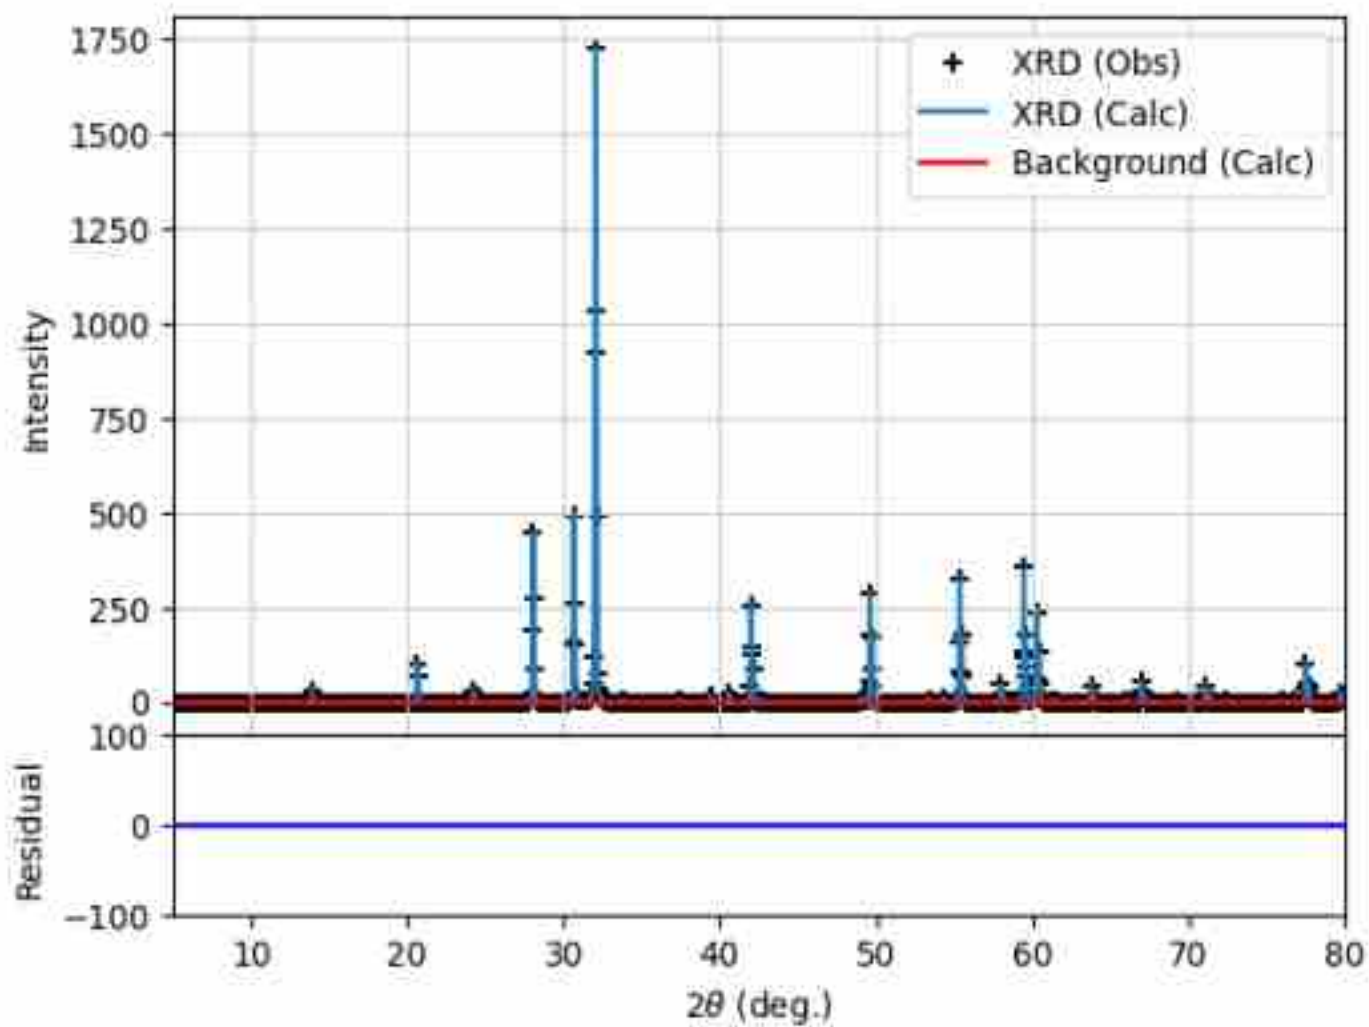

| RMSE before RR | Rwp     | RMSE after RR |
|----------------|---------|---------------|
| 0.007          | 0.03058 | 0.00141       |

# Pr<sub>4</sub>Cd<sub>2</sub>Ni<sub>4</sub>

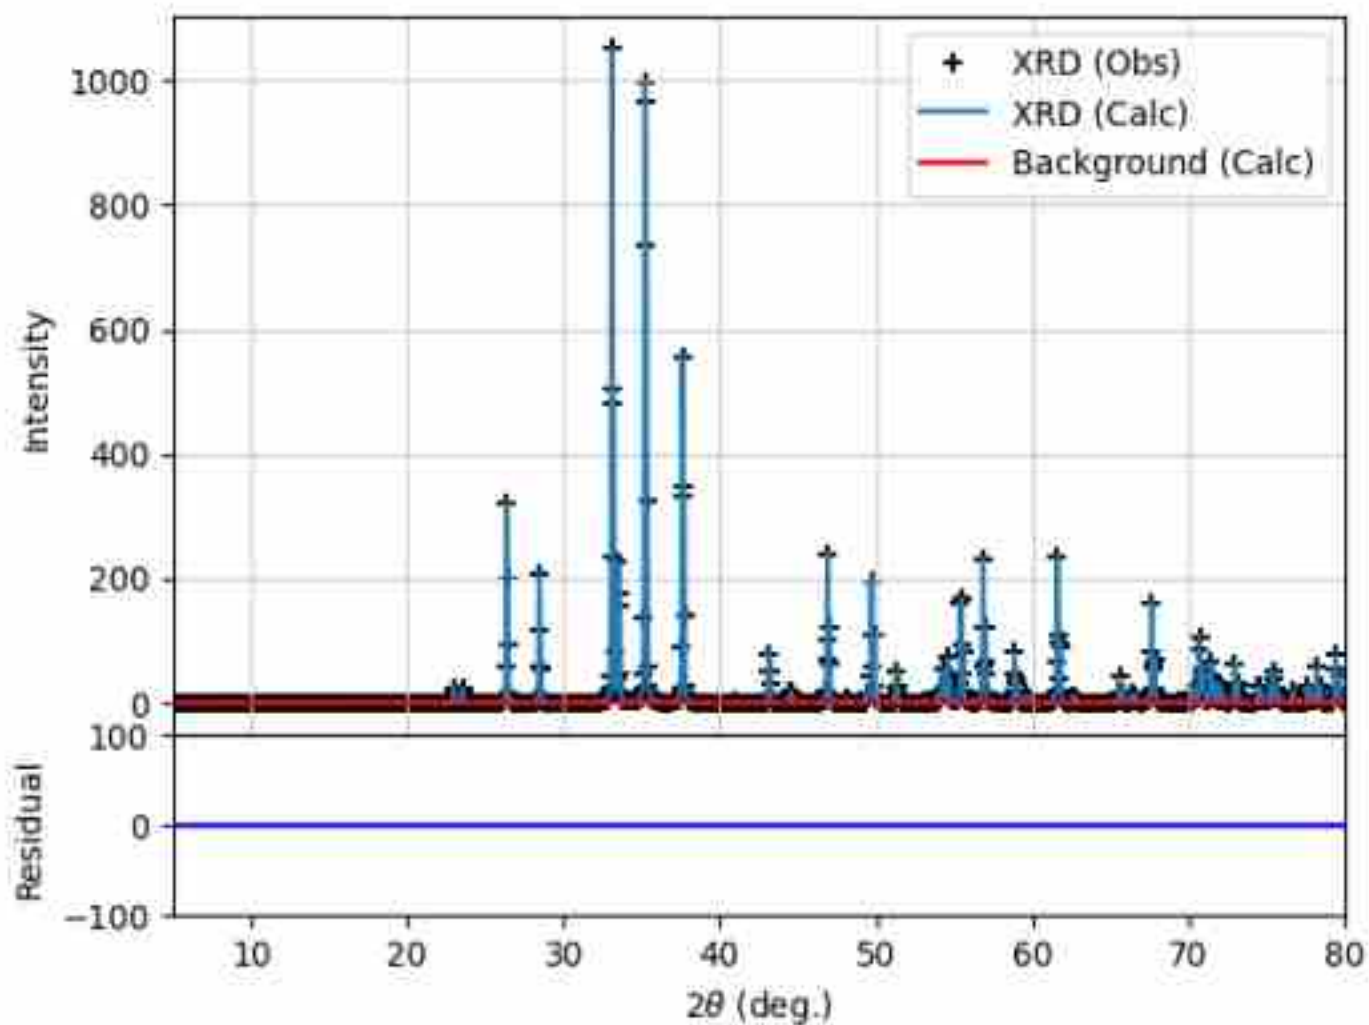

| RMSE before RR | Rwp     | RMSE after RR |
|----------------|---------|---------------|
| 0.007          | 0.01085 | 0.00078       |

# Pu1Pt5

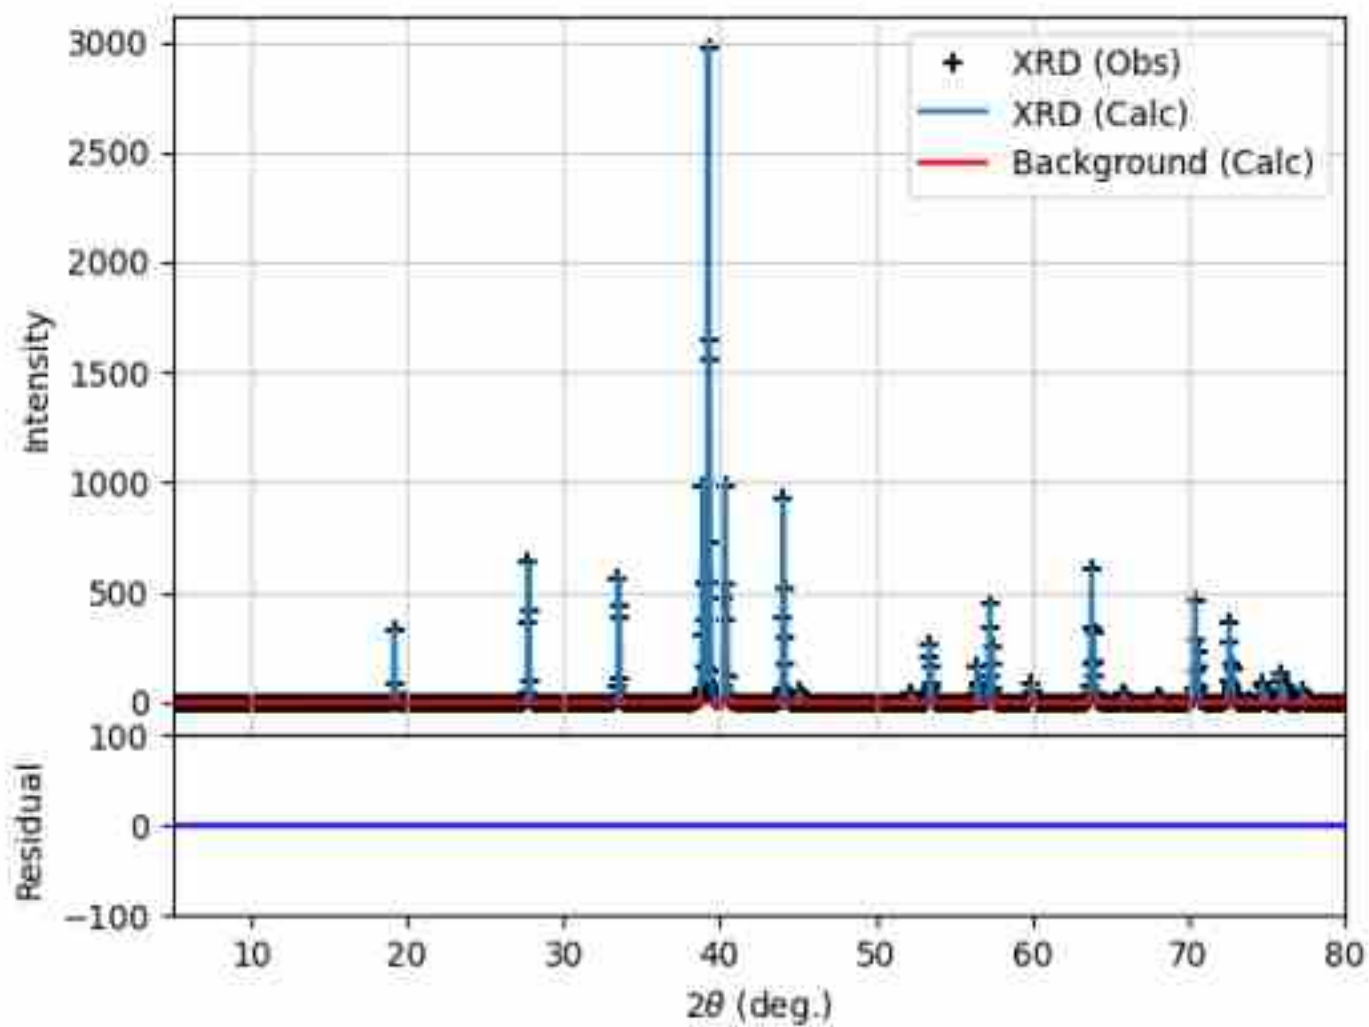

| RMSE before RR | Rwp     | RMSE after RR |
|----------------|---------|---------------|
| 0.007          | 0.00948 | 0.00048       |

# Rb1Ir1O3

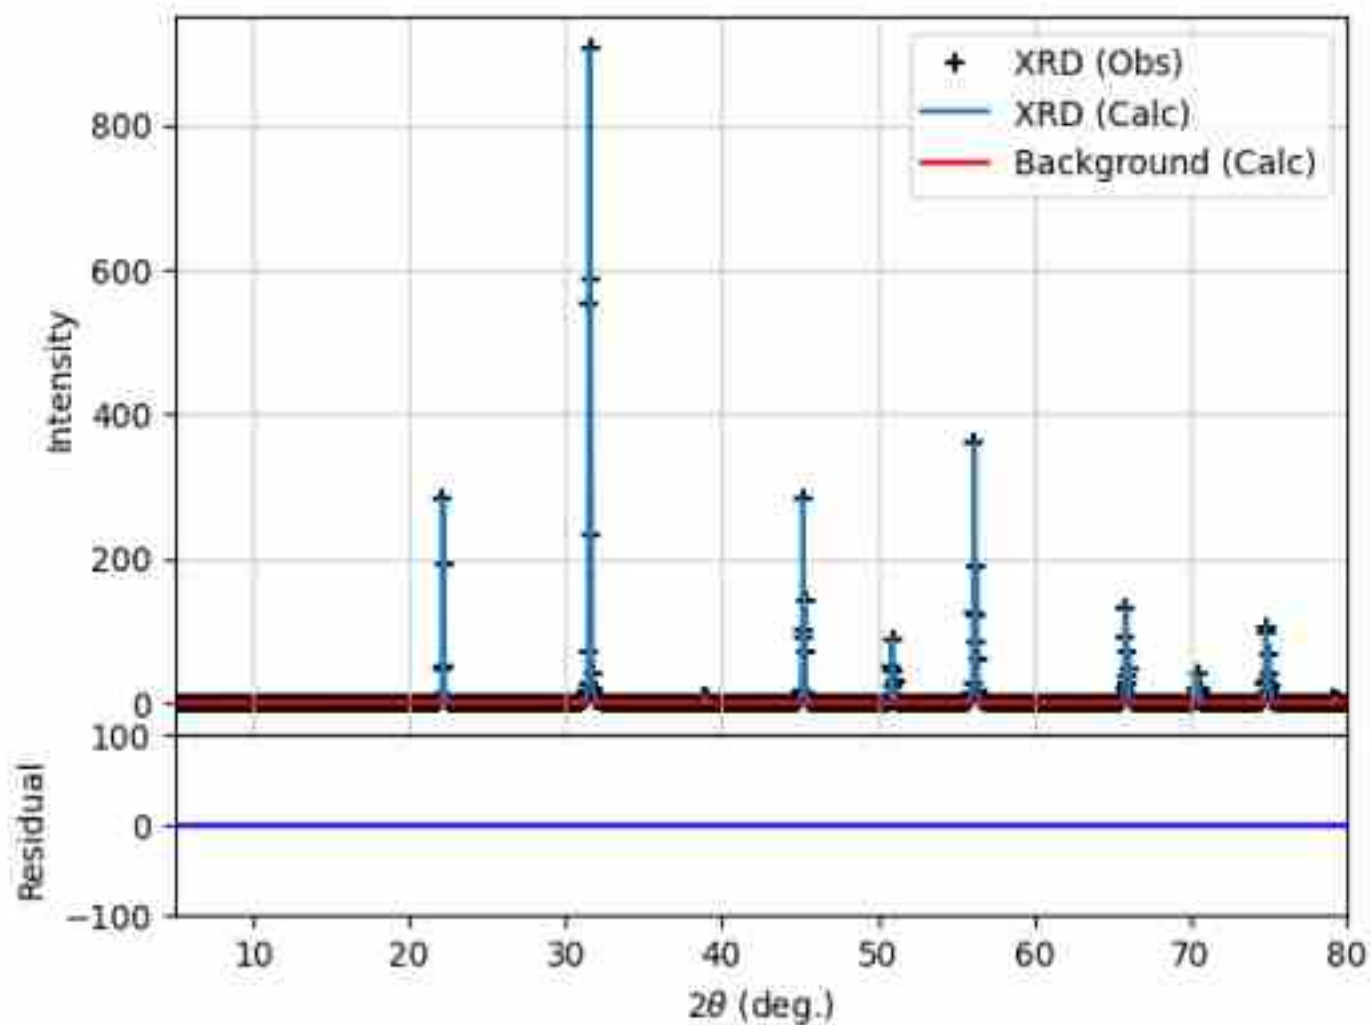

| RMSE before RR | Rwp     | RMSE after RR |
|----------------|---------|---------------|
| 0.007          | 0.01558 | 0.00404       |

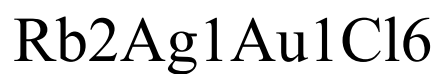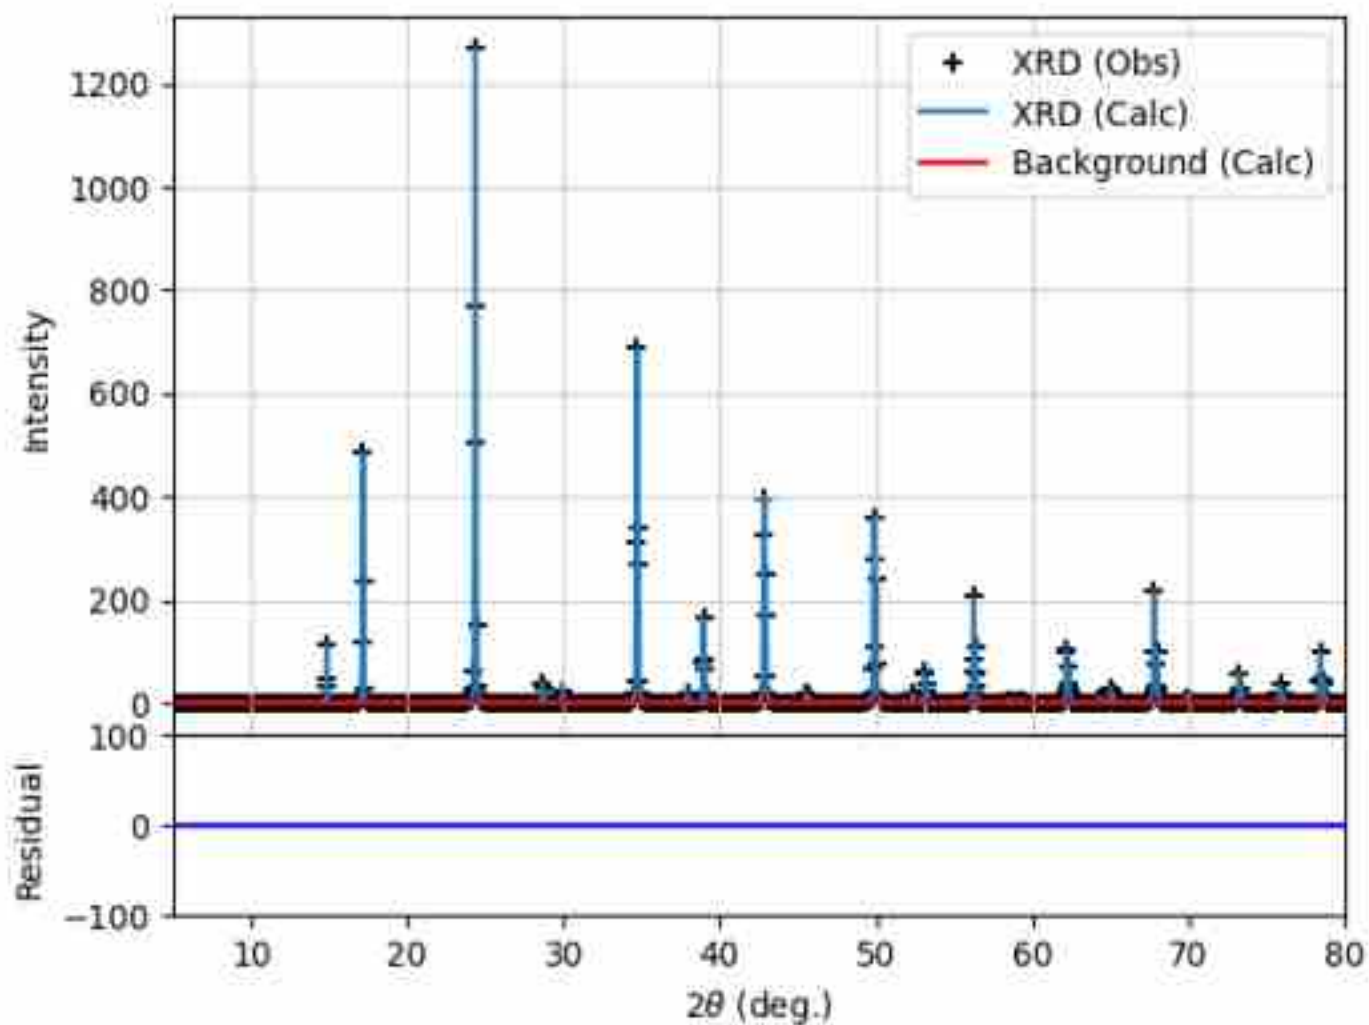

| RMSE before RR | Rwp     | RMSE after RR |
|----------------|---------|---------------|
| 0.007          | 0.01558 | 0.00301       |



# Rb<sub>2</sub>NaAsCl<sub>6</sub>

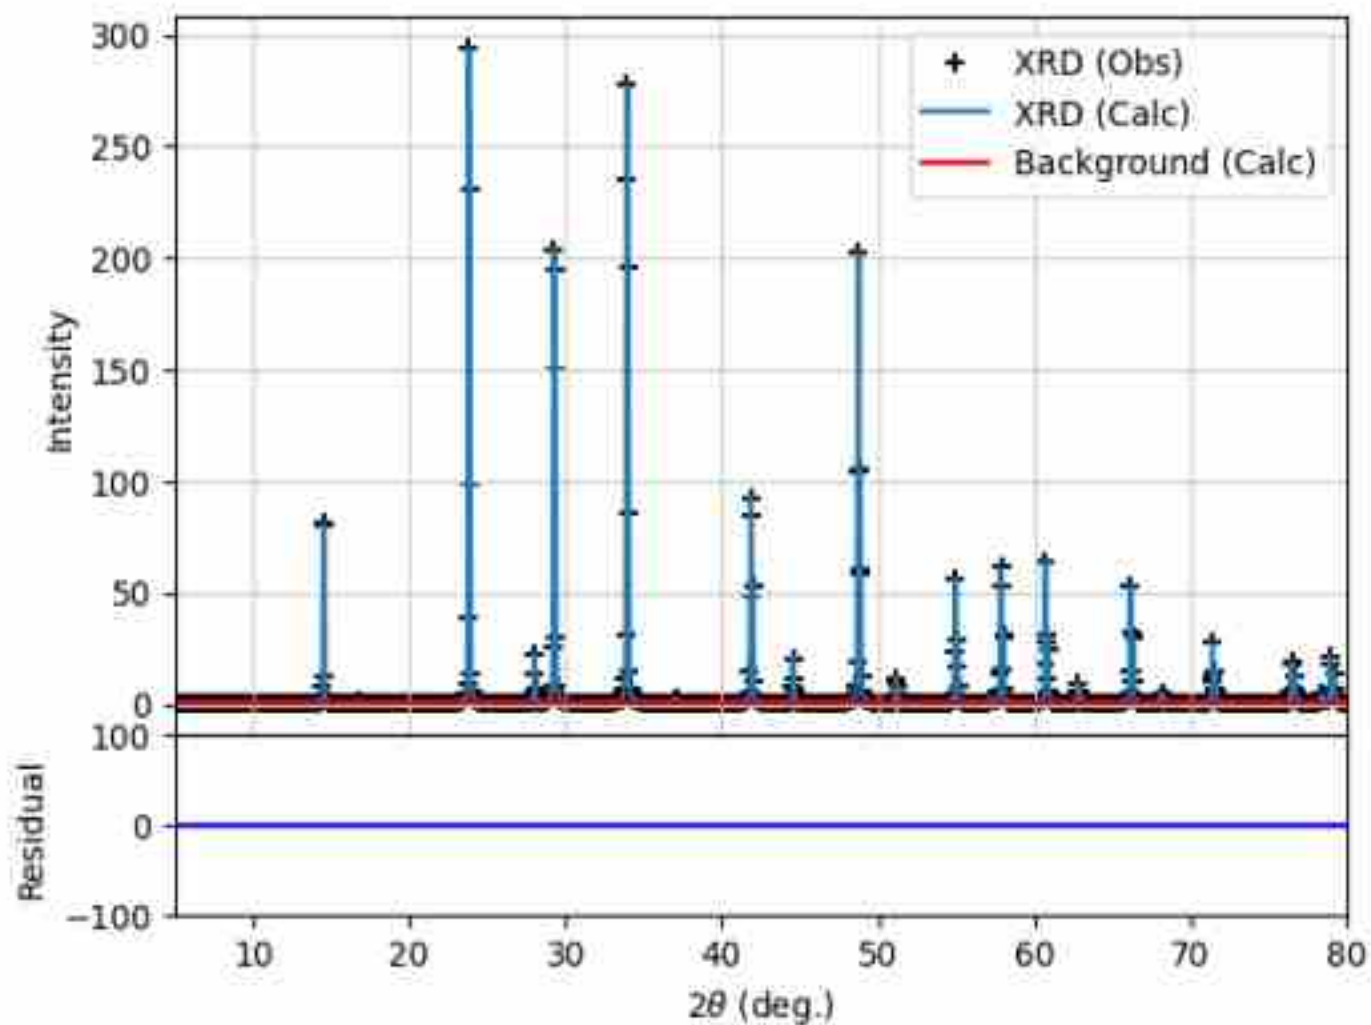

| RMSE before RR | Rwp     | RMSE after RR |
|----------------|---------|---------------|
| 0.007          | 0.05896 | 0.00462       |

# Rb<sub>2</sub>Na<sub>1</sub>Y<sub>1</sub>Cl<sub>6</sub>

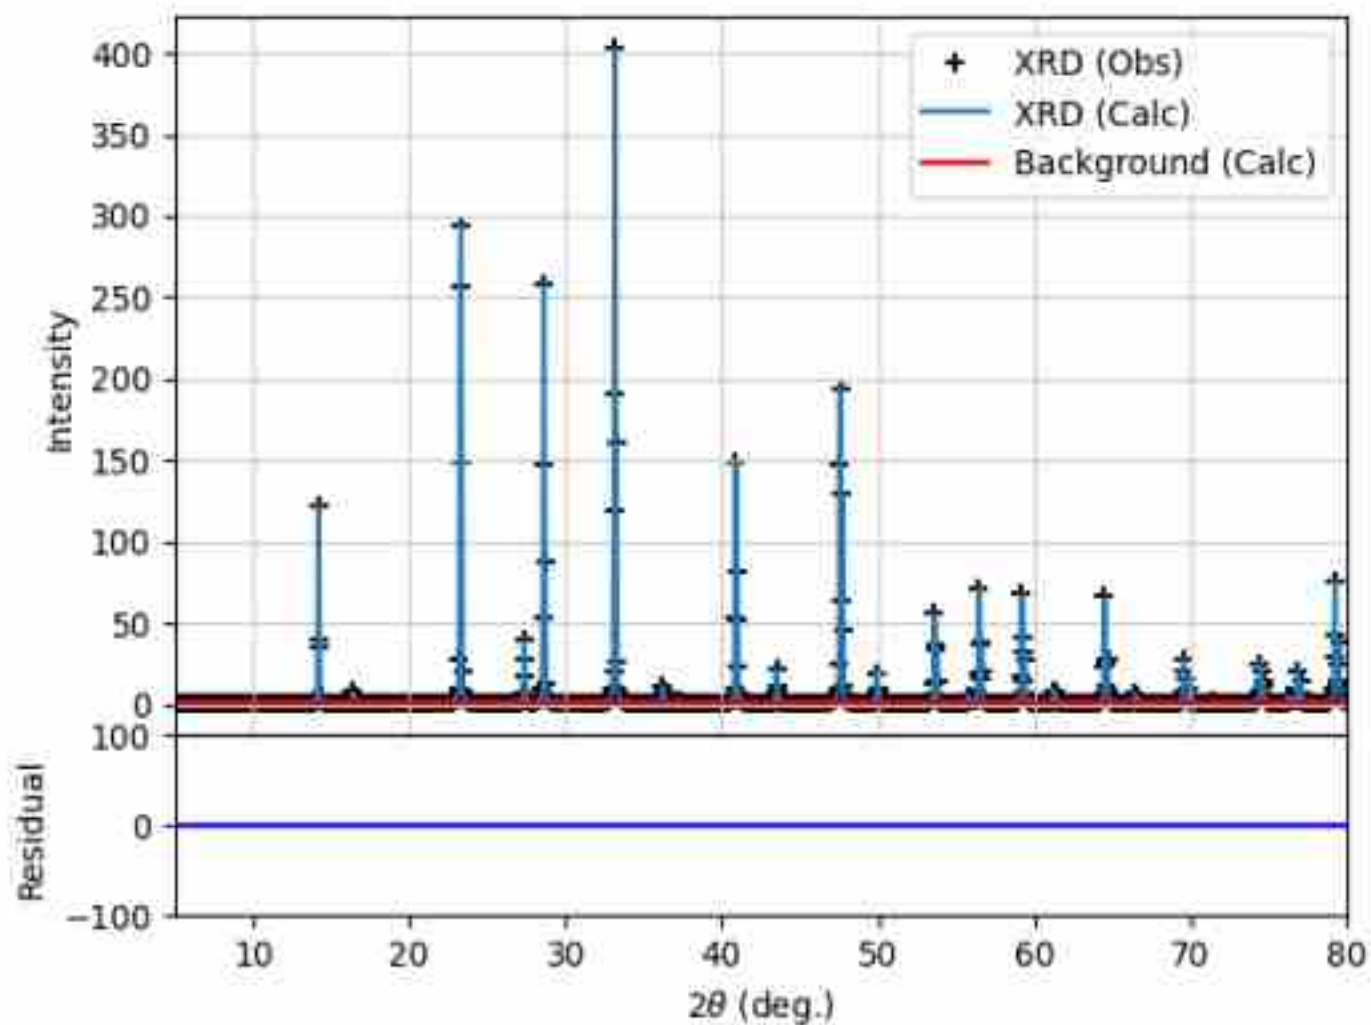

| RMSE before RR | Rwp    | RMSE after RR |
|----------------|--------|---------------|
| 0.007          | 0.0845 | 0.00437       |

# Rb<sub>2</sub>SnI<sub>6</sub>

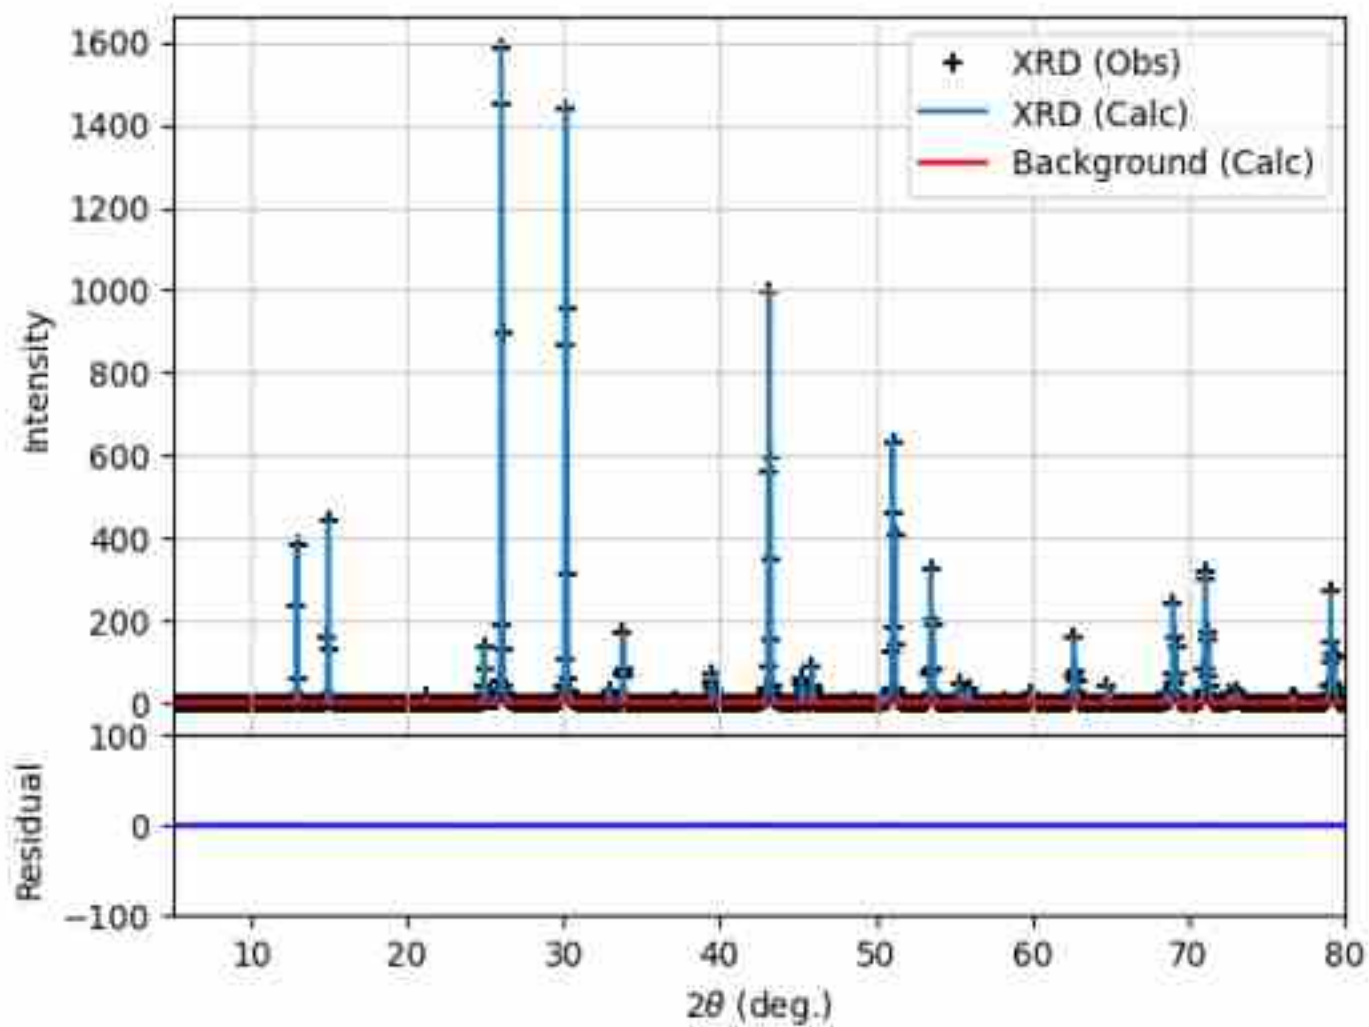

| RMSE before RR | Rwp     | RMSE after RR |
|----------------|---------|---------------|
| 0.007          | 0.16308 | 0.00336       |

# Rb<sub>2</sub>TbAgCl<sub>6</sub>

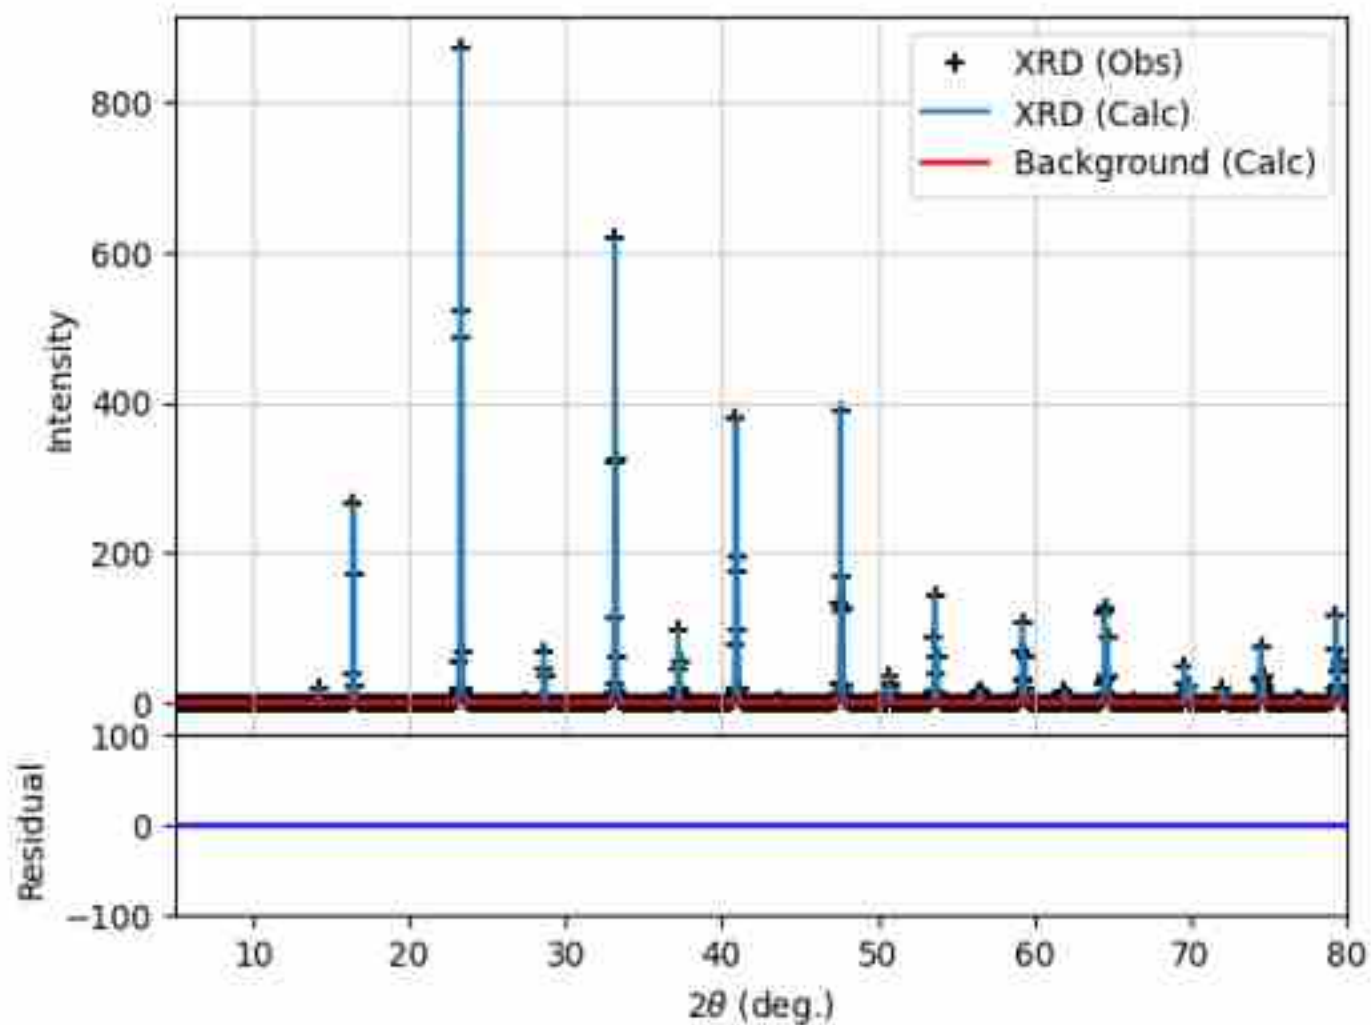

| RMSE before RR | Rwp     | RMSE after RR |
|----------------|---------|---------------|
| 0.007          | 0.05609 | 0.00336       |

# Rb<sub>2</sub>Y<sub>1</sub>Tl<sub>1</sub>F<sub>6</sub>

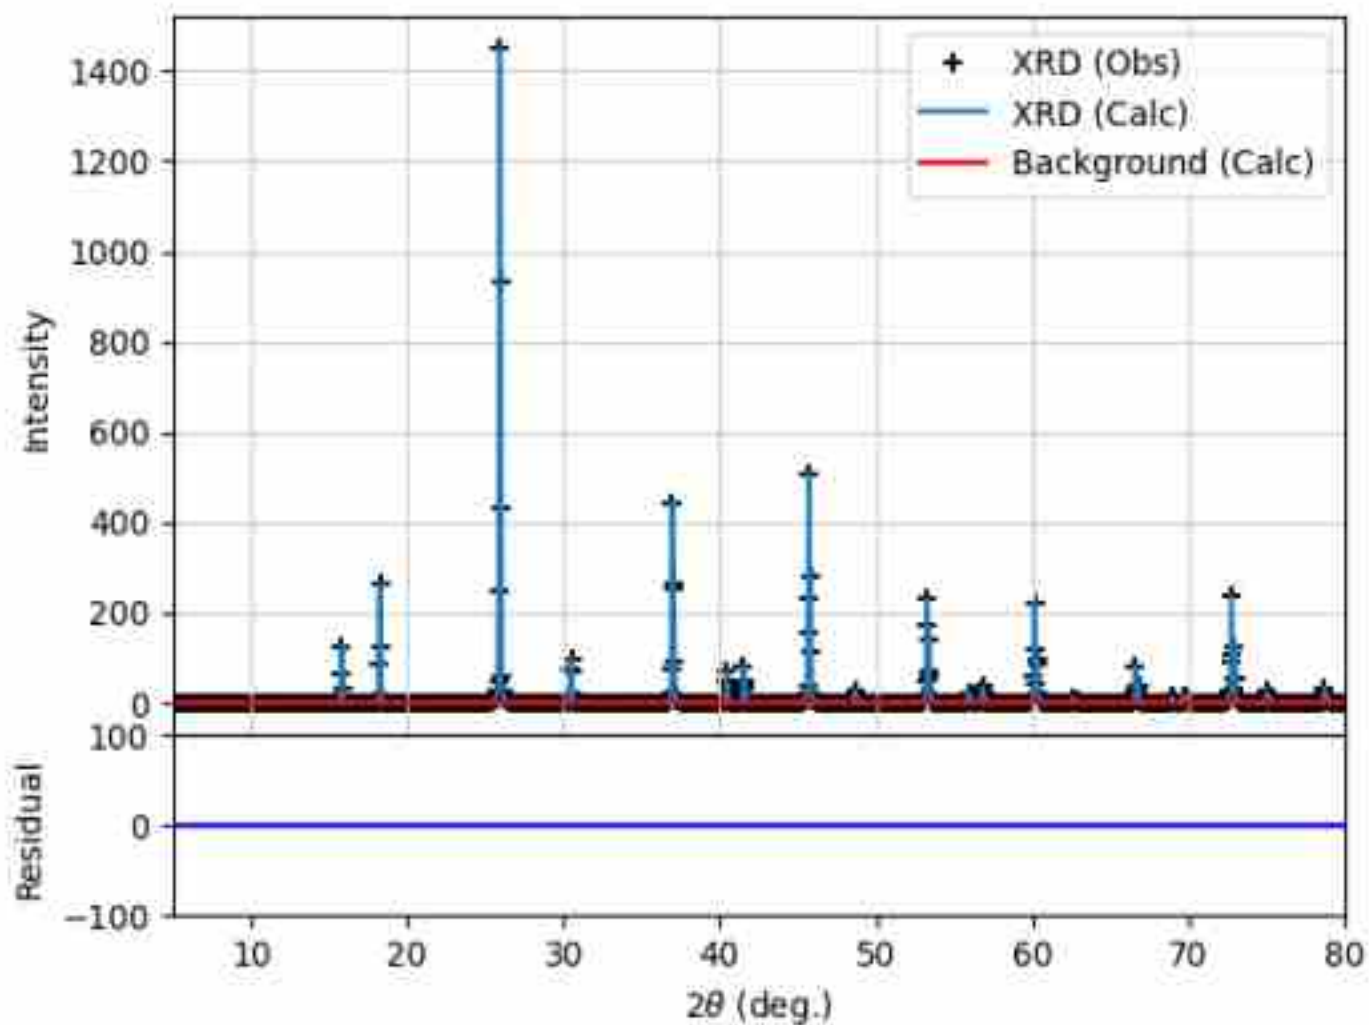

| RMSE before RR | Rwp     | RMSE after RR |
|----------------|---------|---------------|
| 0.007          | 0.00571 | 0.00151       |

# Rb3Sc1Br6

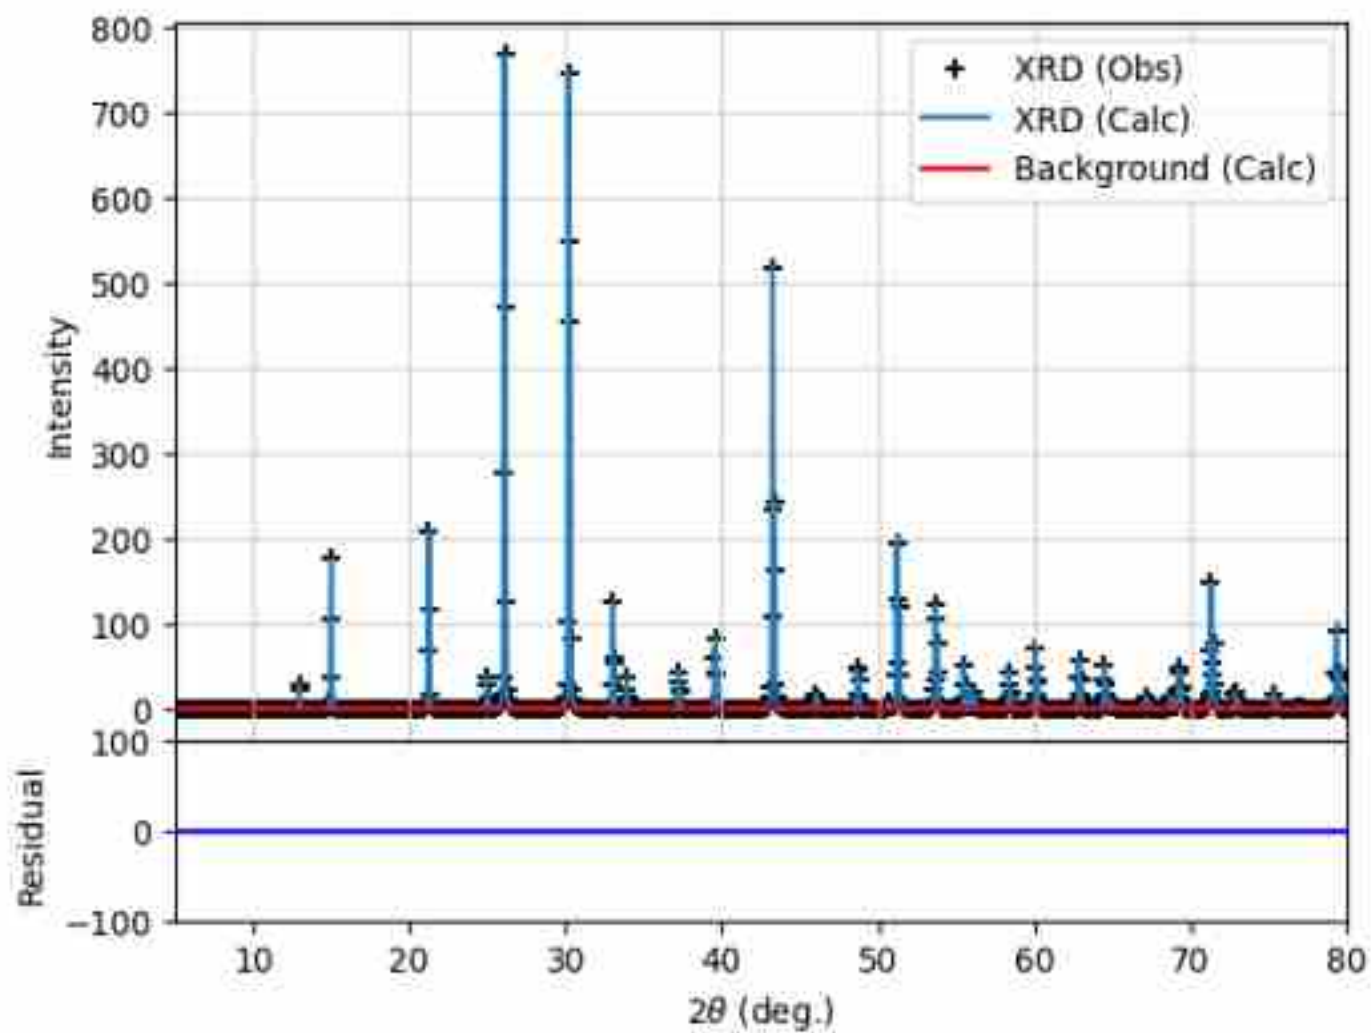

| RMSE before RR | Rwp     | RMSE after RR |
|----------------|---------|---------------|
| 0.007          | 0.02886 | 0.00214       |

# Rh3Pb3

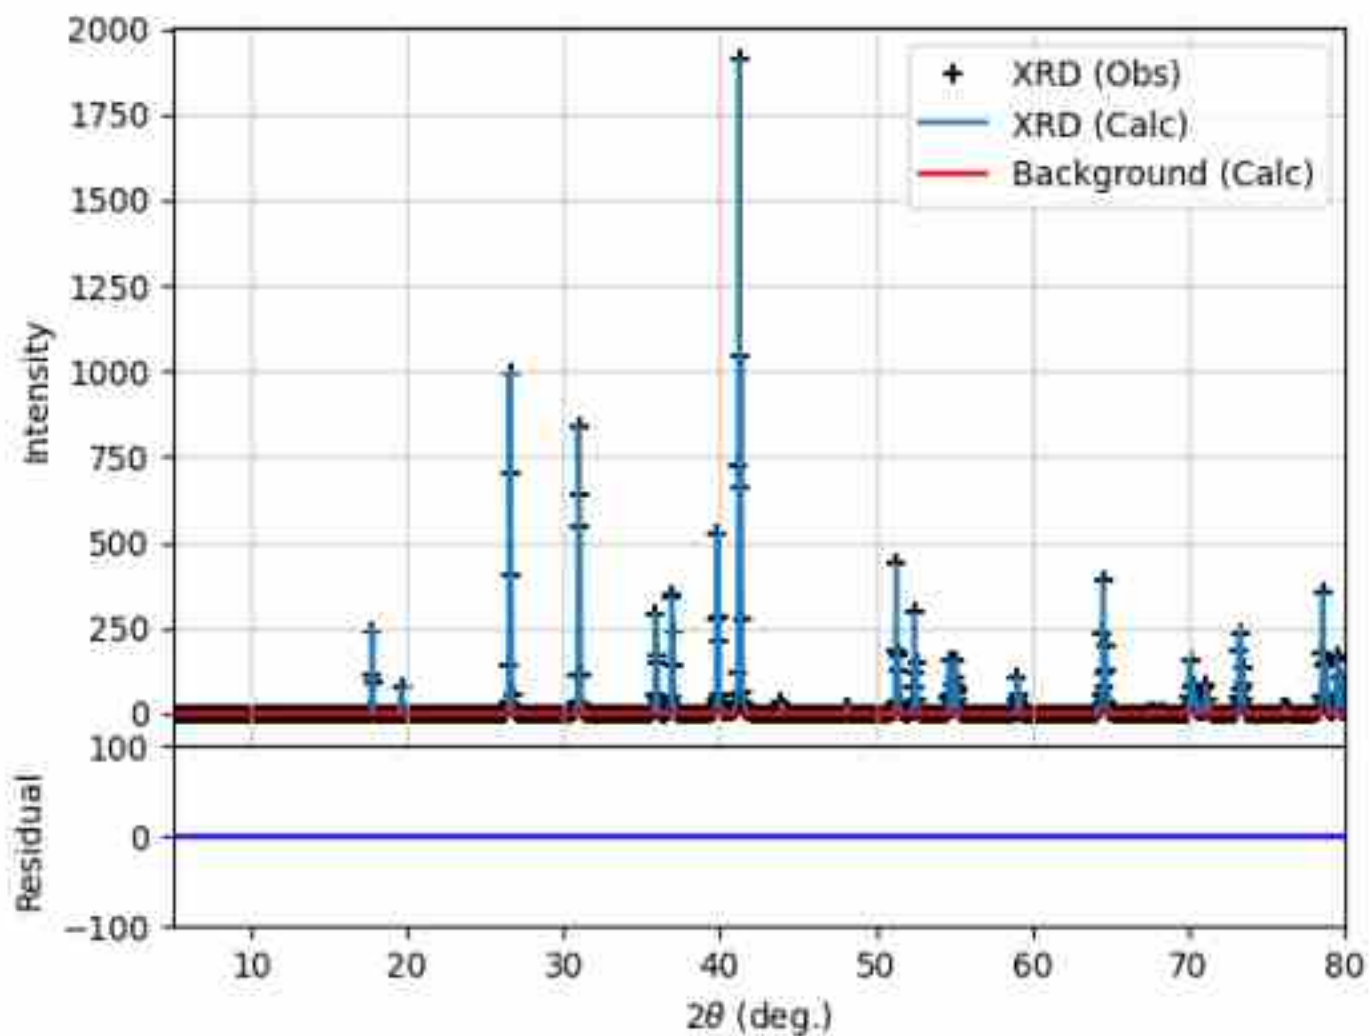

| RMSE before RR | Rwp     | RMSE after RR |
|----------------|---------|---------------|
| 0.007          | 0.00389 | 0.00057       |

# Sc1Ga5Ni1

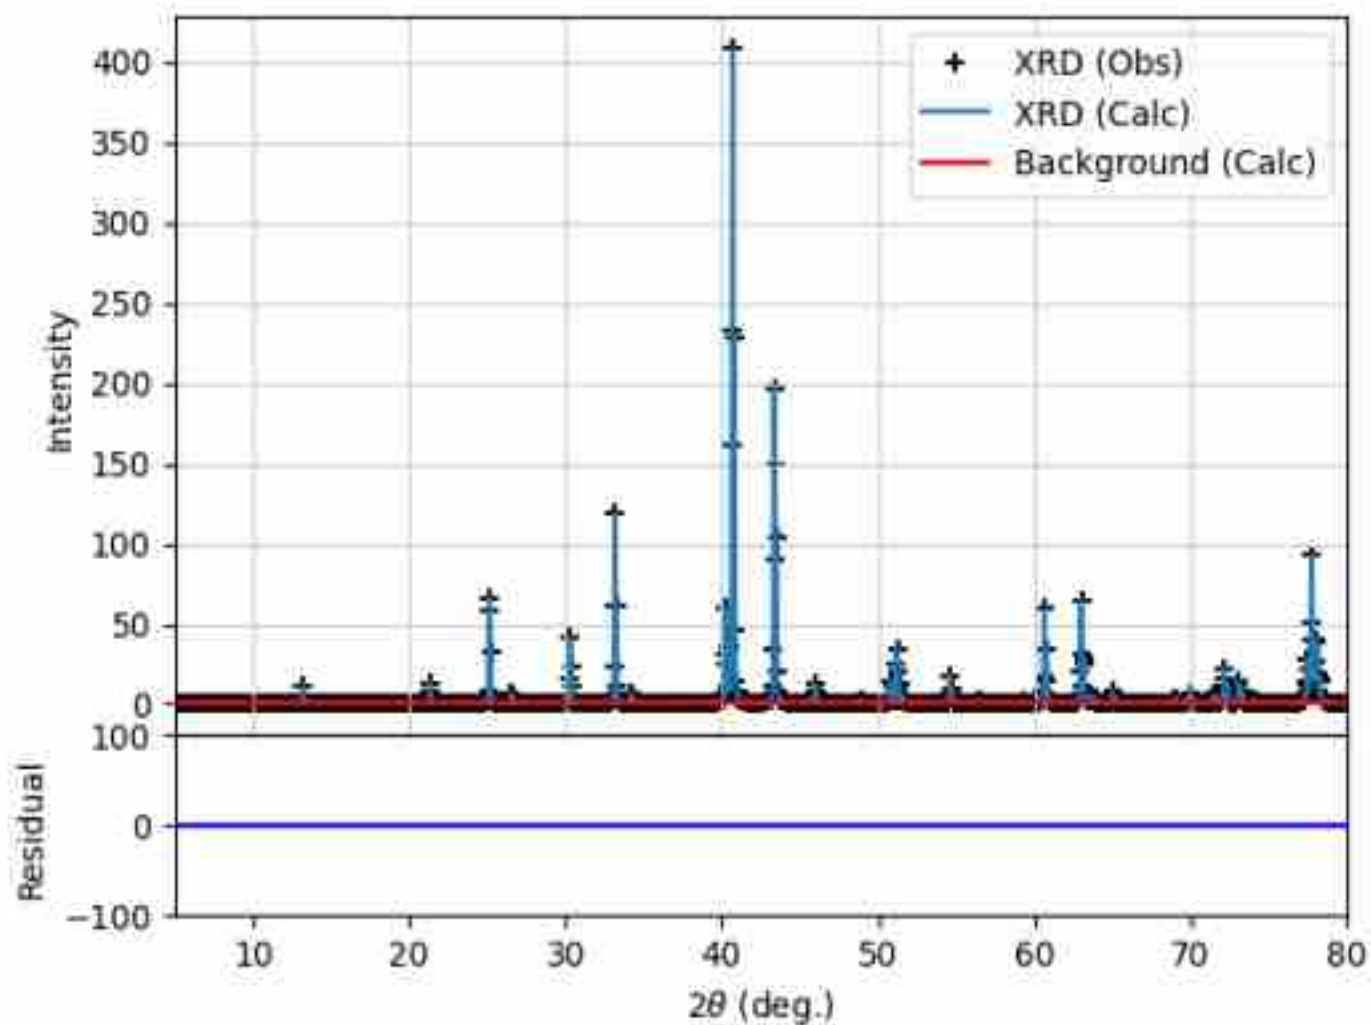

| RMSE before RR | Rwp     | RMSE after RR |
|----------------|---------|---------------|
| 0.007          | 0.00492 | 0.00053       |



# Sc<sub>2</sub>Ga<sub>3</sub>Cu<sub>1</sub>

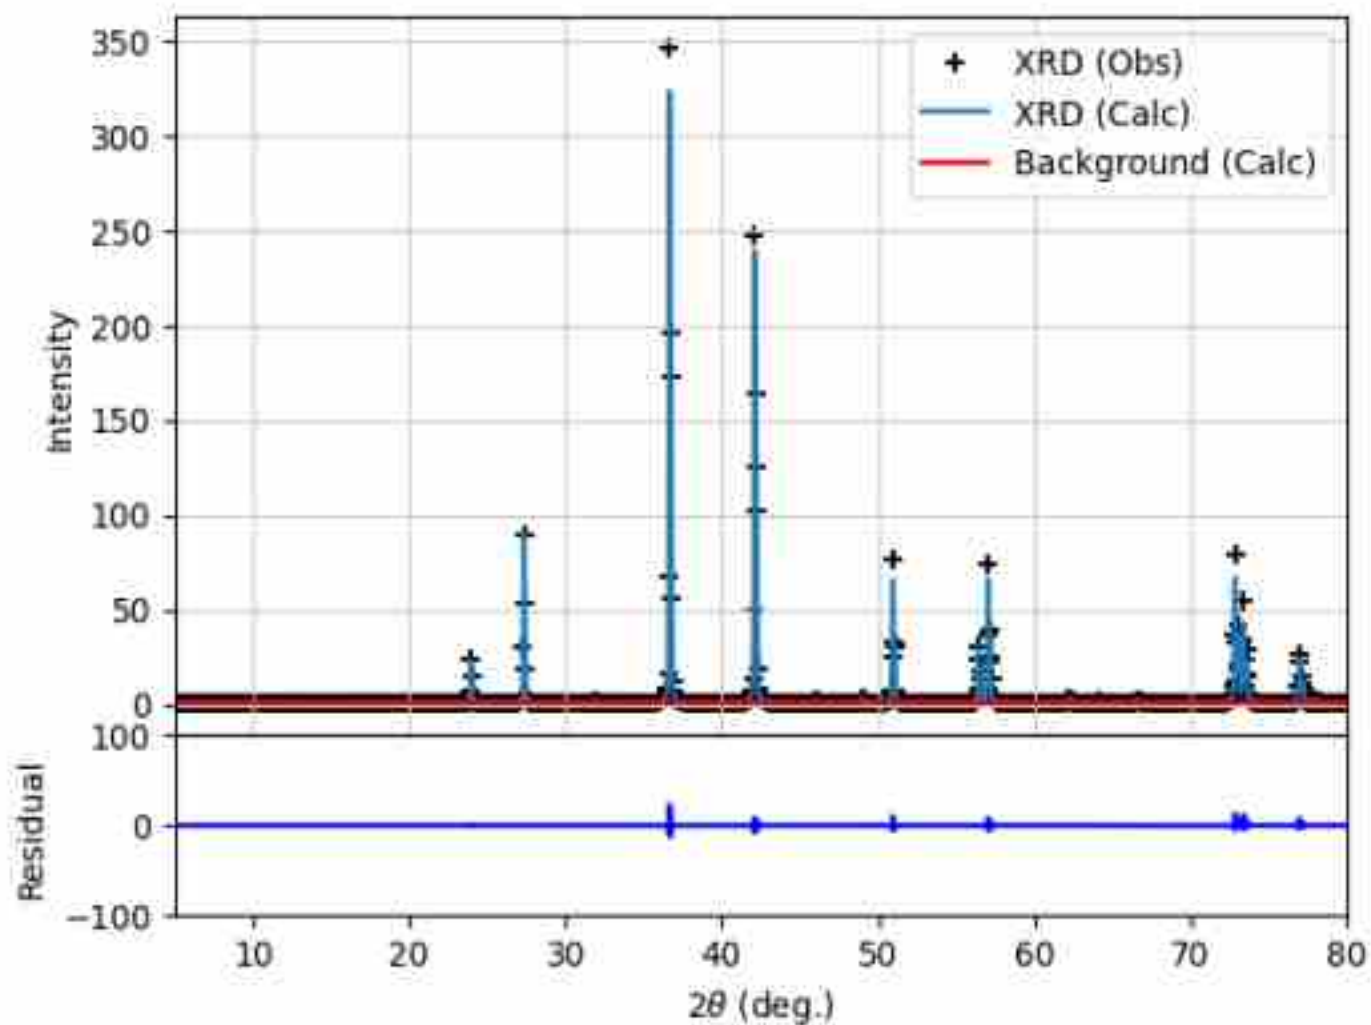

| RMSE before RR | Rwp     | RMSE after RR |
|----------------|---------|---------------|
| 0.007          | 8.85109 | 0.00701       |

# Sc3In1C1

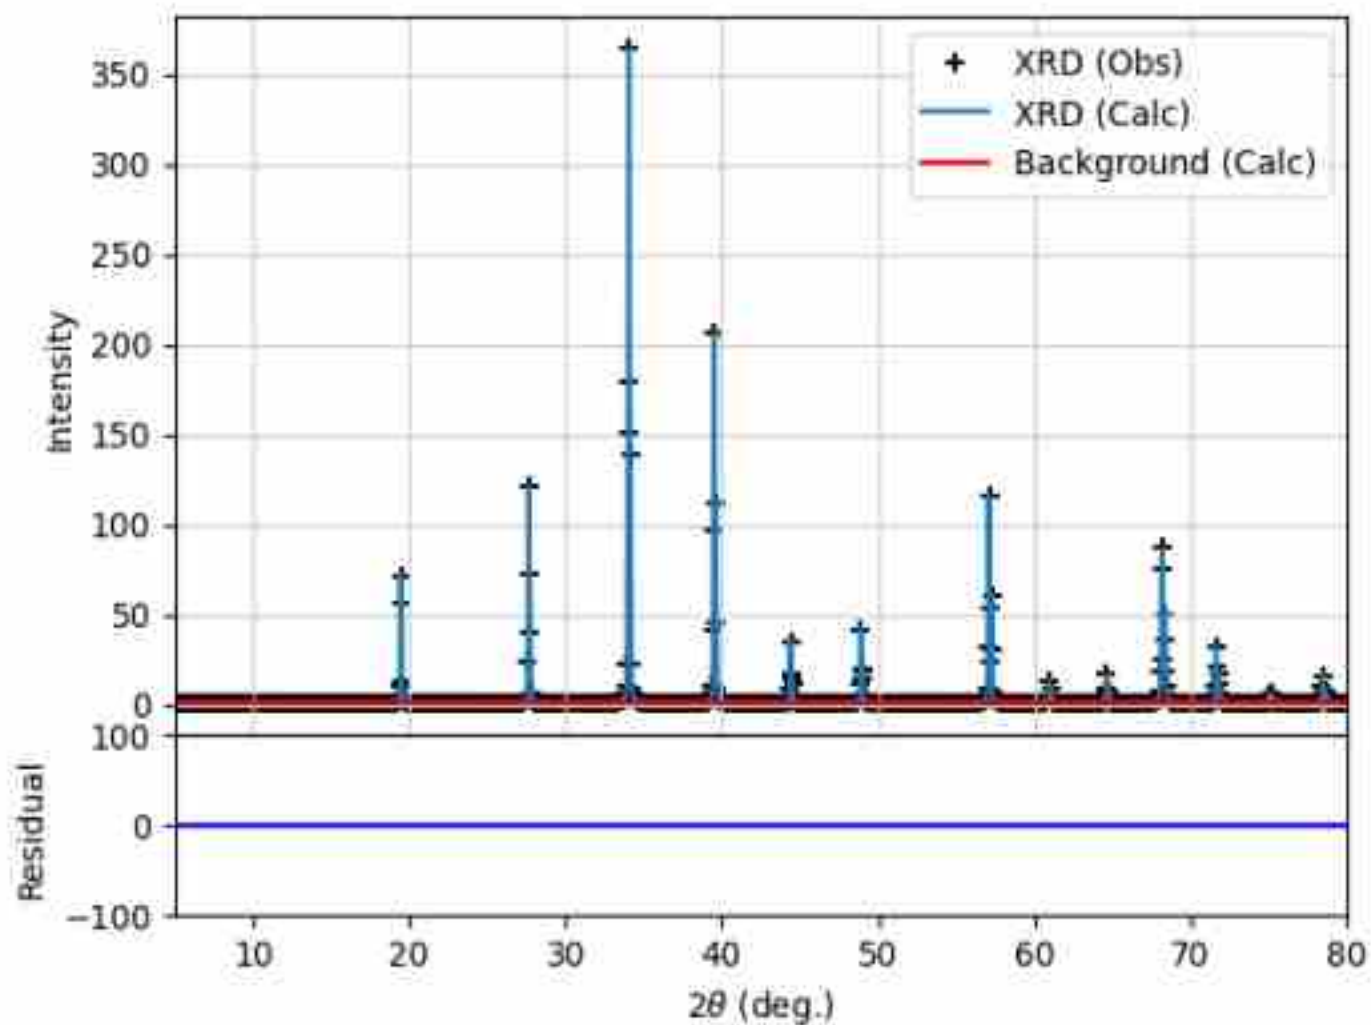

| RMSE before RR | Rwp     | RMSE after RR |
|----------------|---------|---------------|
| 0.007          | 0.01169 | 0.00254       |

# Sc4Al2Si4

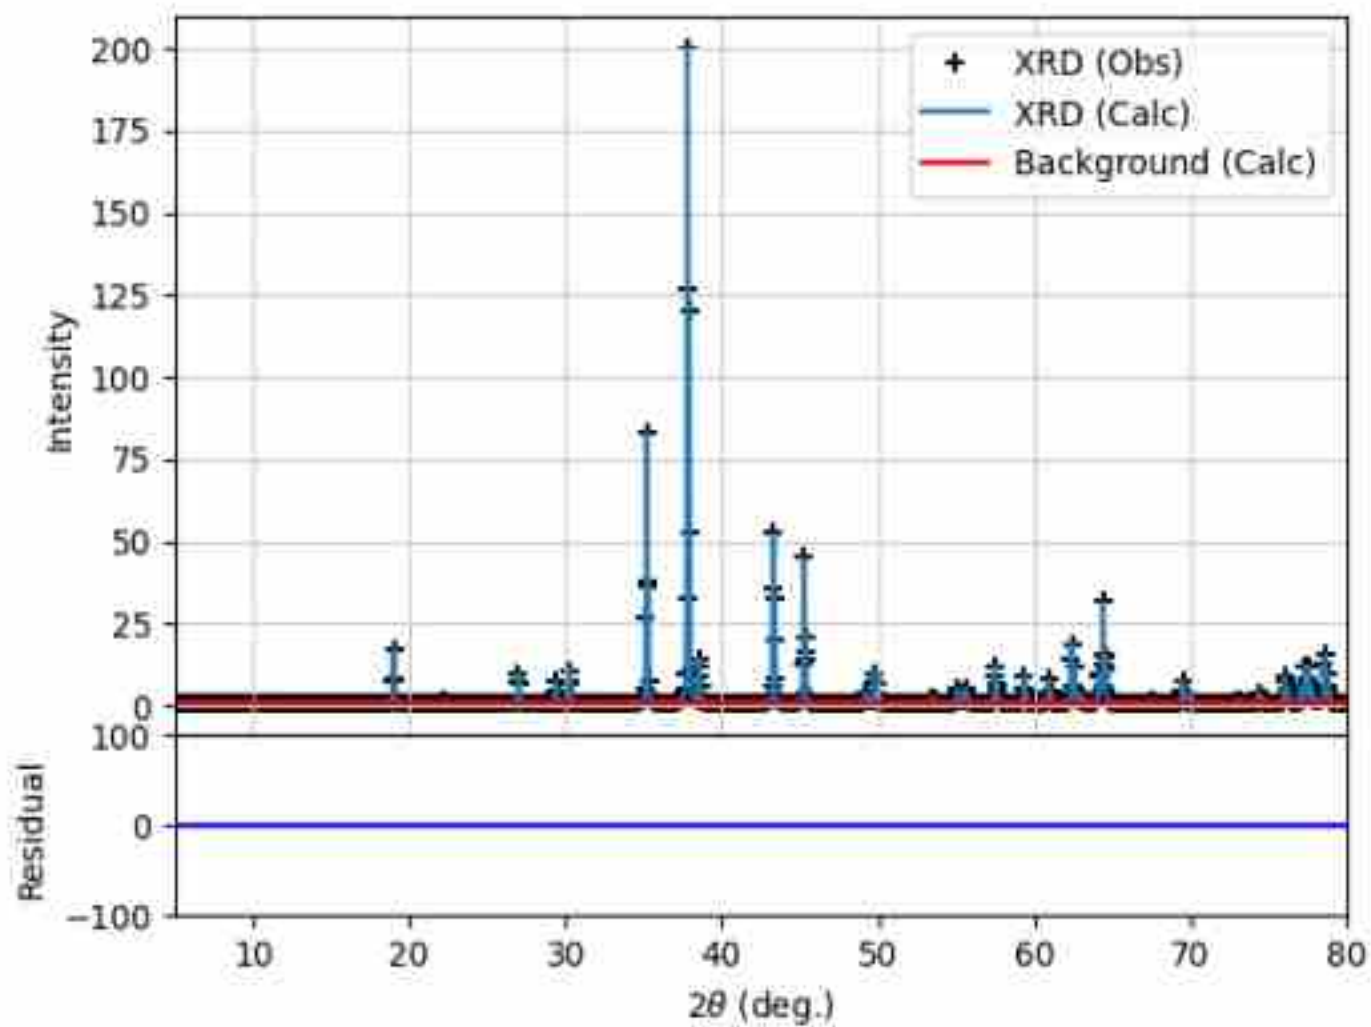

| RMSE before RR | Rwp     | RMSE after RR |
|----------------|---------|---------------|
| 0.007          | 0.00424 | 0.00062       |

# Sm1Ag2Ge2

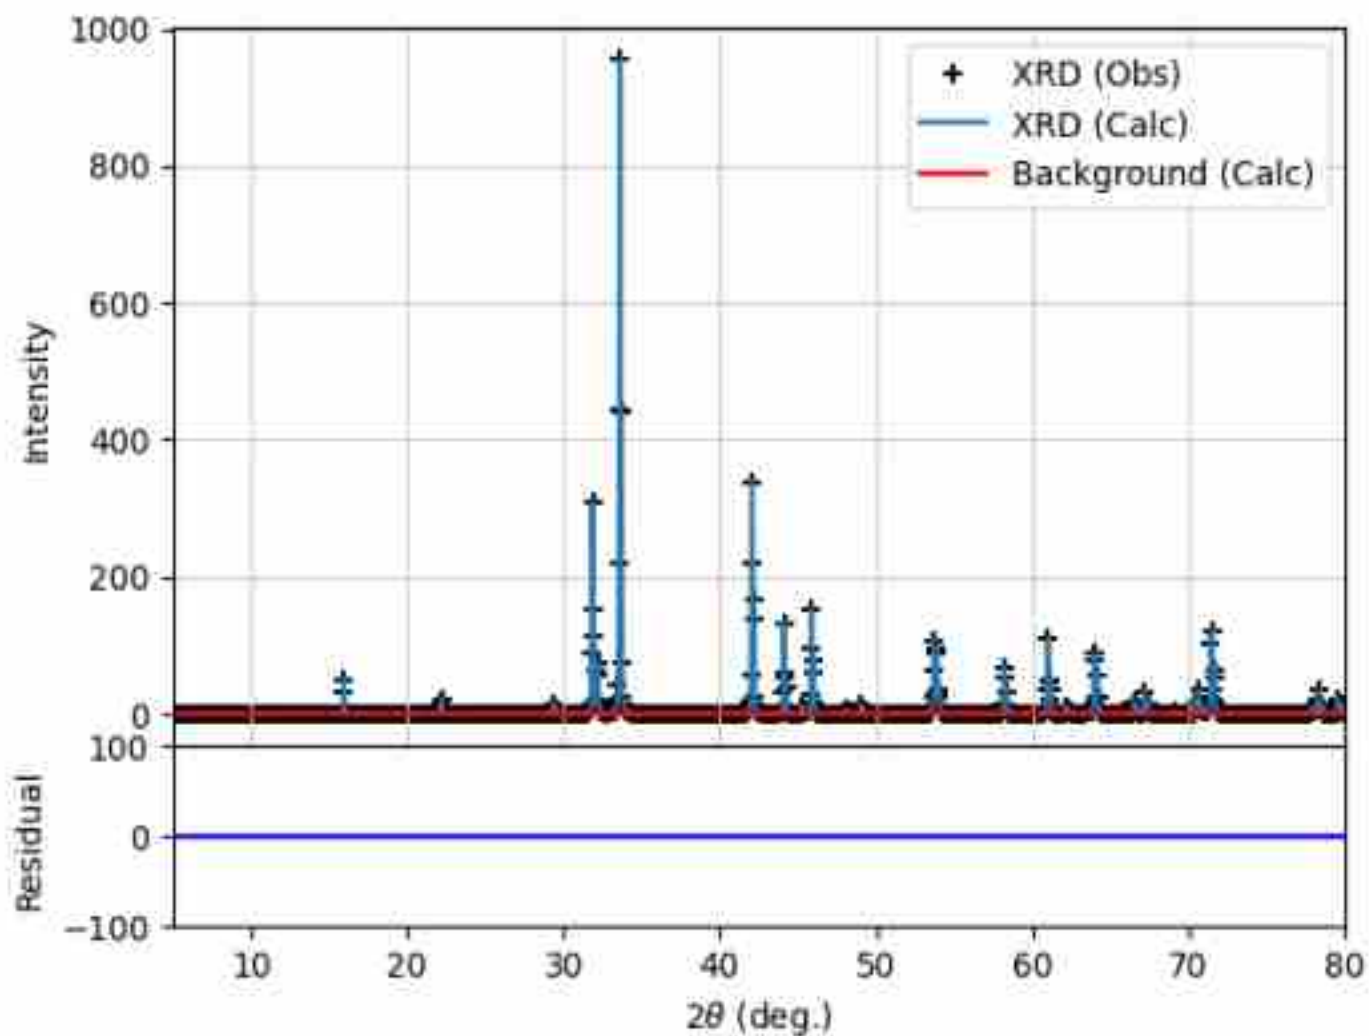

| RMSE before RR | Rwp     | RMSE after RR |
|----------------|---------|---------------|
| 0.007          | 0.00459 | 0.00049       |

# Sm1Dy1Ni2

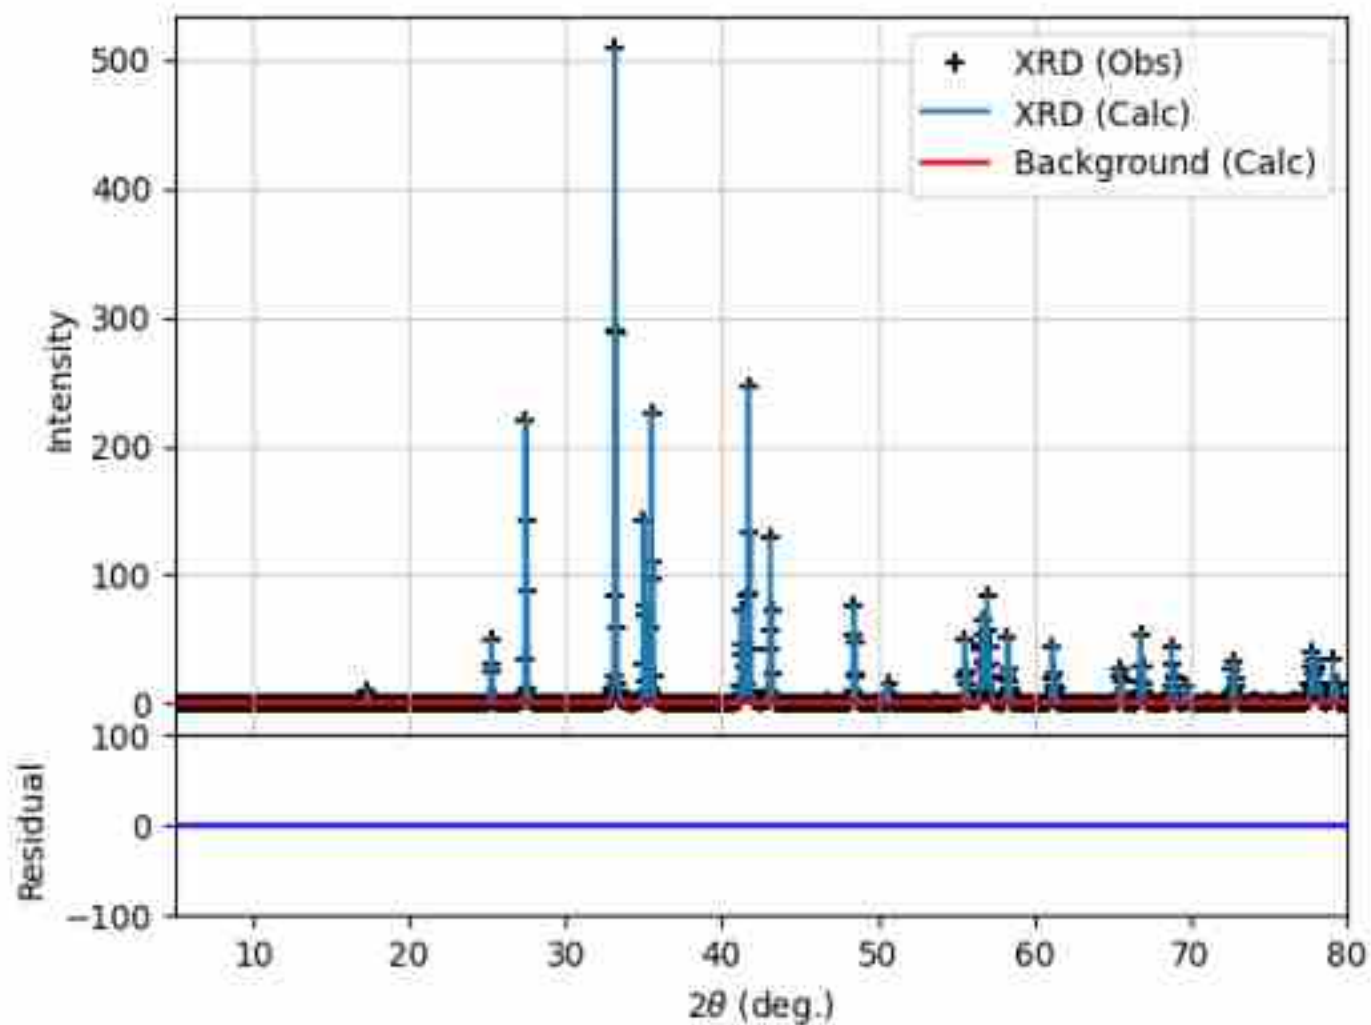

| RMSE before RR | Rwp     | RMSE after RR |
|----------------|---------|---------------|
| 0.007          | 0.00322 | 0.0003        |

# Sm2Ge3Pt1

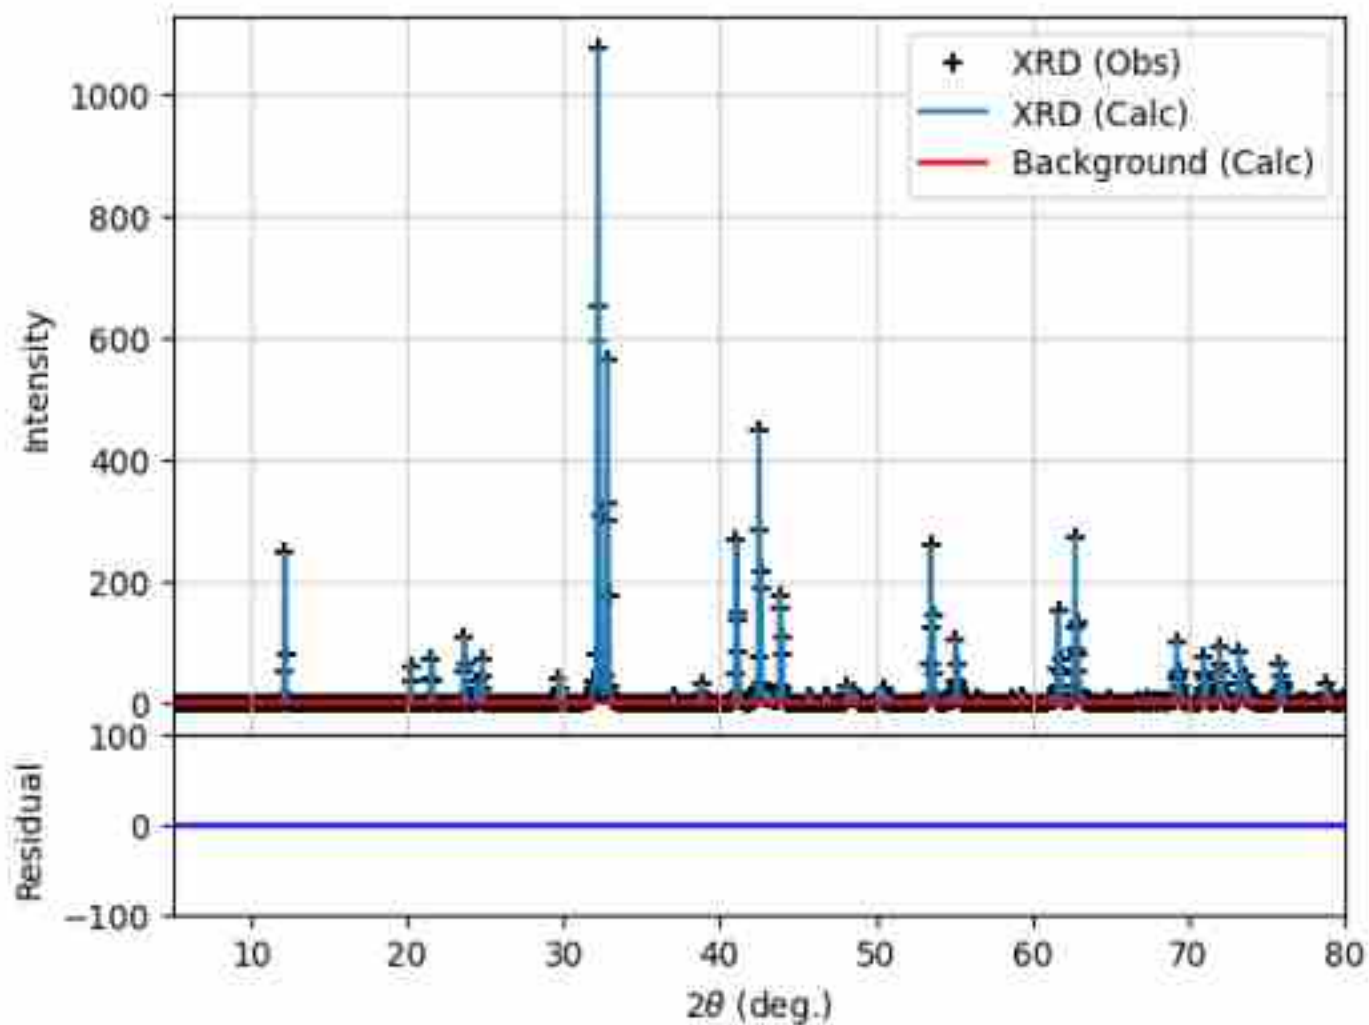

| RMSE before RR | Rwp     | RMSE after RR |
|----------------|---------|---------------|
| 0.007          | 0.00435 | 0.0003        |

# Sm<sub>2</sub>P<sub>4</sub>Ir<sub>4</sub>

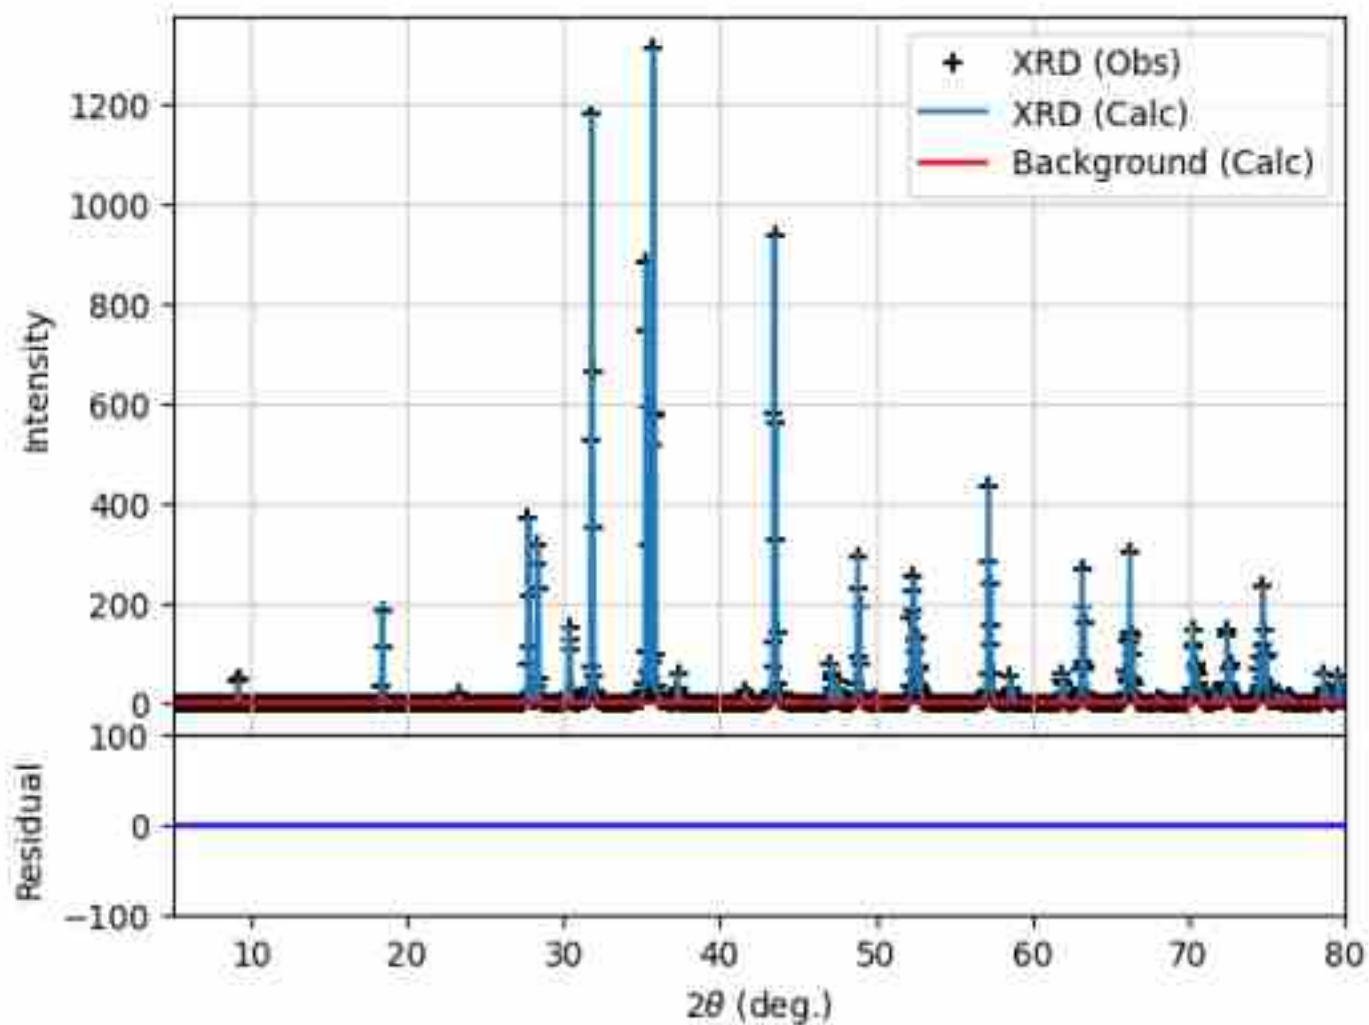

| RMSE before RR | Rwp     | RMSE after RR |
|----------------|---------|---------------|
| 0.007          | 0.00396 | 0.00072       |

# Sm3Sn1N1

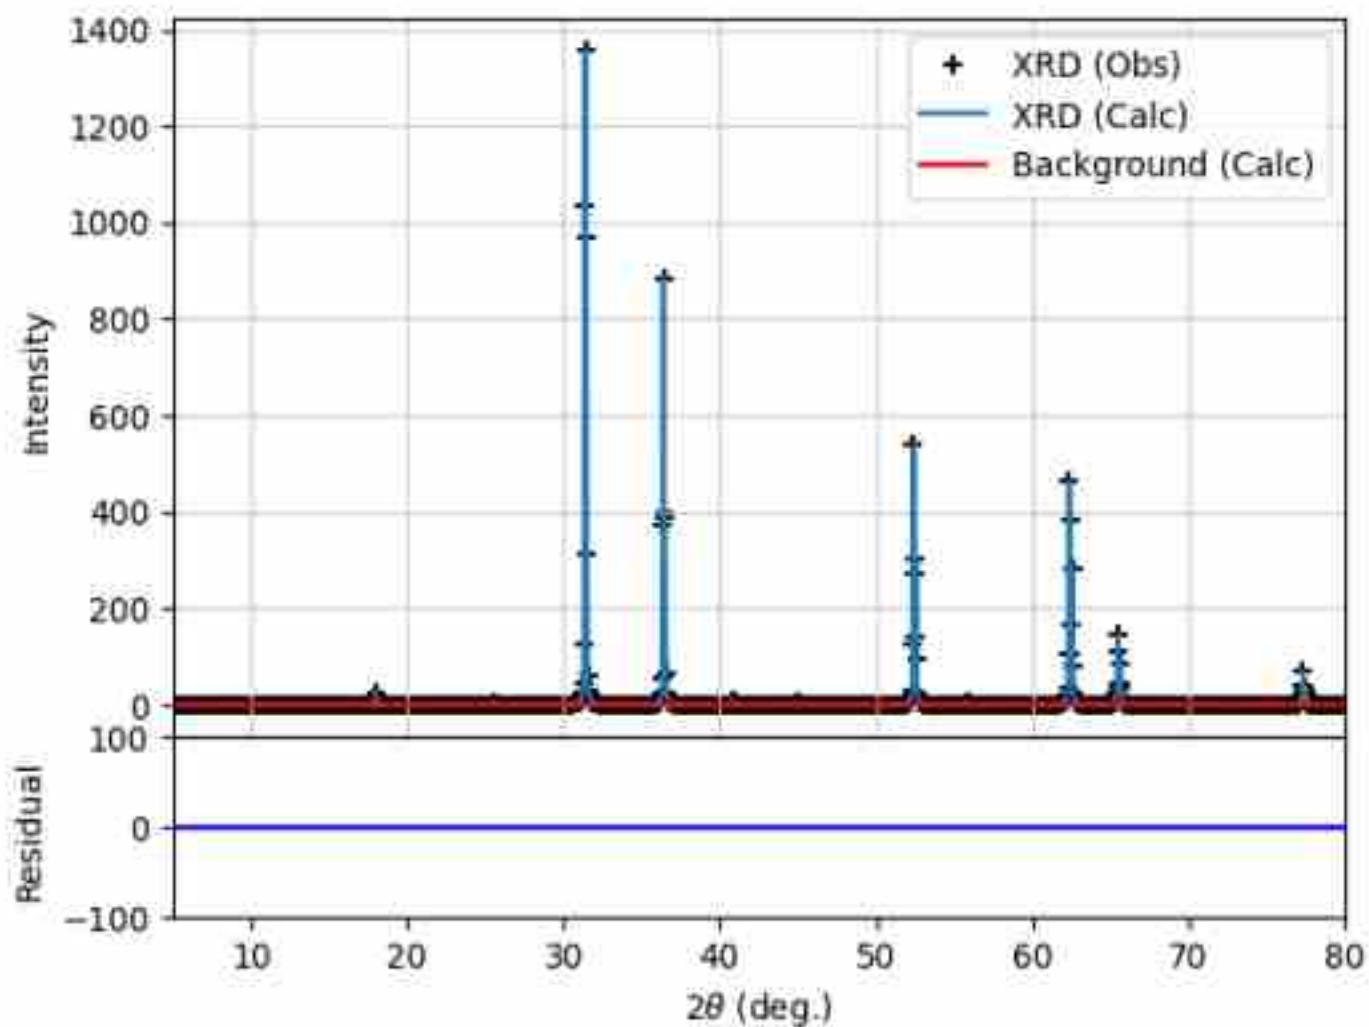

| RMSE before RR | Rwp     | RMSE after RR |
|----------------|---------|---------------|
| 0.007          | 0.25098 | 0.01355       |



# Sr1Eu1Se2

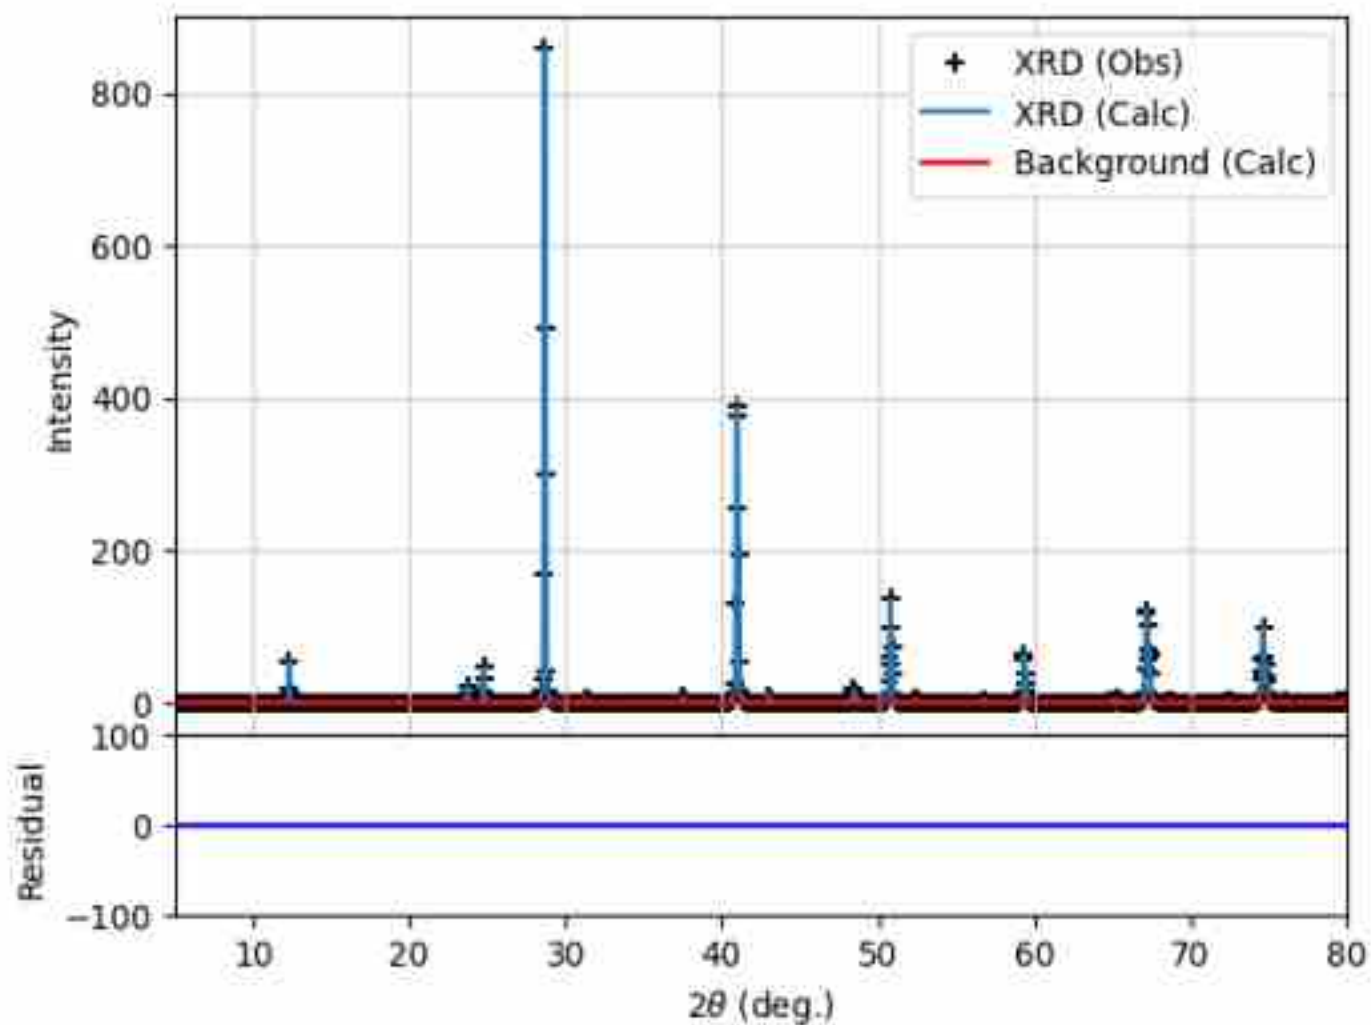

| RMSE before RR | Rwp     | RMSE after RR |
|----------------|---------|---------------|
| 0.007          | 0.00236 | 0.00049       |

# Sr1Zn2N2

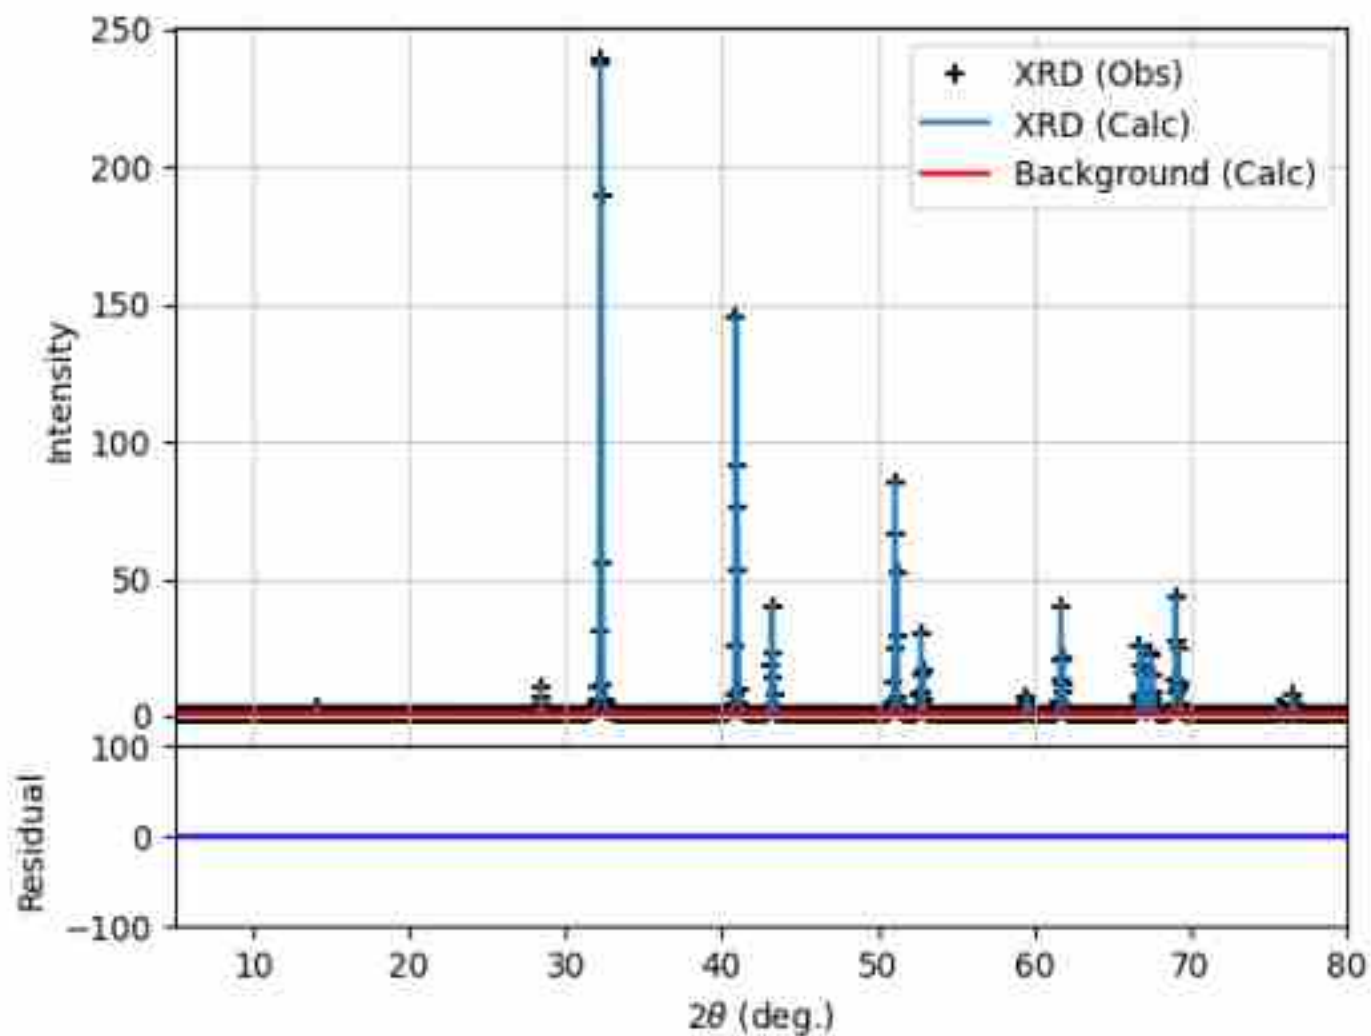

| RMSE before RR | Rwp    | RMSE after RR |
|----------------|--------|---------------|
| 0.007          | 0.0051 | 0.00169       |

# Sr2Rh4

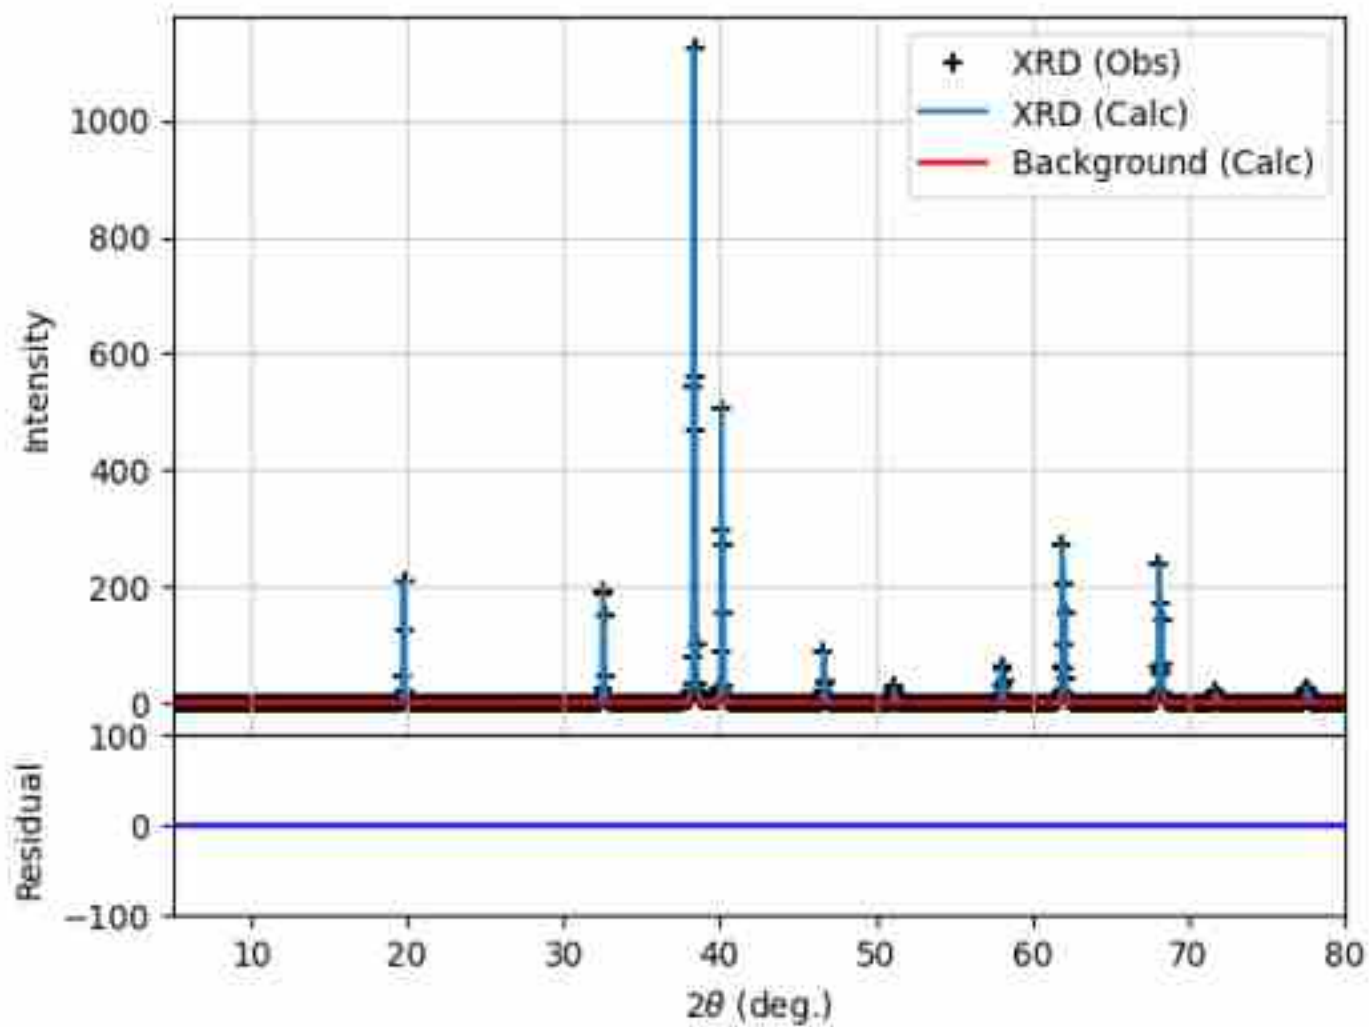

| RMSE before RR | Rwp     | RMSE after RR |
|----------------|---------|---------------|
| 0.007          | 0.00431 | 0.00054       |

# Sr<sub>2</sub>Zn<sub>2</sub>Pb<sub>2</sub>

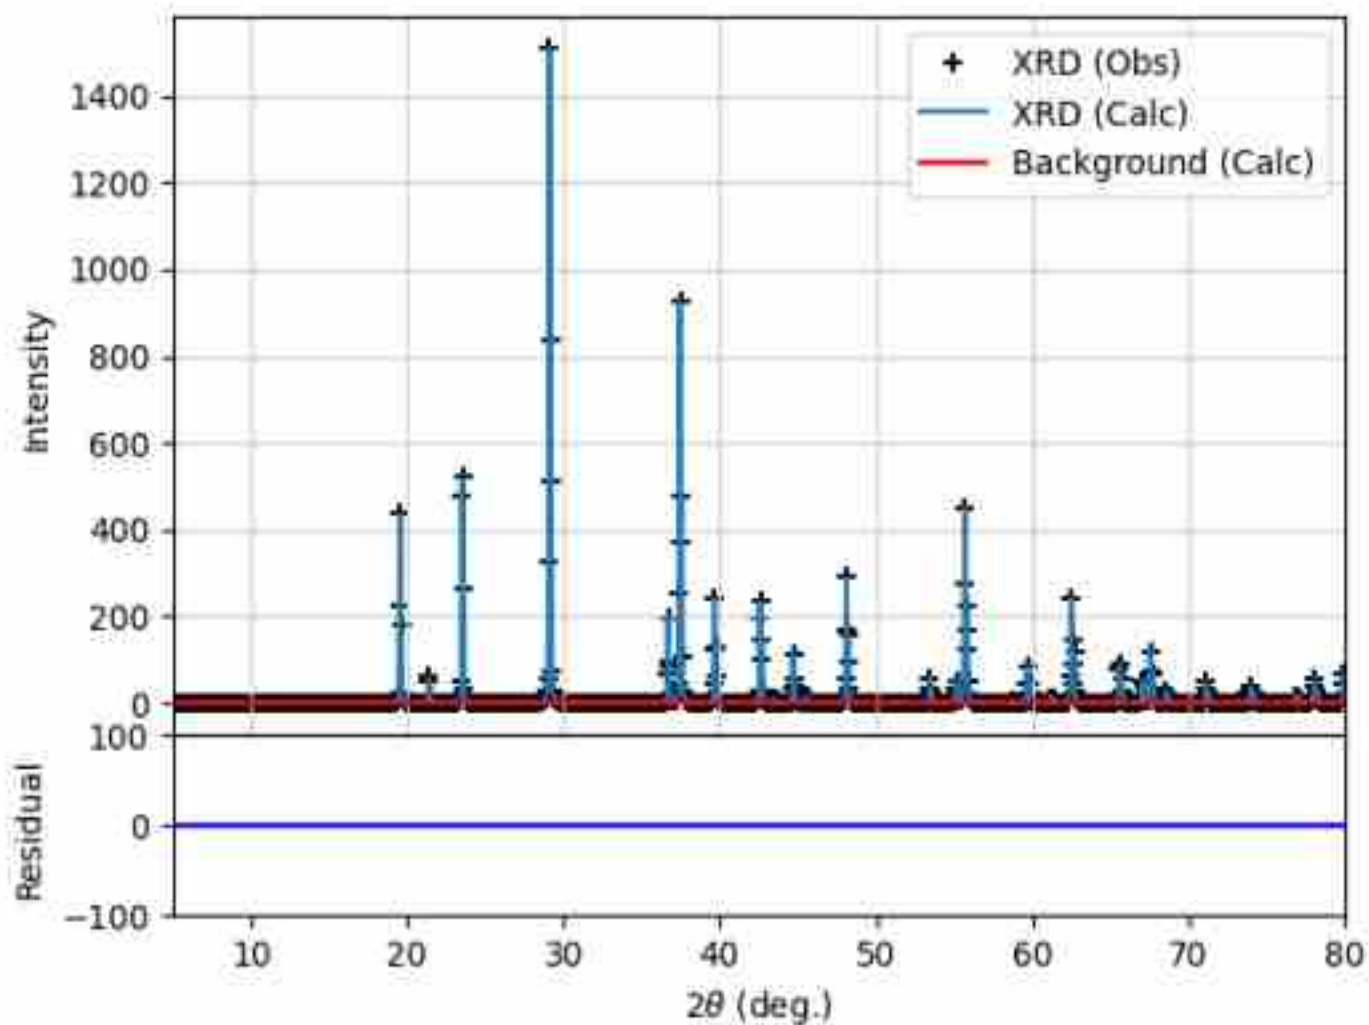

| RMSE before RR | Rwp     | RMSE after RR |
|----------------|---------|---------------|
| 0.007          | 0.00872 | 0.00048       |

# Sr<sub>2</sub>Zn<sub>2</sub>Si<sub>2</sub>

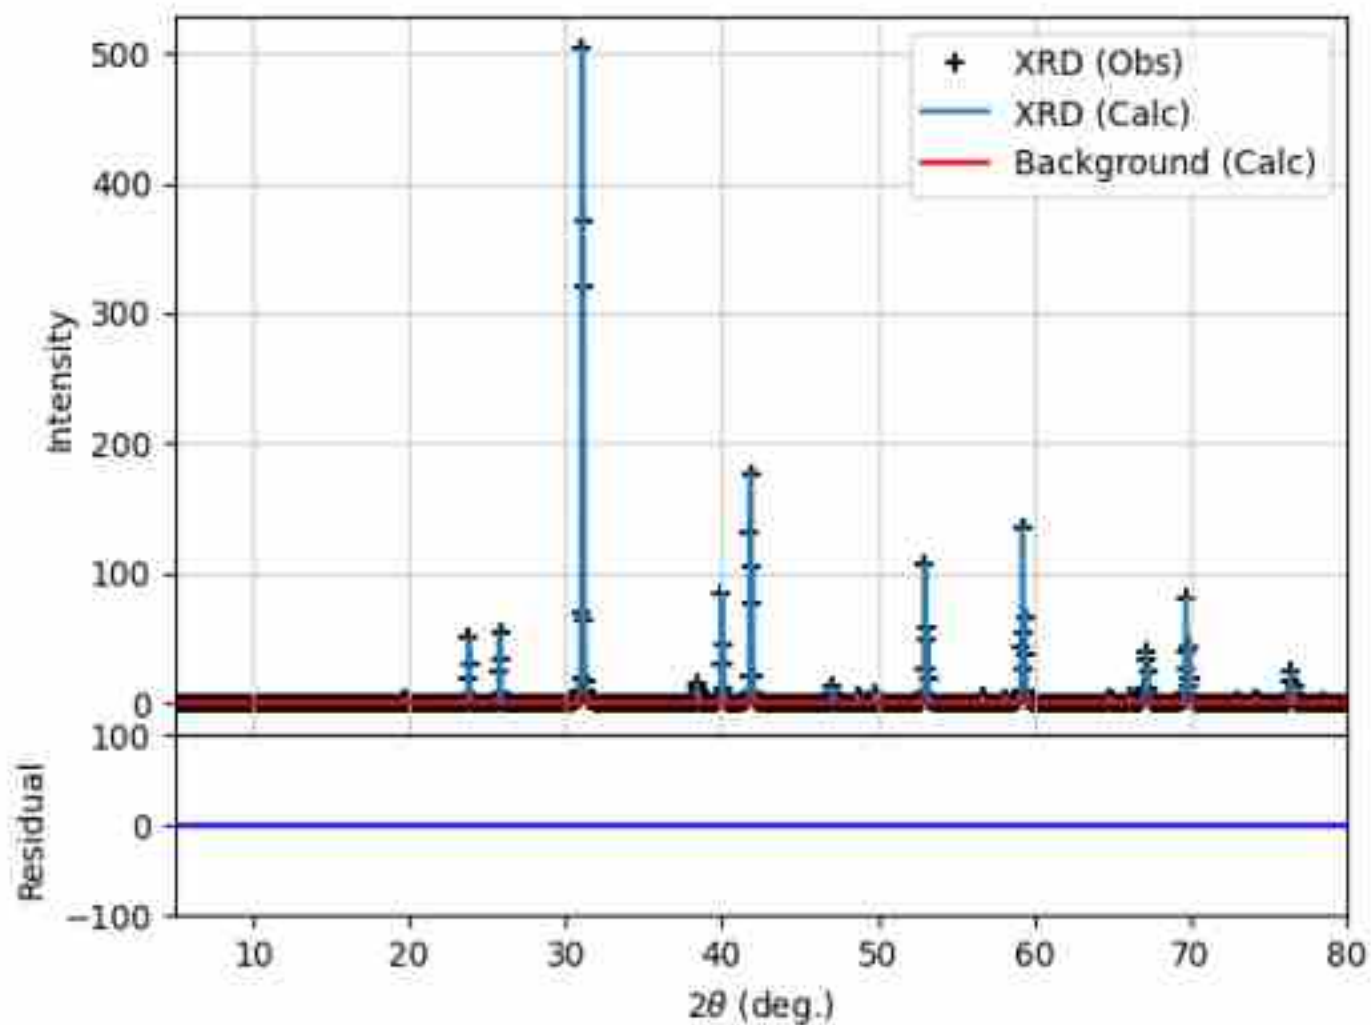

| RMSE before RR | Rwp     | RMSE after RR |
|----------------|---------|---------------|
| 0.007          | 0.01356 | 0.00149       |

# Ta2Cr4

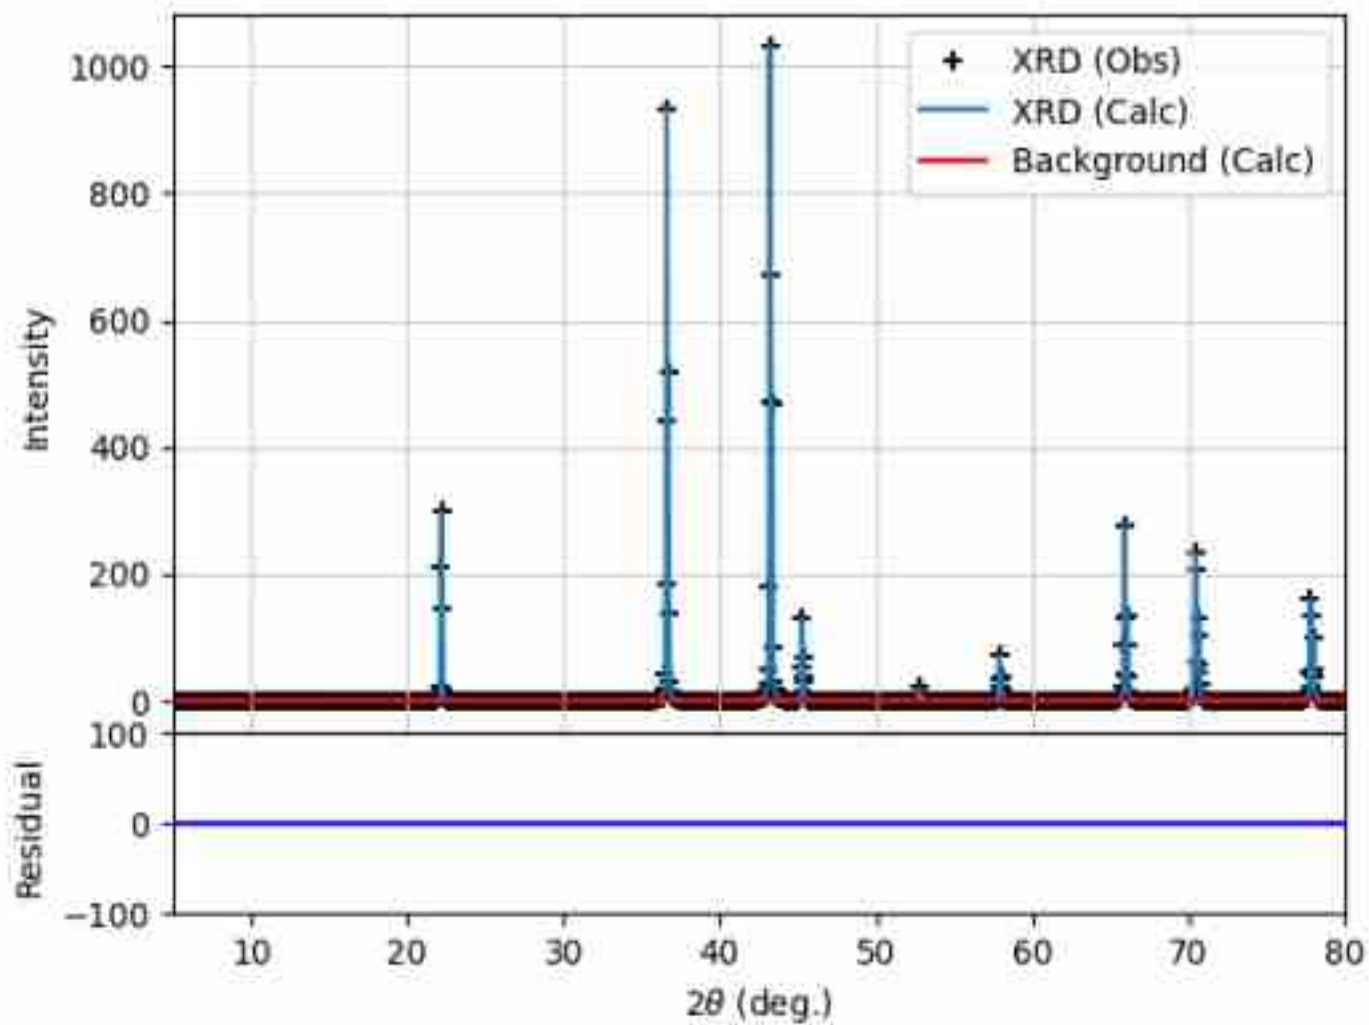

| RMSE before RR | Rwp     | RMSE after RR |
|----------------|---------|---------------|
| 0.007          | 0.03272 | 0.00102       |

# Tb1Cu1Te2

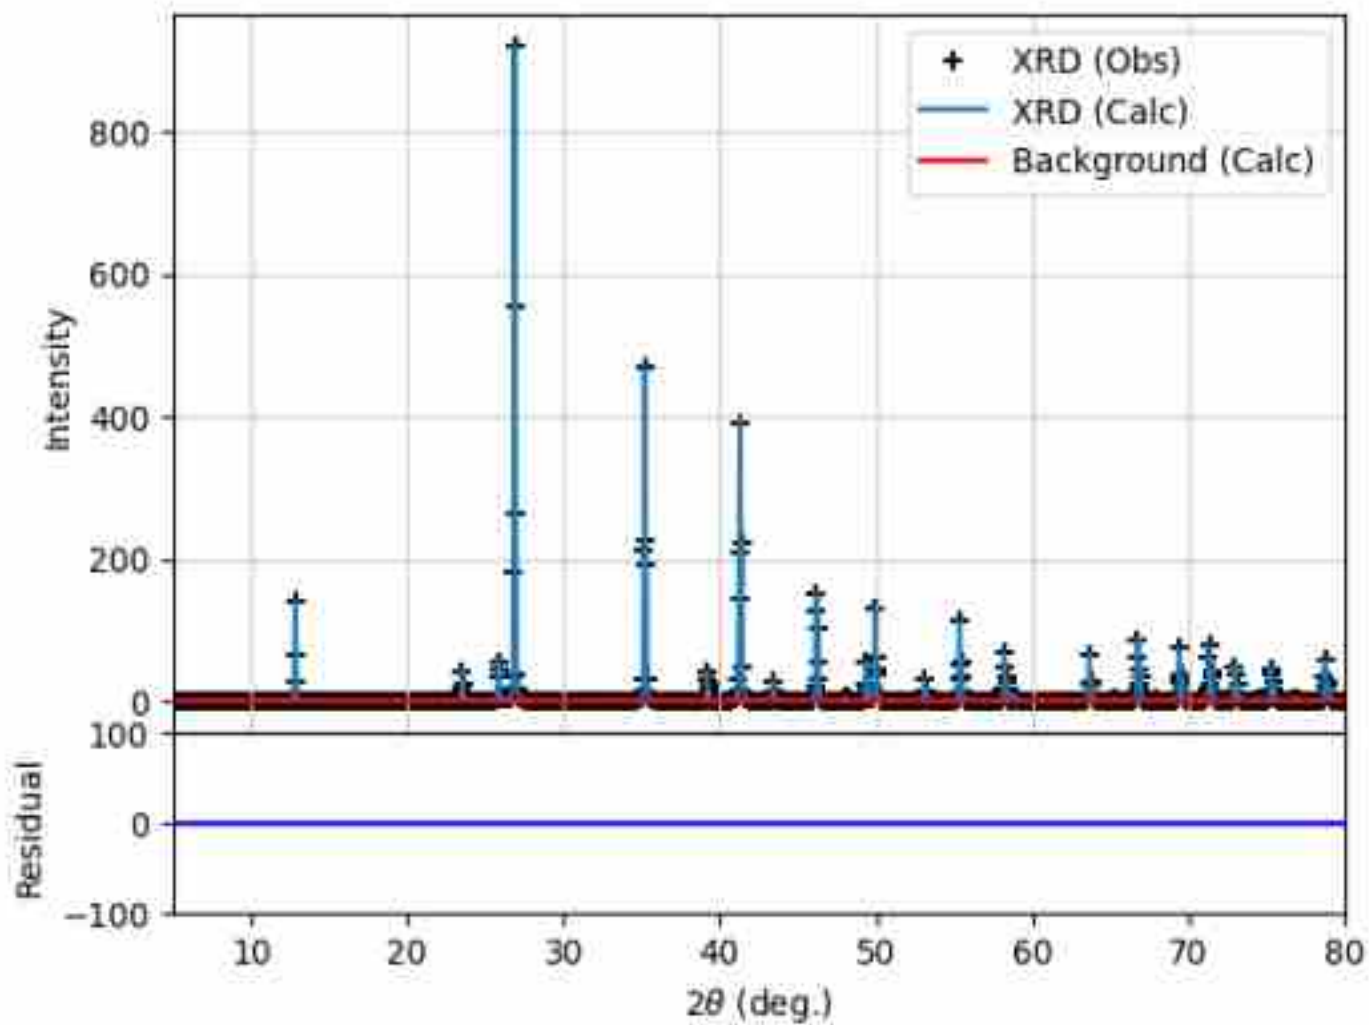

| RMSE before RR | Rwp     | RMSE after RR |
|----------------|---------|---------------|
| 0.007          | 0.00225 | 0.00015       |

# Tb1Cu4Pd1

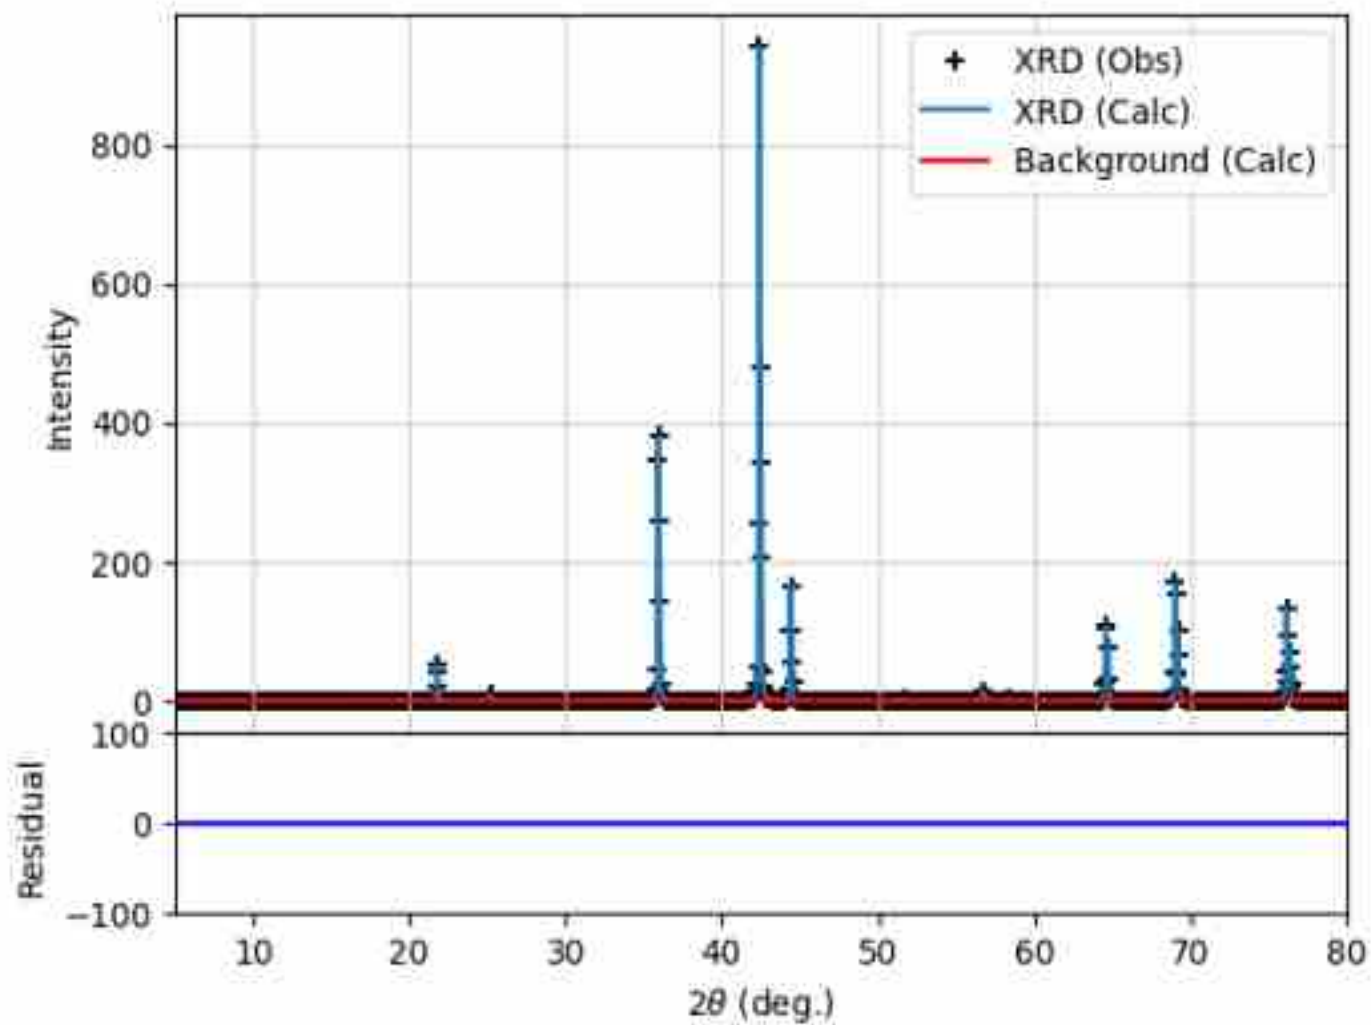

| RMSE before RR | Rwp     | RMSE after RR |
|----------------|---------|---------------|
| 0.007          | 0.00641 | 0.00094       |



# Tb1Fe2Si2

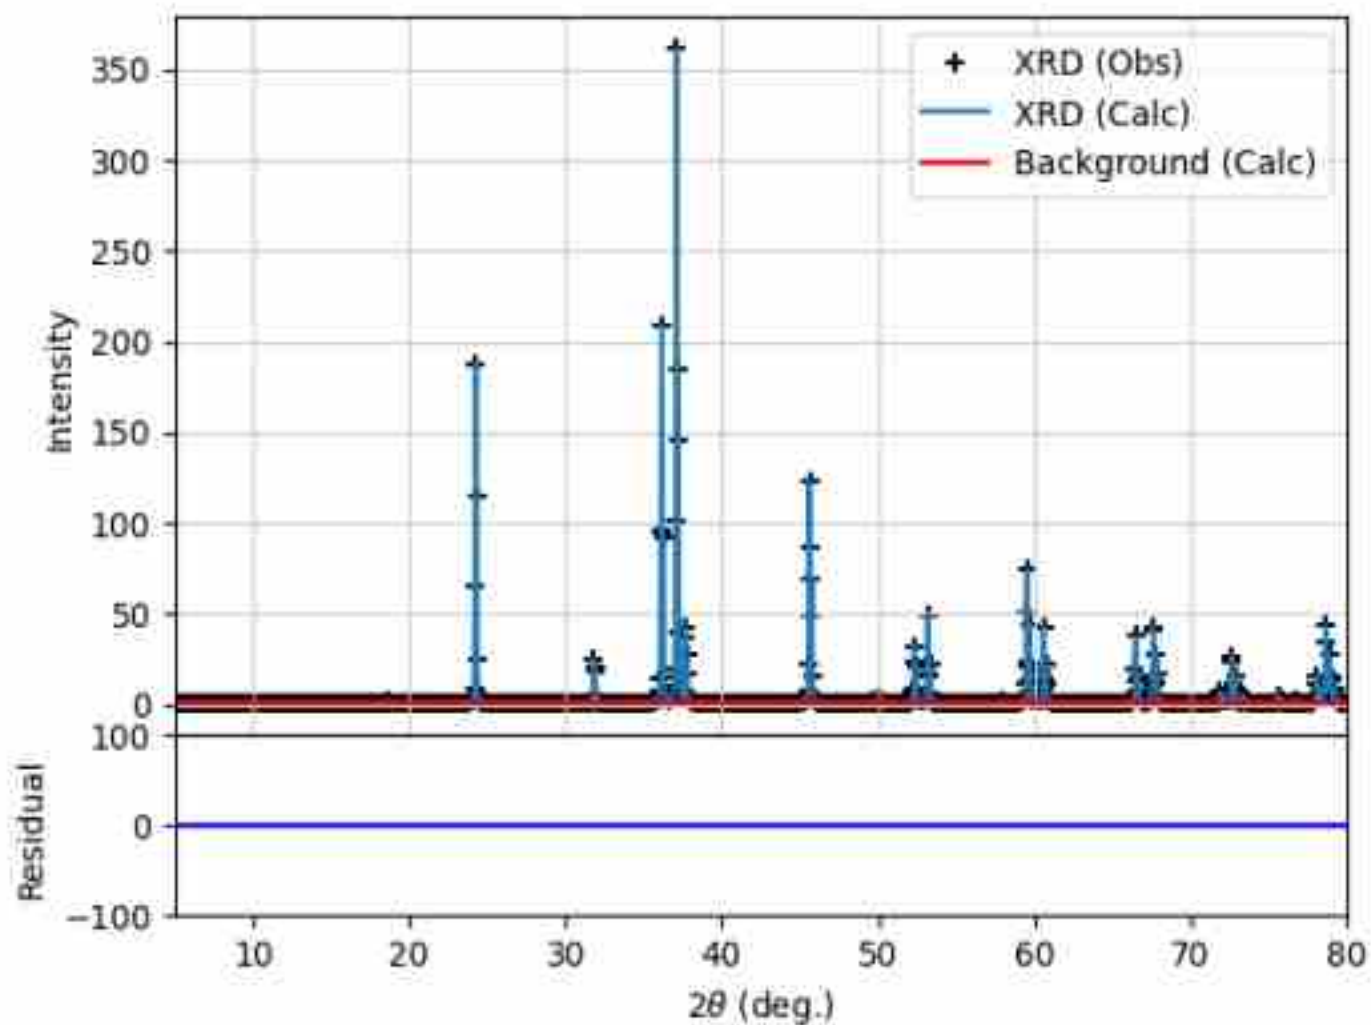

| RMSE before RR | Rwp     | RMSE after RR |
|----------------|---------|---------------|
| 0.007          | 0.00359 | 0.00091       |

# Tb1Ga5Co1

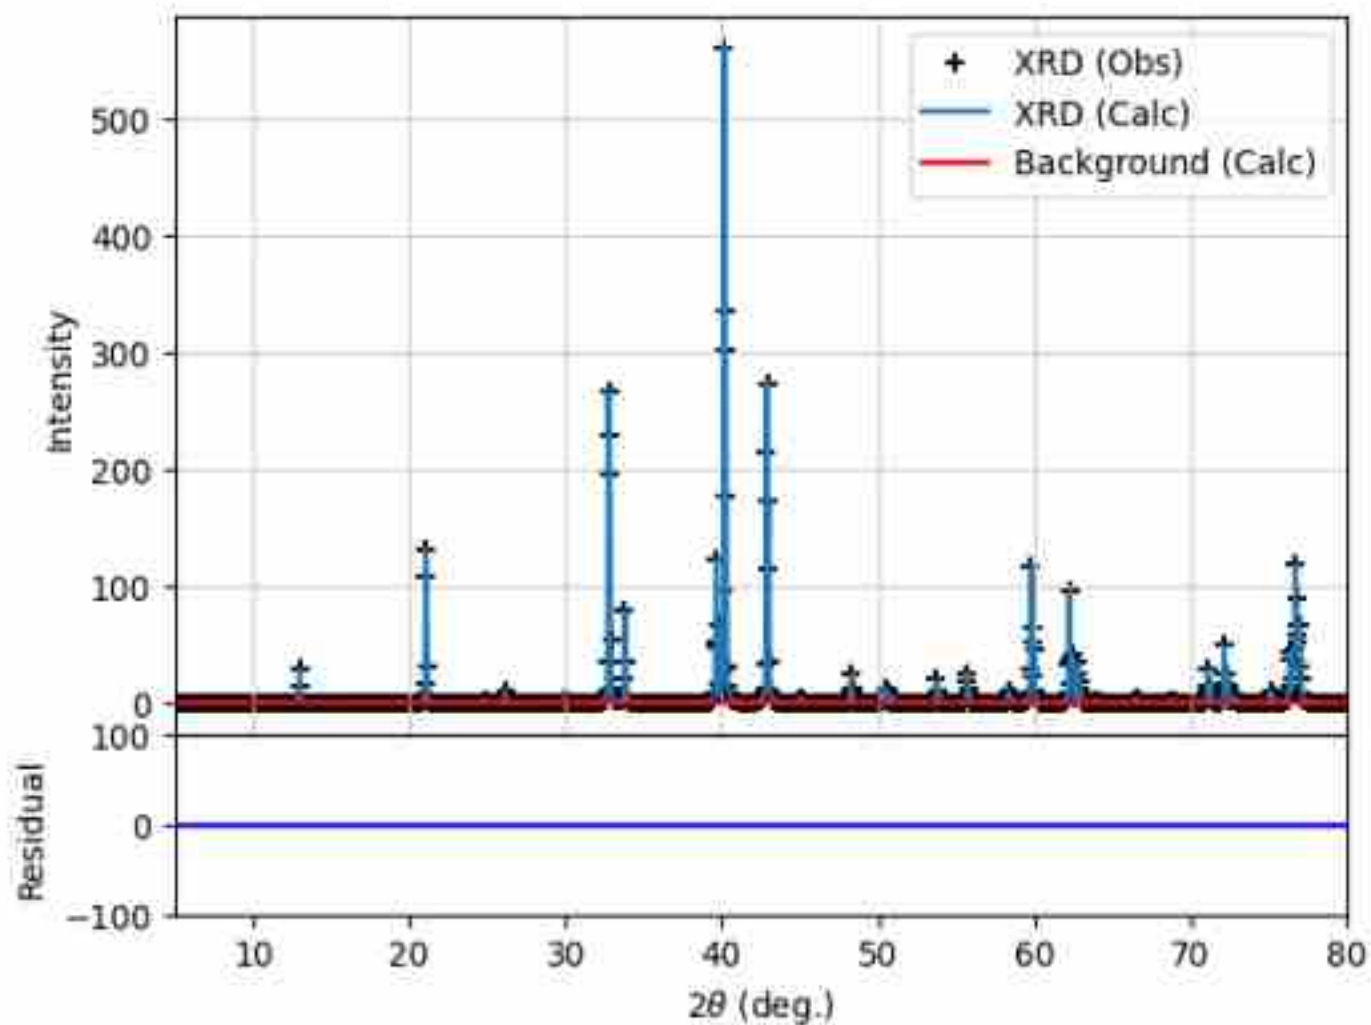

| RMSE before RR | Rwp     | RMSE after RR |
|----------------|---------|---------------|
| 0.007          | 0.00816 | 0.00065       |

# Tb1Si3Rh1

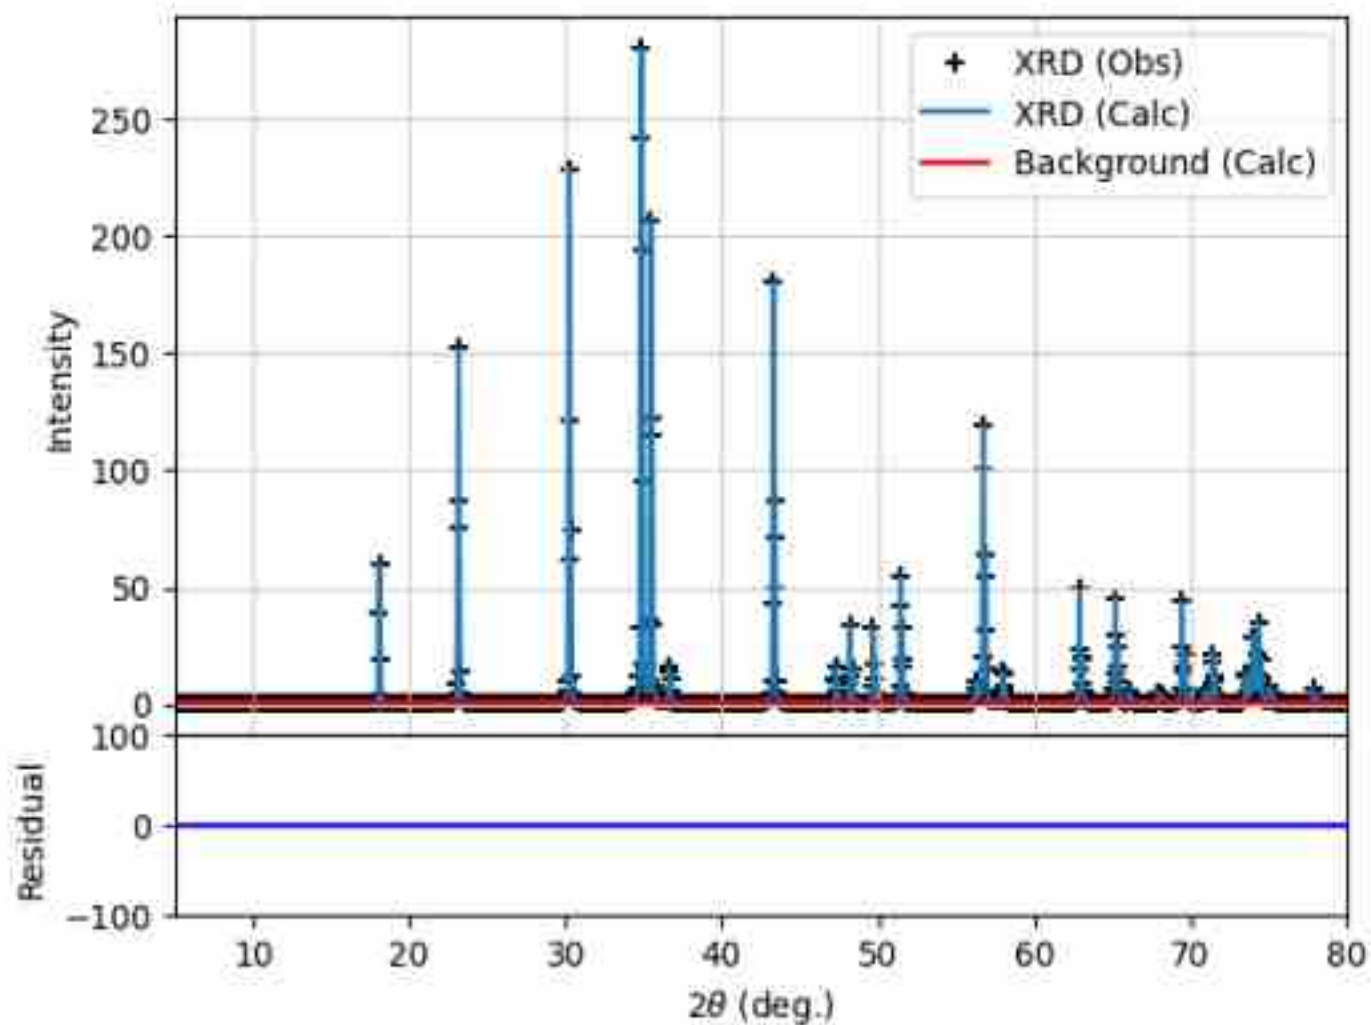

| RMSE before RR | Rwp     | RMSE after RR |
|----------------|---------|---------------|
| 0.007          | 0.06243 | 0.00185       |

# Tb<sub>2</sub>Ni<sub>8</sub>P<sub>4</sub>

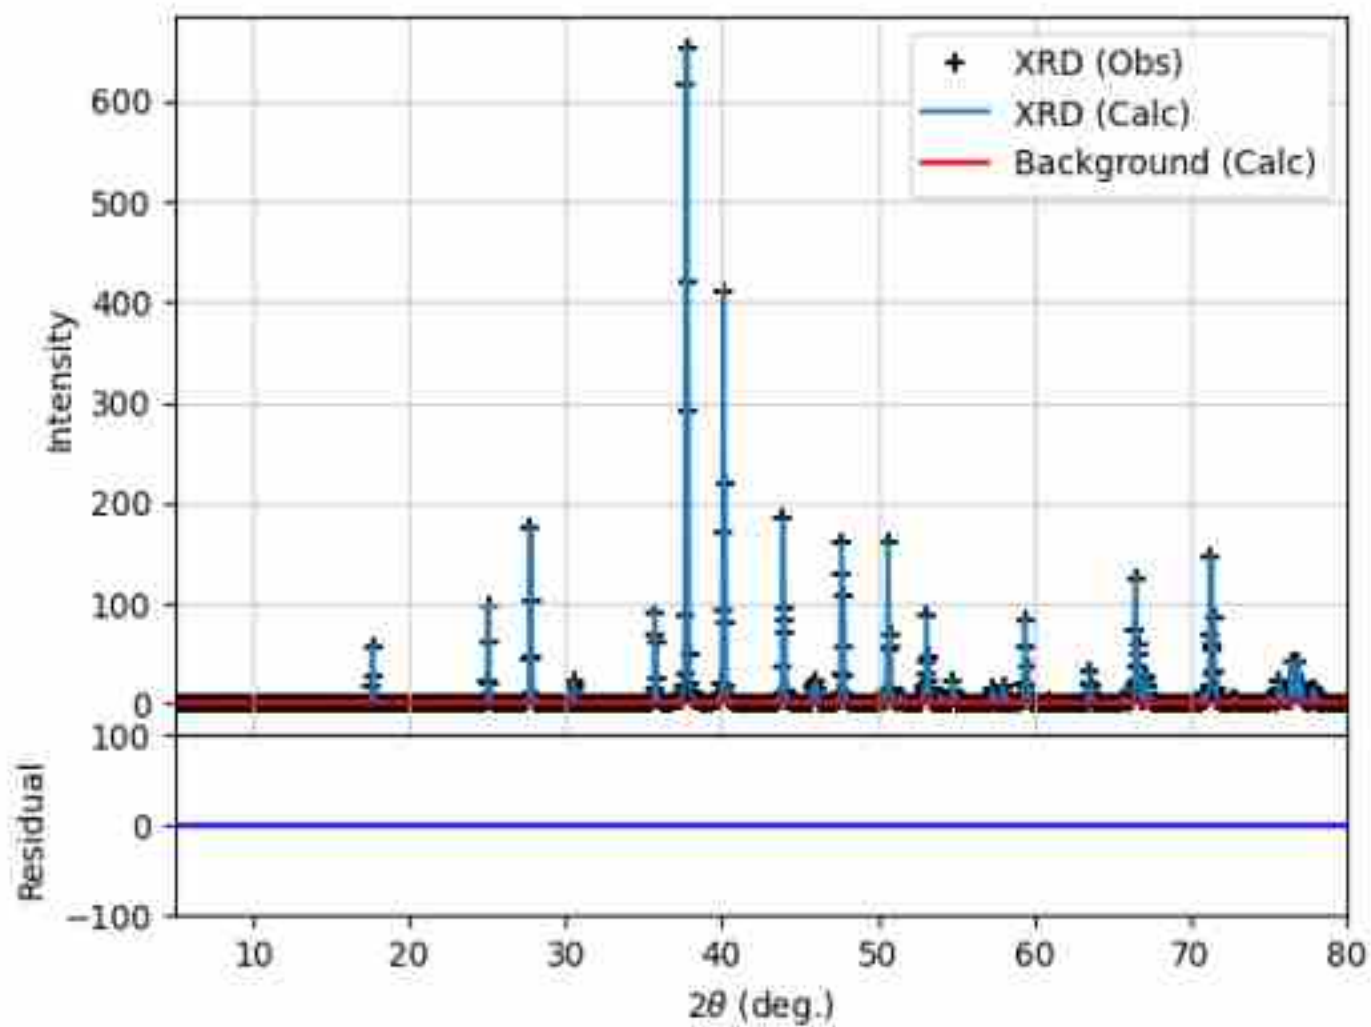

| RMSE before RR | Rwp     | RMSE after RR |
|----------------|---------|---------------|
| 0.007          | 0.00529 | 0.00082       |

# Te1Pb2Se1

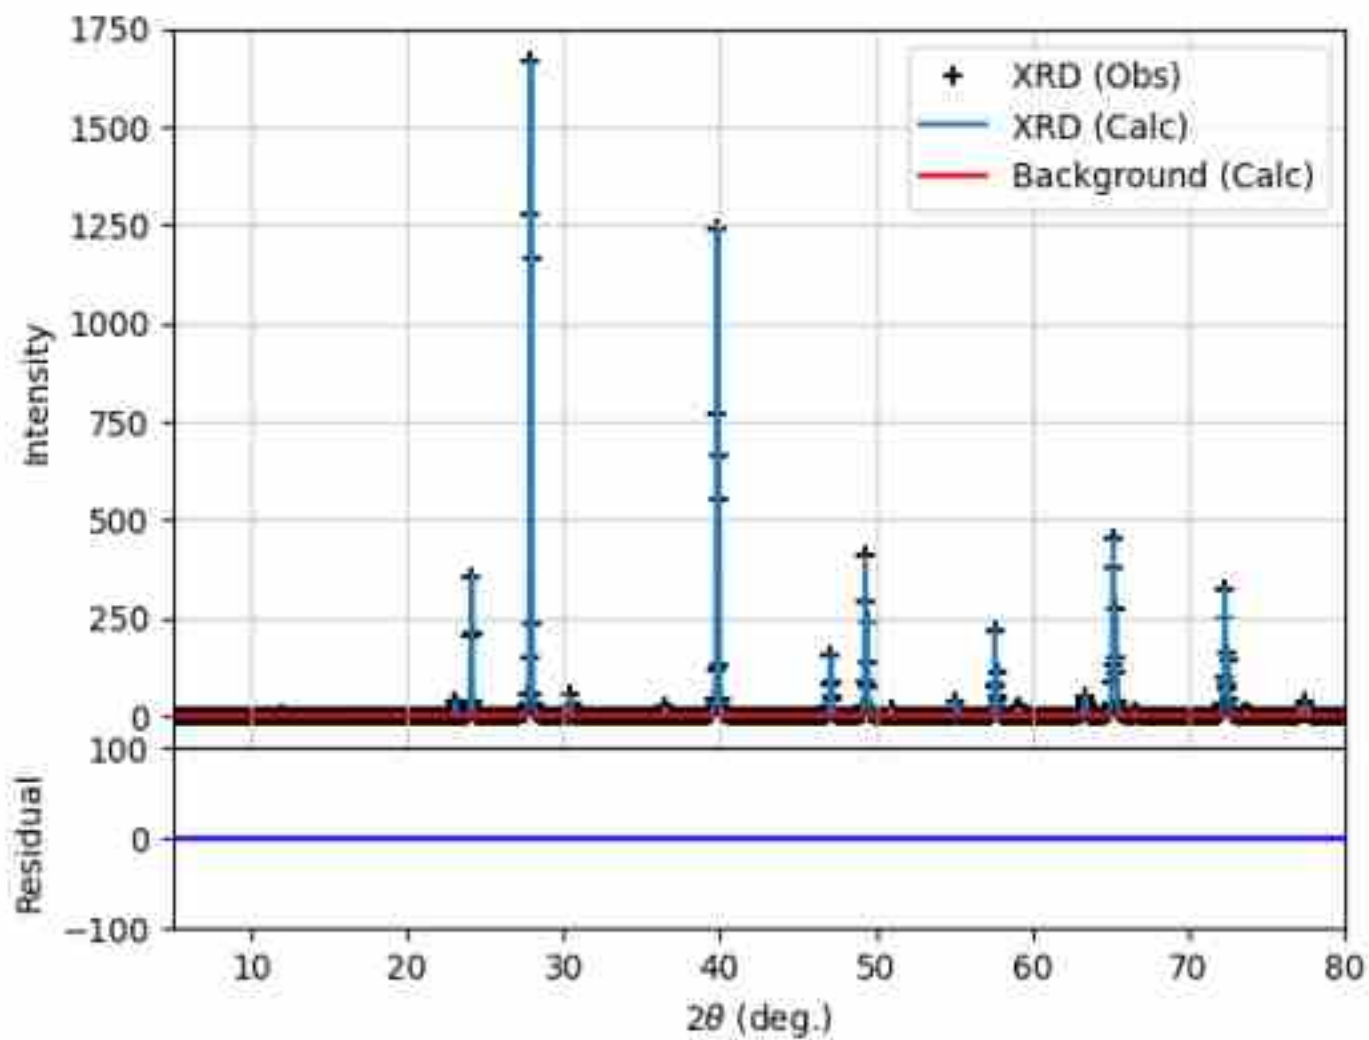

| RMSE before RR | Rwp     | RMSE after RR |
|----------------|---------|---------------|
| 0.007          | 0.00317 | 0.00158       |

# Te<sub>2</sub>Mo<sub>4</sub>Se<sub>2</sub>S<sub>4</sub>

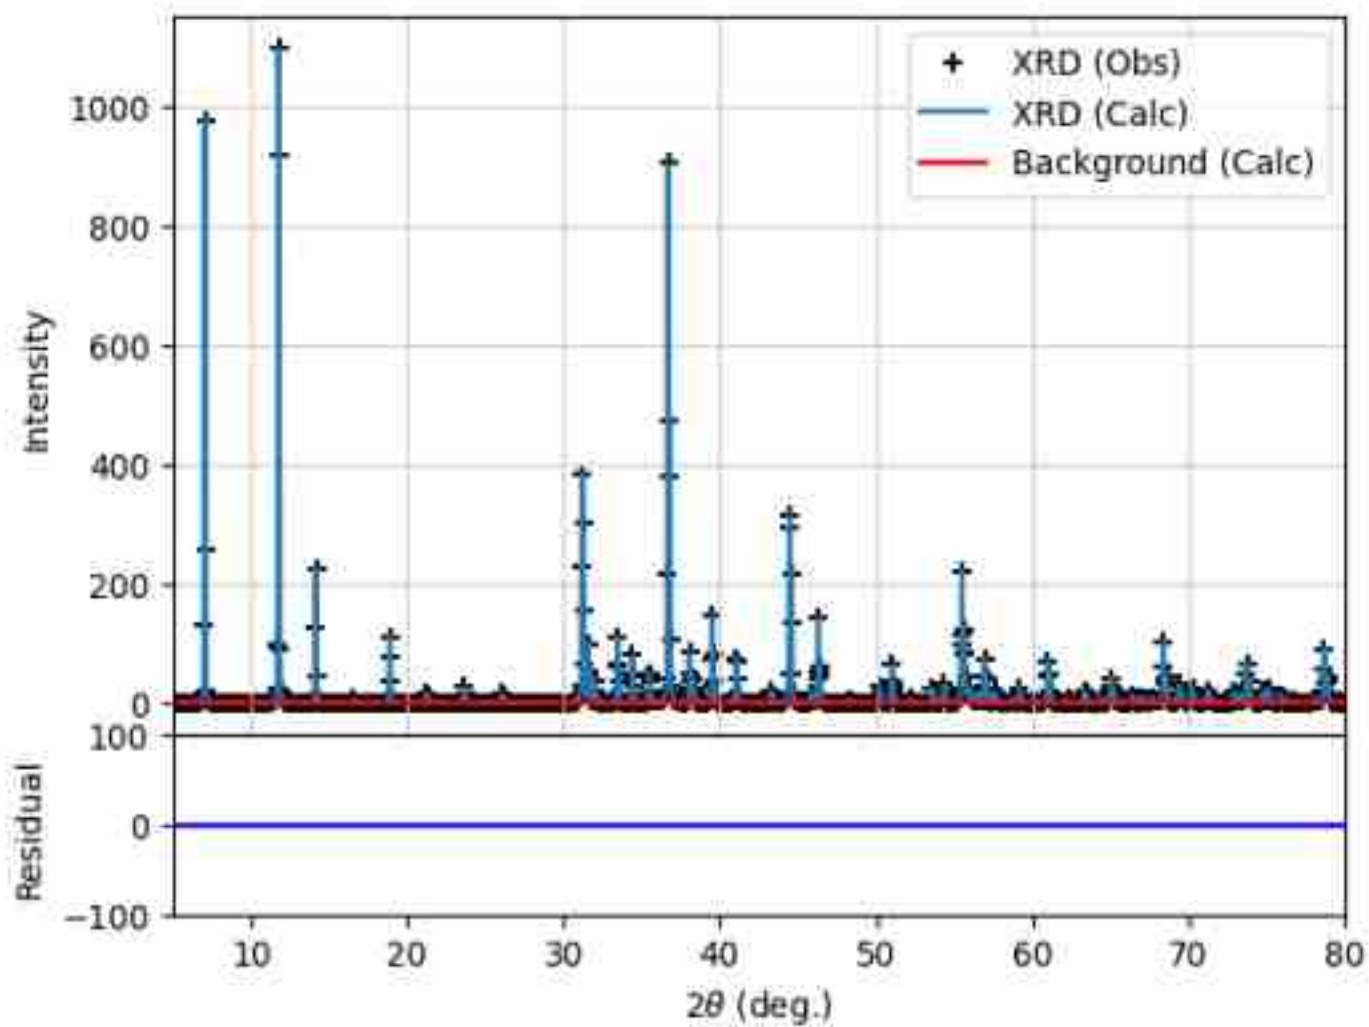

| RMSE before RR | Rwp     | RMSE after RR |
|----------------|---------|---------------|
| 0.07           | 0.00313 | 0.00053       |

# Te6Mo1W3Se2

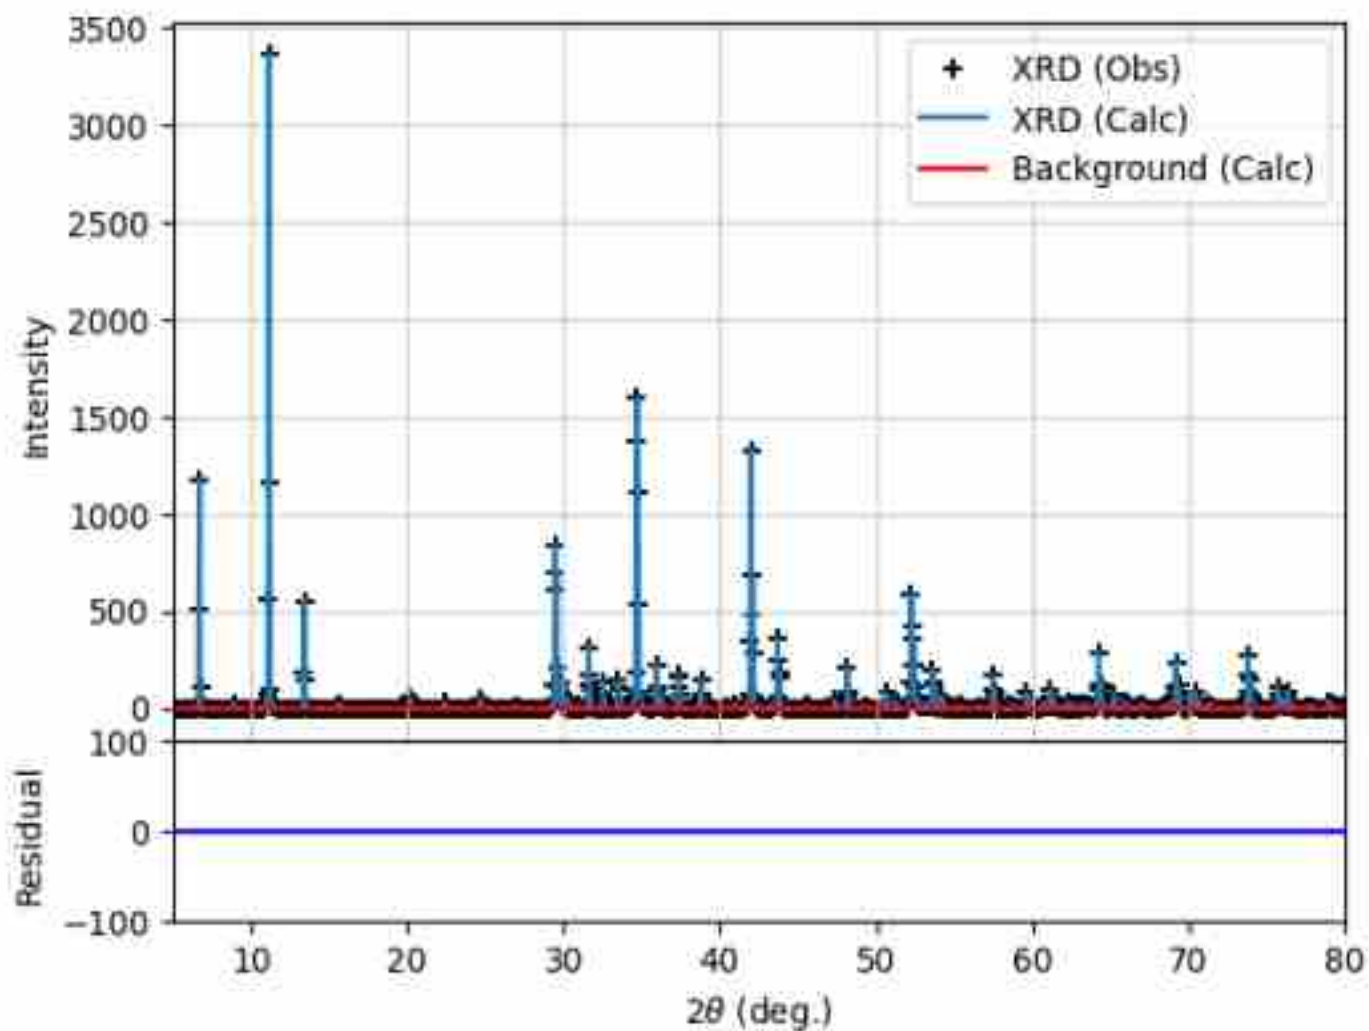

| RMSE before RR | Rwp     | RMSE after RR |
|----------------|---------|---------------|
| 0.07           | 0.00288 | 0.00021       |

# Th<sub>2</sub>Si<sub>4</sub>

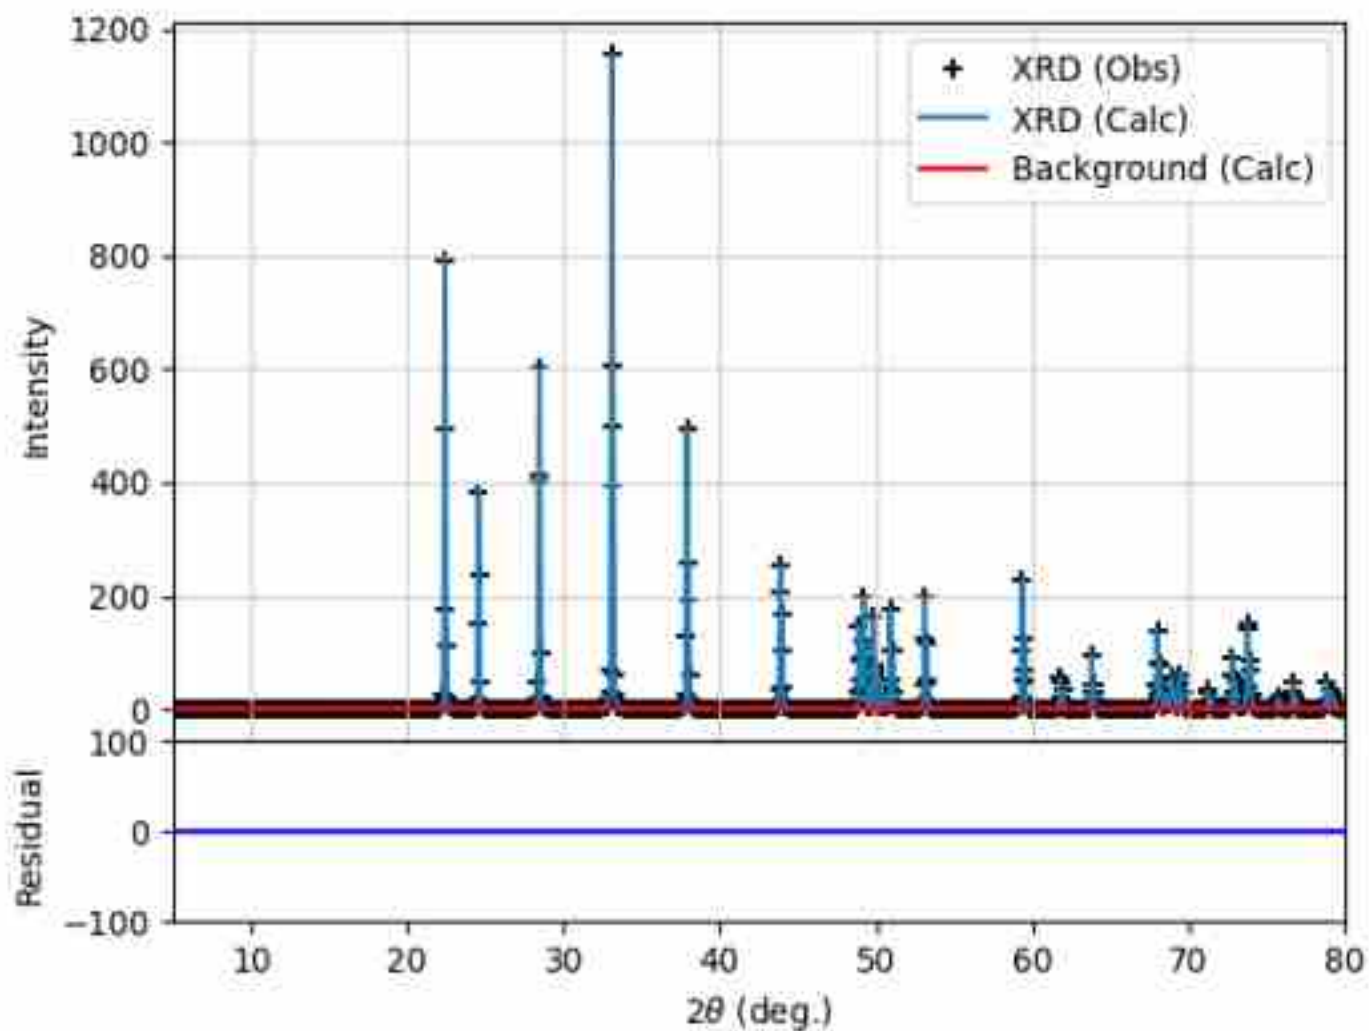

| RMSE before RR | Rwp    | RMSE after RR |
|----------------|--------|---------------|
| 0.007          | 0.0041 | 0.00085       |



# Tl1Ni1F3

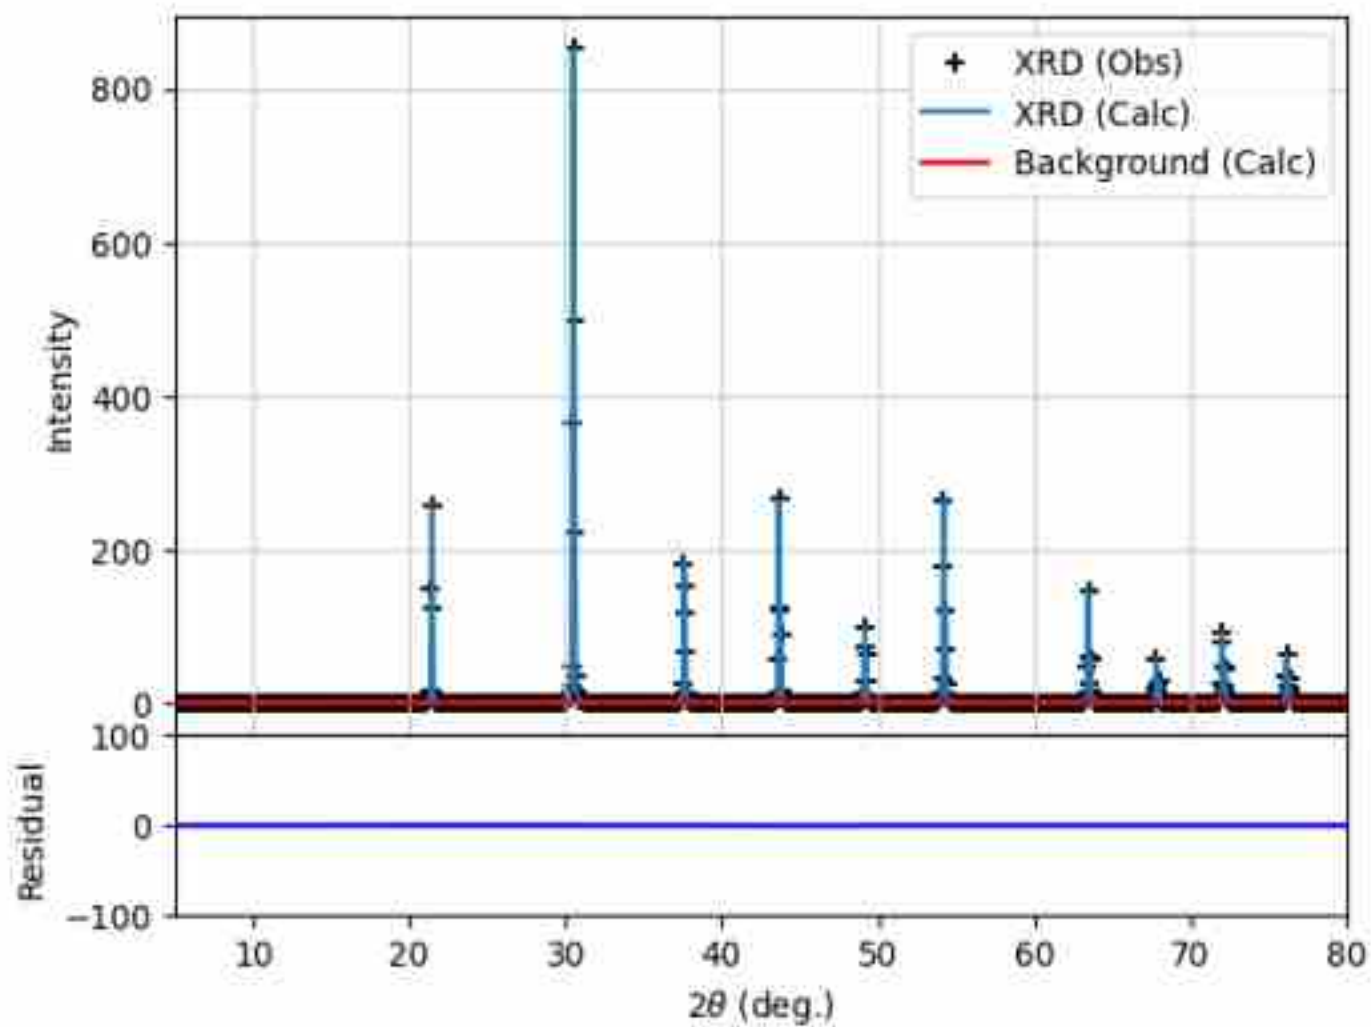

| RMSE before RR | Rwp     | RMSE after RR |
|----------------|---------|---------------|
| 0.007          | 0.14671 | 0.00932       |

# Tl2Sn6

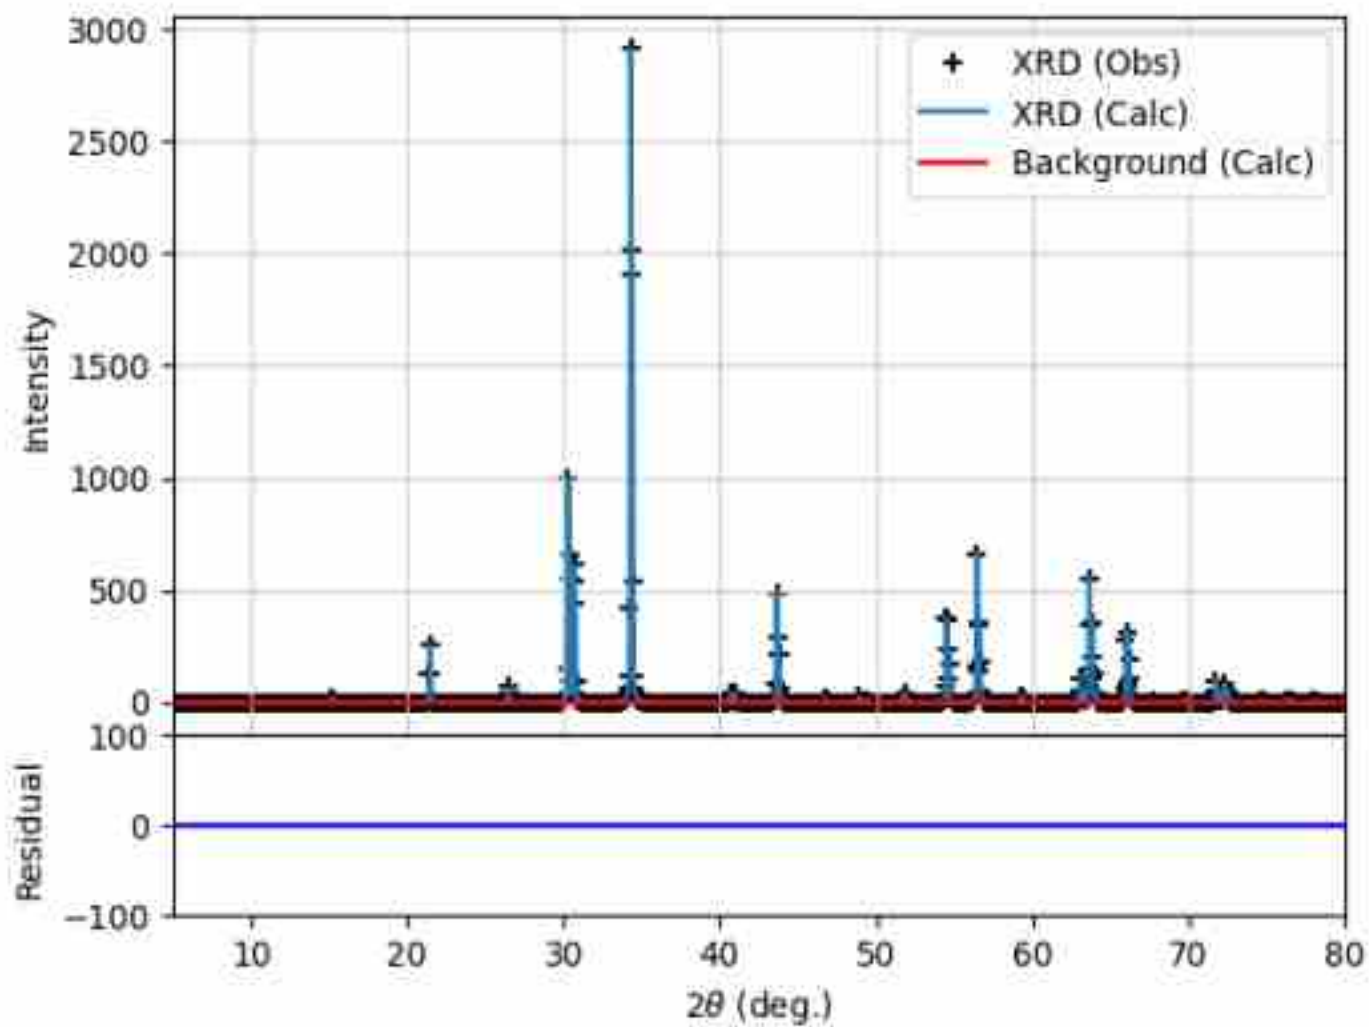

| RMSE before RR | Rwp     | RMSE after RR |
|----------------|---------|---------------|
| 0.007          | 0.00834 | 0.00121       |

# U1Ga5Co1

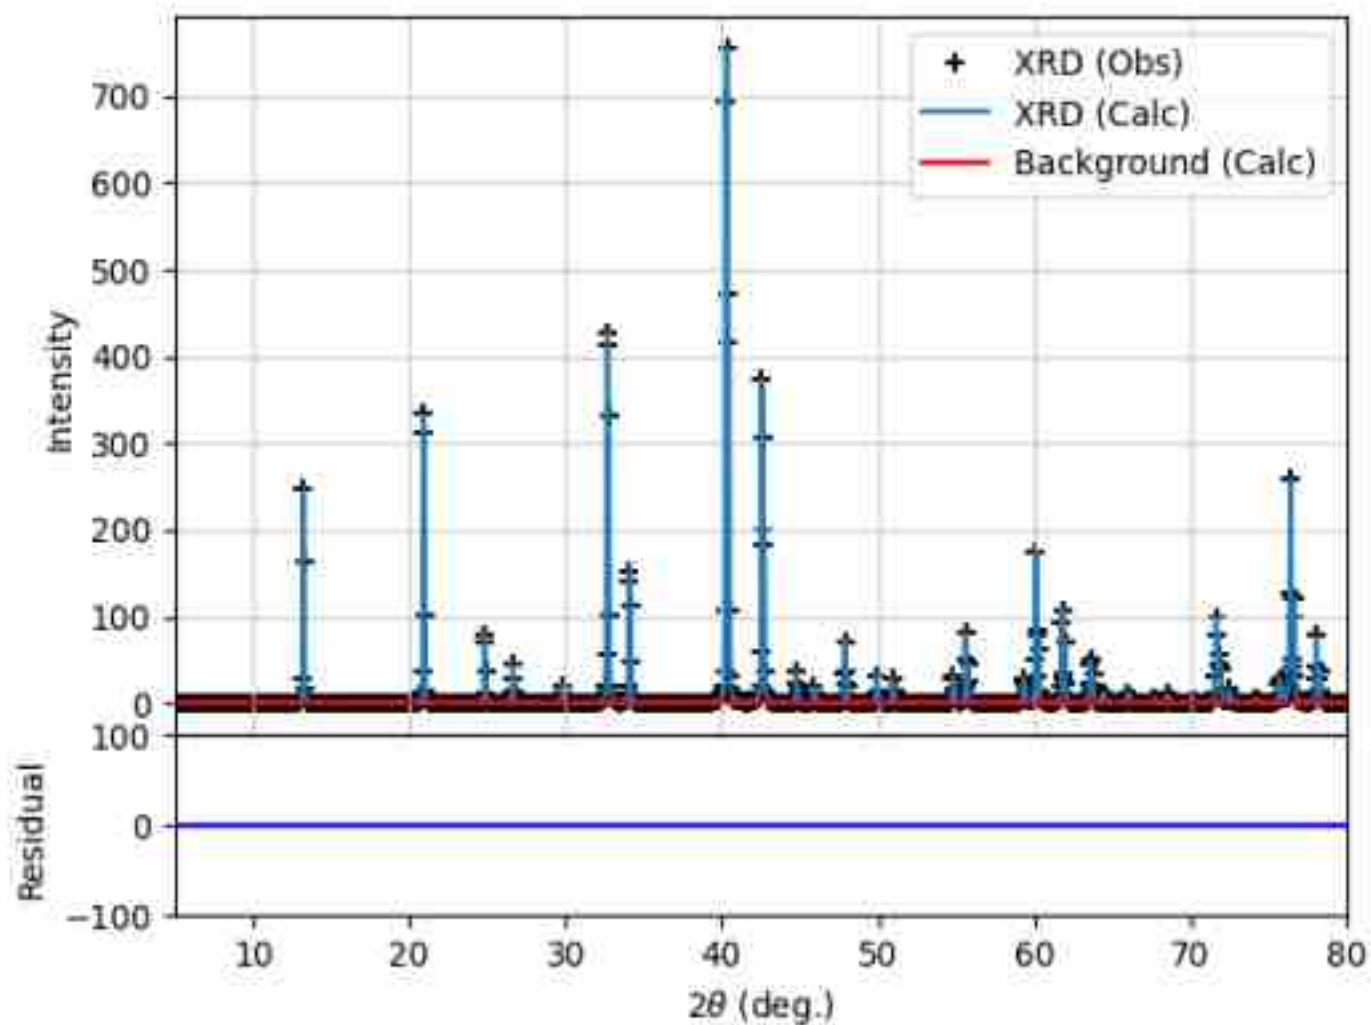

| RMSE before RR | Rwp     | RMSE after RR |
|----------------|---------|---------------|
| 0.007          | 0.00478 | 0.0008        |

# U1Si2Pt2

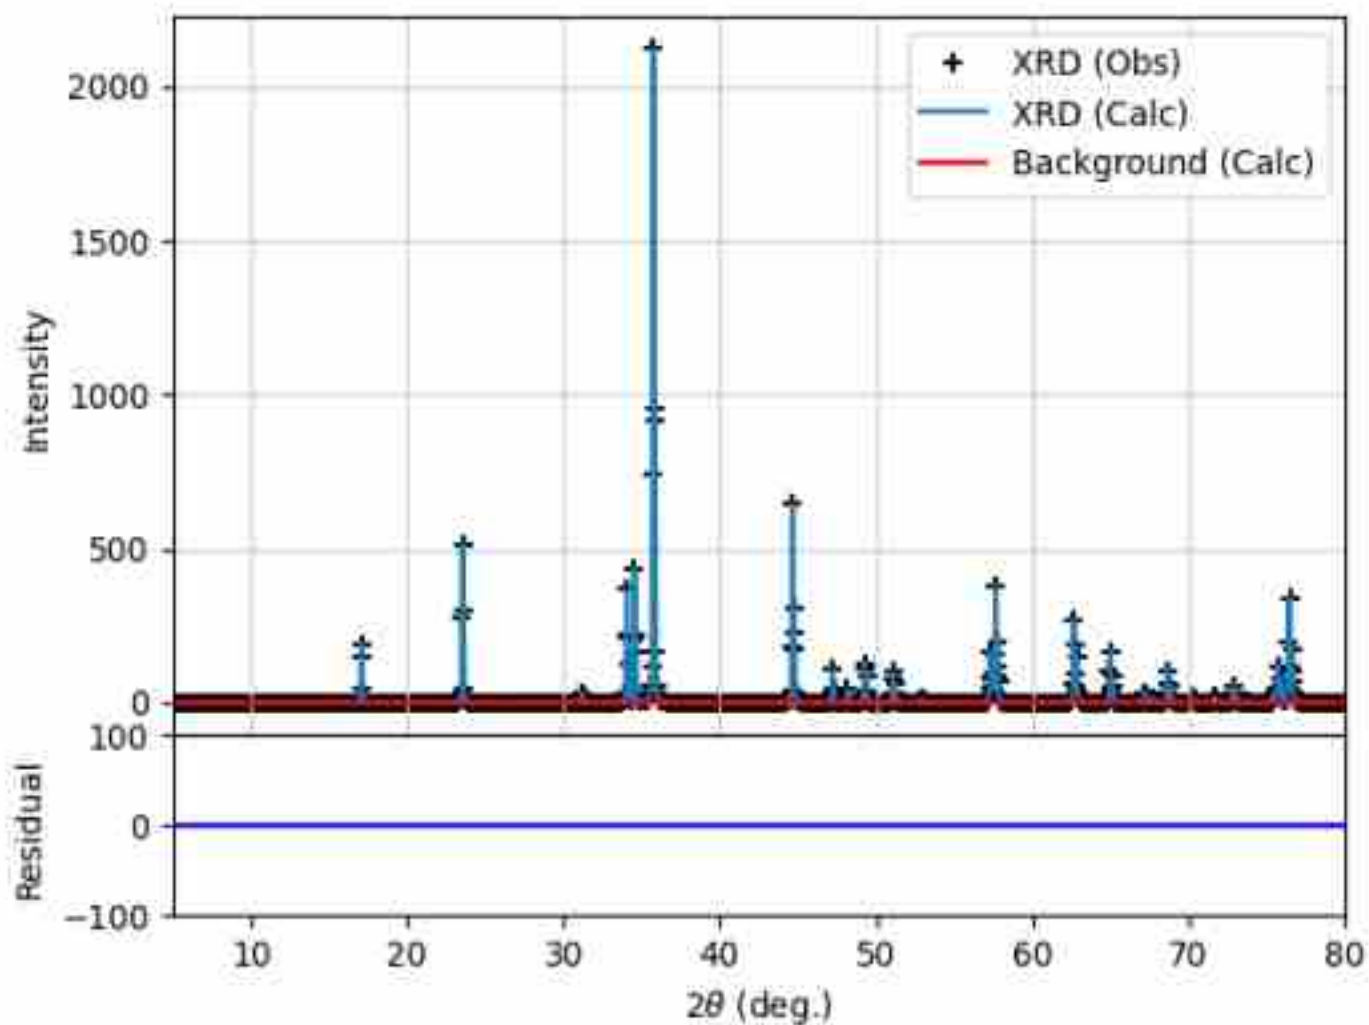

| RMSE before RR | Rwp     | RMSE after RR |
|----------------|---------|---------------|
| 0.007          | 0.00416 | 0.00095       |

# U2P1S1

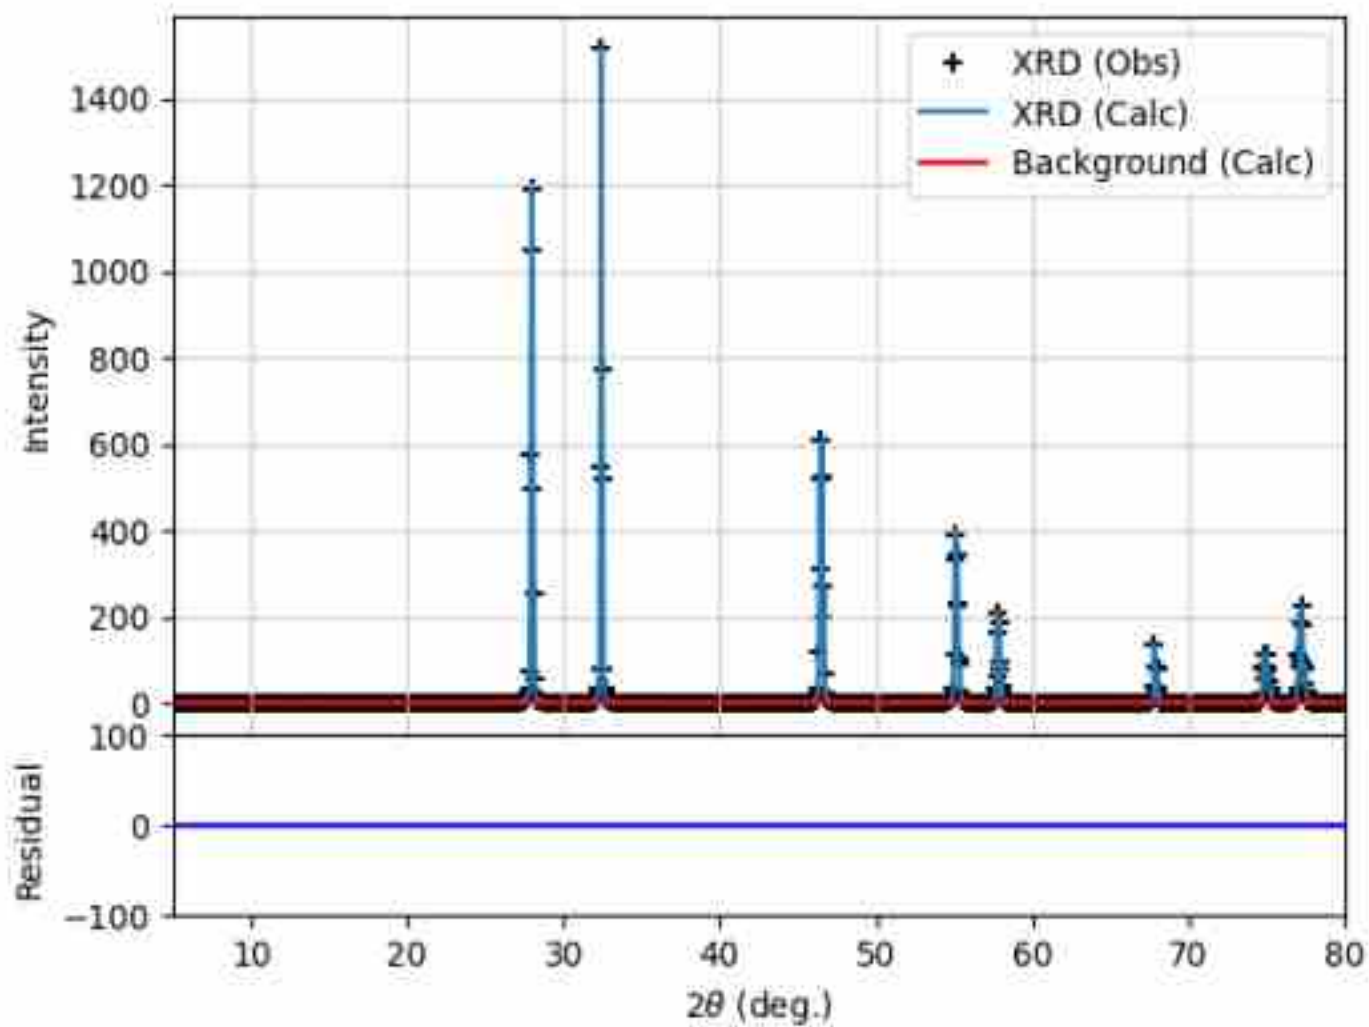

| RMSE before RR | Rwp     | RMSE after RR |
|----------------|---------|---------------|
| 0.007          | 0.00377 | 0.00023       |

# Y1U1S2

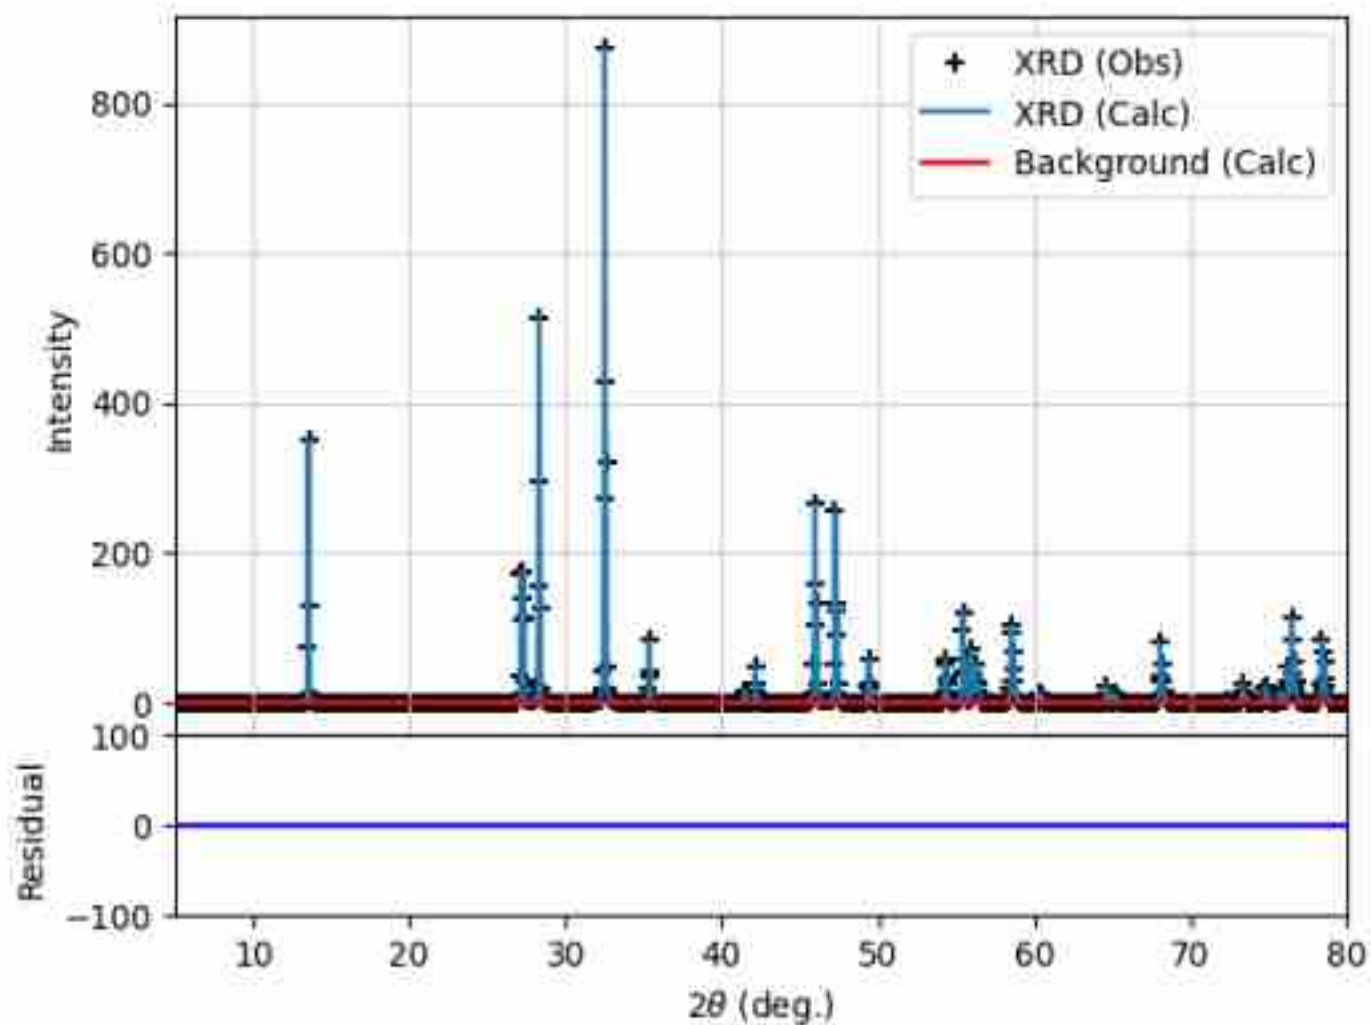

| RMSE before RR | Rwp     | RMSE after RR |
|----------------|---------|---------------|
| 0.007          | 0.02531 | 0.00419       |

# Y<sub>2</sub>Al<sub>2</sub>Zn<sub>2</sub>

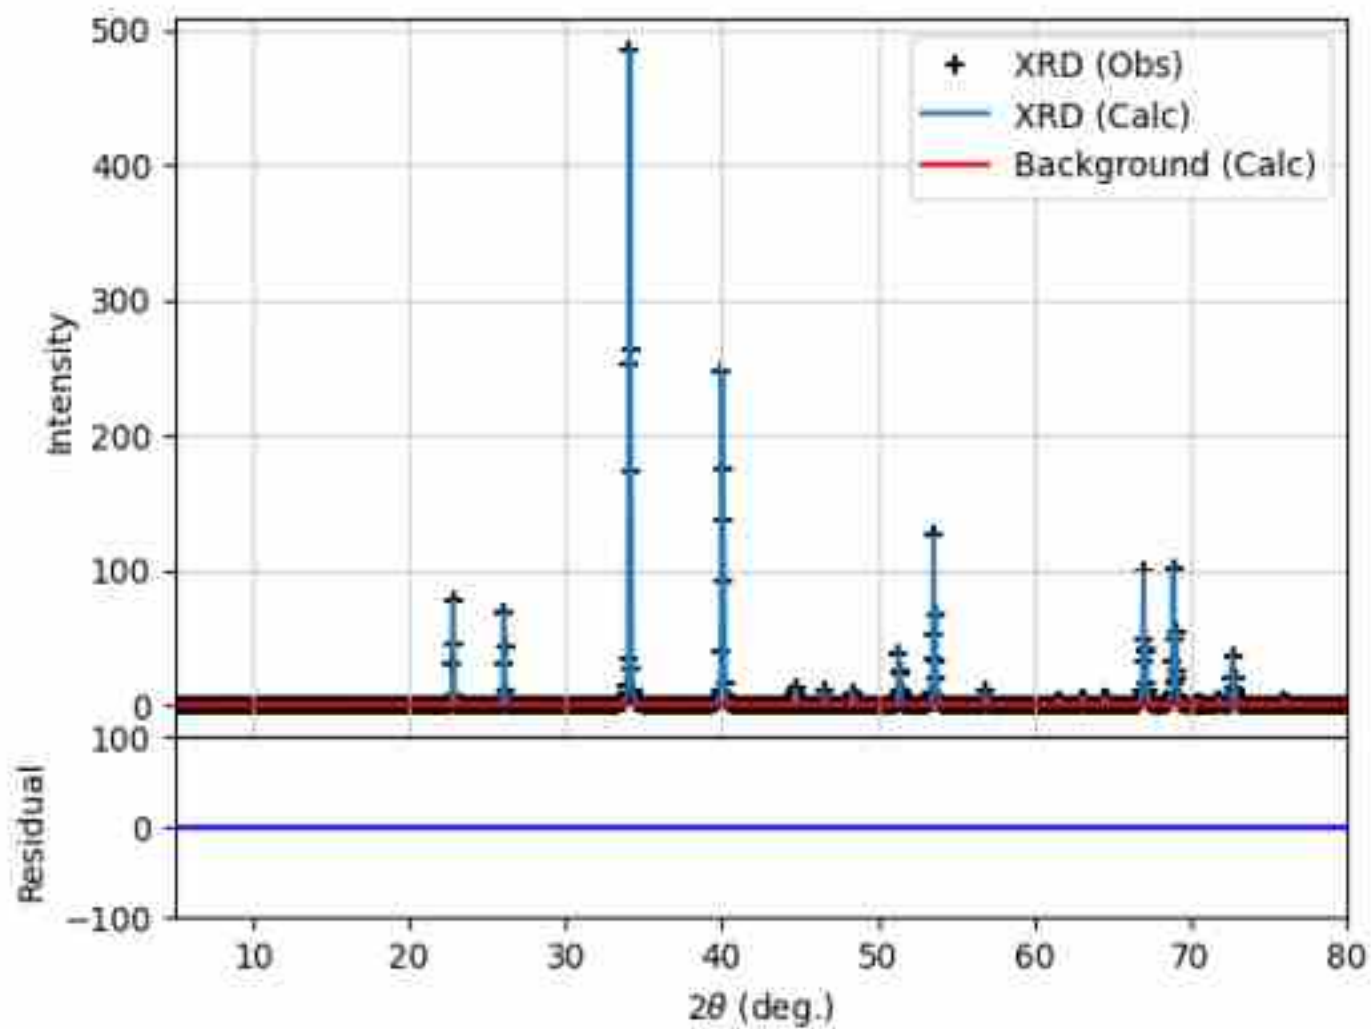

| RMSE before RR | Rwp     | RMSE after RR |
|----------------|---------|---------------|
| 0.007          | 0.00354 | 0.00047       |

# YbI2

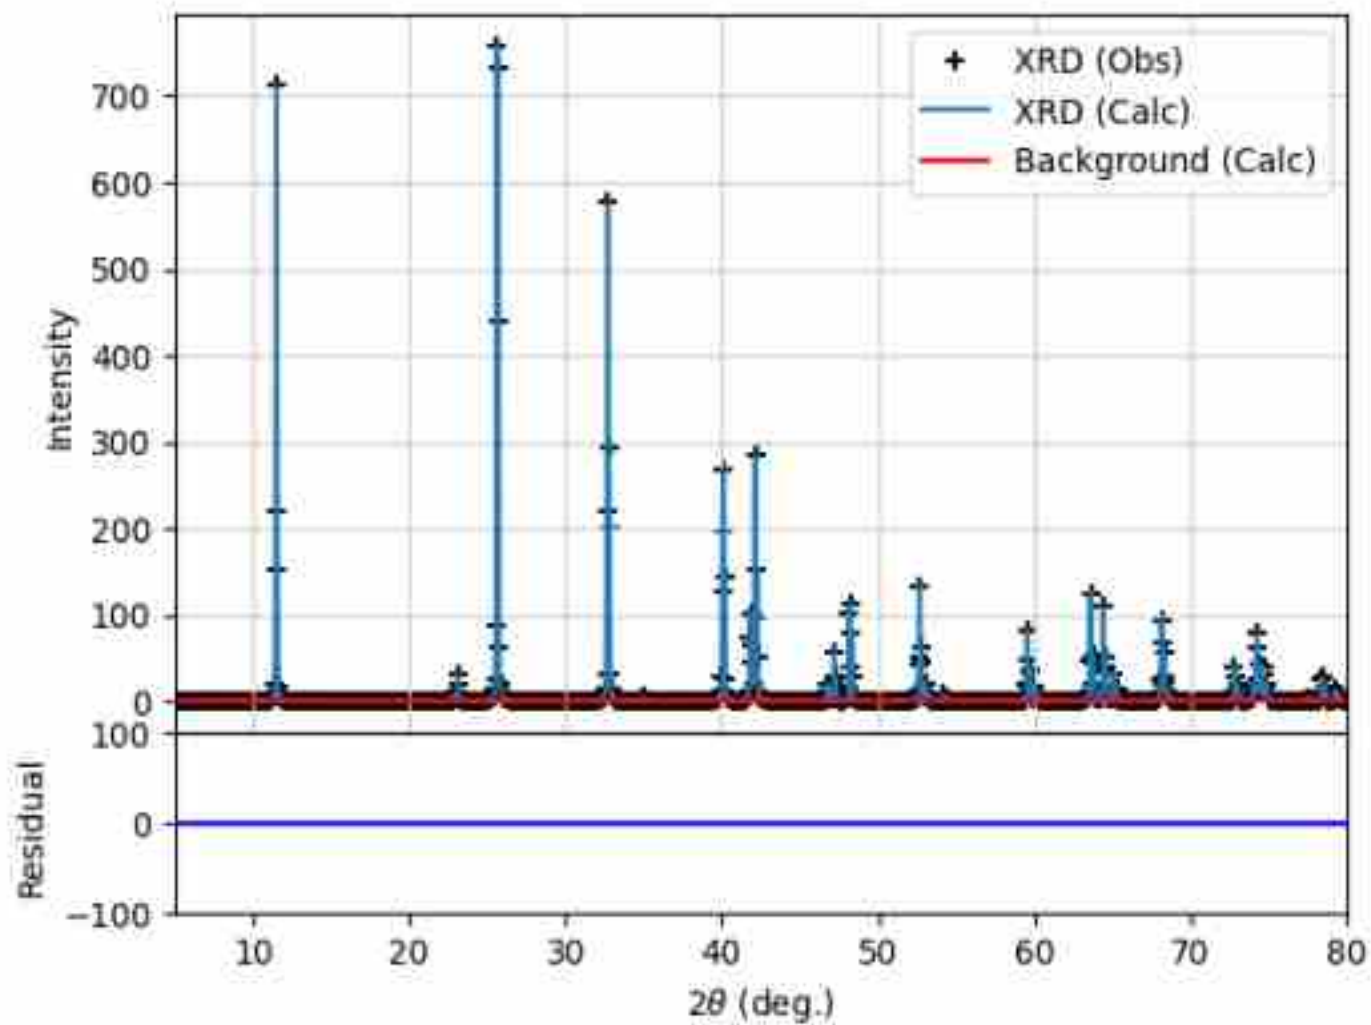

| RMSE before RR | Rwp     | RMSE after RR |
|----------------|---------|---------------|
| 0.007          | 0.00397 | 0.0003        |



# Zr1U1C2

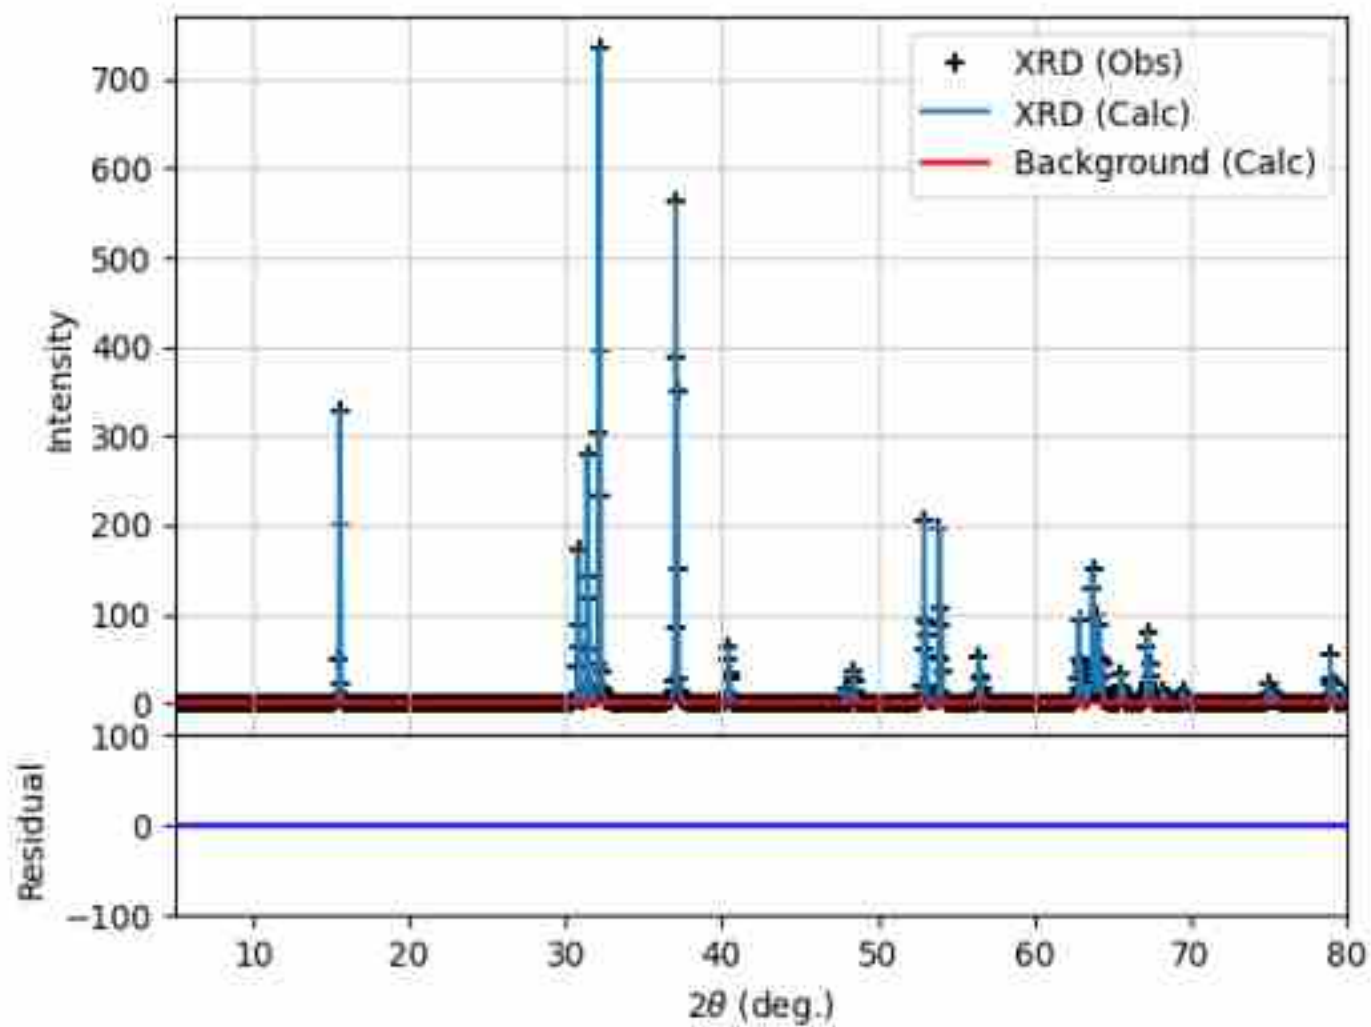

| RMSE before RR | Rwp     | RMSE after RR |
|----------------|---------|---------------|
| 0.007          | 0.00417 | 0.0012        |

# Zr2Cd1

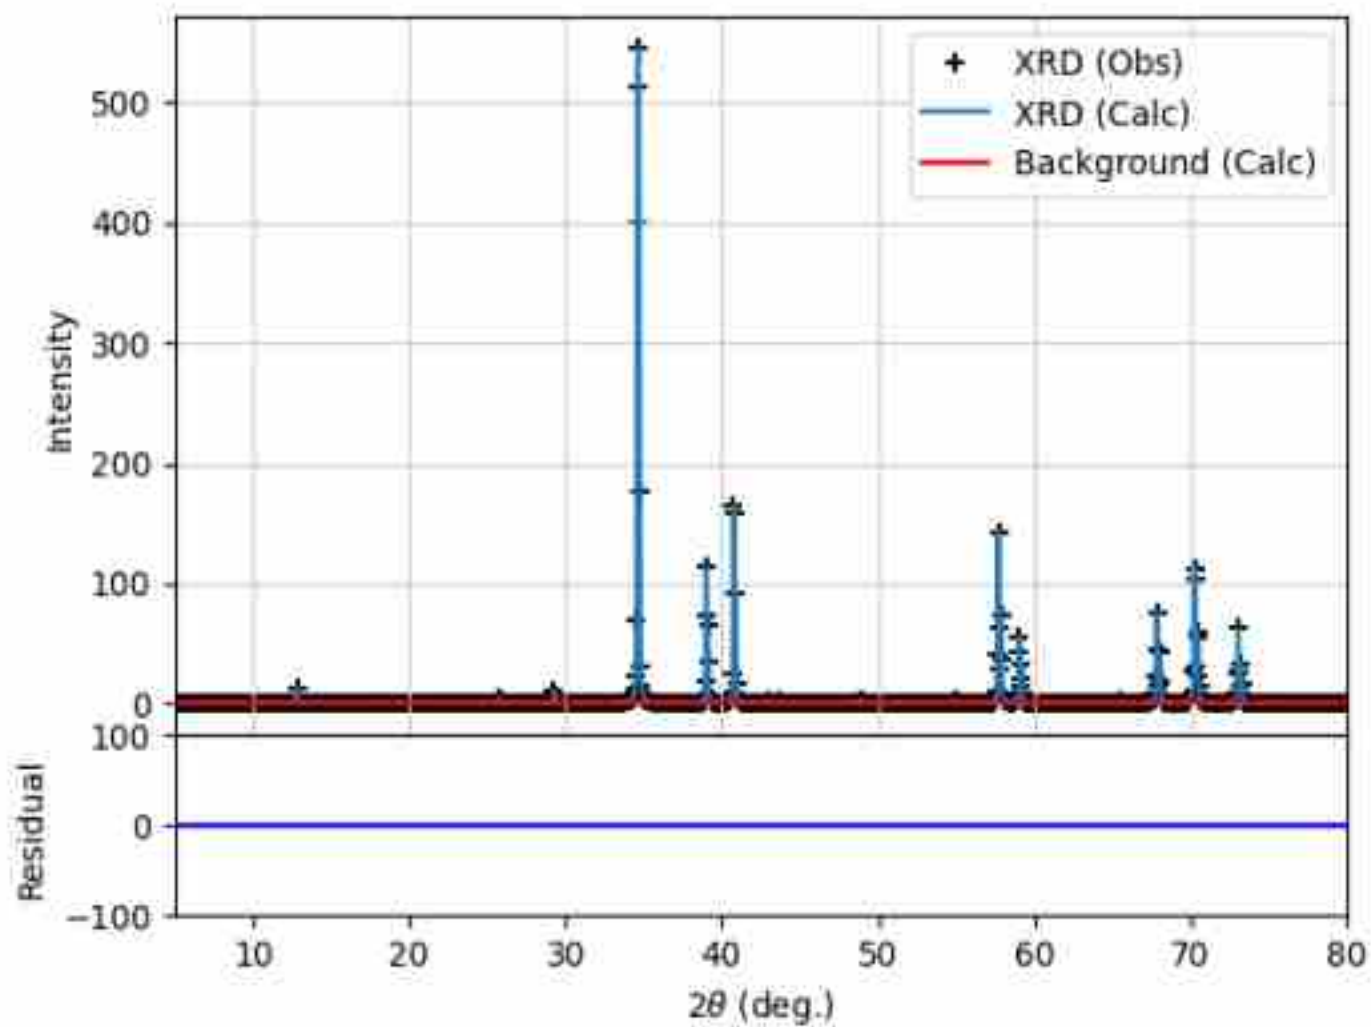

| RMSE before RR | Rwp    | RMSE after RR |
|----------------|--------|---------------|
| 0.007          | 0.0035 | 0.00037       |

# Ac6Y2

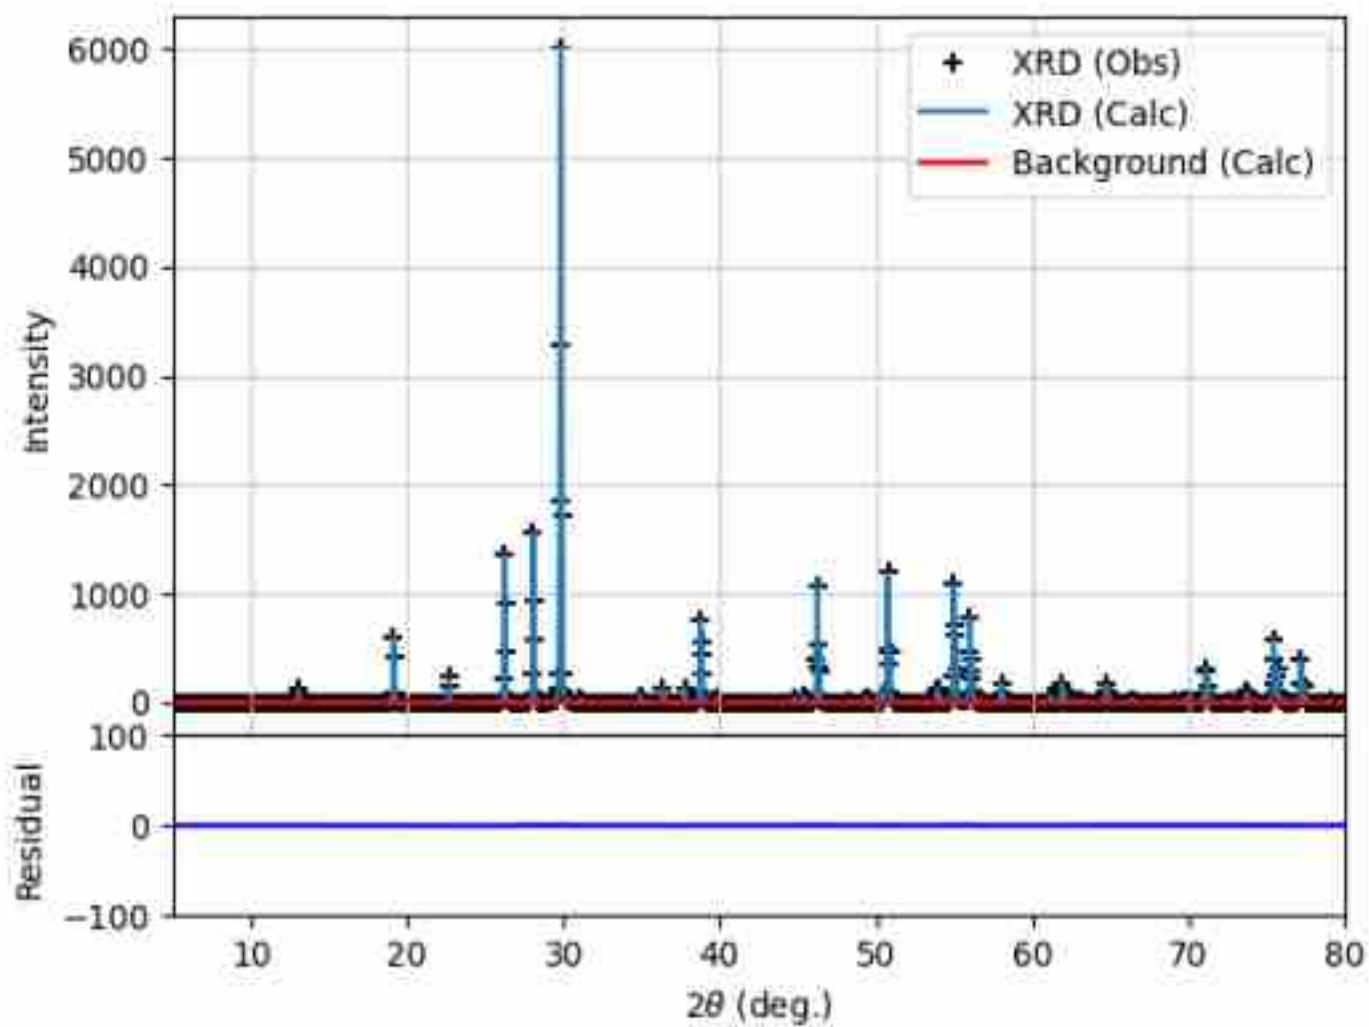

| RMSE before RR | Rwp     | RMSE after RR |
|----------------|---------|---------------|
| 0.008          | 0.25122 | 0.003         |

# Ag<sub>1</sub>Sb<sub>1</sub>Te<sub>2</sub>

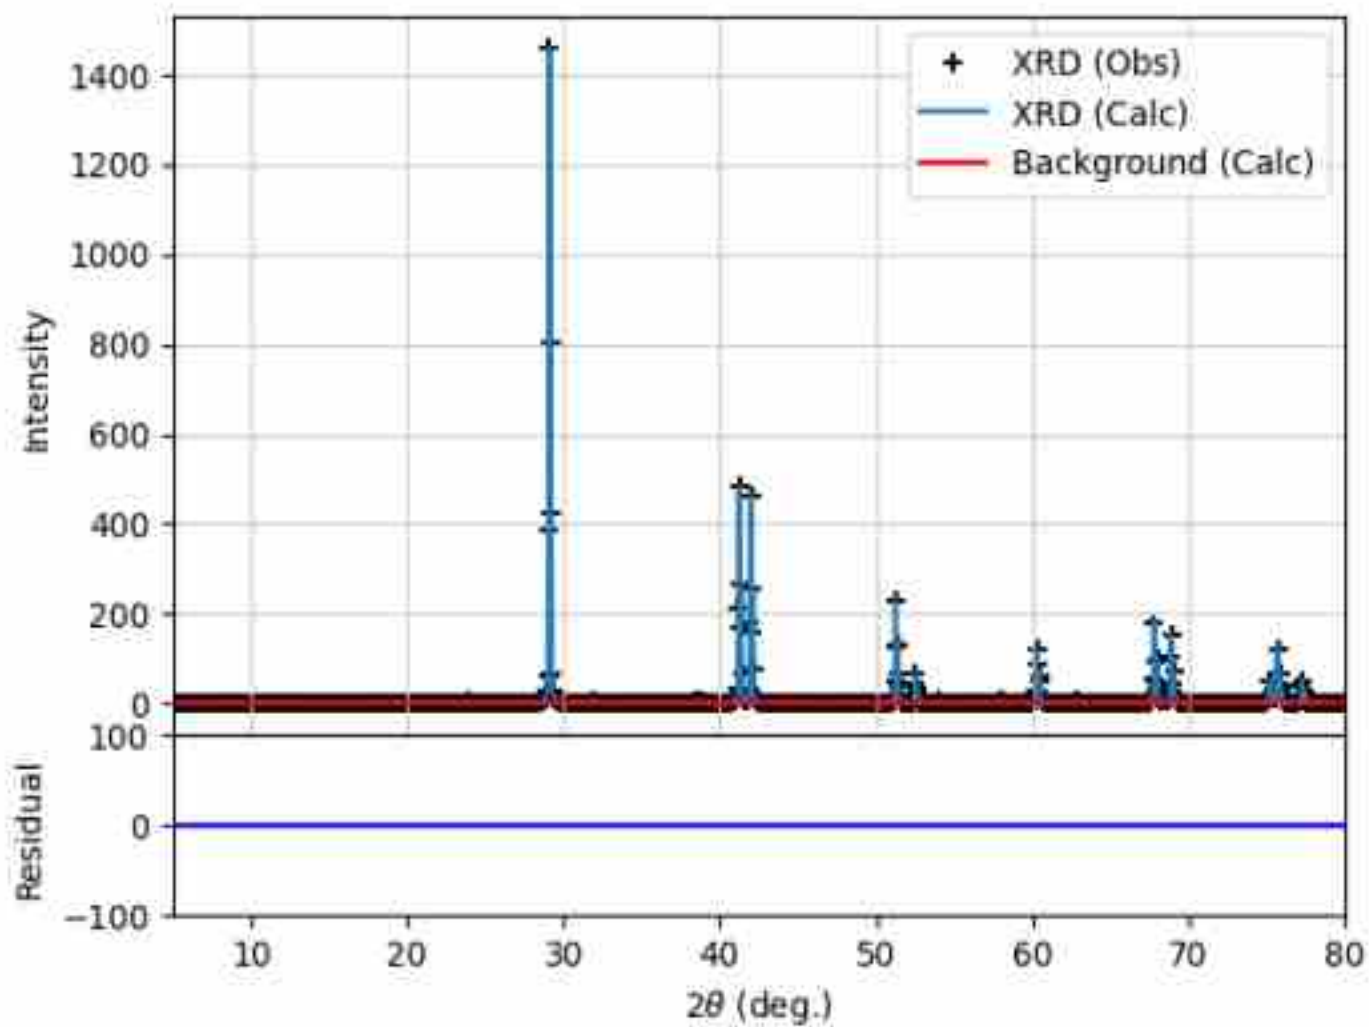

| RMSE before RR | Rwp     | RMSE after RR |
|----------------|---------|---------------|
| 0.008          | 0.00421 | 0.00034       |

# AlAs1

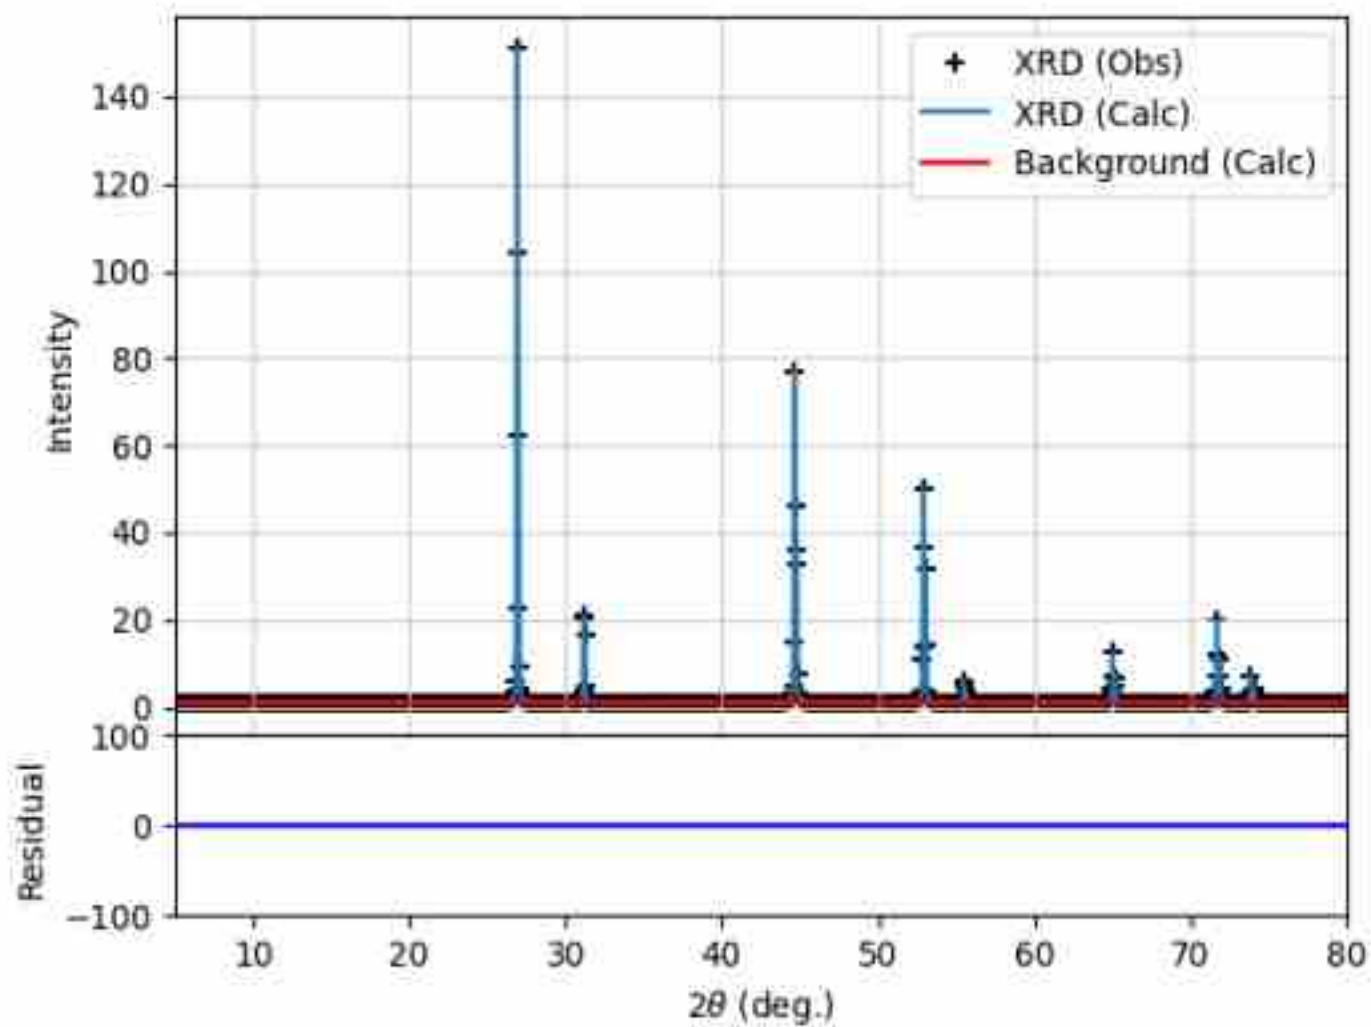

| RMSE before RR | Rwp     | RMSE after RR |
|----------------|---------|---------------|
| 0.008          | 0.01489 | 0.00227       |

# Al1Cr4Ga1C2

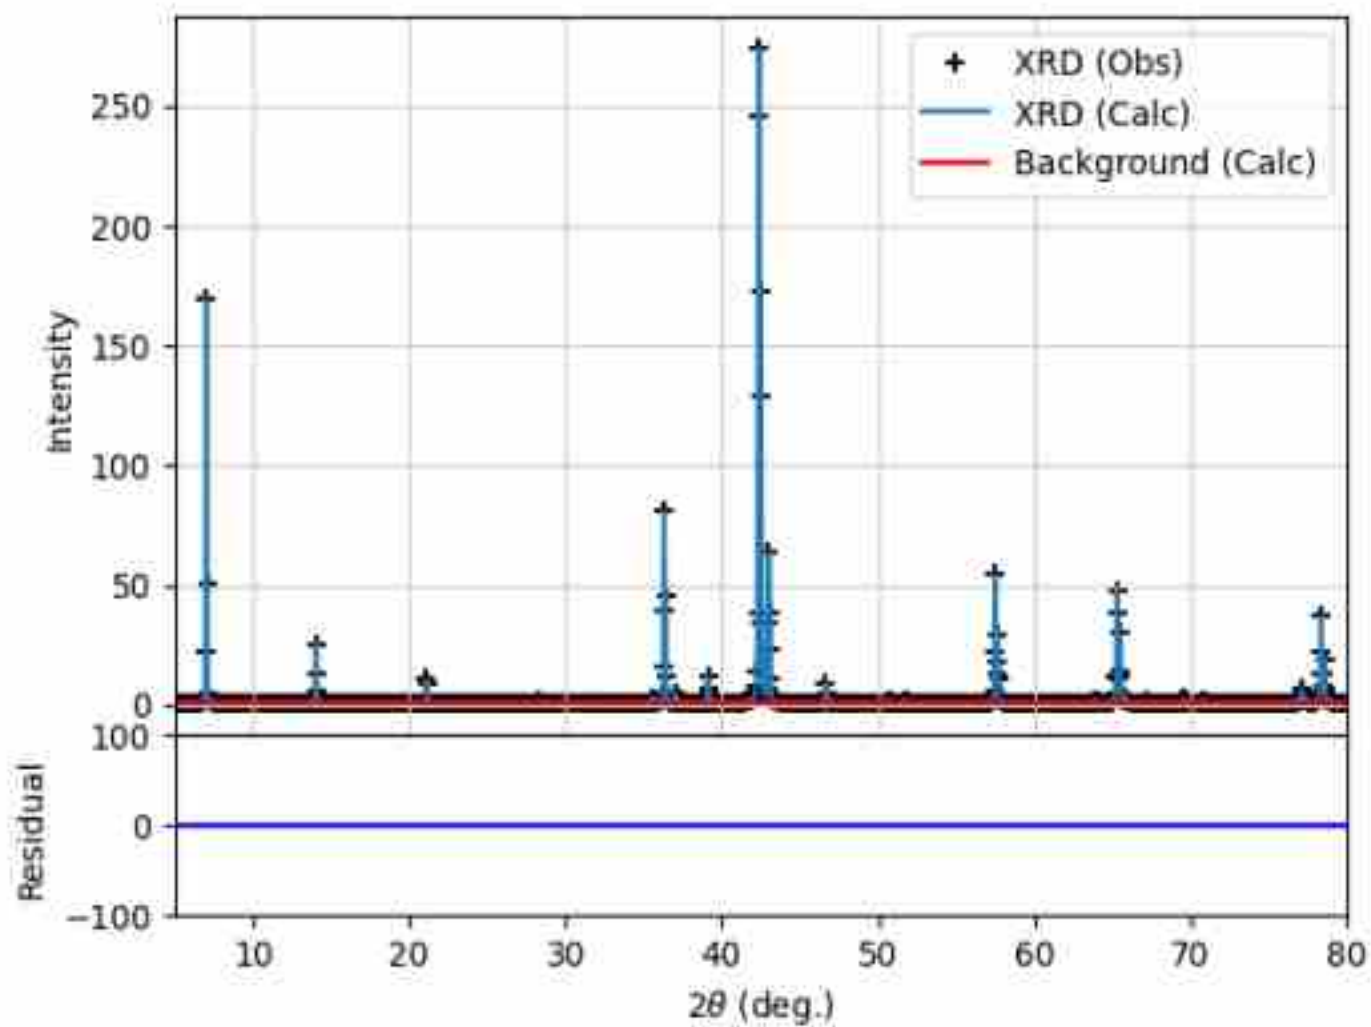

| RMSE before RR | Rwp     | RMSE after RR |
|----------------|---------|---------------|
| 0.008          | 0.00161 | 0.00014       |

# Al<sub>5</sub>Cu<sub>1</sub>Mo<sub>2</sub>

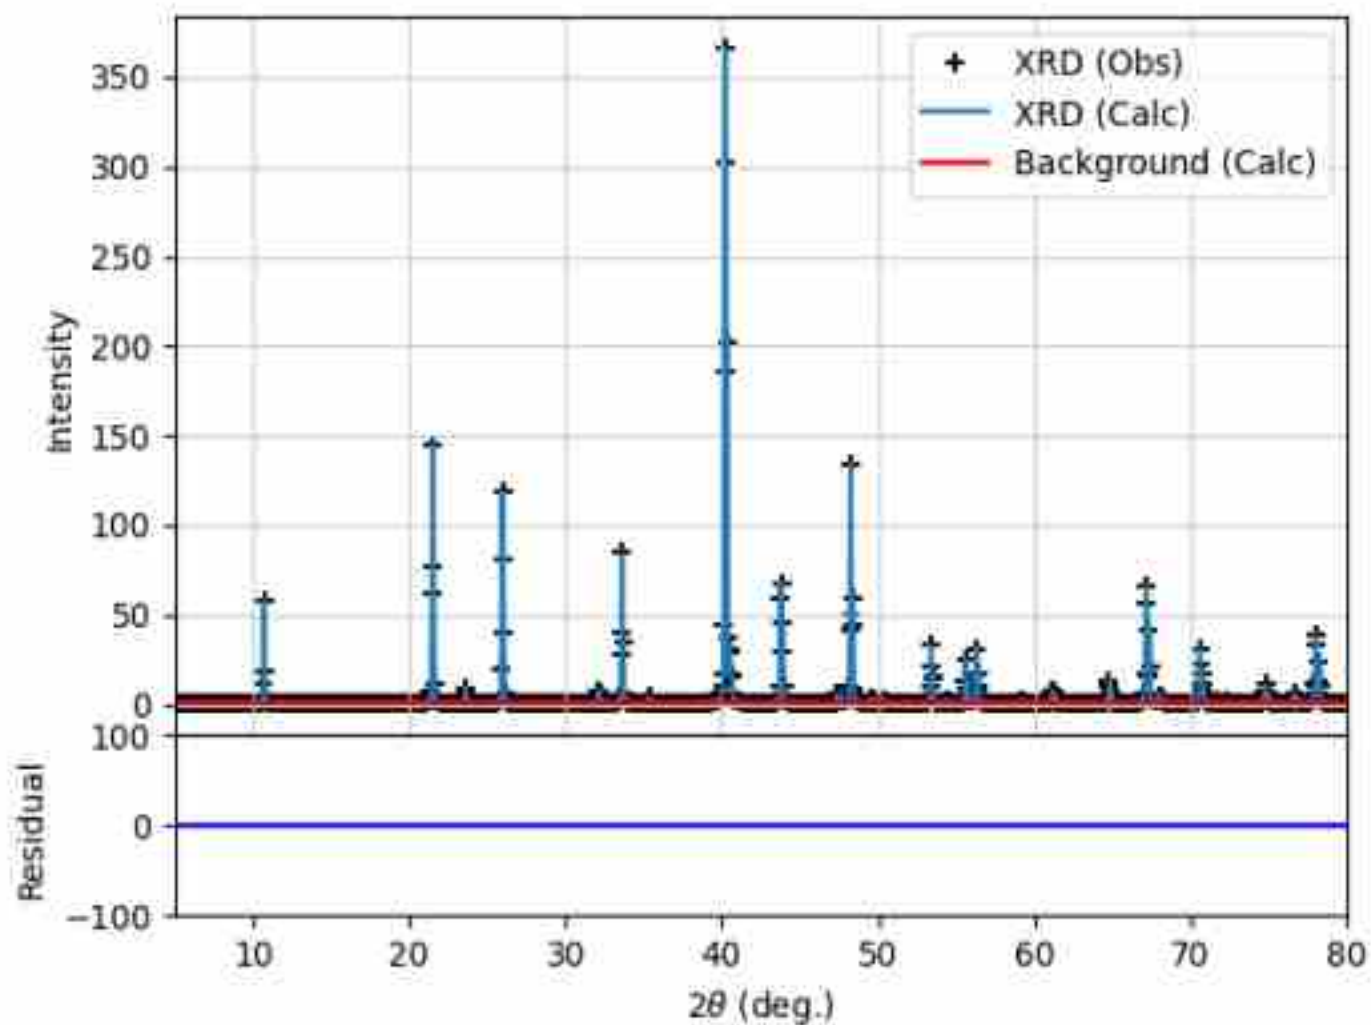

| RMSE before RR | Rwp     | RMSE after RR |
|----------------|---------|---------------|
| 0.008          | 0.00593 | 0.00108       |

# Ba1Al2Si2

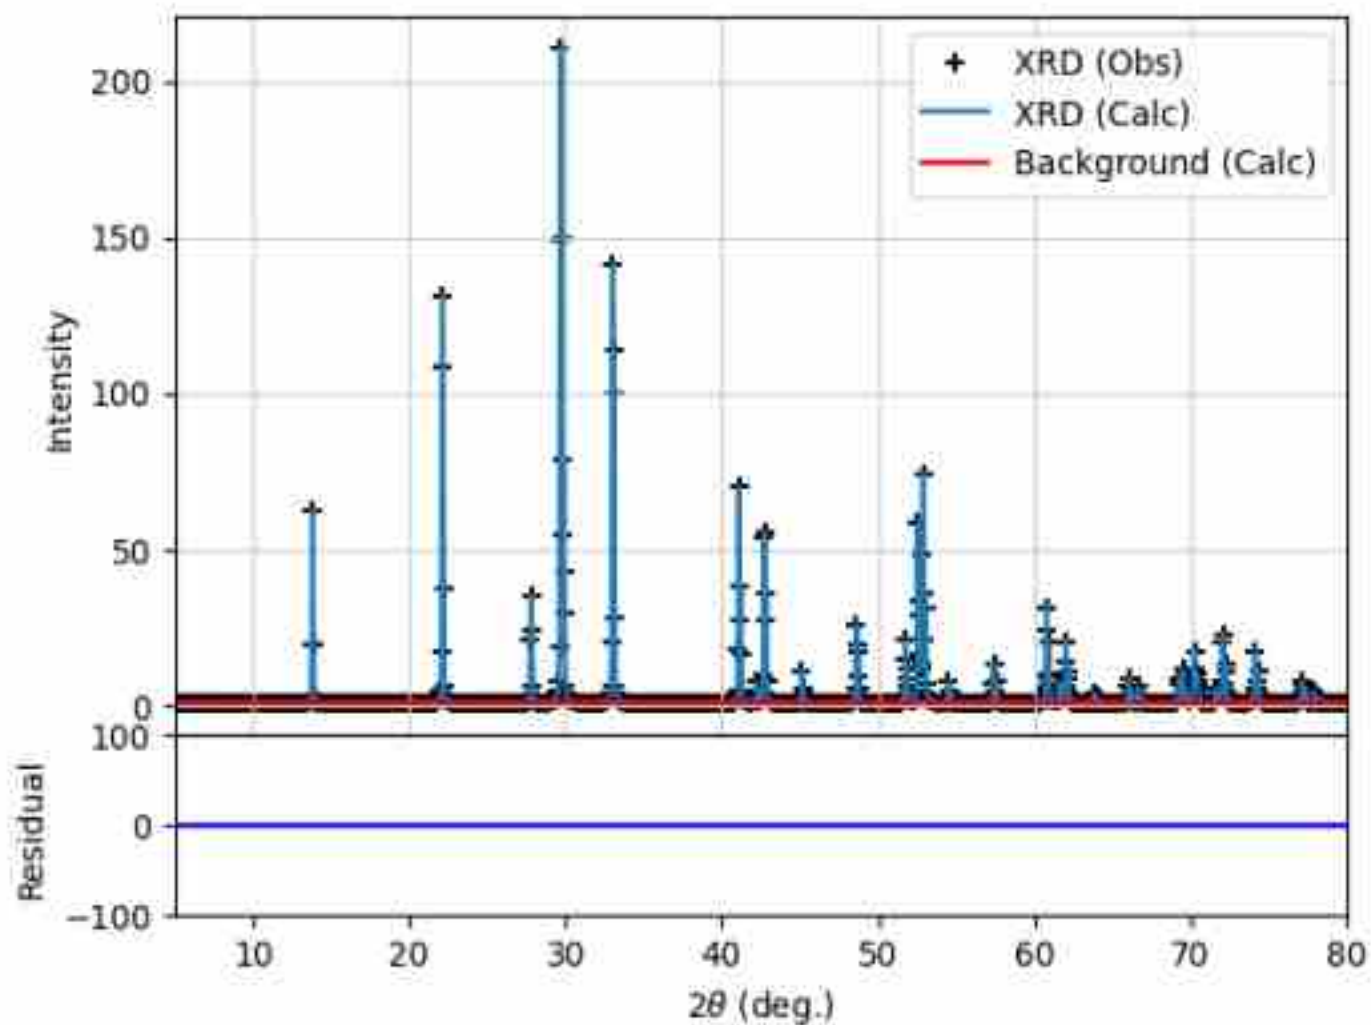

| RMSE before RR | Rwp     | RMSE after RR |
|----------------|---------|---------------|
| 0.008          | 0.00298 | 0.00082       |



# Ba1Cd2Sb2

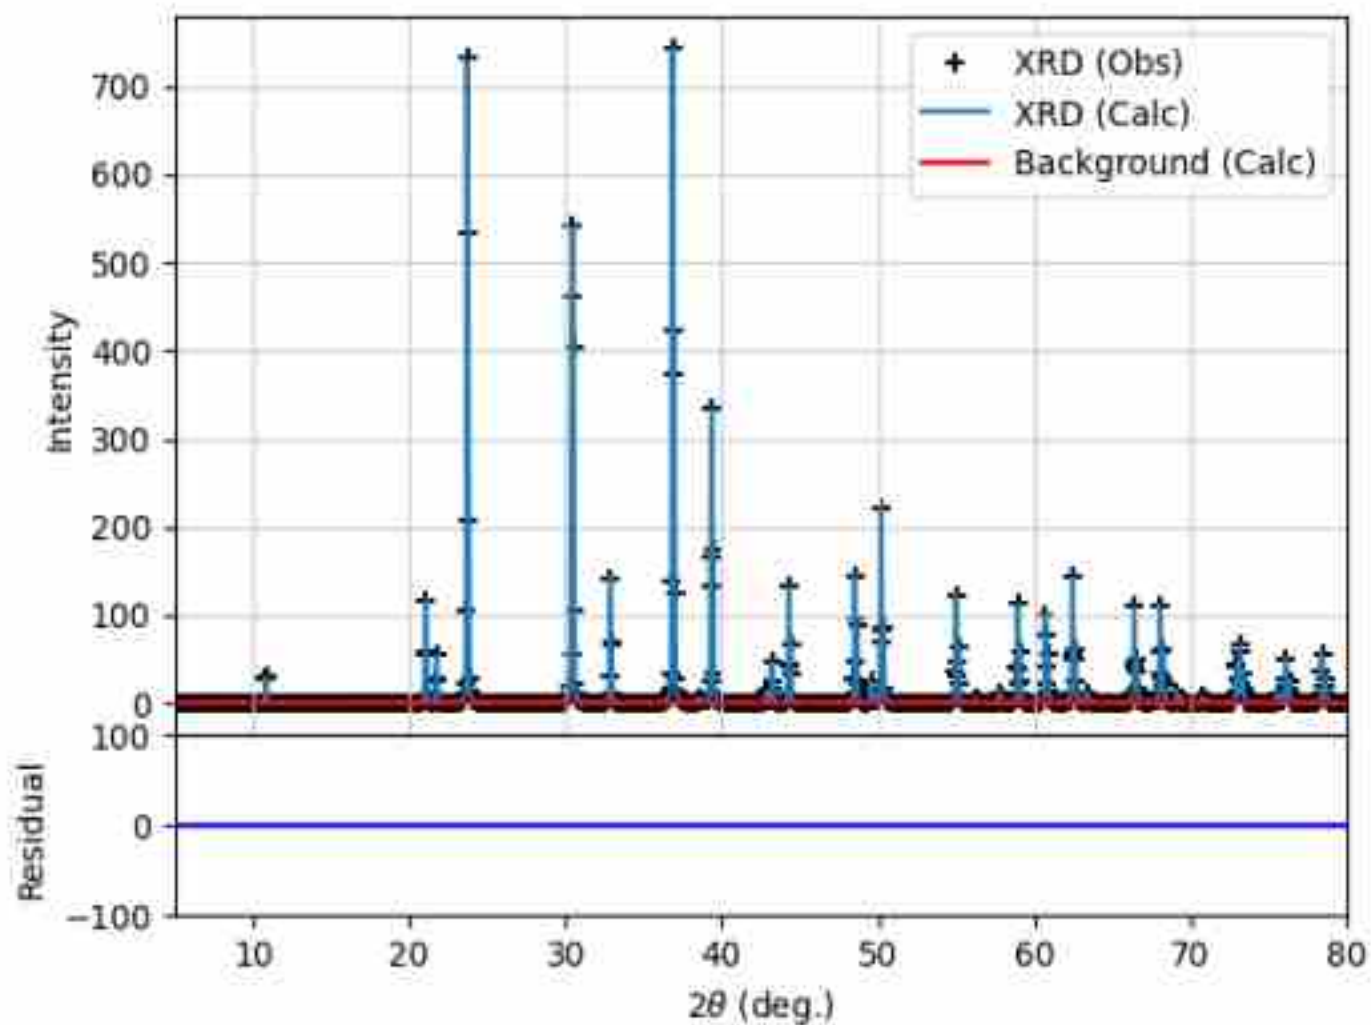

| RMSE before RR | Rwp    | RMSE after RR |
|----------------|--------|---------------|
| 0.008          | 0.0063 | 0.00046       |

# Ba1La1Co2O5

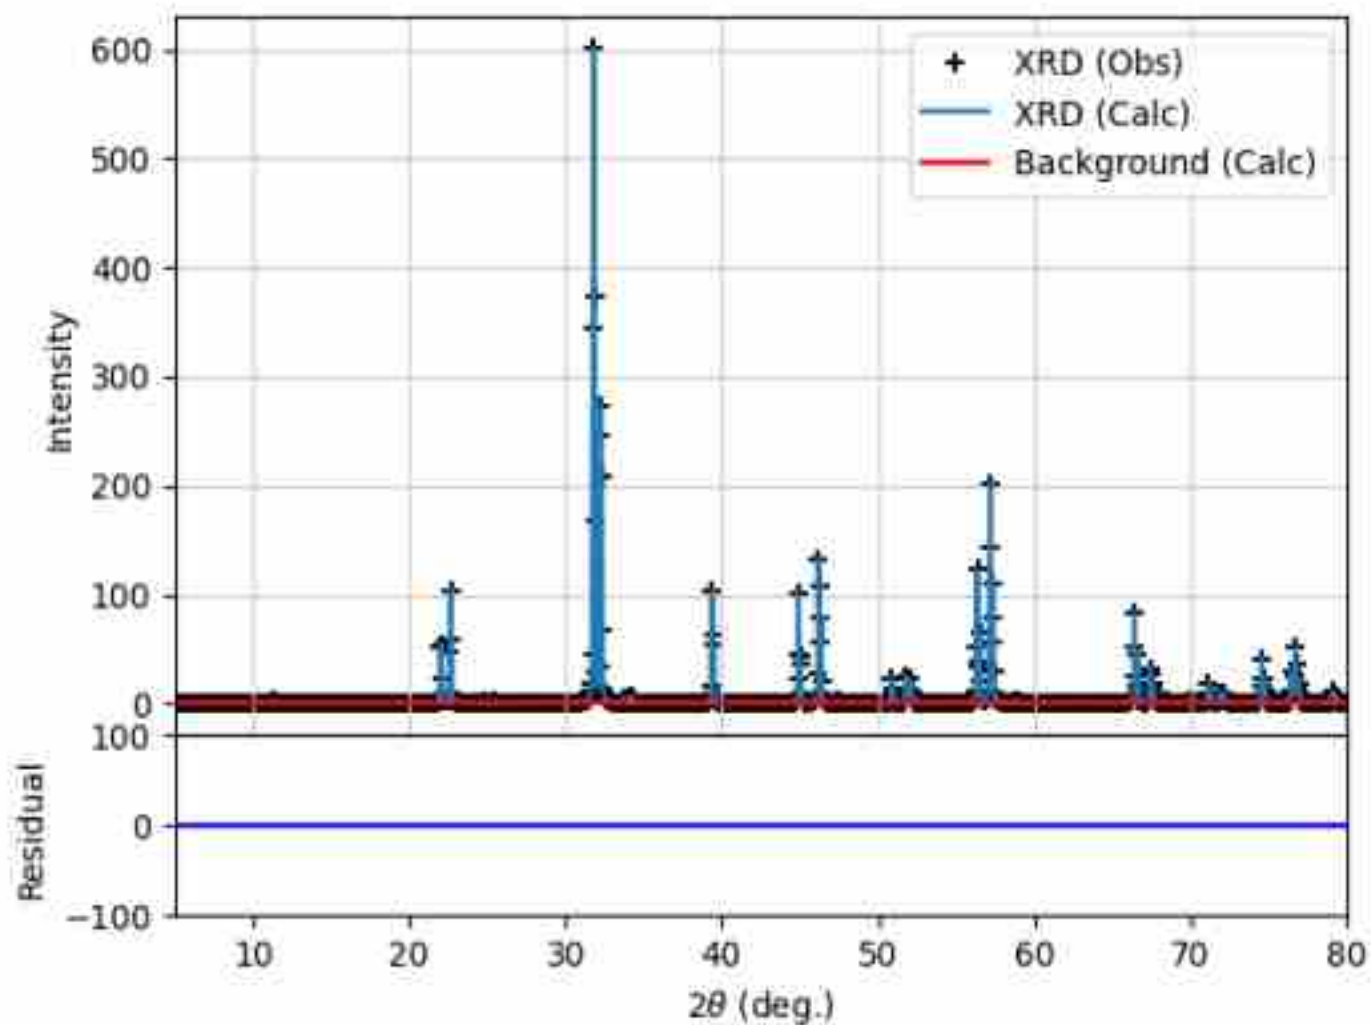

| RMSE before RR | Rwp    | RMSE after RR |
|----------------|--------|---------------|
| 0.008          | 0.0039 | 0.00104       |

# Ba1Sr1Sn2O6

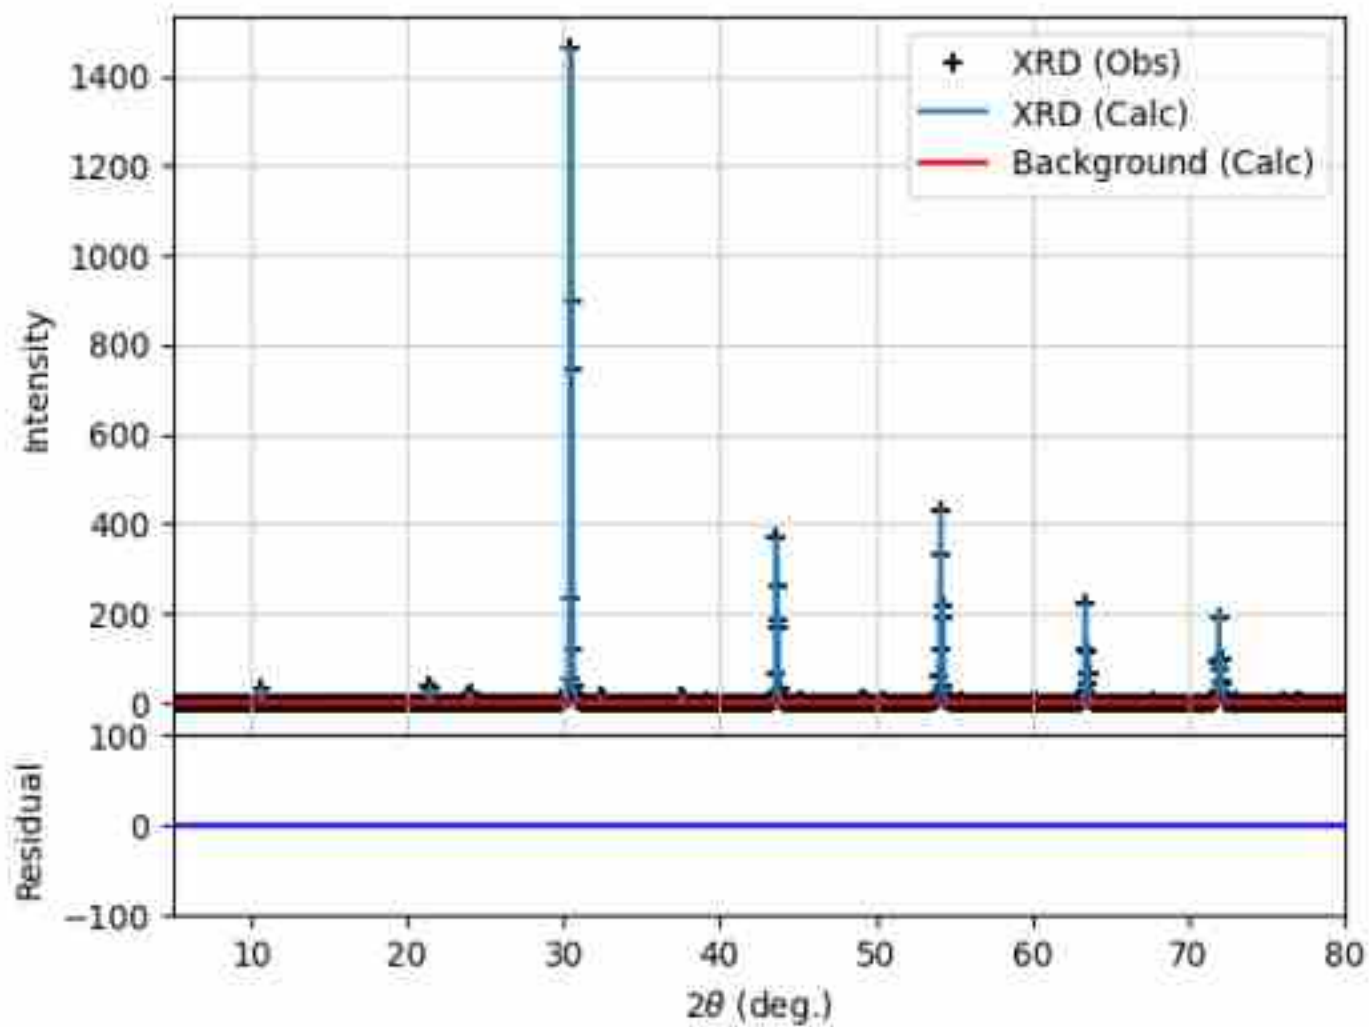

| RMSE before RR | Rwp     | RMSE after RR |
|----------------|---------|---------------|
| 0.008          | 0.00451 | 0.00354       |

# Ba<sub>2</sub>CaIrO<sub>6</sub>

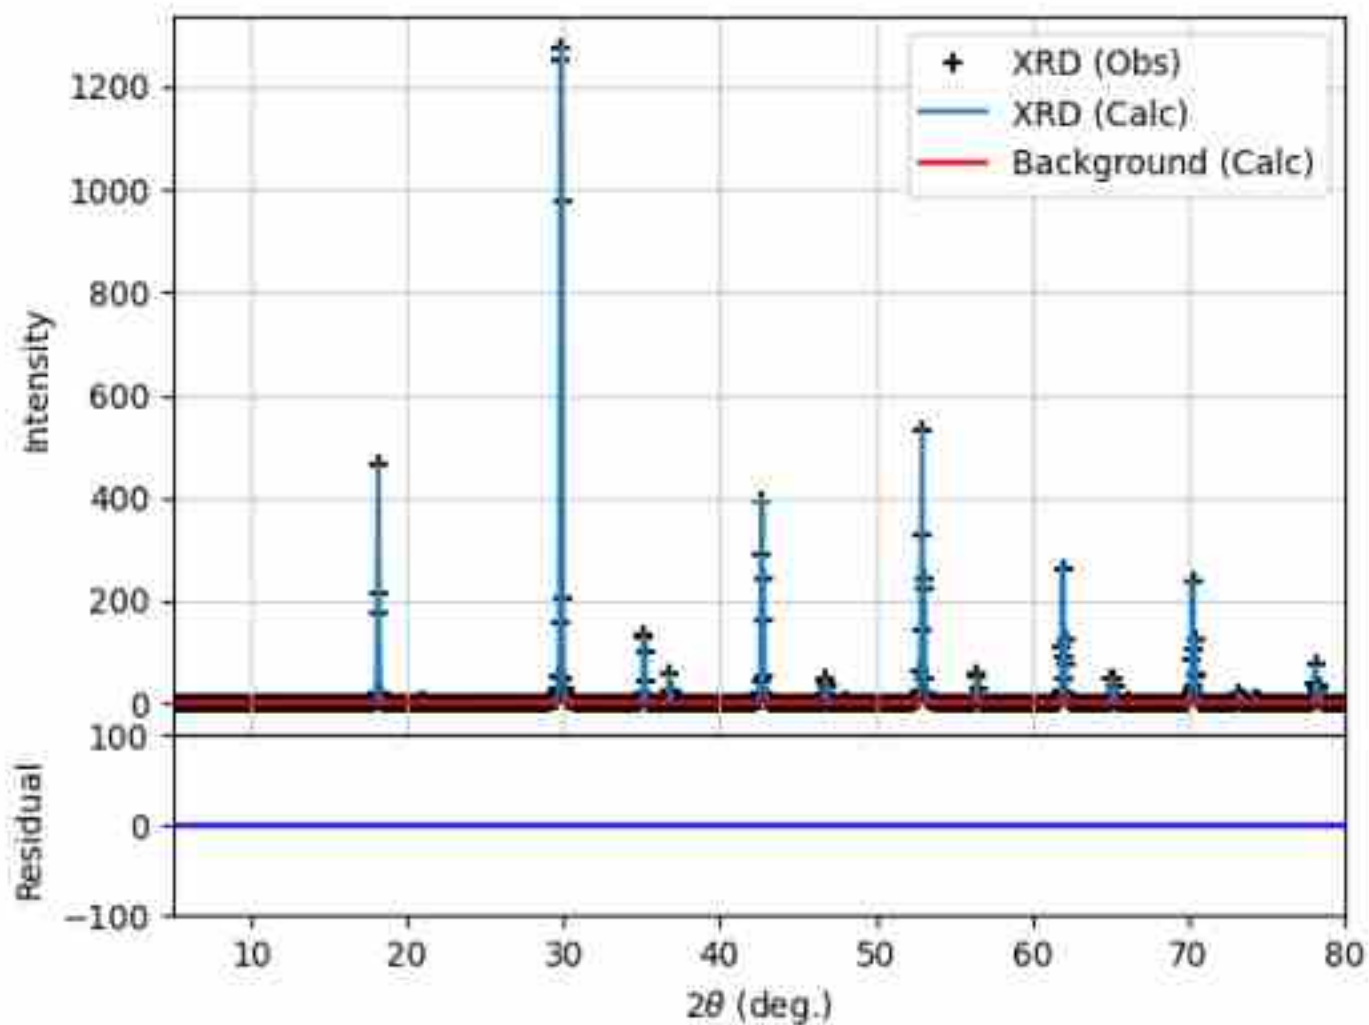

| RMSE before RR | Rwp     | RMSE after RR |
|----------------|---------|---------------|
| 0.008          | 0.01487 | 0.00524       |

# Ba<sub>2</sub>Cu<sub>2</sub>As<sub>2</sub>

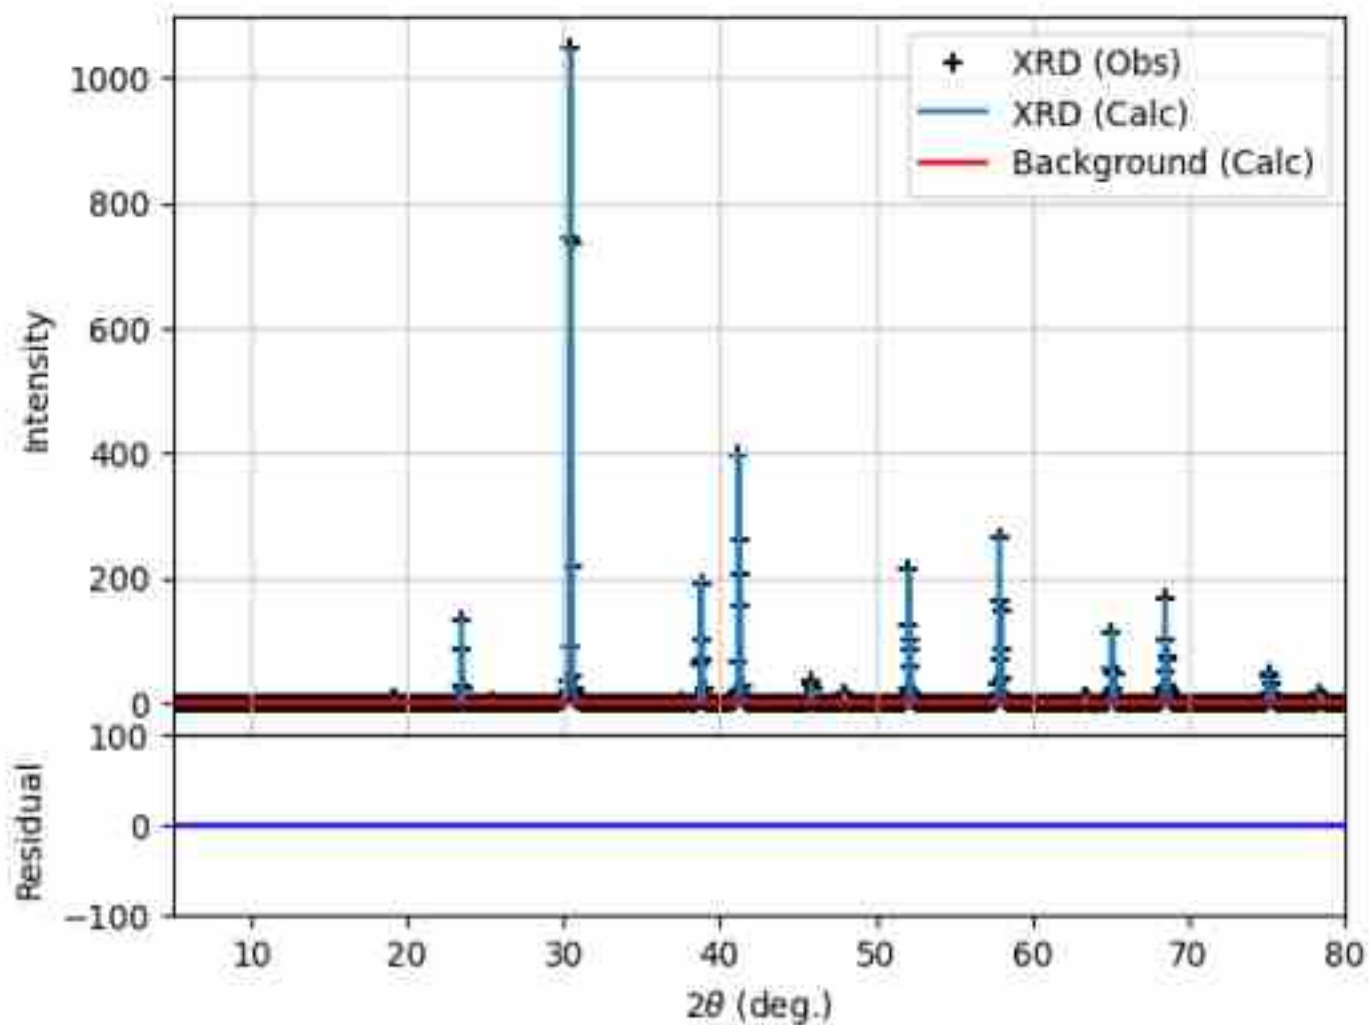

| RMSE before RR | Rwp     | RMSE after RR |
|----------------|---------|---------------|
| 0.008          | 0.00375 | 0.00054       |

# Ba<sub>2</sub>Hf<sub>10</sub>O<sub>4</sub>

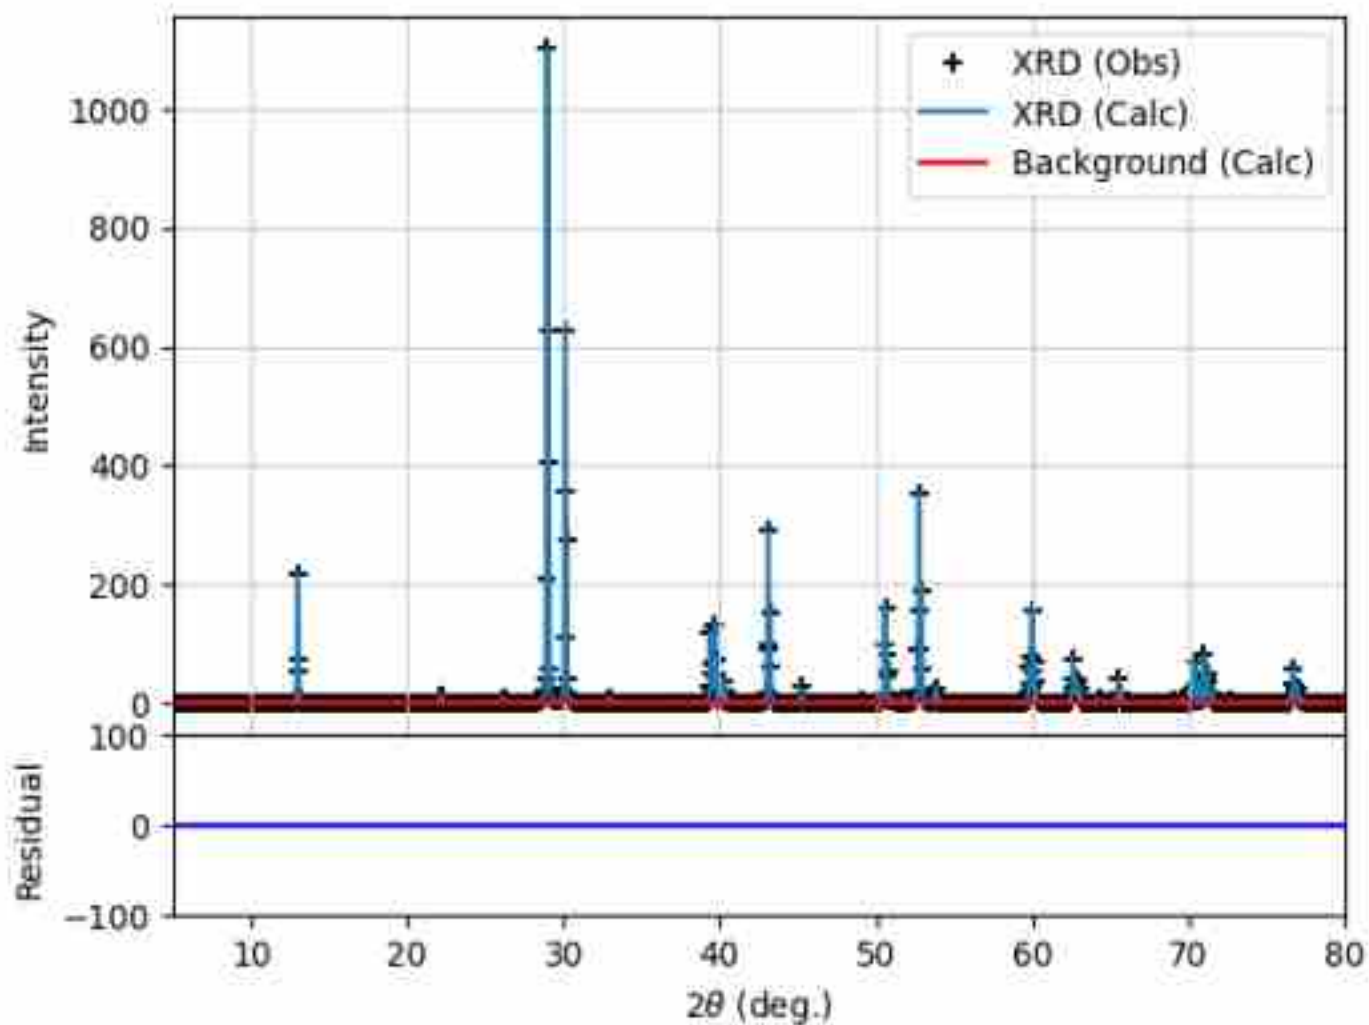

| RMSE before RR | Rwp     | RMSE after RR |
|----------------|---------|---------------|
| 0.008          | 0.00375 | 0.00109       |

# Ba<sub>2</sub>In<sub>1</sub>Sb<sub>1</sub>O<sub>6</sub>

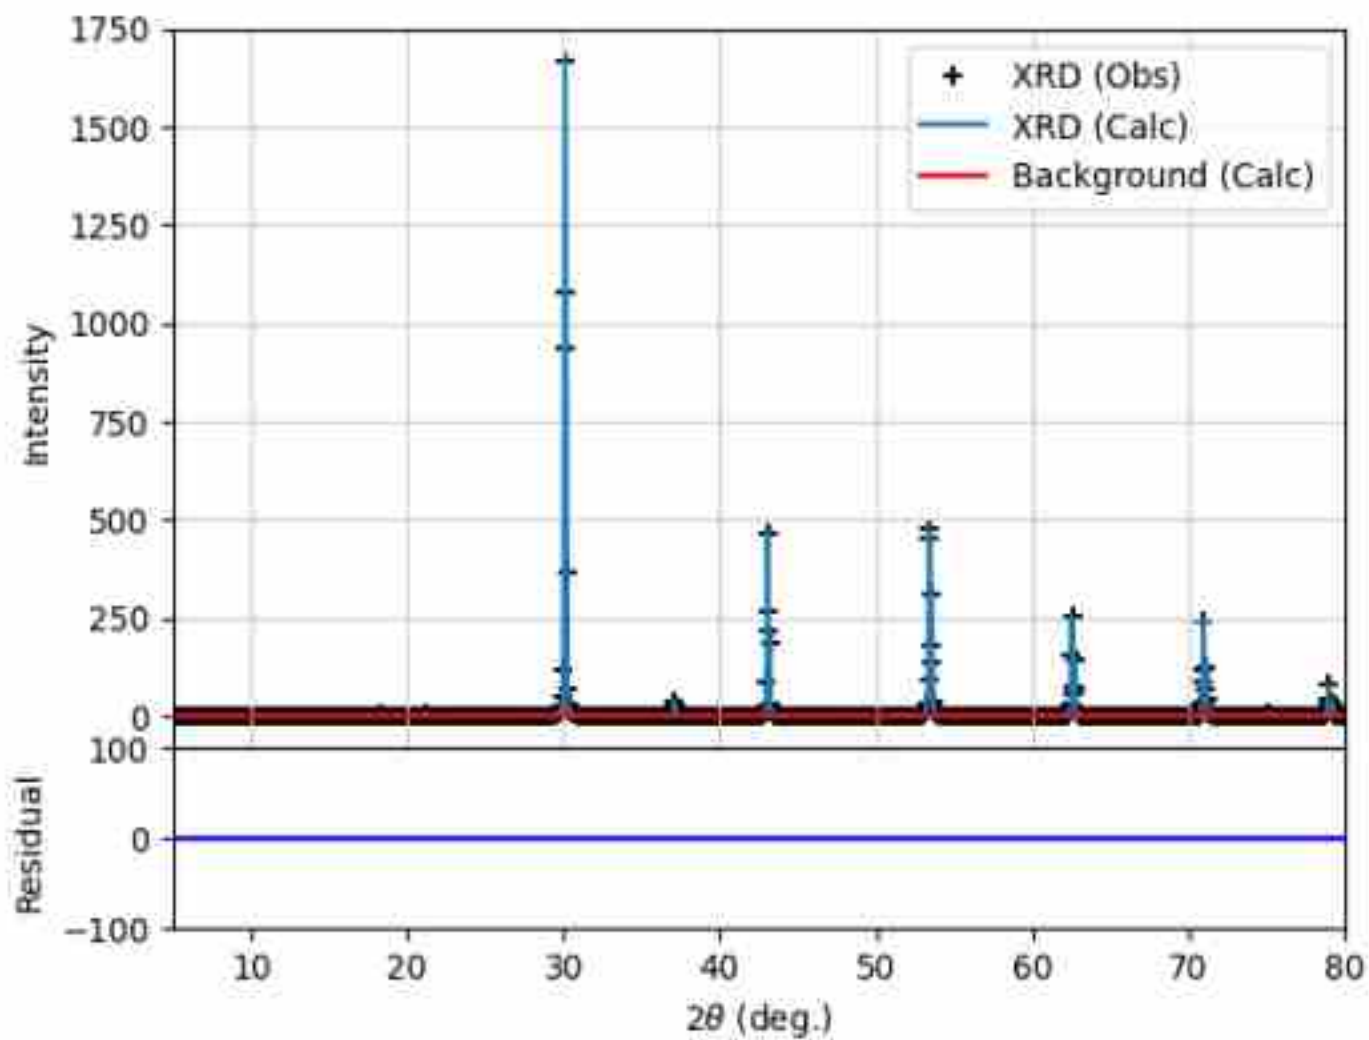

| RMSE before RR | Rwp     | RMSE after RR |
|----------------|---------|---------------|
| 0.008          | 0.01178 | 0.0043        |

# Ba2La1Ir1O6

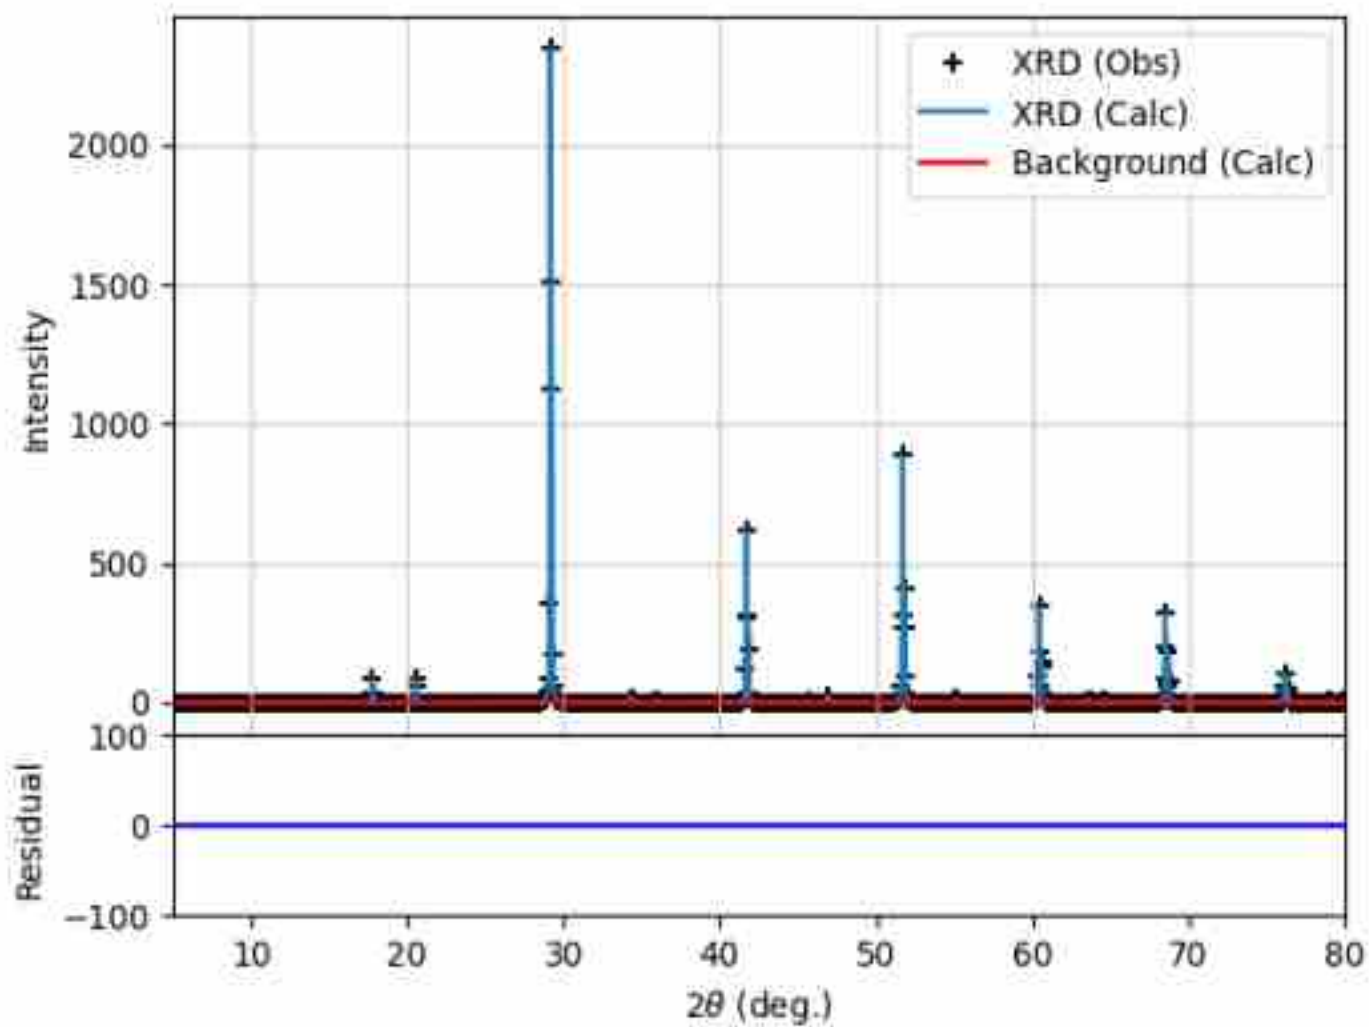

| RMSE before RR | Rwp     | RMSE after RR |
|----------------|---------|---------------|
| 0.008          | 0.00632 | 0.00333       |



# Ba<sub>2</sub>Nd<sub>1</sub>Ru<sub>1</sub>O<sub>6</sub>

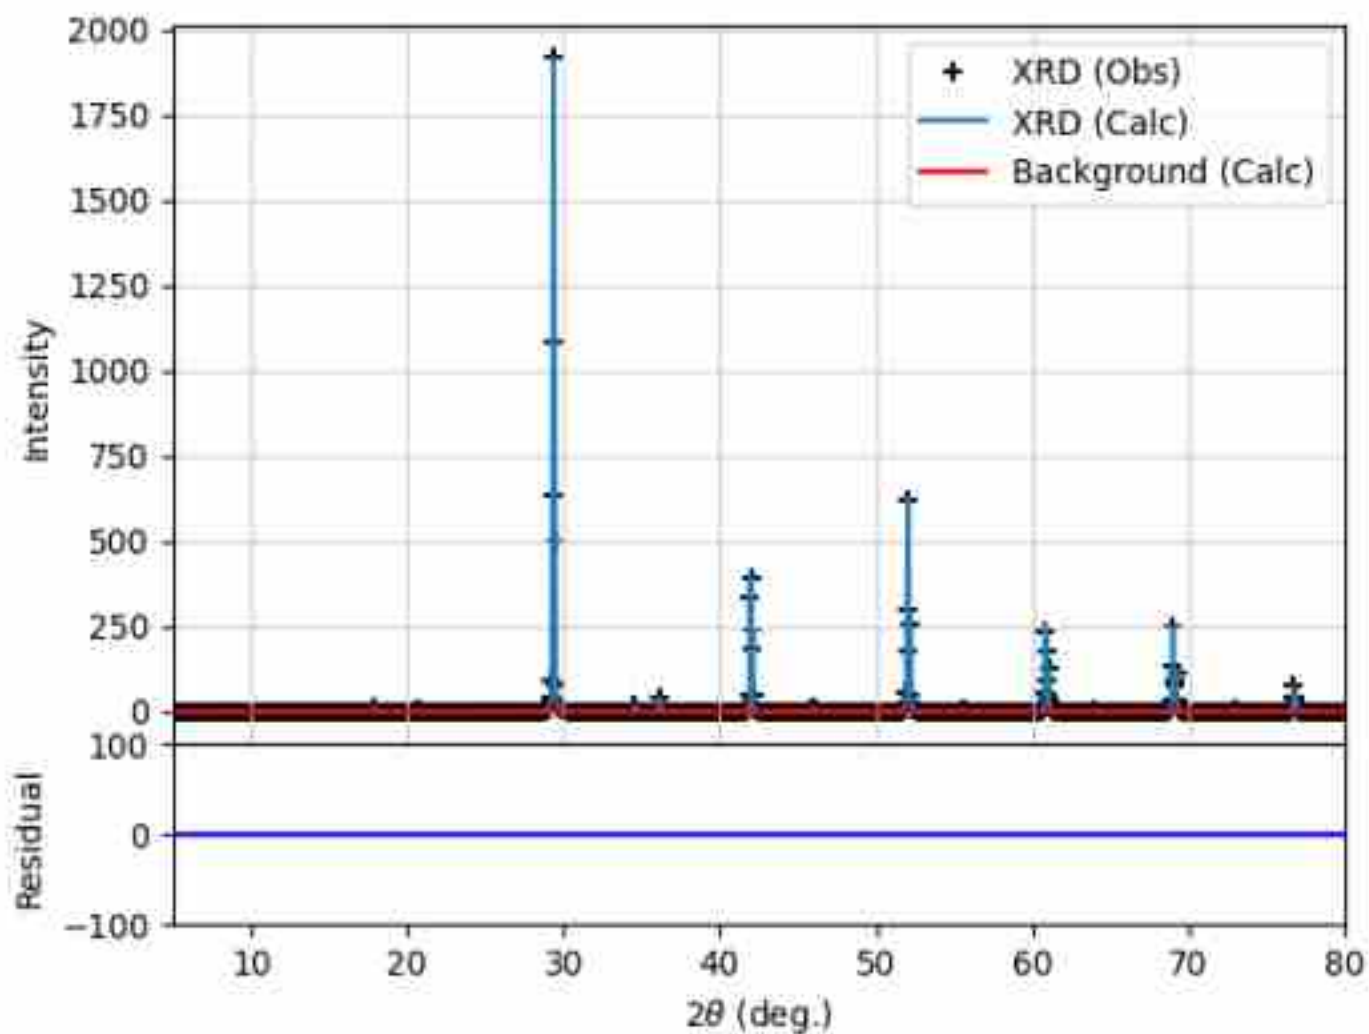

| RMSE before RR | Rwp     | RMSE after RR |
|----------------|---------|---------------|
| 0.008          | 0.00988 | 0.0033        |

# Ba<sub>2</sub>Pr<sub>1</sub>Pt<sub>1</sub>O<sub>6</sub>

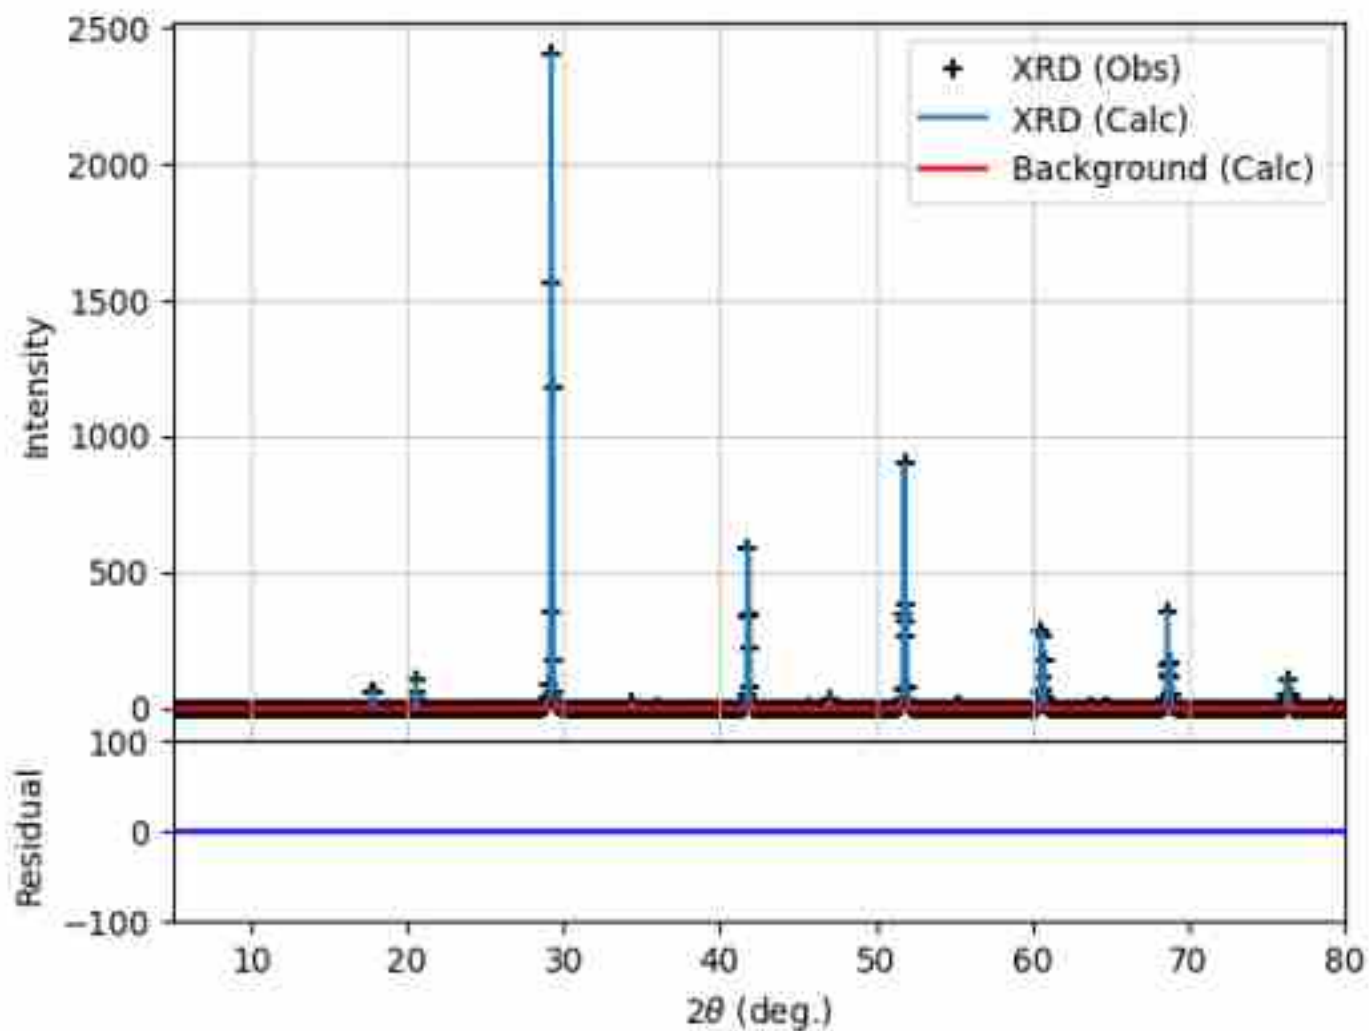

| RMSE before RR | Rwp     | RMSE after RR |
|----------------|---------|---------------|
| 0.008          | 0.01724 | 0.00644       |

# Ba2Sm1Re1O6

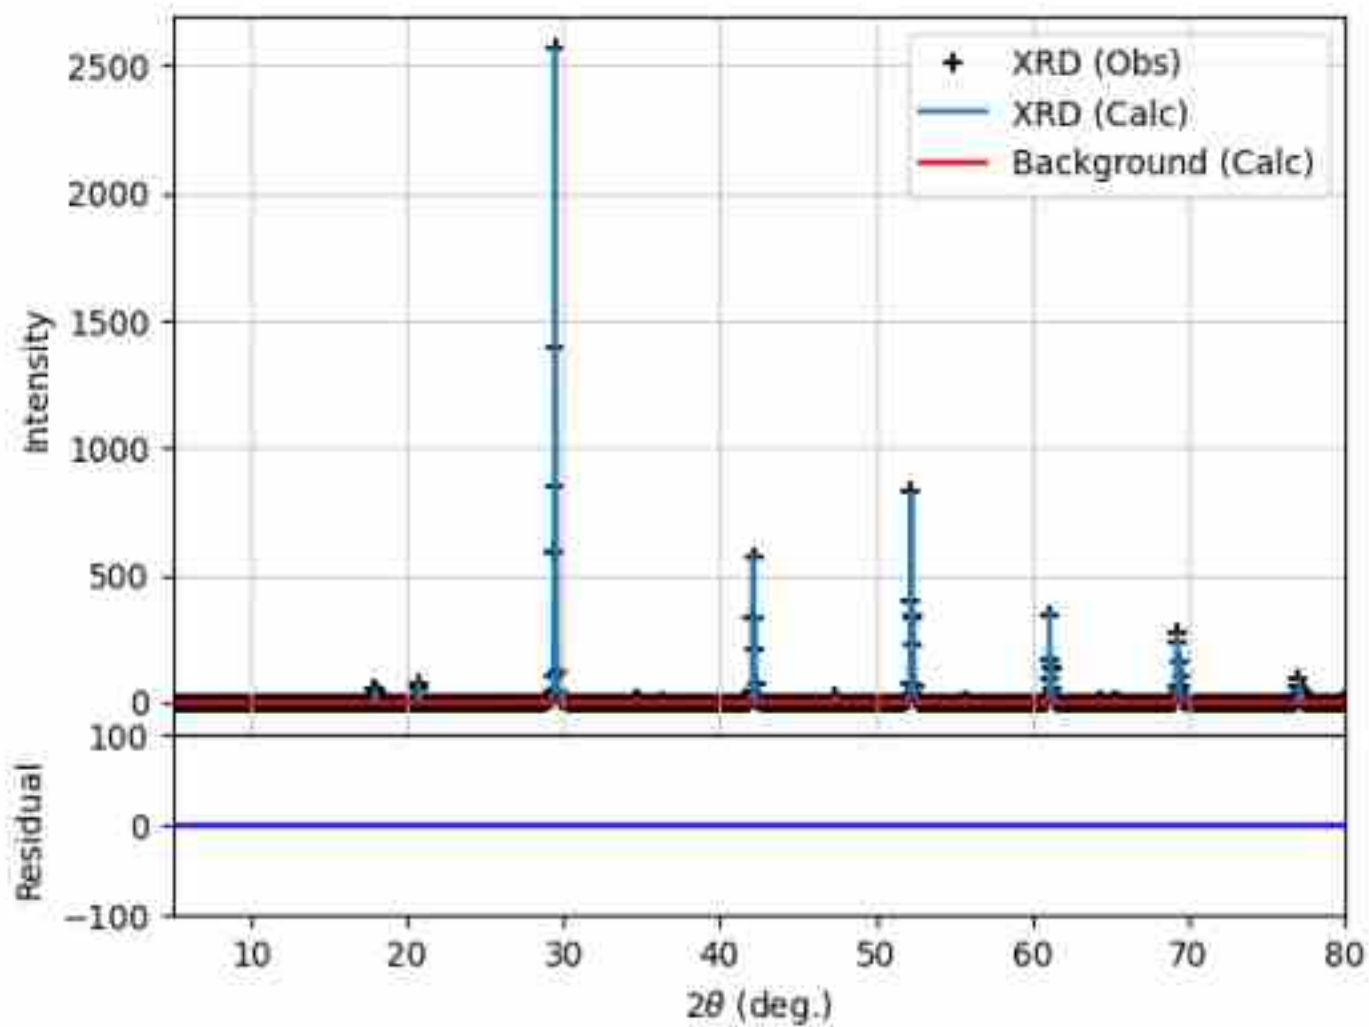

| RMSE before RR | Rwp     | RMSE after RR |
|----------------|---------|---------------|
| 0.008          | 0.00524 | 0.00288       |

# Ba<sub>2</sub>Tb<sub>1</sub>Zr<sub>1</sub>O<sub>6</sub>

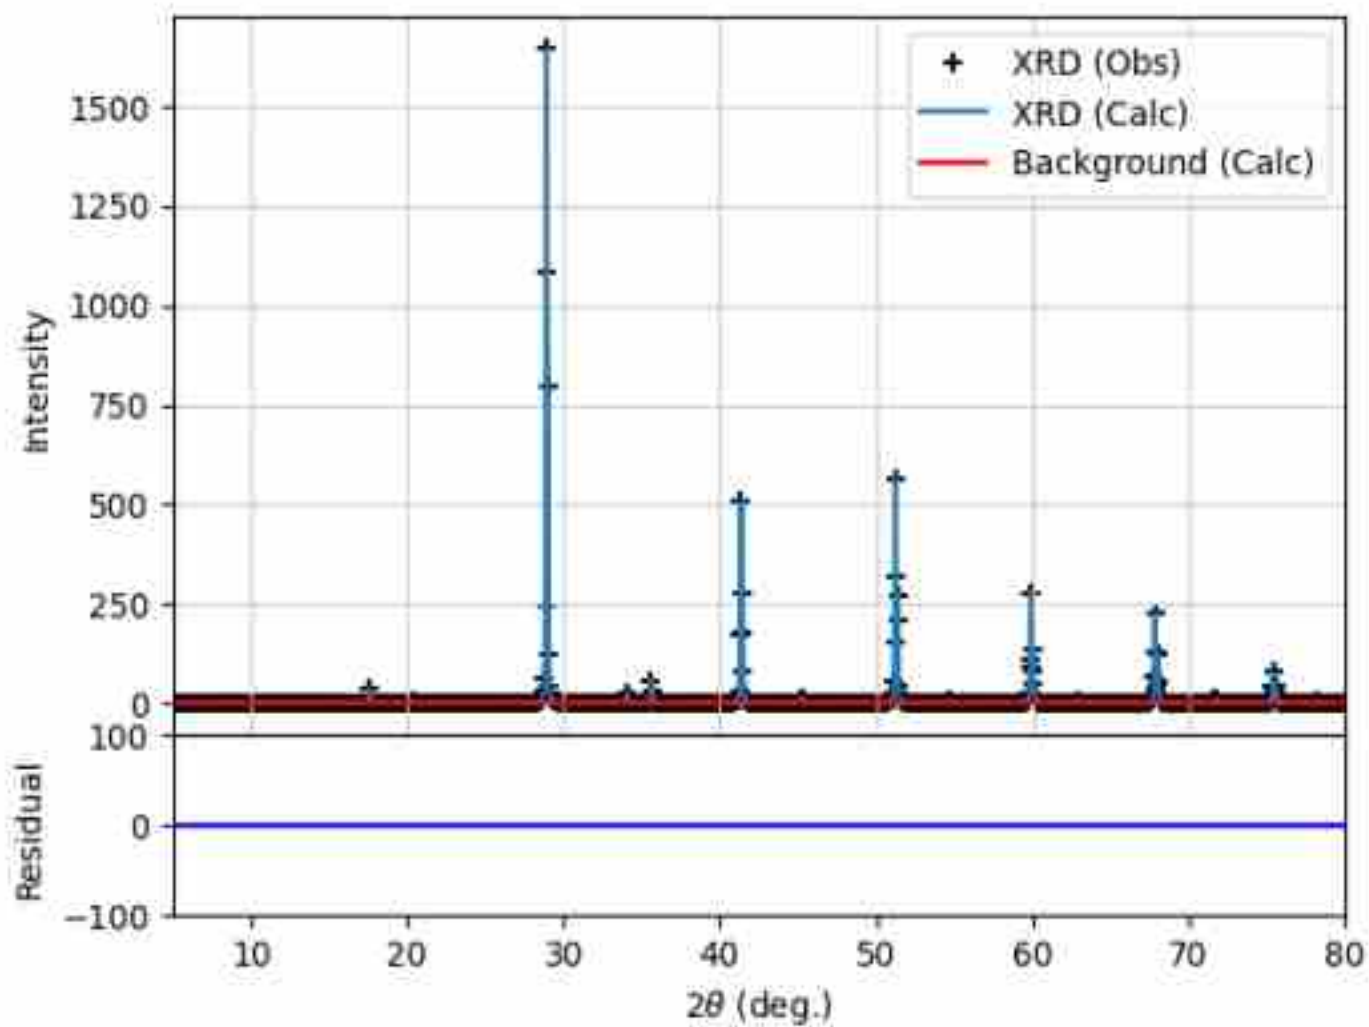

| RMSE before RR | Rwp     | RMSE after RR |
|----------------|---------|---------------|
| 0.008          | 0.00616 | 0.0026        |

# Ba6Yb2

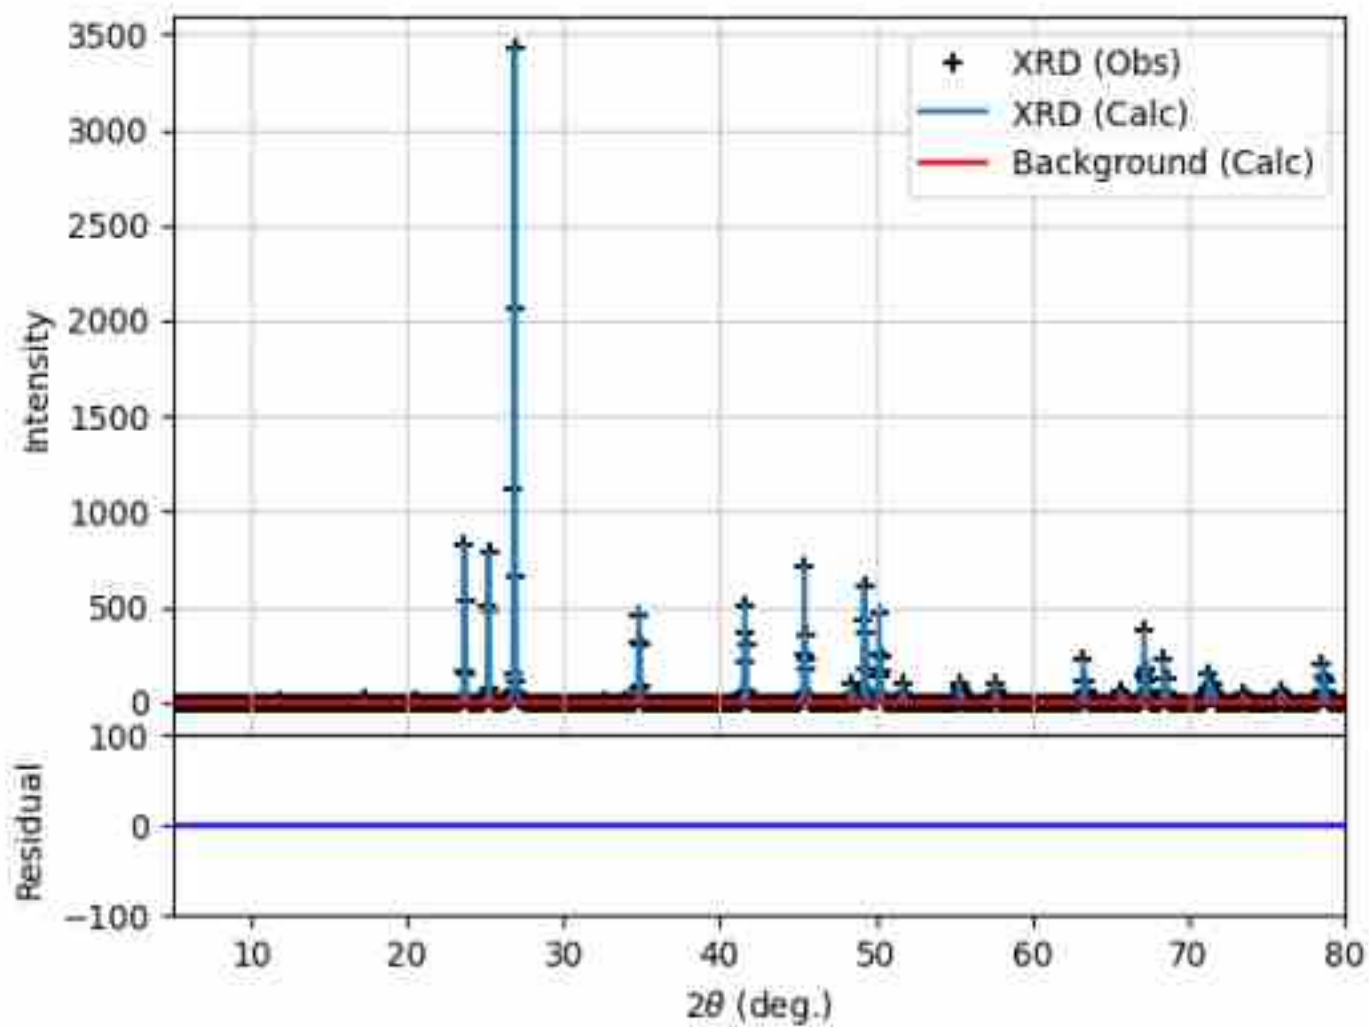

| RMSE before RR | Rwp     | RMSE after RR |
|----------------|---------|---------------|
| 0.008          | 0.01212 | 0.00065       |

# Ca1Eu1Nb1Fe1O6

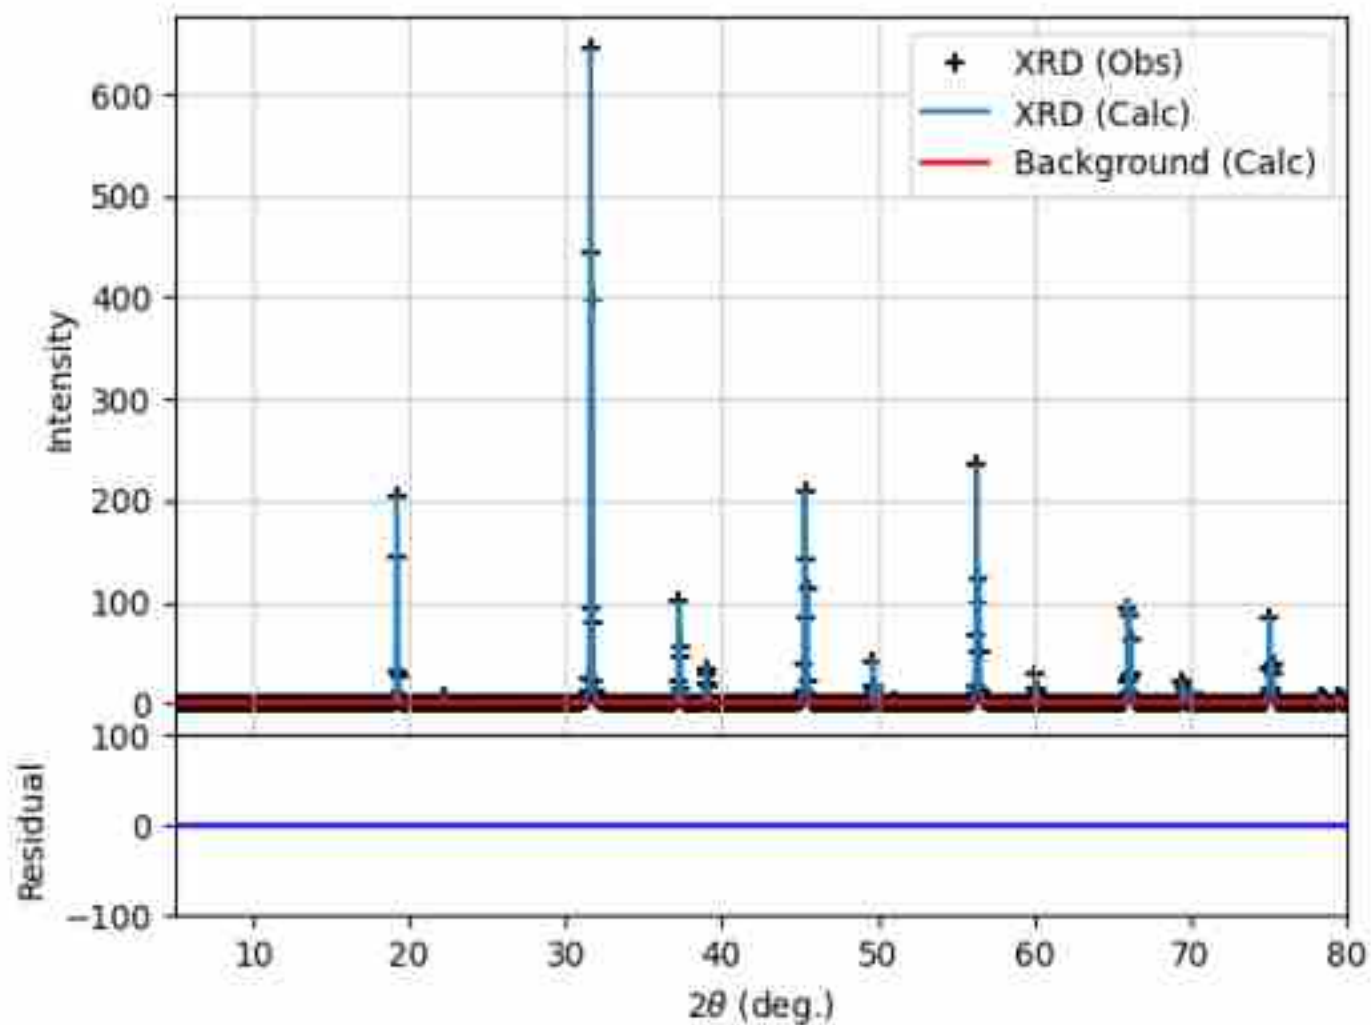

| RMSE before RR | Rwp     | RMSE after RR |
|----------------|---------|---------------|
| 0.008          | 0.00434 | 0.00197       |

# Ca1Ni2Ge2

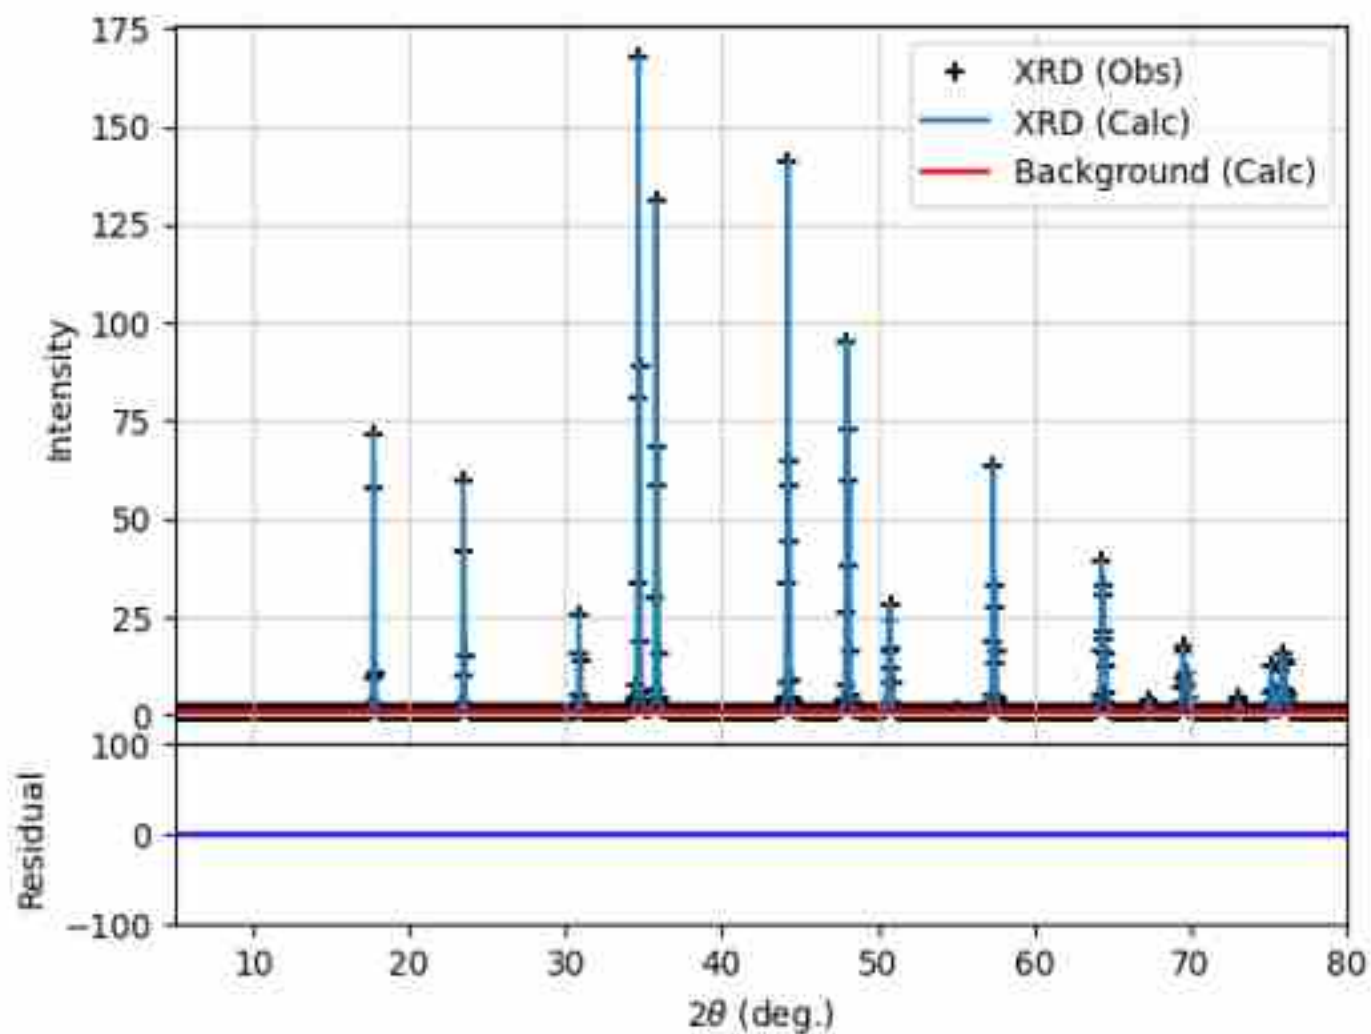

| RMSE before RR | Rwp     | RMSE after RR |
|----------------|---------|---------------|
| 0.008          | 0.00284 | 0.00036       |

# Ca1P2Ru2

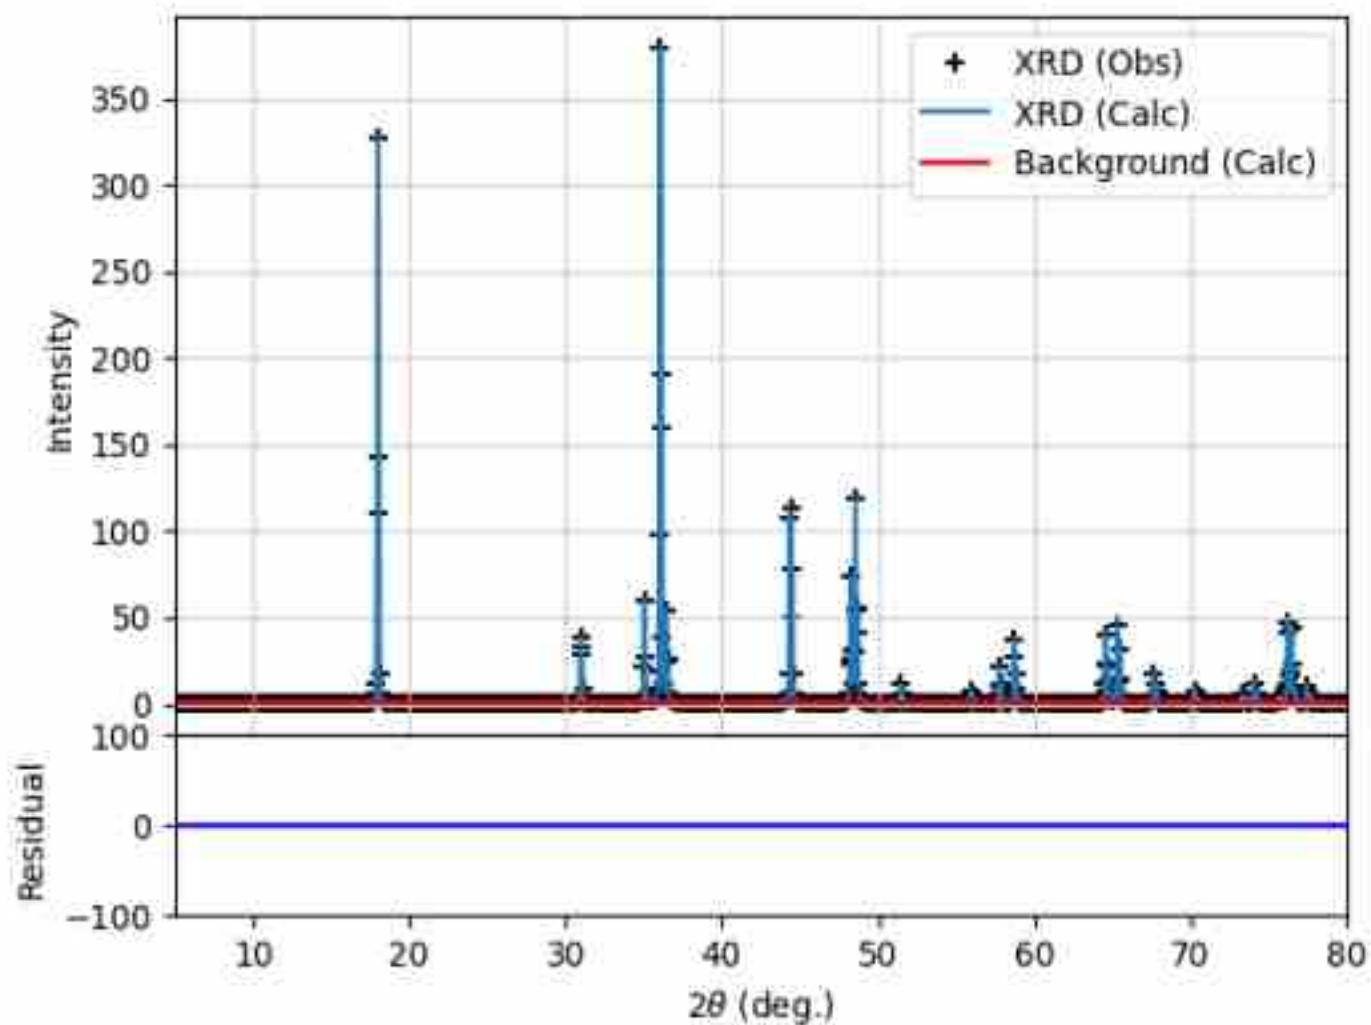

| RMSE before RR | Rwp     | RMSE after RR |
|----------------|---------|---------------|
| 0.008          | 0.00572 | 0.00071       |



# Ca<sub>2</sub>Ni<sub>2</sub>F<sub>8</sub>

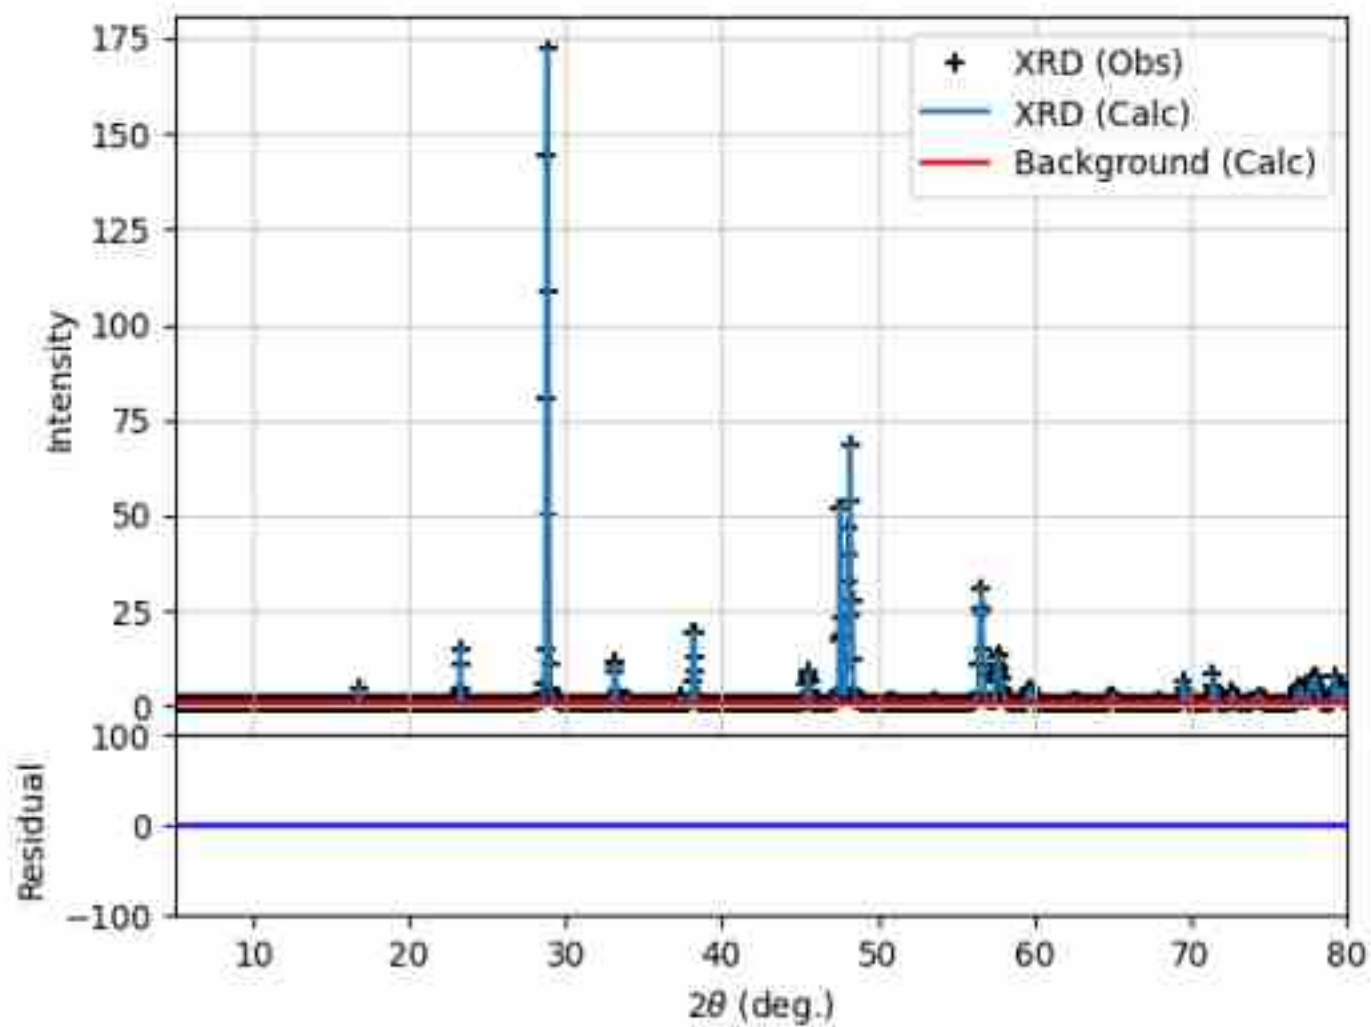

| RMSE before RR | Rwp     | RMSE after RR |
|----------------|---------|---------------|
| 0.08           | 0.00053 | 2e-05         |

# Ca3Sb1P1

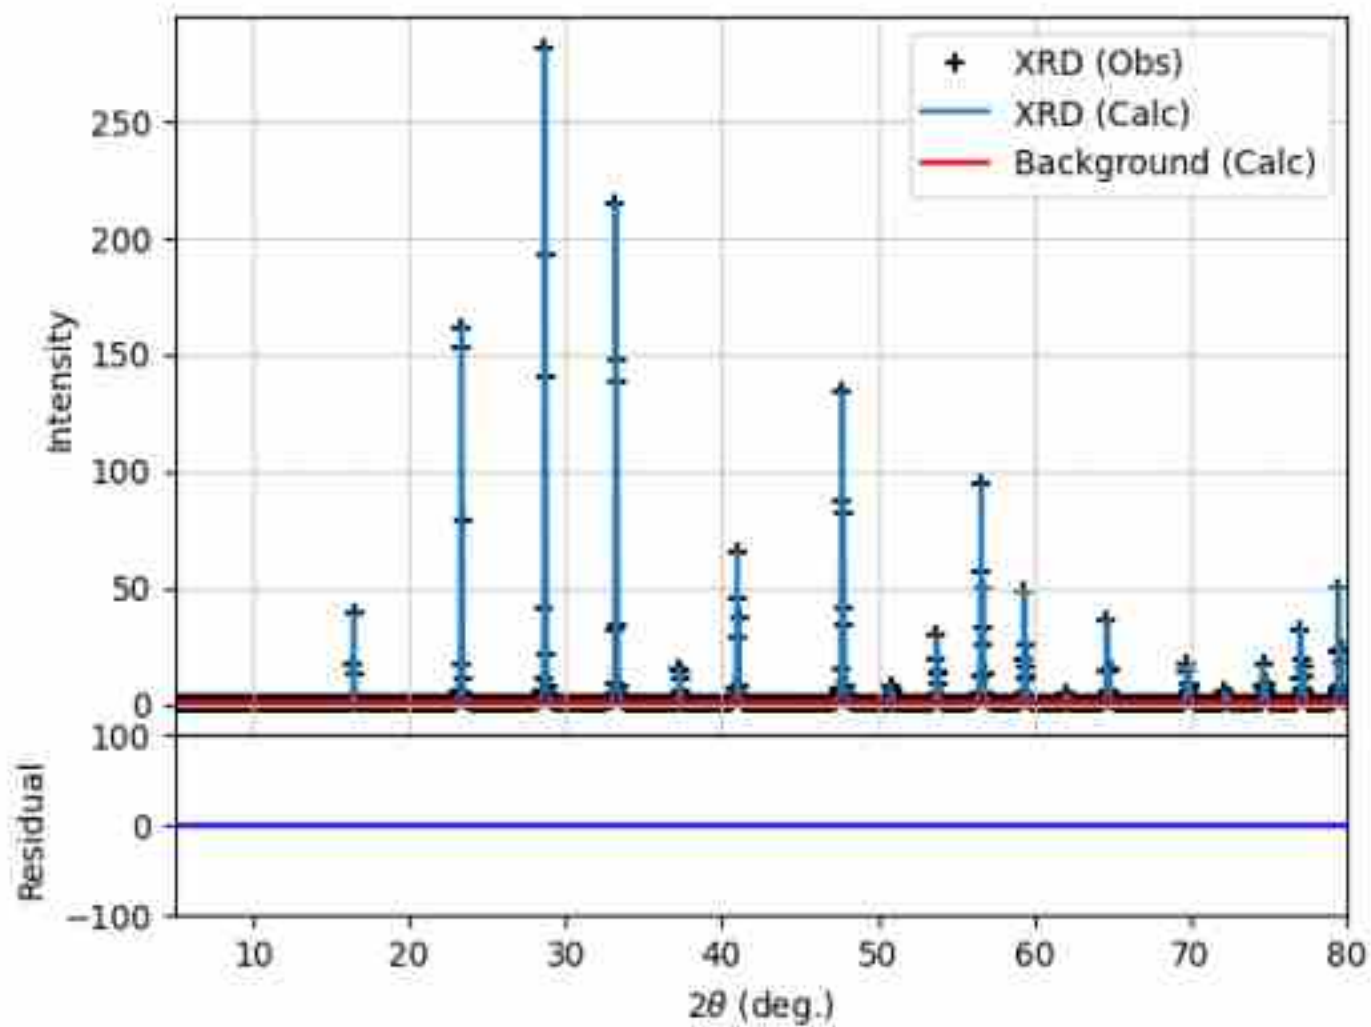

| RMSE before RR | Rwp     | RMSE after RR |
|----------------|---------|---------------|
| 0.008          | 0.02348 | 0.00102       |

# Ca4Bi2

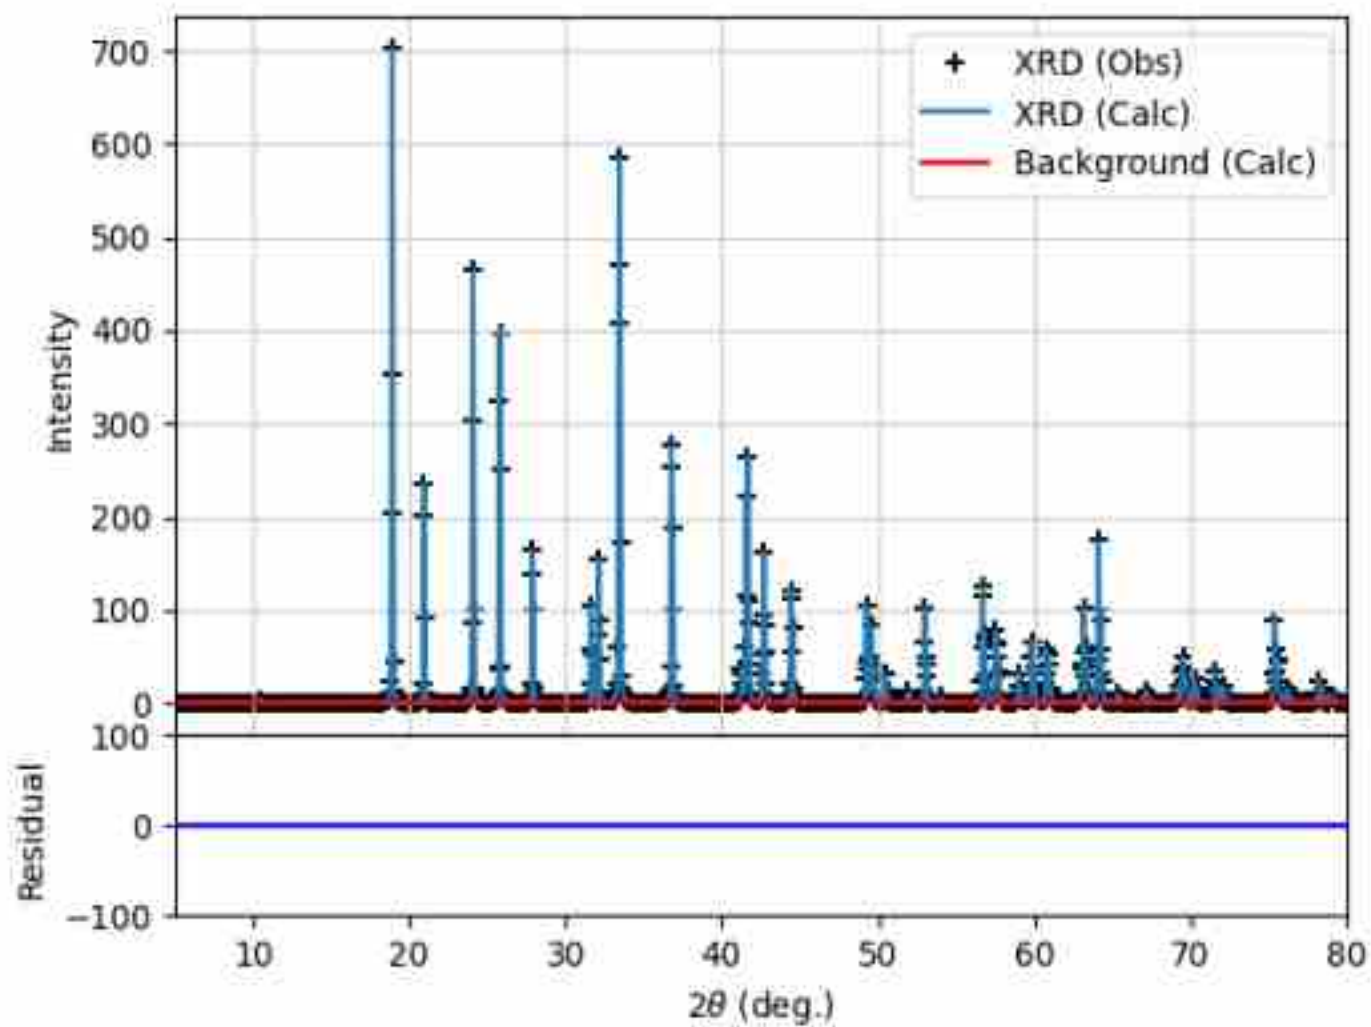

| RMSE before RR | Rwp     | RMSE after RR |
|----------------|---------|---------------|
| 0.008          | 0.00568 | 0.0006        |

# Ce1B2Ir2C1

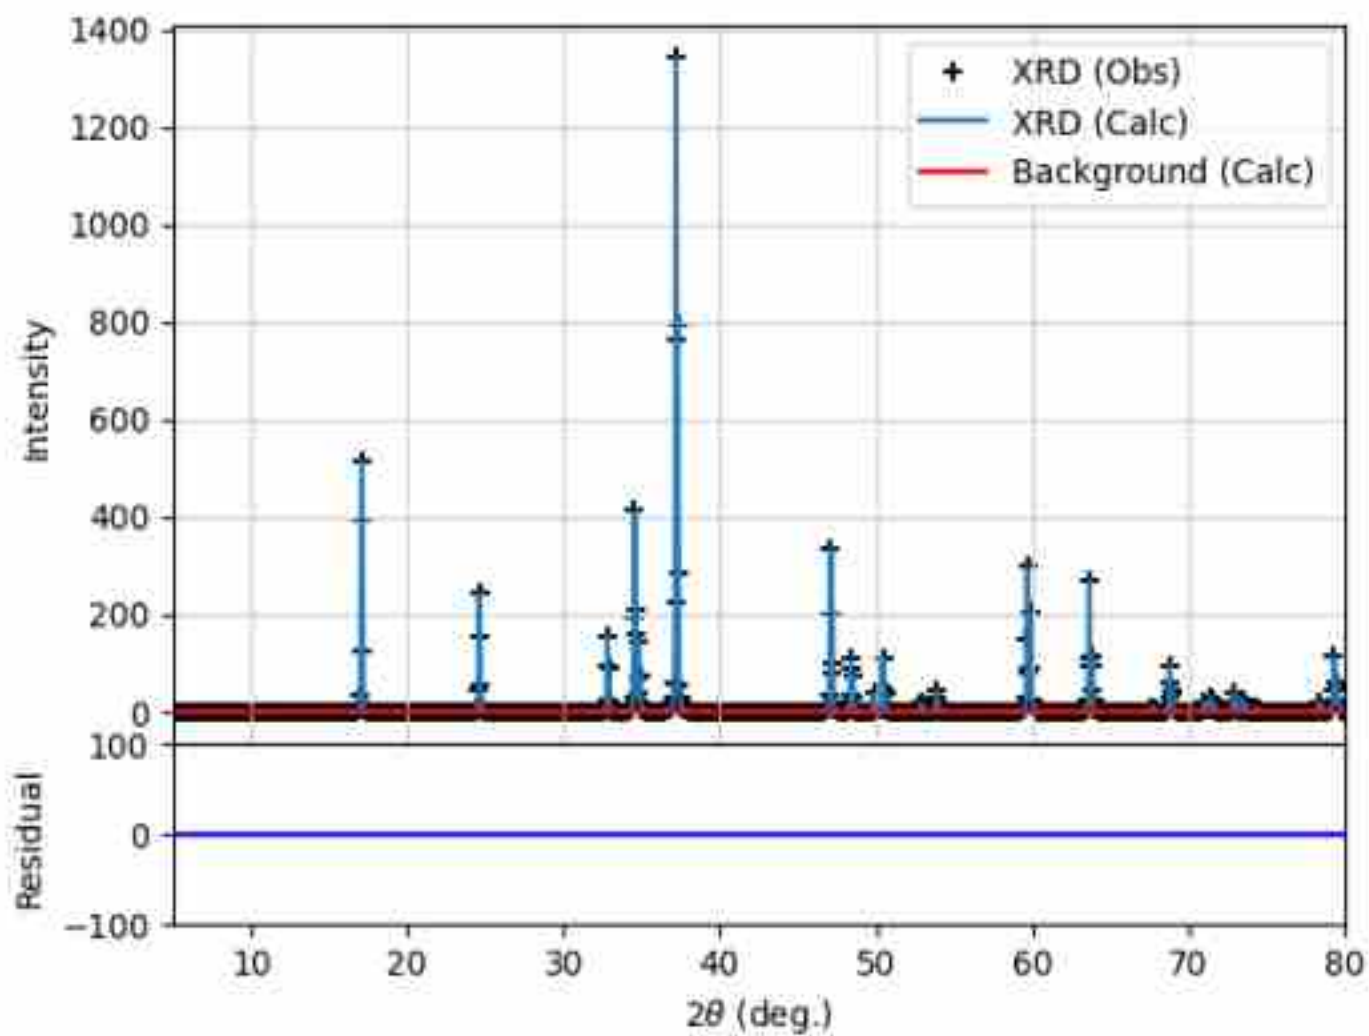

| RMSE before RR | Rwp     | RMSE after RR |
|----------------|---------|---------------|
| 0.008          | 0.00365 | 0.00266       |

# Ce1Ge2Ru2

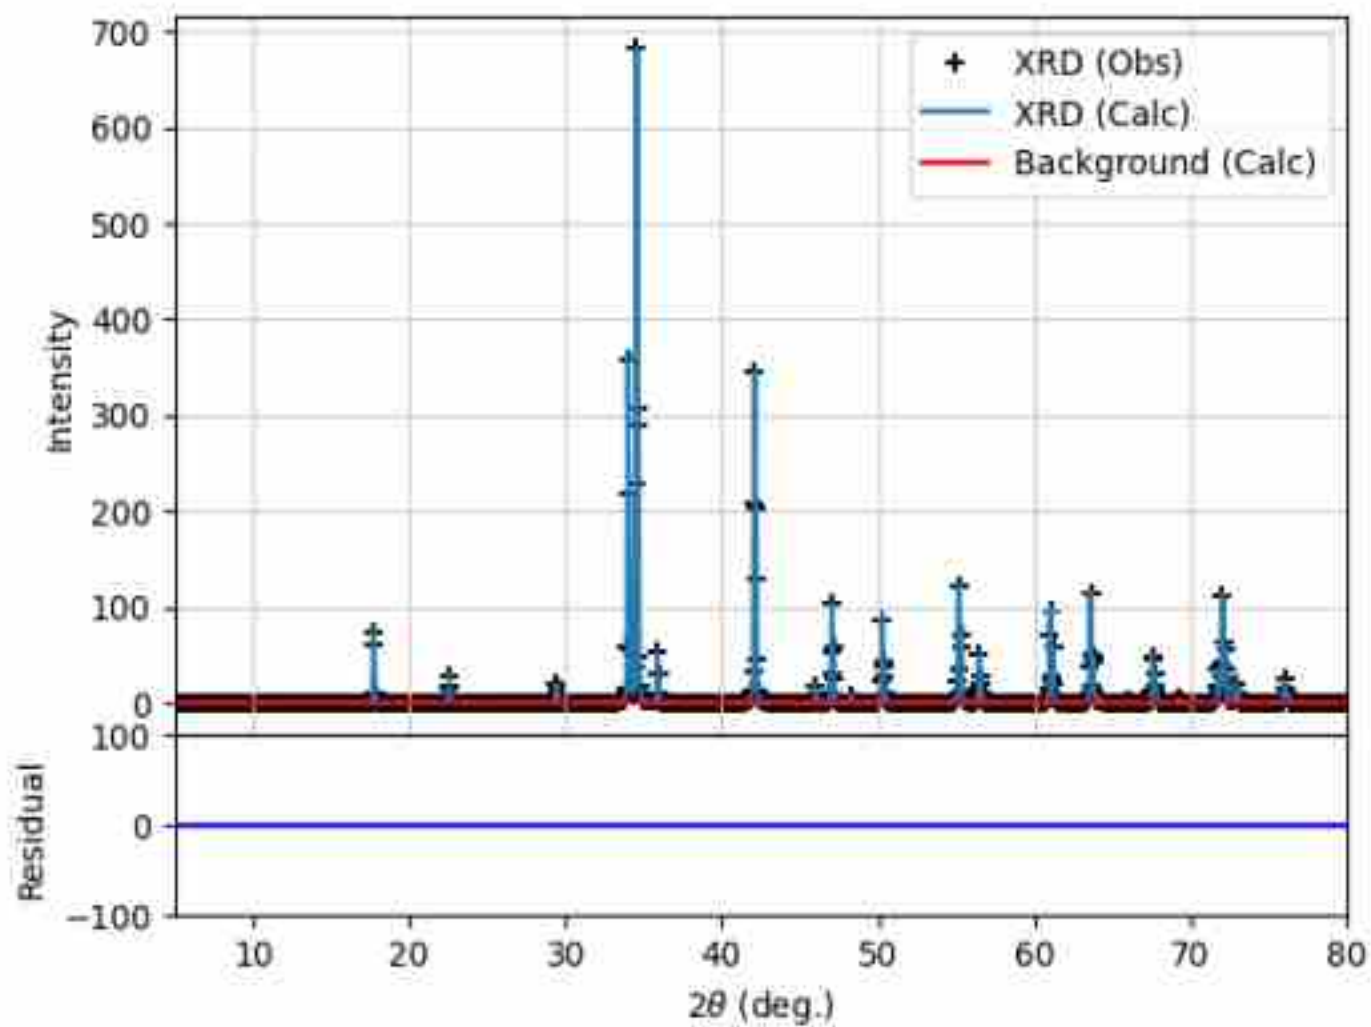

| RMSE before RR | Rwp     | RMSE after RR |
|----------------|---------|---------------|
| 0.008          | 0.00405 | 0.00029       |

# Ce1Nd3Si8

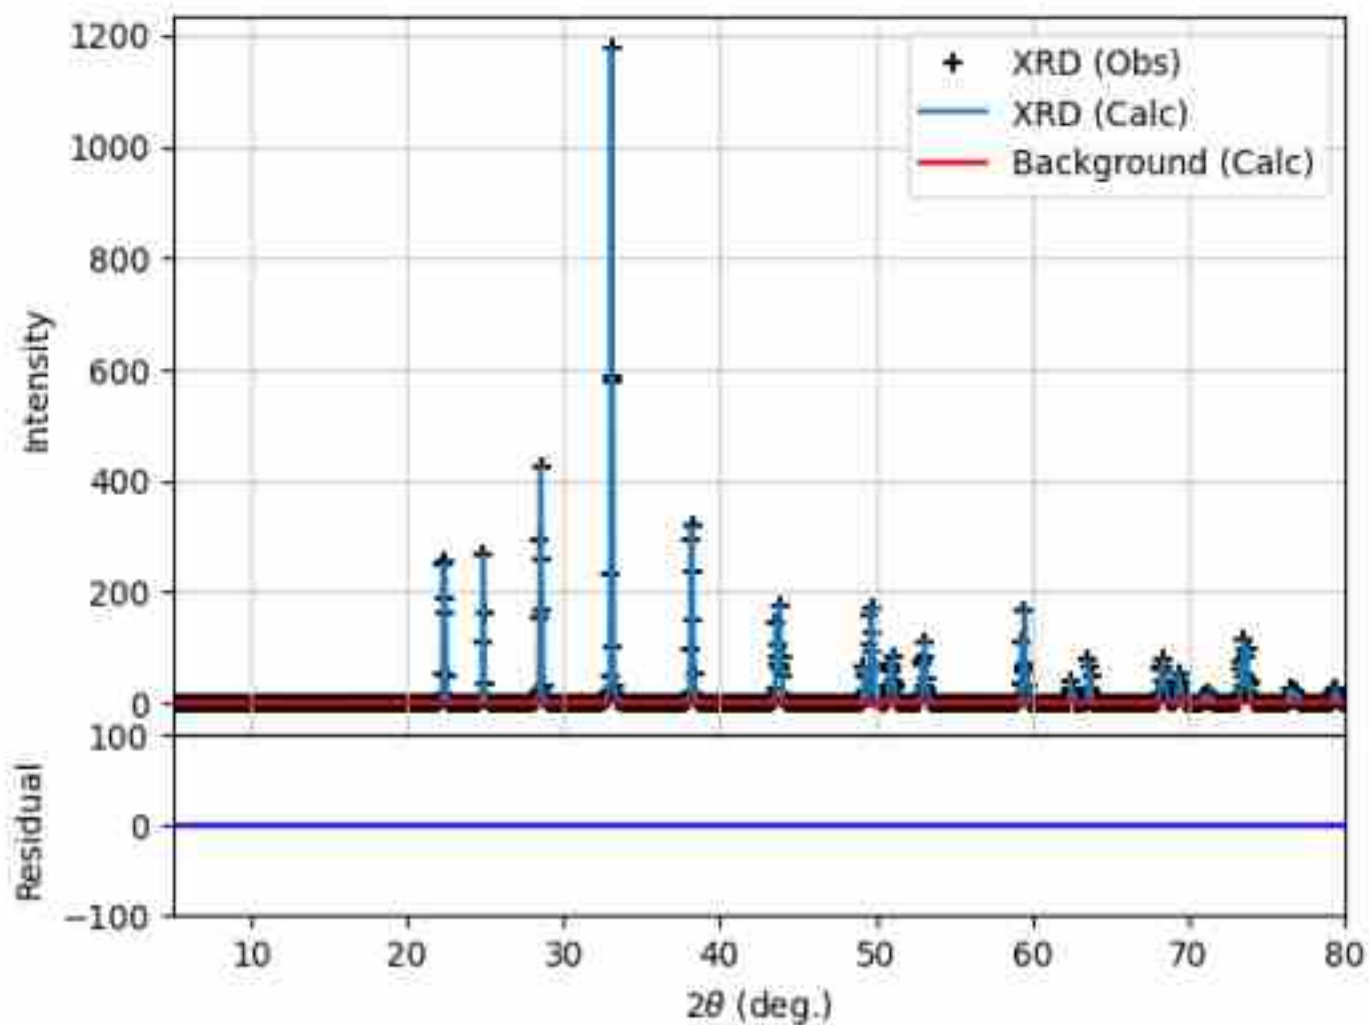

| RMSE before RR | Rwp     | RMSE after RR |
|----------------|---------|---------------|
| 0.008          | 0.00431 | 0.00056       |

# Ce<sub>2</sub>Al<sub>4</sub>Au<sub>4</sub>

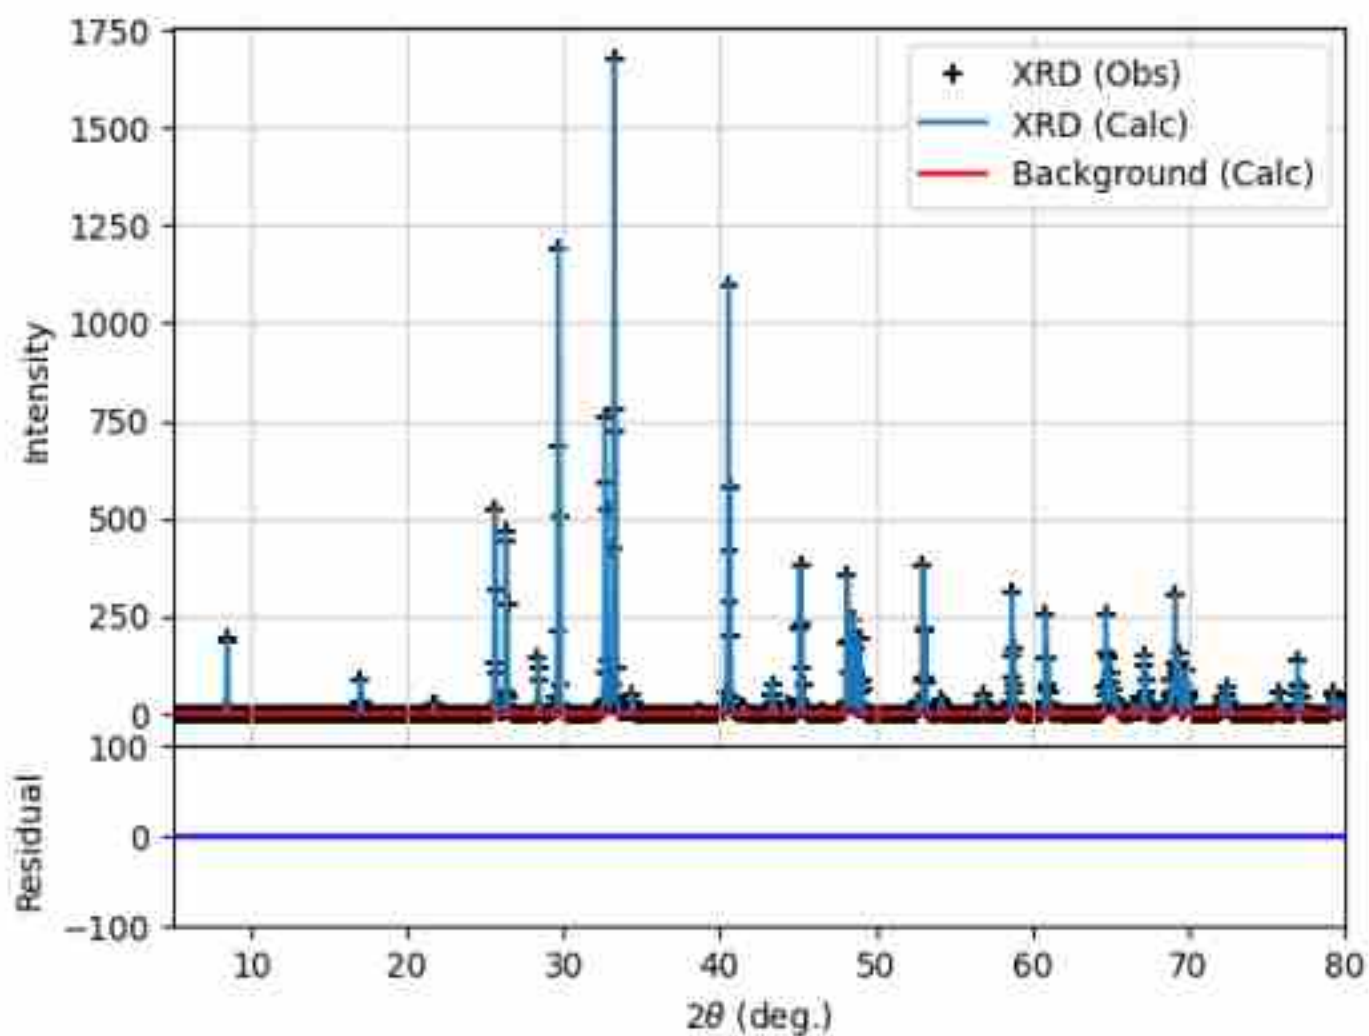

| RMSE before RR | Rwp     | RMSE after RR |
|----------------|---------|---------------|
| 0.008          | 0.00763 | 0.00118       |

# Ce<sub>2</sub>Cu<sub>2</sub>Ge<sub>2</sub>

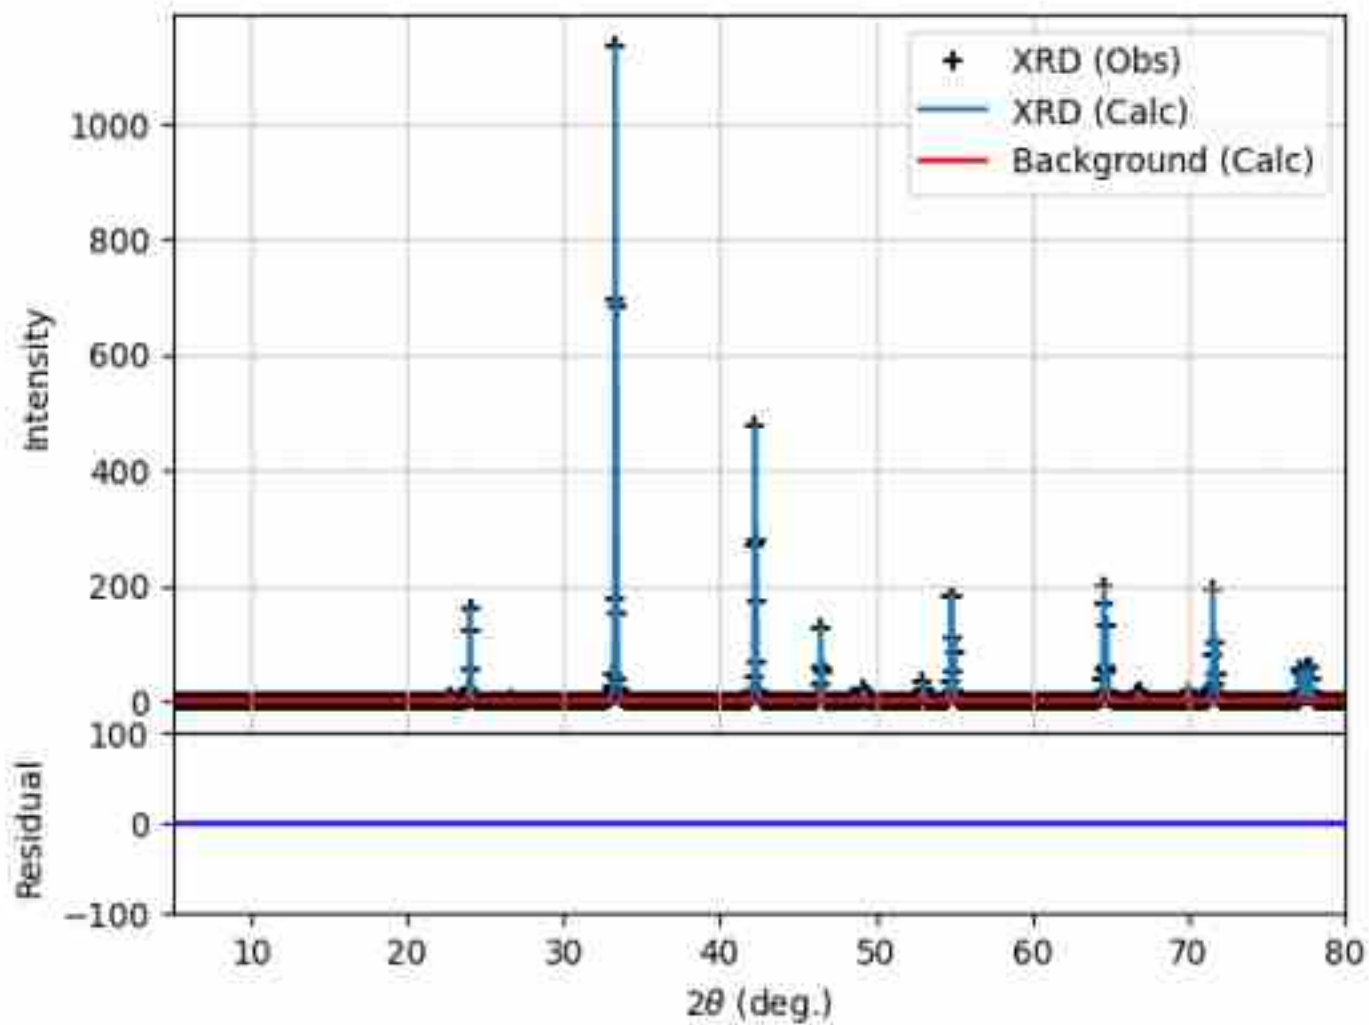

| RMSE before RR | Rwp     | RMSE after RR |
|----------------|---------|---------------|
| 0.008          | 0.03187 | 0.00075       |



# Ce<sub>2</sub>H<sub>2</sub>Se<sub>2</sub>

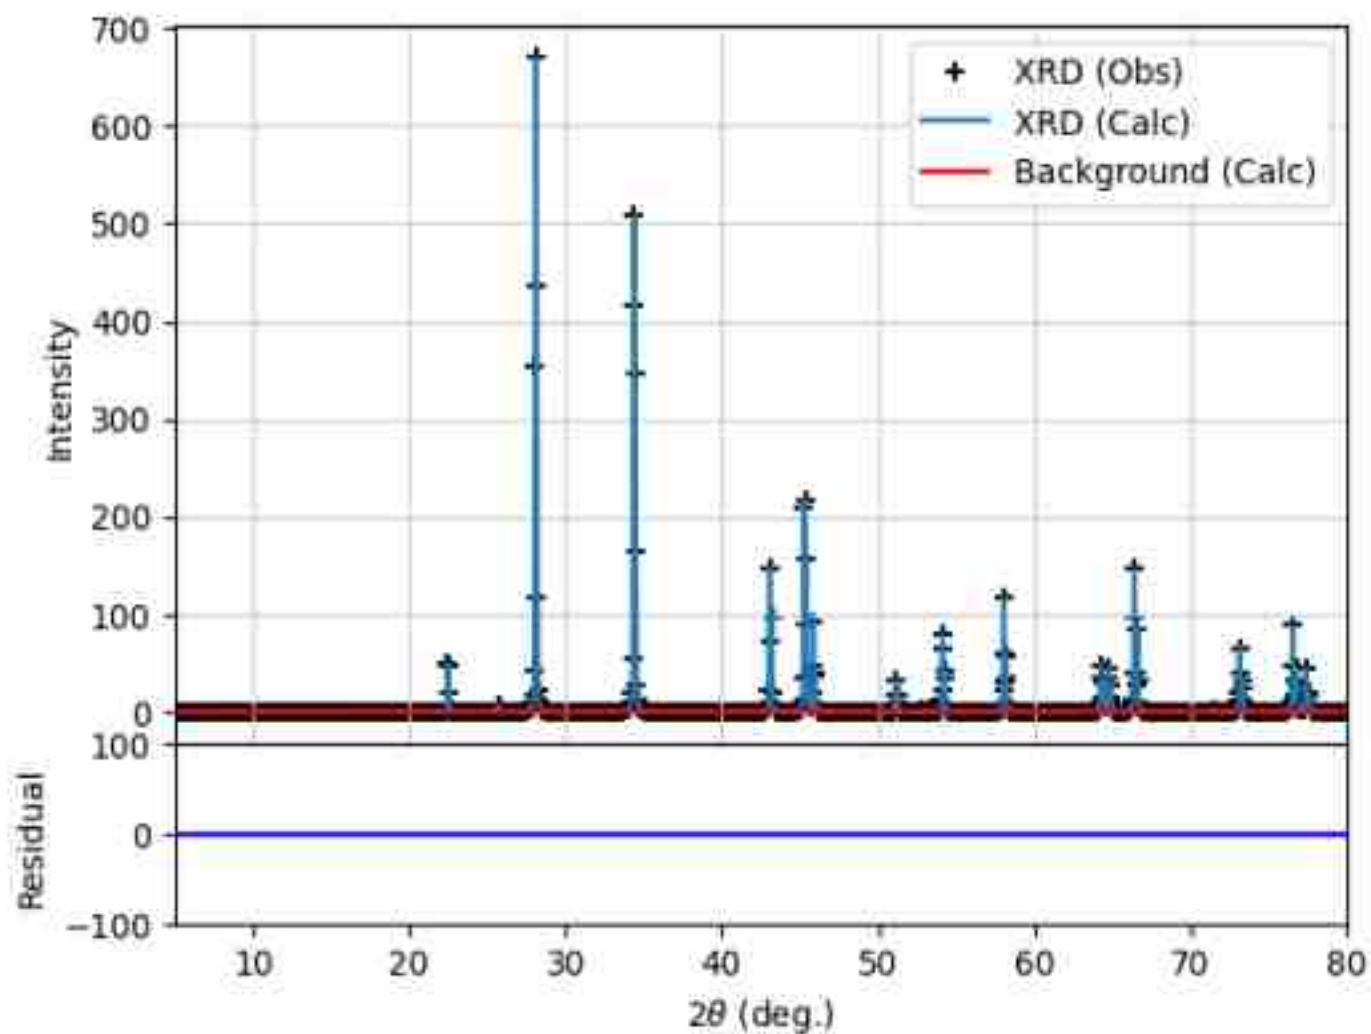

| RMSE before RR | Rwp     | RMSE after RR |
|----------------|---------|---------------|
| 0.008          | 0.00299 | 0.00428       |

# Ce<sub>2</sub>In<sub>2</sub>Pd<sub>4</sub>

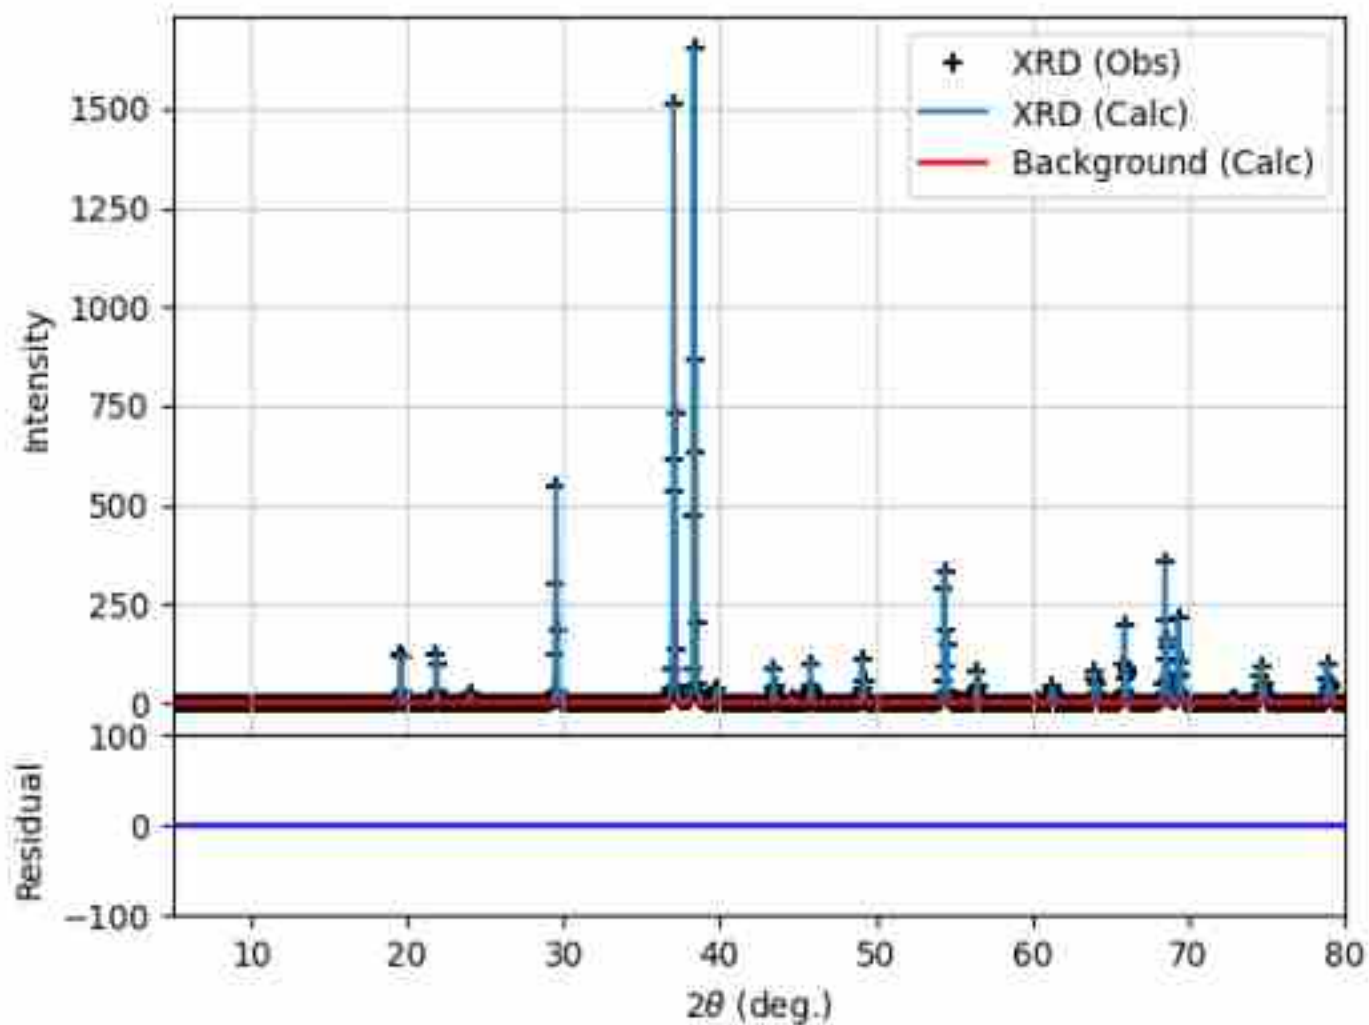

| RMSE before RR | Rwp     | RMSE after RR |
|----------------|---------|---------------|
| 0.008          | 0.00301 | 0.00059       |

# Ce<sub>2</sub>Si<sub>2</sub>Ru<sub>2</sub>

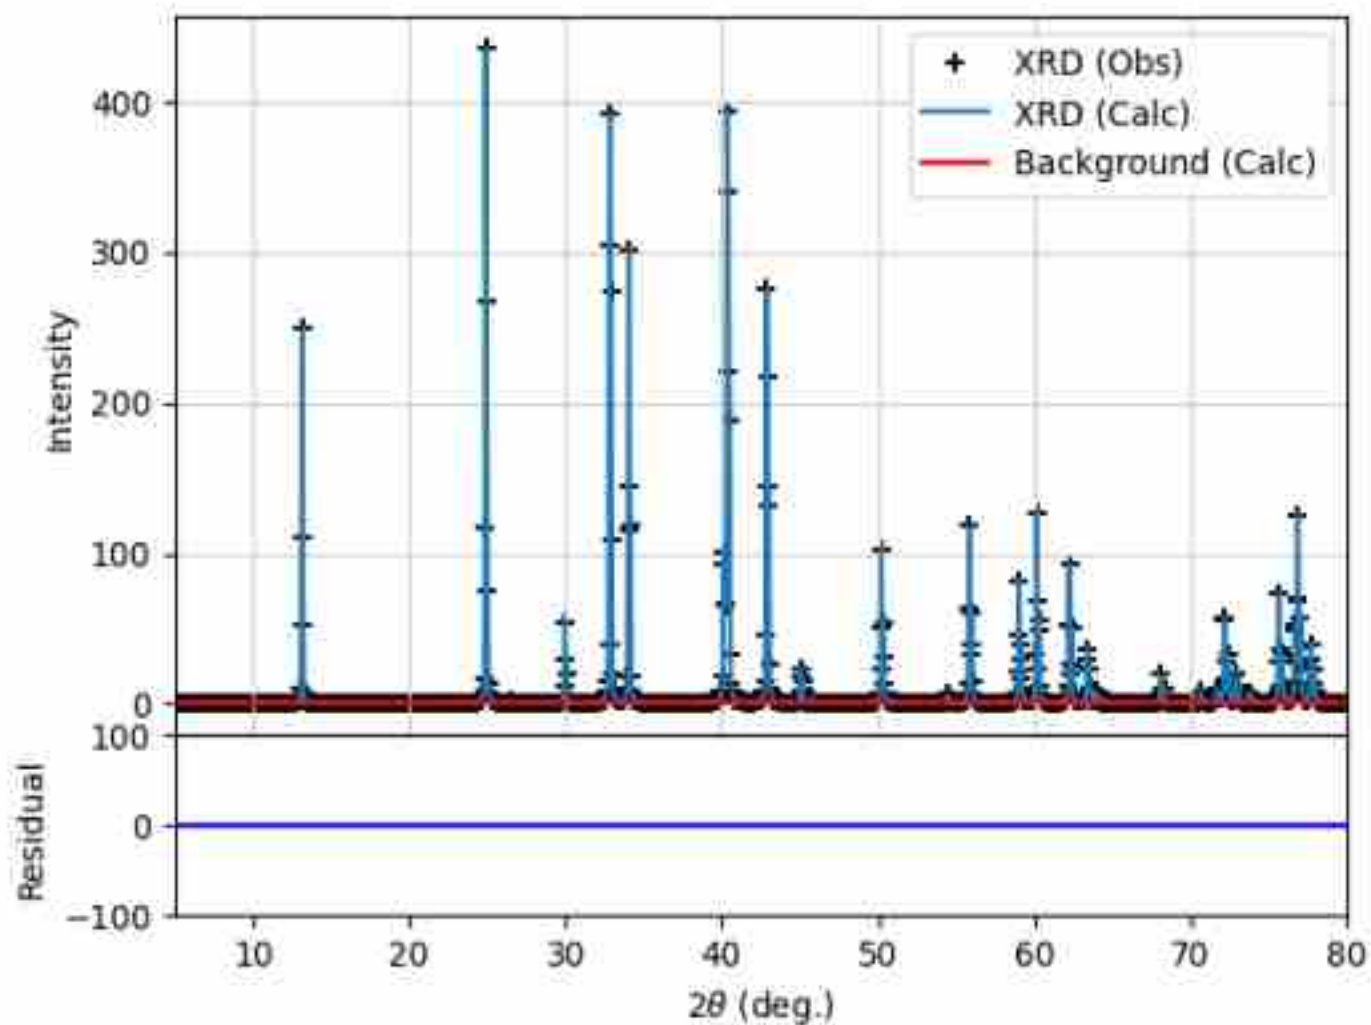

| RMSE before RR | Rwp     | RMSE after RR |
|----------------|---------|---------------|
| 0.008          | 0.01816 | 0.00286       |

# Ce<sub>2</sub>Si<sub>4</sub>Ni<sub>2</sub>

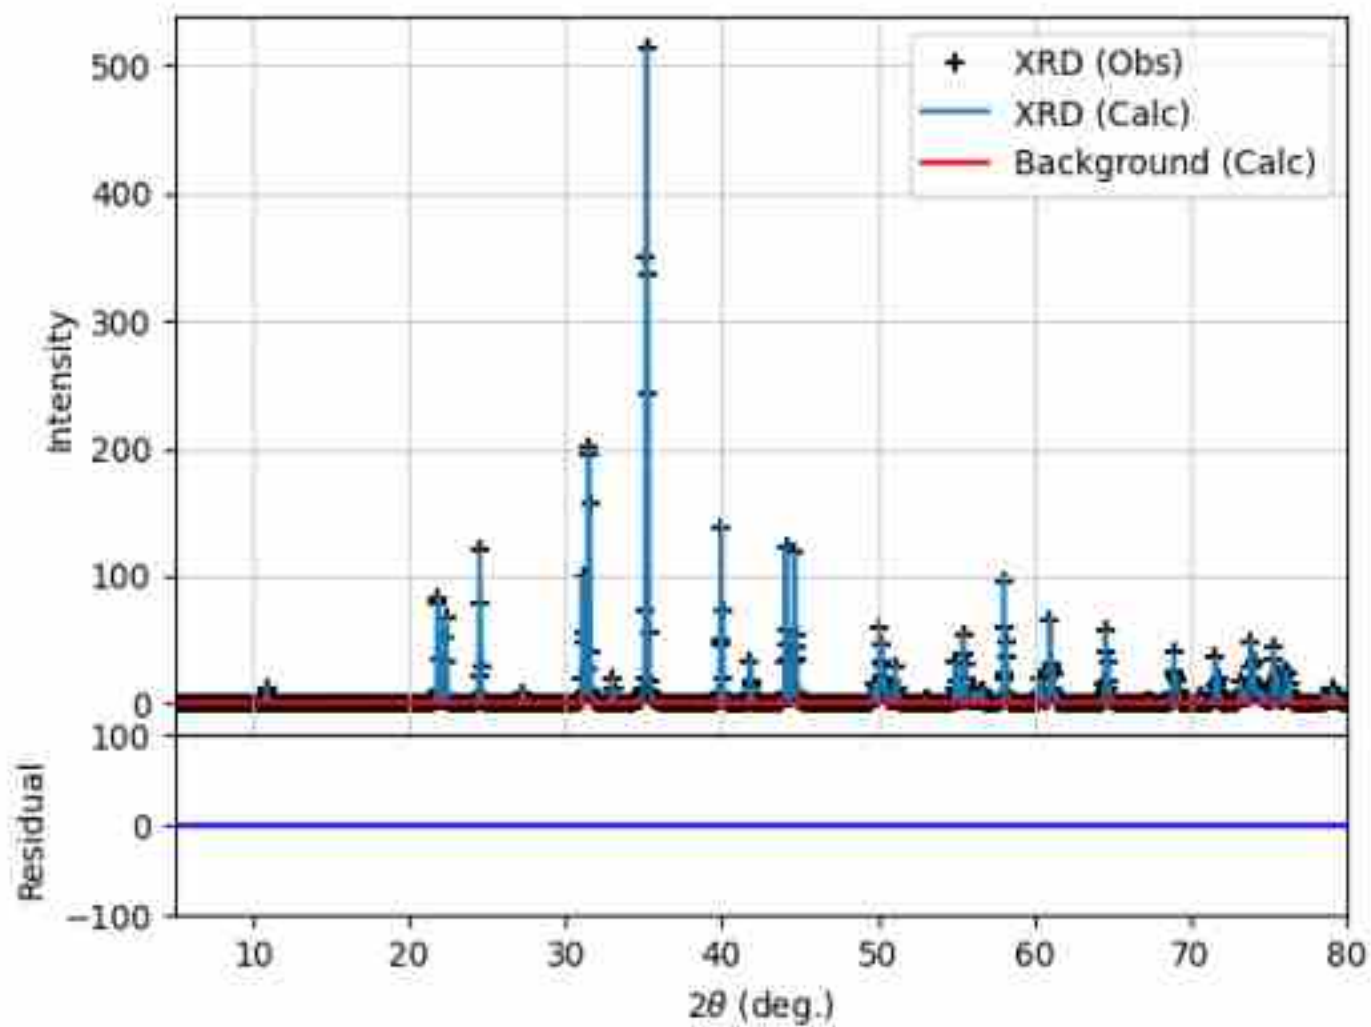

| RMSE before RR | Rwp     | RMSE after RR |
|----------------|---------|---------------|
| 0.008          | 0.00337 | 0.00063       |

# Co1Cl2

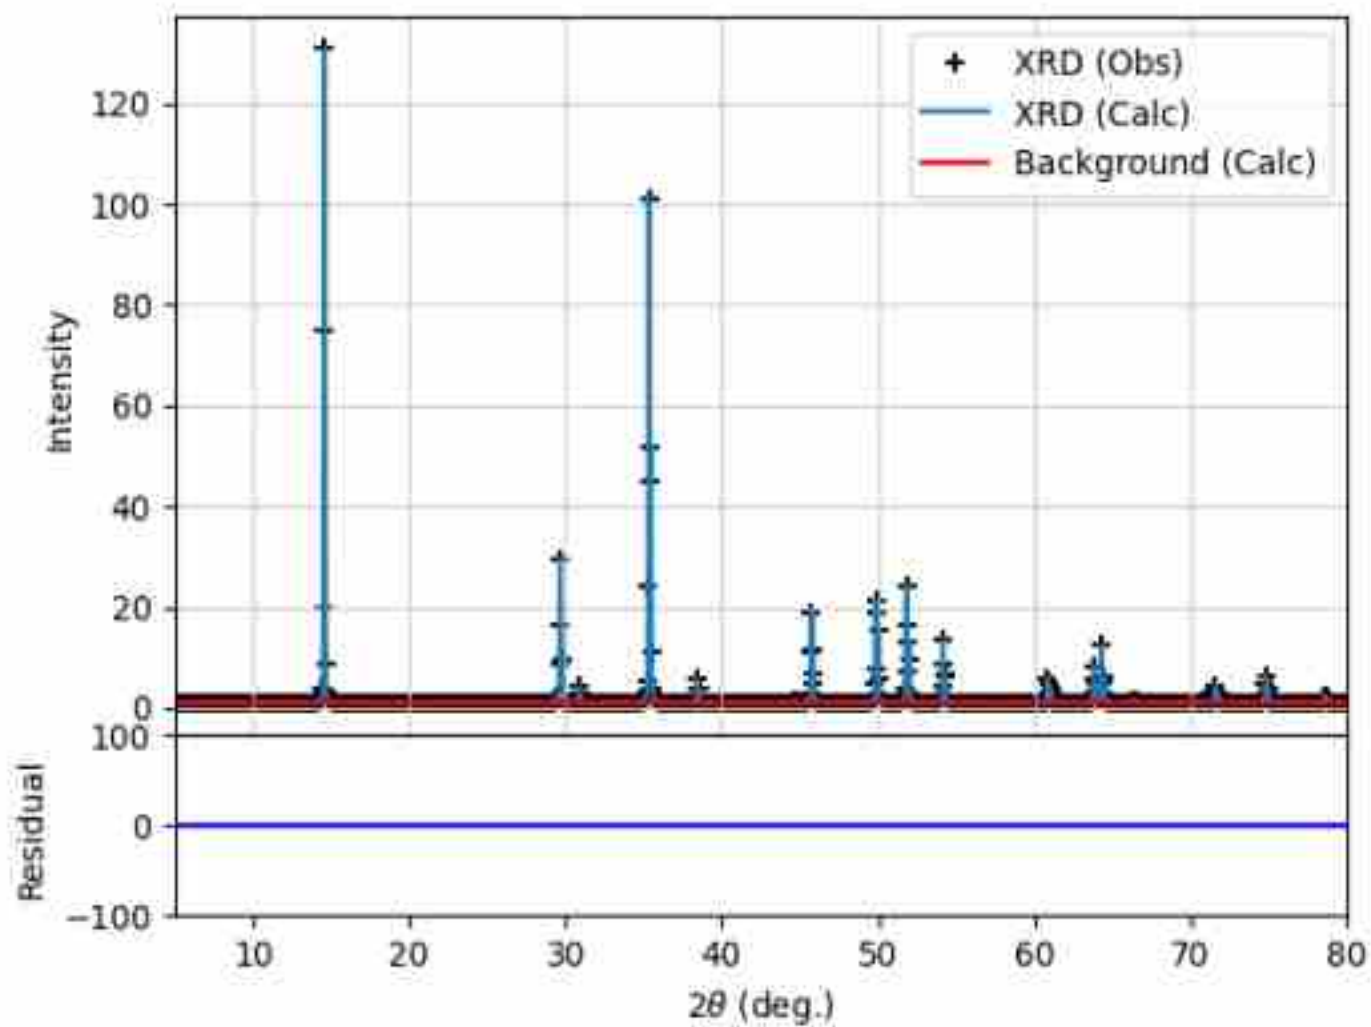

| RMSE before RR | Rwp     | RMSE after RR |
|----------------|---------|---------------|
| 0.008          | 0.00612 | 0.00119       |

# CoI<sub>2</sub>

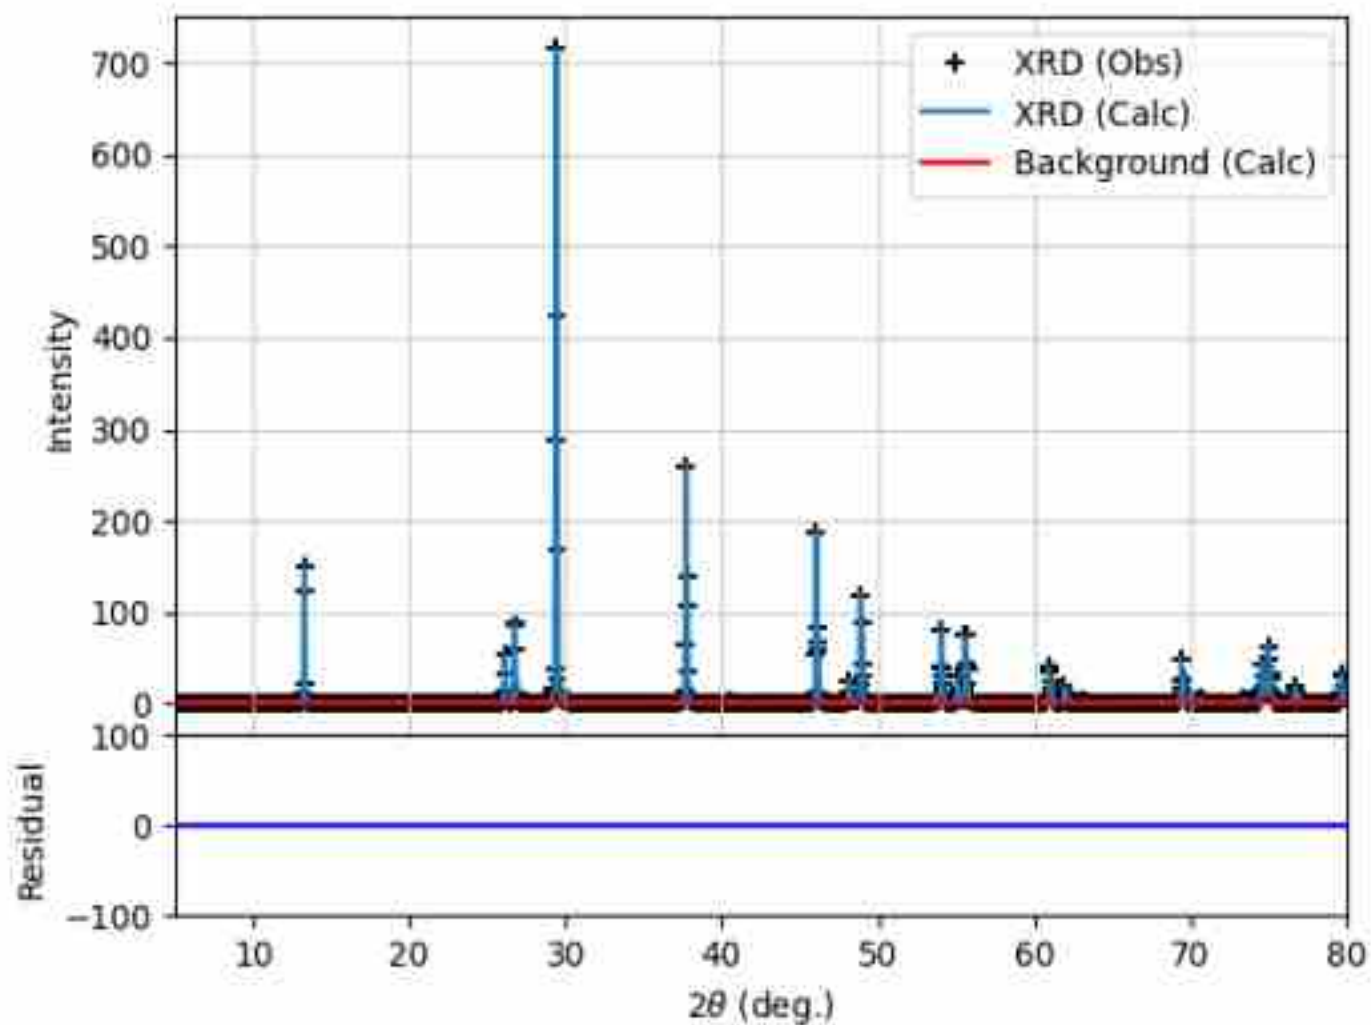

| RMSE before RR | Rwp    | RMSE after RR |
|----------------|--------|---------------|
| 0.008          | 0.0056 | 0.00124       |

# Cr2Sb2

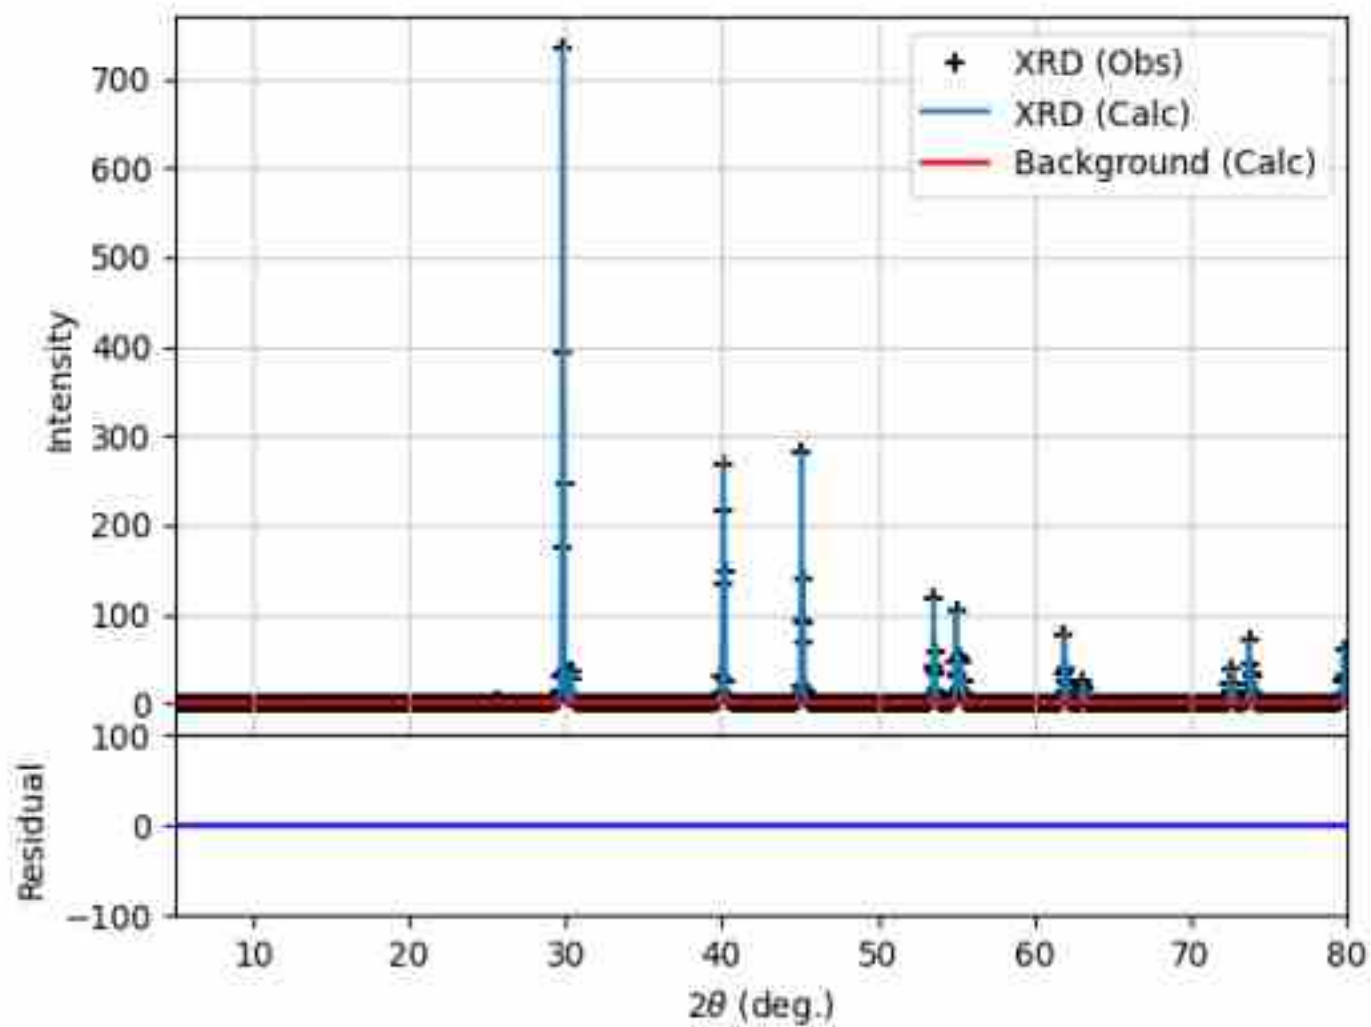

| RMSE before RR | Rwp     | RMSE after RR |
|----------------|---------|---------------|
| 0.008          | 0.00684 | 0.0007        |

# Cr6Ir2

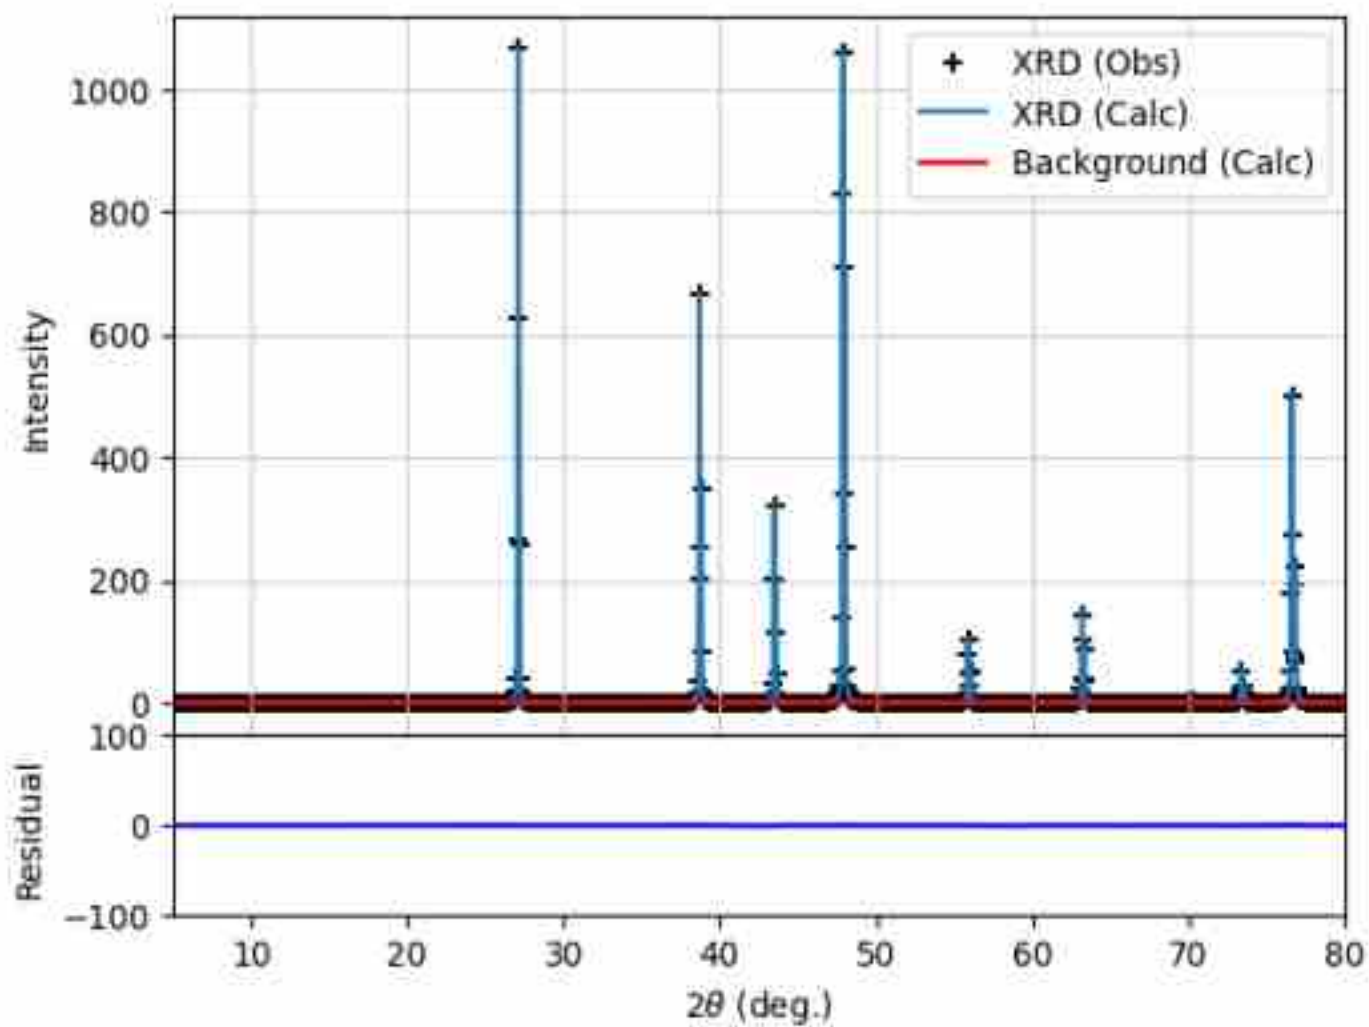

| RMSE before RR | Rwp     | RMSE after RR |
|----------------|---------|---------------|
| 0.008          | 1.03948 | 0.00537       |



# Cs1H1

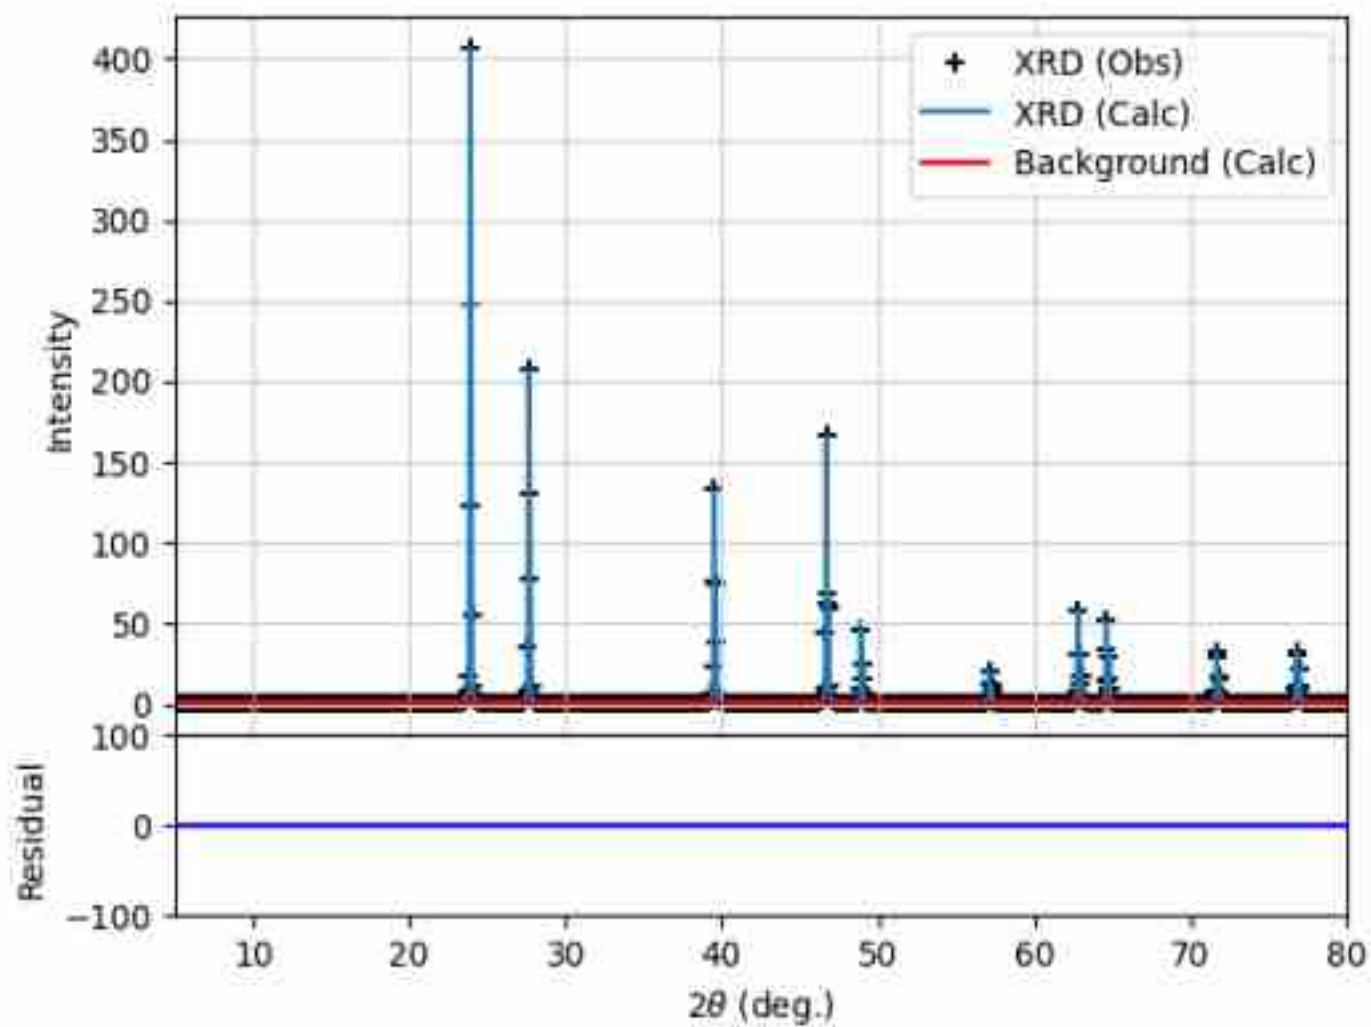

| RMSE before RR | Rwp    | RMSE after RR |
|----------------|--------|---------------|
| 0.008          | 0.0037 | 0.00372       |

# Cs<sub>2</sub>KAsBr<sub>6</sub>

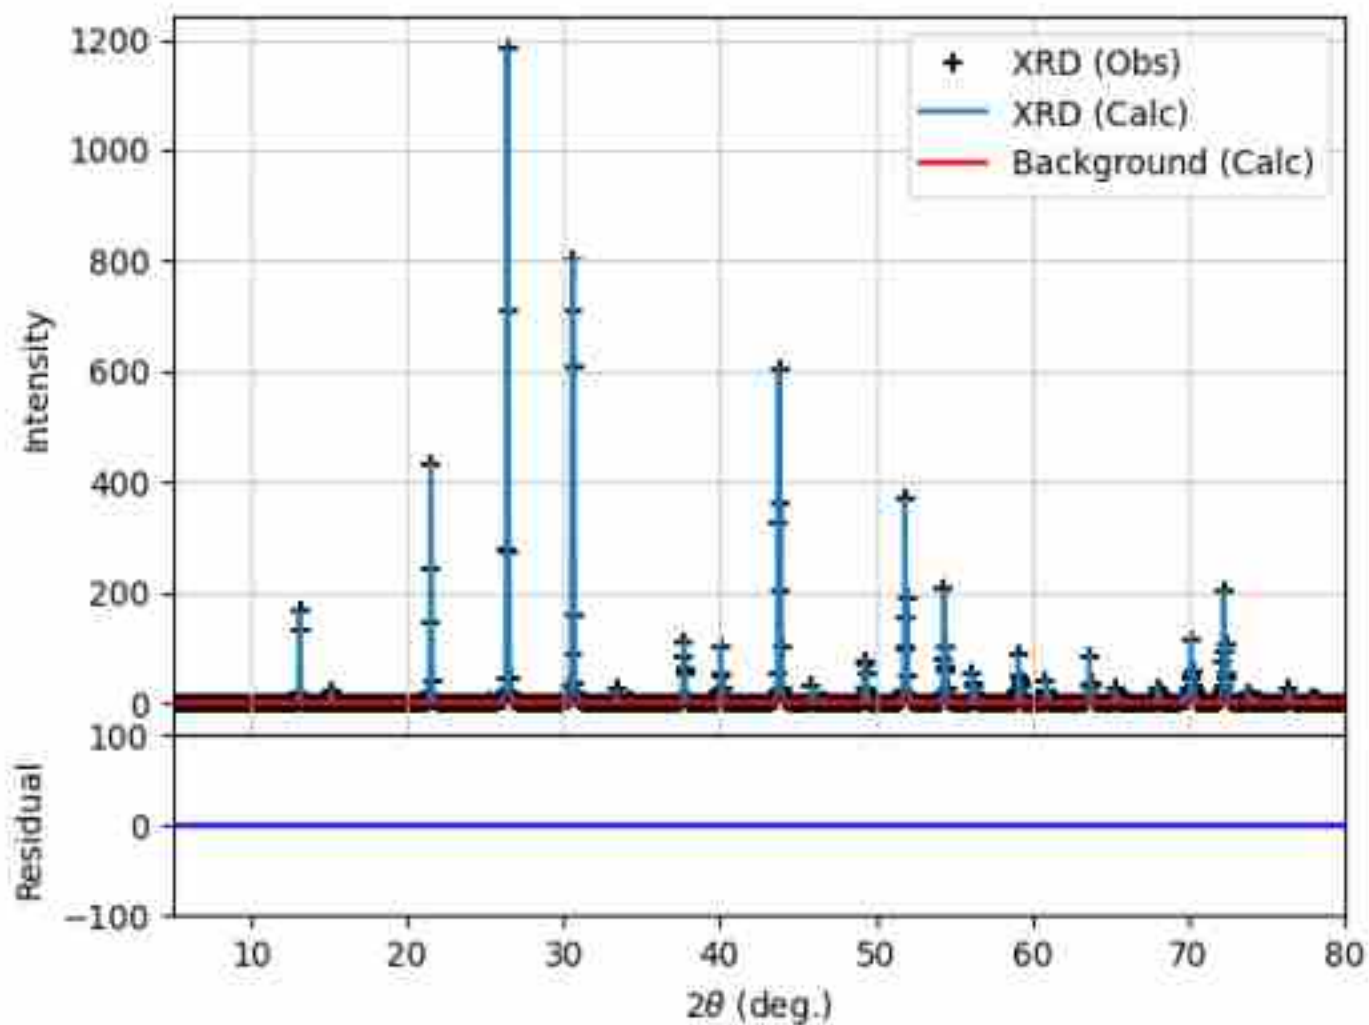

| RMSE before RR | Rwp     | RMSE after RR |
|----------------|---------|---------------|
| 0.008          | 0.00929 | 0.0011        |

# Cs<sub>2</sub>K<sub>1</sub>Dy<sub>1</sub>Cl<sub>6</sub>

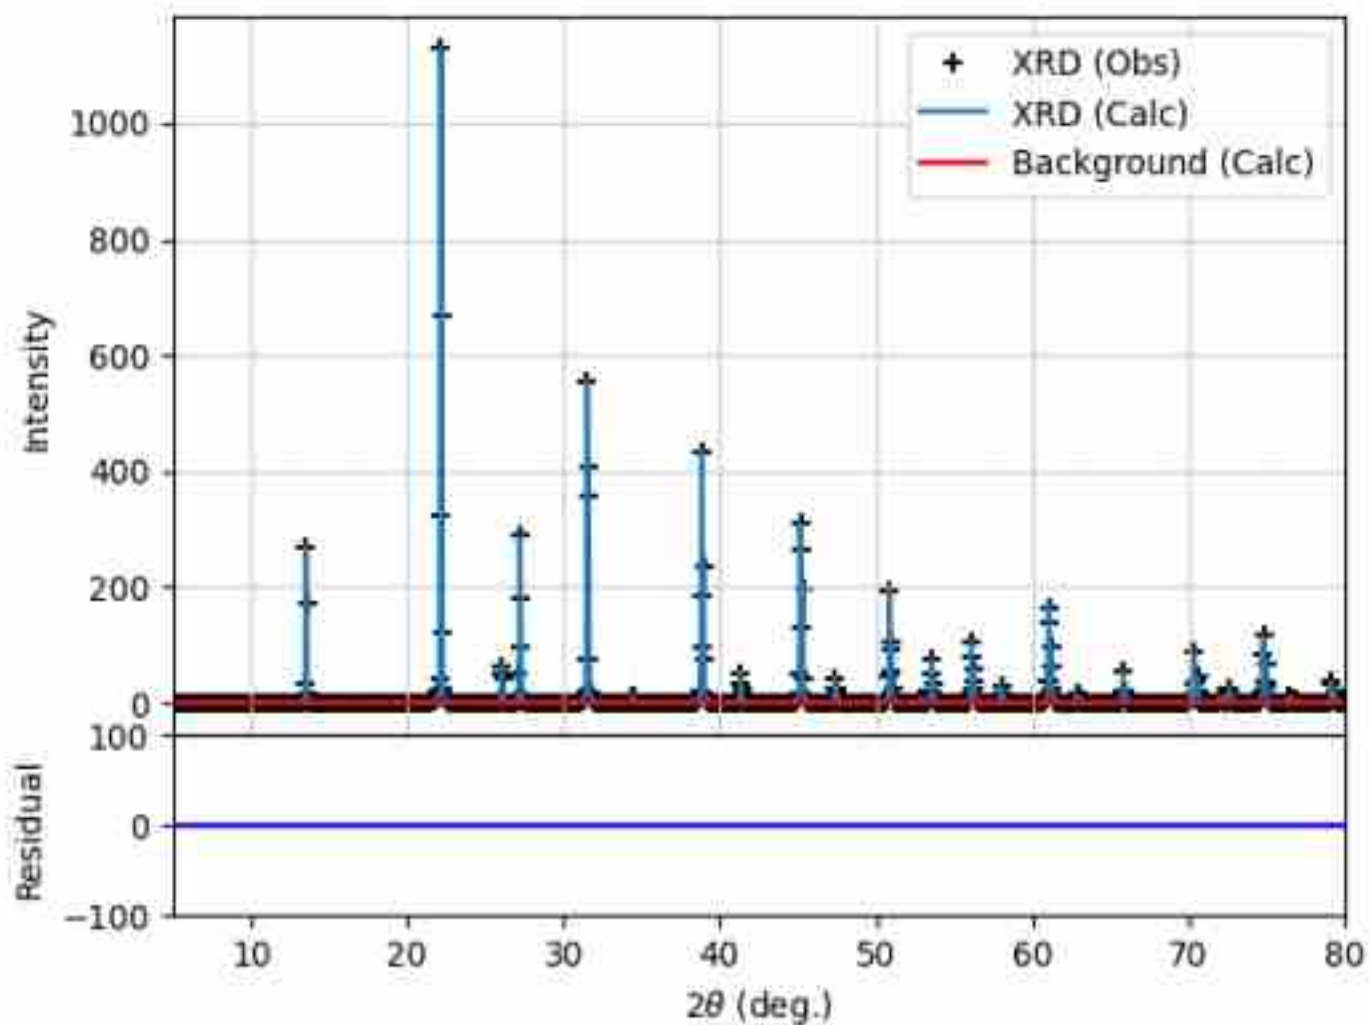

| RMSE before RR | Rwp     | RMSE after RR |
|----------------|---------|---------------|
| 0.008          | 0.00792 | 0.00139       |

# Cs<sub>2</sub>K<sub>1</sub>Eu<sub>1</sub>Cl<sub>6</sub>

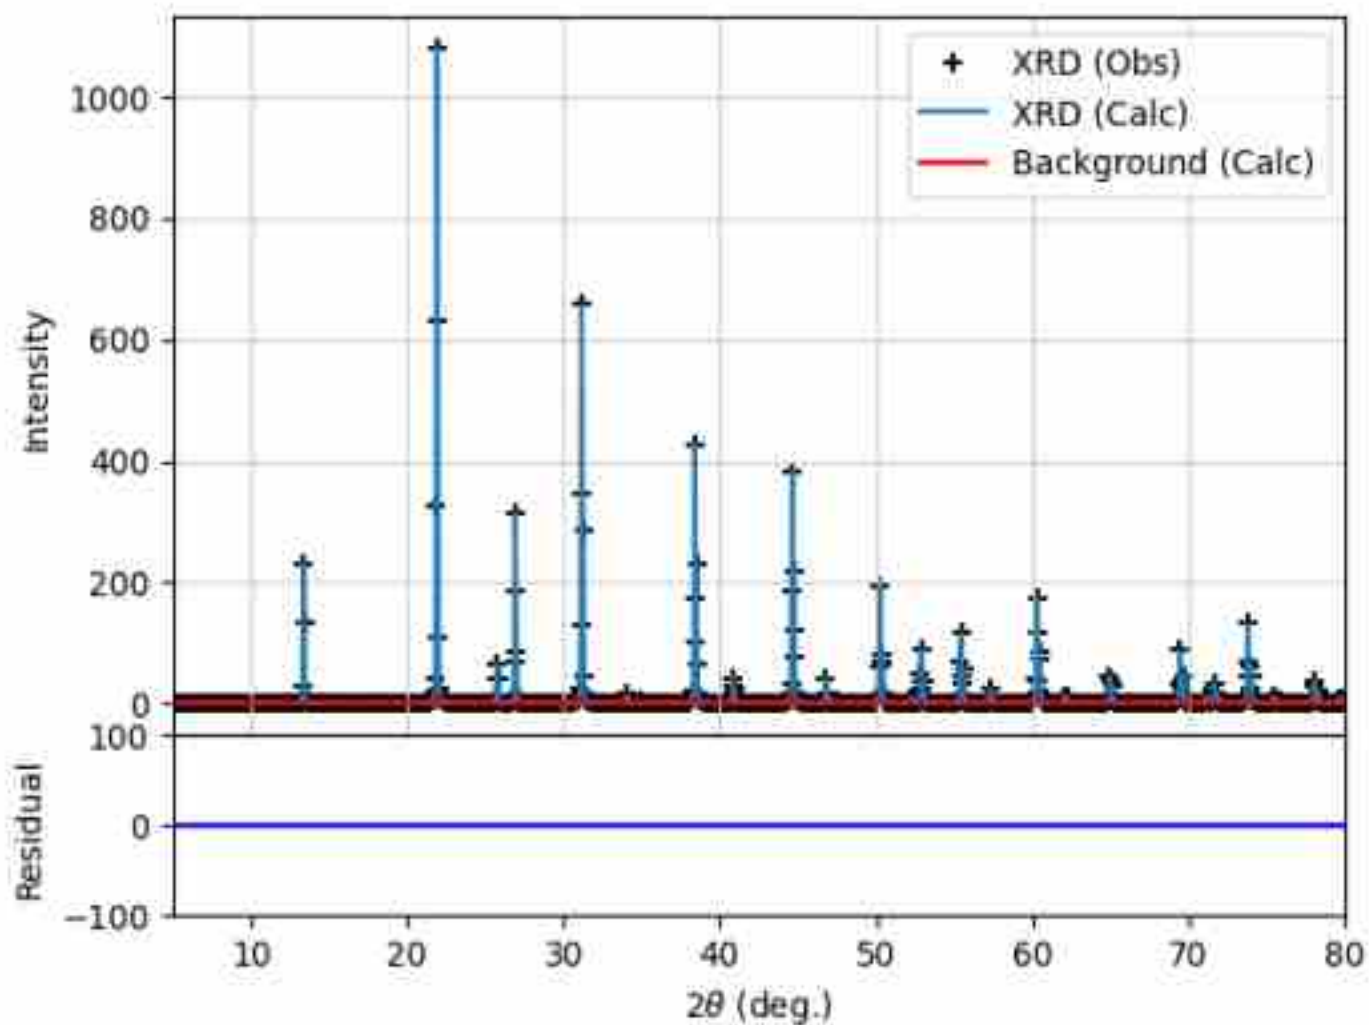

| RMSE before RR | Rwp     | RMSE after RR |
|----------------|---------|---------------|
| 0.008          | 0.00512 | 0.00108       |

# Cs<sub>2</sub>K<sub>1</sub>Sm<sub>1</sub>Cl<sub>6</sub>

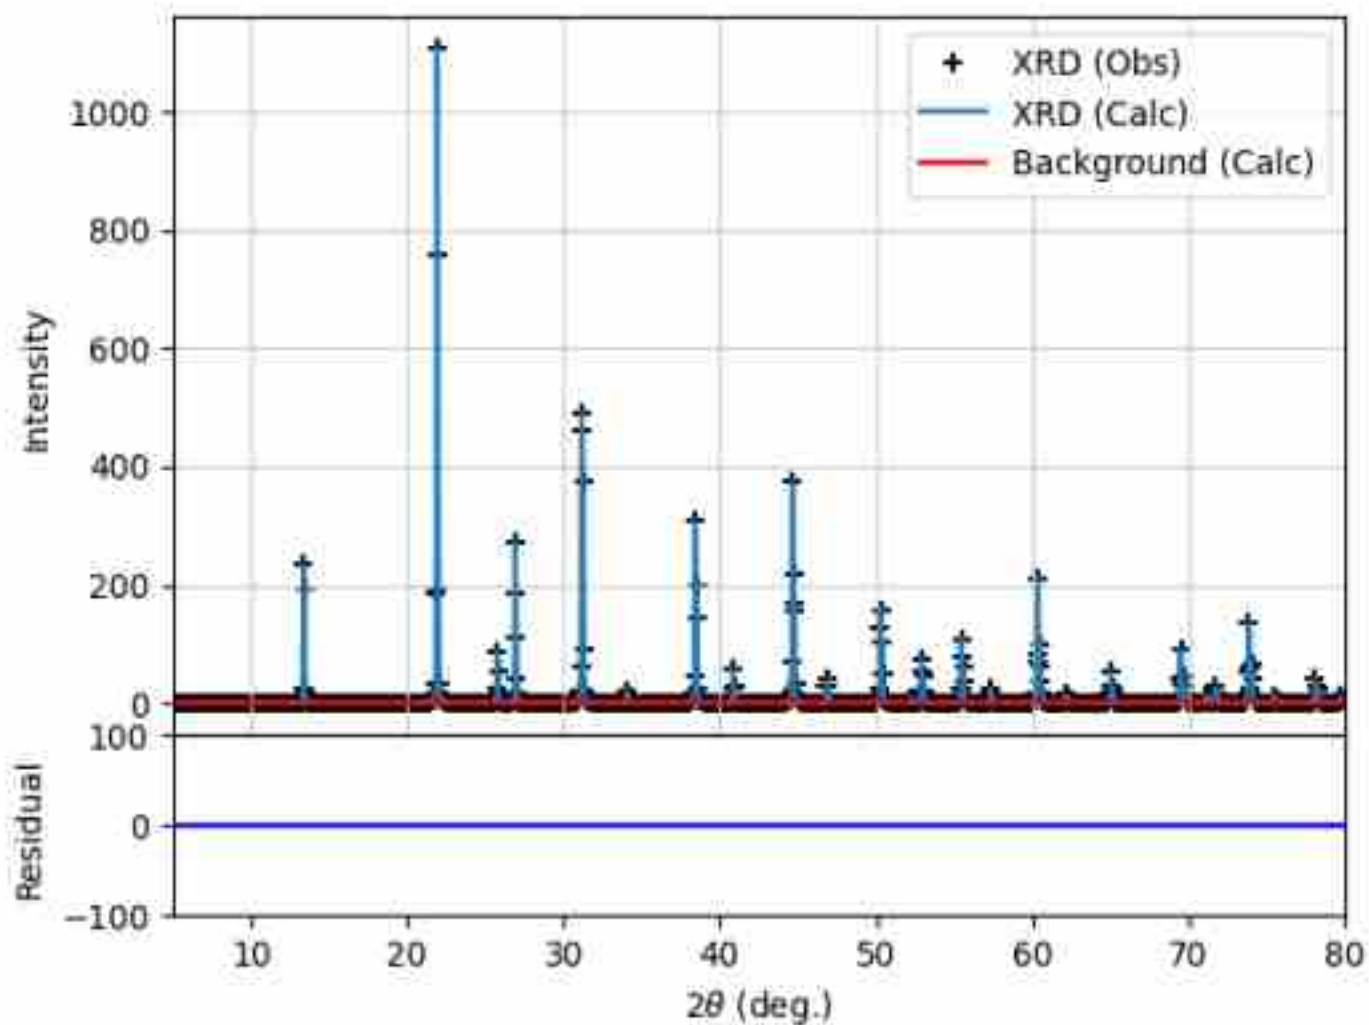

| RMSE before RR | Rwp     | RMSE after RR |
|----------------|---------|---------------|
| 0.008          | 0.01674 | 0.00234       |

# Cs<sub>2</sub>K<sub>1</sub>Y<sub>1</sub>Br<sub>6</sub>

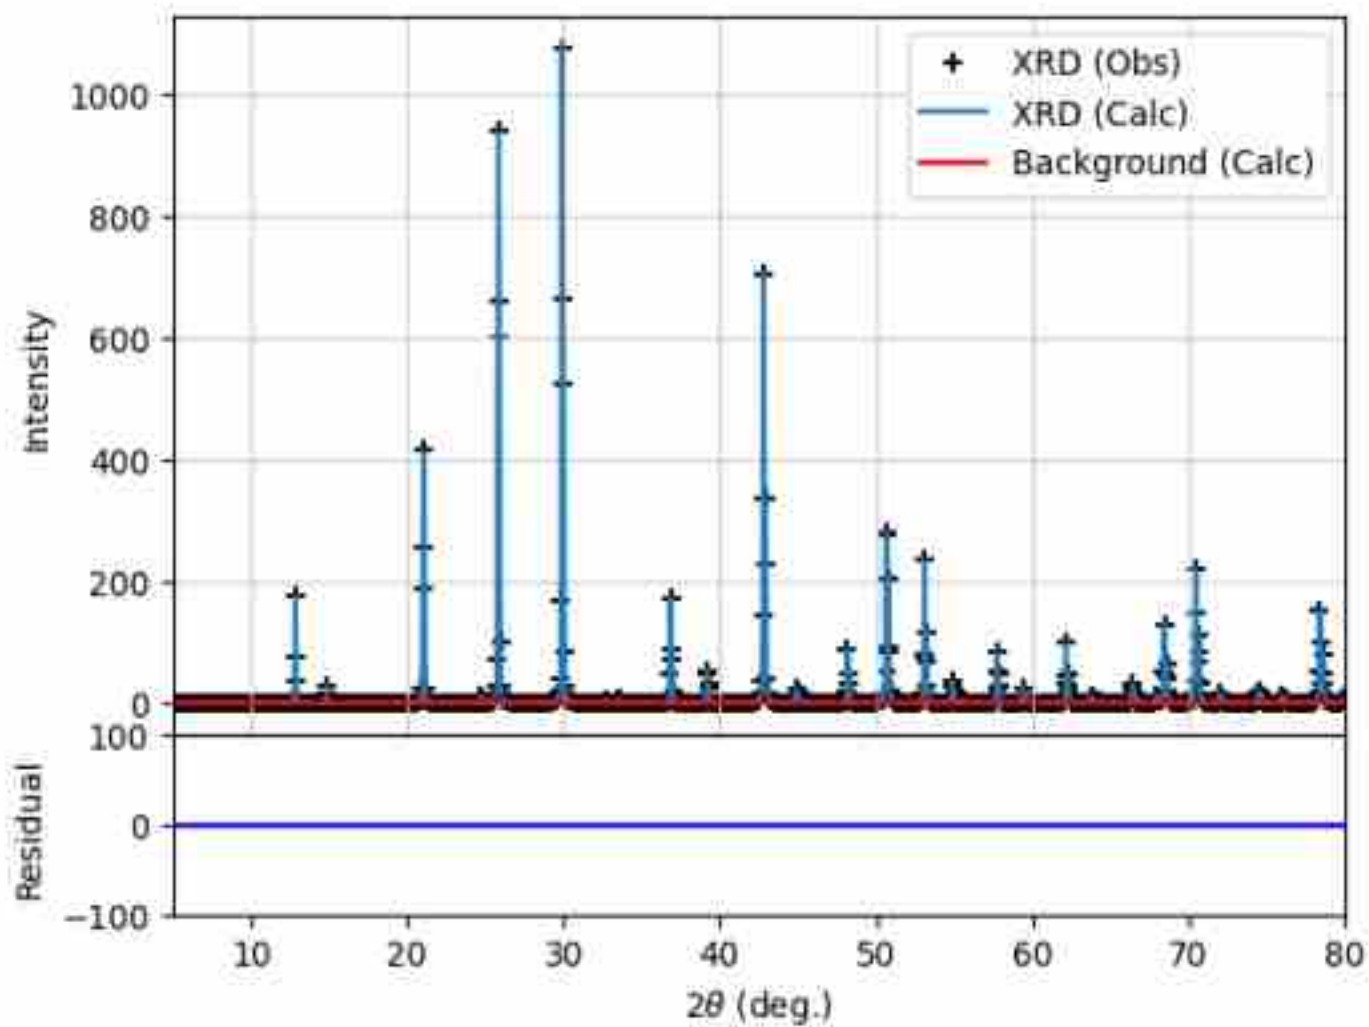

| RMSE before RR | Rwp     | RMSE after RR |
|----------------|---------|---------------|
| 0.008          | 0.12457 | 0.00342       |

# Cs<sub>2</sub>LiYBr<sub>6</sub>

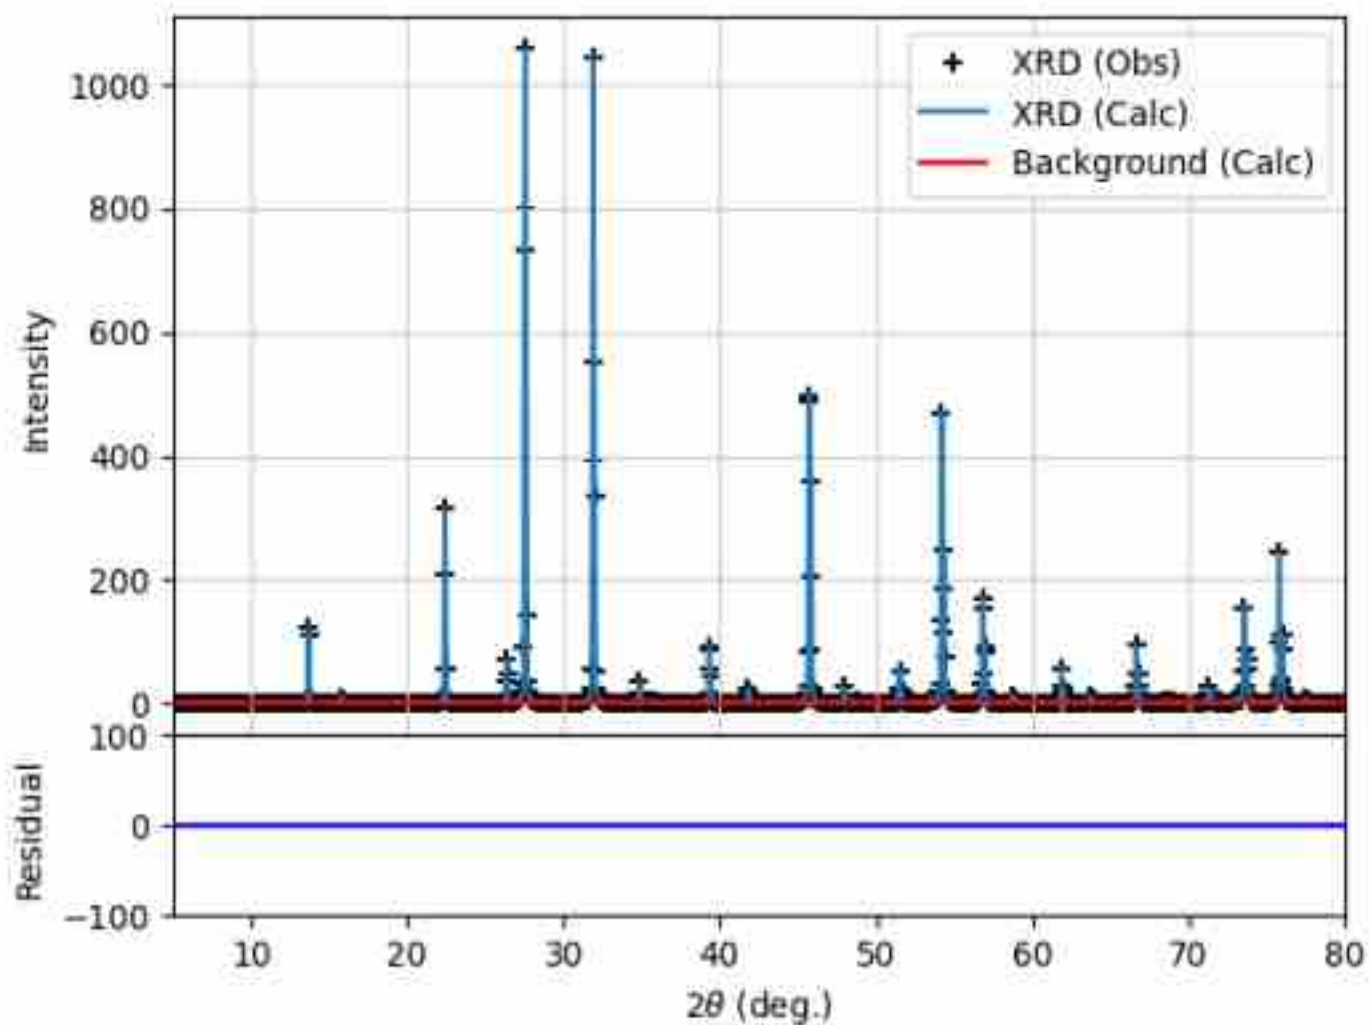

| RMSE before RR | Rwp    | RMSE after RR |
|----------------|--------|---------------|
| 0.008          | 0.0298 | 0.00287       |

# Cs<sub>2</sub>Na<sub>1</sub>Lu<sub>1</sub>Cl<sub>6</sub>

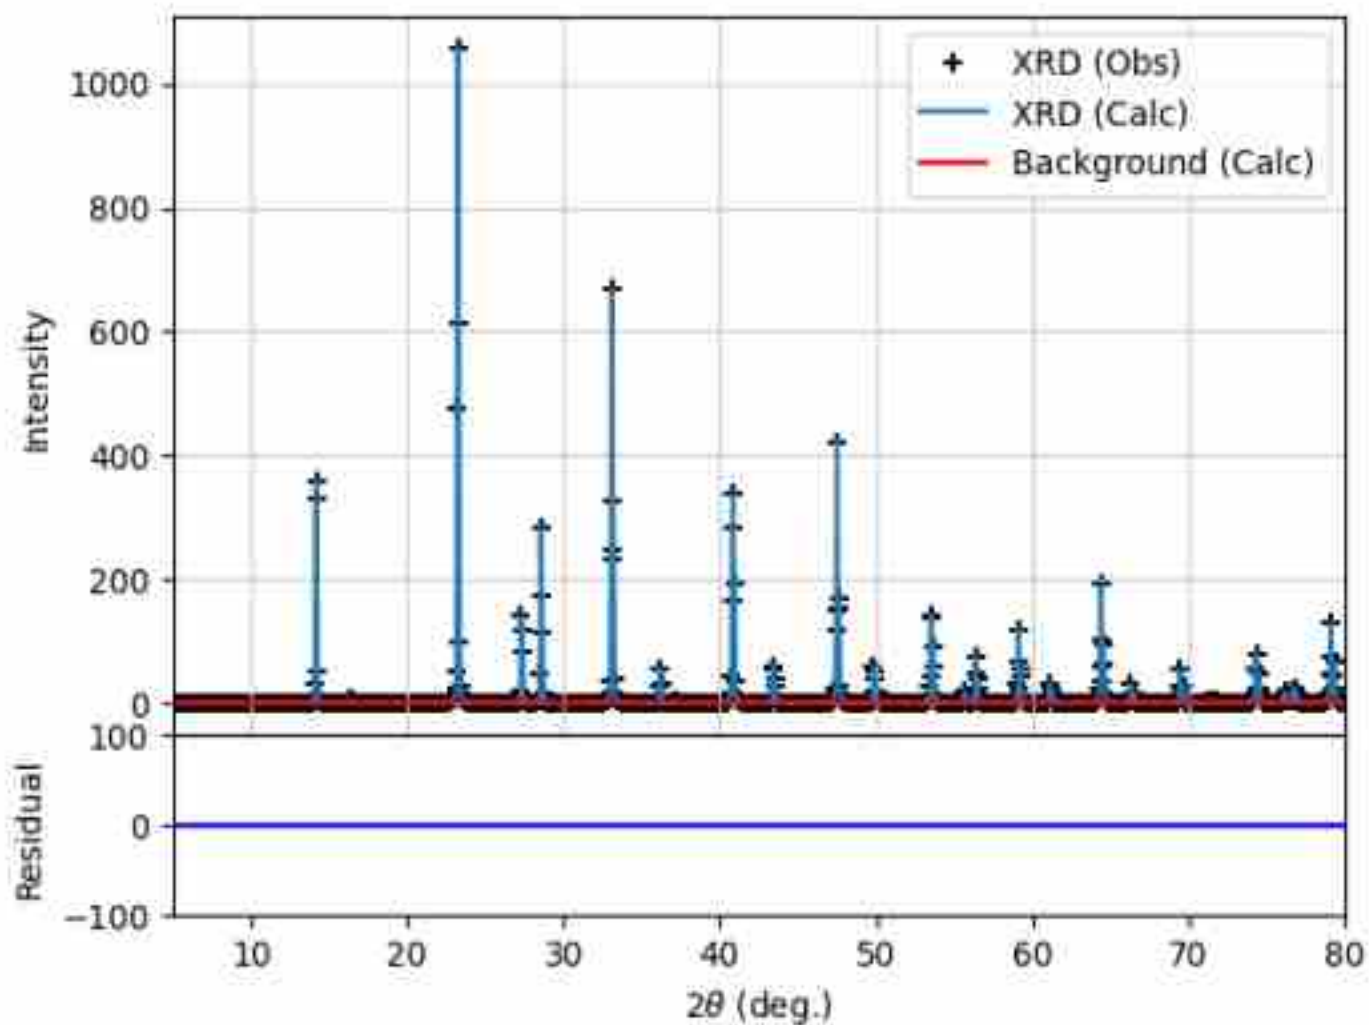

| RMSE before RR | Rwp     | RMSE after RR |
|----------------|---------|---------------|
| 0.008          | 0.00438 | 0.00088       |



# Cs<sub>2</sub>Na<sub>1</sub>Sc<sub>1</sub>Br<sub>6</sub>

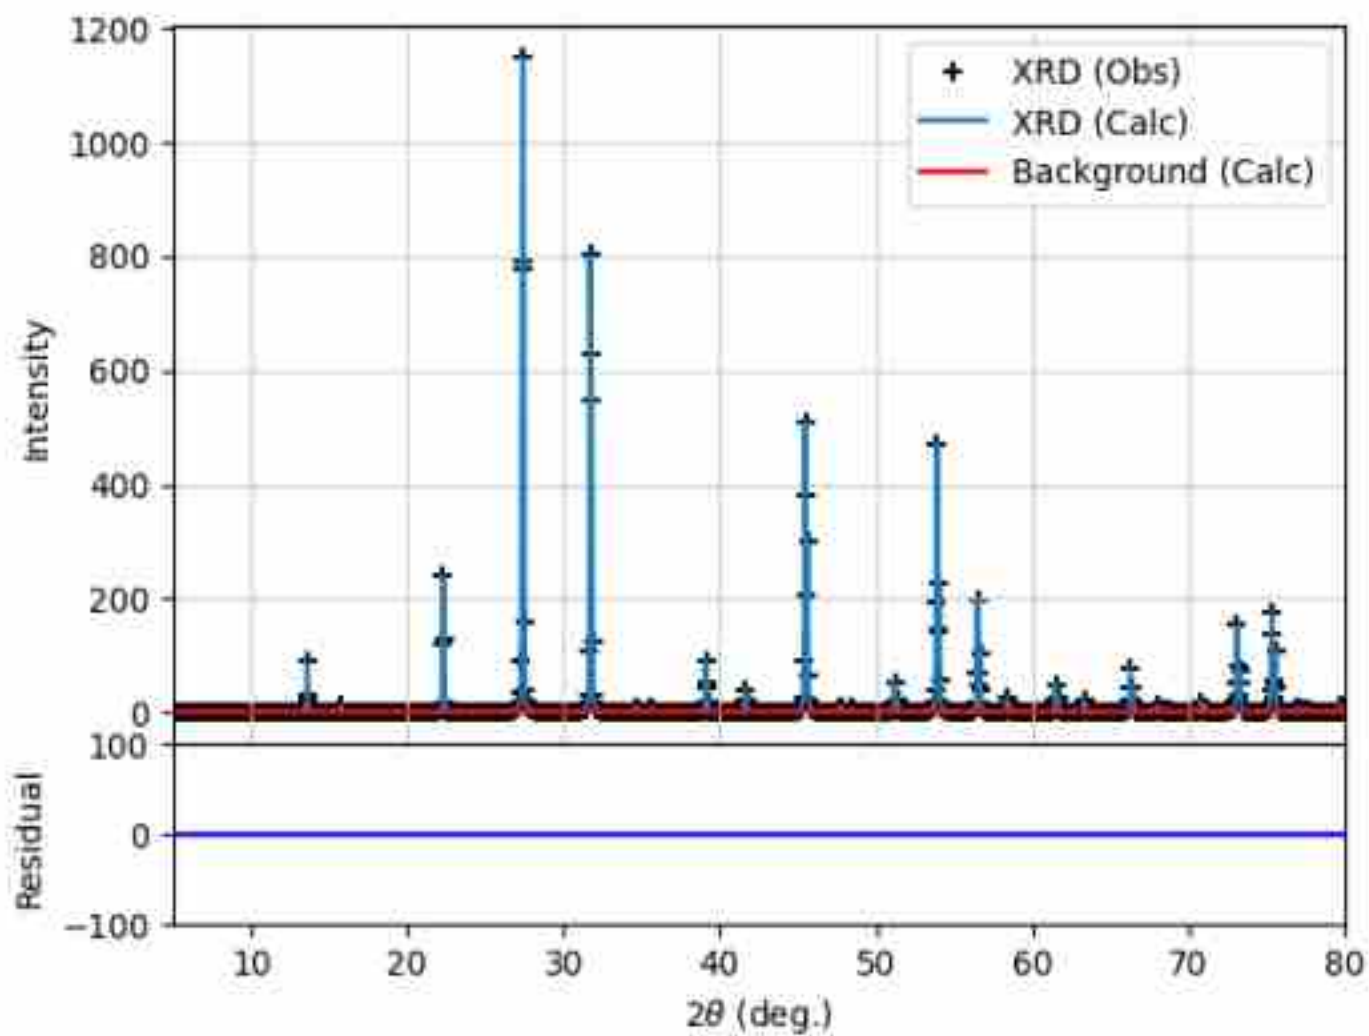

| RMSE before RR | Rwp     | RMSE after RR |
|----------------|---------|---------------|
| 0.008          | 0.02182 | 0.0015        |

# Cs<sub>2</sub>Rb<sub>1</sub>Er<sub>1</sub>Cl<sub>6</sub>

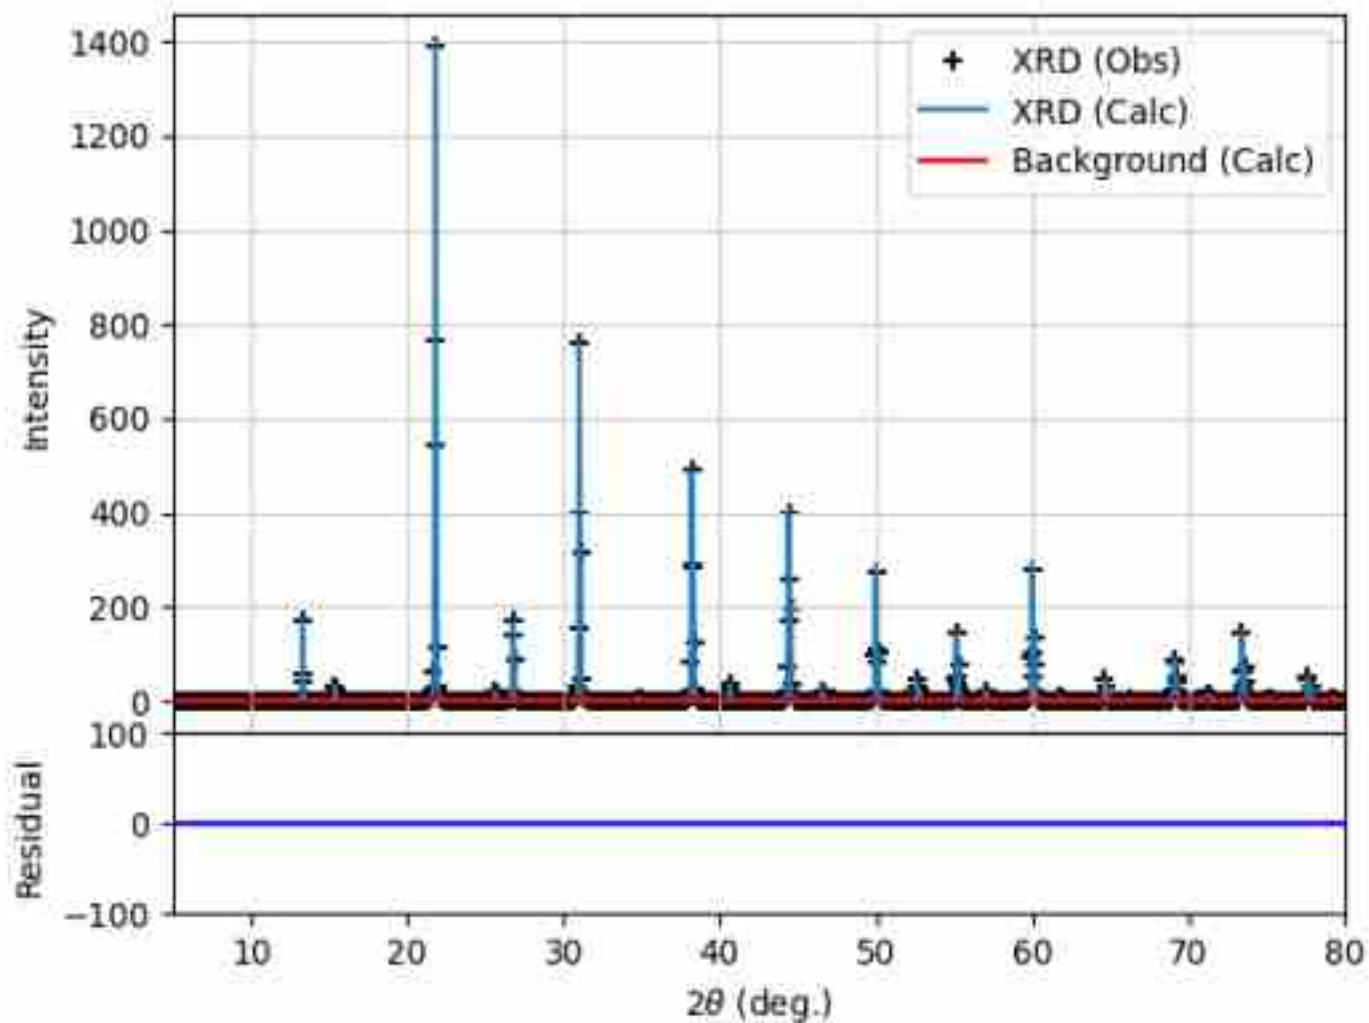

| RMSE before RR | Rwp     | RMSE after RR |
|----------------|---------|---------------|
| 0.008          | 0.00536 | 0.00114       |

# Cs<sub>2</sub>RbInCl<sub>6</sub>

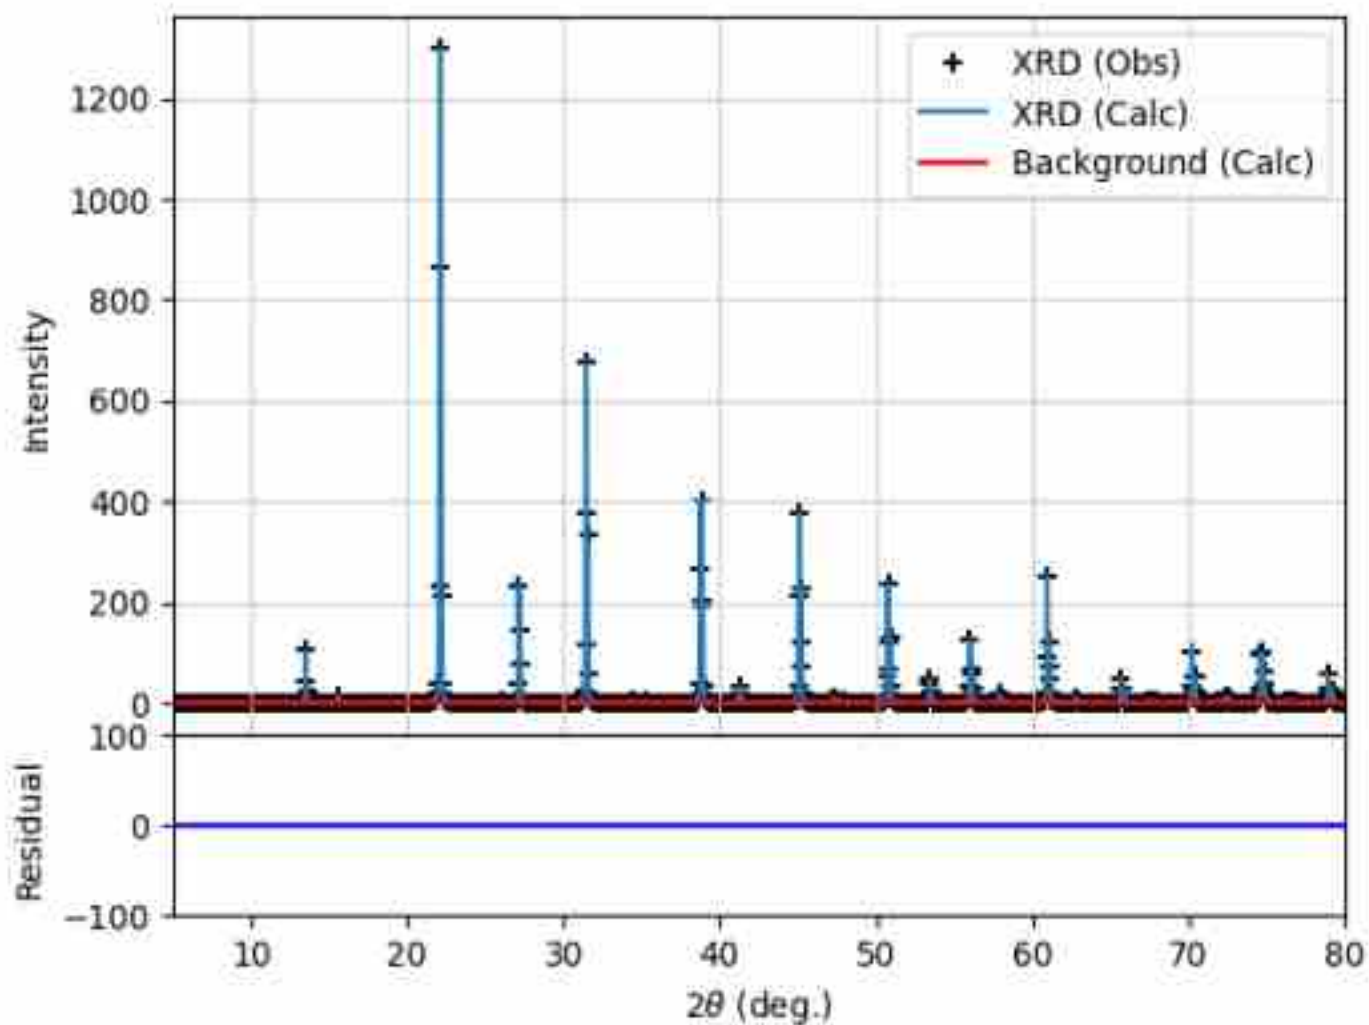

| RMSE before RR | Rwp     | RMSE after RR |
|----------------|---------|---------------|
| 0.008          | 0.00894 | 0.00168       |

# Cs<sub>2</sub>SnBr<sub>6</sub>

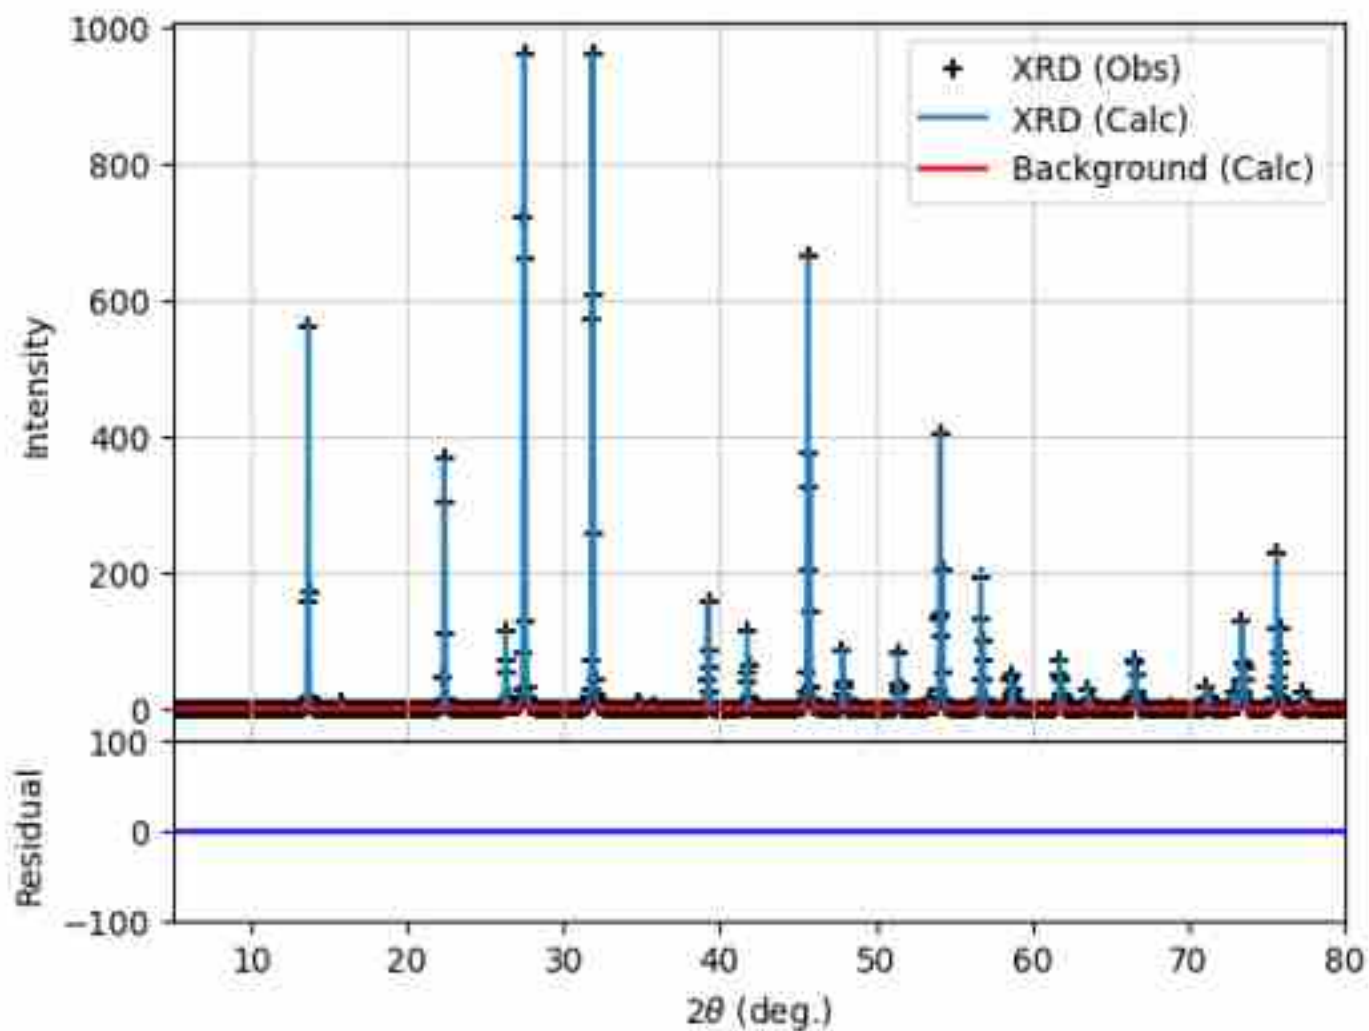

| RMSE before RR | Rwp     | RMSE after RR |
|----------------|---------|---------------|
| 0.008          | 0.04396 | 0.002         |

# Cs<sub>2</sub>TmCl<sub>6</sub>

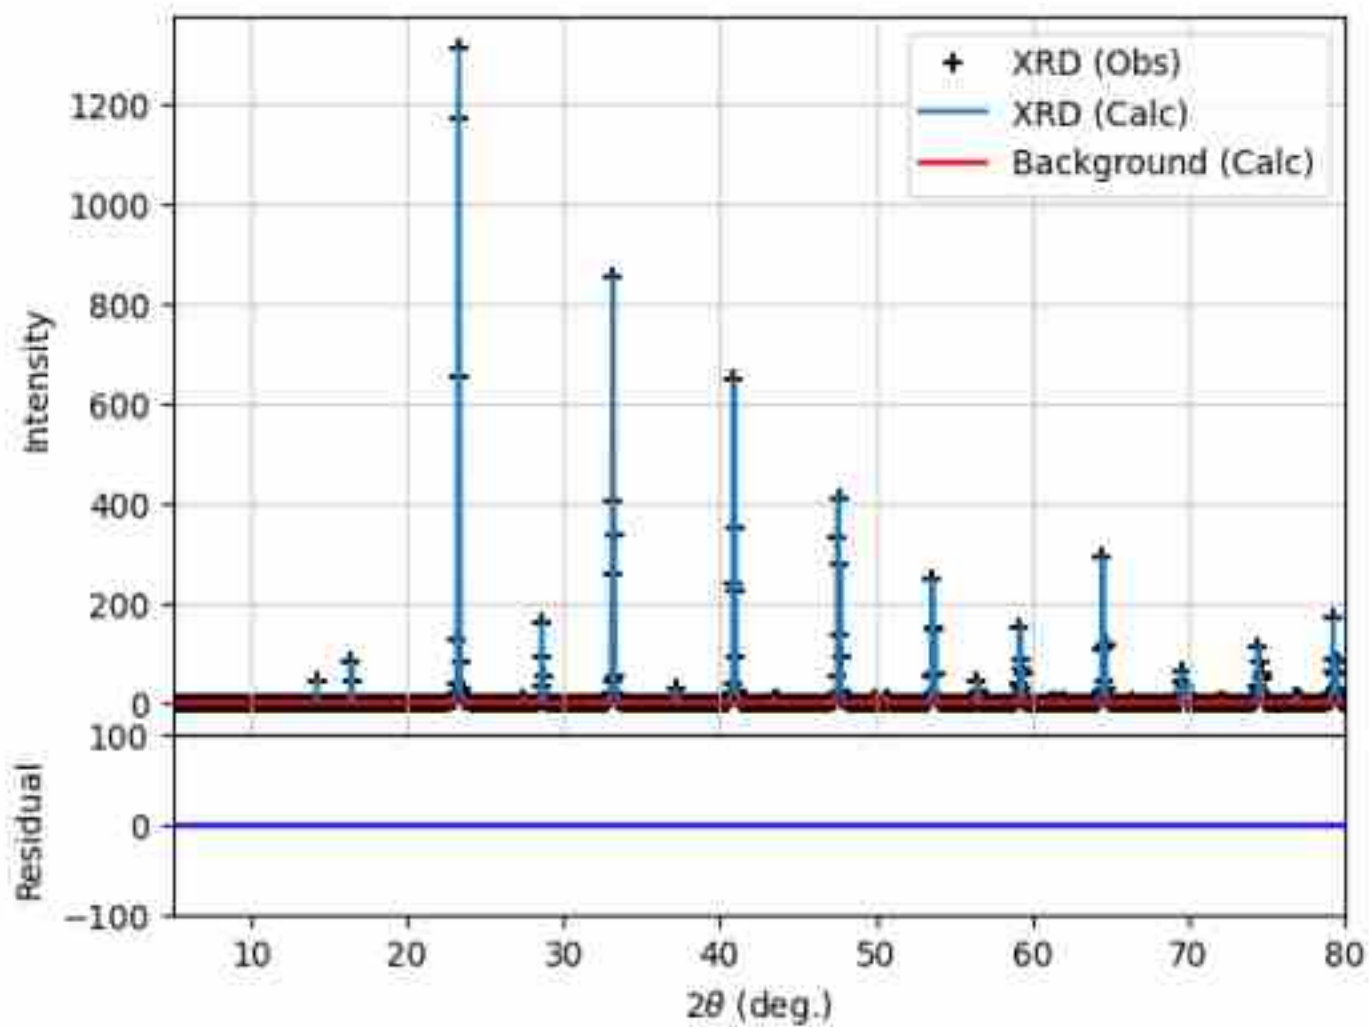

| RMSE before RR | Rwp     | RMSE after RR |
|----------------|---------|---------------|
| 0.008          | 0.03519 | 0.00264       |

# Cs<sub>2</sub>Y<sub>1</sub>Ag<sub>1</sub>Cl<sub>6</sub>

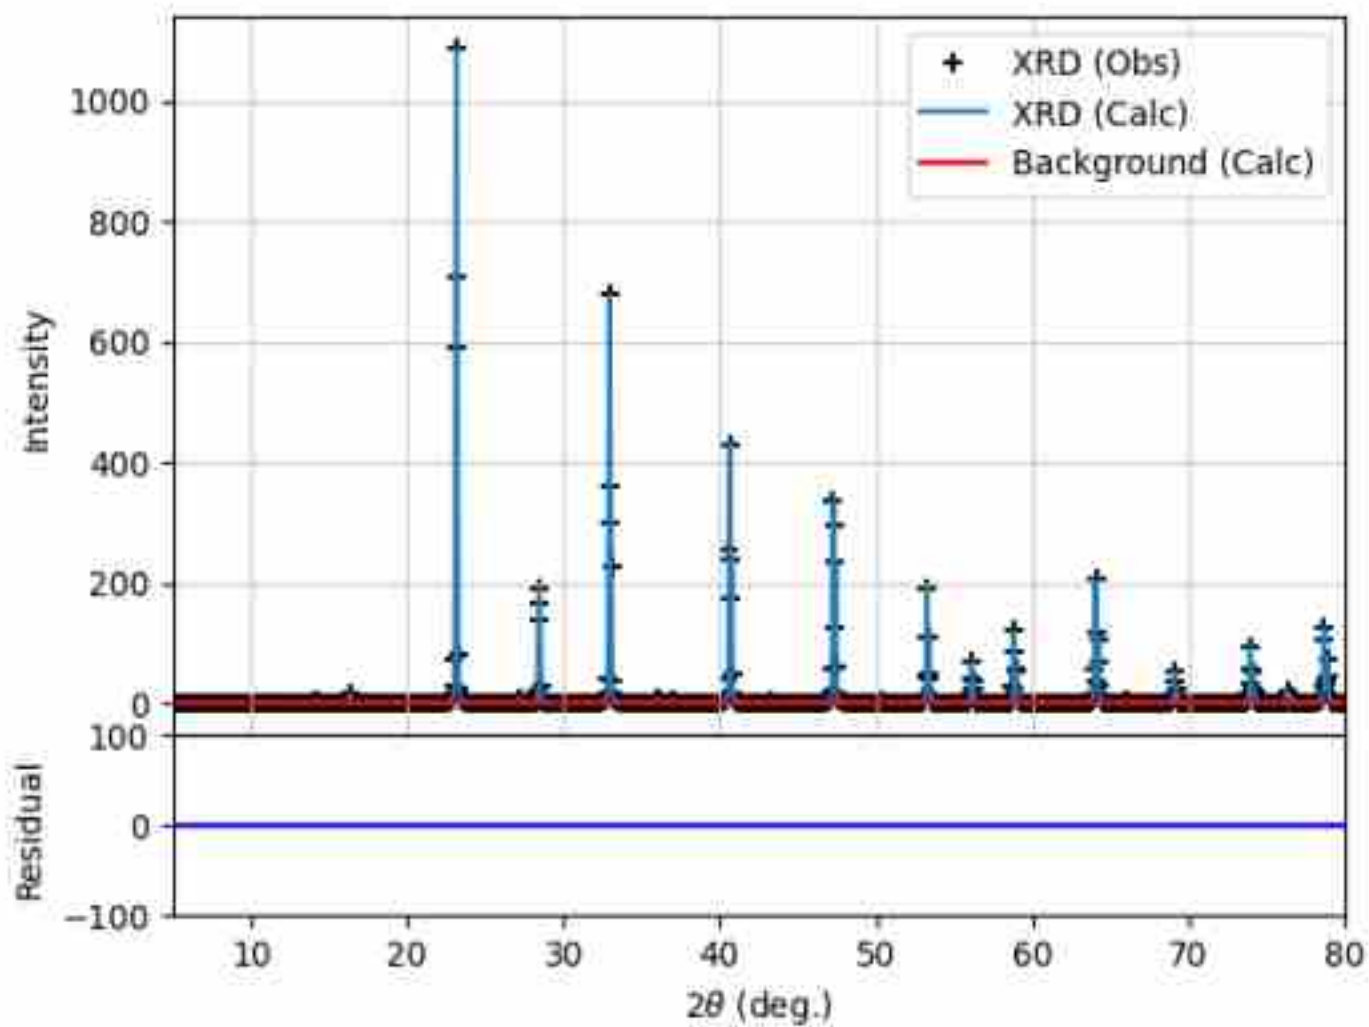

| RMSE before RR | Rwp     | RMSE after RR |
|----------------|---------|---------------|
| 0.008          | 0.13471 | 0.00347       |

# Cs<sub>2</sub>Y<sub>1</sub>Ag<sub>1</sub>F<sub>6</sub>

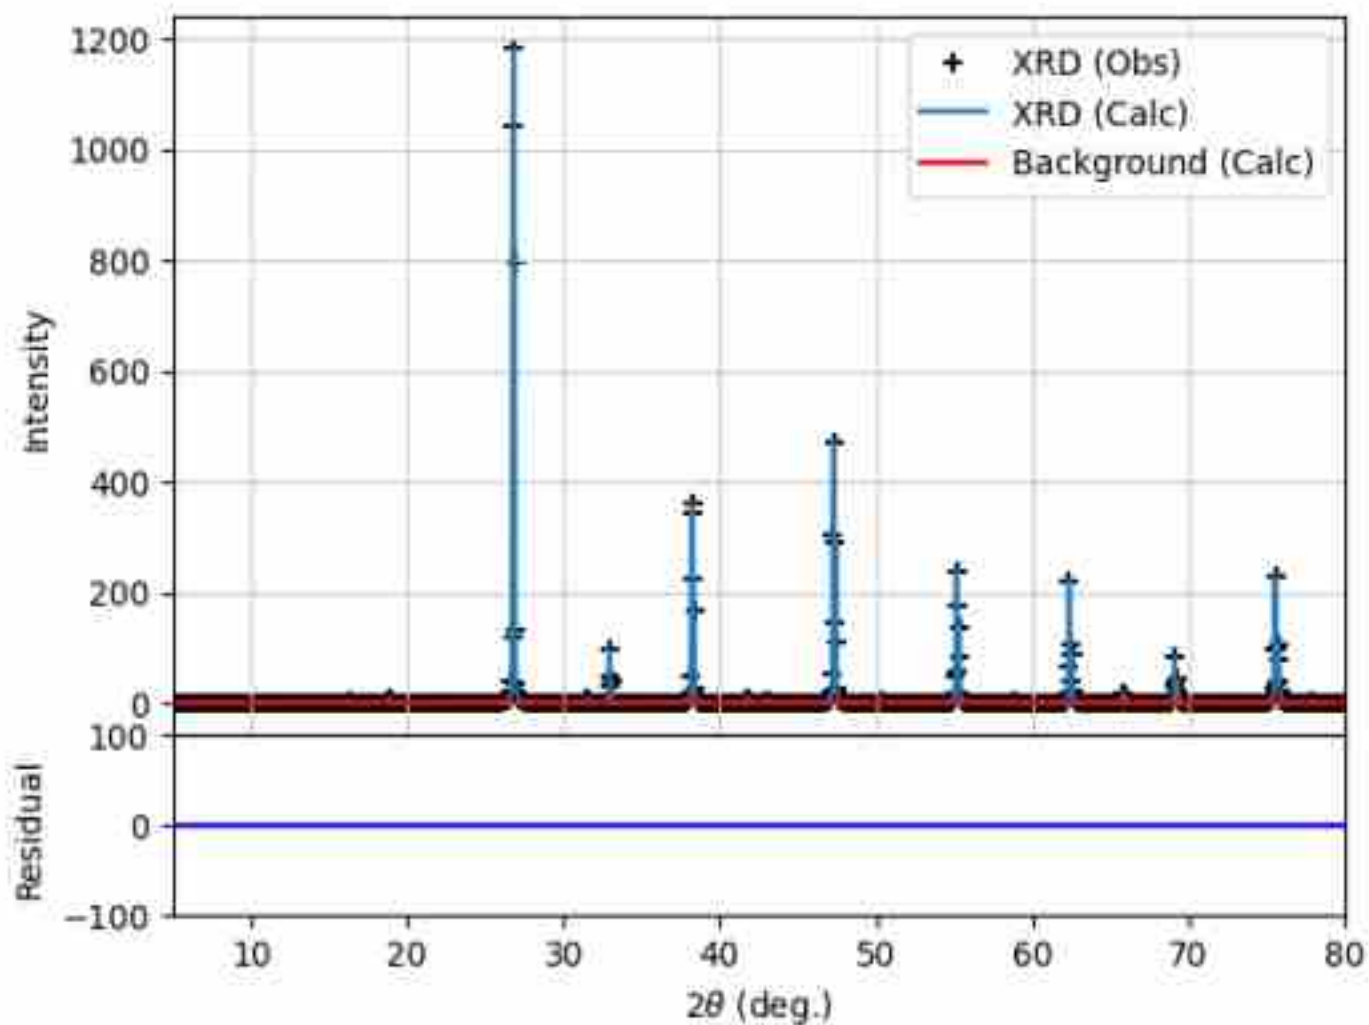

| RMSE before RR | Rwp     | RMSE after RR |
|----------------|---------|---------------|
| 0.008          | 0.01296 | 0.0024        |

# Cs<sub>3</sub>BiBr<sub>6</sub>

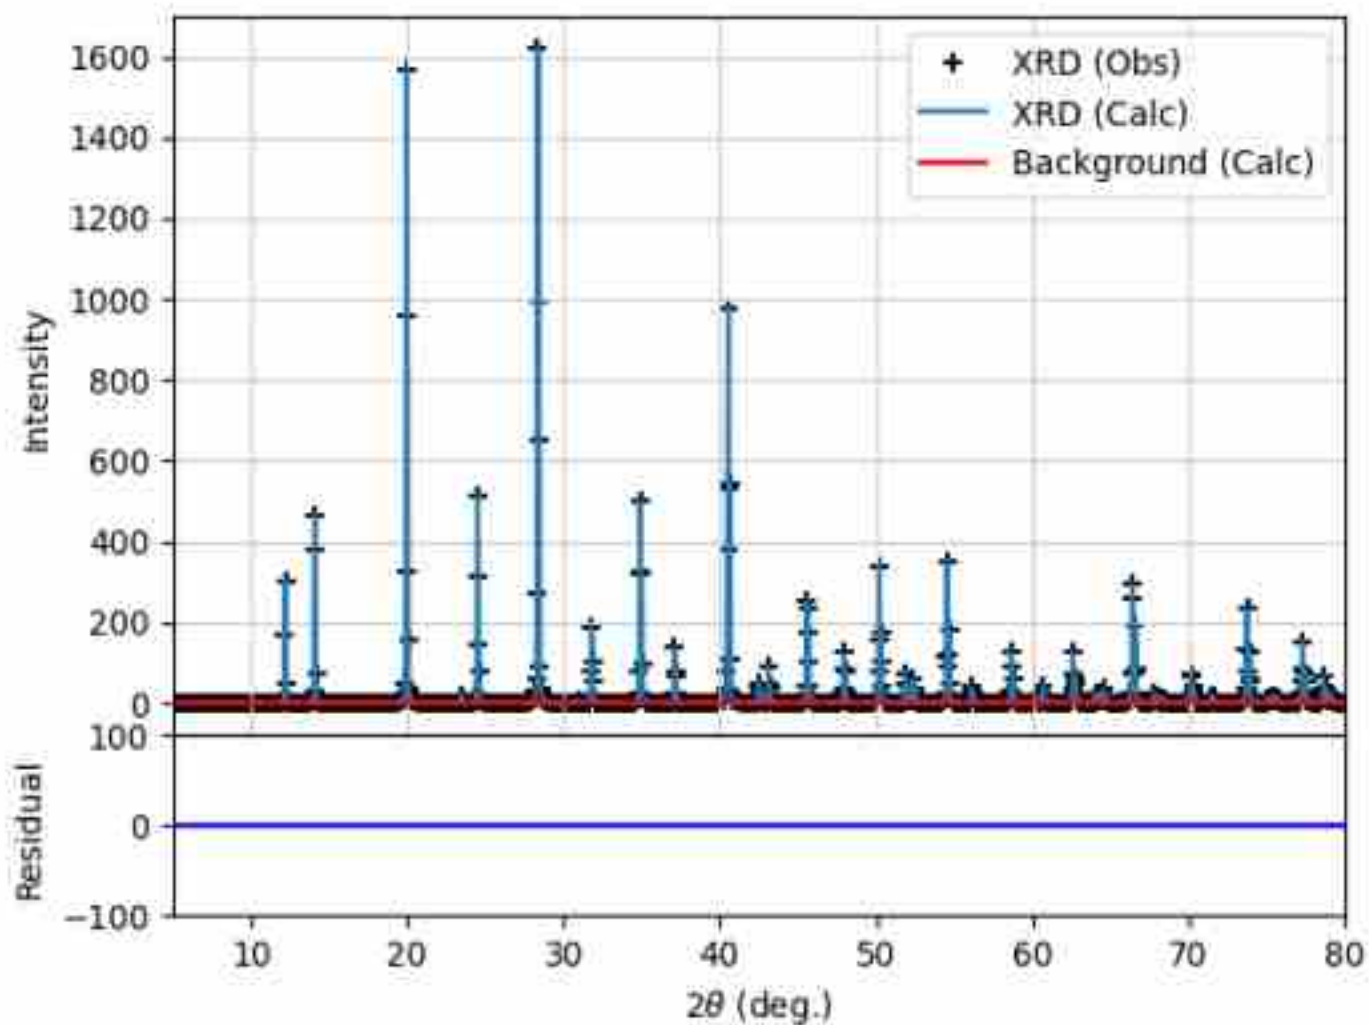

| RMSE before RR | Rwp     | RMSE after RR |
|----------------|---------|---------------|
| 0.008          | 0.00818 | 0.00113       |



# Cs<sub>3</sub>Bi<sub>1</sub>Cl<sub>6</sub>

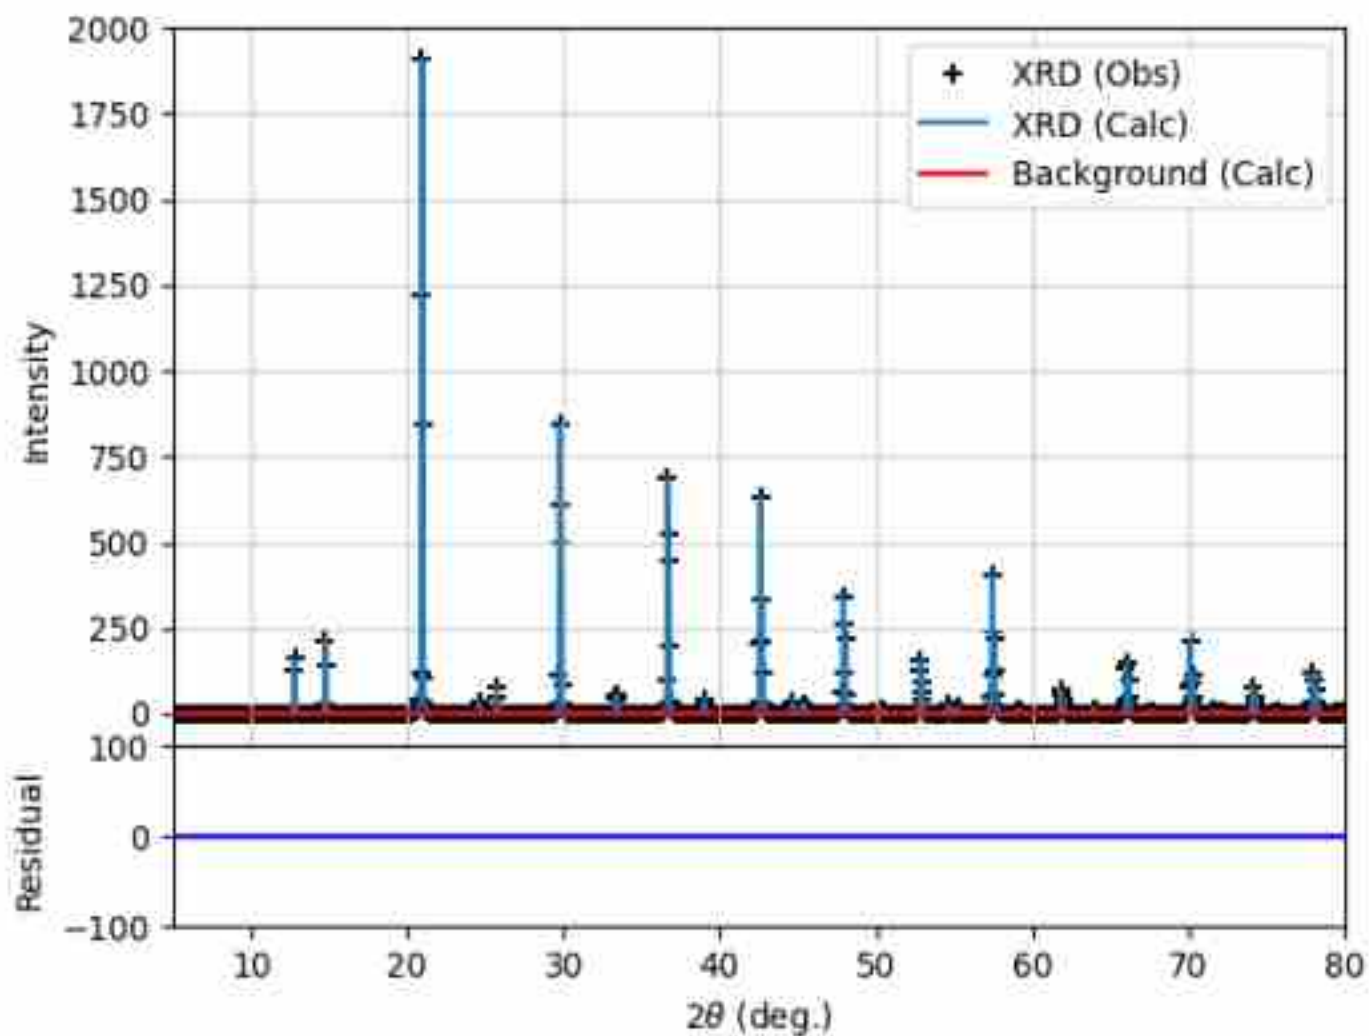

| RMSE before RR | Rwp     | RMSE after RR |
|----------------|---------|---------------|
| 0.008          | 0.00503 | 0.00147       |

# Cs<sub>3</sub>InIBr<sub>6</sub>

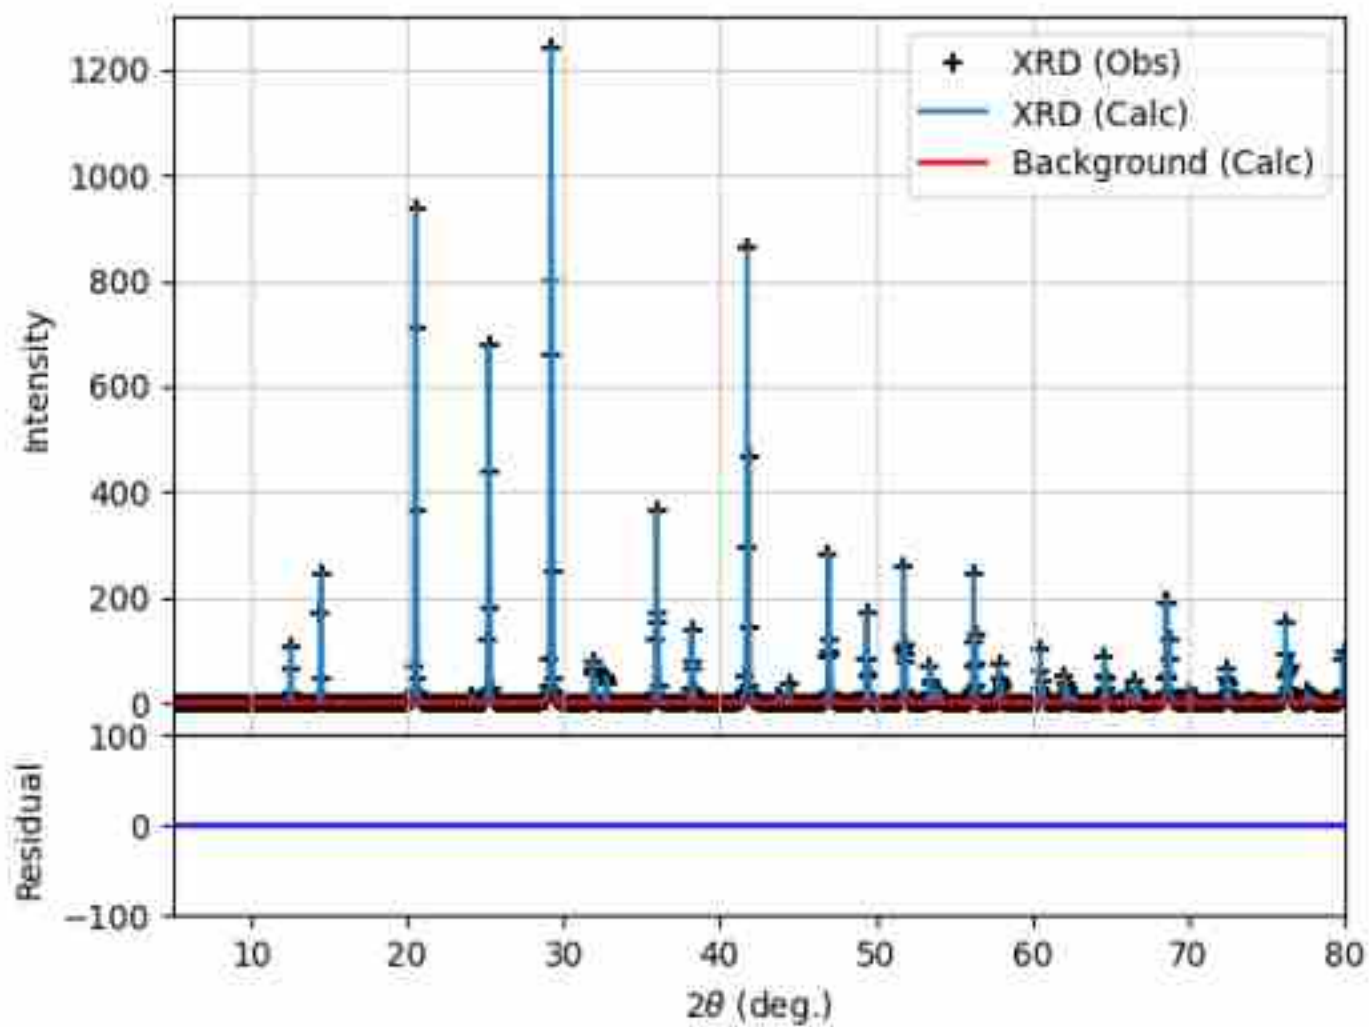

| RMSE before RR | Rwp     | RMSE after RR |
|----------------|---------|---------------|
| 0.008          | 0.01712 | 0.00177       |

# Dy<sub>2</sub>Al<sub>2</sub>Zn<sub>2</sub>

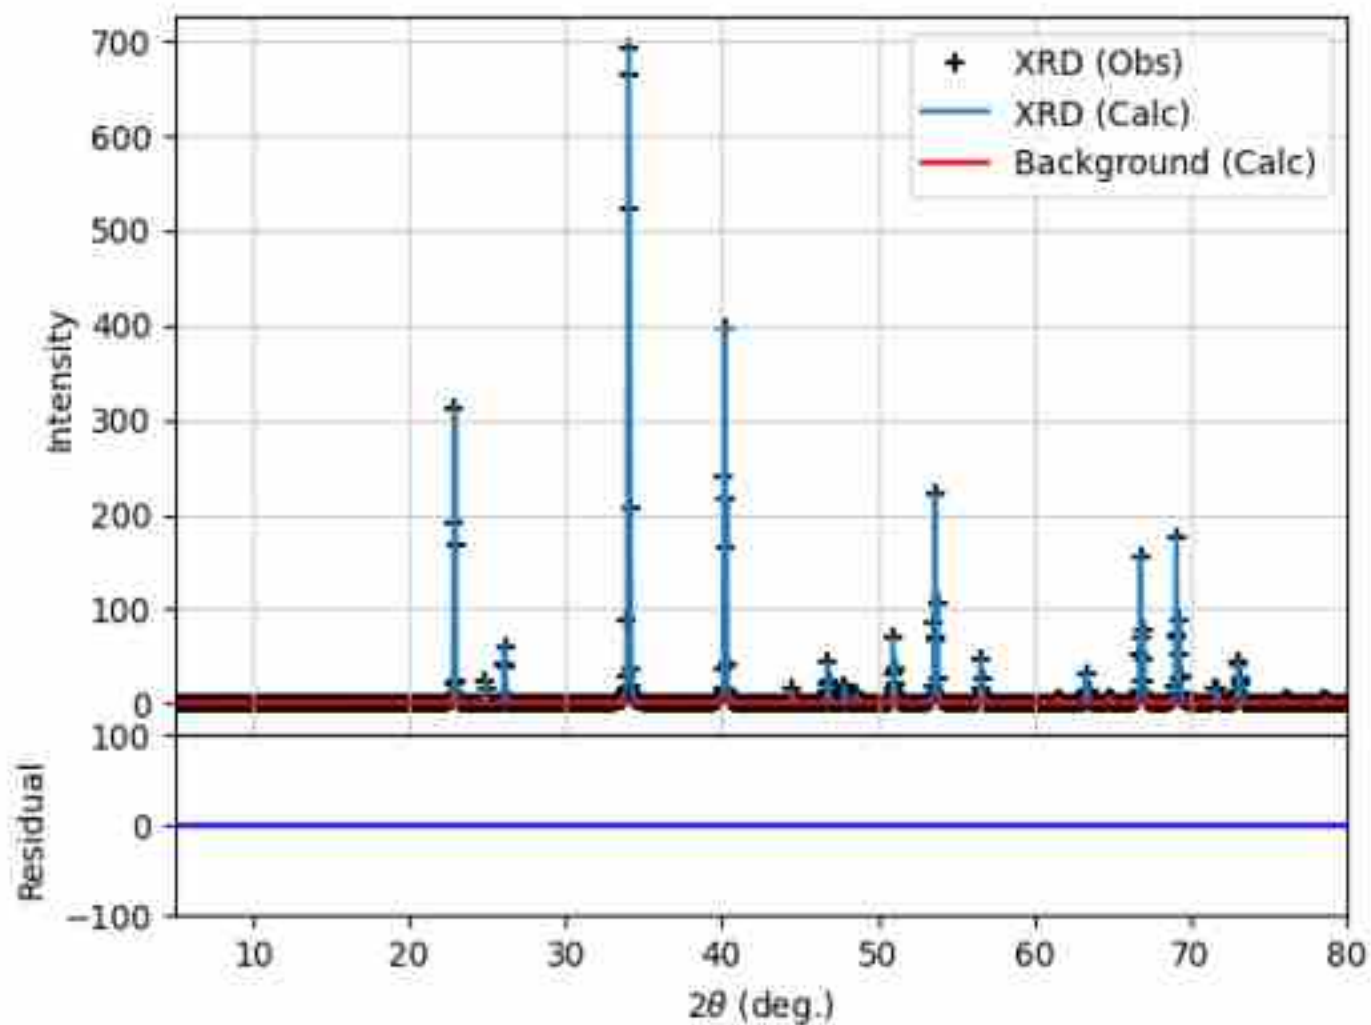

| RMSE before RR | Rwp     | RMSE after RR |
|----------------|---------|---------------|
| 0.008          | 0.00355 | 0.00291       |

# Dy<sub>6</sub>Mn<sub>1</sub>Bi<sub>2</sub>

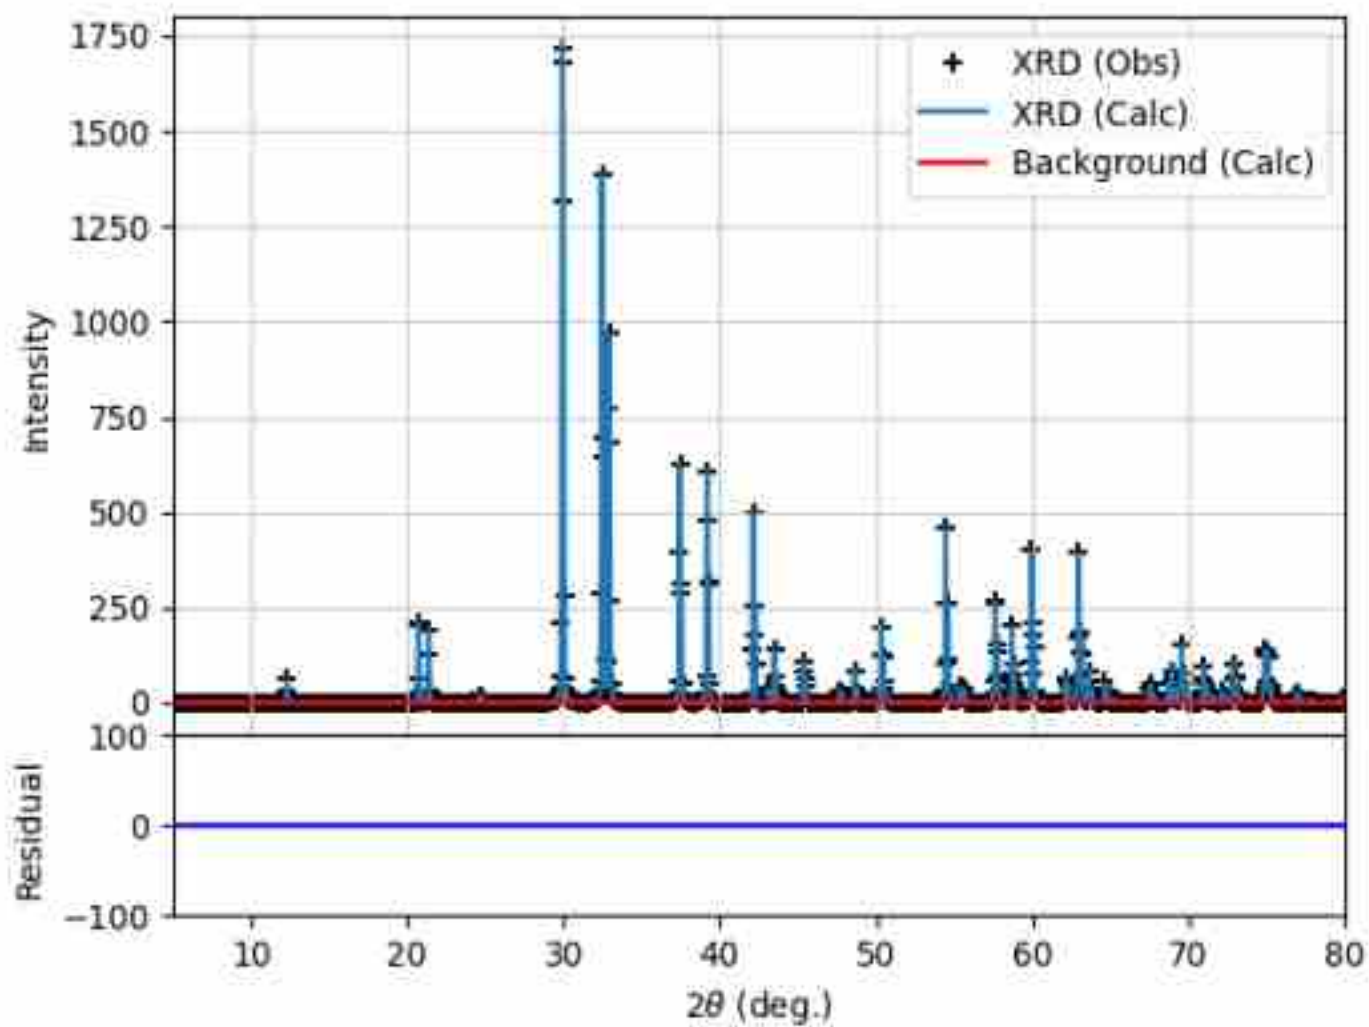

| RMSE before RR | Rwp    | RMSE after RR |
|----------------|--------|---------------|
| 0.008          | 0.0034 | 0.00058       |

# Er1Al1Ga1

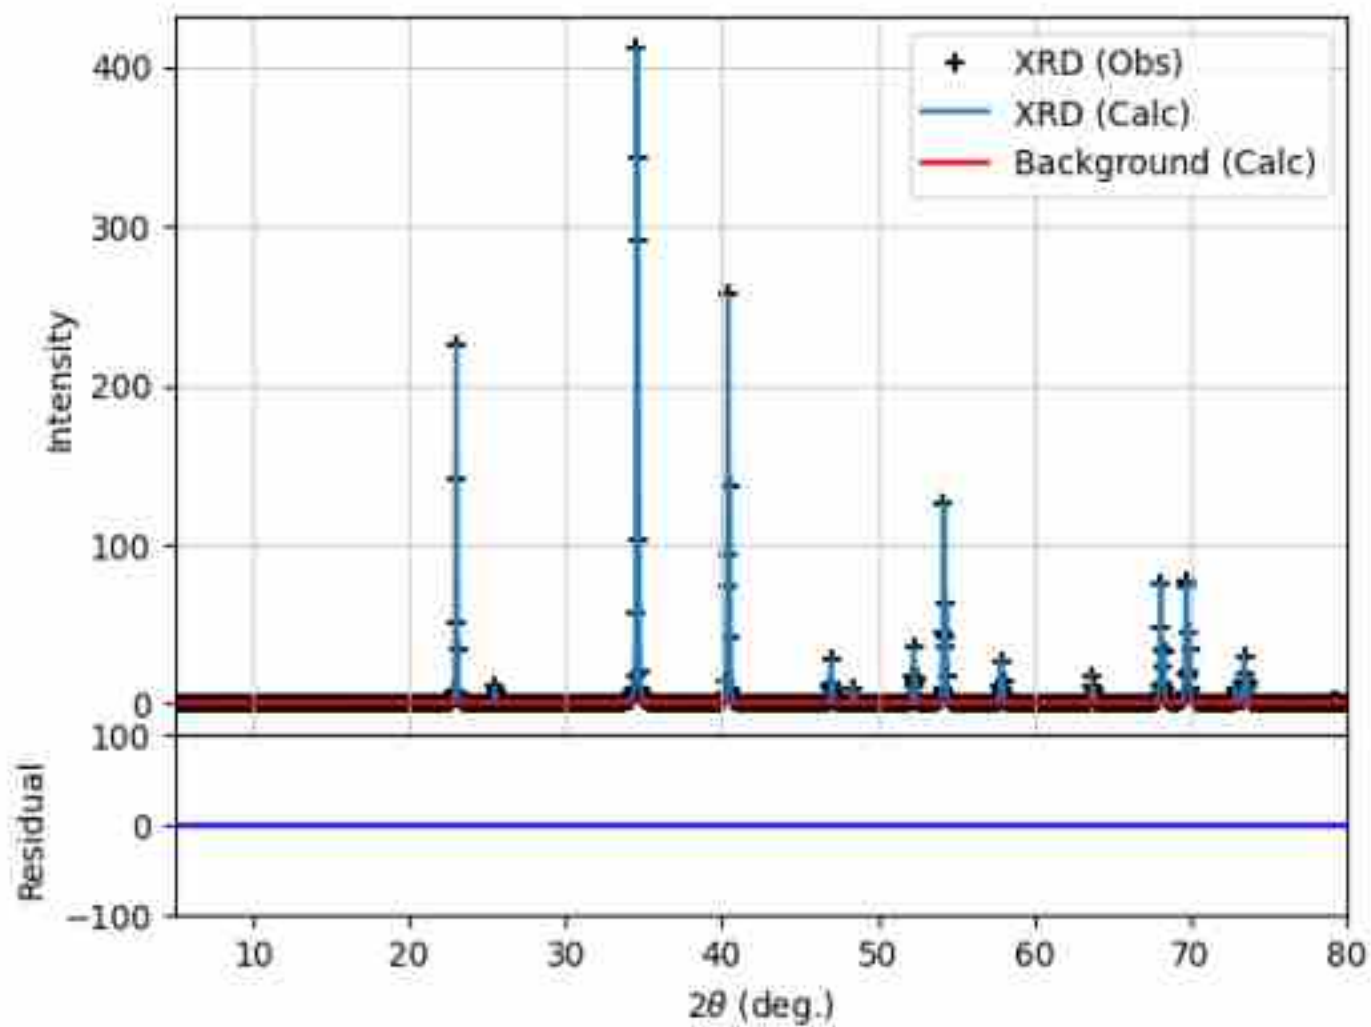

| RMSE before RR | Rwp     | RMSE after RR |
|----------------|---------|---------------|
| 0.008          | 0.02933 | 0.00167       |

# Er1Mn2Si2

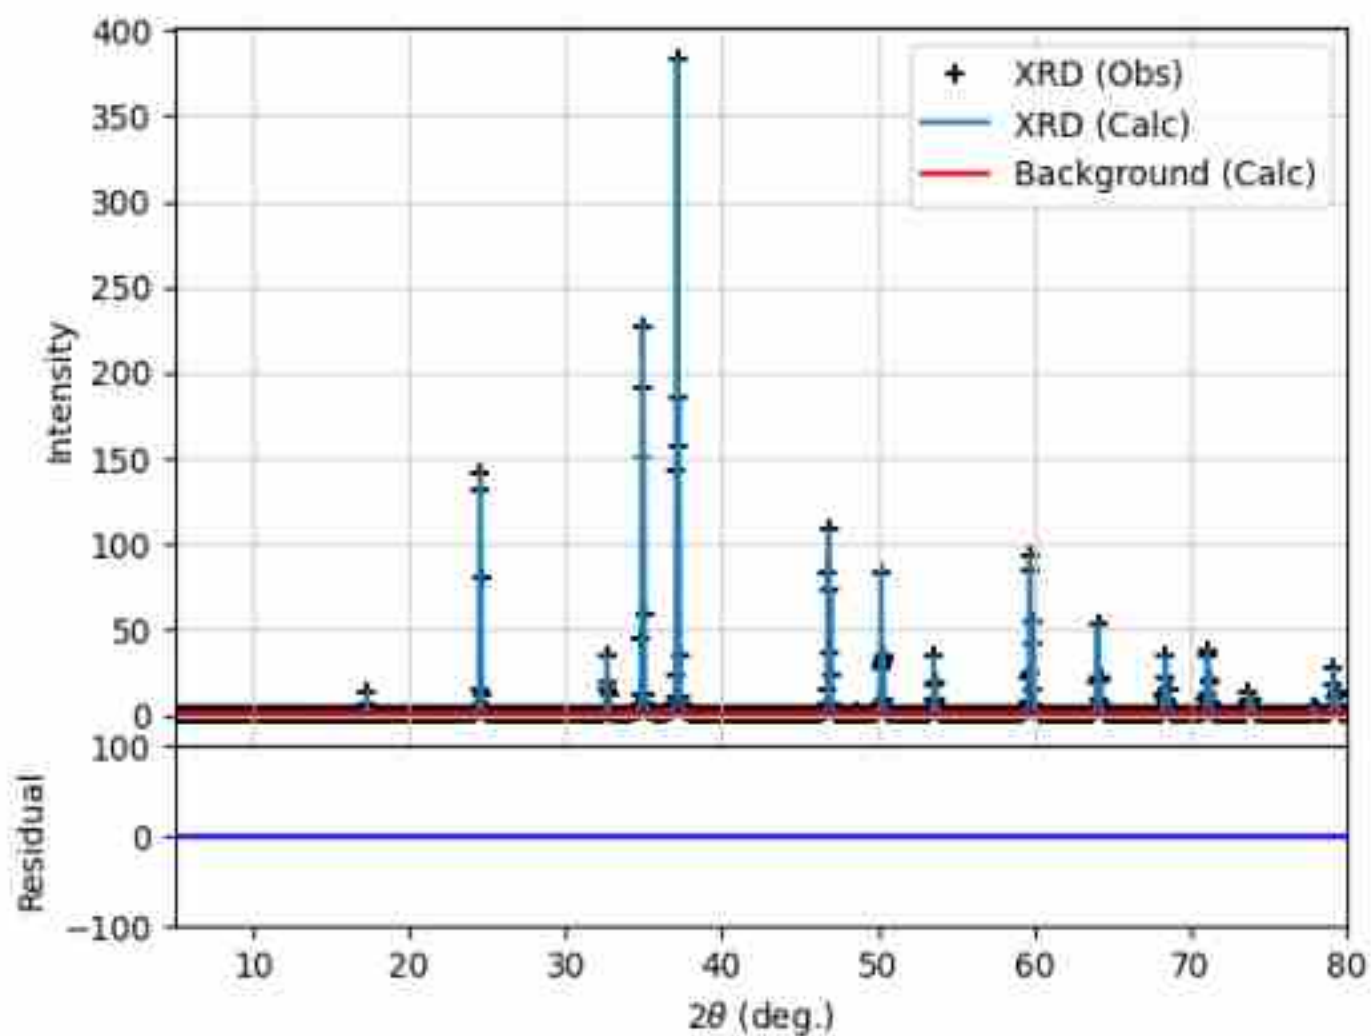

| RMSE before RR | Rwp     | RMSE after RR |
|----------------|---------|---------------|
| 0.008          | 0.00303 | 0.00069       |

# Eu1Cu3Pd2

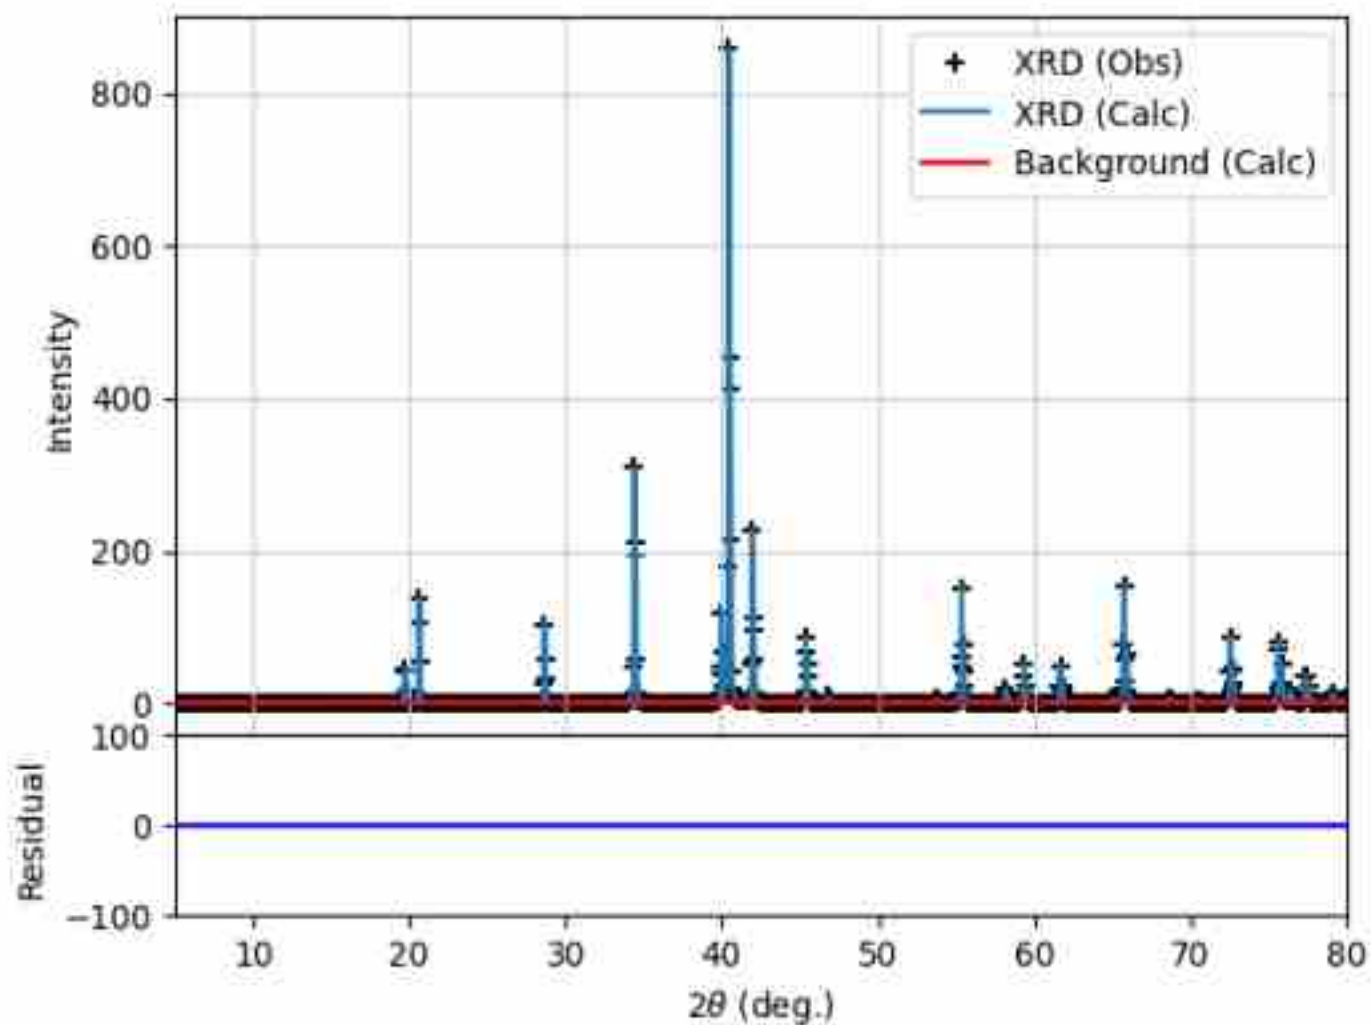

| RMSE before RR | Rwp     | RMSE after RR |
|----------------|---------|---------------|
| 0.008          | 0.00282 | 0.0004        |

# Eu1Cu5

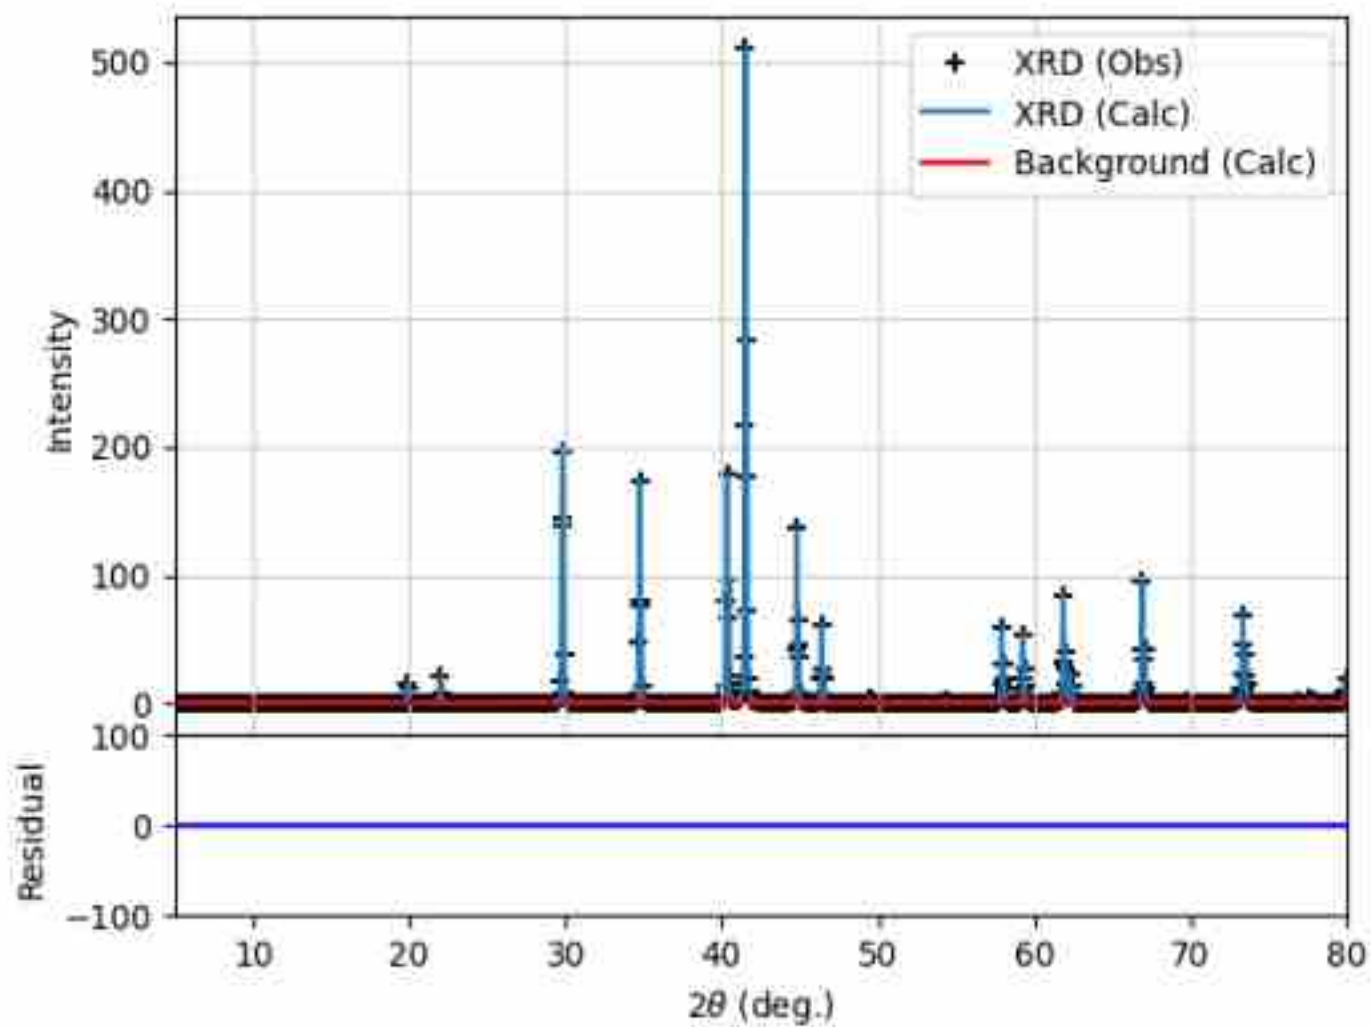

| RMSE before RR | Rwp     | RMSE after RR |
|----------------|---------|---------------|
| 0.008          | 0.00368 | 0.00031       |



# Eu<sub>2</sub>Dy<sub>1</sub>Sb<sub>1</sub>O<sub>6</sub>

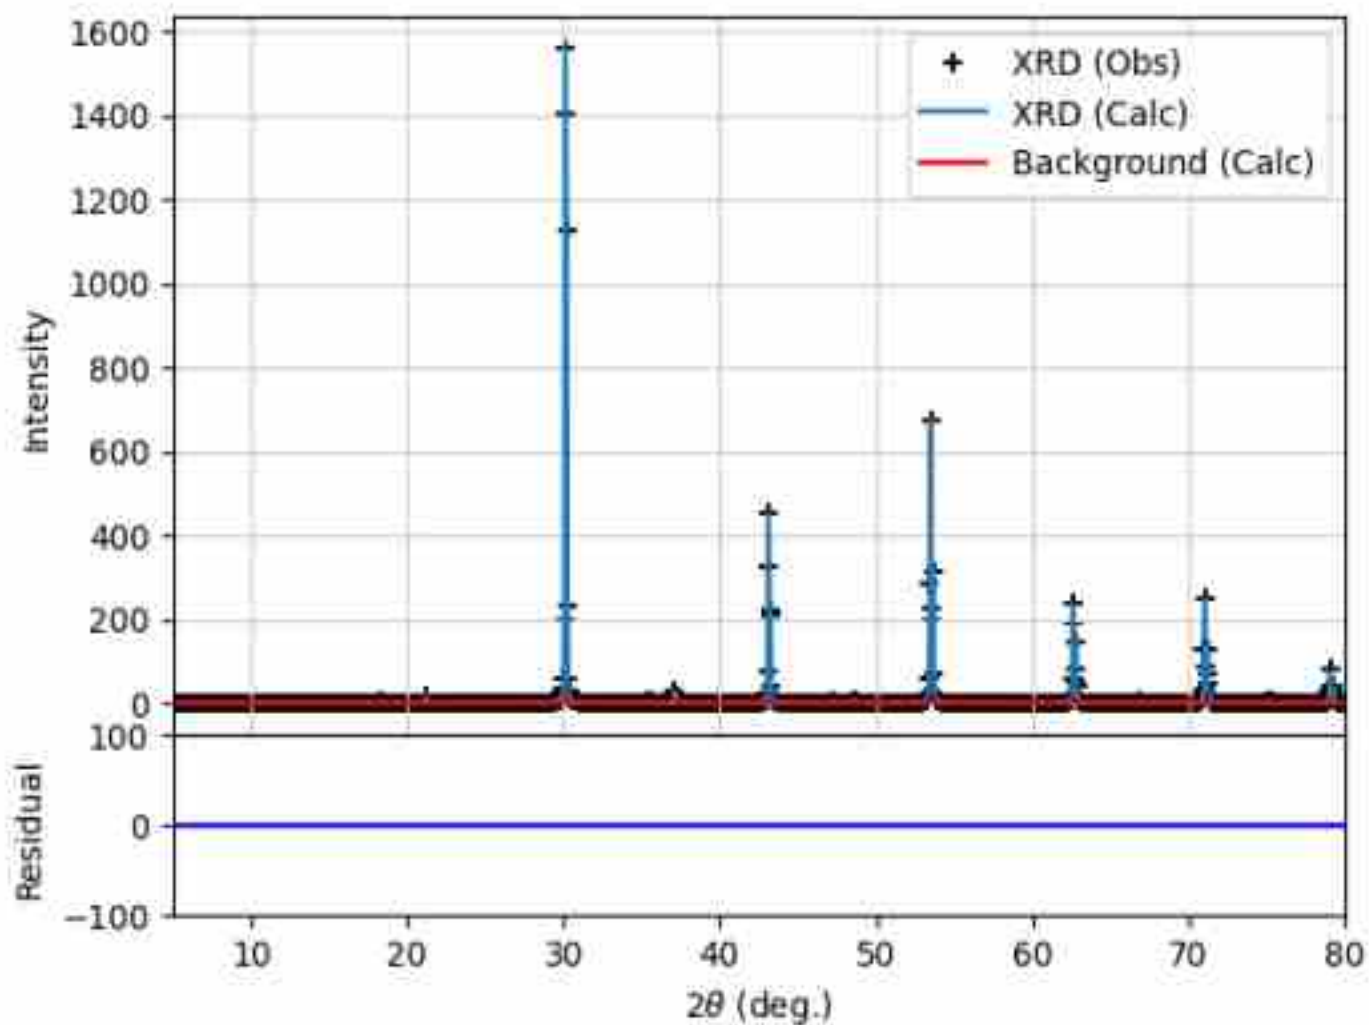

| RMSE before RR | Rwp     | RMSE after RR |
|----------------|---------|---------------|
| 0.008          | 0.00373 | 0.00175       |

# Eu<sub>2</sub>Hf<sub>1</sub>Zr<sub>1</sub>O<sub>6</sub>

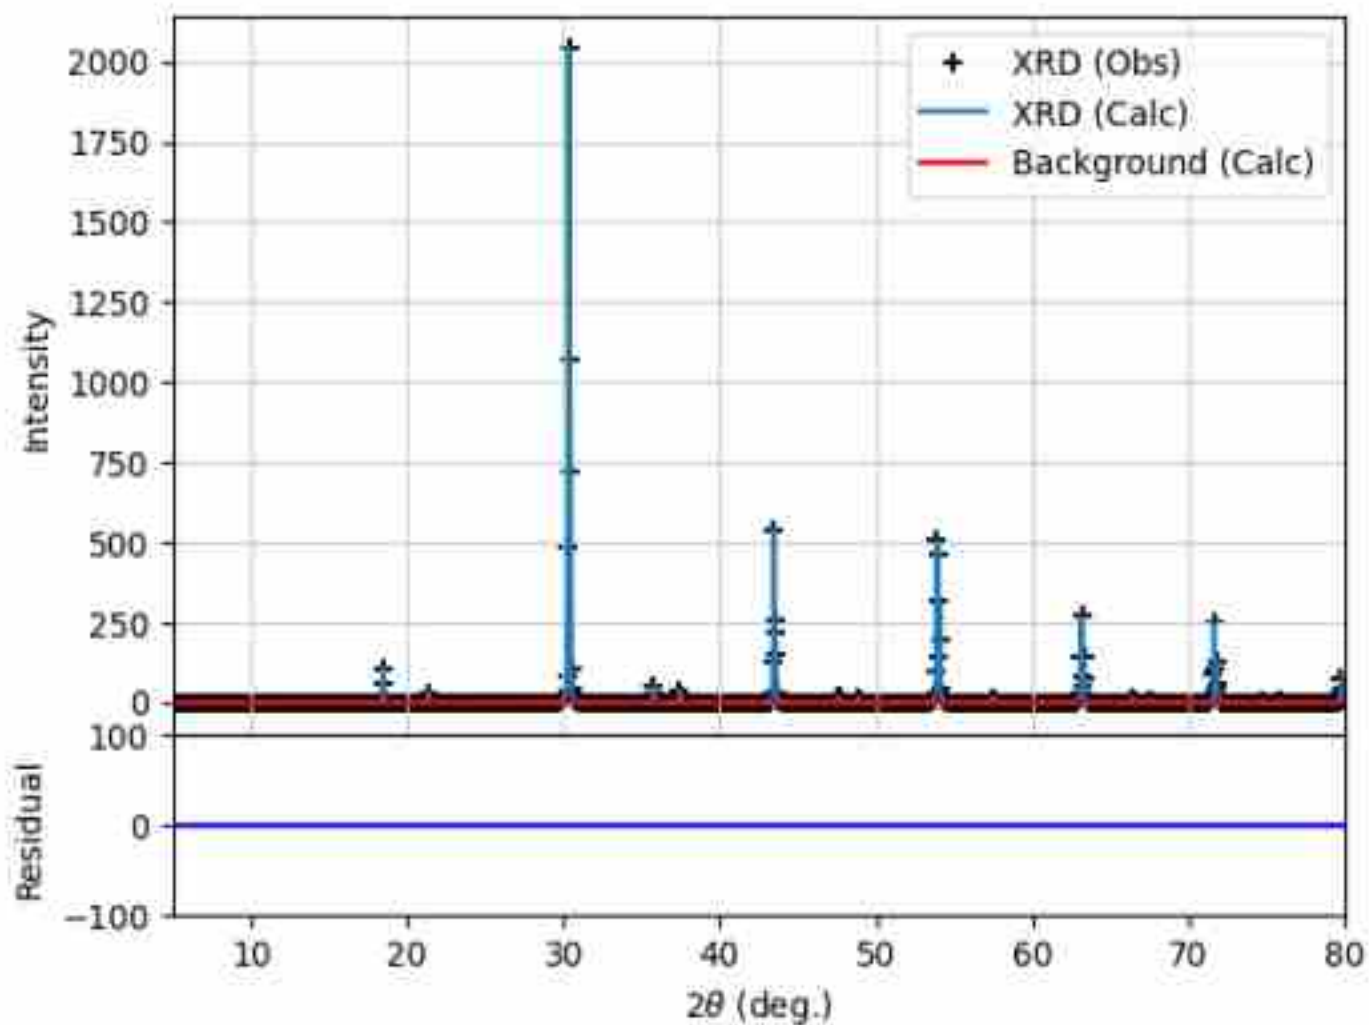

| RMSE before RR | Rwp     | RMSE after RR |
|----------------|---------|---------------|
| 0.008          | 0.00404 | 0.00142       |

# Eu<sub>2</sub>Ir<sub>4</sub>

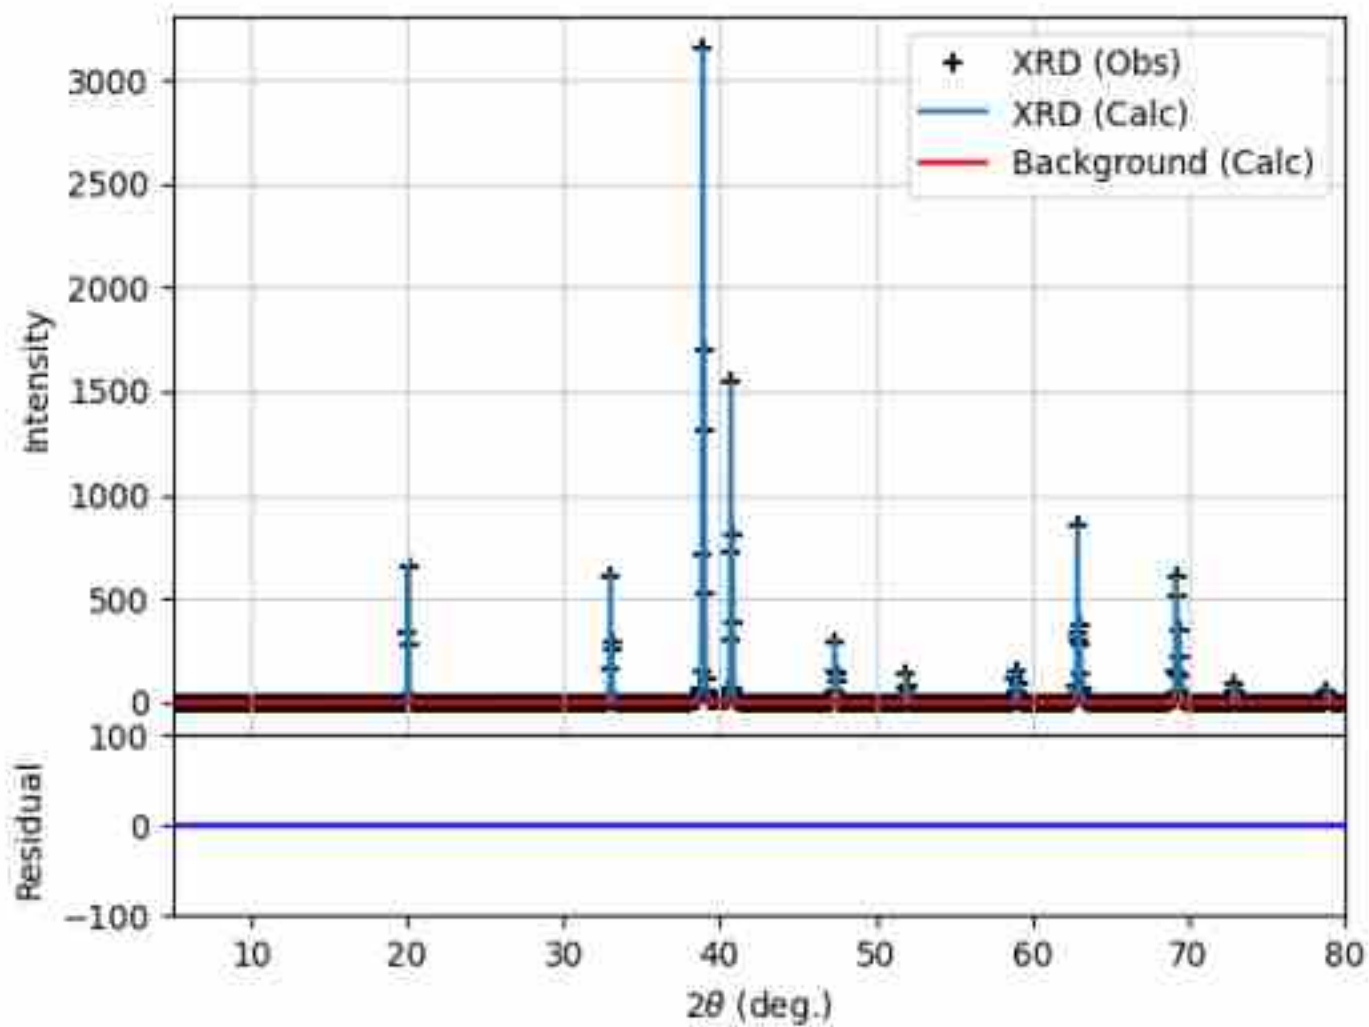

| RMSE before RR | Rwp     | RMSE after RR |
|----------------|---------|---------------|
| 0.008          | 0.02719 | 0.00121       |

# Eu<sub>2</sub>Si<sub>4</sub>

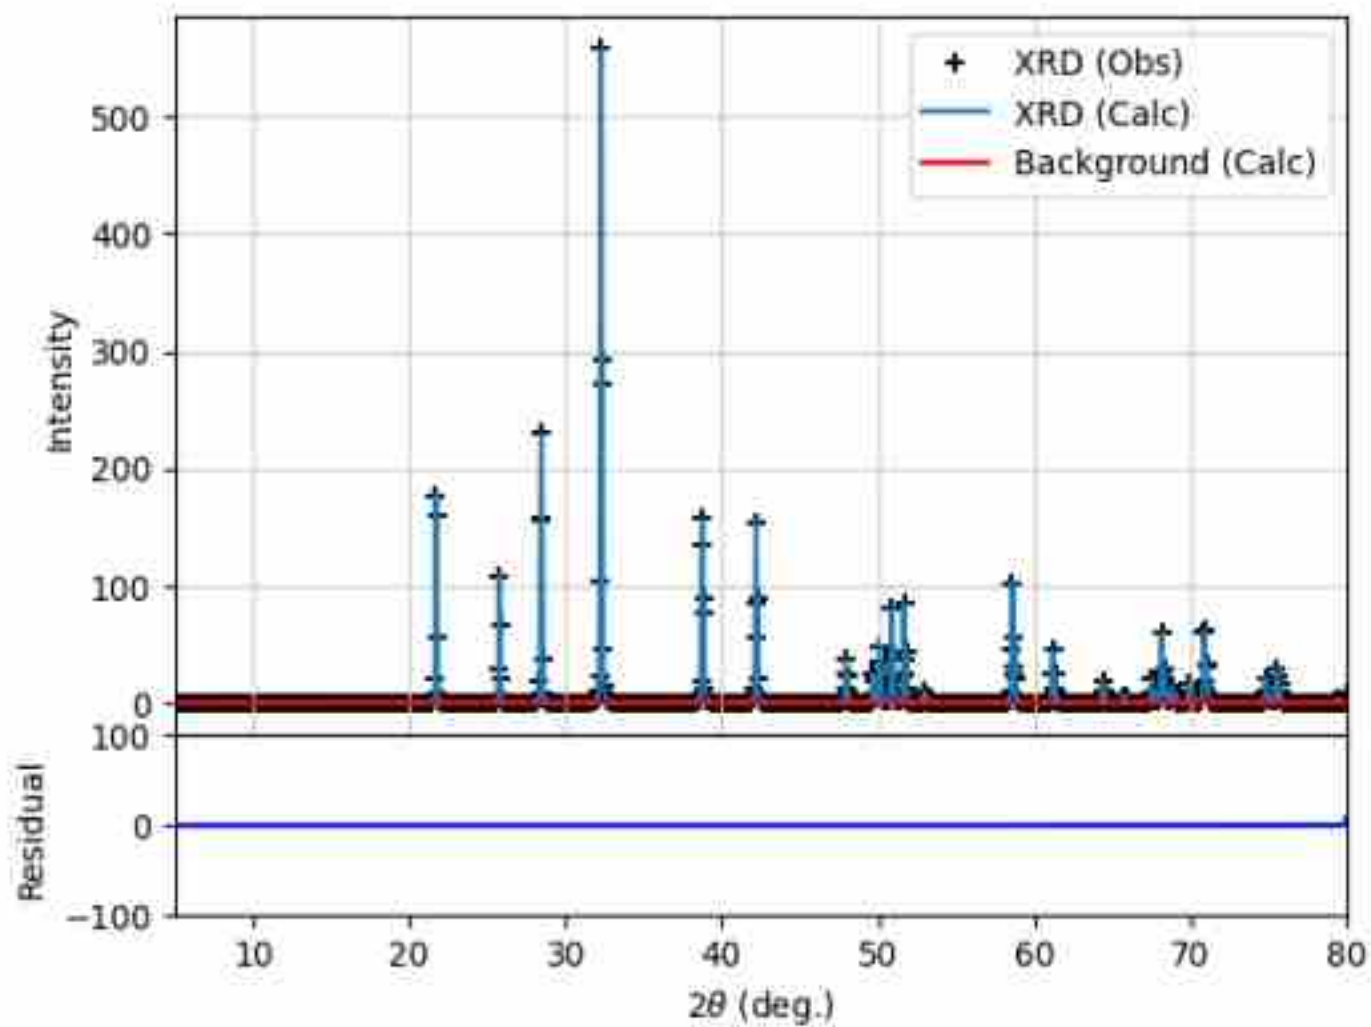

| RMSE before RR | Rwp     | RMSE after RR |
|----------------|---------|---------------|
| 0.008          | 4.52931 | 0.01086       |

# Eu<sub>2</sub>Y<sub>1</sub>Sb<sub>1</sub>O<sub>6</sub>

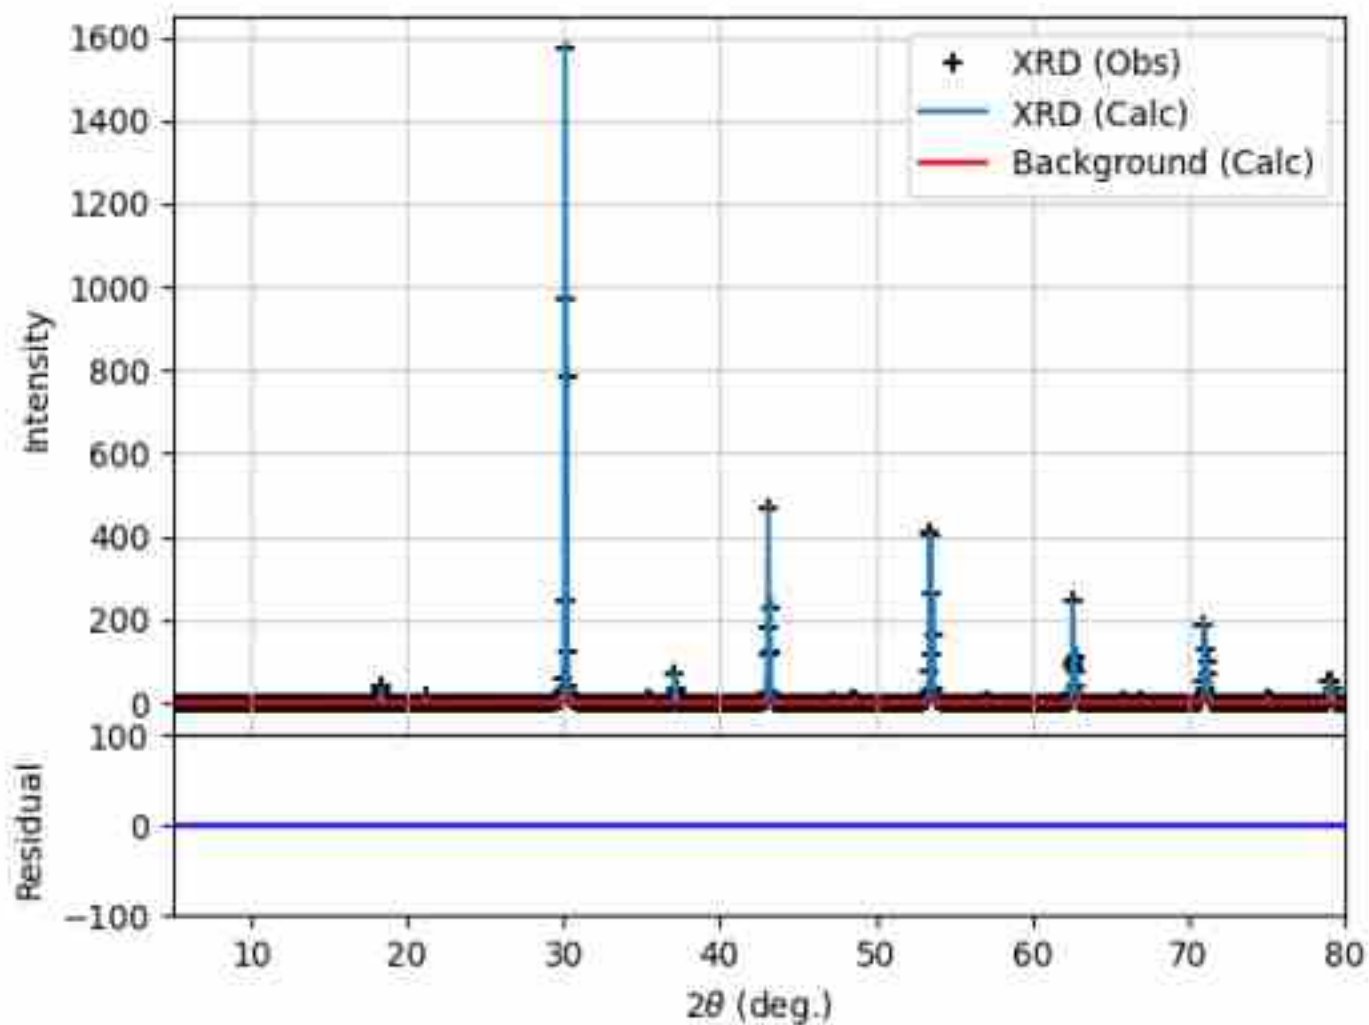

| RMSE before RR | Rwp    | RMSE after RR |
|----------------|--------|---------------|
| 0.008          | 0.0095 | 0.00277       |

# Fe1Cu2Si1Se4

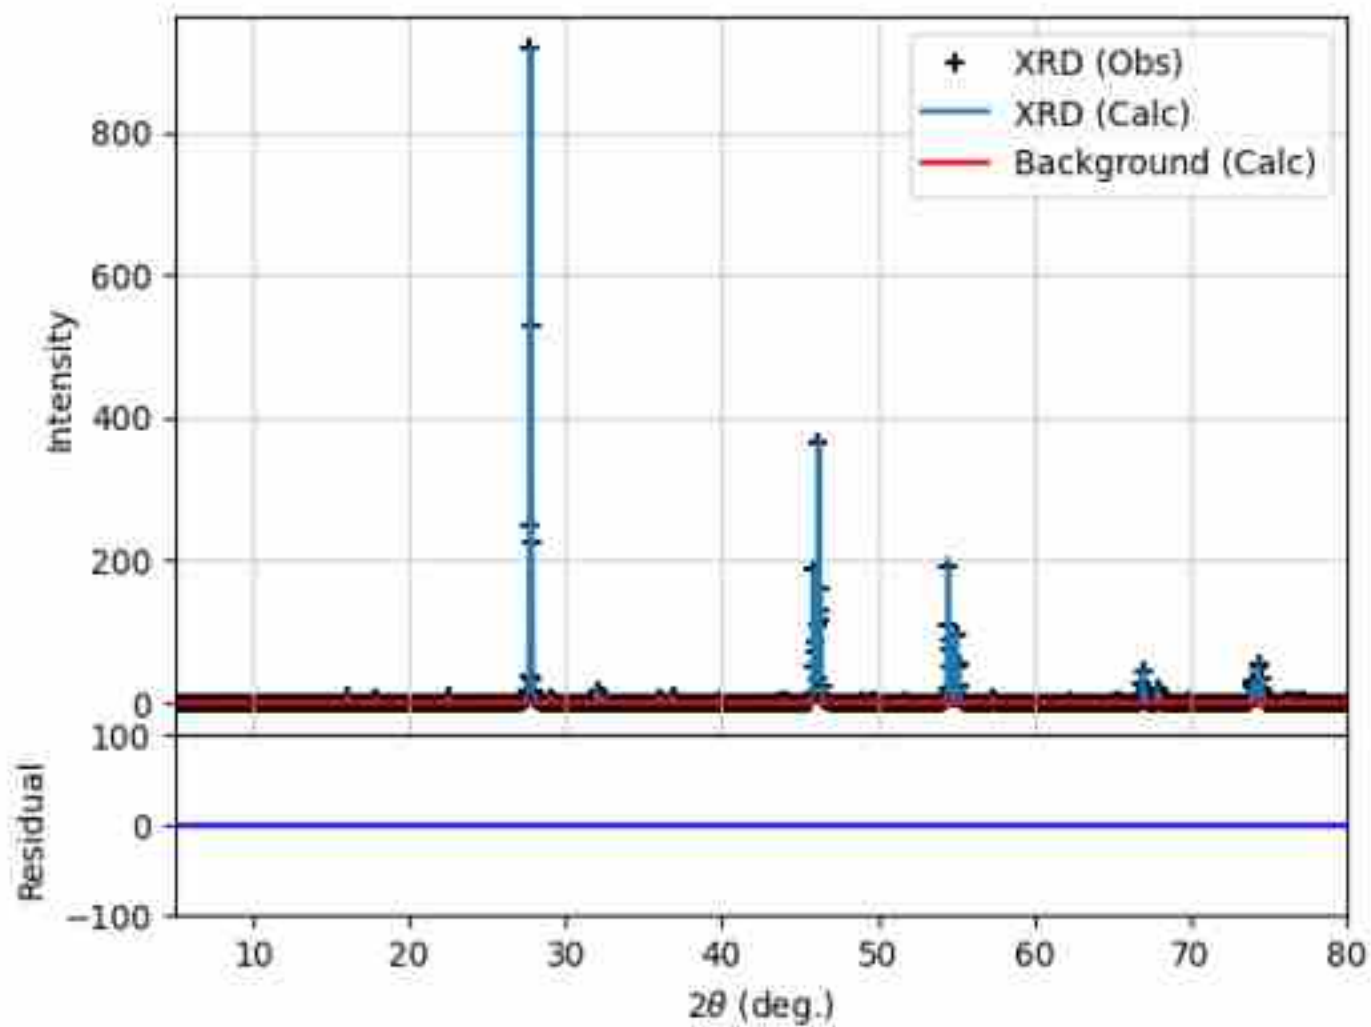

| RMSE before RR | Rwp     | RMSE after RR |
|----------------|---------|---------------|
| 0.008          | 0.00418 | 0.00062       |

# Ga<sub>2</sub>Se<sub>3</sub>

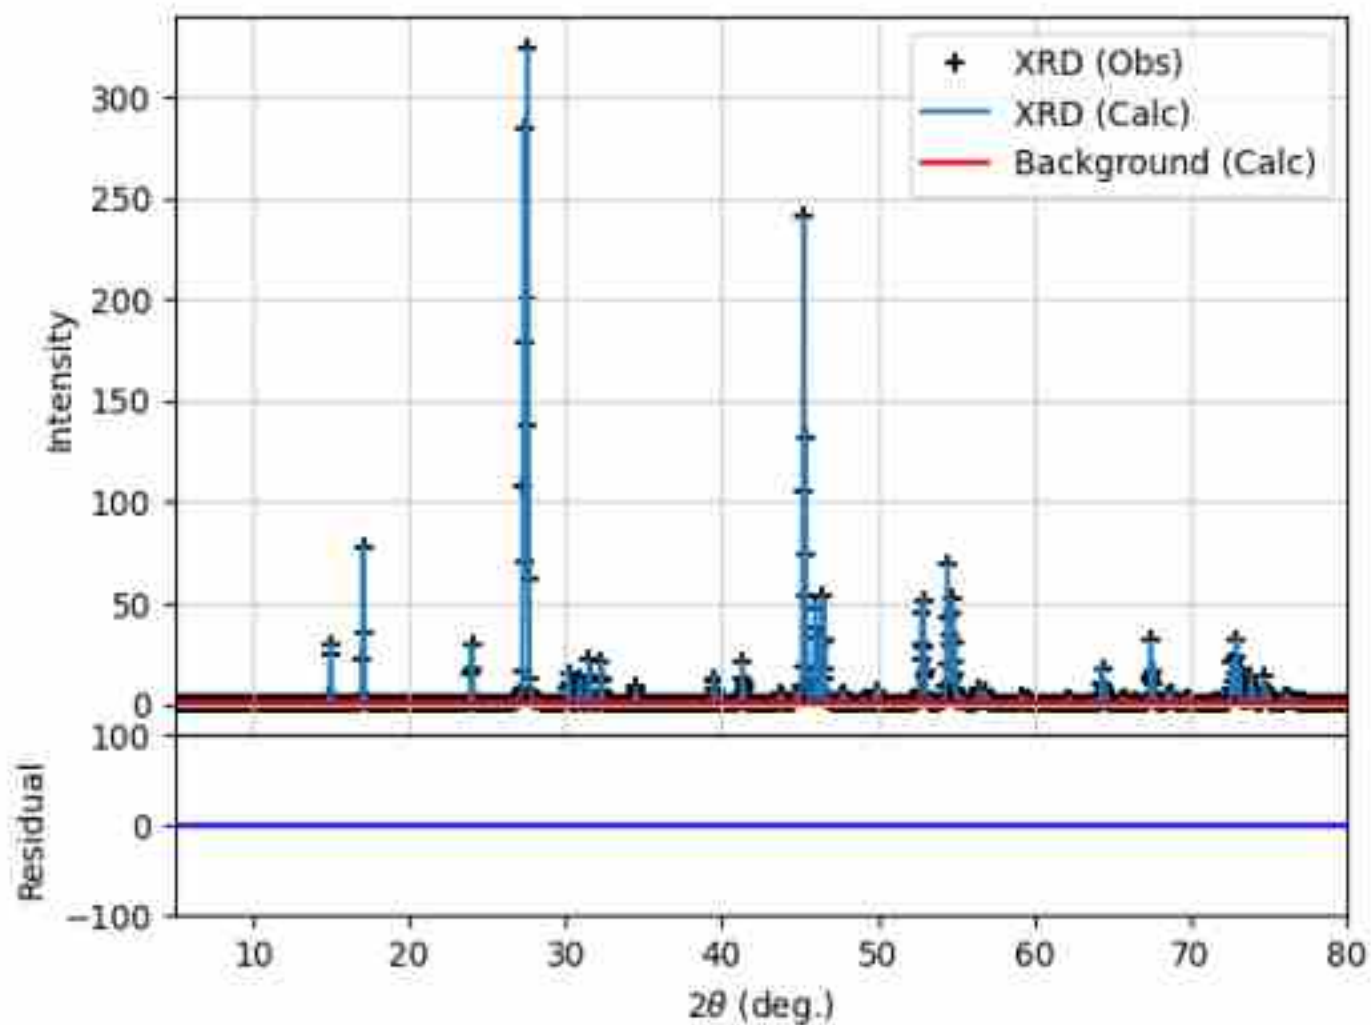

| RMSE before RR | Rwp     | RMSE after RR |
|----------------|---------|---------------|
| 0.008          | 0.00237 | 0.00028       |

# Gd1Ge2Pd2

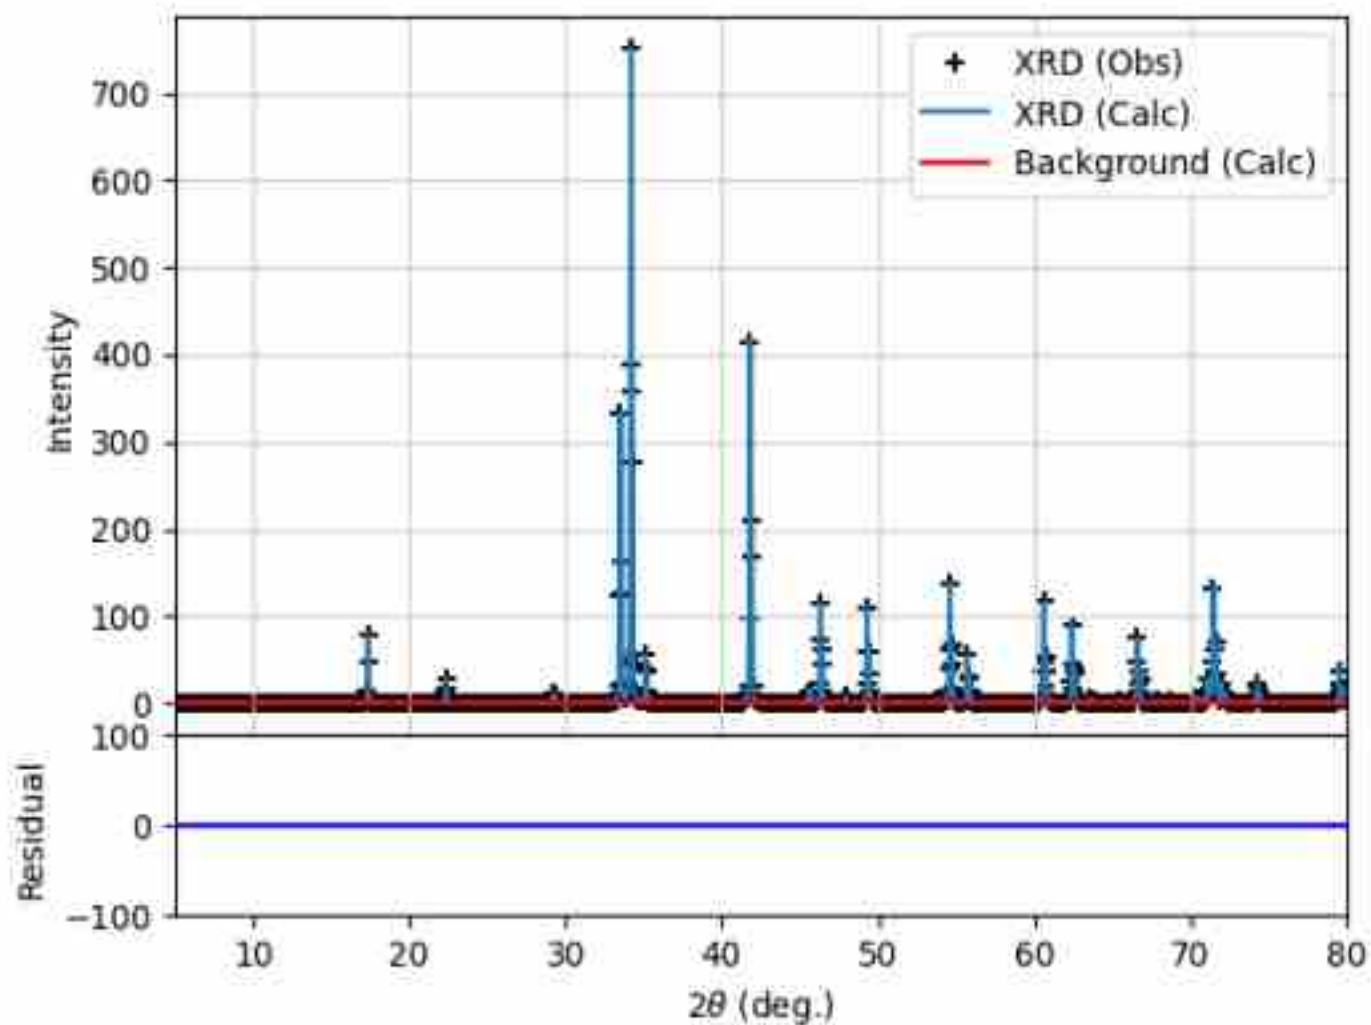

| RMSE before RR | Rwp     | RMSE after RR |
|----------------|---------|---------------|
| 0.008          | 0.00264 | 0.00031       |



# H2C12

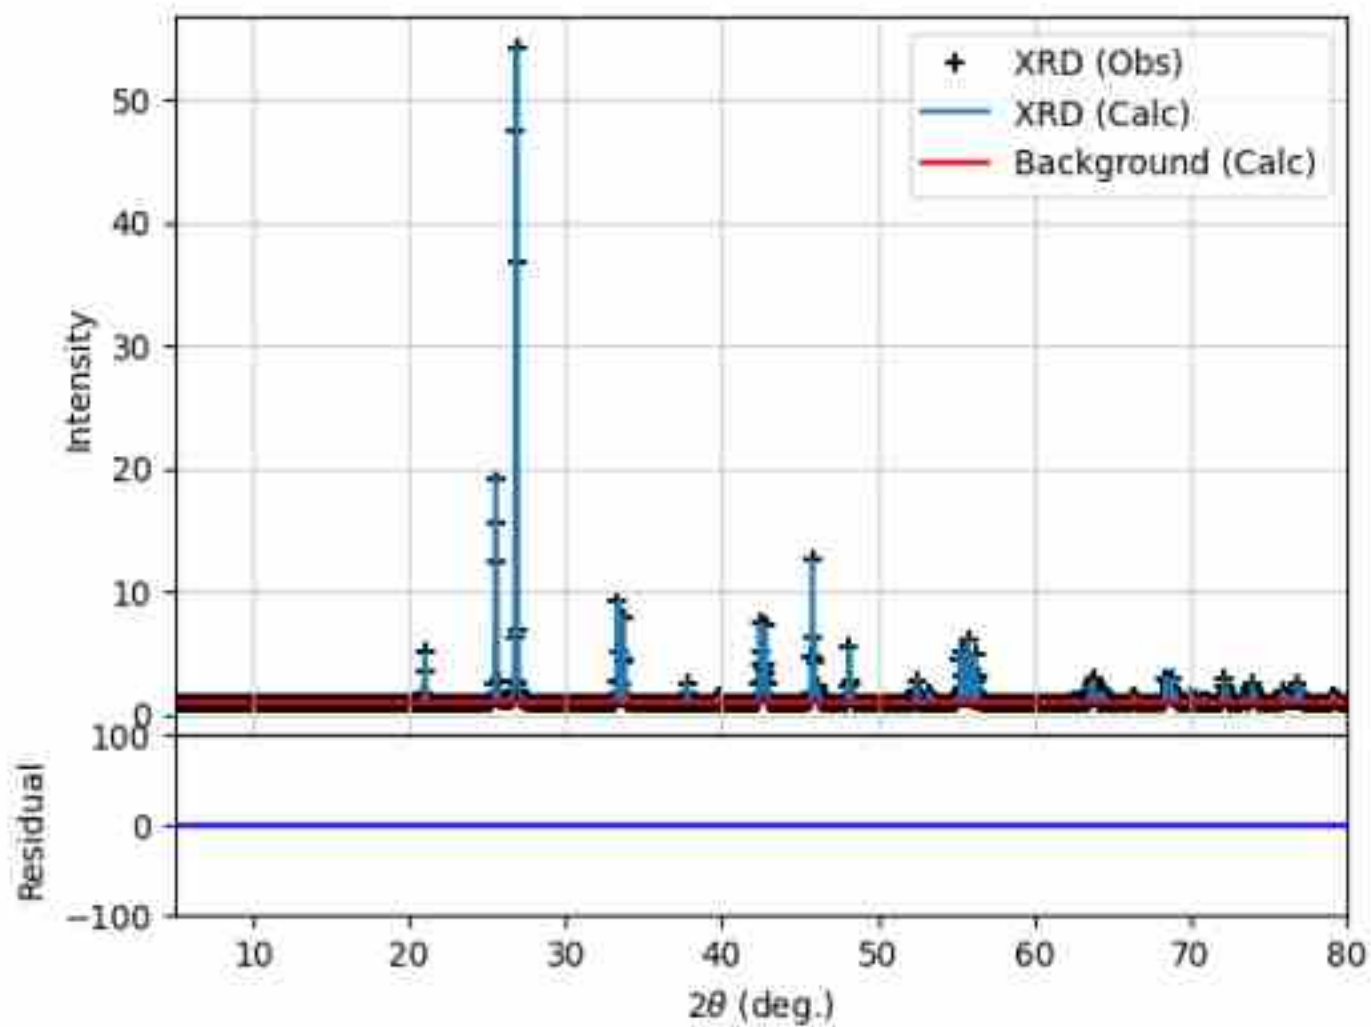

| RMSE before RR | Rwp     | RMSE after RR |
|----------------|---------|---------------|
| 0.008          | 0.00167 | 0.00104       |

# Hf1Ti1N2

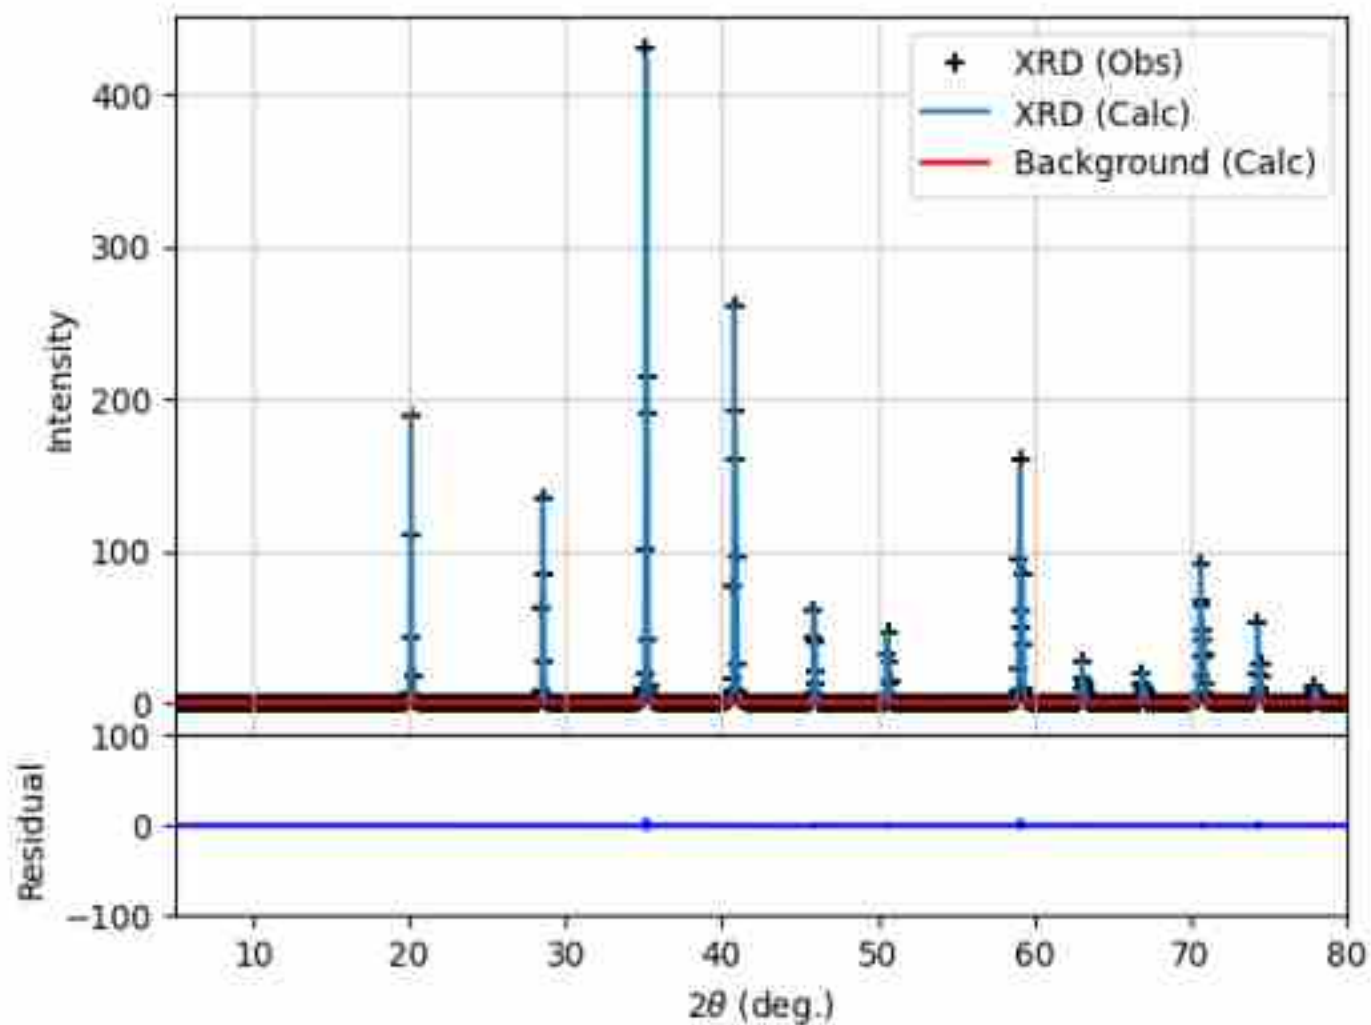

| RMSE before RR | Rwp     | RMSE after RR |
|----------------|---------|---------------|
| 0.008          | 1.20168 | 0.00922       |

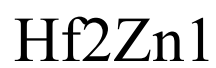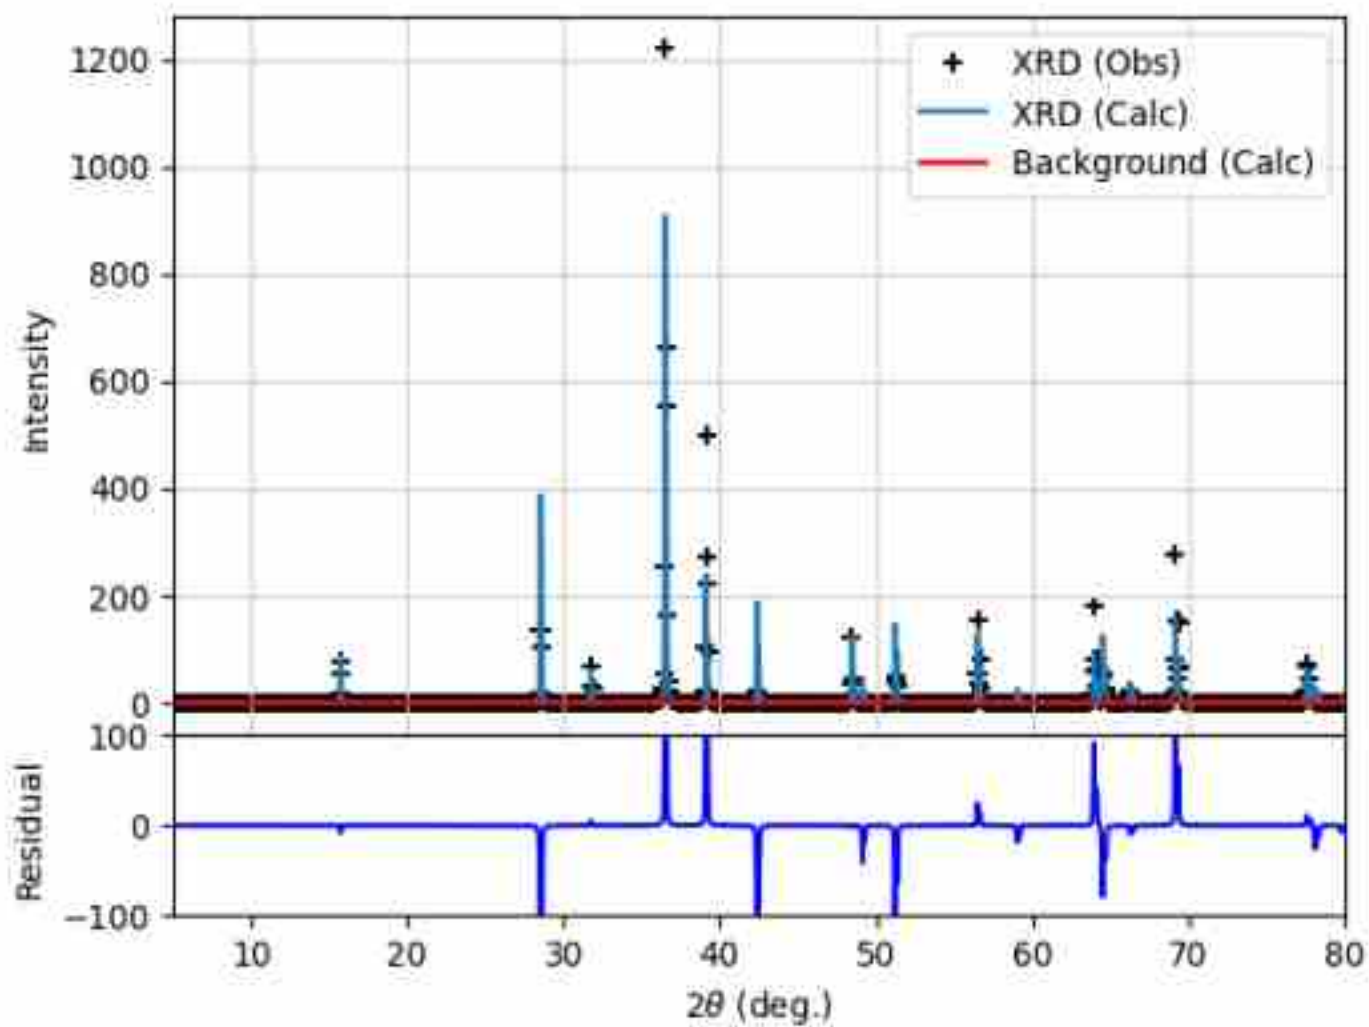

| RMSE before RR | Rwp      | RMSE after RR |
|----------------|----------|---------------|
| 0.008          | 89.80775 | 0.08717       |

# Hf6A12

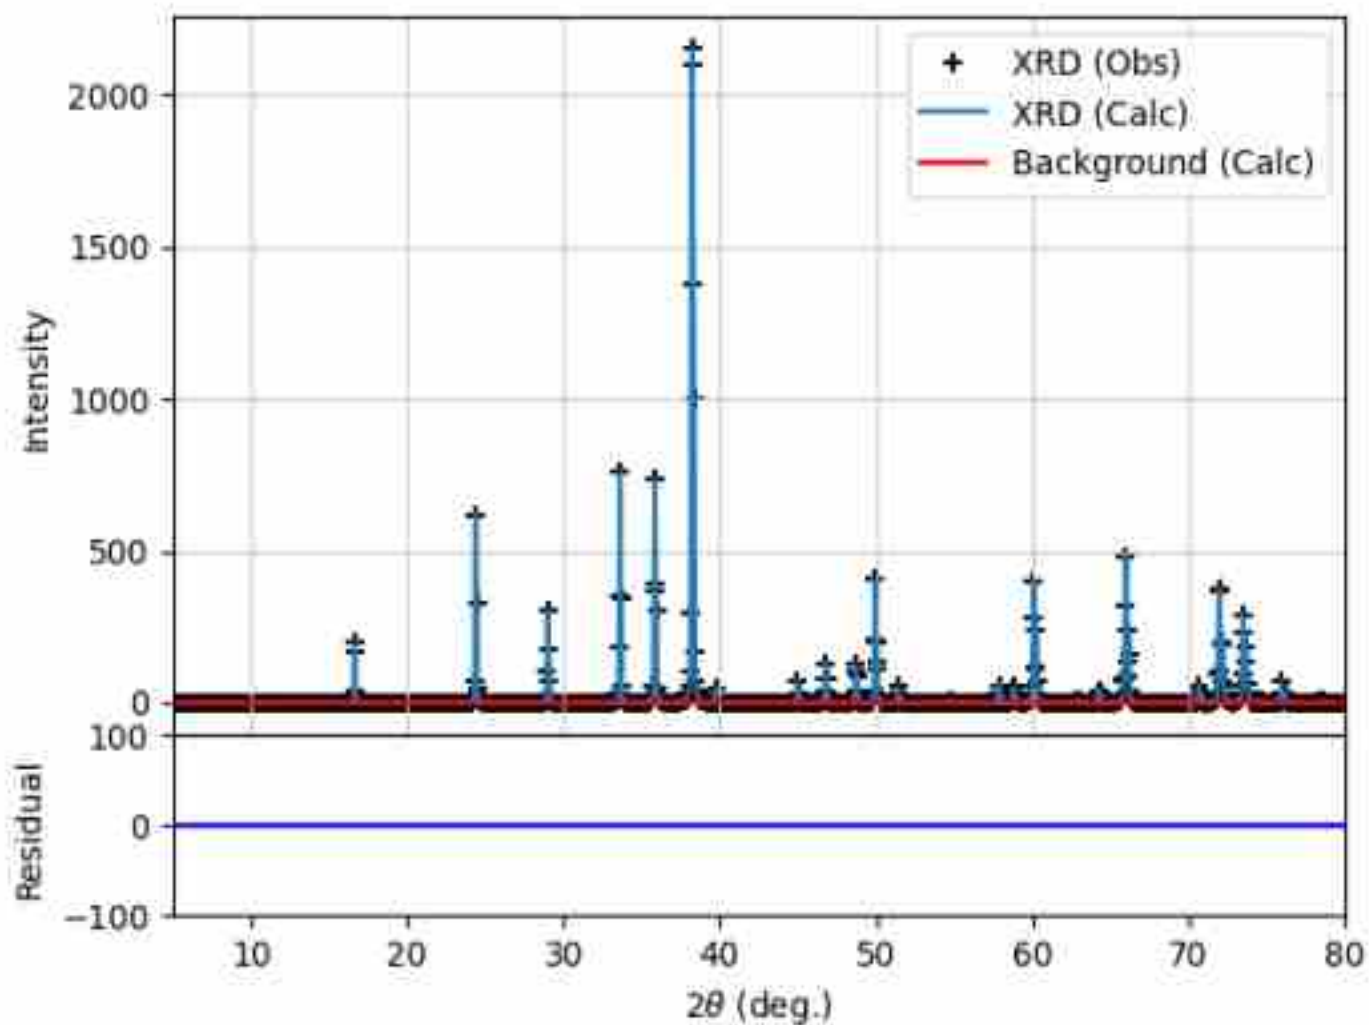

| RMSE before RR | Rwp     | RMSE after RR |
|----------------|---------|---------------|
| 0.008          | 0.00663 | 0.00105       |

# Hg2

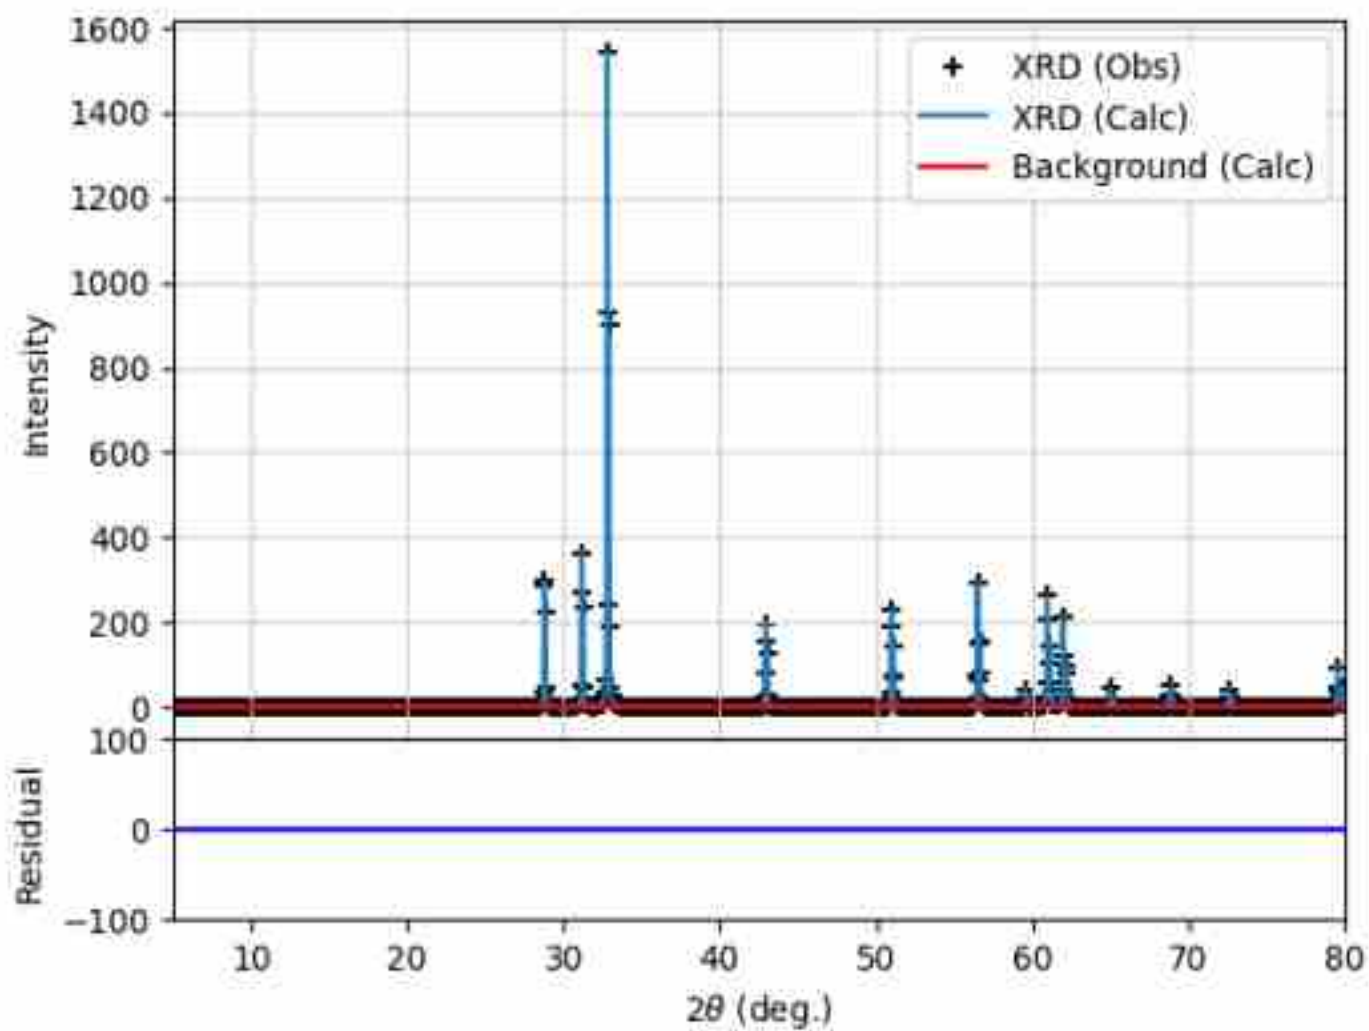

| RMSE before RR | Rwp     | RMSE after RR |
|----------------|---------|---------------|
| 0.008          | 0.00592 | 0.00027       |

# Ho<sub>1</sub>Bi<sub>1</sub>Te<sub>3</sub>

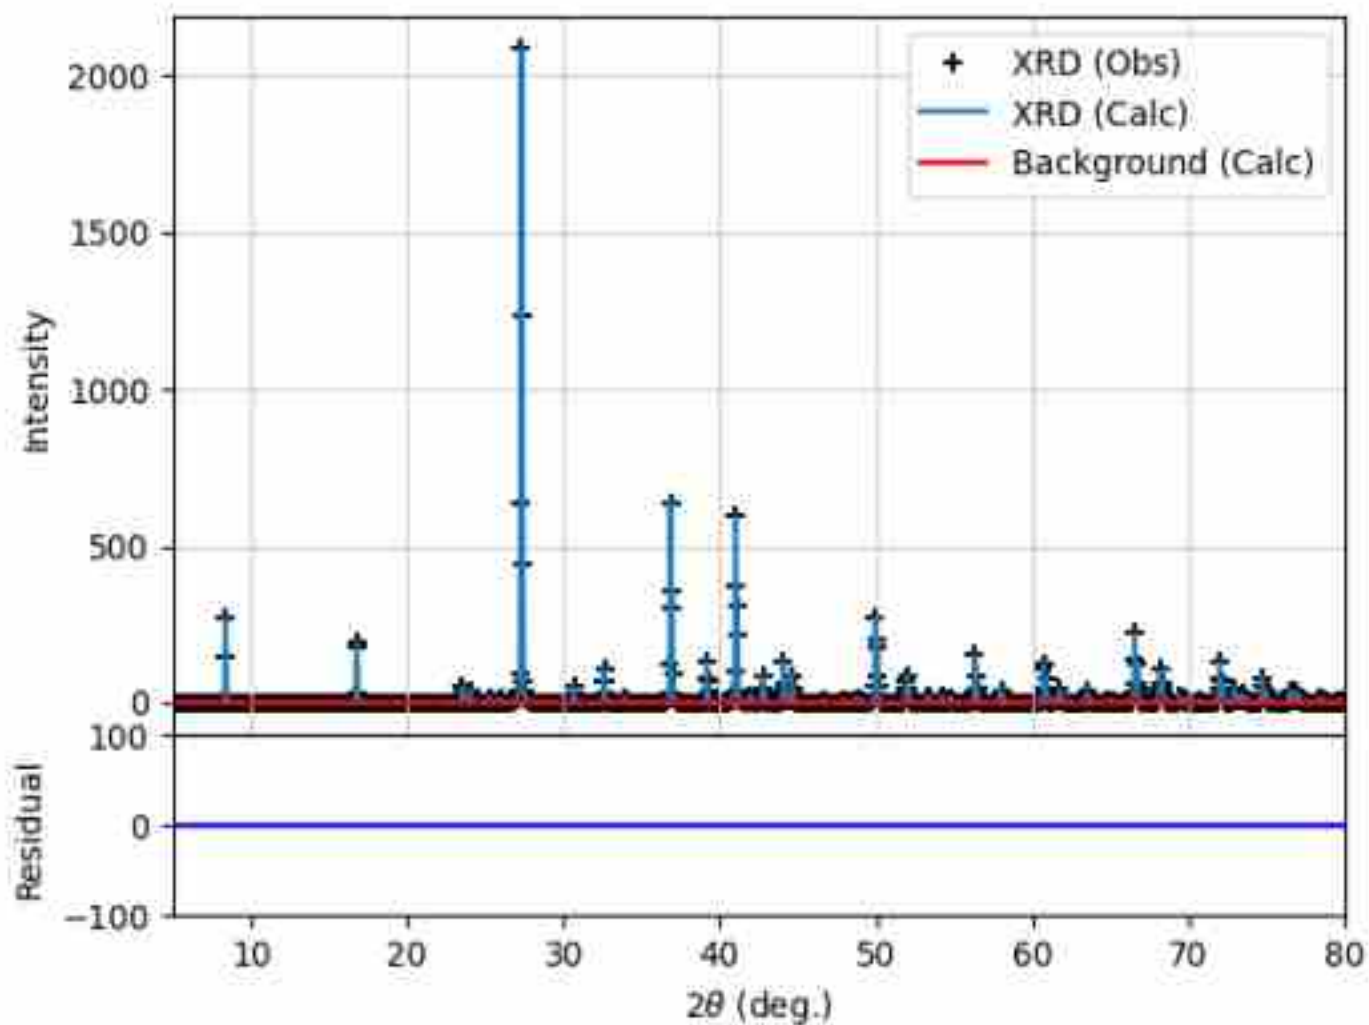

| RMSE before RR | Rwp     | RMSE after RR |
|----------------|---------|---------------|
| 0.008          | 0.00289 | 0.00015       |

# Ho<sub>2</sub>Cu<sub>1</sub>Ge<sub>4</sub>

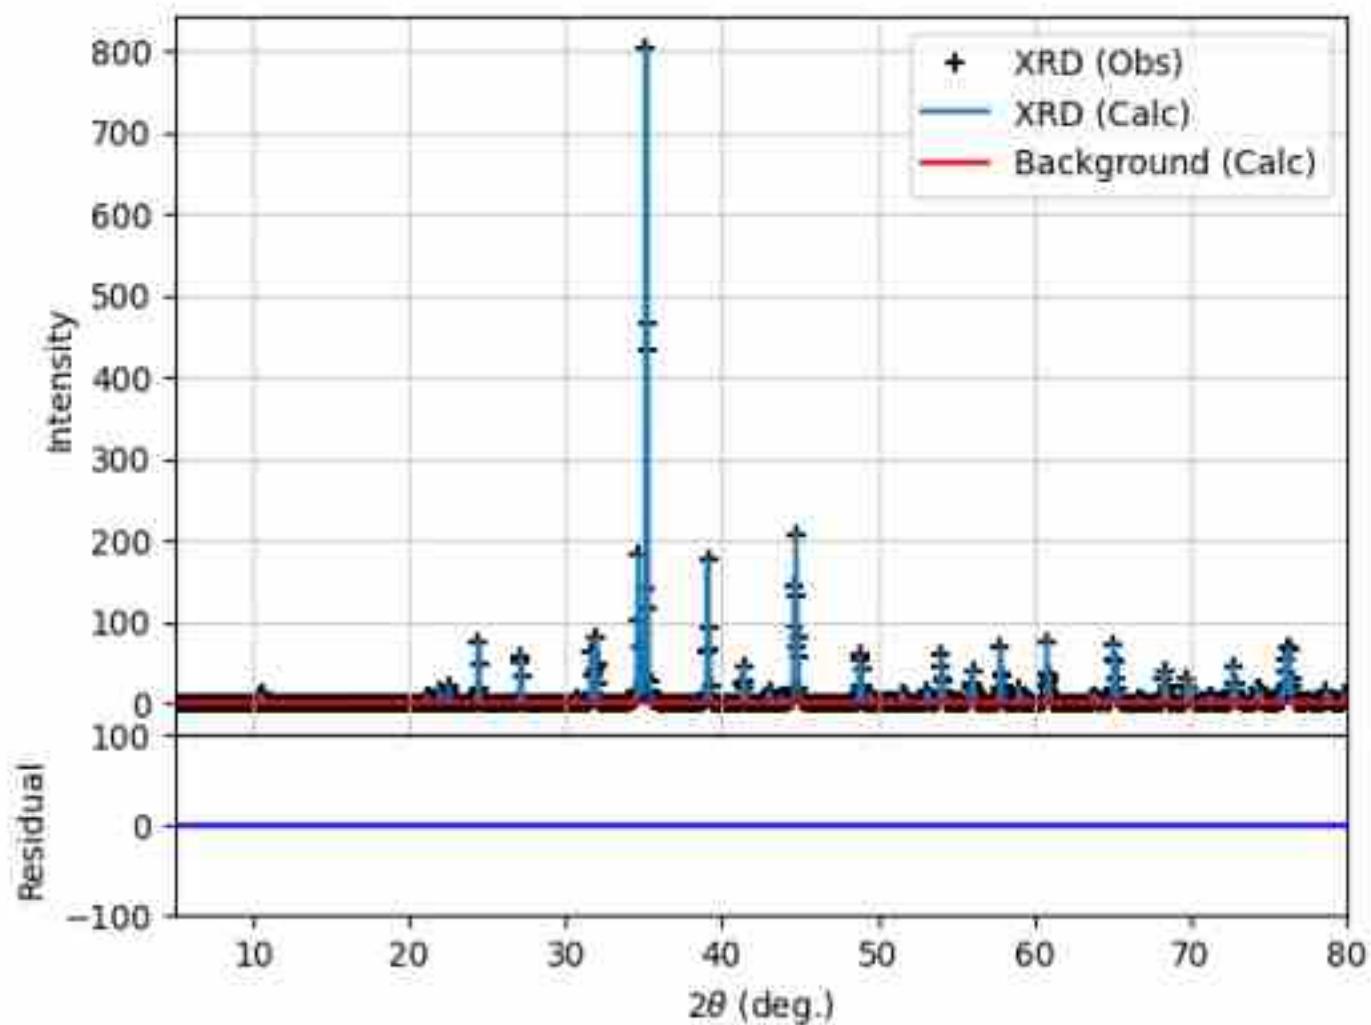

| RMSE before RR | Rwp     | RMSE after RR |
|----------------|---------|---------------|
| 0.008          | 0.00336 | 0.00026       |

# Ho<sub>2</sub>Ga<sub>2</sub>Ag<sub>2</sub>

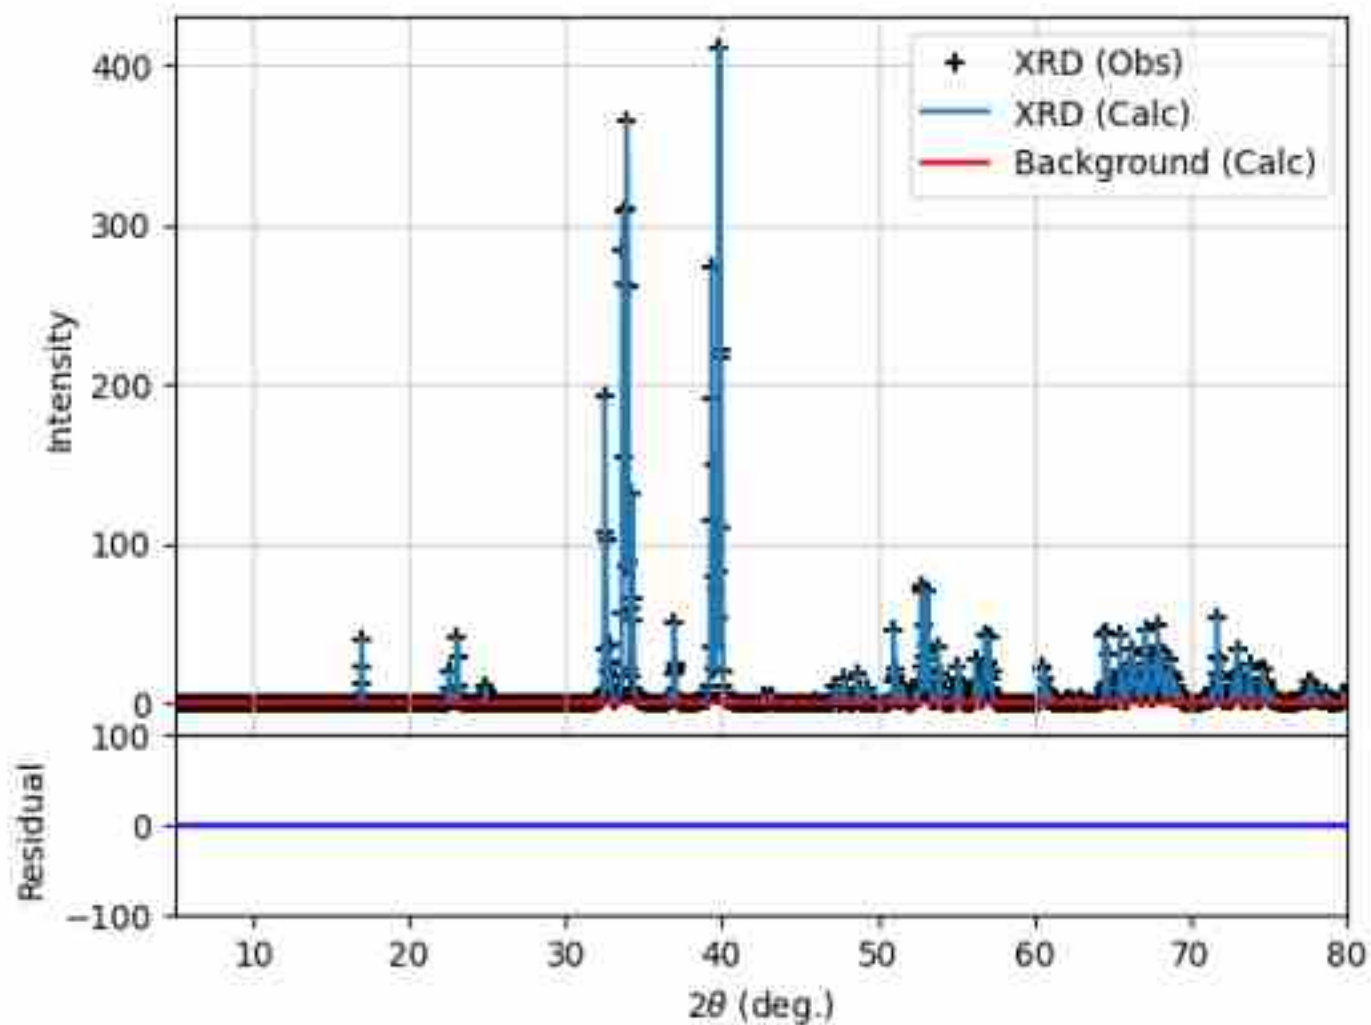

| RMSE before RR | Rwp     | RMSE after RR |
|----------------|---------|---------------|
| 0.008          | 0.00308 | 0.0002        |



# In1Ga1Ag2Te4

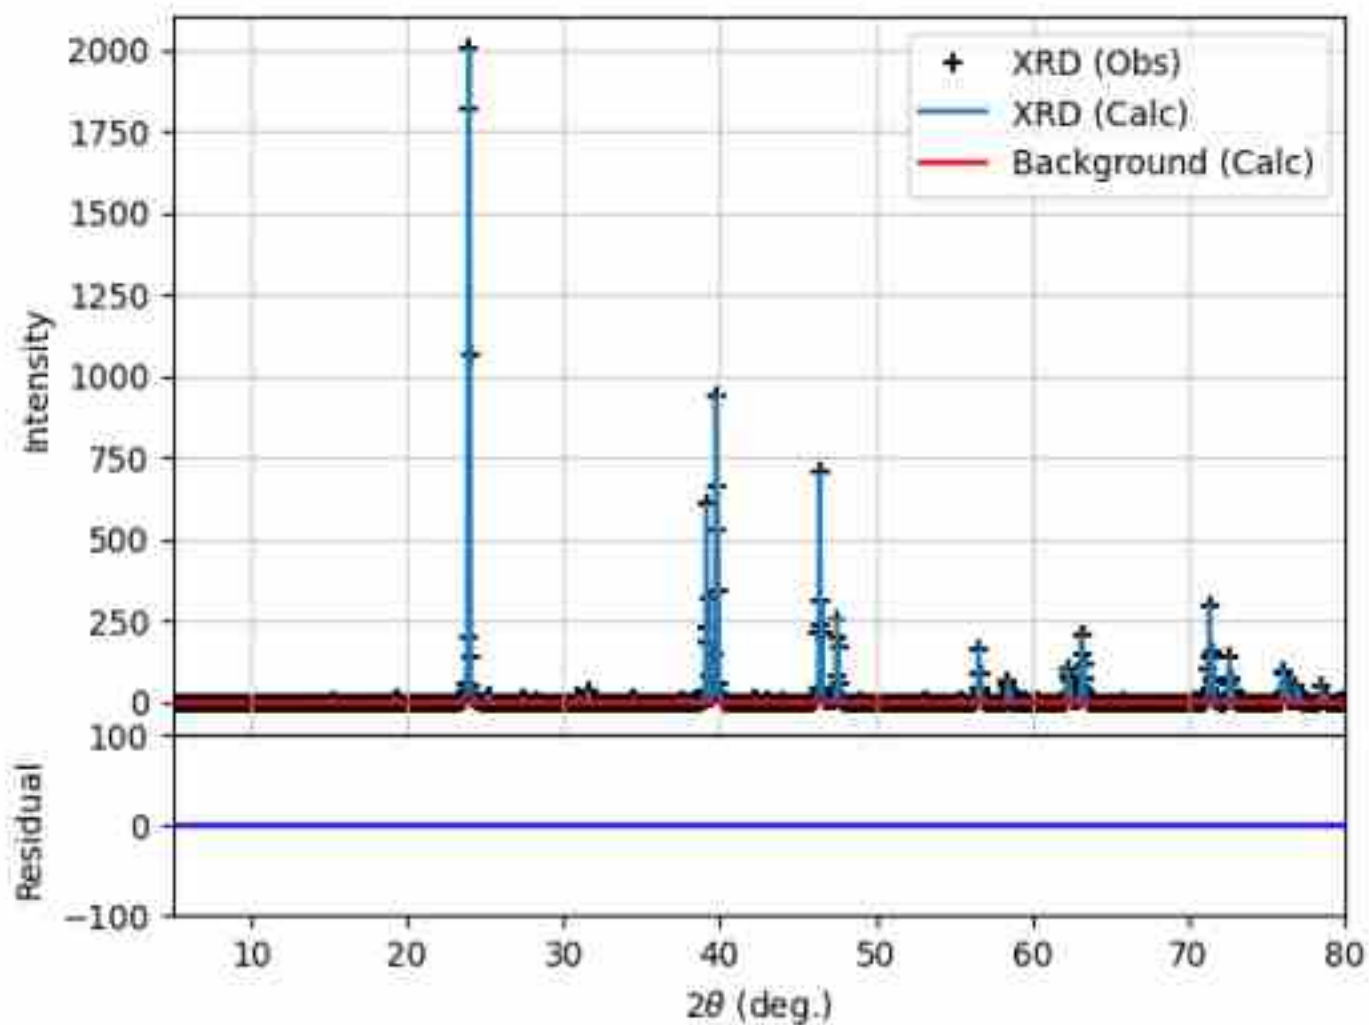

| RMSE before RR | Rwp     | RMSE after RR |
|----------------|---------|---------------|
| 0.008          | 0.00491 | 0.0005        |

# In<sub>2</sub>Cu<sub>2</sub>

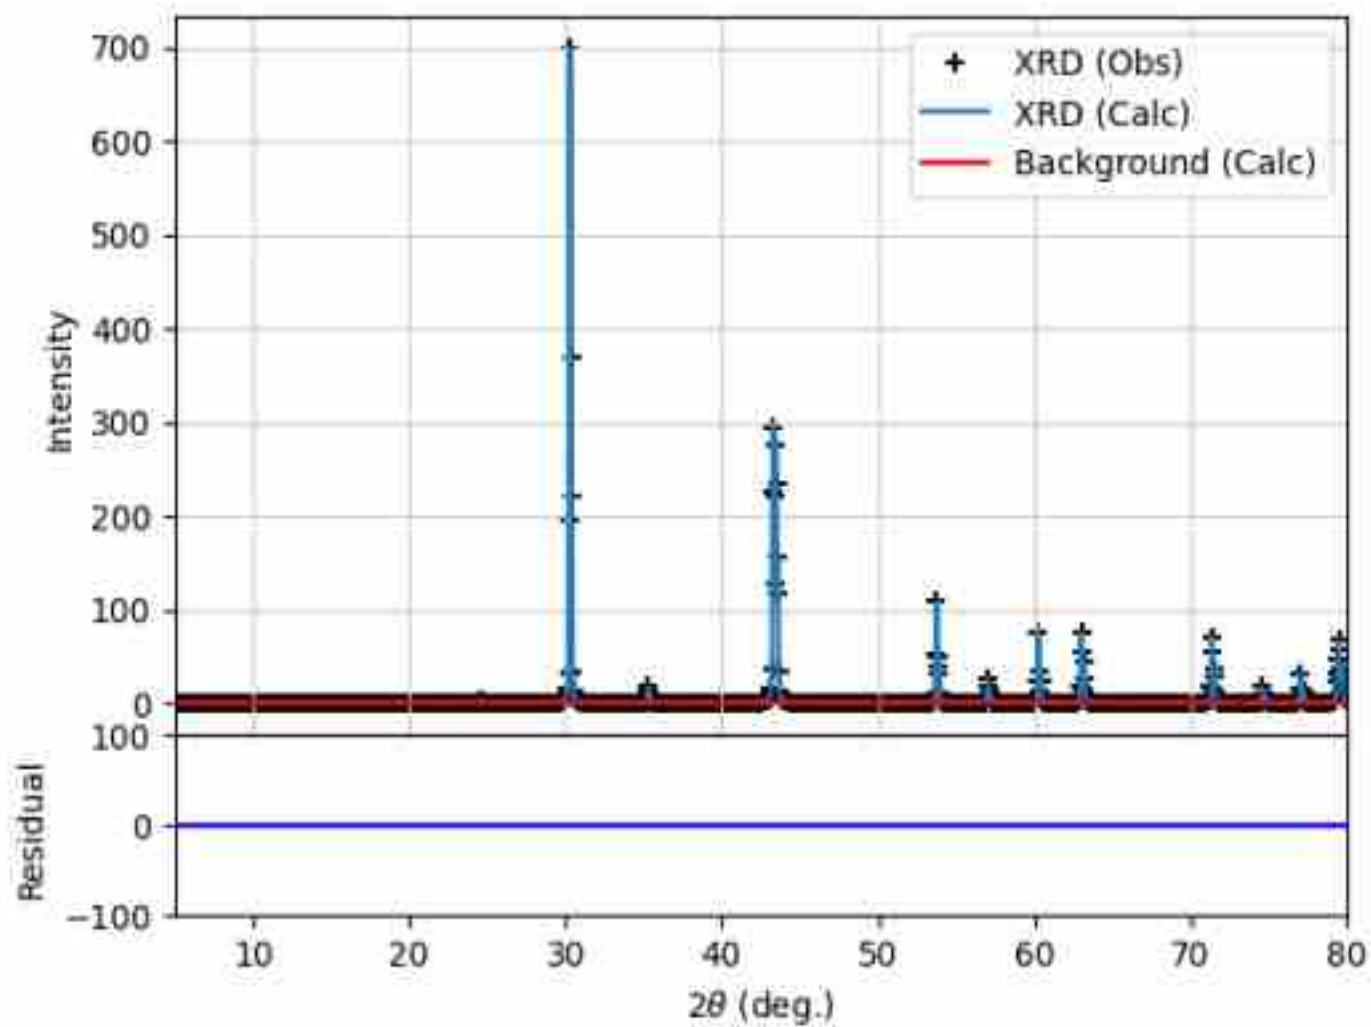

| RMSE before RR | Rwp     | RMSE after RR |
|----------------|---------|---------------|
| 0.008          | 0.01225 | 0.00078       |

# K1Ba1Ce1W1O6

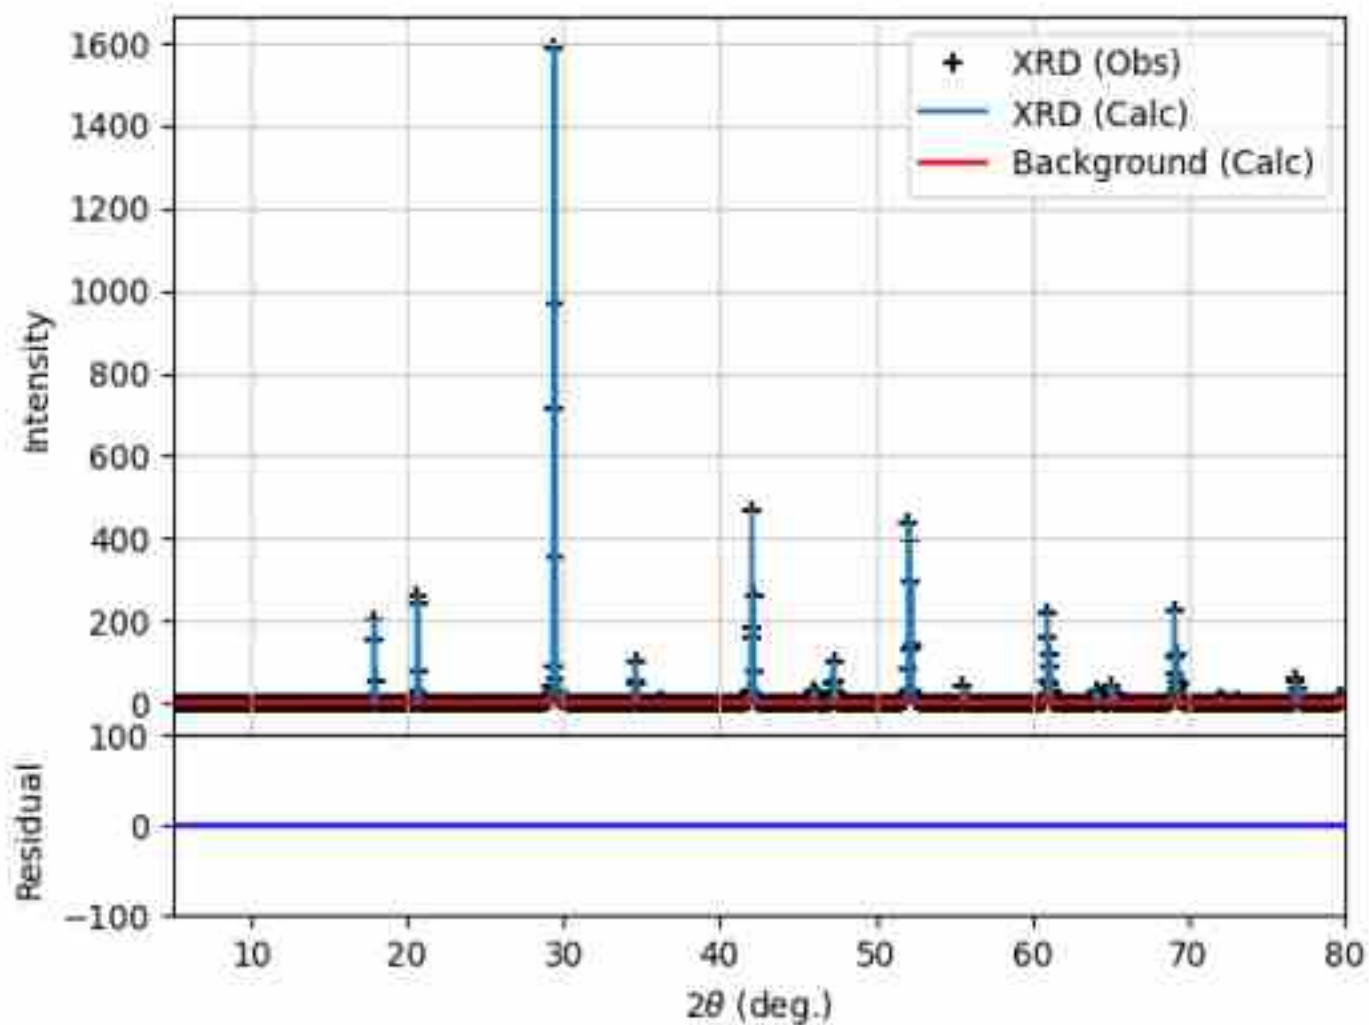

| RMSE before RR | Rwp     | RMSE after RR |
|----------------|---------|---------------|
| 0.008          | 0.00965 | 0.00393       |

# K1Eu1Nb2O6

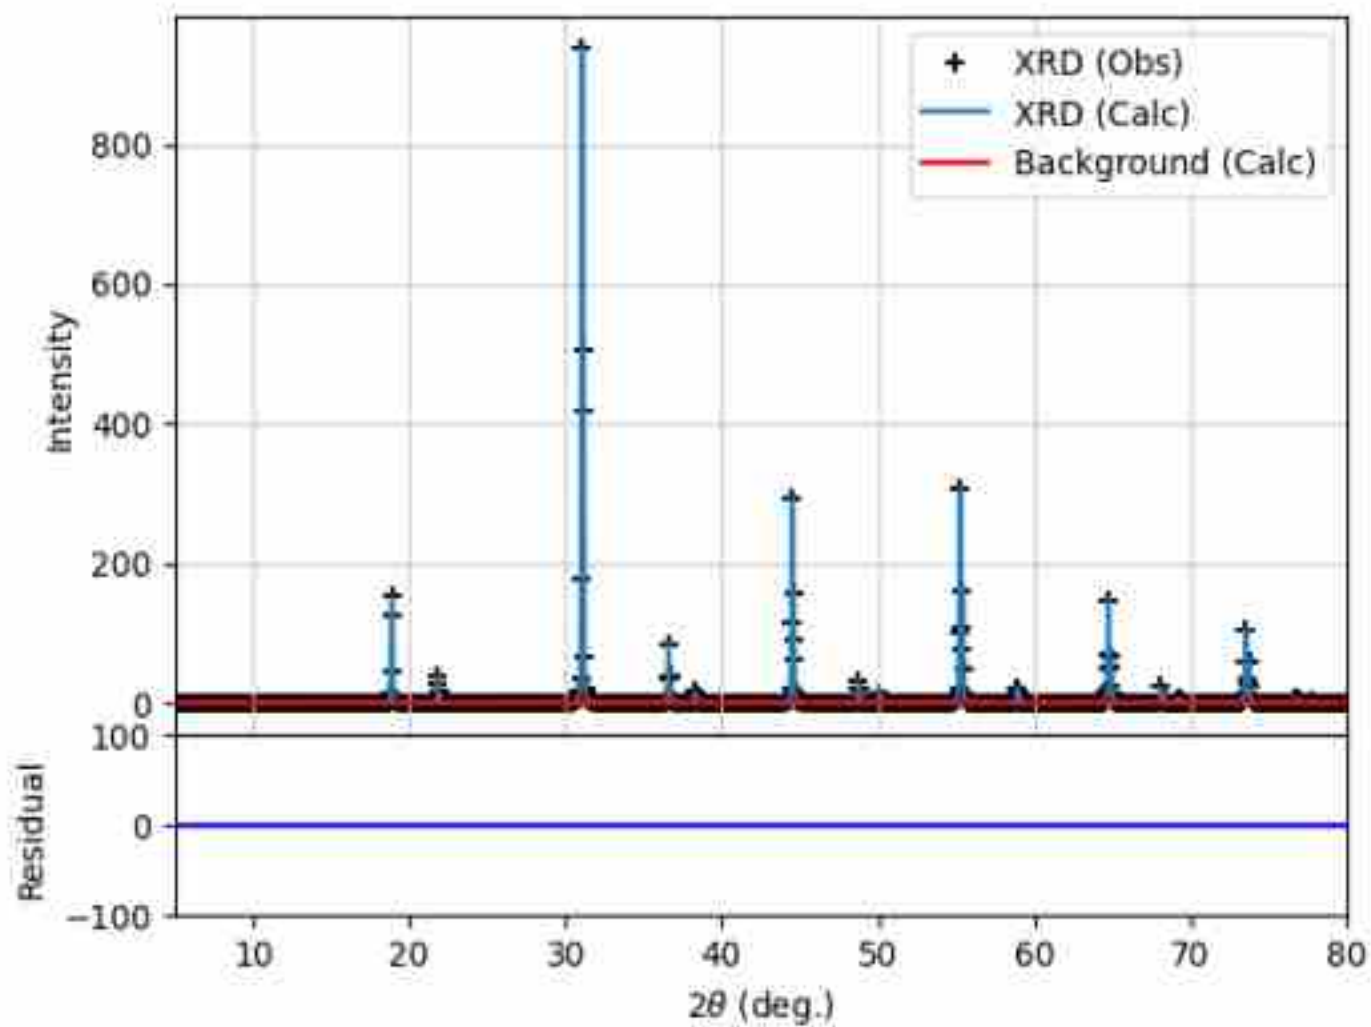

| RMSE before RR | Rwp     | RMSE after RR |
|----------------|---------|---------------|
| 0.008          | 0.00407 | 0.00243       |

# K1La1Nb2O6

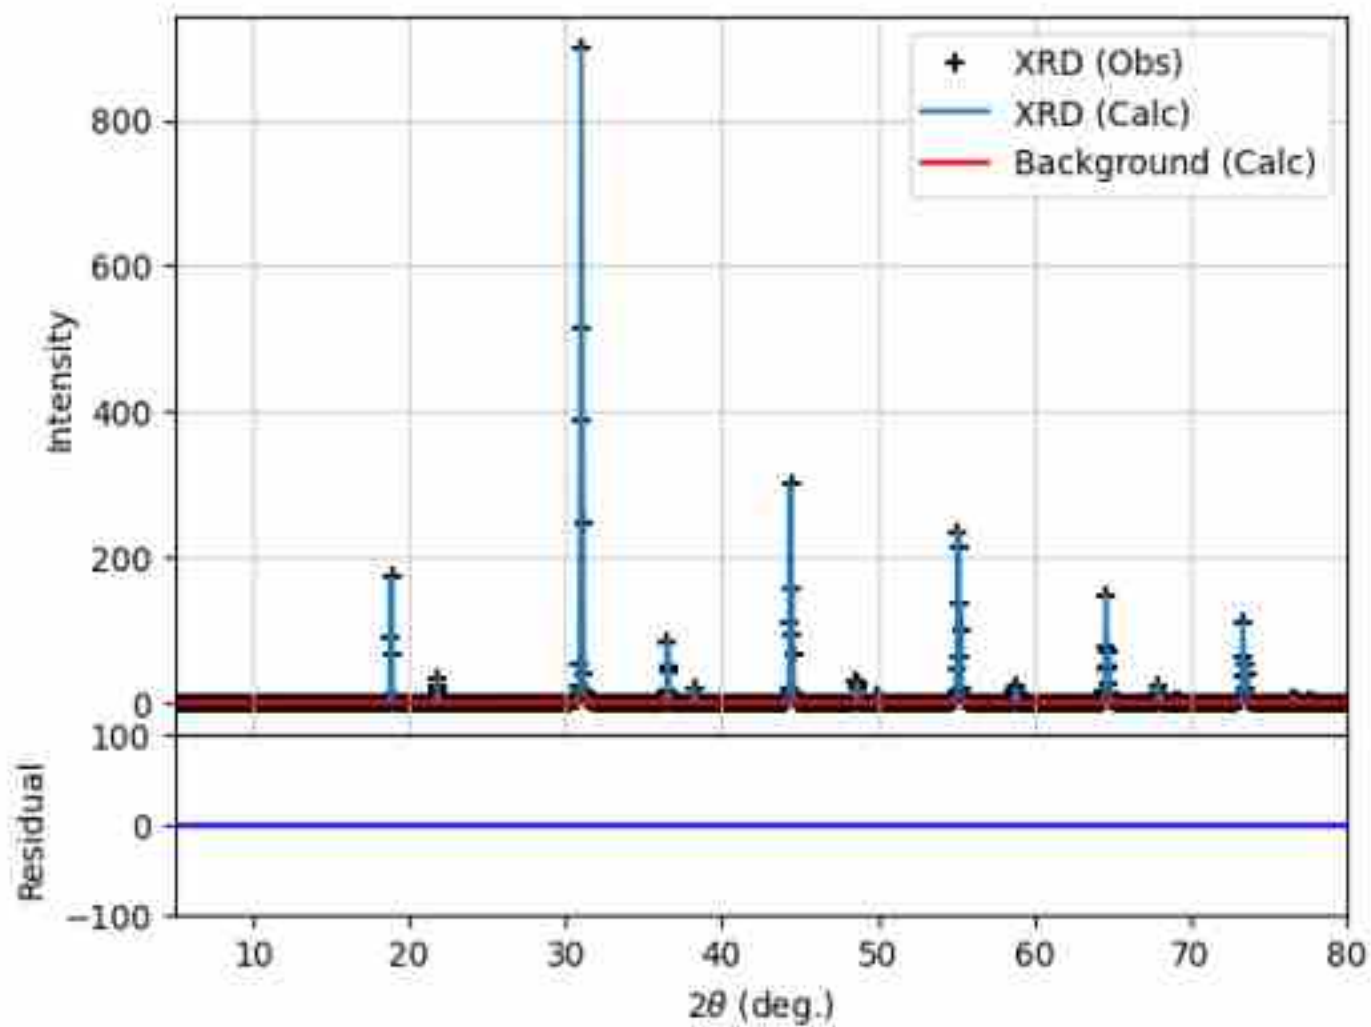

| RMSE before RR | Rwp     | RMSE after RR |
|----------------|---------|---------------|
| 0.008          | 0.00643 | 0.00293       |

# K1Nd1S2

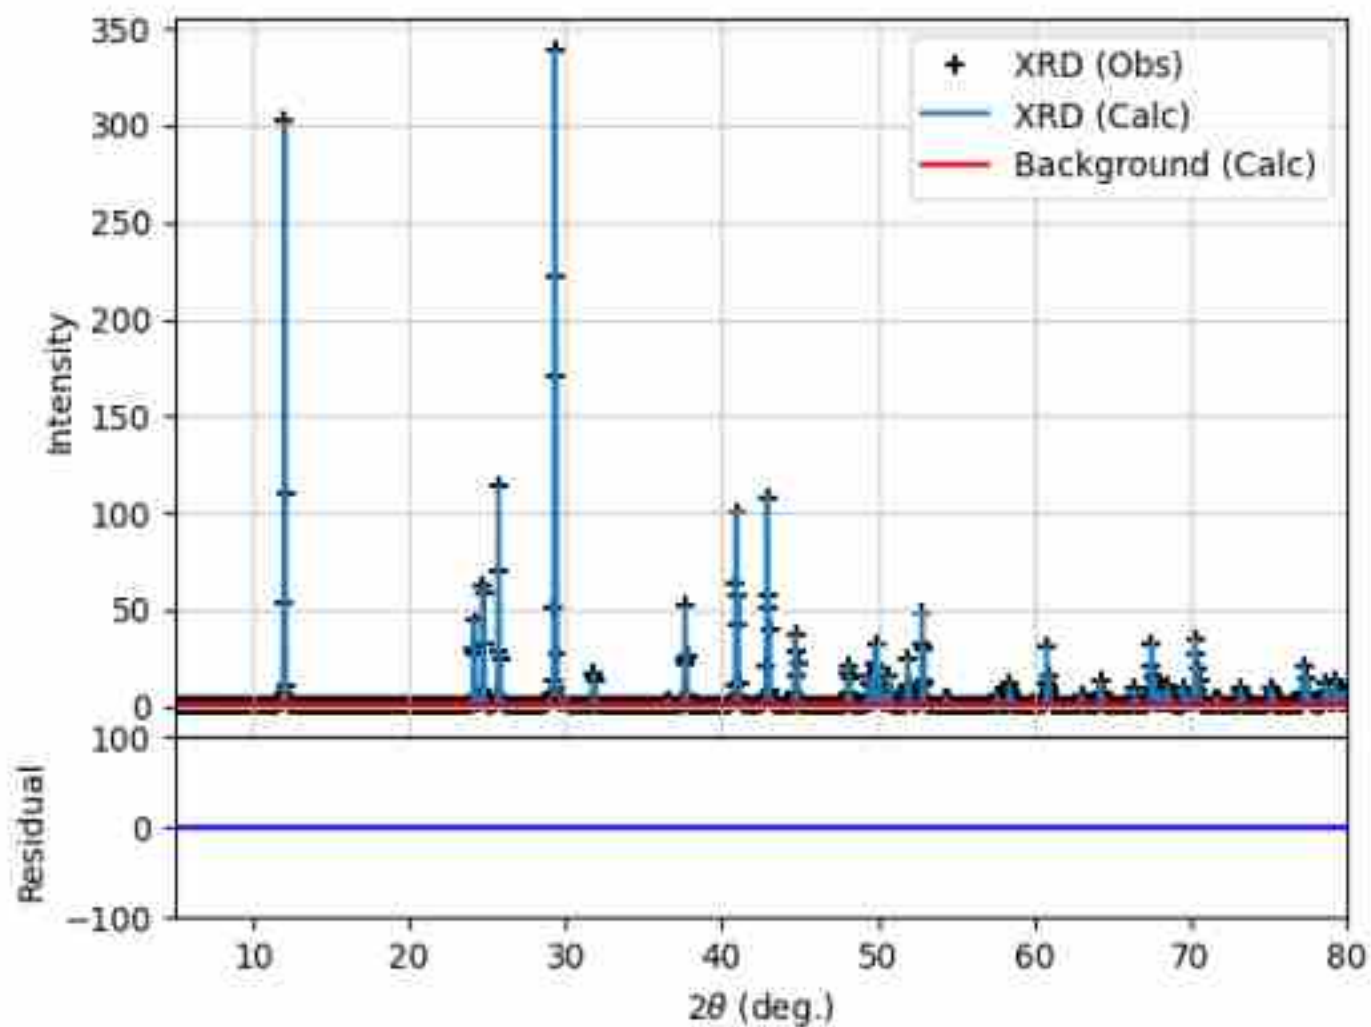

| RMSE before RR | Rwp     | RMSE after RR |
|----------------|---------|---------------|
| 0.008          | 0.00243 | 0.00029       |

# K1Rb2Bi1F6

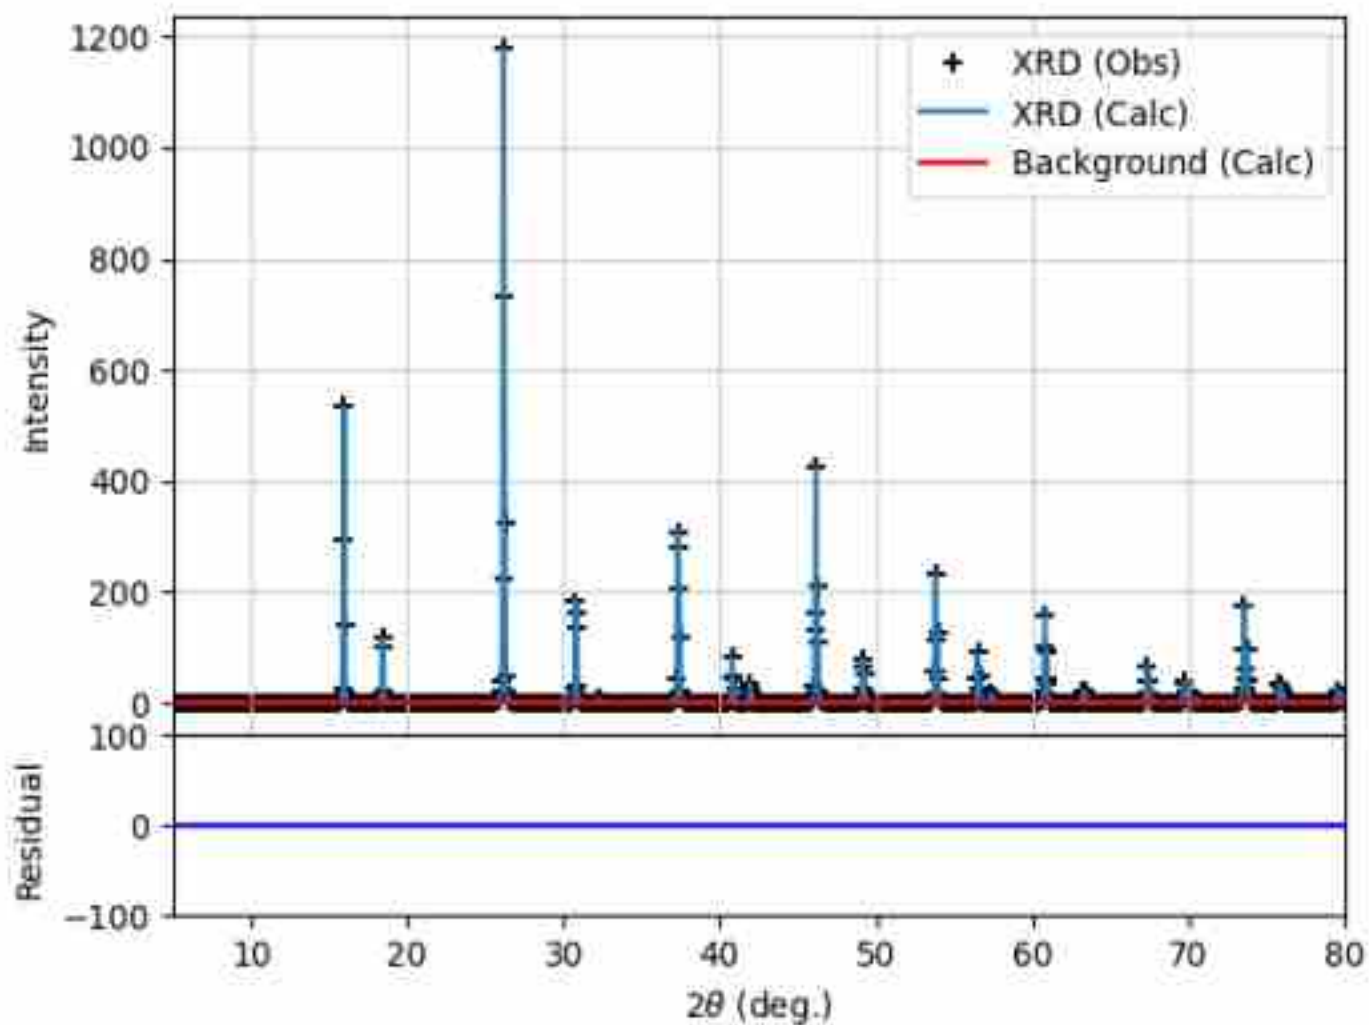

| RMSE before RR | Rwp     | RMSE after RR |
|----------------|---------|---------------|
| 0.008          | 0.03167 | 0.00622       |

# K1Rb2Mo1F6

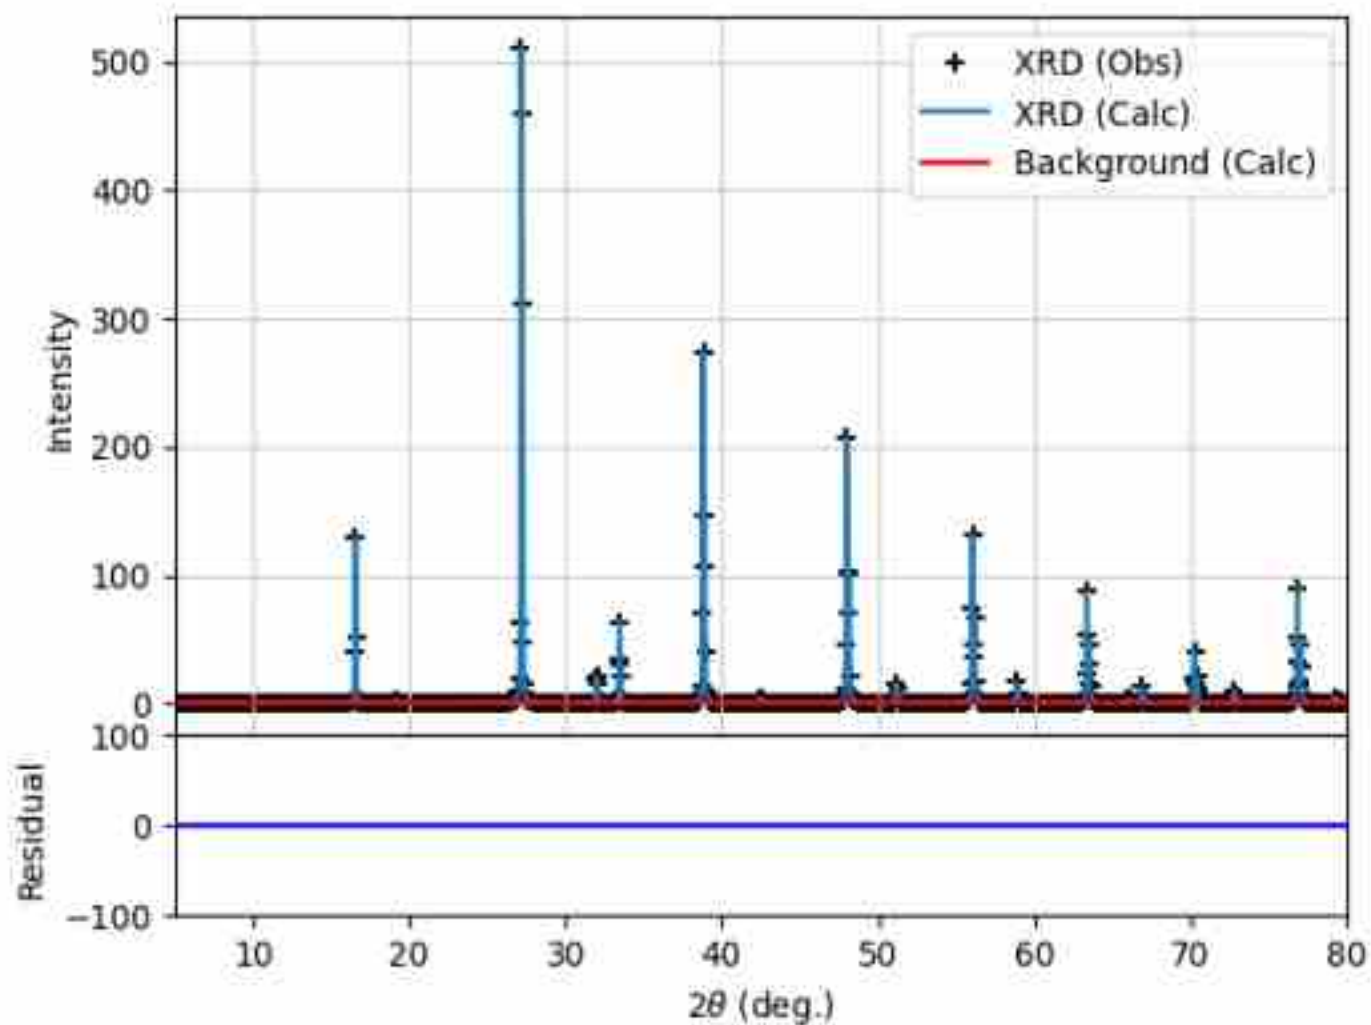

| RMSE before RR | Rwp     | RMSE after RR |
|----------------|---------|---------------|
| 0.008          | 0.00773 | 0.00244       |



# K1Sr1Sm1W1O6

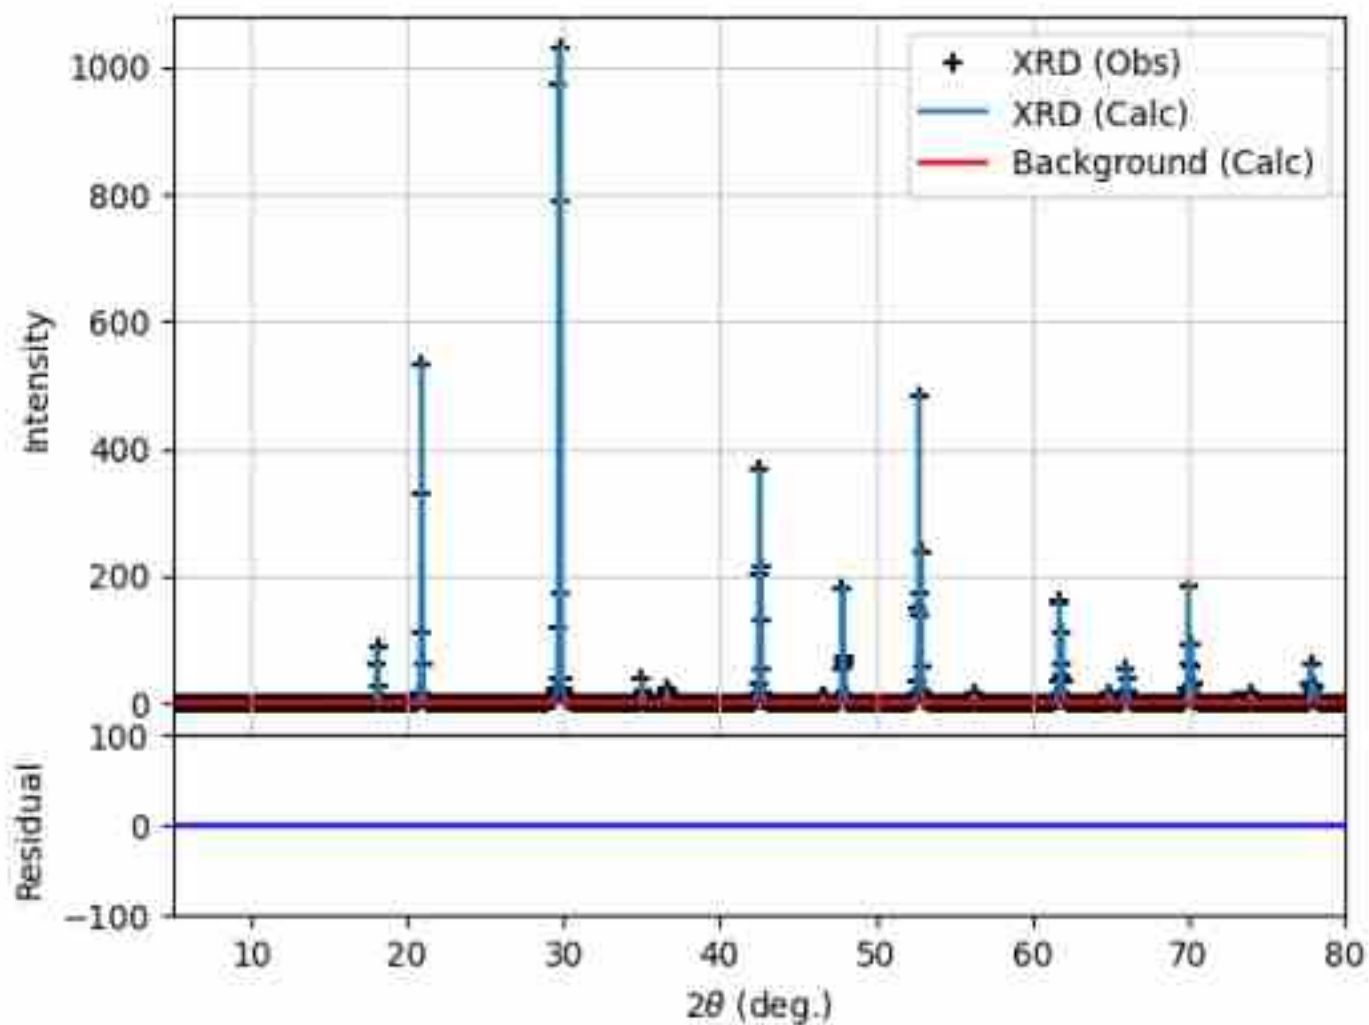

| RMSE before RR | Rwp     | RMSE after RR |
|----------------|---------|---------------|
| 0.008          | 0.00736 | 0.00356       |

# K<sub>2</sub>Li<sub>1</sub>Ir<sub>1</sub>F<sub>6</sub>

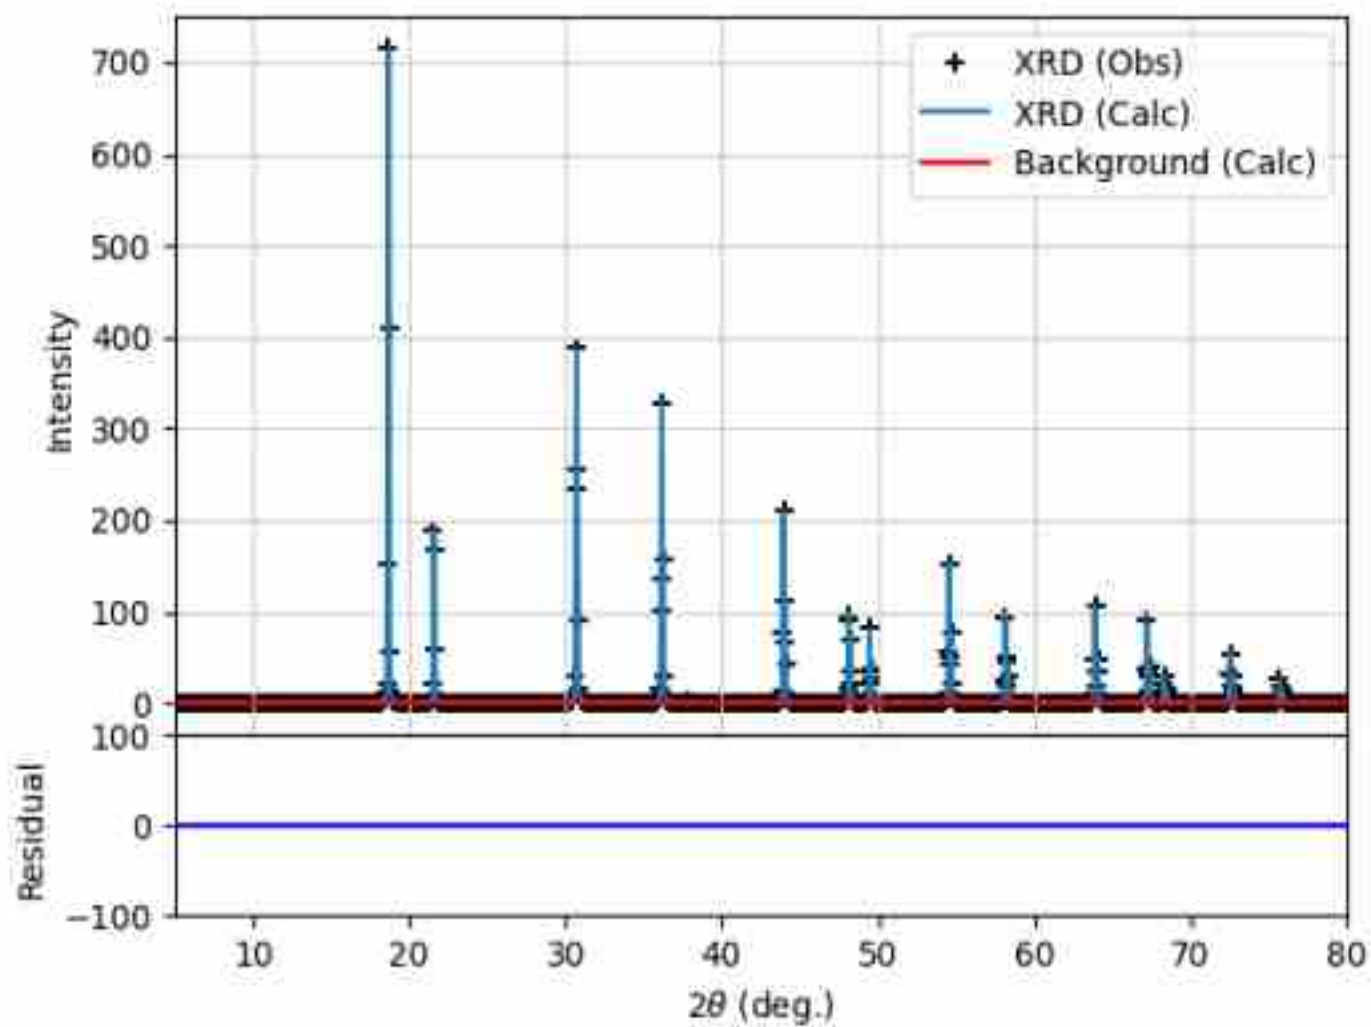

| RMSE before RR | Rwp    | RMSE after RR |
|----------------|--------|---------------|
| 0.008          | 0.0118 | 0.00416       |

# K<sub>2</sub>Li<sub>1</sub>Lu<sub>1</sub>Cl<sub>6</sub>

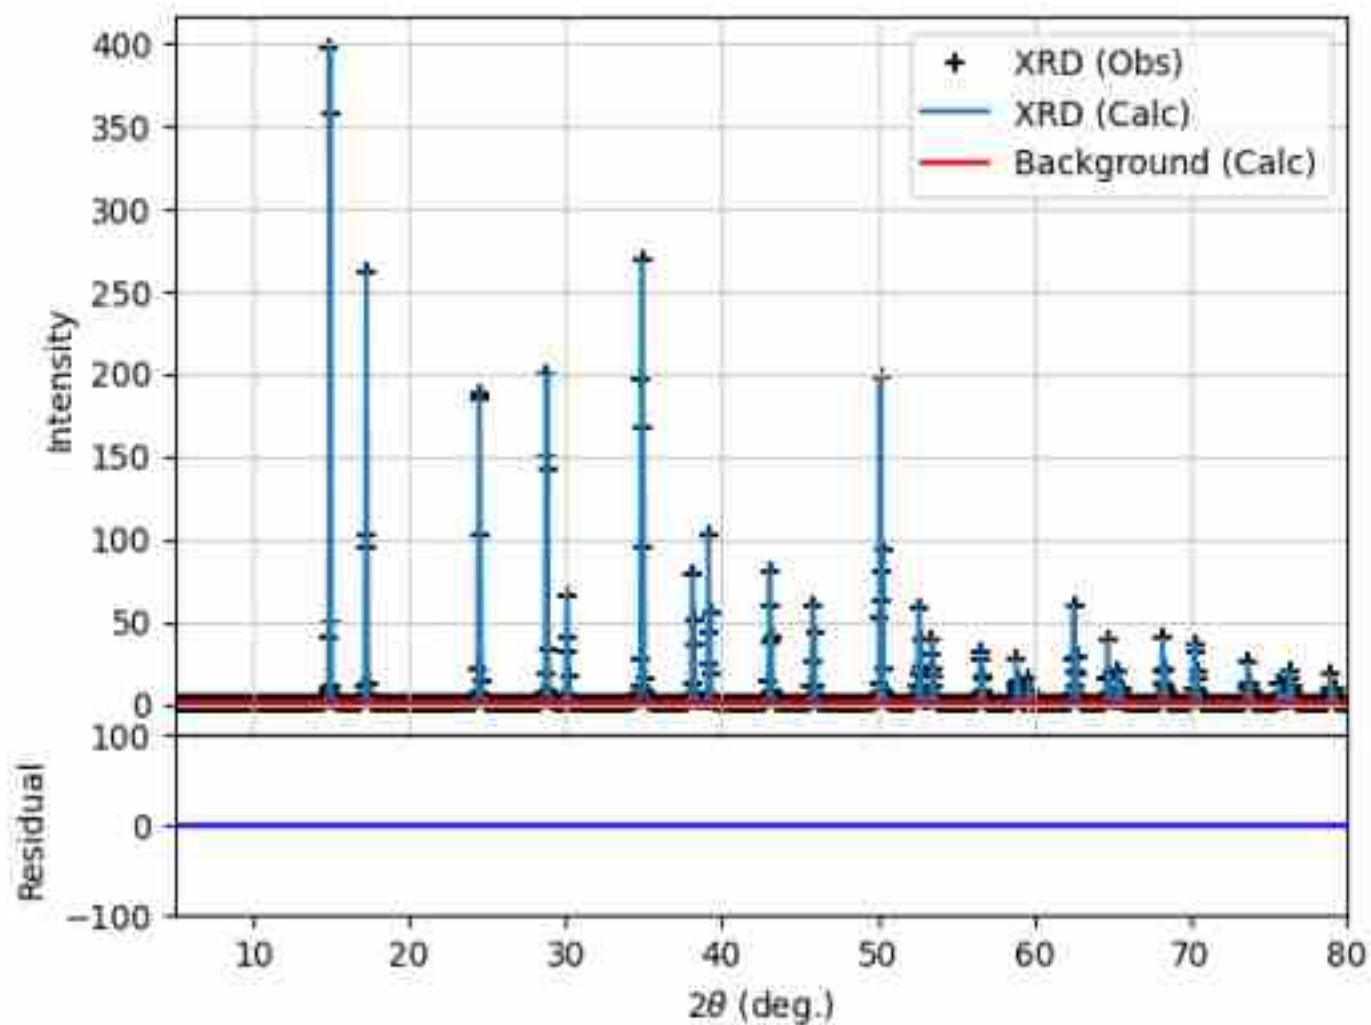

| RMSE before RR | Rwp     | RMSE after RR |
|----------------|---------|---------------|
| 0.008          | 0.01692 | 0.00472       |

# K<sub>2</sub>Na<sub>1</sub>Ga<sub>1</sub>Cl<sub>6</sub>

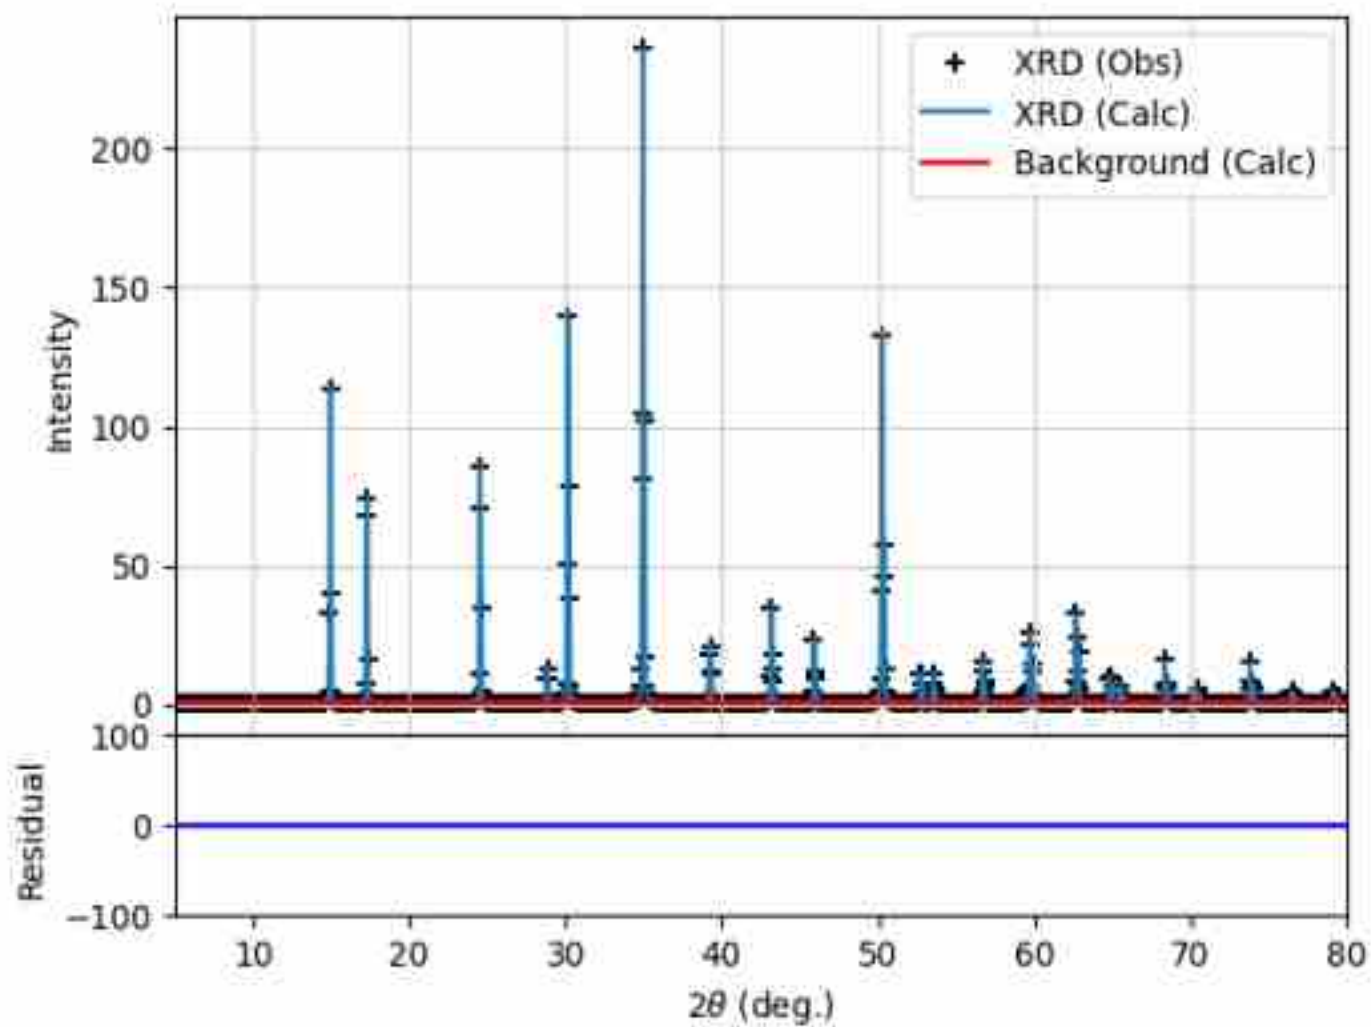

| RMSE before RR | Rwp    | RMSE after RR |
|----------------|--------|---------------|
| 0.008          | 0.0214 | 0.00246       |

# K<sub>2</sub>Zn<sub>2</sub>Sb<sub>2</sub>

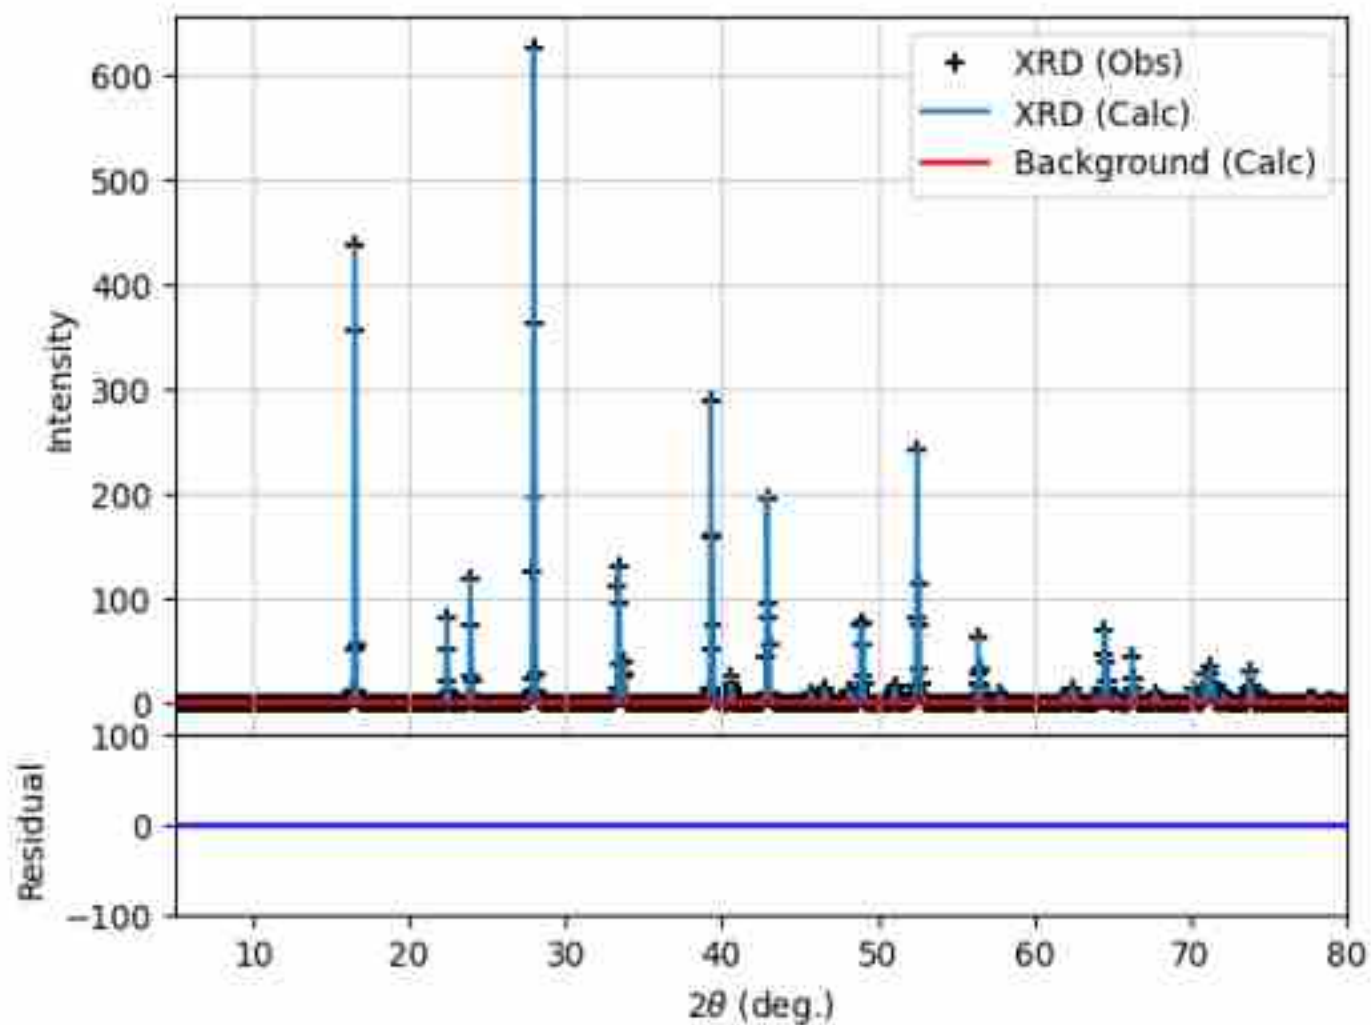

| RMSE before RR | Rwp     | RMSE after RR |
|----------------|---------|---------------|
| 0.008          | 0.00412 | 0.0006        |

# K3Dy1C16

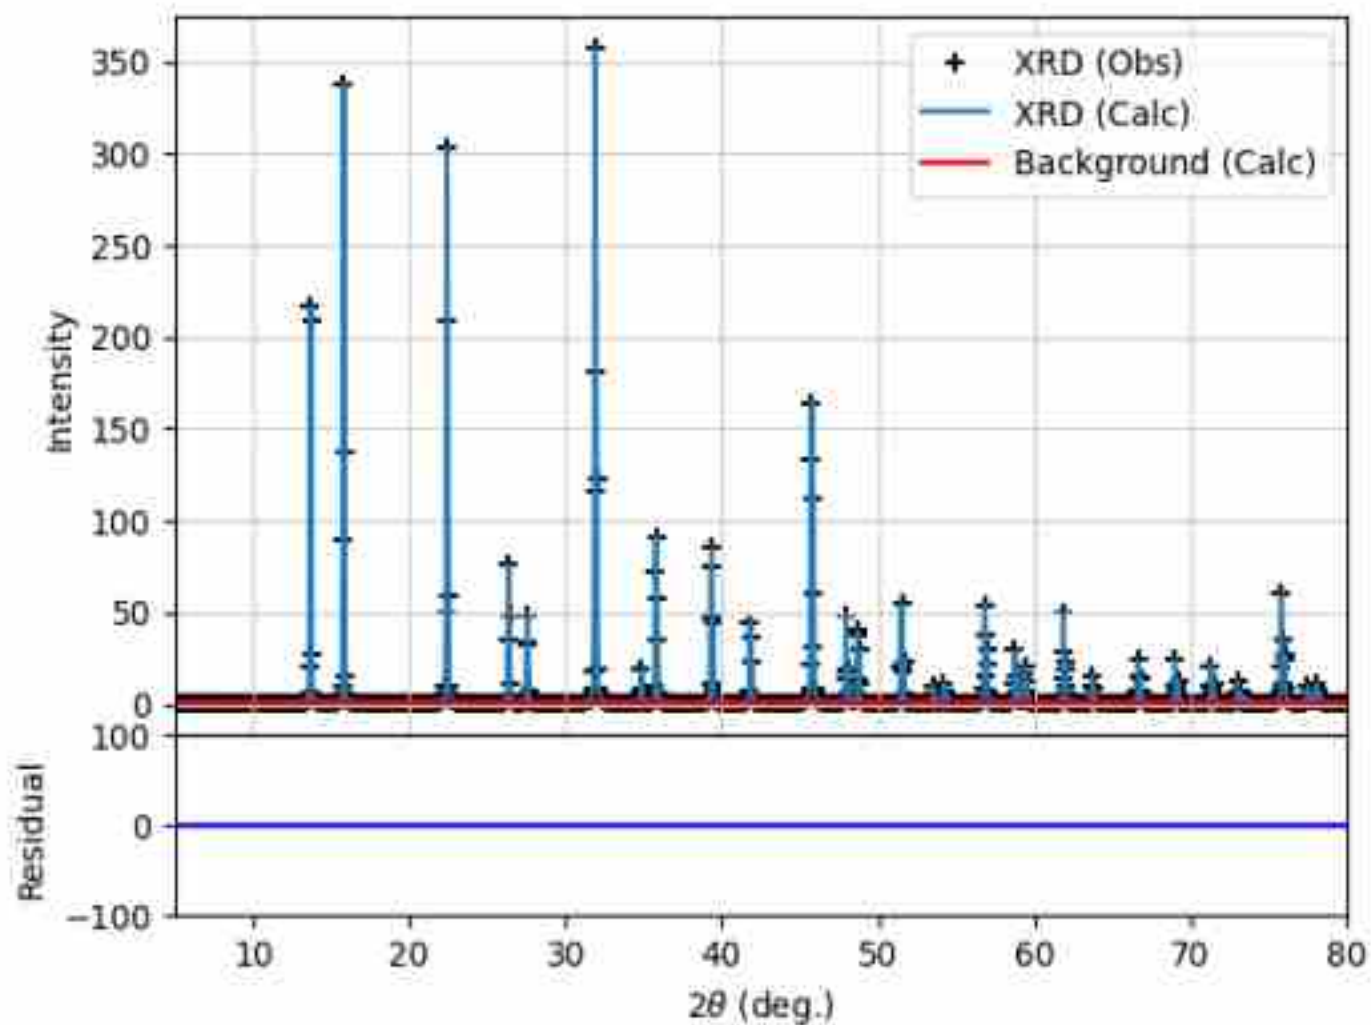

| RMSE before RR | Rwp     | RMSE after RR |
|----------------|---------|---------------|
| 0.008          | 0.01375 | 0.00248       |

# K3Ho1F6

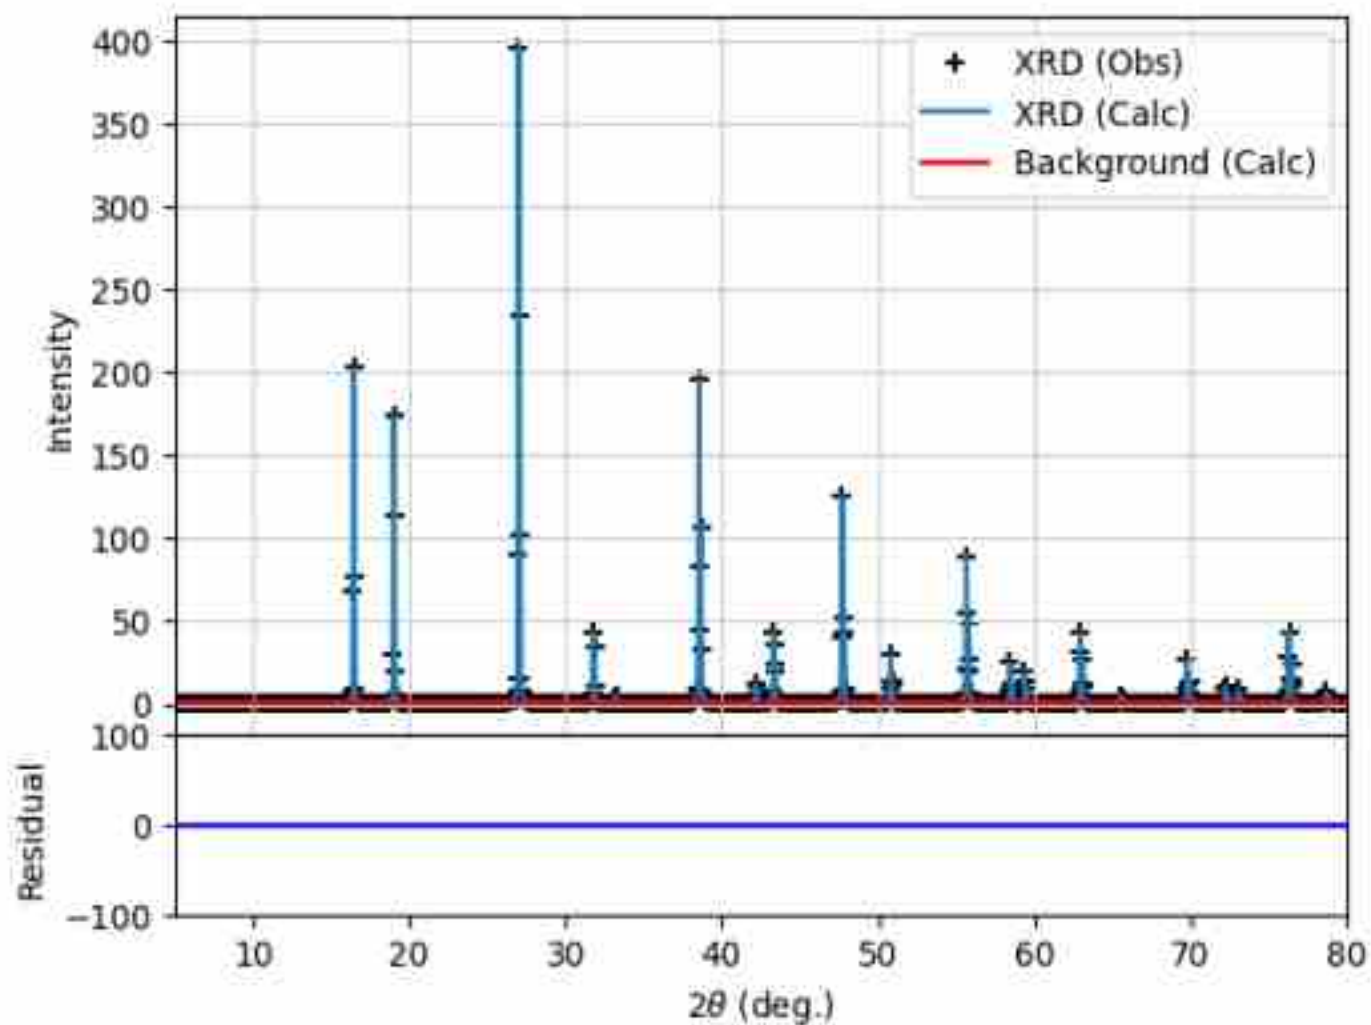

| RMSE before RR | Rwp     | RMSE after RR |
|----------------|---------|---------------|
| 0.008          | 0.01774 | 0.00433       |

# K3Y1Br6

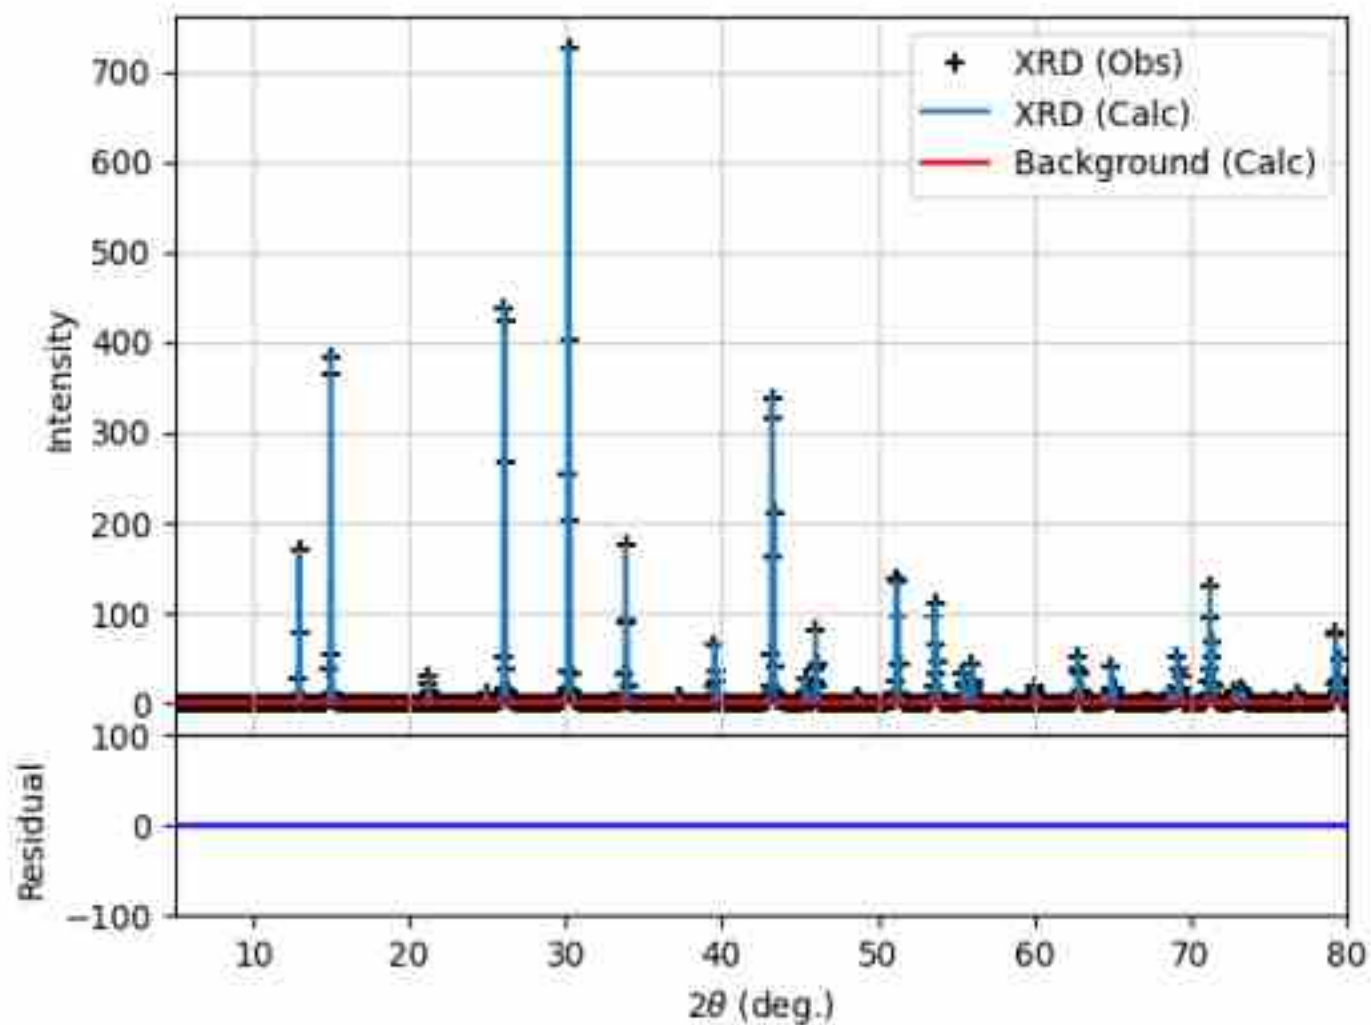

| RMSE before RR | Rwp     | RMSE after RR |
|----------------|---------|---------------|
| 0.008          | 0.02013 | 0.0013        |



# La<sub>1</sub>Ce<sub>1</sub>Pd<sub>6</sub>

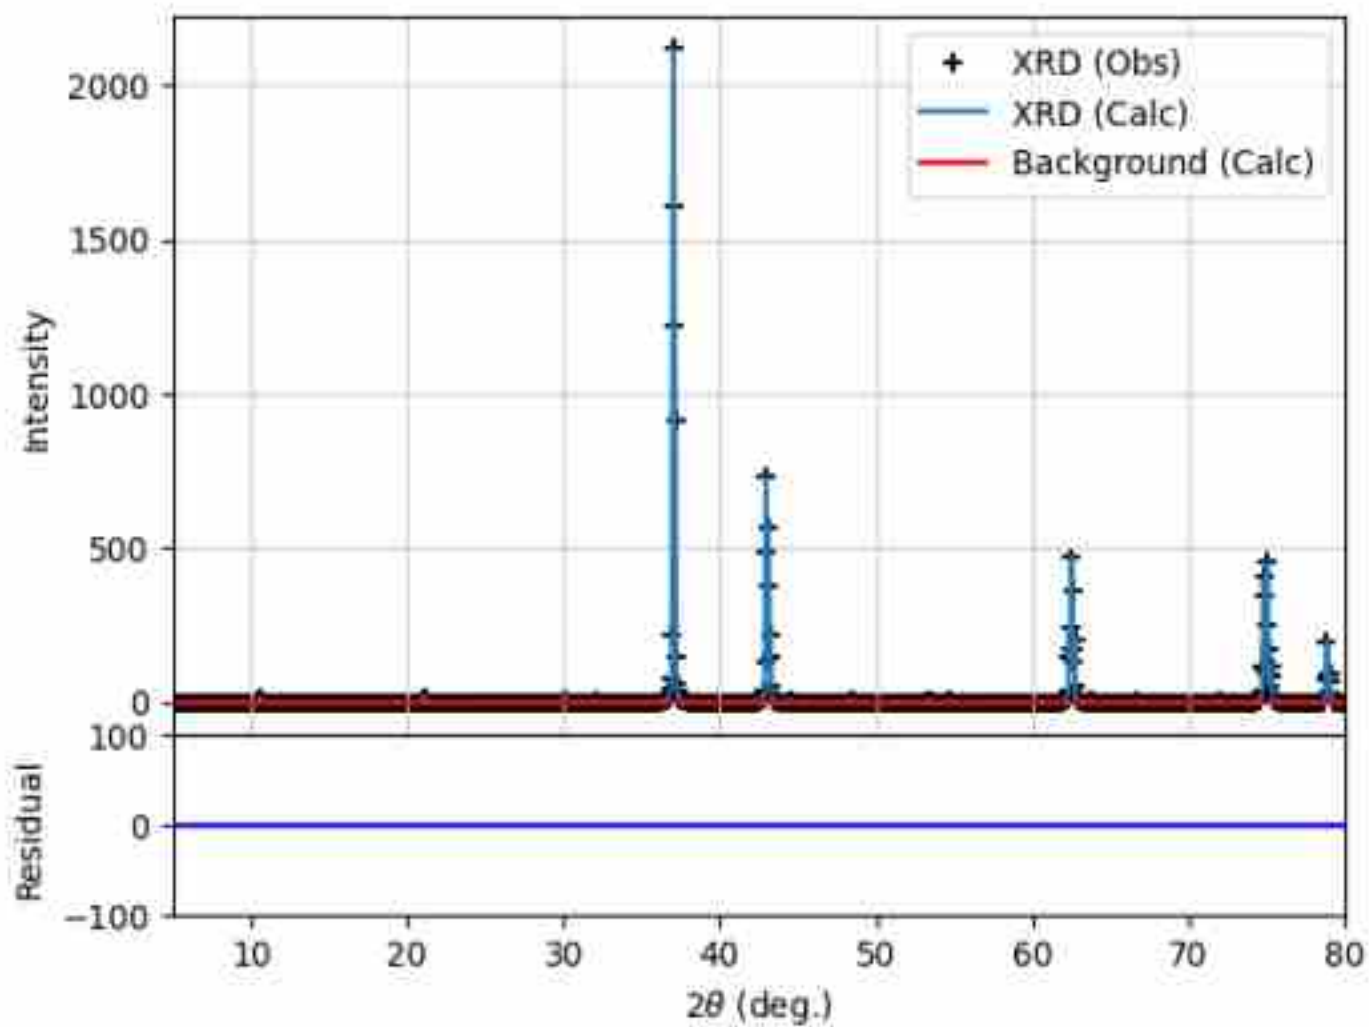

| RMSE before RR | Rwp   | RMSE after RR |
|----------------|-------|---------------|
| 0.008          | 0.005 | 0.00053       |

# La1Ga6Pd1

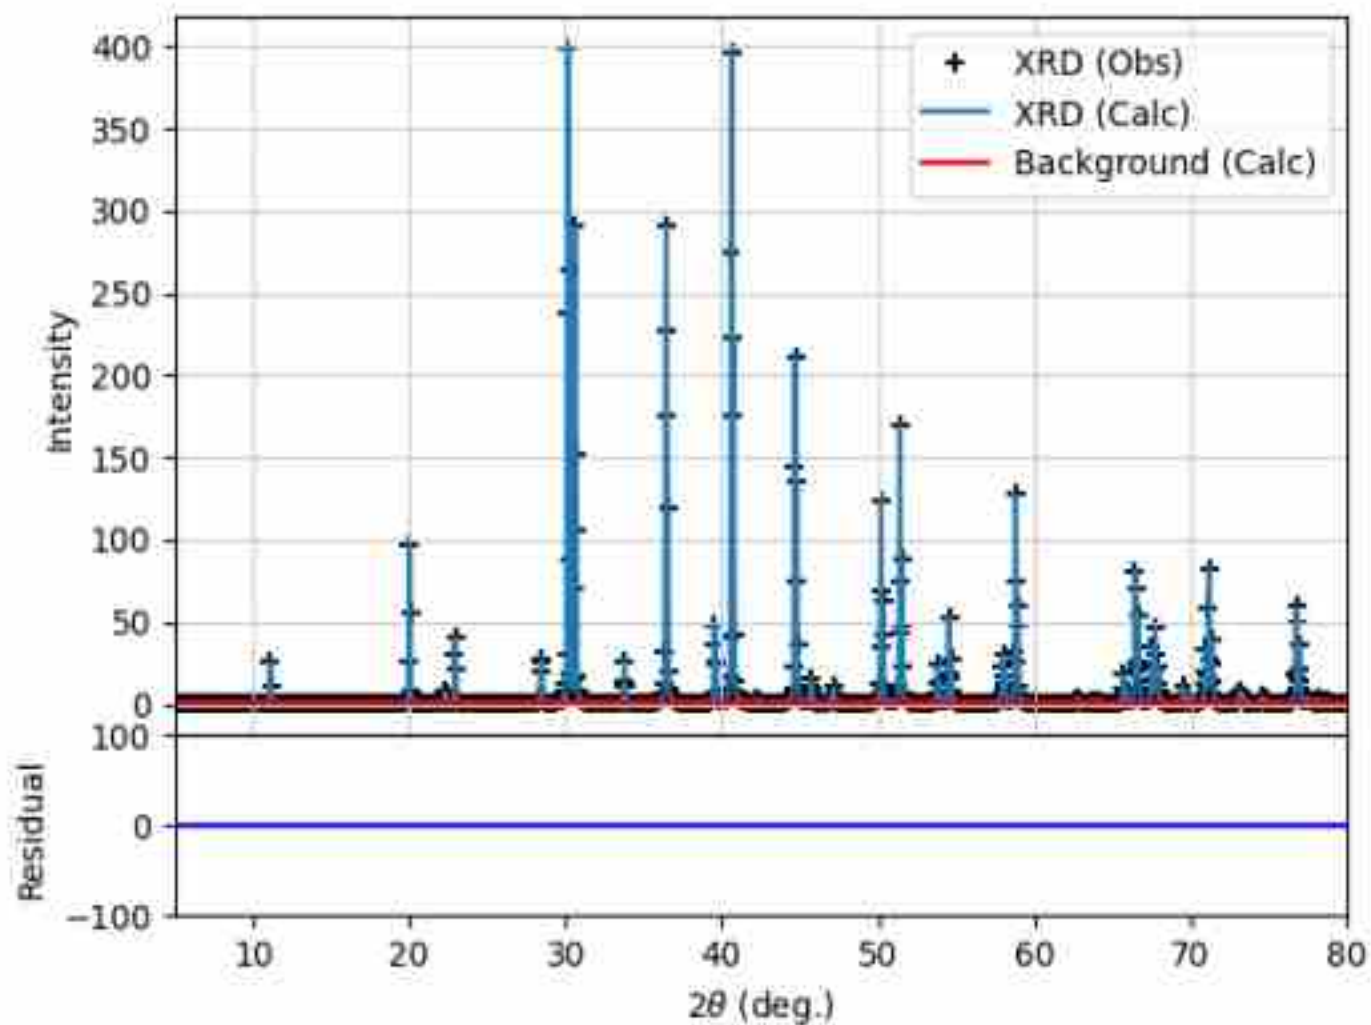

| RMSE before RR | Rwp     | RMSE after RR |
|----------------|---------|---------------|
| 0.008          | 0.00483 | 0.00043       |

# La2Ag4

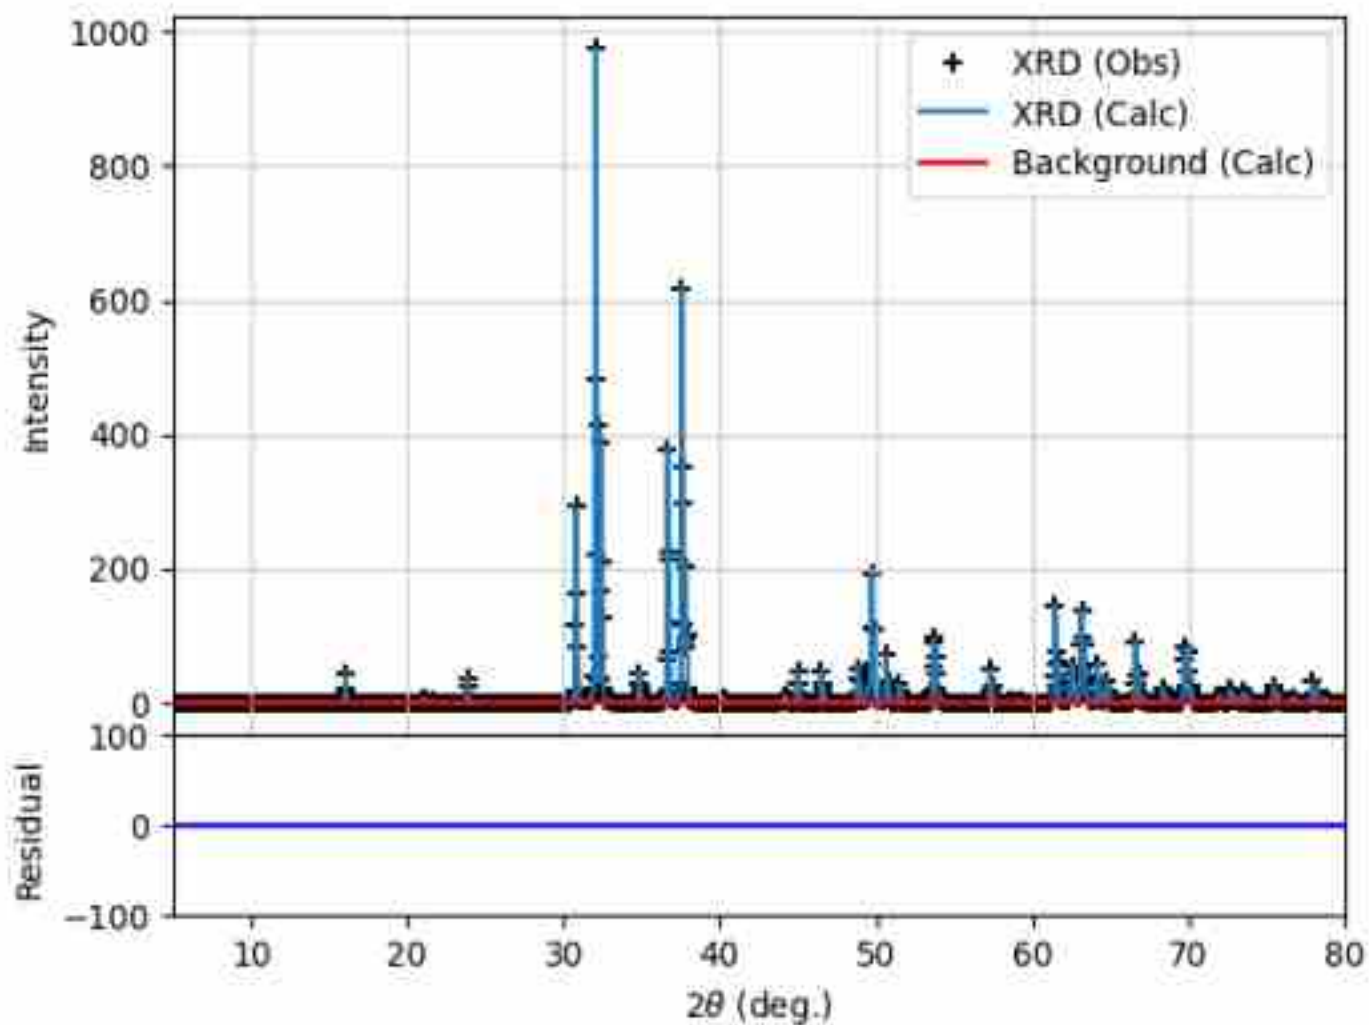

| RMSE before RR | Rwp     | RMSE after RR |
|----------------|---------|---------------|
| 0.008          | 0.00359 | 0.00022       |

# La<sub>2</sub>Co<sub>2</sub>Si<sub>4</sub>

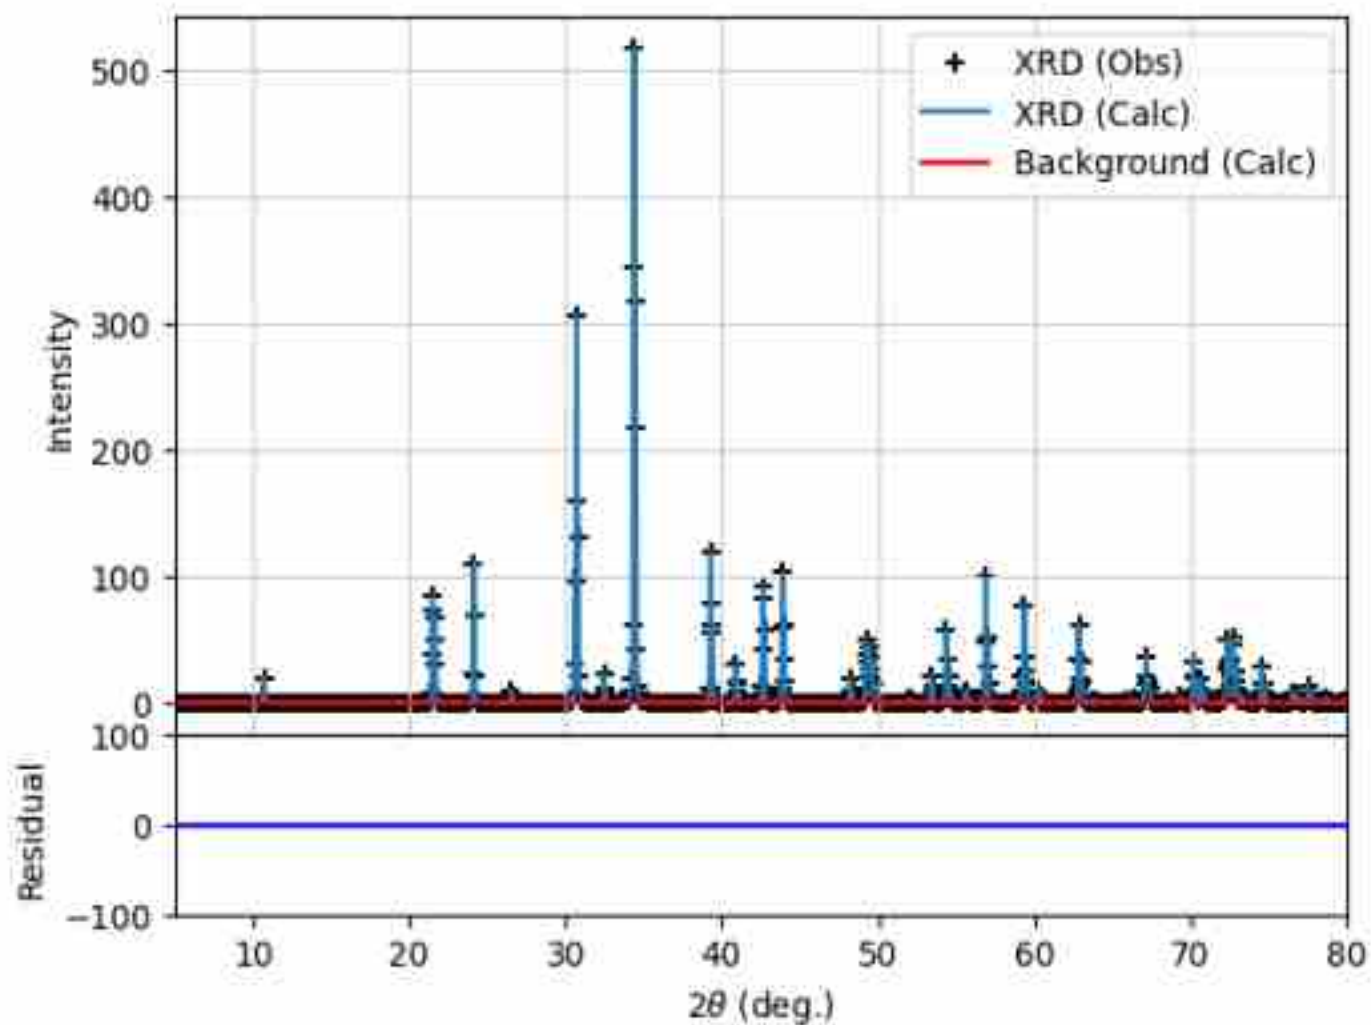

| RMSE before RR | Rwp     | RMSE after RR |
|----------------|---------|---------------|
| 0.008          | 0.00386 | 0.00067       |

# La<sub>2</sub>Ir<sub>4</sub>

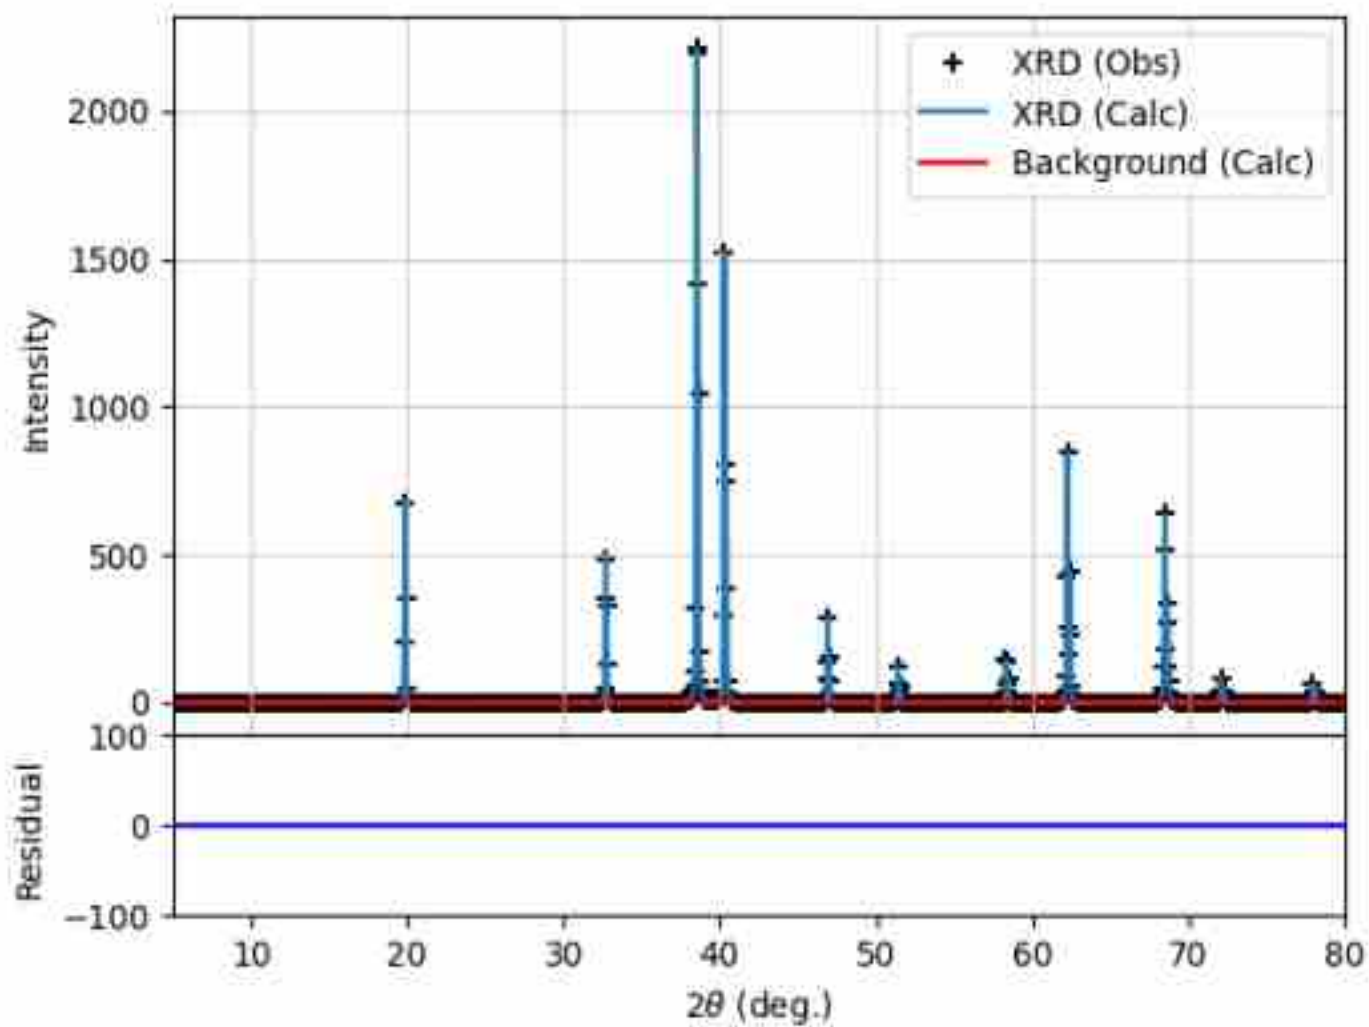

| RMSE before RR | Rwp     | RMSE after RR |
|----------------|---------|---------------|
| 0.008          | 0.00904 | 0.00056       |

# La2Tb6

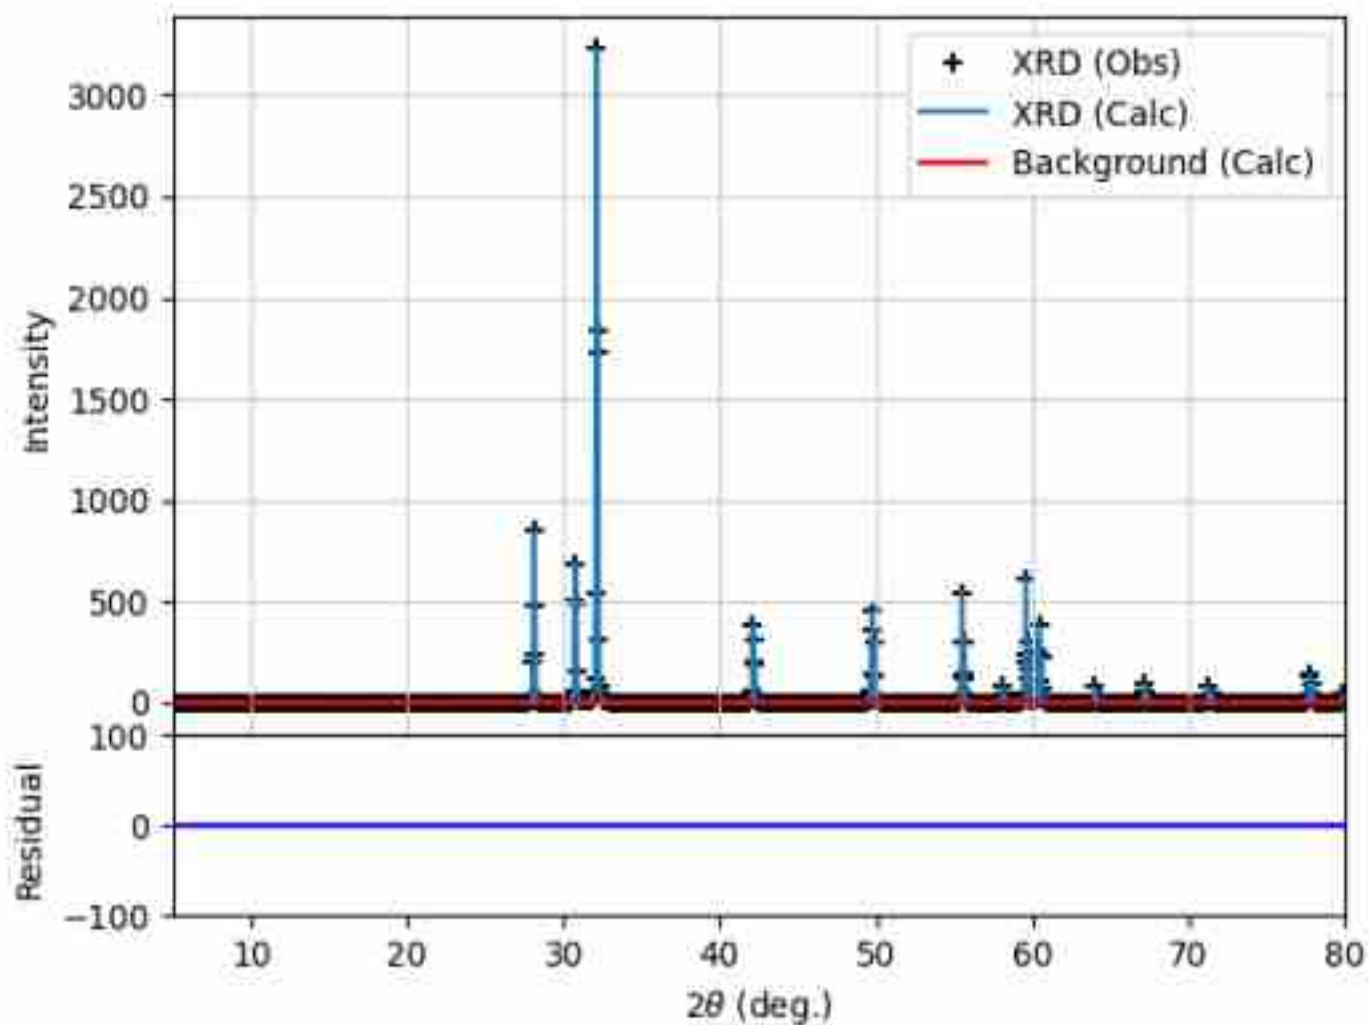

| RMSE before RR | Rwp     | RMSE after RR |
|----------------|---------|---------------|
| 0.008          | 0.02484 | 0.00164       |

# La<sub>2</sub>Tl<sub>2</sub>Cd<sub>2</sub>

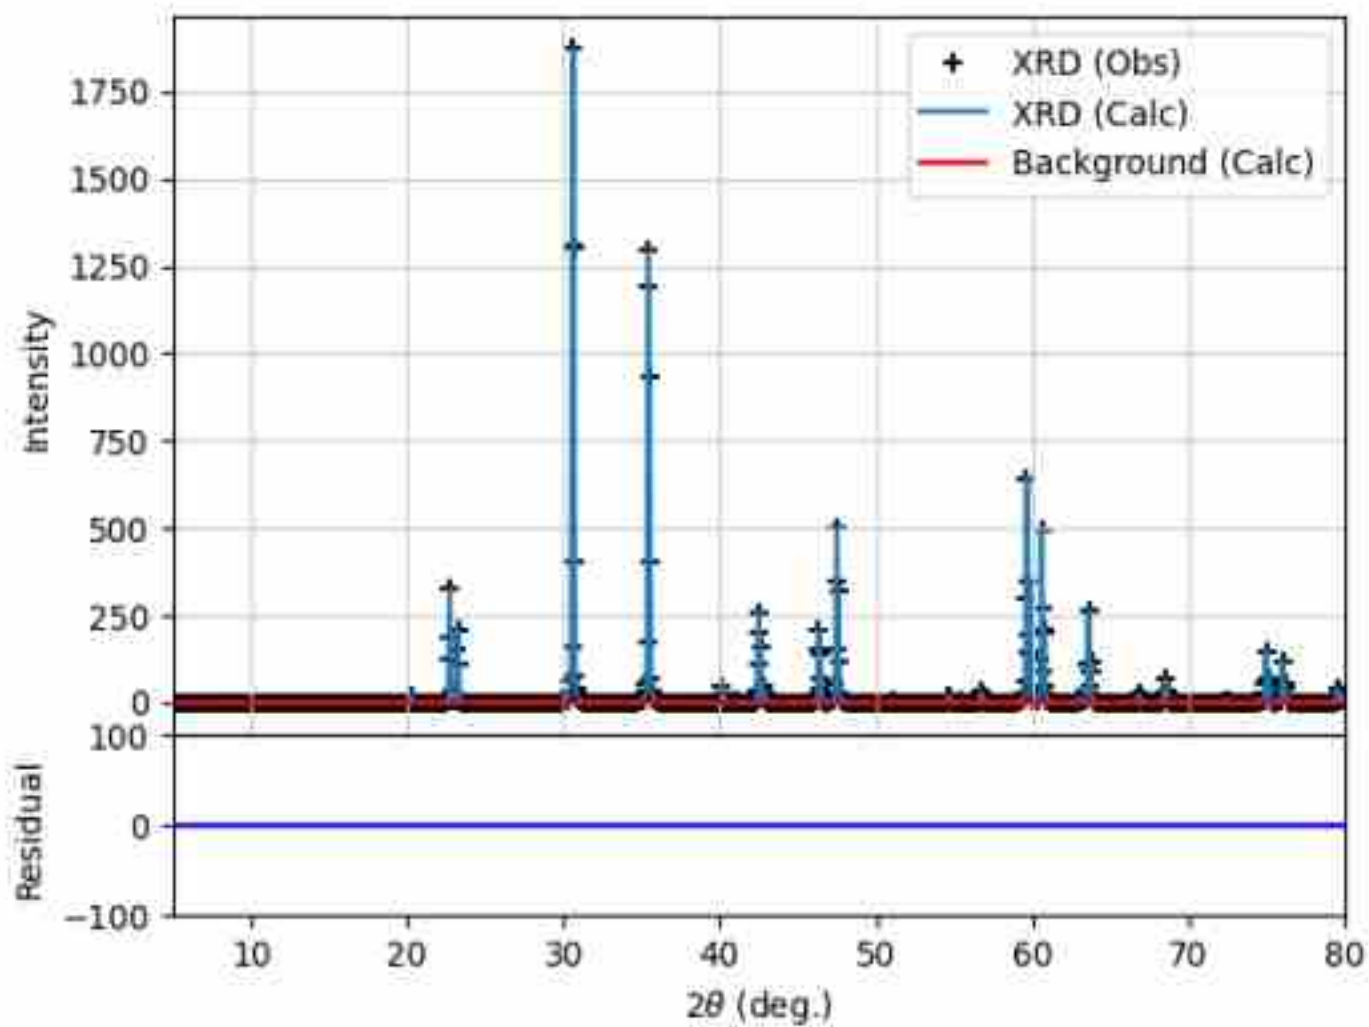

| RMSE before RR | Rwp    | RMSE after RR |
|----------------|--------|---------------|
| 0.008          | 0.0044 | 0.00034       |

# La<sub>4</sub>Bi<sub>2</sub>N<sub>2</sub>

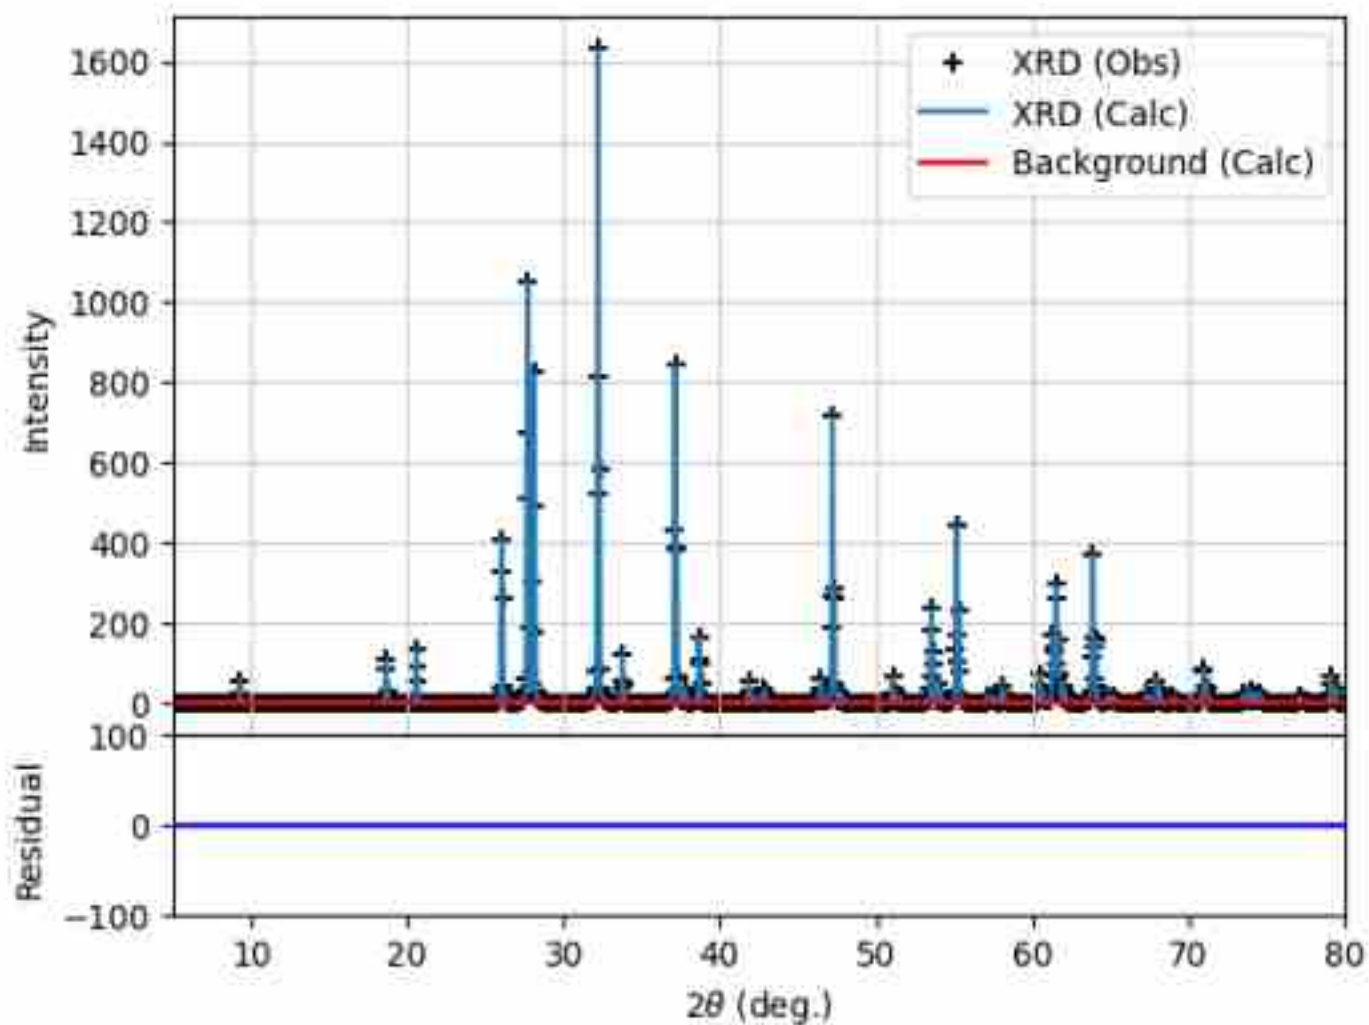

| RMSE before RR | Rwp     | RMSE after RR |
|----------------|---------|---------------|
| 0.008          | 0.00495 | 0.00285       |



# Li1Ti1S2

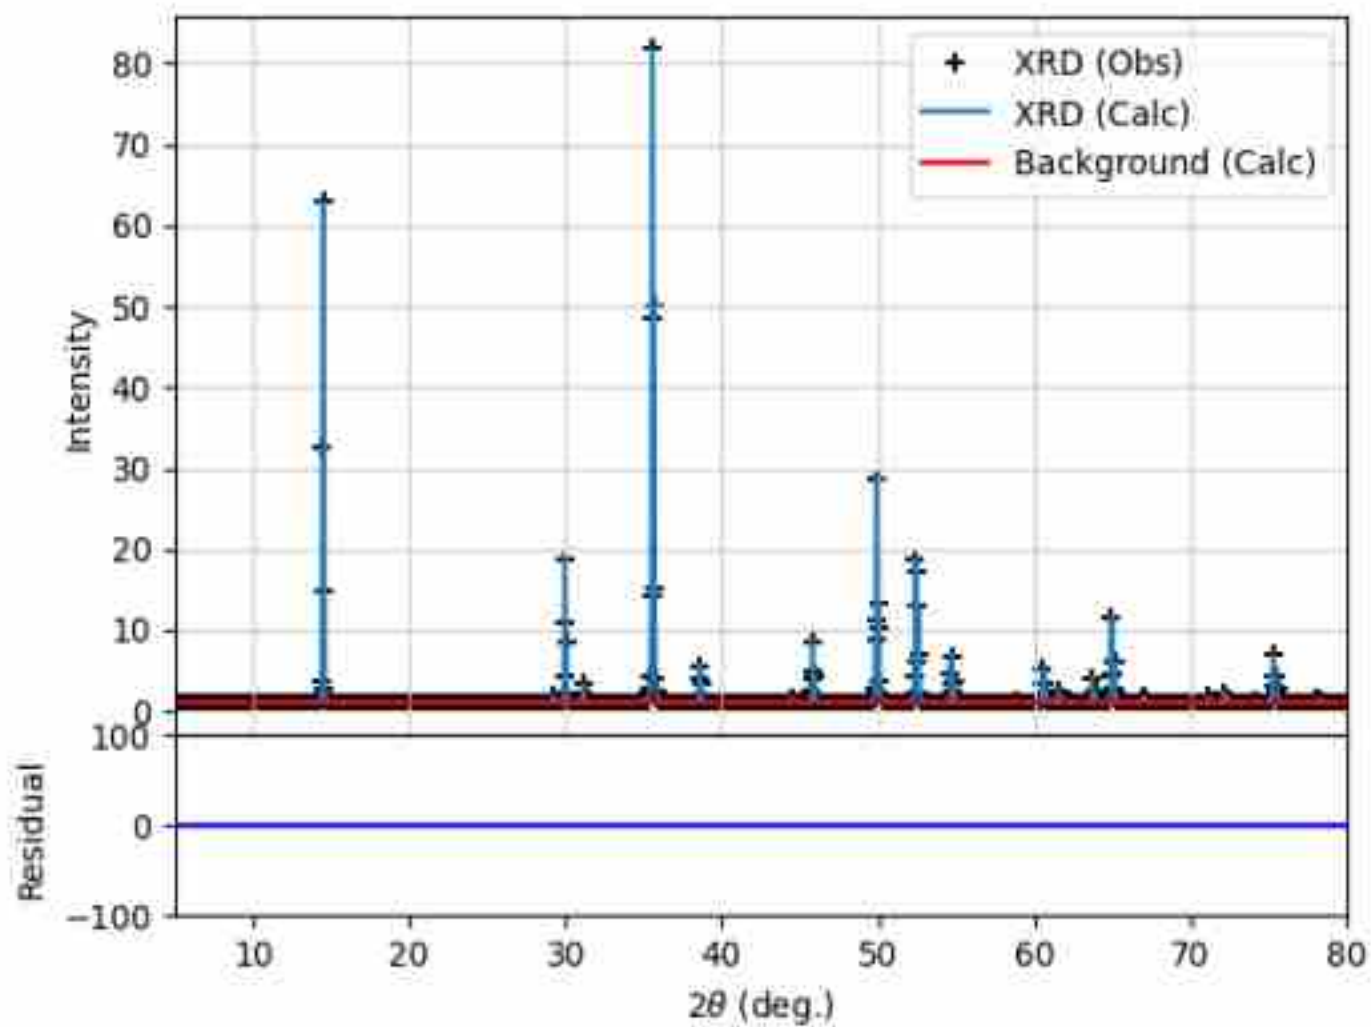

| RMSE before RR | Rwp    | RMSE after RR |
|----------------|--------|---------------|
| 0.008          | 0.0025 | 0.00069       |

# Li<sub>2</sub>Cr<sub>2</sub>P<sub>2</sub>O<sub>8</sub>

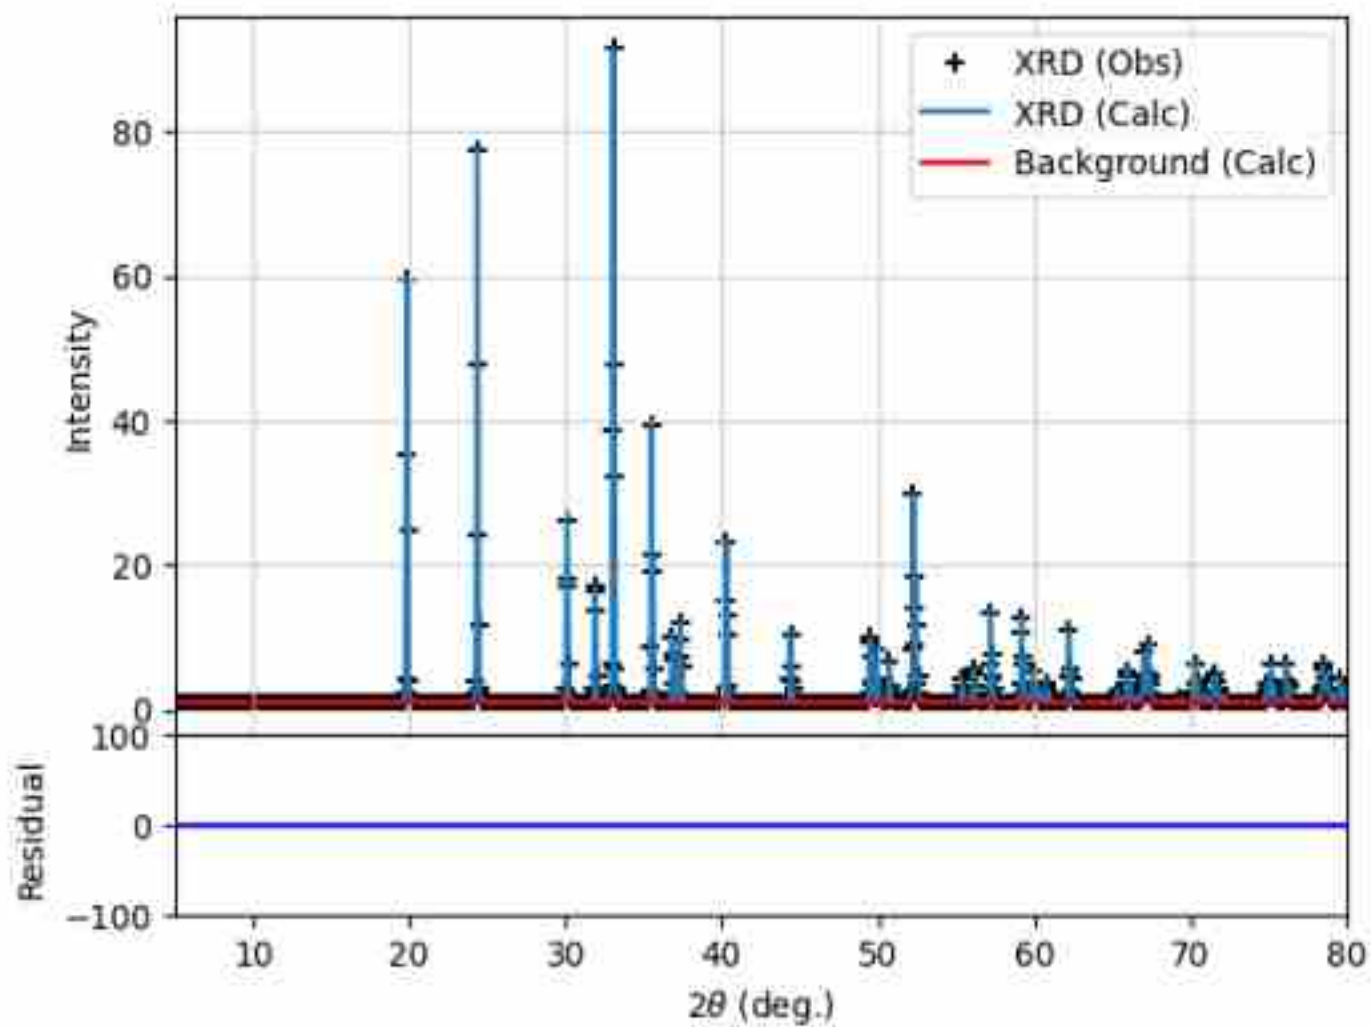

| RMSE before RR | Rwp     | RMSE after RR |
|----------------|---------|---------------|
| 0.08           | 0.00253 | 0.00078       |

# Li<sub>3</sub>Fe<sub>1</sub>O<sub>4</sub>

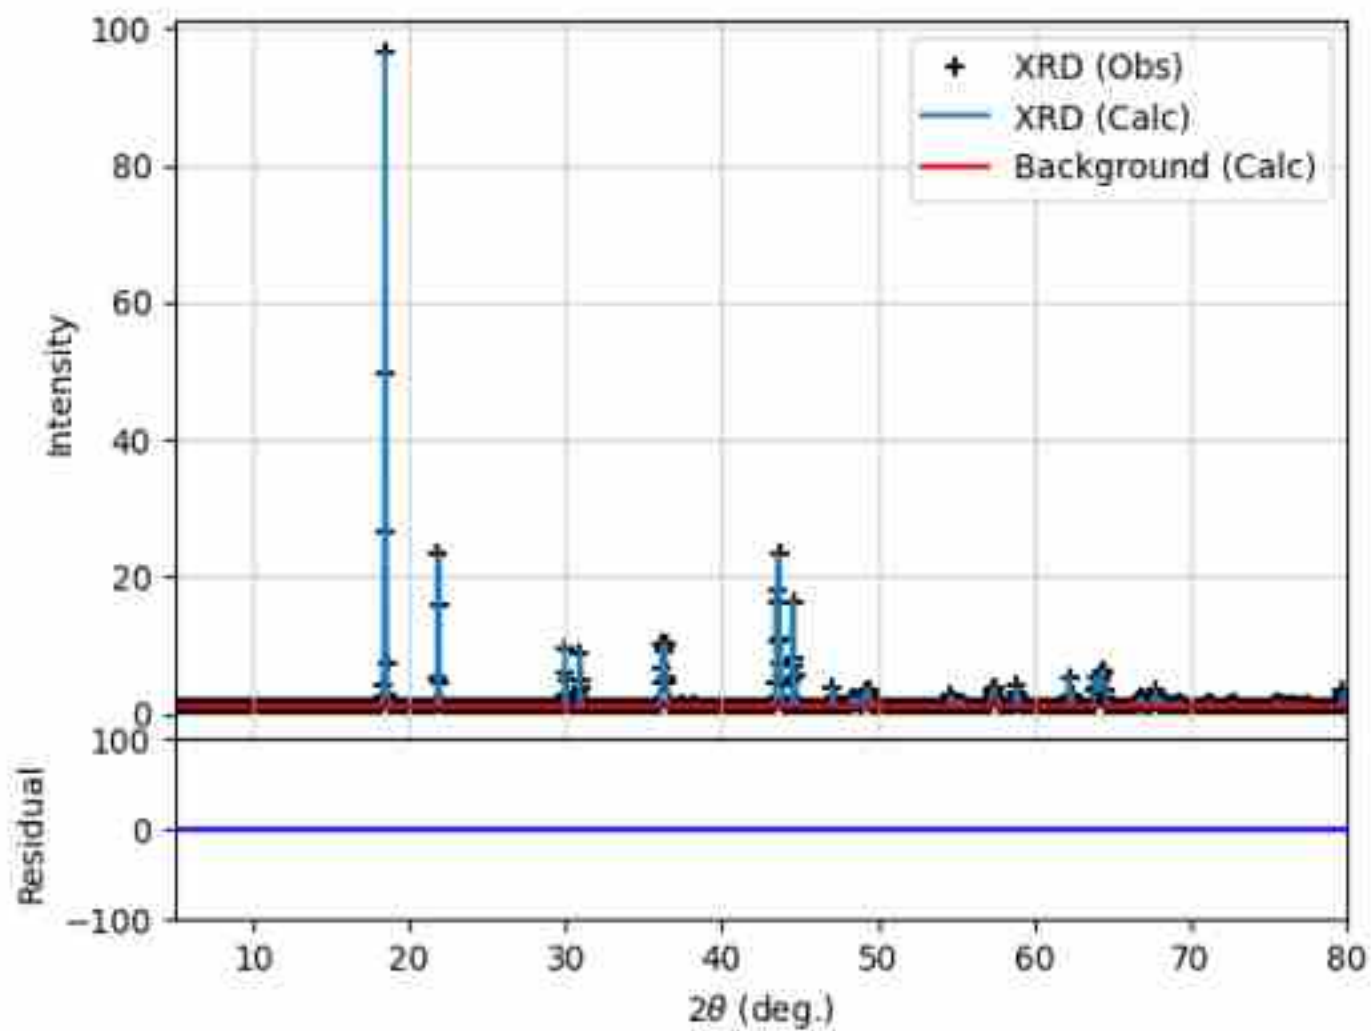

| RMSE before RR | Rwp     | RMSE after RR |
|----------------|---------|---------------|
| 0.008          | 0.00539 | 0.00799       |

# Li<sub>4</sub>Cr<sub>3</sub>Co<sub>10</sub>O<sub>8</sub>

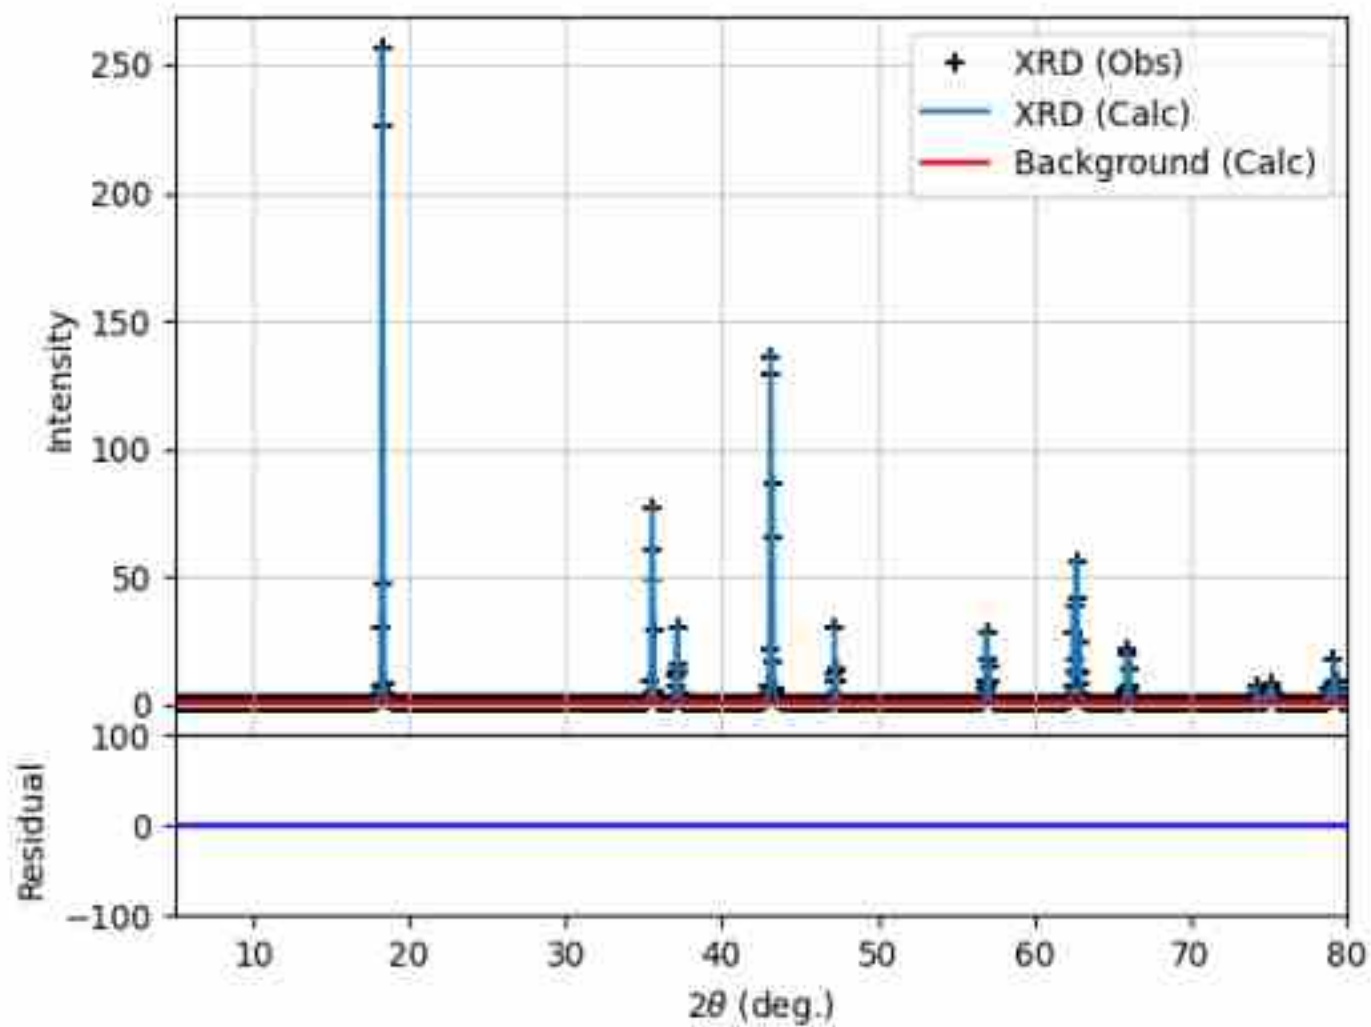

| RMSE before RR | Rwp     | RMSE after RR |
|----------------|---------|---------------|
| 0.008          | 0.00297 | 0.00285       |

# Lu1Ga5Co1

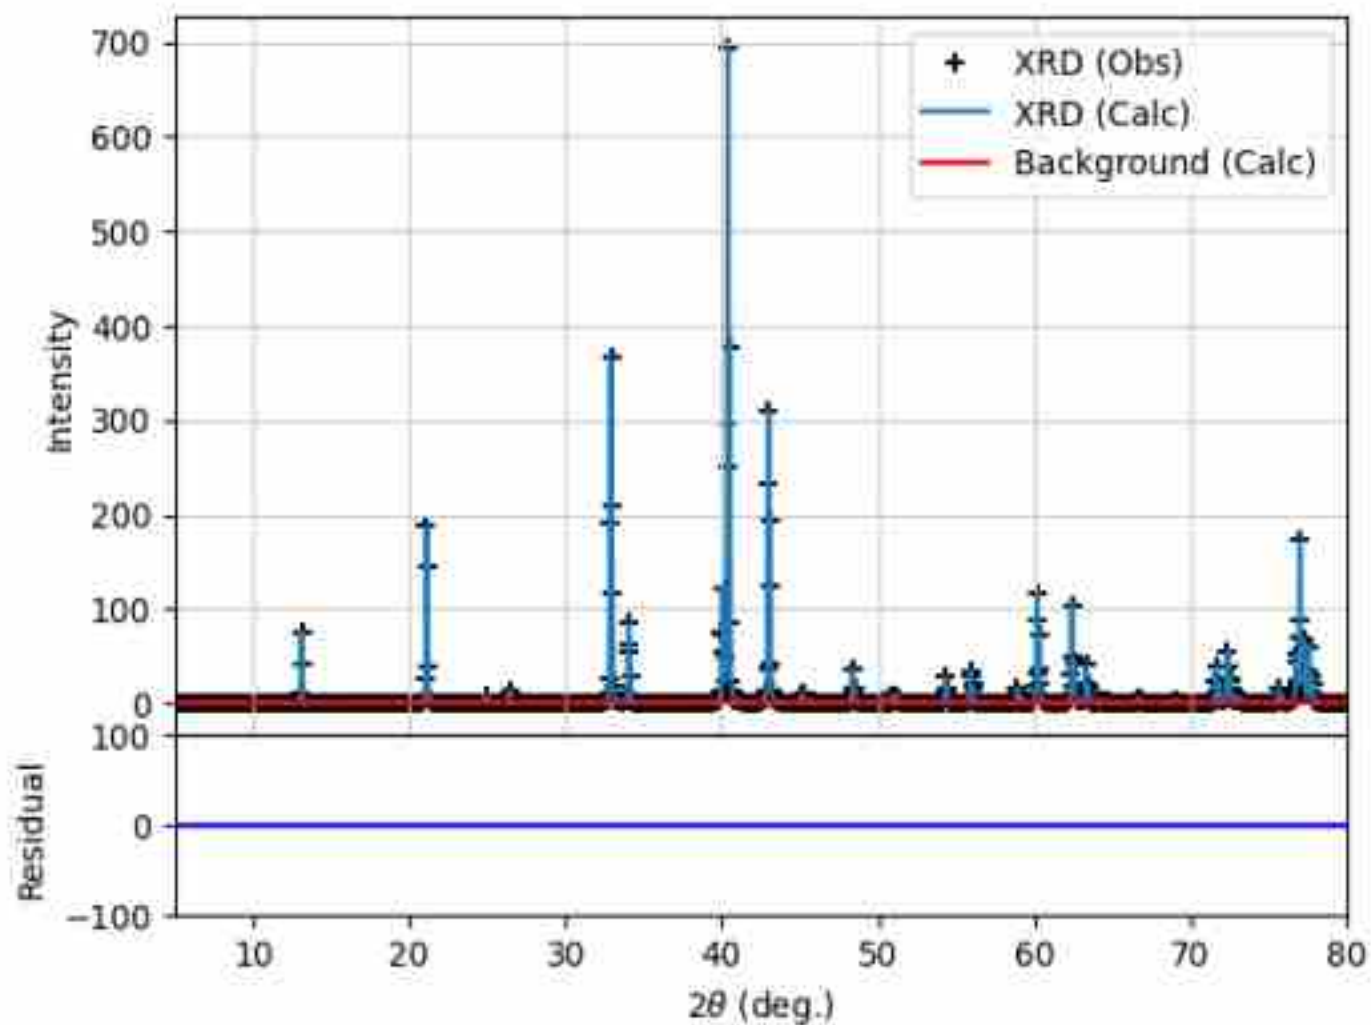

| RMSE before RR | Rwp    | RMSE after RR |
|----------------|--------|---------------|
| 0.008          | 0.0056 | 0.00063       |

# Lu<sub>2</sub>S<sub>10</sub>O<sub>2</sub>

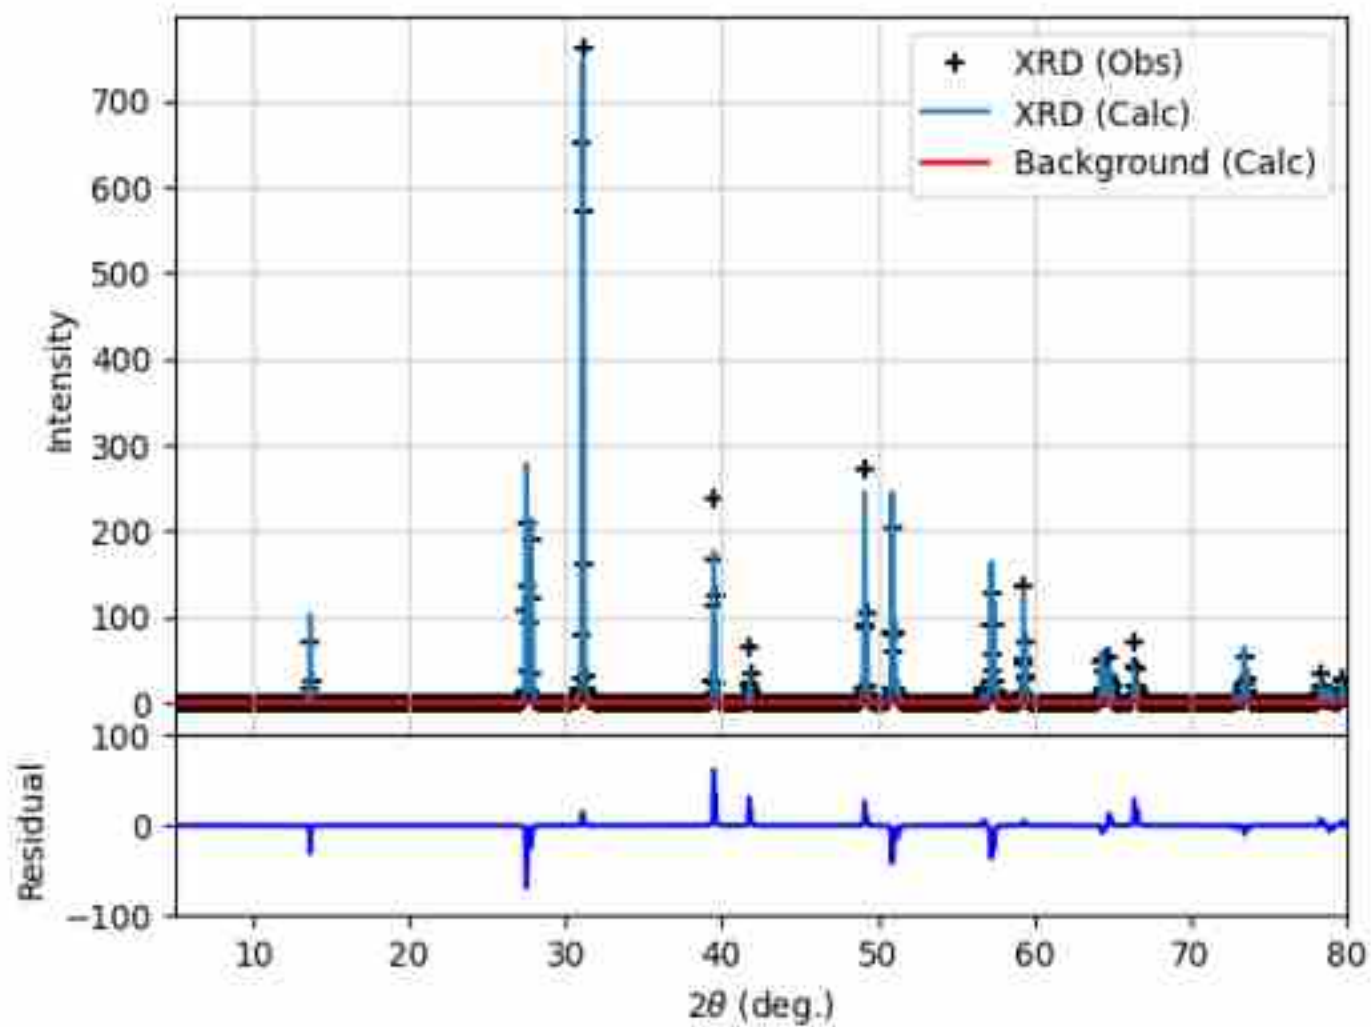

| RMSE before RR | Rwp     | RMSE after RR |
|----------------|---------|---------------|
| 0.008          | 19.4876 | 0.04172       |

# Lu<sub>4</sub>Cd<sub>2</sub>Pd<sub>4</sub>

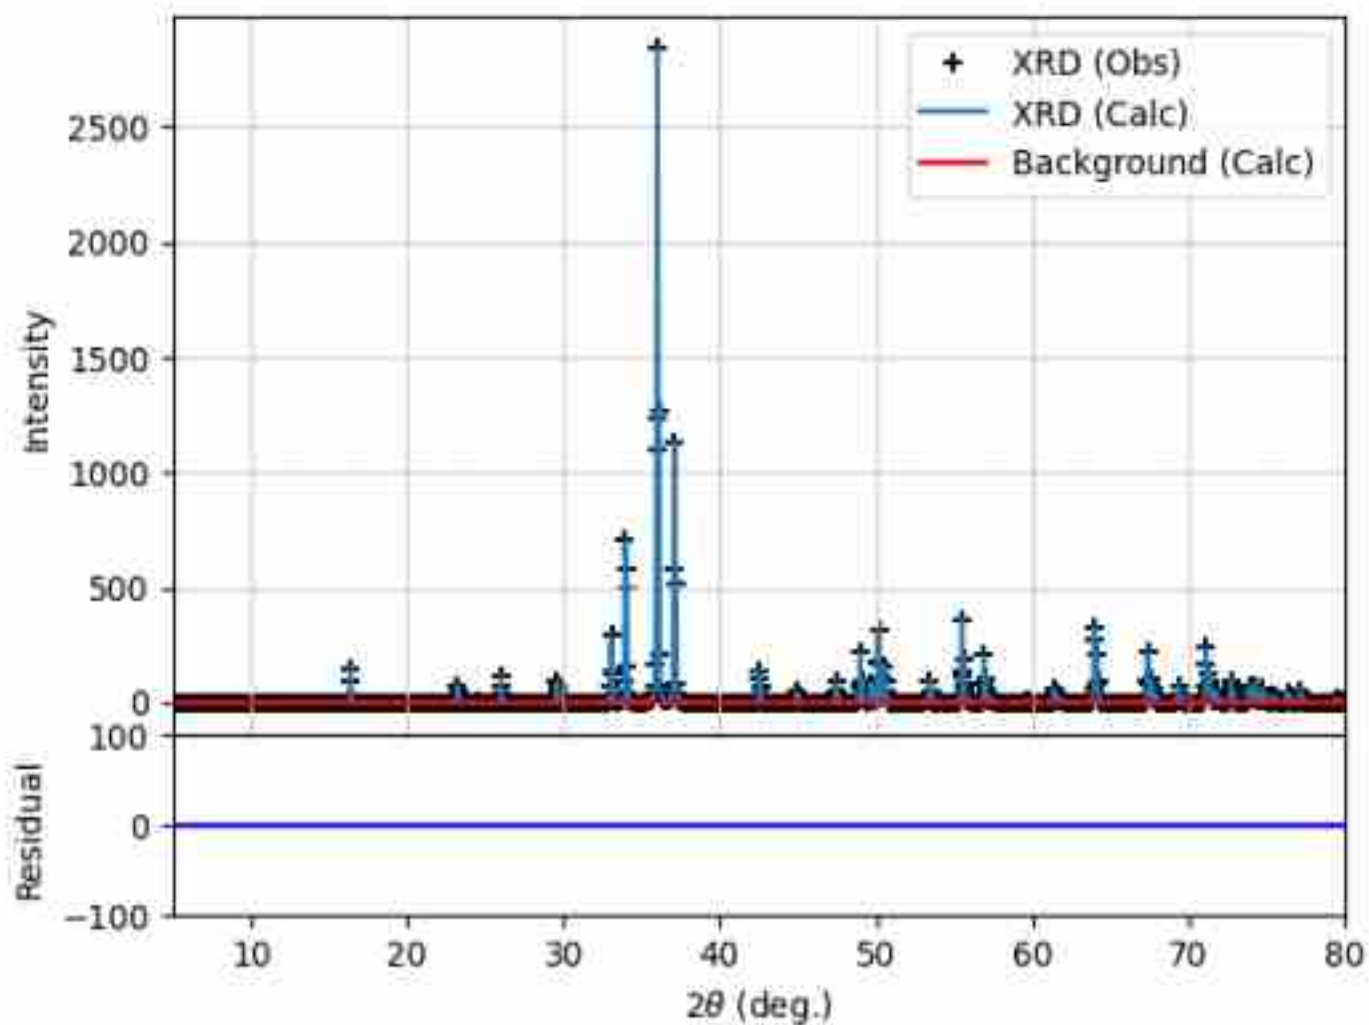

| RMSE before RR | Rwp     | RMSE after RR |
|----------------|---------|---------------|
| 0.008          | 0.01536 | 0.0008        |

# Lu<sub>4</sub>In<sub>2</sub>Au<sub>4</sub>

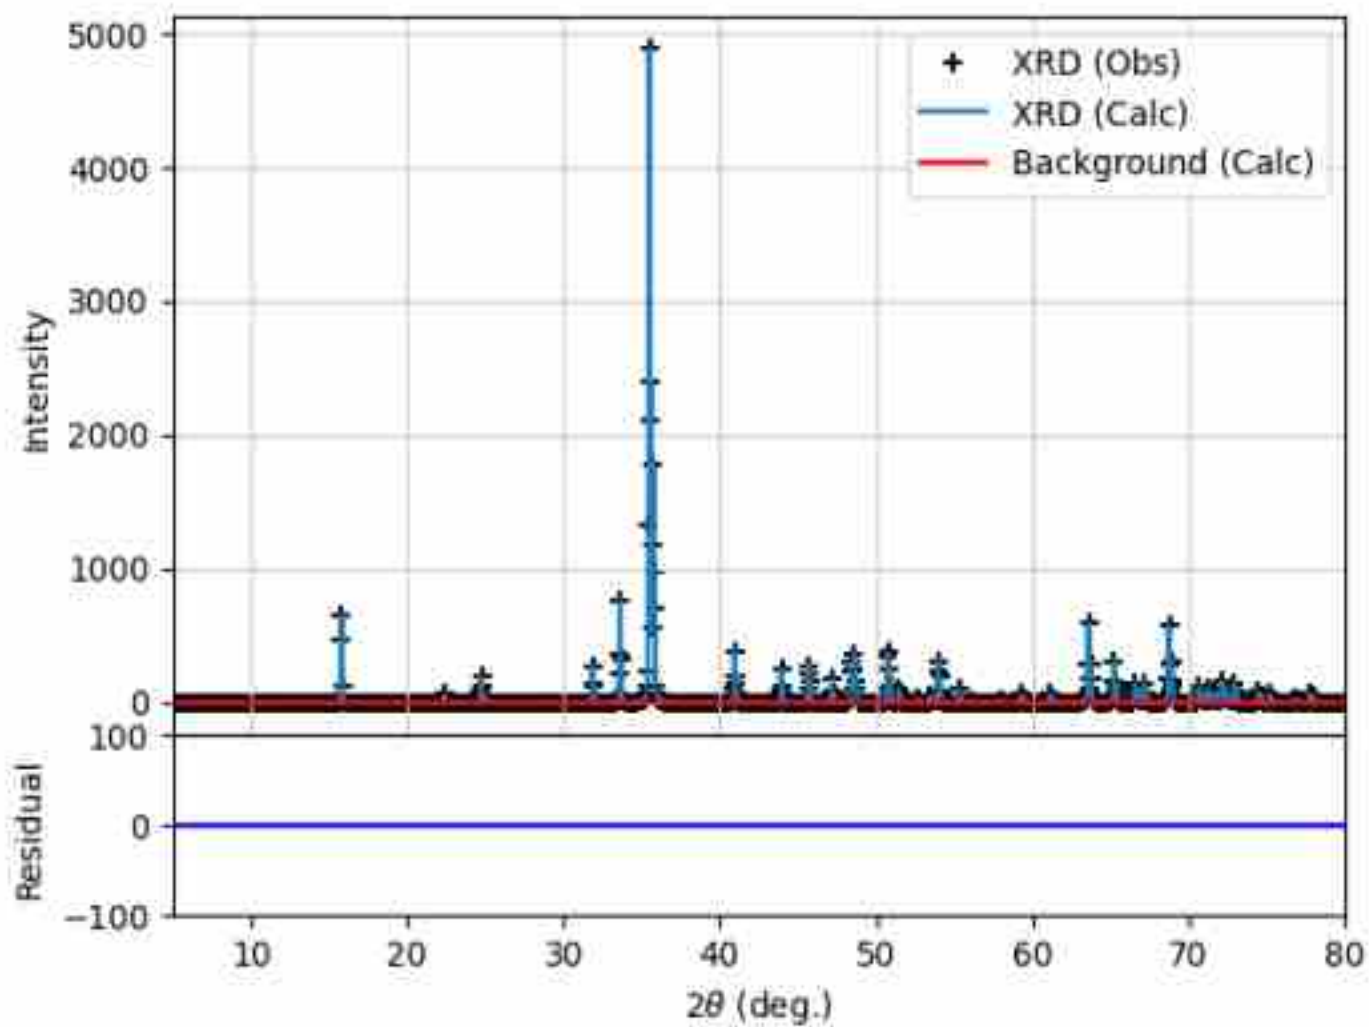

| RMSE before RR | Rwp     | RMSE after RR |
|----------------|---------|---------------|
| 0.008          | 0.00493 | 0.0004        |



# Lu<sub>4</sub>In<sub>2</sub>Cu<sub>4</sub>

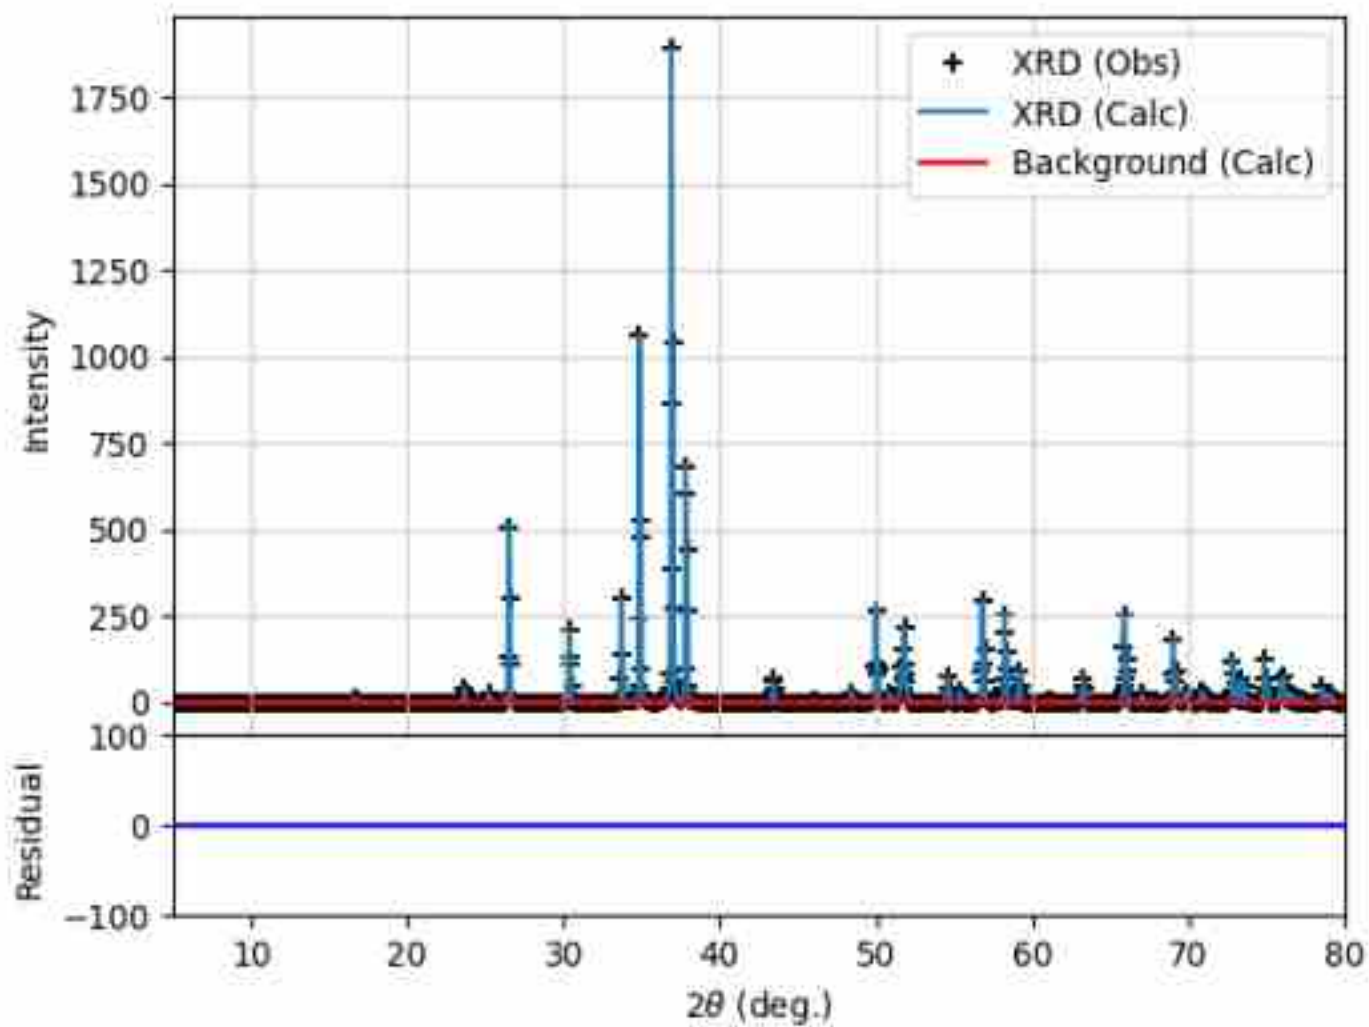

| RMSE before RR | Rwp    | RMSE after RR |
|----------------|--------|---------------|
| 0.008          | 0.0049 | 0.00043       |

# Mg4Cd2

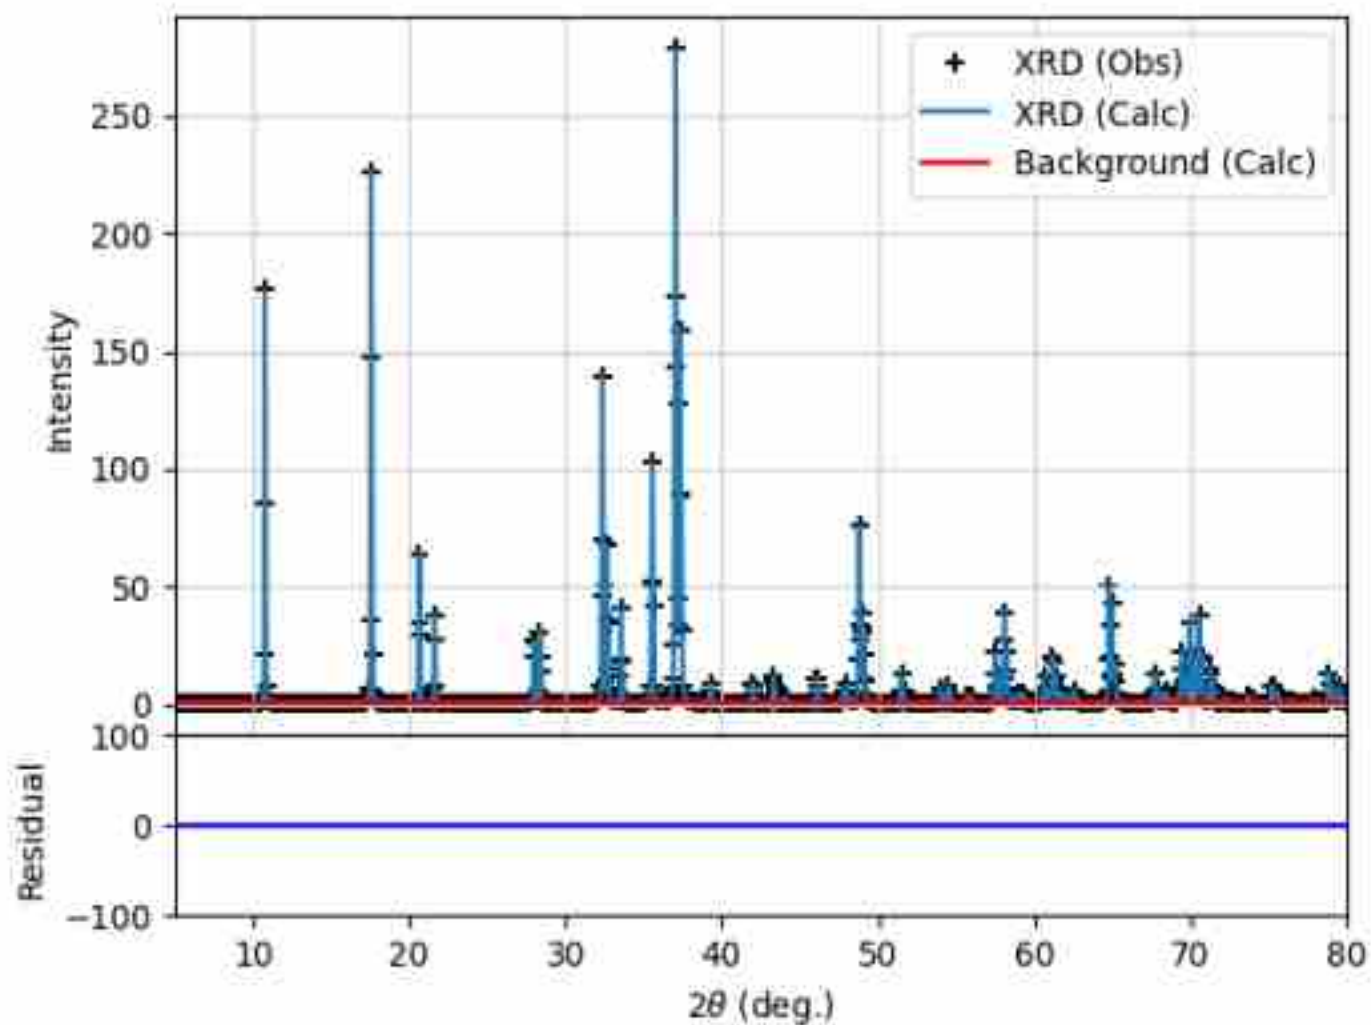

| RMSE before RR | Rwp     | RMSE after RR |
|----------------|---------|---------------|
| 0.008          | 0.00773 | 0.00255       |

# Mn1V1Co4Si2

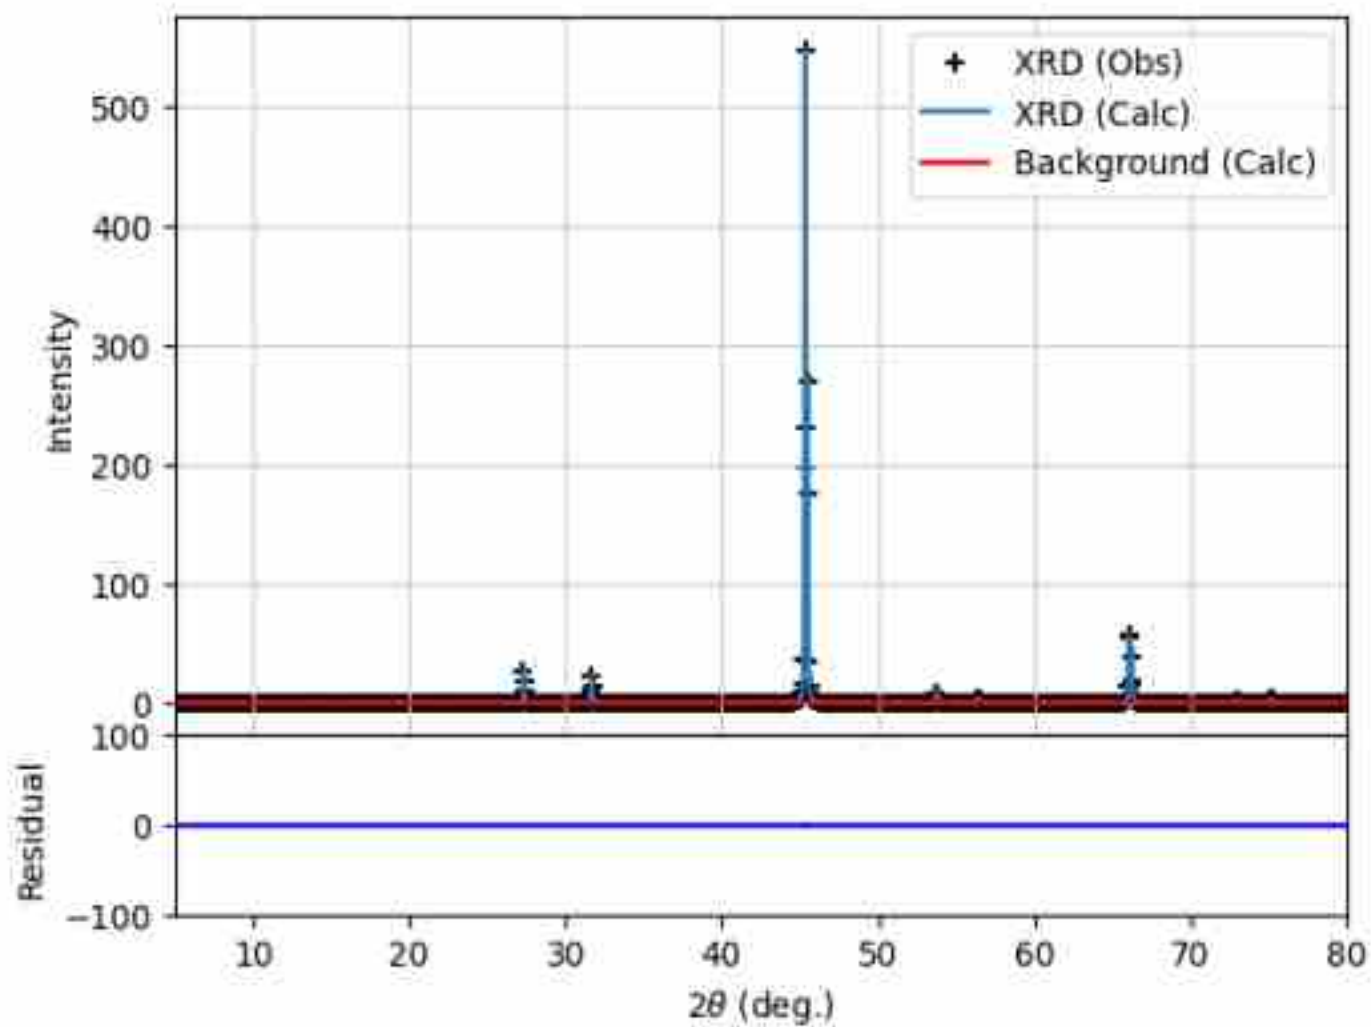

| RMSE before RR | Rwp     | RMSE after RR |
|----------------|---------|---------------|
| 0.008          | 0.16764 | 0.00185       |

Mn<sub>2</sub>Fe<sub>4</sub>Si<sub>1</sub>Ge<sub>1</sub>

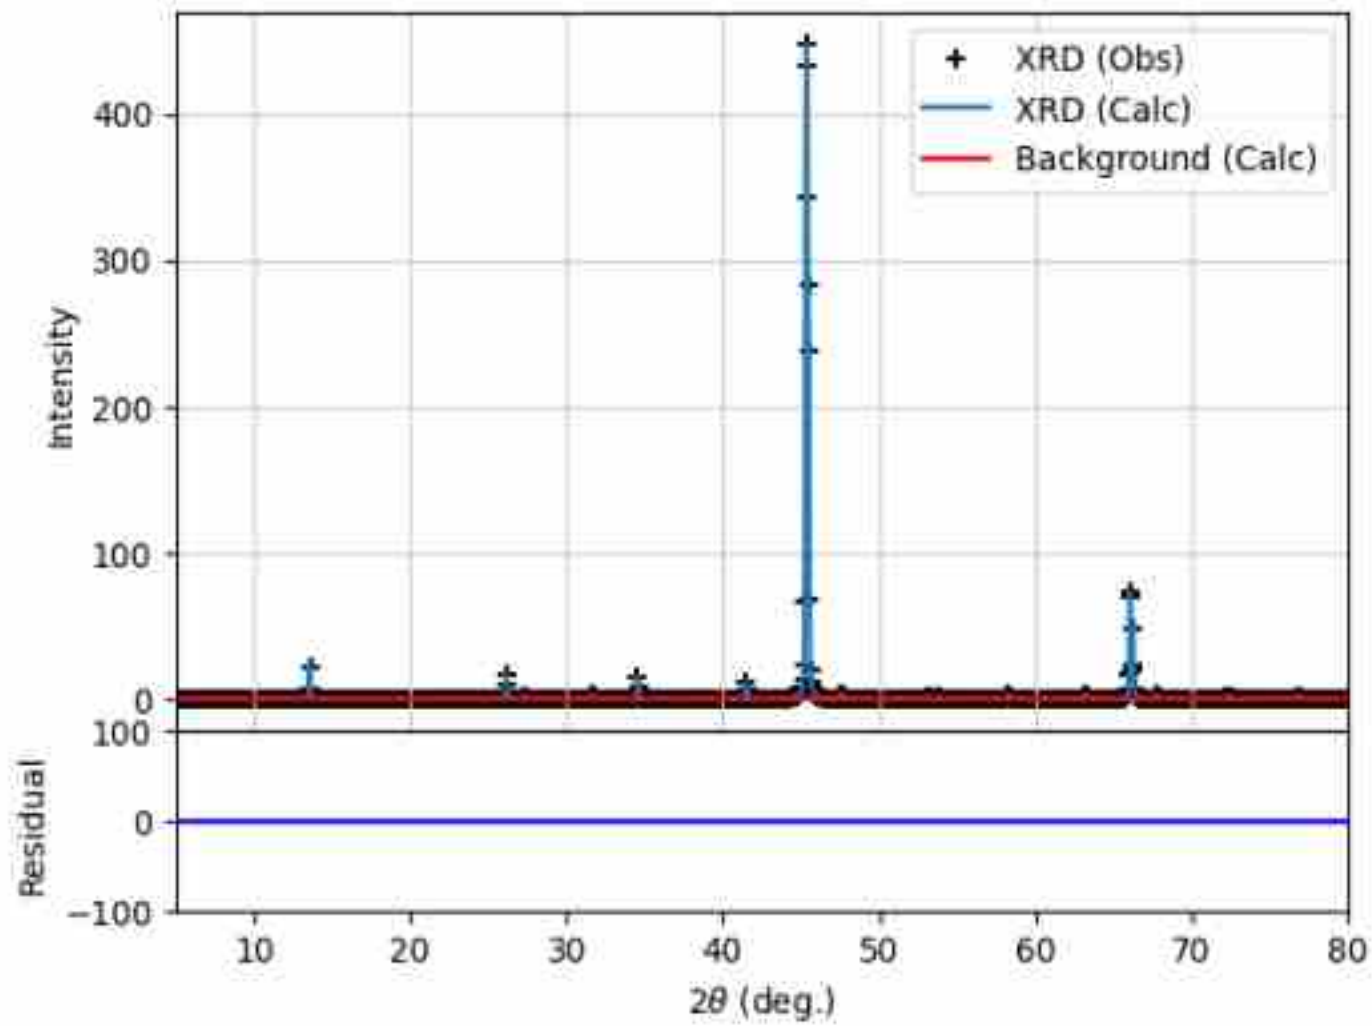

| RMSE before RR | Rwp     | RMSE after RR |
|----------------|---------|---------------|
| 0.008          | 0.00199 | 0.00017       |

# Mn<sub>4</sub>Sn<sub>2</sub>Pd<sub>6</sub>

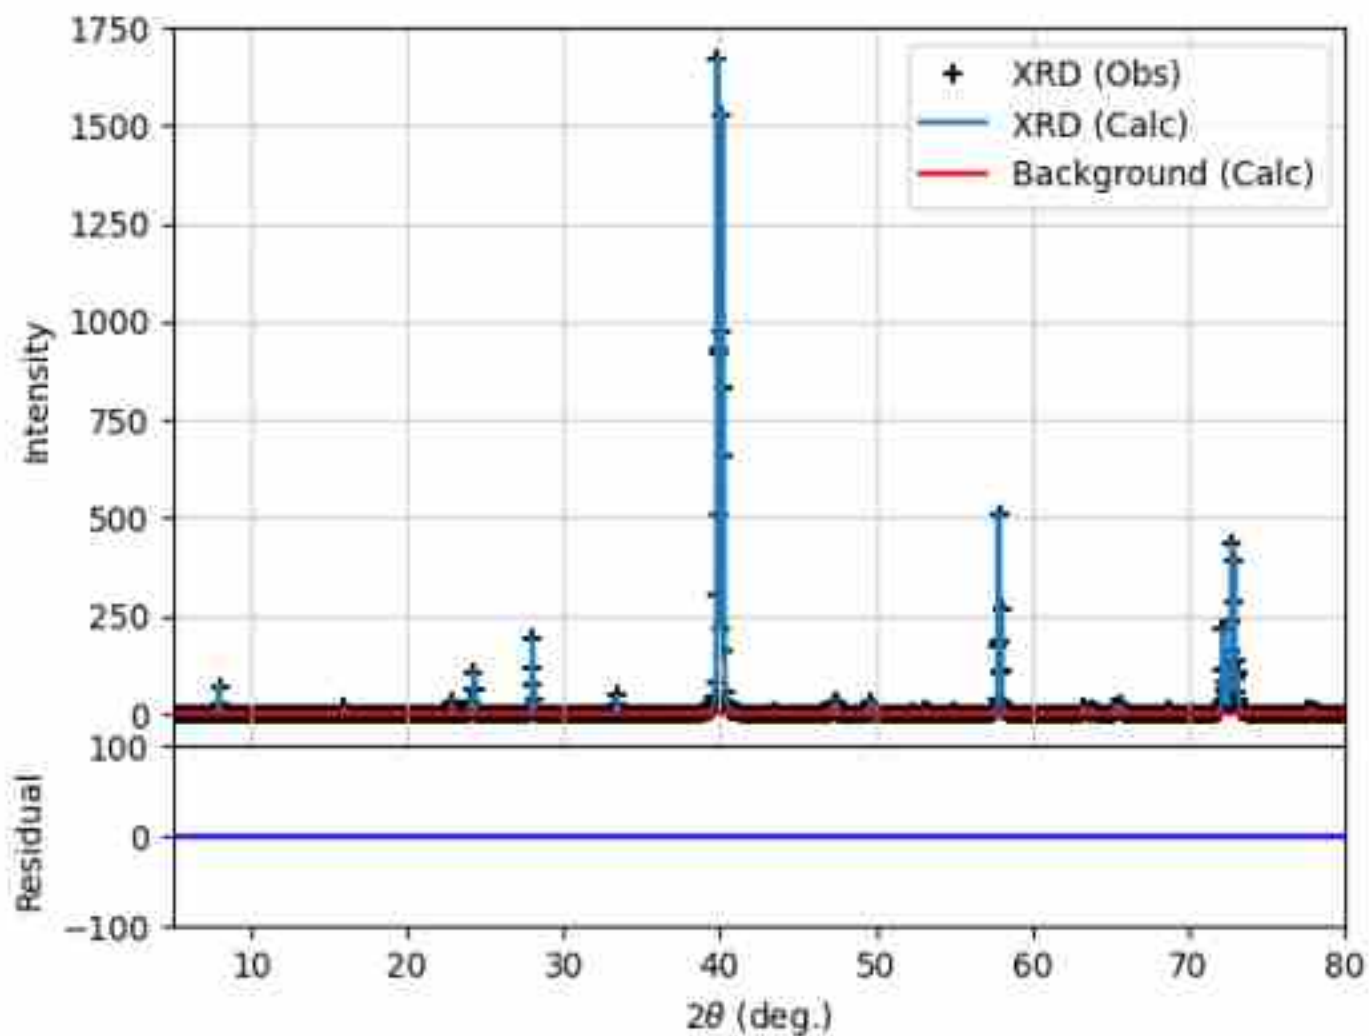

| RMSE before RR | Rwp     | RMSE after RR |
|----------------|---------|---------------|
| 0.008          | 0.00521 | 0.00041       |

# Mo6Os2

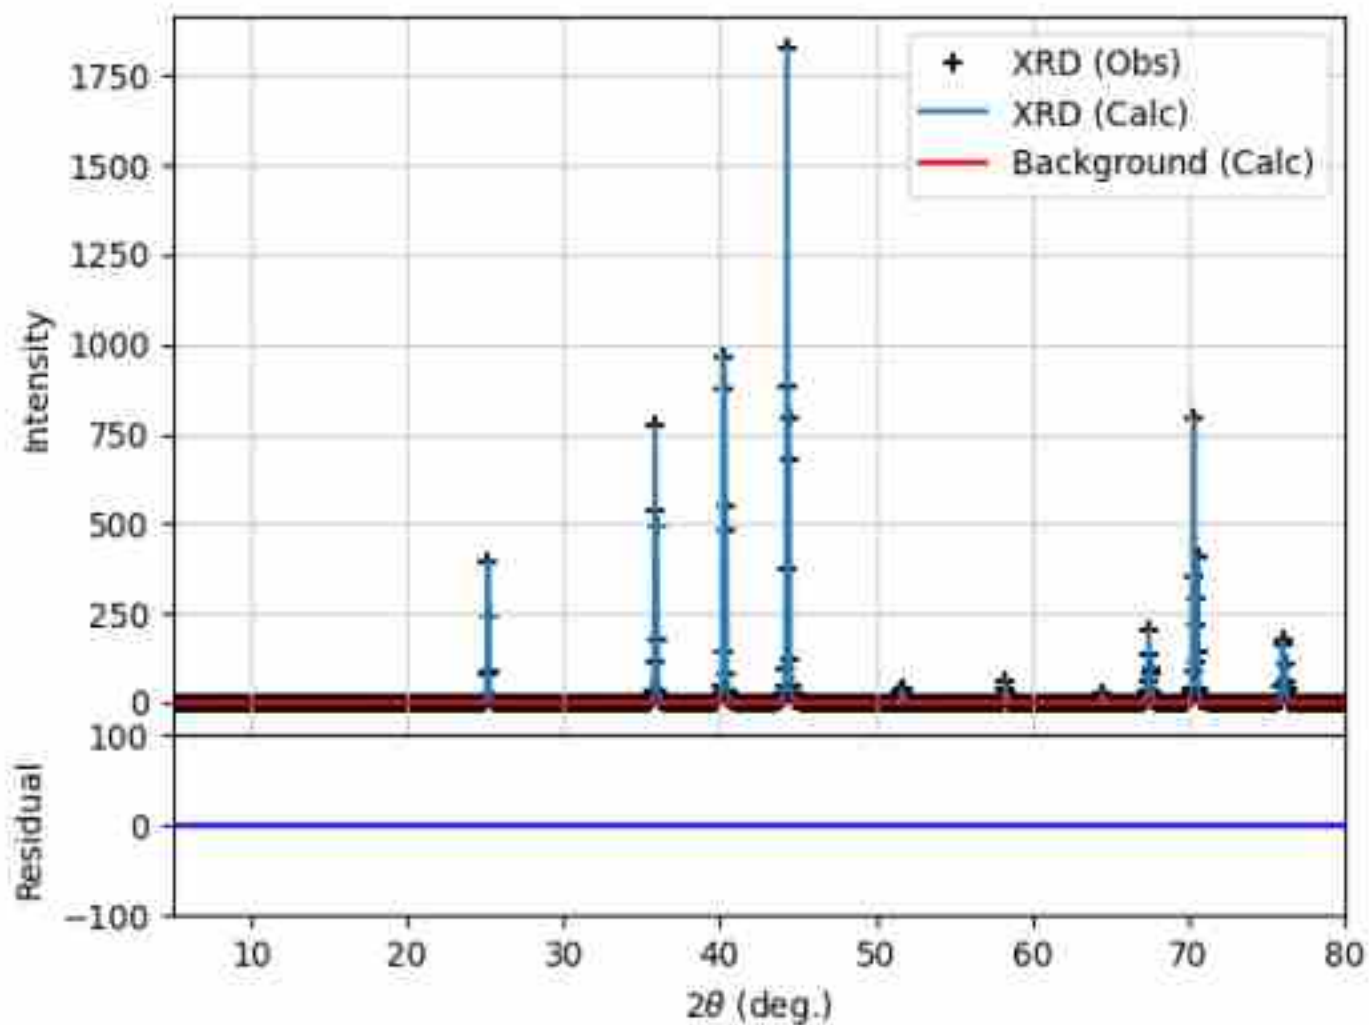

| RMSE before RR | Rwp     | RMSE after RR |
|----------------|---------|---------------|
| 0.008          | 0.00404 | 0.00056       |

# Mo6Pt2

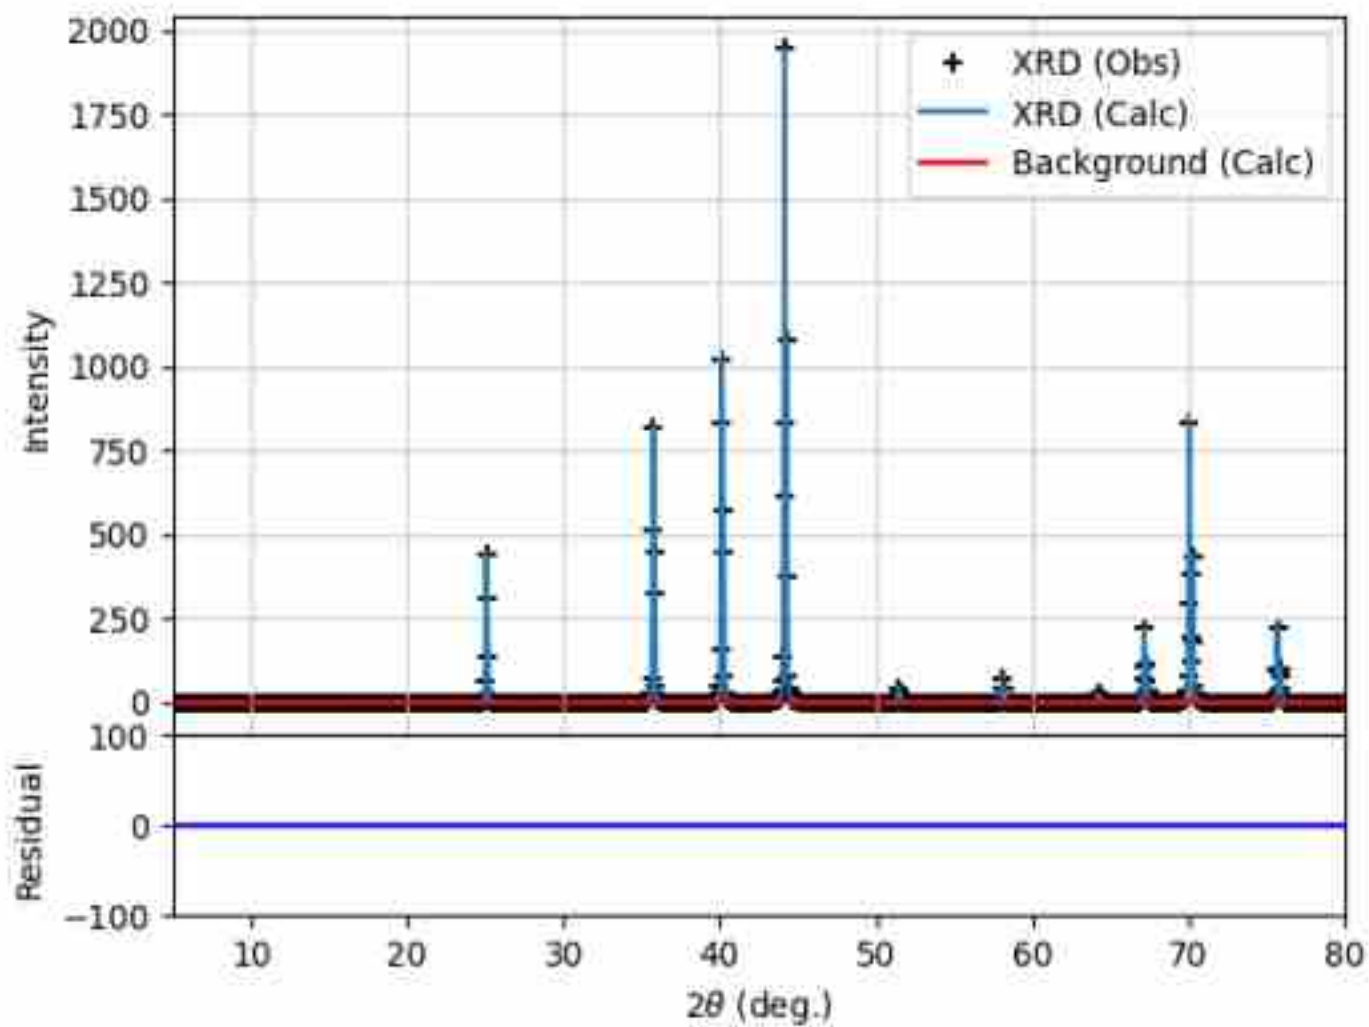

| RMSE before RR | Rwp    | RMSE after RR |
|----------------|--------|---------------|
| 0.008          | 0.0073 | 0.00025       |

# Na<sub>1</sub>Li<sub>1</sub>As<sub>2</sub>S<sub>4</sub>

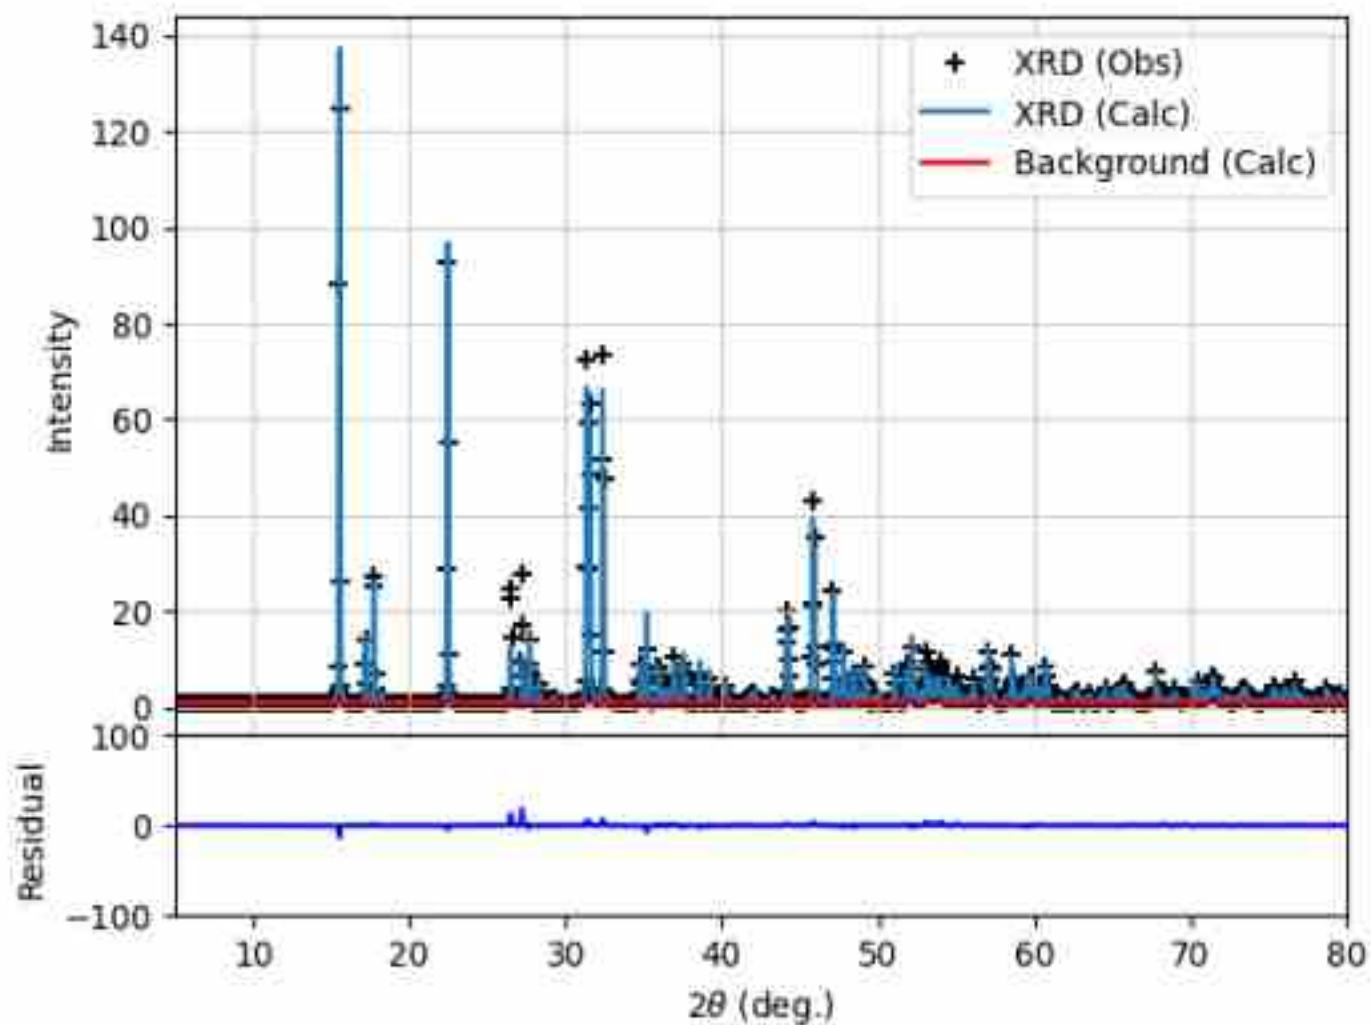

| RMSE before RR | Rwp      | RMSE after RR |
|----------------|----------|---------------|
| 0.08           | 14.96232 | 0.1147        |



# Na1Mg1F3

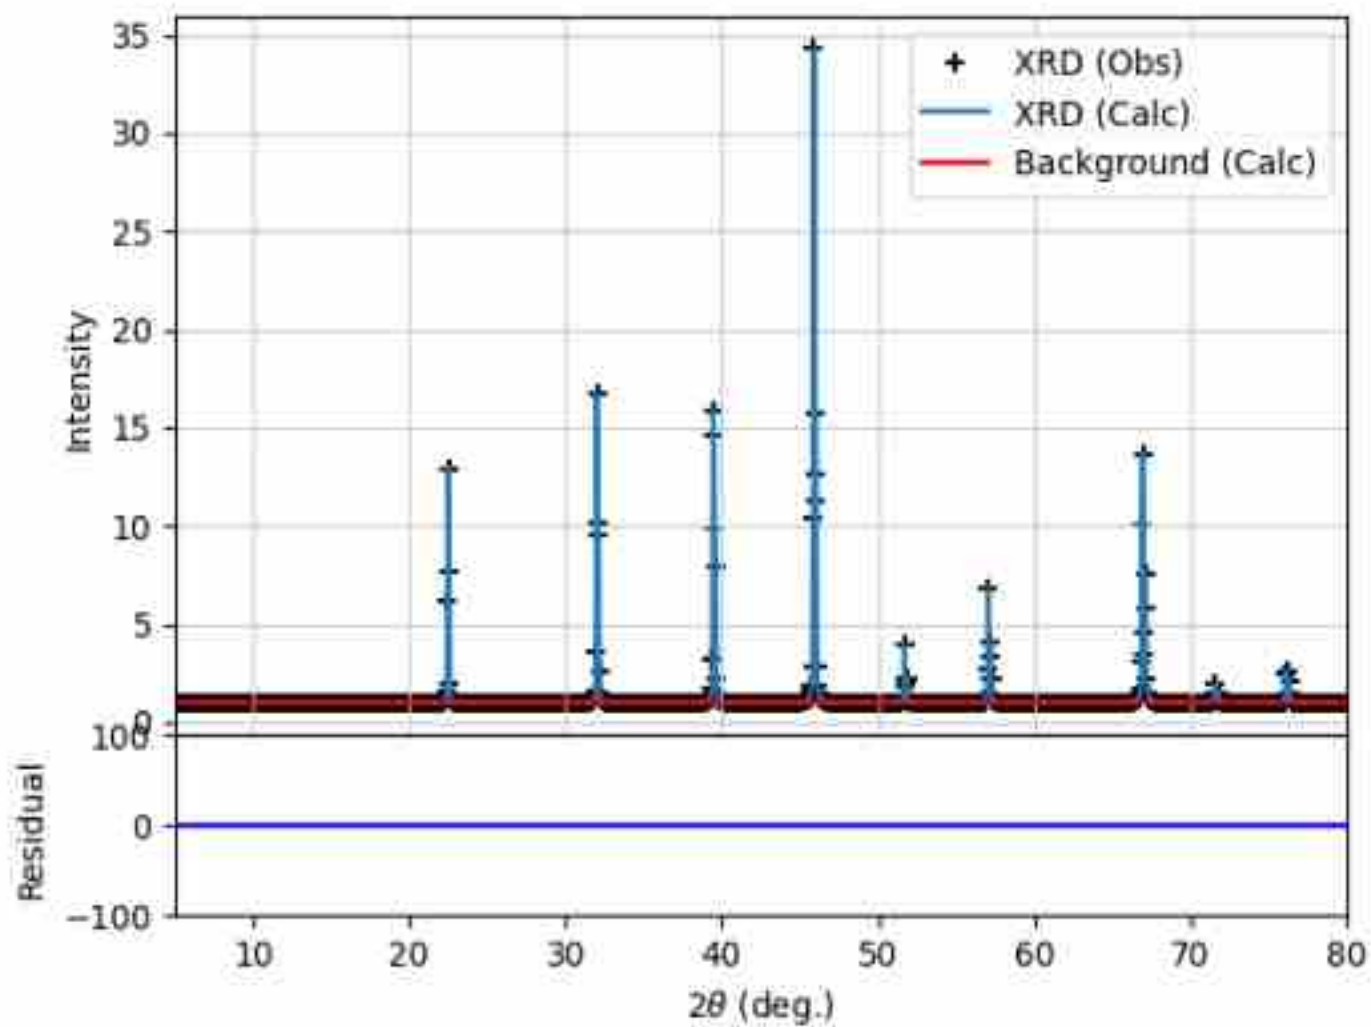

| RMSE before RR | Rwp    | RMSE after RR |
|----------------|--------|---------------|
| 0.008          | 0.0016 | 0.00096       |

# Na<sub>4</sub>Mg<sub>2</sub>Pb<sub>2</sub>

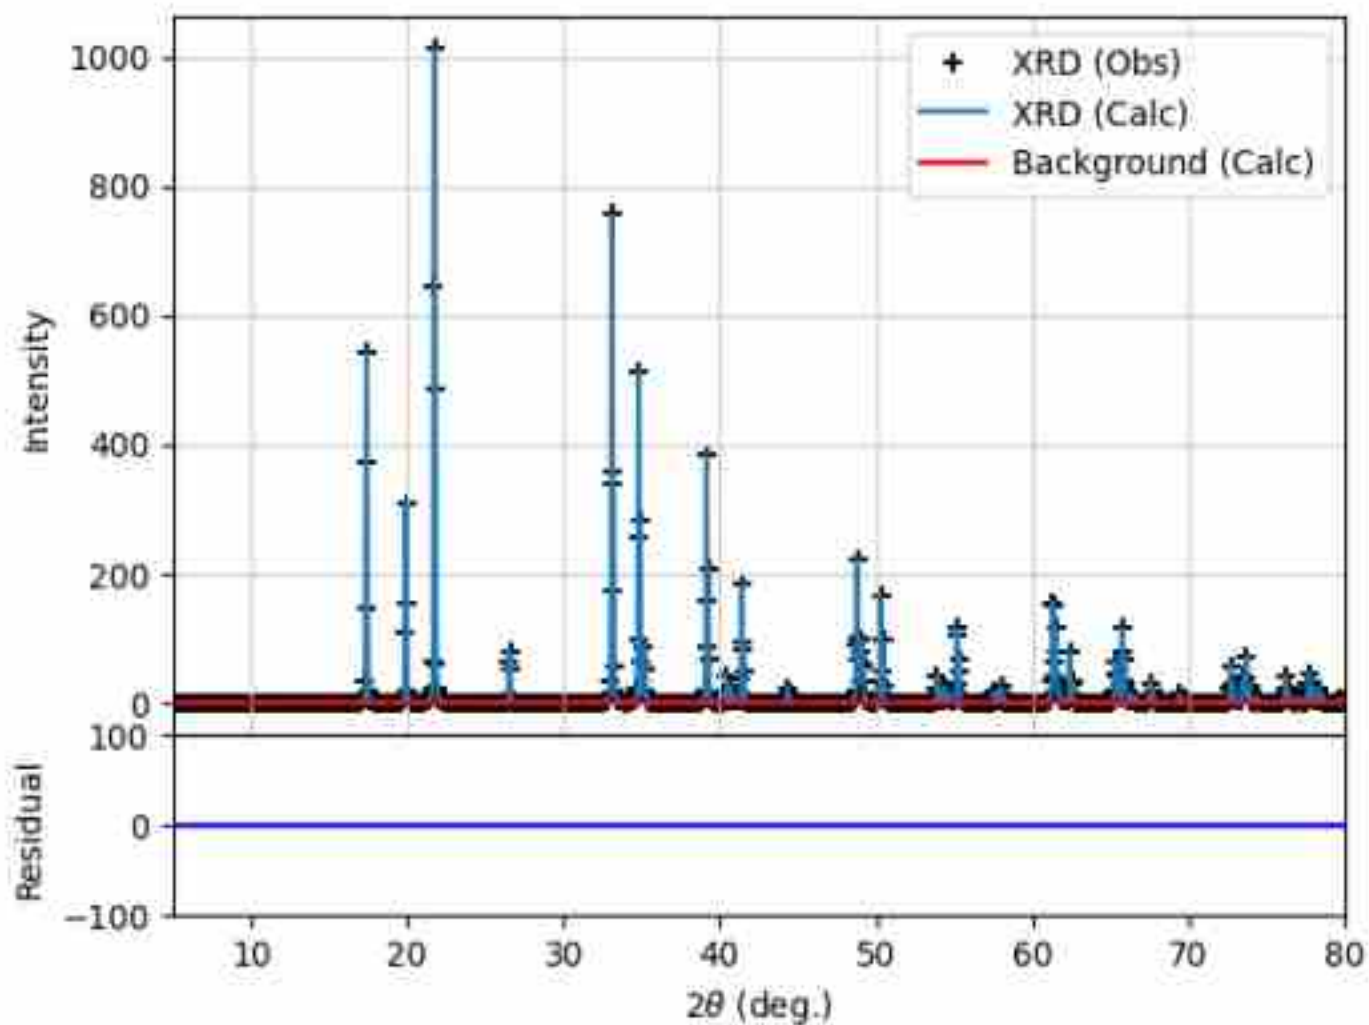

| RMSE before RR | Rwp     | RMSE after RR |
|----------------|---------|---------------|
| 0.008          | 0.00307 | 0.00086       |

# Nd1Al1Ni4

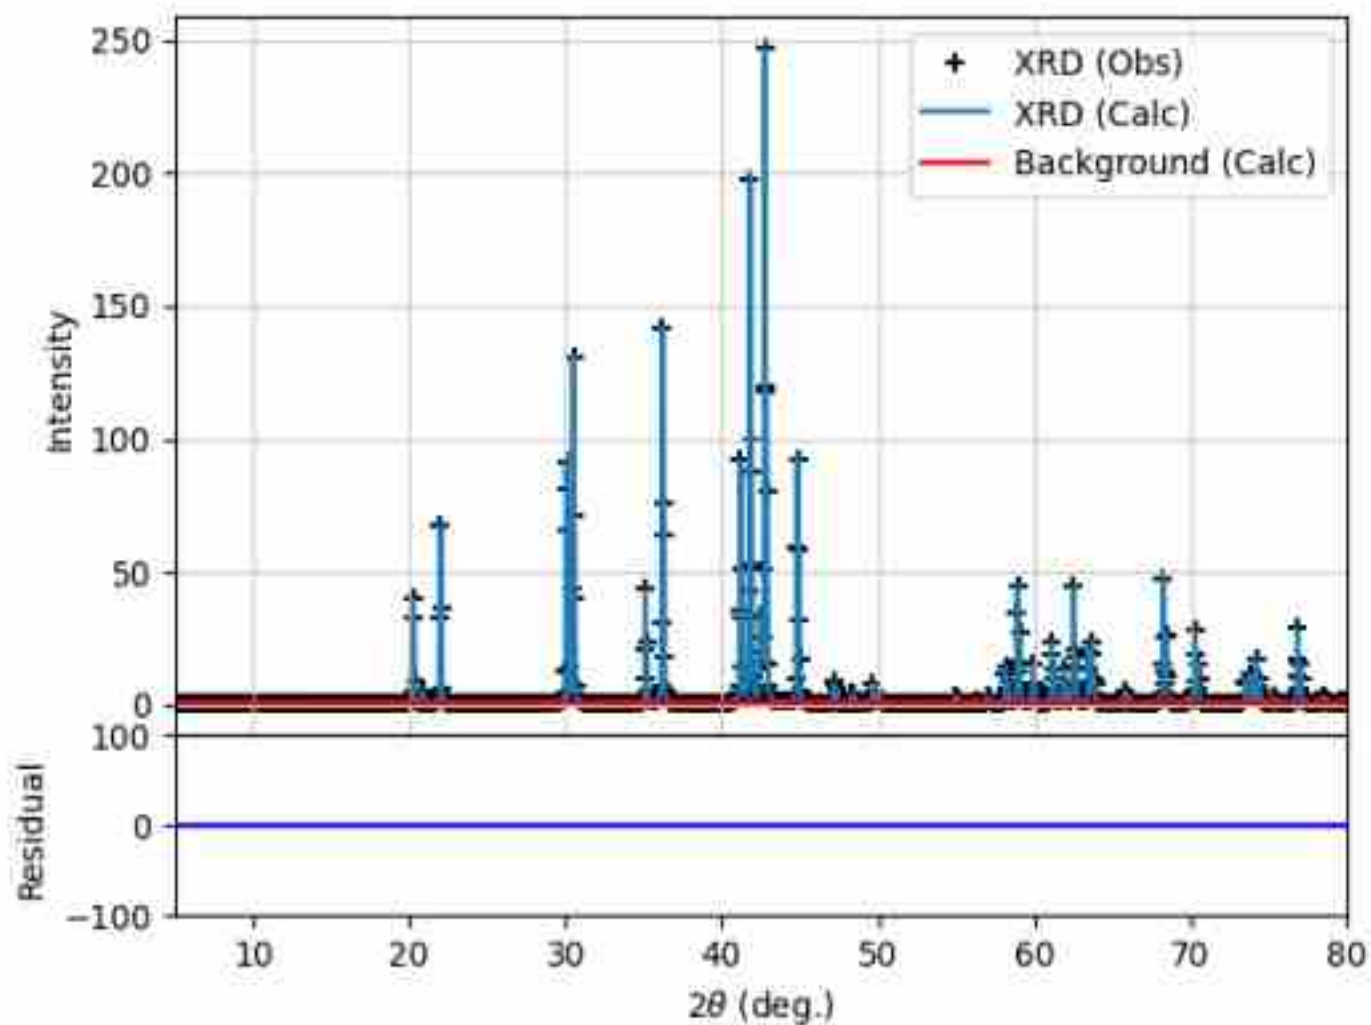

| RMSE before RR | Rwp     | RMSE after RR |
|----------------|---------|---------------|
| 0.008          | 0.00411 | 0.00043       |

# Nd1B2Ru3

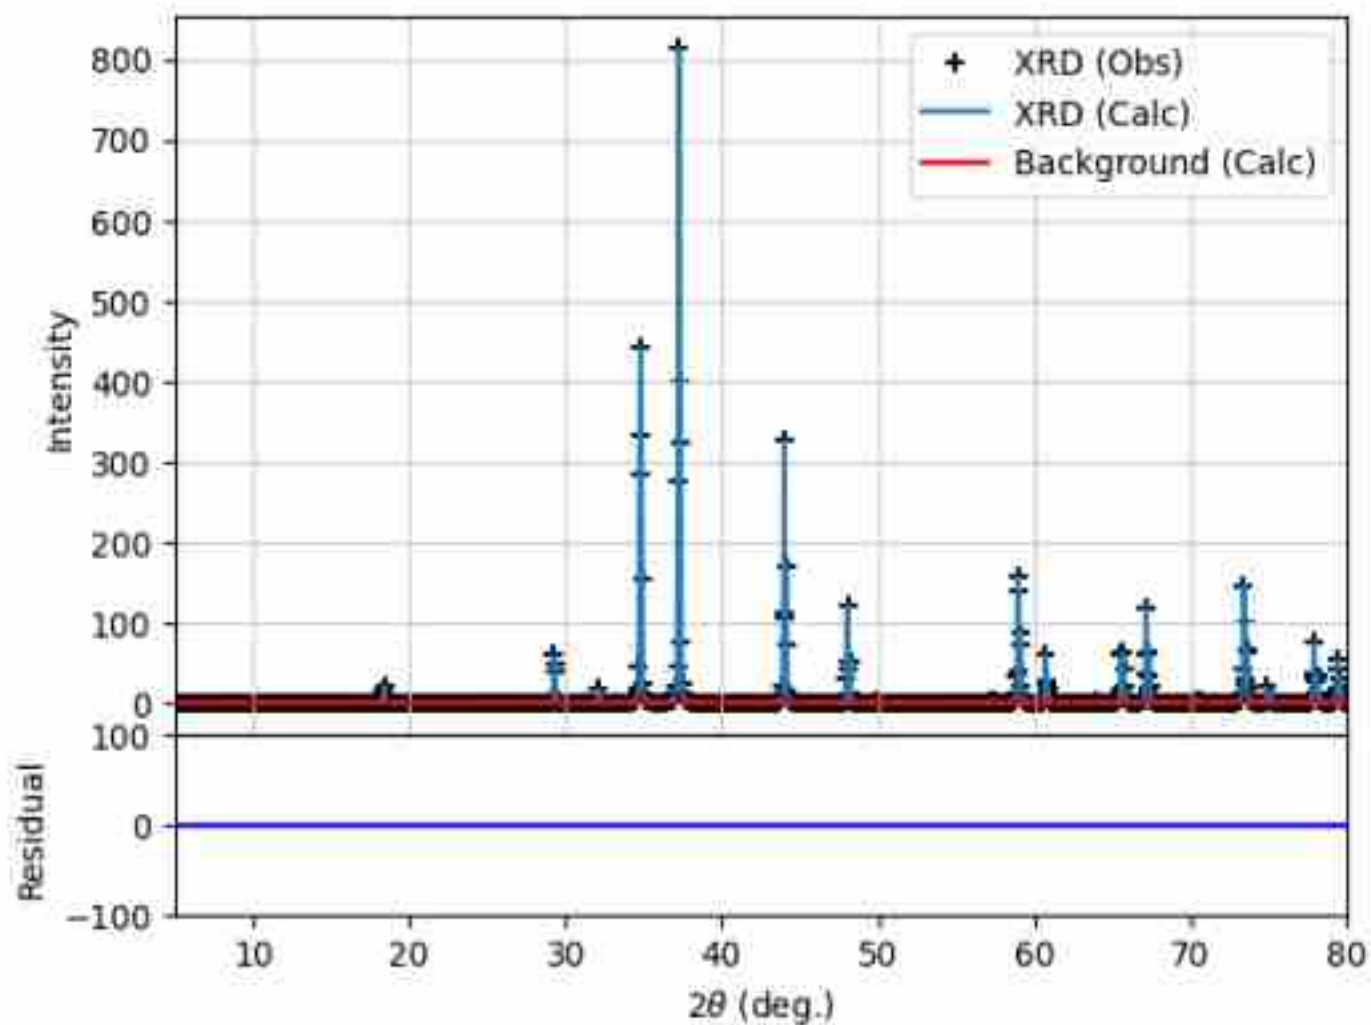

| RMSE before RR | Rwp     | RMSE after RR |
|----------------|---------|---------------|
| 0.008          | 0.00997 | 0.0038        |

# Nd<sub>2</sub>H<sub>2</sub>Se<sub>2</sub>

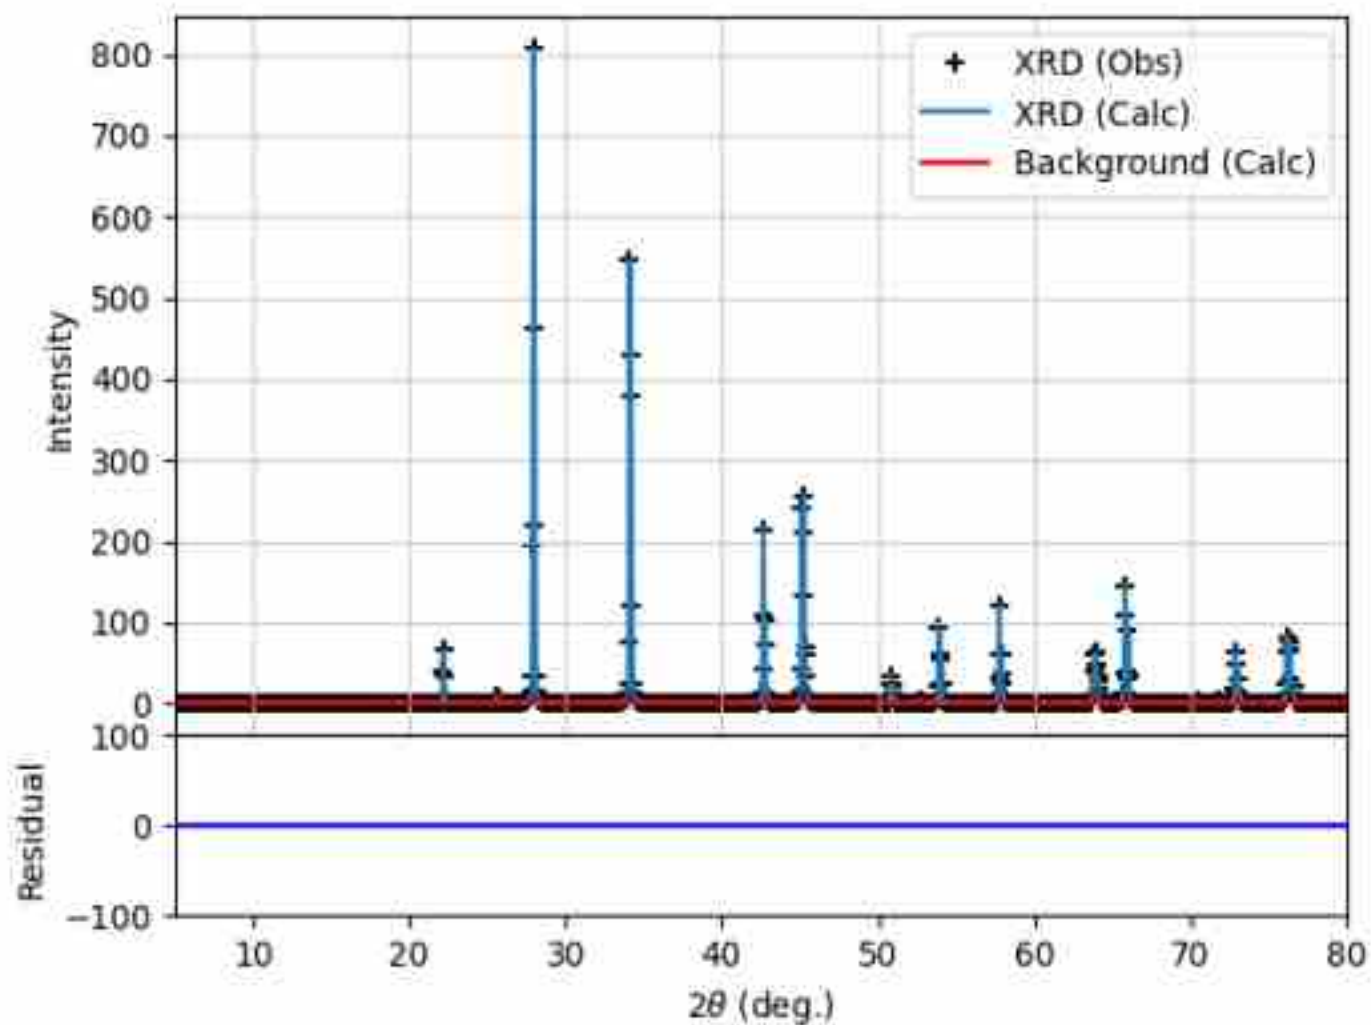

| RMSE before RR | Rwp    | RMSE after RR |
|----------------|--------|---------------|
| 0.008          | 0.0036 | 0.0021        |

# Nd<sub>2</sub>Ni<sub>4</sub>Sn<sub>4</sub>

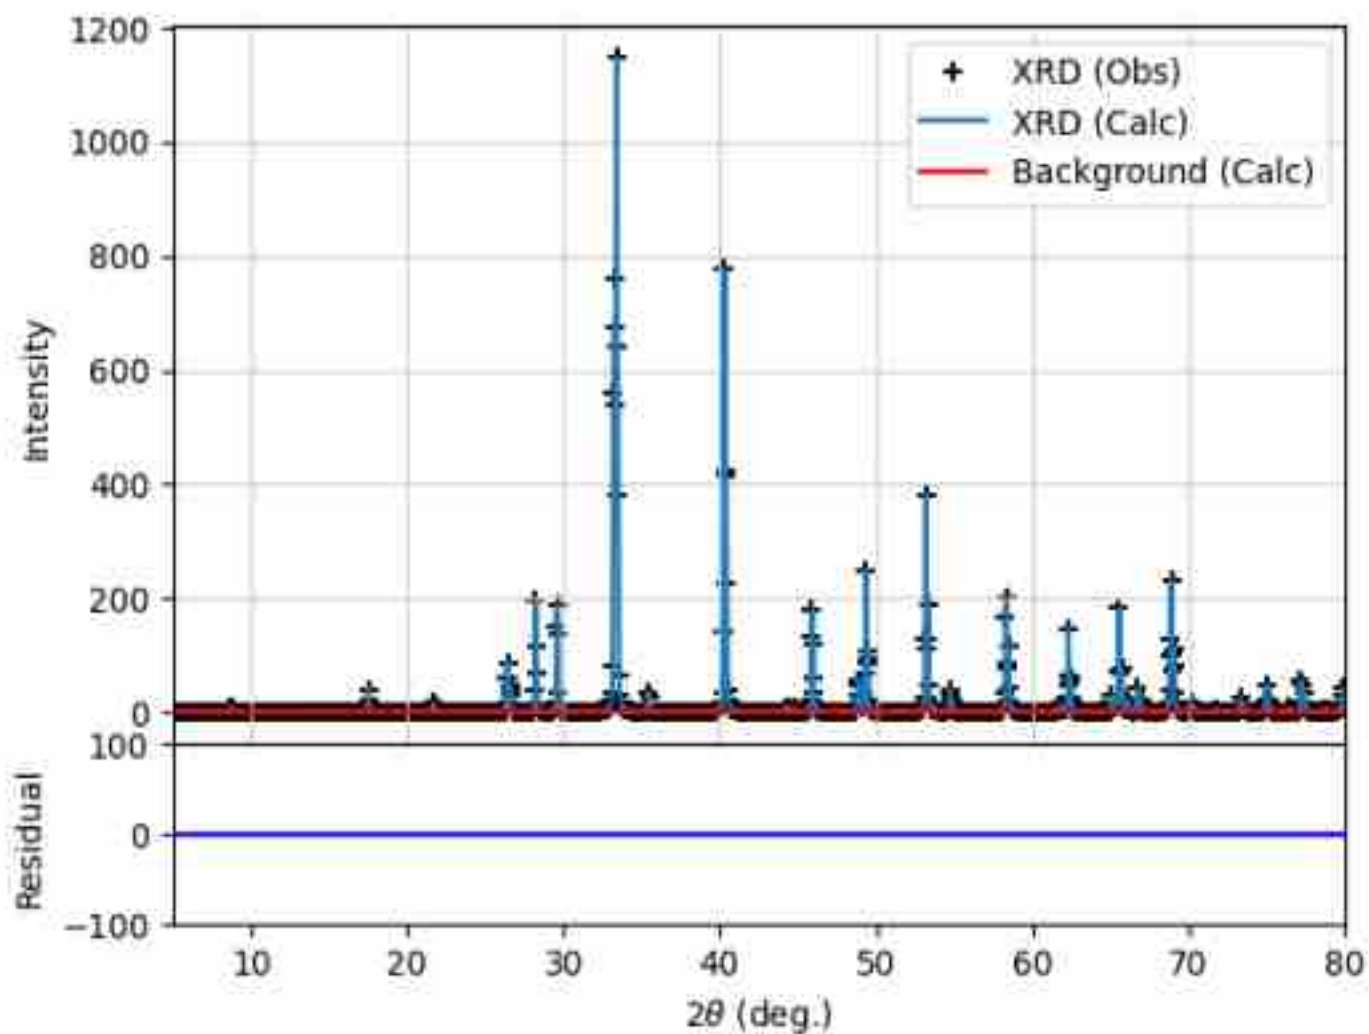

| RMSE before RR | Rwp     | RMSE after RR |
|----------------|---------|---------------|
| 0.008          | 0.00404 | 0.00052       |

# Nd<sub>2</sub>Sb<sub>4</sub>Pd<sub>2</sub>

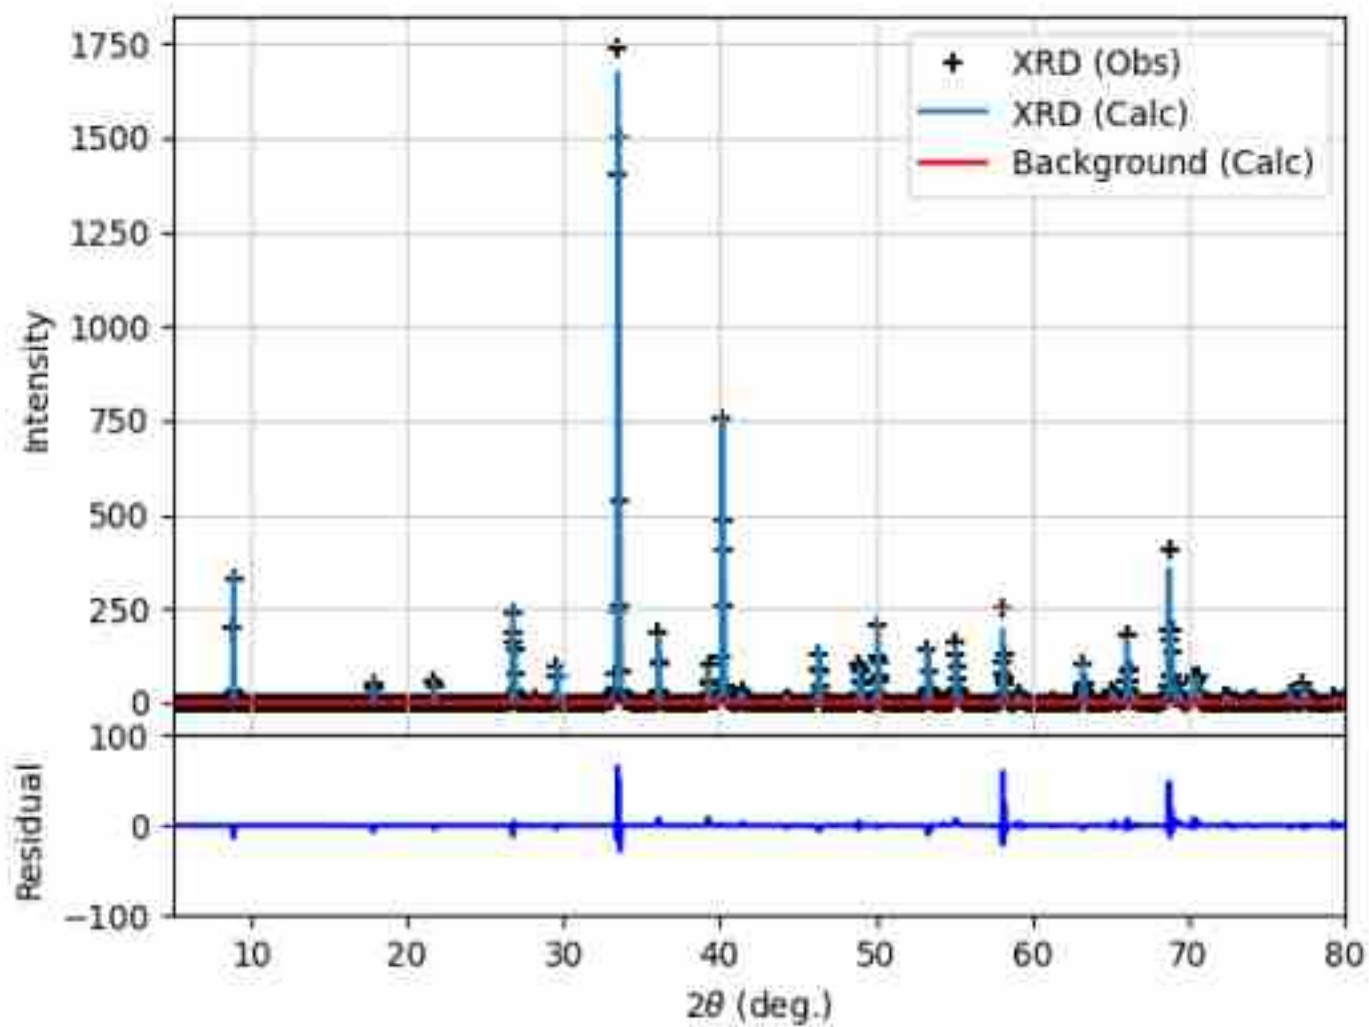

| RMSE before RR | Rwp     | RMSE after RR |
|----------------|---------|---------------|
| 0.008          | 6.65503 | 0.02442       |

# Nd4Sb2

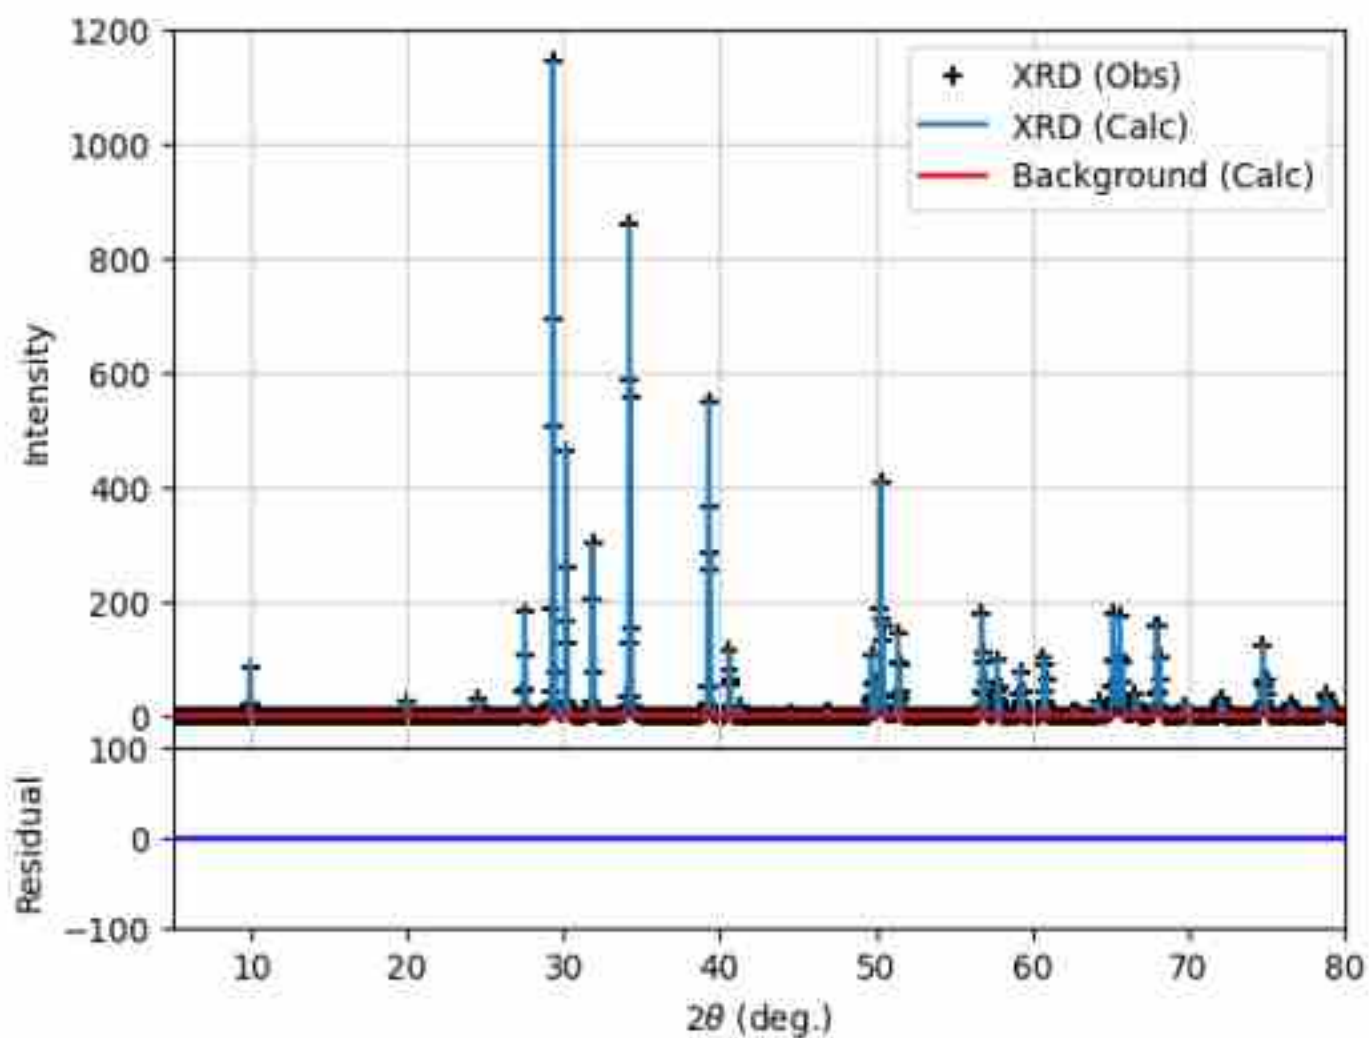

| RMSE before RR | Rwp     | RMSE after RR |
|----------------|---------|---------------|
| 0.008          | 0.00292 | 0.00026       |



# Nd5Mg1

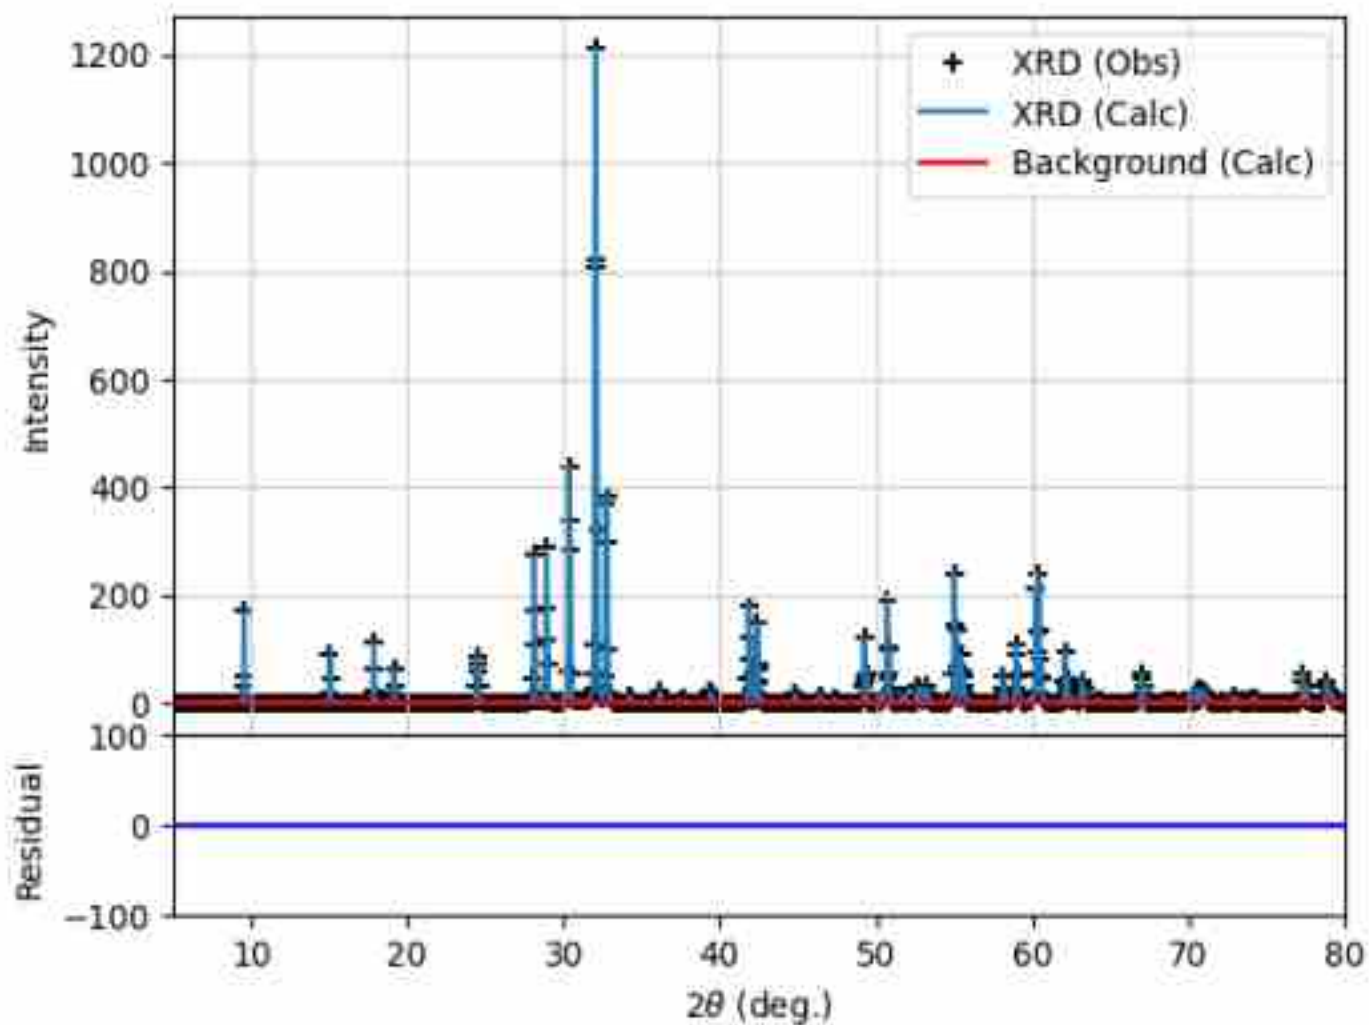

| RMSE before RR | Rwp     | RMSE after RR |
|----------------|---------|---------------|
| 0.008          | 0.00341 | 0.00034       |

# P2F10

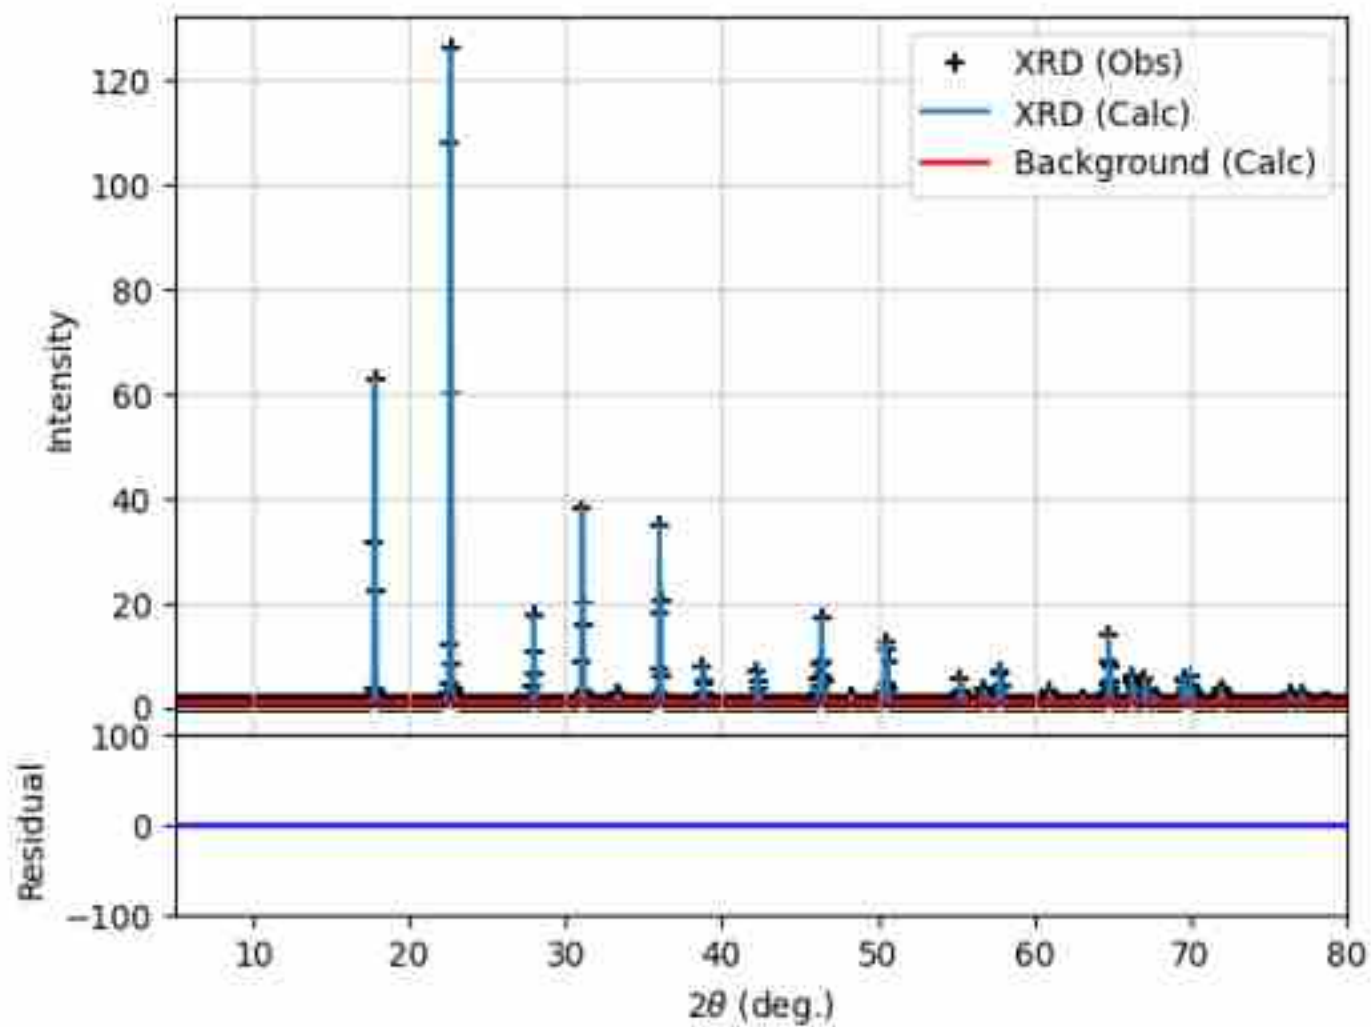

| RMSE before RR | Rwp     | RMSE after RR |
|----------------|---------|---------------|
| 0.08           | 0.00316 | 0.00138       |

# Pa1O2

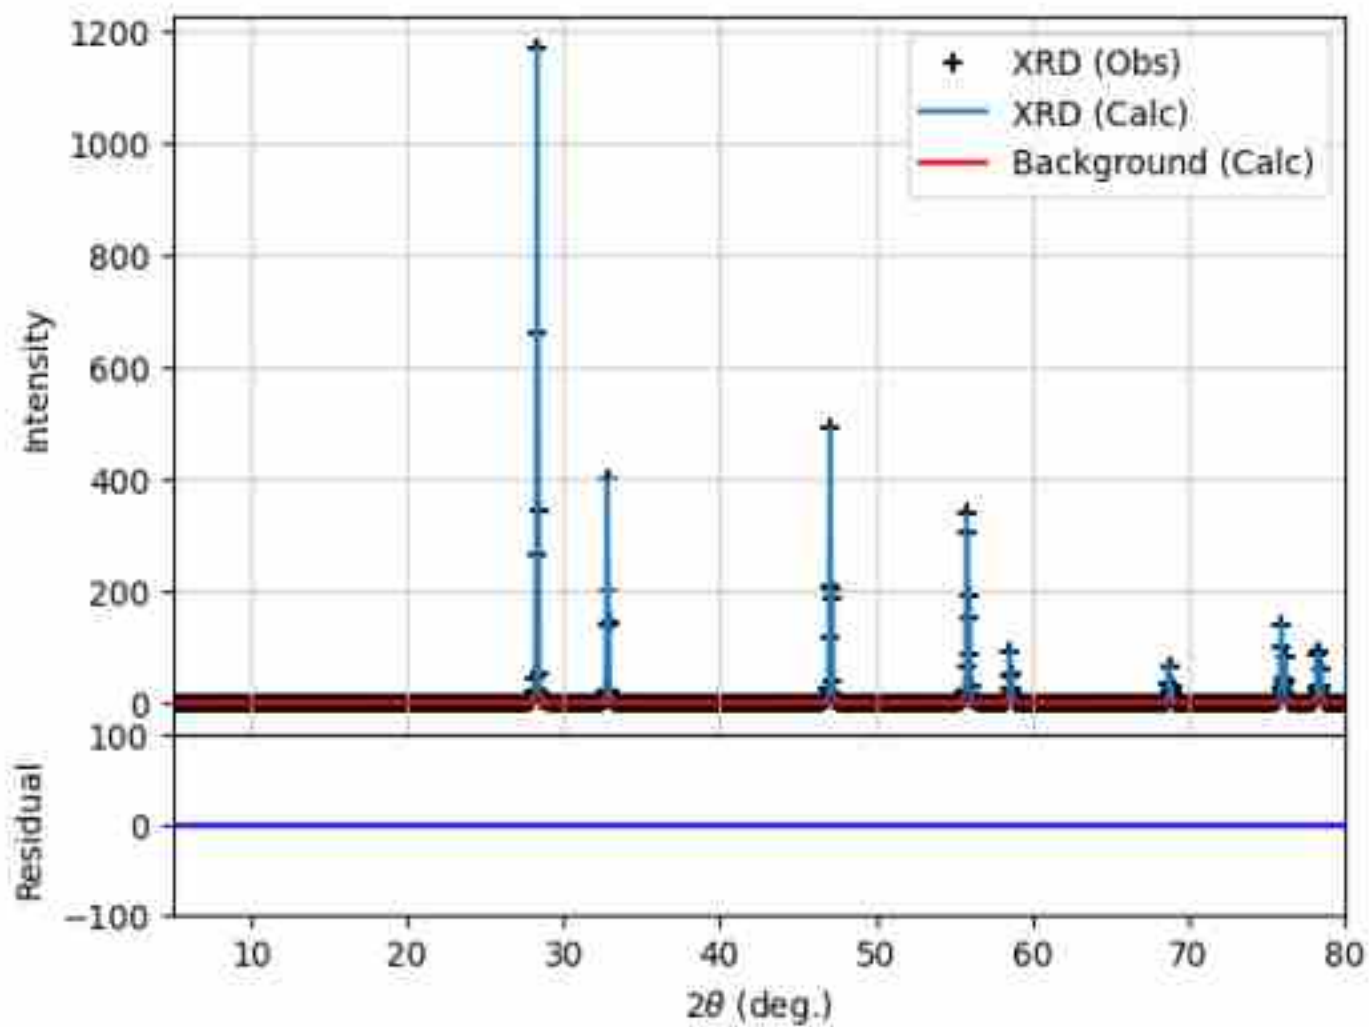

| RMSE before RR | Rwp    | RMSE after RR |
|----------------|--------|---------------|
| 0.008          | 0.0199 | 0.00464       |

# Pd1Au1O2

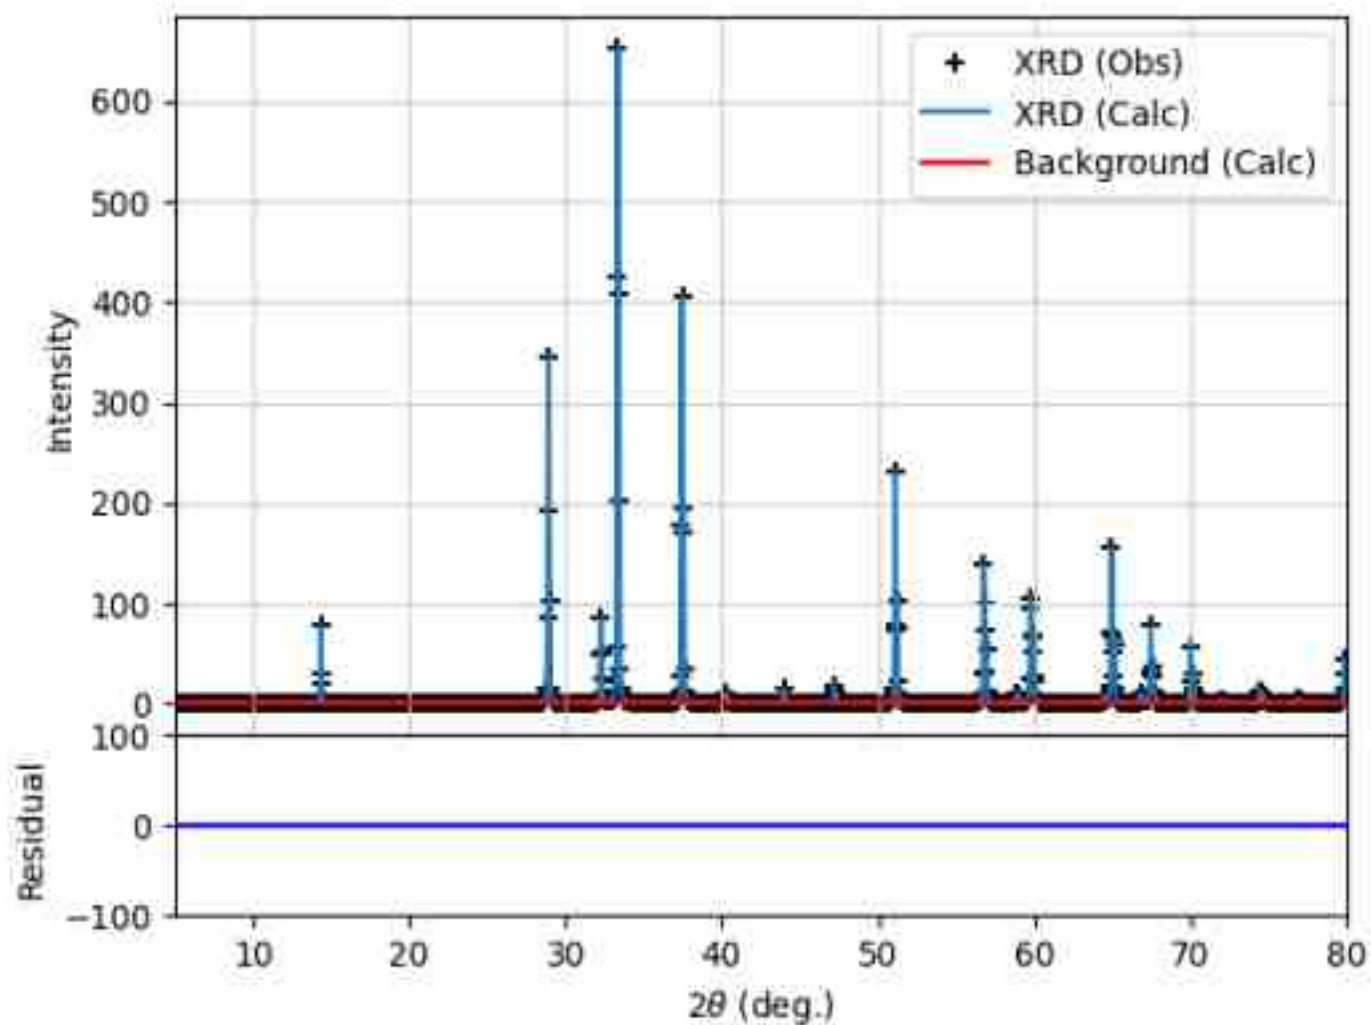

| RMSE before RR | Rwp     | RMSE after RR |
|----------------|---------|---------------|
| 0.008          | 0.00592 | 0.00171       |

# Pr1Ni1C2

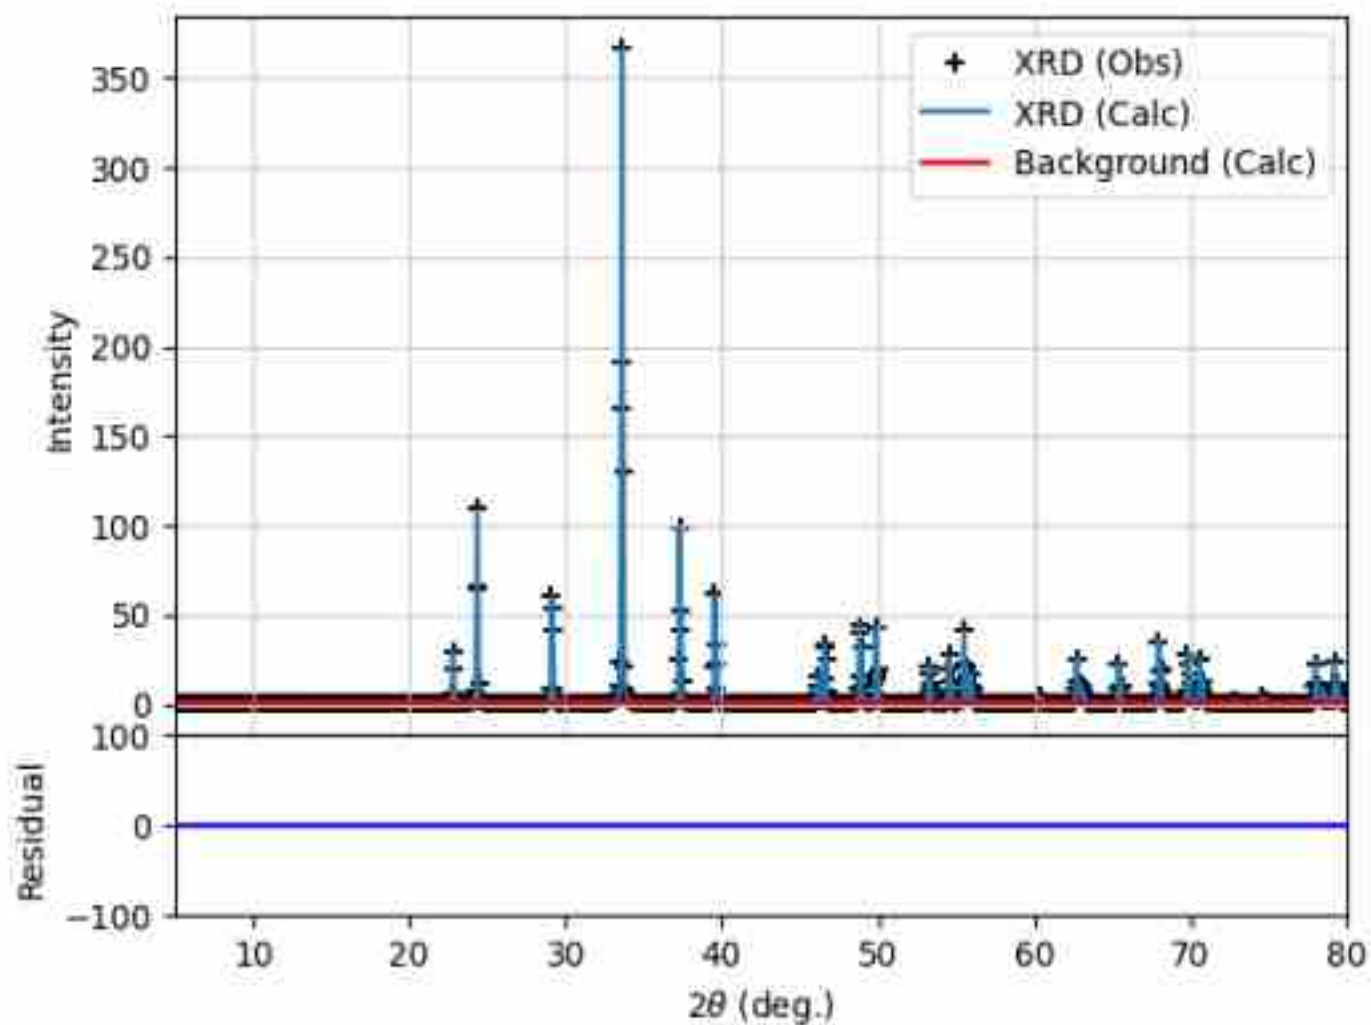

| RMSE before RR | Rwp     | RMSE after RR |
|----------------|---------|---------------|
| 0.008          | 0.00441 | 0.00148       |

# Pr2Er6

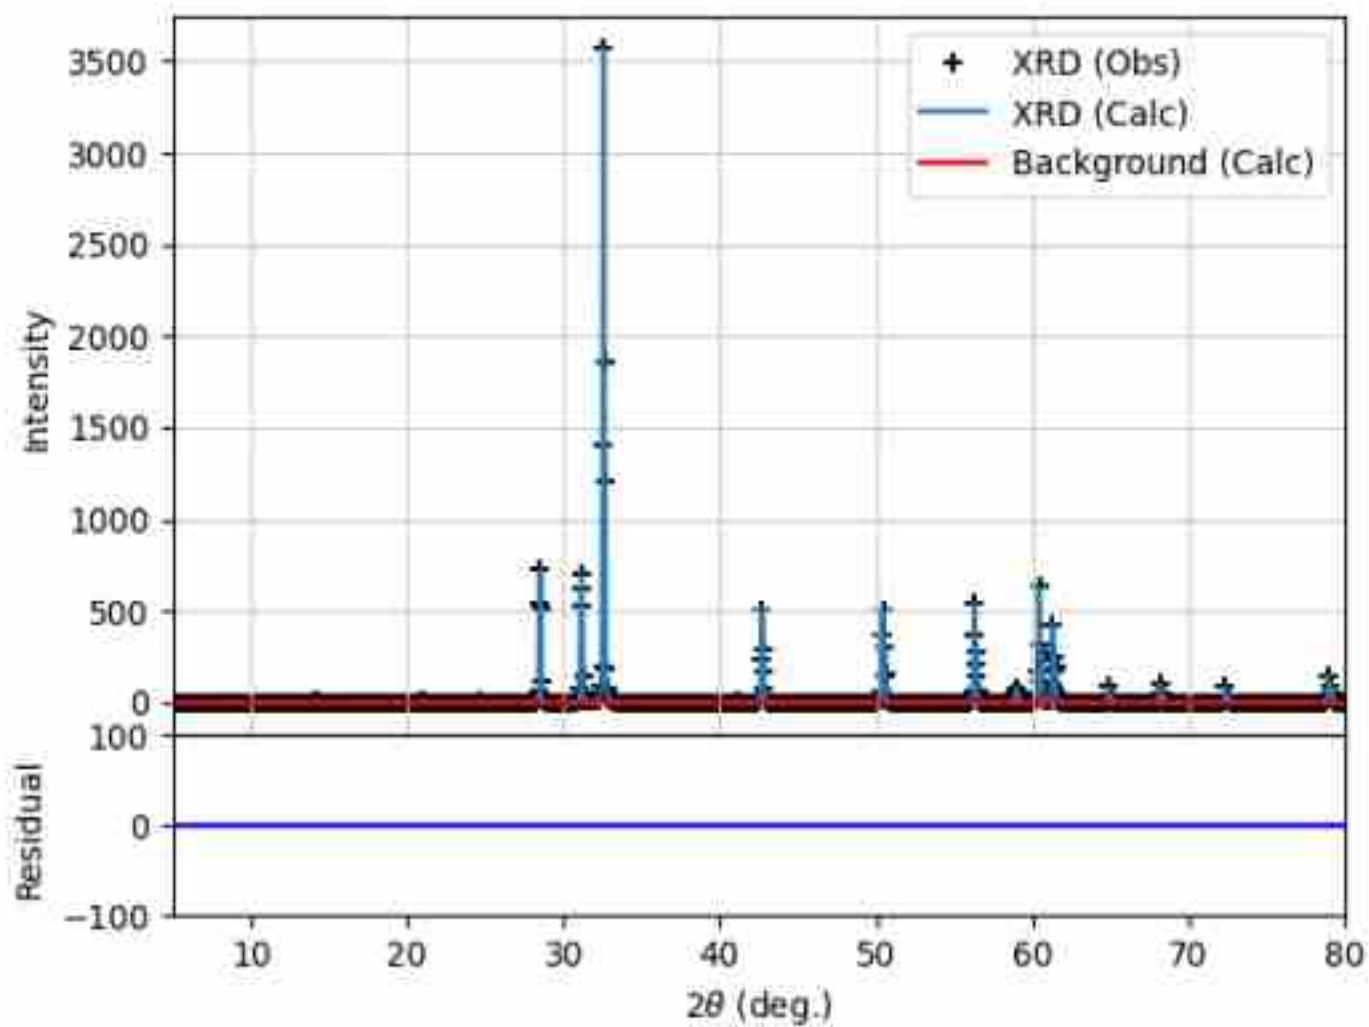

| RMSE before RR | Rwp     | RMSE after RR |
|----------------|---------|---------------|
| 0.008          | 0.02864 | 0.00126       |

# Pr<sub>2</sub>Ge<sub>3</sub>

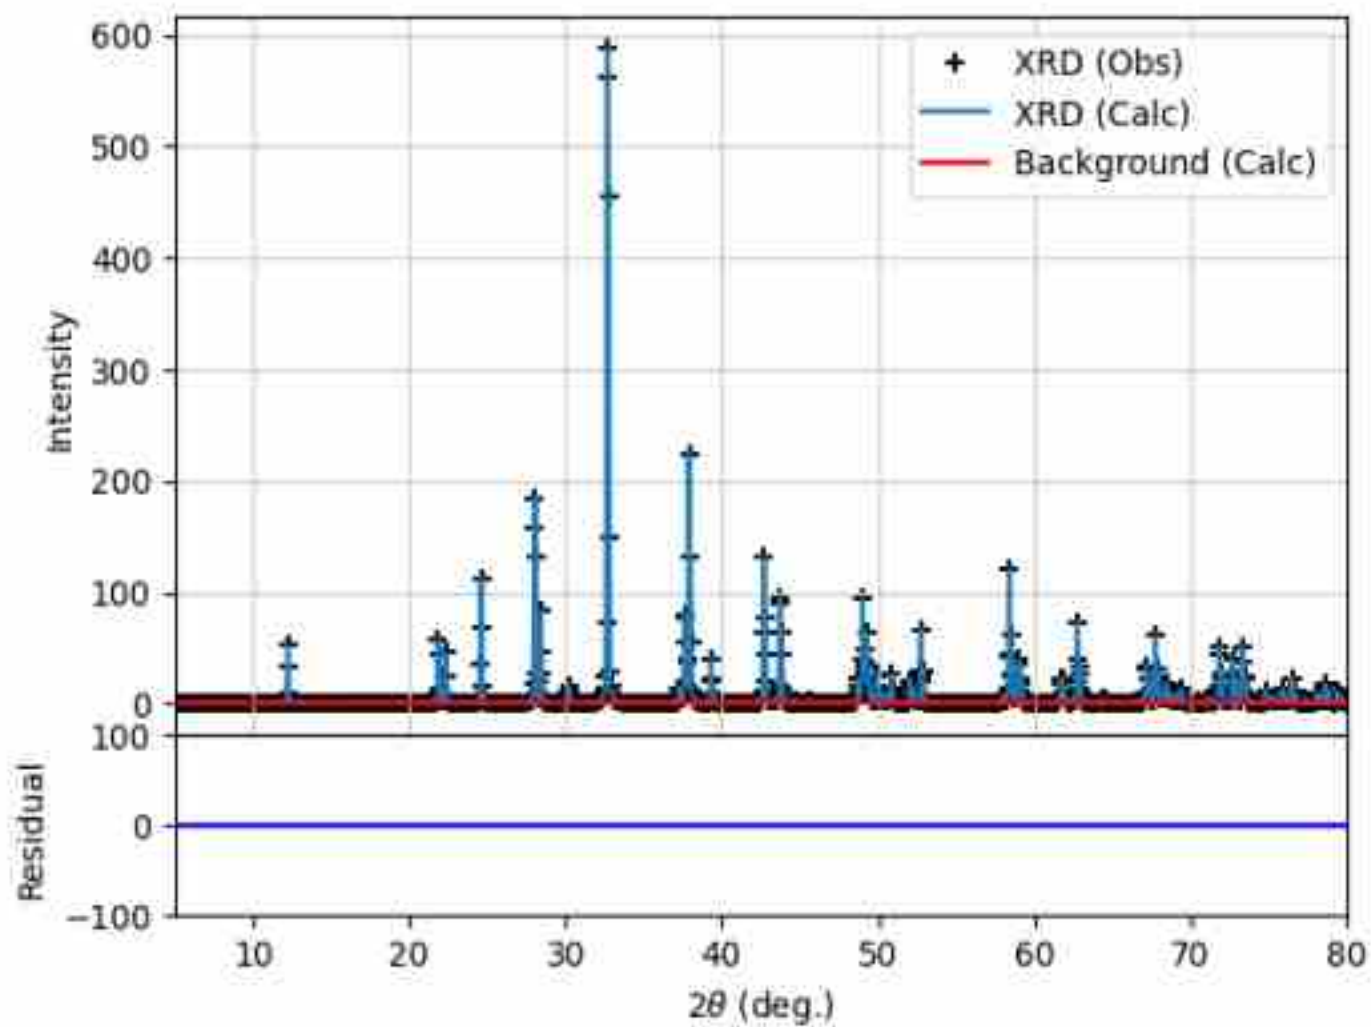

| RMSE before RR | Rwp     | RMSE after RR |
|----------------|---------|---------------|
| 0.008          | 0.00404 | 0.00032       |

# Pr<sub>3</sub>Sn<sub>1</sub>N<sub>1</sub>

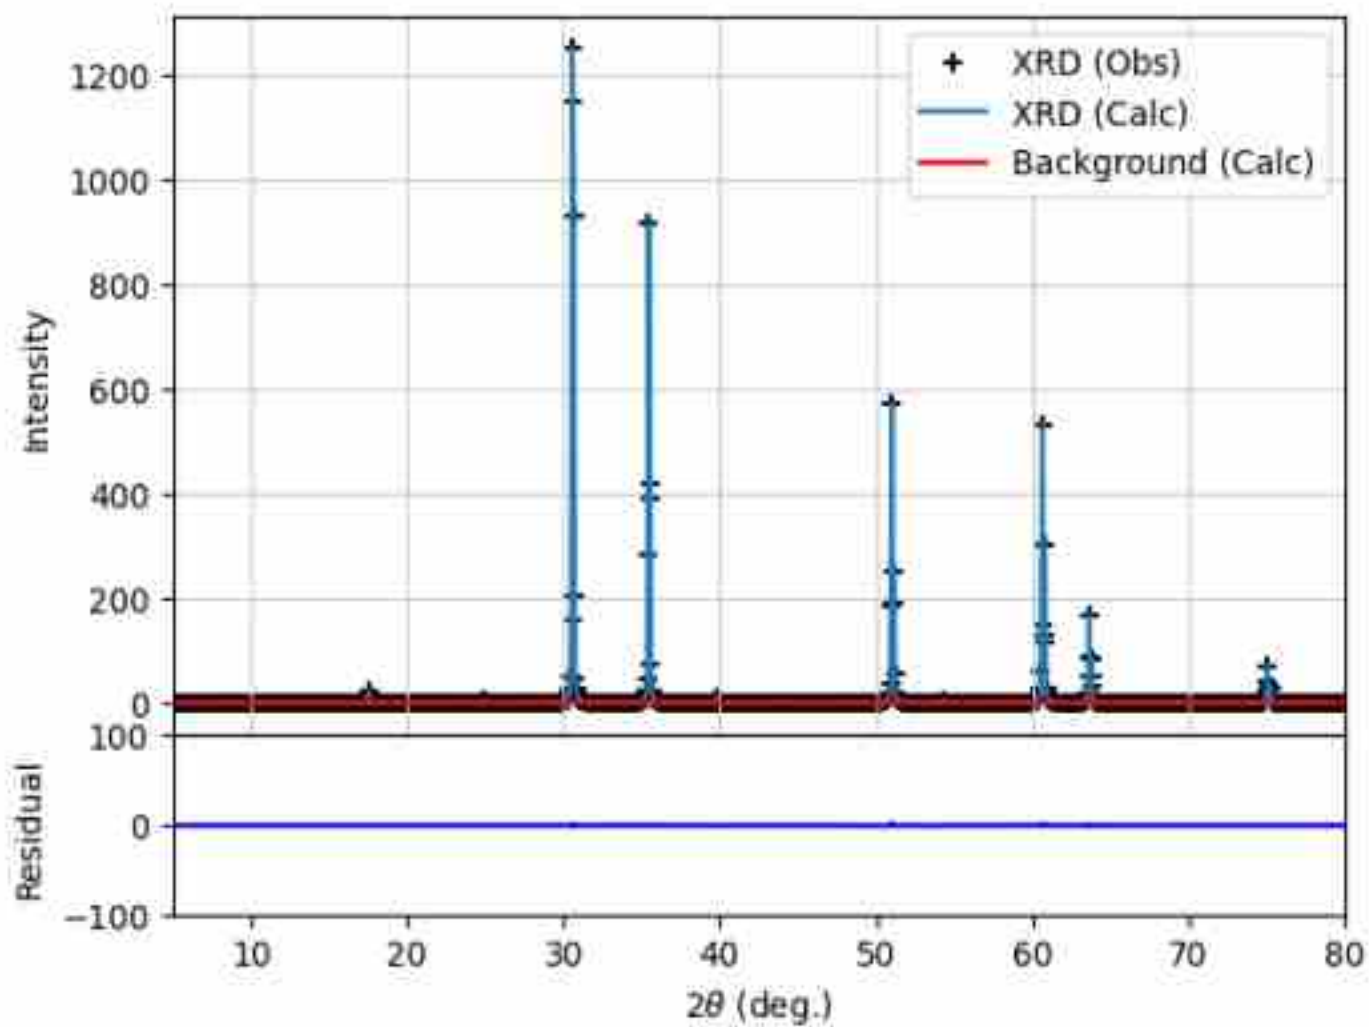

| RMSE before RR | Rwp     | RMSE after RR |
|----------------|---------|---------------|
| 0.008          | 1.25747 | 0.02834       |



# Pu<sub>1</sub>B<sub>2</sub>Ir<sub>3</sub>

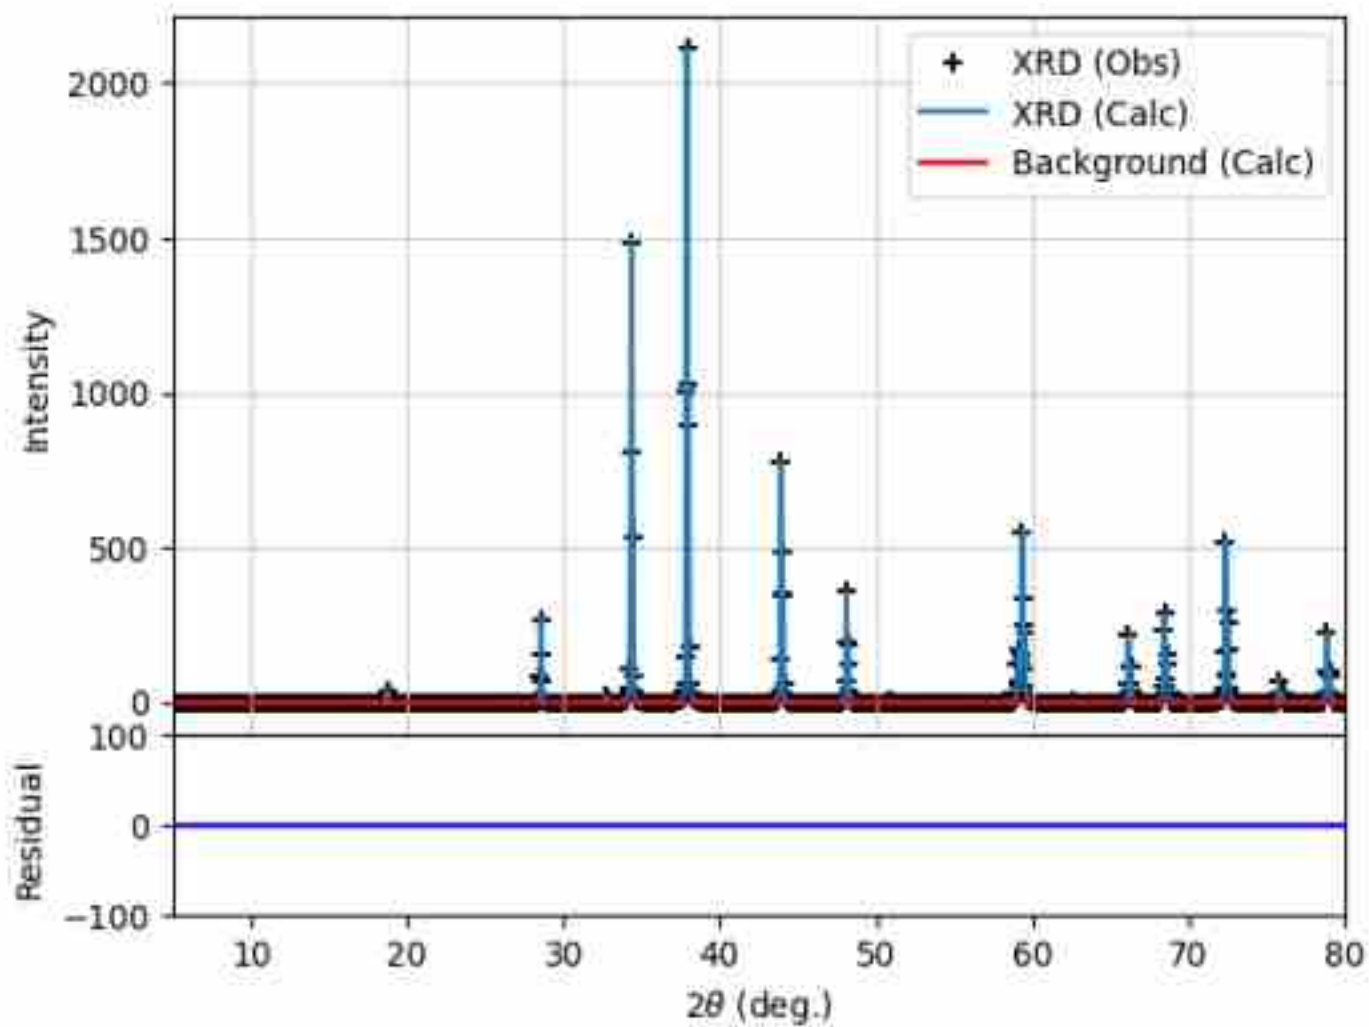

| RMSE before RR | Rwp     | RMSE after RR |
|----------------|---------|---------------|
| 0.008          | 0.01023 | 0.00259       |

# Pu2Al4

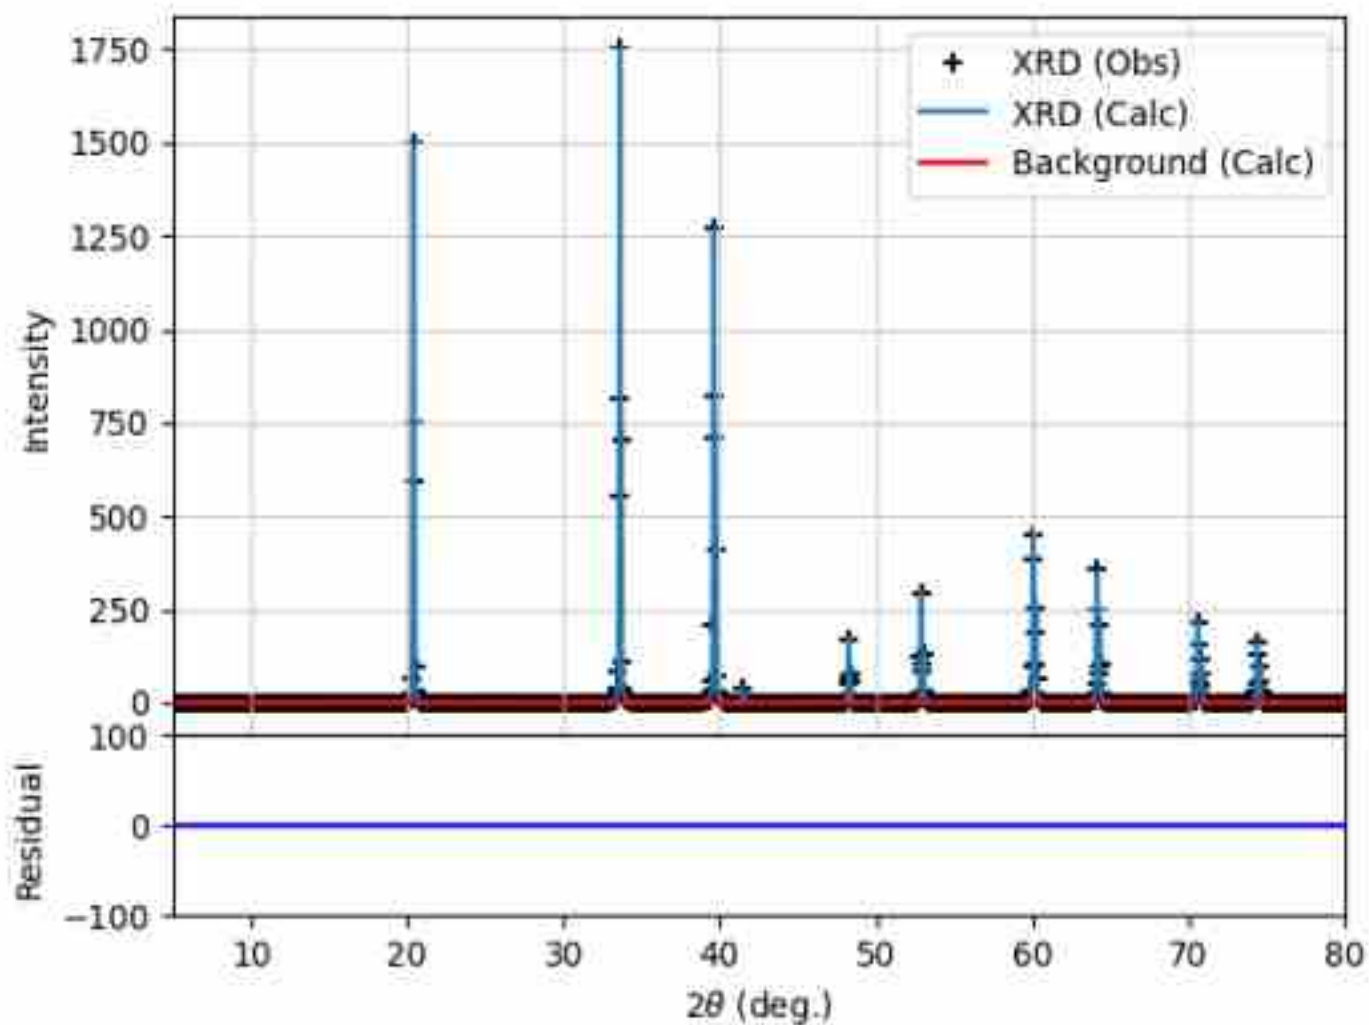

| RMSE before RR | Rwp     | RMSE after RR |
|----------------|---------|---------------|
| 0.008          | 0.00627 | 0.00112       |

# Rb1Er1S2

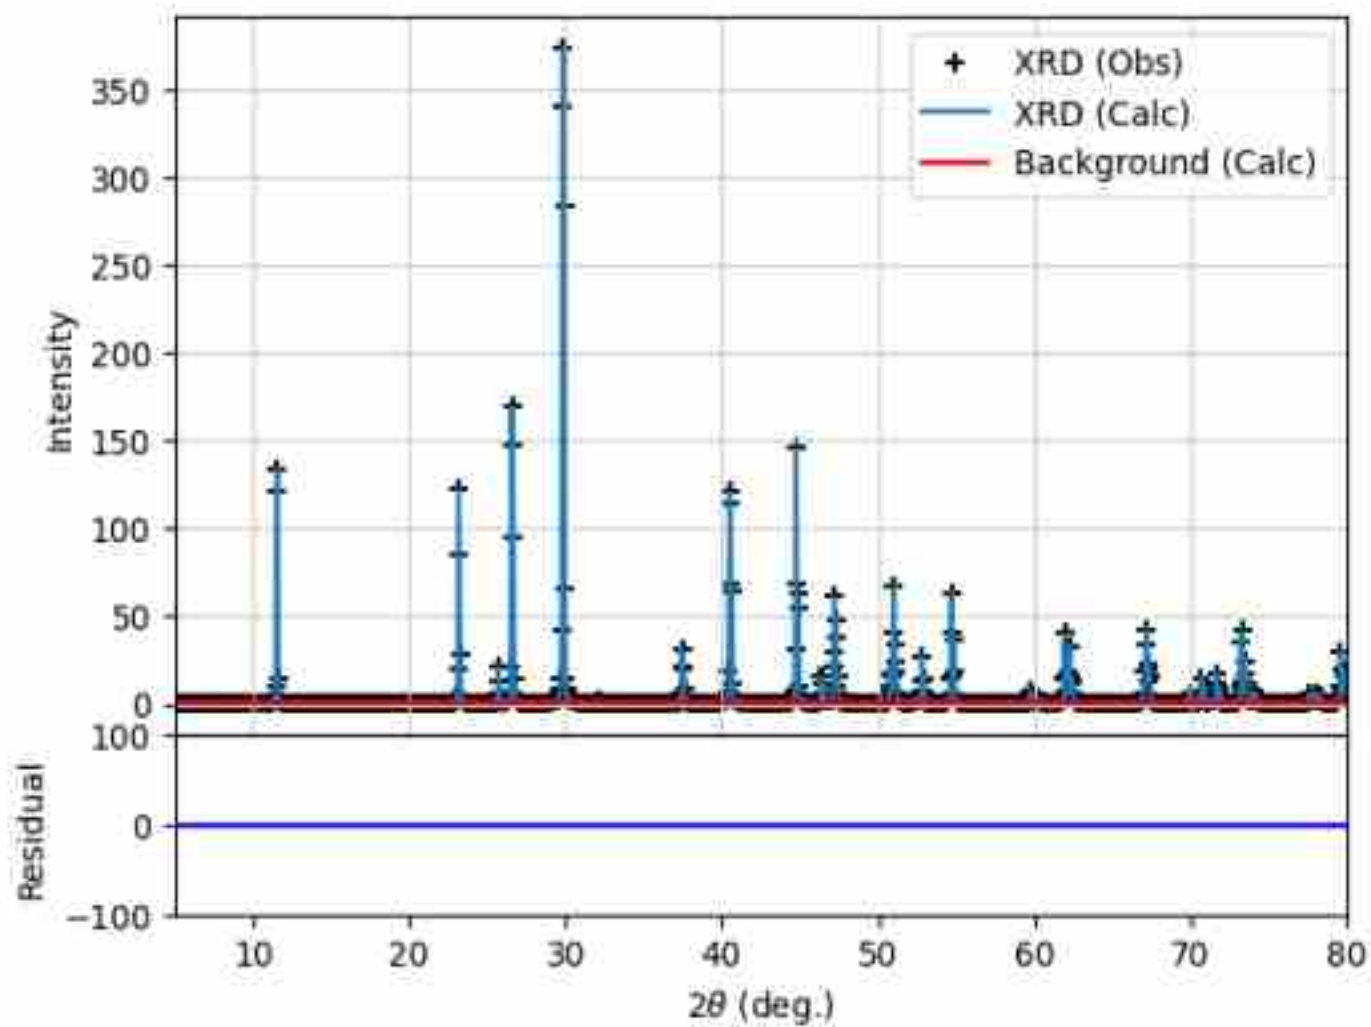

| RMSE before RR | Rwp     | RMSE after RR |
|----------------|---------|---------------|
| 0.008          | 0.00266 | 0.00033       |

# Rb1Tm1O2

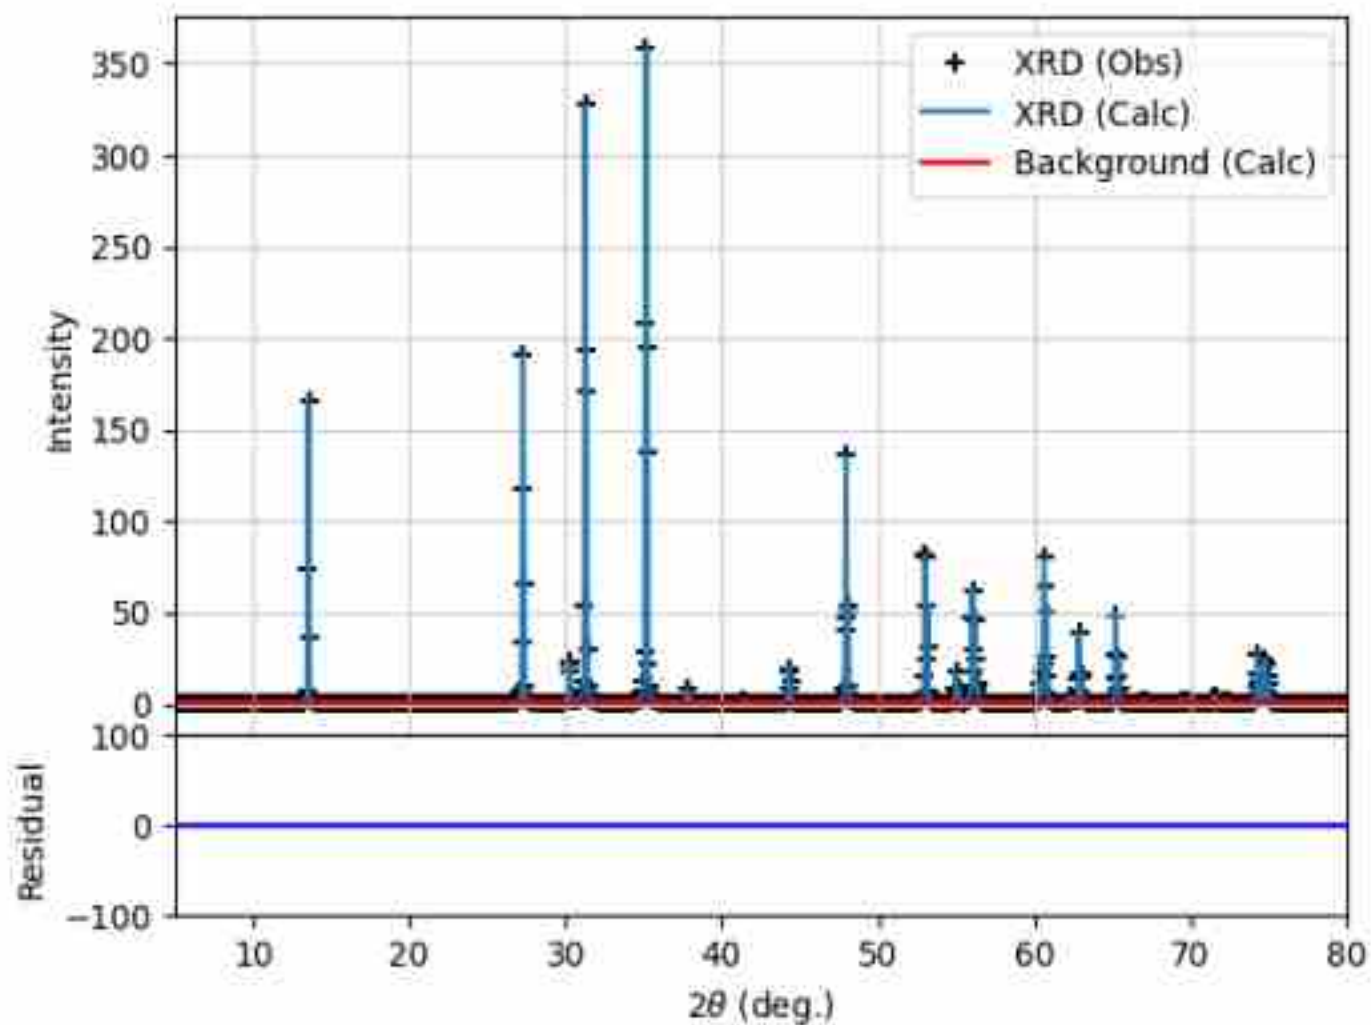

| RMSE before RR | Rwp     | RMSE after RR |
|----------------|---------|---------------|
| 0.008          | 0.00384 | 0.00039       |

# Rb<sub>2</sub>Li<sub>1</sub>Dy<sub>1</sub>Br<sub>6</sub>

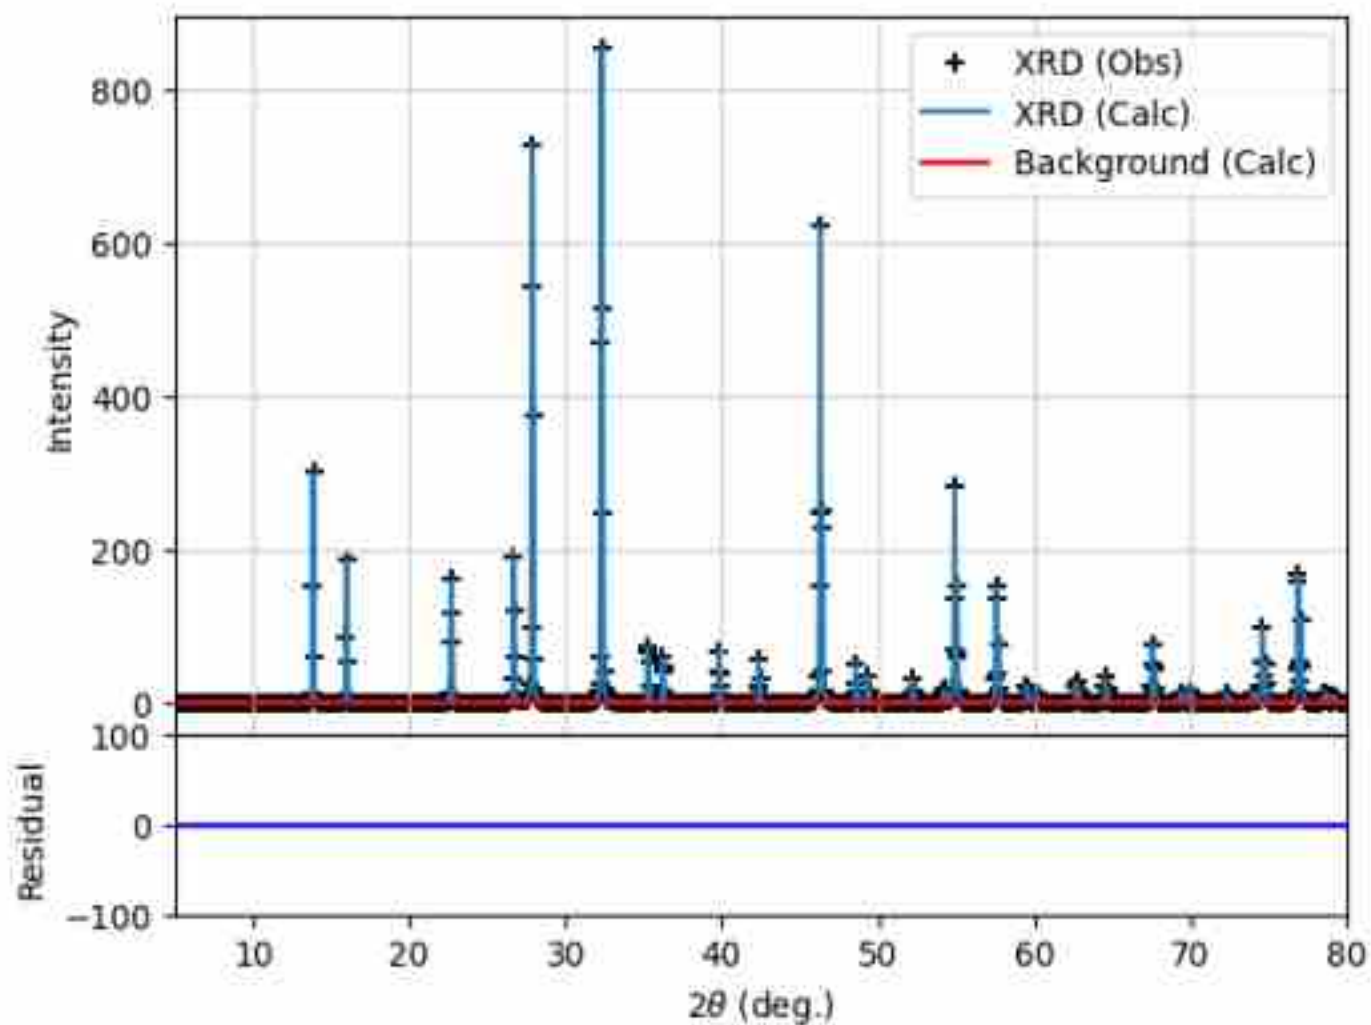

| RMSE before RR | Rwp     | RMSE after RR |
|----------------|---------|---------------|
| 0.008          | 0.02642 | 0.0037        |

# Rb<sub>2</sub>Li<sub>1</sub>Er<sub>1</sub>Cl<sub>6</sub>

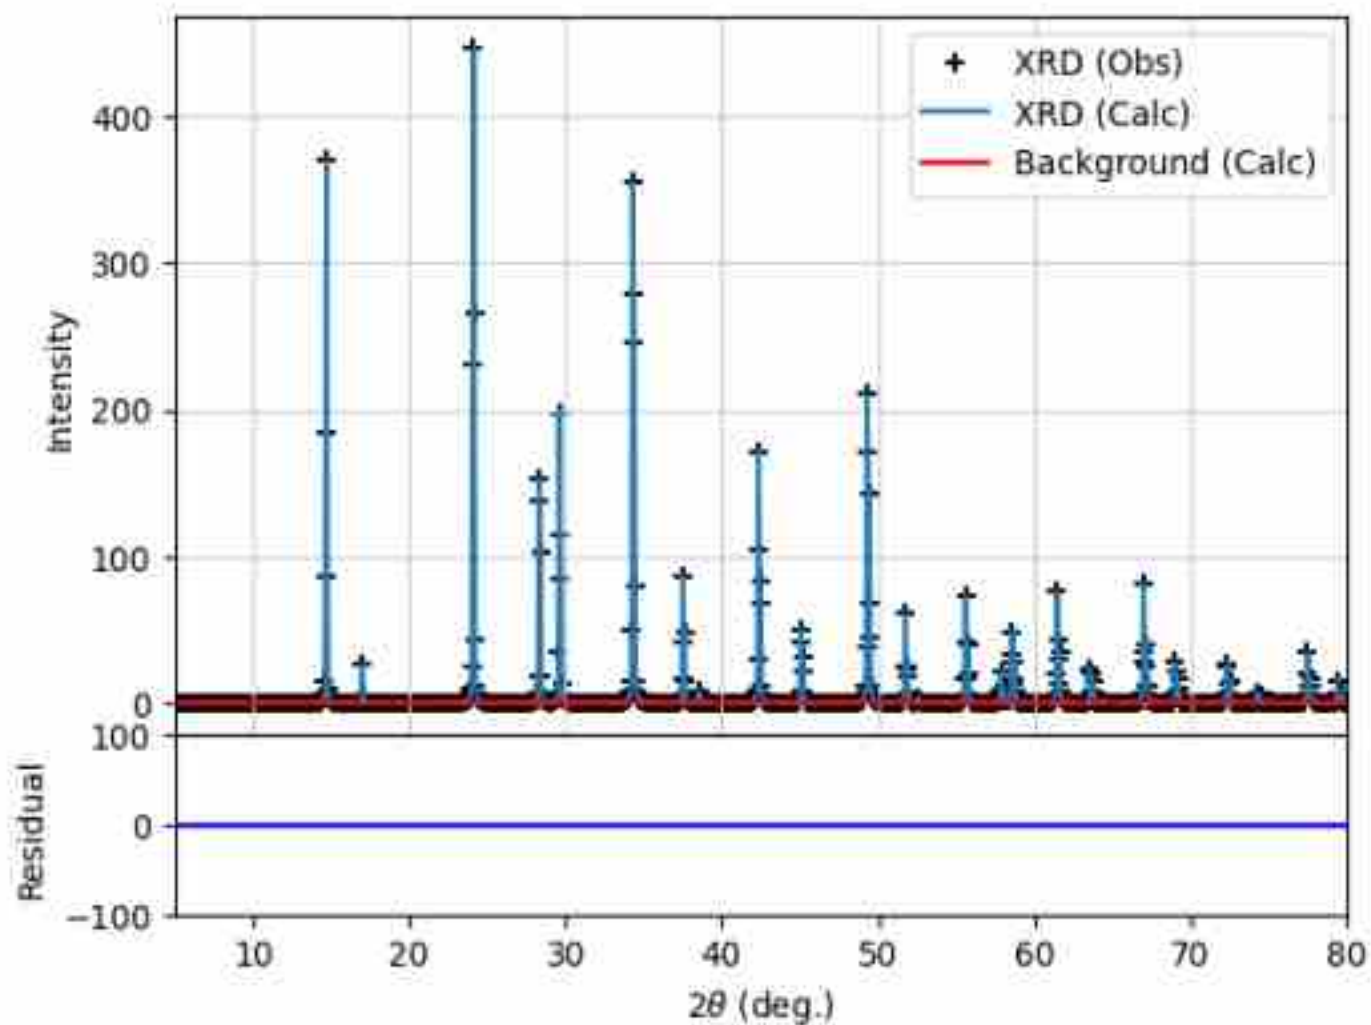

| RMSE before RR | Rwp     | RMSE after RR |
|----------------|---------|---------------|
| 0.008          | 0.01465 | 0.00548       |

# Rb<sub>2</sub>Li<sub>1</sub>Eu<sub>1</sub>Cl<sub>6</sub>

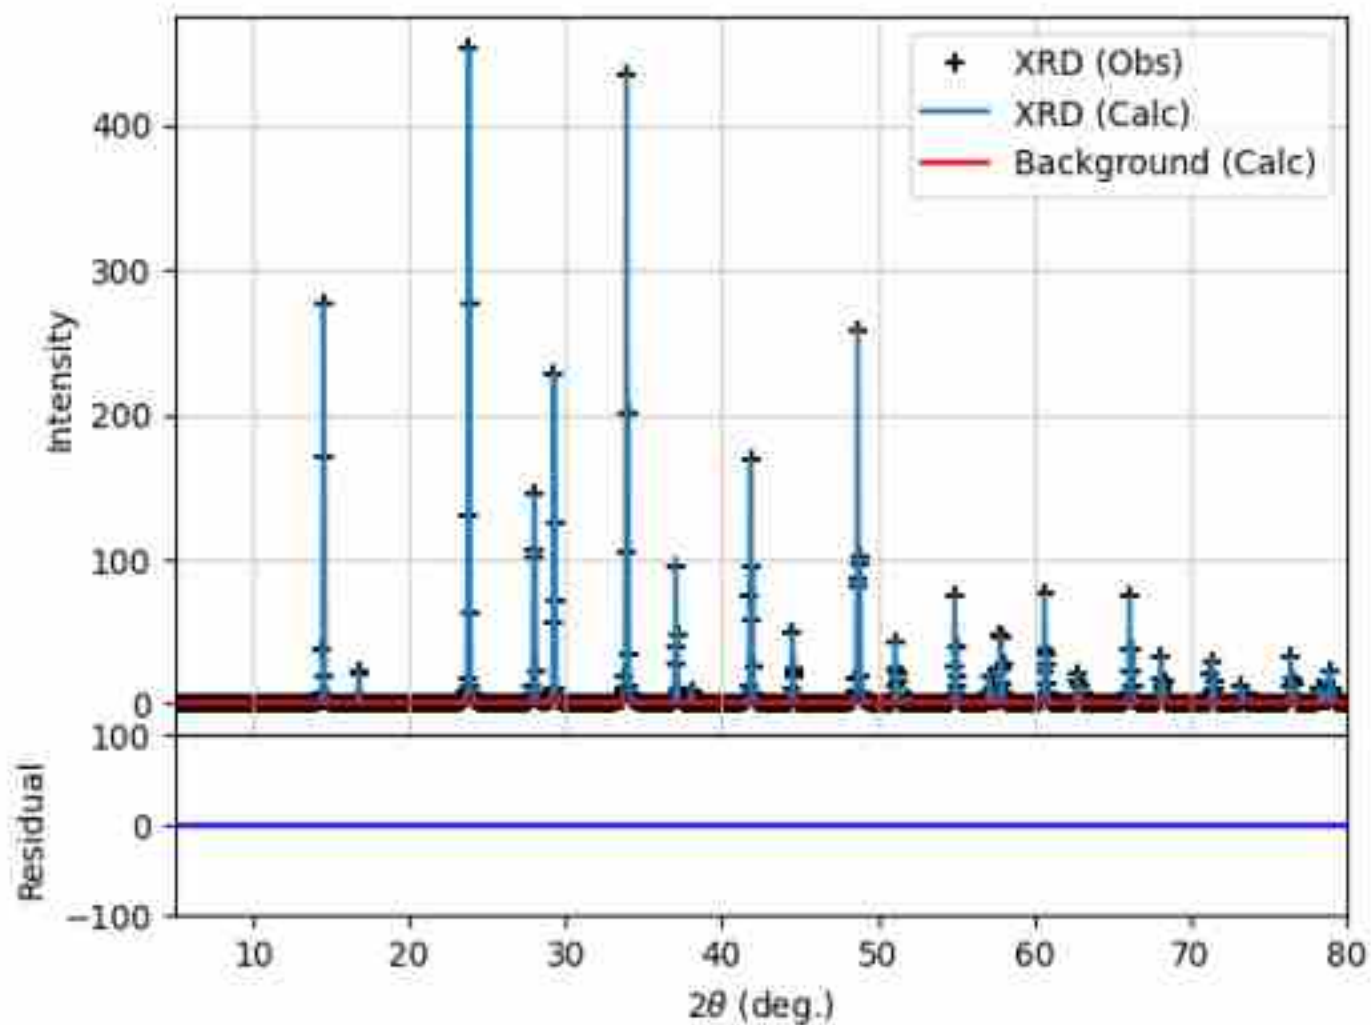

| RMSE before RR | Rwp     | RMSE after RR |
|----------------|---------|---------------|
| 0.008          | 0.05008 | 0.00601       |

# Rb<sub>2</sub>Li<sub>1</sub>La<sub>1</sub>Cl<sub>6</sub>

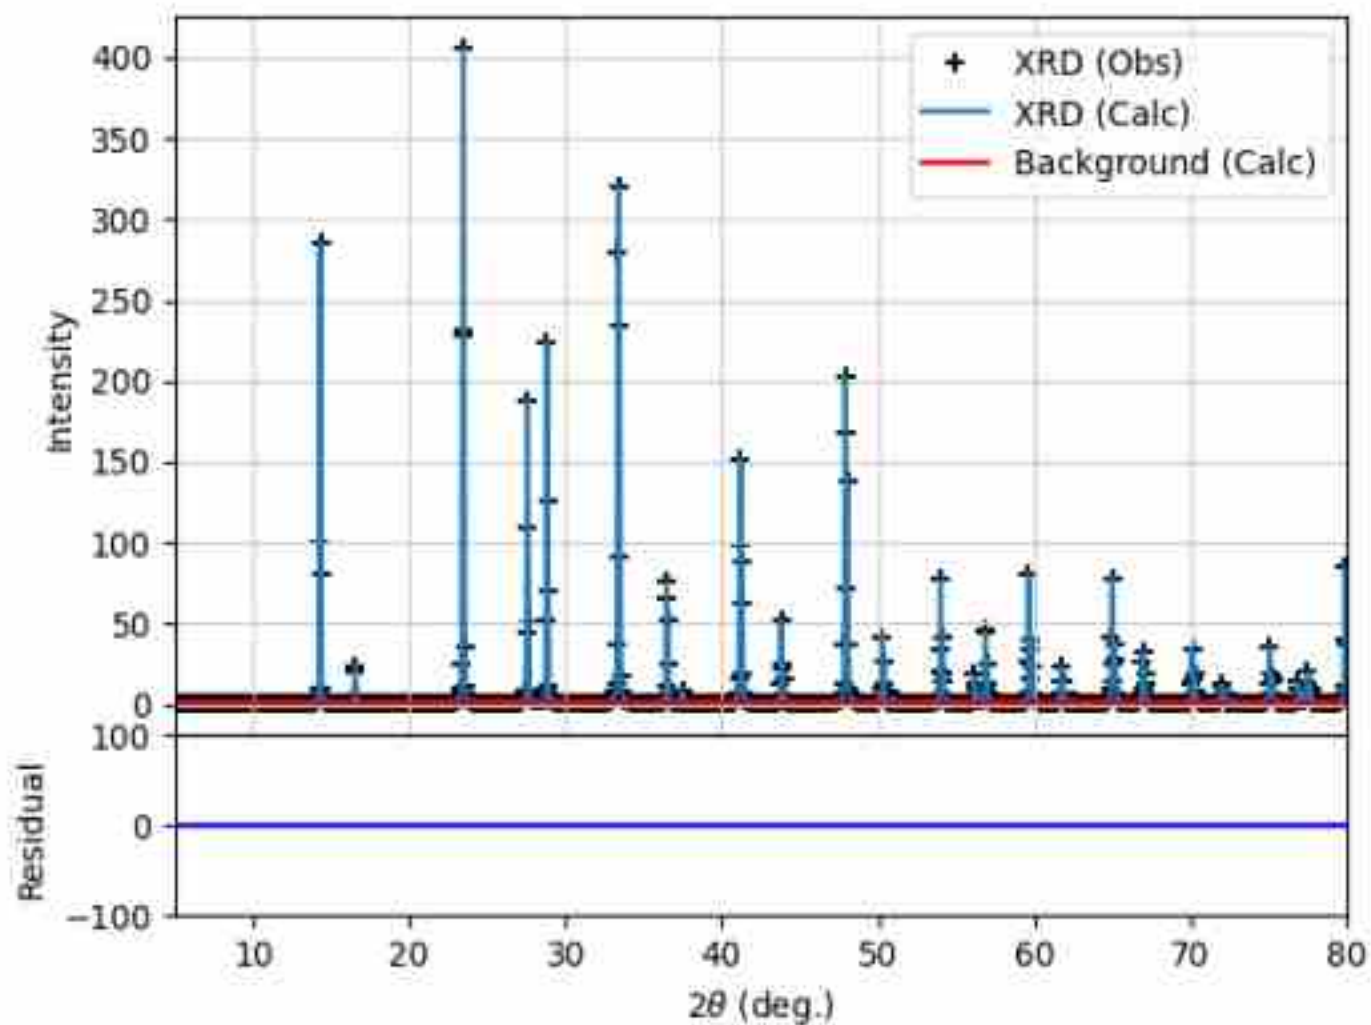

| RMSE before RR | Rwp    | RMSE after RR |
|----------------|--------|---------------|
| 0.008          | 0.0322 | 0.00383       |



# Rb<sub>2</sub>Li<sub>1</sub>Sb<sub>1</sub>I<sub>6</sub>

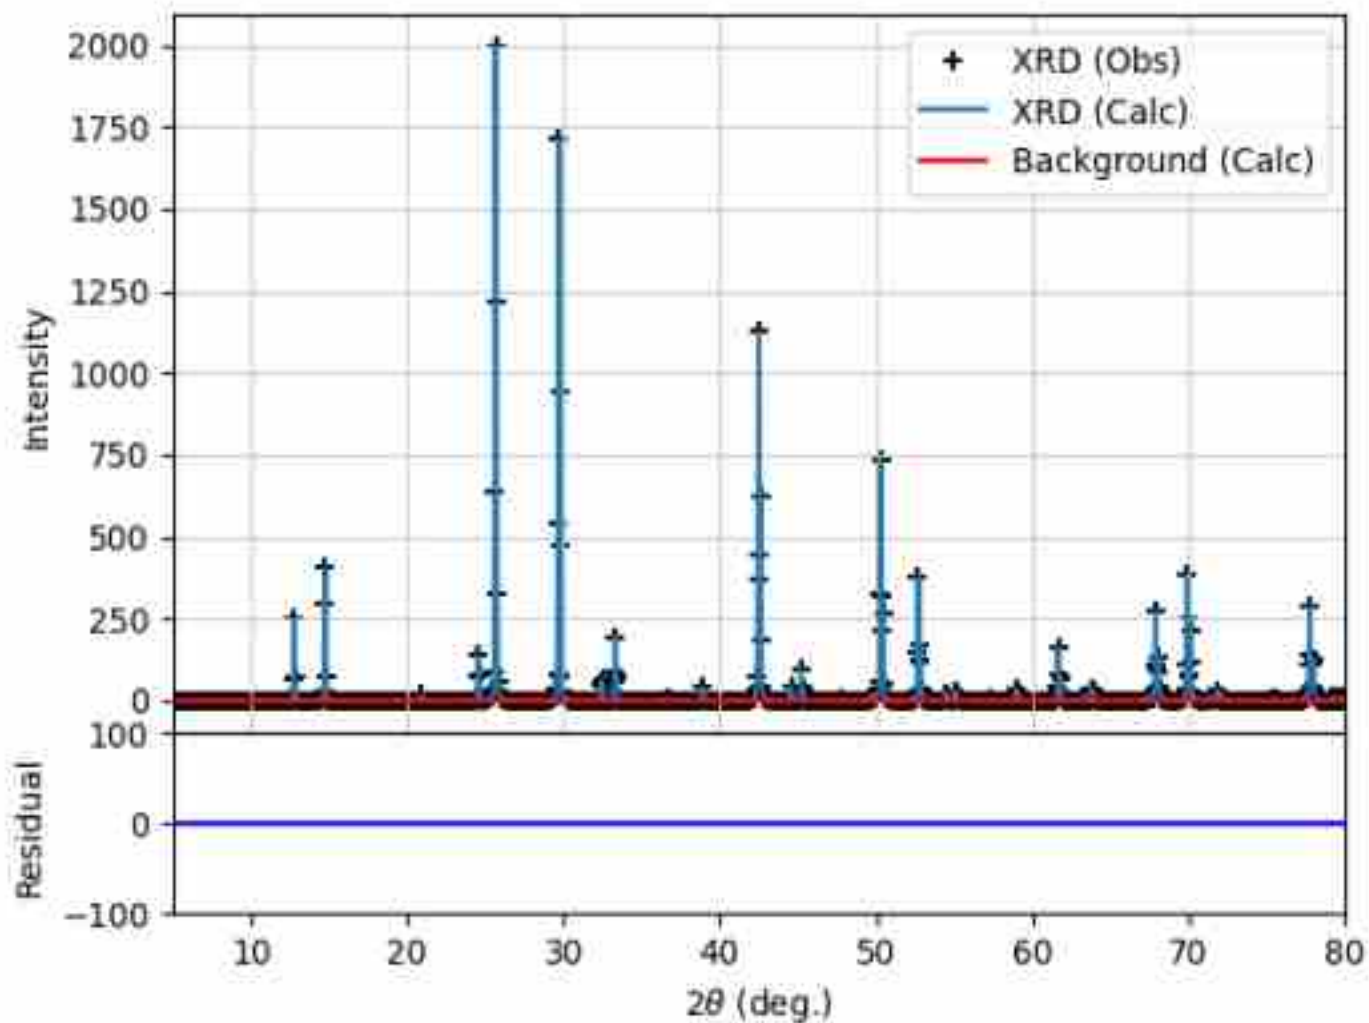

| RMSE before RR | Rwp     | RMSE after RR |
|----------------|---------|---------------|
| 0.008          | 0.08987 | 0.00594       |

# Rb<sub>2</sub>Li<sub>1</sub>Y<sub>1</sub>F<sub>6</sub>

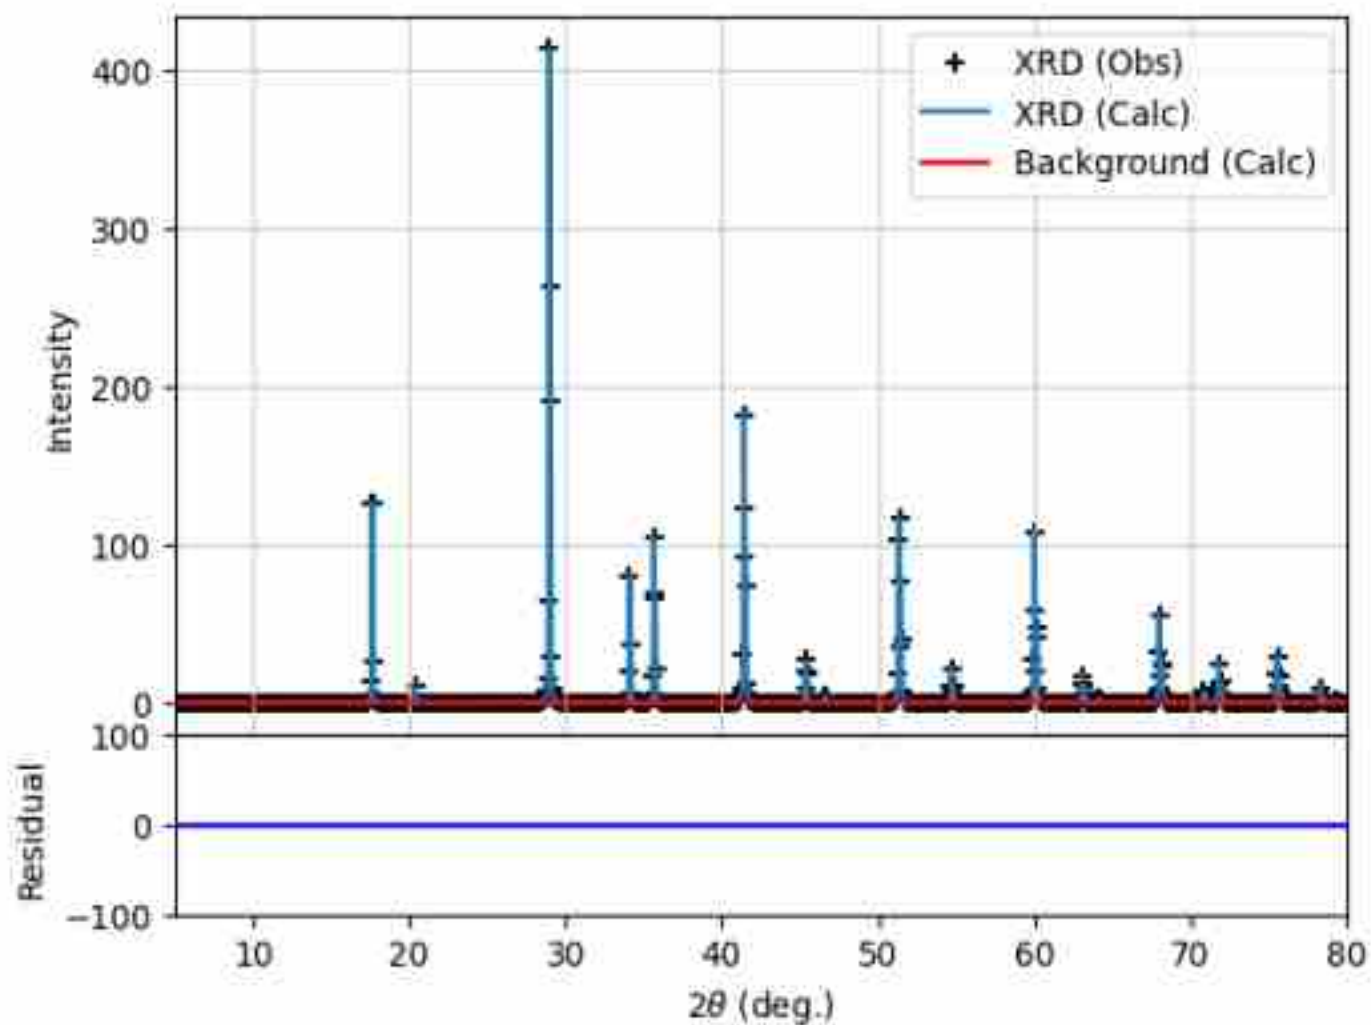

| RMSE before RR | Rwp     | RMSE after RR |
|----------------|---------|---------------|
| 0.008          | 0.01552 | 0.00486       |

# Rb<sub>2</sub>Na<sub>1</sub>Er<sub>1</sub>F<sub>6</sub>

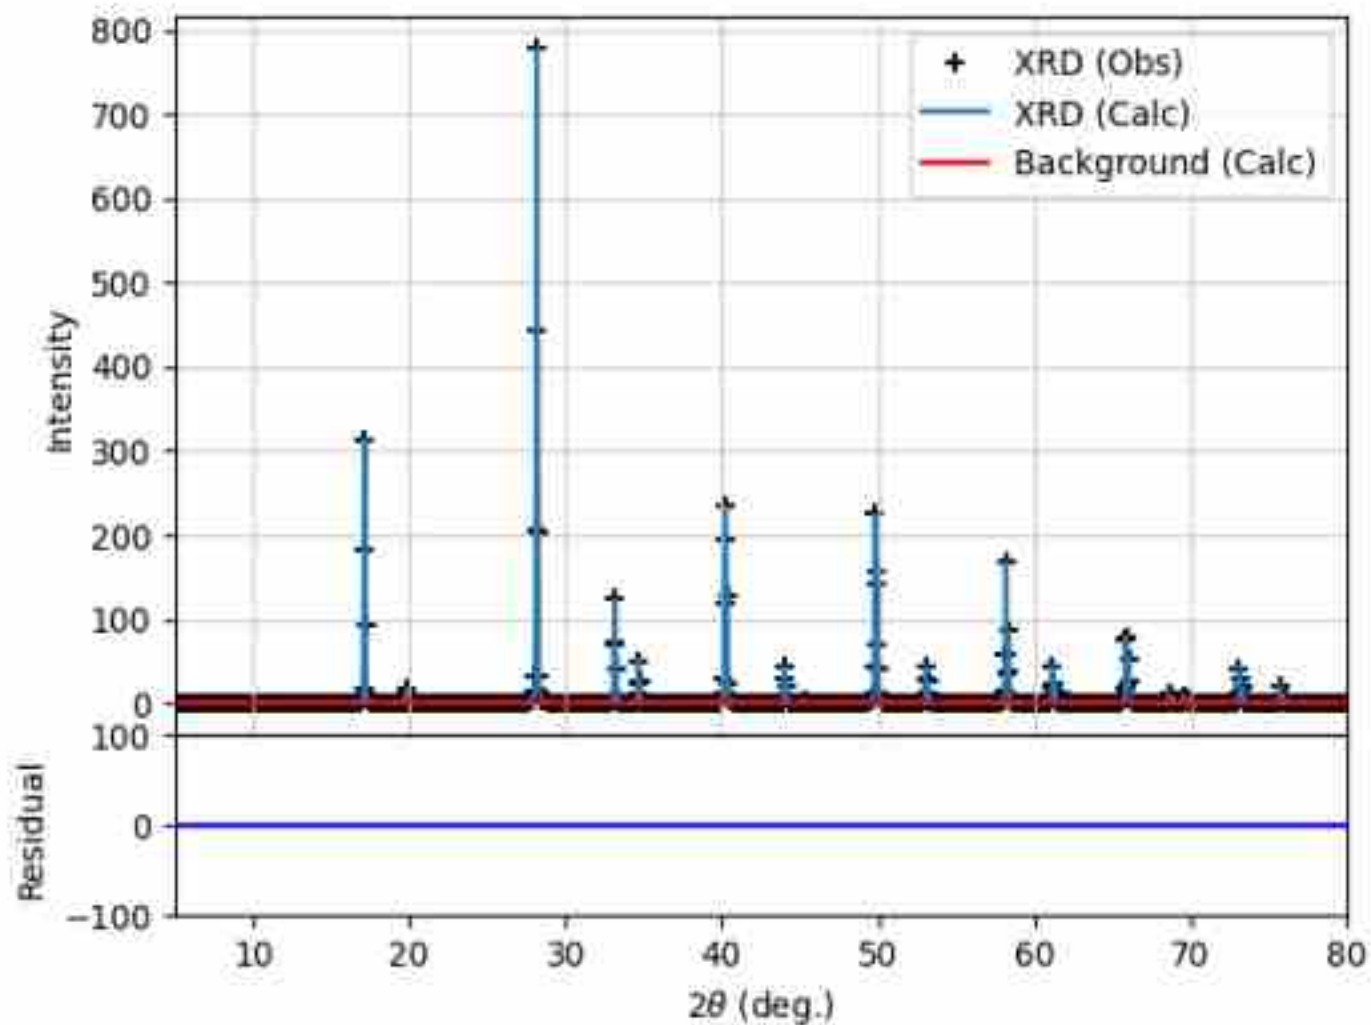

| RMSE before RR | Rwp     | RMSE after RR |
|----------------|---------|---------------|
| 0.008          | 0.00514 | 0.00186       |

# Rb<sub>2</sub>Na<sub>1</sub>Ga<sub>1</sub>Cl<sub>6</sub>

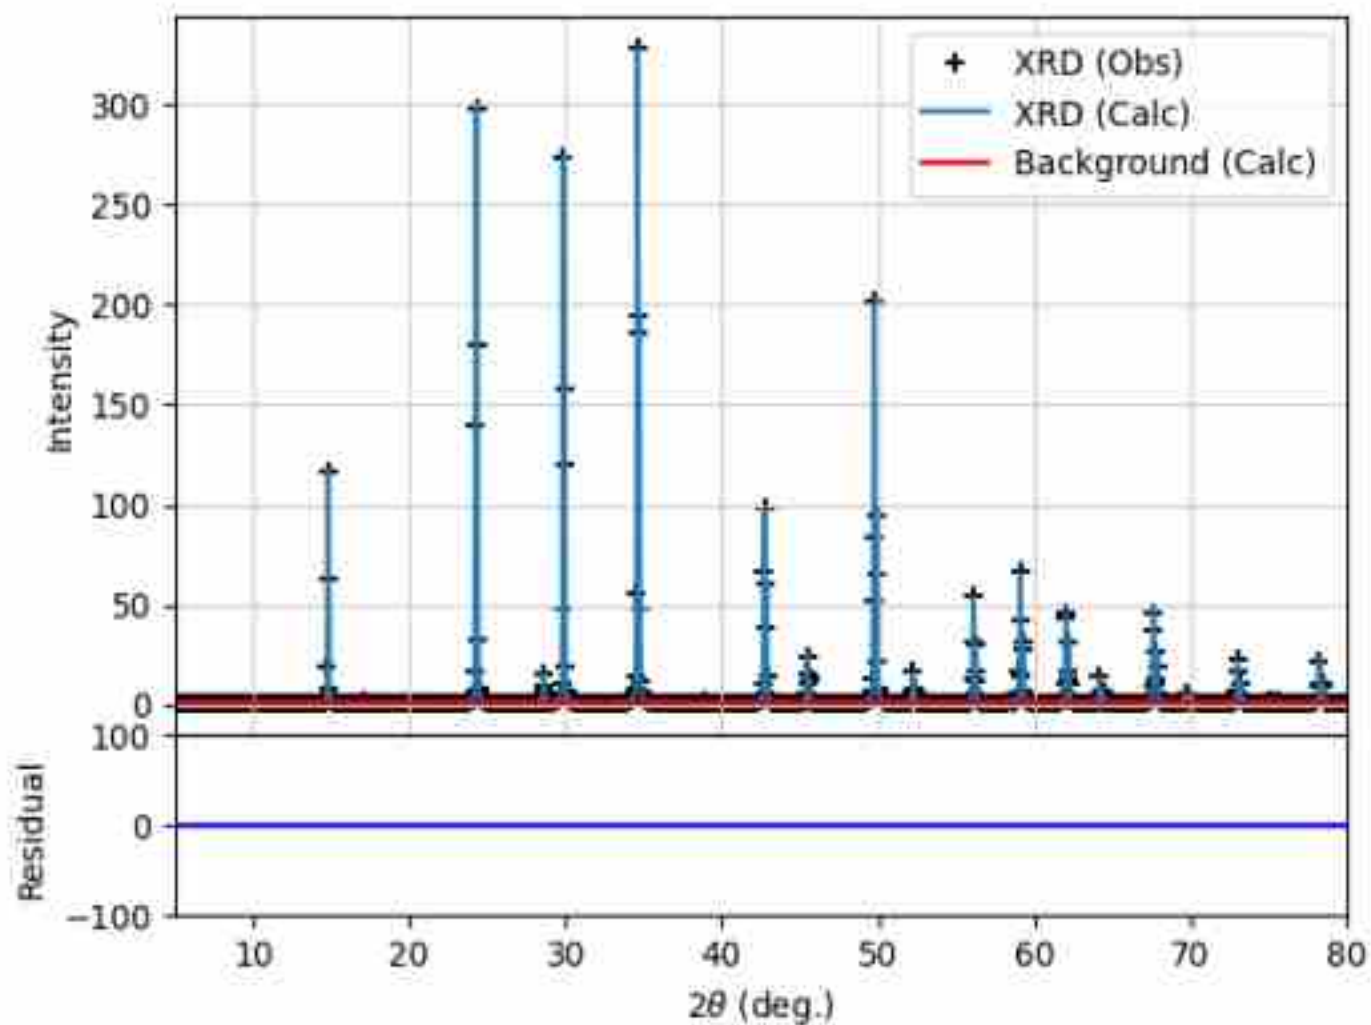

| RMSE before RR | Rwp     | RMSE after RR |
|----------------|---------|---------------|
| 0.008          | 0.02081 | 0.00168       |

# Rb<sub>2</sub>NaInF<sub>6</sub>

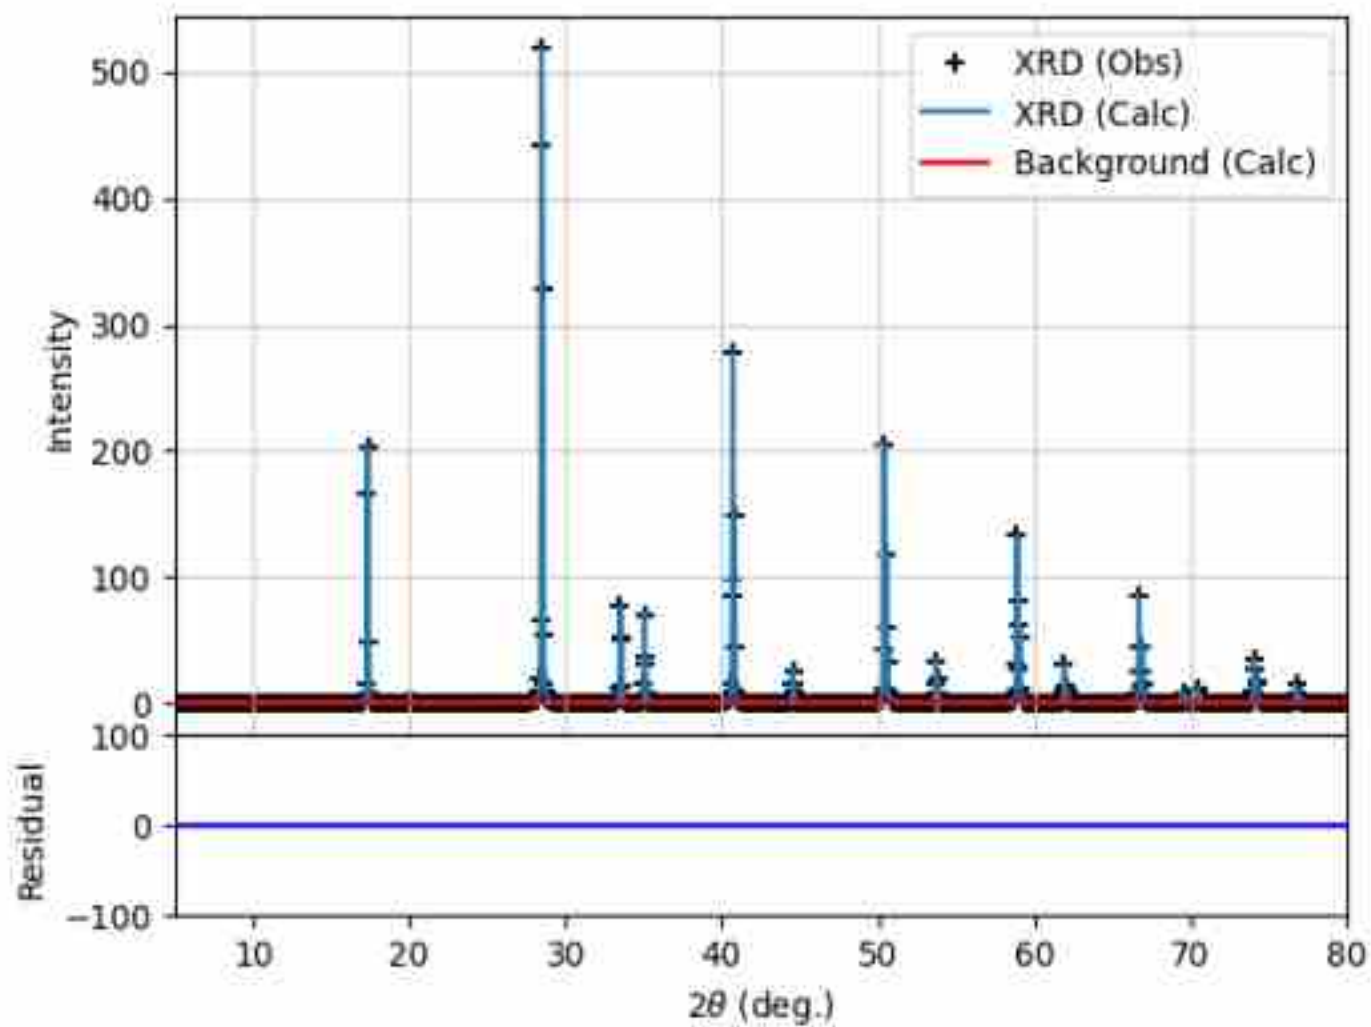

| RMSE before RR | Rwp     | RMSE after RR |
|----------------|---------|---------------|
| 0.008          | 0.00491 | 0.00189       |

# Rb<sub>2</sub>Na<sub>1</sub>Nd<sub>1</sub>Br<sub>6</sub>

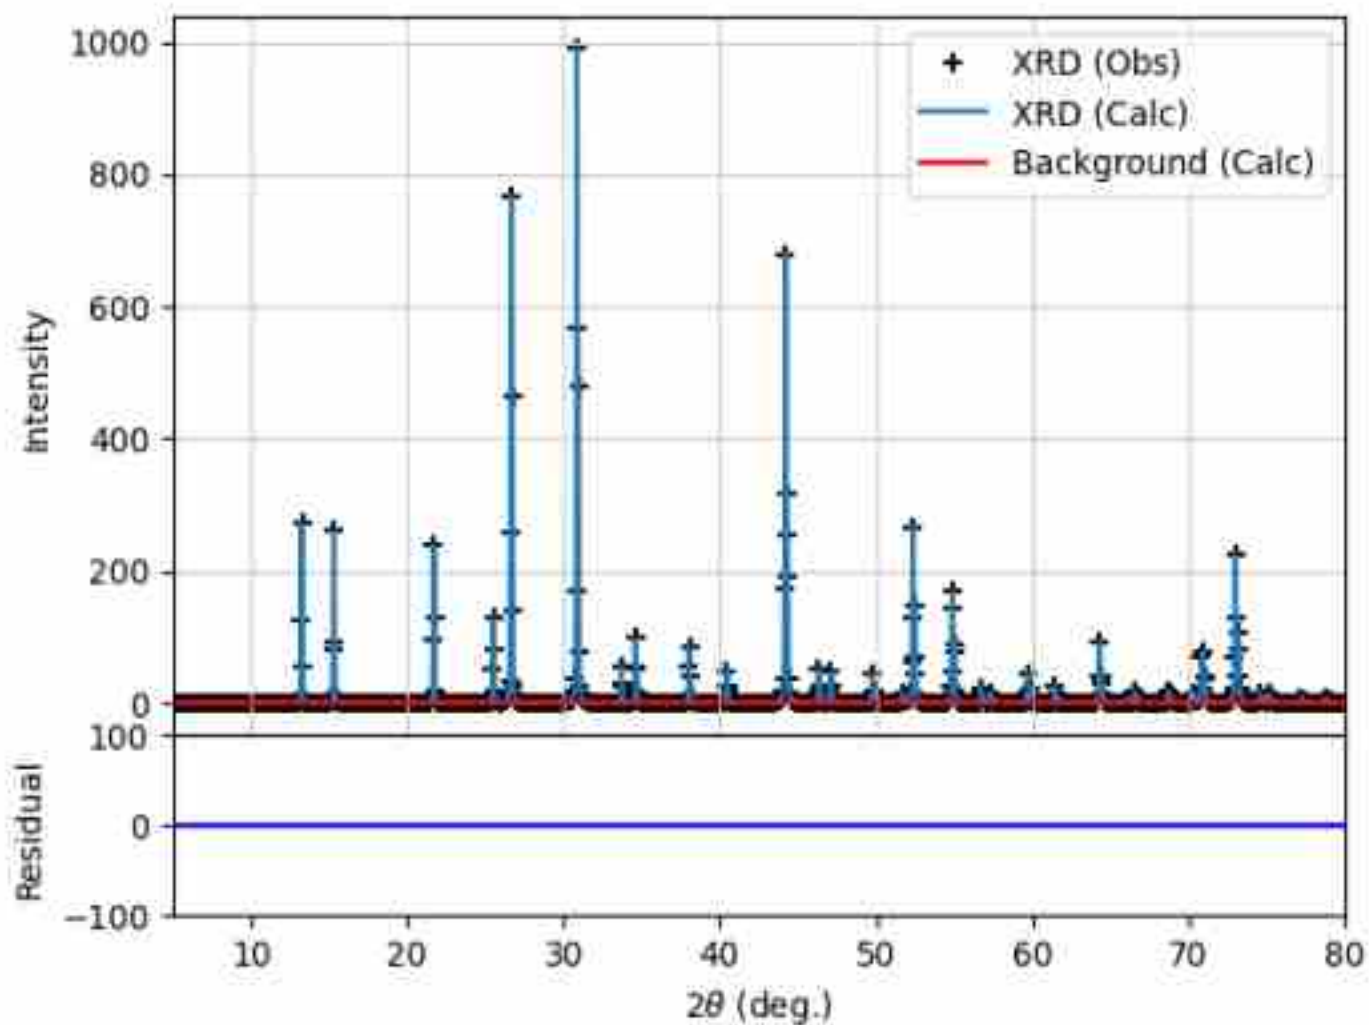

| RMSE before RR | Rwp     | RMSE after RR |
|----------------|---------|---------------|
| 0.008          | 0.02287 | 0.00216       |

# Rb<sub>2</sub>Na<sub>1</sub>Pr<sub>1</sub>Br<sub>6</sub>

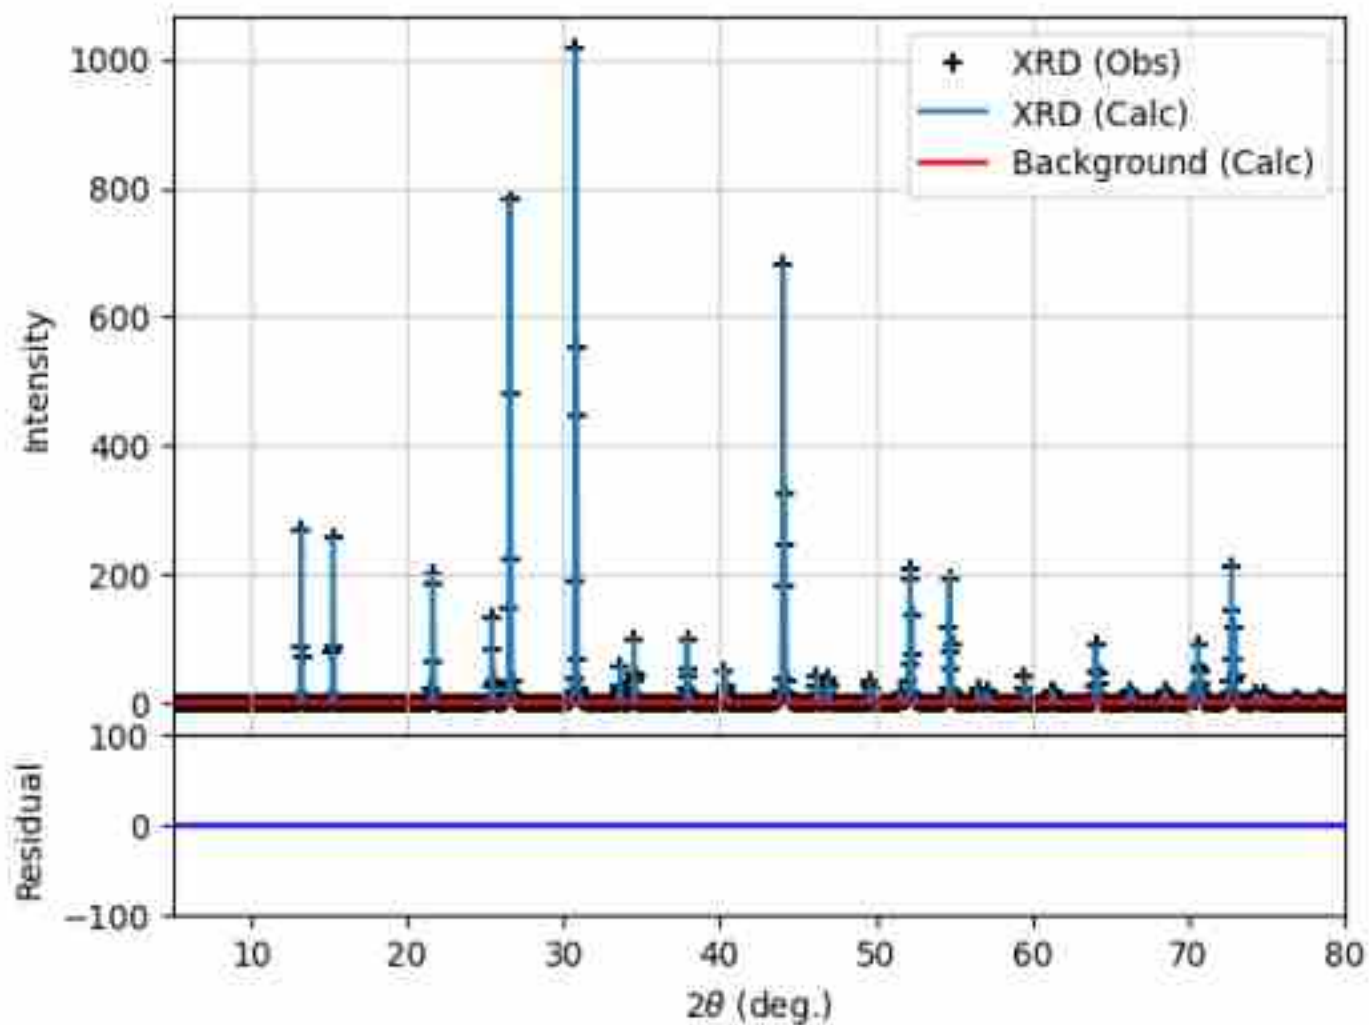

| RMSE before RR | Rwp     | RMSE after RR |
|----------------|---------|---------------|
| 0.008          | 0.02388 | 0.0019        |

# Rb<sub>2</sub>Sn<sub>1</sub>Br<sub>6</sub>

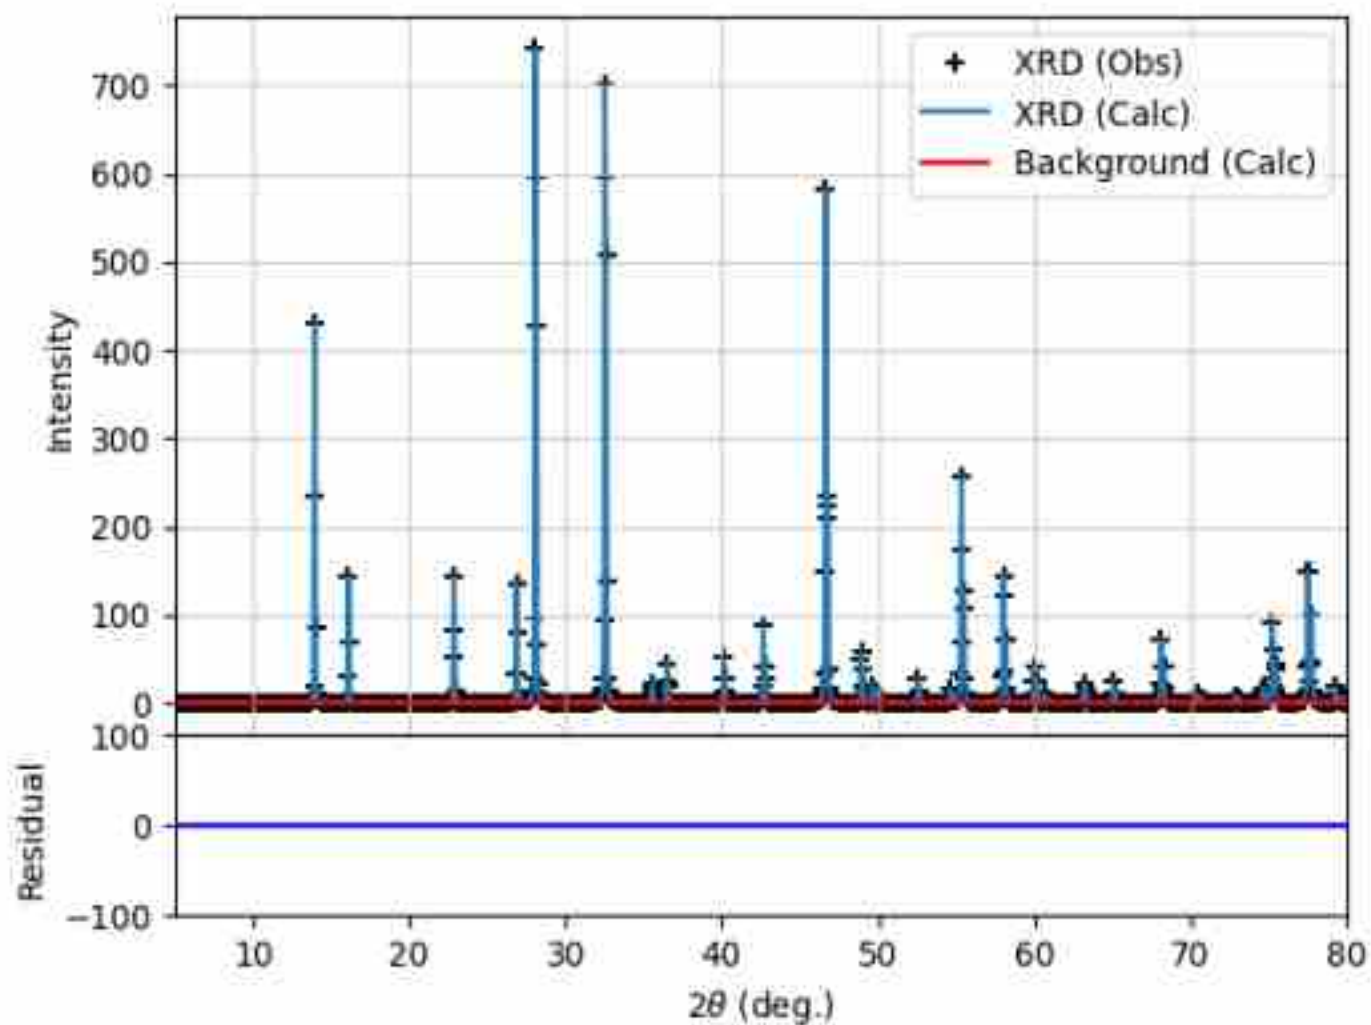

| RMSE before RR | Rwp     | RMSE after RR |
|----------------|---------|---------------|
| 0.008          | 0.03316 | 0.0022        |



# Rb<sub>3</sub>EuCl<sub>6</sub>

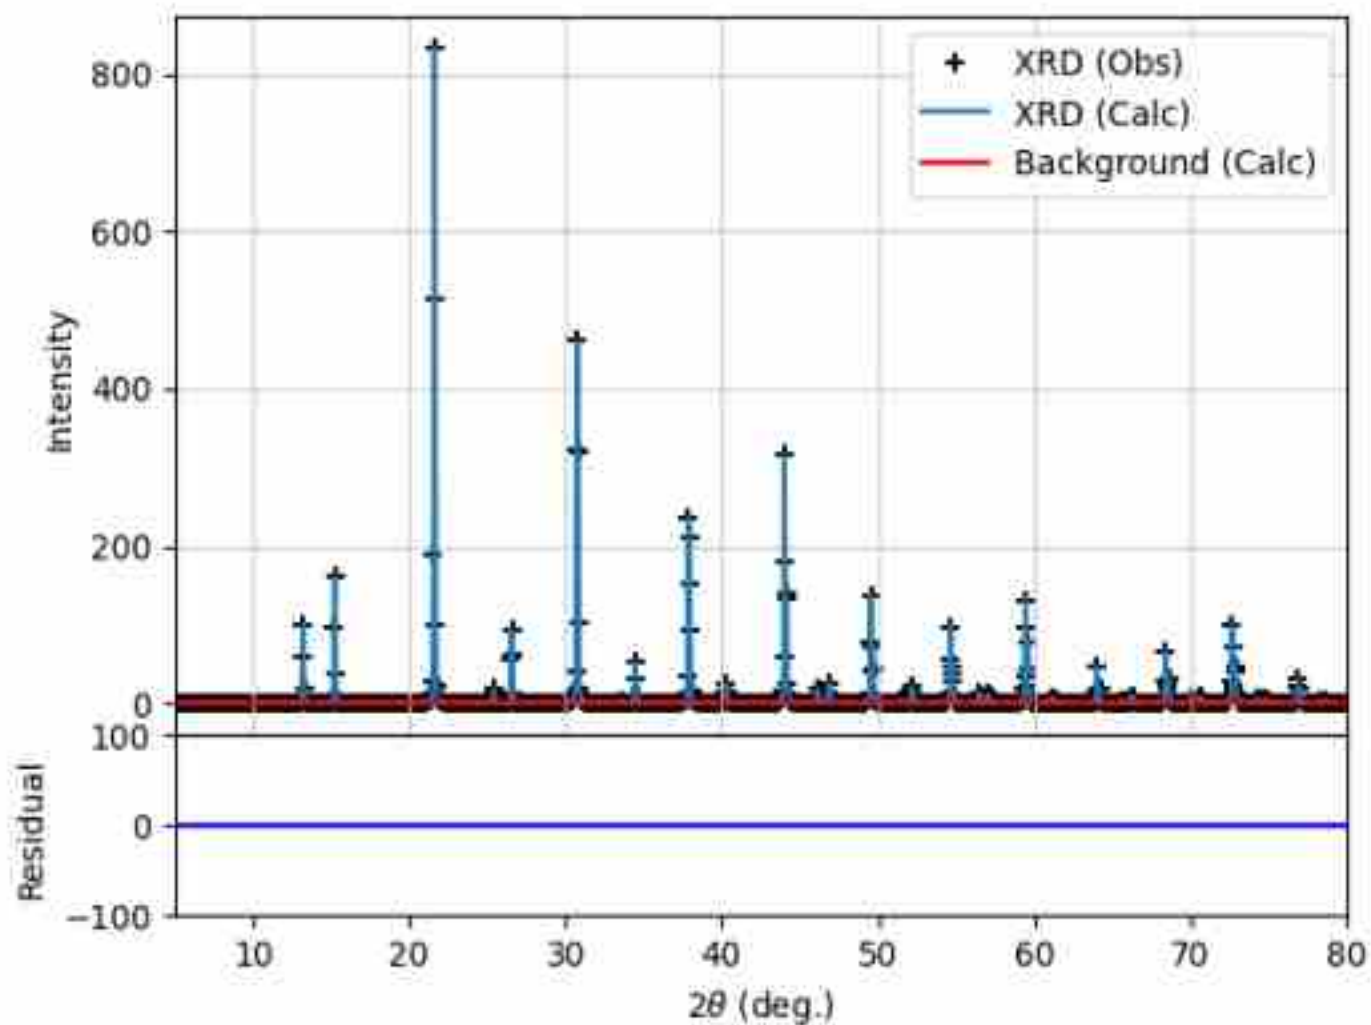

| RMSE before RR | Rwp     | RMSE after RR |
|----------------|---------|---------------|
| 0.008          | 0.01983 | 0.00299       |

# Rb3Lu1F6

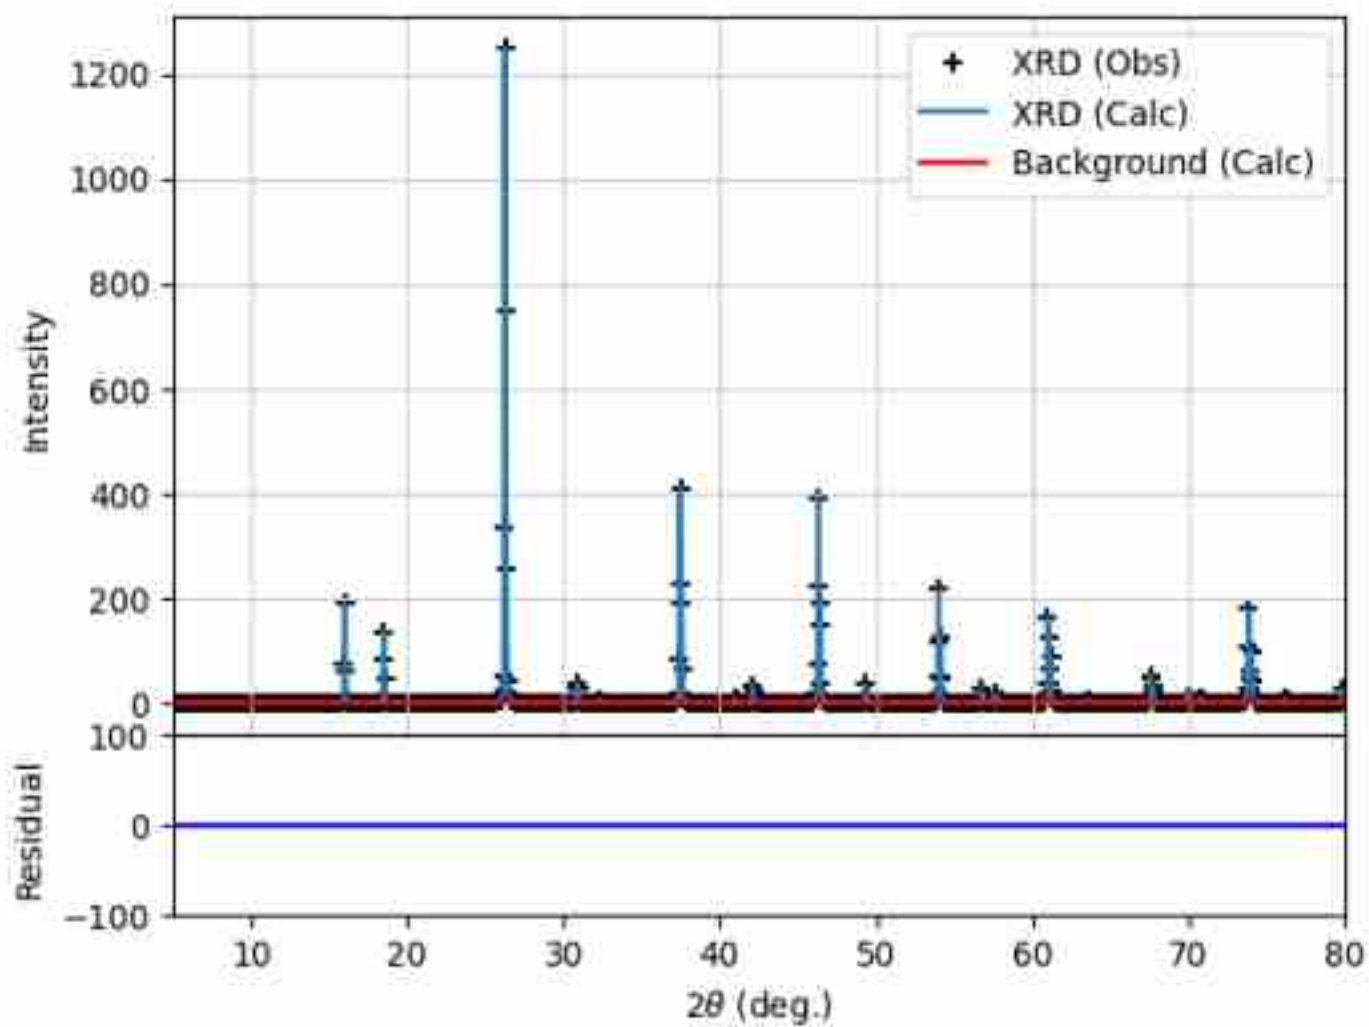

| RMSE before RR | Rwp     | RMSE after RR |
|----------------|---------|---------------|
| 0.008          | 0.01126 | 0.0036        |

# Rb3Sb1Br6

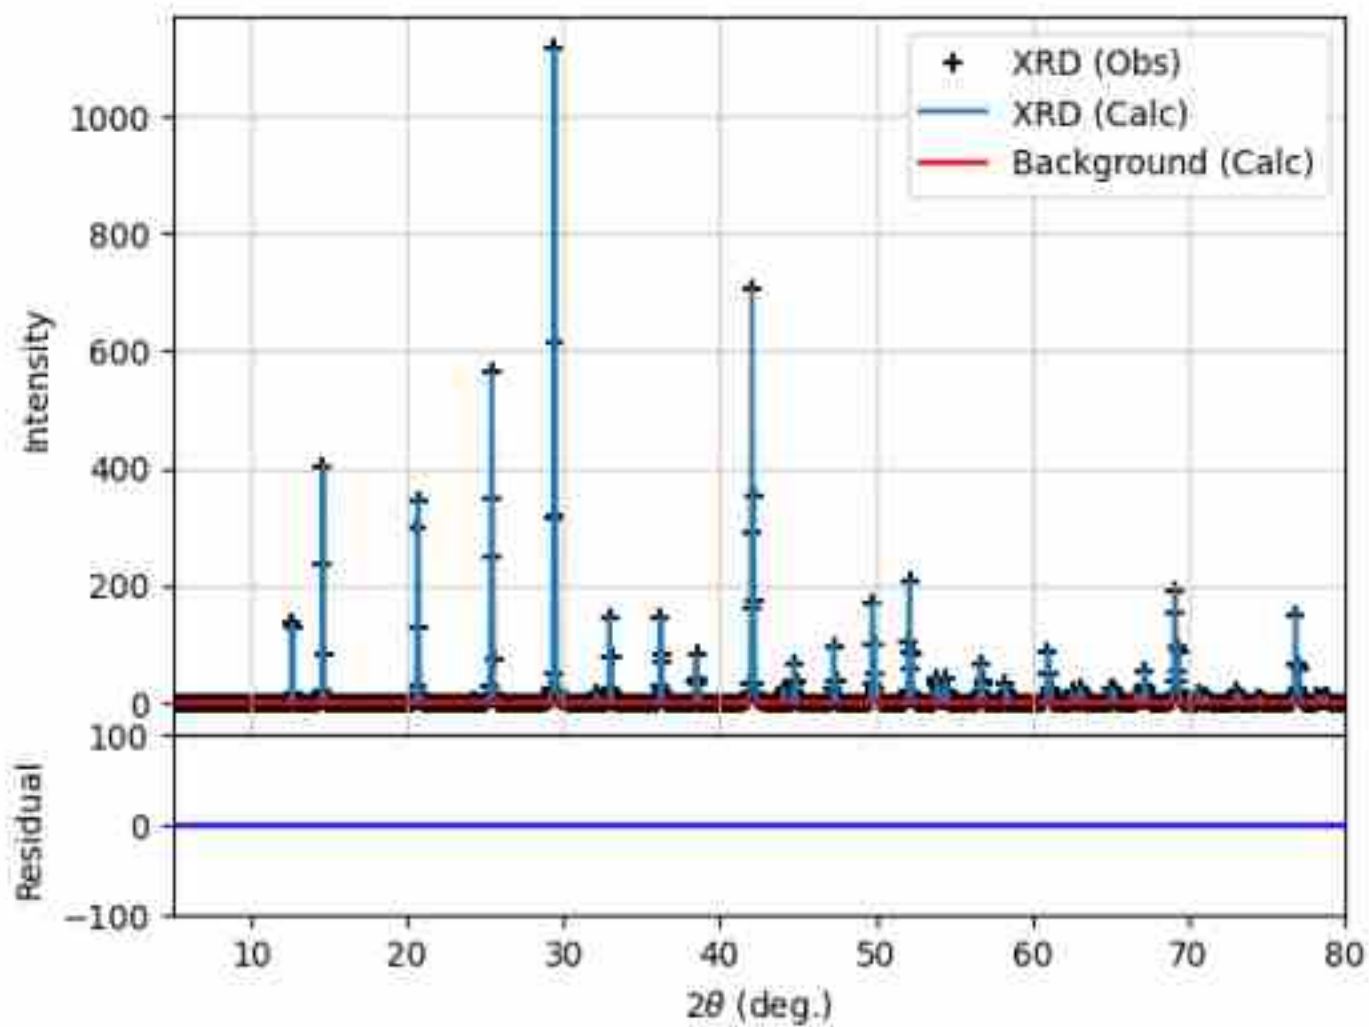

| RMSE before RR | Rwp     | RMSE after RR |
|----------------|---------|---------------|
| 0.008          | 0.14519 | 0.00406       |

# Rb<sub>3</sub>Y<sub>1</sub>F<sub>6</sub>

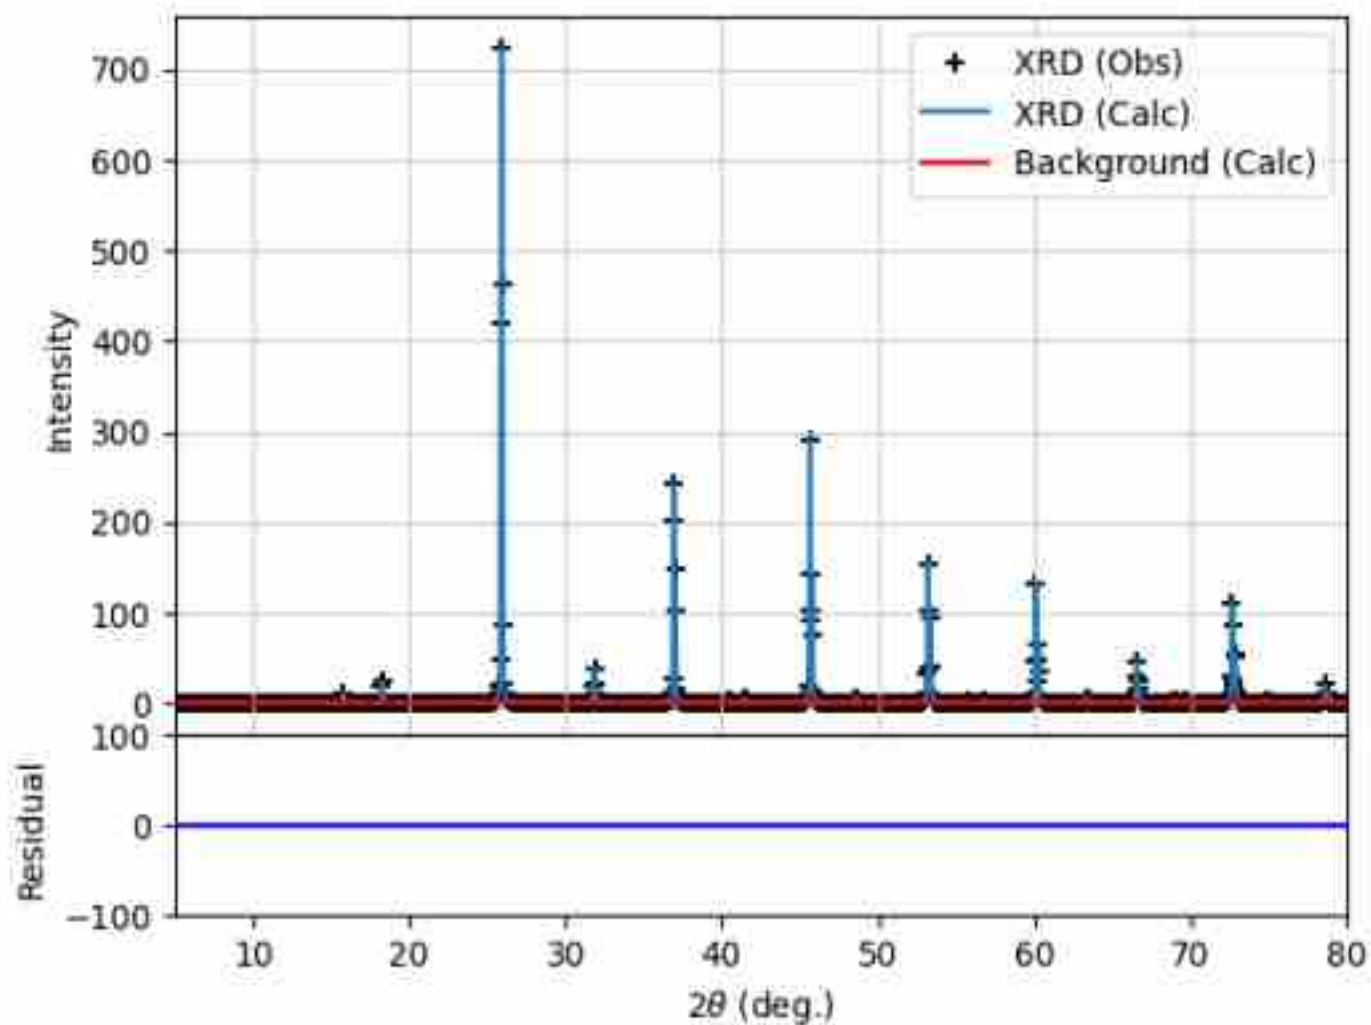

| RMSE before RR | Rwp     | RMSE after RR |
|----------------|---------|---------------|
| 0.008          | 0.00815 | 0.00254       |

# Sc1Ag1Se2

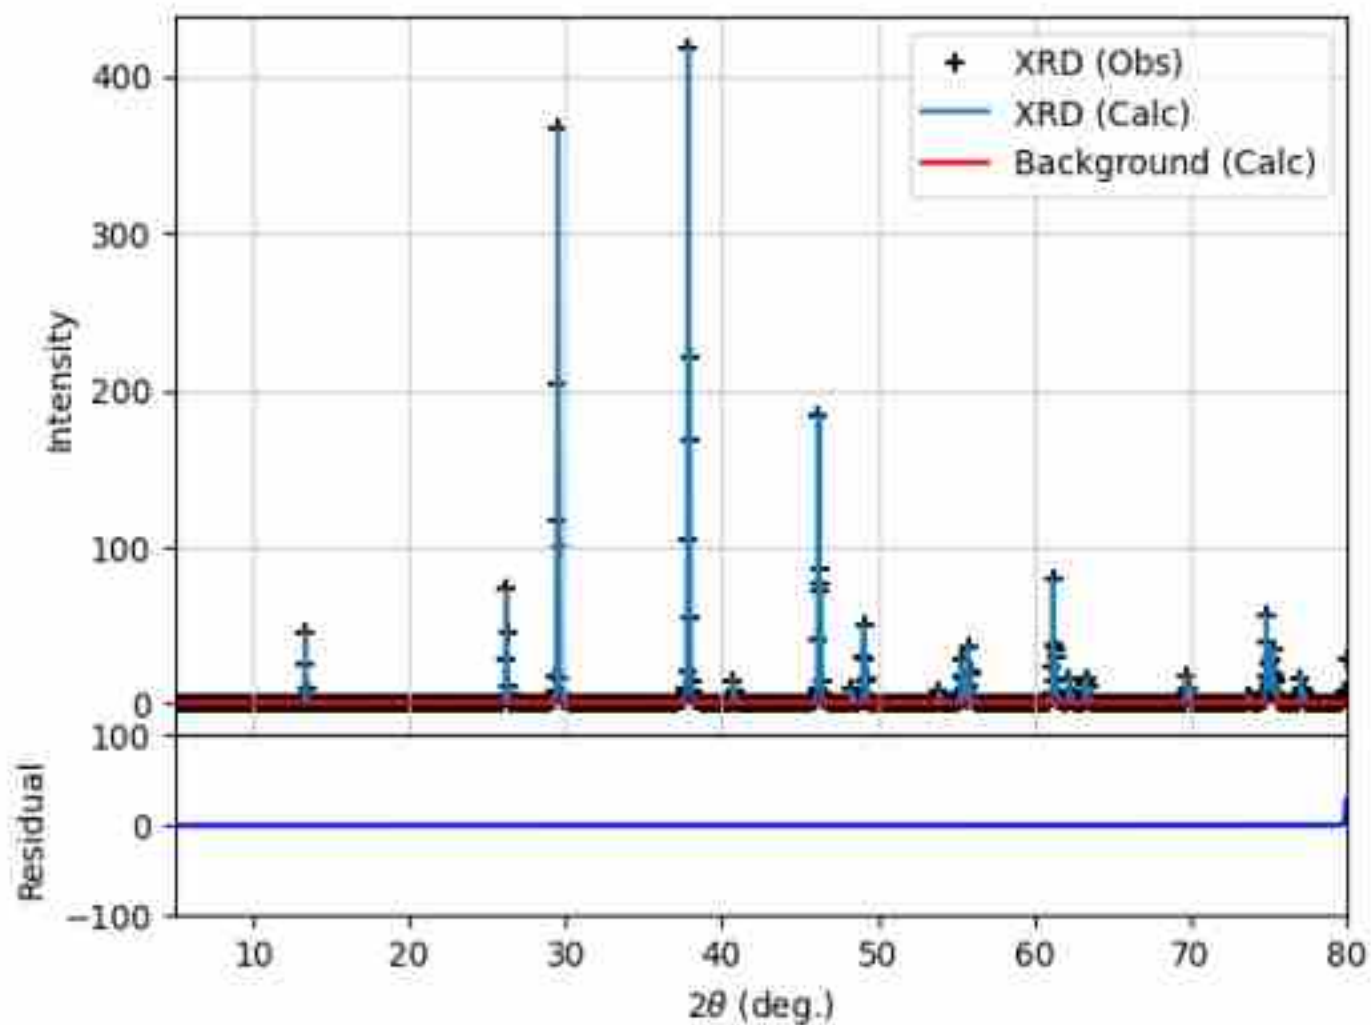

| RMSE before RR | Rwp      | RMSE after RR |
|----------------|----------|---------------|
| 0.008          | 10.74738 | 0.01438       |

# Sc1Ru3C1

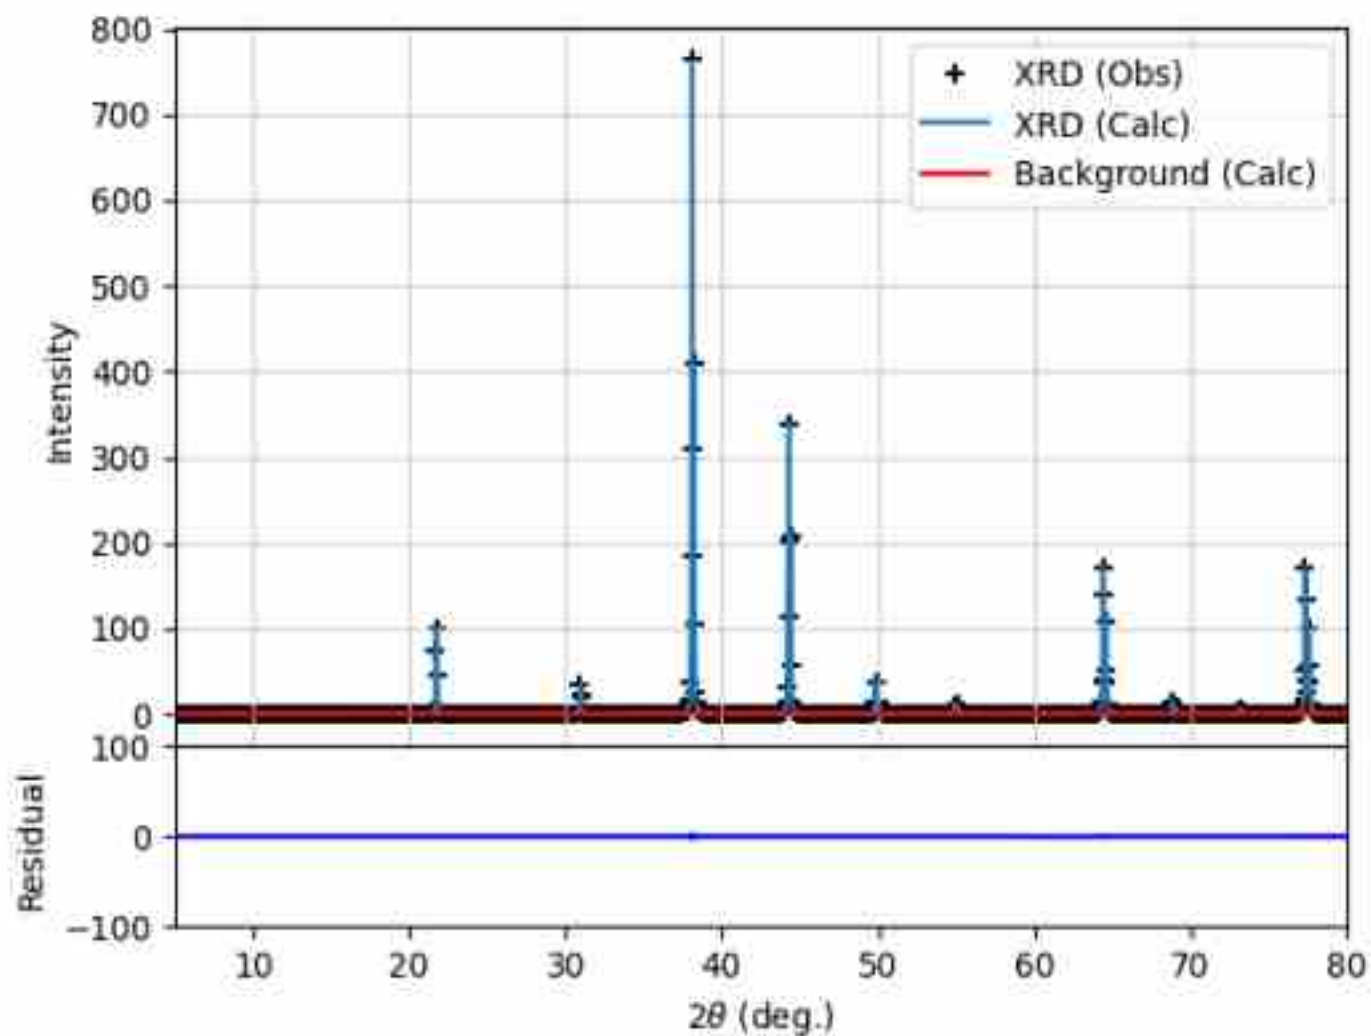

| RMSE before RR | Rwp     | RMSE after RR |
|----------------|---------|---------------|
| 0.008          | 0.20461 | 0.00474       |

# Si6W3

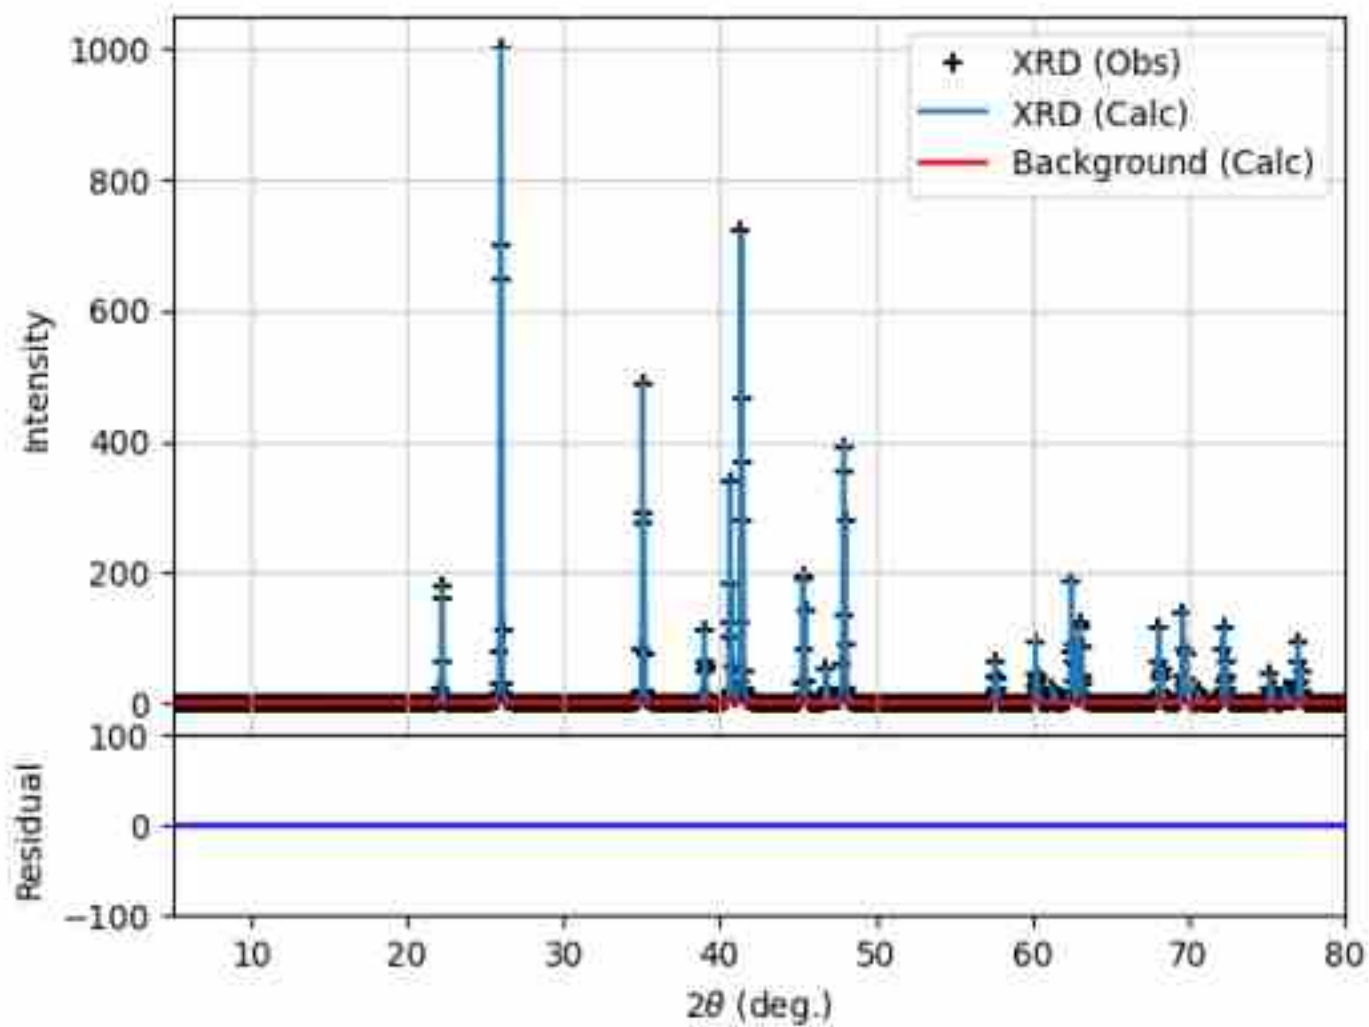

| RMSE before RR | Rwp     | RMSE after RR |
|----------------|---------|---------------|
| 0.008          | 0.00567 | 0.00237       |

# Sm1Gd1Se2

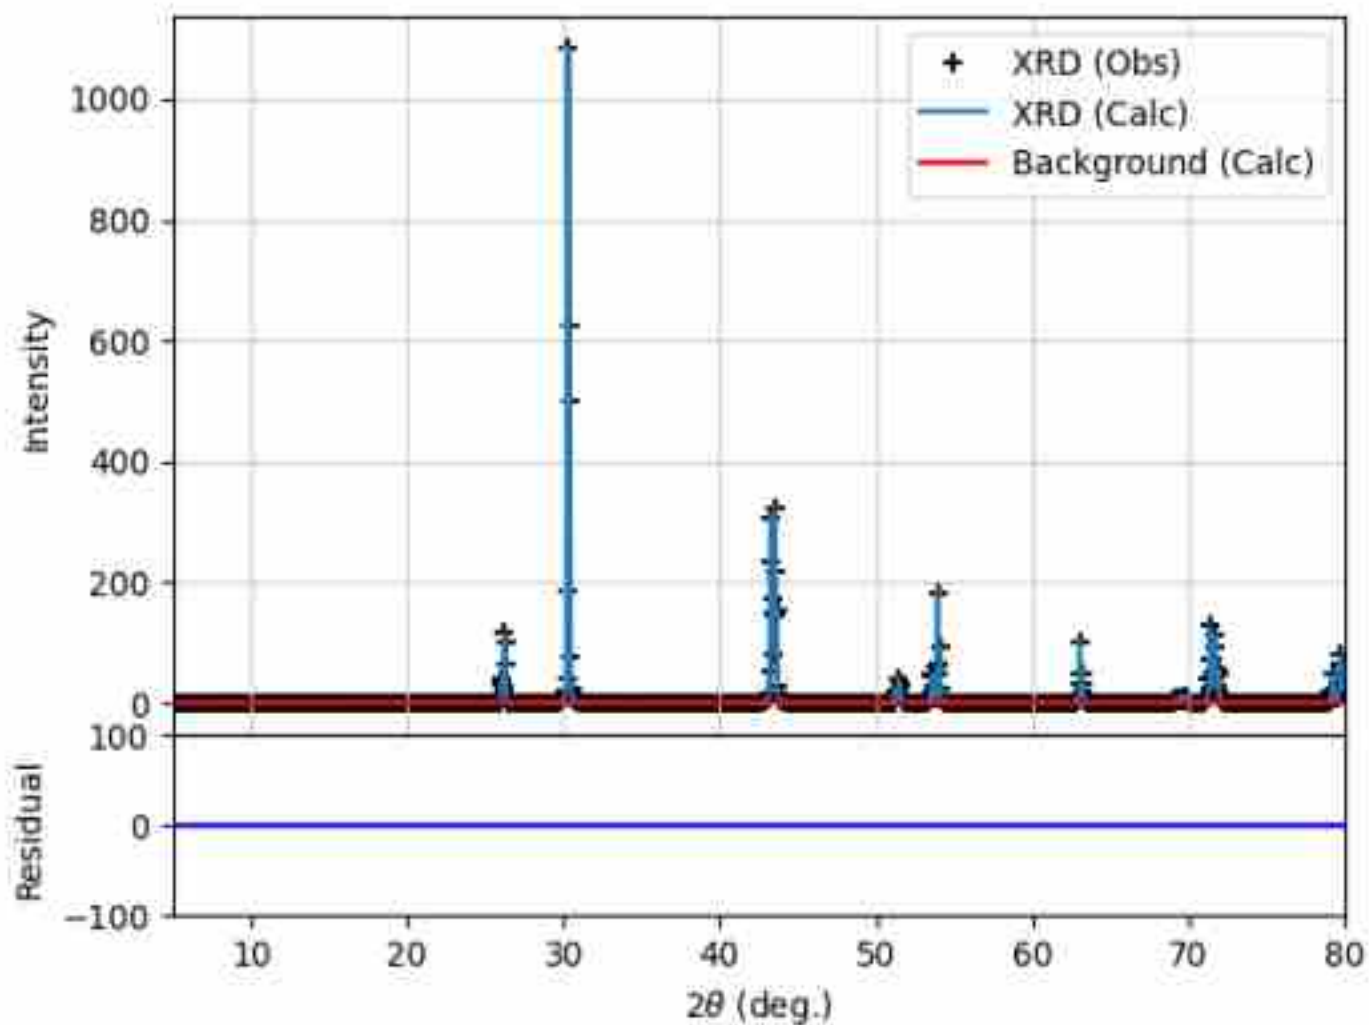

| RMSE before RR | Rwp    | RMSE after RR |
|----------------|--------|---------------|
| 0.008          | 0.0033 | 0.00032       |



# Sm1Mn6Ge6

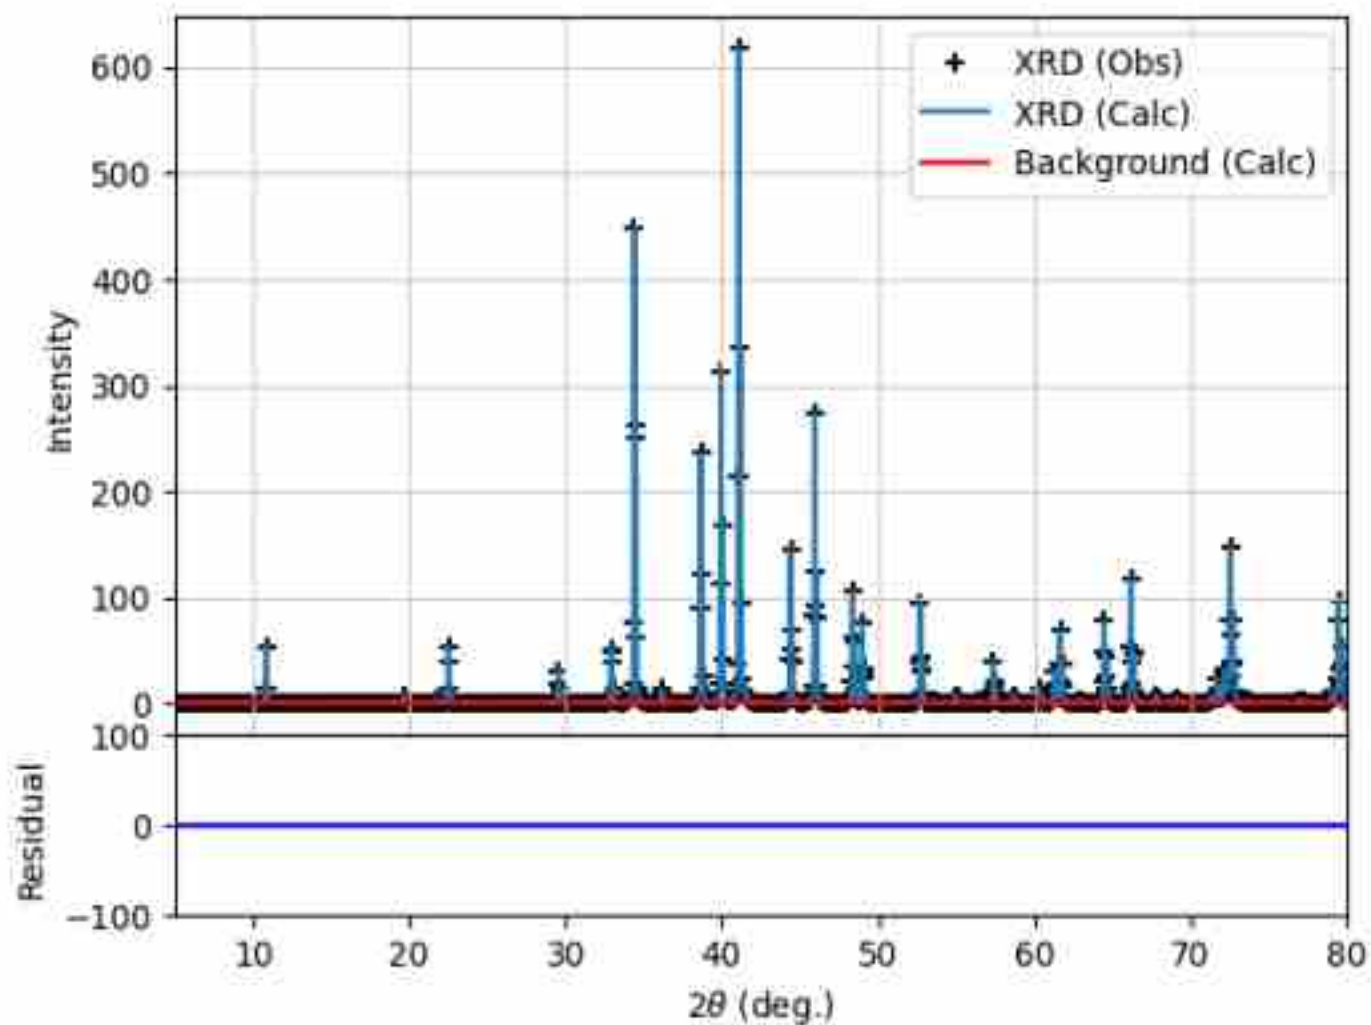

| RMSE before RR | Rwp    | RMSE after RR |
|----------------|--------|---------------|
| 0.008          | 0.0038 | 0.00084       |

# Sm1Tl1Se2

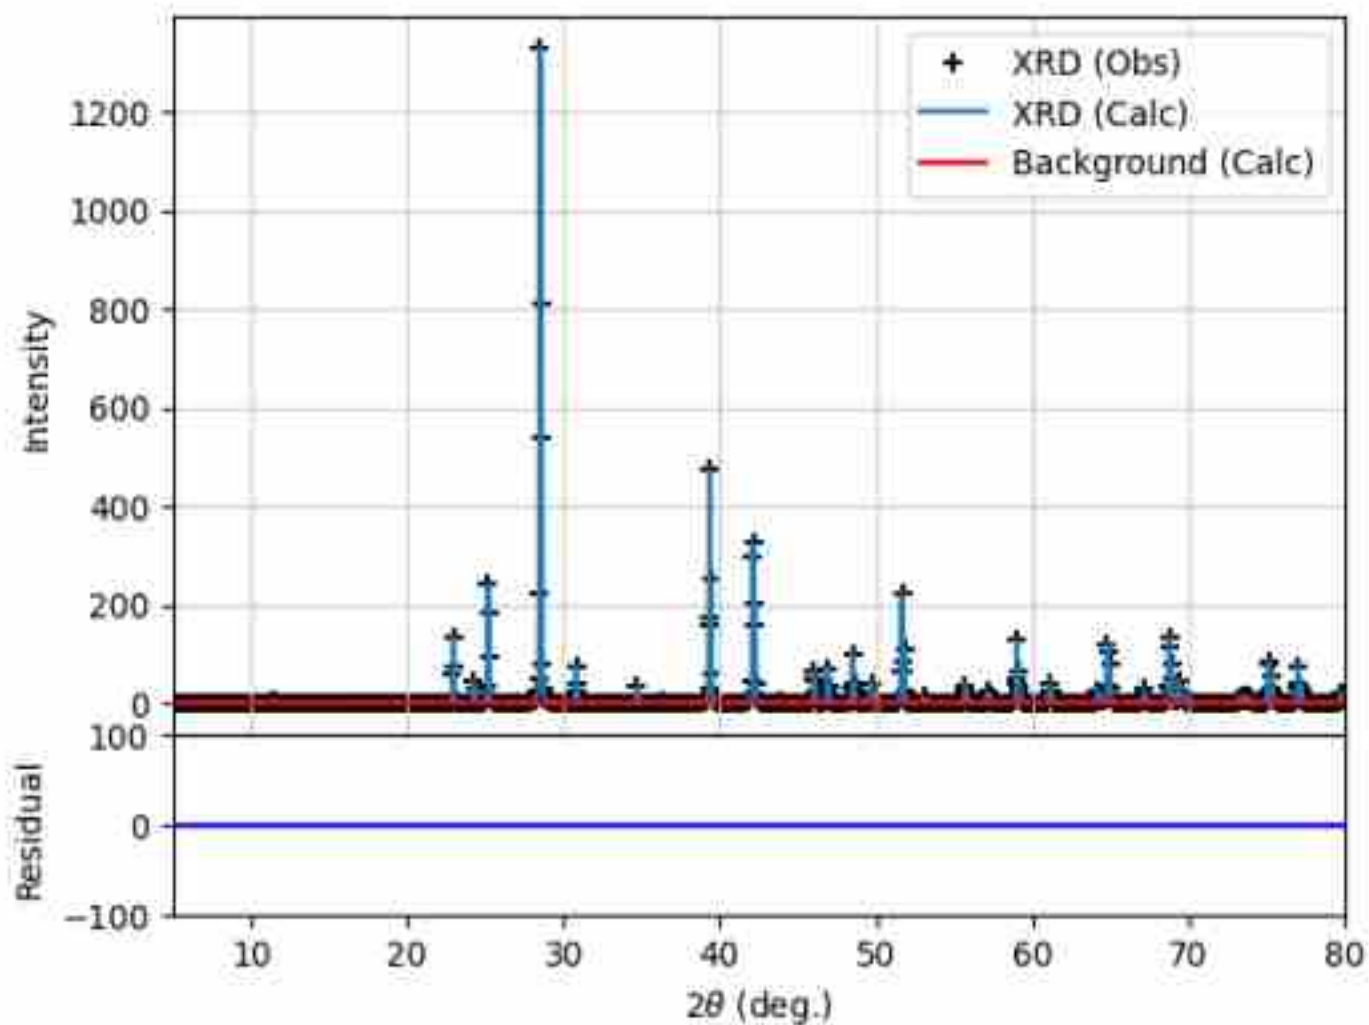

| RMSE before RR | Rwp     | RMSE after RR |
|----------------|---------|---------------|
| 0.008          | 0.00373 | 0.00036       |

# Sm<sub>2</sub>Tl<sub>2</sub>Cd<sub>2</sub>

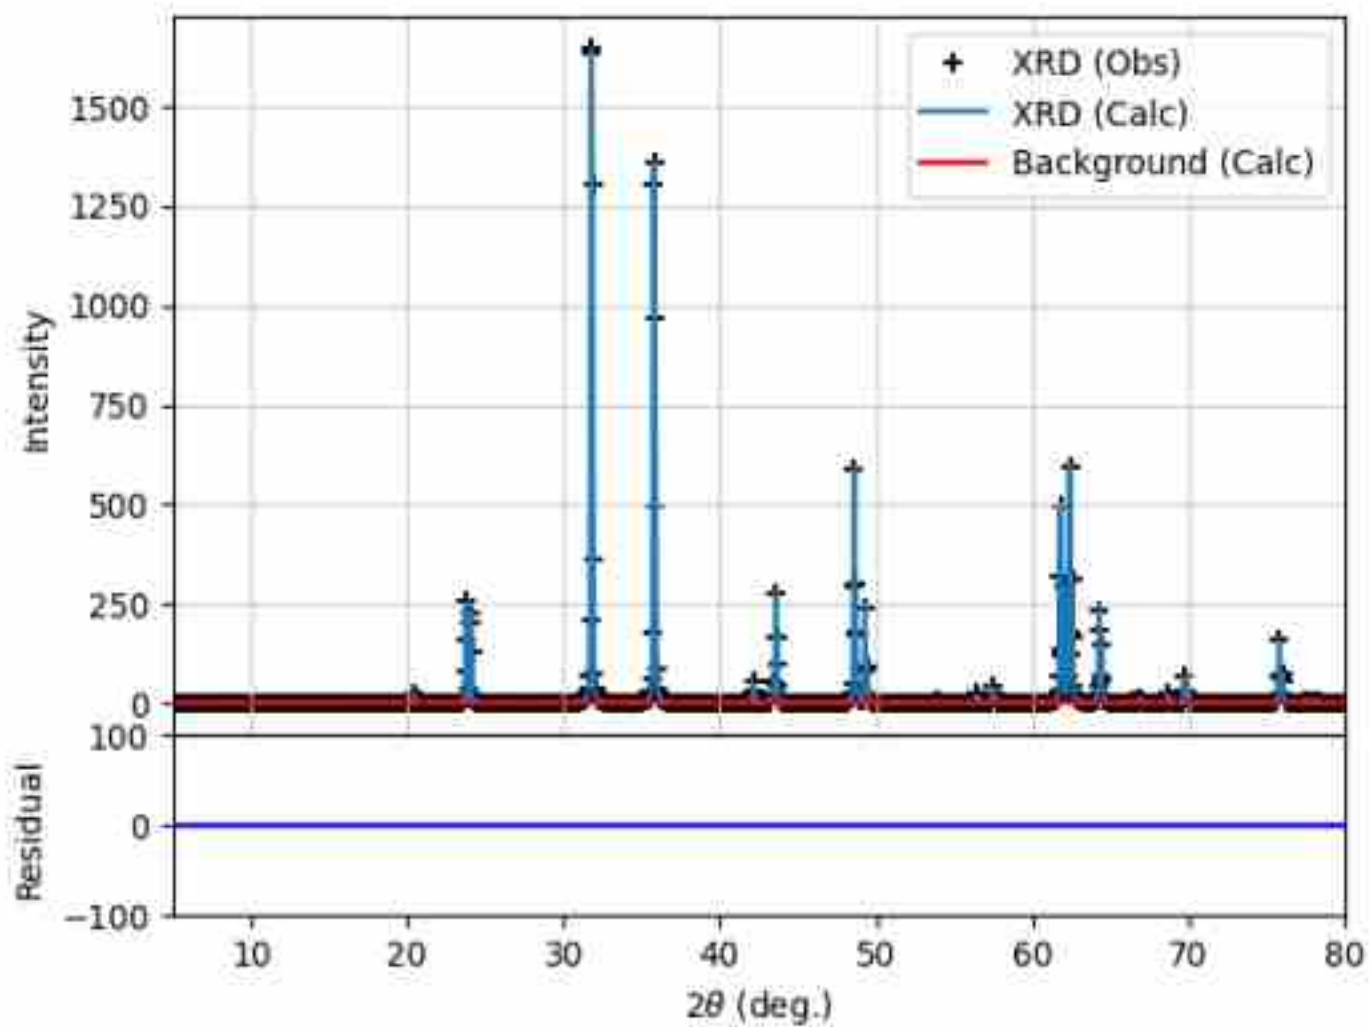

| RMSE before RR | Rwp     | RMSE after RR |
|----------------|---------|---------------|
| 0.008          | 0.01237 | 0.00026       |

# Sm2Tm6

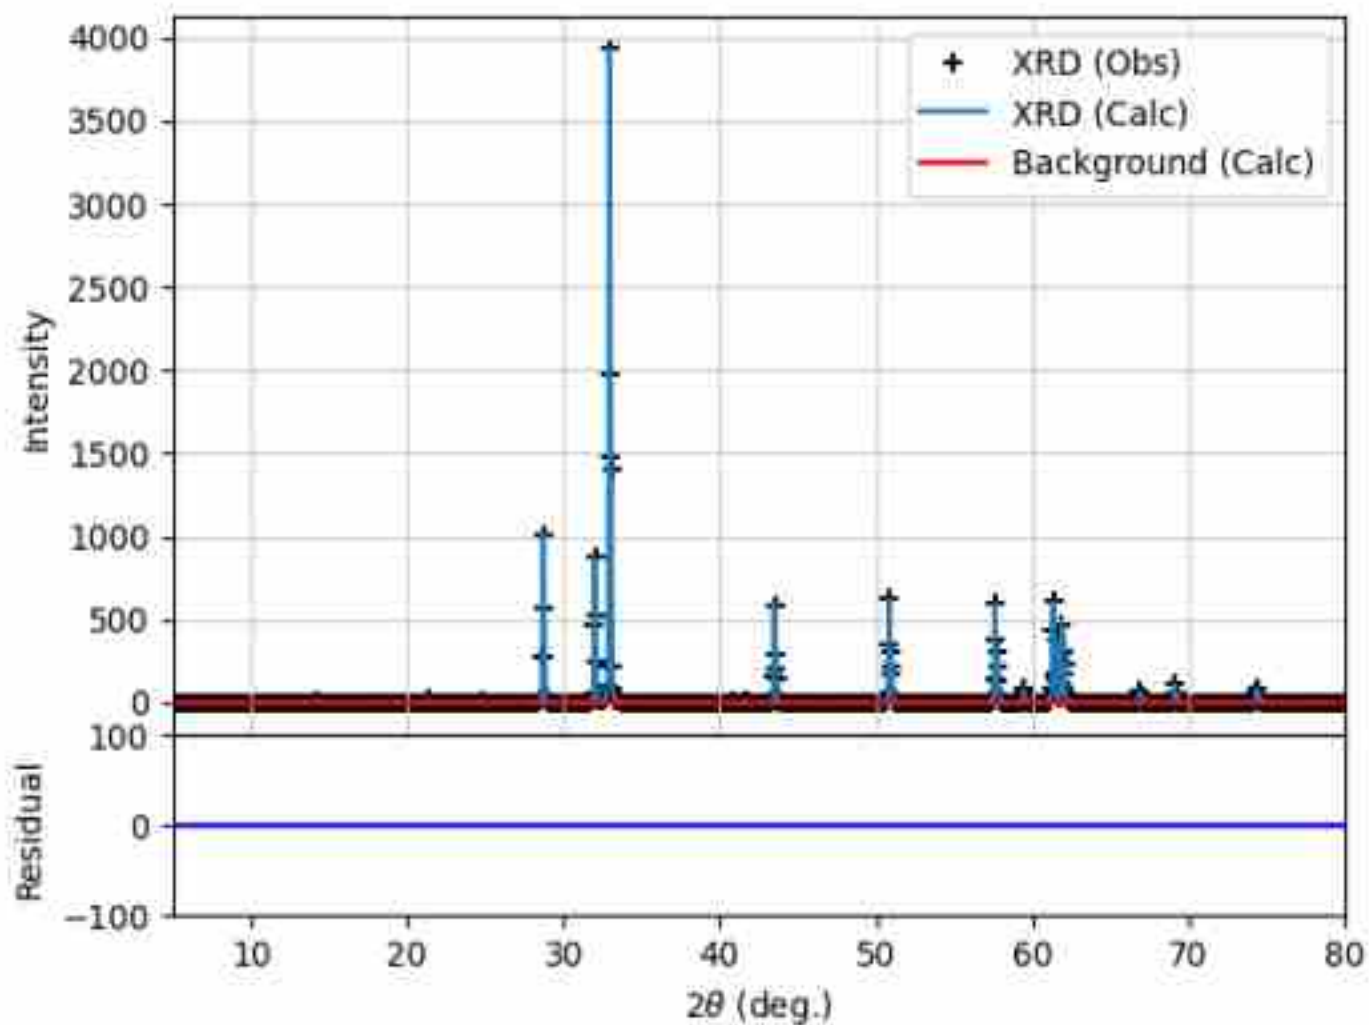

| RMSE before RR | Rwp     | RMSE after RR |
|----------------|---------|---------------|
| 0.008          | 0.00576 | 0.00049       |

# Sm4Cd2Pd4

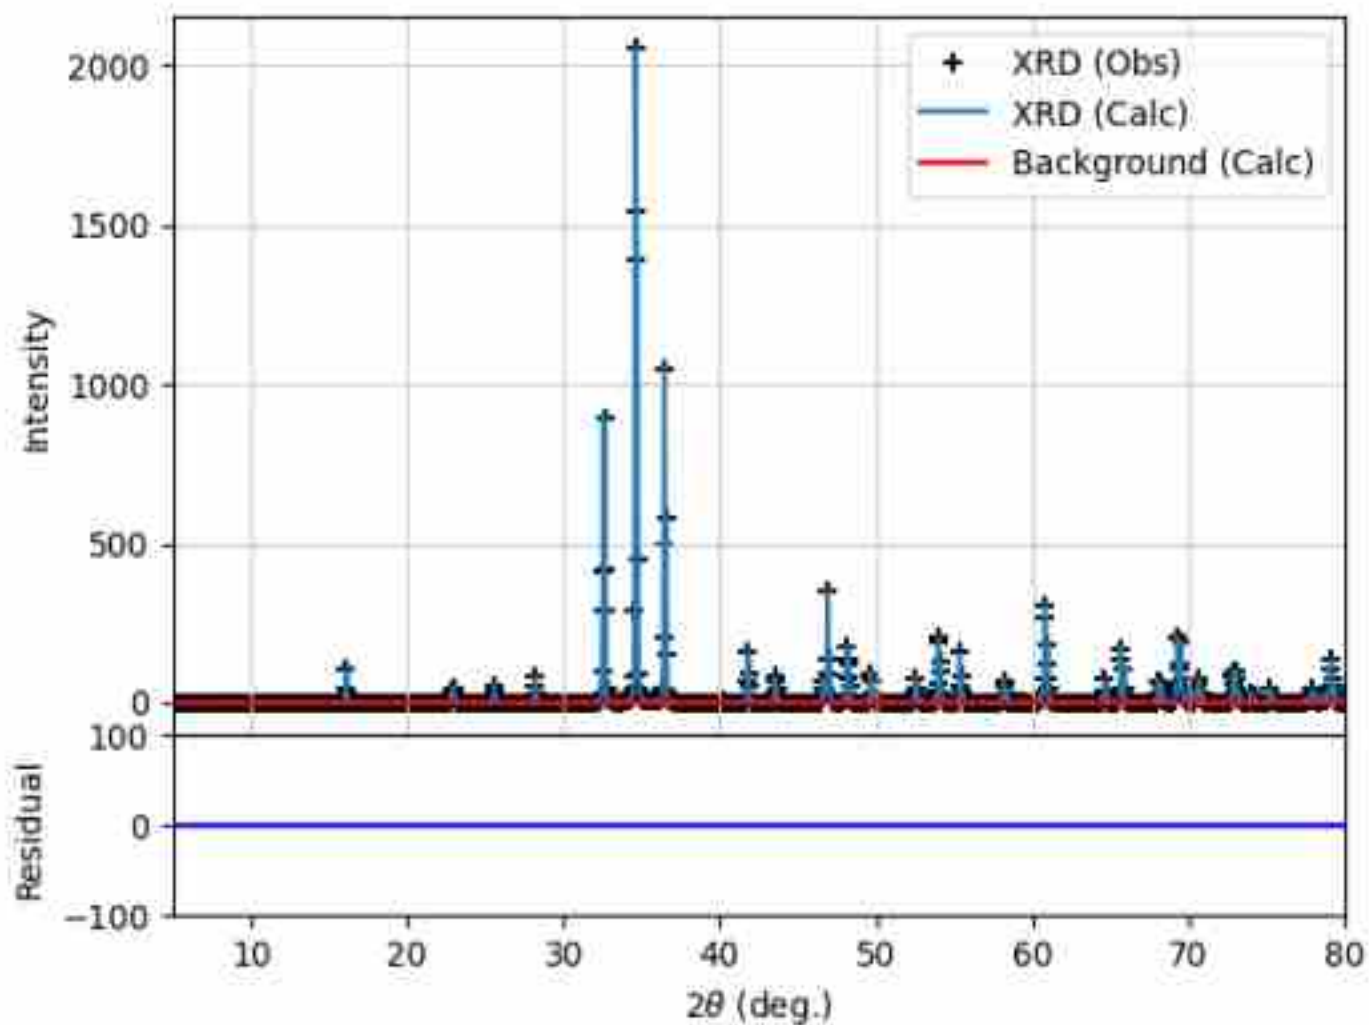

| RMSE before RR | Rwp     | RMSE after RR |
|----------------|---------|---------------|
| 0.008          | 0.00563 | 0.00063       |

# Sr1Eu4O5

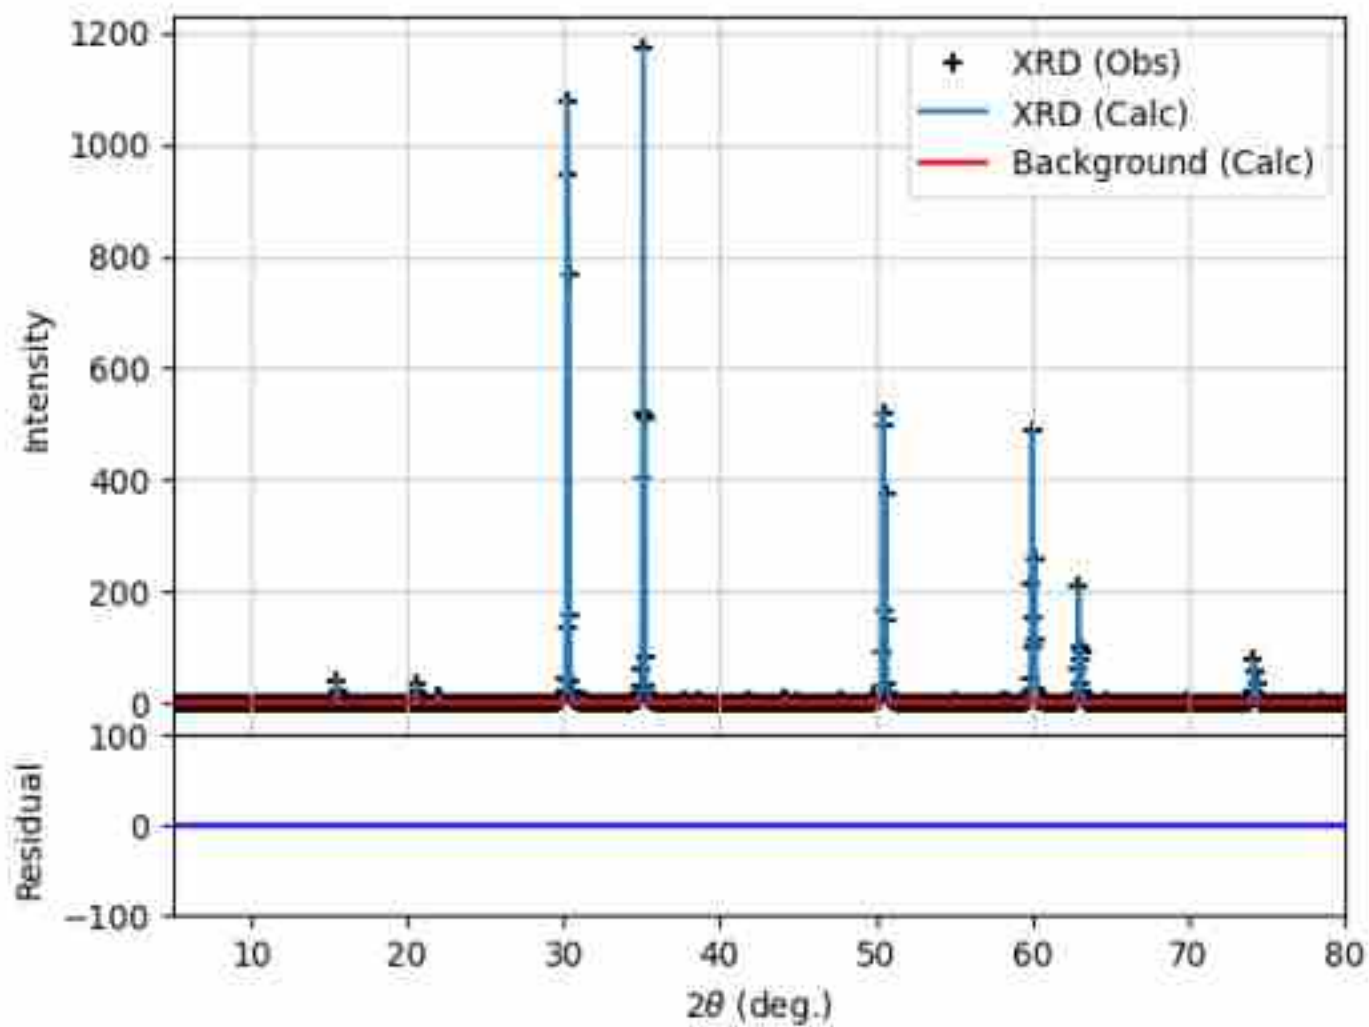

| RMSE before RR | Rwp     | RMSE after RR |
|----------------|---------|---------------|
| 0.008          | 0.01302 | 0.00312       |

# Sr1Zr1N2

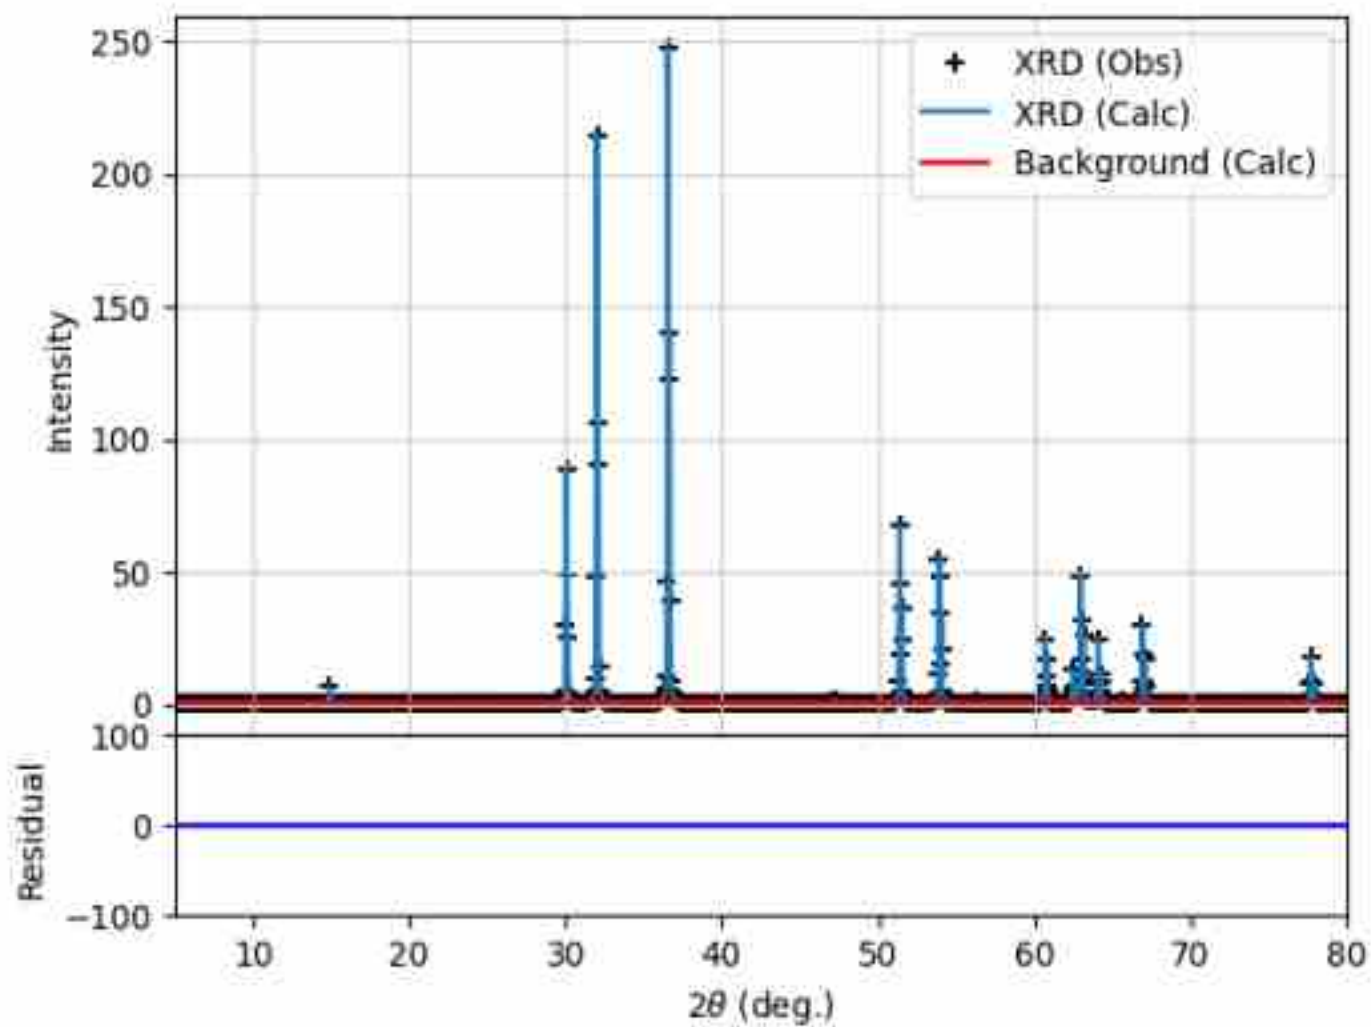

| RMSE before RR | Rwp     | RMSE after RR |
|----------------|---------|---------------|
| 0.008          | 0.00243 | 0.0004        |

# Sr<sub>2</sub>Al<sub>11</sub>Sb<sub>10</sub>O<sub>6</sub>

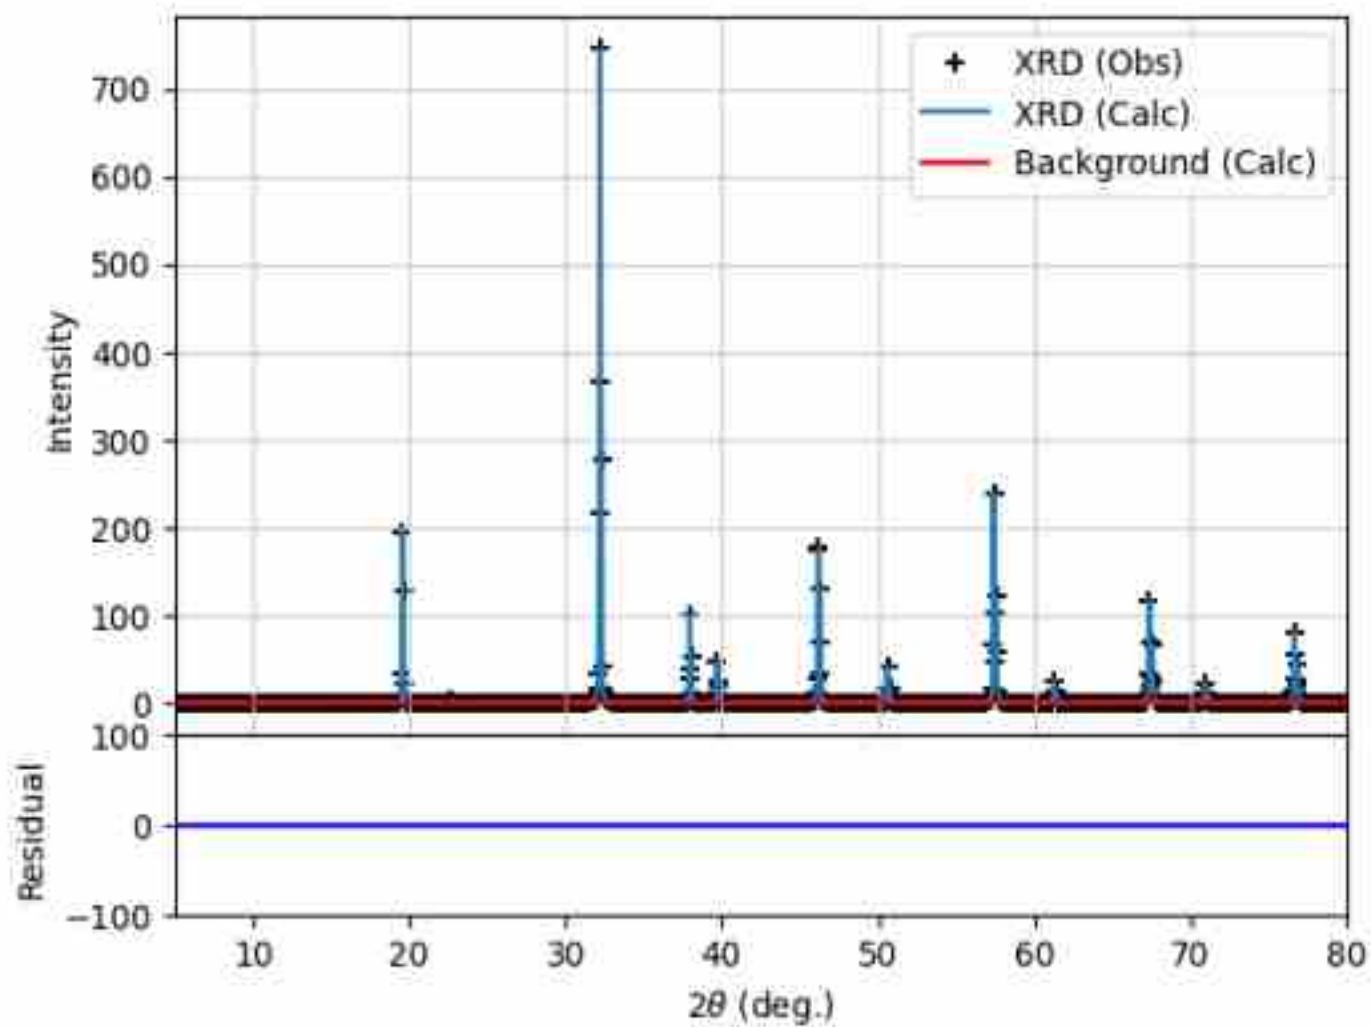

| RMSE before RR | Rwp     | RMSE after RR |
|----------------|---------|---------------|
| 0.008          | 0.00641 | 0.0028        |



# Sr<sub>2</sub>MgIrO<sub>6</sub>

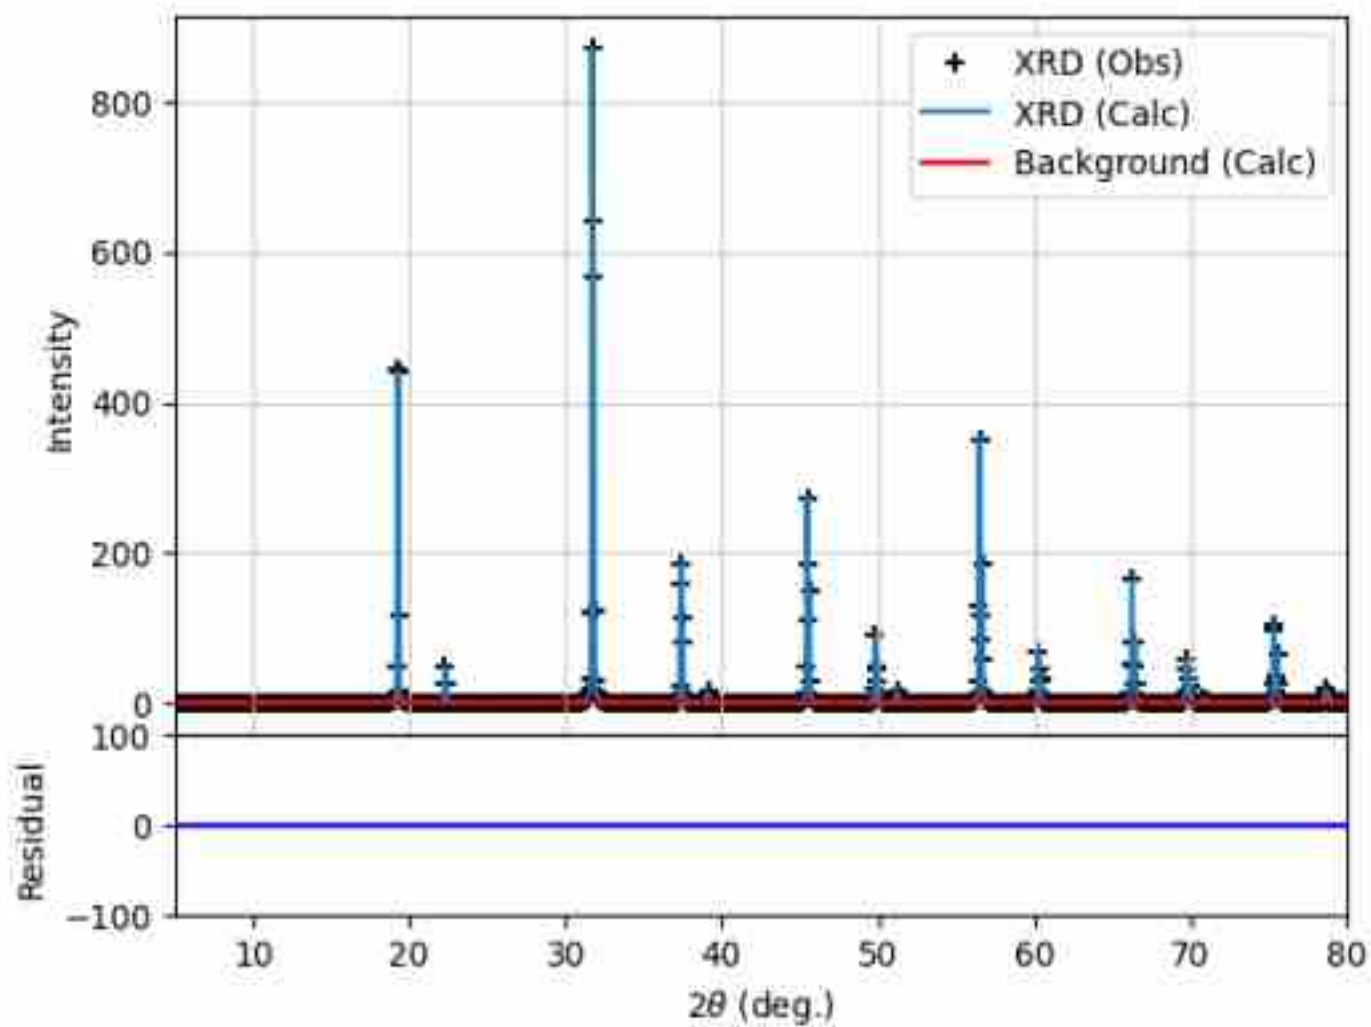

| RMSE before RR | Rwp     | RMSE after RR |
|----------------|---------|---------------|
| 0.008          | 0.00468 | 0.00266       |

Sr4

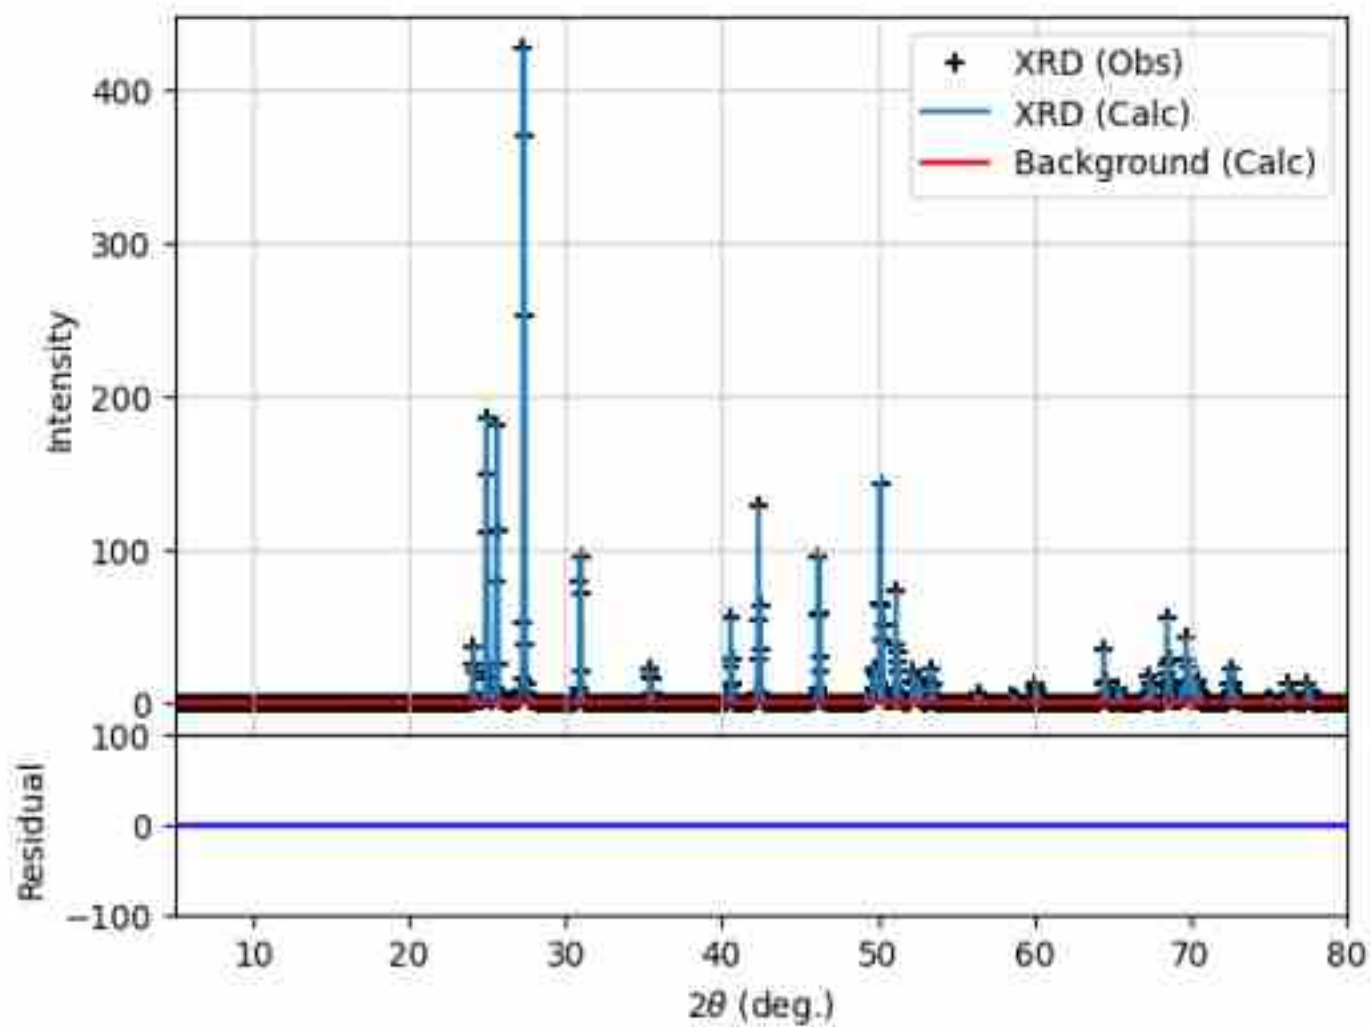

| RMSE before RR | Rwp     | RMSE after RR |
|----------------|---------|---------------|
| 0.008          | 0.00944 | 0.00056       |

# Sr5Zn1Cd4

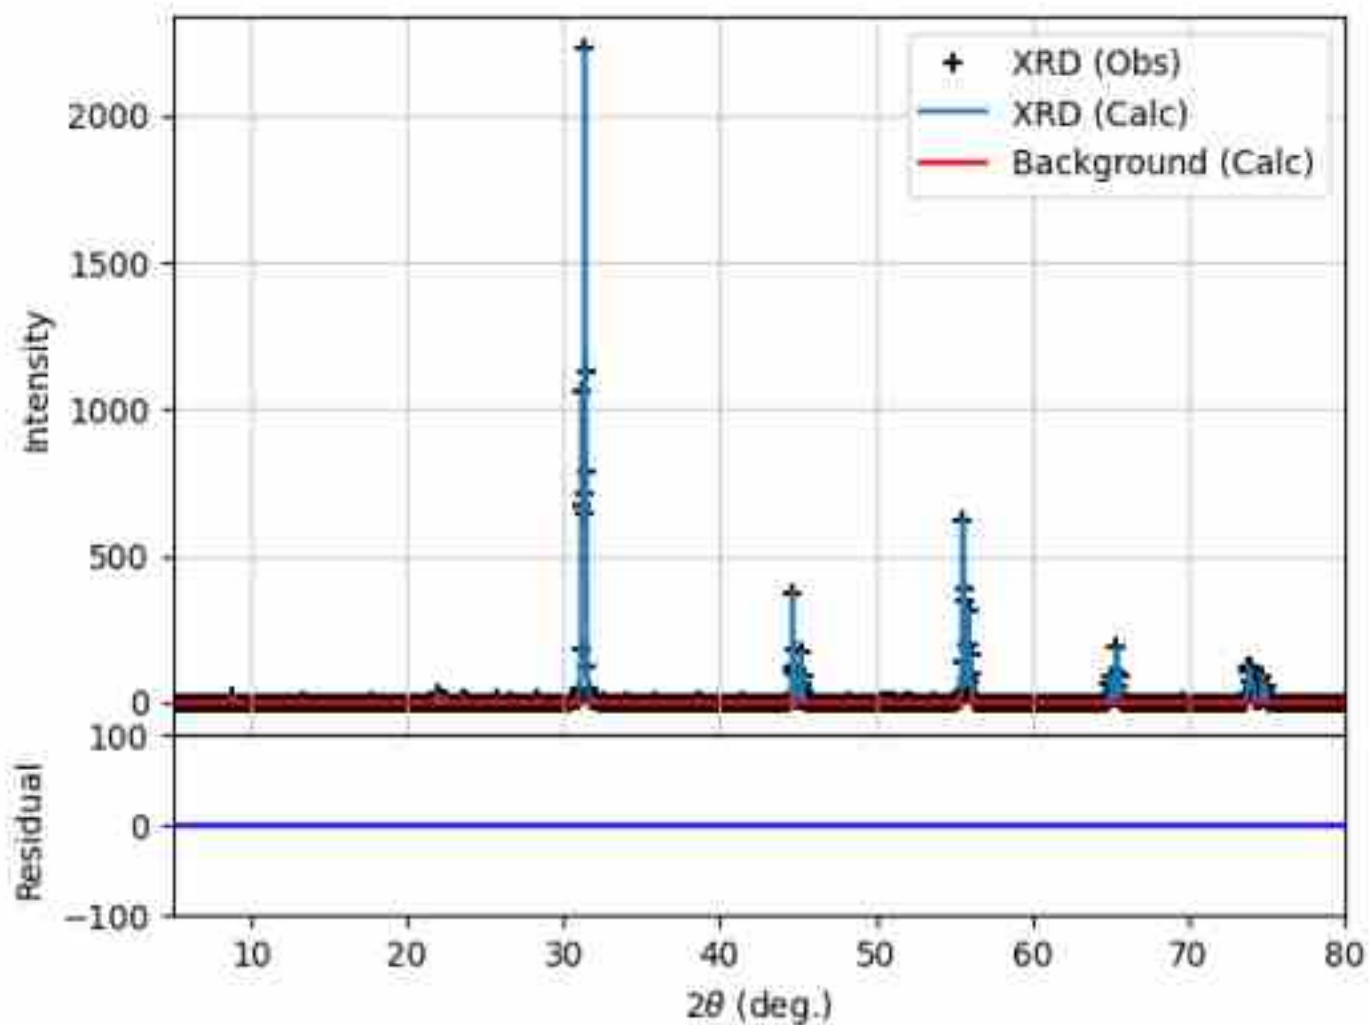

| RMSE before RR | Rwp     | RMSE after RR |
|----------------|---------|---------------|
| 0.008          | 0.00544 | 0.00054       |

# Ta<sub>1</sub>Cu<sub>3</sub>Se<sub>4</sub>

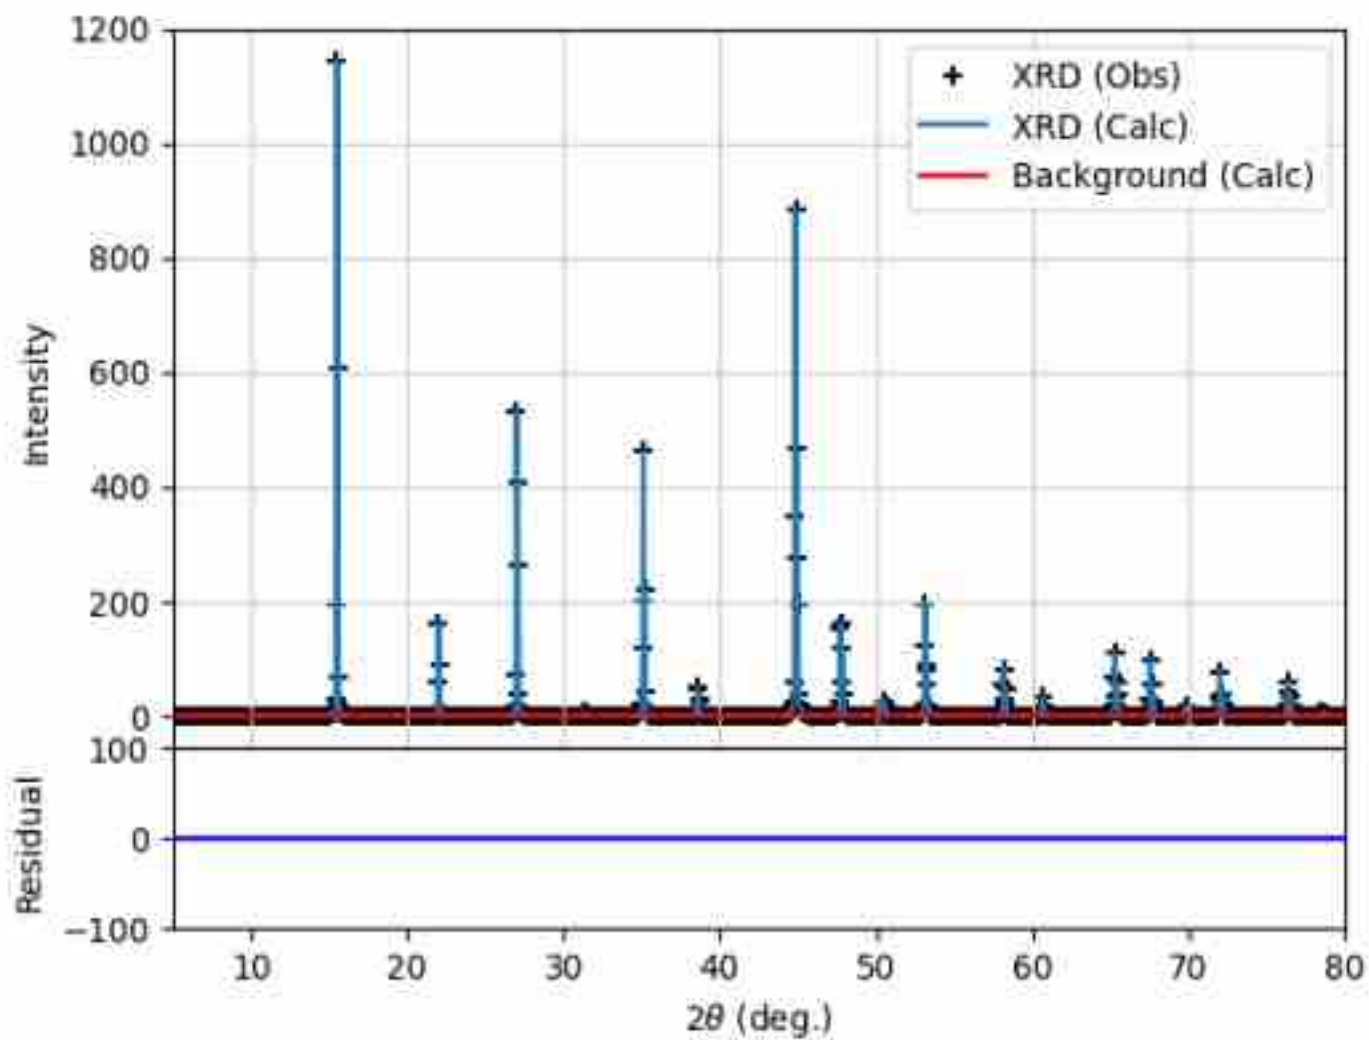

| RMSE before RR | Rwp     | RMSE after RR |
|----------------|---------|---------------|
| 0.008          | 0.01378 | 0.00172       |

# Tb1B2Rh3

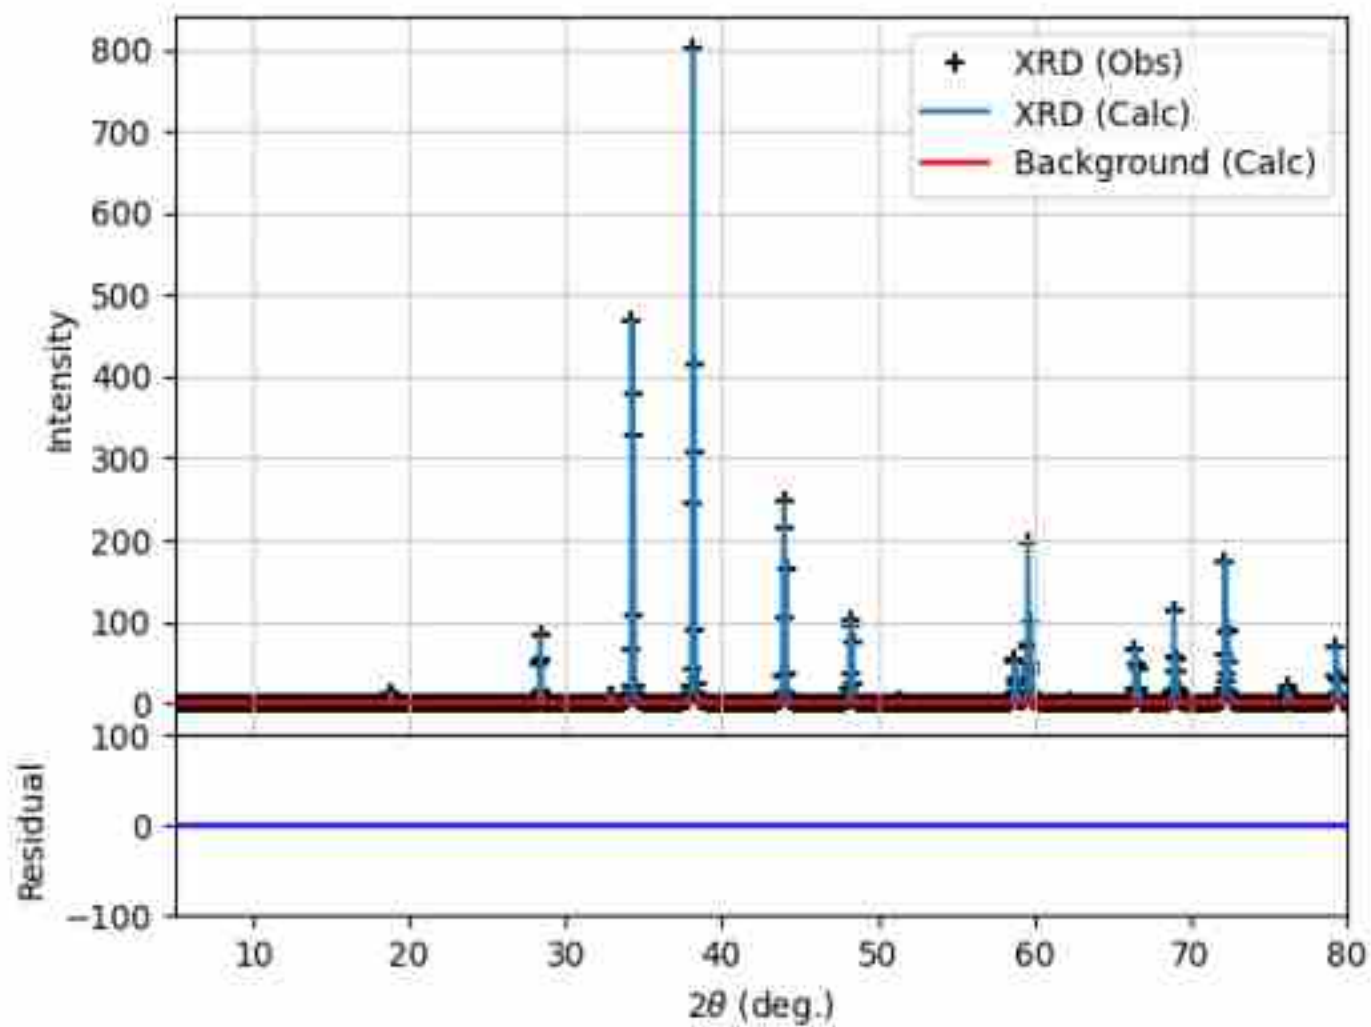

| RMSE before RR | Rwp     | RMSE after RR |
|----------------|---------|---------------|
| 0.008          | 0.00604 | 0.00134       |

# Tb1Ho1Al4

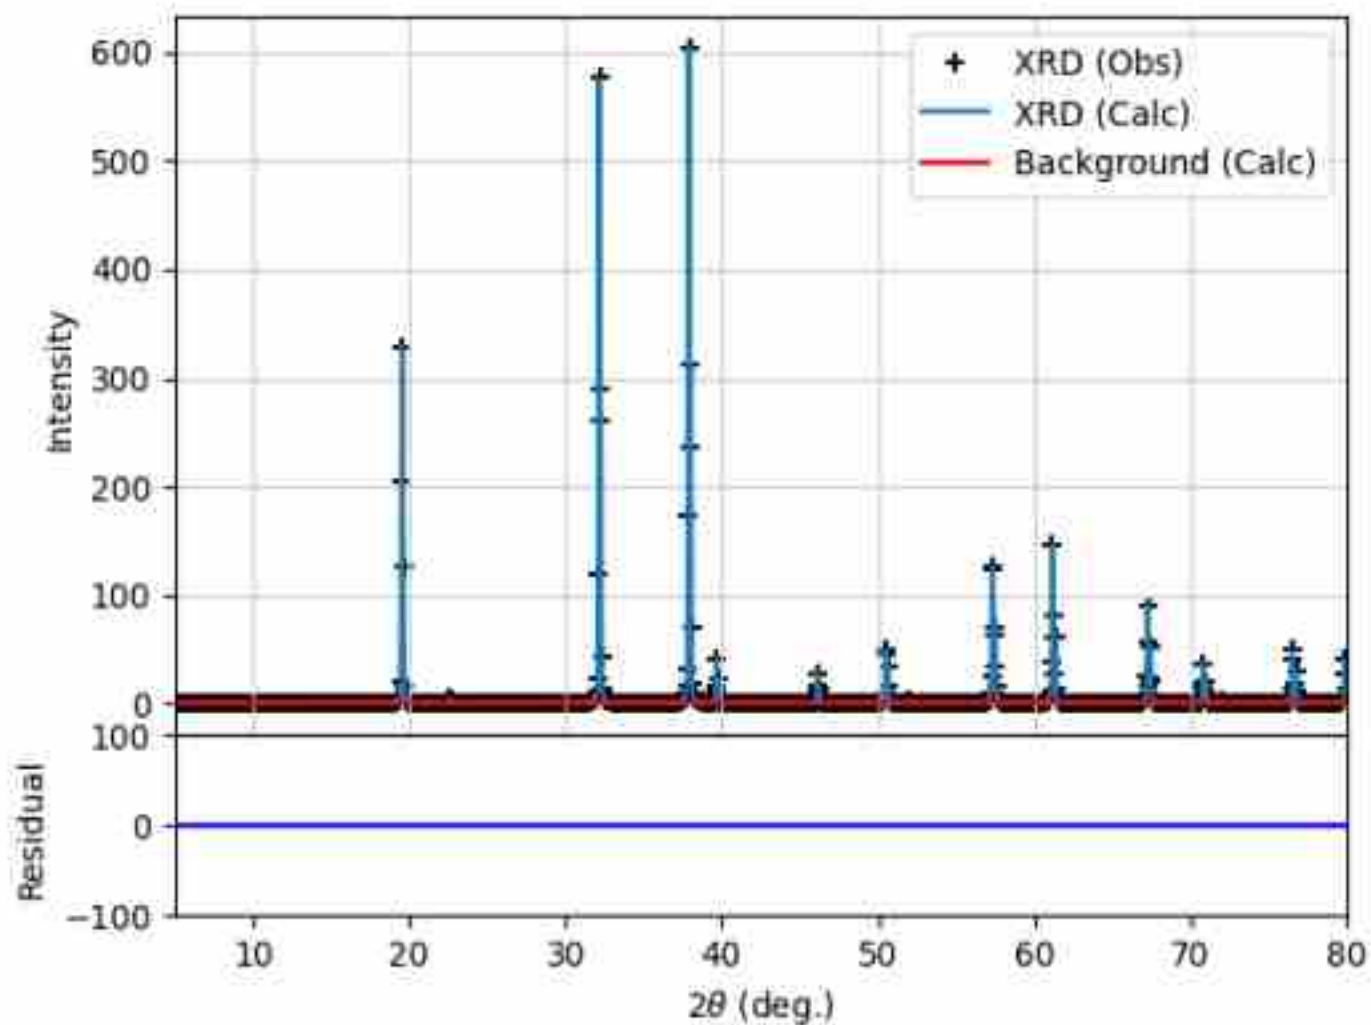

| RMSE before RR | Rwp     | RMSE after RR |
|----------------|---------|---------------|
| 0.008          | 0.00815 | 0.00168       |

# Tb1Sc1Si2

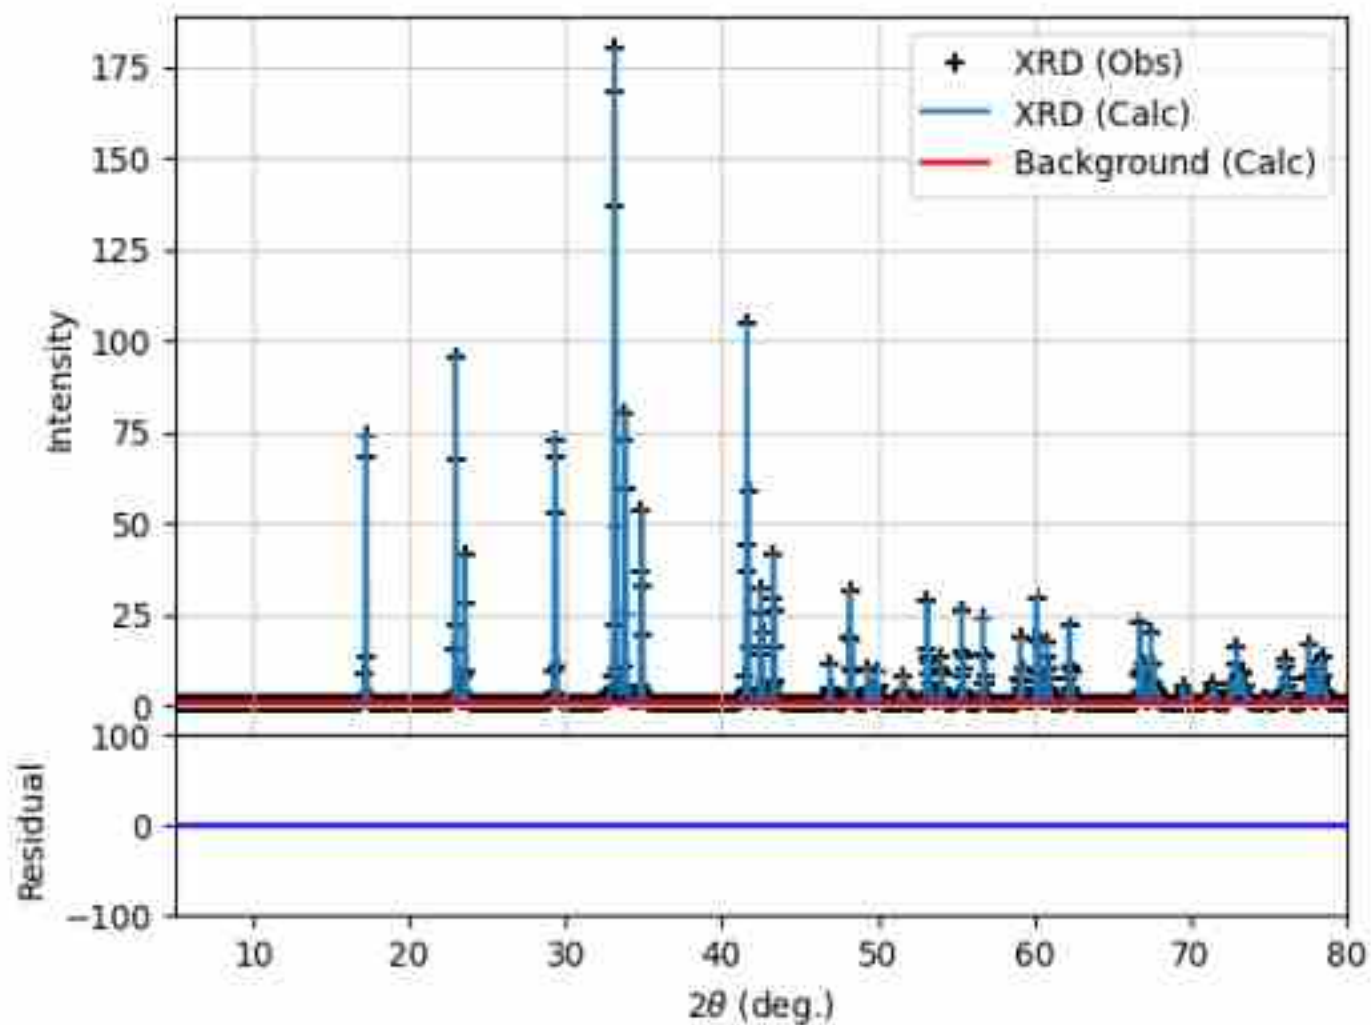

| RMSE before RR | Rwp     | RMSE after RR |
|----------------|---------|---------------|
| 0.008          | 0.00332 | 0.00031       |

# Tb<sub>2</sub>Al<sub>3</sub>Pt<sub>1</sub>

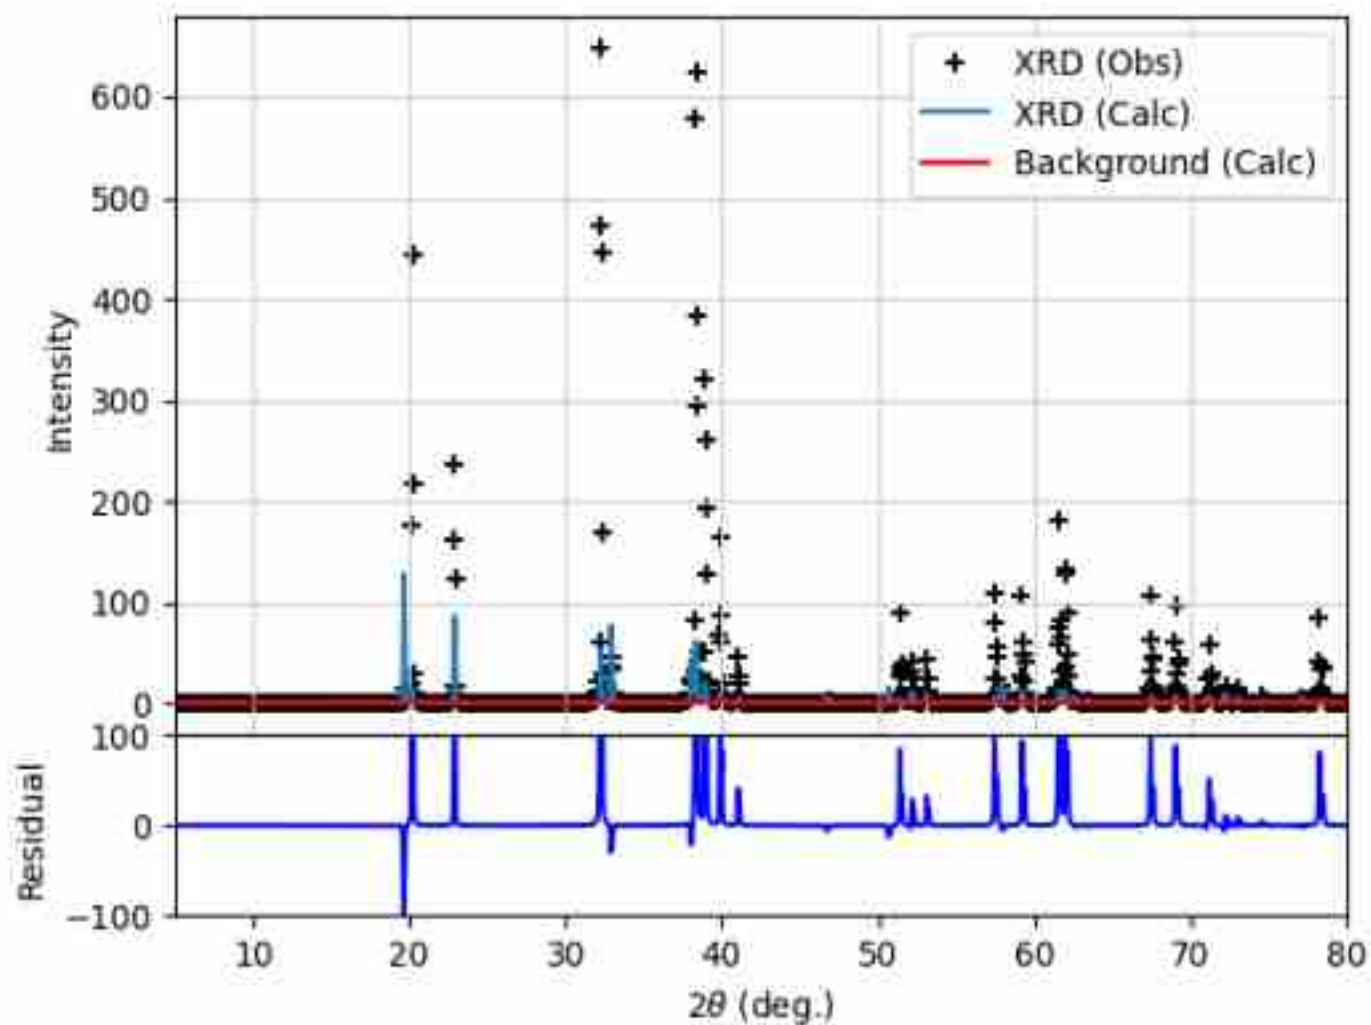

| RMSE before RR | Rwp      | RMSE after RR |
|----------------|----------|---------------|
| 0.008          | 90.10828 | 0.05241       |



# Tb<sub>2</sub>In<sub>1</sub>Ni<sub>2</sub>

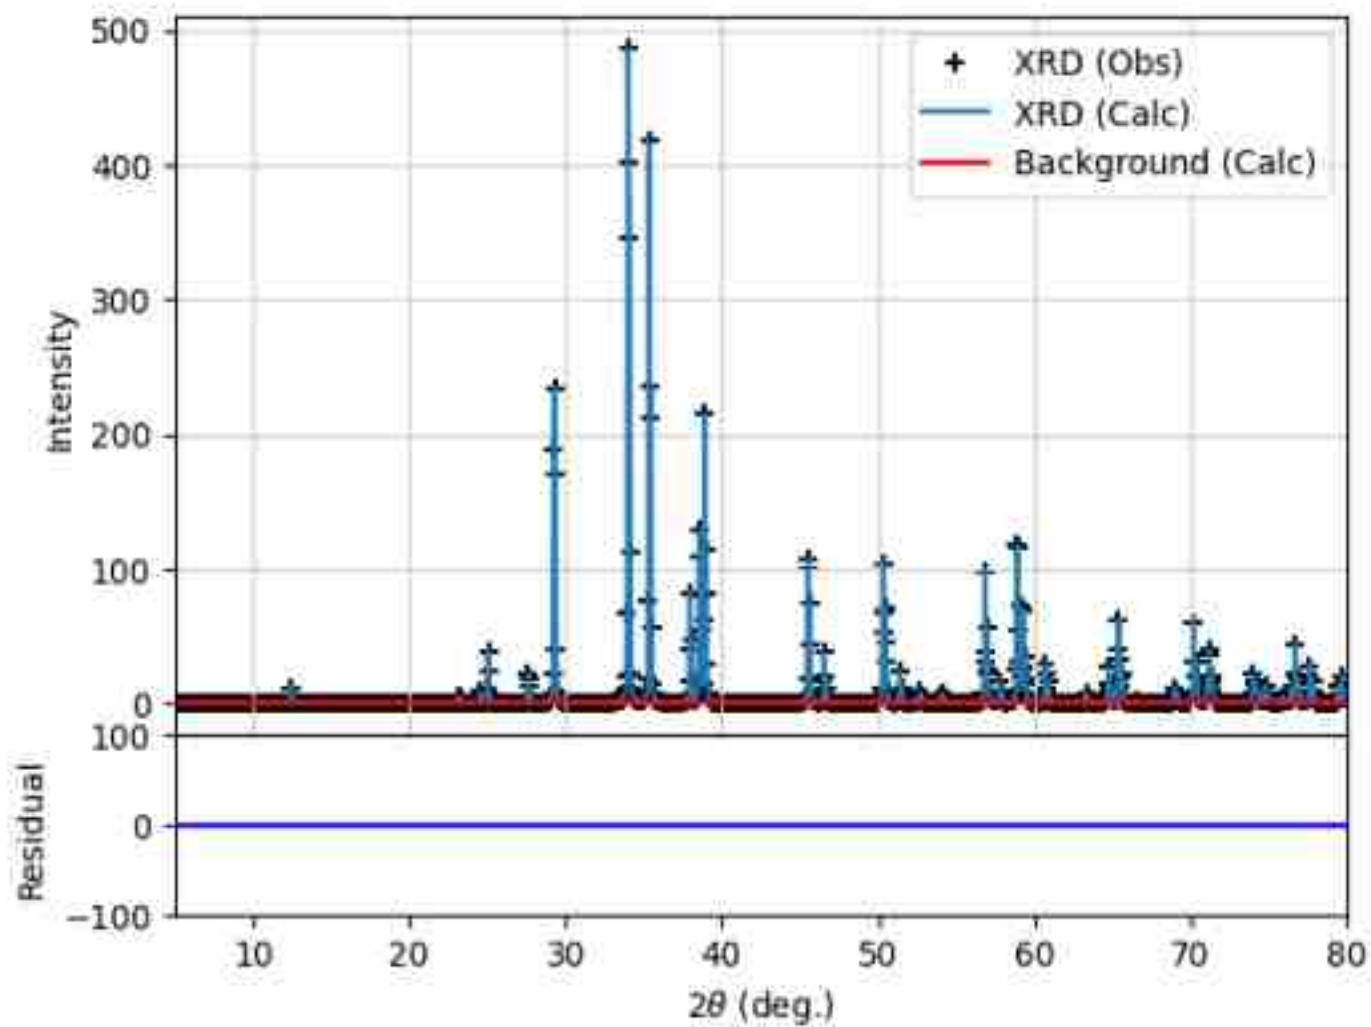

| RMSE before RR | Rwp    | RMSE after RR |
|----------------|--------|---------------|
| 0.008          | 0.0042 | 0.0004        |

# Tb<sub>2</sub>Ni<sub>2</sub>Ge<sub>4</sub>

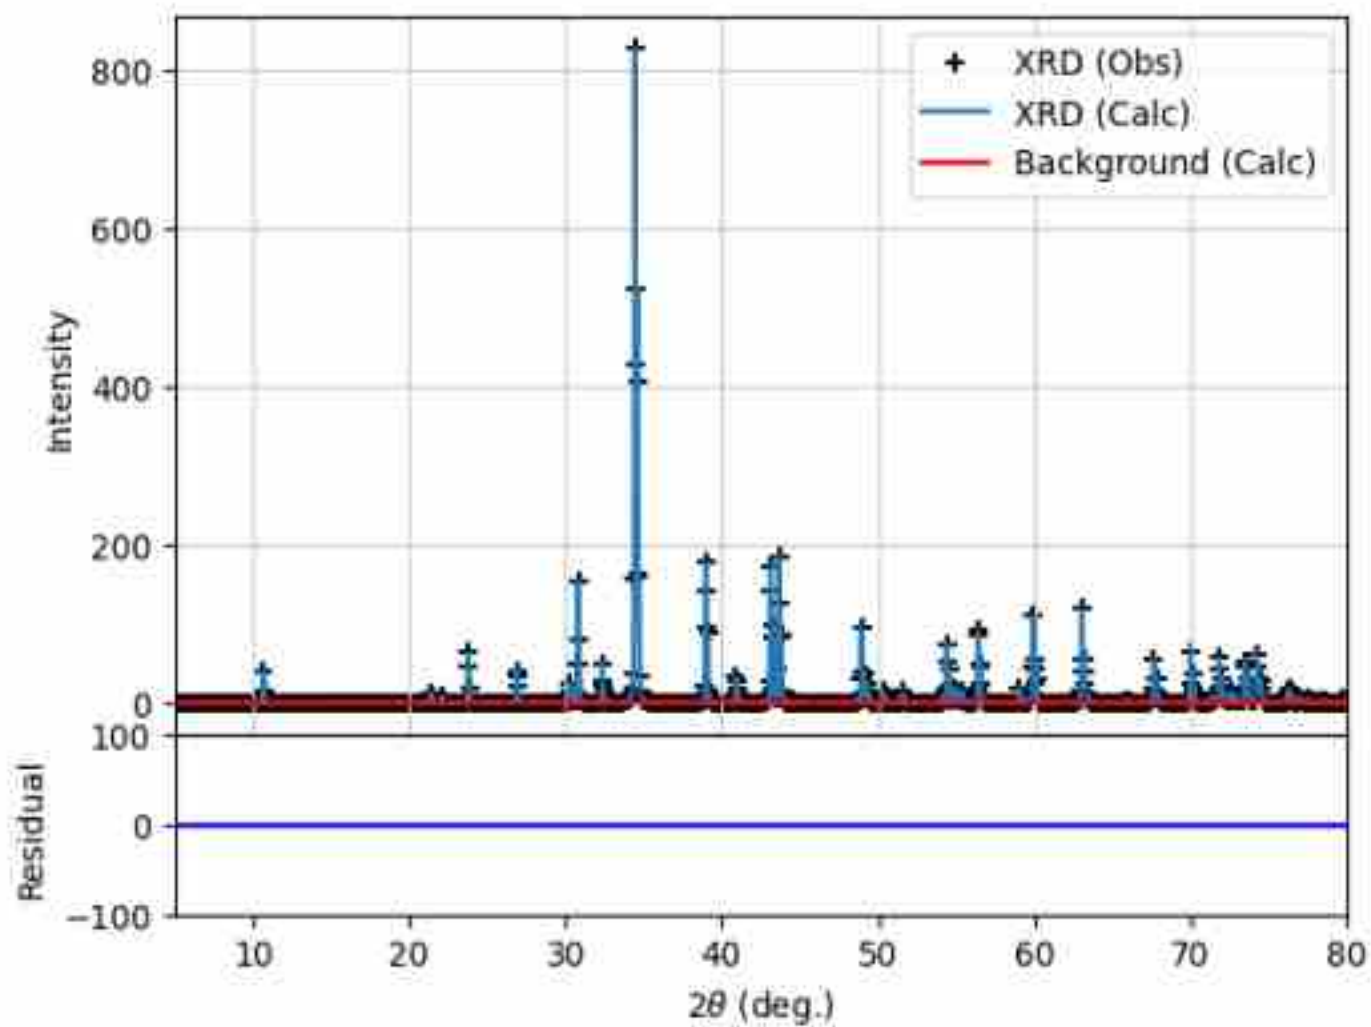

| RMSE before RR | Rwp     | RMSE after RR |
|----------------|---------|---------------|
| 0.008          | 0.00393 | 0.00022       |

# Tb3Al3Pd3

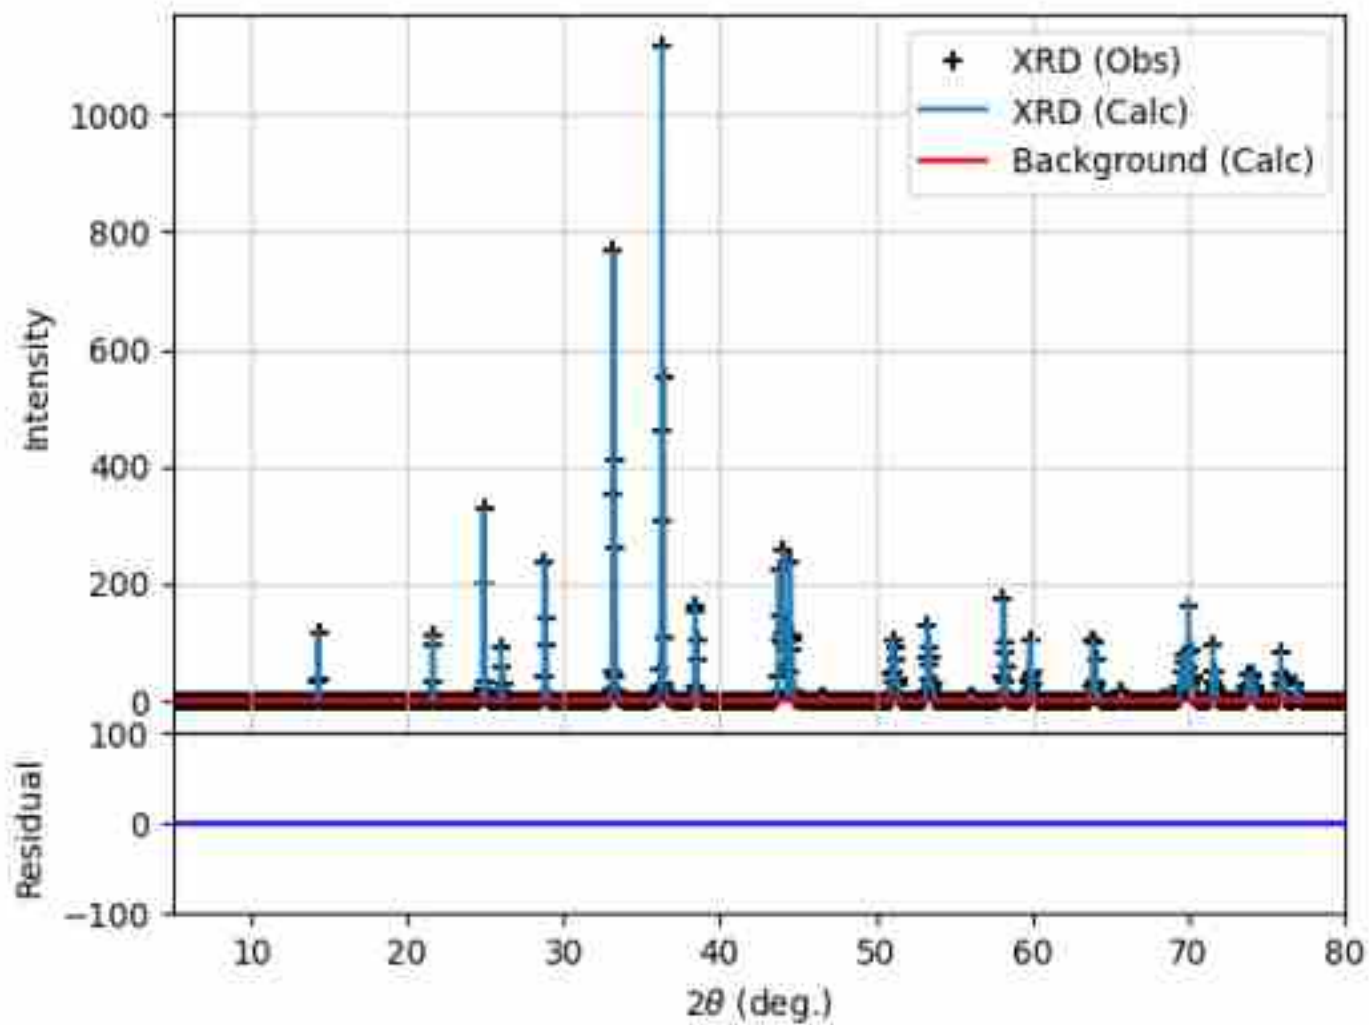

| RMSE before RR | Rwp     | RMSE after RR |
|----------------|---------|---------------|
| 0.008          | 0.00351 | 0.00094       |

# Tb<sub>3</sub>Sn<sub>3</sub>Rh<sub>3</sub>

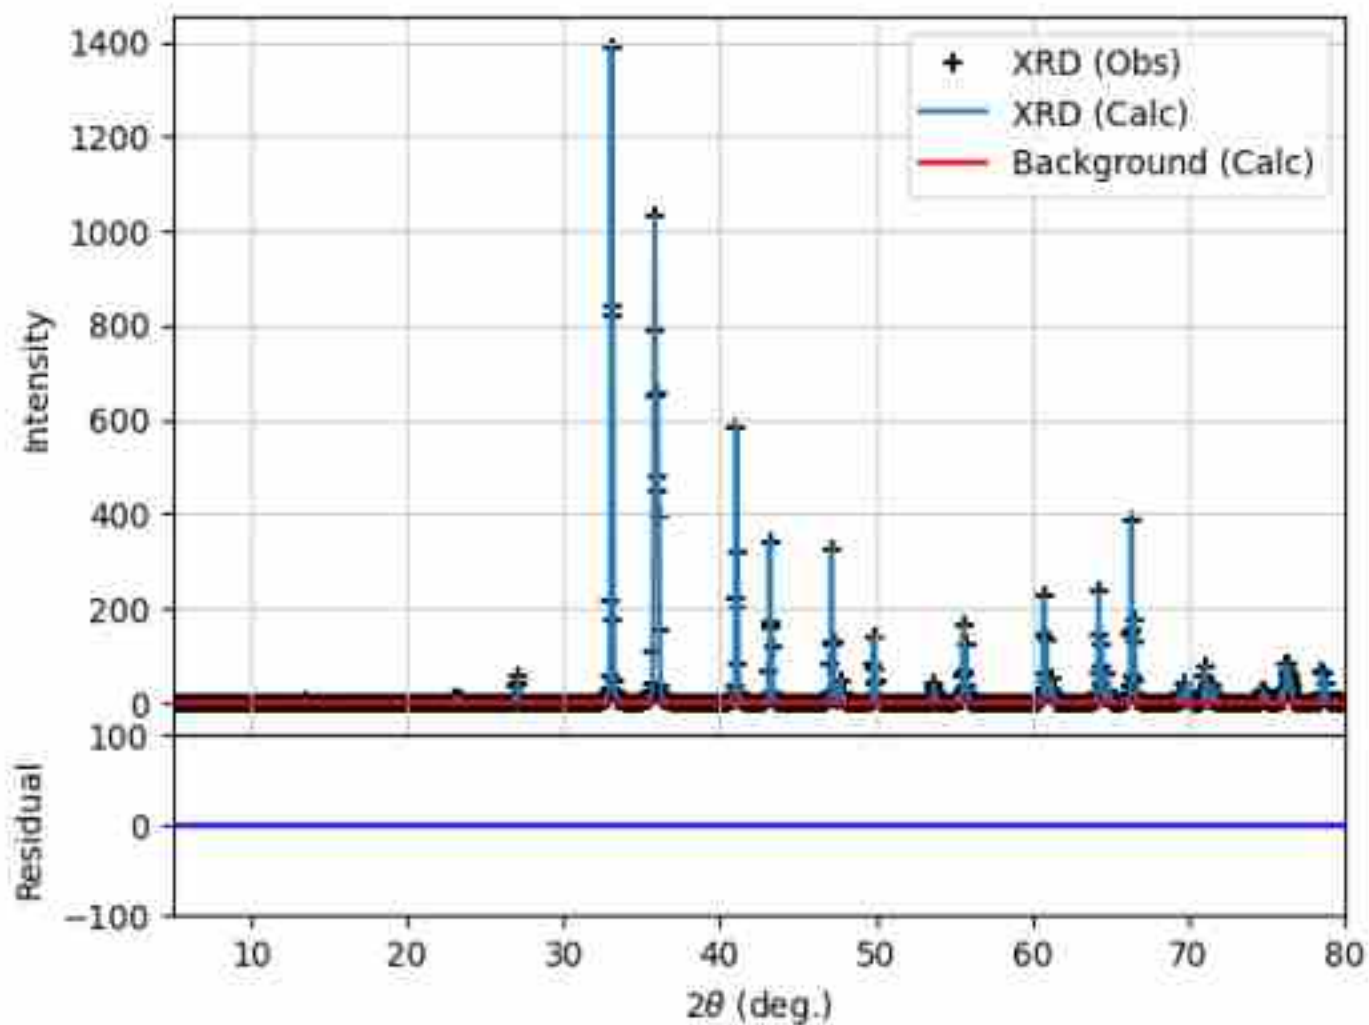

| RMSE before RR | Rwp     | RMSE after RR |
|----------------|---------|---------------|
| 0.008          | 0.00368 | 0.00041       |

# Tb<sub>4</sub>Al<sub>4</sub>Pd<sub>4</sub>

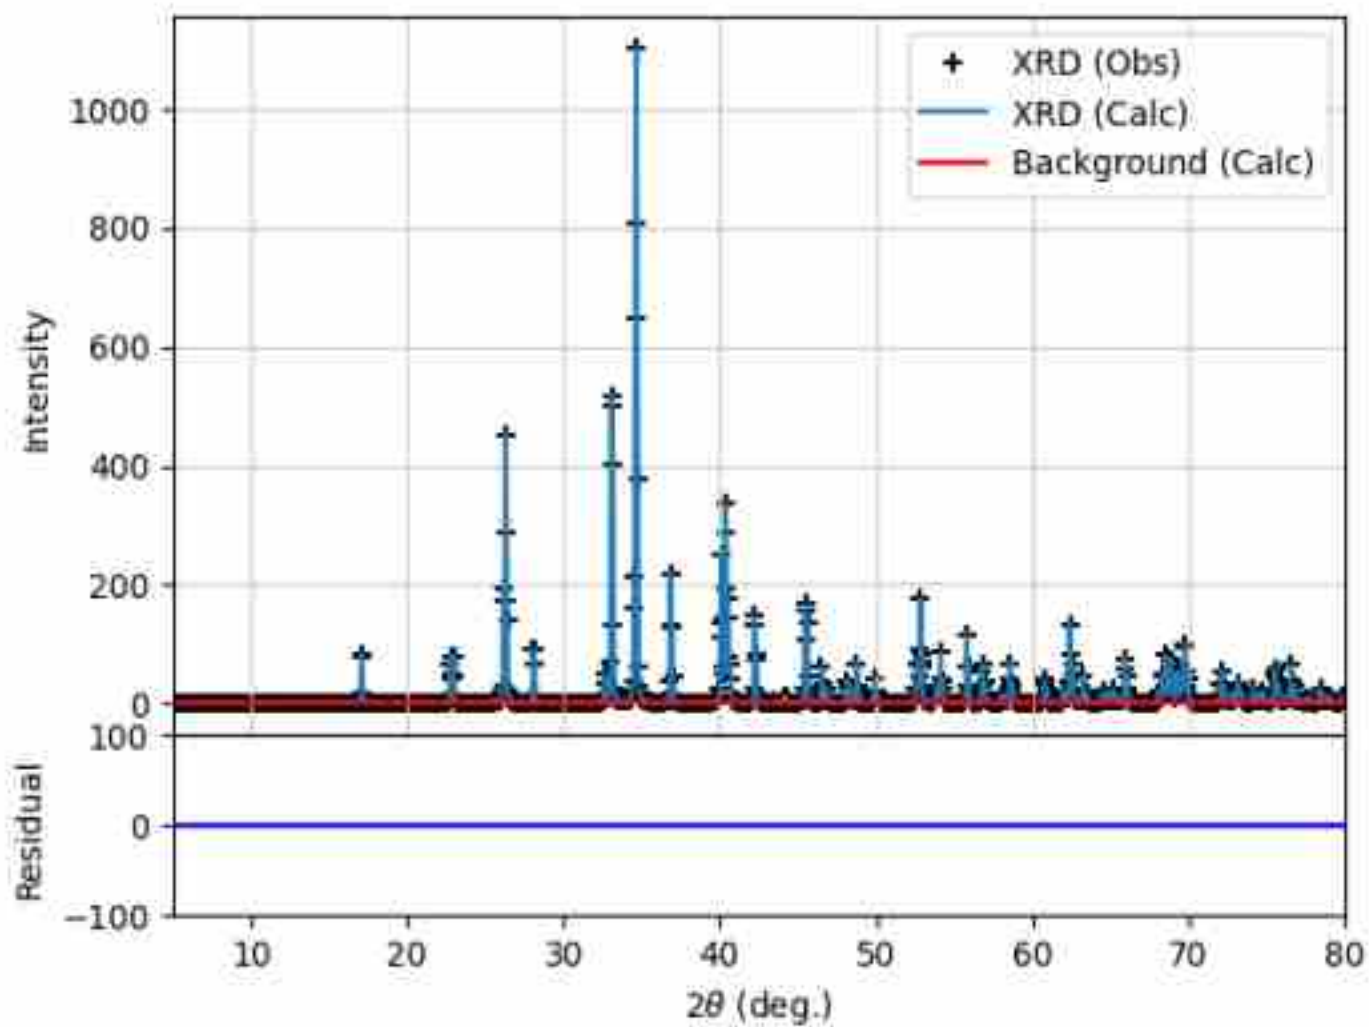

| RMSE before RR | Rwp   | RMSE after RR |
|----------------|-------|---------------|
| 0.008          | 0.005 | 0.00074       |

# Tb<sub>4</sub>Cd<sub>2</sub>Pd<sub>4</sub>

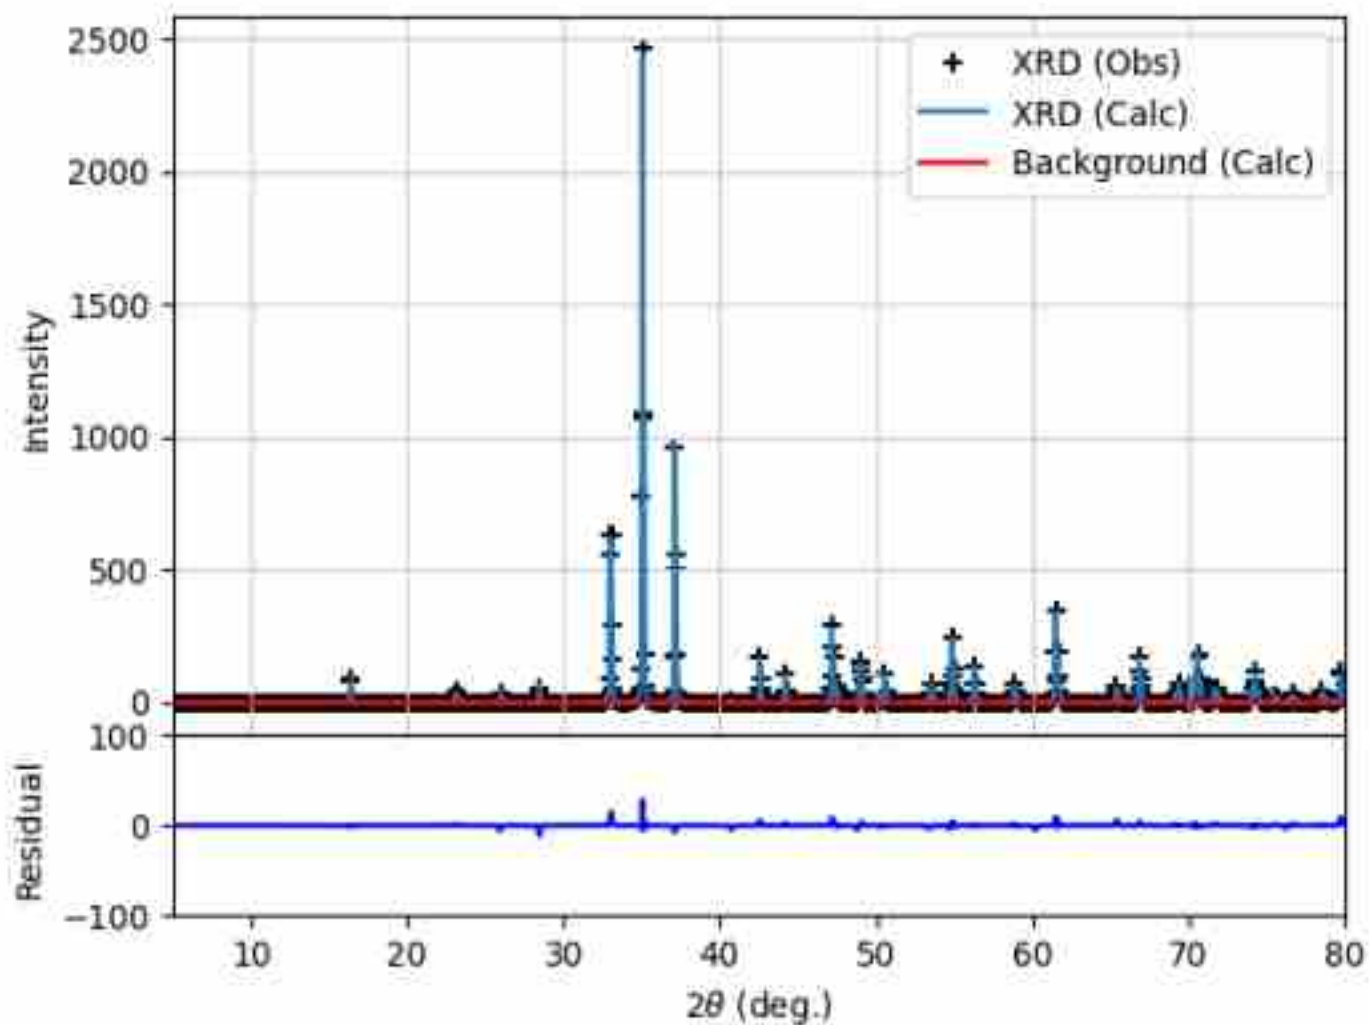

| RMSE before RR | Rwp     | RMSE after RR |
|----------------|---------|---------------|
| 0.008          | 7.33809 | 0.01675       |

# Th1Al3Ni2

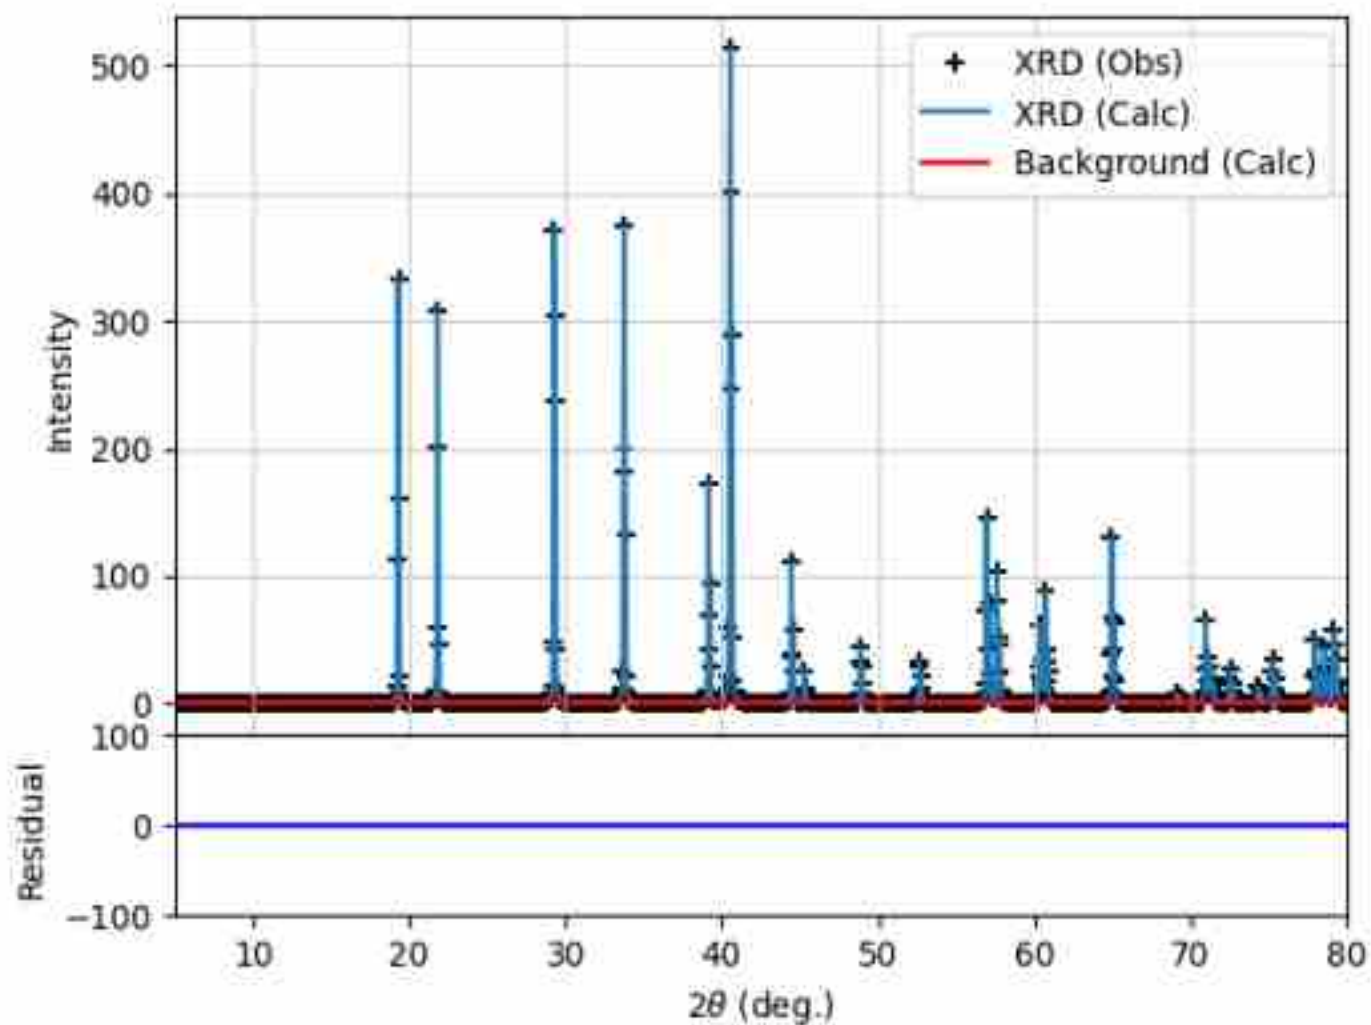

| RMSE before RR | Rwp     | RMSE after RR |
|----------------|---------|---------------|
| 0.008          | 0.11866 | 0.00781       |

# Ti<sub>2</sub>F<sub>6</sub>

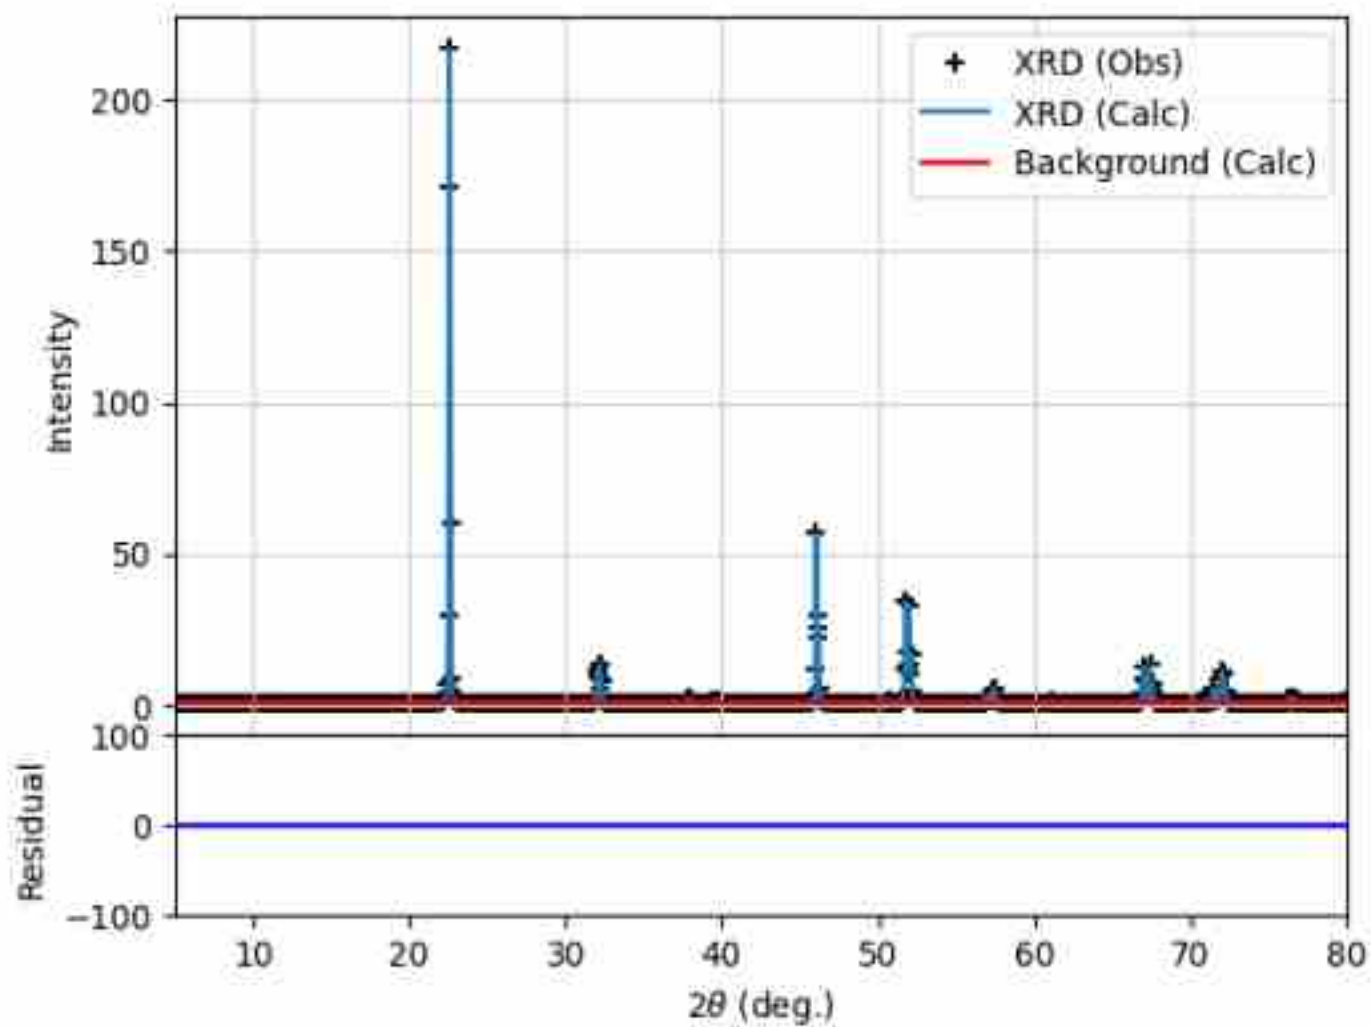

| RMSE before RR | Rwp     | RMSE after RR |
|----------------|---------|---------------|
| 0.08           | 0.00254 | 0.00048       |



# Ti3Cr3P3

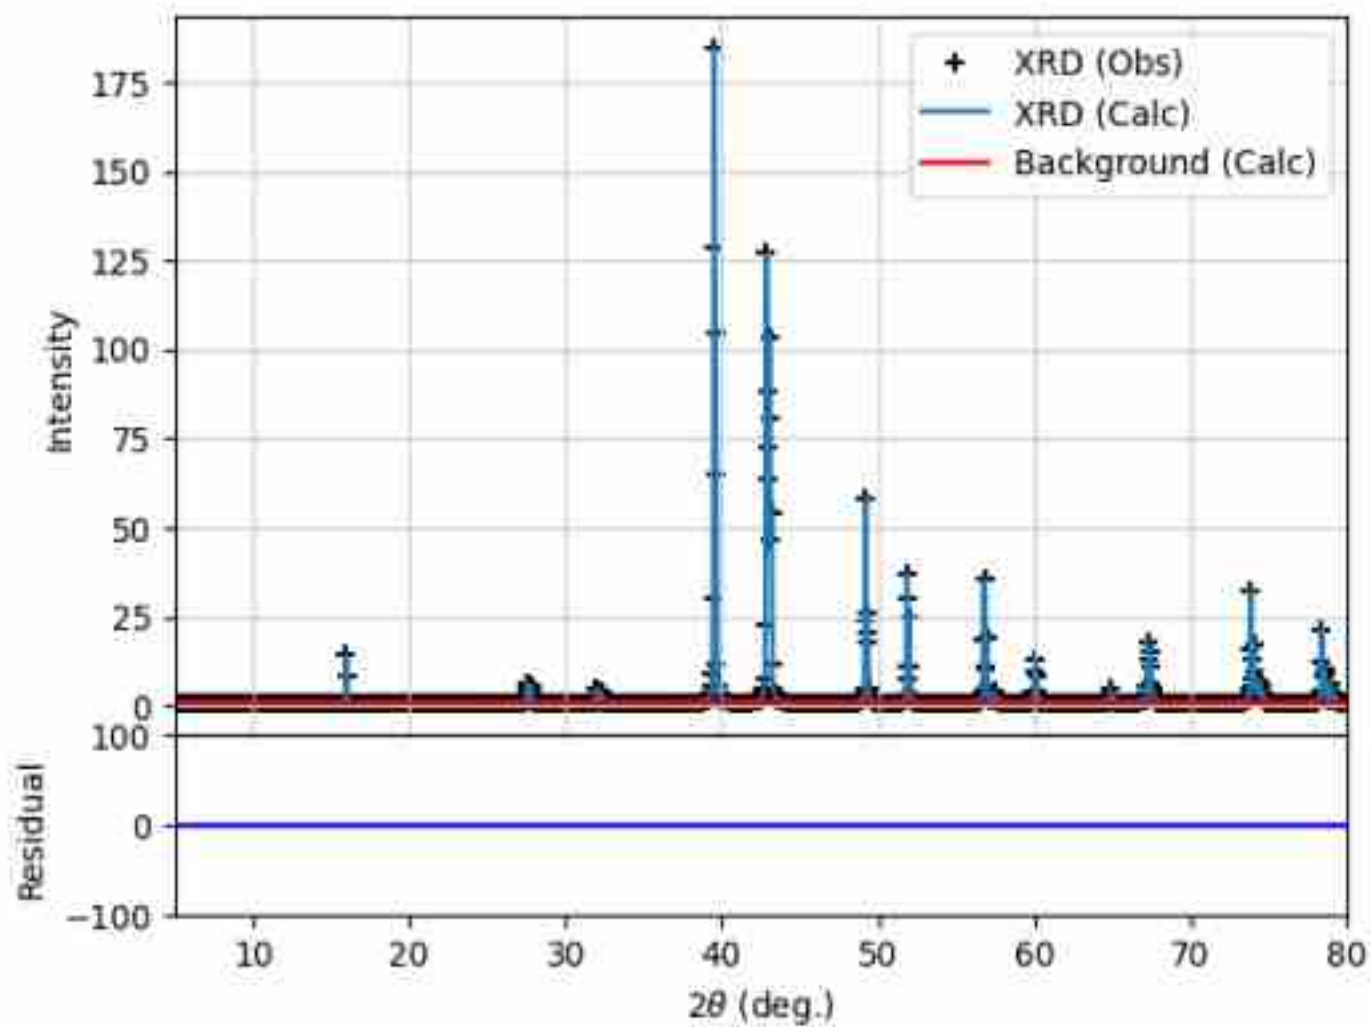

| RMSE before RR | Rwp     | RMSE after RR |
|----------------|---------|---------------|
| 0.008          | 0.00364 | 0.00109       |

# Ti4O8

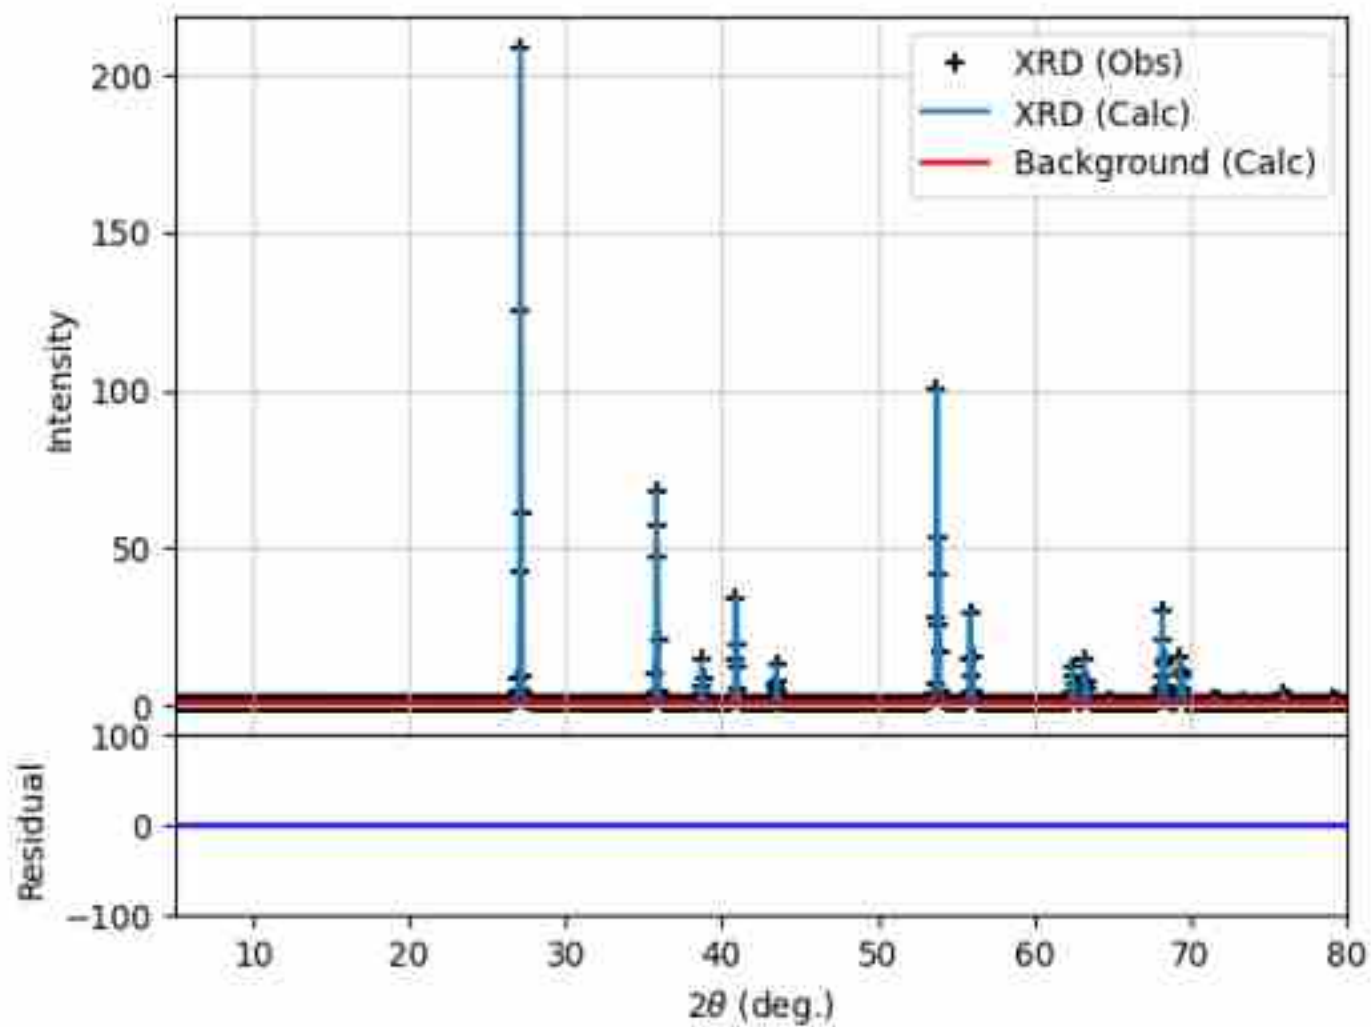

| RMSE before RR | Rwp     | RMSE after RR |
|----------------|---------|---------------|
| 0.008          | 0.00303 | 0.00074       |

# Tm<sub>2</sub>Ni<sub>8</sub>P<sub>4</sub>

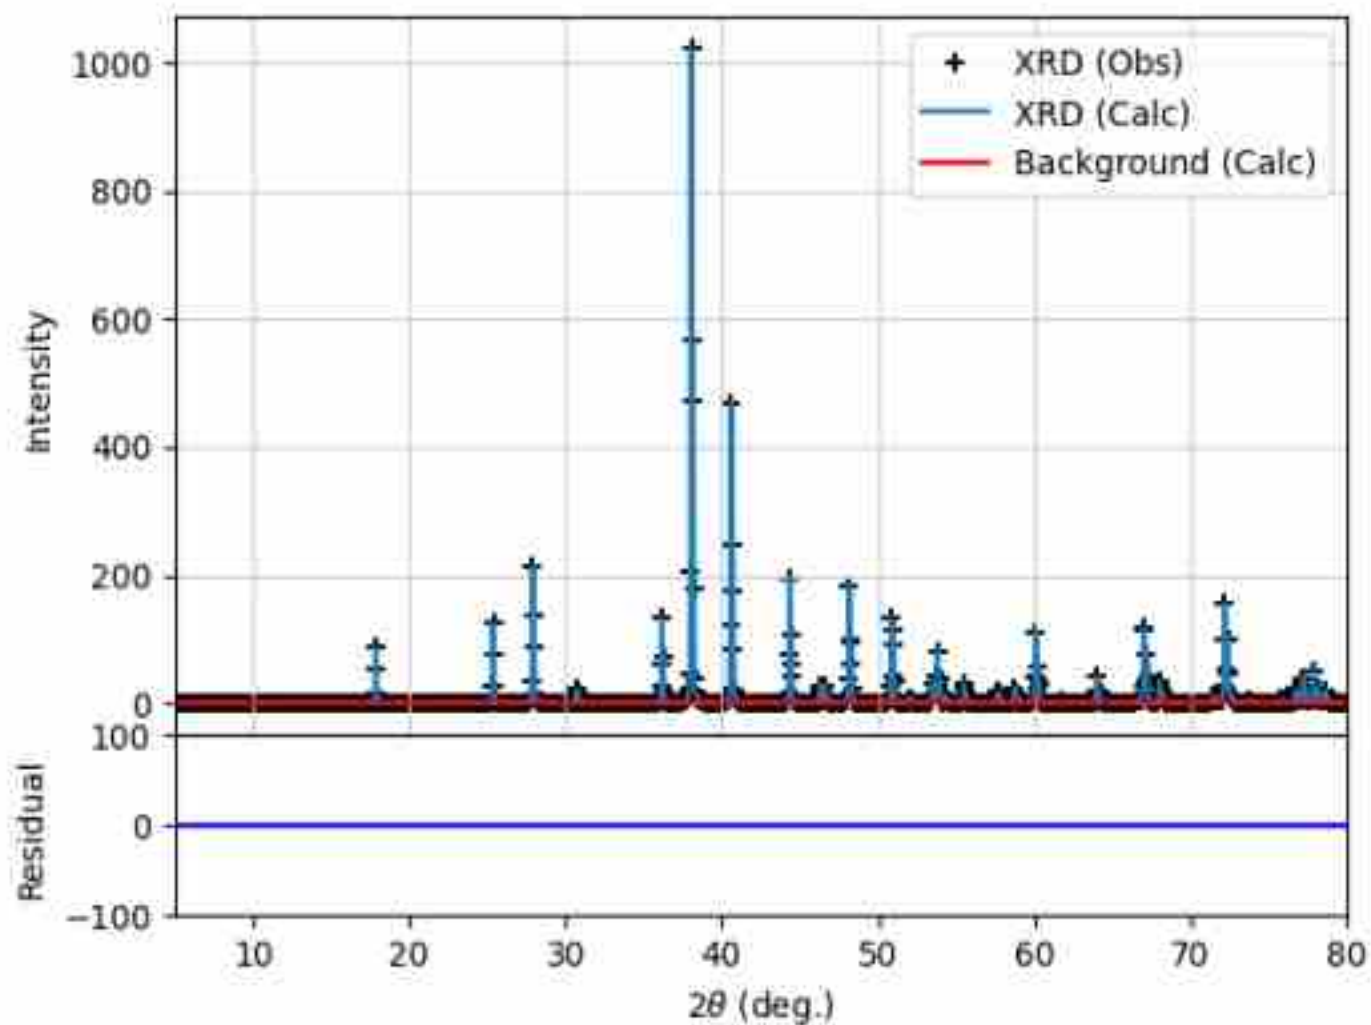

| RMSE before RR | Rwp     | RMSE after RR |
|----------------|---------|---------------|
| 0.008          | 0.00659 | 0.00107       |

# Tm<sub>4</sub>Fe<sub>2</sub>Si<sub>4</sub>

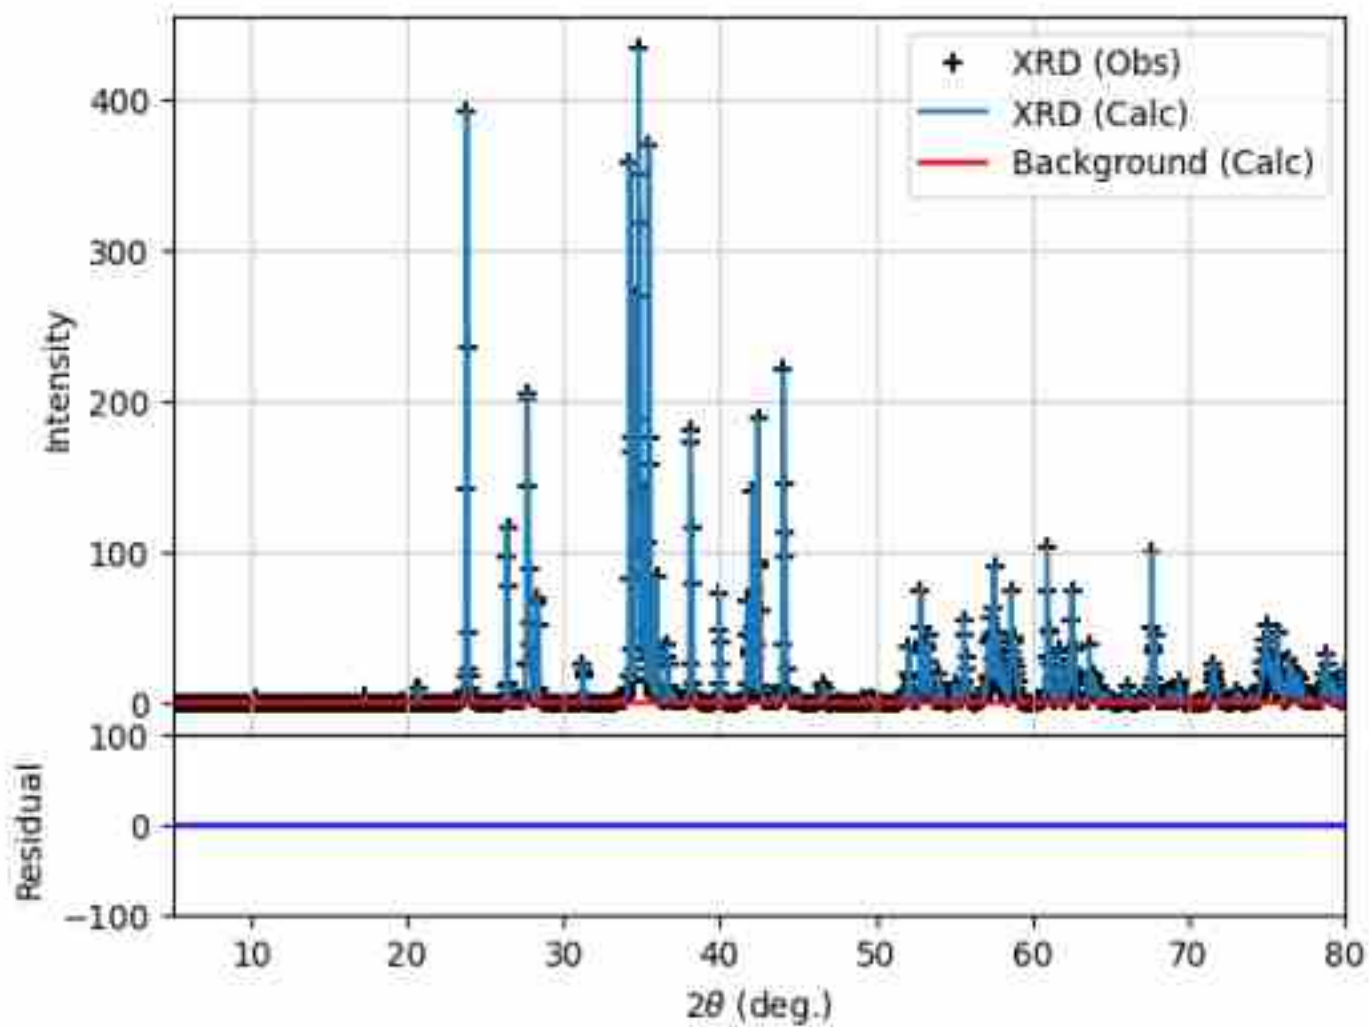

| RMSE before RR | Rwp     | RMSE after RR |
|----------------|---------|---------------|
| 0.008          | 0.00323 | 0.00058       |

# Tm<sub>4</sub>Mg<sub>2</sub>Cu<sub>4</sub>

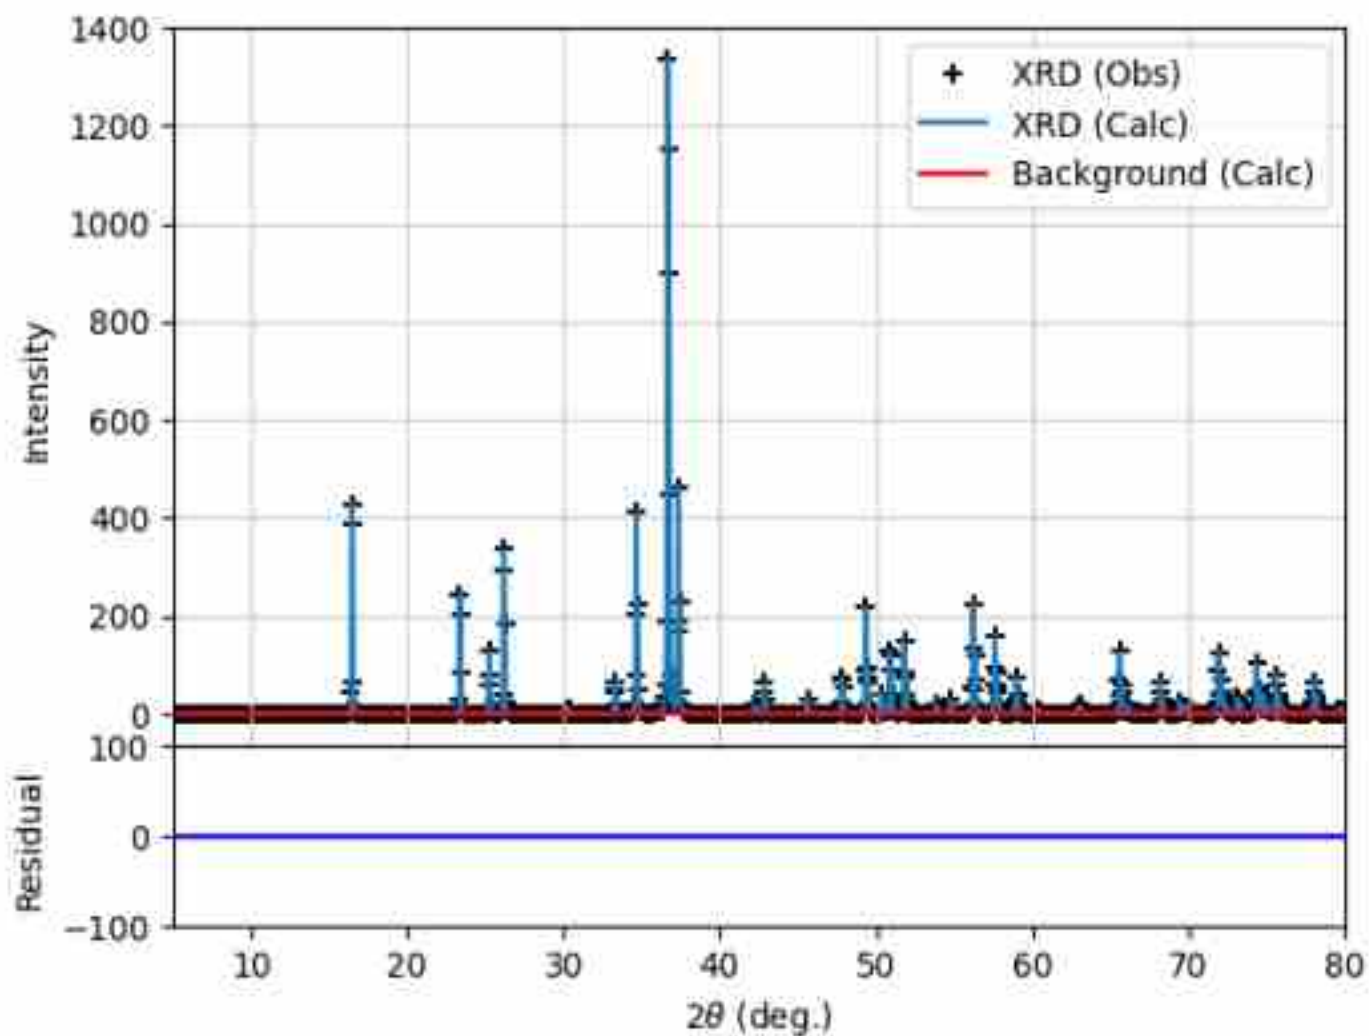

| RMSE before RR | Rwp     | RMSE after RR |
|----------------|---------|---------------|
| 0.008          | 0.00621 | 0.00091       |

# Tm4Pt4

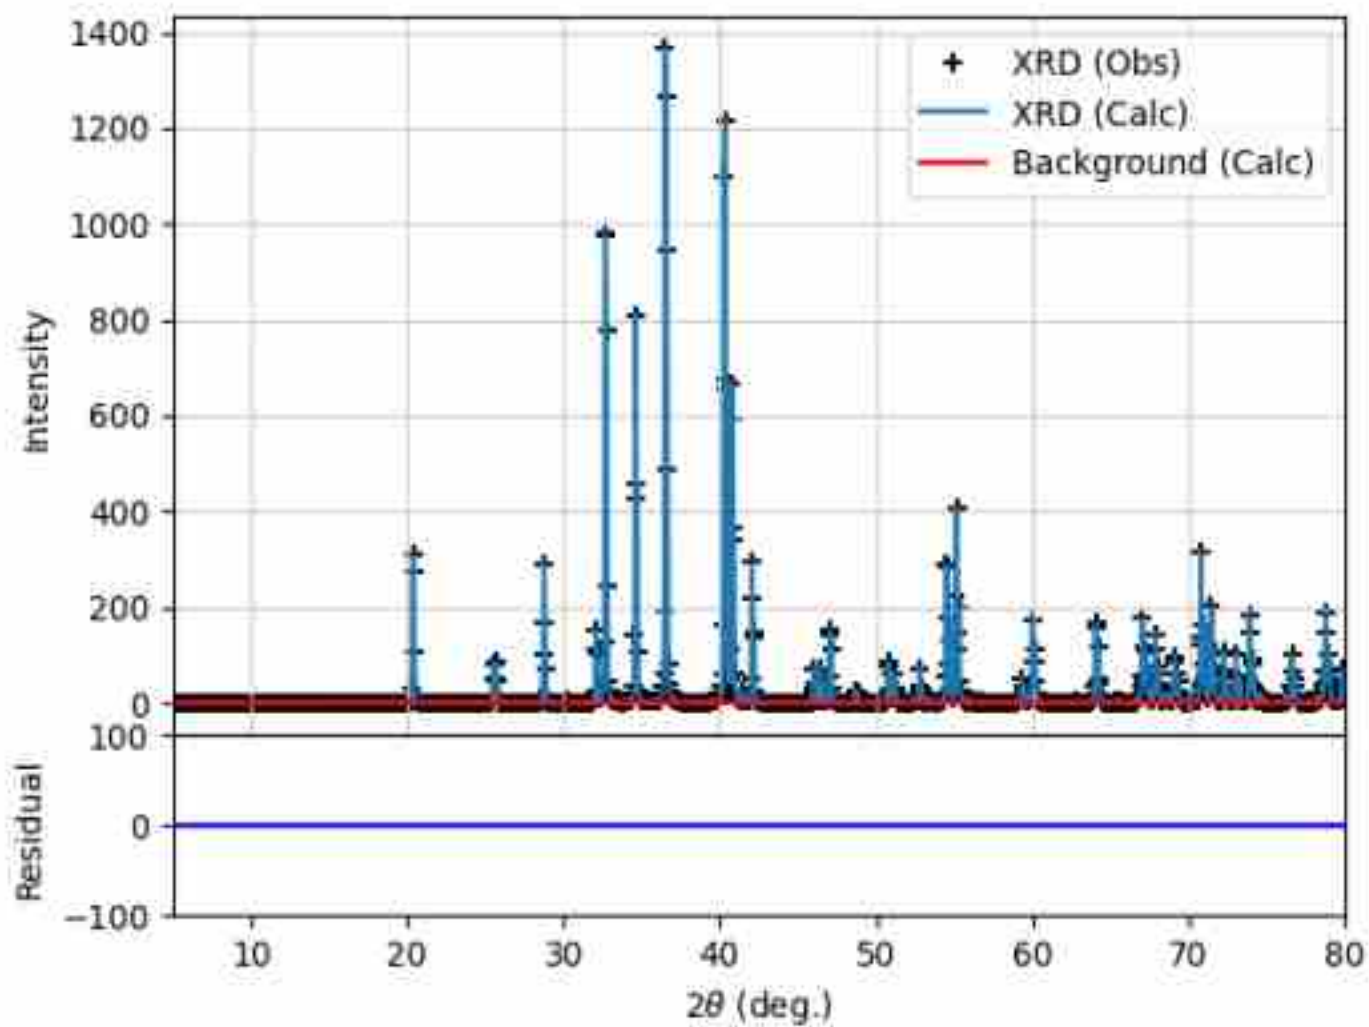

| RMSE before RR | Rwp     | RMSE after RR |
|----------------|---------|---------------|
| 0.008          | 0.00468 | 0.00018       |

# U1Cu1Ge1

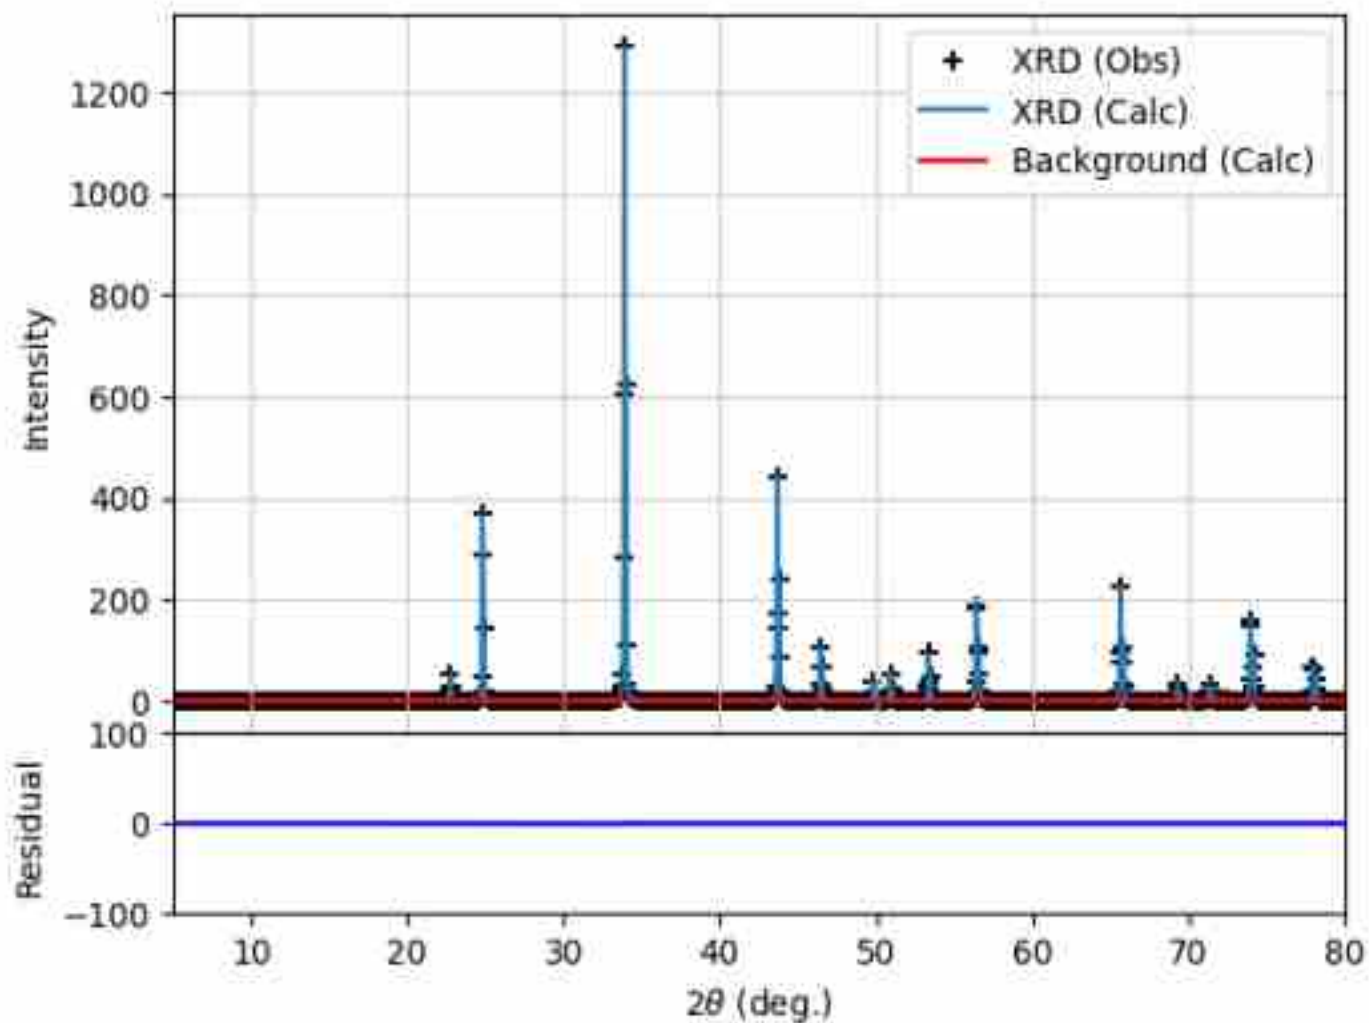

| RMSE before RR | Rwp     | RMSE after RR |
|----------------|---------|---------------|
| 0.008          | 0.03795 | 0.00083       |

# U<sub>2</sub>Se<sub>2</sub>O<sub>2</sub>

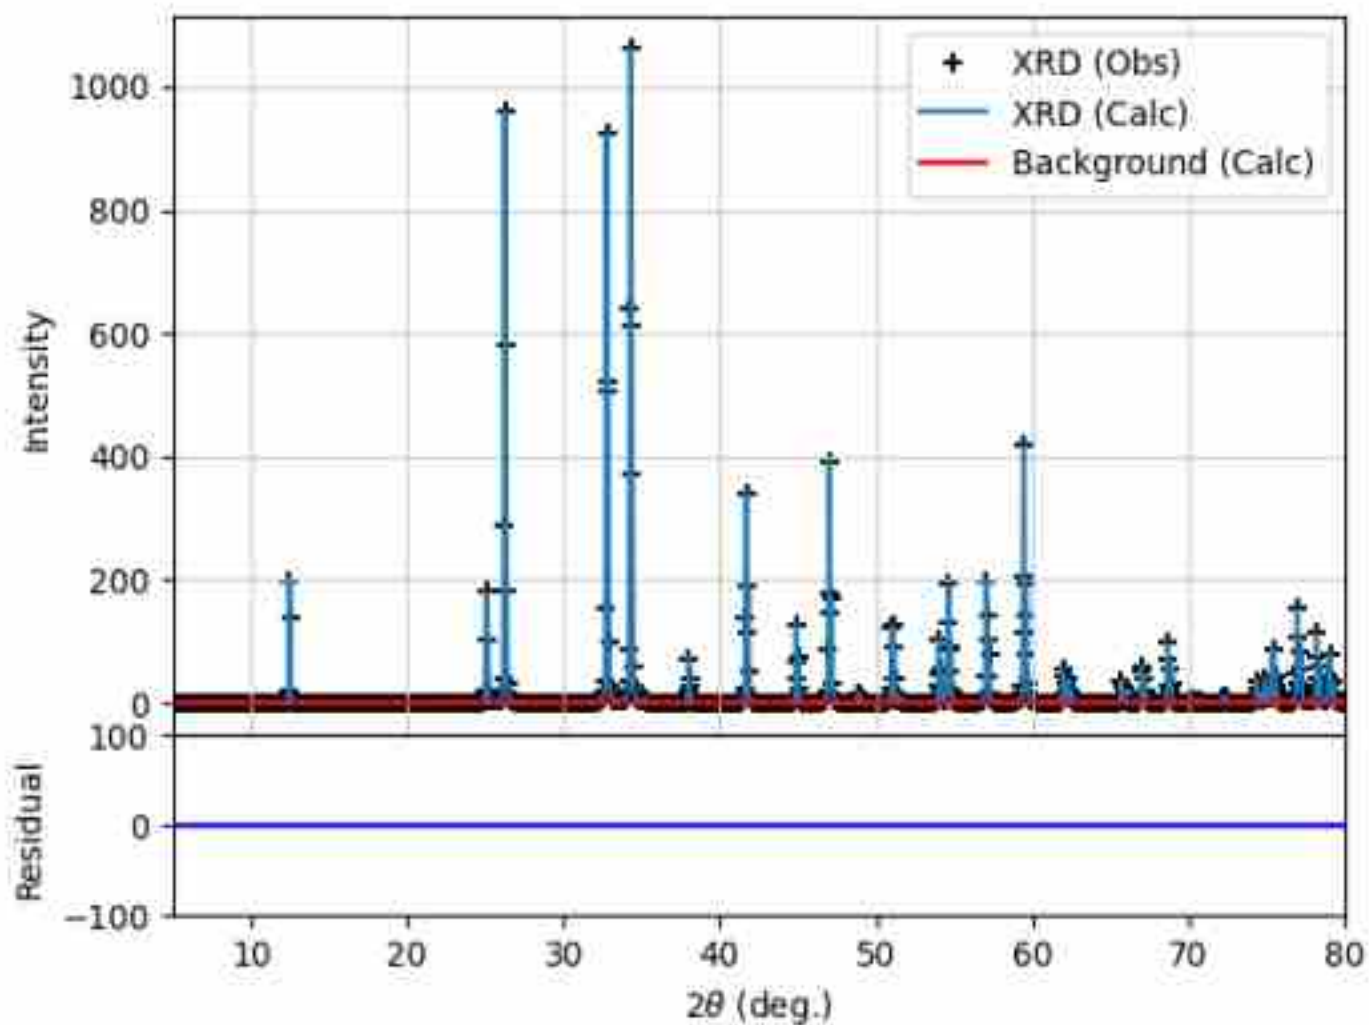

| RMSE before RR | Rwp     | RMSE after RR |
|----------------|---------|---------------|
| 0.008          | 0.00455 | 0.00074       |



# U<sub>3</sub>Sn<sub>7</sub>

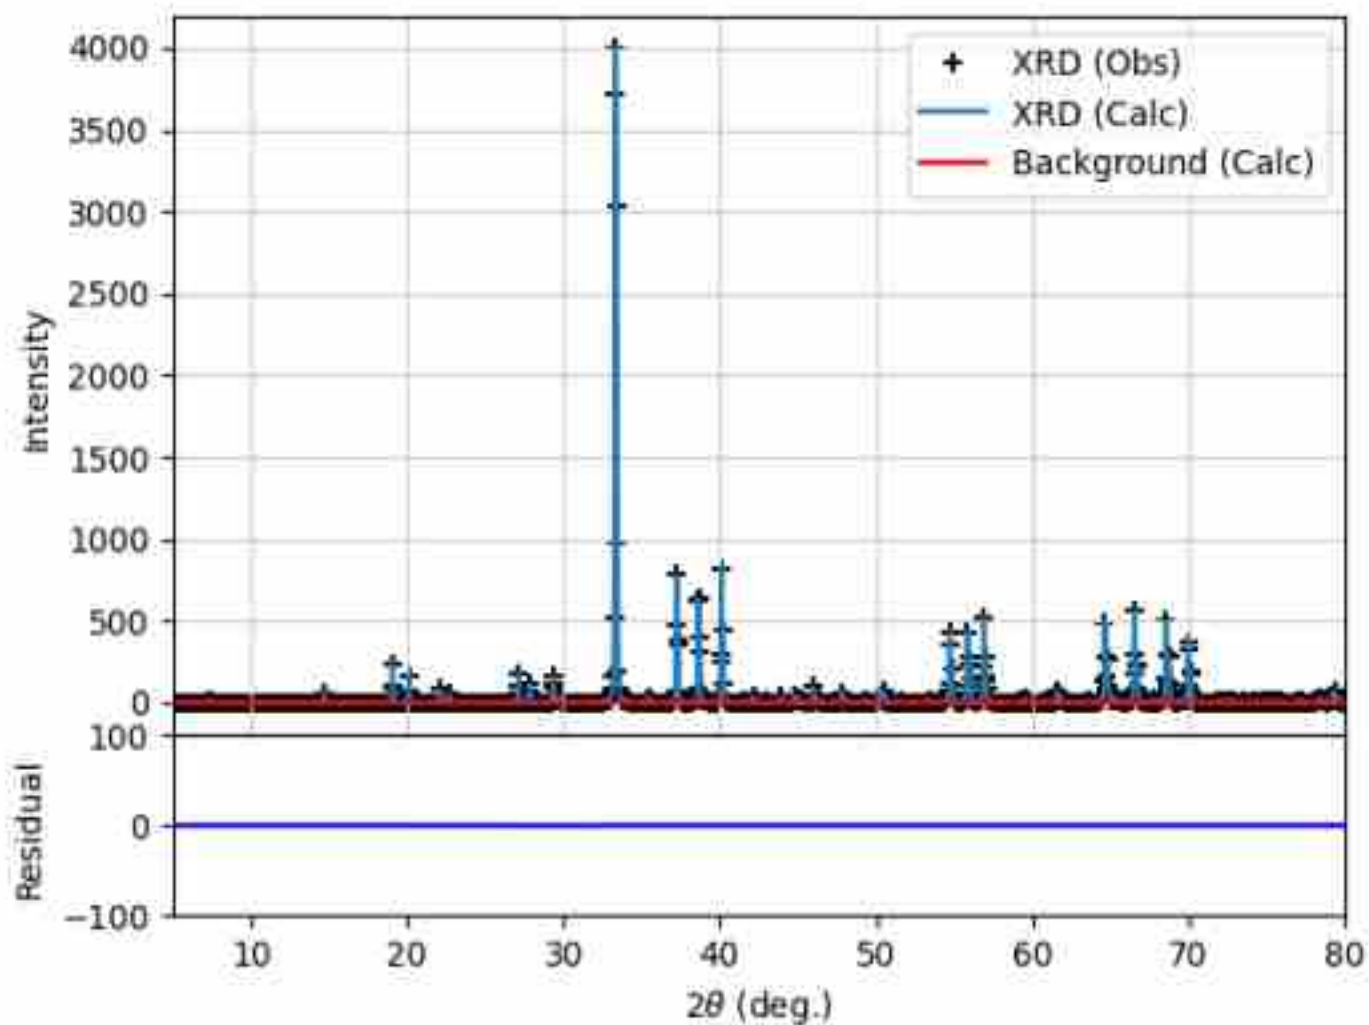

| RMSE before RR | Rwp     | RMSE after RR |
|----------------|---------|---------------|
| 0.008          | 0.00497 | 0.00056       |

# Y<sub>2</sub>Cu<sub>5</sub>Ni<sub>5</sub>

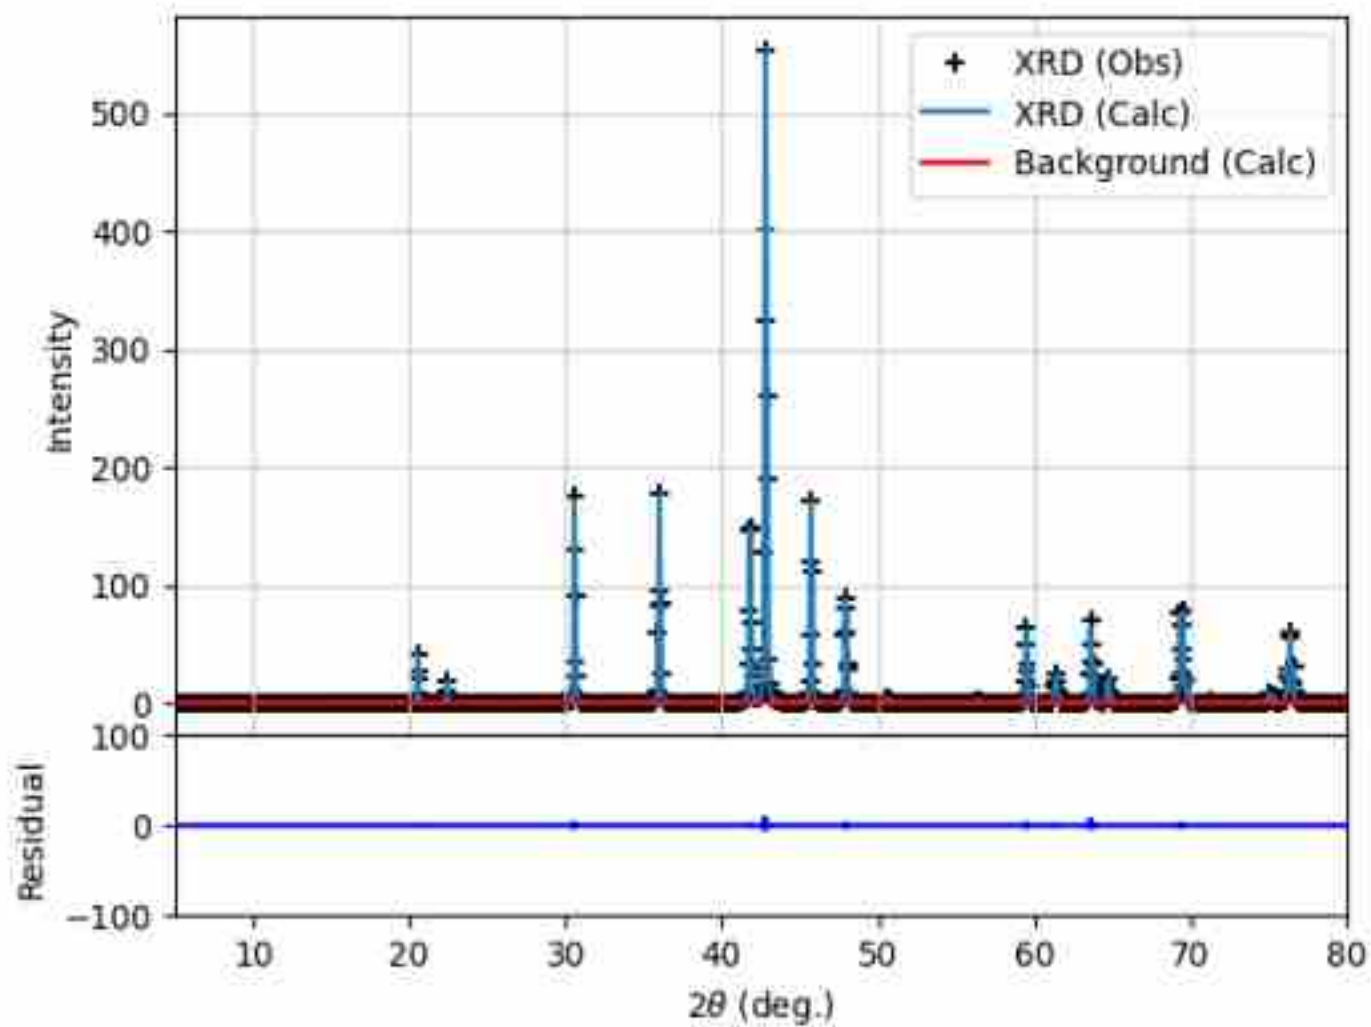

| RMSE before RR | Rwp     | RMSE after RR |
|----------------|---------|---------------|
| 0.008          | 2.07295 | 0.00815       |

# Y<sub>2</sub>Hf<sub>2</sub>O<sub>7</sub>

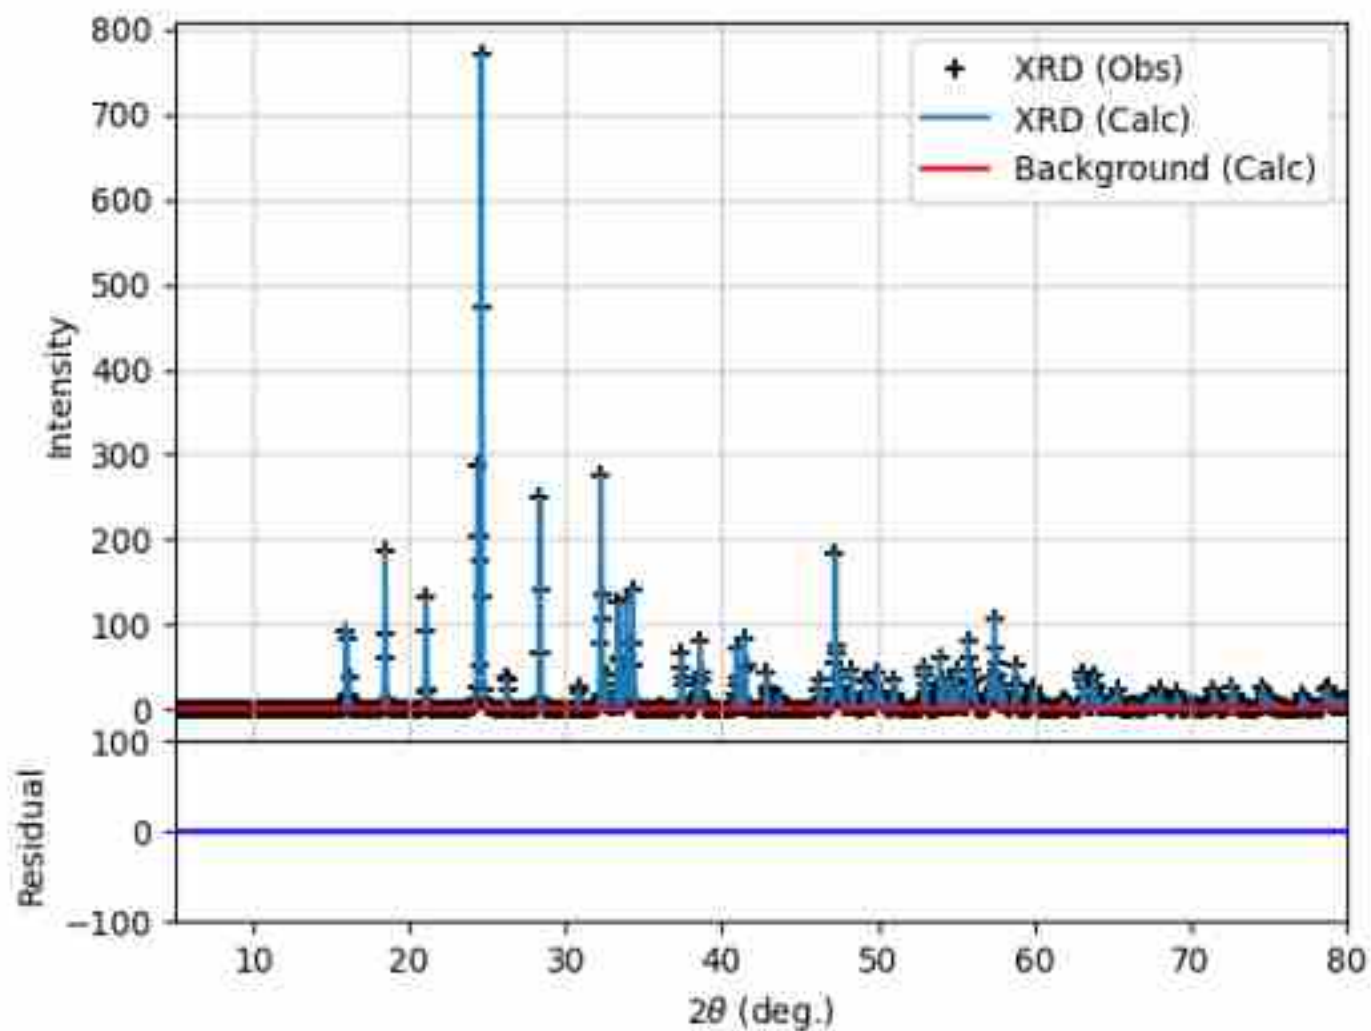

| RMSE before RR | Rwp     | RMSE after RR |
|----------------|---------|---------------|
| 0.008          | 0.00387 | 0.00092       |

# Yb<sub>2</sub>Cu<sub>4</sub>

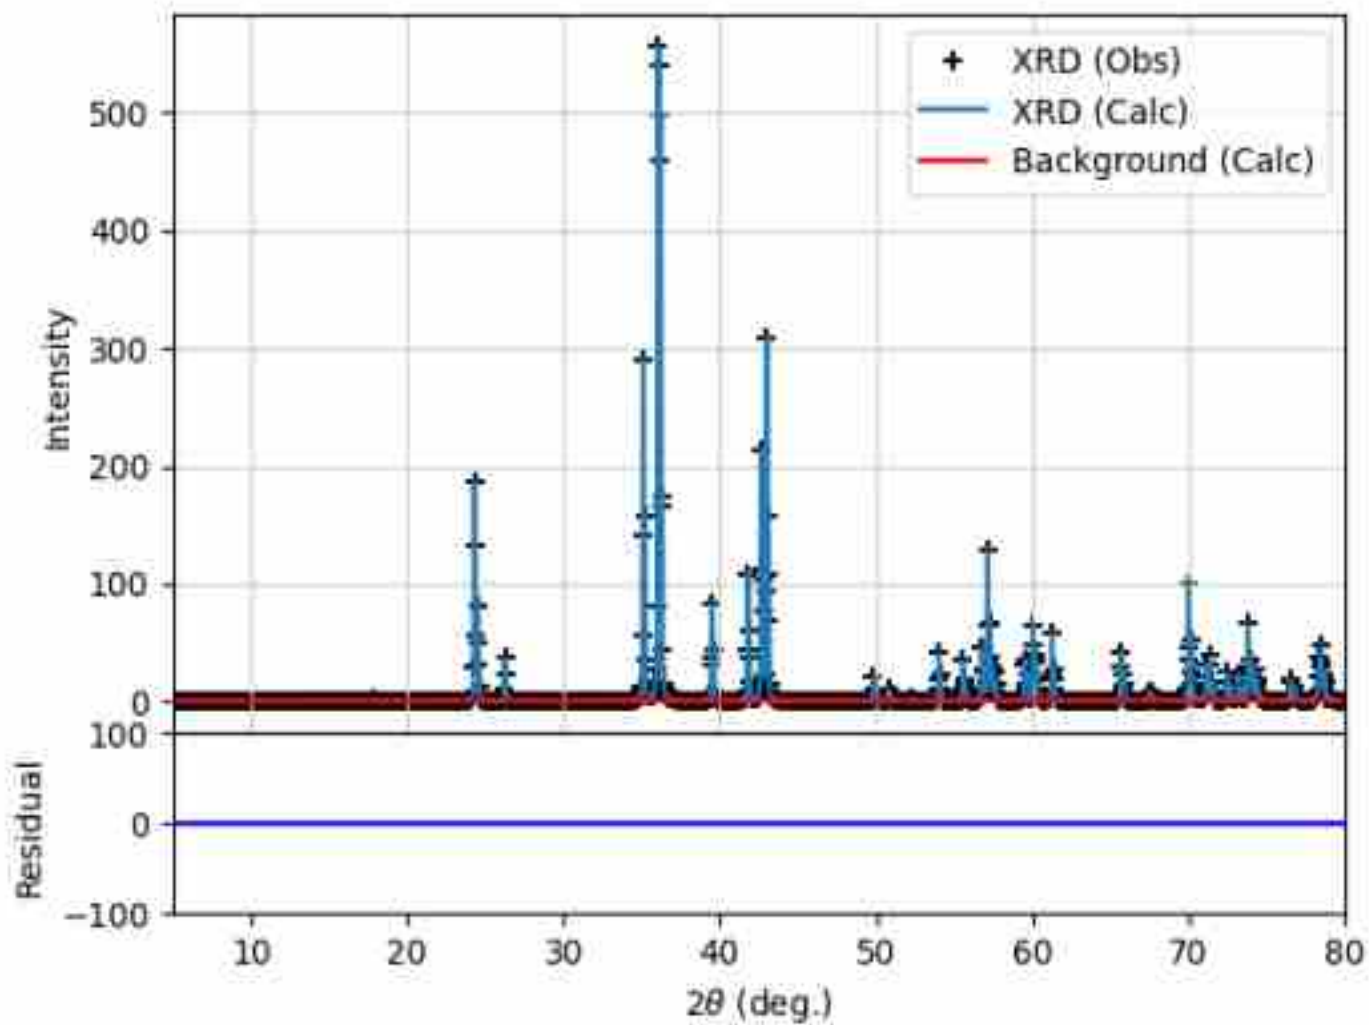

| RMSE before RR | Rwp     | RMSE after RR |
|----------------|---------|---------------|
| 0.008          | 0.00446 | 0.00053       |

# Yb2Ir4

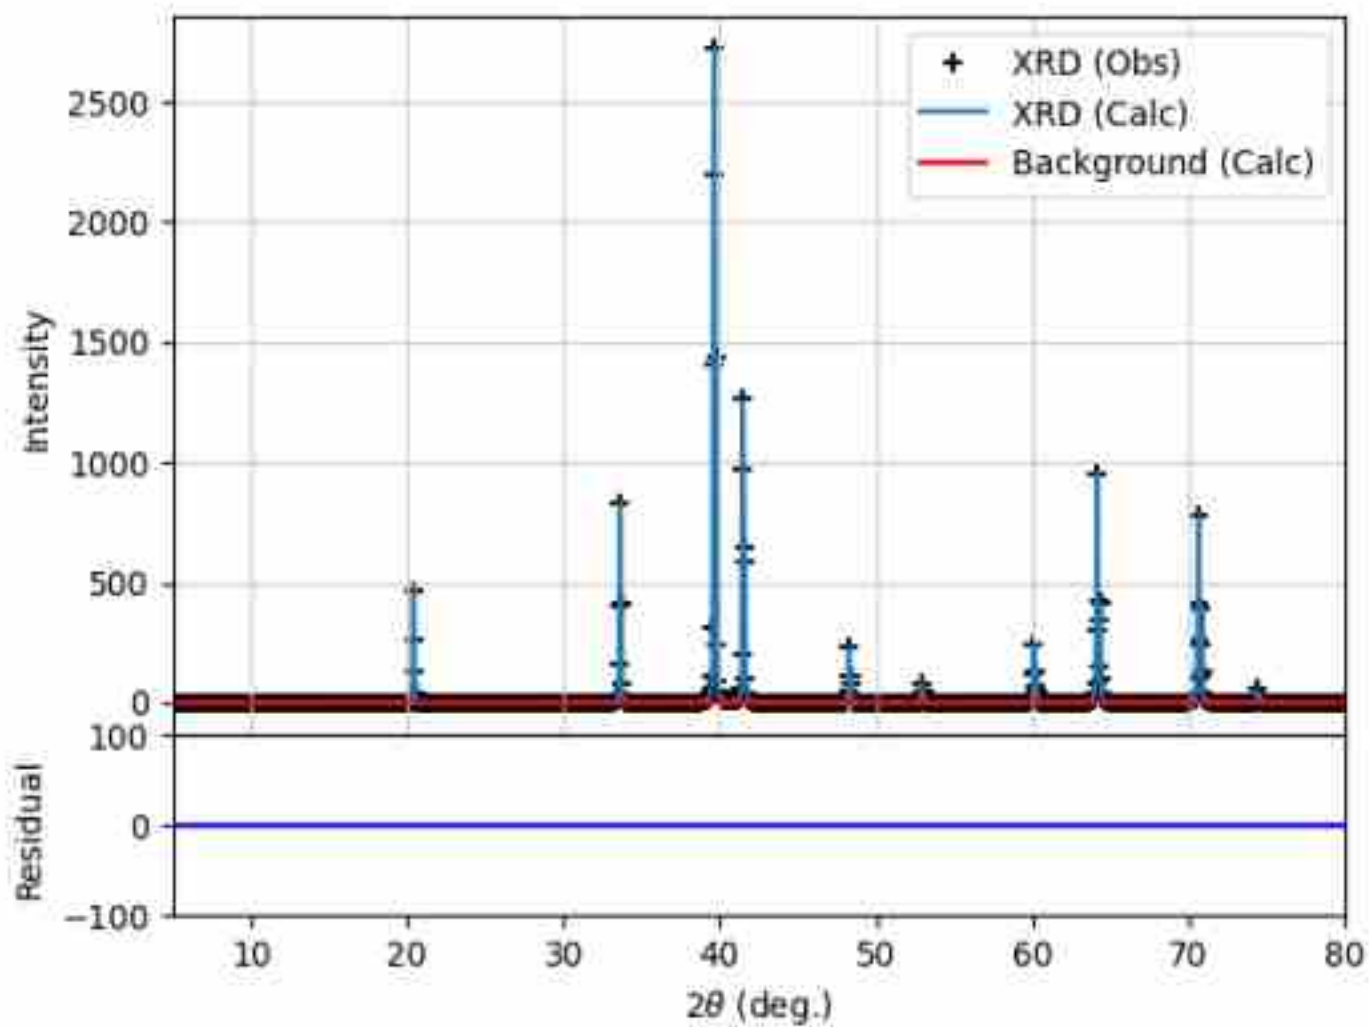

| RMSE before RR | Rwp     | RMSE after RR |
|----------------|---------|---------------|
| 0.008          | 0.12982 | 0.0011        |

# Zn<sub>4</sub>Co<sub>2</sub>W<sub>2</sub>O<sub>12</sub>

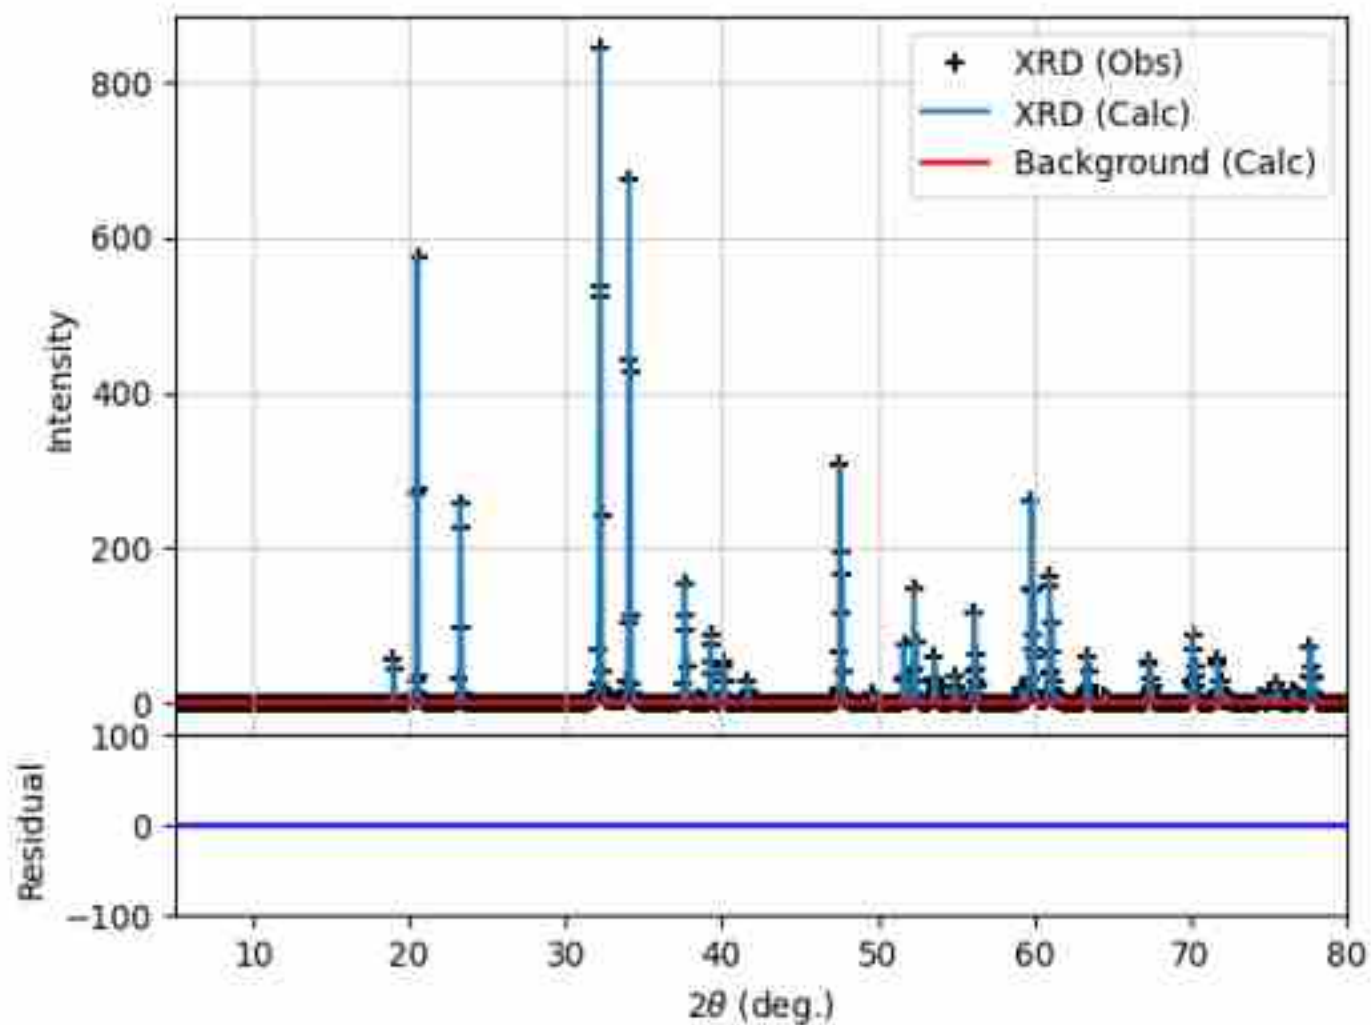

| RMSE before RR | Rwp     | RMSE after RR |
|----------------|---------|---------------|
| 0.08           | 0.00174 | 0.00026       |

# Zr1Nb1Co4

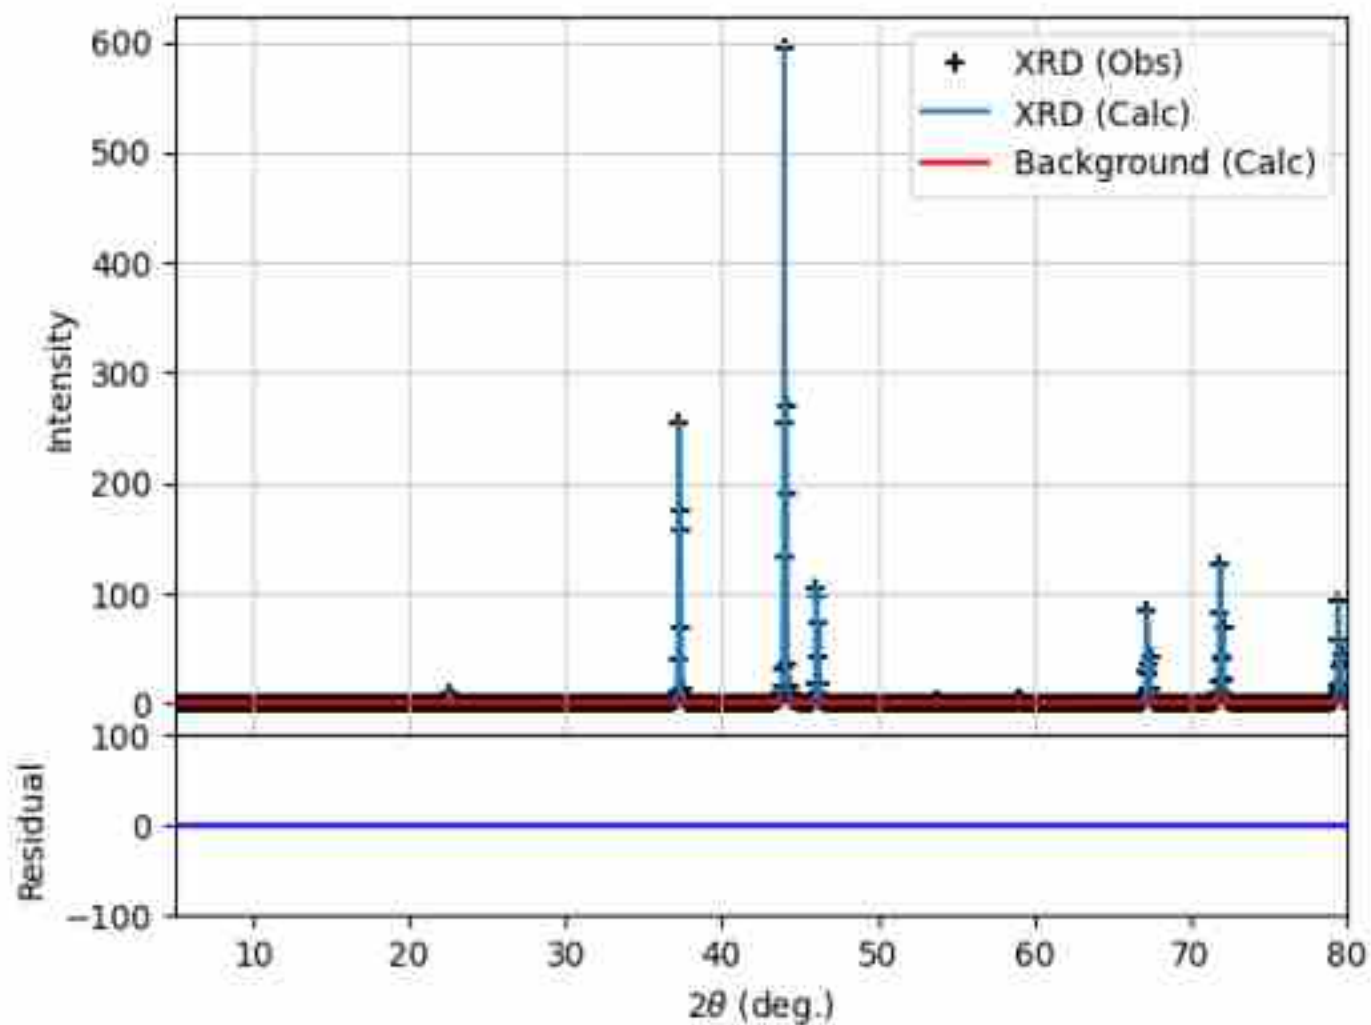

| RMSE before RR | Rwp     | RMSE after RR |
|----------------|---------|---------------|
| 0.008          | 0.02012 | 0.00112       |

# Zr1Ti3As2

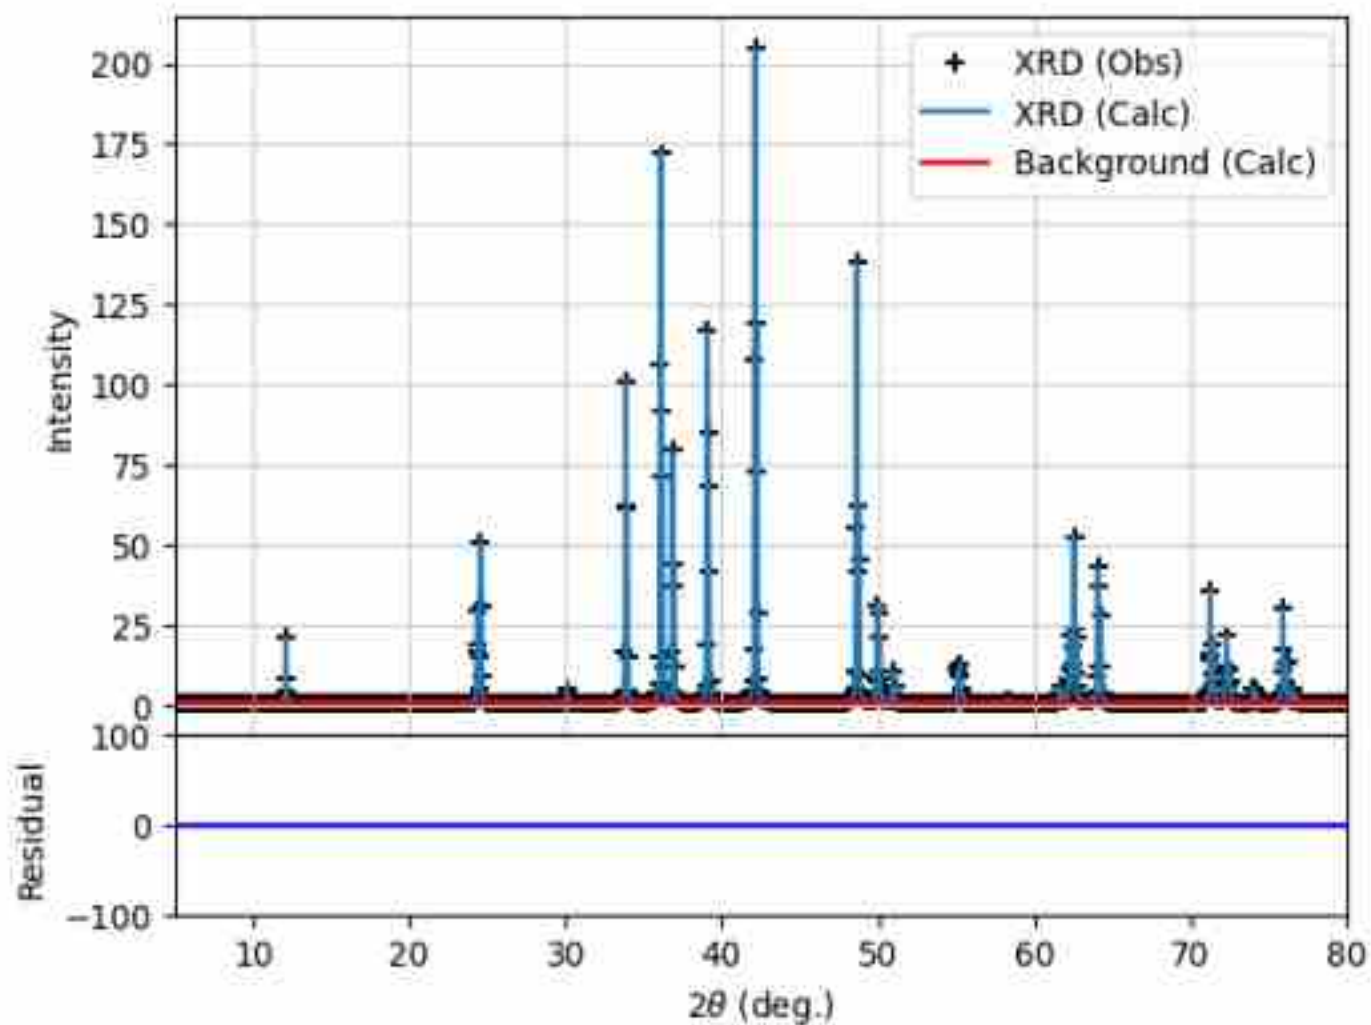

| RMSE before RR | Rwp     | RMSE after RR |
|----------------|---------|---------------|
| 0.008          | 0.00317 | 0.0003        |



# Zr<sub>2</sub>Fe<sub>2</sub>Co<sub>2</sub>

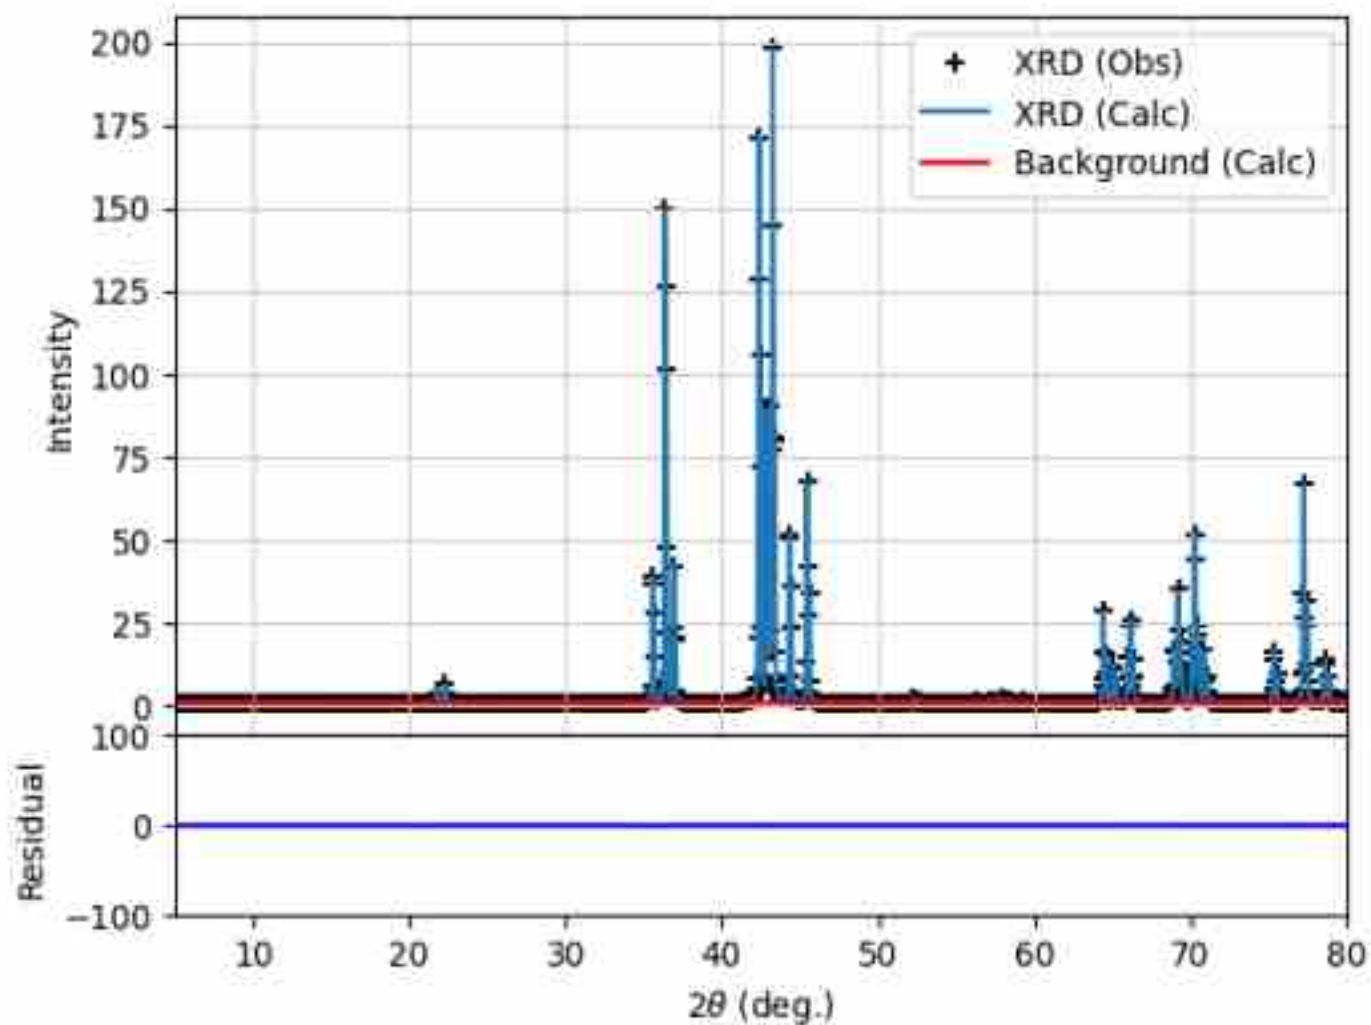

| RMSE before RR | Rwp     | RMSE after RR |
|----------------|---------|---------------|
| 0.008          | 0.58482 | 0.01133       |

# Zr<sub>2</sub>Ga<sub>2</sub>Au<sub>2</sub>

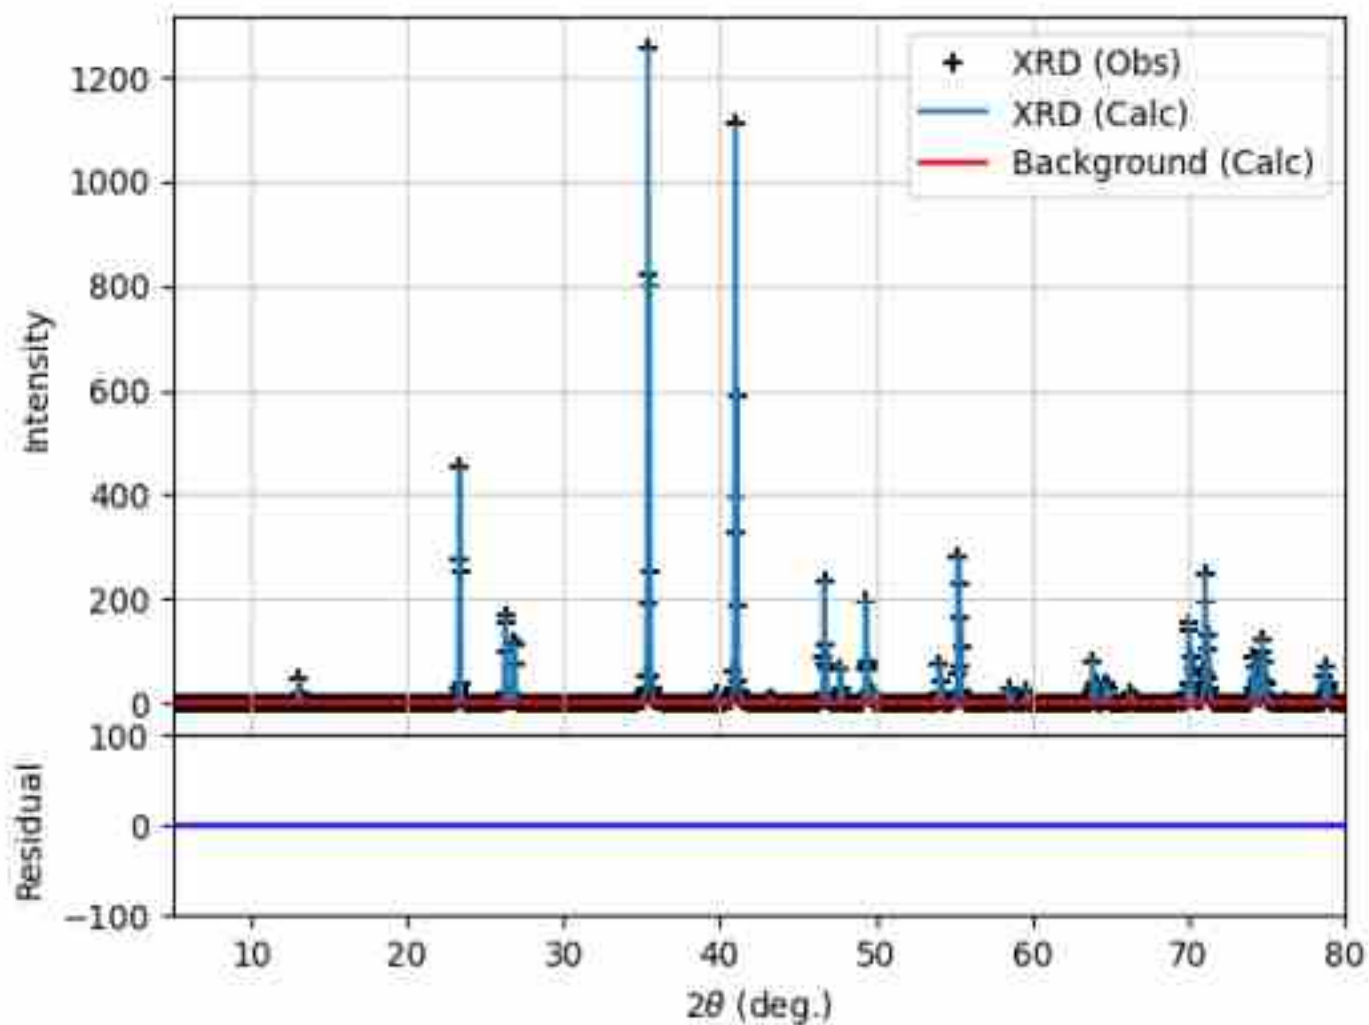

| RMSE before RR | Rwp     | RMSE after RR |
|----------------|---------|---------------|
| 0.008          | 0.00389 | 0.00067       |

# Zr<sub>4</sub>Si<sub>2</sub>Mo<sub>6</sub>

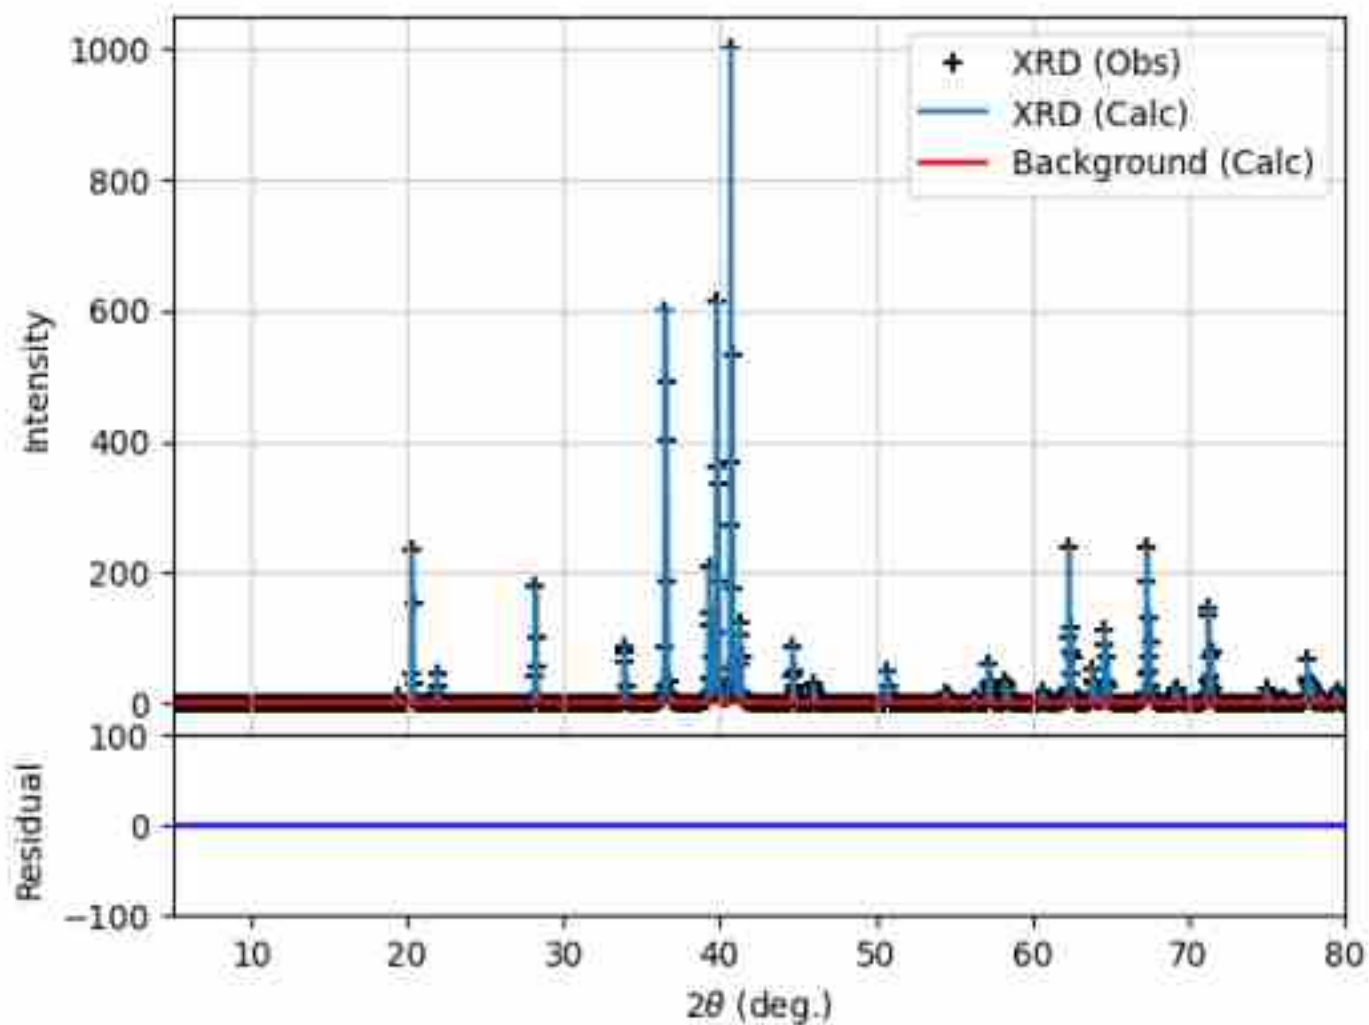

| RMSE before RR | Rwp     | RMSE after RR |
|----------------|---------|---------------|
| 0.008          | 0.00759 | 0.0009        |

# Zr6Sn2

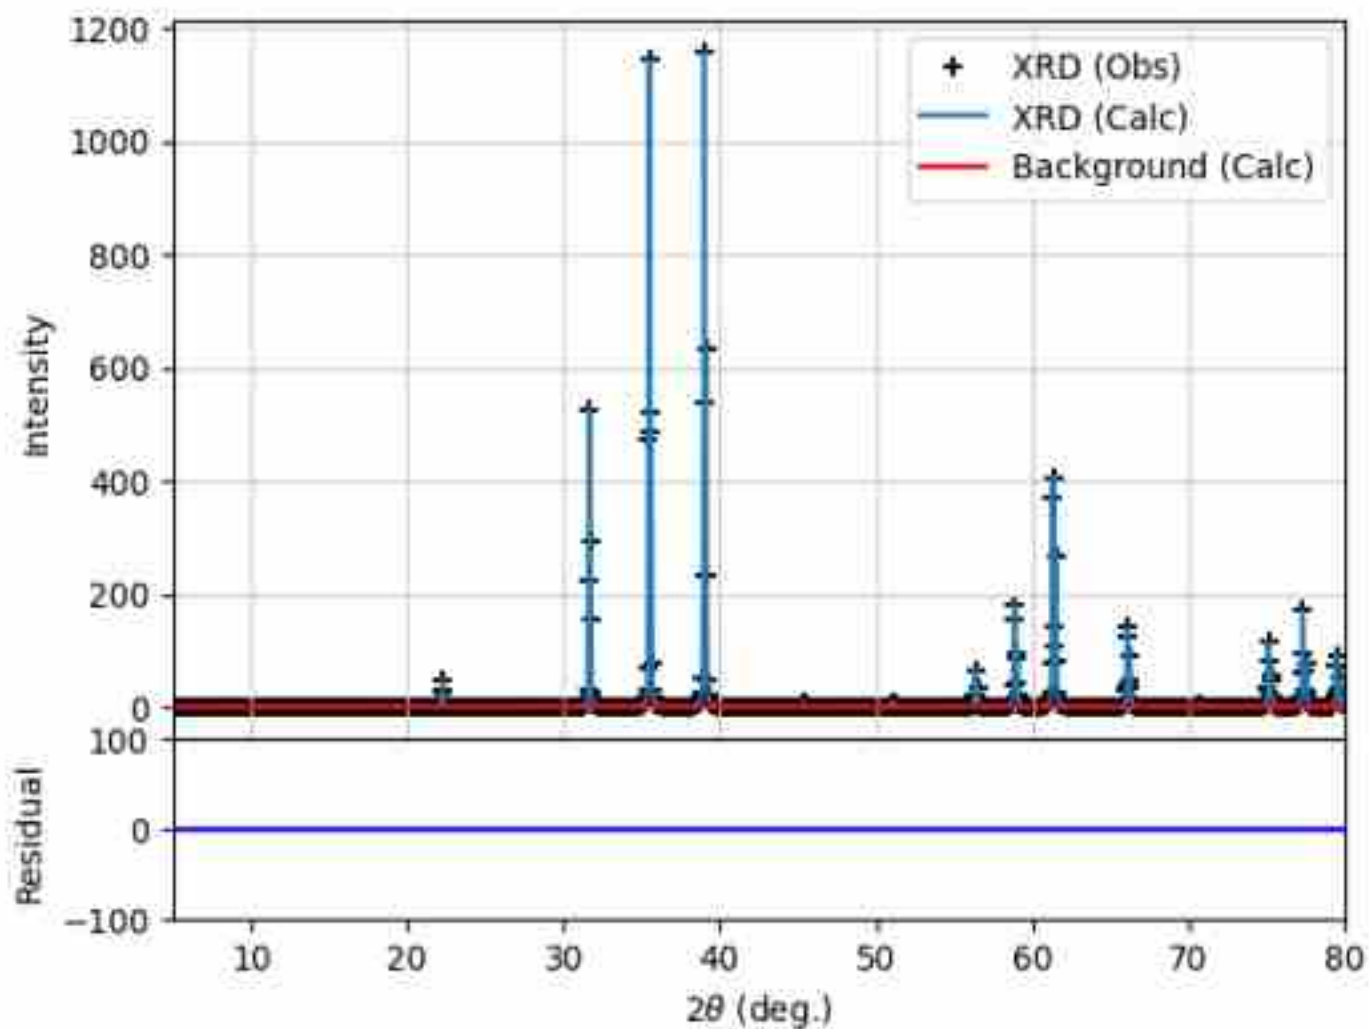

| RMSE before RR | Rwp     | RMSE after RR |
|----------------|---------|---------------|
| 0.008          | 0.00702 | 0.00048       |

# Ag<sub>1</sub>Bi<sub>1</sub>S<sub>2</sub>

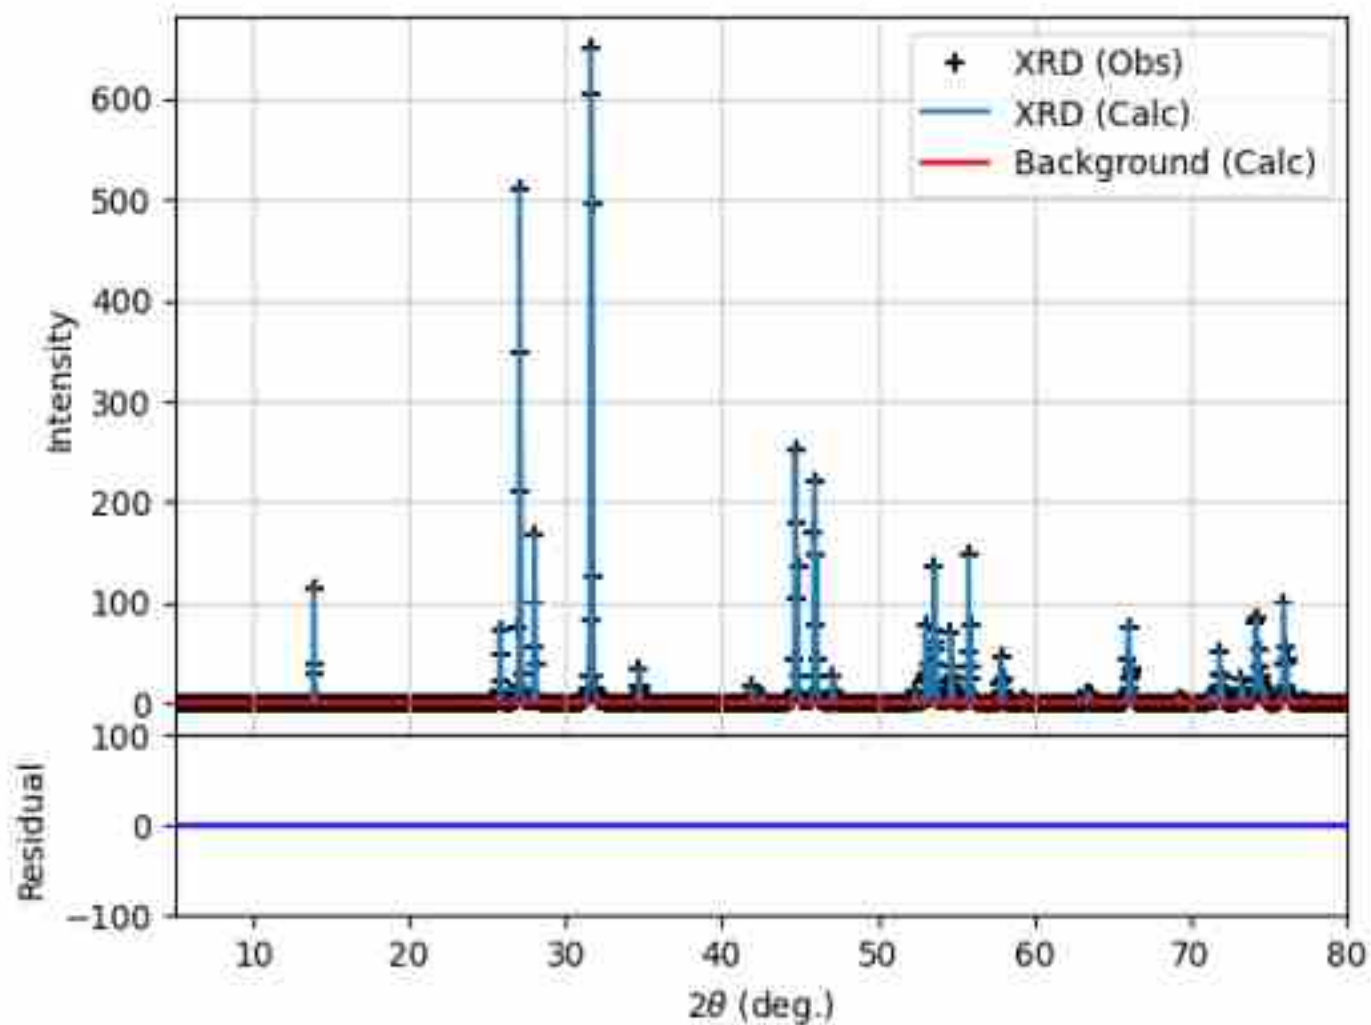

| RMSE before RR | Rwp     | RMSE after RR |
|----------------|---------|---------------|
| 0.009          | 0.00419 | 0.00106       |

# Al1Cu1Pd2

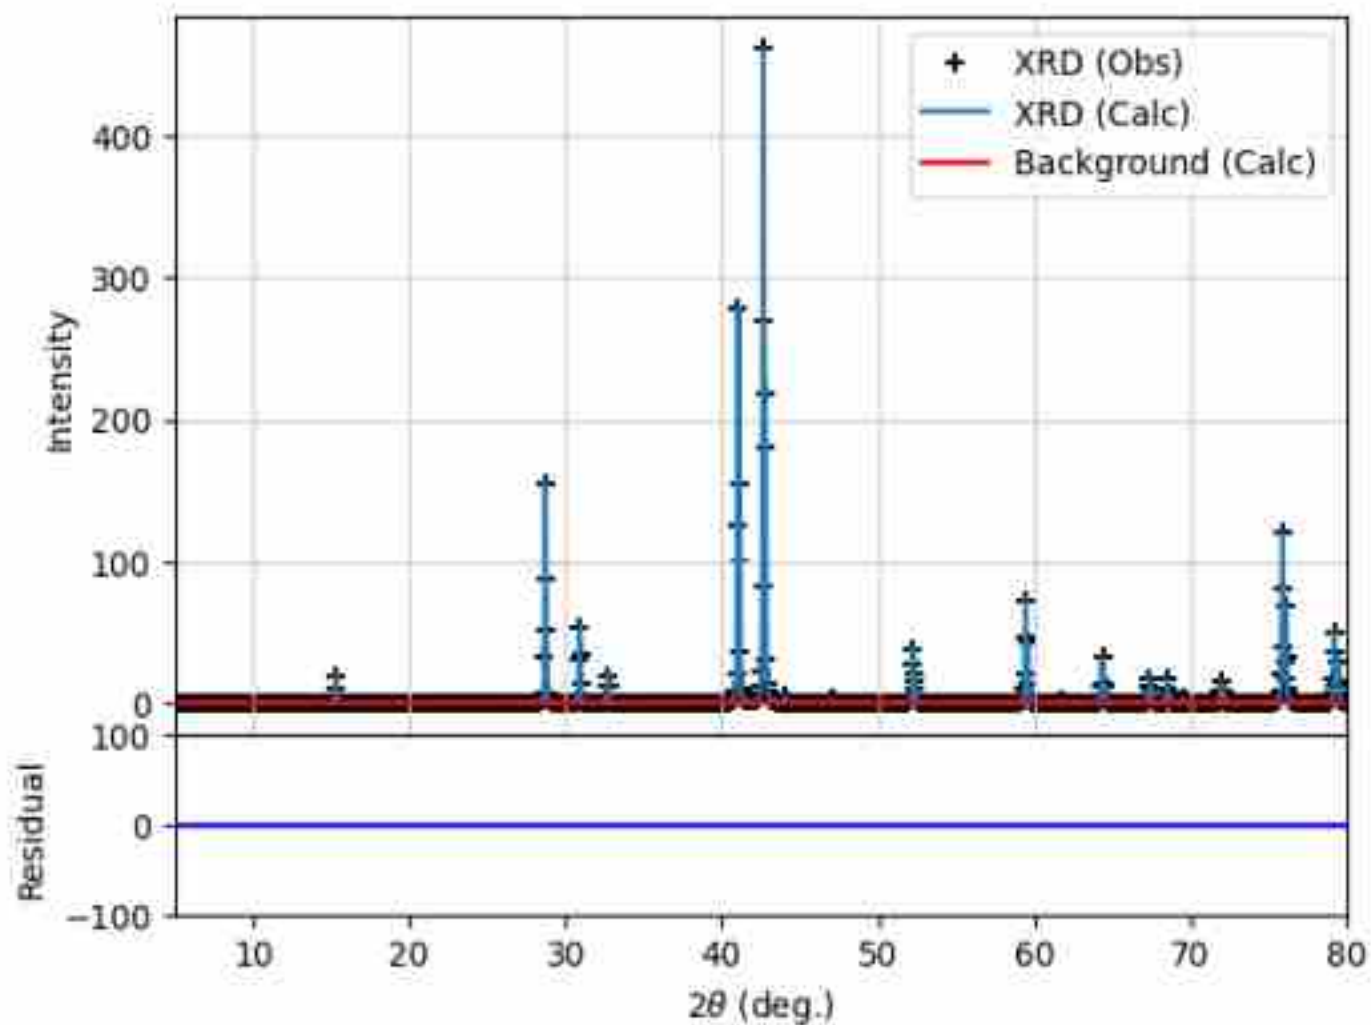

| RMSE before RR | Rwp     | RMSE after RR |
|----------------|---------|---------------|
| 0.009          | 0.00336 | 0.00049       |

# Al<sub>2</sub>H<sub>6</sub>O<sub>6</sub>

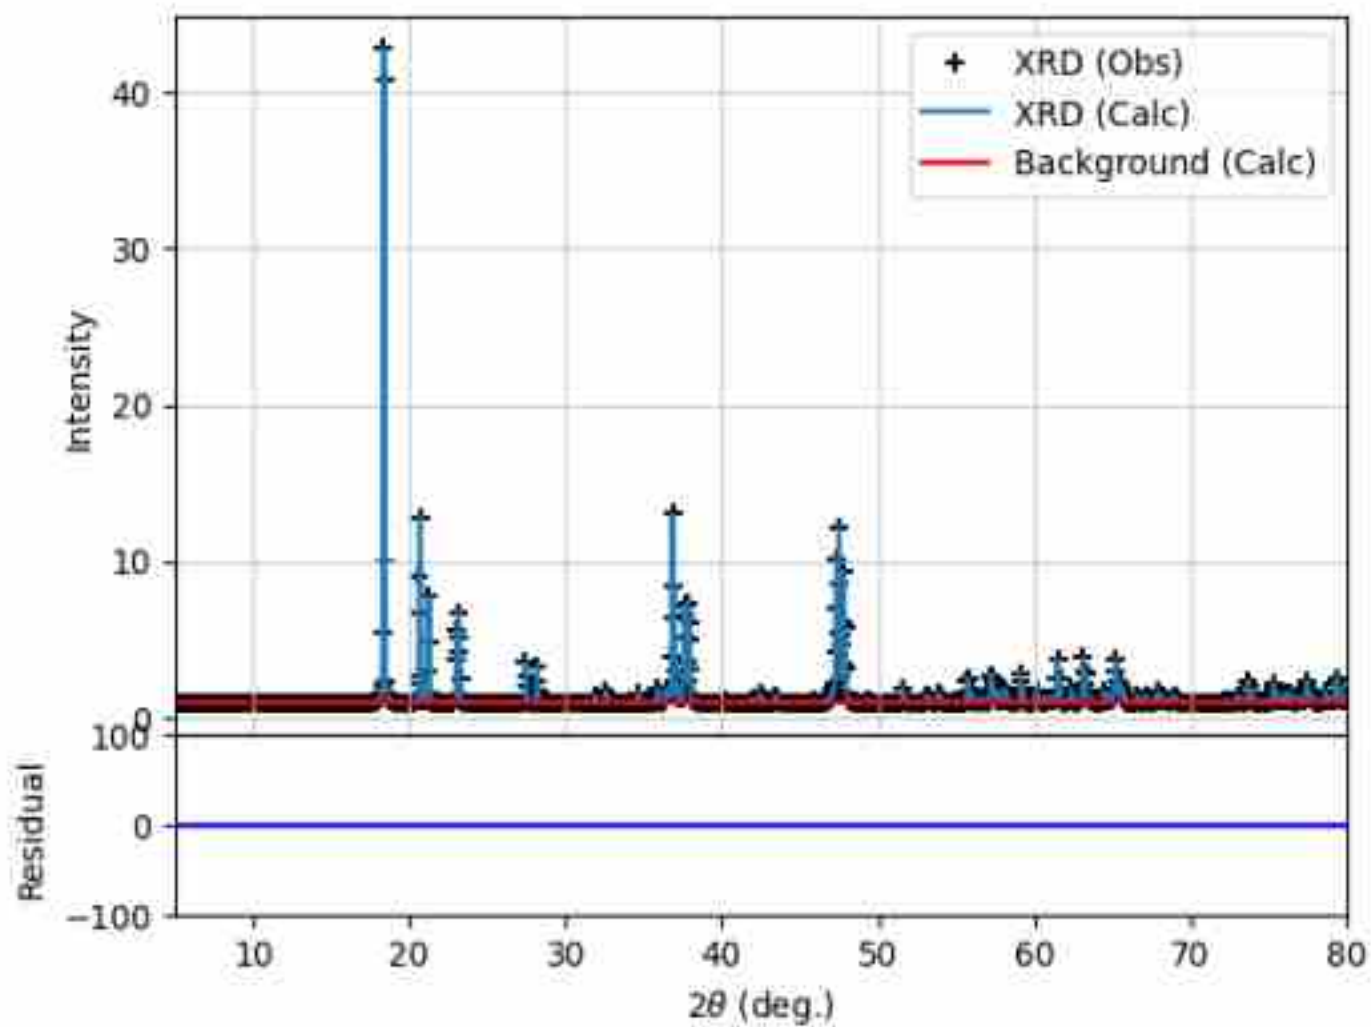

| RMSE before RR | Rwp     | RMSE after RR |
|----------------|---------|---------------|
| 0.09           | 0.11205 | 0.29542       |

# A12P2

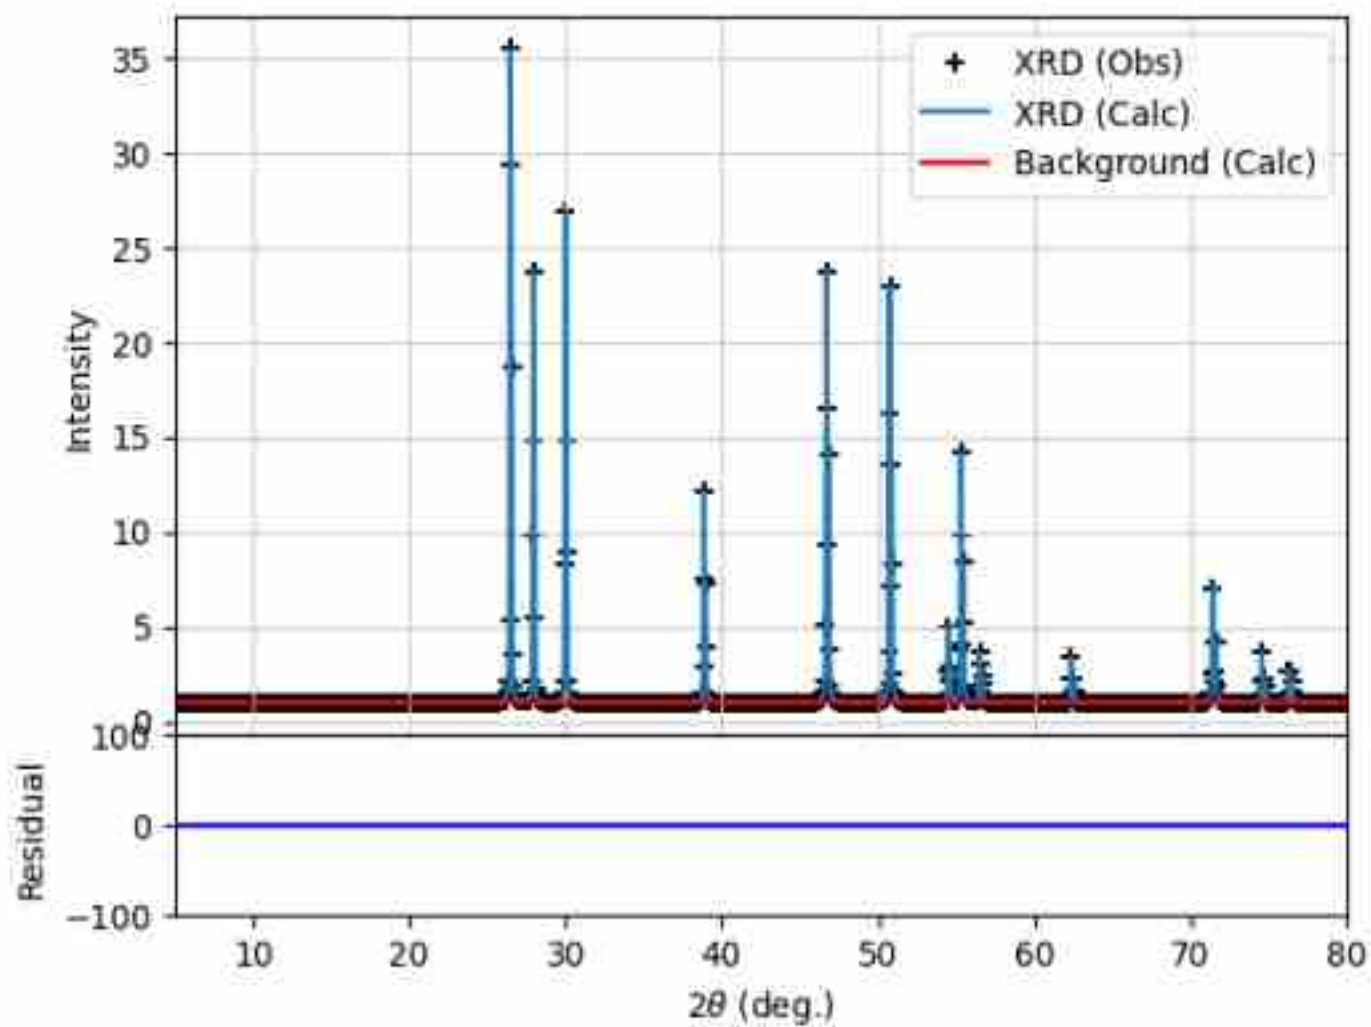

| RMSE before RR | Rwp     | RMSE after RR |
|----------------|---------|---------------|
| 0.009          | 0.00152 | 0.00038       |



# As1Rh1O4

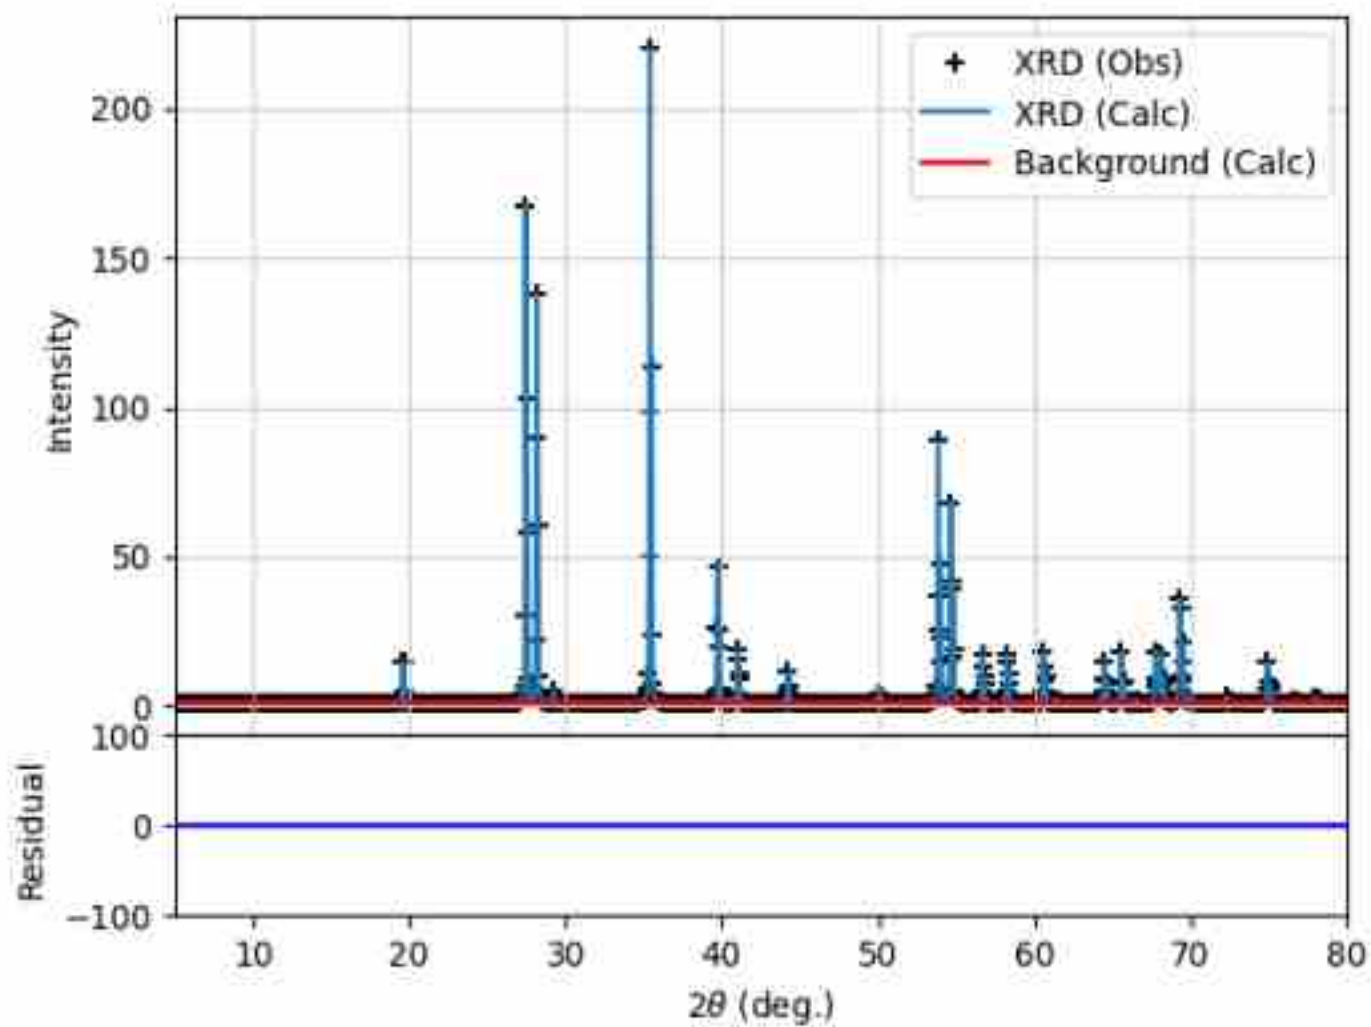

| RMSE before RR | Rwp     | RMSE after RR |
|----------------|---------|---------------|
| 0.009          | 0.00341 | 0.00079       |

# Ba1Cd2Ge2

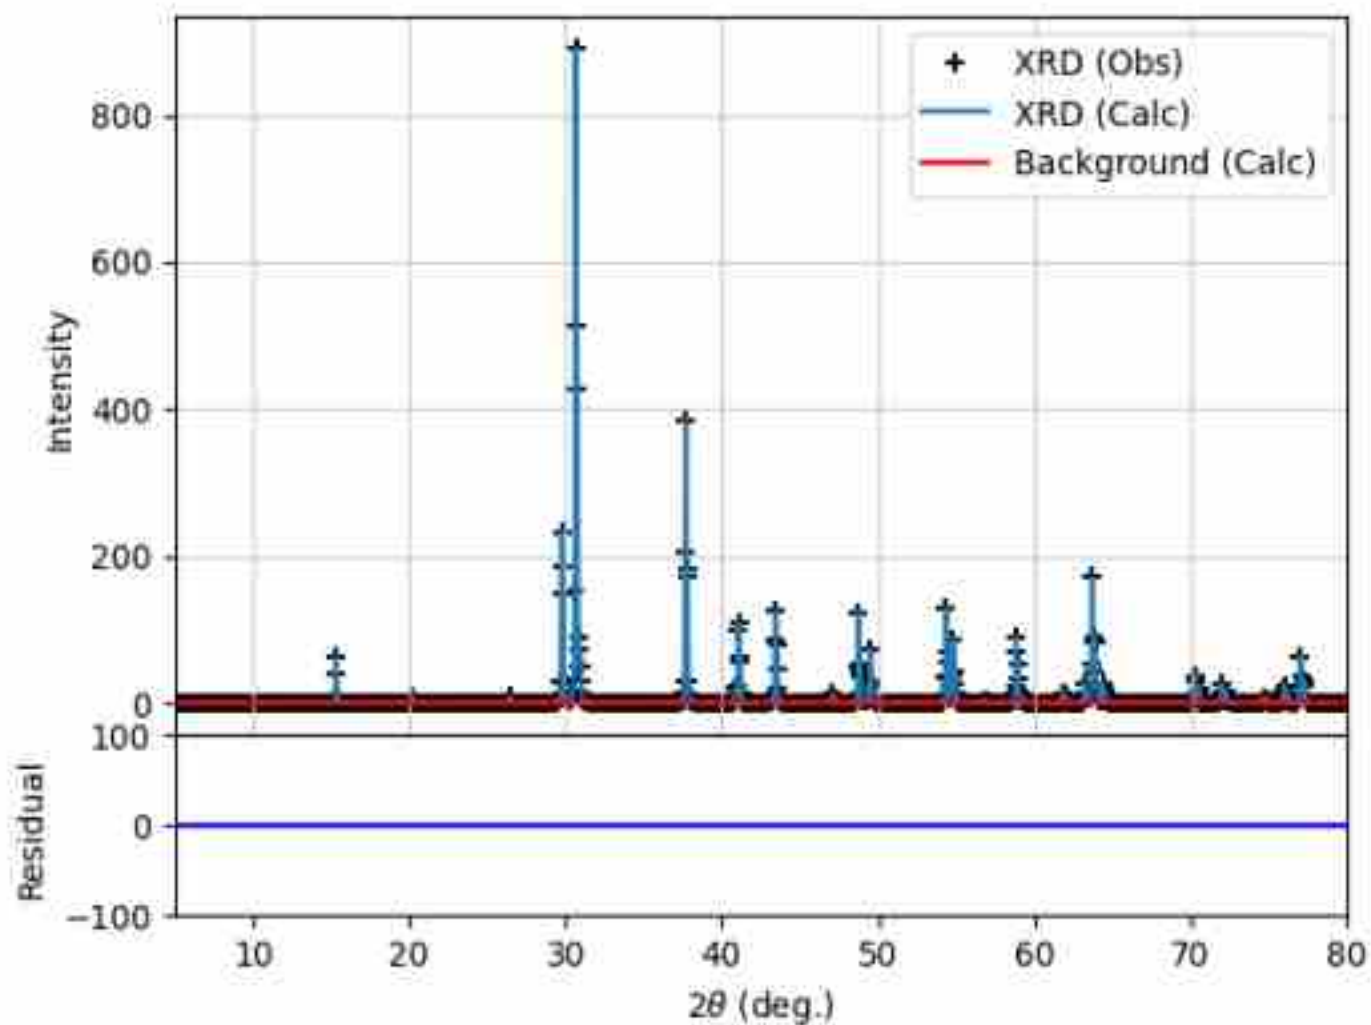

| RMSE before RR | Rwp     | RMSE after RR |
|----------------|---------|---------------|
| 0.009          | 0.00363 | 0.00042       |

# Ba1Cr1F6

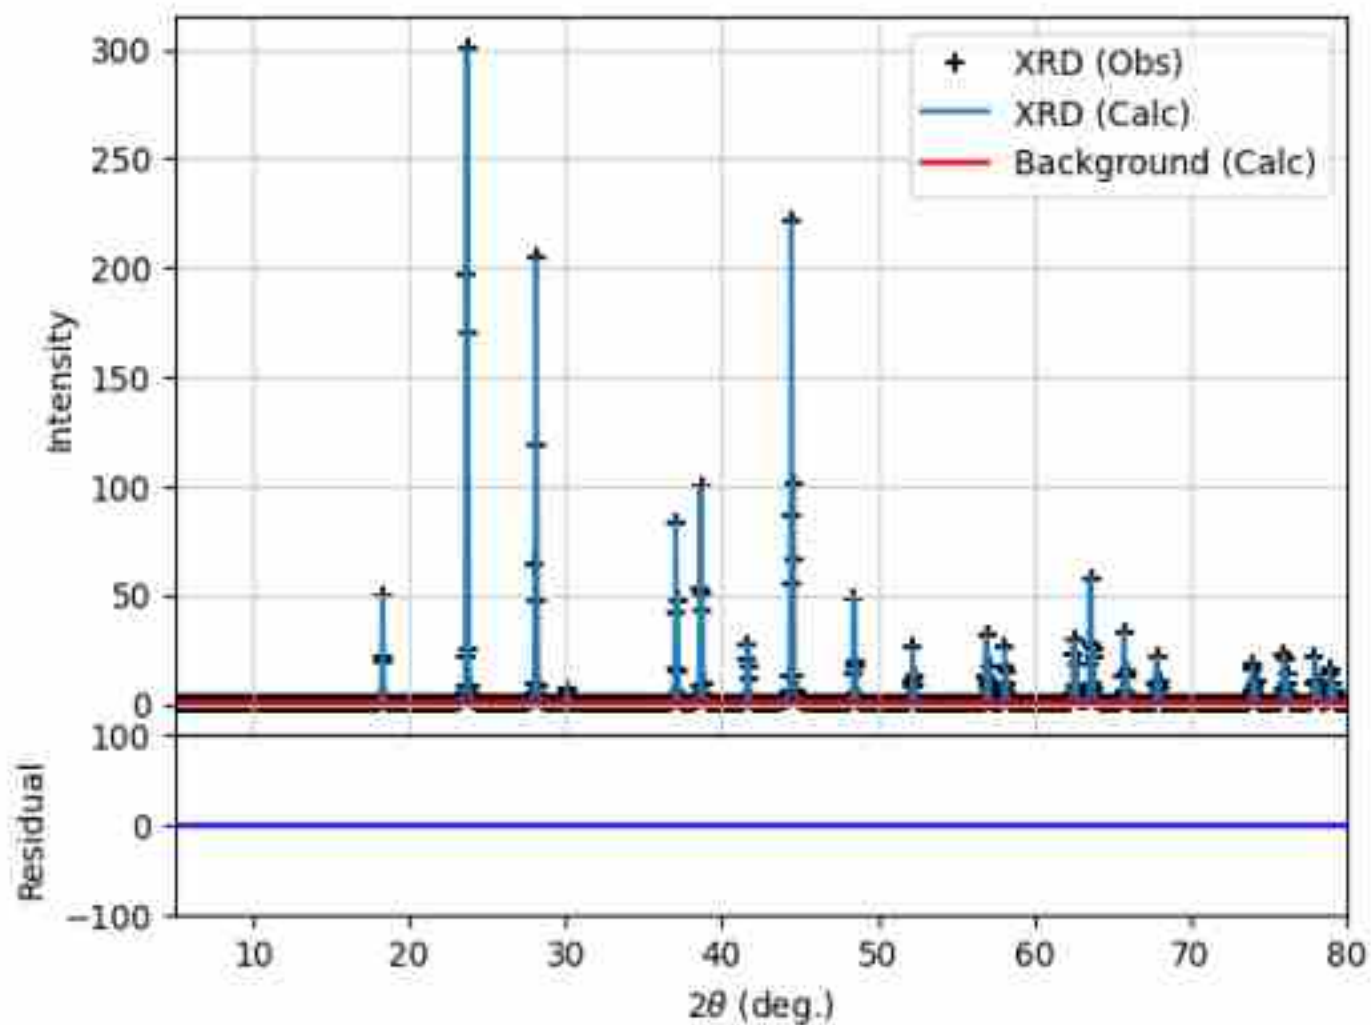

| RMSE before RR | Rwp     | RMSE after RR |
|----------------|---------|---------------|
| 0.009          | 0.00274 | 0.001         |

# Ba1Eu1Hf1Nb1O6

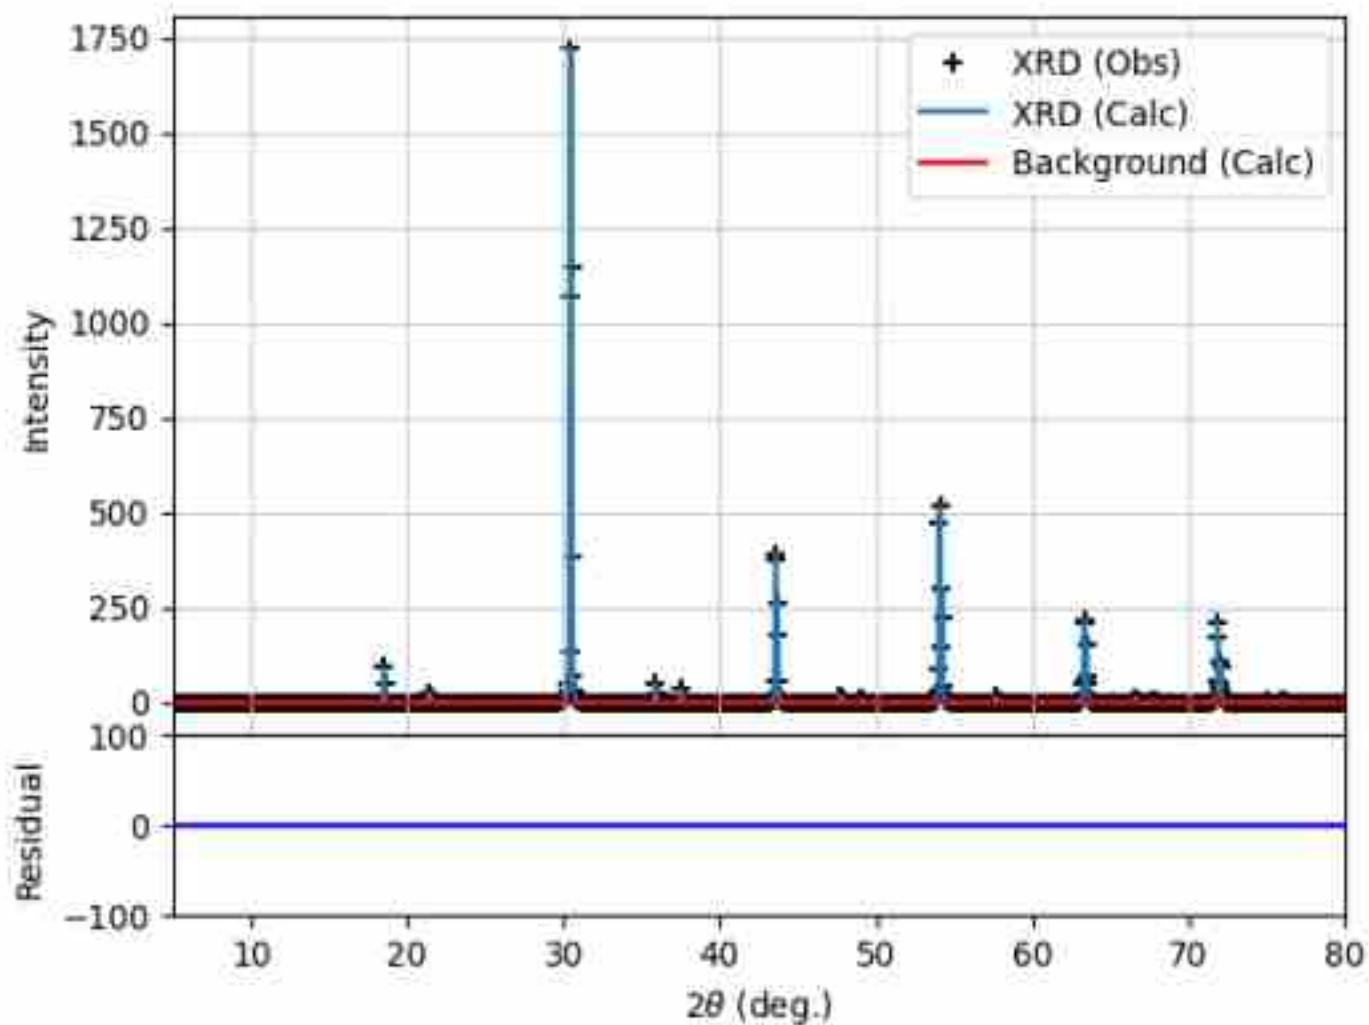

| RMSE before RR | Rwp     | RMSE after RR |
|----------------|---------|---------------|
| 0.009          | 0.00468 | 0.0024        |

# BaIn1O3

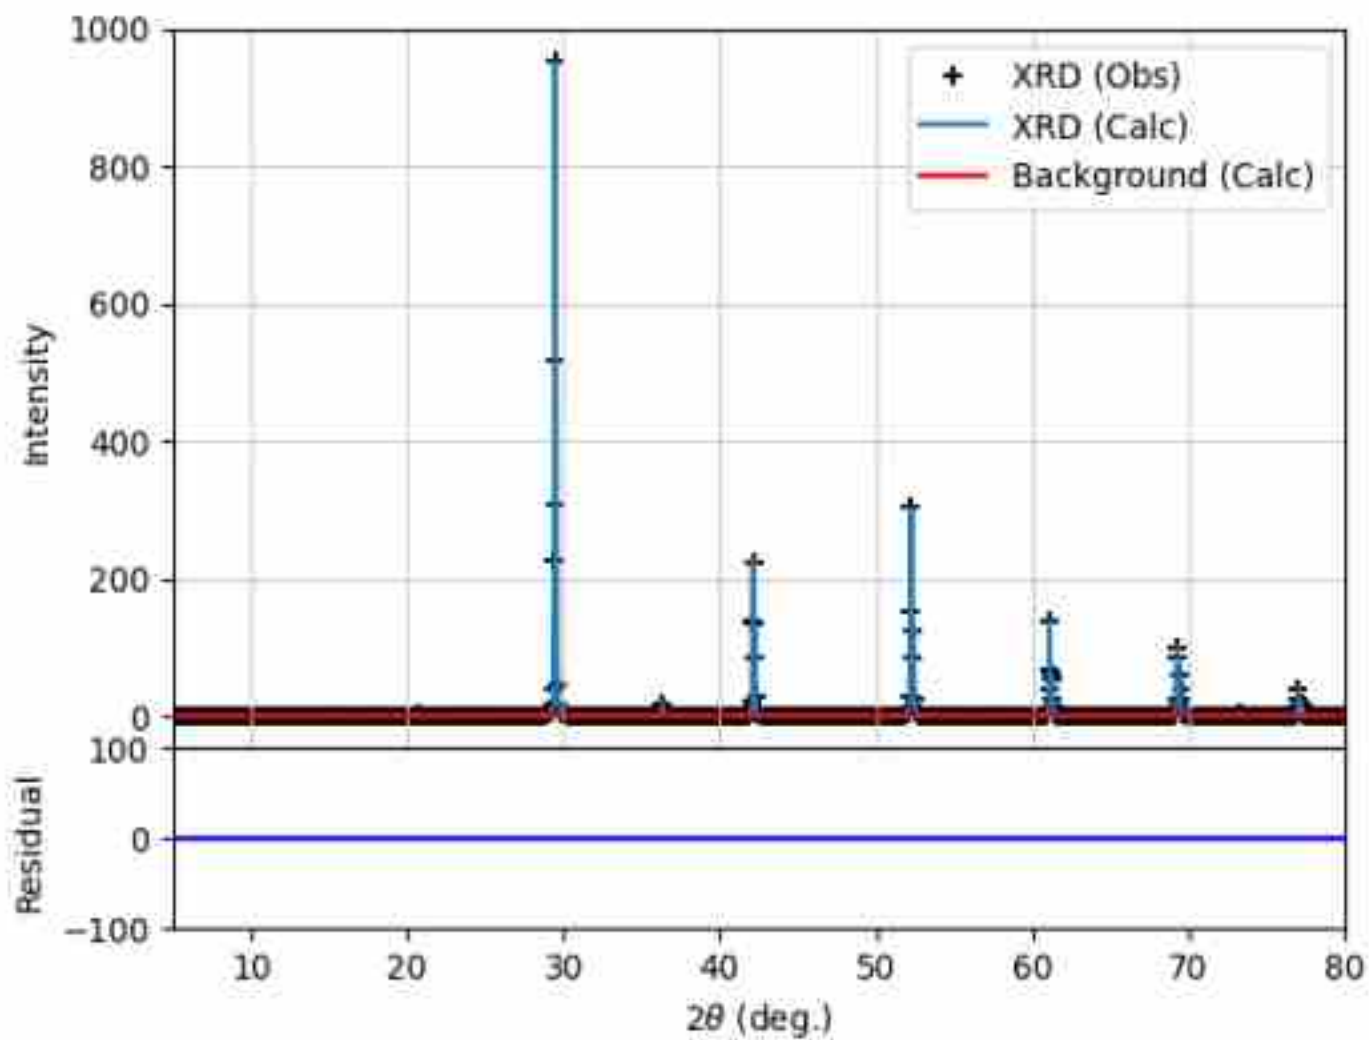

| RMSE before RR | Rwp     | RMSE after RR |
|----------------|---------|---------------|
| 0.009          | 0.00658 | 0.00321       |

# Ba1Pr1Mn2O6

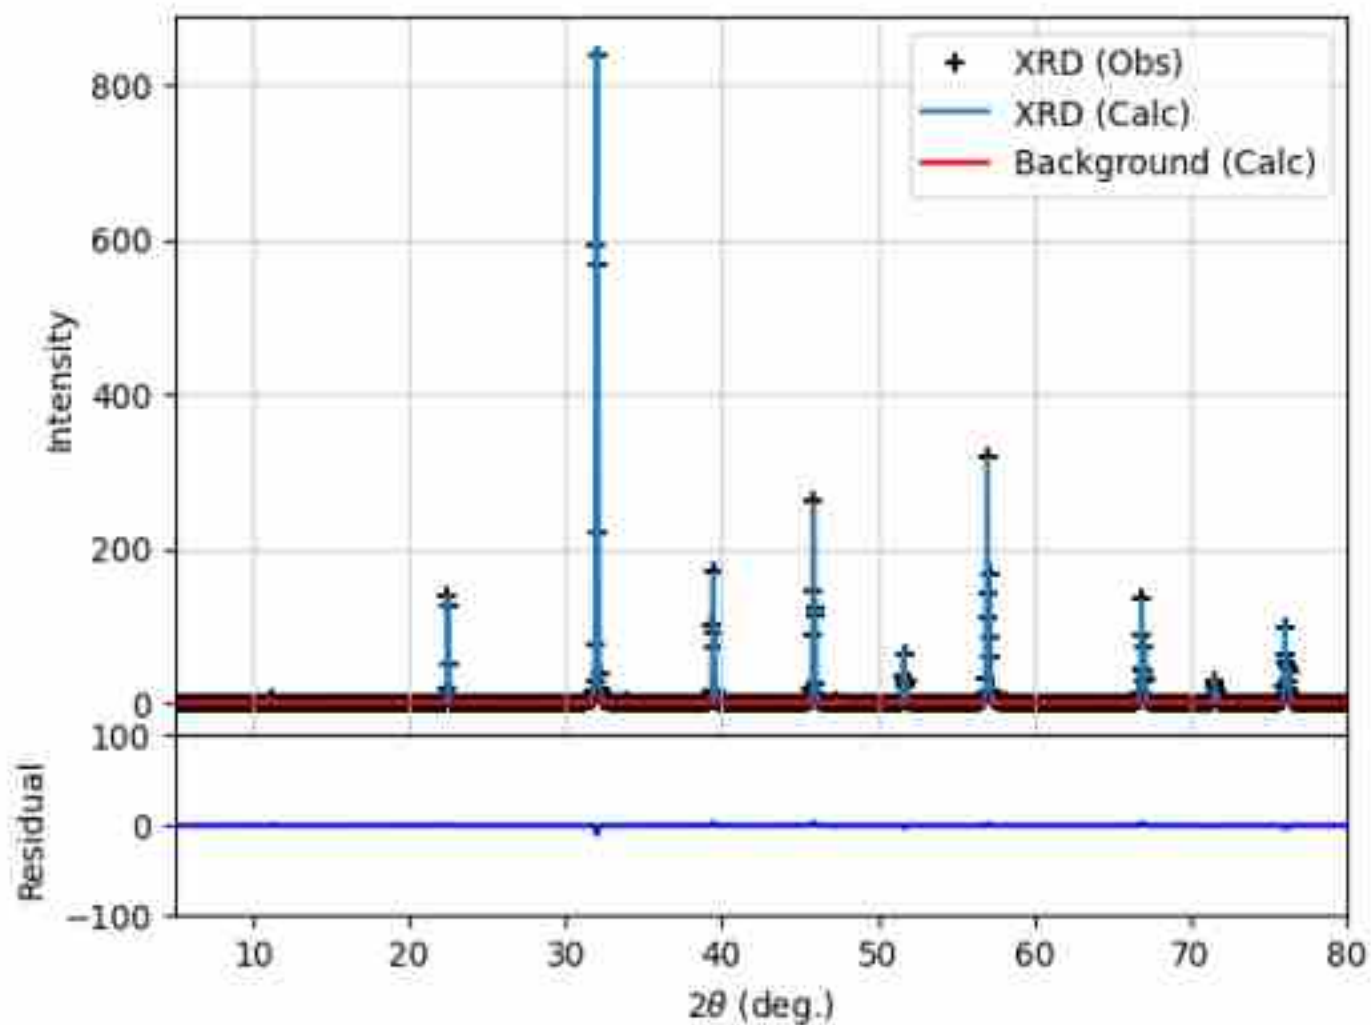

| RMSE before RR | Rwp     | RMSE after RR |
|----------------|---------|---------------|
| 0.009          | 2.20045 | 0.03818       |

# Ba<sub>2</sub>CaReO<sub>6</sub>

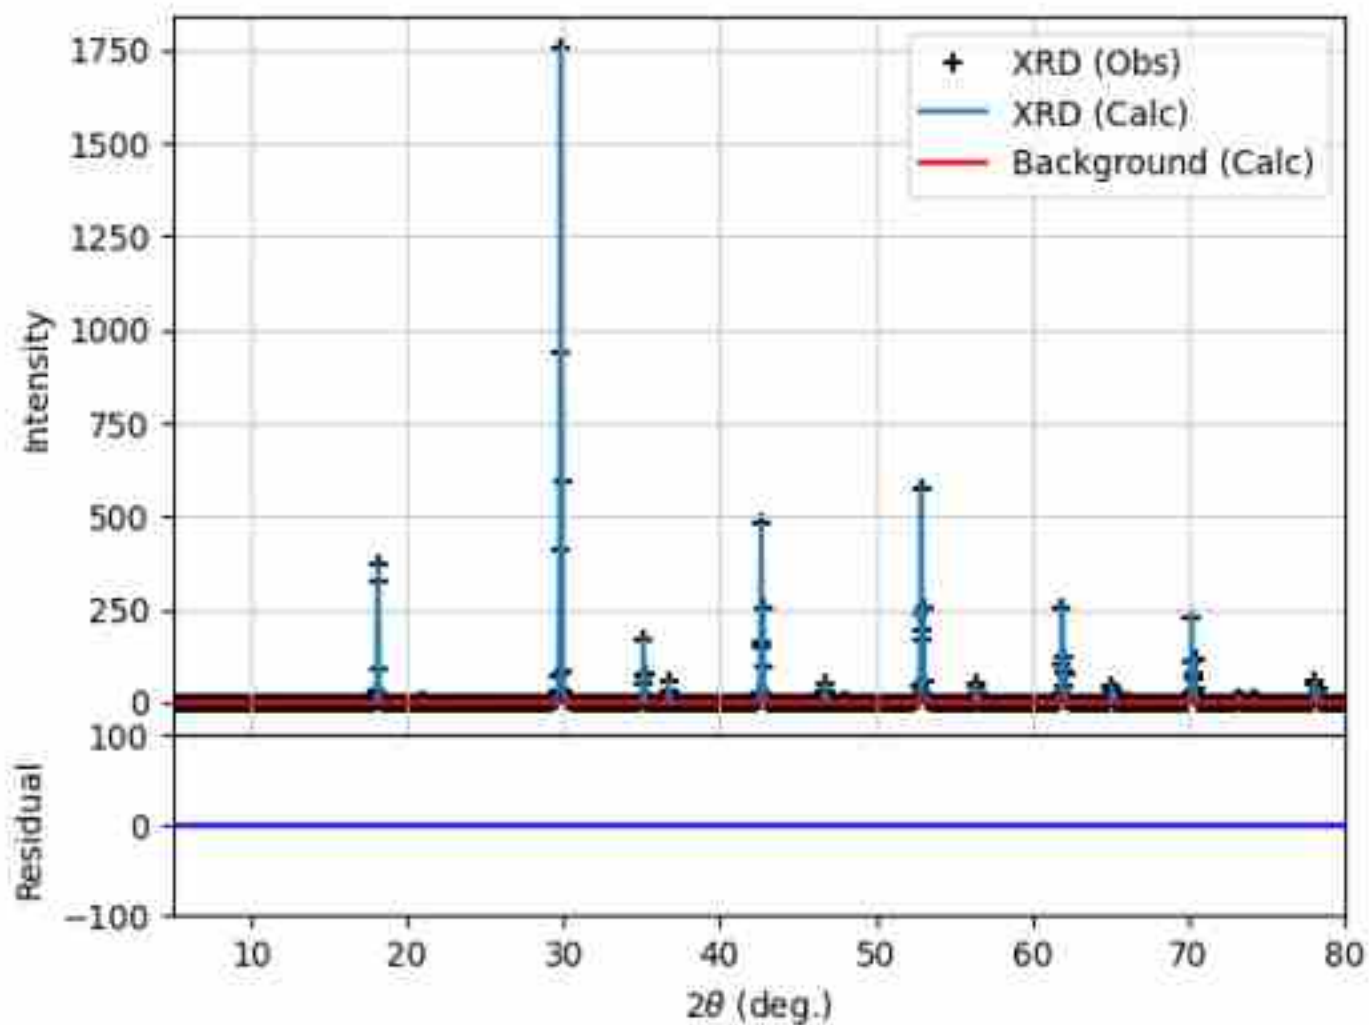

| RMSE before RR | Rwp     | RMSE after RR |
|----------------|---------|---------------|
| 0.009          | 0.02862 | 0.00636       |

# Ba<sub>2</sub>CaW<sub>10</sub>O<sub>6</sub>

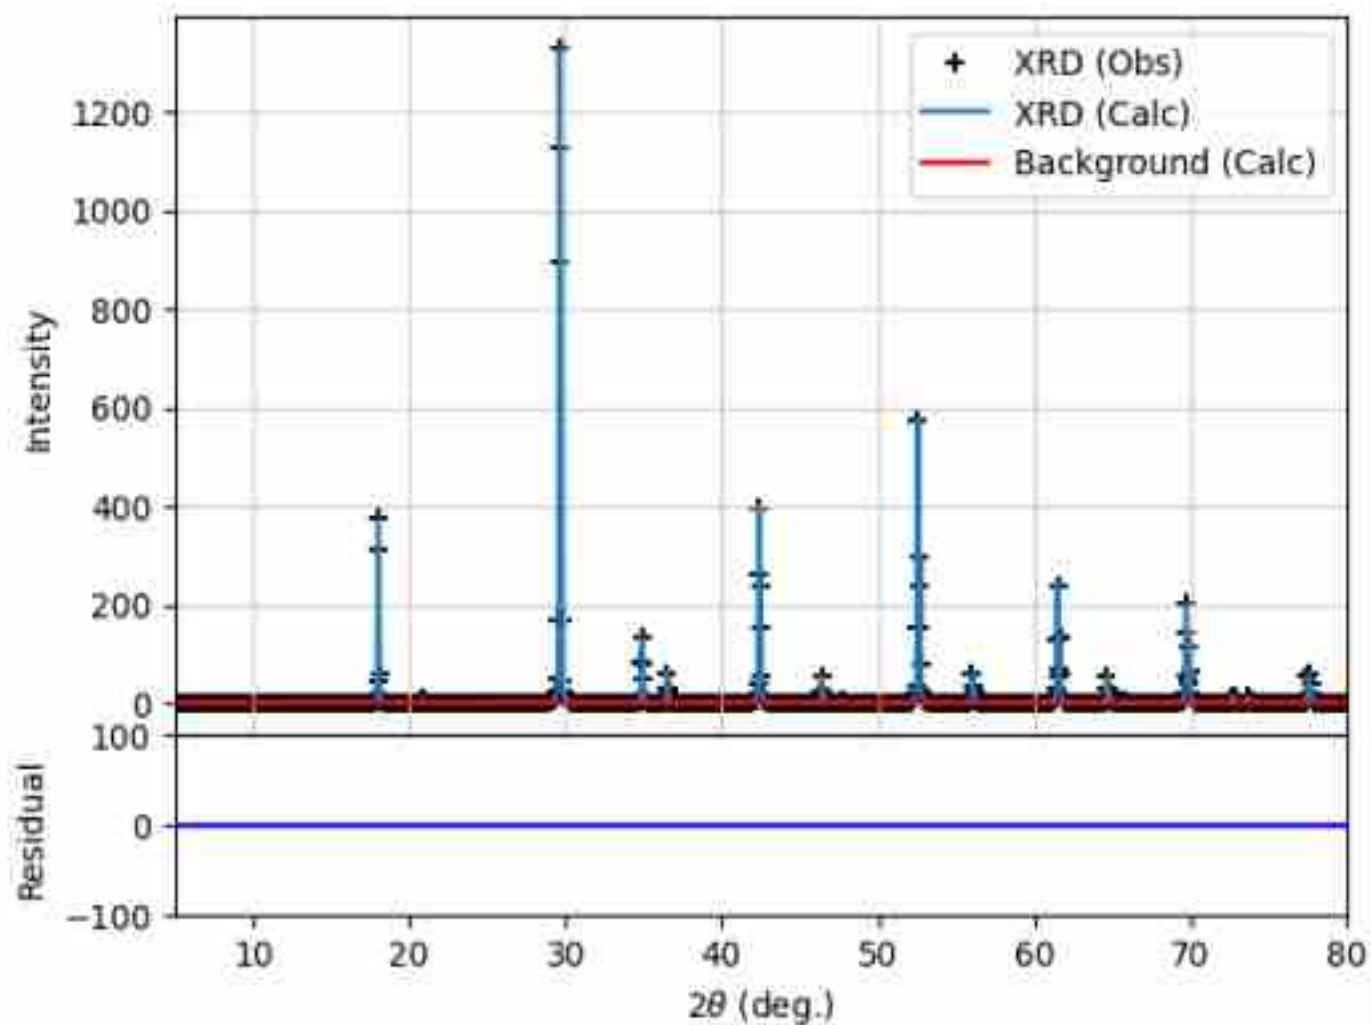

| RMSE before RR | Rwp    | RMSE after RR |
|----------------|--------|---------------|
| 0.009          | 0.0217 | 0.0072        |



# Ba<sub>2</sub>Ce<sub>1</sub>Pb<sub>1</sub>O<sub>6</sub>

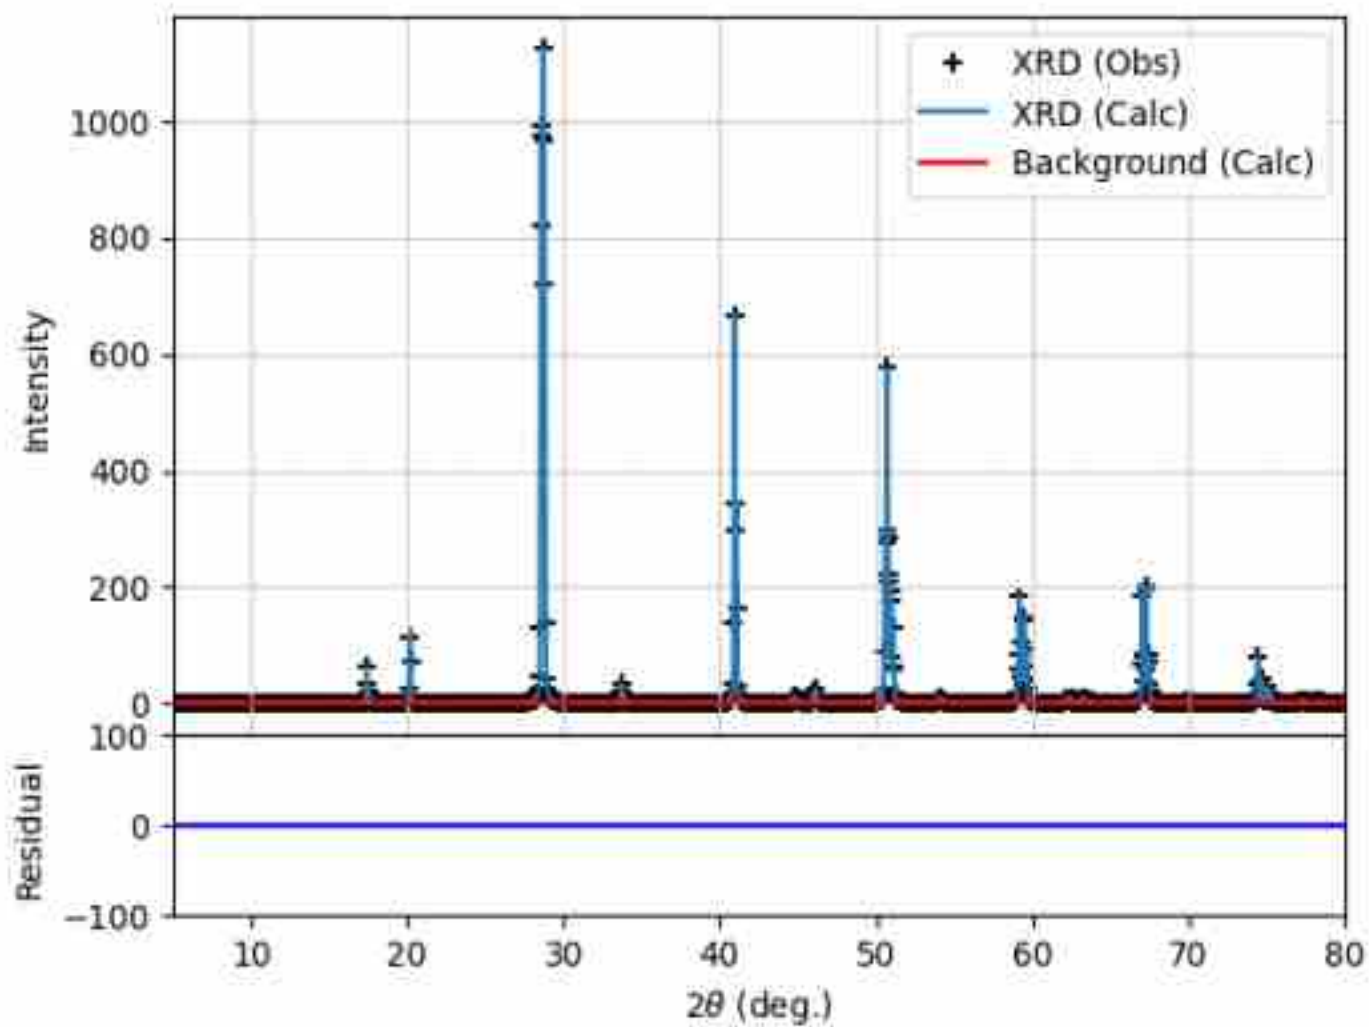

| RMSE before RR | Rwp     | RMSE after RR |
|----------------|---------|---------------|
| 0.09           | 0.00334 | 0.00133       |

# Ba2Cu2S2F2

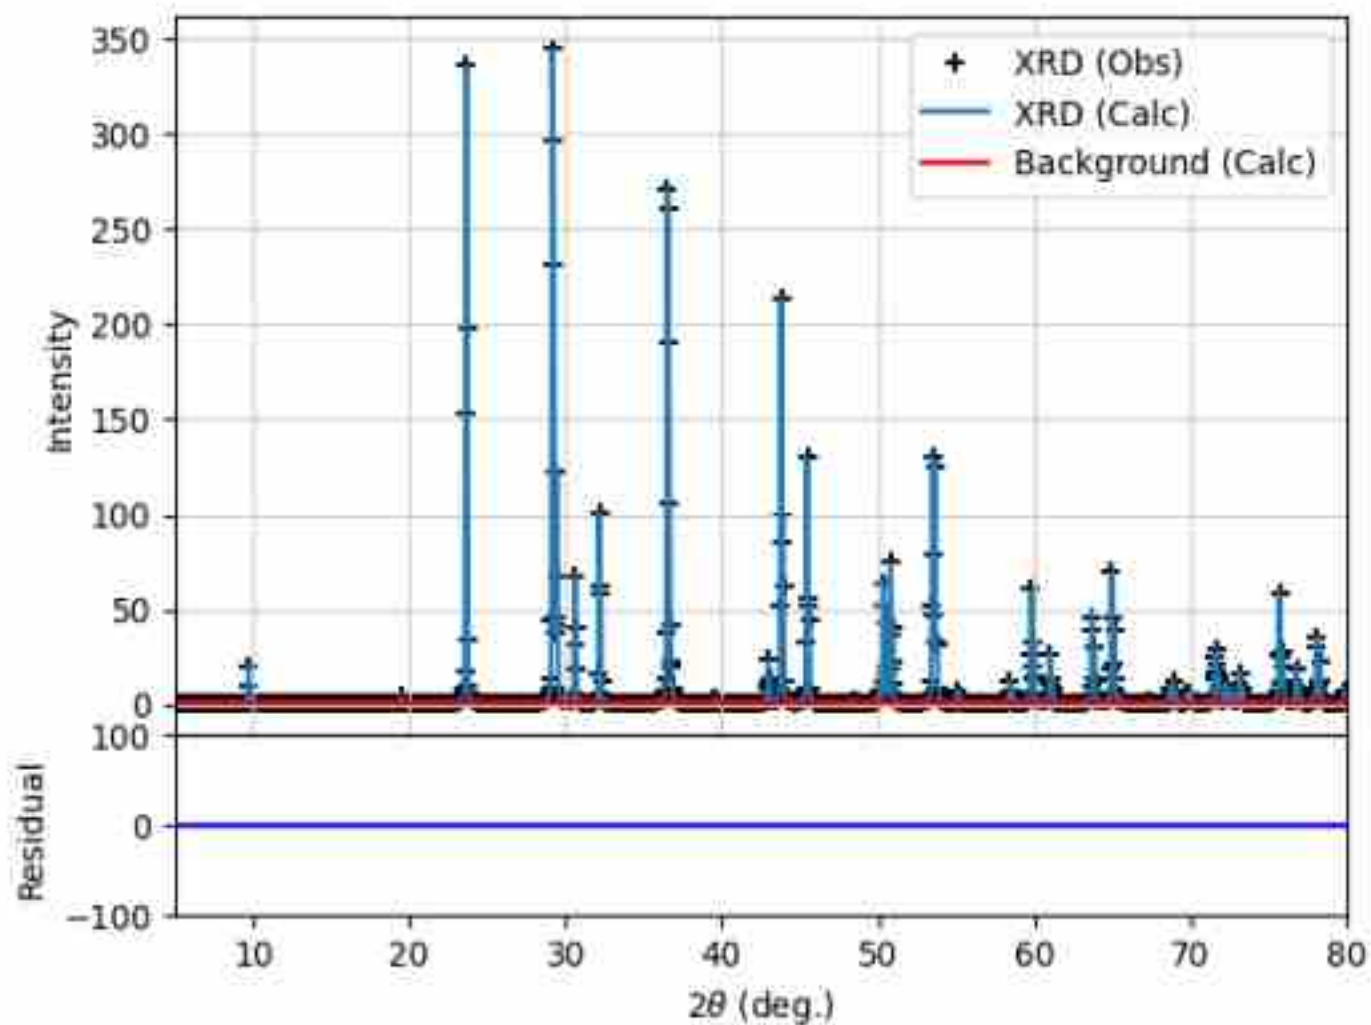

| RMSE before RR | Rwp     | RMSE after RR |
|----------------|---------|---------------|
| 0.009          | 0.00405 | 0.00078       |

# Ba2Ge4

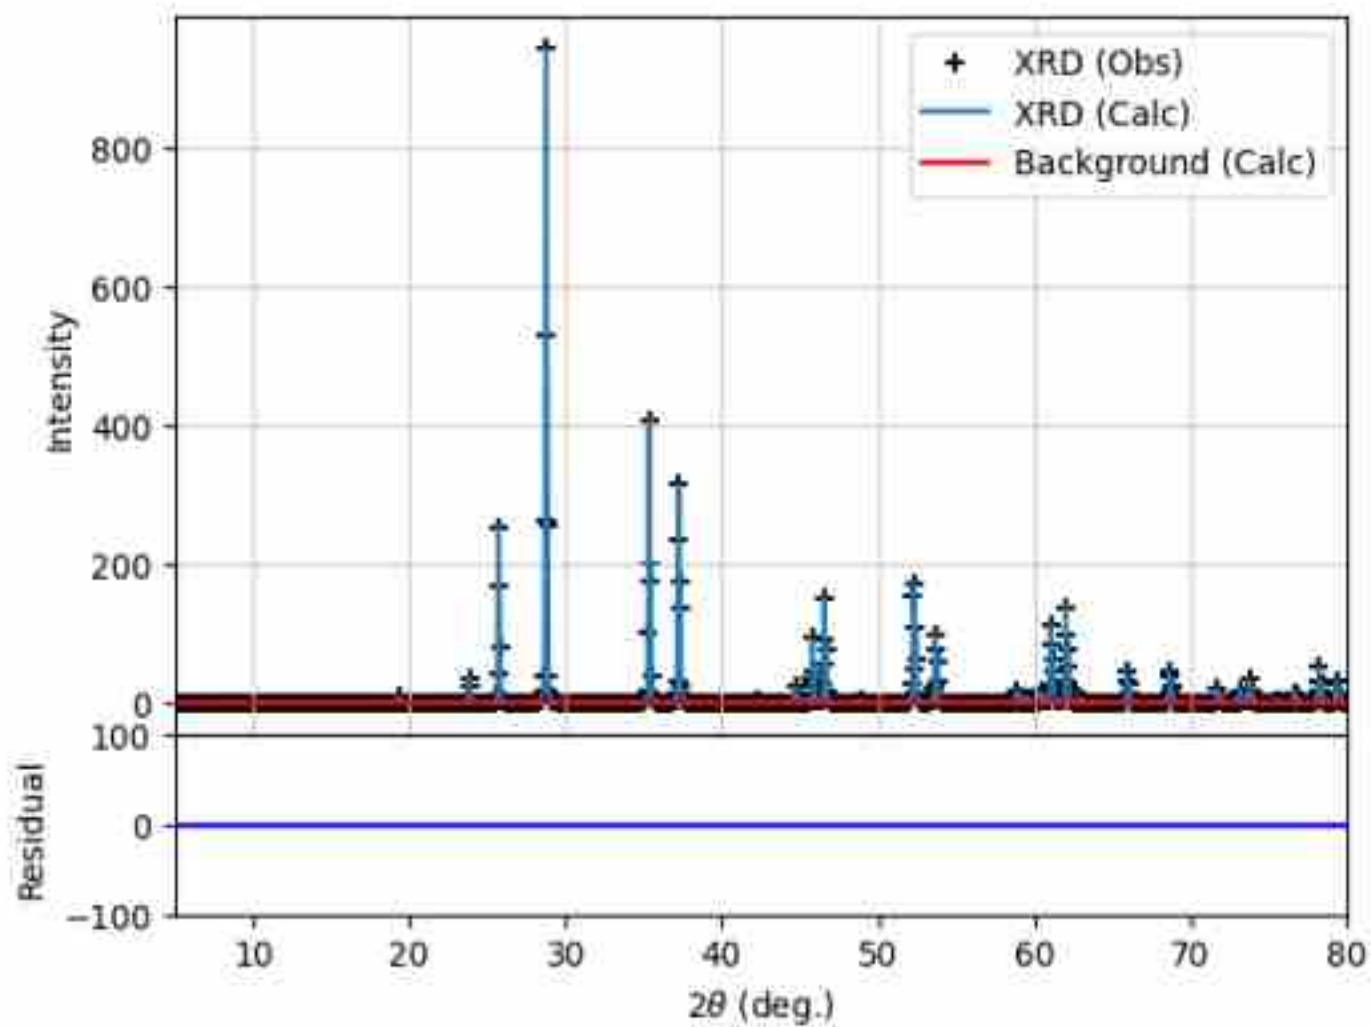

| RMSE before RR | Rwp     | RMSE after RR |
|----------------|---------|---------------|
| 0.009          | 0.00405 | 0.00028       |

# Ba<sub>2</sub>LaPuO<sub>6</sub>

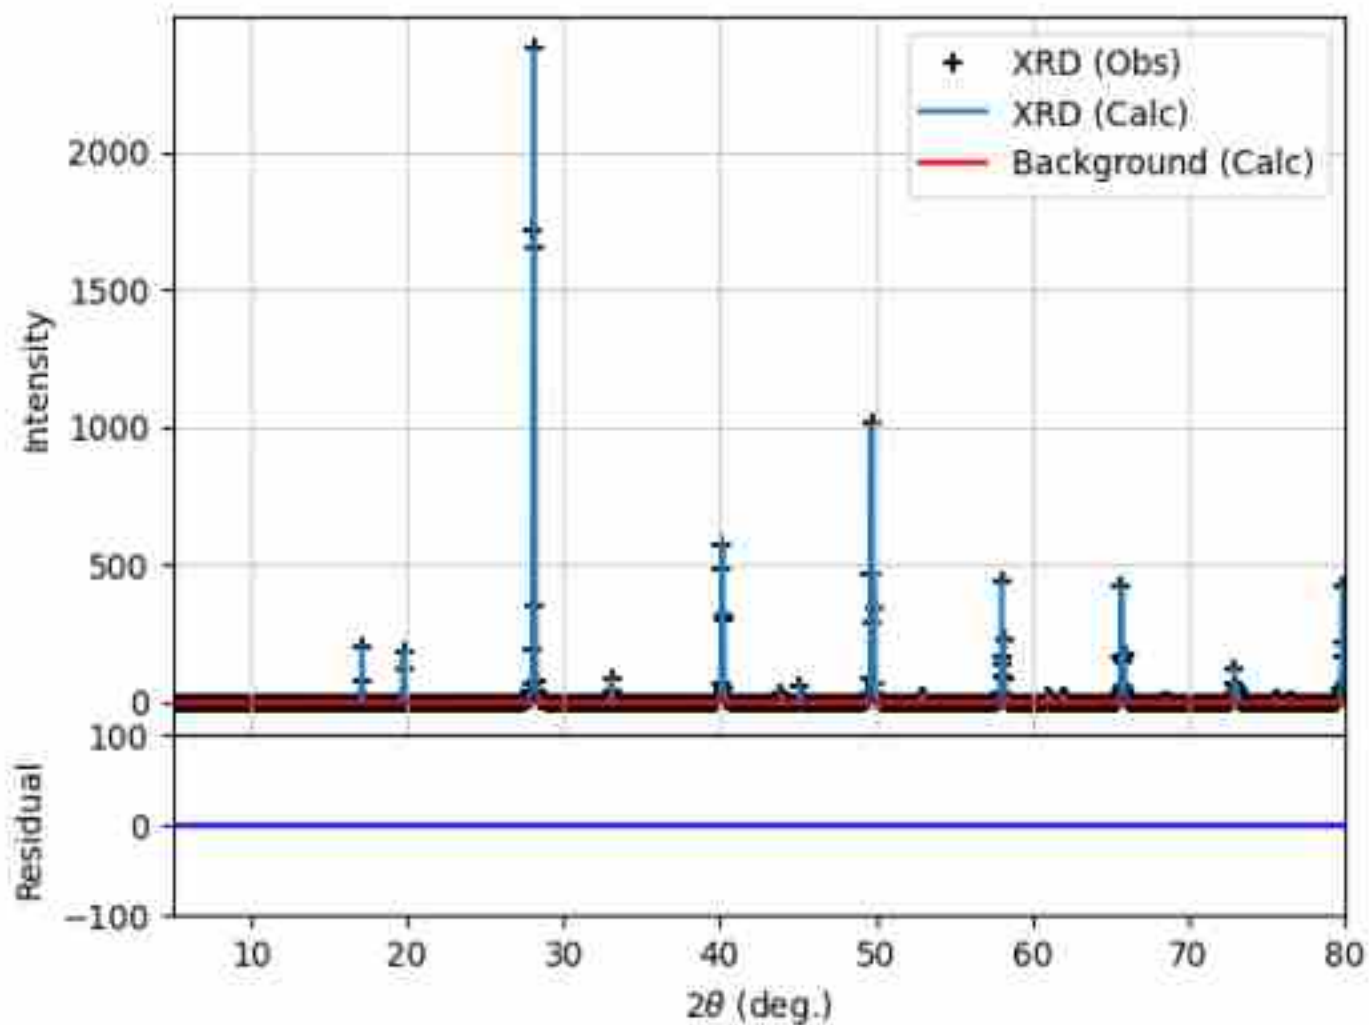

| RMSE before RR | Rwp     | RMSE after RR |
|----------------|---------|---------------|
| 0.009          | 0.01075 | 0.00448       |

# Ba<sub>2</sub>TbPaO<sub>6</sub>

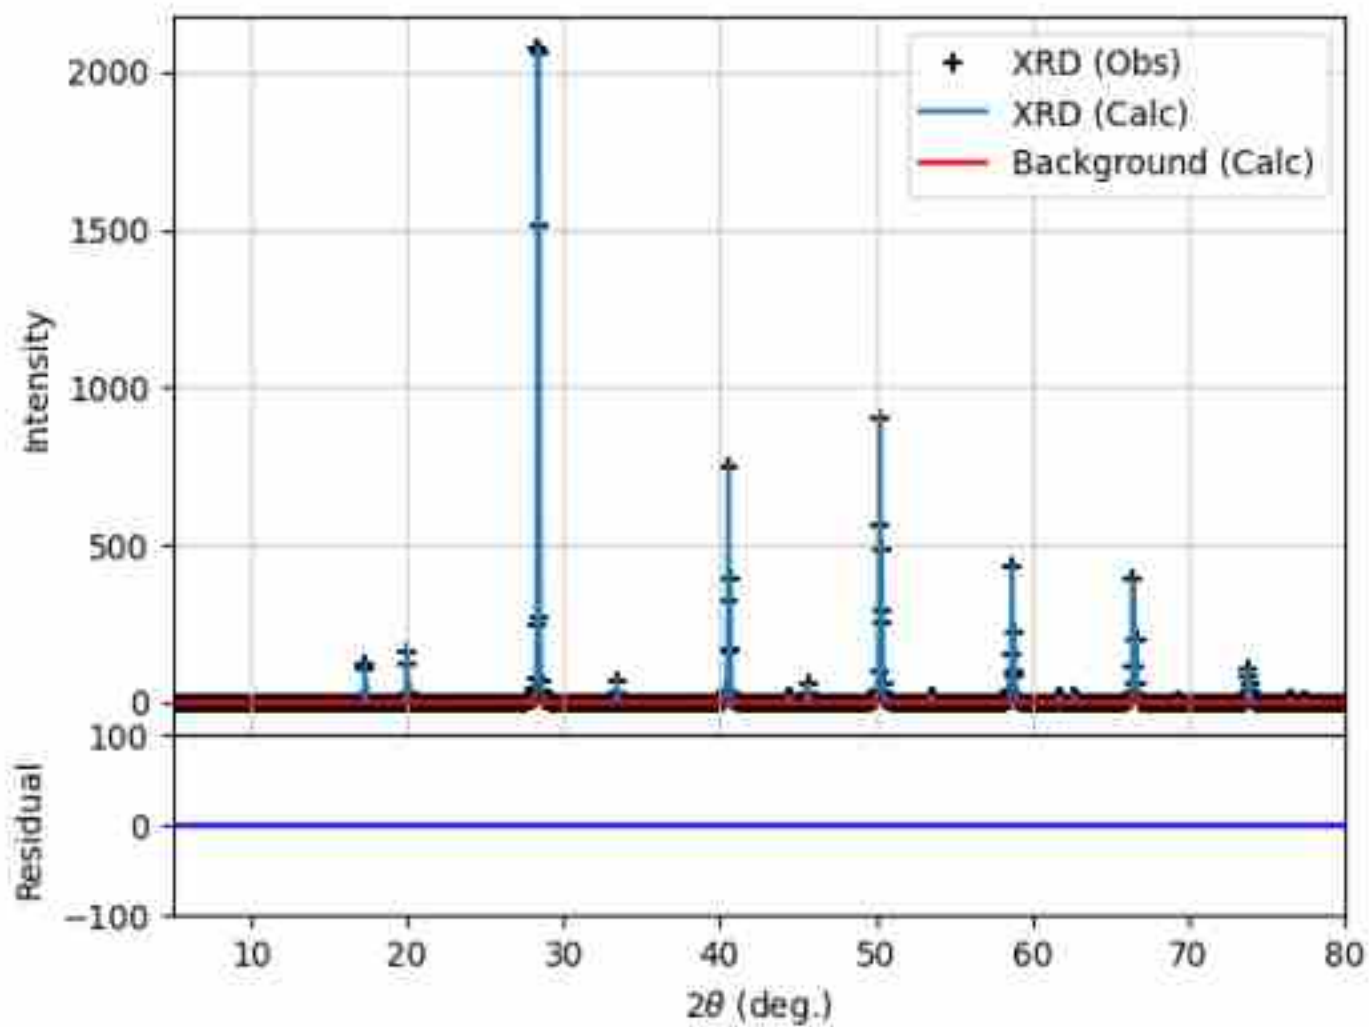

| RMSE before RR | Rwp     | RMSE after RR |
|----------------|---------|---------------|
| 0.009          | 0.00659 | 0.00273       |

# Ba<sub>2</sub>U<sub>1</sub>Cu<sub>1</sub>O<sub>6</sub>

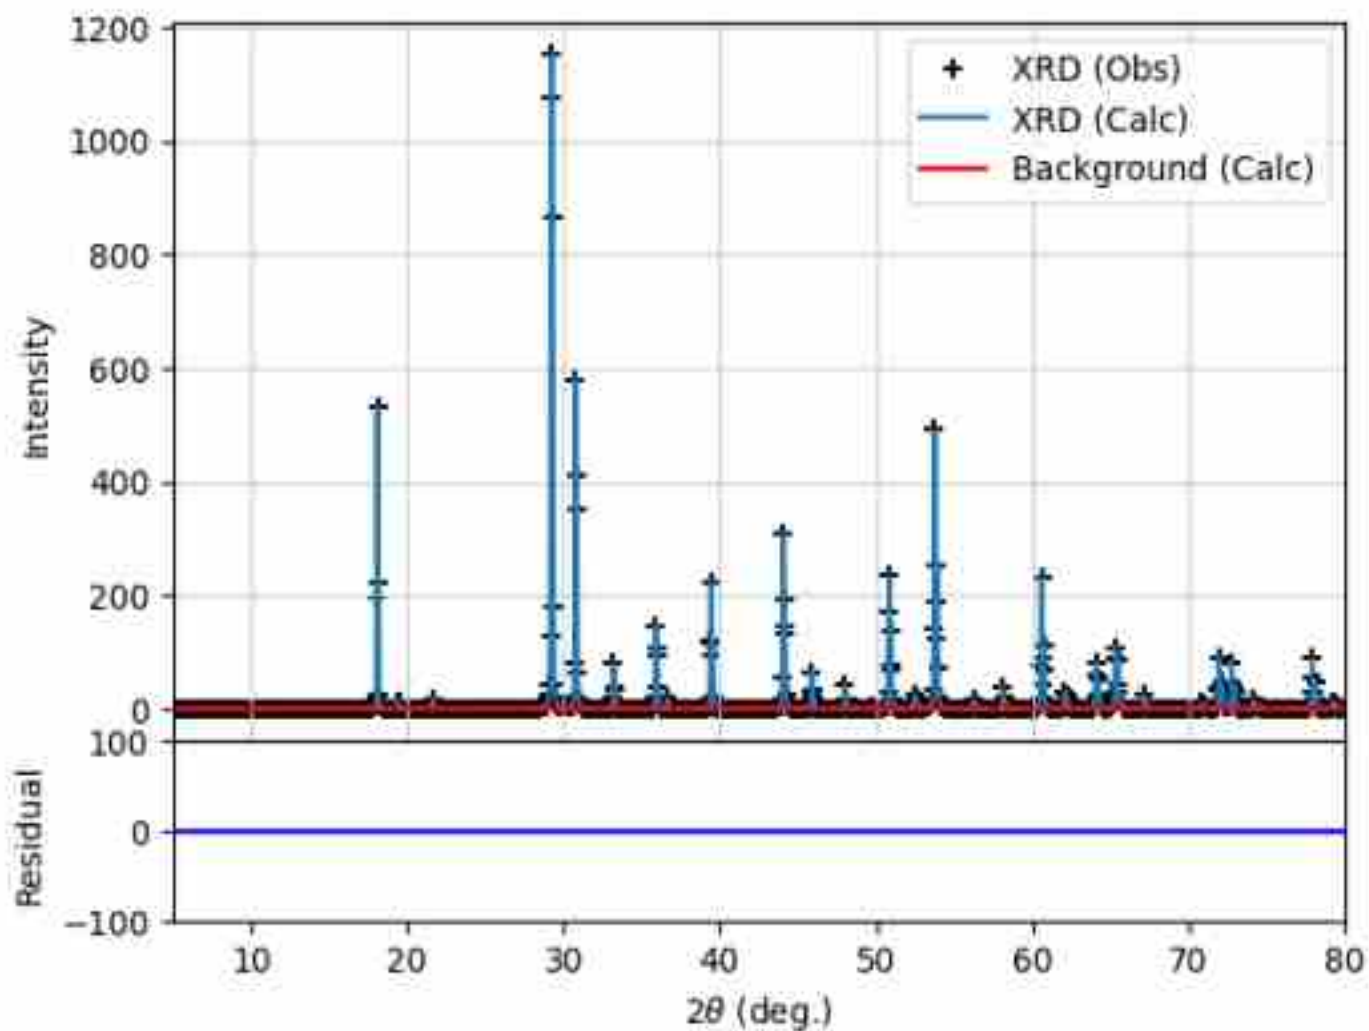

| RMSE before RR | Rwp     | RMSE after RR |
|----------------|---------|---------------|
| 0.09           | 0.00604 | 0.00343       |

# Bi<sub>2</sub>I<sub>2</sub>O<sub>2</sub>

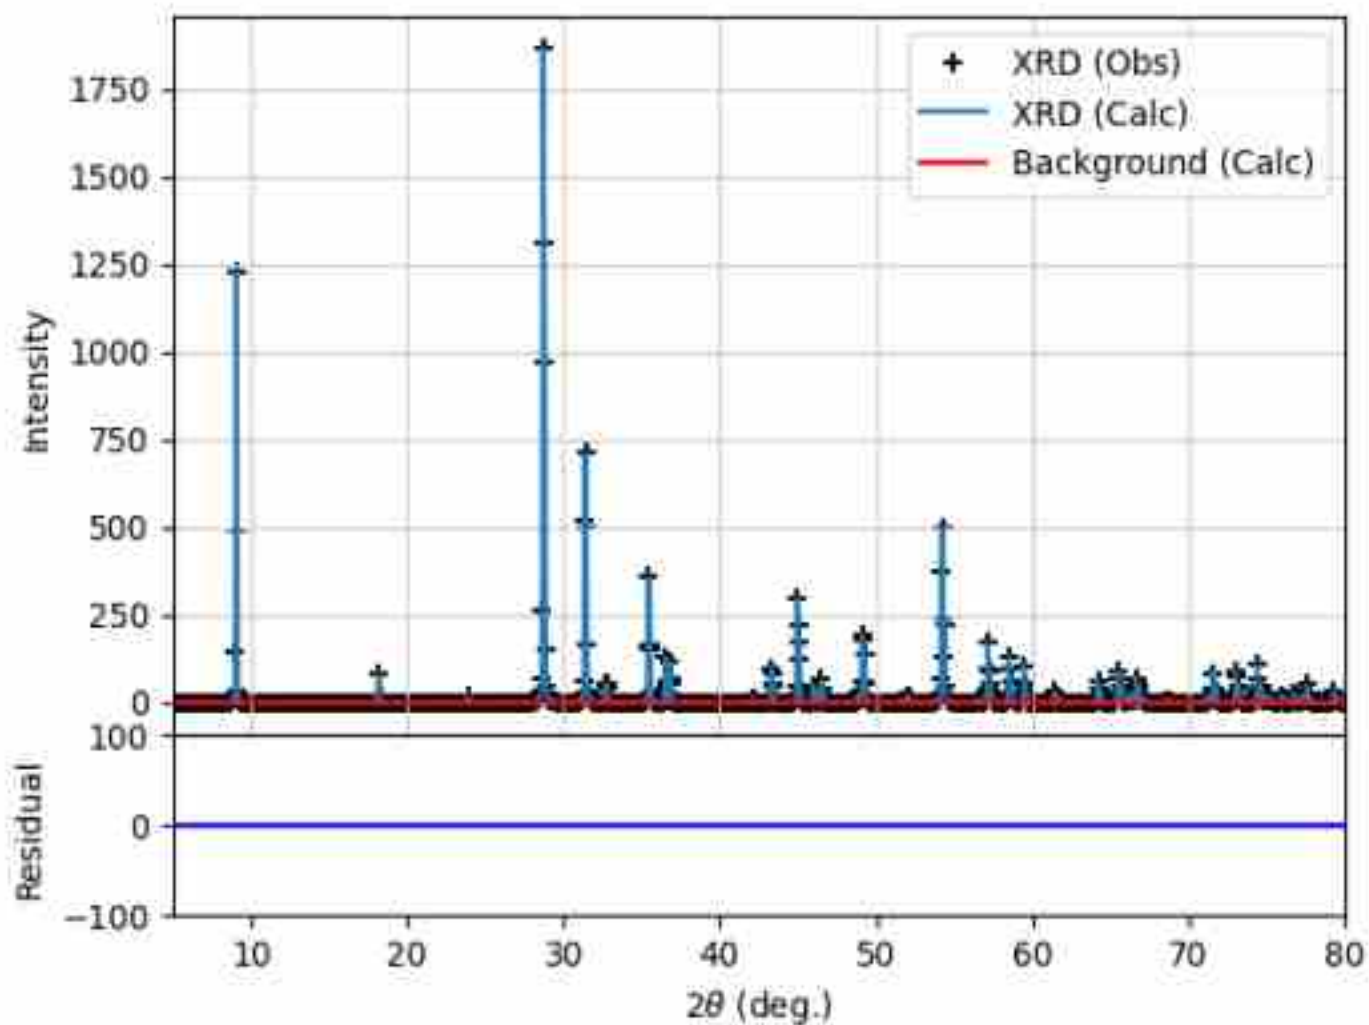

| RMSE before RR | Rwp     | RMSE after RR |
|----------------|---------|---------------|
| 0.009          | 0.00361 | 0.00062       |

# Ca<sub>2</sub>Ag<sub>2</sub>Ge<sub>2</sub>

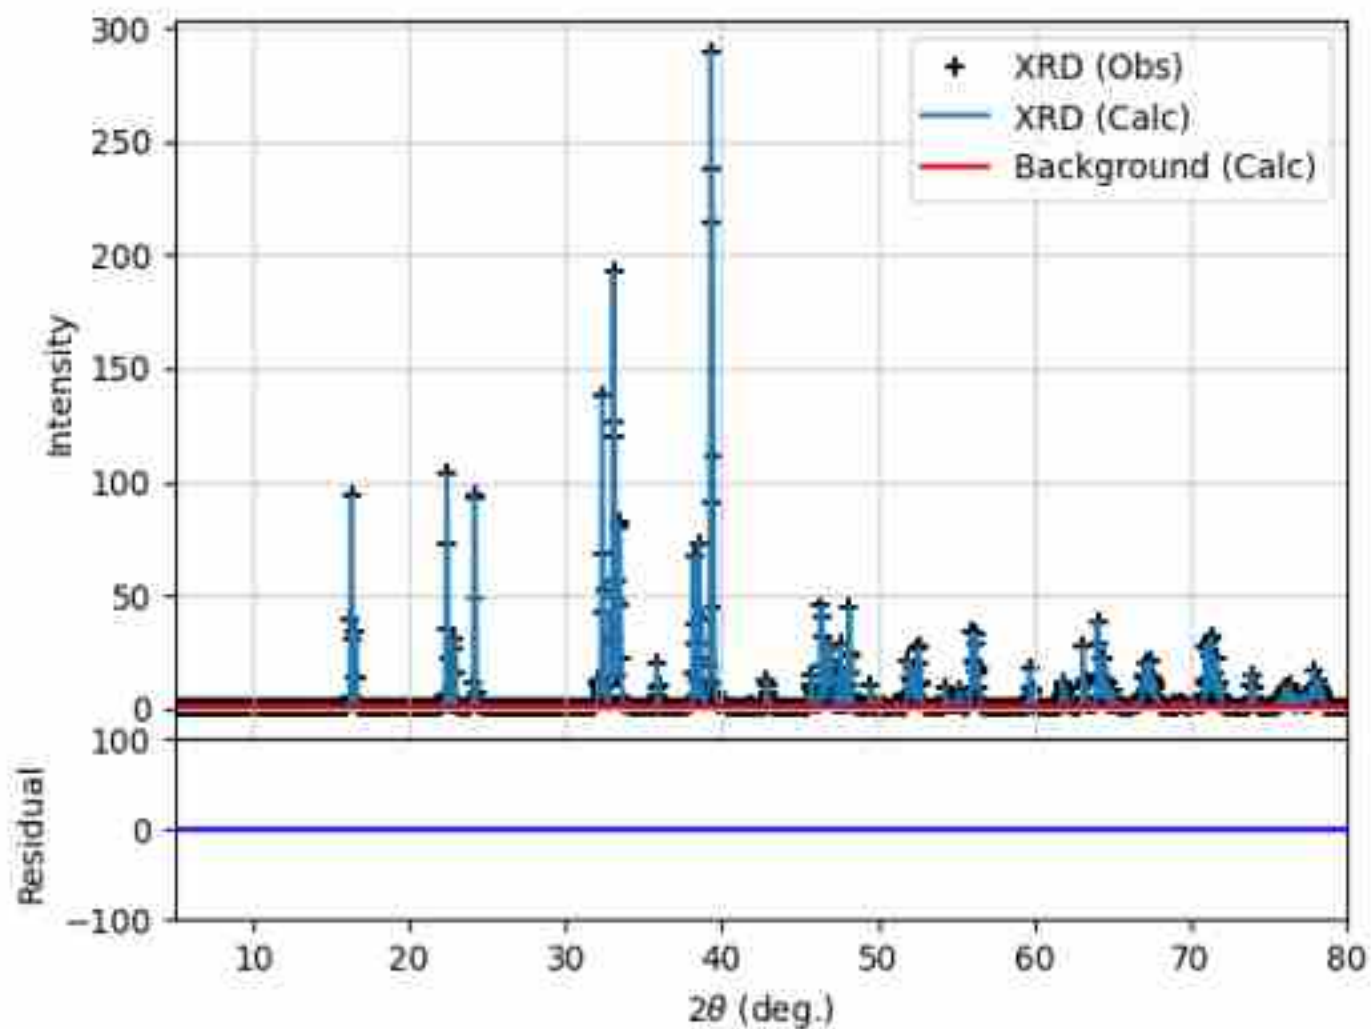

| RMSE before RR | Rwp     | RMSE after RR |
|----------------|---------|---------------|
| 0.009          | 0.00344 | 0.00025       |



# Ca<sub>2</sub>H<sub>2</sub>I<sub>2</sub>

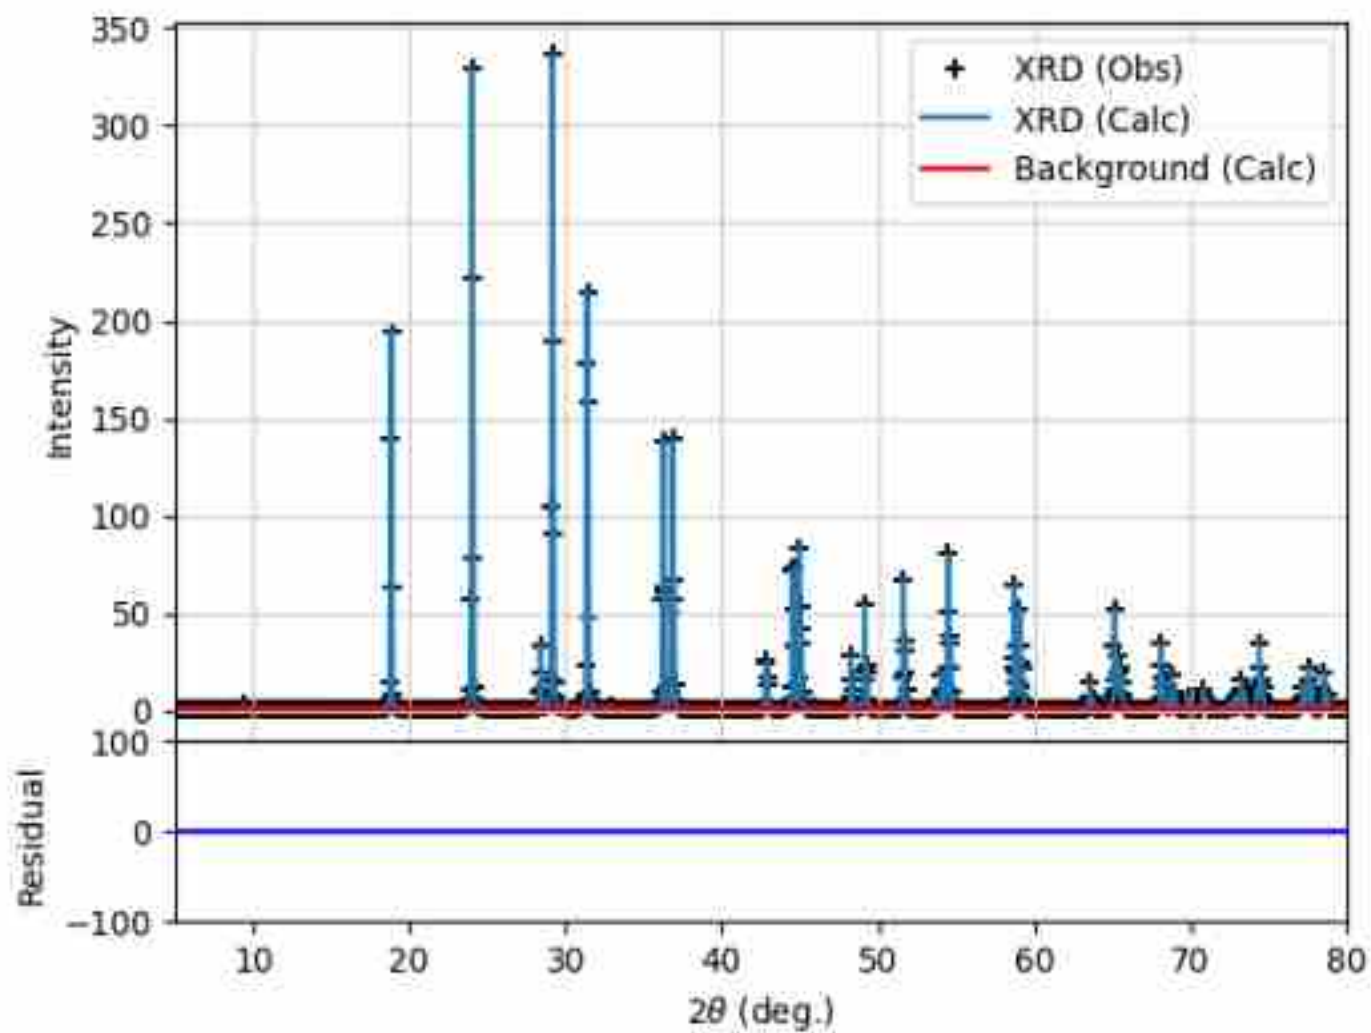

| RMSE before RR | Rwp    | RMSE after RR |
|----------------|--------|---------------|
| 0.009          | 0.0047 | 0.00588       |

# Ca<sub>3</sub>Bi<sub>1</sub>P<sub>1</sub>

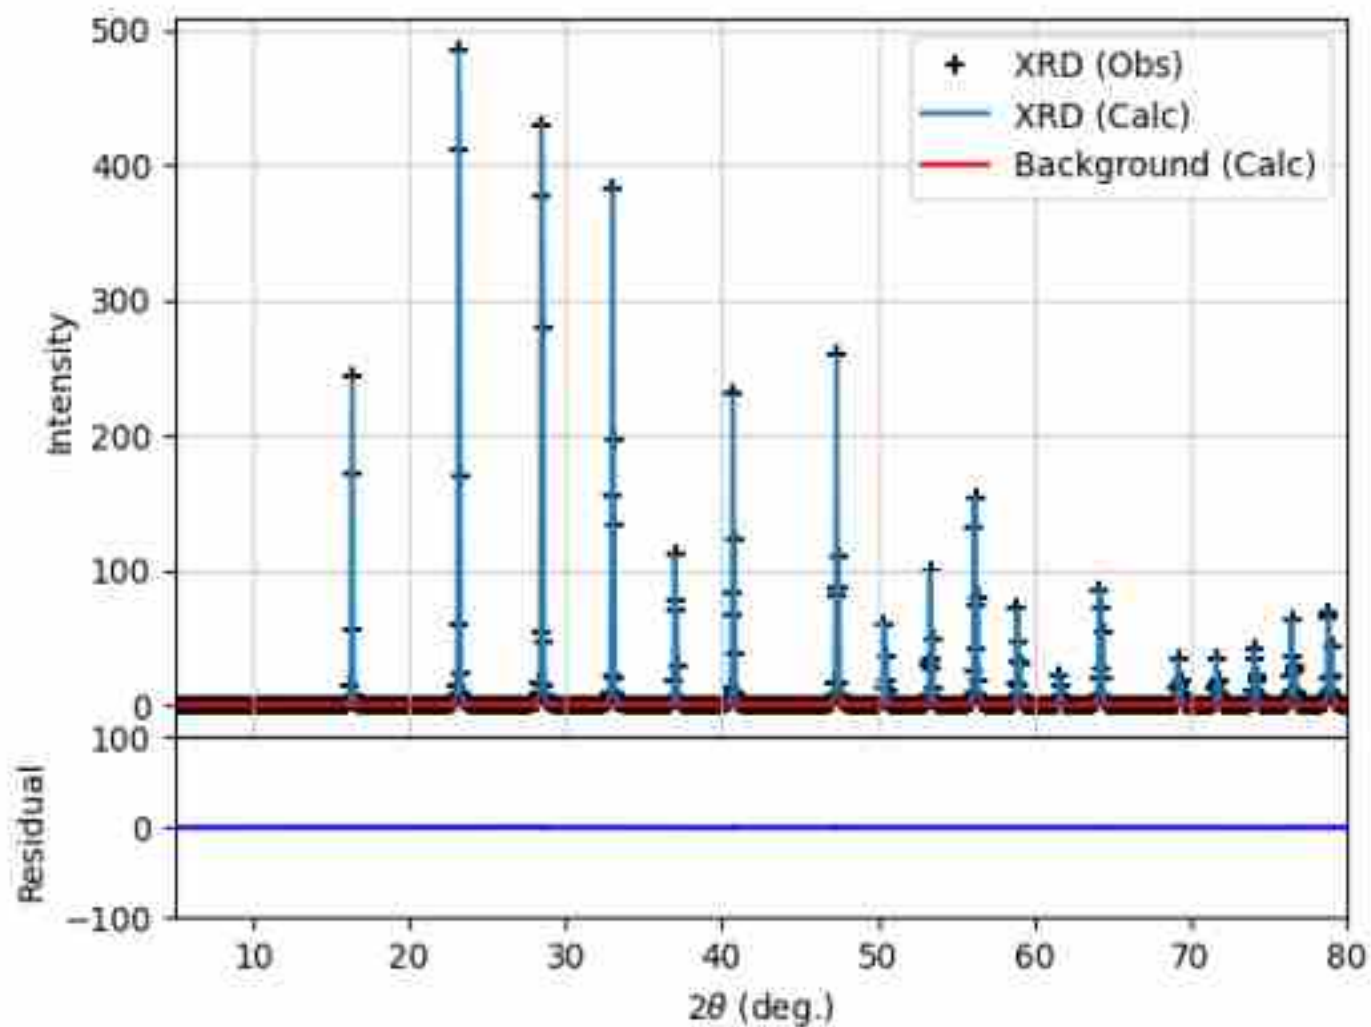

| RMSE before RR | Rwp     | RMSE after RR |
|----------------|---------|---------------|
| 0.009          | 0.21058 | 0.00326       |

# Cd1In1As1Se1

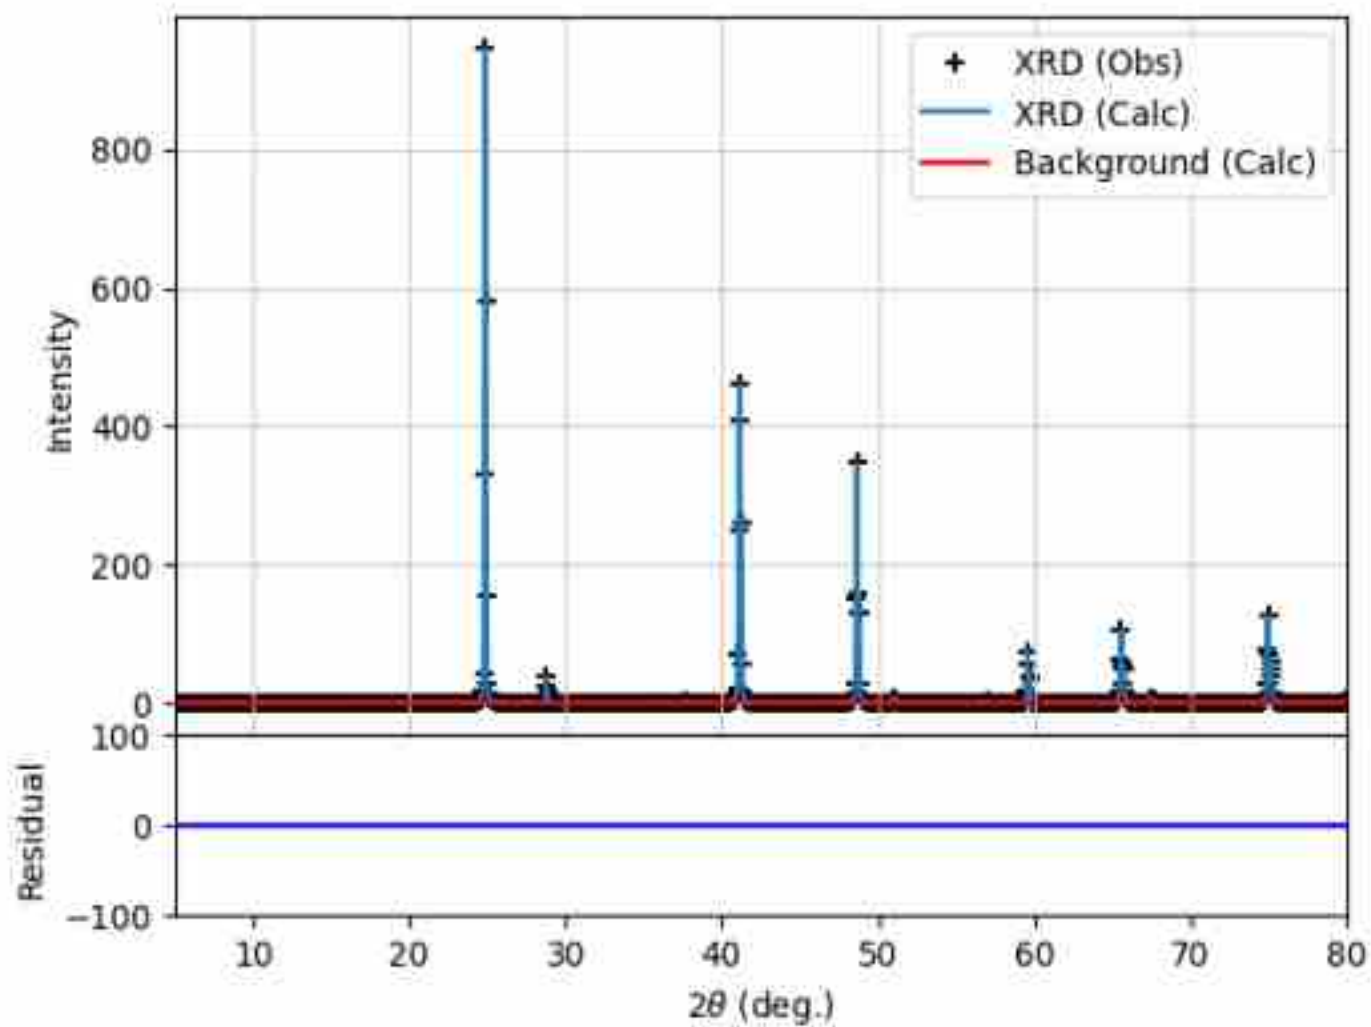

| RMSE before RR | Rwp    | RMSE after RR |
|----------------|--------|---------------|
| 0.009          | 0.0023 | 9e-05         |

# Cd<sub>2</sub>Br<sub>4</sub>

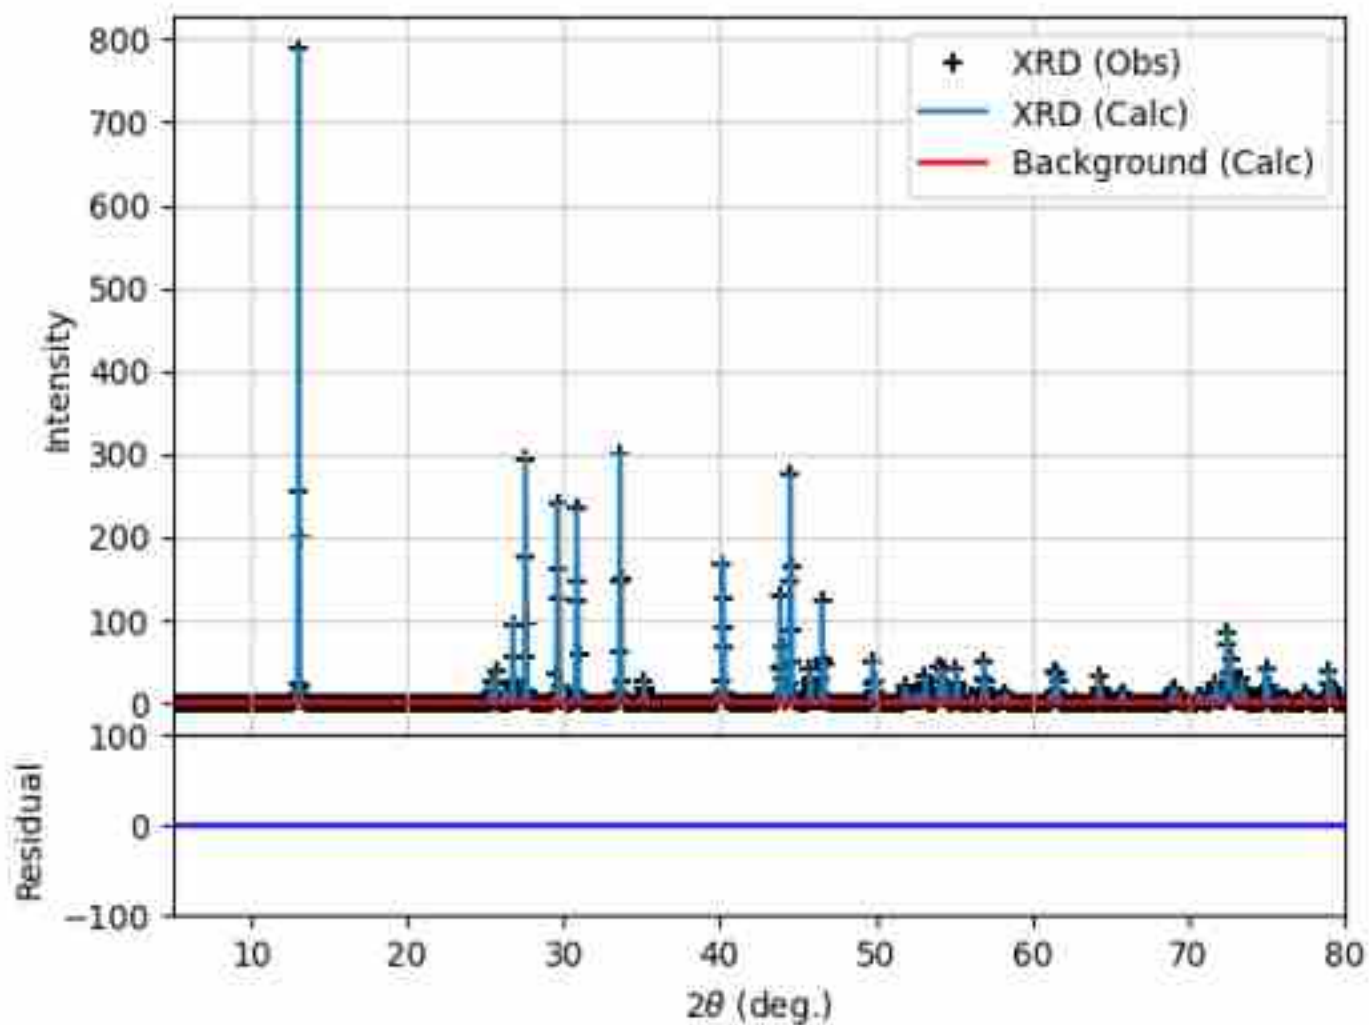

| RMSE before RR | Rwp     | RMSE after RR |
|----------------|---------|---------------|
| 0.009          | 0.00252 | 0.00025       |

# Cd<sub>2</sub>In<sub>6</sub>

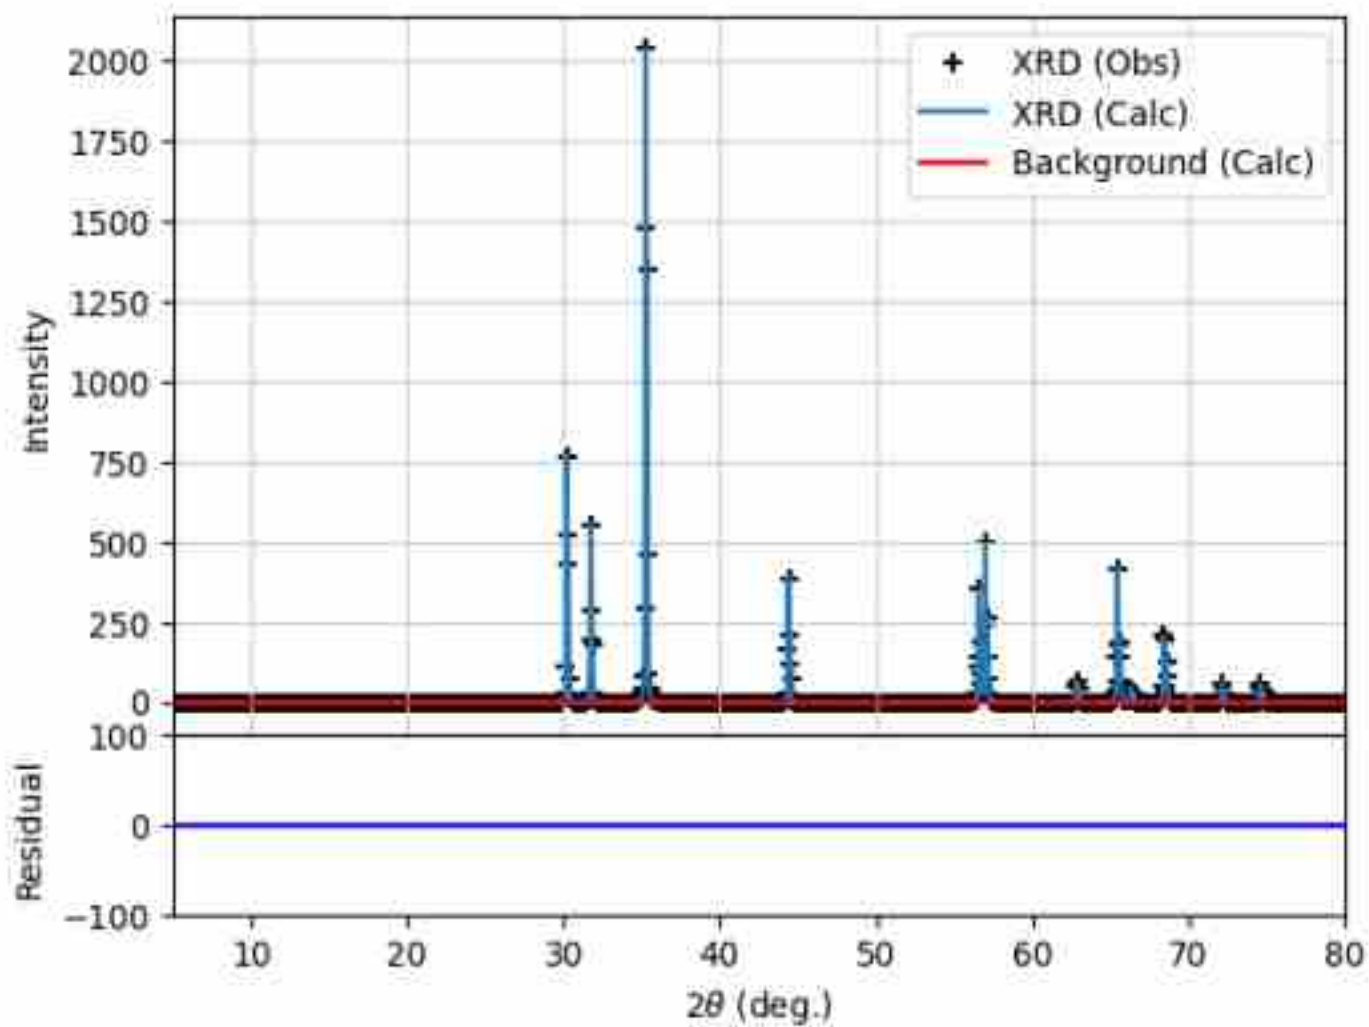

| RMSE before RR | Rwp     | RMSE after RR |
|----------------|---------|---------------|
| 0.009          | 0.00895 | 0.00085       |

# Cd2S2

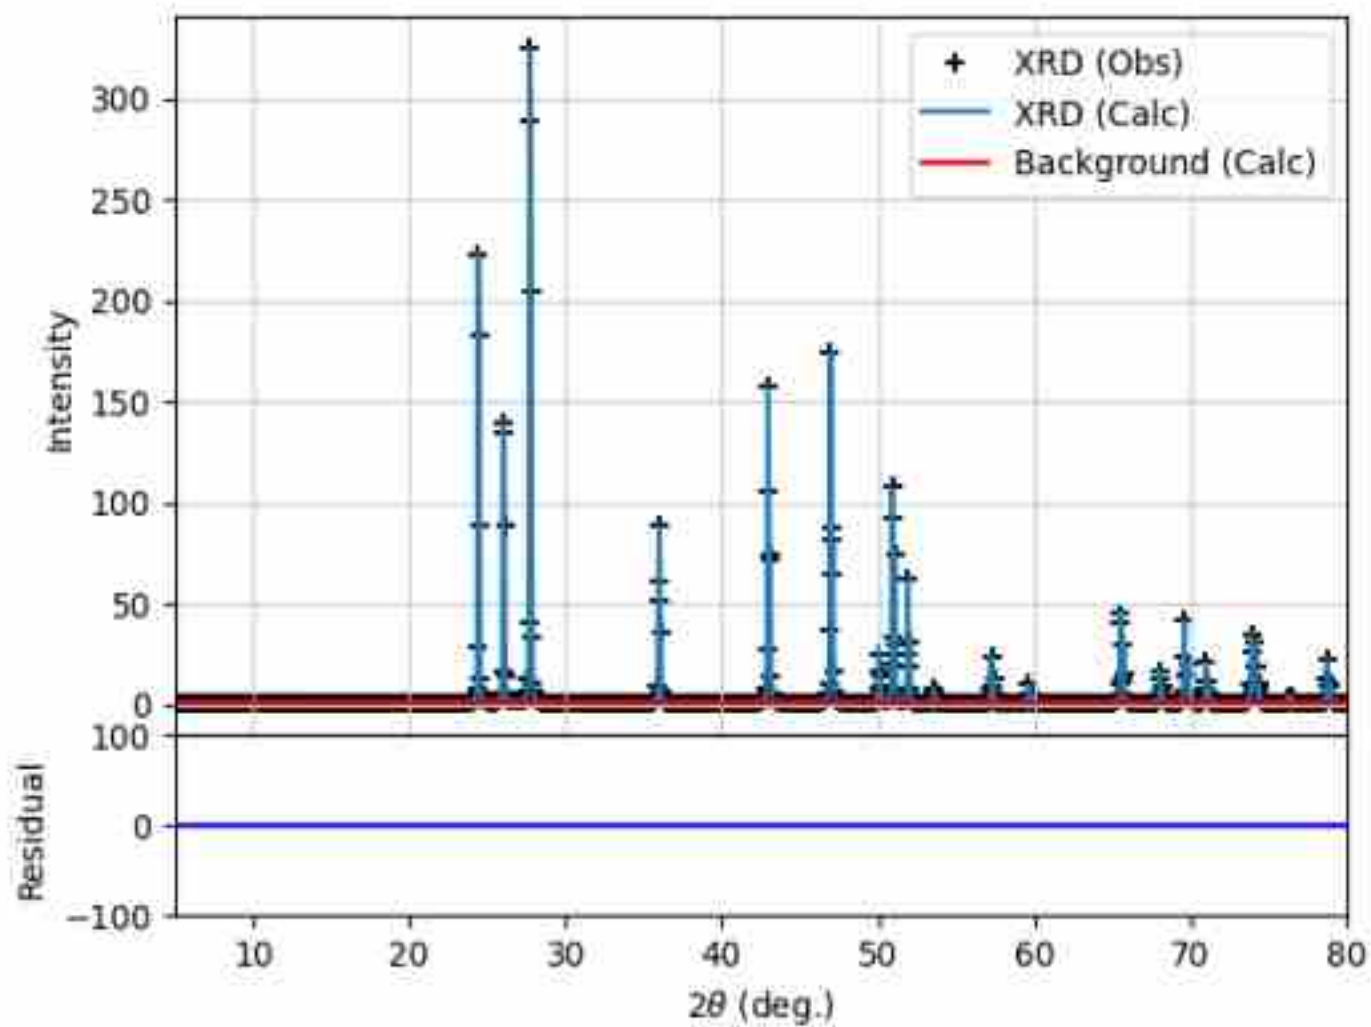

| RMSE before RR | Rwp     | RMSE after RR |
|----------------|---------|---------------|
| 0.009          | 0.00375 | 0.00073       |

# Ce1Mn2Ge2

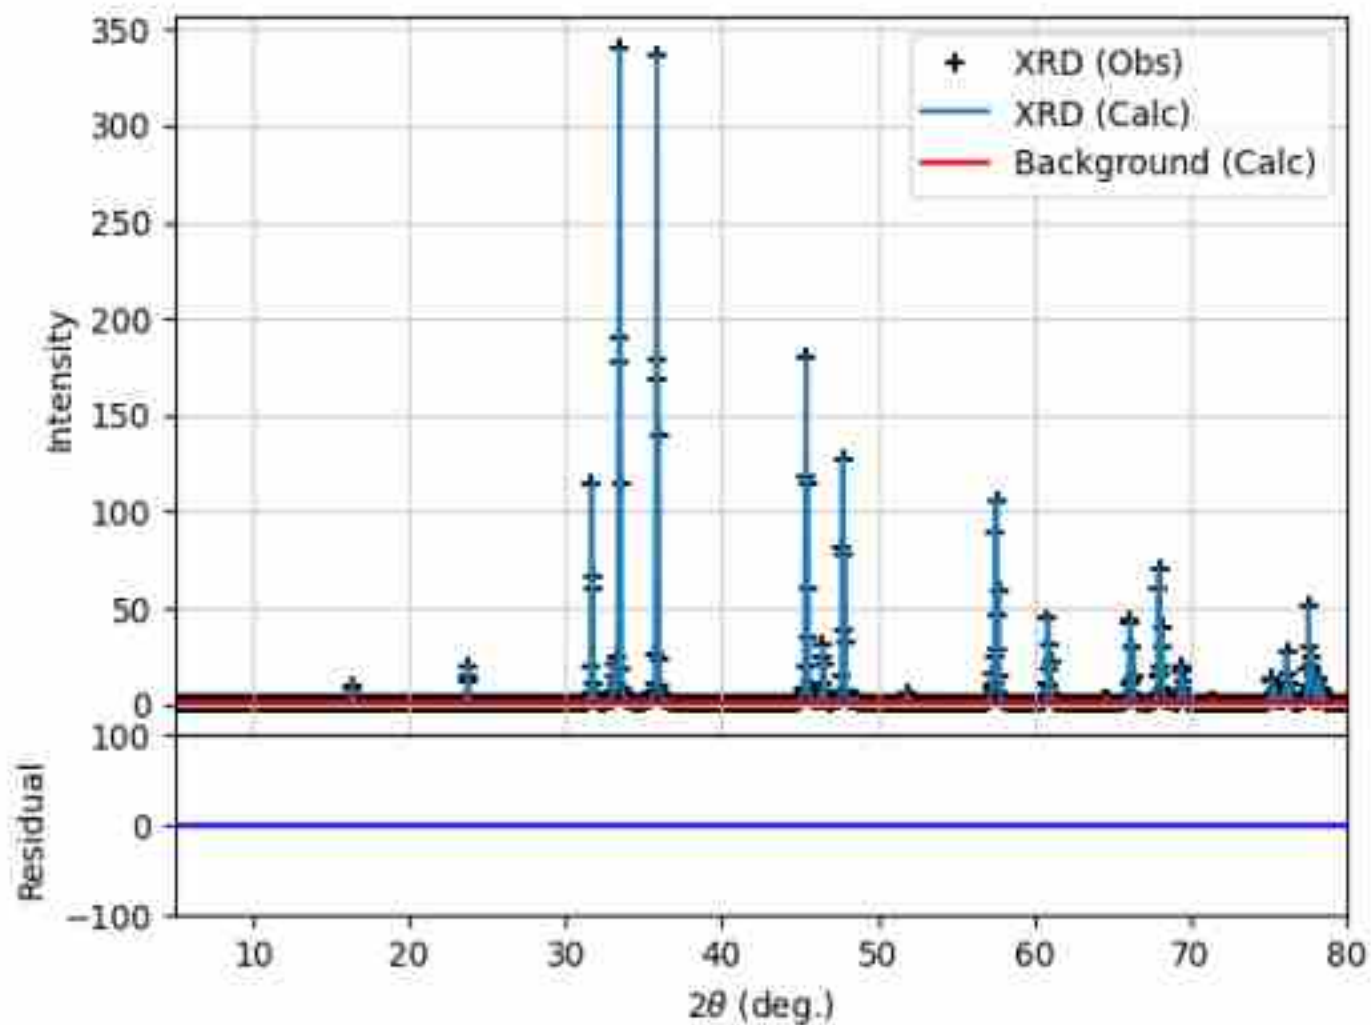

| RMSE before RR | Rwp     | RMSE after RR |
|----------------|---------|---------------|
| 0.009          | 0.00456 | 0.00052       |

# Ce1Ni2Ge2

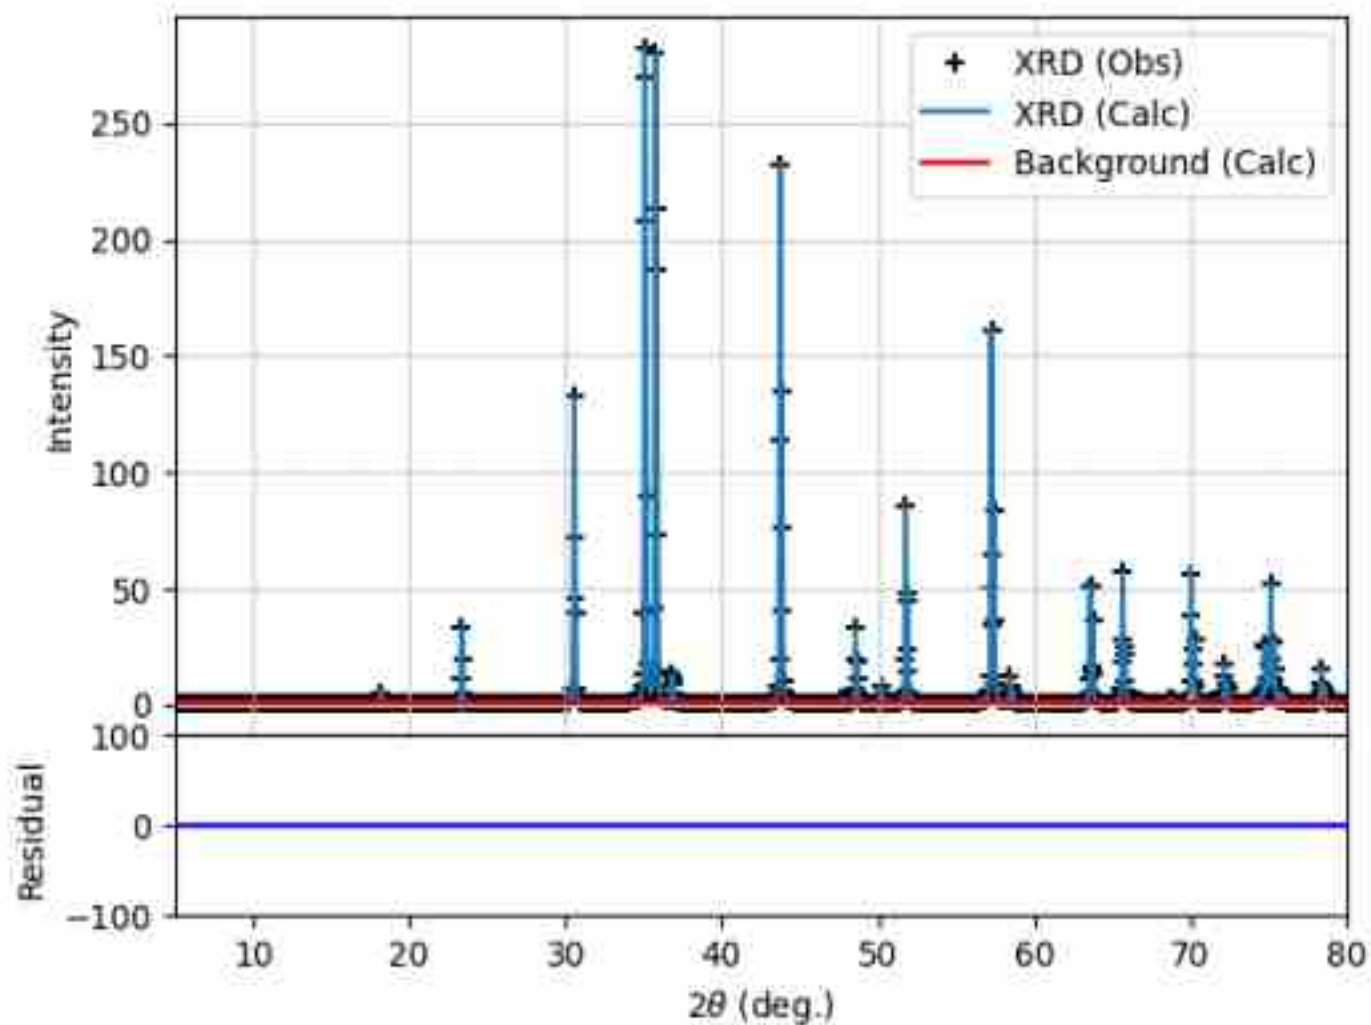

| RMSE before RR | Rwp     | RMSE after RR |
|----------------|---------|---------------|
| 0.009          | 0.00472 | 0.00066       |



# Ce1Y1Fe4

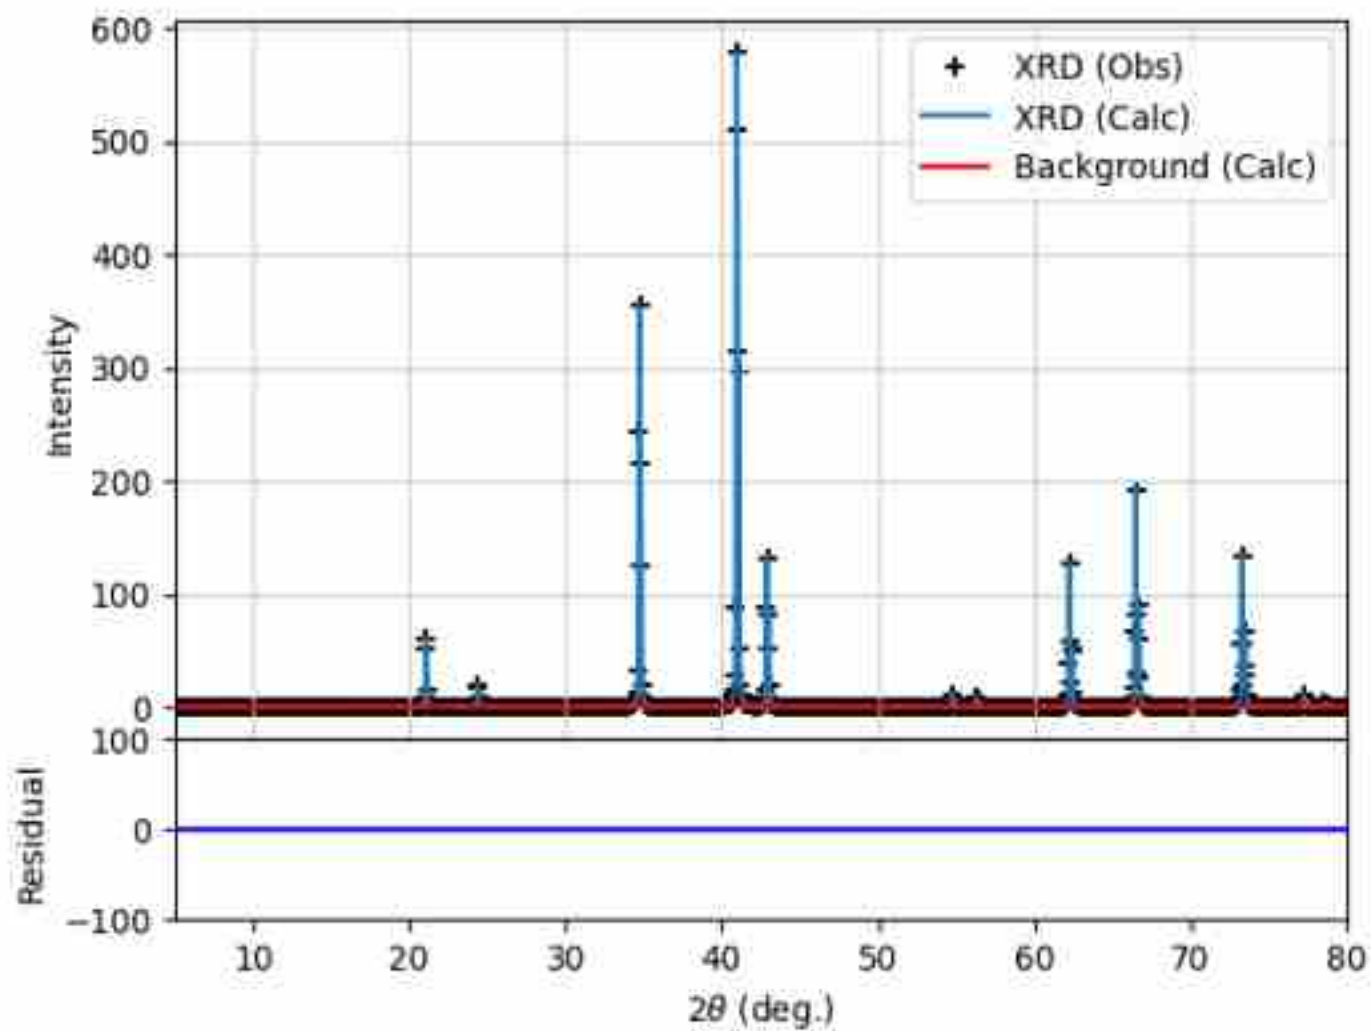

| RMSE before RR | Rwp     | RMSE after RR |
|----------------|---------|---------------|
| 0.009          | 0.03582 | 0.00279       |

# Ce2Au2

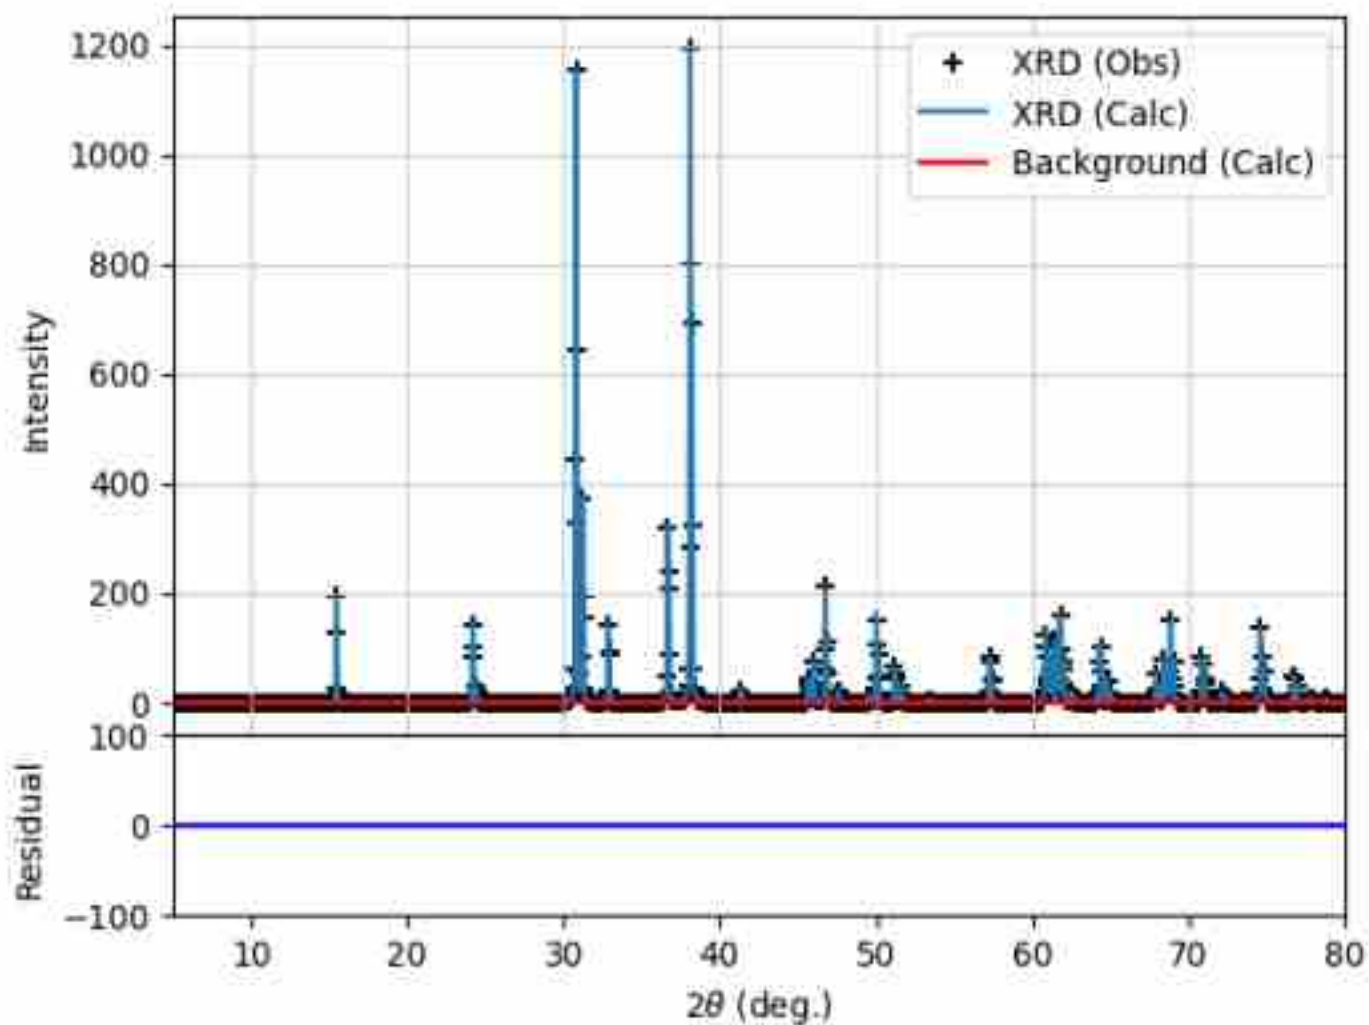

| RMSE before RR | Rwp     | RMSE after RR |
|----------------|---------|---------------|
| 0.009          | 0.00396 | 0.00033       |

# Ce<sub>2</sub>Cu<sub>2</sub>Sb<sub>4</sub>

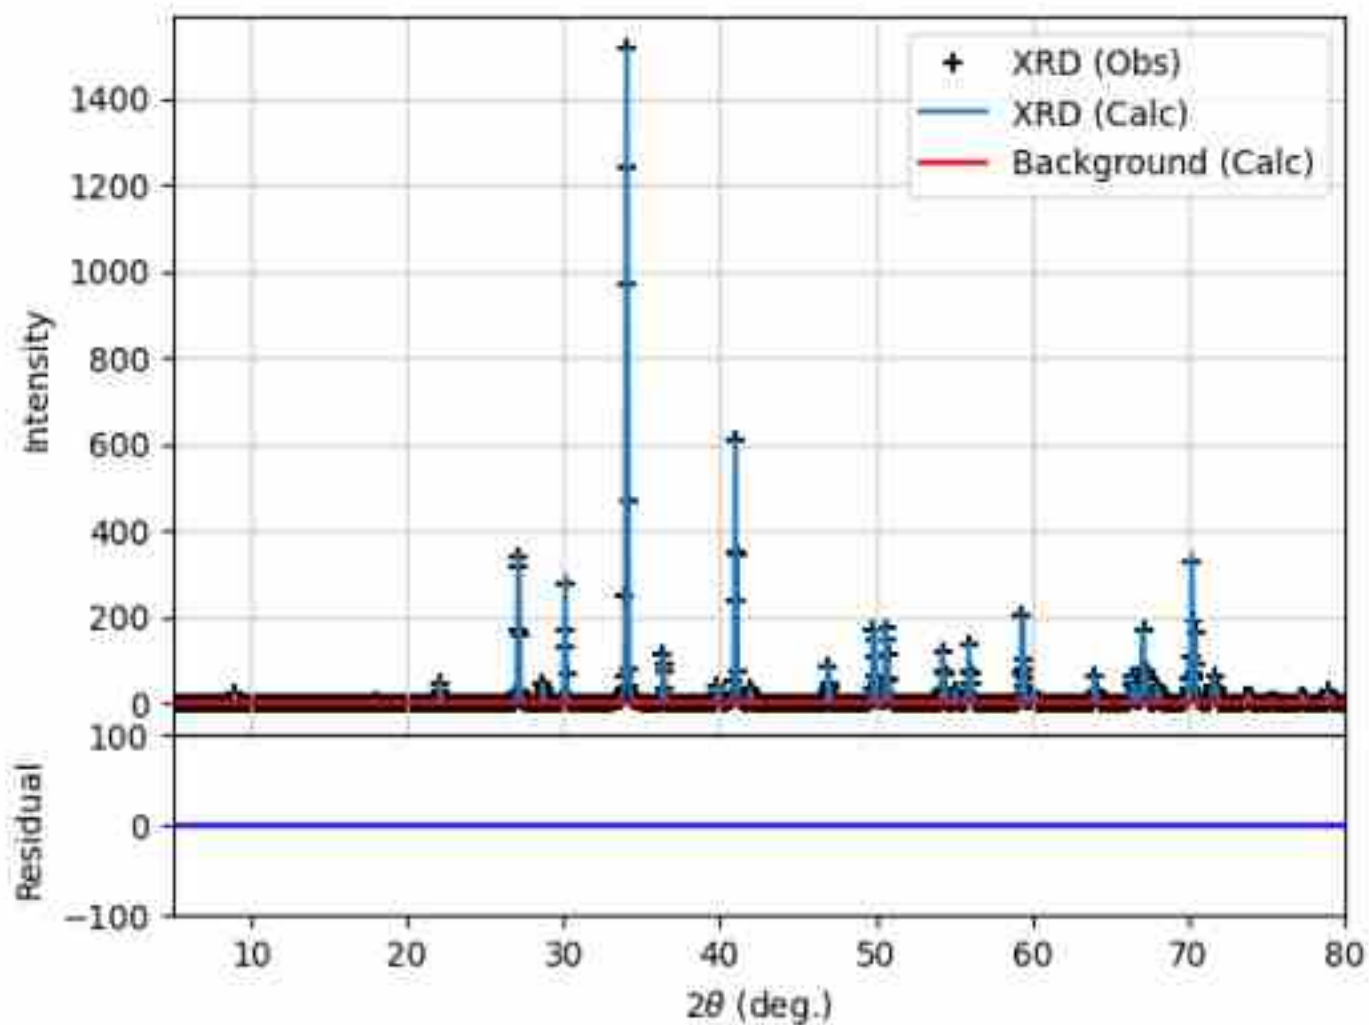

| RMSE before RR | Rwp     | RMSE after RR |
|----------------|---------|---------------|
| 0.009          | 0.00367 | 0.00037       |

# Ce<sub>2</sub>Fe<sub>2</sub>Si<sub>4</sub>

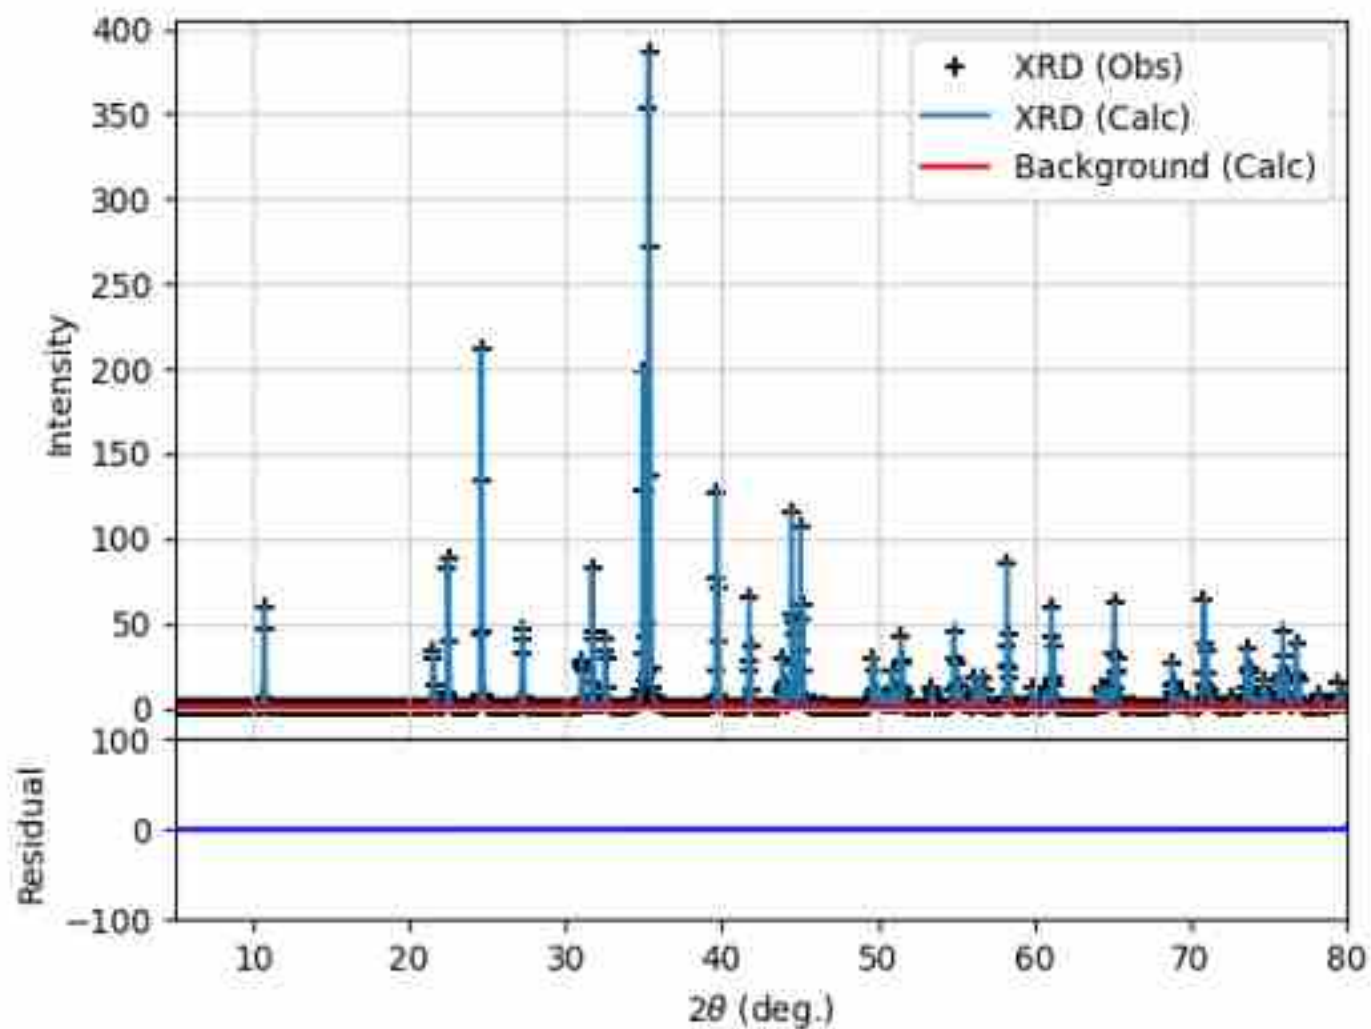

| RMSE before RR | Rwp     | RMSE after RR |
|----------------|---------|---------------|
| 0.009          | 2.29761 | 0.00598       |

# Ce3Sn1N1

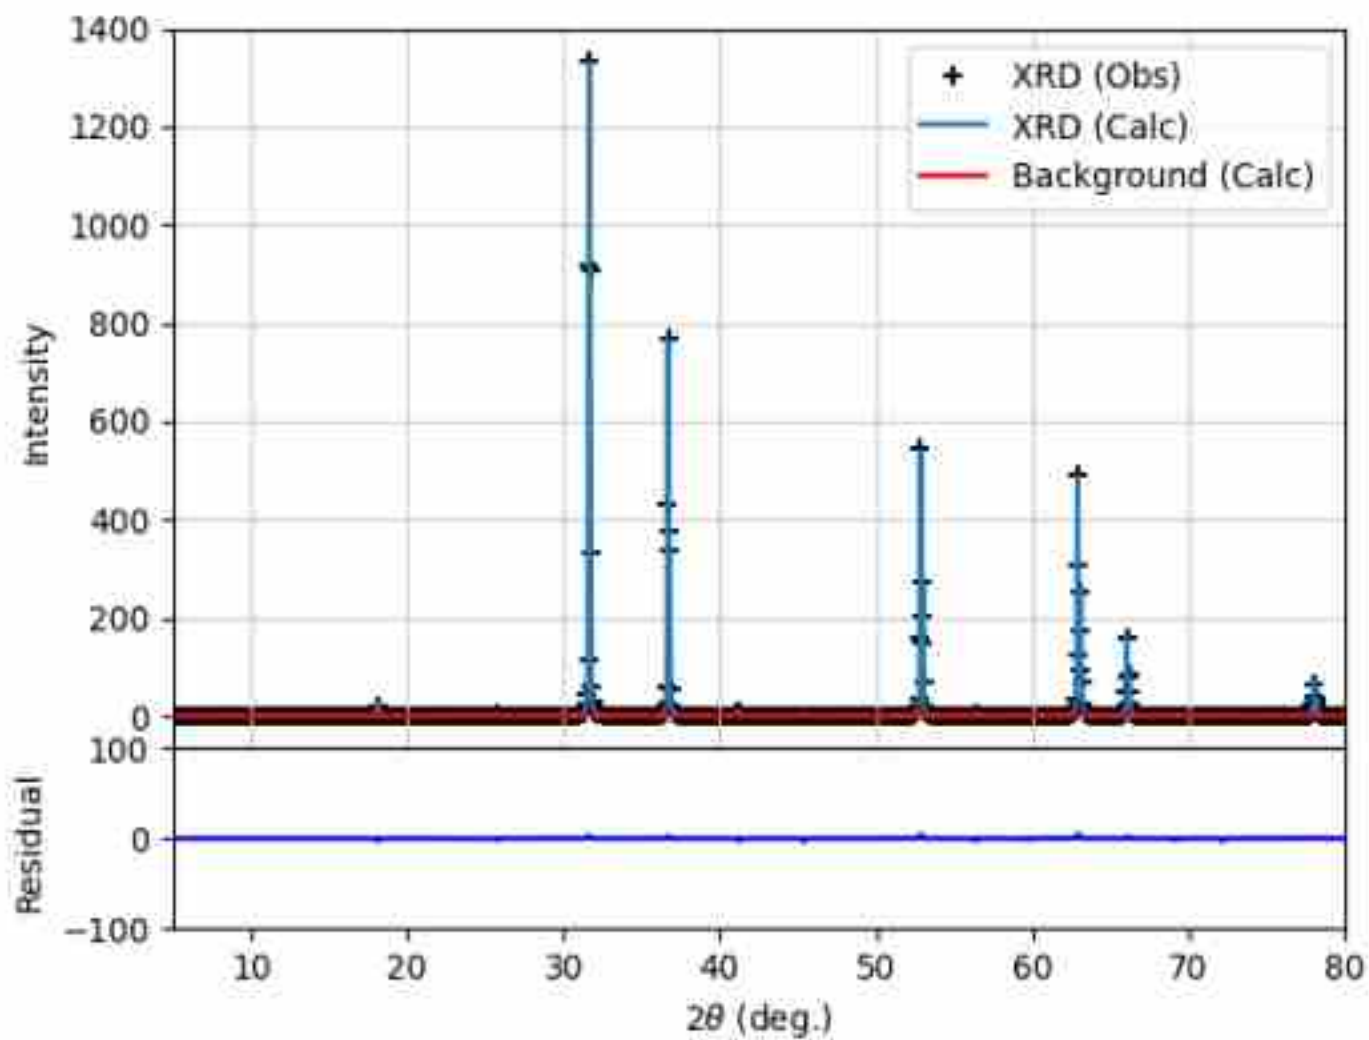

| RMSE before RR | Rwp    | RMSE after RR |
|----------------|--------|---------------|
| 0.009          | 5.9167 | 0.01058       |

# Co<sub>2</sub>Sb<sub>4</sub>

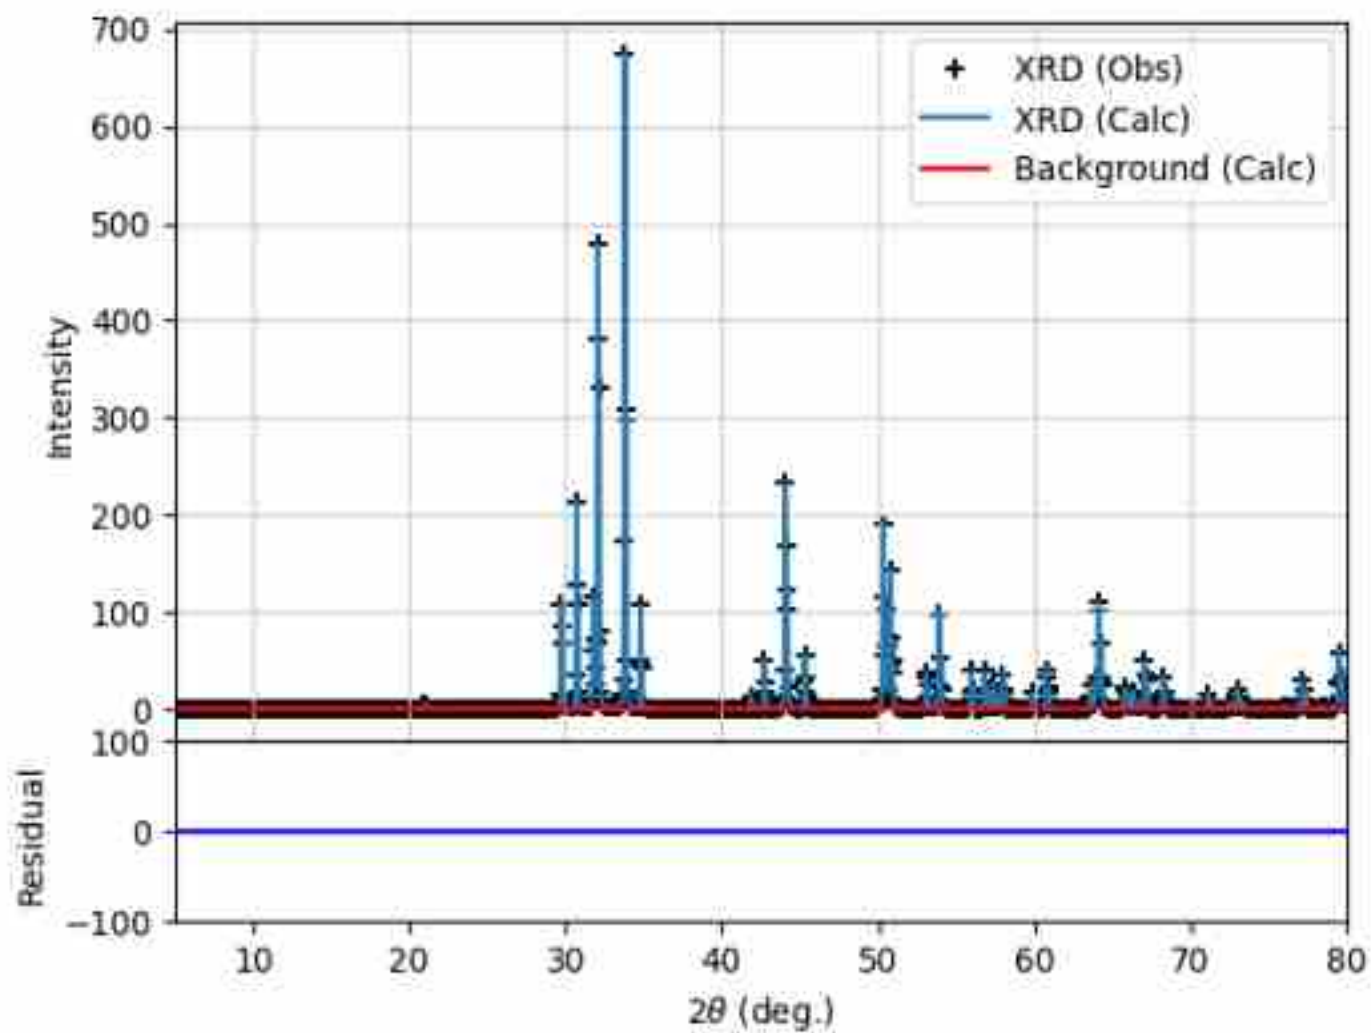

| RMSE before RR | Rwp     | RMSE after RR |
|----------------|---------|---------------|
| 0.009          | 0.00401 | 0.00033       |

# Cs1Er1S2

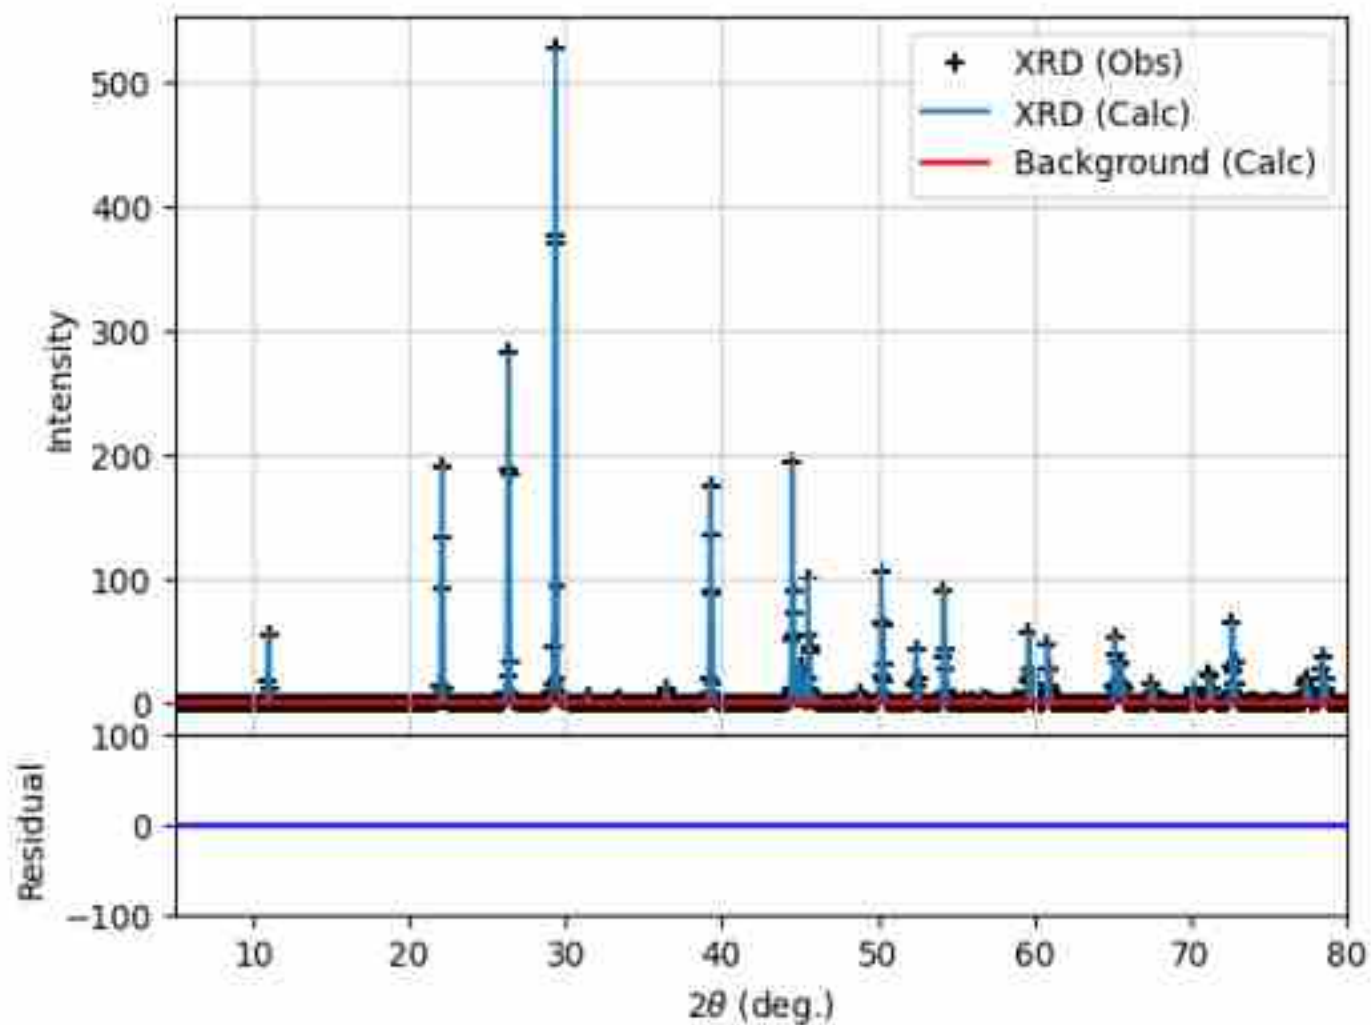

| RMSE before RR | Rwp     | RMSE after RR |
|----------------|---------|---------------|
| 0.009          | 0.00353 | 0.00065       |

# Cs1Rb2Sb1Cl6

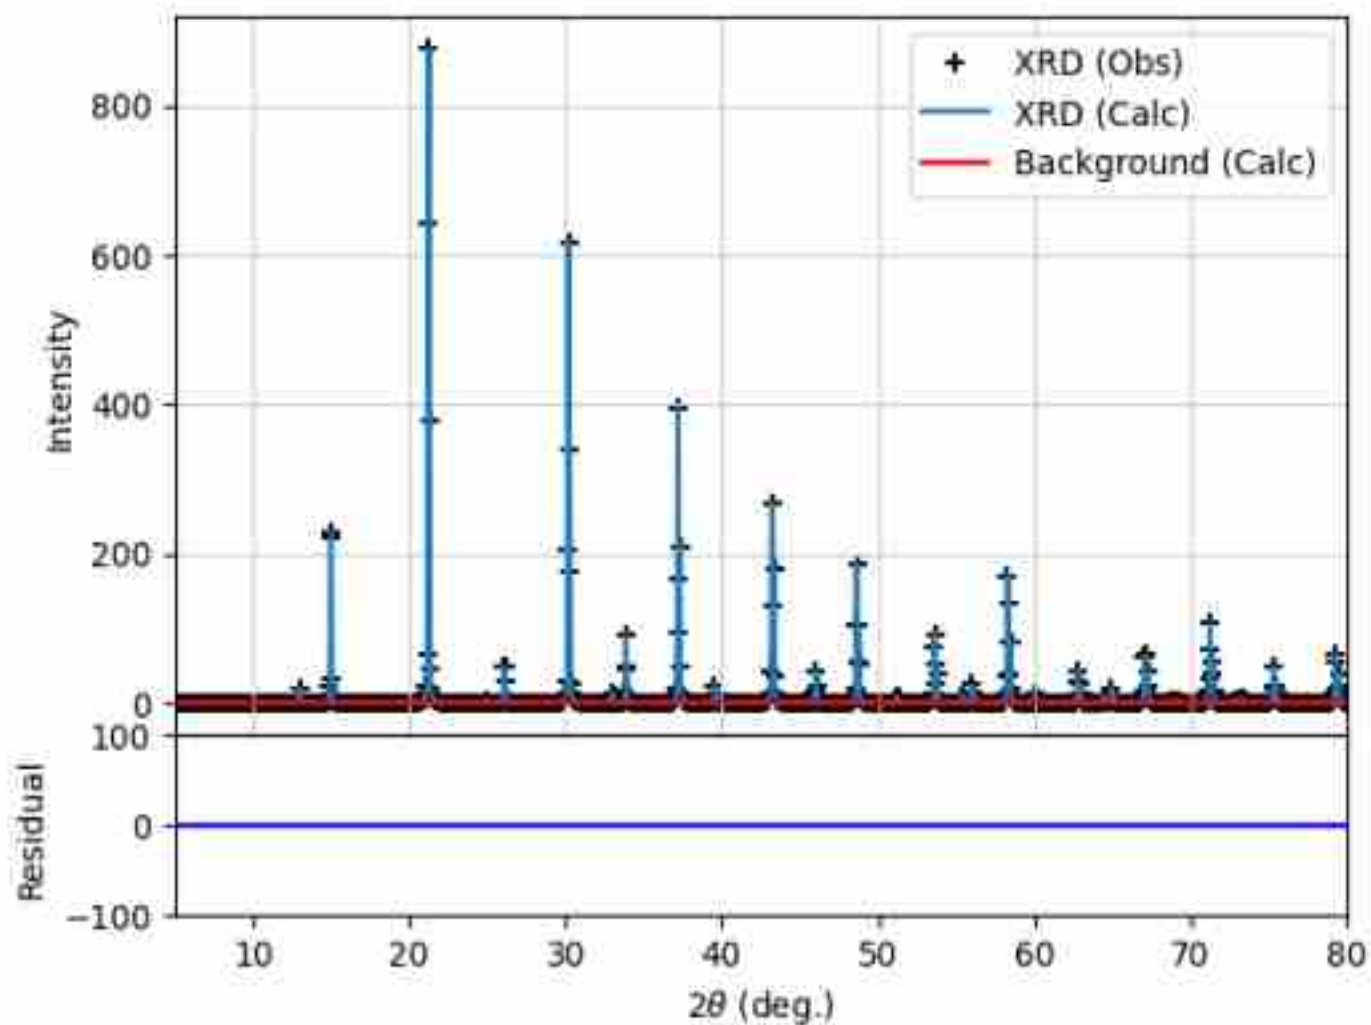

| RMSE before RR | Rwp     | RMSE after RR |
|----------------|---------|---------------|
| 0.009          | 0.00757 | 0.00165       |



# Cs<sub>2</sub>Hg<sub>1</sub>Bi<sub>1</sub>I<sub>6</sub>

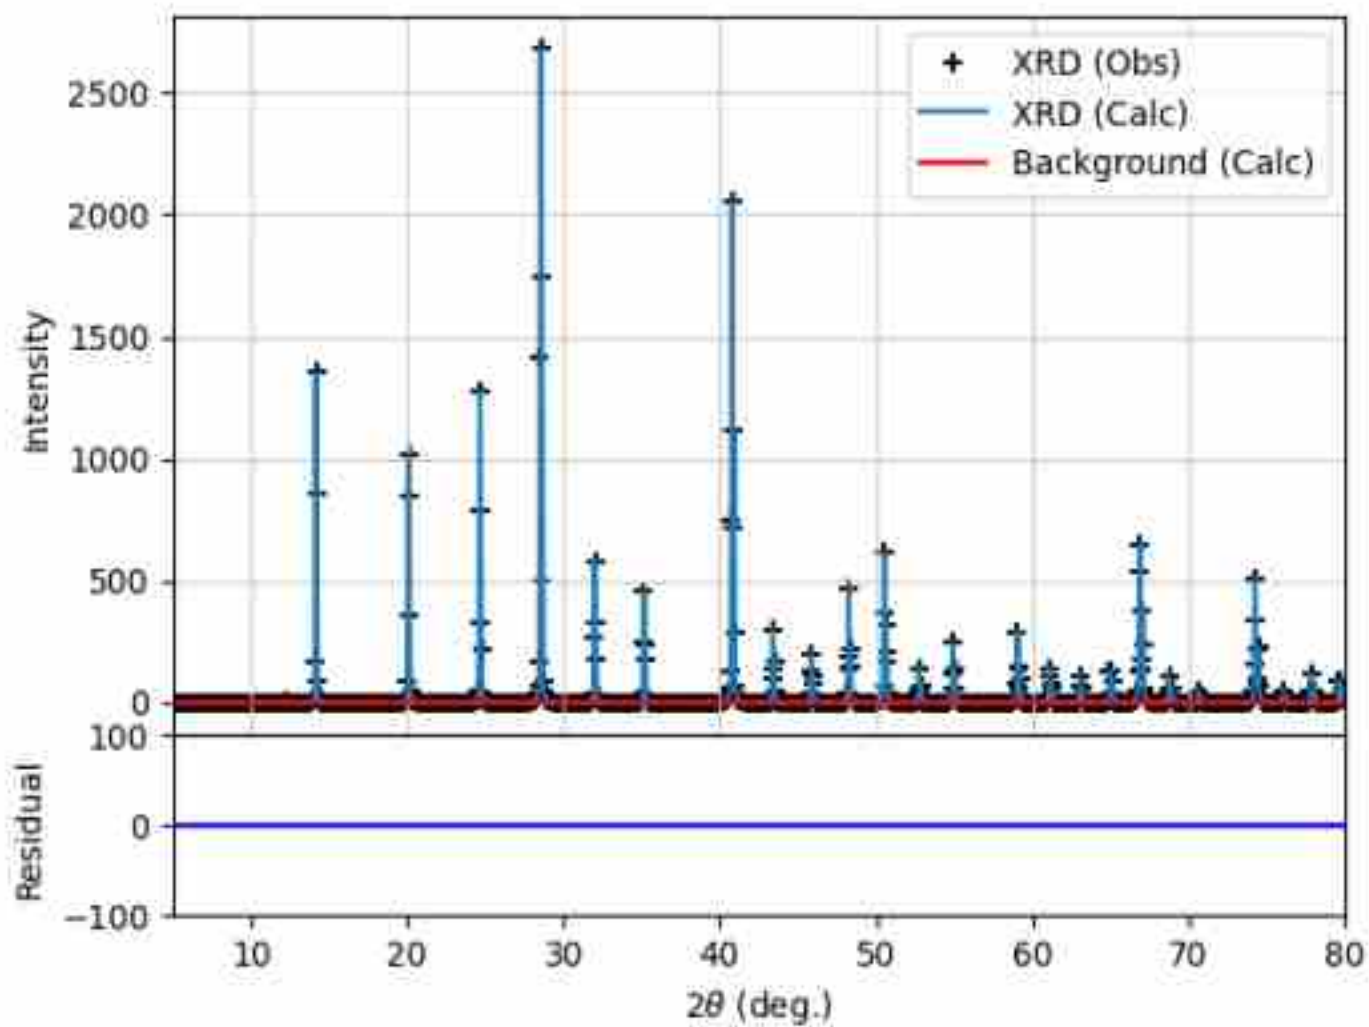

| RMSE before RR | Rwp     | RMSE after RR |
|----------------|---------|---------------|
| 0.009          | 0.04413 | 0.00145       |

# Cs<sub>2</sub>K<sub>1</sub>AlI<sub>6</sub>

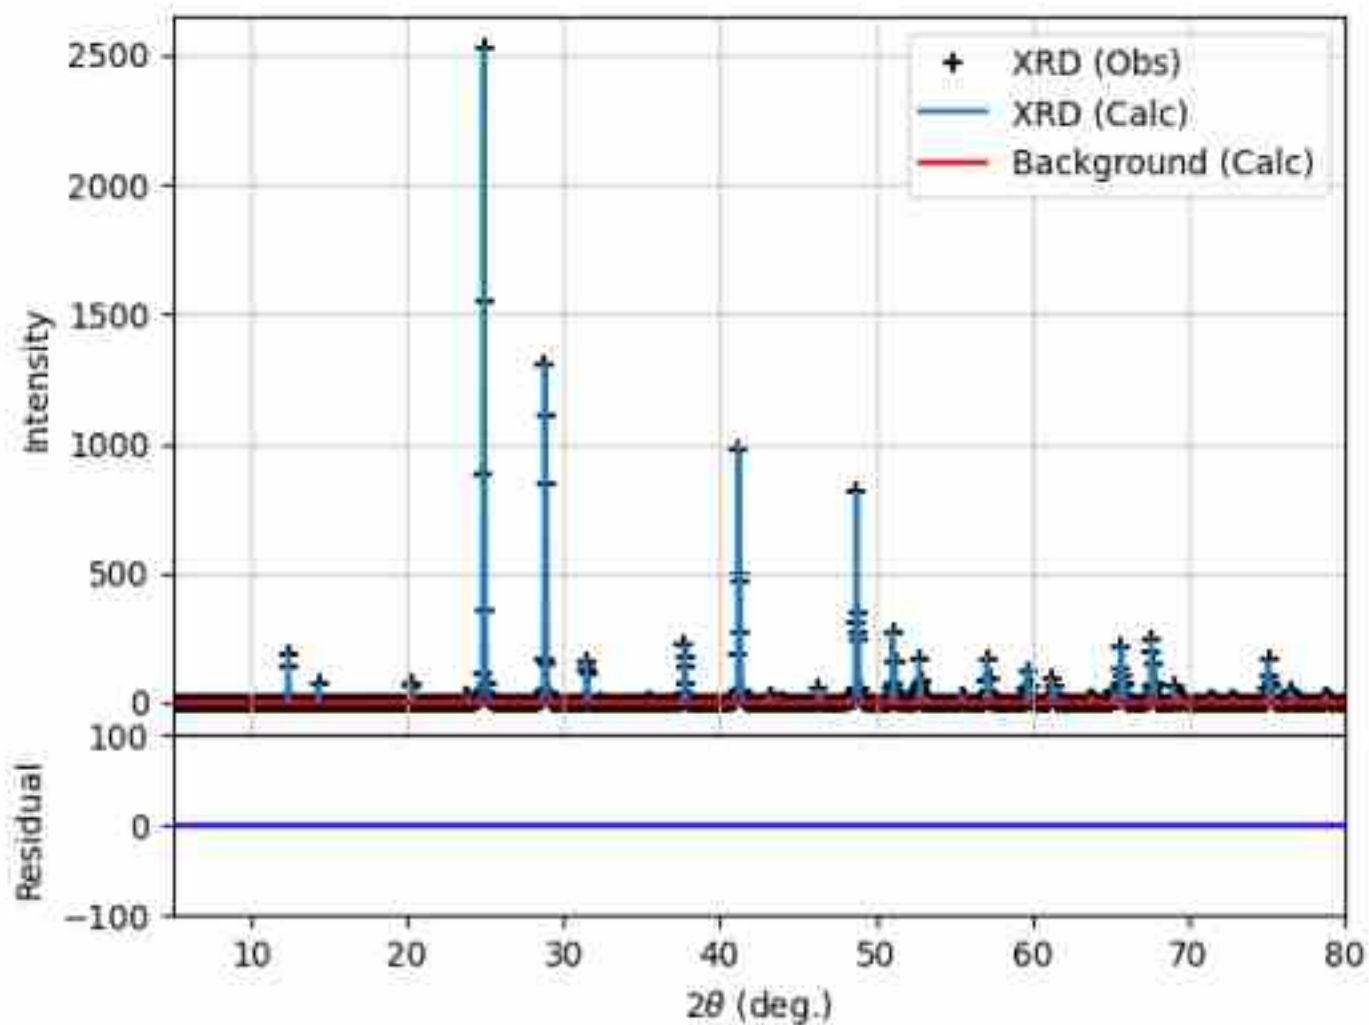

| RMSE before RR | Rwp    | RMSE after RR |
|----------------|--------|---------------|
| 0.009          | 0.0759 | 0.00309       |

# Cs<sub>2</sub>KInI<sub>6</sub>

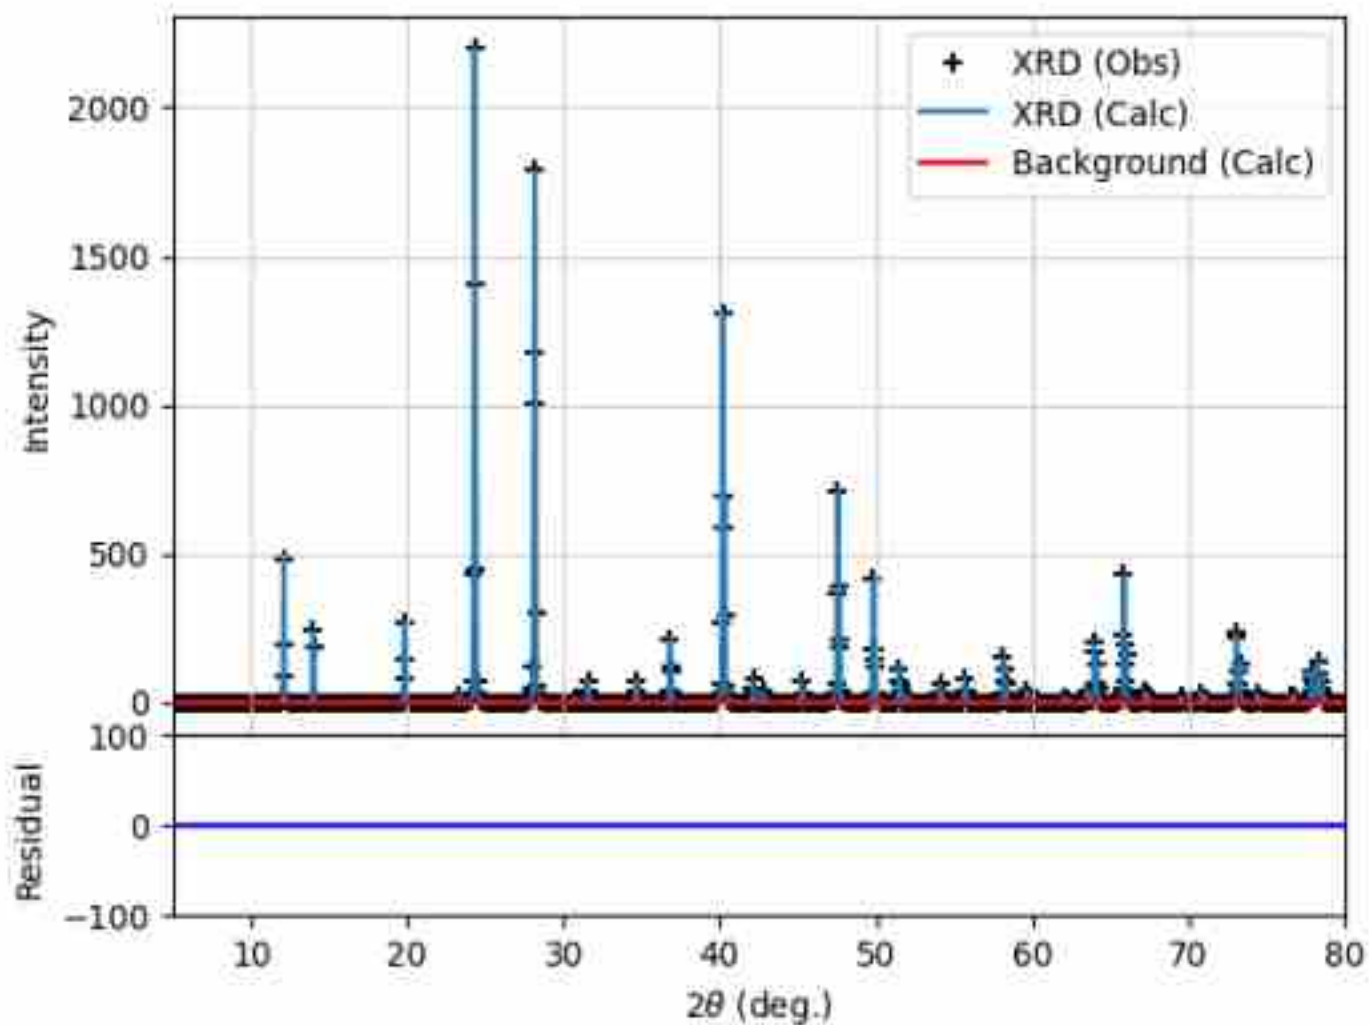

| RMSE before RR | Rwp     | RMSE after RR |
|----------------|---------|---------------|
| 0.009          | 0.01733 | 0.00162       |

# Cs<sub>2</sub>K<sub>1</sub>La<sub>1</sub>F<sub>6</sub>

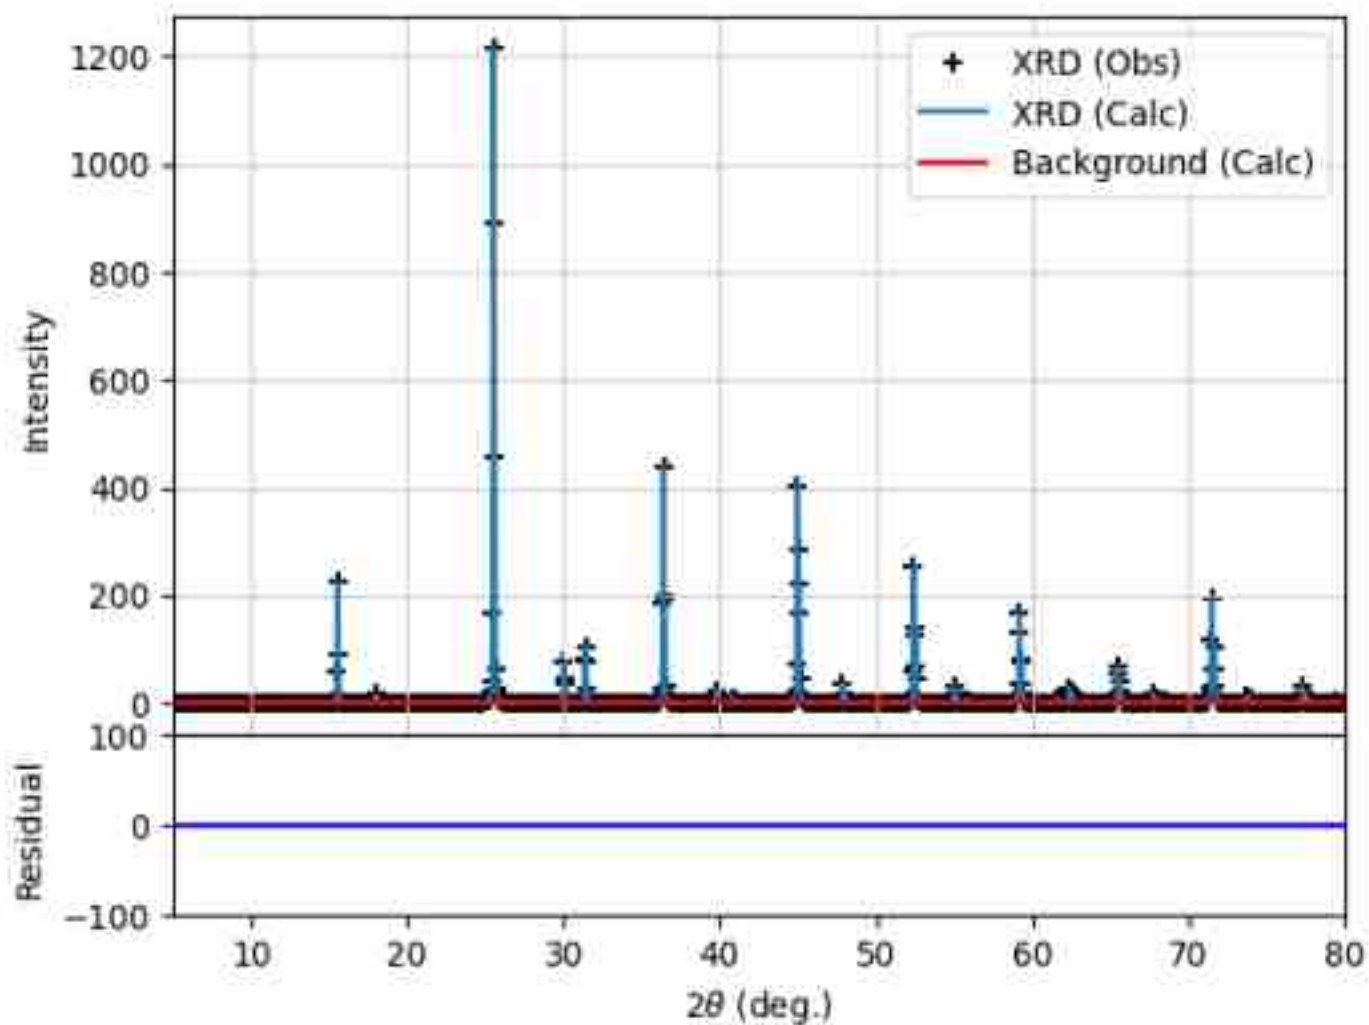

| RMSE before RR | Rwp     | RMSE after RR |
|----------------|---------|---------------|
| 0.009          | 0.03175 | 0.00554       |

# Cs<sub>2</sub>K<sub>1</sub>Pr<sub>1</sub>Cl<sub>6</sub>

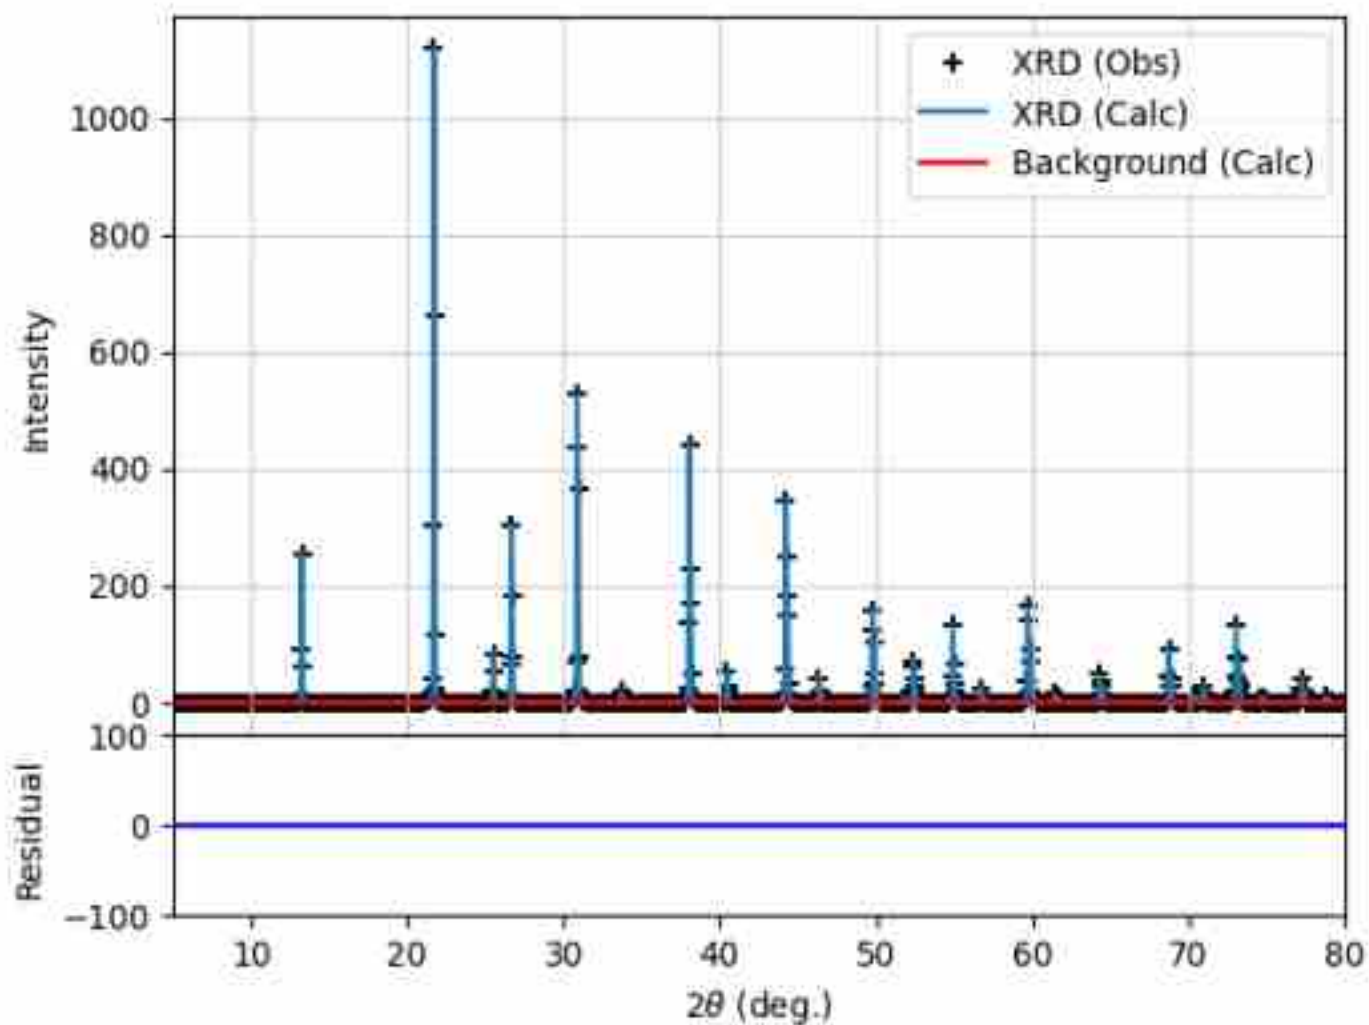

| RMSE before RR | Rwp     | RMSE after RR |
|----------------|---------|---------------|
| 0.009          | 0.00699 | 0.00133       |

# Cs<sub>2</sub>K<sub>1</sub>Yb<sub>1</sub>Cl<sub>6</sub>

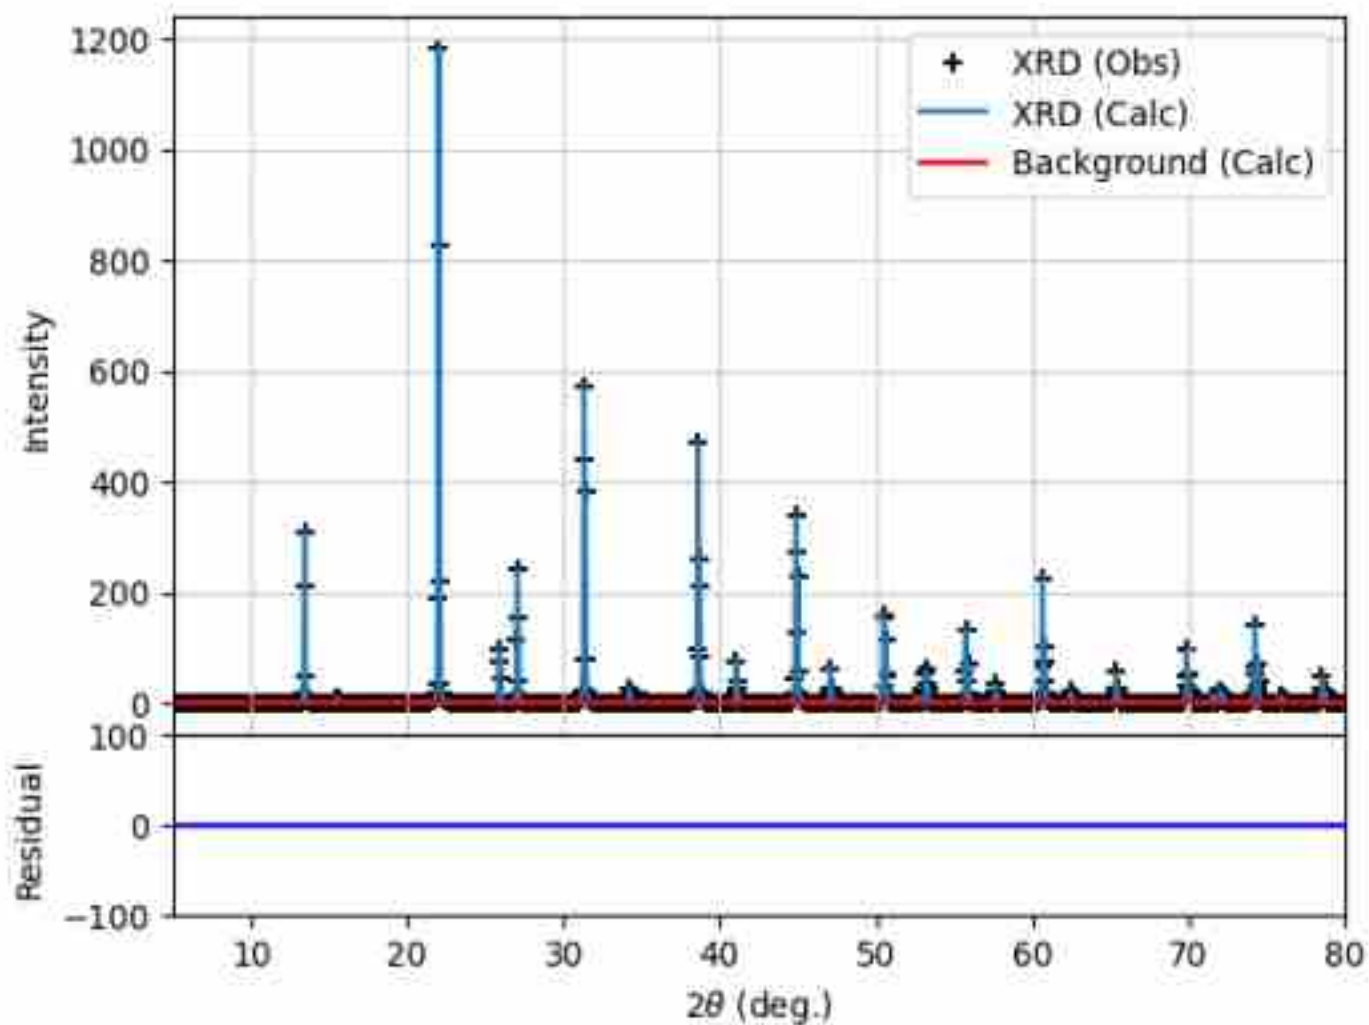

| RMSE before RR | Rwp     | RMSE after RR |
|----------------|---------|---------------|
| 0.009          | 0.00529 | 0.00115       |

# Cs<sub>2</sub>LaCl<sub>6</sub>

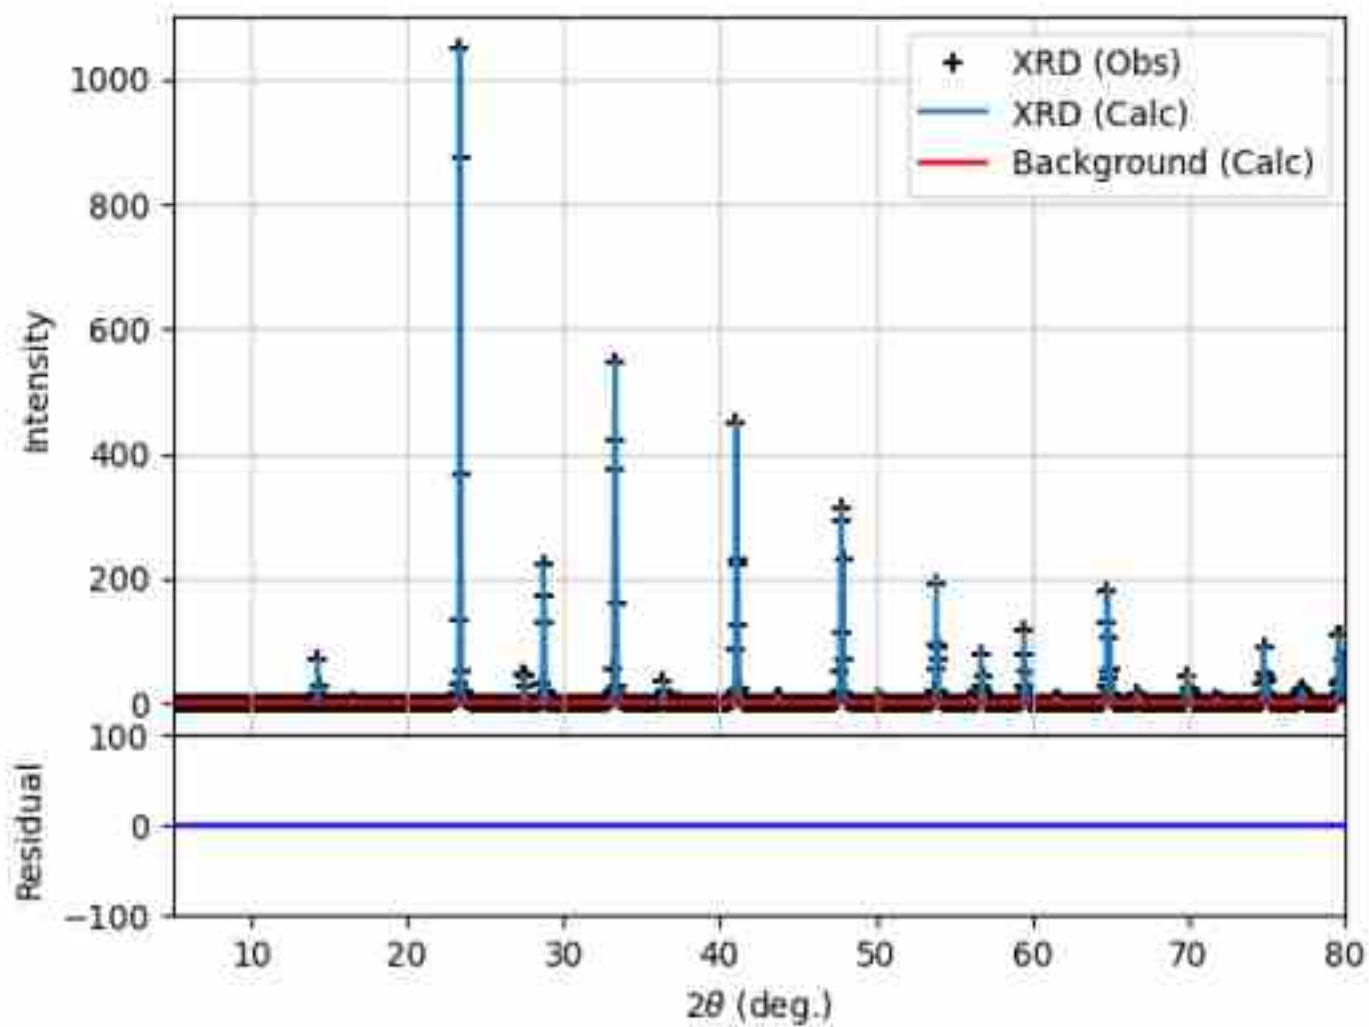

| RMSE before RR | Rwp     | RMSE after RR |
|----------------|---------|---------------|
| 0.009          | 0.01749 | 0.00231       |

# Cs<sub>2</sub>LiBiI<sub>6</sub>

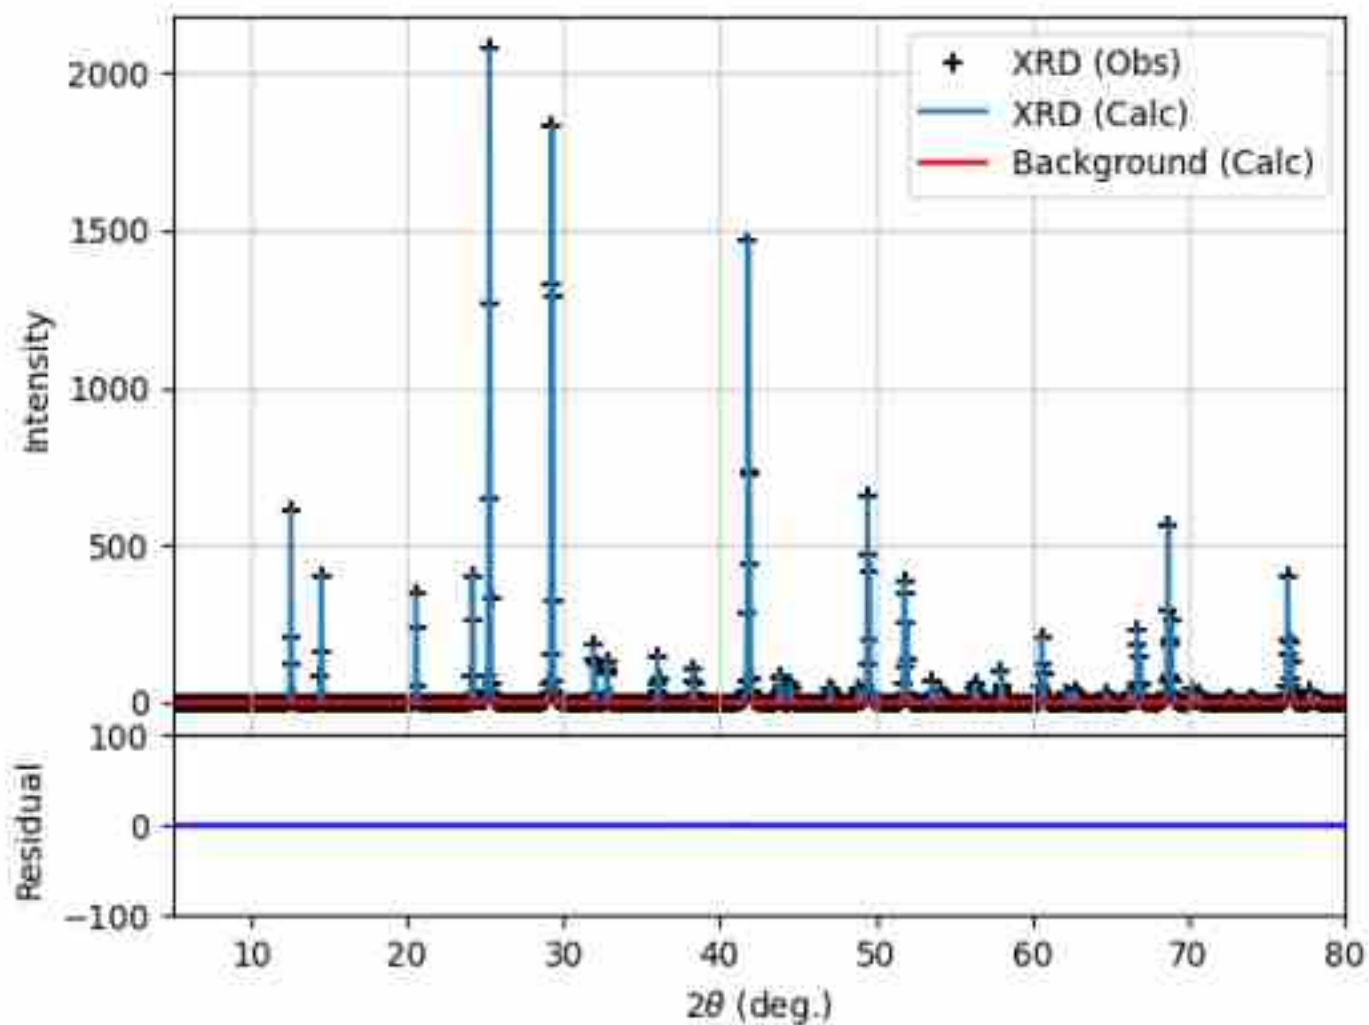

| RMSE before RR | Rwp    | RMSE after RR |
|----------------|--------|---------------|
| 0.009          | 0.0508 | 0.00532       |



# Cs<sub>2</sub>Na<sub>1</sub>Ce<sub>1</sub>F<sub>6</sub>

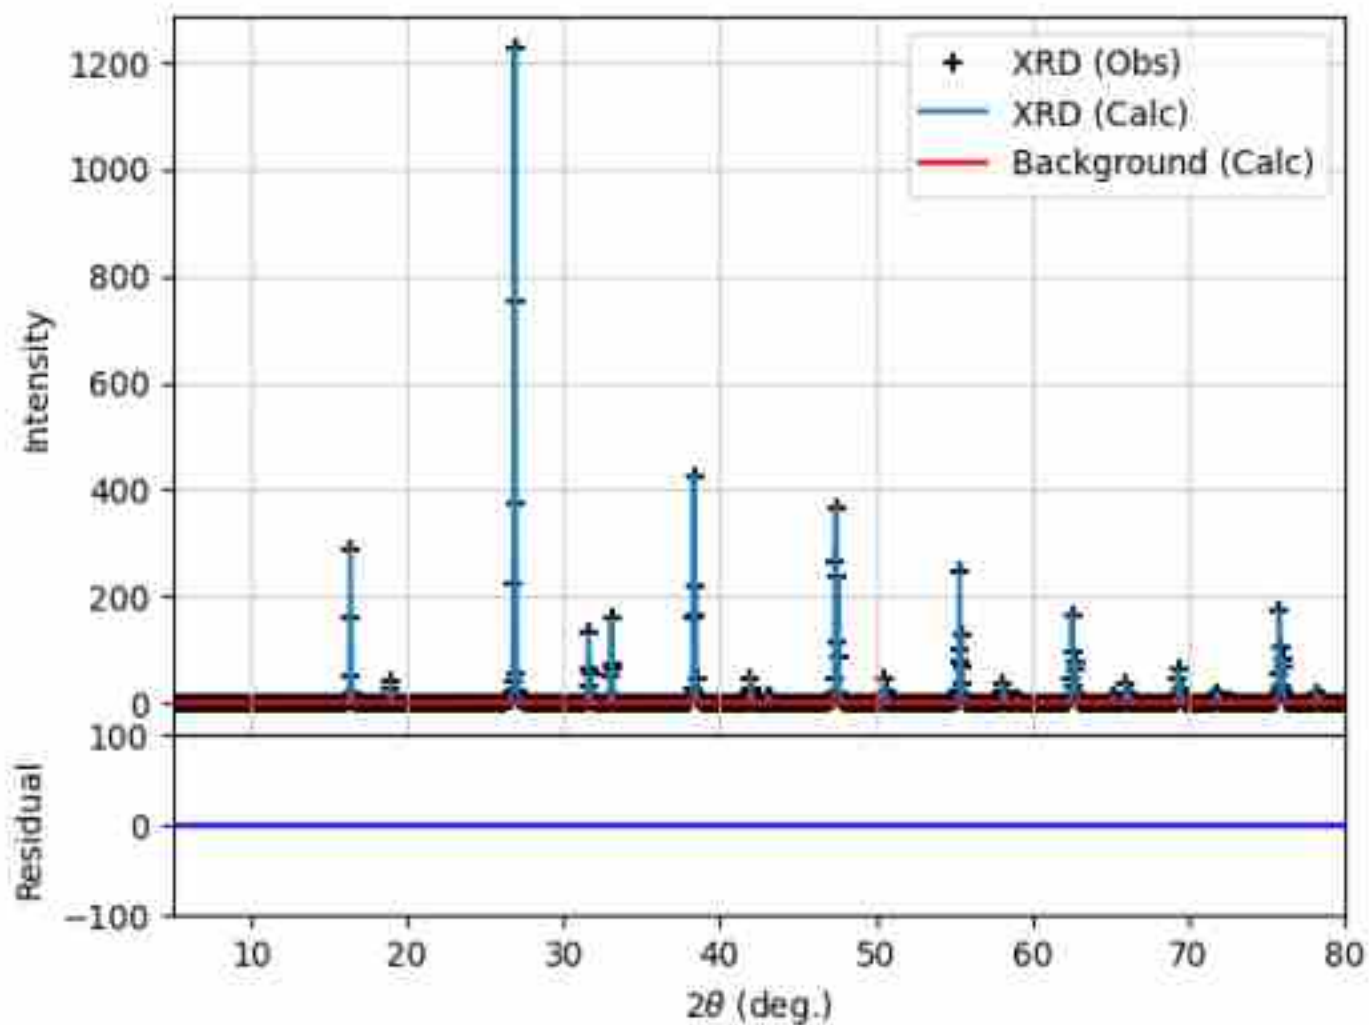

| RMSE before RR | Rwp     | RMSE after RR |
|----------------|---------|---------------|
| 0.009          | 0.01348 | 0.0037        |

# Cs<sub>2</sub>NaIrF<sub>6</sub>

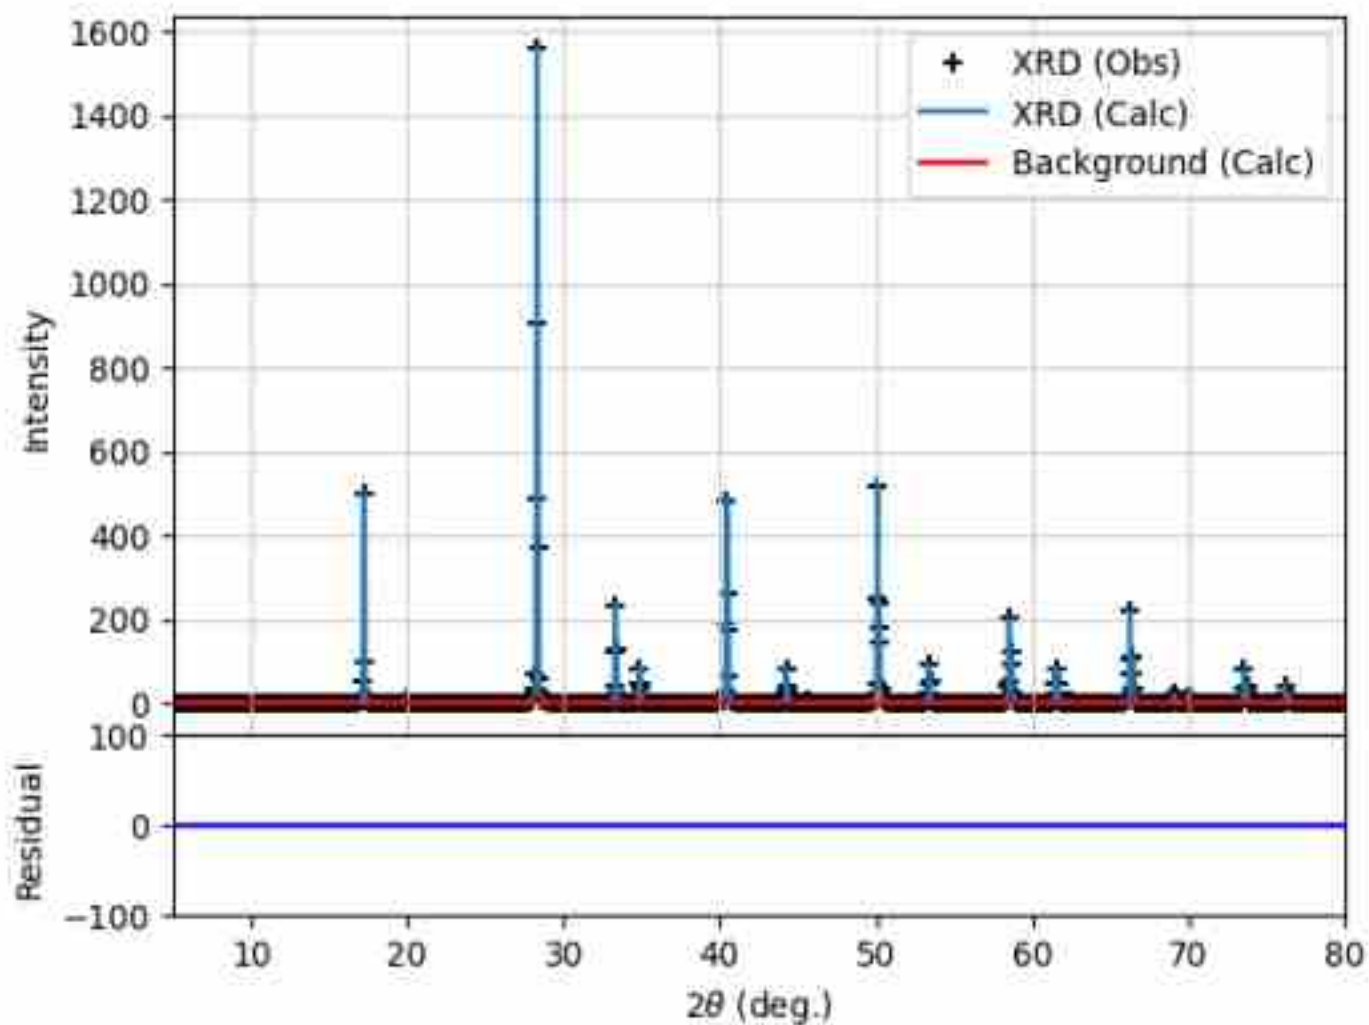

| RMSE before RR | Rwp     | RMSE after RR |
|----------------|---------|---------------|
| 0.009          | 0.01562 | 0.00445       |

# Cs<sub>2</sub>Na<sub>1</sub>La<sub>1</sub>Cl<sub>6</sub>

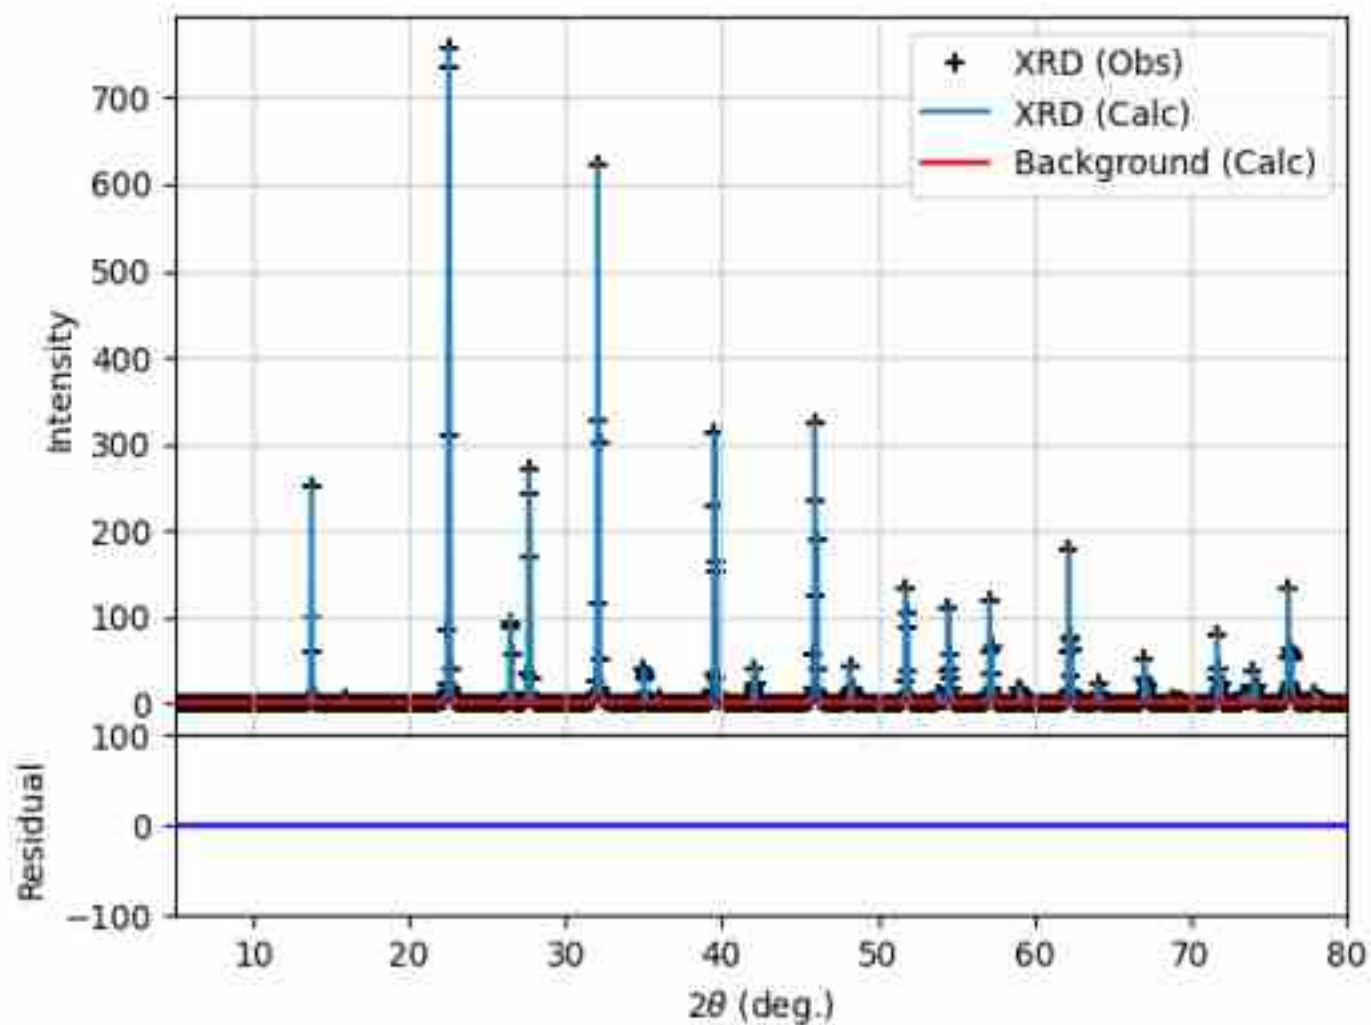

| RMSE before RR | Rwp     | RMSE after RR |
|----------------|---------|---------------|
| 0.009          | 0.01848 | 0.00248       |

# Cs<sub>2</sub>Na<sub>2</sub>S<sub>2</sub>

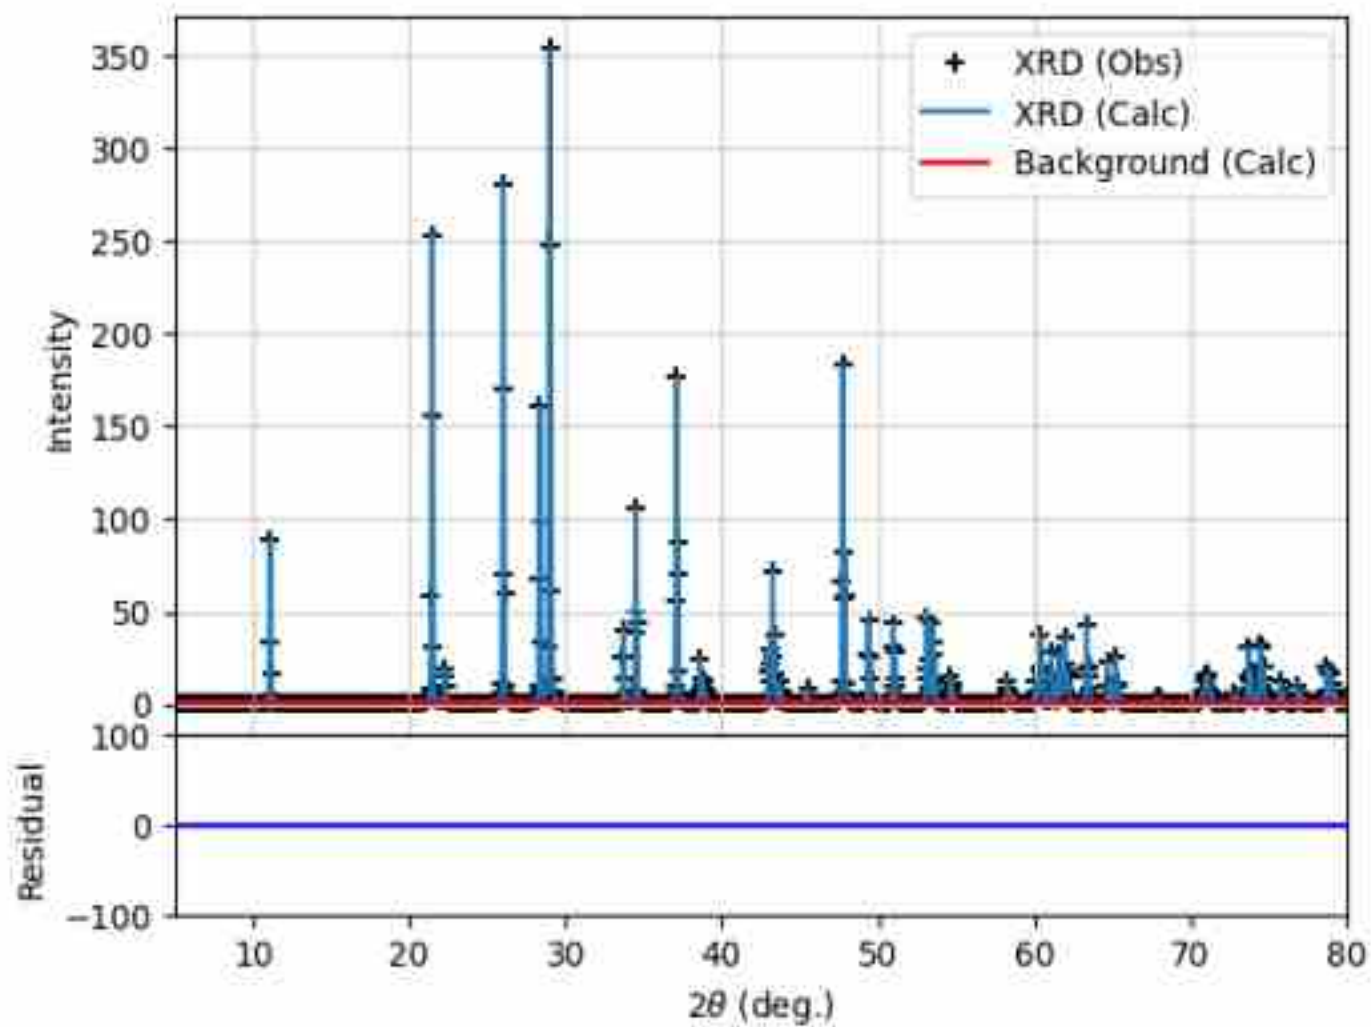

| RMSE before RR | Rwp     | RMSE after RR |
|----------------|---------|---------------|
| 0.009          | 0.00435 | 0.00073       |

# Cs<sub>2</sub>Rb<sub>1</sub>Bi<sub>1</sub>F<sub>6</sub>

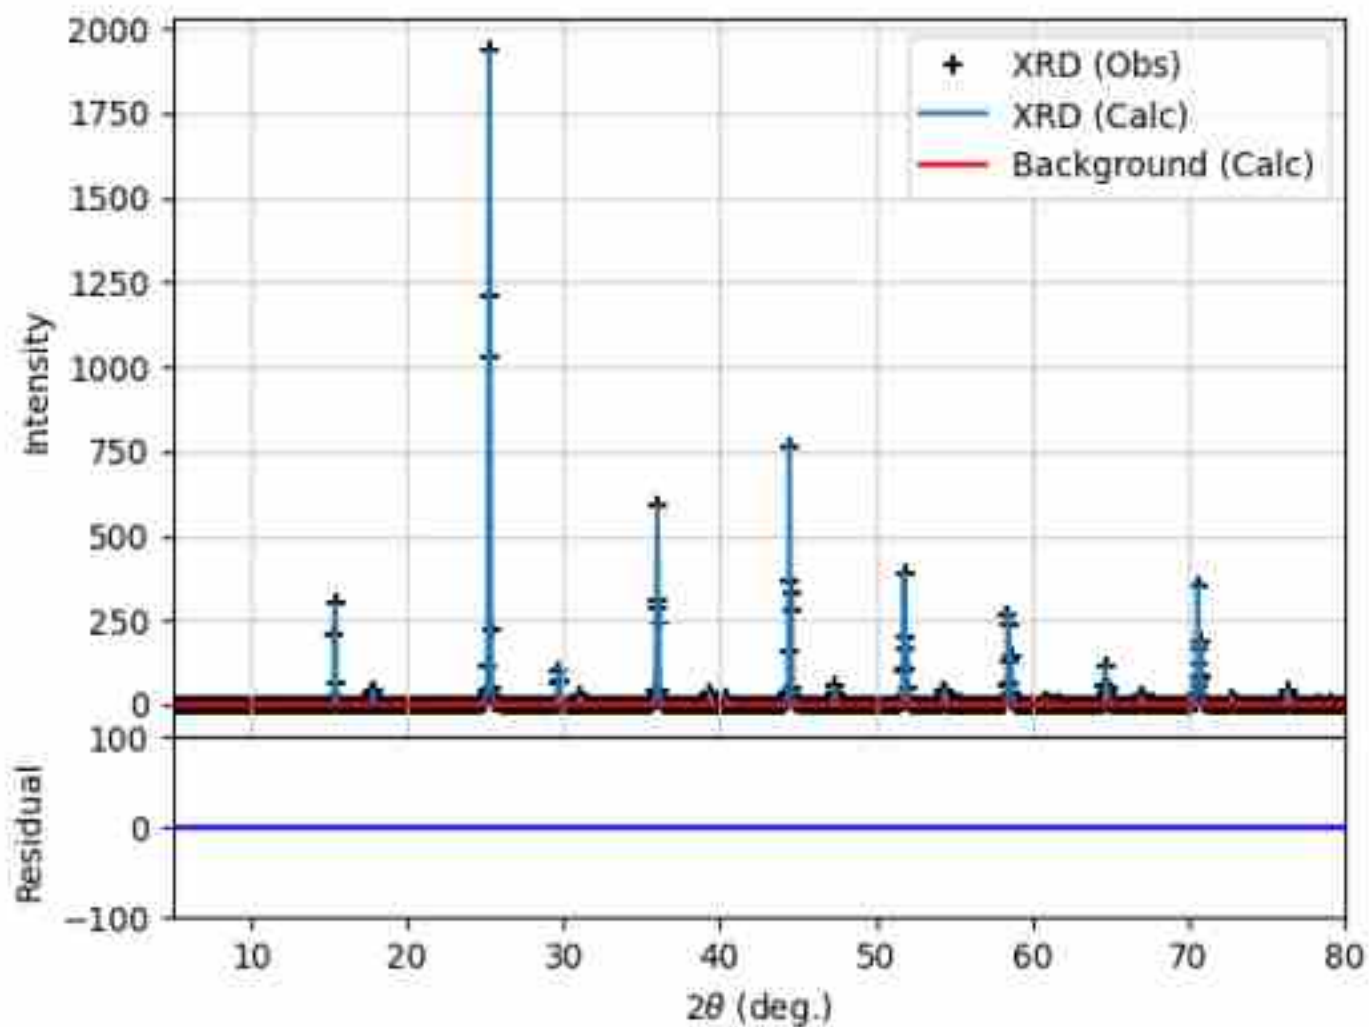

| RMSE before RR | Rwp     | RMSE after RR |
|----------------|---------|---------------|
| 0.009          | 0.00657 | 0.00274       |

# Cs<sub>2</sub>Rb<sub>1</sub>Eu<sub>1</sub>Cl<sub>6</sub>

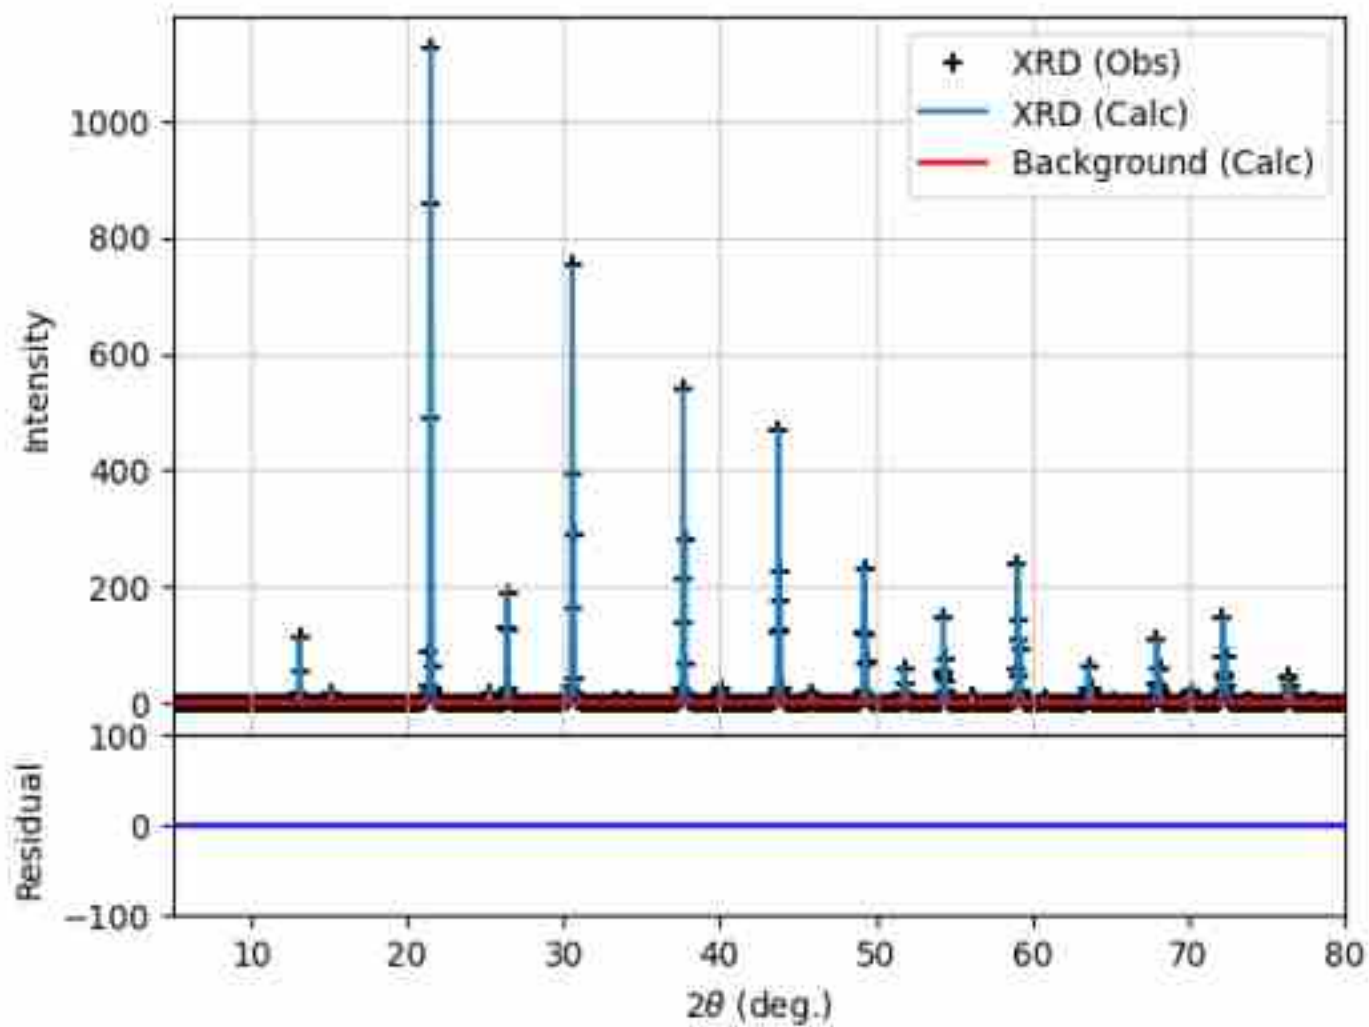

| RMSE before RR | Rwp     | RMSE after RR |
|----------------|---------|---------------|
| 0.009          | 0.00792 | 0.00158       |

# Cs<sub>2</sub>RbInI<sub>6</sub>

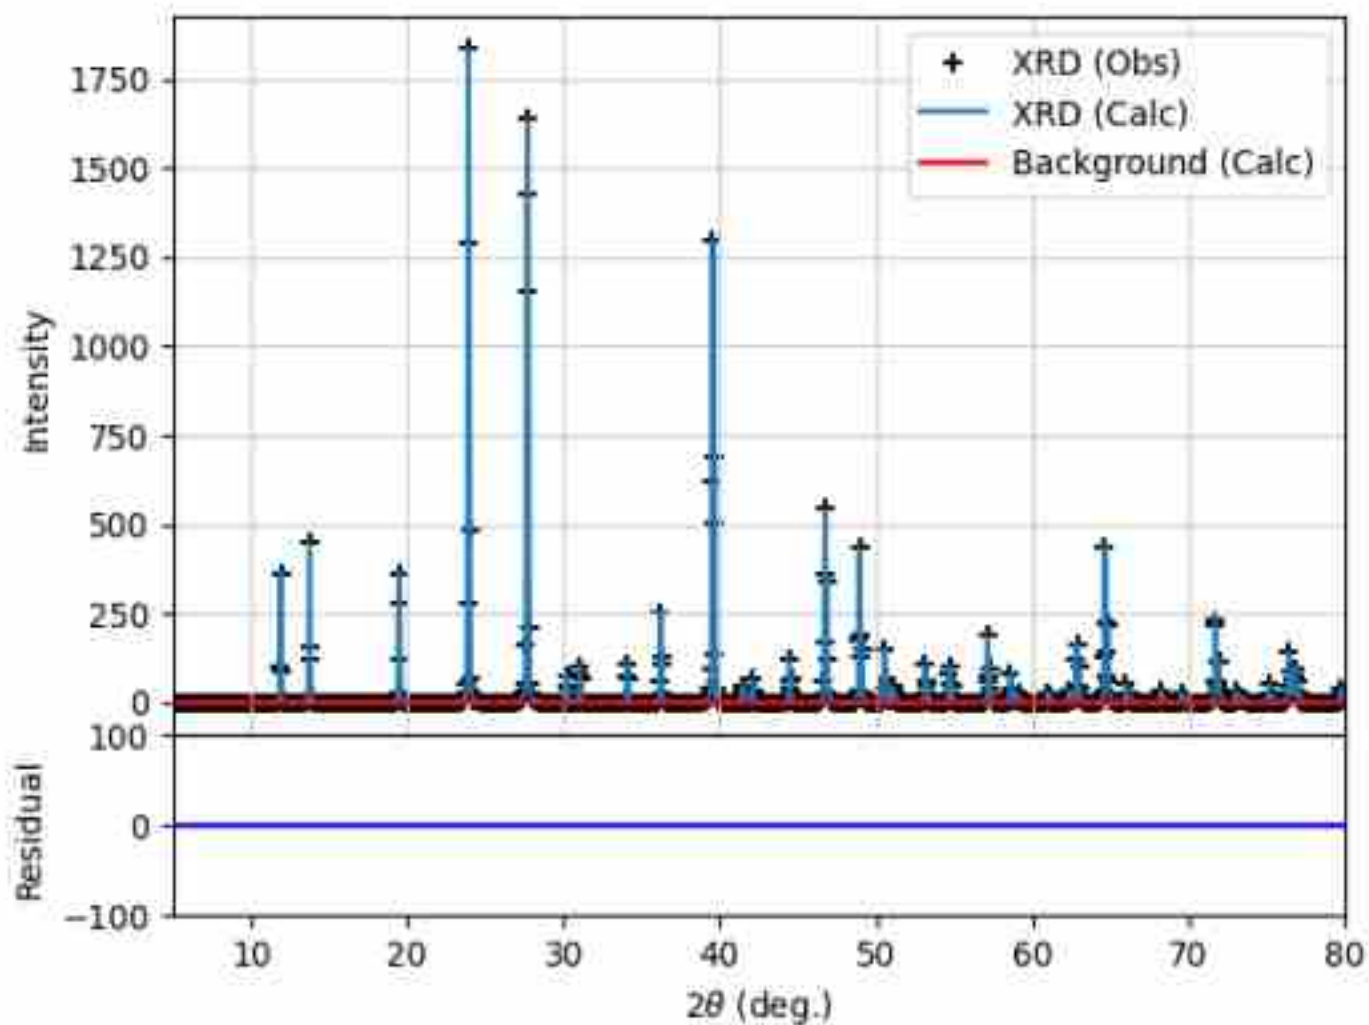

| RMSE before RR | Rwp    | RMSE after RR |
|----------------|--------|---------------|
| 0.009          | 0.0283 | 0.00193       |

# Cs<sub>2</sub>TlI<sub>6</sub>AuI<sub>6</sub>

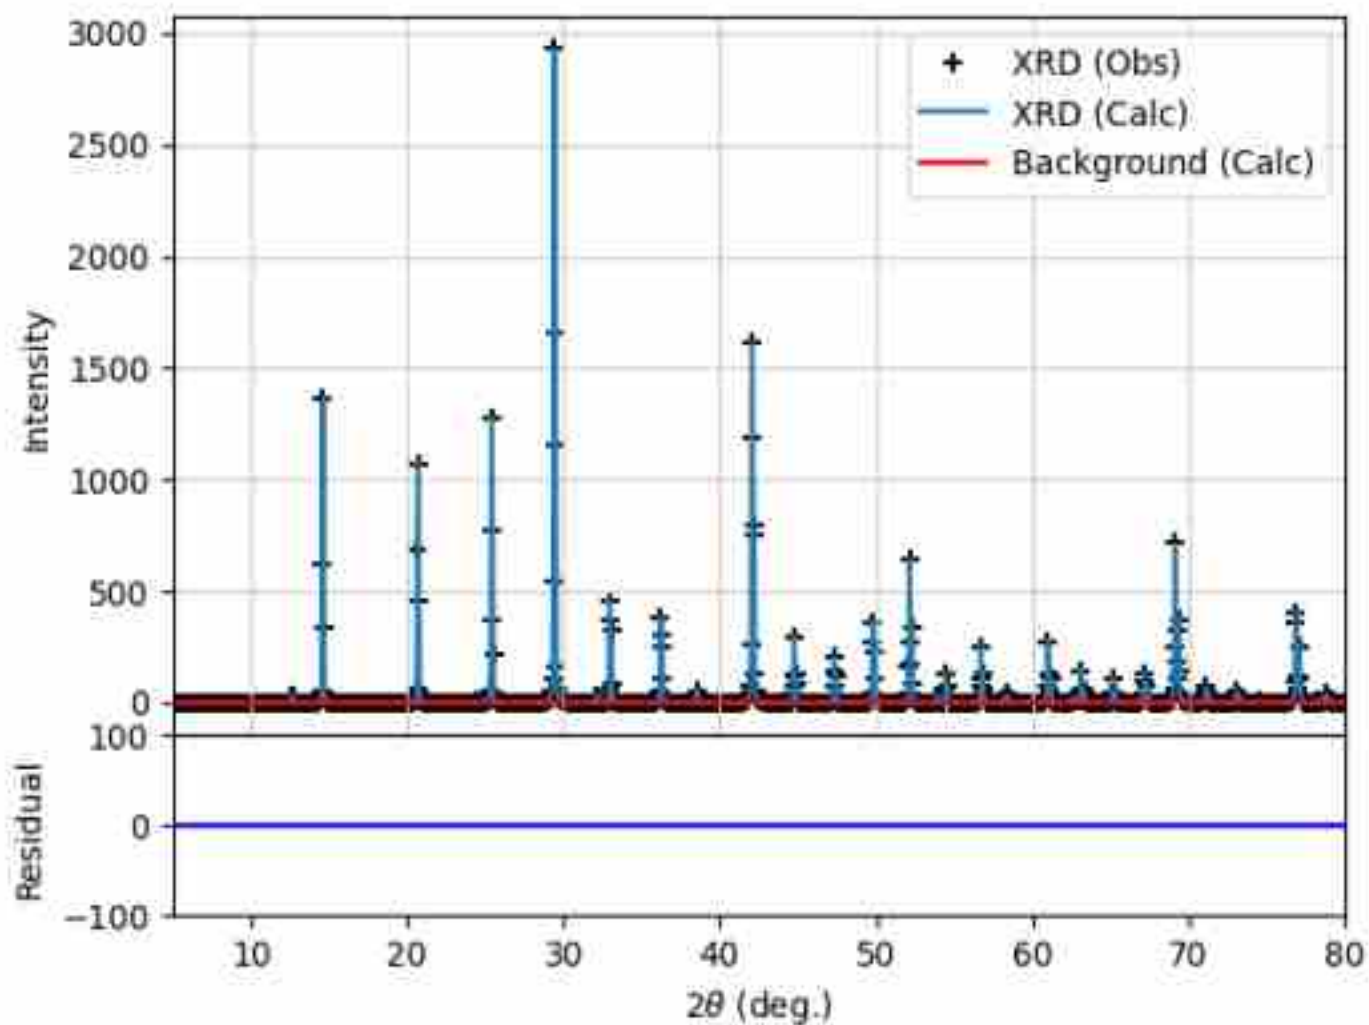

| RMSE before RR | Rwp     | RMSE after RR |
|----------------|---------|---------------|
| 0.009          | 0.02758 | 0.00203       |



# Cs<sub>2</sub>Y<sub>1</sub>Tl<sub>1</sub>F<sub>6</sub>

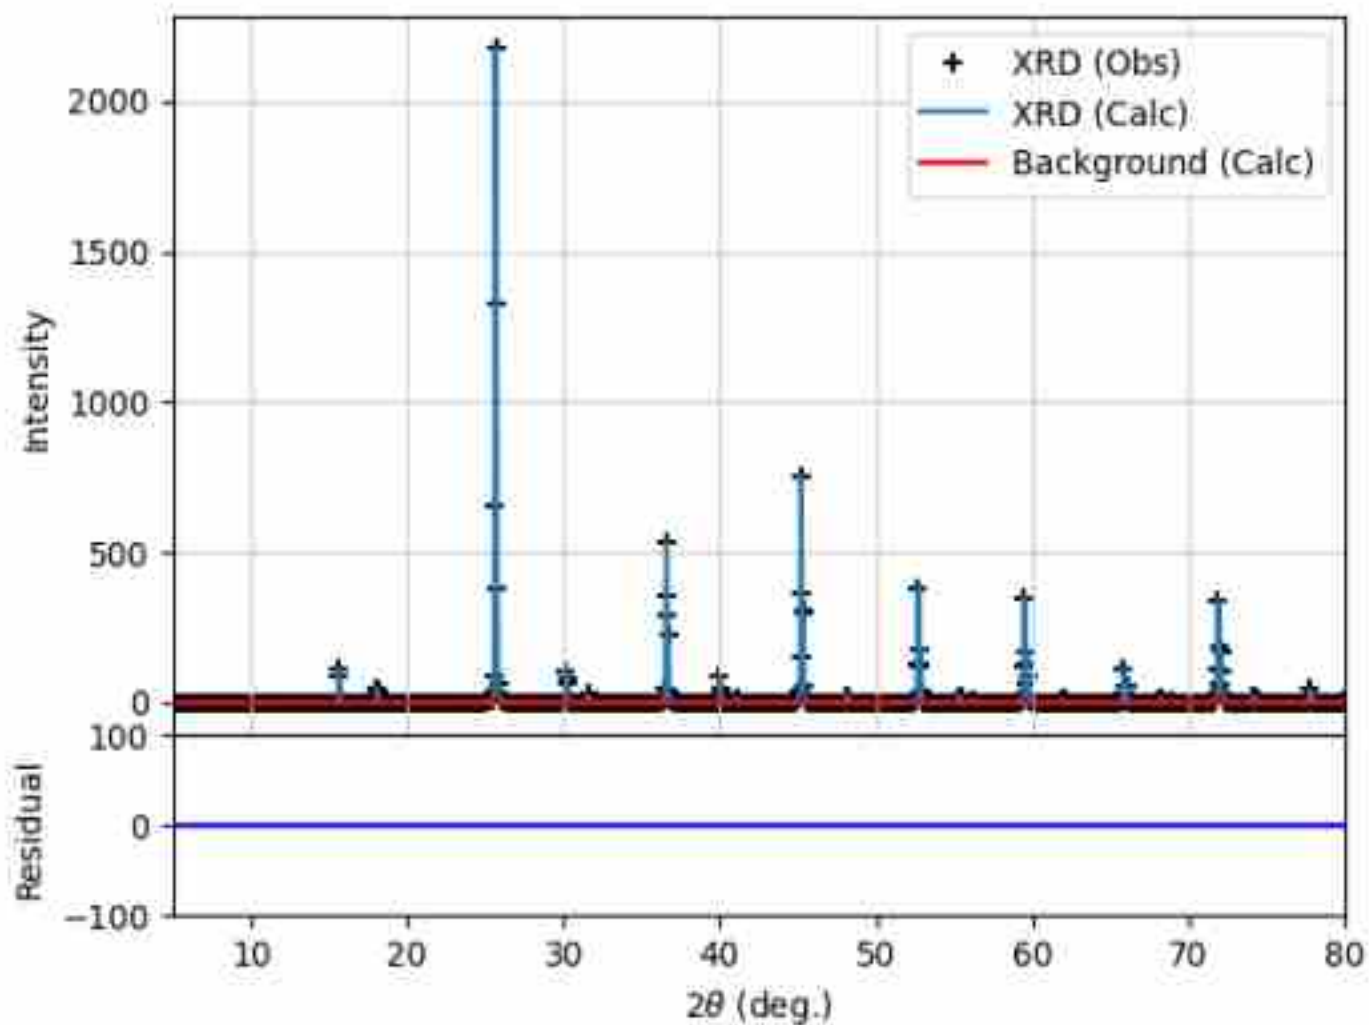

| RMSE before RR | Rwp     | RMSE after RR |
|----------------|---------|---------------|
| 0.009          | 0.00661 | 0.00293       |

Cu<sub>2</sub>As<sub>2</sub>

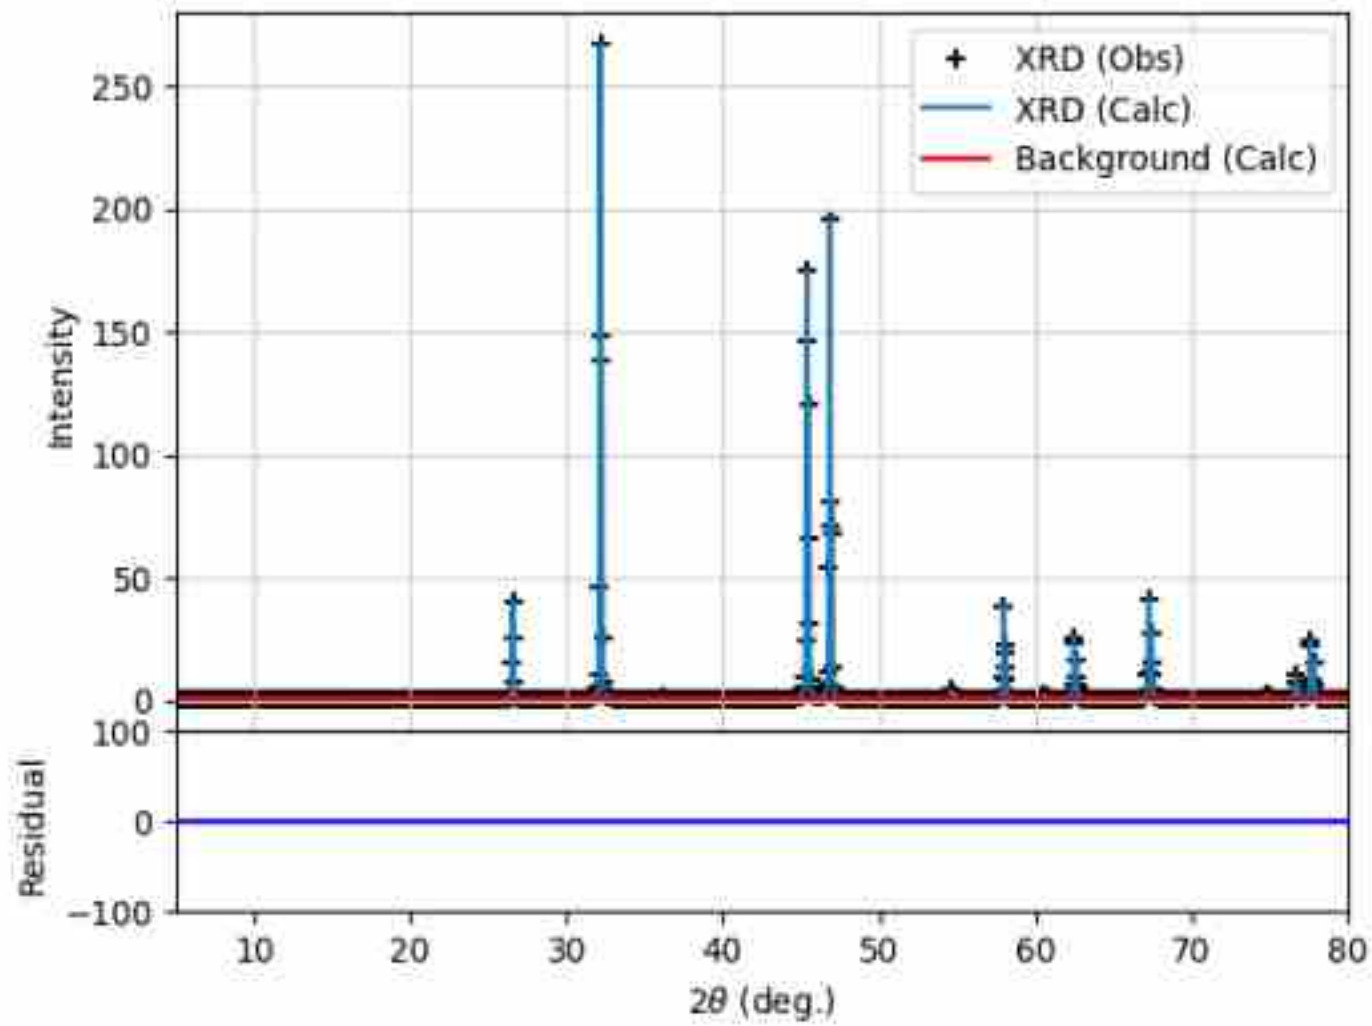

| RMSE before RR | Rwp     | RMSE after RR |
|----------------|---------|---------------|
| 0.009          | 0.00319 | 0.00034       |

# Dy<sub>1</sub>Cu<sub>4</sub>Pd<sub>1</sub>

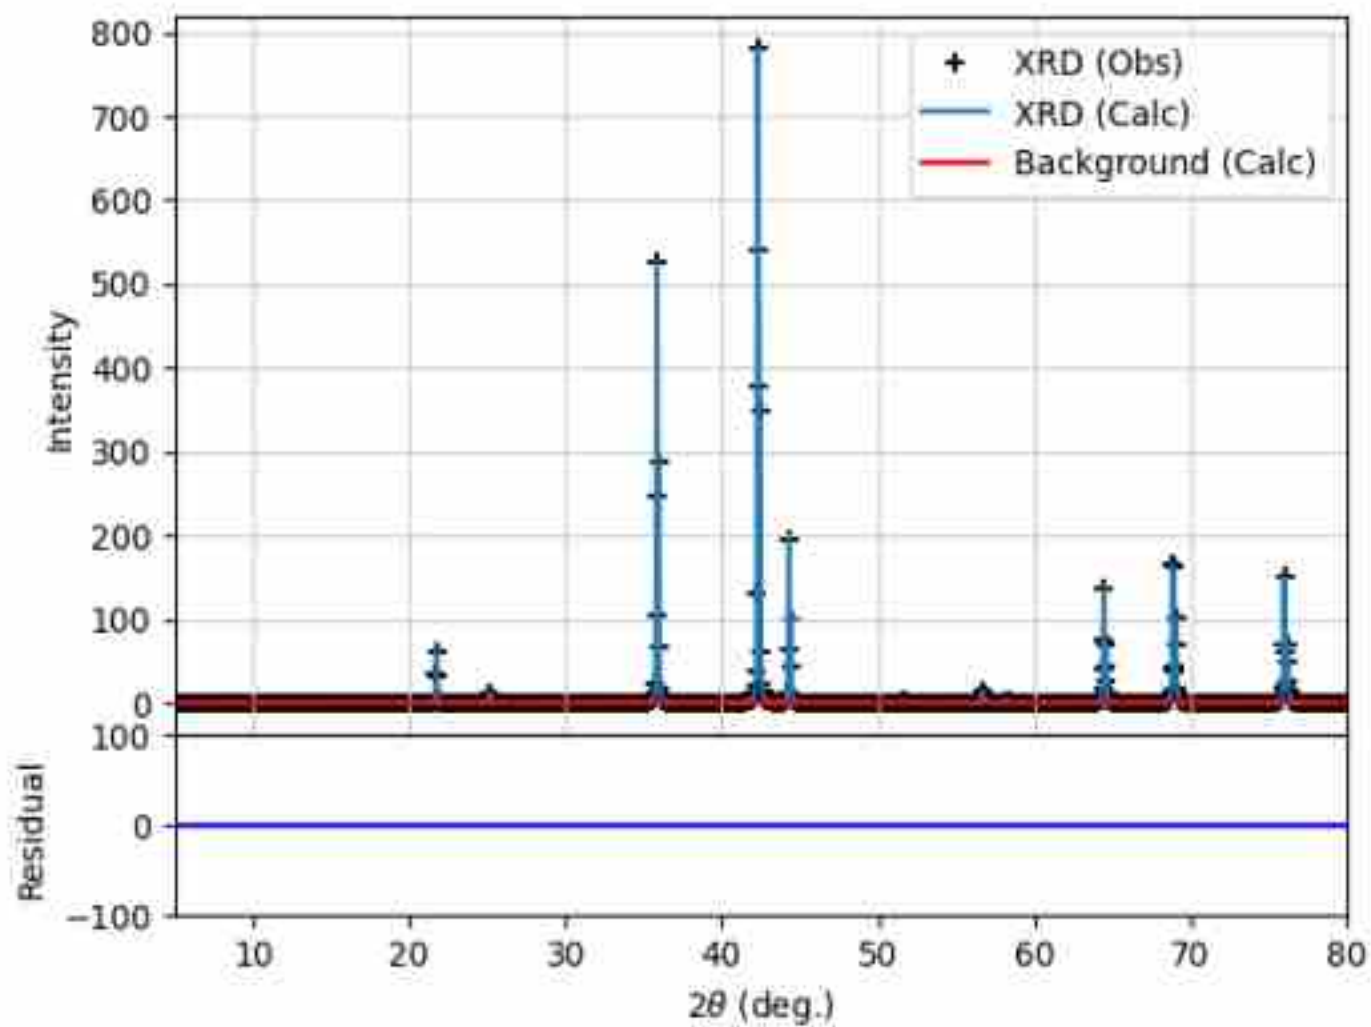

| RMSE before RR | Rwp     | RMSE after RR |
|----------------|---------|---------------|
| 0.009          | 0.10223 | 0.00294       |

# Dy1Rh5

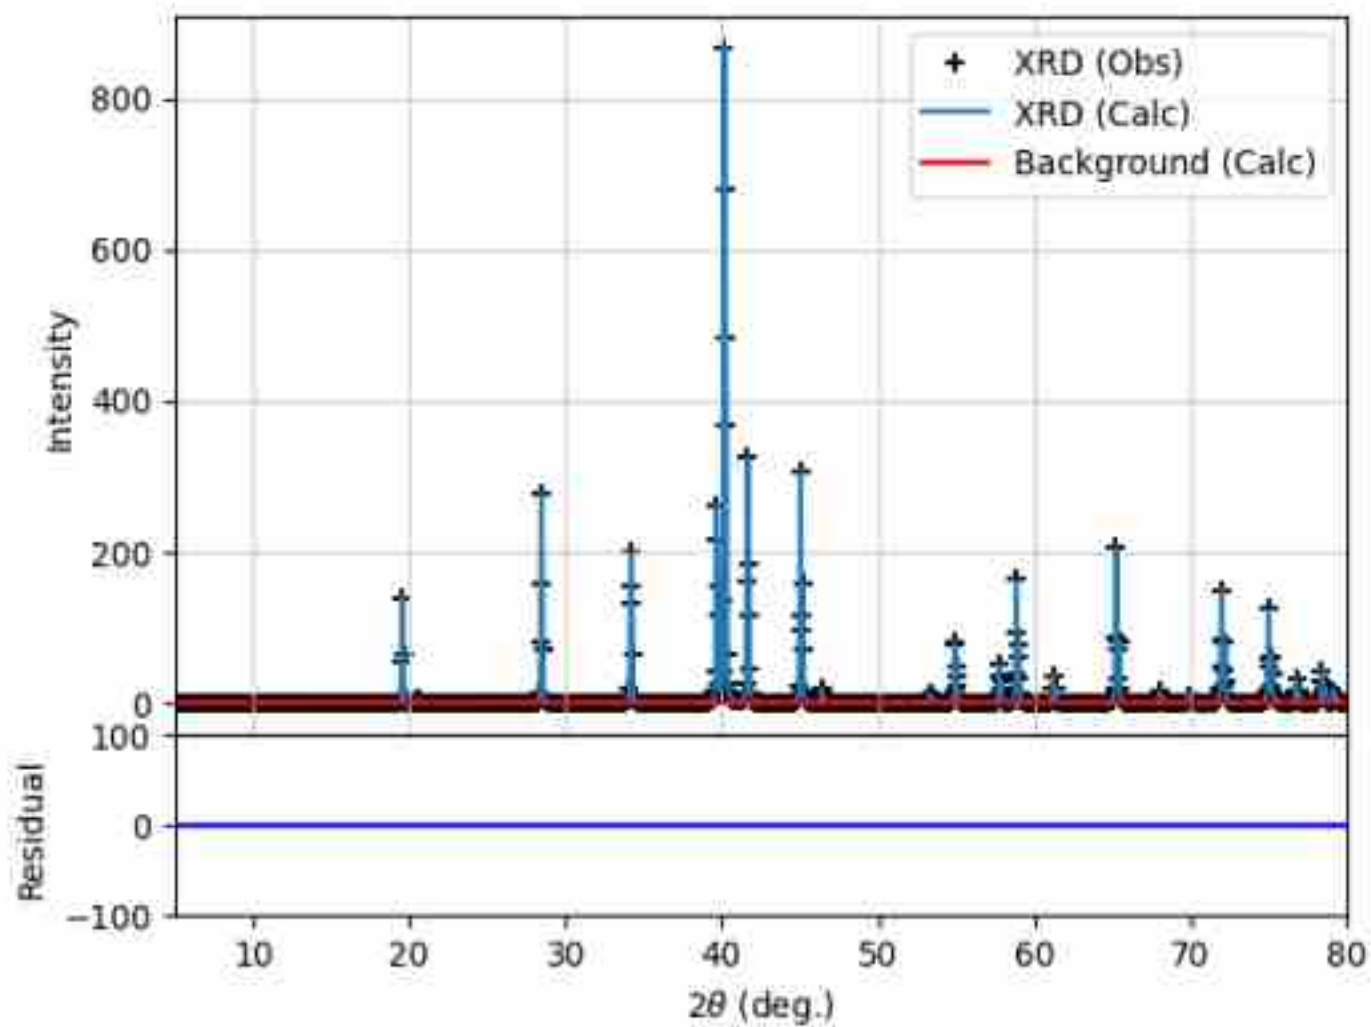

| RMSE before RR | Rwp     | RMSE after RR |
|----------------|---------|---------------|
| 0.009          | 0.02996 | 0.00119       |

# Dy<sub>2</sub>Sn<sub>4</sub>

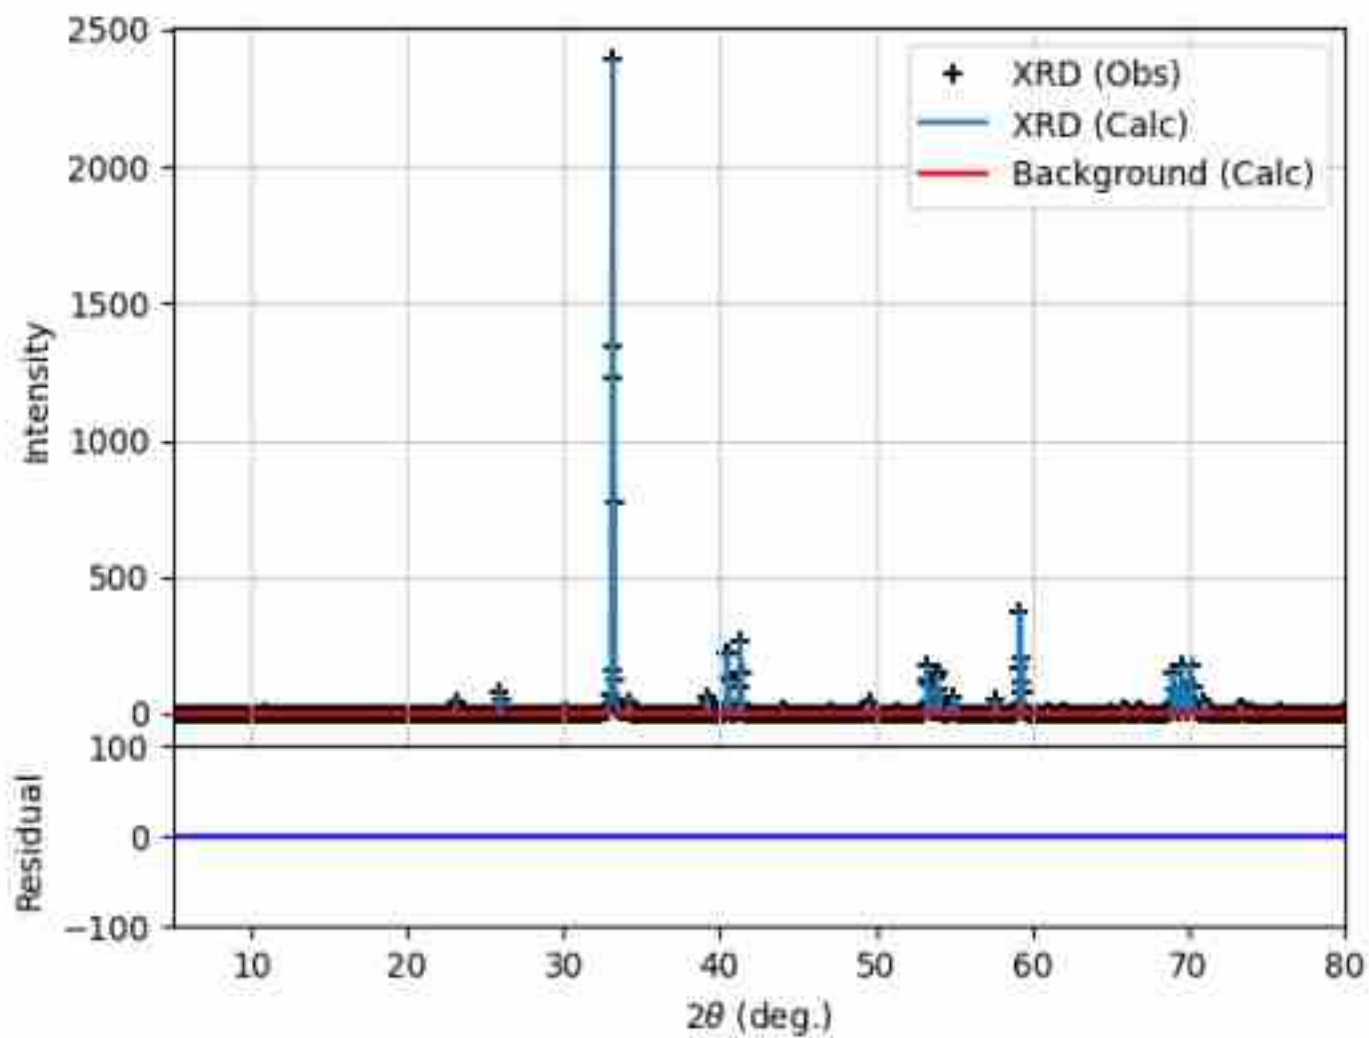

| RMSE before RR | Rwp     | RMSE after RR |
|----------------|---------|---------------|
| 0.009          | 0.00401 | 0.00018       |

# Dy<sub>4</sub>Mg<sub>2</sub>Si<sub>4</sub>

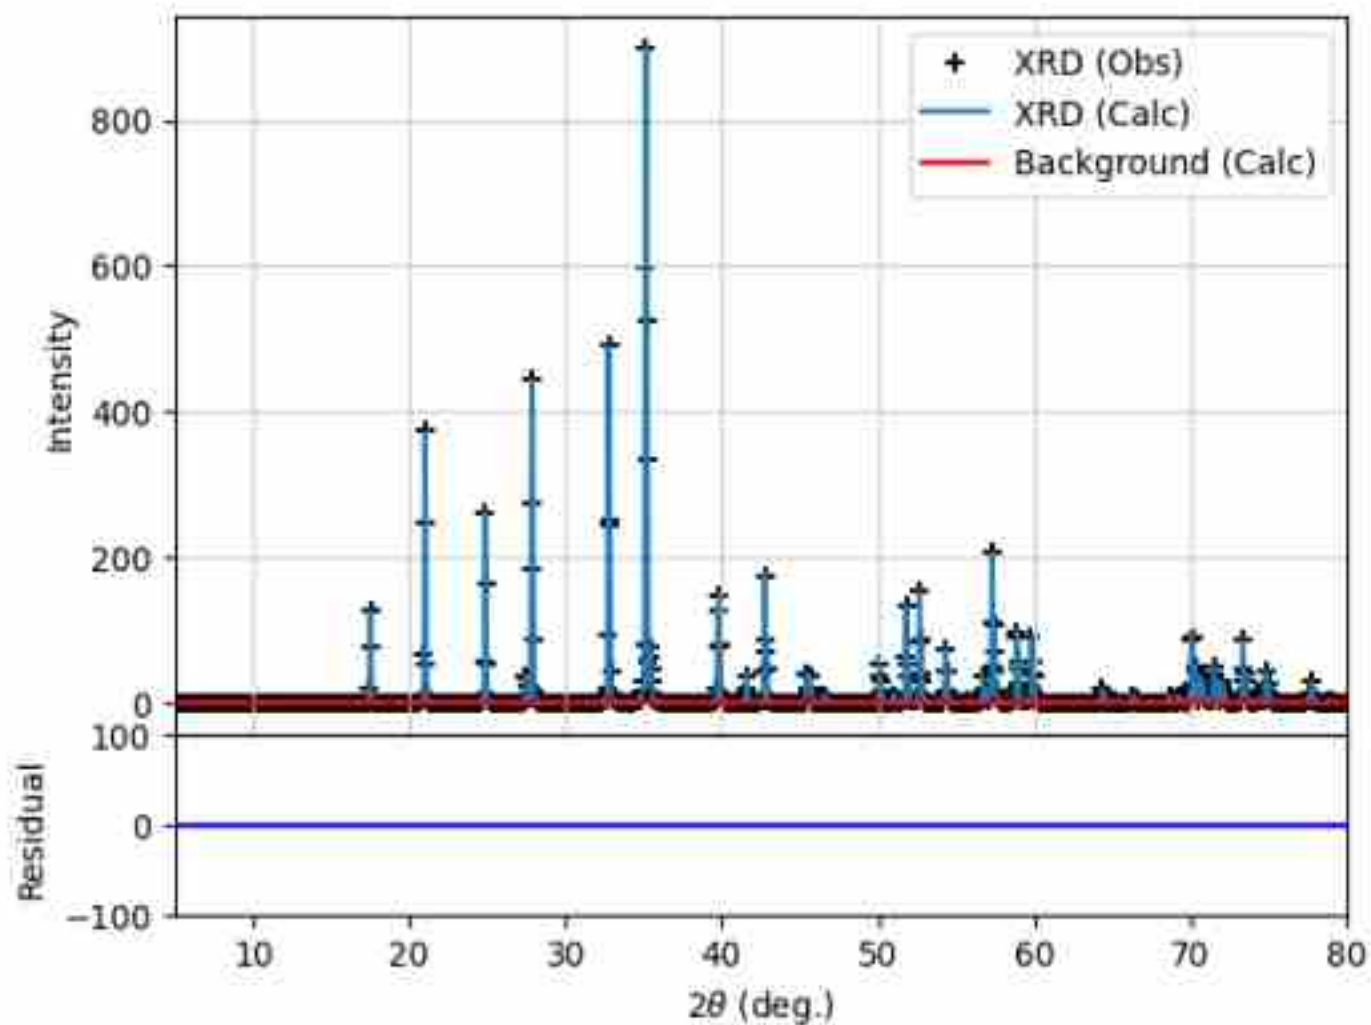

| RMSE before RR | Rwp     | RMSE after RR |
|----------------|---------|---------------|
| 0.009          | 0.00623 | 0.00109       |

# Er1Bi2I1O4

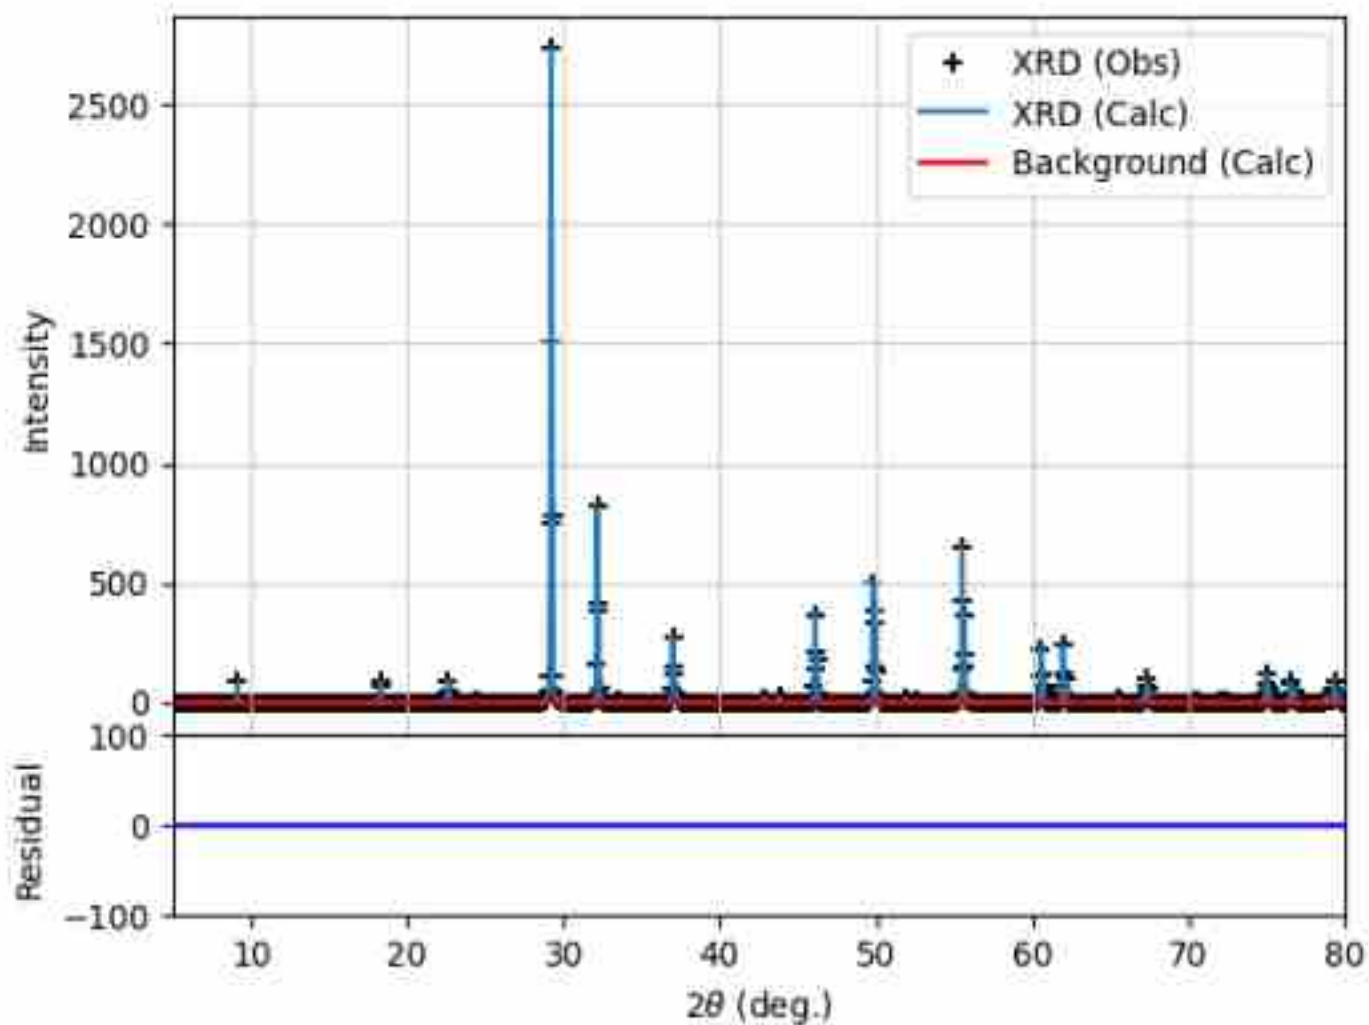

| RMSE before RR | Rwp     | RMSE after RR |
|----------------|---------|---------------|
| 0.009          | 0.00543 | 0.00145       |

# Er<sub>2</sub>Al<sub>2</sub>Zn<sub>2</sub>

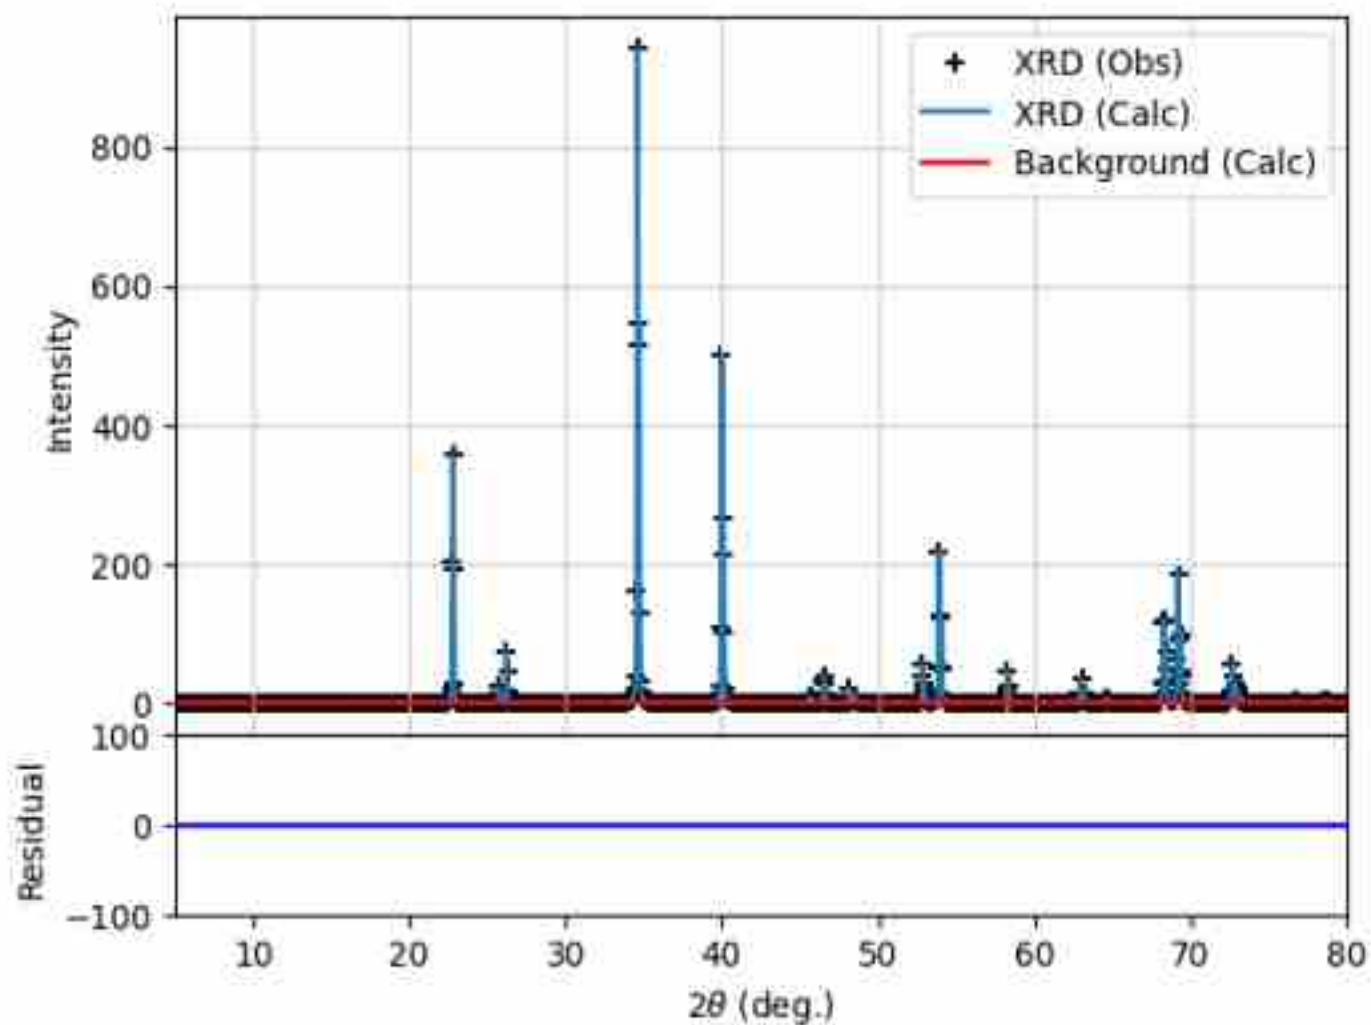

| RMSE before RR | Rwp     | RMSE after RR |
|----------------|---------|---------------|
| 0.009          | 0.00748 | 0.0015        |



# Er<sub>2</sub>C<sub>1</sub>

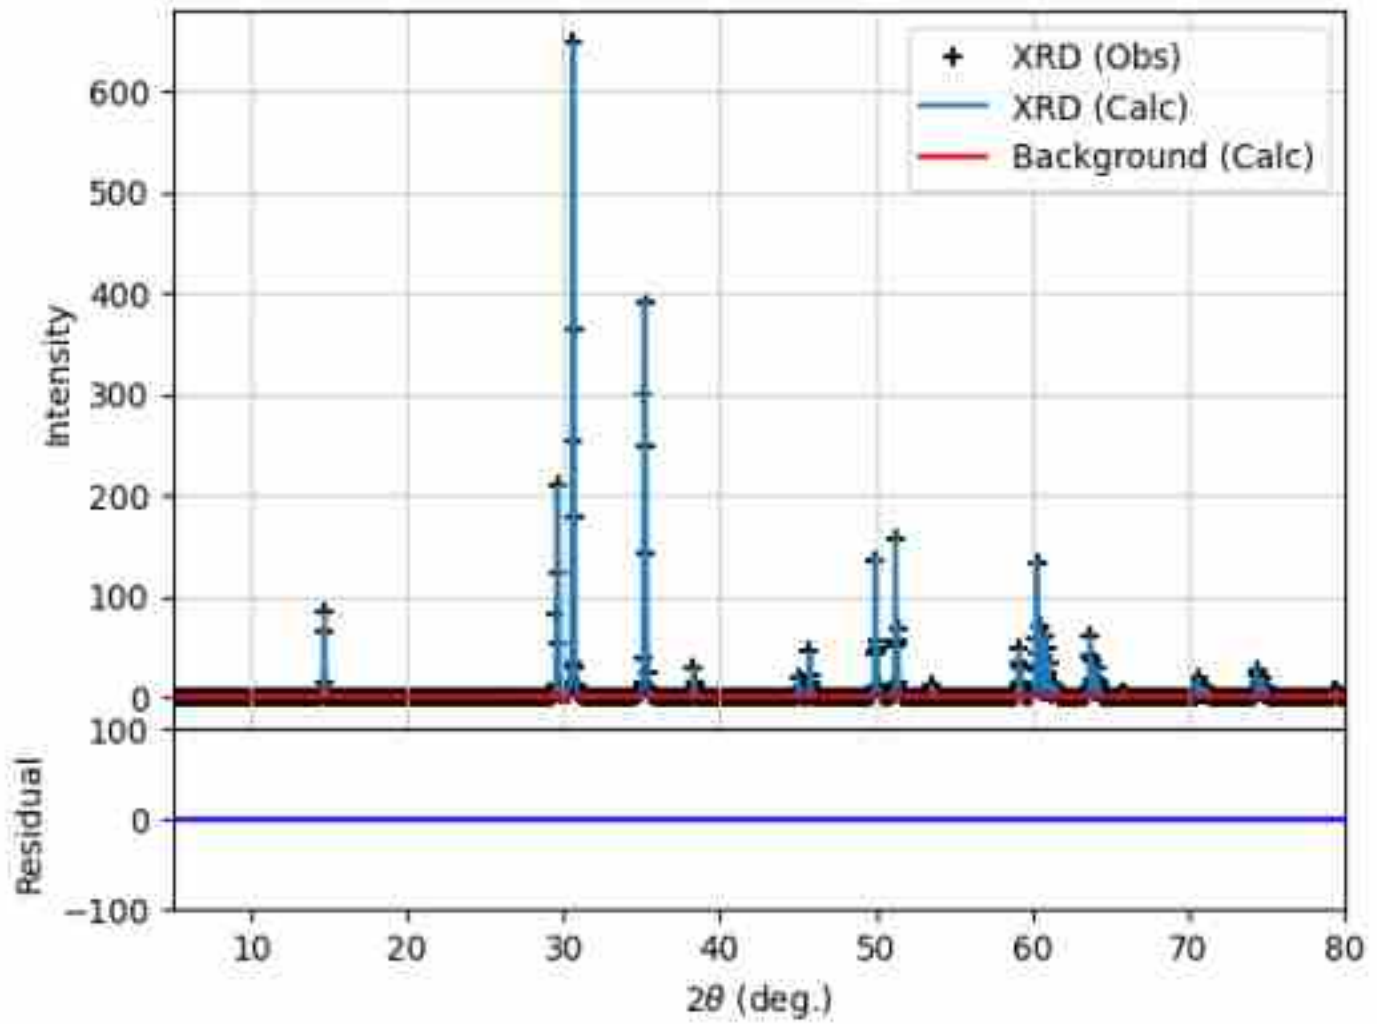

| RMSE before RR | Rwp     | RMSE after RR |
|----------------|---------|---------------|
| 0.009          | 0.00464 | 0.00183       |

# Er<sub>2</sub>Si<sub>4</sub>Ni<sub>2</sub>

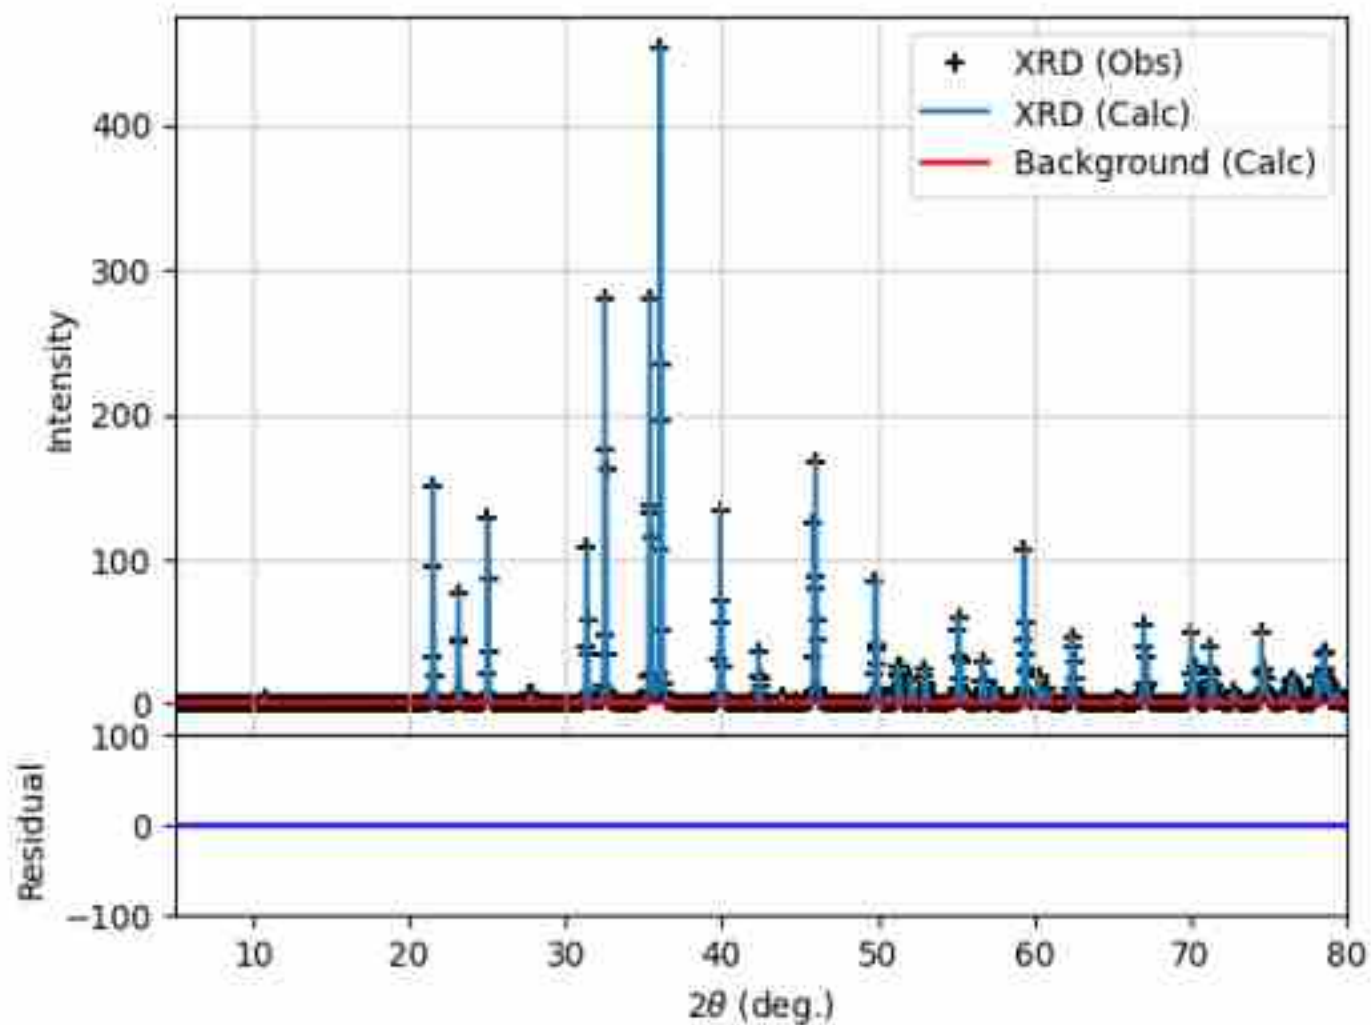

| RMSE before RR | Rwp     | RMSE after RR |
|----------------|---------|---------------|
| 0.009          | 0.00447 | 0.00076       |

# Er<sub>2</sub>Tm<sub>6</sub>

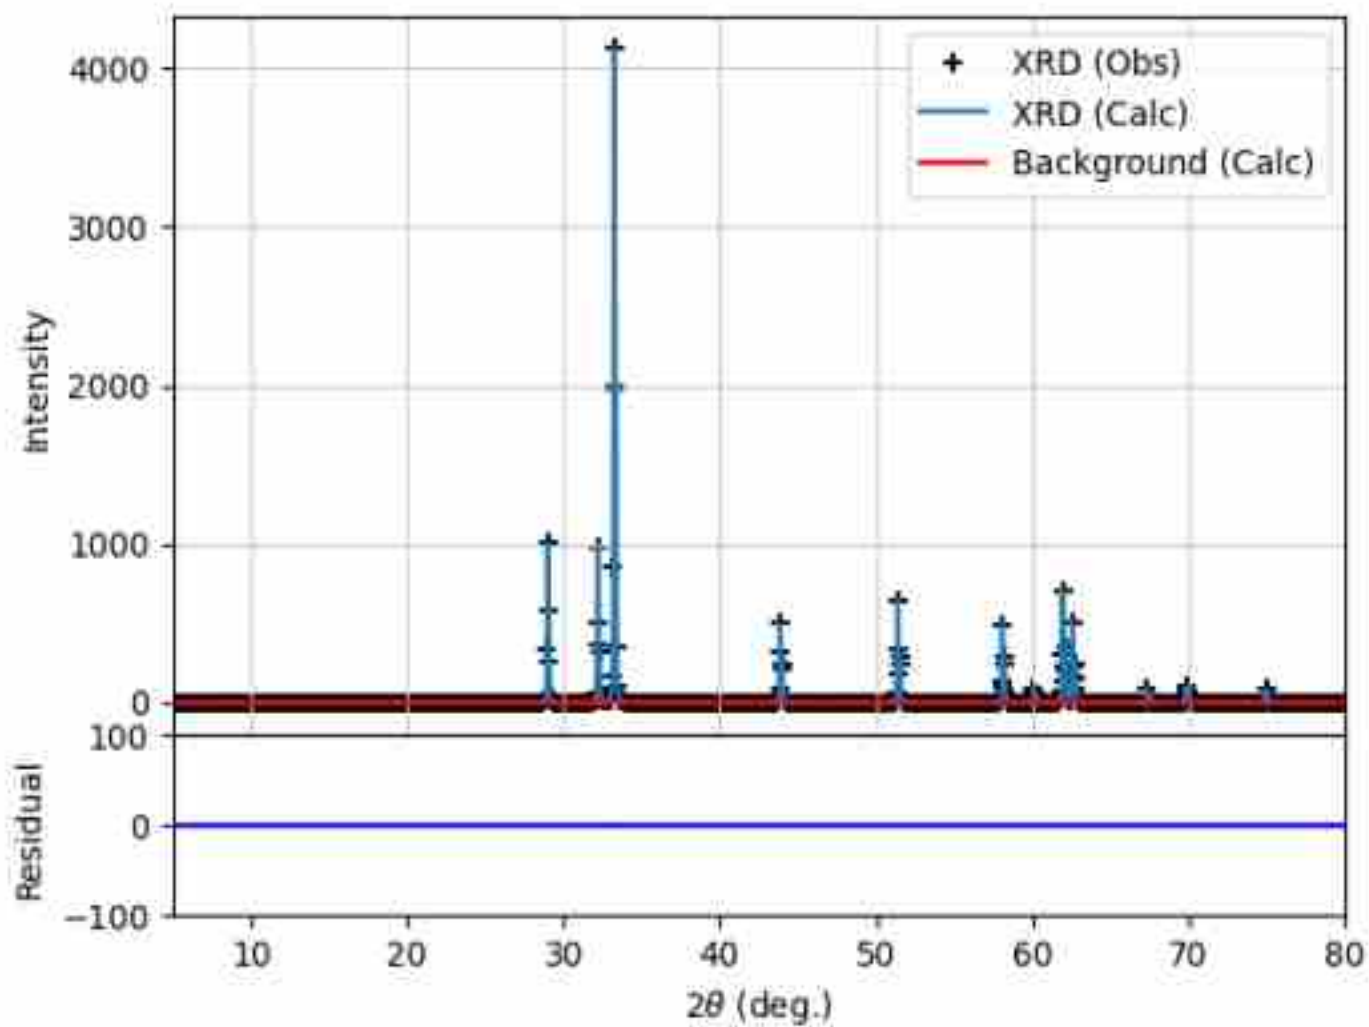

| RMSE before RR | Rwp     | RMSE after RR |
|----------------|---------|---------------|
| 0.009          | 0.01128 | 0.00061       |

# Er<sub>6</sub>Mn<sub>1</sub>Bi<sub>2</sub>

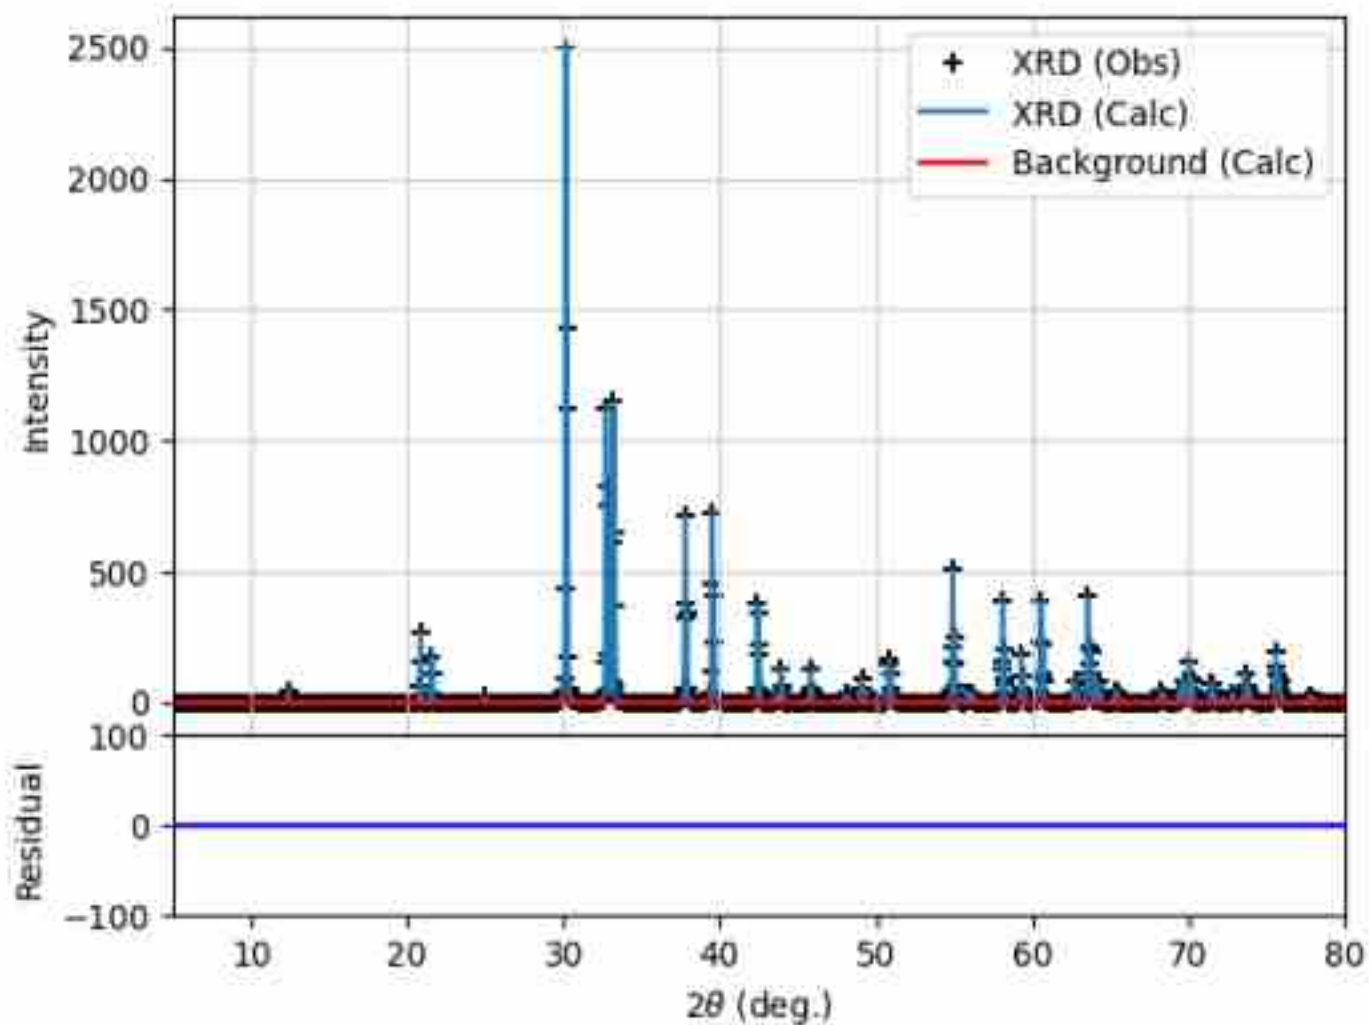

| RMSE before RR | Rwp     | RMSE after RR |
|----------------|---------|---------------|
| 0.009          | 0.00362 | 0.00058       |

# Eu1As2Ru2

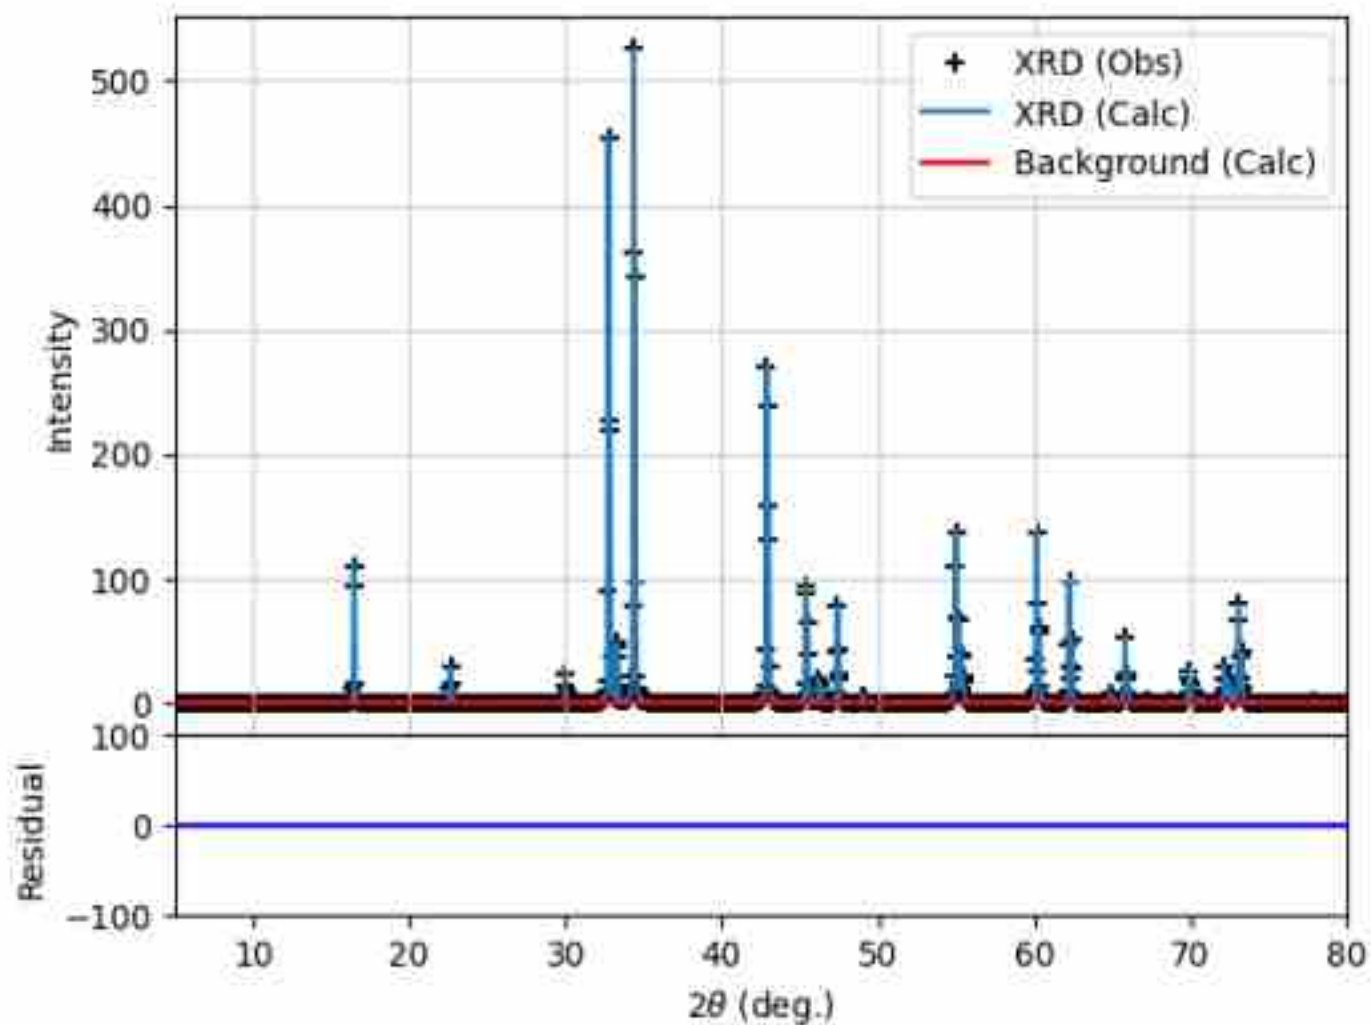

| RMSE before RR | Rwp     | RMSE after RR |
|----------------|---------|---------------|
| 0.009          | 0.00263 | 0.00047       |

# Eu1Ni2Ge2

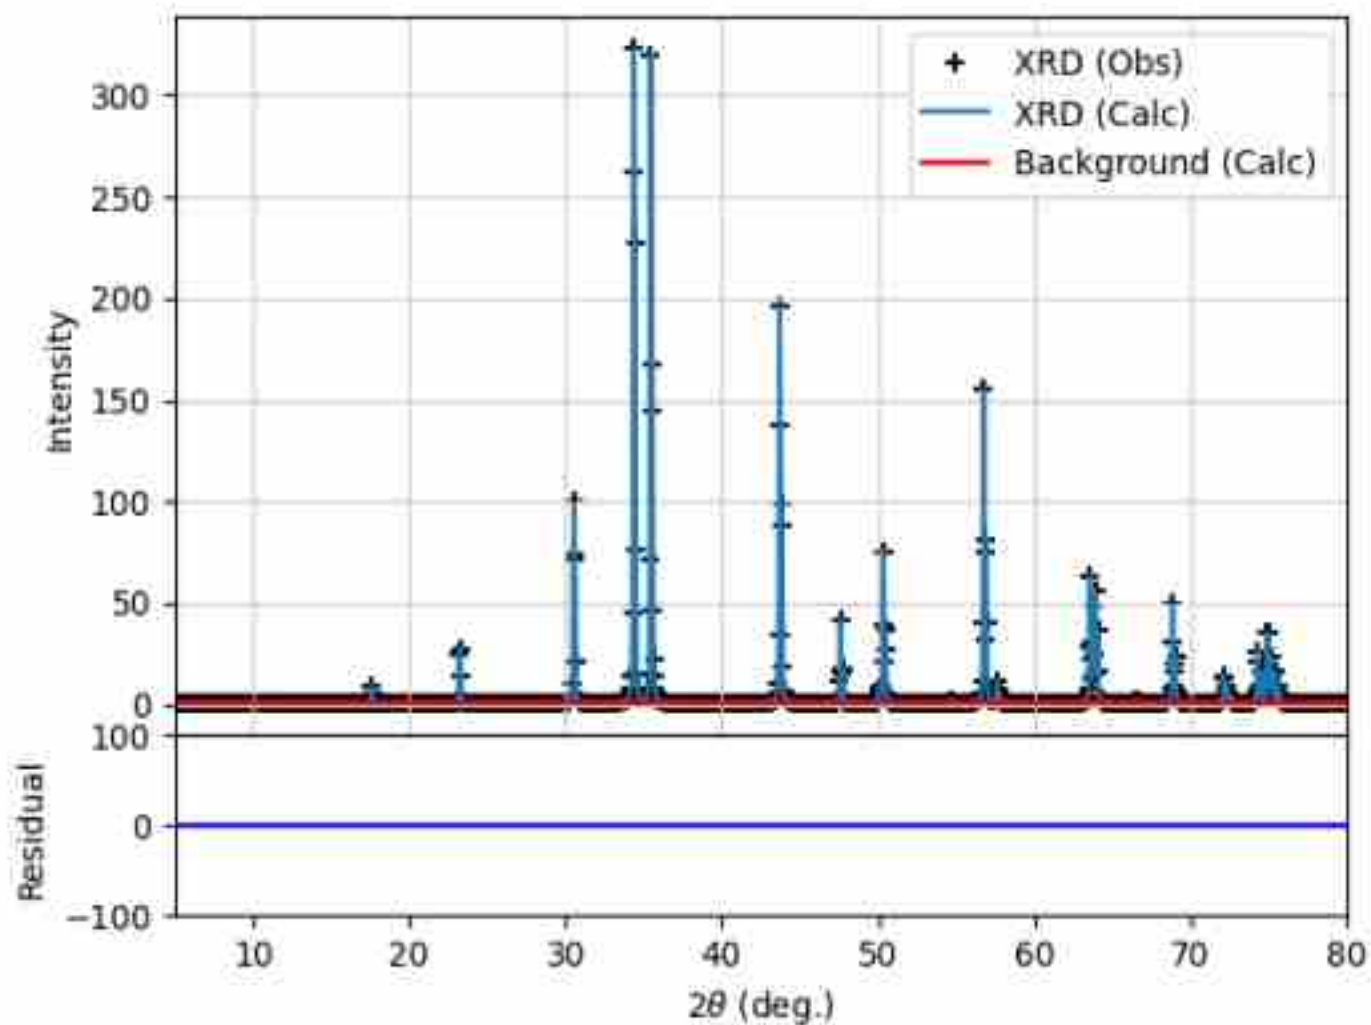

| RMSE before RR | Rwp     | RMSE after RR |
|----------------|---------|---------------|
| 0.009          | 0.00345 | 0.00062       |

# Eu<sub>2</sub>Br<sub>2</sub>O<sub>2</sub>

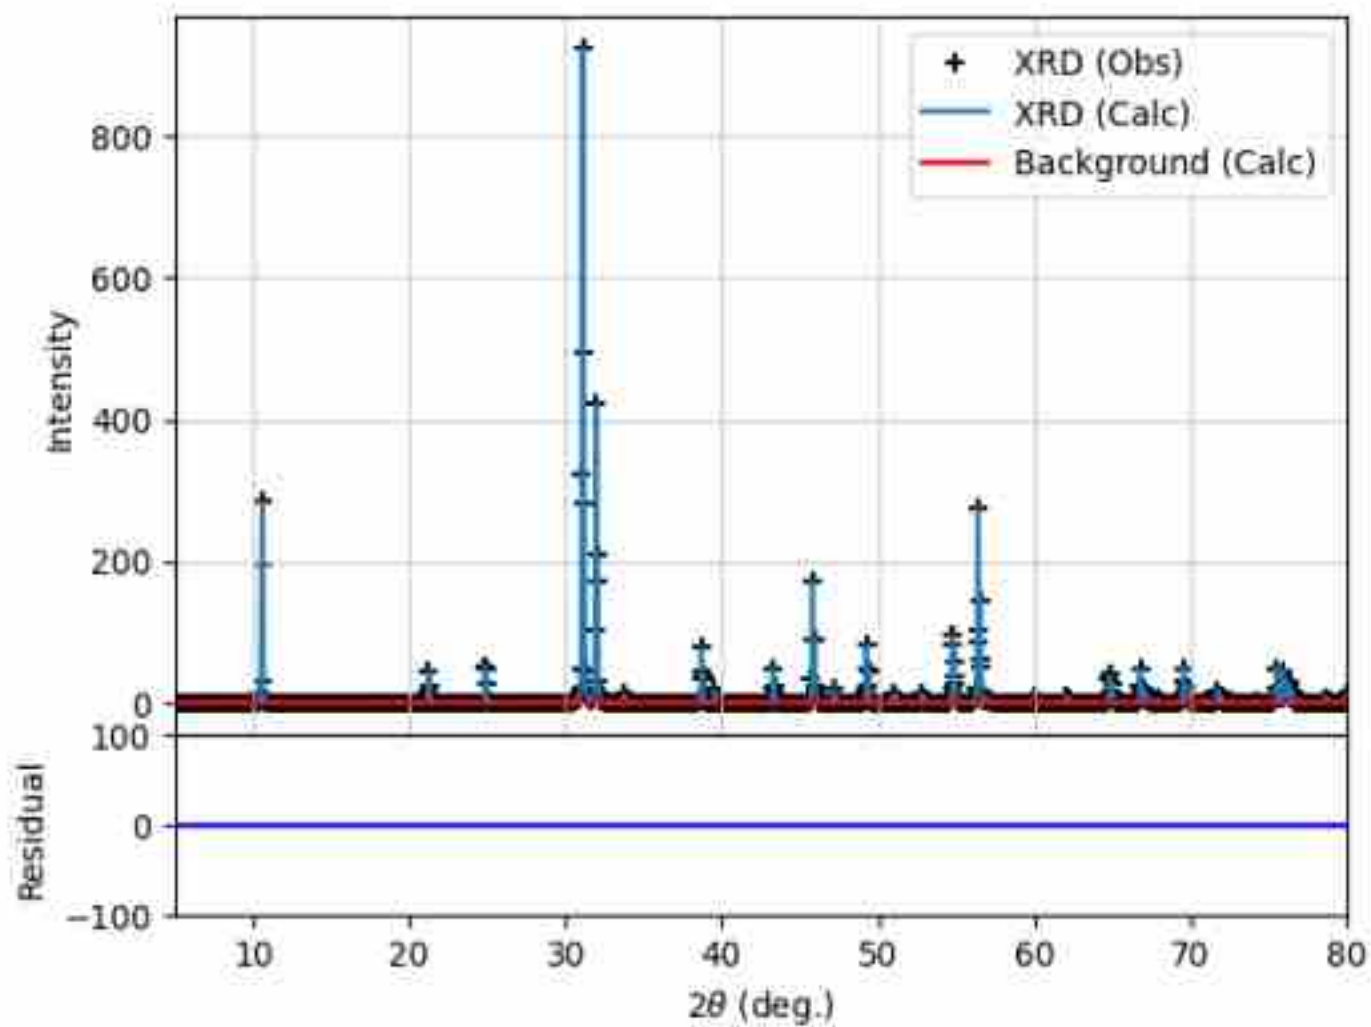

| RMSE before RR | Rwp     | RMSE after RR |
|----------------|---------|---------------|
| 0.009          | 0.00625 | 0.00215       |

# Eu<sub>2</sub>Sb<sub>4</sub>Pd<sub>4</sub>

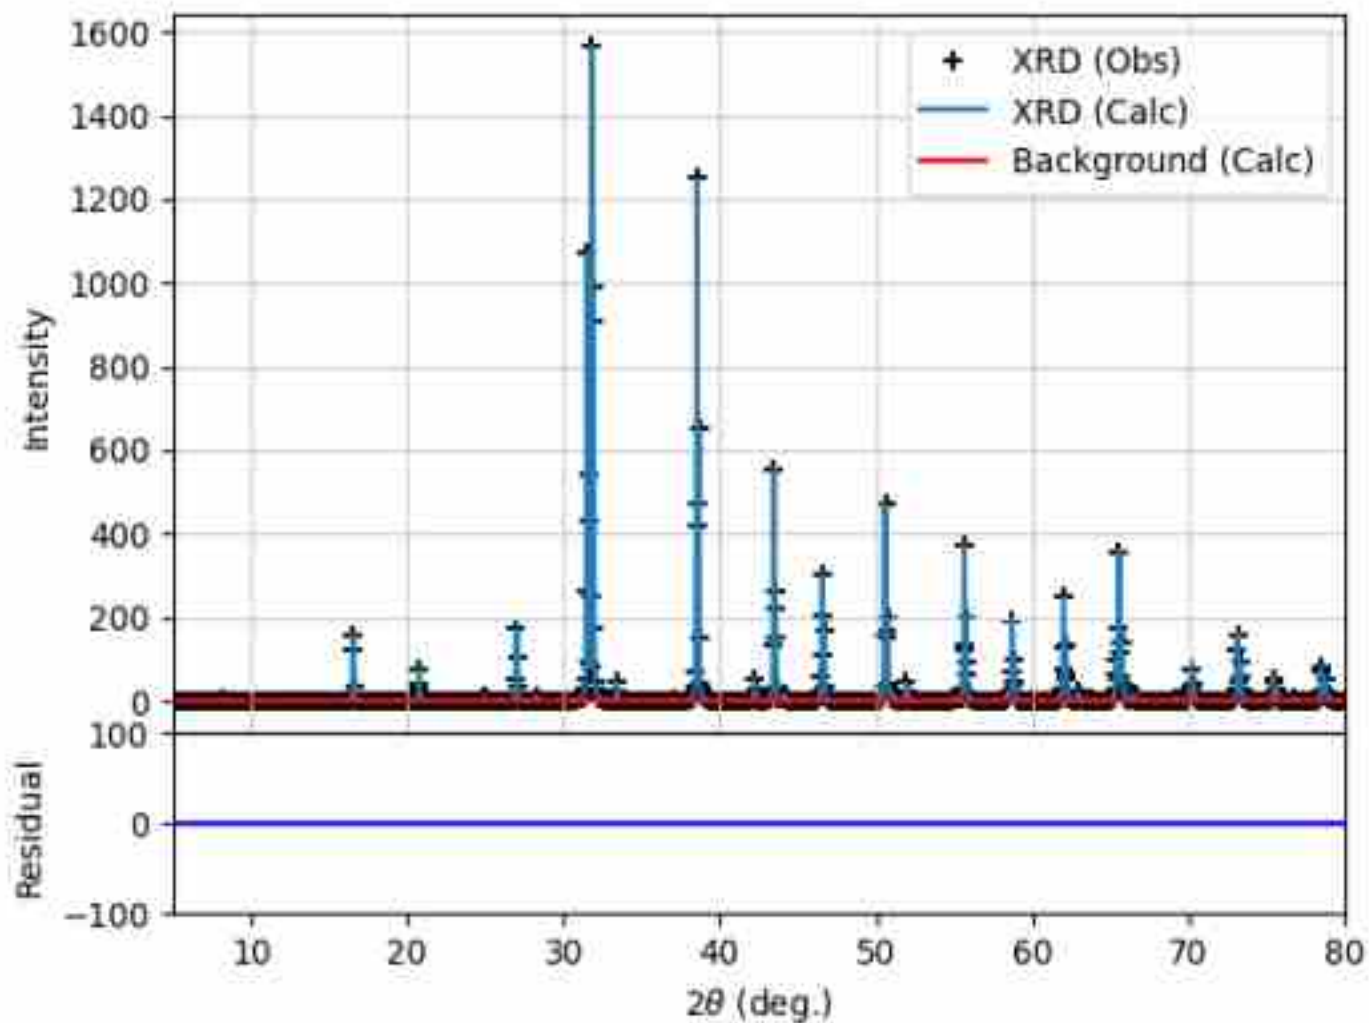

| RMSE before RR | Rwp     | RMSE after RR |
|----------------|---------|---------------|
| 0.009          | 0.00377 | 0.00034       |



# Eu2Sn2

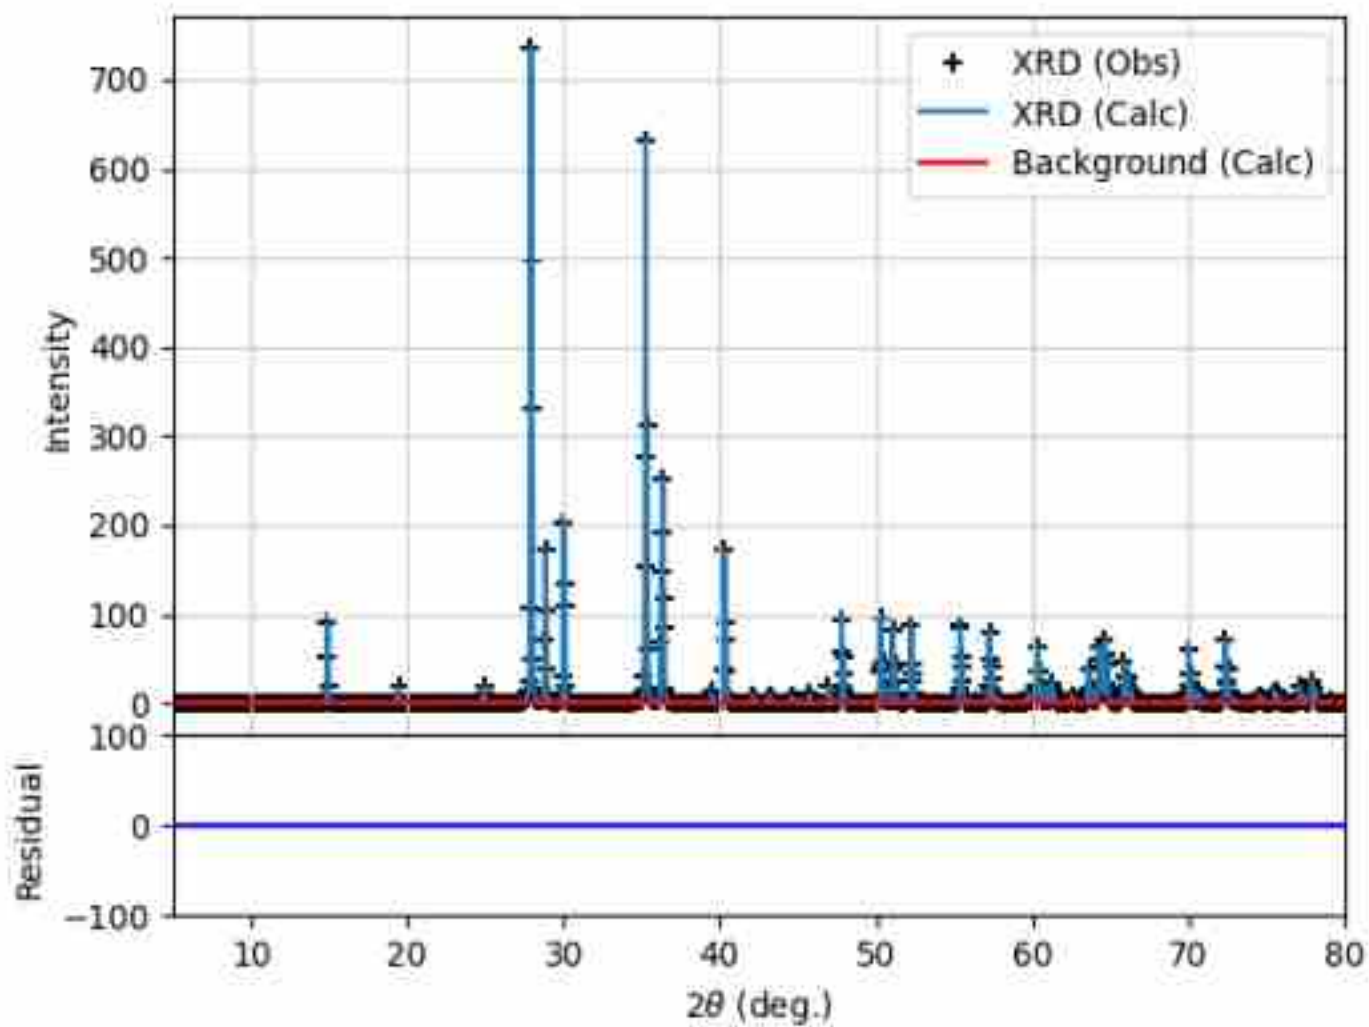

| RMSE before RR | Rwp     | RMSE after RR |
|----------------|---------|---------------|
| 0.009          | 0.00349 | 0.00024       |

# Eu3W1O6

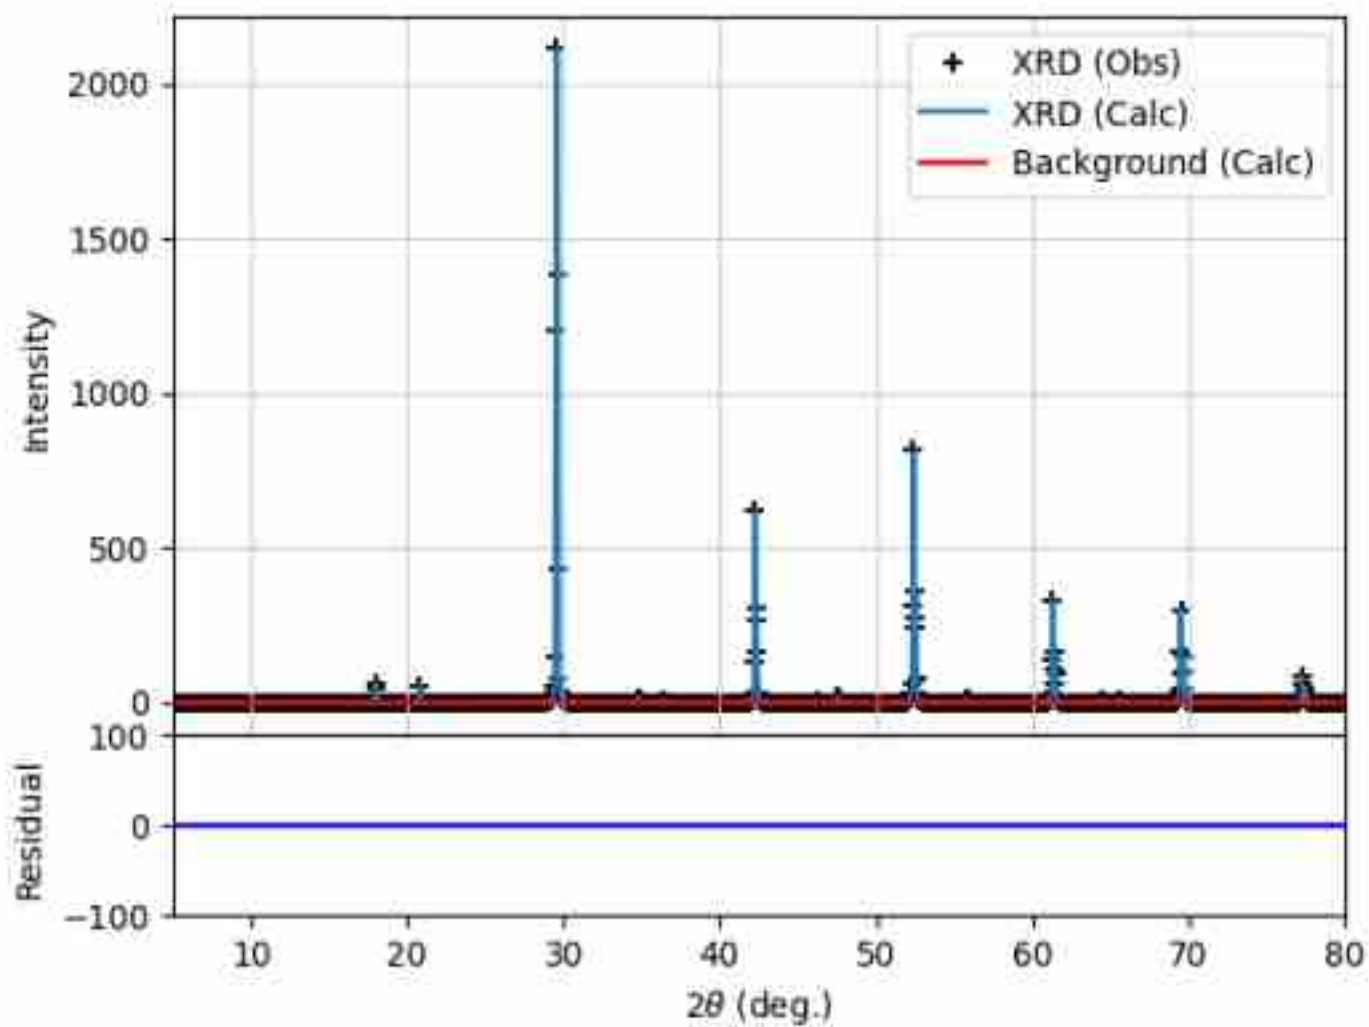

| RMSE before RR | Rwp     | RMSE after RR |
|----------------|---------|---------------|
| 0.009          | 0.00577 | 0.00266       |

# Fe<sub>1</sub>Cu<sub>2</sub>Sn<sub>1</sub>S<sub>4</sub>

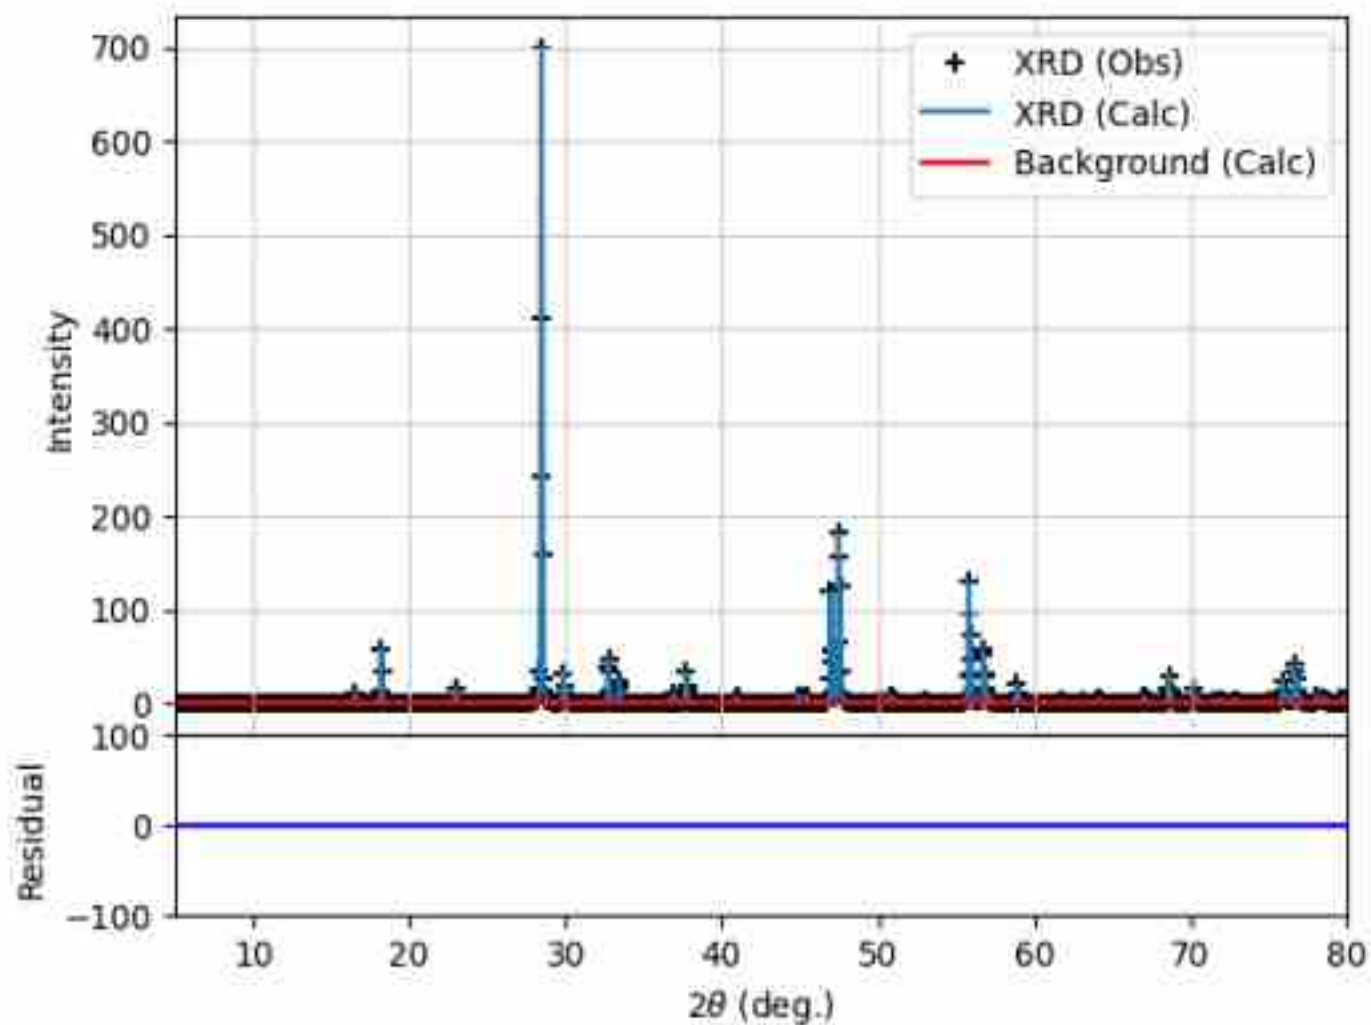

| RMSE before RR | Rwp     | RMSE after RR |
|----------------|---------|---------------|
| 0.009          | 0.00372 | 0.00075       |

# Fe<sub>3</sub>Ge<sub>2</sub>

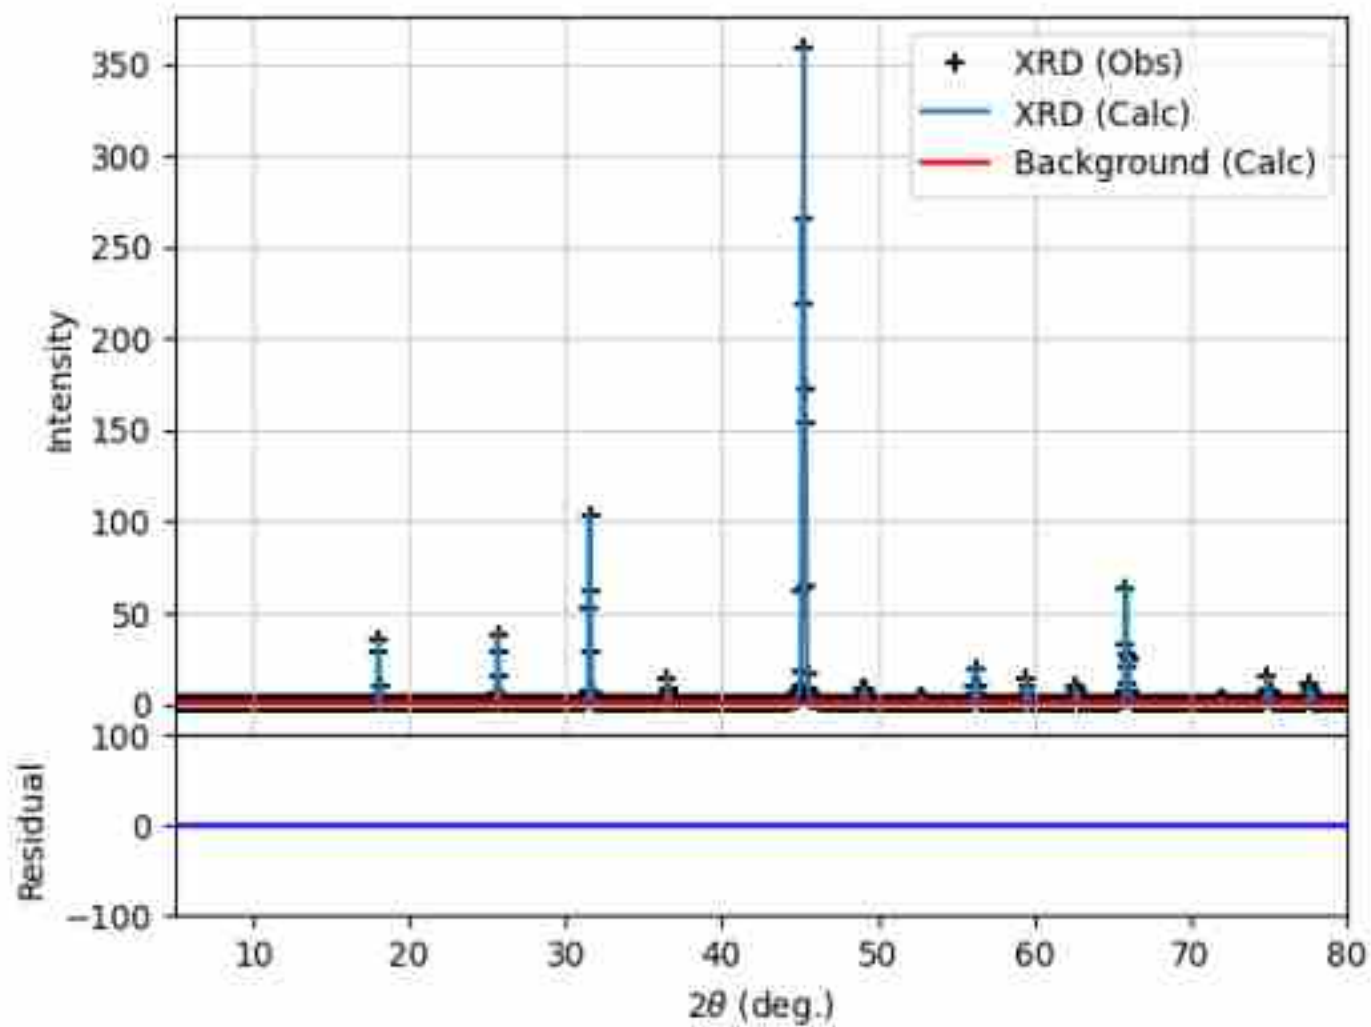

| RMSE before RR | Rwp     | RMSE after RR |
|----------------|---------|---------------|
| 0.009          | 0.00295 | 0.00044       |

# Ga1N1

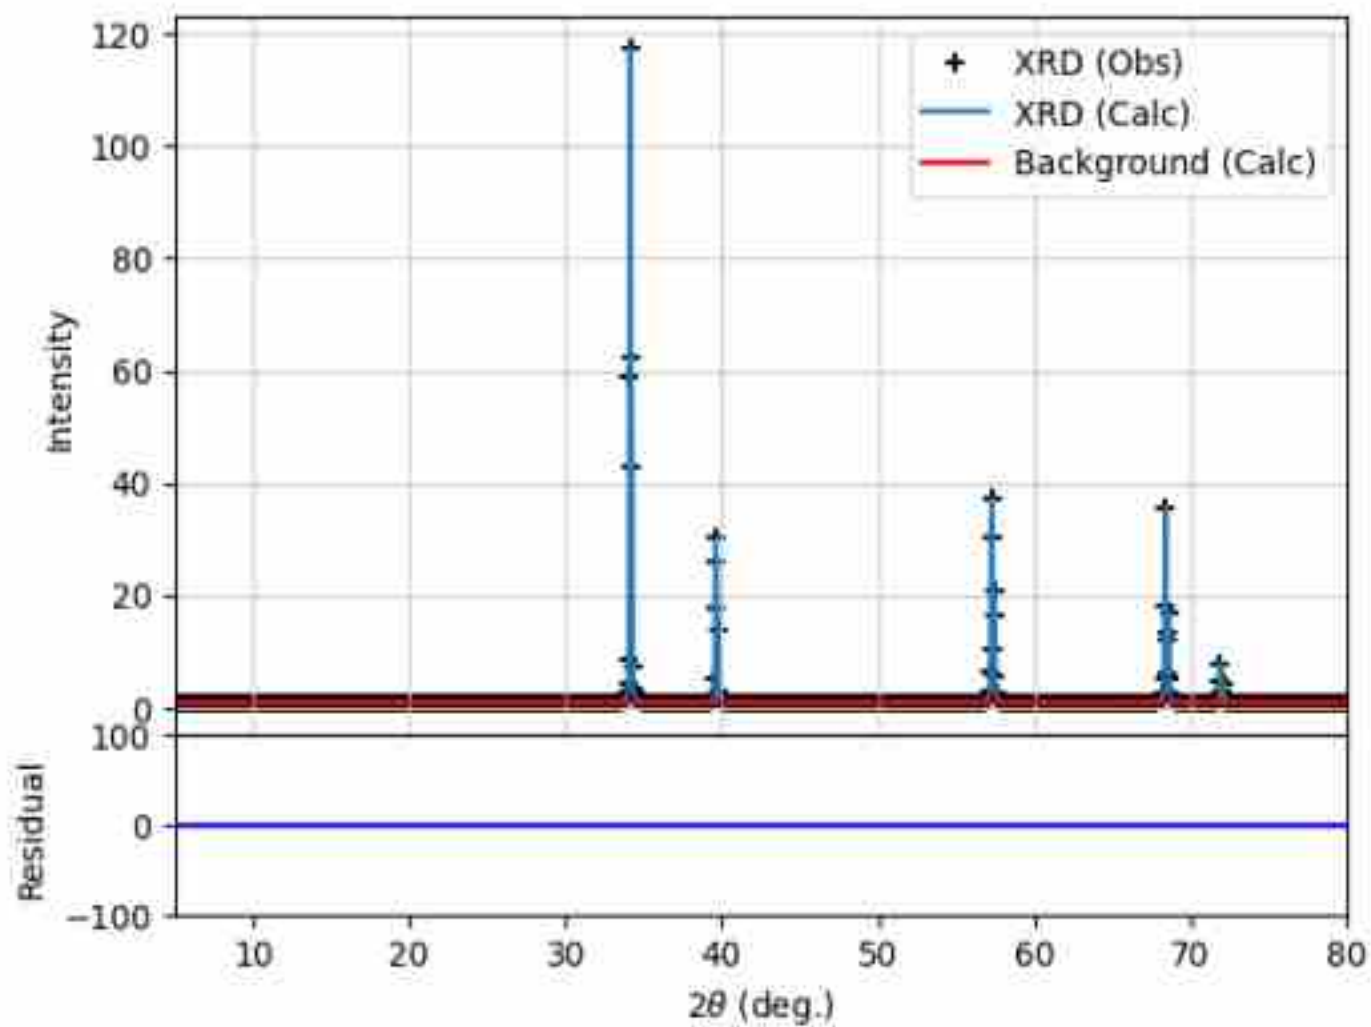

| RMSE before RR | Rwp     | RMSE after RR |
|----------------|---------|---------------|
| 0.009          | 0.00219 | 0.00065       |

# Gd1Al3Cu1

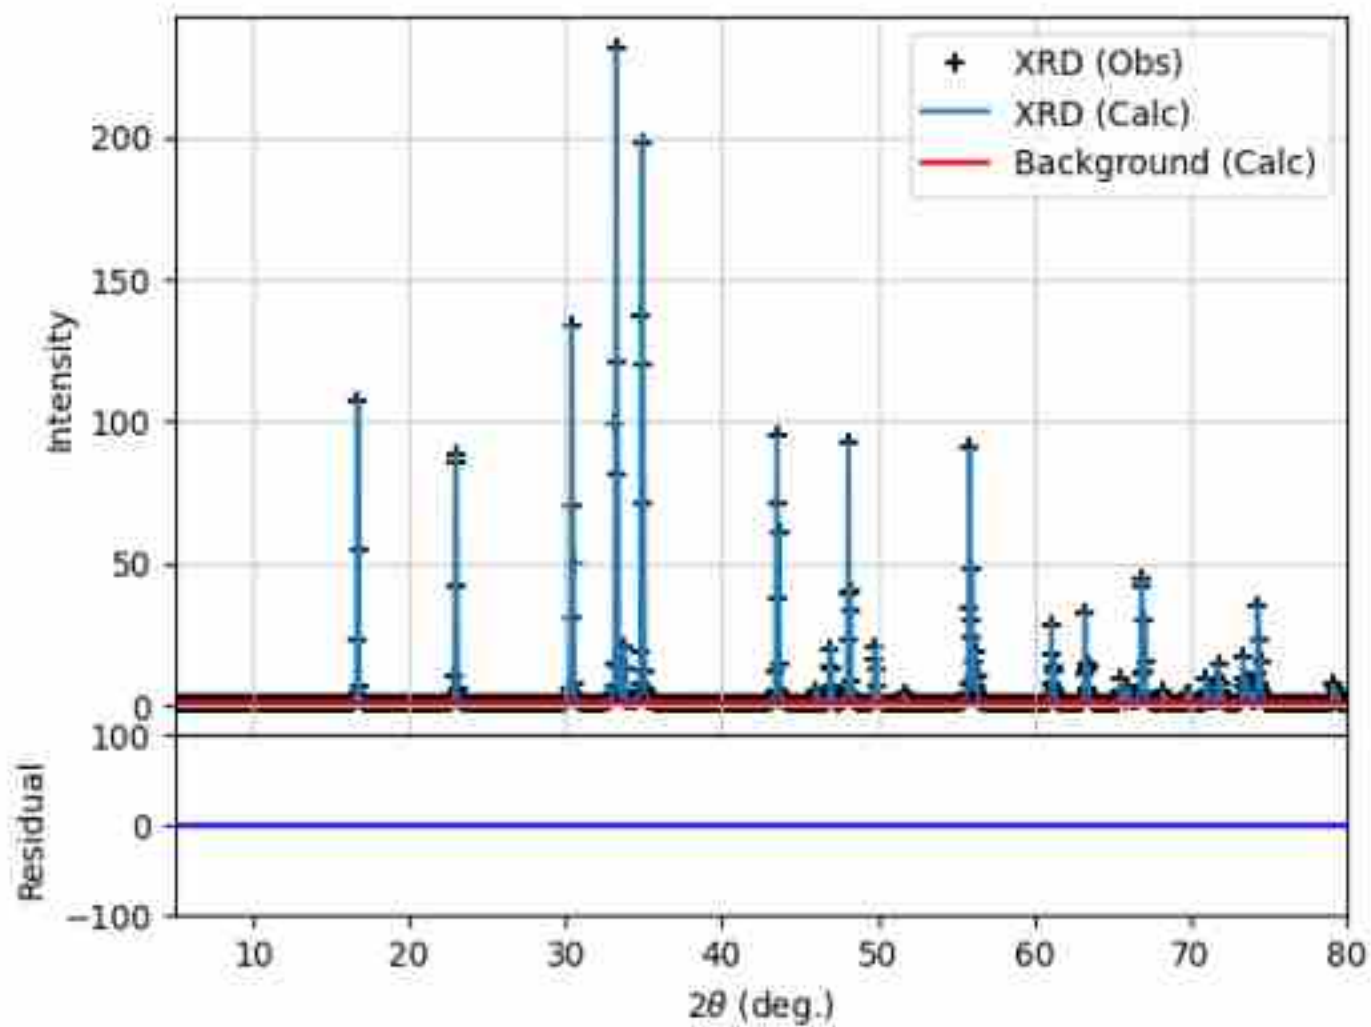

| RMSE before RR | Rwp     | RMSE after RR |
|----------------|---------|---------------|
| 0.009          | 0.00368 | 0.00067       |

# Gd1Fe1C2

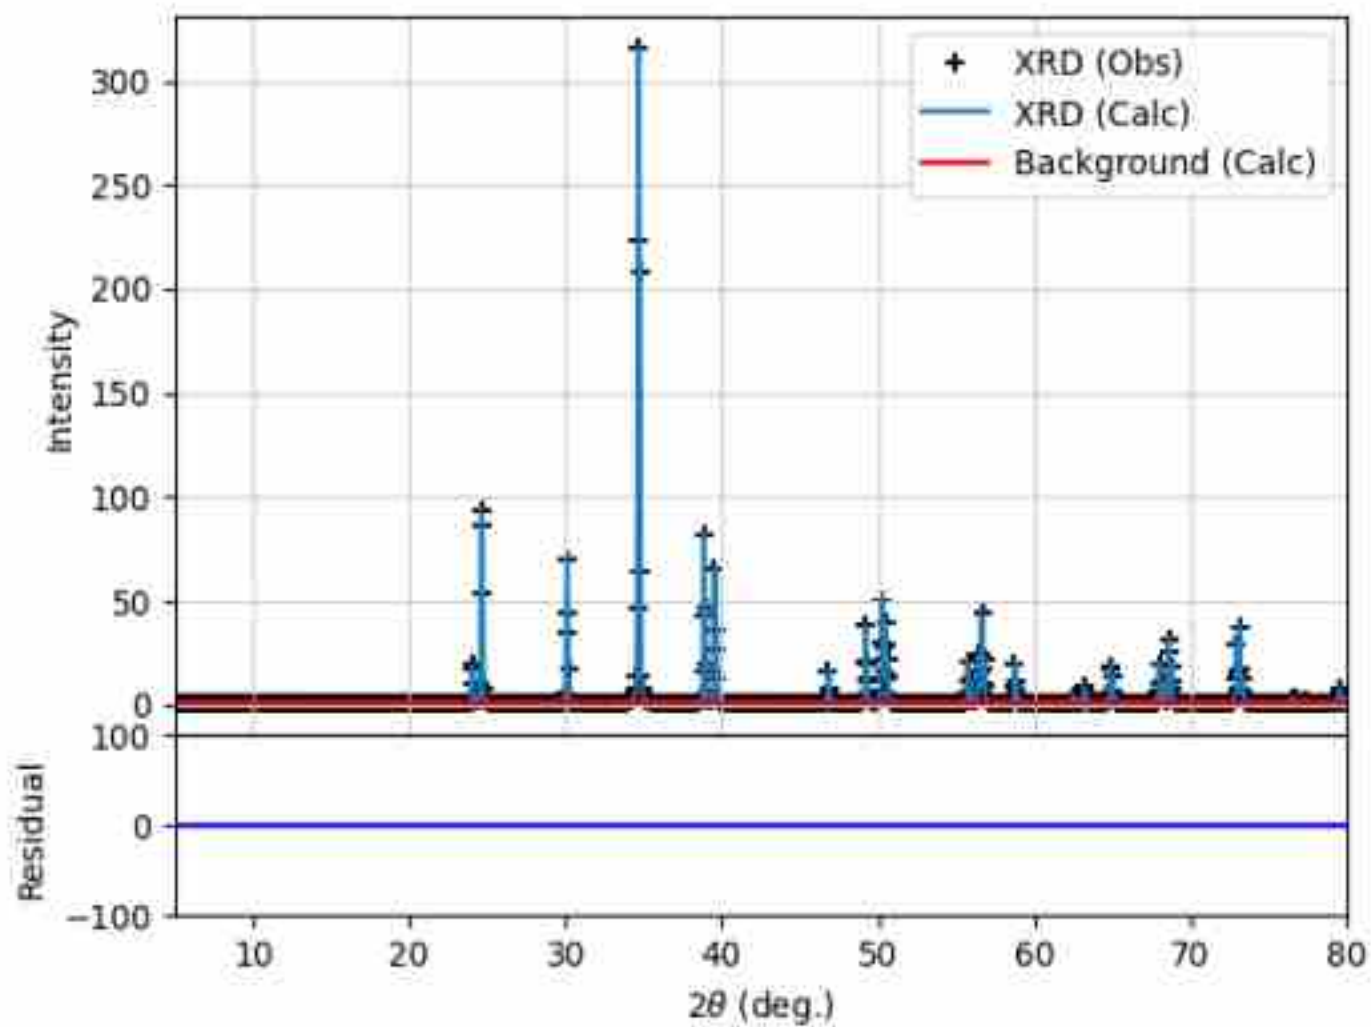

| RMSE before RR | Rwp     | RMSE after RR |
|----------------|---------|---------------|
| 0.009          | 0.00381 | 0.00048       |

# Gd1Ni1As1

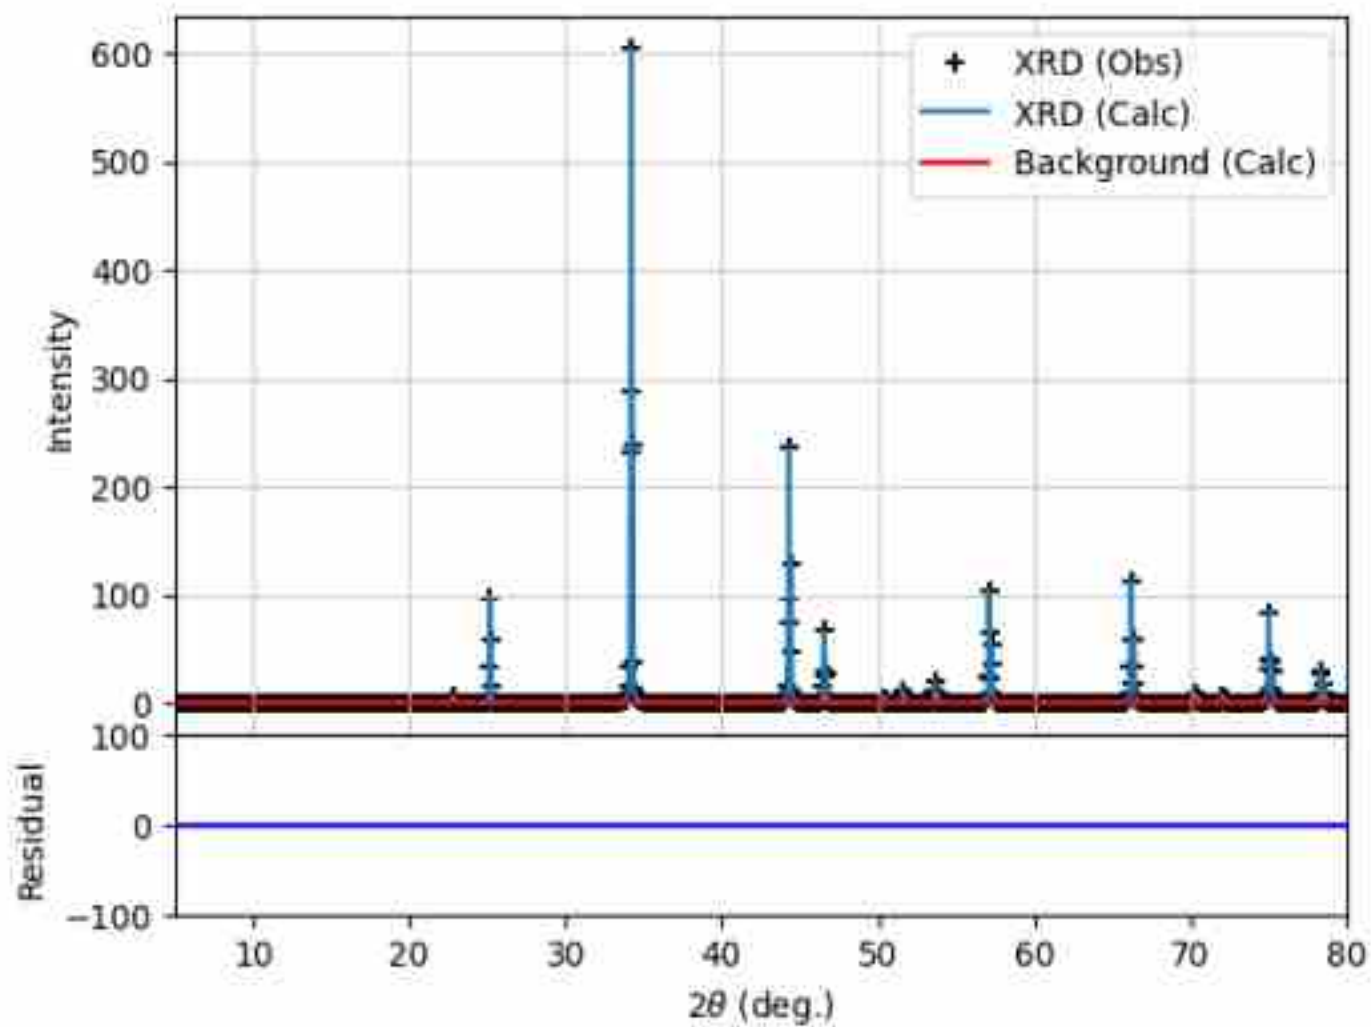

| RMSE before RR | Rwp     | RMSE after RR |
|----------------|---------|---------------|
| 0.009          | 0.01038 | 0.00162       |



# Gd<sub>2</sub>Co<sub>2</sub>Si<sub>2</sub>

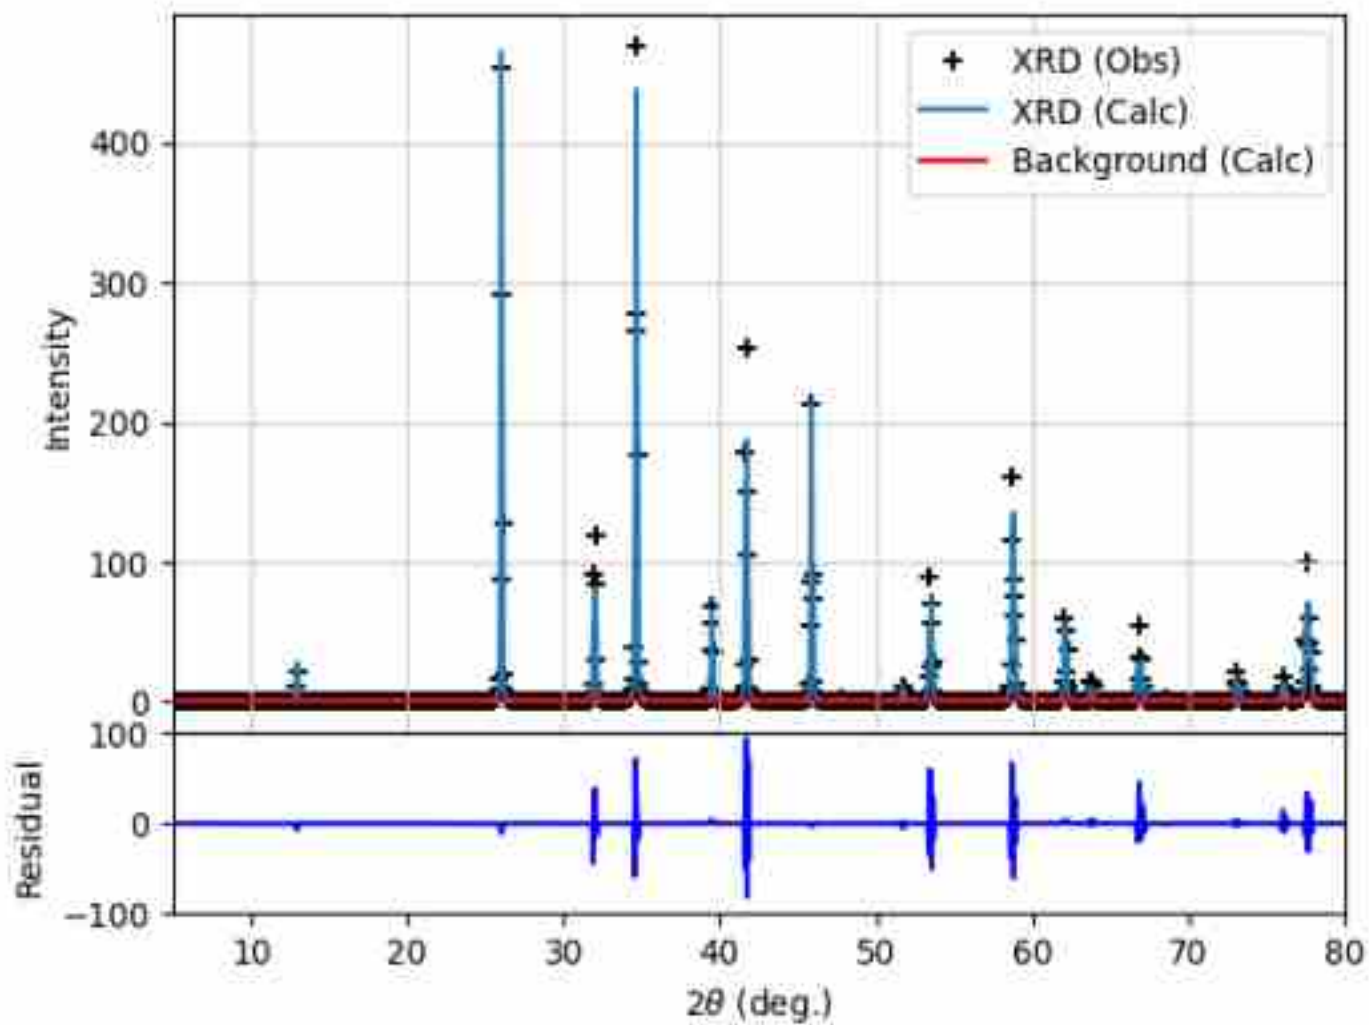

| RMSE before RR | Rwp      | RMSE after RR |
|----------------|----------|---------------|
| 0.009          | 45.65309 | 0.0105        |

# Gd<sub>2</sub>In<sub>1</sub>Ni<sub>2</sub>

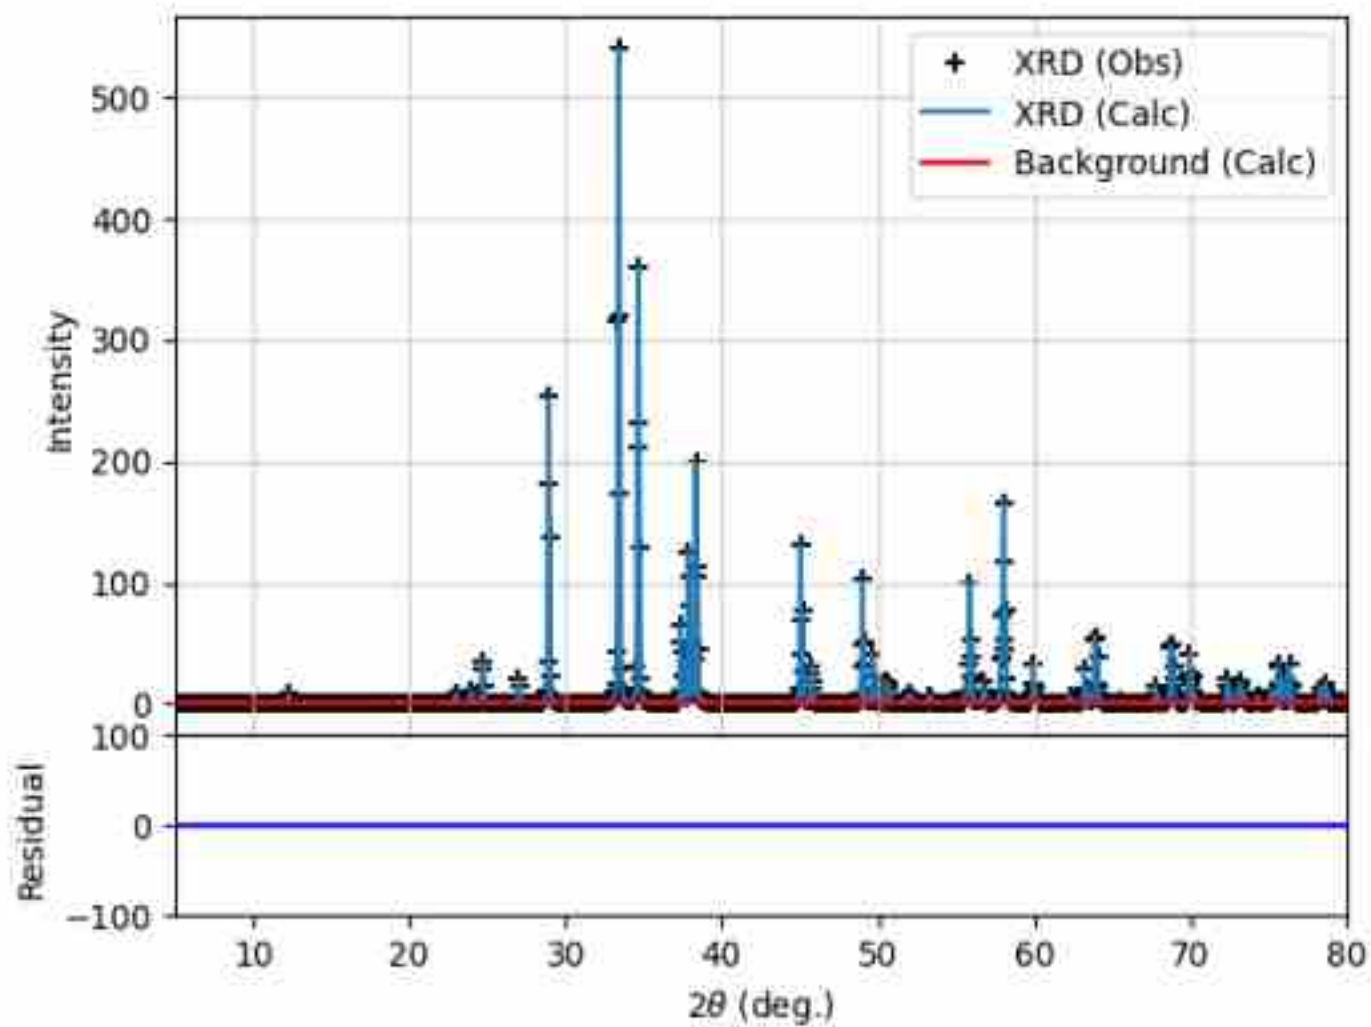

| RMSE before RR | Rwp     | RMSE after RR |
|----------------|---------|---------------|
| 0.009          | 0.00387 | 0.0003        |

# Gd<sub>3</sub>In<sub>3</sub>Rh<sub>3</sub>

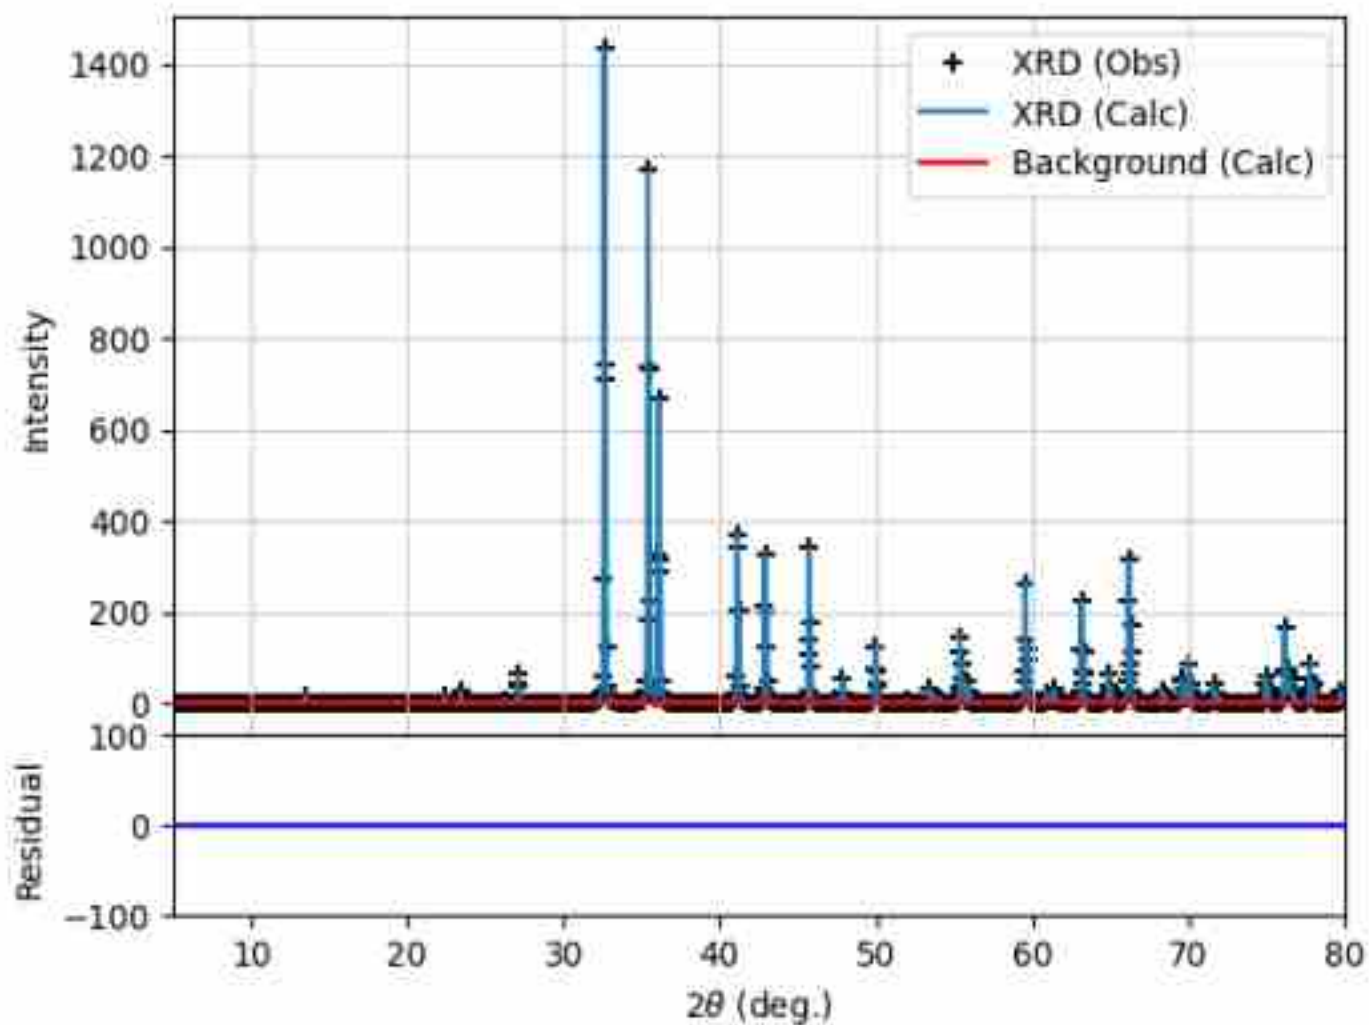

| RMSE before RR | Rwp     | RMSE after RR |
|----------------|---------|---------------|
| 0.009          | 0.00598 | 0.00055       |

# Hf<sub>2</sub>Ni<sub>4</sub>Sb<sub>2</sub>

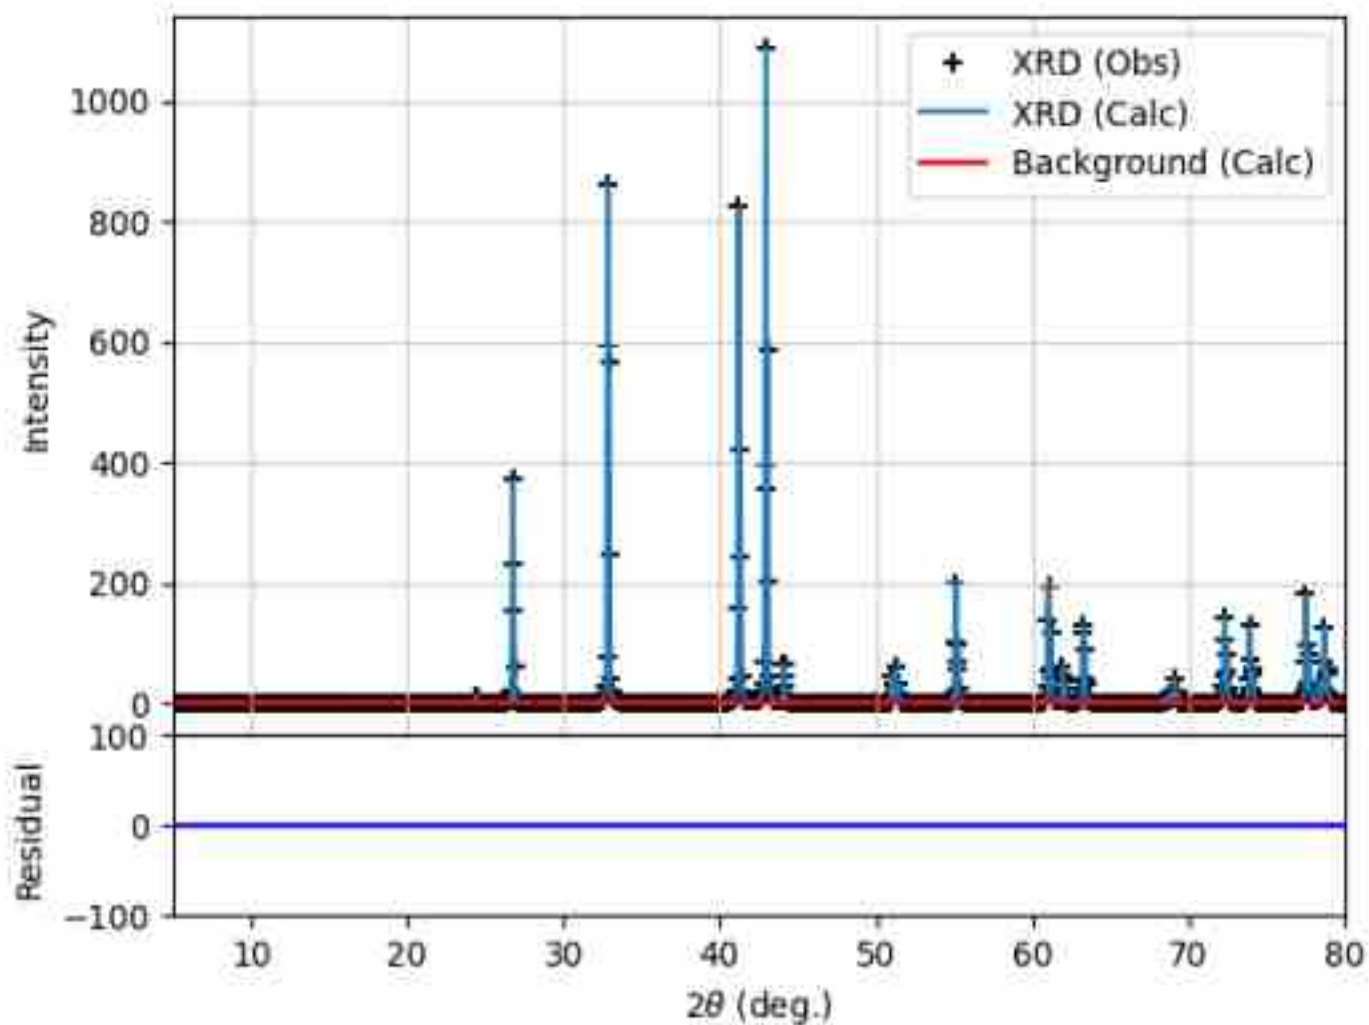

| RMSE before RR | Rwp    | RMSE after RR |
|----------------|--------|---------------|
| 0.009          | 0.0053 | 0.00089       |

# Hf5Sc1

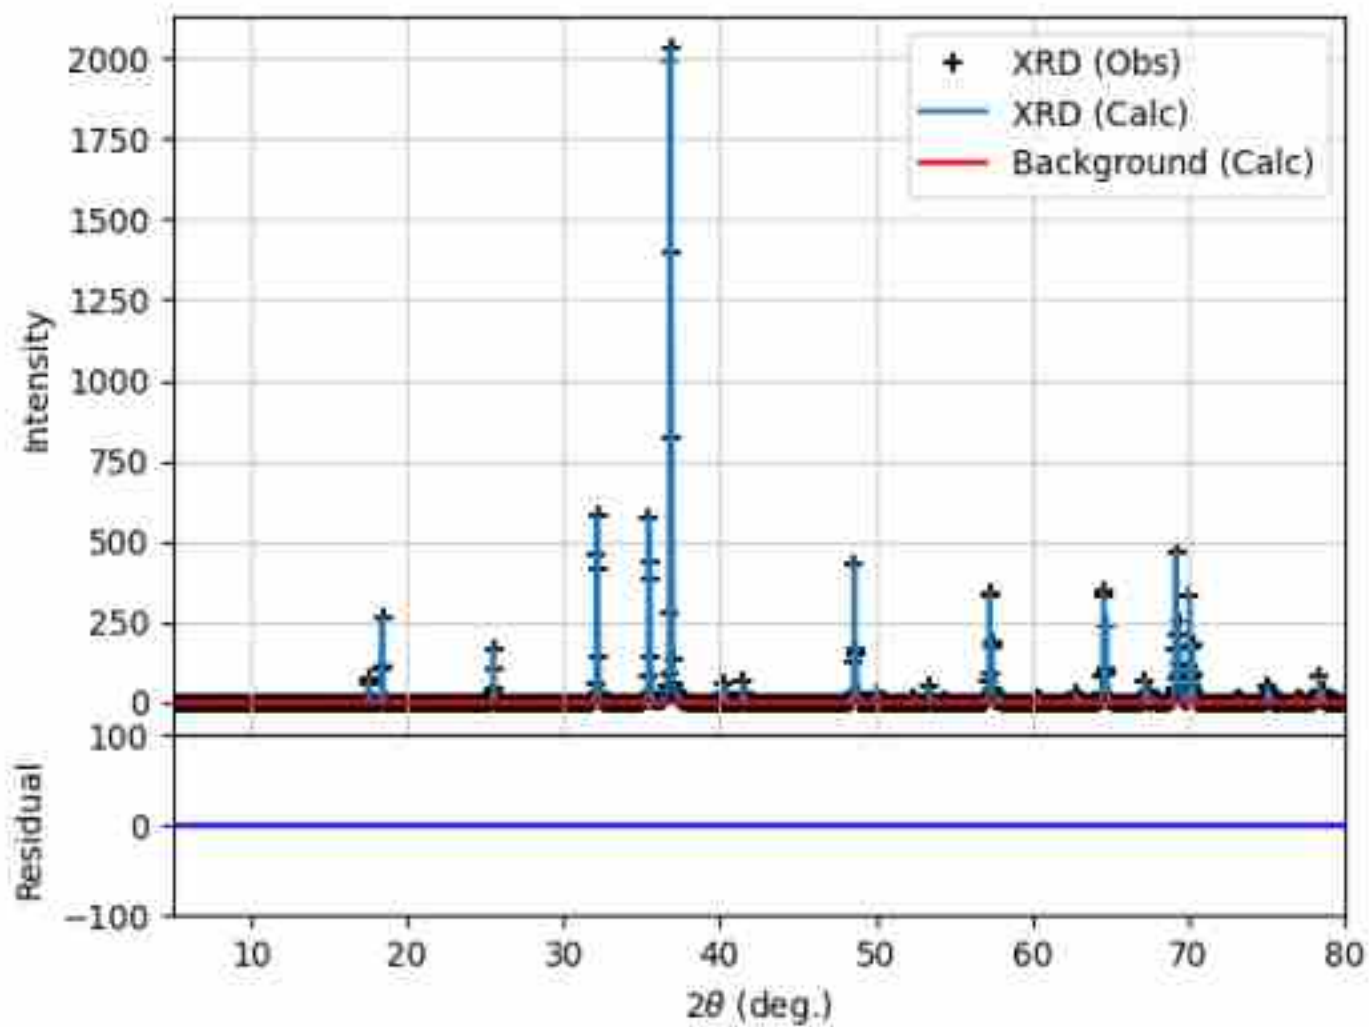

| RMSE before RR | Rwp     | RMSE after RR |
|----------------|---------|---------------|
| 0.009          | 0.01436 | 0.00136       |

# Hg4Pt1

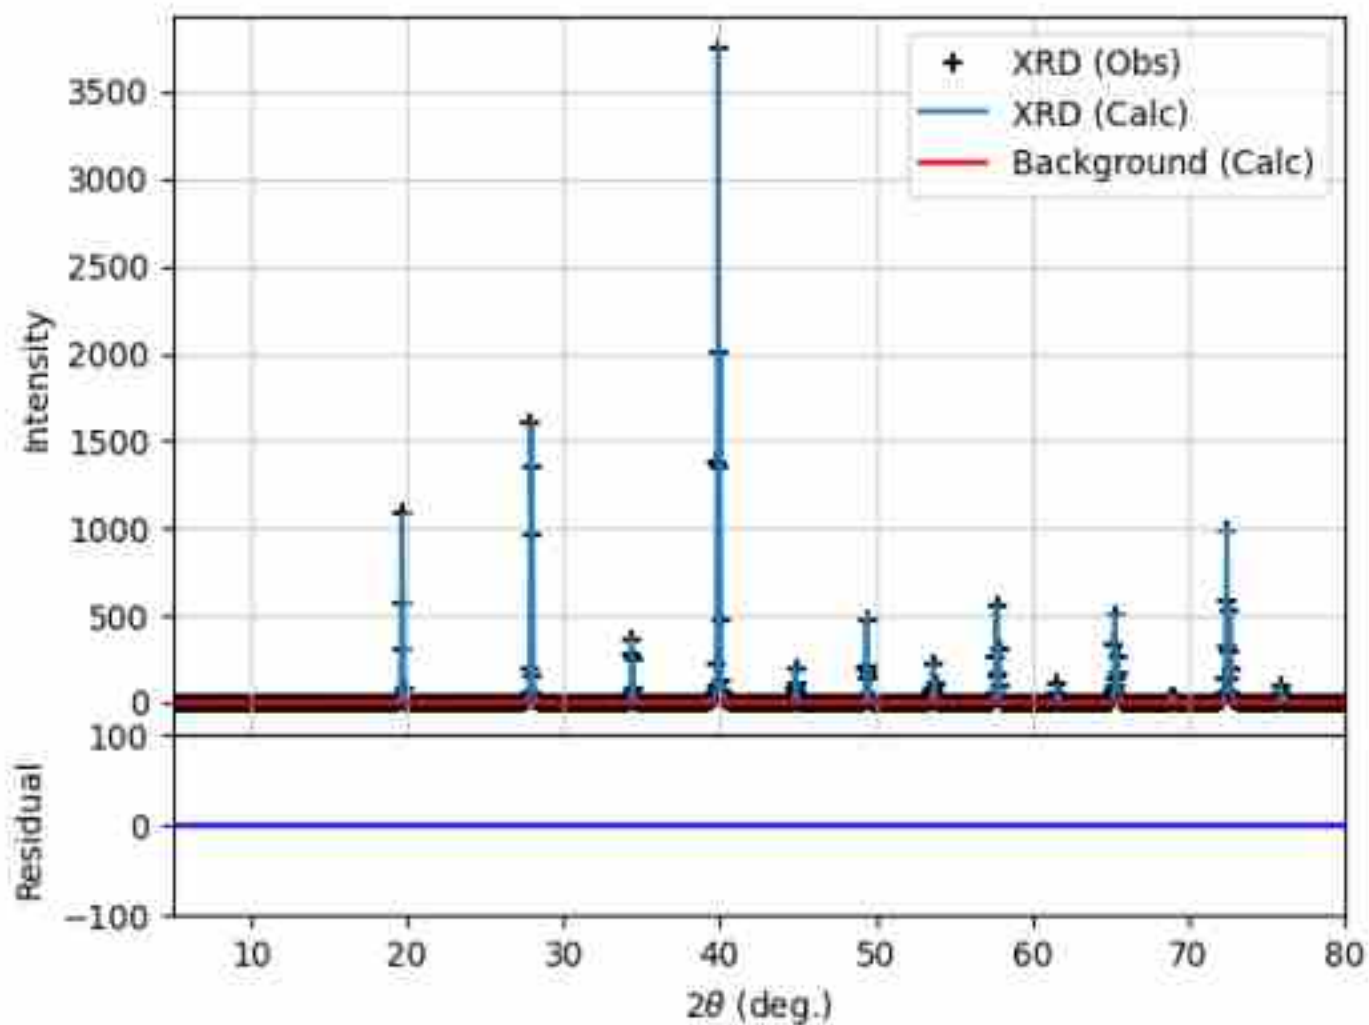

| RMSE before RR | Rwp     | RMSE after RR |
|----------------|---------|---------------|
| 0.009          | 0.02707 | 0.00106       |

# Ho1Co4Ni1

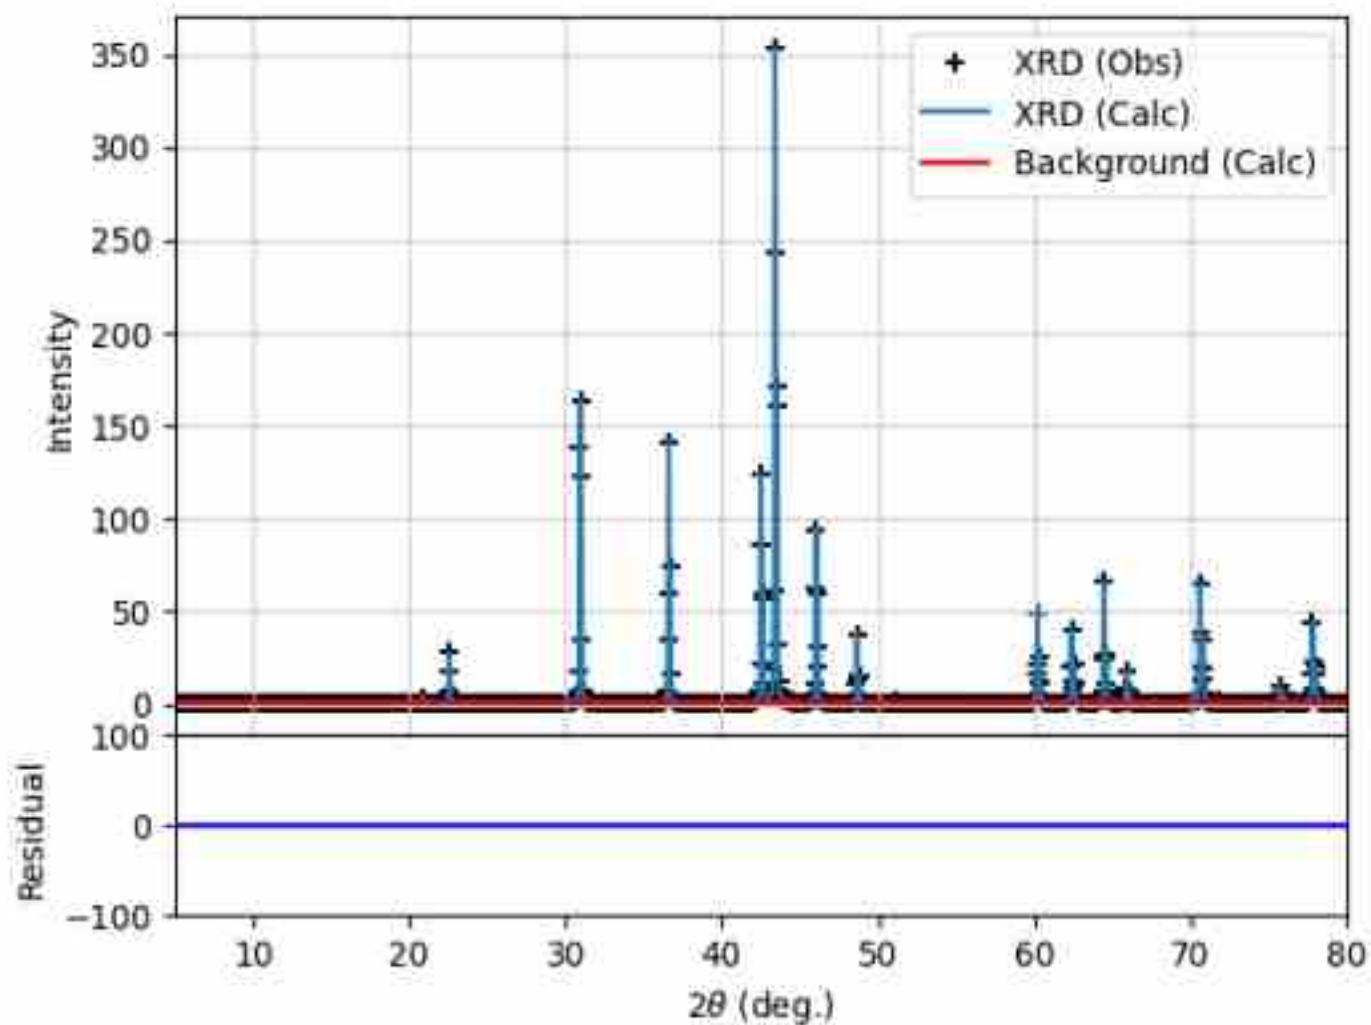

| RMSE before RR | Rwp     | RMSE after RR |
|----------------|---------|---------------|
| 0.009          | 0.00424 | 0.0005        |

# Ho<sub>2</sub>Cu<sub>10</sub>O<sub>4</sub>

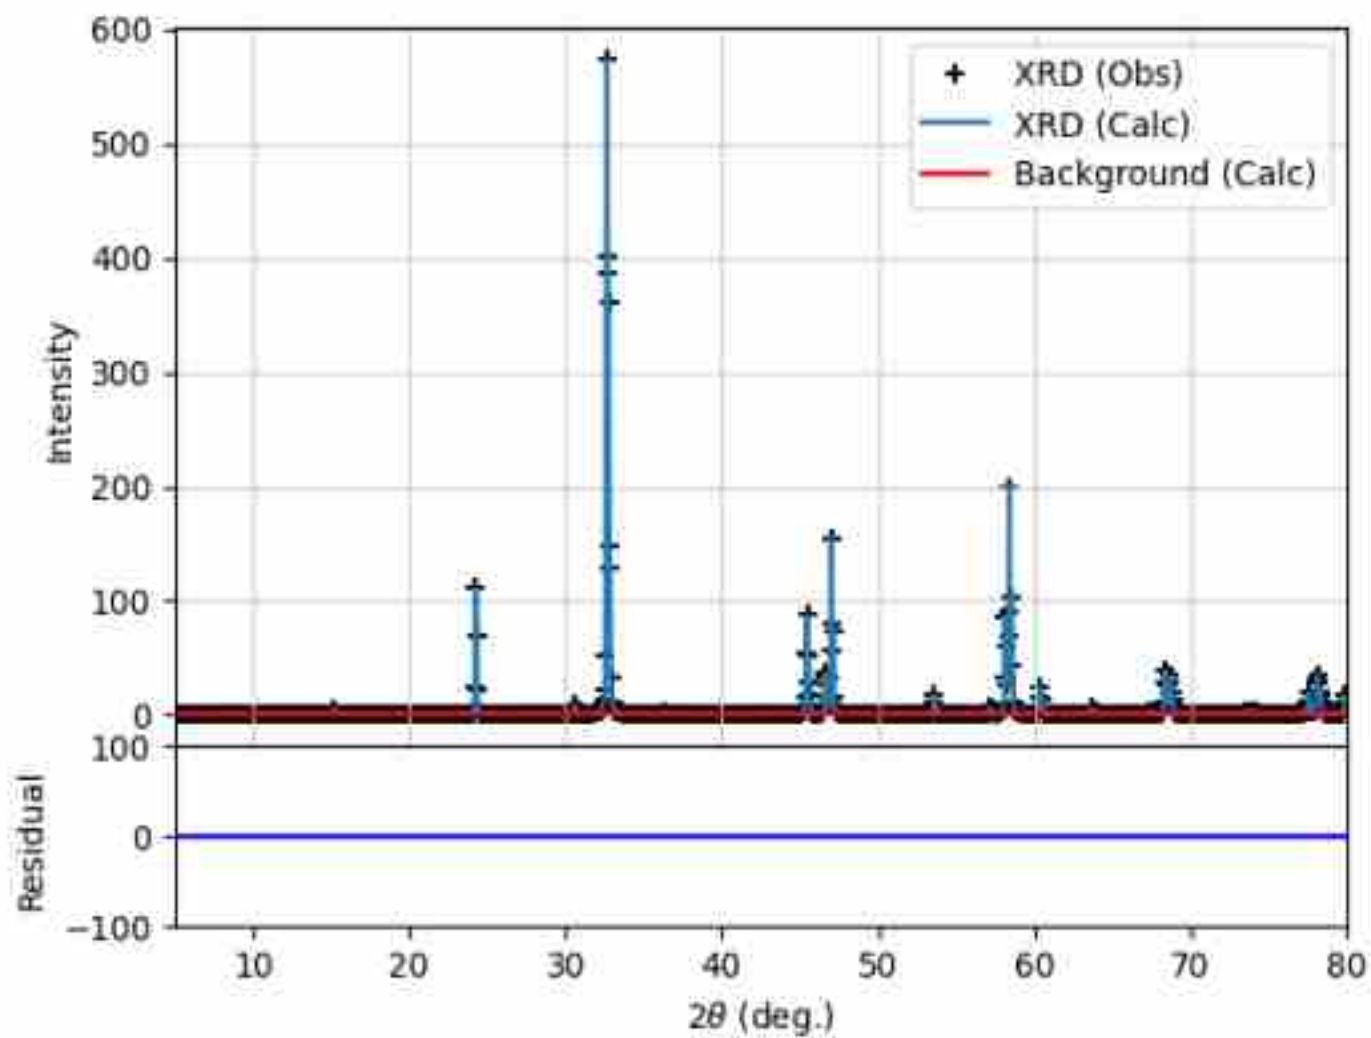

| RMSE before RR | Rwp     | RMSE after RR |
|----------------|---------|---------------|
| 0.009          | 0.00284 | 0.00115       |



# Ho<sub>2</sub>Ga<sub>1</sub>Ru<sub>1</sub>

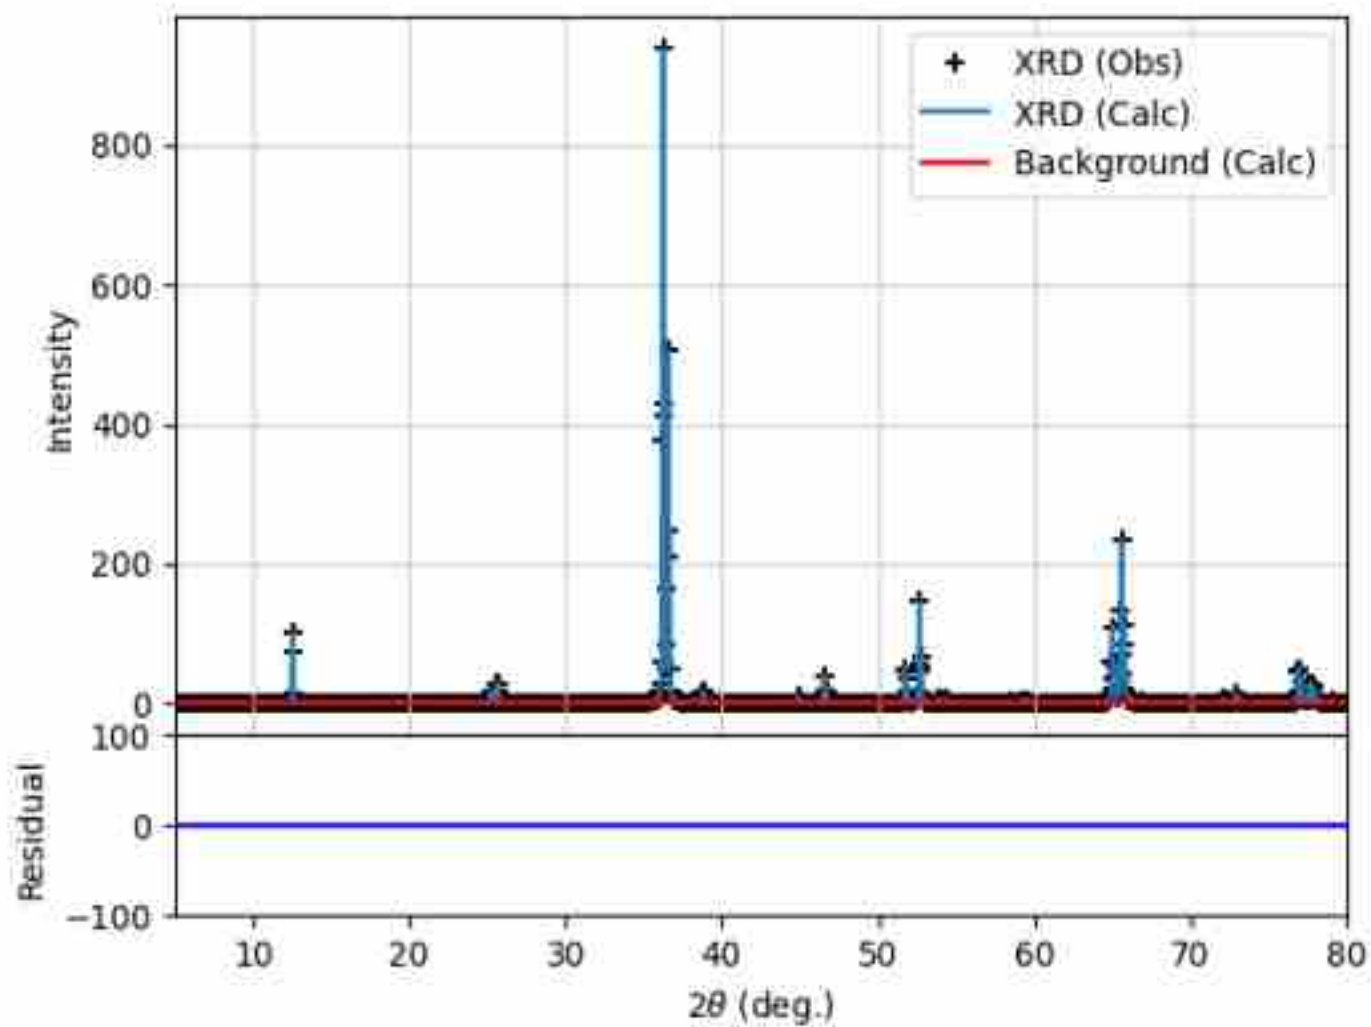

| RMSE before RR | Rwp     | RMSE after RR |
|----------------|---------|---------------|
| 0.009          | 0.00371 | 0.00025       |

# Ho<sub>2</sub>Ga<sub>2</sub>

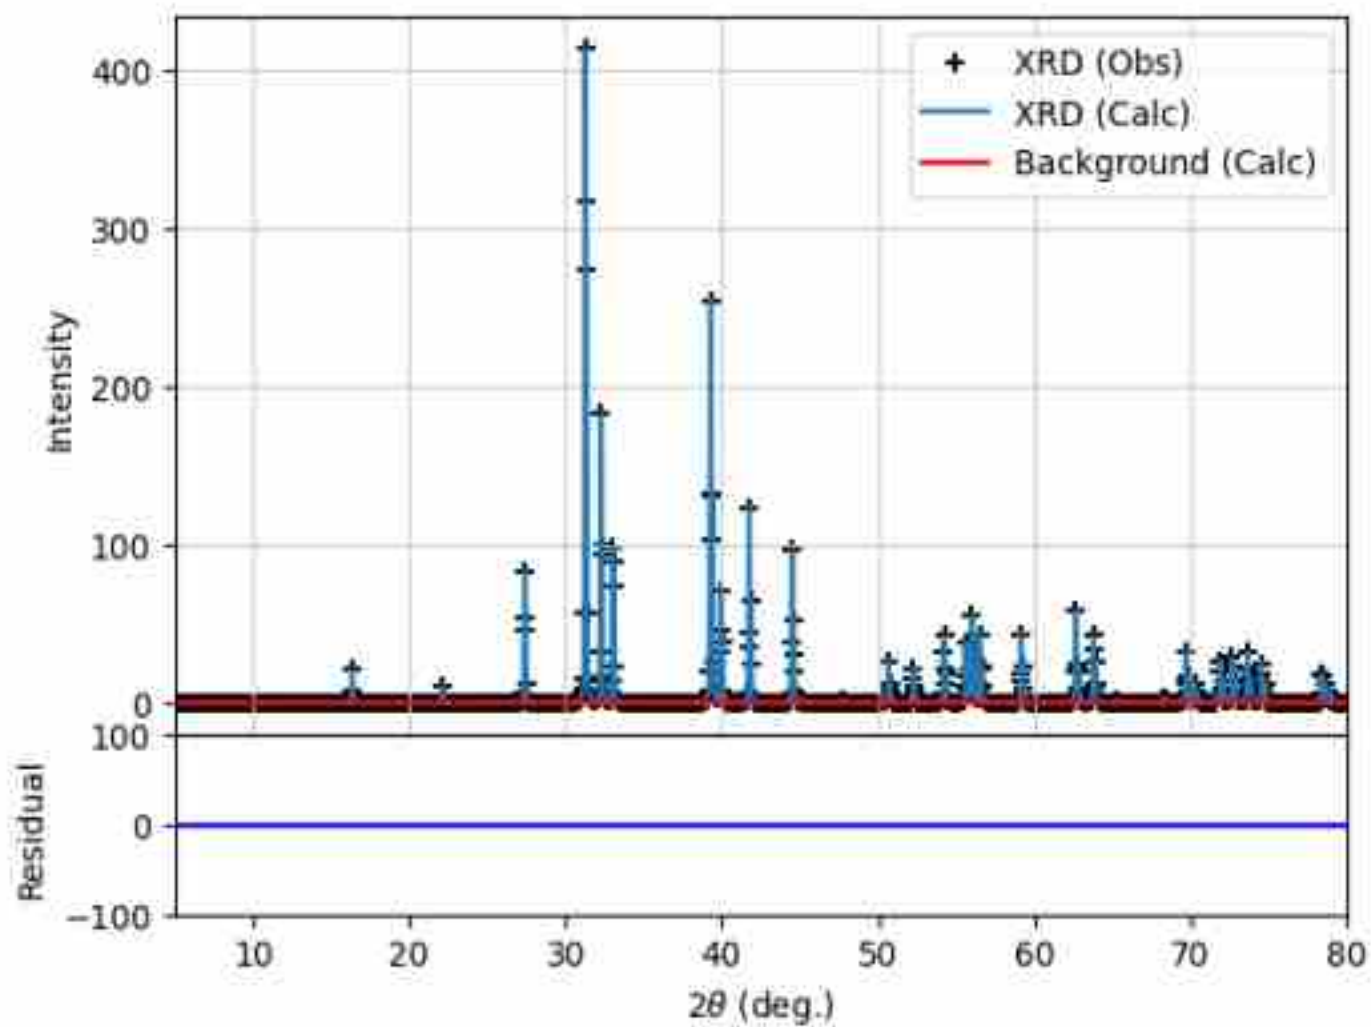

| RMSE before RR | Rwp    | RMSE after RR |
|----------------|--------|---------------|
| 0.009          | 0.0042 | 0.00014       |

# Ho<sub>2</sub>Ni<sub>8</sub>As<sub>4</sub>

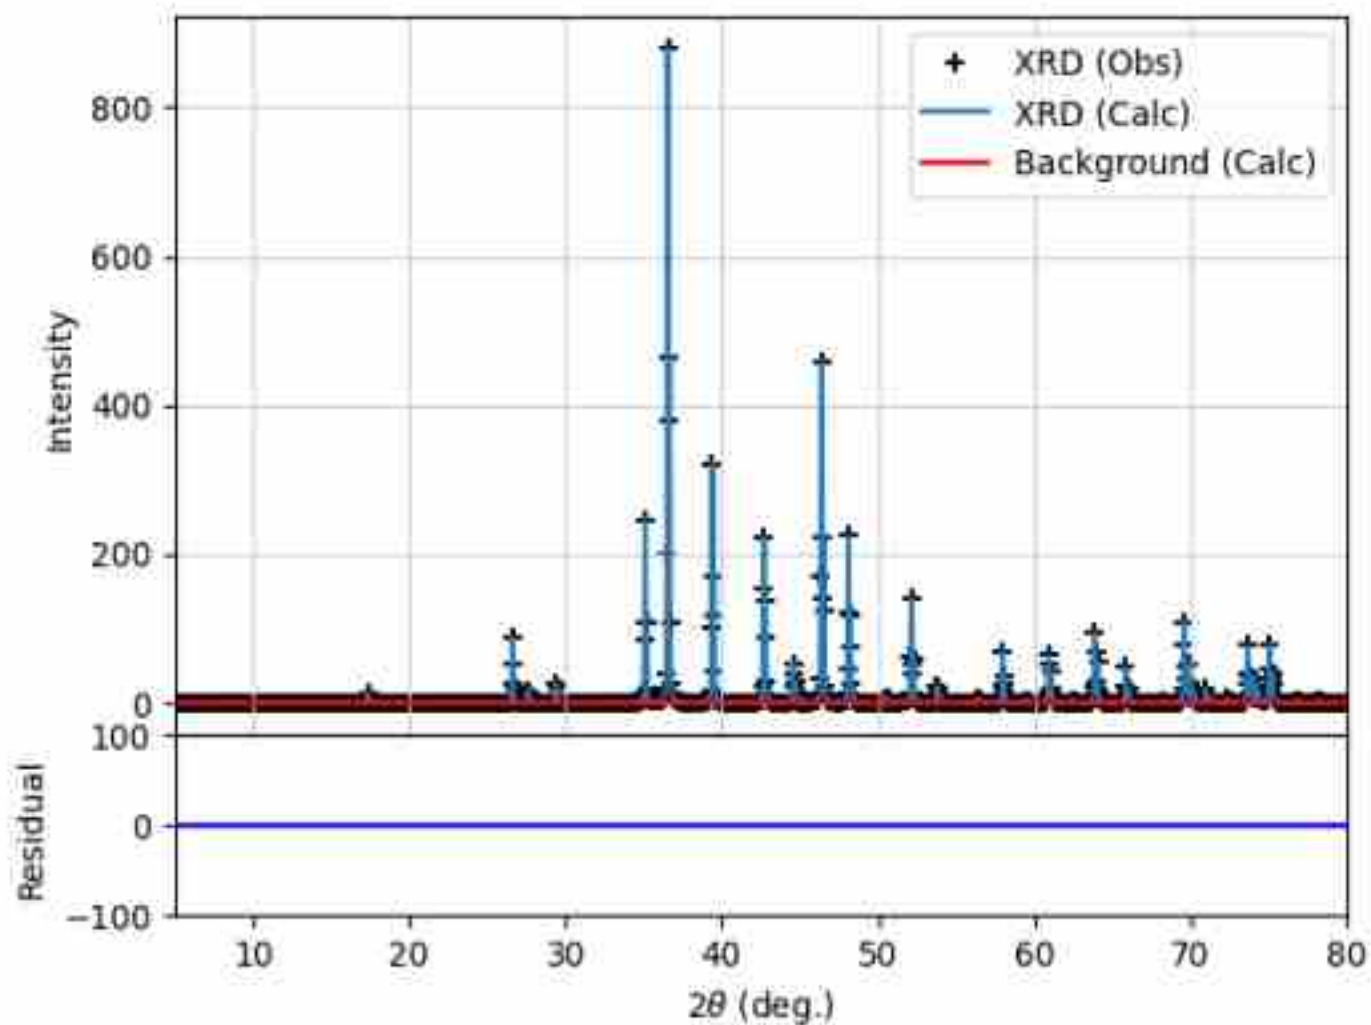

| RMSE before RR | Rwp     | RMSE after RR |
|----------------|---------|---------------|
| 0.009          | 0.00417 | 0.00037       |

# Ho<sub>2</sub>Re<sub>2</sub>Si<sub>2</sub>C<sub>1</sub>

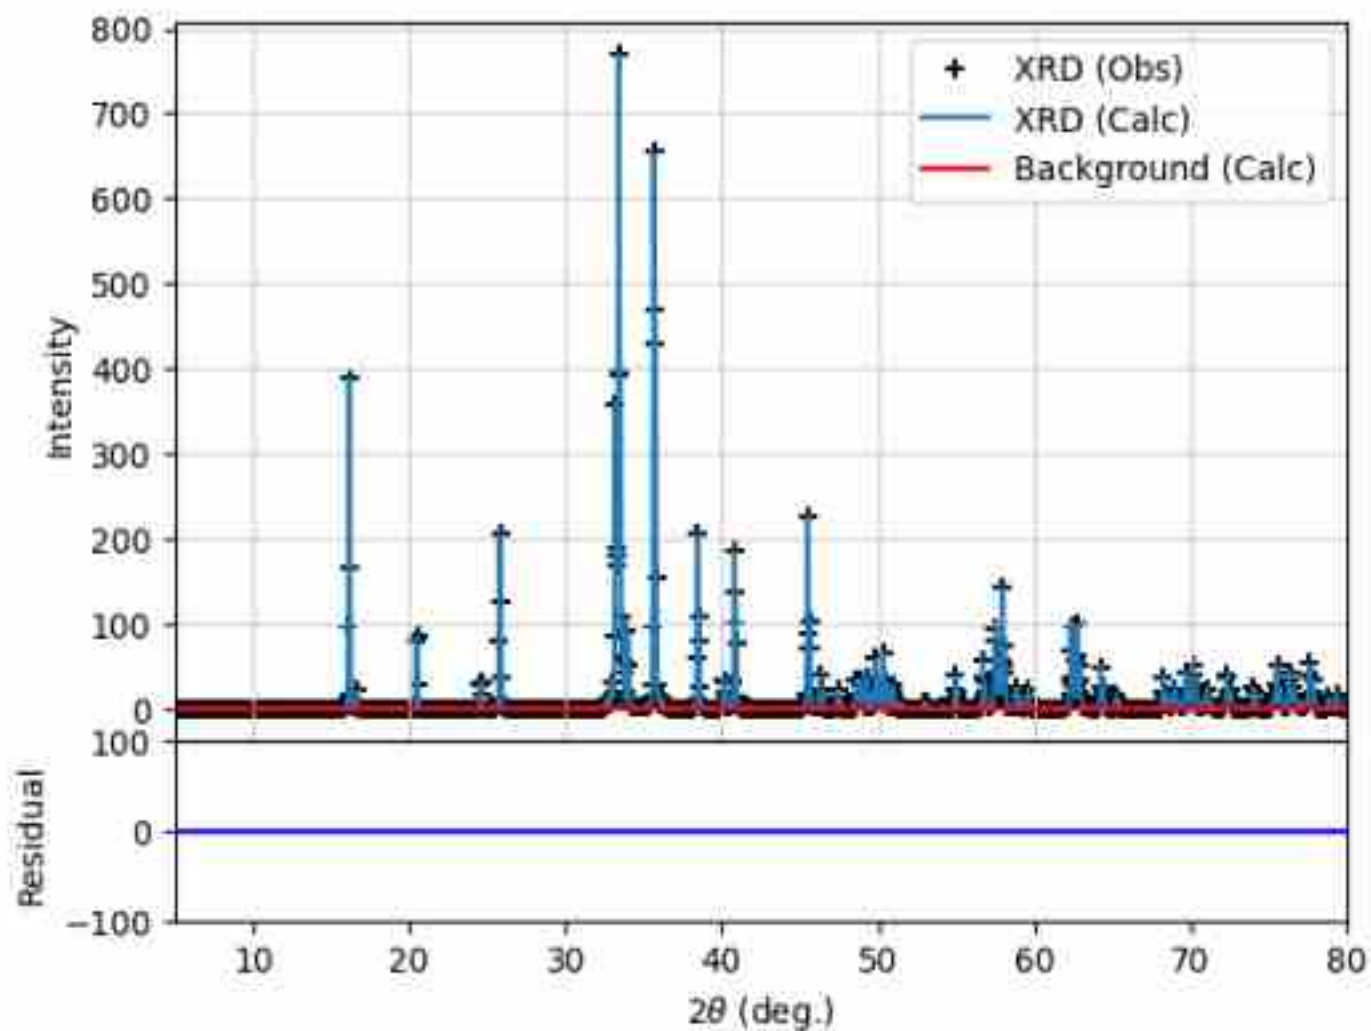

| RMSE before RR | Rwp     | RMSE after RR |
|----------------|---------|---------------|
| 0.009          | 0.00357 | 0.00062       |

# Ho<sub>2</sub>S<sub>2</sub>F<sub>2</sub>

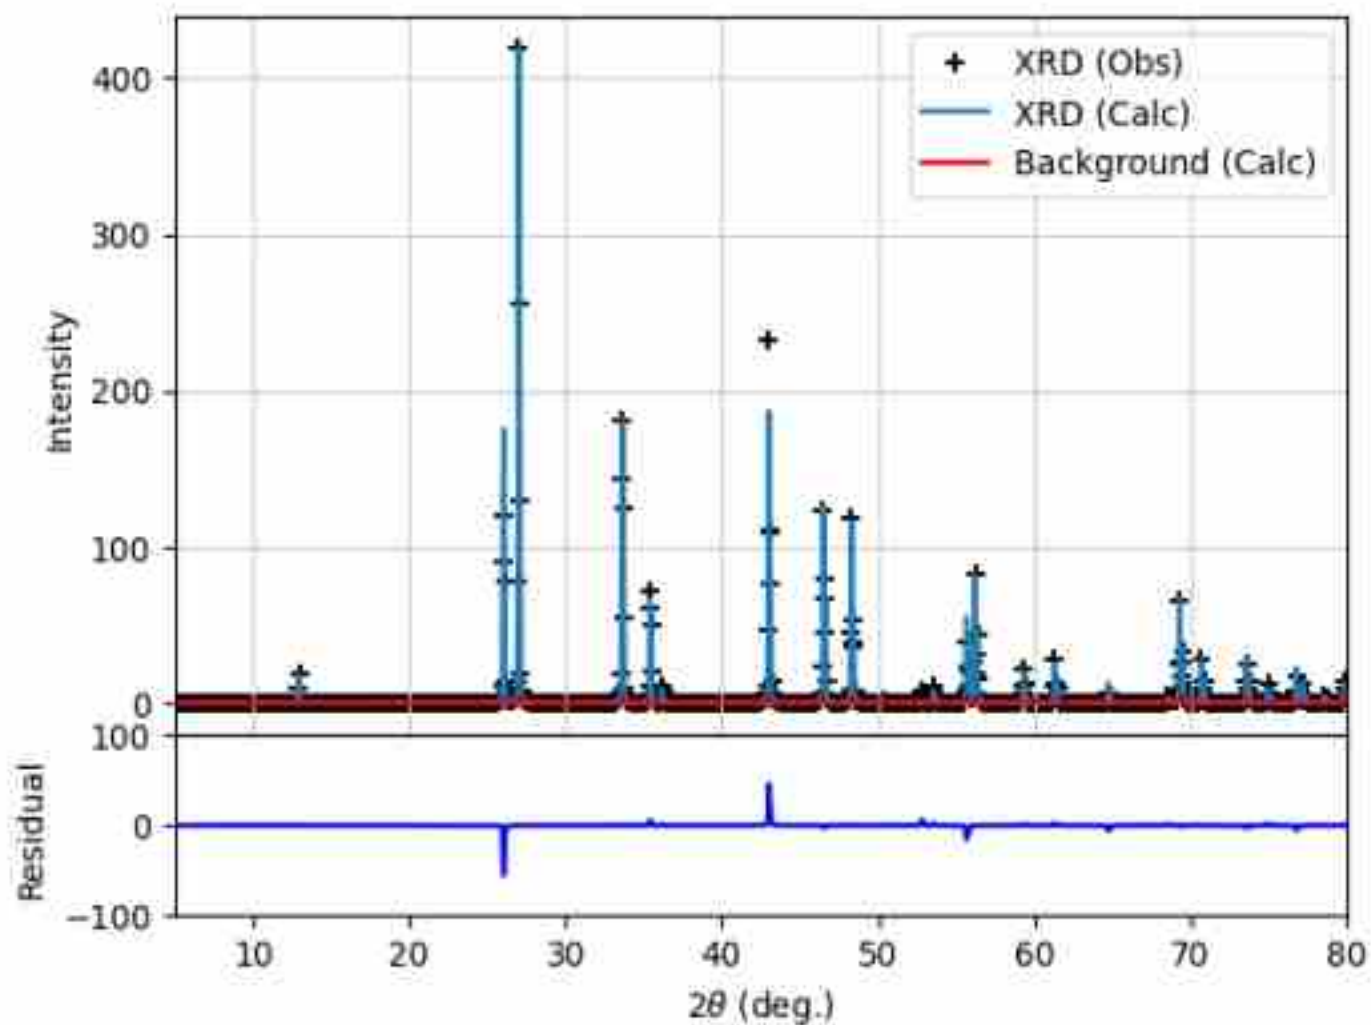

| RMSE before RR | Rwp     | RMSE after RR |
|----------------|---------|---------------|
| 0.009          | 15.8382 | 0.02993       |

# Ho<sub>3</sub>Sn<sub>3</sub>Pt<sub>3</sub>

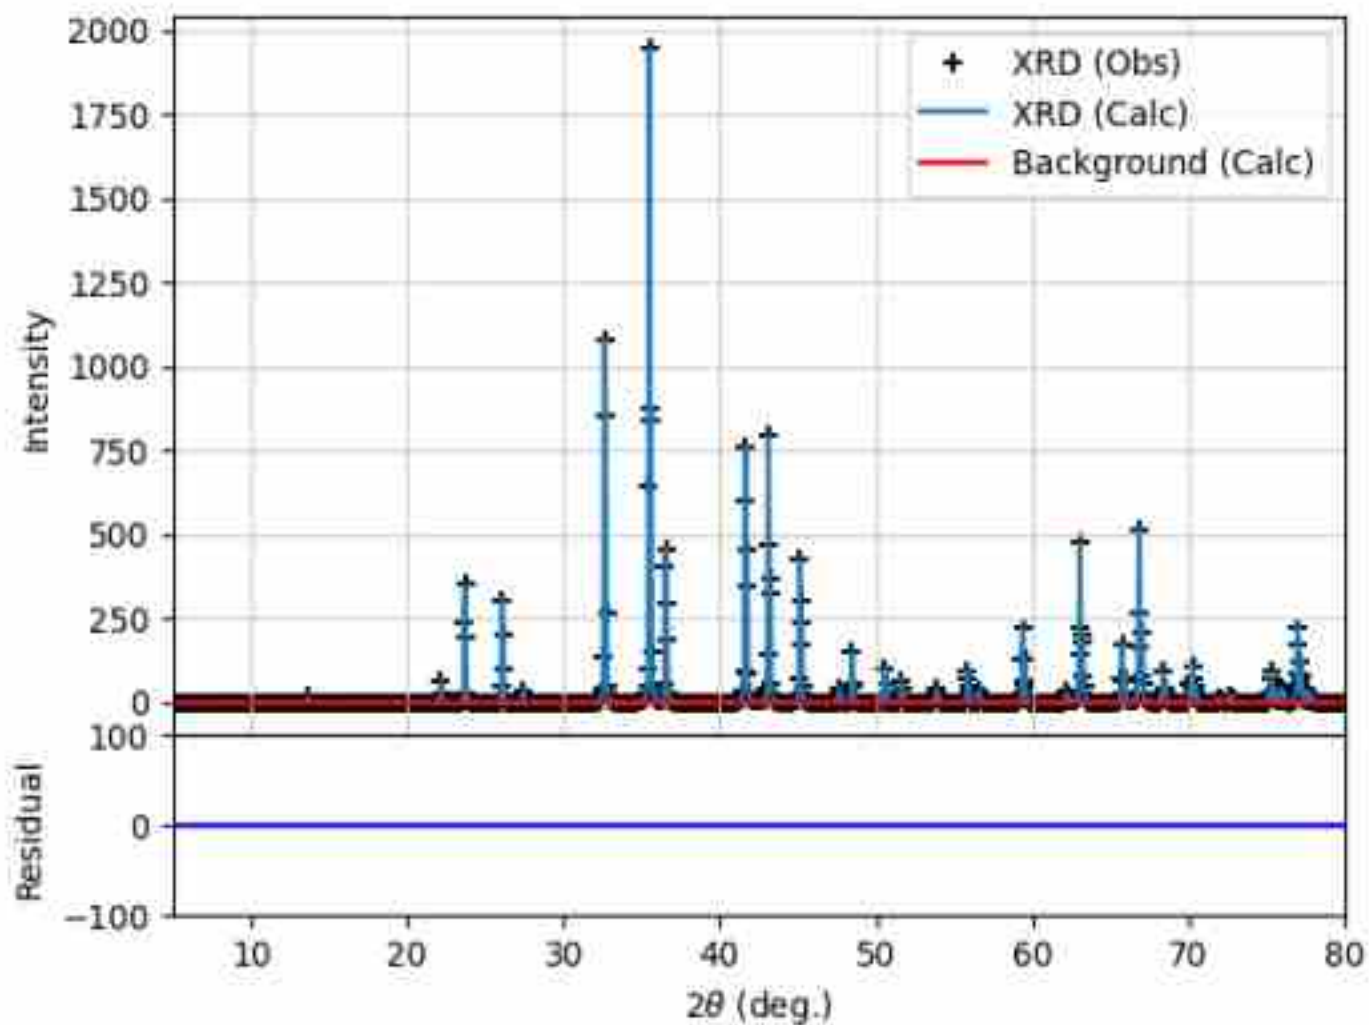

| RMSE before RR | Rwp     | RMSE after RR |
|----------------|---------|---------------|
| 0.009          | 0.00494 | 0.00081       |

# Ho<sub>4</sub>Ge<sub>4</sub>Ru<sub>4</sub>

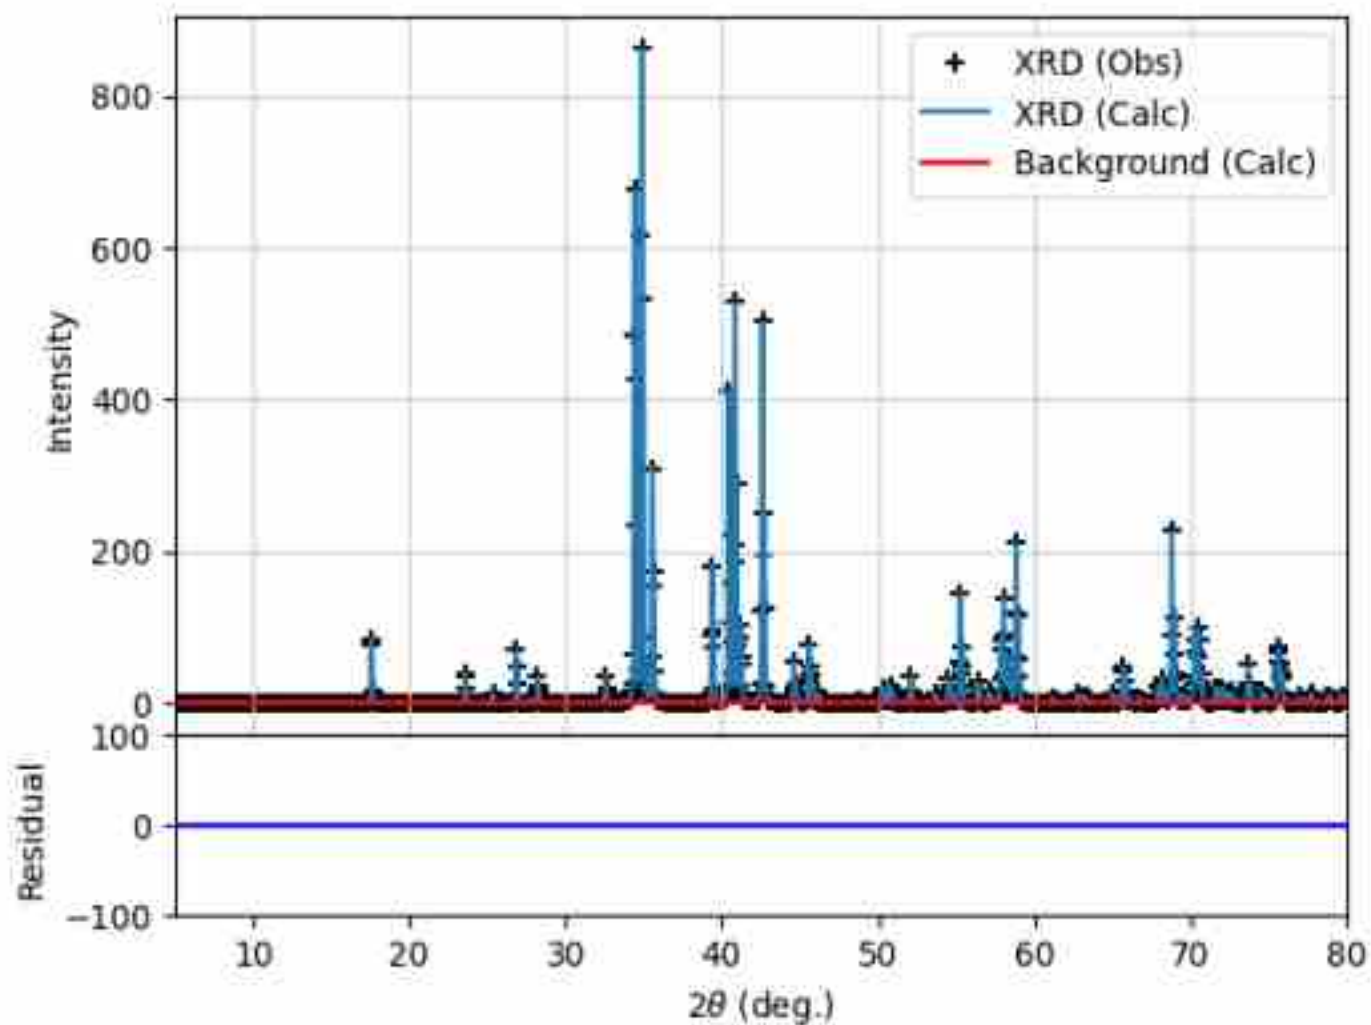

| RMSE before RR | Rwp     | RMSE after RR |
|----------------|---------|---------------|
| 0.009          | 0.00545 | 0.00052       |

# Ho<sub>4</sub>Si<sub>3</sub>Ge<sub>1</sub>

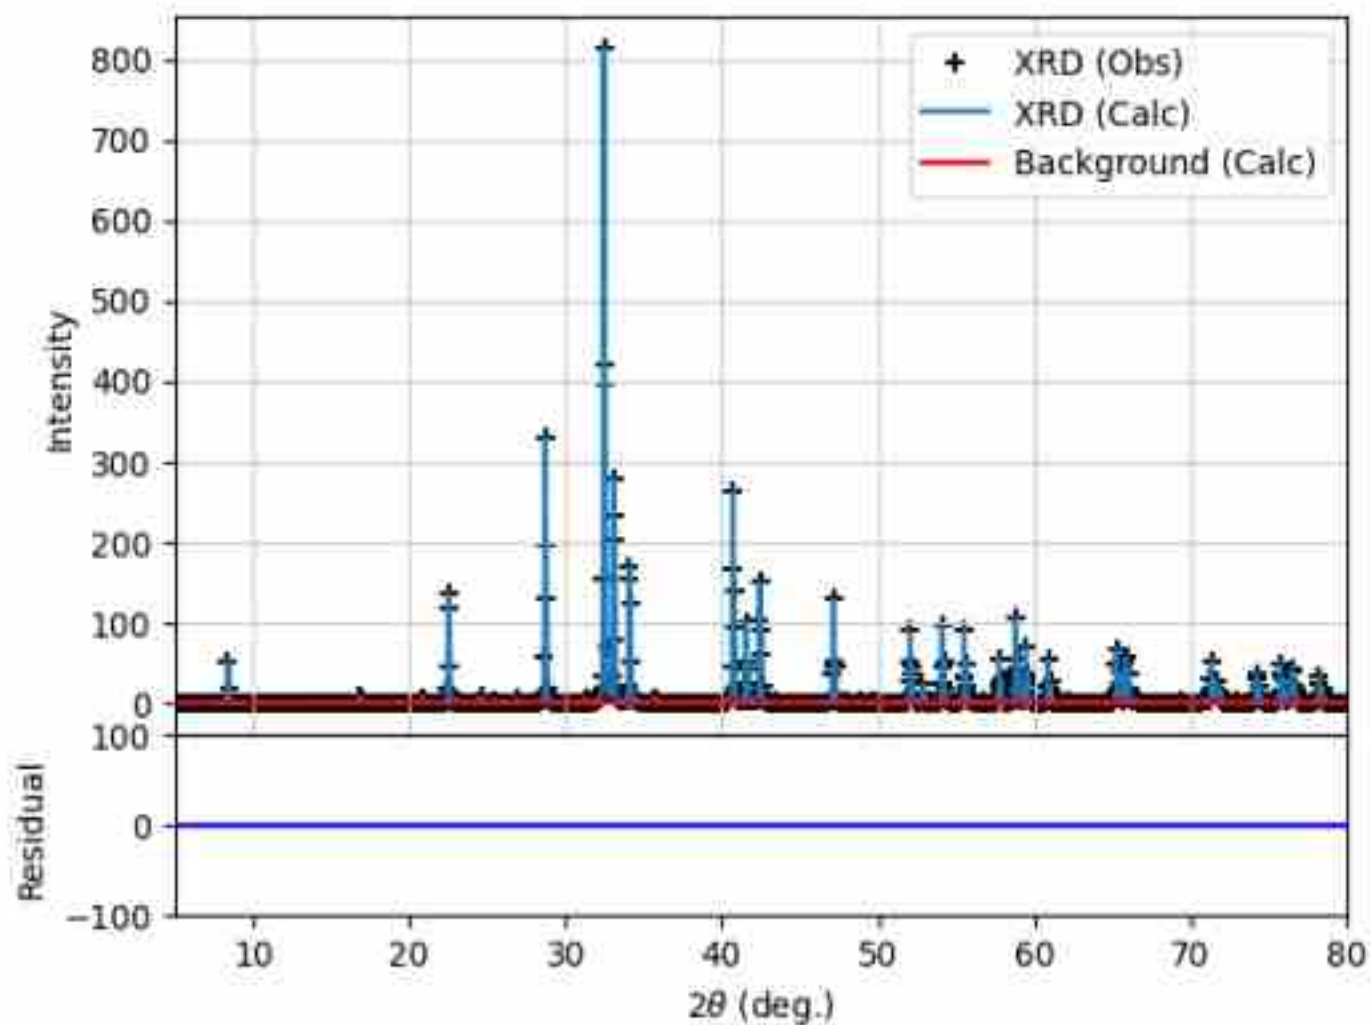

| RMSE before RR | Rwp     | RMSE after RR |
|----------------|---------|---------------|
| 0.009          | 0.00428 | 0.00023       |



# Ho8Al4

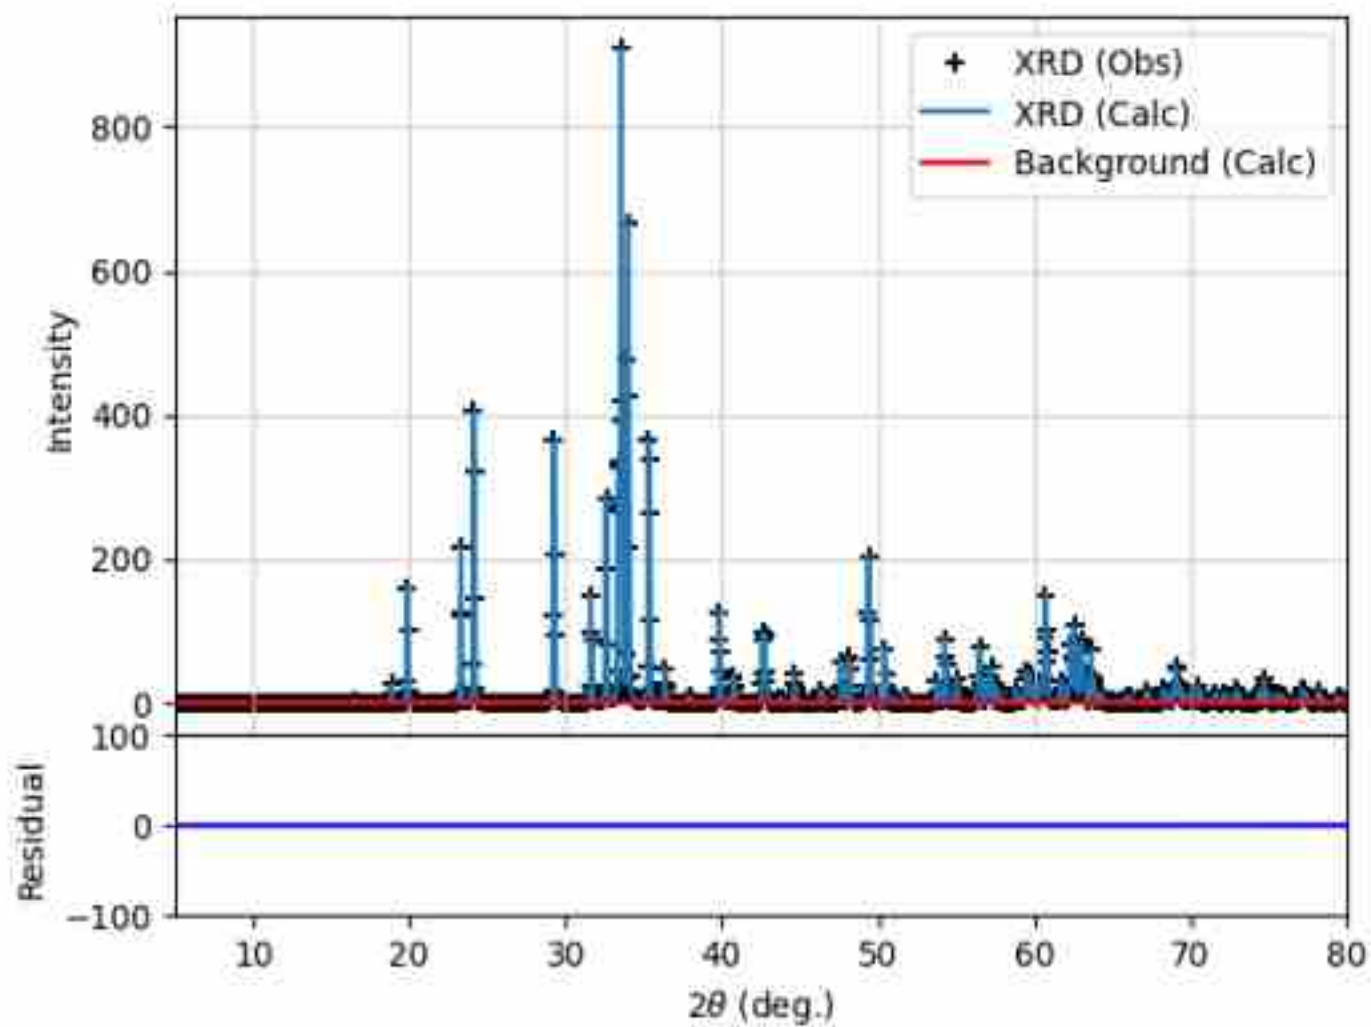

| RMSE before RR | Rwp     | RMSE after RR |
|----------------|---------|---------------|
| 0.009          | 0.33205 | 0.0068        |

# In<sub>2</sub>CuAgS<sub>4</sub>

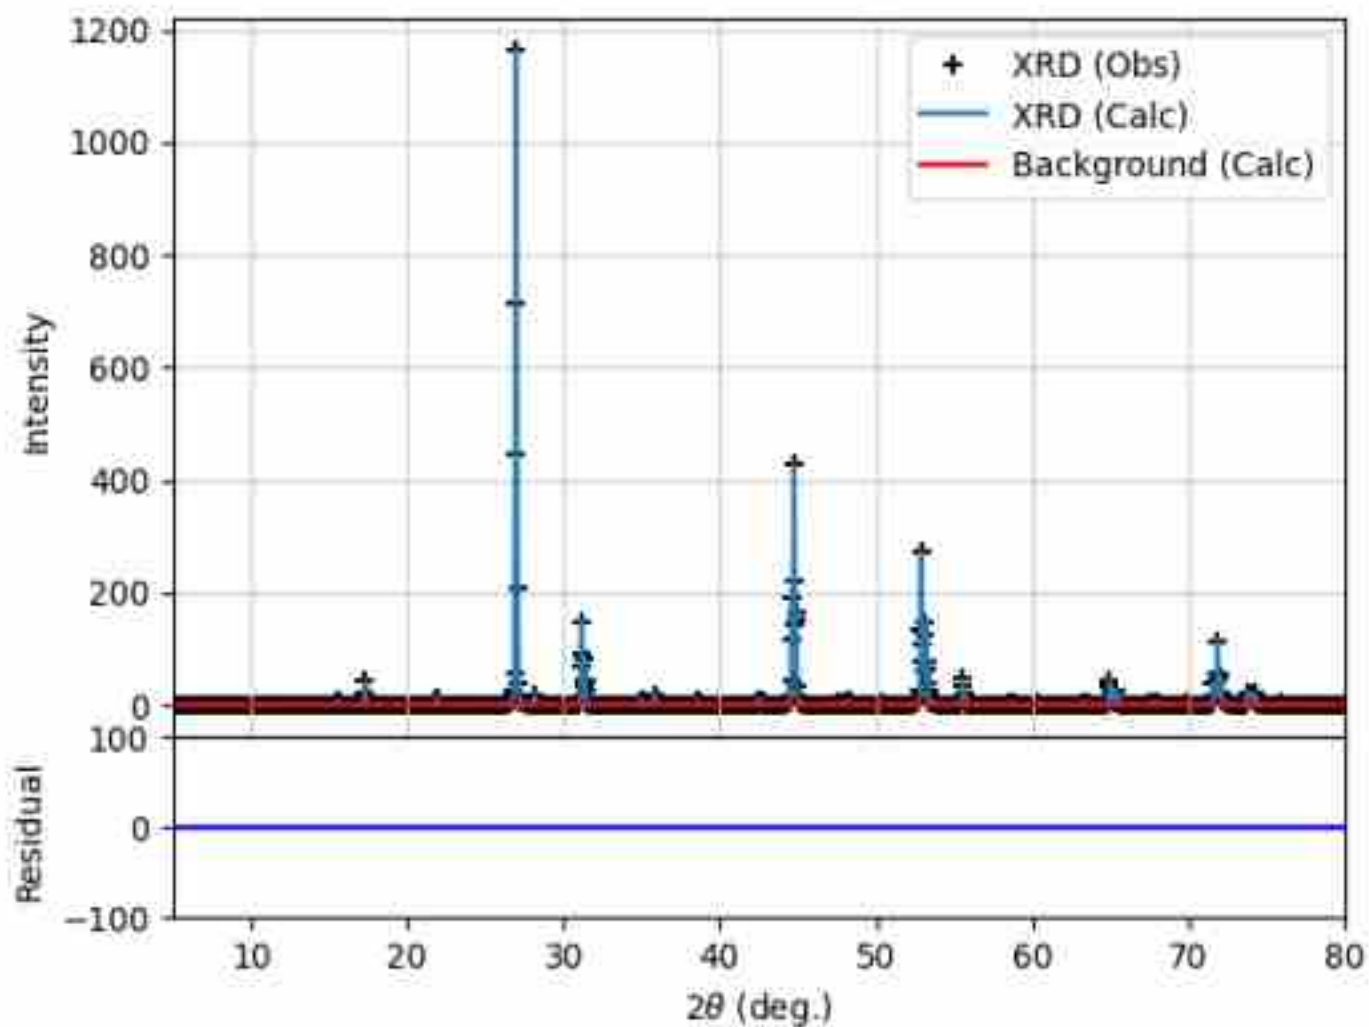

| RMSE before RR | Rwp     | RMSE after RR |
|----------------|---------|---------------|
| 0.009          | 0.00299 | 0.00088       |

# K1Ag1Br3

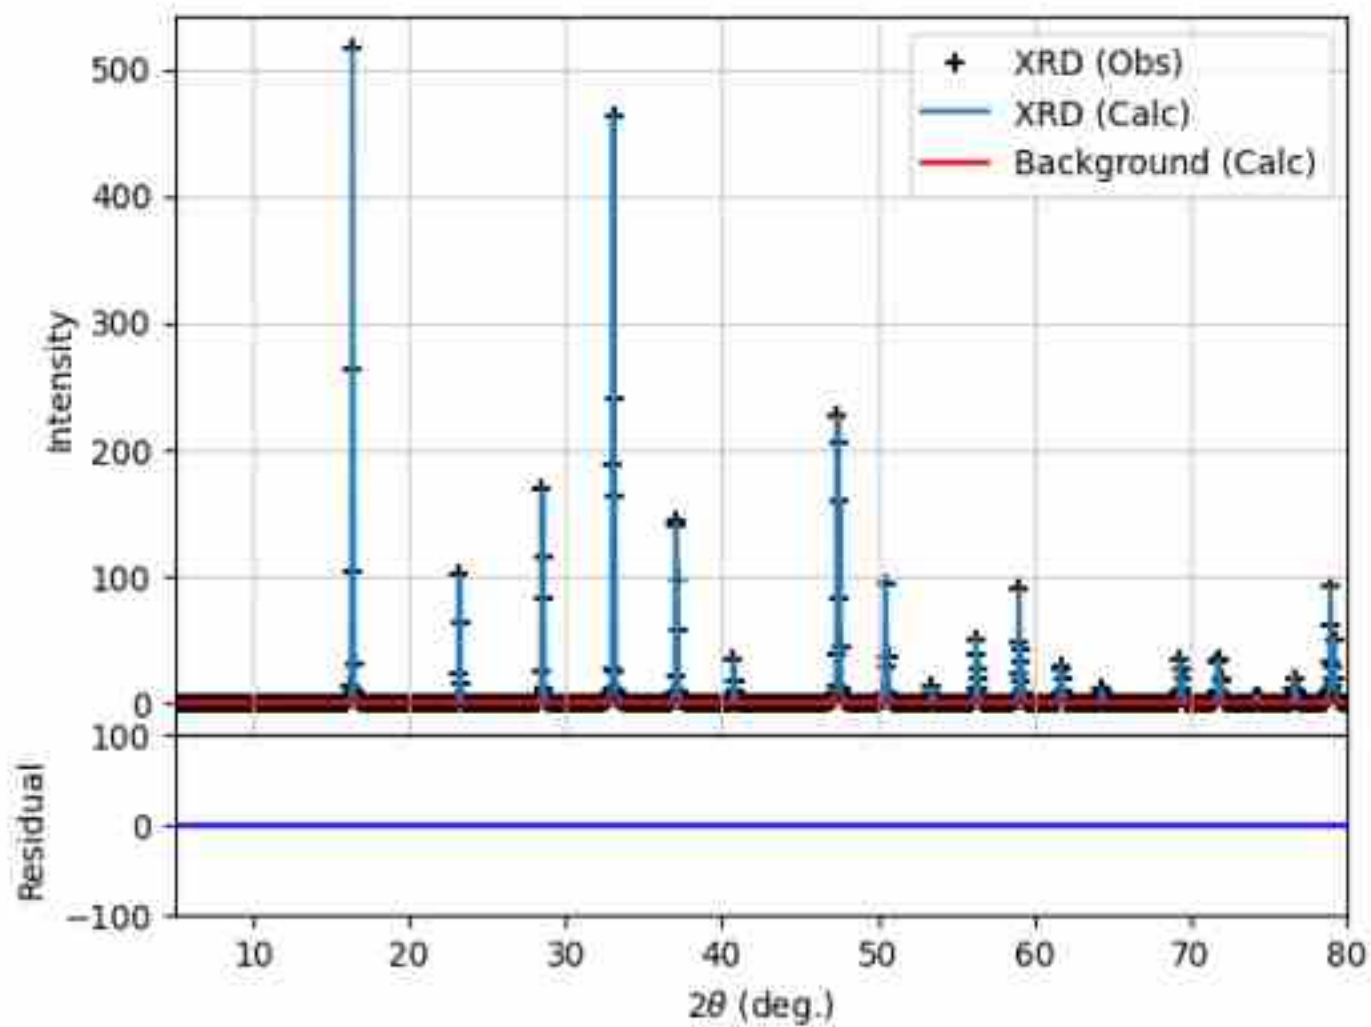

| RMSE before RR | Rwp     | RMSE after RR |
|----------------|---------|---------------|
| 0.009          | 0.04634 | 0.00576       |

# K1Ba1Nd1W1O6

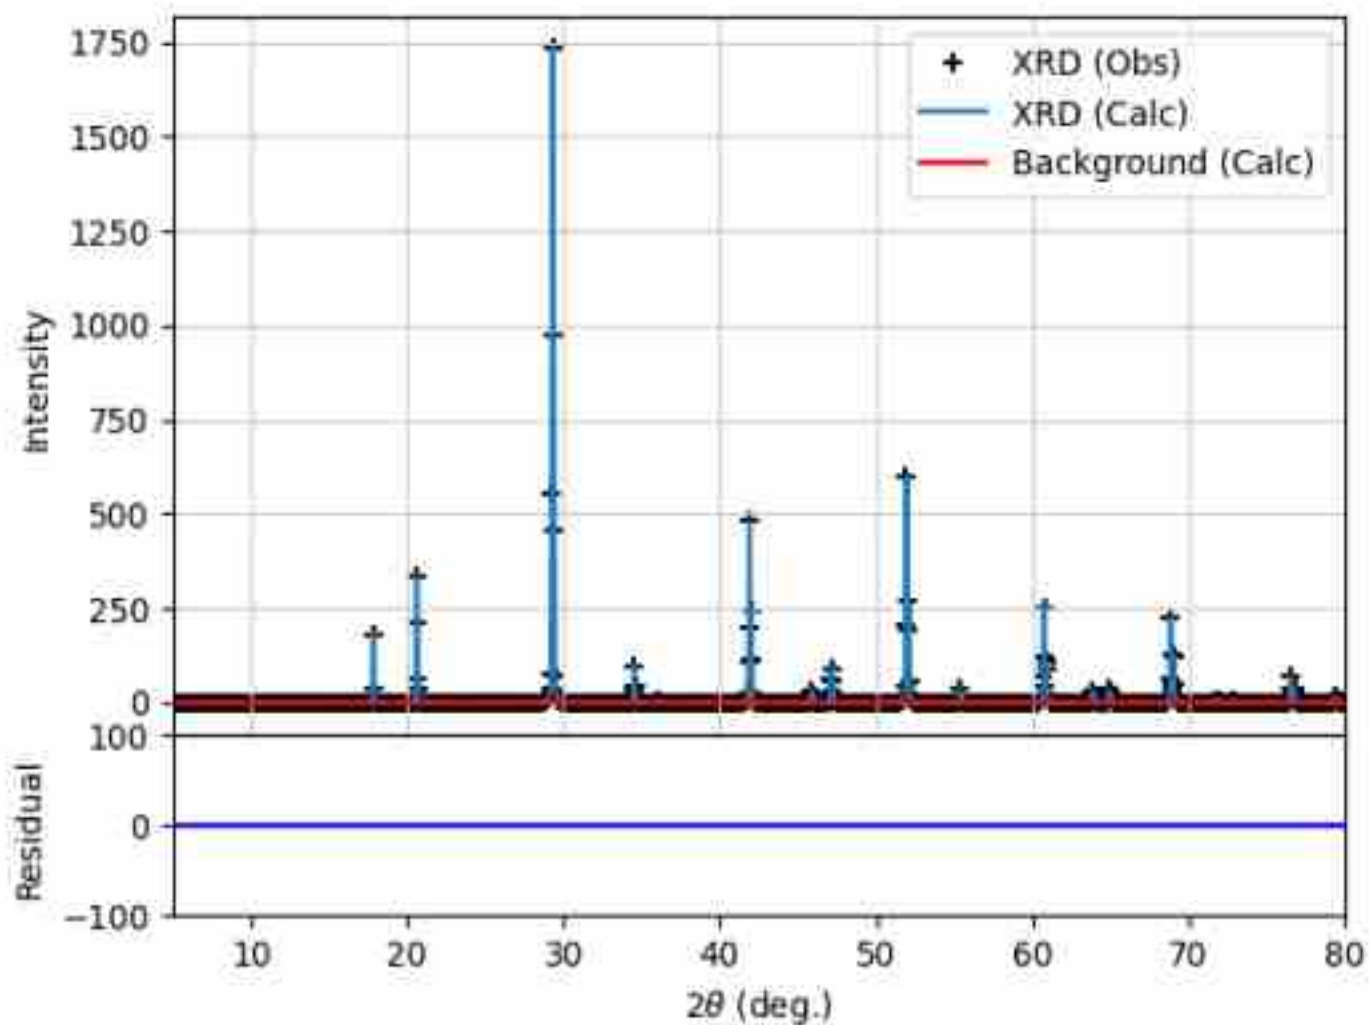

| RMSE before RR | Rwp     | RMSE after RR |
|----------------|---------|---------------|
| 0.009          | 0.00726 | 0.00374       |

# K1Rb2Co1F6

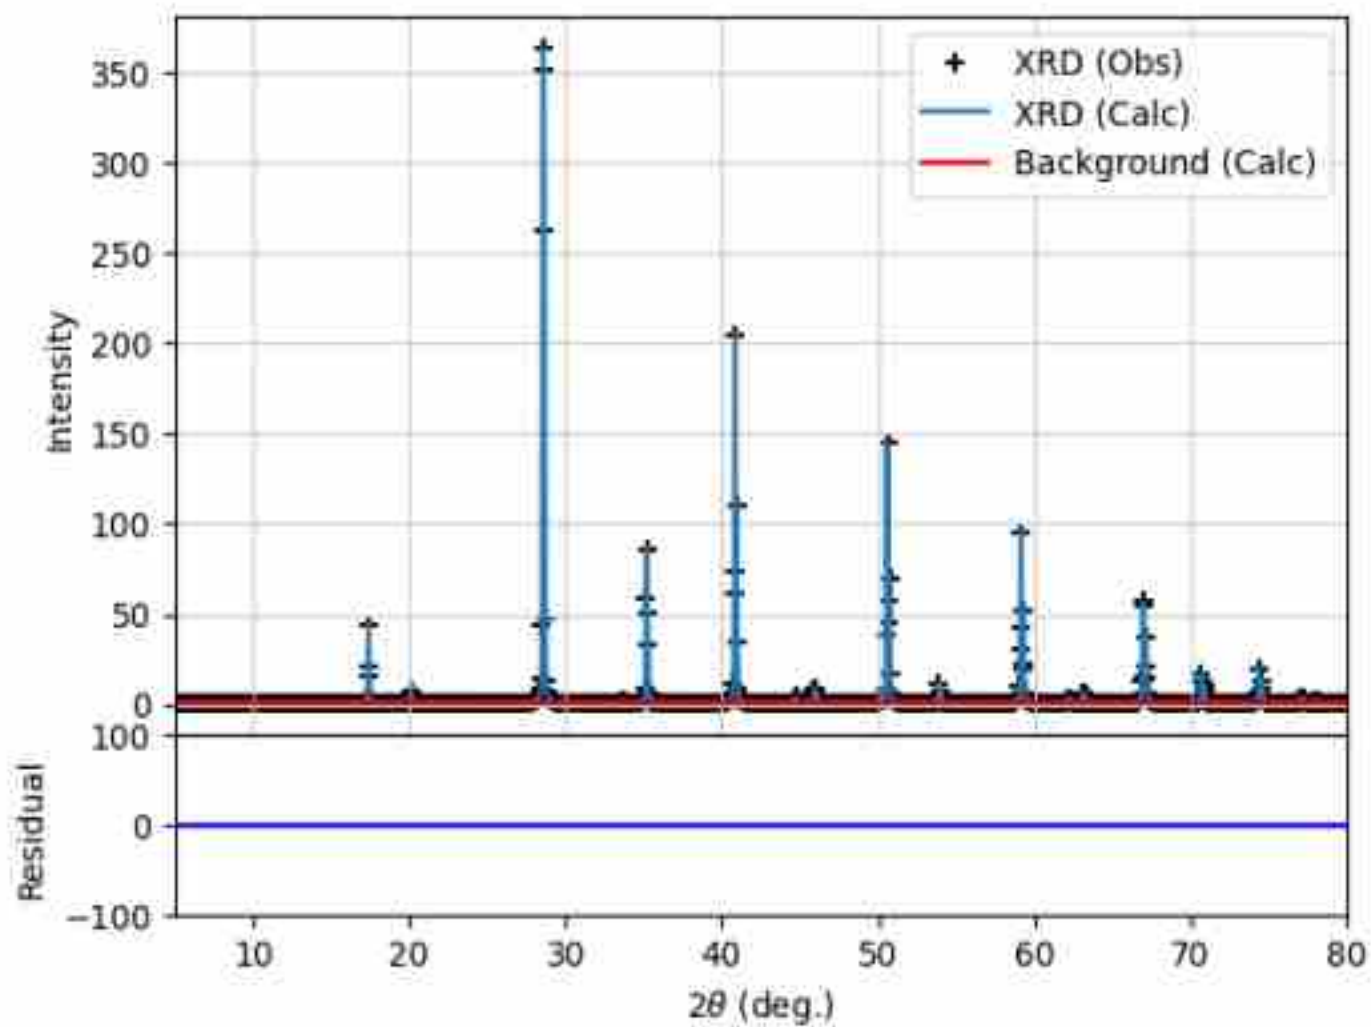

| RMSE before RR | Rwp     | RMSE after RR |
|----------------|---------|---------------|
| 0.009          | 0.01412 | 0.00321       |

# K1Rb2In1F6

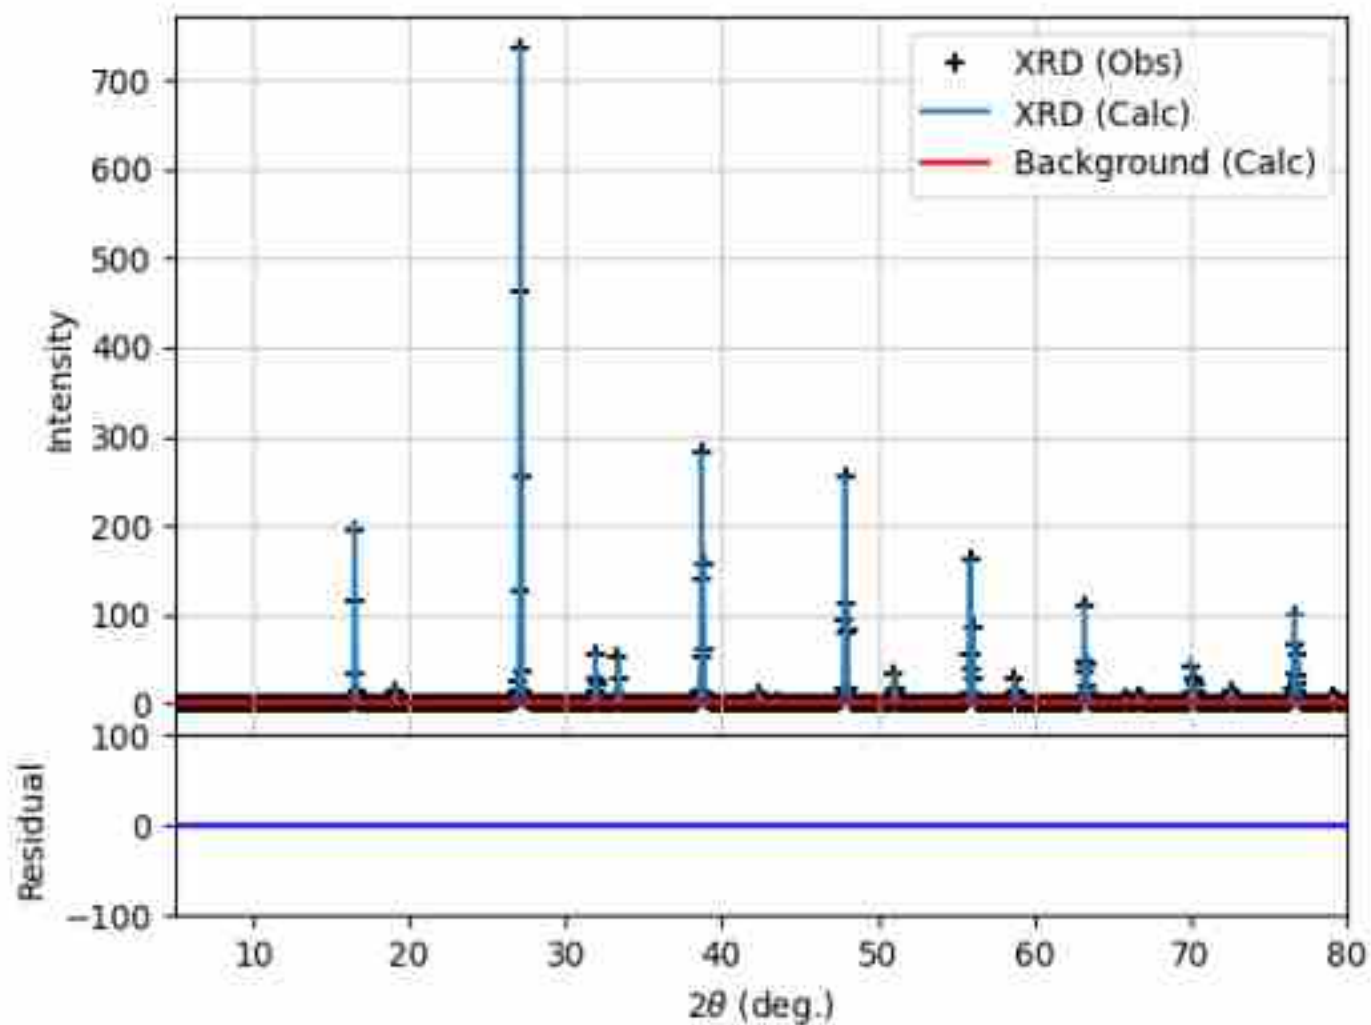

| RMSE before RR | Rwp     | RMSE after RR |
|----------------|---------|---------------|
| 0.009          | 0.00978 | 0.00282       |

# K1Rb2Rh1F6

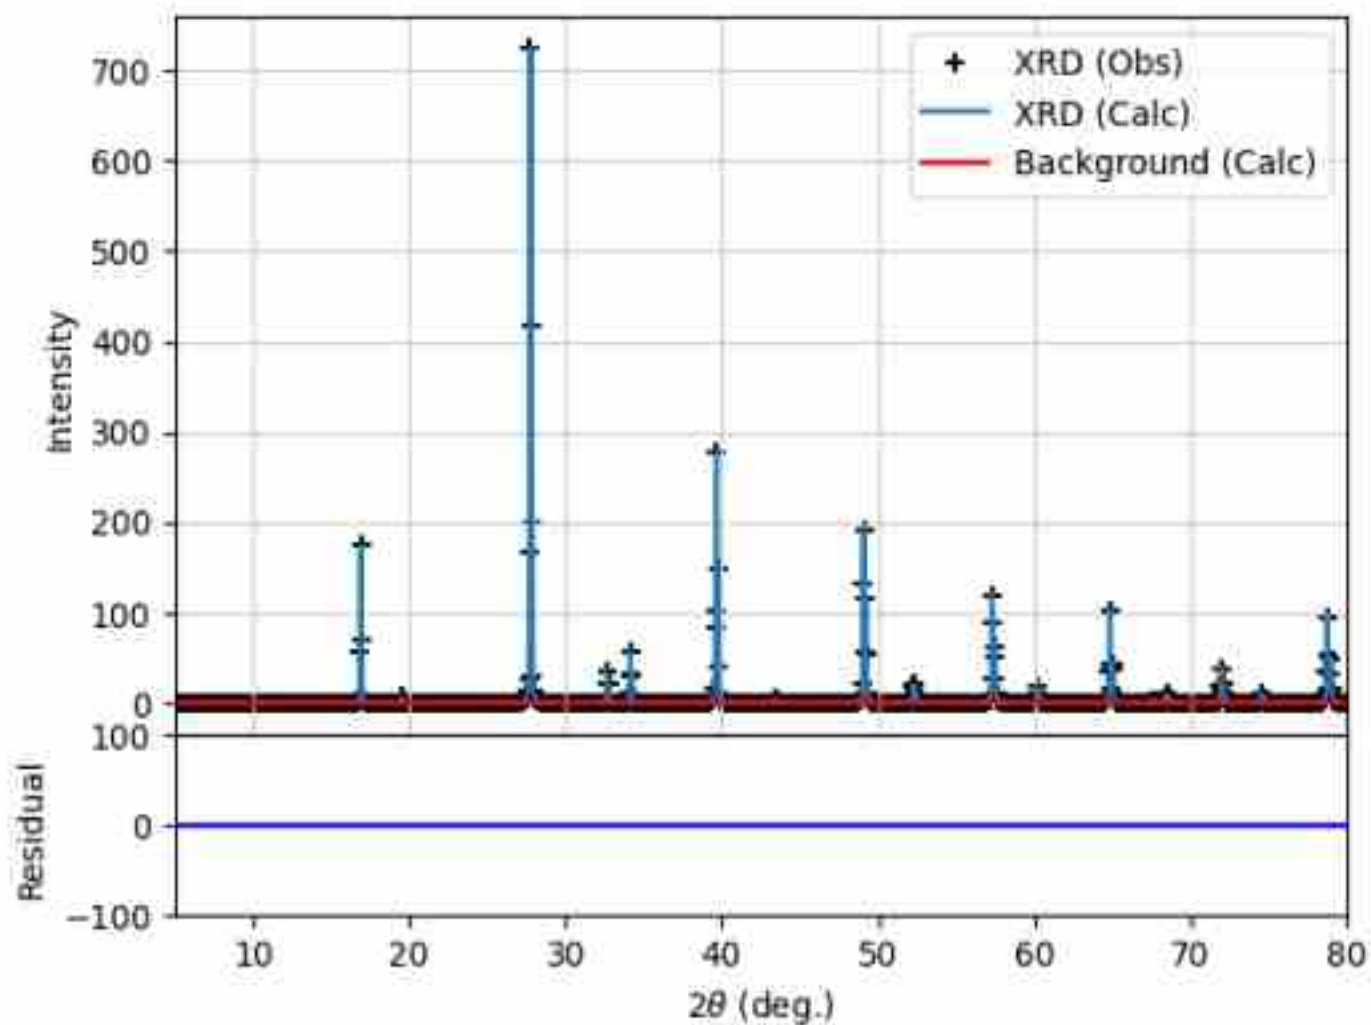

| RMSE before RR | Rwp     | RMSE after RR |
|----------------|---------|---------------|
| 0.009          | 0.01259 | 0.00308       |

# K1Rb2Sc1Cl6

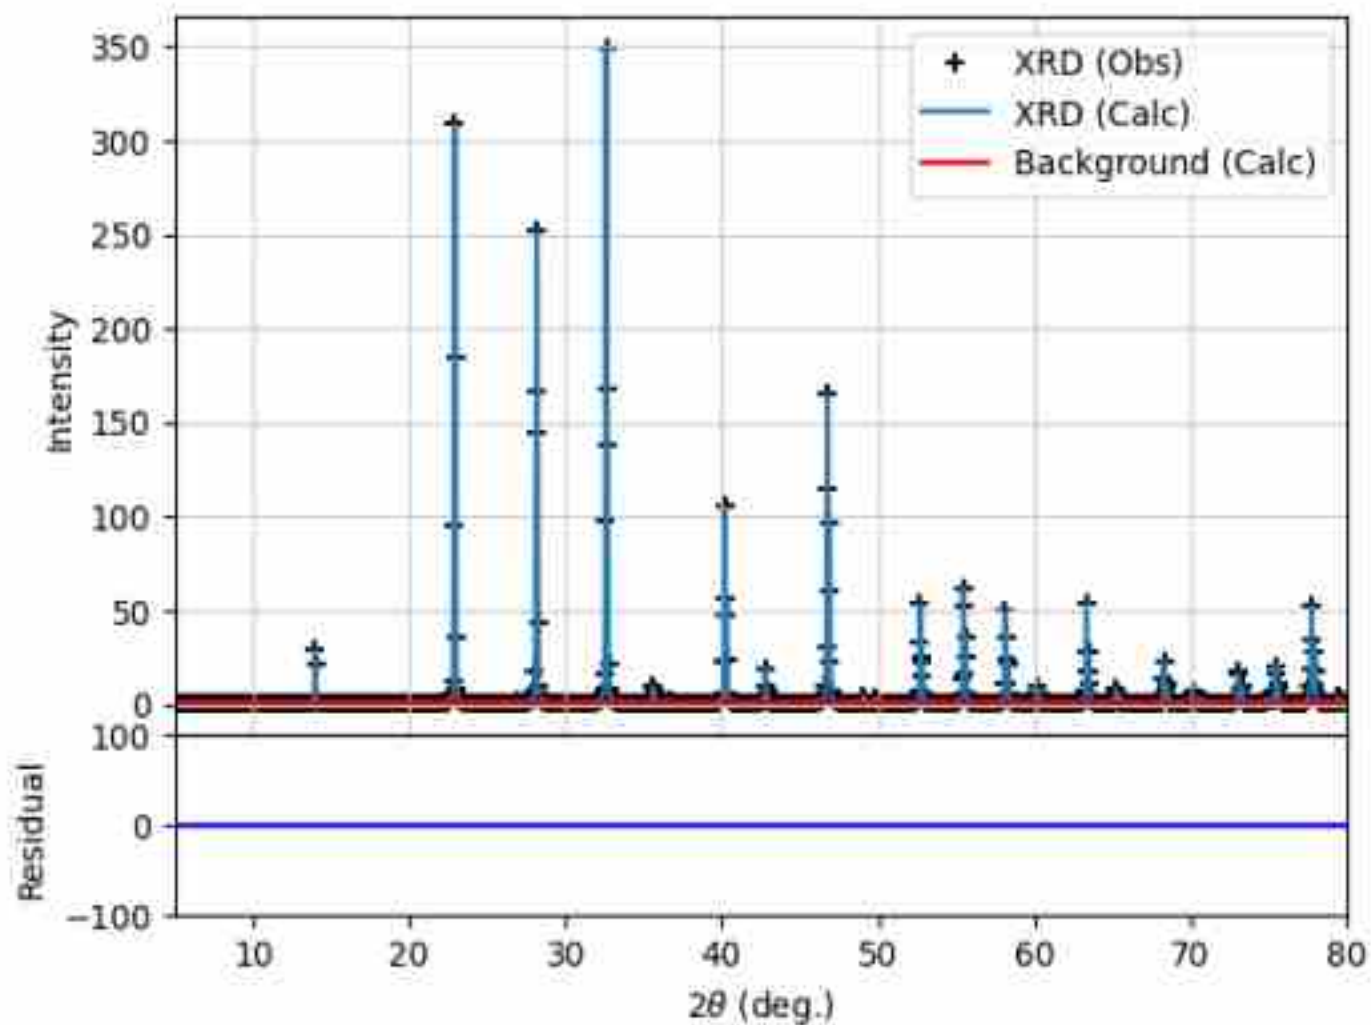

| RMSE before RR | Rwp     | RMSE after RR |
|----------------|---------|---------------|
| 0.009          | 0.03779 | 0.00303       |



# K1Rb2Sc1F6

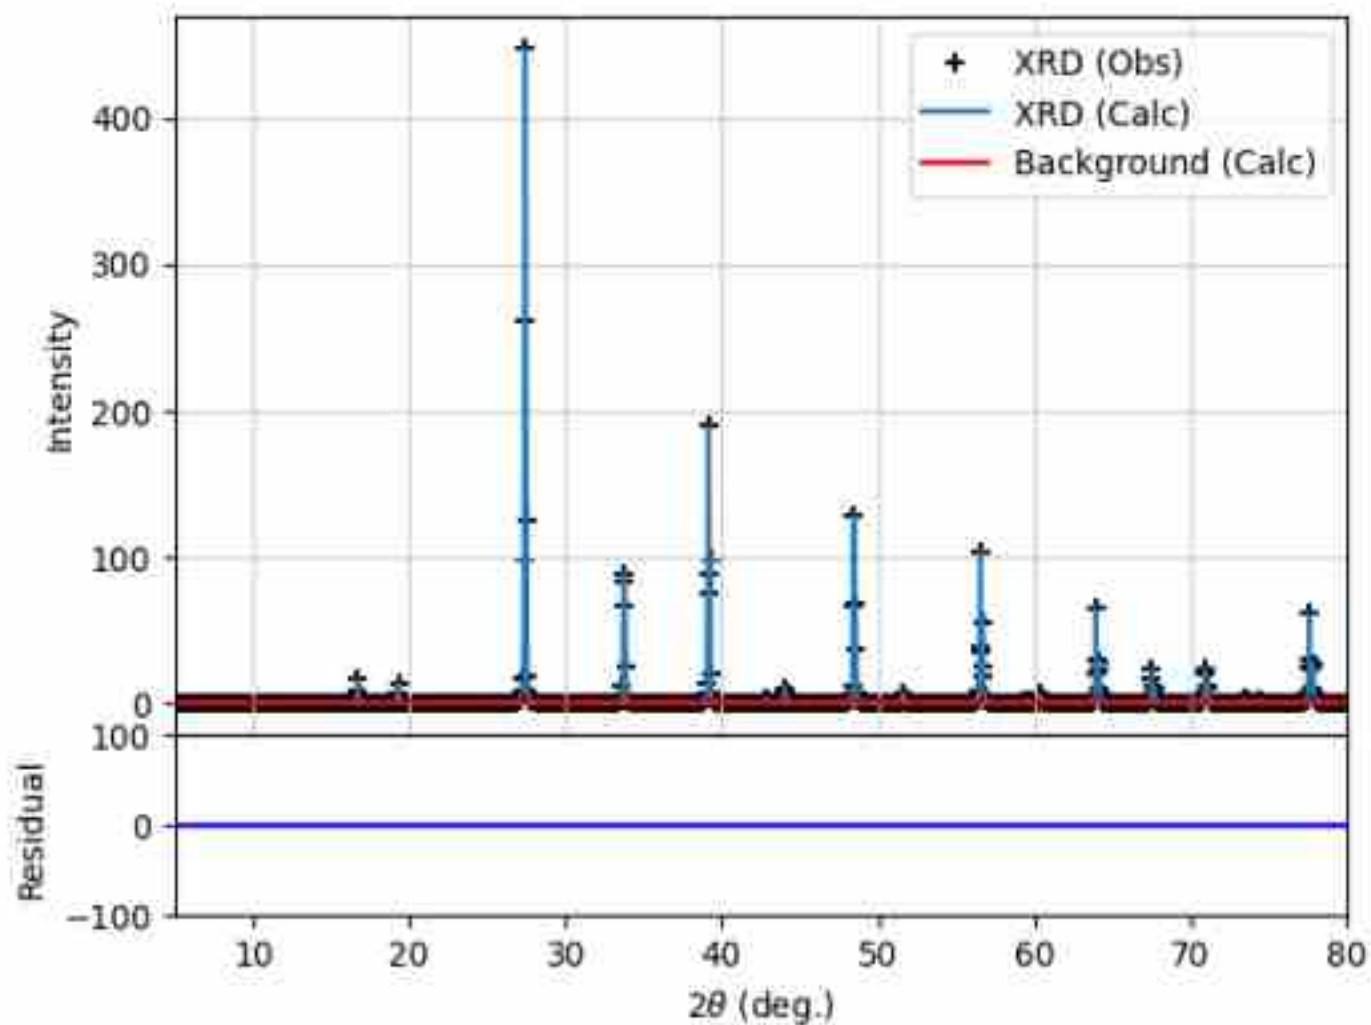

| RMSE before RR | Rwp     | RMSE after RR |
|----------------|---------|---------------|
| 0.009          | 0.01179 | 0.00284       |

# K1Sr1Dy1W1O6

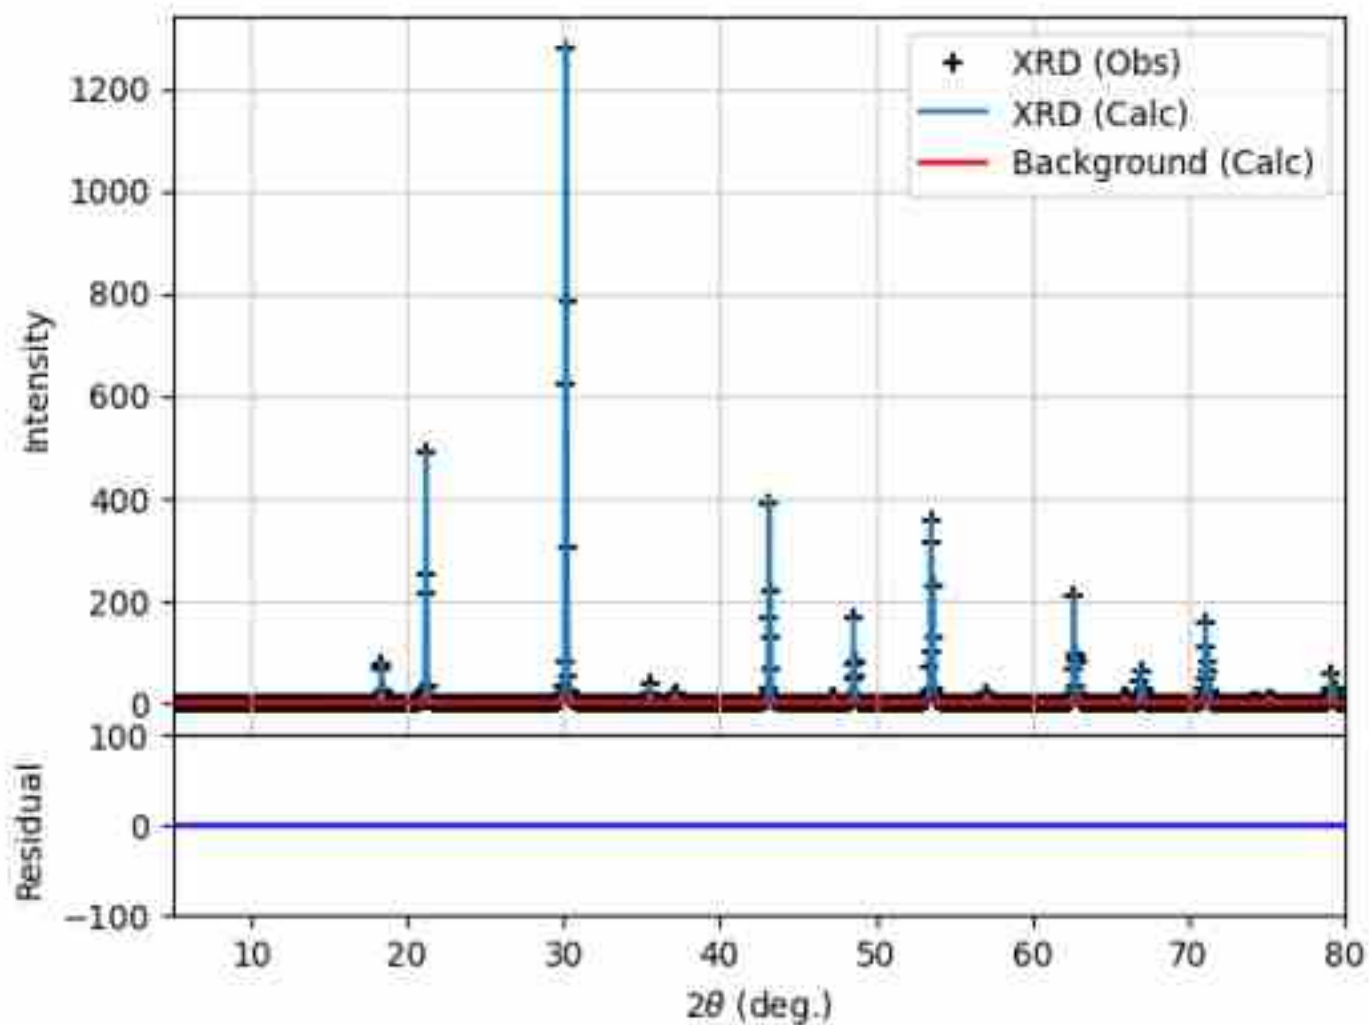

| RMSE before RR | Rwp     | RMSE after RR |
|----------------|---------|---------------|
| 0.009          | 0.01037 | 0.004         |

K2Ag1Mo1Br6

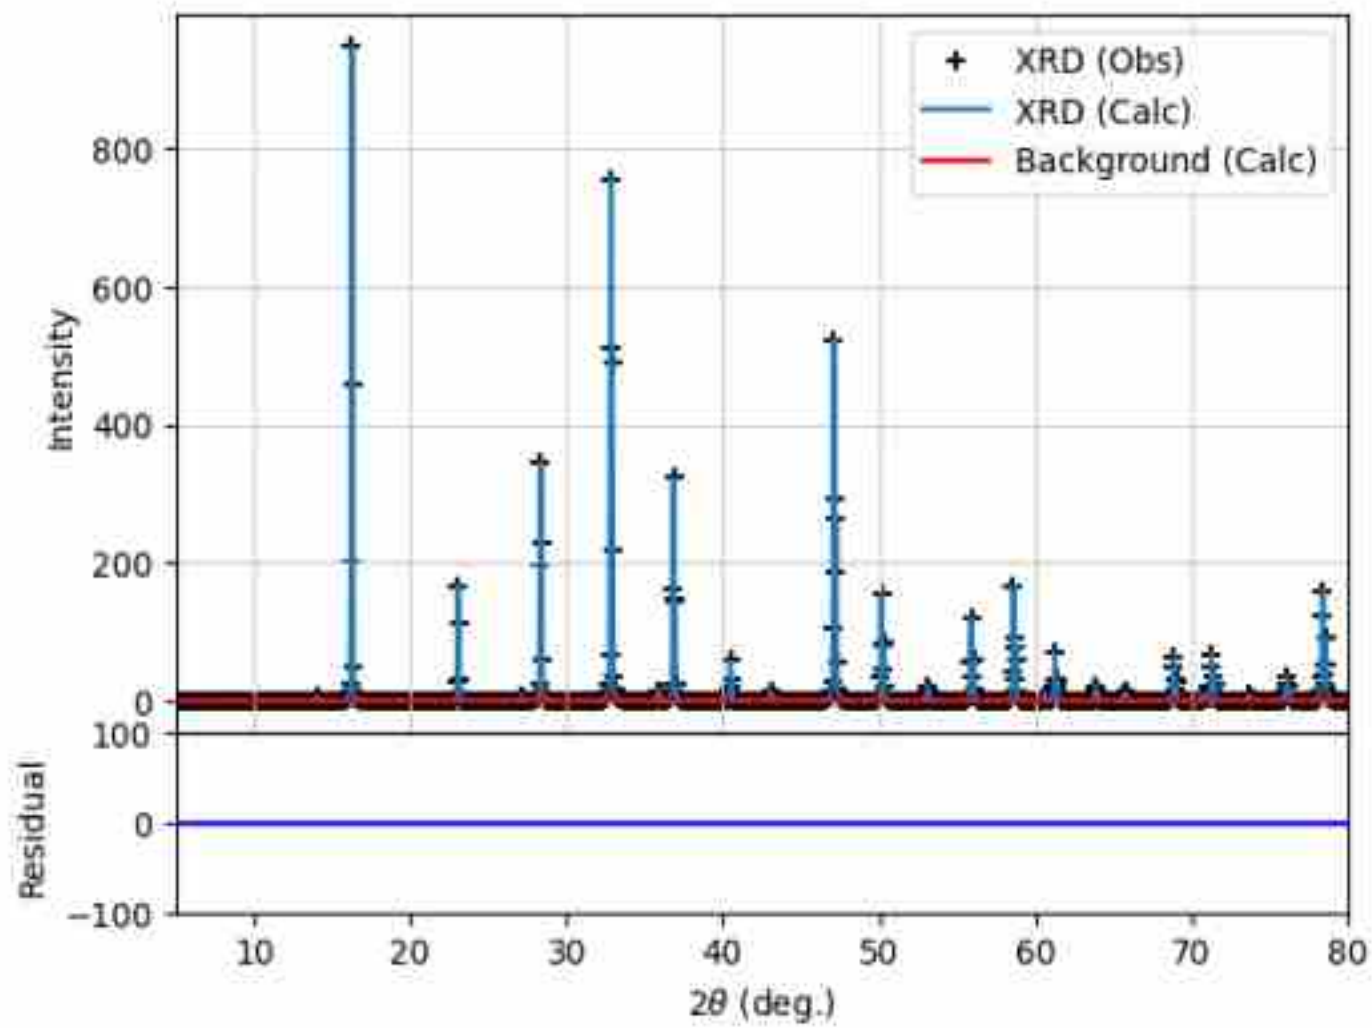

| RMSE before RR | Rwp     | RMSE after RR |
|----------------|---------|---------------|
| 0.009          | 0.04504 | 0.0029        |

# K<sub>2</sub>Ag<sub>1</sub>Mo<sub>1</sub>F<sub>6</sub>

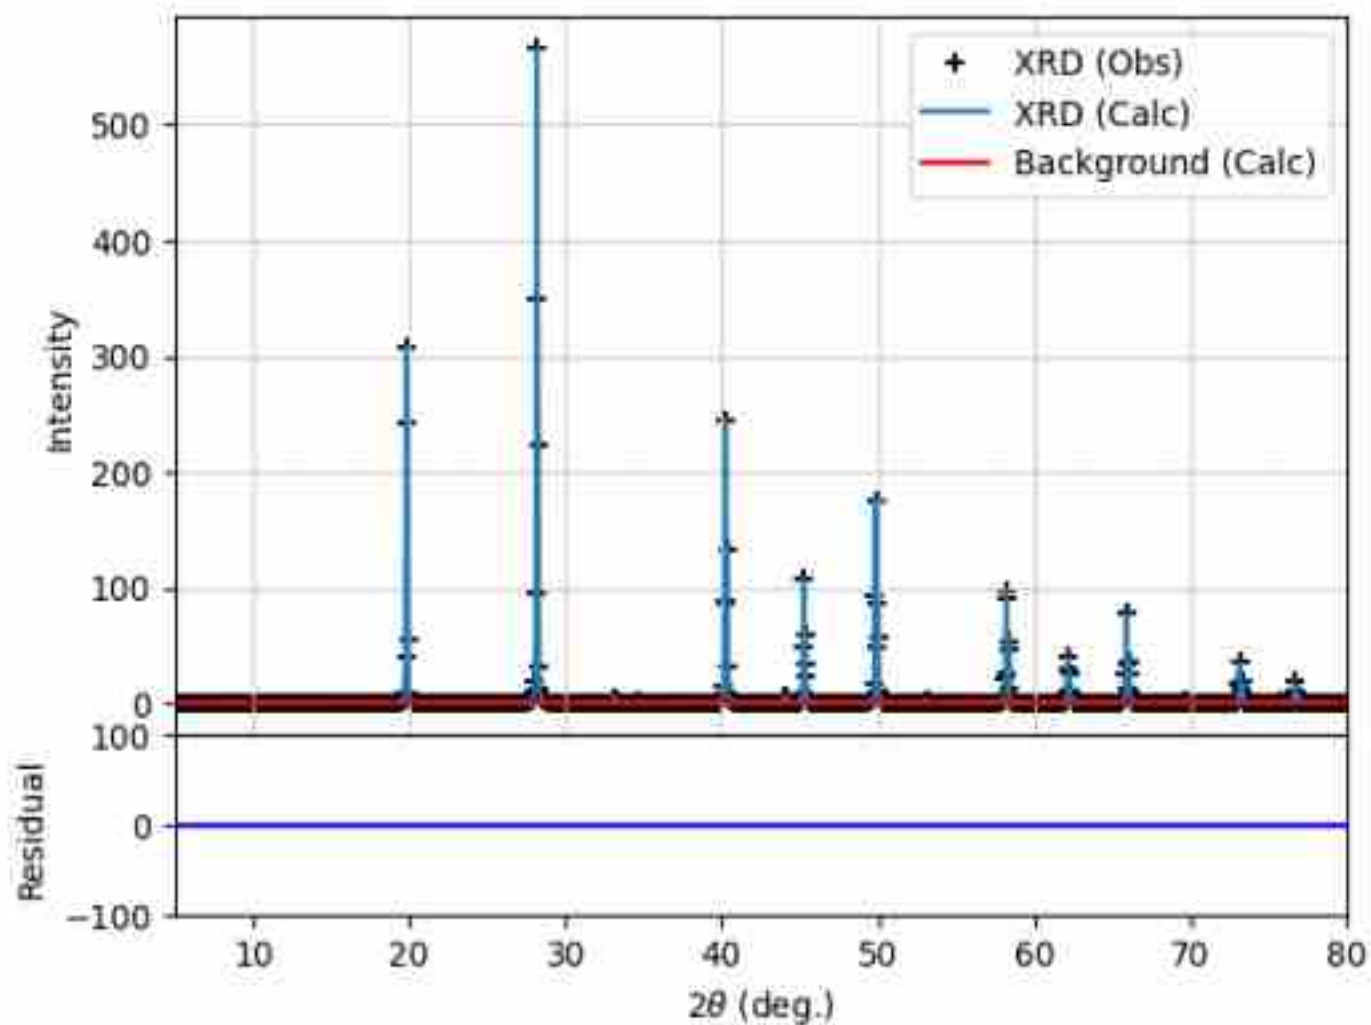

| RMSE before RR | Rwp     | RMSE after RR |
|----------------|---------|---------------|
| 0.009          | 0.01709 | 0.00344       |

# K<sub>2</sub>Cu<sub>2</sub>F<sub>6</sub>

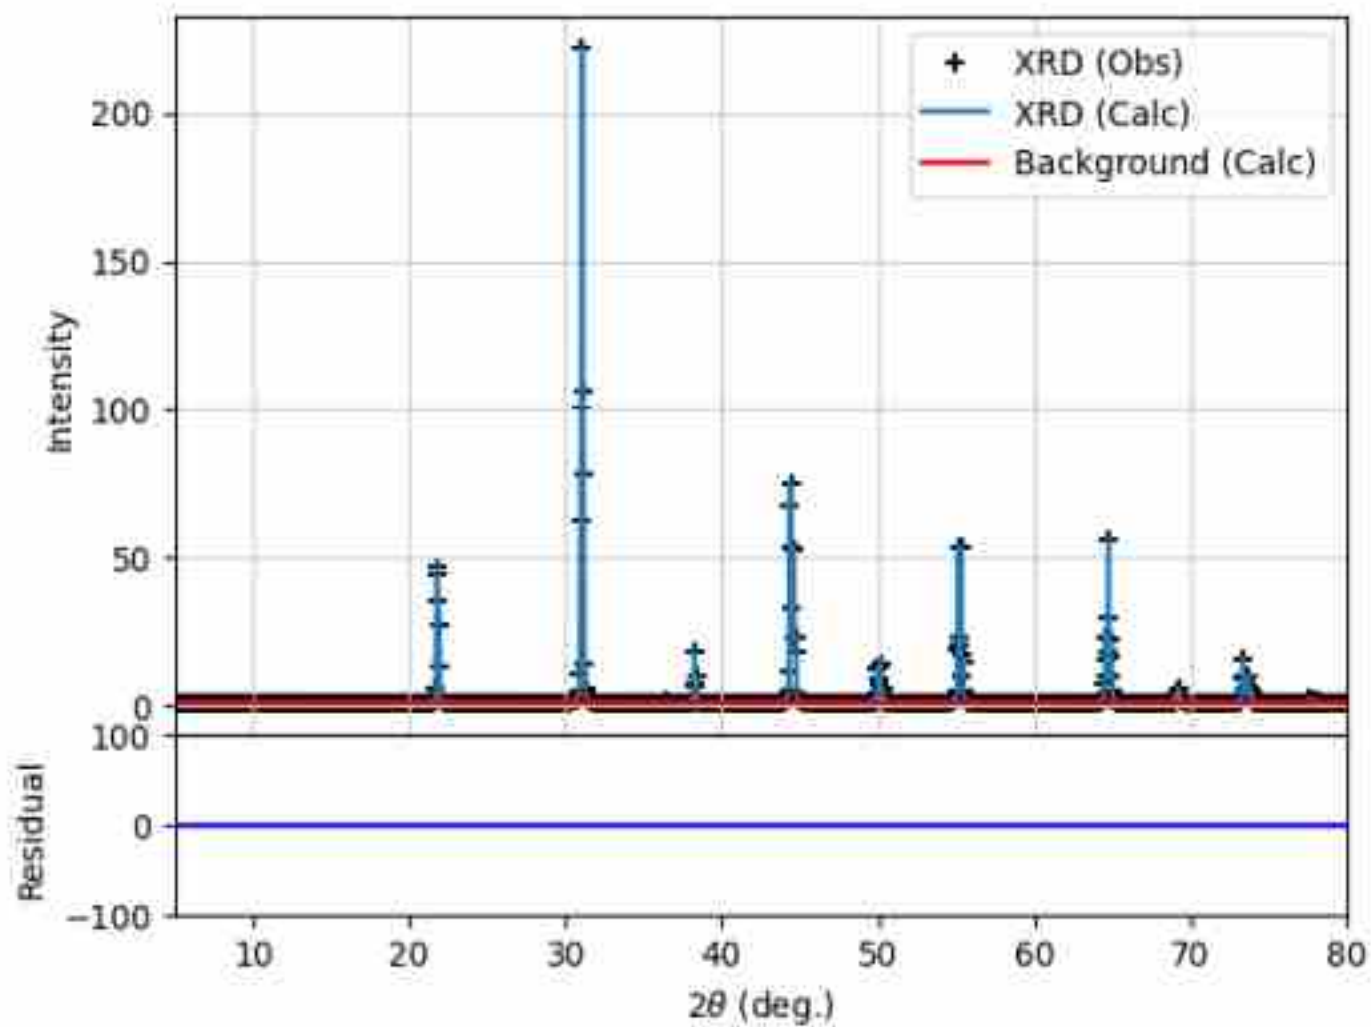

| RMSE before RR | Rwp     | RMSE after RR |
|----------------|---------|---------------|
| 0.009          | 0.02588 | 0.00195       |

# K<sub>2</sub>InIAgI<sub>6</sub>

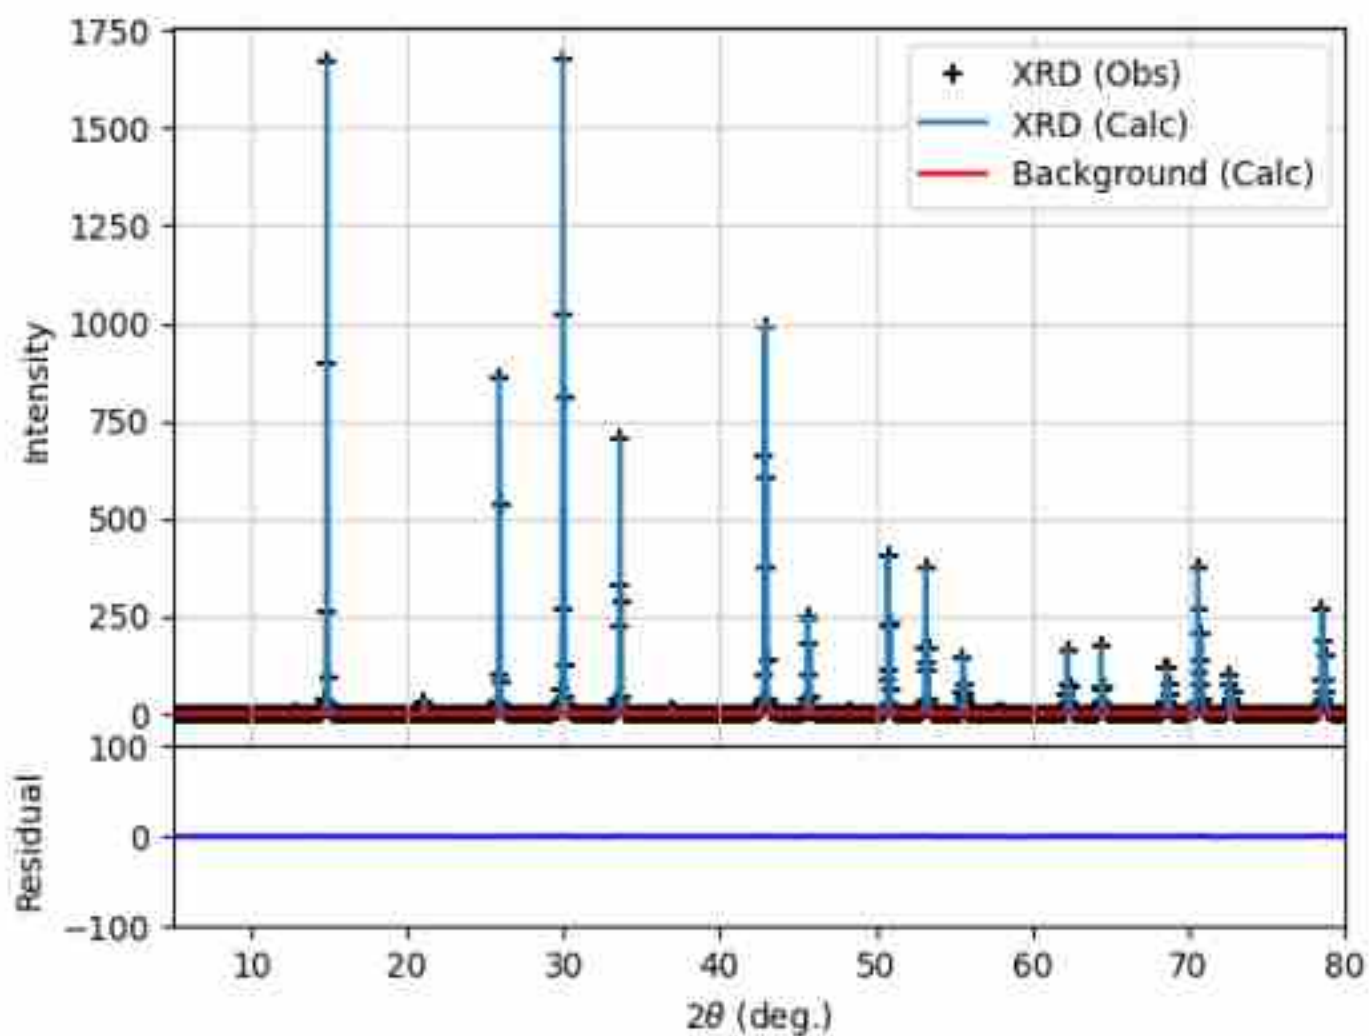

| RMSE before RR | Rwp    | RMSE after RR |
|----------------|--------|---------------|
| 0.009          | 1.3167 | 0.00631       |

# K<sub>2</sub>Na<sub>1</sub>Ce<sub>1</sub>I<sub>6</sub>

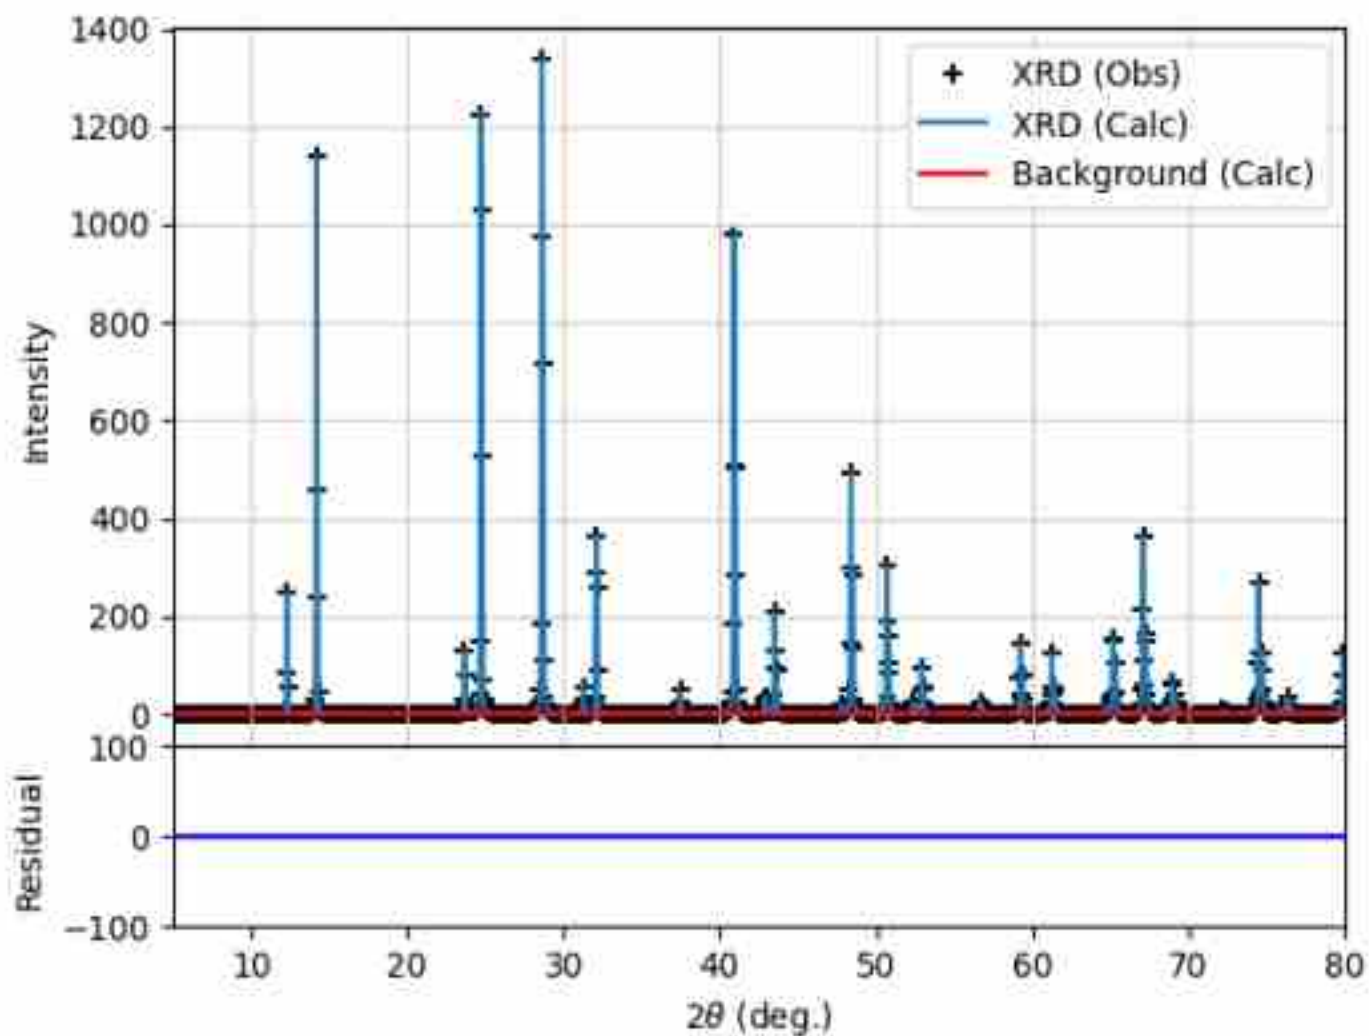

| RMSE before RR | Rwp     | RMSE after RR |
|----------------|---------|---------------|
| 0.009          | 0.03159 | 0.00255       |

# K<sub>2</sub>Na<sub>1</sub>Y<sub>1</sub>Br<sub>6</sub>

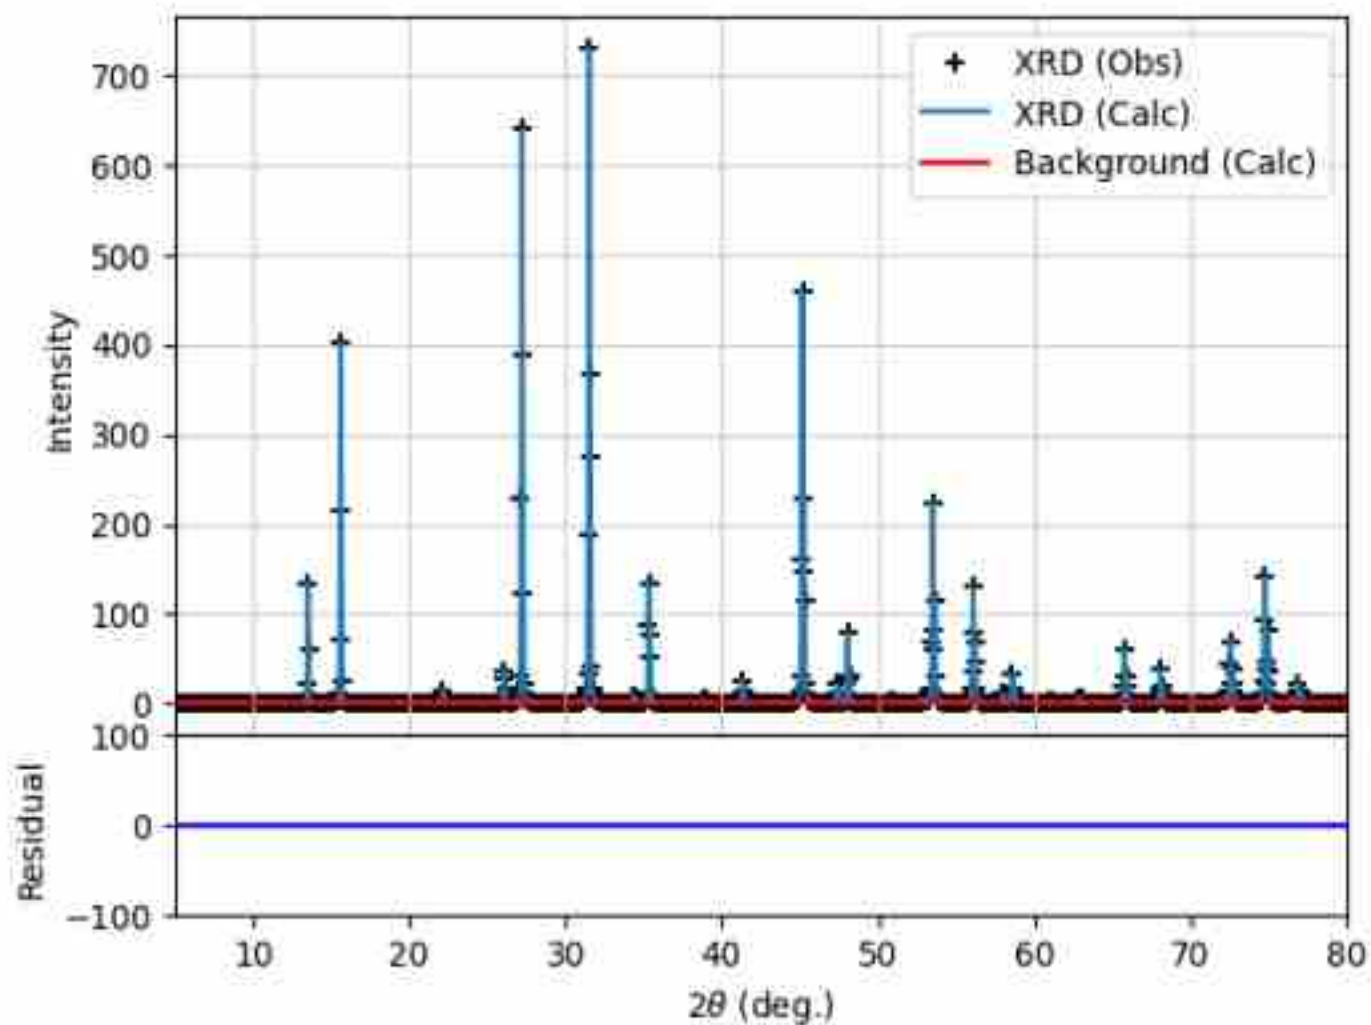

| RMSE before RR | Rwp     | RMSE after RR |
|----------------|---------|---------------|
| 0.009          | 0.03571 | 0.00233       |



# K<sub>2</sub>Na<sub>1</sub>Y<sub>1</sub>Cl<sub>6</sub>

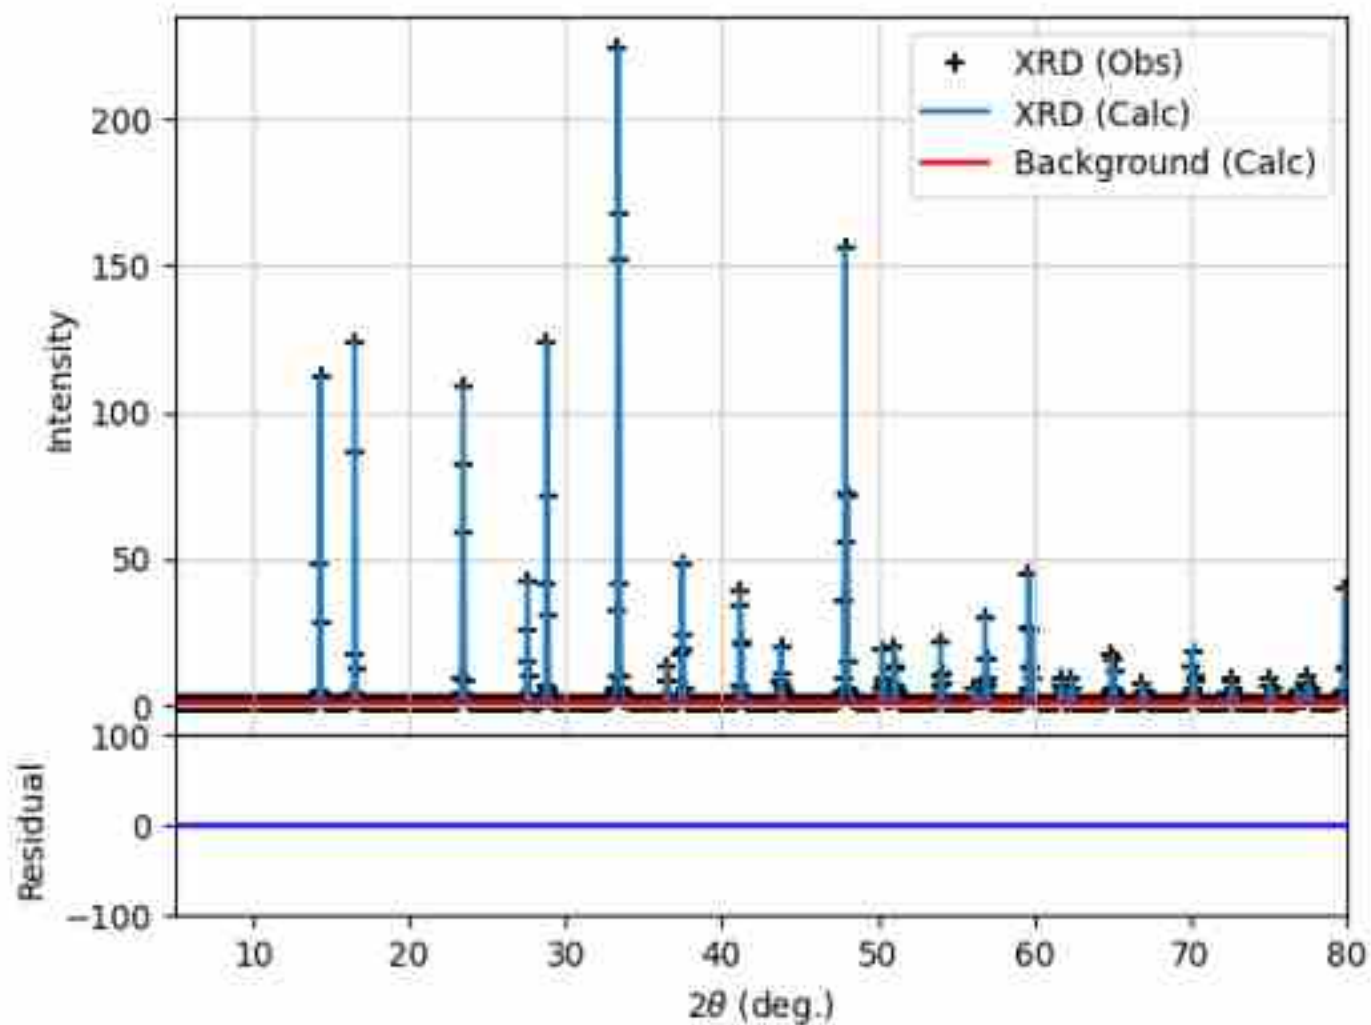

| RMSE before RR | Rwp     | RMSE after RR |
|----------------|---------|---------------|
| 0.009          | 0.01519 | 0.00207       |

# K2Sc1Ag1F6

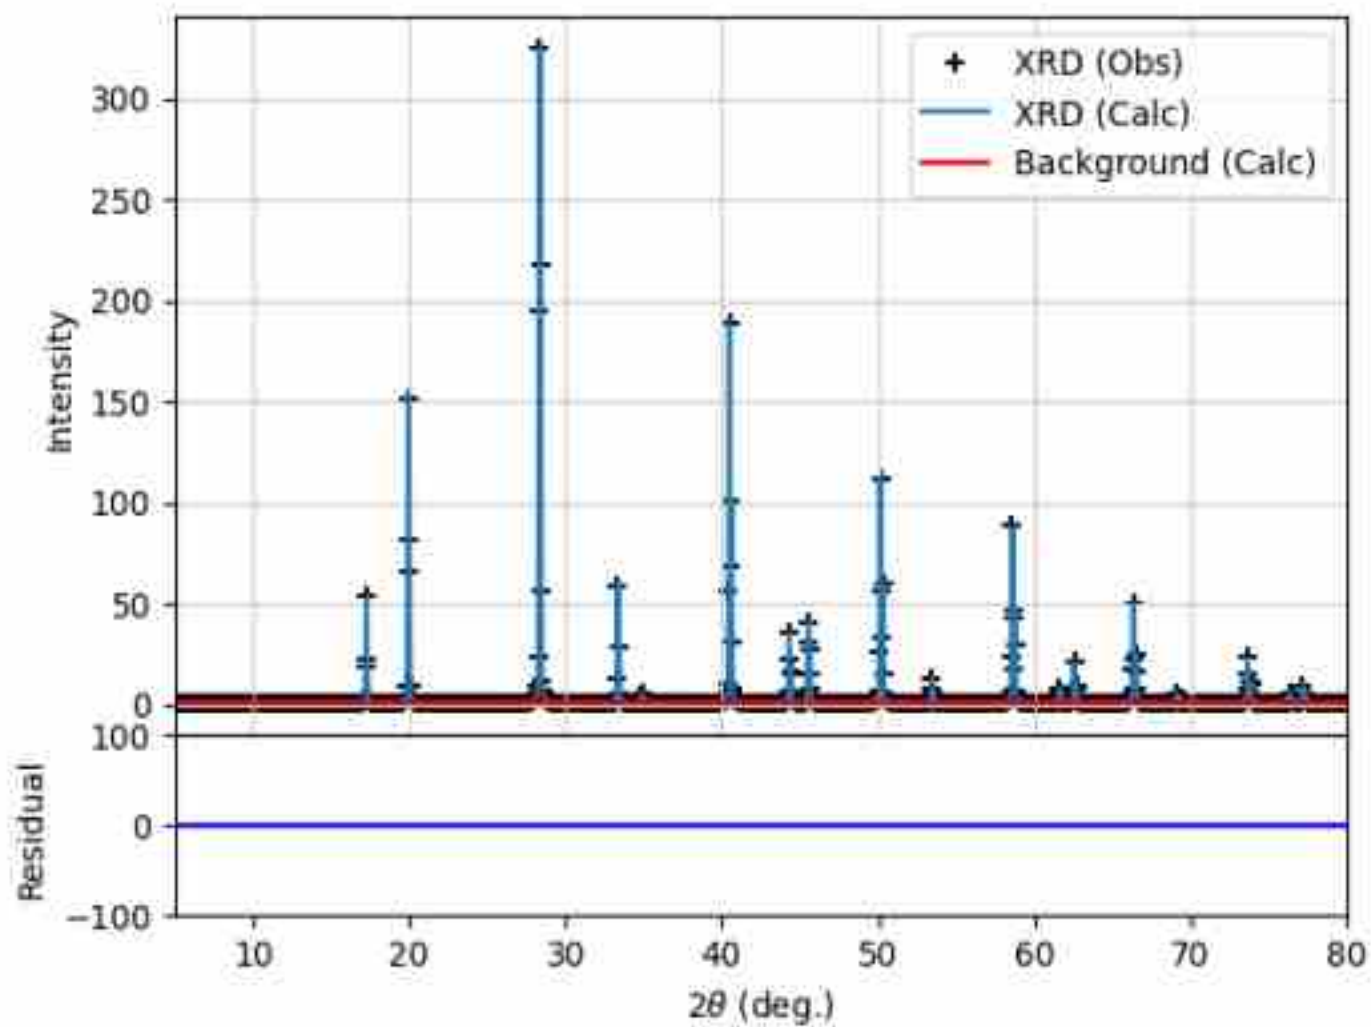

| RMSE before RR | Rwp     | RMSE after RR |
|----------------|---------|---------------|
| 0.009          | 0.02112 | 0.00483       |

# K<sub>2</sub>TbAgCl<sub>6</sub>

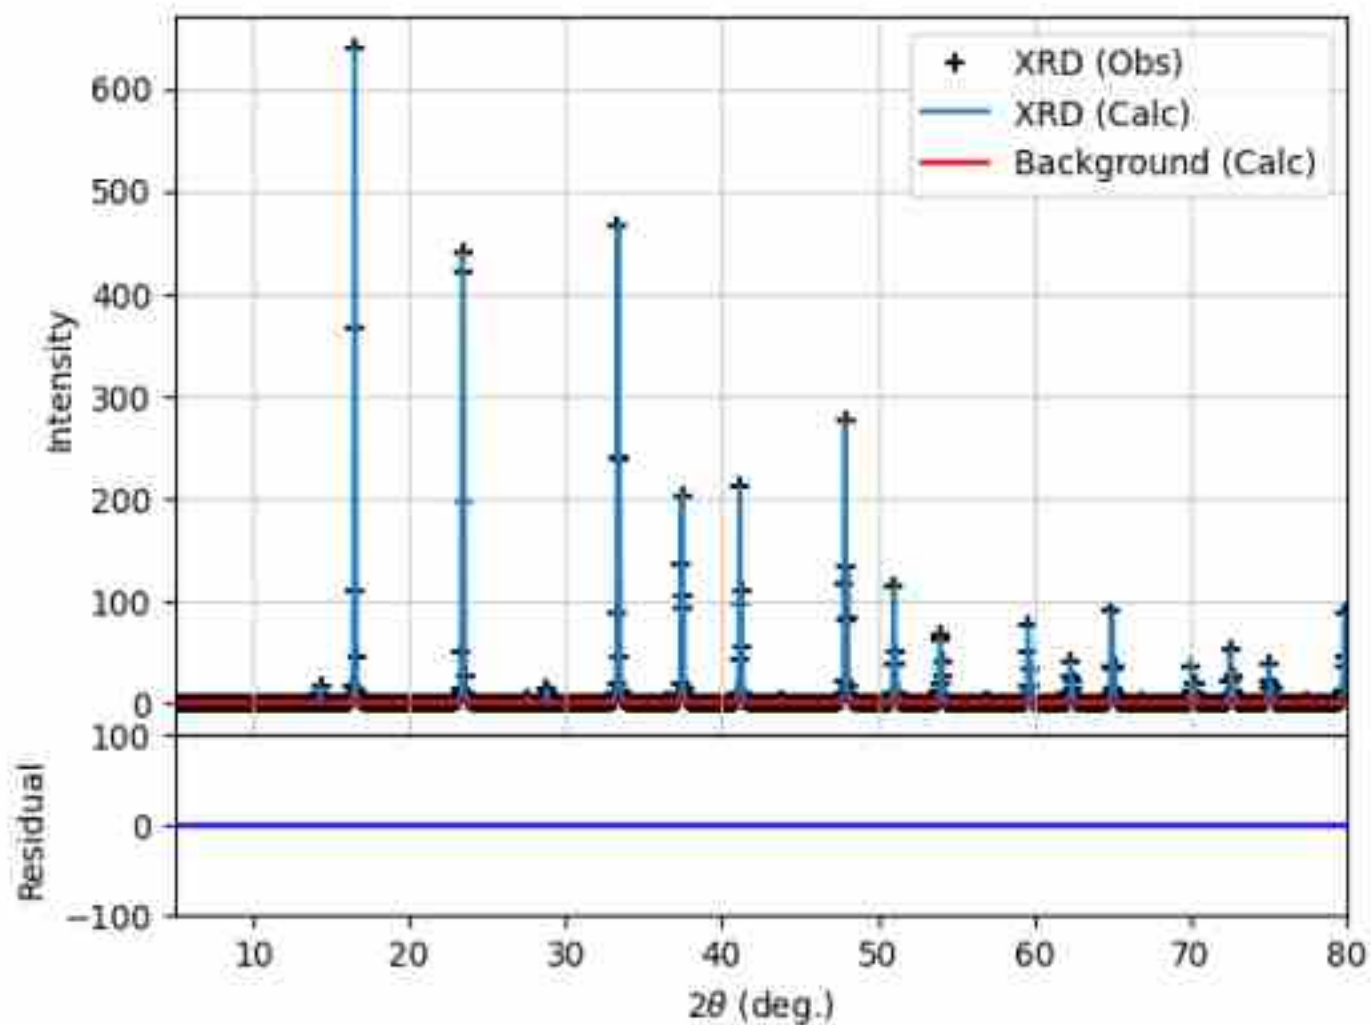

| RMSE before RR | Rwp    | RMSE after RR |
|----------------|--------|---------------|
| 0.009          | 0.0135 | 0.00203       |

# K2Tl1Rh1F6

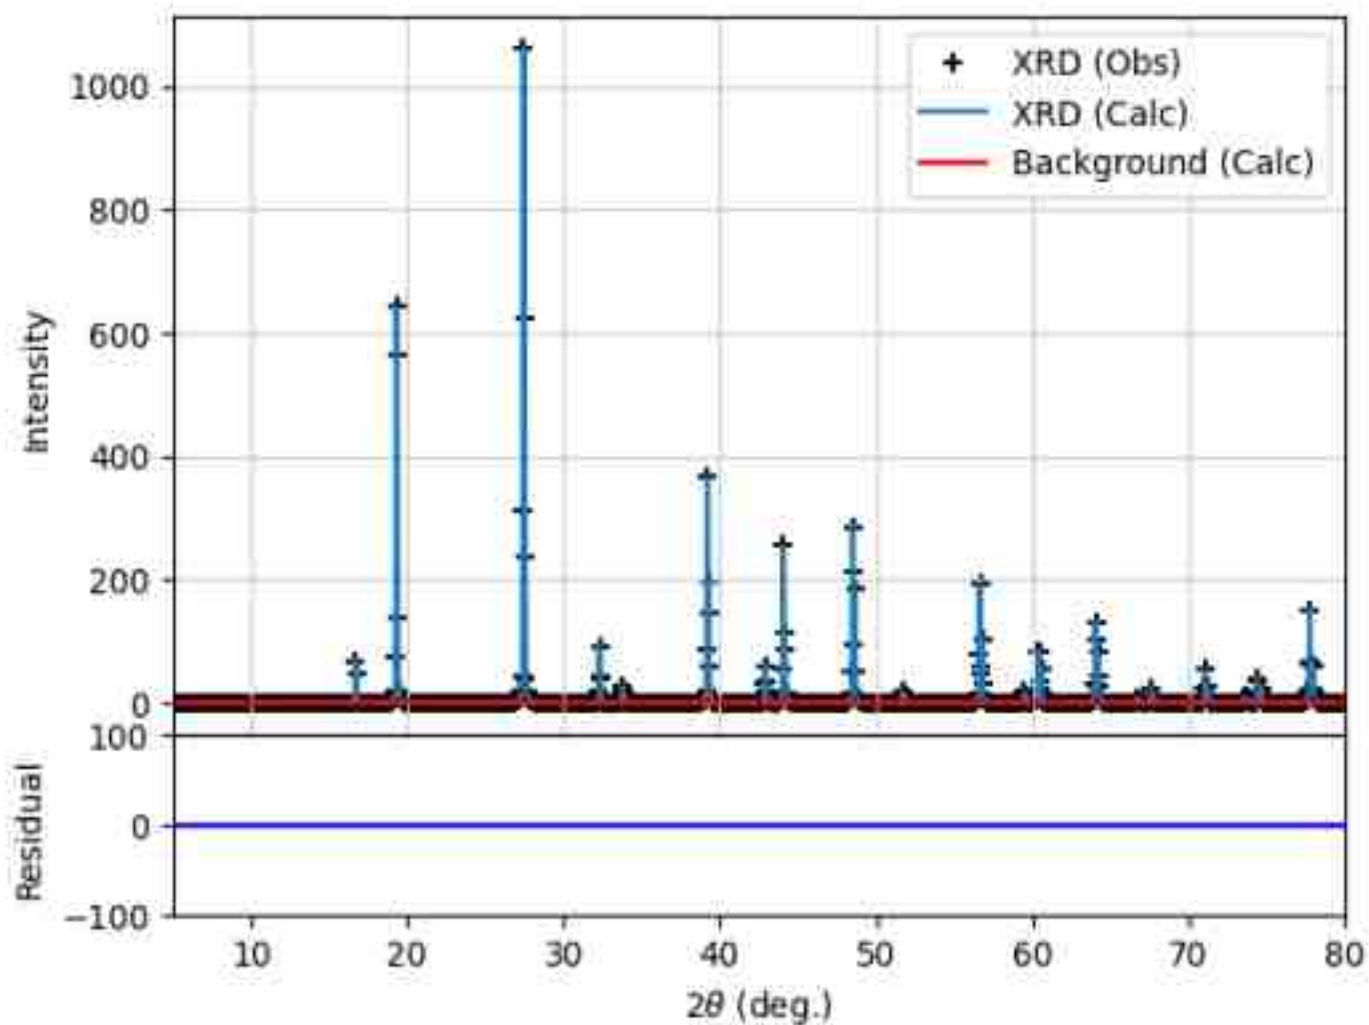

| RMSE before RR | Rwp     | RMSE after RR |
|----------------|---------|---------------|
| 0.009          | 0.01596 | 0.00406       |

# K<sub>3</sub>AsBr<sub>6</sub>

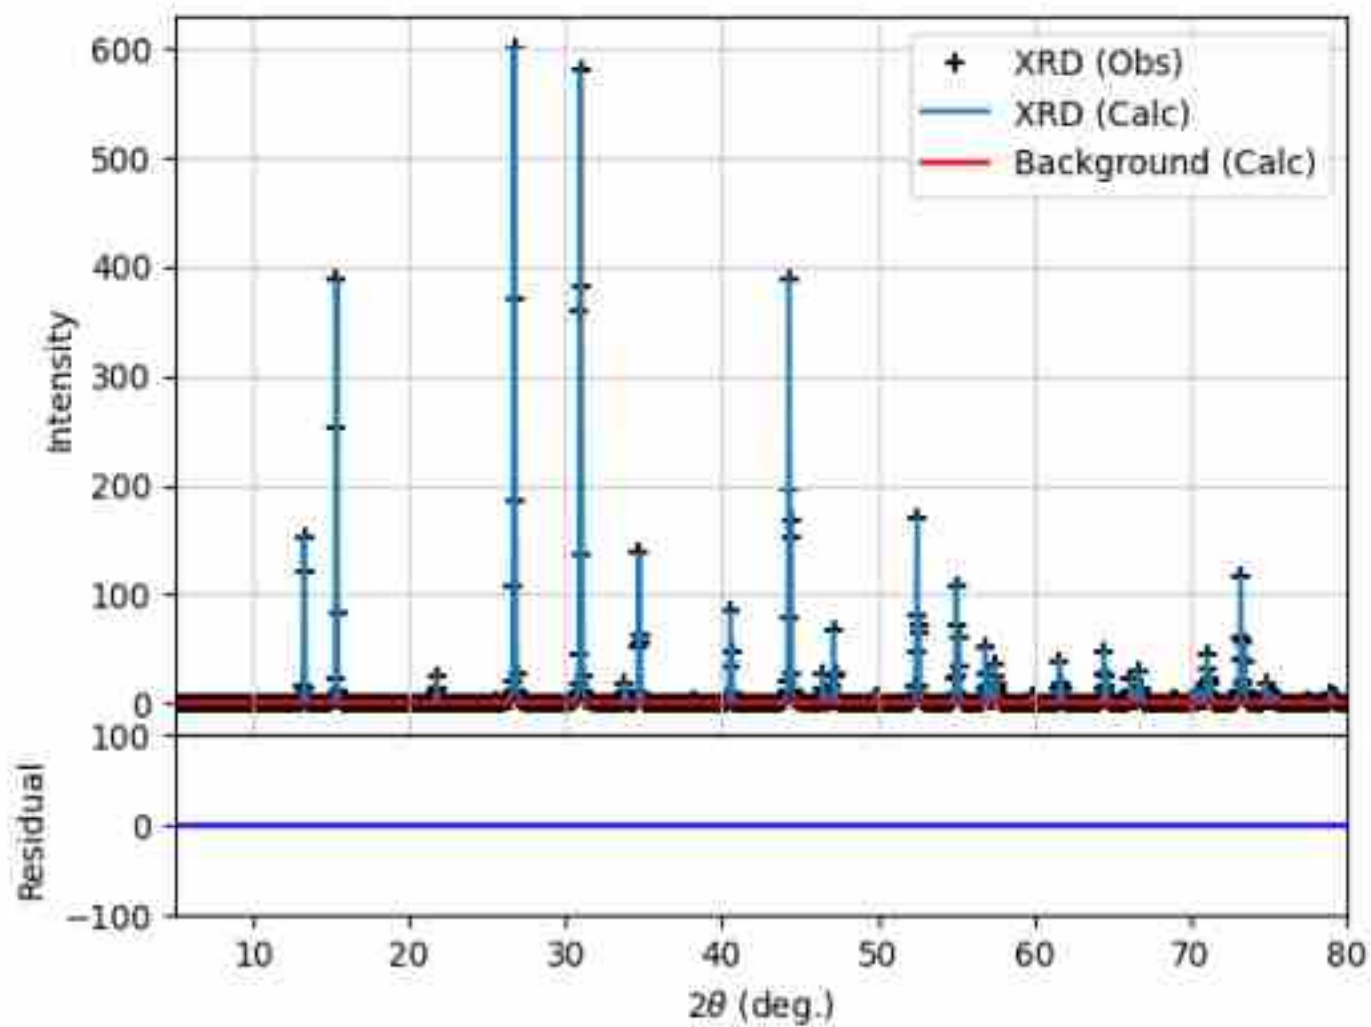

| RMSE before RR | Rwp     | RMSE after RR |
|----------------|---------|---------------|
| 0.009          | 0.08967 | 0.00352       |

# K3Mo1Cl6

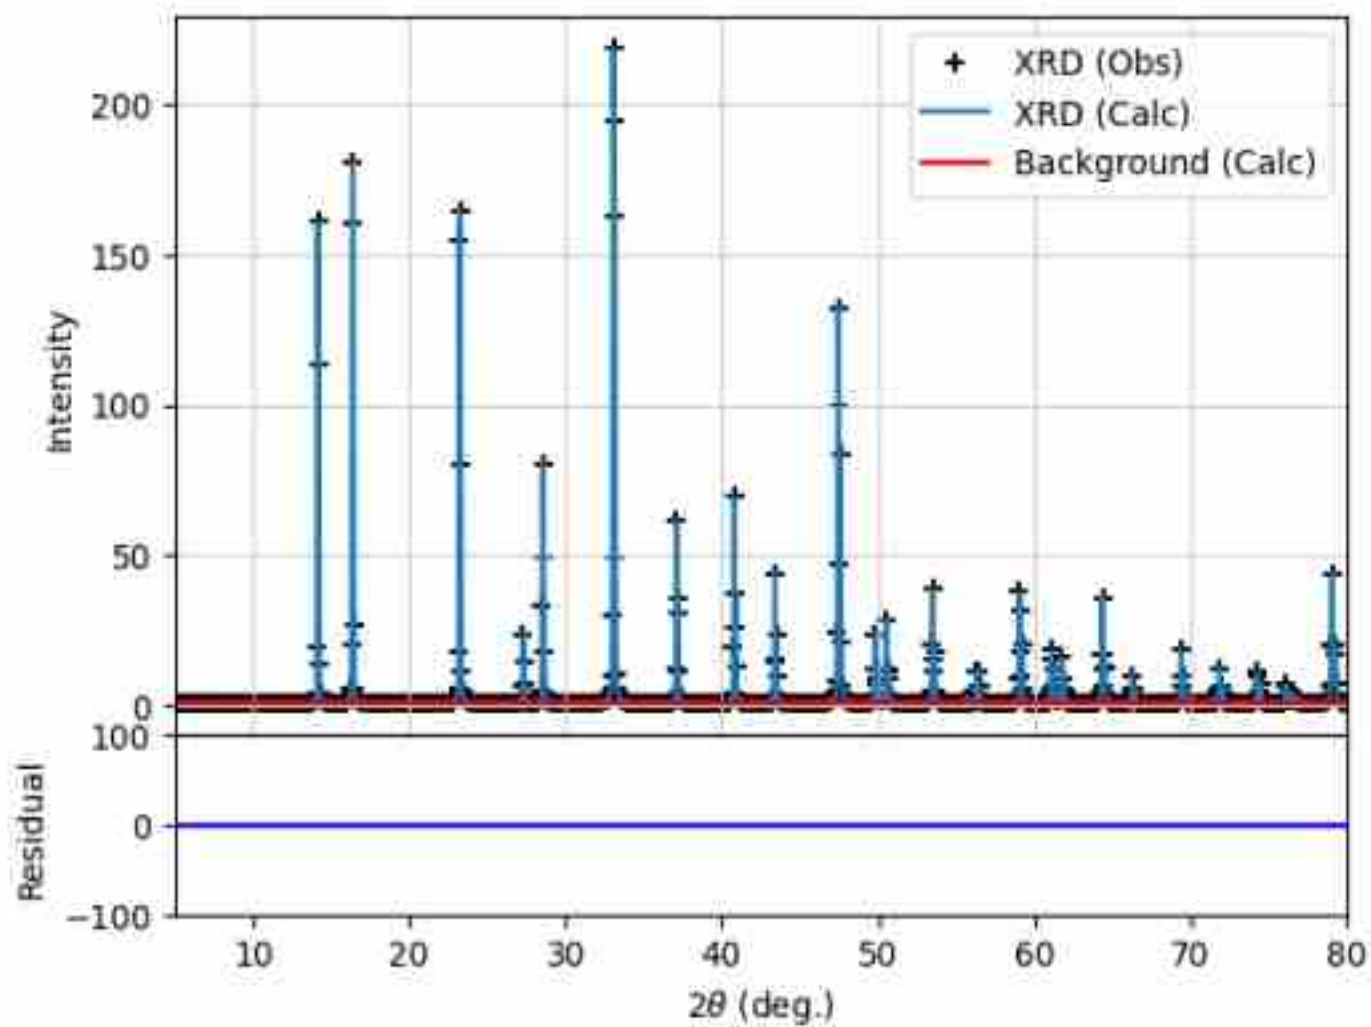

| RMSE before RR | Rwp     | RMSE after RR |
|----------------|---------|---------------|
| 0.009          | 0.02945 | 0.00317       |

# K3Sc1Br6

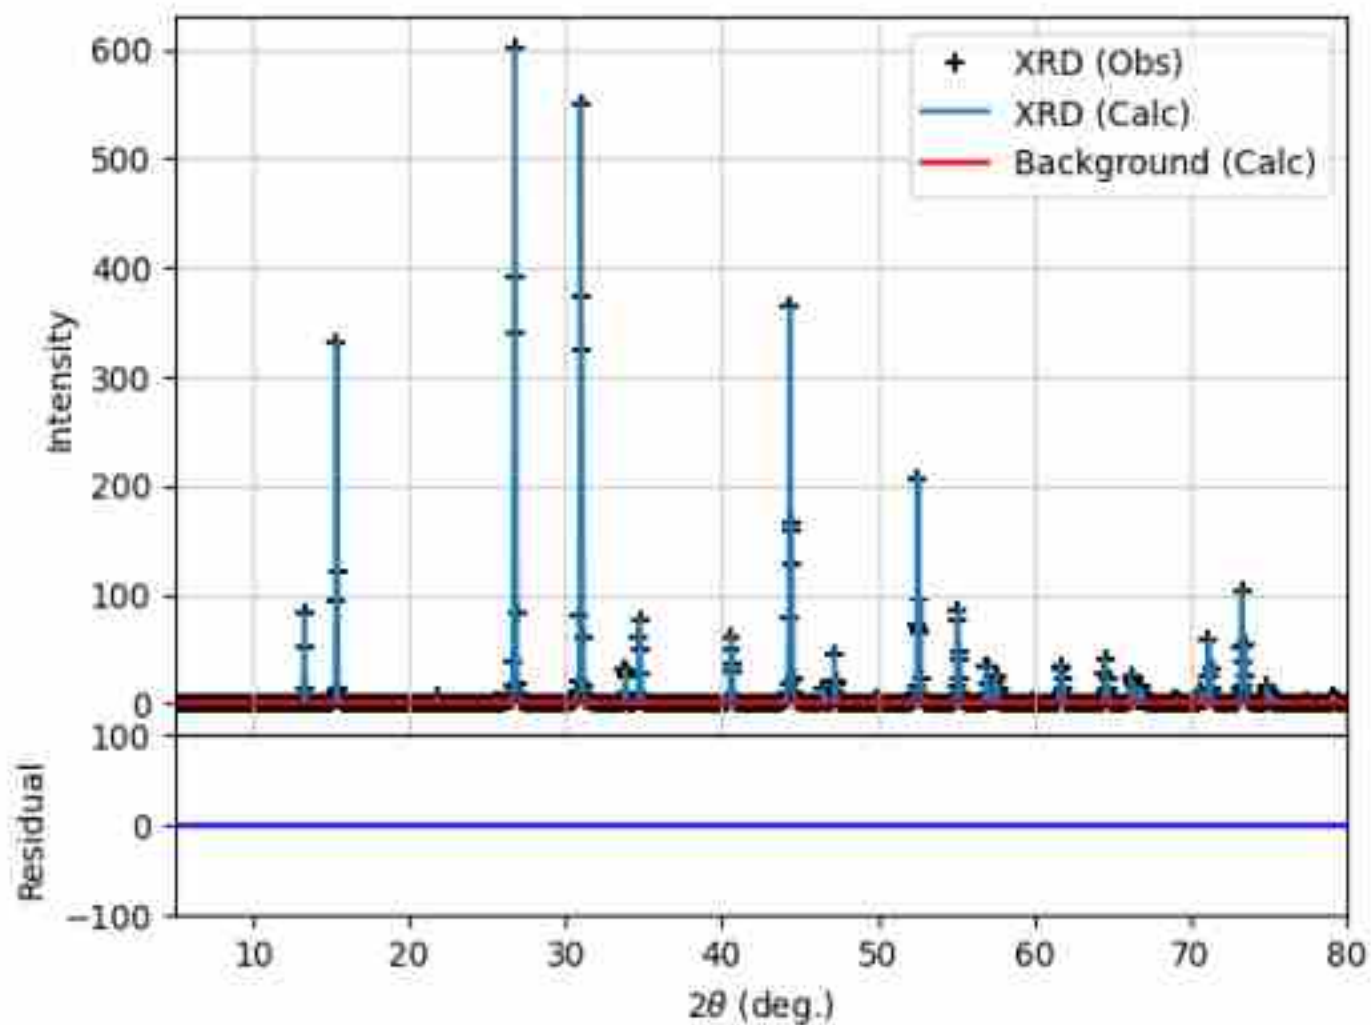

| RMSE before RR | Rwp     | RMSE after RR |
|----------------|---------|---------------|
| 0.009          | 0.06487 | 0.0032        |

# K4C2O6

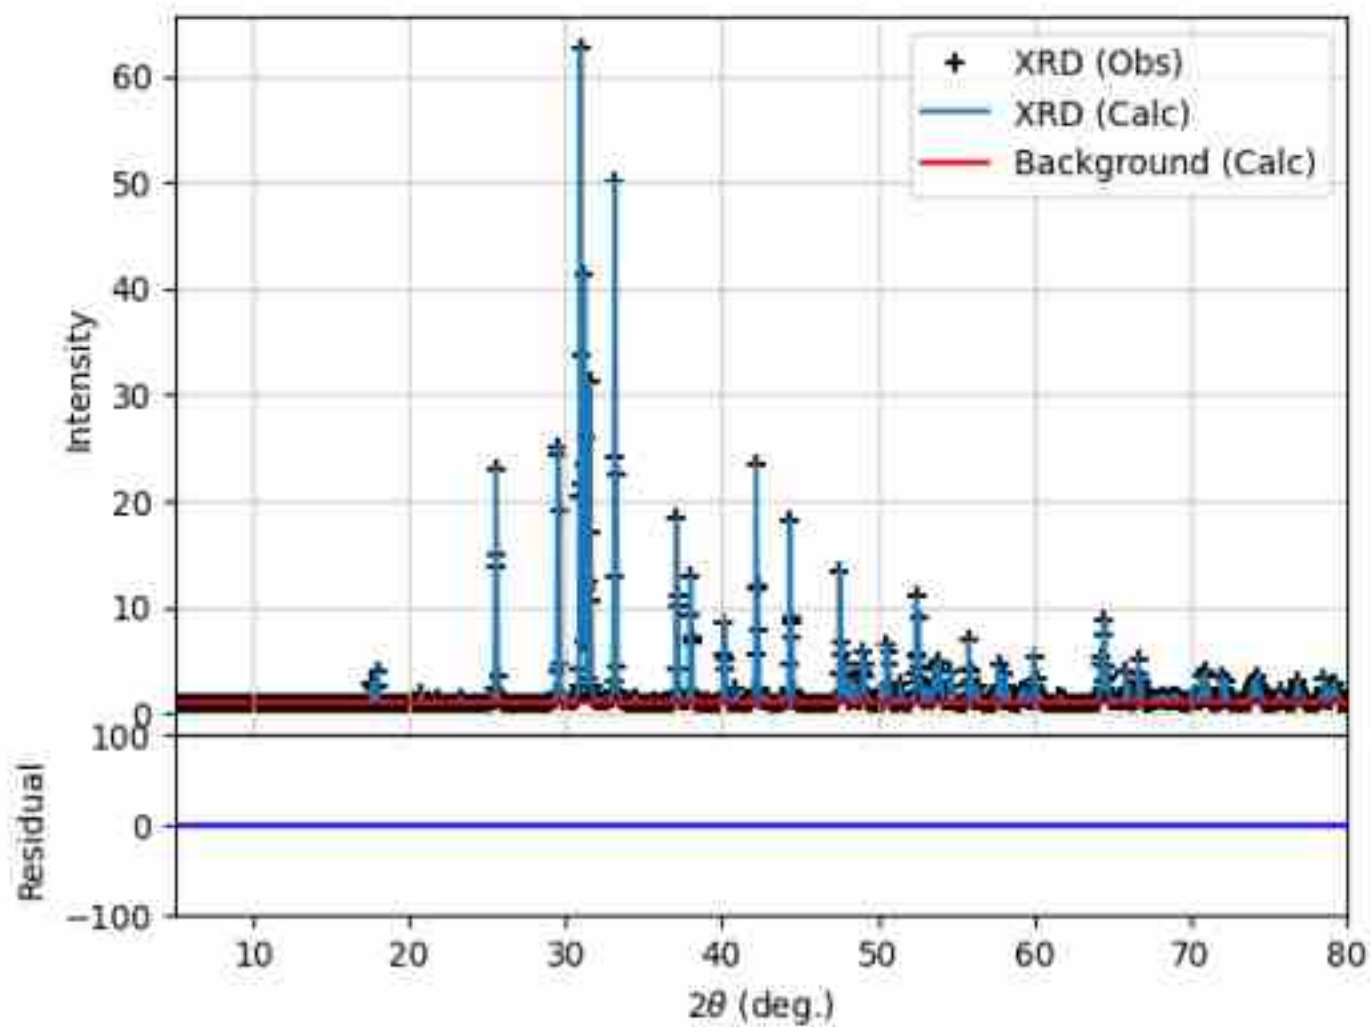

| RMSE before RR | Rwp     | RMSE after RR |
|----------------|---------|---------------|
| 0.09           | 0.00228 | 0.00068       |



# K6Rb2

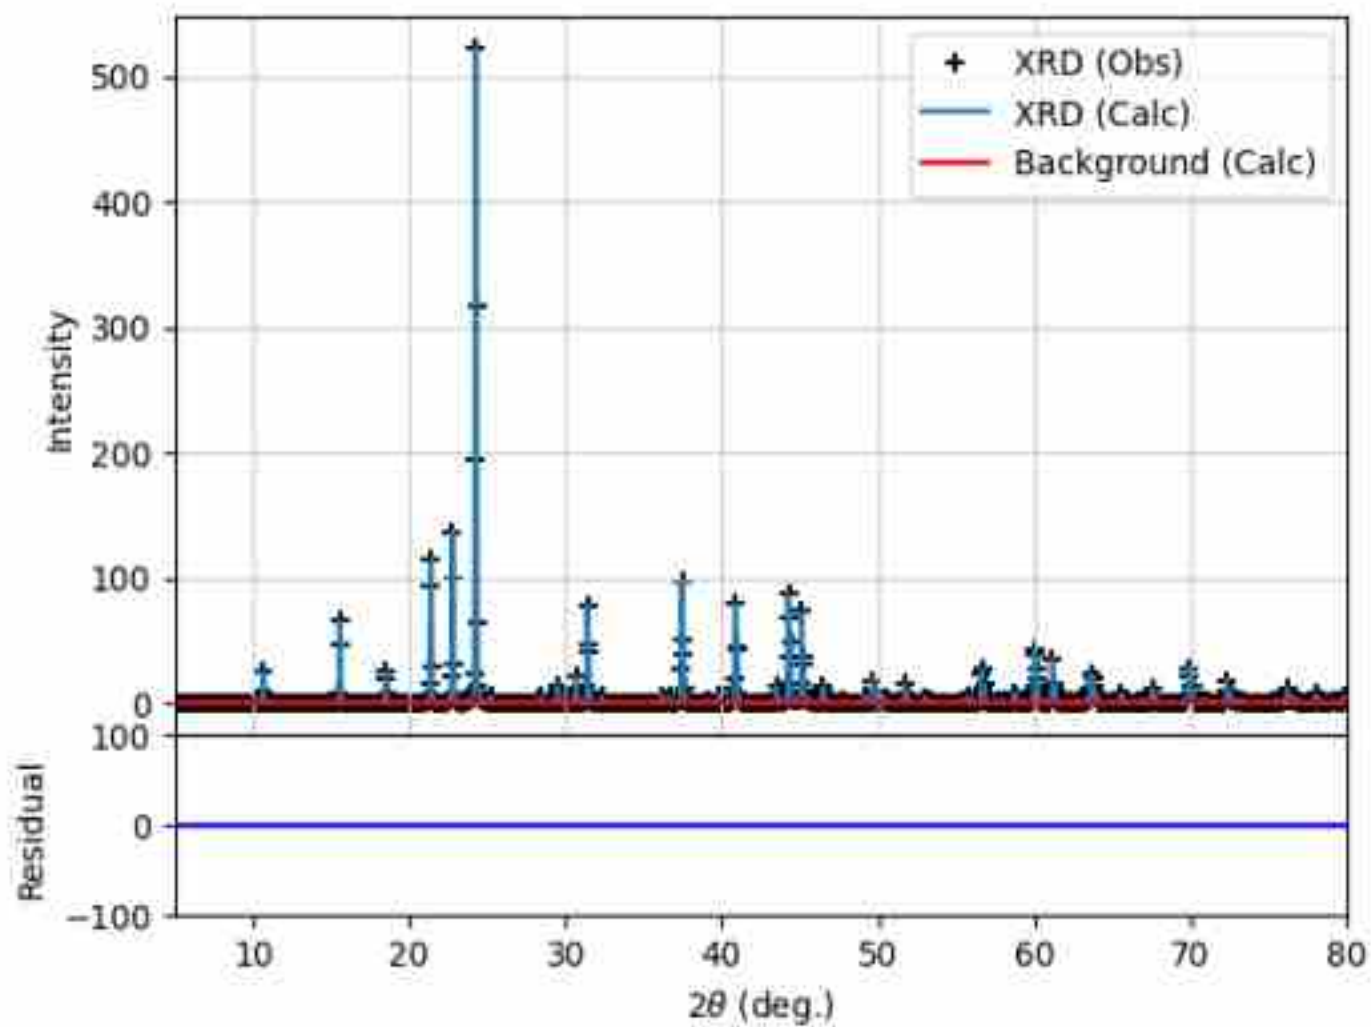

| RMSE before RR | Rwp     | RMSE after RR |
|----------------|---------|---------------|
| 0.009          | 0.04667 | 0.00272       |

# La<sub>1</sub>Ni<sub>2</sub>Ge<sub>2</sub>

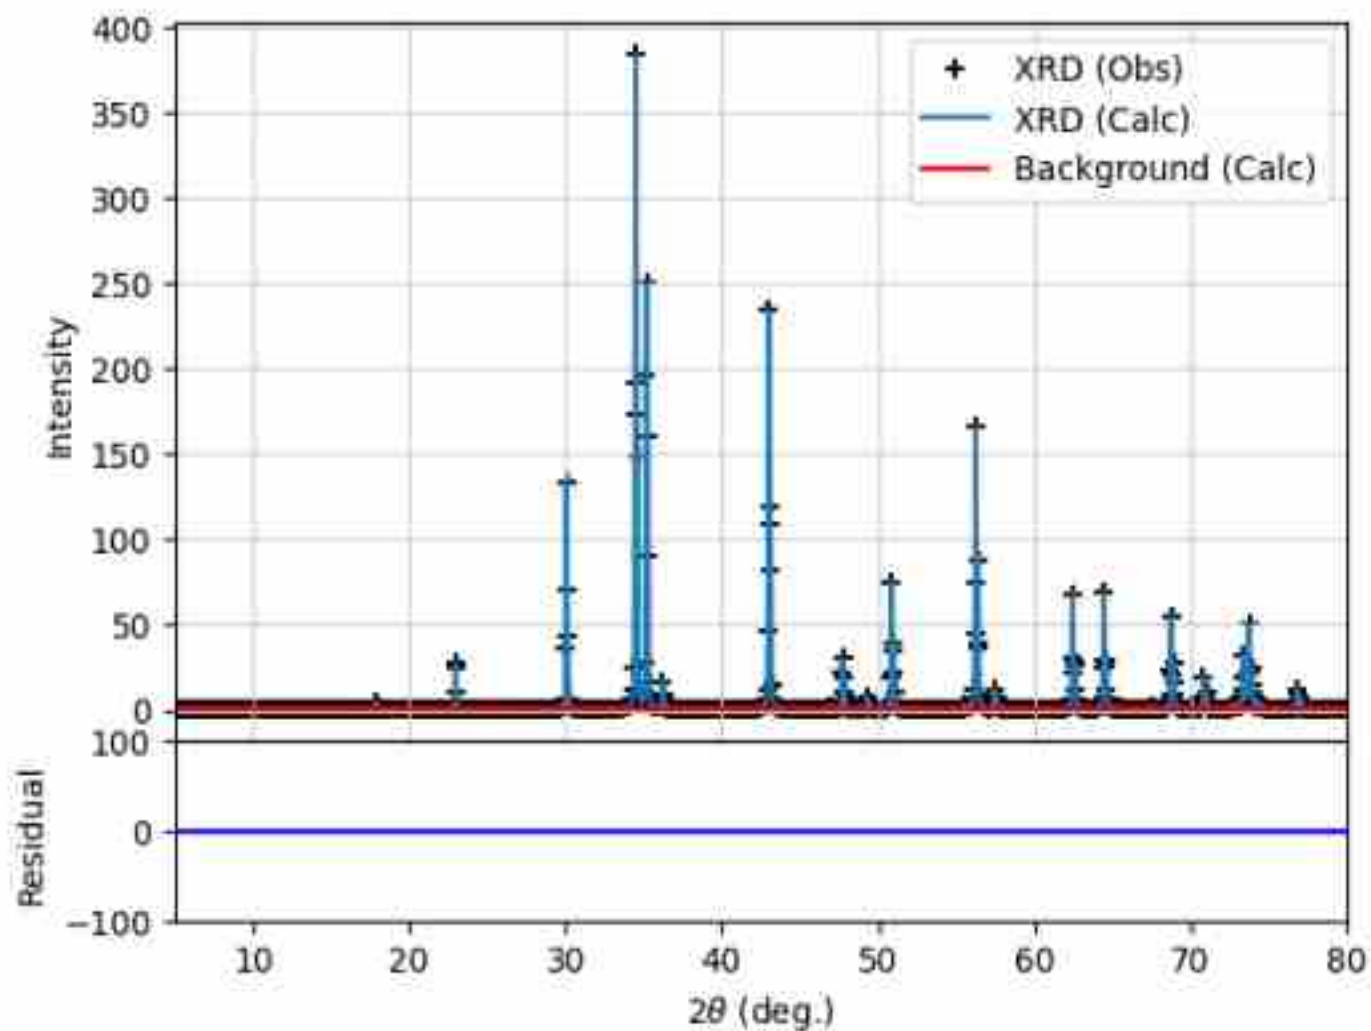

| RMSE before RR | Rwp     | RMSE after RR |
|----------------|---------|---------------|
| 0.009          | 0.00321 | 0.00035       |

# La1Pr1Al4

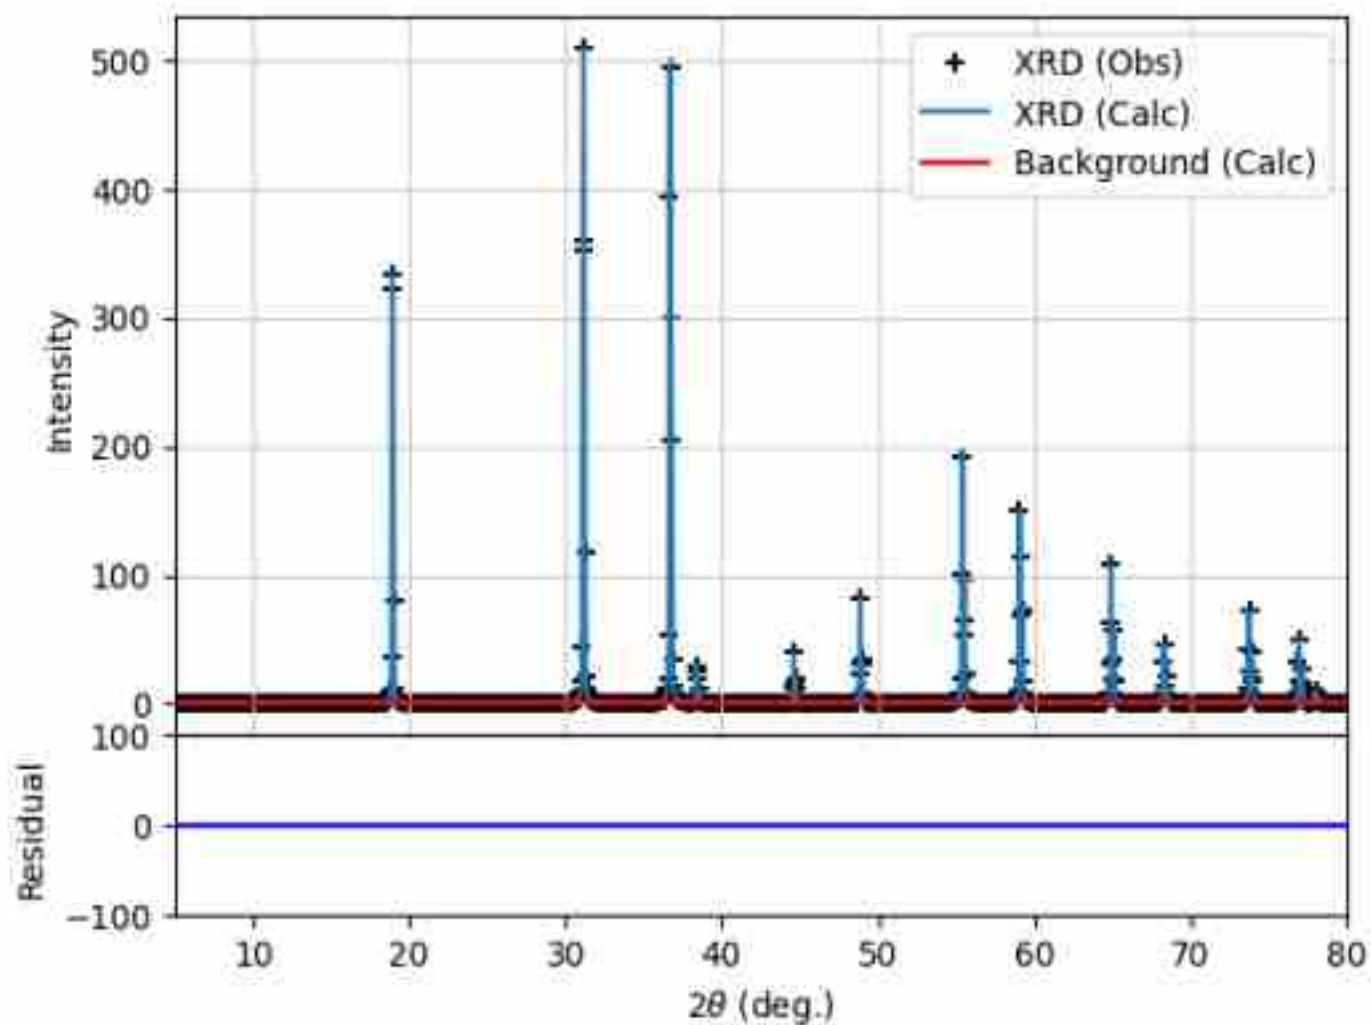

| RMSE before RR | Rwp    | RMSE after RR |
|----------------|--------|---------------|
| 0.009          | 0.0325 | 0.00205       |

# La<sub>2</sub>Al<sub>3</sub>Ge<sub>1</sub>

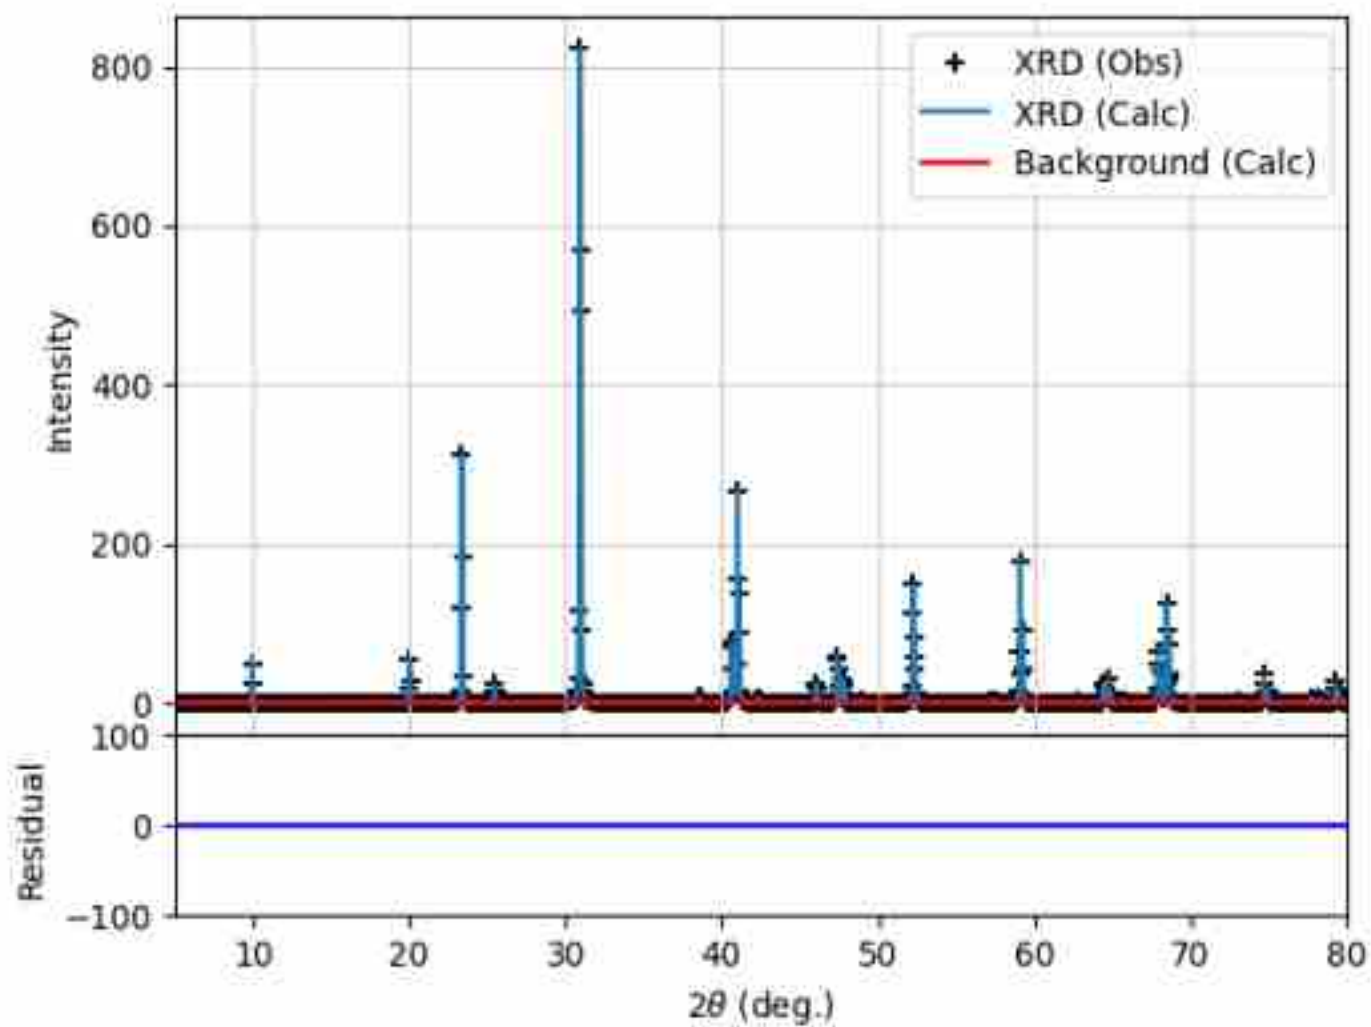

| RMSE before RR | Rwp     | RMSE after RR |
|----------------|---------|---------------|
| 0.009          | 0.00207 | 0.00057       |

# La<sub>2</sub>Al<sub>4</sub>Pd<sub>4</sub>

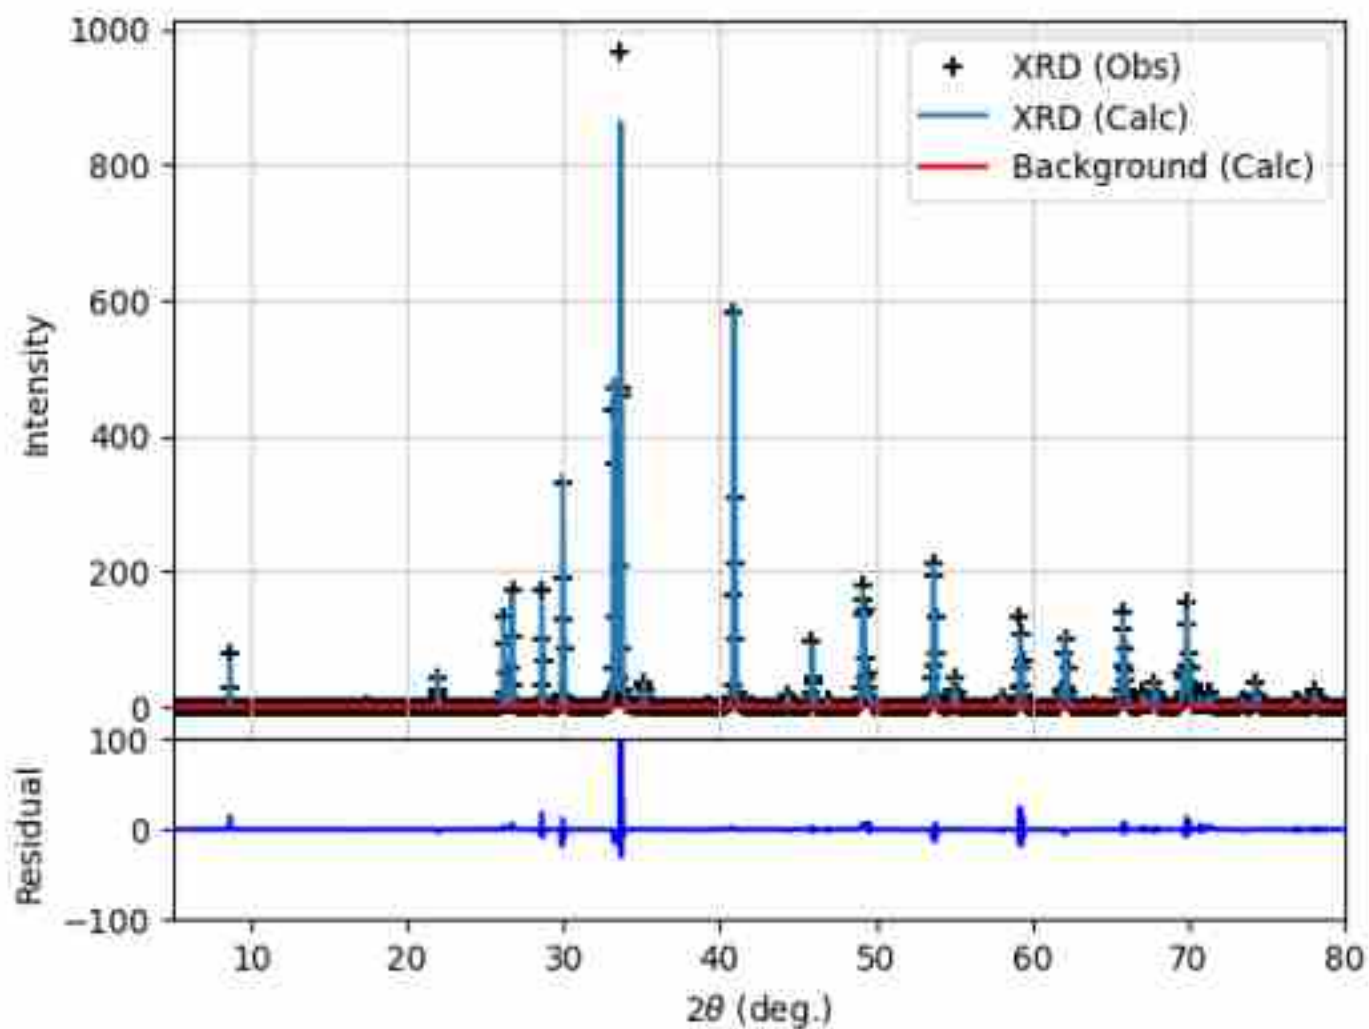

| RMSE before RR | Rwp    | RMSE after RR |
|----------------|--------|---------------|
| 0.009          | 8.6681 | 0.01485       |

# La<sub>2</sub>Fe<sub>2</sub>Si<sub>4</sub>

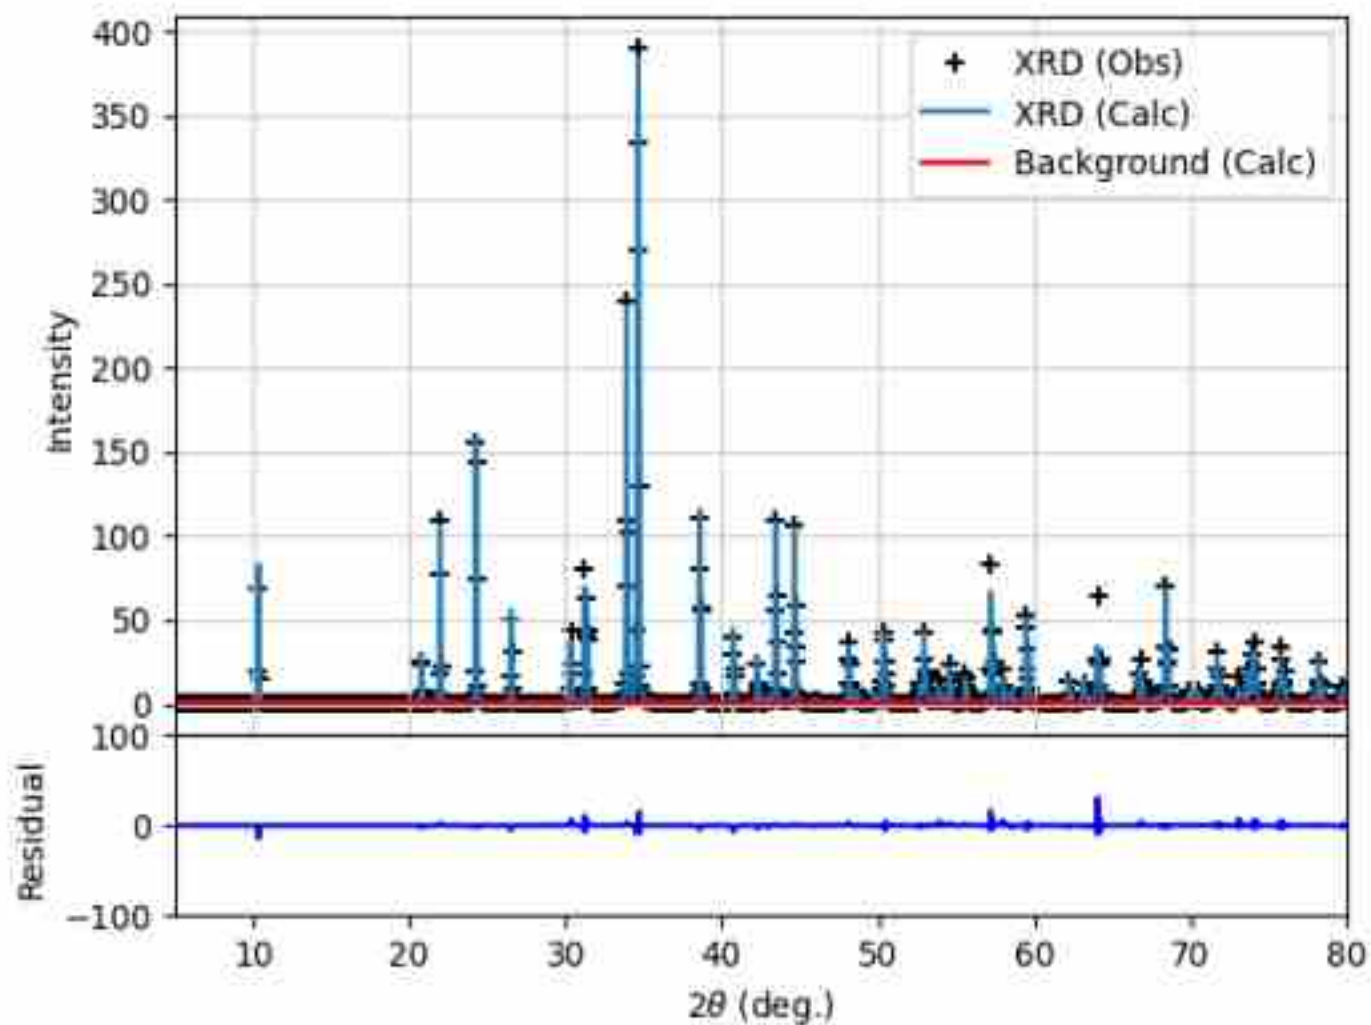

| RMSE before RR | Rwp      | RMSE after RR |
|----------------|----------|---------------|
| 0.009          | 12.15105 | 0.0113        |

# La<sub>2</sub>Ga<sub>2</sub>Si<sub>2</sub>

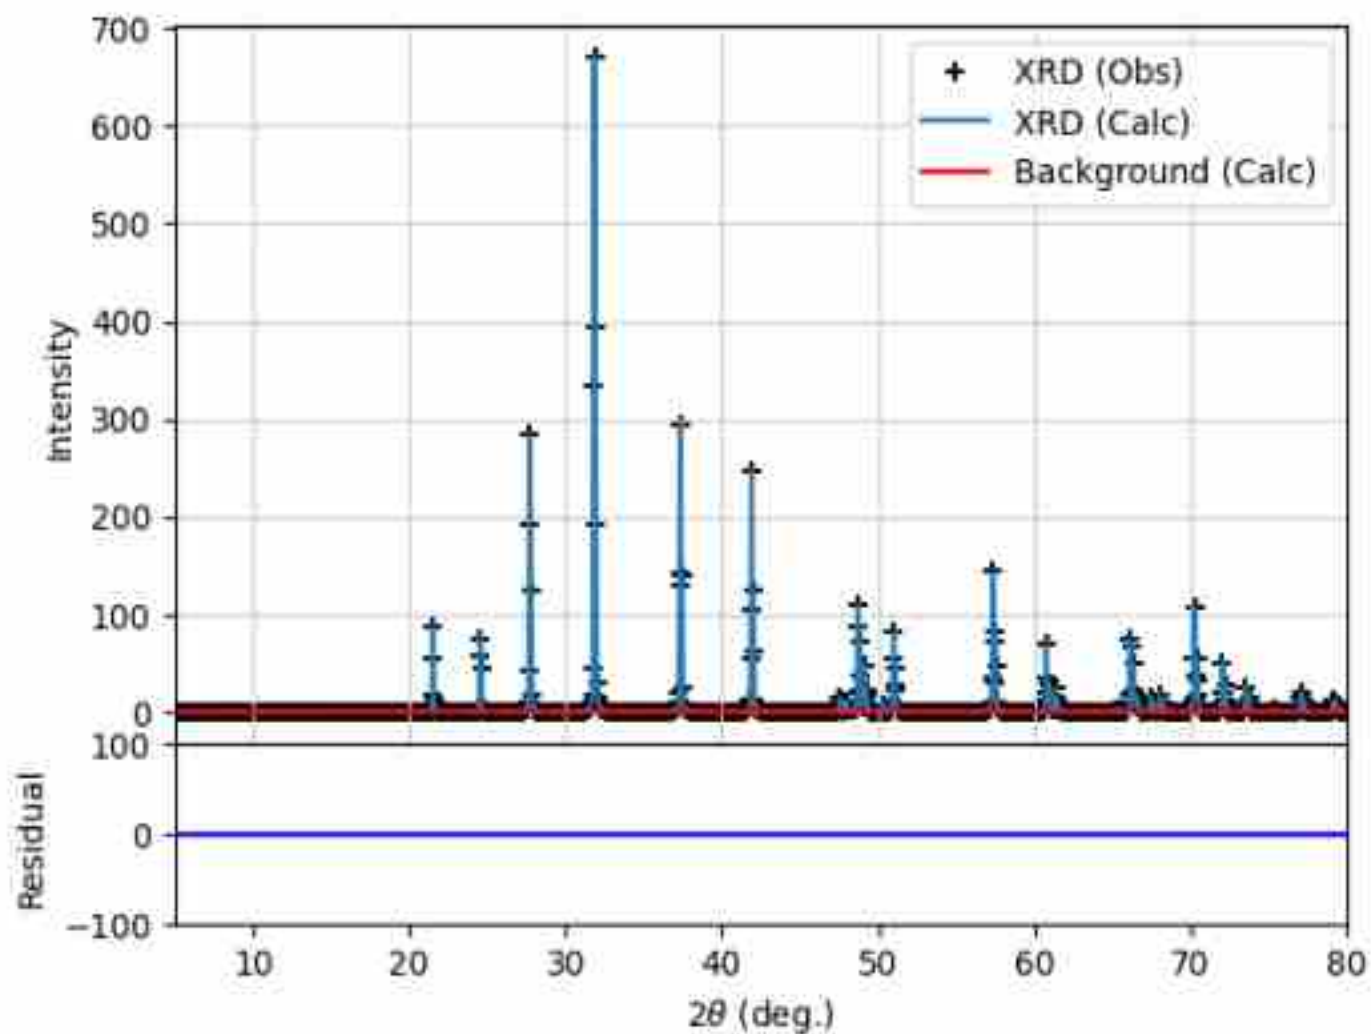

| RMSE before RR | Rwp     | RMSE after RR |
|----------------|---------|---------------|
| 0.009          | 0.00382 | 0.00047       |

# La<sub>2</sub>Ge<sub>4</sub>Ir<sub>4</sub>

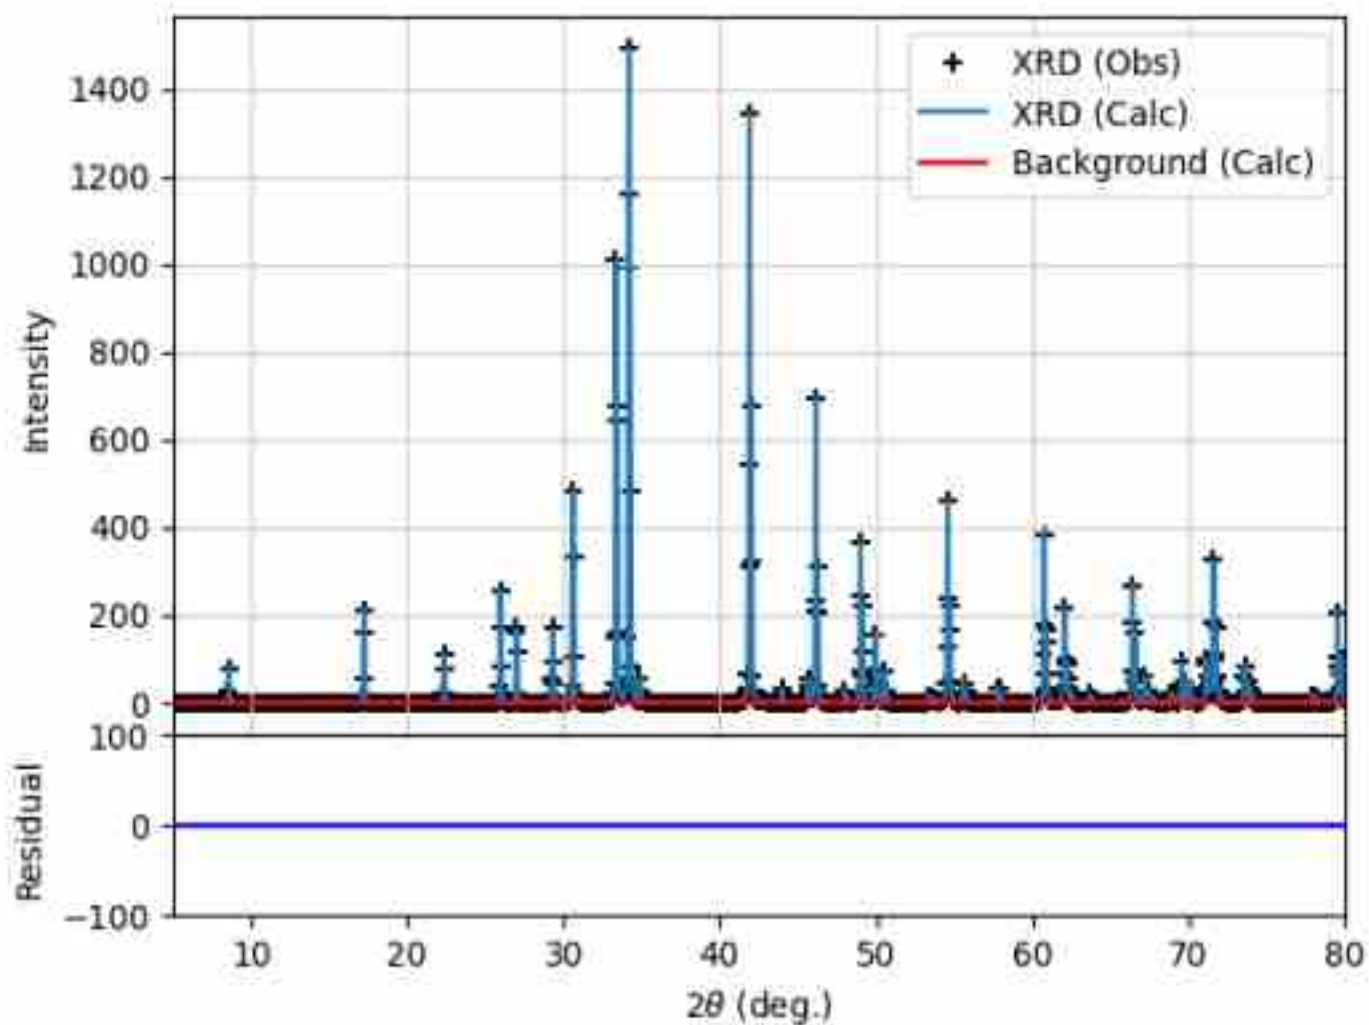

| RMSE before RR | Rwp     | RMSE after RR |
|----------------|---------|---------------|
| 0.009          | 0.00759 | 0.00051       |



# La<sub>2</sub>Tl<sub>3</sub>Pb<sub>3</sub>

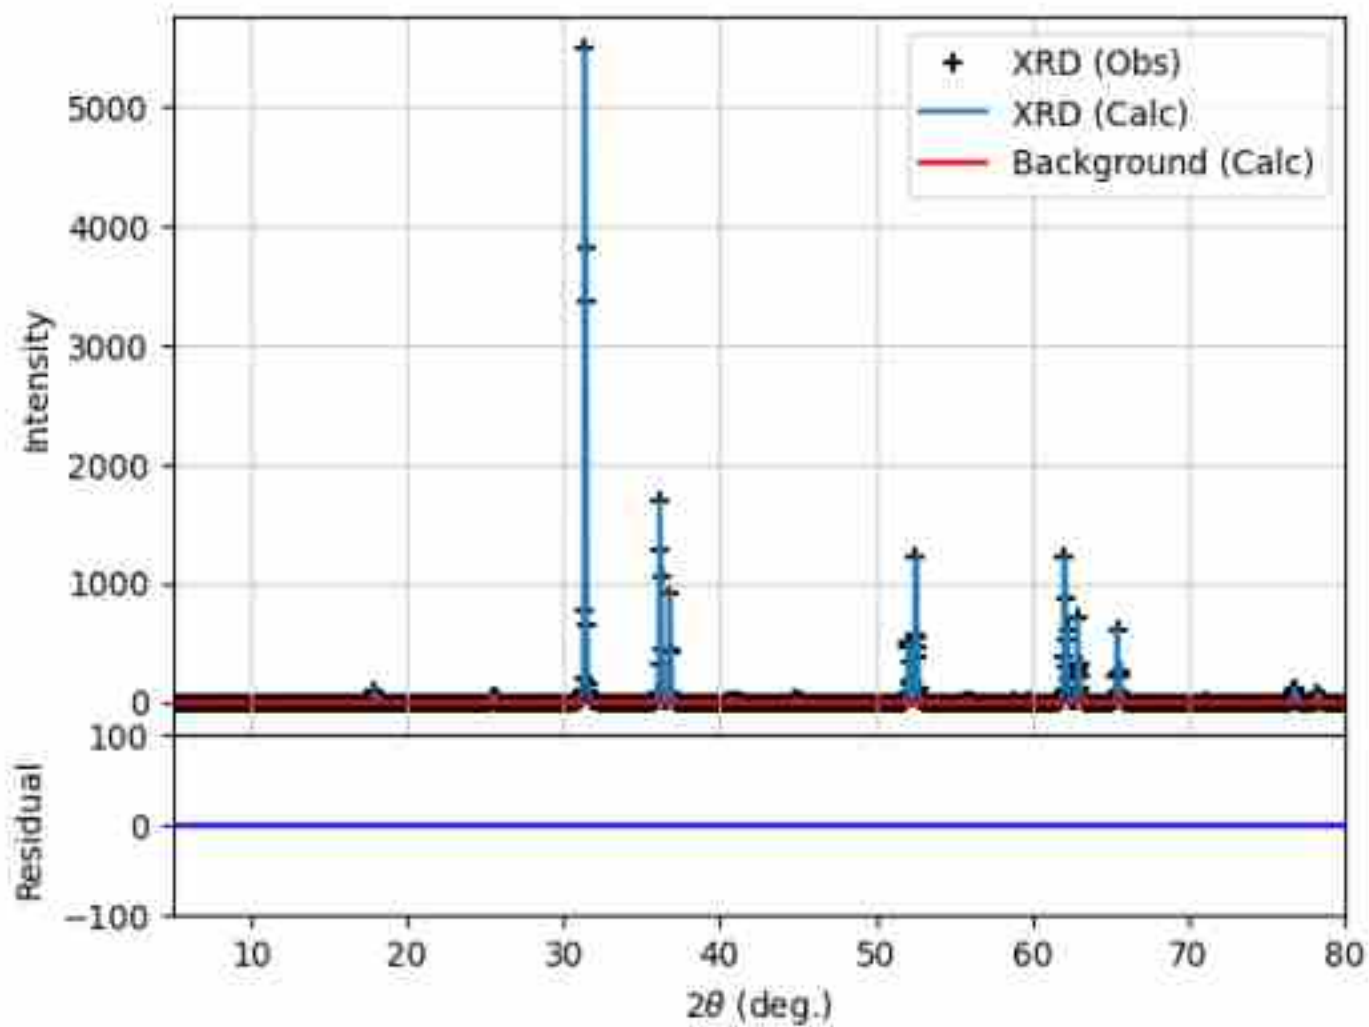

| RMSE before RR | Rwp     | RMSE after RR |
|----------------|---------|---------------|
| 0.009          | 0.07866 | 0.00415       |

# La4Au4

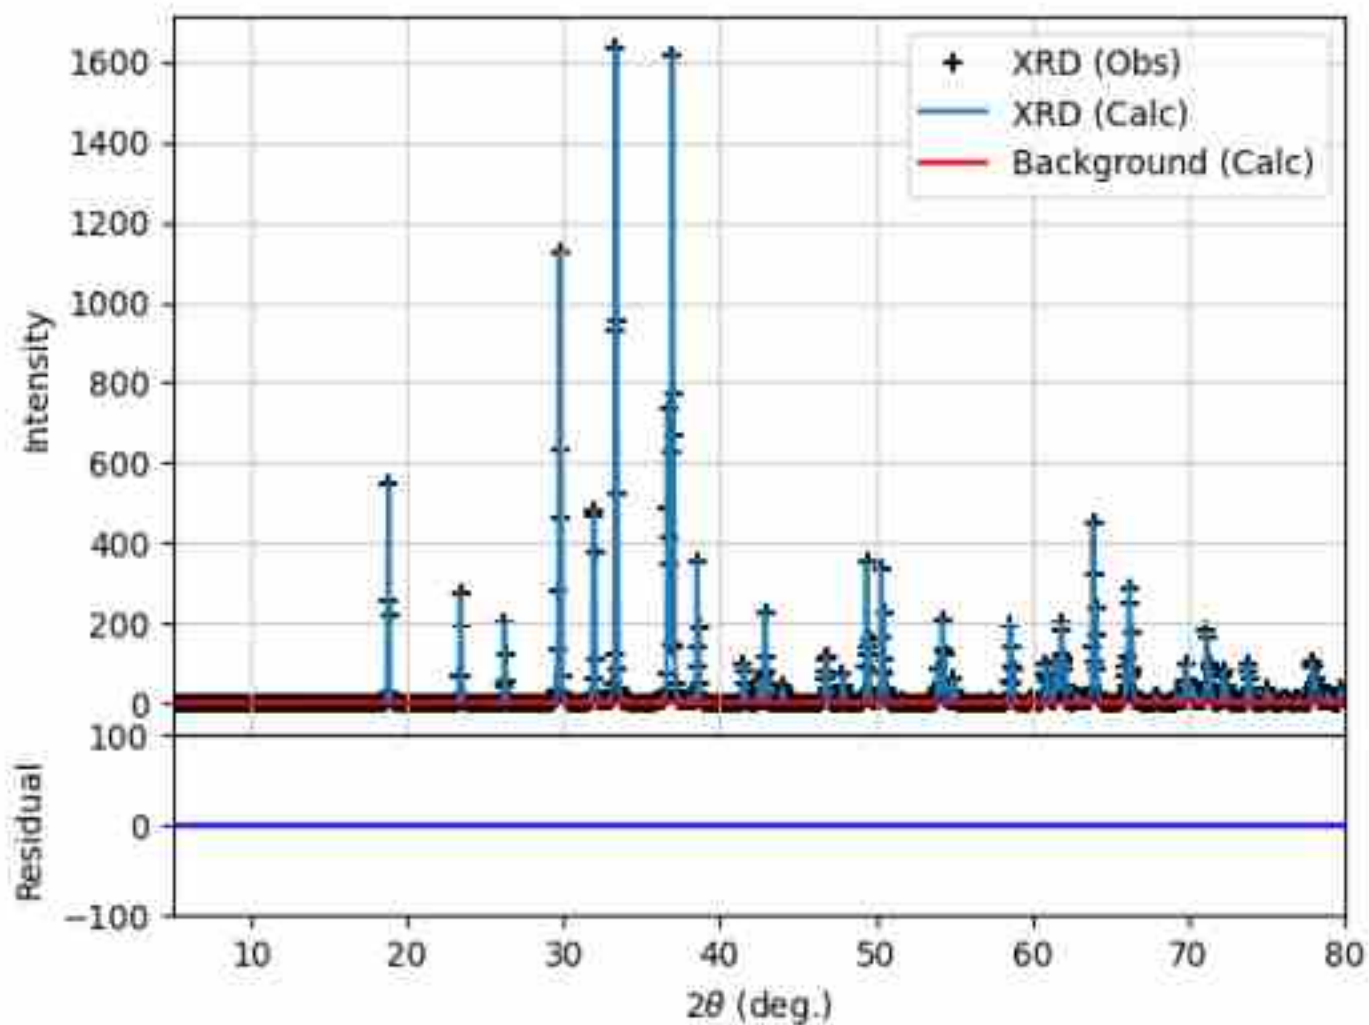

| RMSE before RR | Rwp    | RMSE after RR |
|----------------|--------|---------------|
| 0.009          | 0.0047 | 0.00028       |

# Lu1Al2Pd5

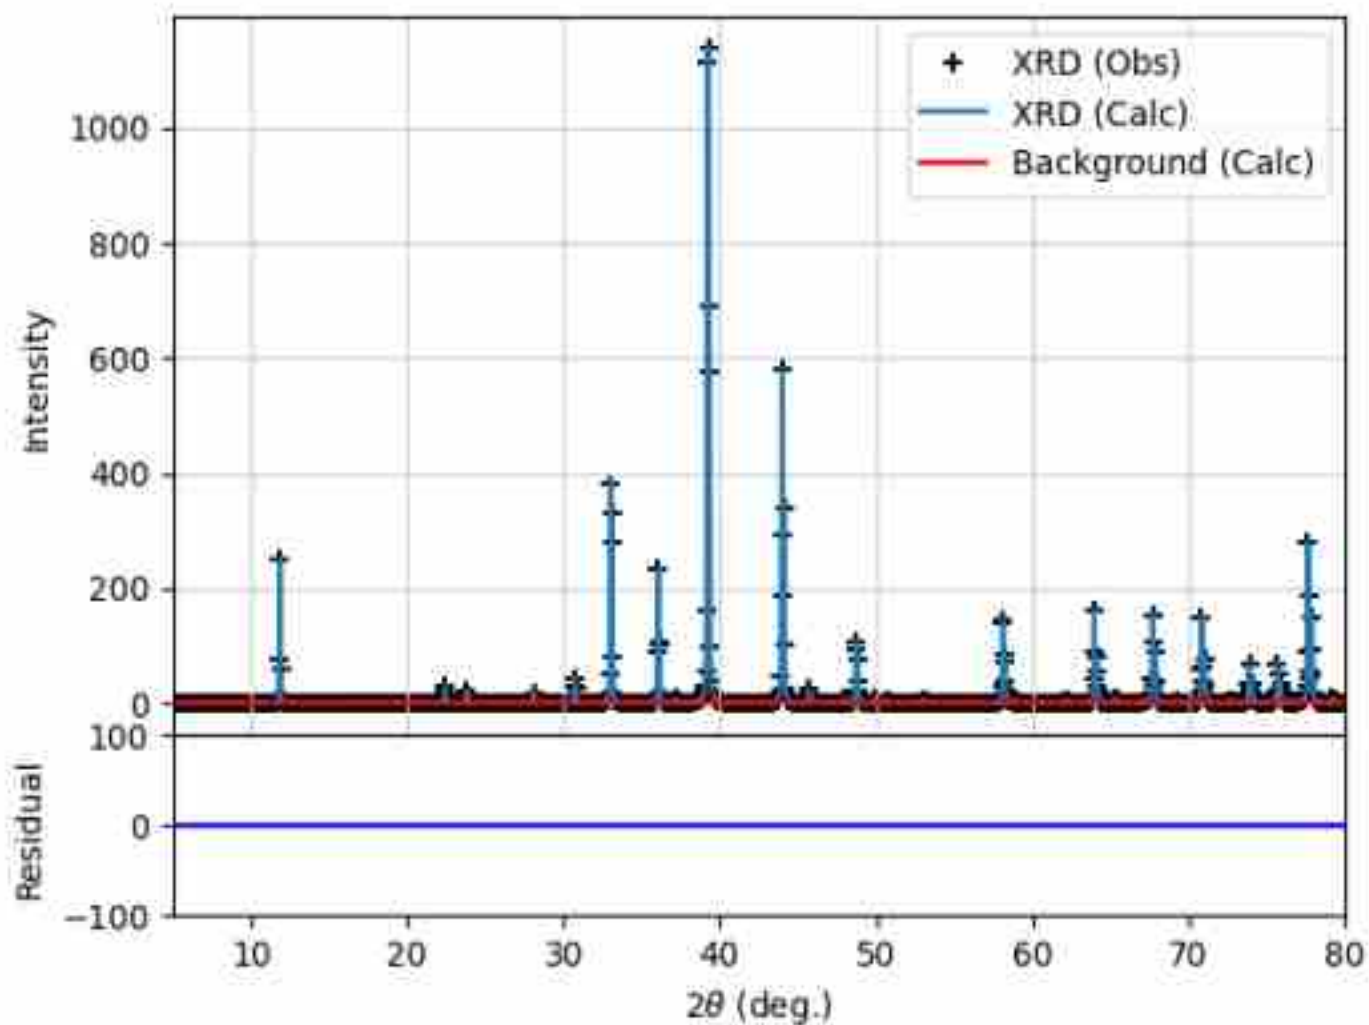

| RMSE before RR | Rwp     | RMSE after RR |
|----------------|---------|---------------|
| 0.009          | 0.00412 | 0.00053       |

# Lu1Co6Ge6

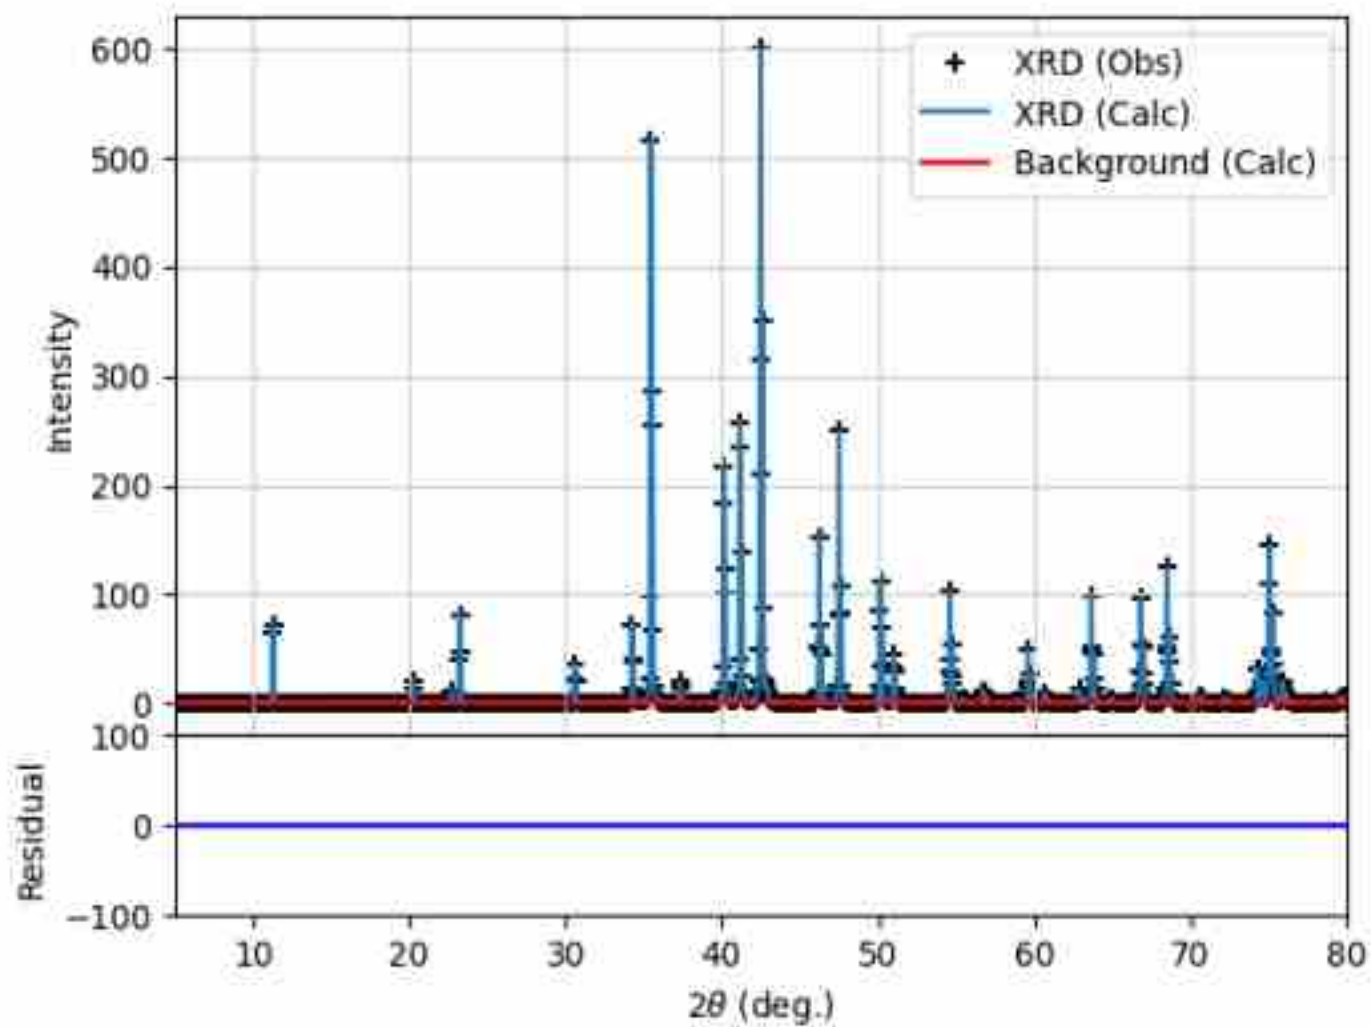

| RMSE before RR | Rwp     | RMSE after RR |
|----------------|---------|---------------|
| 0.009          | 0.00472 | 0.00146       |

# Lu<sub>2</sub>Si<sub>2</sub>O<sub>7</sub>

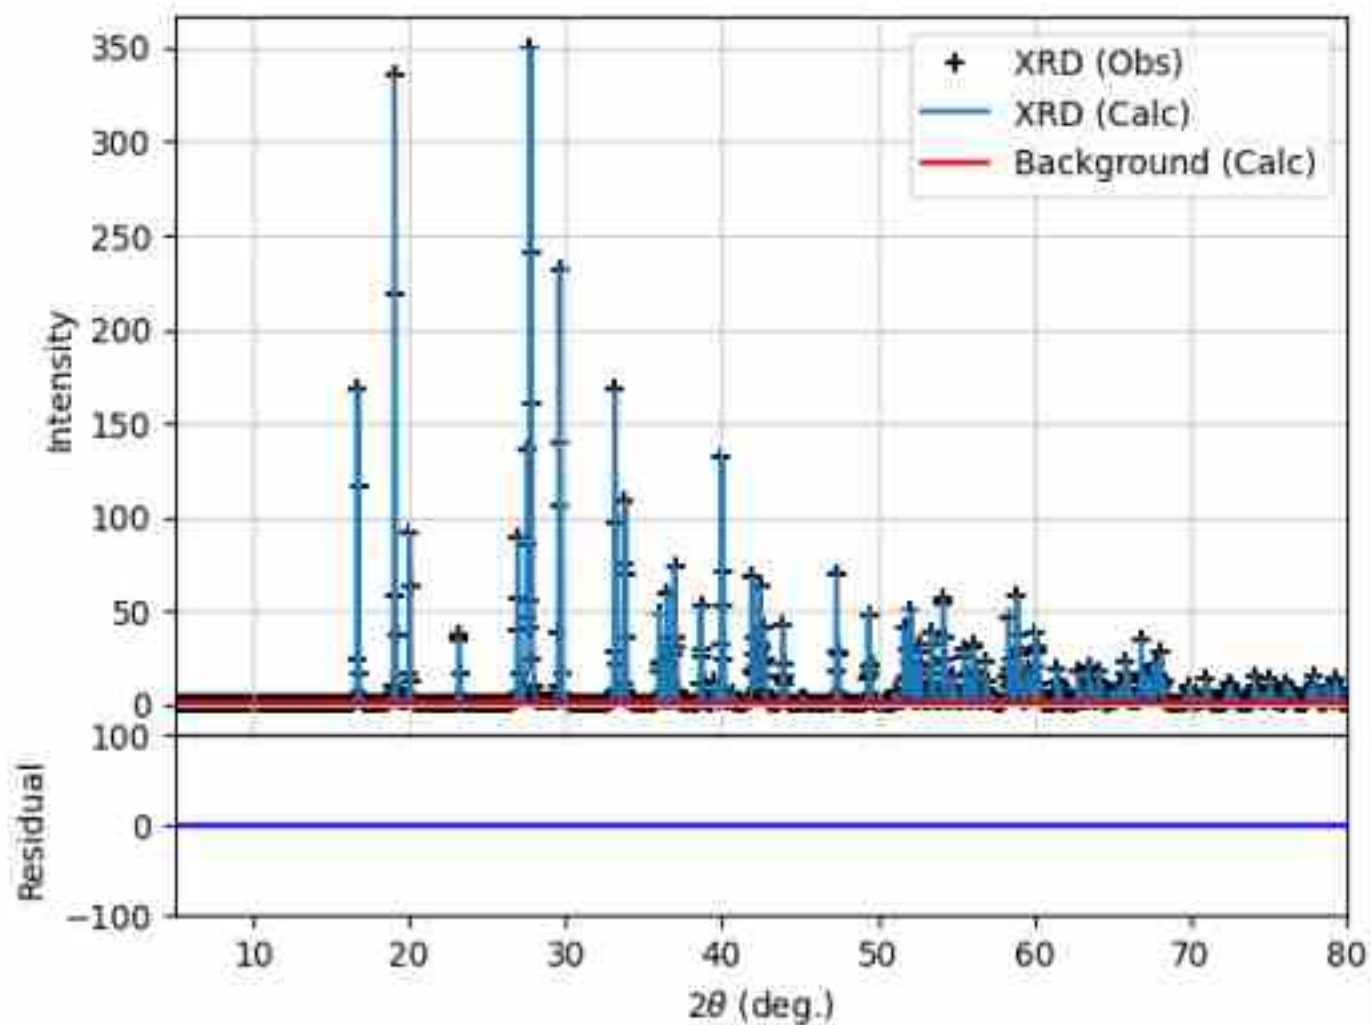

| RMSE before RR | Rwp     | RMSE after RR |
|----------------|---------|---------------|
| 0.009          | 0.00304 | 0.00058       |

# Lu<sub>3</sub>Al<sub>3</sub>Au<sub>3</sub>

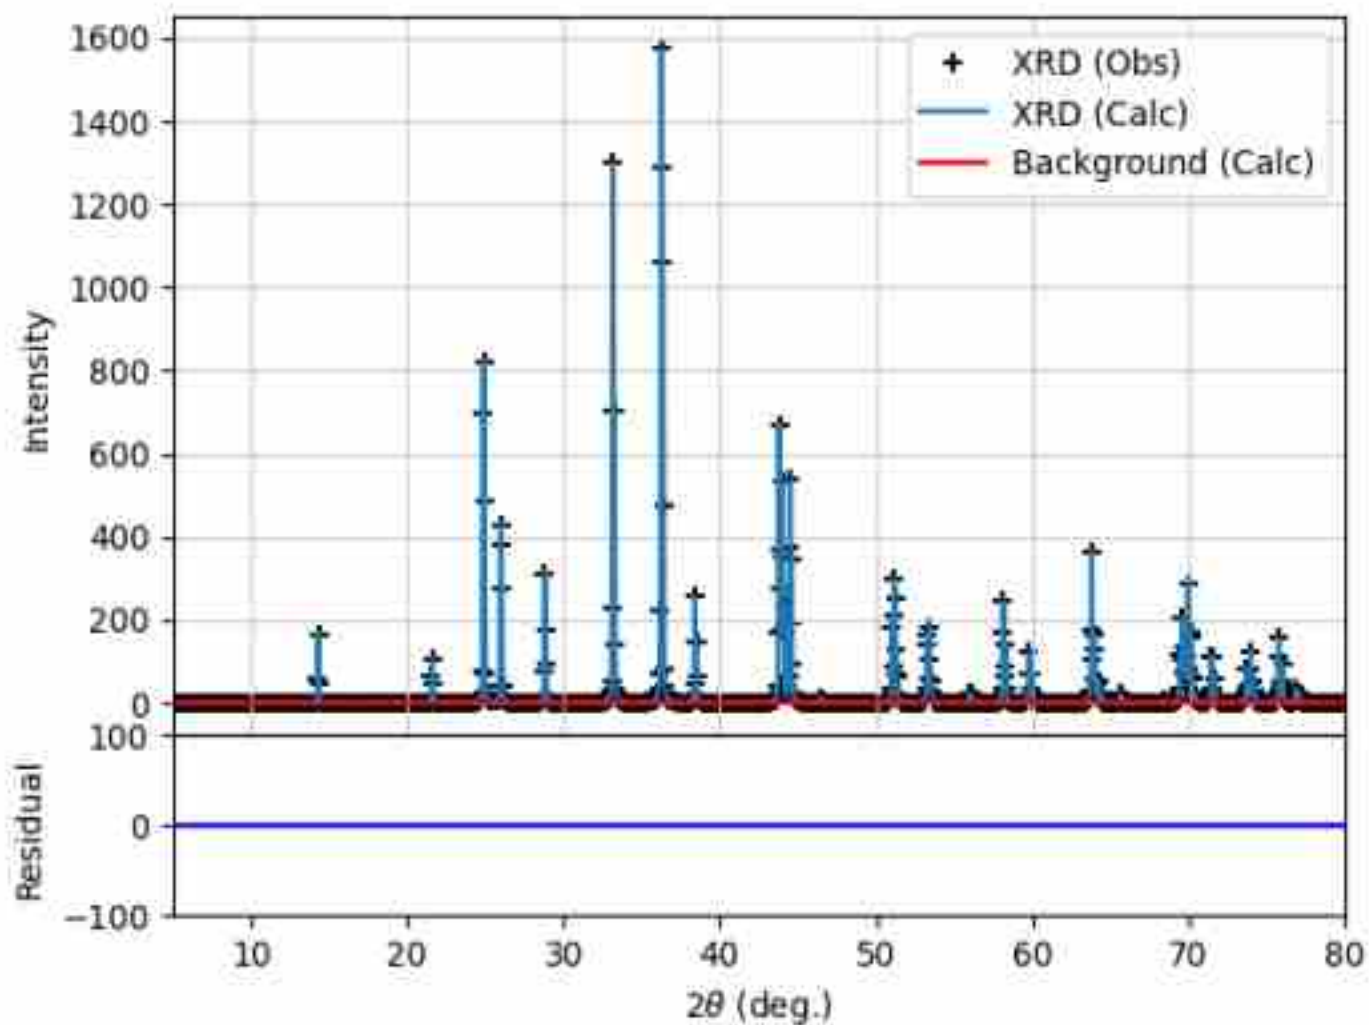

| RMSE before RR | Rwp     | RMSE after RR |
|----------------|---------|---------------|
| 0.009          | 0.00518 | 0.0007        |

# Lu<sub>3</sub>In<sub>3</sub>Ni<sub>3</sub>

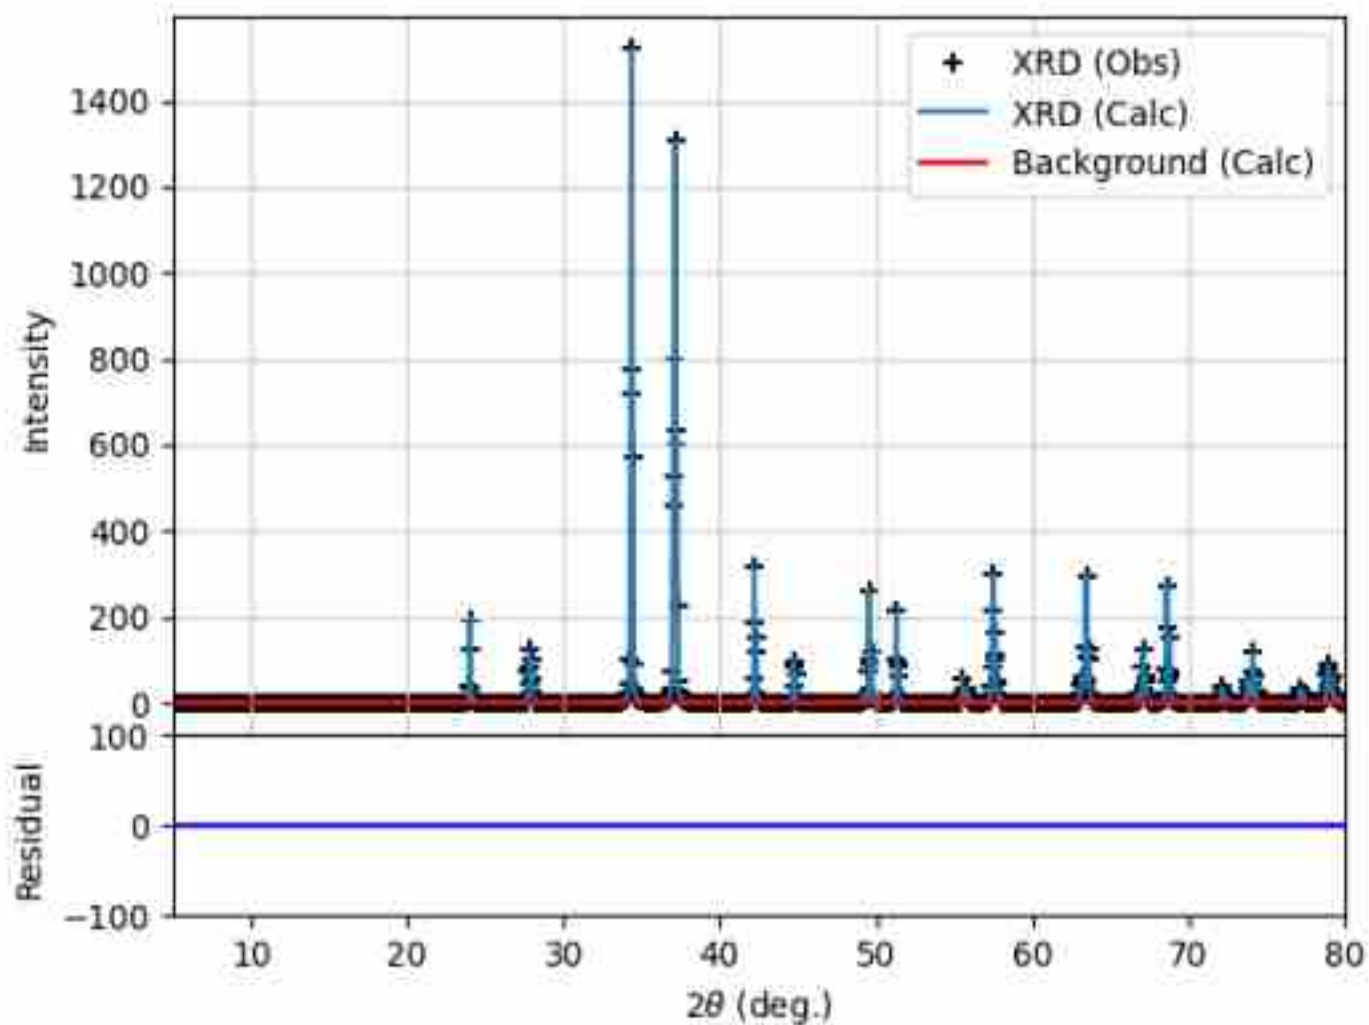

| RMSE before RR | Rwp    | RMSE after RR |
|----------------|--------|---------------|
| 0.009          | 0.0039 | 0.00128       |

# Mg<sub>1</sub>Al<sub>2</sub>Si<sub>2</sub>

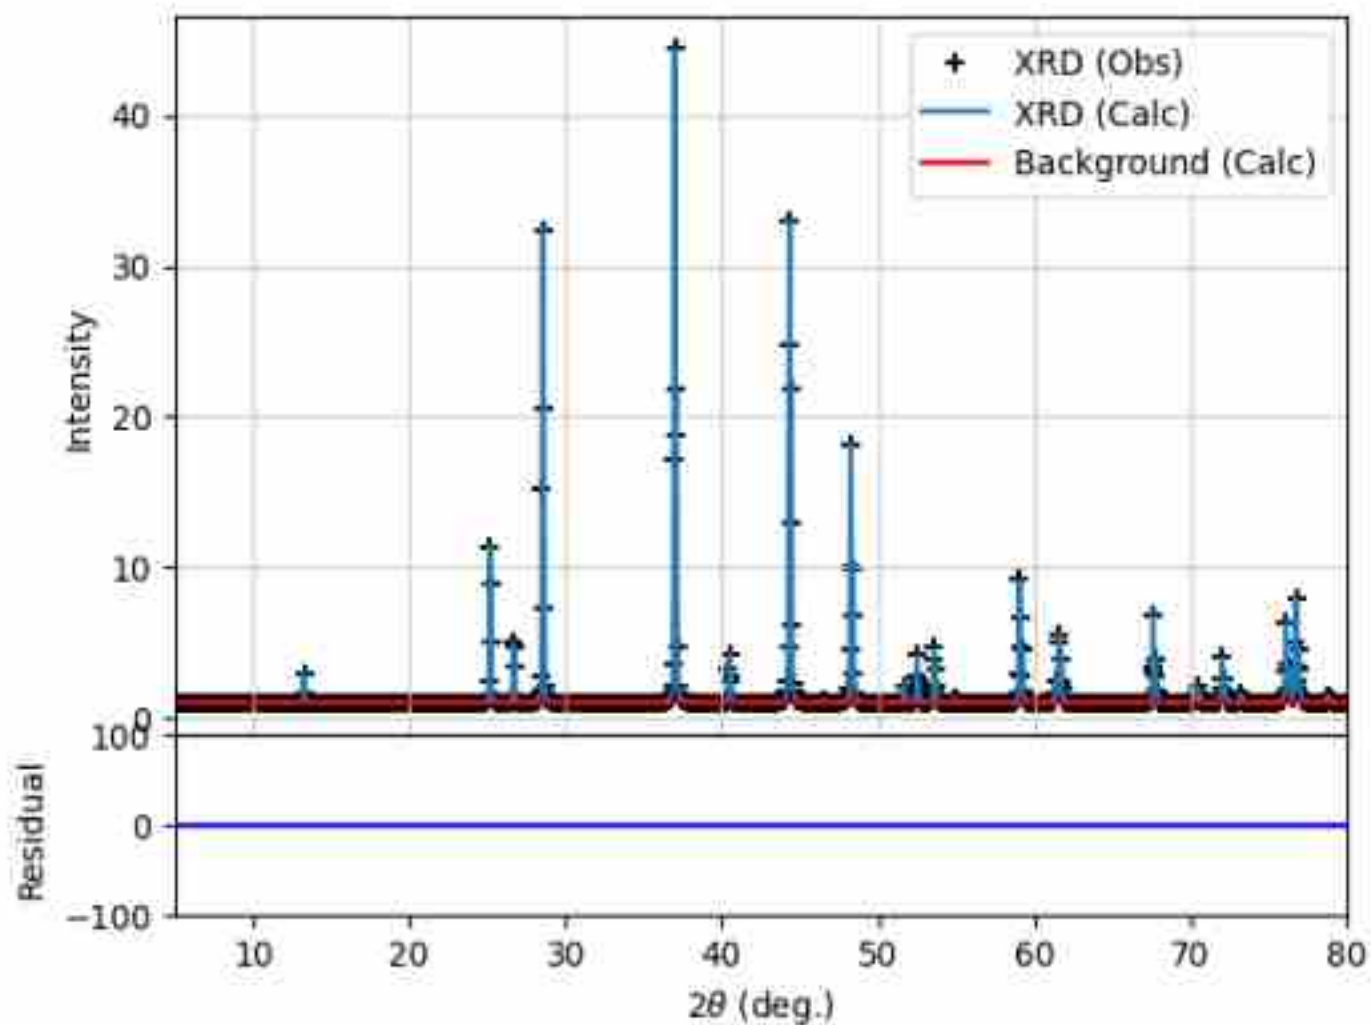

| RMSE before RR | Rwp     | RMSE after RR |
|----------------|---------|---------------|
| 0.009          | 0.00169 | 0.00058       |



# Mg1Cd5

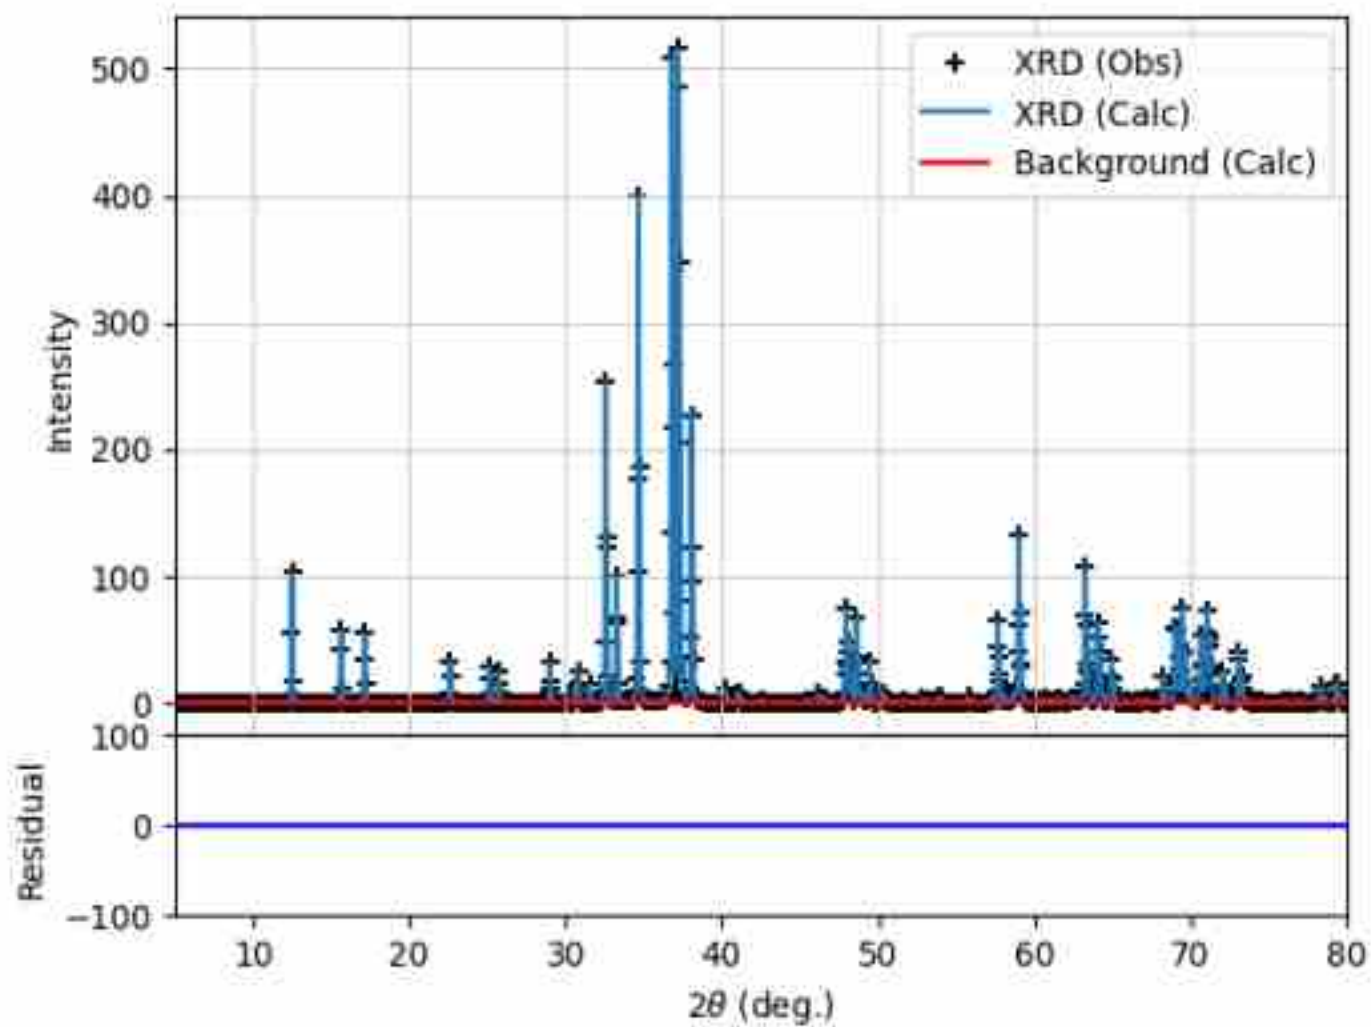

| RMSE before RR | Rwp     | RMSE after RR |
|----------------|---------|---------------|
| 0.009          | 0.00402 | 0.0002        |

# Mg1Pb5

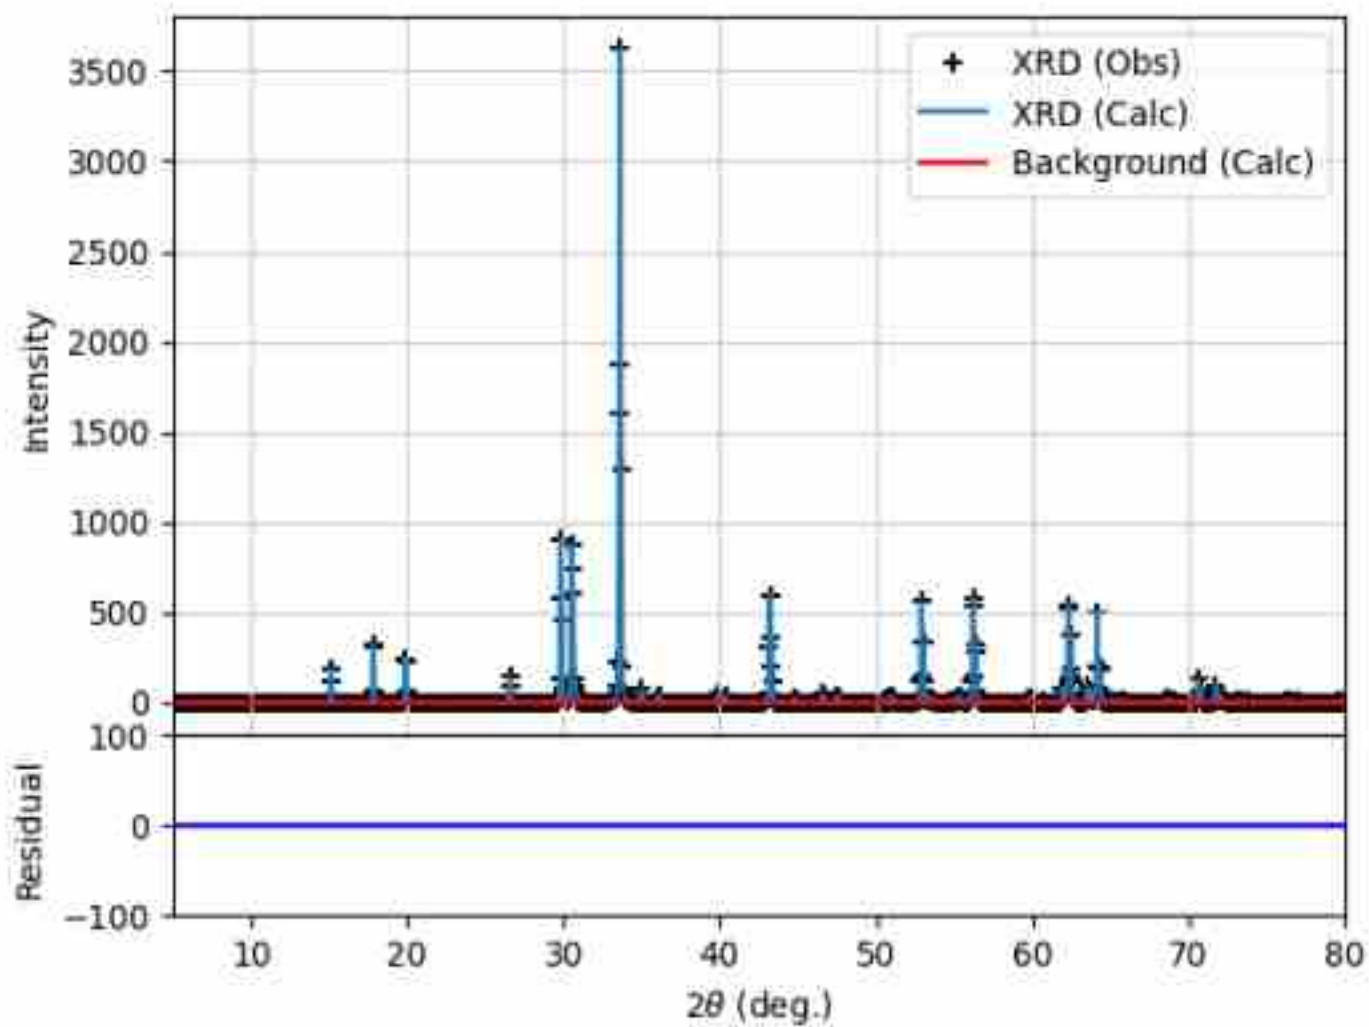

| RMSE before RR | Rwp     | RMSE after RR |
|----------------|---------|---------------|
| 0.009          | 0.00308 | 0.00033       |

# Mg<sub>1</sub>Ti<sub>1</sub>N<sub>2</sub>

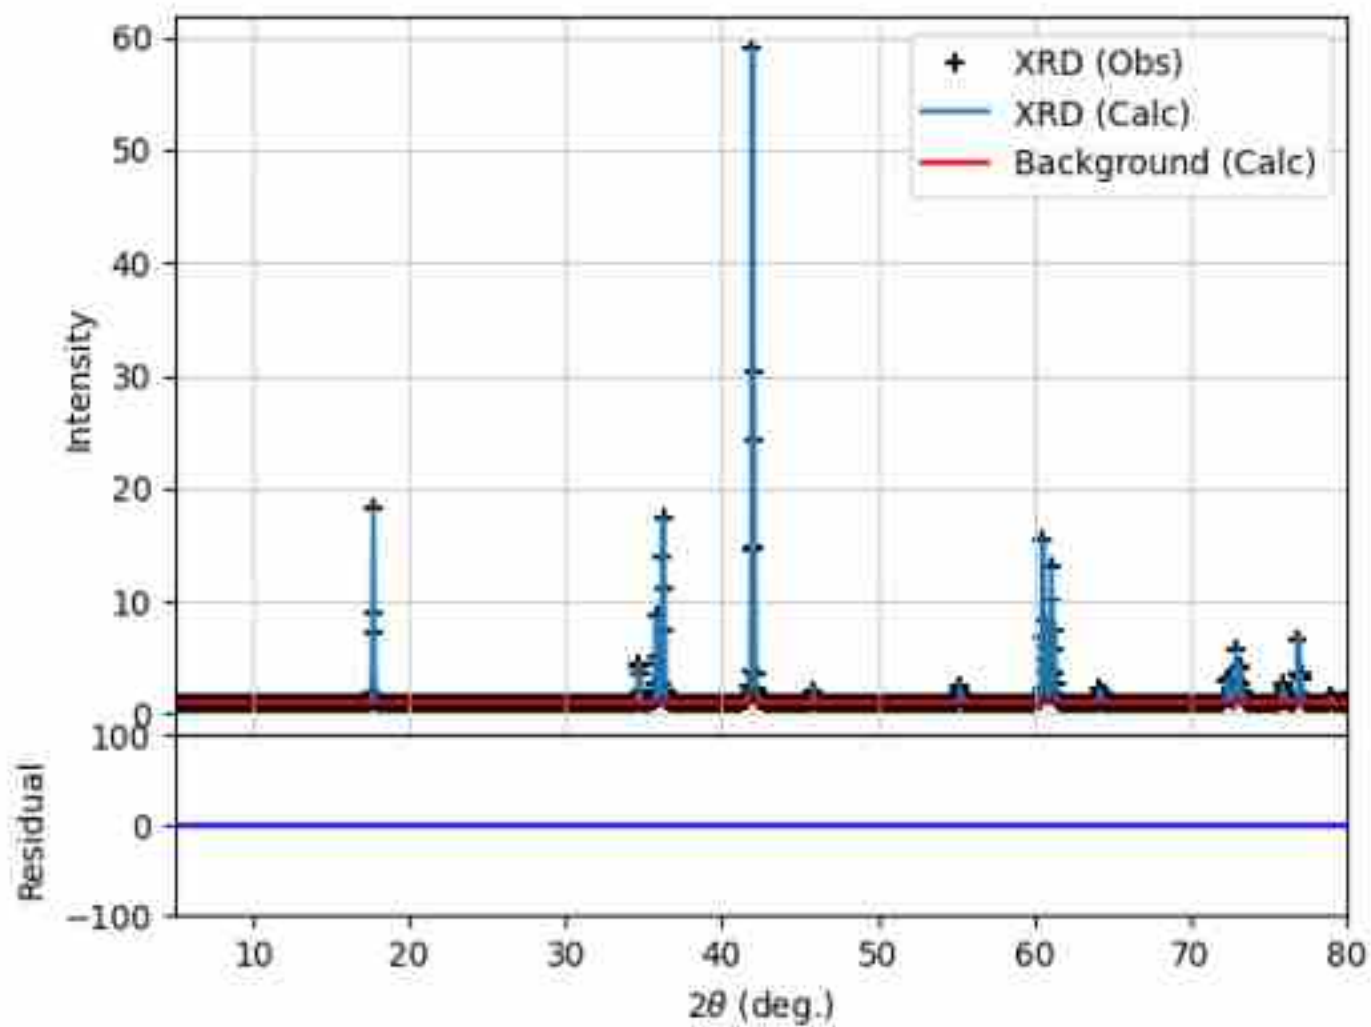

| RMSE before RR | Rwp     | RMSE after RR |
|----------------|---------|---------------|
| 0.009          | 0.00123 | 0.00038       |

# Mg<sub>1</sub>Zn<sub>5</sub>

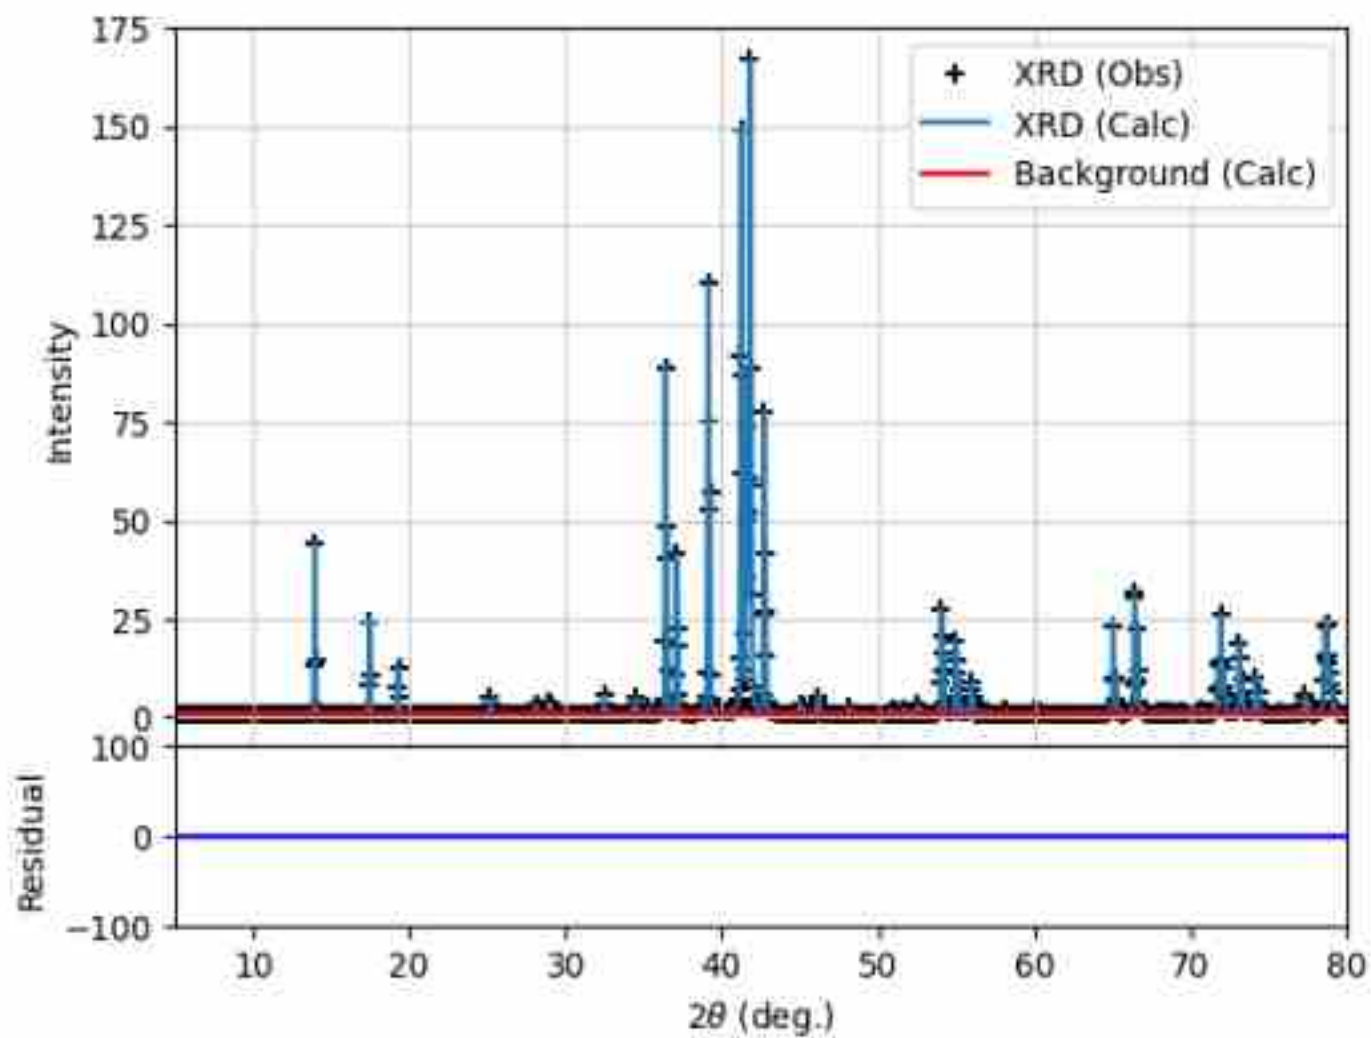

| RMSE before RR | Rwp     | RMSE after RR |
|----------------|---------|---------------|
| 0.009          | 0.00195 | 0.00029       |

# Mg<sub>2</sub>Cd<sub>4</sub>

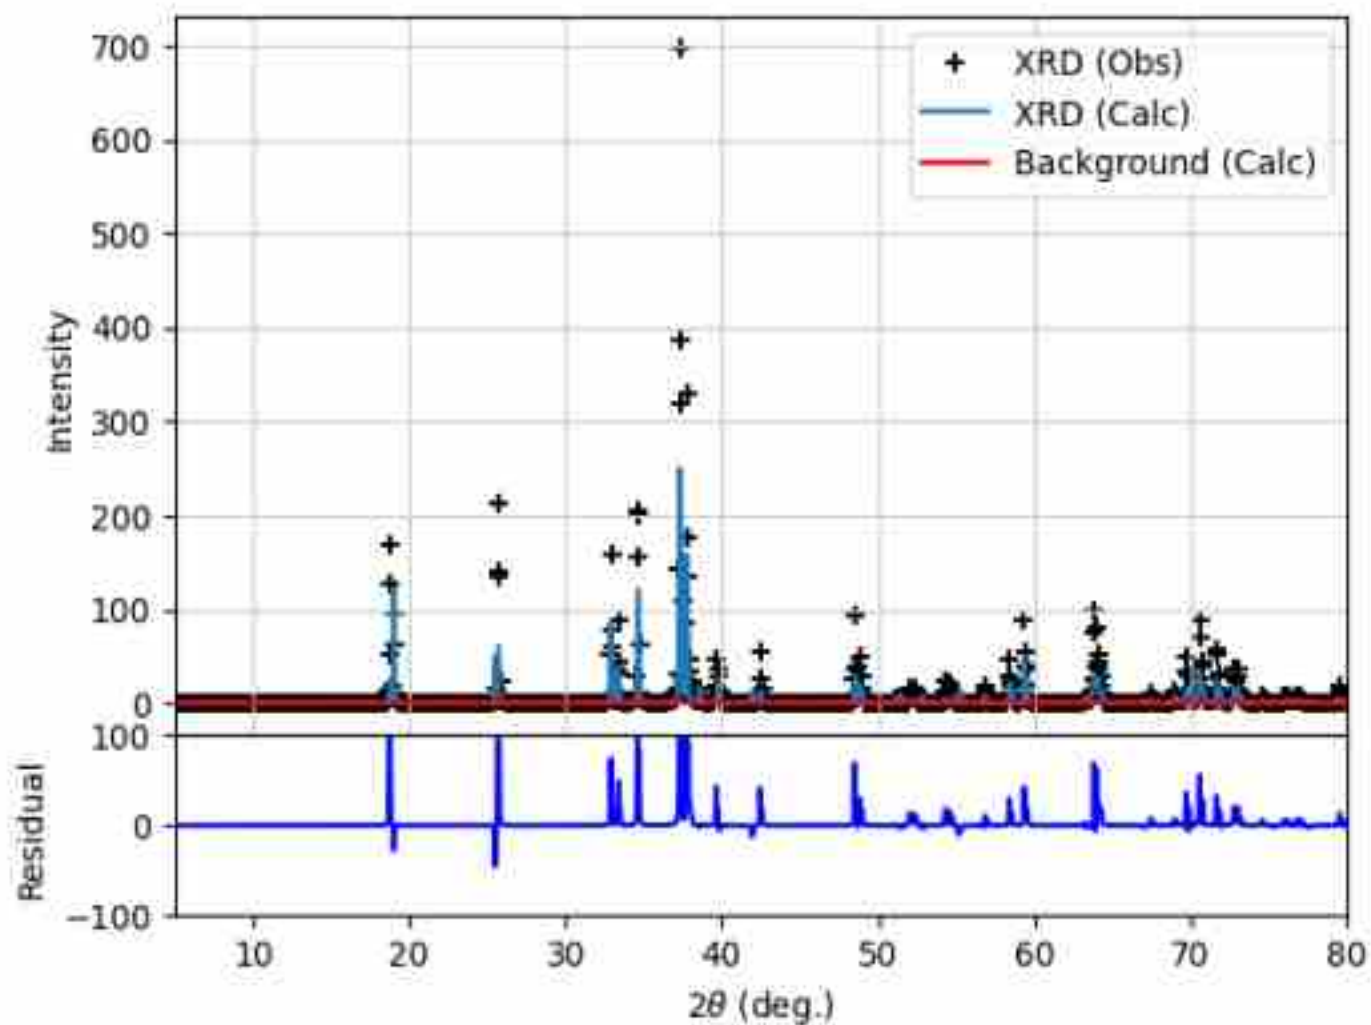

| RMSE before RR | Rwp      | RMSE after RR |
|----------------|----------|---------------|
| 0.009          | 63.96244 | 0.03522       |

# Mg<sub>2</sub>Pt<sub>4</sub>

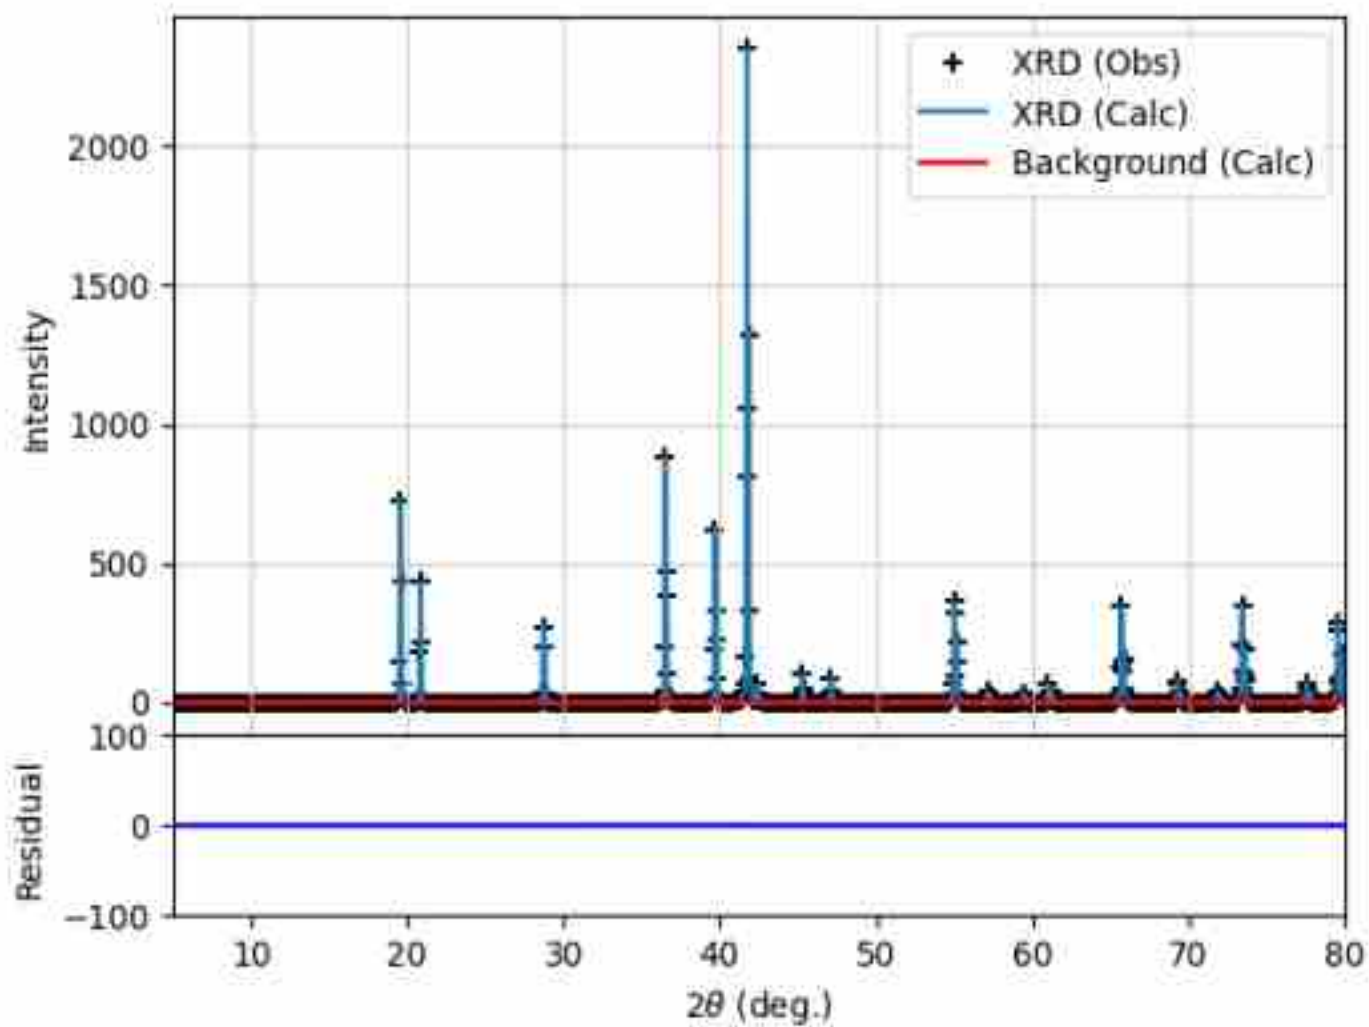

| RMSE before RR | Rwp     | RMSE after RR |
|----------------|---------|---------------|
| 0.009          | 0.02988 | 0.00228       |

# Mg6Au2

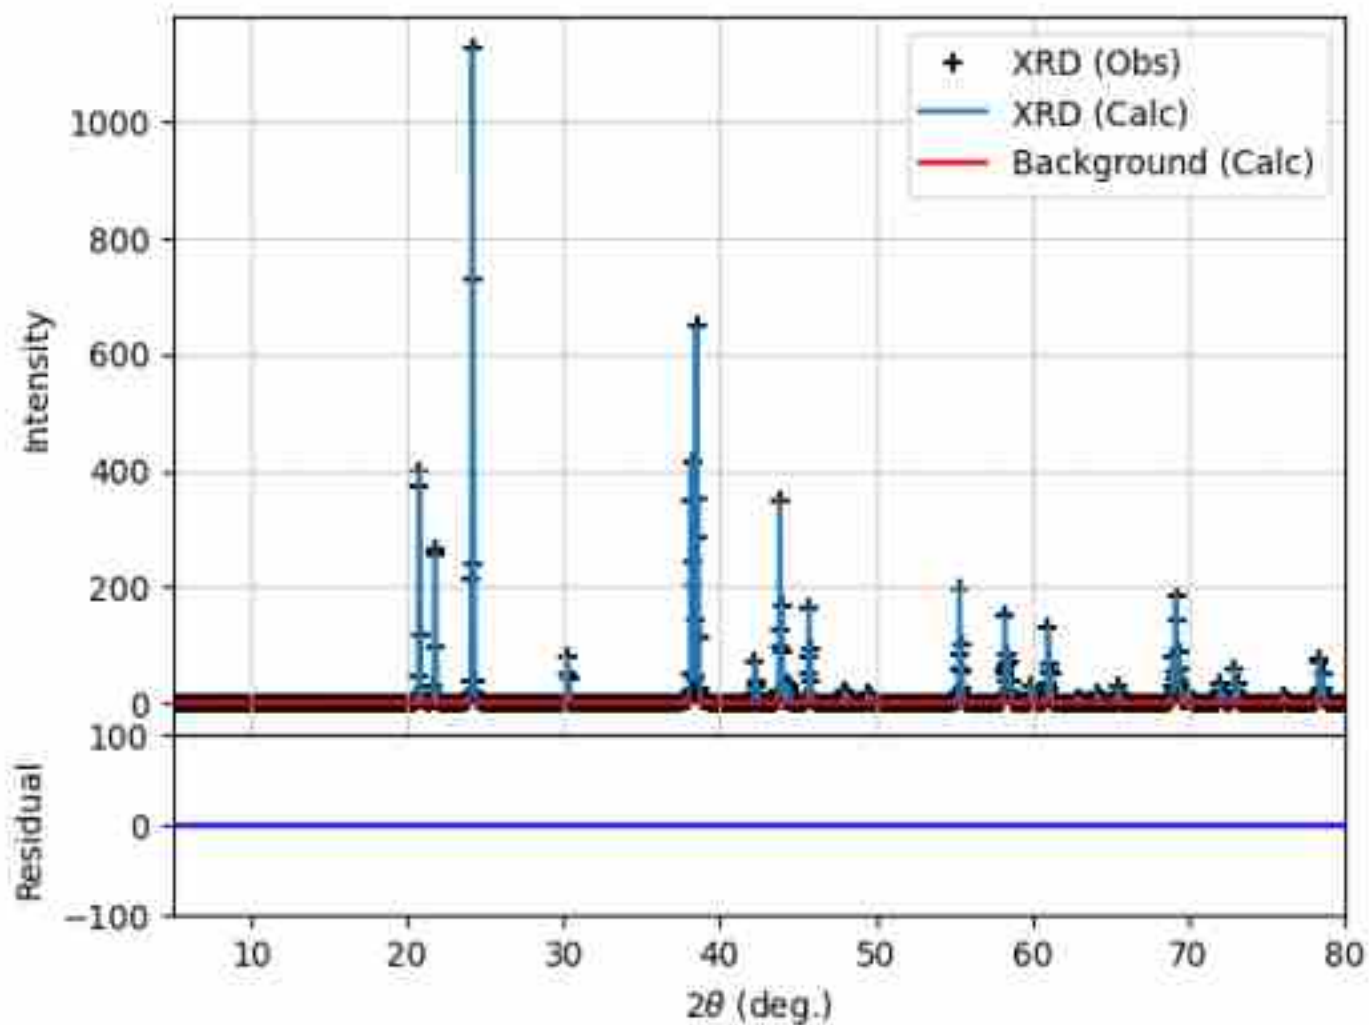

| RMSE before RR | Rwp   | RMSE after RR |
|----------------|-------|---------------|
| 0.009          | 0.004 | 0.00084       |

# Mn1Au2

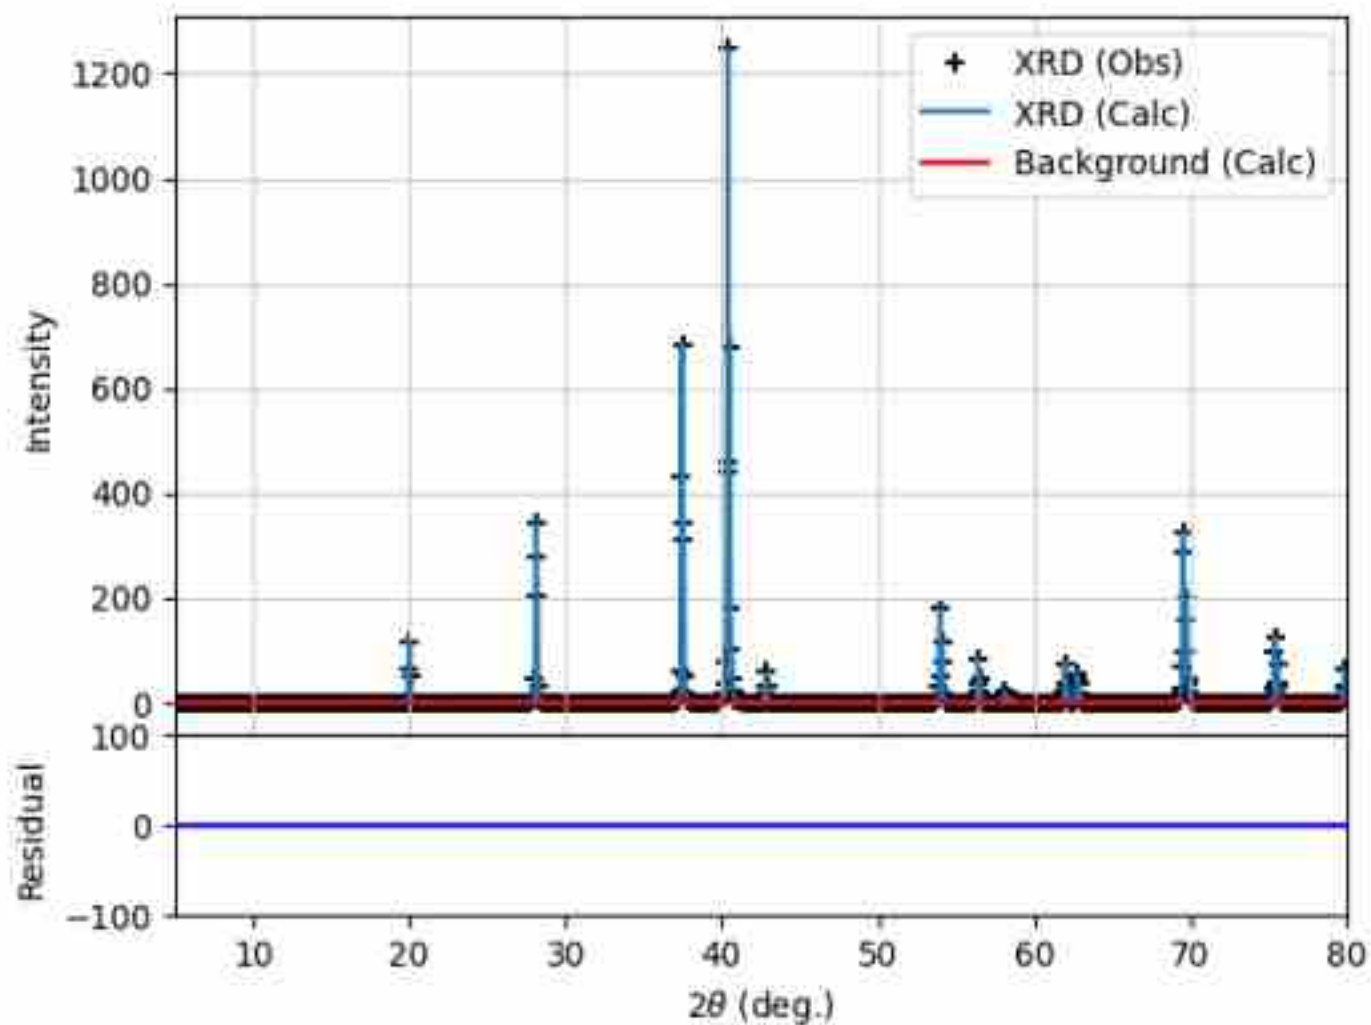

| RMSE before RR | Rwp     | RMSE after RR |
|----------------|---------|---------------|
| 0.009          | 0.00619 | 0.00075       |



# Mn1Co3C1

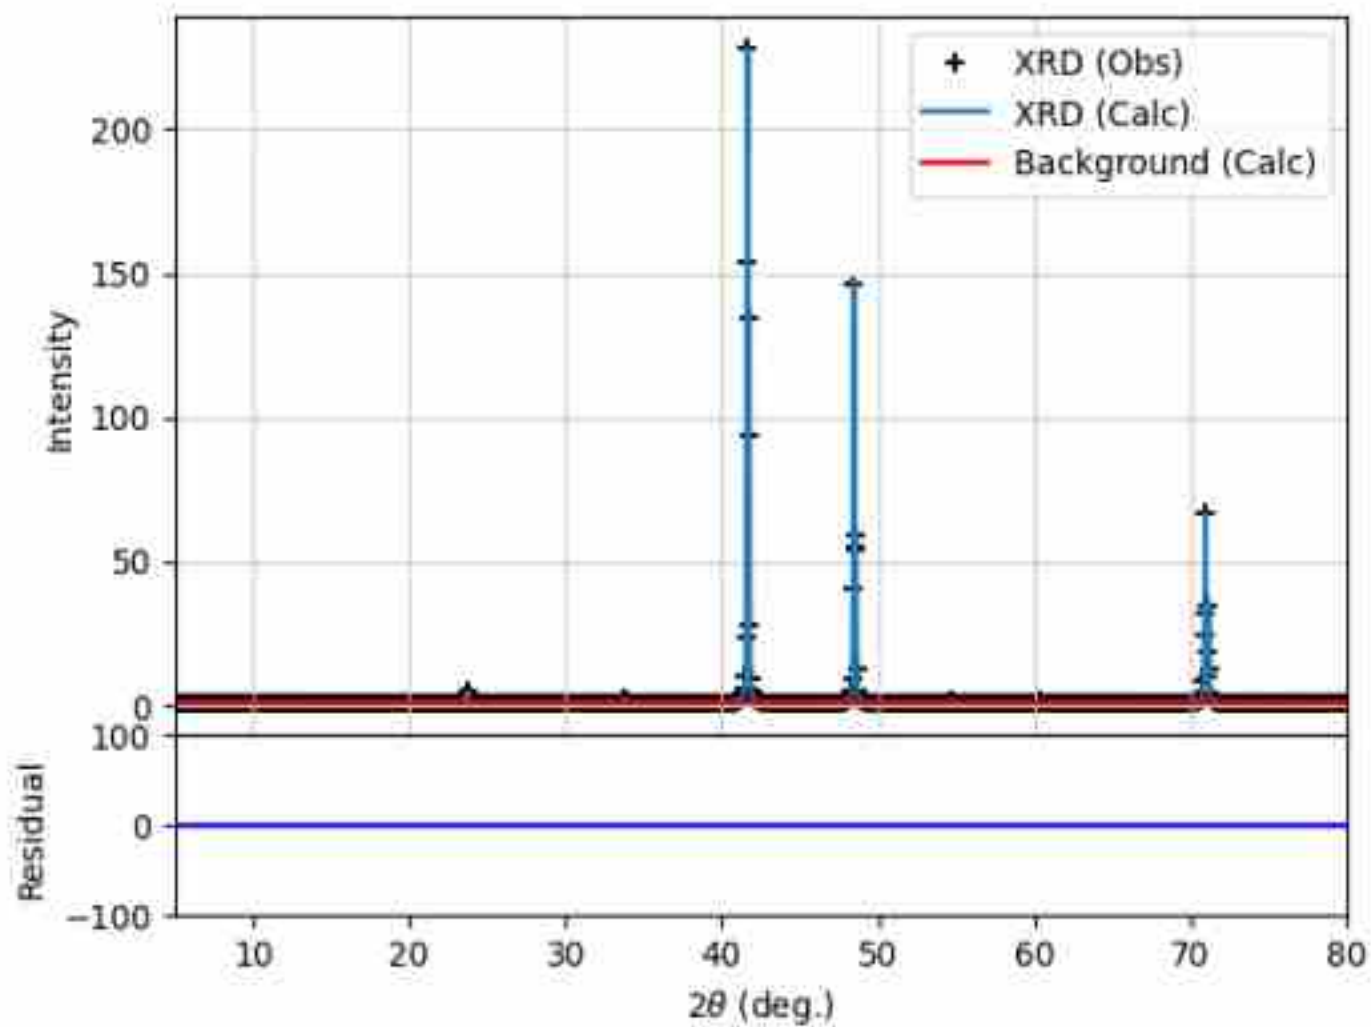

| RMSE before RR | Rwp     | RMSE after RR |
|----------------|---------|---------------|
| 0.009          | 0.00468 | 0.00214       |

# Mn1Cu2Sn1Se4

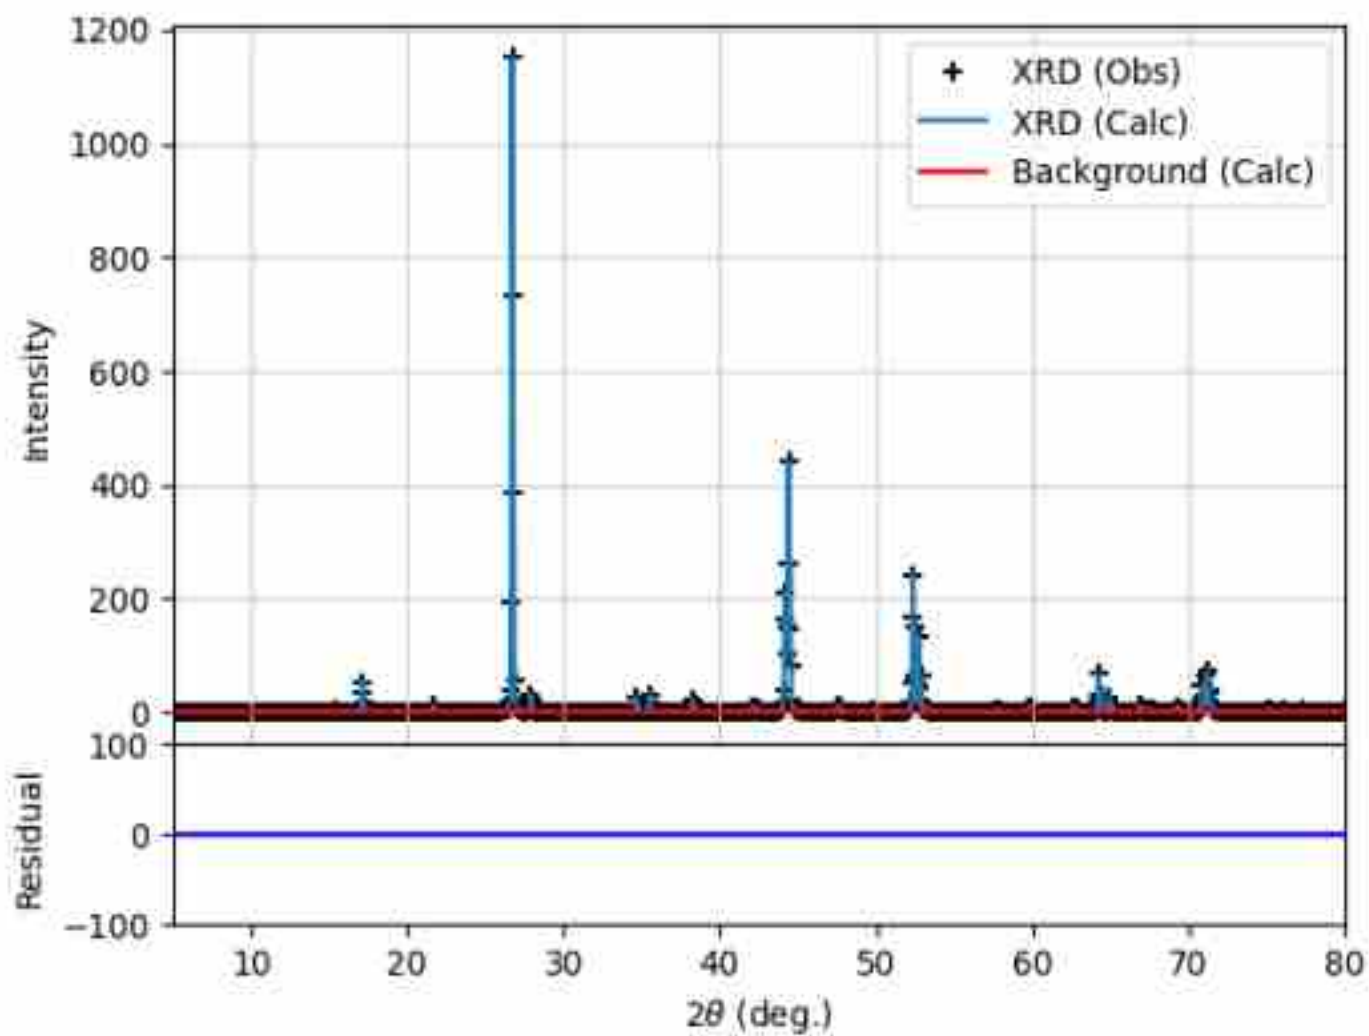

| RMSE before RR | Rwp     | RMSE after RR |
|----------------|---------|---------------|
| 0.009          | 0.00839 | 0.00093       |

# Mn1Ga1Rh2

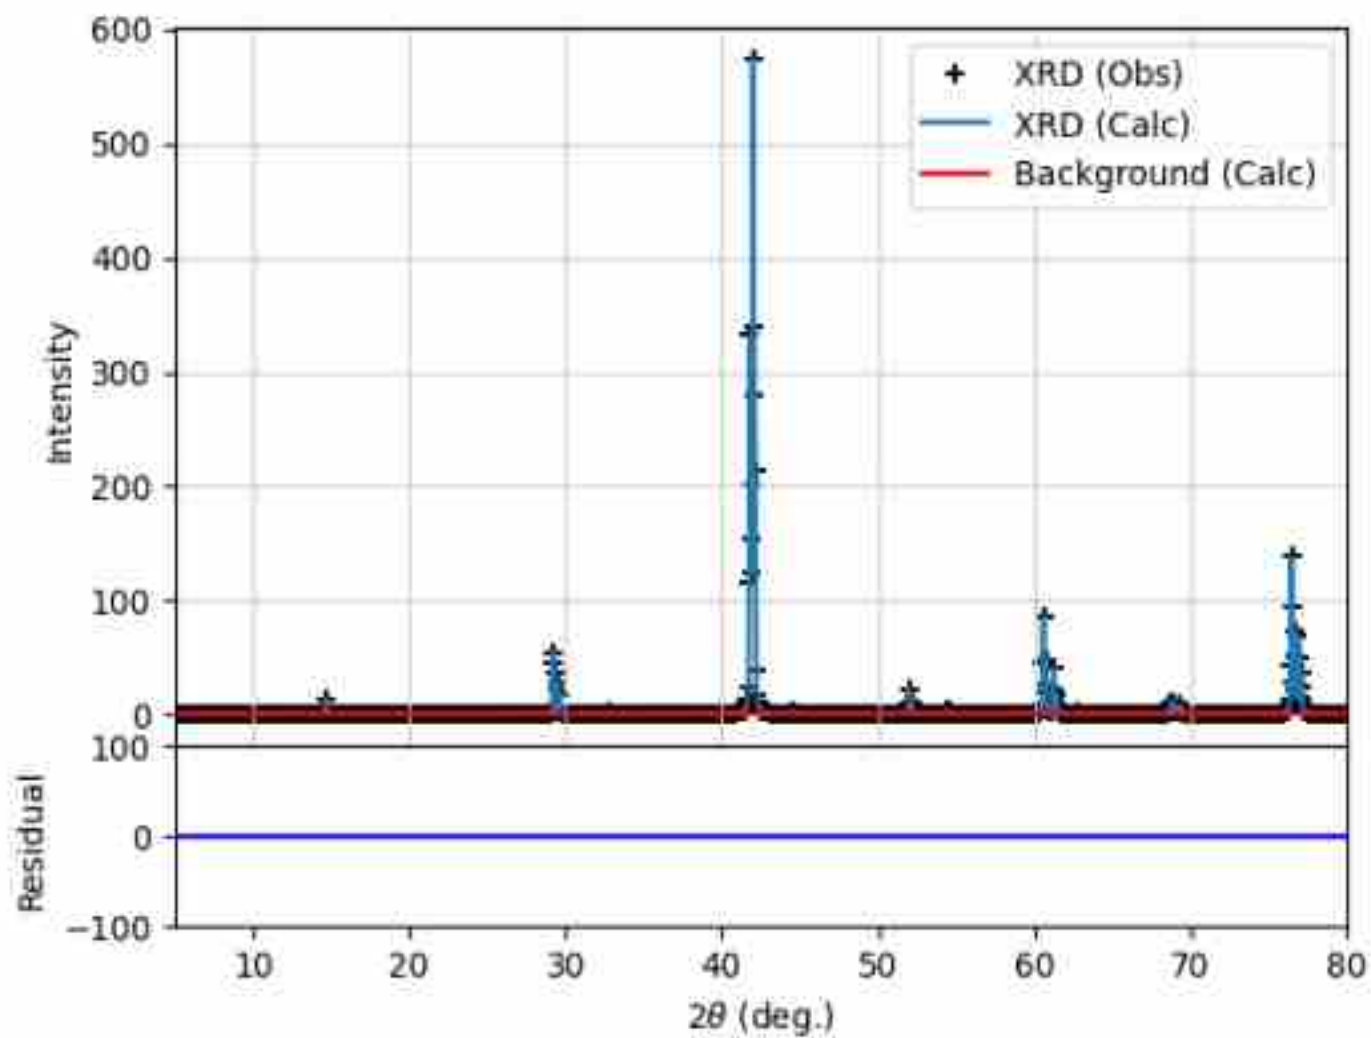

| RMSE before RR | Rwp    | RMSE after RR |
|----------------|--------|---------------|
| 0.009          | 0.0036 | 0.0002        |

# Mn<sub>2</sub>Ir<sub>6</sub>

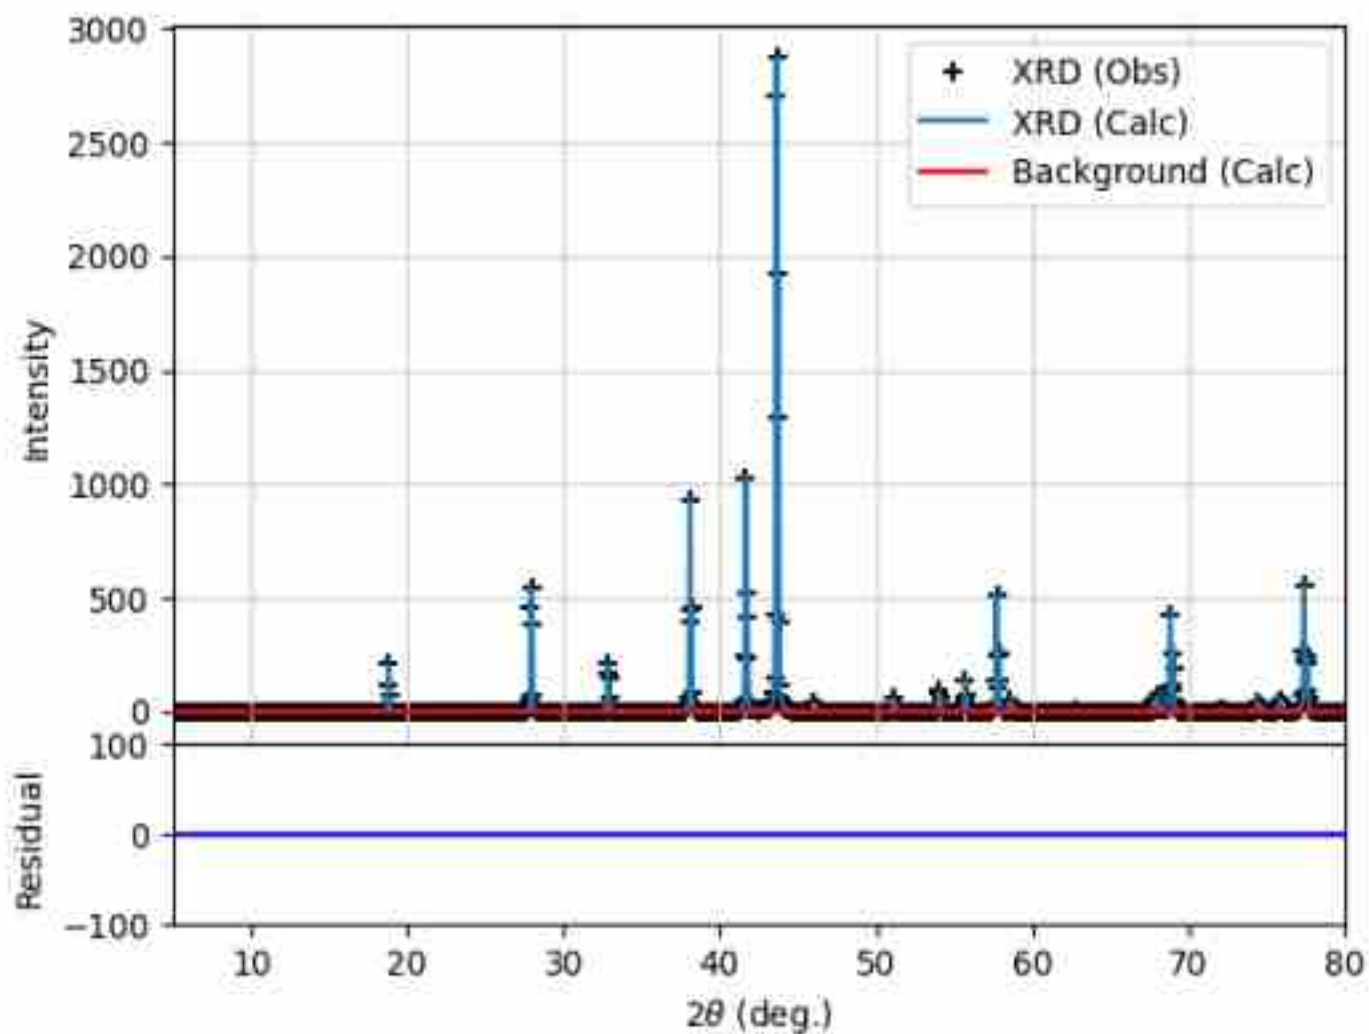

| RMSE before RR | Rwp     | RMSE after RR |
|----------------|---------|---------------|
| 0.009          | 0.02036 | 0.00151       |

# Mn<sub>2</sub>Pd<sub>6</sub>

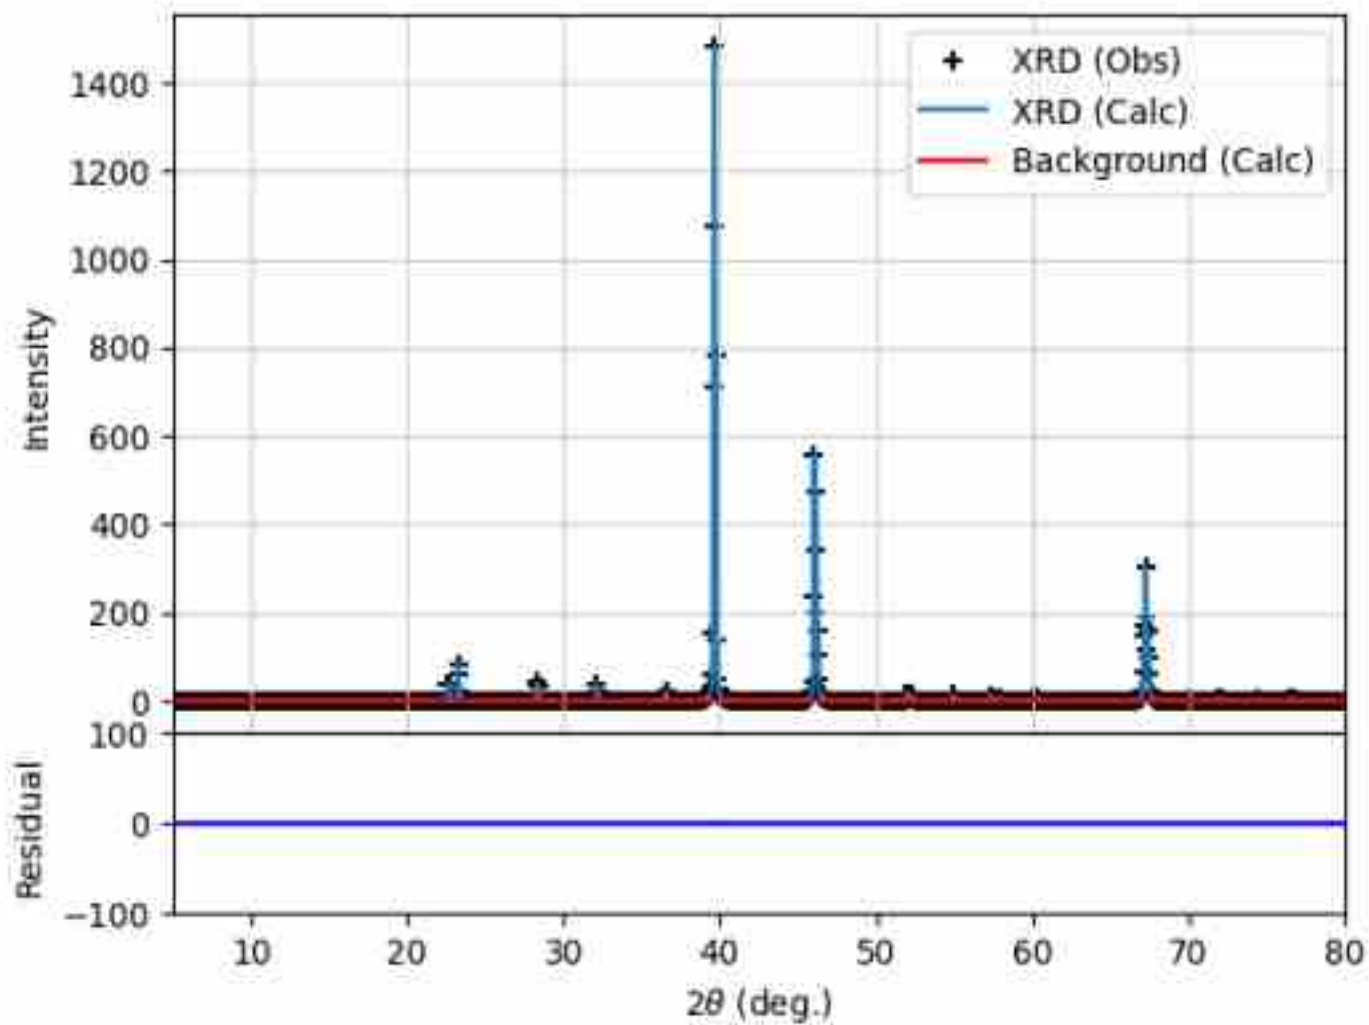

| RMSE before RR | Rwp     | RMSE after RR |
|----------------|---------|---------------|
| 0.009          | 0.24089 | 0.00403       |

# Mo1Pd2Rh1

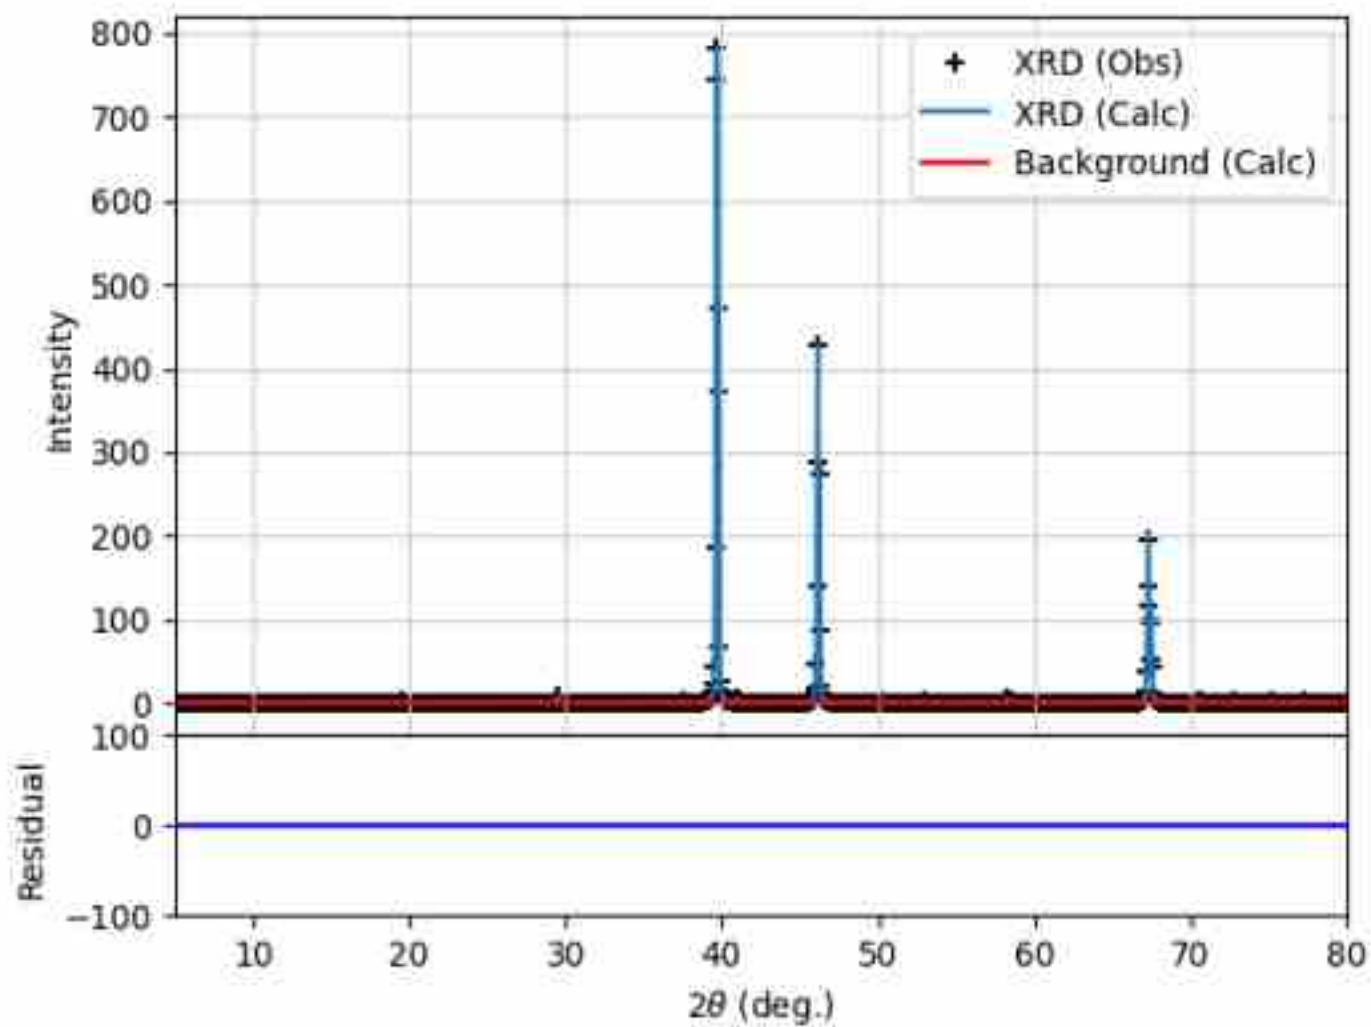

| RMSE before RR | Rwp     | RMSE after RR |
|----------------|---------|---------------|
| 0.009          | 0.00581 | 0.00022       |

# Mo6Ir2

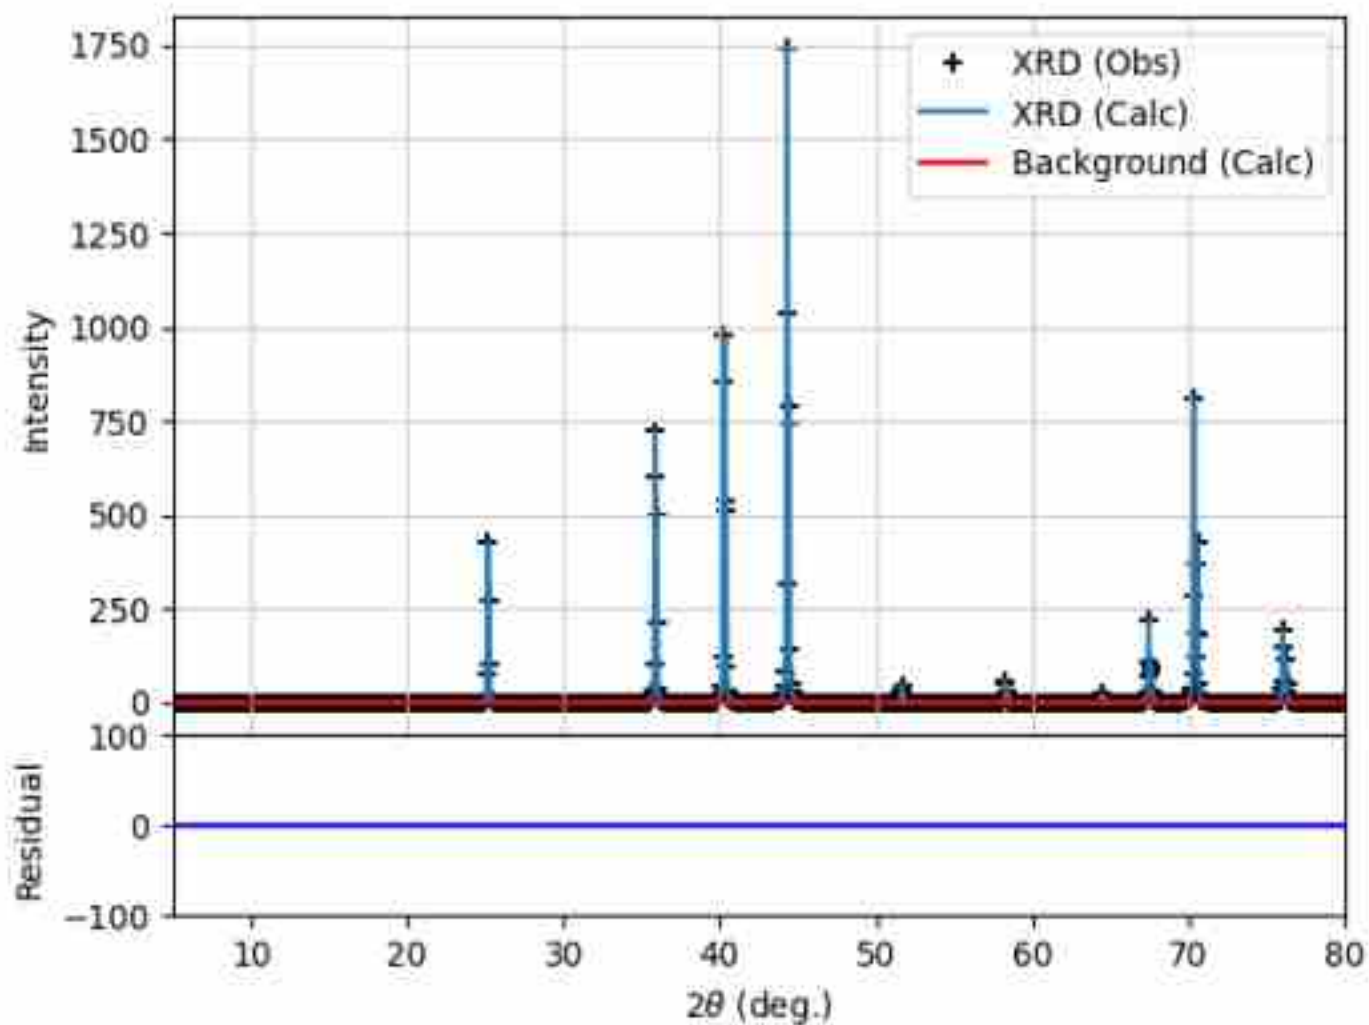

| RMSE before RR | Rwp     | RMSE after RR |
|----------------|---------|---------------|
| 0.009          | 0.00993 | 0.00067       |

# Na1Cr1Se2

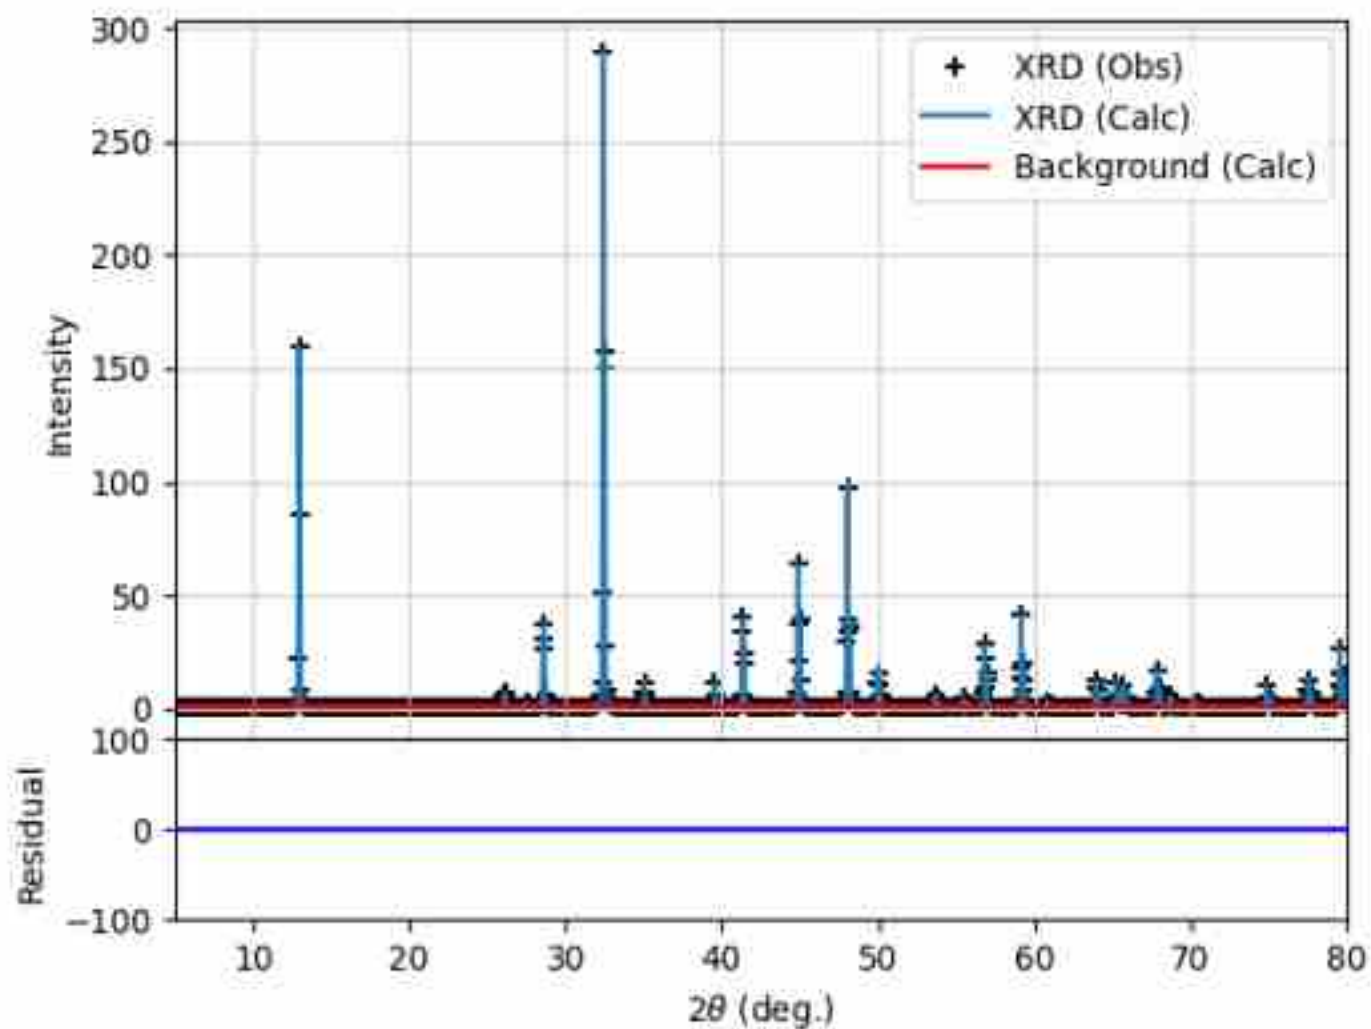

| RMSE before RR | Rwp     | RMSE after RR |
|----------------|---------|---------------|
| 0.009          | 0.00235 | 0.00031       |



# Na<sub>2</sub>LiGaF<sub>6</sub>

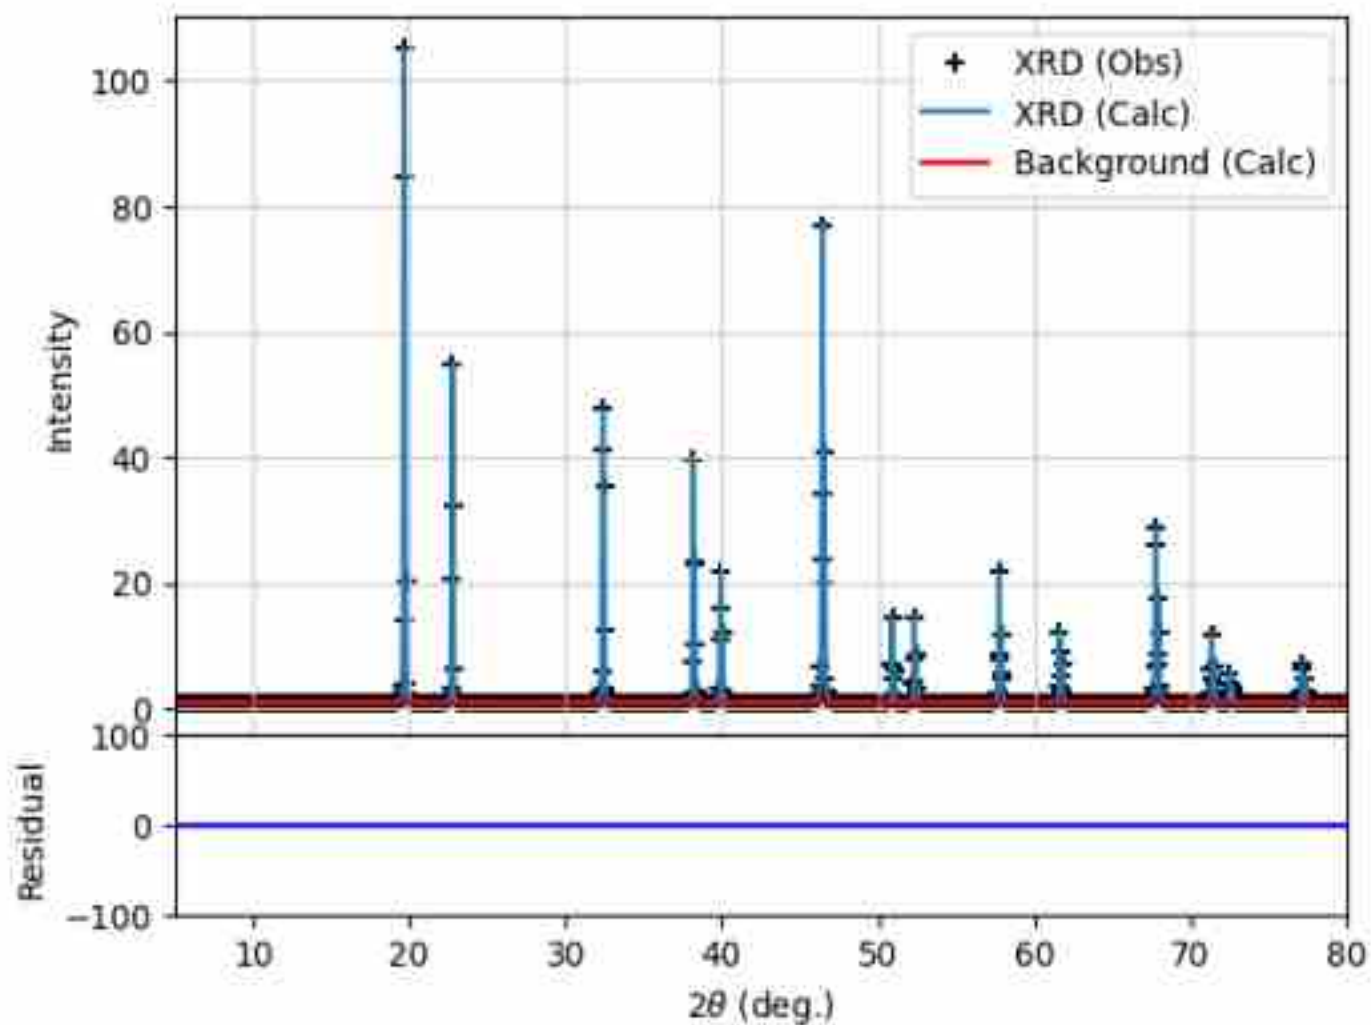

| RMSE before RR | Rwp     | RMSE after RR |
|----------------|---------|---------------|
| 0.009          | 0.03354 | 0.00633       |

# Nb1Al2Ni9

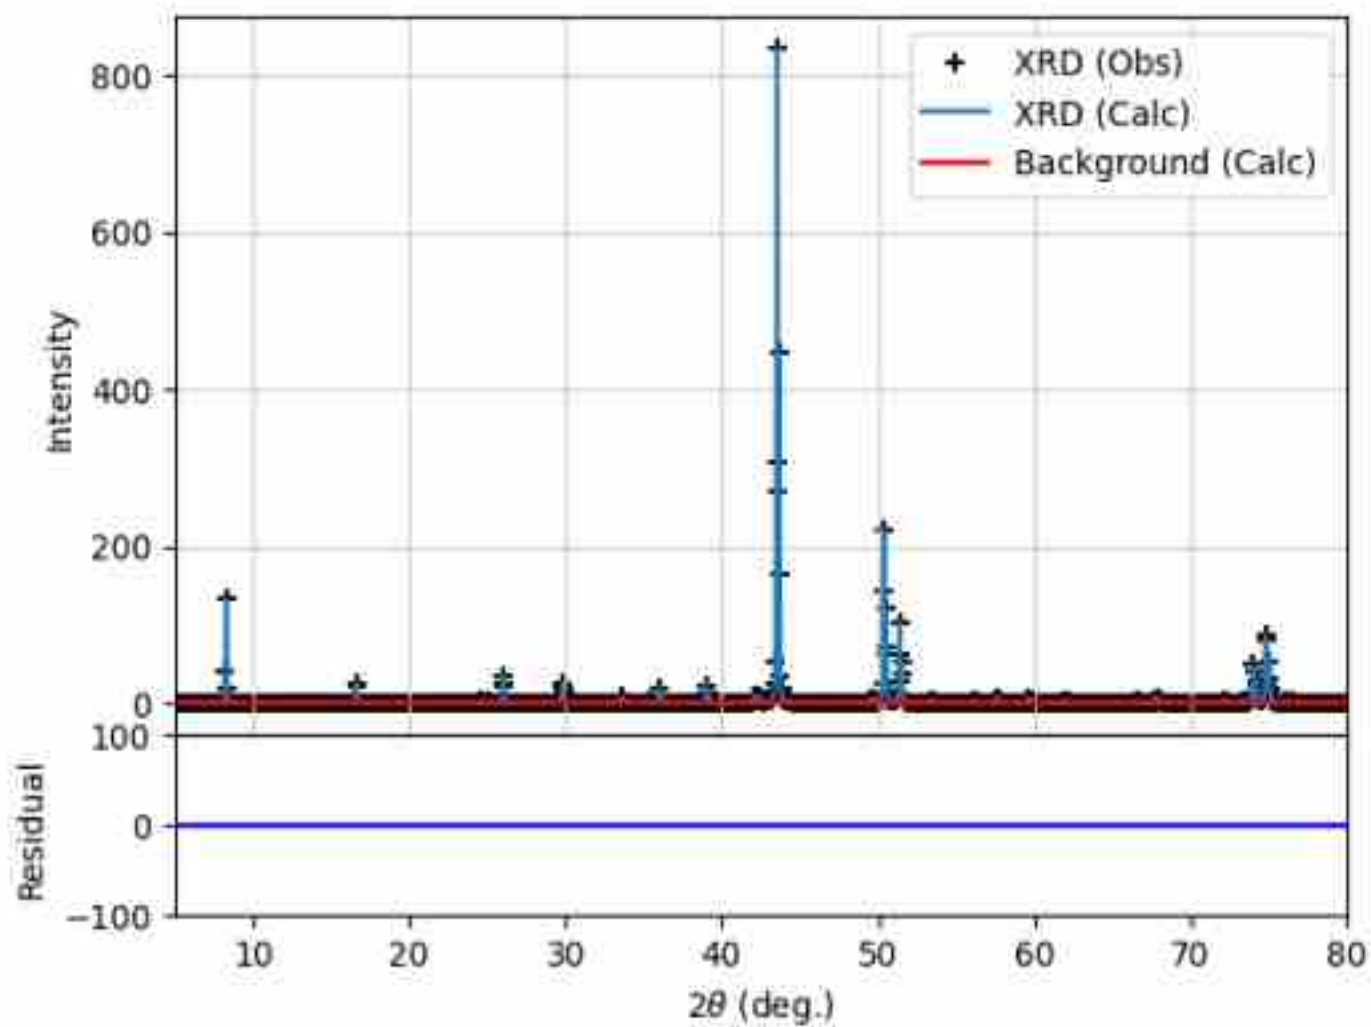

| RMSE before RR | Rwp     | RMSE after RR |
|----------------|---------|---------------|
| 0.009          | 0.00642 | 0.0007        |

# Nb1N1

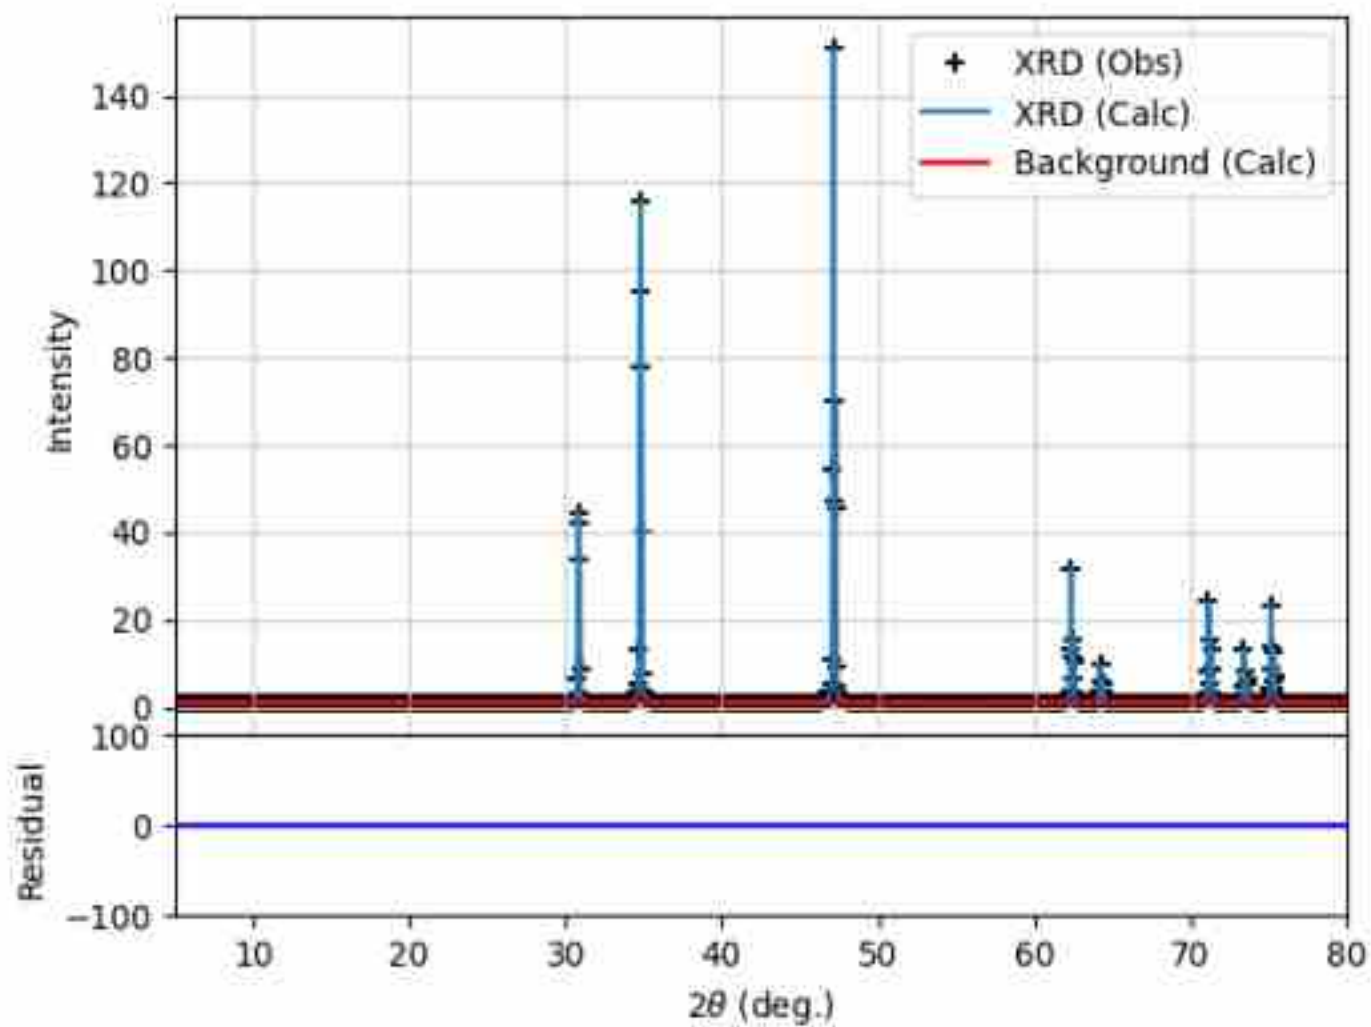

| RMSE before RR | Rwp     | RMSE after RR |
|----------------|---------|---------------|
| 0.009          | 0.00404 | 0.00059       |

# Nb1Re1

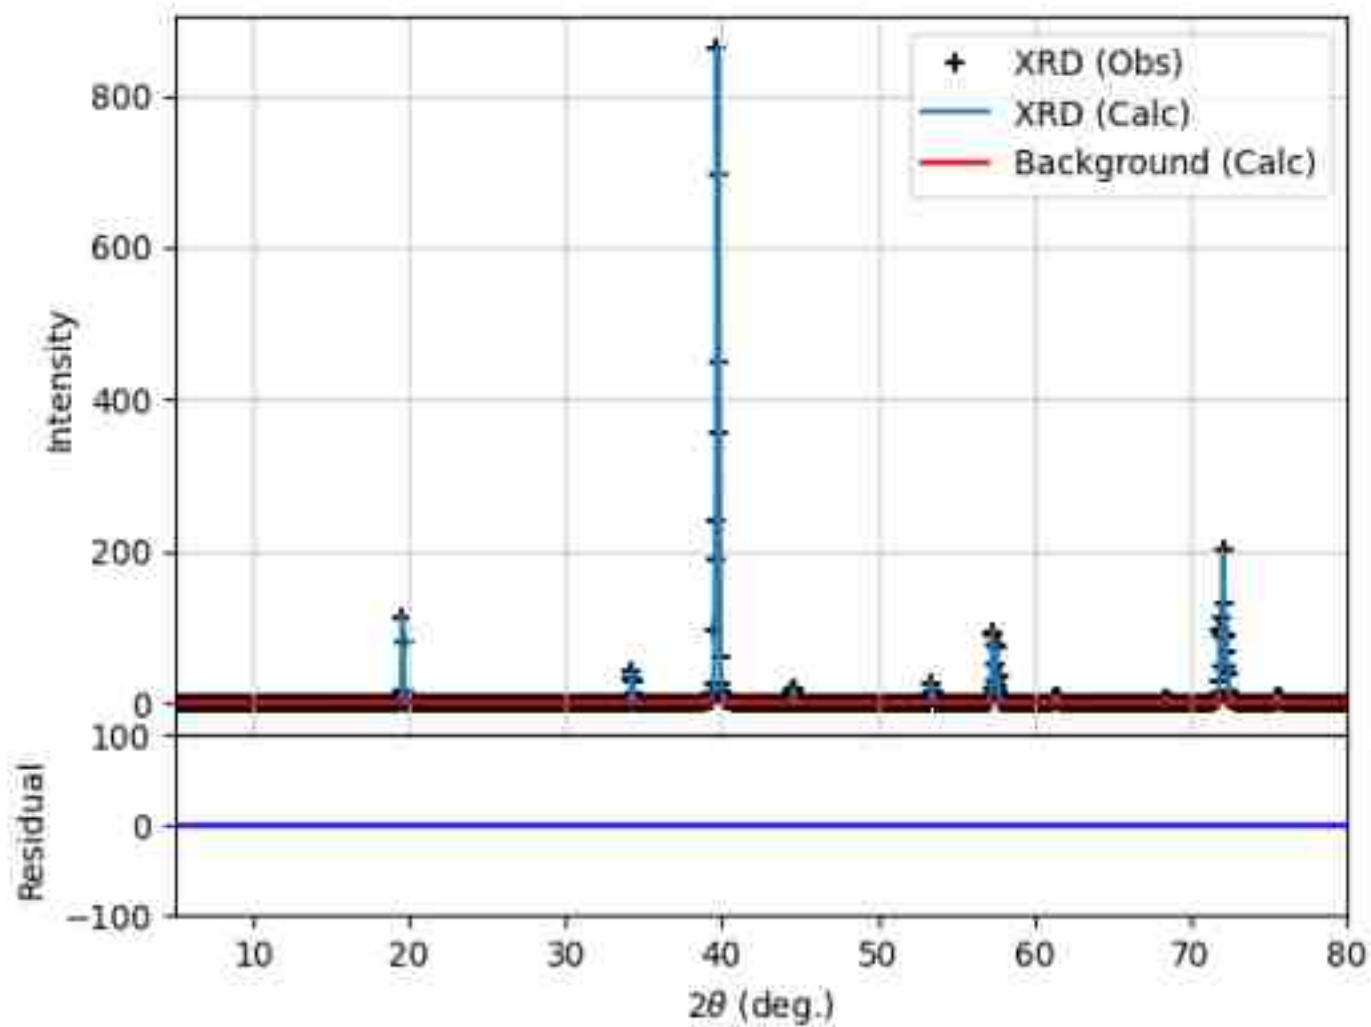

| RMSE before RR | Rwp     | RMSE after RR |
|----------------|---------|---------------|
| 0.009          | 0.00311 | 0.00015       |

# Nd1Al1Co4

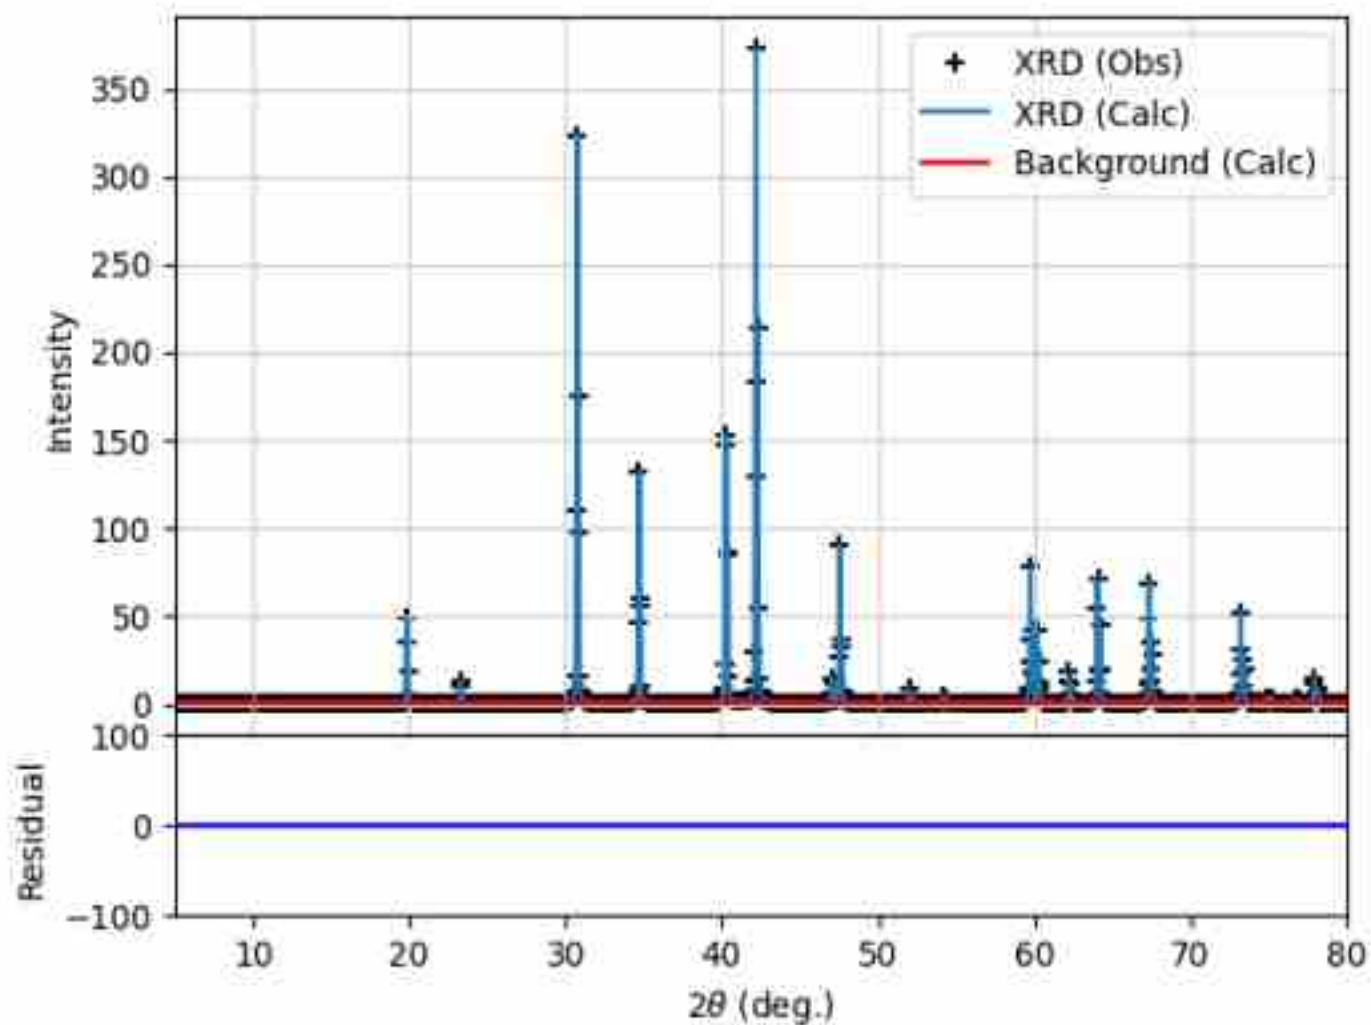

| RMSE before RR | Rwp     | RMSE after RR |
|----------------|---------|---------------|
| 0.009          | 0.02791 | 0.00251       |

# Nd1Bi2C11O4

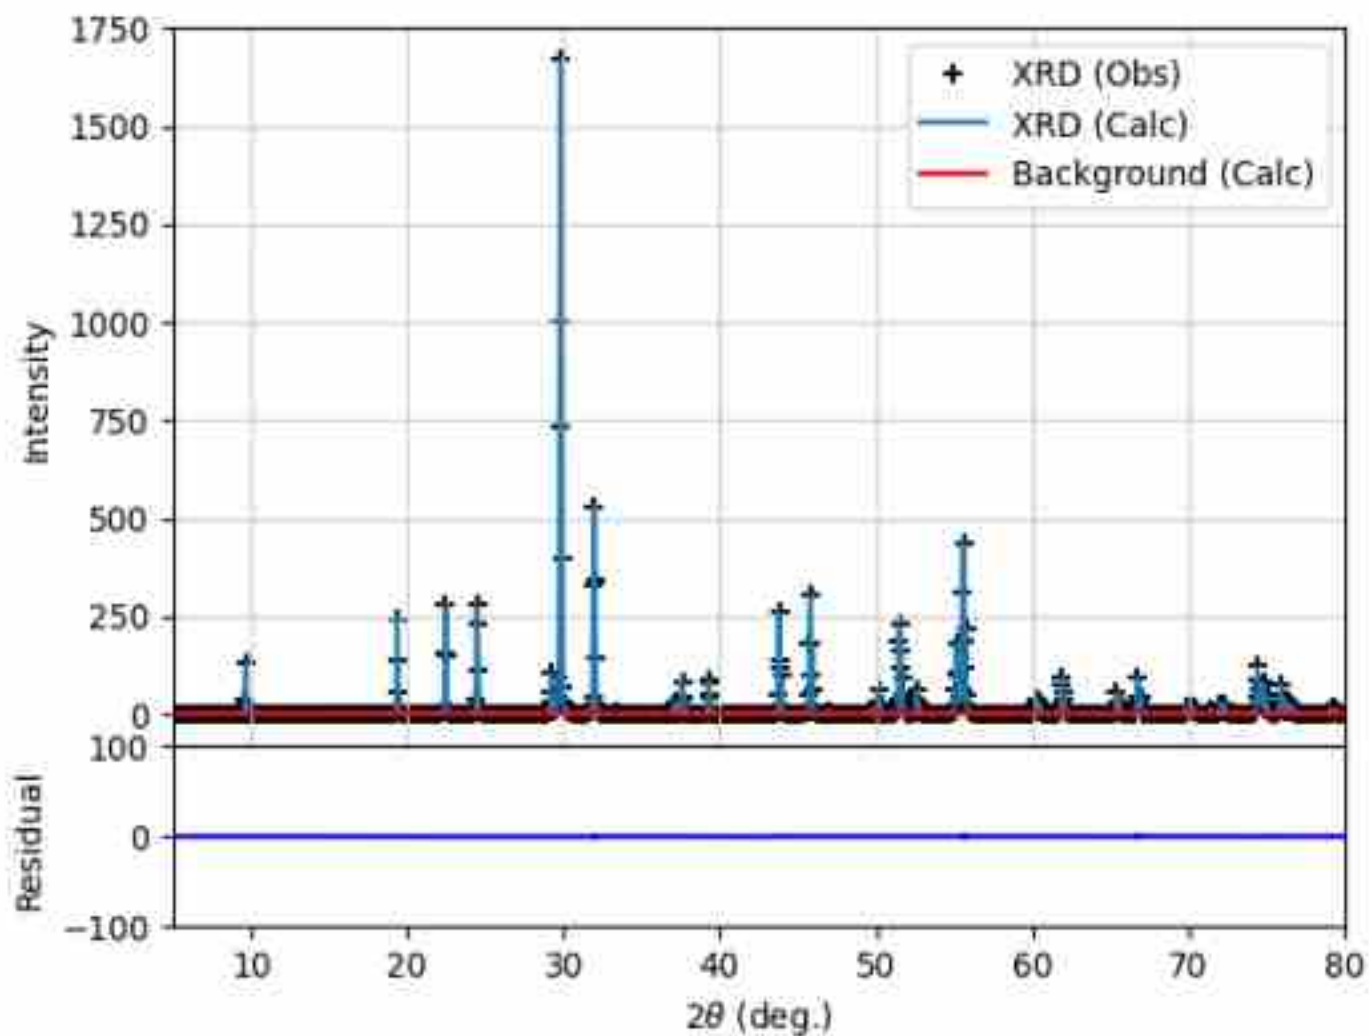

| RMSE before RR | Rwp     | RMSE after RR |
|----------------|---------|---------------|
| 0.009          | 0.30057 | 0.00241       |

# Nd1Fe5

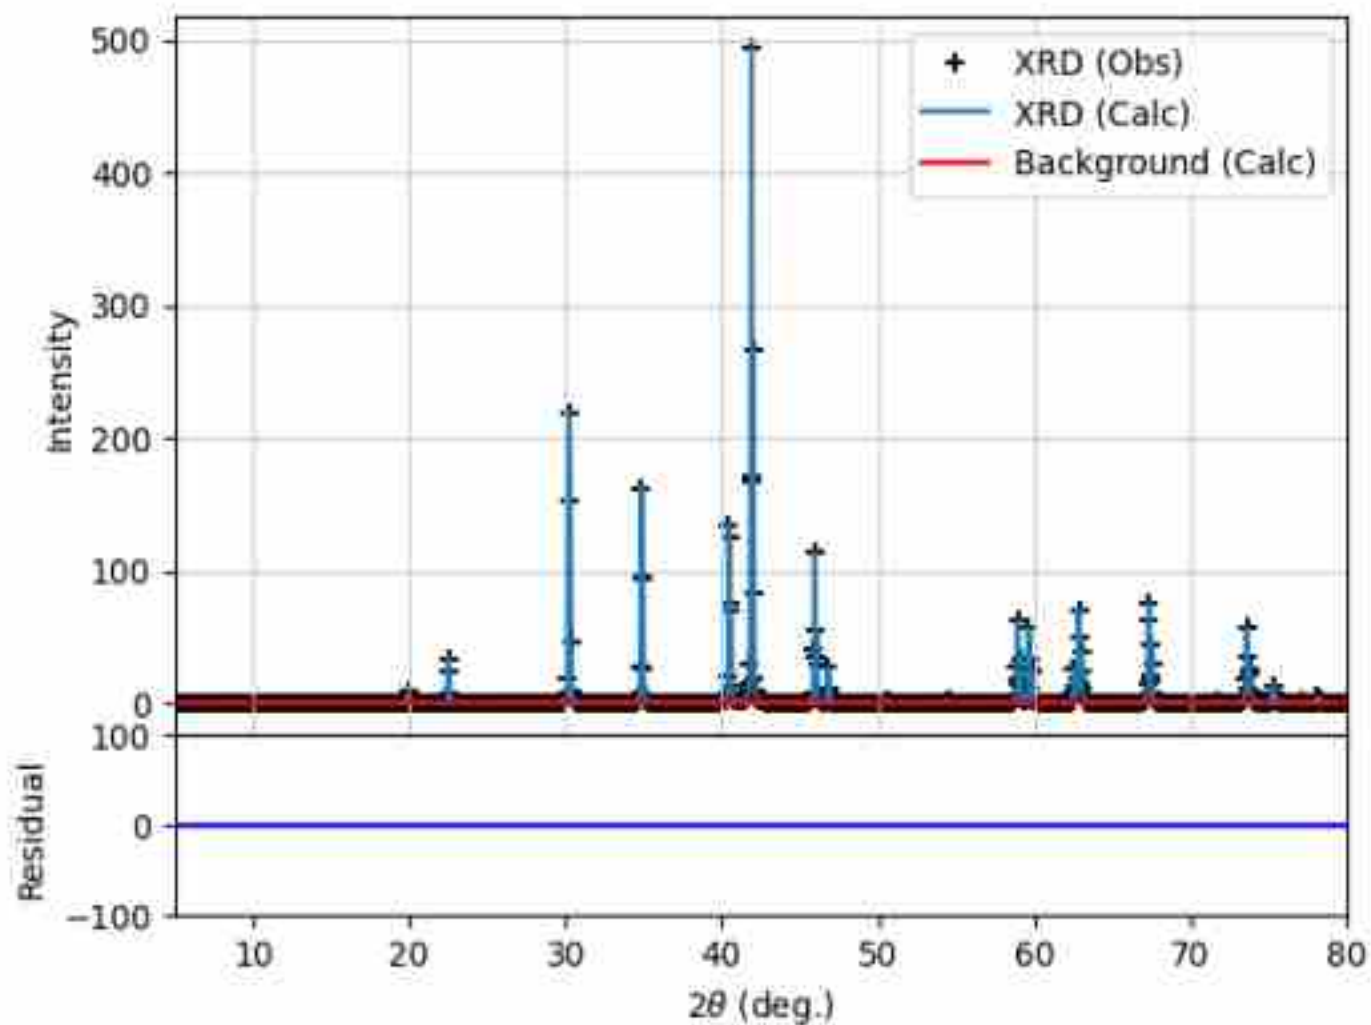

| RMSE before RR | Rwp     | RMSE after RR |
|----------------|---------|---------------|
| 0.009          | 0.00201 | 0.00044       |

# Nd1Ni2Sn2

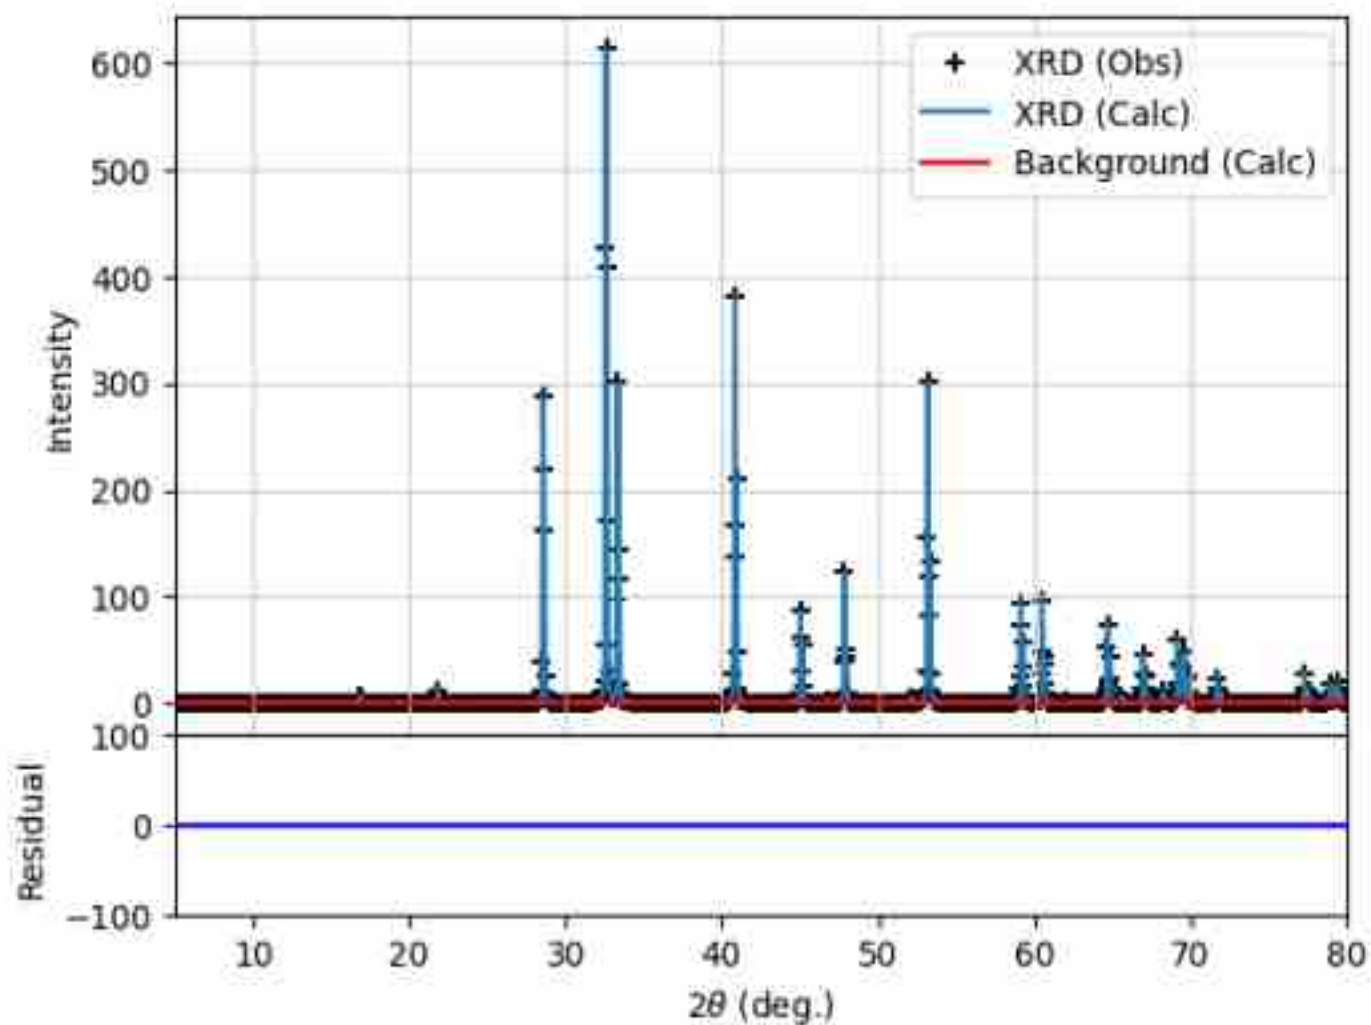

| RMSE before RR | Rwp     | RMSE after RR |
|----------------|---------|---------------|
| 0.009          | 0.00483 | 0.00374       |



# Nd<sub>1</sub>Si<sub>3</sub>O<sub>s</sub>1

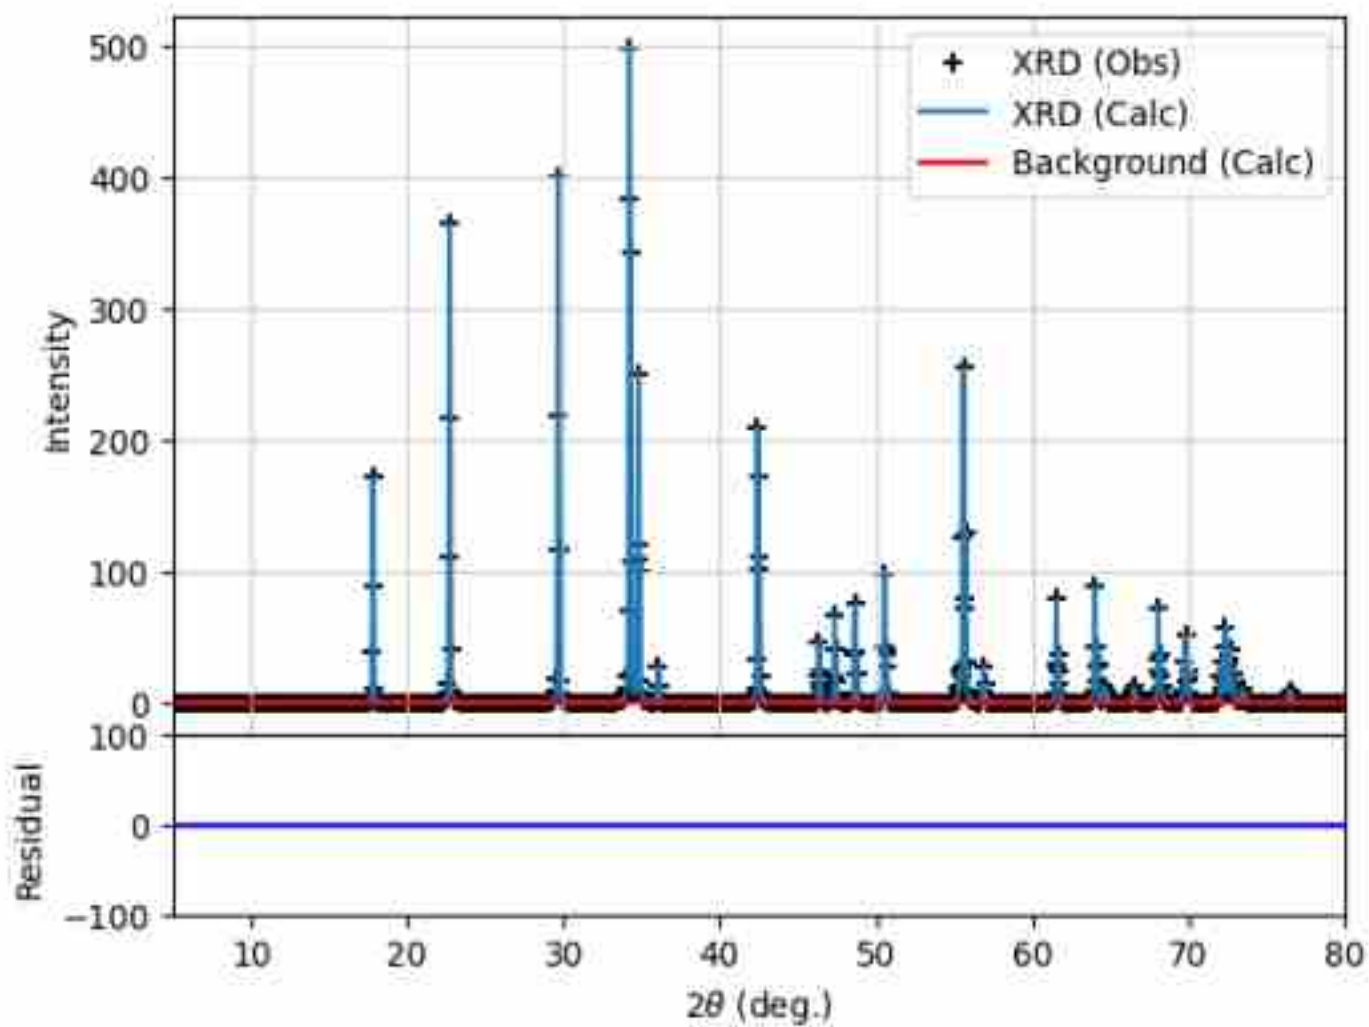

| RMSE before RR | Rwp     | RMSE after RR |
|----------------|---------|---------------|
| 0.009          | 0.00329 | 0.00085       |

# Nd<sub>2</sub>Ga<sub>7</sub>Pd<sub>1</sub>

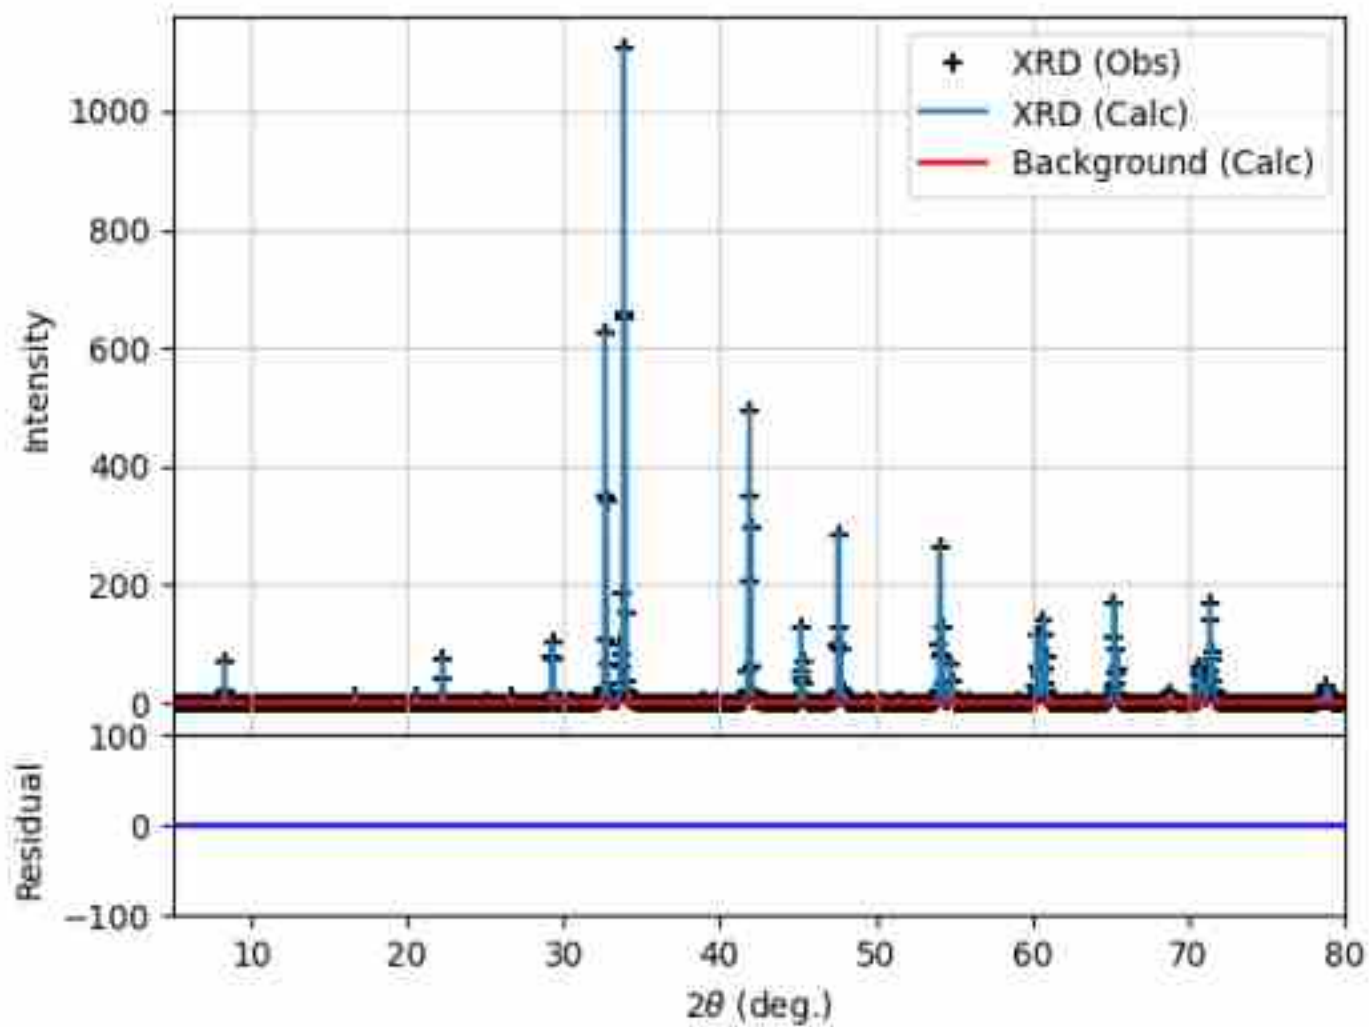

| RMSE before RR | Rwp     | RMSE after RR |
|----------------|---------|---------------|
| 0.009          | 0.00576 | 0.00041       |

# Nd<sub>2</sub>Ho<sub>6</sub>

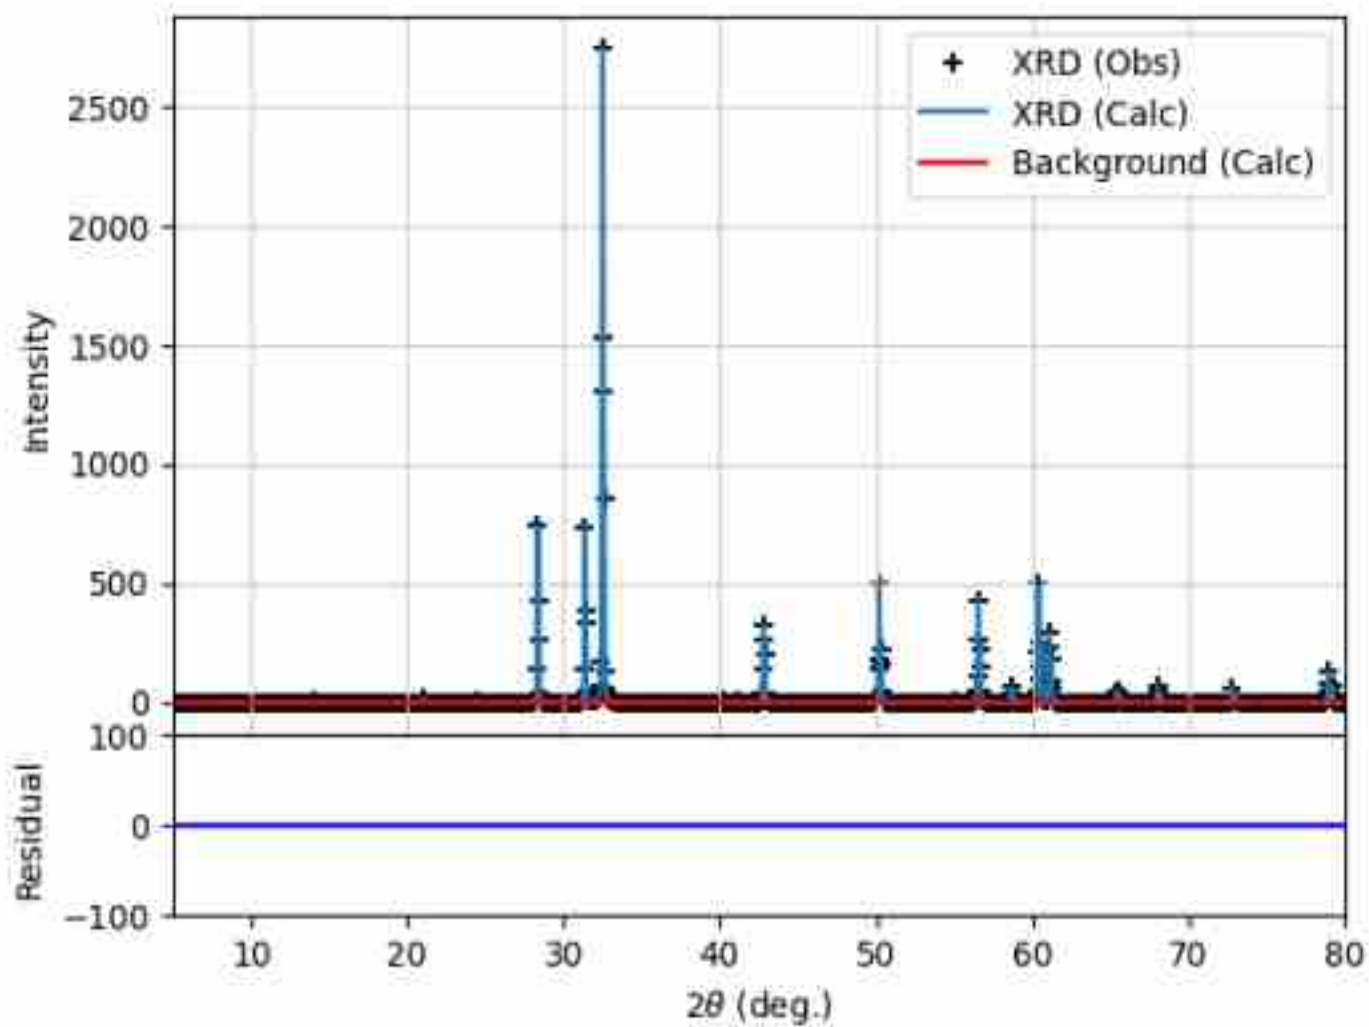

| RMSE before RR | Rwp     | RMSE after RR |
|----------------|---------|---------------|
| 0.009          | 0.00509 | 0.00053       |

# Nd<sub>2</sub>Ni<sub>2</sub>Sb<sub>4</sub>

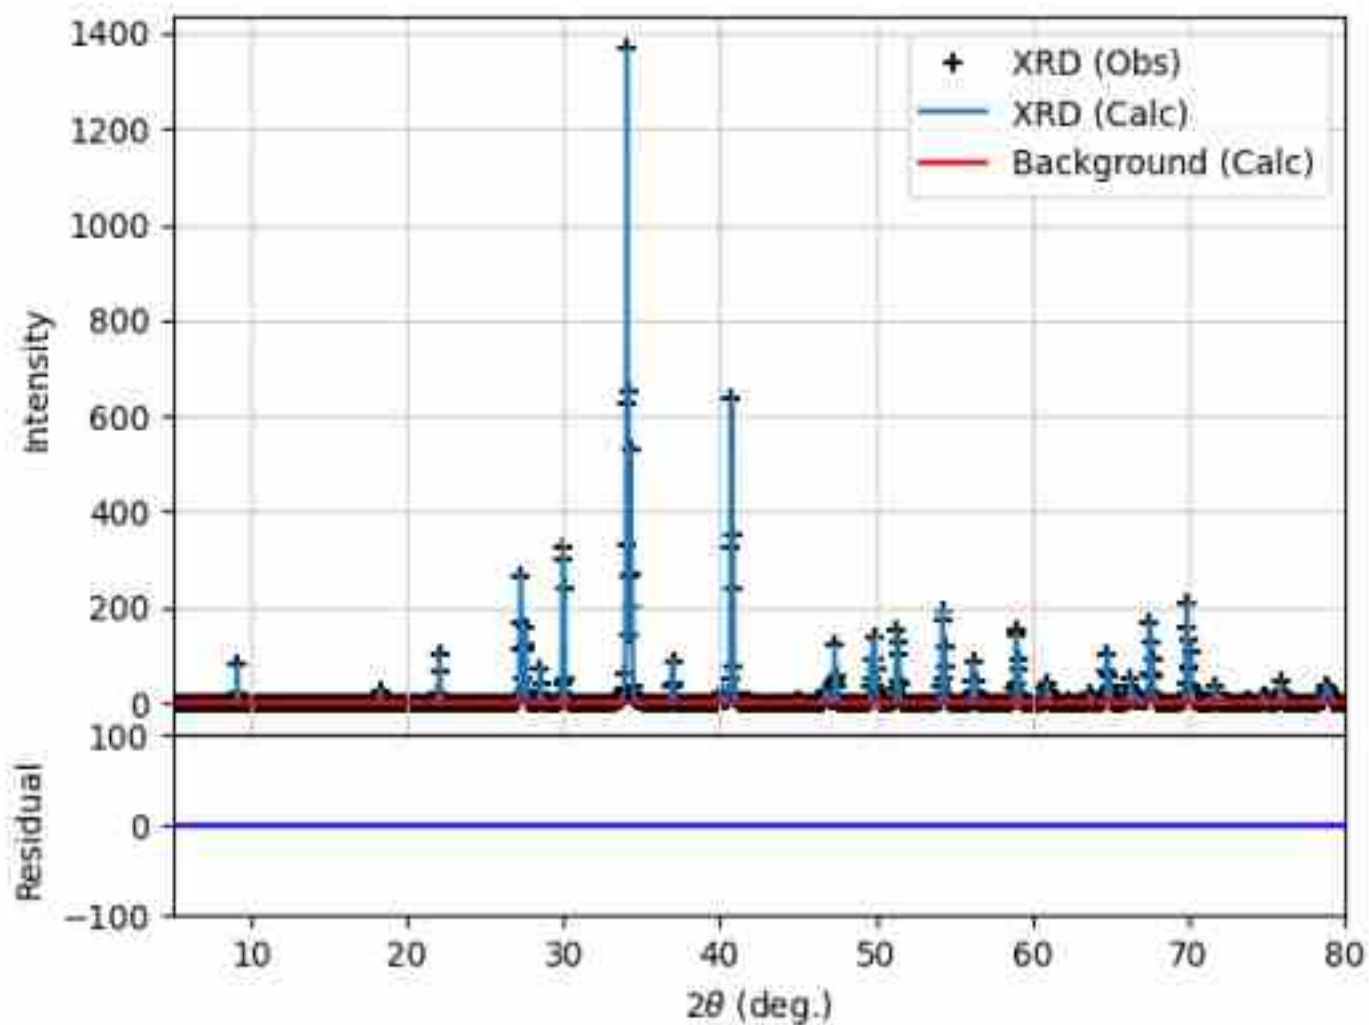

| RMSE before RR | Rwp     | RMSE after RR |
|----------------|---------|---------------|
| 0.009          | 0.00343 | 0.00027       |

# Nd<sub>2</sub>Ni<sub>2</sub>Sn<sub>2</sub>H<sub>4</sub>

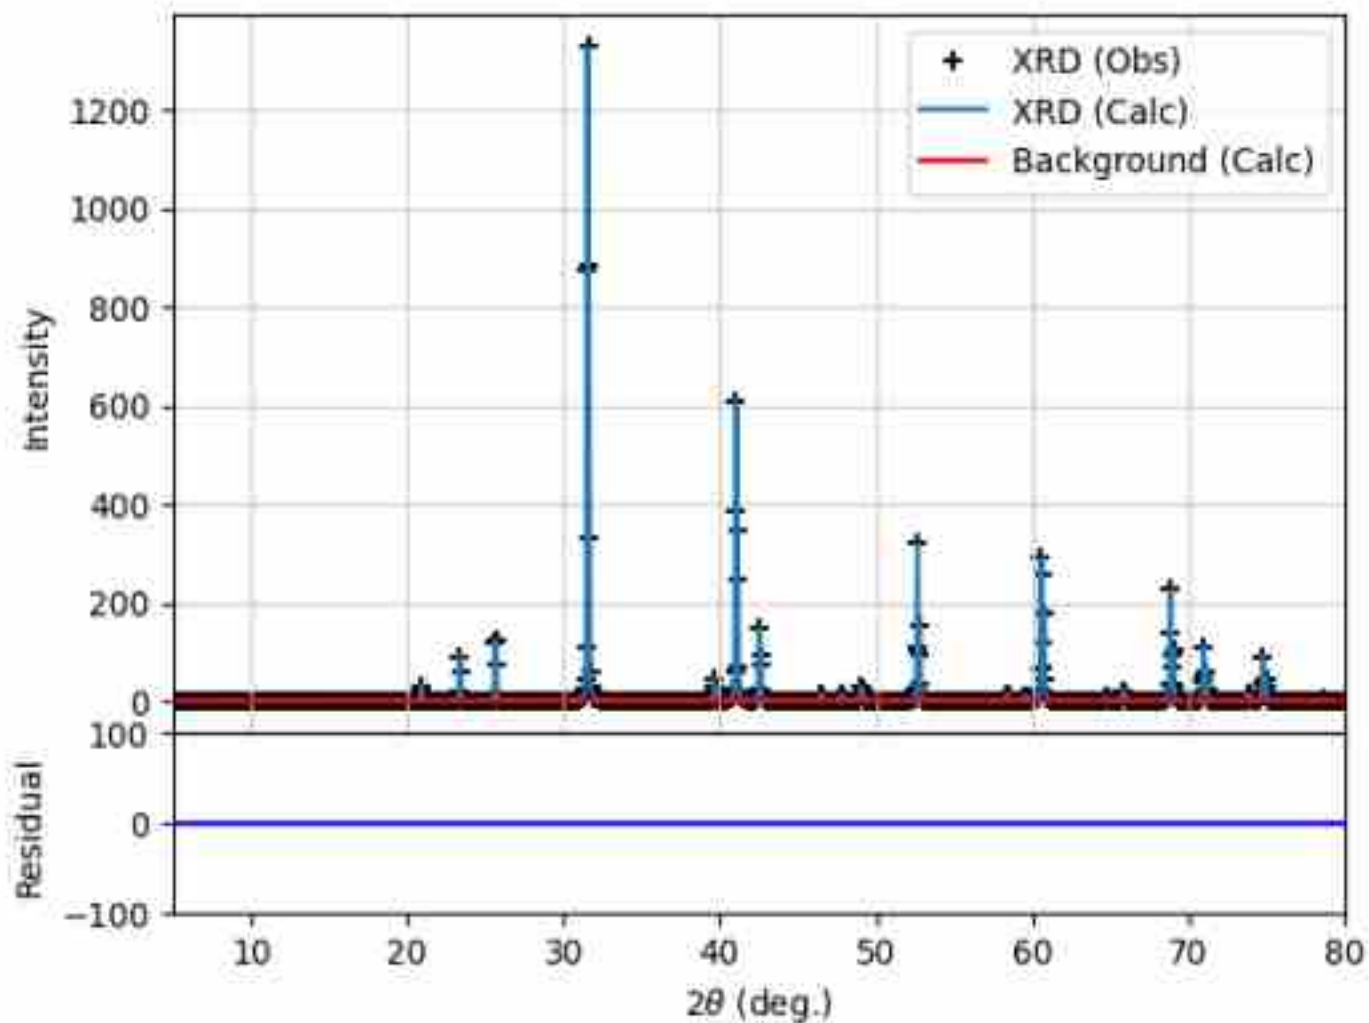

| RMSE before RR | Rwp     | RMSE after RR |
|----------------|---------|---------------|
| 0.009          | 0.02872 | 0.01073       |

# Nd<sub>2</sub>S<sub>2</sub>F<sub>2</sub>

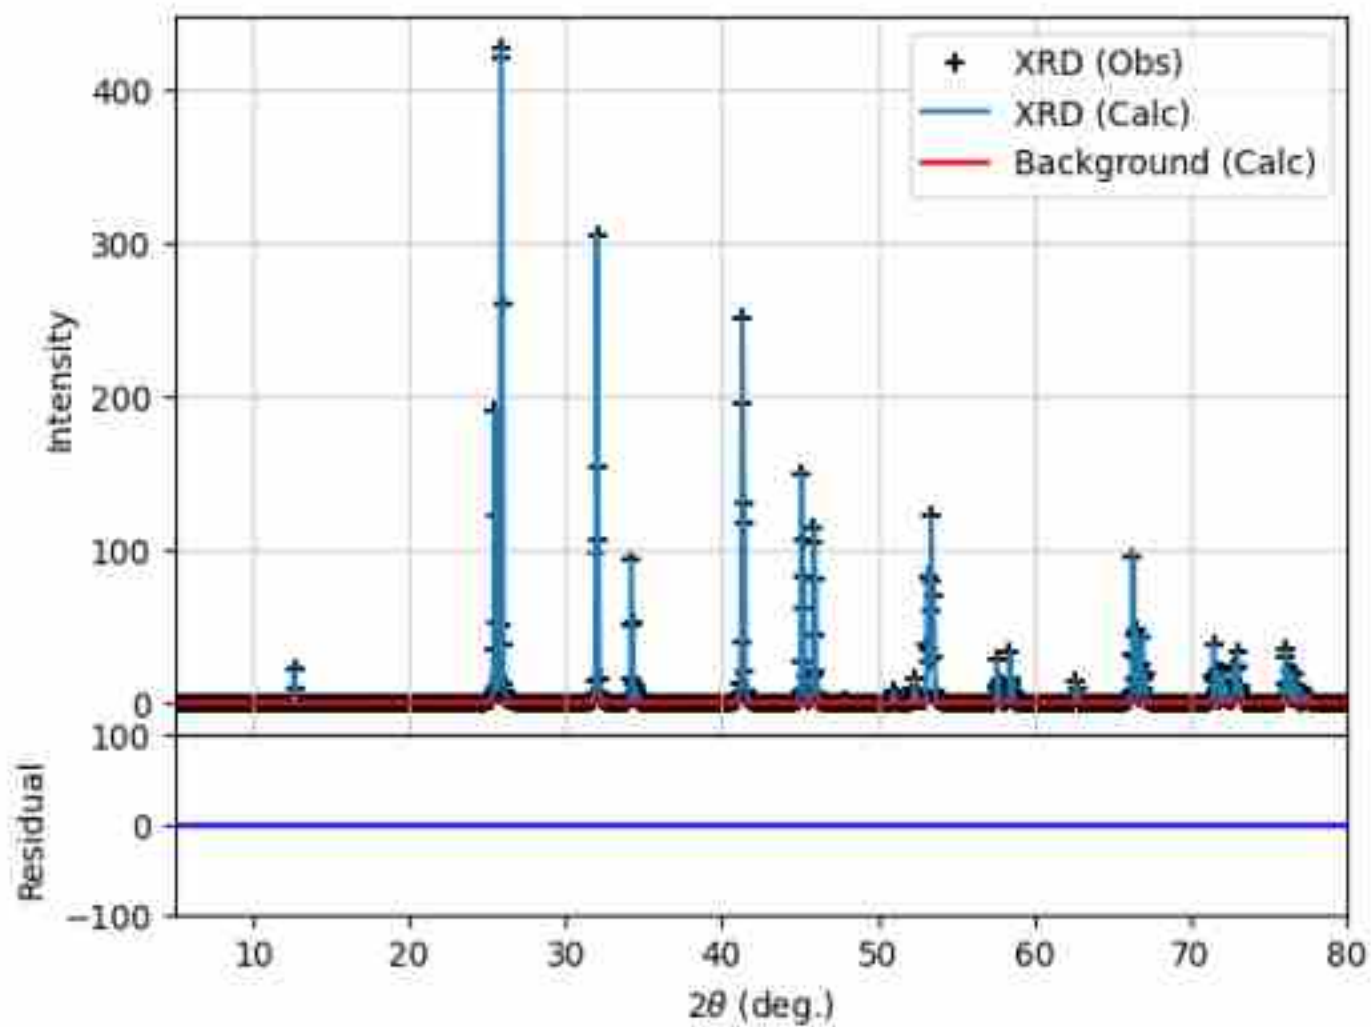

| RMSE before RR | Rwp     | RMSE after RR |
|----------------|---------|---------------|
| 0.009          | 0.00449 | 0.00128       |

# Nd<sub>2</sub>Si<sub>4</sub>Ir<sub>4</sub>

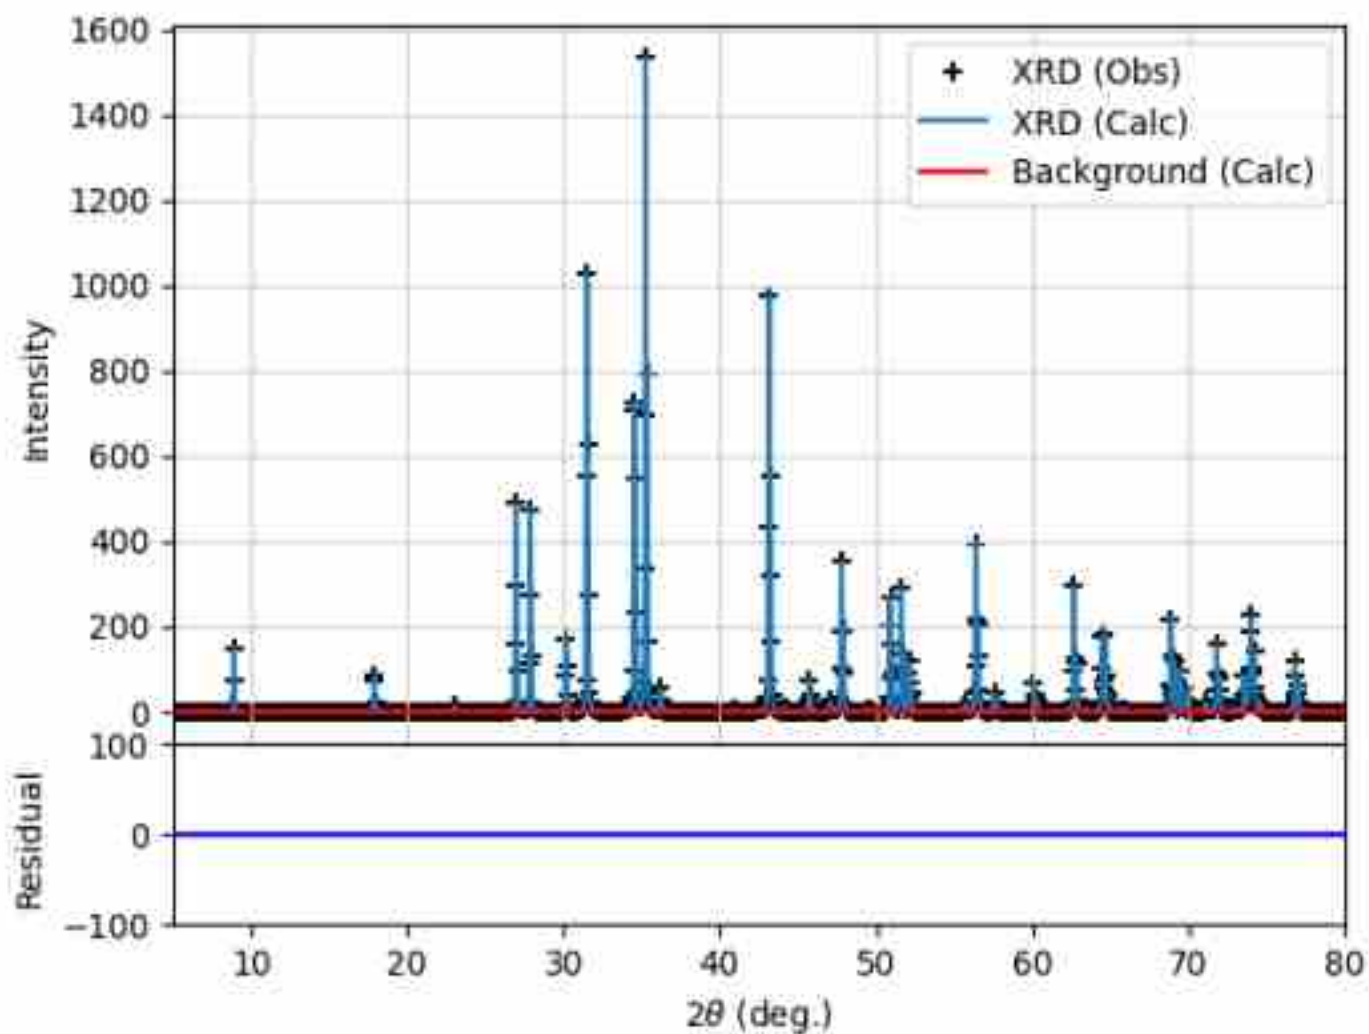

| RMSE before RR | Rwp     | RMSE after RR |
|----------------|---------|---------------|
| 0.009          | 0.00505 | 0.00114       |

# Nd<sub>2</sub>ZnSb<sub>4</sub>

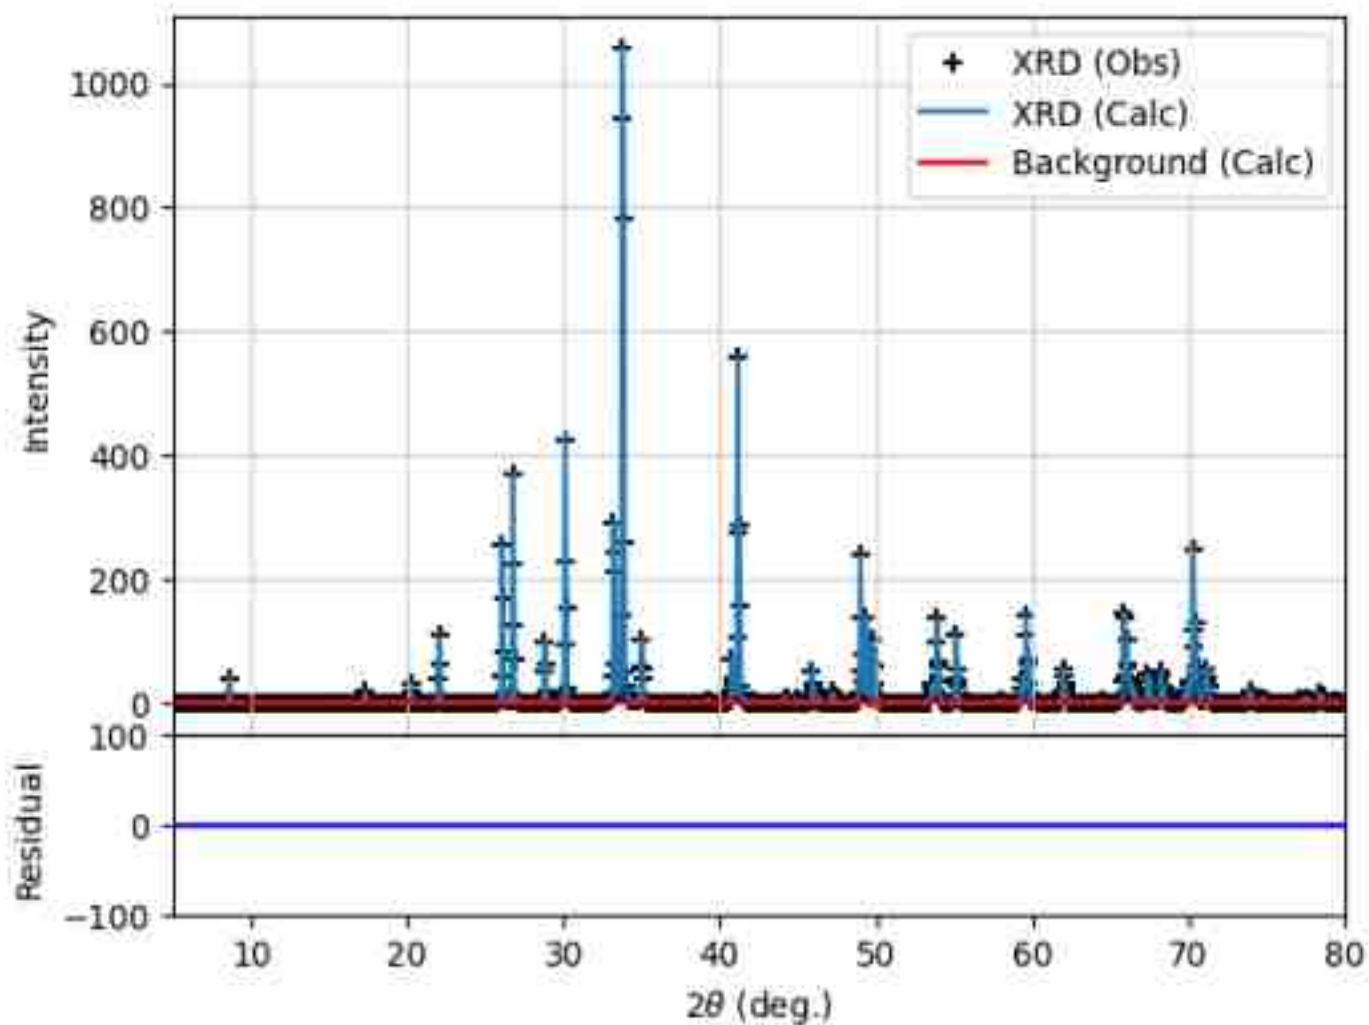

| RMSE before RR | Rwp     | RMSE after RR |
|----------------|---------|---------------|
| 0.009          | 0.01252 | 0.00055       |



# Nd<sub>3</sub>Mg<sub>3</sub>Ag<sub>3</sub>

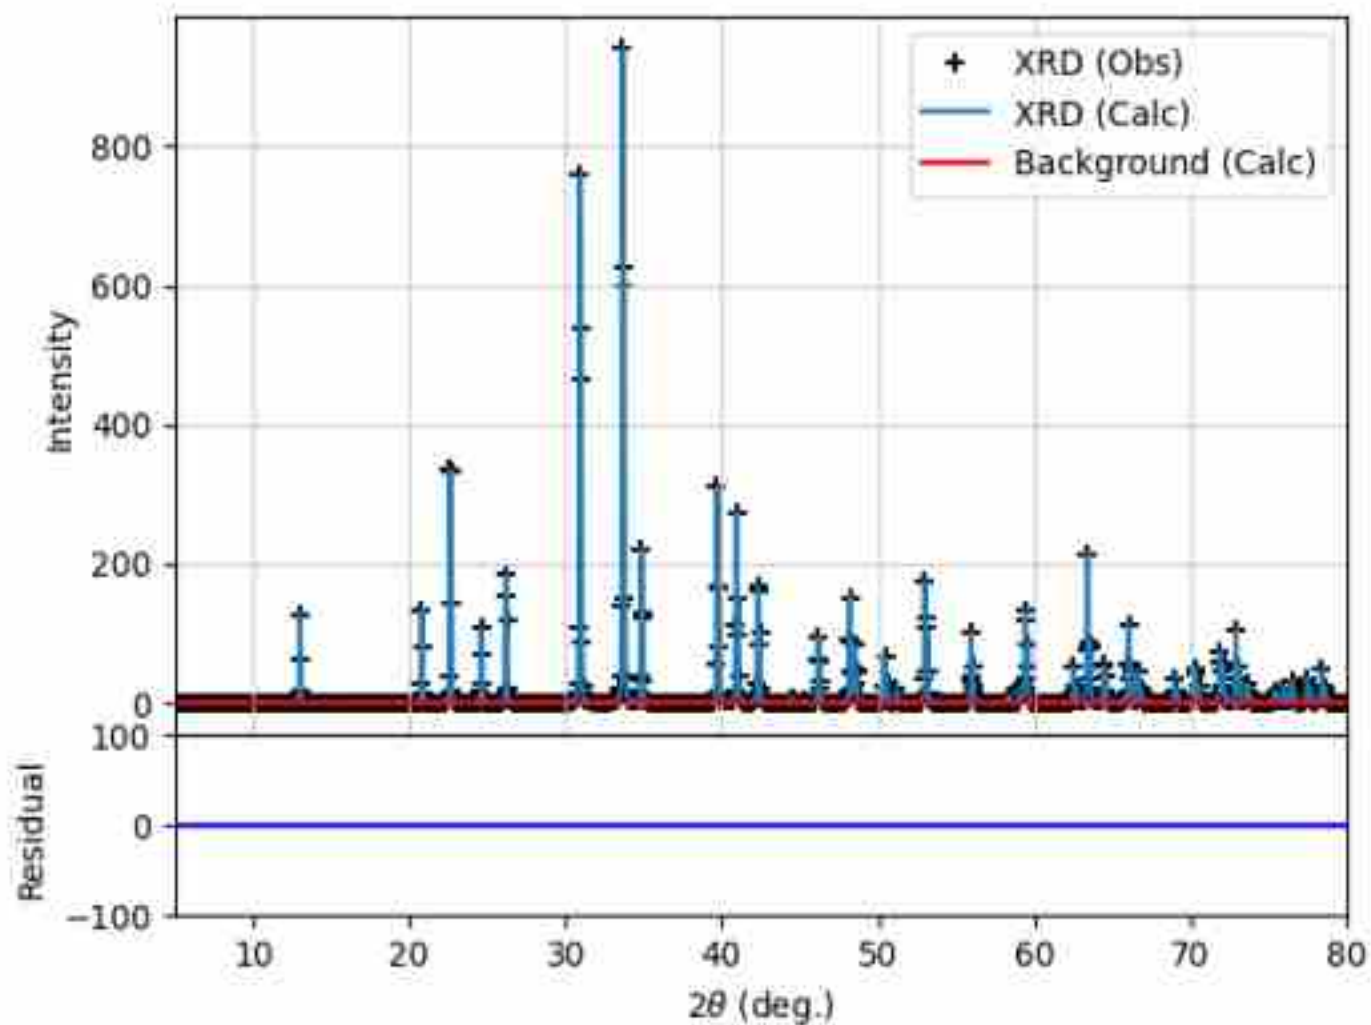

| RMSE before RR | Rwp     | RMSE after RR |
|----------------|---------|---------------|
| 0.009          | 0.00966 | 0.00148       |

# Nd4Bi2

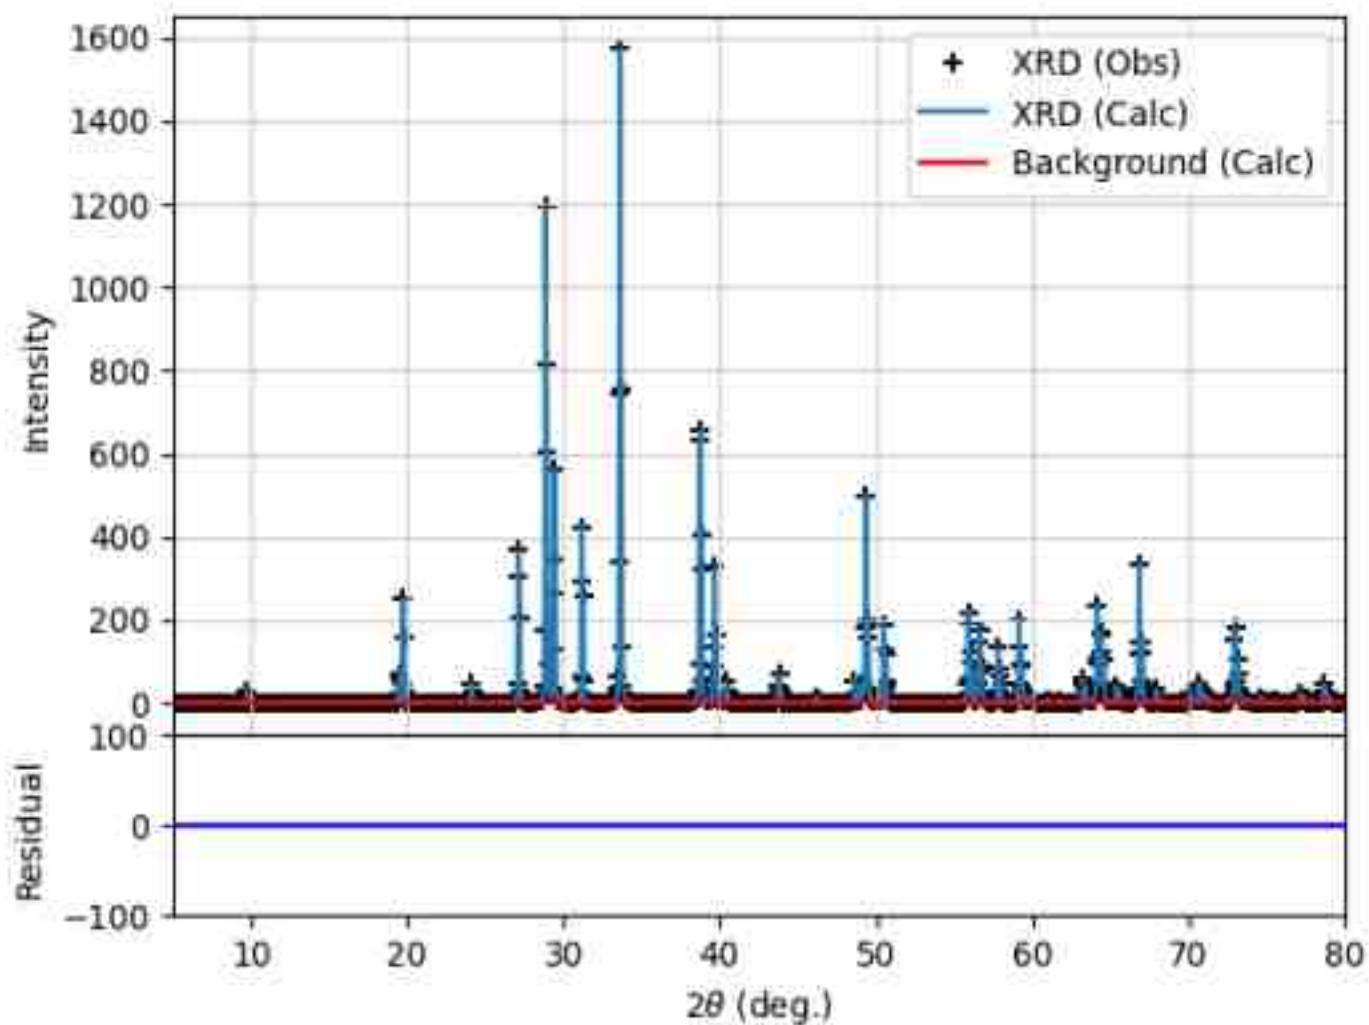

| RMSE before RR | Rwp     | RMSE after RR |
|----------------|---------|---------------|
| 0.009          | 0.00365 | 0.00028       |

# Pr<sub>2</sub>Ni<sub>2</sub>

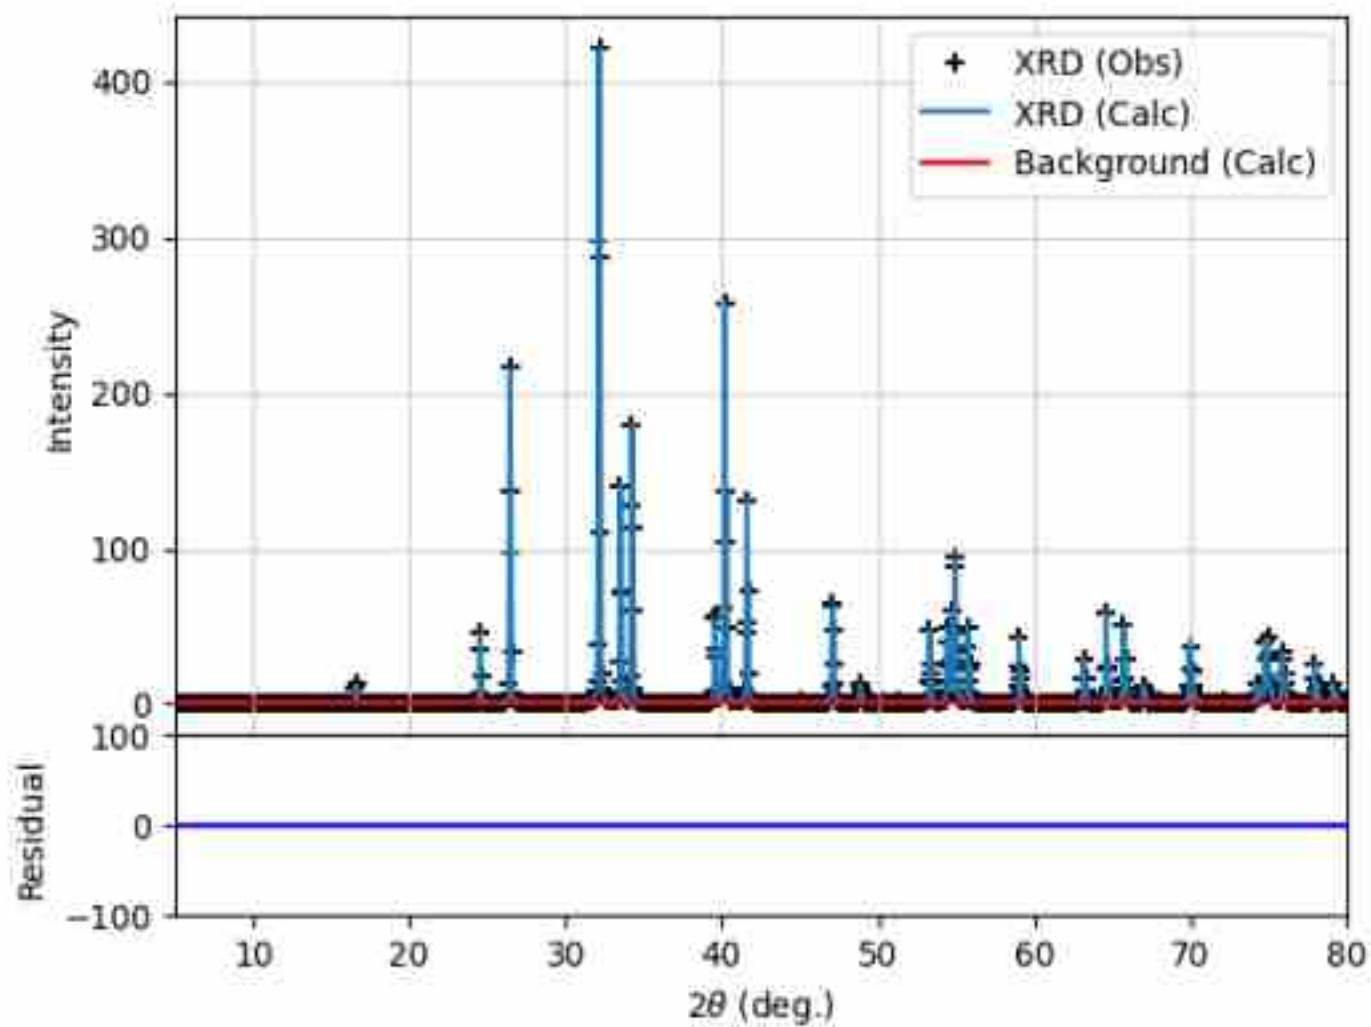

| RMSE before RR | Rwp     | RMSE after RR |
|----------------|---------|---------------|
| 0.009          | 0.00467 | 0.00031       |

# Pr<sub>4</sub>In<sub>2</sub>Cu<sub>4</sub>

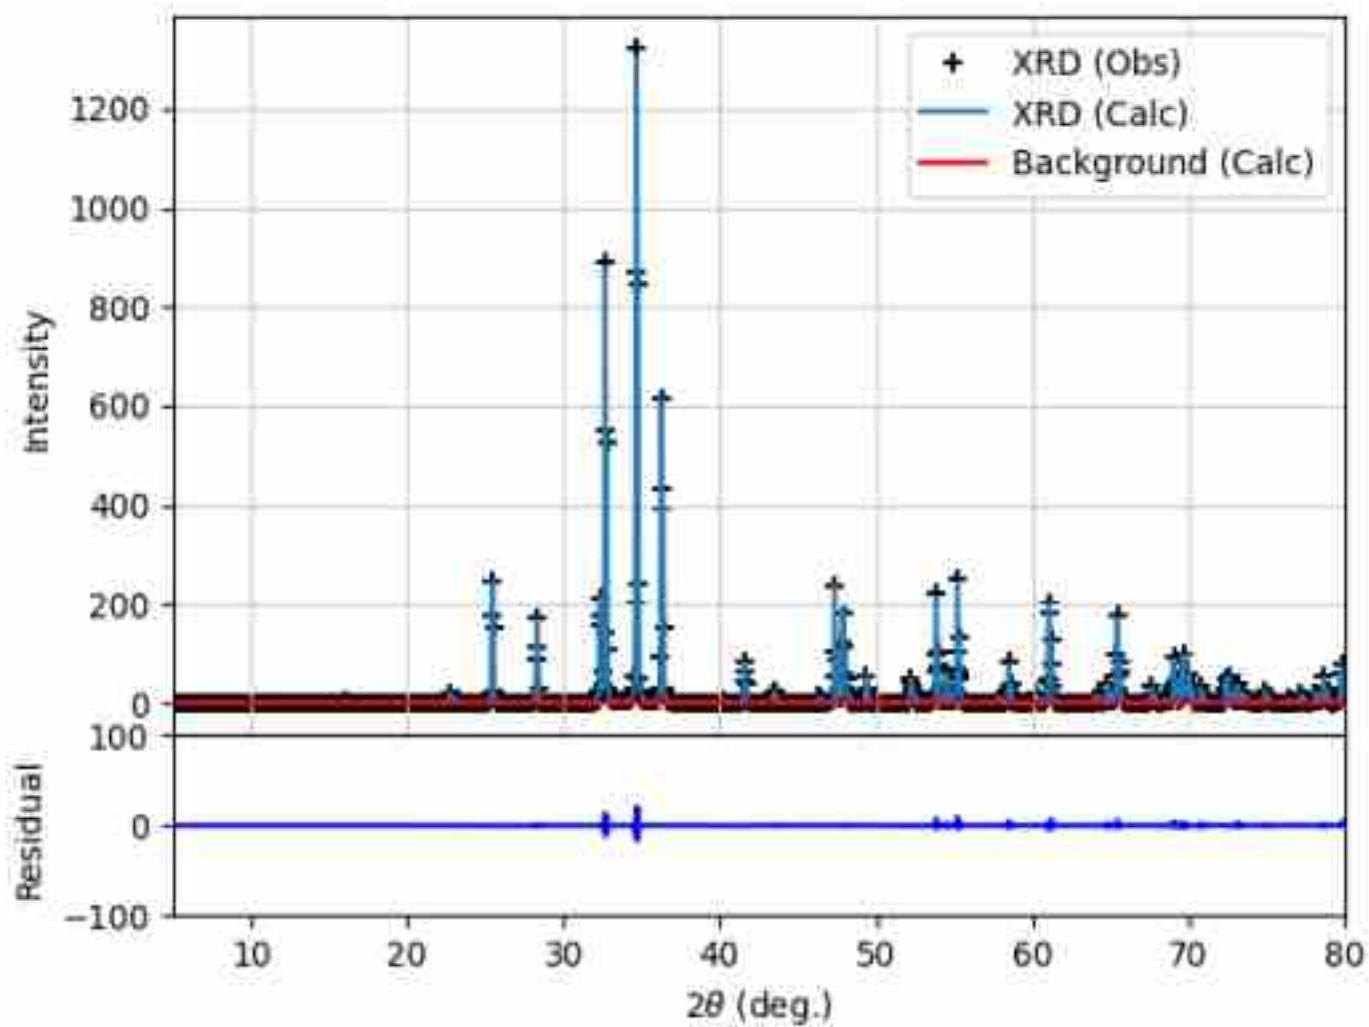

| RMSE before RR | Rwp     | RMSE after RR |
|----------------|---------|---------------|
| 0.009          | 2.59549 | 0.00731       |

# Rb1Nd1S2

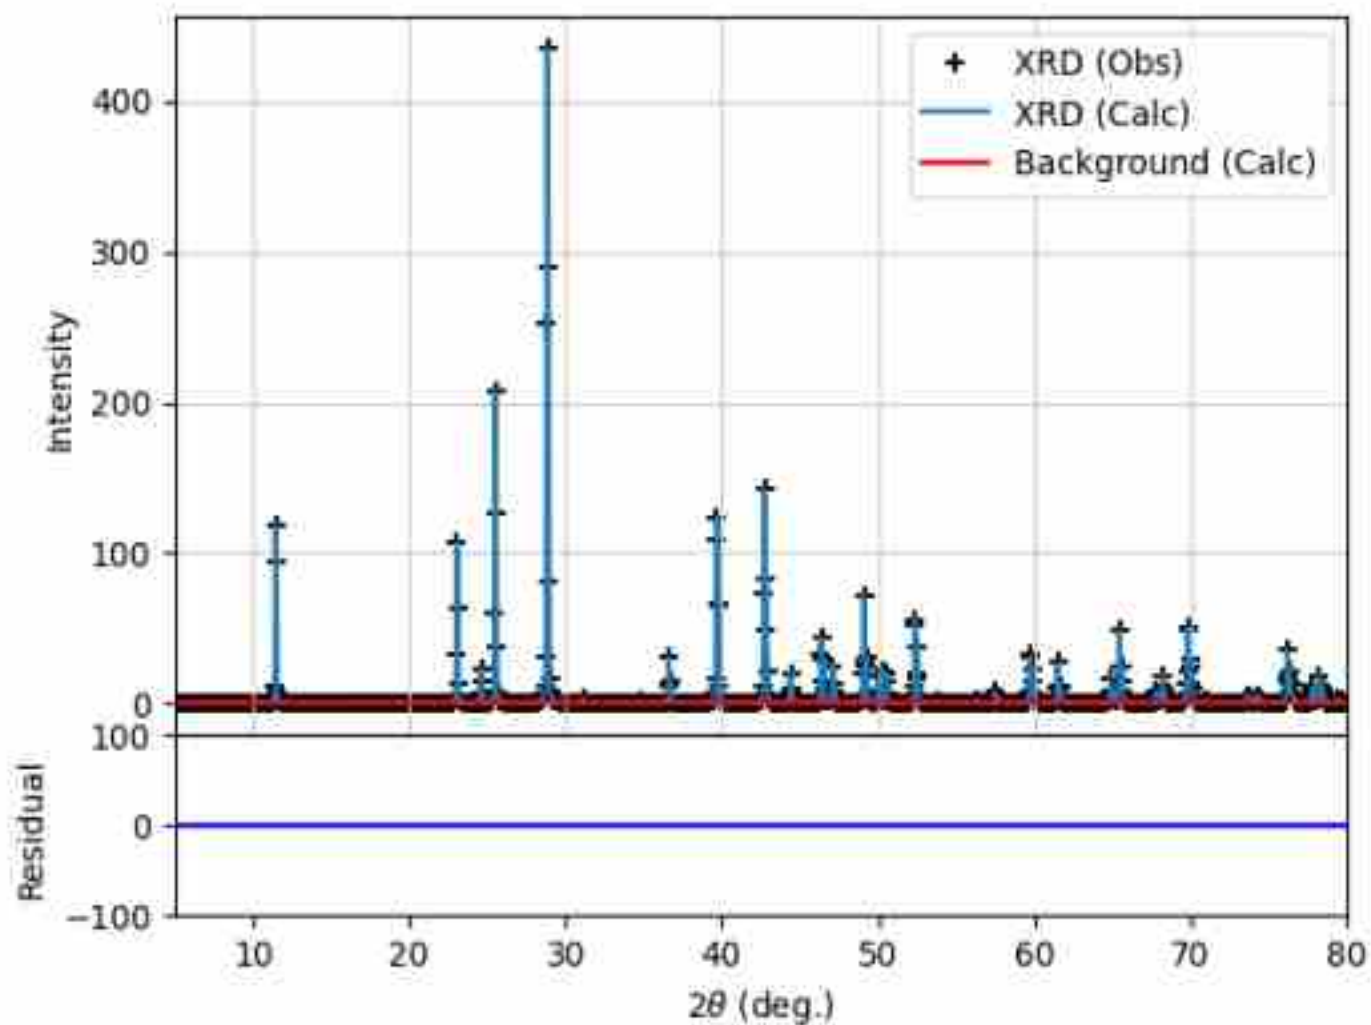

| RMSE before RR | Rwp     | RMSE after RR |
|----------------|---------|---------------|
| 0.009          | 0.00776 | 0.0007        |

# Rb1Zn4As3

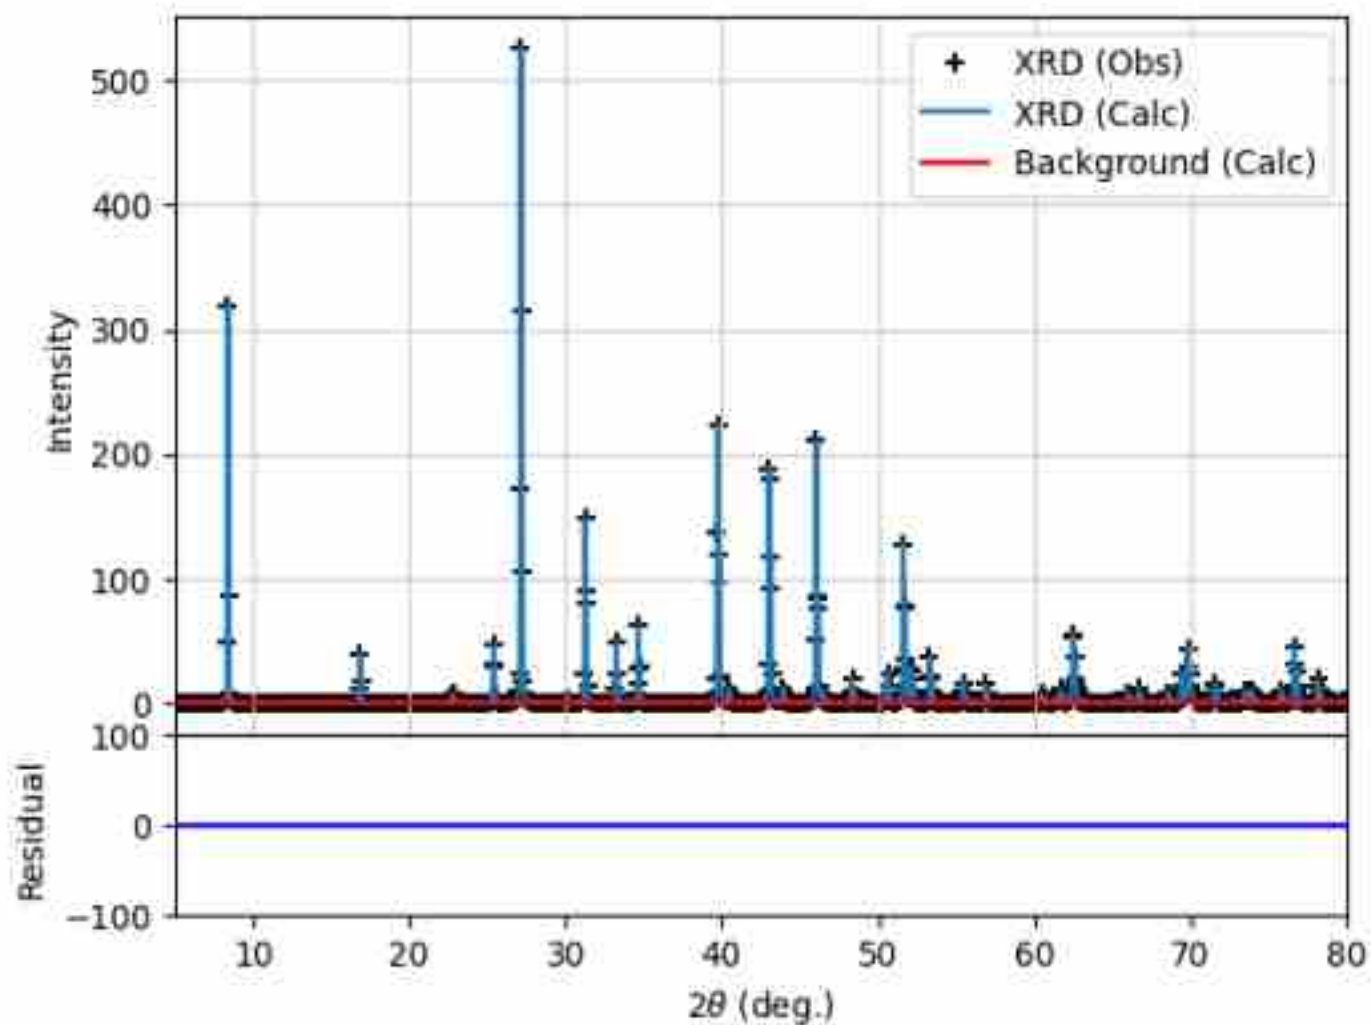

| RMSE before RR | Rwp     | RMSE after RR |
|----------------|---------|---------------|
| 0.009          | 0.00613 | 0.0006        |

# Rb<sub>2</sub>CeAgBr<sub>6</sub>

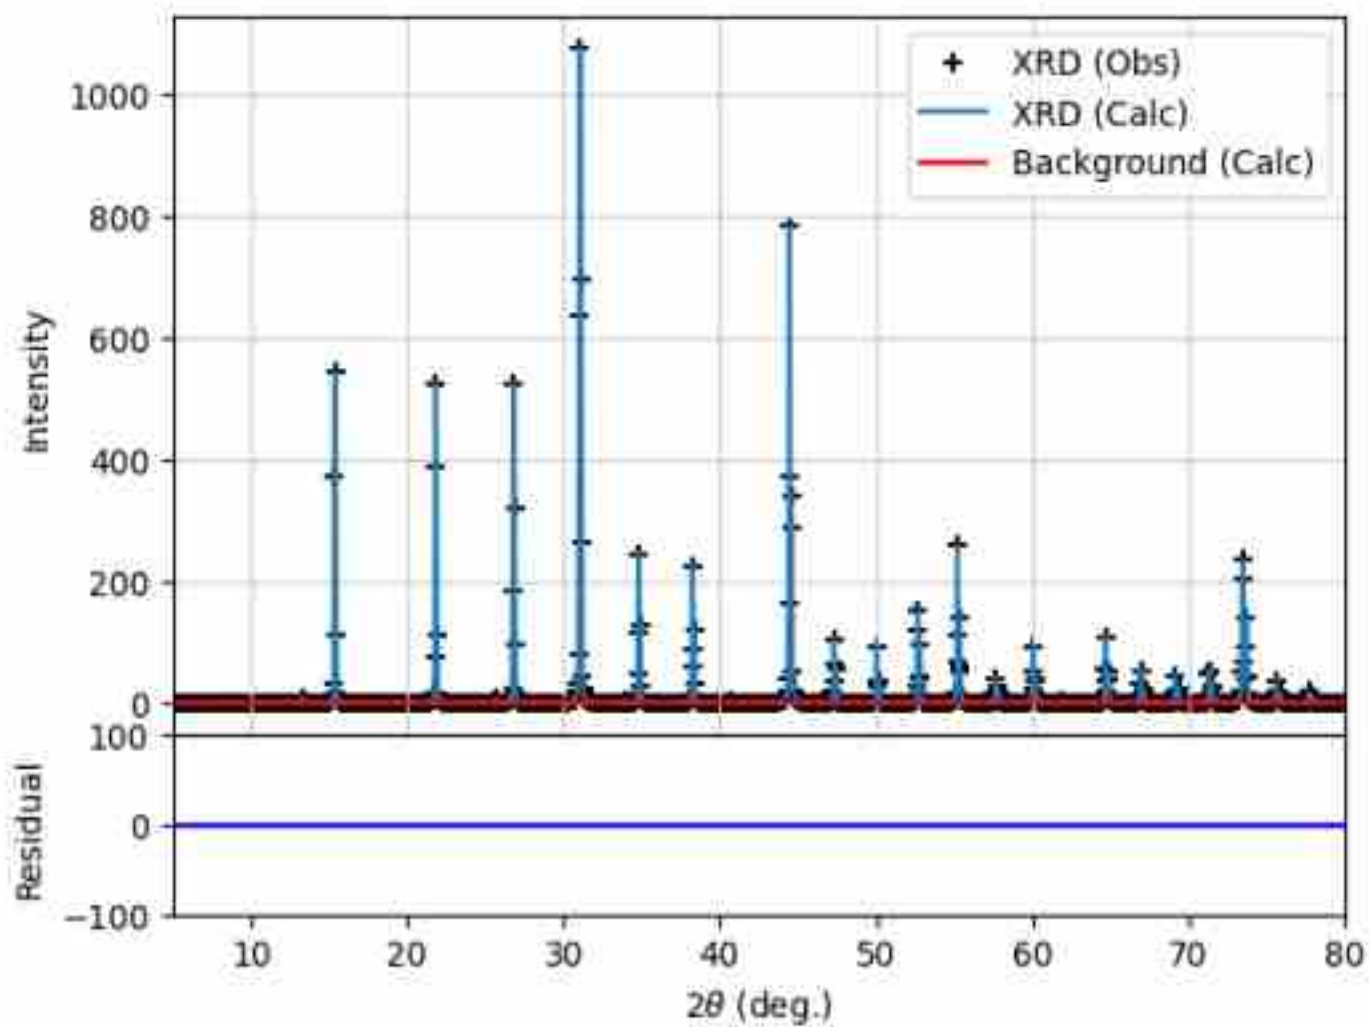

| RMSE before RR | Rwp     | RMSE after RR |
|----------------|---------|---------------|
| 0.009          | 0.01578 | 0.00147       |

# Rb<sub>2</sub>Cu<sub>1</sub>Bi<sub>1</sub>I<sub>6</sub>

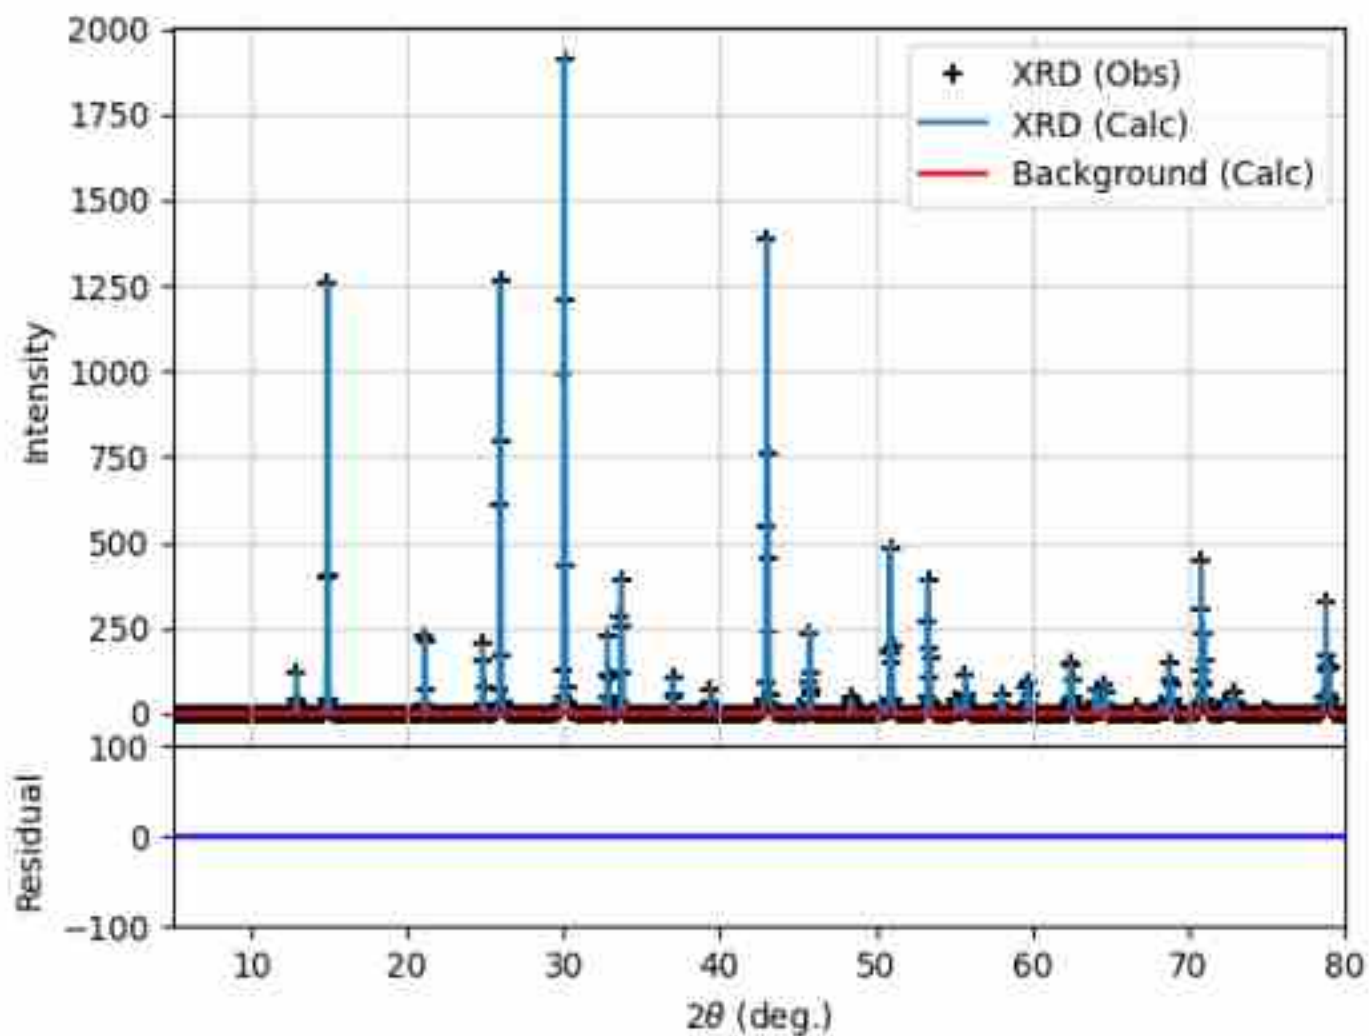

| RMSE before RR | Rwp     | RMSE after RR |
|----------------|---------|---------------|
| 0.009          | 0.03726 | 0.00204       |



# Rb<sub>2</sub>HgAsBr<sub>6</sub>

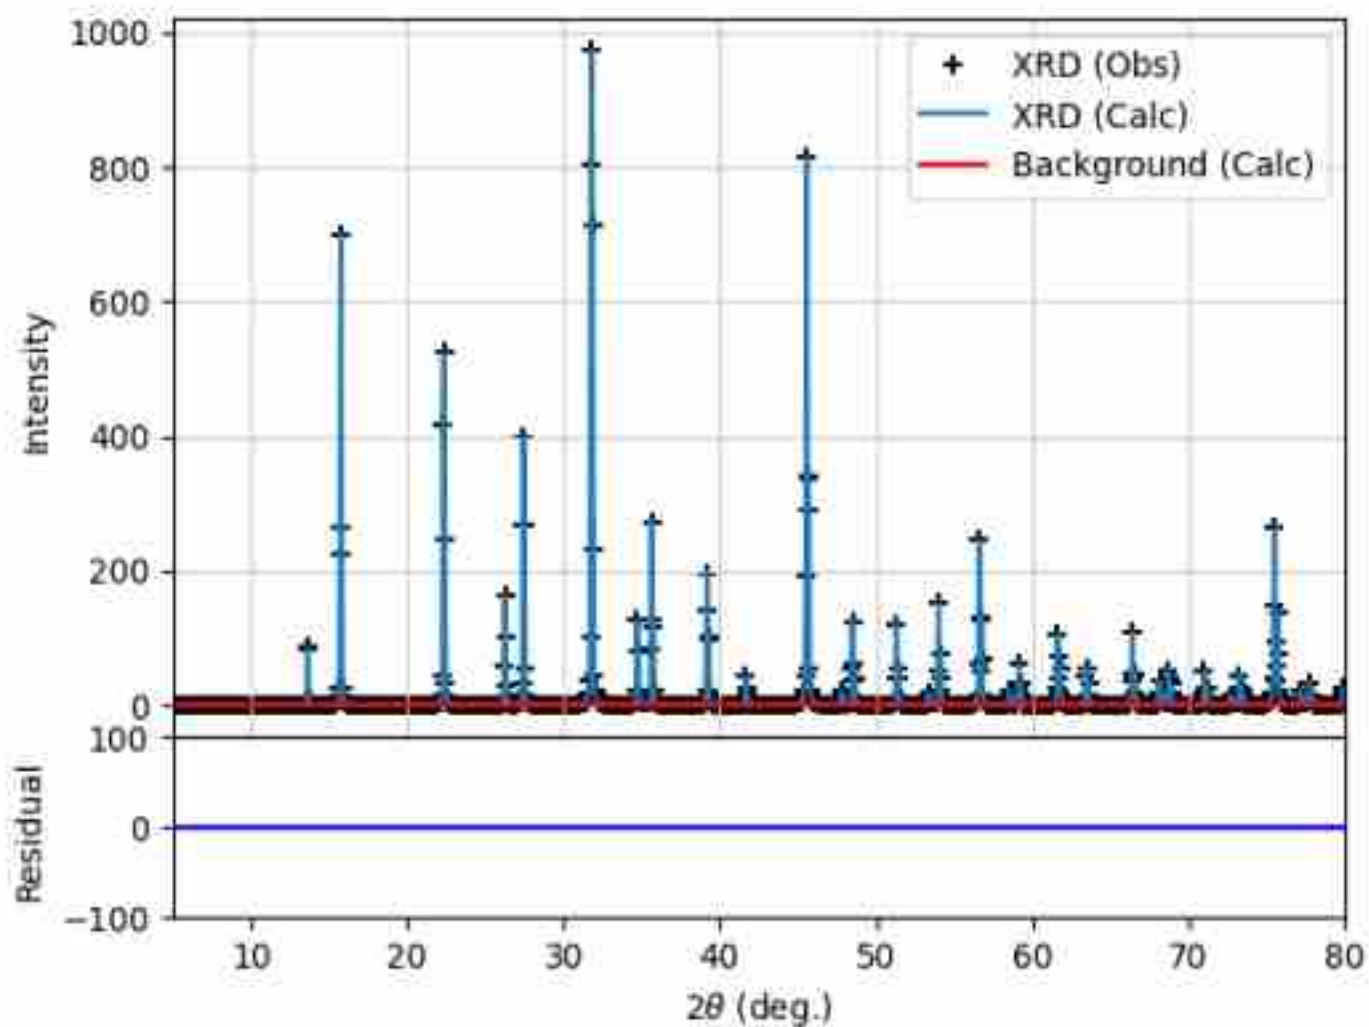

| RMSE before RR | Rwp     | RMSE after RR |
|----------------|---------|---------------|
| 0.009          | 0.01485 | 0.00177       |

# Rb<sub>2</sub>In<sub>1</sub>Ag<sub>1</sub>Cl<sub>6</sub>

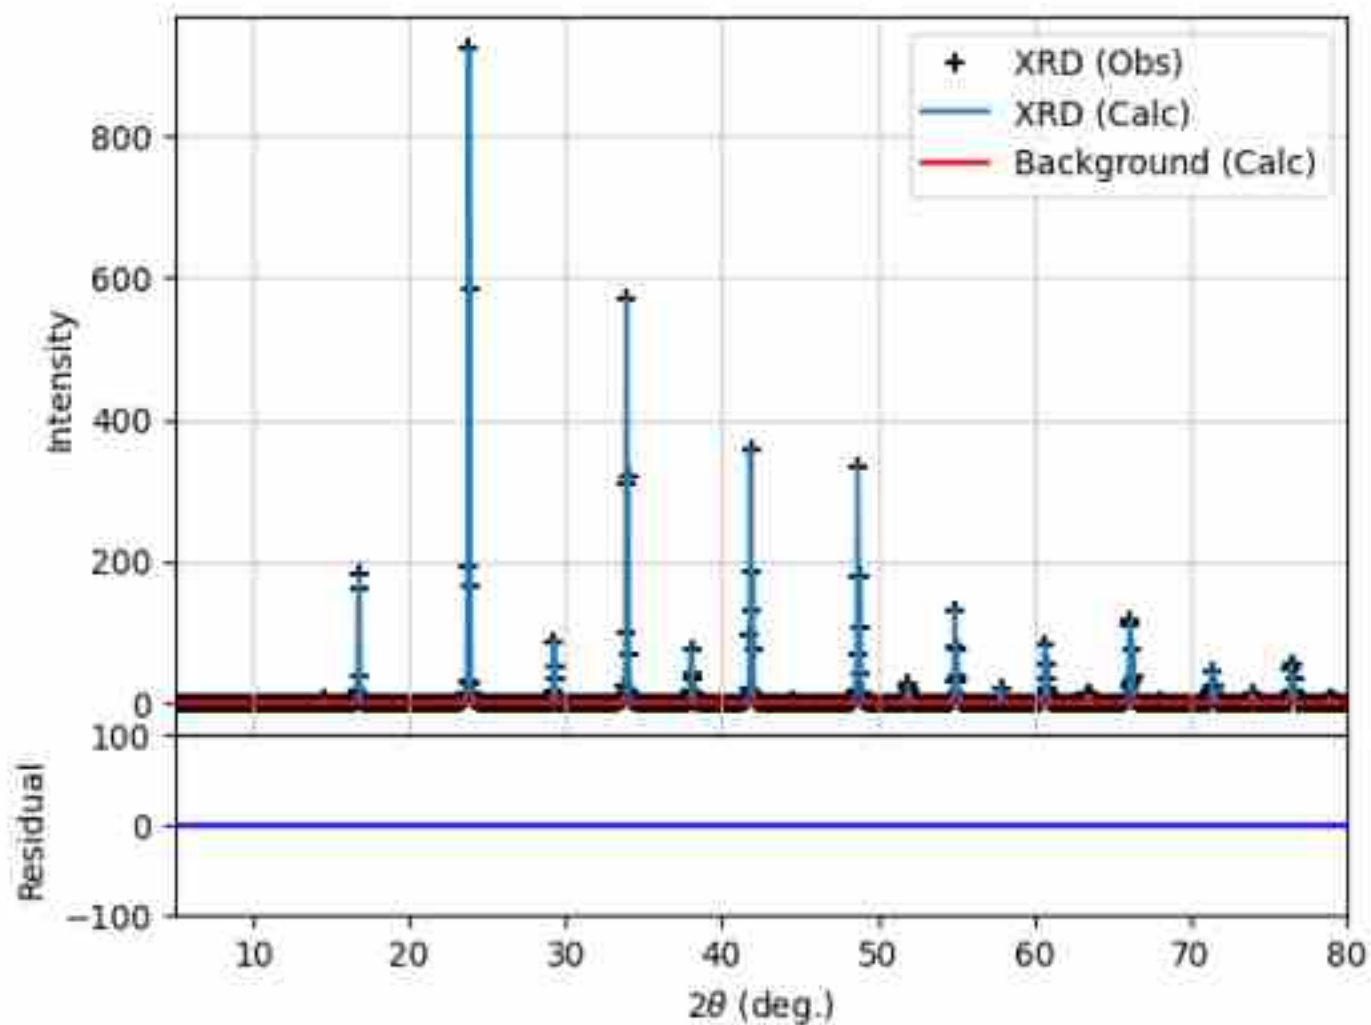

| RMSE before RR | Rwp     | RMSE after RR |
|----------------|---------|---------------|
| 0.009          | 0.01939 | 0.00278       |

# Rb<sub>2</sub>LiInCl<sub>6</sub>

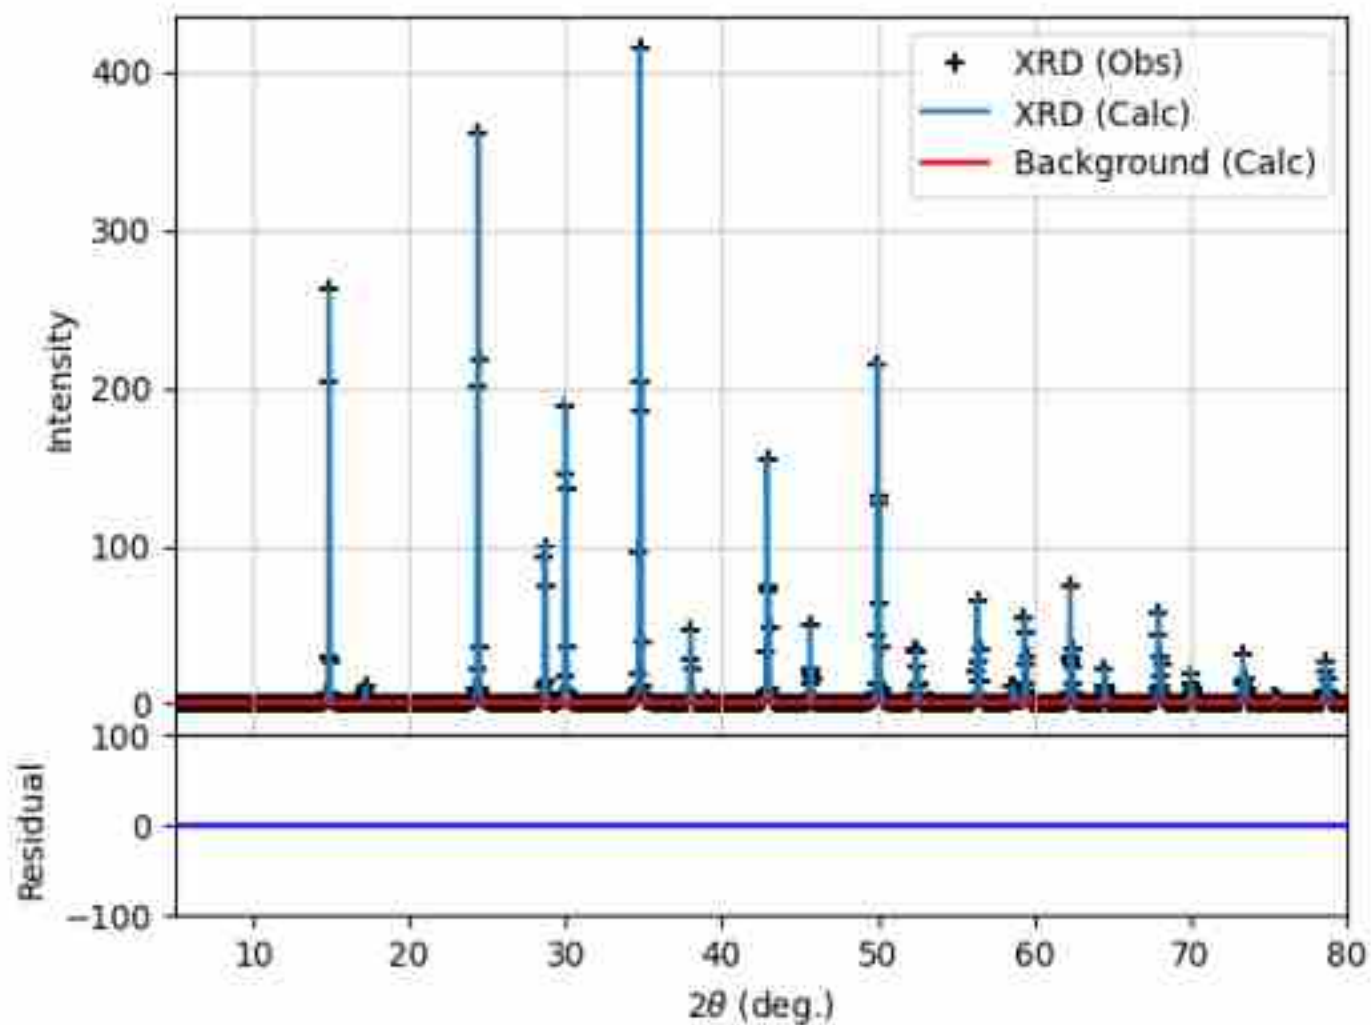

| RMSE before RR | Rwp     | RMSE after RR |
|----------------|---------|---------------|
| 0.009          | 0.02185 | 0.0032        |

# Rb<sub>2</sub>LiMoCl<sub>6</sub>

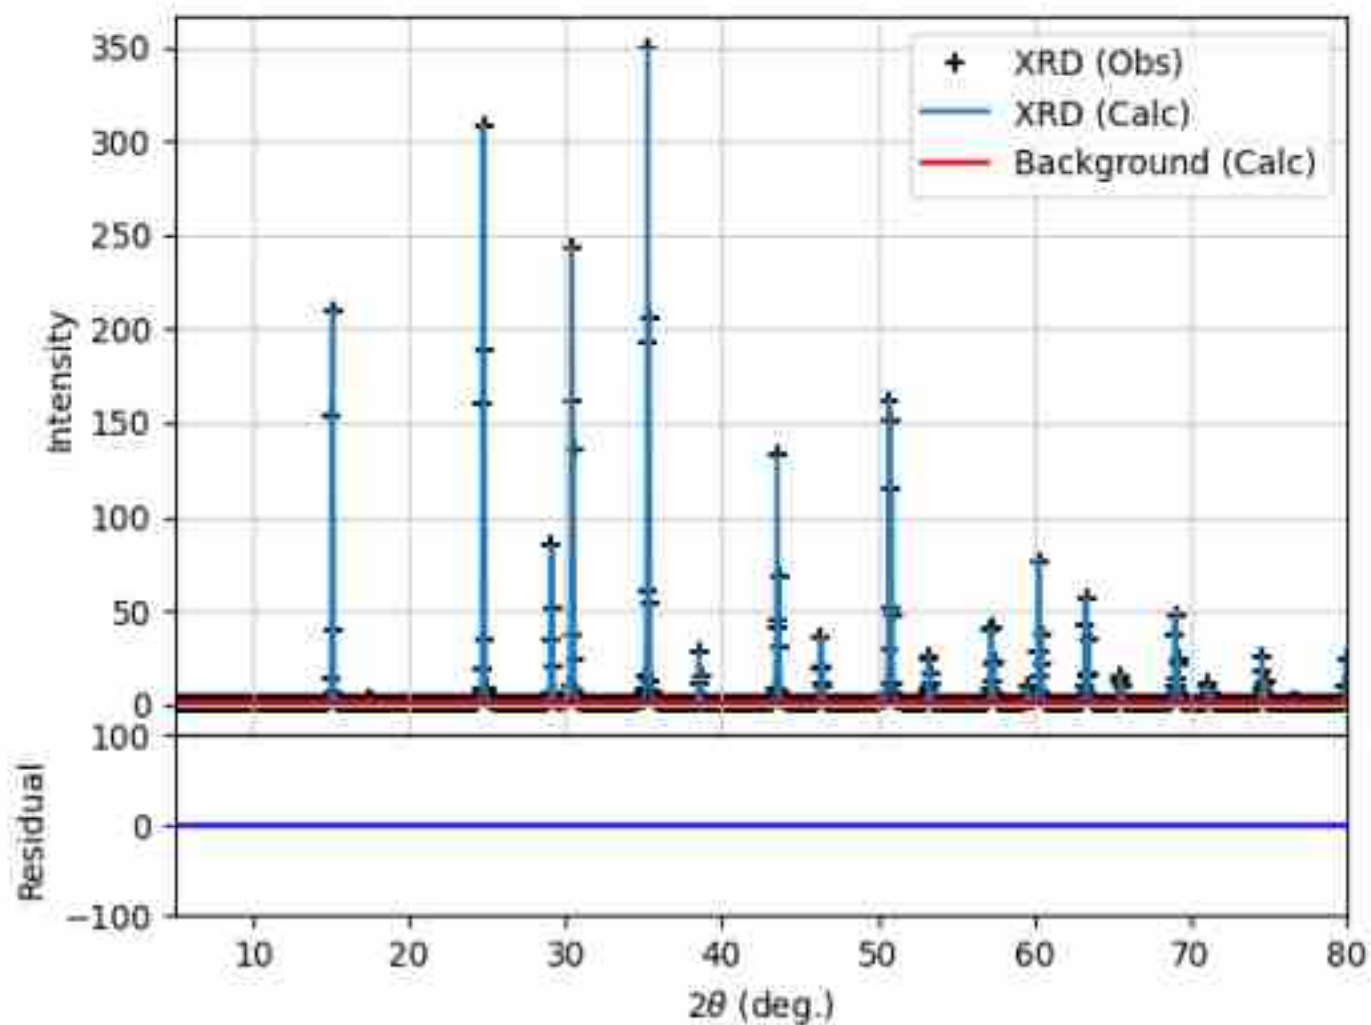

| RMSE before RR | Rwp     | RMSE after RR |
|----------------|---------|---------------|
| 0.009          | 0.01553 | 0.00213       |

# Rb<sub>2</sub>Na<sub>1</sub>Cr<sub>1</sub>Cl<sub>6</sub>

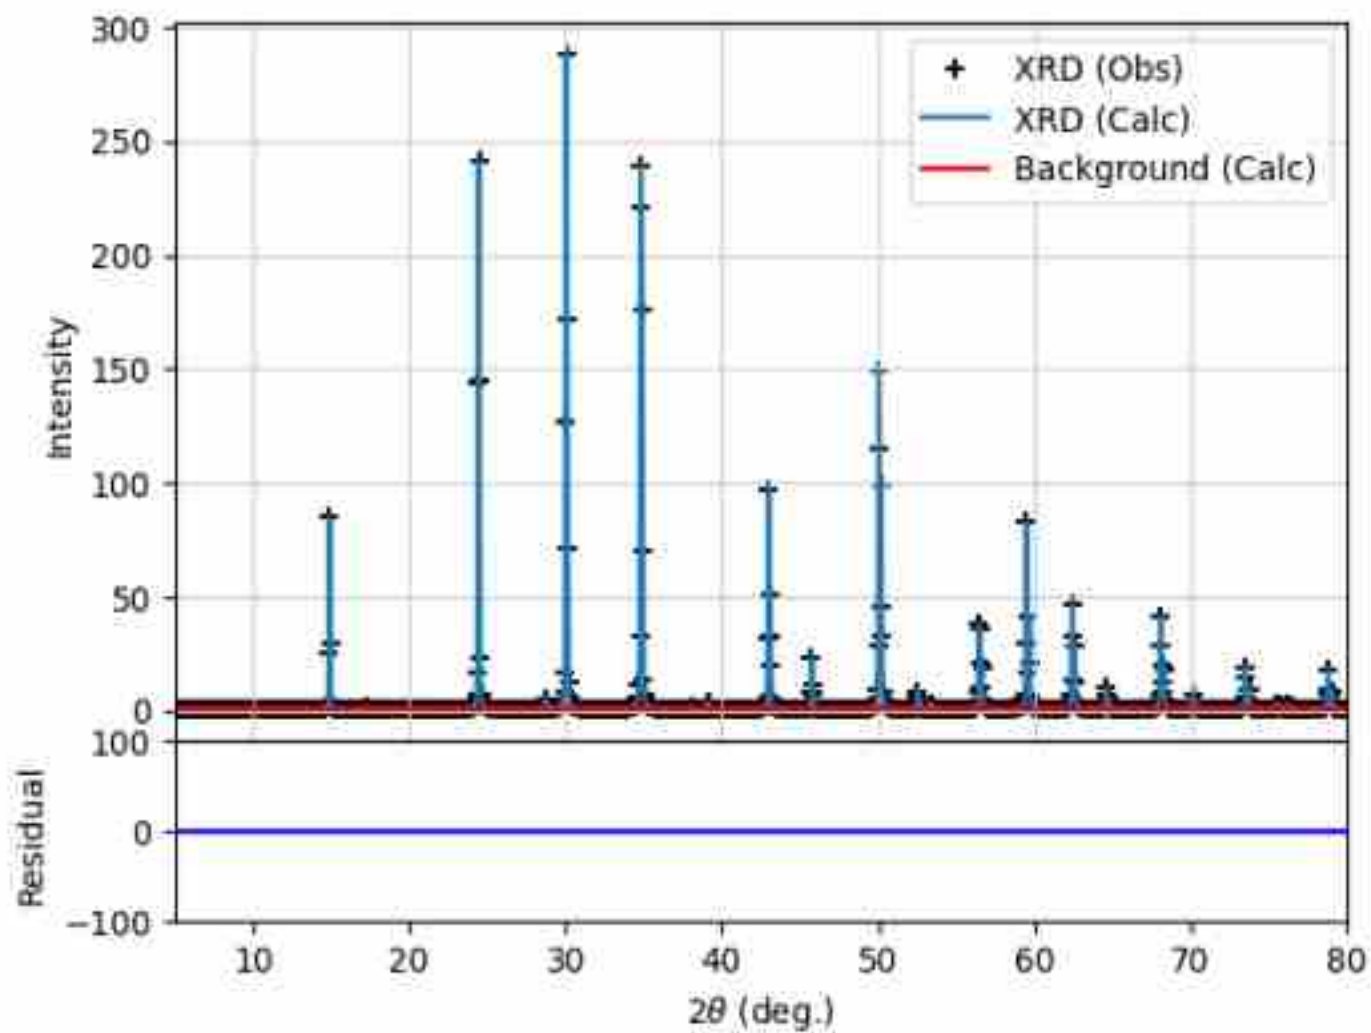

| RMSE before RR | Rwp     | RMSE after RR |
|----------------|---------|---------------|
| 0.009          | 0.05207 | 0.00344       |

# Rb3Tl1C16

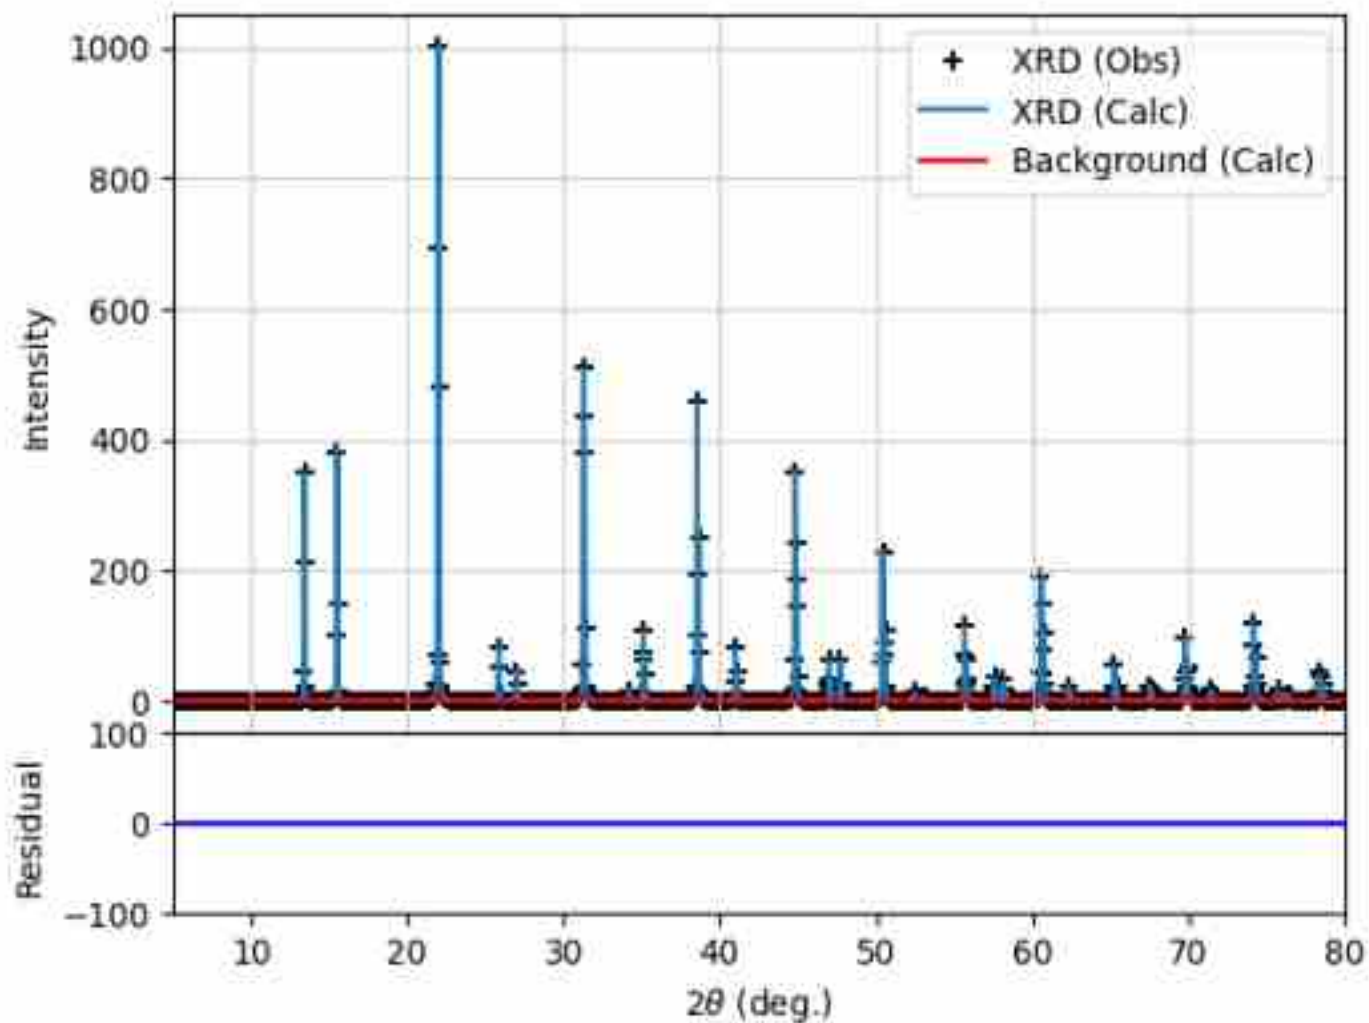

| RMSE before RR | Rwp     | RMSE after RR |
|----------------|---------|---------------|
| 0.009          | 0.00515 | 0.00111       |

# Rb3V1F6

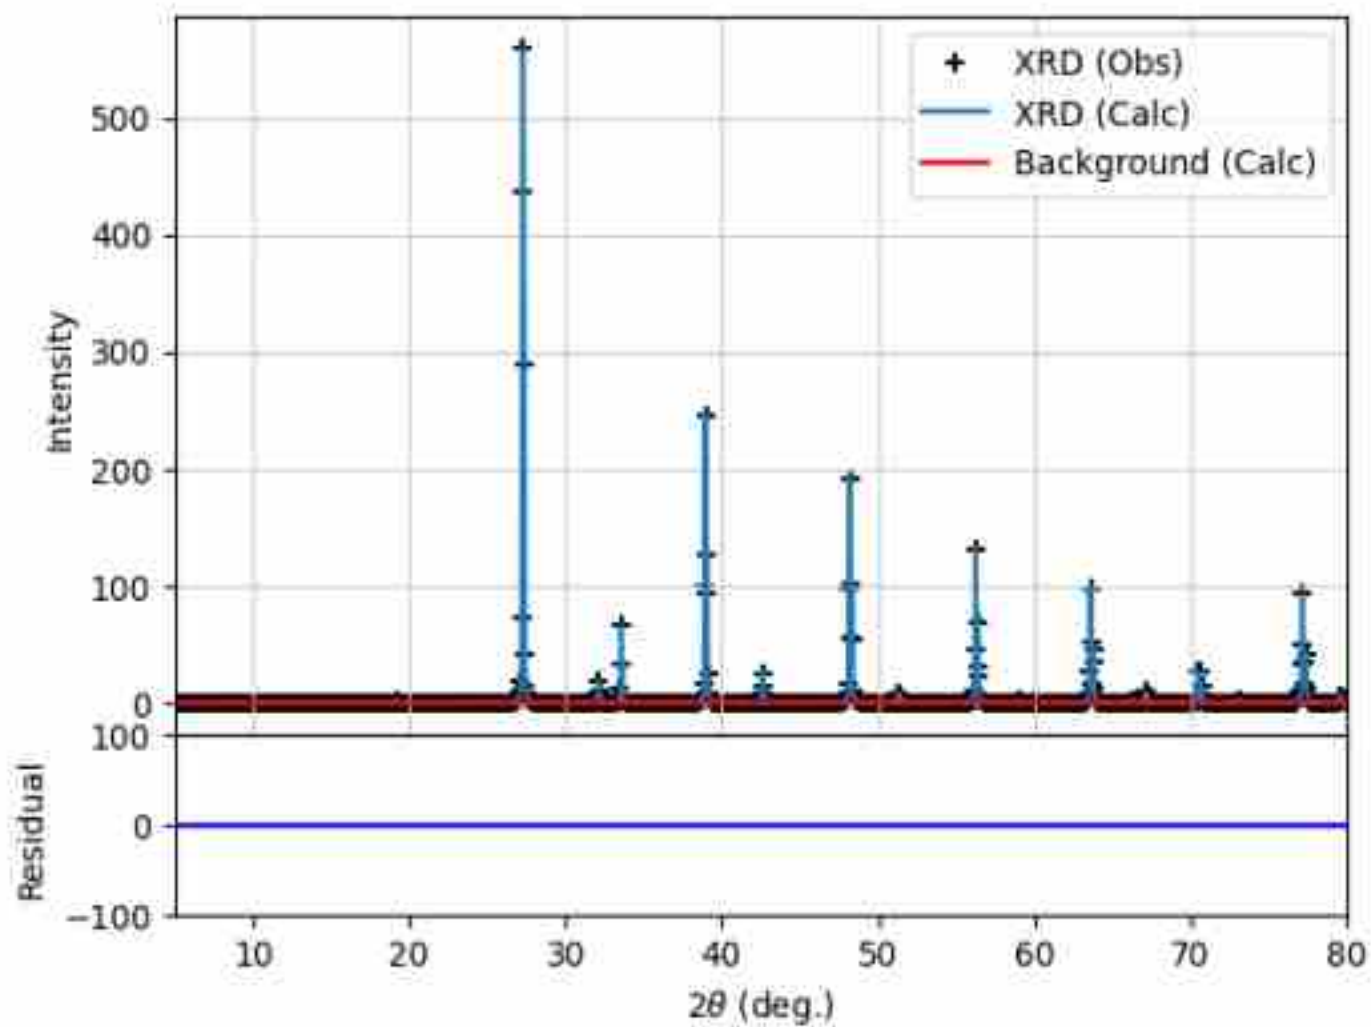

| RMSE before RR | Rwp     | RMSE after RR |
|----------------|---------|---------------|
| 0.009          | 0.01452 | 0.00245       |

# Re1W2

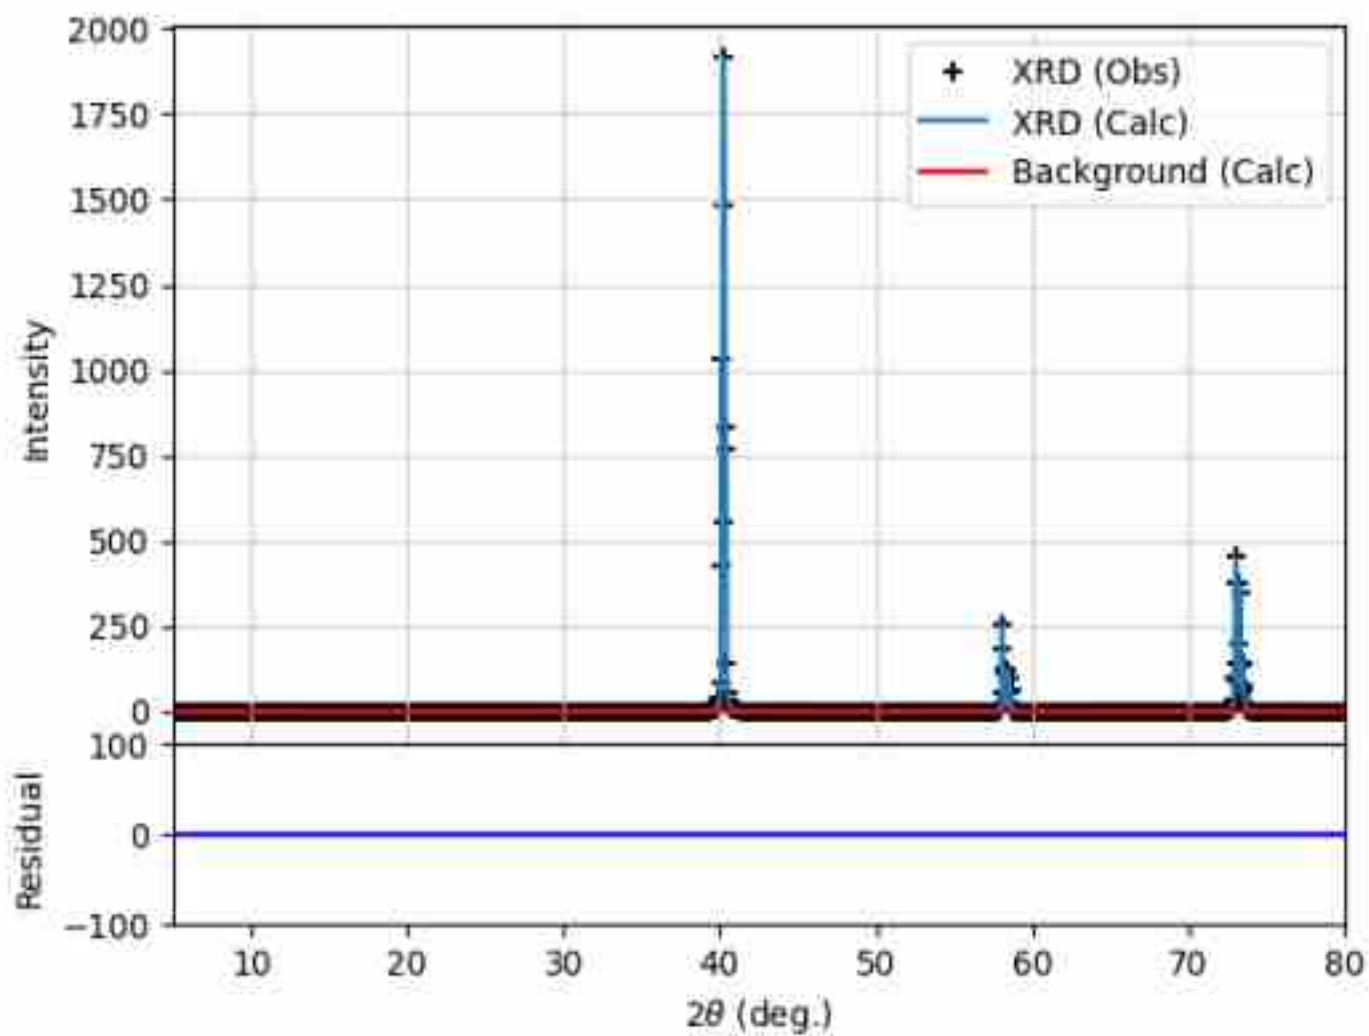

| RMSE before RR | Rwp     | RMSE after RR |
|----------------|---------|---------------|
| 0.009          | 0.00299 | 0.00013       |



# Sc1Cu2

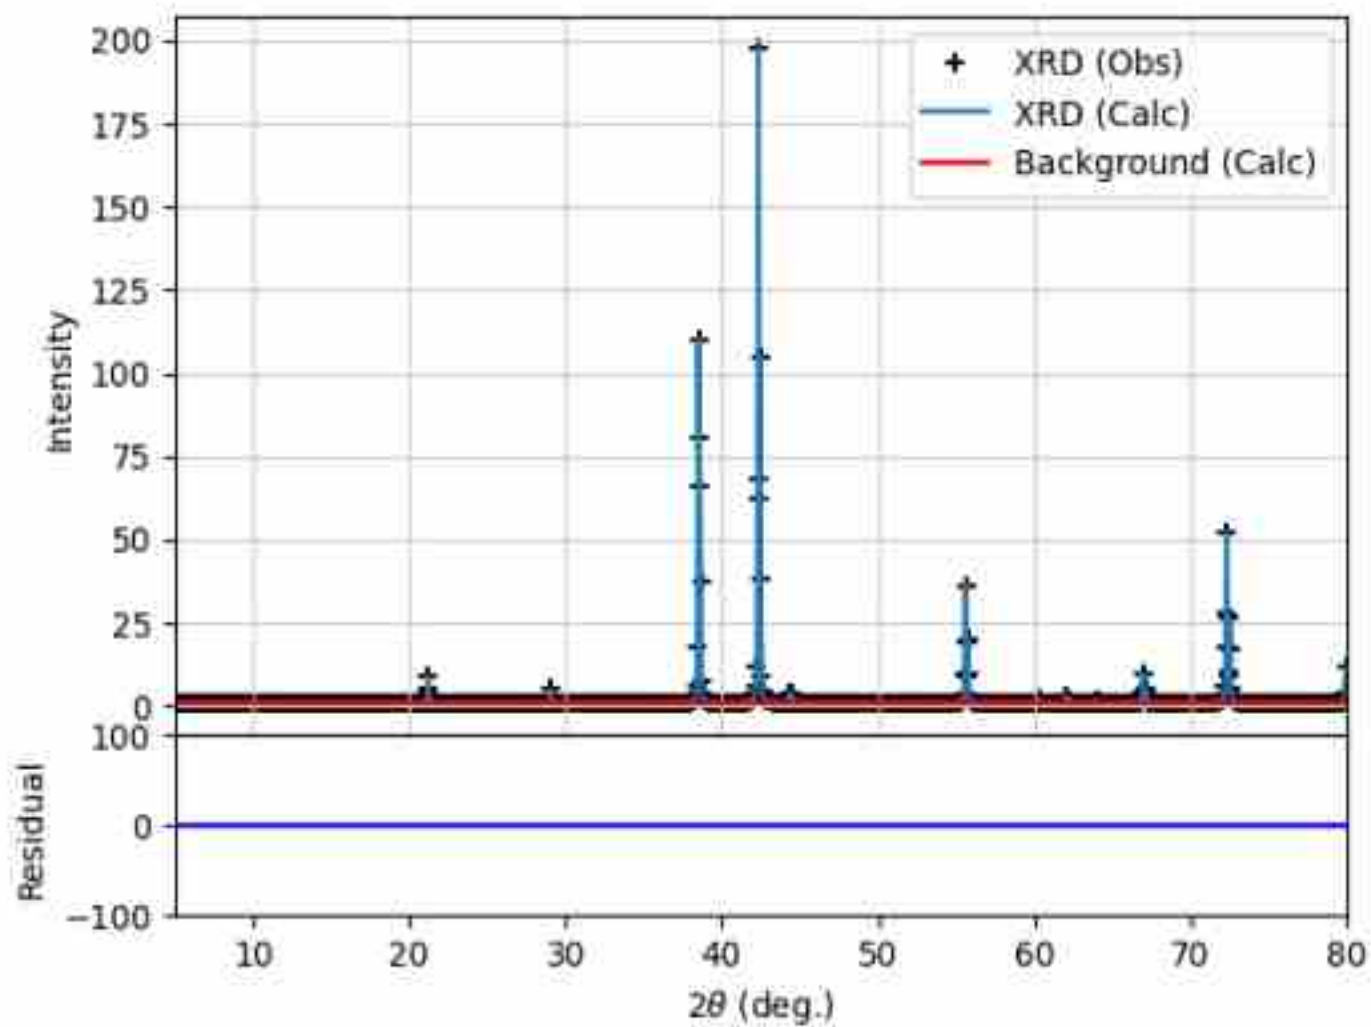

| RMSE before RR | Rwp     | RMSE after RR |
|----------------|---------|---------------|
| 0.009          | 0.00386 | 0.00033       |

# Sm1Bi1Te3

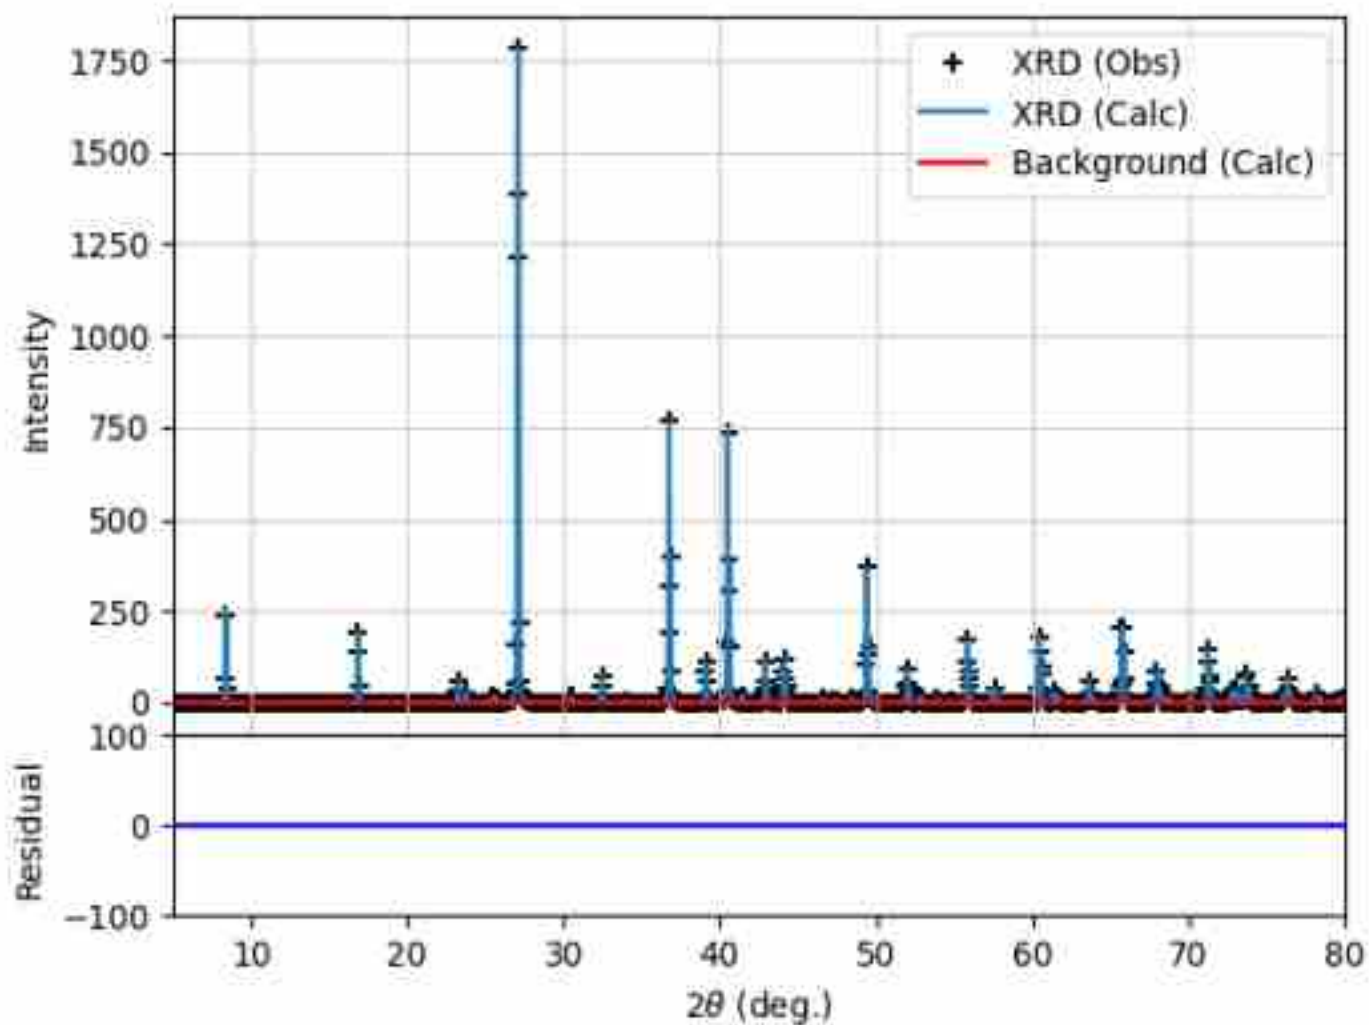

| RMSE before RR | Rwp    | RMSE after RR |
|----------------|--------|---------------|
| 0.009          | 0.0036 | 0.00011       |

# Sm1Er1Ni2

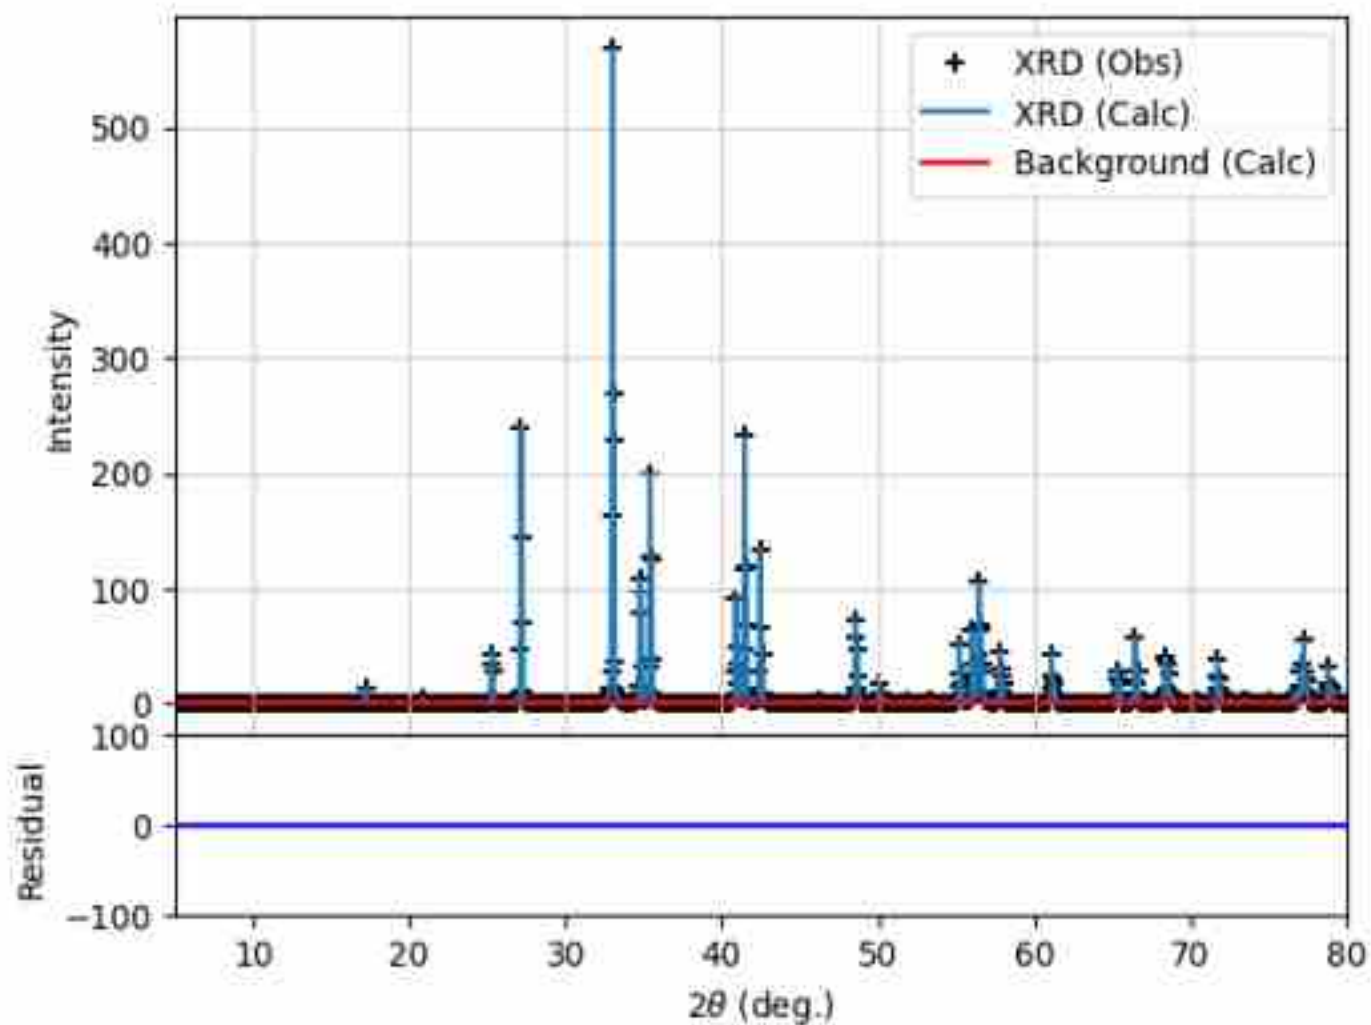

| RMSE before RR | Rwp     | RMSE after RR |
|----------------|---------|---------------|
| 0.009          | 0.00353 | 0.00037       |

# Sm1Ga3Ni1

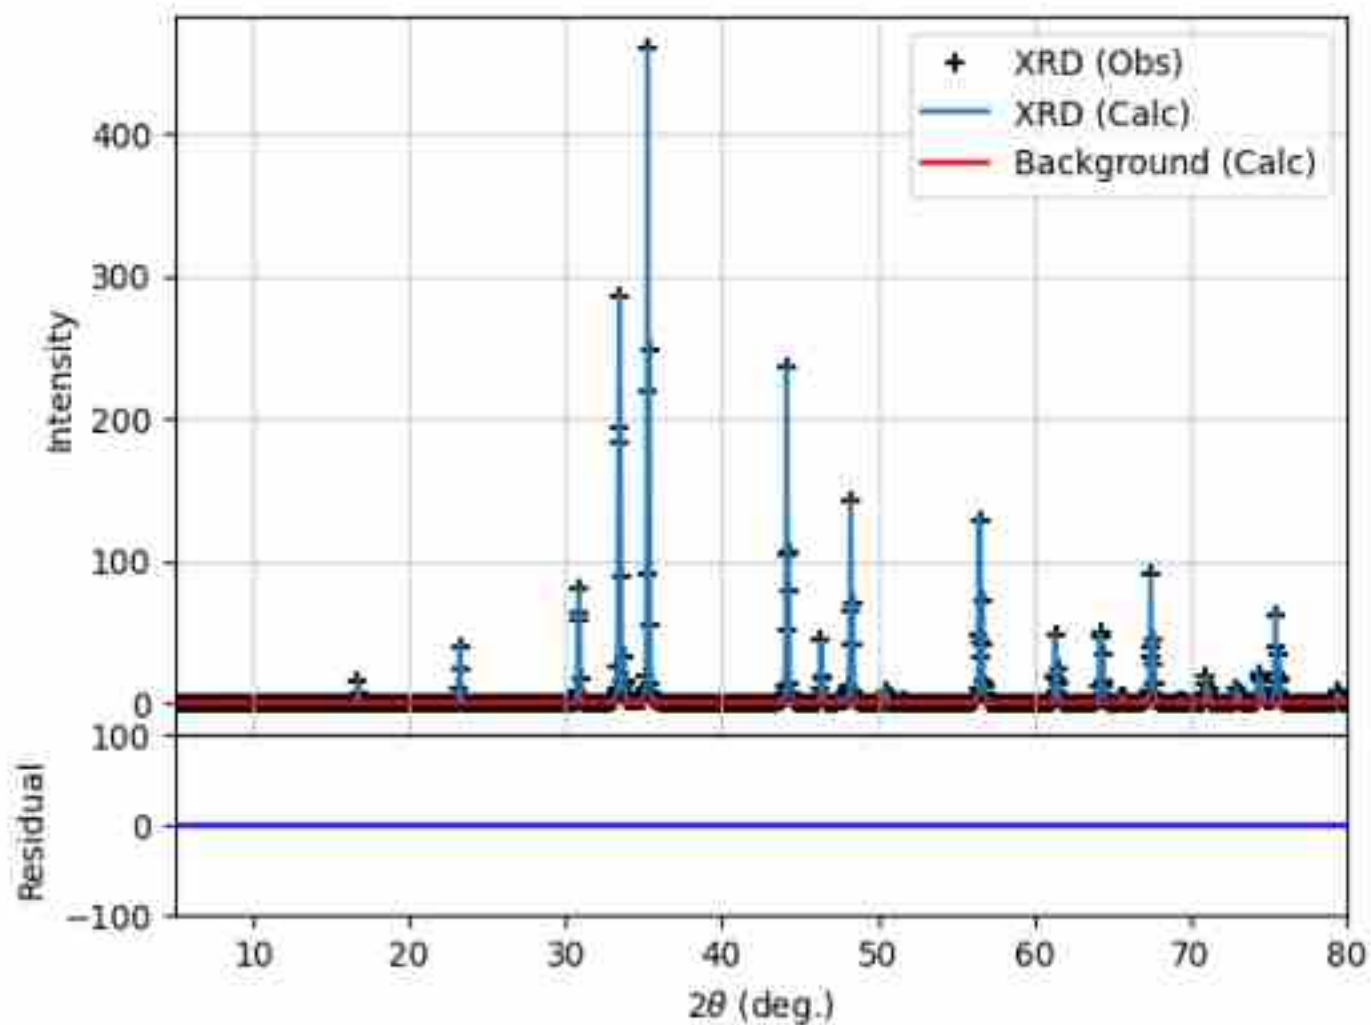

| RMSE before RR | Rwp    | RMSE after RR |
|----------------|--------|---------------|
| 0.009          | 0.0037 | 0.00044       |

# Sm1Ga3Pt1

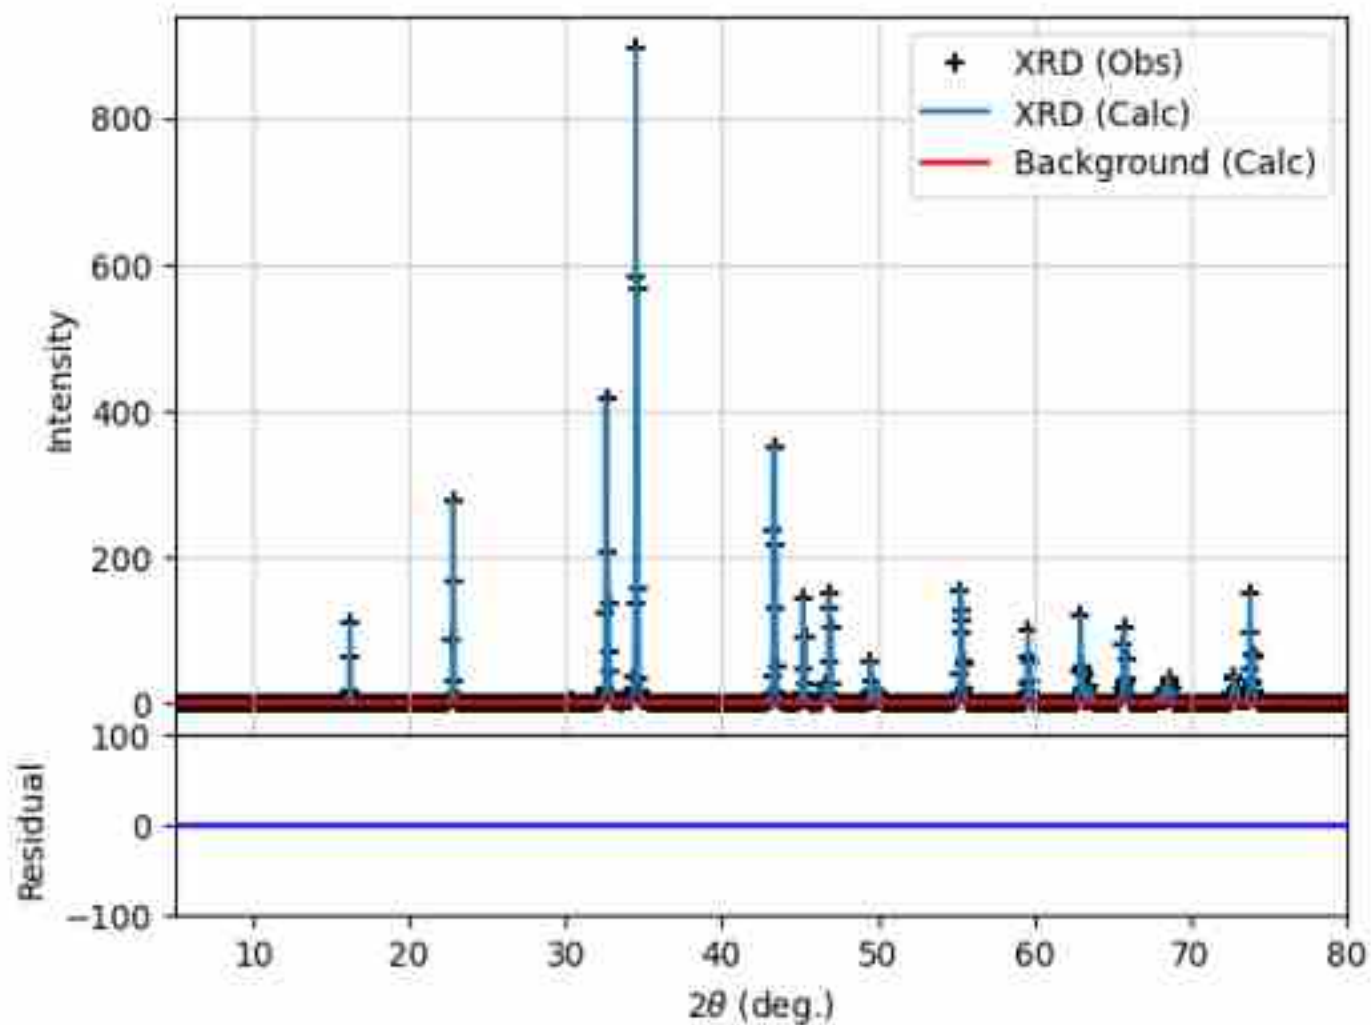

| RMSE before RR | Rwp     | RMSE after RR |
|----------------|---------|---------------|
| 0.009          | 0.00339 | 0.0006        |

# Sm<sub>2</sub>Al<sub>2</sub>Si<sub>2</sub>

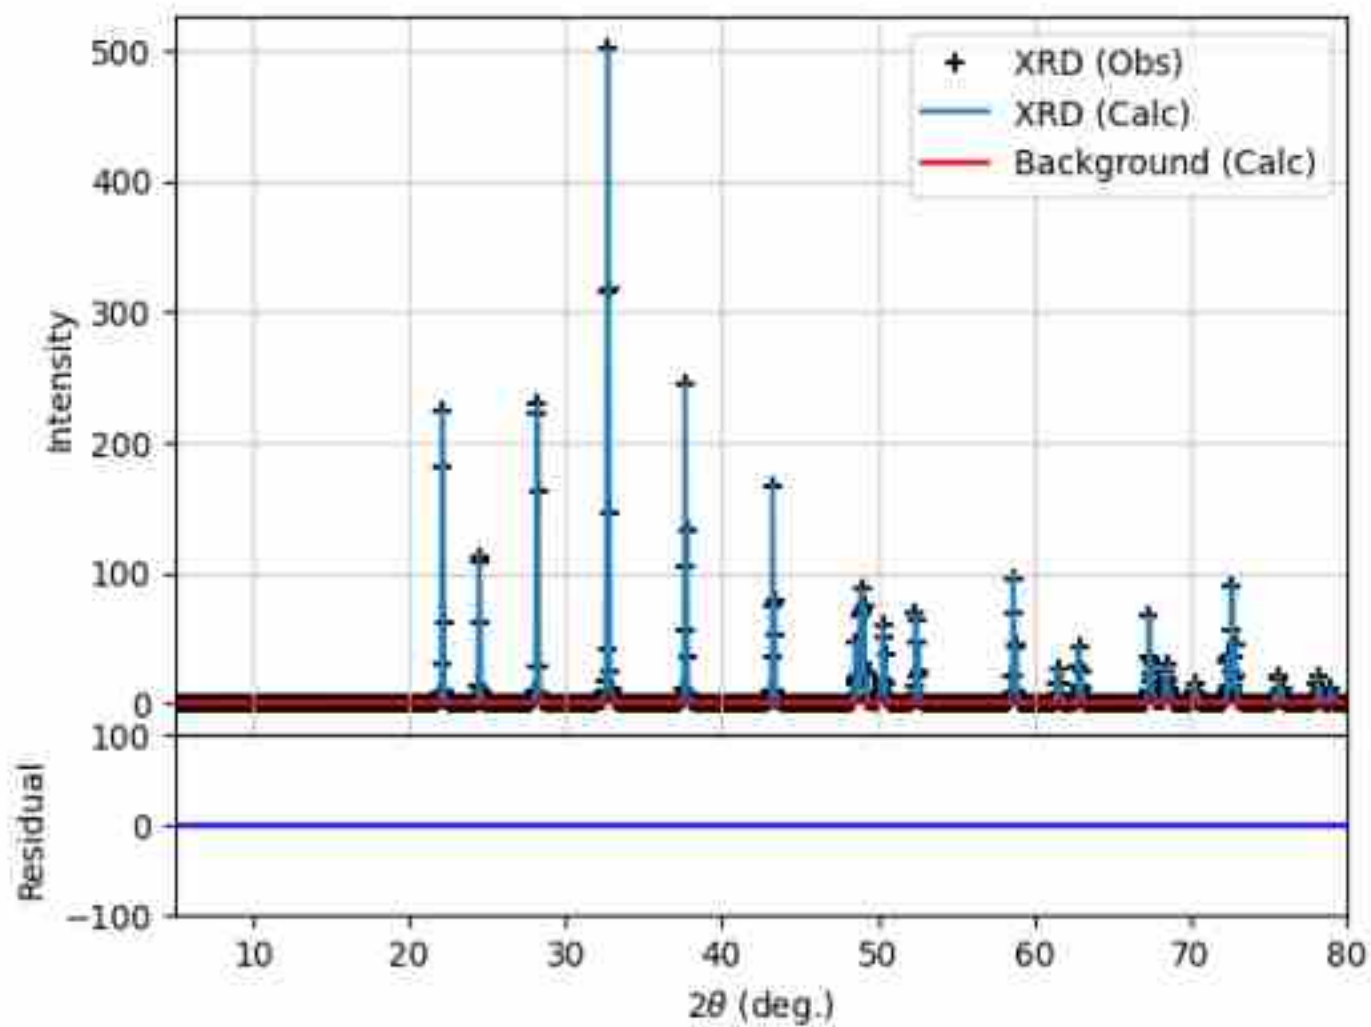

| RMSE before RR | Rwp     | RMSE after RR |
|----------------|---------|---------------|
| 0.009          | 0.01507 | 0.00232       |

# Sm<sub>2</sub>Er<sub>6</sub>S<sub>12</sub>

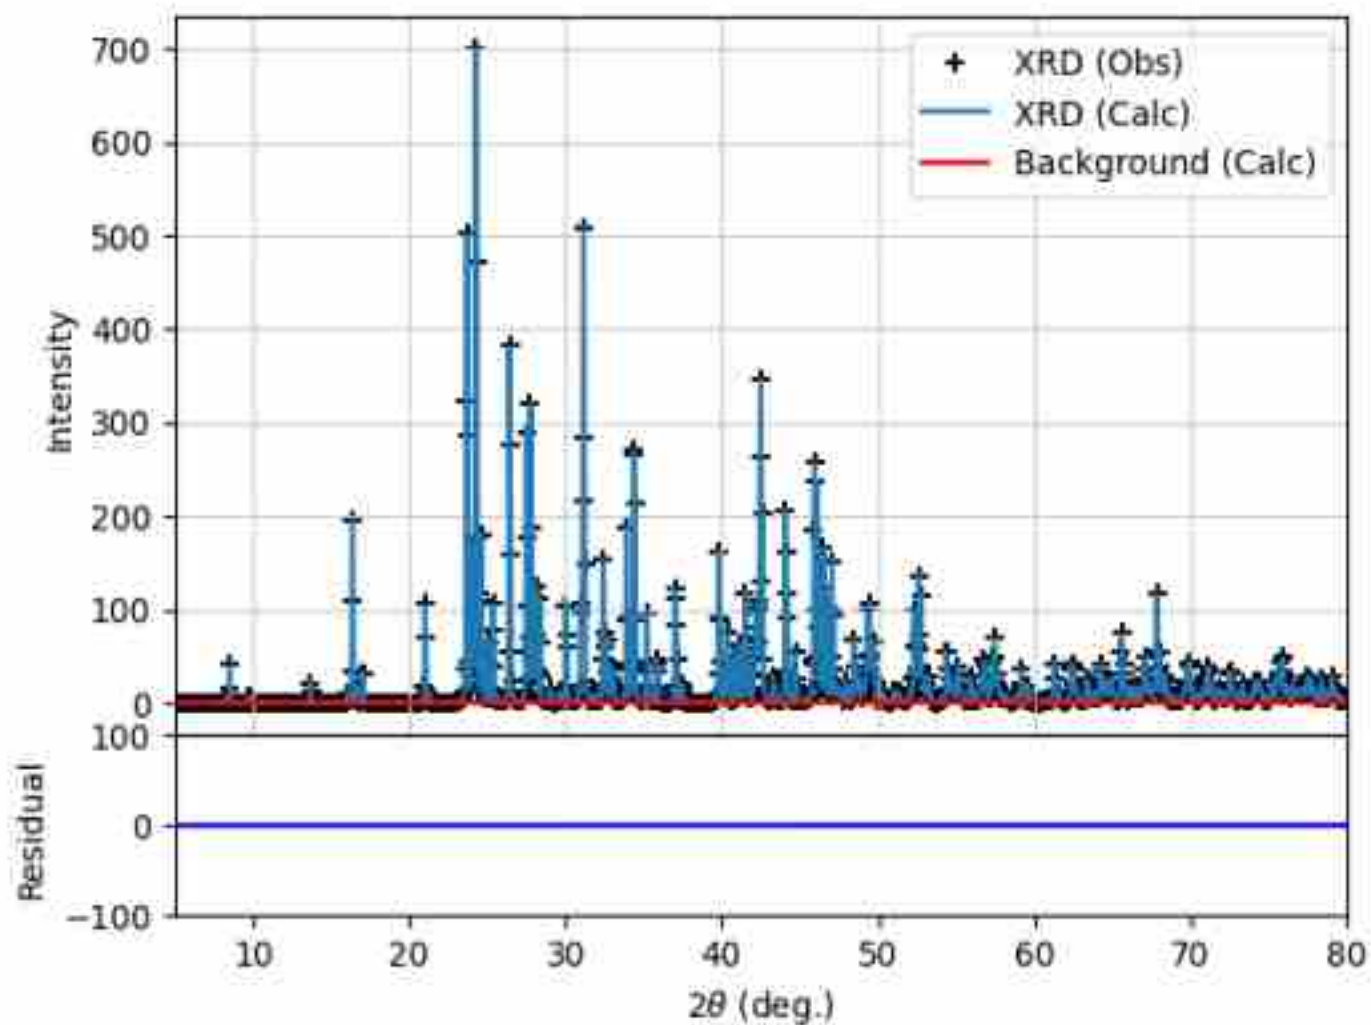

| RMSE before RR | Rwp     | RMSE after RR |
|----------------|---------|---------------|
| 0.009          | 0.28133 | 0.0083        |

# Sm2Ru4

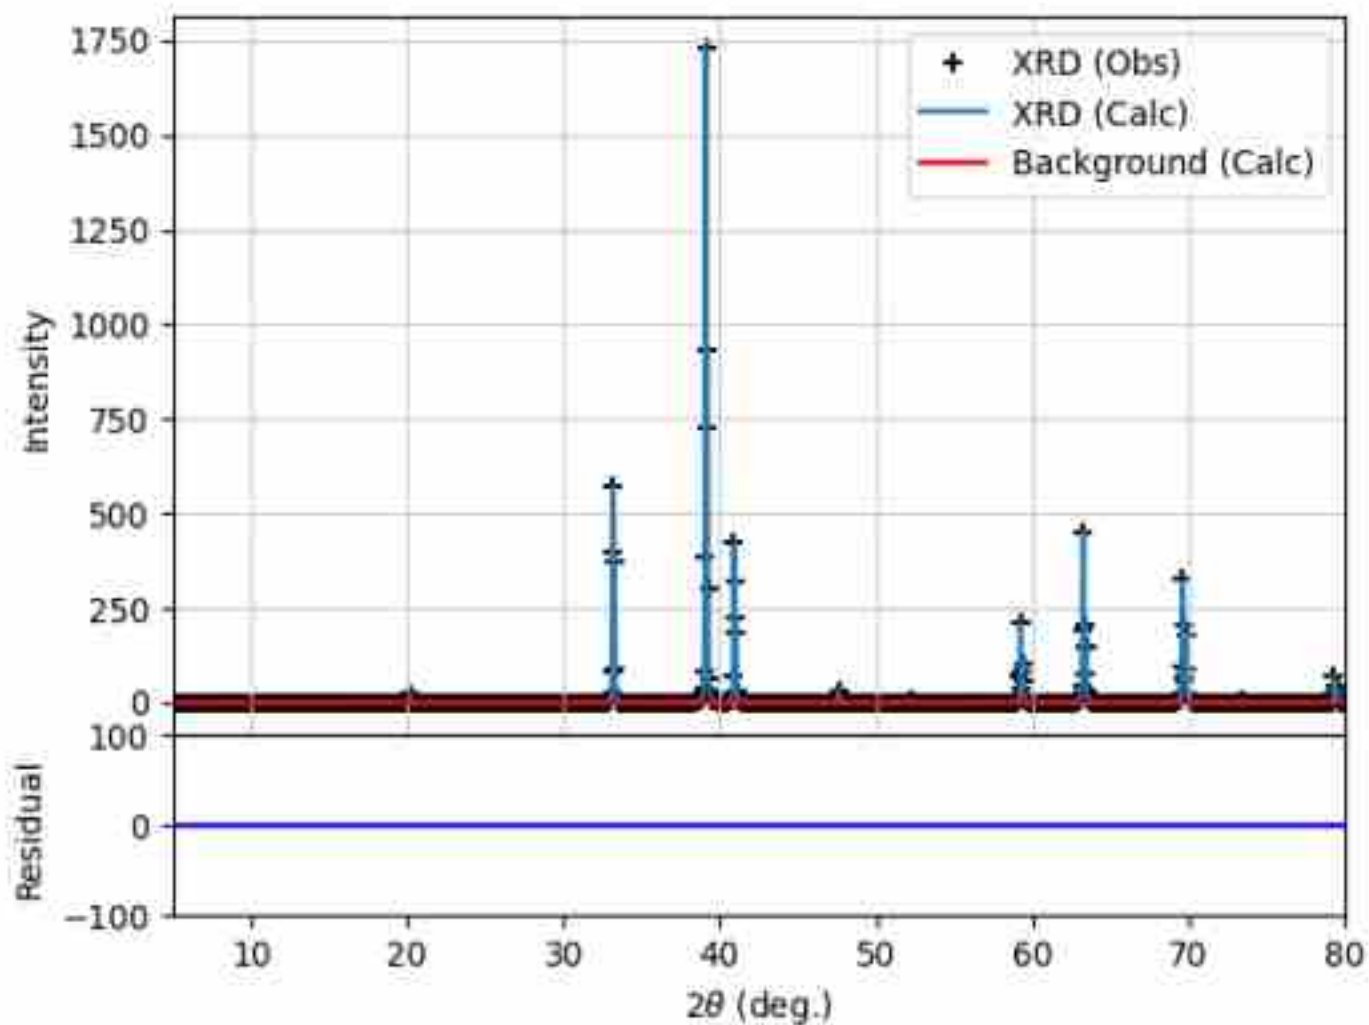

| RMSE before RR | Rwp     | RMSE after RR |
|----------------|---------|---------------|
| 0.009          | 0.00406 | 0.00056       |



# Sm<sub>3</sub>Ni<sub>3</sub>Sn<sub>3</sub>

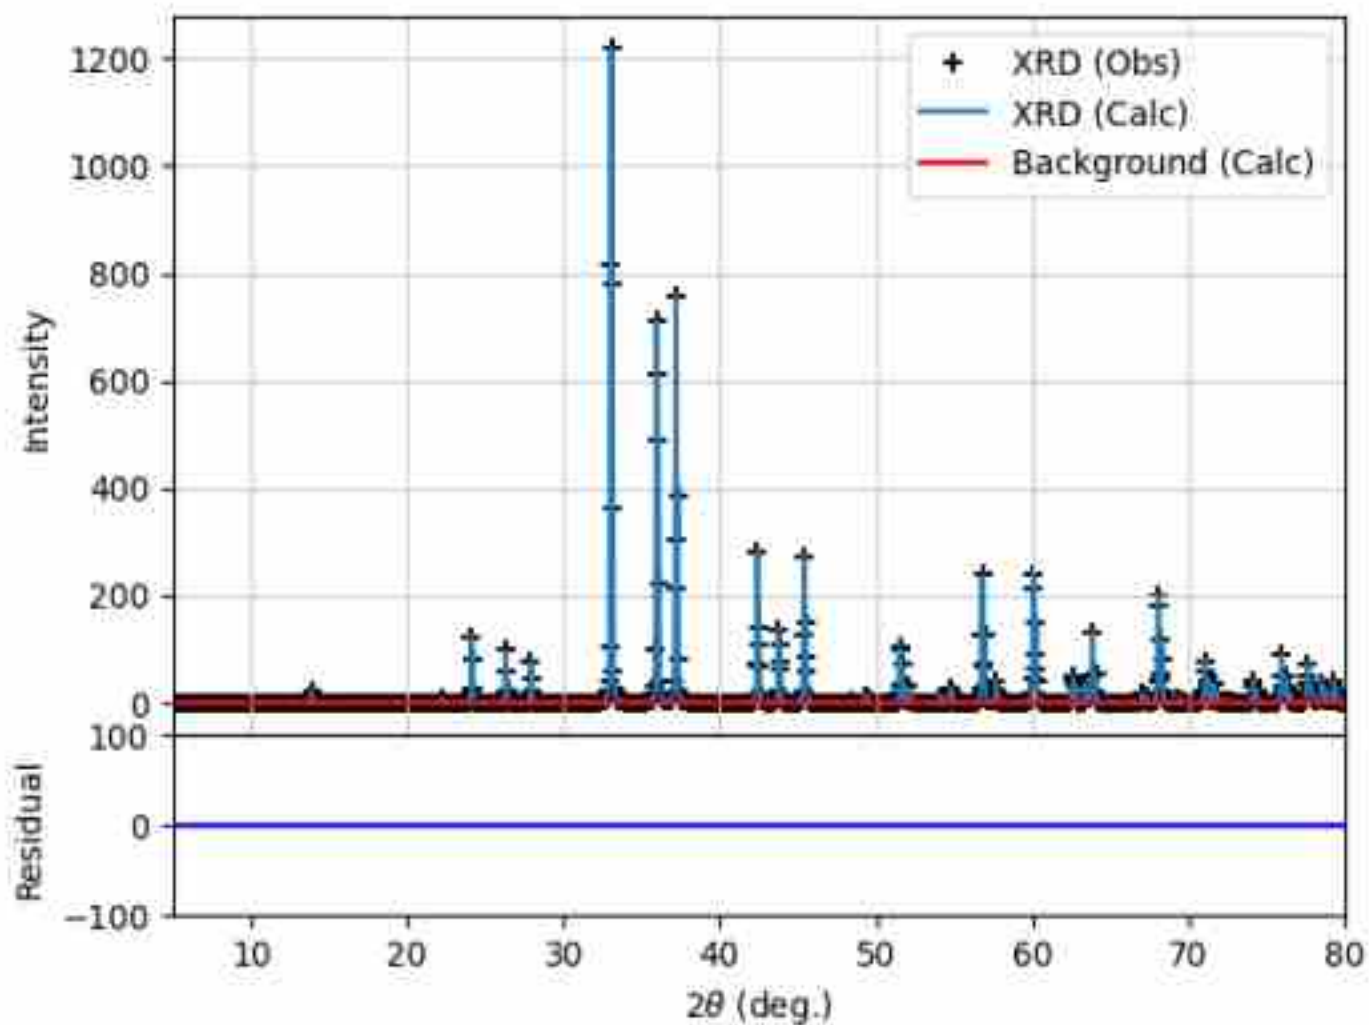

| RMSE before RR | Rwp     | RMSE after RR |
|----------------|---------|---------------|
| 0.009          | 0.00904 | 0.00175       |

# Sr1Cu2O3

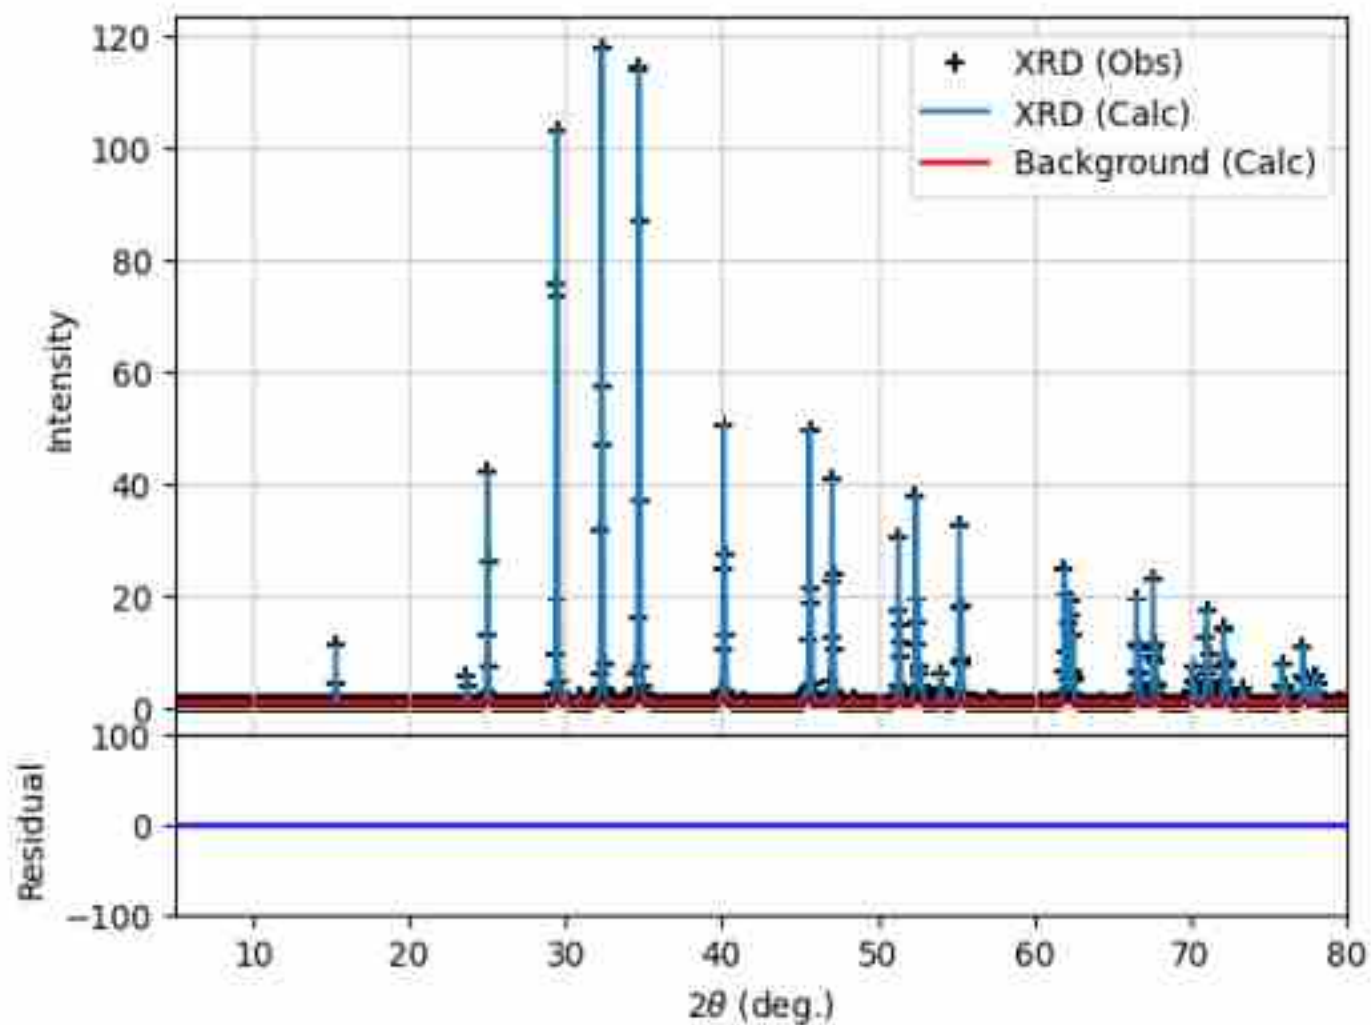

| RMSE before RR | Rwp    | RMSE after RR |
|----------------|--------|---------------|
| 0.009          | 0.0035 | 0.00072       |

# Sr1Eu1Mg1W1O6

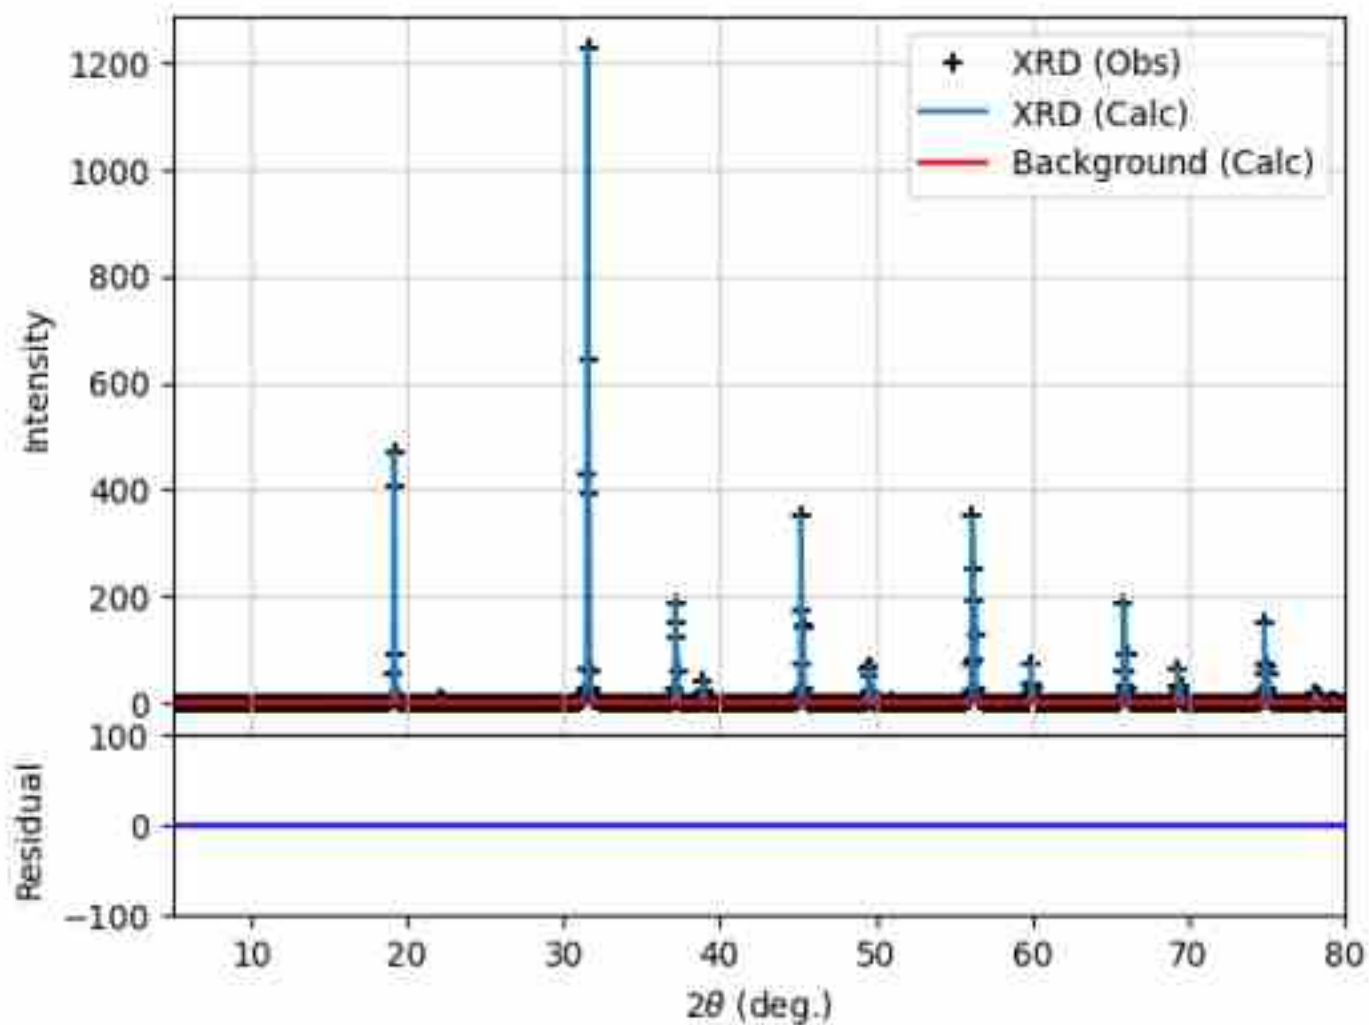

| RMSE before RR | Rwp     | RMSE after RR |
|----------------|---------|---------------|
| 0.009          | 0.00507 | 0.0024        |

# Sr1Pd5

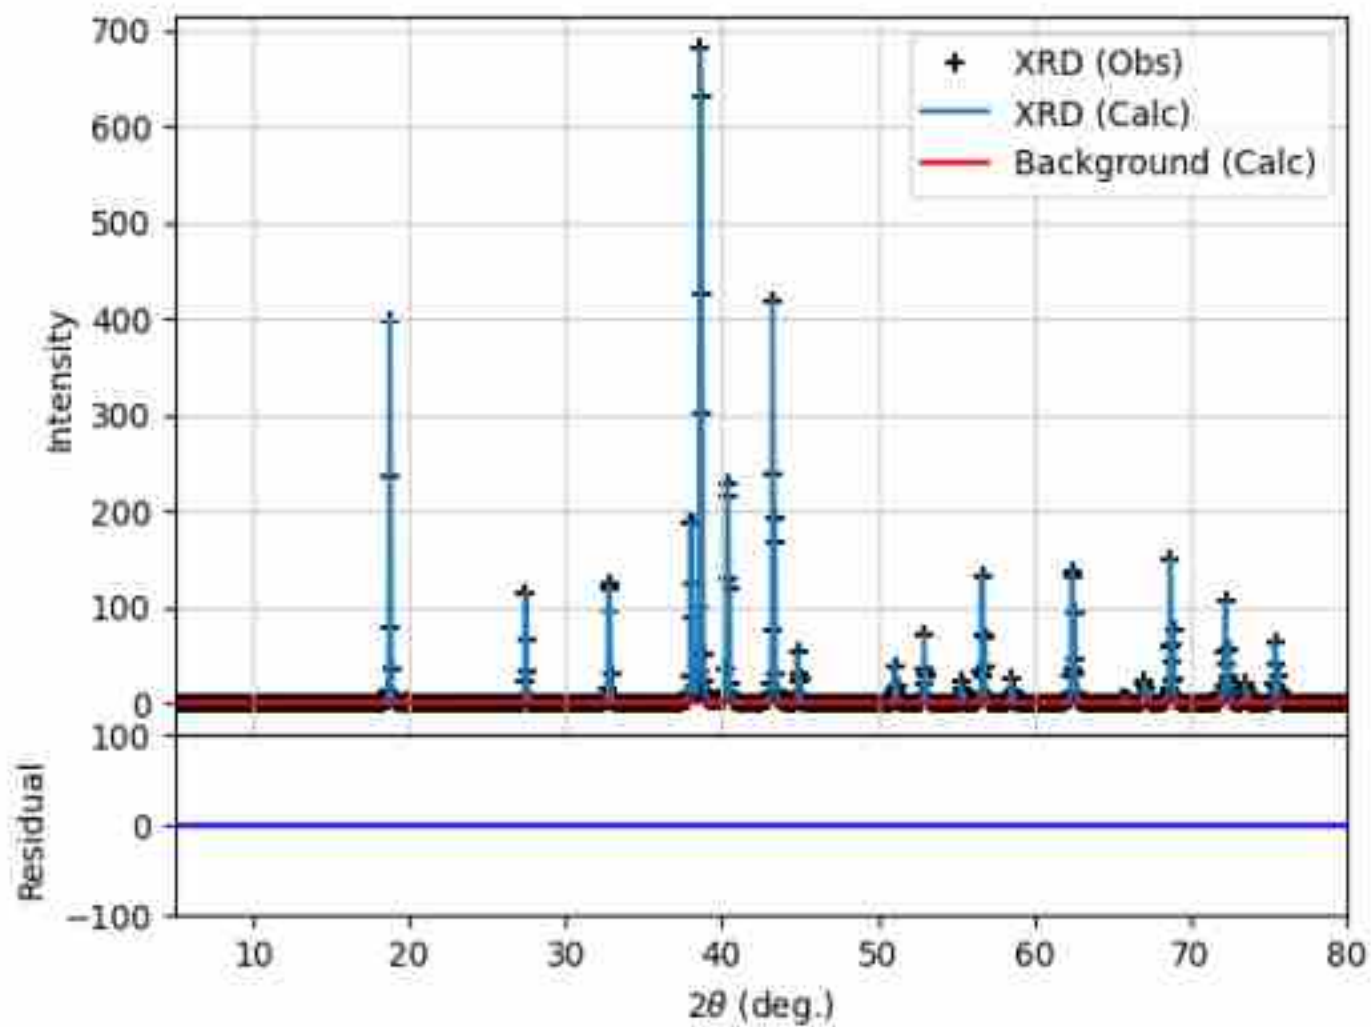

| RMSE before RR | Rwp     | RMSE after RR |
|----------------|---------|---------------|
| 0.009          | 0.01135 | 0.00066       |

# Sr1Sm1Al1O4

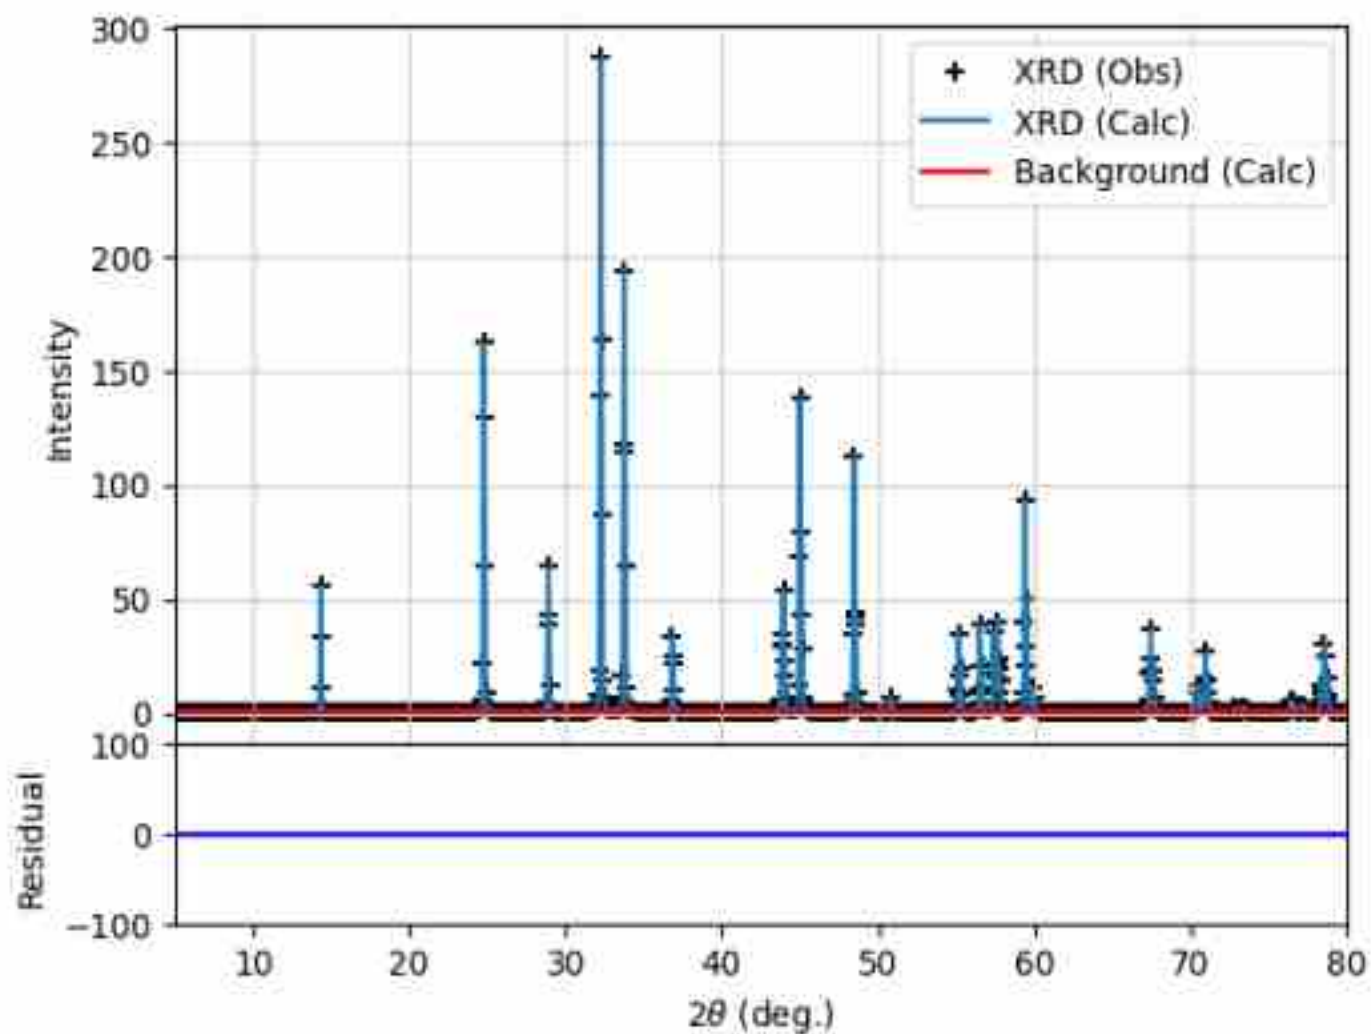

| RMSE before RR | Rwp     | RMSE after RR |
|----------------|---------|---------------|
| 0.009          | 0.00386 | 0.00093       |

# Sr<sub>2</sub>Gd<sub>1</sub>Sb<sub>1</sub>O<sub>6</sub>

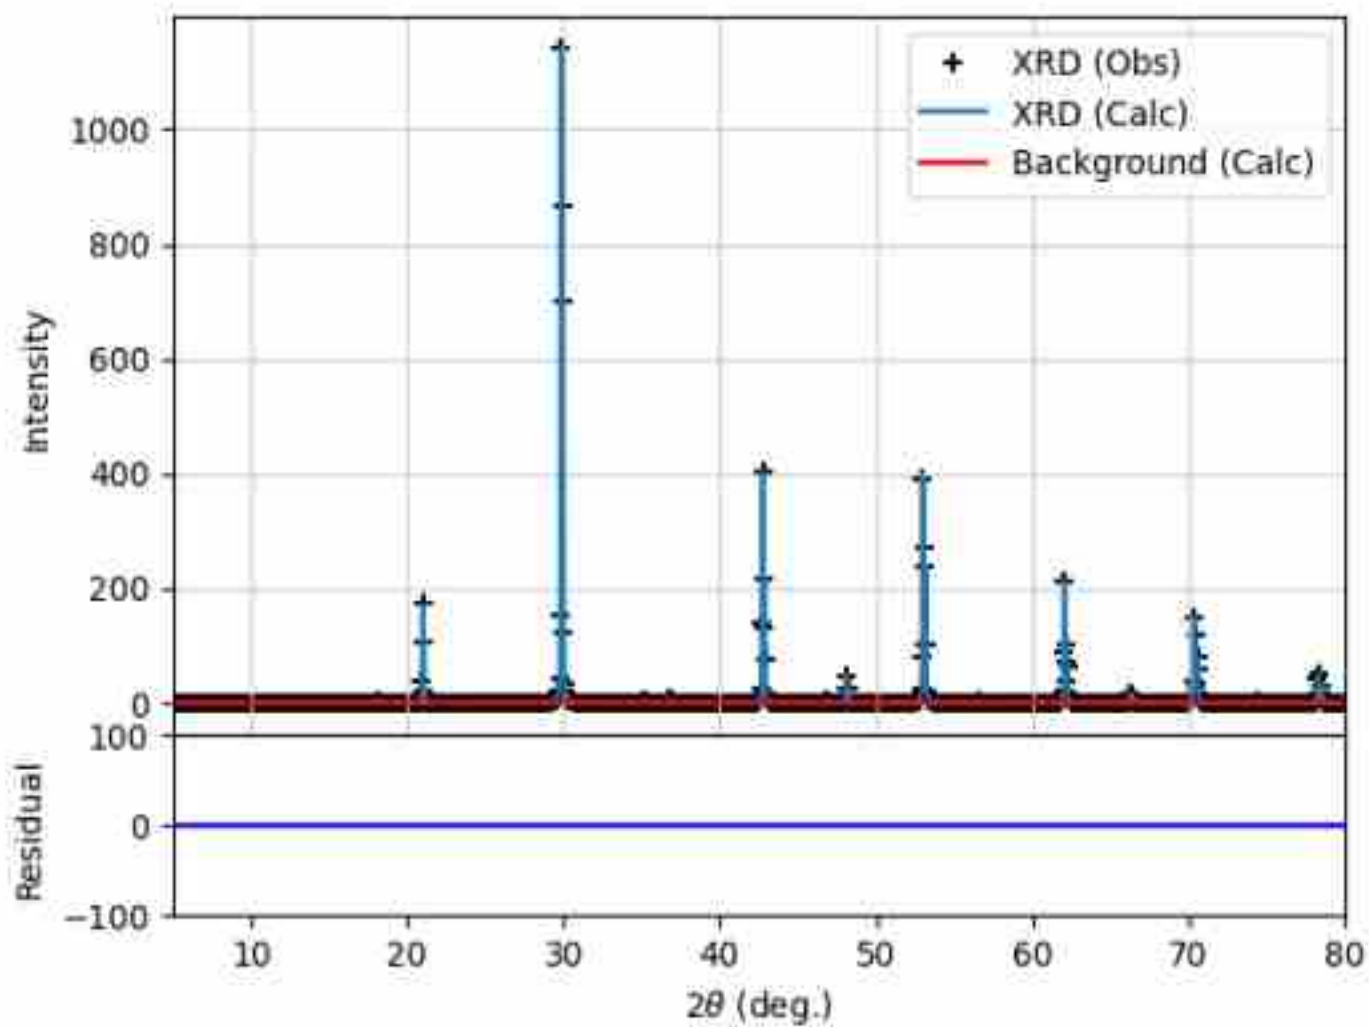

| RMSE before RR | Rwp     | RMSE after RR |
|----------------|---------|---------------|
| 0.009          | 0.02277 | 0.00511       |

# Sr<sub>2</sub>Hf<sub>1</sub>Zr<sub>1</sub>O<sub>6</sub>

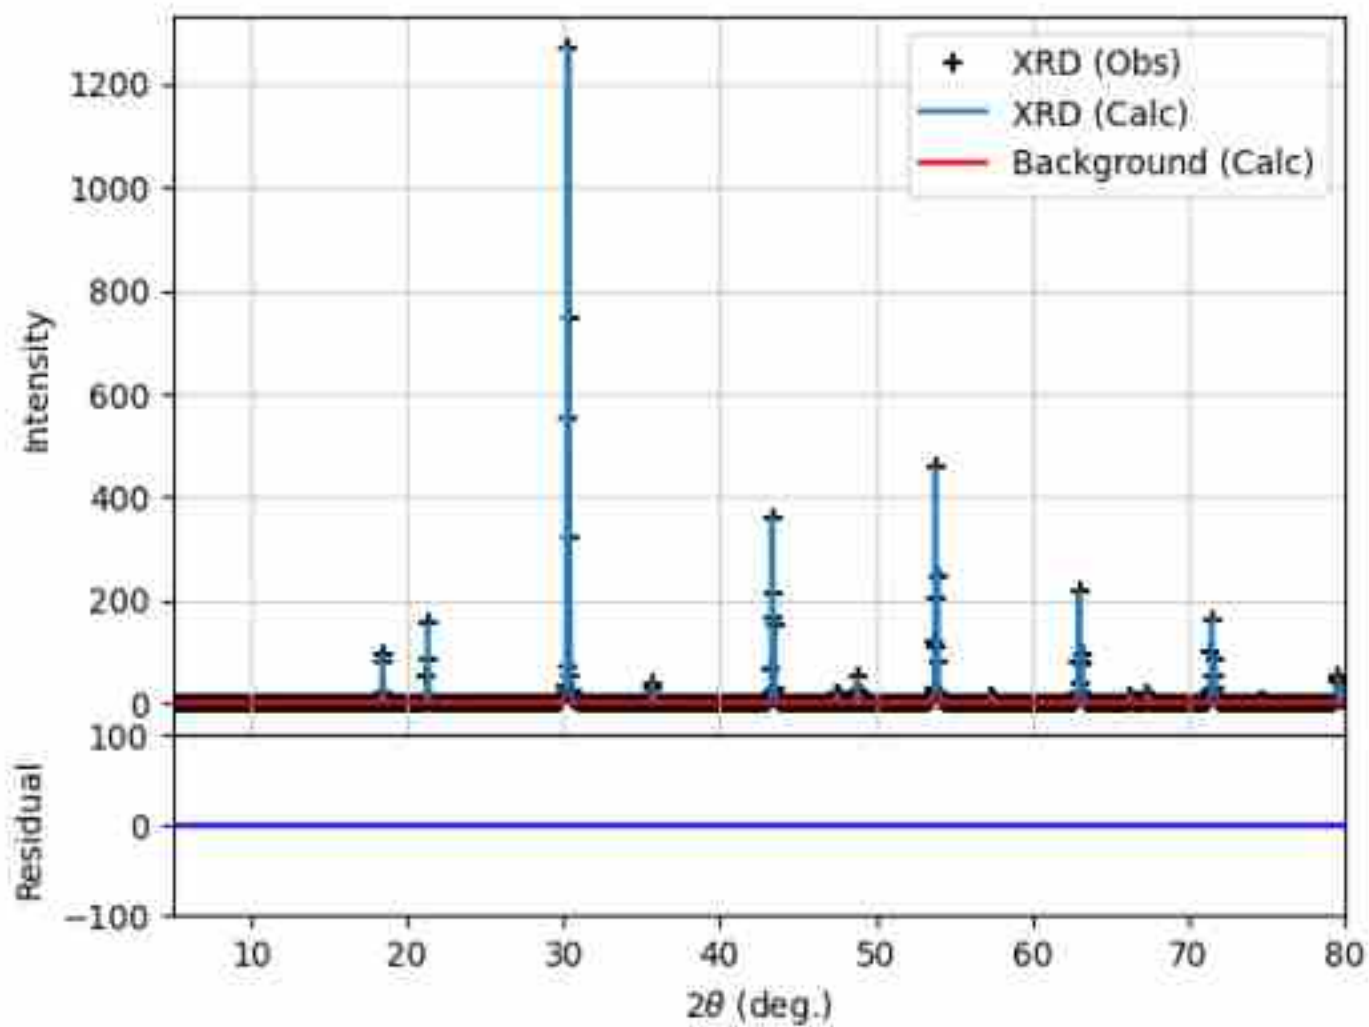

| RMSE before RR | Rwp     | RMSE after RR |
|----------------|---------|---------------|
| 0.009          | 0.00415 | 0.00198       |

# Sr2Sm1Sb1O6

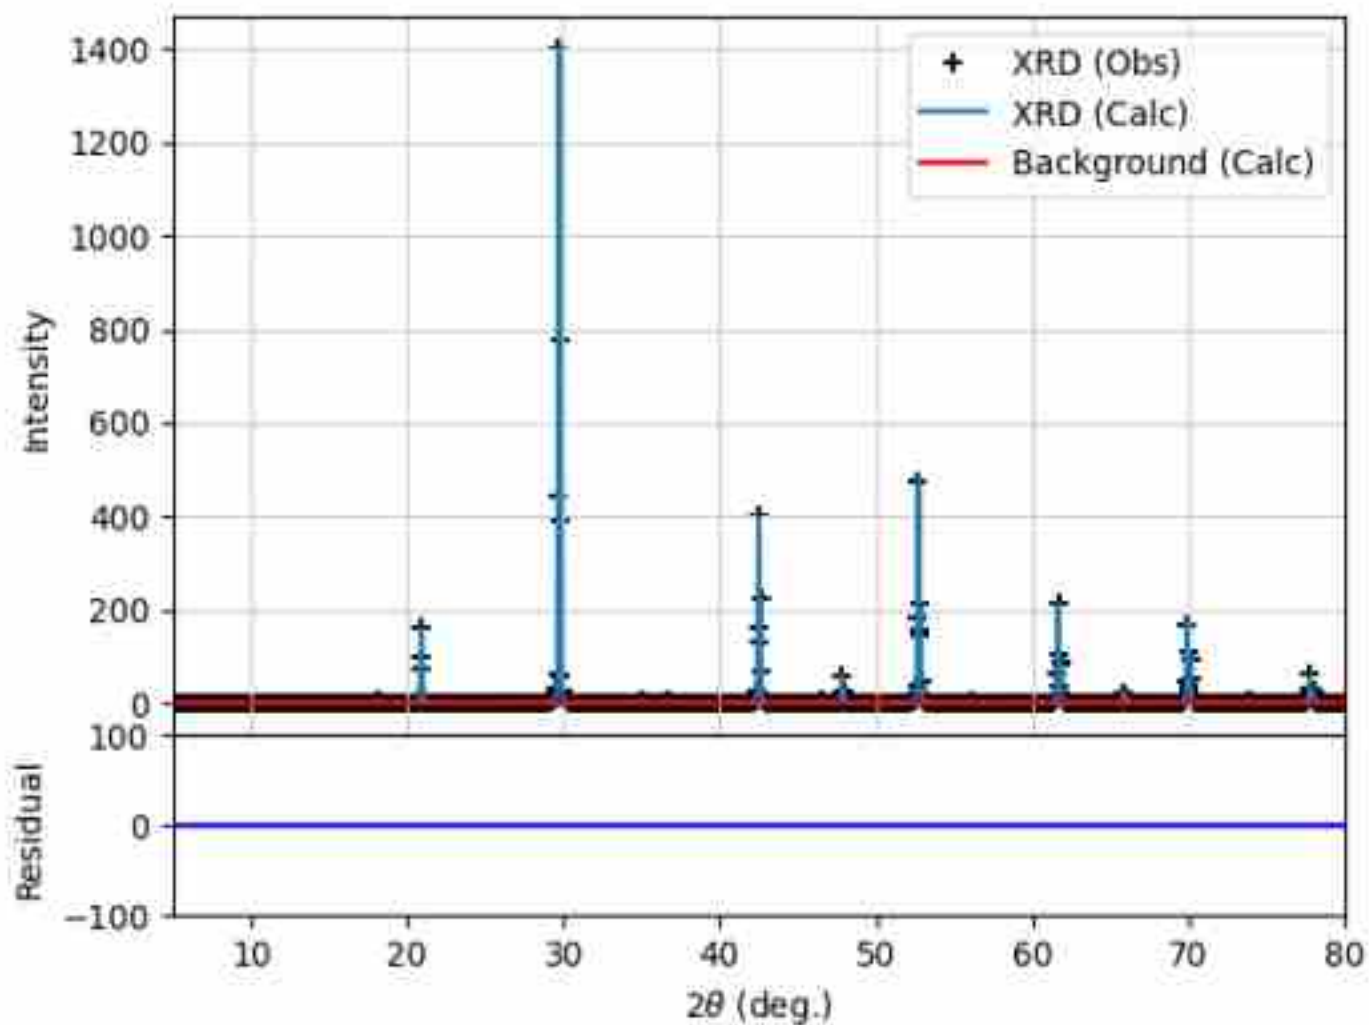

| RMSE before RR | Rwp     | RMSE after RR |
|----------------|---------|---------------|
| 0.009          | 0.01512 | 0.00506       |



# Ta1Pd2

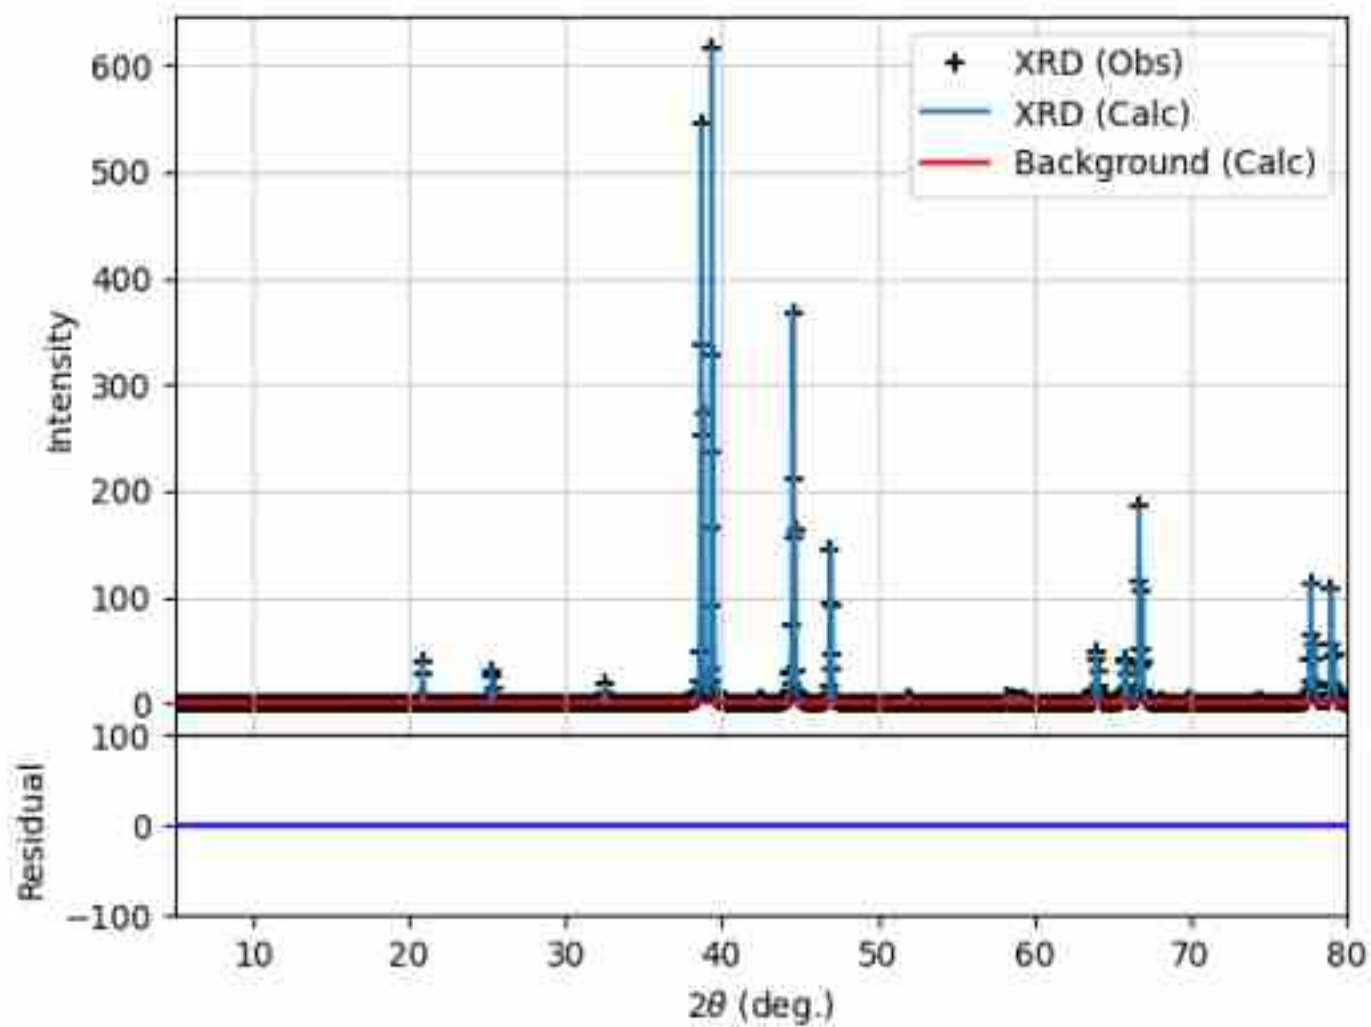

| RMSE before RR | Rwp     | RMSE after RR |
|----------------|---------|---------------|
| 0.009          | 0.01276 | 0.00044       |

# Ta4Co2

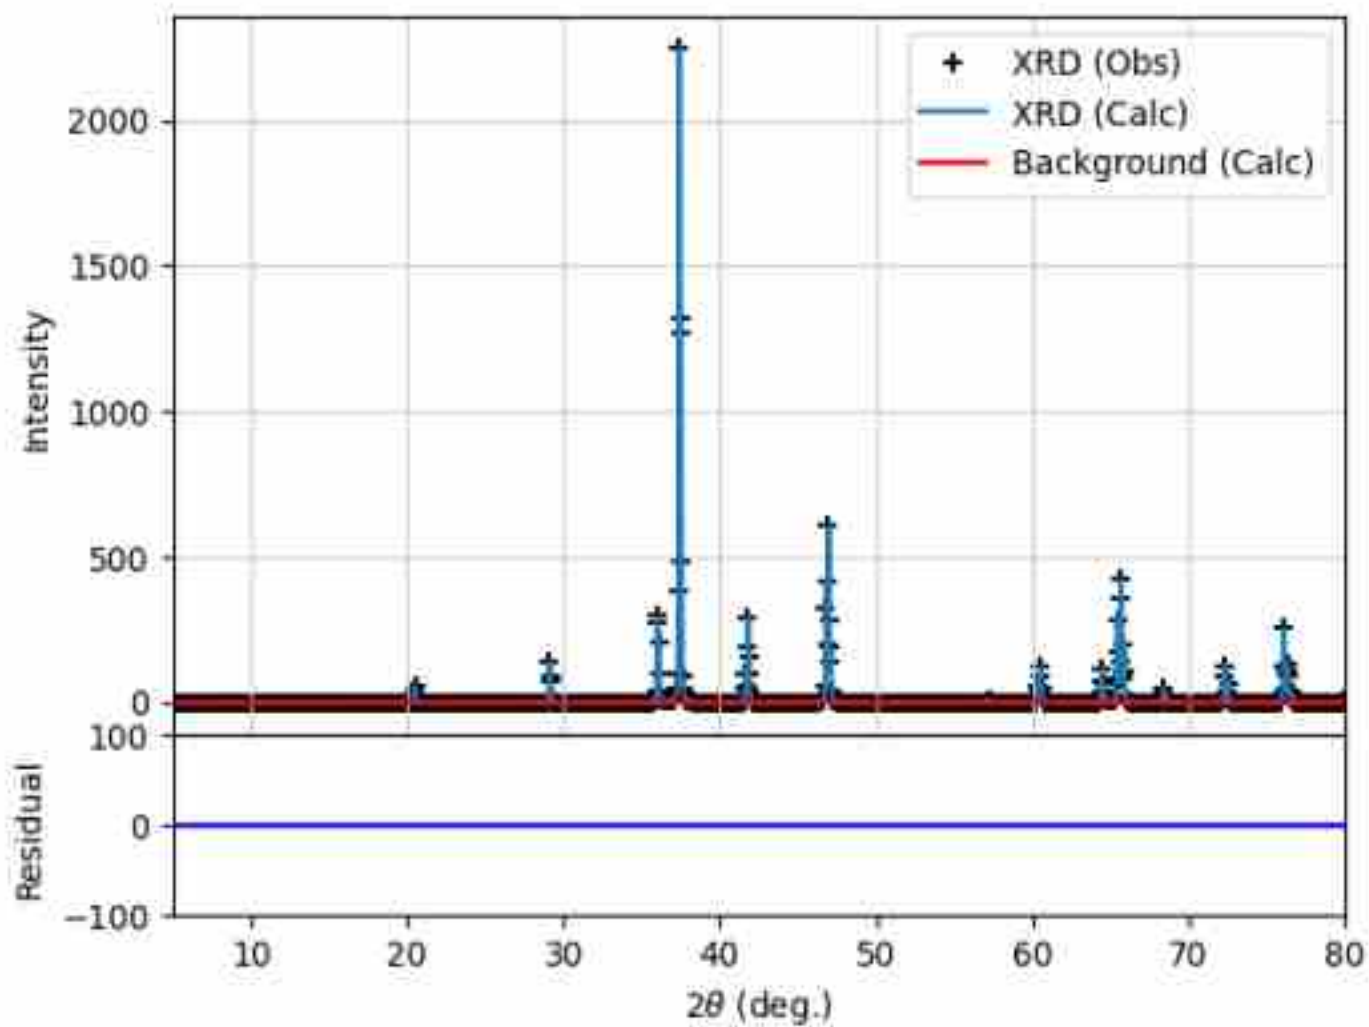

| RMSE before RR | Rwp     | RMSE after RR |
|----------------|---------|---------------|
| 0.009          | 0.00423 | 0.00044       |

# Tb1Si2Ir2

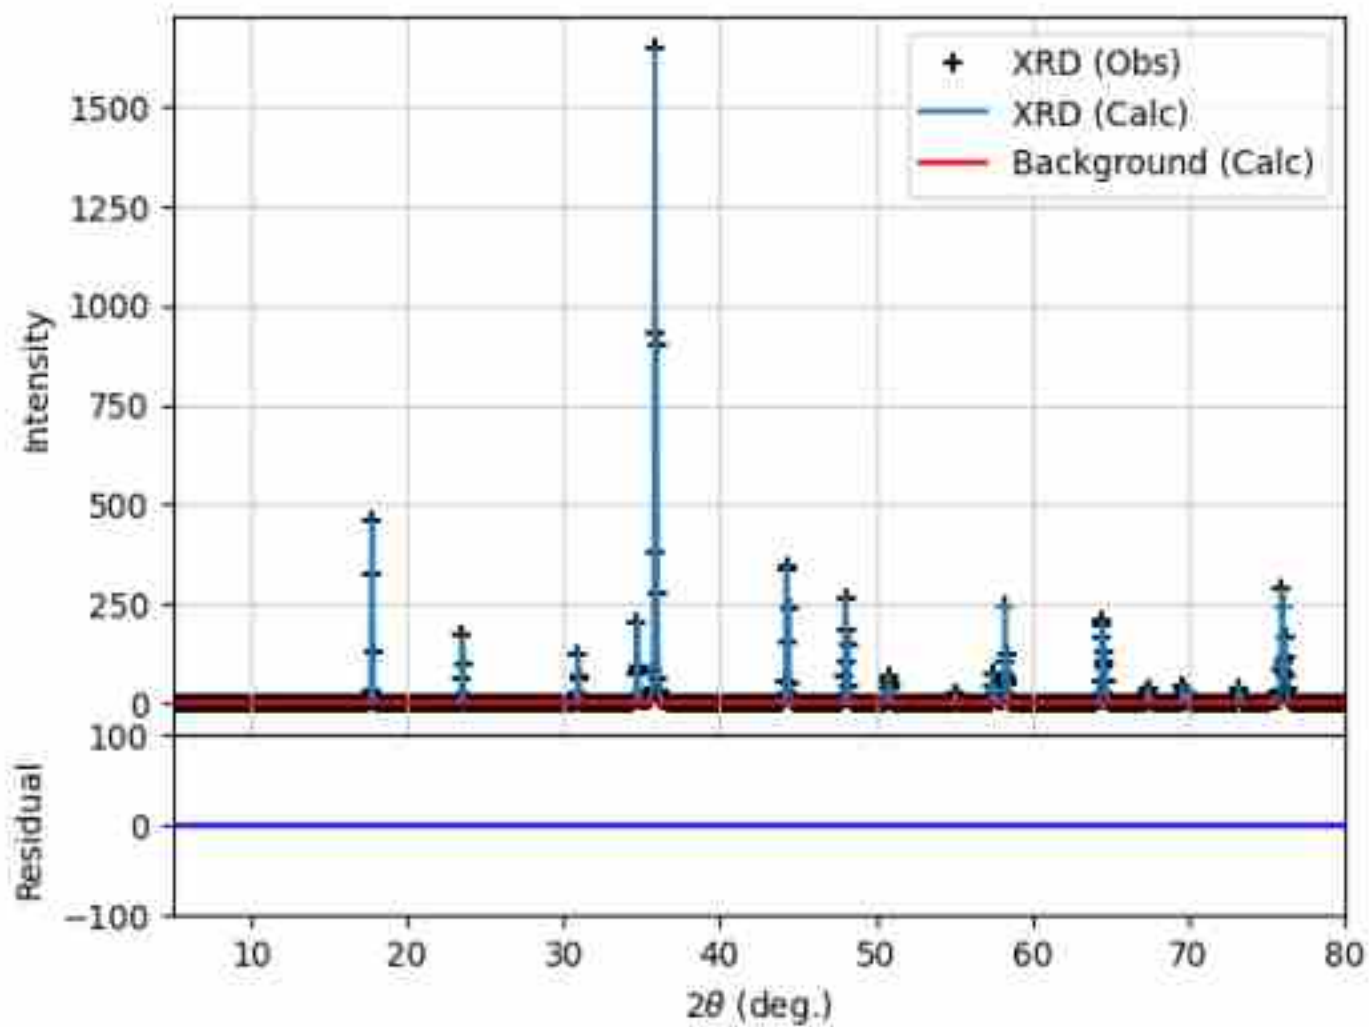

| RMSE before RR | Rwp     | RMSE after RR |
|----------------|---------|---------------|
| 0.009          | 0.00495 | 0.00091       |

# Tb<sub>2</sub>Co<sub>1</sub>Ge<sub>4</sub>

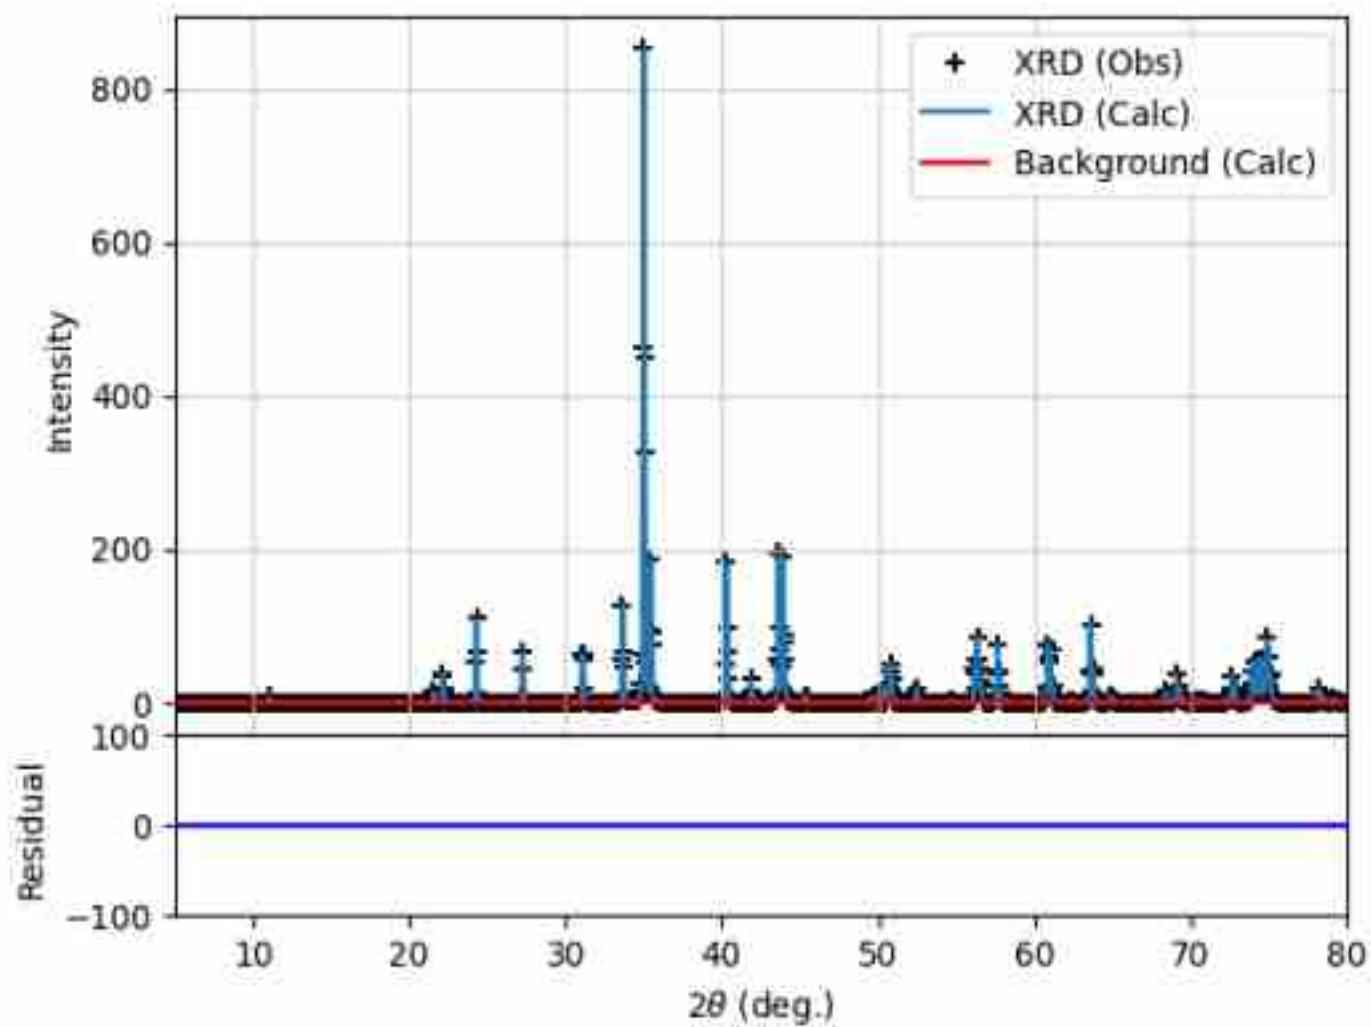

| RMSE before RR | Rwp     | RMSE after RR |
|----------------|---------|---------------|
| 0.009          | 0.00405 | 0.00026       |

# Tb4Tc8

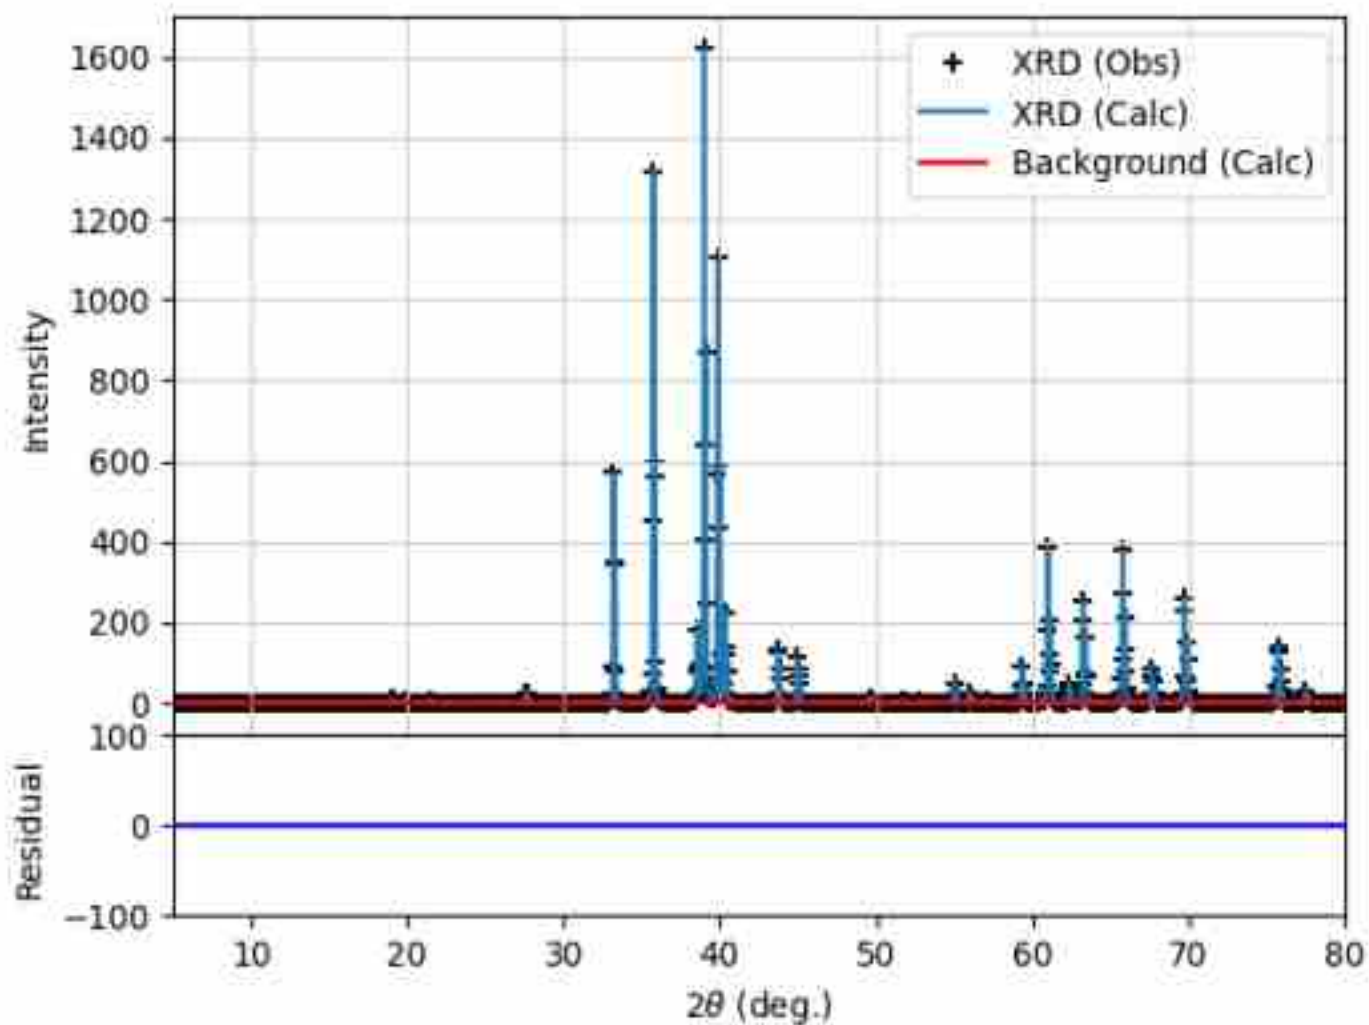

| RMSE before RR | Rwp     | RMSE after RR |
|----------------|---------|---------------|
| 0.009          | 0.00365 | 0.00031       |

# Th1Cu2

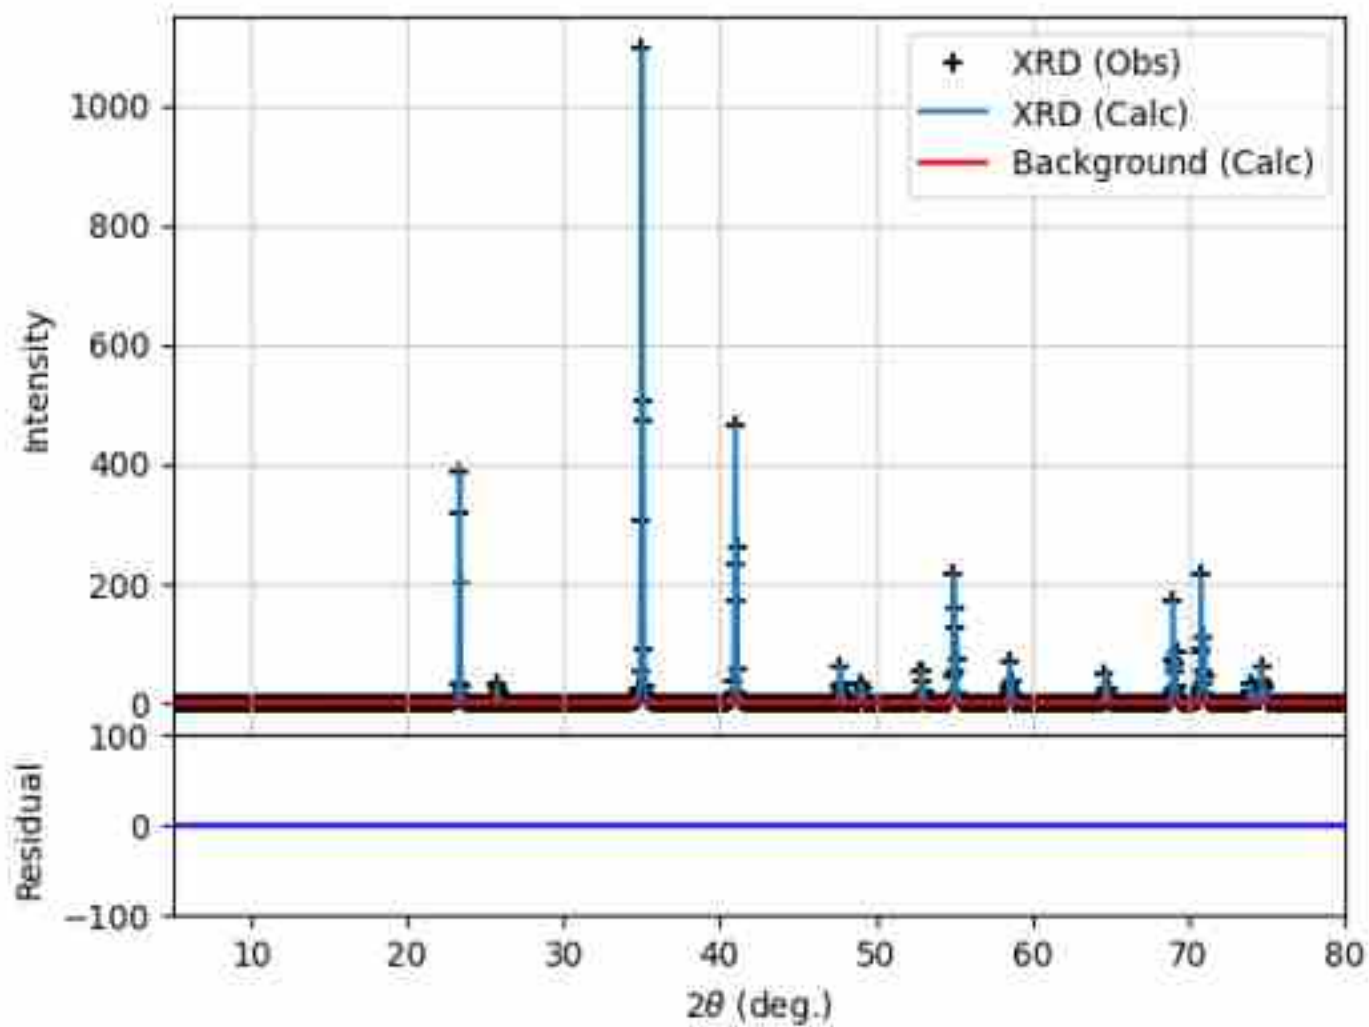

| RMSE before RR | Rwp     | RMSE after RR |
|----------------|---------|---------------|
| 0.009          | 0.00476 | 0.00069       |

# Th<sub>2</sub>Ni<sub>1</sub>C<sub>2</sub>

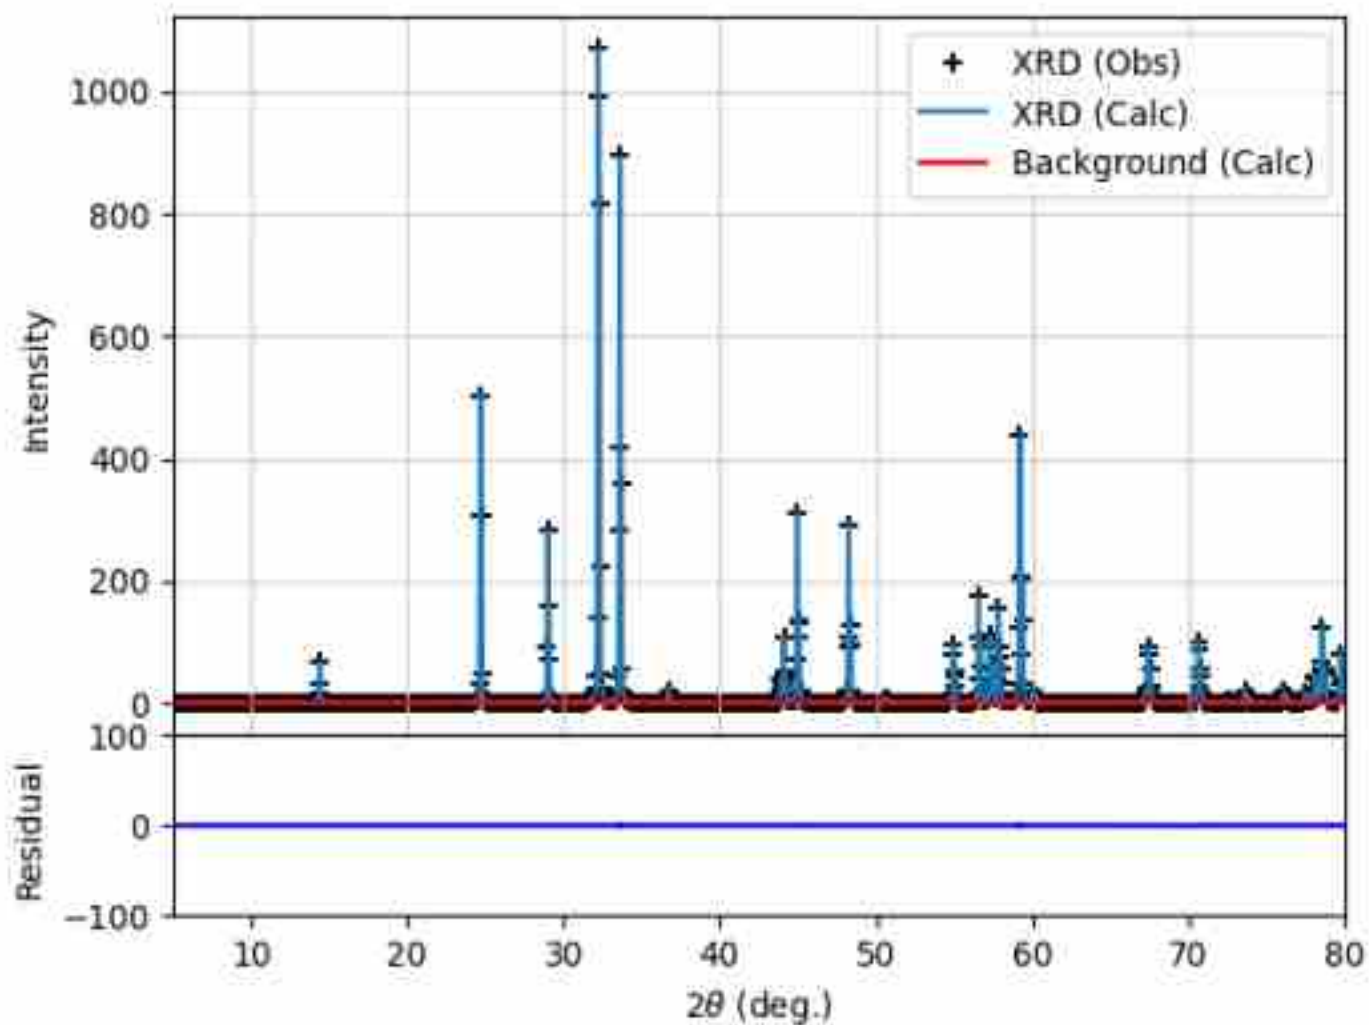

| RMSE before RR | Rwp     | RMSE after RR |
|----------------|---------|---------------|
| 0.009          | 0.12638 | 0.00493       |

# Th<sub>2</sub>Rh<sub>4</sub>

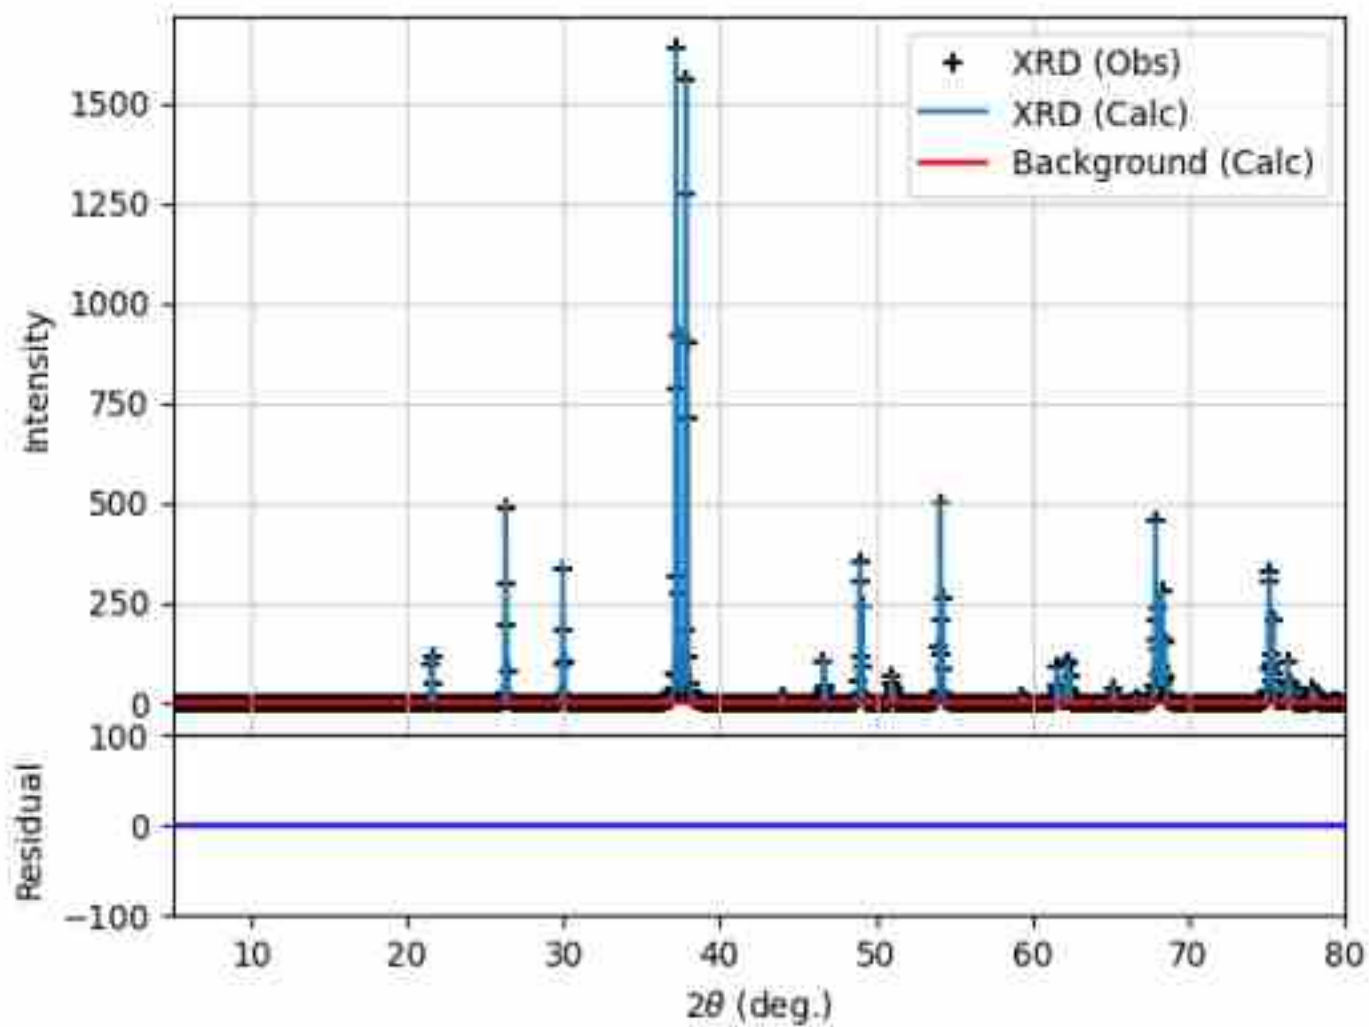

| RMSE before RR | Rwp     | RMSE after RR |
|----------------|---------|---------------|
| 0.009          | 0.00527 | 0.00054       |



Th2Ru4

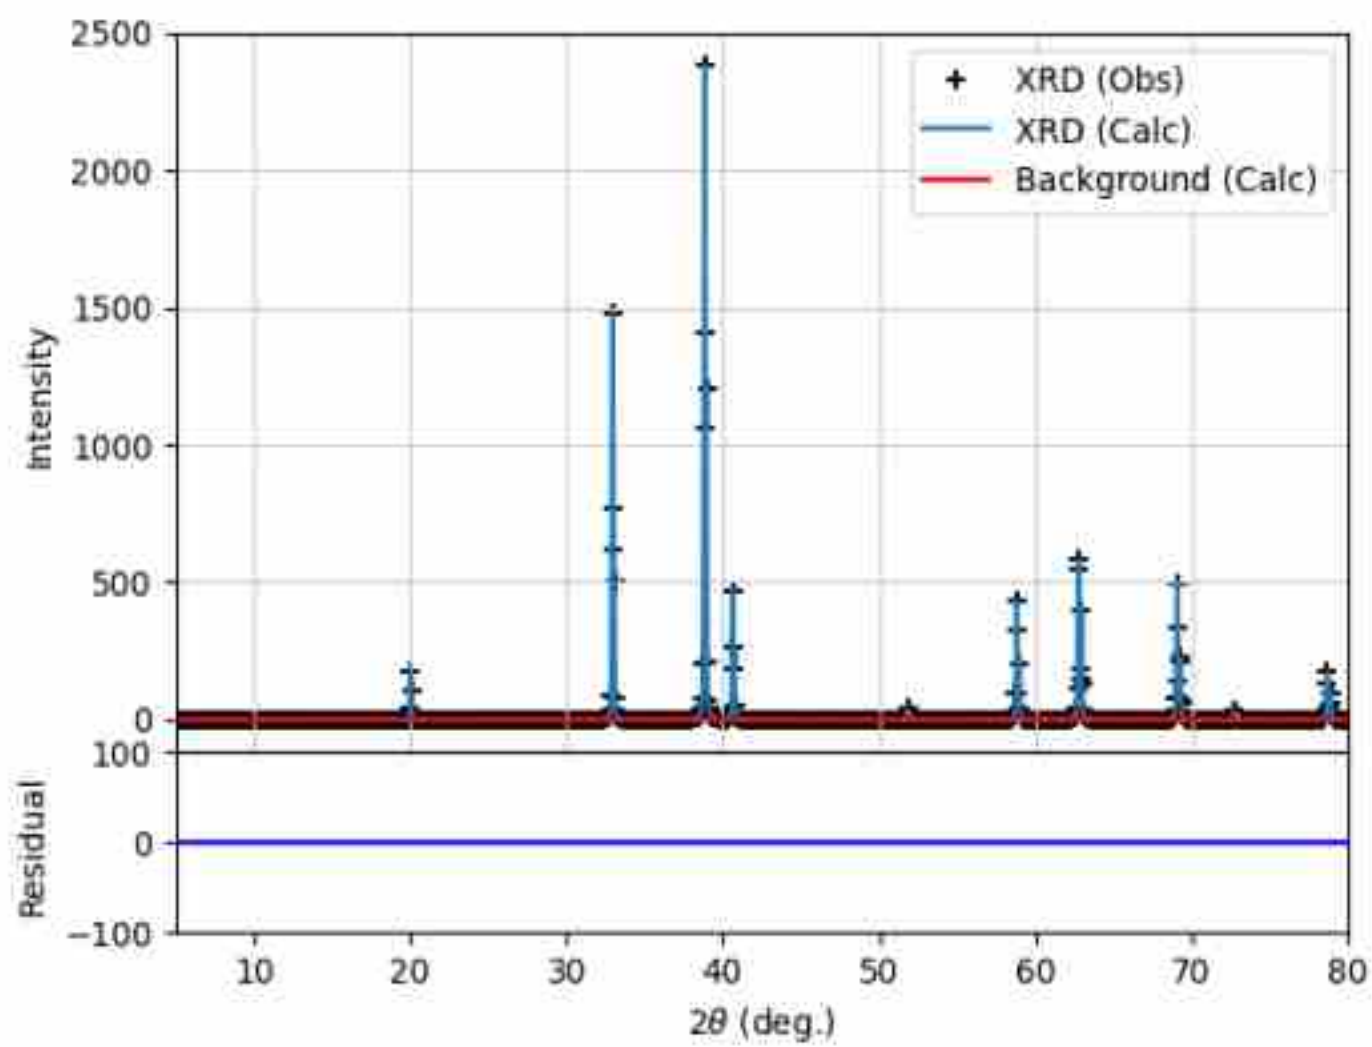

| RMSE before RR | Rwp     | RMSE after RR |
|----------------|---------|---------------|
| 0.009          | 0.00553 | 0.00082       |

# Th<sub>2</sub>Se<sub>2</sub>O<sub>2</sub>

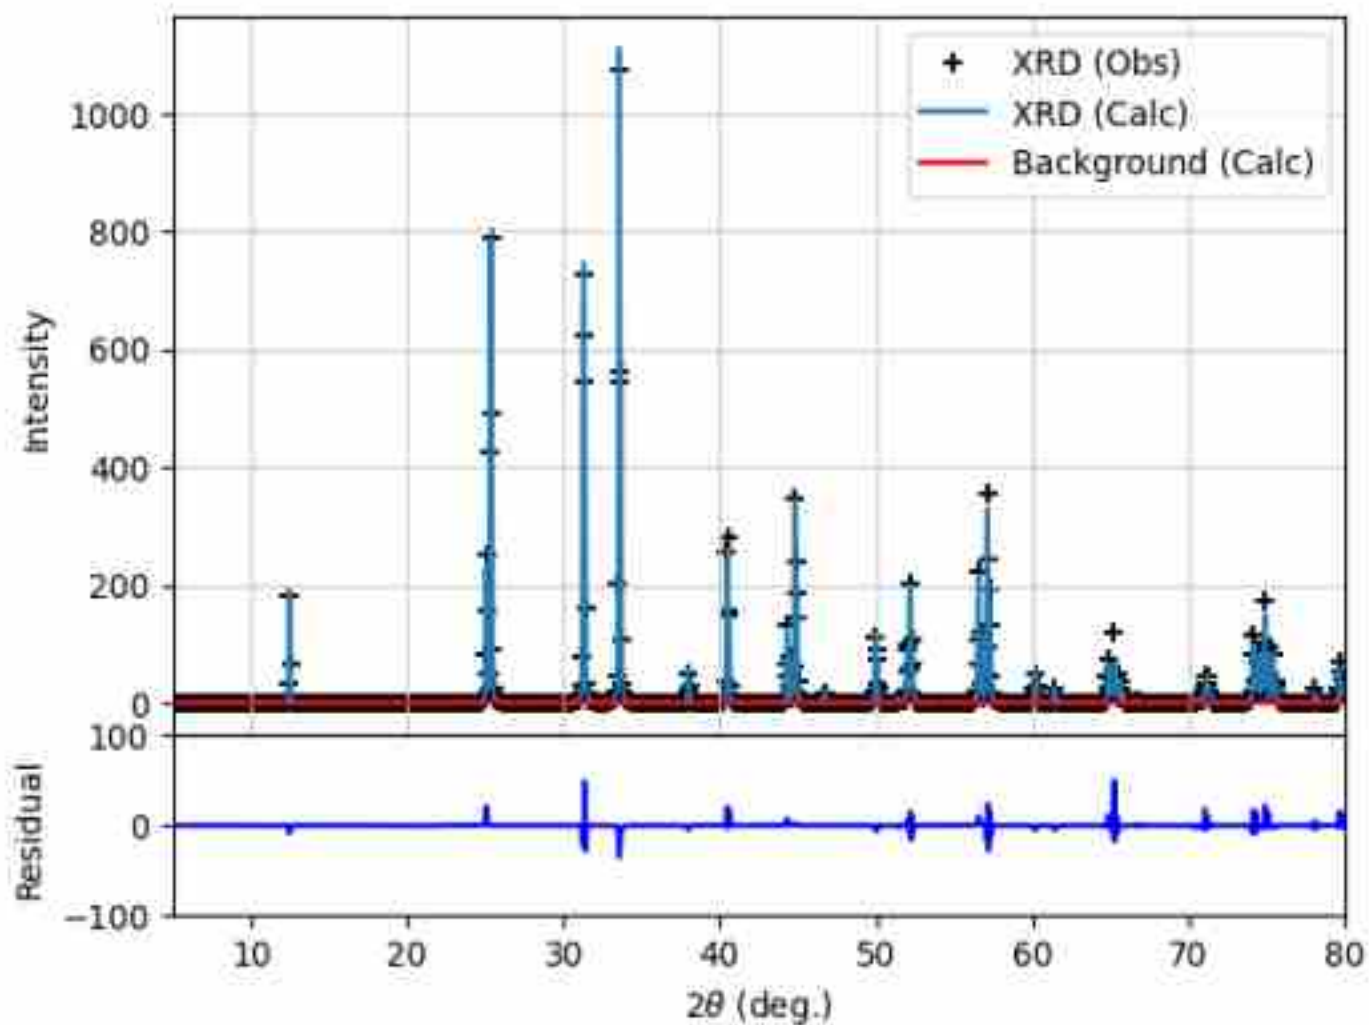

| RMSE before RR | Rwp      | RMSE after RR |
|----------------|----------|---------------|
| 0.009          | 10.11556 | 0.0319        |

# Ti1Nb1C2

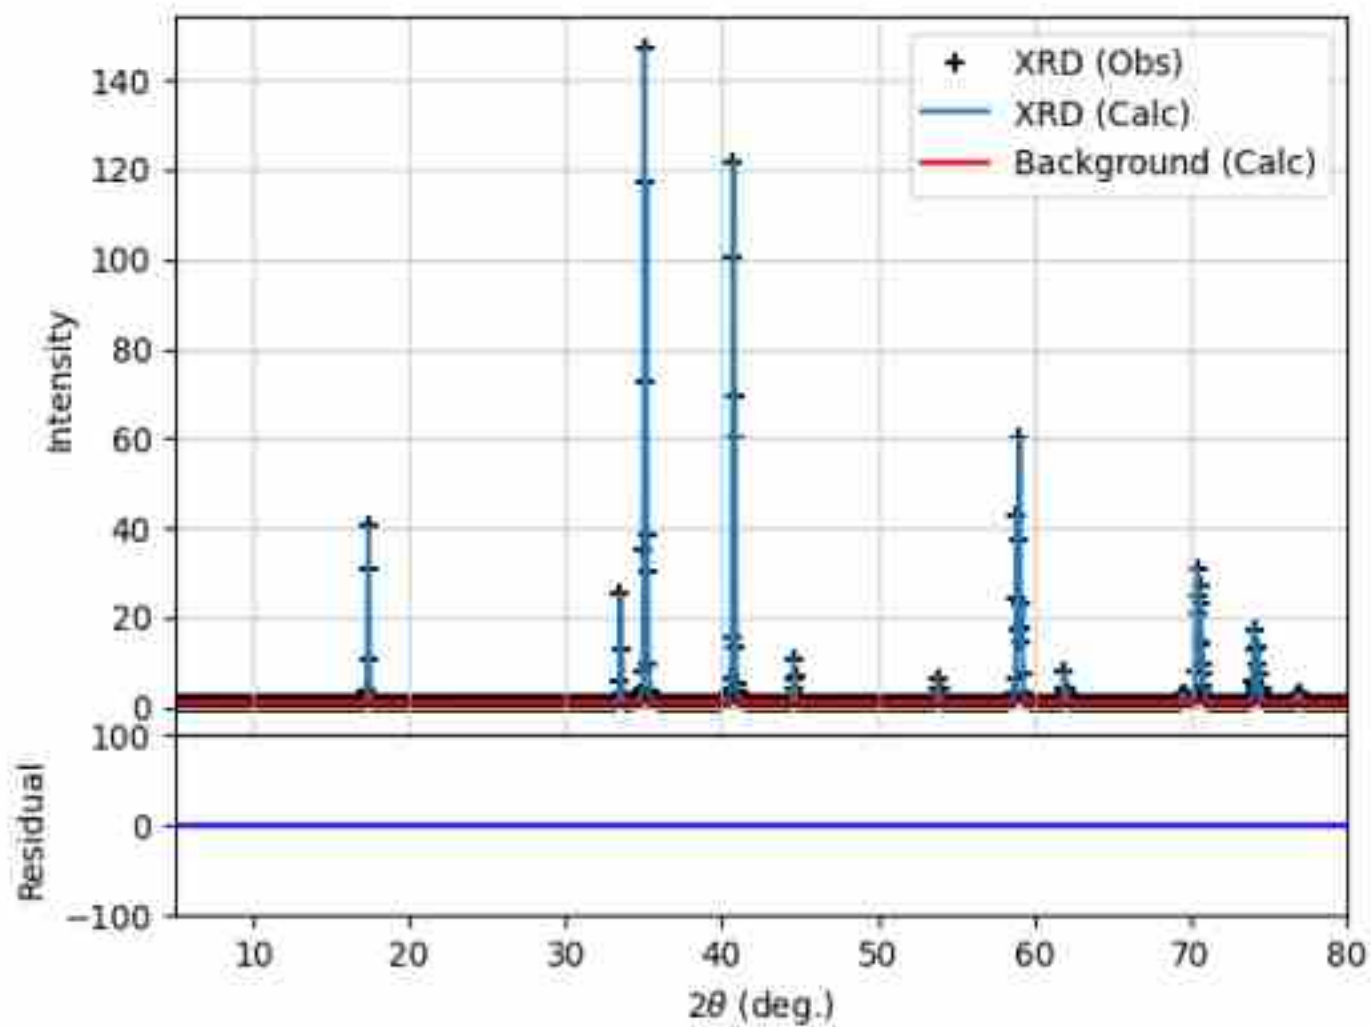

| RMSE before RR | Rwp    | RMSE after RR |
|----------------|--------|---------------|
| 0.009          | 0.0039 | 0.00121       |

# Tl1Ag1F3

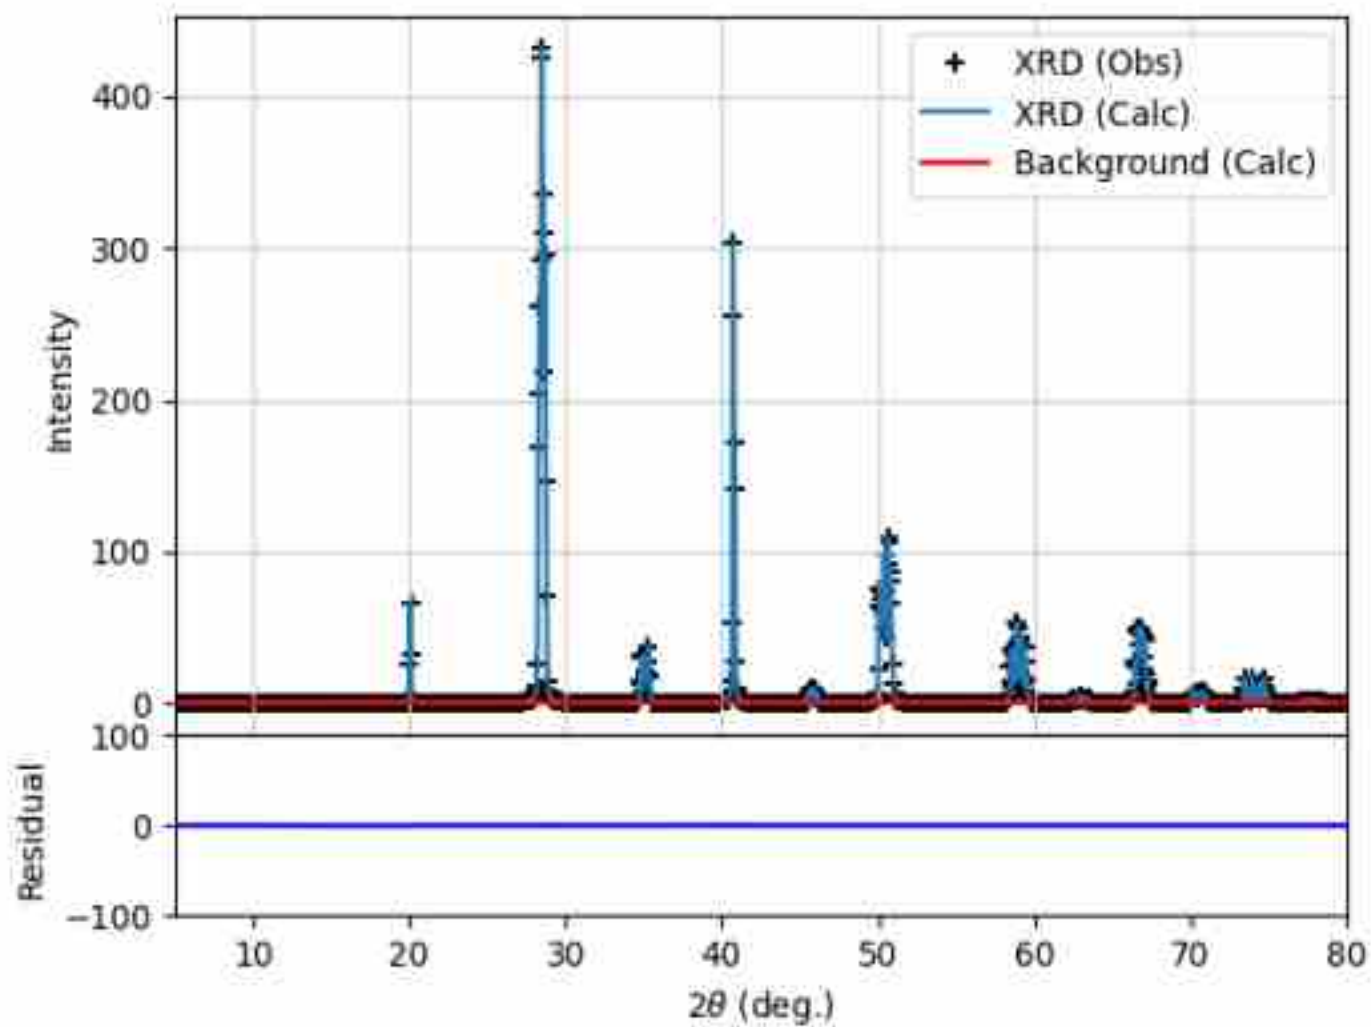

| RMSE before RR | Rwp     | RMSE after RR |
|----------------|---------|---------------|
| 0.009          | 0.39964 | 0.01431       |

# Tm1Al1Cu4

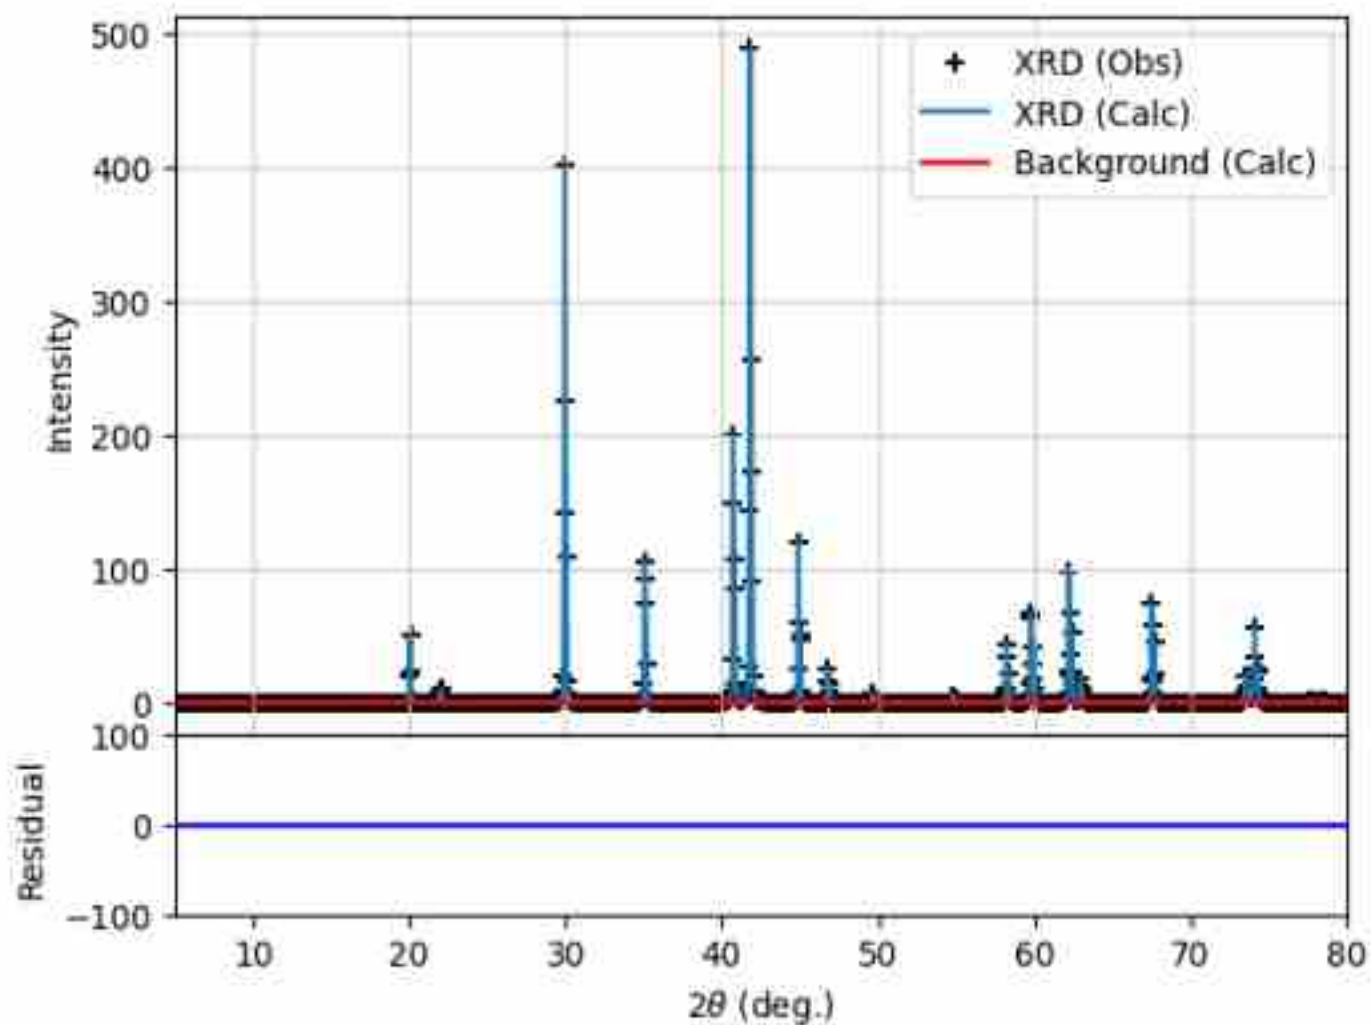

| RMSE before RR | Rwp    | RMSE after RR |
|----------------|--------|---------------|
| 0.009          | 0.0175 | 0.00165       |

# Tm1Fe2Si2

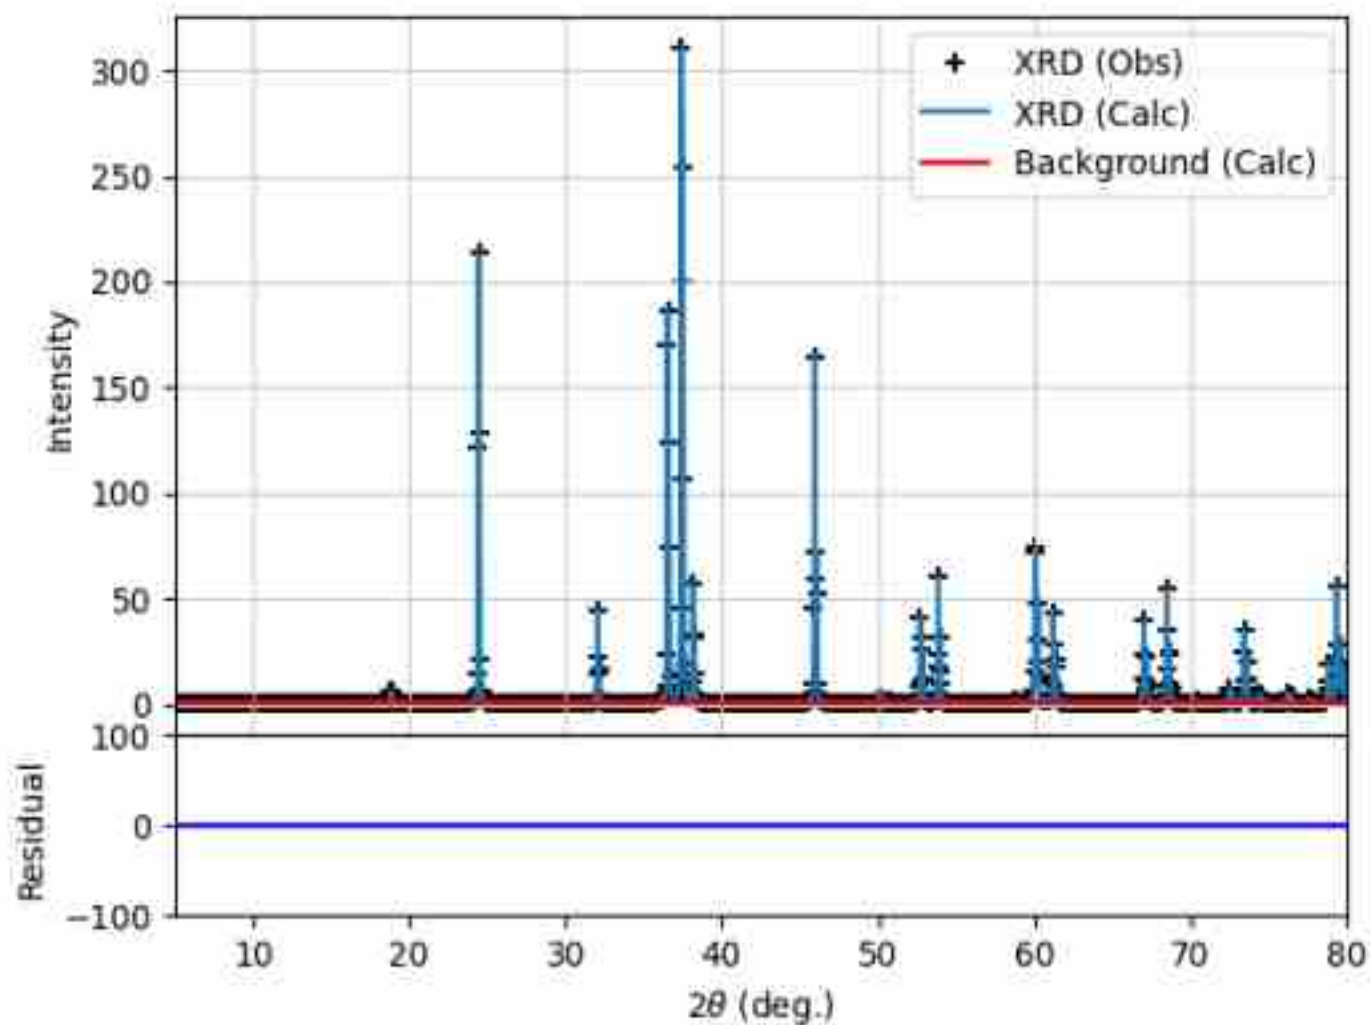

| RMSE before RR | Rwp     | RMSE after RR |
|----------------|---------|---------------|
| 0.009          | 0.00356 | 0.0007        |

# Tm<sub>2</sub>Br<sub>2</sub>O<sub>2</sub>

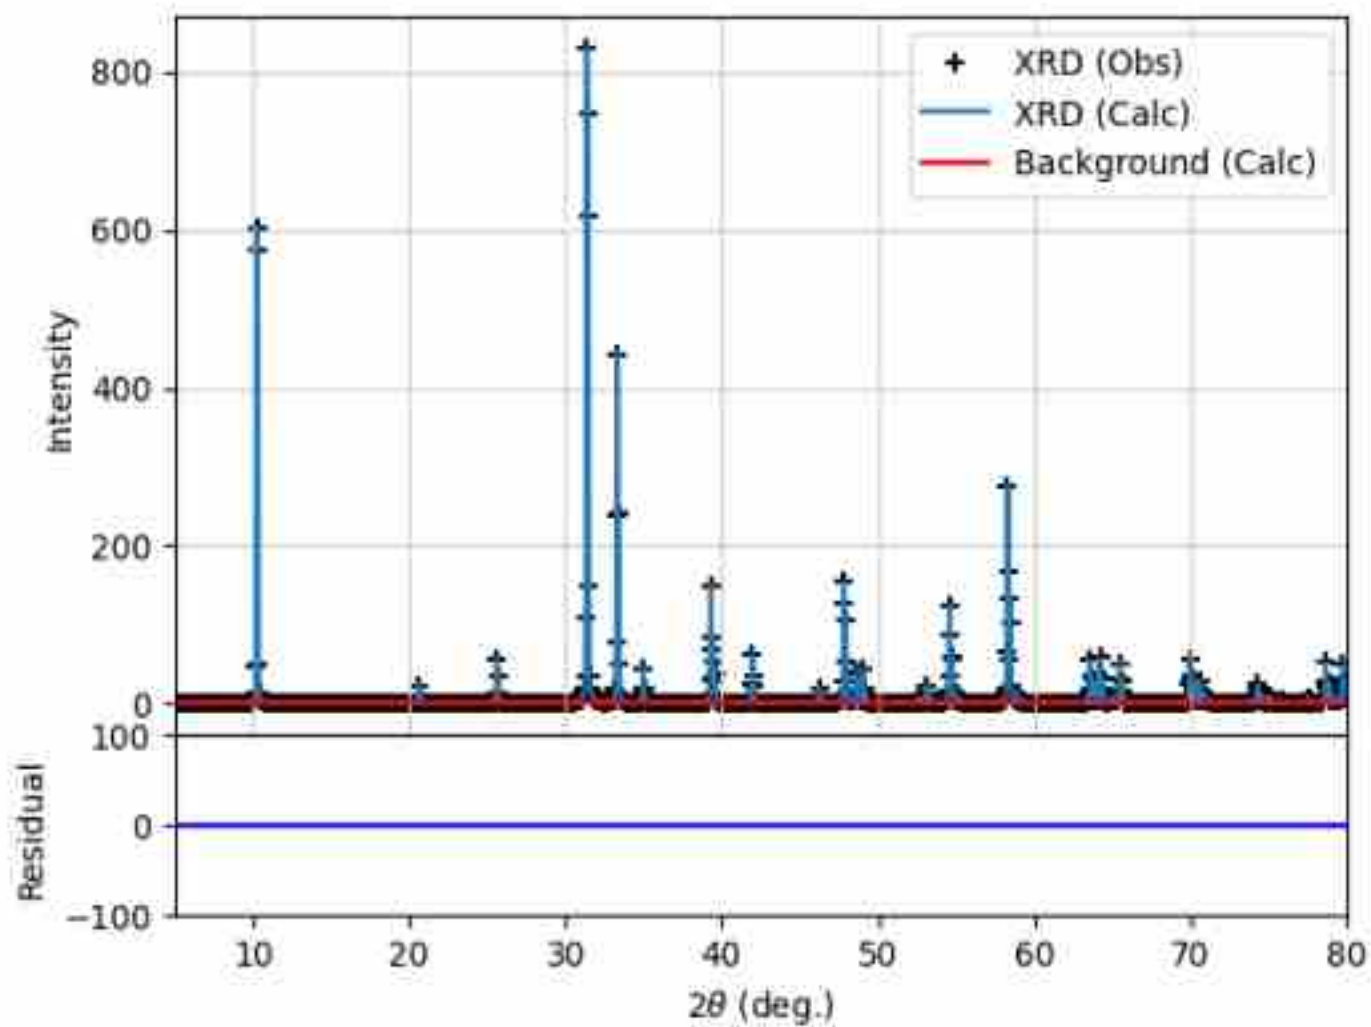

| RMSE before RR | Rwp     | RMSE after RR |
|----------------|---------|---------------|
| 0.009          | 0.00527 | 0.00165       |

# Tm<sub>2</sub>In<sub>1</sub>Ni<sub>2</sub>

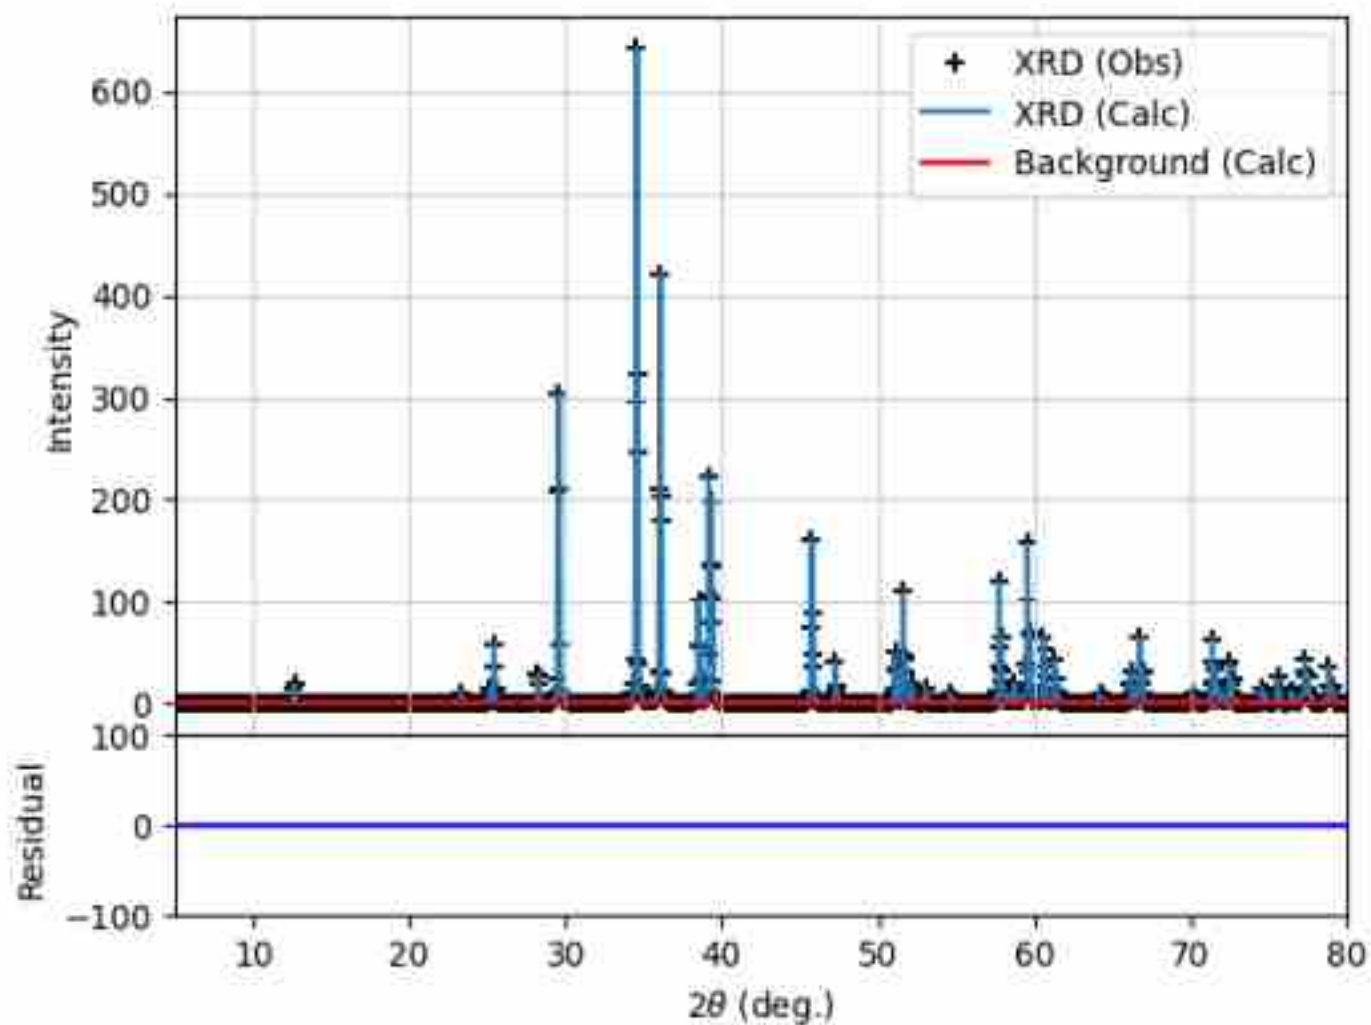

| RMSE before RR | Rwp     | RMSE after RR |
|----------------|---------|---------------|
| 0.009          | 0.00482 | 0.00053       |



# Tm<sub>4</sub>Cd<sub>2</sub>Cu<sub>4</sub>

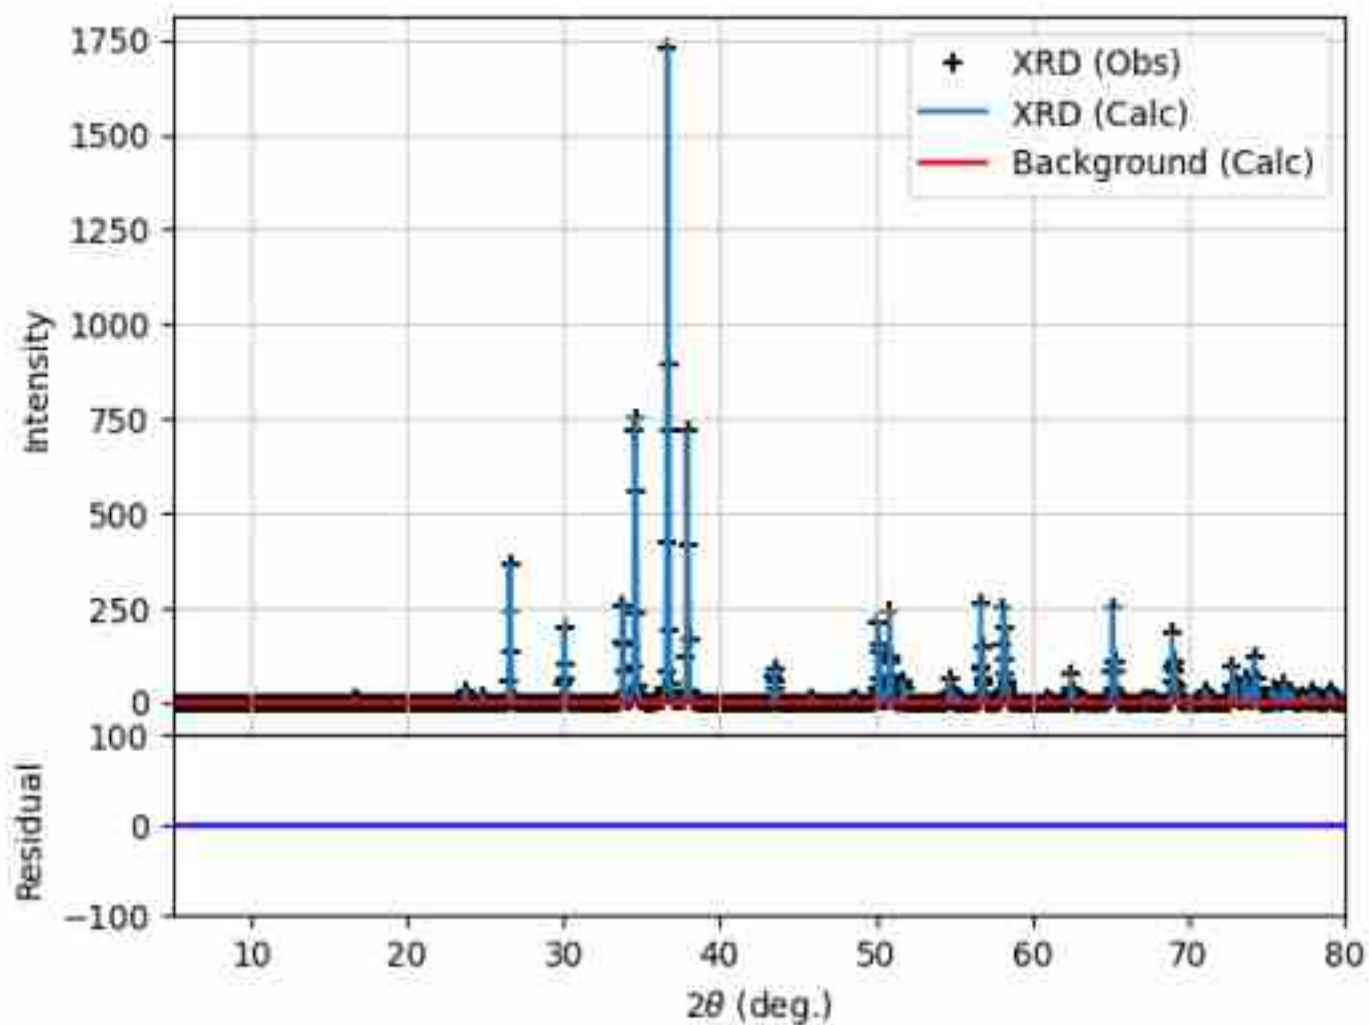

| RMSE before RR | Rwp     | RMSE after RR |
|----------------|---------|---------------|
| 0.009          | 0.00457 | 0.00051       |

# Tm<sub>4</sub>Mg<sub>2</sub>Si<sub>4</sub>

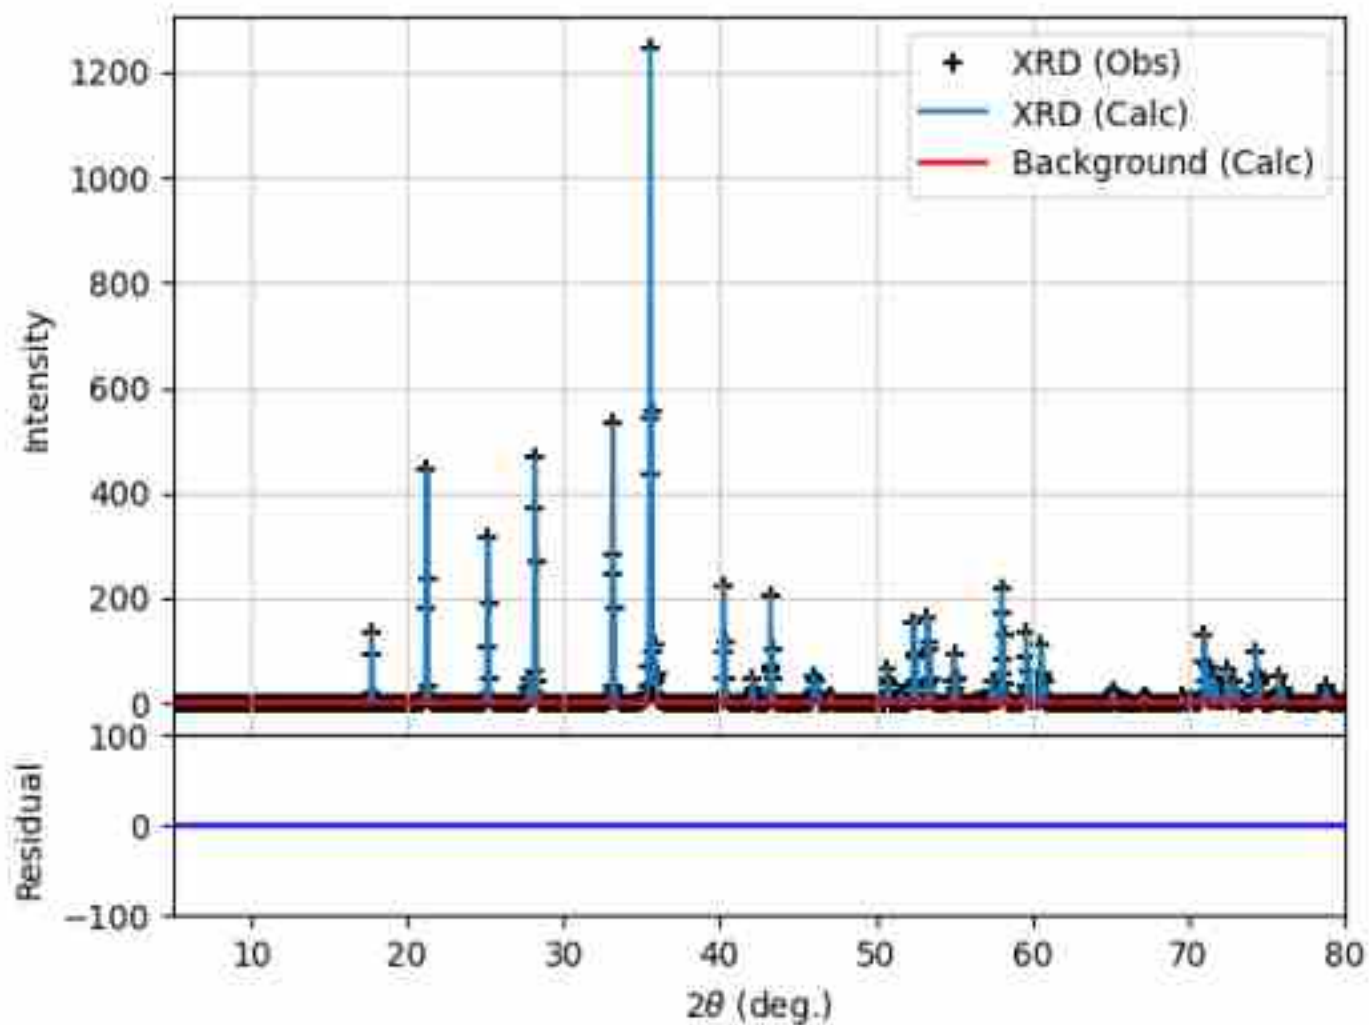

| RMSE before RR | Rwp     | RMSE after RR |
|----------------|---------|---------------|
| 0.009          | 0.00509 | 0.00111       |

# U<sub>2</sub>Co<sub>3</sub>Cu<sub>1</sub>Ge<sub>4</sub>

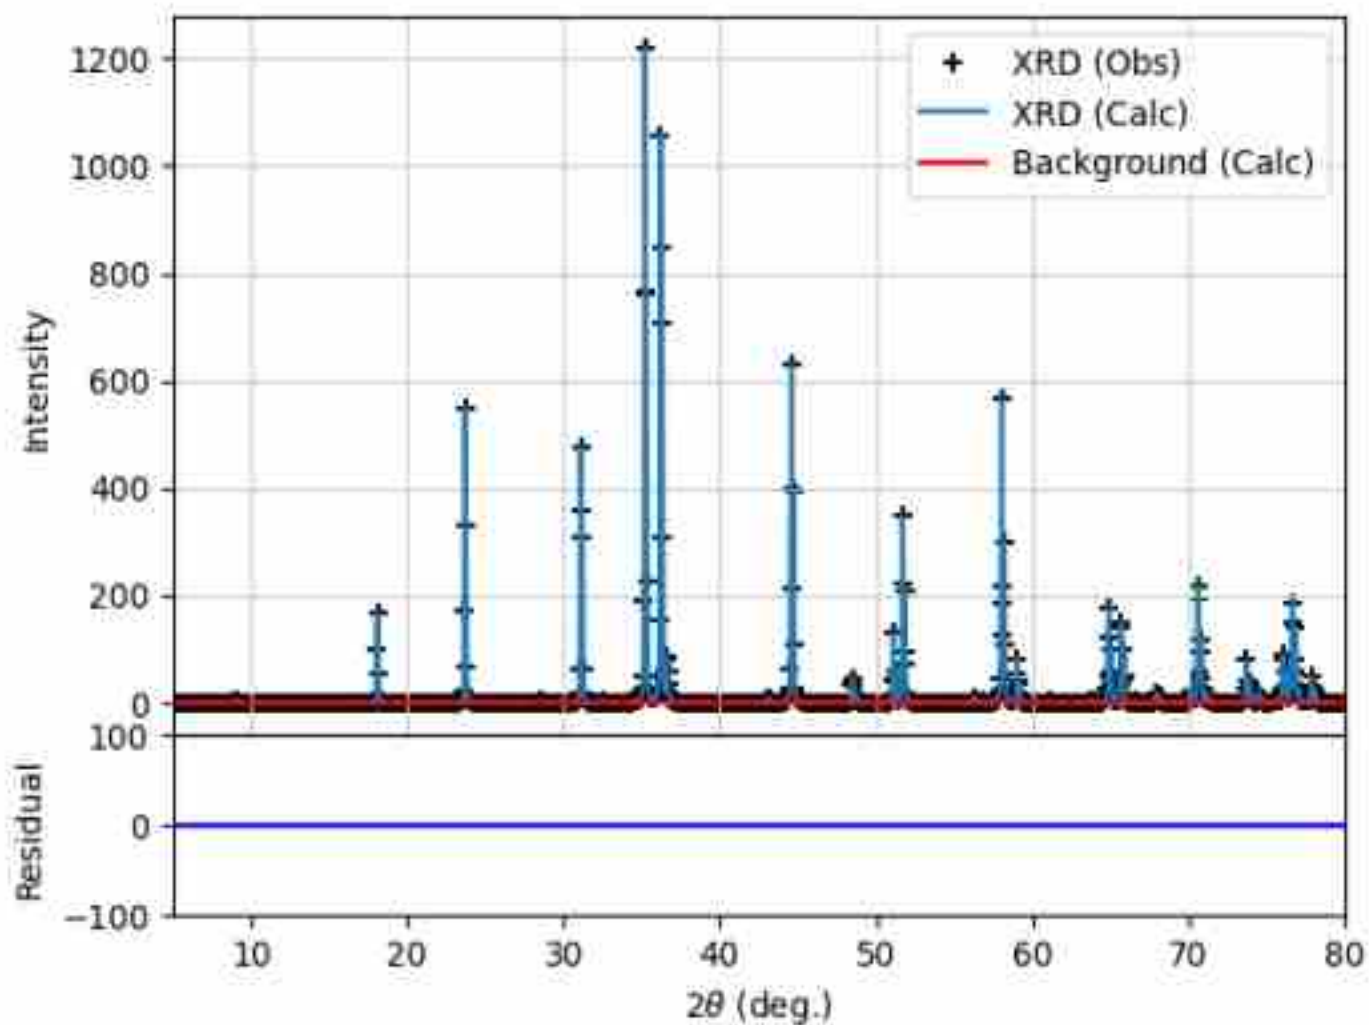

| RMSE before RR | Rwp     | RMSE after RR |
|----------------|---------|---------------|
| 0.009          | 0.00474 | 0.00073       |

# U<sub>2</sub>Ga<sub>2</sub>Cu<sub>2</sub>

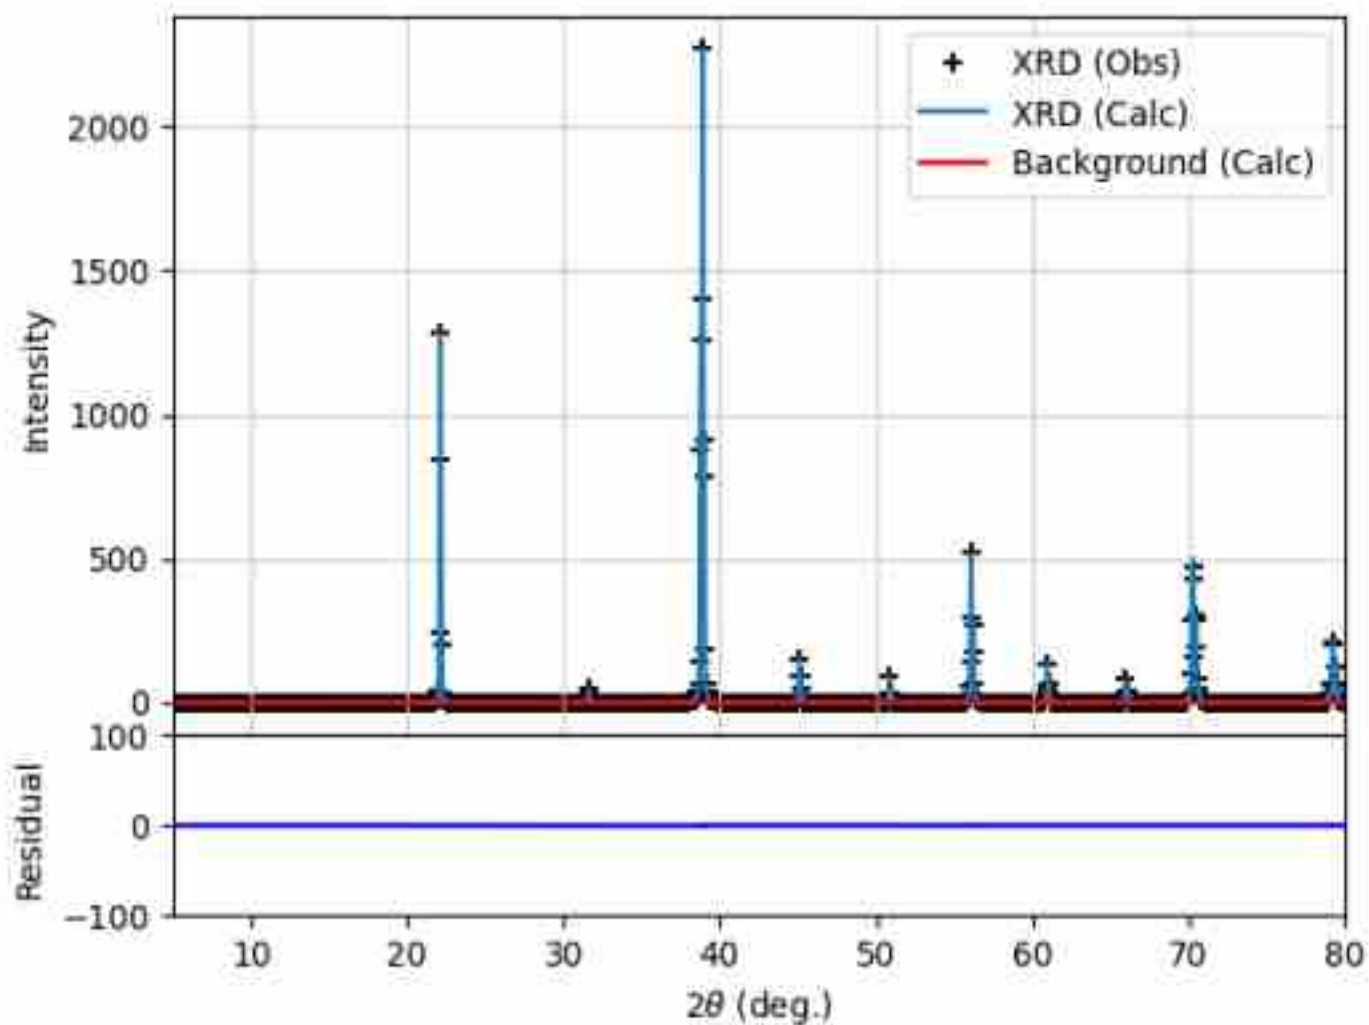

| RMSE before RR | Rwp     | RMSE after RR |
|----------------|---------|---------------|
| 0.009          | 0.04602 | 0.00179       |

# U<sub>2</sub>In<sub>3</sub>Sn<sub>3</sub>

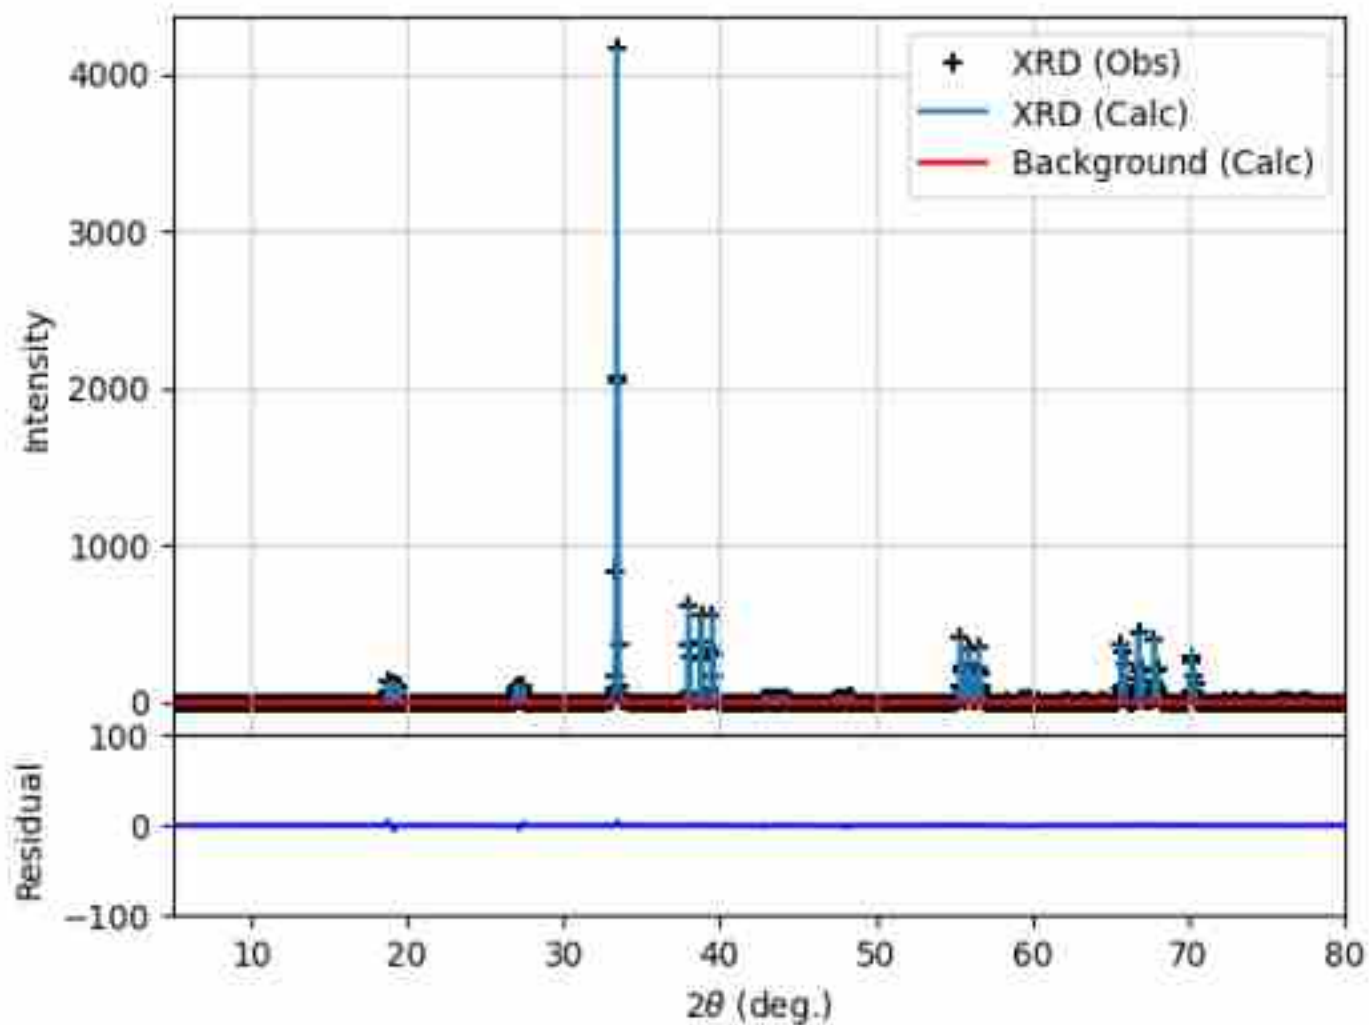

| RMSE before RR | Rwp     | RMSE after RR |
|----------------|---------|---------------|
| 0.009          | 1.07349 | 0.00868       |

# V1Fe1Cu2O4

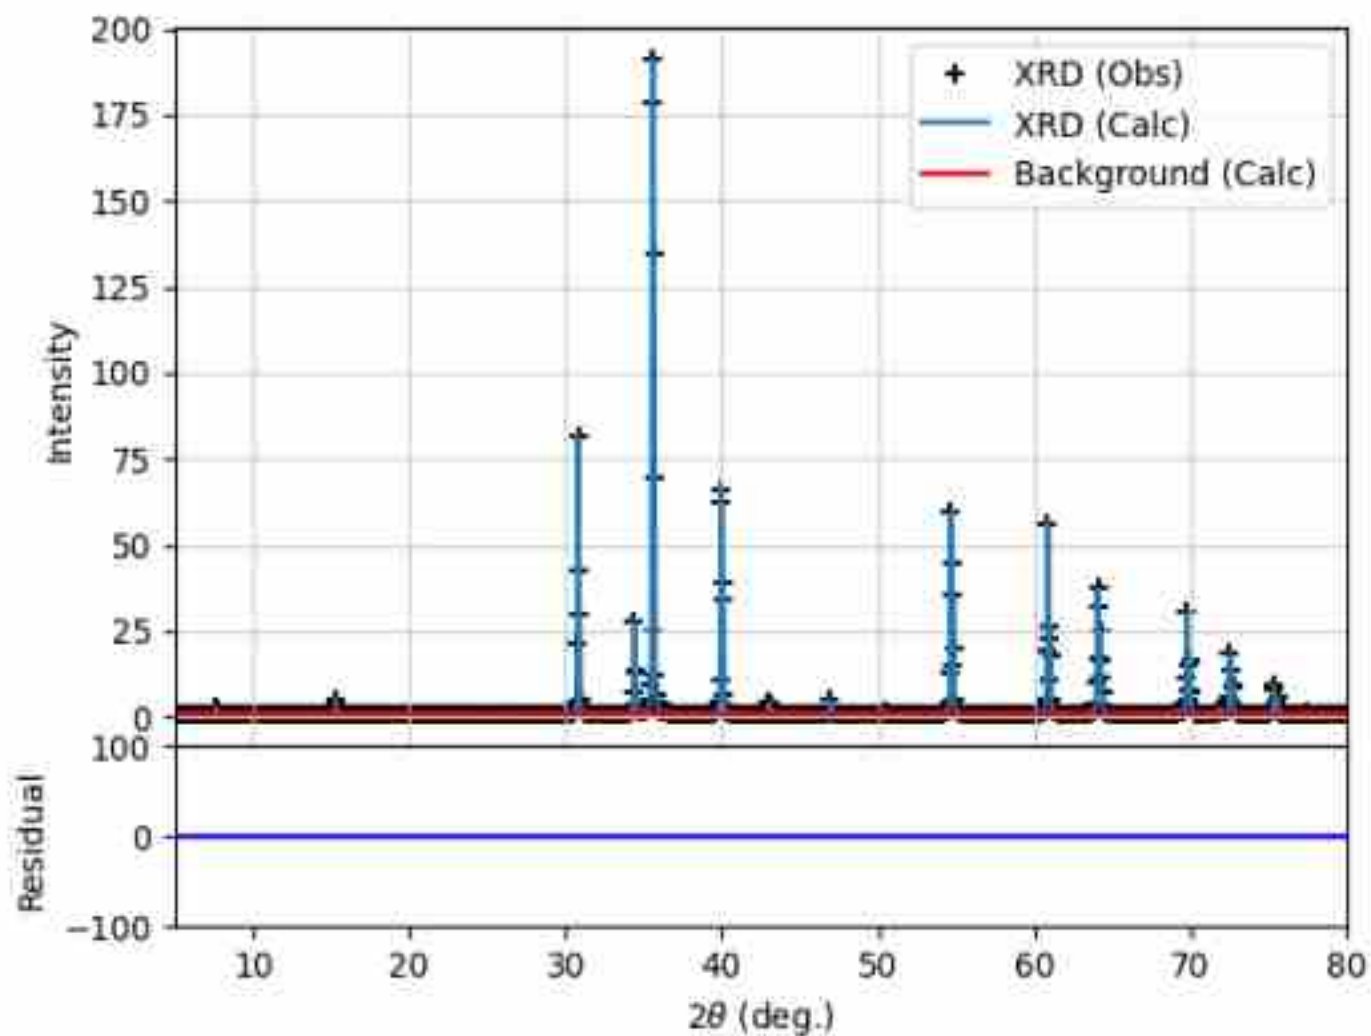

| RMSE before RR | Rwp     | RMSE after RR |
|----------------|---------|---------------|
| 0.009          | 0.00382 | 0.00105       |

# V1Fe4

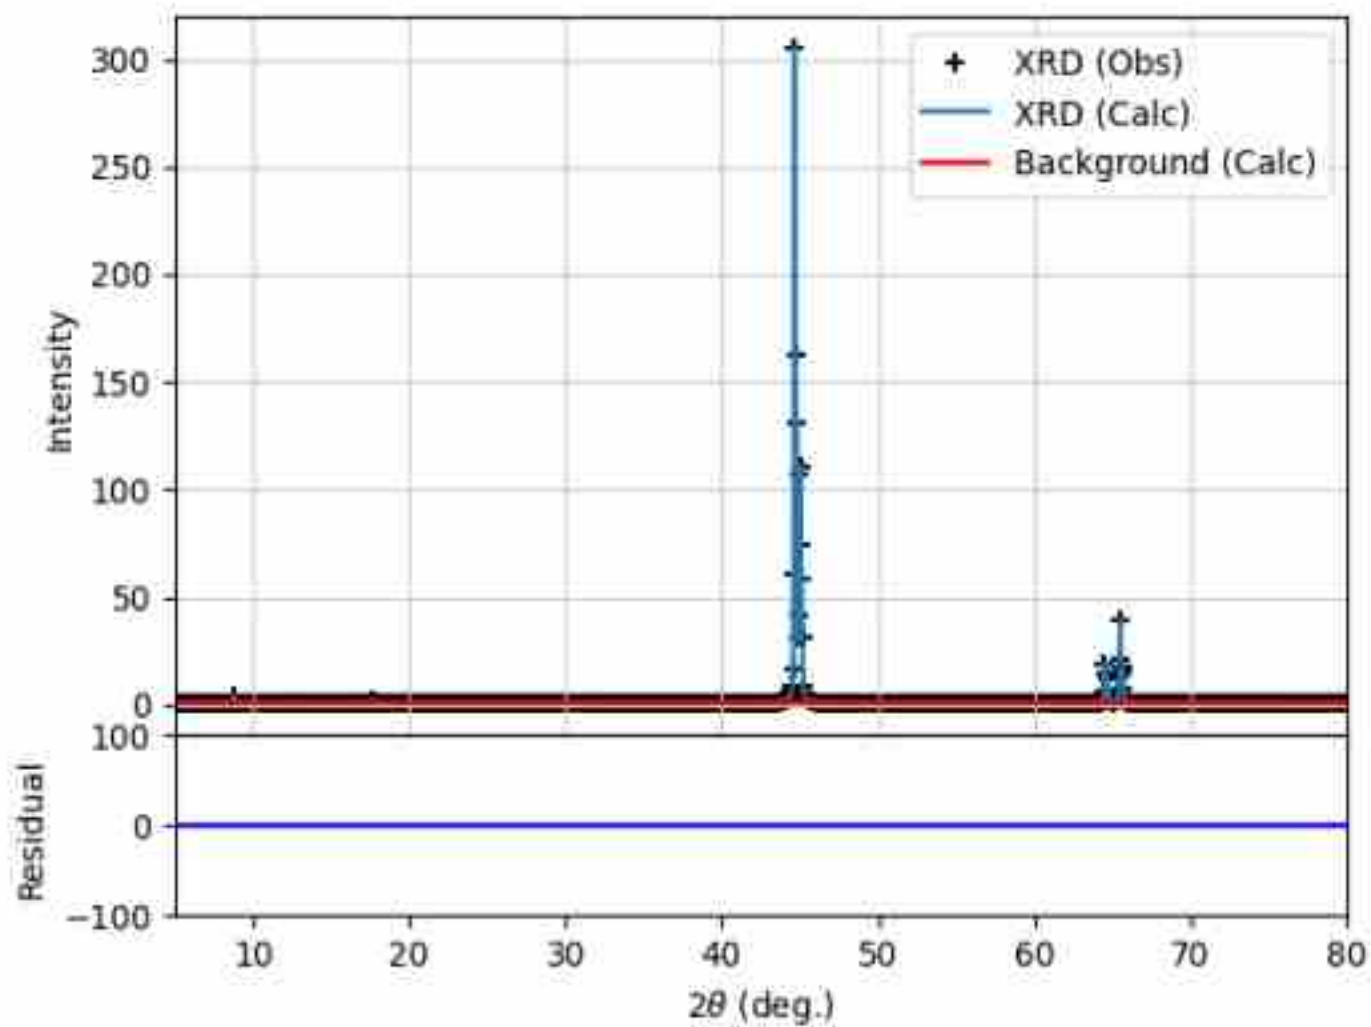

| RMSE before RR | Rwp     | RMSE after RR |
|----------------|---------|---------------|
| 0.009          | 0.02176 | 0.0004        |

# V6Ni2

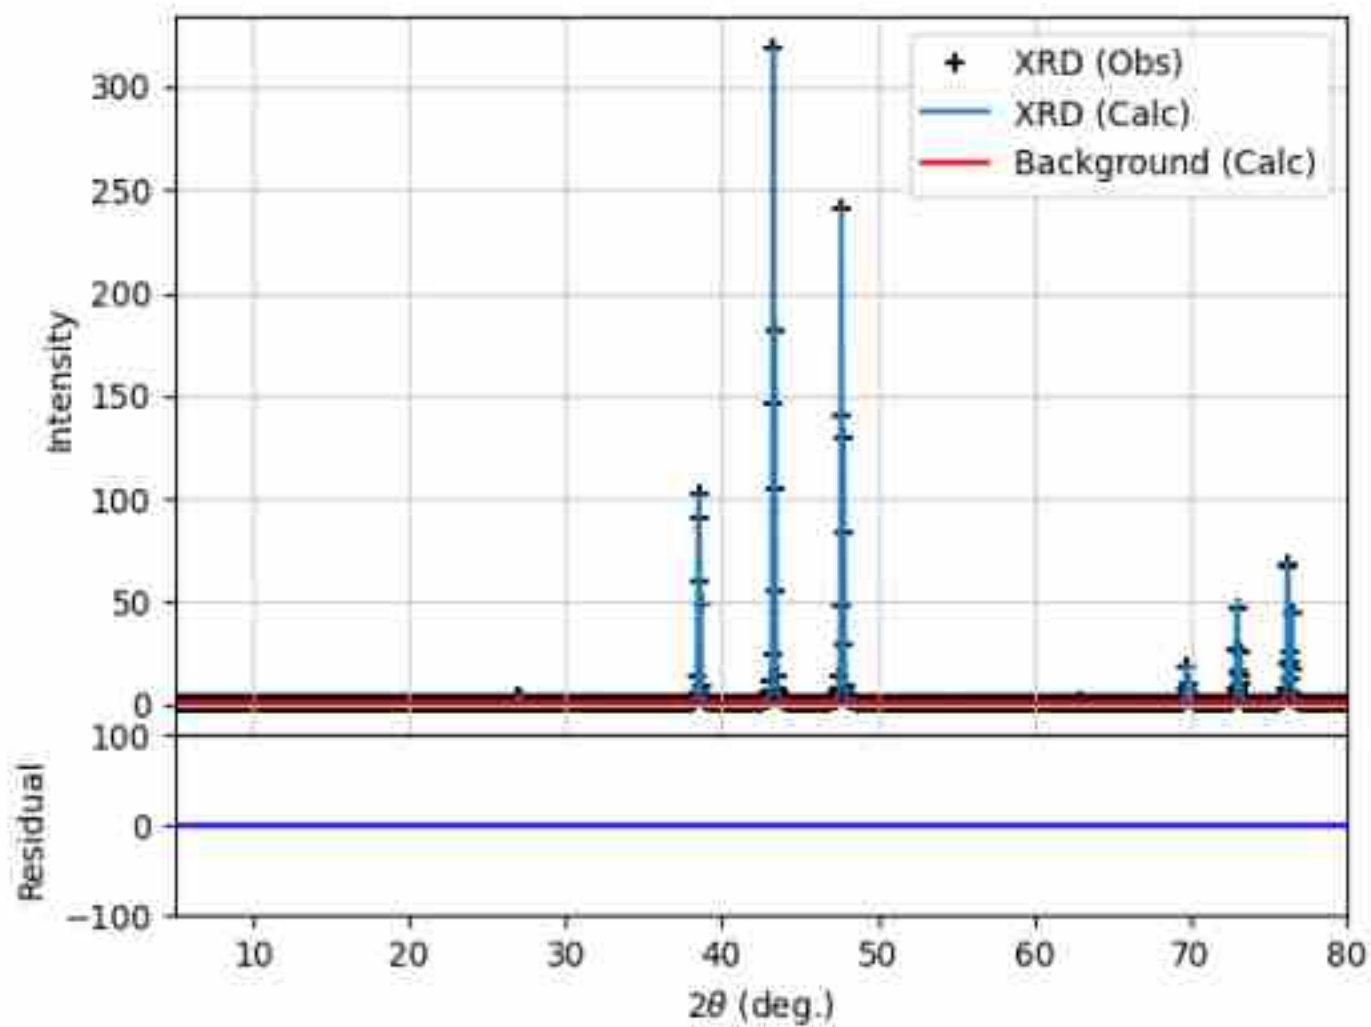

| RMSE before RR | Rwp    | RMSE after RR |
|----------------|--------|---------------|
| 0.009          | 0.0078 | 0.0009        |



# Y1Al3Ag1

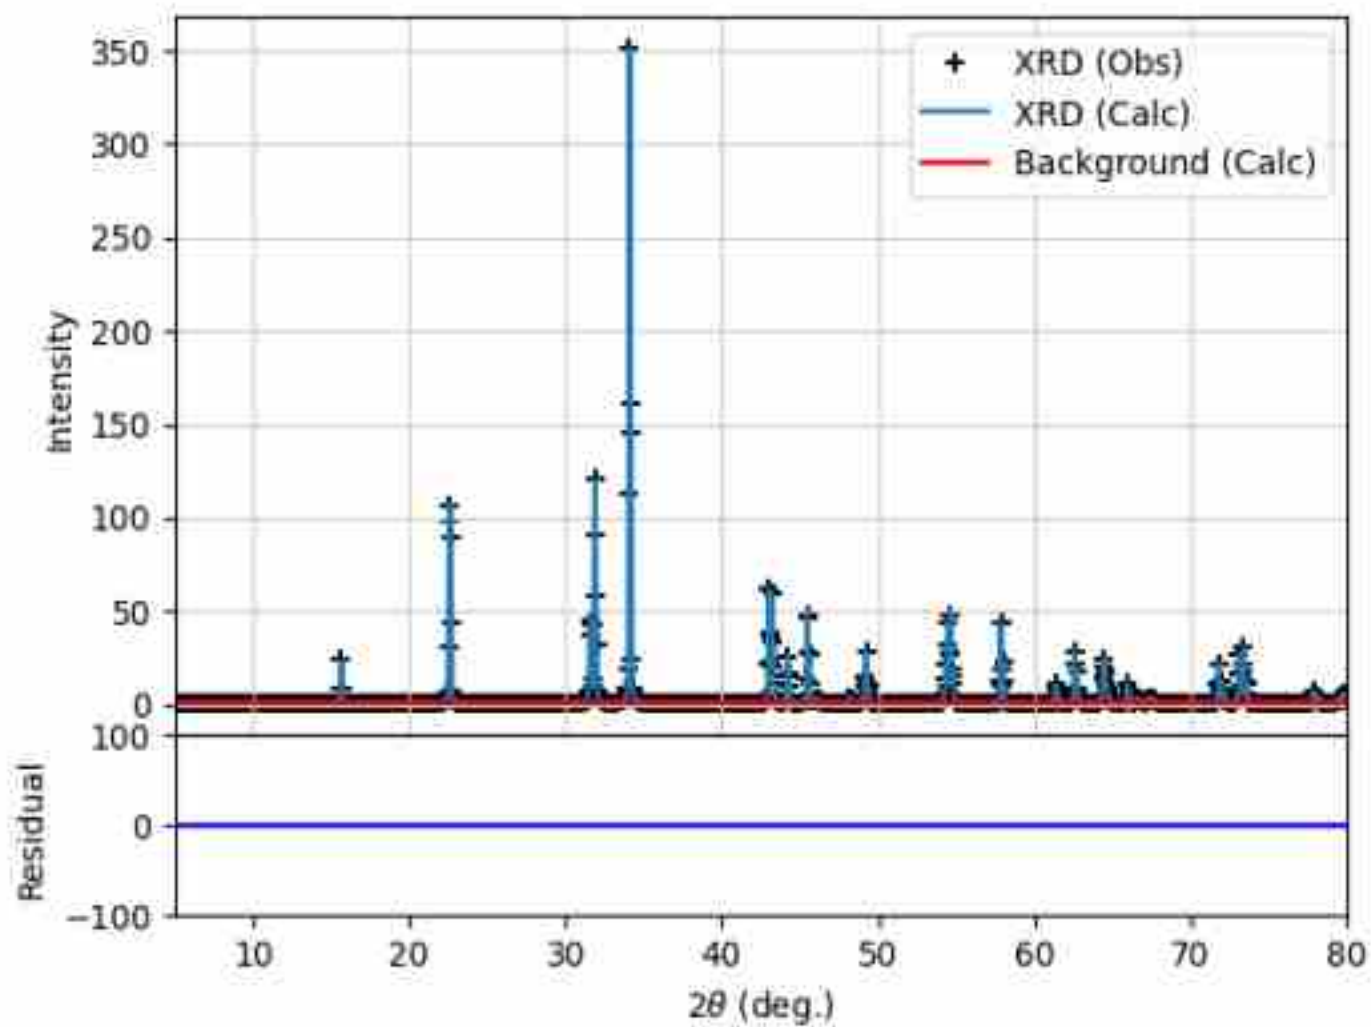

| RMSE before RR | Rwp     | RMSE after RR |
|----------------|---------|---------------|
| 0.009          | 0.00219 | 0.00032       |

# Y1Ho1C4

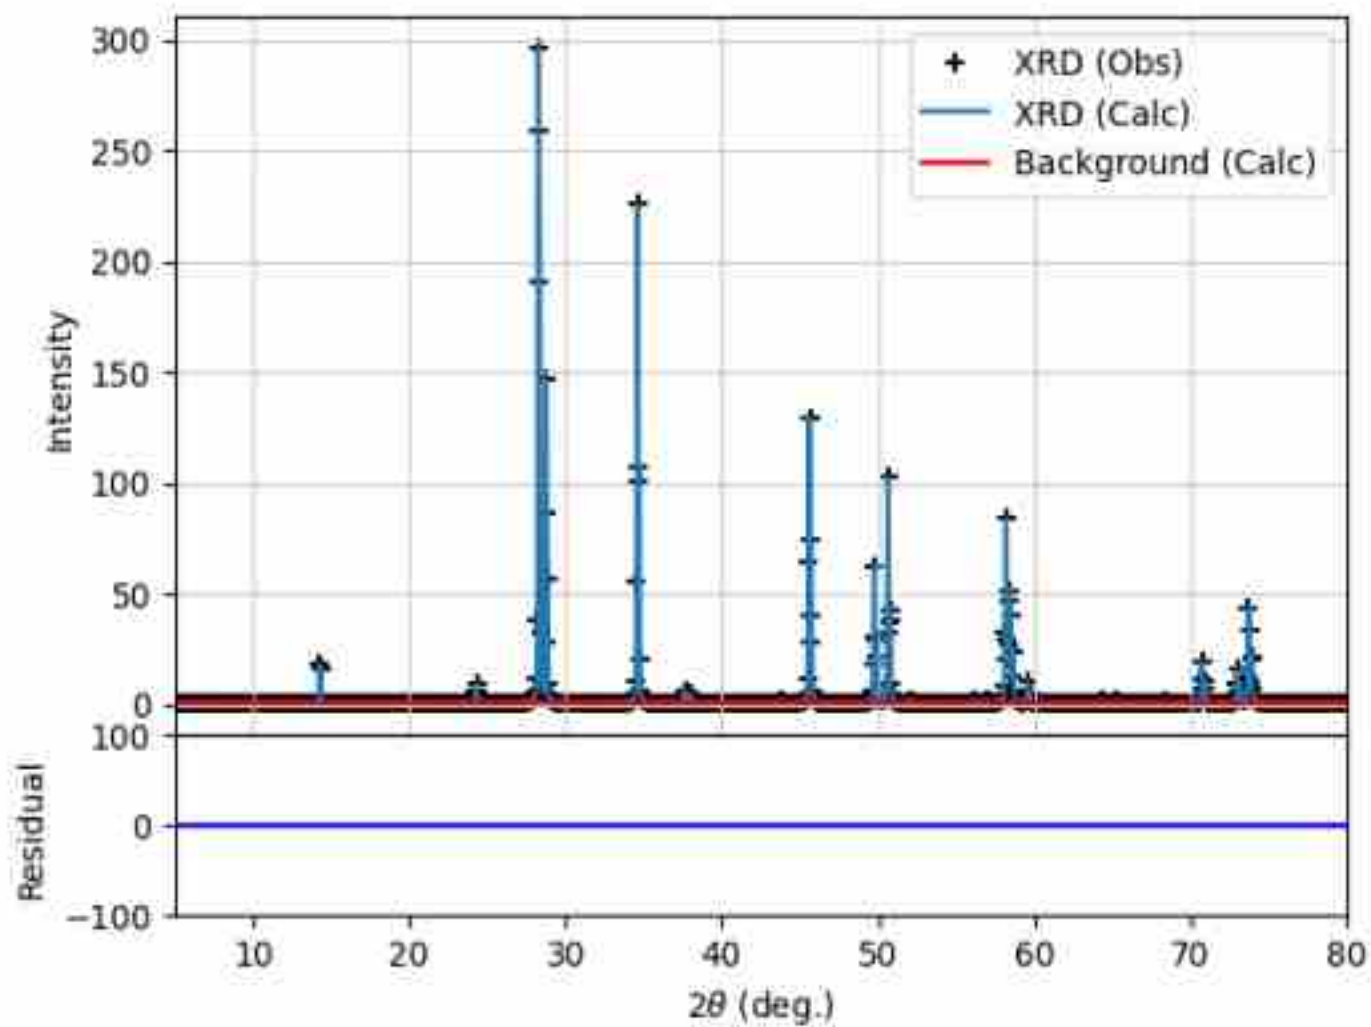

| RMSE before RR | Rwp     | RMSE after RR |
|----------------|---------|---------------|
| 0.009          | 0.00379 | 0.00212       |

# Y1Si1B1Rh3

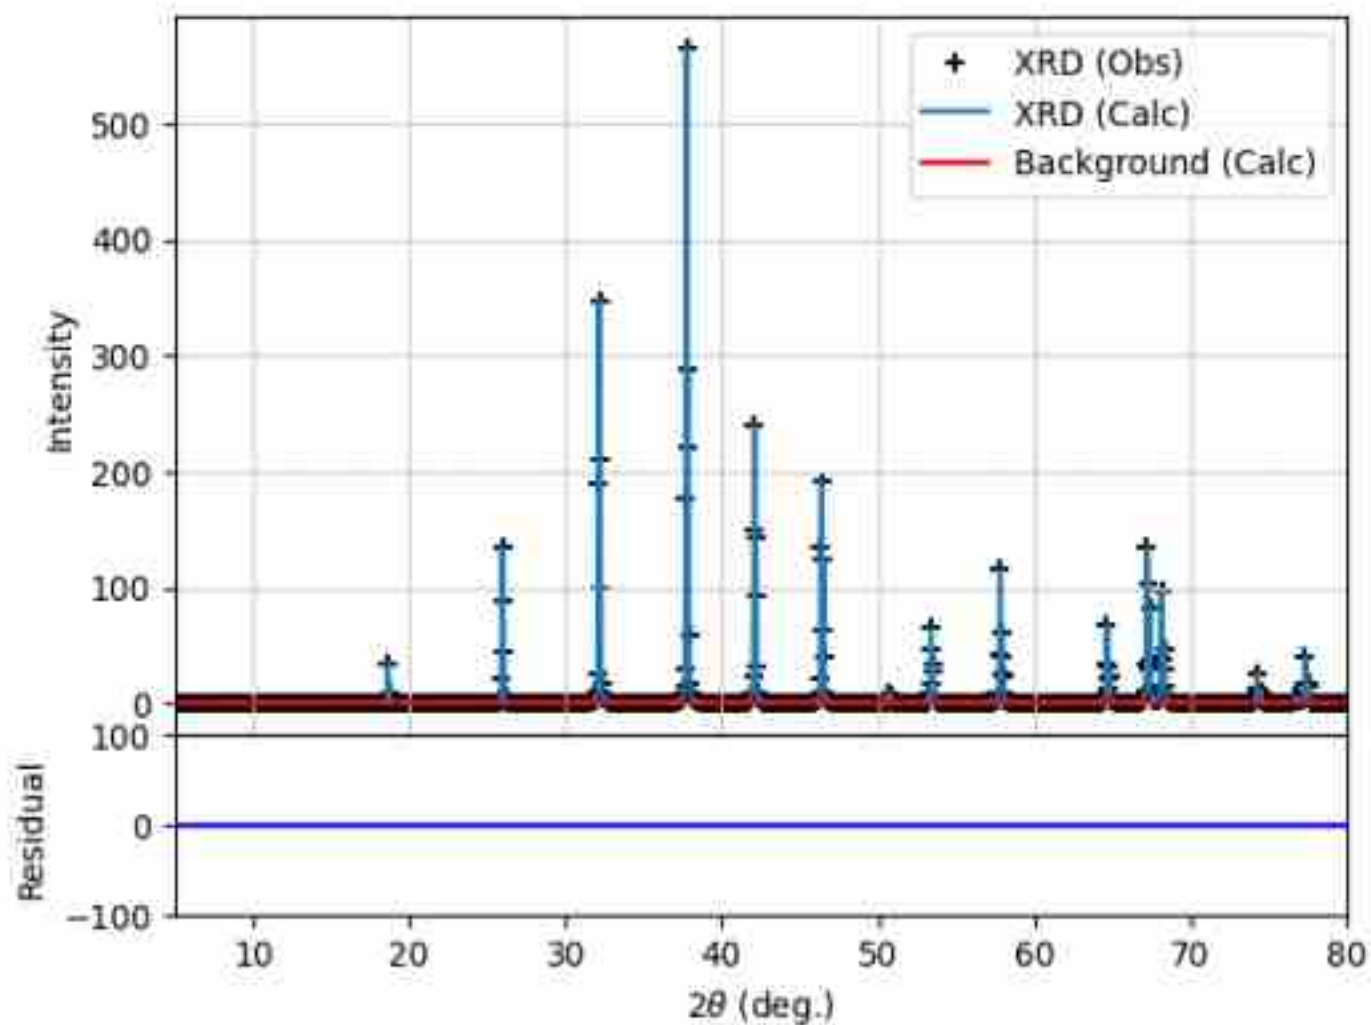

| RMSE before RR | Rwp     | RMSE after RR |
|----------------|---------|---------------|
| 0.009          | 0.00563 | 0.00107       |

# Y<sub>2</sub>Mn<sub>2</sub>Si<sub>2</sub>

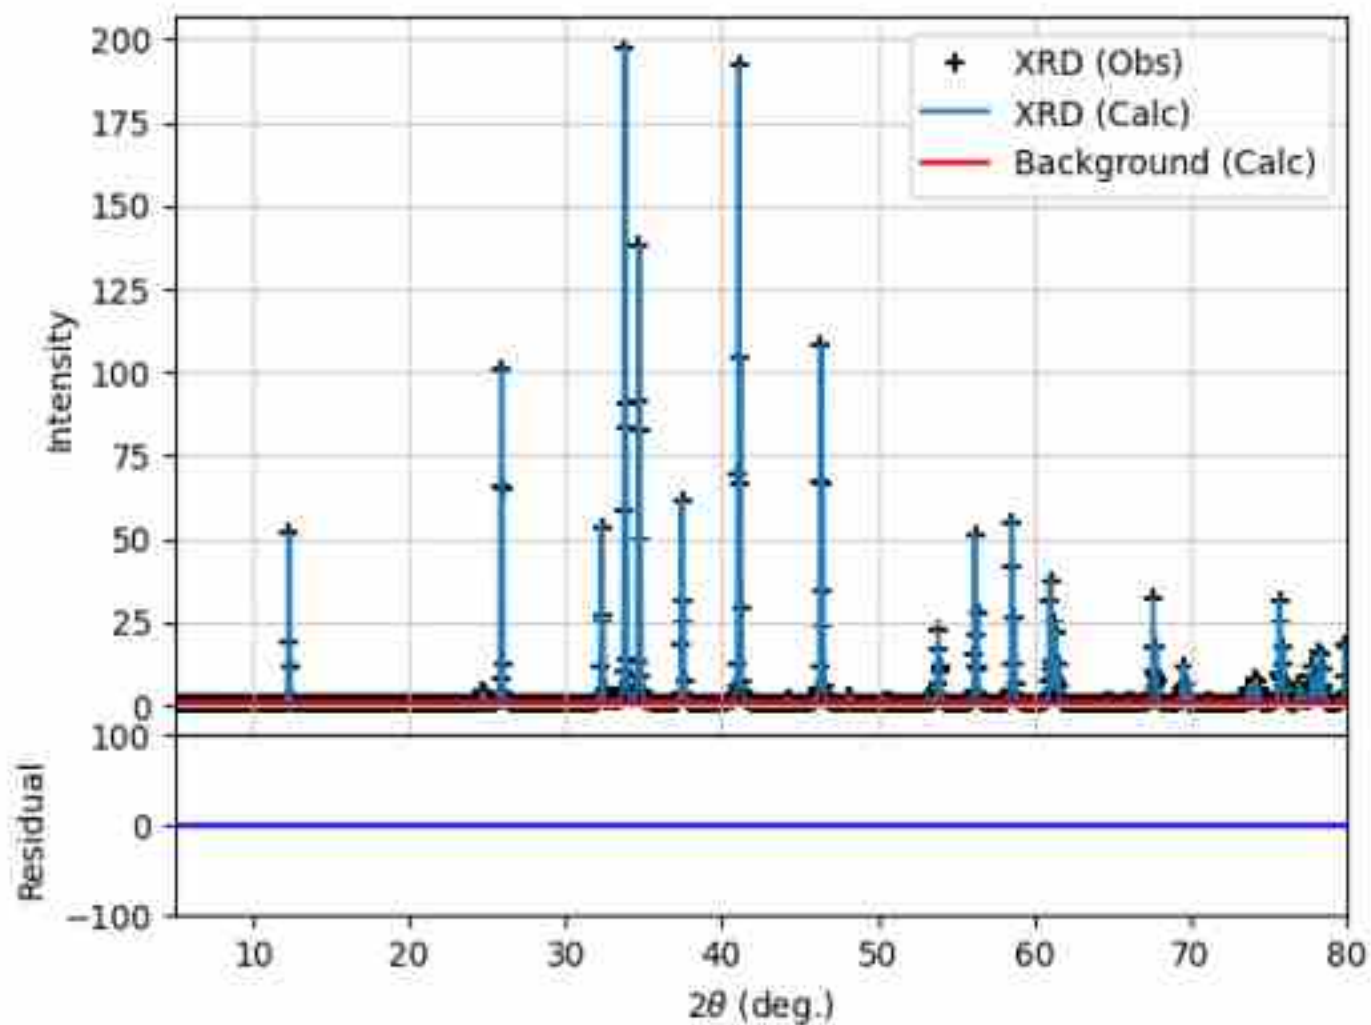

| RMSE before RR | Rwp    | RMSE after RR |
|----------------|--------|---------------|
| 0.009          | 0.0042 | 0.00052       |

# Y<sub>2</sub>Si<sub>4</sub>

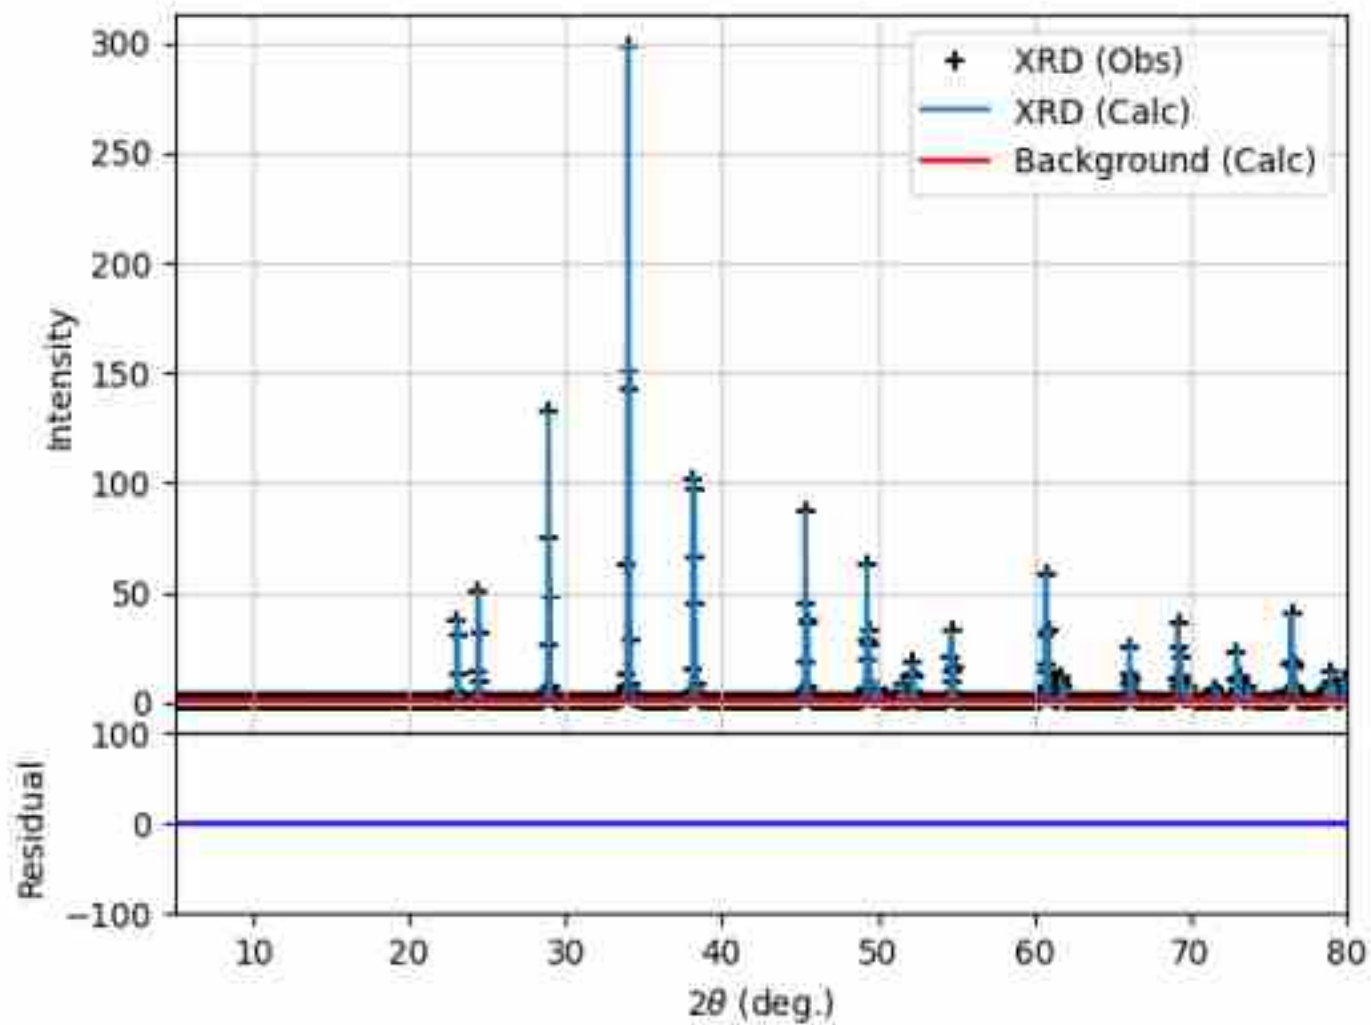

| RMSE before RR | Rwp     | RMSE after RR |
|----------------|---------|---------------|
| 0.009          | 0.00428 | 0.00085       |

# Y2Tm6

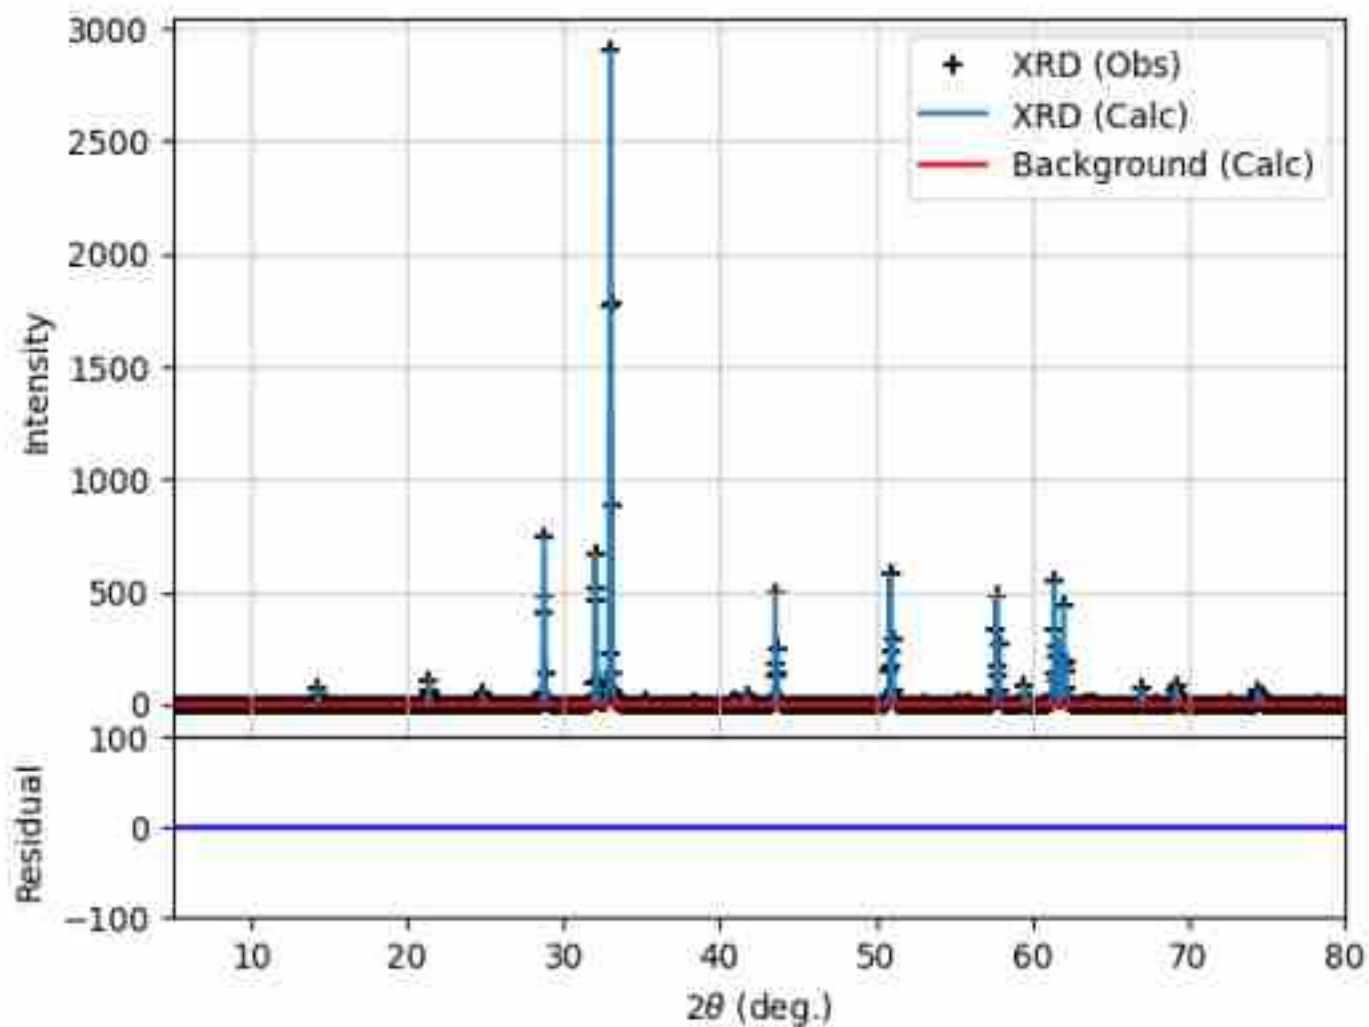

| RMSE before RR | Rwp     | RMSE after RR |
|----------------|---------|---------------|
| 0.009          | 0.04466 | 0.00173       |

# Y<sub>3</sub>In<sub>3</sub>Cu<sub>3</sub>

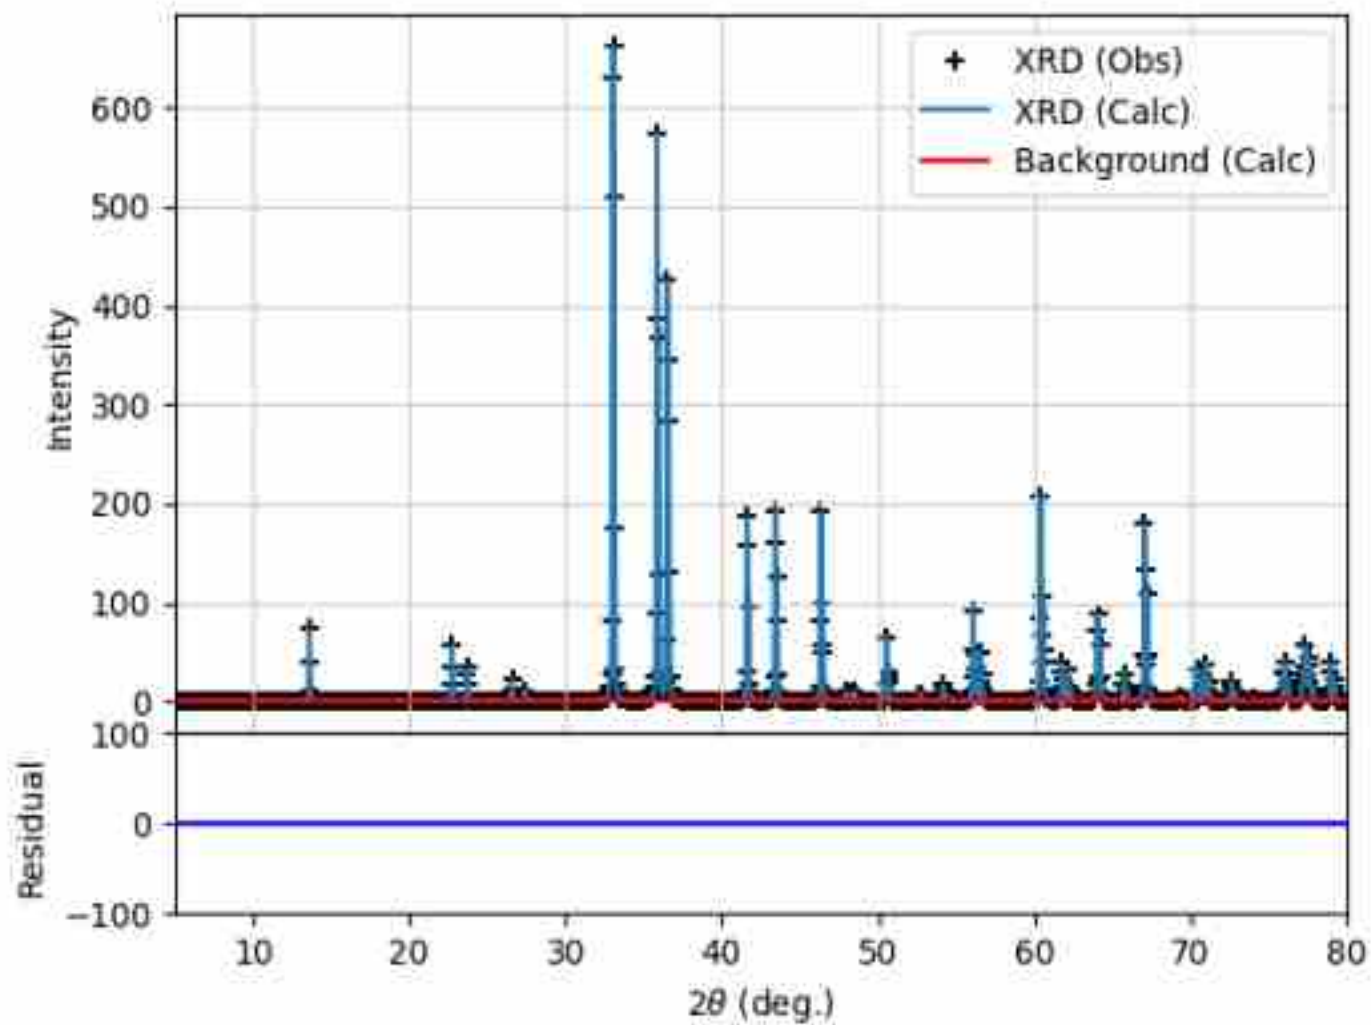

| RMSE before RR | Rwp     | RMSE after RR |
|----------------|---------|---------------|
| 0.009          | 0.00473 | 0.00108       |

# Yb1Ga1Cu4

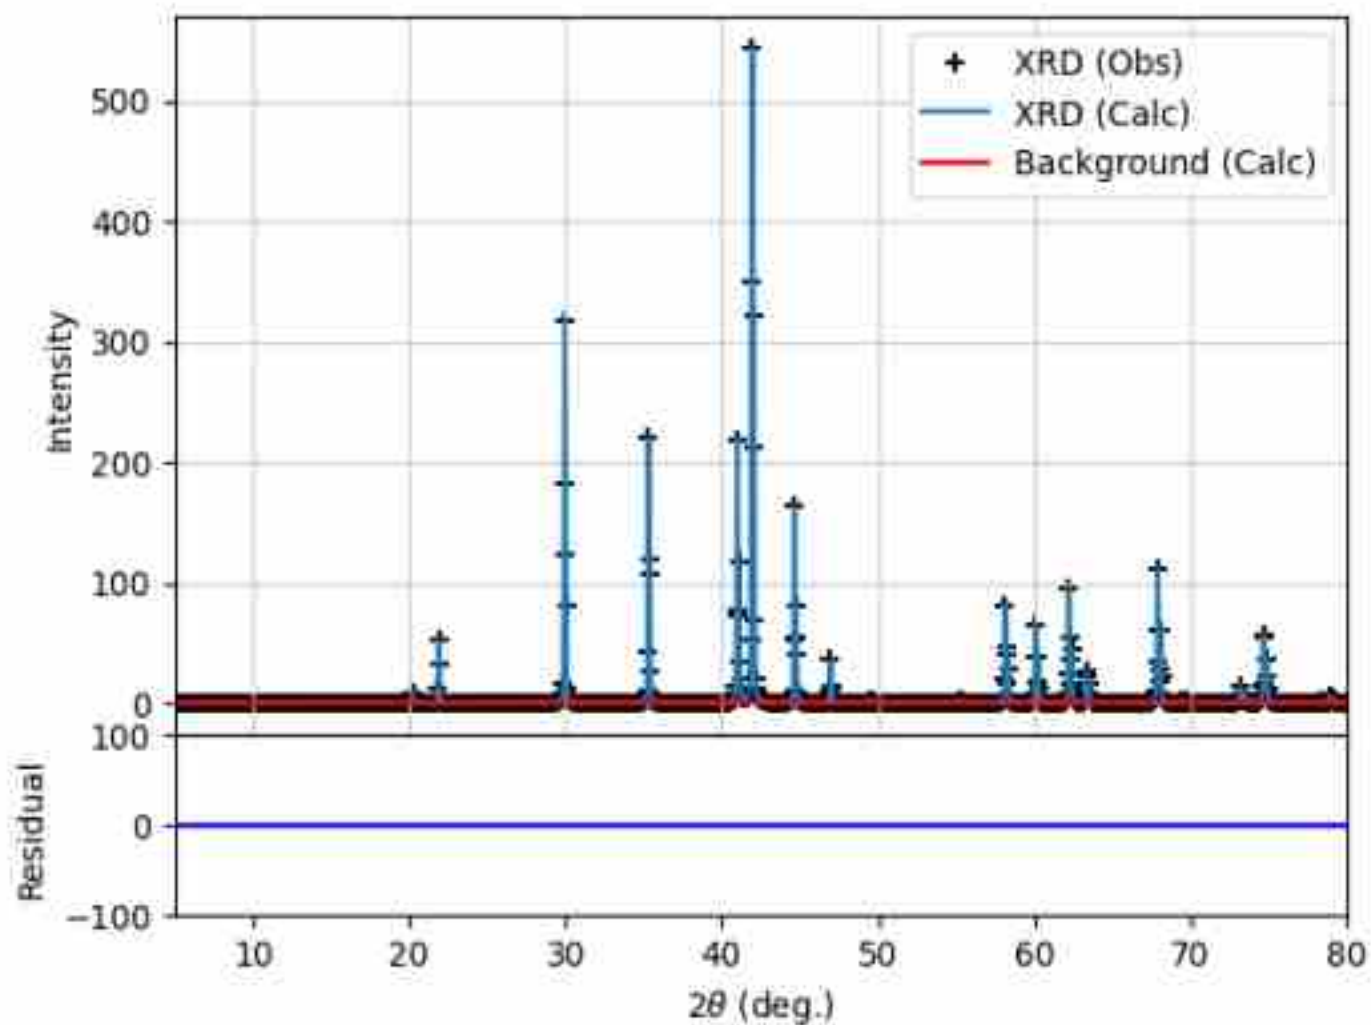

| RMSE before RR | Rwp     | RMSE after RR |
|----------------|---------|---------------|
| 0.009          | 0.00418 | 0.00065       |



# Yb1Ga4

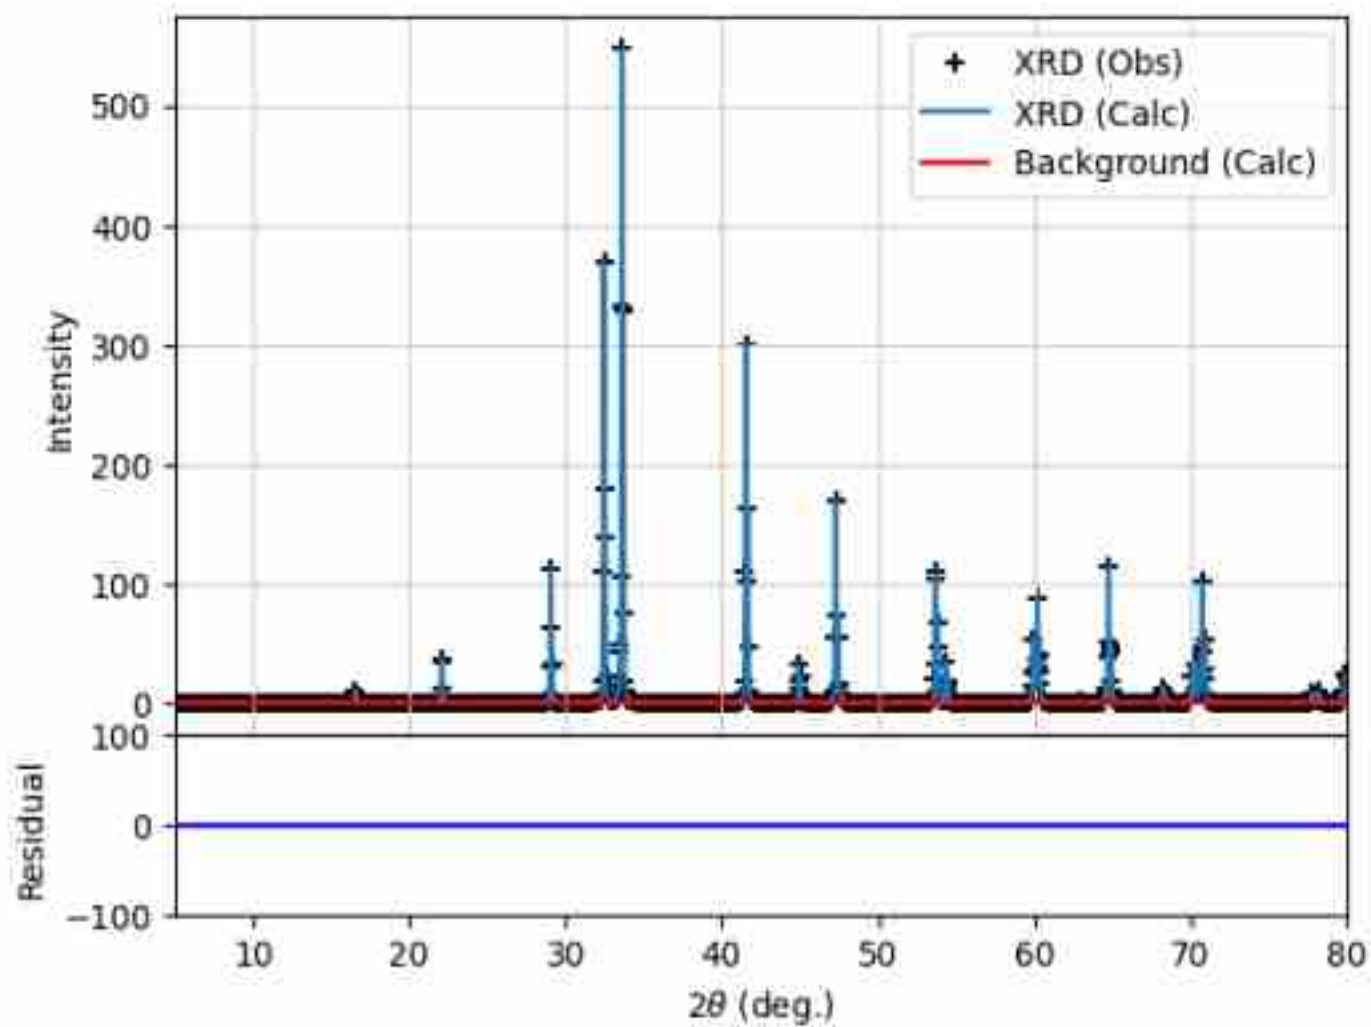

| RMSE before RR | Rwp     | RMSE after RR |
|----------------|---------|---------------|
| 0.009          | 0.00275 | 0.00023       |

# Yb1Y1Al4

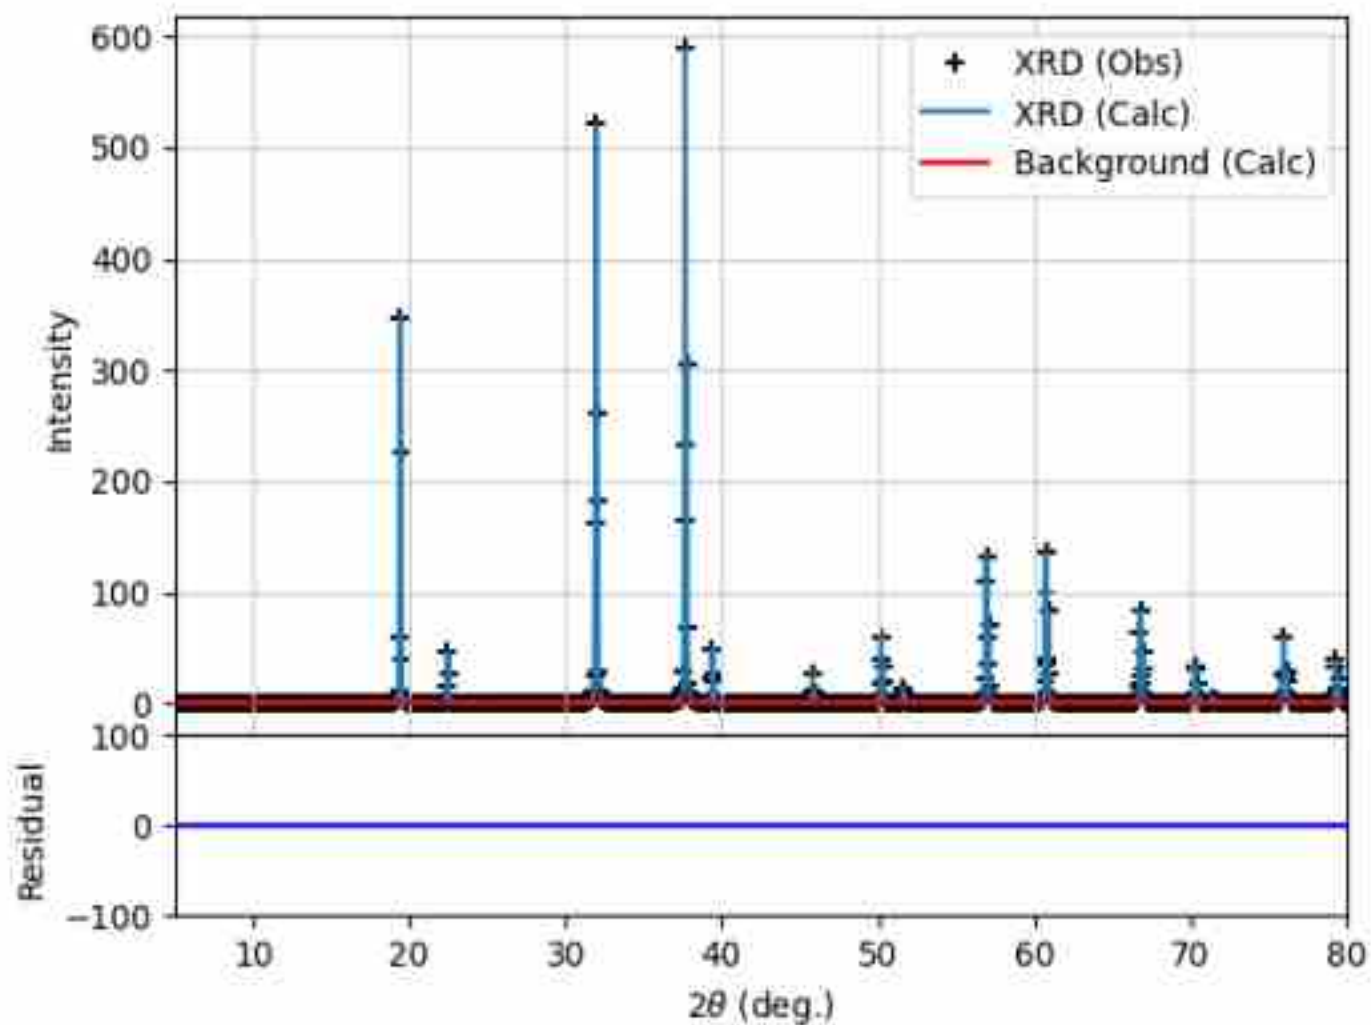

| RMSE before RR | Rwp     | RMSE after RR |
|----------------|---------|---------------|
| 0.009          | 0.00877 | 0.00169       |

# Yb1Zn1Cu1P2

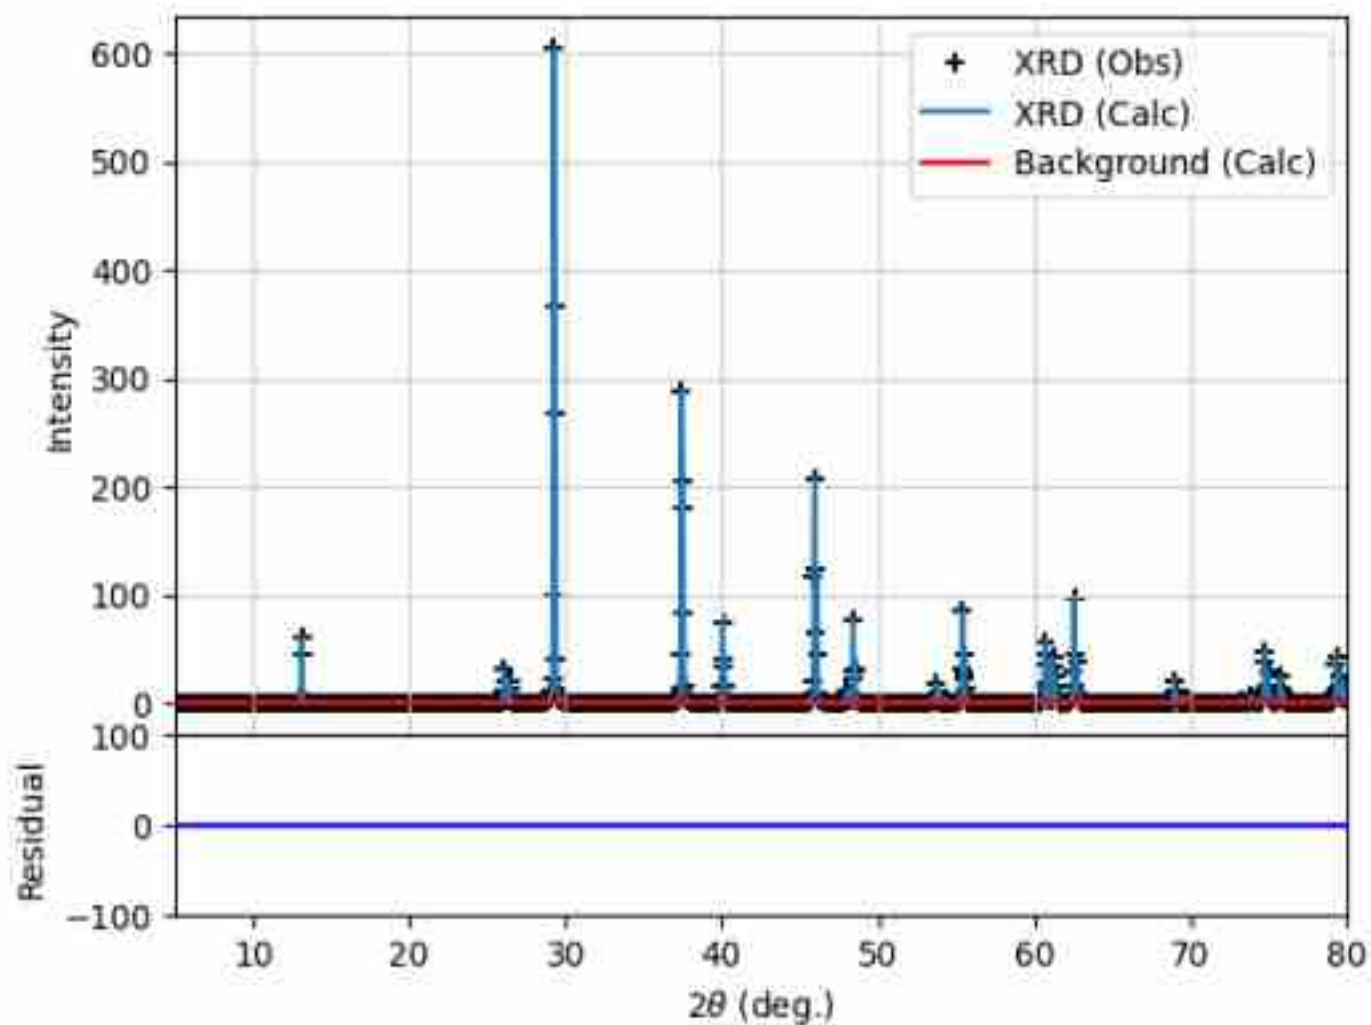

| RMSE before RR | Rwp     | RMSE after RR |
|----------------|---------|---------------|
| 0.009          | 0.00339 | 0.00061       |

# Yb1Zn2Ga2

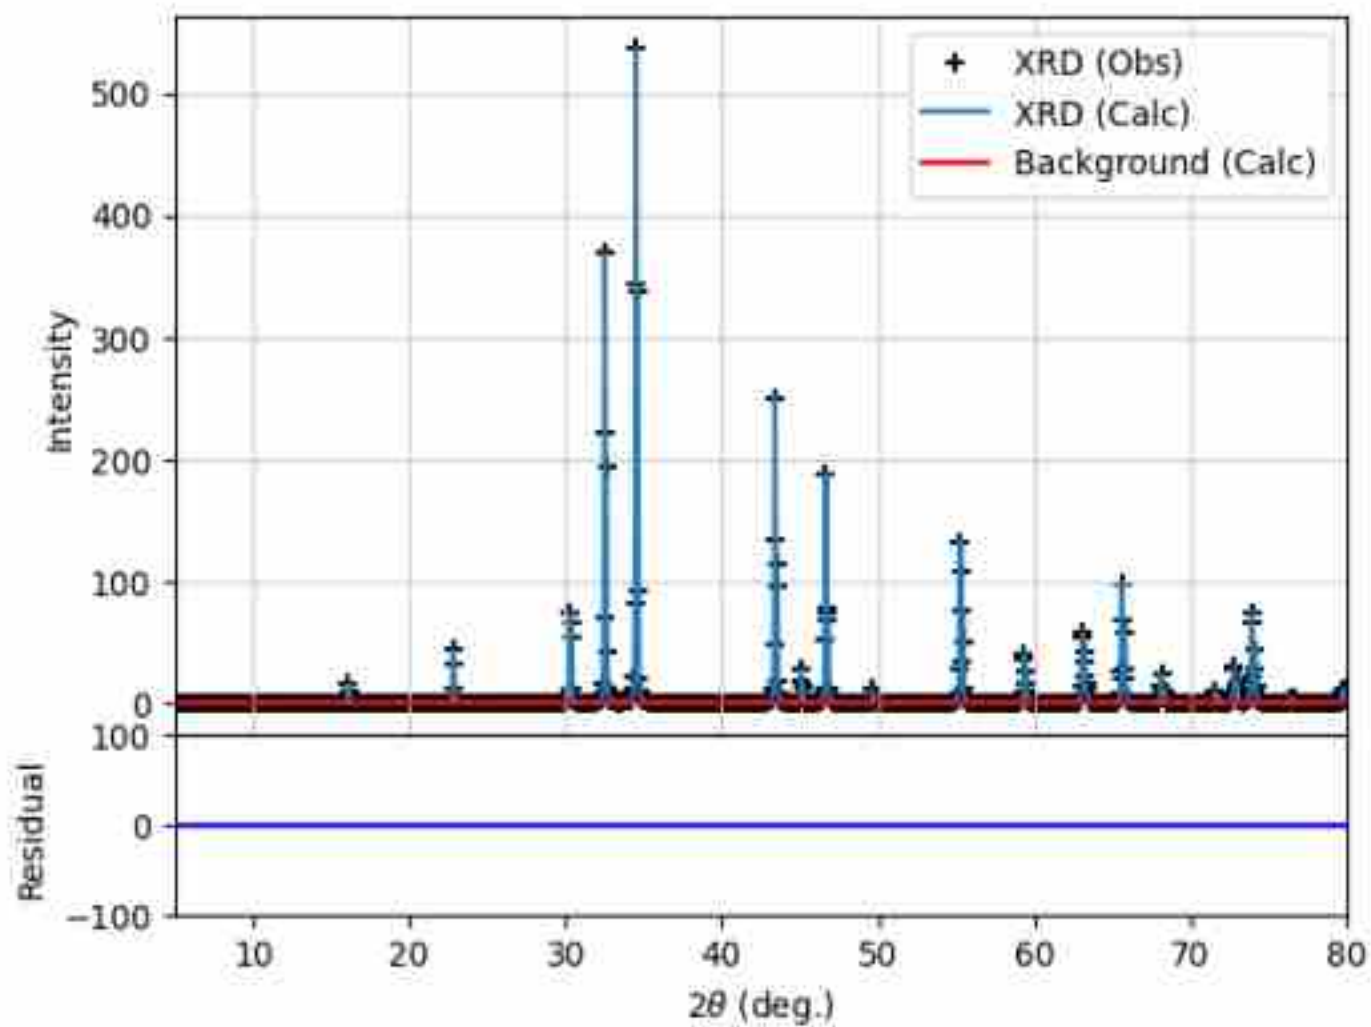

| RMSE before RR | Rwp     | RMSE after RR |
|----------------|---------|---------------|
| 0.009          | 0.00412 | 0.00043       |

# Yb6Sn2

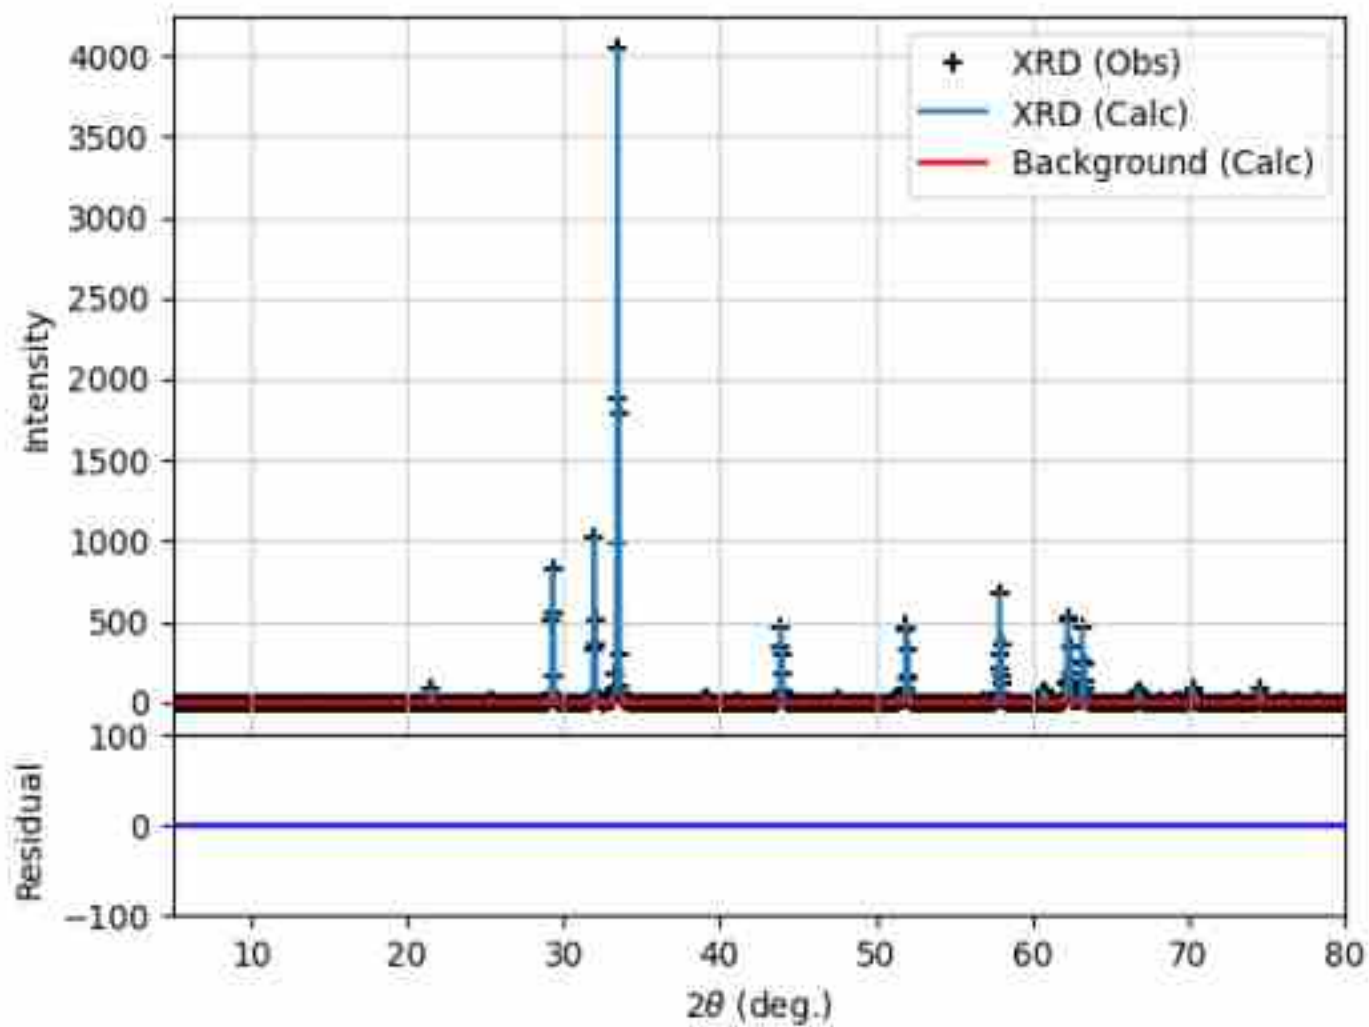

| RMSE before RR | Rwp     | RMSE after RR |
|----------------|---------|---------------|
| 0.009          | 0.06792 | 0.00141       |

# Zn1Ga2S4

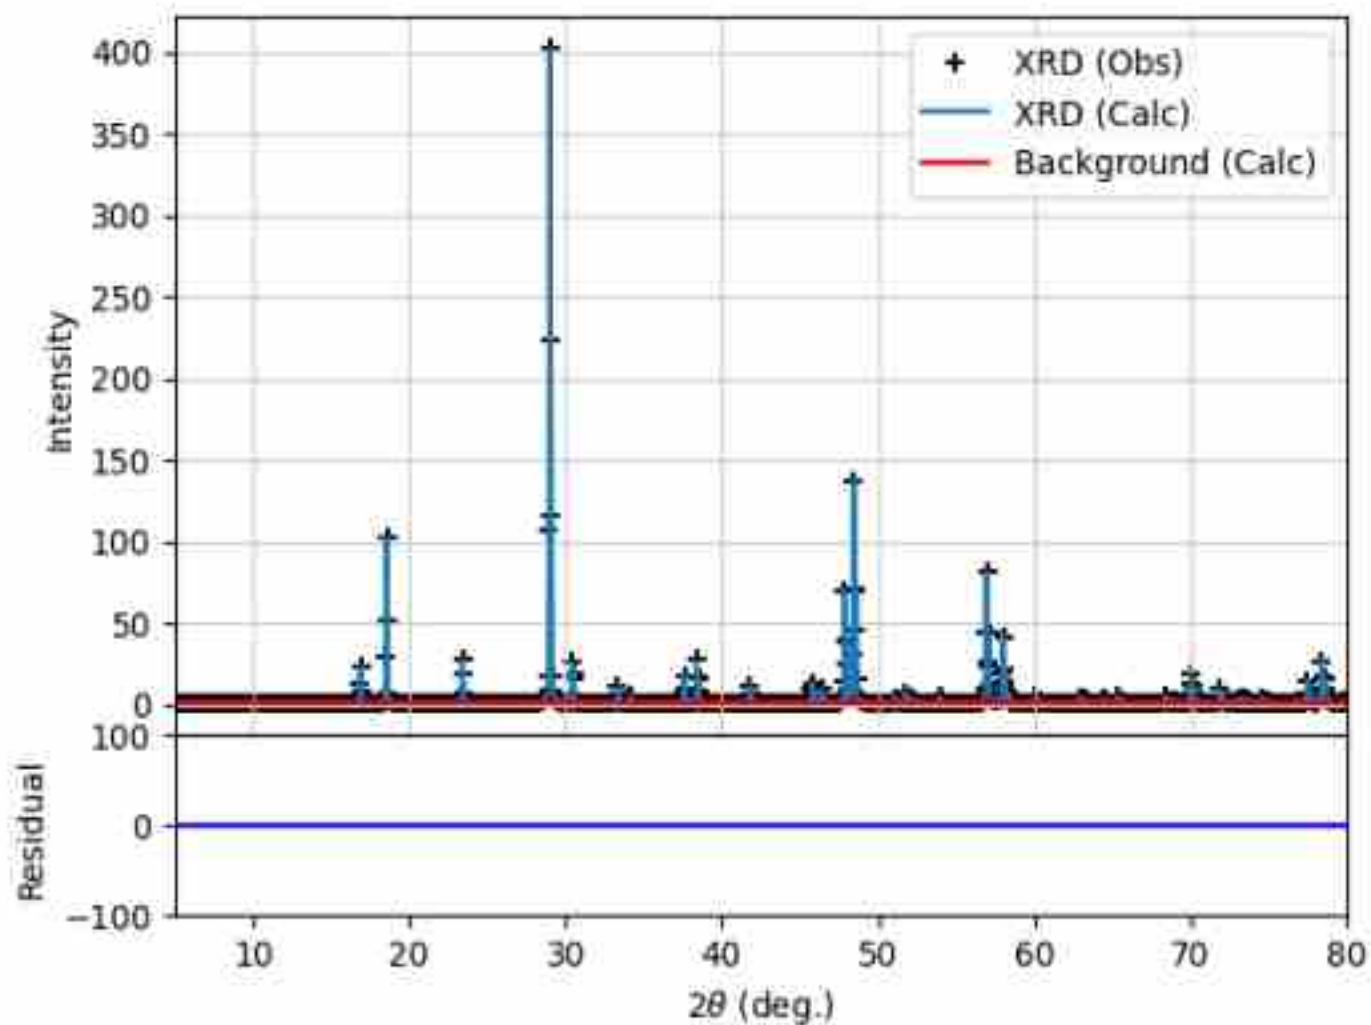

| RMSE before RR | Rwp     | RMSE after RR |
|----------------|---------|---------------|
| 0.009          | 0.00276 | 0.00093       |

# Zn<sub>2</sub>Ni<sub>3</sub>O<sub>5</sub>

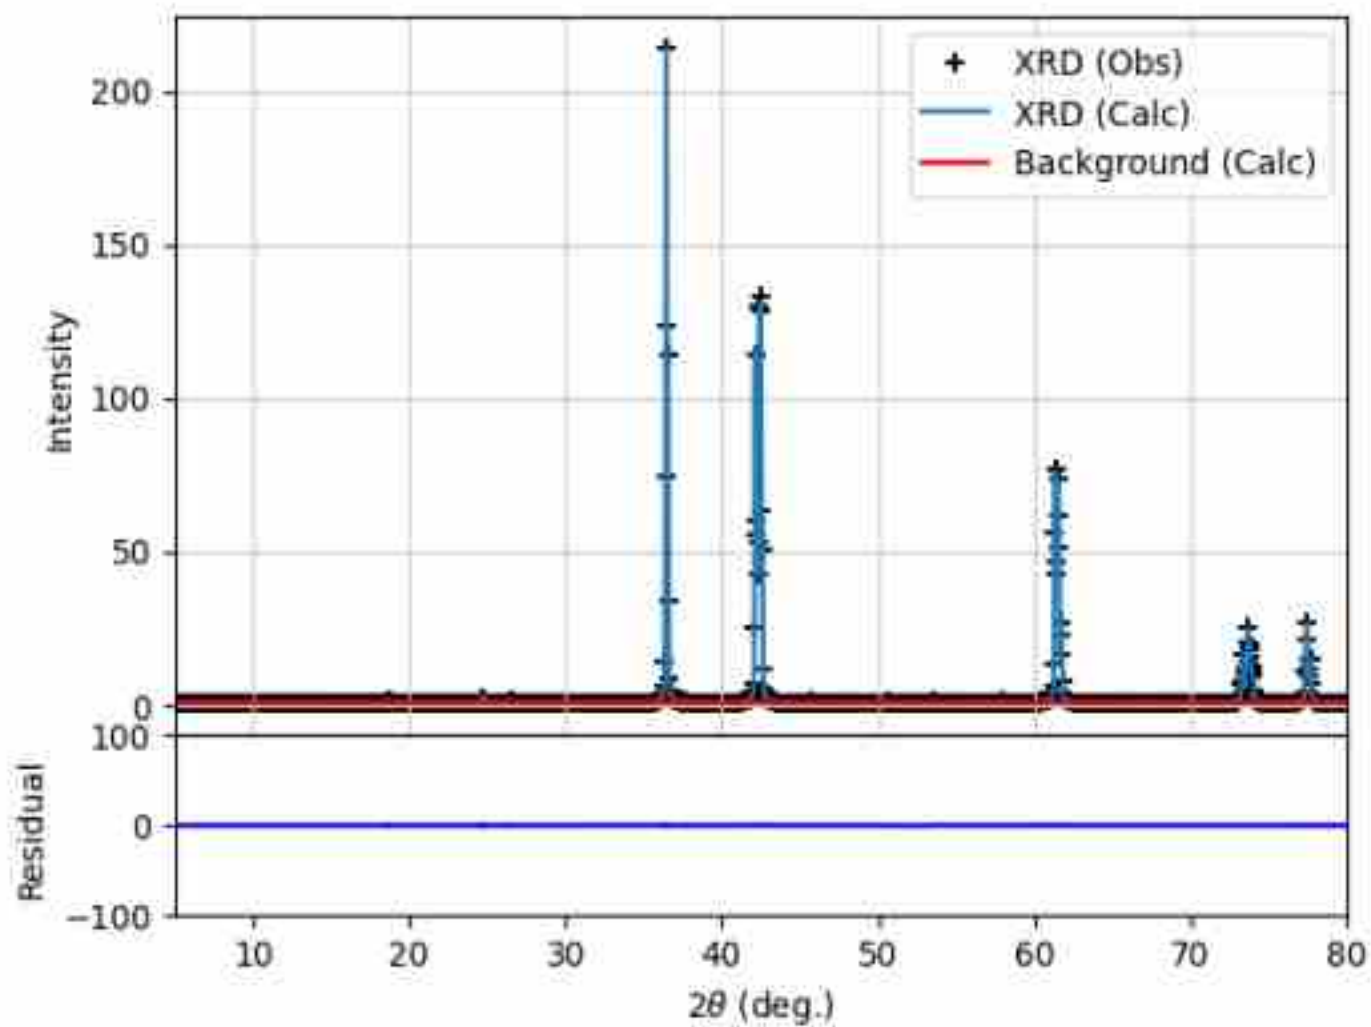

| RMSE before RR | Rwp     | RMSE after RR |
|----------------|---------|---------------|
| 0.009          | 3.96386 | 0.00896       |

# Zr1Be2

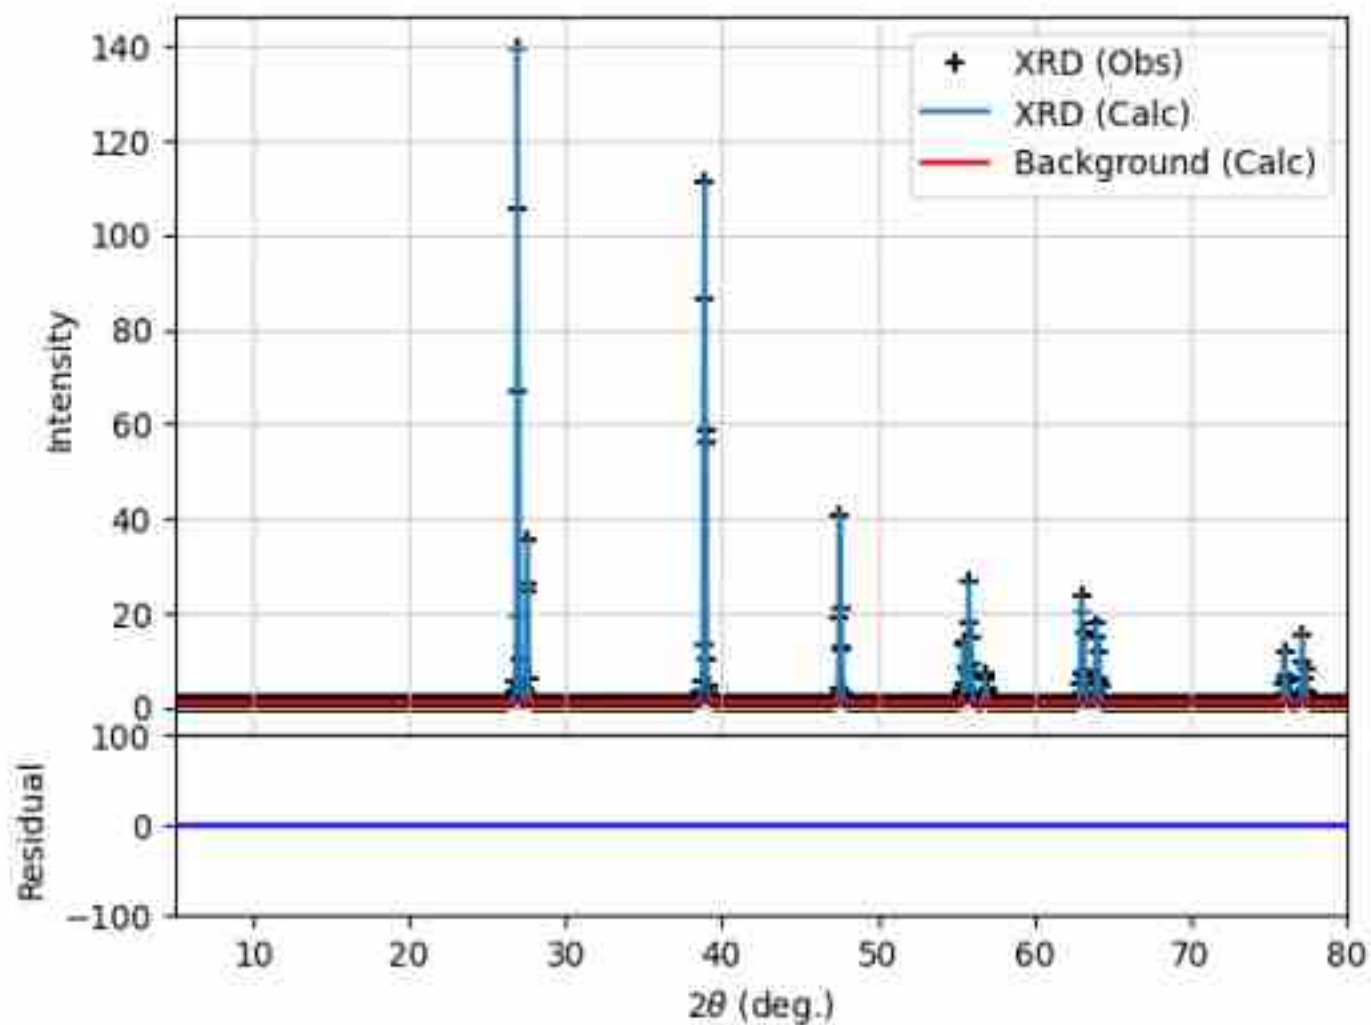

| RMSE before RR | Rwp     | RMSE after RR |
|----------------|---------|---------------|
| 0.009          | 0.00198 | 0.00146       |



# Zr1Co2Si2

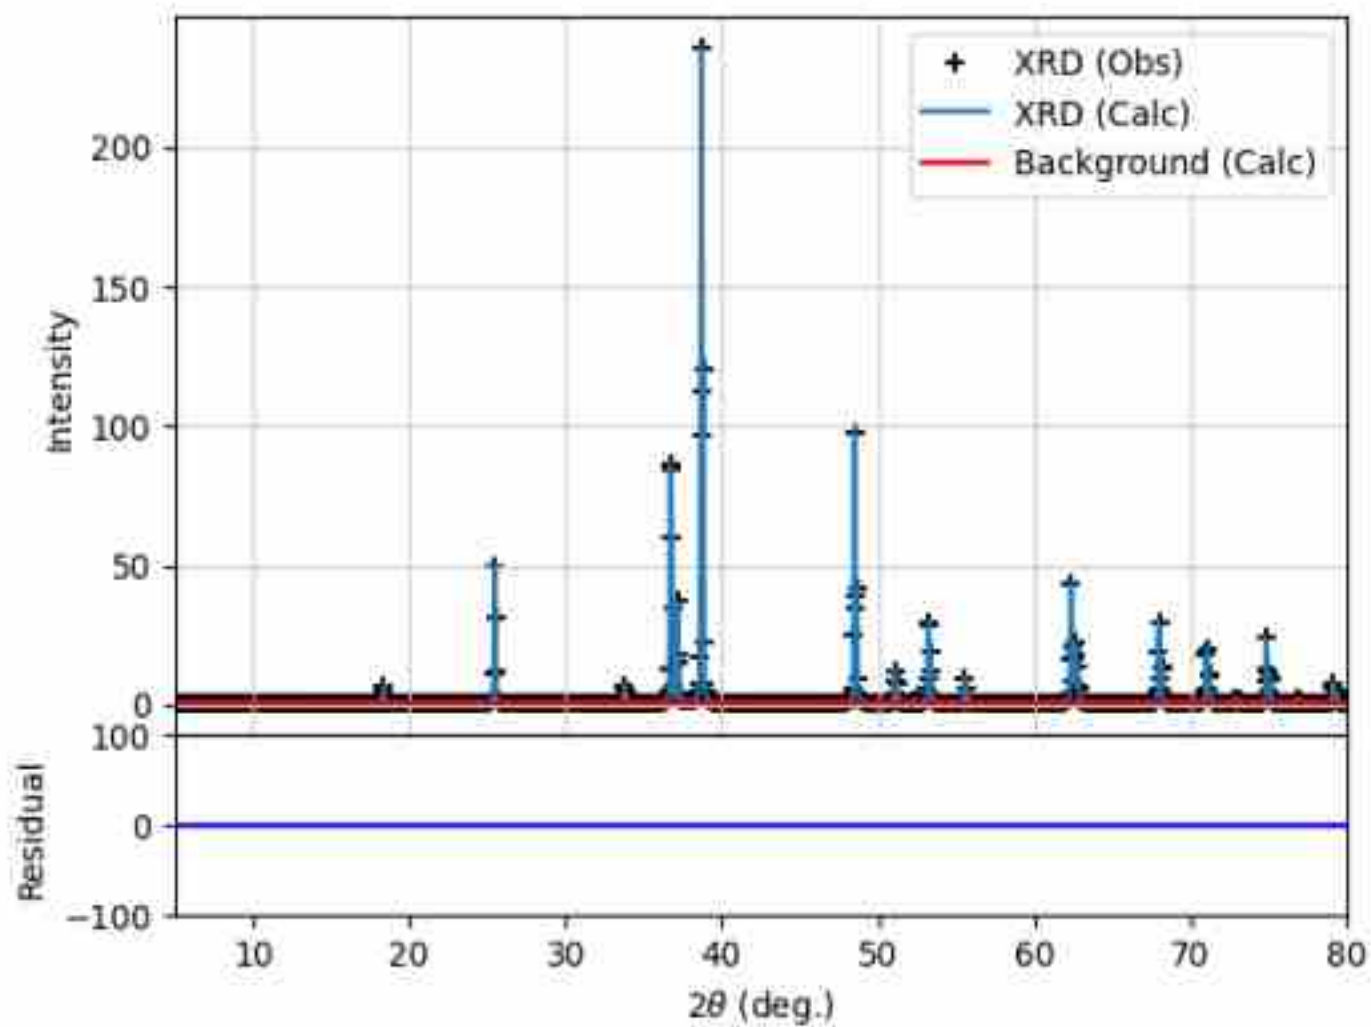

| RMSE before RR | Rwp     | RMSE after RR |
|----------------|---------|---------------|
| 0.009          | 0.00323 | 0.00055       |

# Zr1Ti1N2

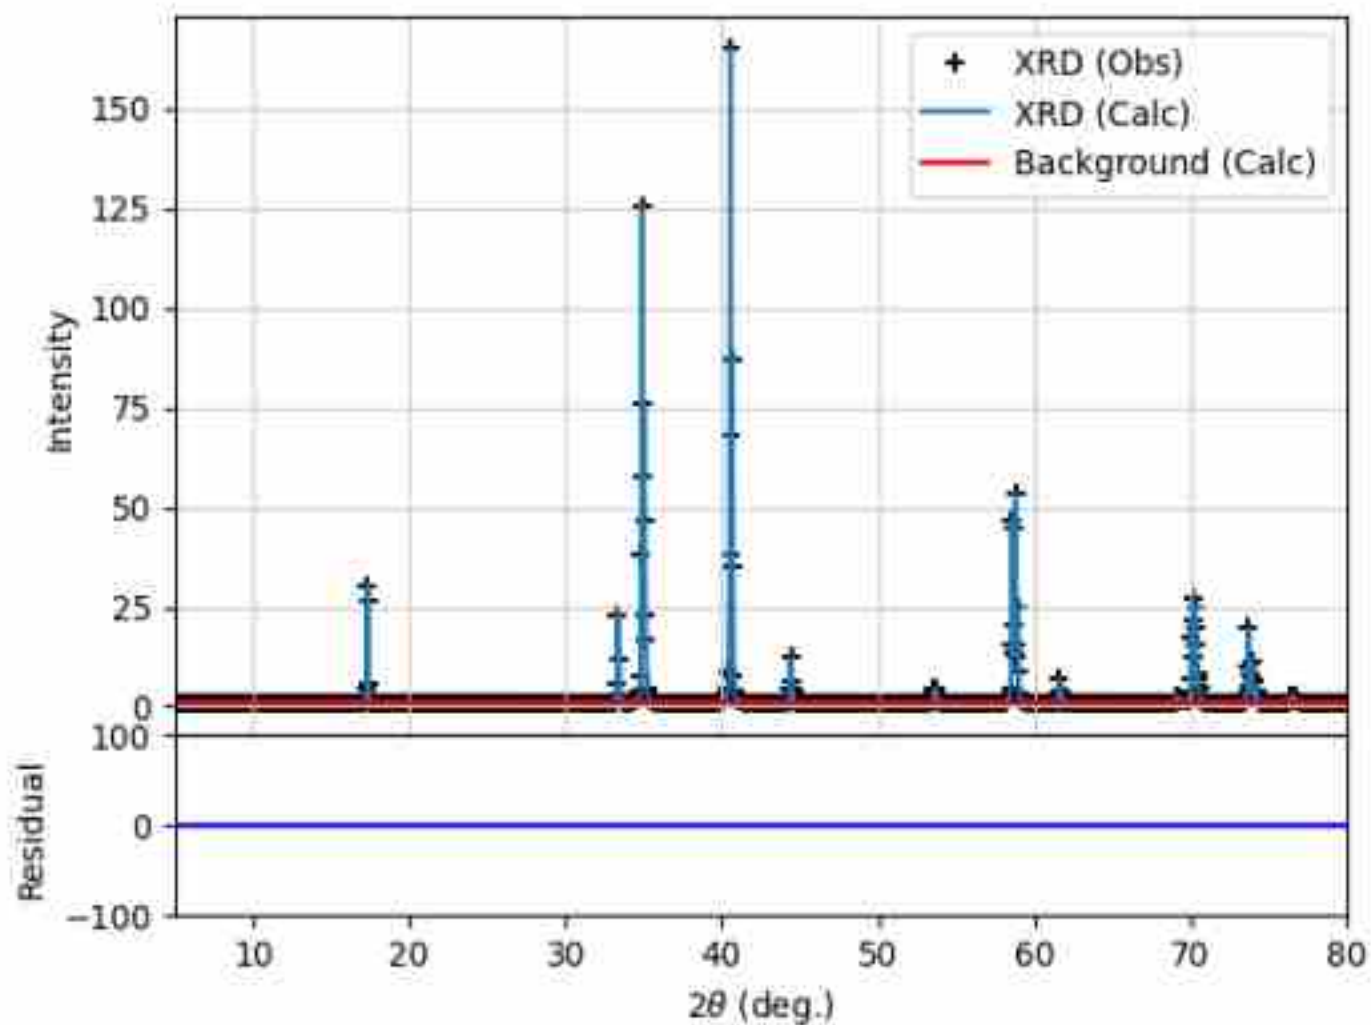

| RMSE before RR | Rwp     | RMSE after RR |
|----------------|---------|---------------|
| 0.009          | 0.00899 | 0.00211       |

# Zr<sub>2</sub>N<sub>2</sub>

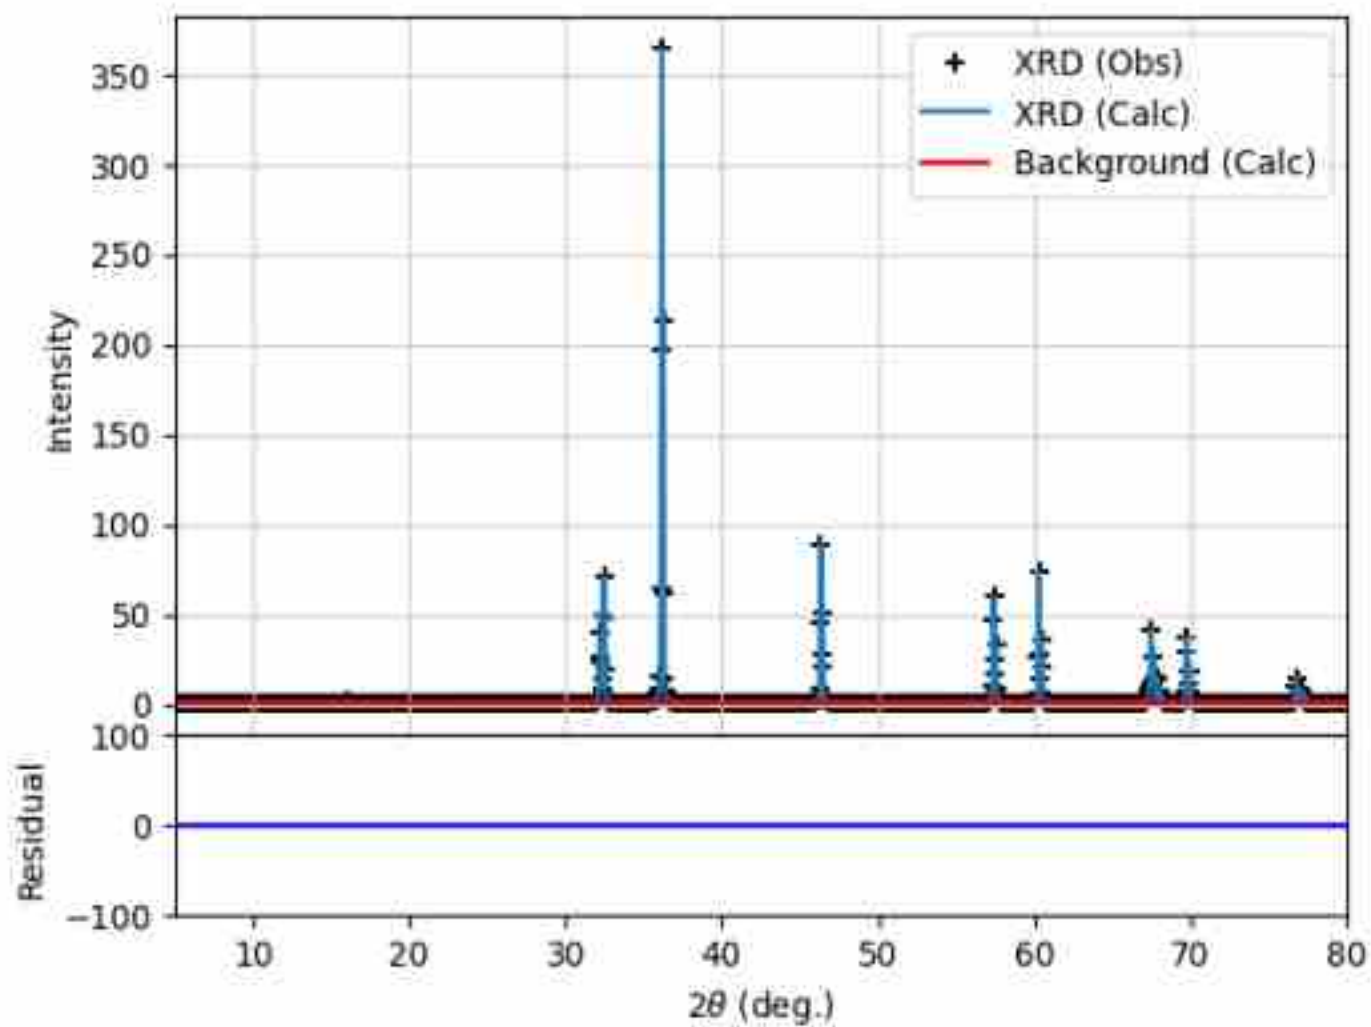

| RMSE before RR | Rwp     | RMSE after RR |
|----------------|---------|---------------|
| 0.009          | 0.00217 | 0.00061       |

# Zr<sub>2</sub>S1N<sub>2</sub>

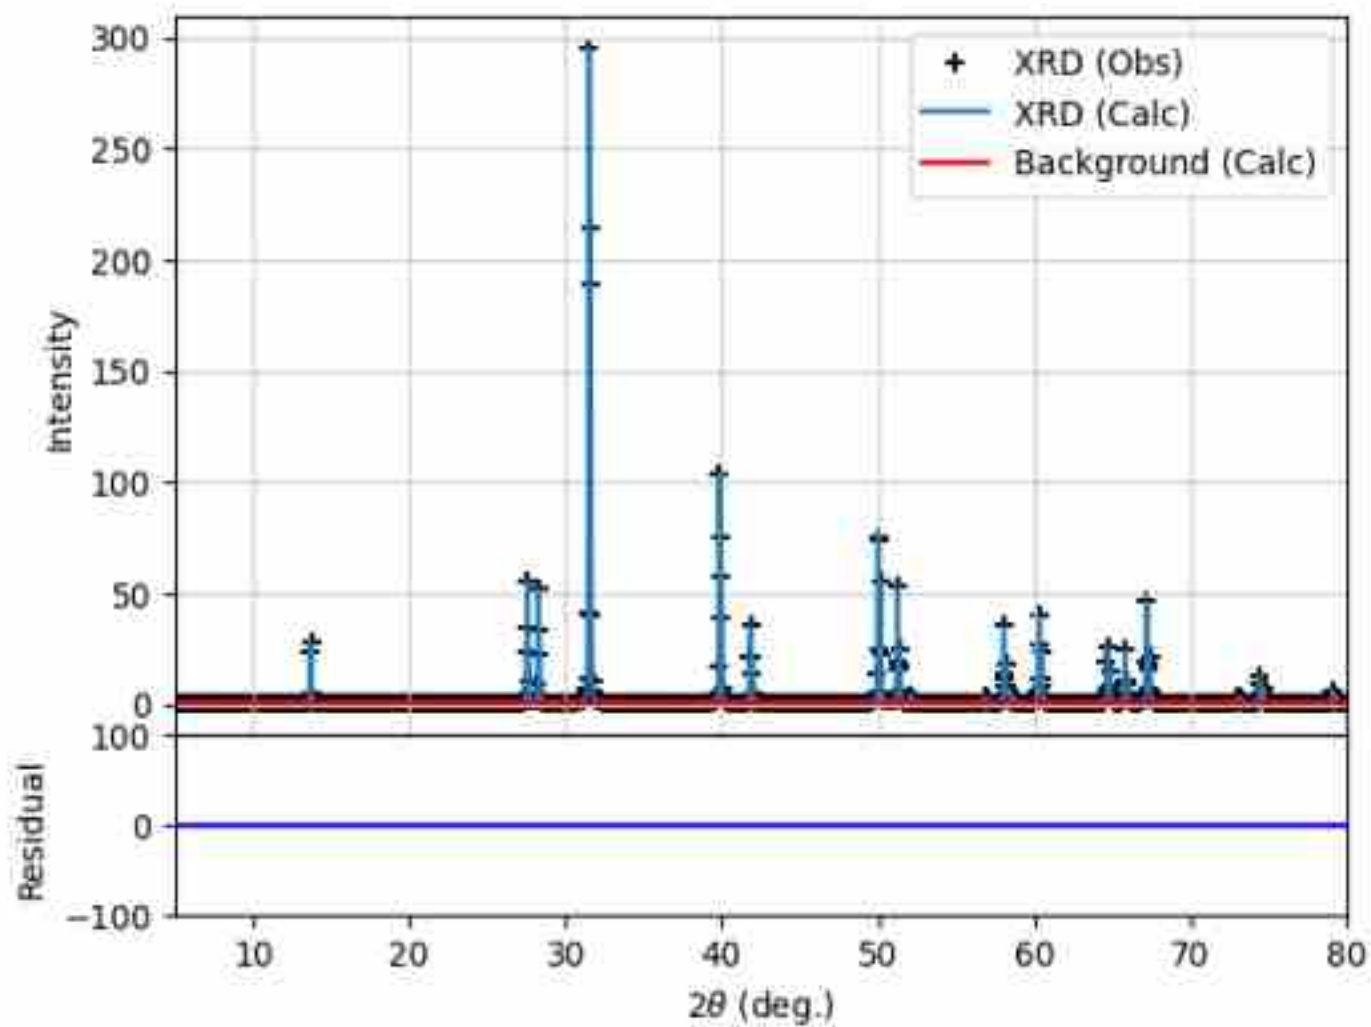

| RMSE before RR | Rwp     | RMSE after RR |
|----------------|---------|---------------|
| 0.009          | 0.00231 | 0.00179       |

# Zr<sub>2</sub>V<sub>2</sub>Si<sub>2</sub>

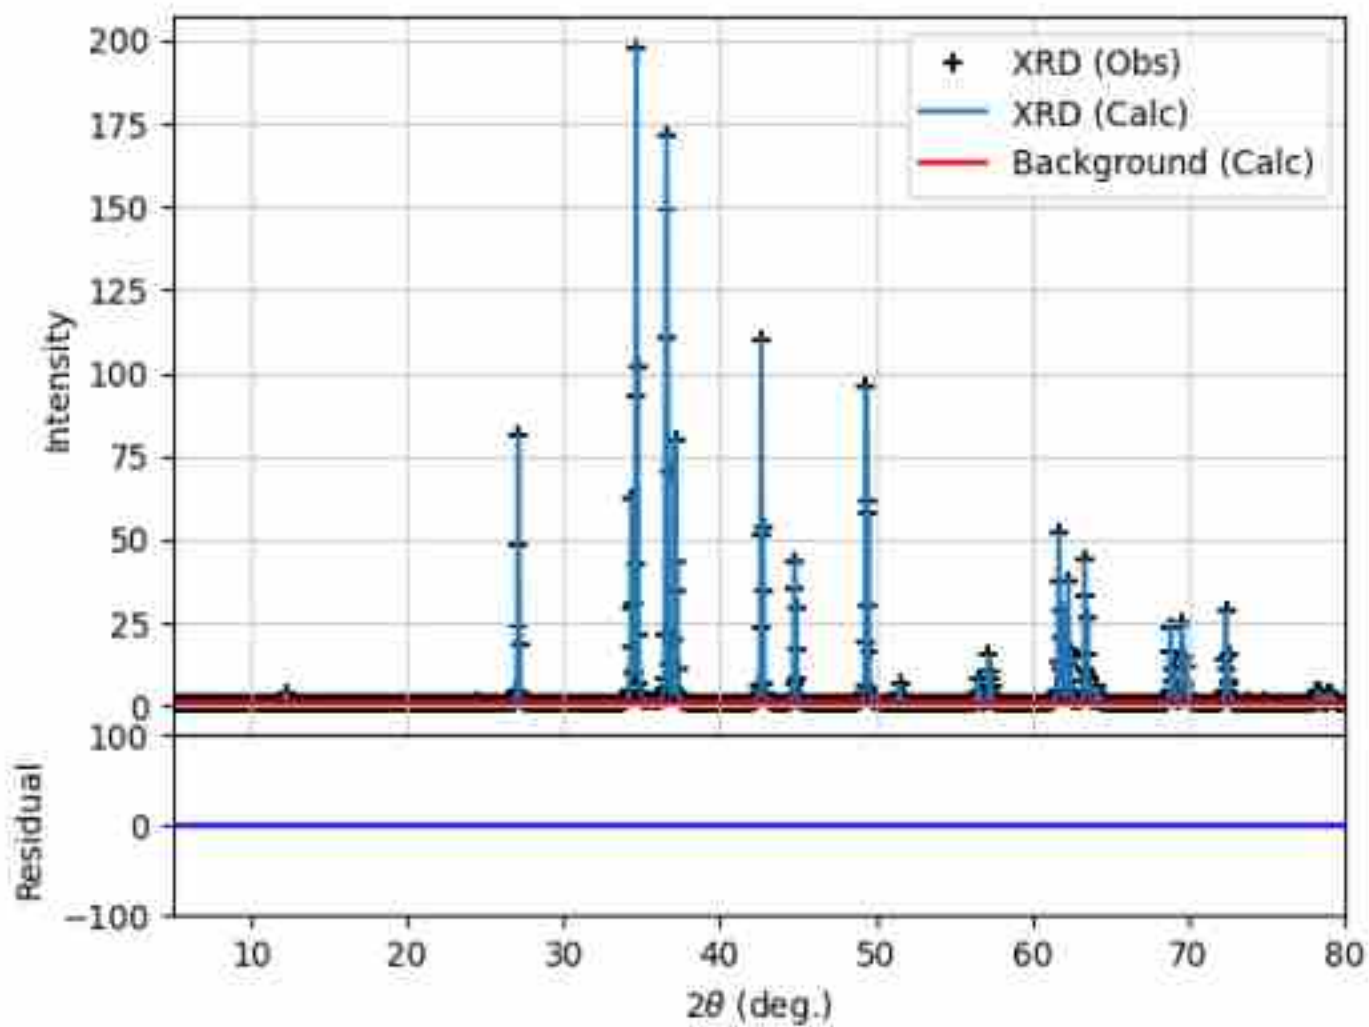

| RMSE before RR | Rwp     | RMSE after RR |
|----------------|---------|---------------|
| 0.009          | 0.00441 | 0.00091       |

# Al<sub>2</sub>VNi<sub>9</sub>

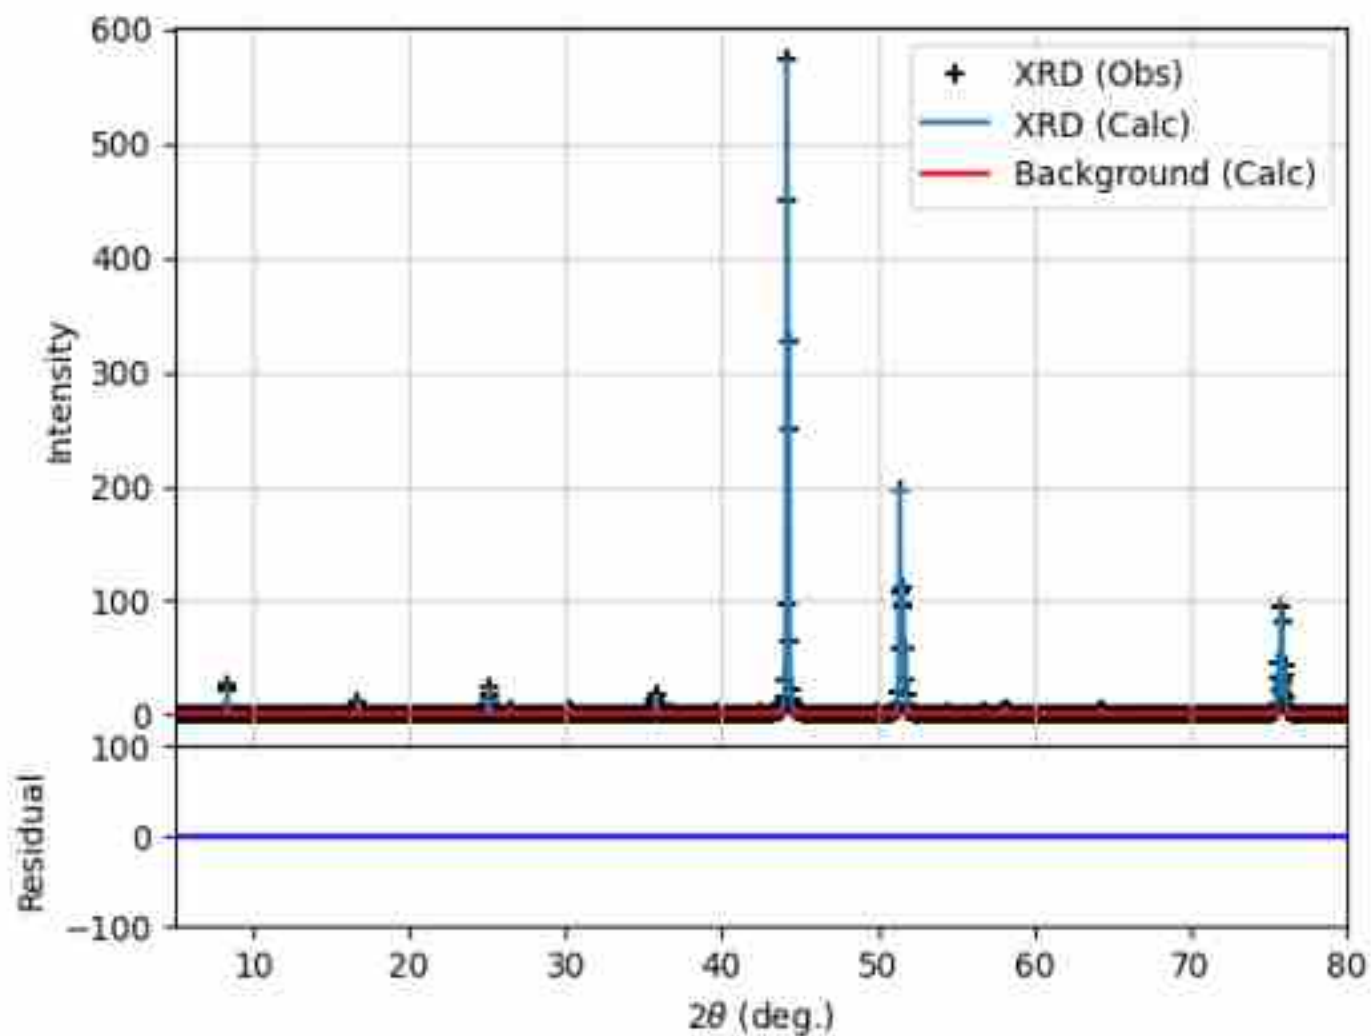

| RMSE before RR | Rwp     | RMSE after RR |
|----------------|---------|---------------|
| 0.011          | 0.00432 | 0.00058       |

# As1P1Rh4

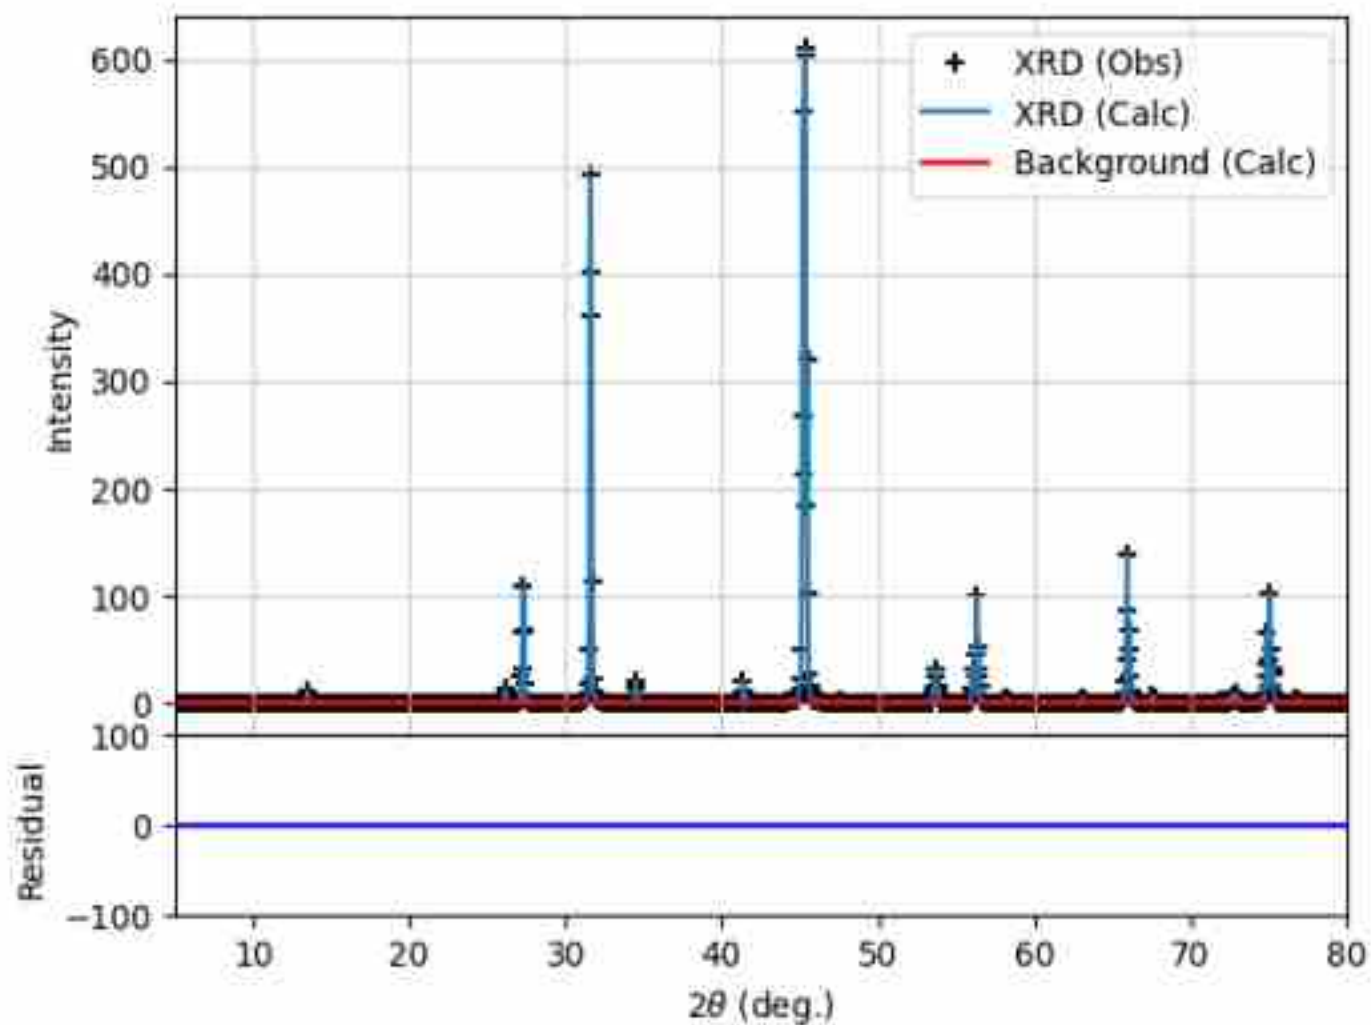

| RMSE before RR | Rwp     | RMSE after RR |
|----------------|---------|---------------|
| 0.011          | 0.00356 | 0.00047       |

# Ba1Au5

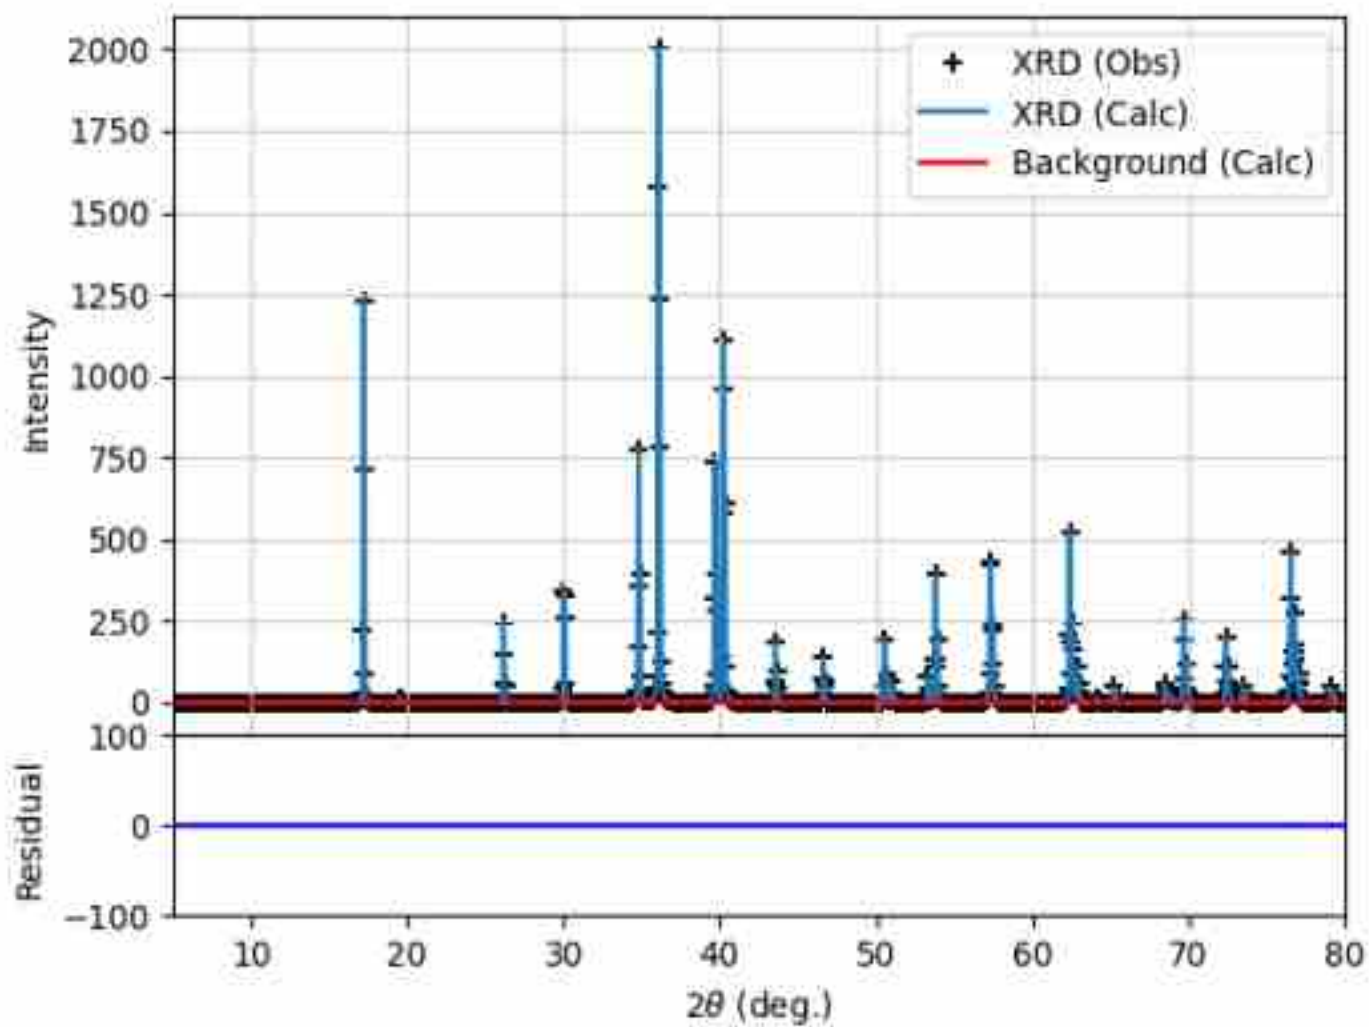

| RMSE before RR | Rwp   | RMSE after RR |
|----------------|-------|---------------|
| 0.011          | 0.041 | 0.00193       |



# Ba1Nd1Mn2O5

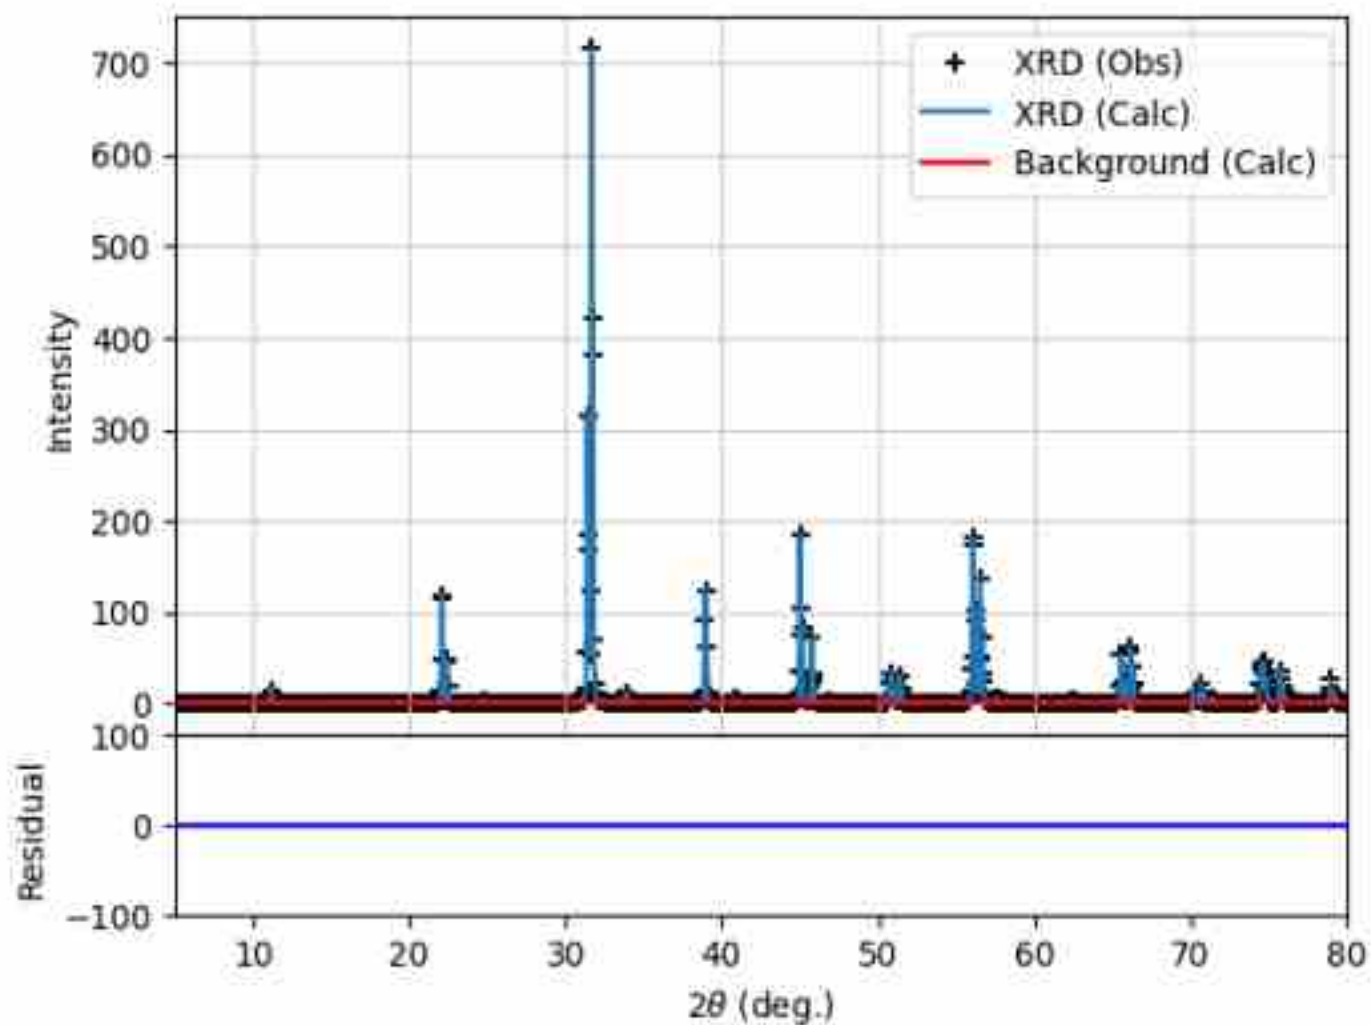

| RMSE before RR | Rwp     | RMSE after RR |
|----------------|---------|---------------|
| 0.011          | 0.00397 | 0.00106       |

# Ba1Ni2As2

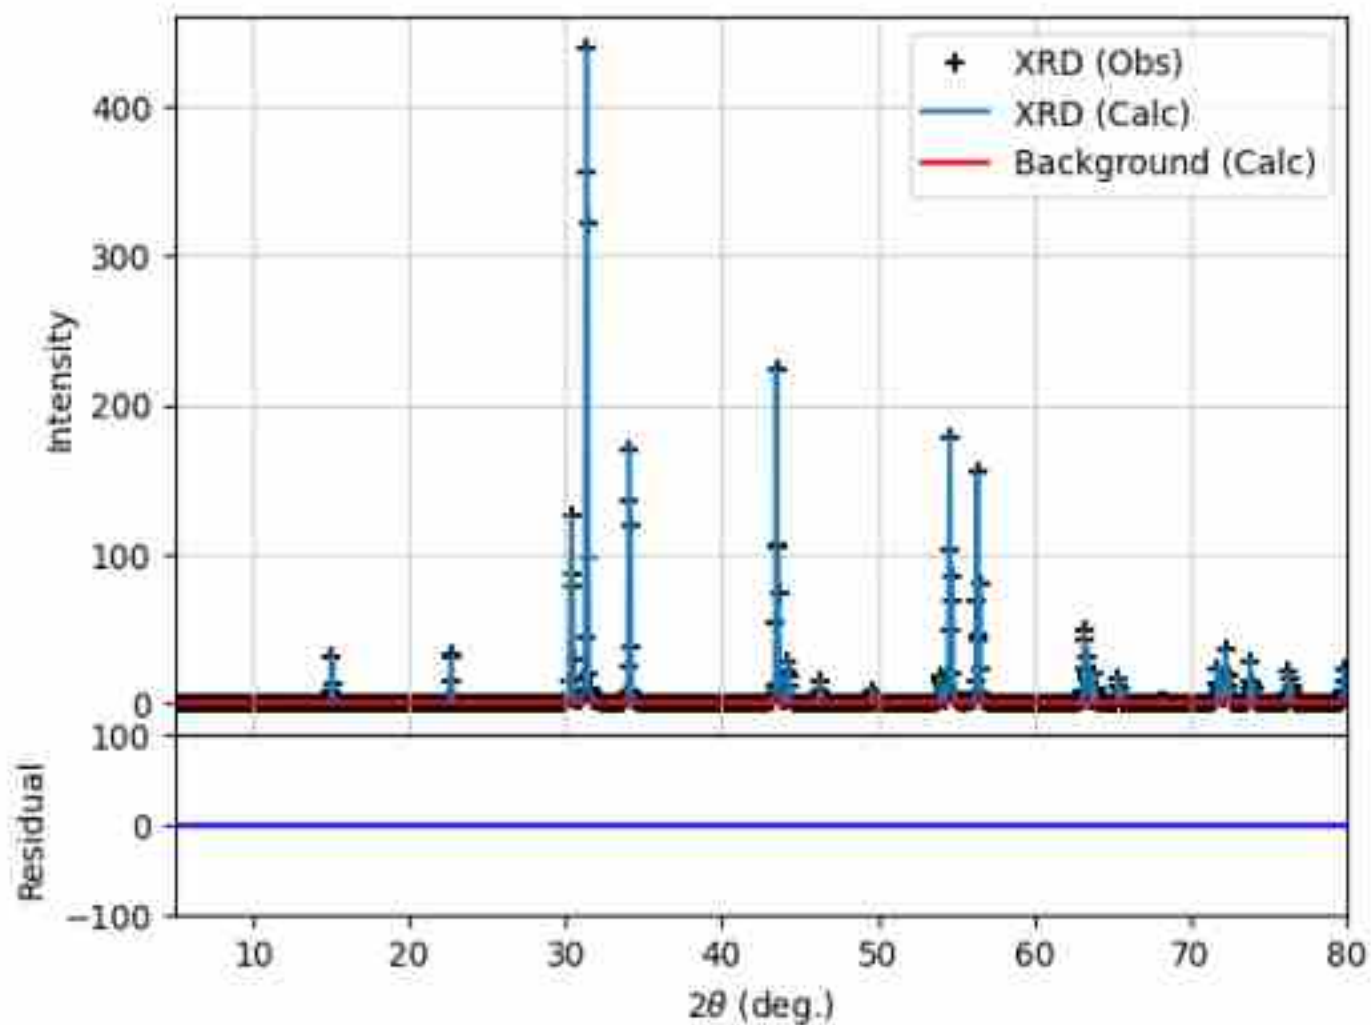

| RMSE before RR | Rwp    | RMSE after RR |
|----------------|--------|---------------|
| 0.011          | 0.0032 | 0.0004        |

# Ba1Np1O3

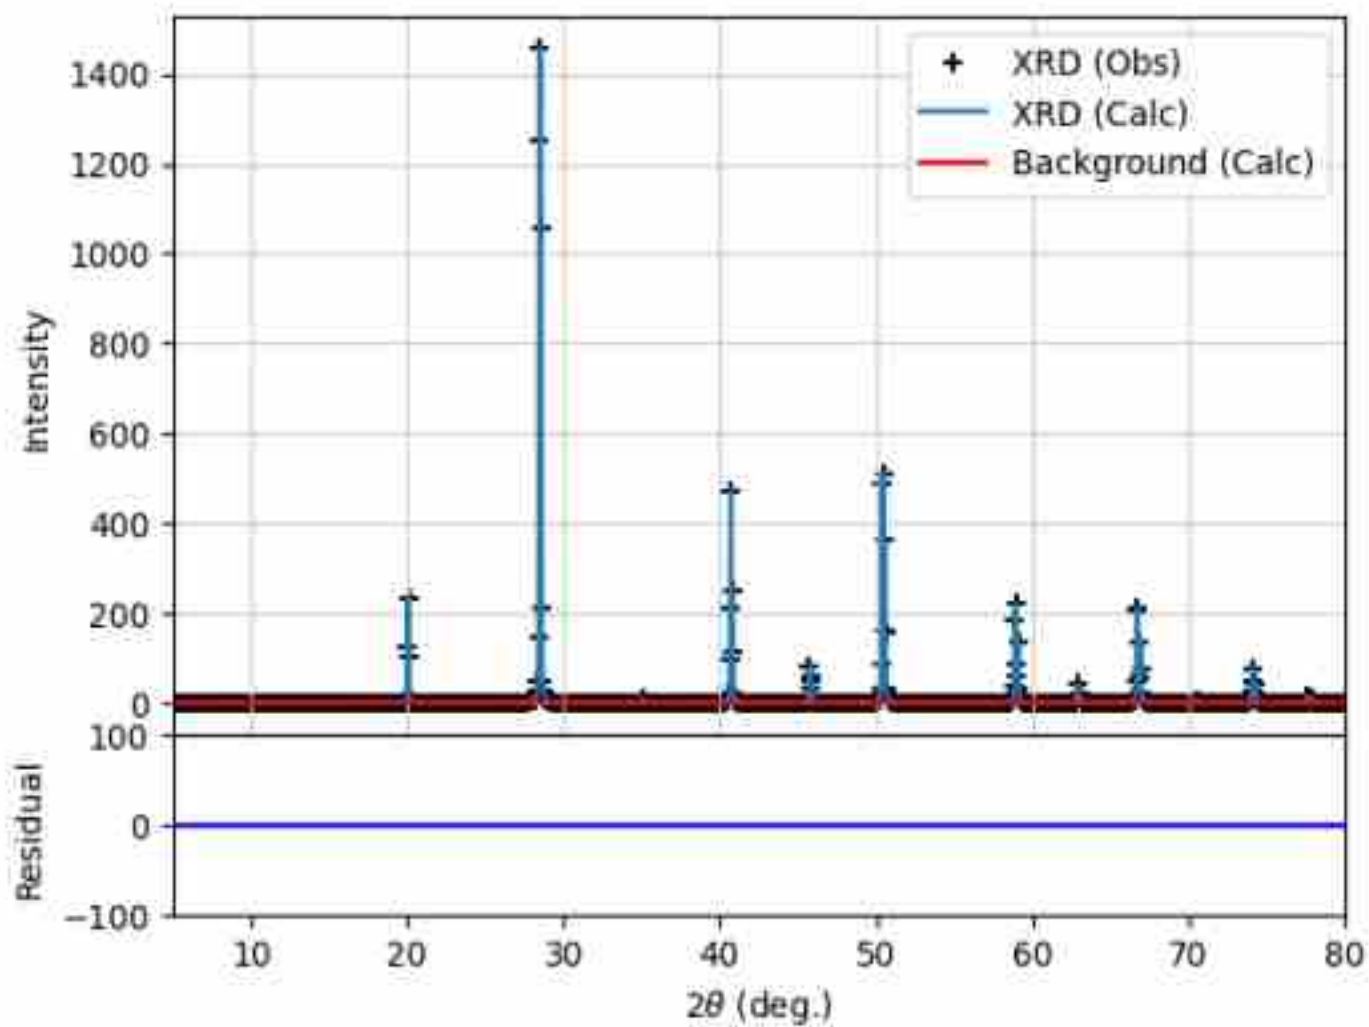

| RMSE before RR | Rwp     | RMSE after RR |
|----------------|---------|---------------|
| 0.011          | 0.00293 | 0.00125       |

# Ba1P2Os2

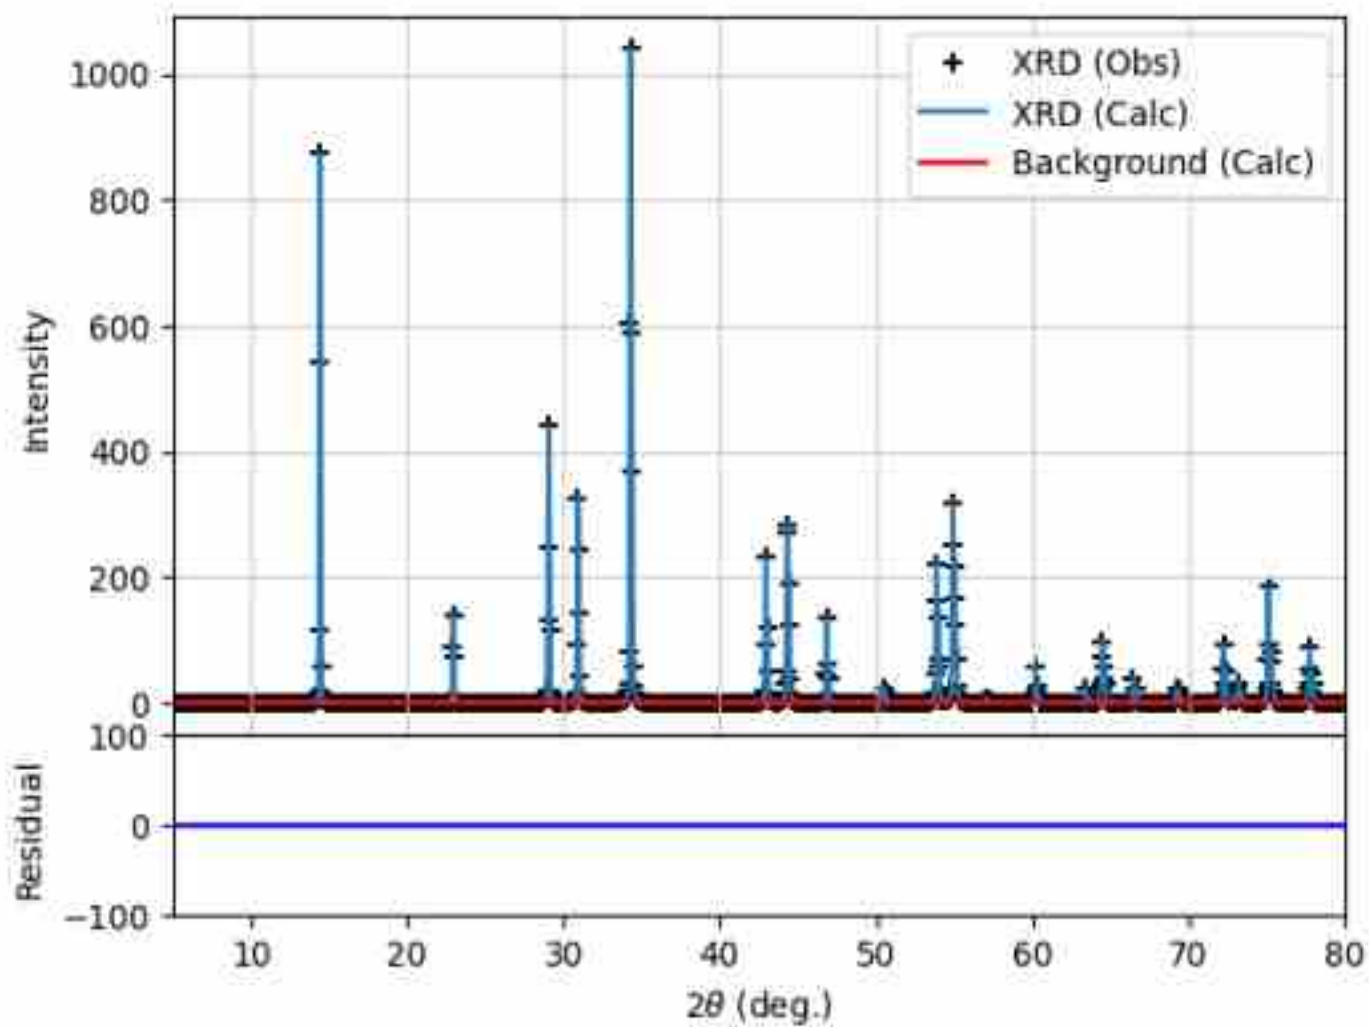

| RMSE before RR | Rwp     | RMSE after RR |
|----------------|---------|---------------|
| 0.011          | 0.00301 | 0.00037       |

# Ba1Sr1Mn1W1O6

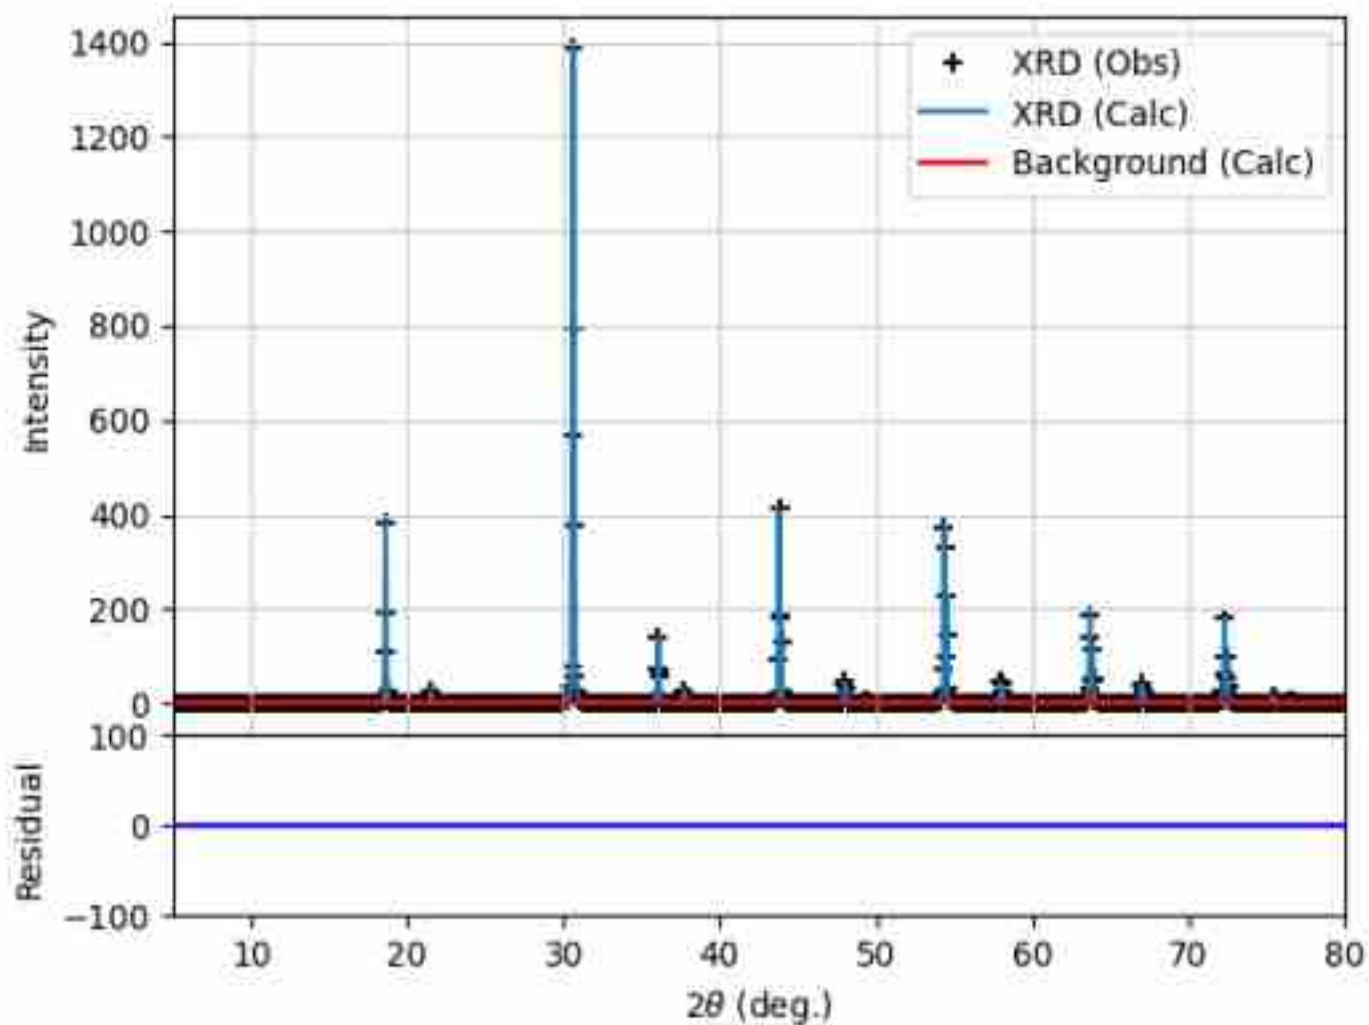

| RMSE before RR | Rwp     | RMSE after RR |
|----------------|---------|---------------|
| 0.011          | 0.00629 | 0.00264       |

# Ba2Cd1Mo1O6

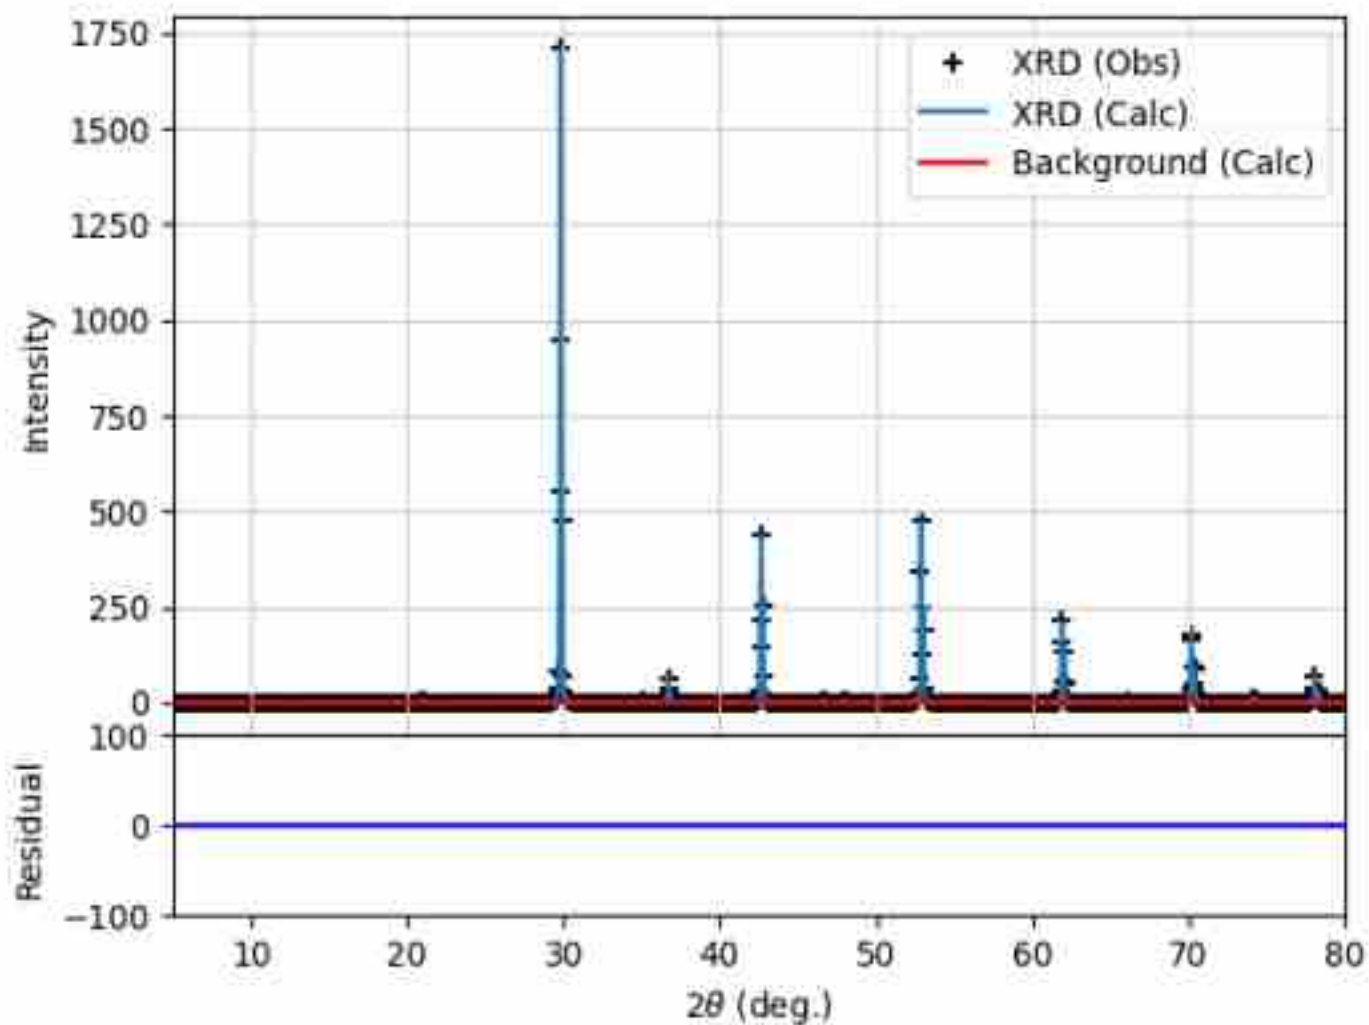

| RMSE before RR | Rwp     | RMSE after RR |
|----------------|---------|---------------|
| 0.011          | 0.01606 | 0.00538       |

# Ba<sub>2</sub>Ce<sub>1</sub>Sn<sub>1</sub>O<sub>6</sub>

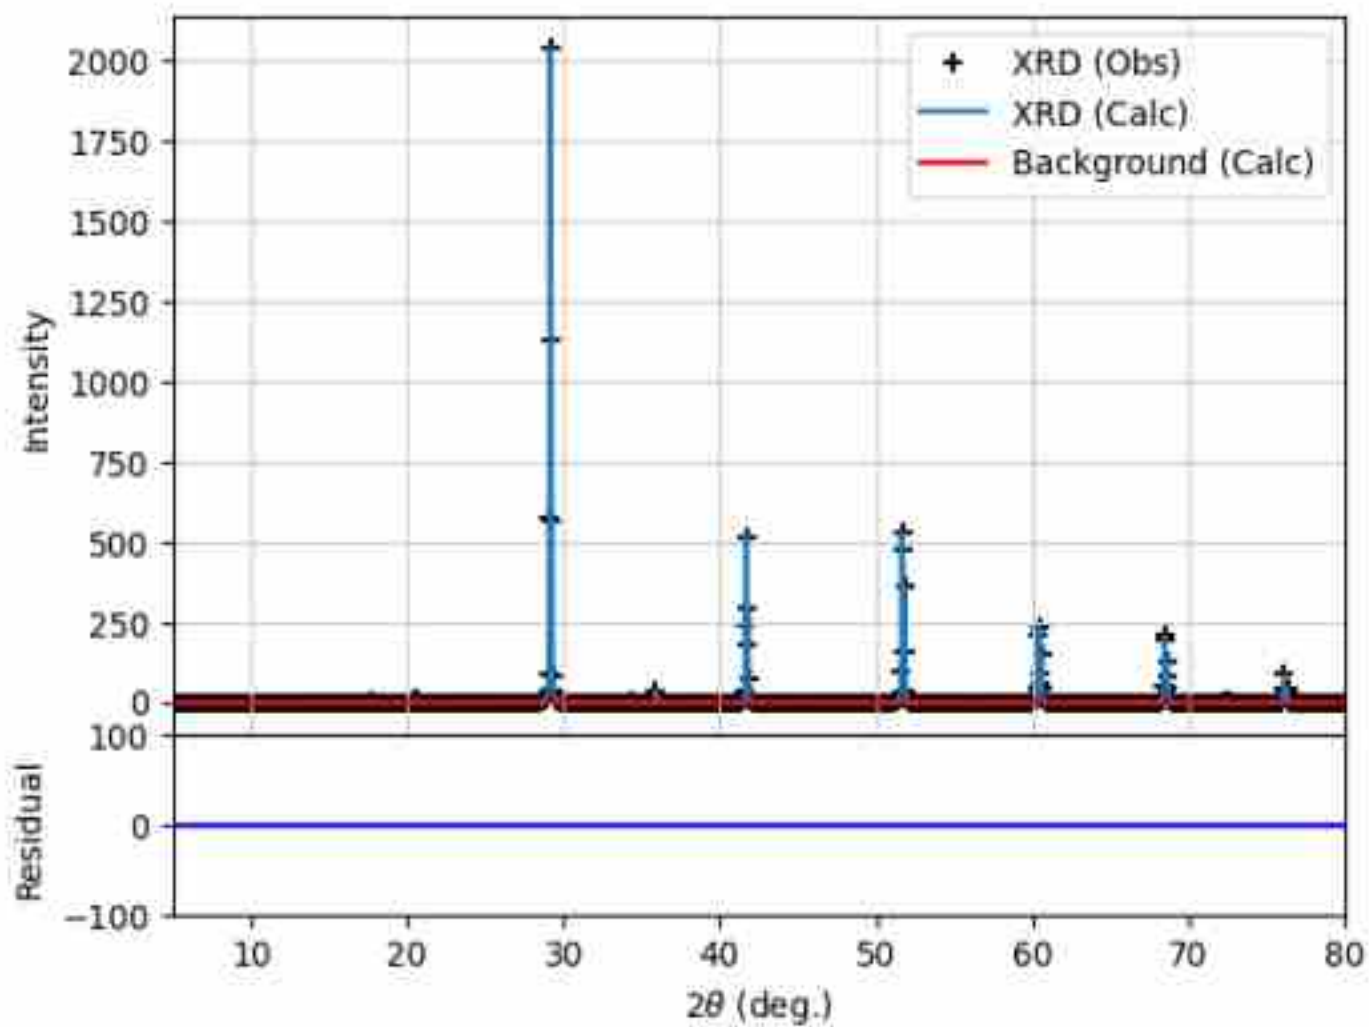

| RMSE before RR | Rwp     | RMSE after RR |
|----------------|---------|---------------|
| 0.011          | 0.02352 | 0.00624       |

# Ba<sub>2</sub>Ce<sub>1</sub>Zr<sub>1</sub>O<sub>6</sub>

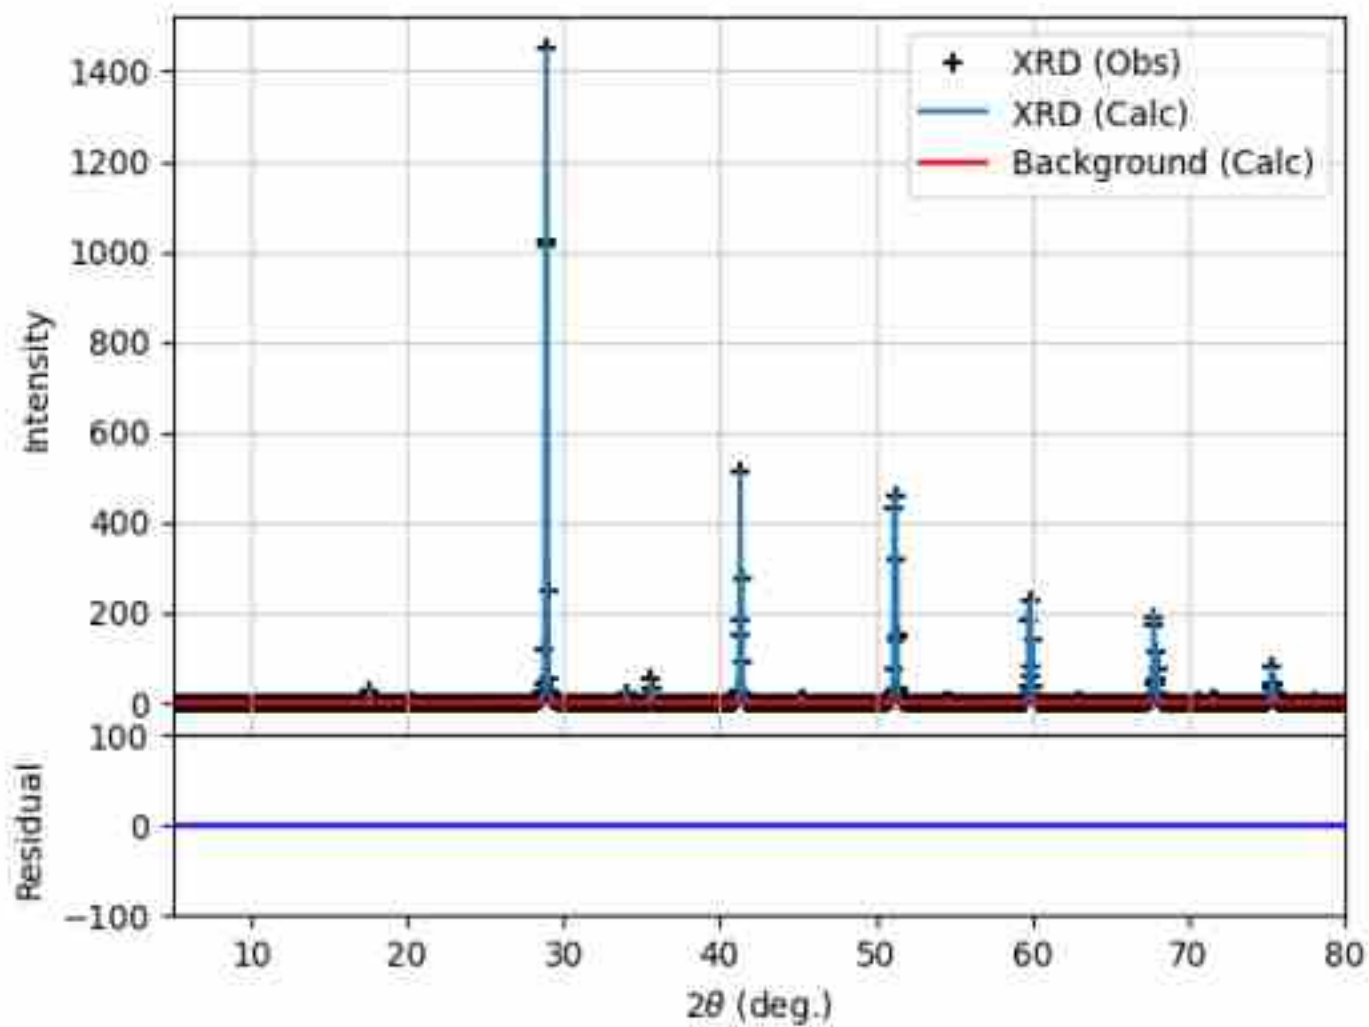

| RMSE before RR | Rwp     | RMSE after RR |
|----------------|---------|---------------|
| 0.011          | 0.00653 | 0.00246       |



# Ba<sub>2</sub>Dy<sub>1</sub>Bi<sub>1</sub>O<sub>6</sub>

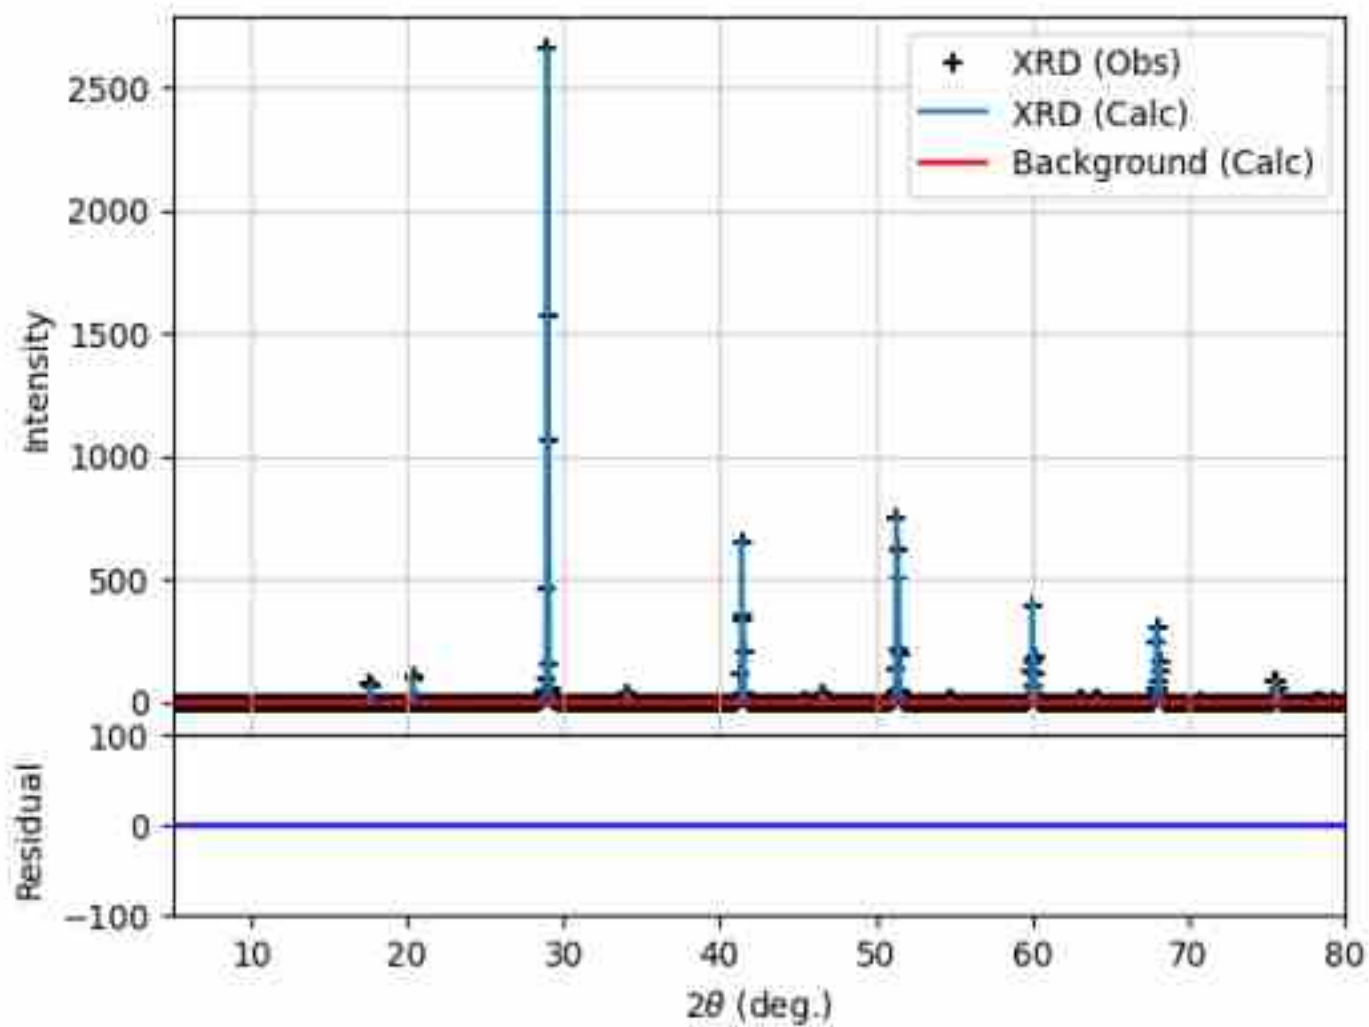

| RMSE before RR | Rwp     | RMSE after RR |
|----------------|---------|---------------|
| 0.011          | 0.00386 | 0.00213       |

# Ba<sub>2</sub>ErTaO<sub>6</sub>

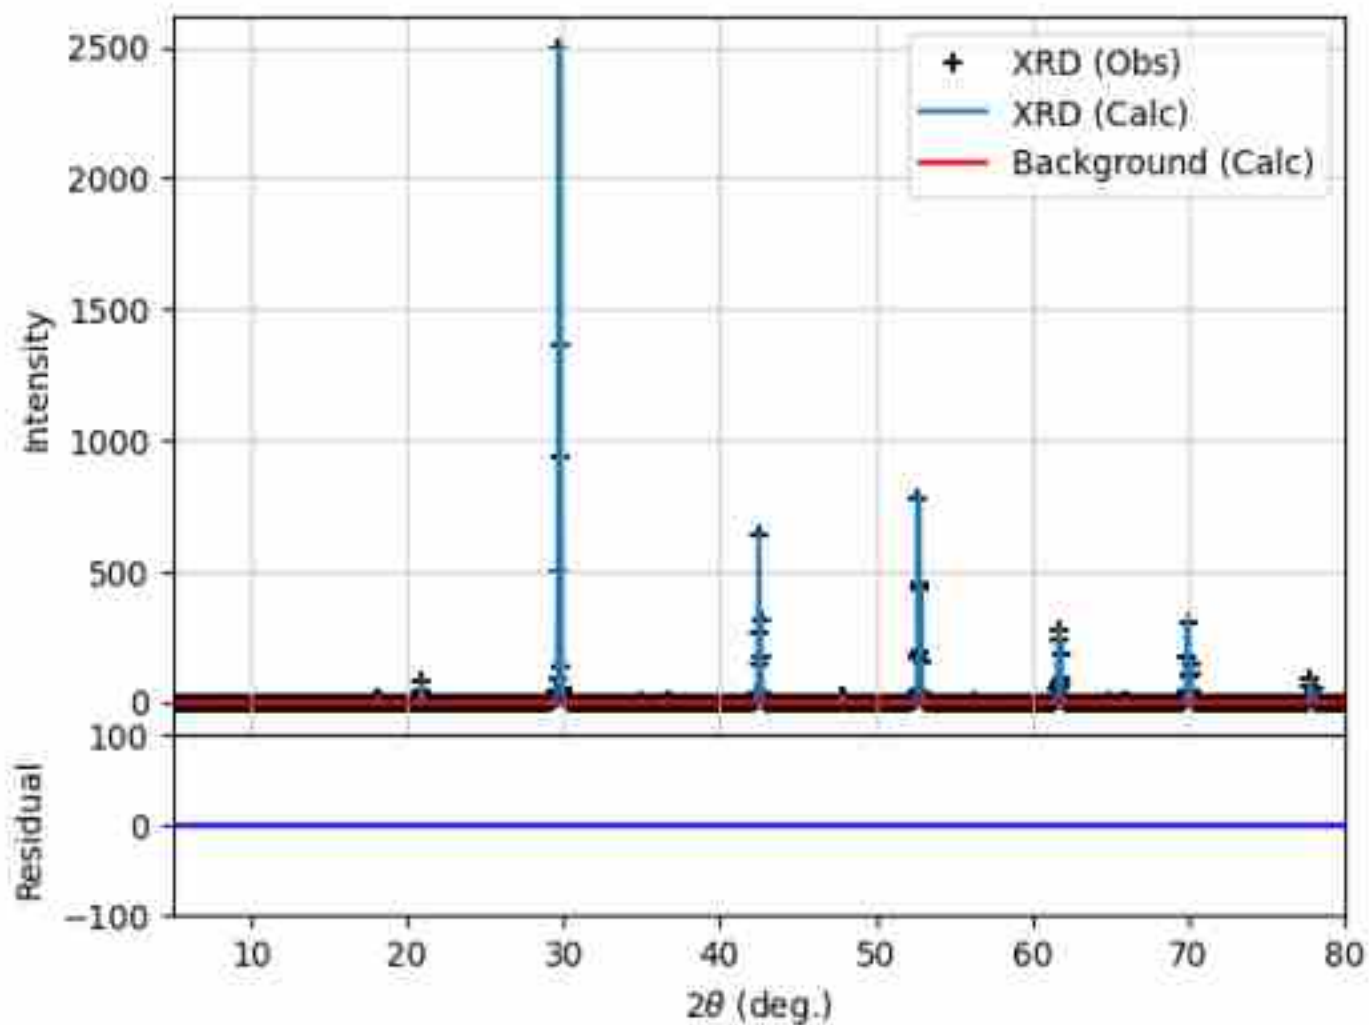

| RMSE before RR | Rwp     | RMSE after RR |
|----------------|---------|---------------|
| 0.011          | 0.00587 | 0.00294       |

# Ba<sub>2</sub>Gd<sub>1</sub>Pa<sub>1</sub>O<sub>6</sub>

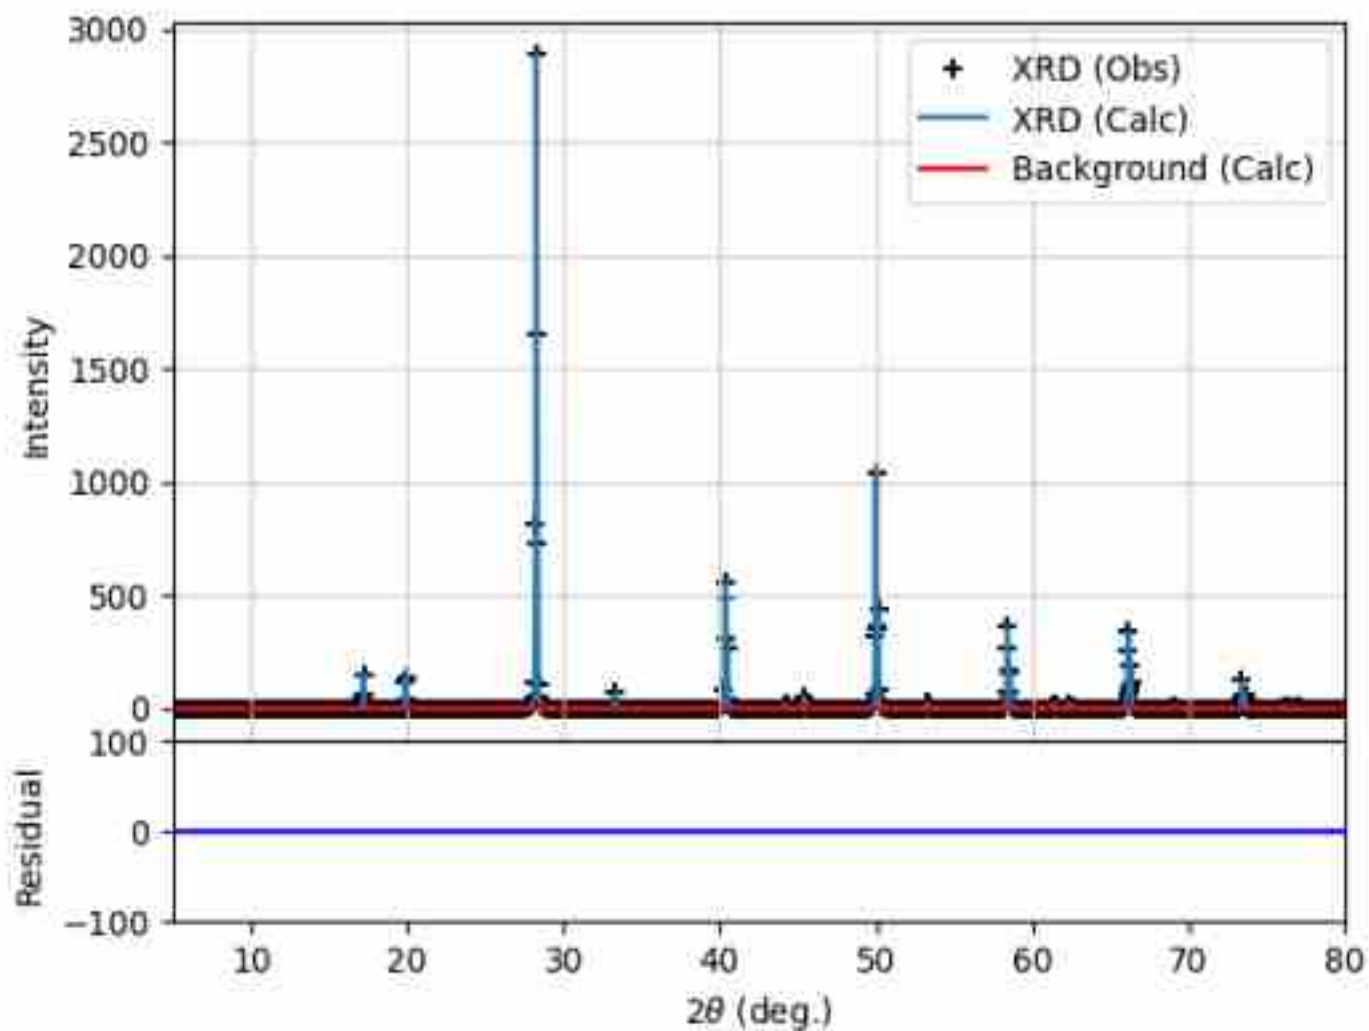

| RMSE before RR | Rwp     | RMSE after RR |
|----------------|---------|---------------|
| 0.011          | 0.00375 | 0.00161       |

# Ba<sub>2</sub>In<sub>1</sub>Cu<sub>1</sub>O<sub>4</sub>

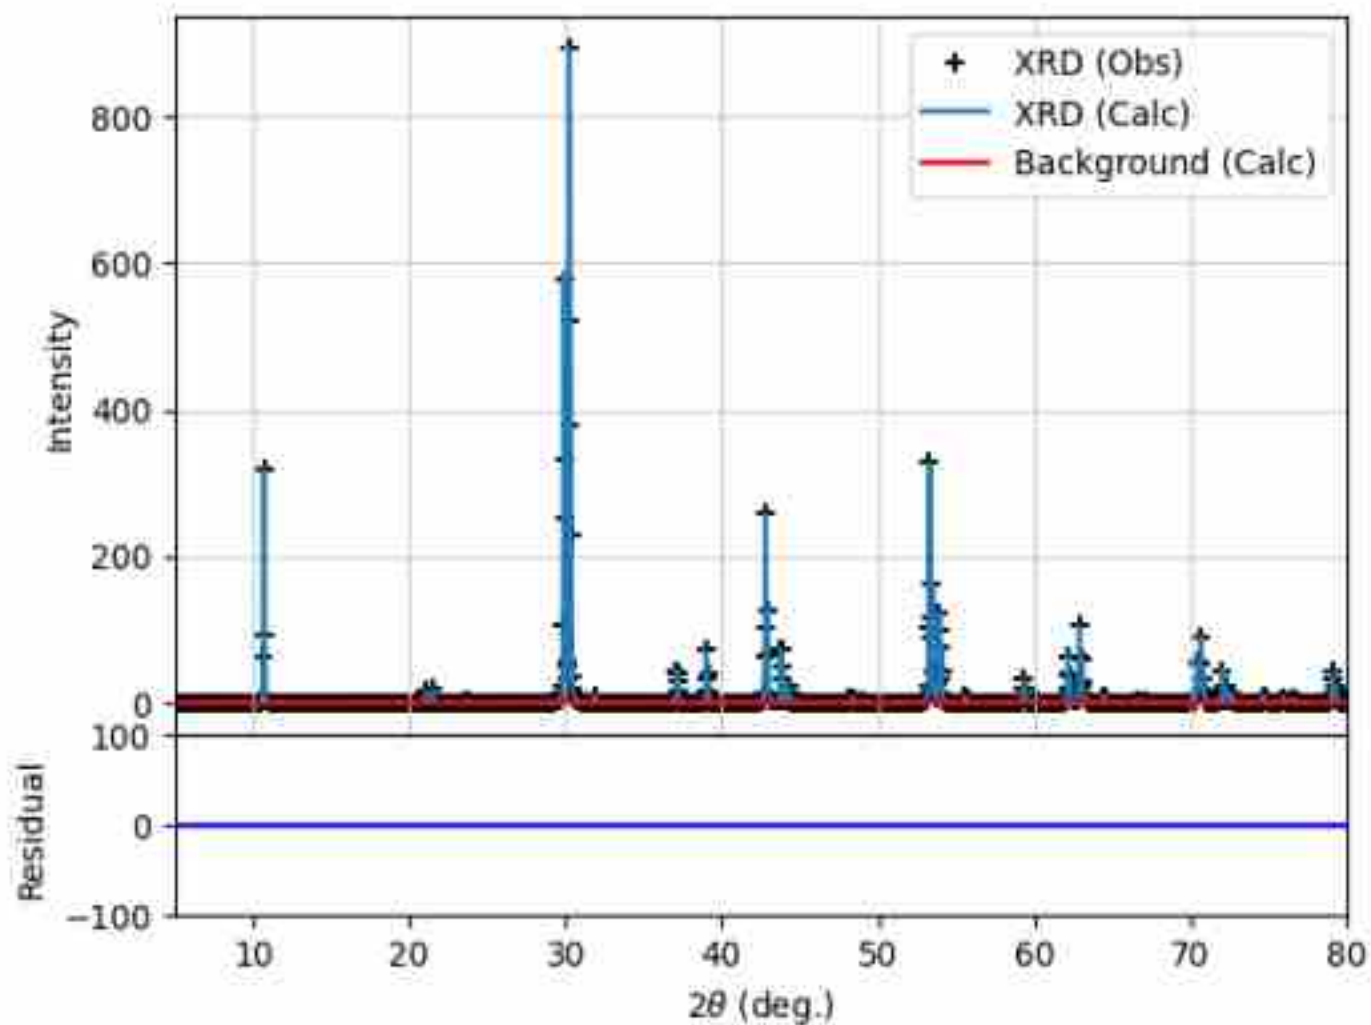

| RMSE before RR | Rwp     | RMSE after RR |
|----------------|---------|---------------|
| 0.011          | 0.00381 | 0.00098       |

# Ba<sub>2</sub>Nd<sub>1</sub>Co<sub>1</sub>Cu<sub>2</sub>O<sub>7</sub>

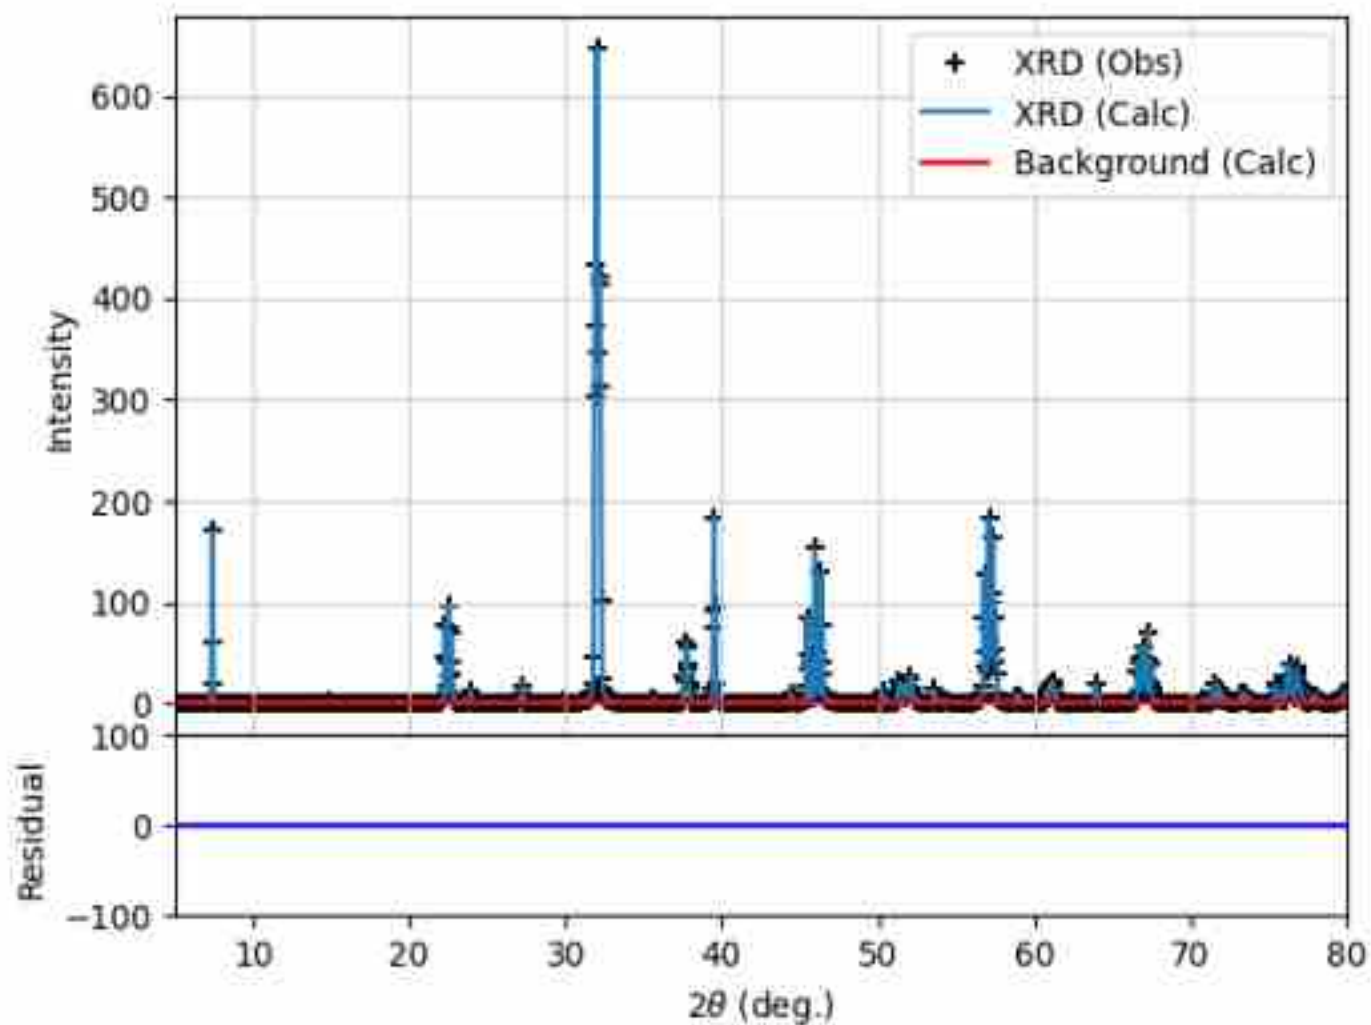

| RMSE before RR | Rwp     | RMSE after RR |
|----------------|---------|---------------|
| 0.011          | 0.00486 | 0.00094       |

# Ba<sub>2</sub>Sm<sub>1</sub>Pa<sub>1</sub>O<sub>6</sub>

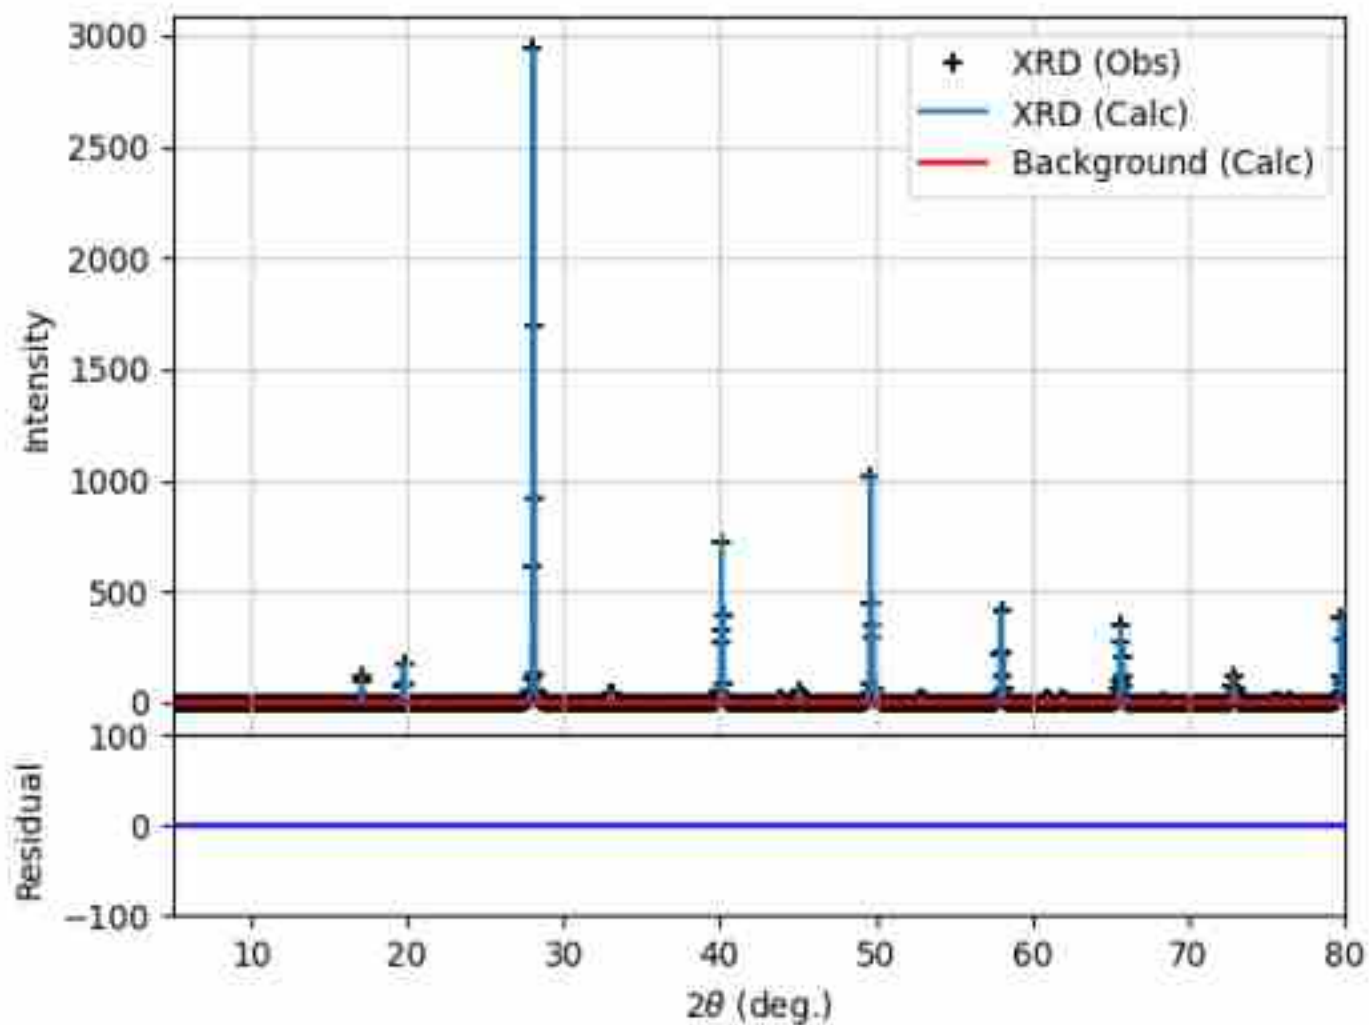

| RMSE before RR | Rwp     | RMSE after RR |
|----------------|---------|---------------|
| 0.011          | 0.00803 | 0.00404       |

# Ba<sub>2</sub>Tb<sub>1</sub>Bi<sub>1</sub>O<sub>6</sub>

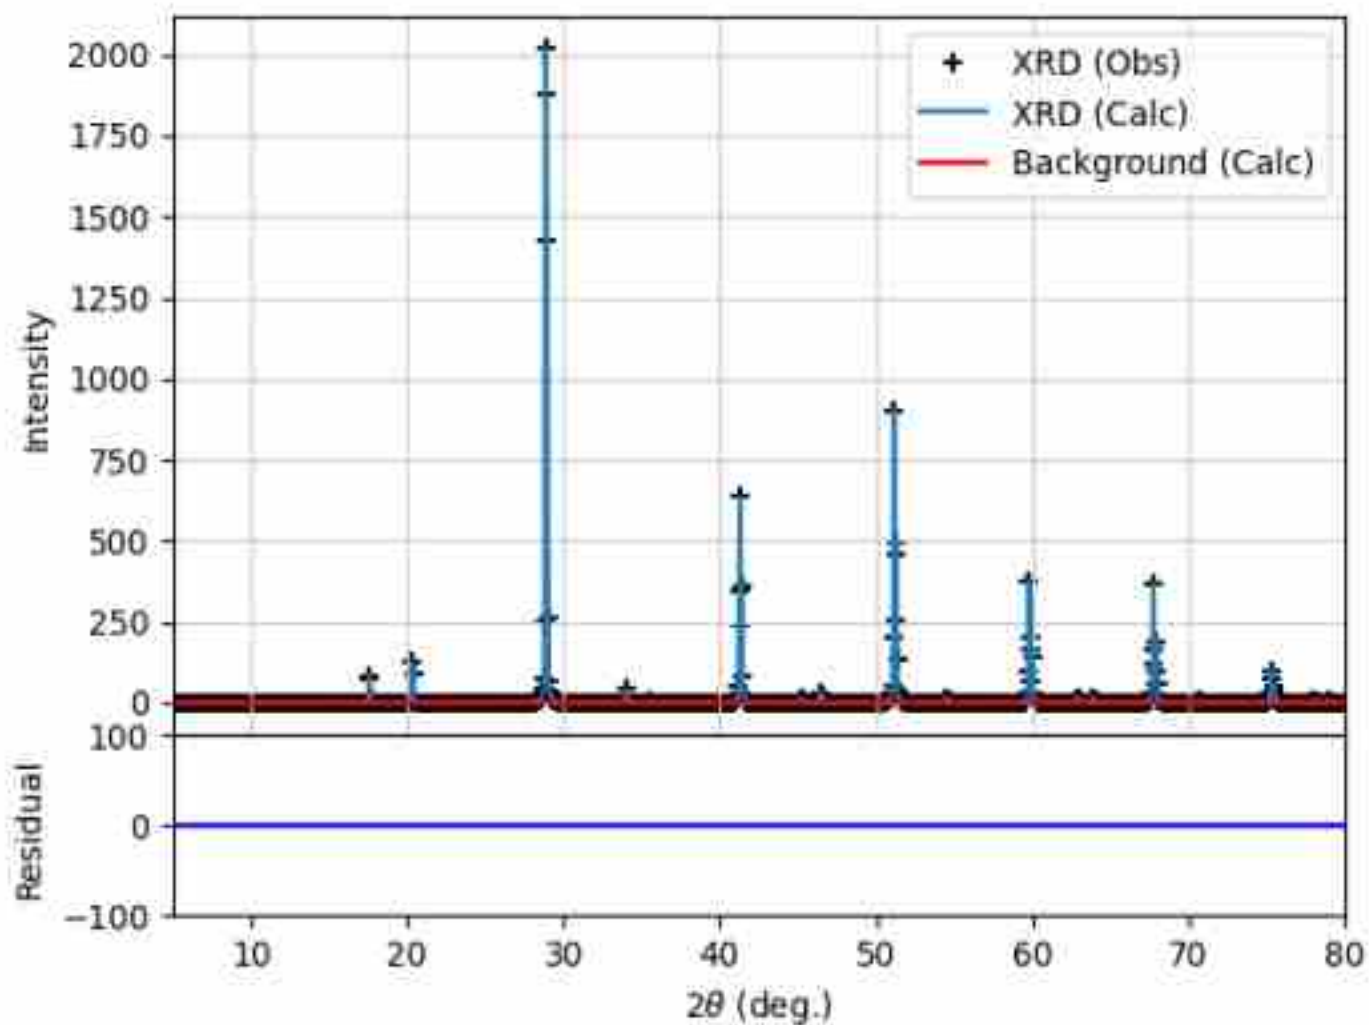

| RMSE before RR | Rwp     | RMSE after RR |
|----------------|---------|---------------|
| 0.011          | 0.00312 | 0.00177       |

# Ba<sub>2</sub>TbNb<sub>2</sub>O<sub>10</sub>

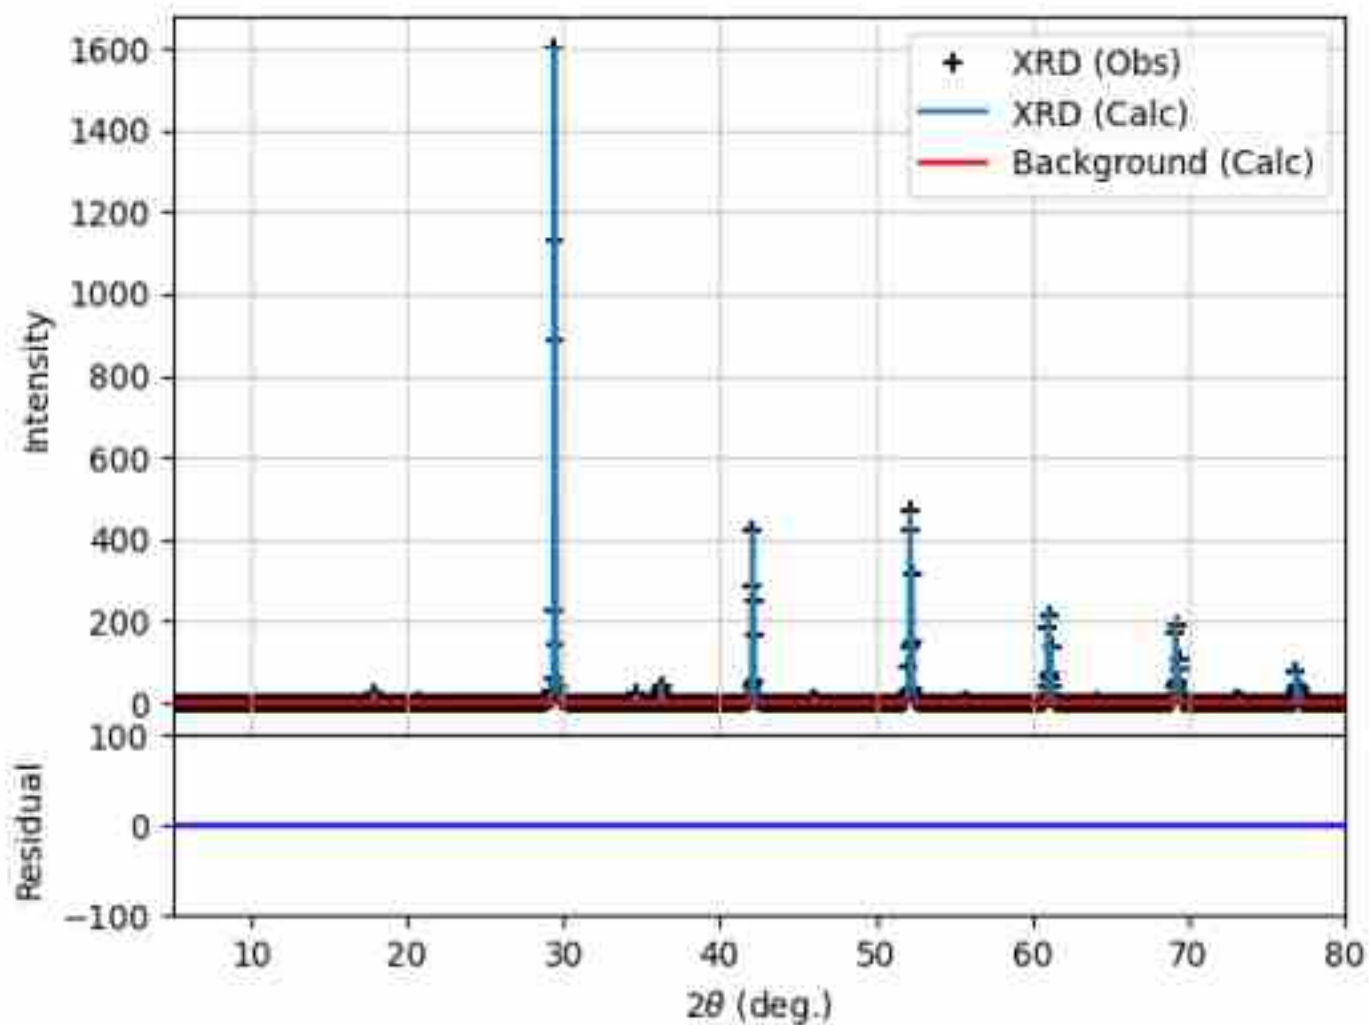

| RMSE before RR | Rwp     | RMSE after RR |
|----------------|---------|---------------|
| 0.011          | 0.03665 | 0.00751       |



# Ba<sub>2</sub>TmMoO<sub>6</sub>

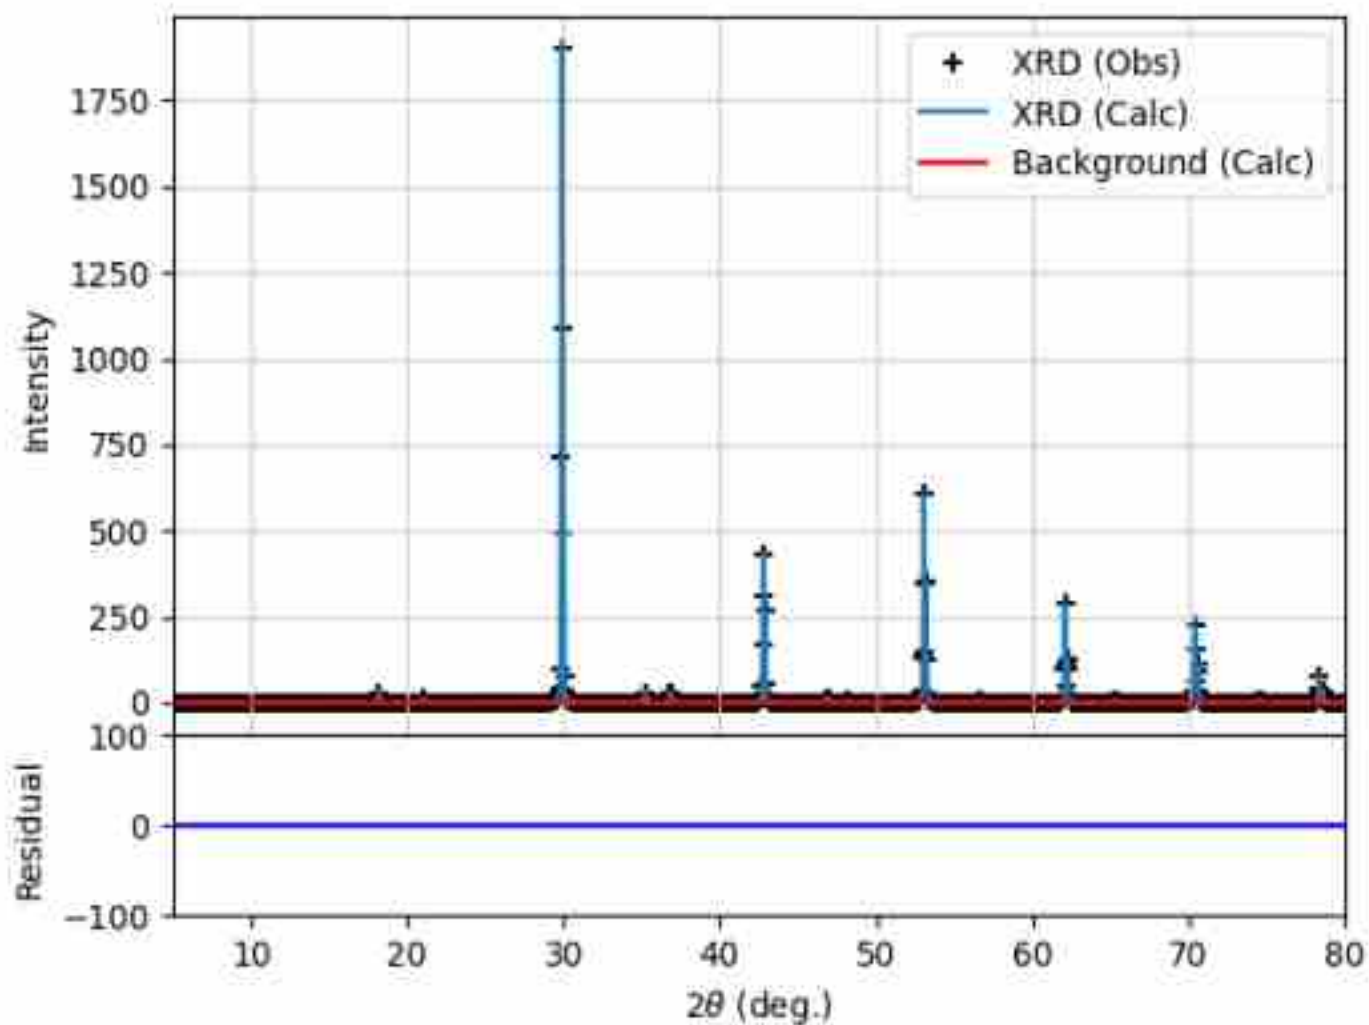

| RMSE before RR | Rwp     | RMSE after RR |
|----------------|---------|---------------|
| 0.011          | 0.02284 | 0.00658       |

# Ba<sub>2</sub>U<sub>1</sub>Cr<sub>1</sub>O<sub>6</sub>

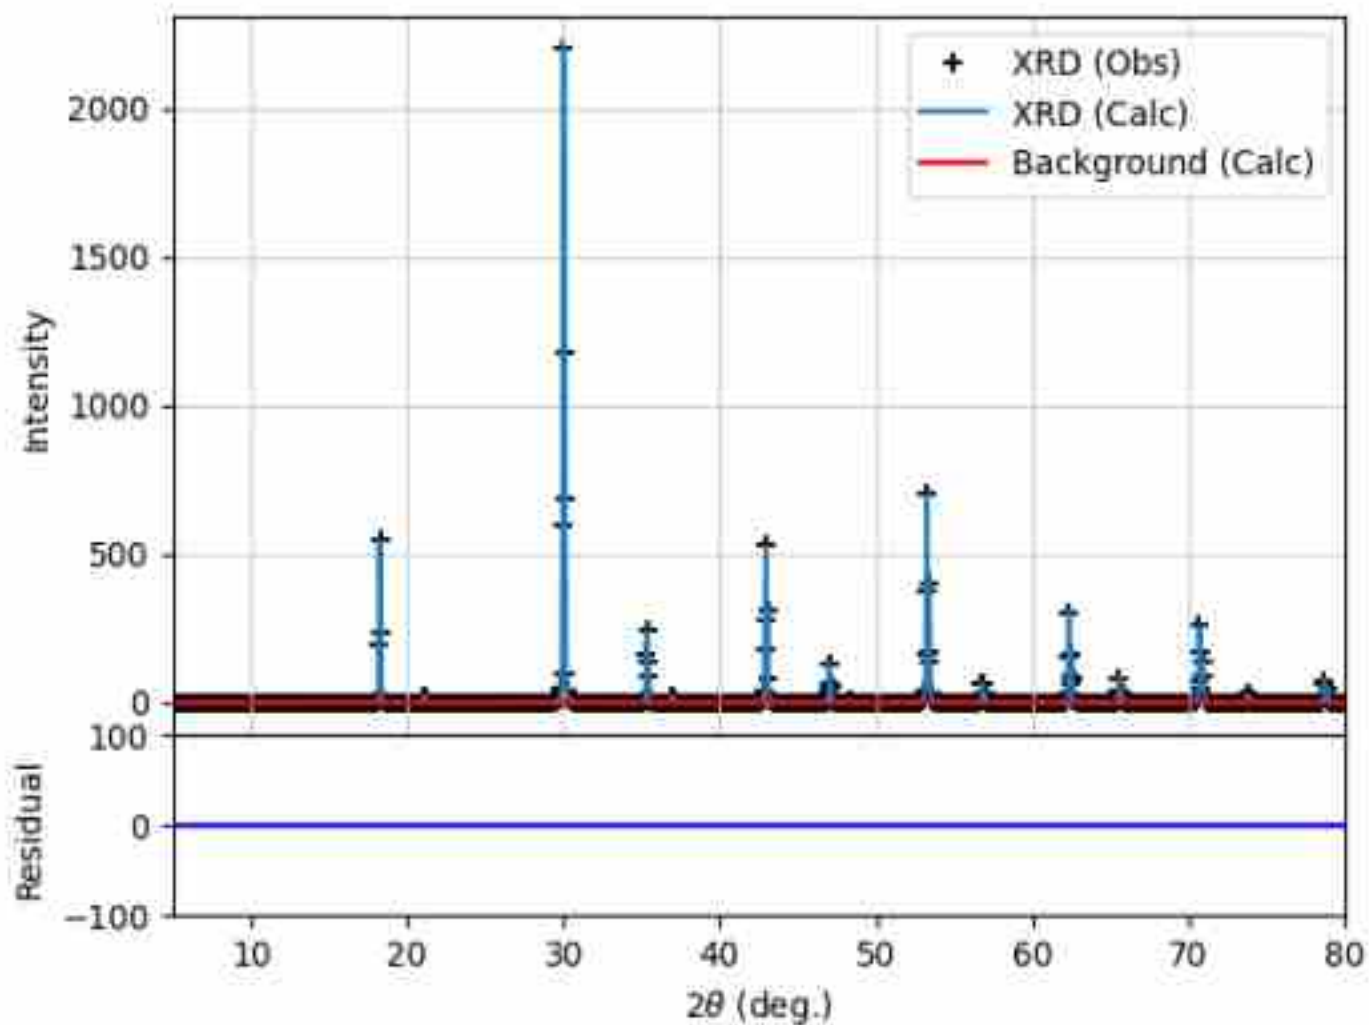

| RMSE before RR | Rwp     | RMSE after RR |
|----------------|---------|---------------|
| 0.011          | 0.01541 | 0.0056        |

# Ba2Y1U1O6

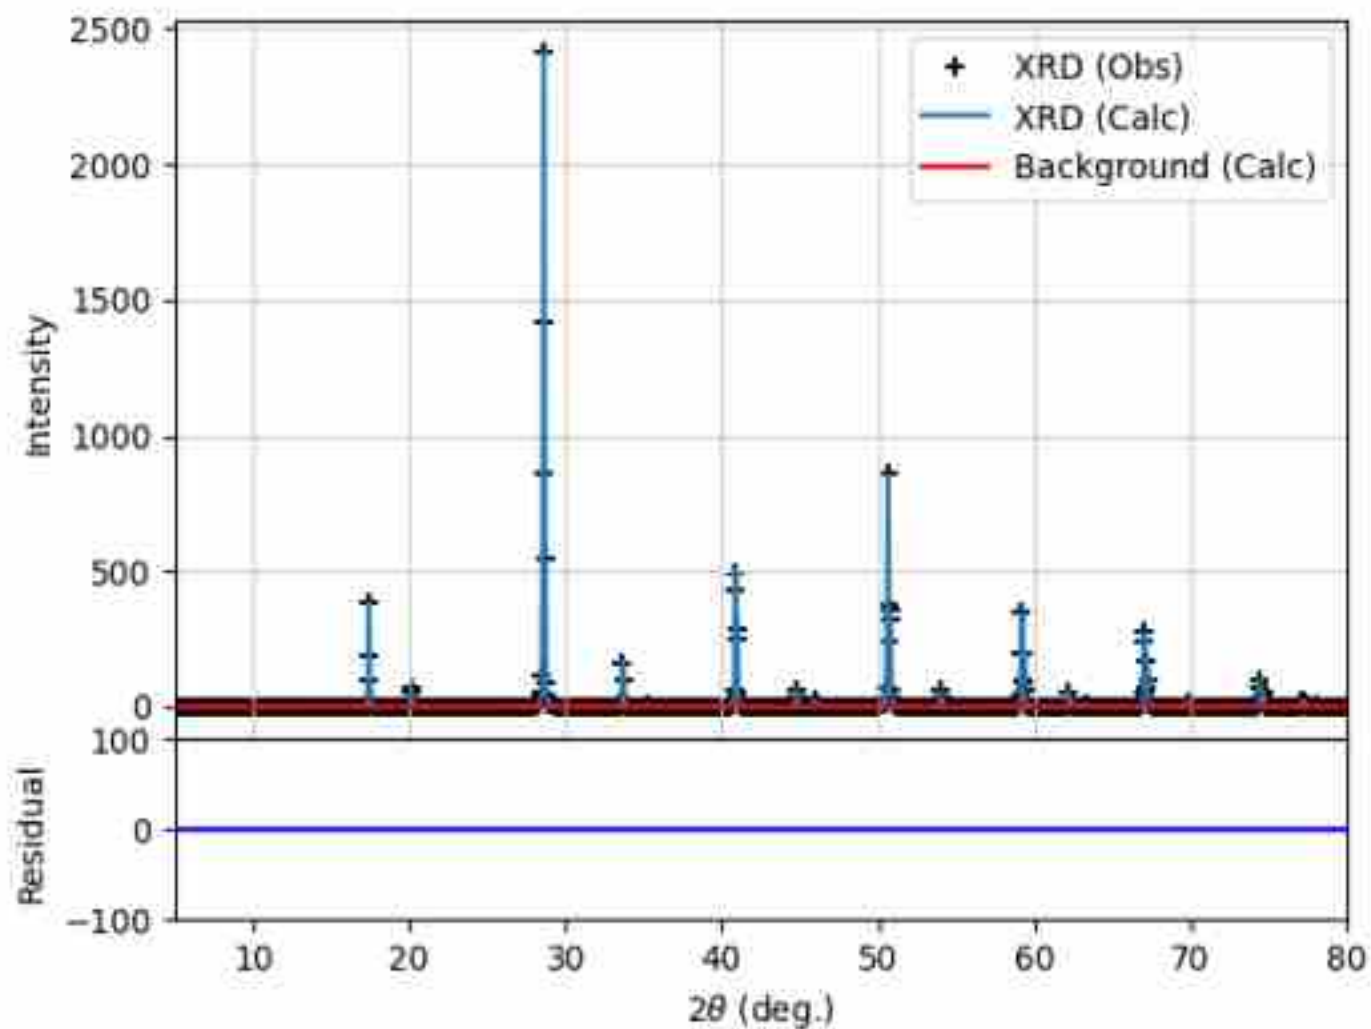

| RMSE before RR | Rwp     | RMSE after RR |
|----------------|---------|---------------|
| 0.011          | 0.00619 | 0.00364       |

# Ba<sub>2</sub>Y<sub>2</sub>Mn<sub>4</sub>O<sub>10</sub>

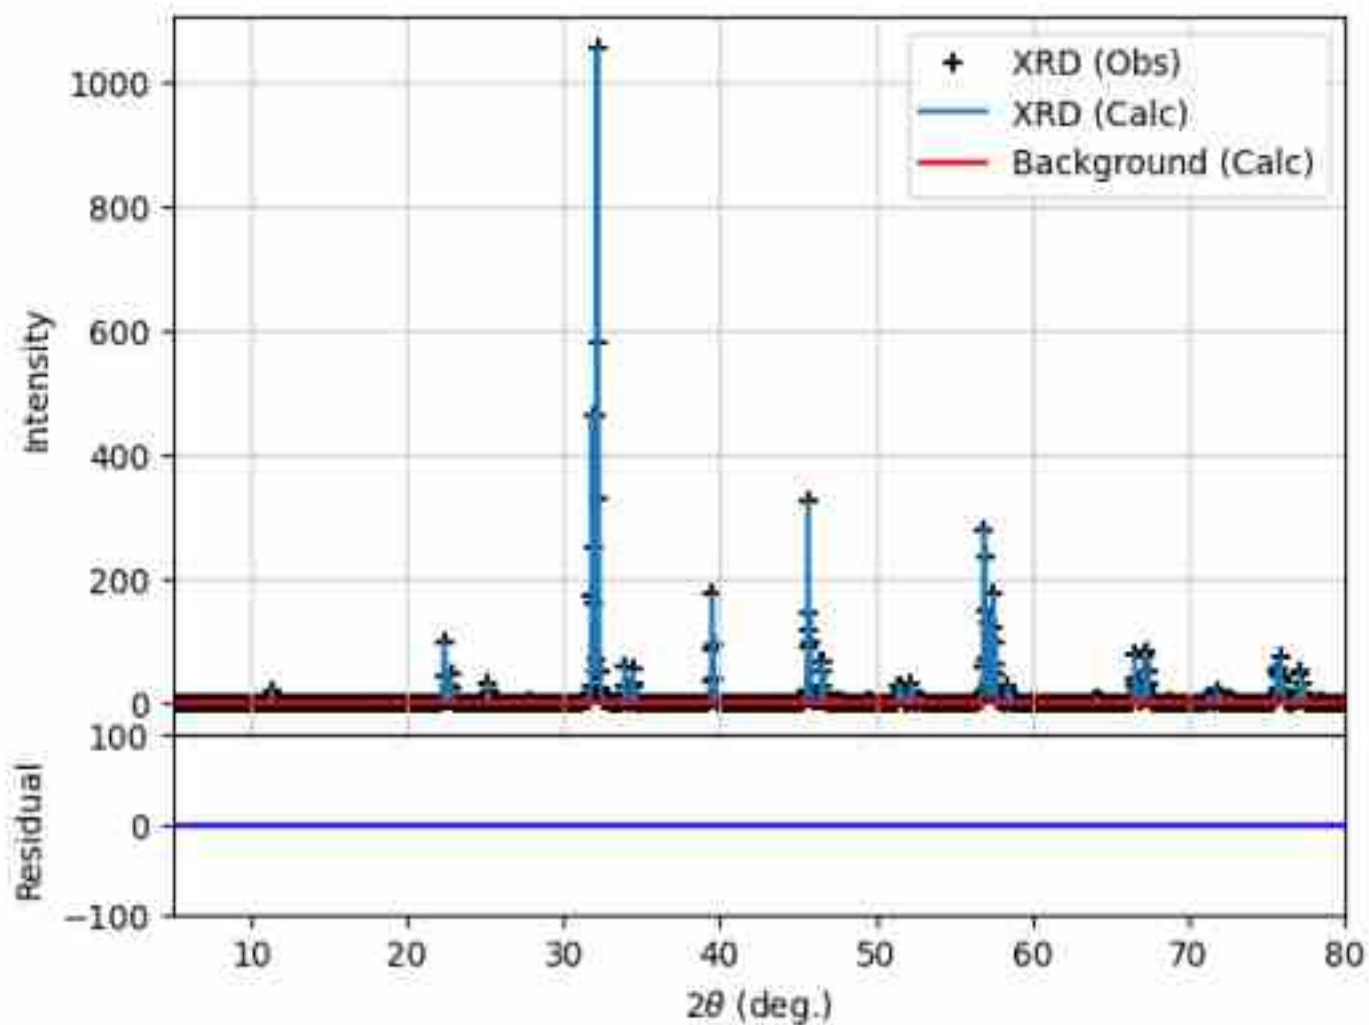

| RMSE before RR | Rwp     | RMSE after RR |
|----------------|---------|---------------|
| 0.011          | 0.25929 | 0.0112        |

# Ca<sub>1</sub>Eu<sub>2</sub>W<sub>1</sub>O<sub>6</sub>

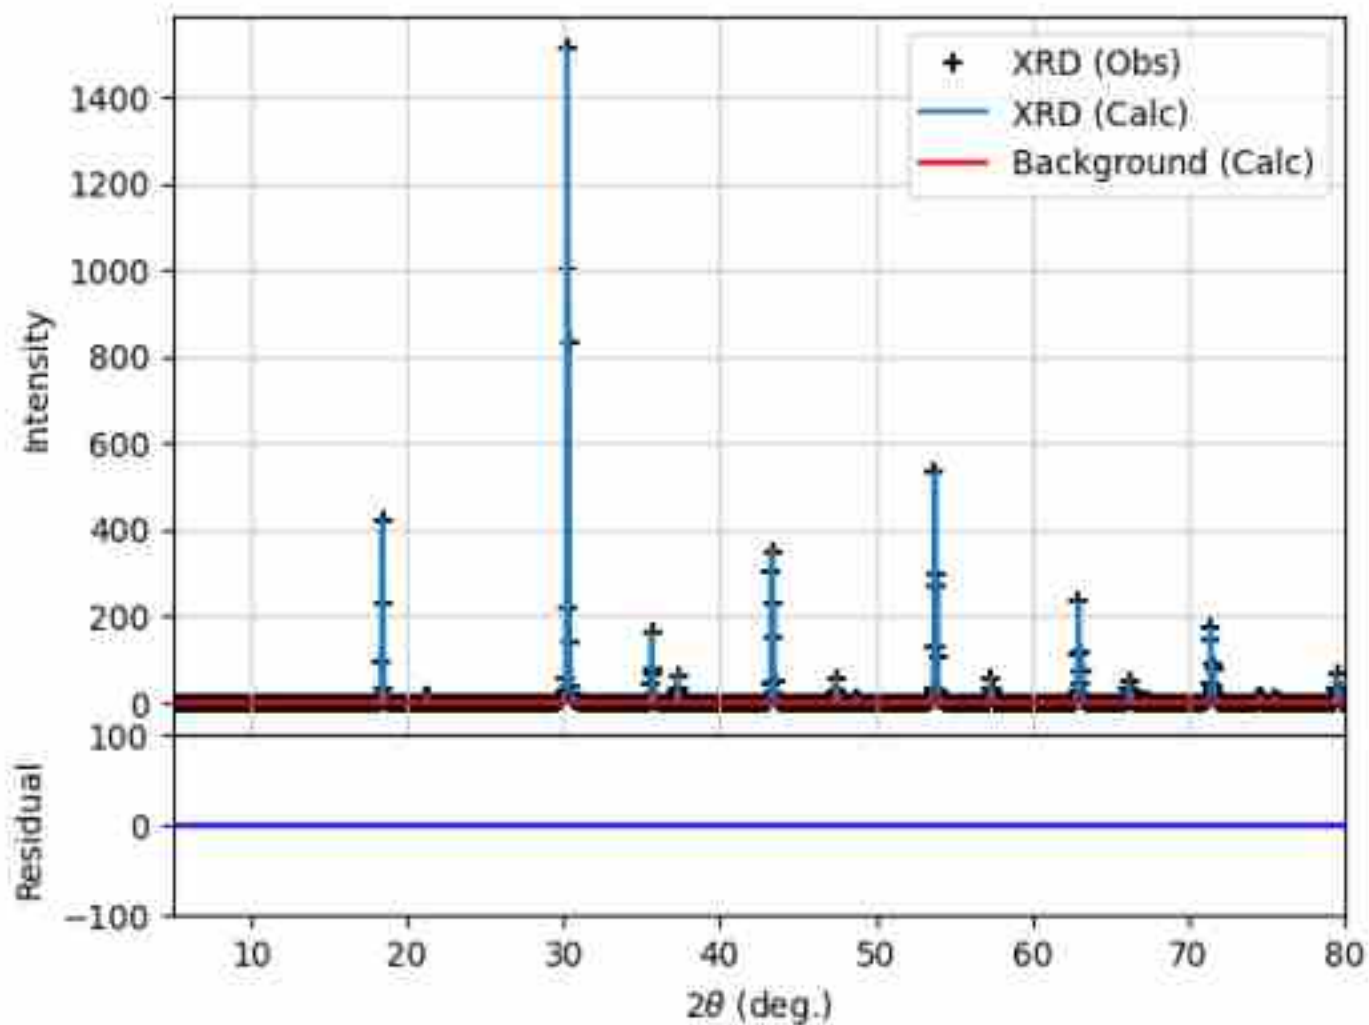

| RMSE before RR | Rwp     | RMSE after RR |
|----------------|---------|---------------|
| 0.011          | 0.00374 | 0.00194       |

# Cd<sub>1</sub>Ga<sub>2</sub>Se<sub>4</sub>

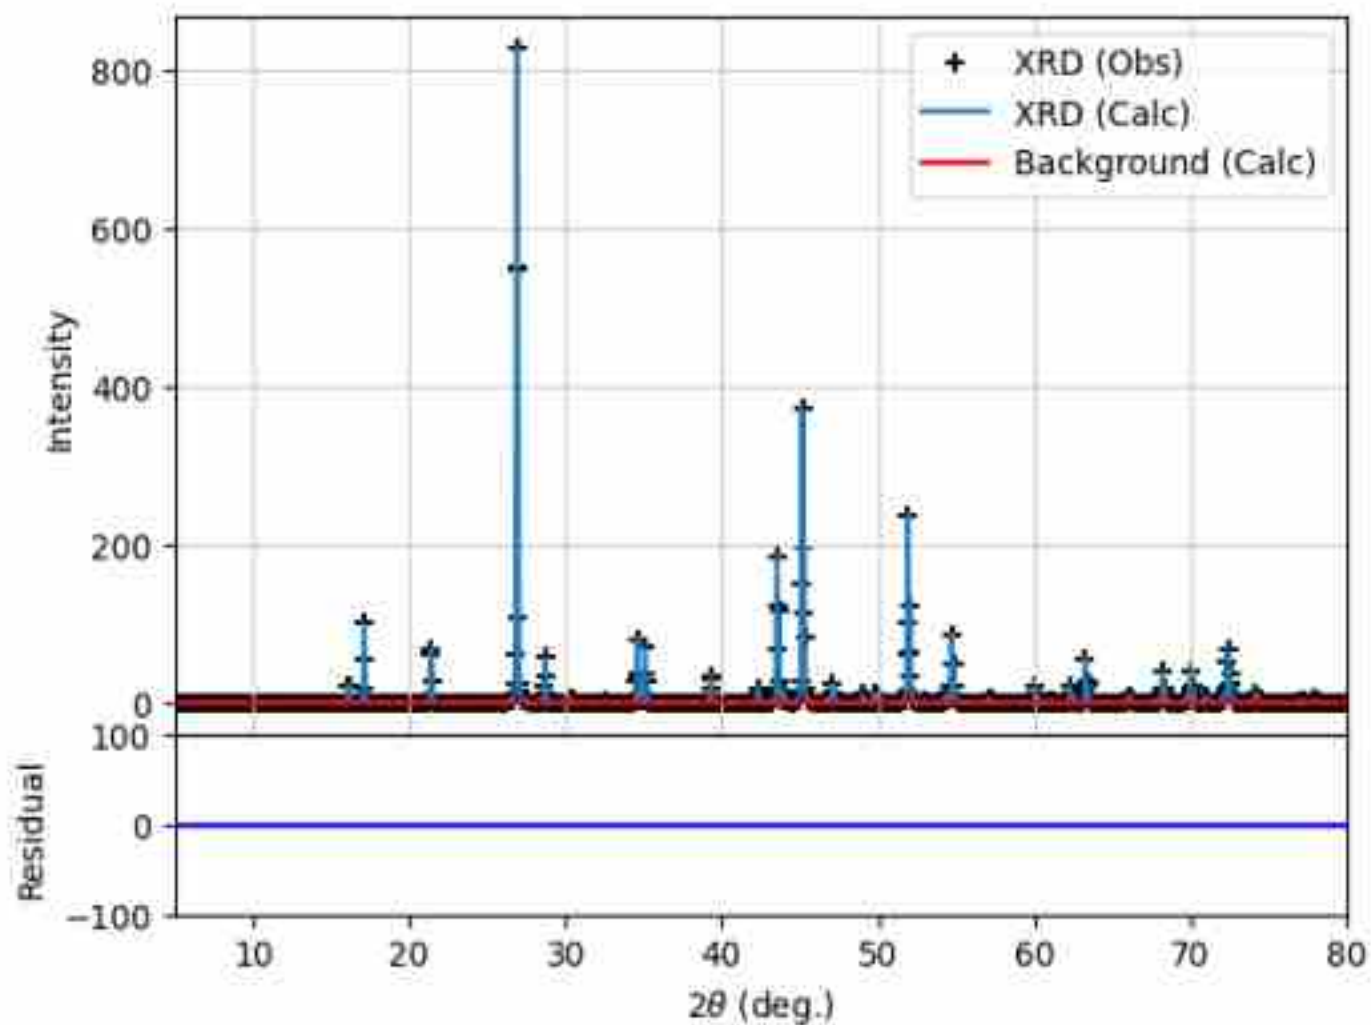

| RMSE before RR | Rwp     | RMSE after RR |
|----------------|---------|---------------|
| 0.011          | 0.00353 | 0.00041       |

# Cd<sub>2</sub>As<sub>2</sub>O<sub>7</sub>

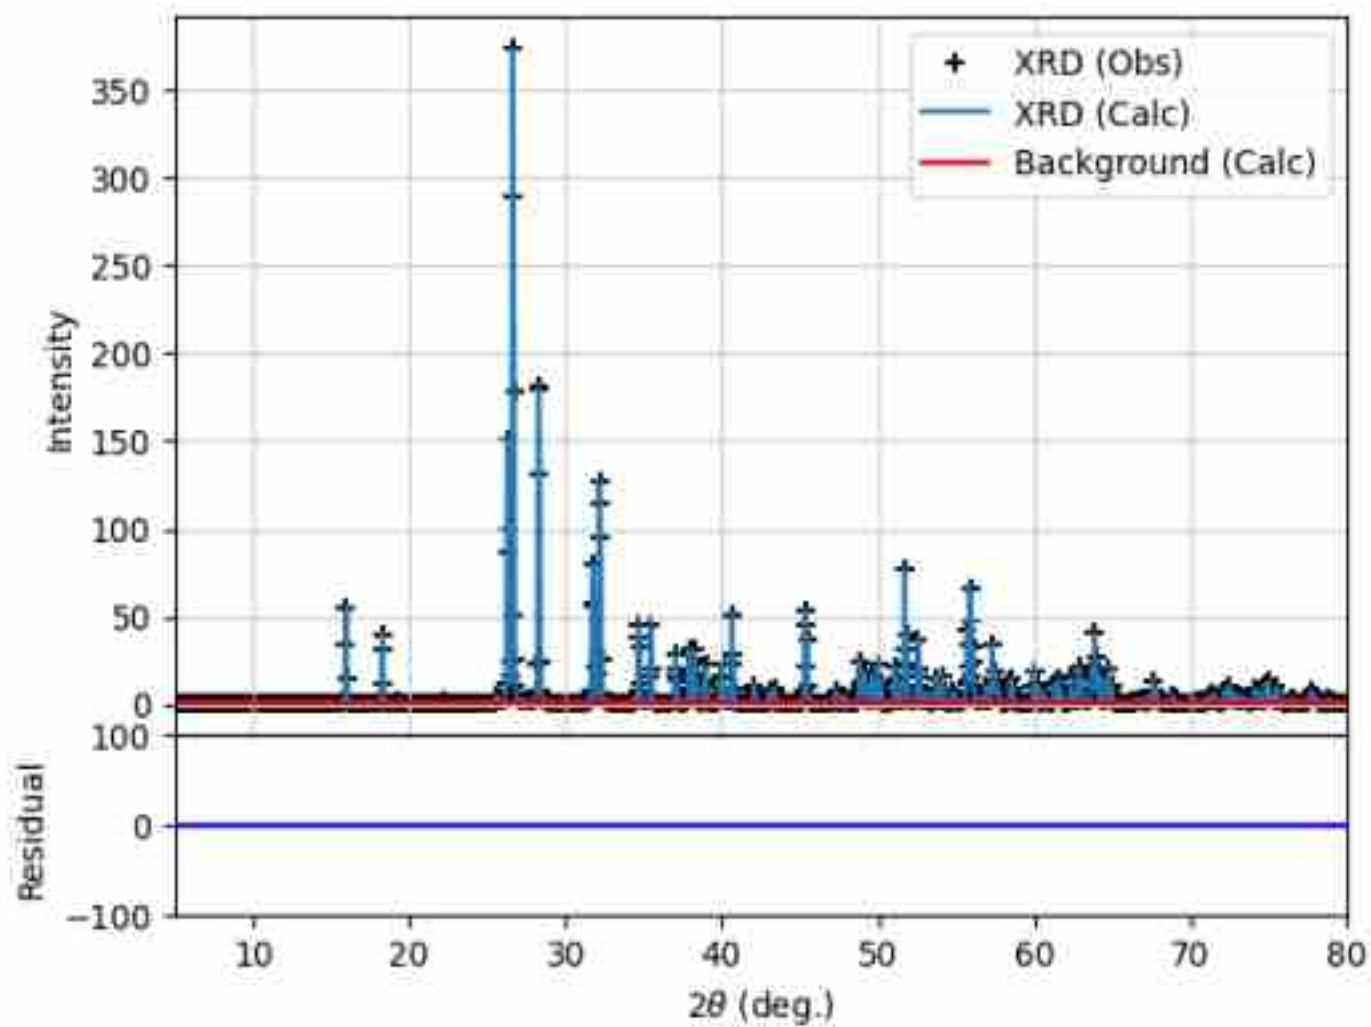

| RMSE before RR | Rwp     | RMSE after RR |
|----------------|---------|---------------|
| 0.011          | 0.00289 | 0.0005        |

# Ce1B2Pt2C1

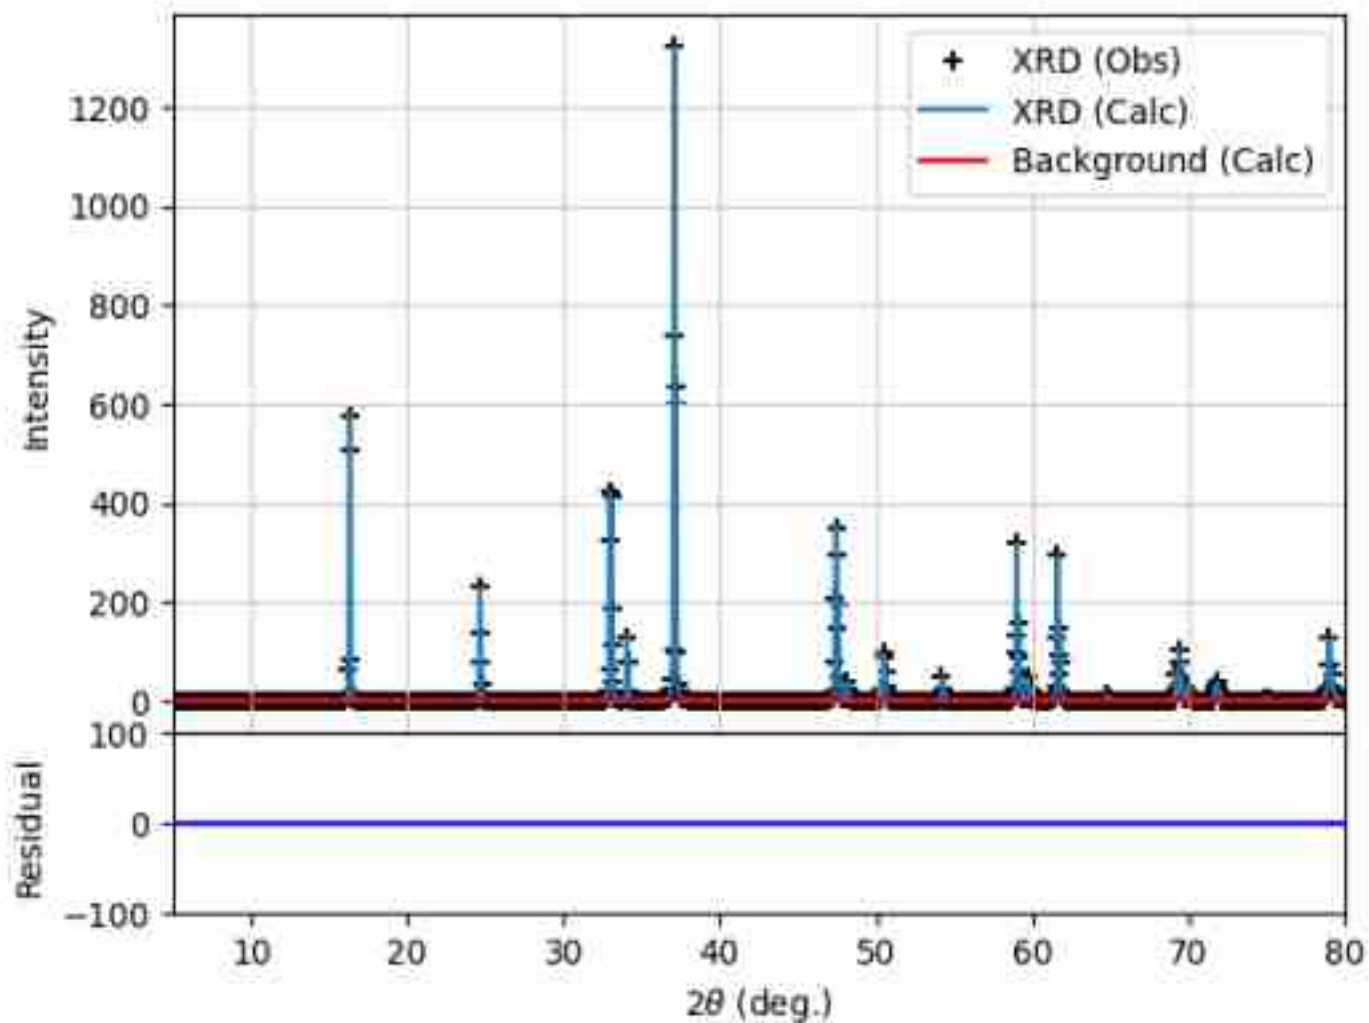

| RMSE before RR | Rwp     | RMSE after RR |
|----------------|---------|---------------|
| 0.011          | 0.00383 | 0.00197       |



# Ce1Er4S7

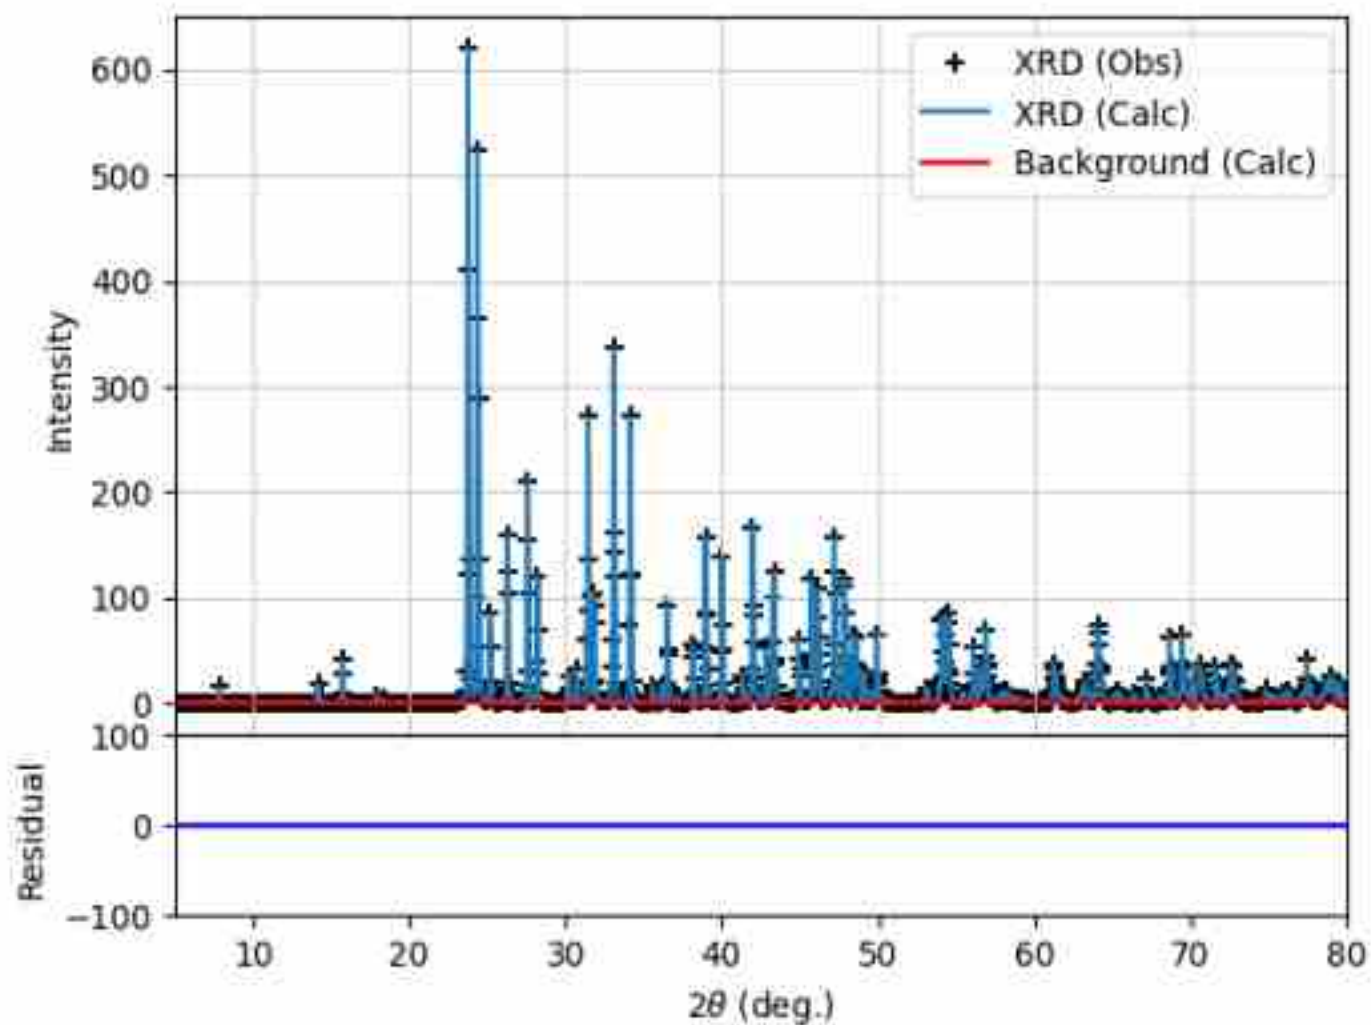

| RMSE before RR | Rwp     | RMSE after RR |
|----------------|---------|---------------|
| 0.011          | 0.00291 | 0.00026       |

# Ce1Fe2Ge2

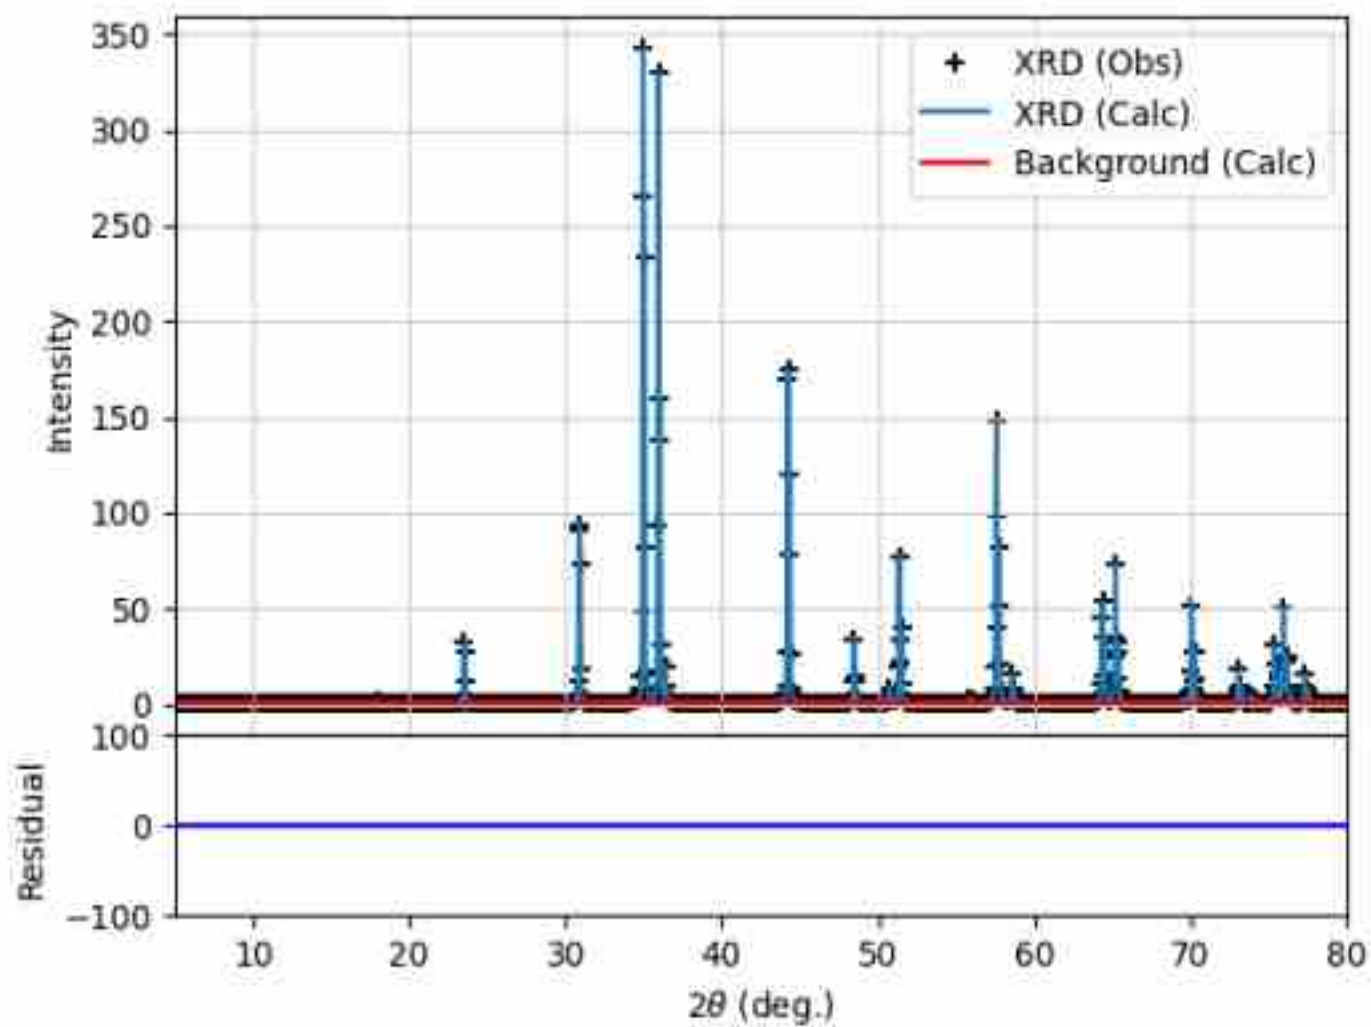

| RMSE before RR | Rwp     | RMSE after RR |
|----------------|---------|---------------|
| 0.011          | 0.00487 | 0.00078       |

# Ce1Lu1Al4

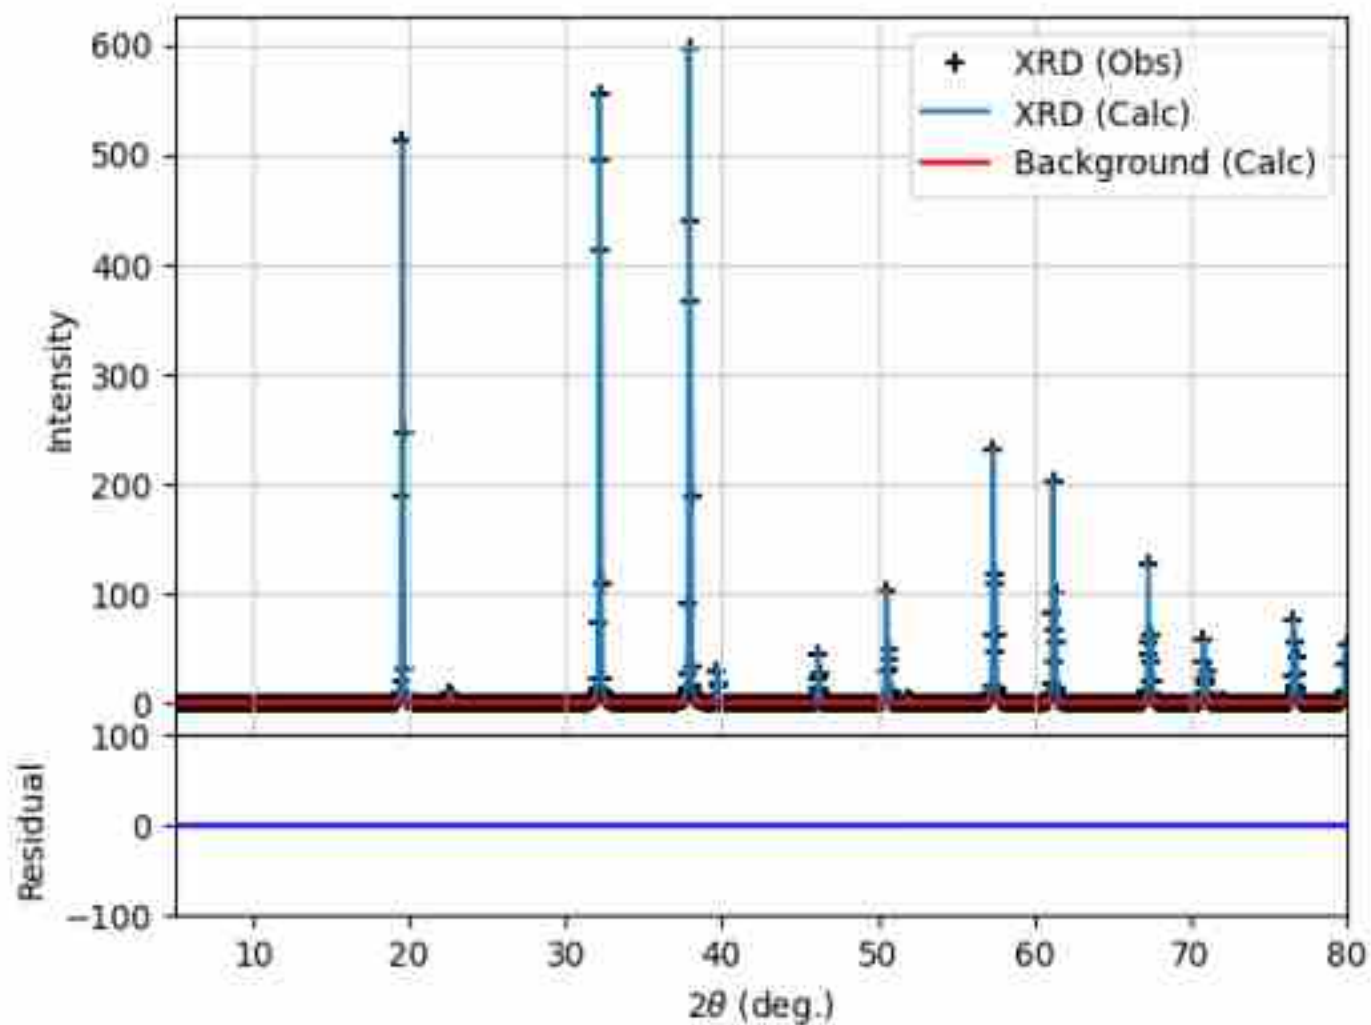

| RMSE before RR | Rwp     | RMSE after RR |
|----------------|---------|---------------|
| 0.011          | 0.09082 | 0.00689       |

# Ce1Mg5

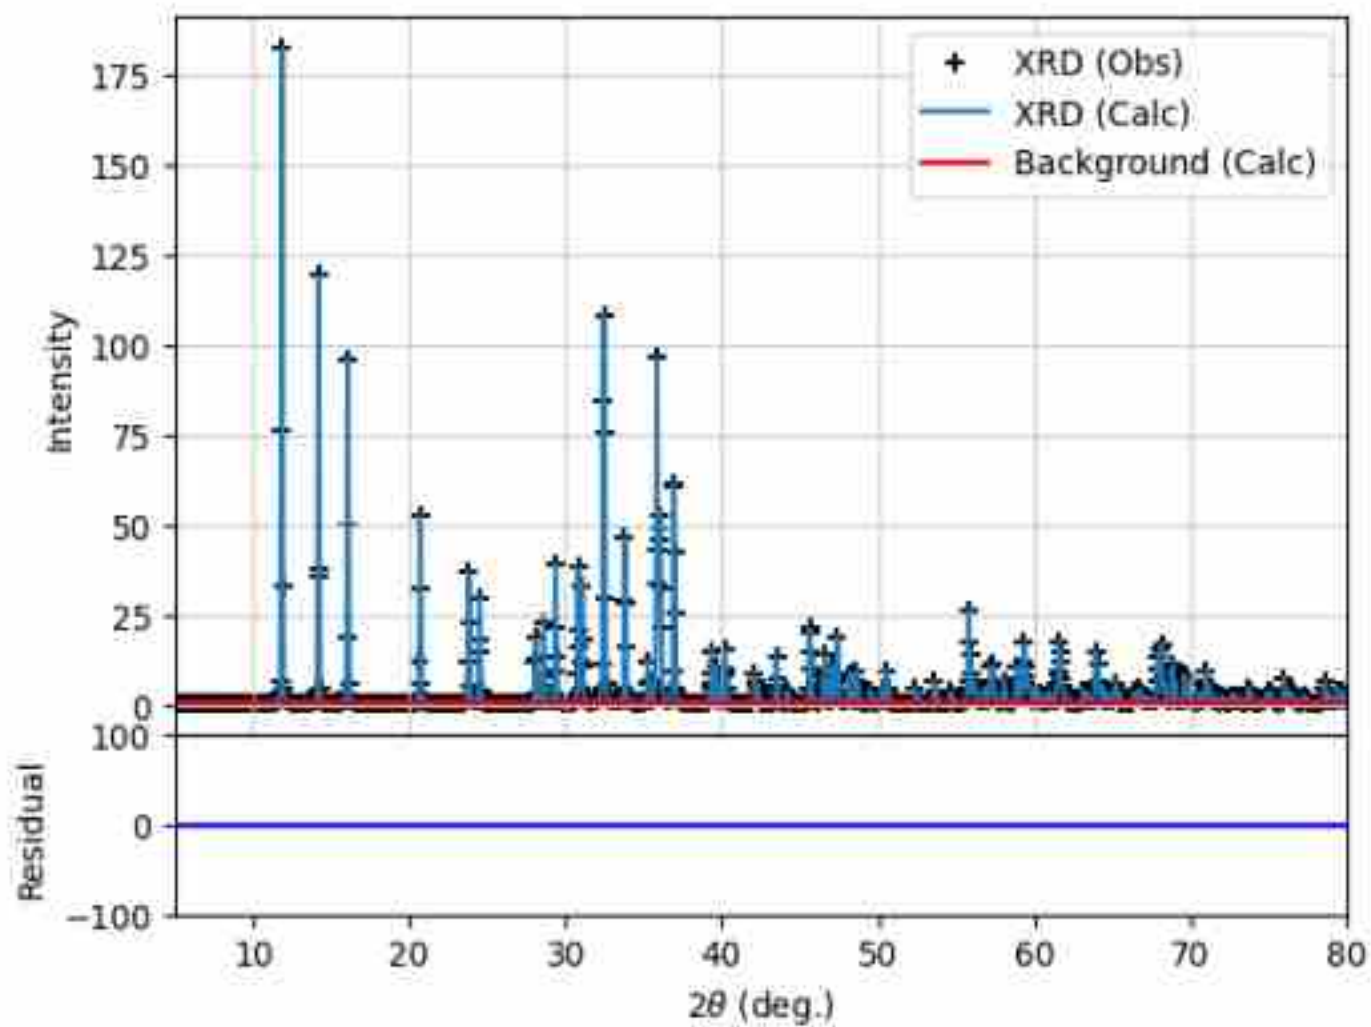

| RMSE before RR | Rwp     | RMSE after RR |
|----------------|---------|---------------|
| 0.011          | 0.00245 | 0.00046       |

# Ce1Si2Rh2

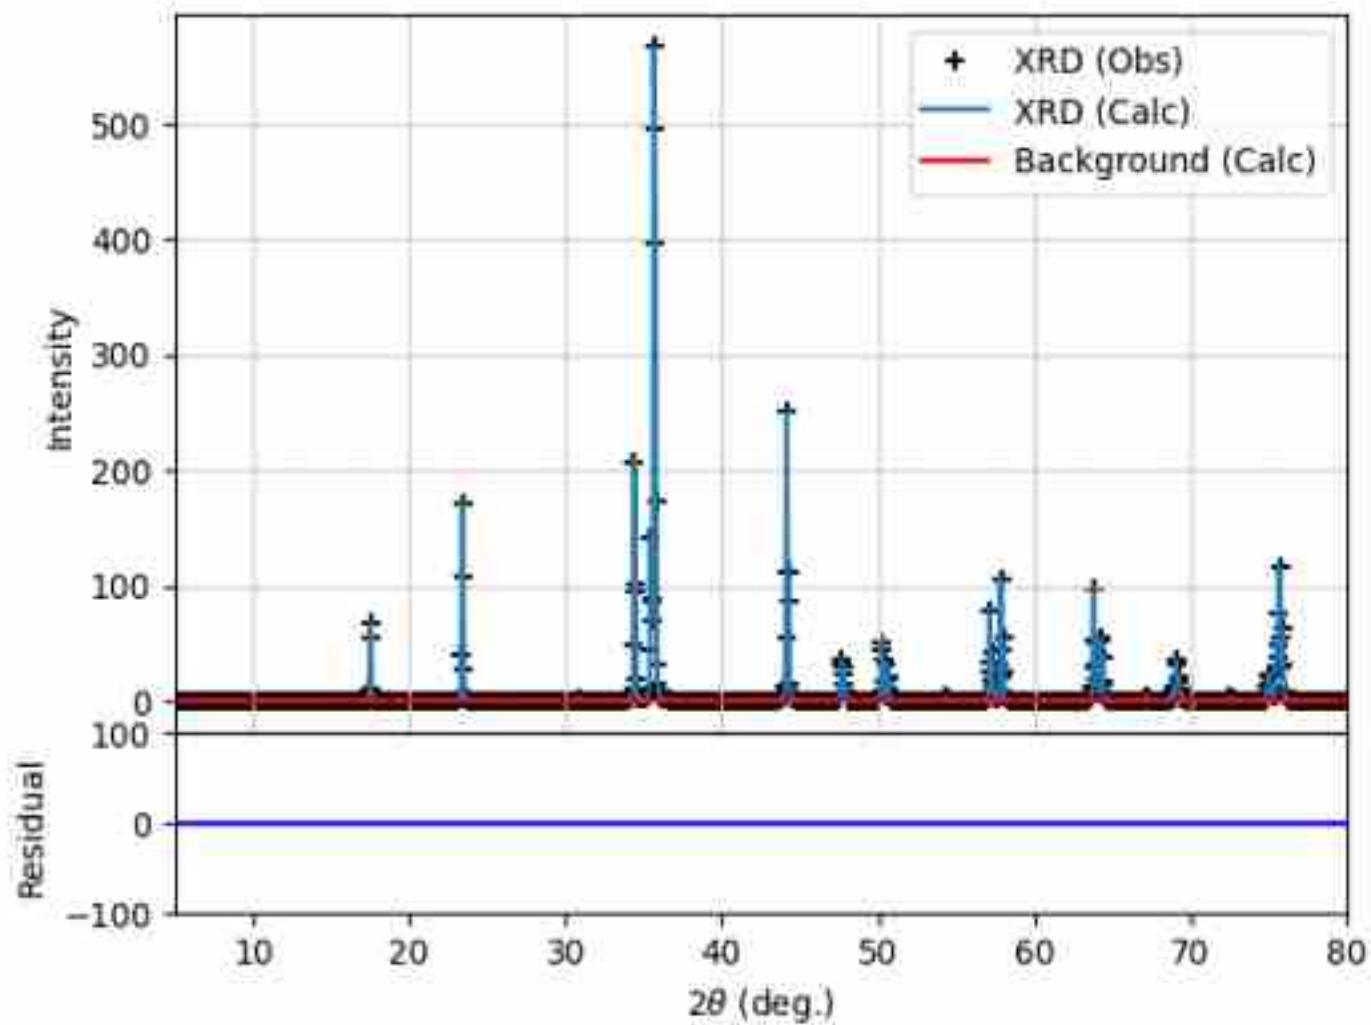

| RMSE before RR | Rwp     | RMSE after RR |
|----------------|---------|---------------|
| 0.011          | 0.00341 | 0.00079       |

# Ce1Si3Rh1

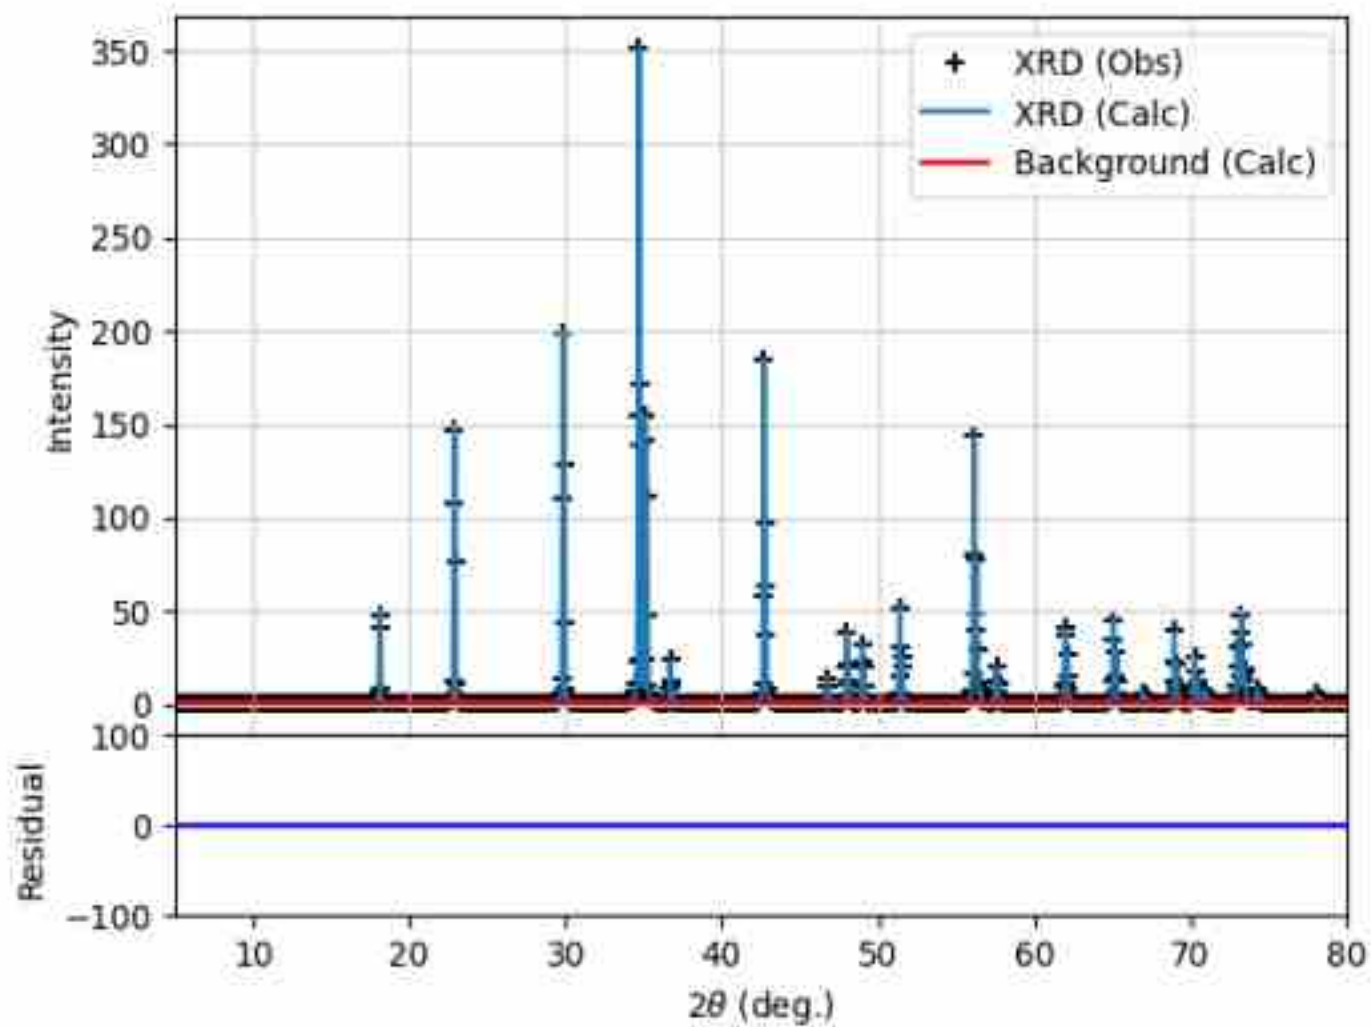

| RMSE before RR | Rwp     | RMSE after RR |
|----------------|---------|---------------|
| 0.011          | 0.00372 | 0.00058       |

# Ce<sub>2</sub>Al<sub>3</sub>Sn<sub>1</sub>

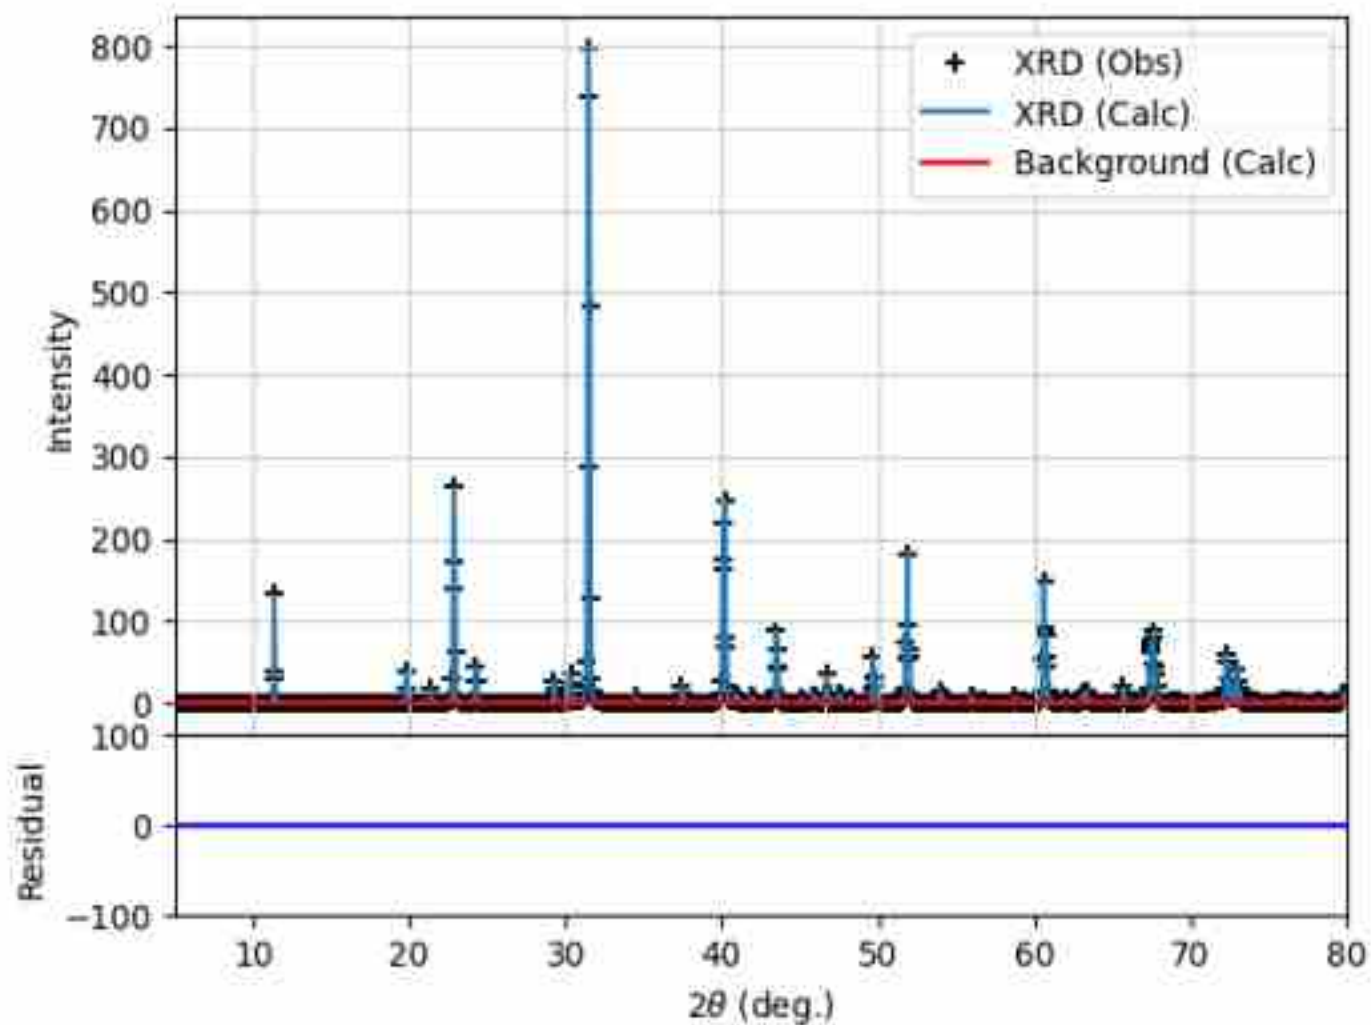

| RMSE before RR | Rwp     | RMSE after RR |
|----------------|---------|---------------|
| 0.011          | 0.00261 | 0.0002        |

# Ce<sub>2</sub>Cu<sub>1</sub>Ge<sub>3</sub>

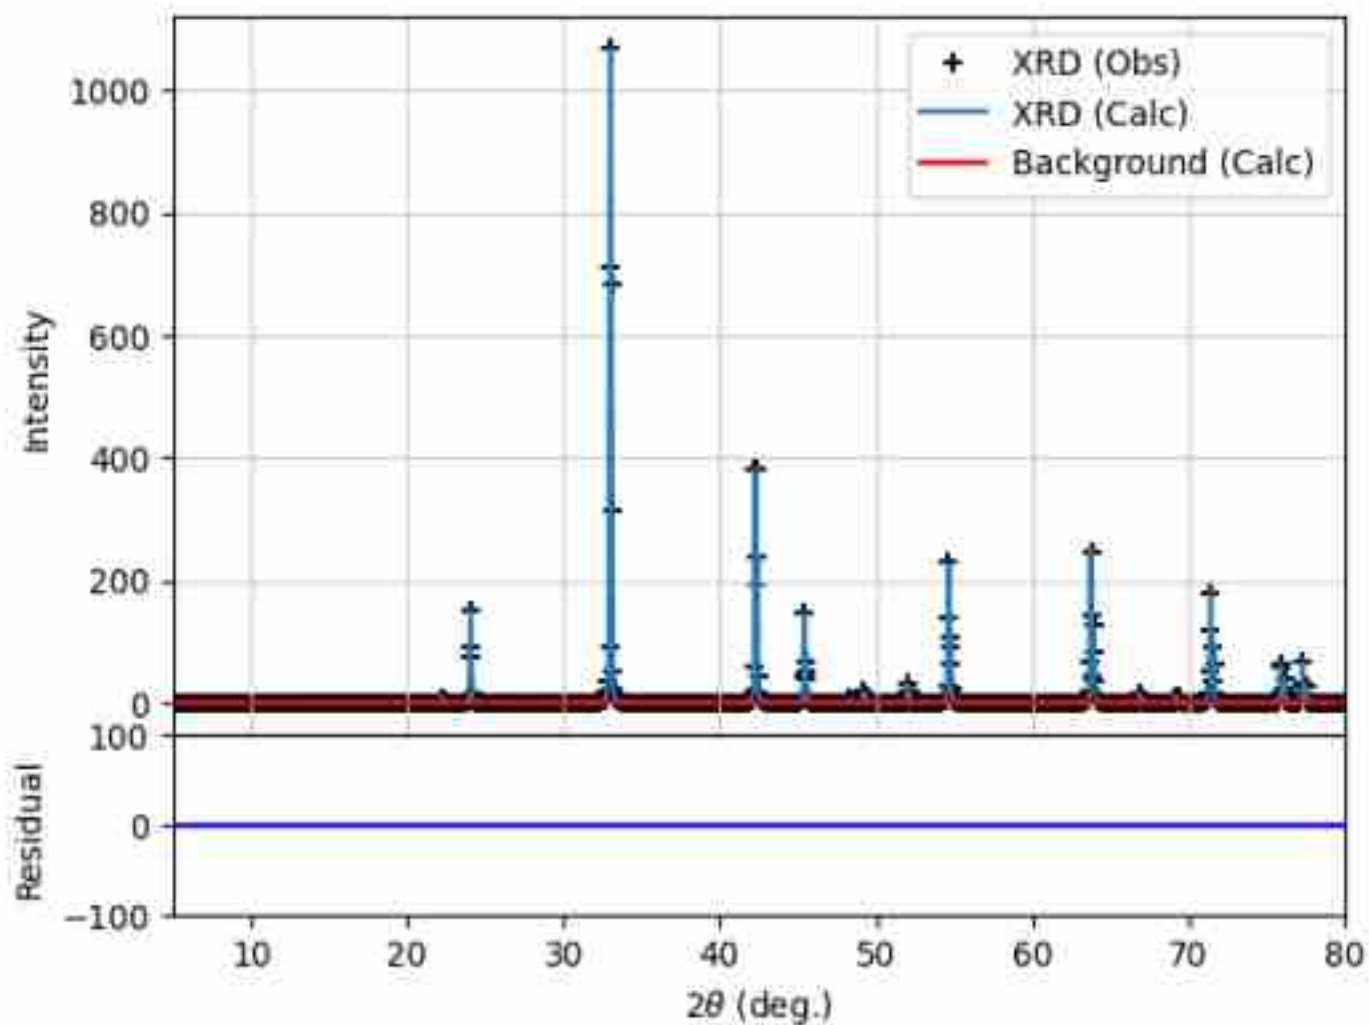

| RMSE before RR | Rwp     | RMSE after RR |
|----------------|---------|---------------|
| 0.011          | 0.00424 | 0.00026       |



# Ce<sub>2</sub>Mn<sub>2</sub>Ge<sub>2</sub>

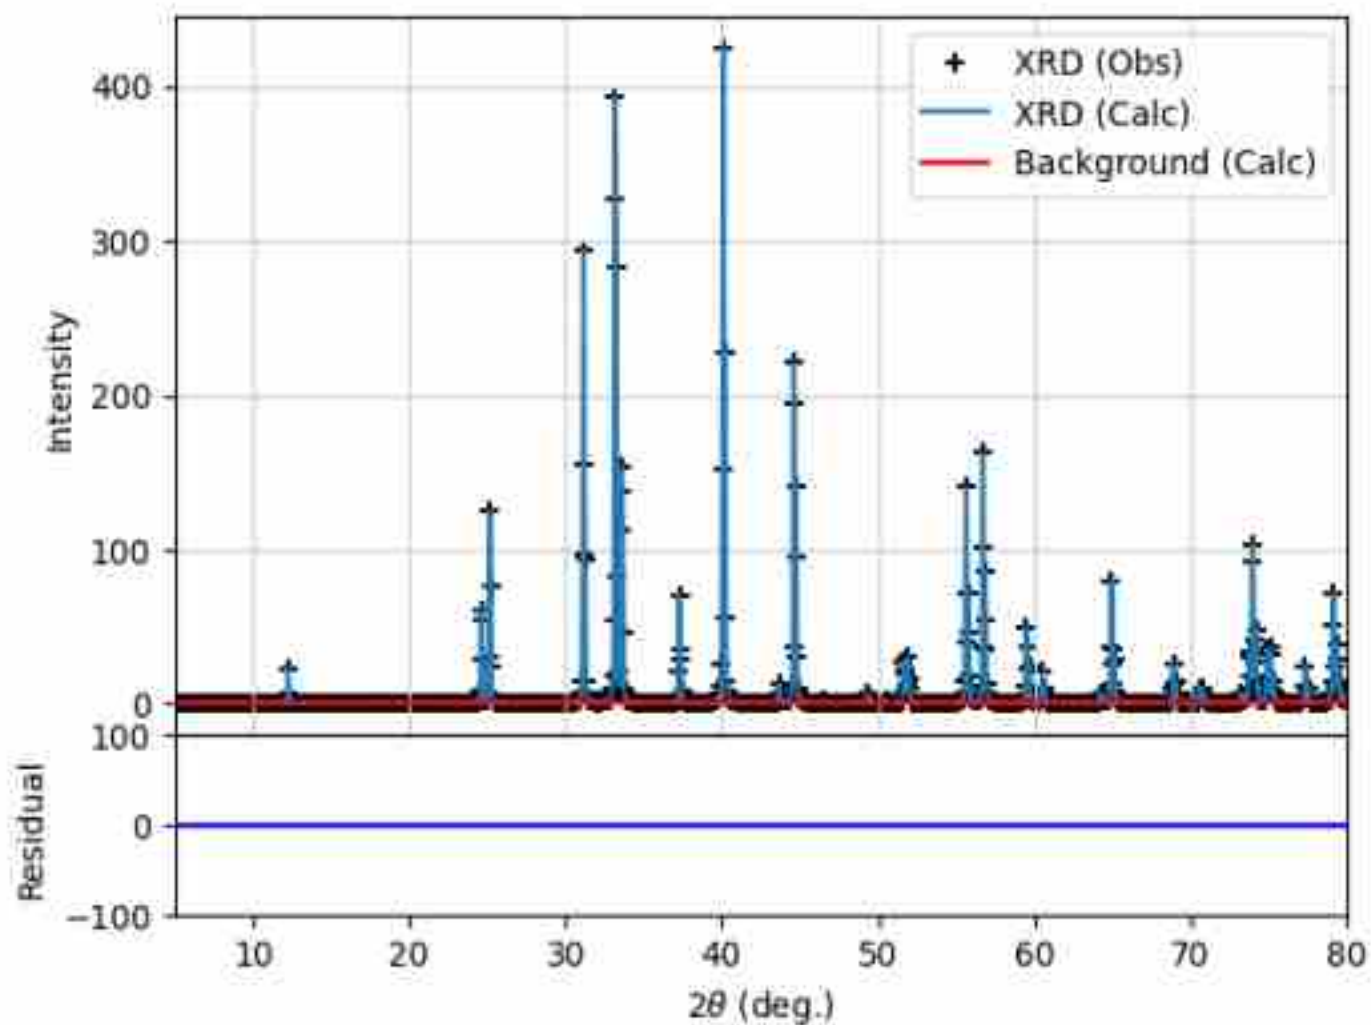

| RMSE before RR | Rwp   | RMSE after RR |
|----------------|-------|---------------|
| 0.011          | 0.005 | 0.00028       |

# Ce<sub>3</sub>Mg<sub>3</sub>Pt<sub>3</sub>

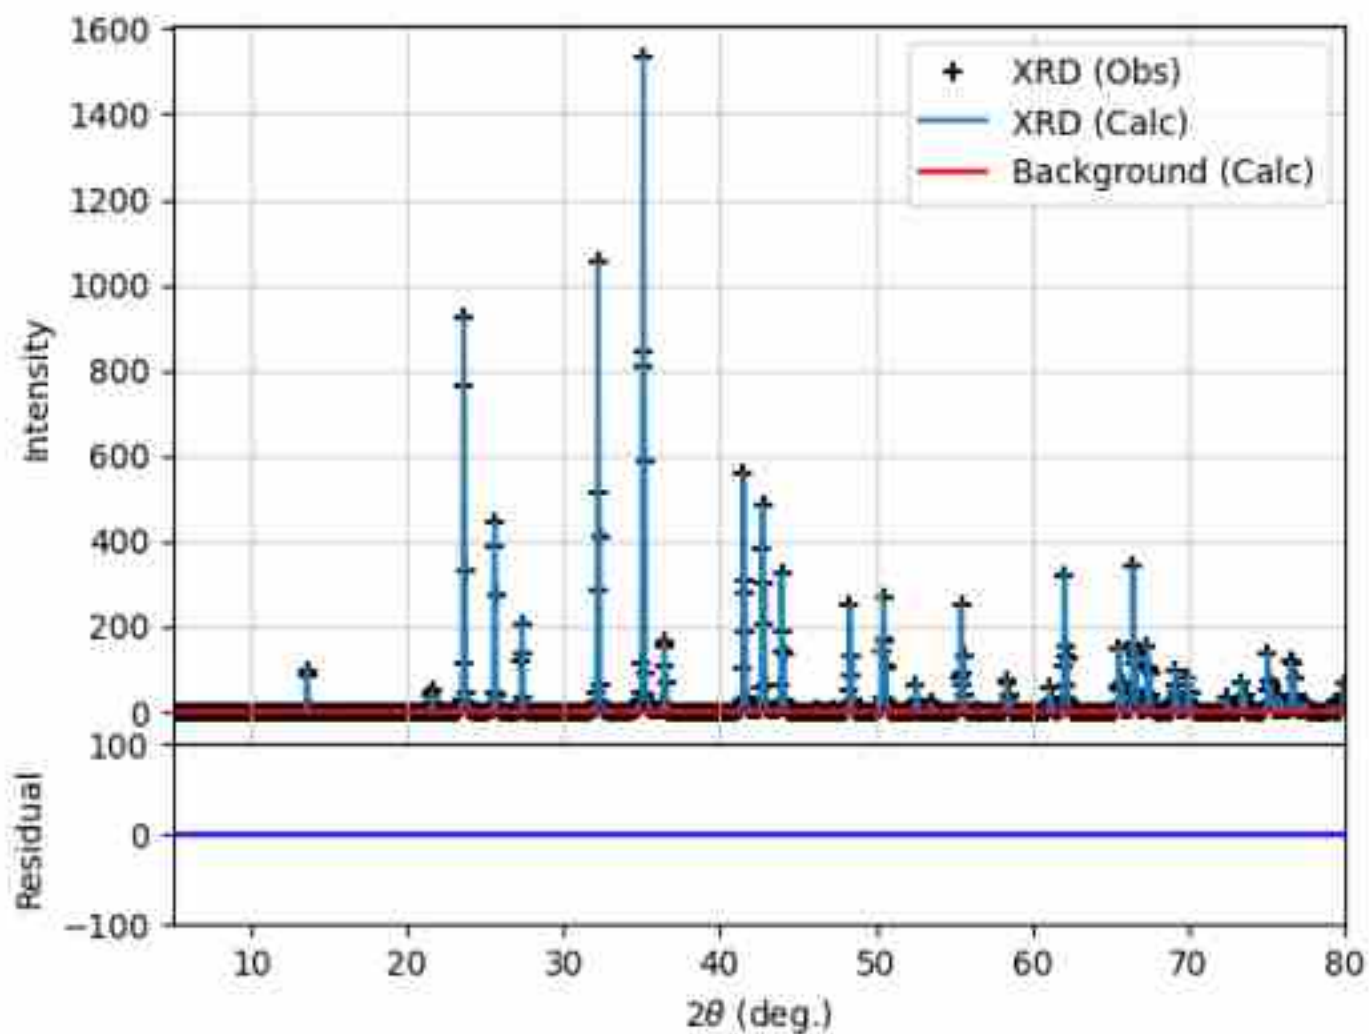

| RMSE before RR | Rwp     | RMSE after RR |
|----------------|---------|---------------|
| 0.011          | 0.00385 | 0.00109       |

# Ce<sub>3</sub>Sn<sub>3</sub>Pd<sub>3</sub>

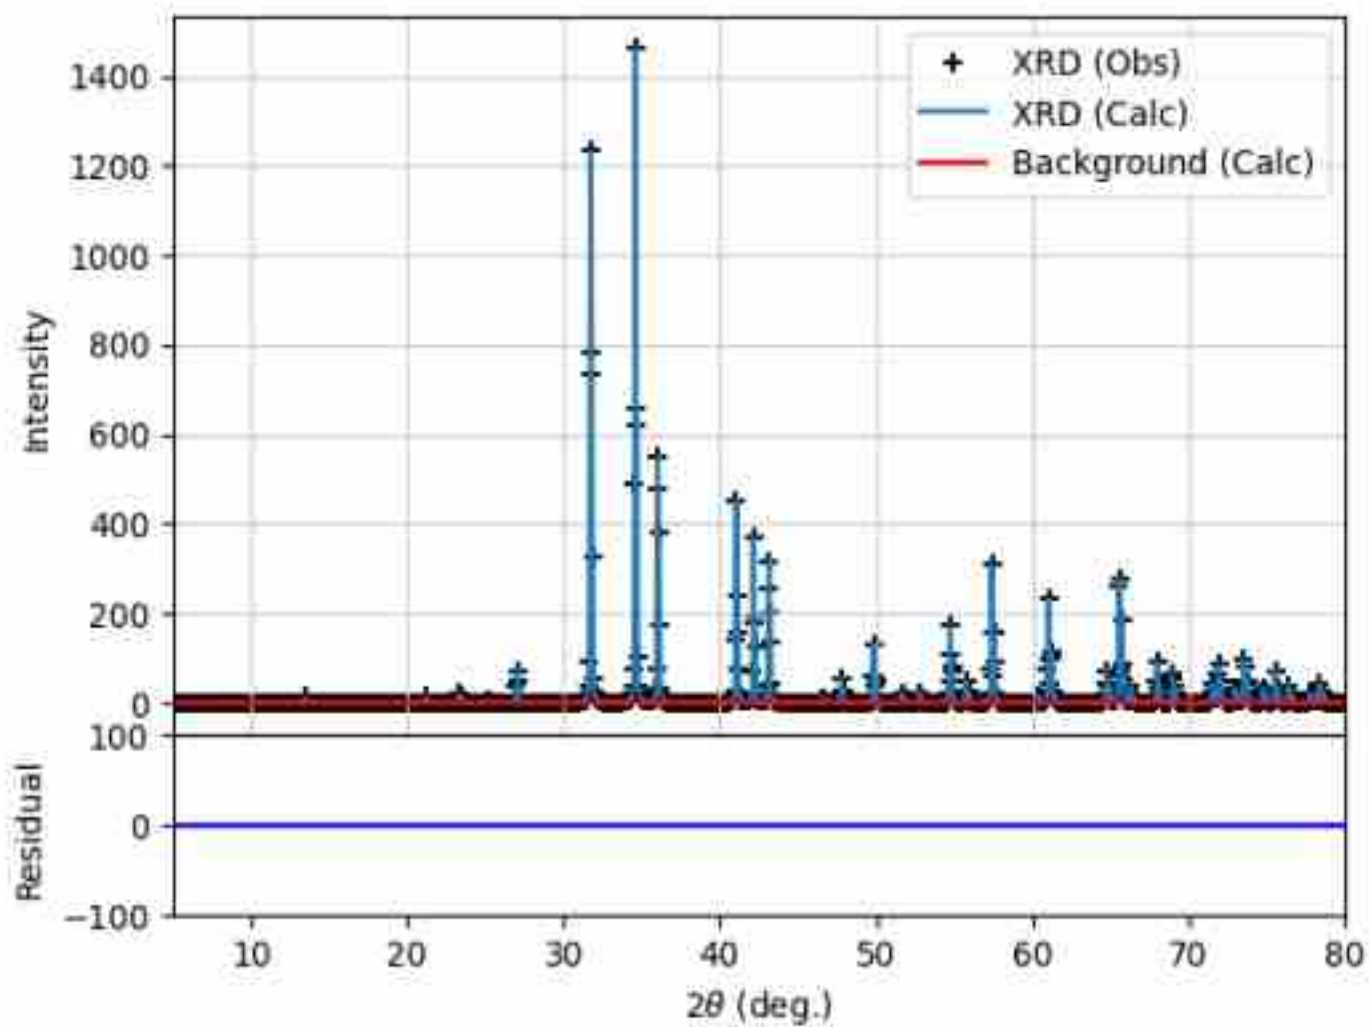

| RMSE before RR | Rwp     | RMSE after RR |
|----------------|---------|---------------|
| 0.011          | 0.00339 | 0.00035       |

# Ce<sub>4</sub>Ni<sub>4</sub>Sn<sub>4</sub>

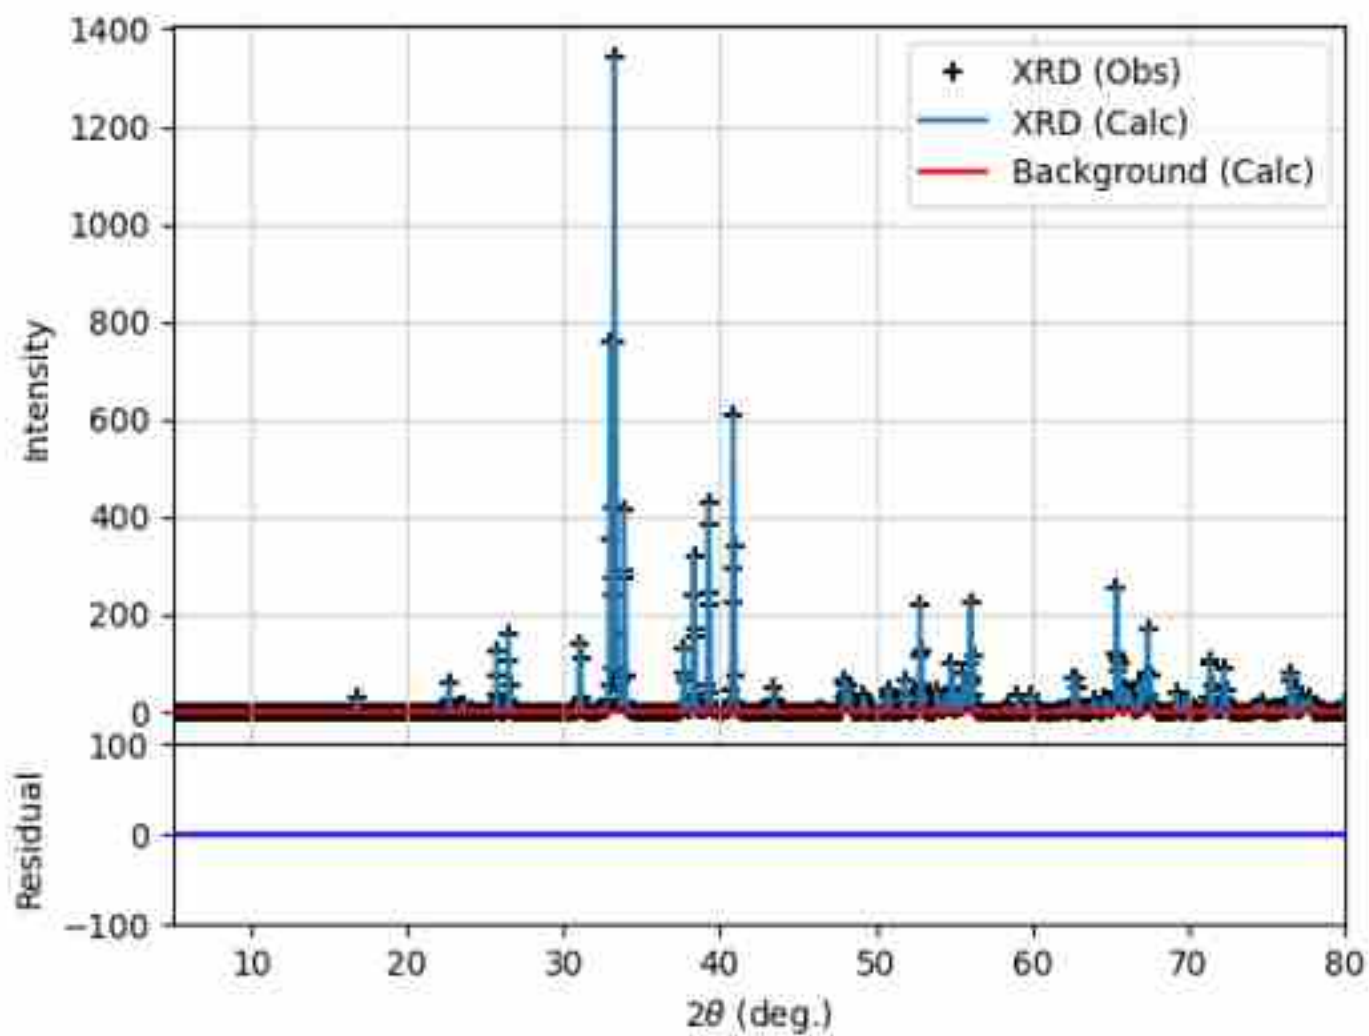

| RMSE before RR | Rwp     | RMSE after RR |
|----------------|---------|---------------|
| 0.011          | 0.00472 | 0.00032       |

# Co1Ni1As2

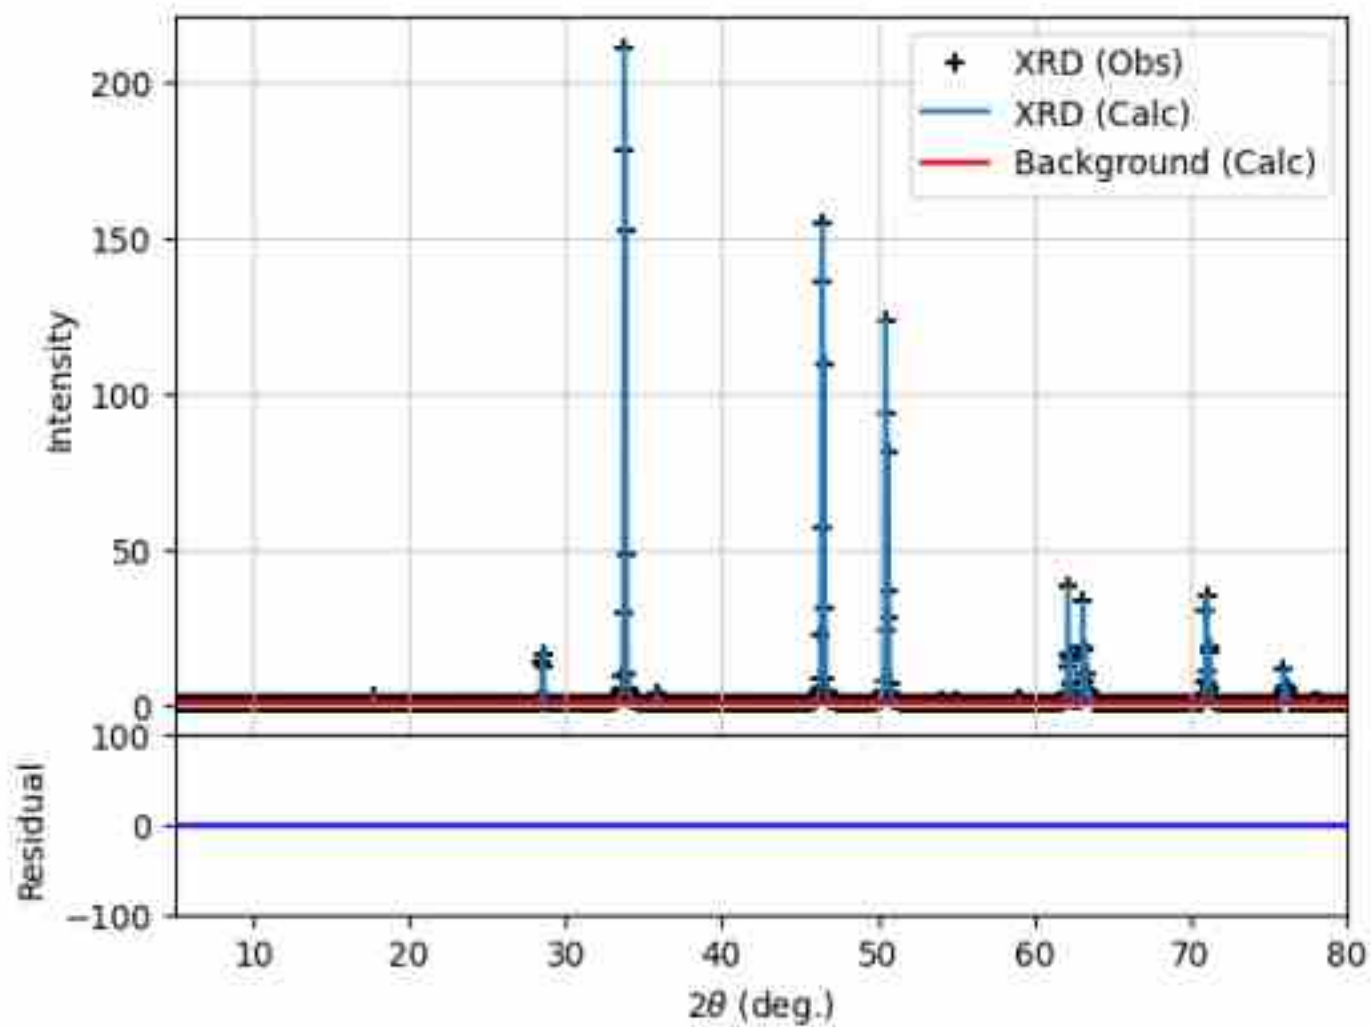

| RMSE before RR | Rwp     | RMSE after RR |
|----------------|---------|---------------|
| 0.011          | 0.00504 | 0.00066       |

# Co1Ni1Te2

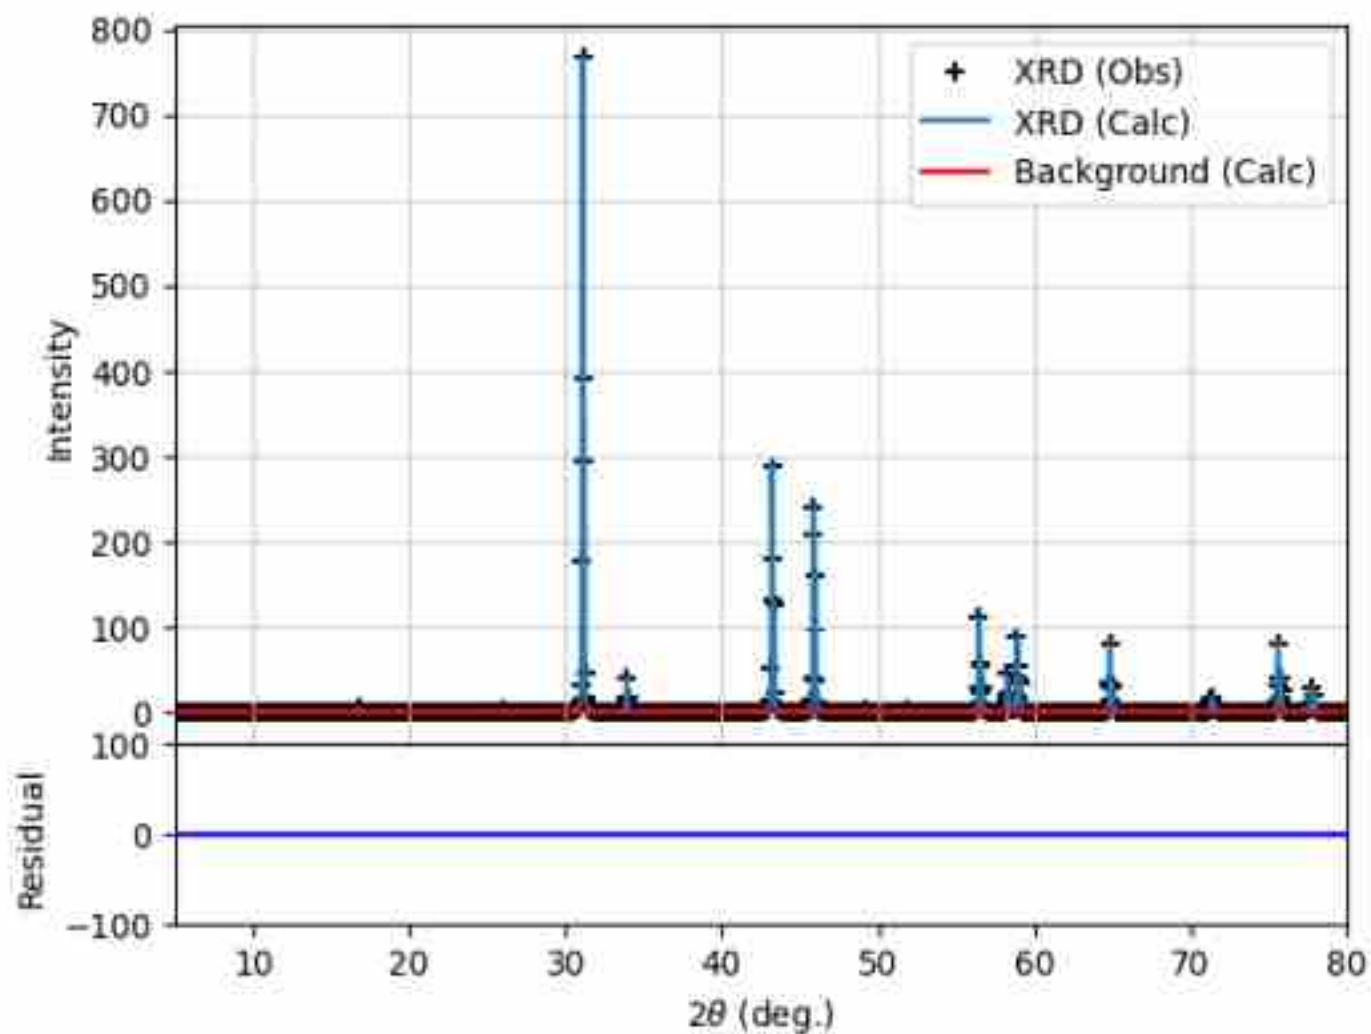

| RMSE before RR | Rwp     | RMSE after RR |
|----------------|---------|---------------|
| 0.011          | 0.00675 | 0.00031       |

# Co1Si4Ni1

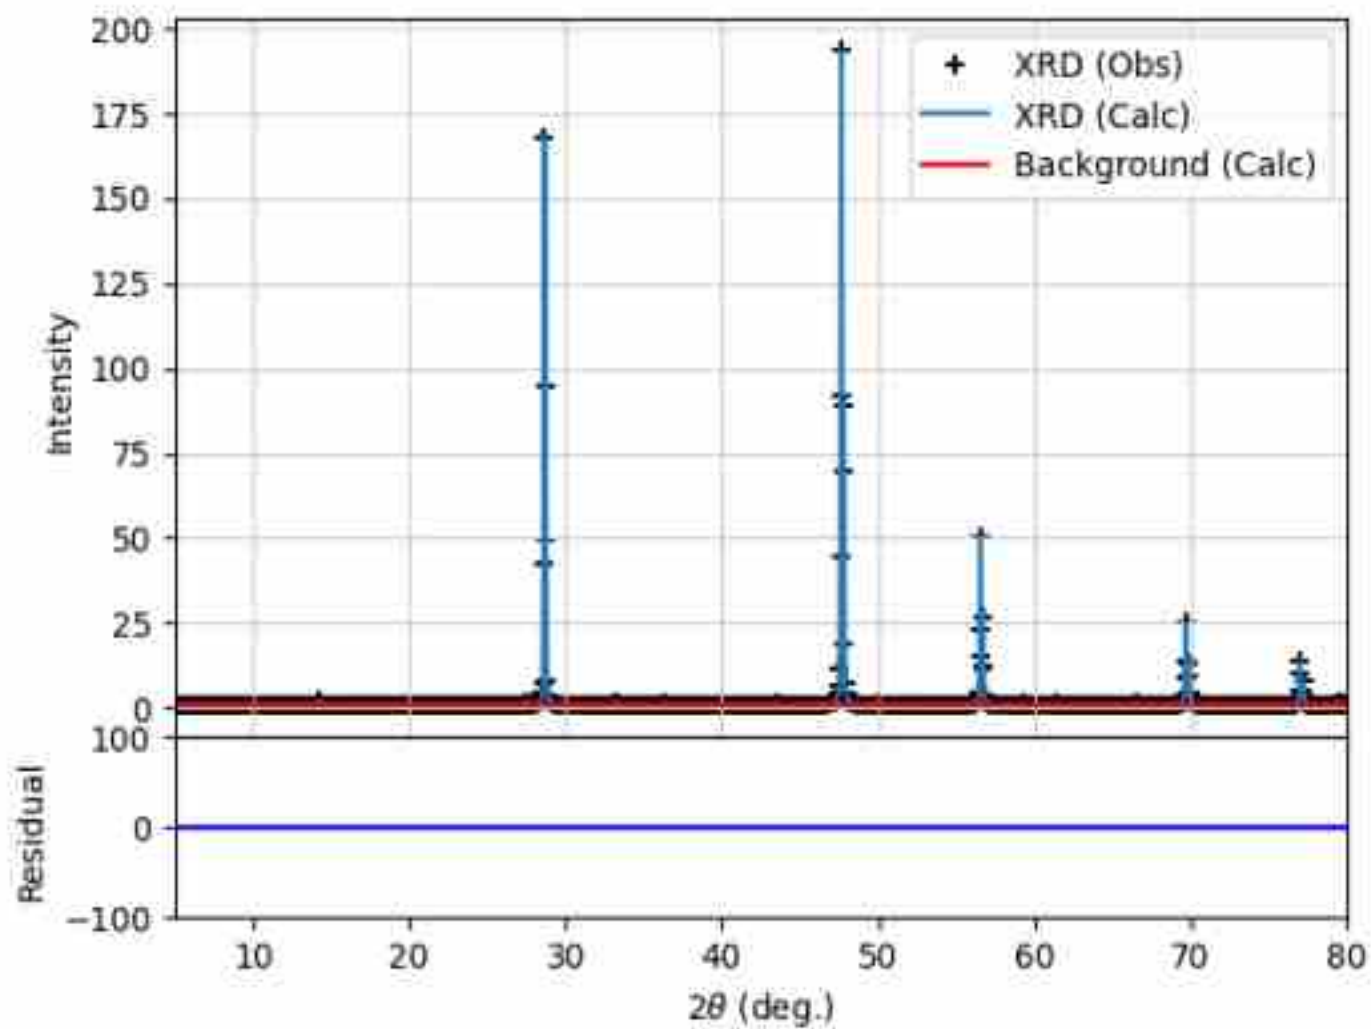

| RMSE before RR | Rwp     | RMSE after RR |
|----------------|---------|---------------|
| 0.011          | 0.02746 | 0.00486       |

# Co2Sb2

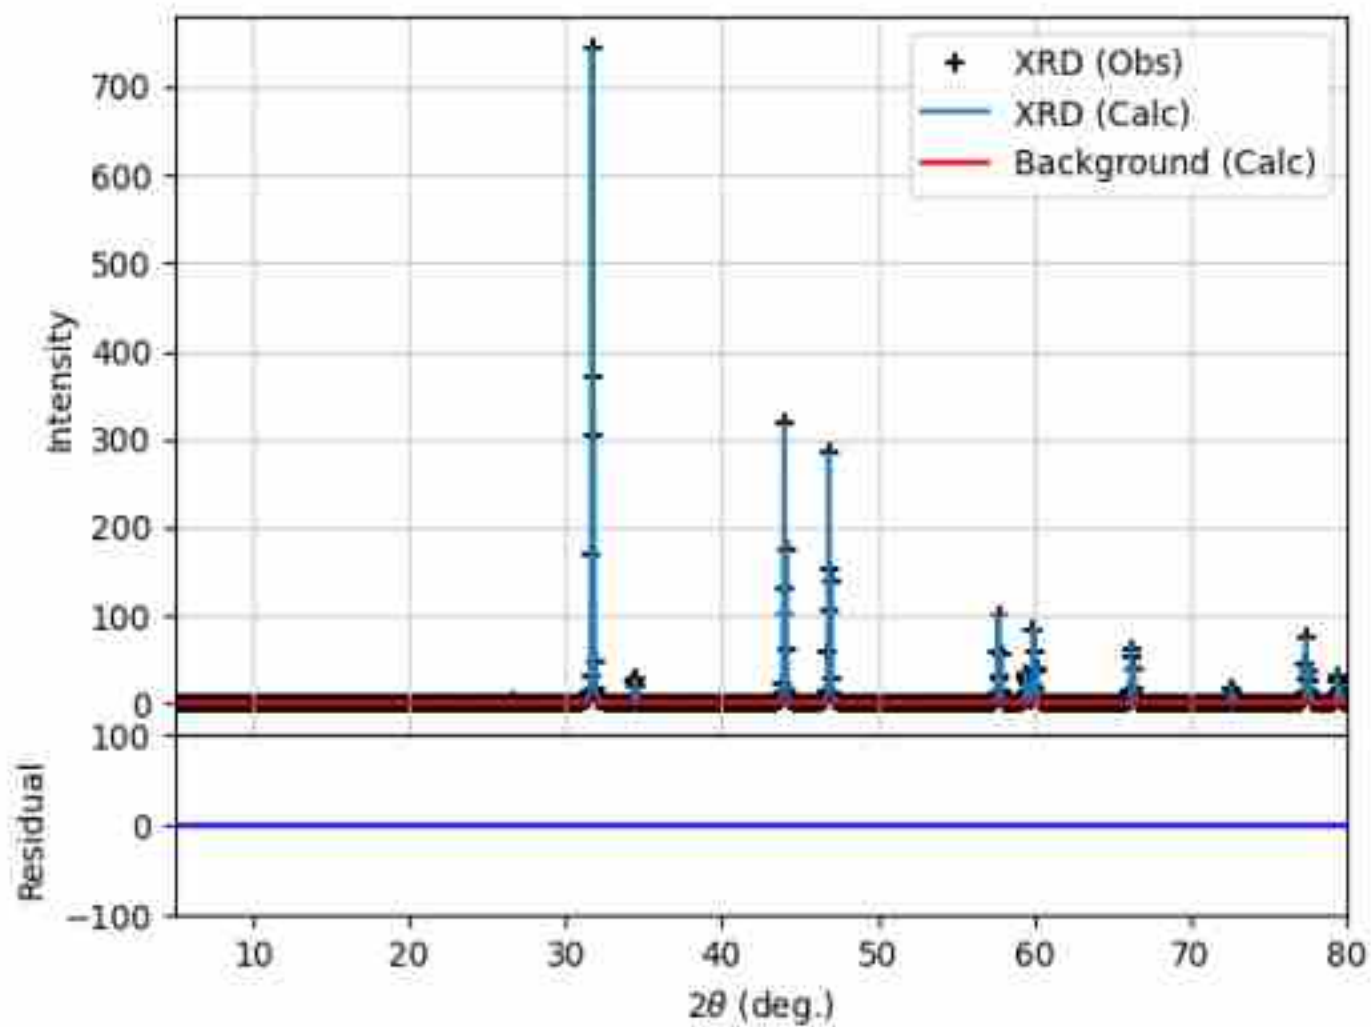

| RMSE before RR | Rwp     | RMSE after RR |
|----------------|---------|---------------|
| 0.011          | 0.02522 | 0.00043       |



# Co6Pt2

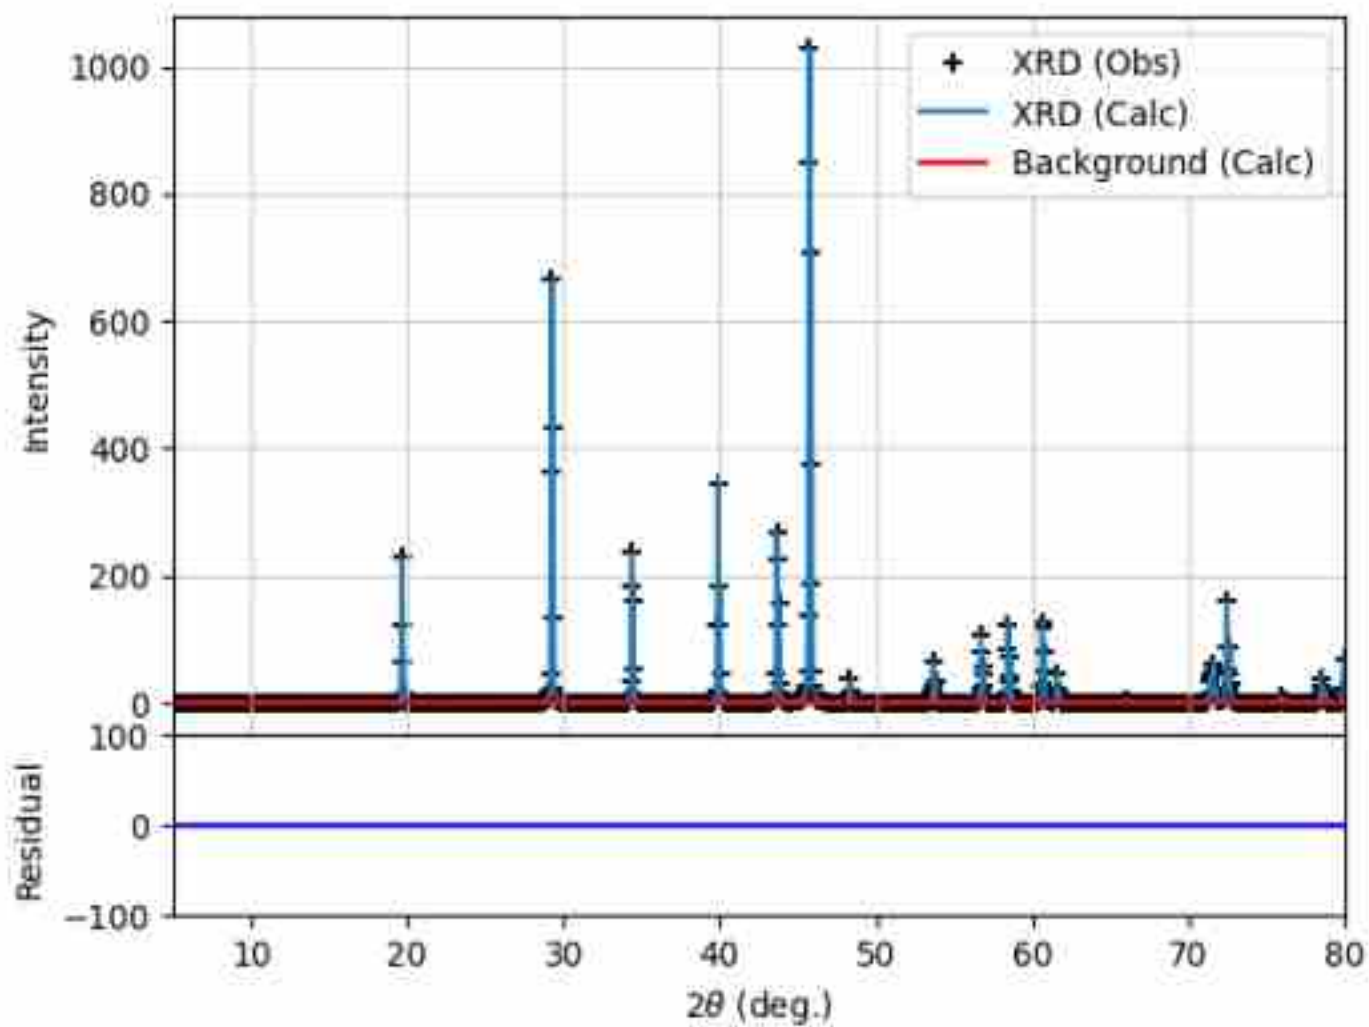

| RMSE before RR | Rwp    | RMSE after RR |
|----------------|--------|---------------|
| 0.011          | 0.0094 | 0.00196       |

# Cr1N1

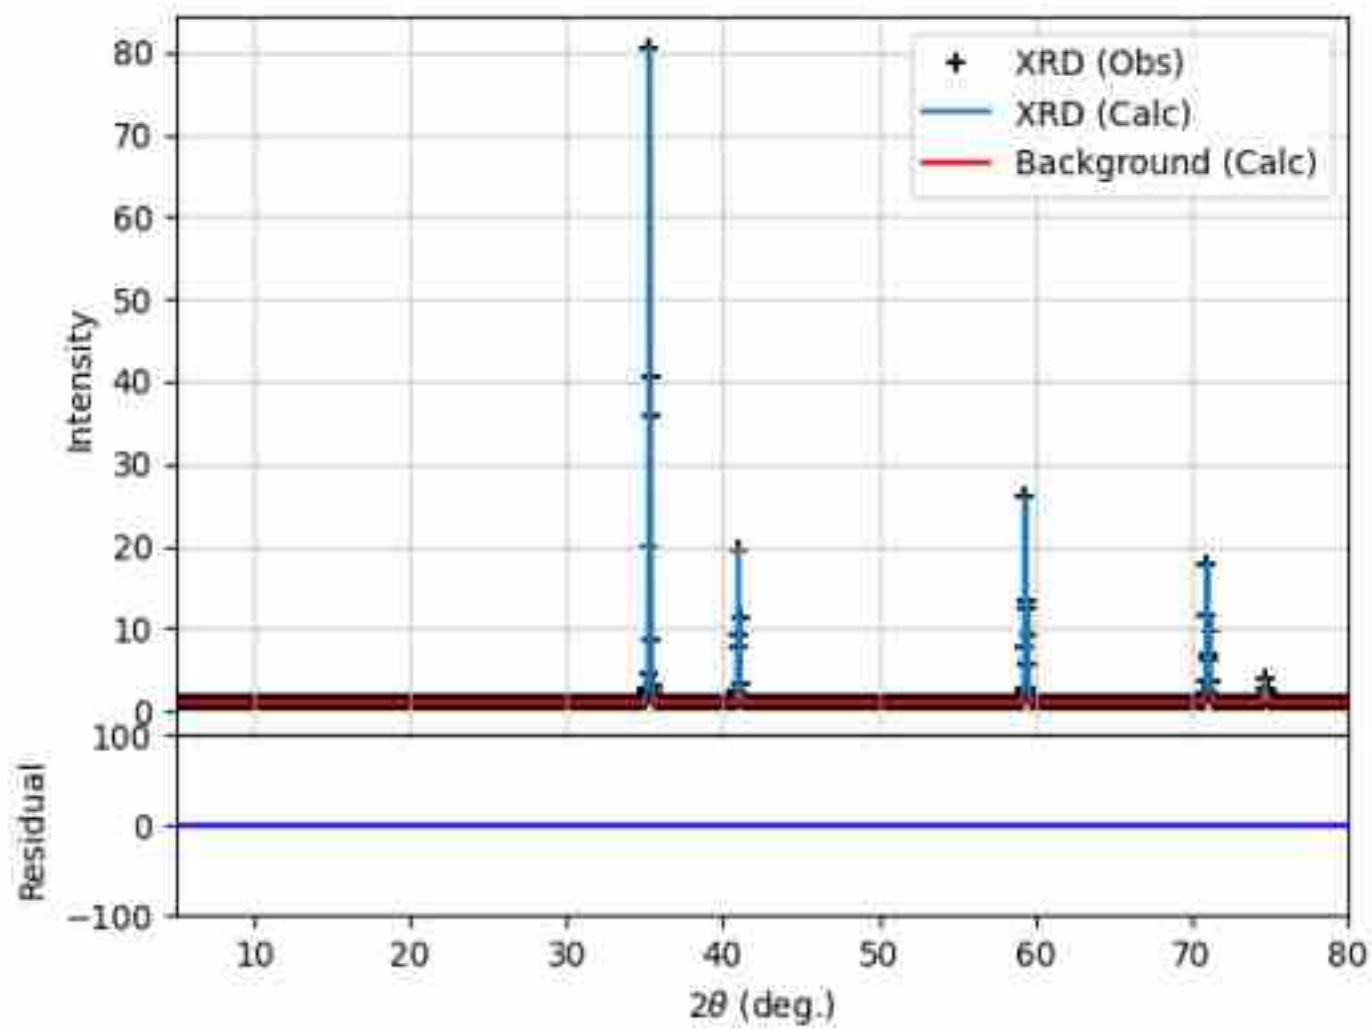

| RMSE before RR | Rwp     | RMSE after RR |
|----------------|---------|---------------|
| 0.011          | 0.01754 | 0.00285       |

# Cr1Se2

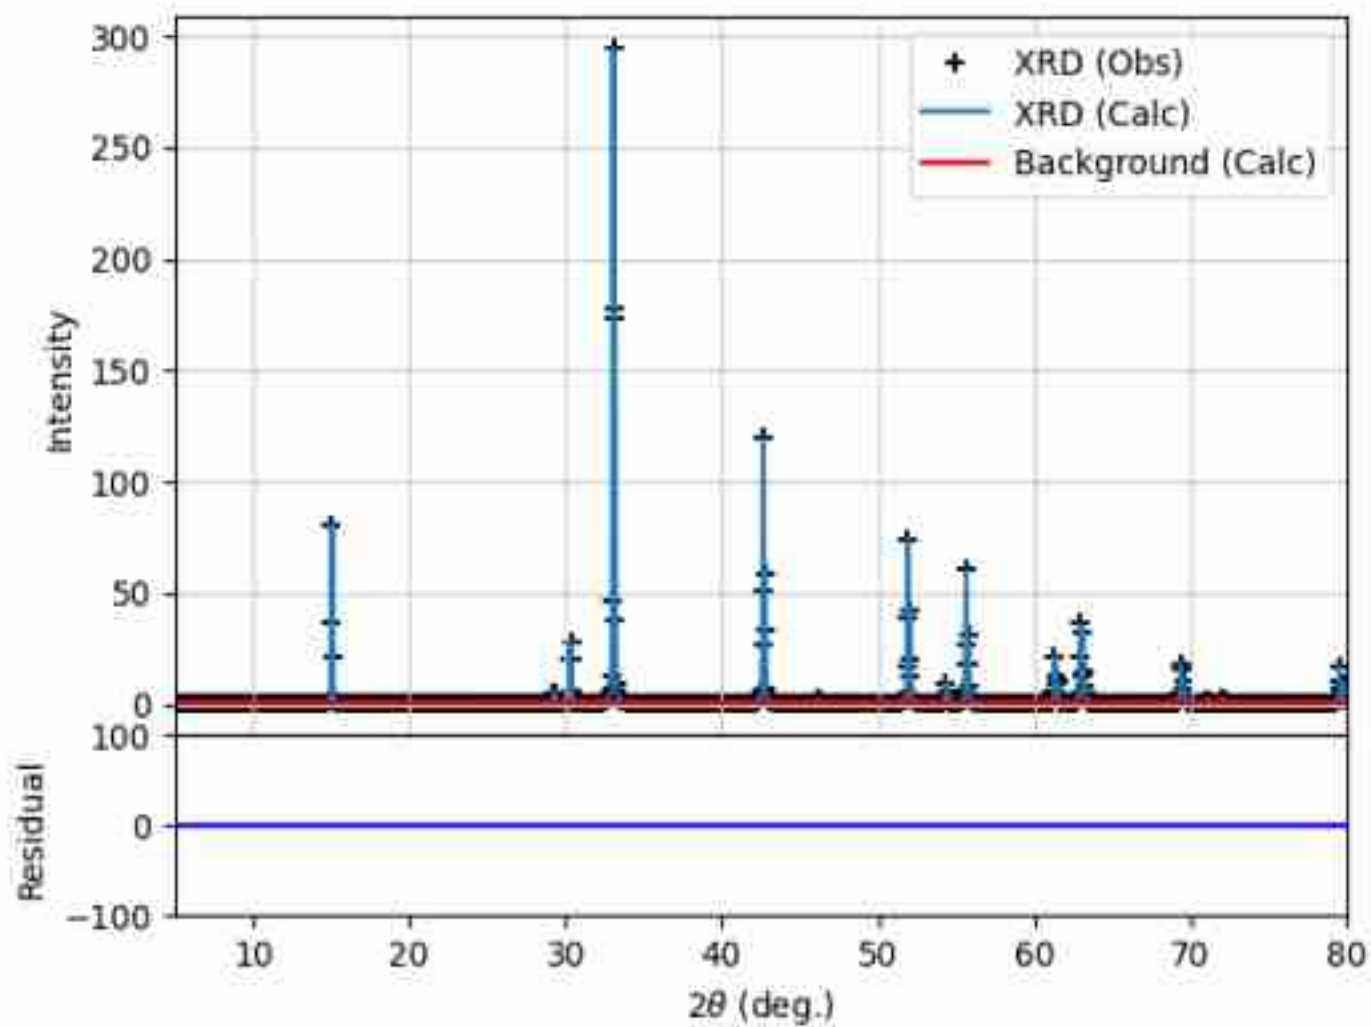

| RMSE before RR | Rwp     | RMSE after RR |
|----------------|---------|---------------|
| 0.011          | 0.00364 | 0.00058       |

# Cr2P4

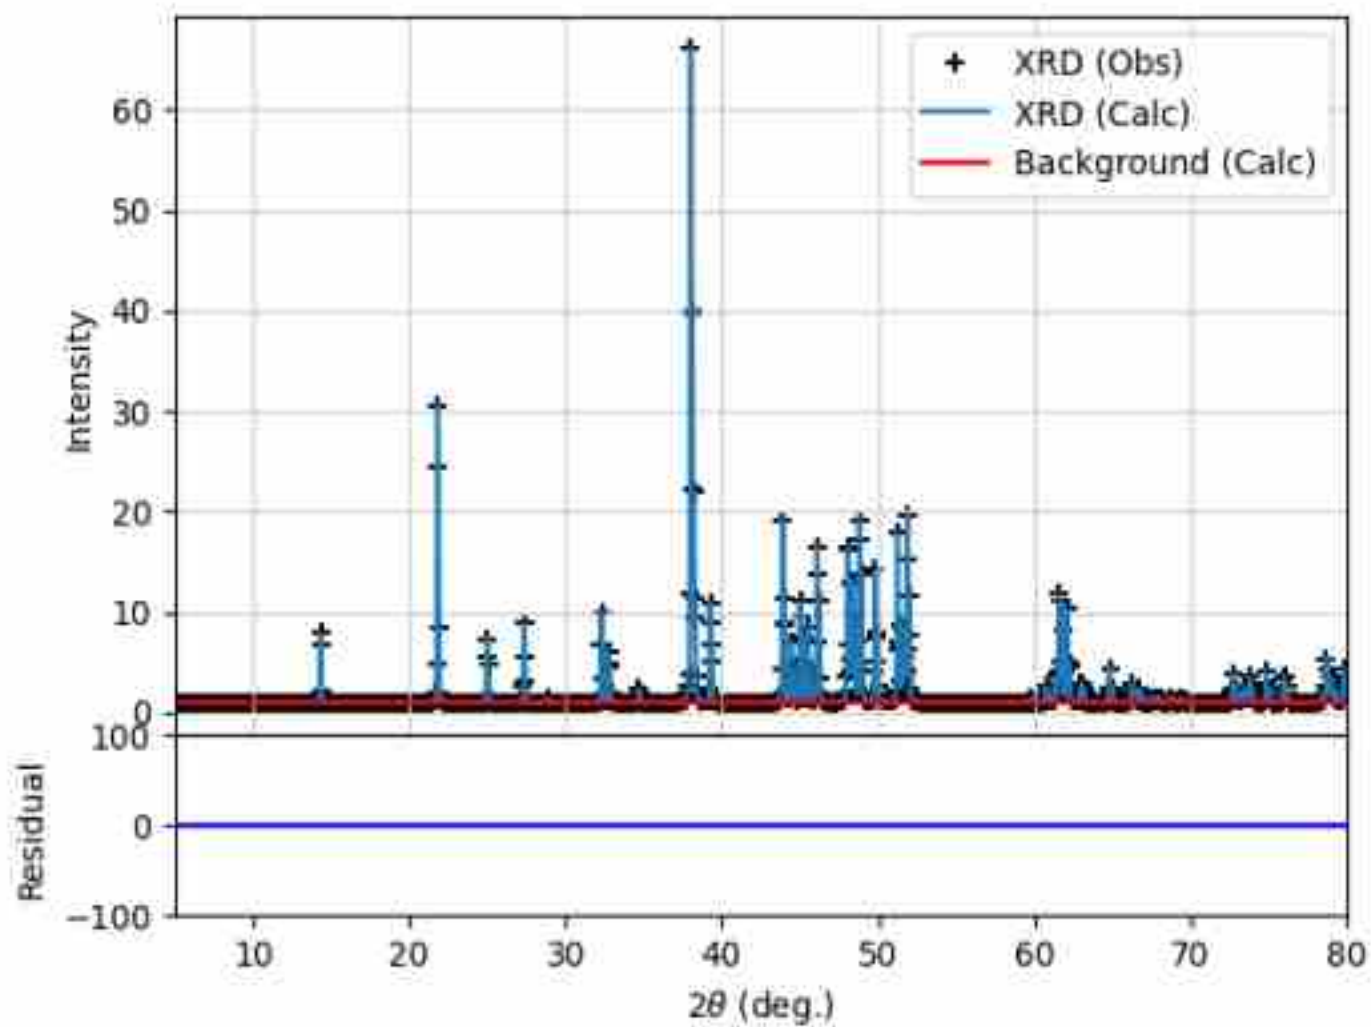

| RMSE before RR | Rwp     | RMSE after RR |
|----------------|---------|---------------|
| 0.011          | 0.00213 | 0.0003        |

# Cr<sub>3</sub>Rh<sub>1</sub>N<sub>1</sub>

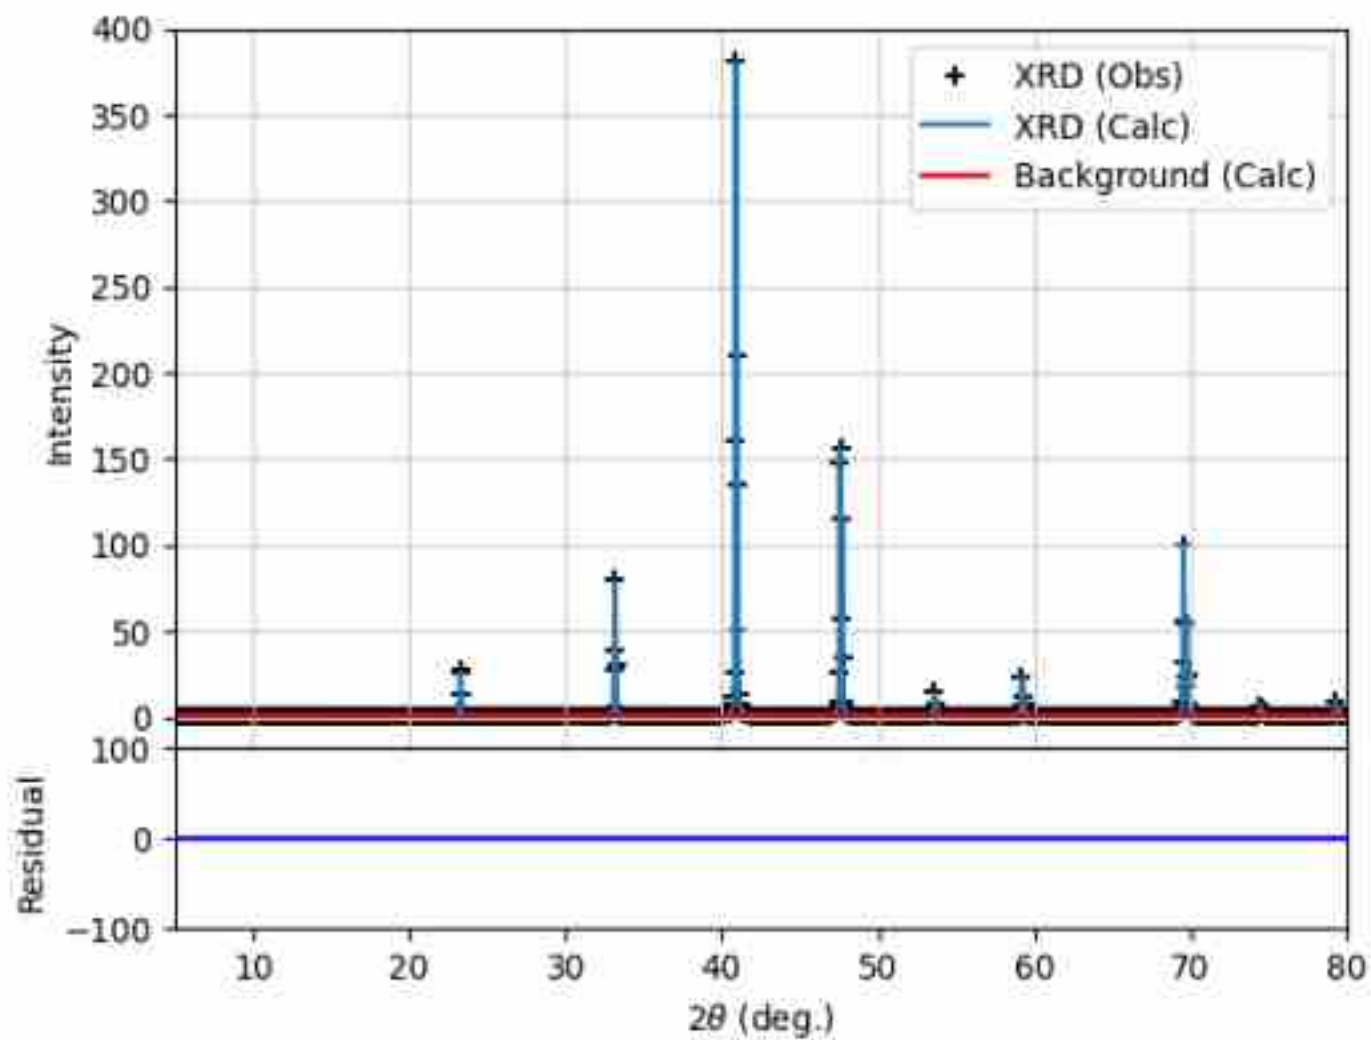

| RMSE before RR | Rwp     | RMSE after RR |
|----------------|---------|---------------|
| 0.011          | 0.01708 | 0.0012        |

# Cs1Bi1O3

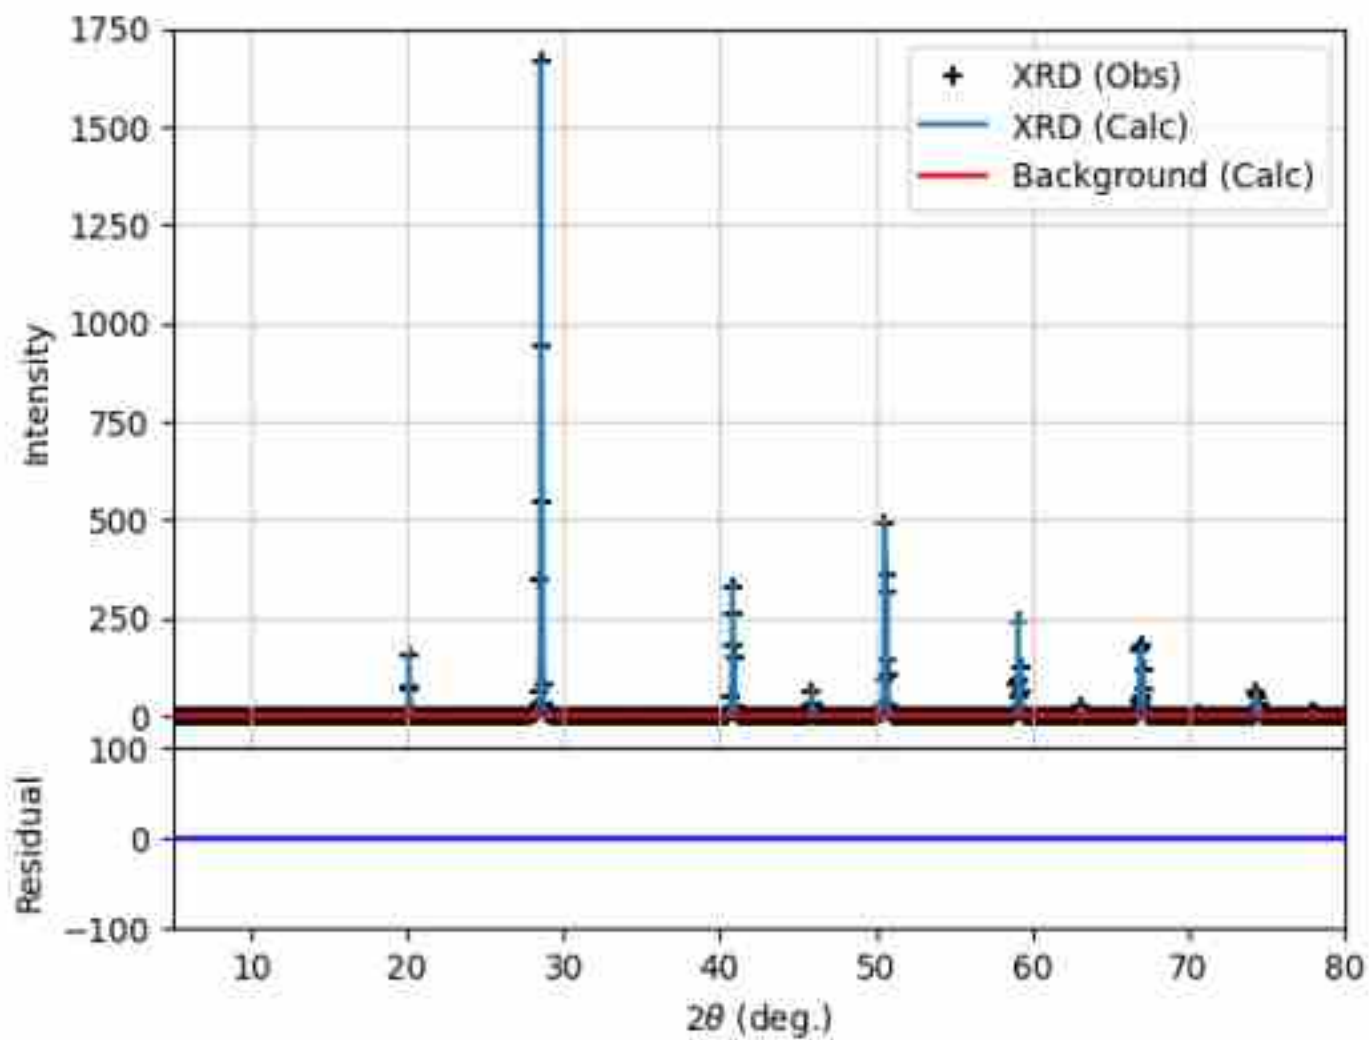

| RMSE before RR | Rwp     | RMSE after RR |
|----------------|---------|---------------|
| 0.011          | 0.05125 | 0.00507       |

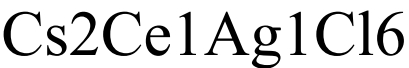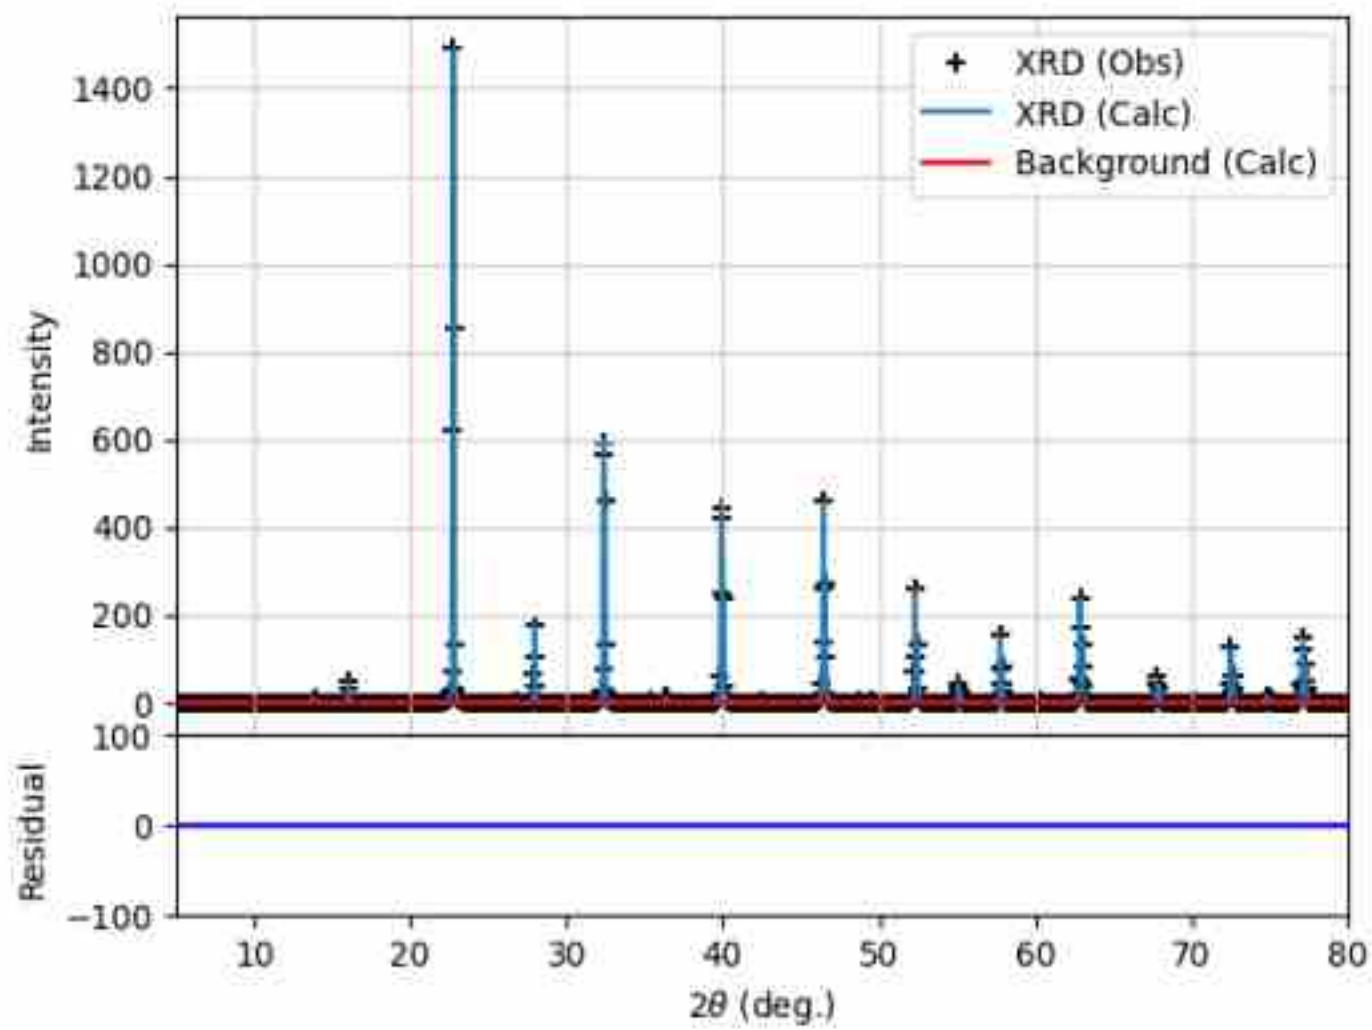

| RMSE before RR | Rwp     | RMSE after RR |
|----------------|---------|---------------|
| 0.011          | 0.05312 | 0.00332       |

# Cs<sub>2</sub>Cu<sub>1</sub>Sb<sub>1</sub>I<sub>6</sub>

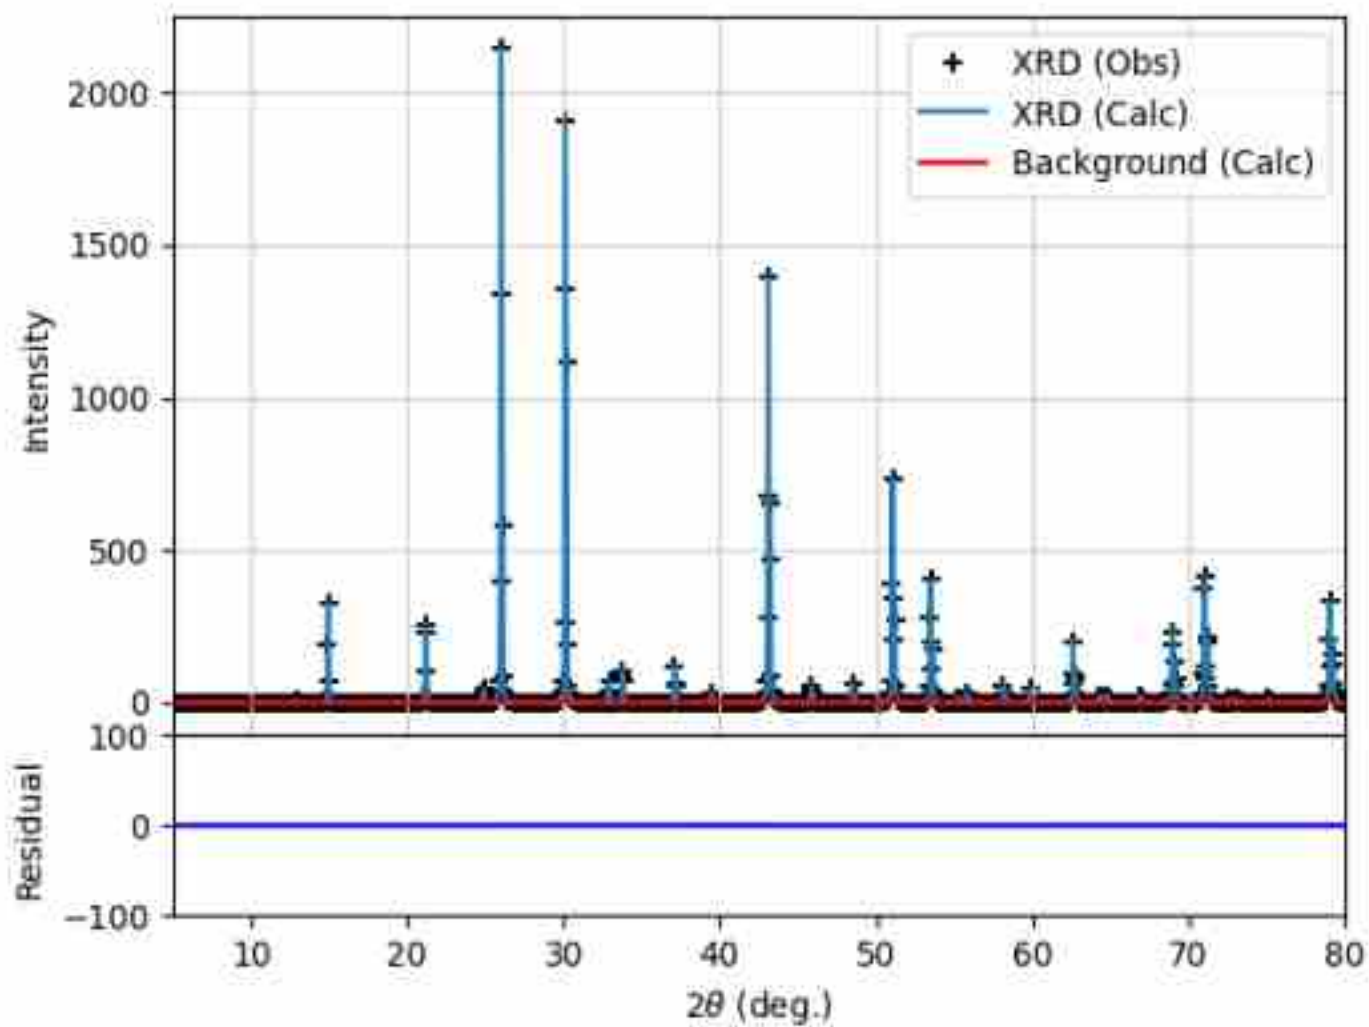

| RMSE before RR | Rwp     | RMSE after RR |
|----------------|---------|---------------|
| 0.011          | 0.13257 | 0.0035        |



# Cs<sub>2</sub>Er<sub>1</sub>Cu<sub>1</sub>Cl<sub>6</sub>

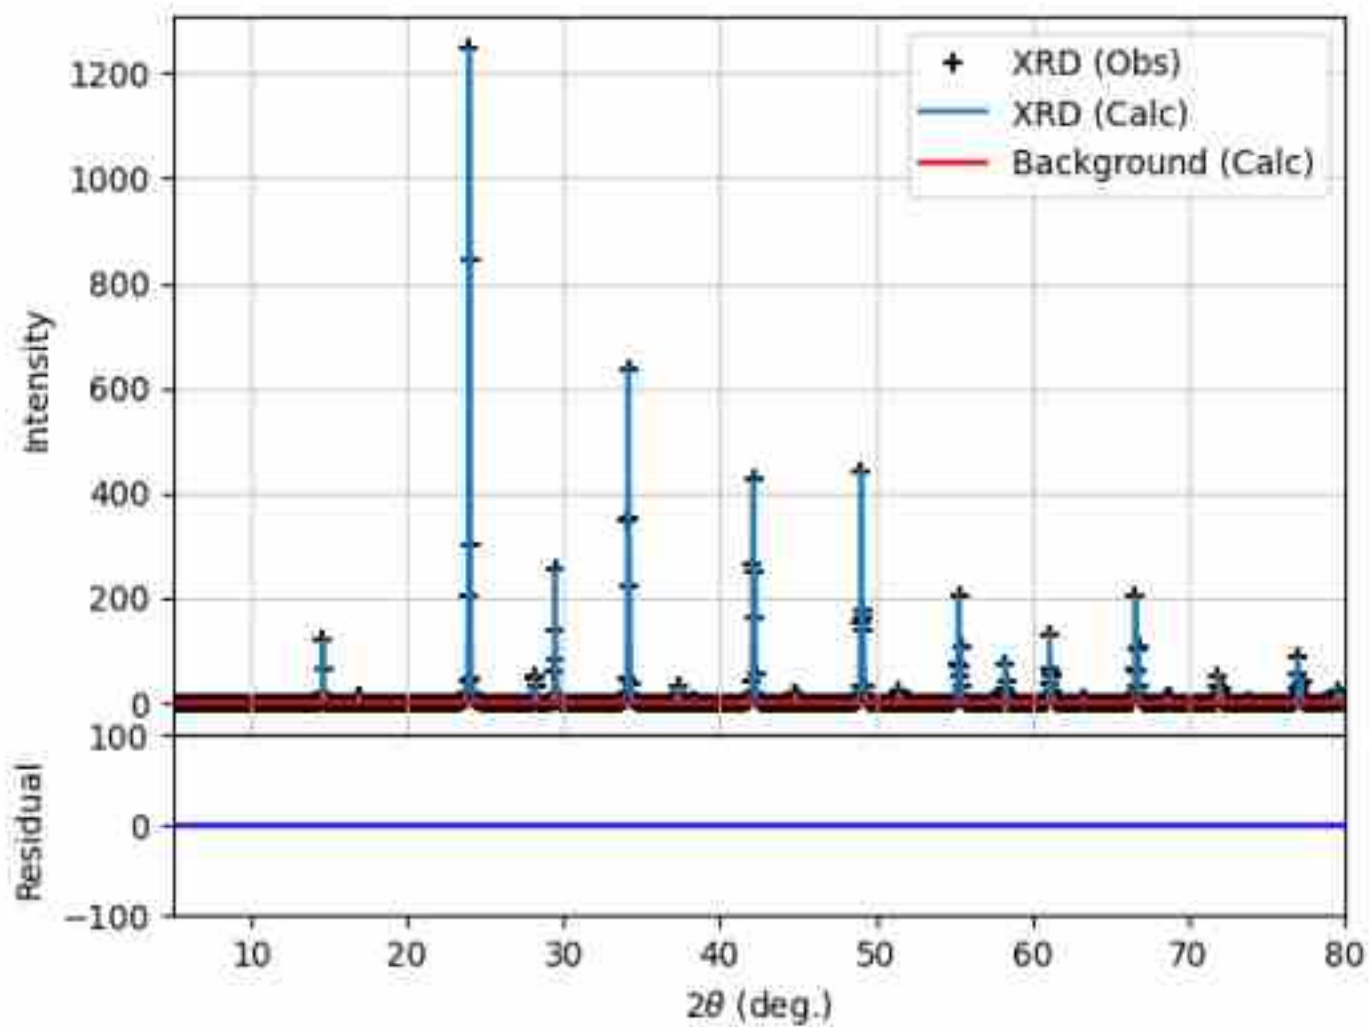

| RMSE before RR | Rwp     | RMSE after RR |
|----------------|---------|---------------|
| 0.011          | 0.05983 | 0.00428       |

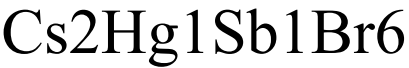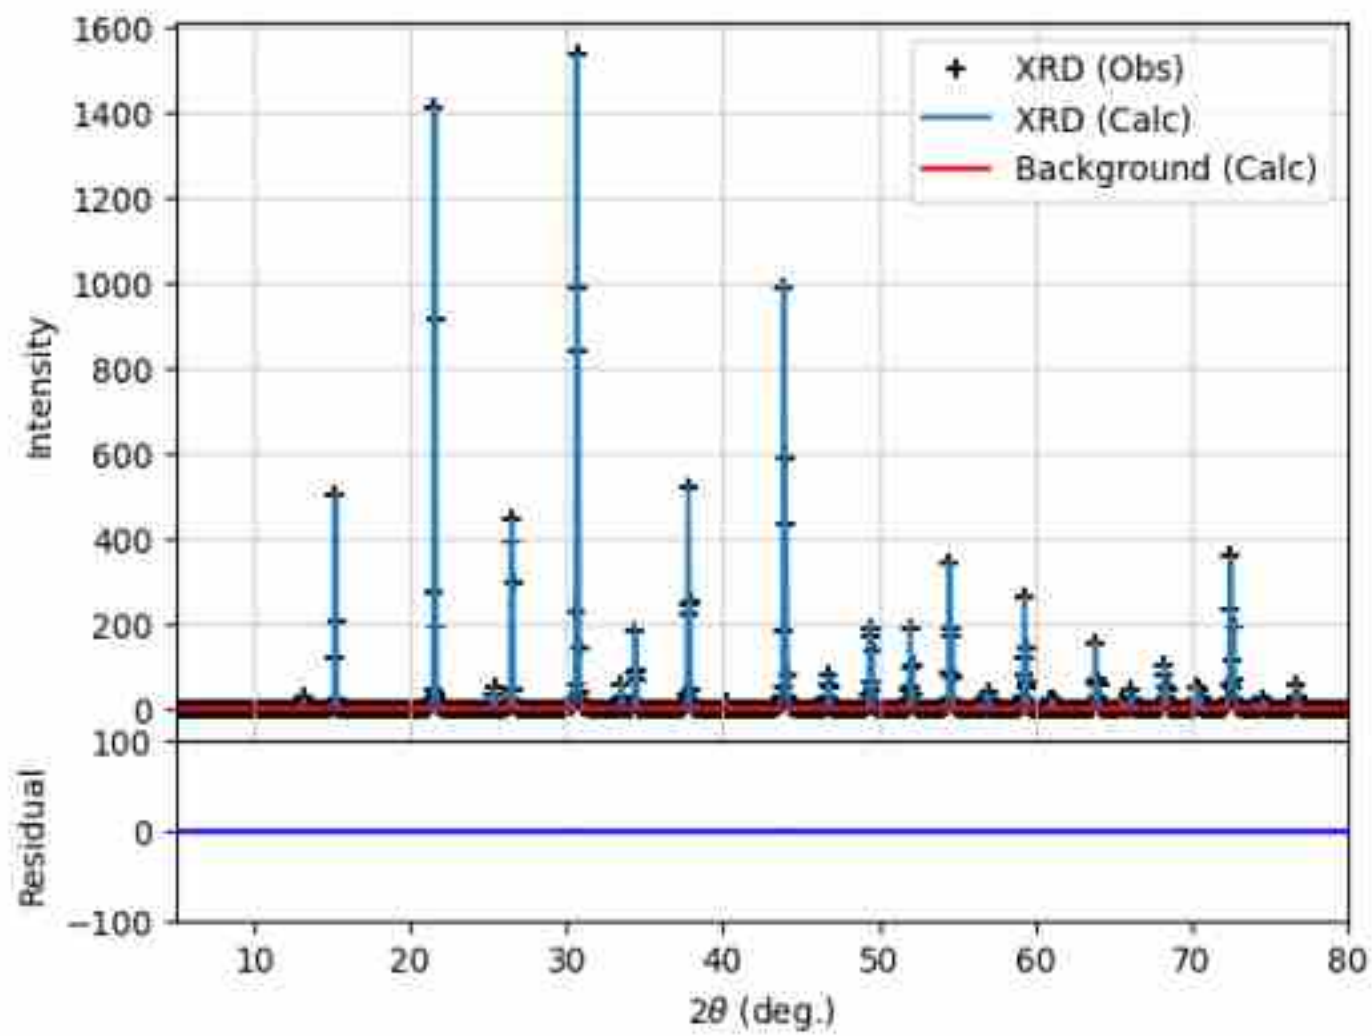

| RMSE before RR | Rwp     | RMSE after RR |
|----------------|---------|---------------|
| 0.011          | 0.15033 | 0.00349       |

# Cs<sub>2</sub>In<sub>1</sub>Au<sub>1</sub>Br<sub>6</sub>

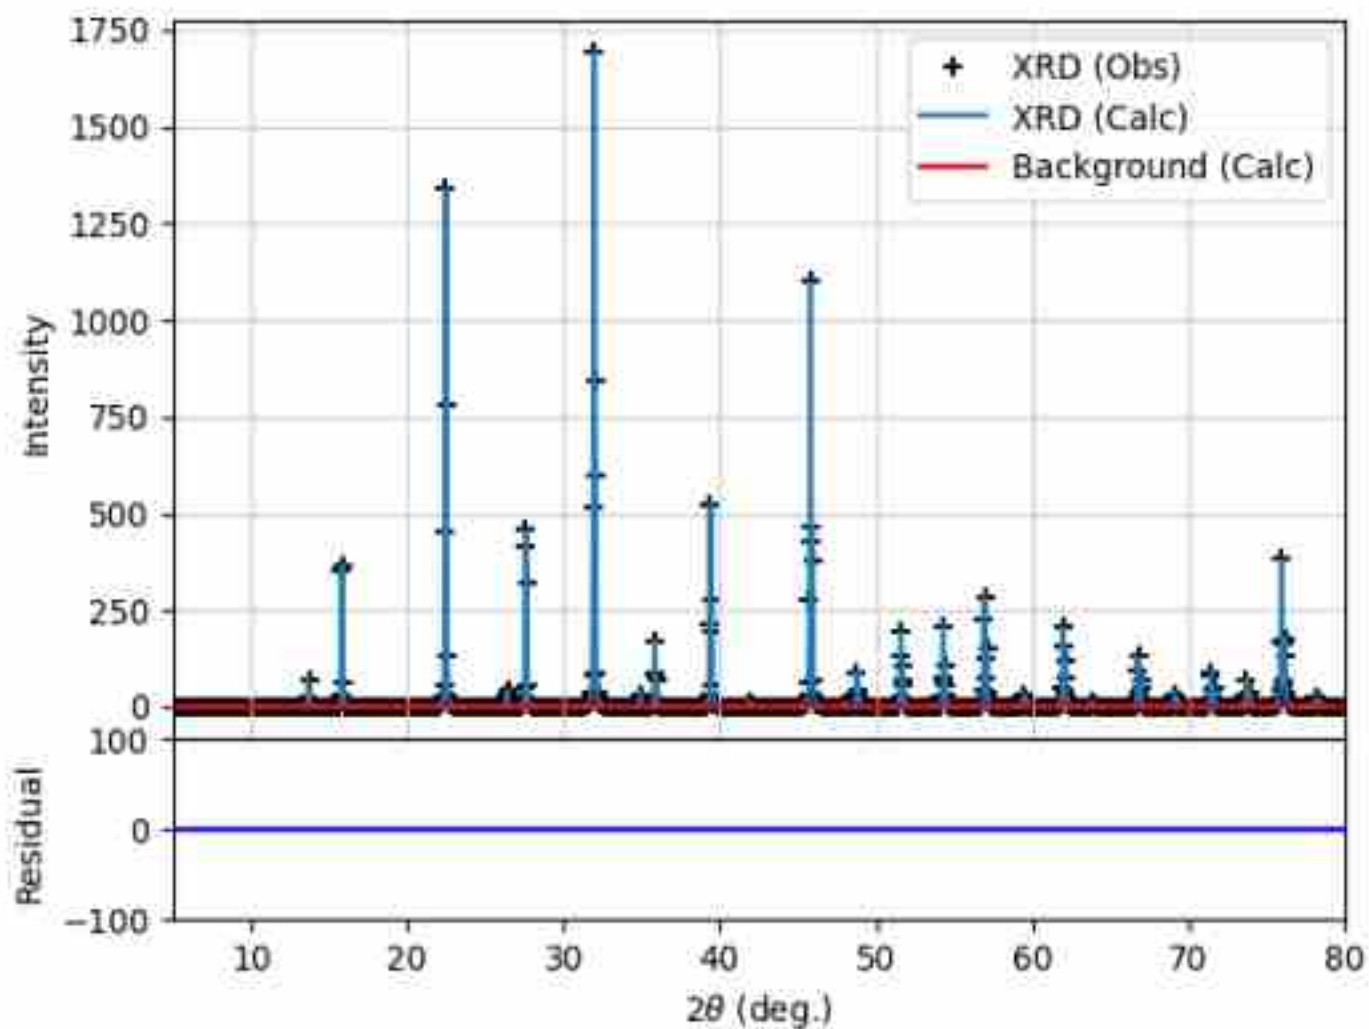

| RMSE before RR | Rwp     | RMSE after RR |
|----------------|---------|---------------|
| 0.011          | 0.02225 | 0.00216       |

# Cs<sub>2</sub>K<sub>1</sub>Sb<sub>1</sub>F<sub>6</sub>

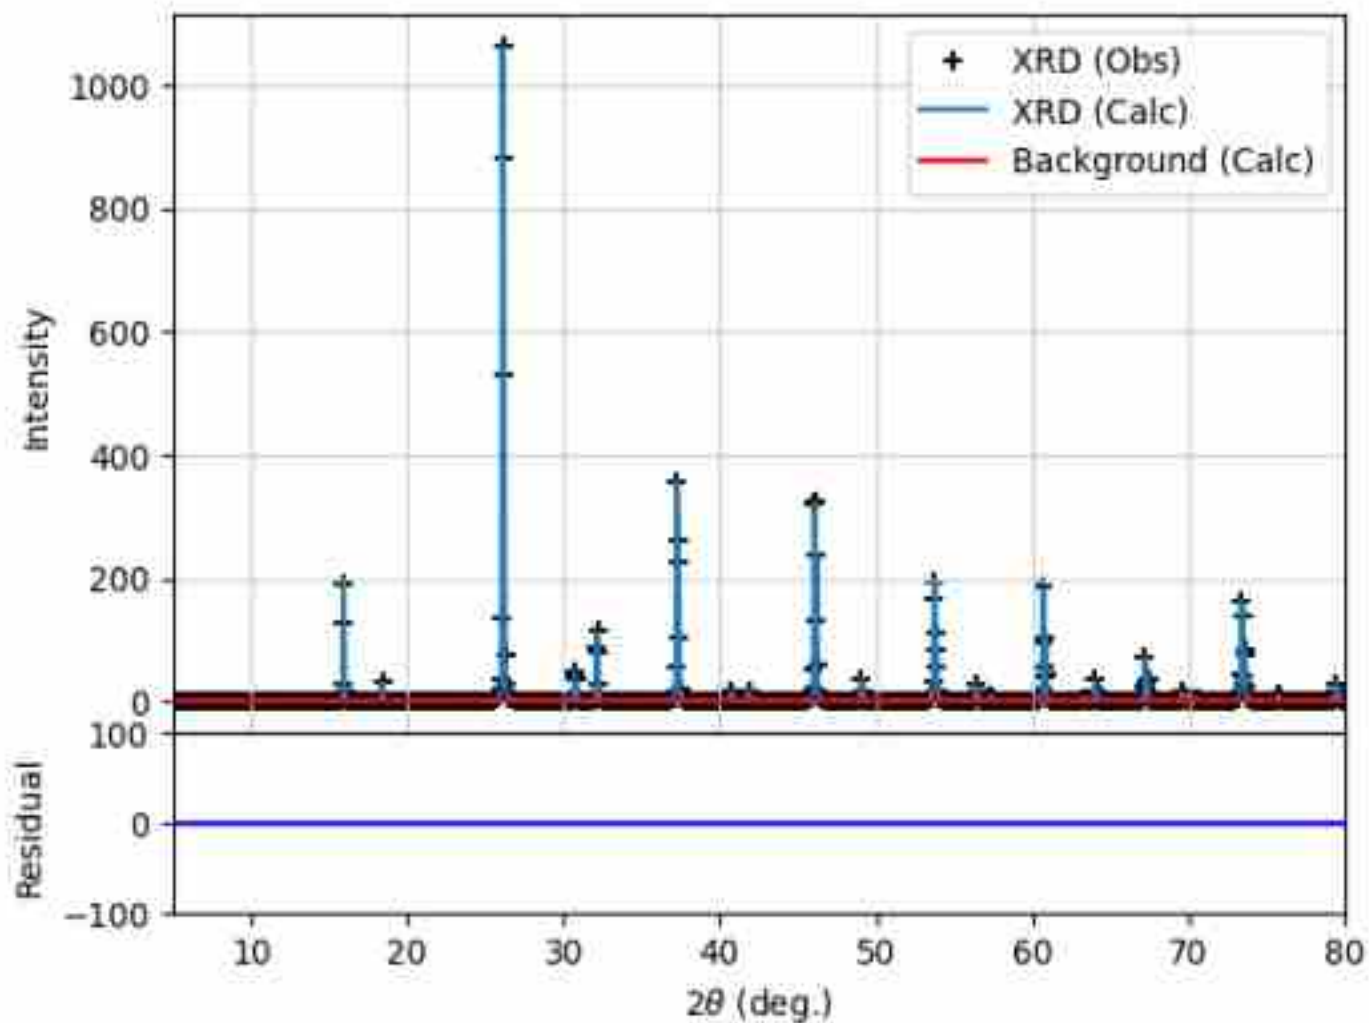

| RMSE before RR | Rwp     | RMSE after RR |
|----------------|---------|---------------|
| 0.011          | 0.08293 | 0.00826       |

# Cs<sub>2</sub>Li<sub>1</sub>Eu<sub>1</sub>Cl<sub>6</sub>

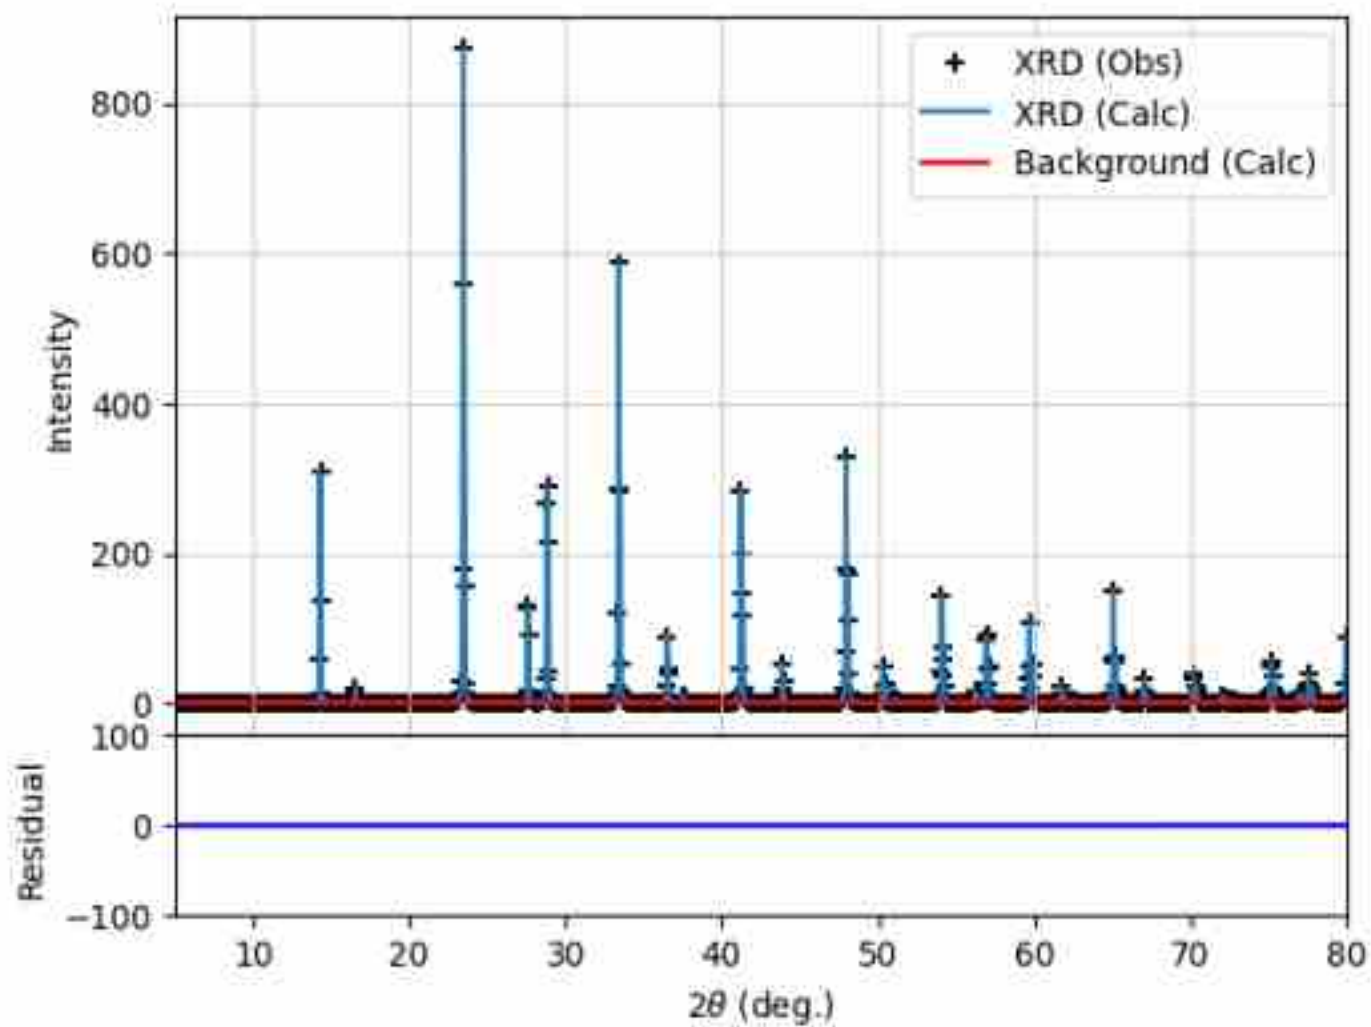

| RMSE before RR | Rwp     | RMSE after RR |
|----------------|---------|---------------|
| 0.011          | 0.03857 | 0.00484       |

# Cs<sub>2</sub>Li<sub>1</sub>Lu<sub>1</sub>Cl<sub>6</sub>

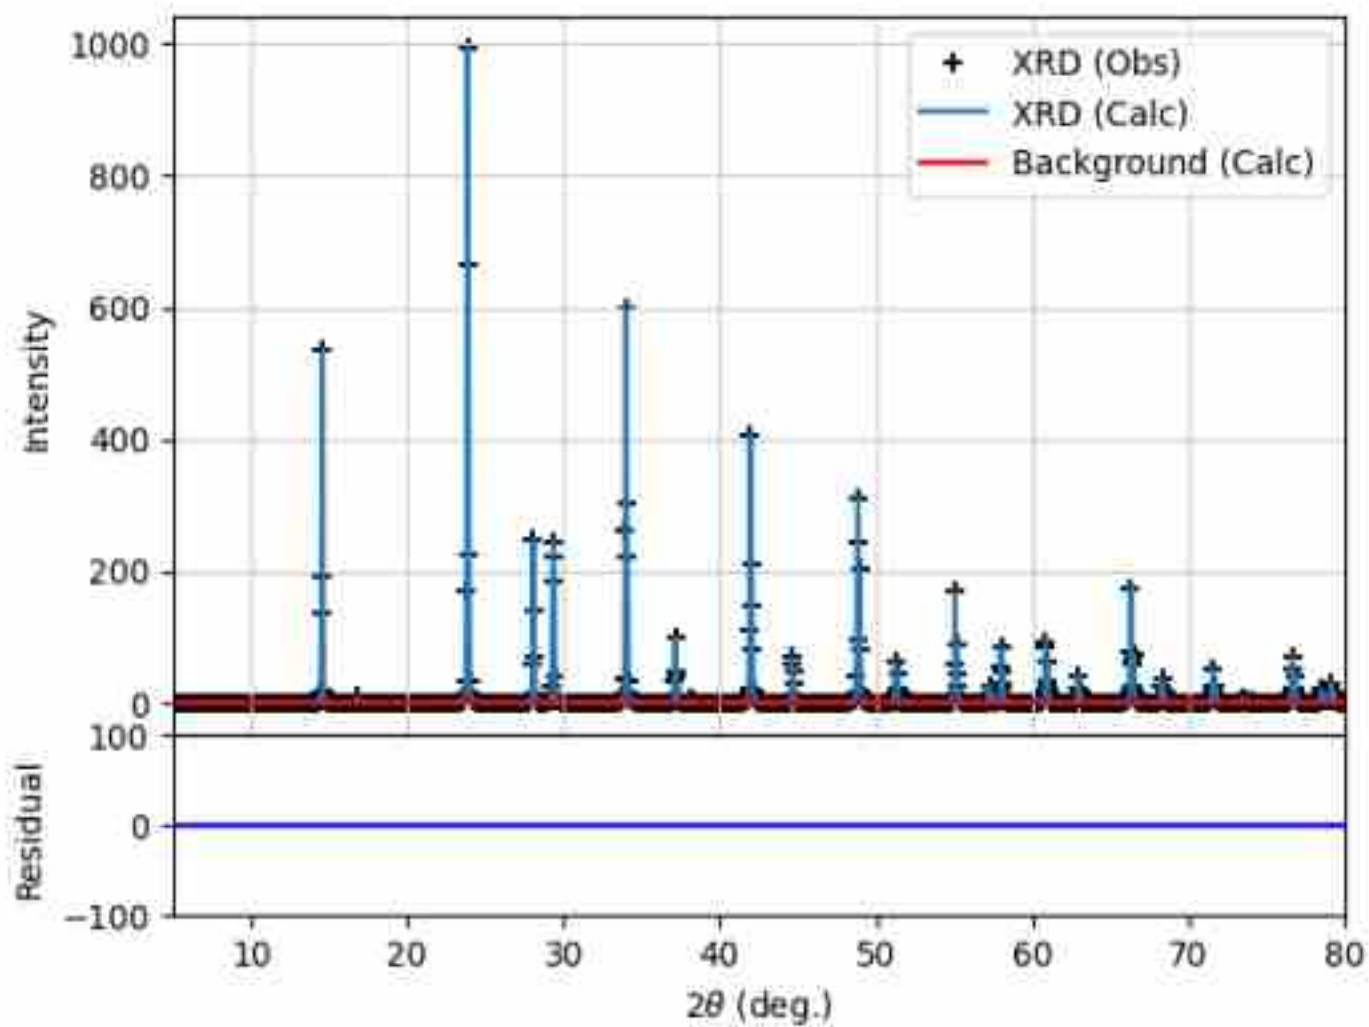

| RMSE before RR | Rwp     | RMSE after RR |
|----------------|---------|---------------|
| 0.011          | 0.04817 | 0.00451       |

# Cs<sub>2</sub>Na<sub>1</sub>Nd<sub>1</sub>F<sub>6</sub>

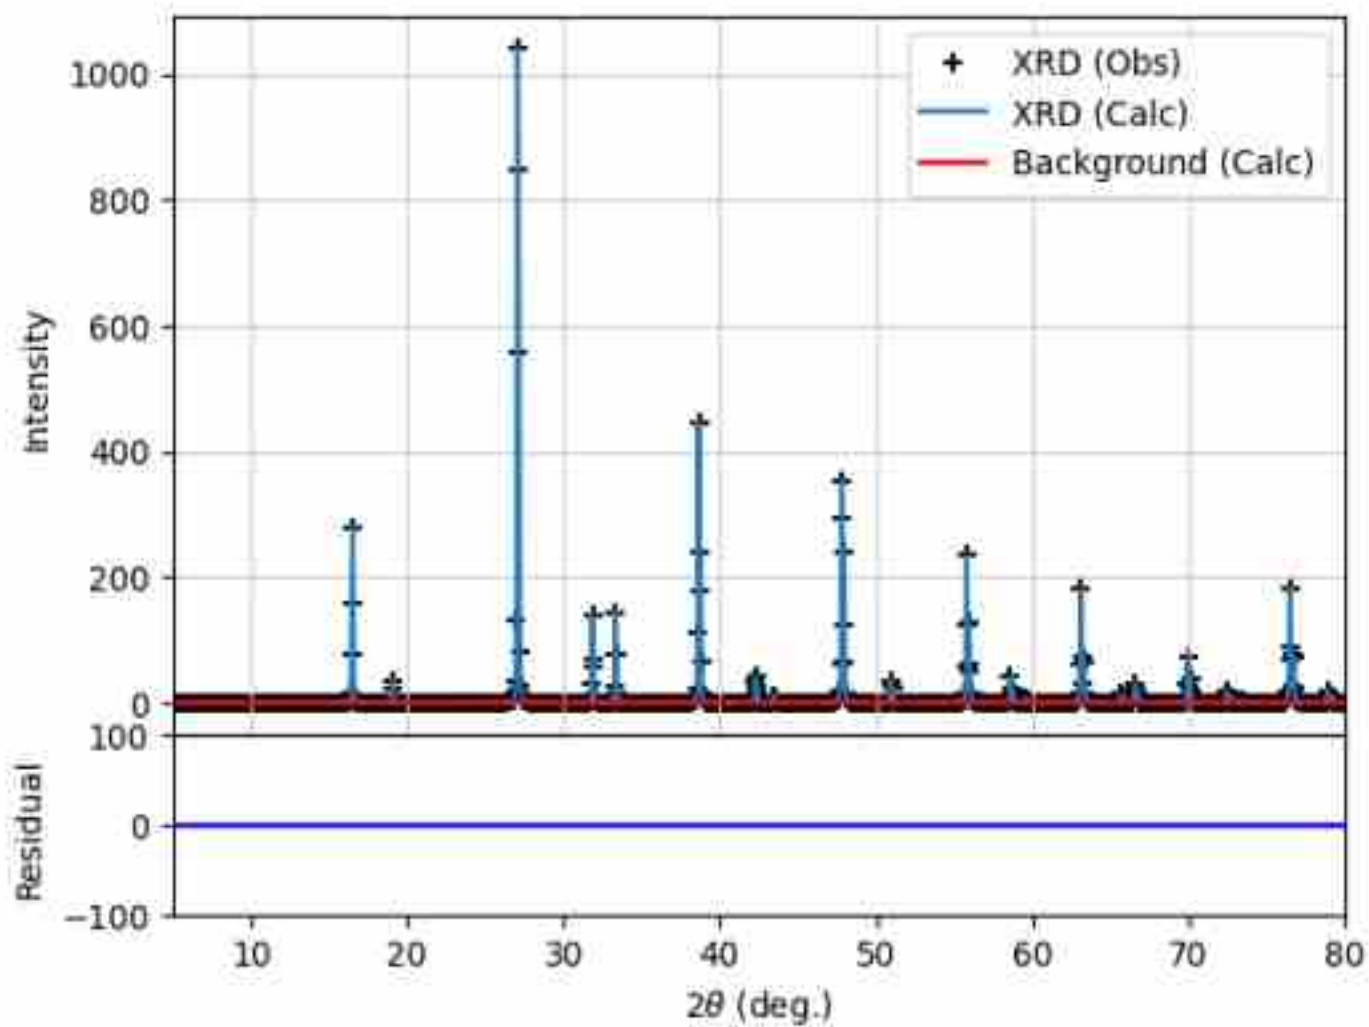

| RMSE before RR | Rwp     | RMSE after RR |
|----------------|---------|---------------|
| 0.011          | 0.01272 | 0.00378       |

# Cs<sub>2</sub>NdAgCl<sub>6</sub>

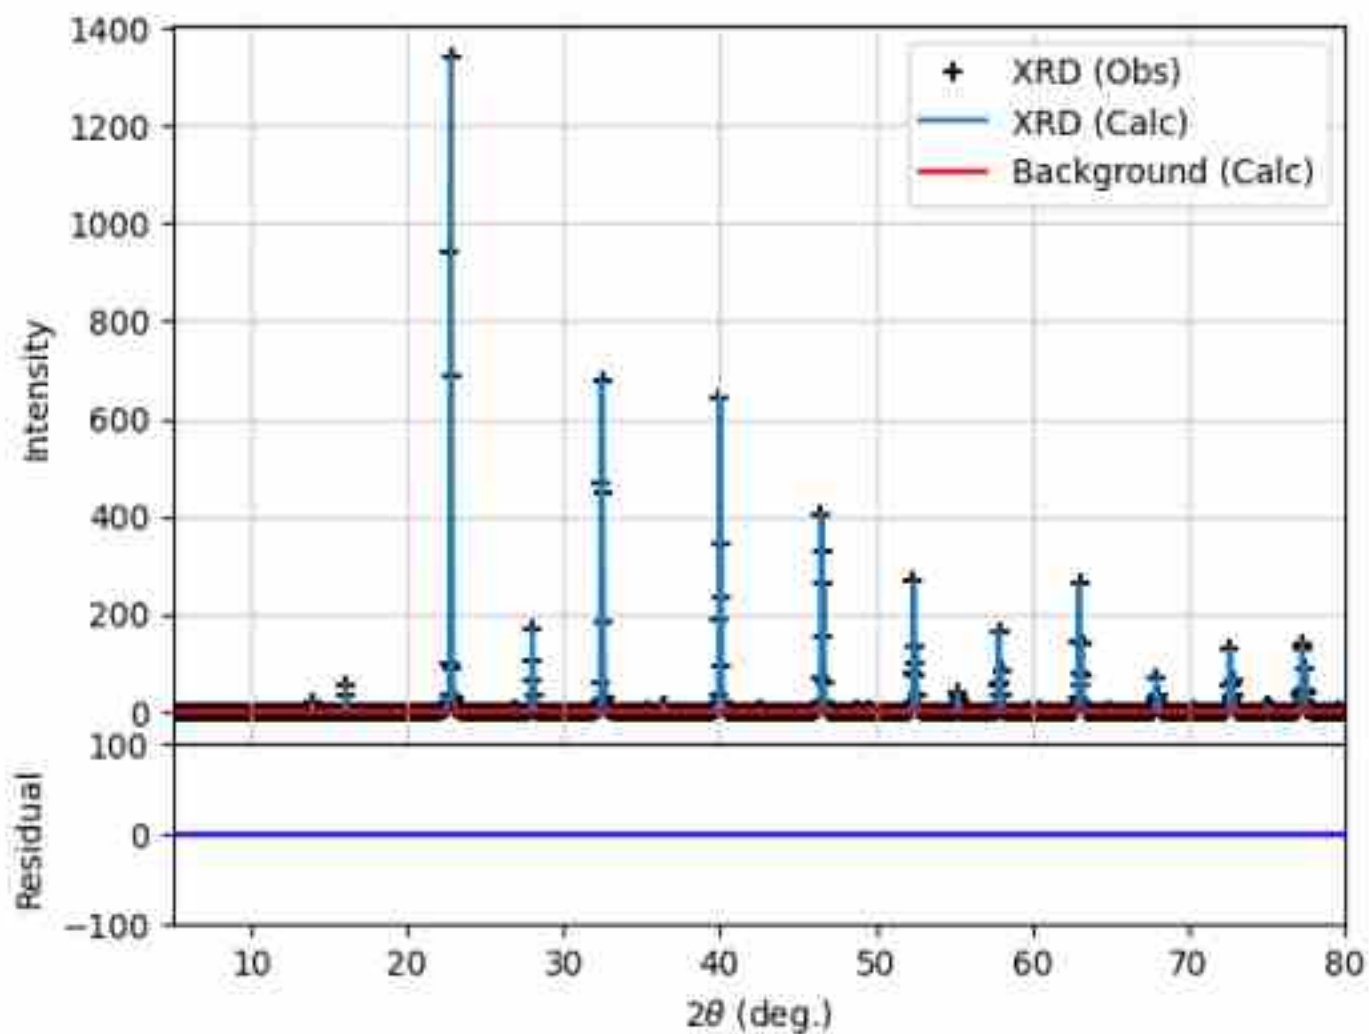

| RMSE before RR | Rwp     | RMSE after RR |
|----------------|---------|---------------|
| 0.011          | 0.00662 | 0.00112       |



# Cs<sub>2</sub>Sm<sub>1</sub>Cu<sub>1</sub>Cl<sub>6</sub>

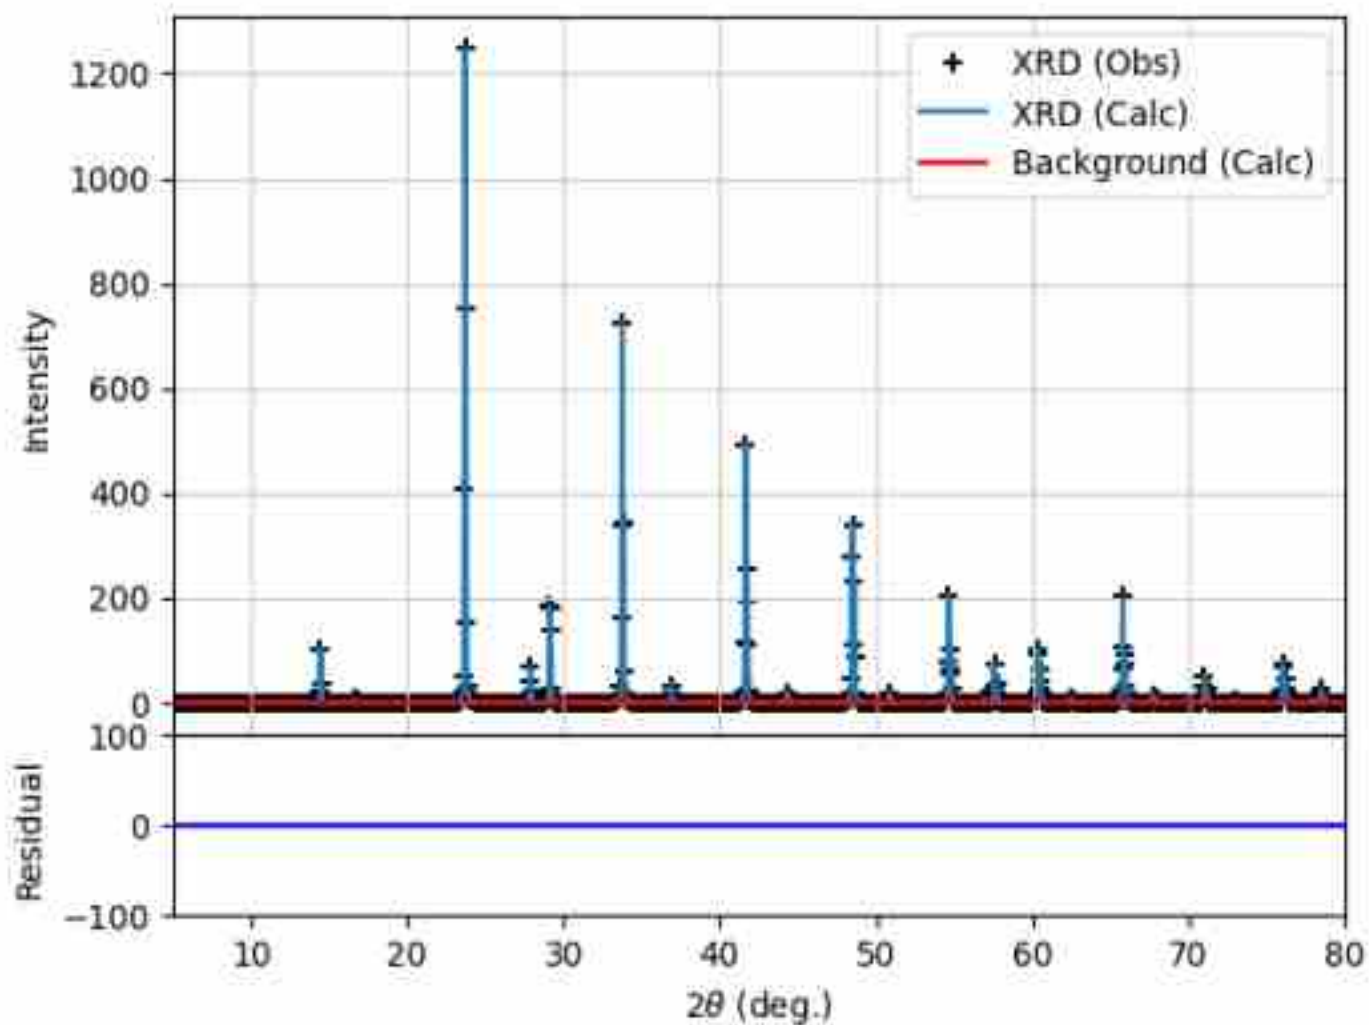

| RMSE before RR | Rwp     | RMSE after RR |
|----------------|---------|---------------|
| 0.011          | 0.02643 | 0.00264       |

# Cs<sub>2</sub>TaCl<sub>6</sub>

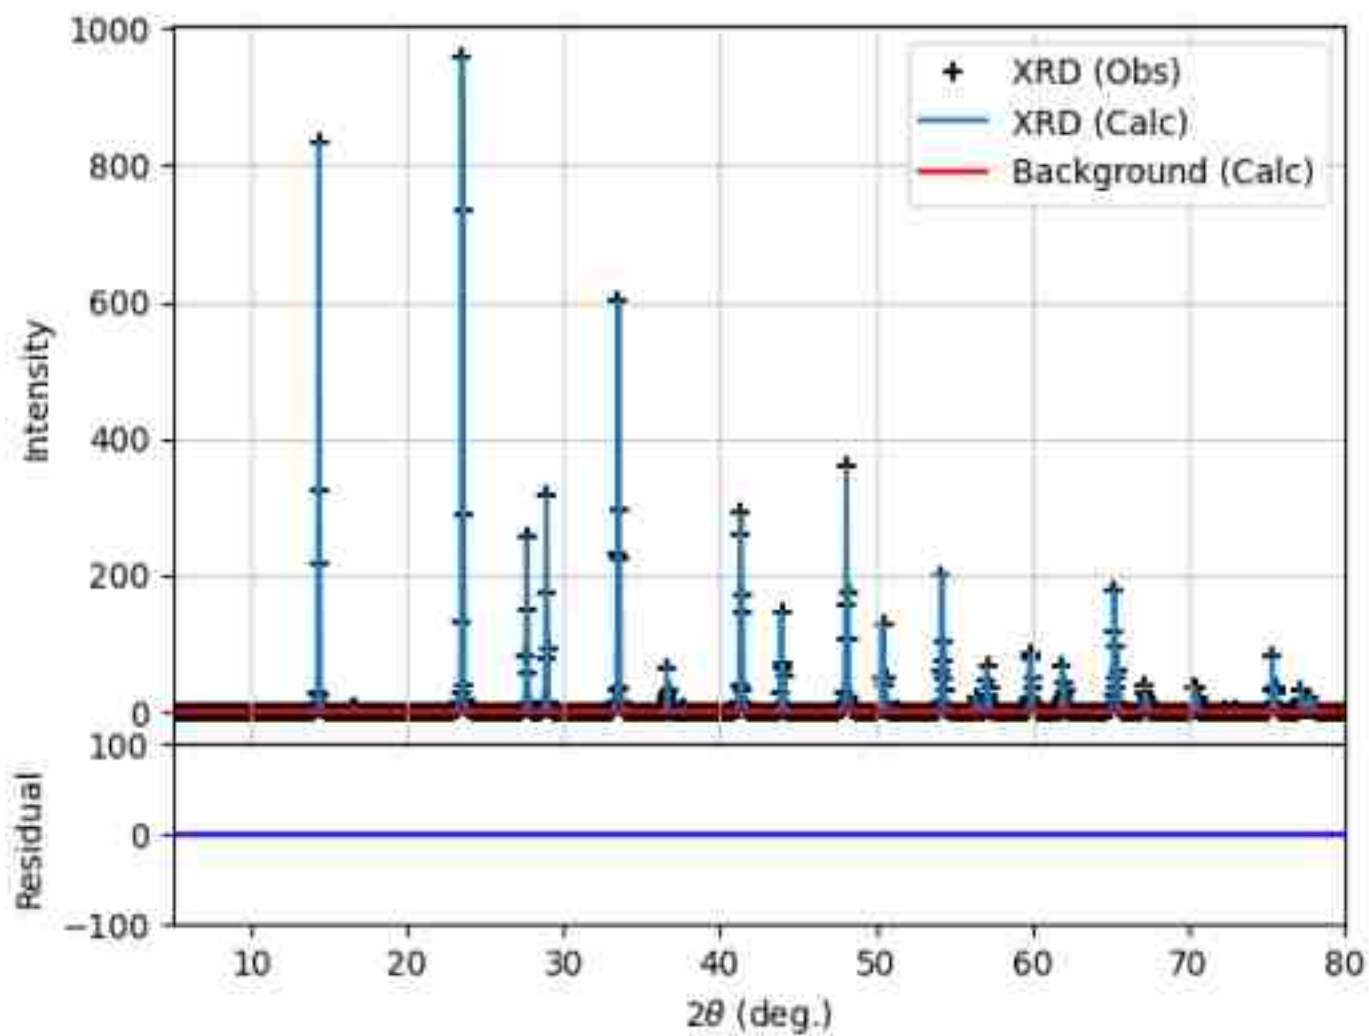

| RMSE before RR | Rwp     | RMSE after RR |
|----------------|---------|---------------|
| 0.011          | 0.01482 | 0.00254       |

# Cs<sub>2</sub>Tl<sub>1</sub>V<sub>1</sub>F<sub>6</sub>

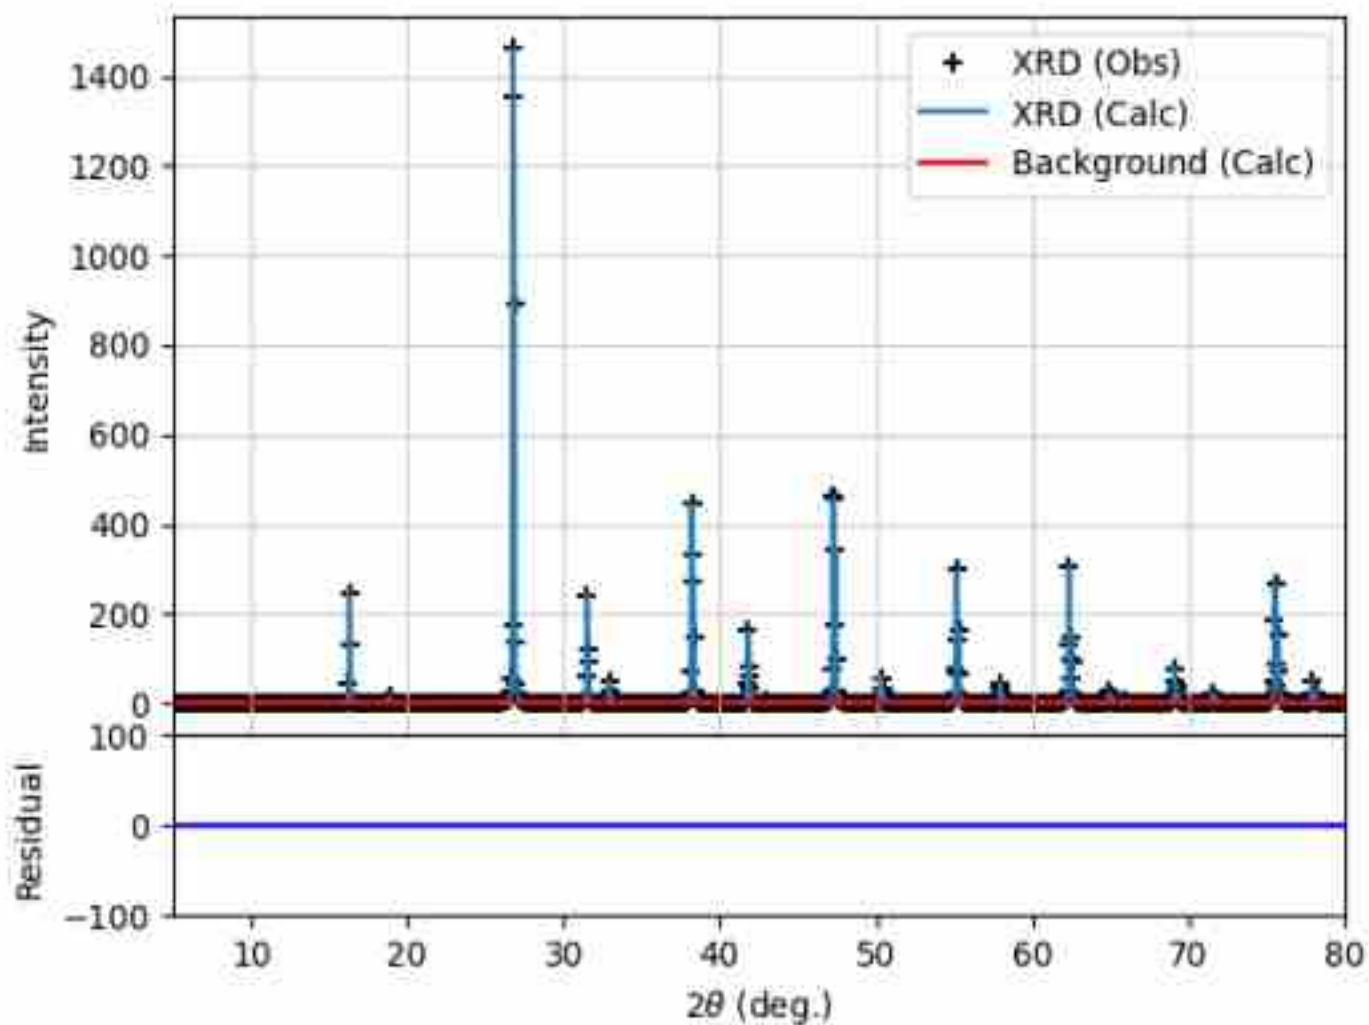

| RMSE before RR | Rwp     | RMSE after RR |
|----------------|---------|---------------|
| 0.011          | 0.00849 | 0.0035        |

# Cs<sub>2</sub>Y<sub>1</sub>Ag<sub>1</sub>Br<sub>6</sub>

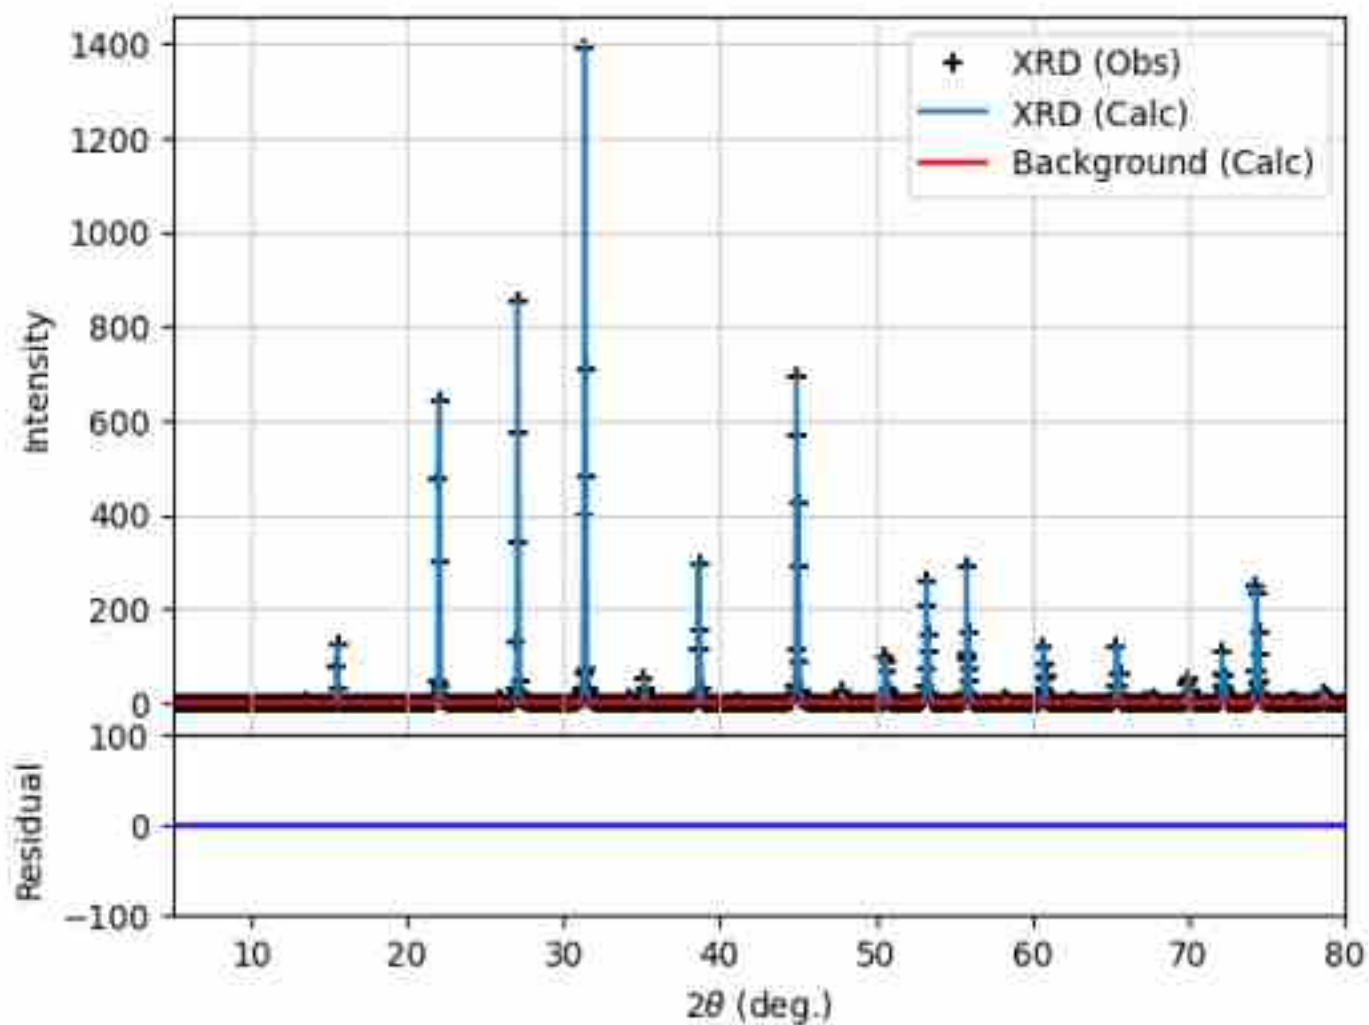

| RMSE before RR | Rwp     | RMSE after RR |
|----------------|---------|---------------|
| 0.011          | 0.07547 | 0.00224       |

# Cs<sub>2</sub>Y<sub>1</sub>Cu<sub>1</sub>Cl<sub>6</sub>

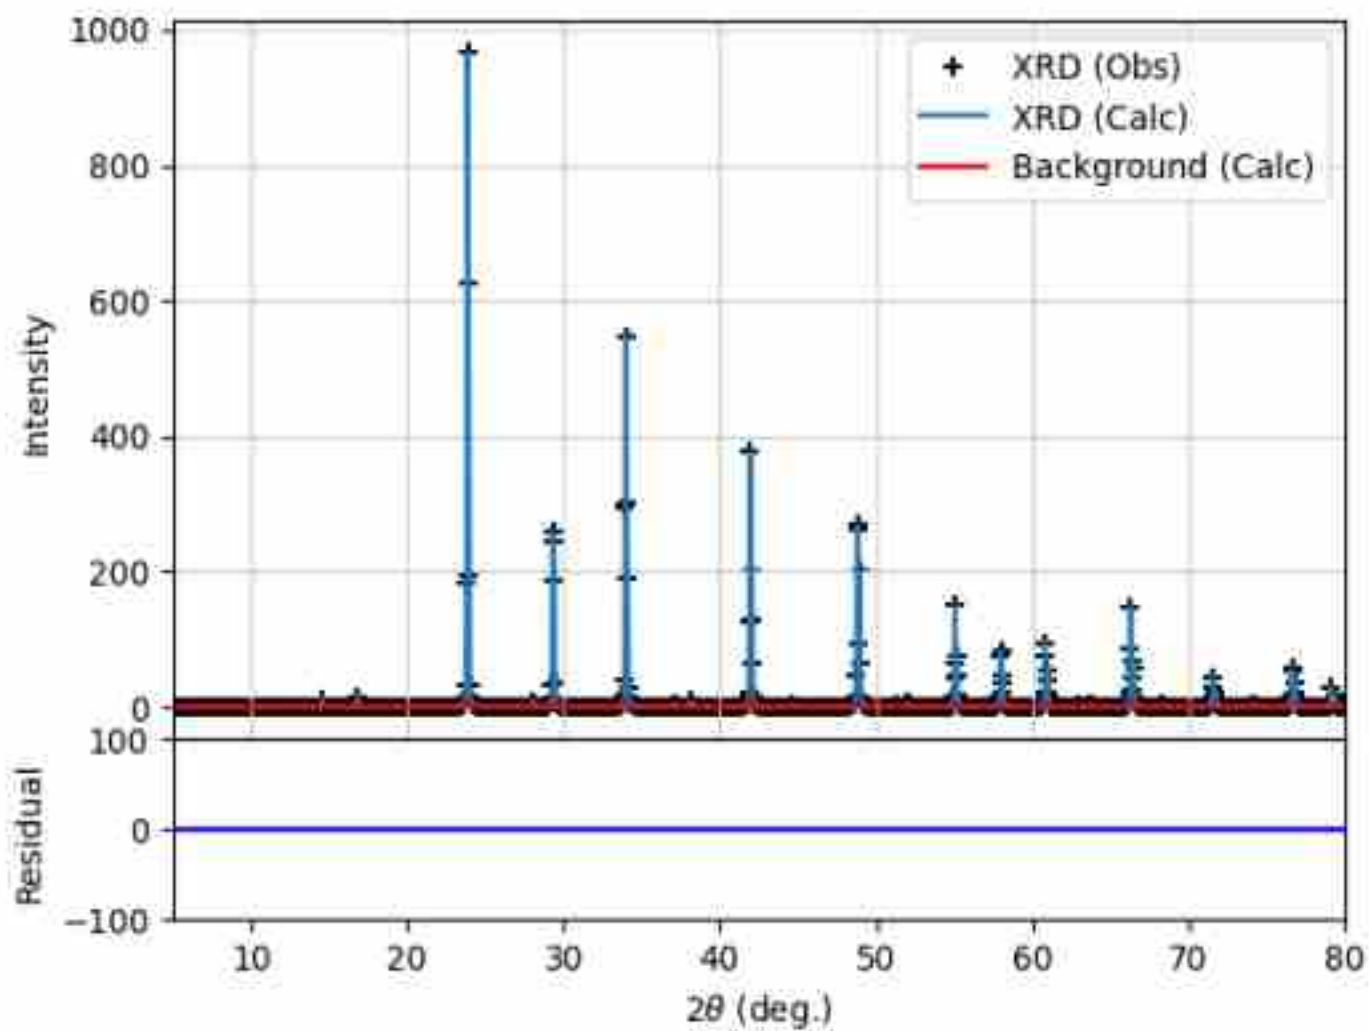

| RMSE before RR | Rwp     | RMSE after RR |
|----------------|---------|---------------|
| 0.011          | 0.04848 | 0.00282       |

# Cs3Ga1F6

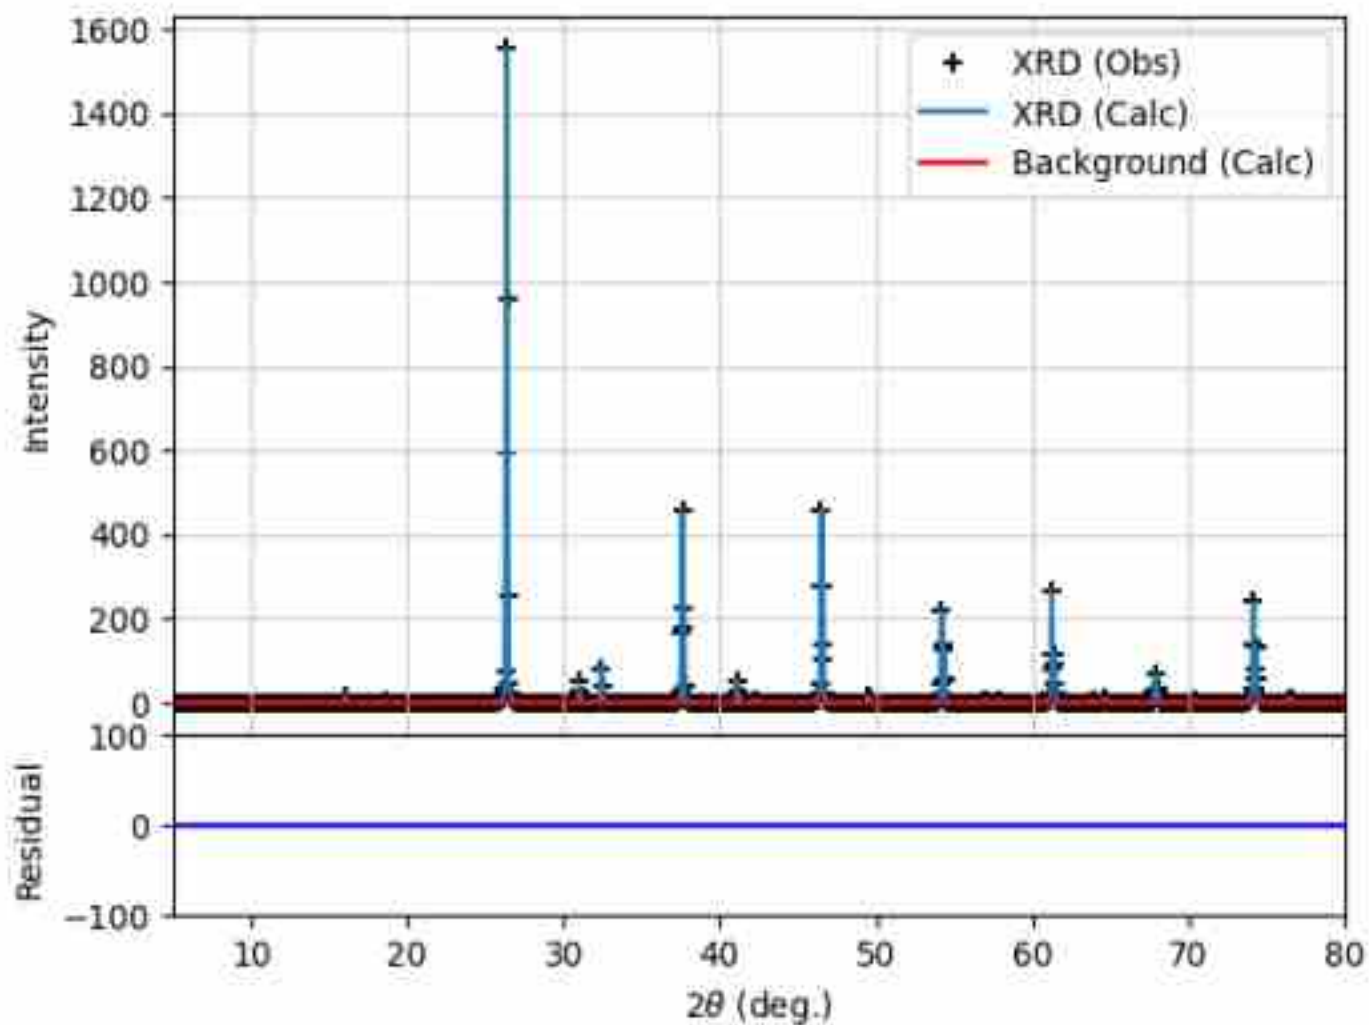

| RMSE before RR | Rwp    | RMSE after RR |
|----------------|--------|---------------|
| 0.011          | 0.0057 | 0.00196       |

# Dy1Y1C4

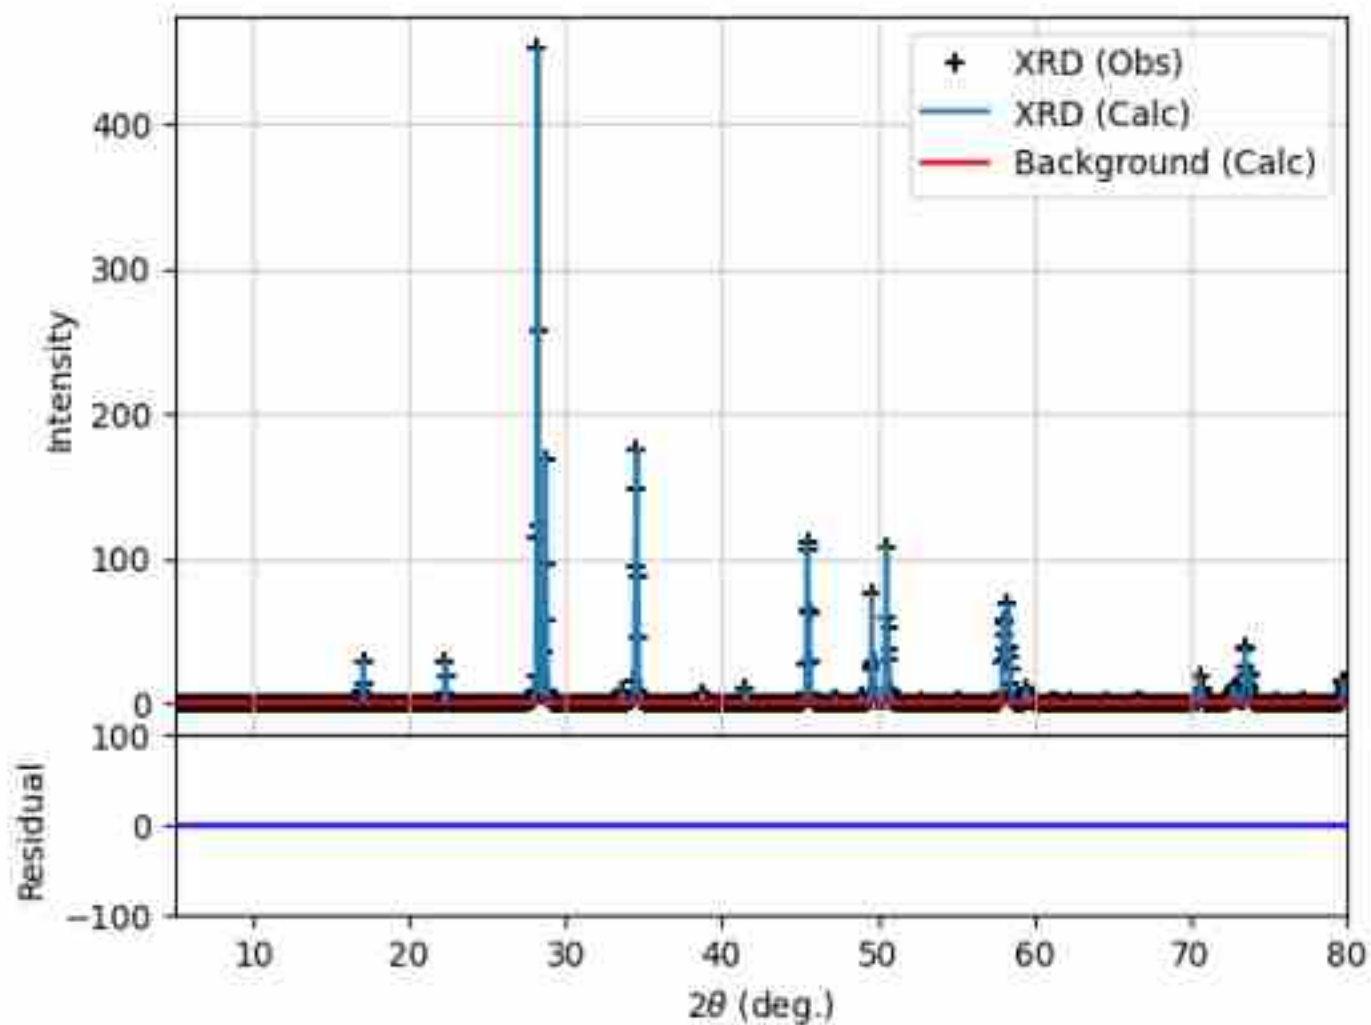

| RMSE before RR | Rwp     | RMSE after RR |
|----------------|---------|---------------|
| 0.011          | 0.00307 | 0.00221       |

# Dy<sub>2</sub>Fe<sub>1</sub>Ge<sub>4</sub>

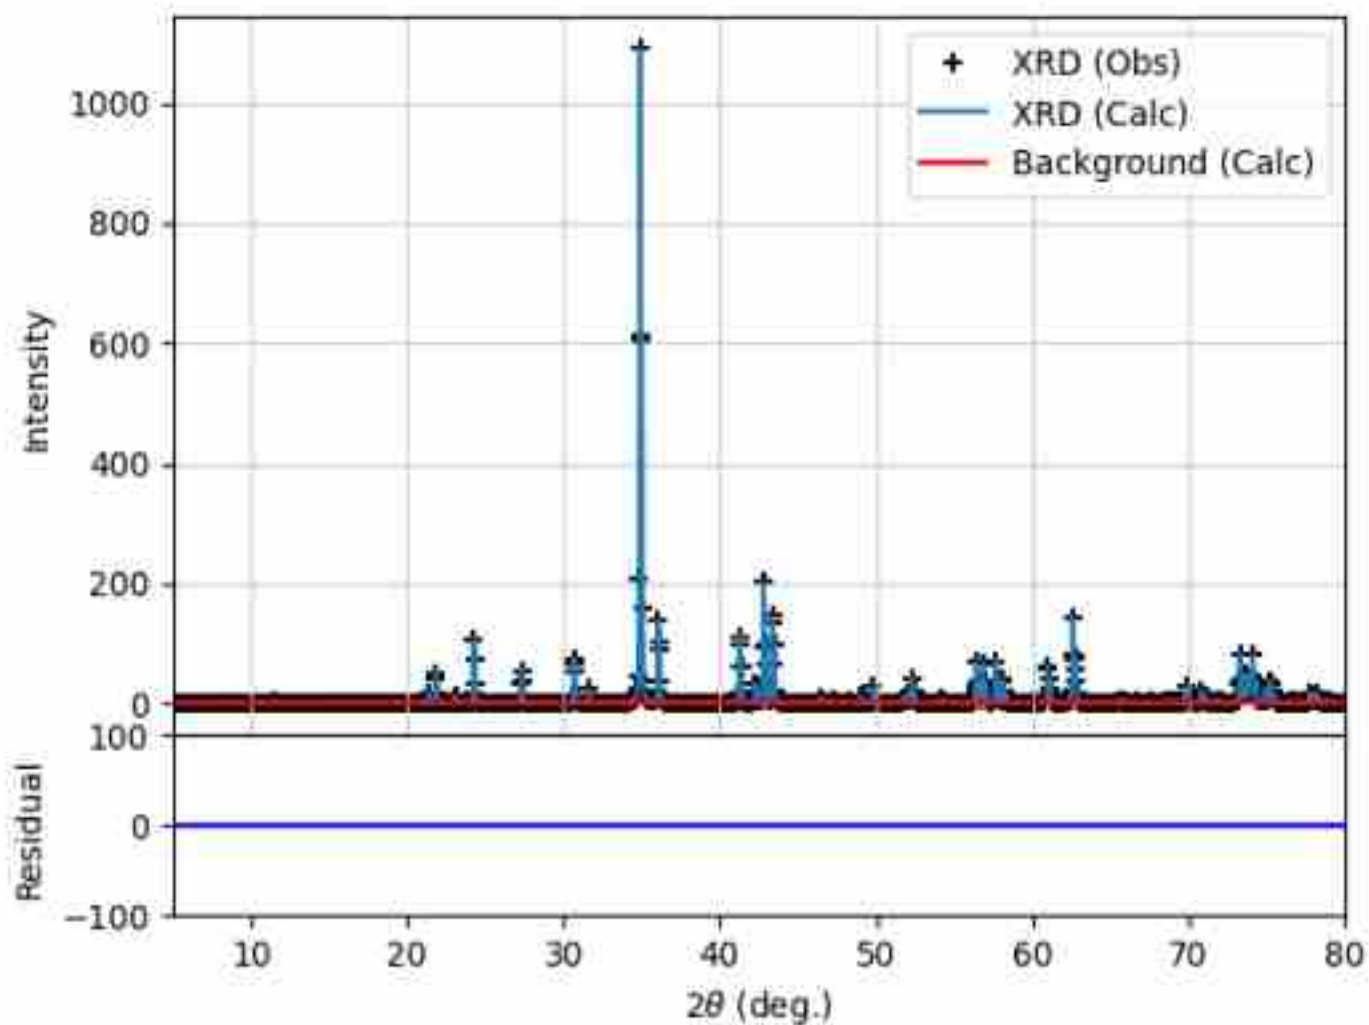

| RMSE before RR | Rwp     | RMSE after RR |
|----------------|---------|---------------|
| 0.011          | 0.00317 | 0.0003        |



# Dy<sub>3</sub>In<sub>3</sub>Rh<sub>3</sub>

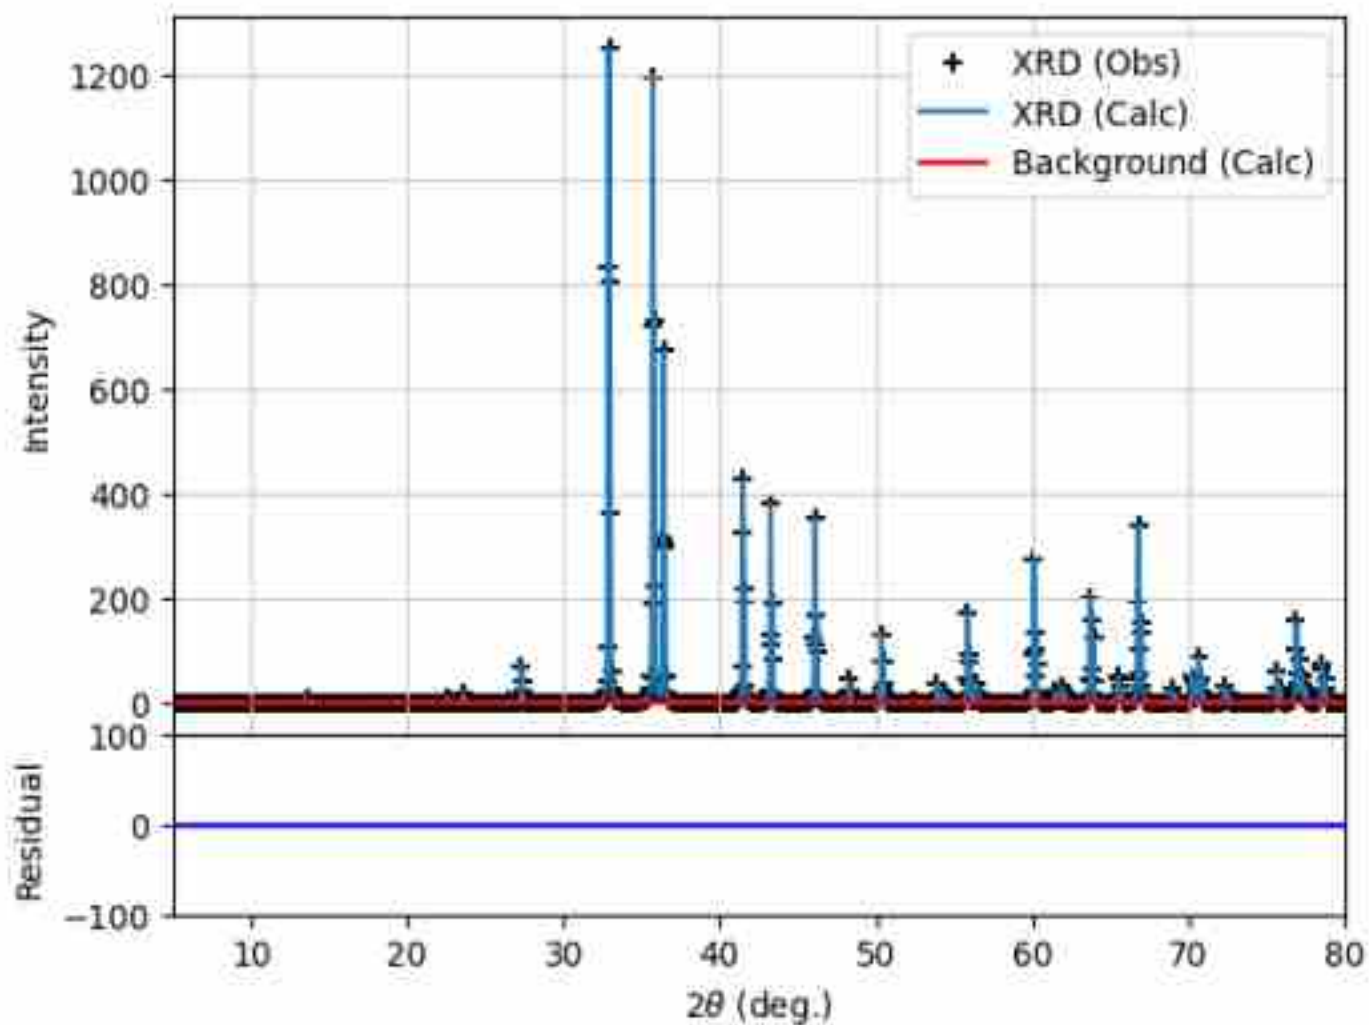

| RMSE before RR | Rwp     | RMSE after RR |
|----------------|---------|---------------|
| 0.011          | 0.00742 | 0.00119       |

# Dy8Pt4

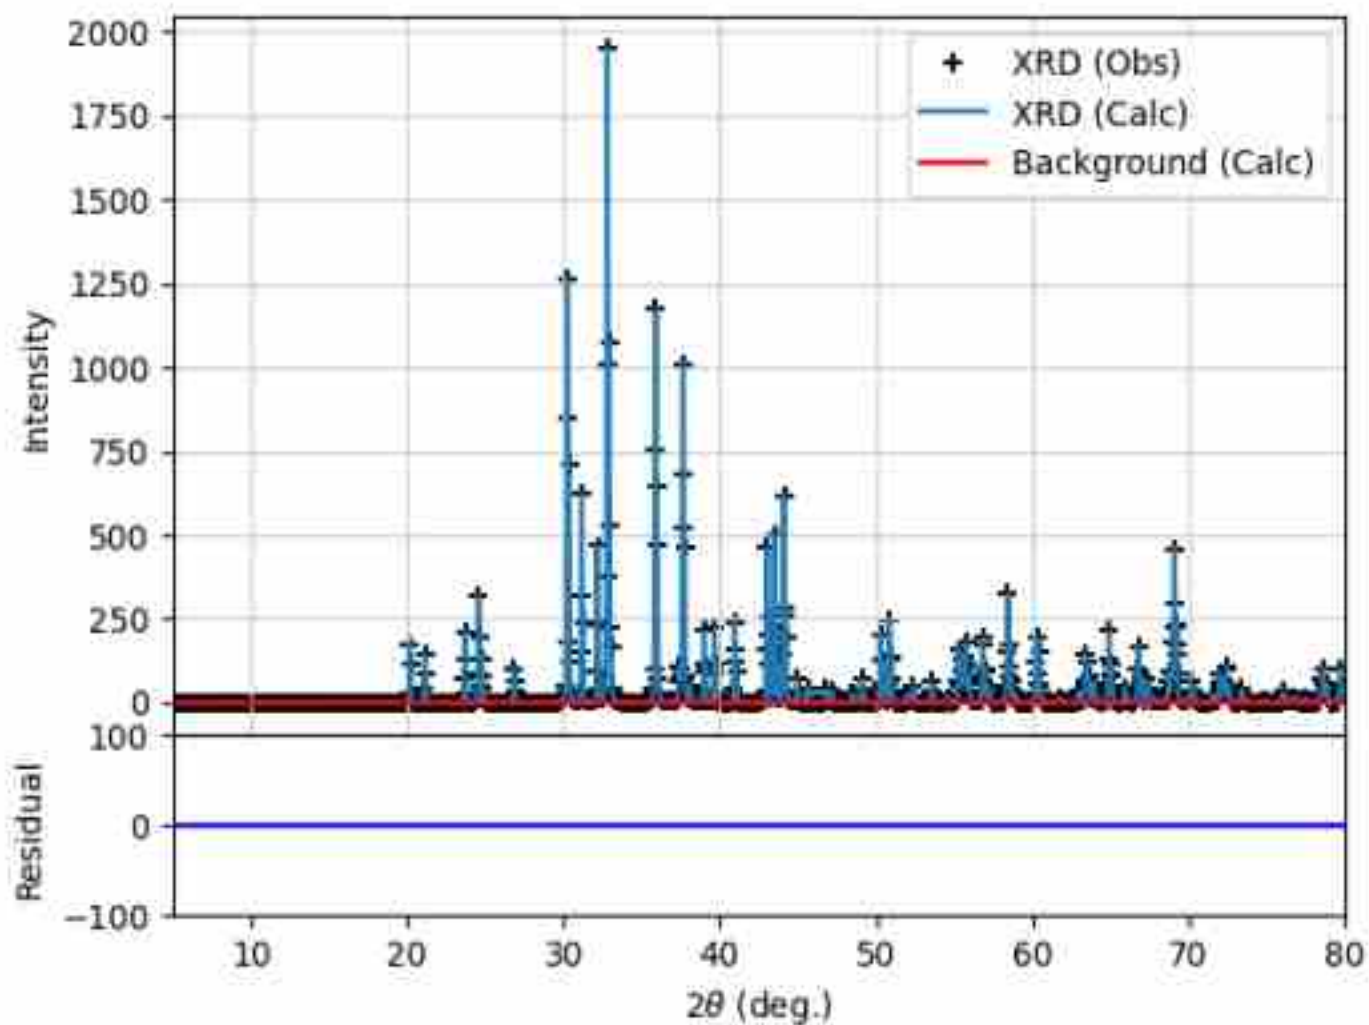

| RMSE before RR | Rwp     | RMSE after RR |
|----------------|---------|---------------|
| 0.011          | 0.00462 | 0.00042       |

# Er1In1Pt4

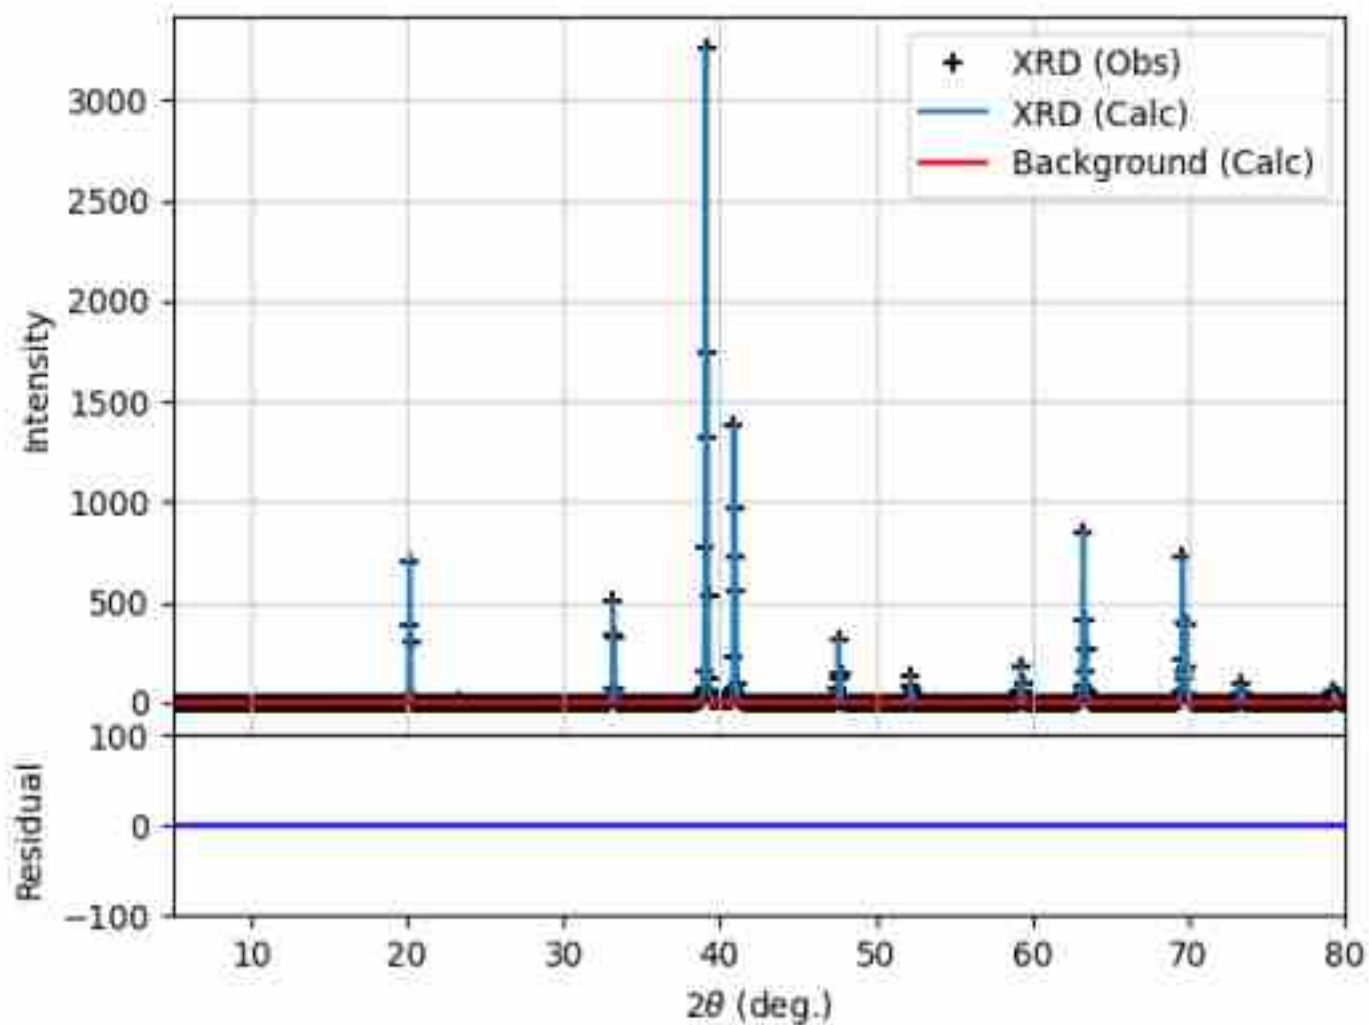

| RMSE before RR | Rwp     | RMSE after RR |
|----------------|---------|---------------|
| 0.011          | 0.05929 | 0.00209       |

# Er<sub>1</sub>Mn<sub>4</sub>Fe<sub>2</sub>Sn<sub>6</sub>

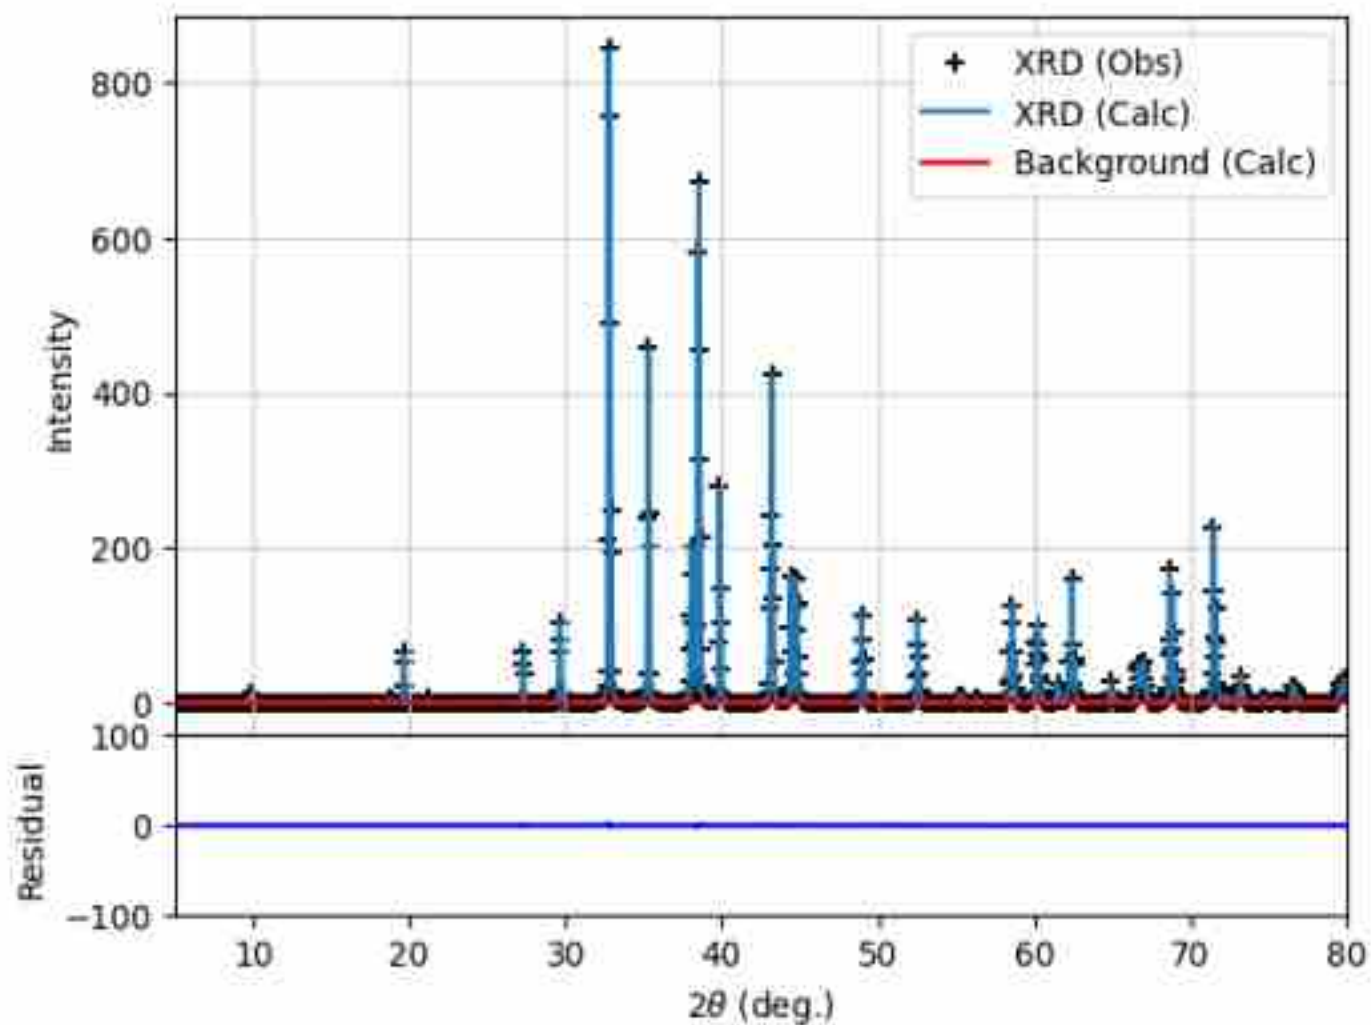

| RMSE before RR | Rwp     | RMSE after RR |
|----------------|---------|---------------|
| 0.011          | 0.29909 | 0.00744       |

# Er1Mo6S8

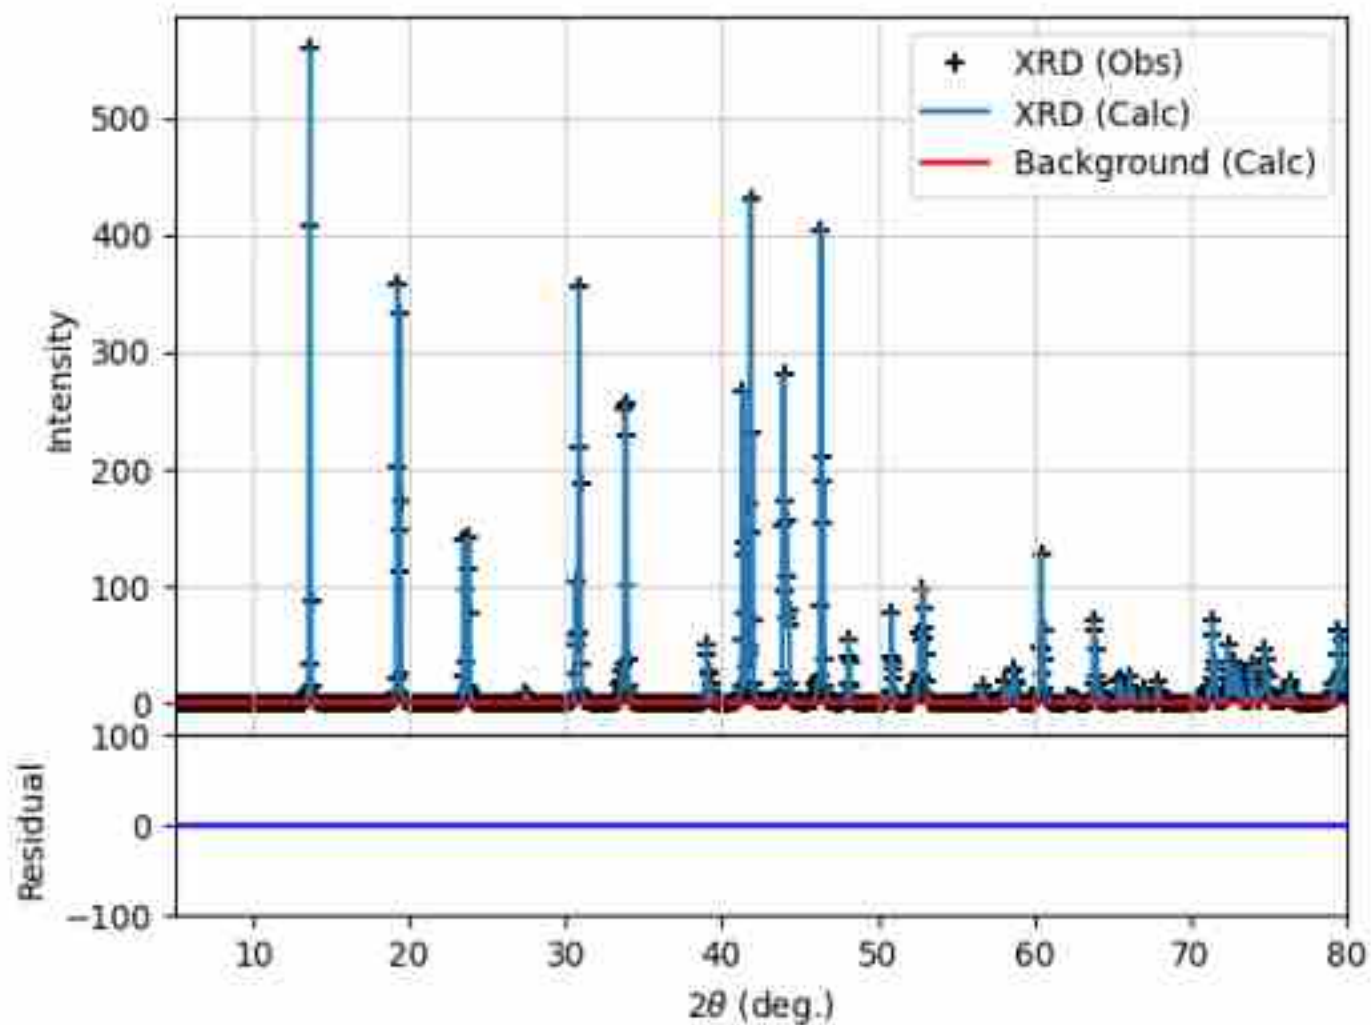

| RMSE before RR | Rwp     | RMSE after RR |
|----------------|---------|---------------|
| 0.011          | 0.00303 | 0.00077       |

# Er<sub>2</sub>H<sub>2</sub>Cl<sub>2</sub>

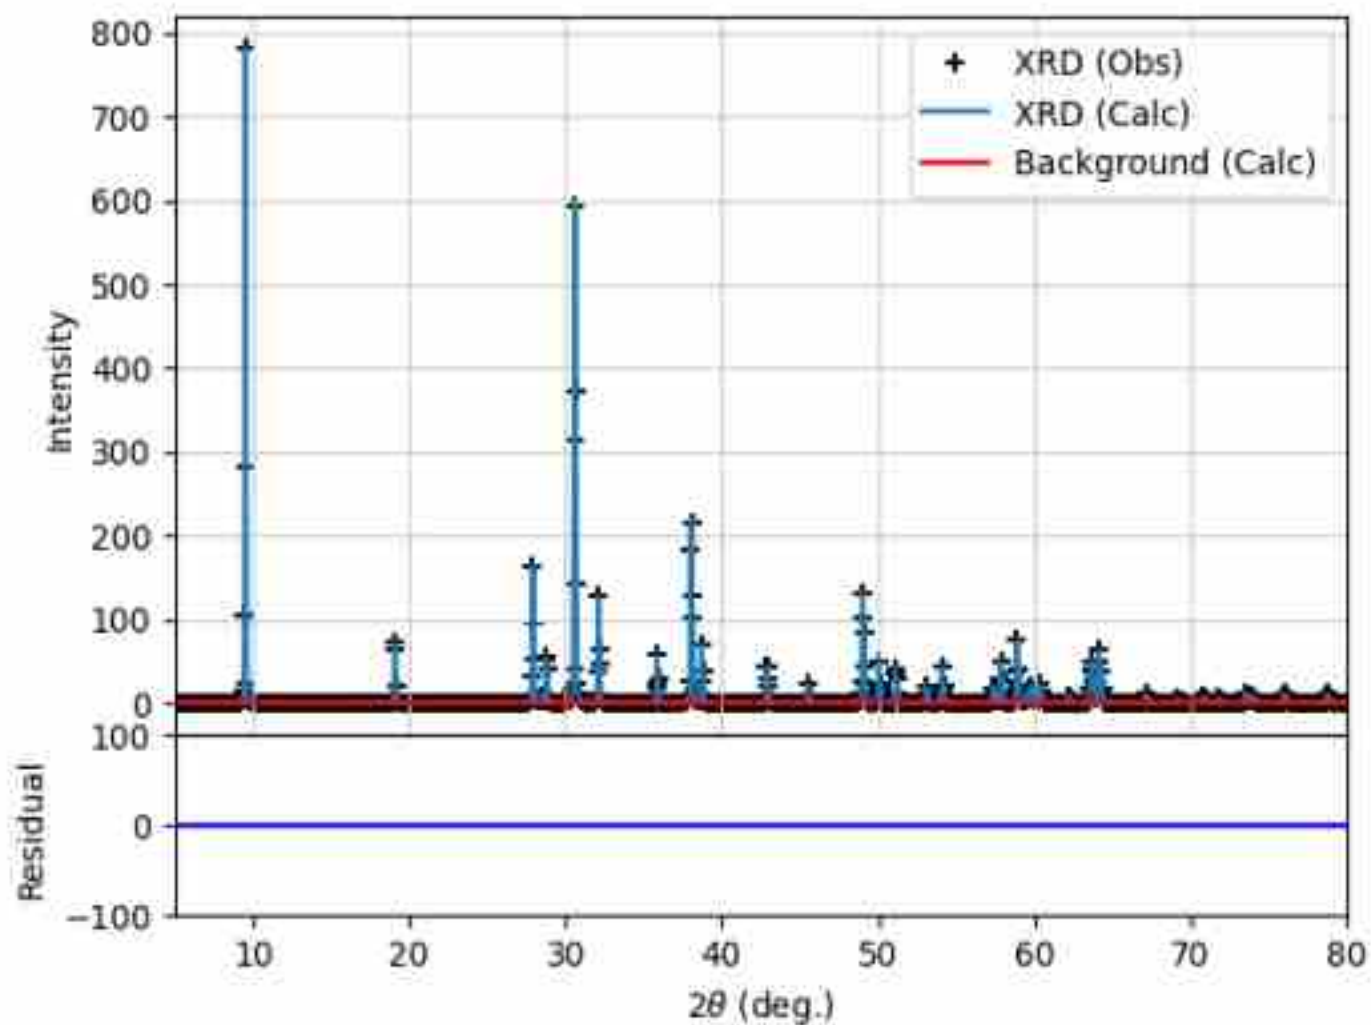

| RMSE before RR | Rwp     | RMSE after RR |
|----------------|---------|---------------|
| 0.011          | 0.00508 | 0.00621       |

# Er<sub>3</sub>Sn<sub>3</sub>Rh<sub>3</sub>

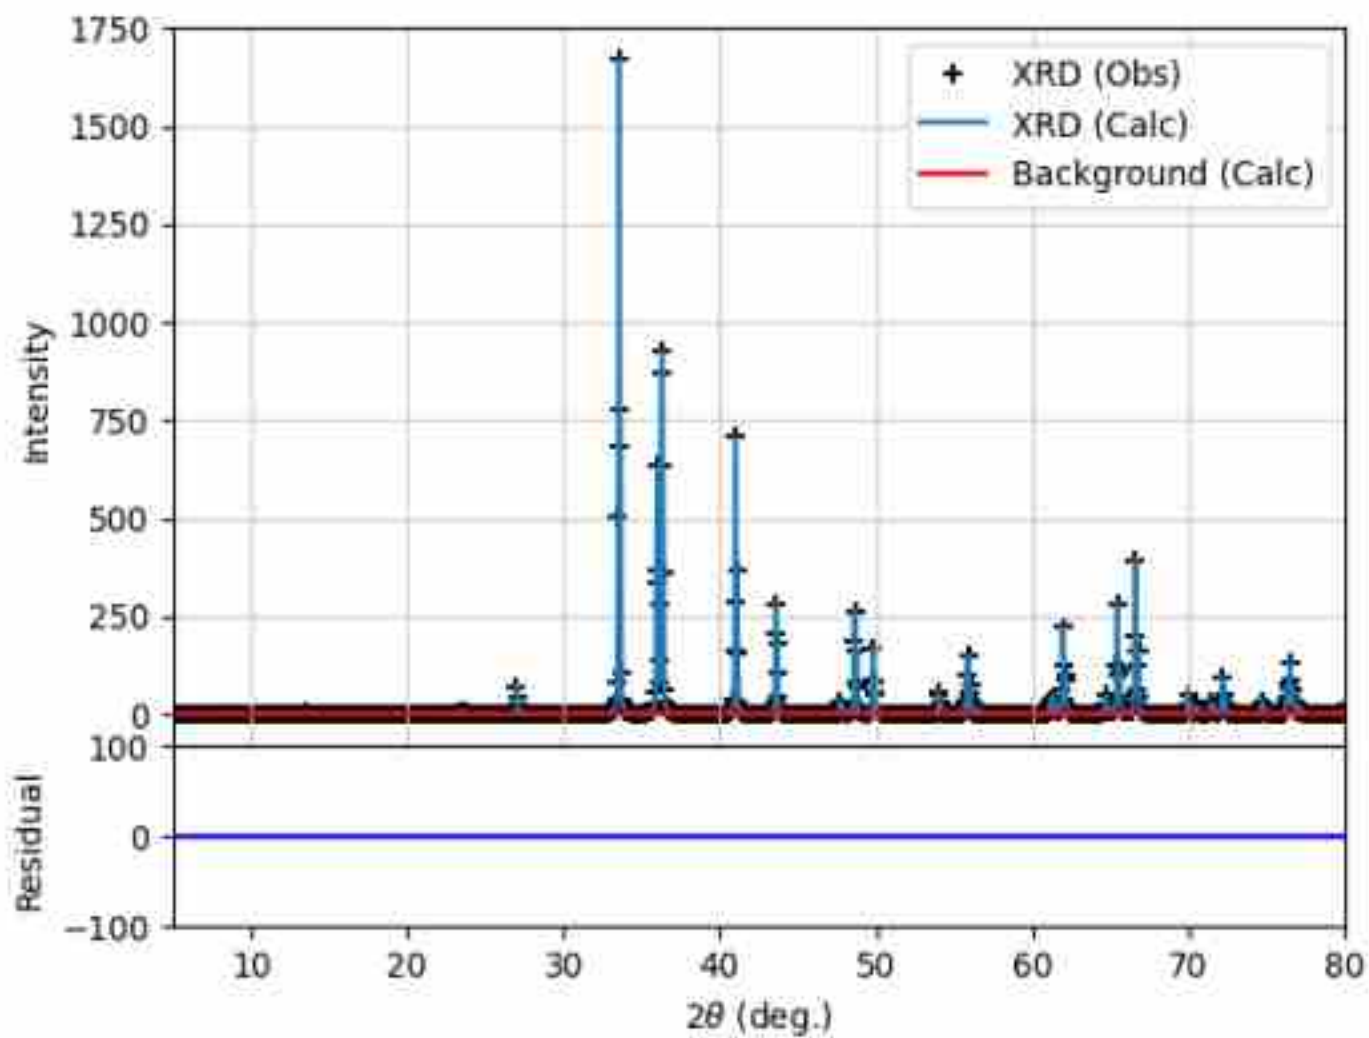

| RMSE before RR | Rwp     | RMSE after RR |
|----------------|---------|---------------|
| 0.011          | 0.01824 | 0.00215       |

# Er3Th1

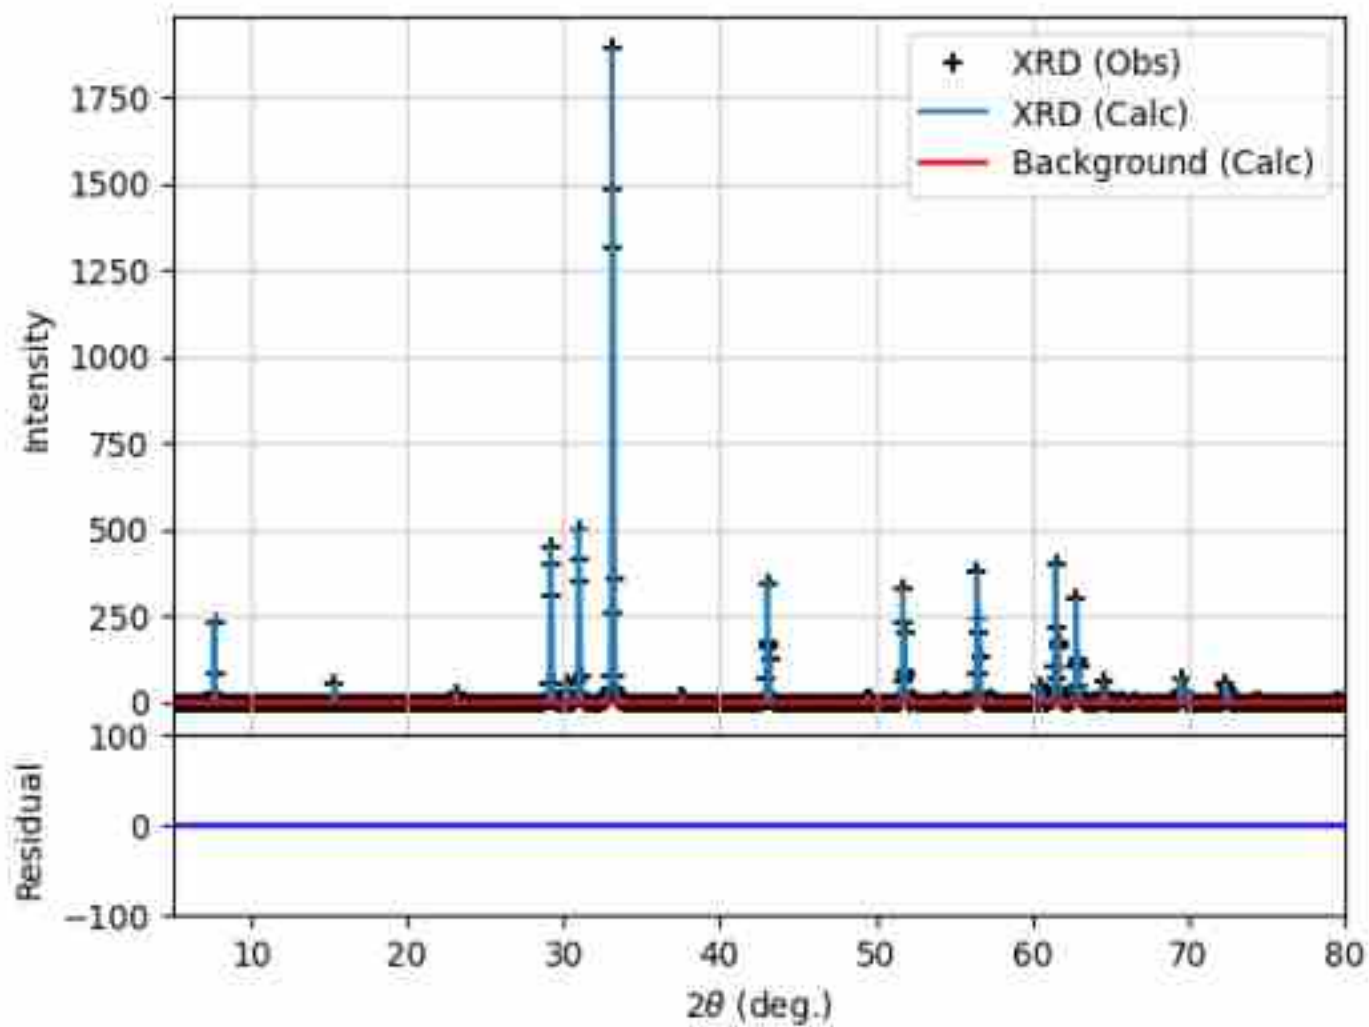

| RMSE before RR | Rwp     | RMSE after RR |
|----------------|---------|---------------|
| 0.011          | 0.00392 | 0.0003        |



# Eu1Au5

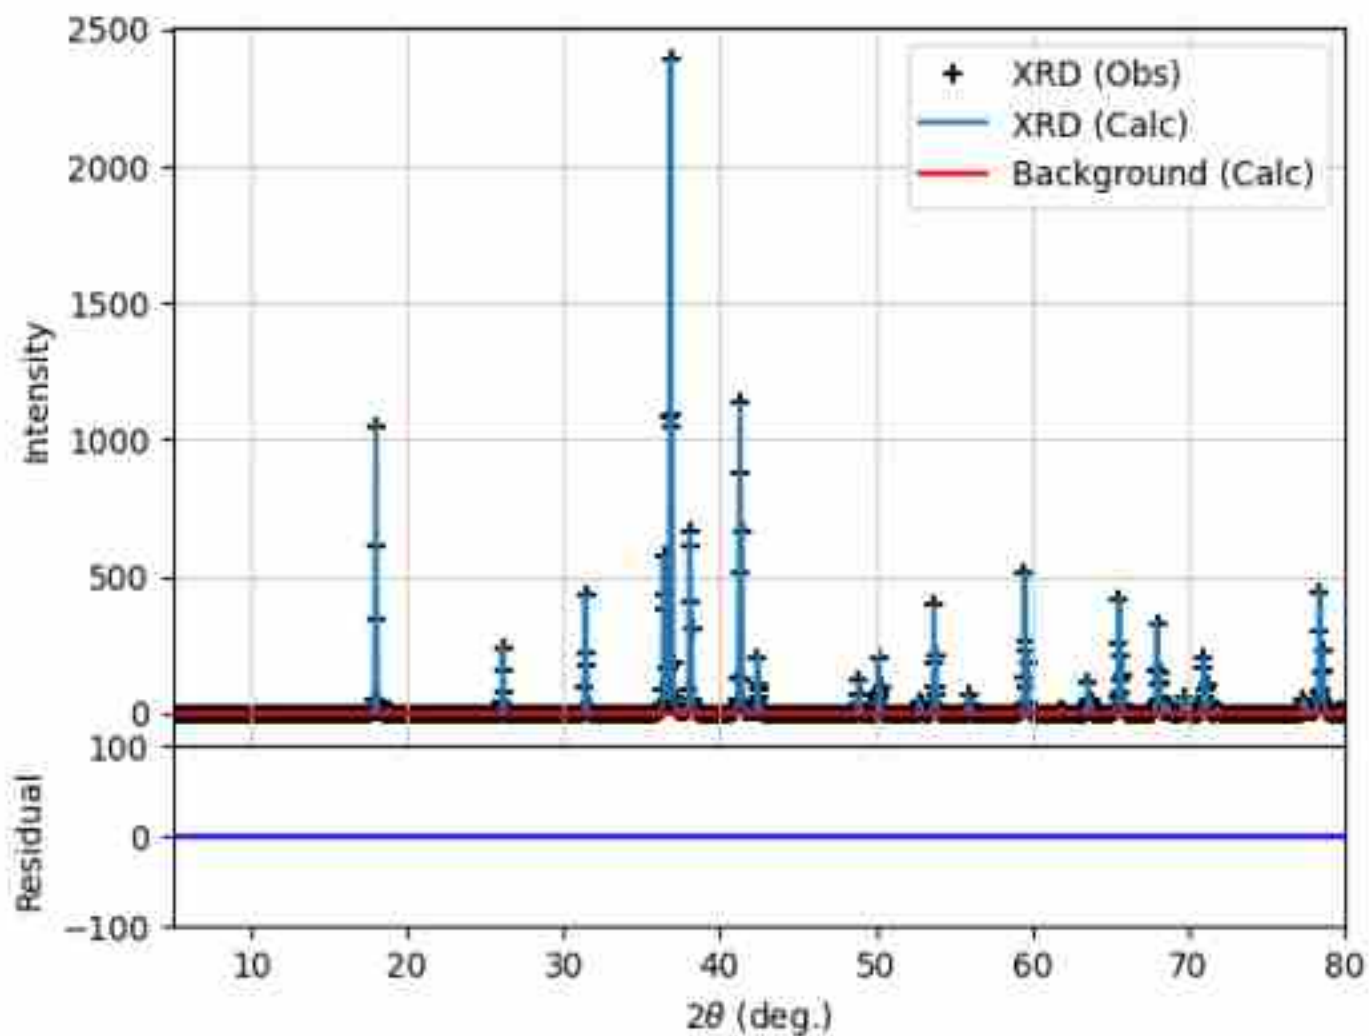

| RMSE before RR | Rwp     | RMSE after RR |
|----------------|---------|---------------|
| 0.011          | 0.00476 | 0.00195       |

# Eu1Bi2I1O4

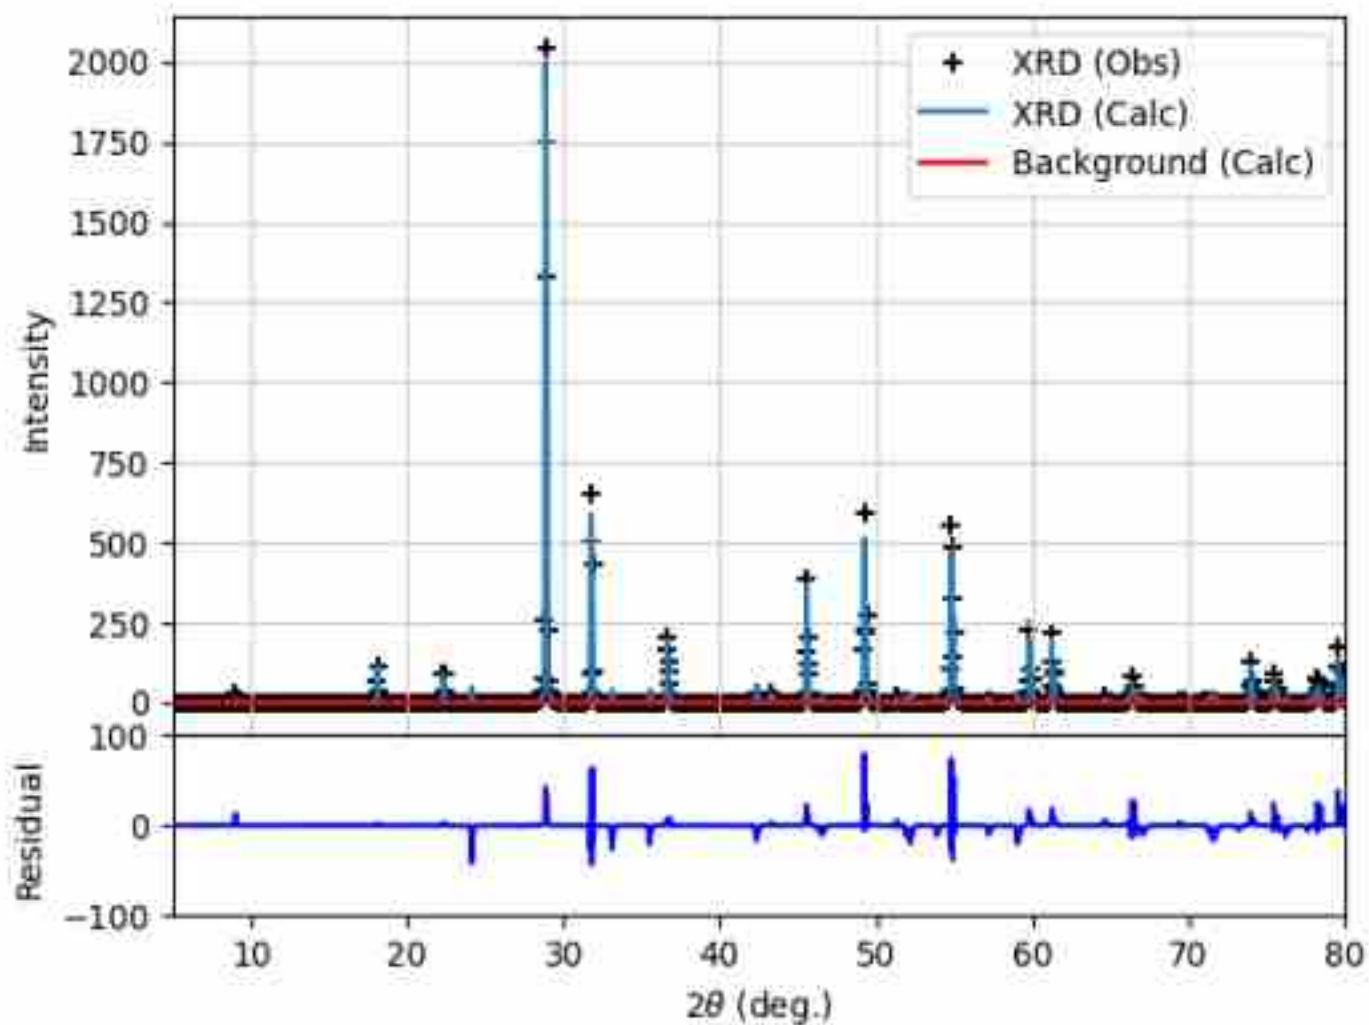

| RMSE before RR | Rwp      | RMSE after RR |
|----------------|----------|---------------|
| 0.011          | 35.44189 | 0.02618       |

# Eu1Mo6S8

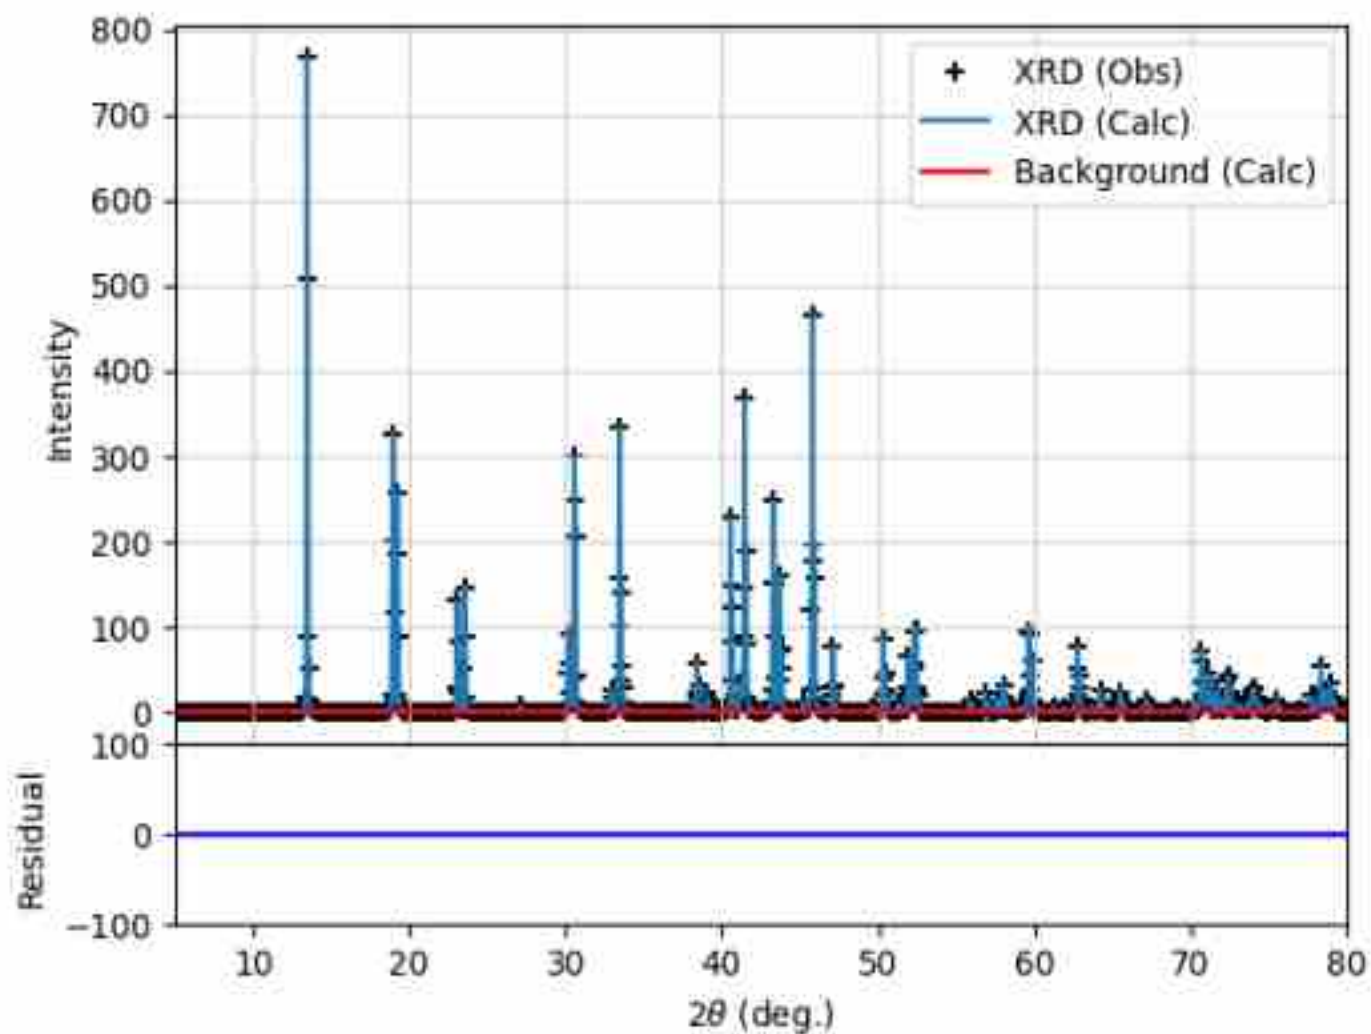

| RMSE before RR | Rwp     | RMSE after RR |
|----------------|---------|---------------|
| 0.011          | 0.00309 | 0.00038       |

# Eu<sub>1</sub>Zn<sub>2</sub>As<sub>2</sub>

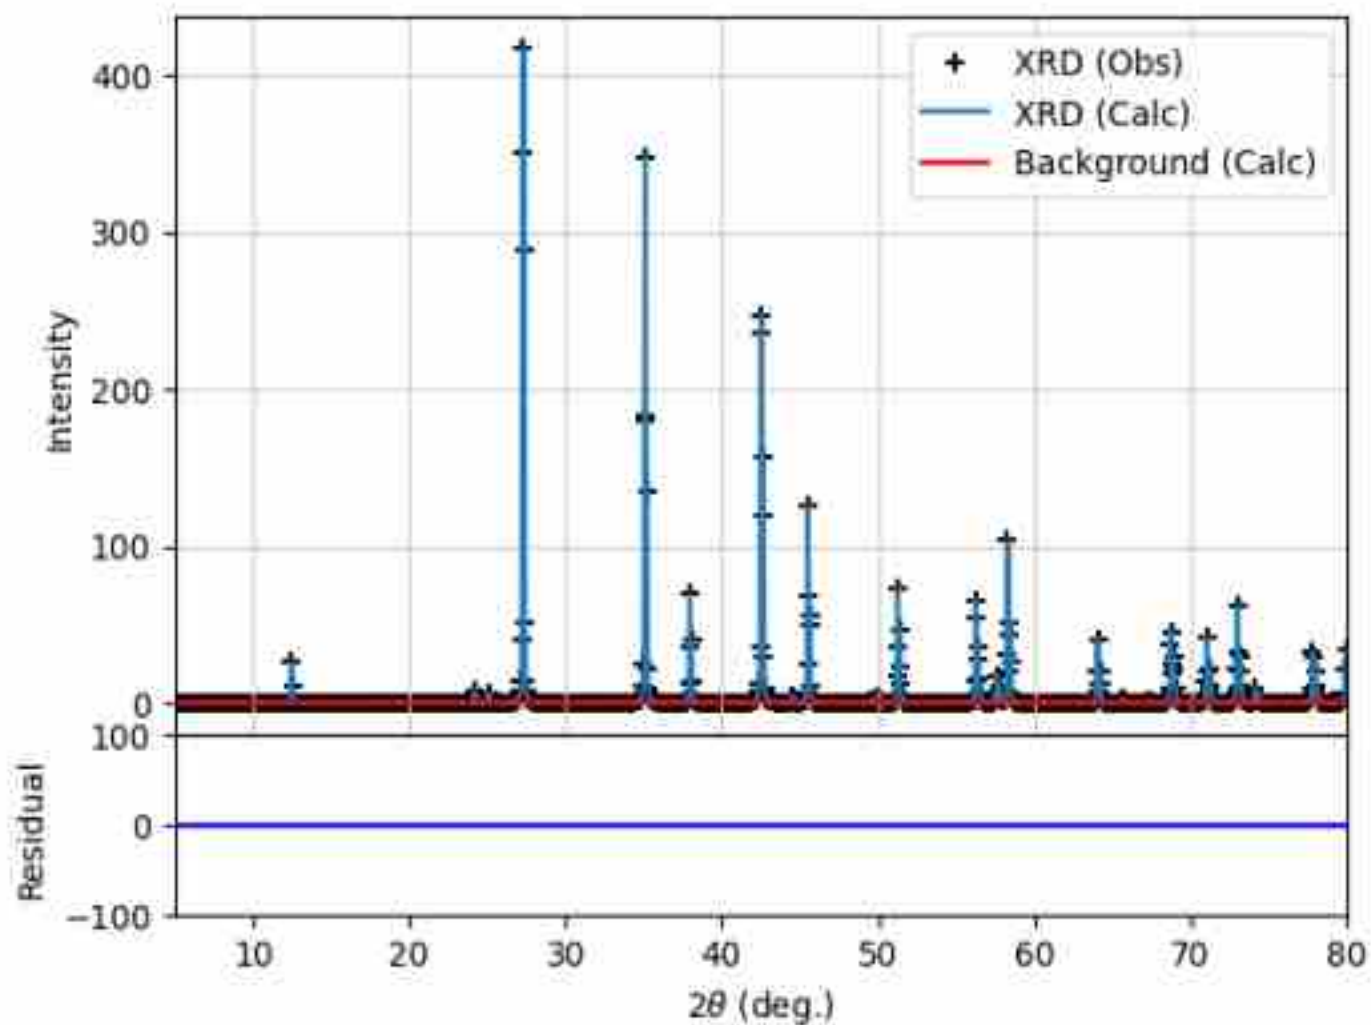

| RMSE before RR | Rwp     | RMSE after RR |
|----------------|---------|---------------|
| 0.011          | 0.00325 | 0.00054       |

# Eu<sub>2</sub>Cr<sub>1</sub>Sn<sub>1</sub>O<sub>6</sub>

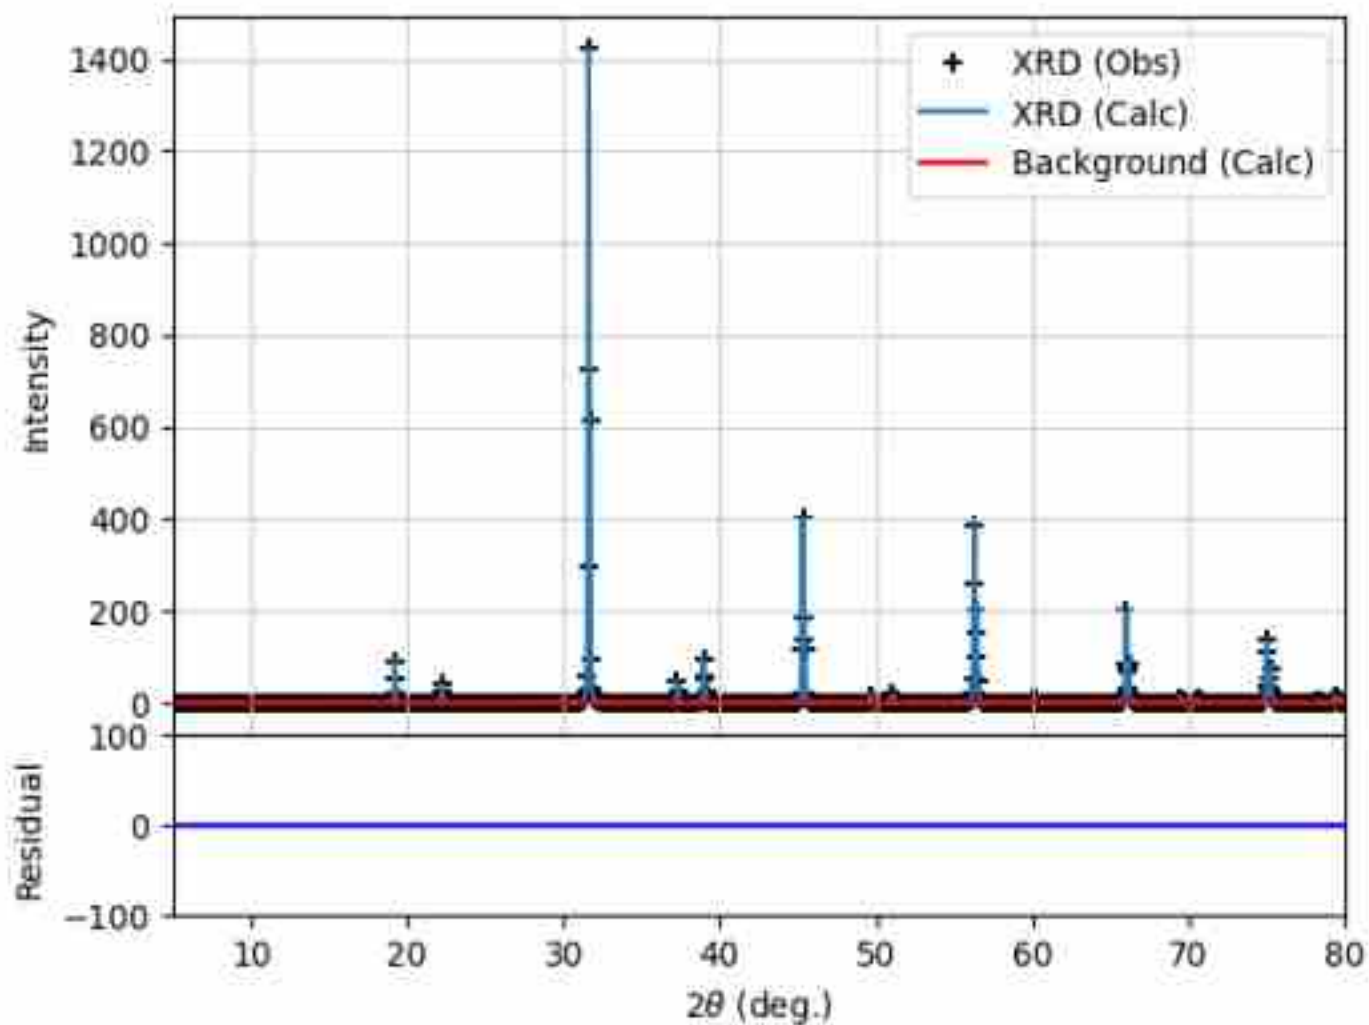

| RMSE before RR | Rwp     | RMSE after RR |
|----------------|---------|---------------|
| 0.011          | 0.02989 | 0.00682       |

# Eu<sub>2</sub>MnW<sub>10</sub>O<sub>6</sub>

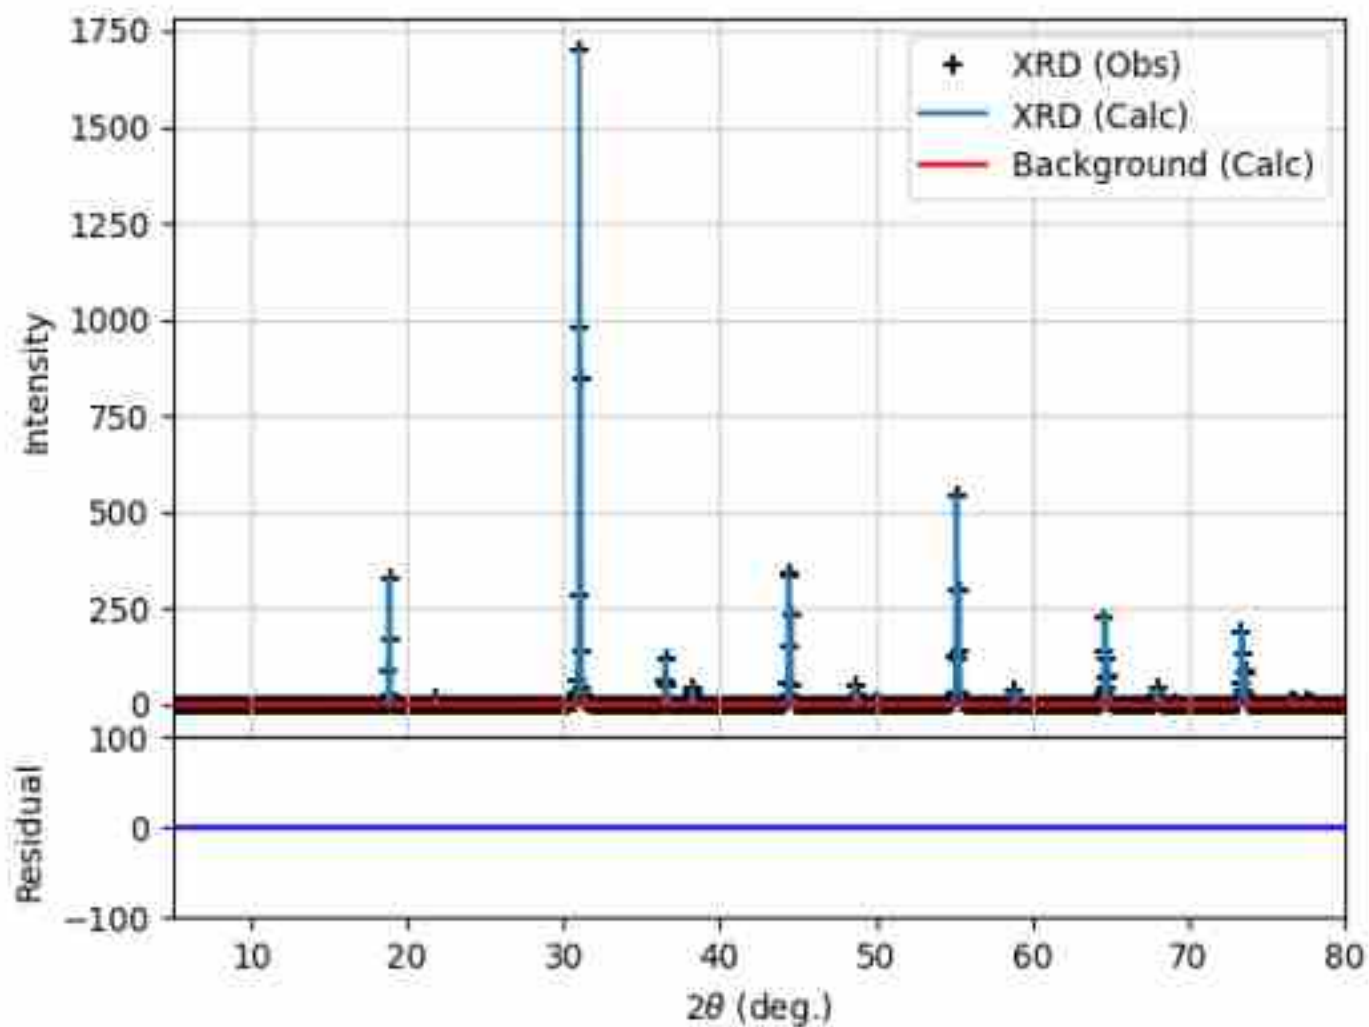

| RMSE before RR | Rwp     | RMSE after RR |
|----------------|---------|---------------|
| 0.011          | 0.00571 | 0.00276       |

# Eu<sub>2</sub>Zn<sub>4</sub>Sn<sub>4</sub>

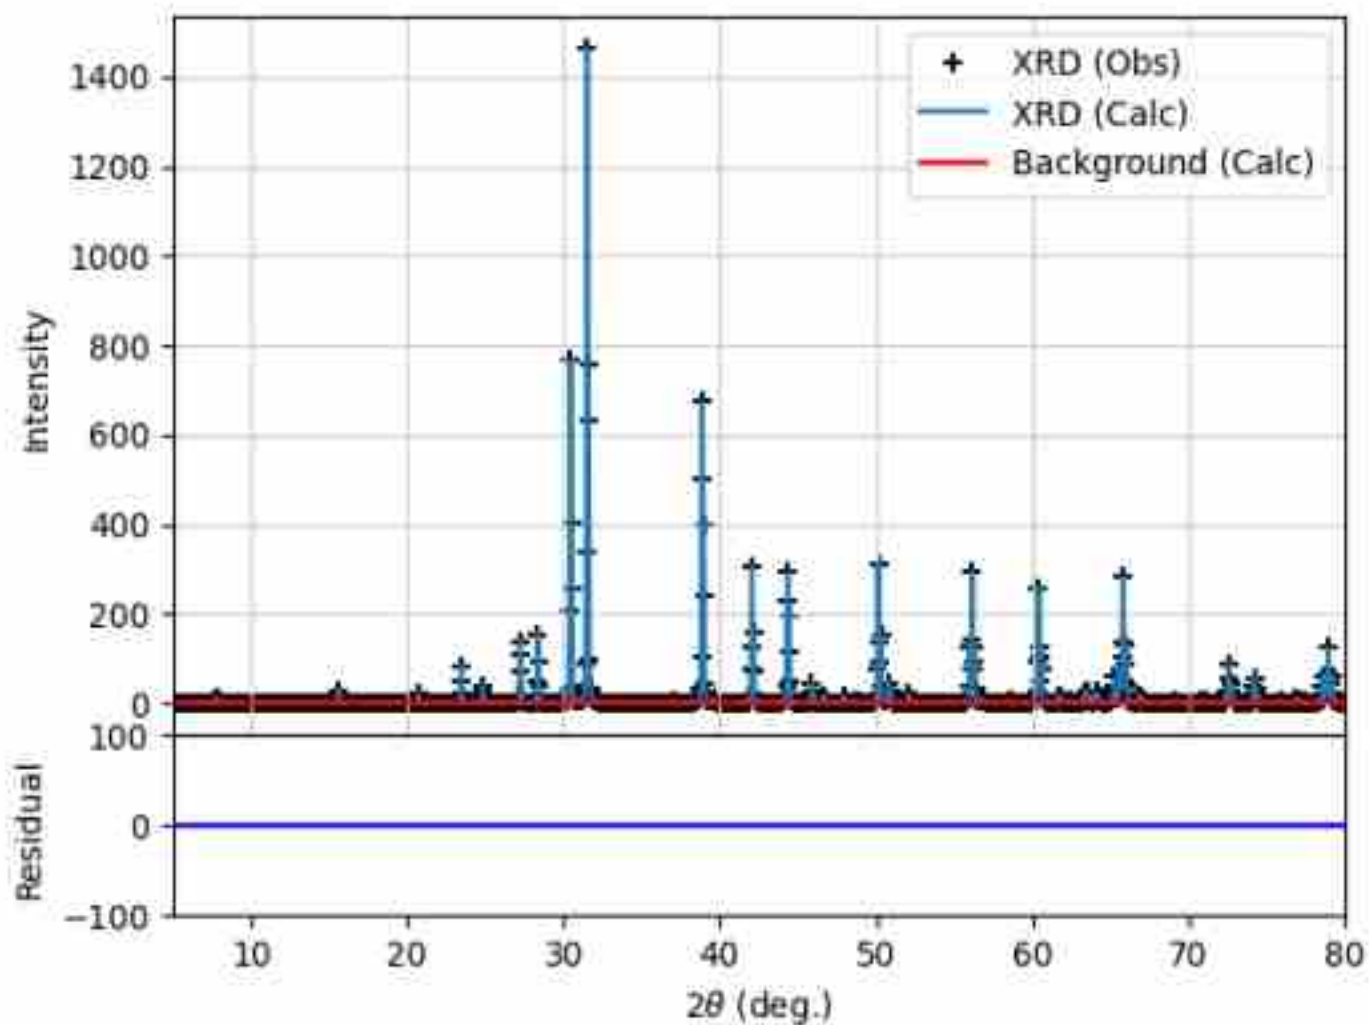

| RMSE before RR | Rwp     | RMSE after RR |
|----------------|---------|---------------|
| 0.011          | 0.00505 | 0.00089       |

# Eu<sub>3</sub>Zn<sub>2</sub>Cu<sub>2</sub>P<sub>4</sub>

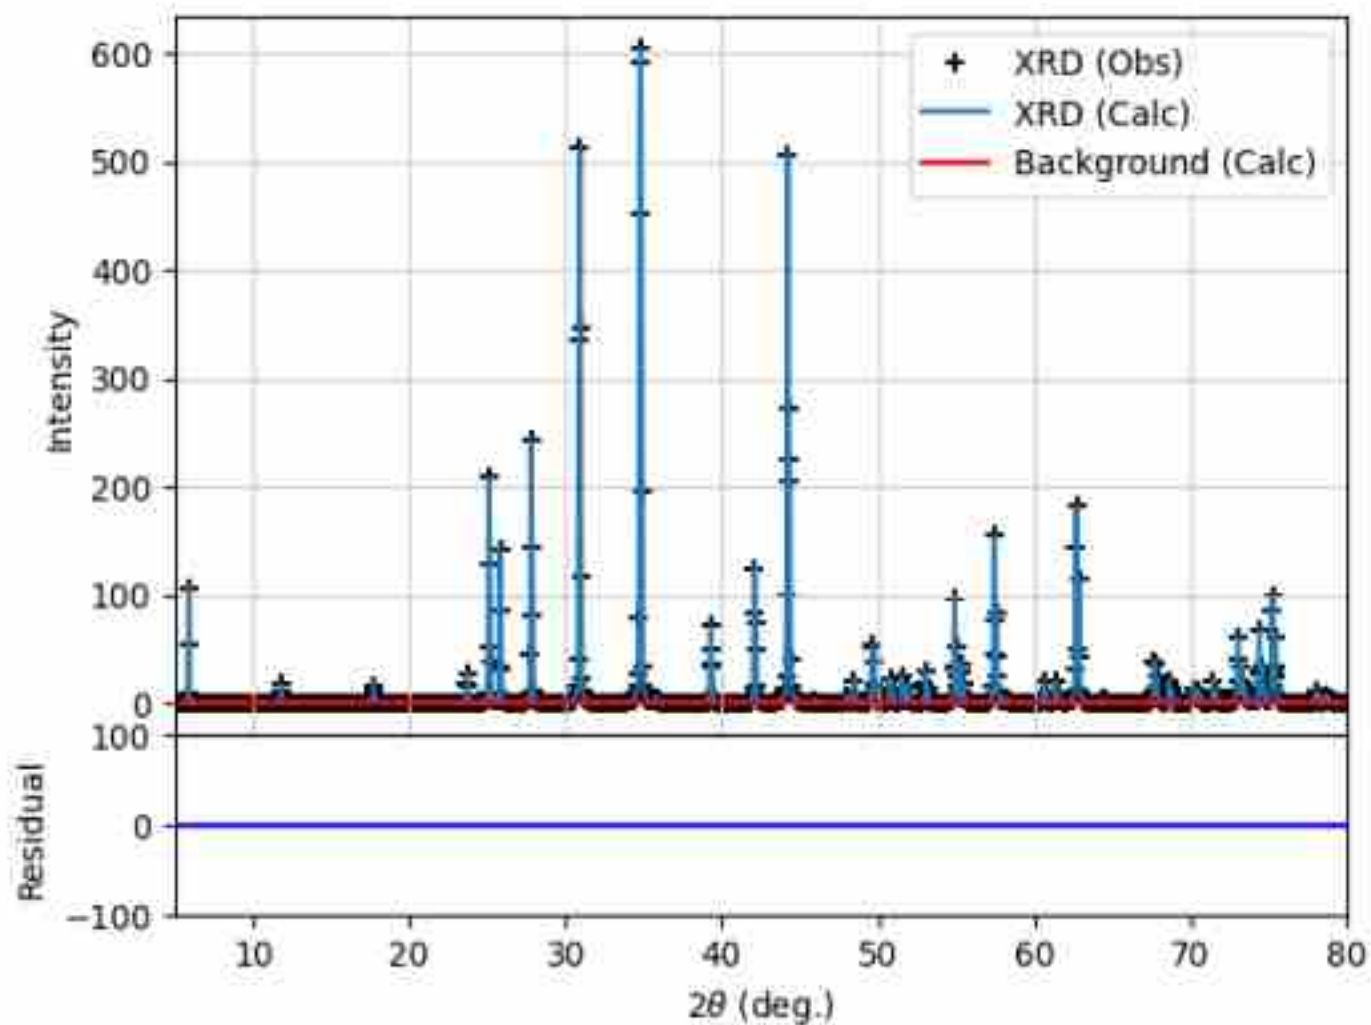

| RMSE before RR | Rwp     | RMSE after RR |
|----------------|---------|---------------|
| 0.011          | 0.00298 | 0.00046       |



# Eu6Ag4

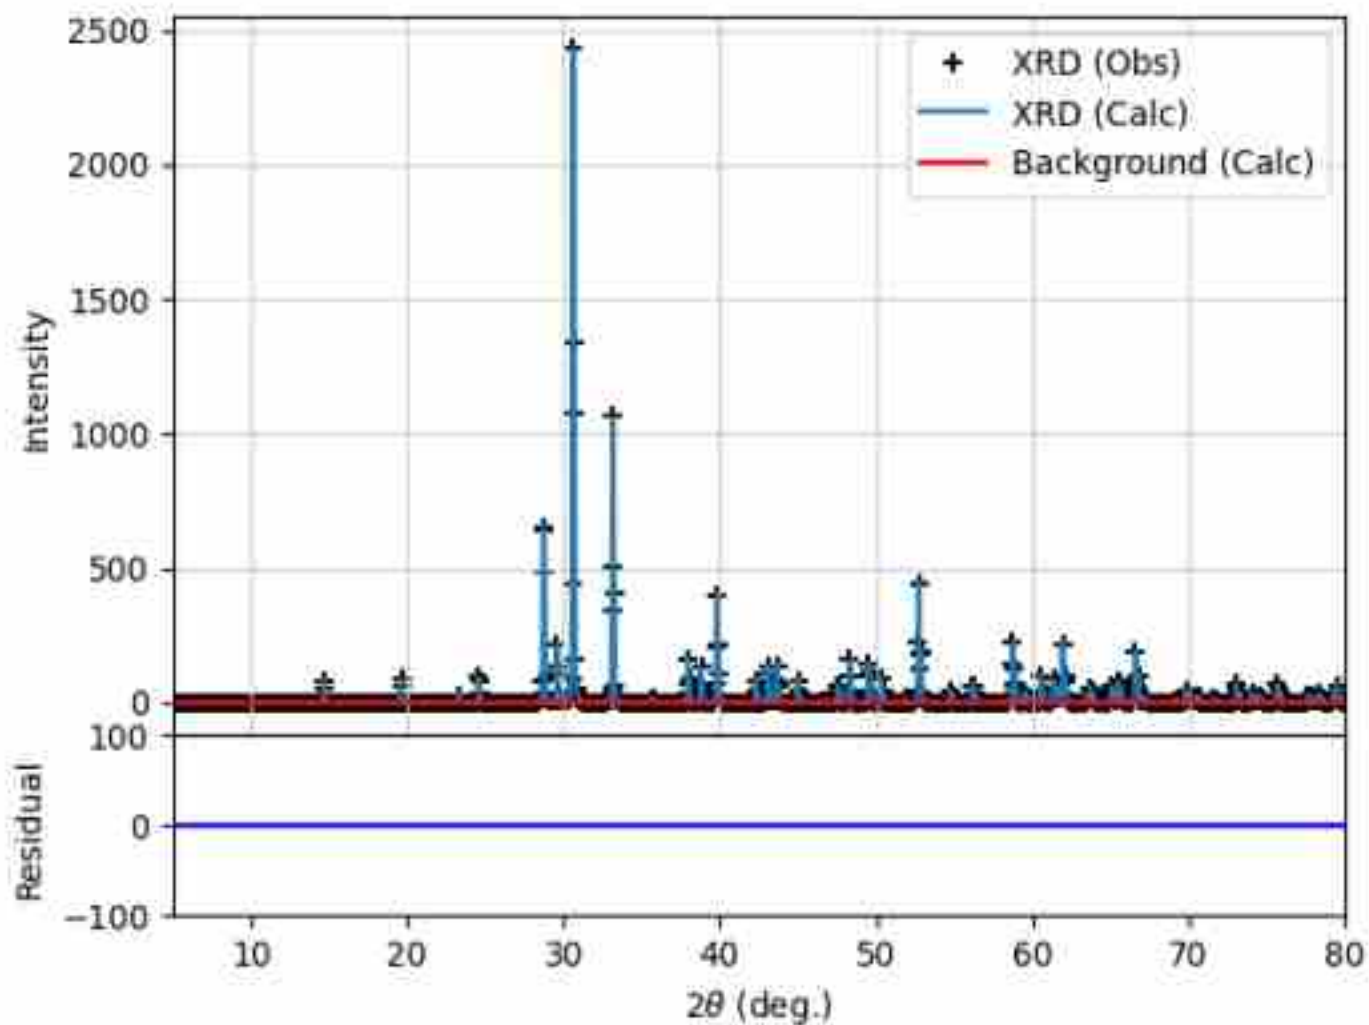

| RMSE before RR | Rwp     | RMSE after RR |
|----------------|---------|---------------|
| 0.011          | 0.01299 | 0.00046       |

# Fe<sub>2</sub>As<sub>4</sub>

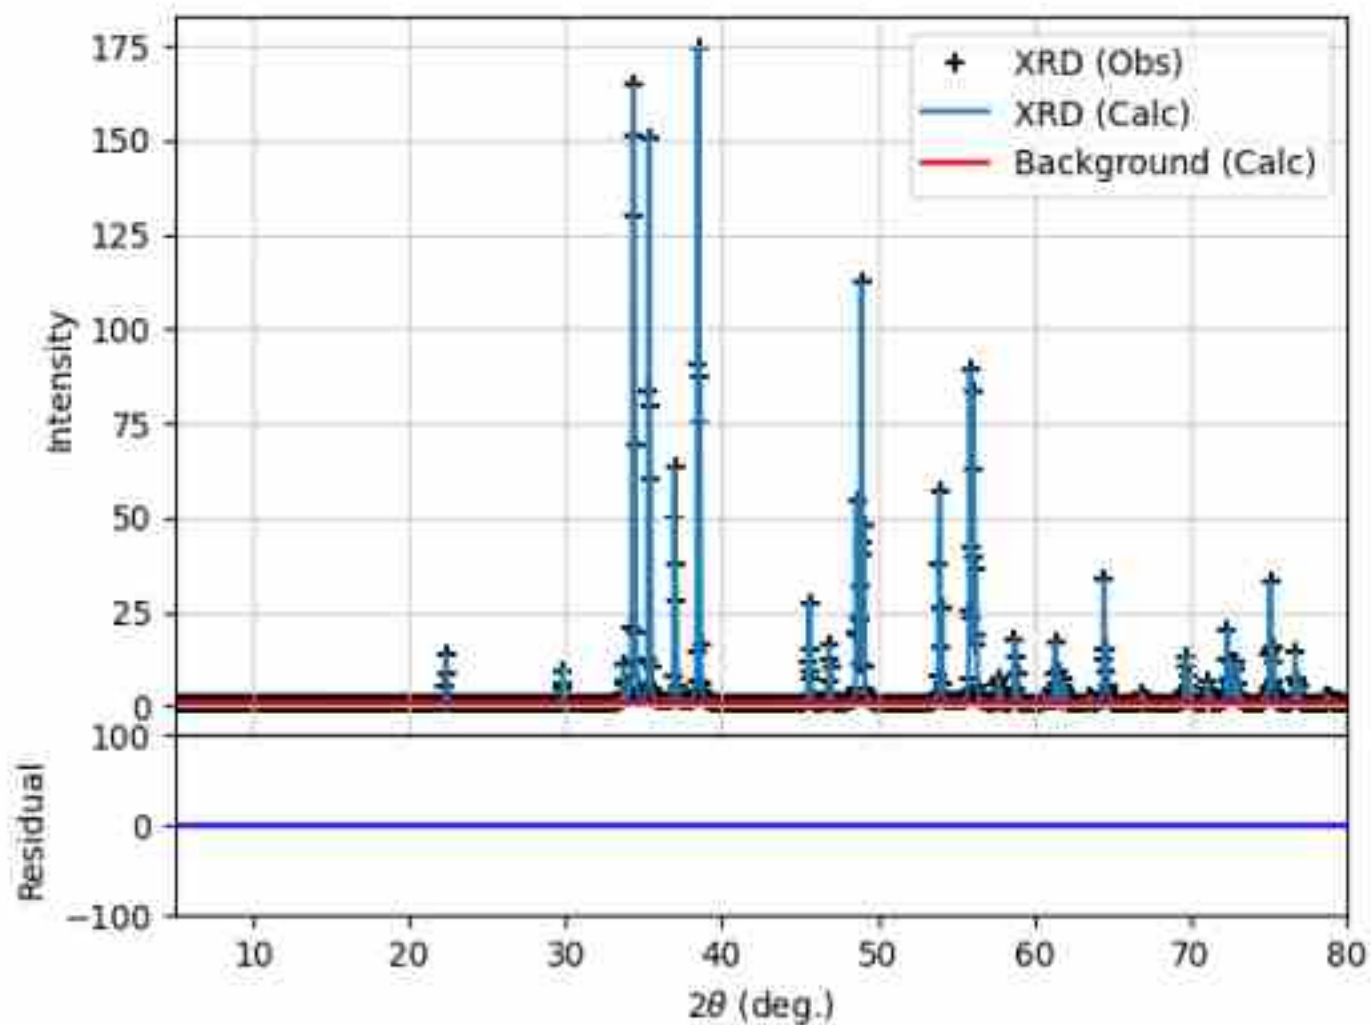

| RMSE before RR | Rwp     | RMSE after RR |
|----------------|---------|---------------|
| 0.011          | 0.00415 | 0.00051       |

# Fe<sub>2</sub>Sb<sub>2</sub>As<sub>2</sub>

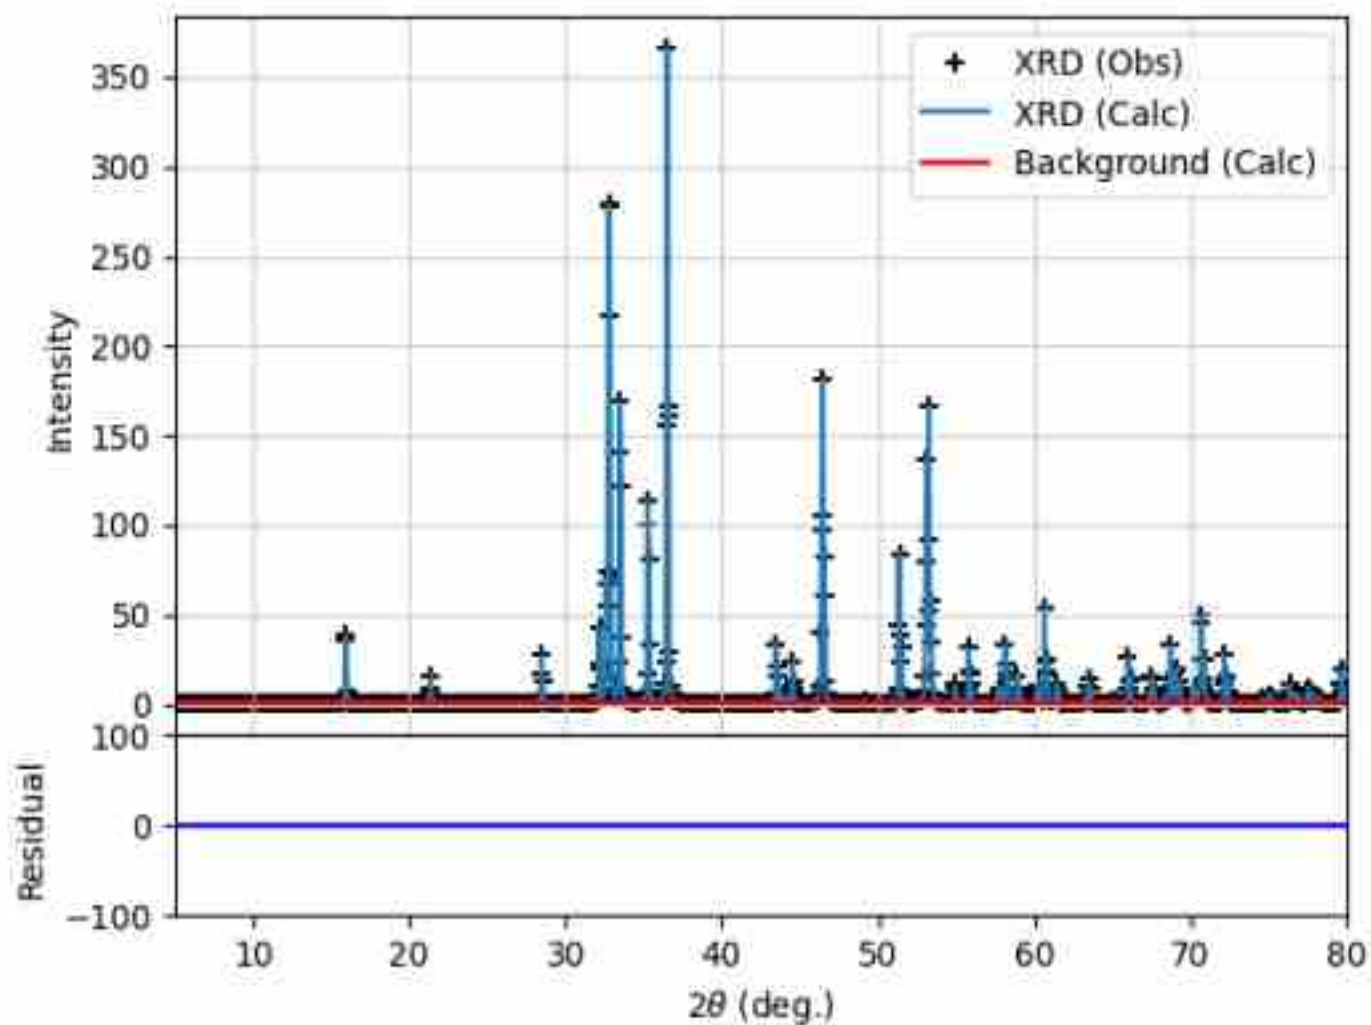

| RMSE before RR | Rwp     | RMSE after RR |
|----------------|---------|---------------|
| 0.011          | 0.00522 | 0.00047       |

# Fe6Sn2

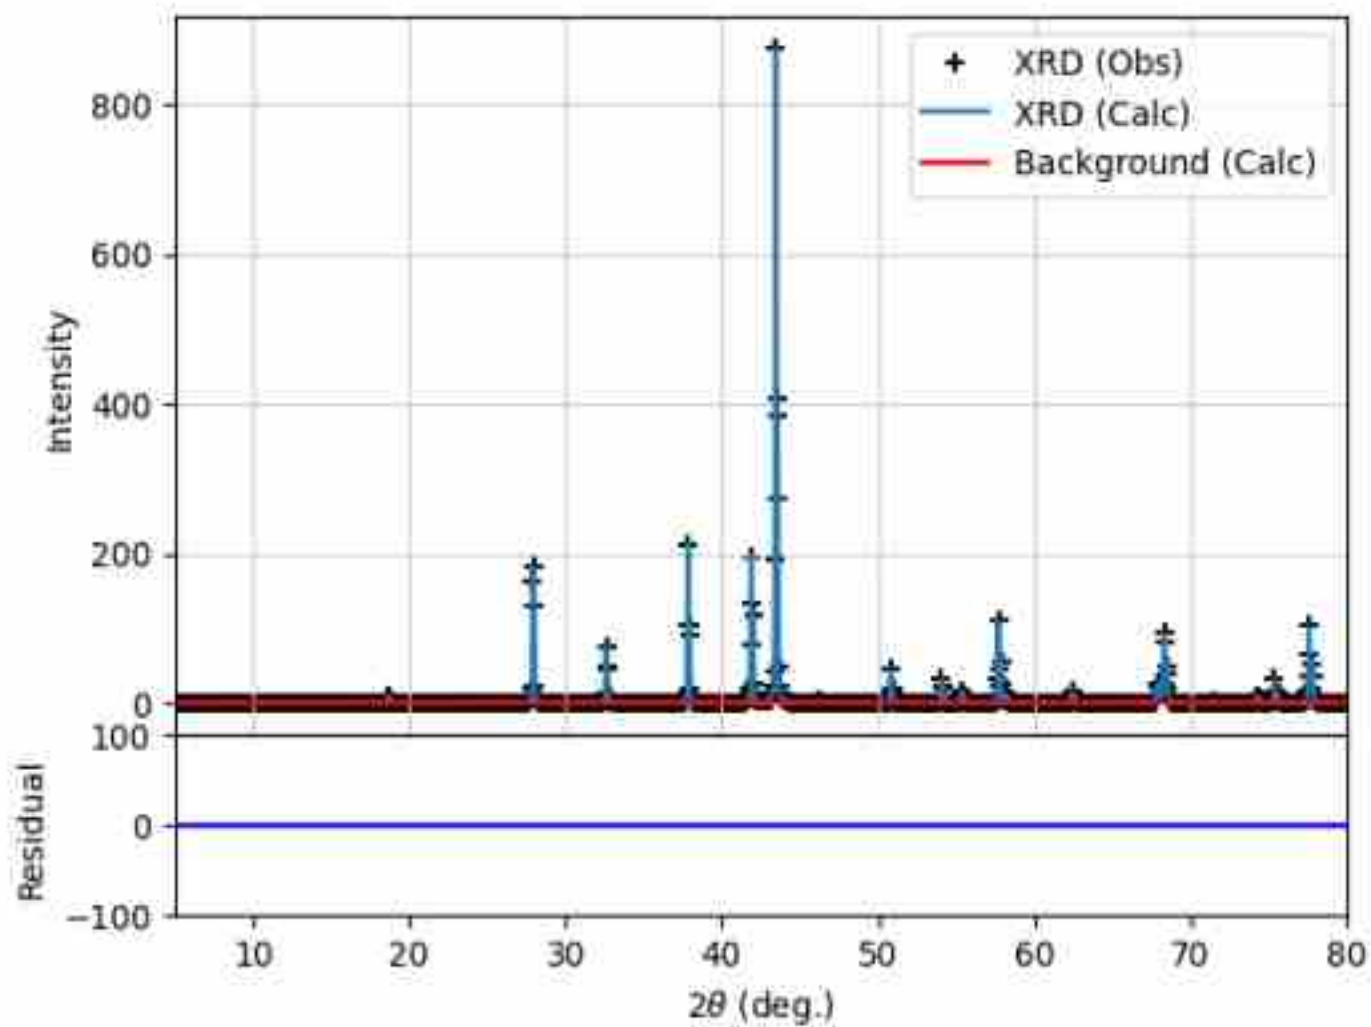

| RMSE before RR | Rwp    | RMSE after RR |
|----------------|--------|---------------|
| 0.011          | 0.0102 | 0.00139       |

# Ga<sub>2</sub>HgTe<sub>4</sub>

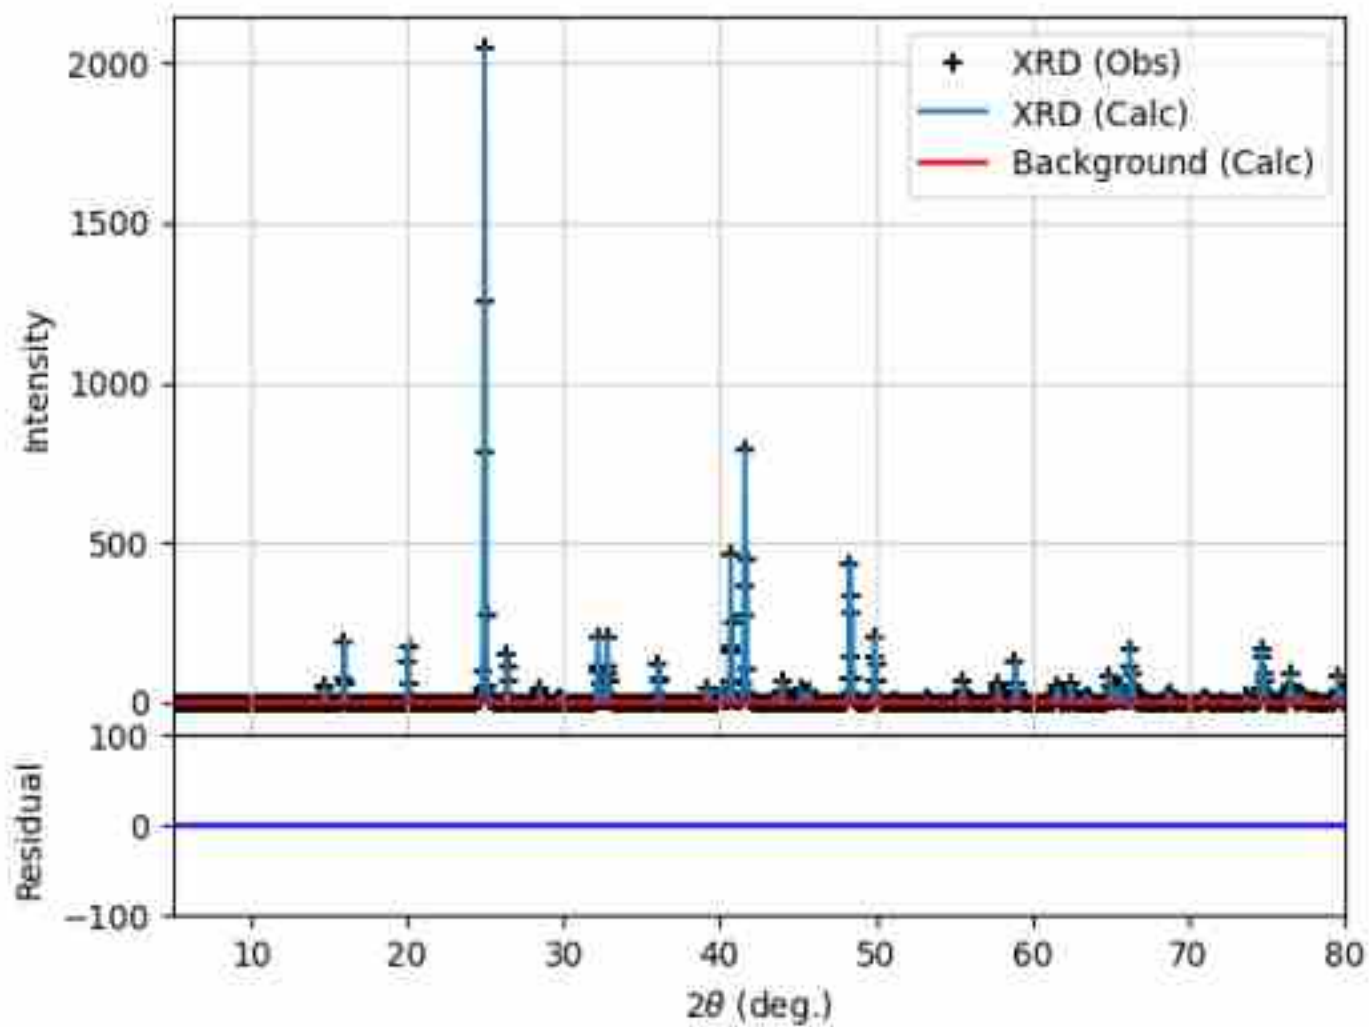

| RMSE before RR | Rwp    | RMSE after RR |
|----------------|--------|---------------|
| 0.011          | 0.0047 | 0.00062       |

# Gd<sub>3</sub>Co<sub>2</sub>Ge<sub>4</sub>

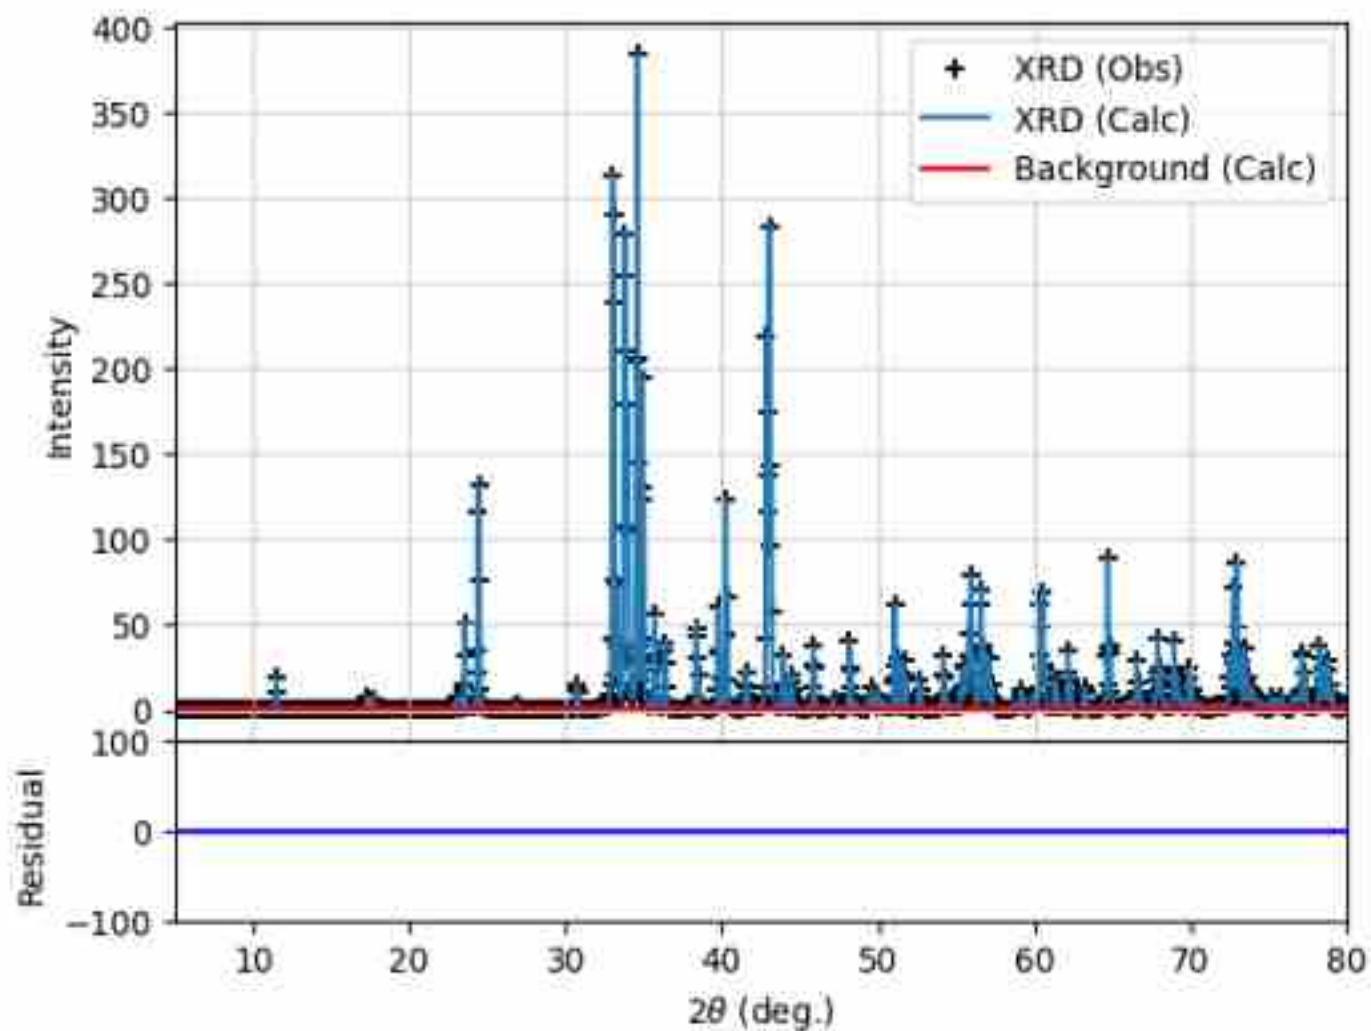

| RMSE before RR | Rwp     | RMSE after RR |
|----------------|---------|---------------|
| 0.011          | 0.00279 | 0.00024       |

# Ge<sub>2</sub>As<sub>2</sub>W<sub>2</sub>

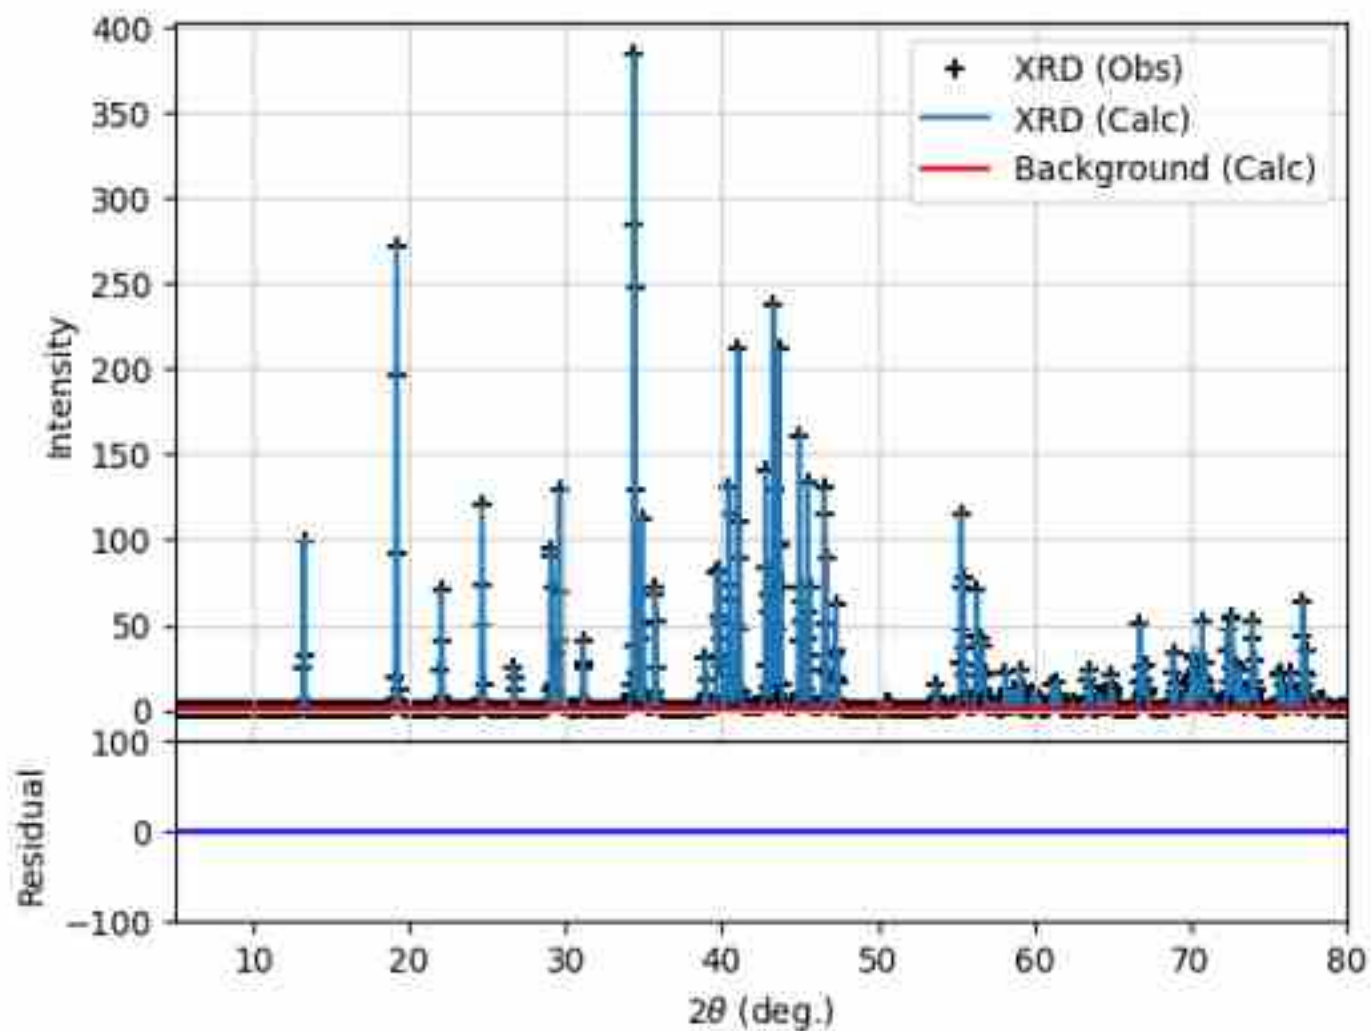

| RMSE before RR | Rwp    | RMSE after RR |
|----------------|--------|---------------|
| 0.011          | 0.0031 | 0.00036       |

# Hf1Mn6Ge6

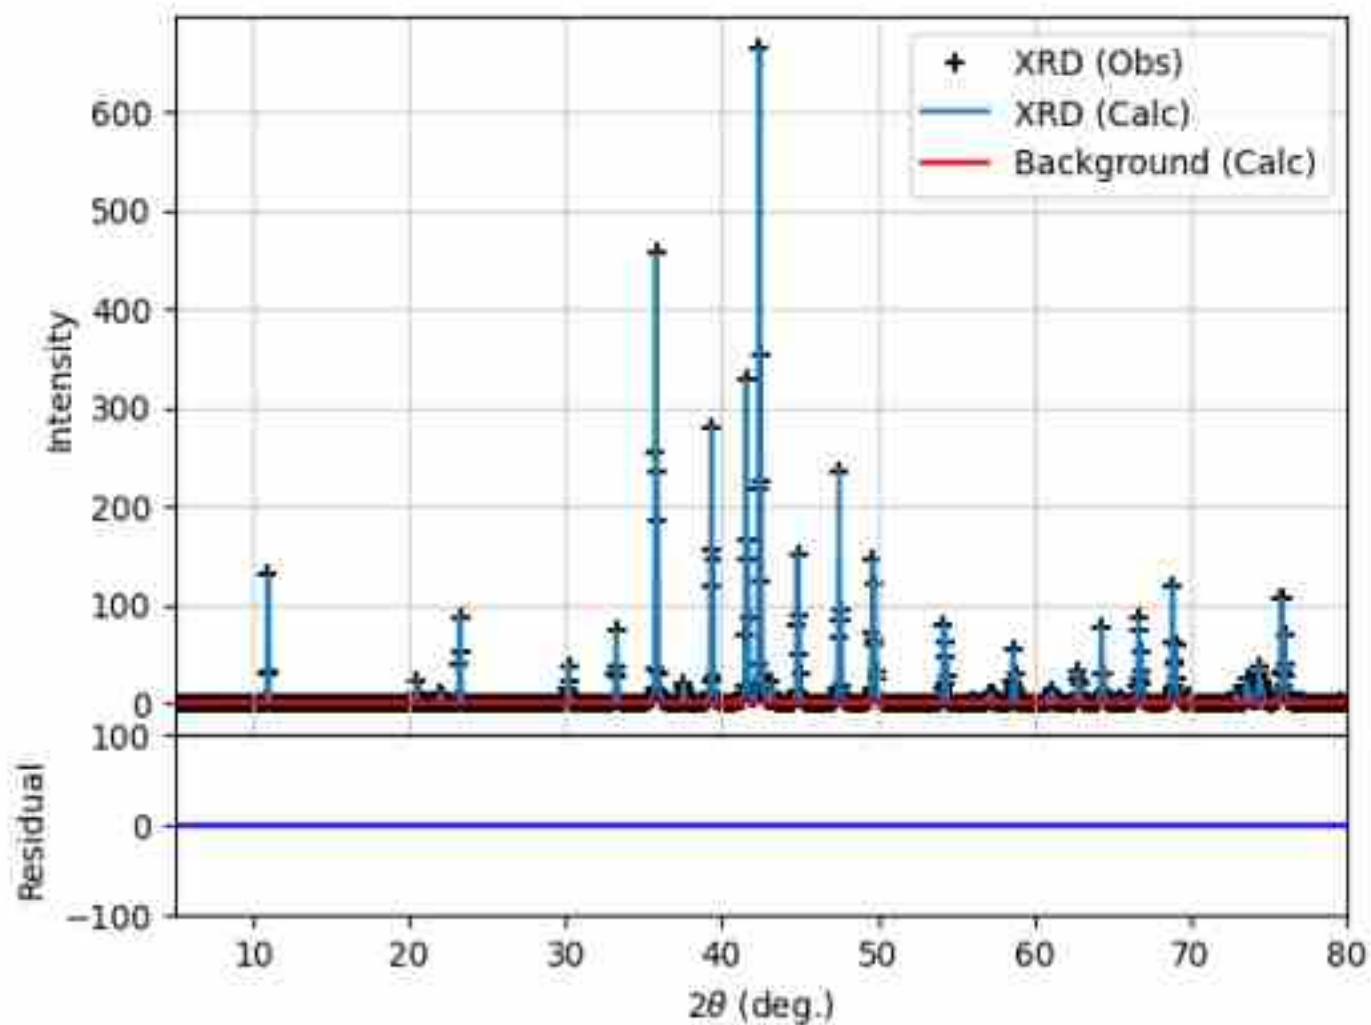

| RMSE before RR | Rwp     | RMSE after RR |
|----------------|---------|---------------|
| 0.011          | 0.00474 | 0.00125       |



# Hf1Ti1Se4

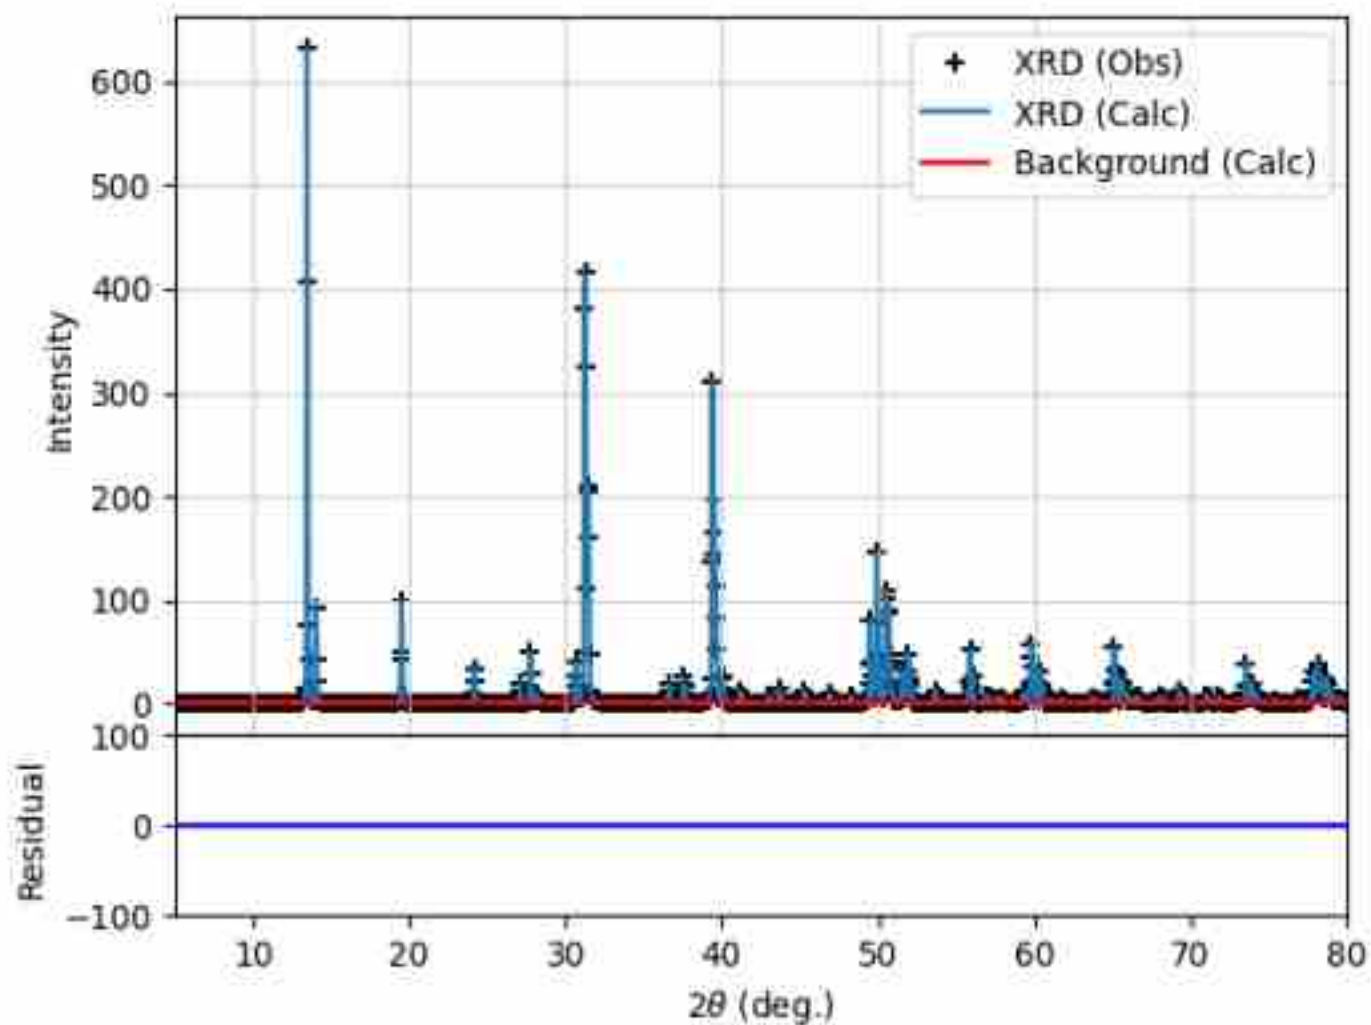

| RMSE before RR | Rwp     | RMSE after RR |
|----------------|---------|---------------|
| 0.011          | 0.00368 | 0.00031       |

# Hf<sub>2</sub>Br<sub>2</sub>N<sub>2</sub>

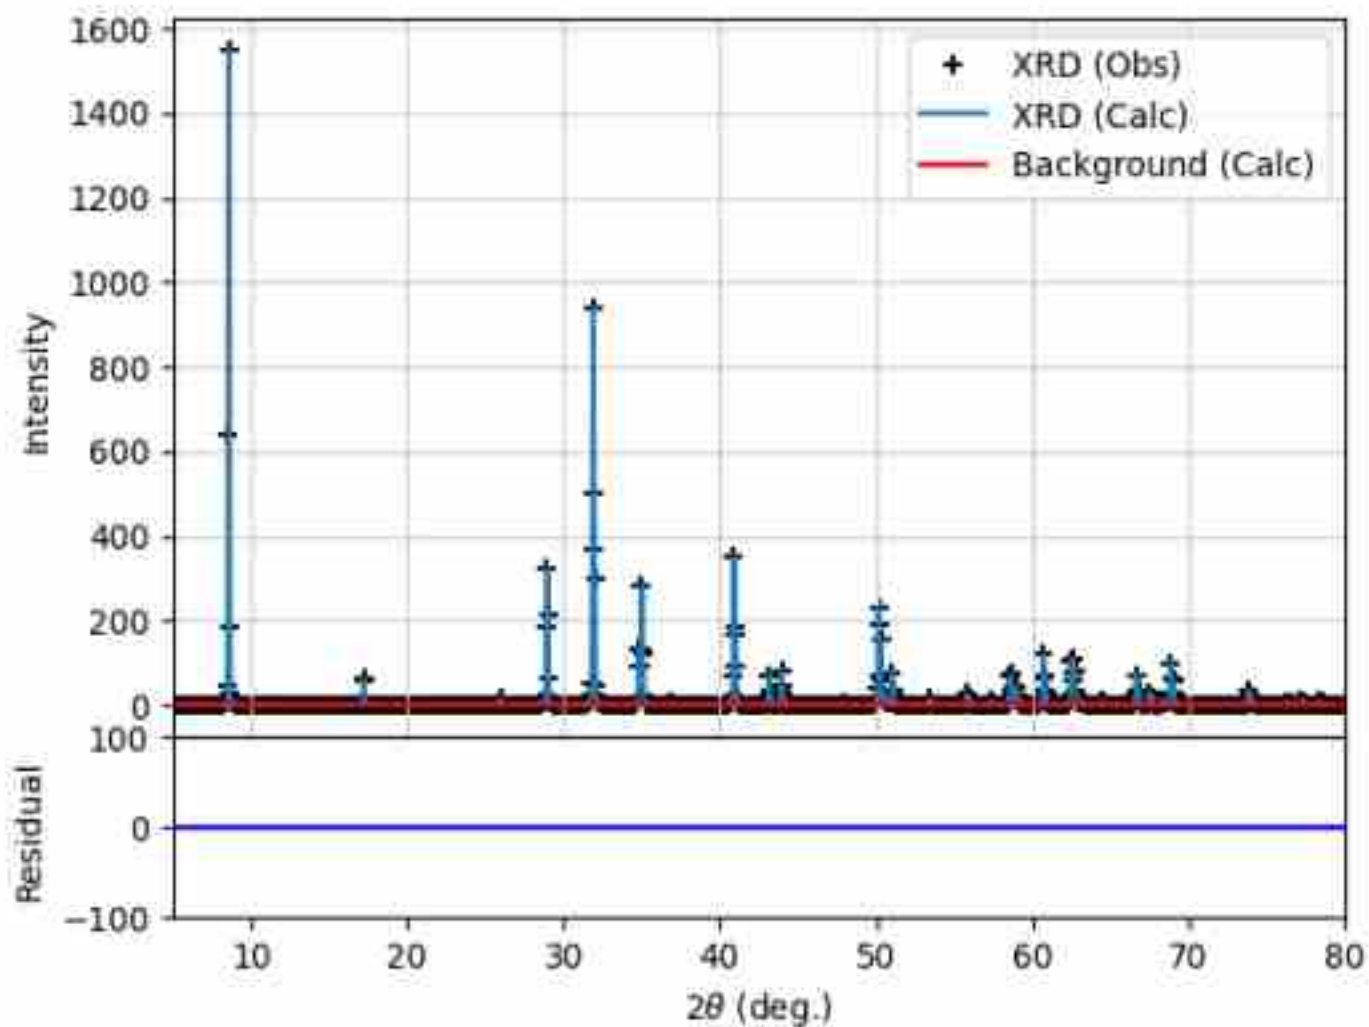

| RMSE before RR | Rwp     | RMSE after RR |
|----------------|---------|---------------|
| 0.011          | 0.00299 | 0.00091       |

# Hf4Mn8

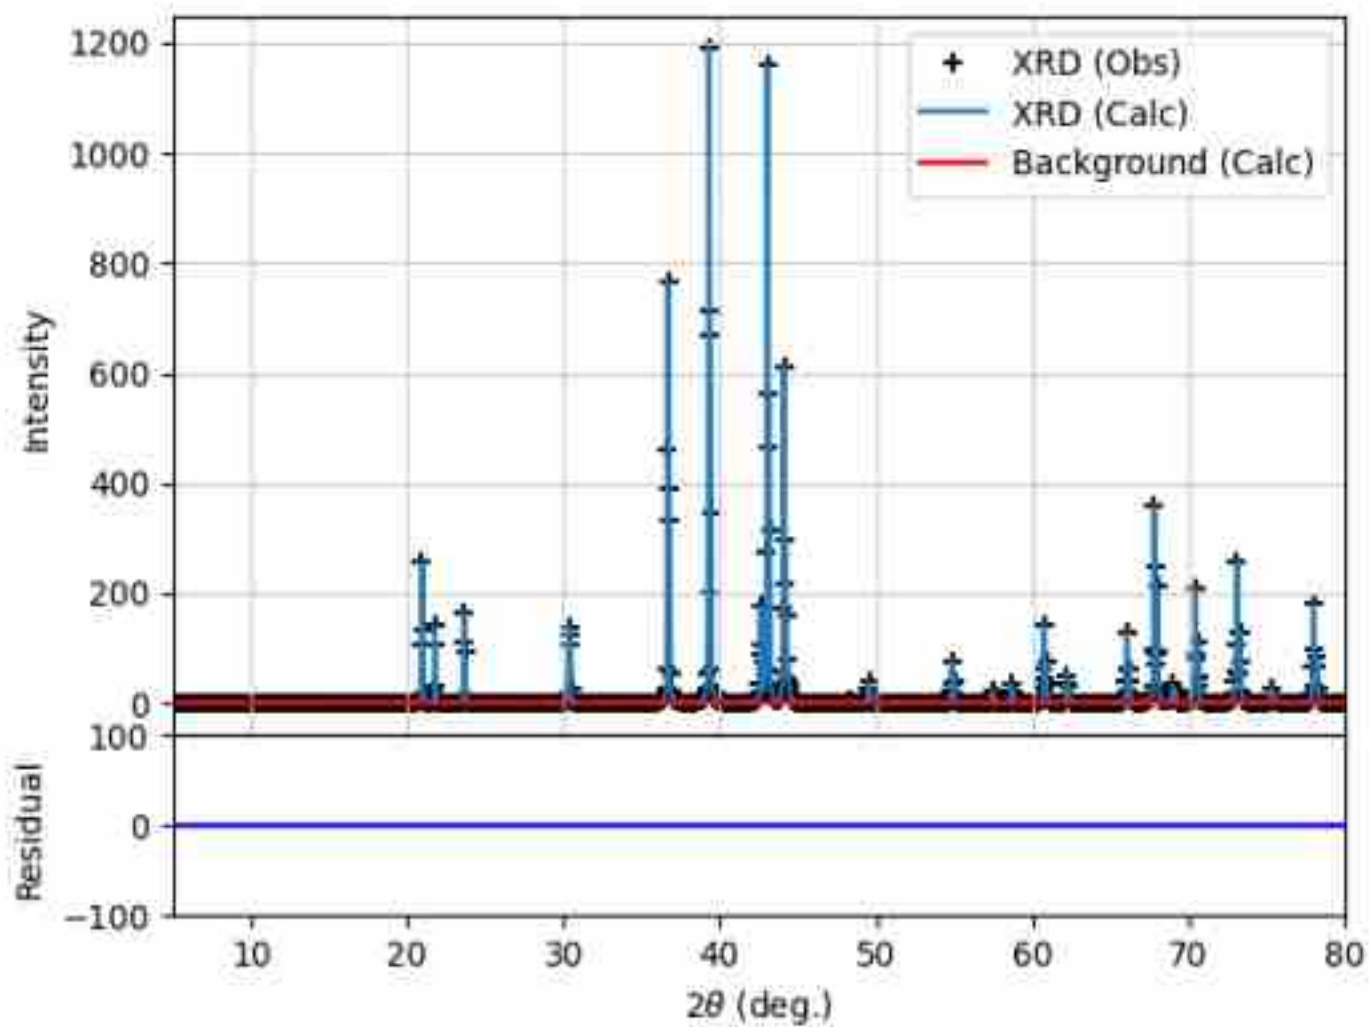

| RMSE before RR | Rwp     | RMSE after RR |
|----------------|---------|---------------|
| 0.011          | 0.00636 | 0.00138       |

# Ho1Ni2P2

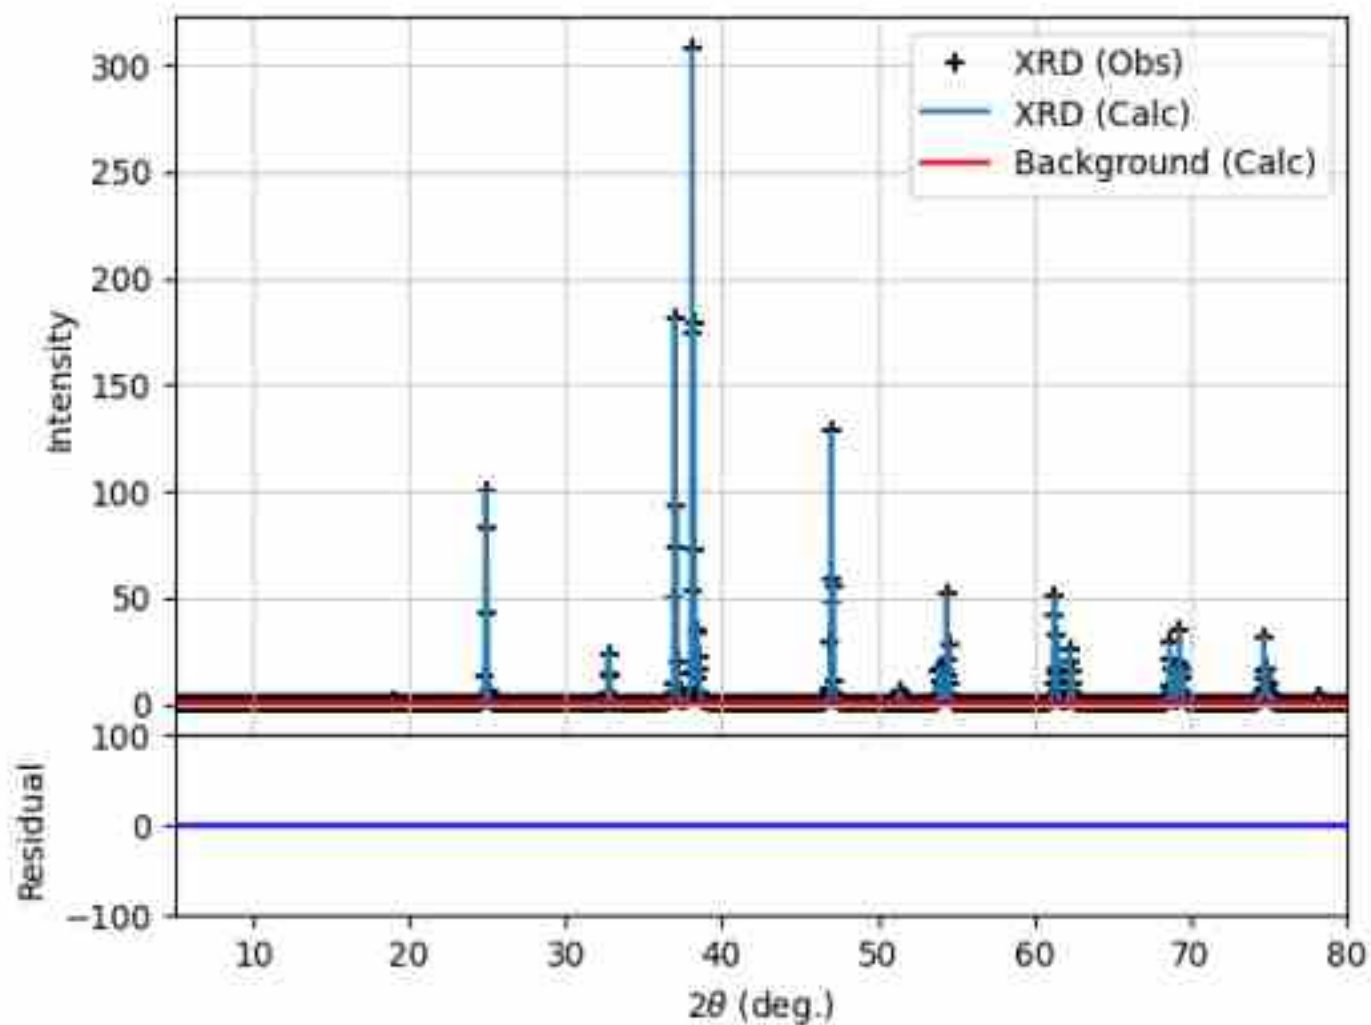

| RMSE before RR | Rwp     | RMSE after RR |
|----------------|---------|---------------|
| 0.011          | 0.00279 | 0.00046       |

# Ho1P2Ru2

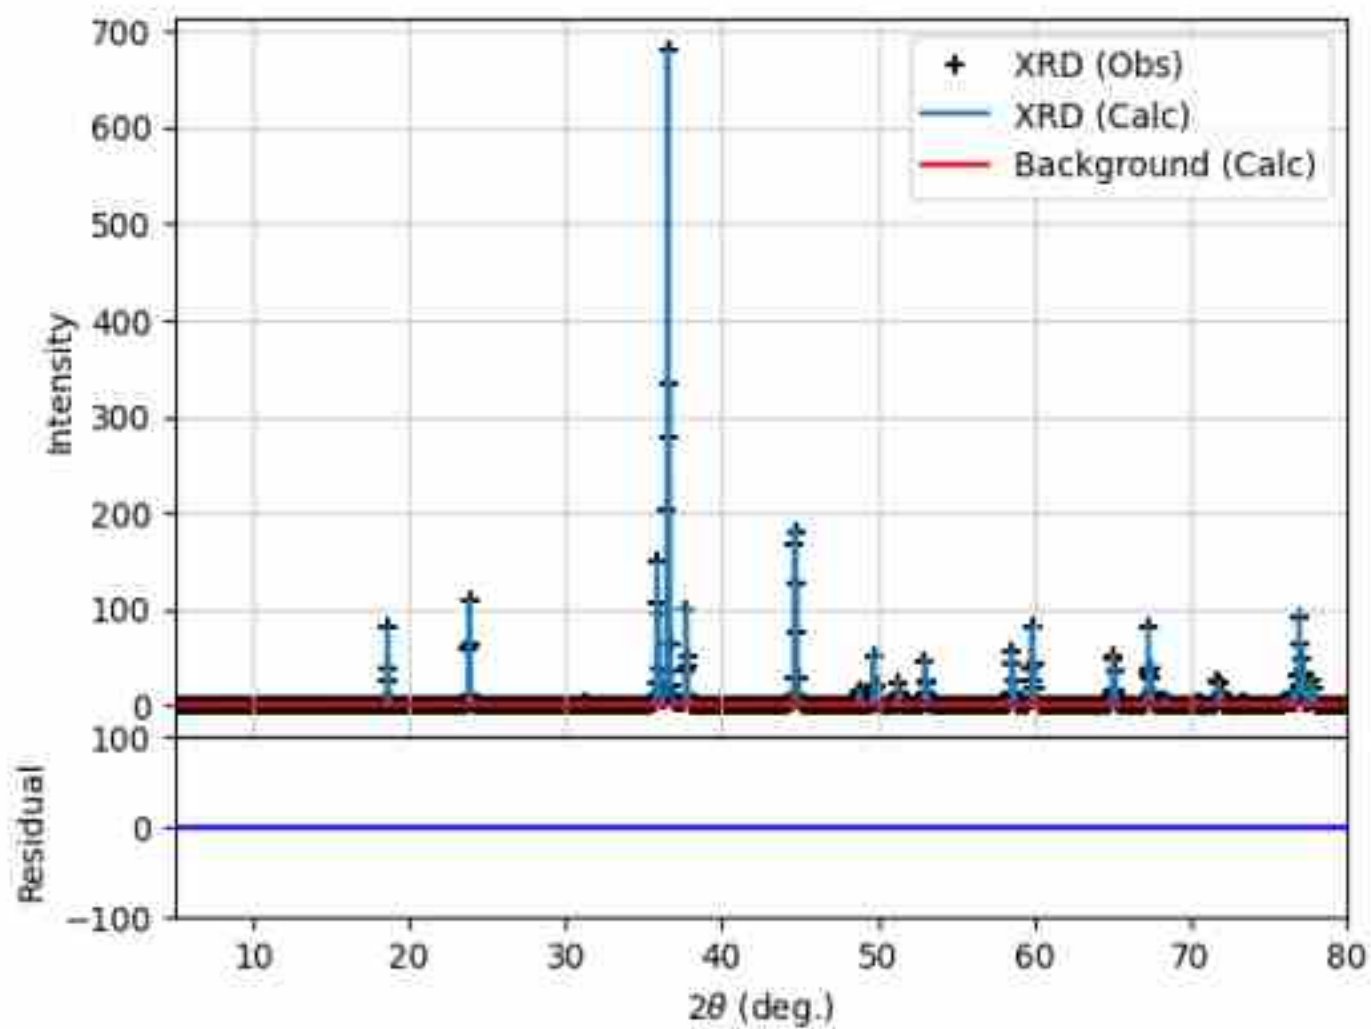

| RMSE before RR | Rwp    | RMSE after RR |
|----------------|--------|---------------|
| 0.011          | 0.0032 | 0.00035       |

# Ho<sub>2</sub>Co<sub>5</sub>Ni<sub>5</sub>

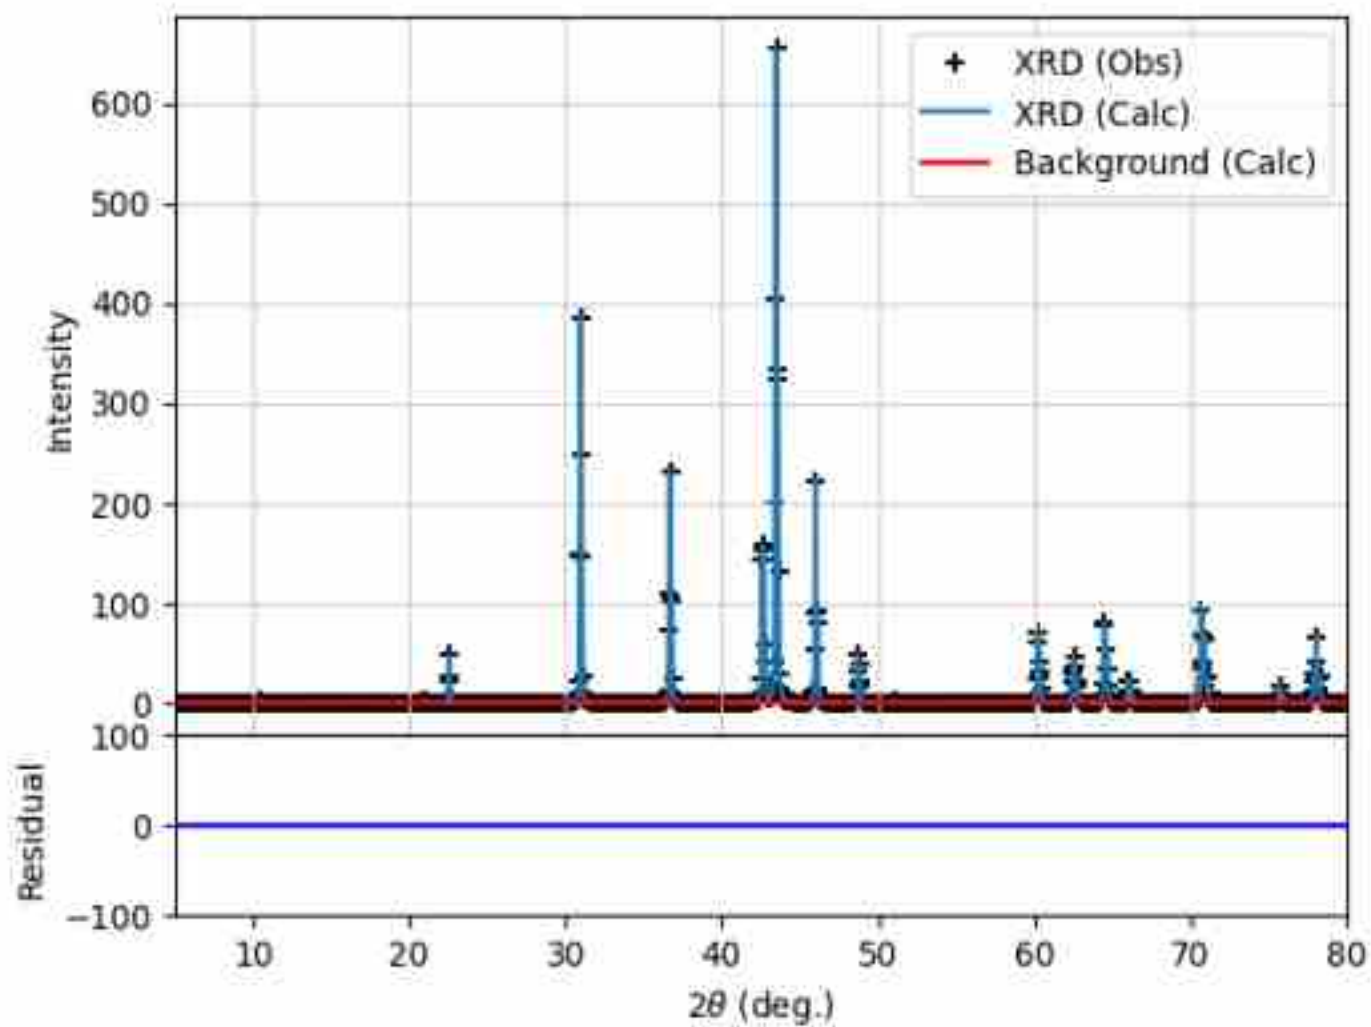

| RMSE before RR | Rwp     | RMSE after RR |
|----------------|---------|---------------|
| 0.011          | 0.00351 | 0.0004        |

# Ho<sub>2</sub>Fe<sub>2</sub>Si<sub>2</sub>C<sub>1</sub>

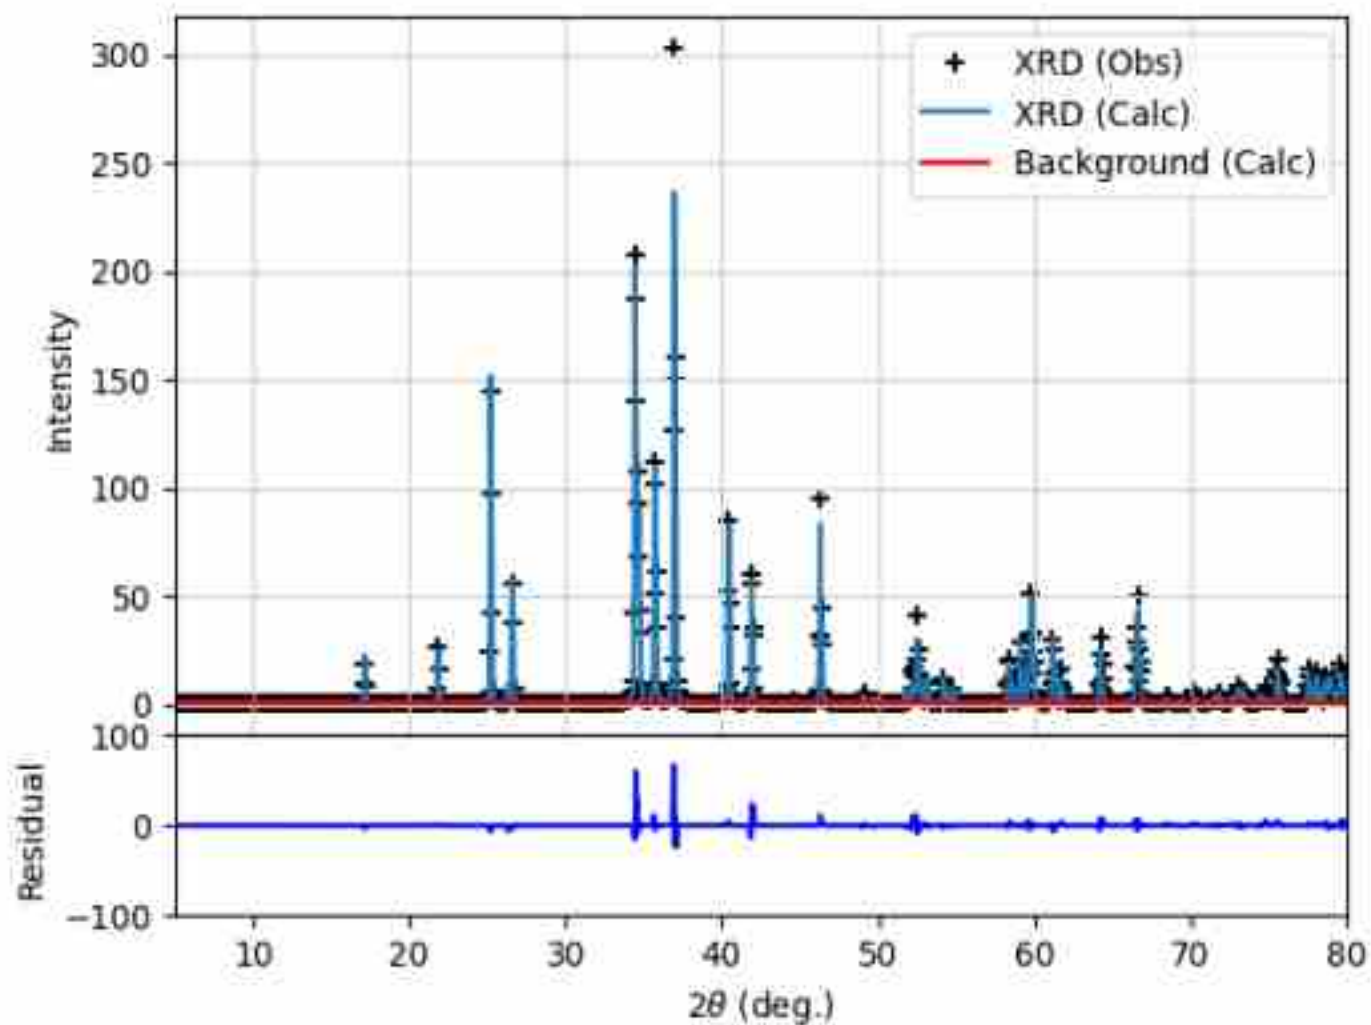

| RMSE before RR | Rwp      | RMSE after RR |
|----------------|----------|---------------|
| 0.011          | 20.92532 | 0.13916       |

# Ho<sub>2</sub>In<sub>2</sub>Co<sub>4</sub>

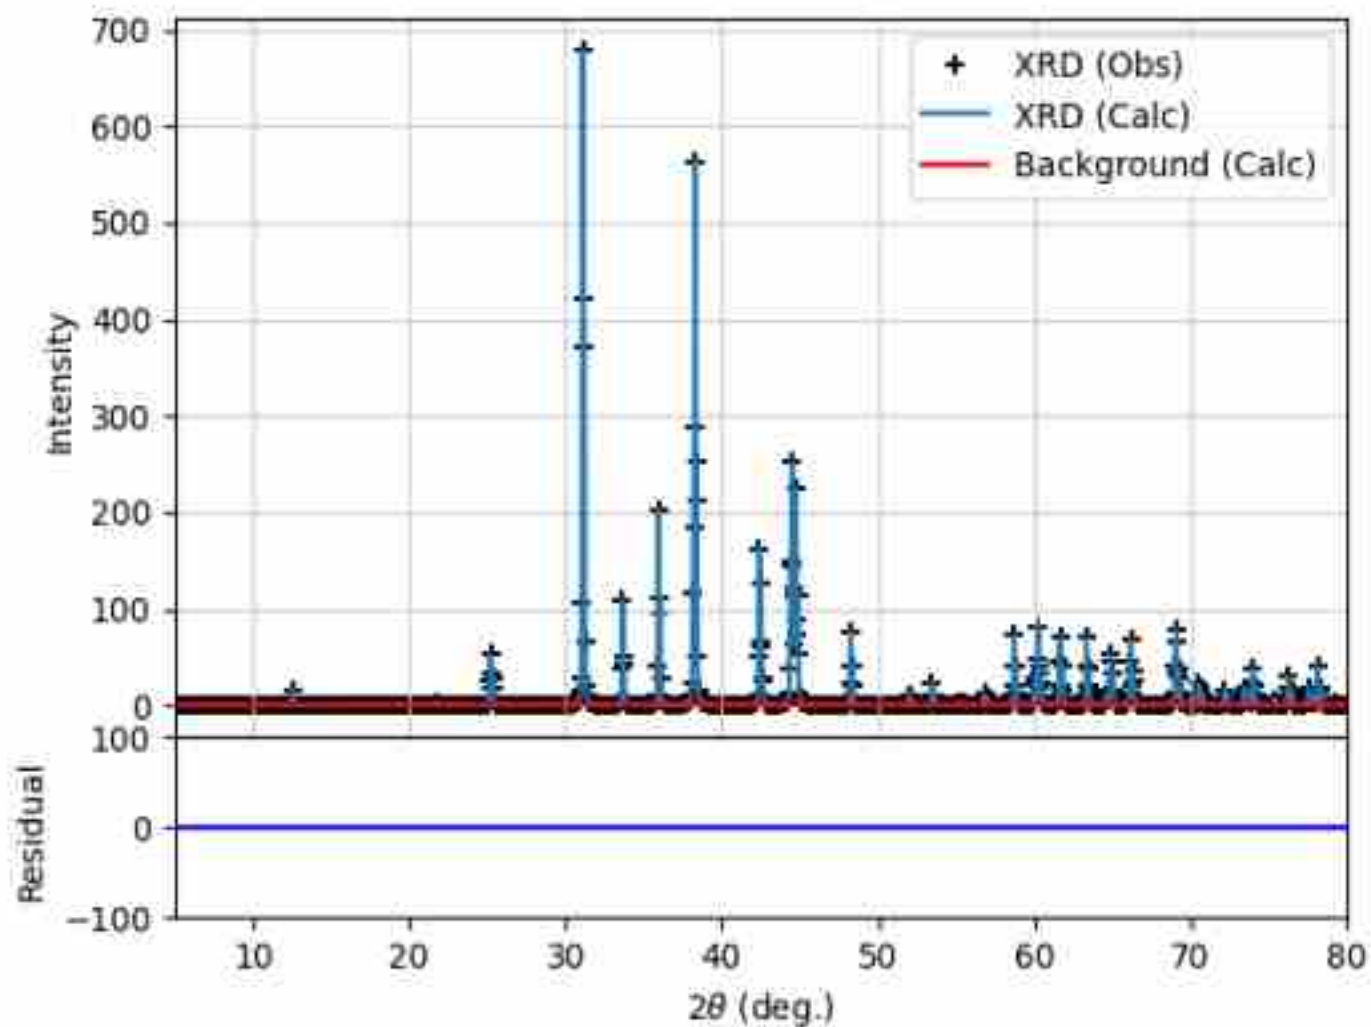

| RMSE before RR | Rwp    | RMSE after RR |
|----------------|--------|---------------|
| 0.011          | 0.0049 | 0.00072       |



# Ho<sub>4</sub>Mg<sub>2</sub>Ge<sub>4</sub>

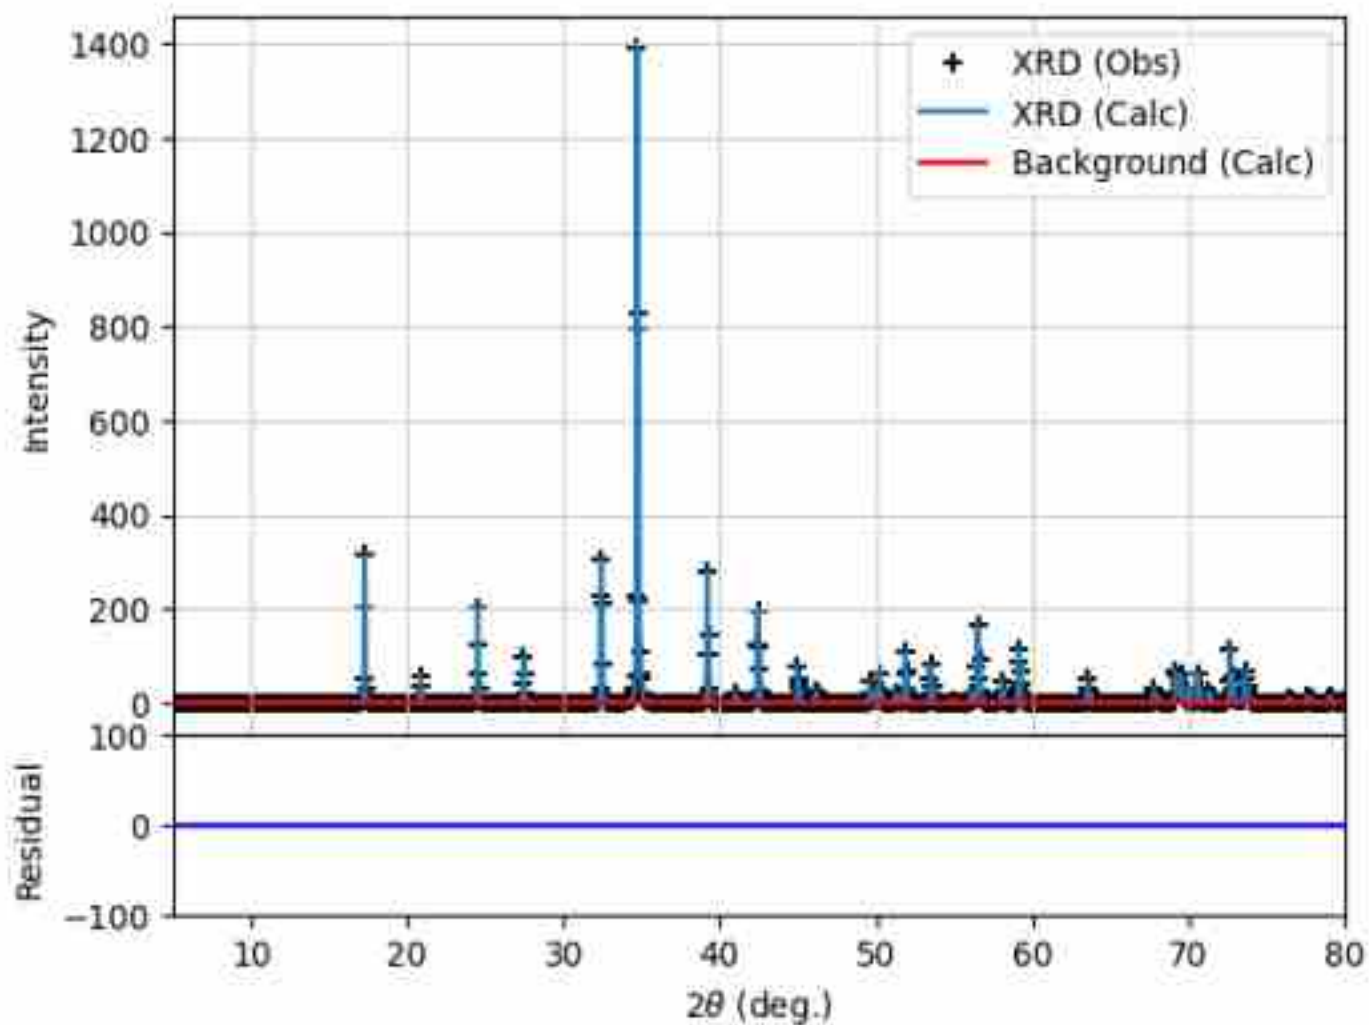

| RMSE before RR | Rwp     | RMSE after RR |
|----------------|---------|---------------|
| 0.011          | 0.00559 | 0.0006        |

# In1Cu1Te2

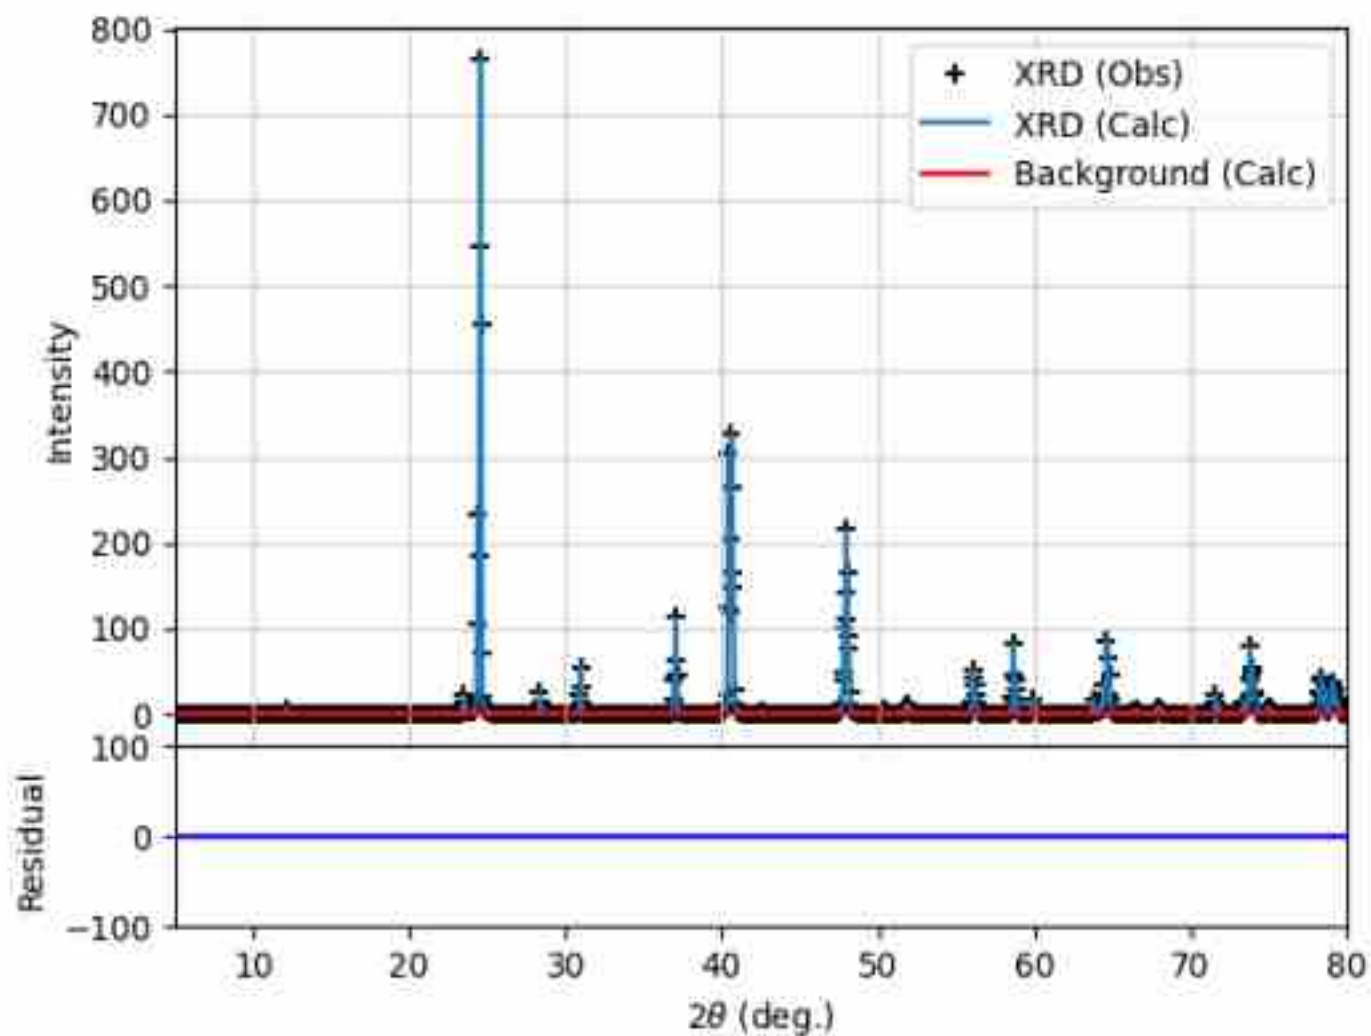

| RMSE before RR | Rwp     | RMSE after RR |
|----------------|---------|---------------|
| 0.011          | 0.00326 | 0.00017       |

# In<sub>2</sub>Ag<sub>2</sub>Se<sub>4</sub>

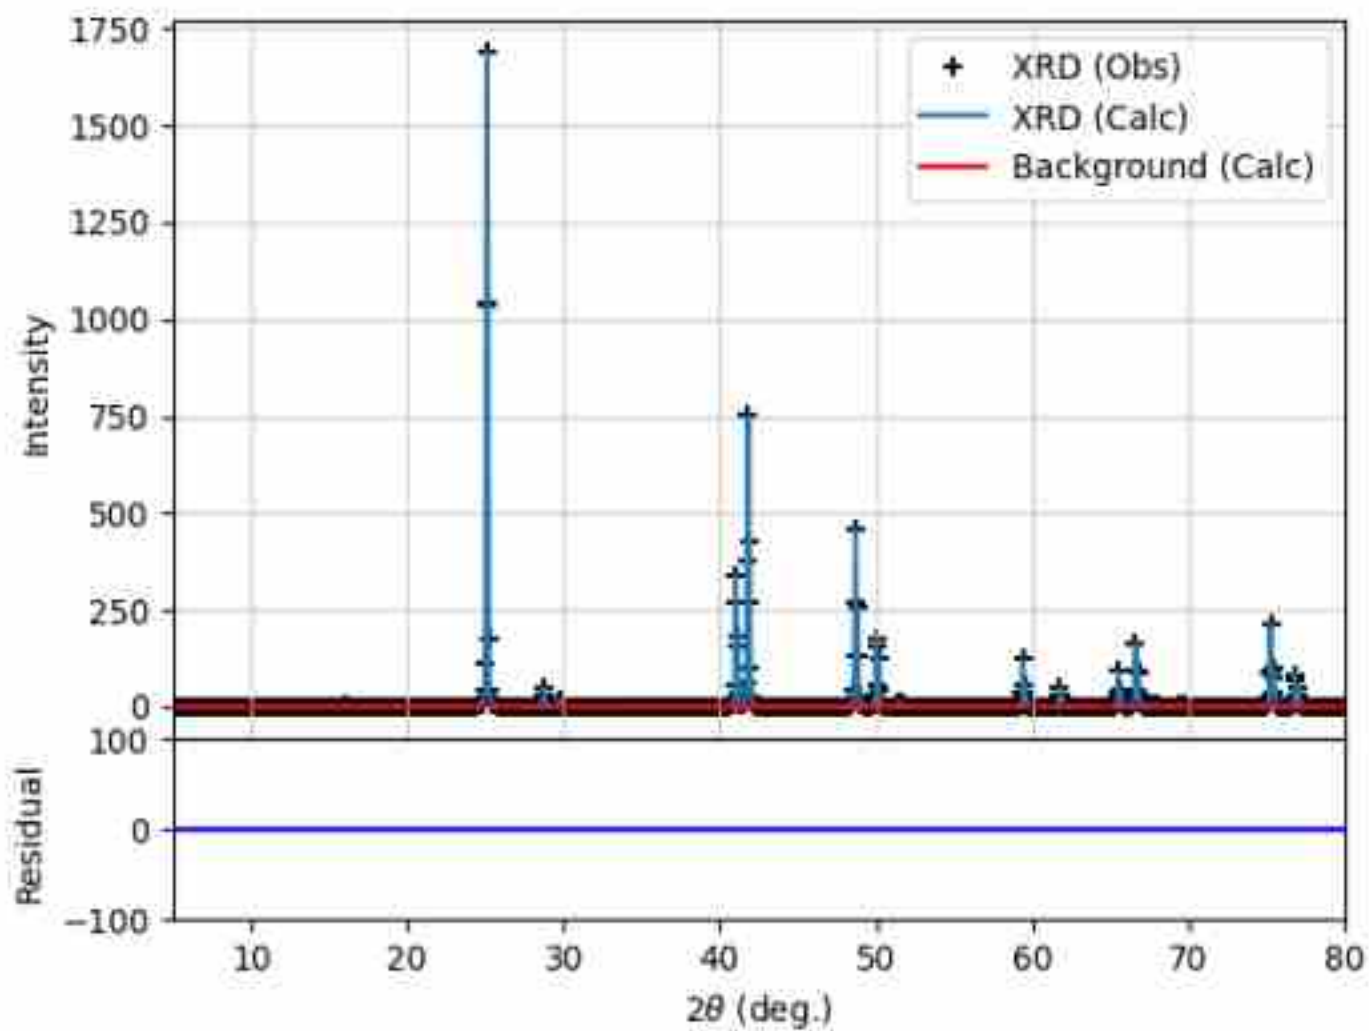

| RMSE before RR | Rwp     | RMSE after RR |
|----------------|---------|---------------|
| 0.011          | 0.01019 | 0.00094       |

# K1Ba1Pr1W1O6

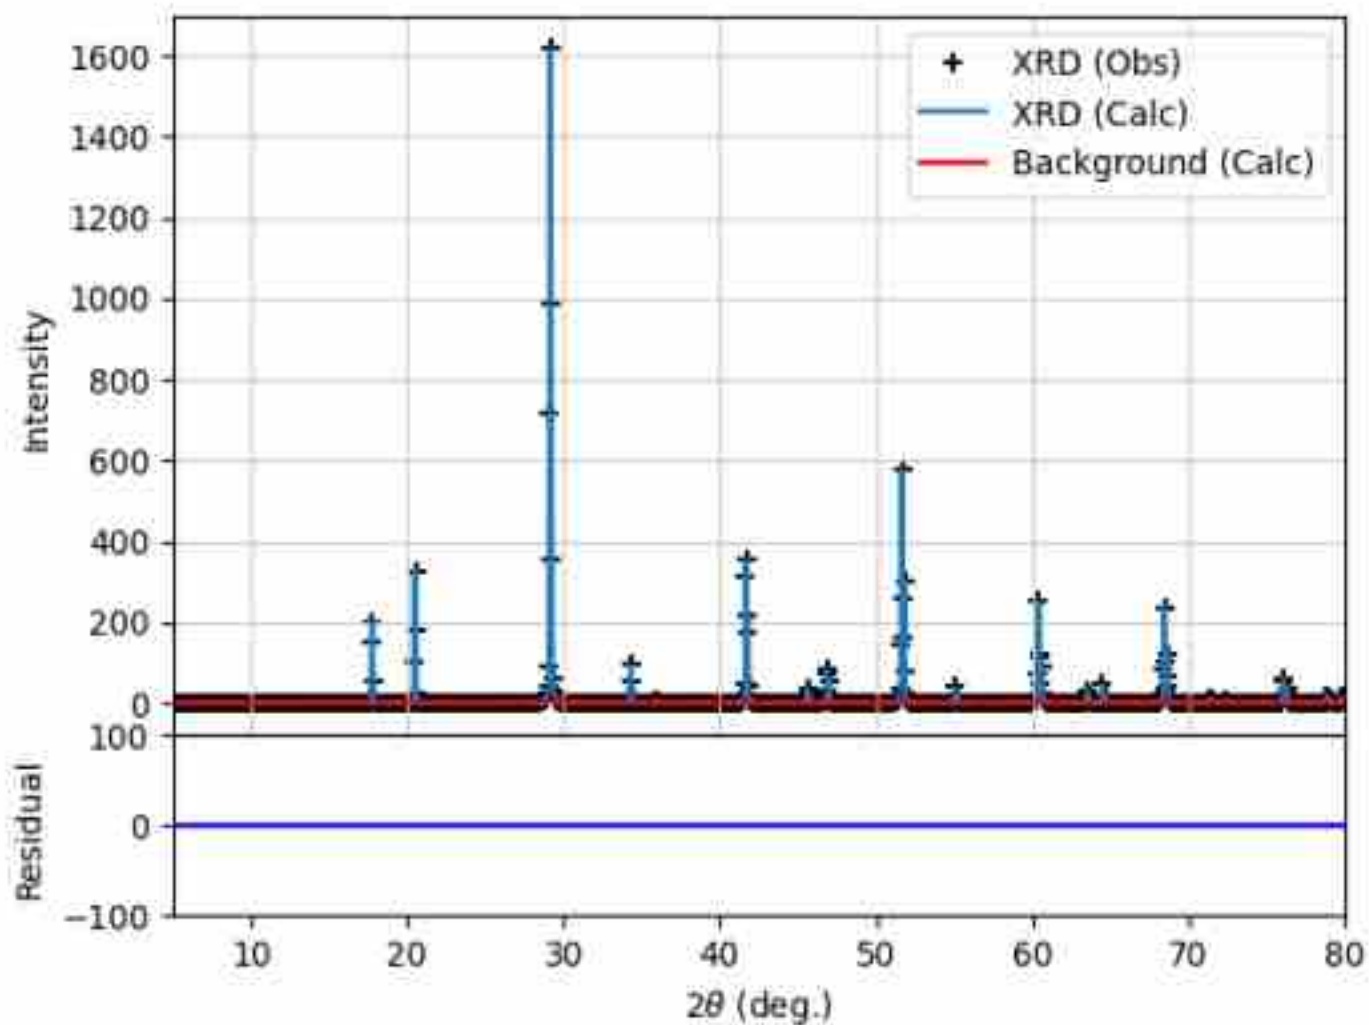

| RMSE before RR | Rwp    | RMSE after RR |
|----------------|--------|---------------|
| 0.011          | 0.0125 | 0.00484       |

# K1Ti1S2

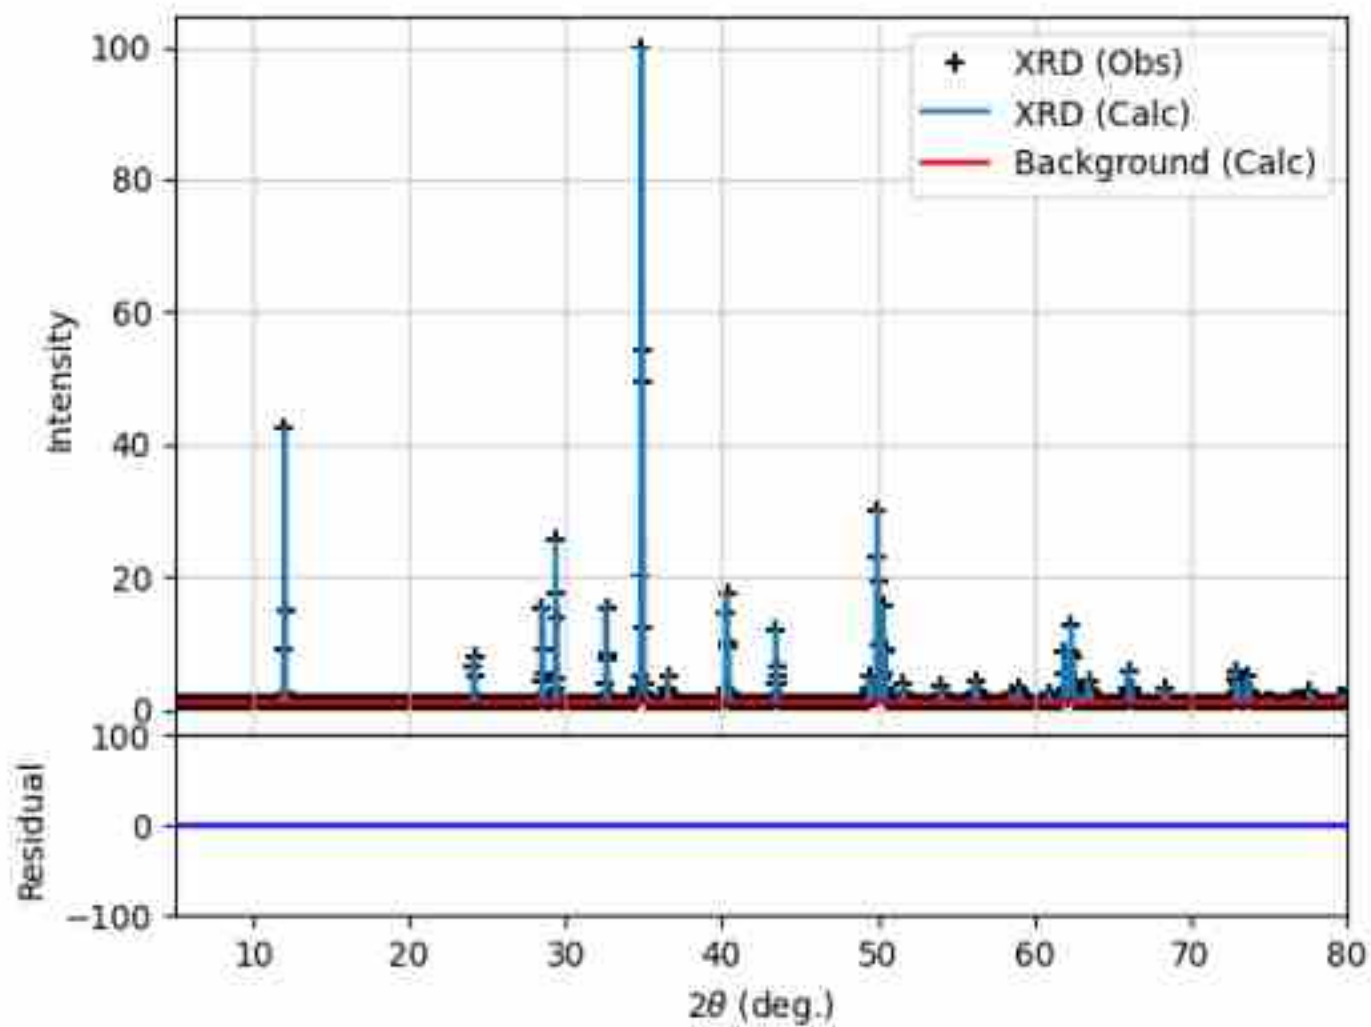

| RMSE before RR | Rwp     | RMSE after RR |
|----------------|---------|---------------|
| 0.011          | 0.00202 | 0.0003        |

# K1Tl2Ga1F6

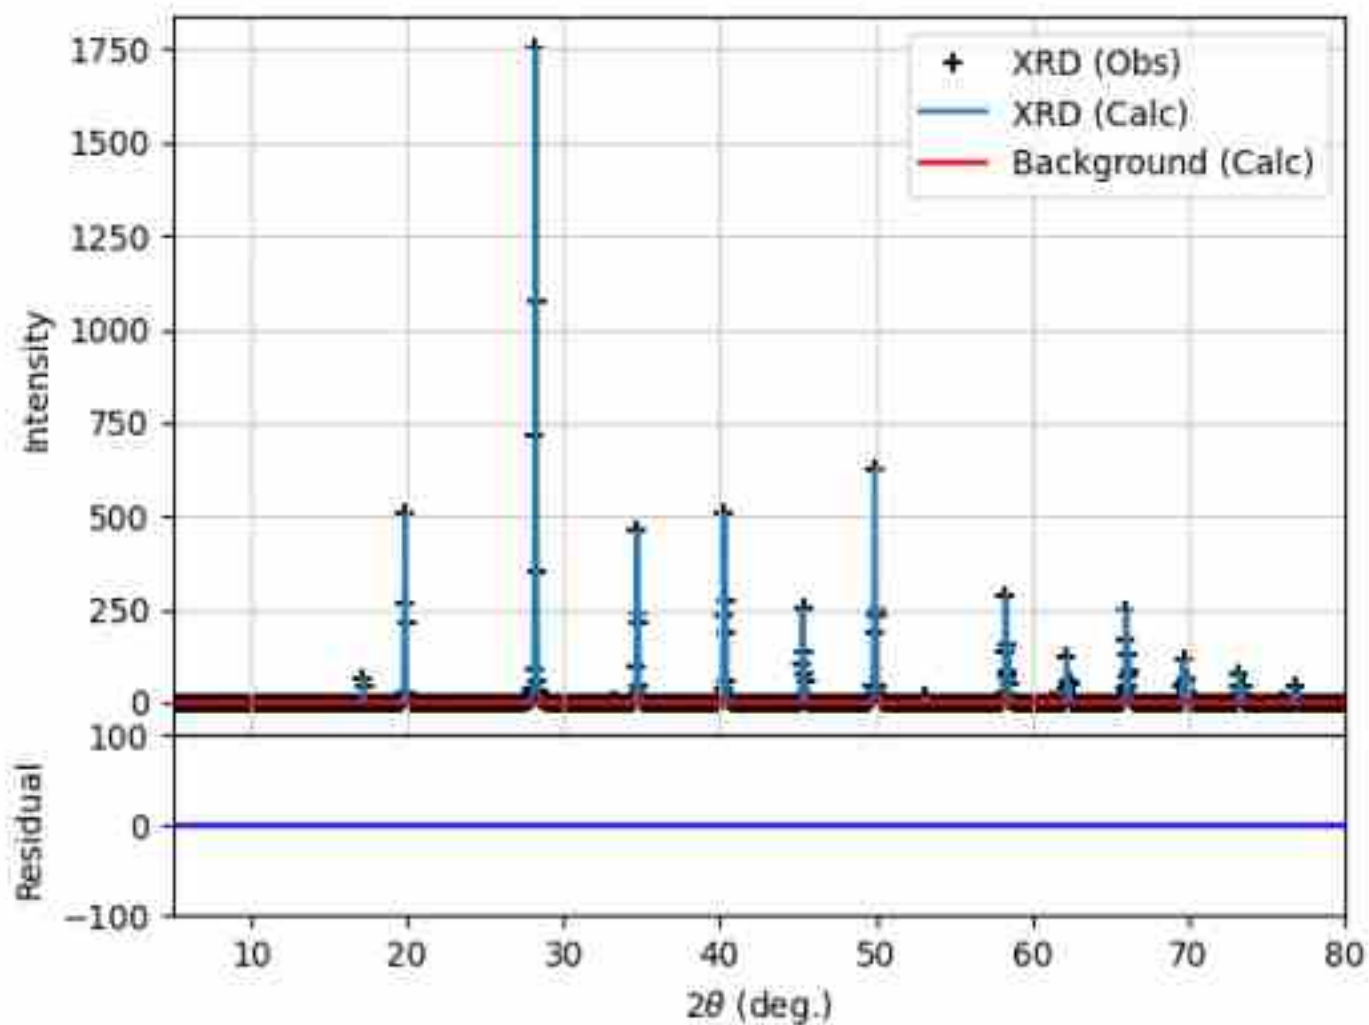

| RMSE before RR | Rwp     | RMSE after RR |
|----------------|---------|---------------|
| 0.011          | 0.00895 | 0.00354       |

# K<sub>2</sub>Ag<sub>1</sub>As<sub>1</sub>F<sub>6</sub>

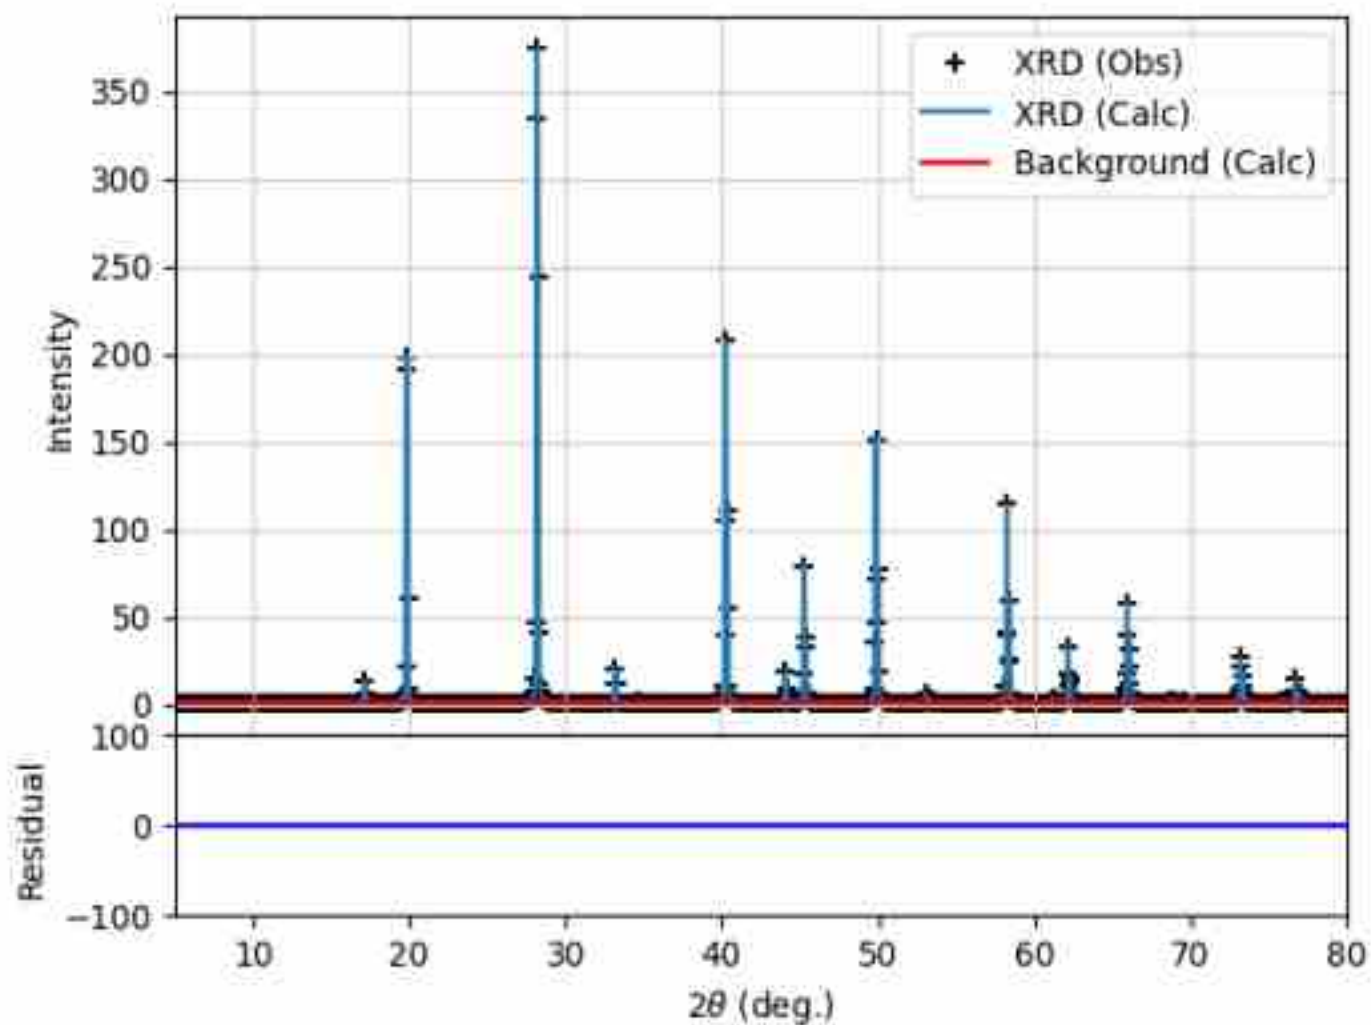

| RMSE before RR | Rwp     | RMSE after RR |
|----------------|---------|---------------|
| 0.011          | 0.04828 | 0.0069        |

# K<sub>2</sub>ErCl<sub>6</sub>

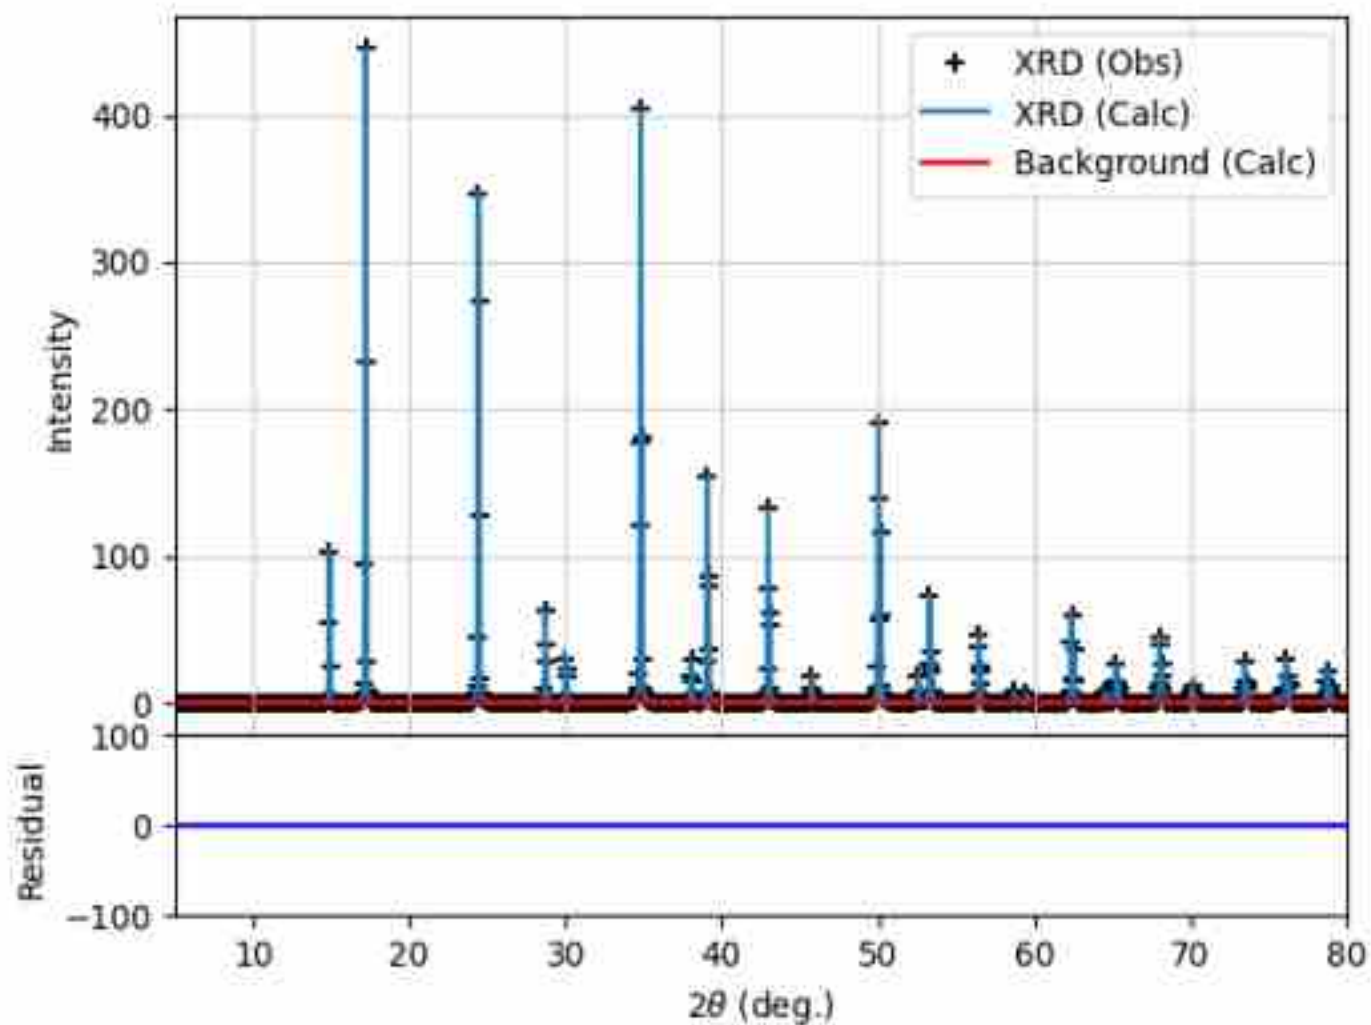

| RMSE before RR | Rwp     | RMSE after RR |
|----------------|---------|---------------|
| 0.011          | 0.03368 | 0.00391       |



# K<sub>2</sub>Na<sub>1</sub>Ga<sub>1</sub>F<sub>6</sub>

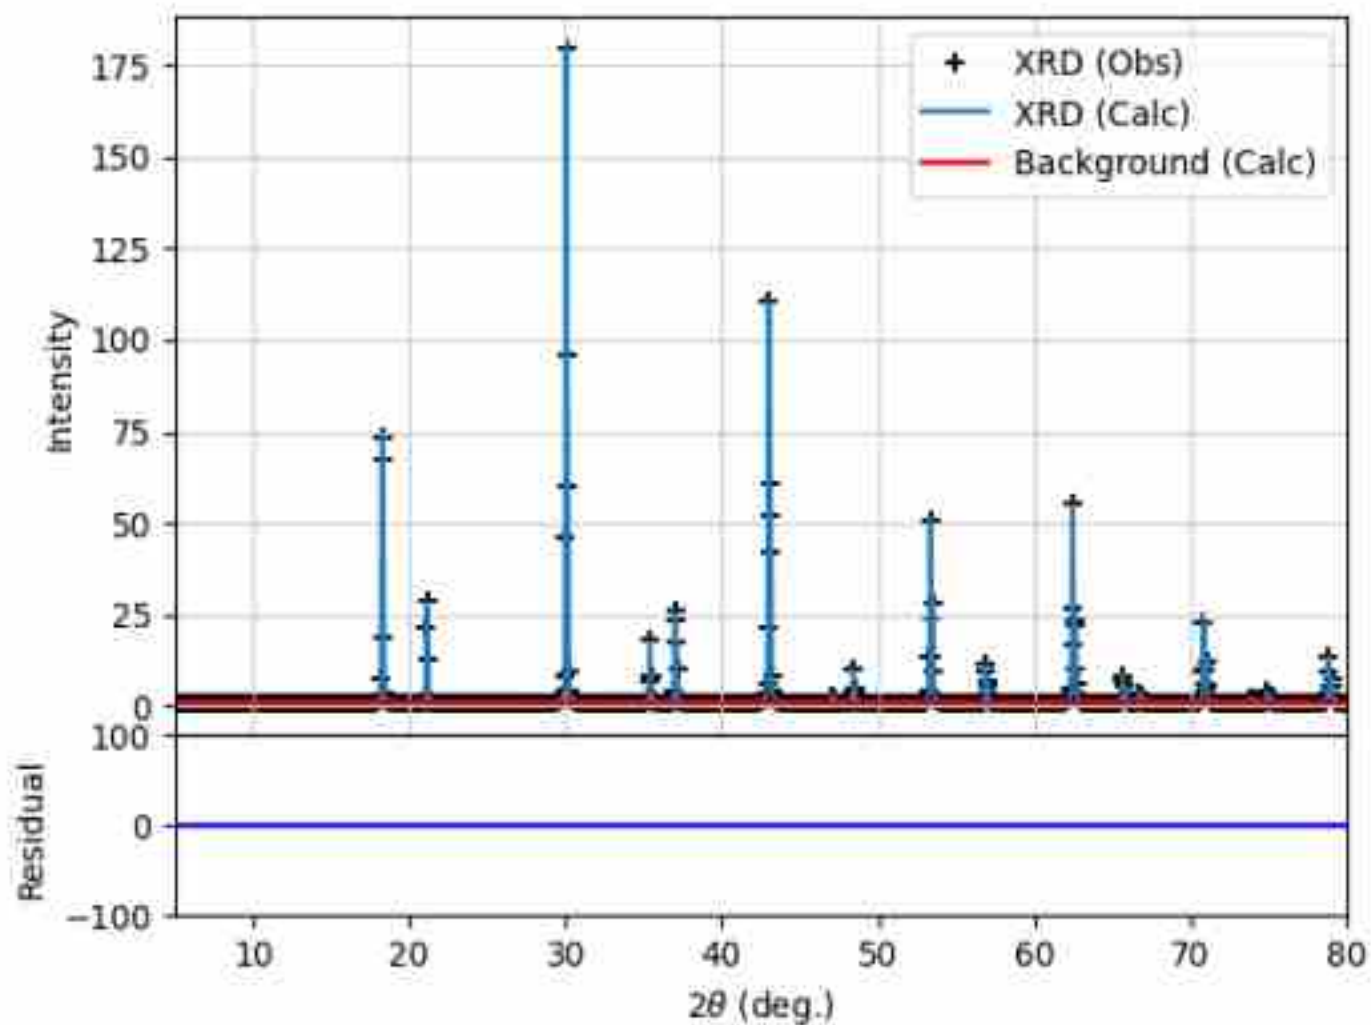

| RMSE before RR | Rwp     | RMSE after RR |
|----------------|---------|---------------|
| 0.011          | 0.02818 | 0.00468       |

# K<sub>2</sub>Na<sub>1</sub>Gd<sub>1</sub>Cl<sub>6</sub>

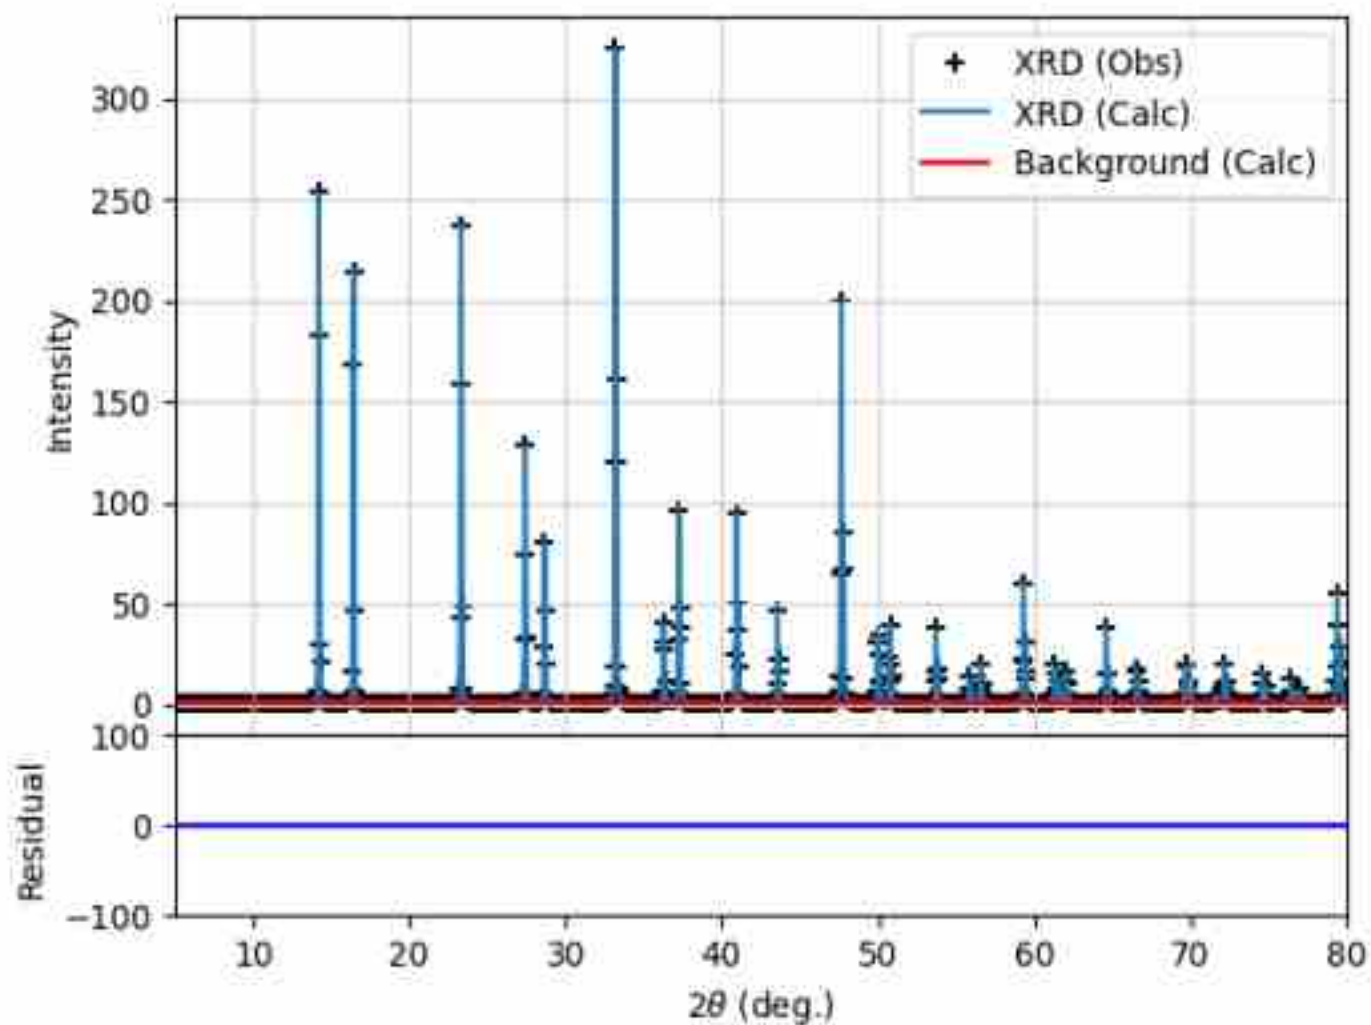

| RMSE before RR | Rwp     | RMSE after RR |
|----------------|---------|---------------|
| 0.011          | 0.02415 | 0.00241       |

# K<sub>2</sub>O<sub>s</sub>1Cl<sub>6</sub>

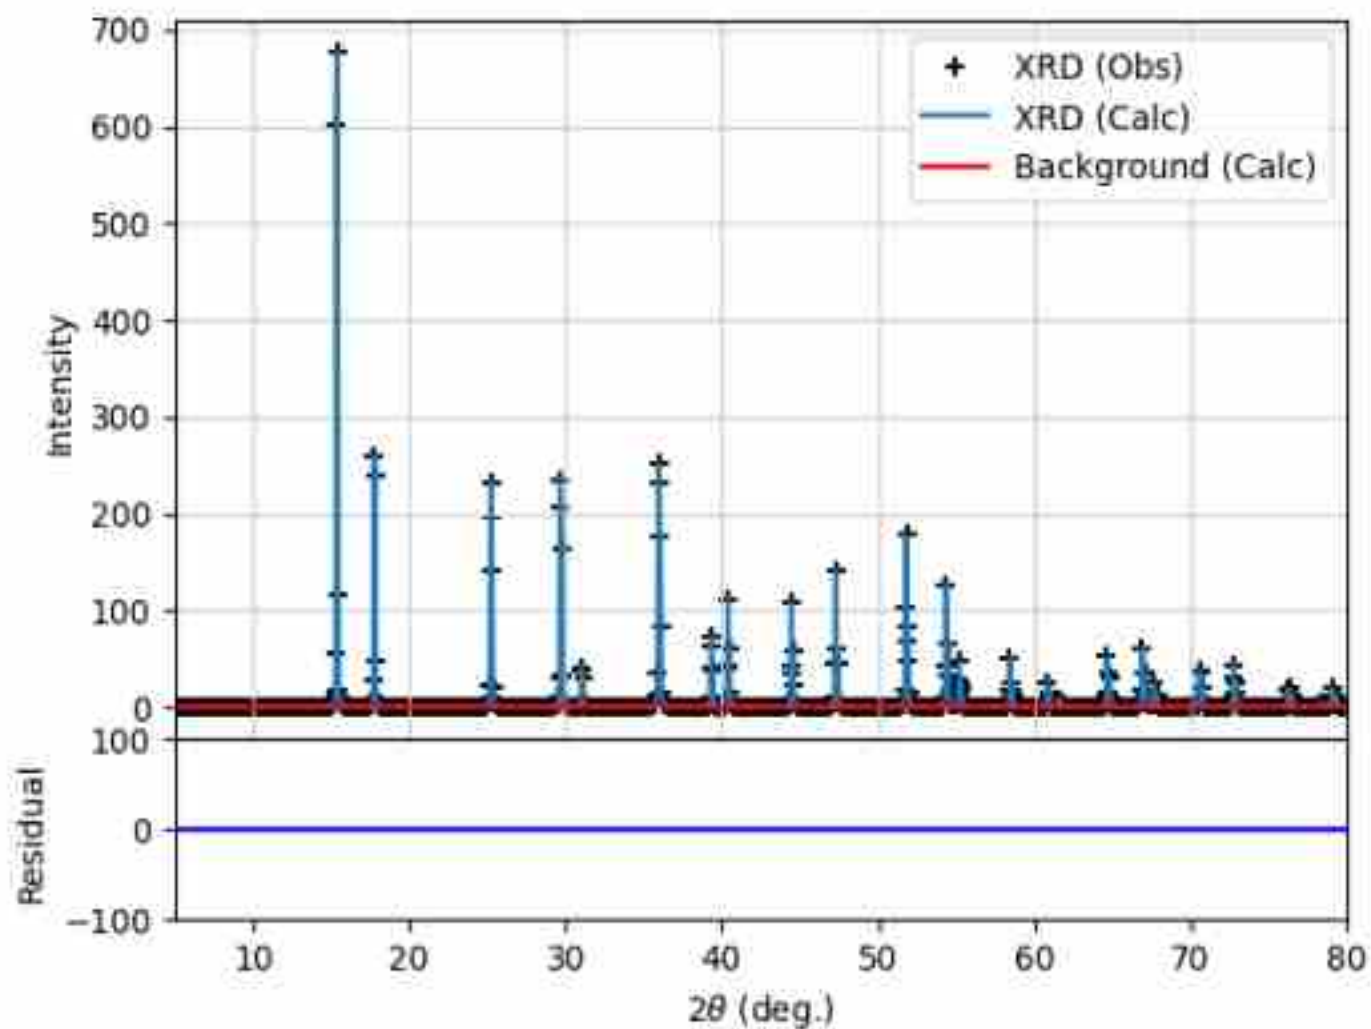

| RMSE before RR | Rwp    | RMSE after RR |
|----------------|--------|---------------|
| 0.011          | 0.0511 | 0.00477       |

# K2Rb1Sc1Cl6

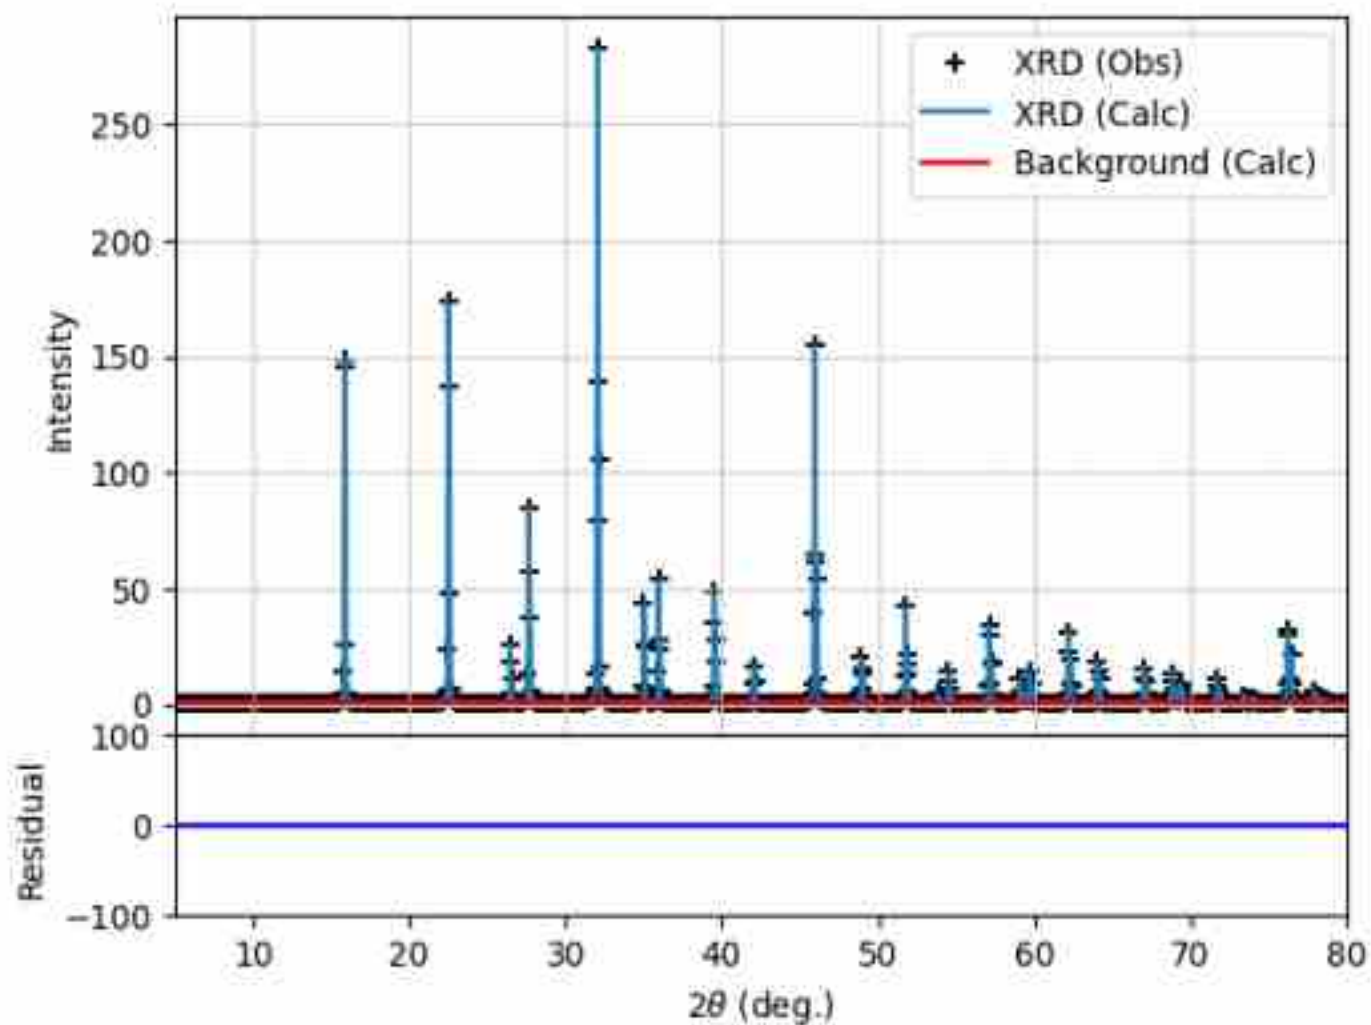

| RMSE before RR | Rwp     | RMSE after RR |
|----------------|---------|---------------|
| 0.011          | 0.02687 | 0.00244       |

# K2Sc1In1Br6

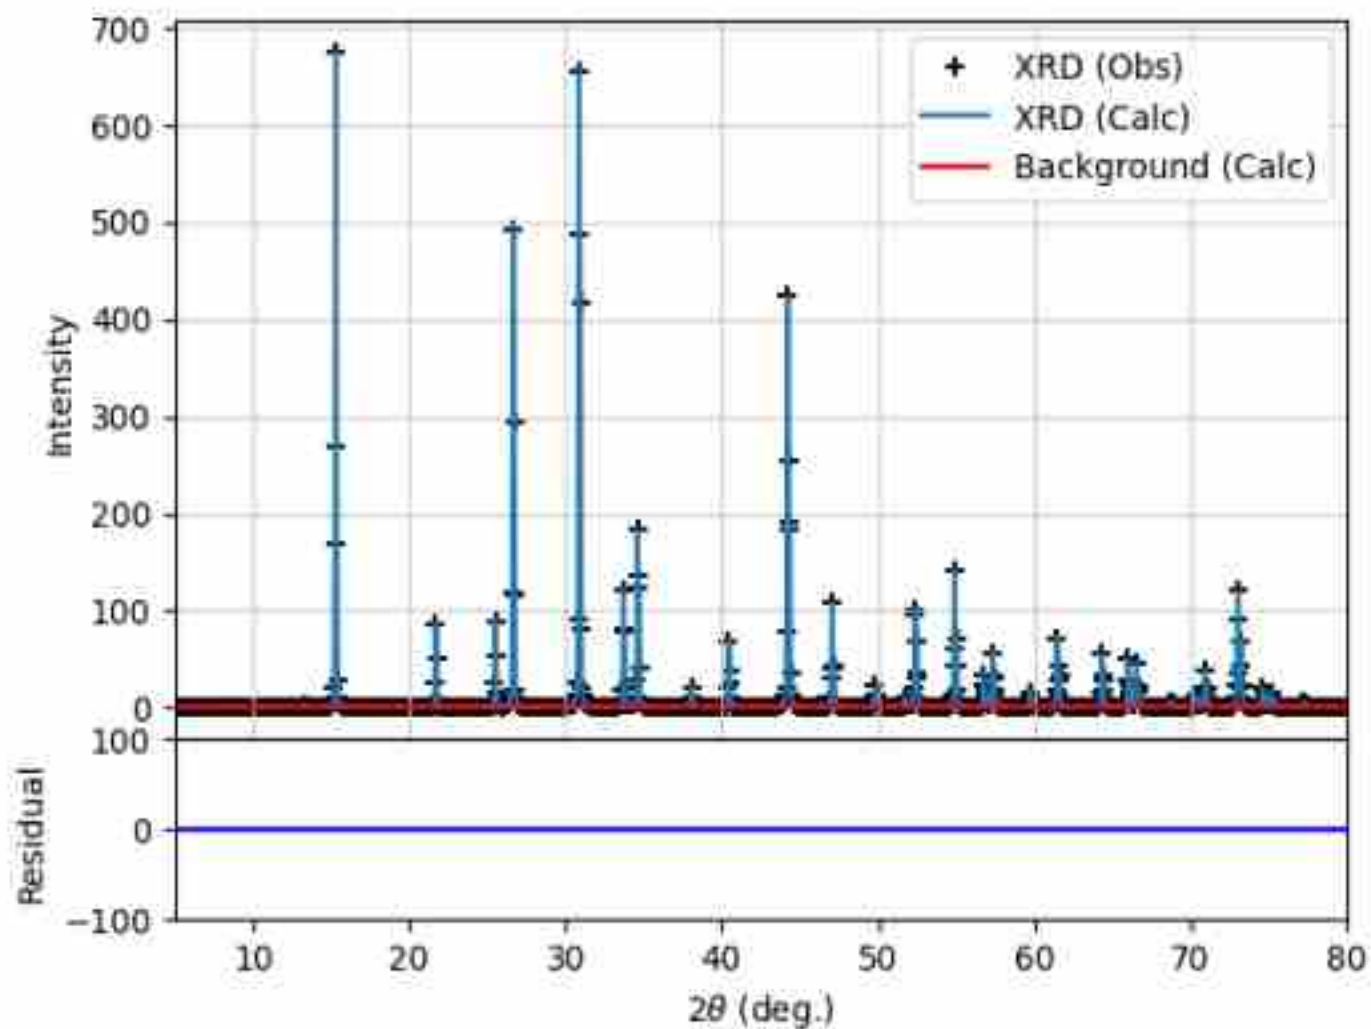

| RMSE before RR | Rwp     | RMSE after RR |
|----------------|---------|---------------|
| 0.011          | 0.20327 | 0.00482       |

# K<sub>2</sub>TcBr<sub>6</sub>

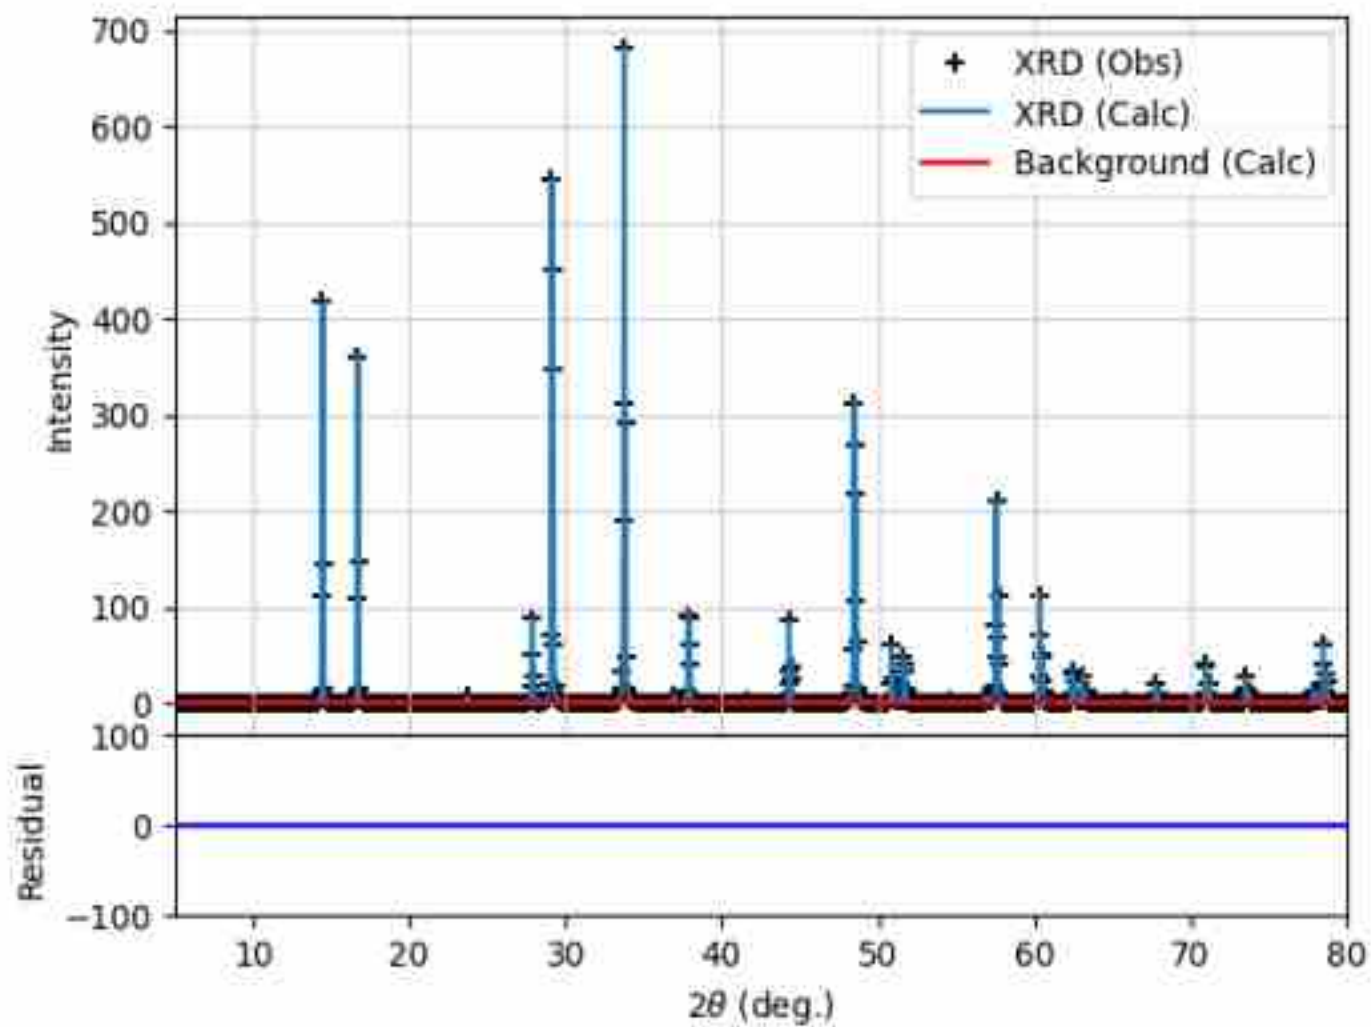

| RMSE before RR | Rwp     | RMSE after RR |
|----------------|---------|---------------|
| 0.011          | 0.13722 | 0.00446       |

# K<sub>2</sub>TlAgBr<sub>6</sub>

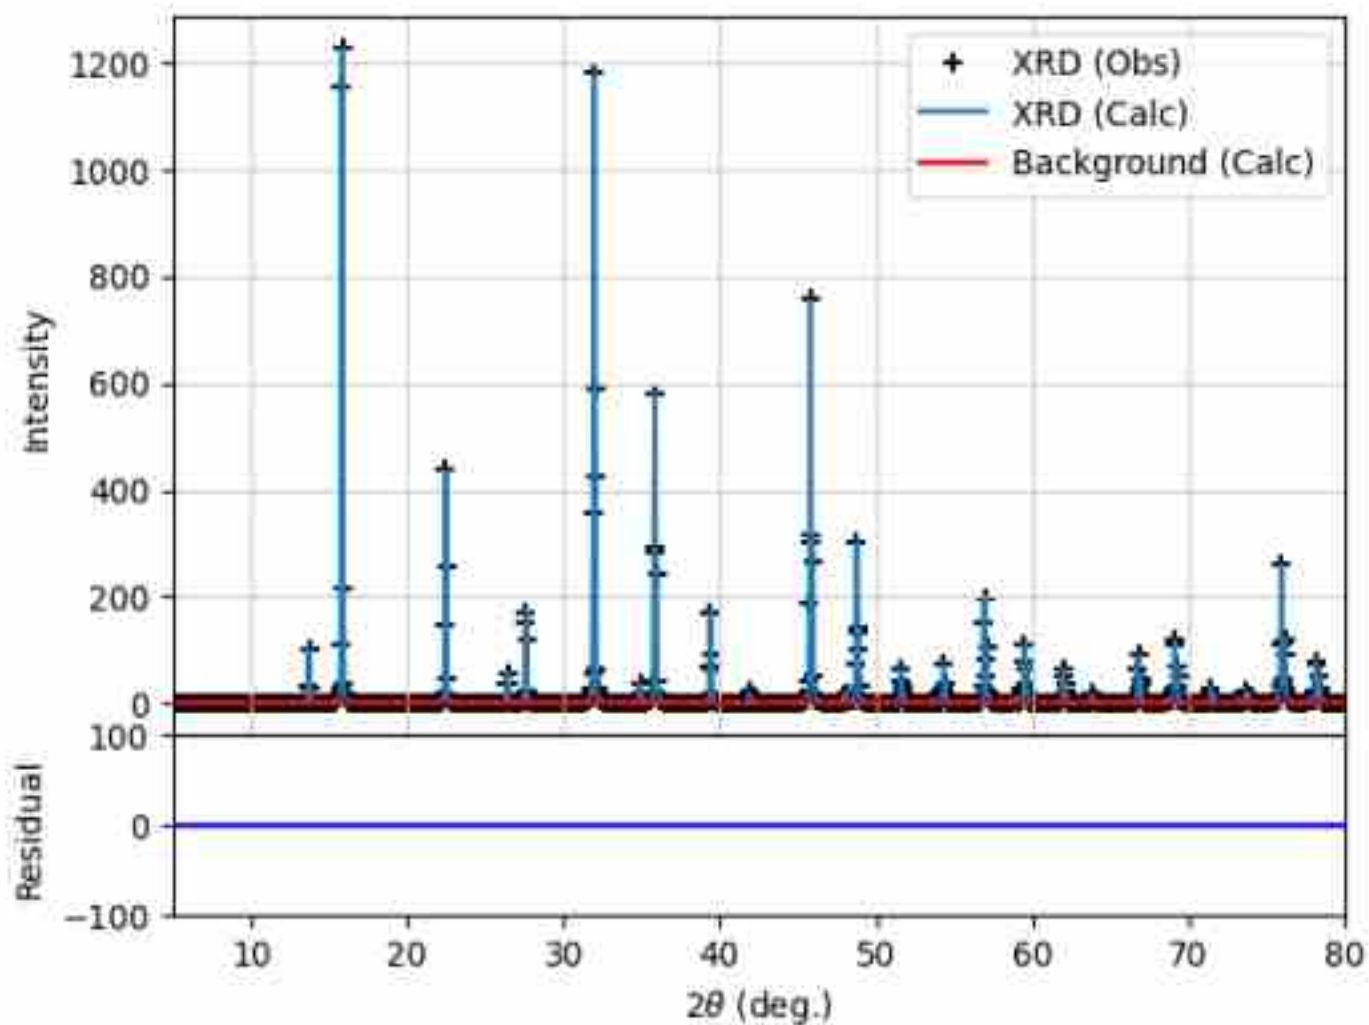

| RMSE before RR | Rwp     | RMSE after RR |
|----------------|---------|---------------|
| 0.011          | 0.03495 | 0.00248       |

# K2Tl1Mo1F6

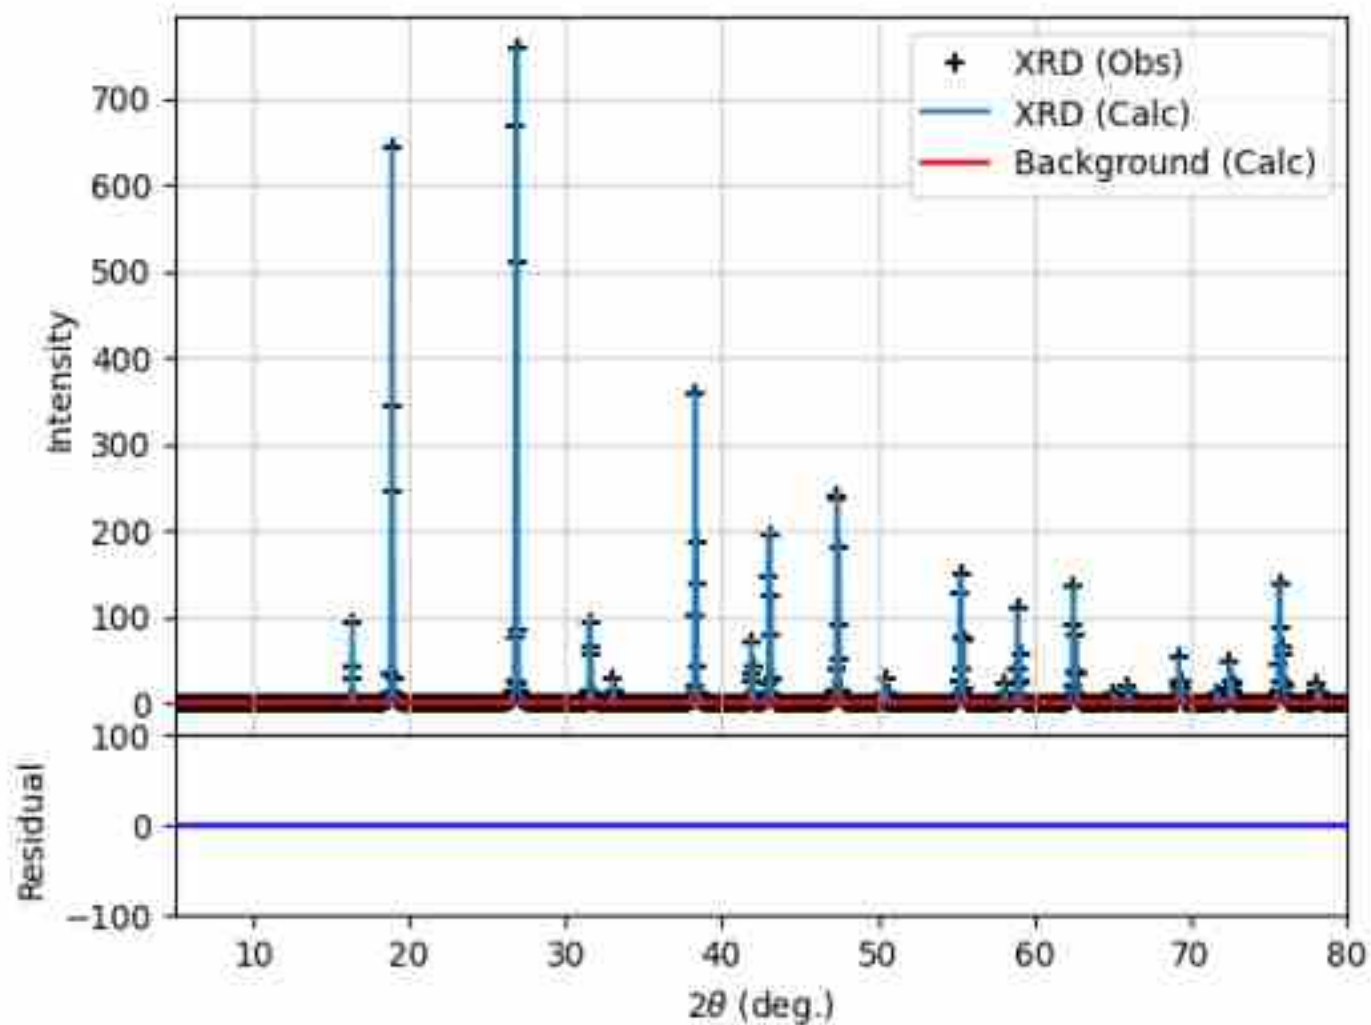

| RMSE before RR | Rwp     | RMSE after RR |
|----------------|---------|---------------|
| 0.011          | 0.01892 | 0.00509       |



# K<sub>3</sub>Mn<sub>2</sub>F<sub>7</sub>

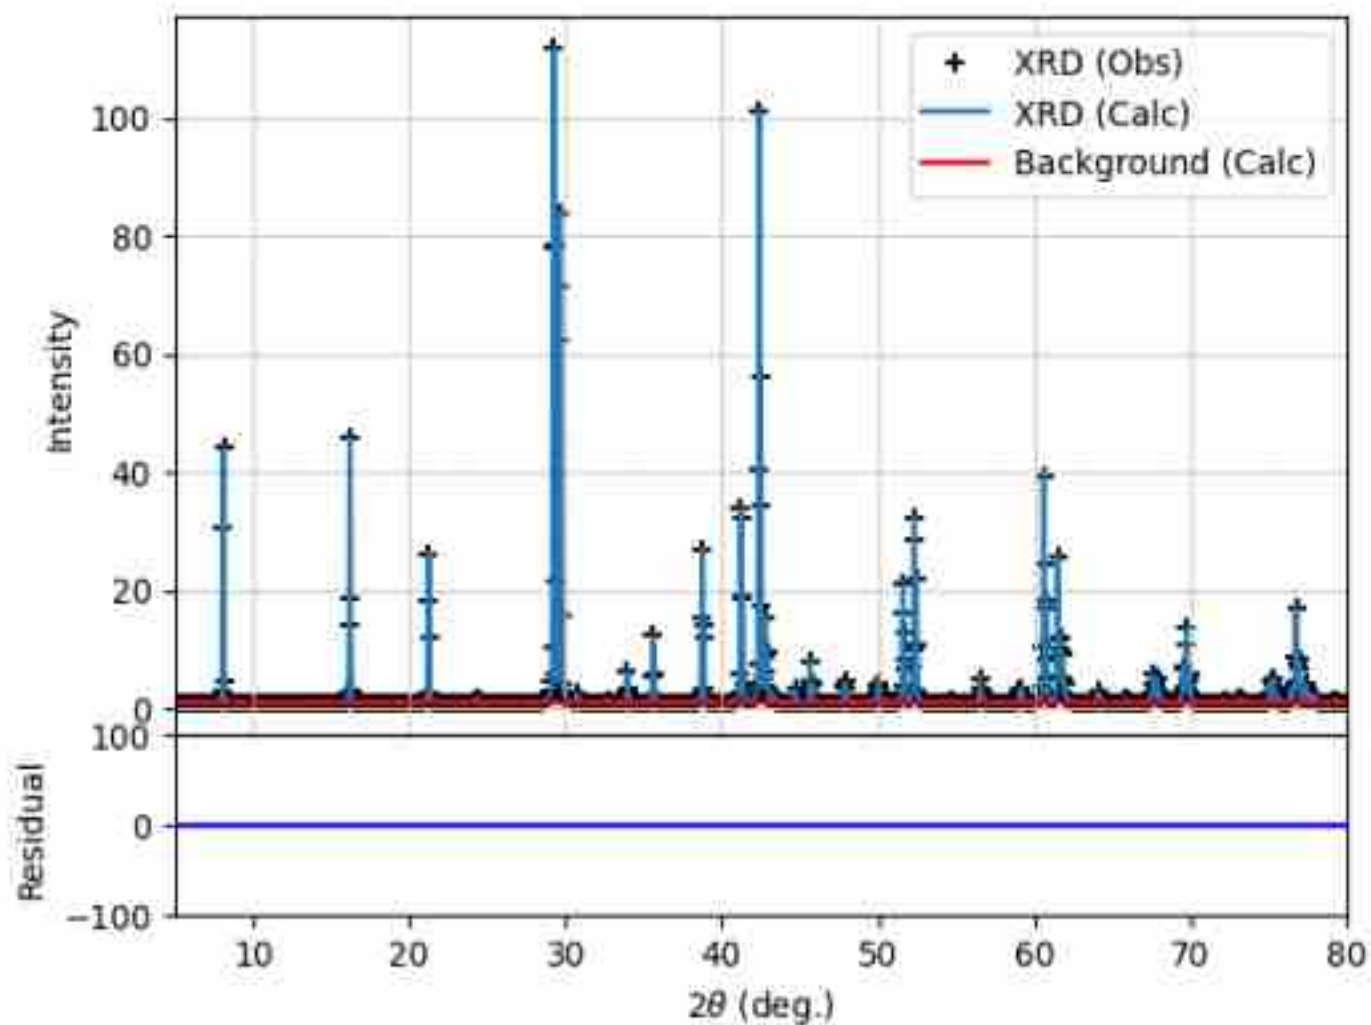

| RMSE before RR | Rwp     | RMSE after RR |
|----------------|---------|---------------|
| 0.011          | 0.00266 | 0.00079       |

# K3T11F6

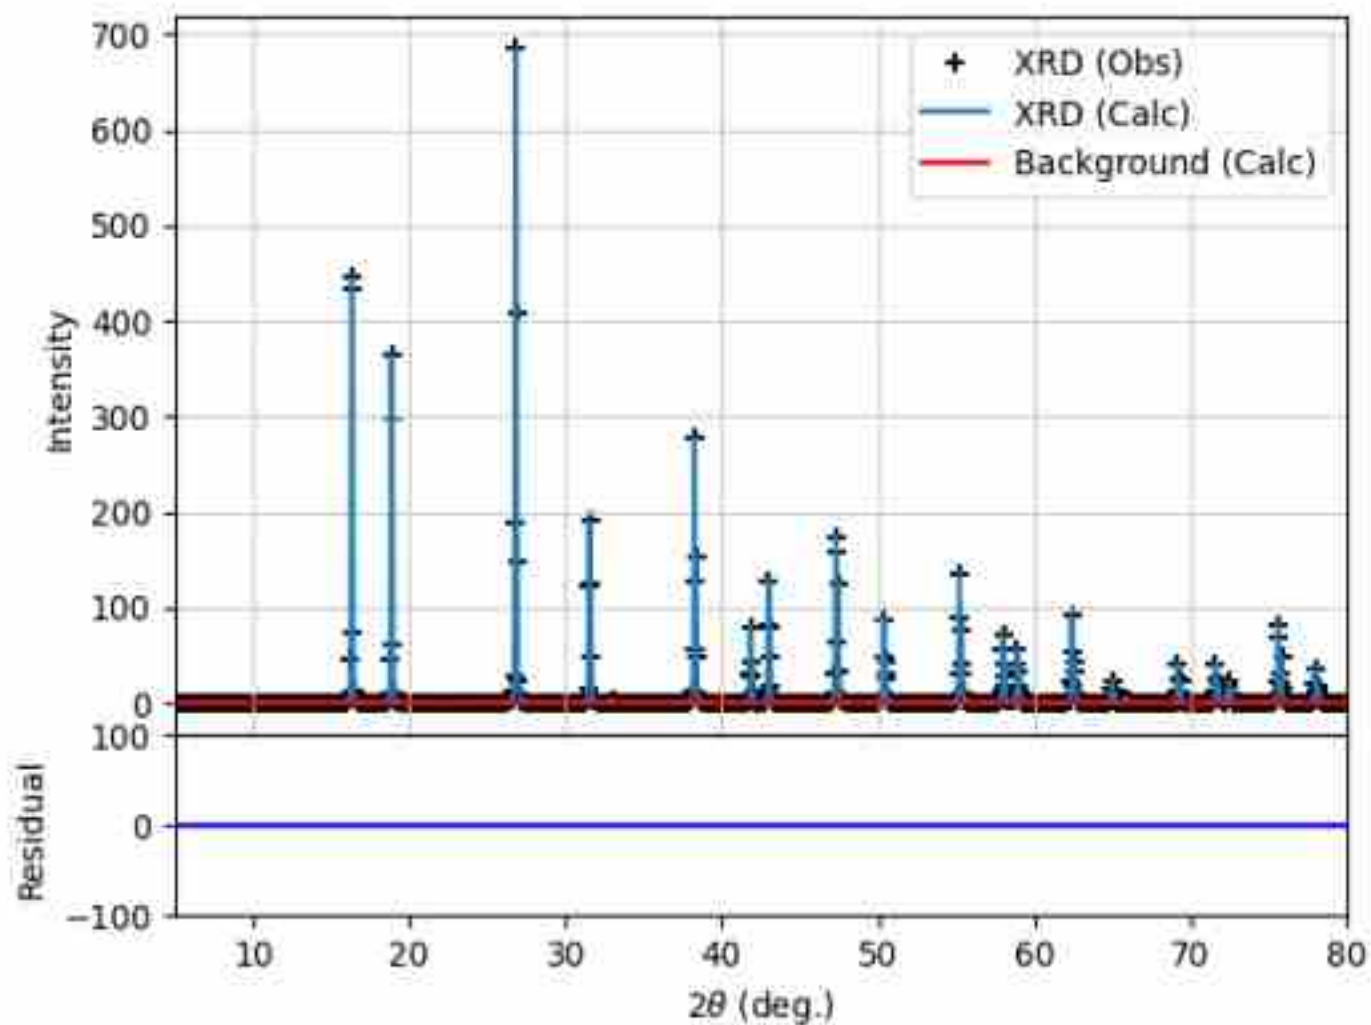

| RMSE before RR | Rwp     | RMSE after RR |
|----------------|---------|---------------|
| 0.011          | 0.04631 | 0.00704       |

# K5Br4C11

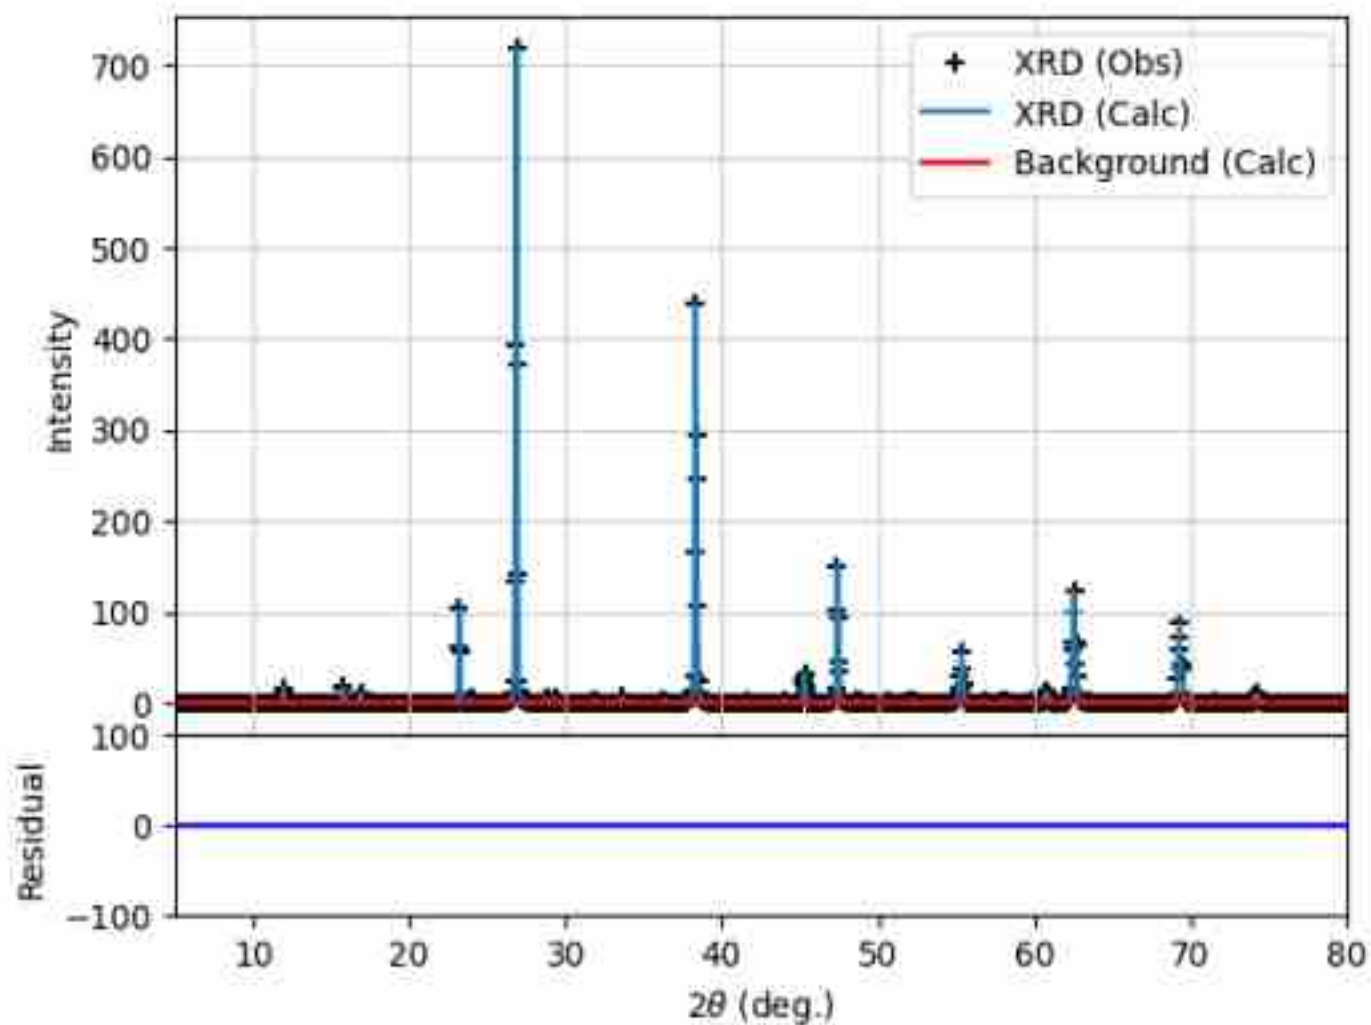

| RMSE before RR | Rwp     | RMSE after RR |
|----------------|---------|---------------|
| 0.011          | 0.00301 | 0.00026       |

# La<sub>1</sub>Al<sub>5</sub>Ni<sub>2</sub>

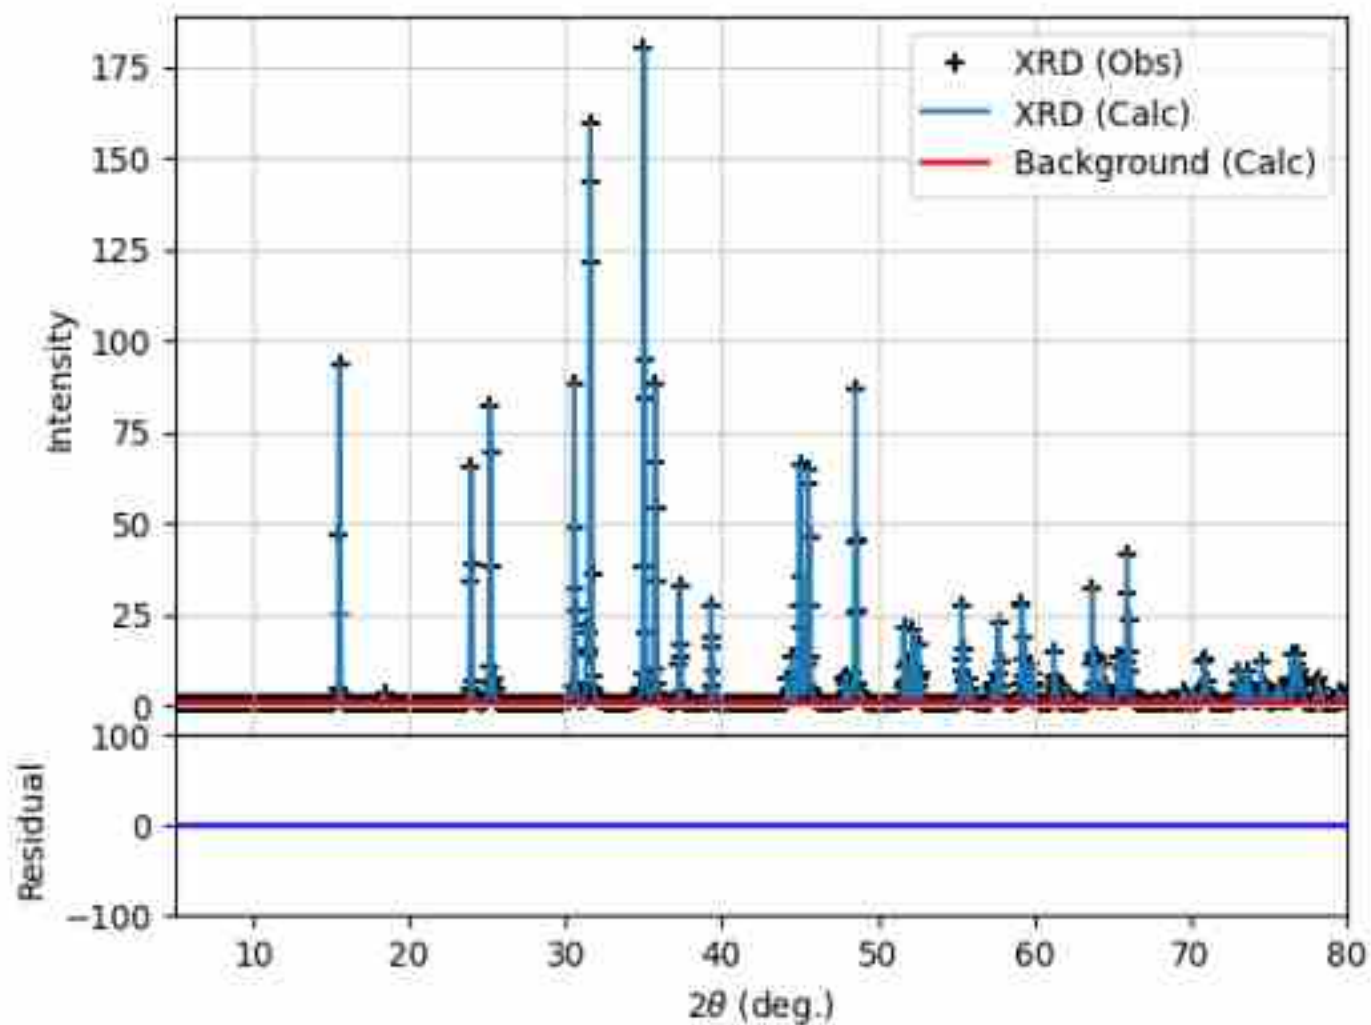

| RMSE before RR | Rwp     | RMSE after RR |
|----------------|---------|---------------|
| 0.011          | 0.00433 | 0.00088       |

# La1Gd1Br2O2

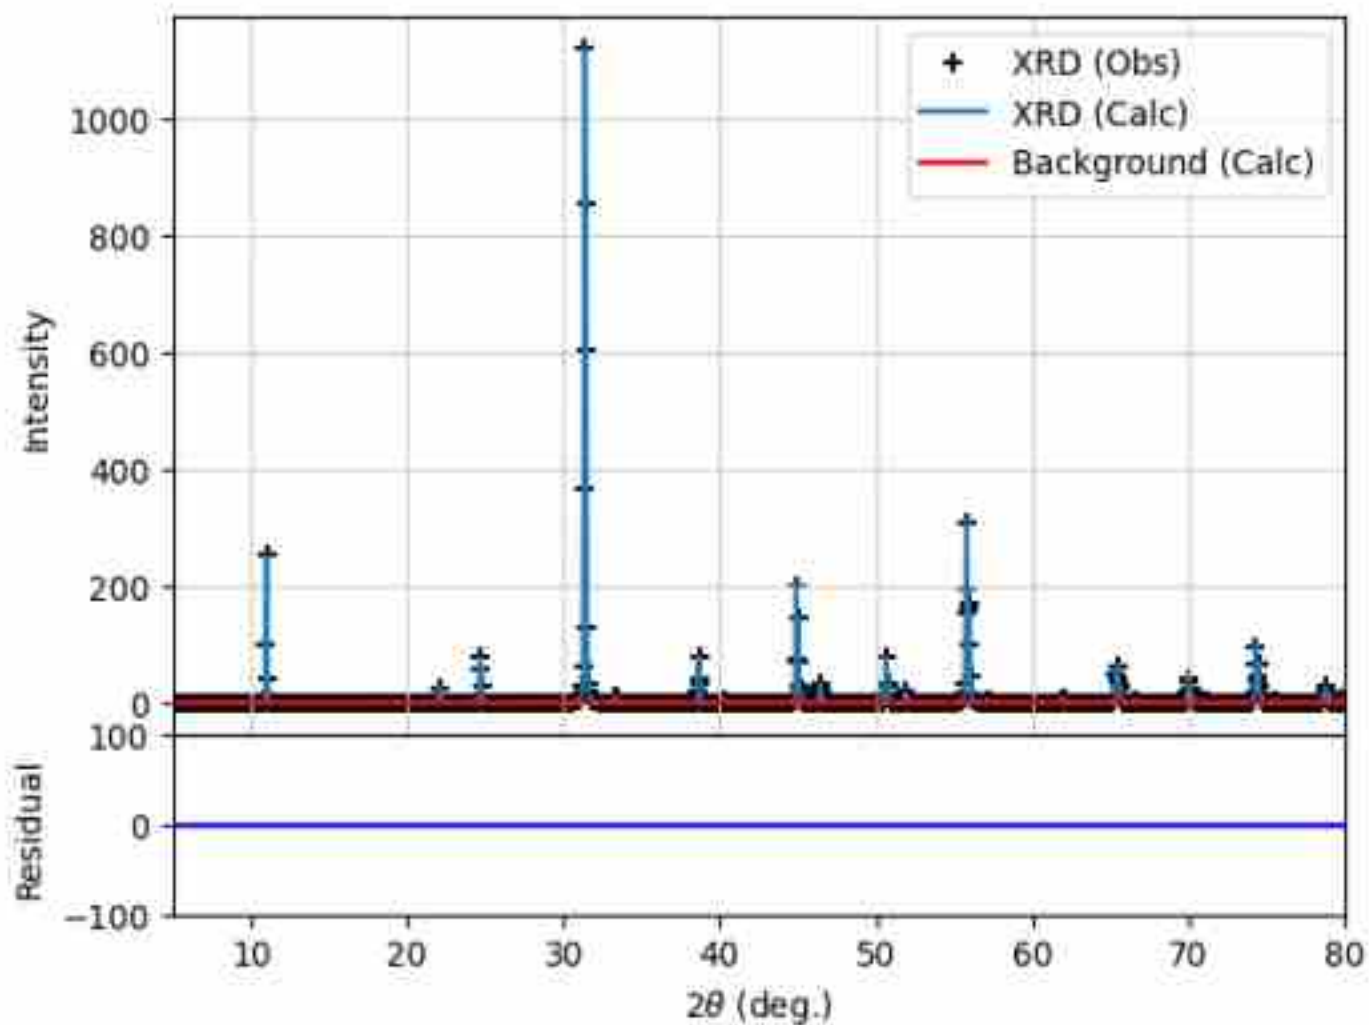

| RMSE before RR | Rwp     | RMSE after RR |
|----------------|---------|---------------|
| 0.011          | 0.00284 | 0.00076       |

# La<sub>1</sub>Mo<sub>6</sub>S<sub>8</sub>

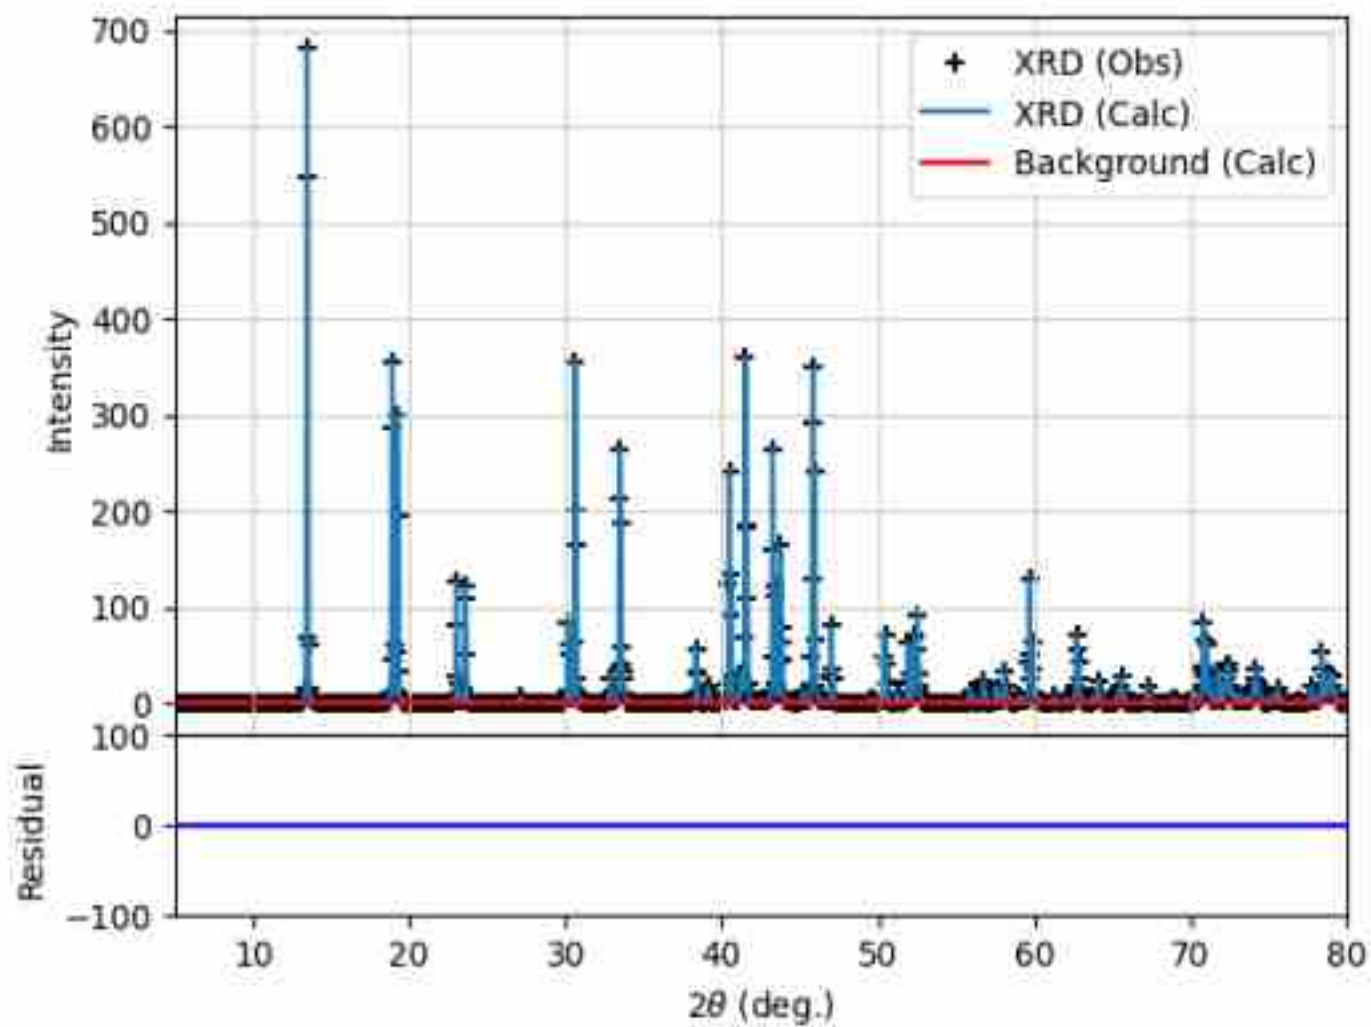

| RMSE before RR | Rwp    | RMSE after RR |
|----------------|--------|---------------|
| 0.011          | 0.0033 | 0.00066       |

# La1Pd5

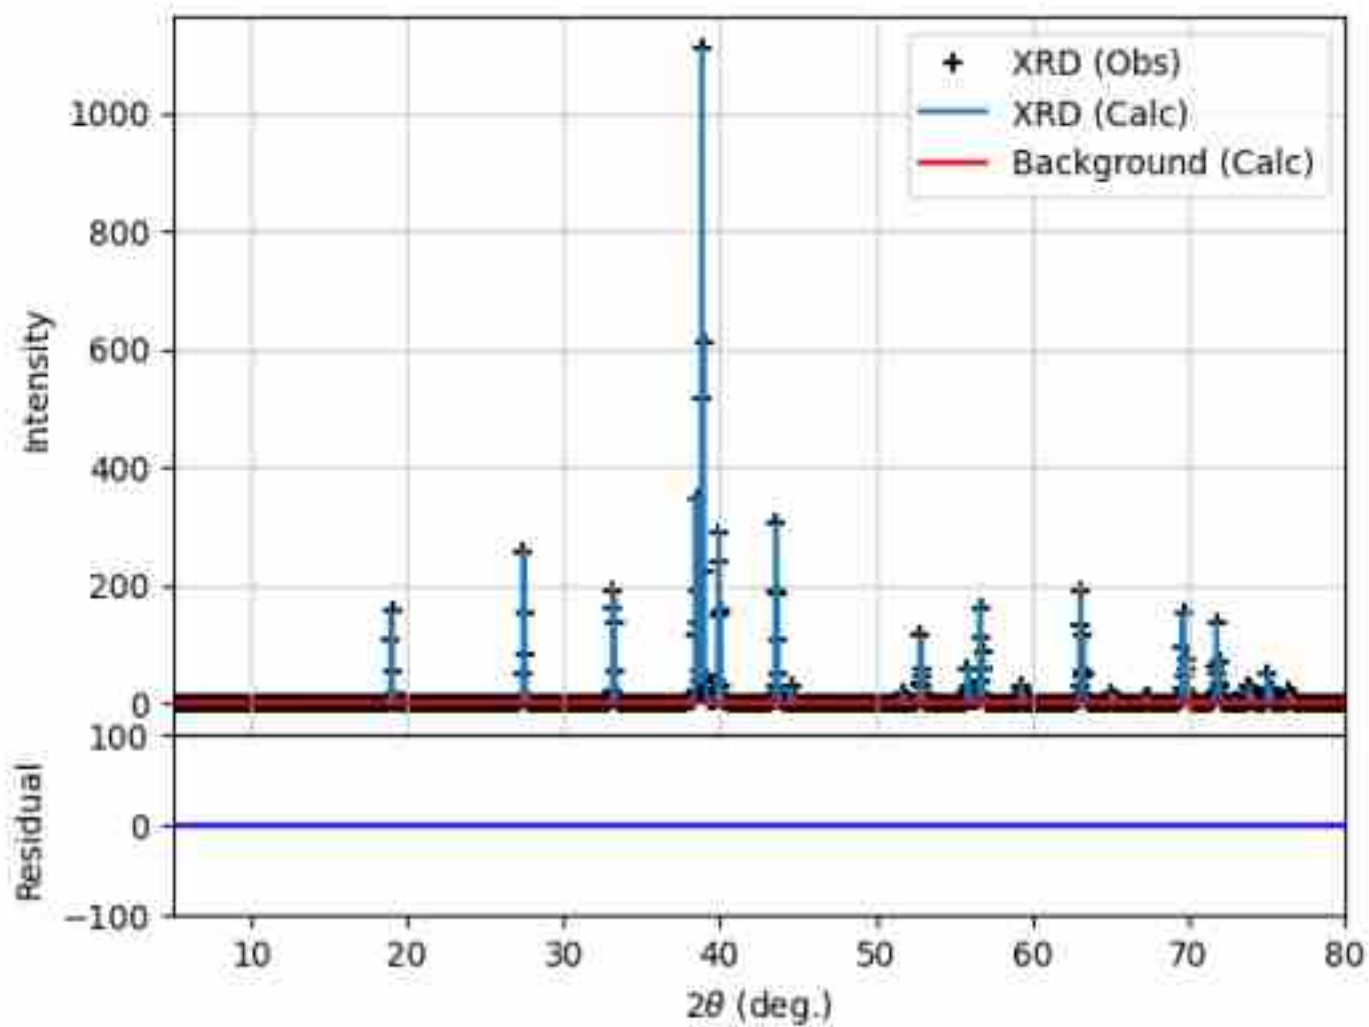

| RMSE before RR | Rwp     | RMSE after RR |
|----------------|---------|---------------|
| 0.011          | 0.00392 | 0.00053       |

# La<sub>2</sub>Ge<sub>2</sub>Ru<sub>2</sub>

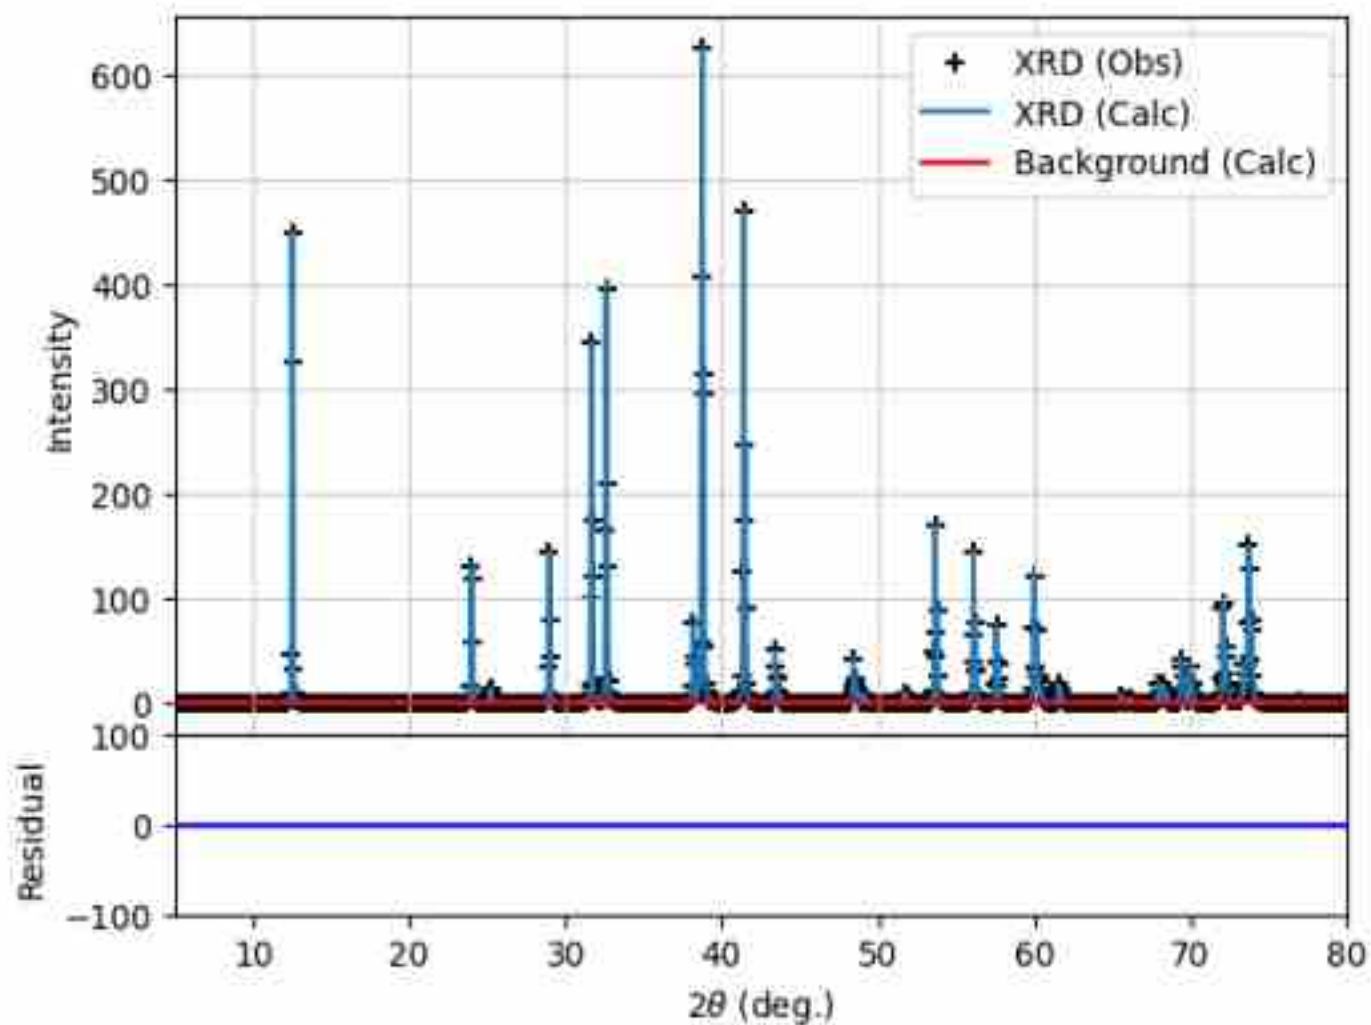

| RMSE before RR | Rwp     | RMSE after RR |
|----------------|---------|---------------|
| 0.011          | 0.00458 | 0.00092       |



# La<sub>2</sub>Ni<sub>2</sub>Sn<sub>4</sub>

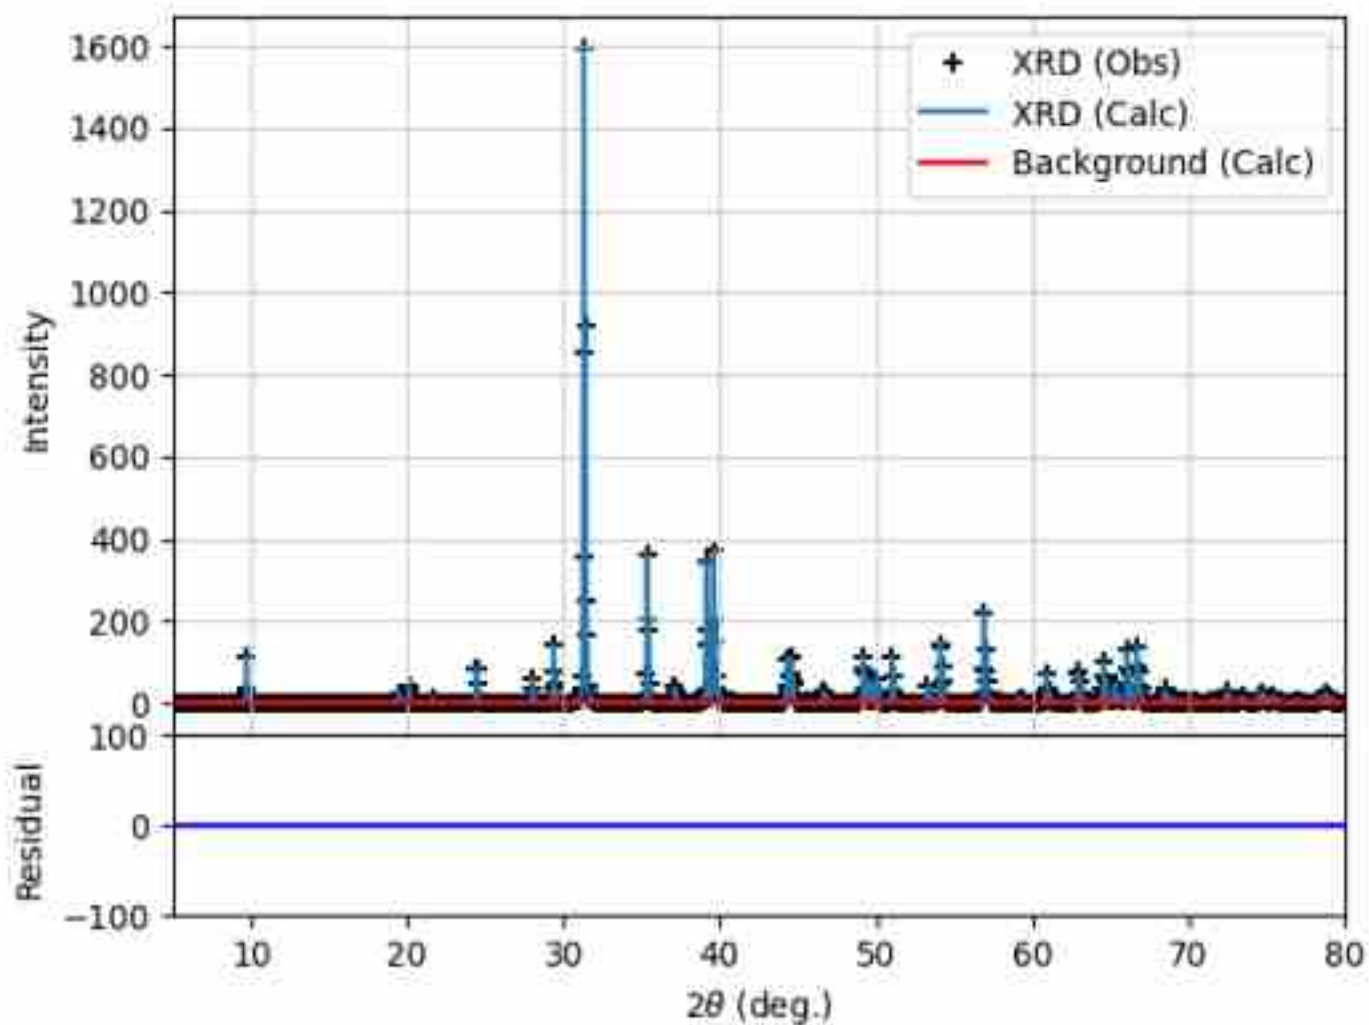

| RMSE before RR | Rwp     | RMSE after RR |
|----------------|---------|---------------|
| 0.011          | 0.00335 | 0.00032       |

# La<sub>2</sub>Sn<sub>4</sub>Rh<sub>2</sub>

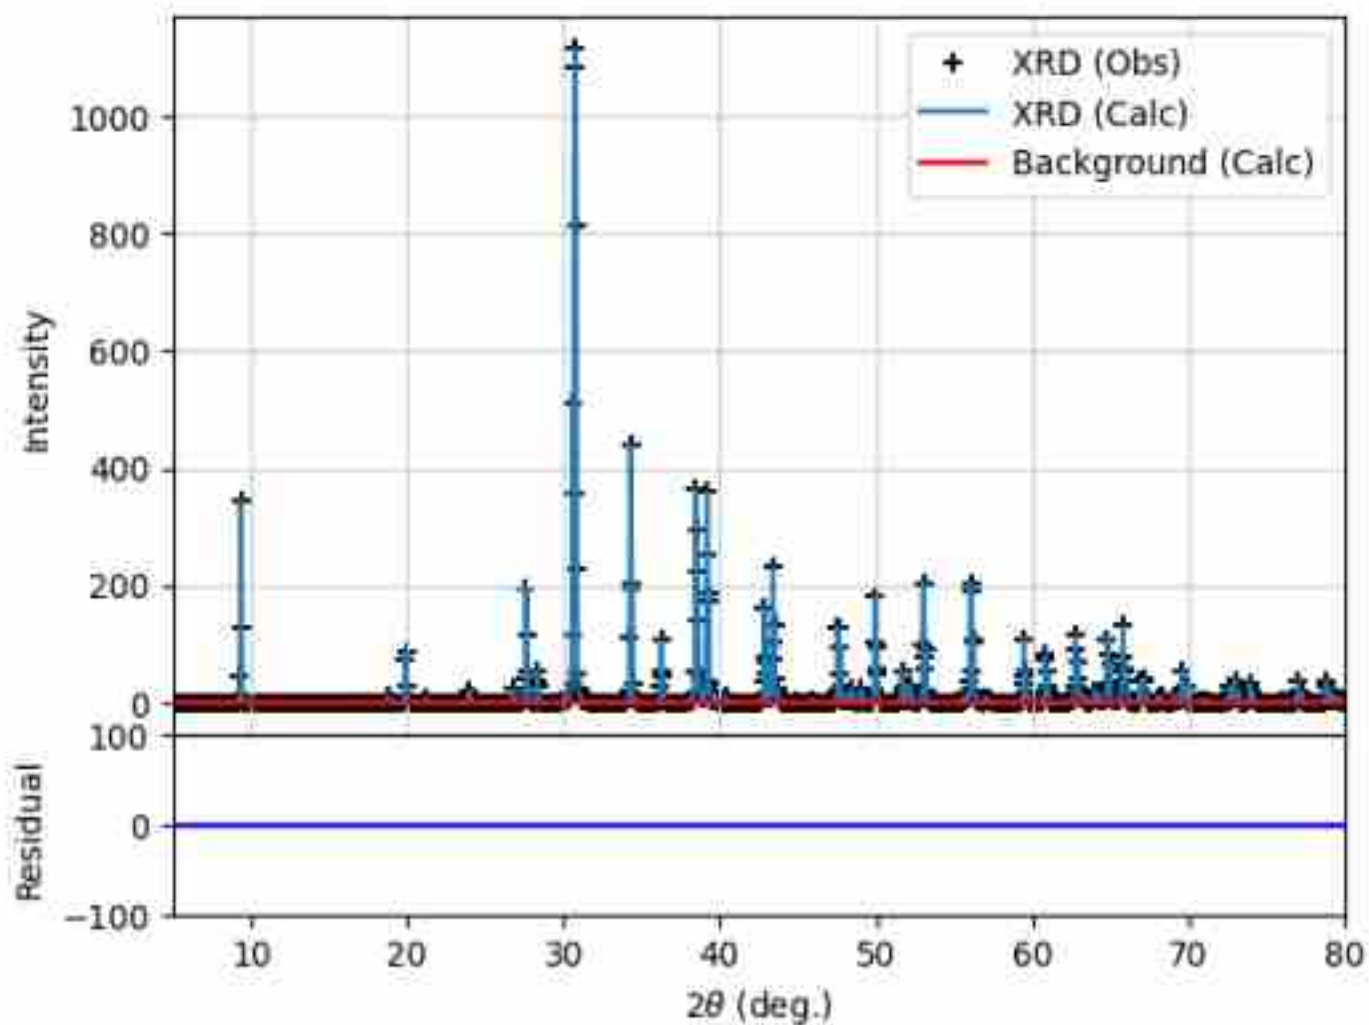

| RMSE before RR | Rwp     | RMSE after RR |
|----------------|---------|---------------|
| 0.011          | 0.00476 | 0.00056       |

# La<sub>2</sub>Y<sub>6</sub>S<sub>12</sub>

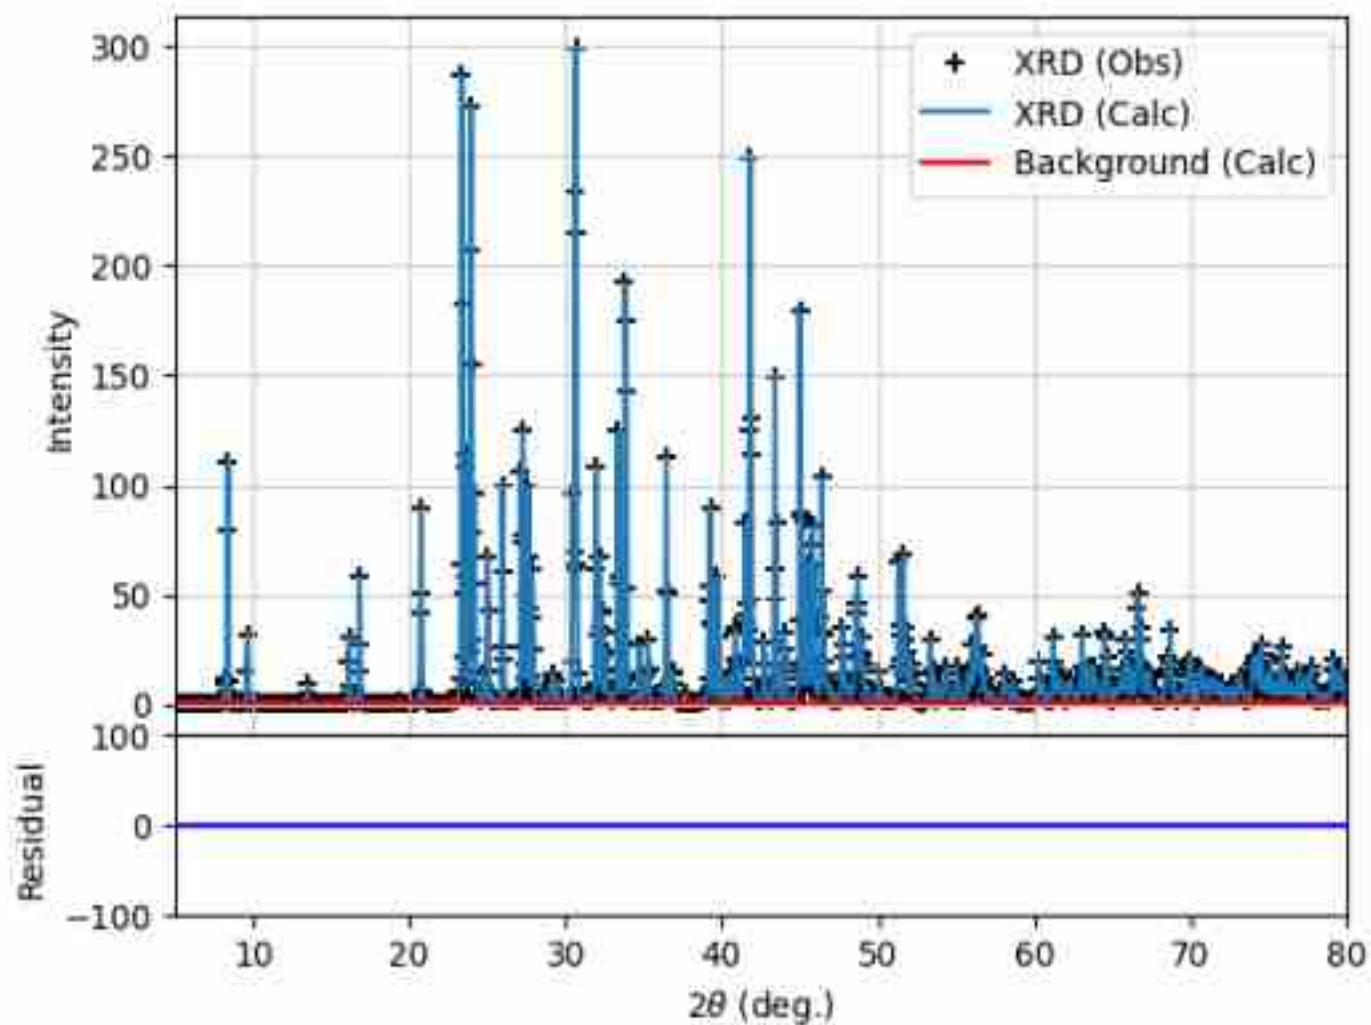

| RMSE before RR | Rwp     | RMSE after RR |
|----------------|---------|---------------|
| 0.011          | 0.00332 | 0.00039       |

# Li<sub>2</sub>Nd<sub>4</sub>Ru<sub>2</sub>O<sub>12</sub>

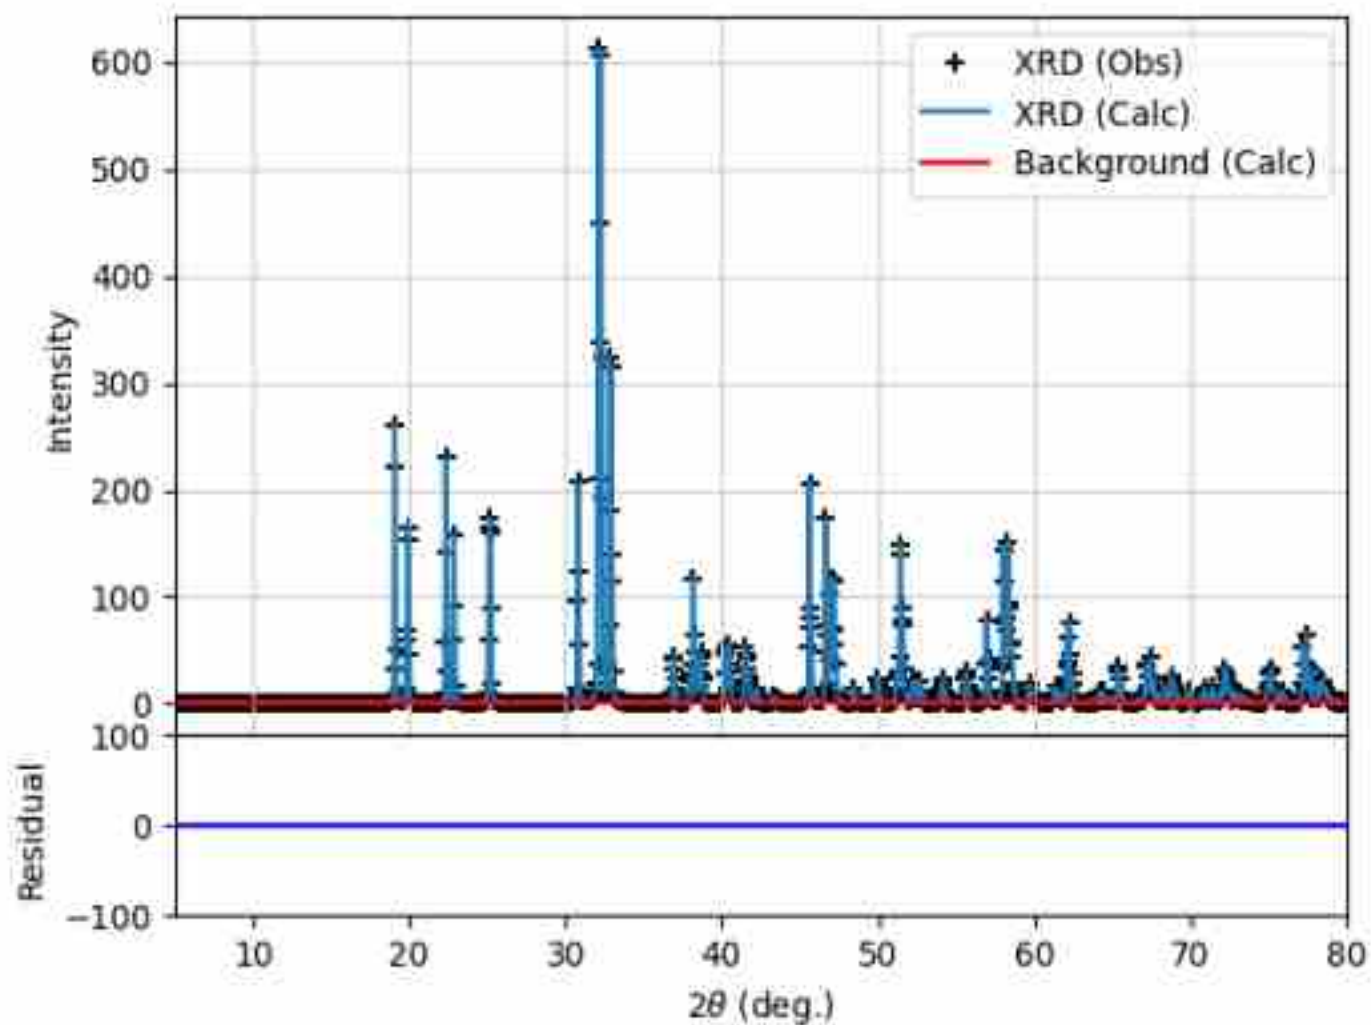

| RMSE before RR | Rwp     | RMSE after RR |
|----------------|---------|---------------|
| 0.011          | 0.00437 | 0.00127       |

# Li<sub>5</sub>Ti<sub>3</sub>O<sub>8</sub>

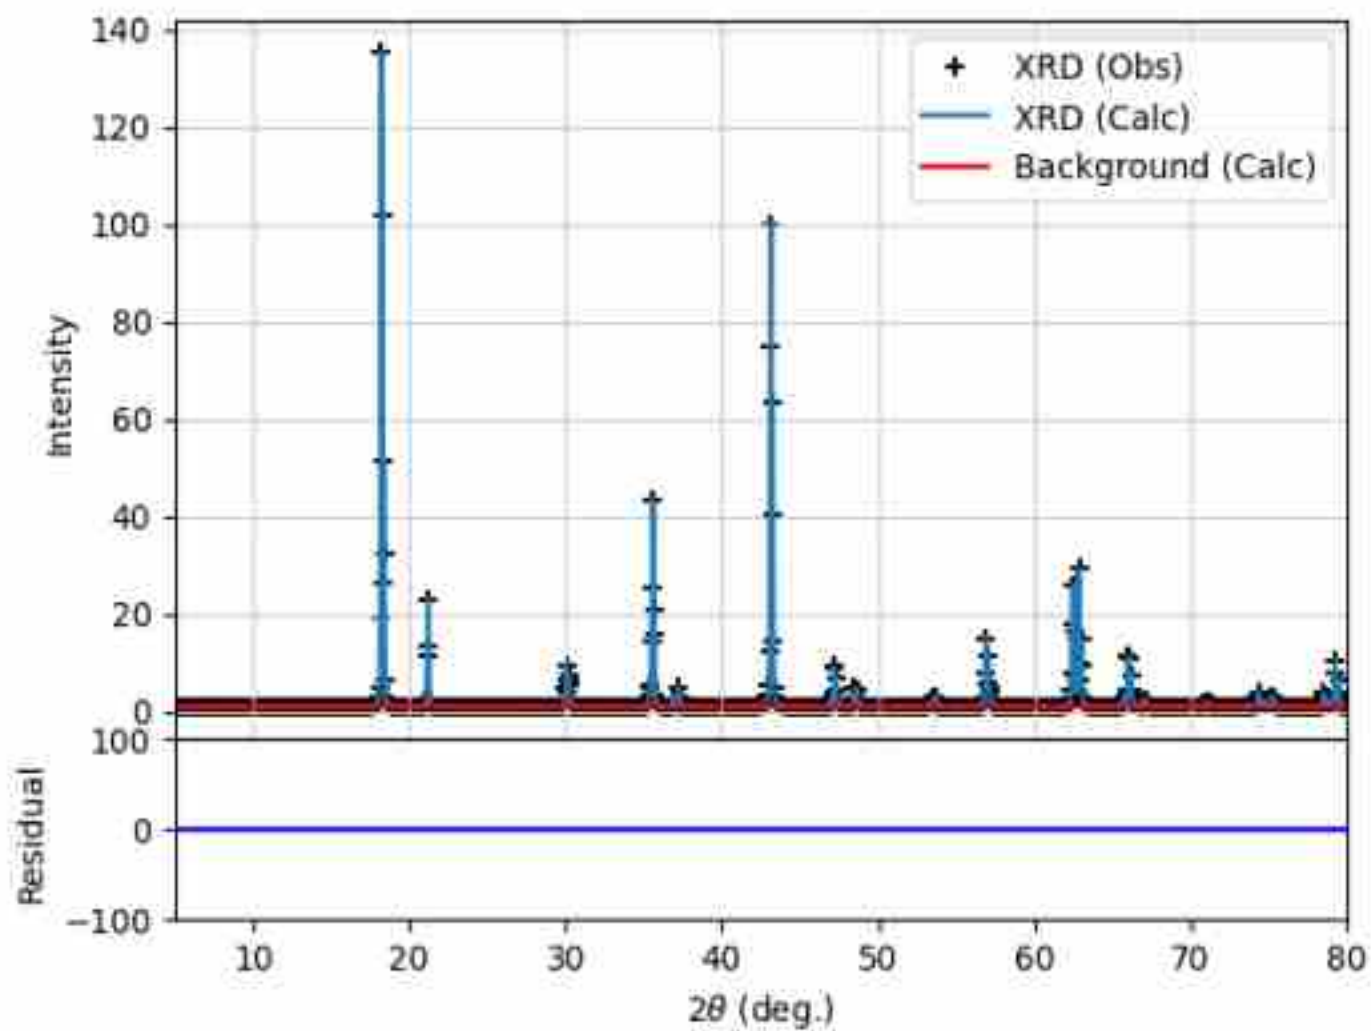

| RMSE before RR | Rwp     | RMSE after RR |
|----------------|---------|---------------|
| 0.011          | 0.00507 | 0.00192       |

# Lu<sub>2</sub>Ni<sub>2</sub>Ge<sub>4</sub>

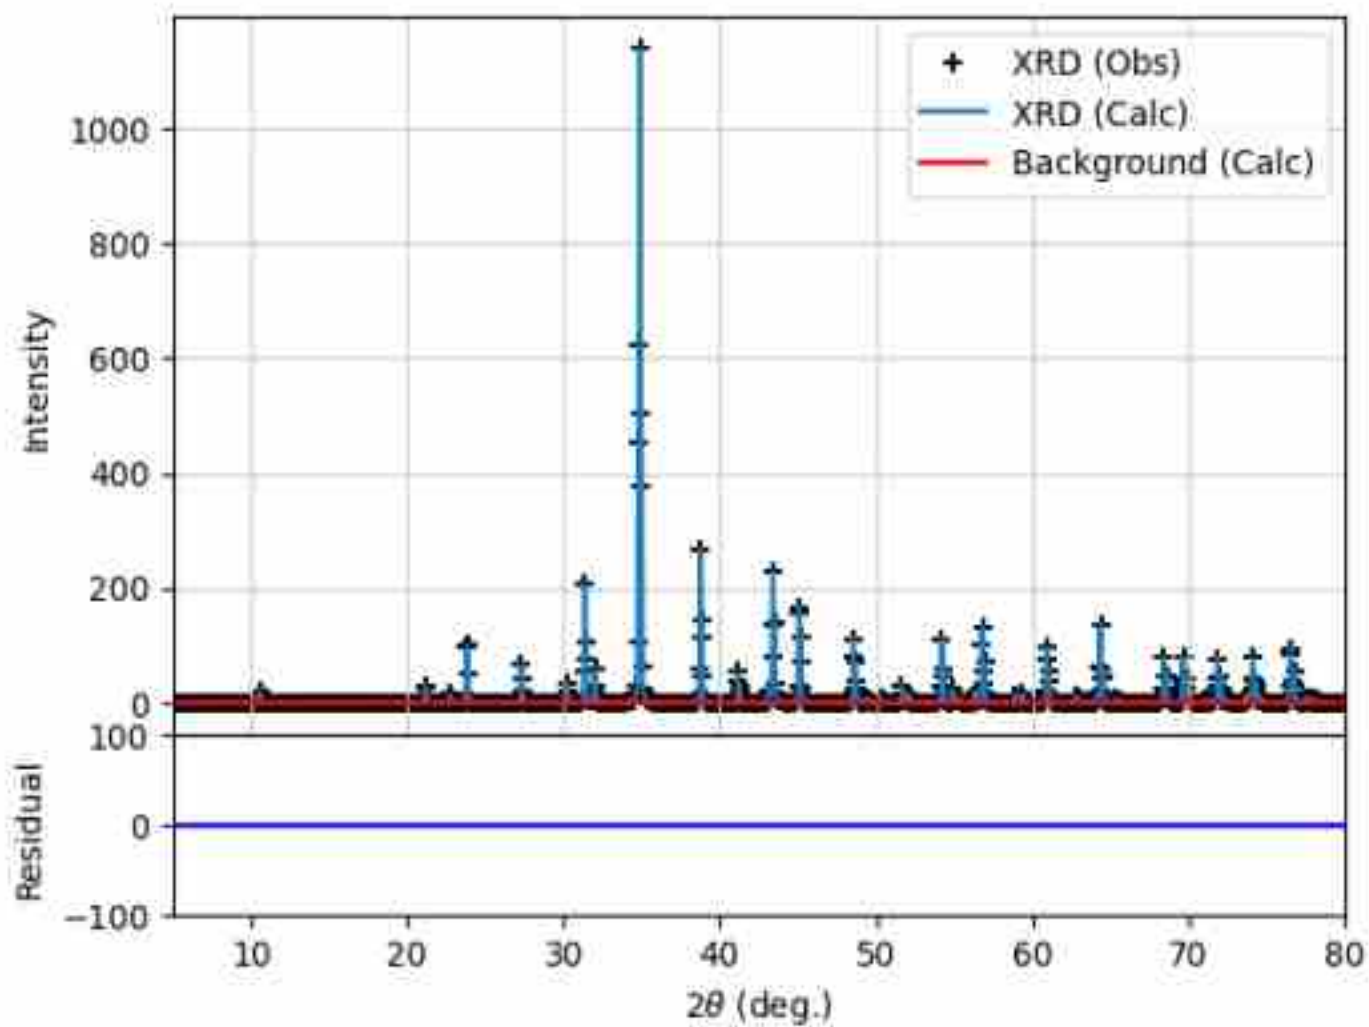

| RMSE before RR | Rwp     | RMSE after RR |
|----------------|---------|---------------|
| 0.011          | 0.00399 | 0.00042       |

# Lu<sub>4</sub>Al<sub>4</sub>Fe<sub>4</sub>

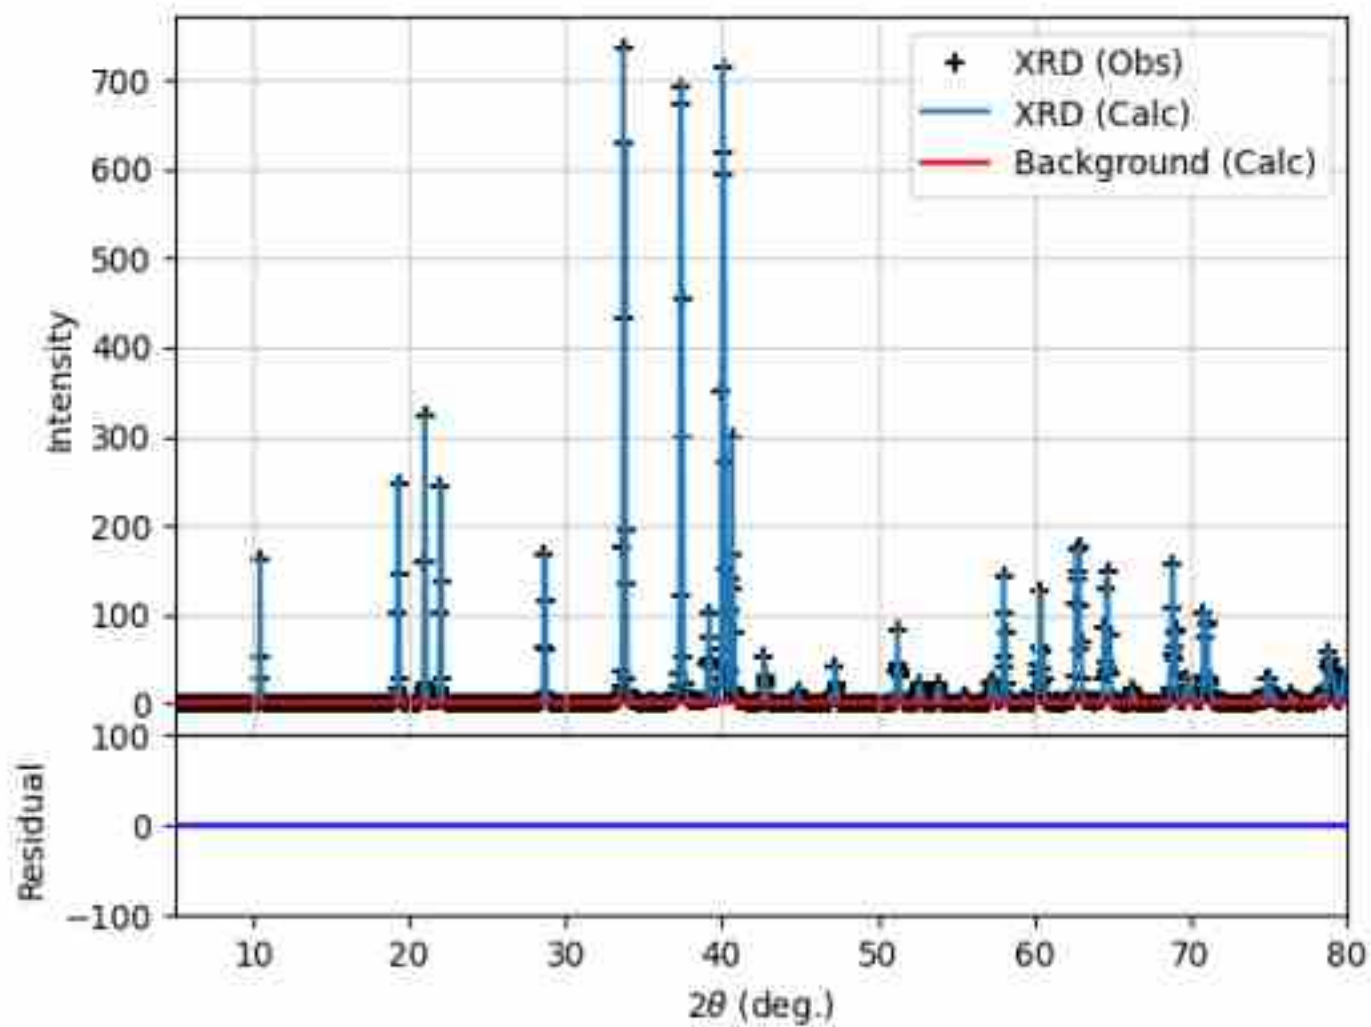

| RMSE before RR | Rwp    | RMSE after RR |
|----------------|--------|---------------|
| 0.011          | 0.0042 | 0.00104       |

# Mg<sub>1</sub>Ni<sub>6</sub>Ge<sub>6</sub>

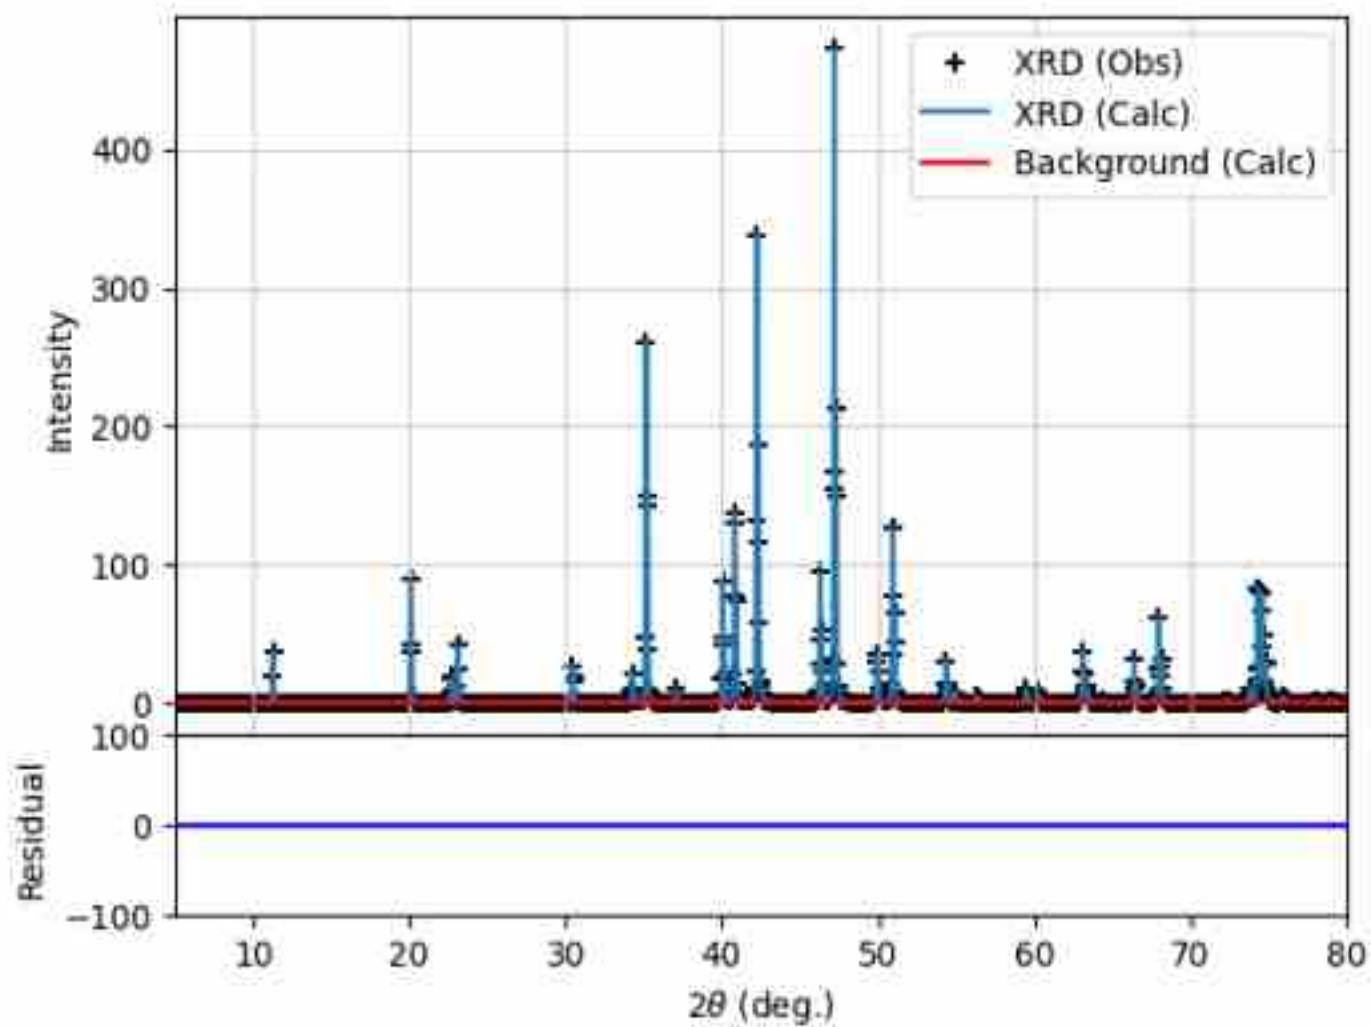

| RMSE before RR | Rwp     | RMSE after RR |
|----------------|---------|---------------|
| 0.011          | 0.00267 | 0.00046       |



# Mg1Pb5

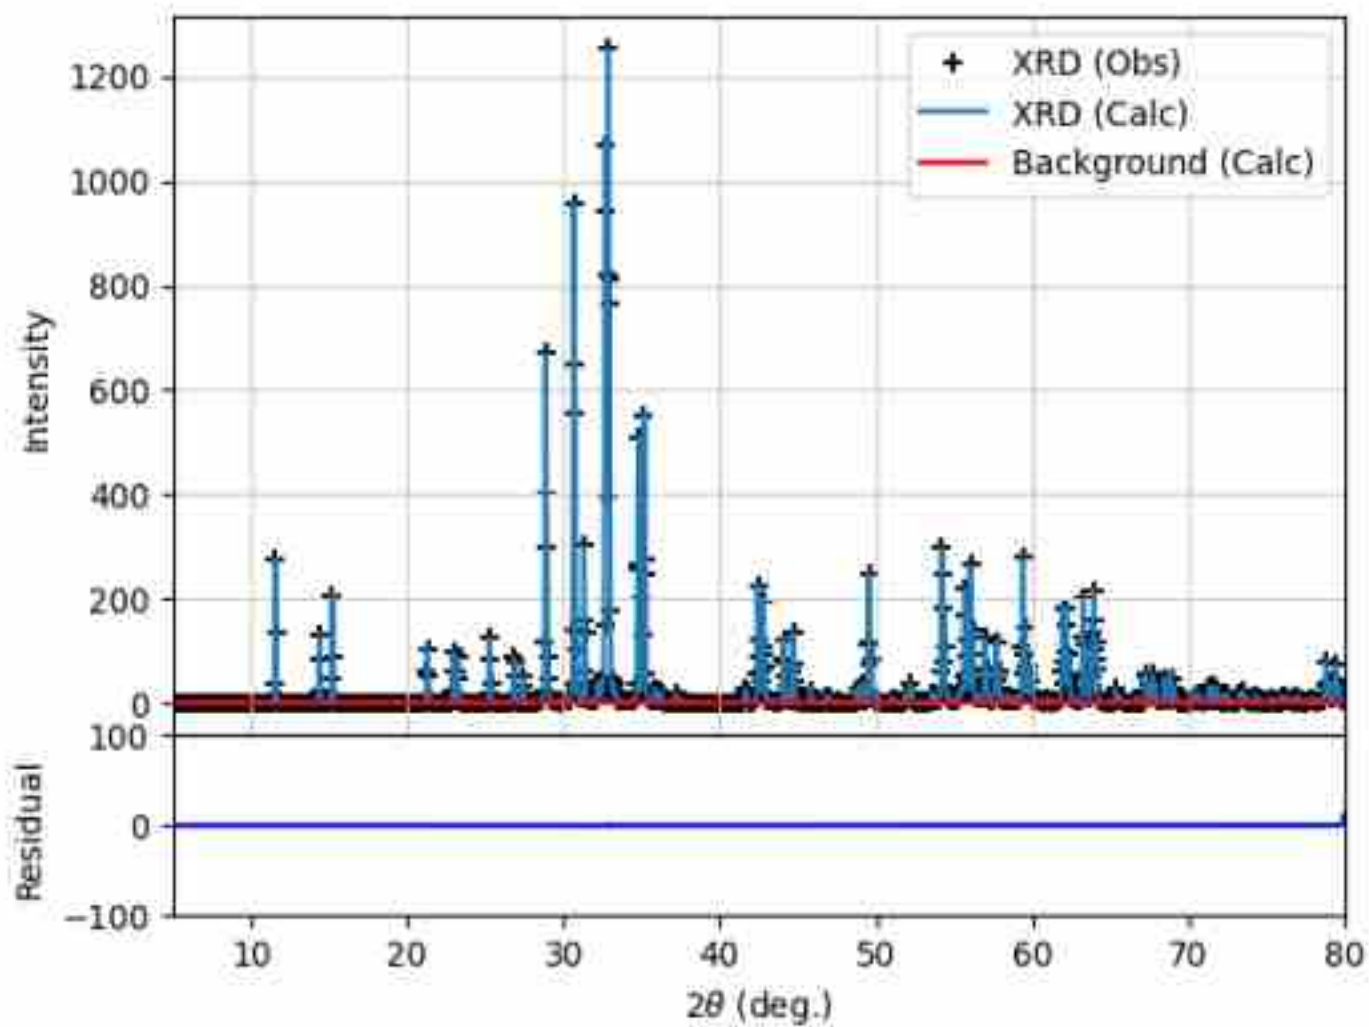

| RMSE before RR | Rwp     | RMSE after RR |
|----------------|---------|---------------|
| 0.011          | 2.59839 | 0.0015        |

# Mg<sub>1</sub>Zn<sub>3</sub>S<sub>4</sub>

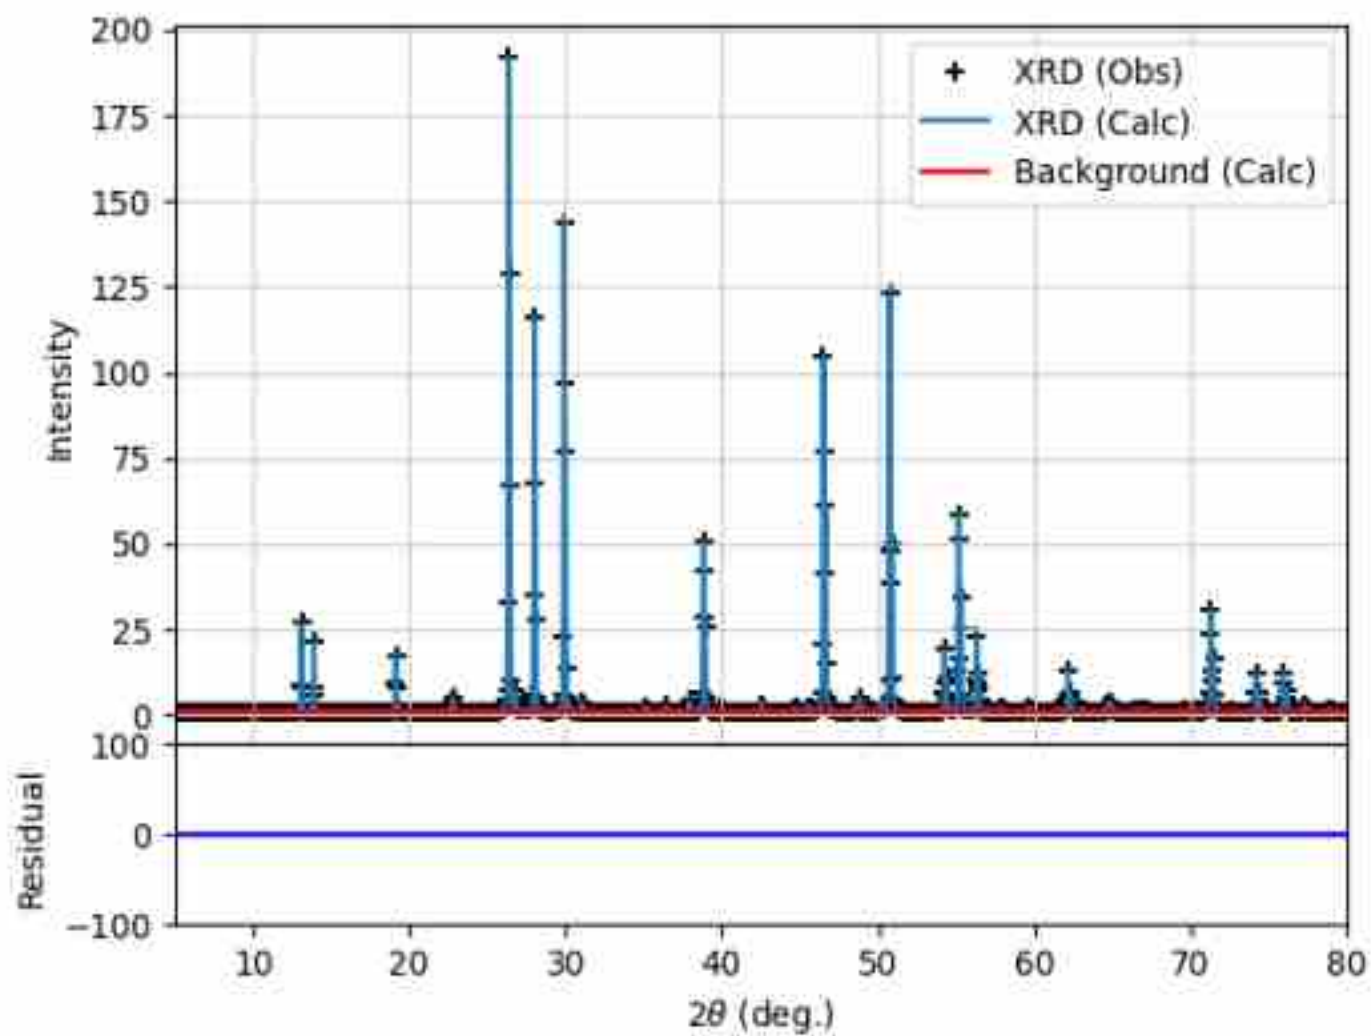

| RMSE before RR | Rwp     | RMSE after RR |
|----------------|---------|---------------|
| 0.011          | 0.00168 | 0.00016       |

# Mg<sub>2</sub>Ge<sub>2</sub>O<sub>6</sub>

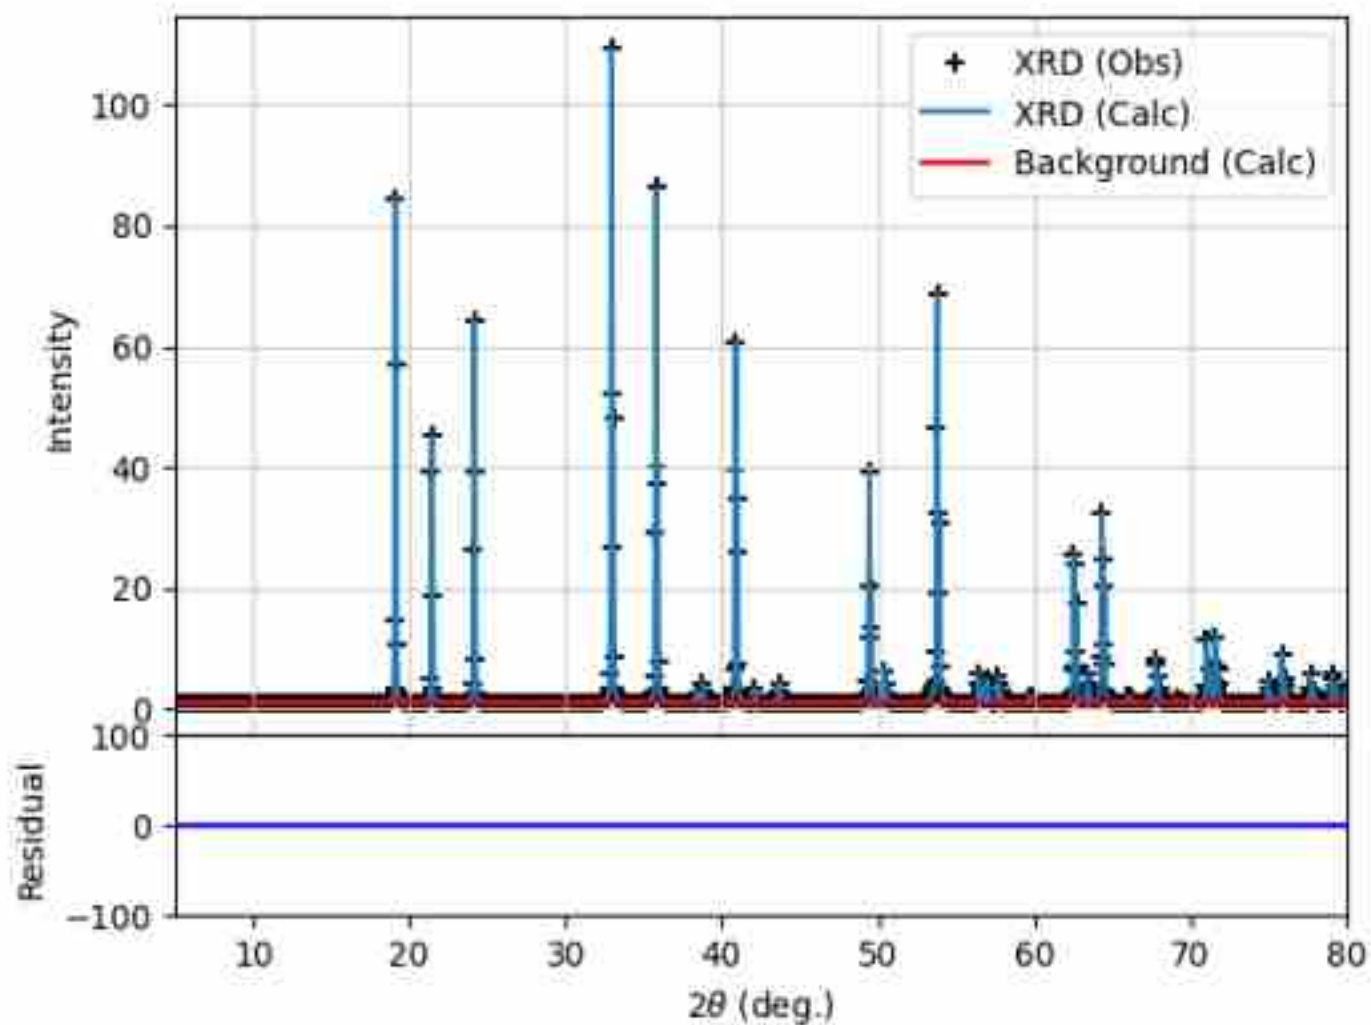

| RMSE before RR | Rwp     | RMSE after RR |
|----------------|---------|---------------|
| 0.011          | 0.00258 | 0.00091       |

# Mg<sub>3</sub>Zn<sub>3</sub>

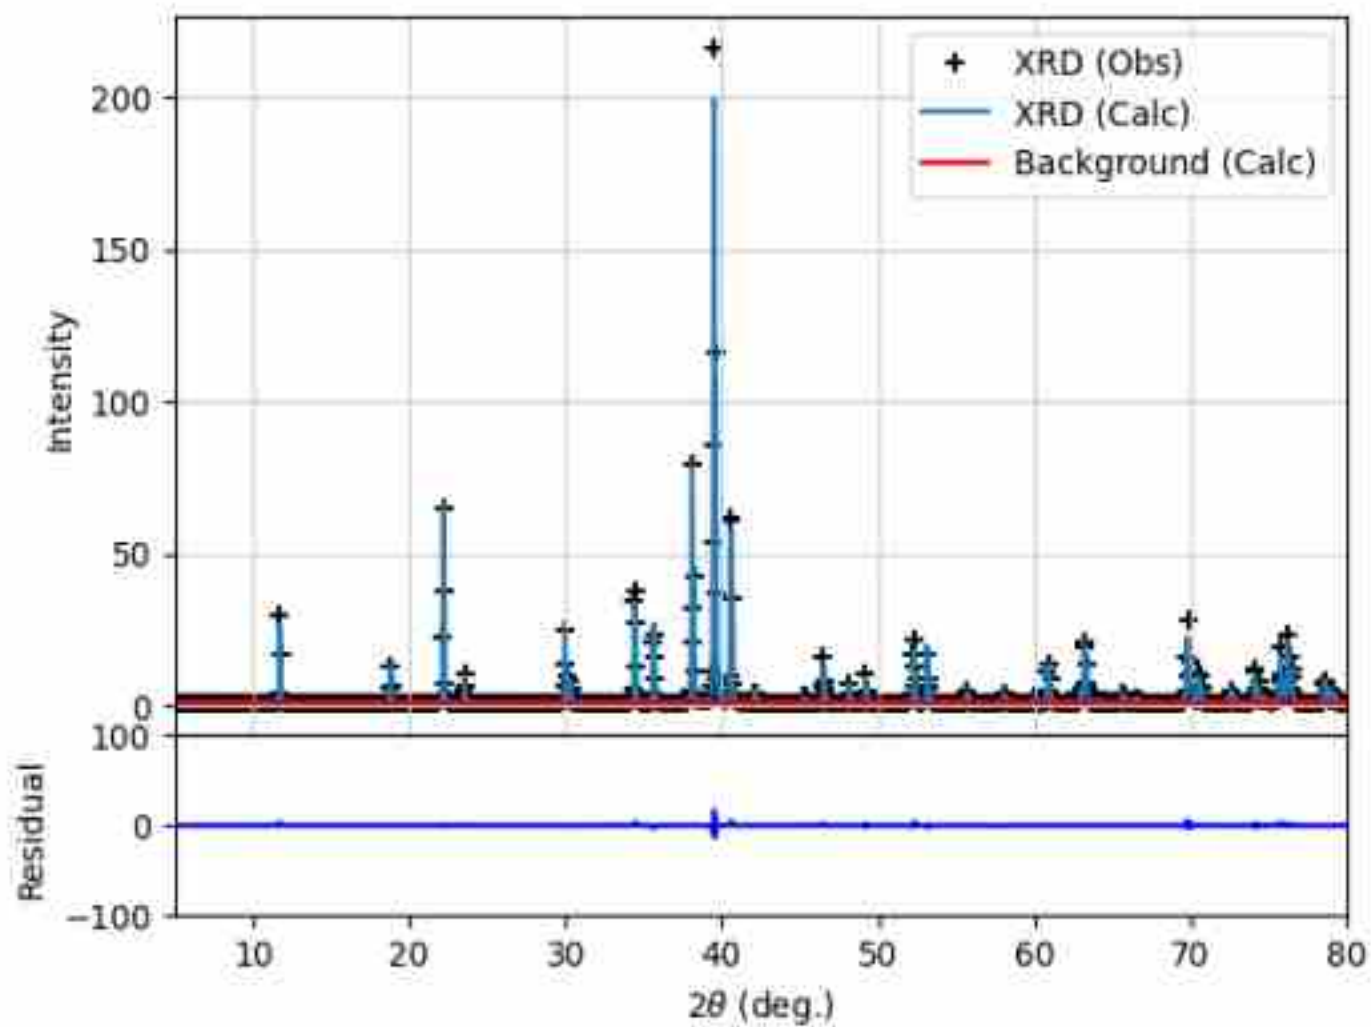

| RMSE before RR | Rwp     | RMSE after RR |
|----------------|---------|---------------|
| 0.011          | 7.65569 | 0.01064       |

# Mg5Cu1

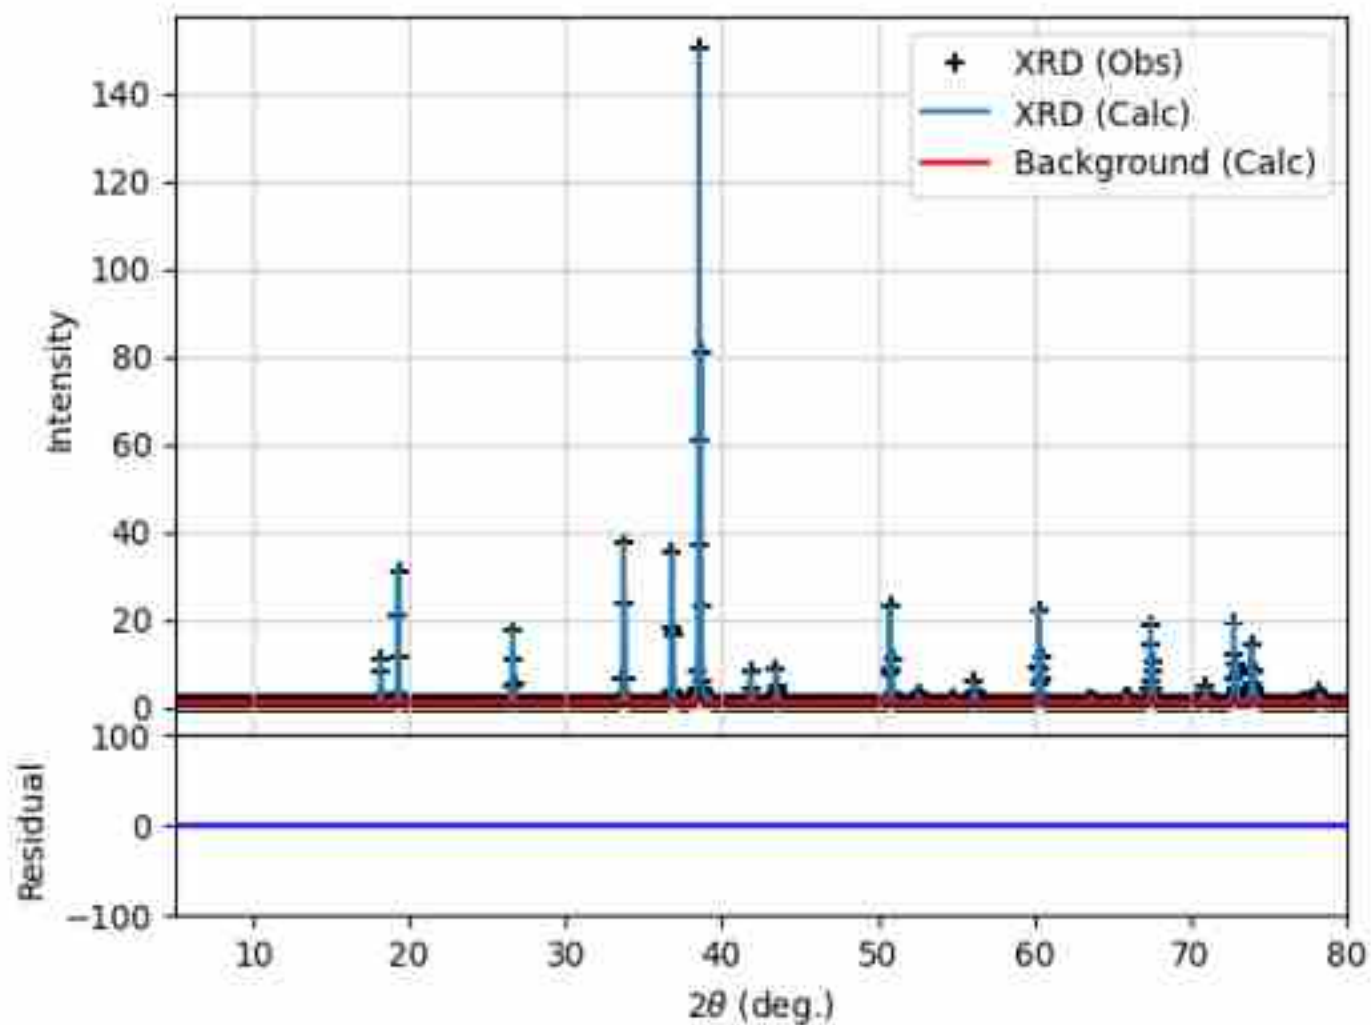

| RMSE before RR | Rwp     | RMSE after RR |
|----------------|---------|---------------|
| 0.011          | 0.03884 | 0.00401       |

# Mg5Ga1

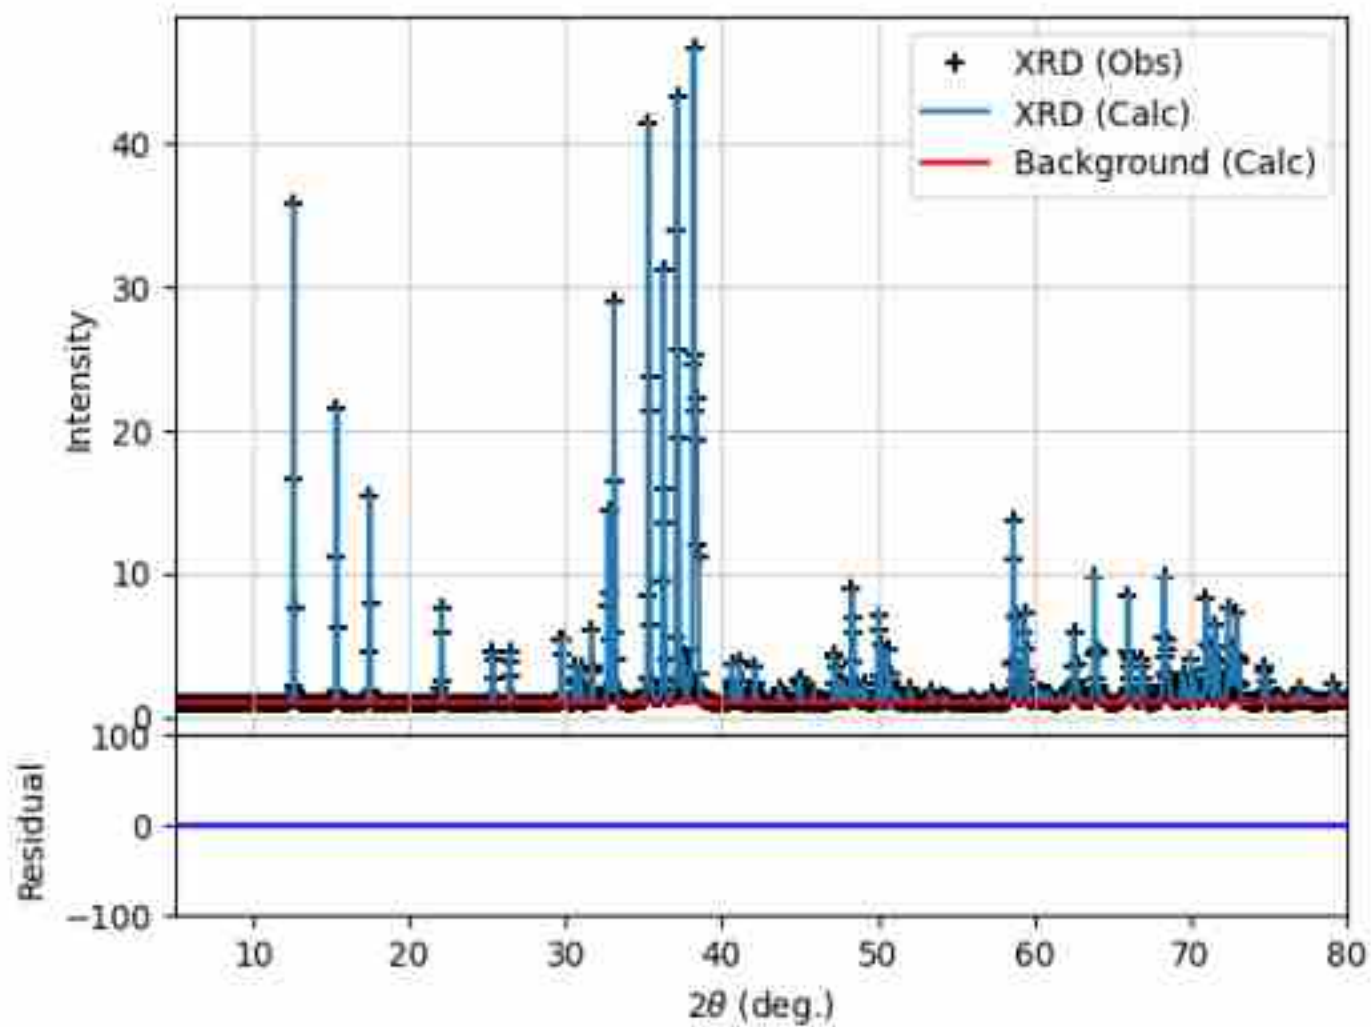

| RMSE before RR | Rwp    | RMSE after RR |
|----------------|--------|---------------|
| 0.011          | 0.0025 | 0.00034       |

# Mn1Co1Pt2

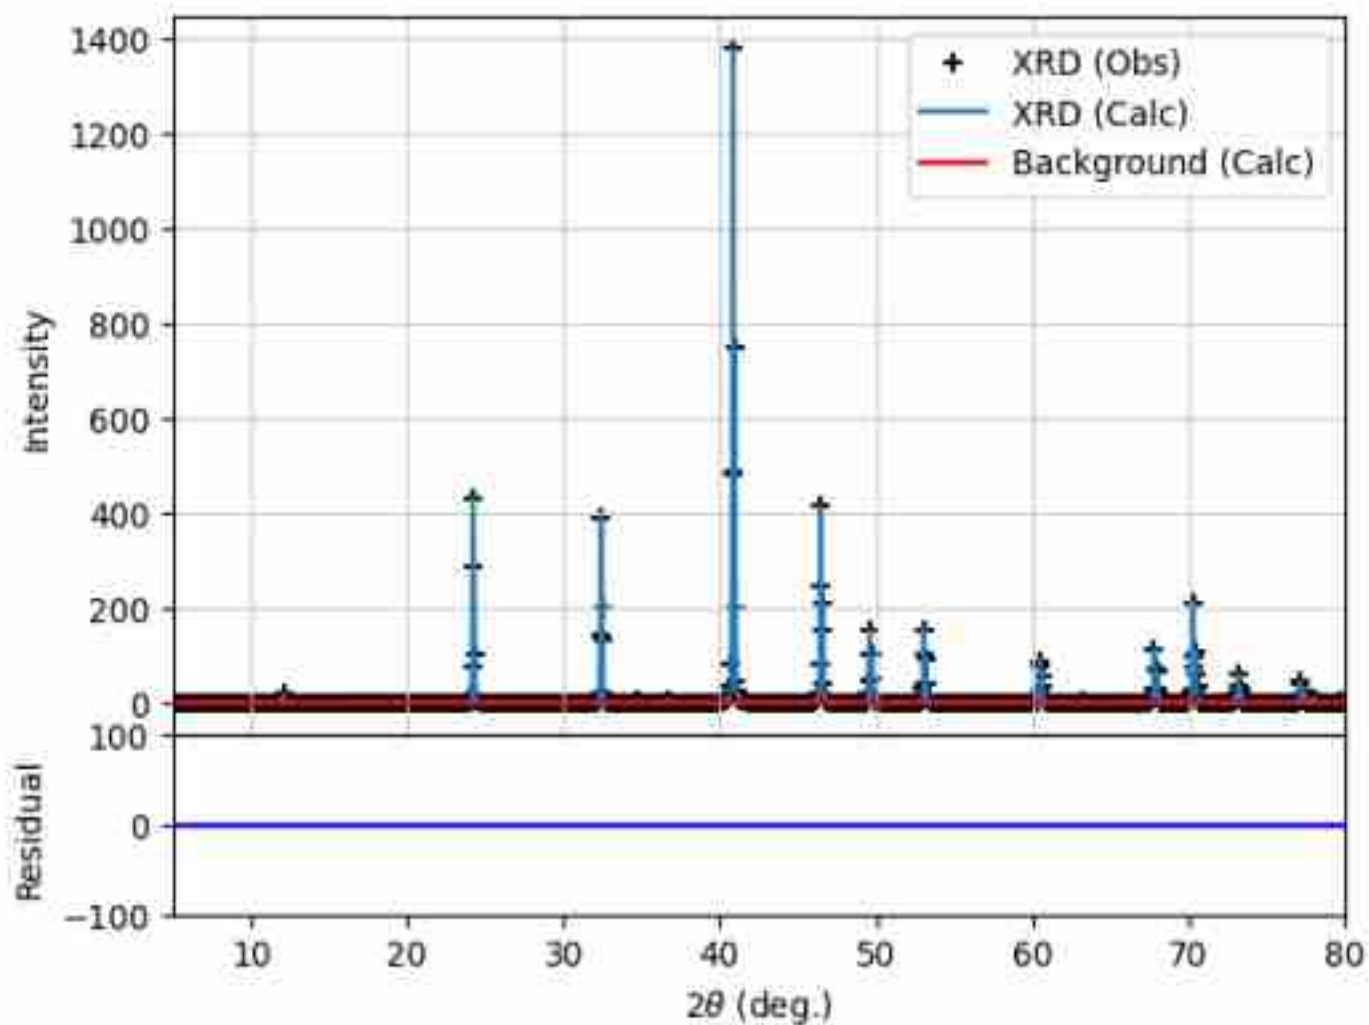

| RMSE before RR | Rwp     | RMSE after RR |
|----------------|---------|---------------|
| 0.011          | 0.01811 | 0.00099       |

# Mn<sub>2</sub>Al<sub>2</sub>O<sub>8</sub>

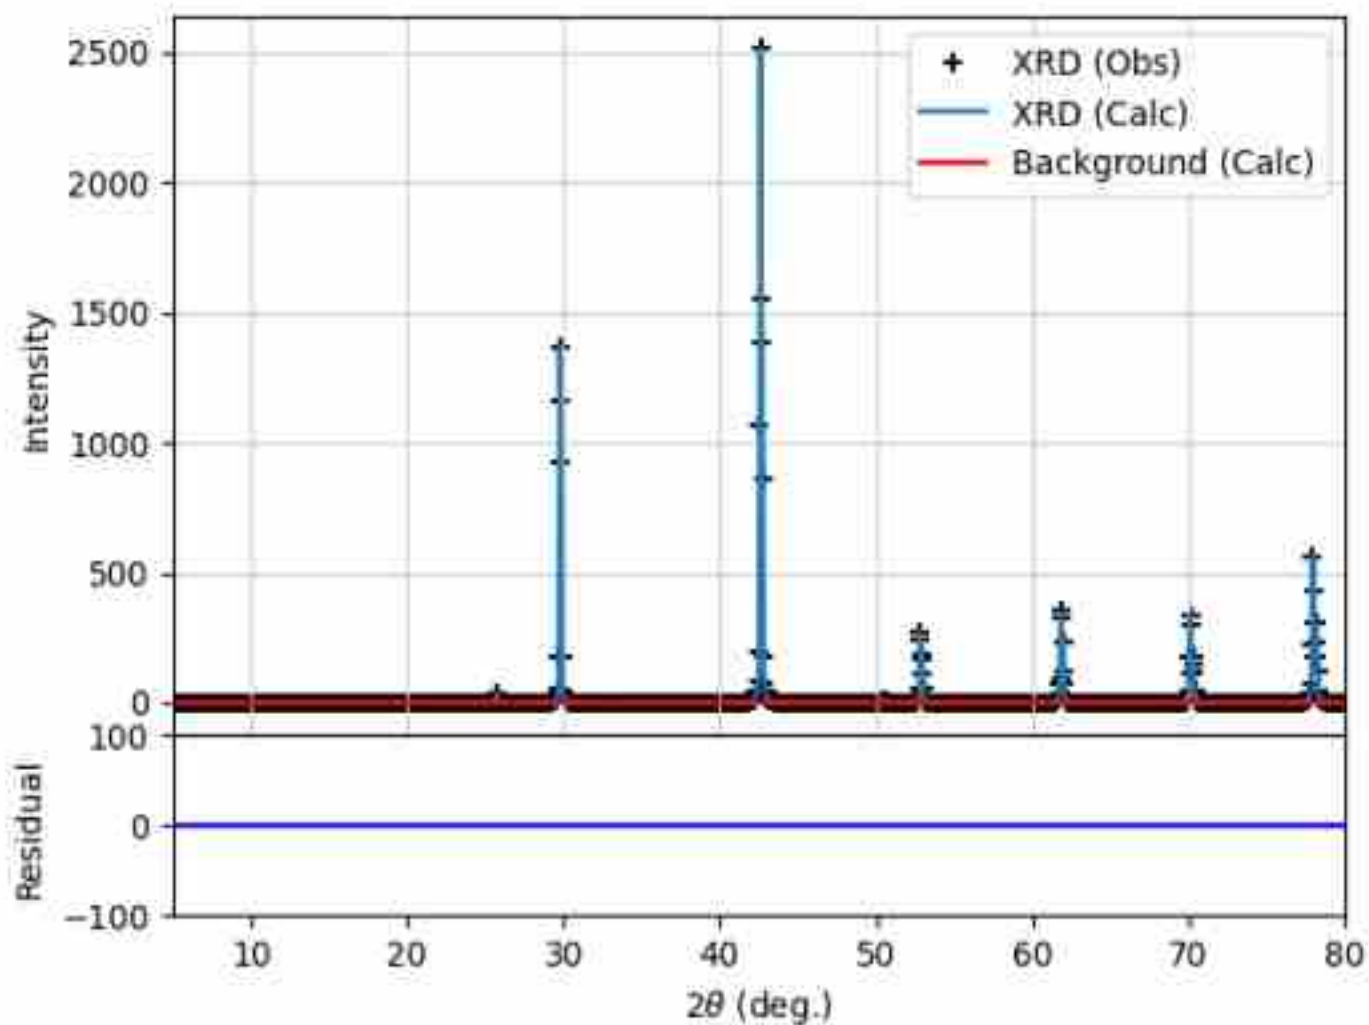

| RMSE before RR | Rwp     | RMSE after RR |
|----------------|---------|---------------|
| 0.011          | 0.01679 | 0.00169       |



# Mn<sub>2</sub>In<sub>1</sub>Ag<sub>1</sub>Te<sub>4</sub>

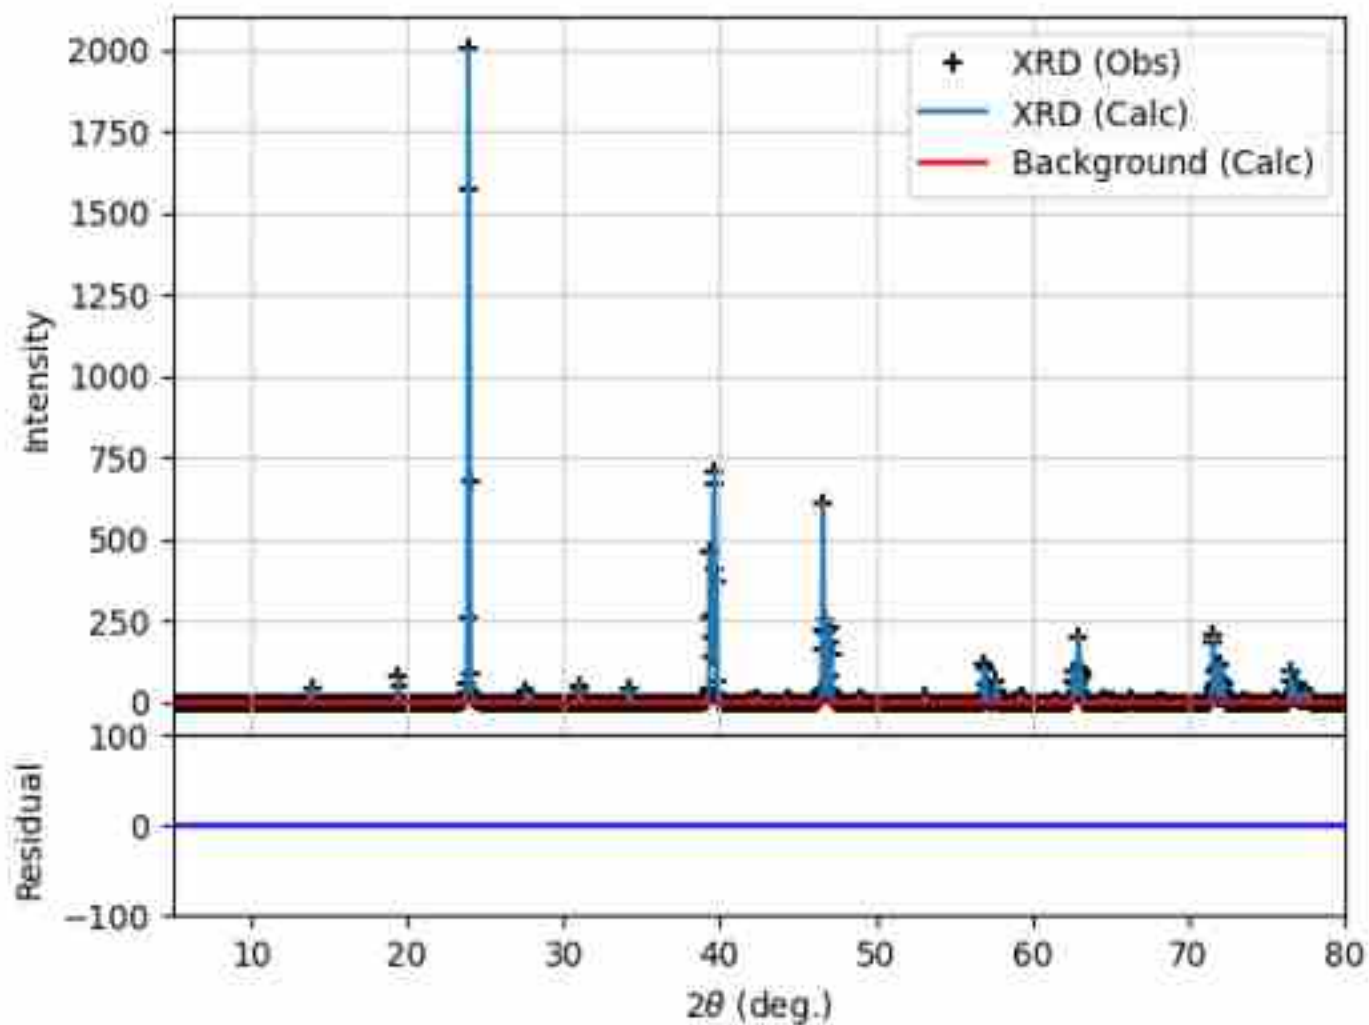

| RMSE before RR | Rwp     | RMSE after RR |
|----------------|---------|---------------|
| 0.011          | 0.00449 | 0.0003        |

# Mn<sub>2</sub>N<sub>1</sub>

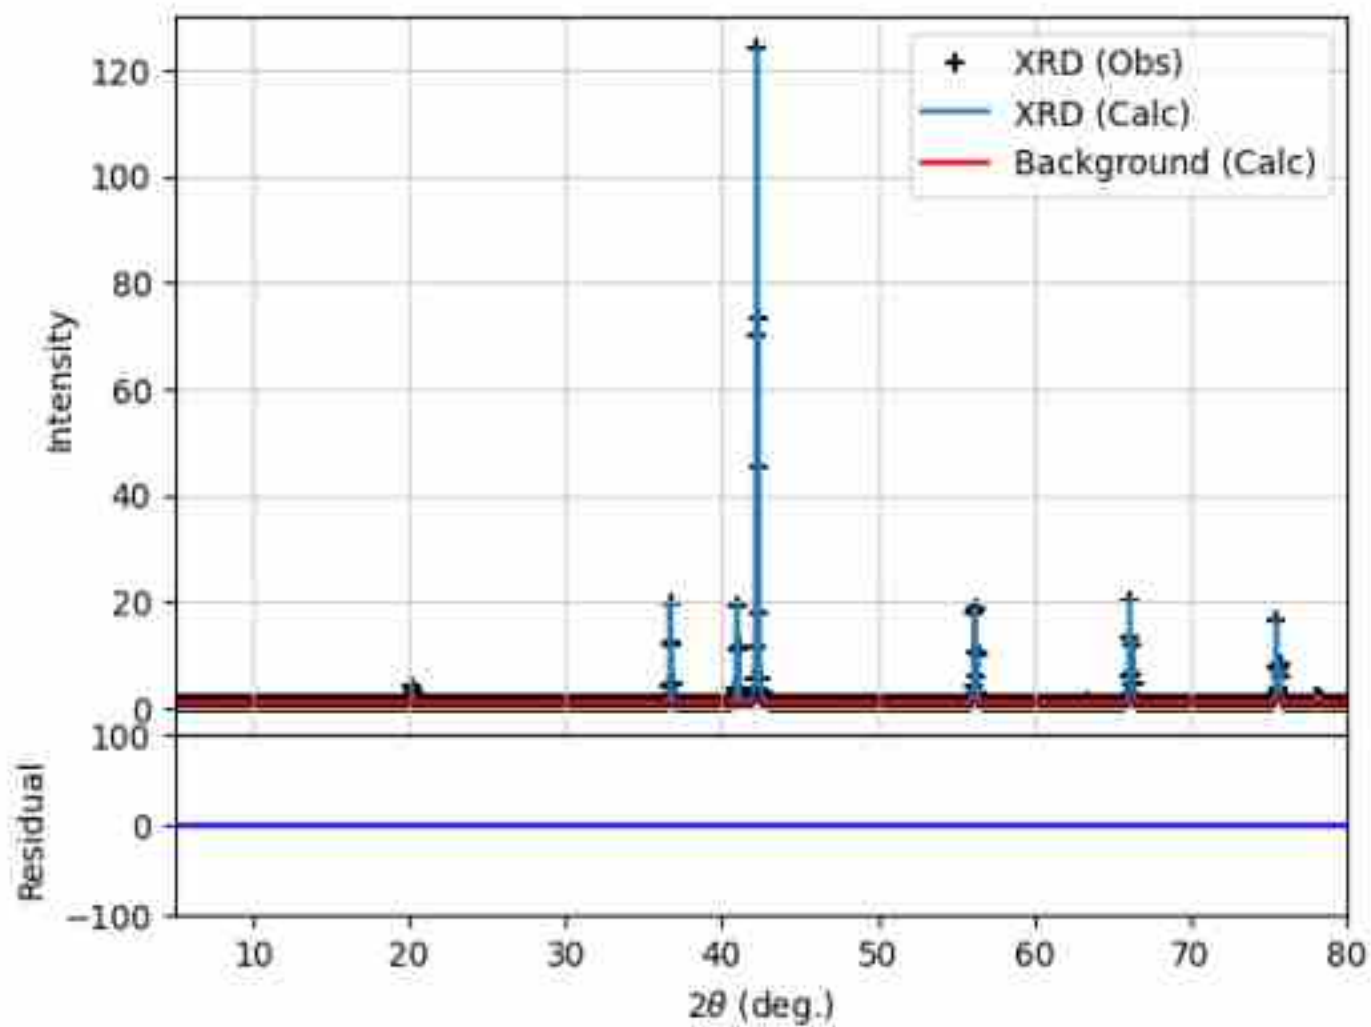

| RMSE before RR | Rwp     | RMSE after RR |
|----------------|---------|---------------|
| 0.011          | 0.00295 | 0.00137       |

# Mn<sub>2</sub>Pd<sub>6</sub>

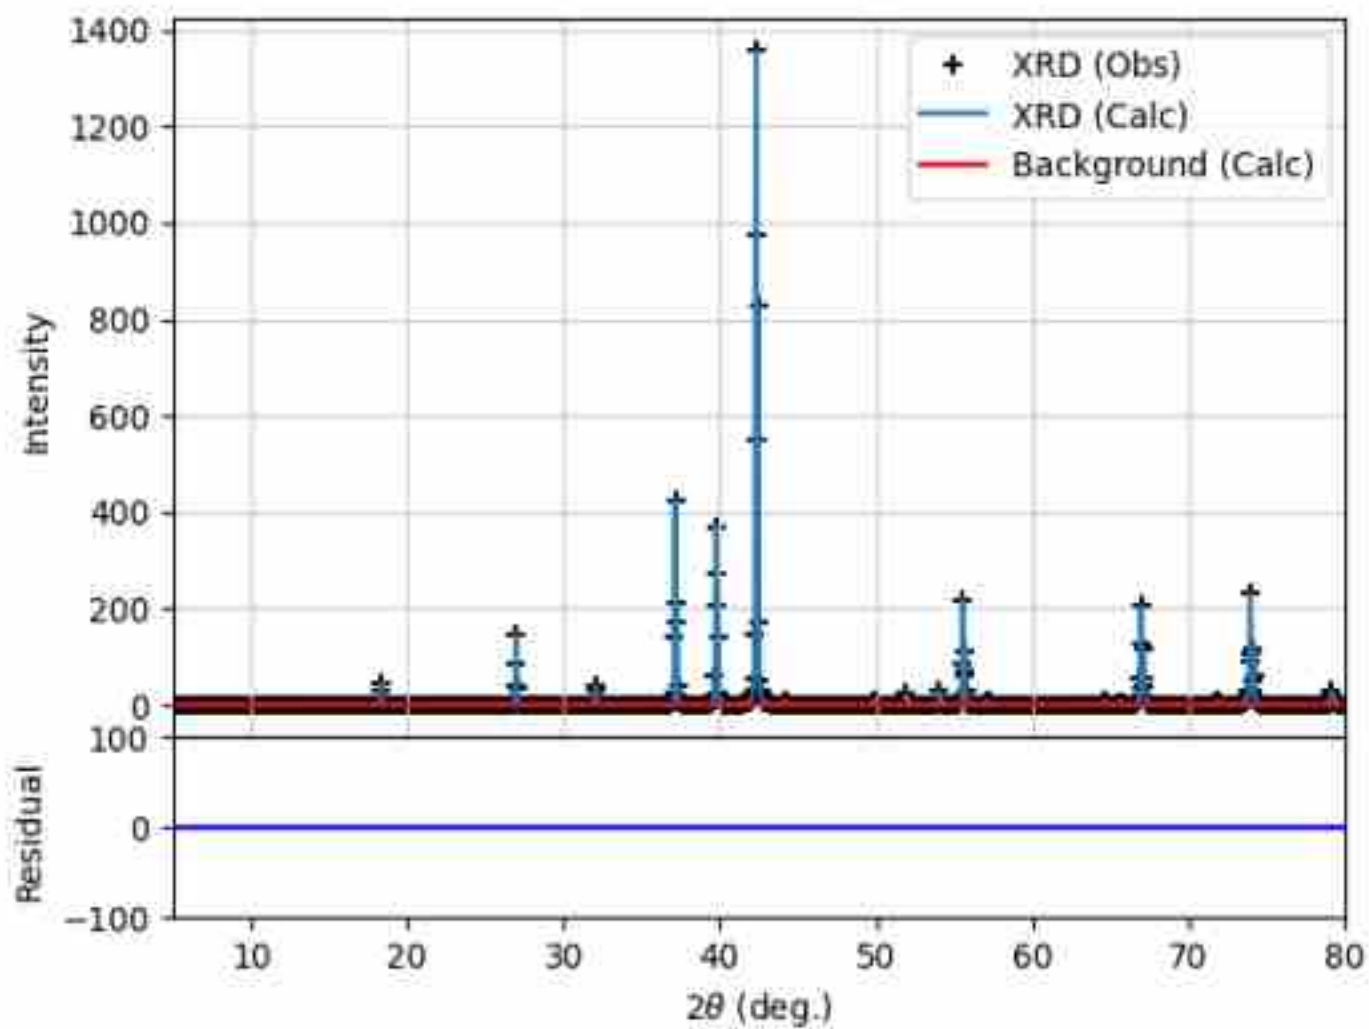

| RMSE before RR | Rwp  | RMSE after RR |
|----------------|------|---------------|
| 0.011          | 0.05 | 0.00211       |

# Mn<sub>3</sub>Si

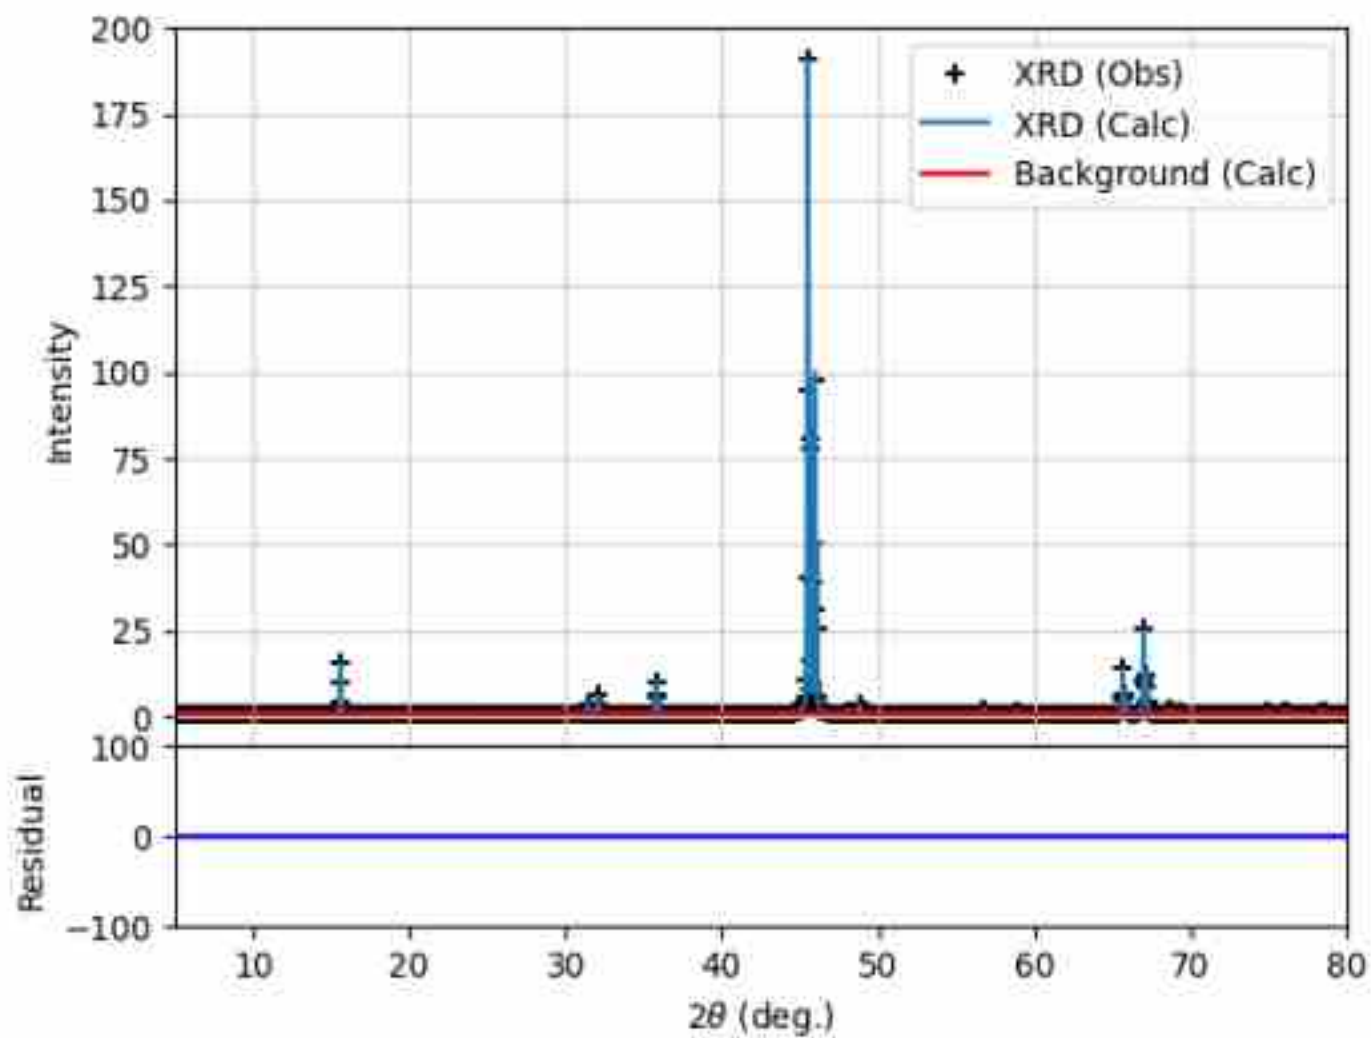

| RMSE before RR | Rwp     | RMSE after RR |
|----------------|---------|---------------|
| 0.011          | 0.00369 | 0.00063       |

# Na1Ce1O2

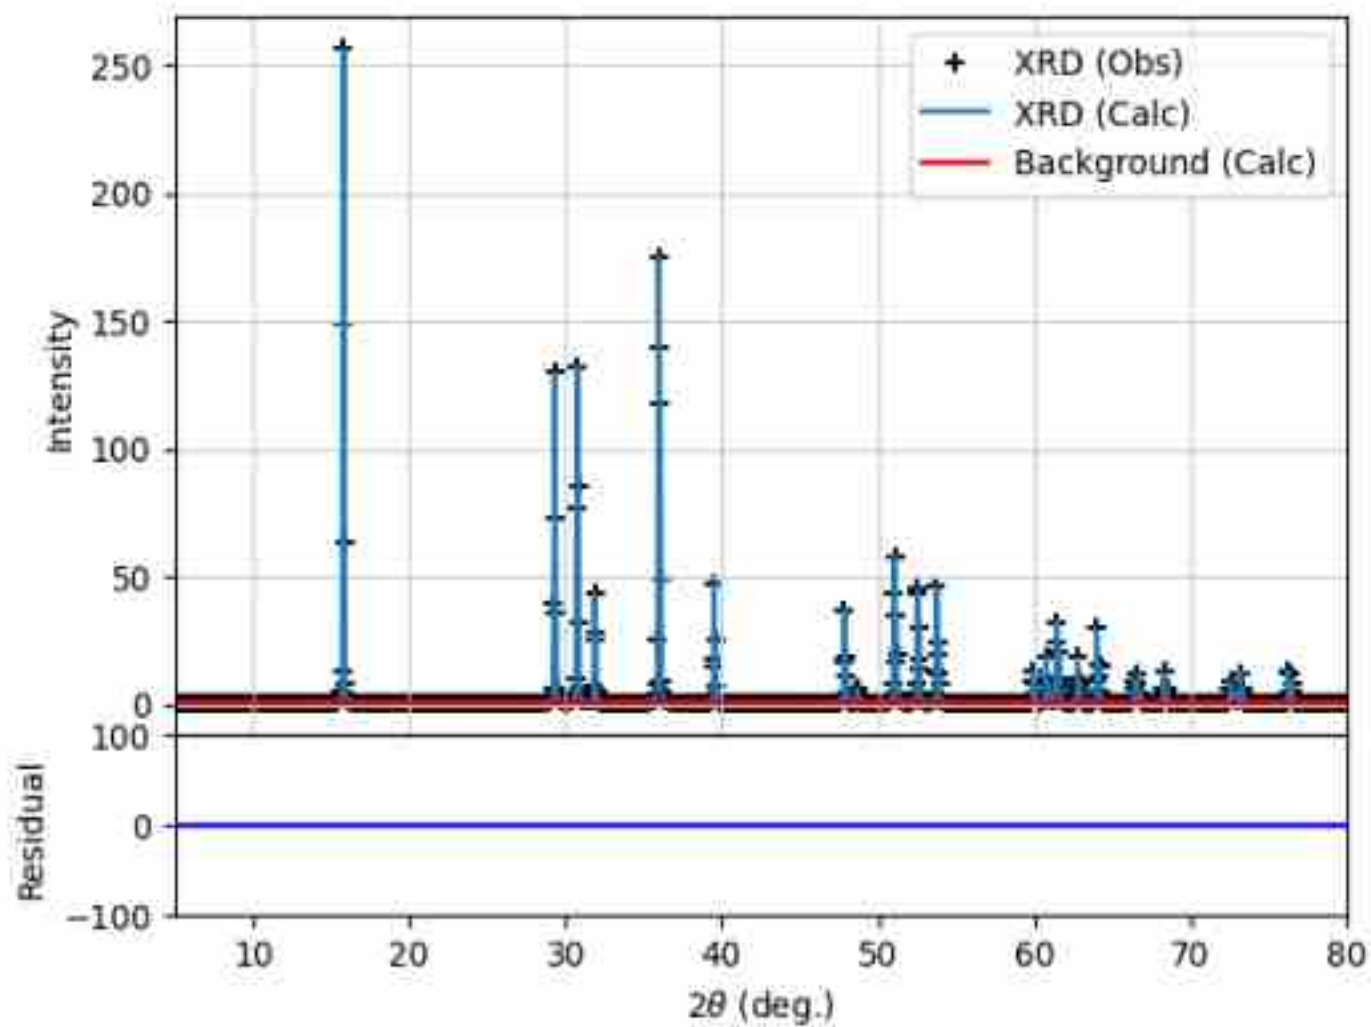

| RMSE before RR | Rwp     | RMSE after RR |
|----------------|---------|---------------|
| 0.011          | 0.00279 | 0.00083       |

# Na1Fe1Cu1Se2

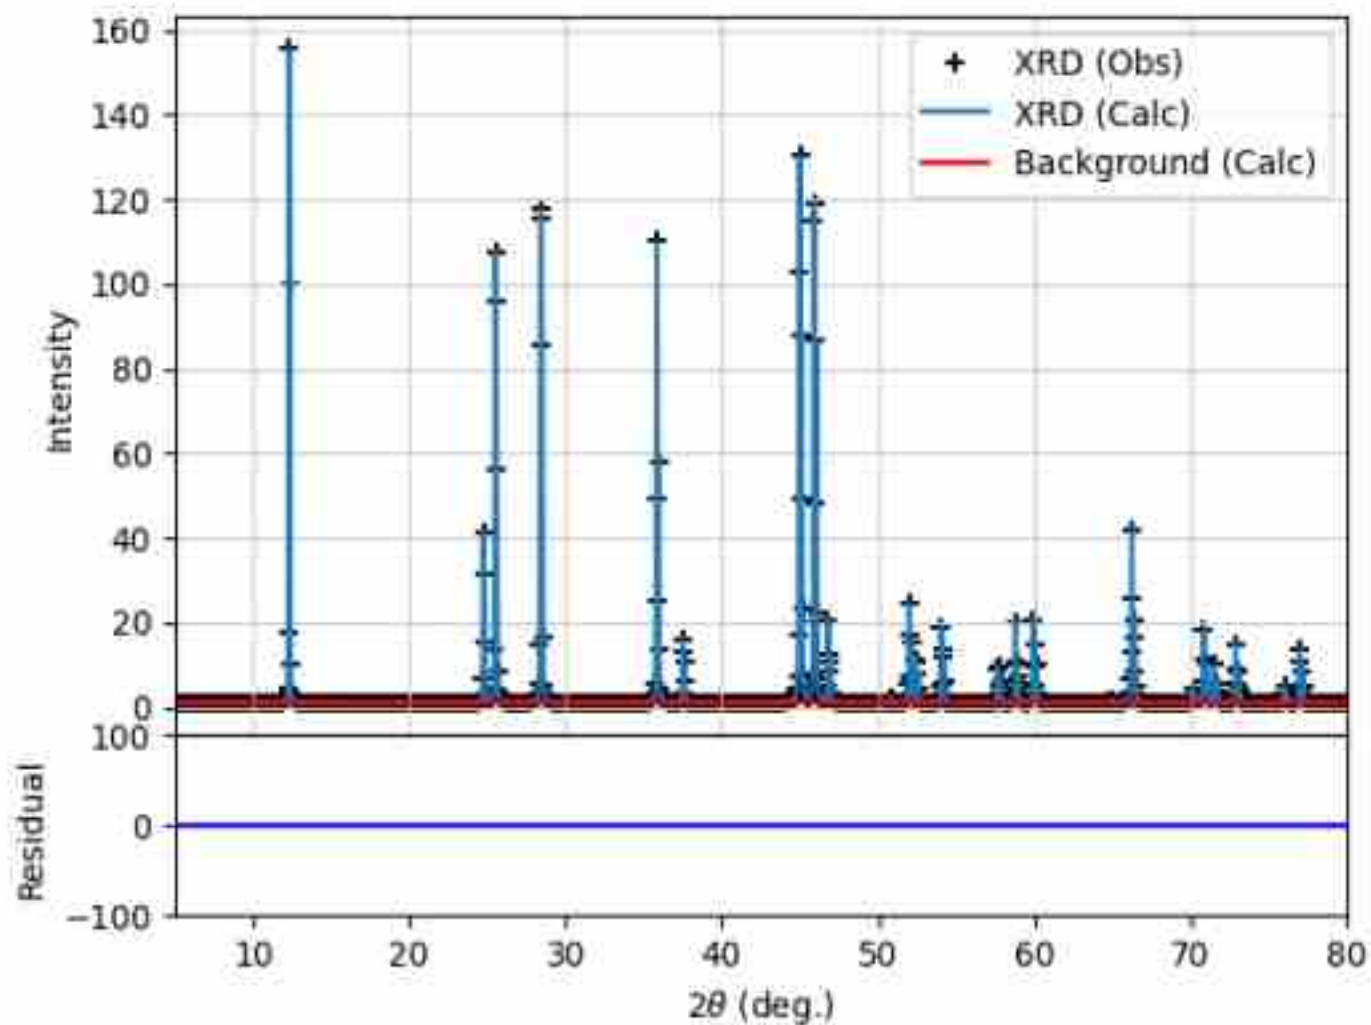

| RMSE before RR | Rwp     | RMSE after RR |
|----------------|---------|---------------|
| 0.011          | 0.00256 | 0.00064       |

# NaIn1O2

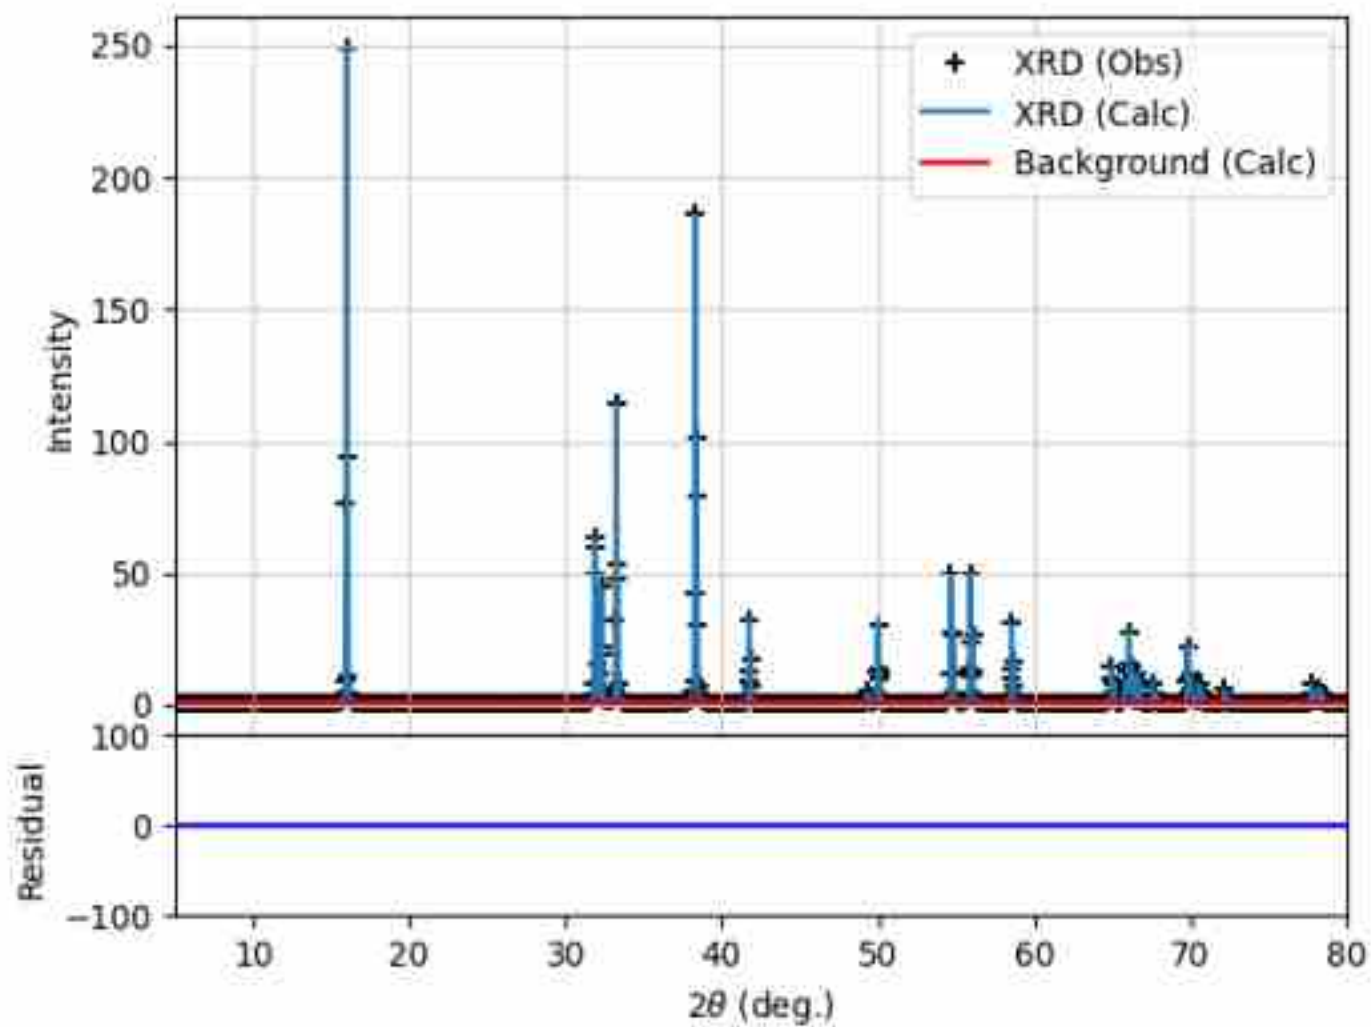

| RMSE before RR | Rwp     | RMSE after RR |
|----------------|---------|---------------|
| 0.011          | 0.00327 | 0.002         |

# Na<sub>2</sub>LiNiF<sub>6</sub>

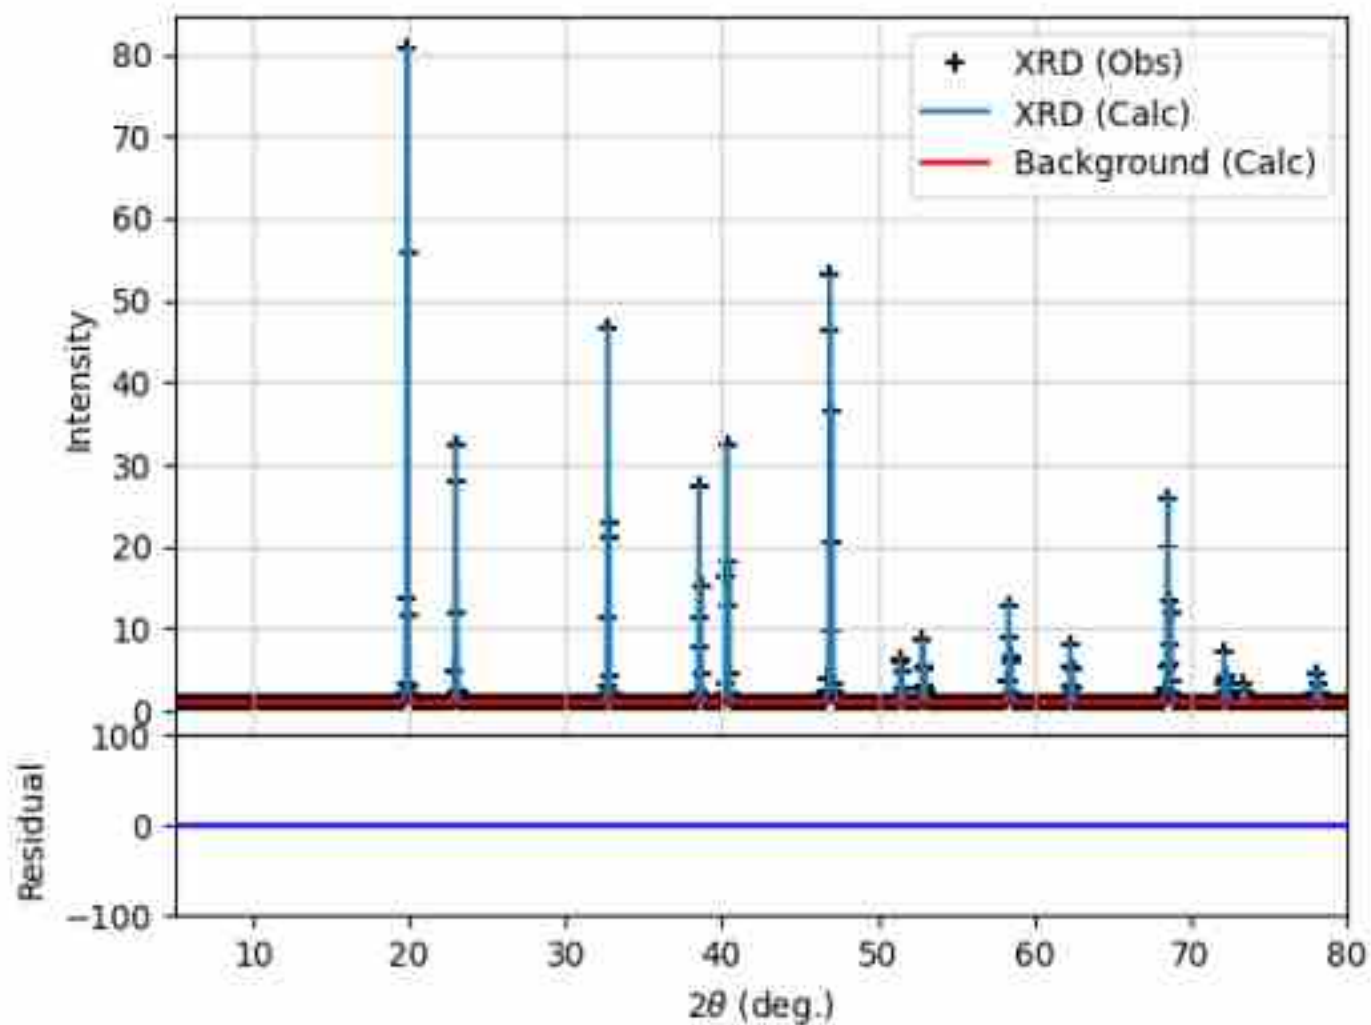

| RMSE before RR | Rwp     | RMSE after RR |
|----------------|---------|---------------|
| 0.011          | 0.00939 | 0.00287       |



# Na<sub>3</sub>Sb1S<sub>4</sub>

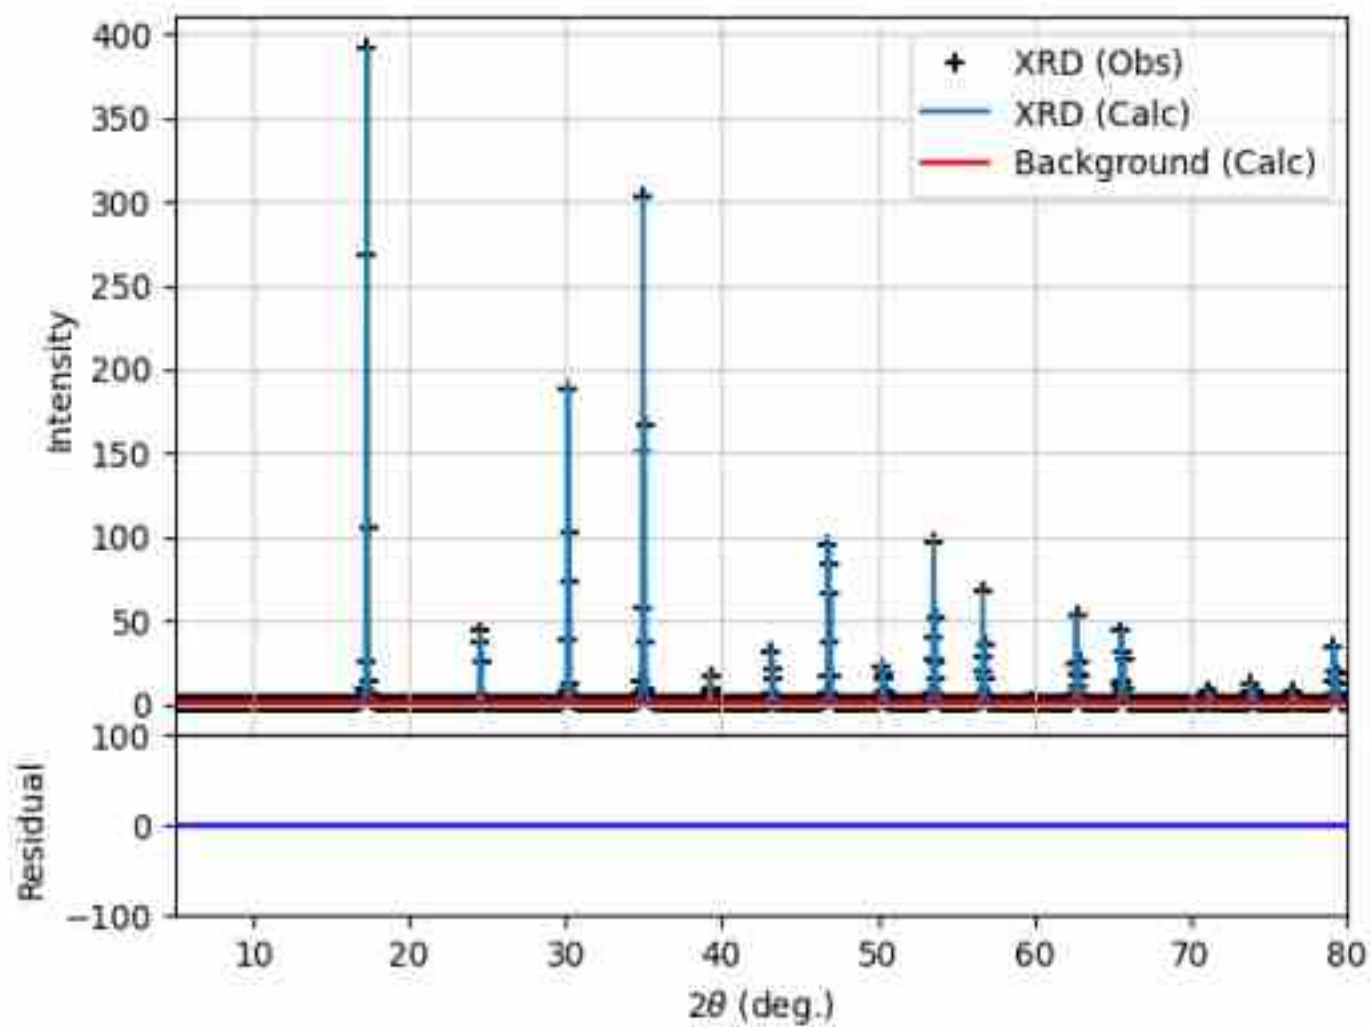

| RMSE before RR | Rwp     | RMSE after RR |
|----------------|---------|---------------|
| 0.011          | 0.02176 | 0.00374       |

# Nb6Ga1Ge1

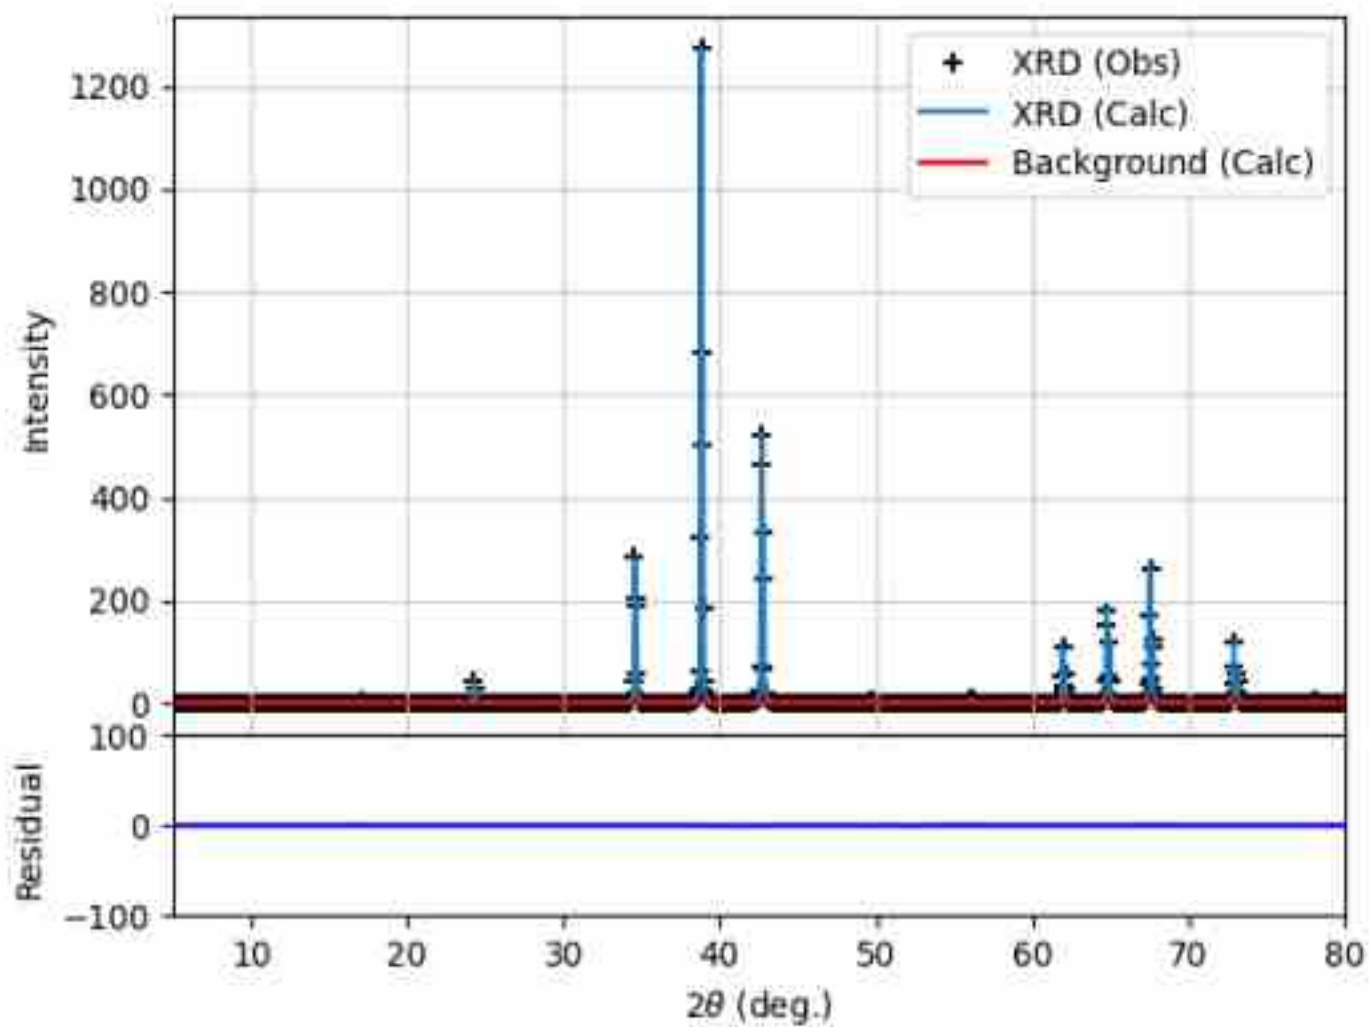

| RMSE before RR | Rwp   | RMSE after RR |
|----------------|-------|---------------|
| 0.011          | 0.863 | 0.01635       |

# Nb6Pt1Au1

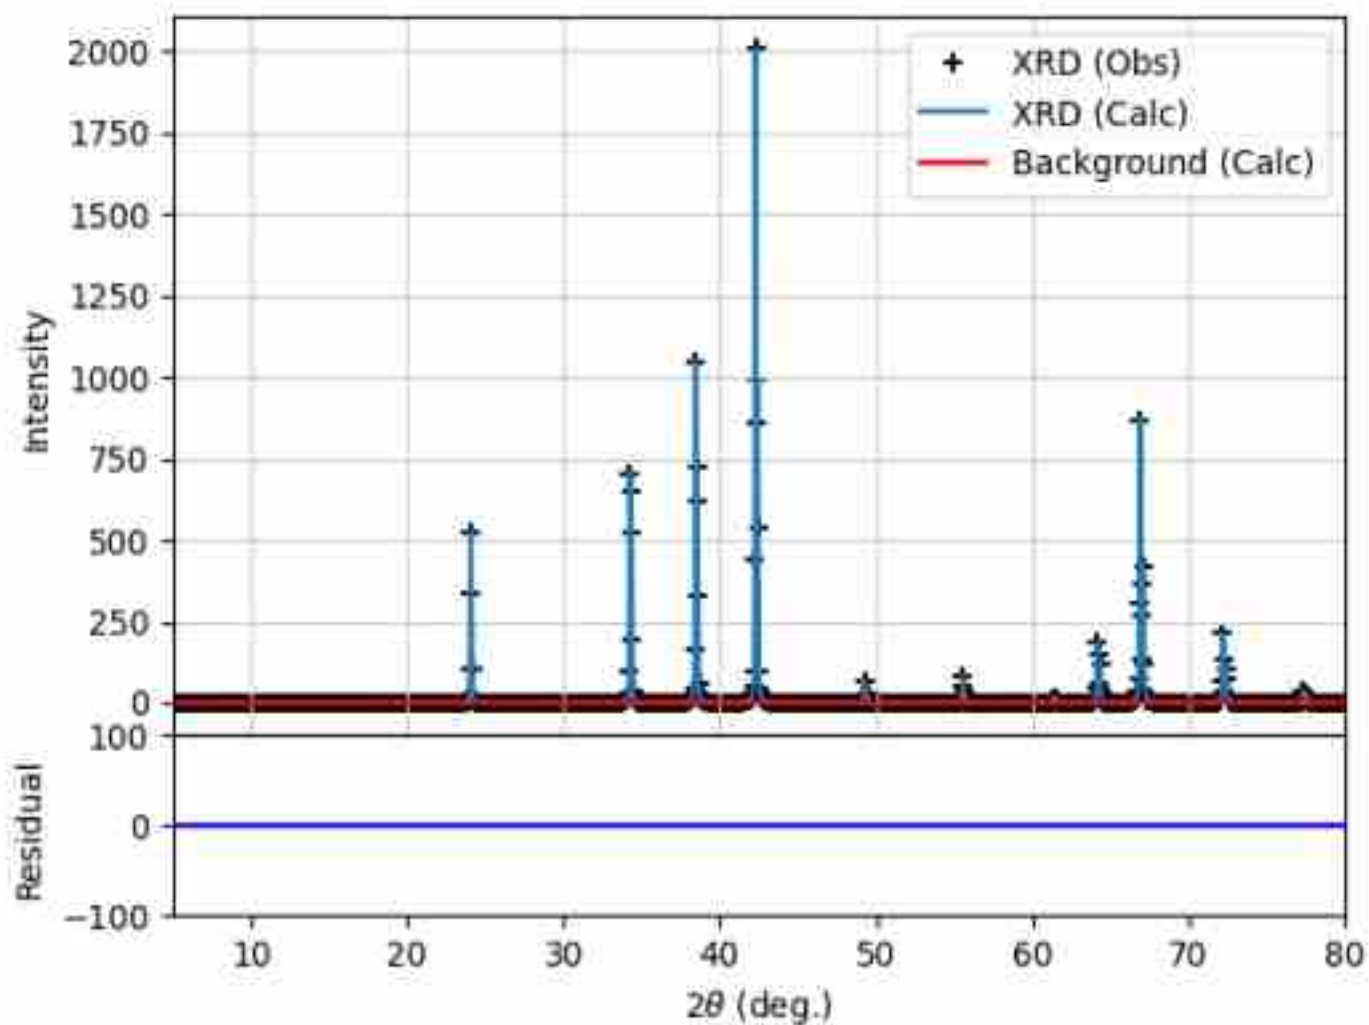

| RMSE before RR | Rwp     | RMSE after RR |
|----------------|---------|---------------|
| 0.011          | 0.01007 | 0.00062       |

# Nd1Al2Pt3

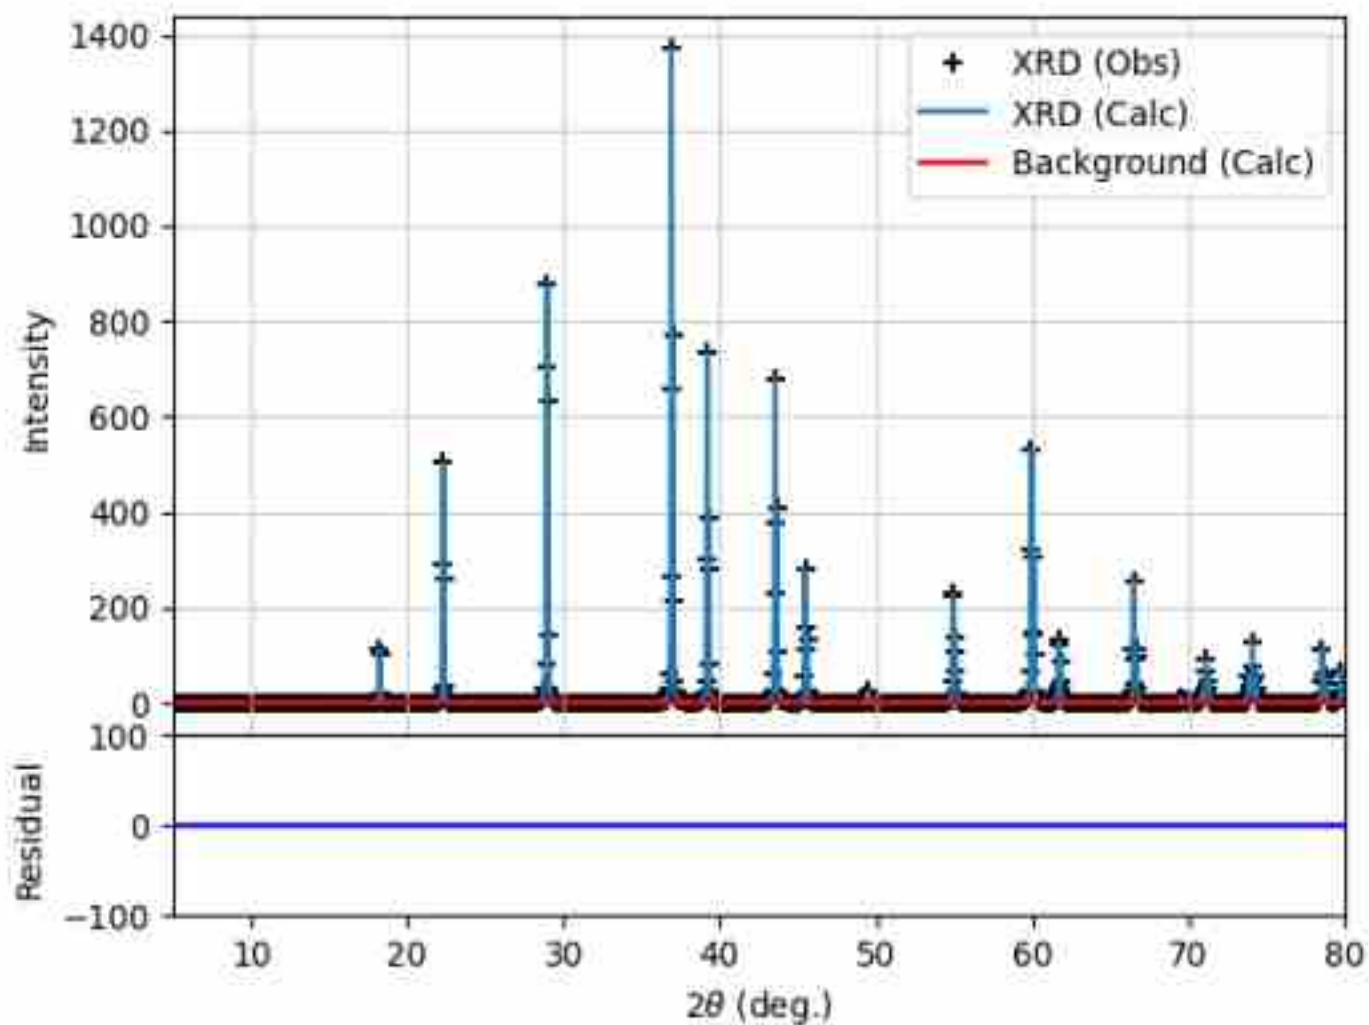

| RMSE before RR | Rwp     | RMSE after RR |
|----------------|---------|---------------|
| 0.011          | 0.00295 | 0.00084       |

# Nd<sub>3</sub>Tl<sub>3</sub>Pd<sub>3</sub>

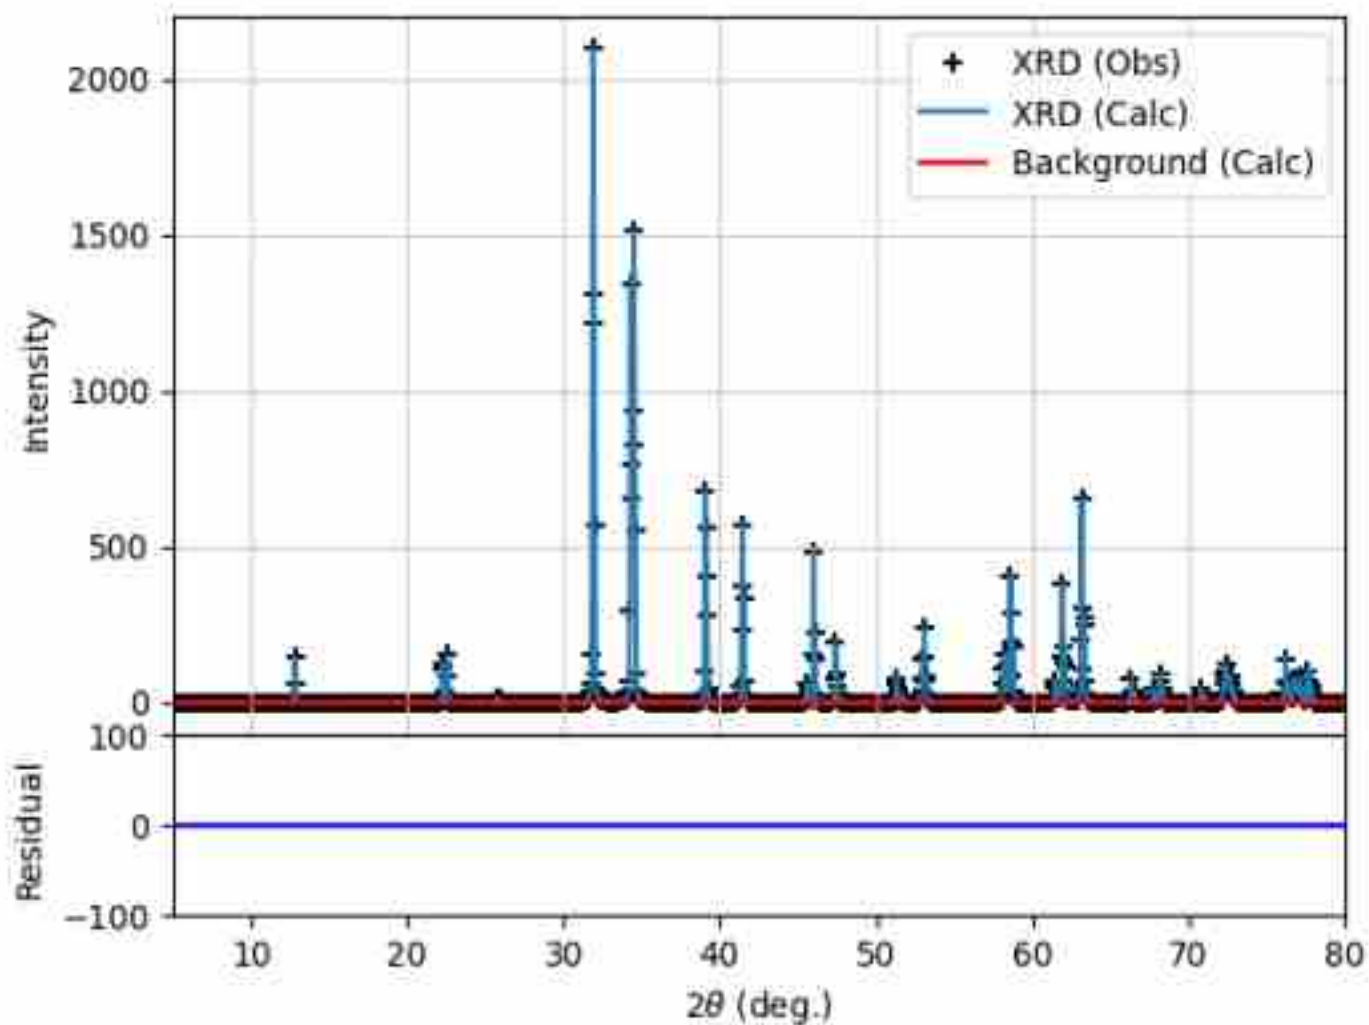

| RMSE before RR | Rwp    | RMSE after RR |
|----------------|--------|---------------|
| 0.011          | 0.0072 | 0.00149       |

# Nd4In2Rh4

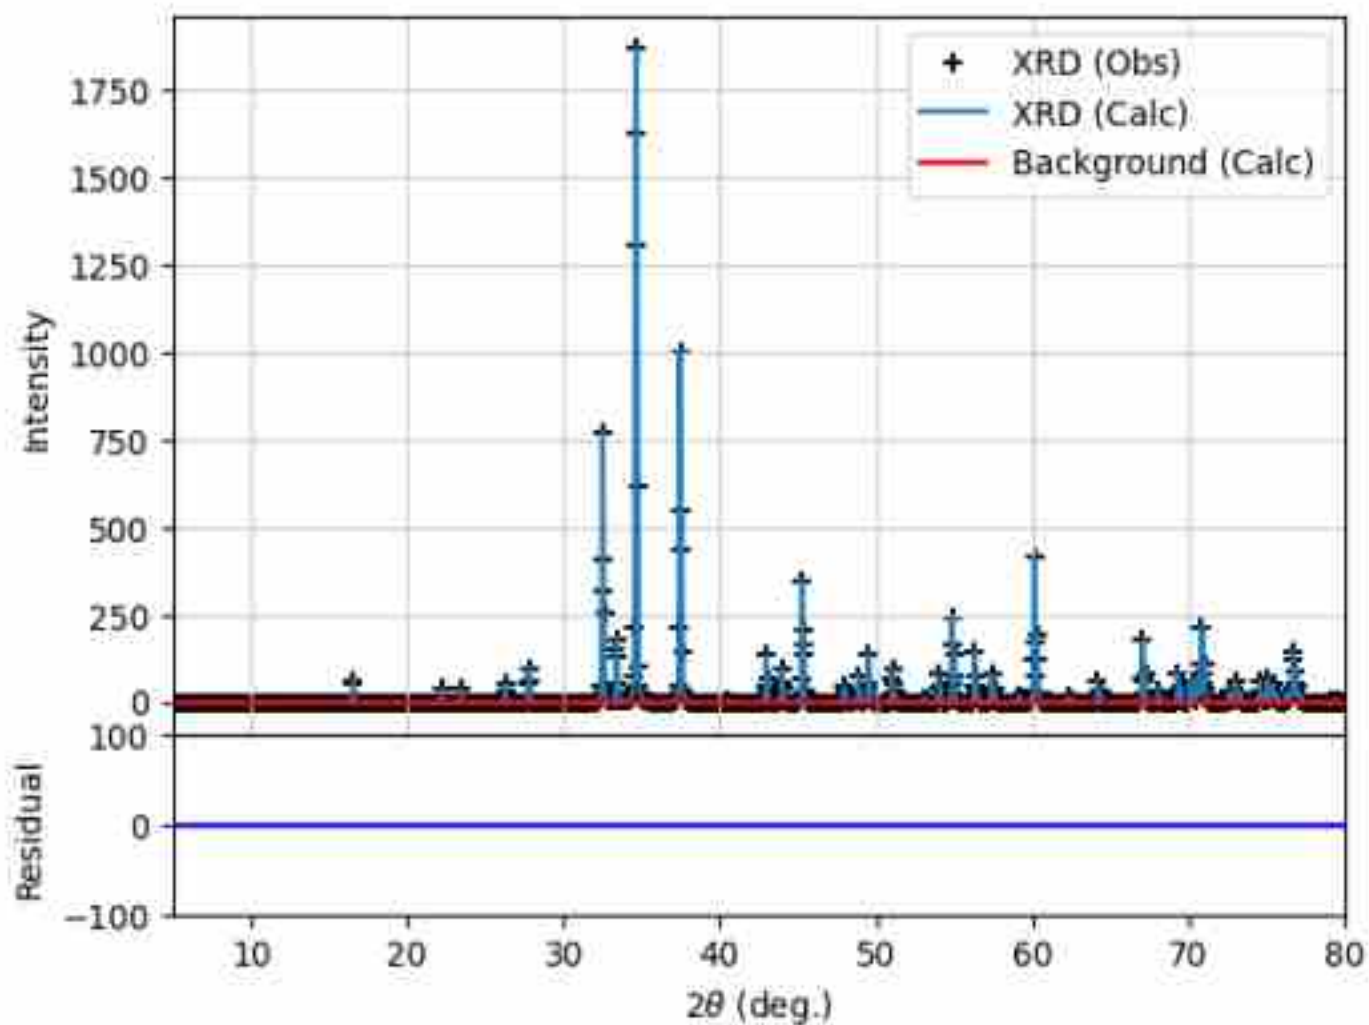

| RMSE before RR | Rwp     | RMSE after RR |
|----------------|---------|---------------|
| 0.011          | 0.00498 | 0.00034       |

# Nd<sub>4</sub>Sn<sub>4</sub>Pd<sub>4</sub>

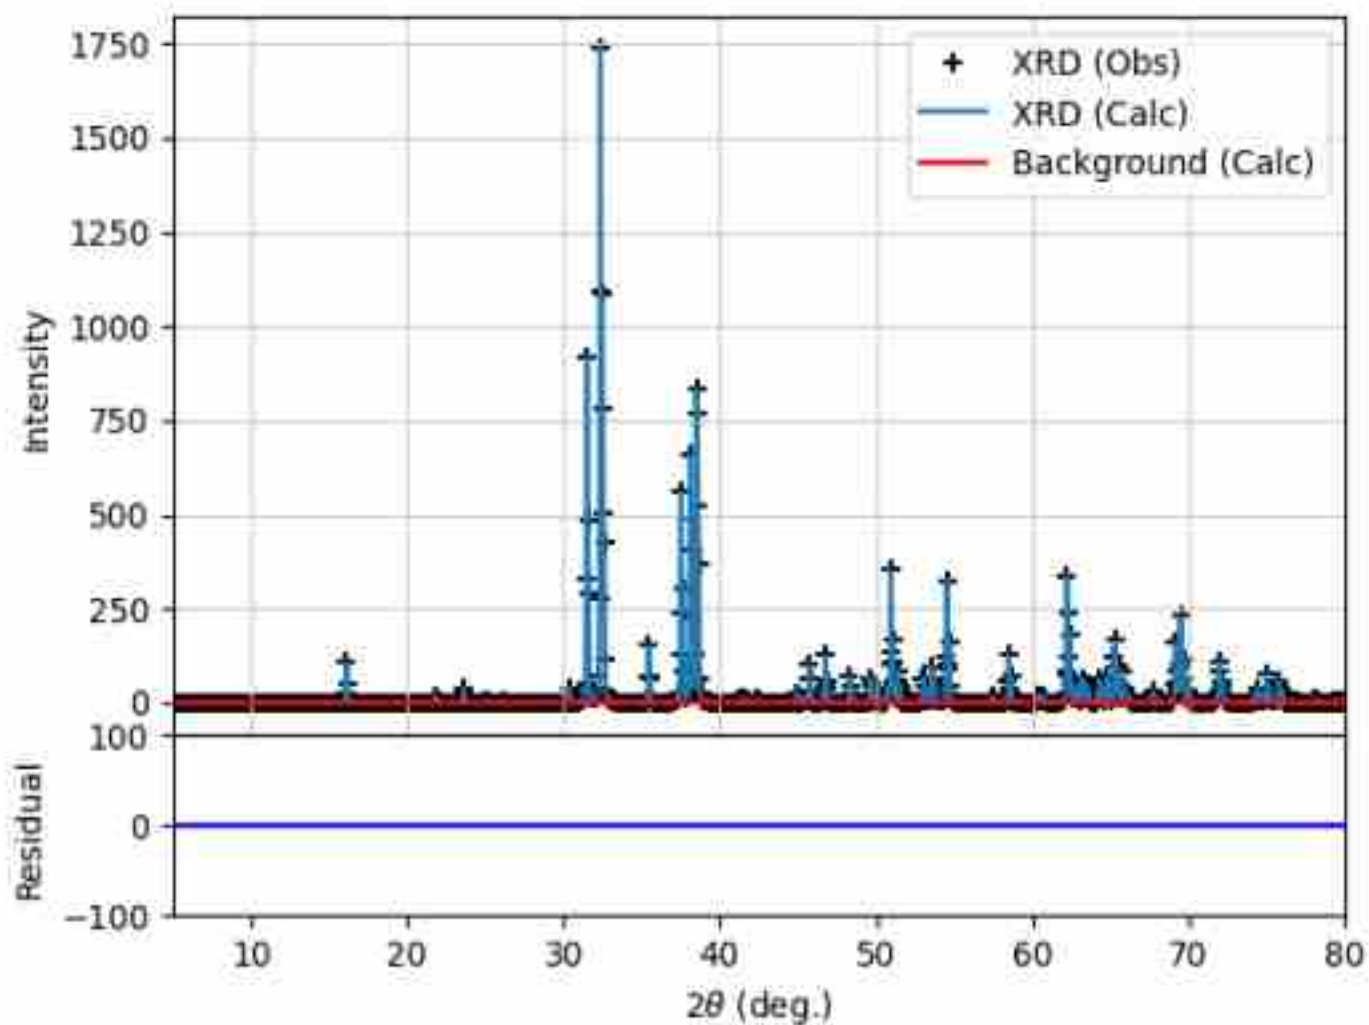

| RMSE before RR | Rwp     | RMSE after RR |
|----------------|---------|---------------|
| 0.011          | 0.00529 | 0.00031       |

# Np<sub>2</sub>Si<sub>4</sub>Pt<sub>4</sub>

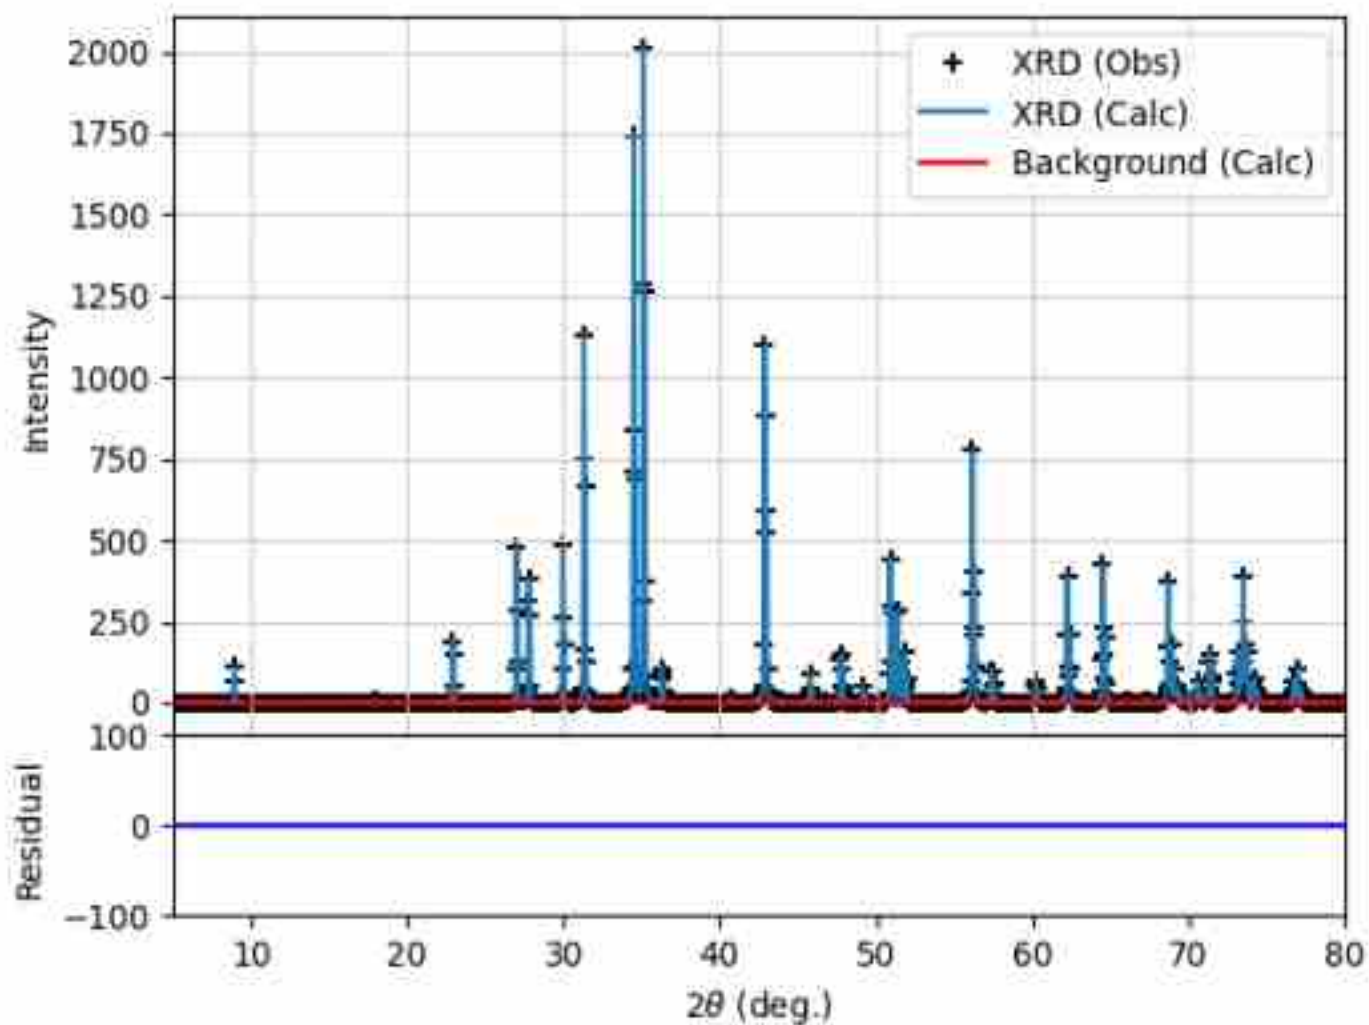

| RMSE before RR | Rwp     | RMSE after RR |
|----------------|---------|---------------|
| 0.011          | 0.00447 | 0.00066       |



# Pa1Ag1O3

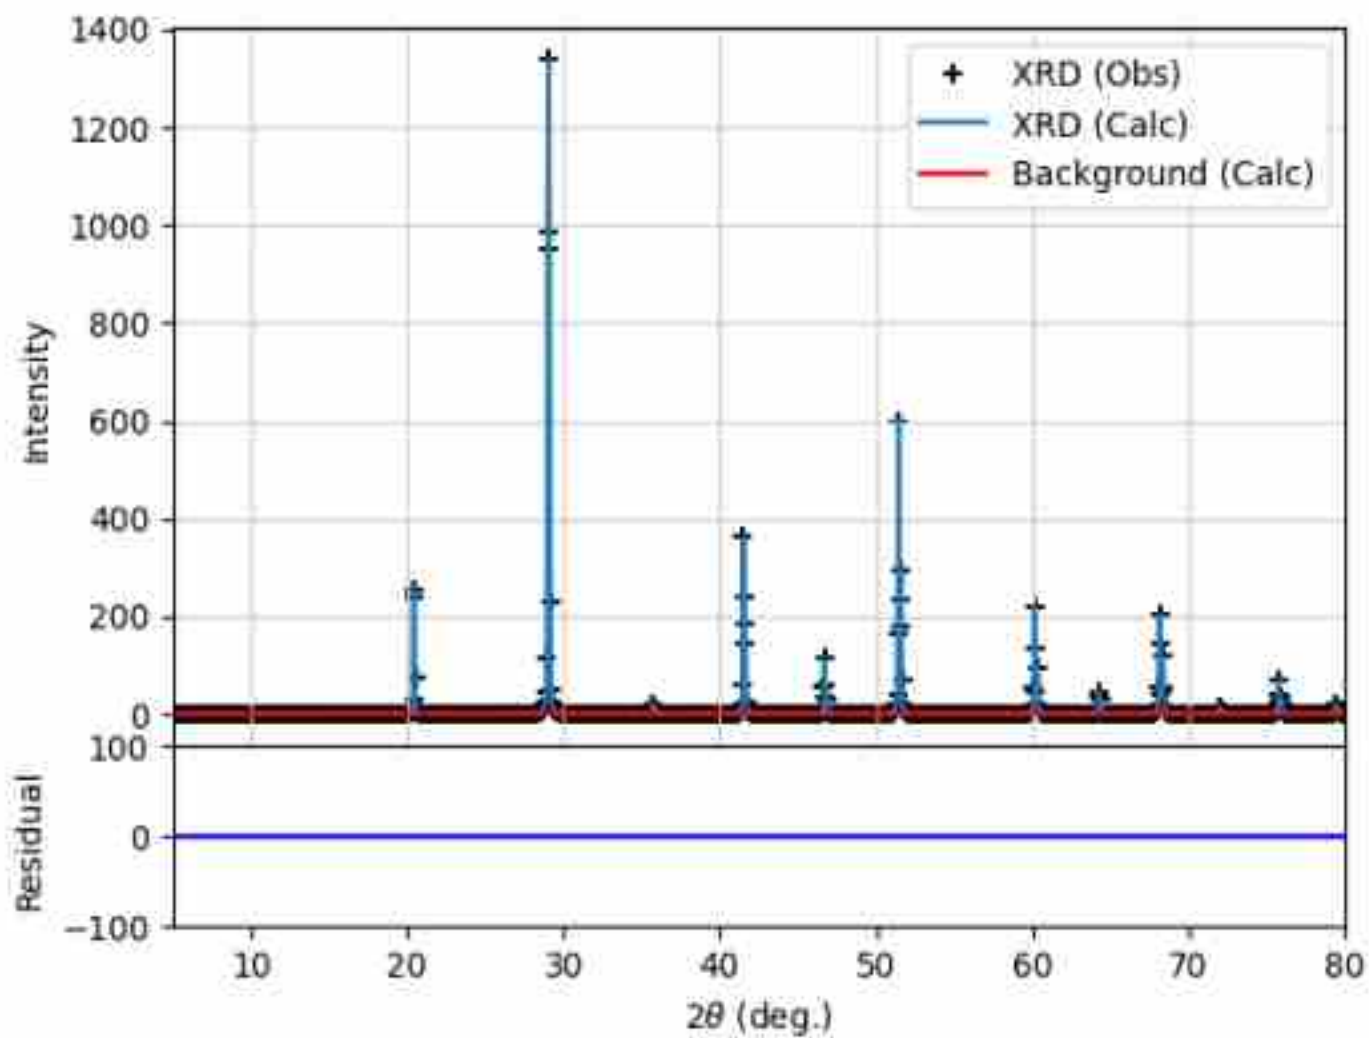

| RMSE before RR | Rwp    | RMSE after RR |
|----------------|--------|---------------|
| 0.011          | 0.0179 | 0.00562       |

# Pm2S4

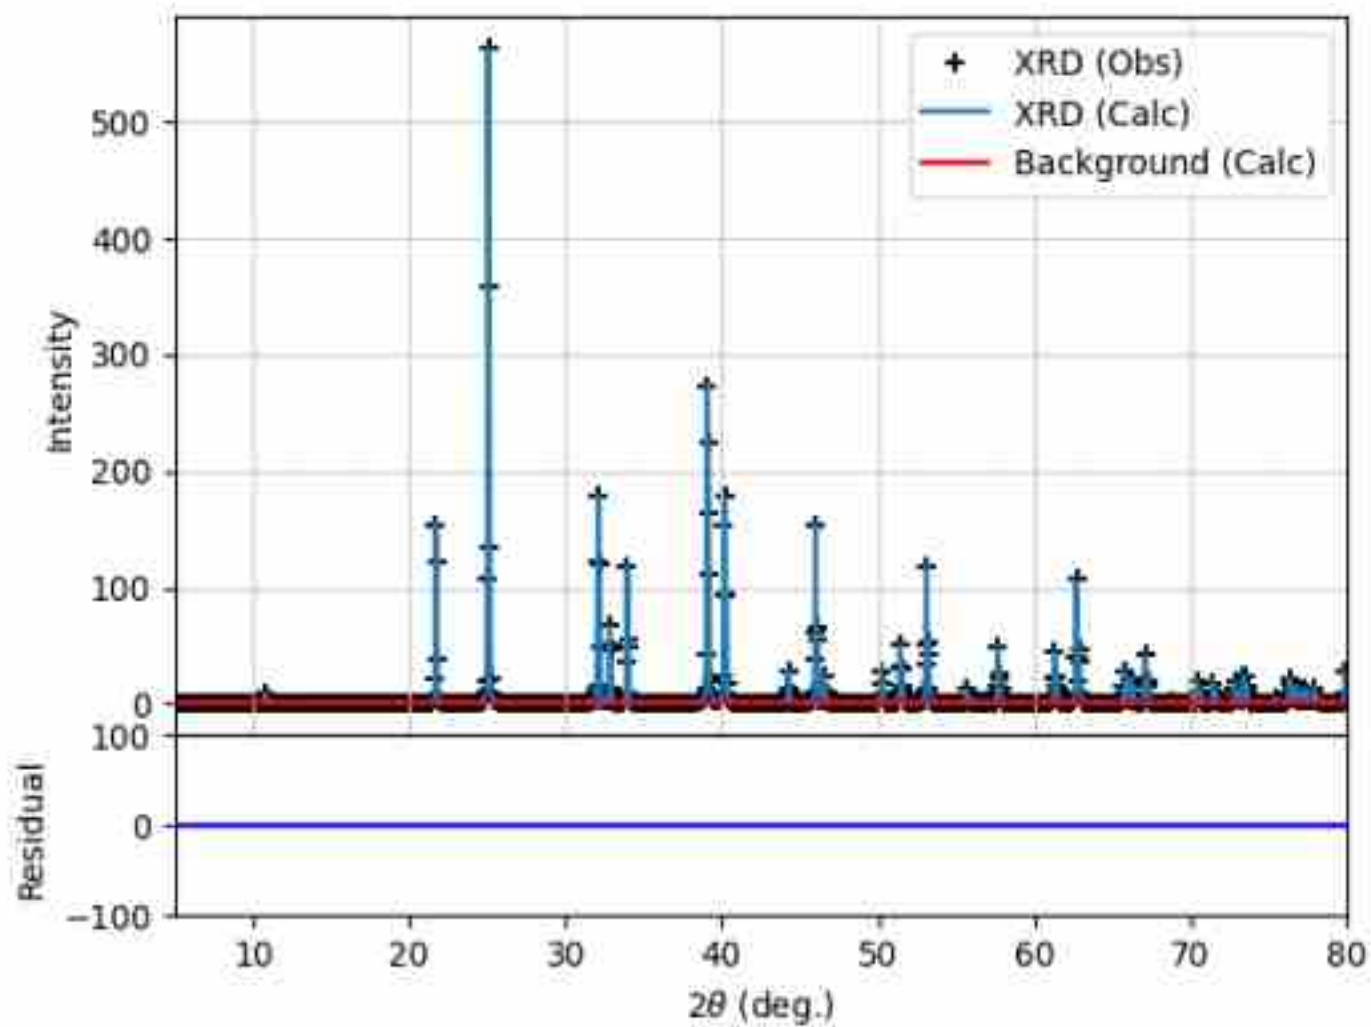

| RMSE before RR | Rwp     | RMSE after RR |
|----------------|---------|---------------|
| 0.011          | 0.00408 | 0.00086       |

# Pr1Co5

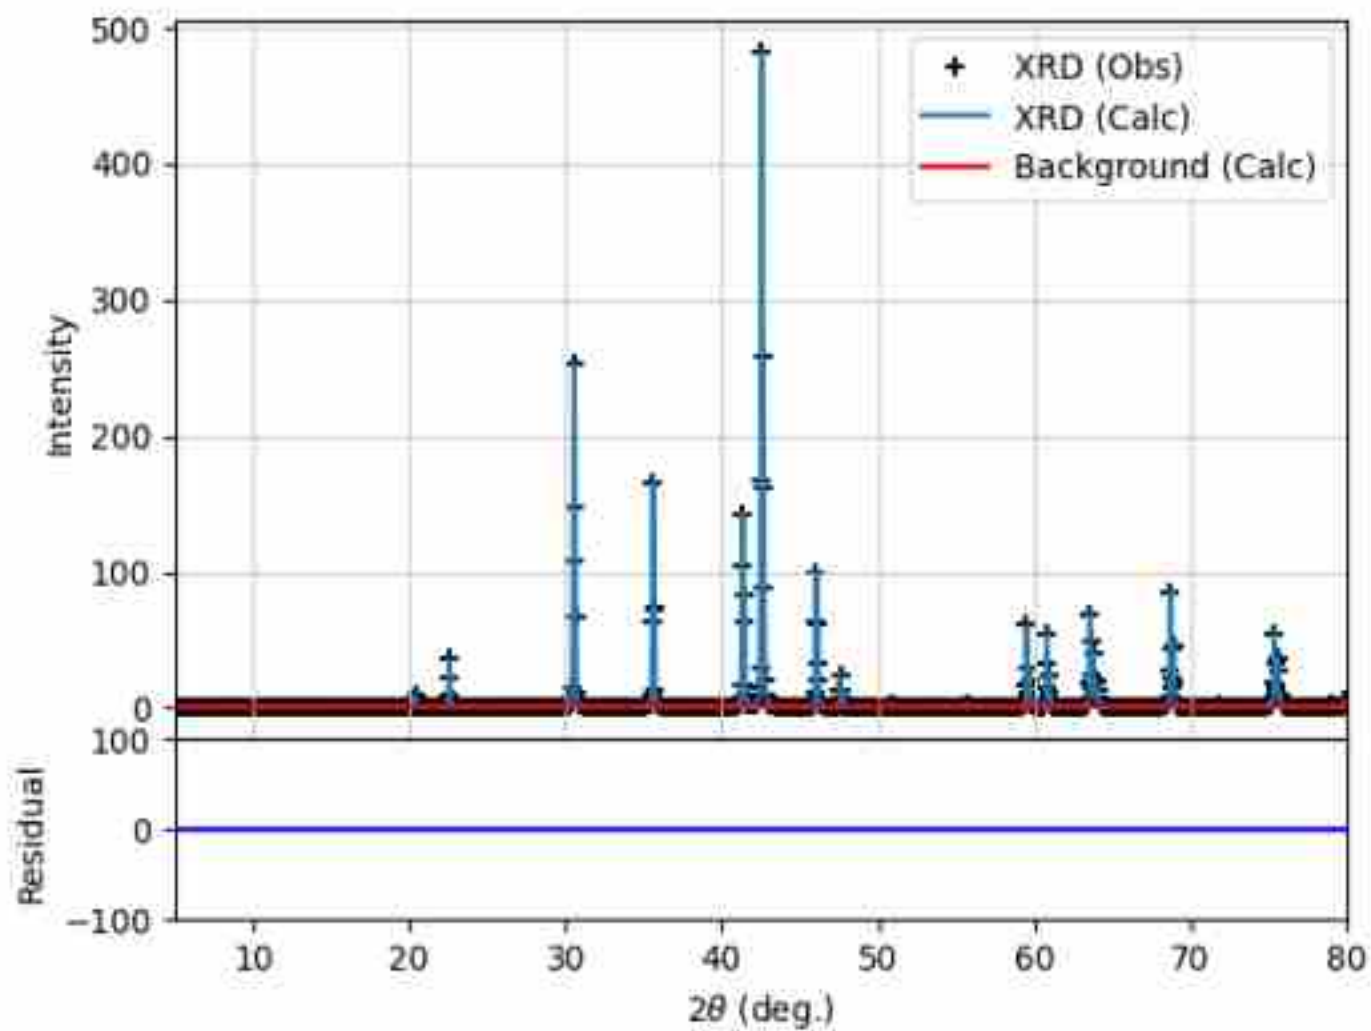

| RMSE before RR | Rwp     | RMSE after RR |
|----------------|---------|---------------|
| 0.011          | 0.04426 | 0.00318       |

# Pr1Cu1O2

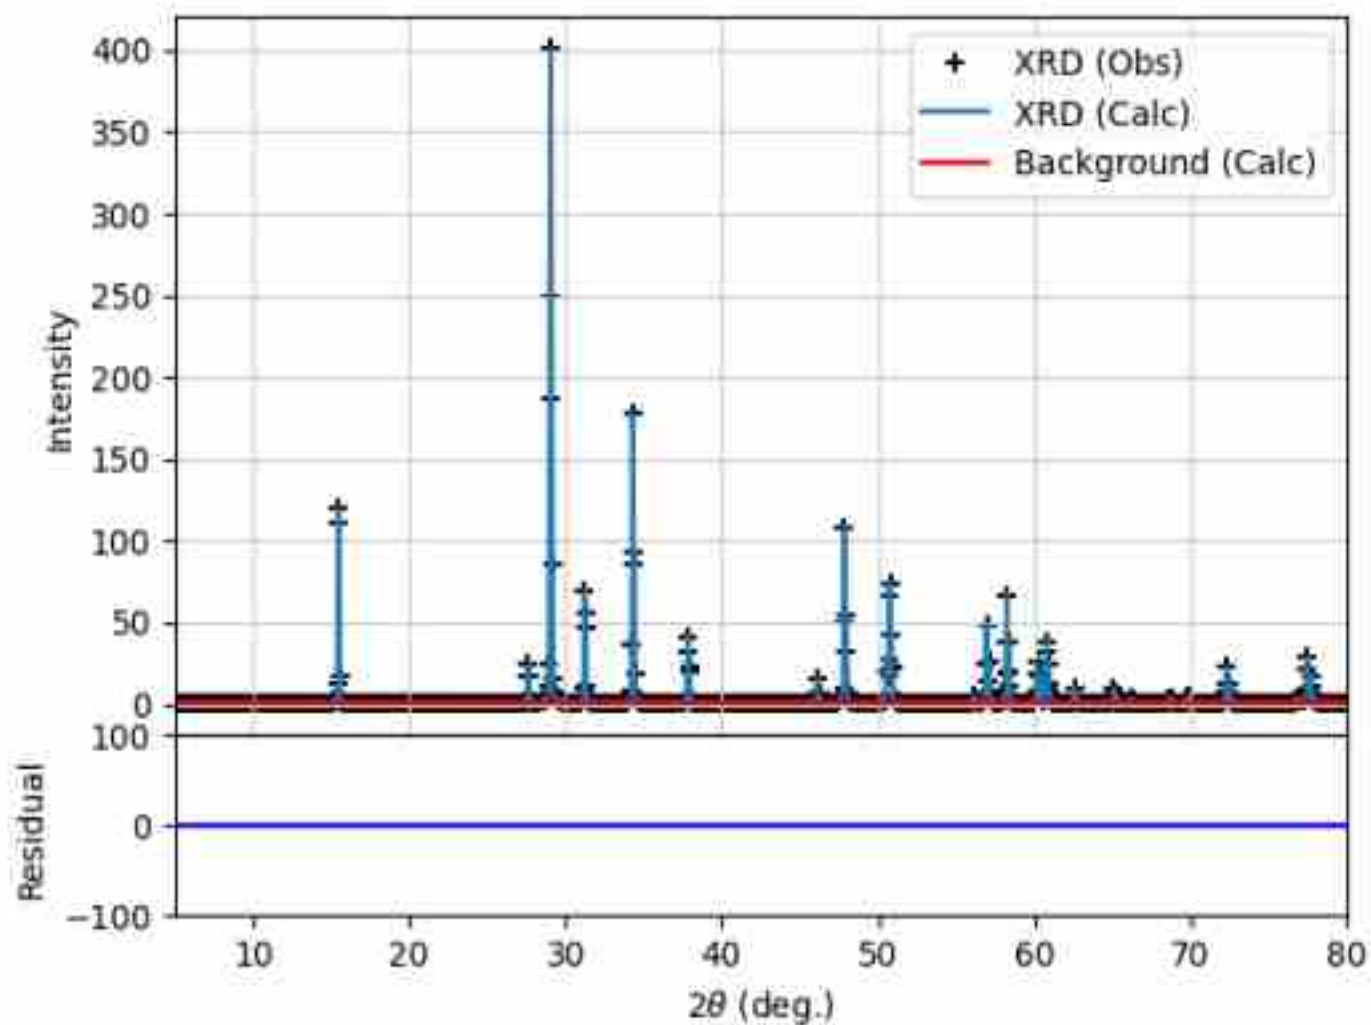

| RMSE before RR | Rwp     | RMSE after RR |
|----------------|---------|---------------|
| 0.011          | 0.08317 | 0.0038        |

# Pr<sub>1</sub>Mn<sub>2</sub>Si<sub>1</sub>Ge<sub>1</sub>

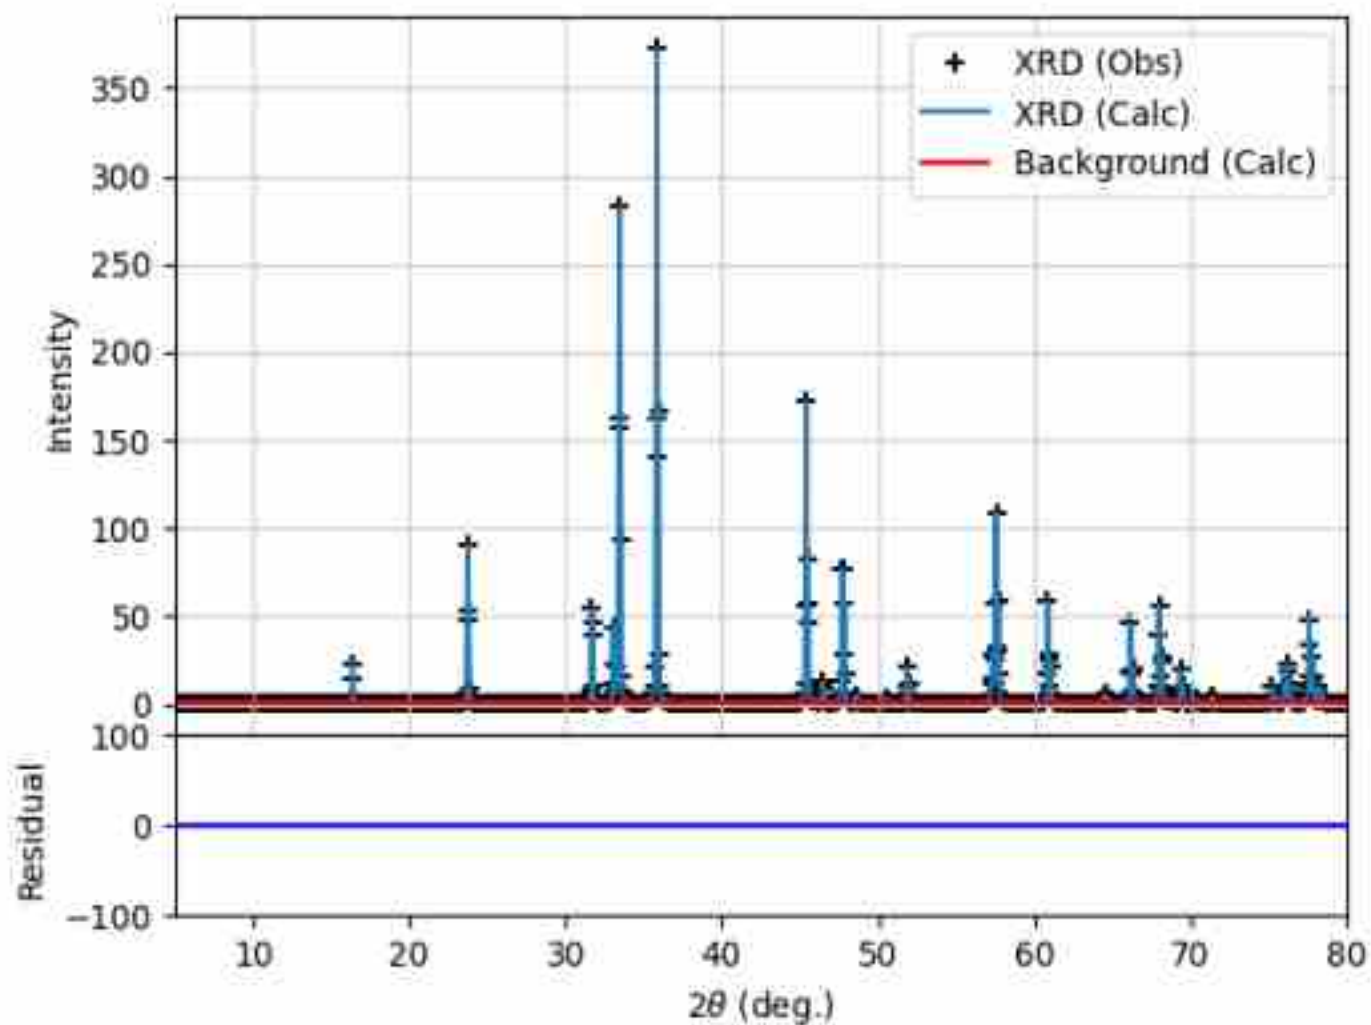

| RMSE before RR | Rwp     | RMSE after RR |
|----------------|---------|---------------|
| 0.011          | 0.00367 | 0.00063       |

# Pr<sub>1</sub>Y<sub>1</sub>Mg<sub>4</sub>

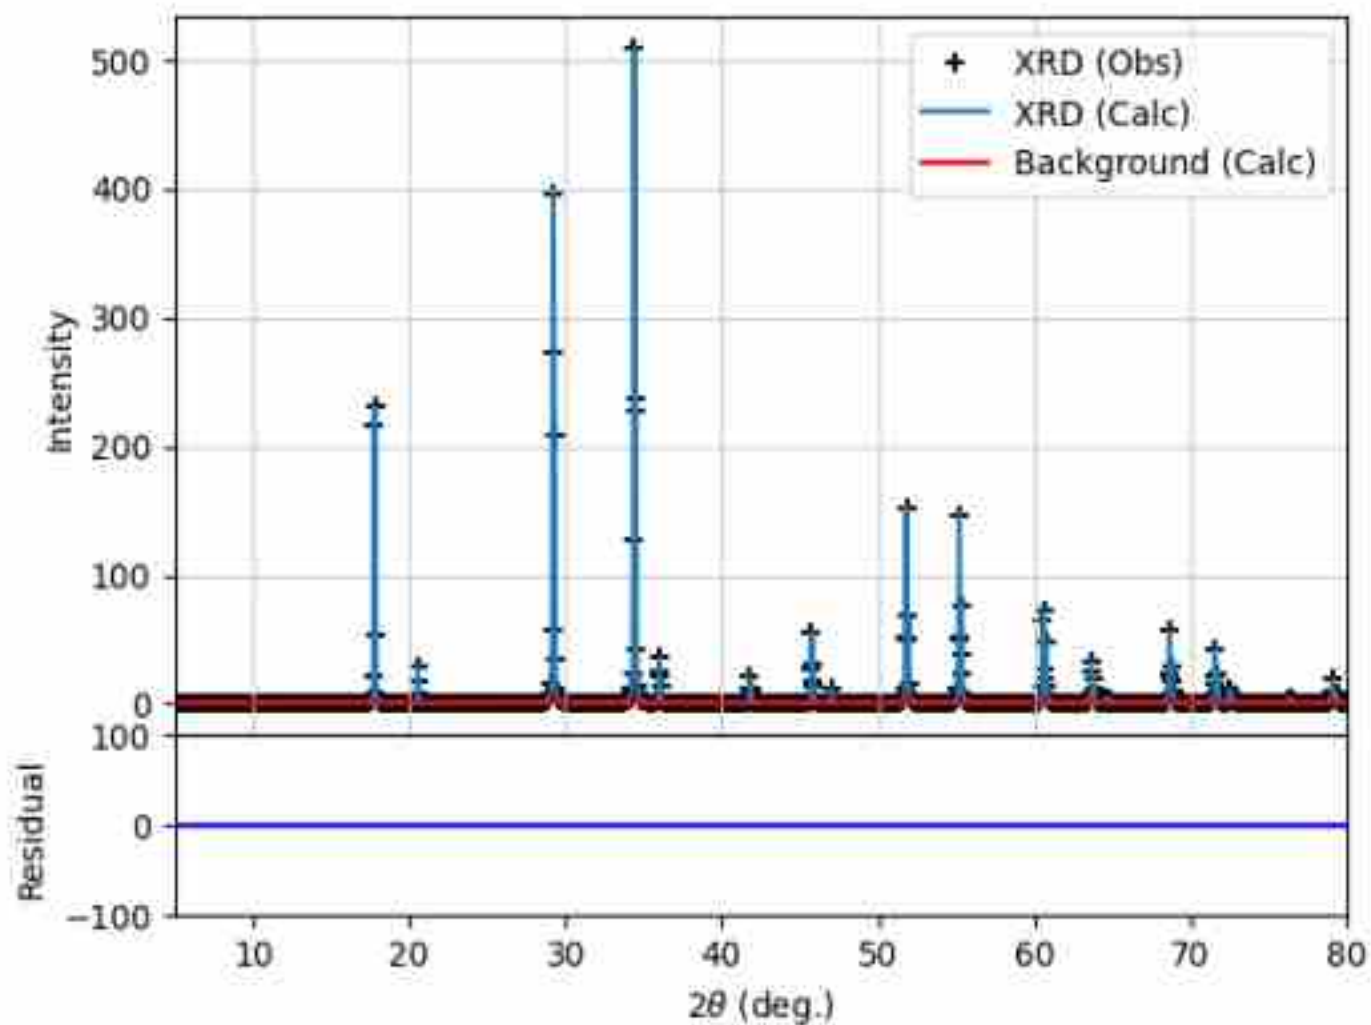

| RMSE before RR | Rwp    | RMSE after RR |
|----------------|--------|---------------|
| 0.011          | 0.0039 | 0.00145       |

# Pr<sub>2</sub>Ni<sub>2</sub>Ge<sub>6</sub>

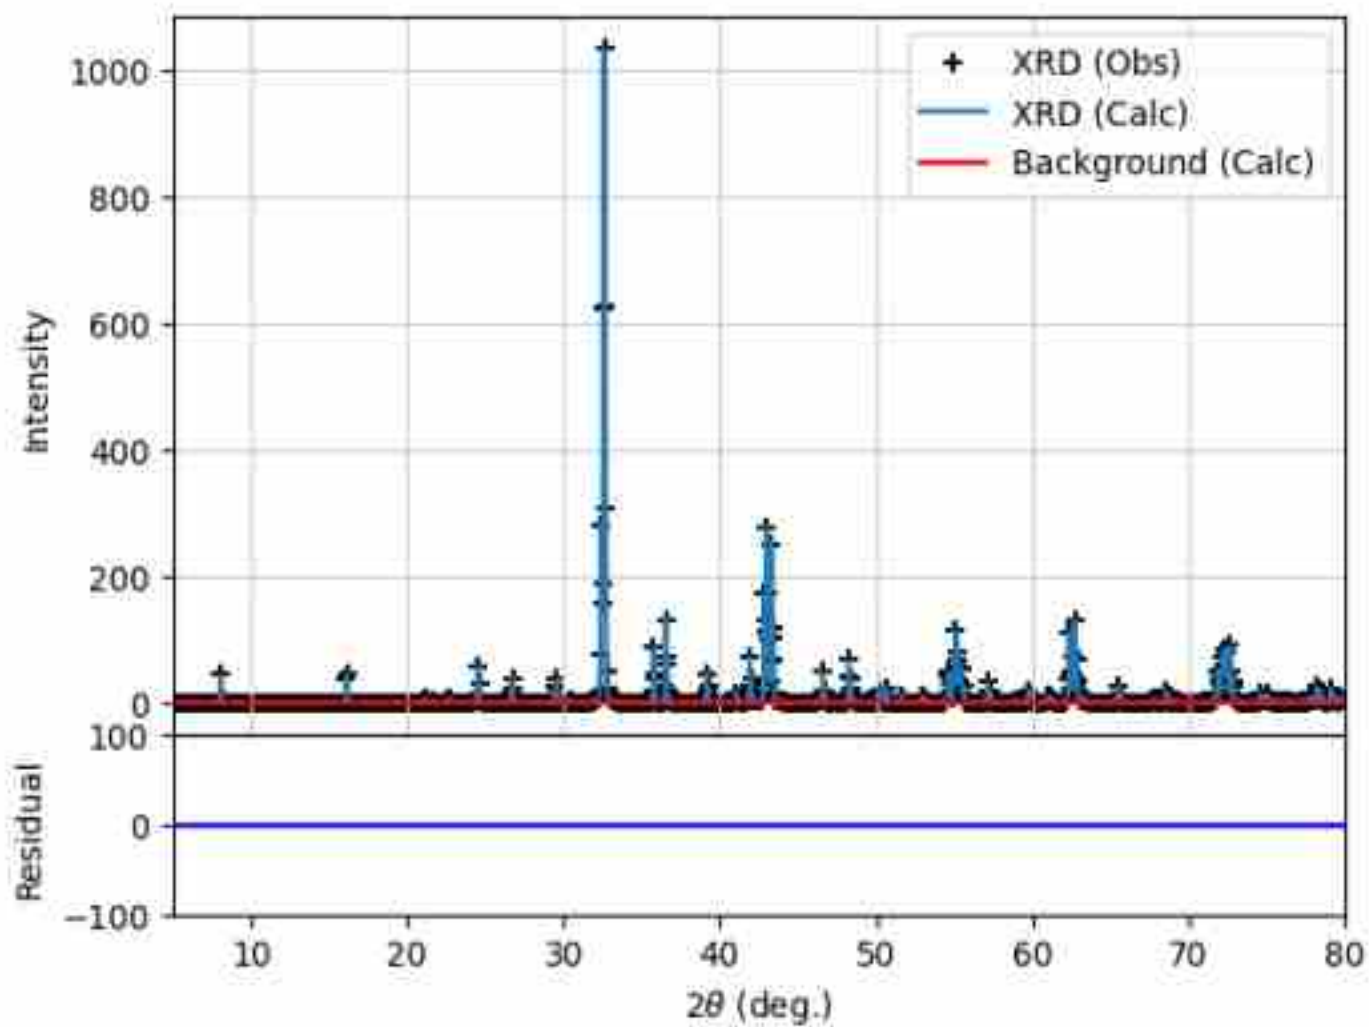

| RMSE before RR | Rwp     | RMSE after RR |
|----------------|---------|---------------|
| 0.011          | 0.00434 | 0.00049       |

# Pr<sub>3</sub>In<sub>3</sub>Pd<sub>3</sub>

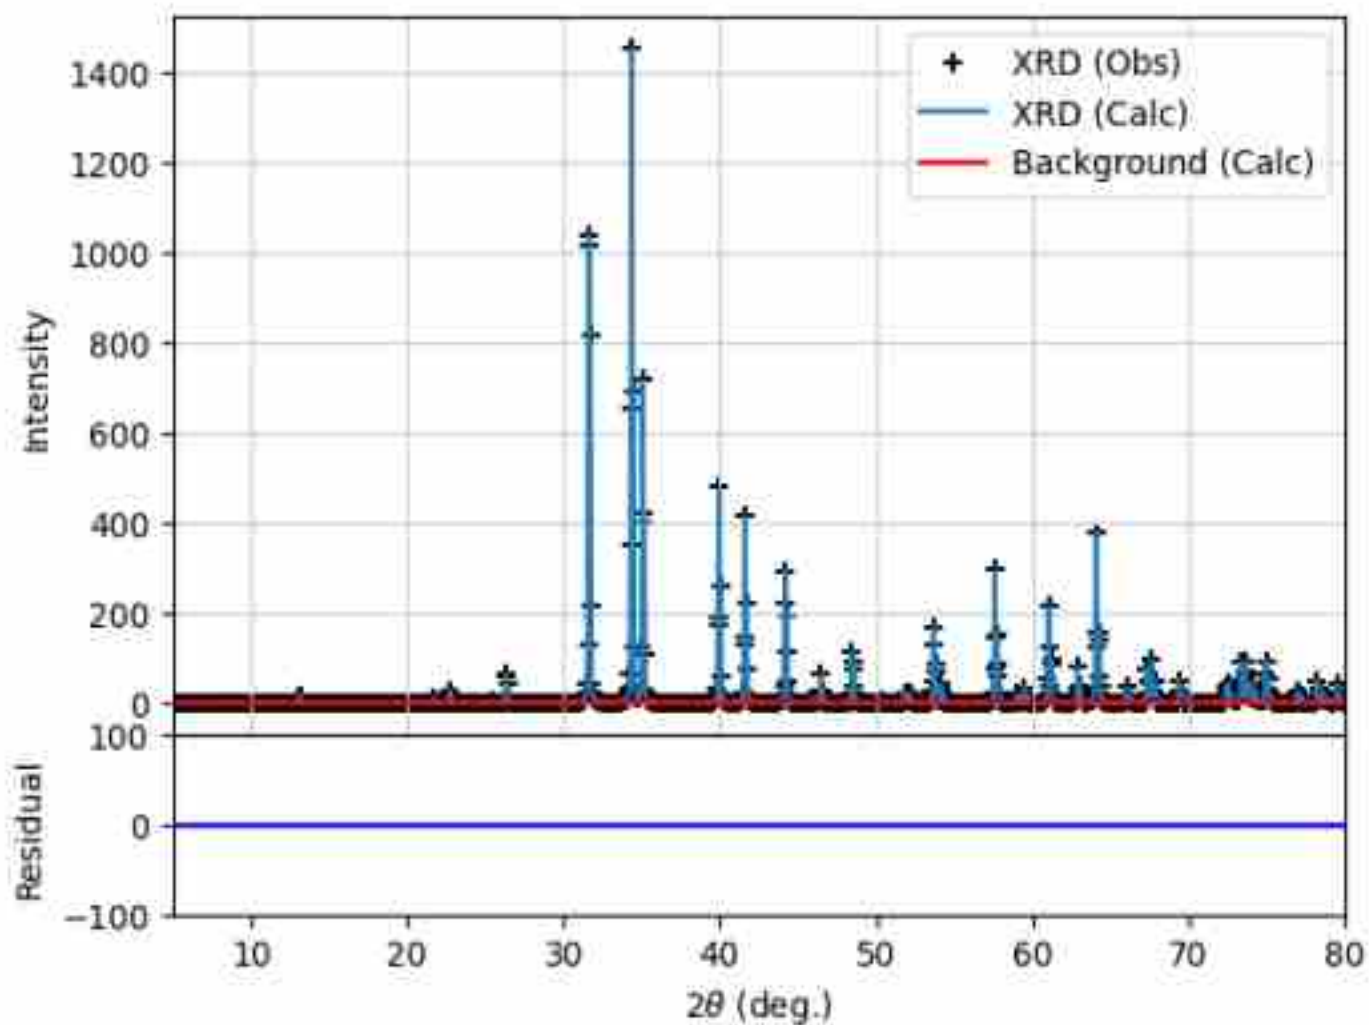

| RMSE before RR | Rwp     | RMSE after RR |
|----------------|---------|---------------|
| 0.011          | 0.00435 | 0.0009        |



# Pr<sub>3</sub>Mg<sub>3</sub>Tl<sub>3</sub>

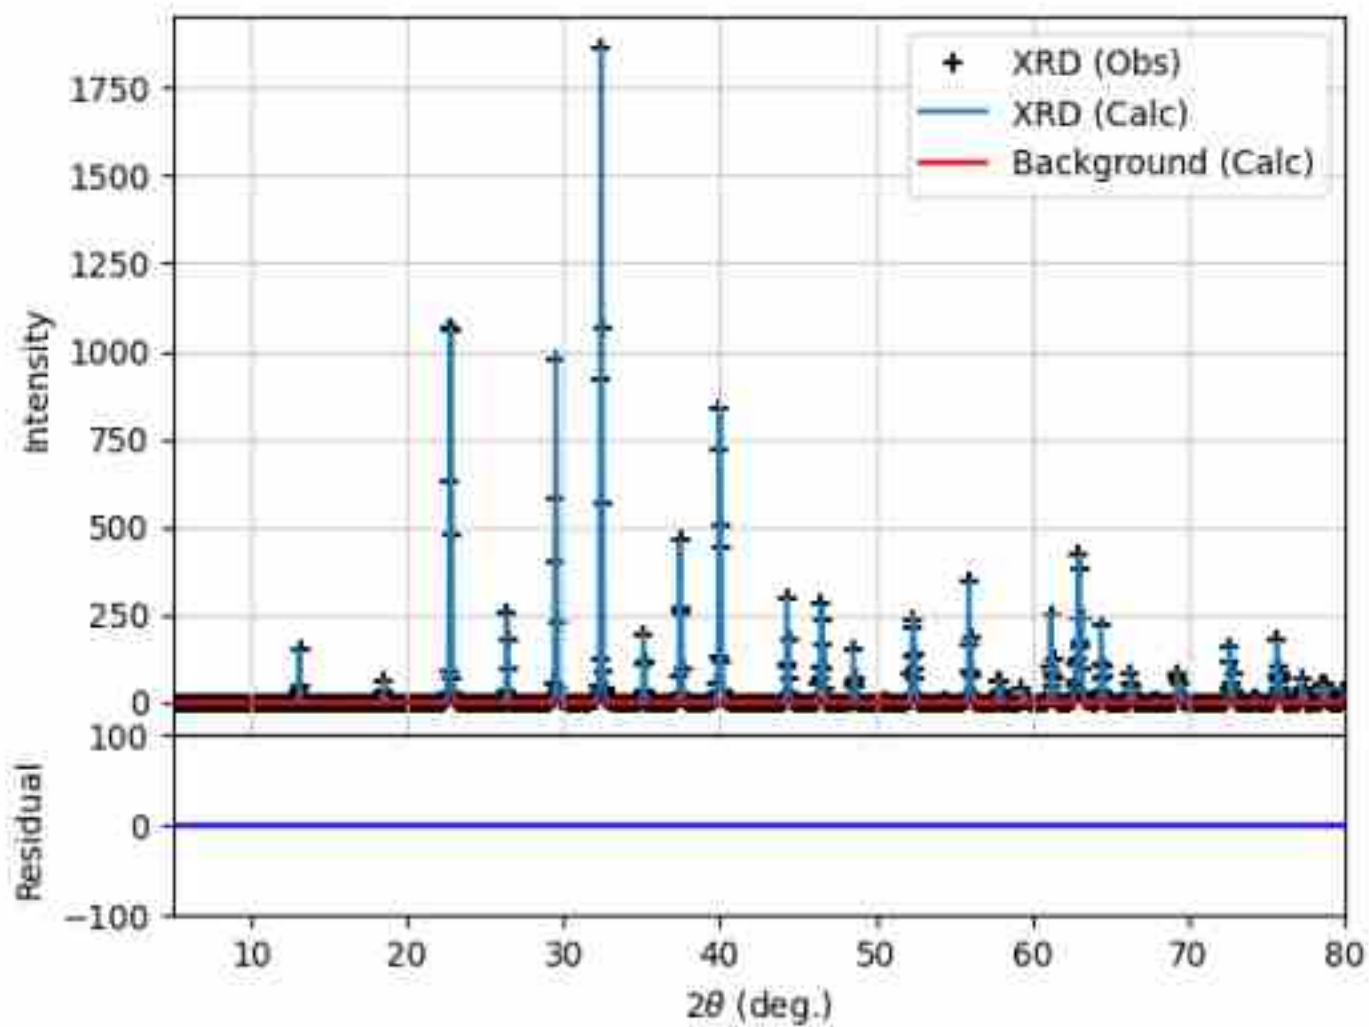

| RMSE before RR | Rwp     | RMSE after RR |
|----------------|---------|---------------|
| 0.011          | 0.00761 | 0.00148       |

# Pr6In2

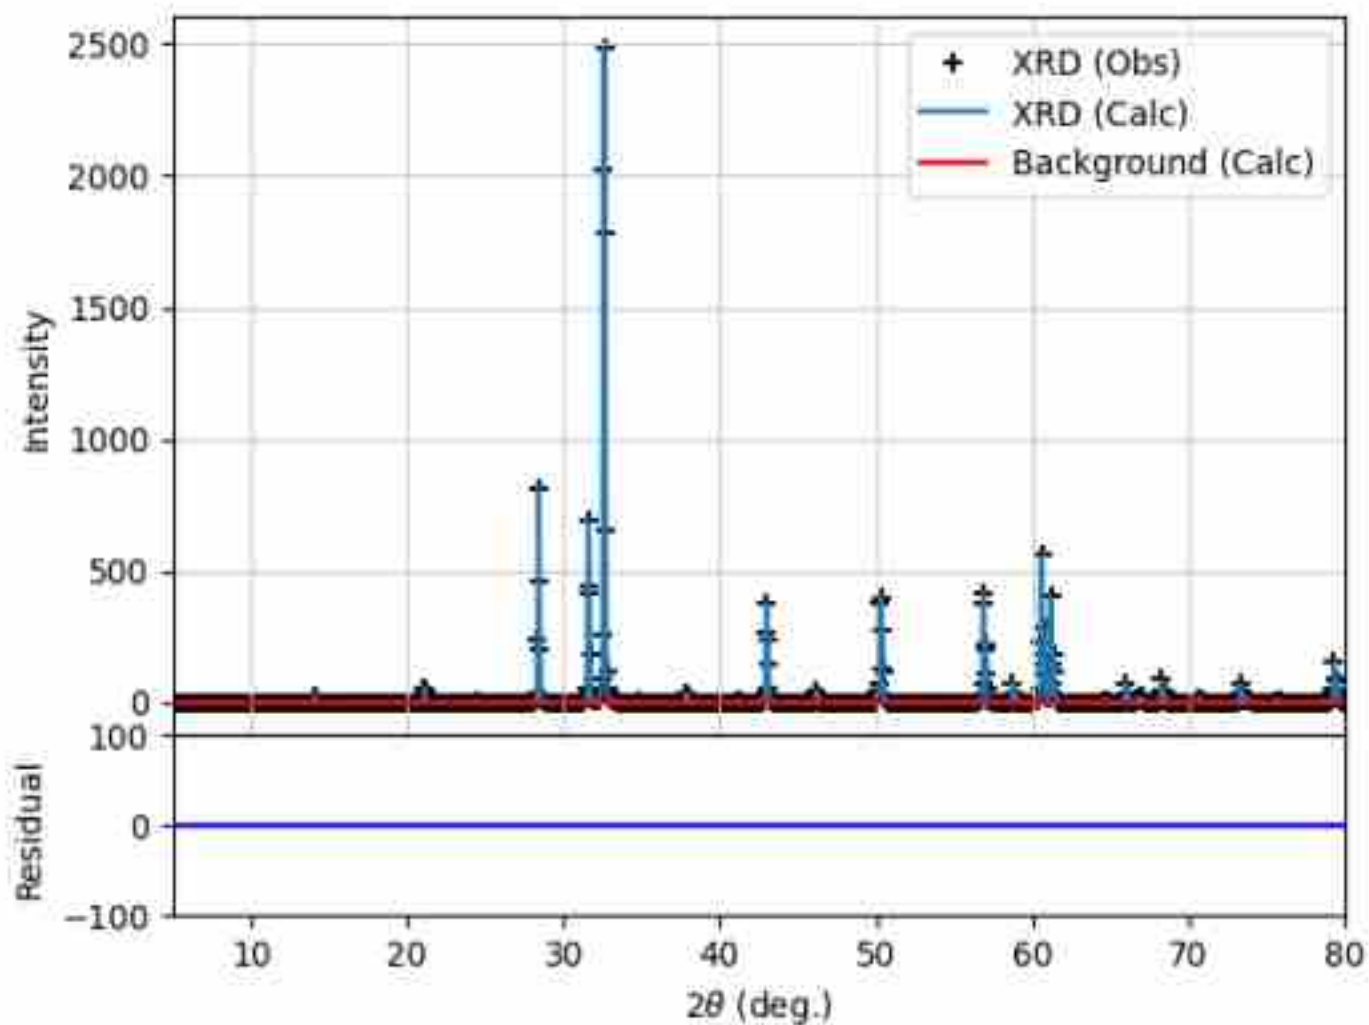

| RMSE before RR | Rwp     | RMSE after RR |
|----------------|---------|---------------|
| 0.011          | 0.02931 | 0.00118       |

# Pu1Si2Ni2

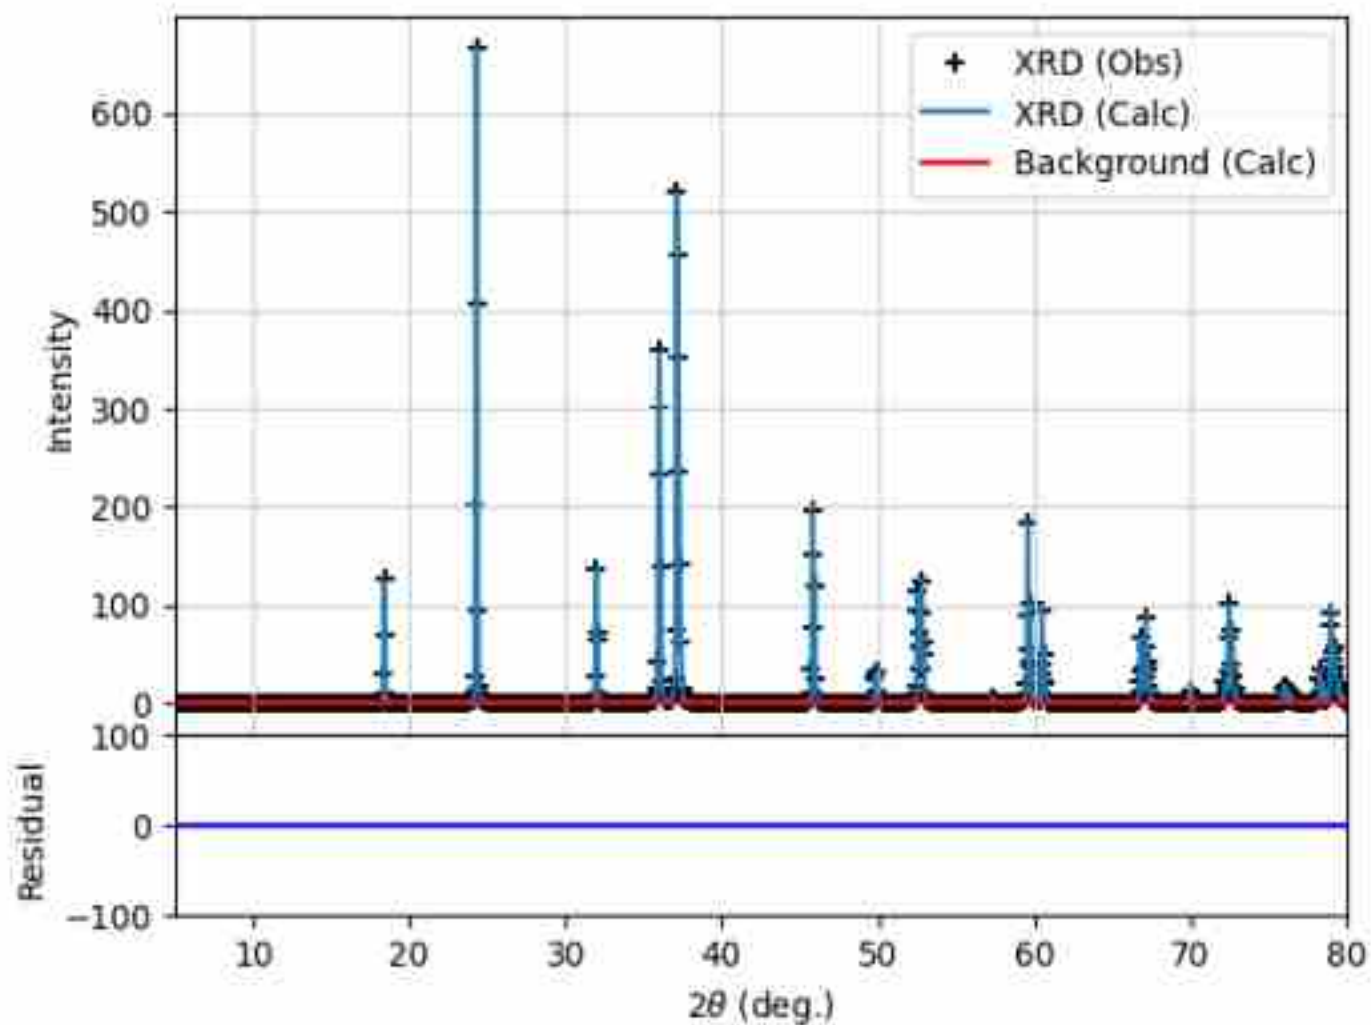

| RMSE before RR | Rwp     | RMSE after RR |
|----------------|---------|---------------|
| 0.011          | 0.00339 | 0.00084       |

# Pu1U1C2

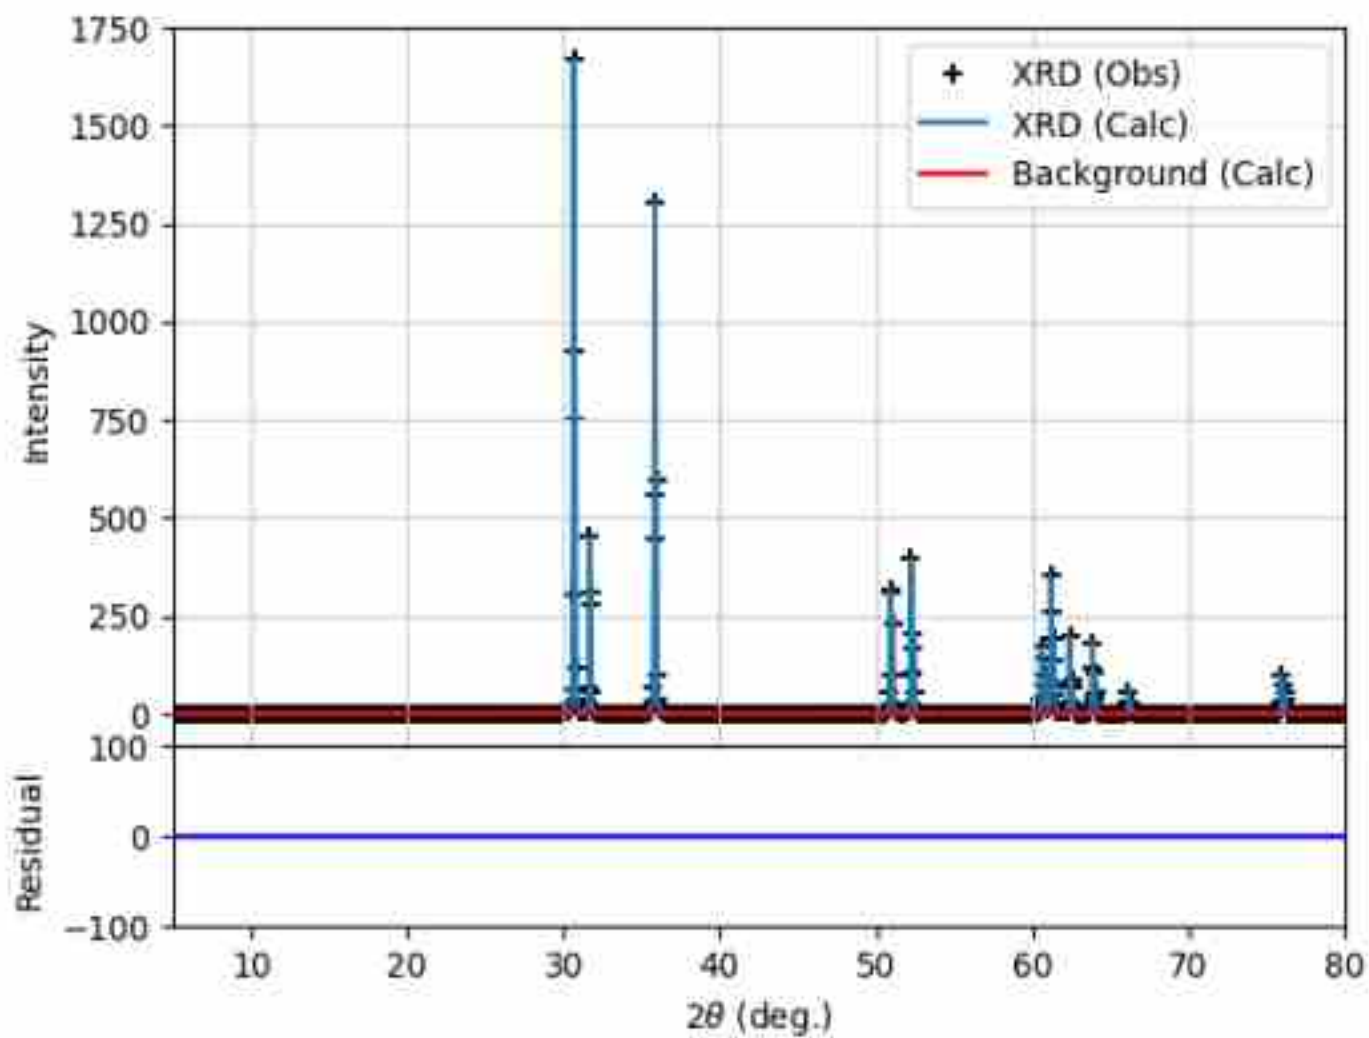

| RMSE before RR | Rwp     | RMSE after RR |
|----------------|---------|---------------|
| 0.011          | 0.00808 | 0.00266       |

# Pu2C16

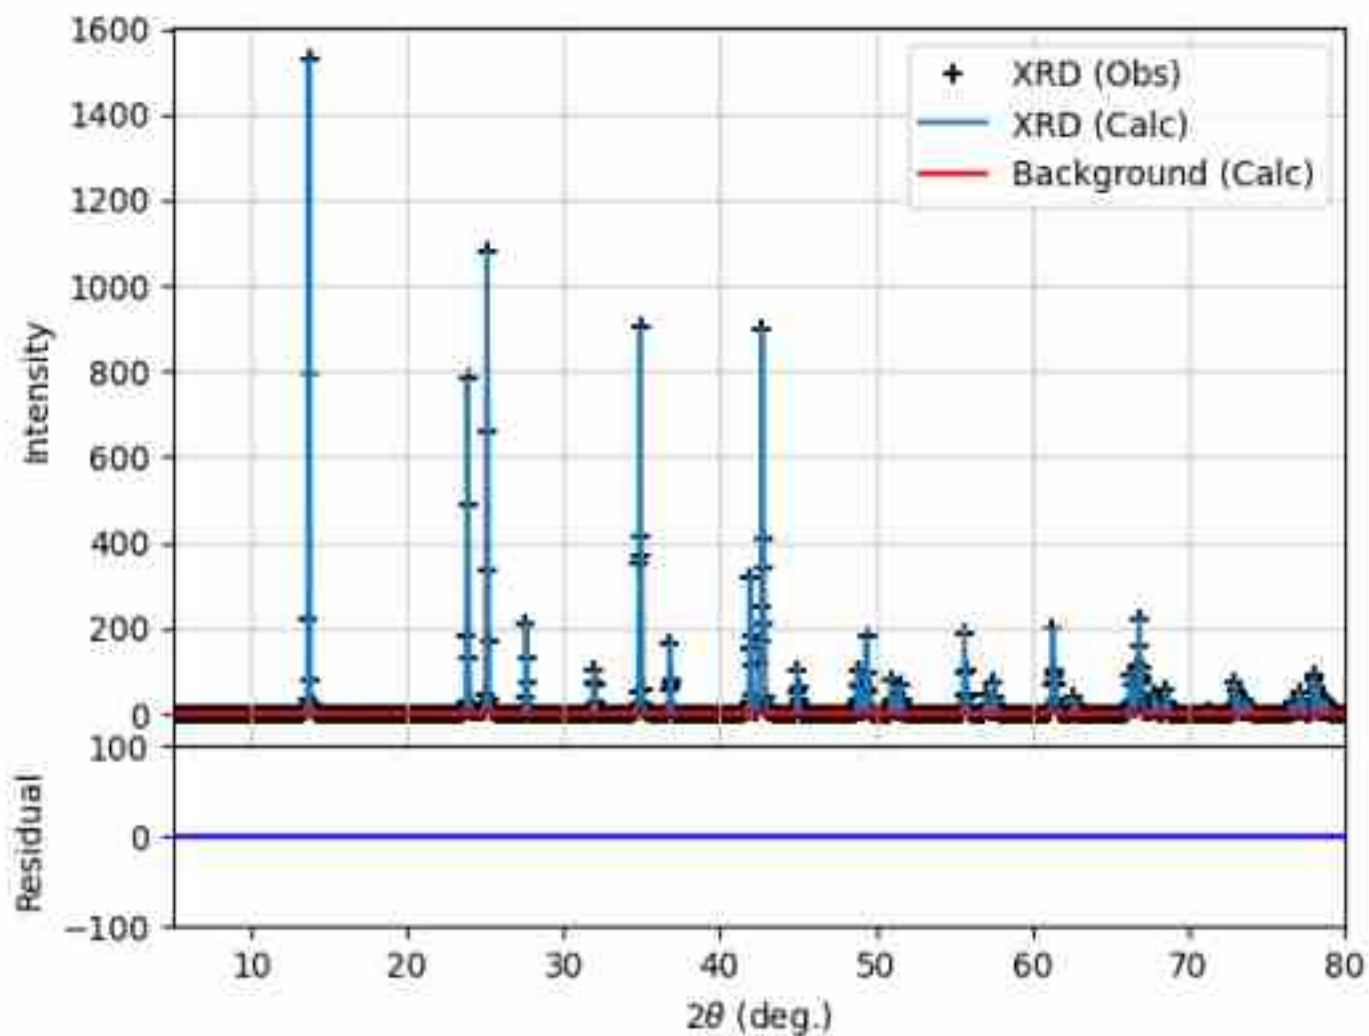

| RMSE before RR | Rwp     | RMSE after RR |
|----------------|---------|---------------|
| 0.011          | 0.00443 | 0.00097       |

# Pu6Si4

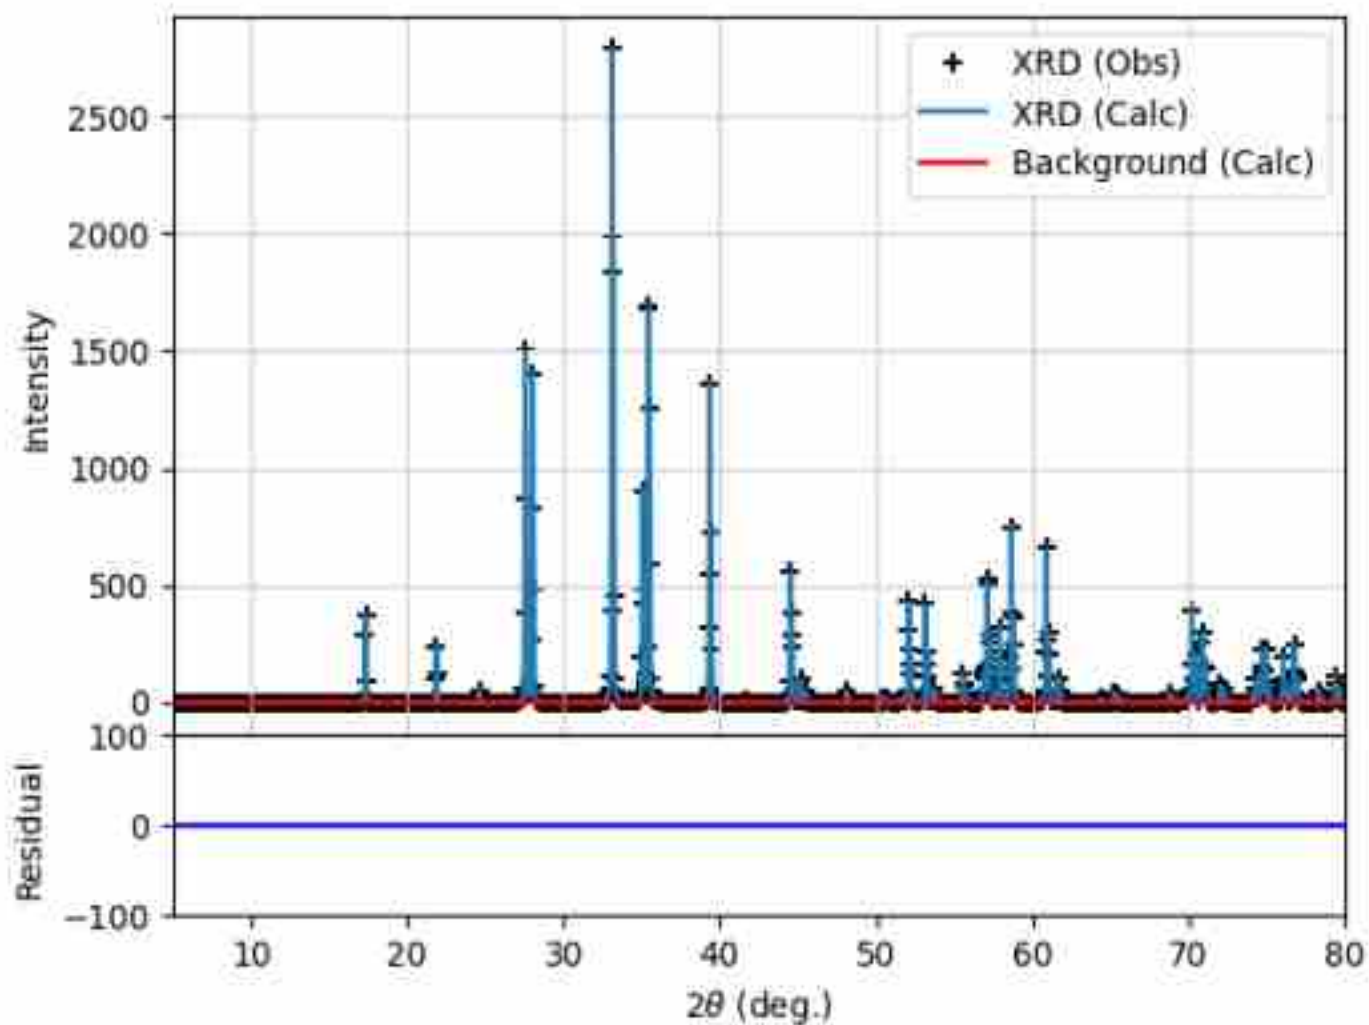

| RMSE before RR | Rwp     | RMSE after RR |
|----------------|---------|---------------|
| 0.011          | 0.00594 | 0.00097       |

# Rb1Nd1Te2

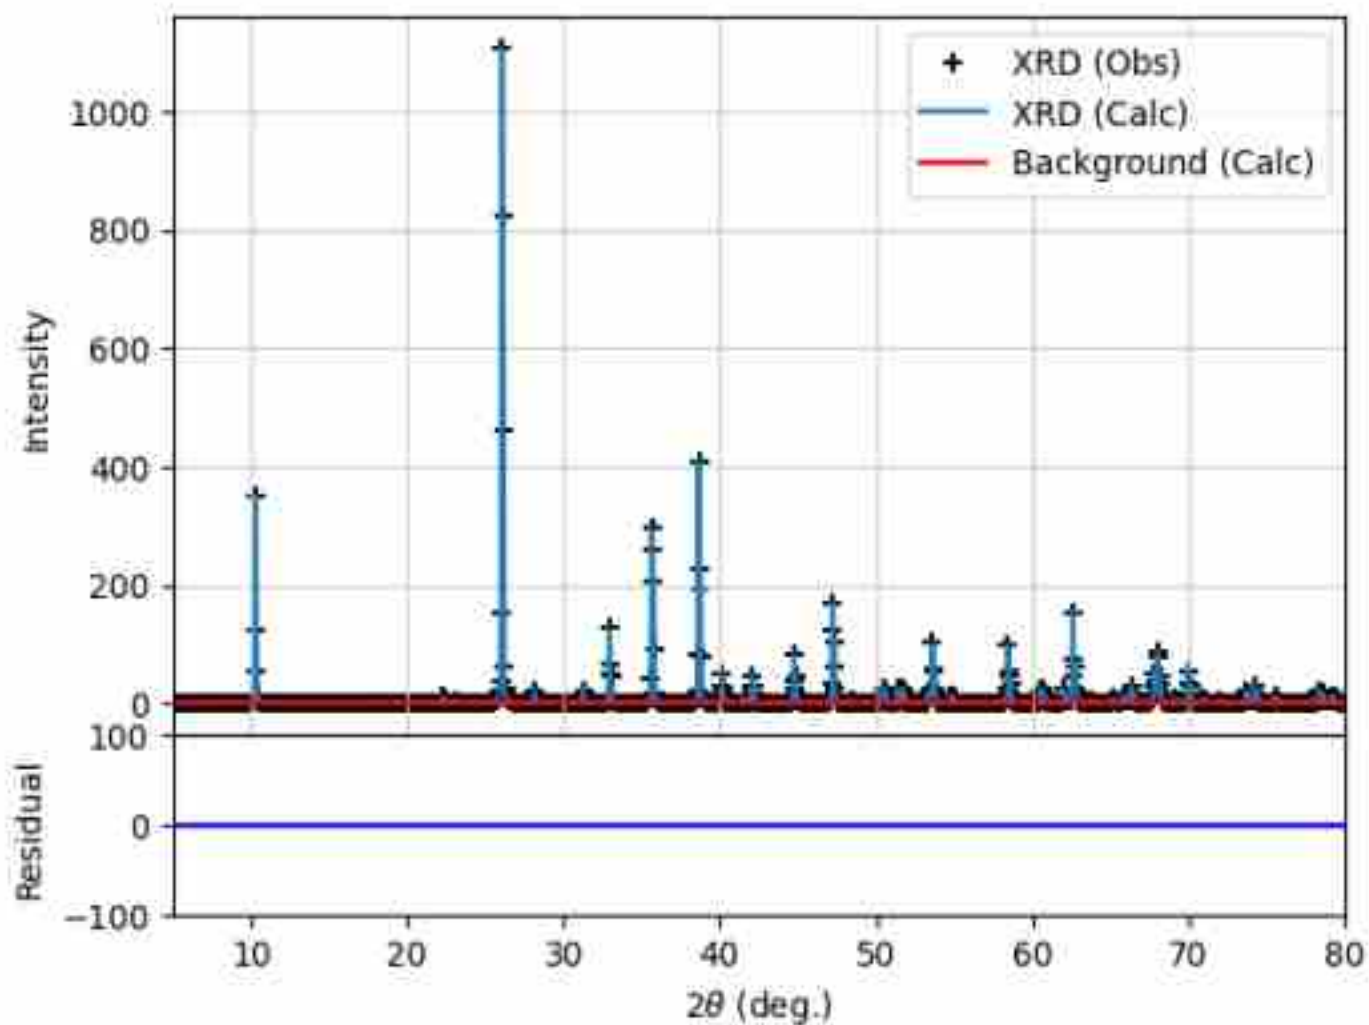

| RMSE before RR | Rwp     | RMSE after RR |
|----------------|---------|---------------|
| 0.011          | 0.00305 | 0.00015       |

# Rb1Pa1O3

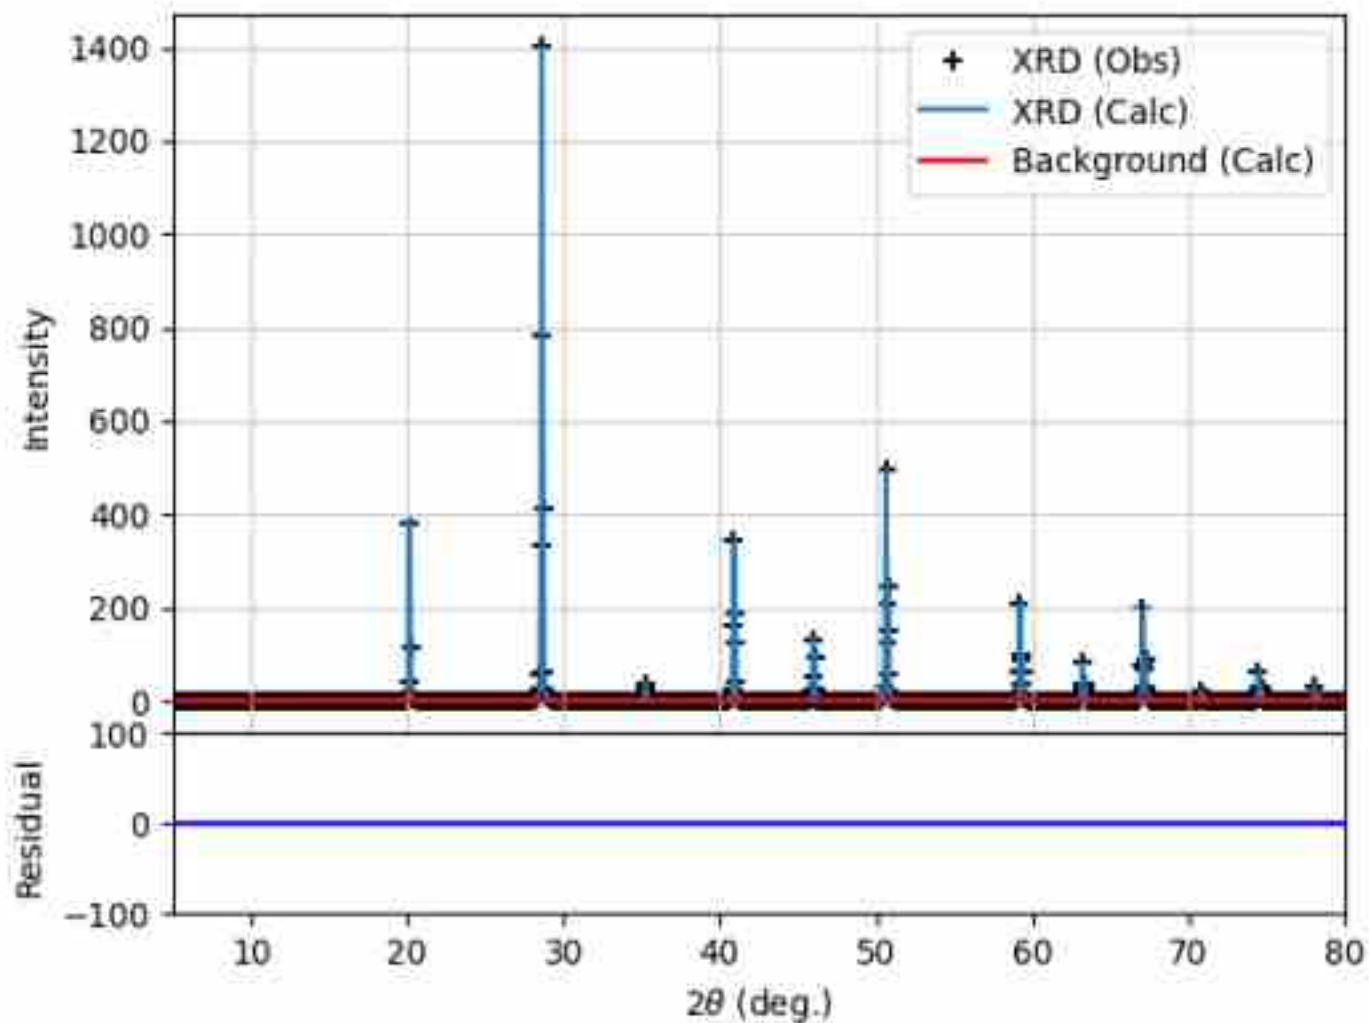

| RMSE before RR | Rwp     | RMSE after RR |
|----------------|---------|---------------|
| 0.011          | 0.00465 | 0.00167       |



# Rb1Y1S2

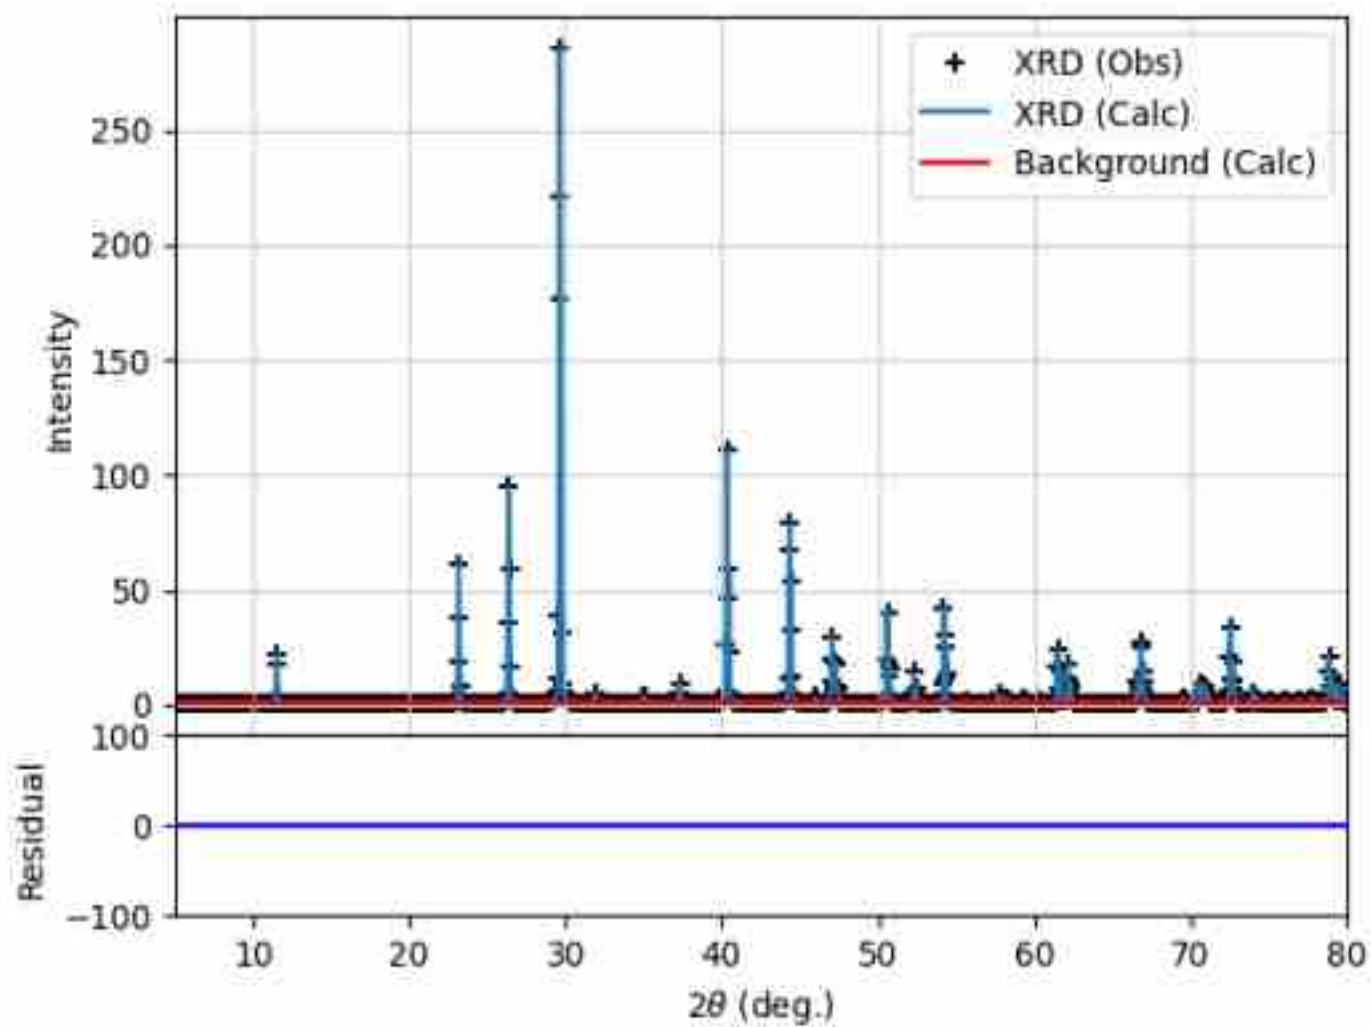

| RMSE before RR | Rwp     | RMSE after RR |
|----------------|---------|---------------|
| 0.011          | 0.00279 | 0.0003        |

# Rb<sub>2</sub>Hg<sub>1</sub>As<sub>1</sub>I<sub>6</sub>

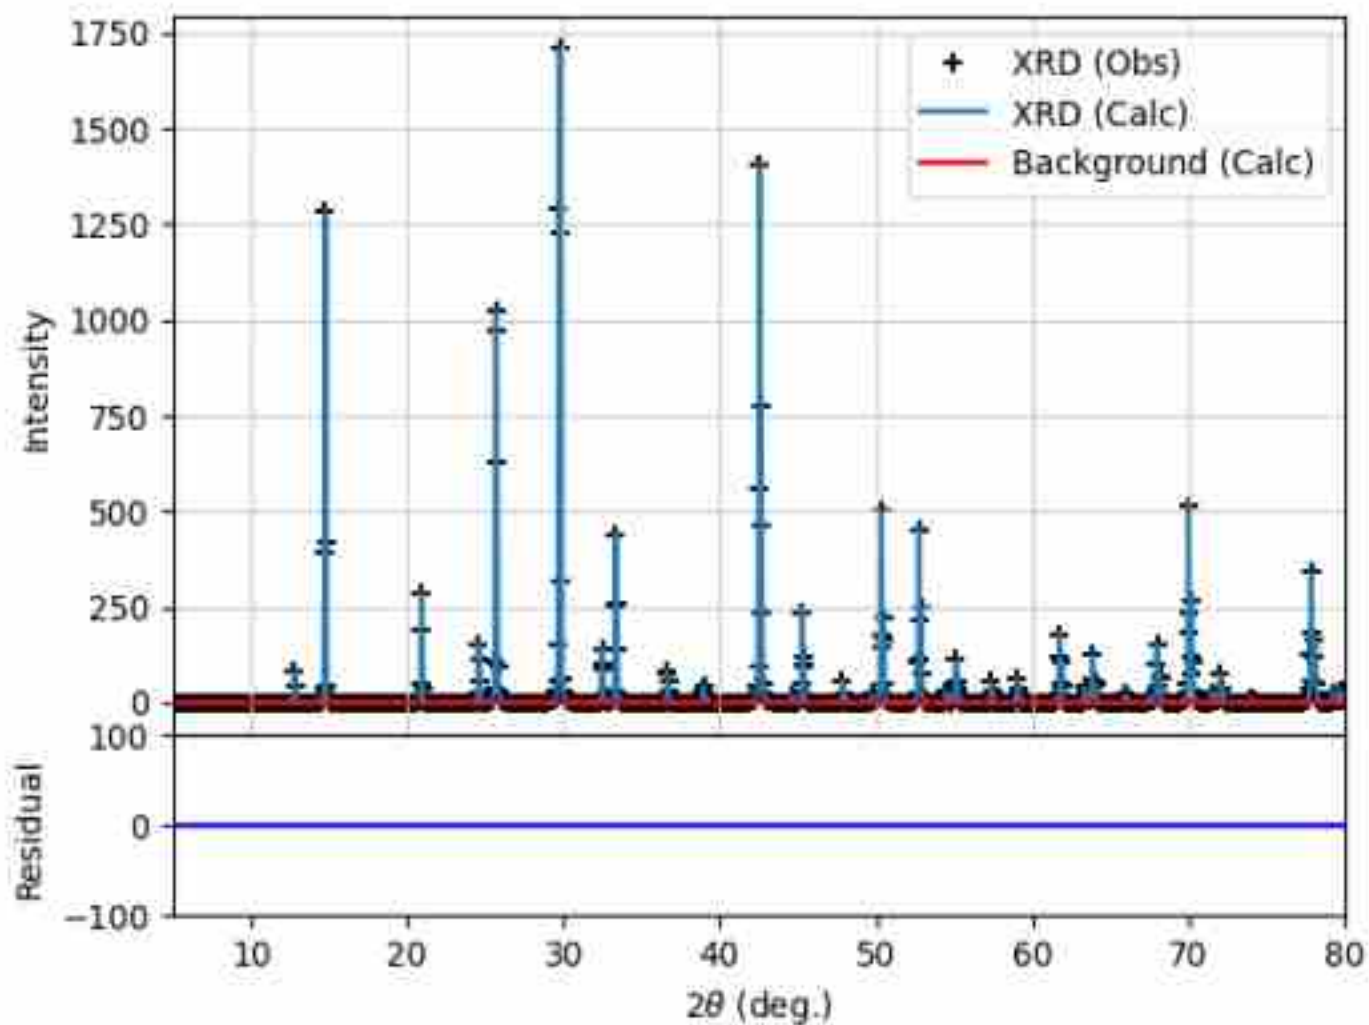

| RMSE before RR | Rwp     | RMSE after RR |
|----------------|---------|---------------|
| 0.011          | 0.03987 | 0.00166       |

# Rb<sub>2</sub>In<sub>2</sub>F<sub>6</sub>

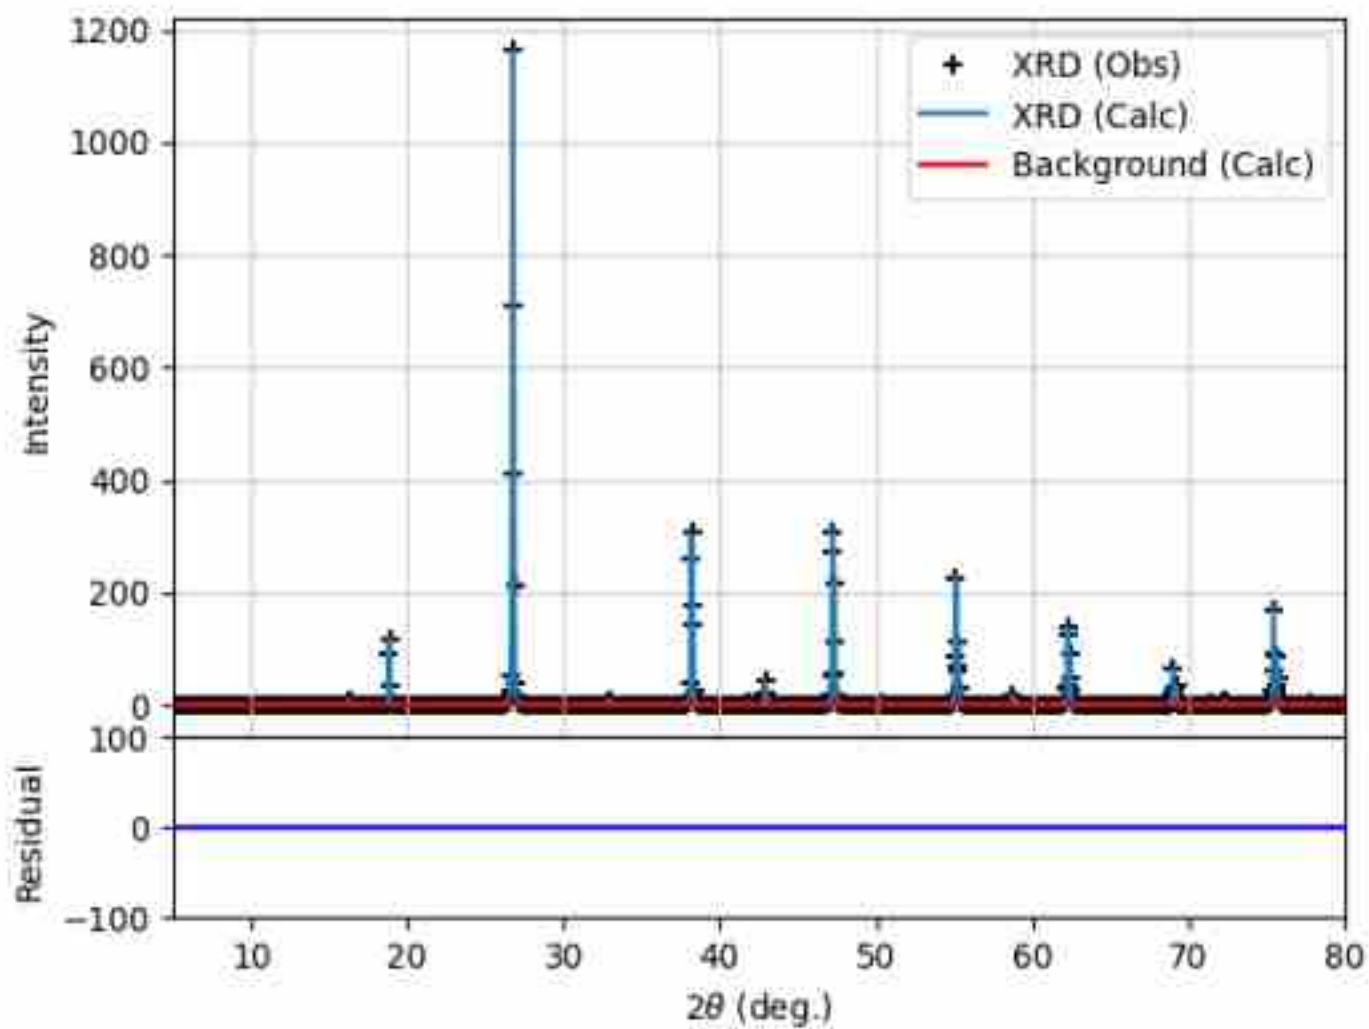

| RMSE before RR | Rwp     | RMSE after RR |
|----------------|---------|---------------|
| 0.011          | 0.00833 | 0.00277       |

# Rb<sub>2</sub>LiAlF<sub>6</sub>

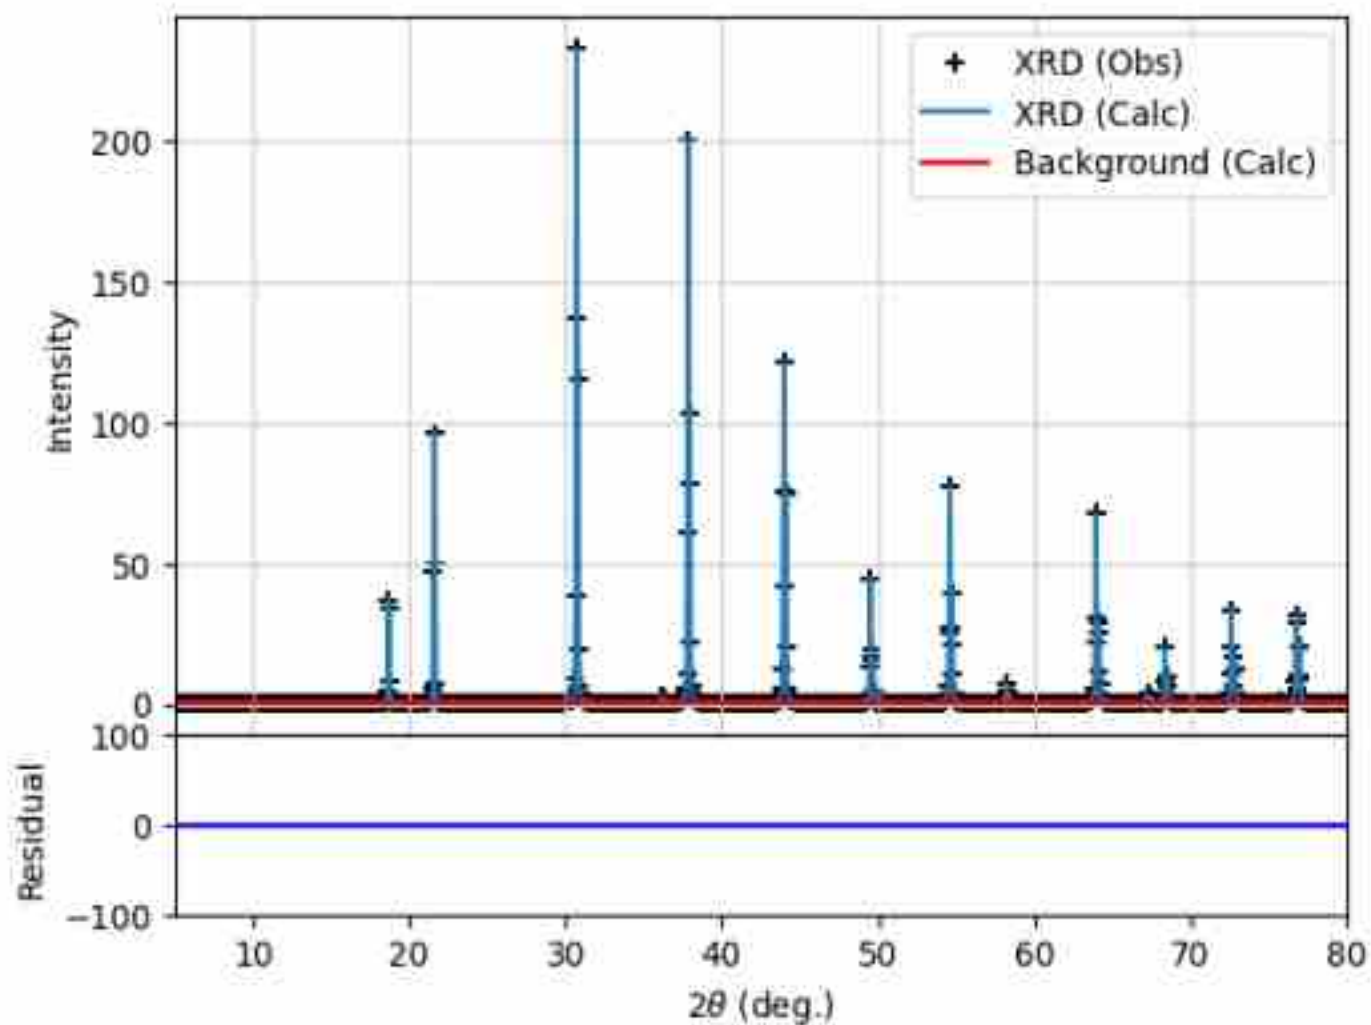

| RMSE before RR | Rwp     | RMSE after RR |
|----------------|---------|---------------|
| 0.011          | 0.01295 | 0.00389       |

# Rb<sub>2</sub>LiInF<sub>6</sub>

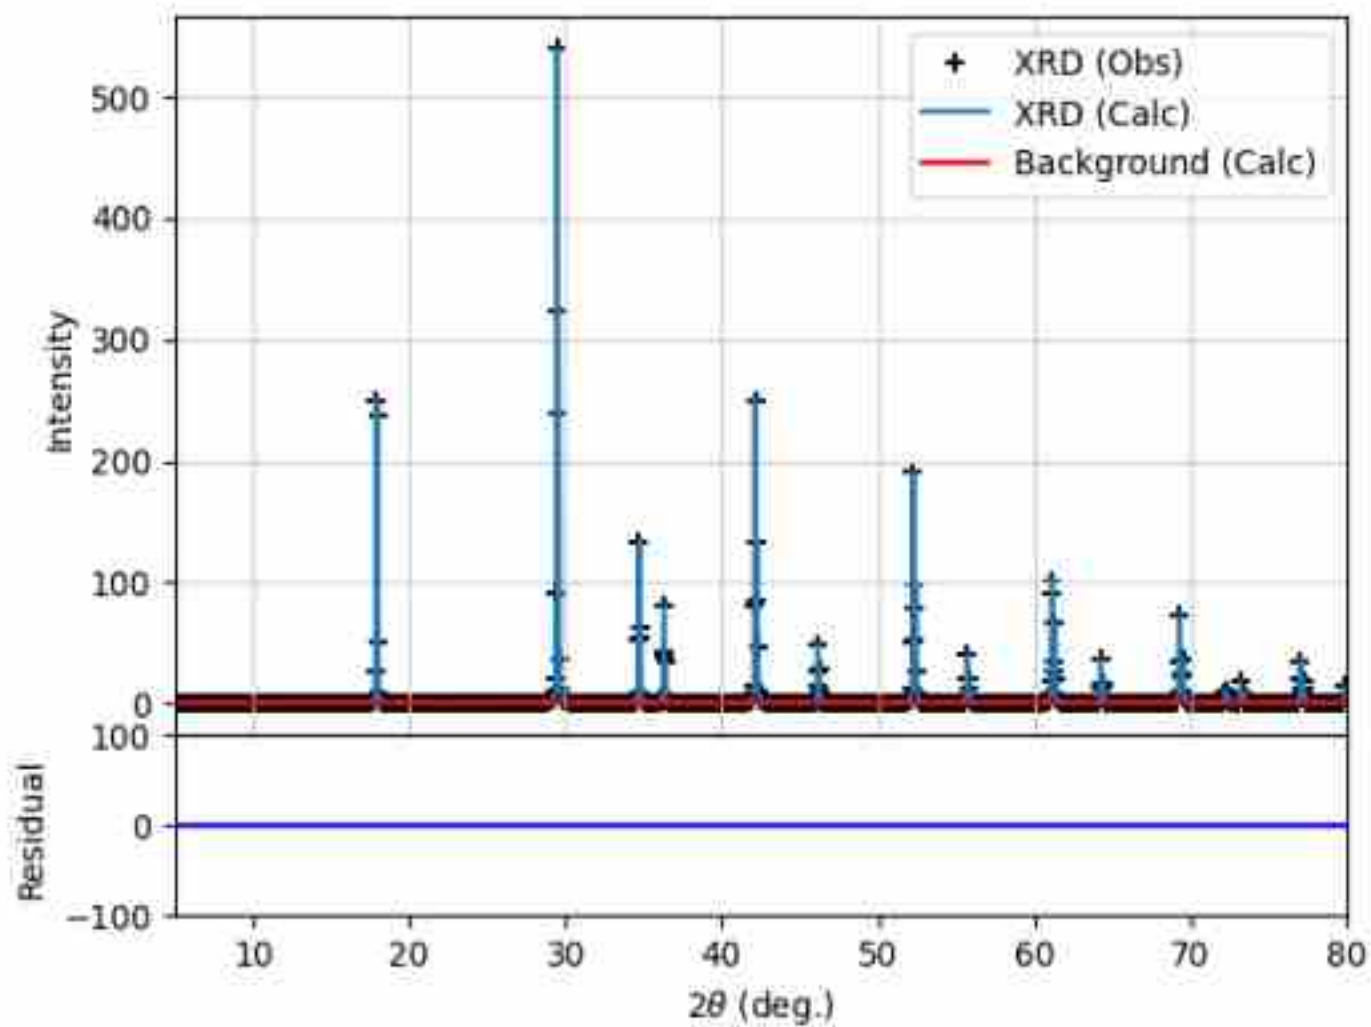

| RMSE before RR | Rwp     | RMSE after RR |
|----------------|---------|---------------|
| 0.011          | 0.00789 | 0.00355       |

# Rb<sub>2</sub>Na<sub>1</sub>Co<sub>1</sub>F<sub>6</sub>

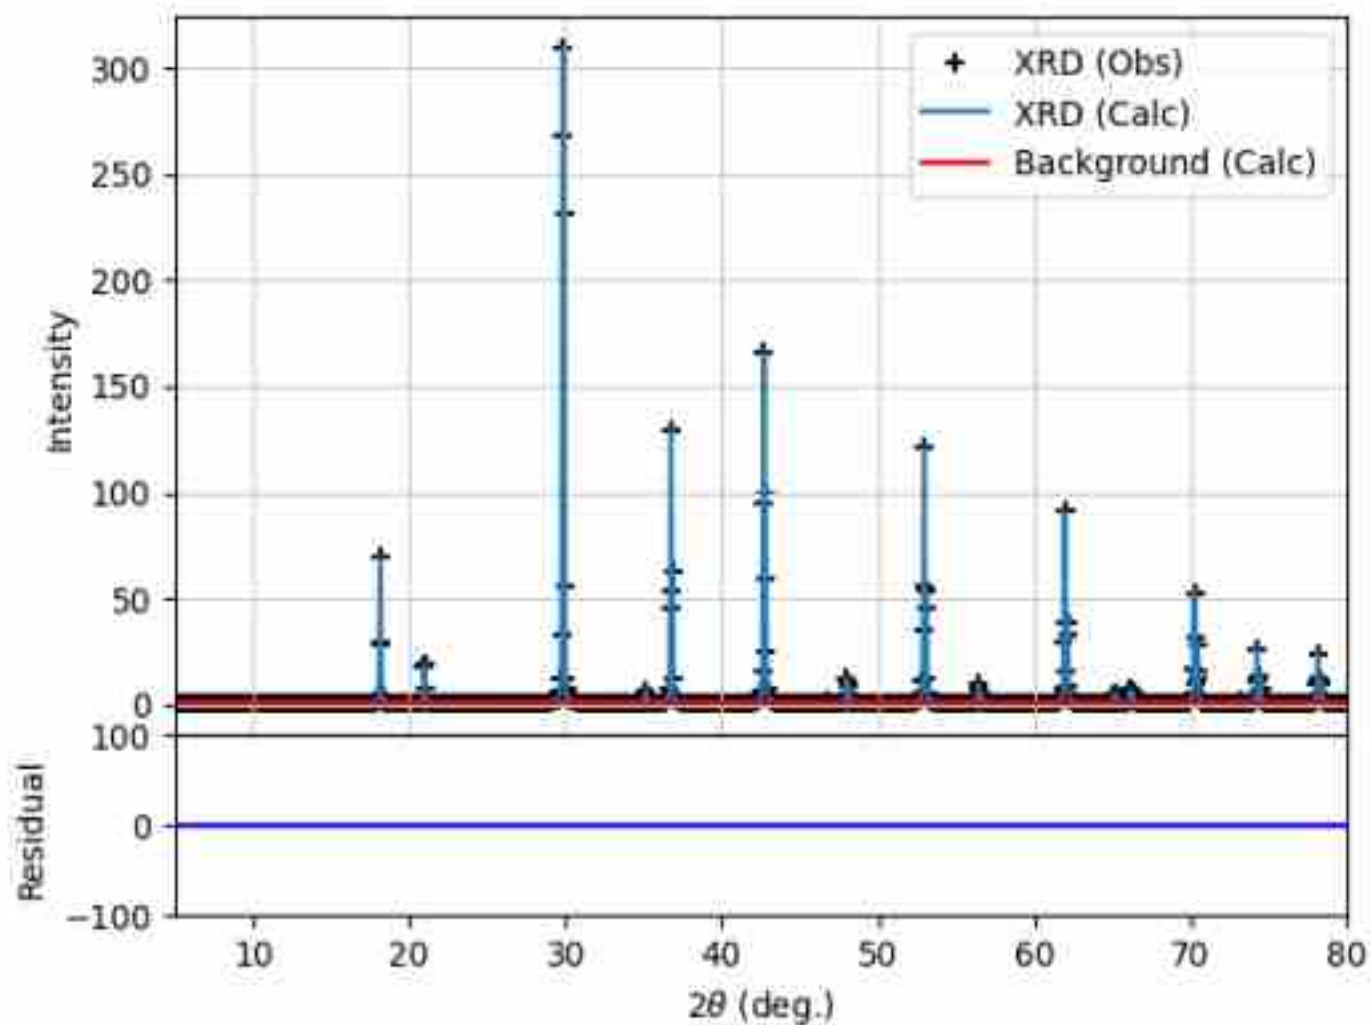

| RMSE before RR | Rwp     | RMSE after RR |
|----------------|---------|---------------|
| 0.011          | 0.01864 | 0.00387       |

# Rb<sub>2</sub>Na<sub>1</sub>Nd<sub>1</sub>I<sub>6</sub>

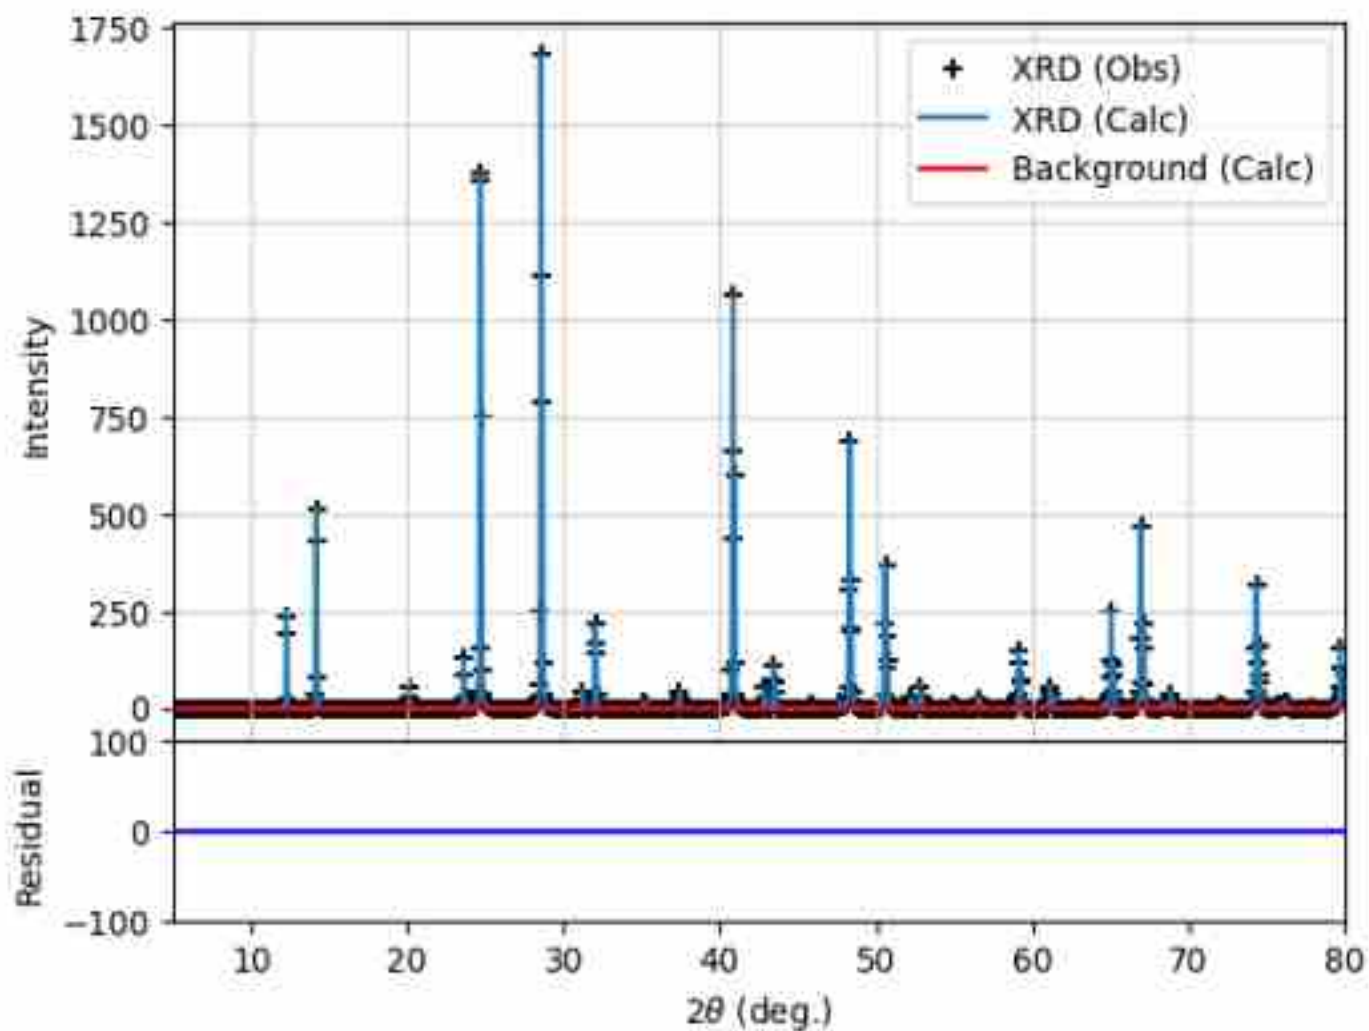

| RMSE before RR | Rwp     | RMSE after RR |
|----------------|---------|---------------|
| 0.011          | 0.02234 | 0.00158       |

# Rb<sub>2</sub>TbCl<sub>6</sub>

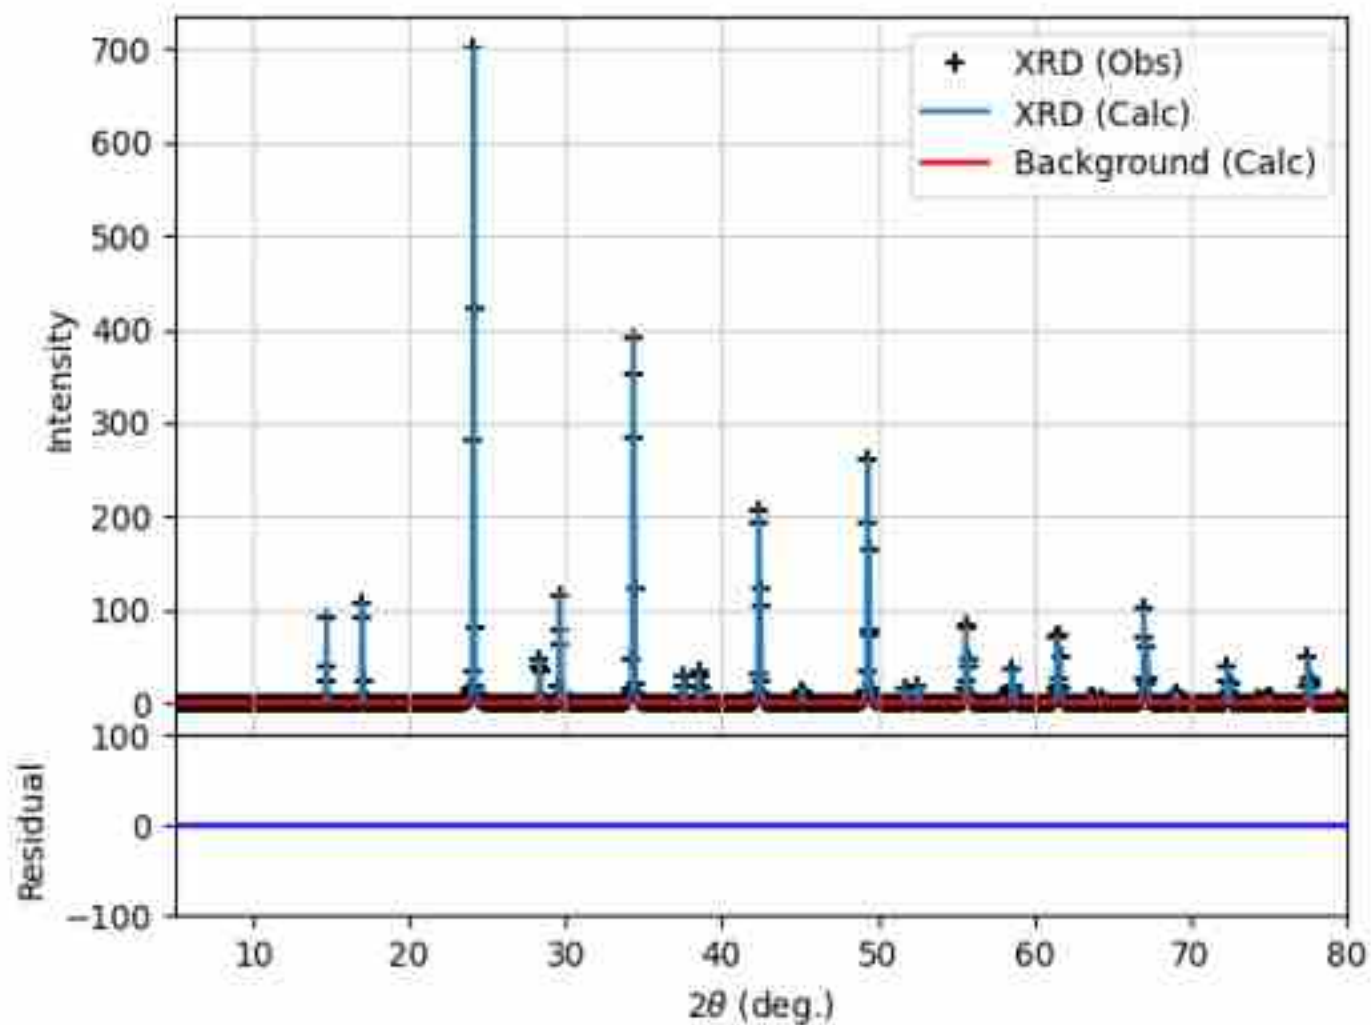

| RMSE before RR | Rwp     | RMSE after RR |
|----------------|---------|---------------|
| 0.011          | 0.01562 | 0.00235       |



# Rb<sub>2</sub>TlI<sub>6</sub>AuI<sub>6</sub>

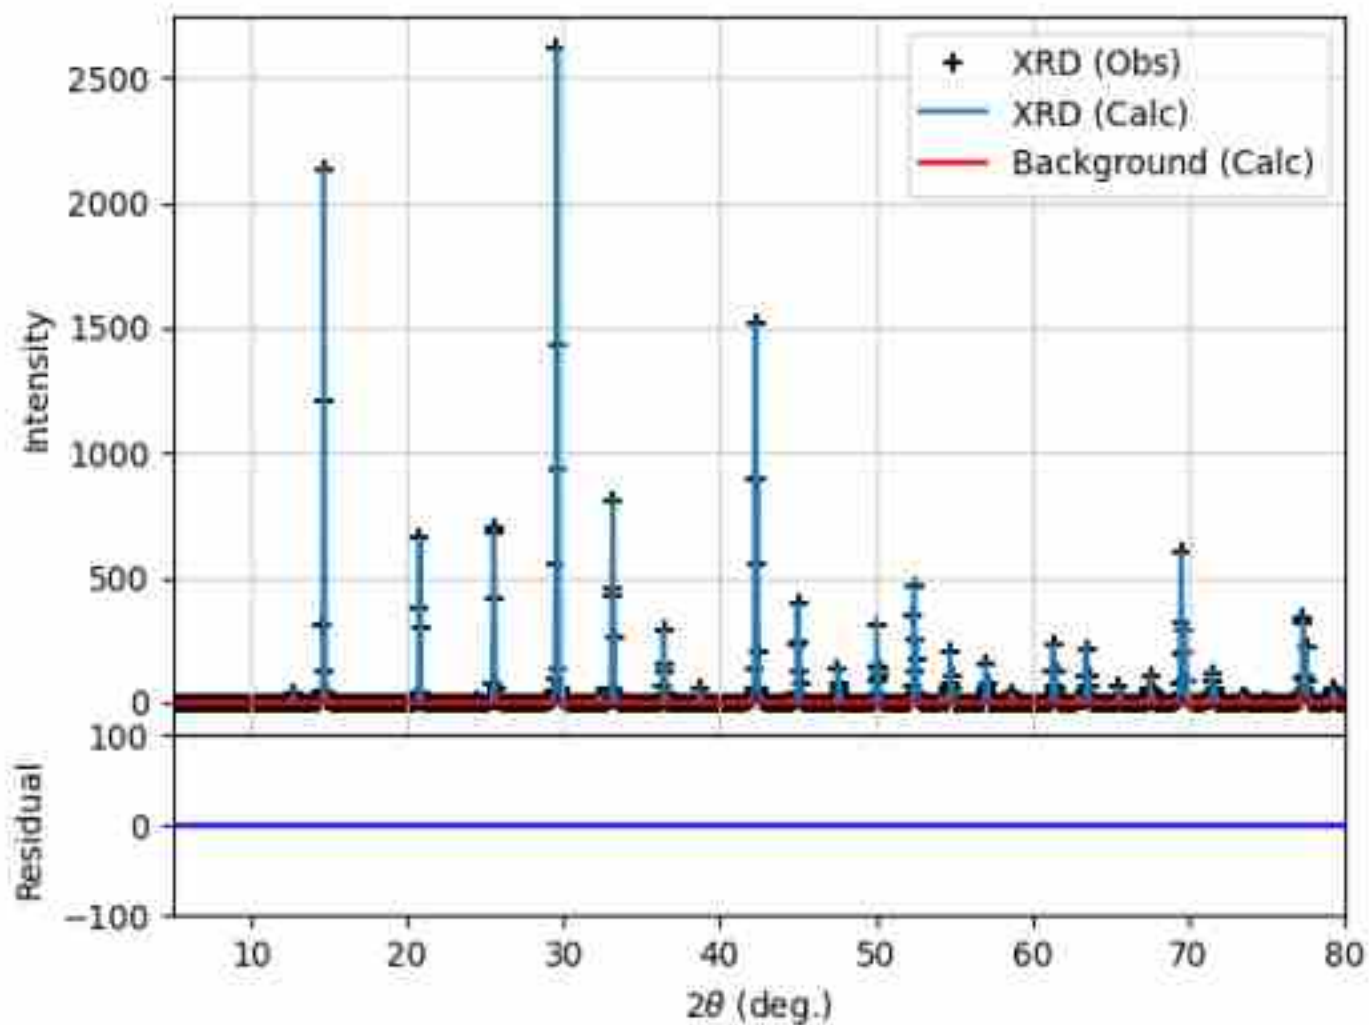

| RMSE before RR | Rwp     | RMSE after RR |
|----------------|---------|---------------|
| 0.011          | 0.04162 | 0.00195       |

# Rb<sub>2</sub>TlGaCl<sub>6</sub>

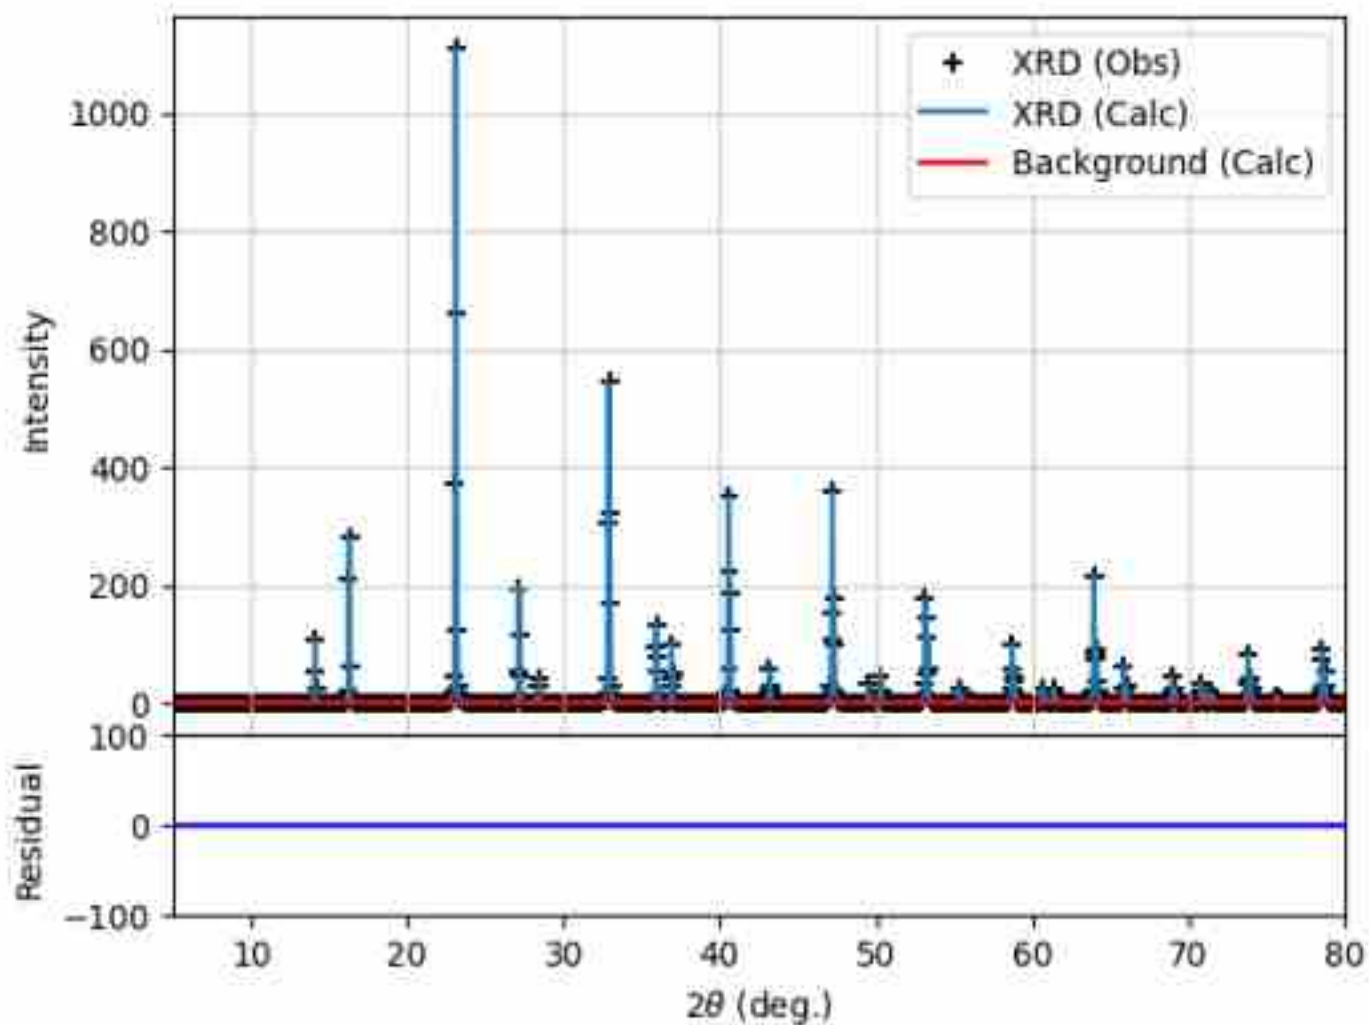

| RMSE before RR | Rwp     | RMSE after RR |
|----------------|---------|---------------|
| 0.011          | 0.00673 | 0.00186       |

# Rb3Br1O1

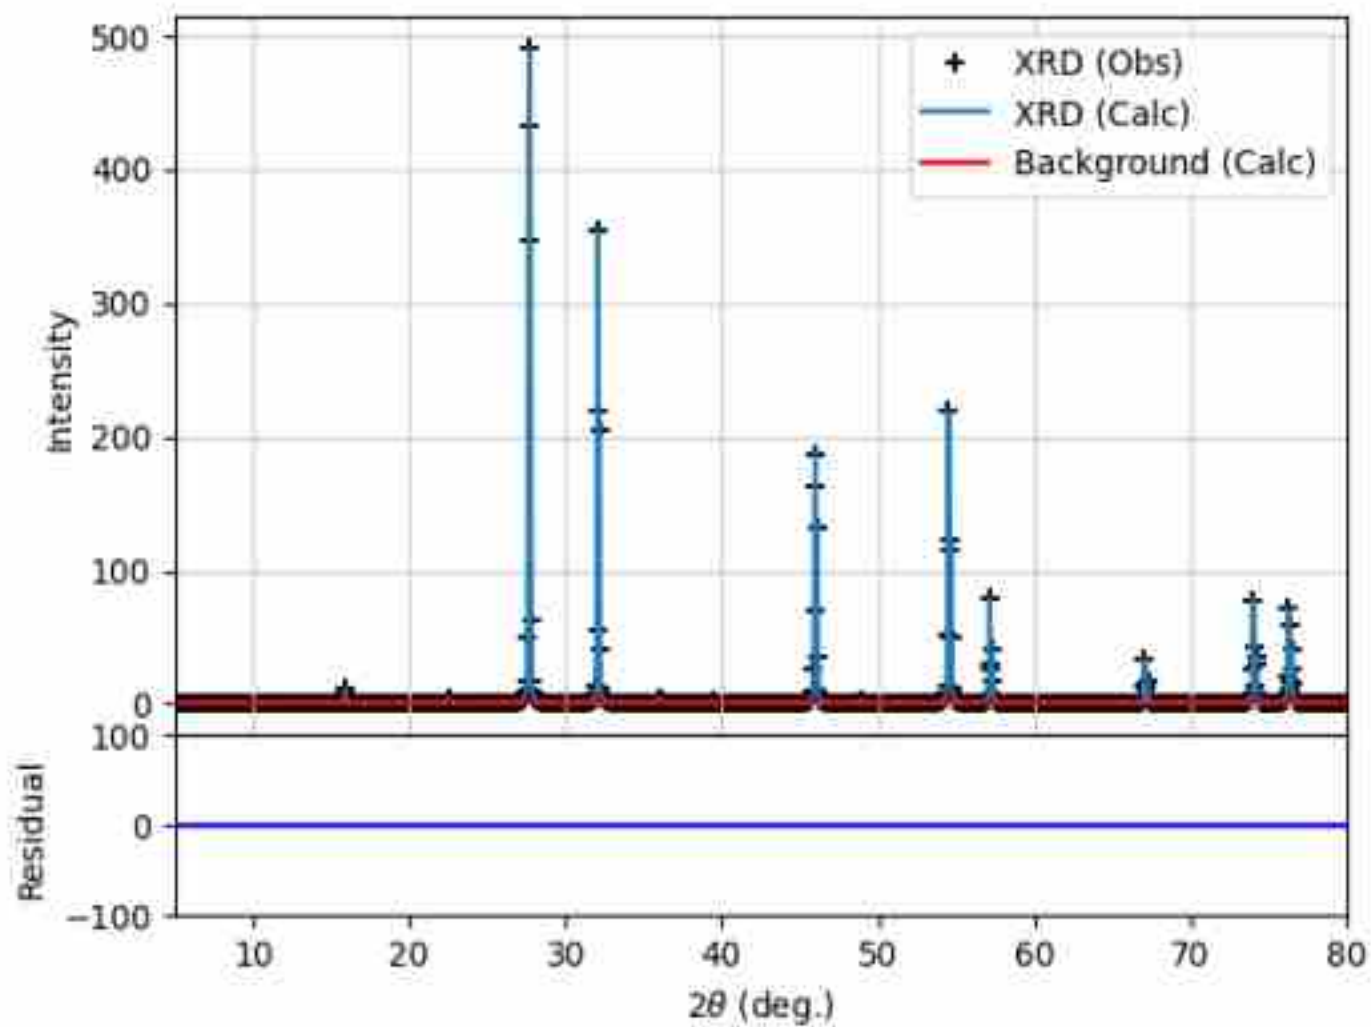

| RMSE before RR | Rwp    | RMSE after RR |
|----------------|--------|---------------|
| 0.011          | 0.0099 | 0.00075       |

# Rb6Na2

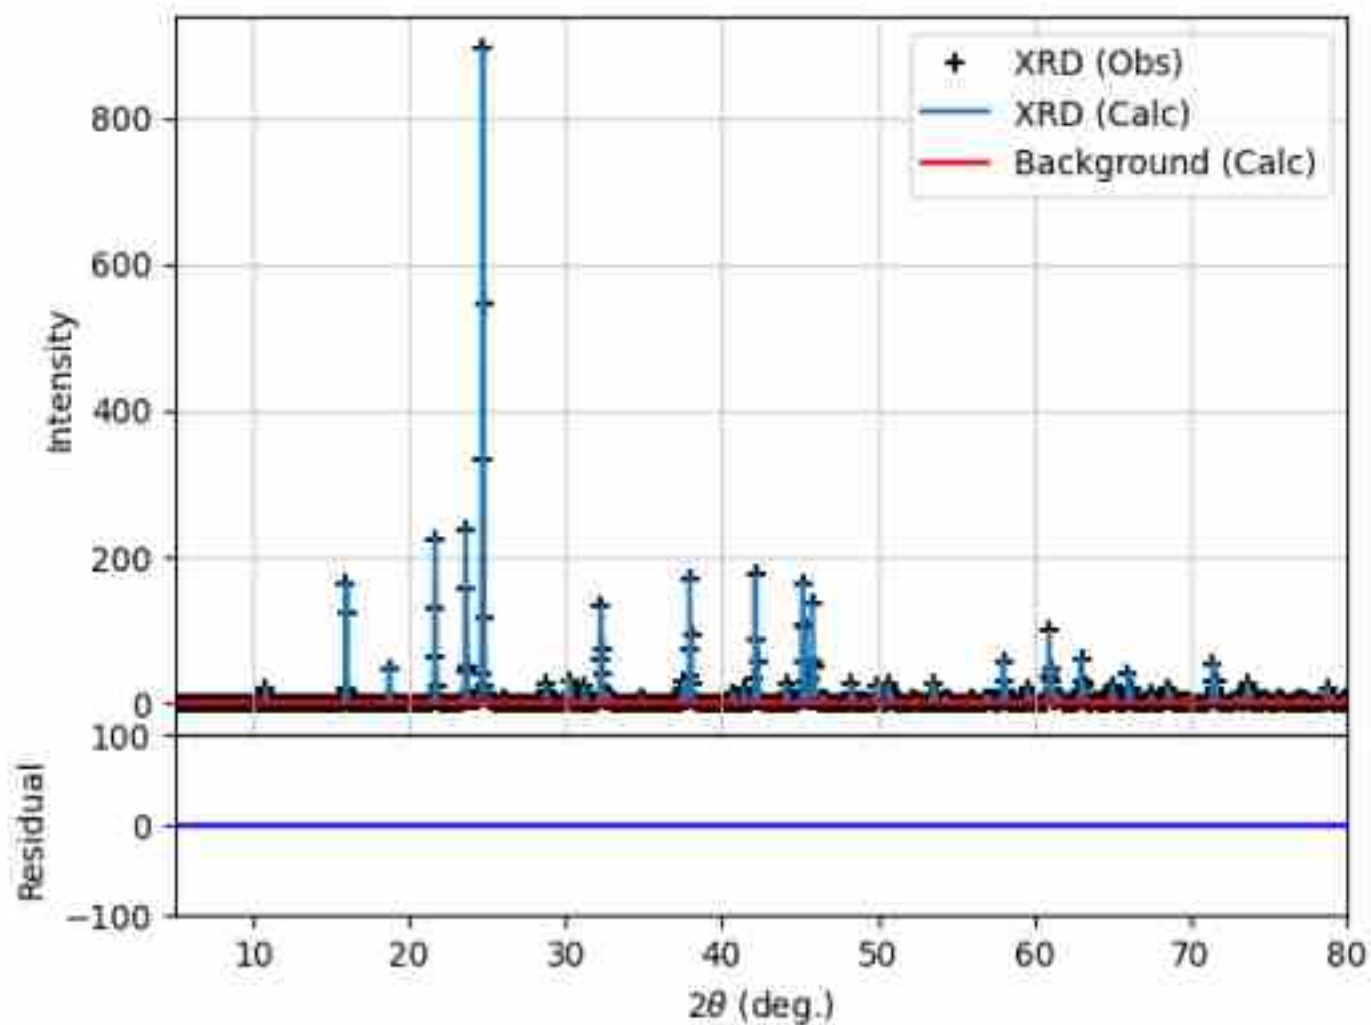

| RMSE before RR | Rwp     | RMSE after RR |
|----------------|---------|---------------|
| 0.011          | 0.02516 | 0.00161       |

# Sm1Ga2Pd2

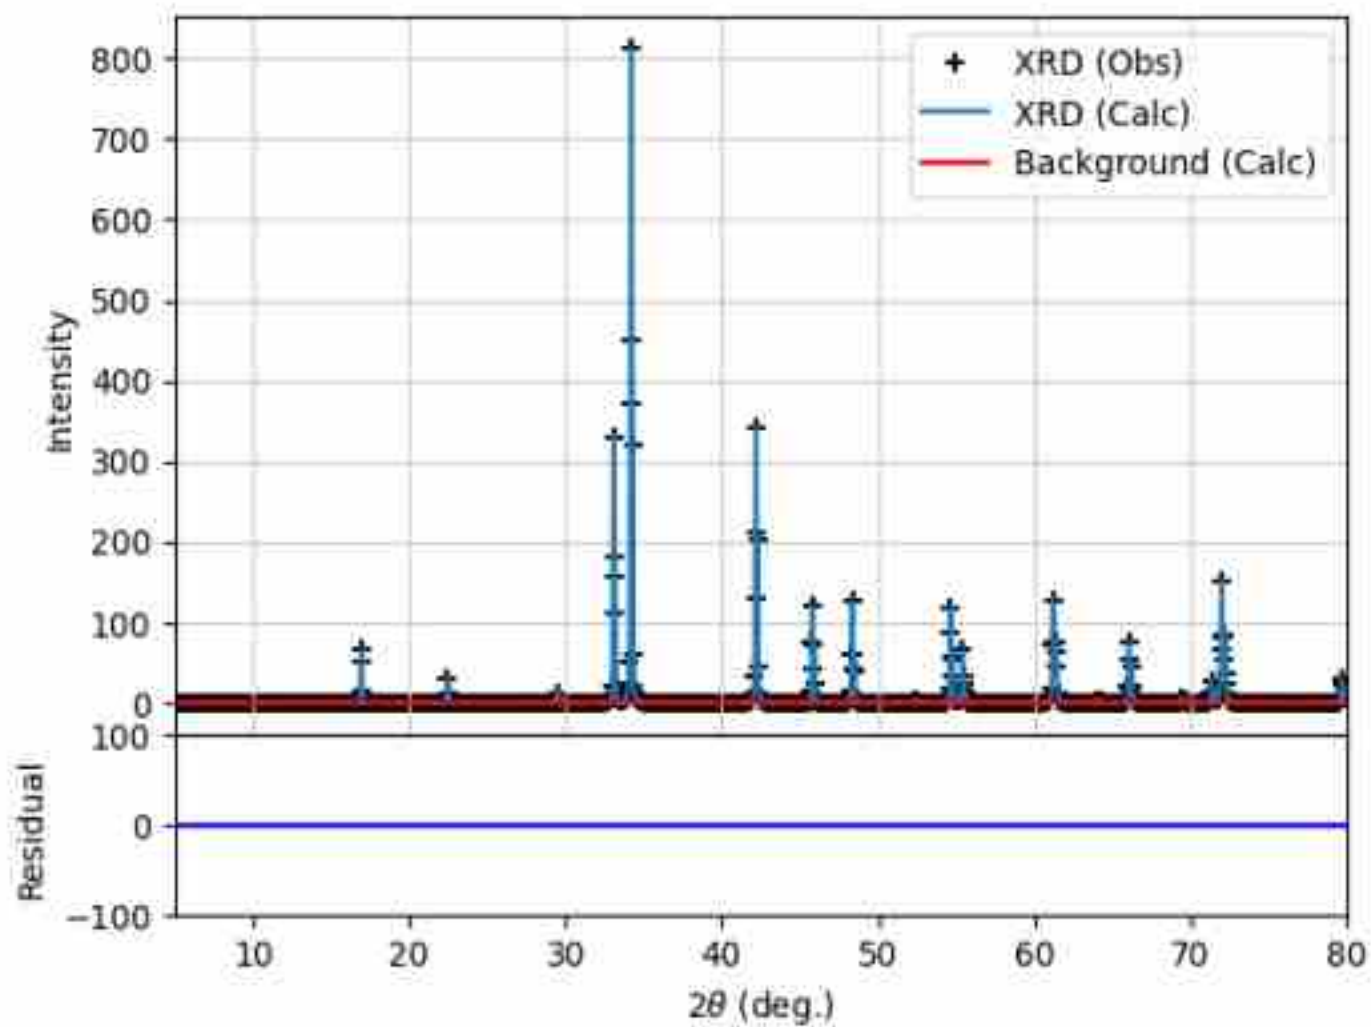

| RMSE before RR | Rwp     | RMSE after RR |
|----------------|---------|---------------|
| 0.011          | 0.00292 | 0.00059       |

# Sm1Ho3Ni4

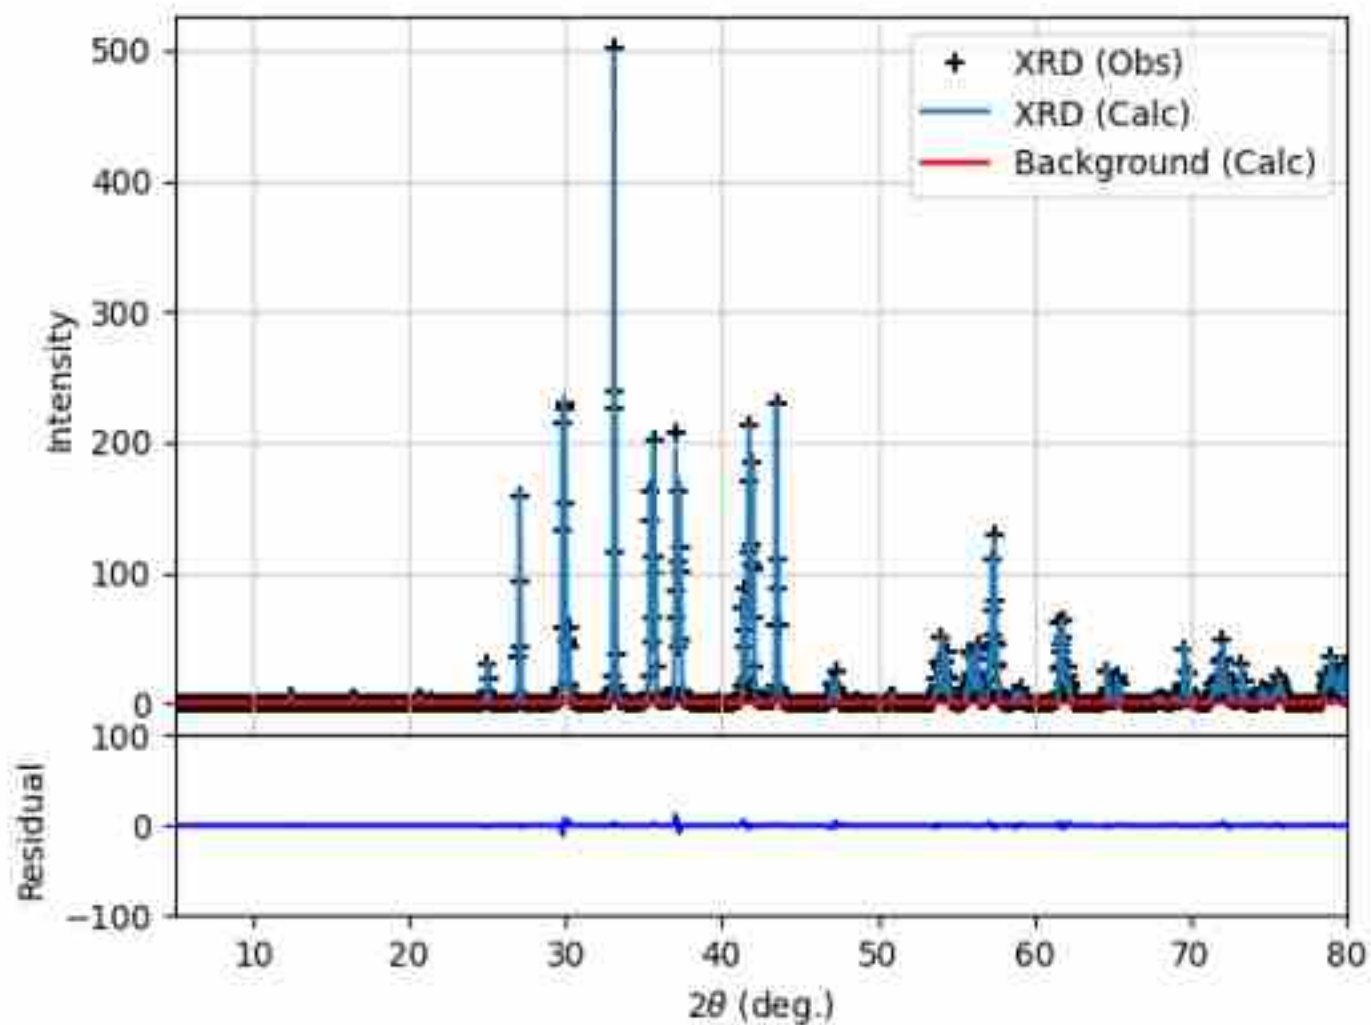

| RMSE before RR | Rwp     | RMSE after RR |
|----------------|---------|---------------|
| 0.011          | 4.26141 | 0.01517       |

# Sm1Mn6Sn6

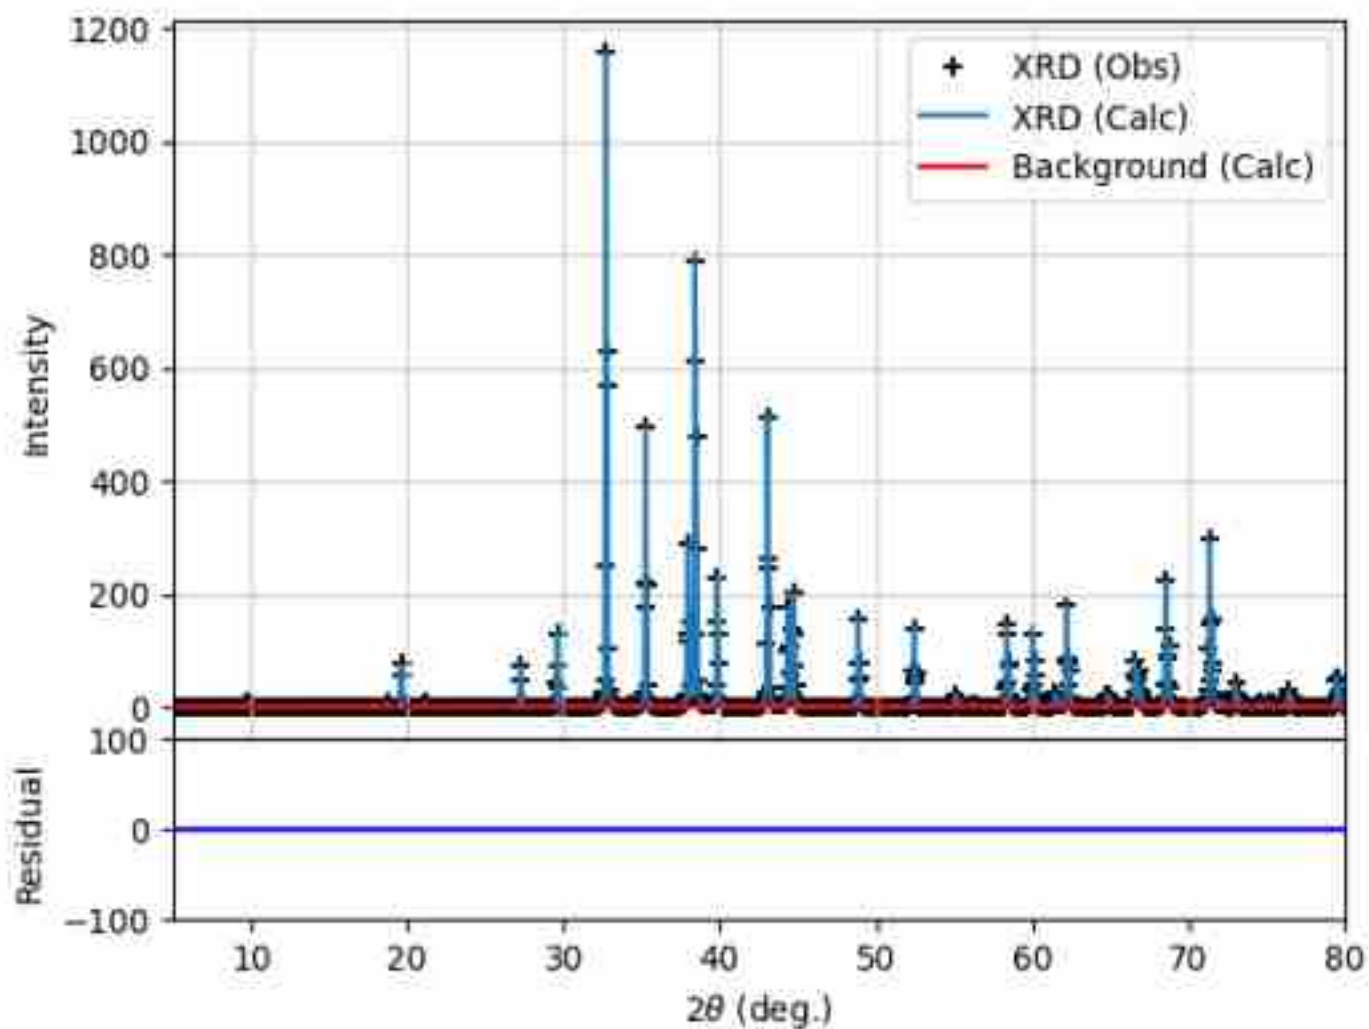

| RMSE before RR | Rwp     | RMSE after RR |
|----------------|---------|---------------|
| 0.011          | 0.00399 | 0.00065       |

# Sm6Gd2

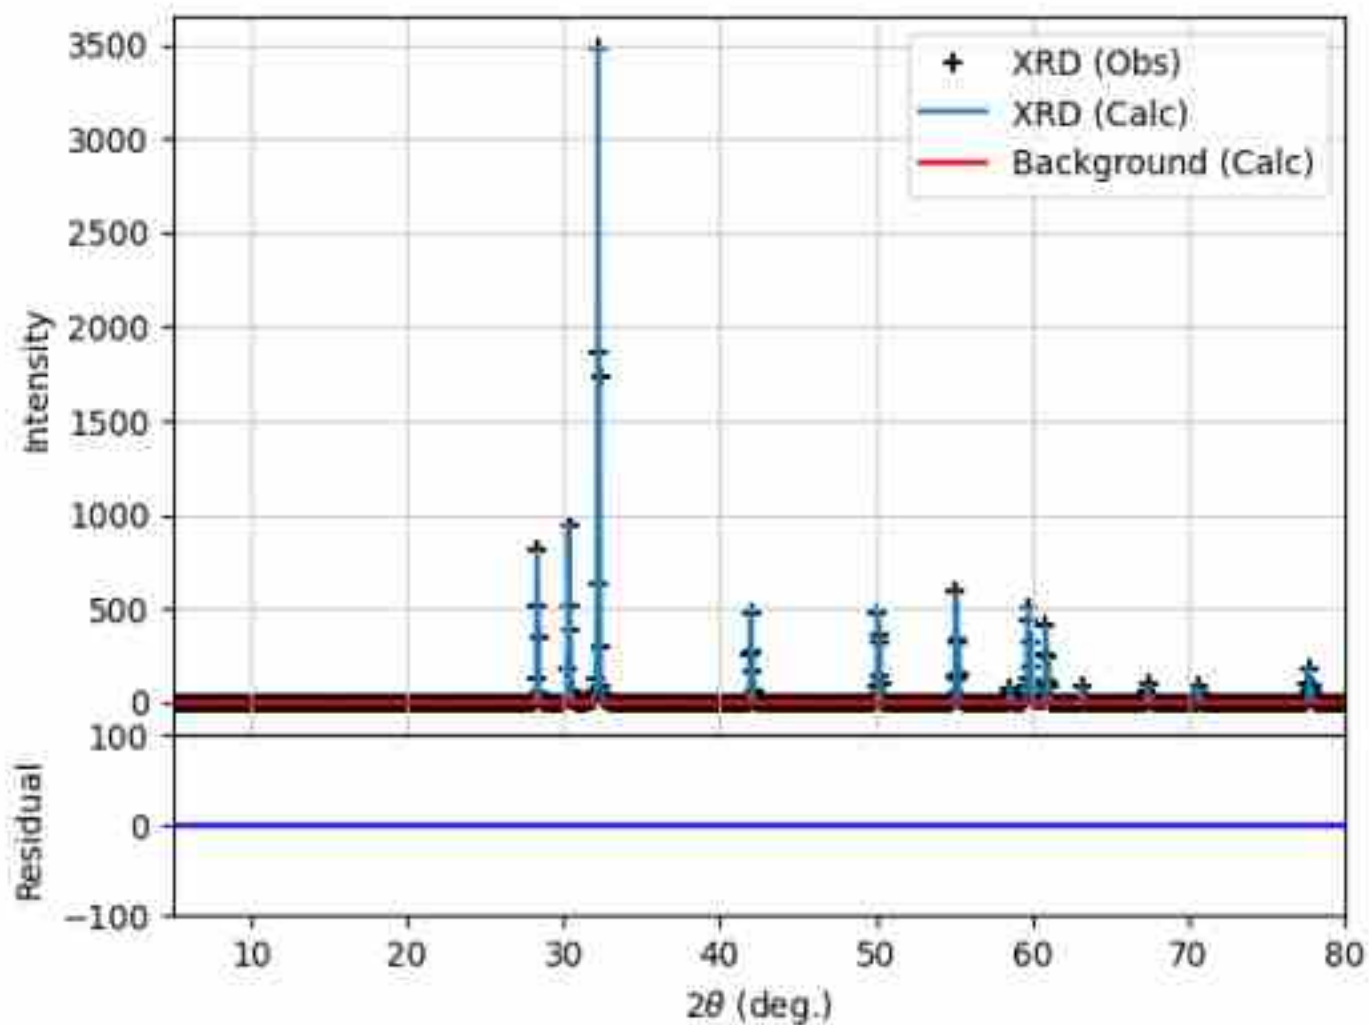

| RMSE before RR | Rwp     | RMSE after RR |
|----------------|---------|---------------|
| 0.011          | 0.00913 | 0.00068       |



# Sr1In2Hg2

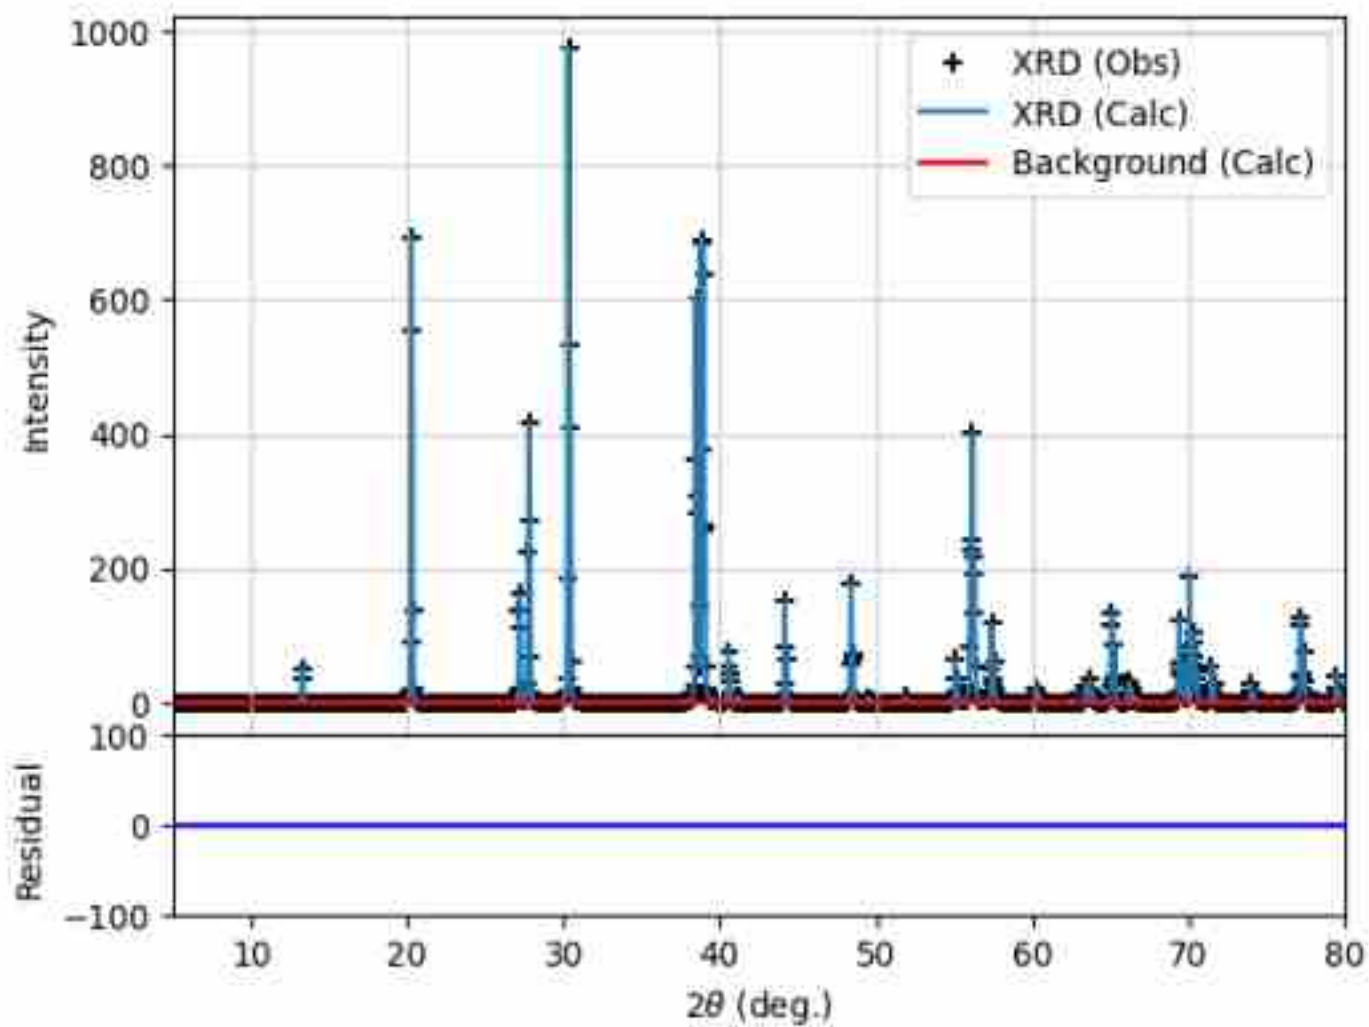

| RMSE before RR | Rwp     | RMSE after RR |
|----------------|---------|---------------|
| 0.011          | 0.00441 | 0.0003        |

# Sr1Tc1O3

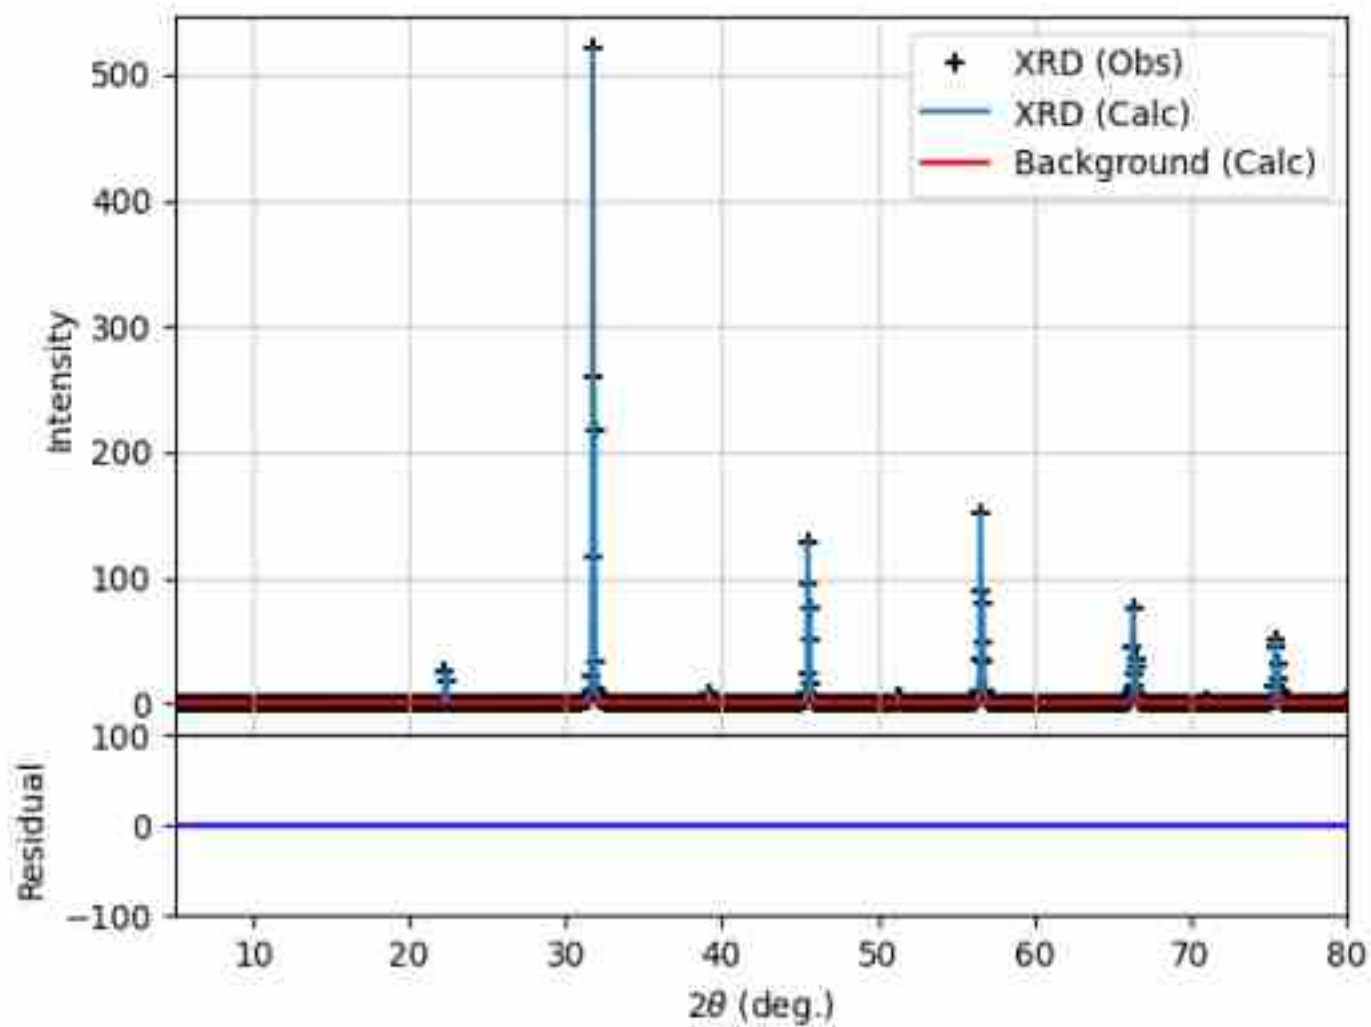

| RMSE before RR | Rwp     | RMSE after RR |
|----------------|---------|---------------|
| 0.011          | 0.01362 | 0.00442       |

# Sr<sub>2</sub>Cd<sub>2</sub>Sn<sub>2</sub>

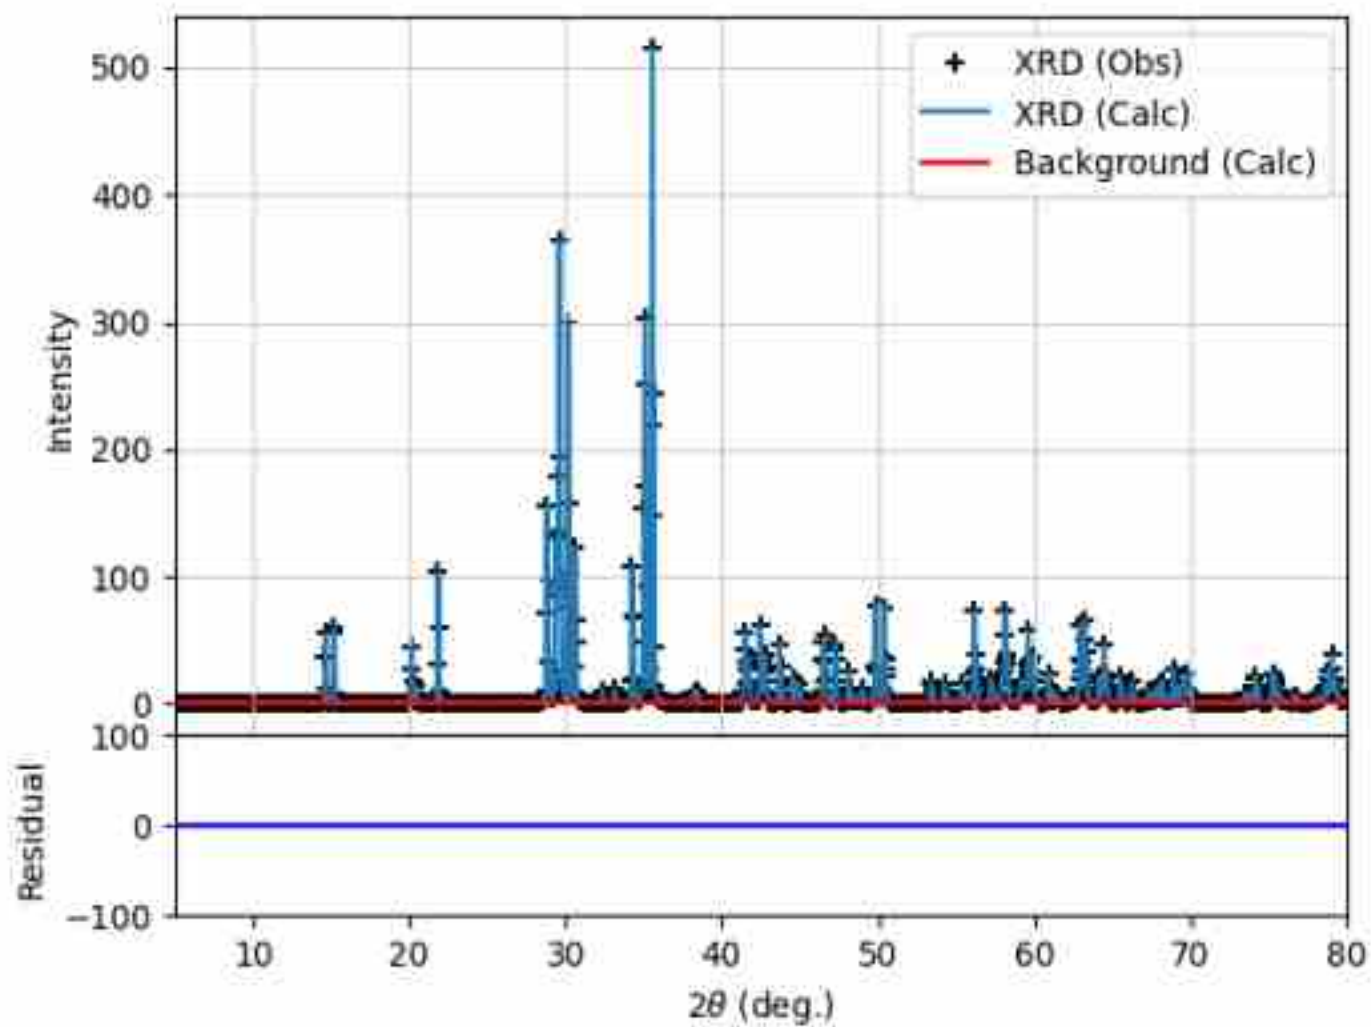

| RMSE before RR | Rwp     | RMSE after RR |
|----------------|---------|---------------|
| 0.011          | 0.00282 | 0.0002        |

# Sr<sub>2</sub>Co<sub>1</sub>Se<sub>10</sub>O<sub>2</sub>

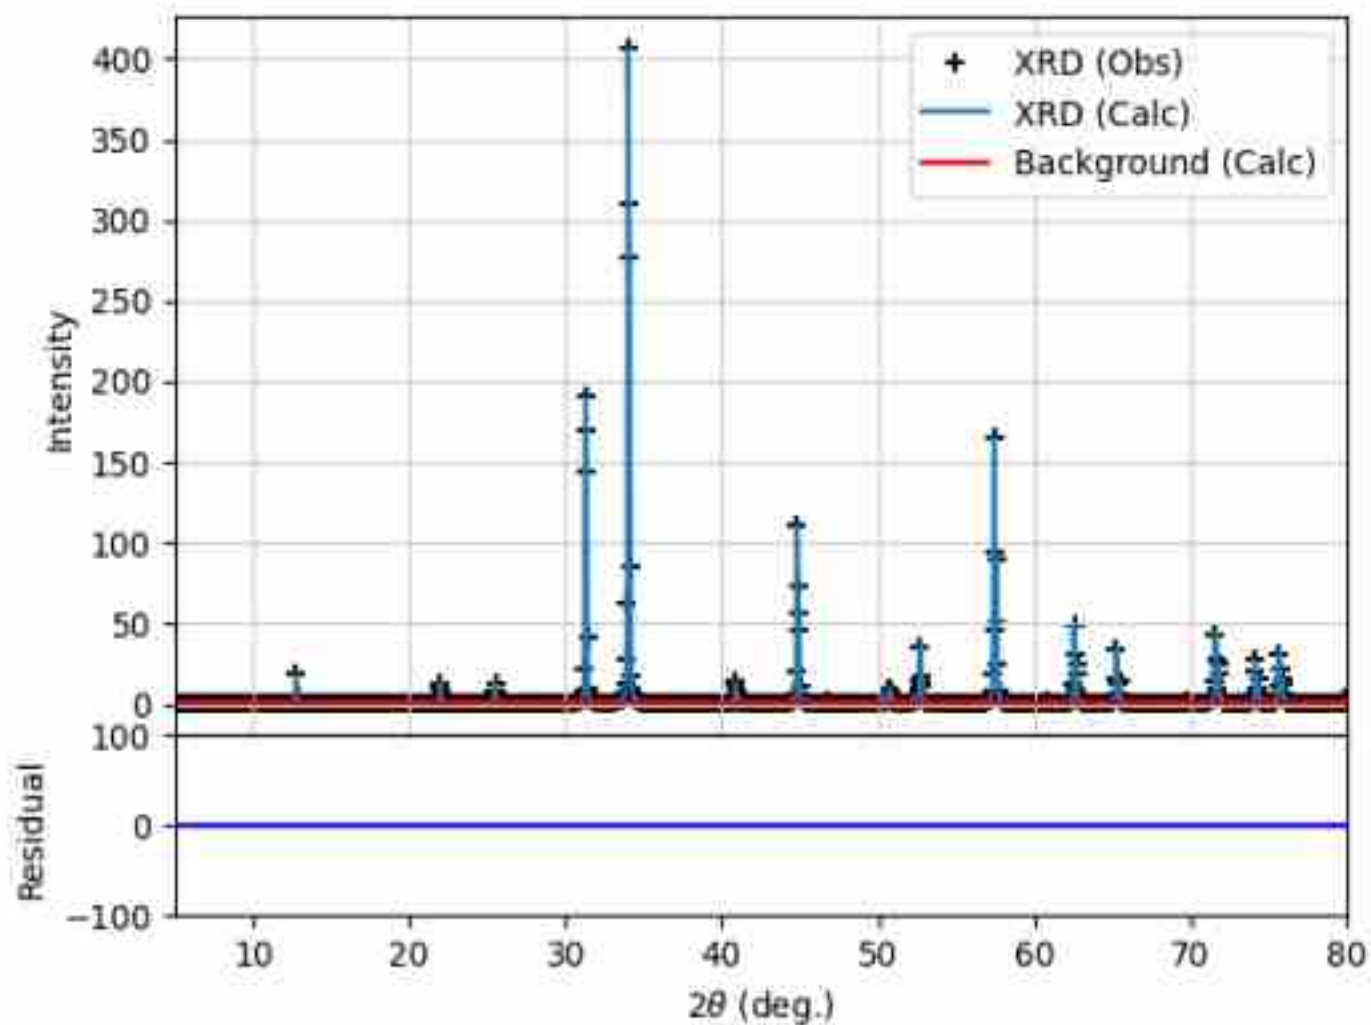

| RMSE before RR | Rwp     | RMSE after RR |
|----------------|---------|---------------|
| 0.011          | 0.00293 | 0.00287       |

# Sr<sub>2</sub>LiReO<sub>6</sub>

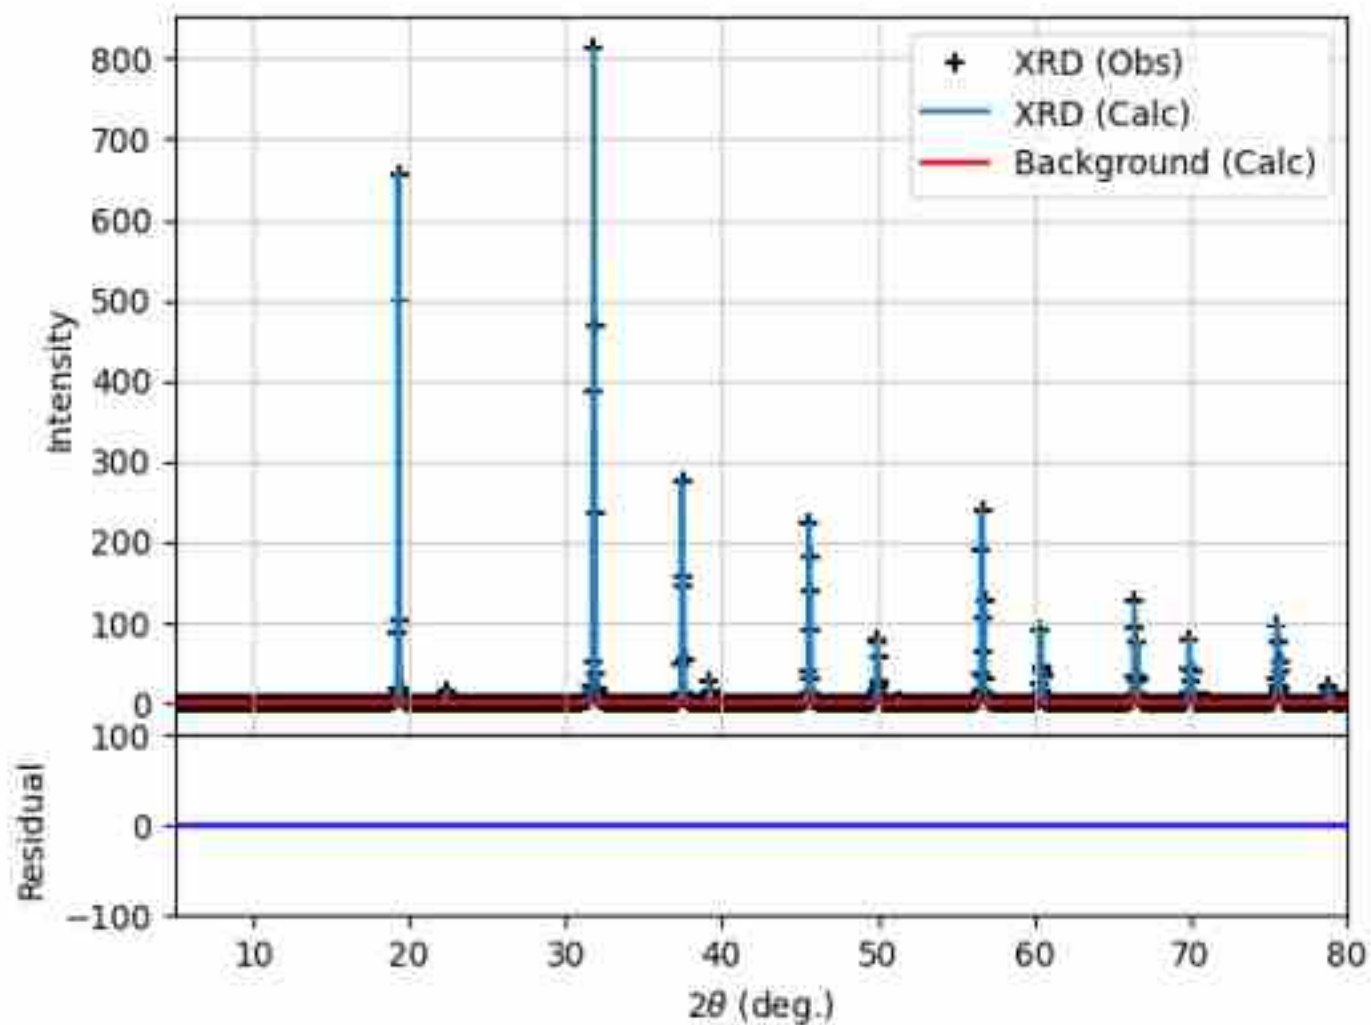

| RMSE before RR | Rwp    | RMSE after RR |
|----------------|--------|---------------|
| 0.011          | 0.0059 | 0.00432       |

# Sr<sub>2</sub>Zr<sub>1</sub>Sn<sub>1</sub>O<sub>6</sub>

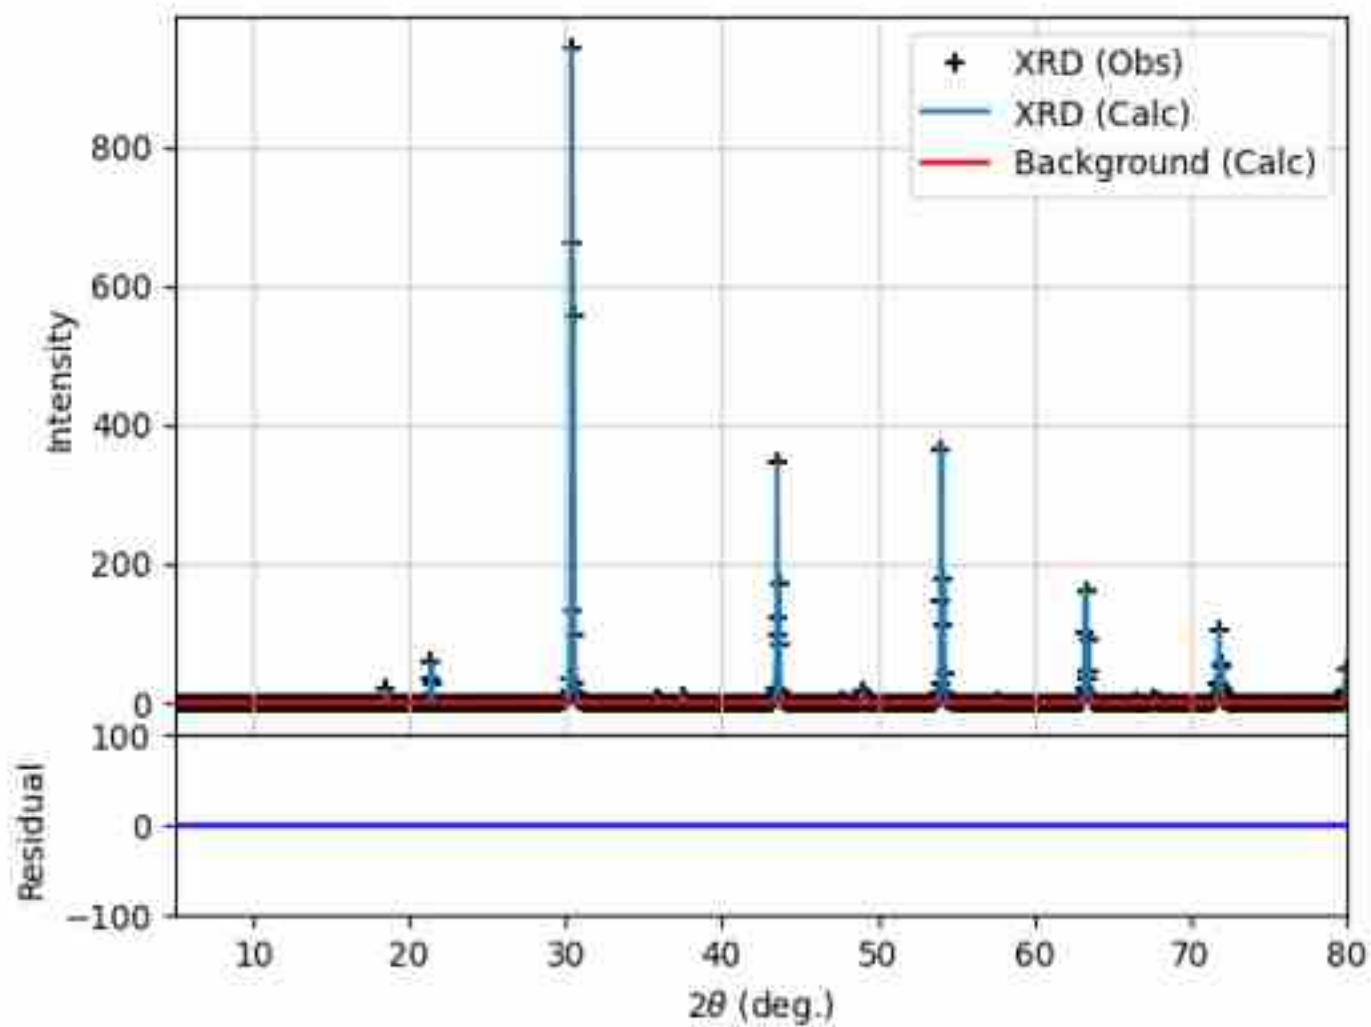

| RMSE before RR | Rwp     | RMSE after RR |
|----------------|---------|---------------|
| 0.011          | 0.01223 | 0.00428       |

# Sr<sub>4</sub>Ca<sub>4</sub>Ge<sub>4</sub>

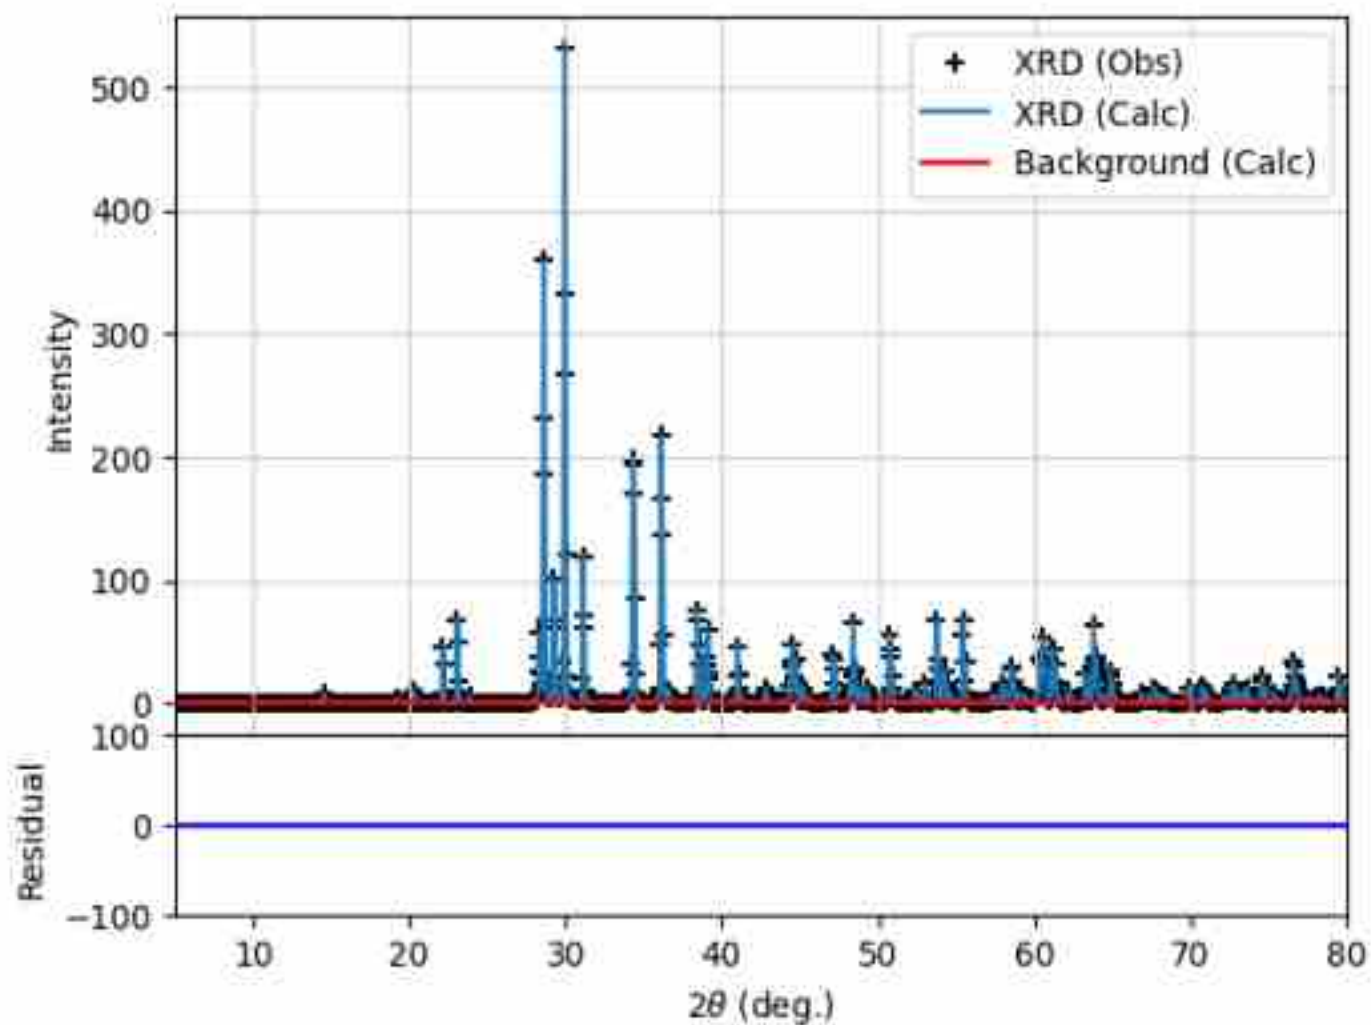

| RMSE before RR | Rwp     | RMSE after RR |
|----------------|---------|---------------|
| 0.011          | 0.00312 | 0.00026       |

# Ta1Nb1C2

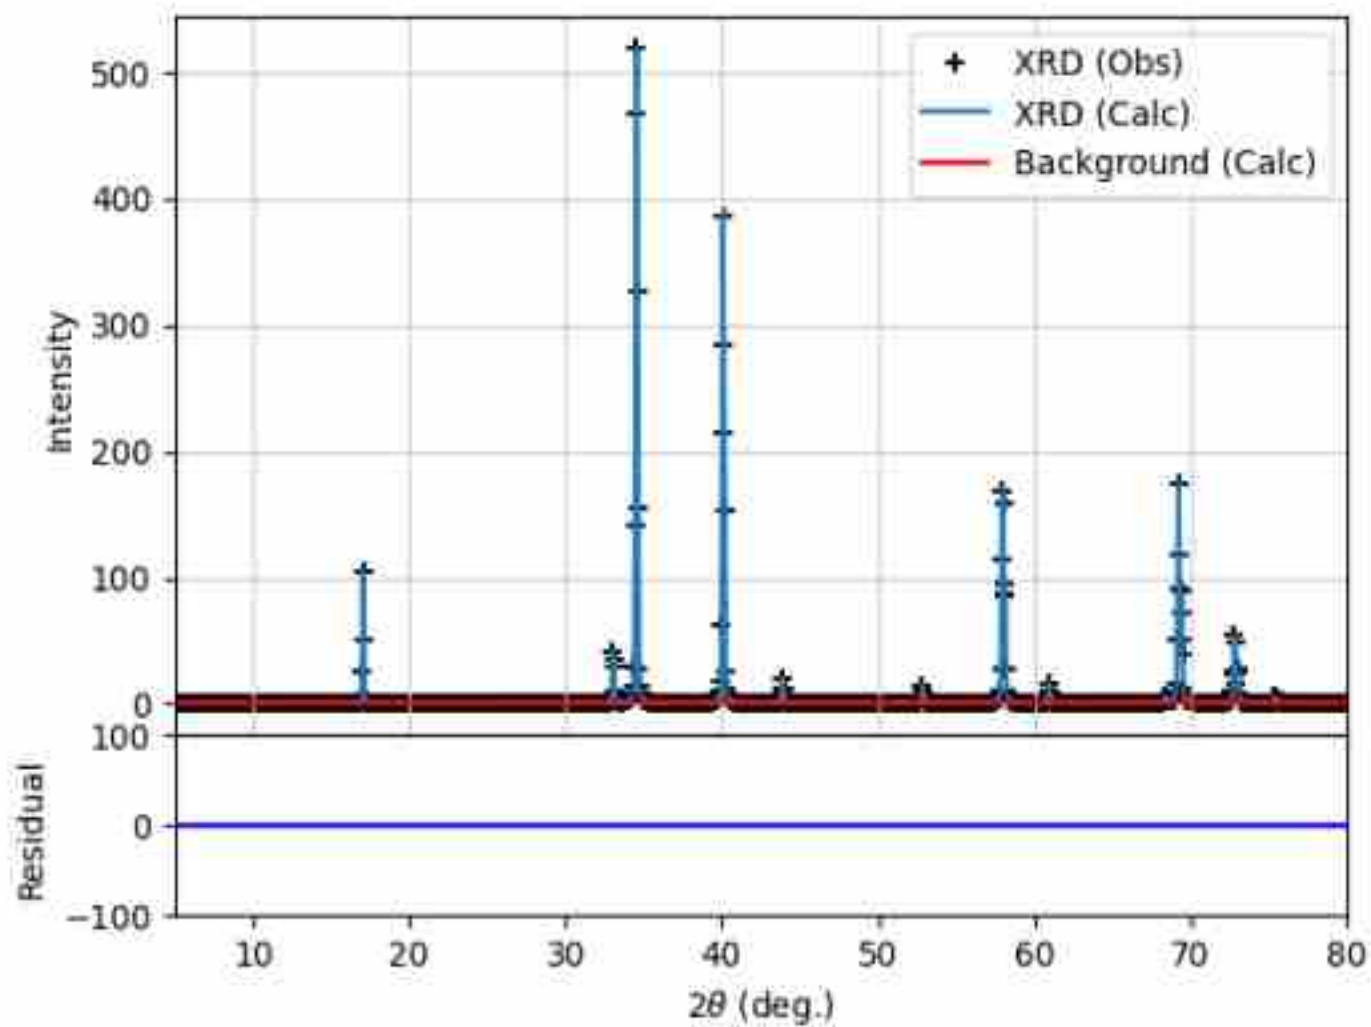

| RMSE before RR | Rwp     | RMSE after RR |
|----------------|---------|---------------|
| 0.011          | 0.00295 | 0.00078       |



# Tb1Be1Cu4

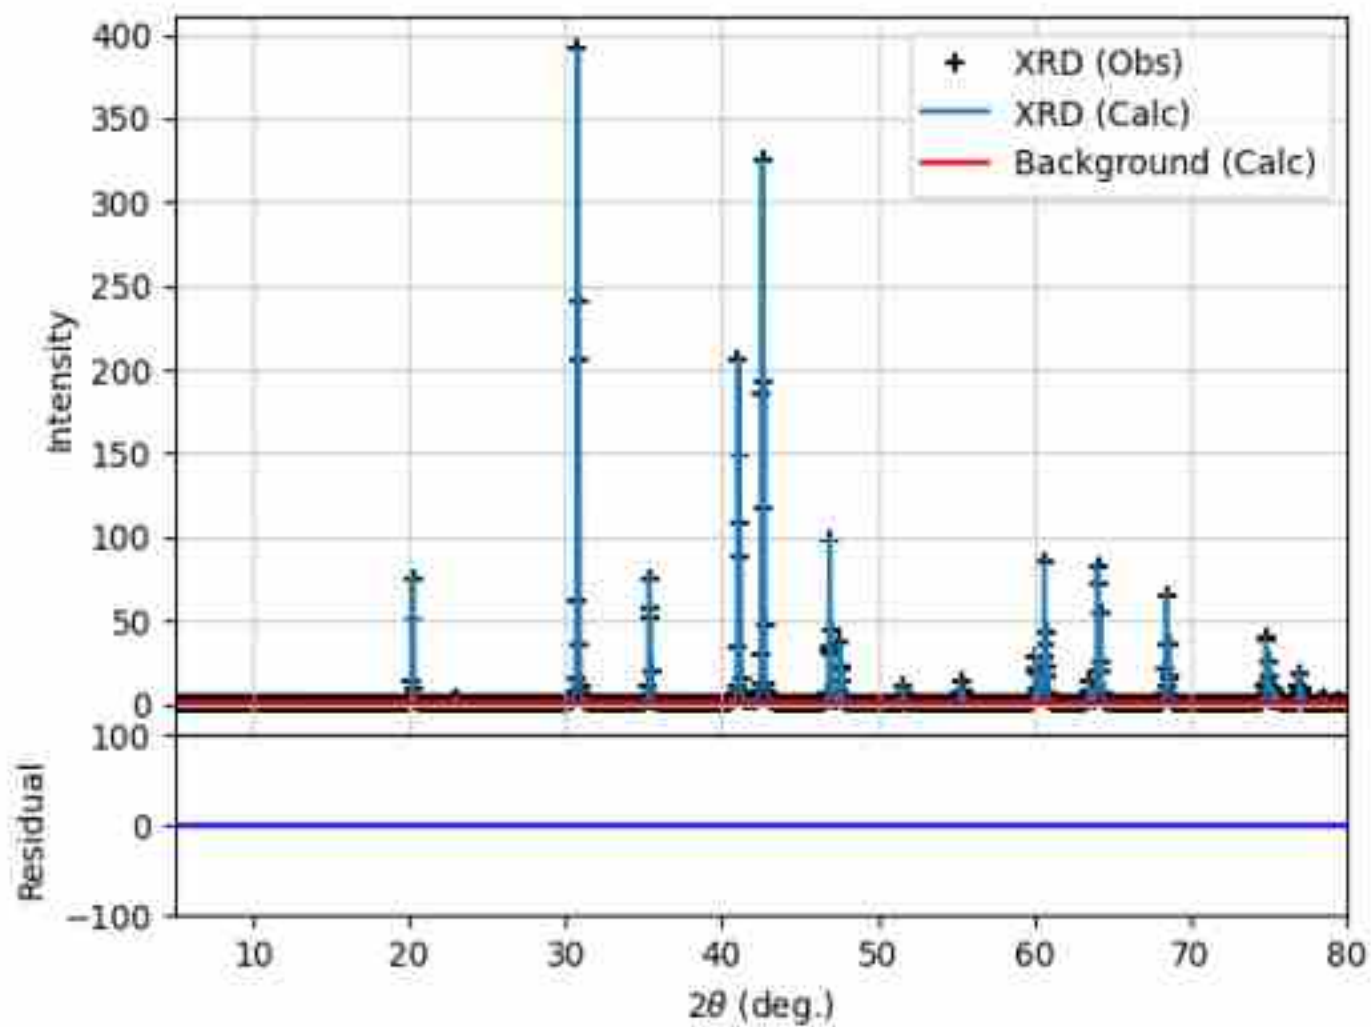

| RMSE before RR | Rwp     | RMSE after RR |
|----------------|---------|---------------|
| 0.011          | 0.04248 | 0.0036        |

# Tb1Bi2I1O4

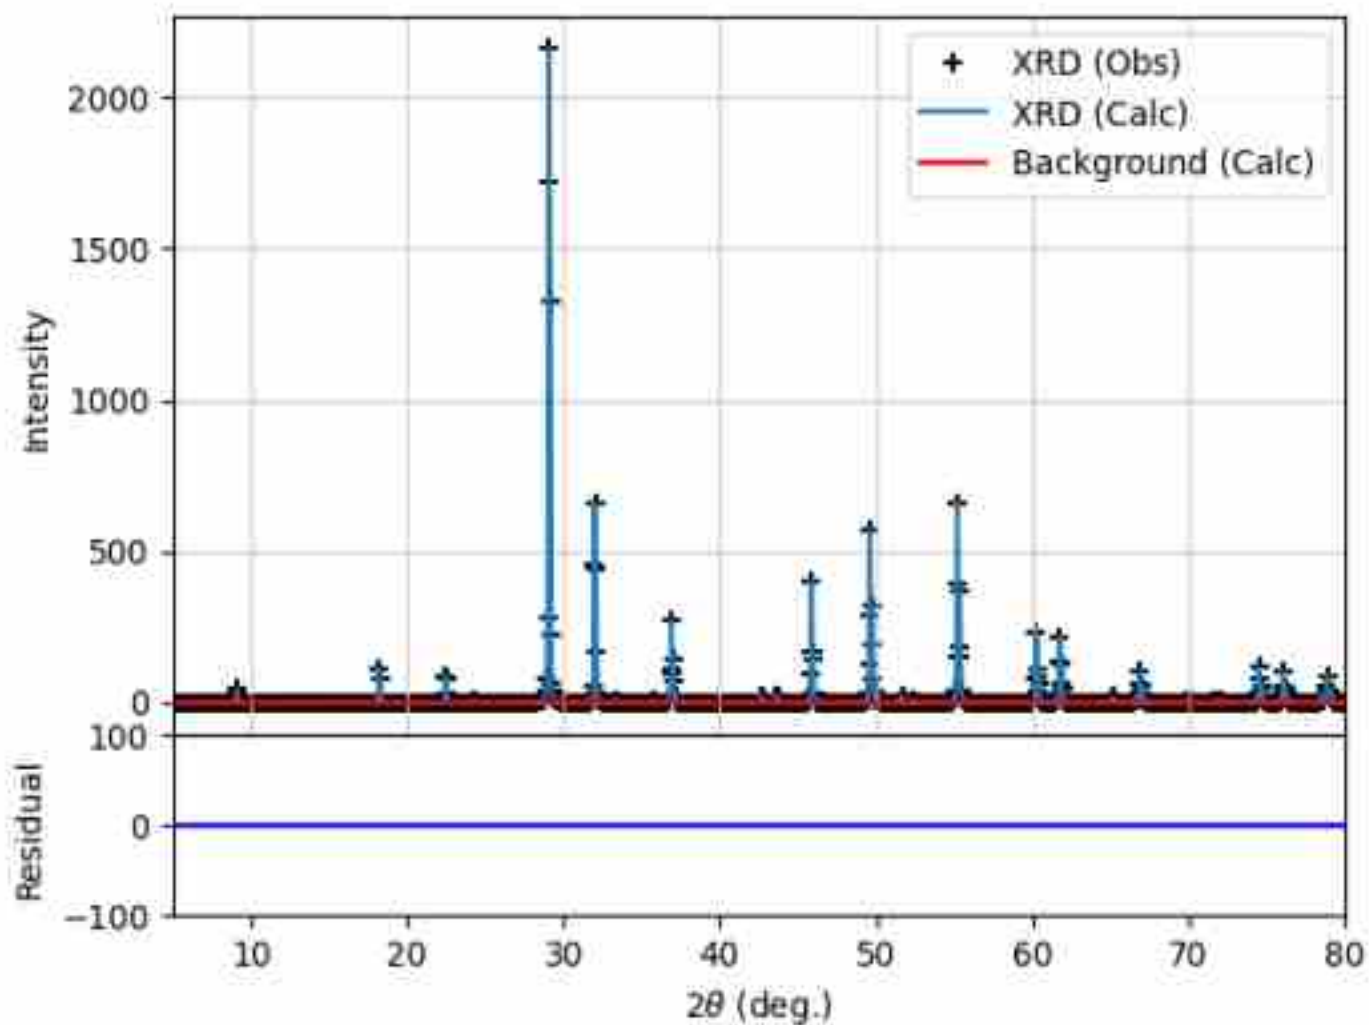

| RMSE before RR | Rwp     | RMSE after RR |
|----------------|---------|---------------|
| 0.011          | 0.00516 | 0.00225       |

Tb1Ga3Ni1

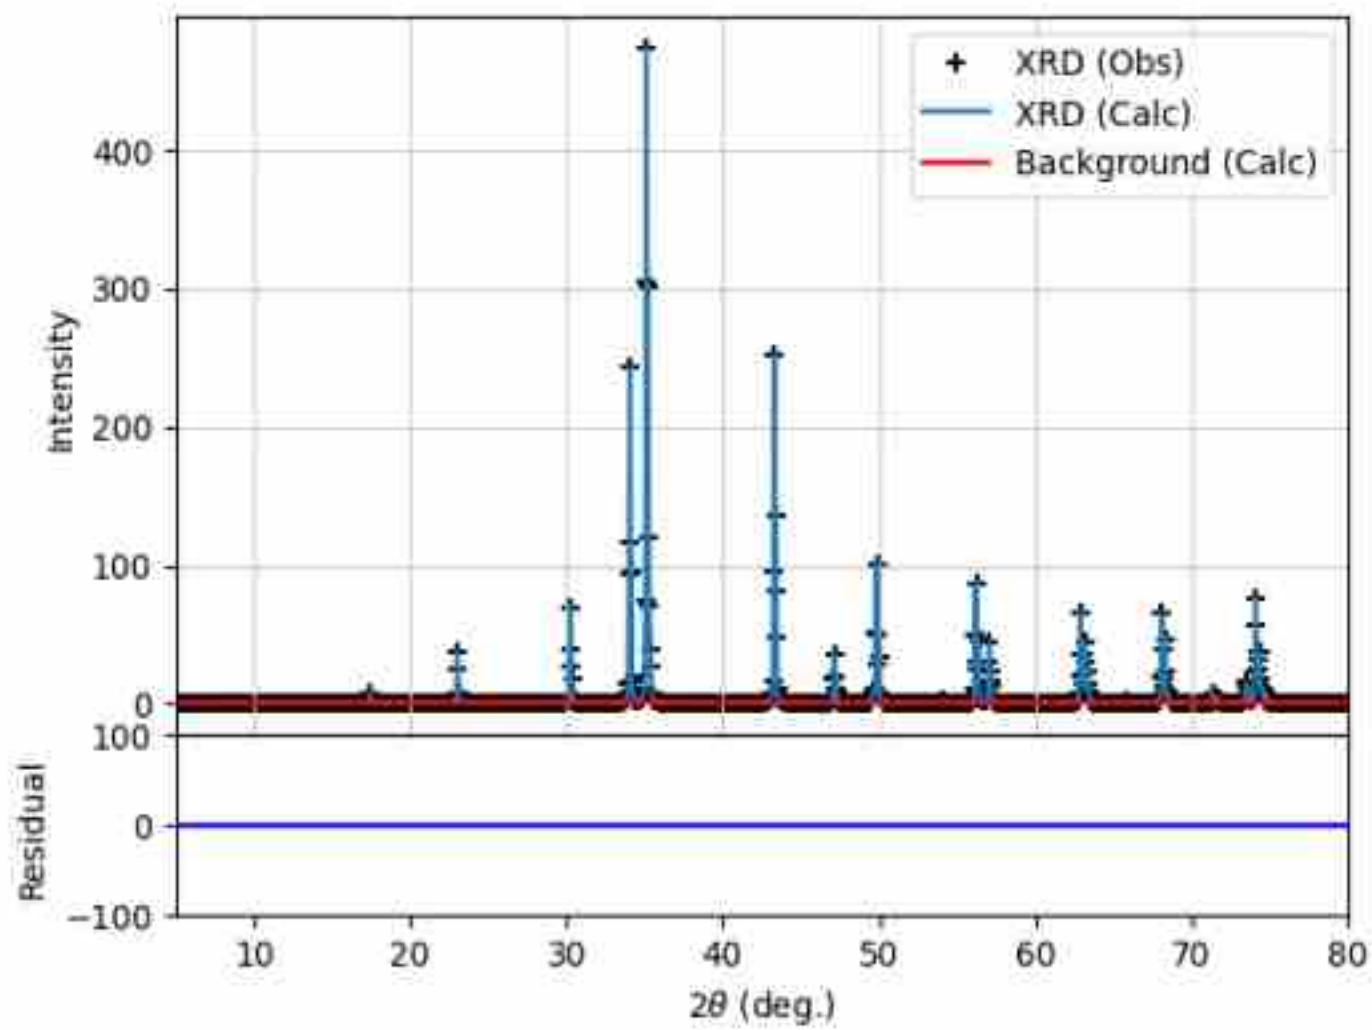

| RMSE before RR | Rwp     | RMSE after RR |
|----------------|---------|---------------|
| 0.011          | 0.00324 | 0.00035       |

# Tb1Mo6S8

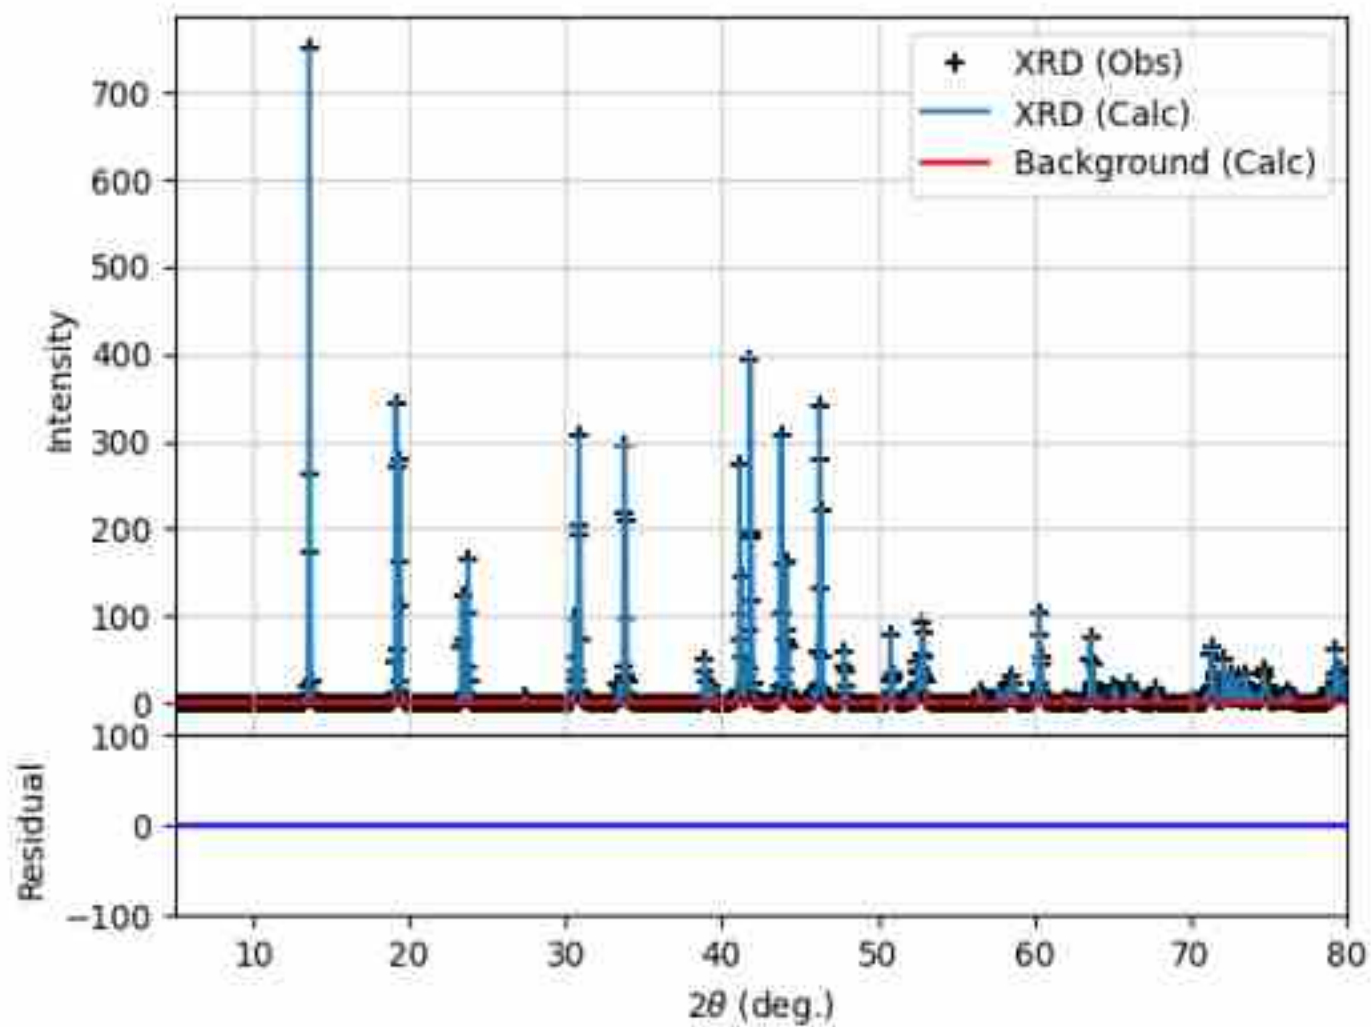

| RMSE before RR | Rwp     | RMSE after RR |
|----------------|---------|---------------|
| 0.011          | 0.00314 | 0.0007        |

# Tb2Nd6

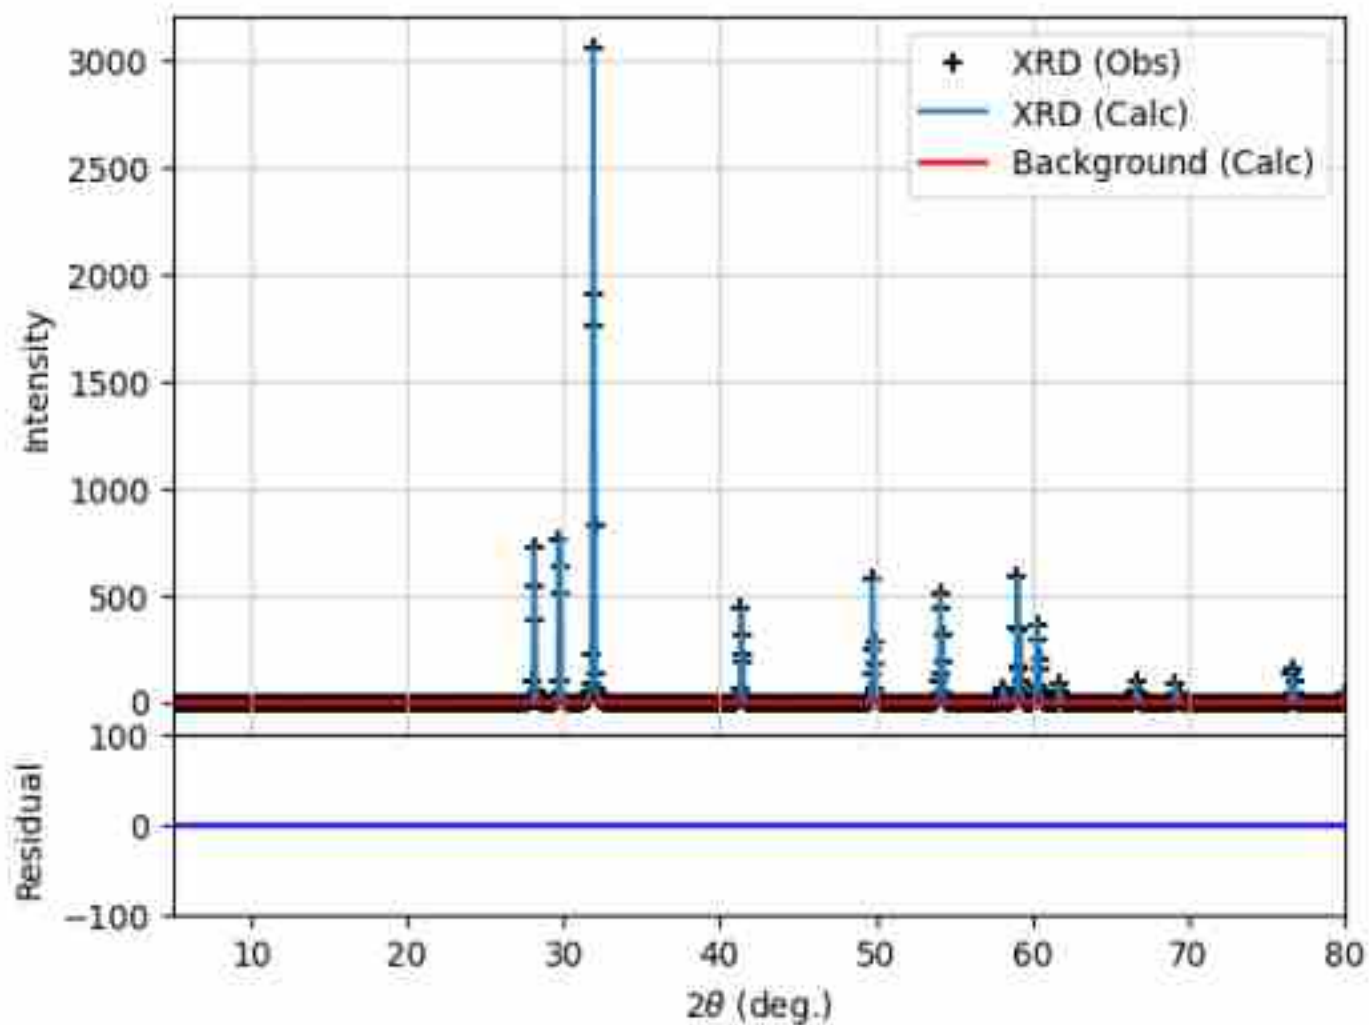

| RMSE before RR | Rwp     | RMSE after RR |
|----------------|---------|---------------|
| 0.011          | 0.00622 | 0.00039       |

# Tb<sub>2</sub>Ni<sub>2</sub>O<sub>6</sub>

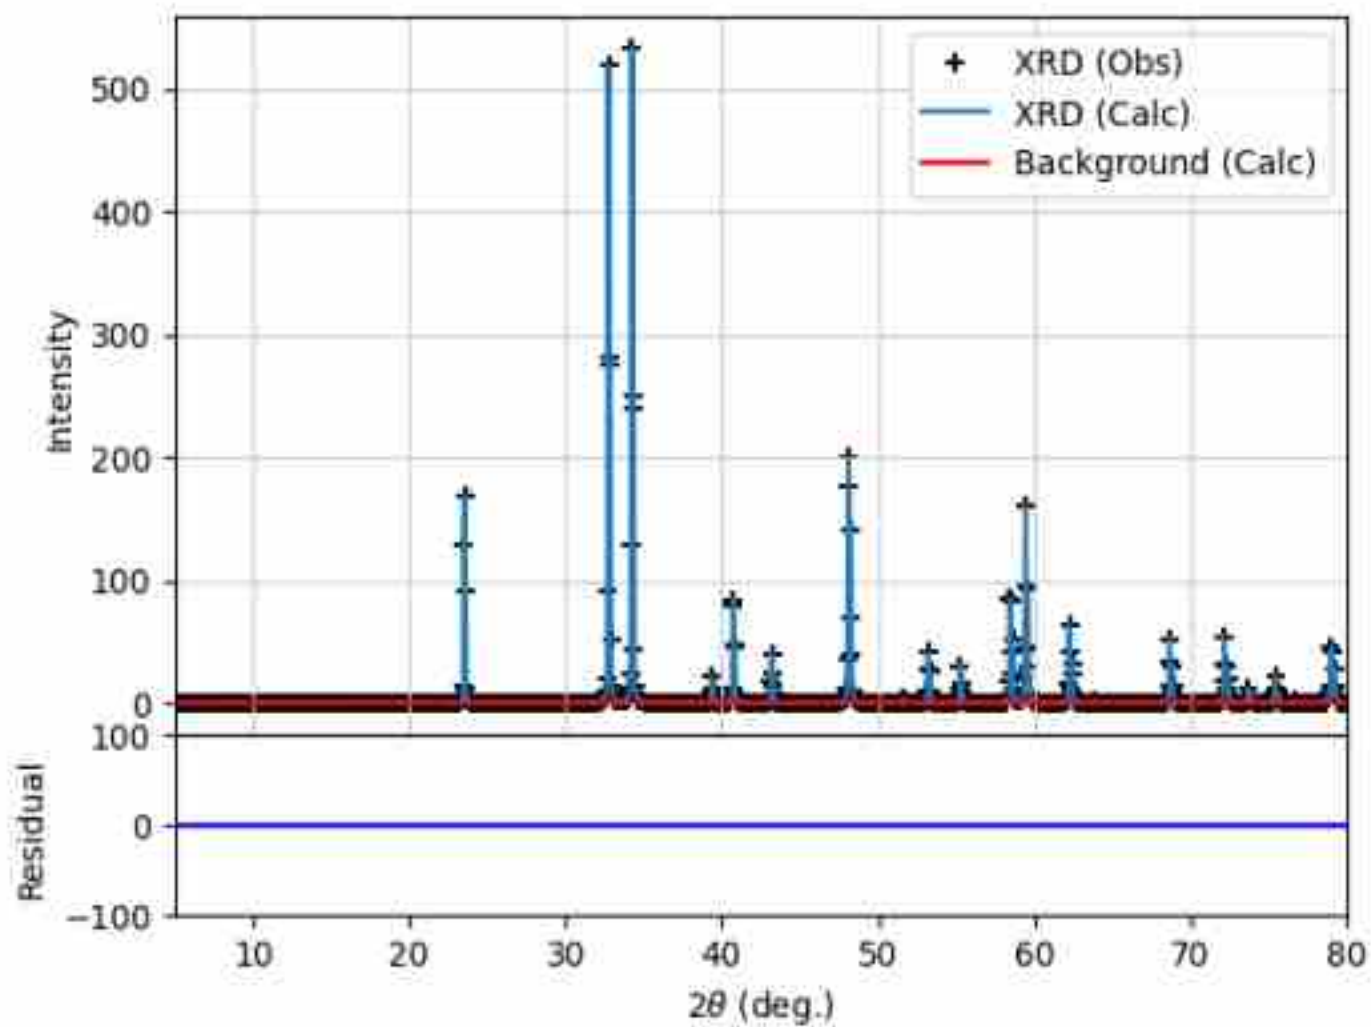

| RMSE before RR | Rwp     | RMSE after RR |
|----------------|---------|---------------|
| 0.011          | 0.00445 | 0.00193       |

# Tb2Sm6

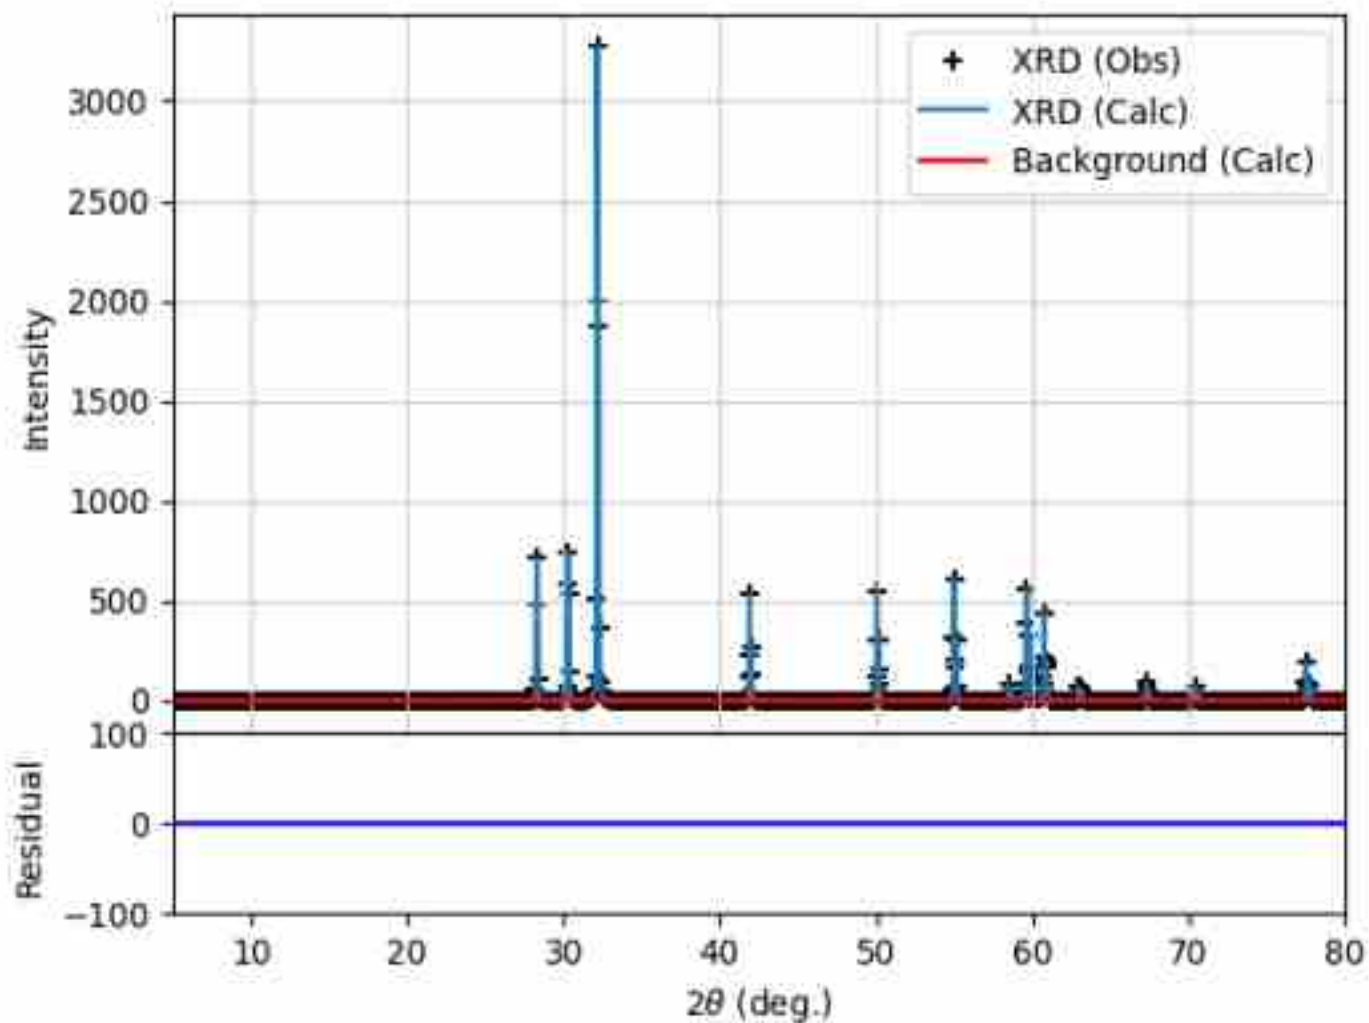

| RMSE before RR | Rwp     | RMSE after RR |
|----------------|---------|---------------|
| 0.011          | 0.00564 | 0.00043       |

# Tb<sub>4</sub>Ce<sub>1</sub>S<sub>7</sub>

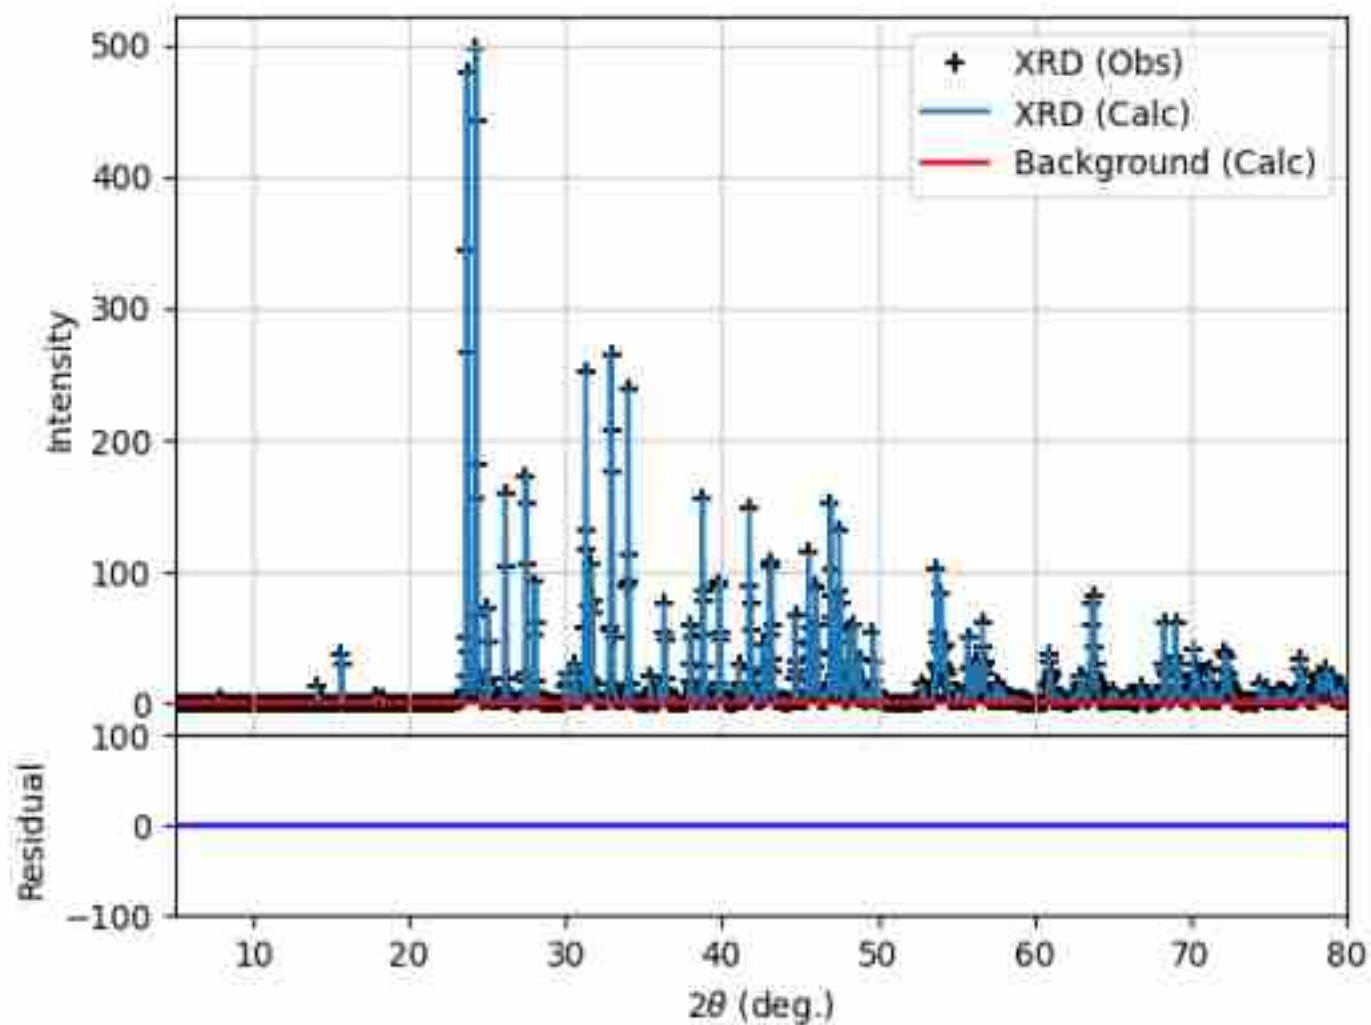

| RMSE before RR | Rwp    | RMSE after RR |
|----------------|--------|---------------|
| 0.011          | 0.0035 | 0.00036       |



# Tb7Fe1I12

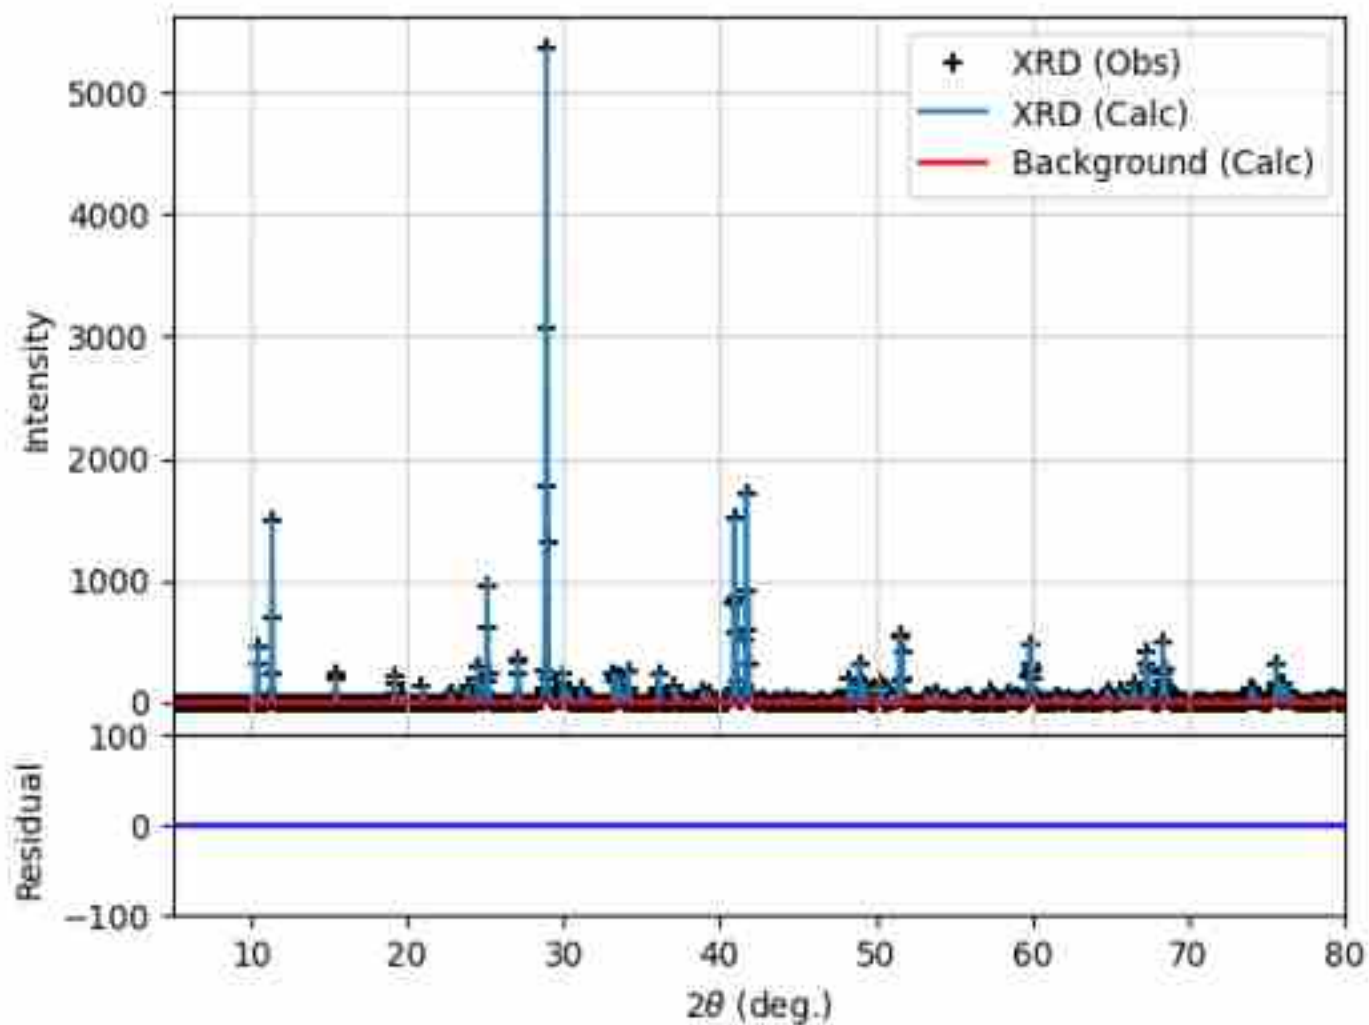

| RMSE before RR | Rwp     | RMSE after RR |
|----------------|---------|---------------|
| 0.011          | 0.00325 | 0.00043       |

# Th<sub>2</sub>Al<sub>2</sub>

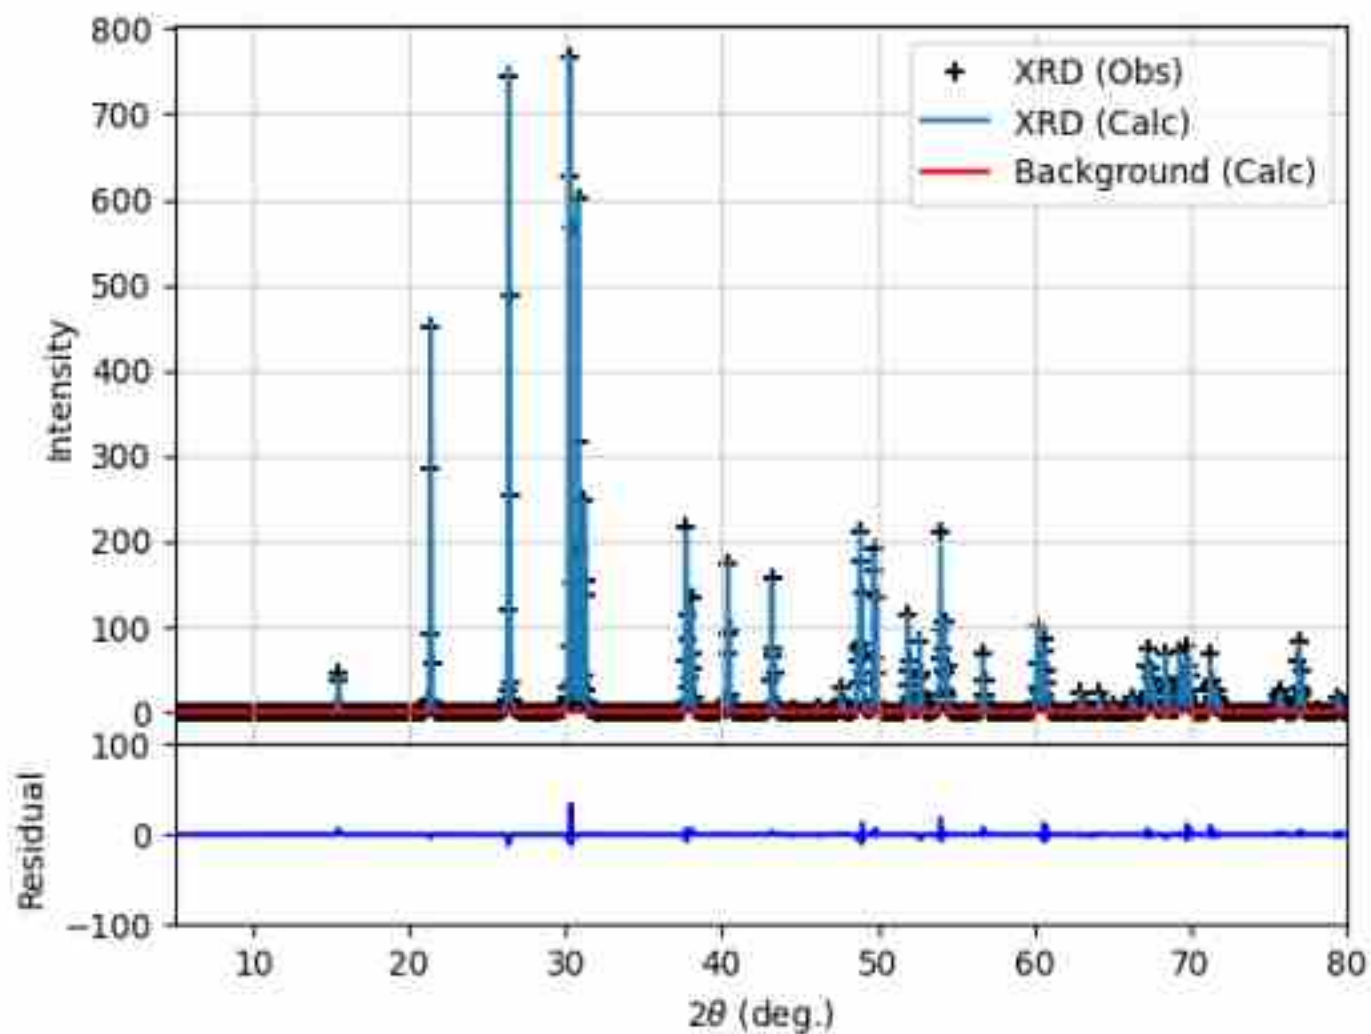

| RMSE before RR | Rwp     | RMSE after RR |
|----------------|---------|---------------|
| 0.011          | 5.77226 | 0.01241       |

# Th<sub>3</sub>Co<sub>3</sub>Sn<sub>3</sub>

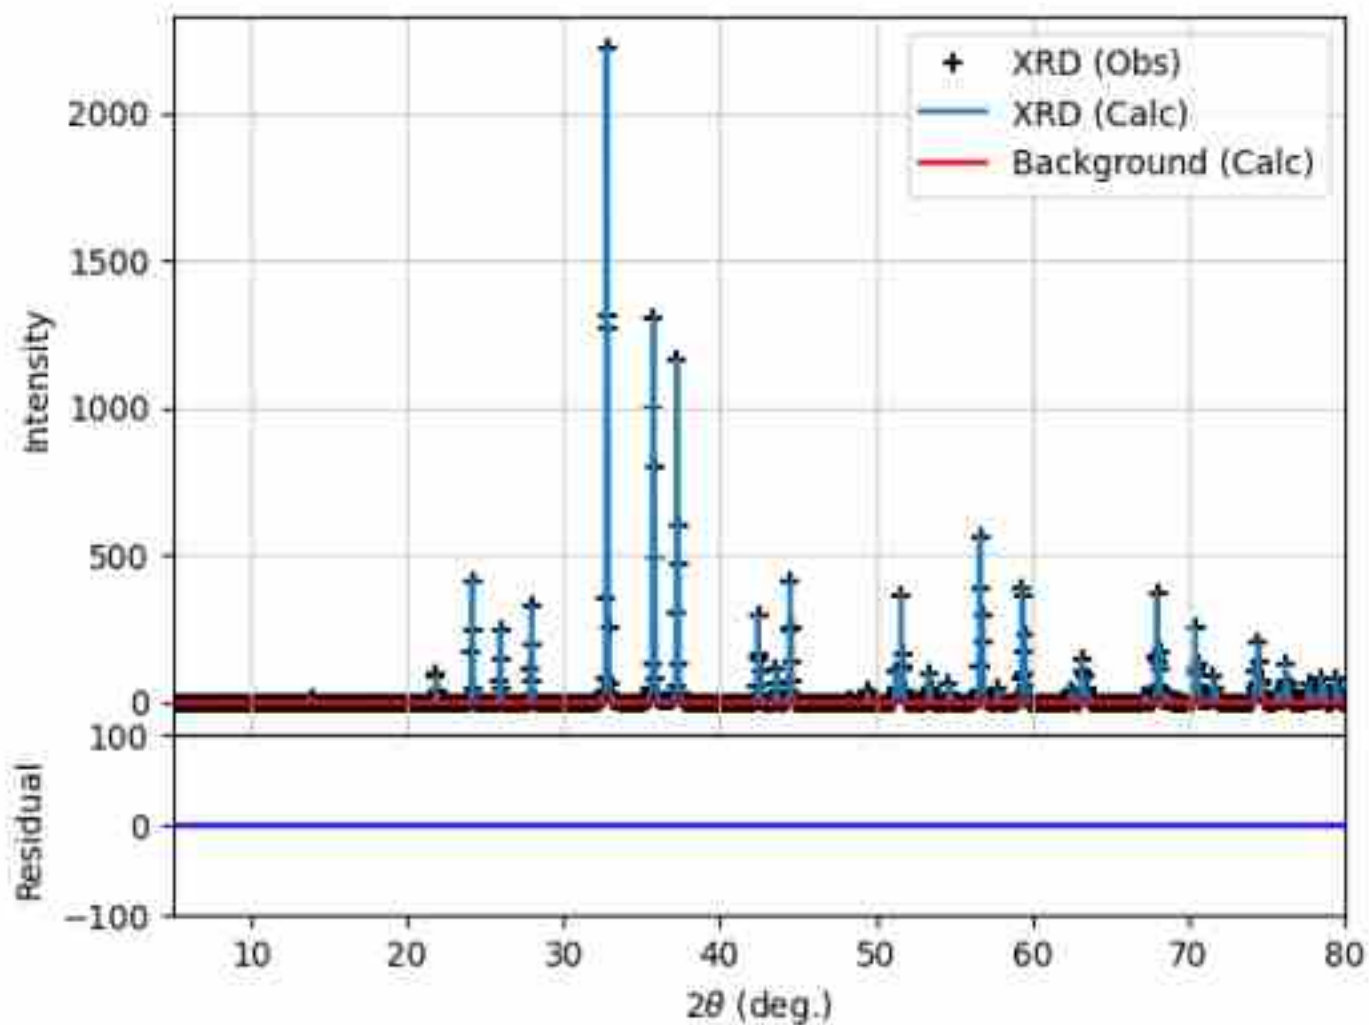

| RMSE before RR | Rwp     | RMSE after RR |
|----------------|---------|---------------|
| 0.011          | 0.00474 | 0.00084       |

# Ti1Mo1P2

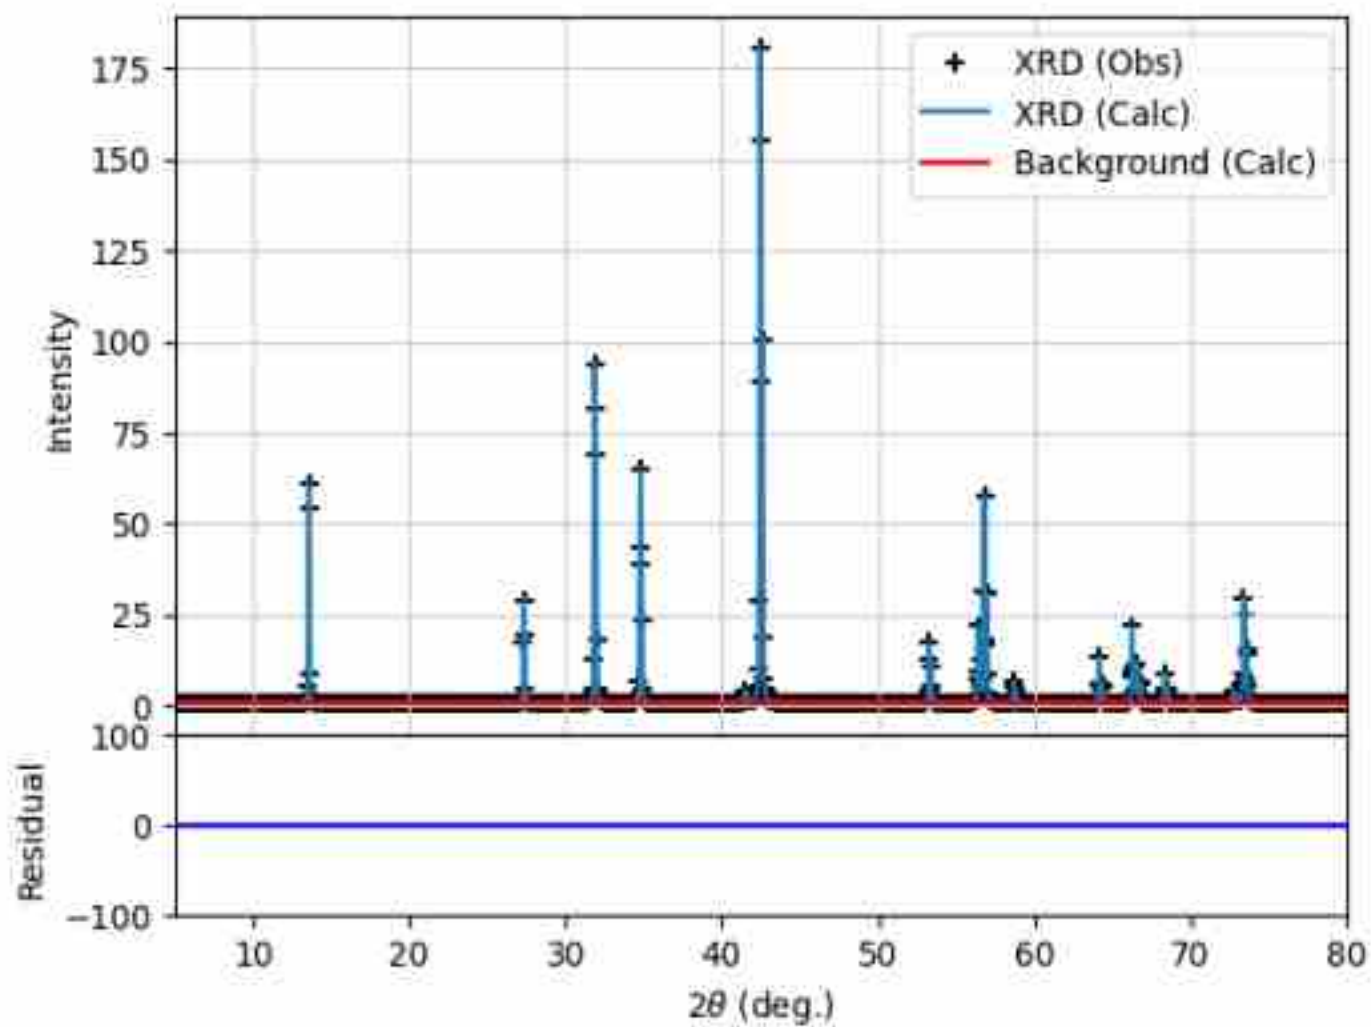

| RMSE before RR | Rwp     | RMSE after RR |
|----------------|---------|---------------|
| 0.011          | 0.00184 | 0.00063       |

# Ti1Nb1Cr4

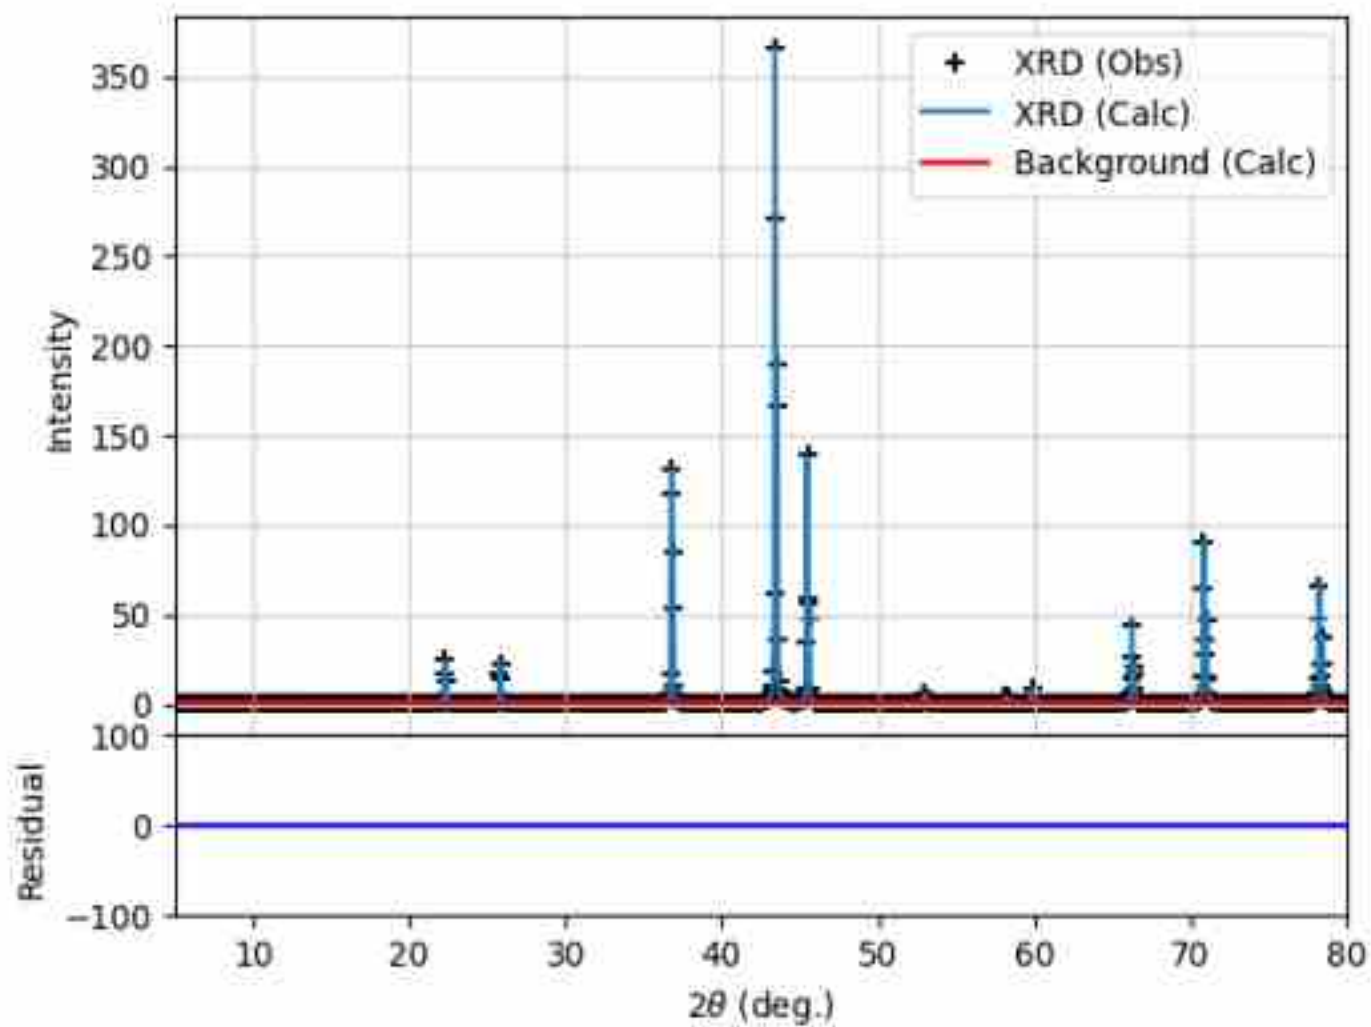

| RMSE before RR | Rwp     | RMSE after RR |
|----------------|---------|---------------|
| 0.011          | 0.02535 | 0.00283       |

# Ti3O3

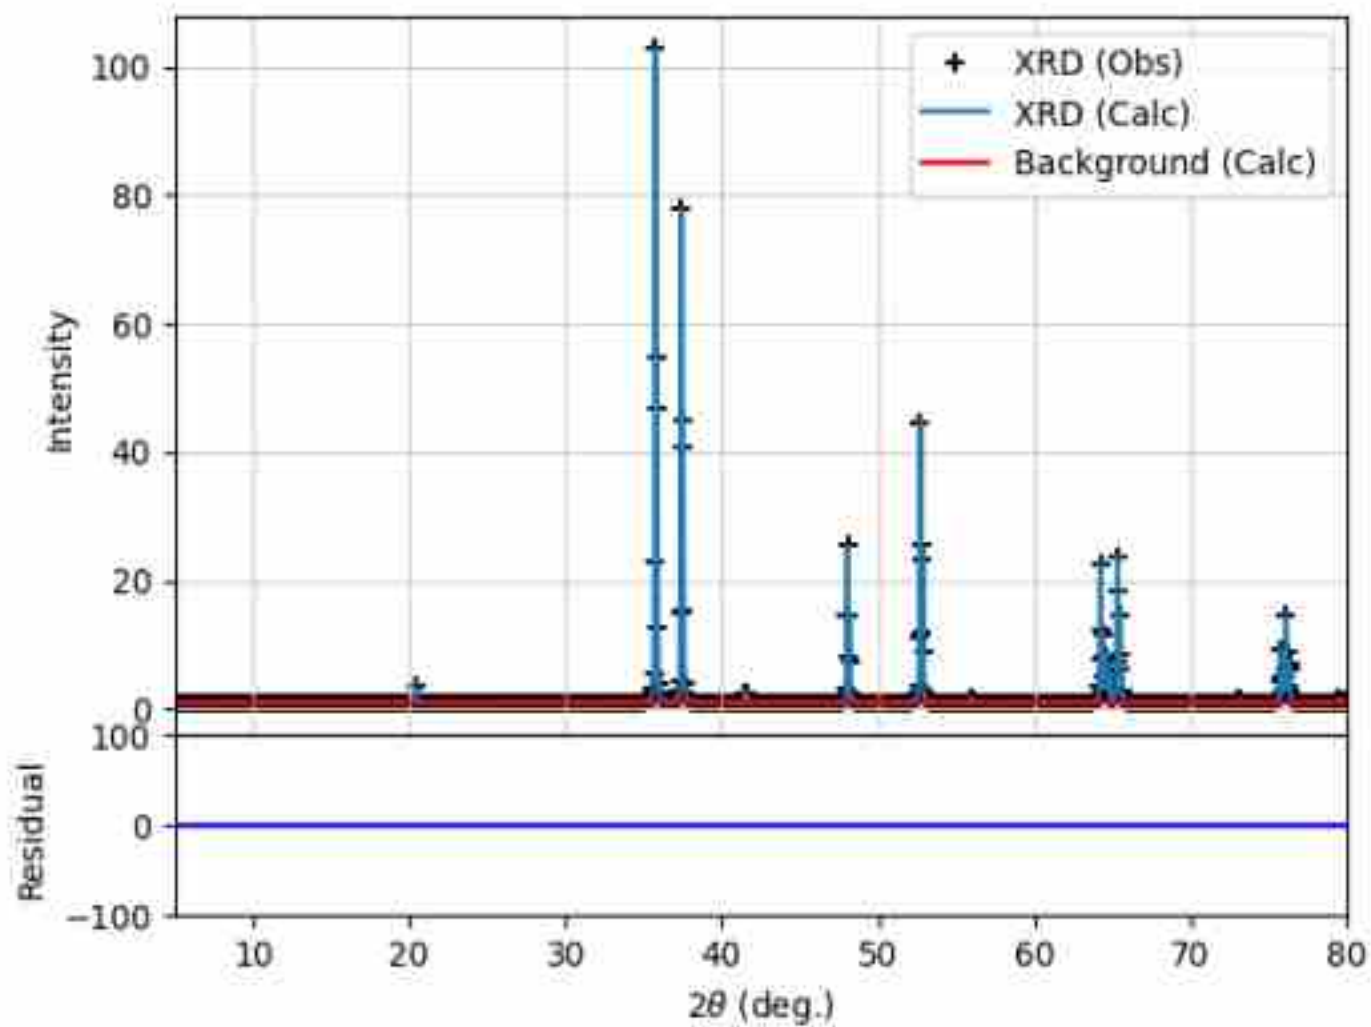

| RMSE before RR | Rwp     | RMSE after RR |
|----------------|---------|---------------|
| 0.011          | 0.00216 | 0.00112       |

# Ti6Pt1Au1

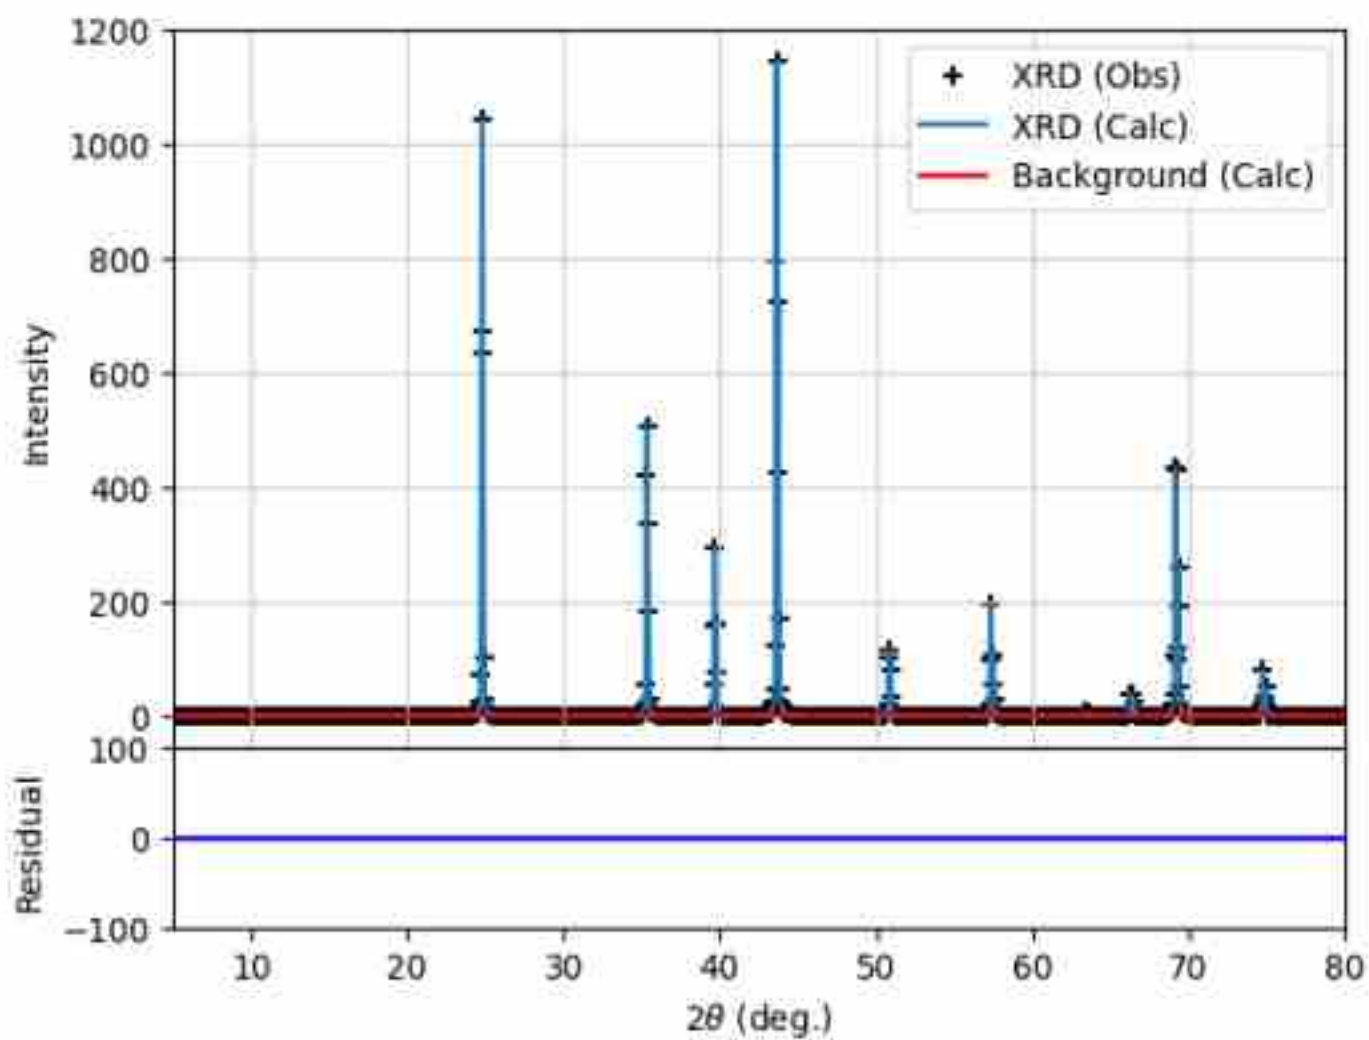

| RMSE before RR | Rwp     | RMSE after RR |
|----------------|---------|---------------|
| 0.011          | 0.00668 | 0.00104       |

# Tl2In6

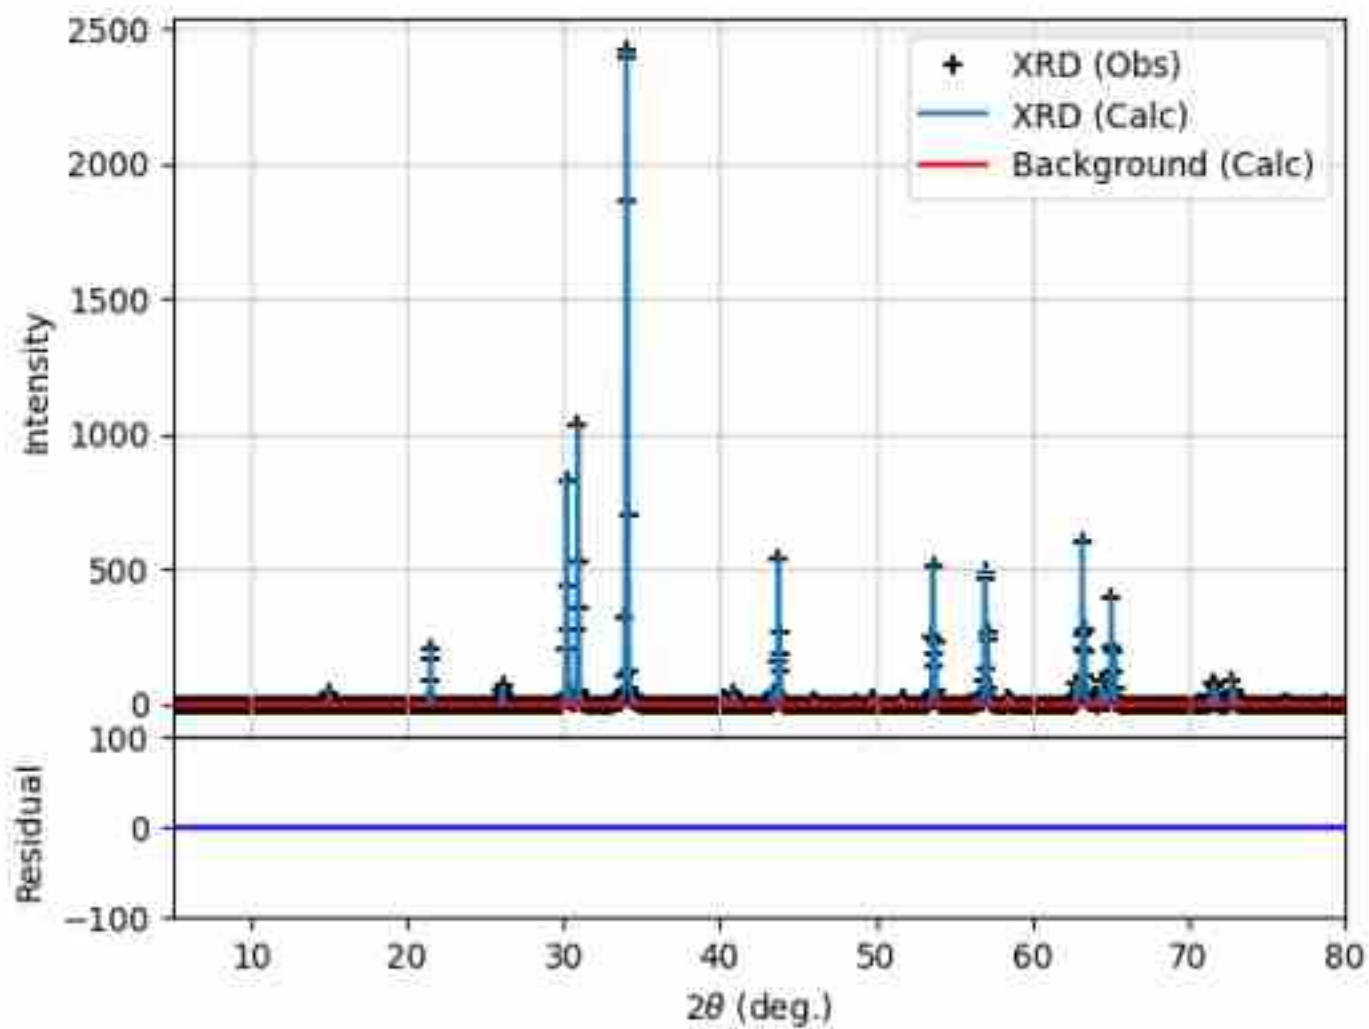

| RMSE before RR | Rwp    | RMSE after RR |
|----------------|--------|---------------|
| 0.011          | 0.0086 | 0.00076       |



# Tl6Pb2

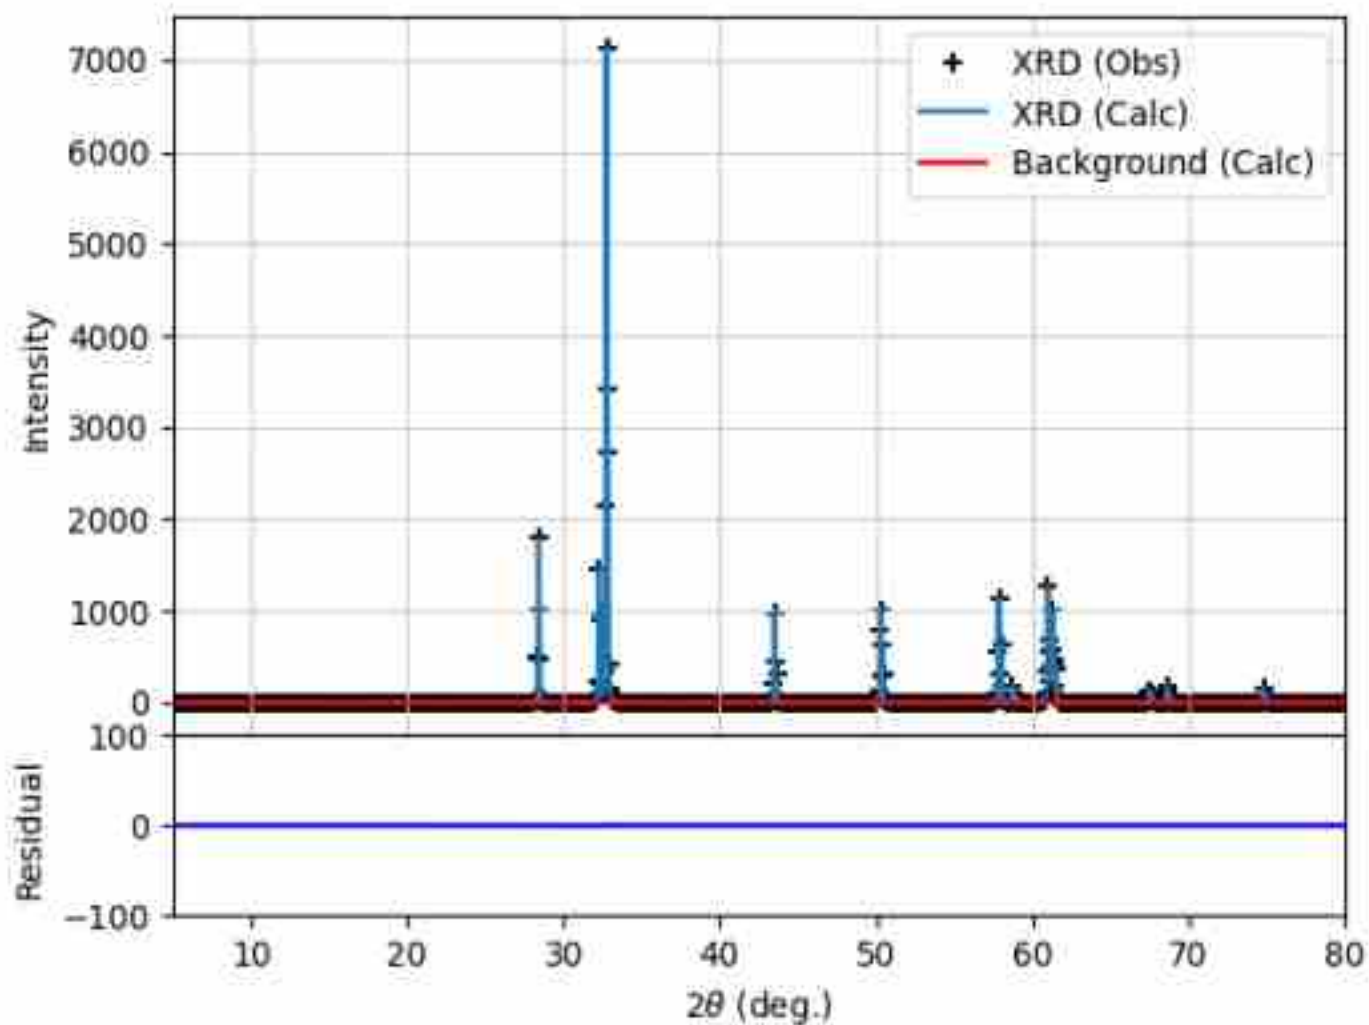

| RMSE before RR | Rwp     | RMSE after RR |
|----------------|---------|---------------|
| 0.011          | 0.04736 | 0.00118       |

# Tm1Fe10Mo2

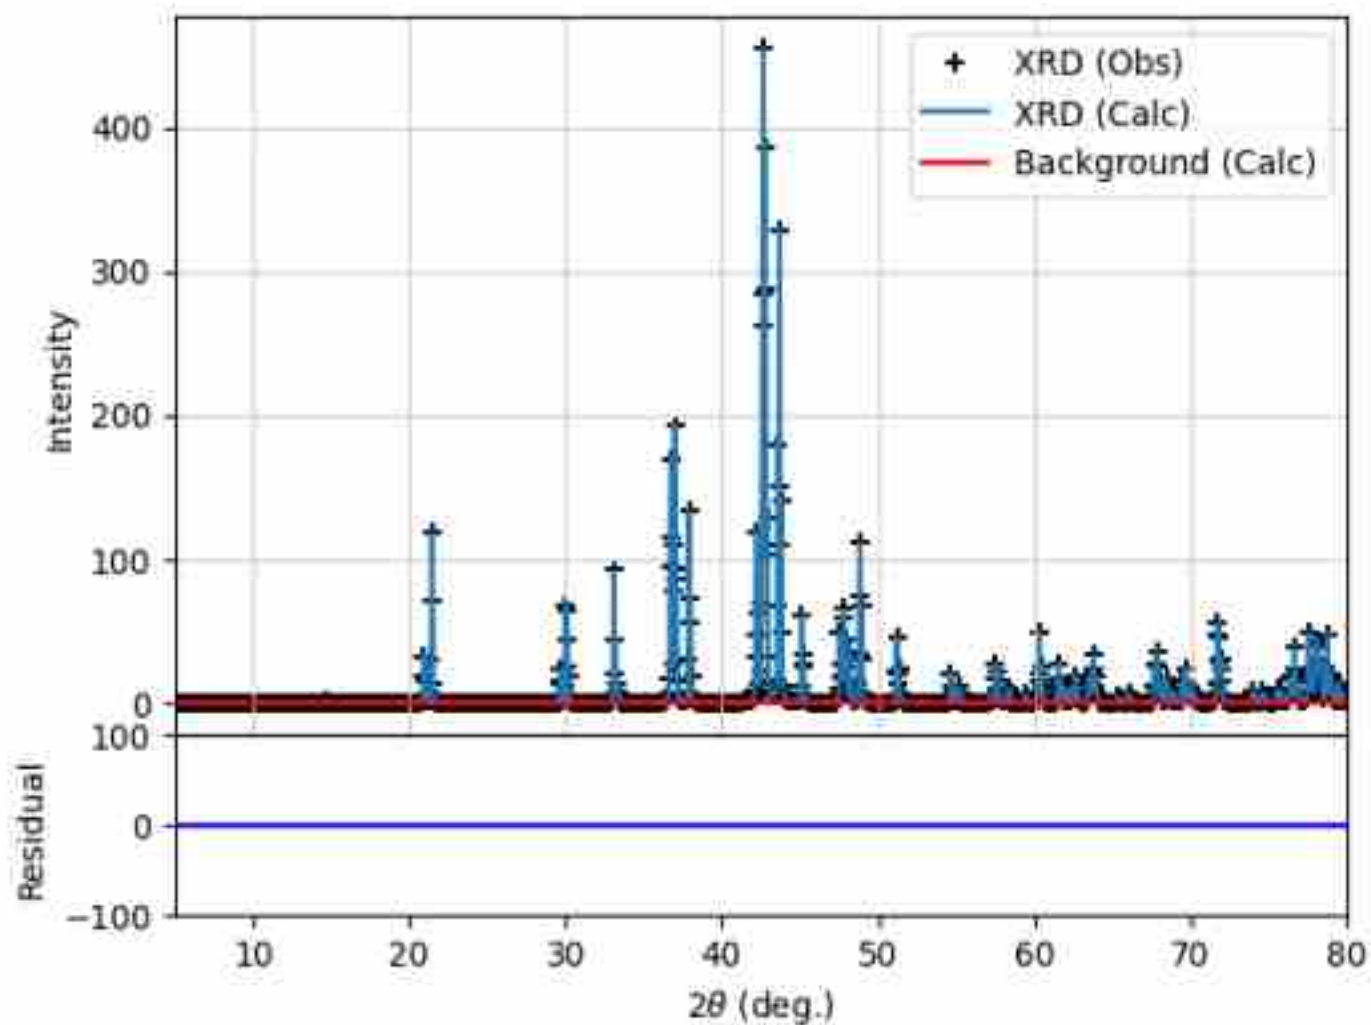

| RMSE before RR | Rwp     | RMSE after RR |
|----------------|---------|---------------|
| 0.011          | 0.00296 | 0.0004        |

# Tm<sub>1</sub>Mn<sub>6</sub>Ga<sub>2</sub>Sn<sub>4</sub>

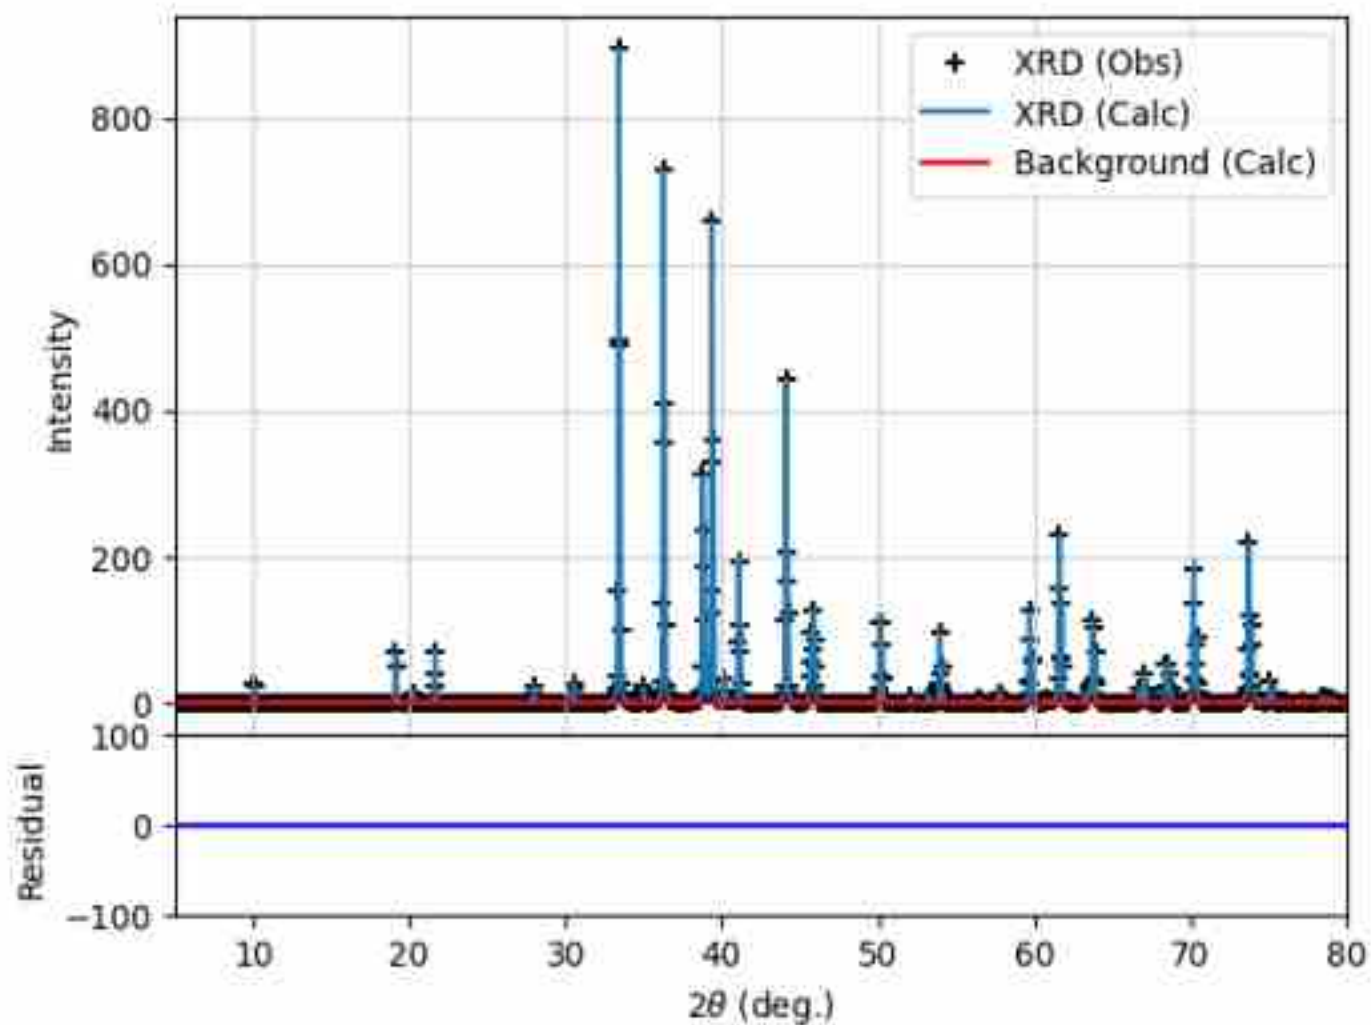

| RMSE before RR | Rwp     | RMSE after RR |
|----------------|---------|---------------|
| 0.011          | 0.00452 | 0.00084       |

# Tm<sub>2</sub>CoGe<sub>4</sub>

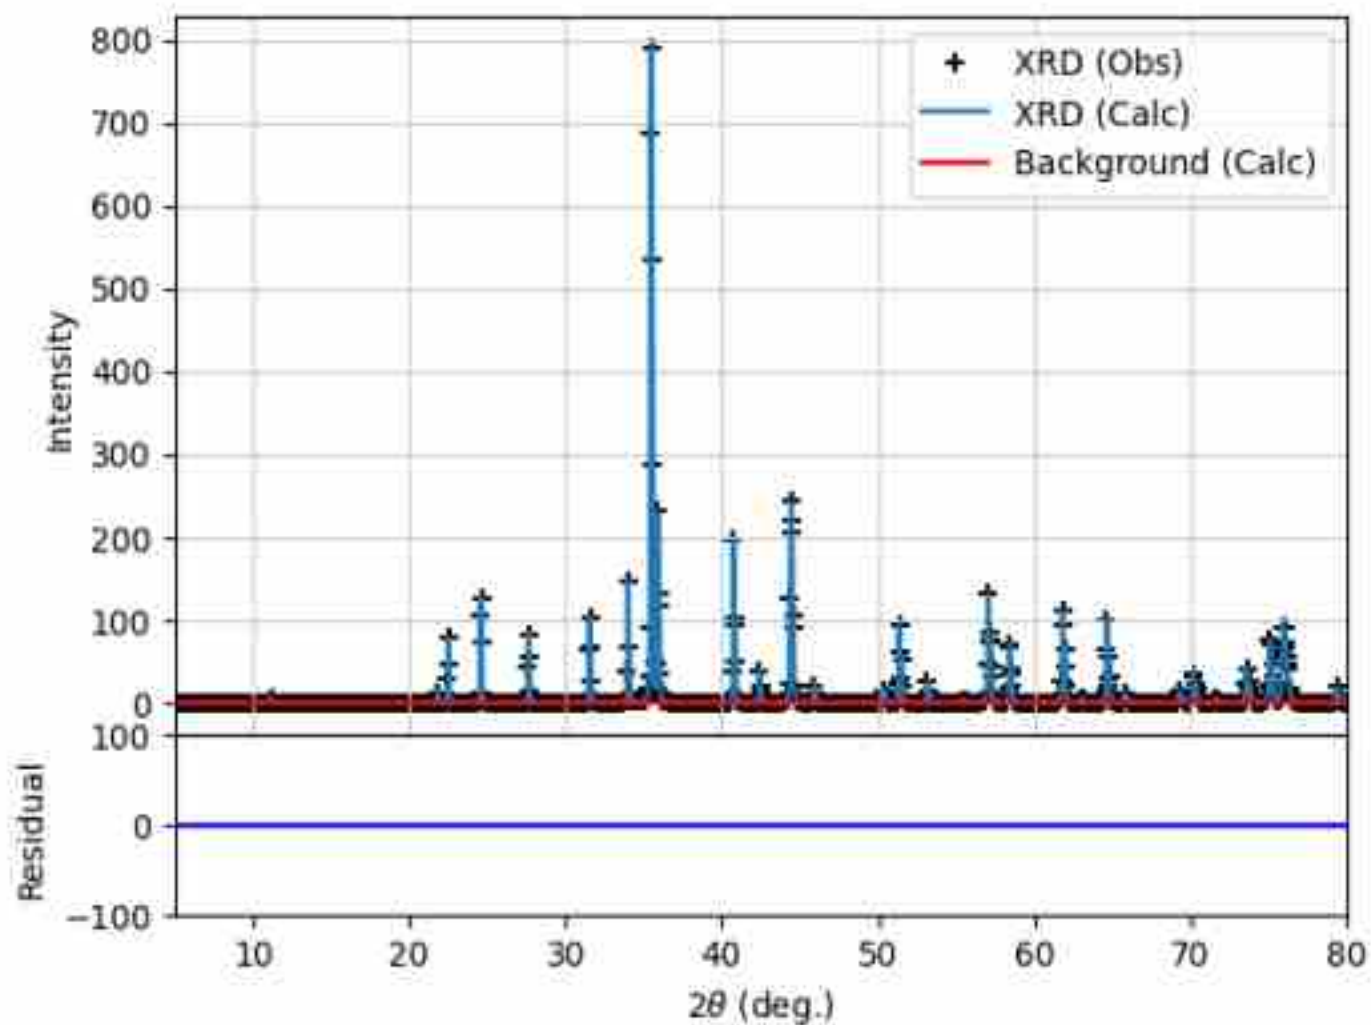

| RMSE before RR | Rwp     | RMSE after RR |
|----------------|---------|---------------|
| 0.011          | 0.00435 | 0.00074       |

# Tm<sub>2</sub>Ga<sub>6</sub>

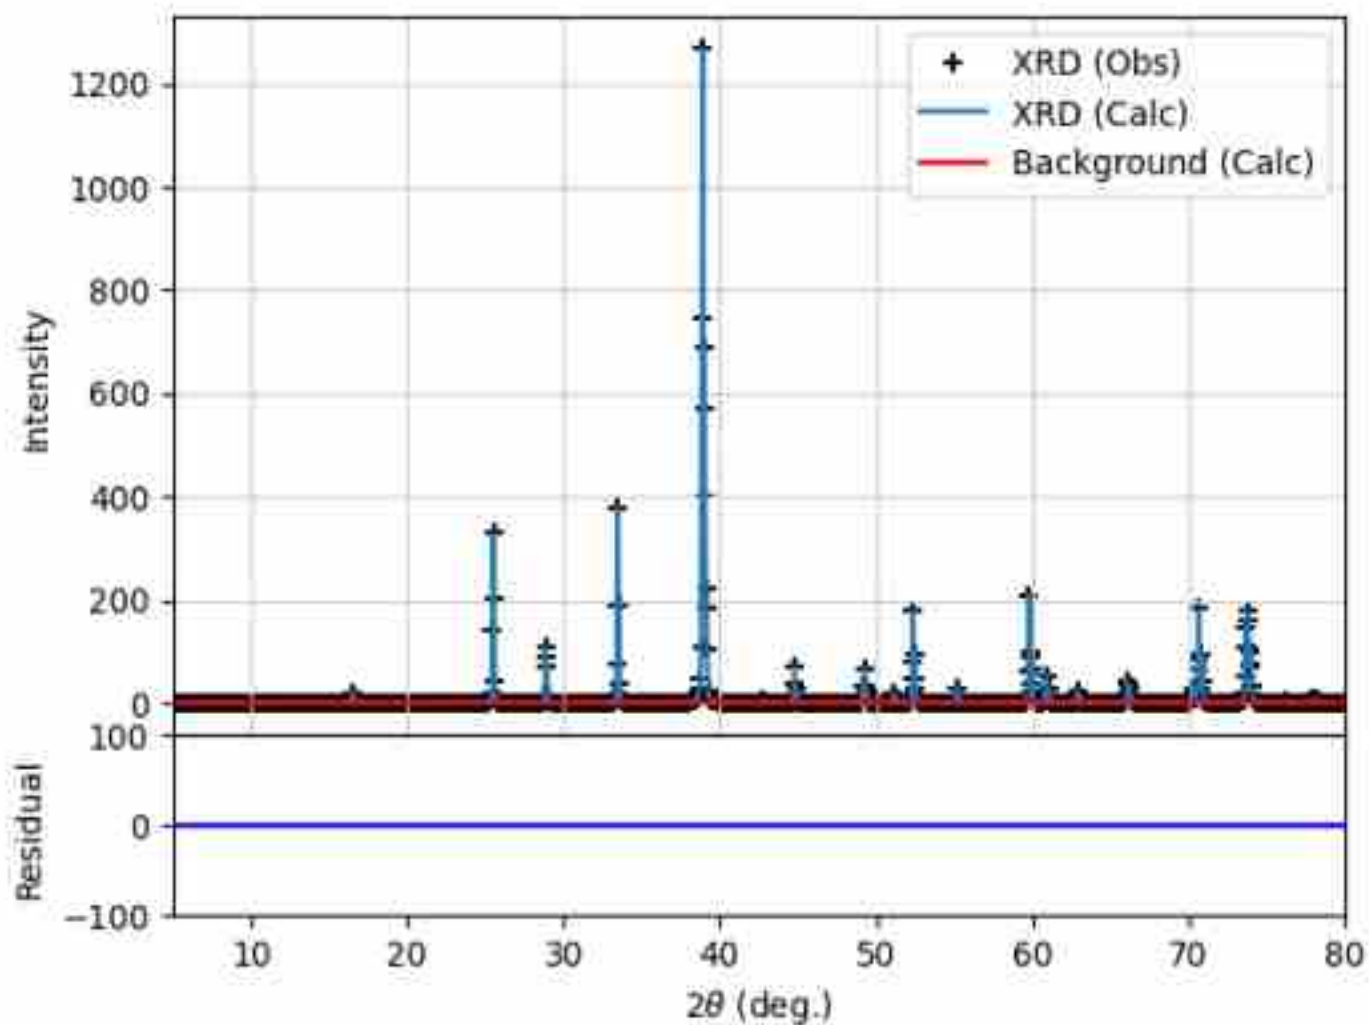

| RMSE before RR | Rwp    | RMSE after RR |
|----------------|--------|---------------|
| 0.011          | 0.0266 | 0.0023        |

# Tm<sub>3</sub>In<sub>3</sub>Pd<sub>3</sub>

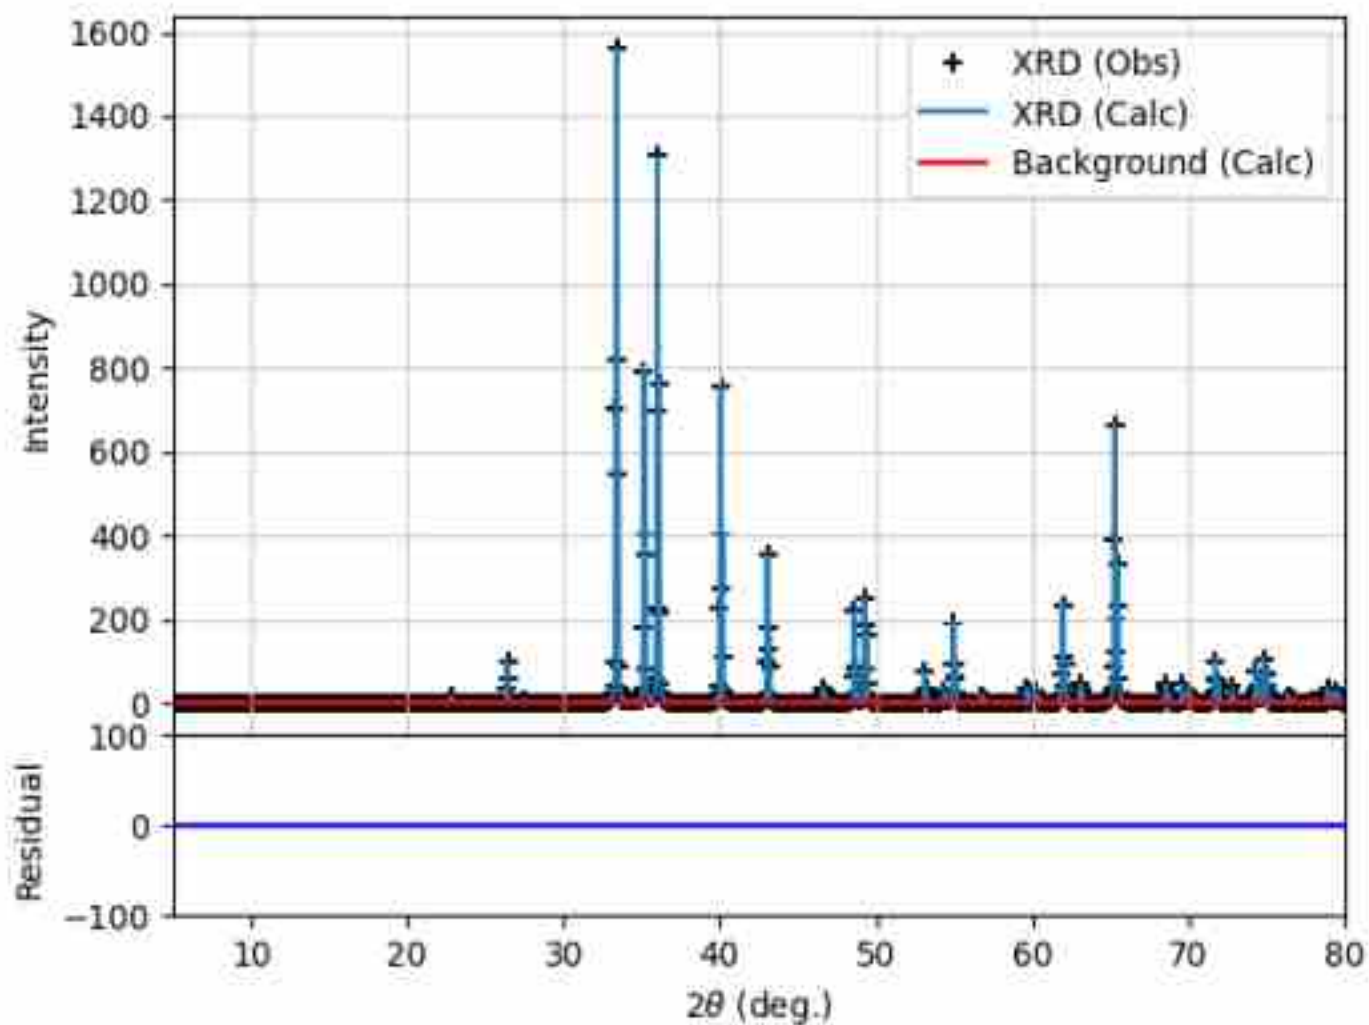

| RMSE before RR | Rwp     | RMSE after RR |
|----------------|---------|---------------|
| 0.011          | 0.00583 | 0.00049       |

# Tm<sub>3</sub>Sn<sub>3</sub>Pt<sub>3</sub>

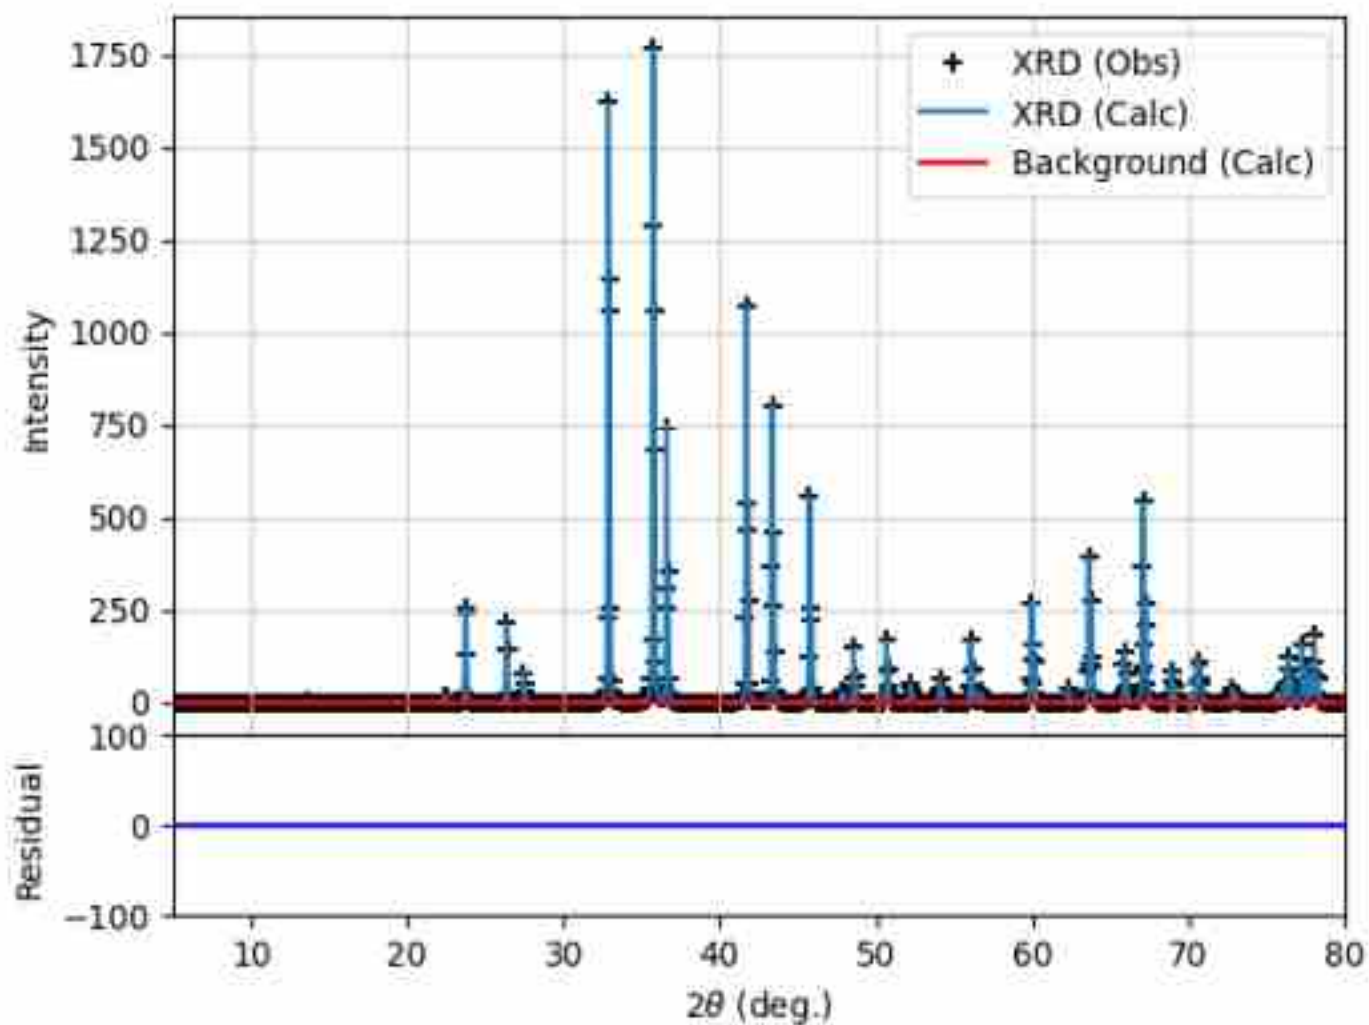

| RMSE before RR | Rwp     | RMSE after RR |
|----------------|---------|---------------|
| 0.011          | 0.00347 | 0.00055       |

# Tm<sub>8</sub>Au<sub>4</sub>

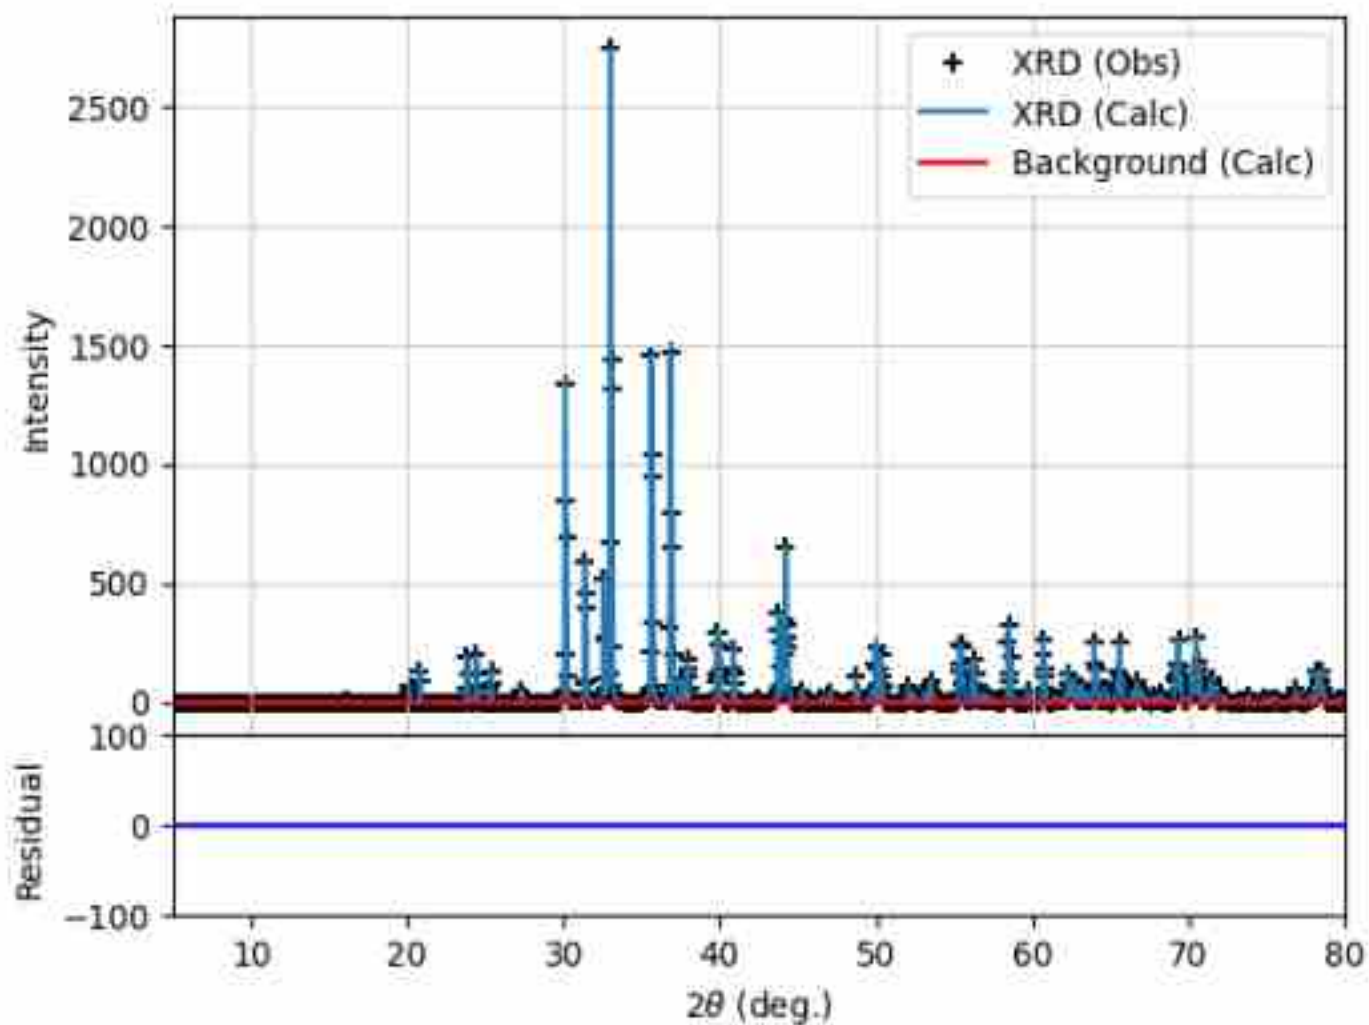

| RMSE before RR | Rwp    | RMSE after RR |
|----------------|--------|---------------|
| 0.011          | 0.0044 | 0.00032       |



# U1Cu4Pd1

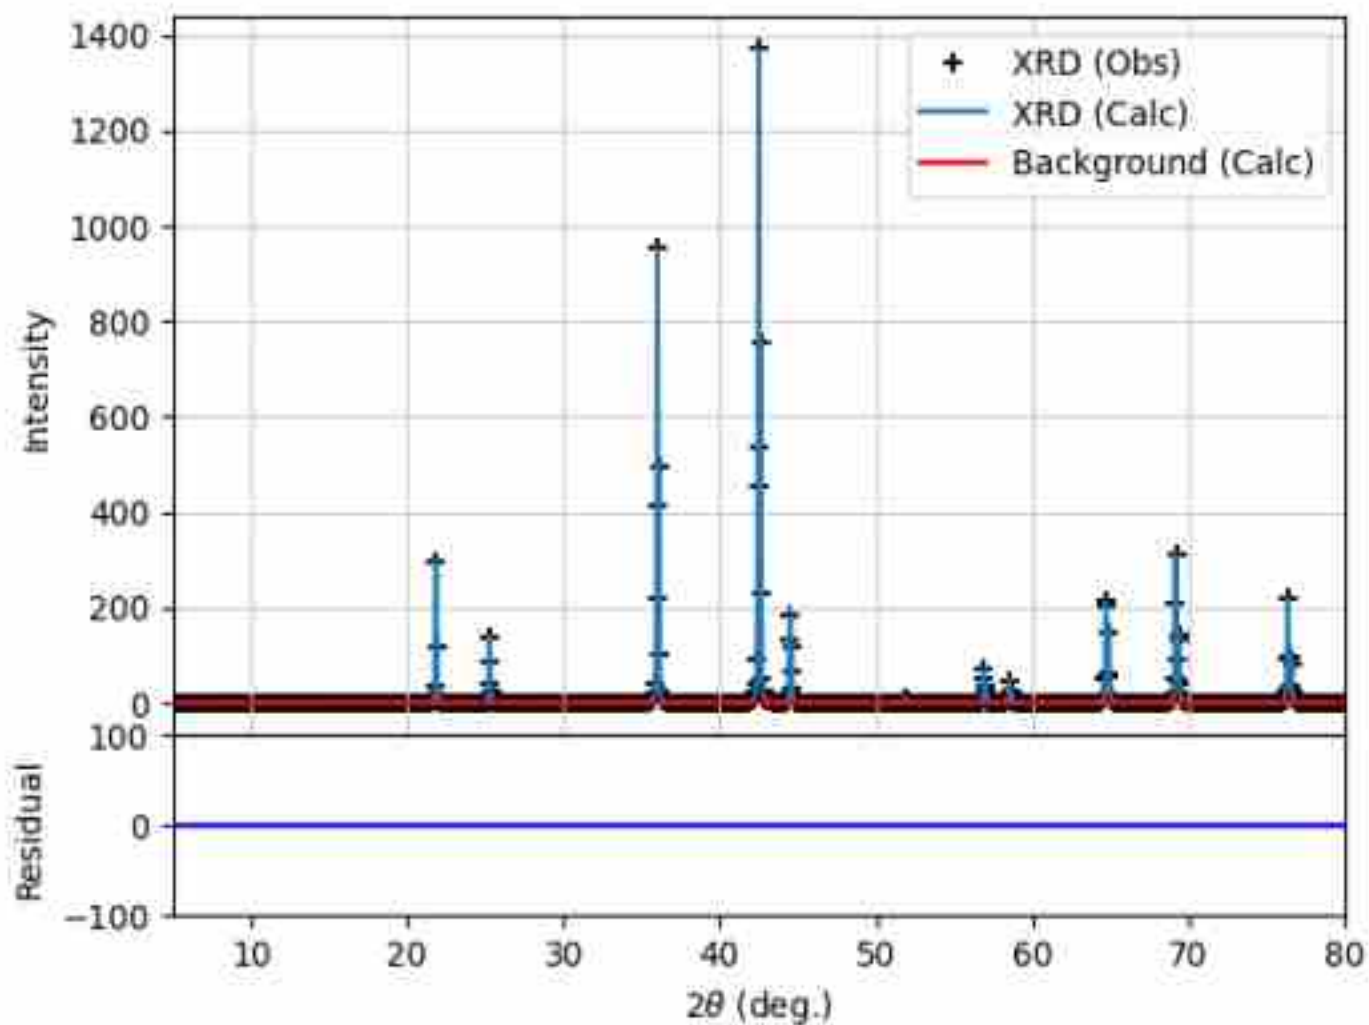

| RMSE before RR | Rwp     | RMSE after RR |
|----------------|---------|---------------|
| 0.011          | 0.01893 | 0.00232       |

# U3P2S1

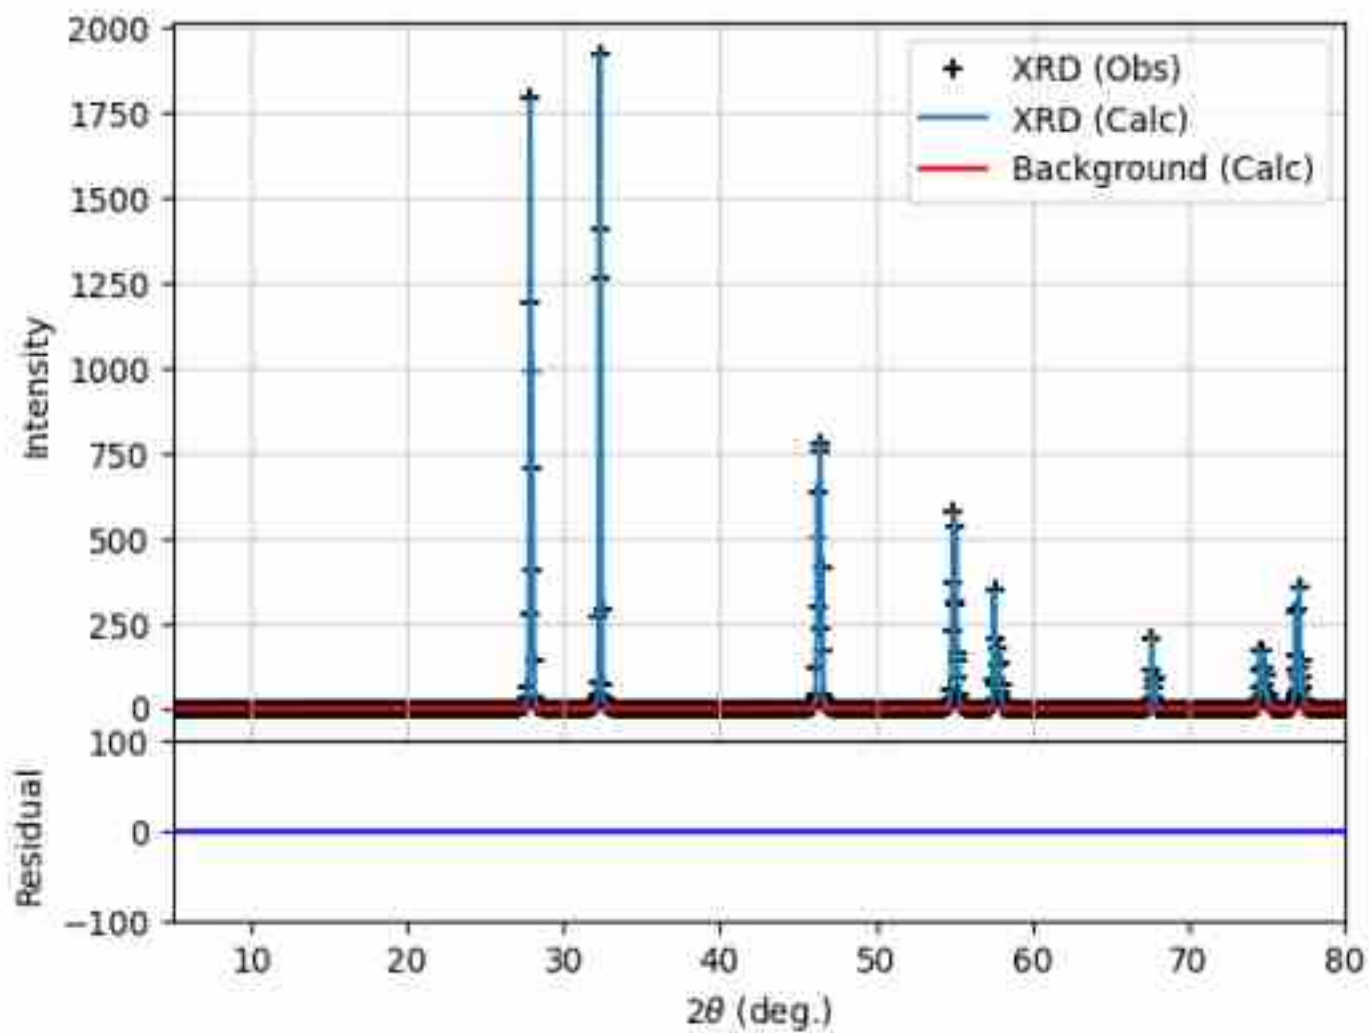

| RMSE before RR | Rwp     | RMSE after RR |
|----------------|---------|---------------|
| 0.011          | 0.00271 | 0.0005        |

# U<sub>3</sub>Sn<sub>3</sub>Ru<sub>3</sub>

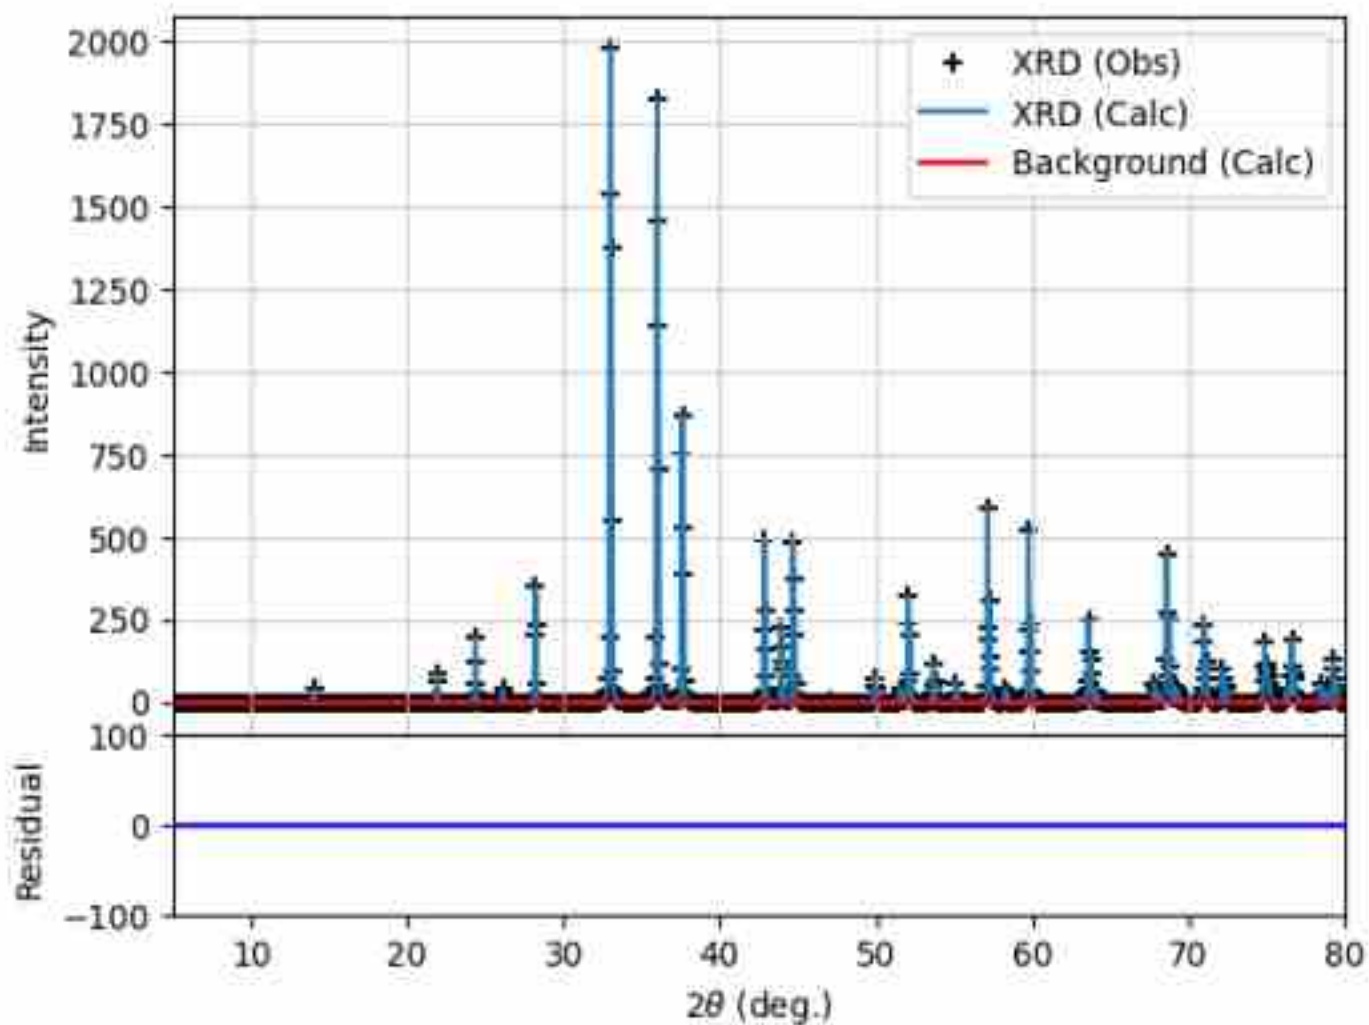

| RMSE before RR | Rwp     | RMSE after RR |
|----------------|---------|---------------|
| 0.011          | 0.00639 | 0.00077       |

# V1Cr2Te4

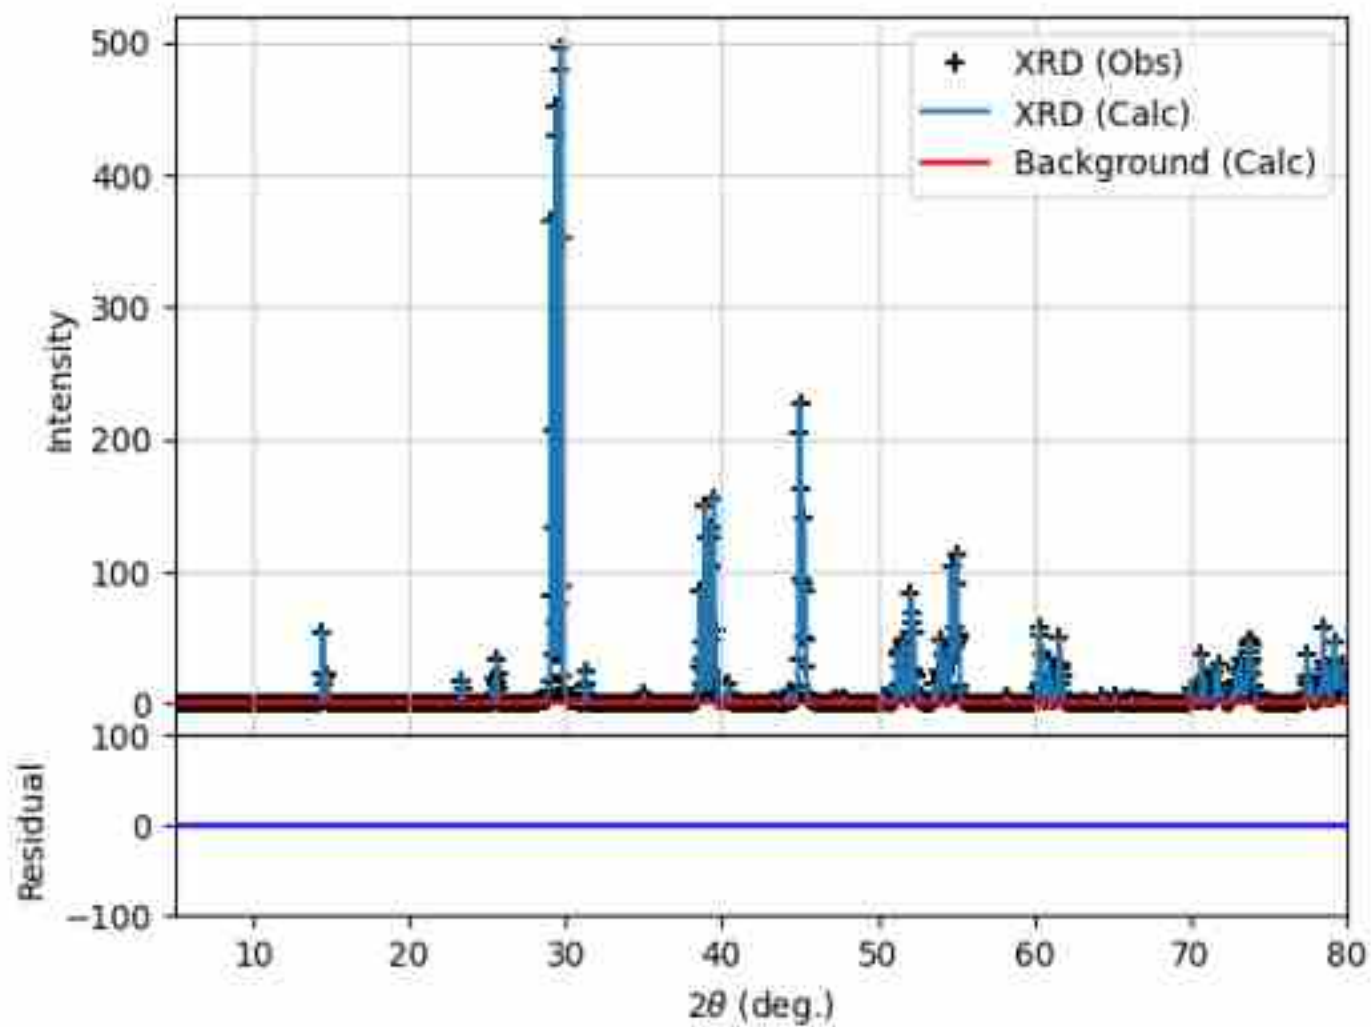

| RMSE before RR | Rwp     | RMSE after RR |
|----------------|---------|---------------|
| 0.011          | 0.00337 | 0.00022       |

# V1Te2

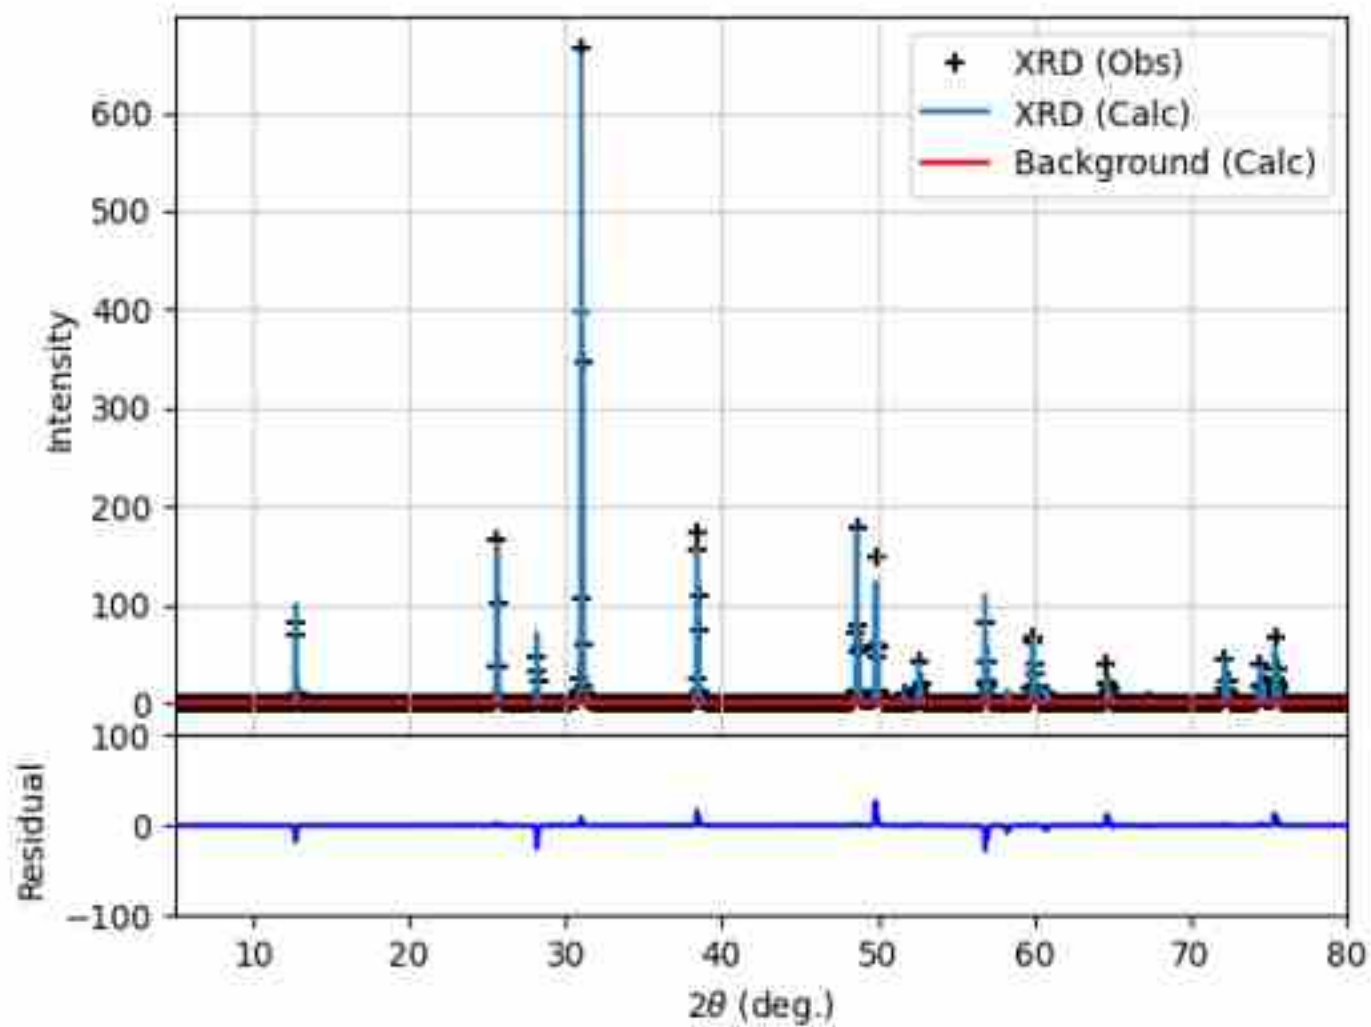

| RMSE before RR | Rwp      | RMSE after RR |
|----------------|----------|---------------|
| 0.011          | 14.61776 | 0.01093       |

# Y1Fe10Mo2

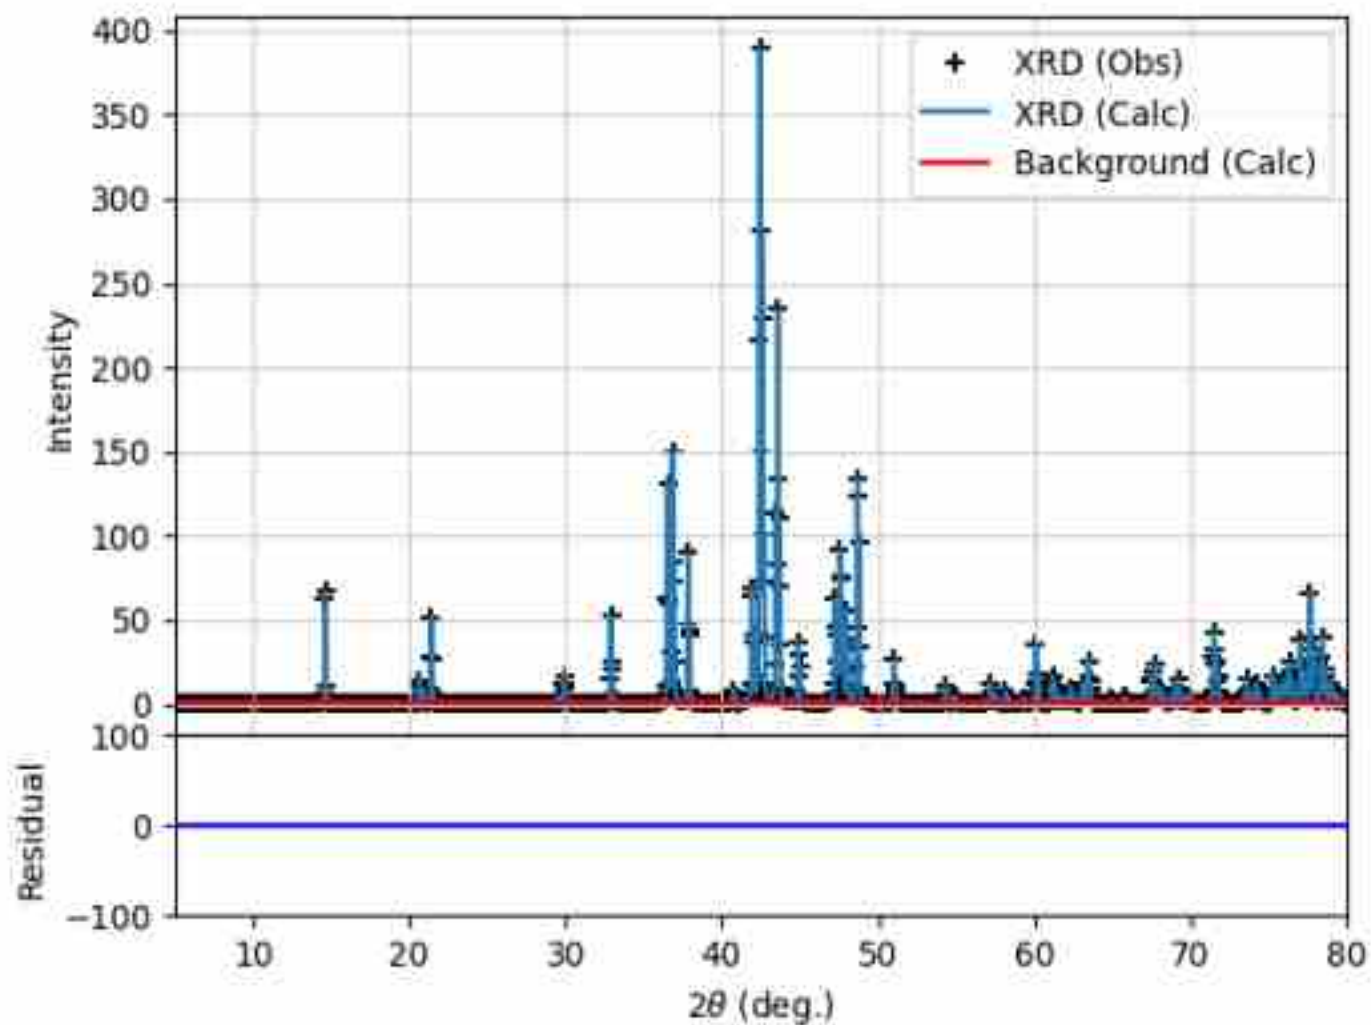

| RMSE before RR | Rwp     | RMSE after RR |
|----------------|---------|---------------|
| 0.011          | 0.00323 | 0.0004        |

# Y<sub>2</sub>Co<sub>4</sub>

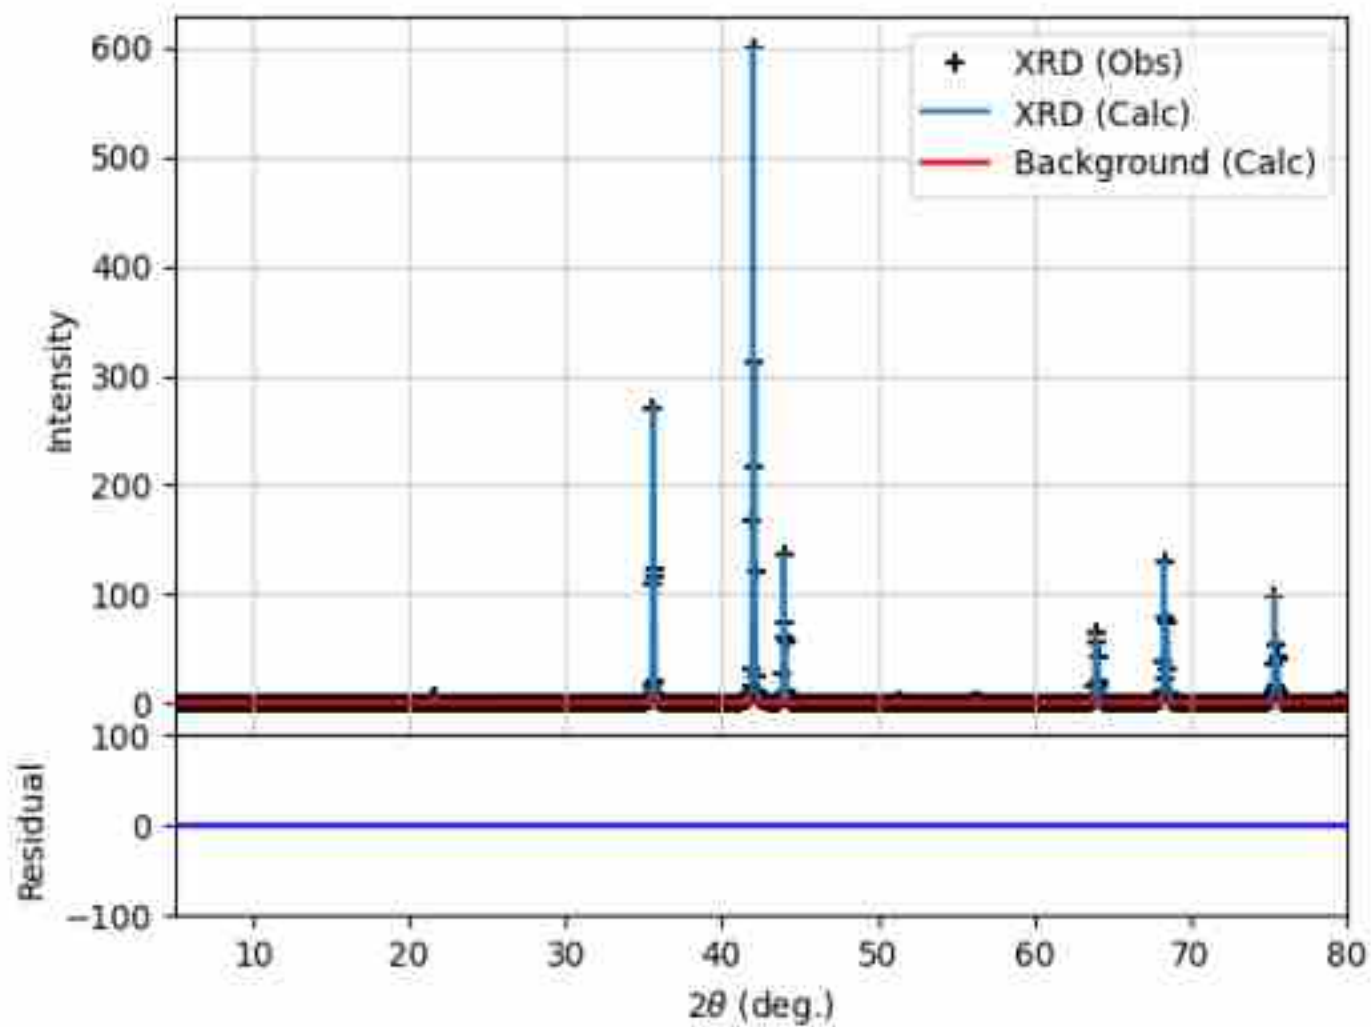

| RMSE before RR | Rwp     | RMSE after RR |
|----------------|---------|---------------|
| 0.011          | 0.00369 | 0.00039       |

# Y2Cu2As4

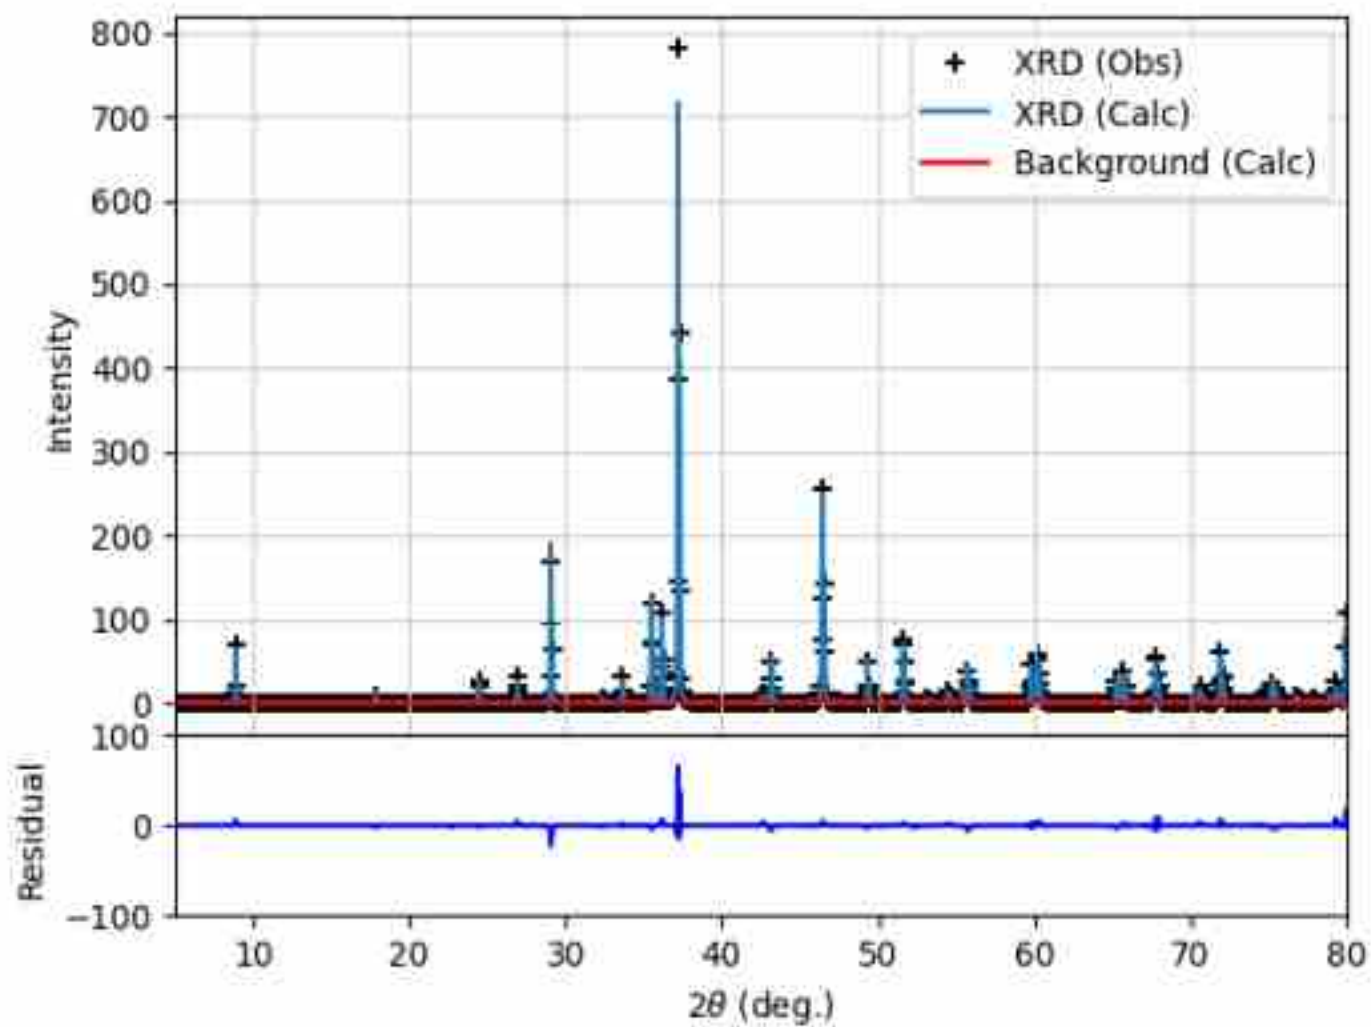

| RMSE before RR | Rwp      | RMSE after RR |
|----------------|----------|---------------|
| 0.011          | 10.13205 | 0.01053       |



# Y<sub>2</sub>Ni<sub>2</sub>Ge<sub>6</sub>

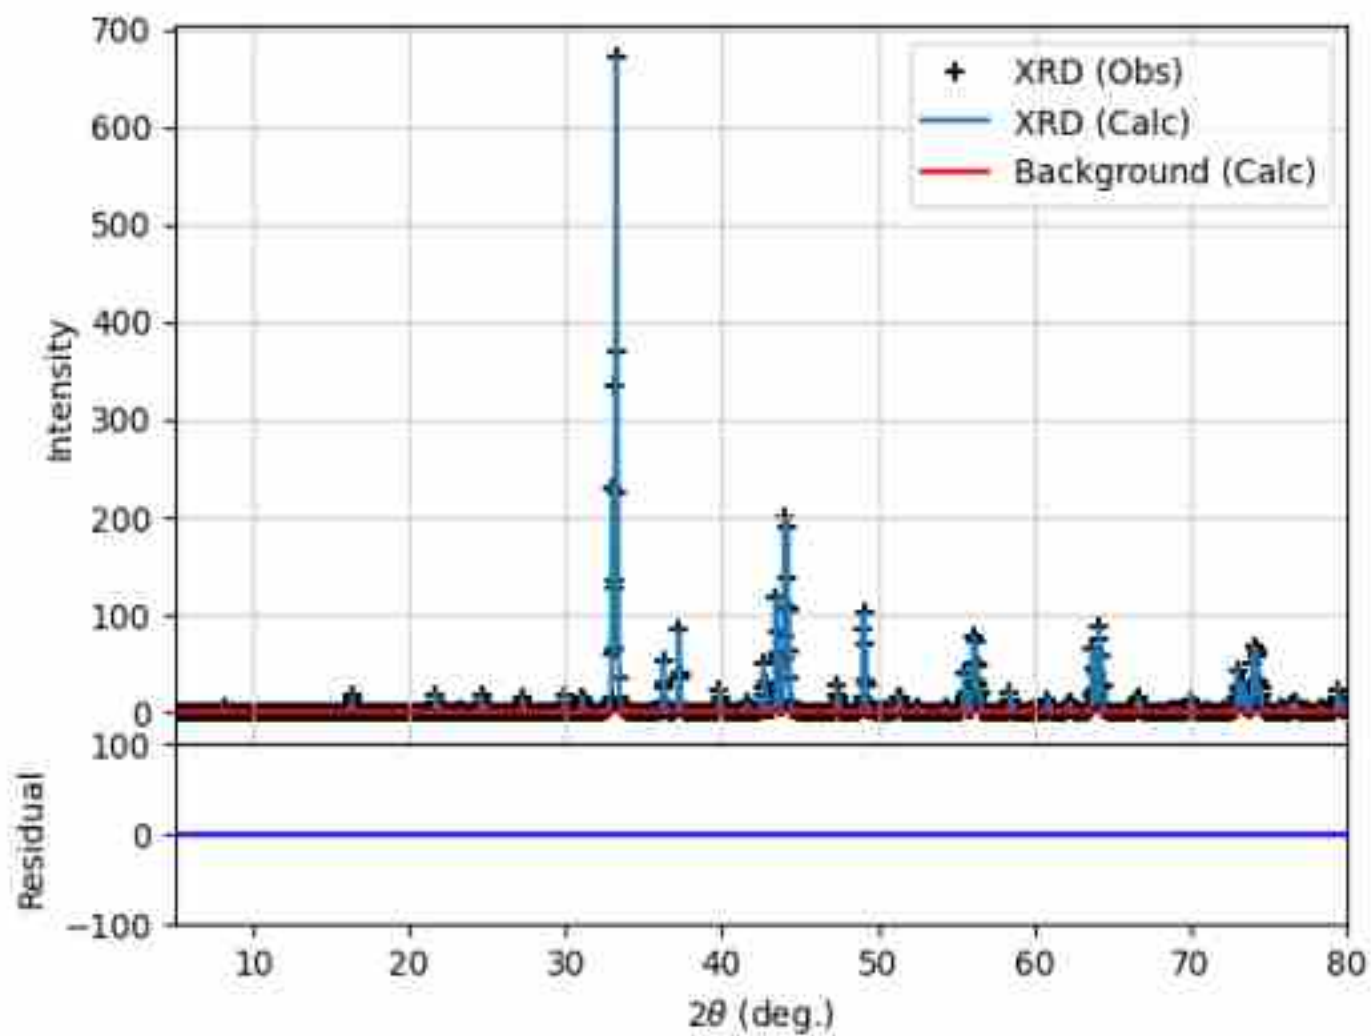

| RMSE before RR | Rwp     | RMSE after RR |
|----------------|---------|---------------|
| 0.011          | 0.00317 | 0.00024       |

# Y2W2C12O8

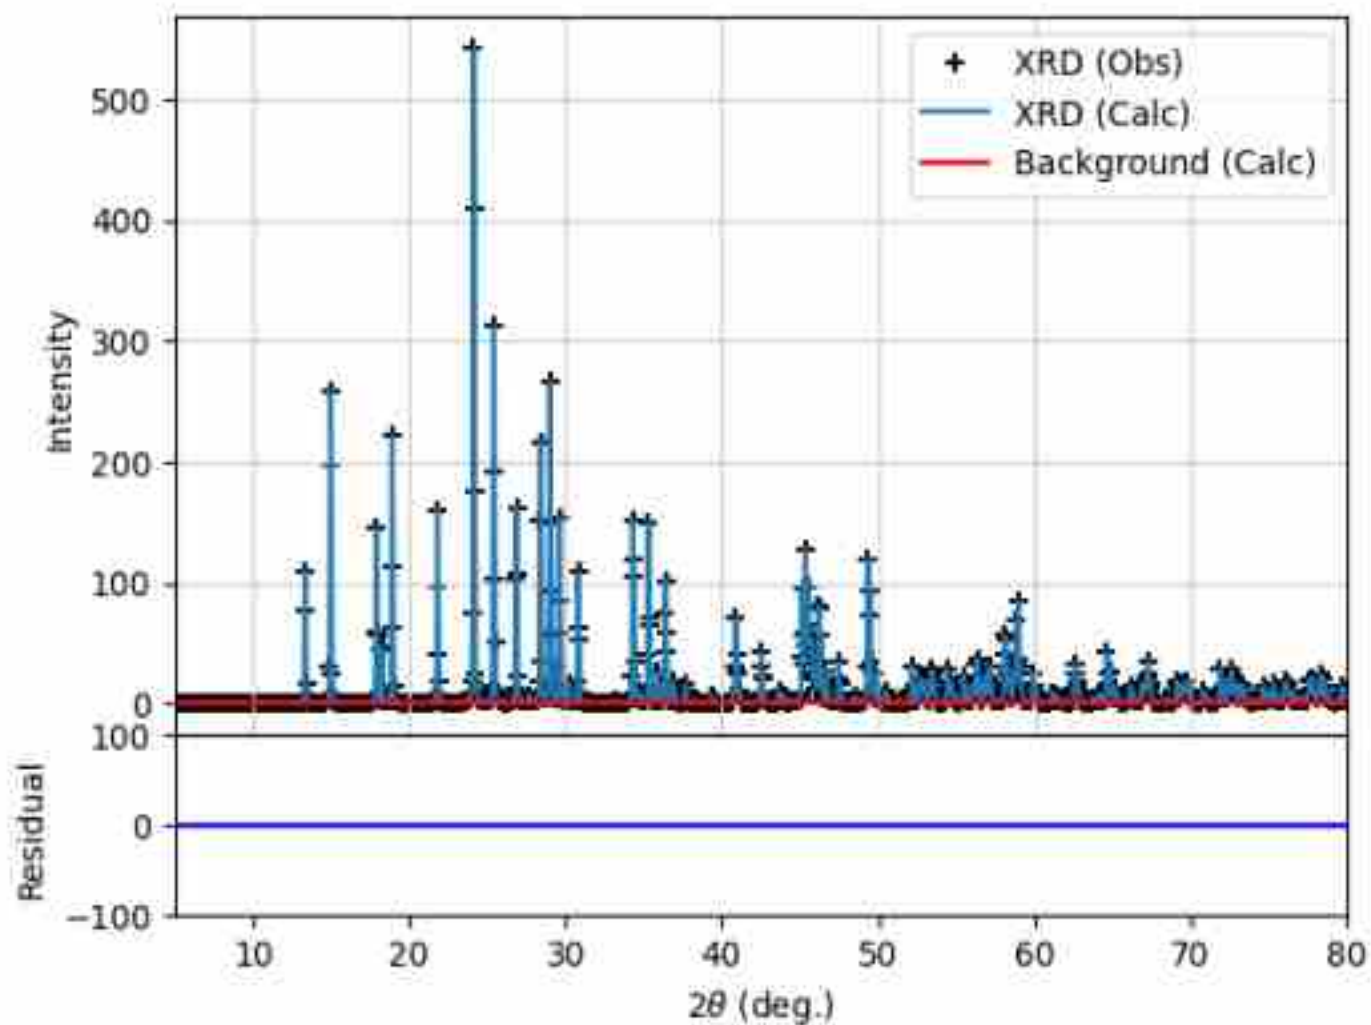

| RMSE before RR | Rwp     | RMSE after RR |
|----------------|---------|---------------|
| 0.011          | 0.00308 | 0.00082       |

# Yb1Al1Cu4

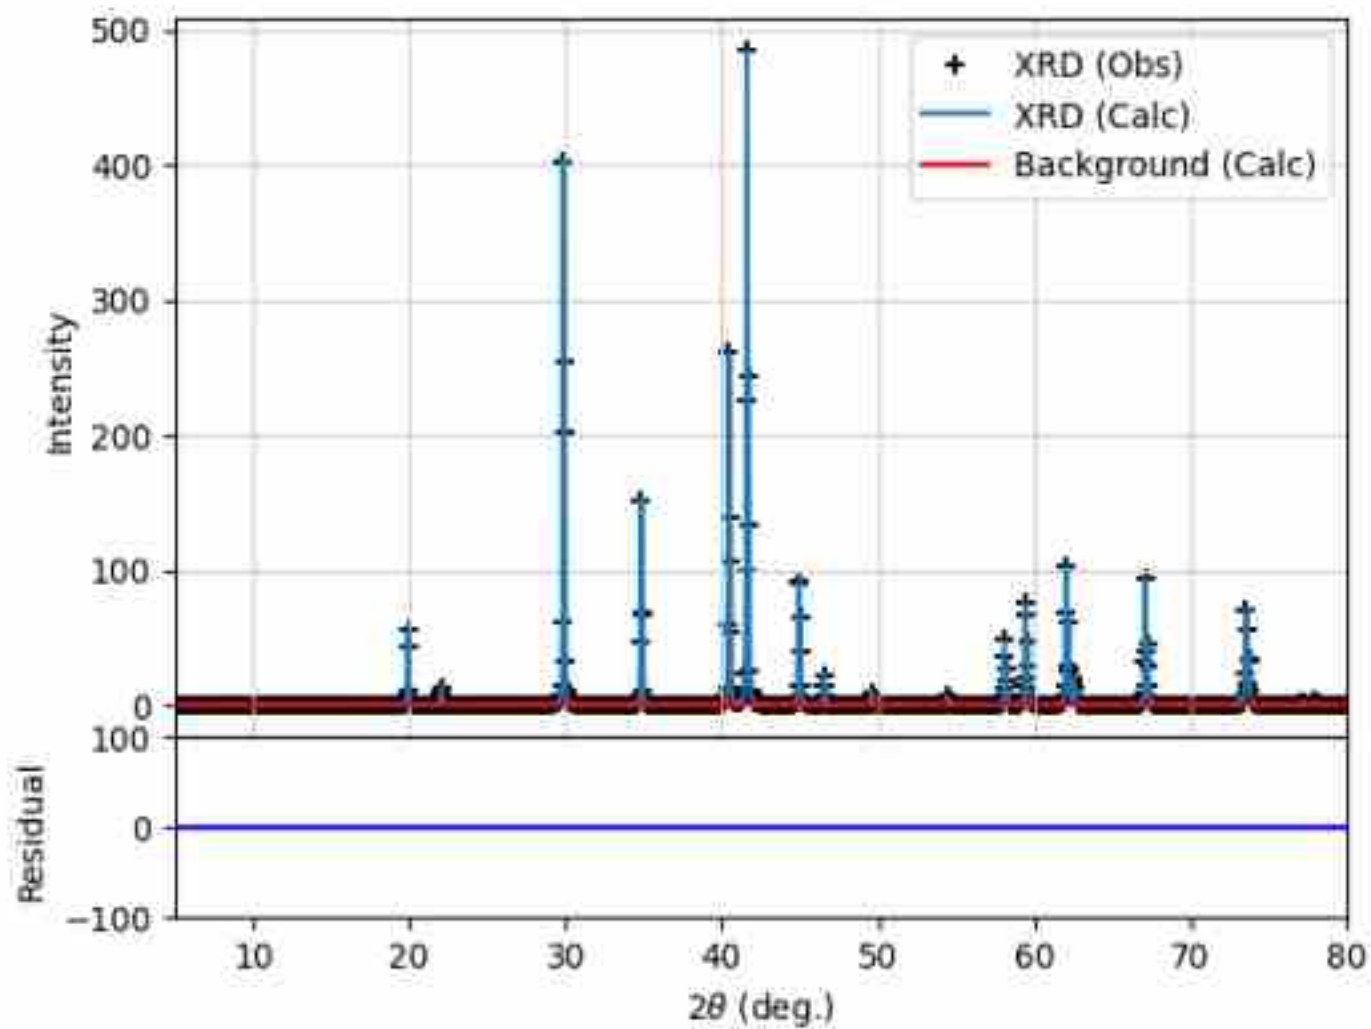

| RMSE before RR | Rwp     | RMSE after RR |
|----------------|---------|---------------|
| 0.011          | 0.01148 | 0.00183       |

# Yb1Co2Si2

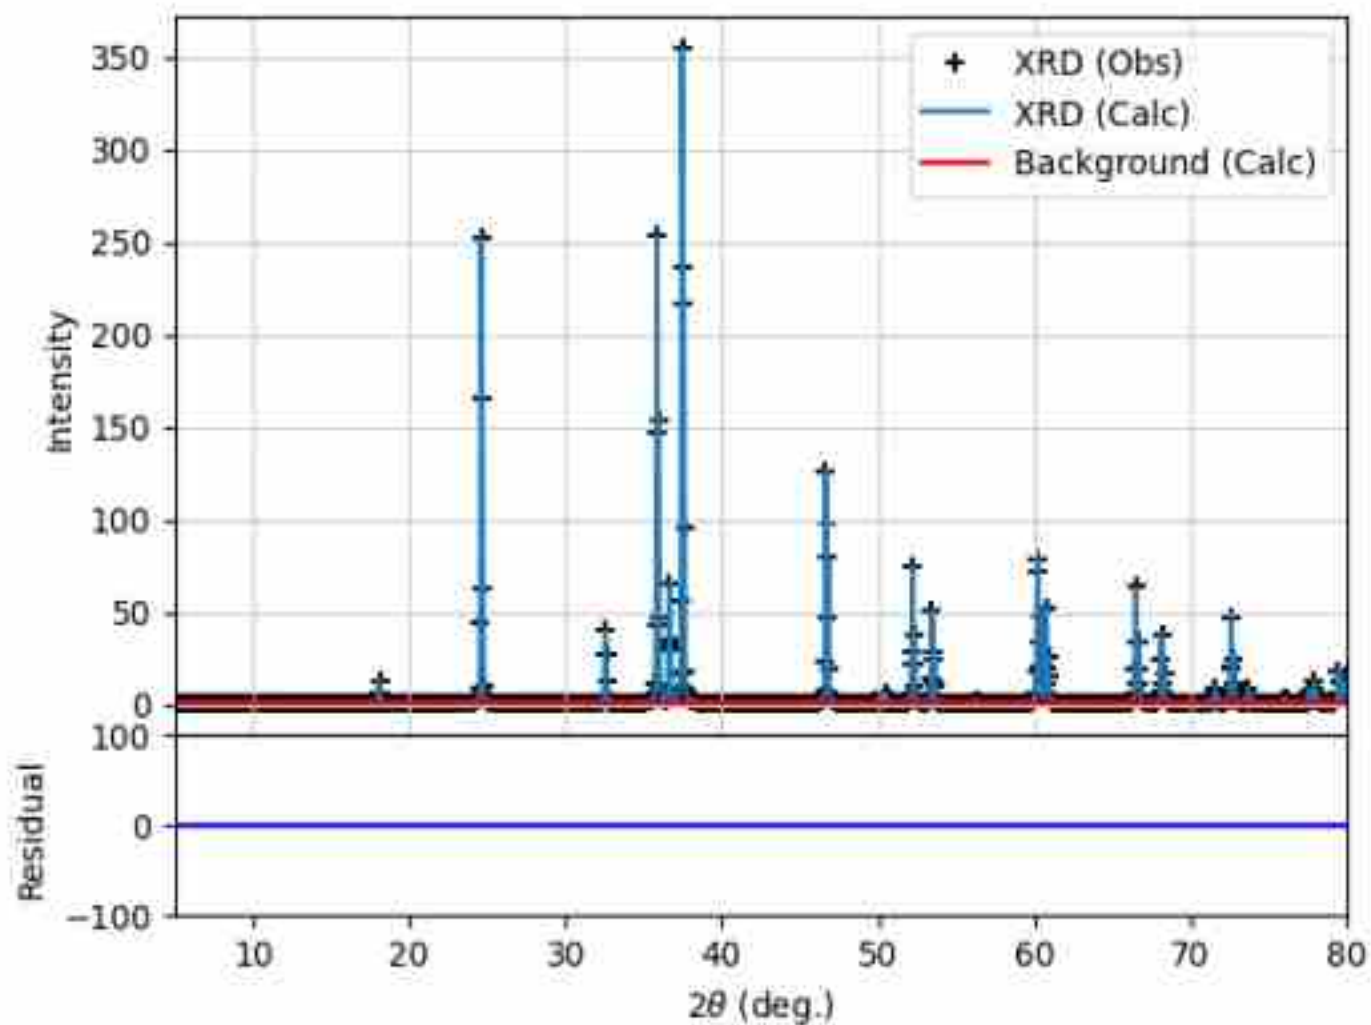

| RMSE before RR | Rwp     | RMSE after RR |
|----------------|---------|---------------|
| 0.011          | 0.00428 | 0.00098       |

# Yb5Mg1

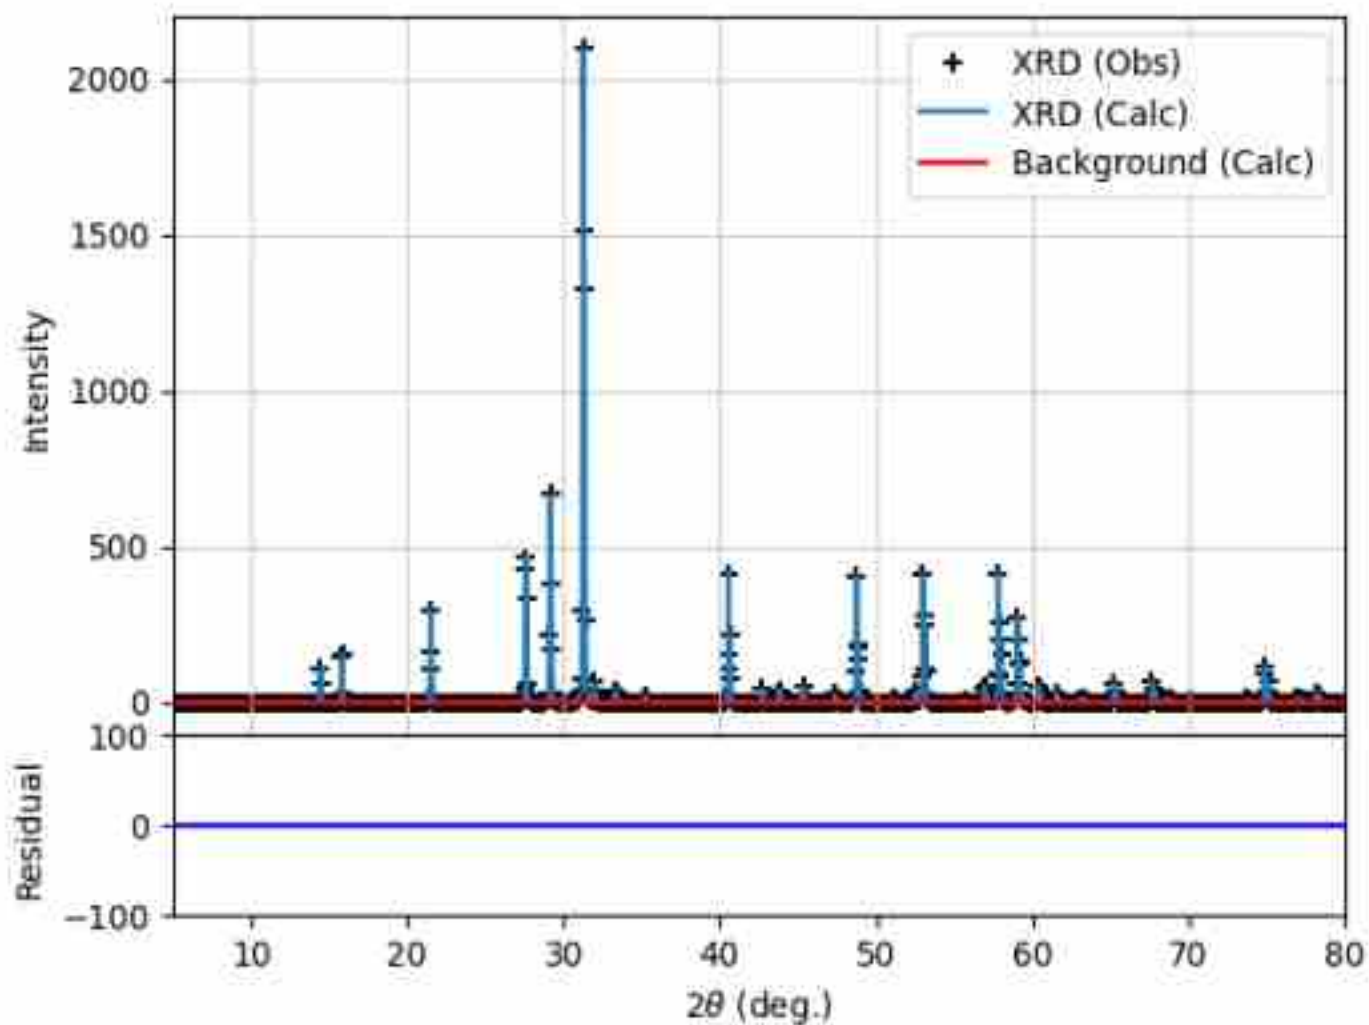

| RMSE before RR | Rwp     | RMSE after RR |
|----------------|---------|---------------|
| 0.011          | 0.00349 | 0.0007        |

# Zn1Fe3C1

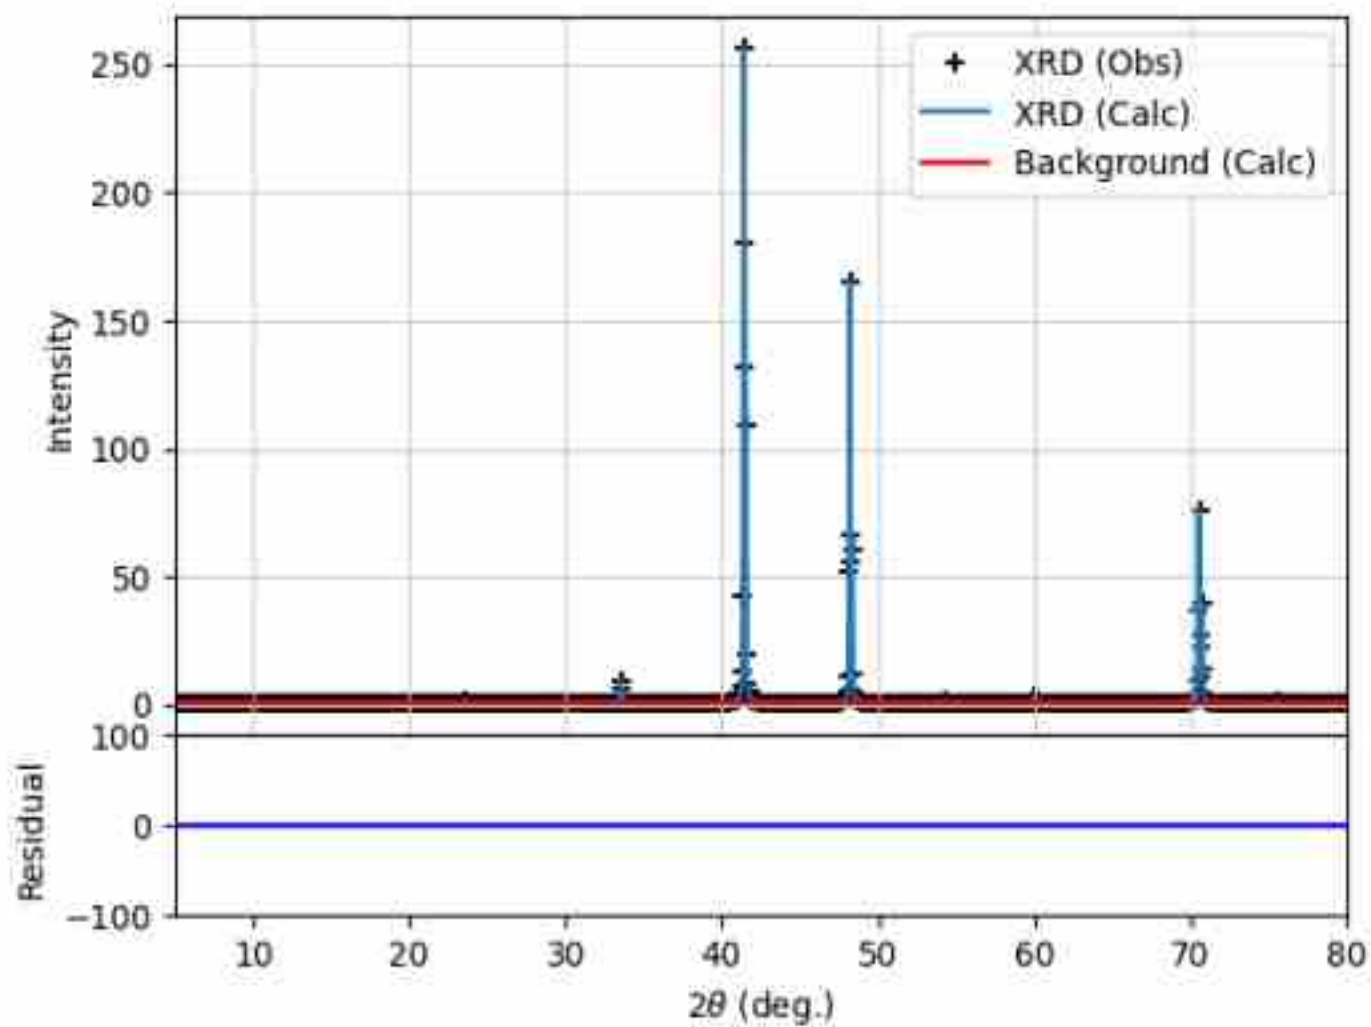

| RMSE before RR | Rwp     | RMSE after RR |
|----------------|---------|---------------|
| 0.011          | 0.00588 | 0.00275       |

# Zn<sub>1</sub>Hg<sub>1</sub>Se<sub>2</sub>

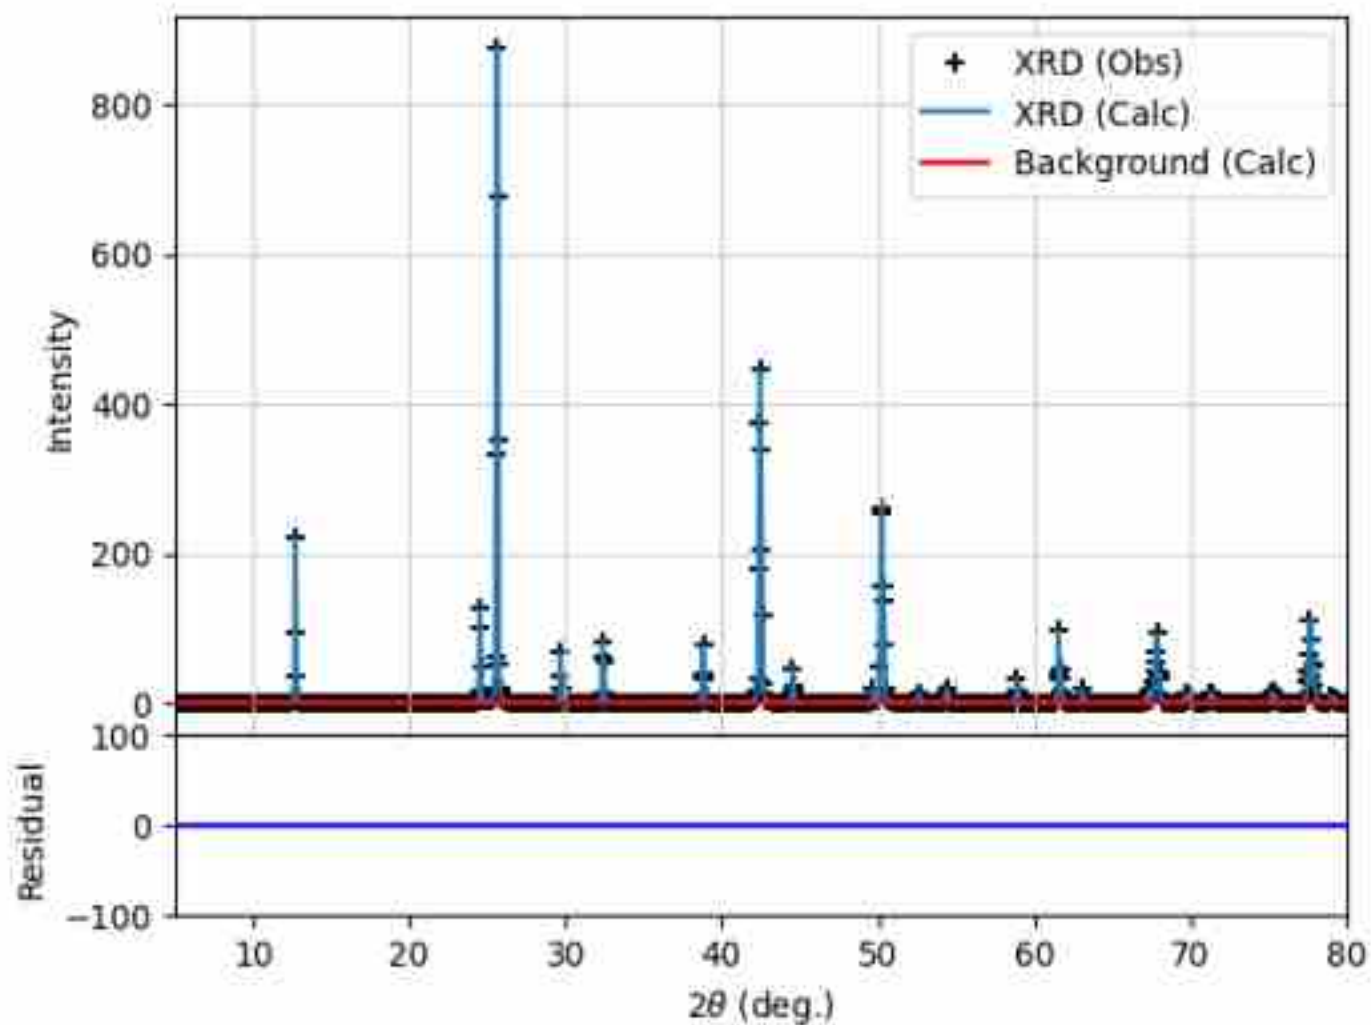

| RMSE before RR | Rwp     | RMSE after RR |
|----------------|---------|---------------|
| 0.011          | 0.00236 | 0.00029       |

# Zr<sub>2</sub>VCo<sub>3</sub>

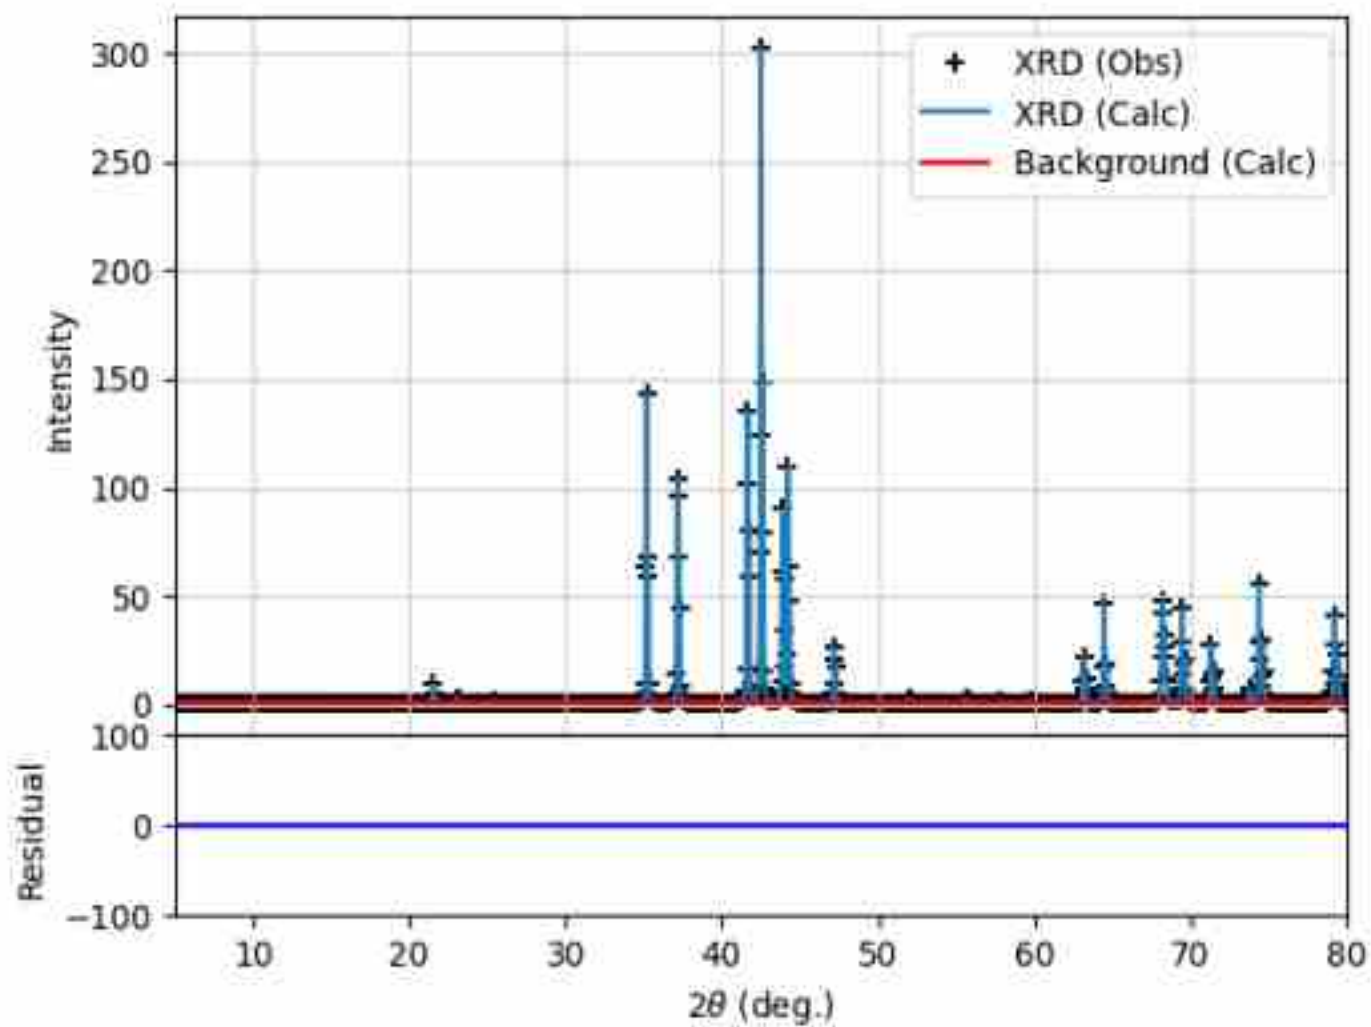

| RMSE before RR | Rwp     | RMSE after RR |
|----------------|---------|---------------|
| 0.011          | 0.00516 | 0.00038       |



# Zr4Cr8

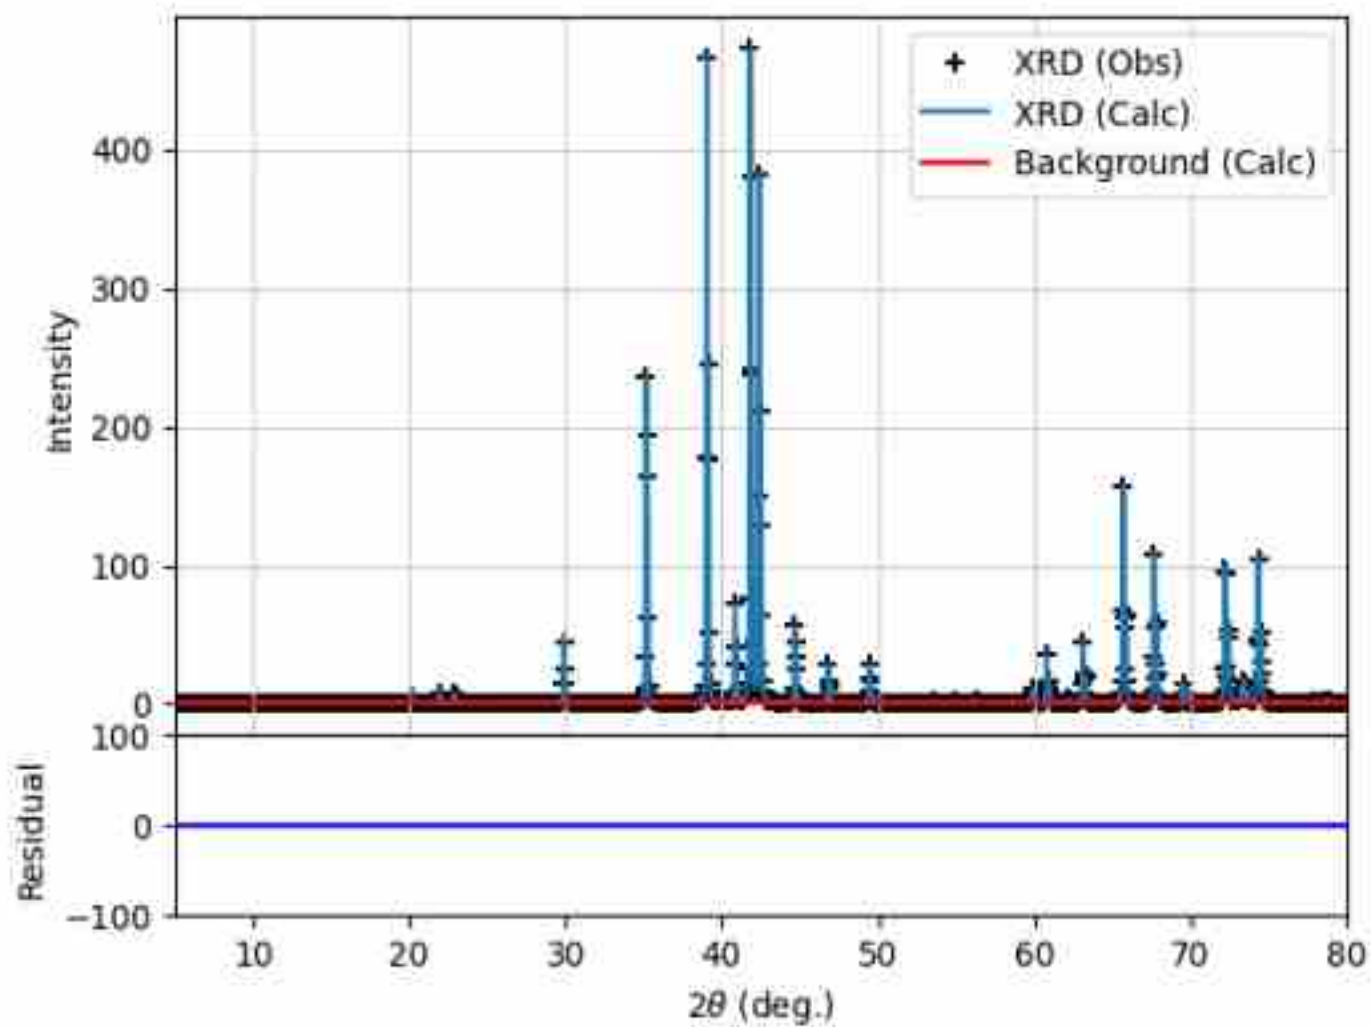

| RMSE before RR | Rwp     | RMSE after RR |
|----------------|---------|---------------|
| 0.011          | 0.00369 | 0.00062       |

# Ag<sub>2</sub>Au<sub>6</sub>

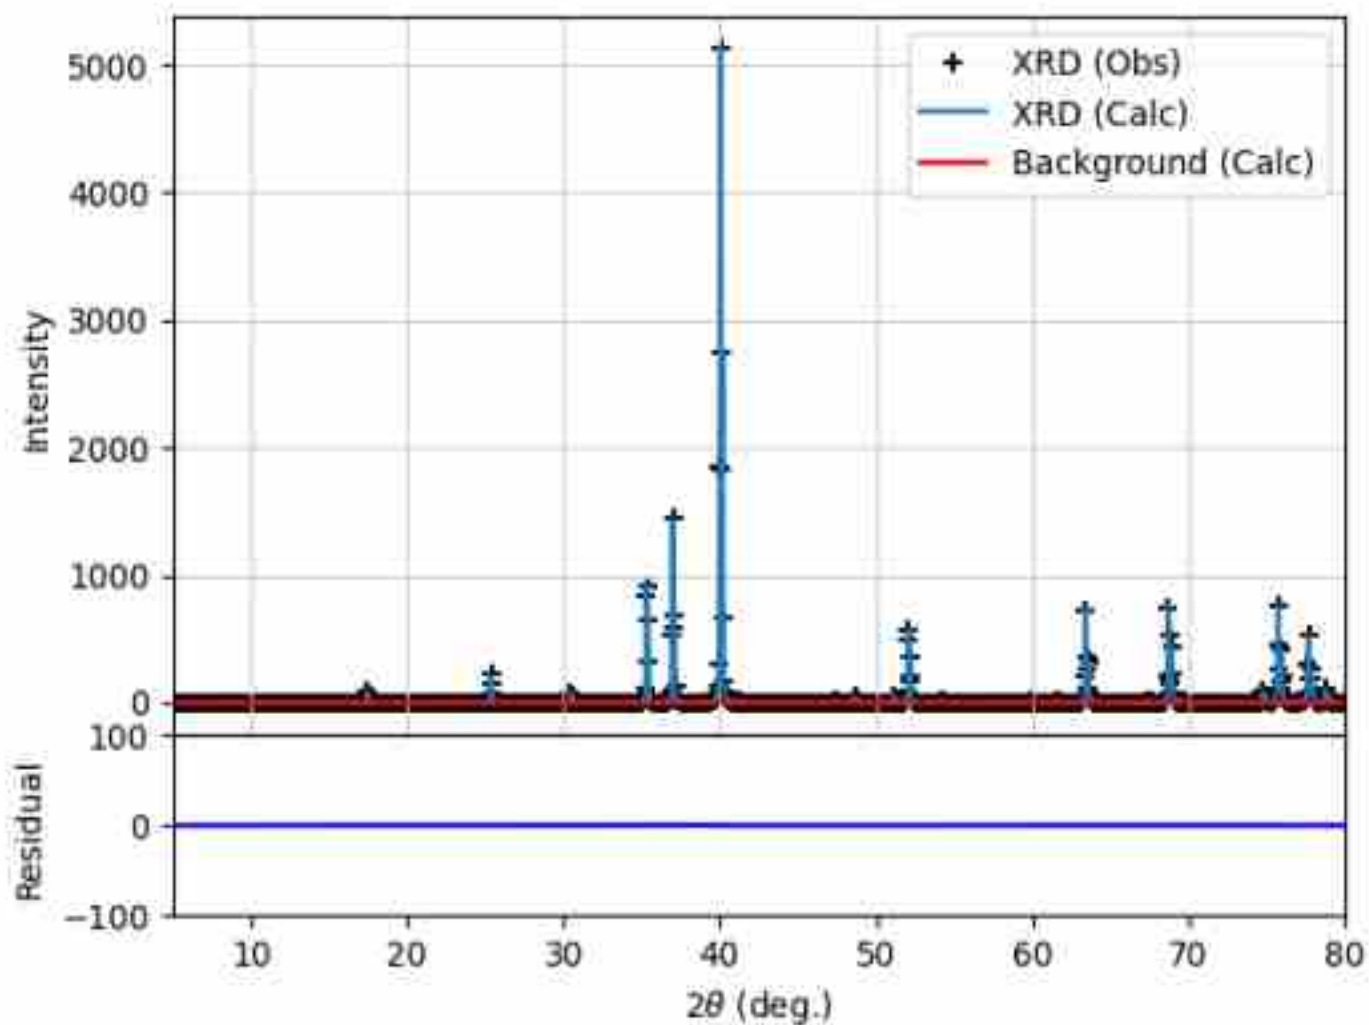

| RMSE before RR | Rwp     | RMSE after RR |
|----------------|---------|---------------|
| 0.012          | 0.07421 | 0.00236       |

# Ag<sub>4</sub>Te<sub>2</sub>

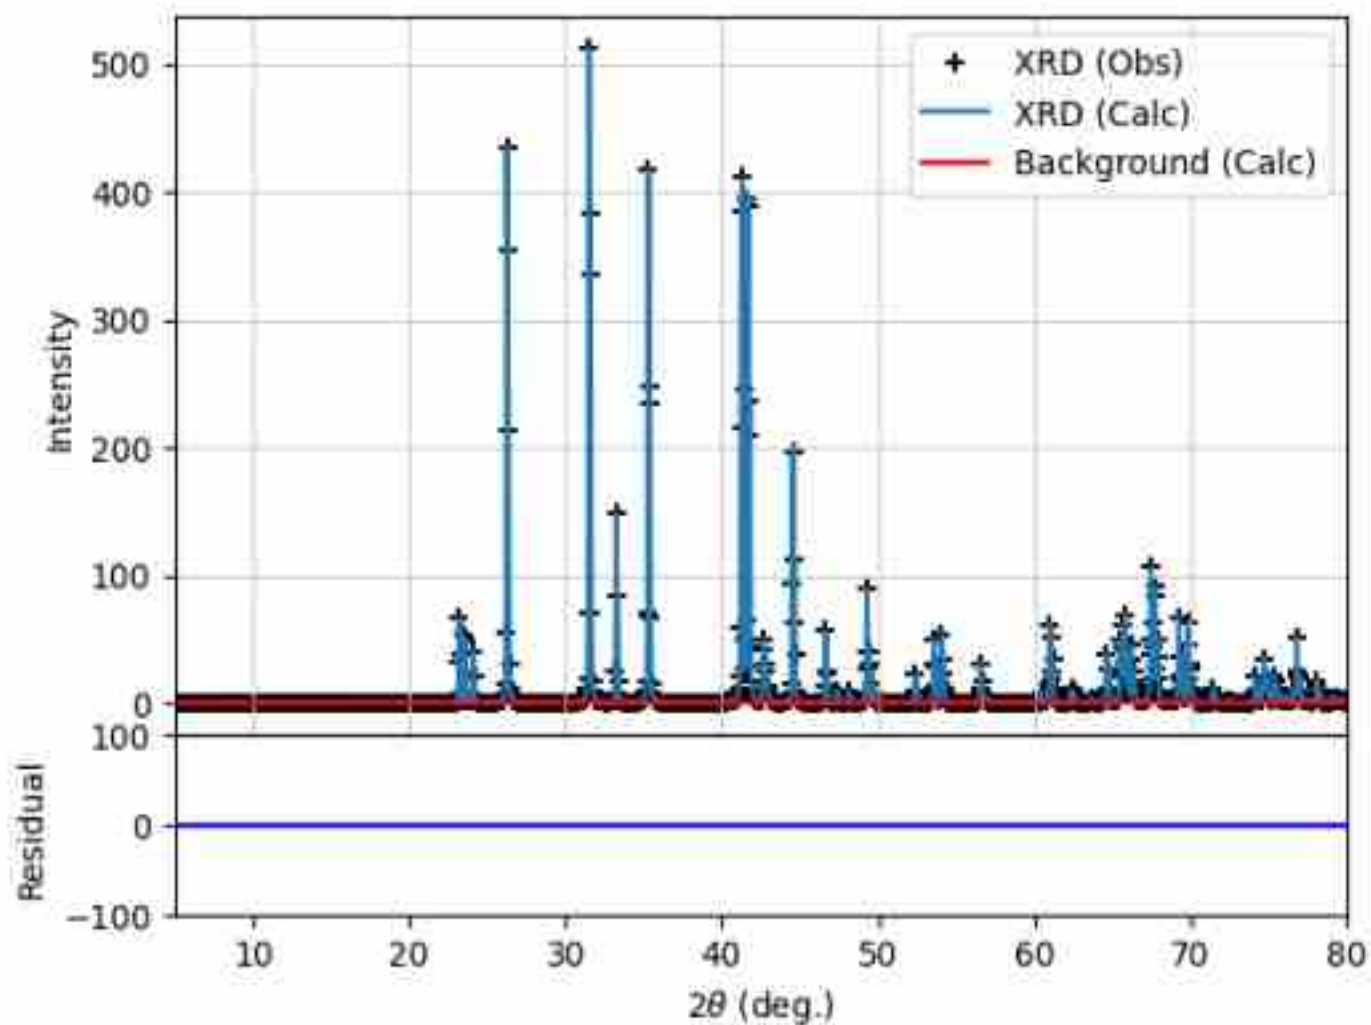

| RMSE before RR | Rwp     | RMSE after RR |
|----------------|---------|---------------|
| 0.012          | 0.00392 | 0.0003        |

# AlInAg<sub>2</sub>S<sub>4</sub>

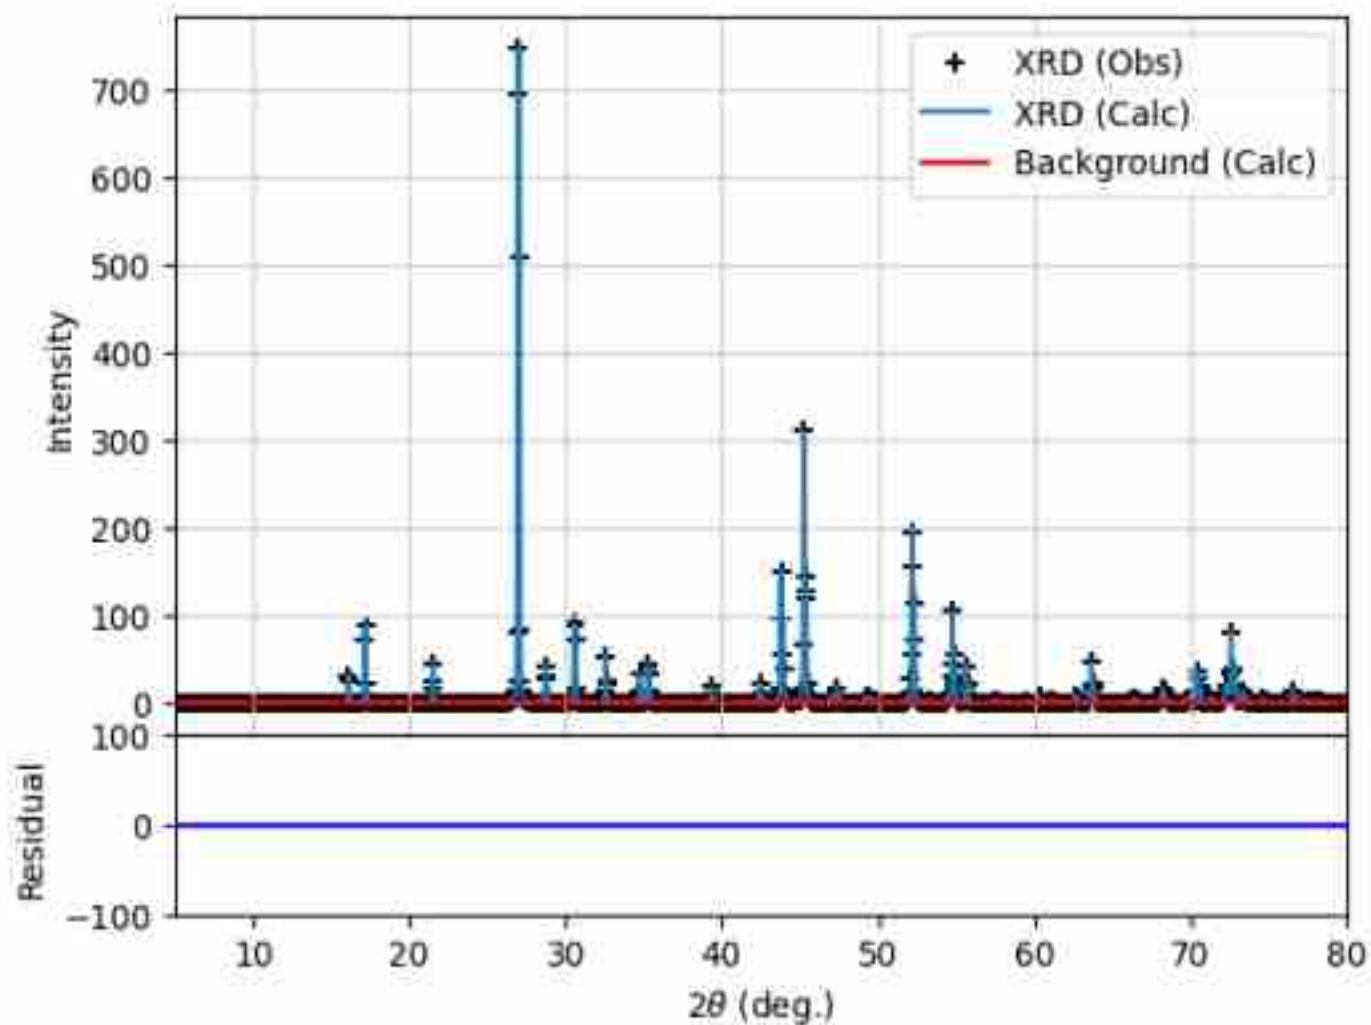

| RMSE before RR | Rwp     | RMSE after RR |
|----------------|---------|---------------|
| 0.012          | 0.00348 | 0.00131       |

# Ba1Eu1O2

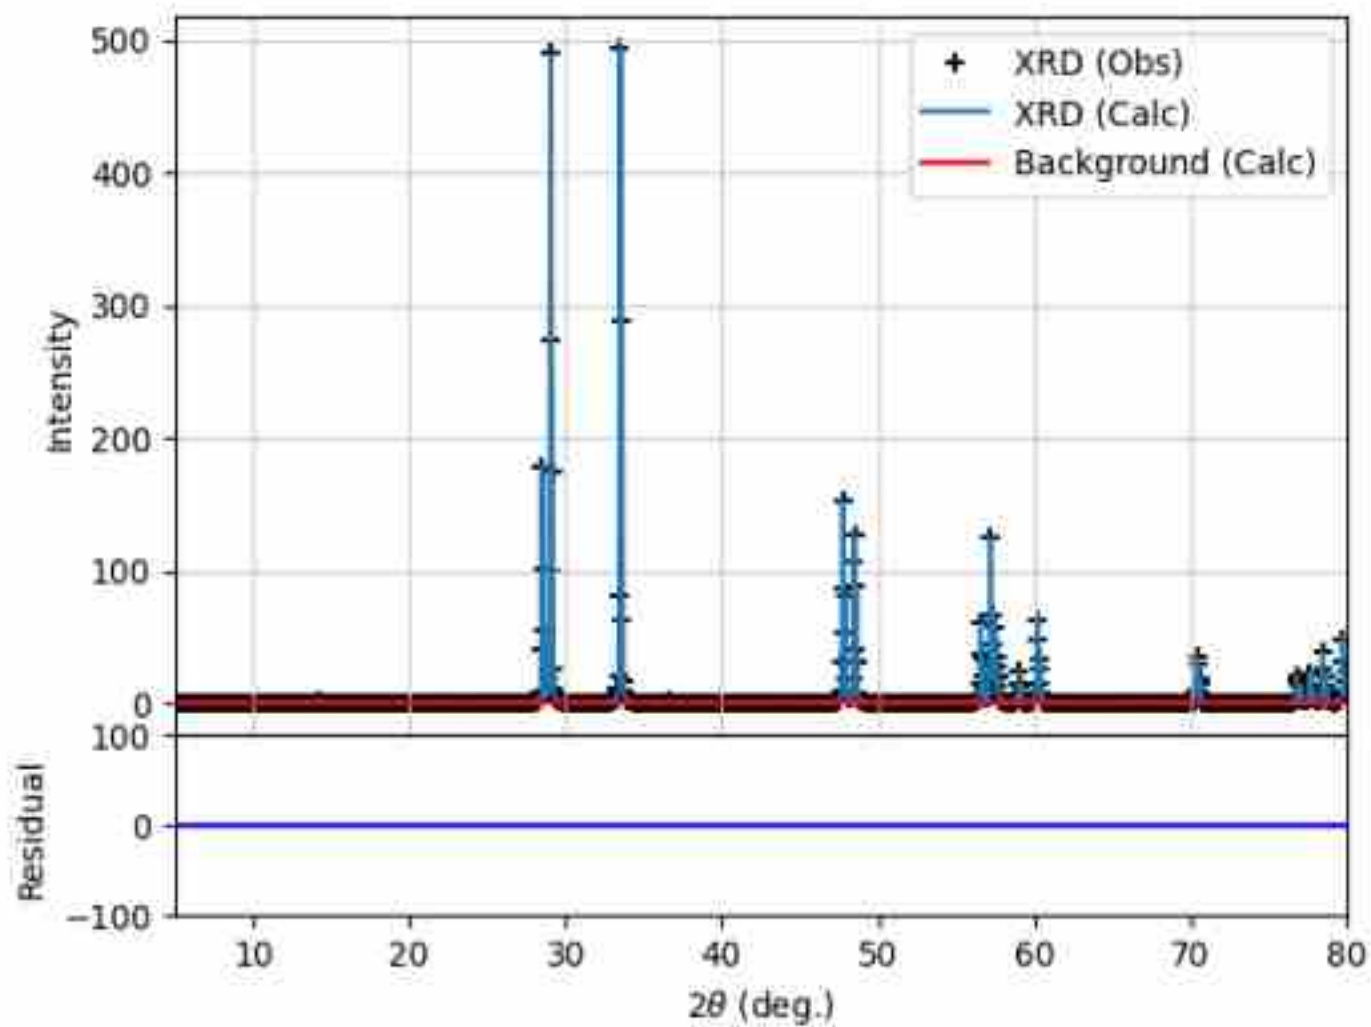

| RMSE before RR | Rwp     | RMSE after RR |
|----------------|---------|---------------|
| 0.012          | 0.01397 | 0.0026        |

# Ba1Ge2Au2

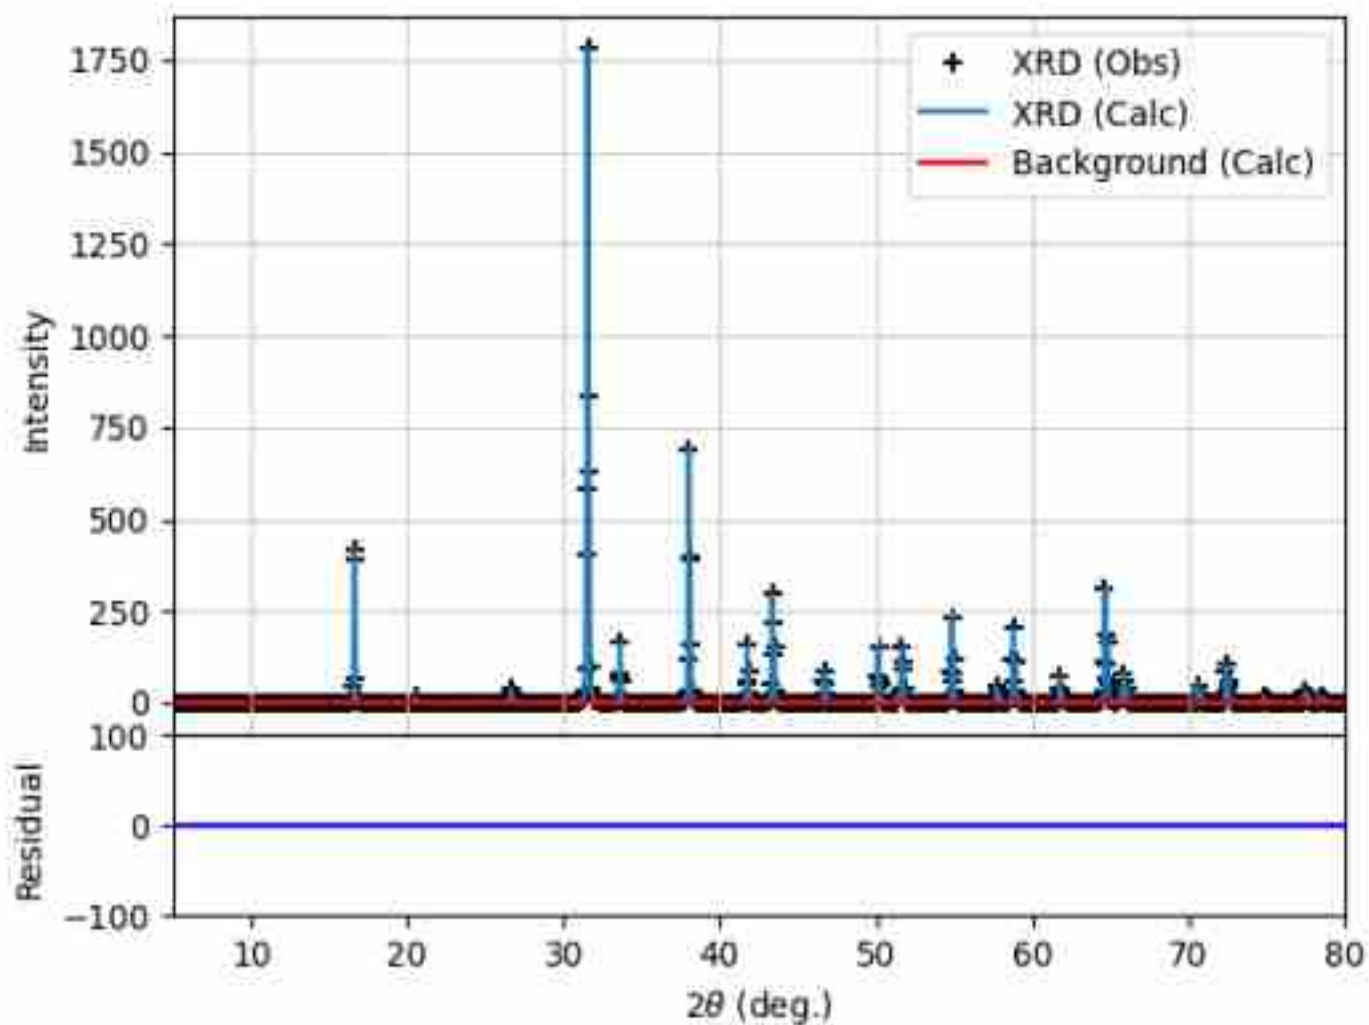

| RMSE before RR | Rwp     | RMSE after RR |
|----------------|---------|---------------|
| 0.012          | 0.00297 | 0.00028       |

# Ba1Mg1In3

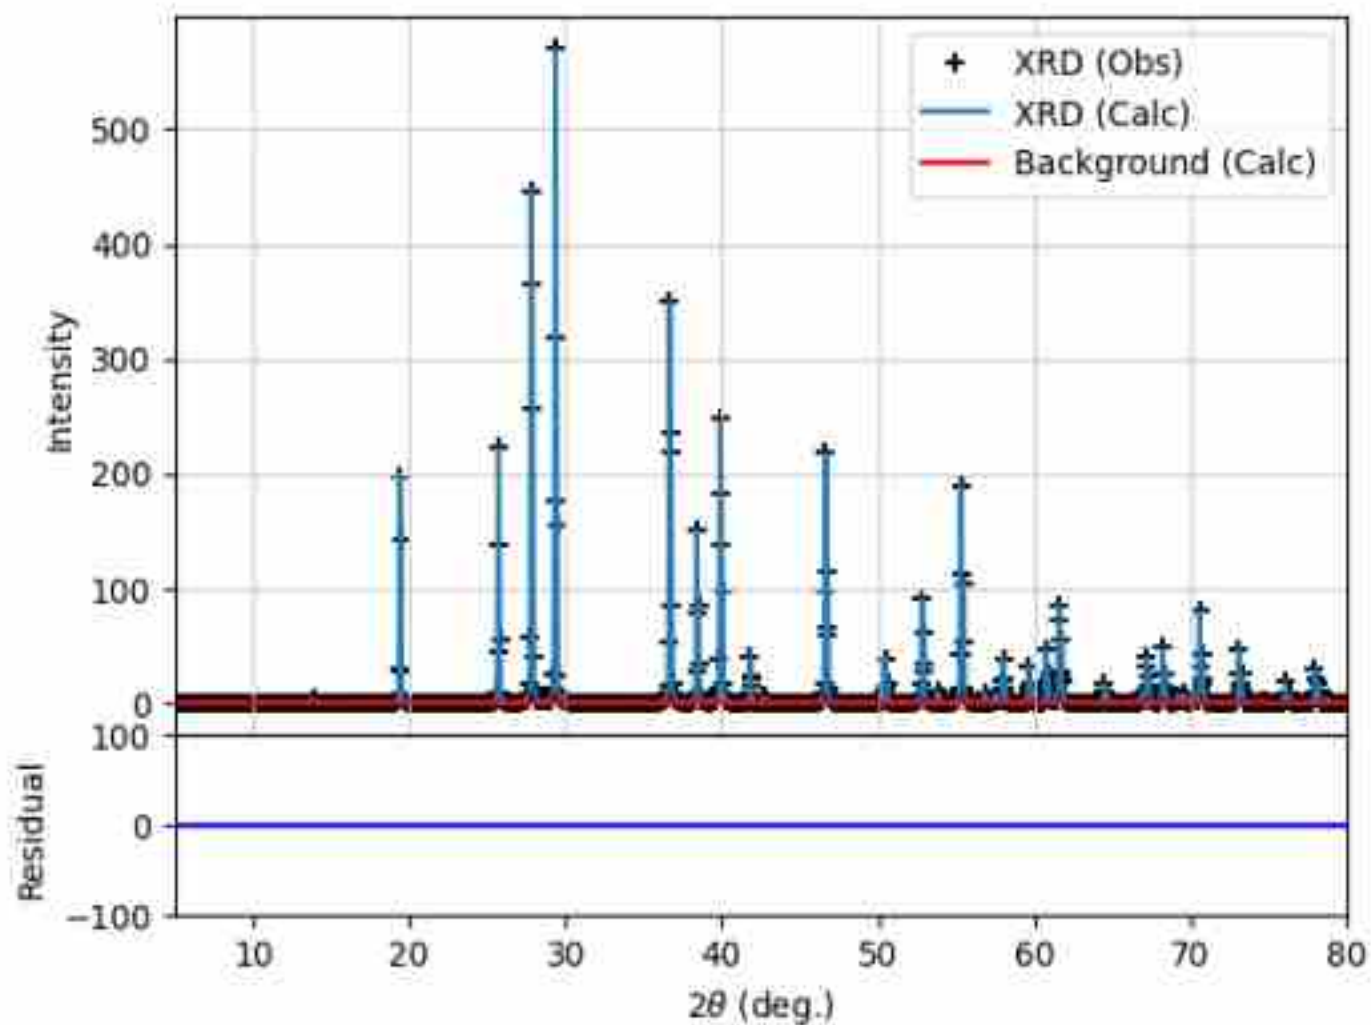

| RMSE before RR | Rwp   | RMSE after RR |
|----------------|-------|---------------|
| 0.012          | 0.004 | 0.00024       |

# Ba1Mg4Ge3

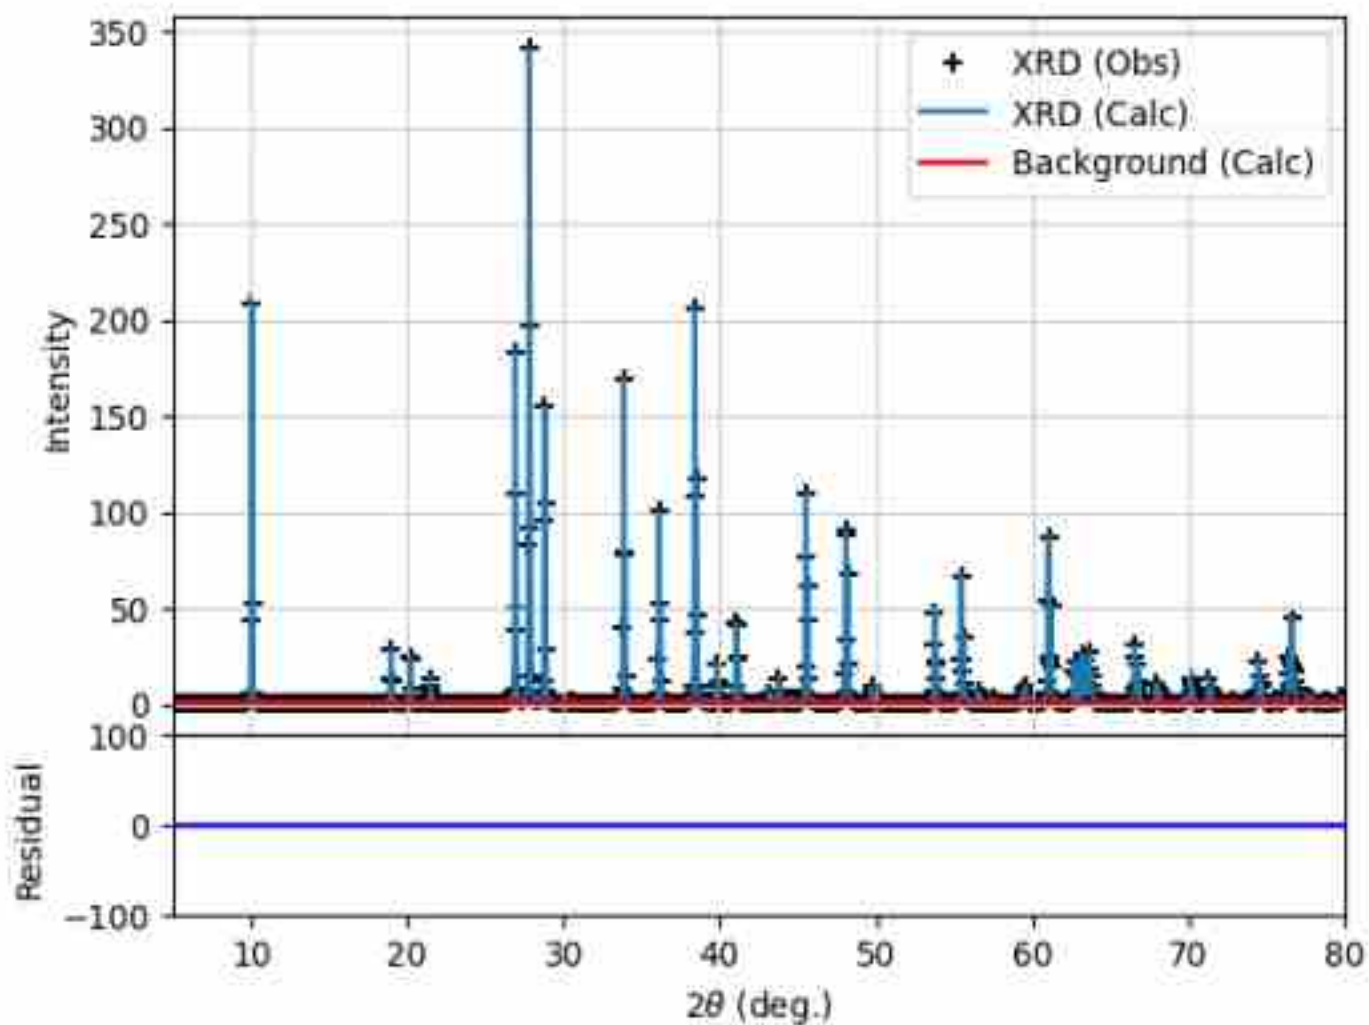

| RMSE before RR | Rwp     | RMSE after RR |
|----------------|---------|---------------|
| 0.012          | 0.00486 | 0.00134       |



# Ba1Sn2

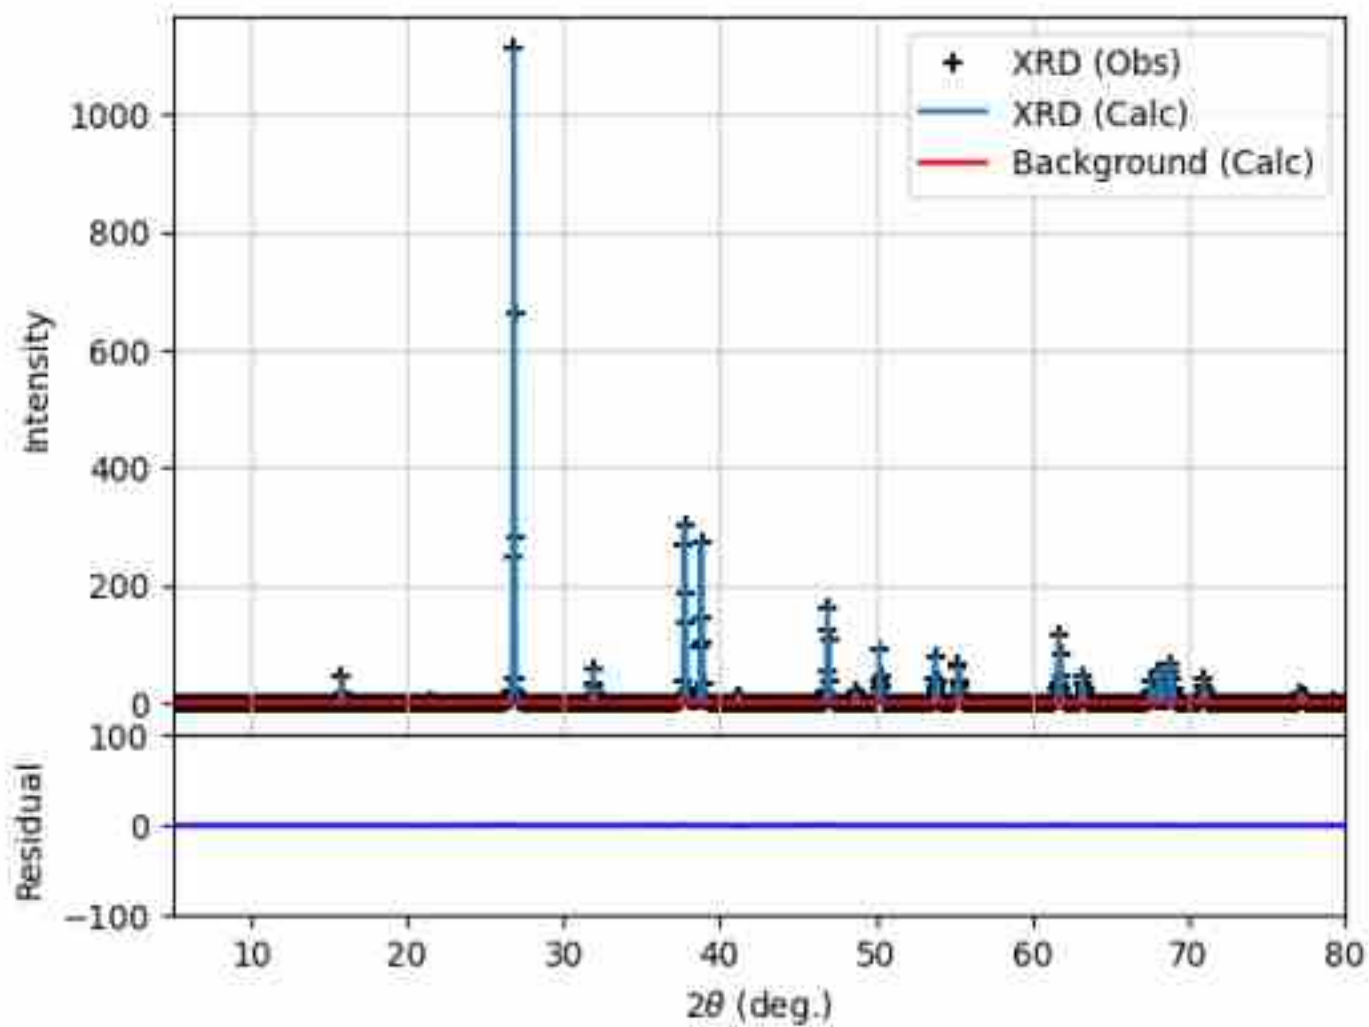

| RMSE before RR | Rwp     | RMSE after RR |
|----------------|---------|---------------|
| 0.012          | 1.61496 | 0.00042       |

# Ba<sub>2</sub>Lu<sub>1</sub>Bi<sub>1</sub>O<sub>6</sub>

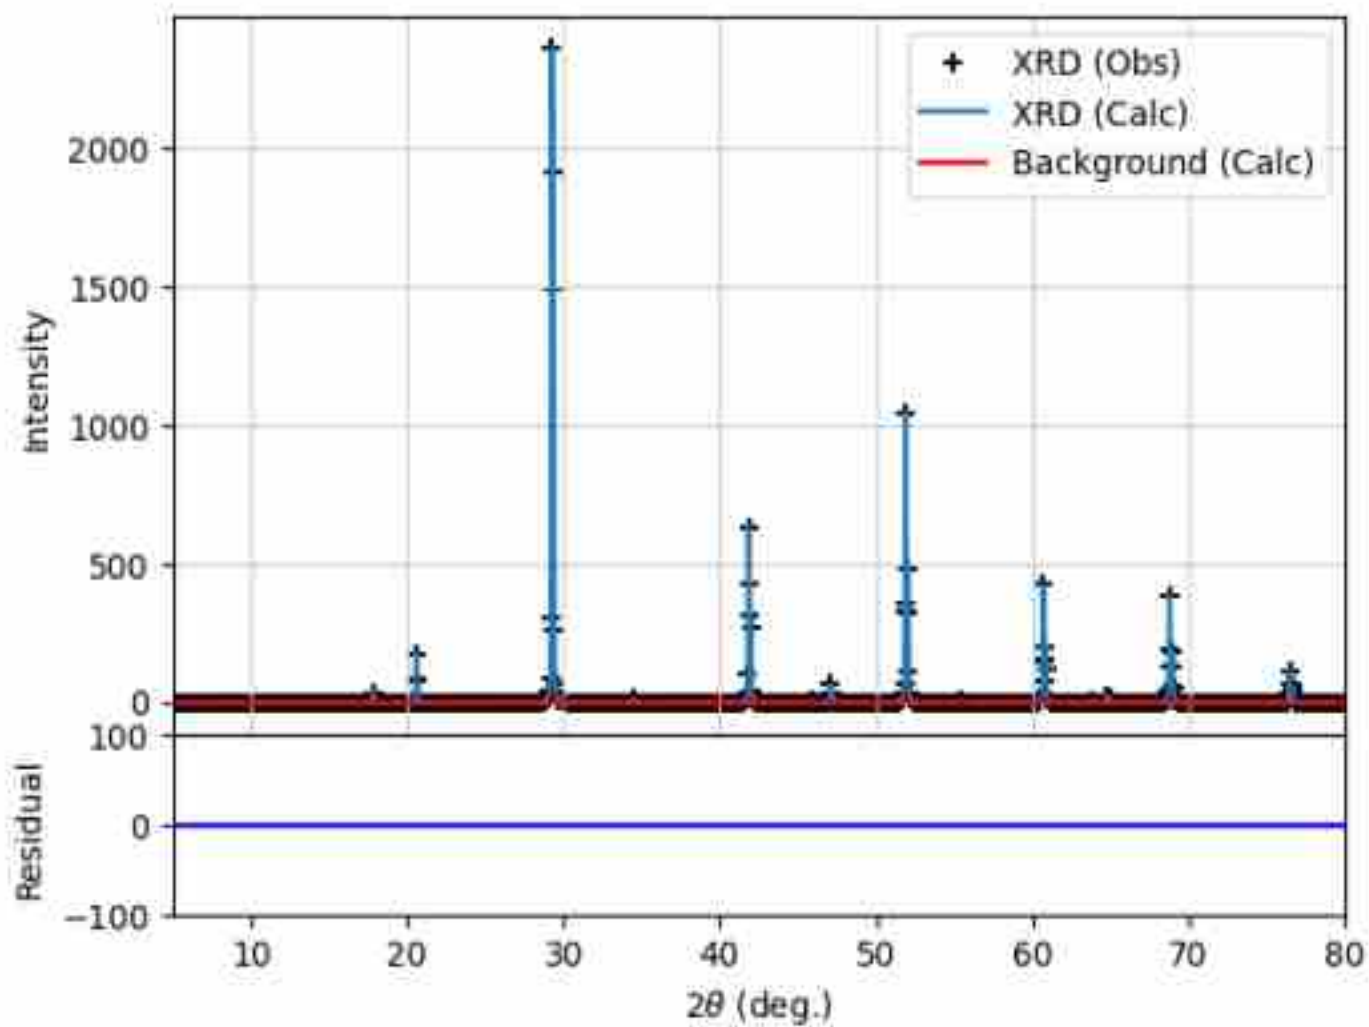

| RMSE before RR | Rwp     | RMSE after RR |
|----------------|---------|---------------|
| 0.012          | 0.00766 | 0.00243       |

# Ba<sub>2</sub>LuTaO<sub>6</sub>

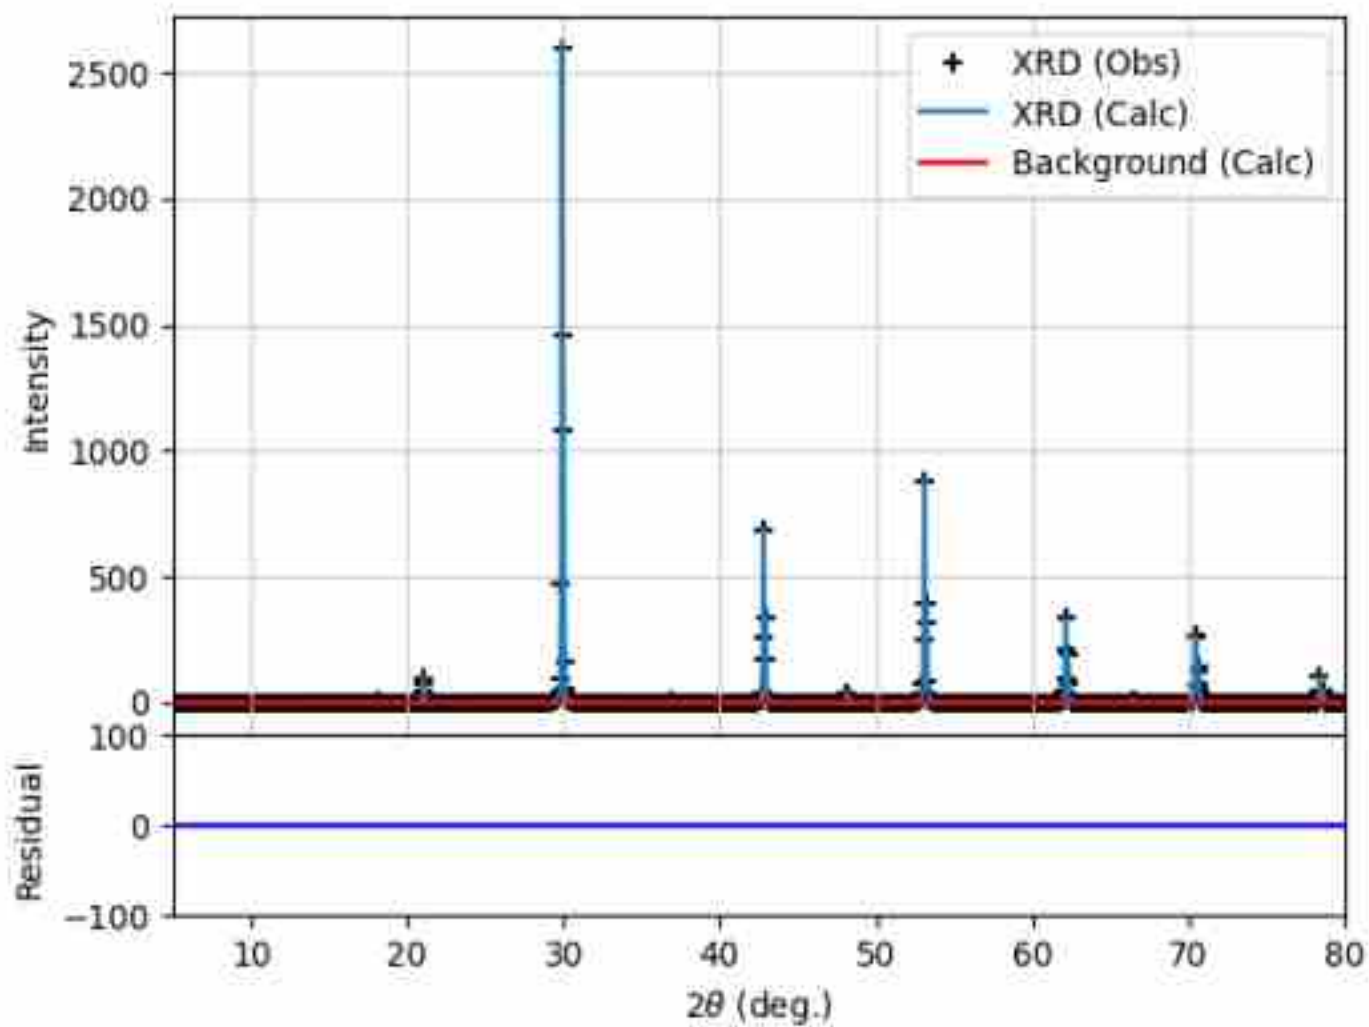

| RMSE before RR | Rwp     | RMSE after RR |
|----------------|---------|---------------|
| 0.012          | 0.00822 | 0.00416       |

# Ba<sub>2</sub>Mg<sub>2</sub>Ge<sub>2</sub>

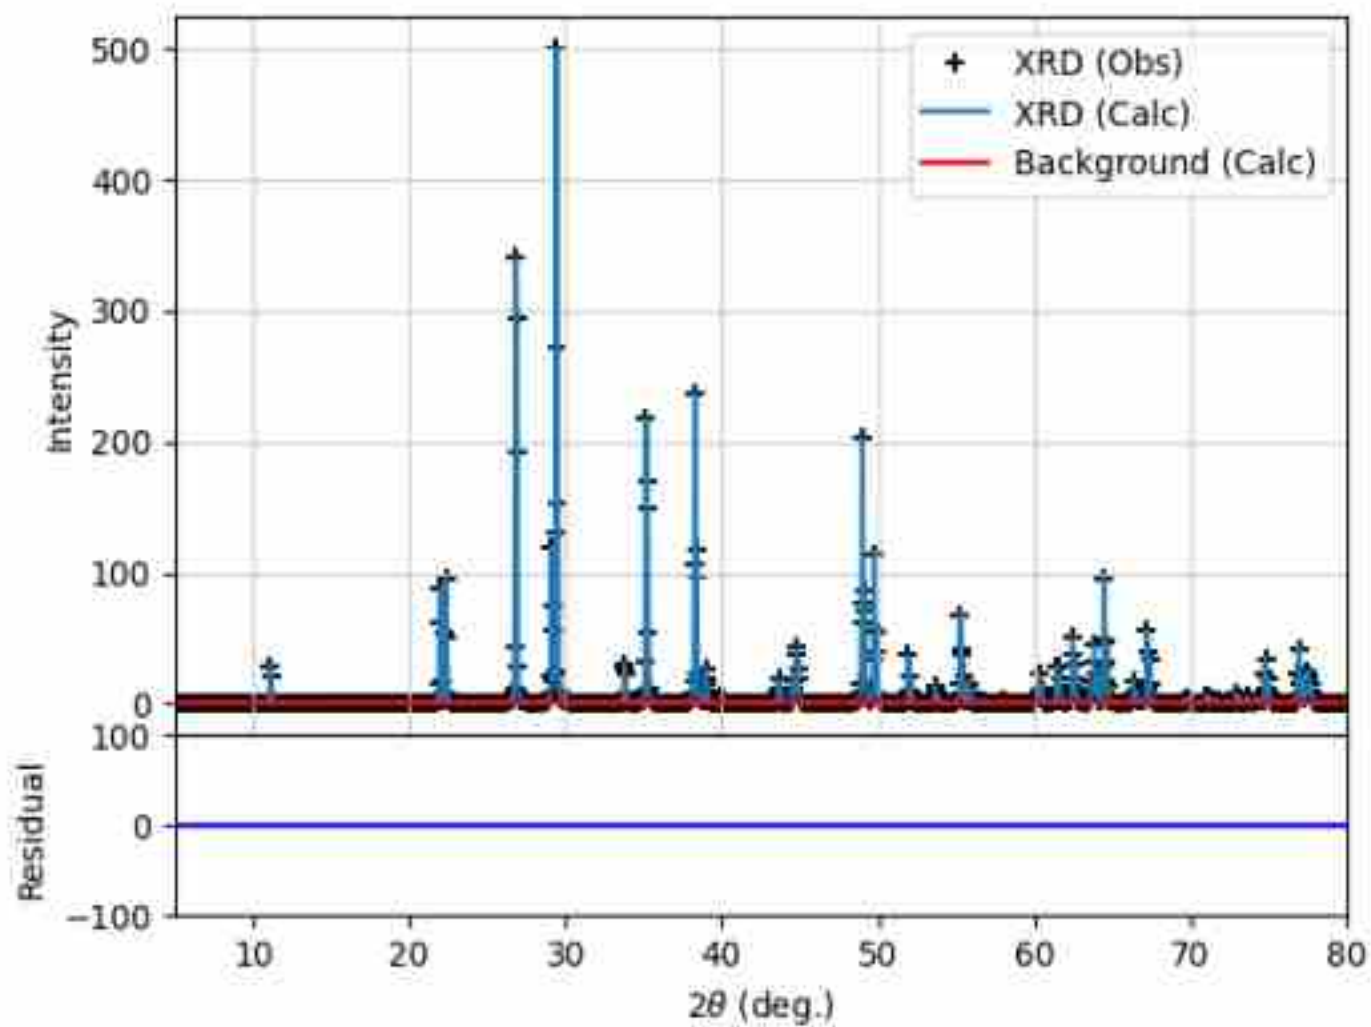

| RMSE before RR | Rwp     | RMSE after RR |
|----------------|---------|---------------|
| 0.012          | 0.00447 | 0.00092       |

# Ba2Nb1Rh1O6

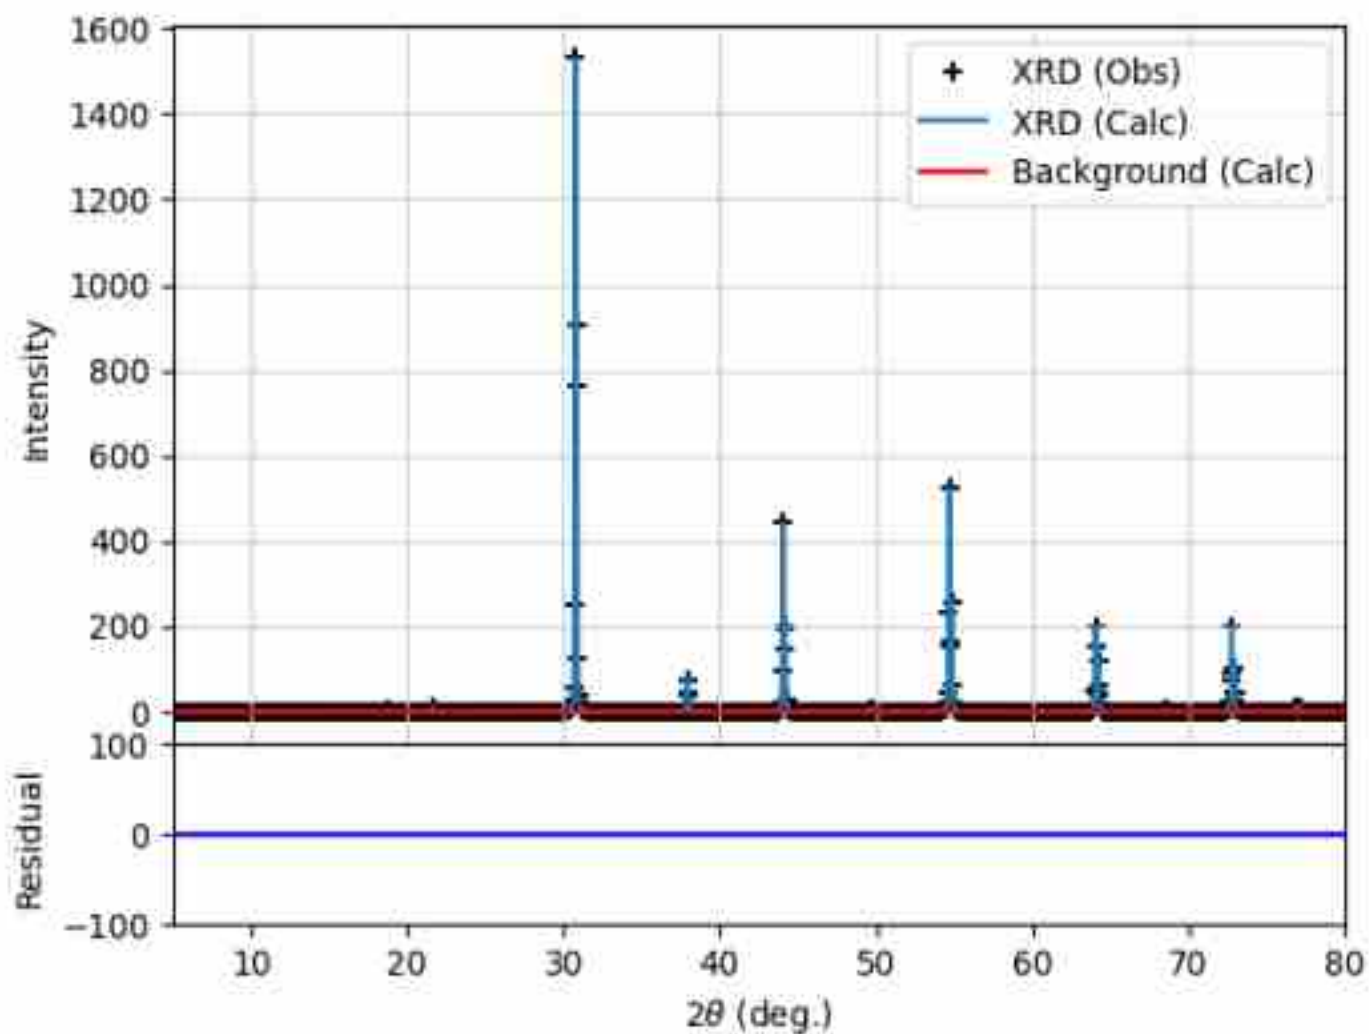

| RMSE before RR | Rwp     | RMSE after RR |
|----------------|---------|---------------|
| 0.012          | 0.00749 | 0.00221       |

# Ba2Pu1Pb1O6

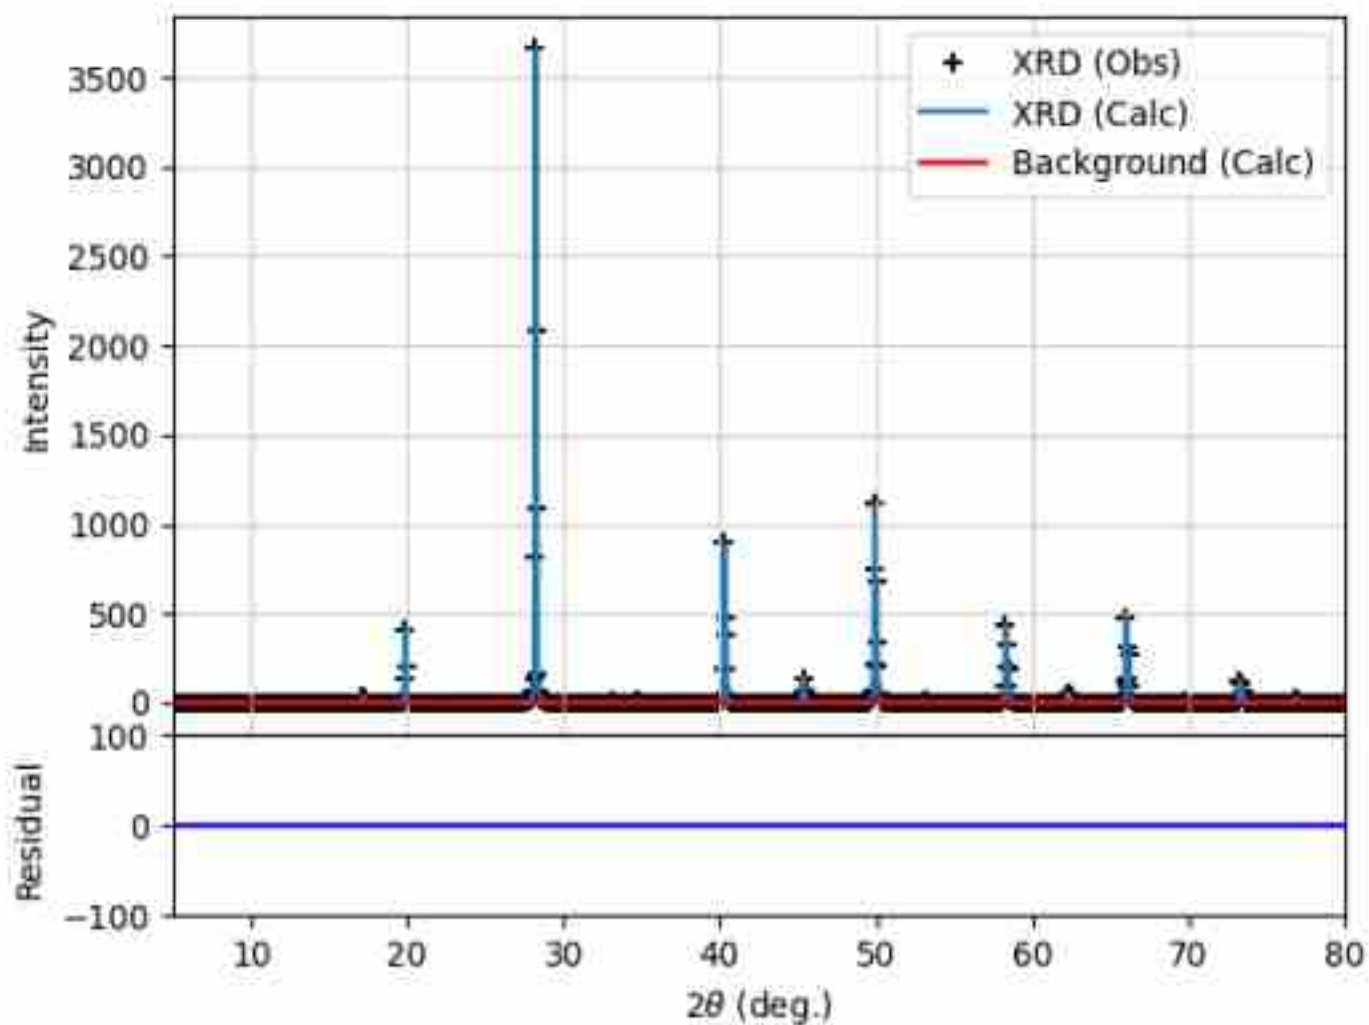

| RMSE before RR | Rwp     | RMSE after RR |
|----------------|---------|---------------|
| 0.012          | 0.00828 | 0.0035        |

# Ba2Sc1Ta1O6

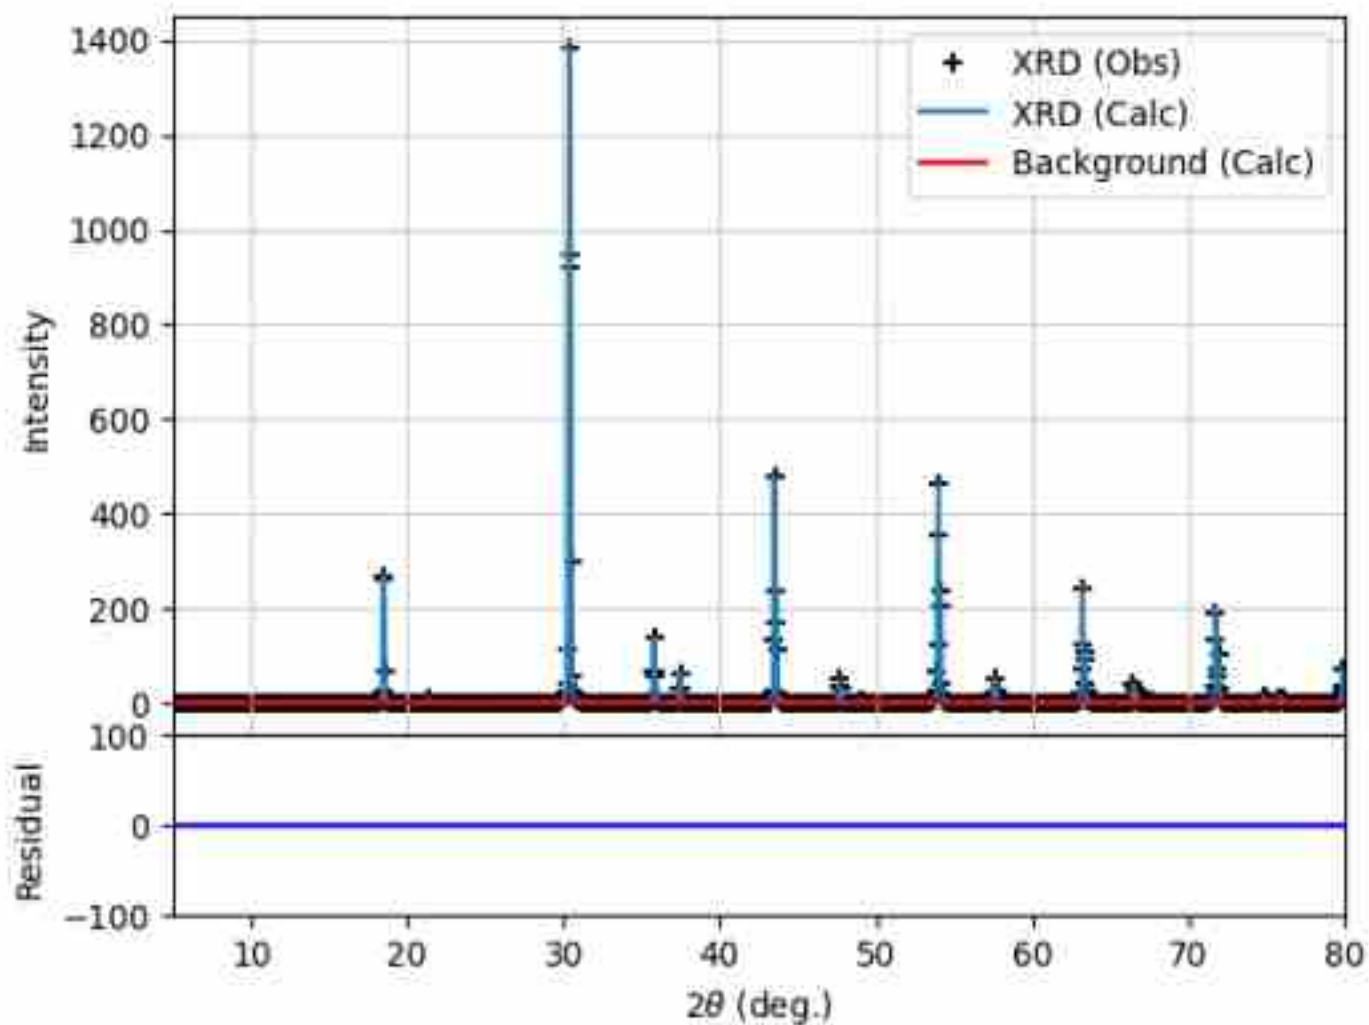

| RMSE before RR | Rwp     | RMSE after RR |
|----------------|---------|---------------|
| 0.012          | 0.01243 | 0.00432       |

# Ba2Sn2

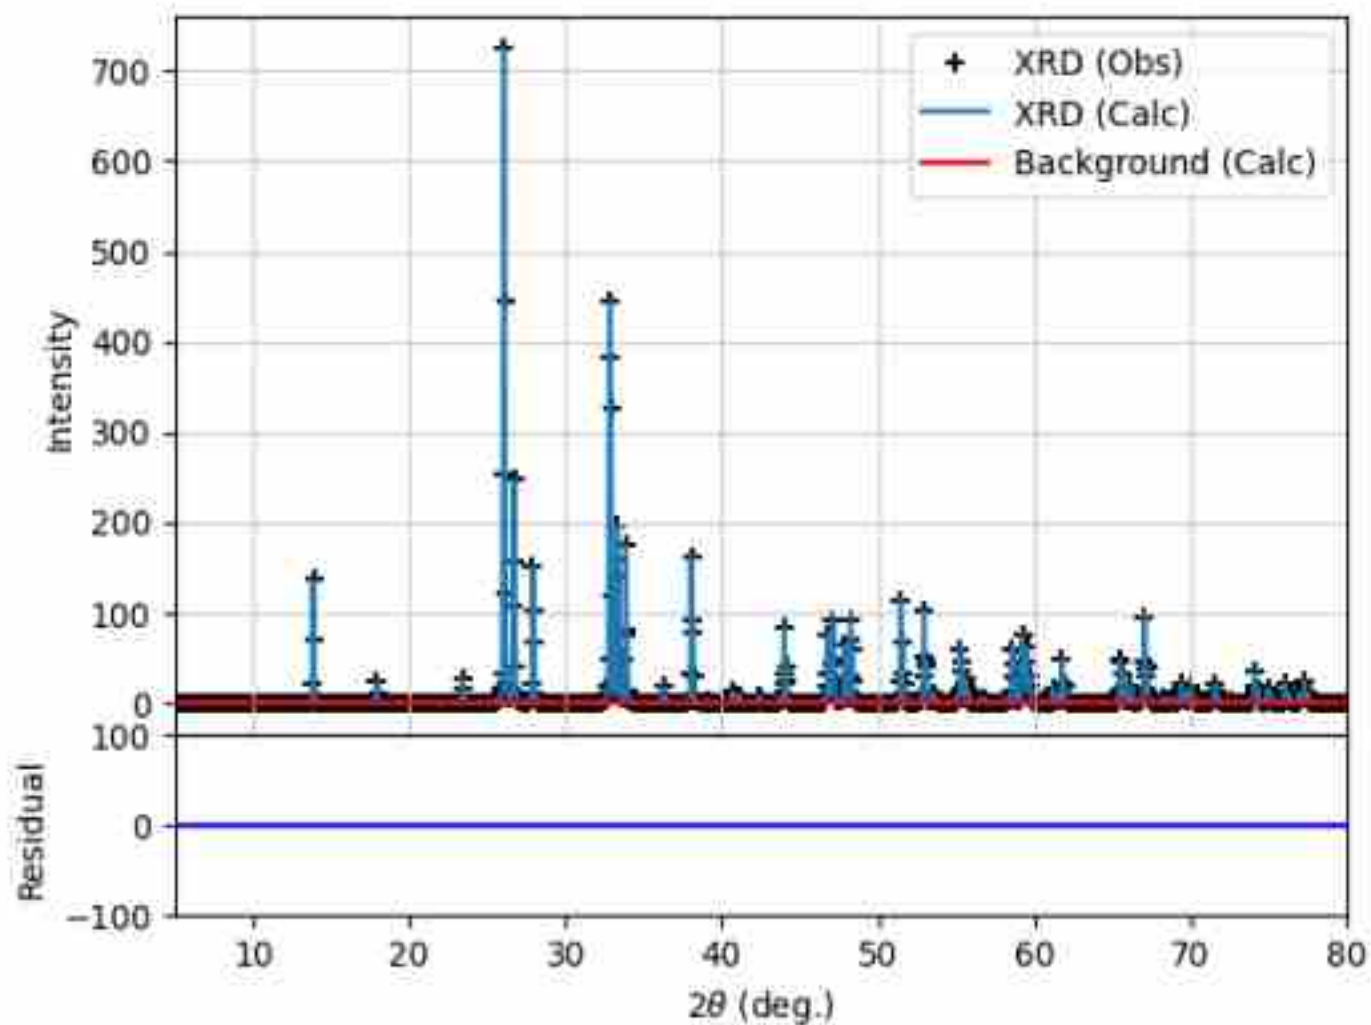

| RMSE before RR | Rwp     | RMSE after RR |
|----------------|---------|---------------|
| 0.012          | 0.00347 | 0.00018       |



# Ba<sub>2</sub>Sr<sub>2</sub>Pr<sub>2</sub>Nb<sub>2</sub>O<sub>12</sub>

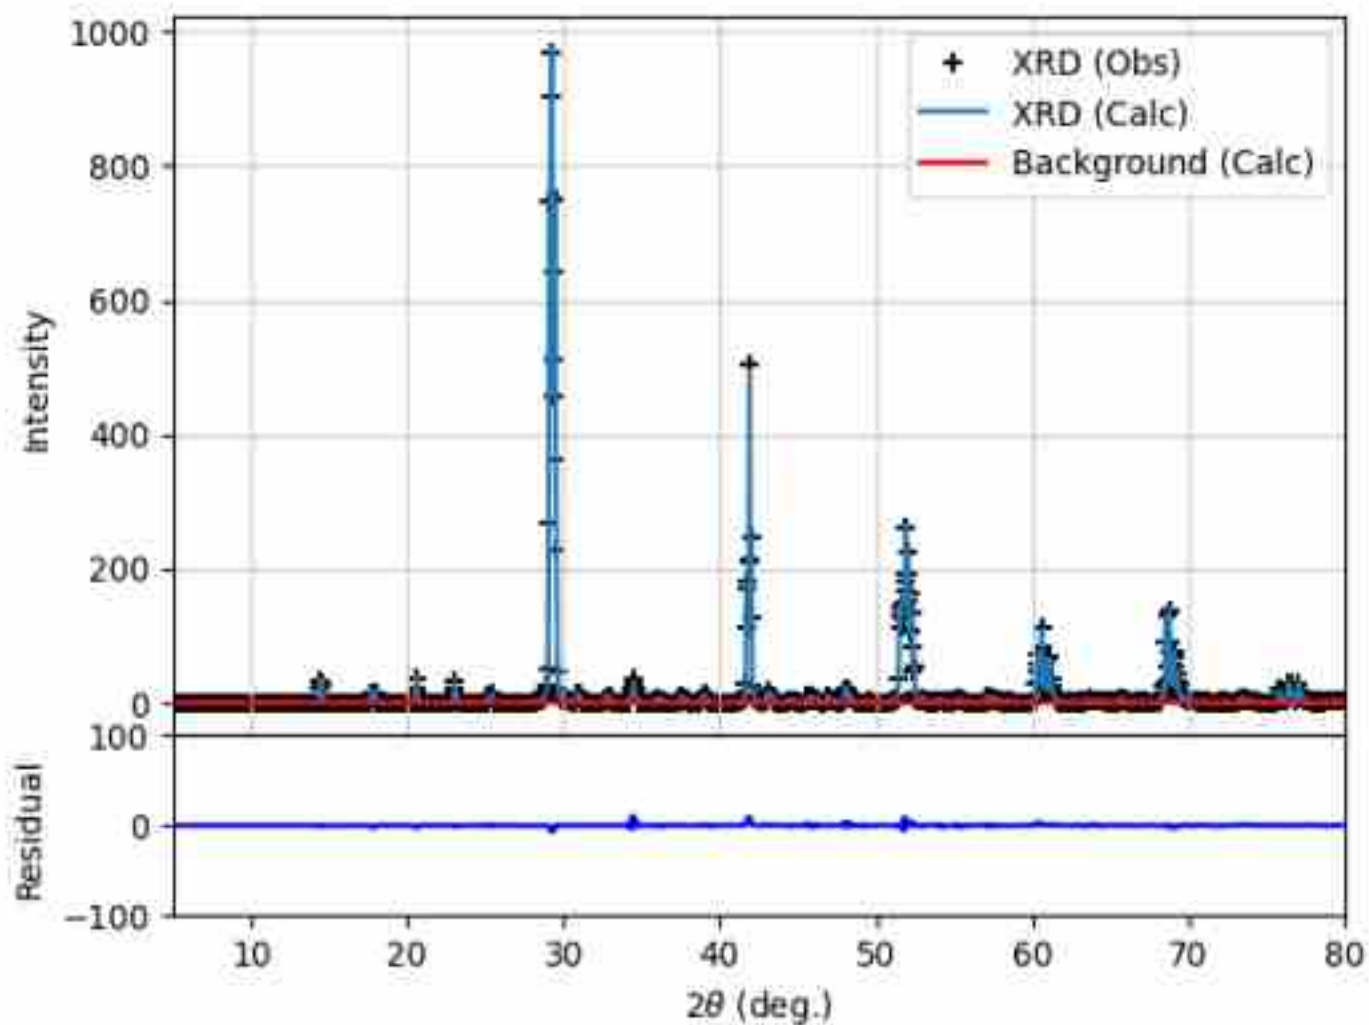

| RMSE before RR | Rwp    | RMSE after RR |
|----------------|--------|---------------|
| 0.012          | 5.6175 | 0.16169       |

# Ba<sub>3</sub>ZnN<sub>2</sub>O<sub>1</sub>

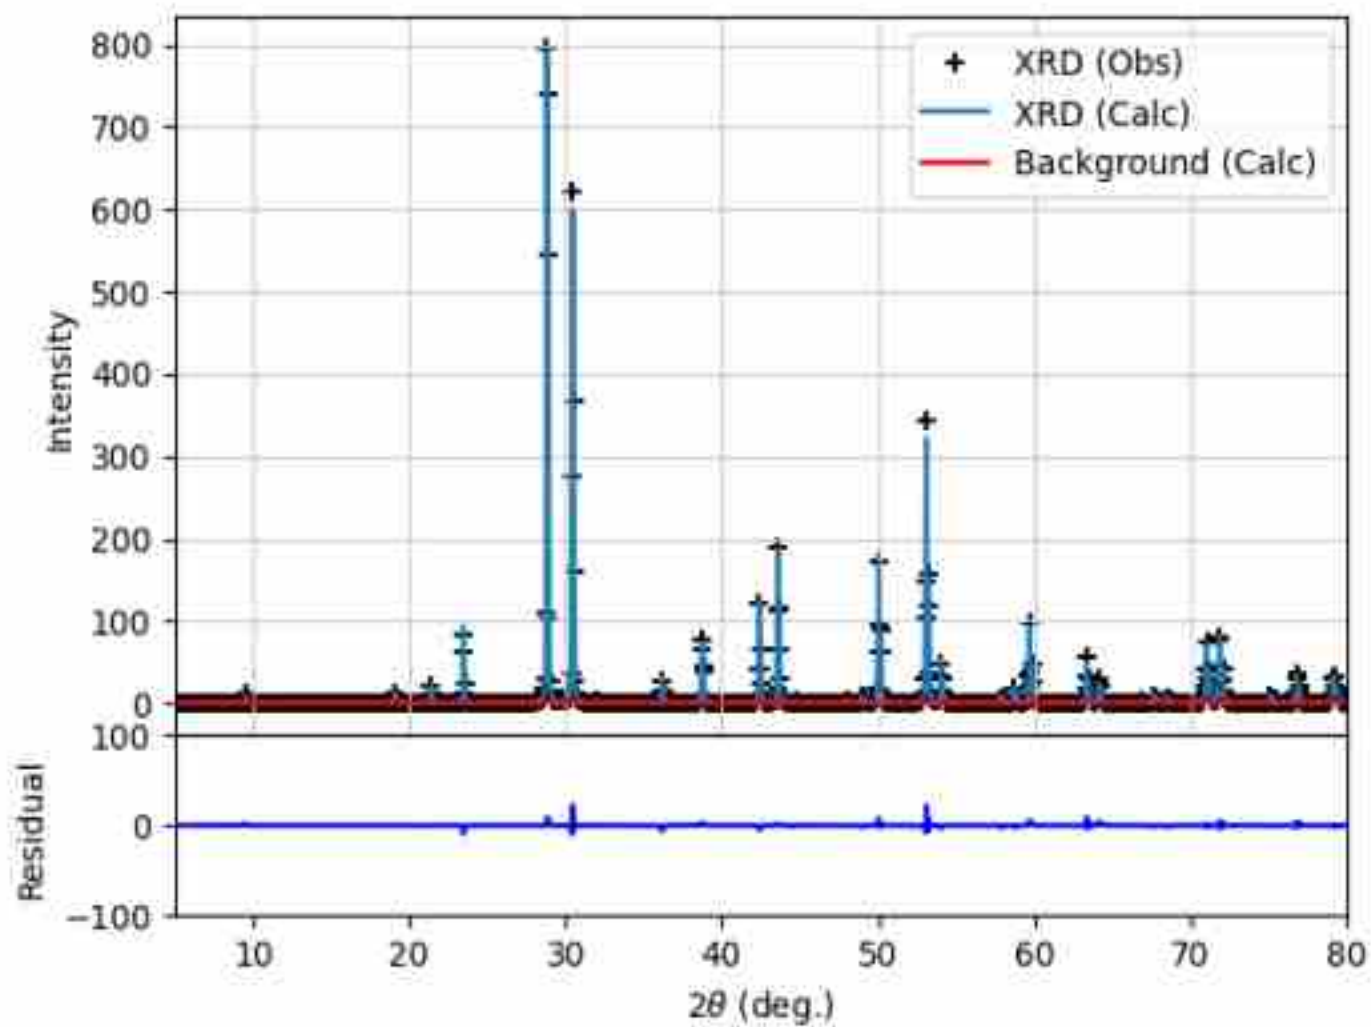

| RMSE before RR | Rwp     | RMSE after RR |
|----------------|---------|---------------|
| 0.012          | 5.57535 | 0.04358       |

# Ba<sub>4</sub>Mn<sub>4</sub>O<sub>12</sub>

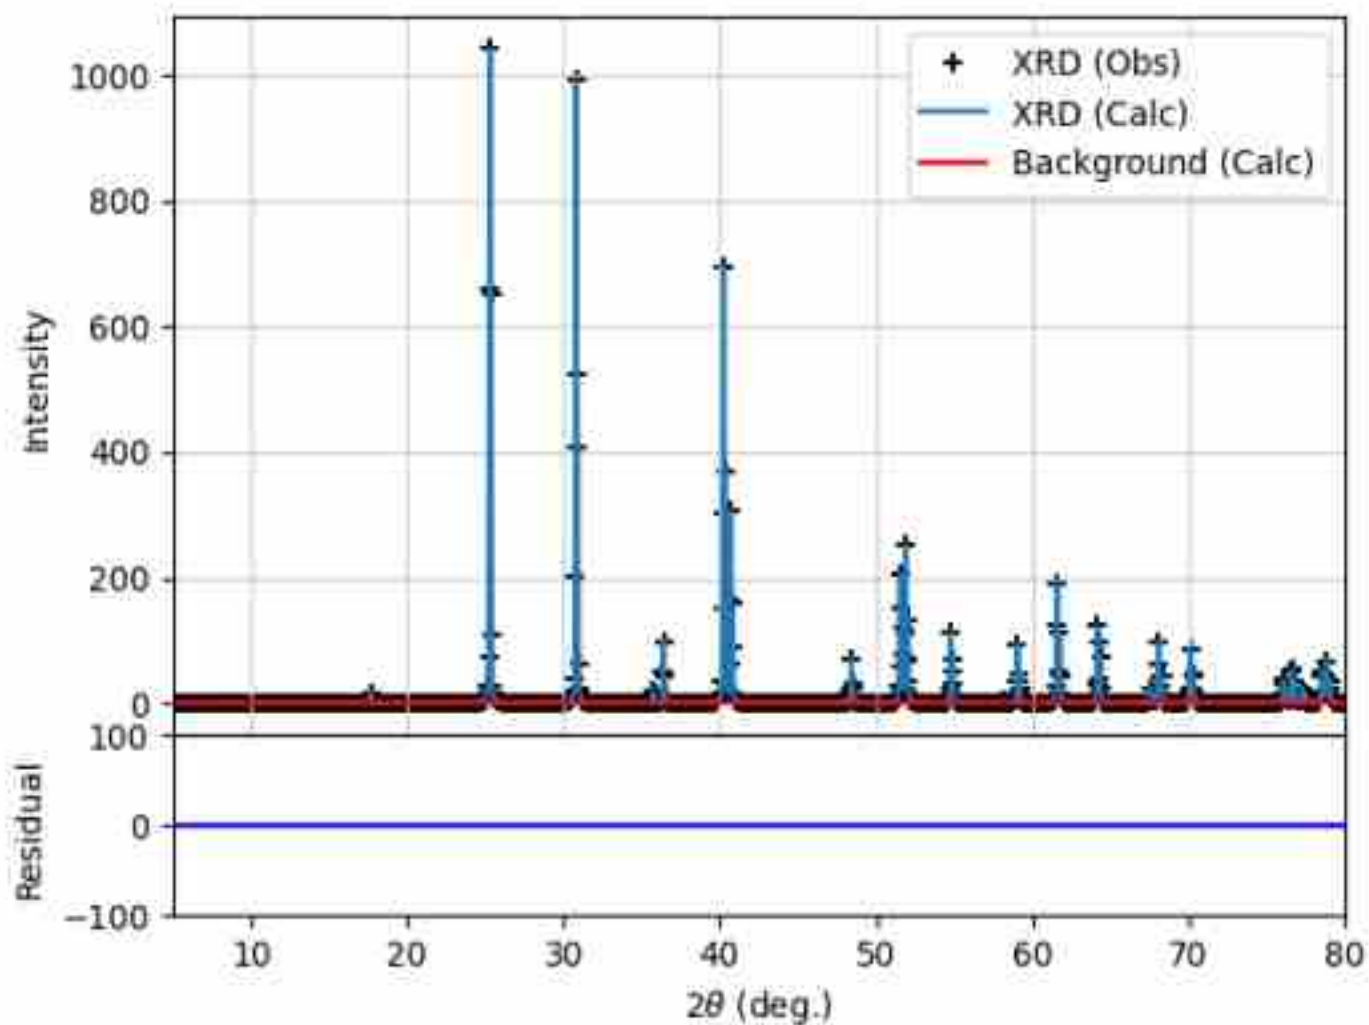

| RMSE before RR | Rwp     | RMSE after RR |
|----------------|---------|---------------|
| 0.012          | 0.00307 | 0.00067       |

# Bi1Pb4

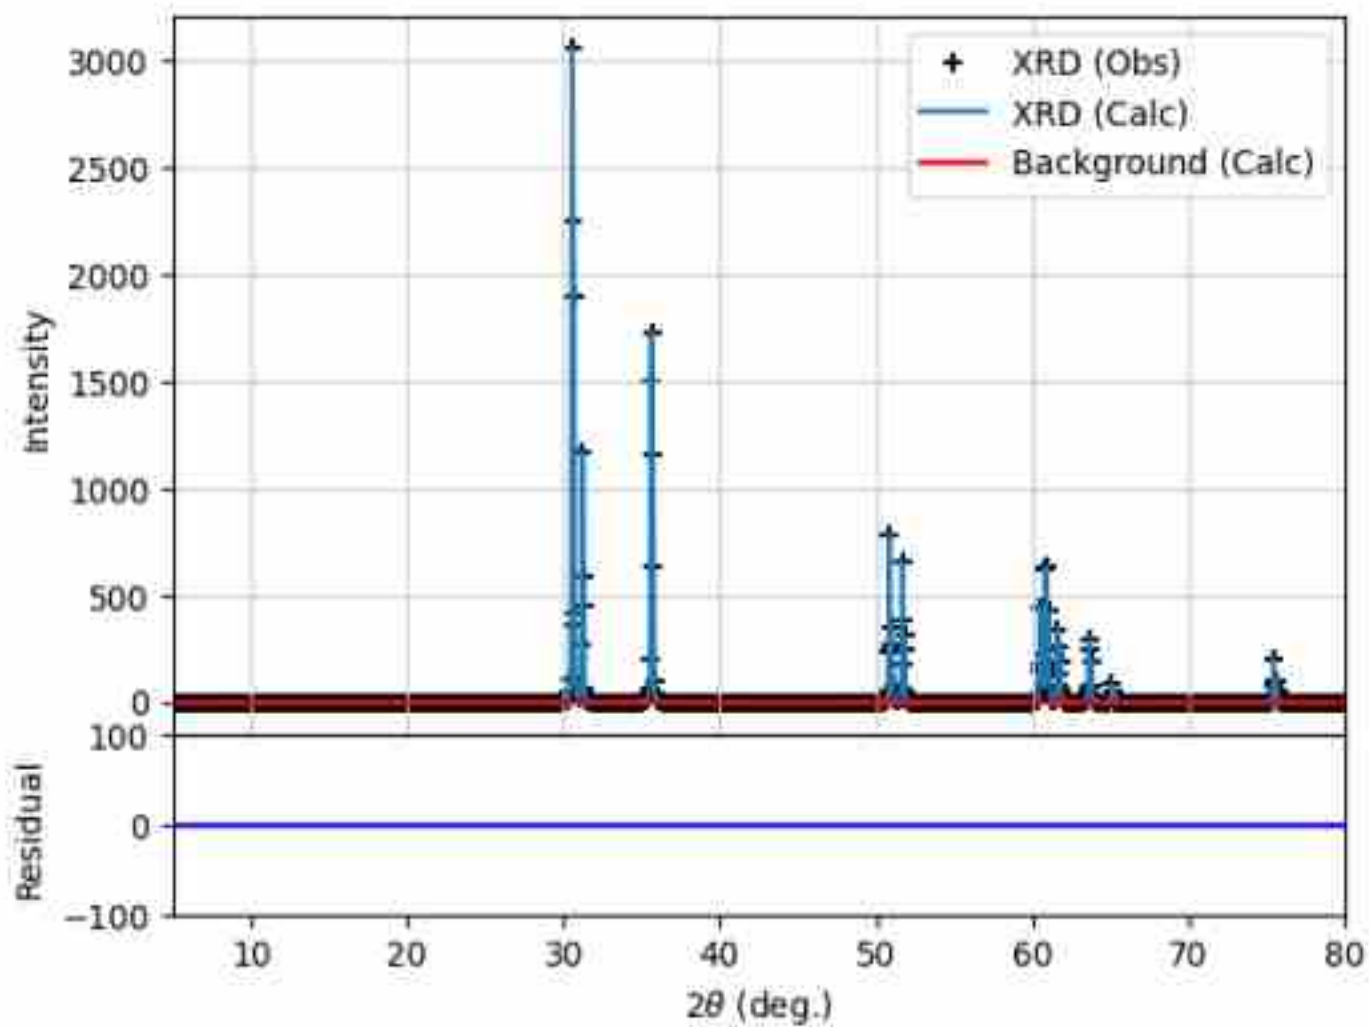

| RMSE before RR | Rwp     | RMSE after RR |
|----------------|---------|---------------|
| 0.012          | 0.00318 | 0.00025       |

# Ca1Eu1S2

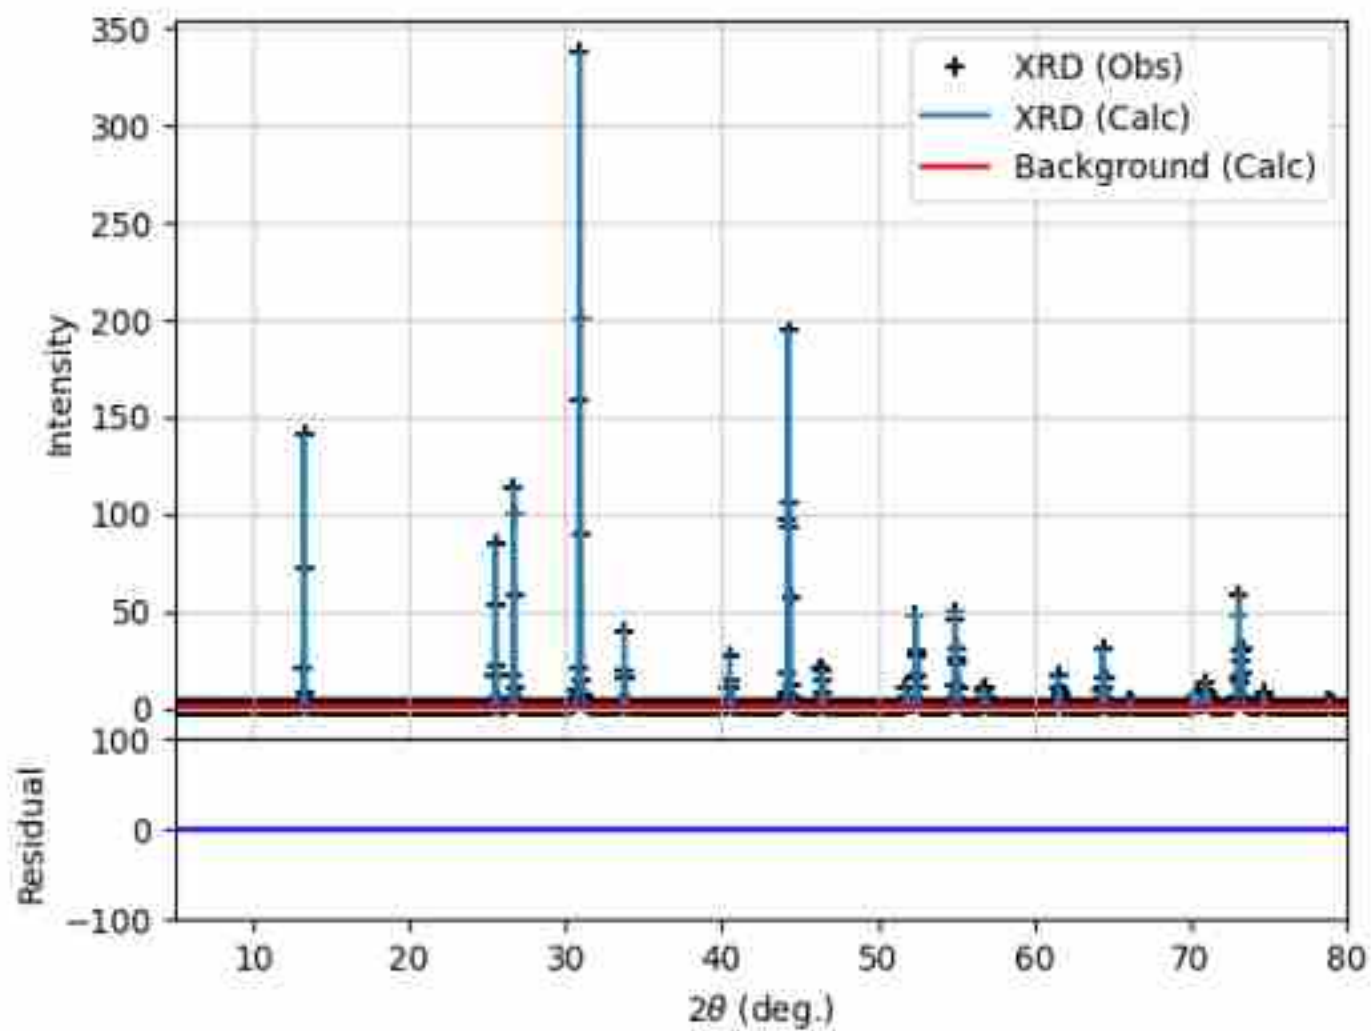

| RMSE before RR | Rwp     | RMSE after RR |
|----------------|---------|---------------|
| 0.012          | 0.00281 | 0.00035       |

# Ca1Ho2Te4

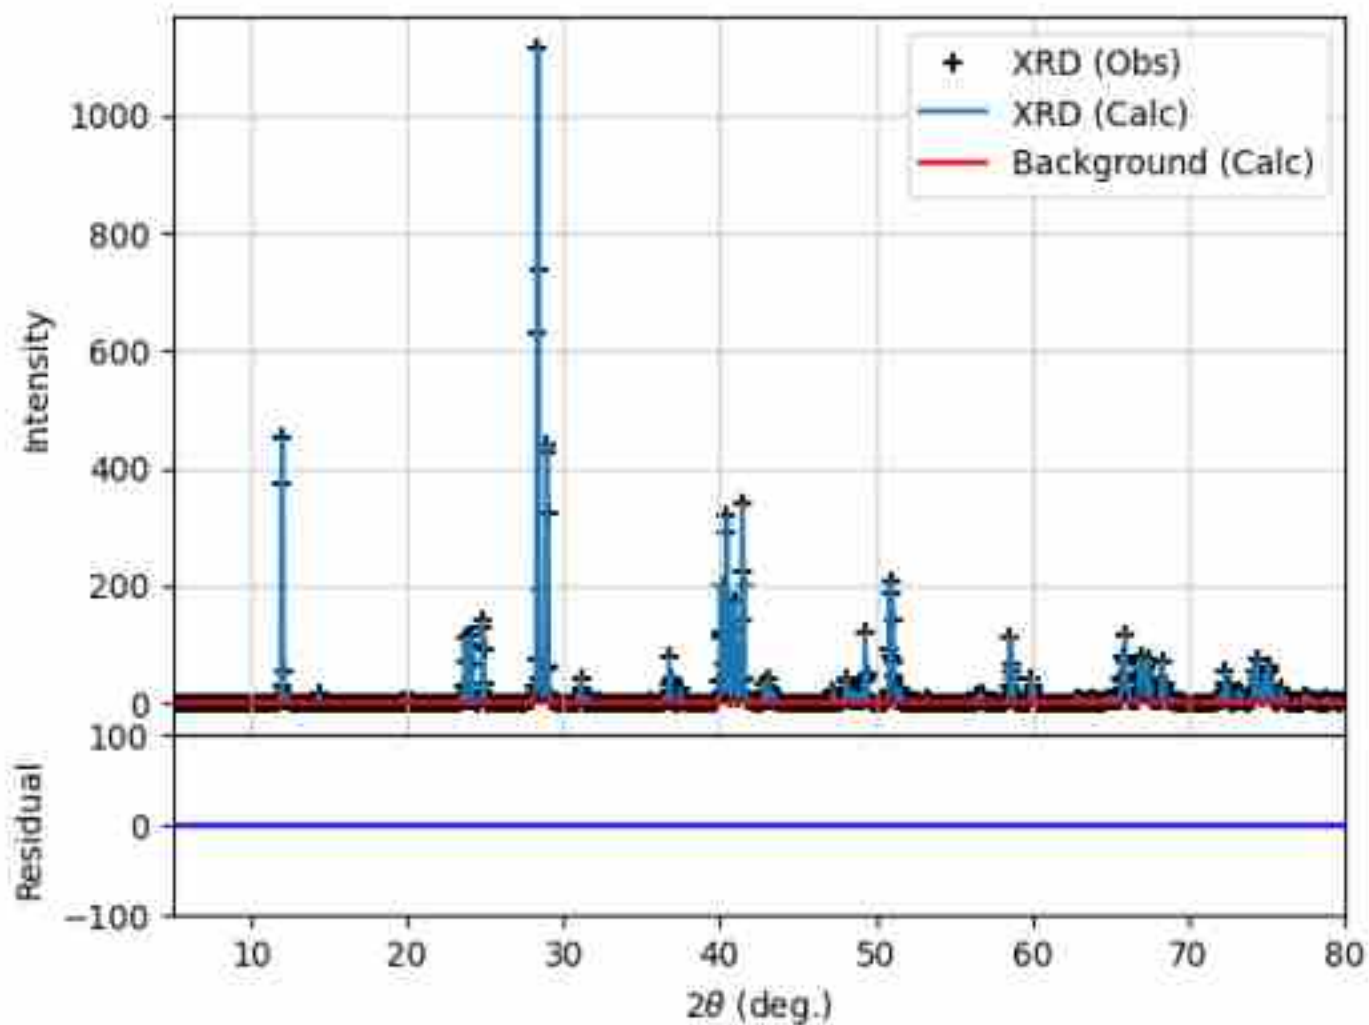

| RMSE before RR | Rwp     | RMSE after RR |
|----------------|---------|---------------|
| 0.012          | 0.00356 | 0.00032       |

# Ca1Mn2Te3

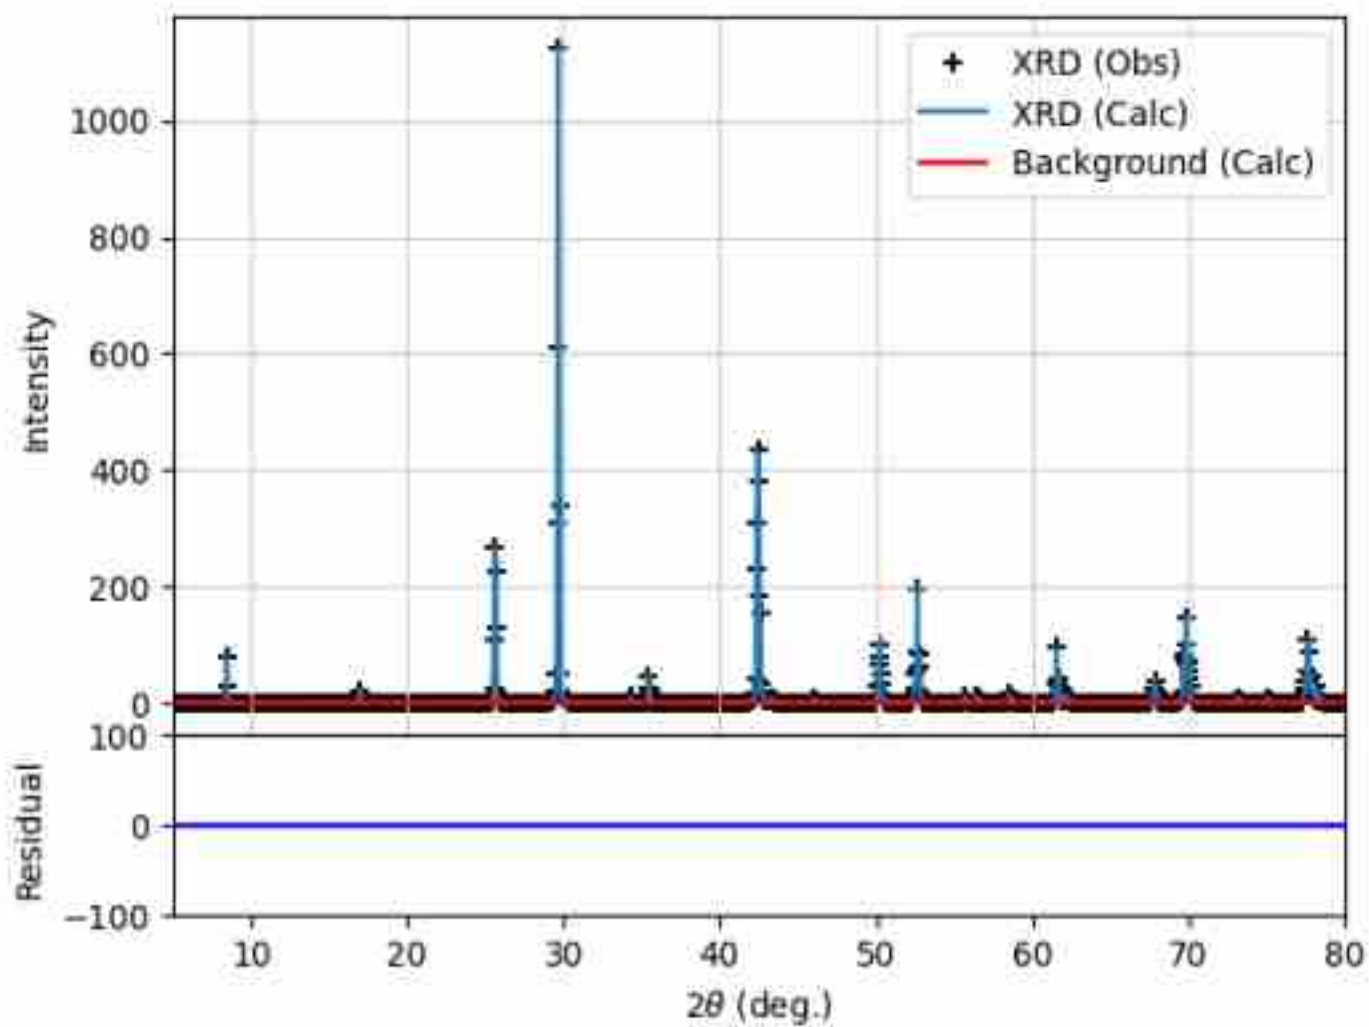

| RMSE before RR | Rwp     | RMSE after RR |
|----------------|---------|---------------|
| 0.012          | 0.00498 | 0.00106       |

# Ca<sub>2</sub>H<sub>4</sub>

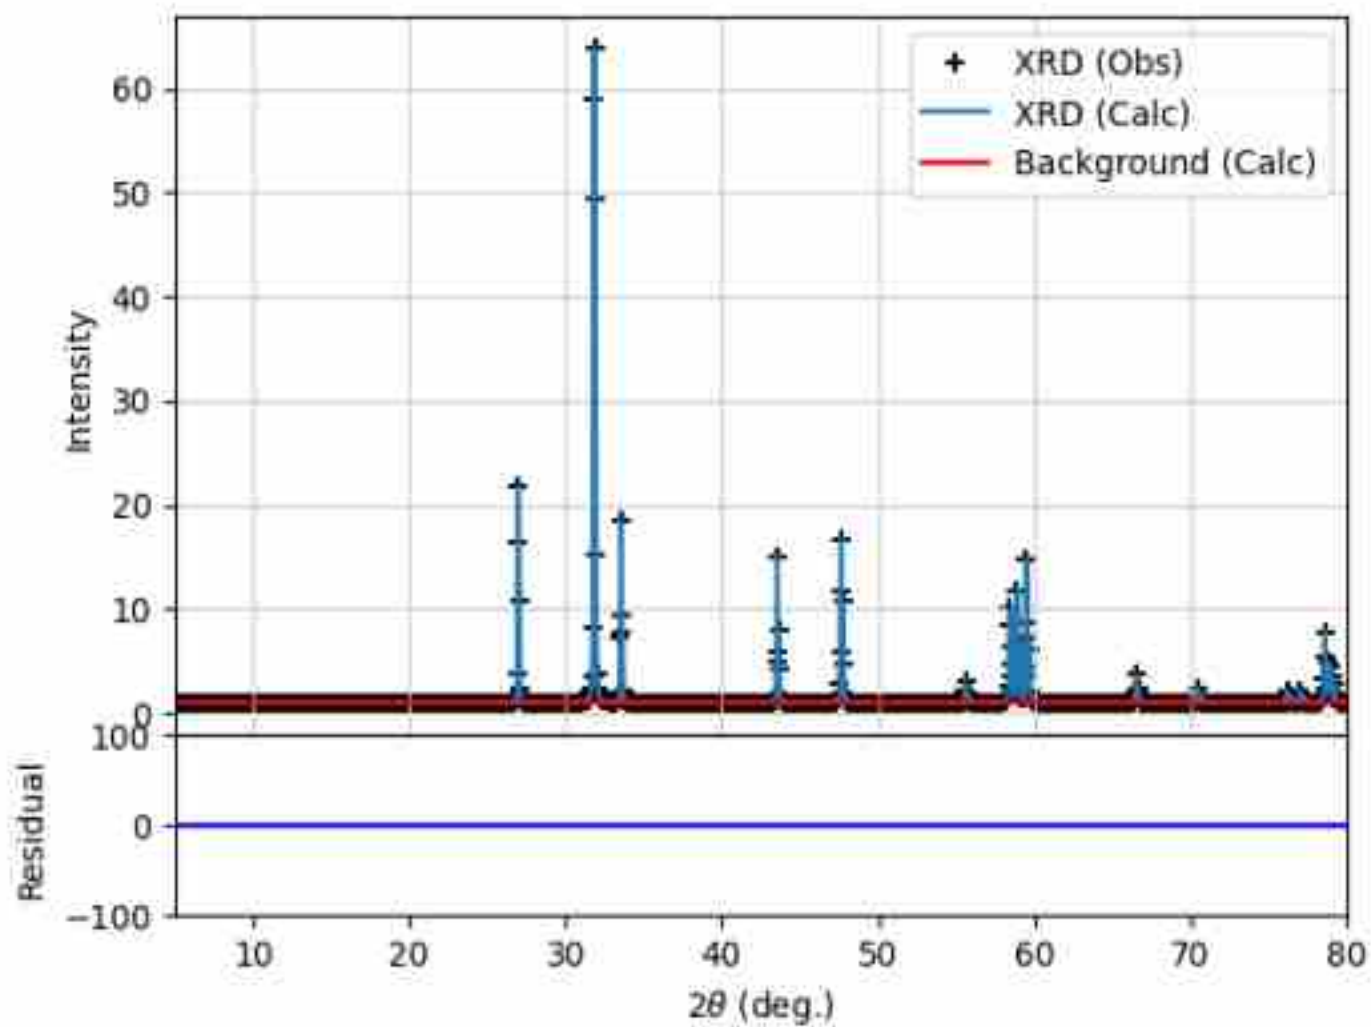

| RMSE before RR | Rwp     | RMSE after RR |
|----------------|---------|---------------|
| 0.012          | 0.00226 | 0.00456       |



# Ca<sub>2</sub>Ho<sub>2</sub>Mn<sub>4</sub>O<sub>12</sub>

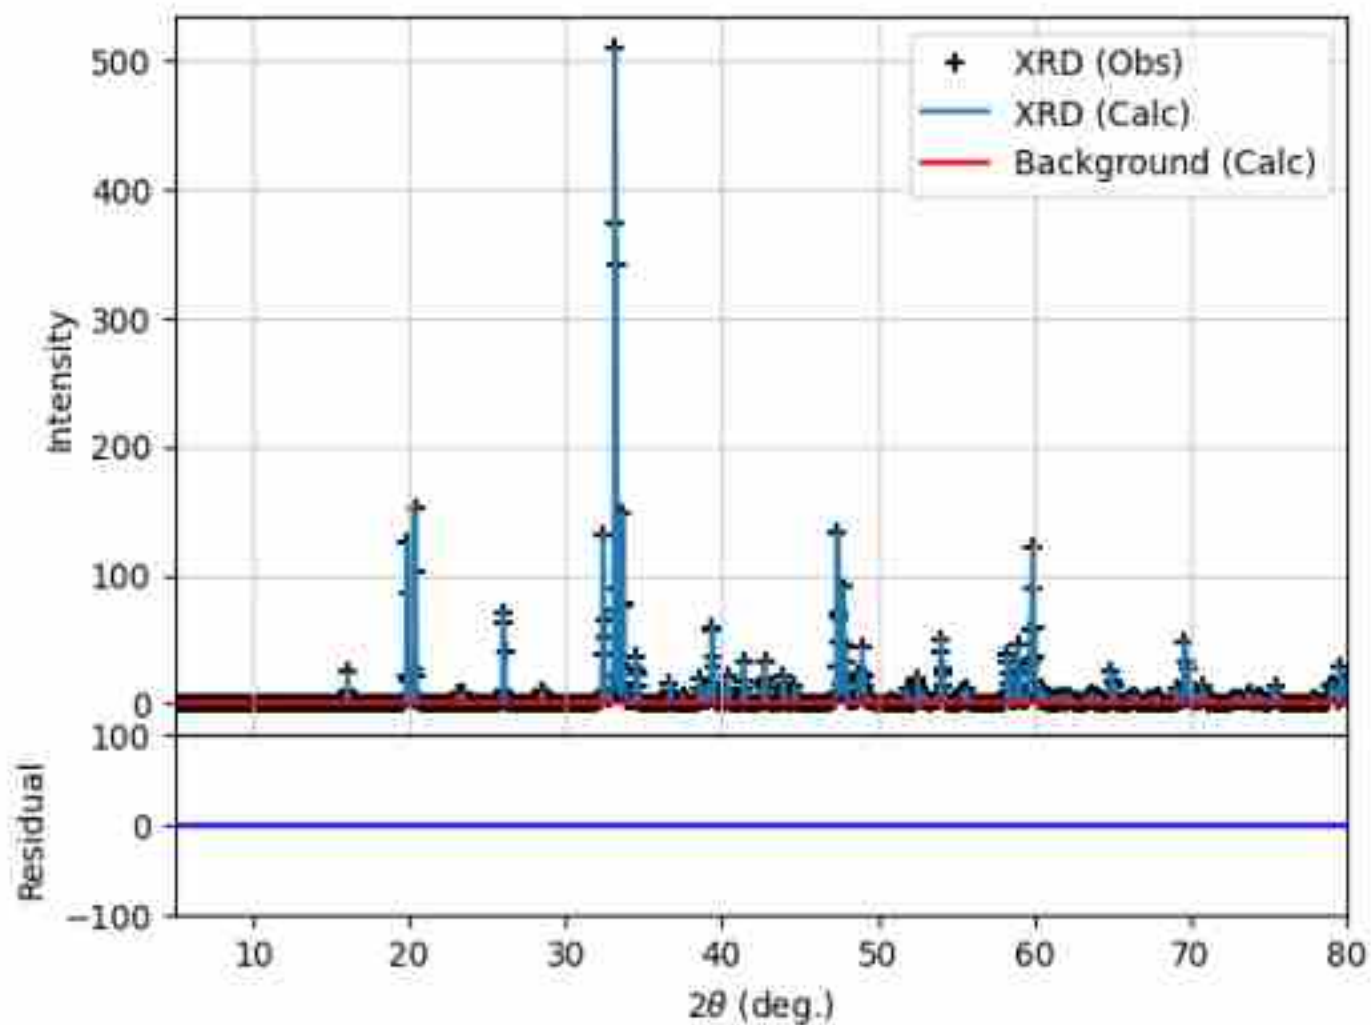

| RMSE before RR | Rwp     | RMSE after RR |
|----------------|---------|---------------|
| 0.012          | 0.00421 | 0.00078       |

# Ca<sub>2</sub>Ni<sub>2</sub>Ge<sub>2</sub>

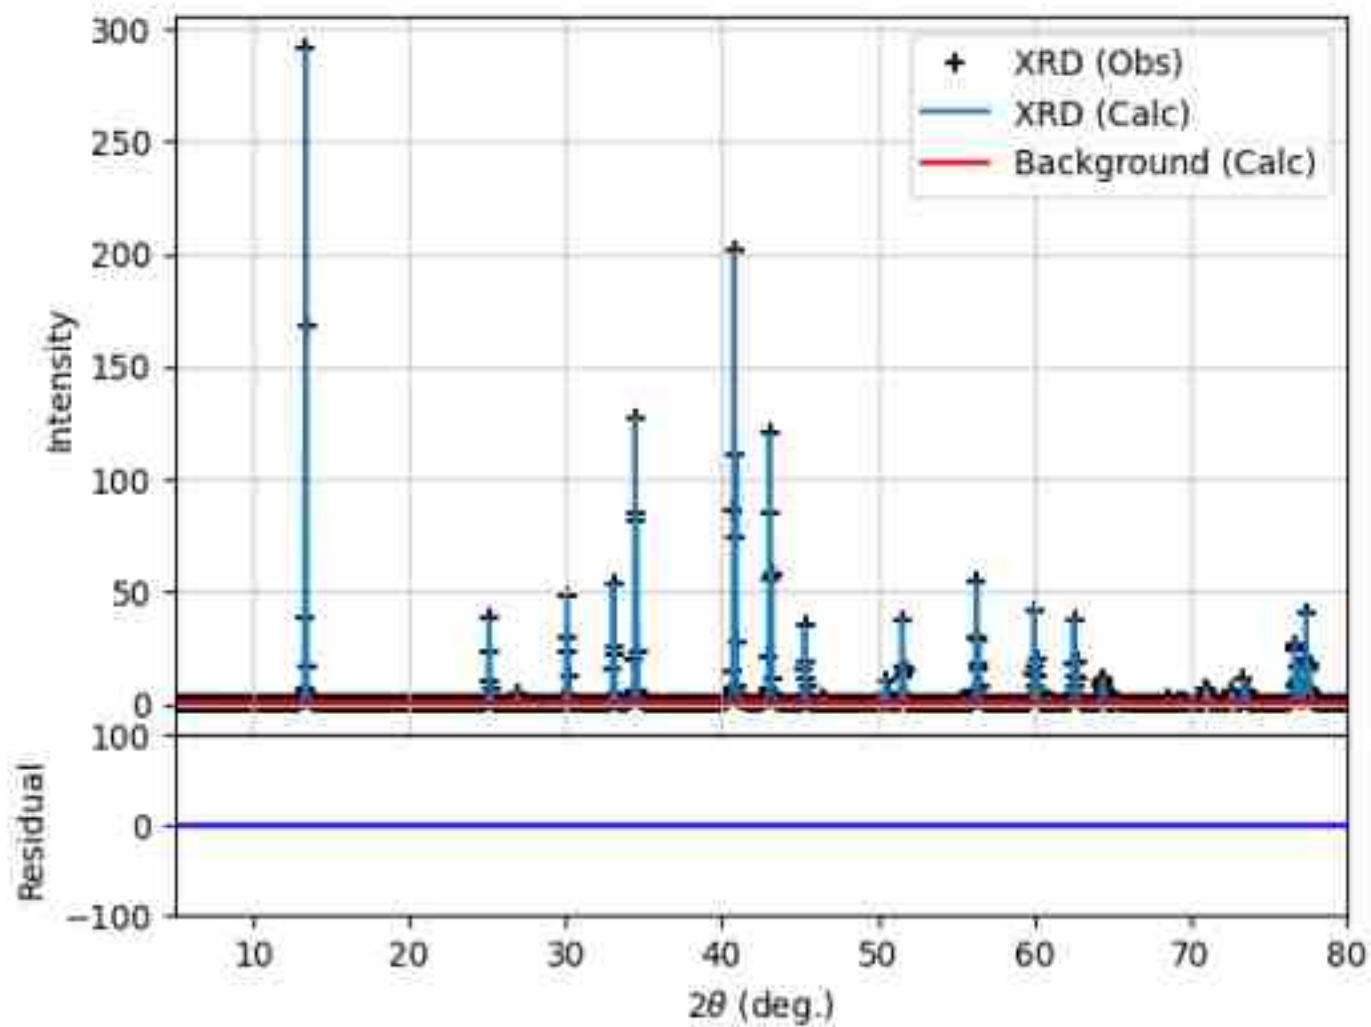

| RMSE before RR | Rwp     | RMSE after RR |
|----------------|---------|---------------|
| 0.012          | 0.00339 | 0.00026       |

# Ca<sub>4</sub>Pt<sub>4</sub>Pb<sub>4</sub>

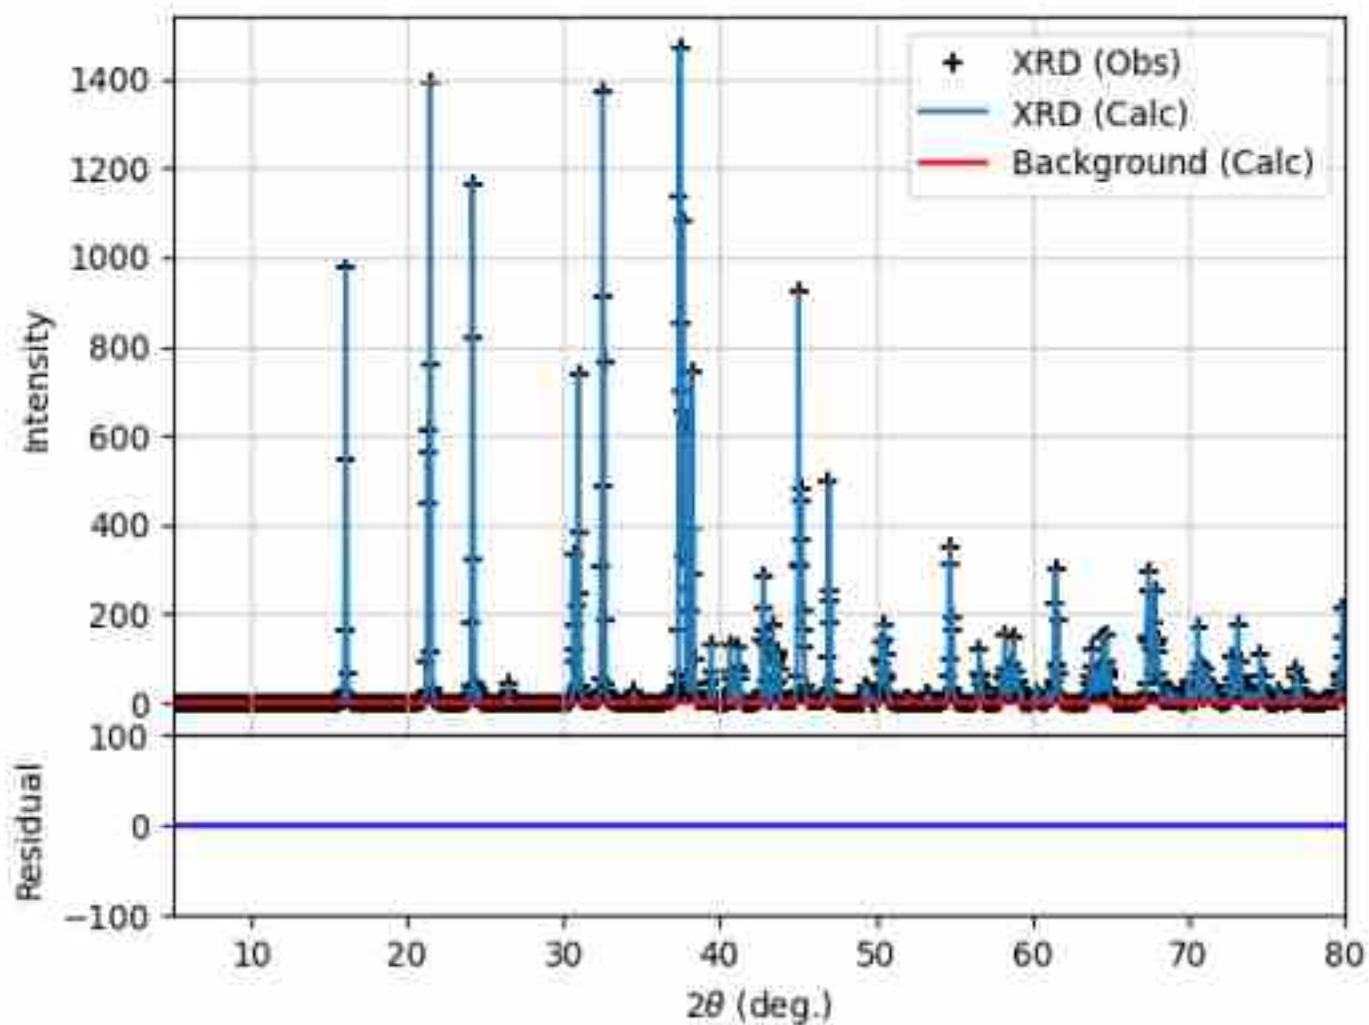

| RMSE before RR | Rwp     | RMSE after RR |
|----------------|---------|---------------|
| 0.012          | 0.00466 | 0.00057       |

# Cd1Cu2Sn1Se4

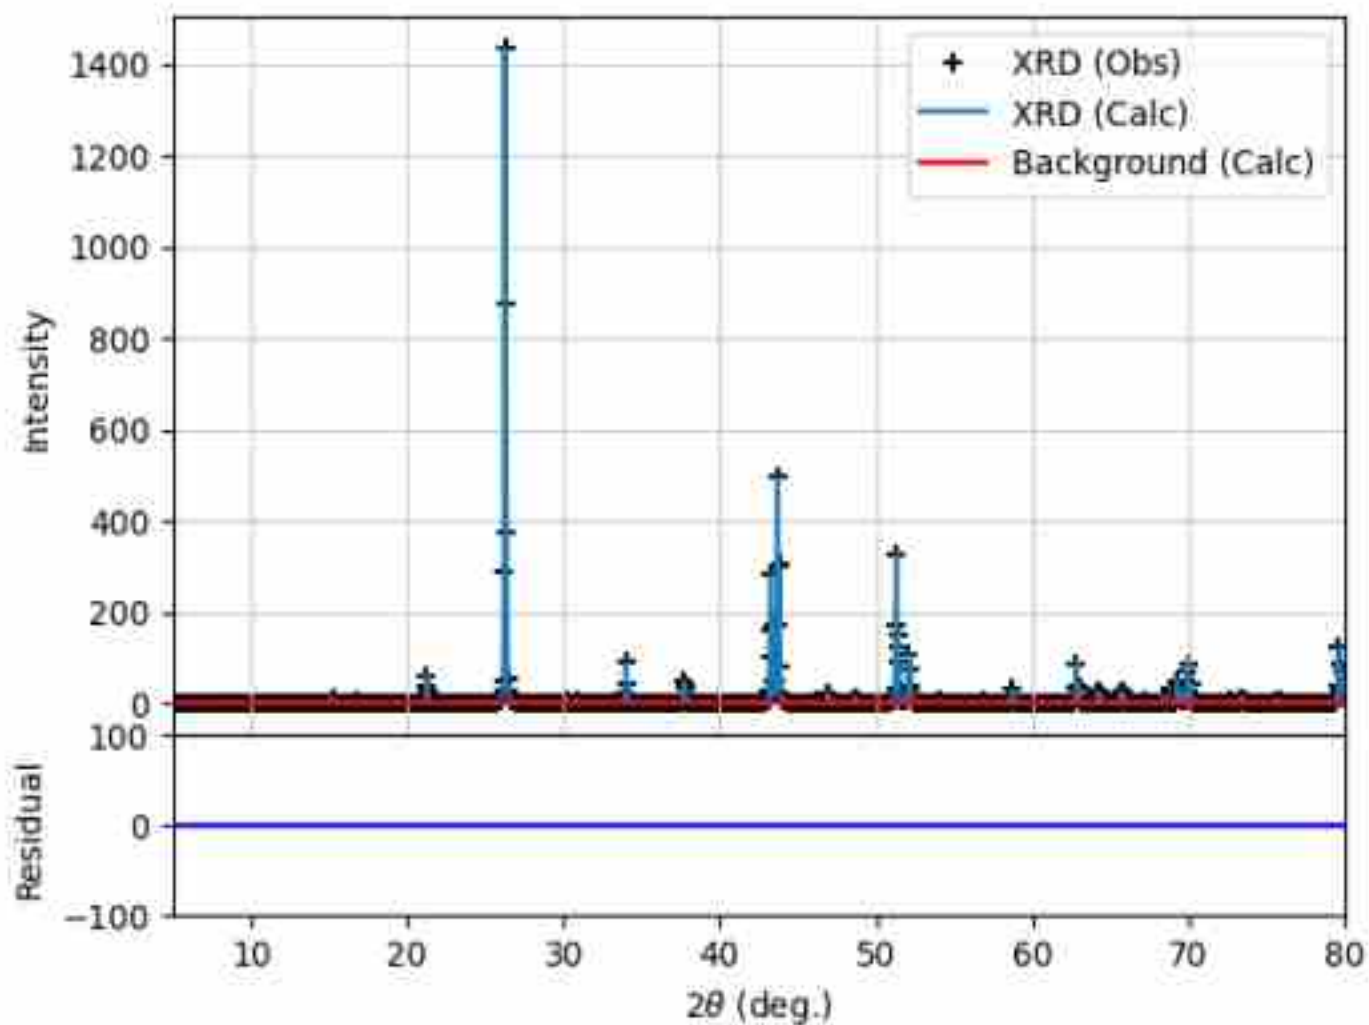

| RMSE before RR | Rwp     | RMSE after RR |
|----------------|---------|---------------|
| 0.012          | 0.00323 | 0.00037       |

Ce1Al2Ga2

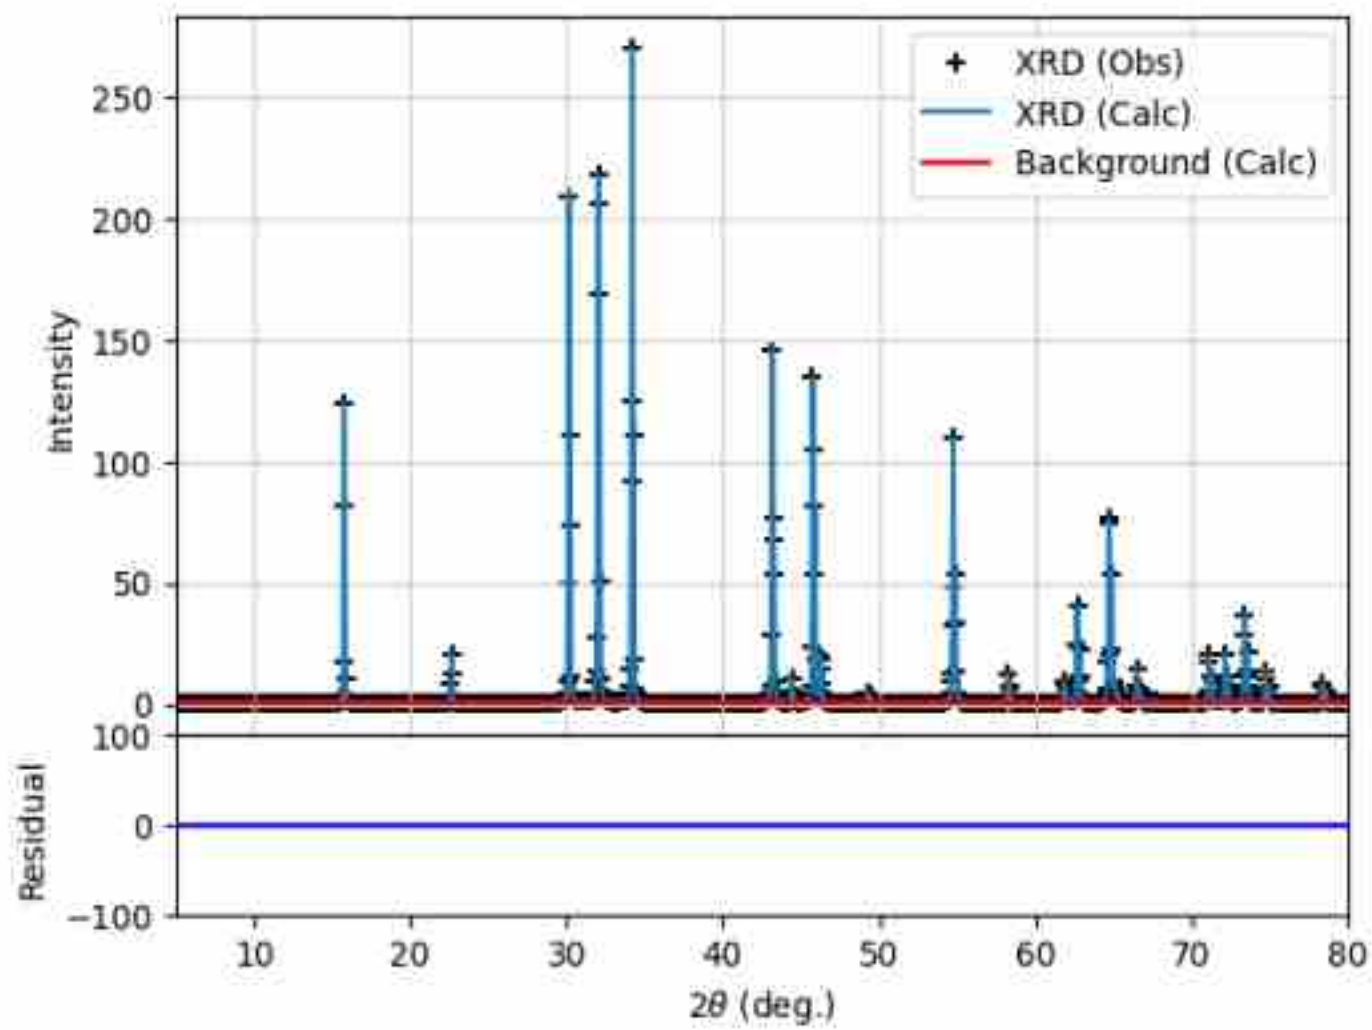

| RMSE before RR | Rwp     | RMSE after RR |
|----------------|---------|---------------|
| 0.012          | 0.00438 | 0.0007        |

# Ce1Al8Fe4

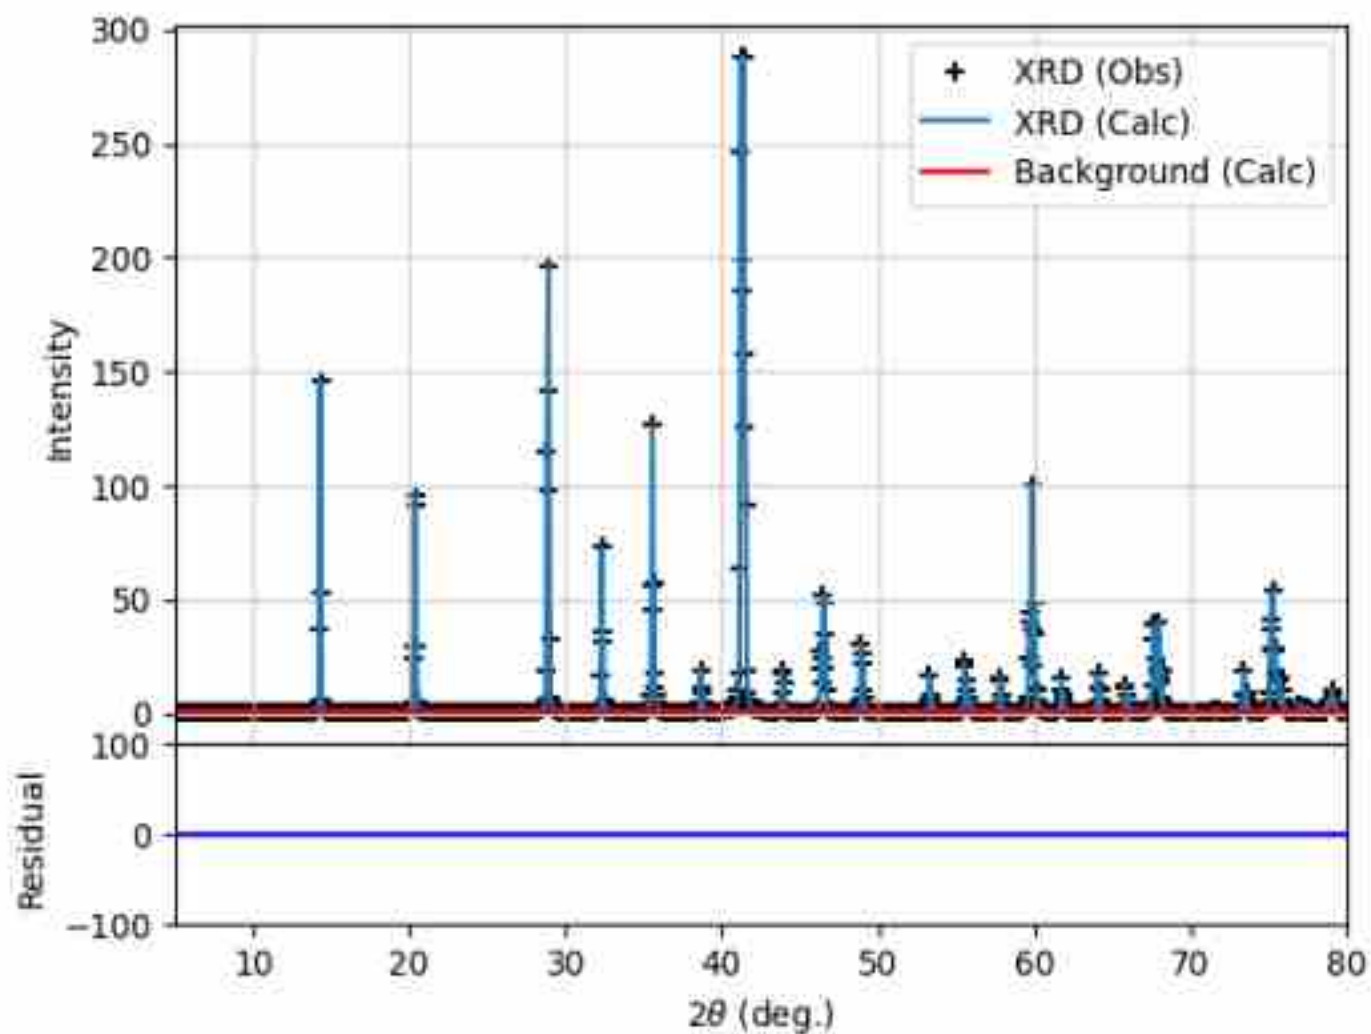

| RMSE before RR | Rwp     | RMSE after RR |
|----------------|---------|---------------|
| 0.012          | 0.00331 | 0.00087       |

# Ce<sub>1</sub>Y<sub>2</sub>Al<sub>3</sub>Pd<sub>3</sub>

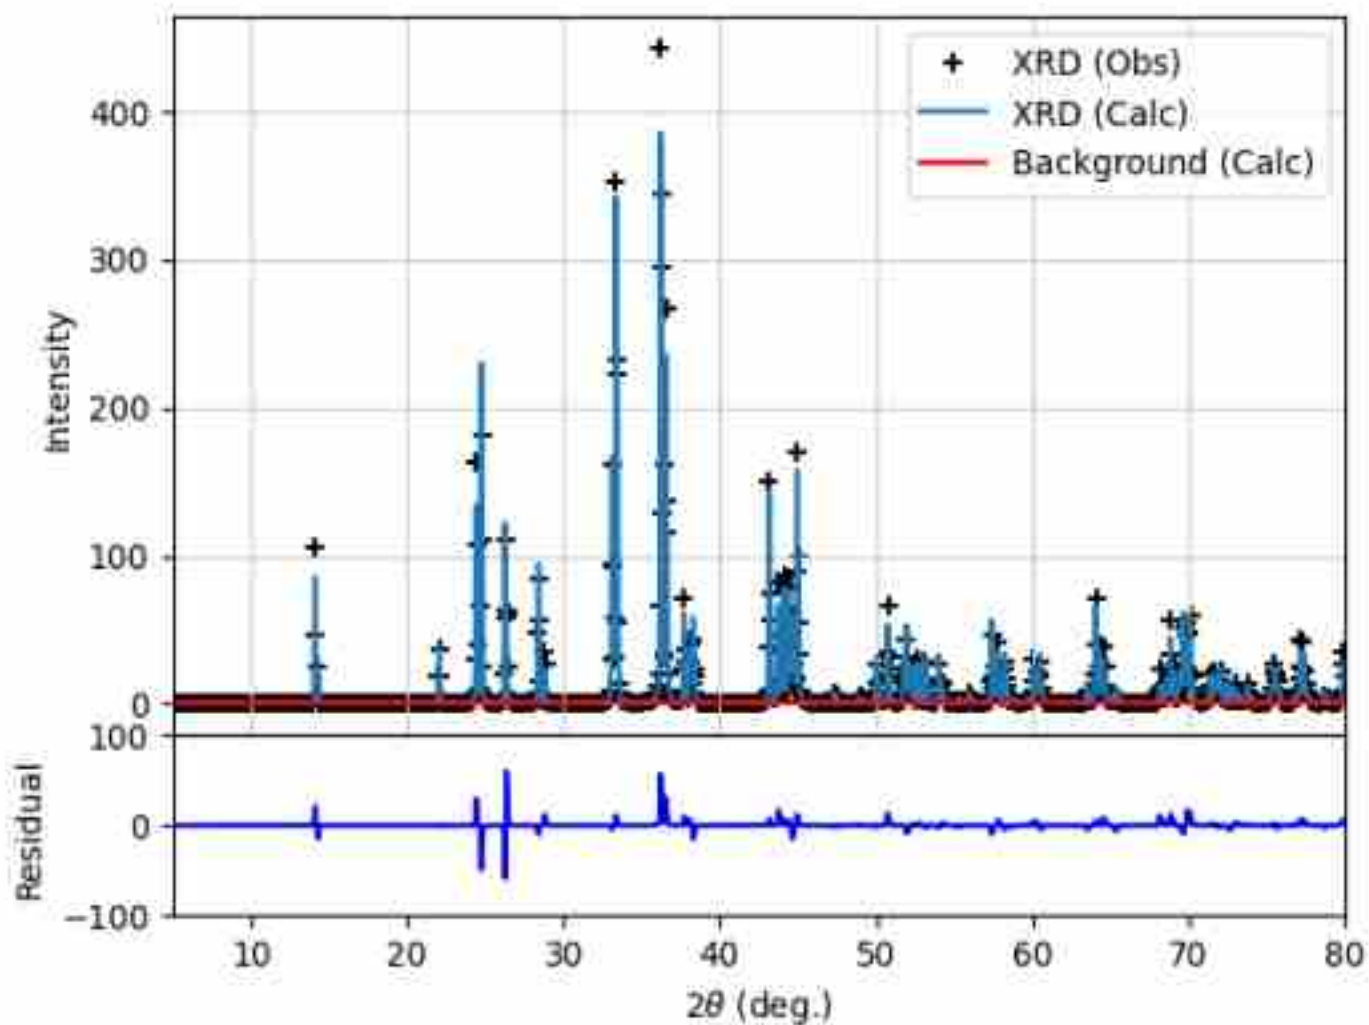

| RMSE before RR | Rwp      | RMSE after RR |
|----------------|----------|---------------|
| 0.012          | 19.90851 | 0.06781       |

# Ce<sub>2</sub>Si<sub>2</sub>O<sub>8</sub>

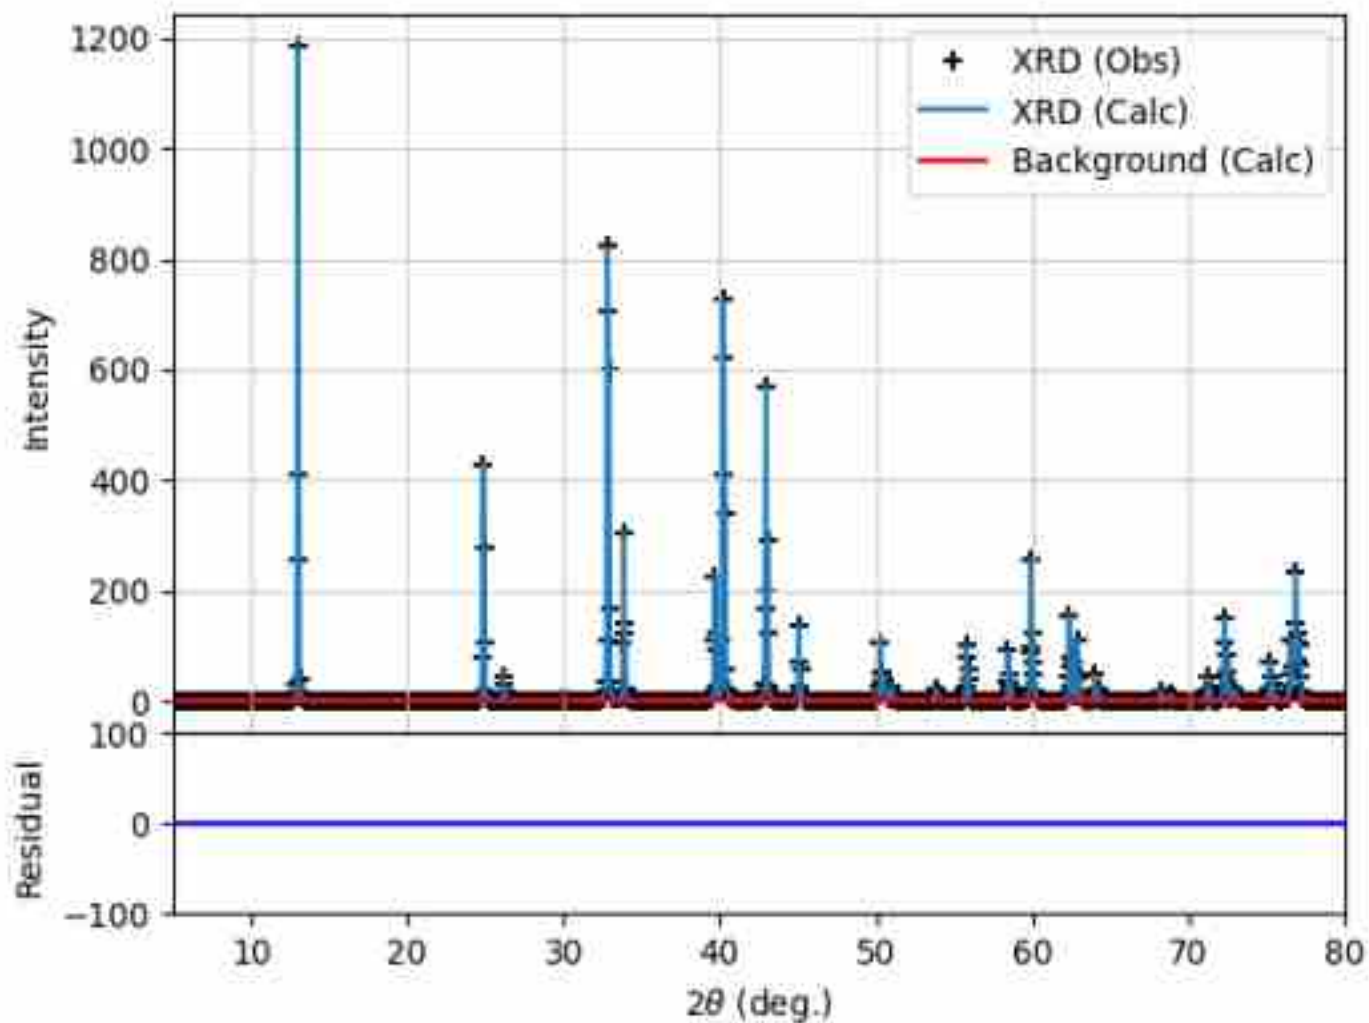

| RMSE before RR | Rwp     | RMSE after RR |
|----------------|---------|---------------|
| 0.012          | 0.00507 | 0.0008        |



# Ce<sub>2</sub>ZnNi<sub>2</sub>

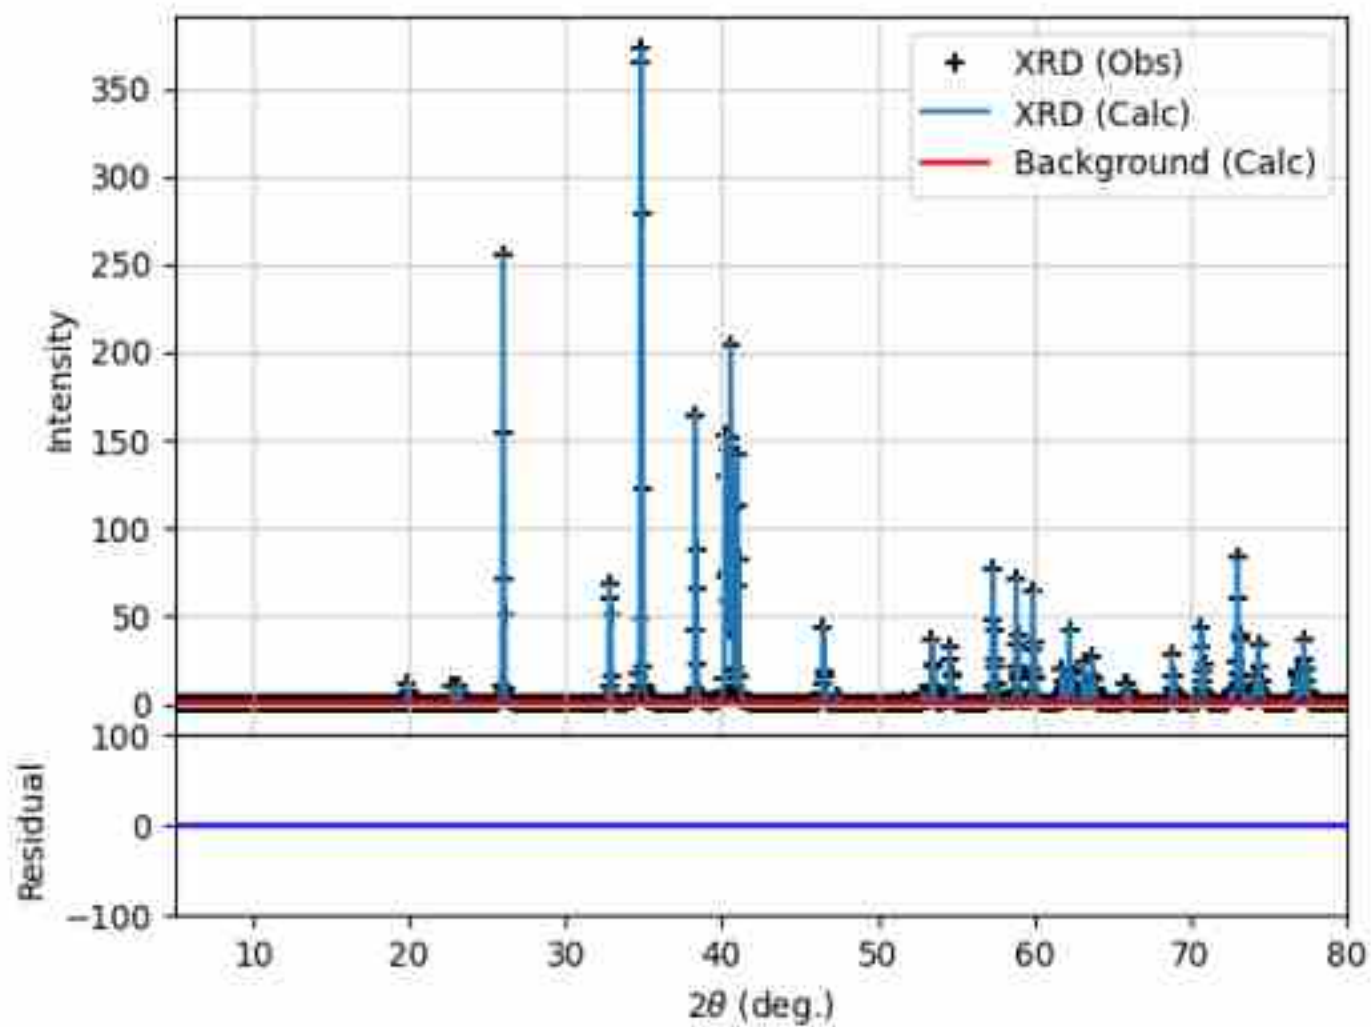

| RMSE before RR | Rwp     | RMSE after RR |
|----------------|---------|---------------|
| 0.012          | 0.00422 | 0.00032       |

# Ce3In3Pt3

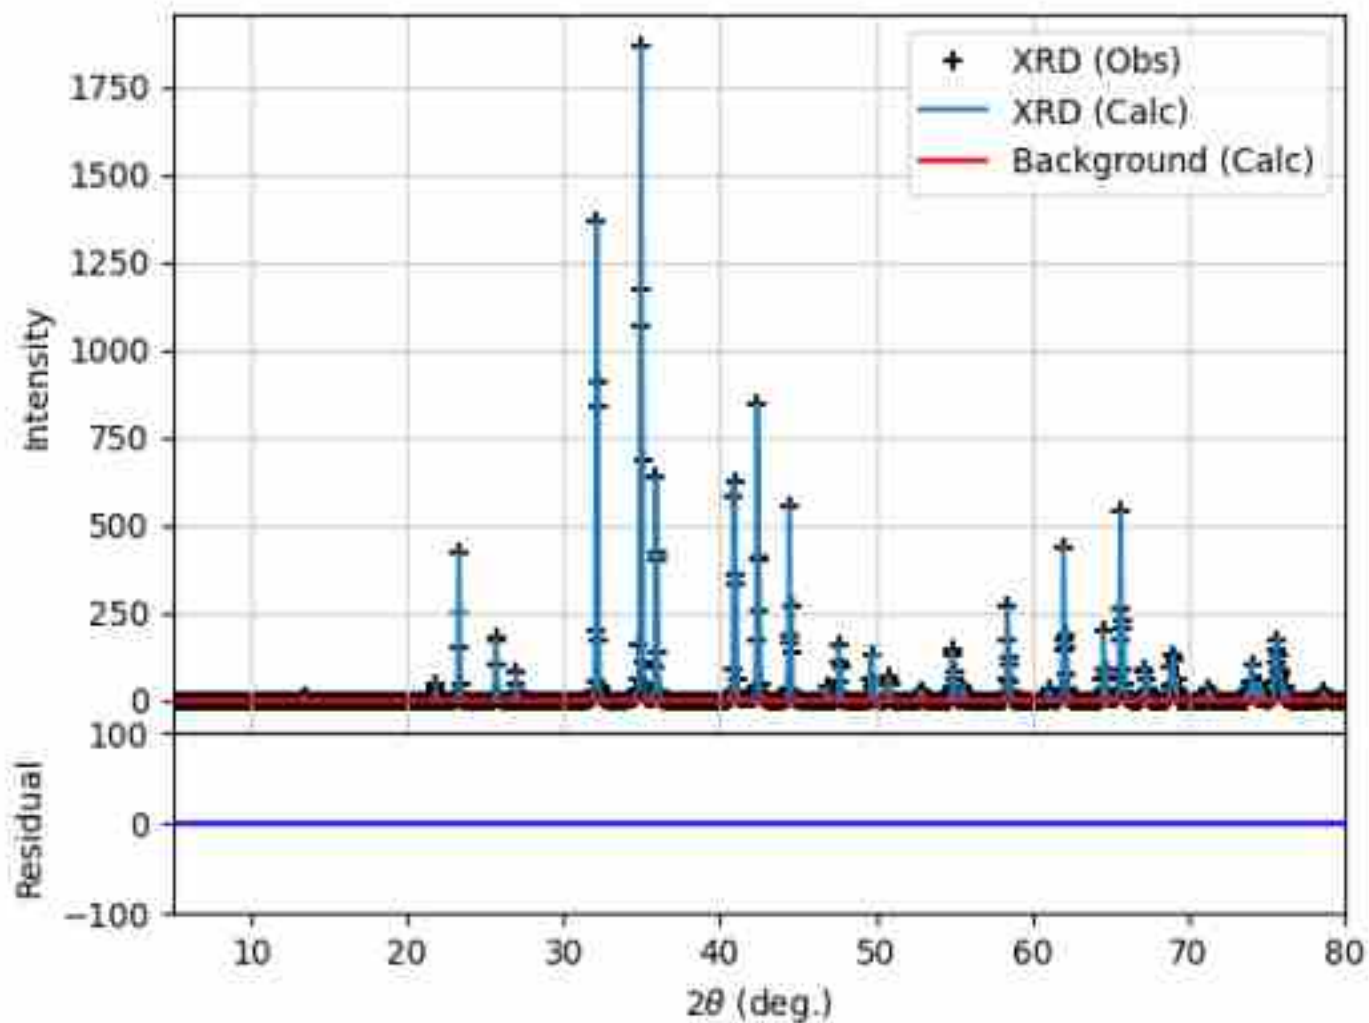

| RMSE before RR | Rwp     | RMSE after RR |
|----------------|---------|---------------|
| 0.012          | 0.00441 | 0.00076       |

# Ce<sub>4</sub>In<sub>2</sub>Ge<sub>4</sub>

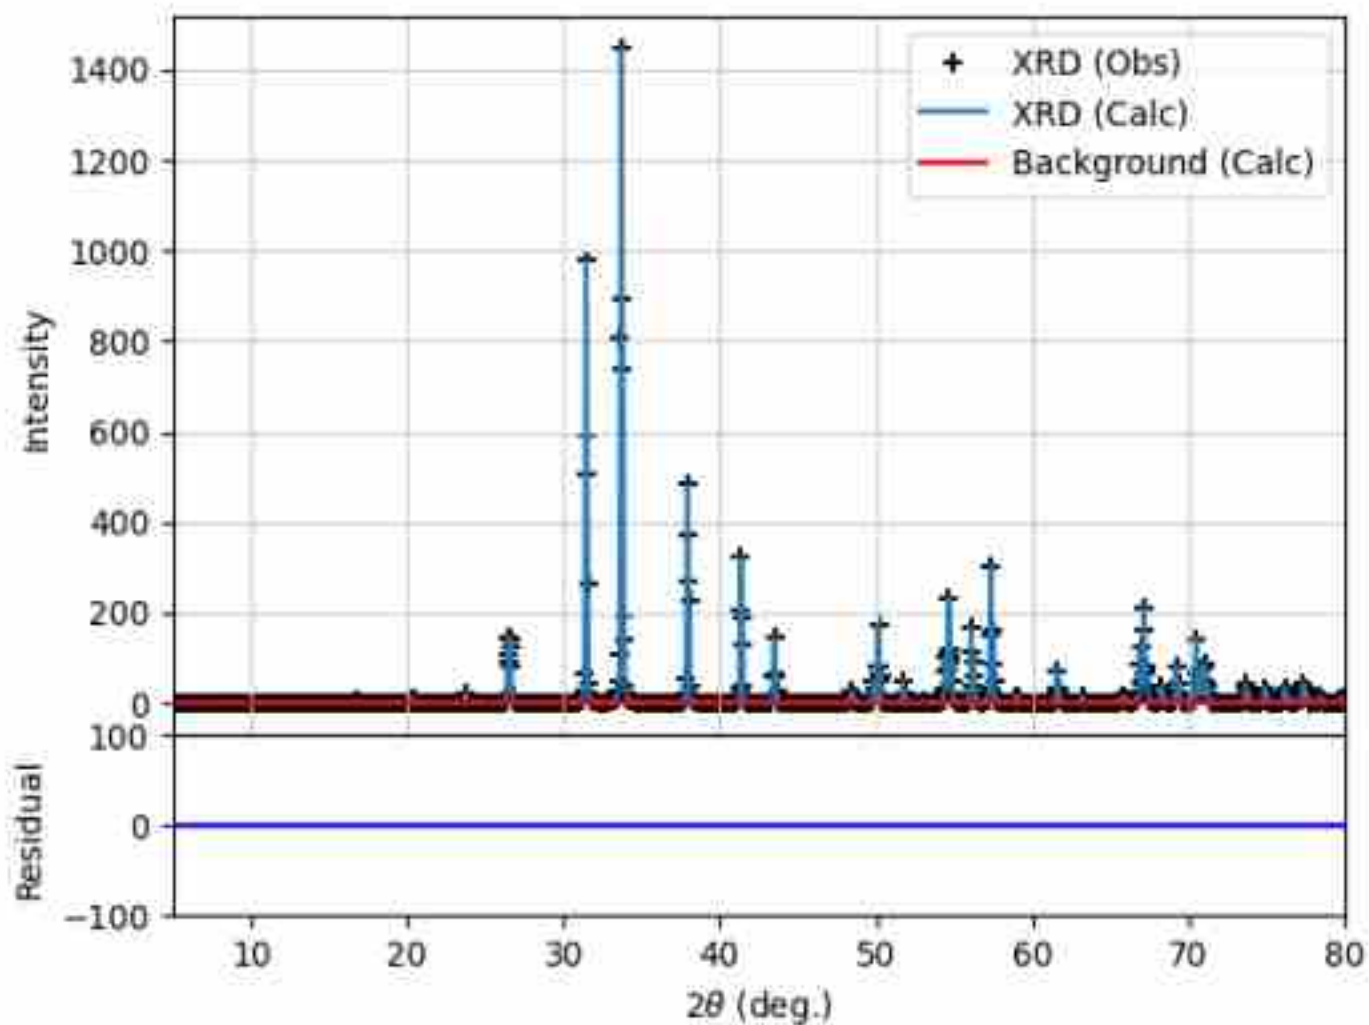

| RMSE before RR | Rwp     | RMSE after RR |
|----------------|---------|---------------|
| 0.012          | 0.00607 | 0.00075       |

# Cr1Ag1Te2

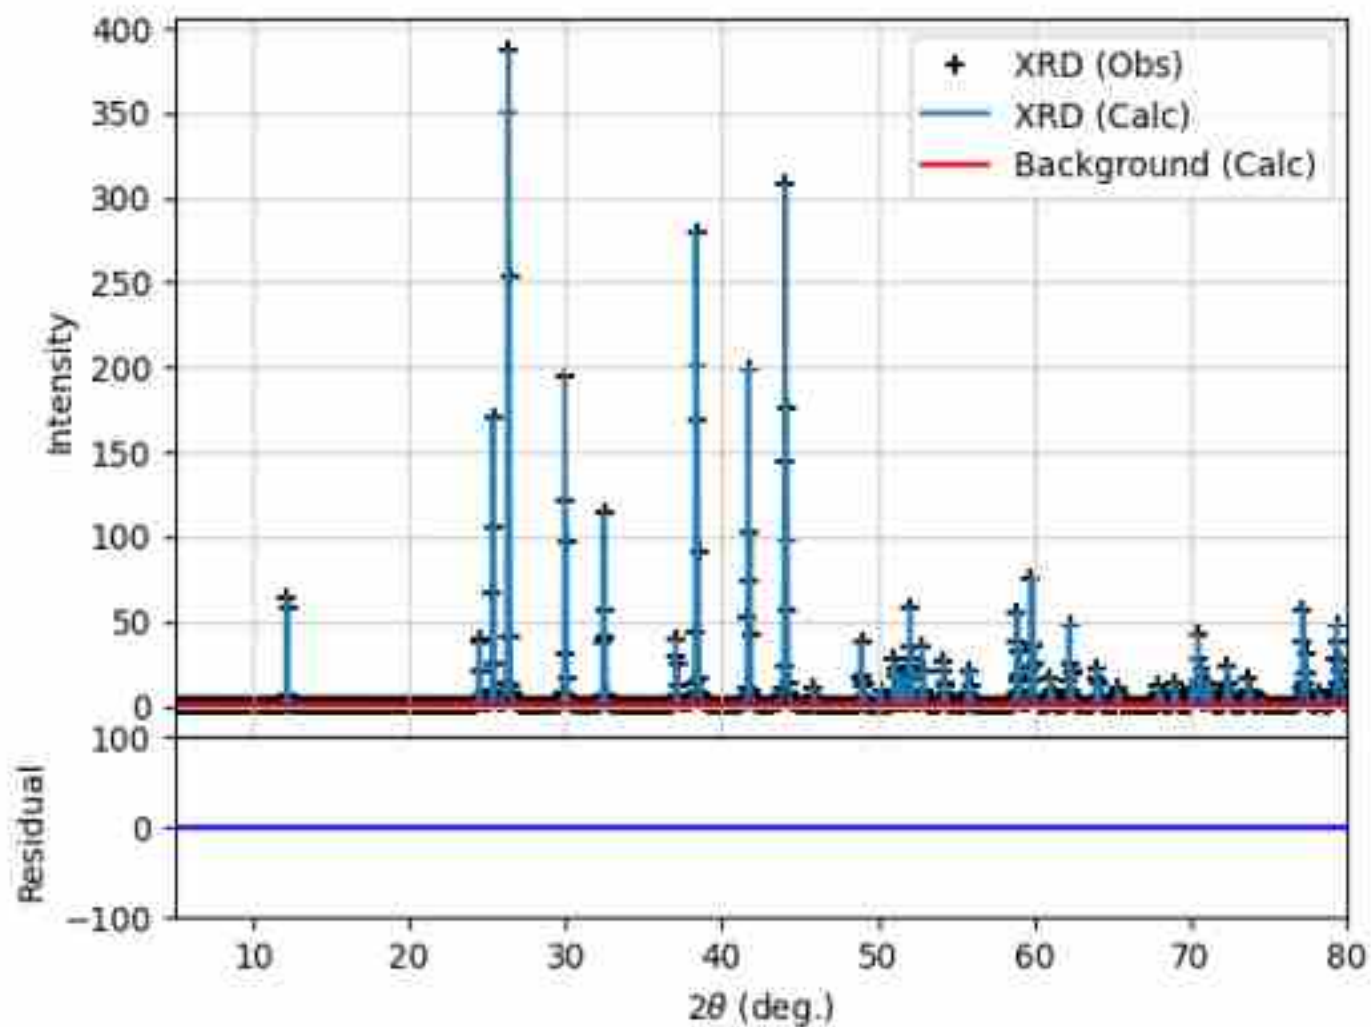

| RMSE before RR | Rwp     | RMSE after RR |
|----------------|---------|---------------|
| 0.012          | 0.00285 | 0.00023       |

# Cr<sub>4</sub>Ga<sub>2</sub>C<sub>2</sub>

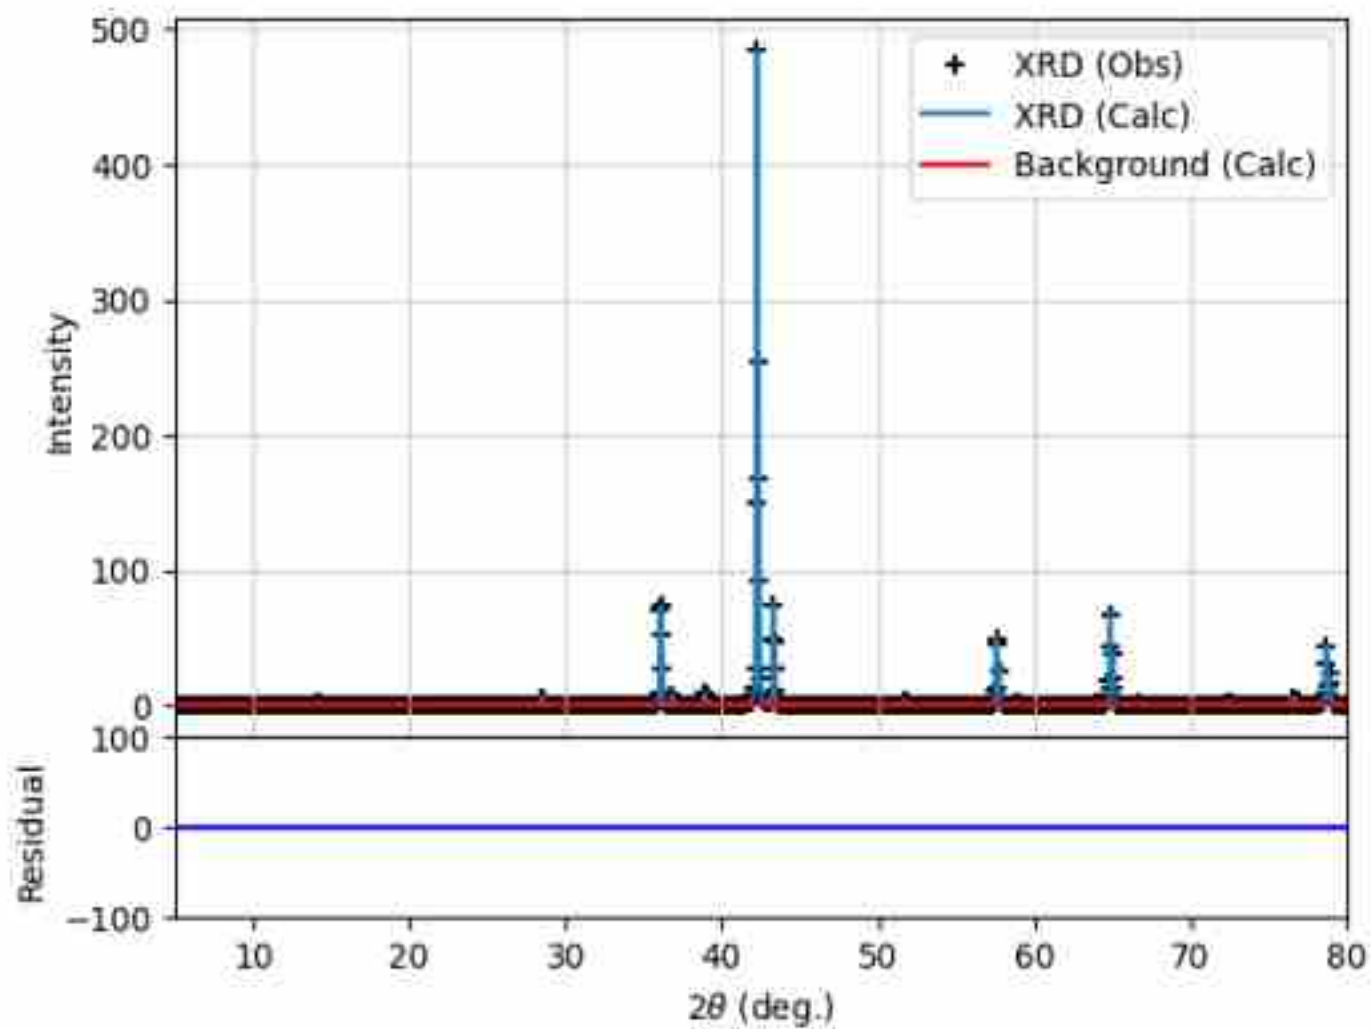

| RMSE before RR | Rwp     | RMSE after RR |
|----------------|---------|---------------|
| 0.012          | 0.00319 | 0.00142       |

# Cs1Cr5Se8

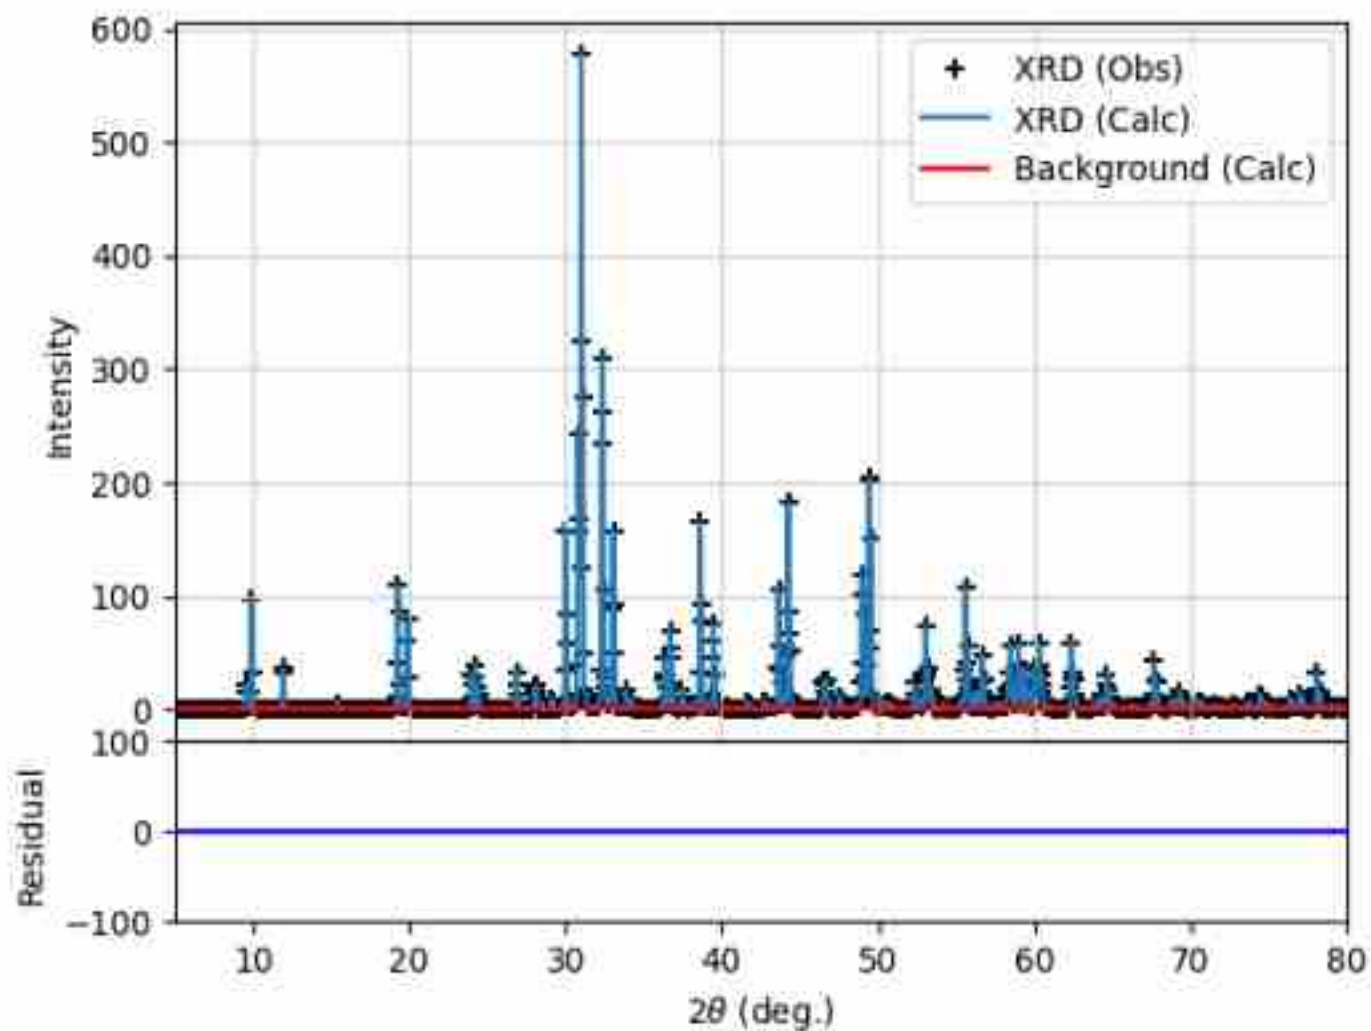

| RMSE before RR | Rwp     | RMSE after RR |
|----------------|---------|---------------|
| 0.012          | 0.00314 | 0.00037       |

# Cs1Rb2Ir1F6

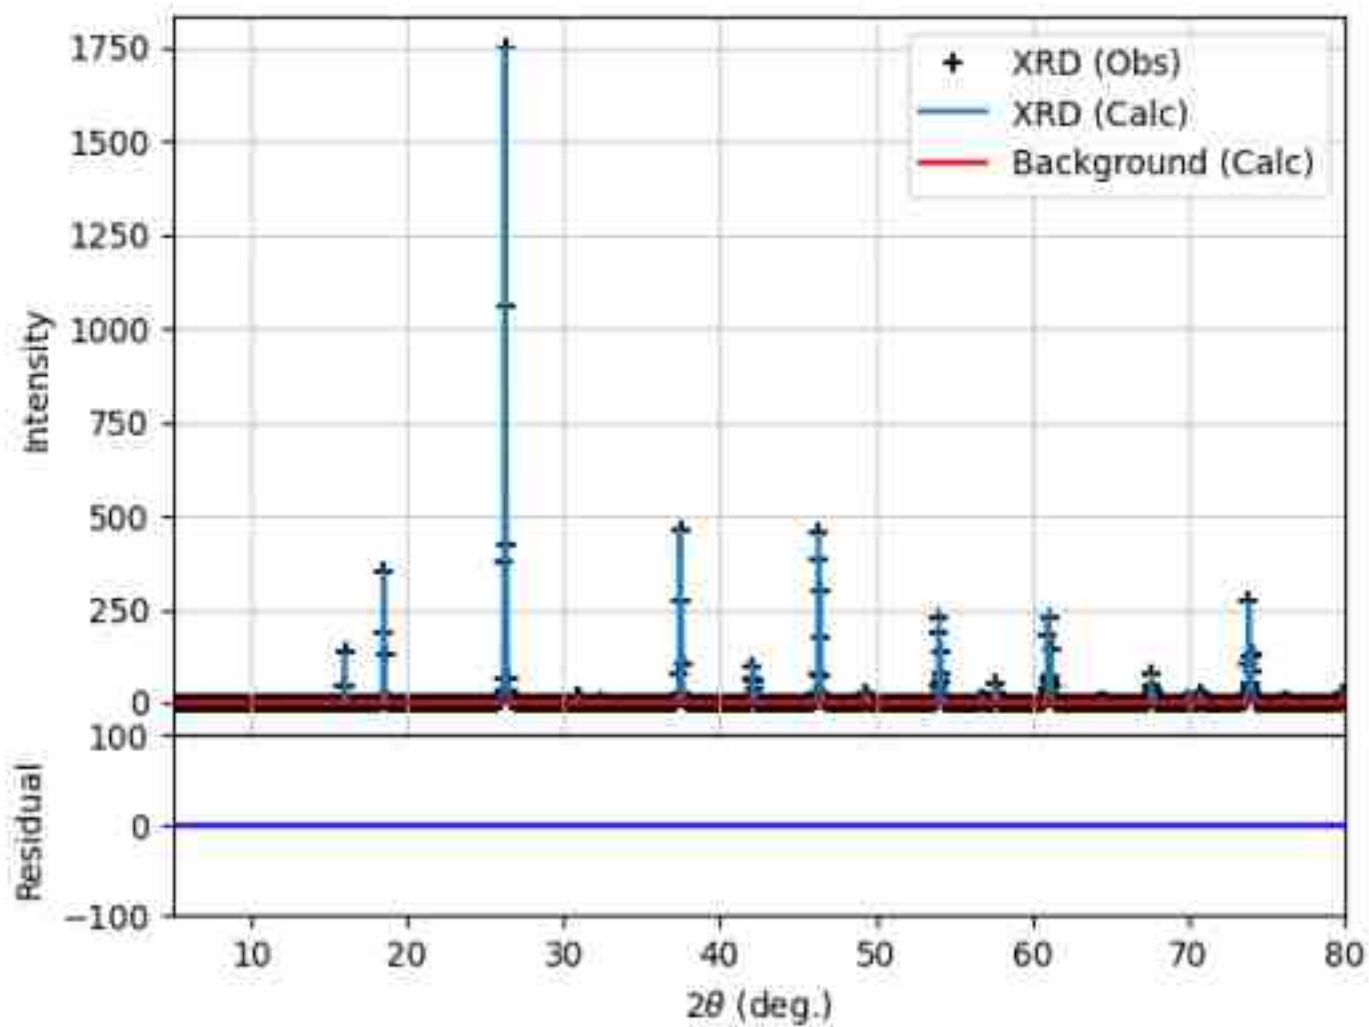

| RMSE before RR | Rwp     | RMSE after RR |
|----------------|---------|---------------|
| 0.012          | 0.00738 | 0.00268       |

Cs<sub>2</sub>Au<sub>2</sub>Se<sub>2</sub>

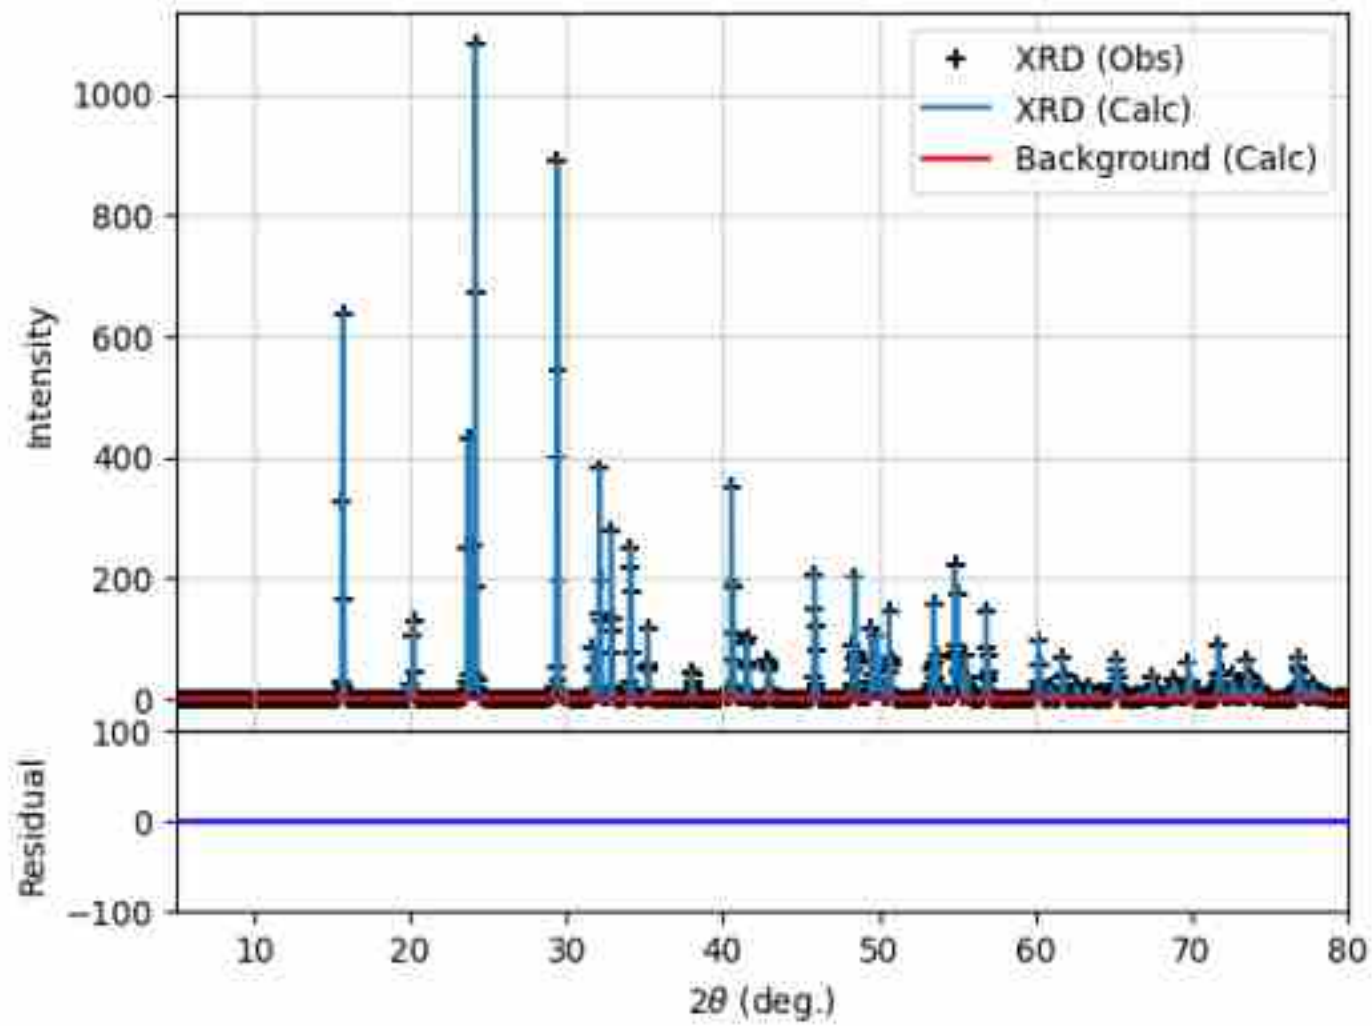

| RMSE before RR | Rwp     | RMSE after RR |
|----------------|---------|---------------|
| 0.012          | 0.00415 | 0.00031       |



# Cs<sub>2</sub>K<sub>1</sub>Ce<sub>1</sub>I<sub>6</sub>

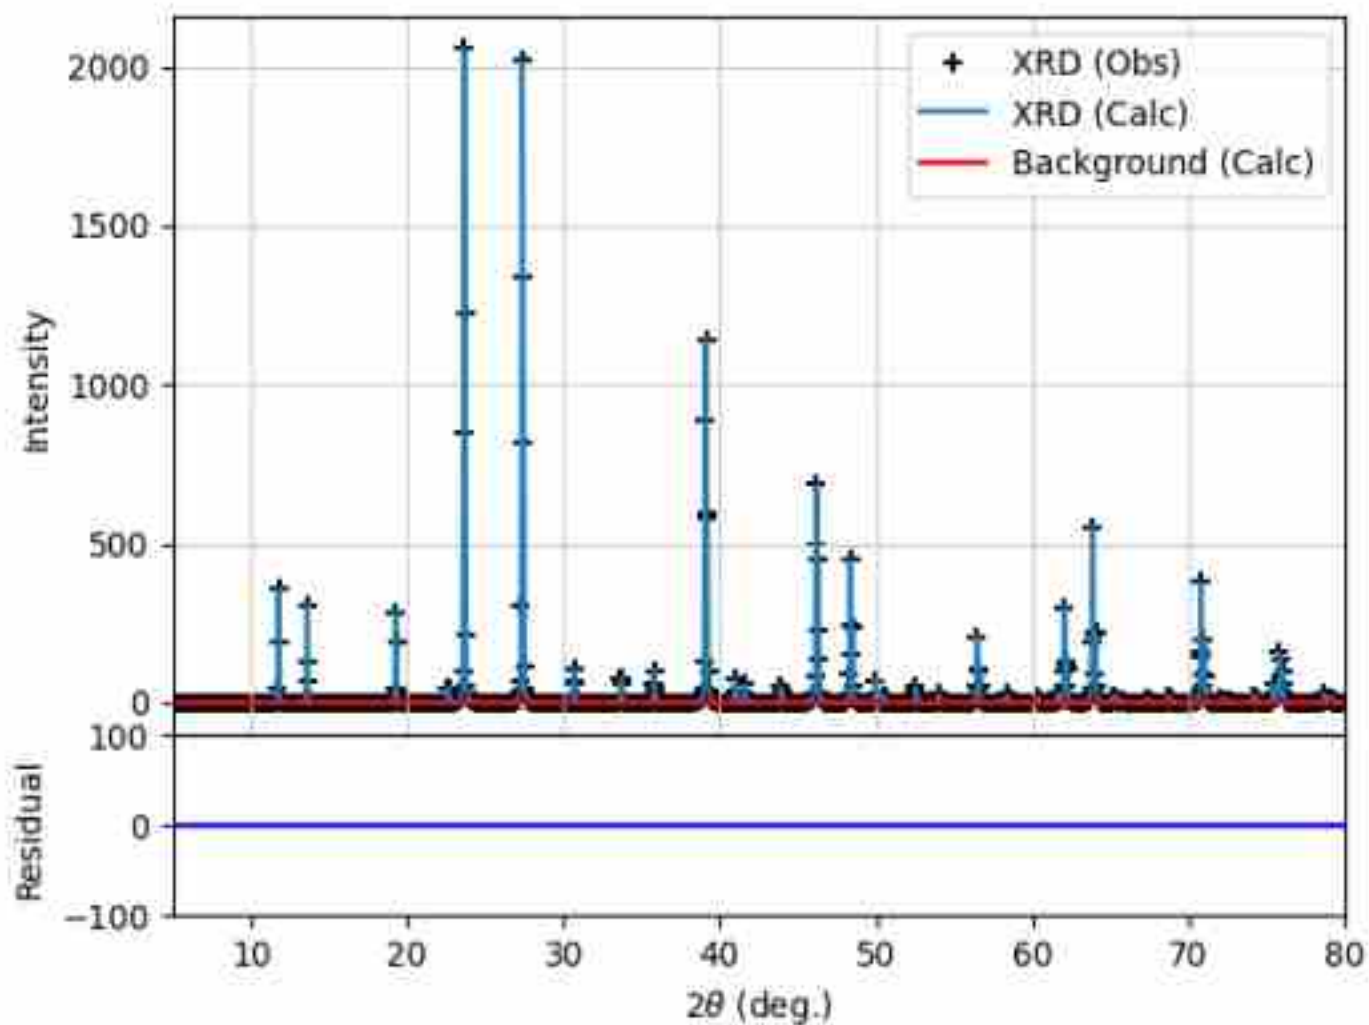

| RMSE before RR | Rwp     | RMSE after RR |
|----------------|---------|---------------|
| 0.012          | 0.02817 | 0.00154       |

# Cs<sub>2</sub>K<sub>1</sub>Mn<sub>1</sub>F<sub>6</sub>

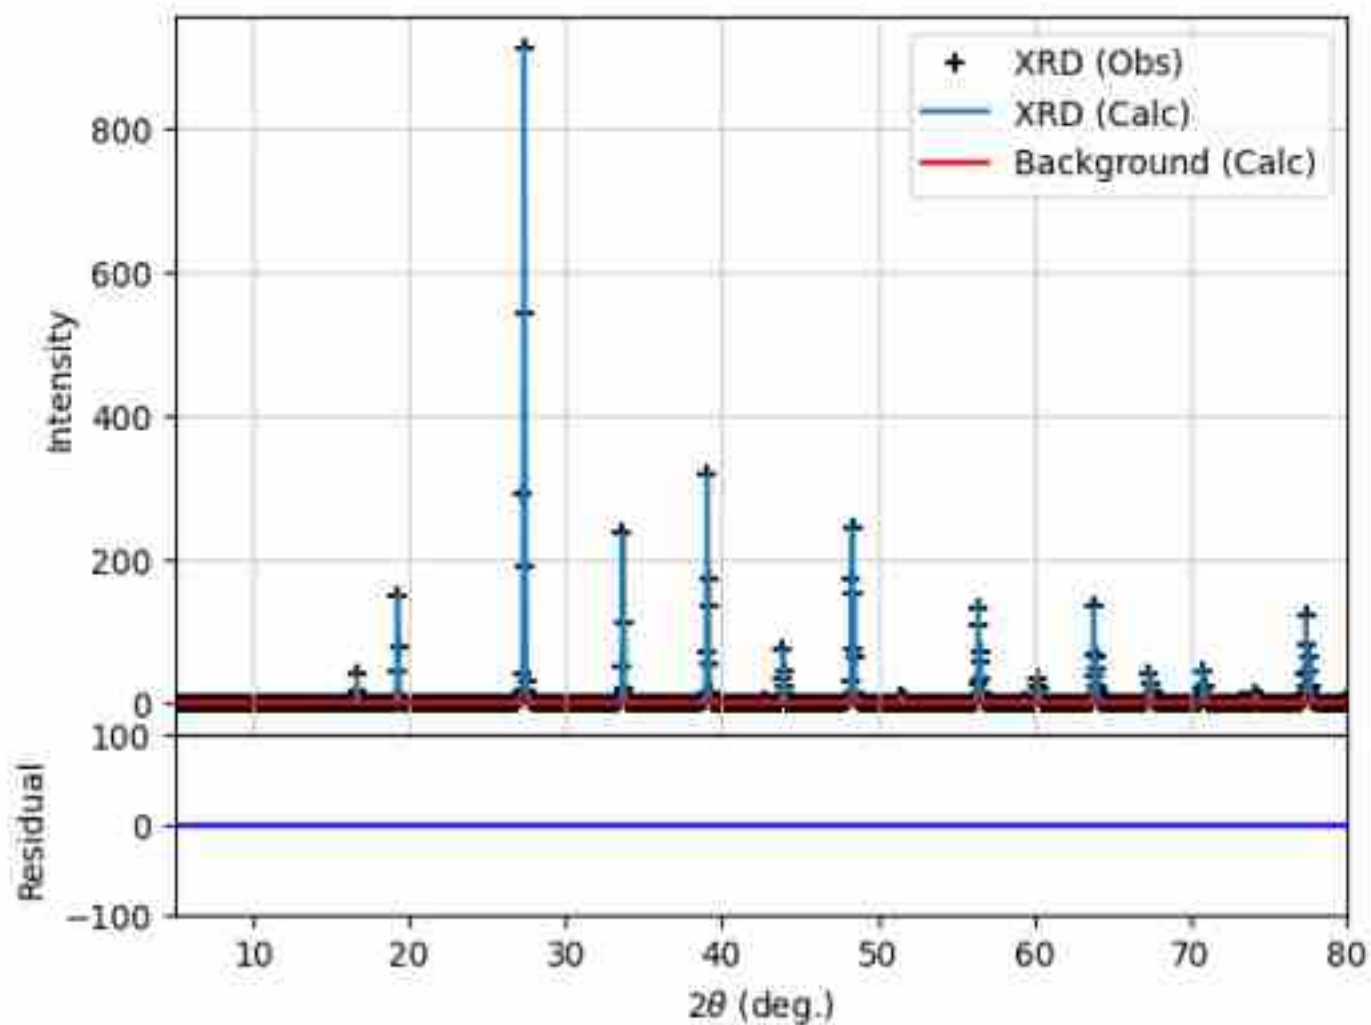

| RMSE before RR | Rwp     | RMSE after RR |
|----------------|---------|---------------|
| 0.012          | 0.00752 | 0.00226       |

# Cs<sub>2</sub>K<sub>1</sub>Ni<sub>1</sub>F<sub>6</sub>

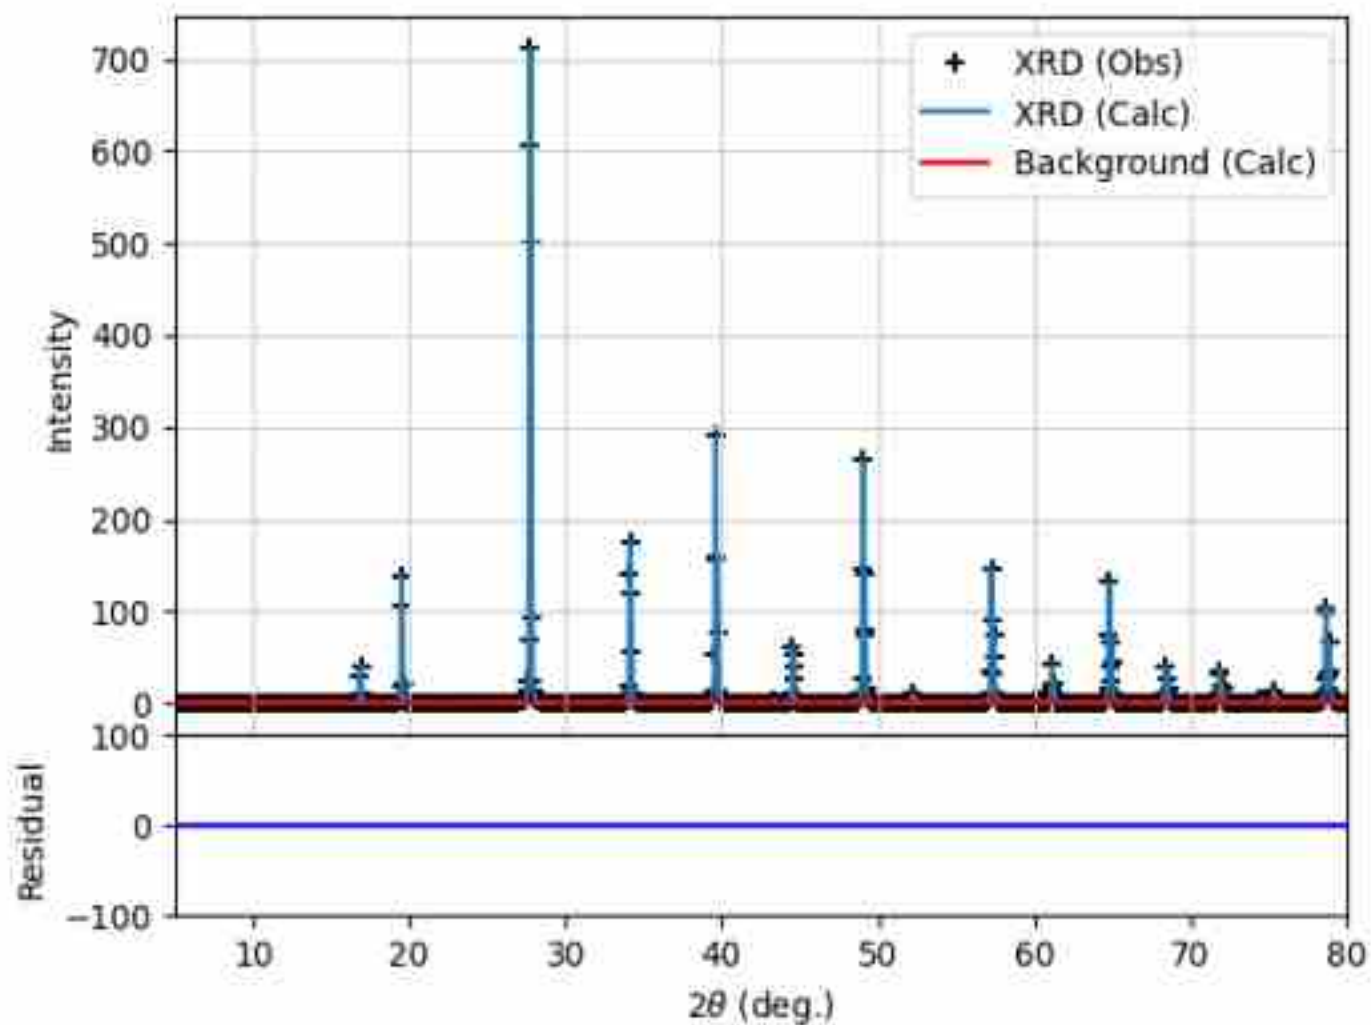

| RMSE before RR | Rwp     | RMSE after RR |
|----------------|---------|---------------|
| 0.012          | 0.01465 | 0.00391       |

# Cs<sub>2</sub>PdBr<sub>6</sub>

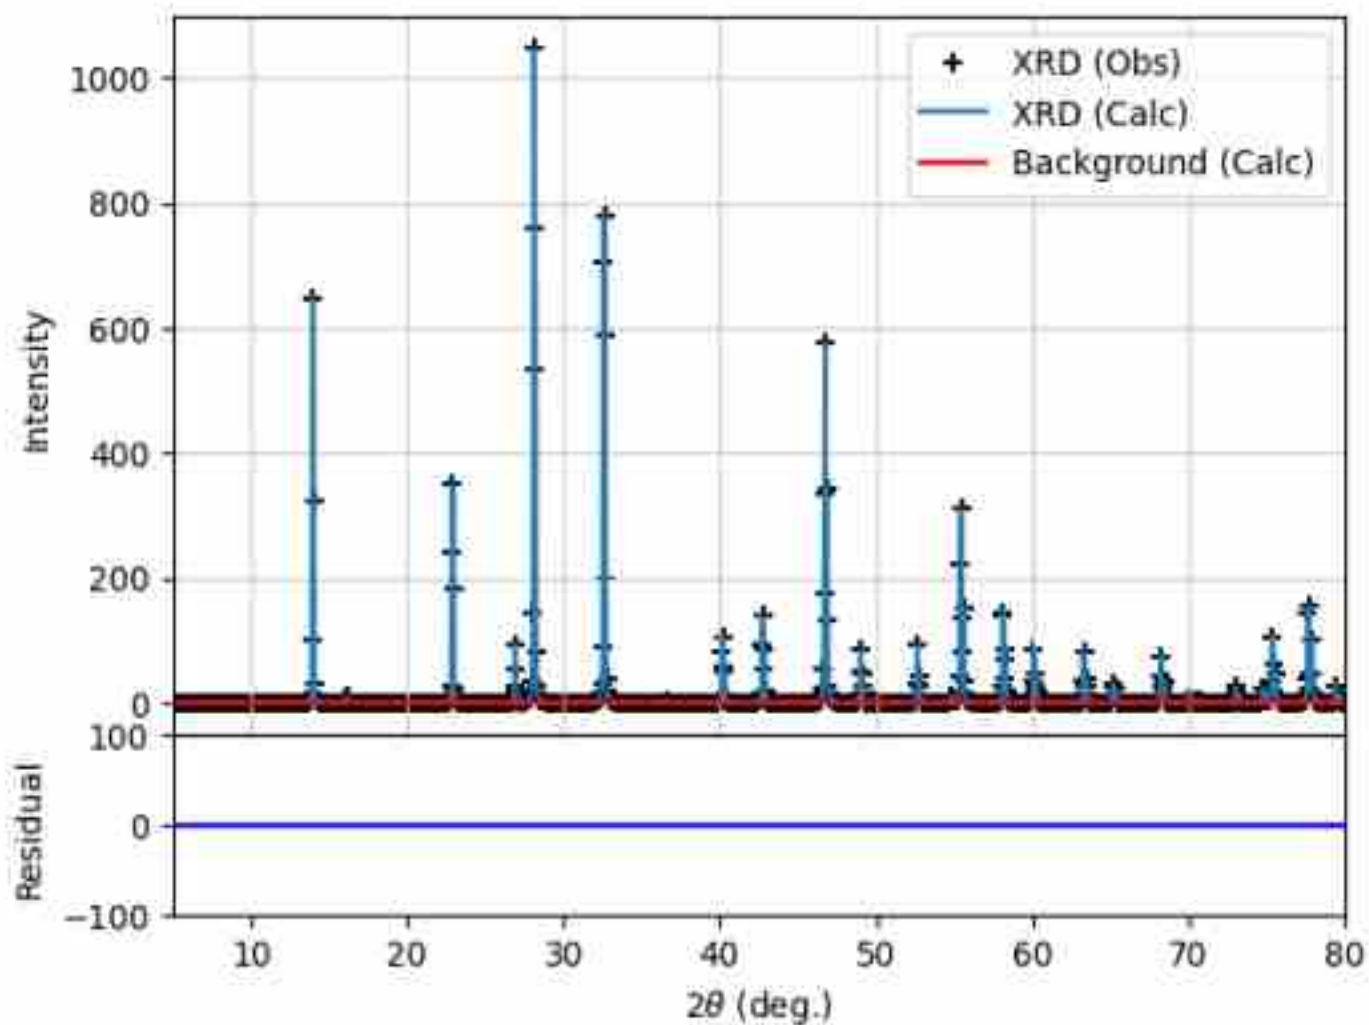

| RMSE before RR | Rwp    | RMSE after RR |
|----------------|--------|---------------|
| 0.012          | 0.0339 | 0.00213       |

# Cs<sub>2</sub>PrAgF<sub>6</sub>

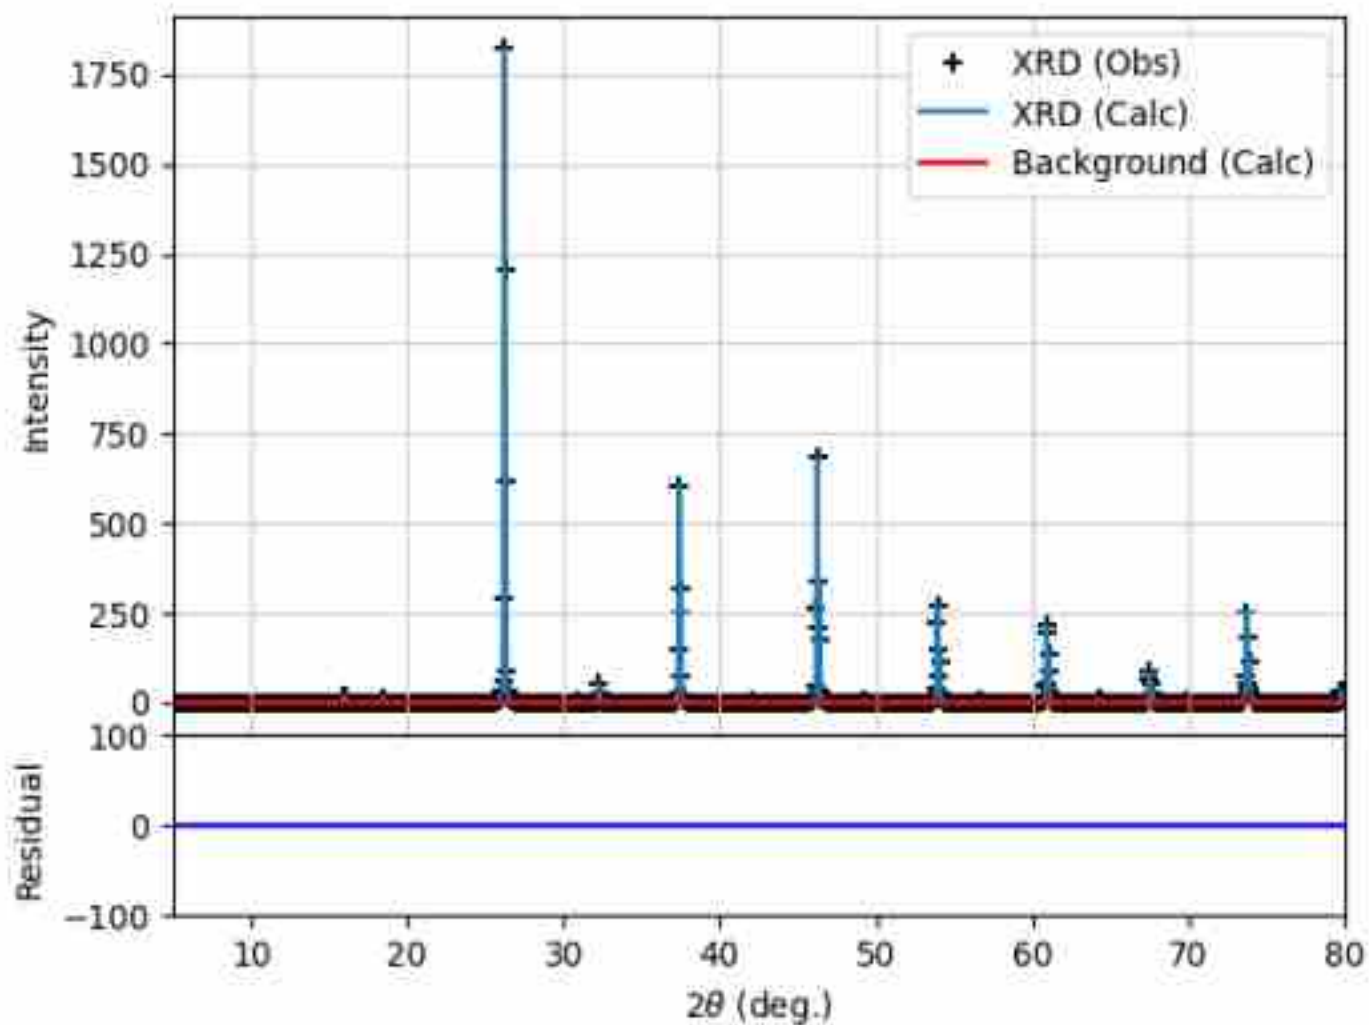

| RMSE before RR | Rwp     | RMSE after RR |
|----------------|---------|---------------|
| 0.012          | 0.00606 | 0.00219       |

# Cs<sub>2</sub>Rb<sub>1</sub>Fe<sub>1</sub>F<sub>6</sub>

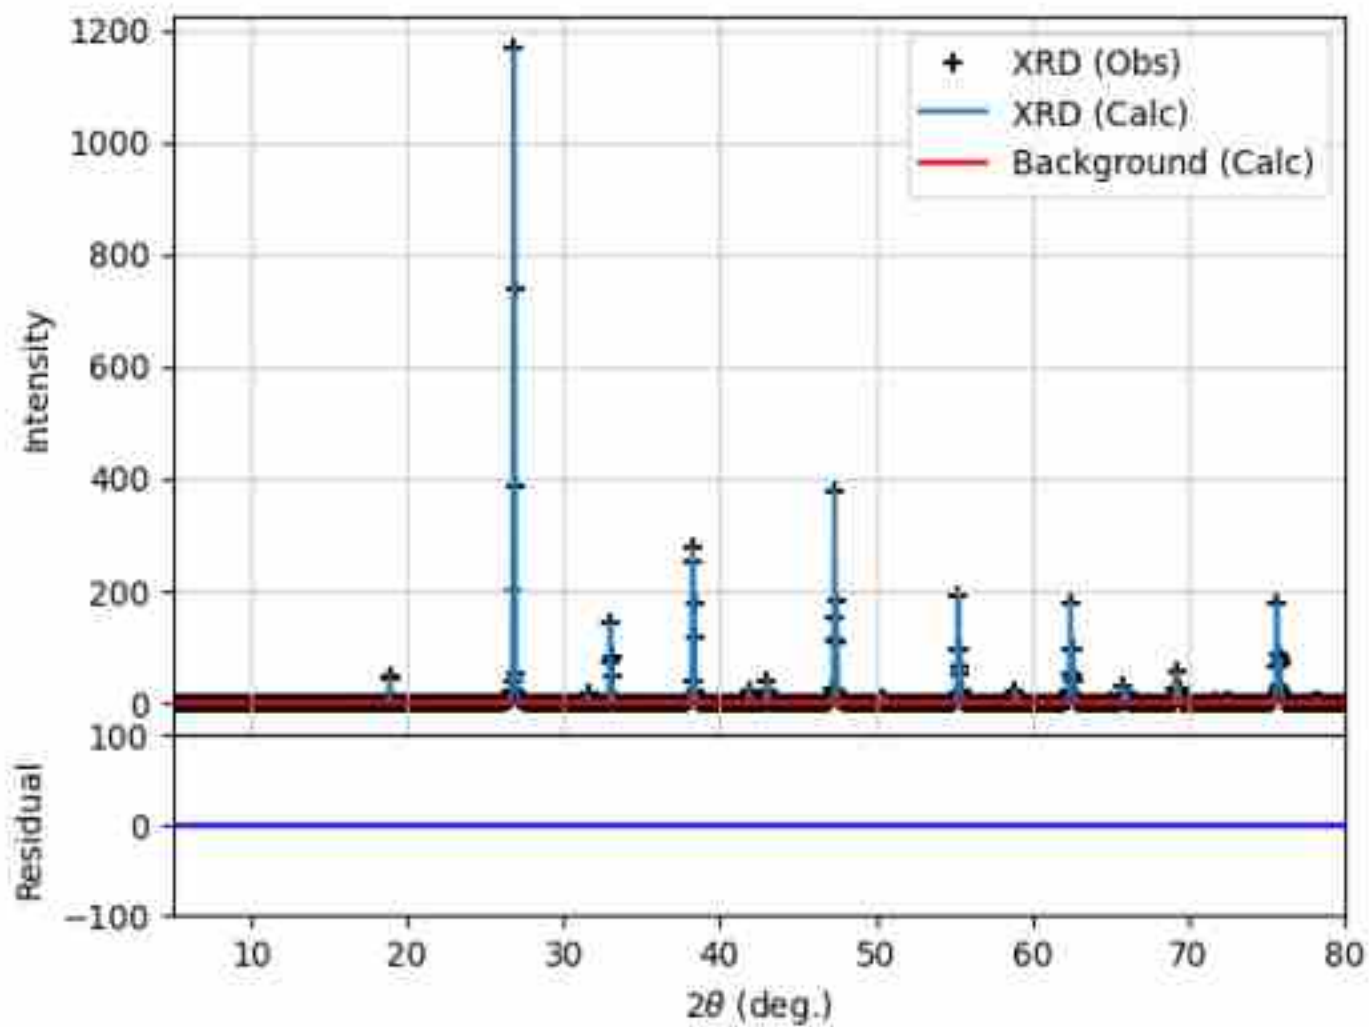

| RMSE before RR | Rwp     | RMSE after RR |
|----------------|---------|---------------|
| 0.012          | 0.00494 | 0.00188       |

# Cs<sub>2</sub>RbGaF<sub>6</sub>

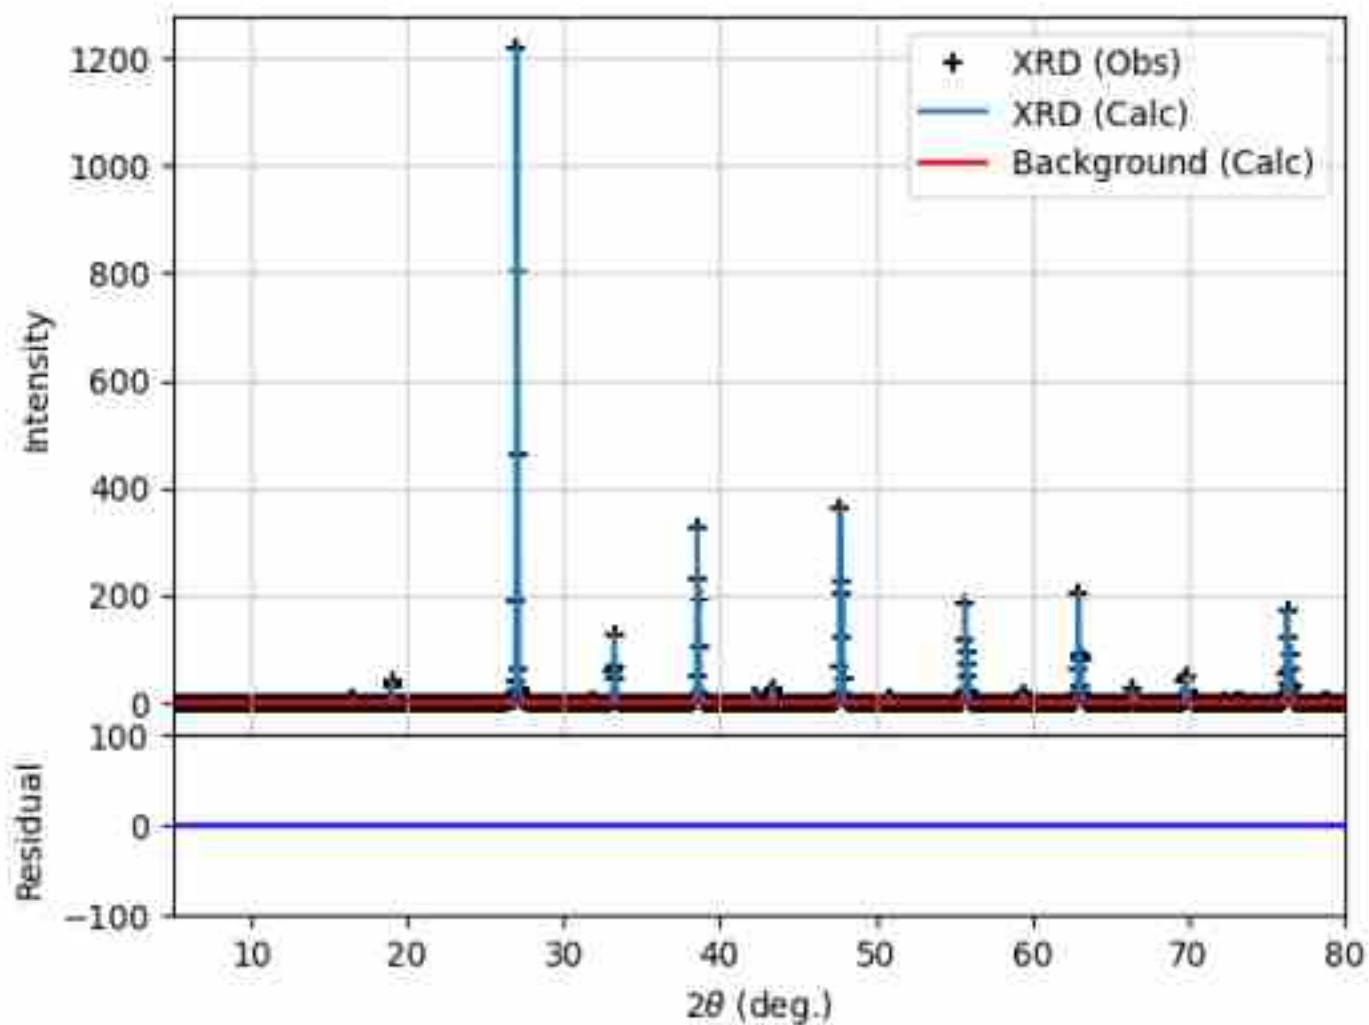

| RMSE before RR | Rwp     | RMSE after RR |
|----------------|---------|---------------|
| 0.012          | 0.01127 | 0.00306       |

# Cs<sub>2</sub>SbI<sub>6</sub>

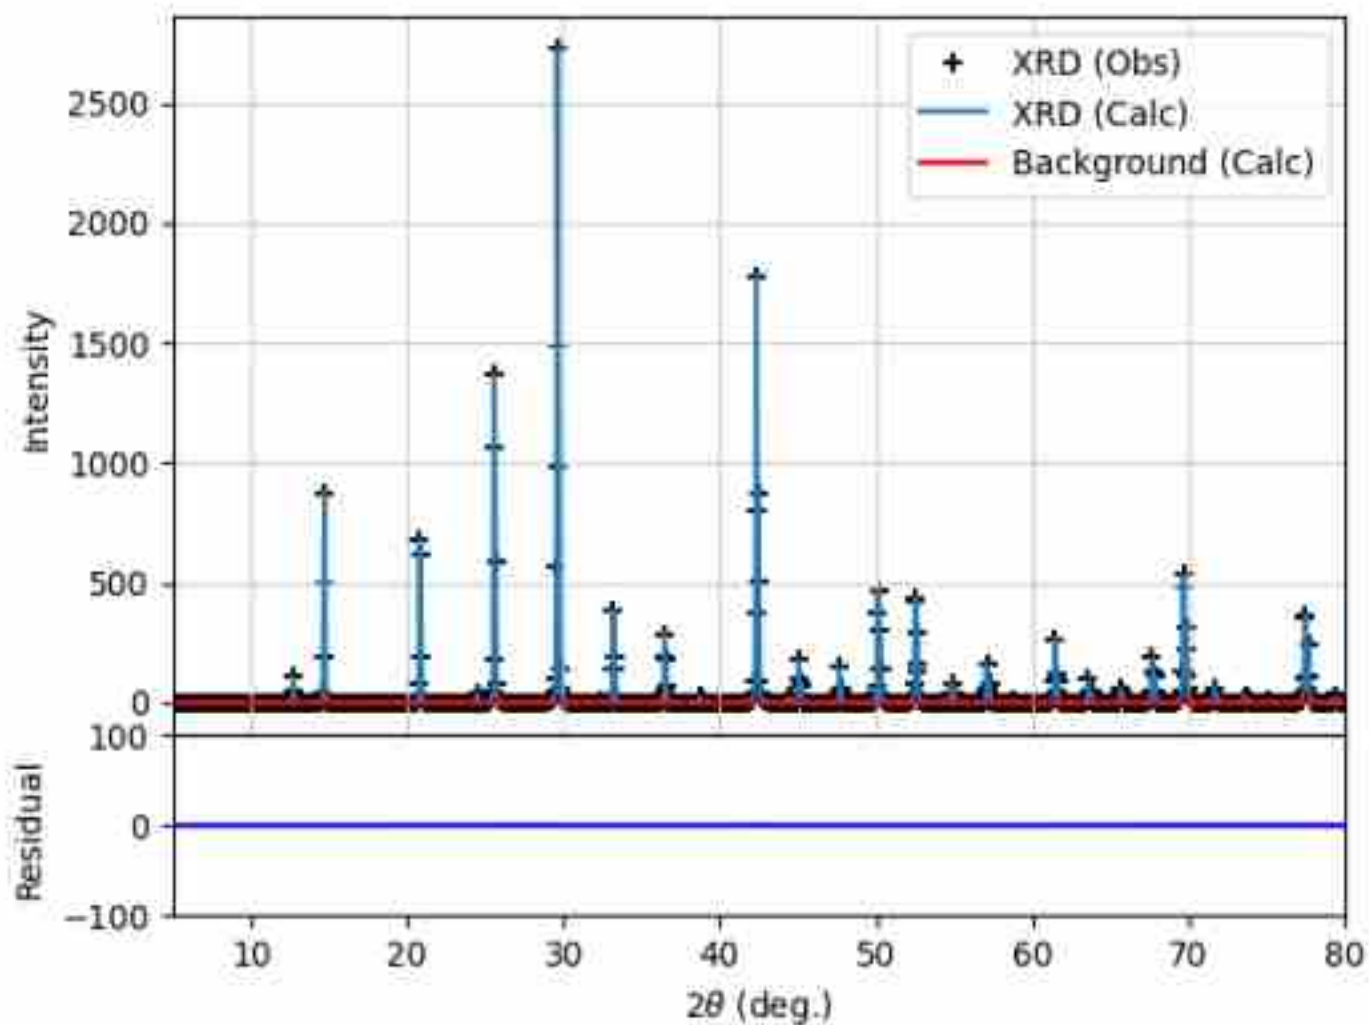

| RMSE before RR | Rwp    | RMSE after RR |
|----------------|--------|---------------|
| 0.012          | 0.1362 | 0.00299       |



# Cs<sub>2</sub>TiI<sub>6</sub>

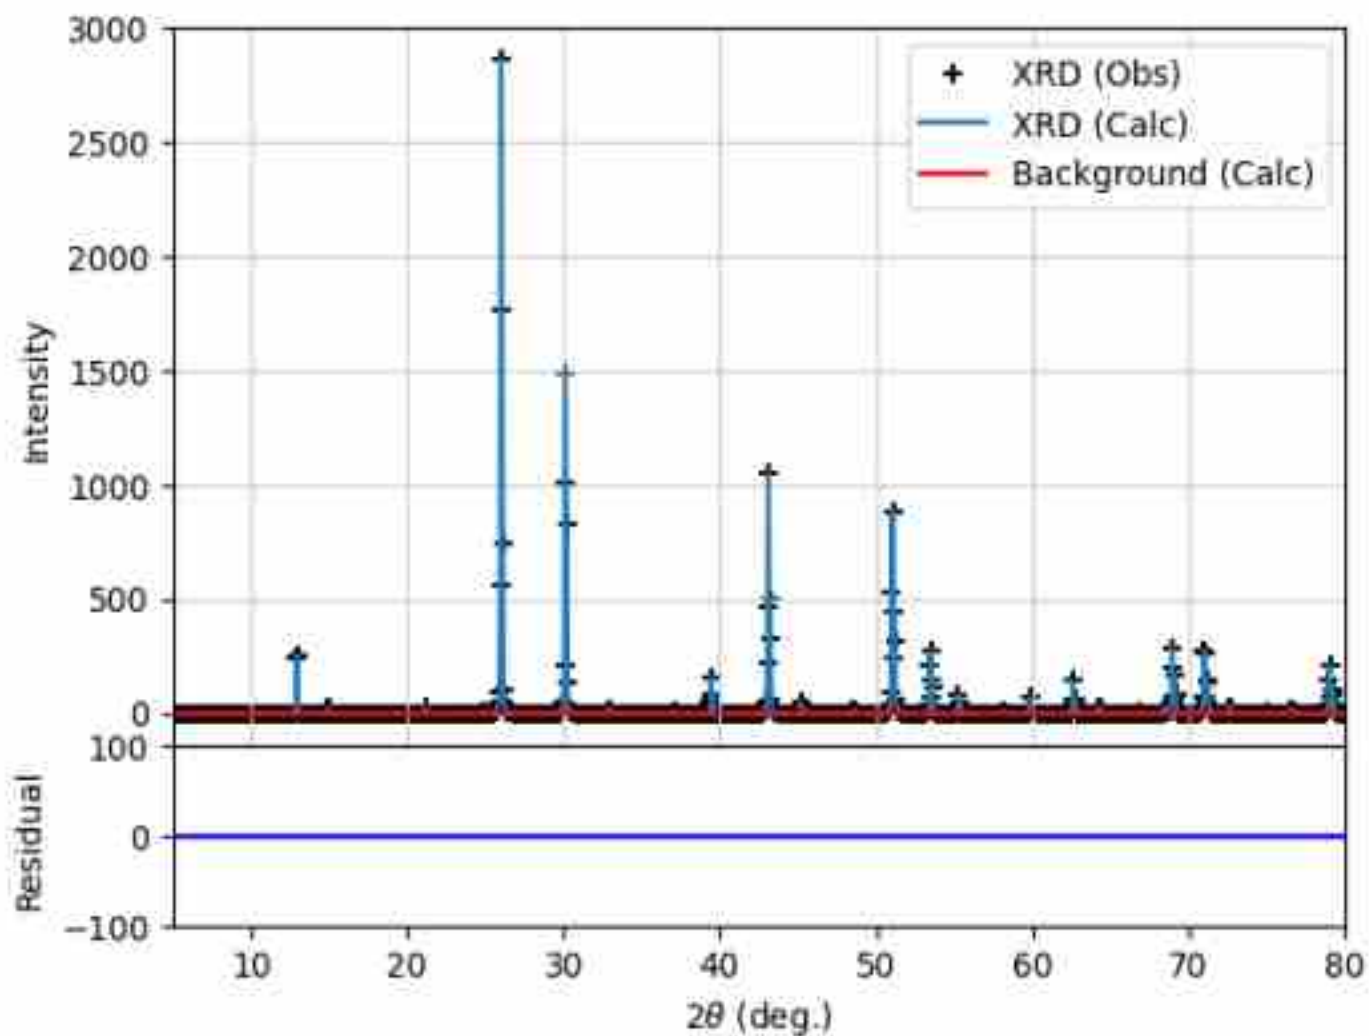

| RMSE before RR | Rwp     | RMSE after RR |
|----------------|---------|---------------|
| 0.012          | 0.07451 | 0.00267       |

# Cs<sub>2</sub>TlAgCl<sub>6</sub>

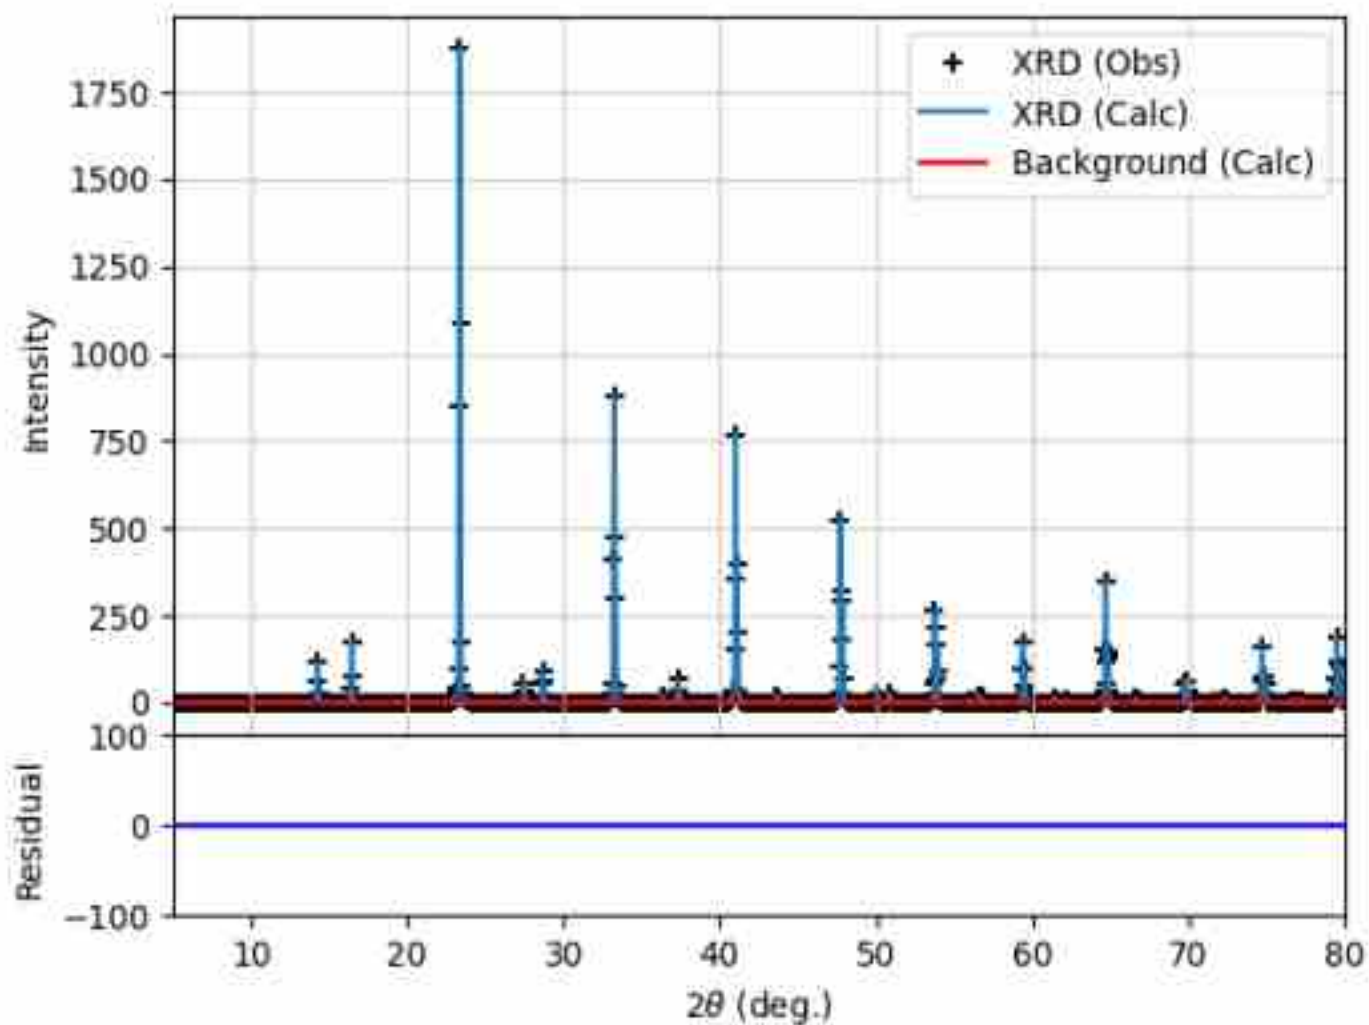

| RMSE before RR | Rwp     | RMSE after RR |
|----------------|---------|---------------|
| 0.012          | 0.01097 | 0.00242       |

# Cs<sub>2</sub>Y<sub>2</sub>Zn<sub>2</sub>Te<sub>6</sub>

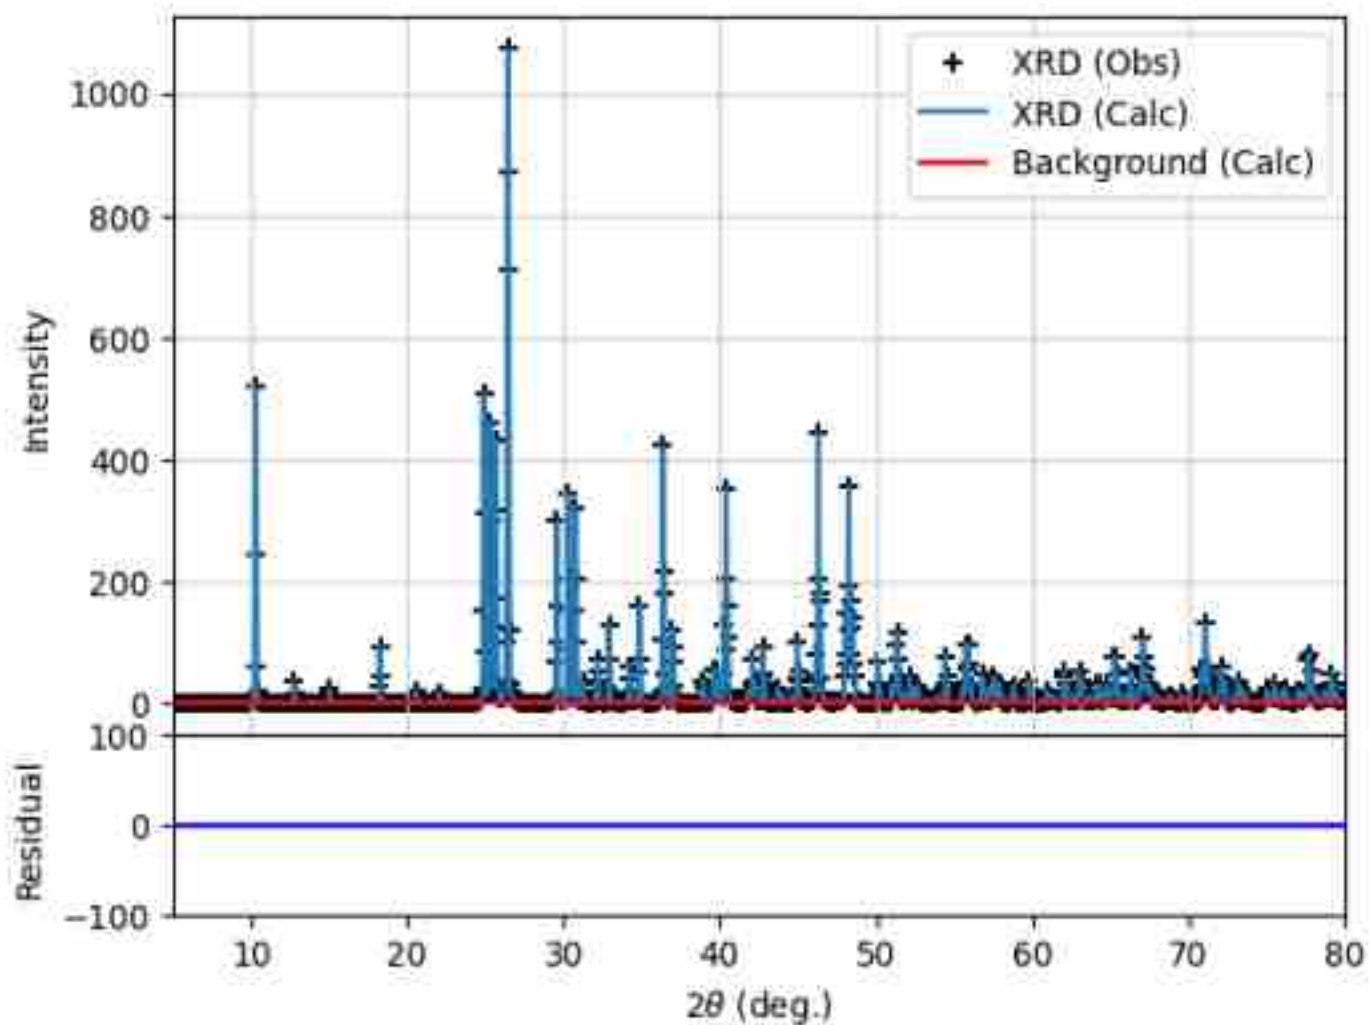

| RMSE before RR | Rwp     | RMSE after RR |
|----------------|---------|---------------|
| 0.012          | 0.00374 | 0.0003        |

# Cs<sub>3</sub>AsI<sub>6</sub>

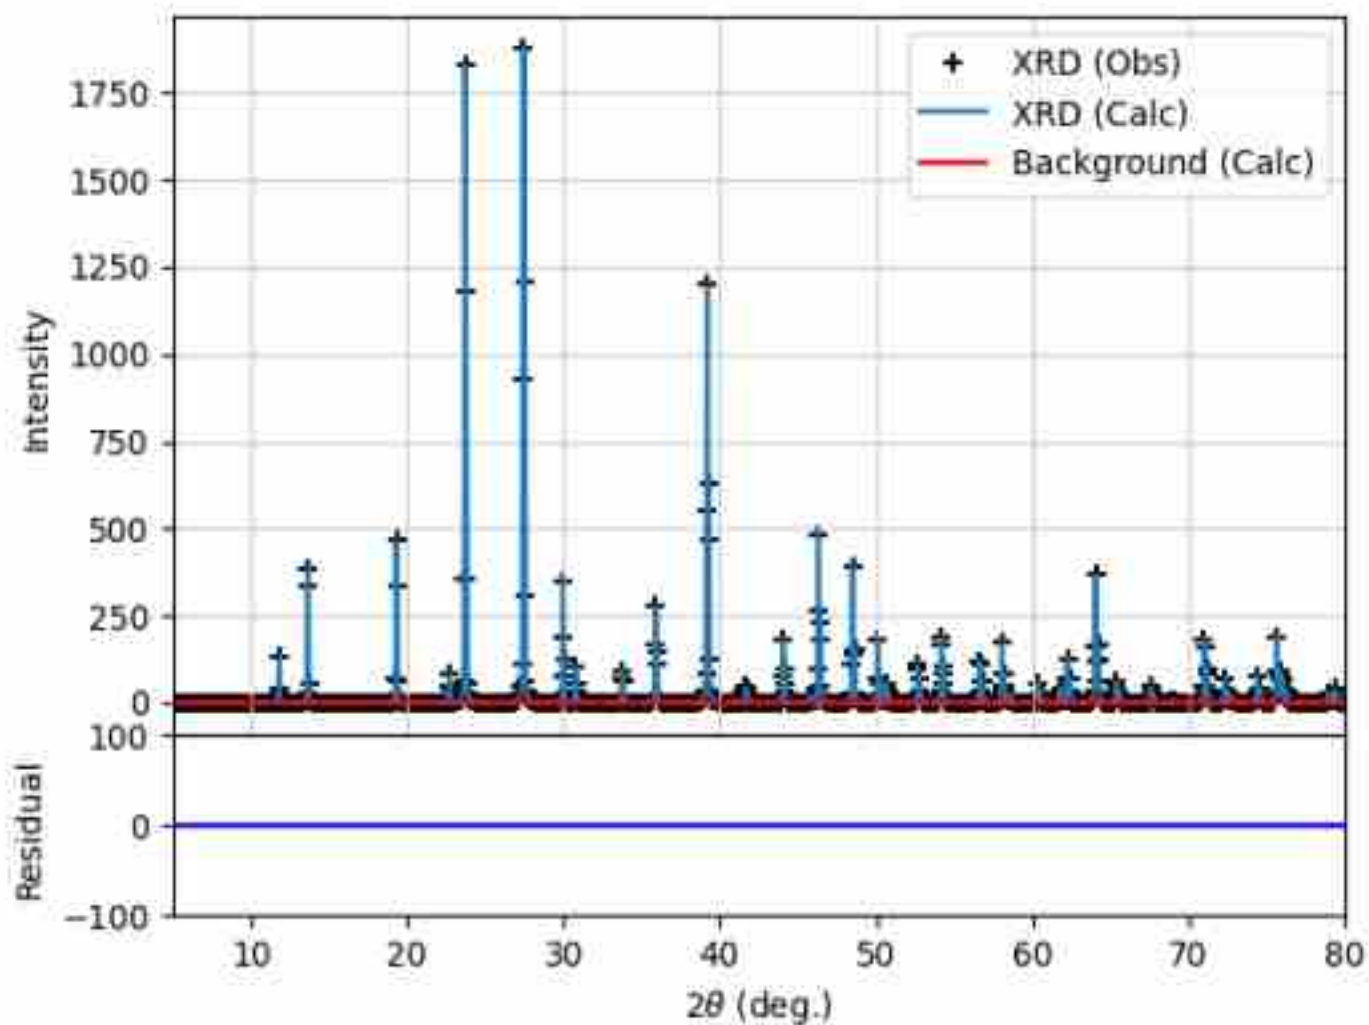

| RMSE before RR | Rwp     | RMSE after RR |
|----------------|---------|---------------|
| 0.012          | 0.09719 | 0.0035        |

# $\text{Cu}_2\text{HgGeSe}_4$

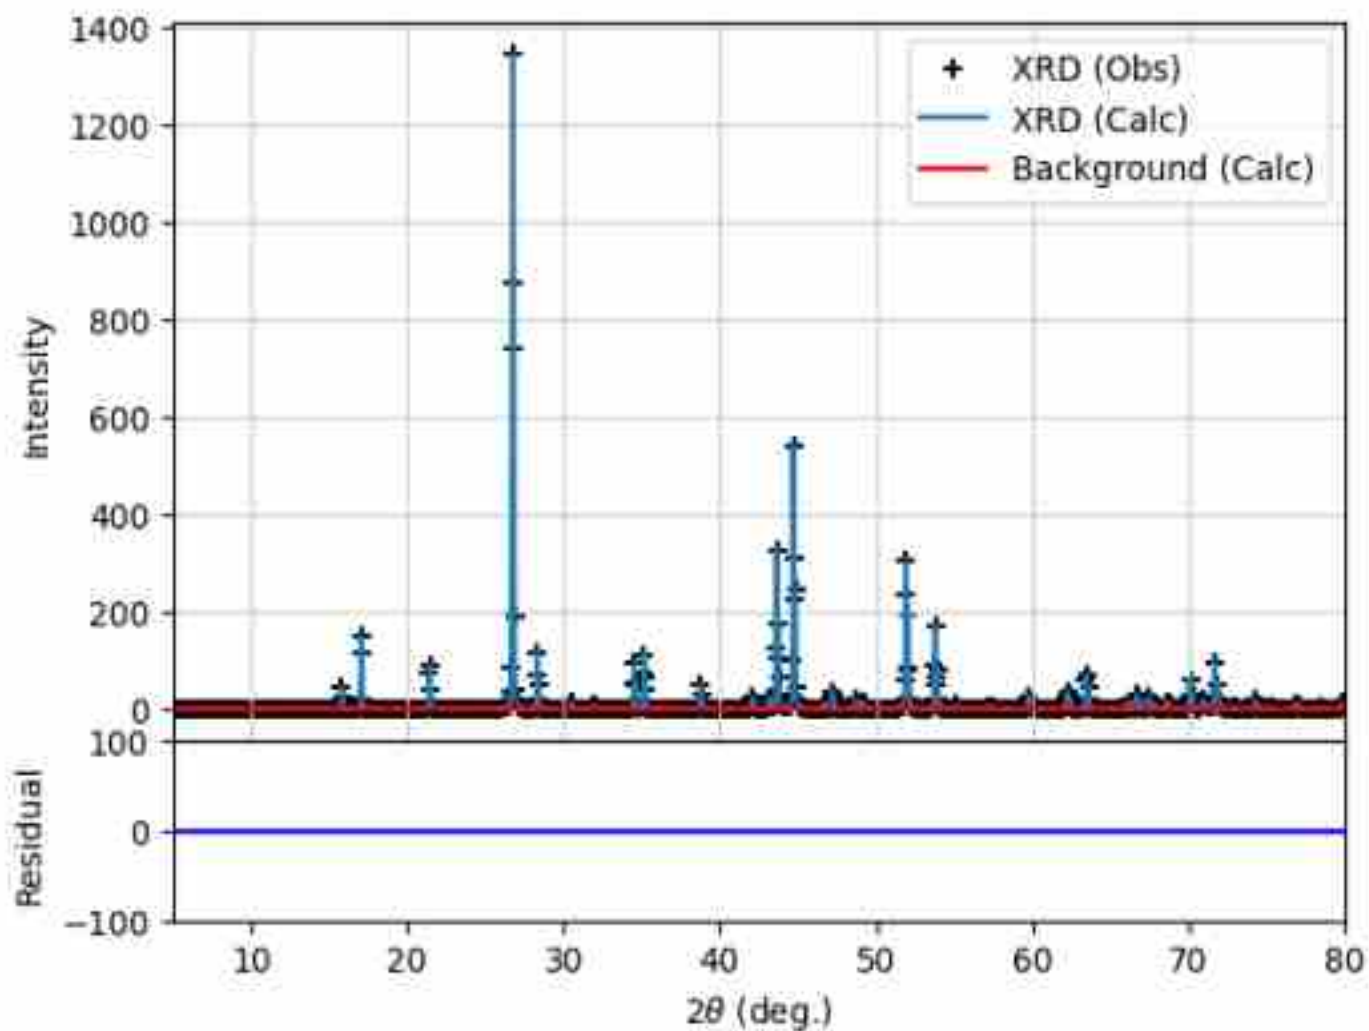

| RMSE before RR | Rwp     | RMSE after RR |
|----------------|---------|---------------|
| 0.012          | 0.00509 | 0.00064       |

# Cu<sub>2</sub>Ni<sub>1</sub>Sn<sub>1</sub>S<sub>4</sub>

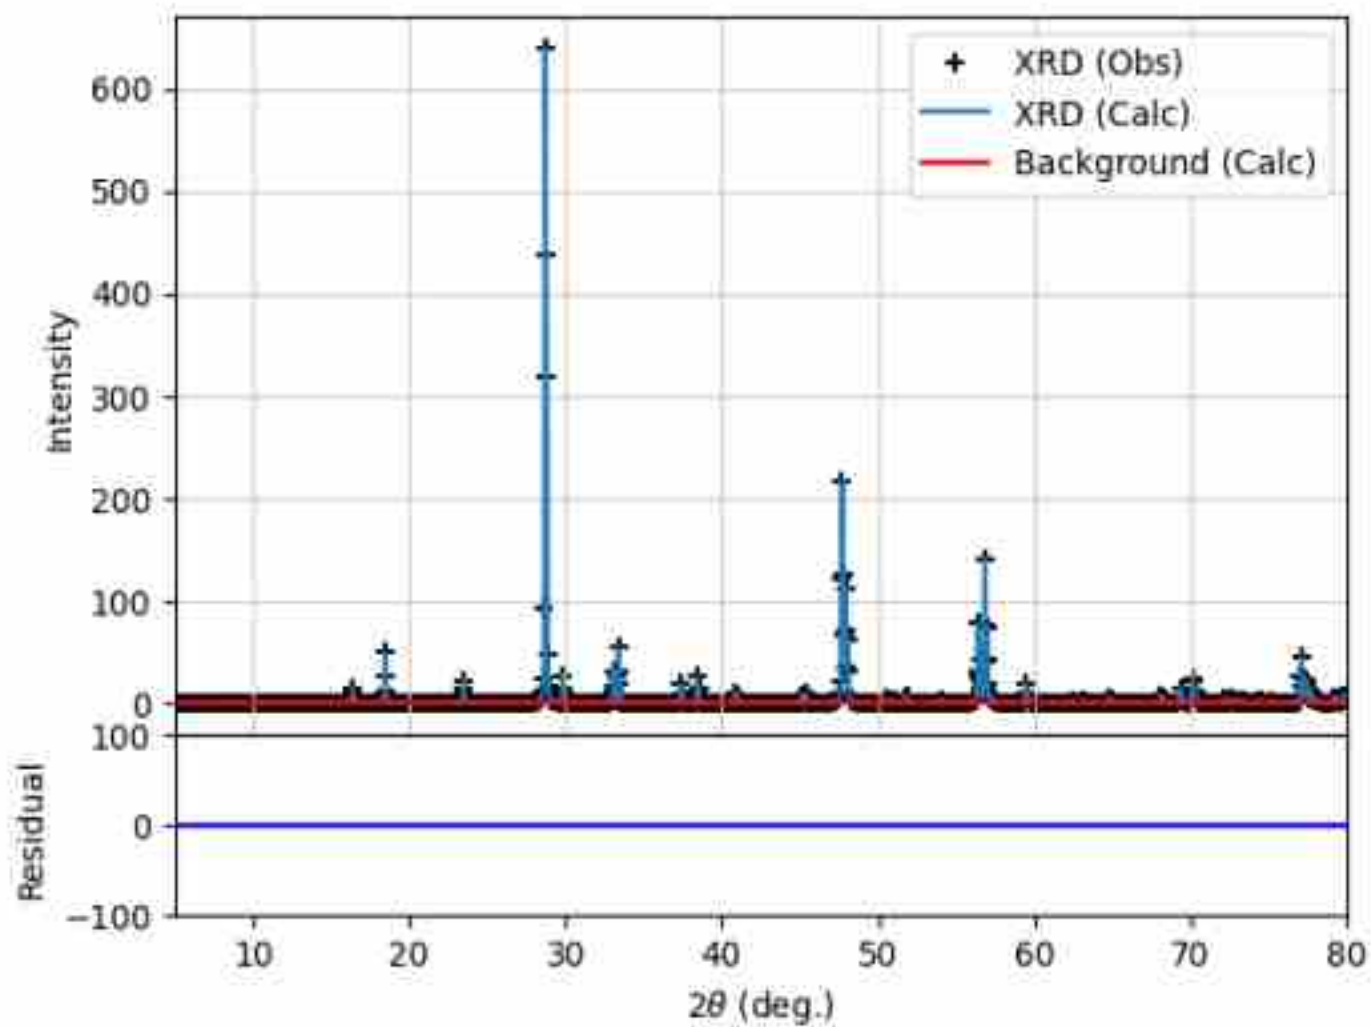

| RMSE before RR | Rwp     | RMSE after RR |
|----------------|---------|---------------|
| 0.012          | 0.00446 | 0.00096       |

# Dy1Cr2Si2C1

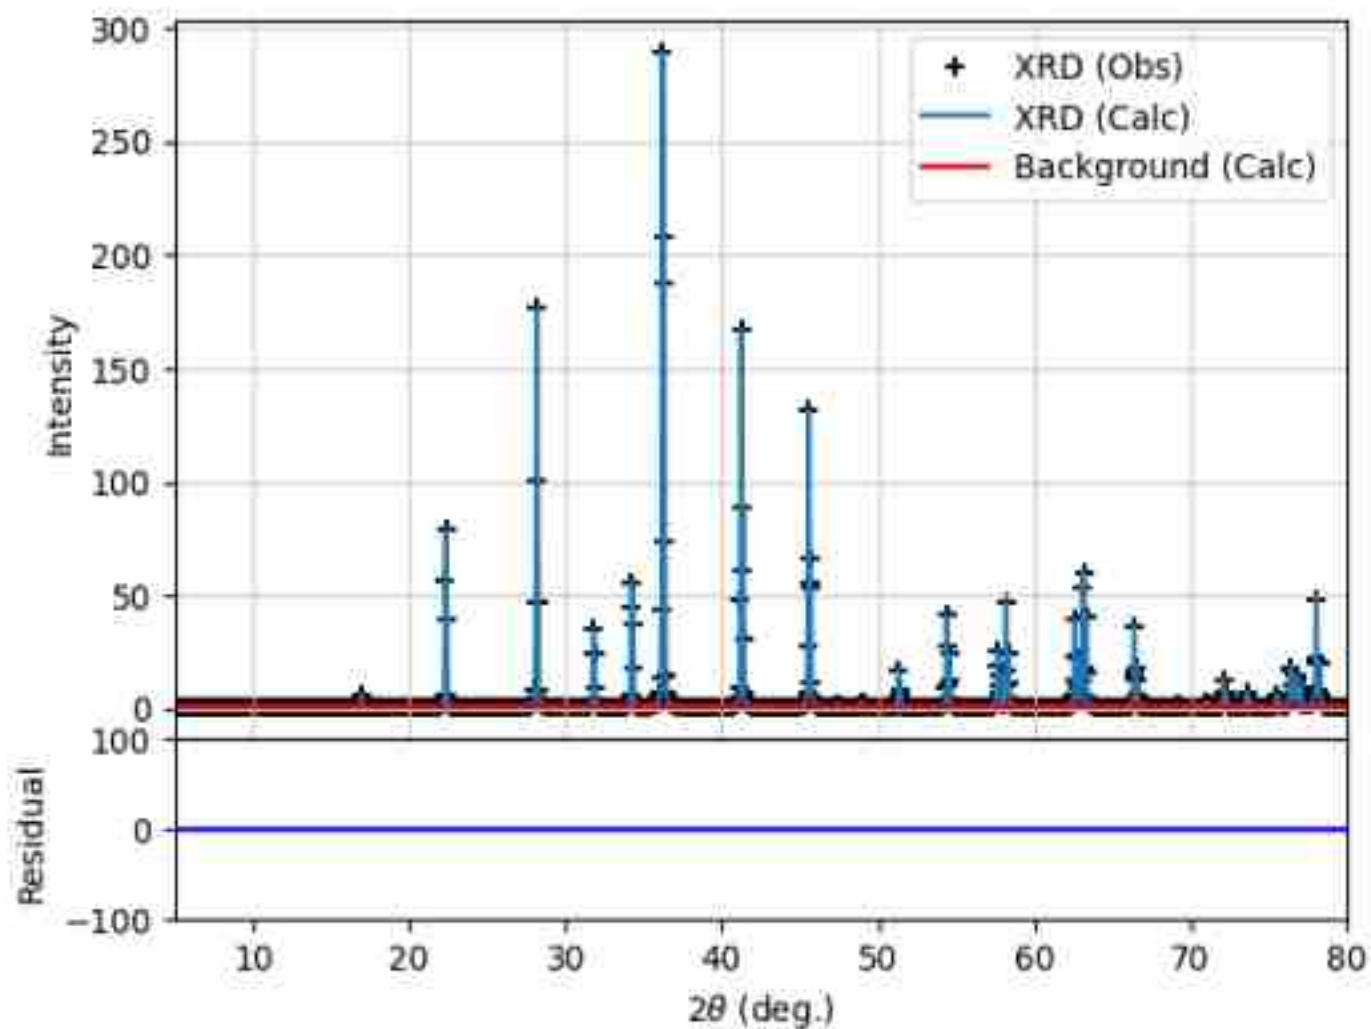

| RMSE before RR | Rwp     | RMSE after RR |
|----------------|---------|---------------|
| 0.012          | 0.00362 | 0.00096       |

# Dy1Mo6Se8

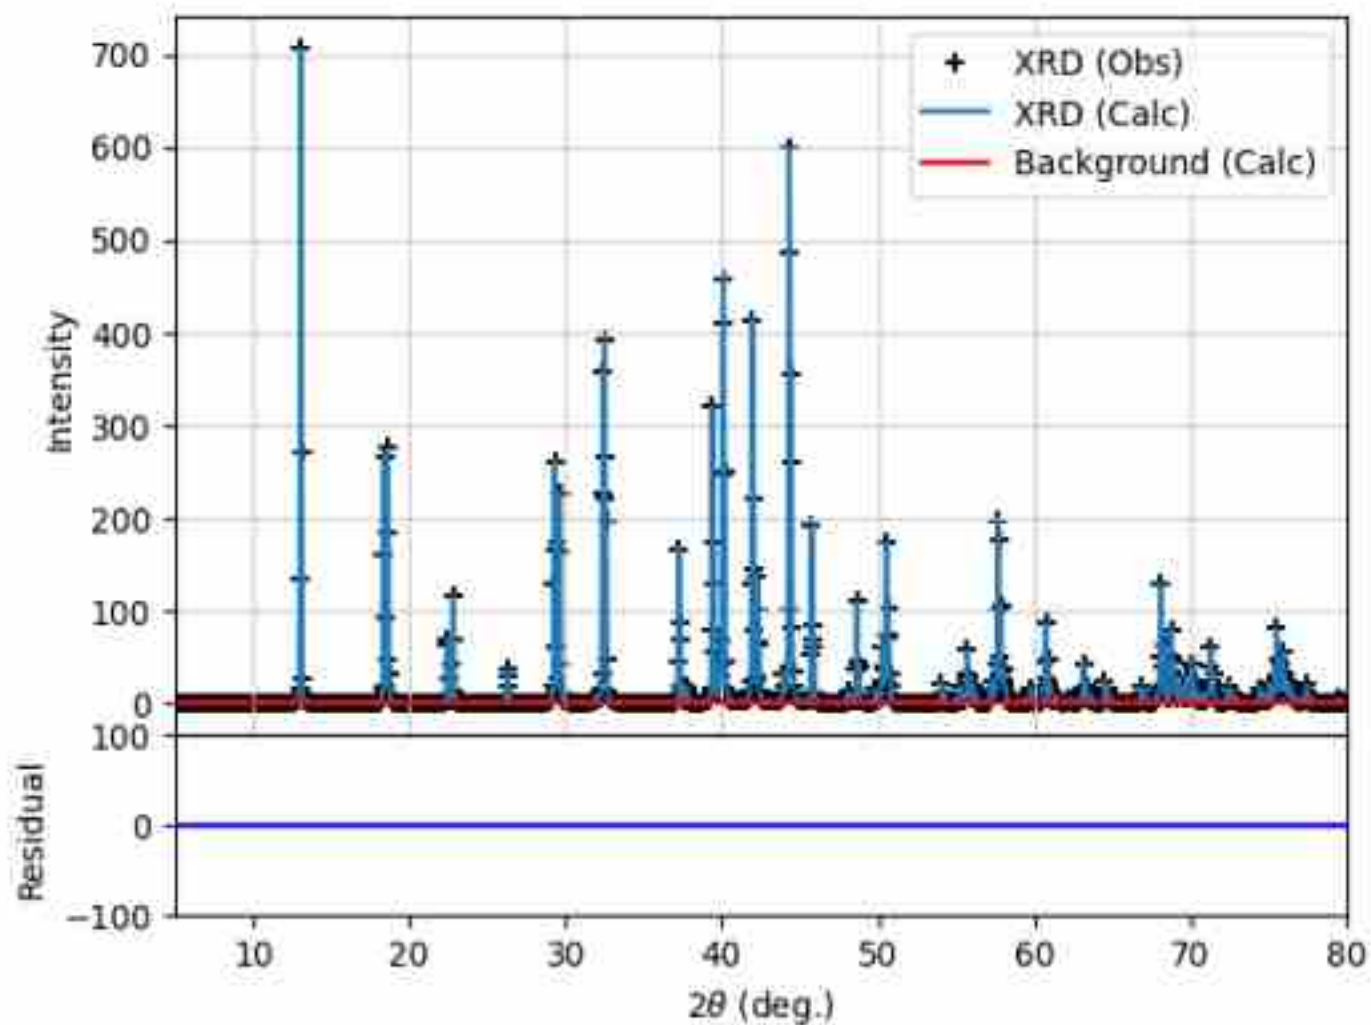

| RMSE before RR | Rwp     | RMSE after RR |
|----------------|---------|---------------|
| 0.012          | 0.00361 | 0.00038       |



# Dy<sub>2</sub>Al<sub>6</sub>

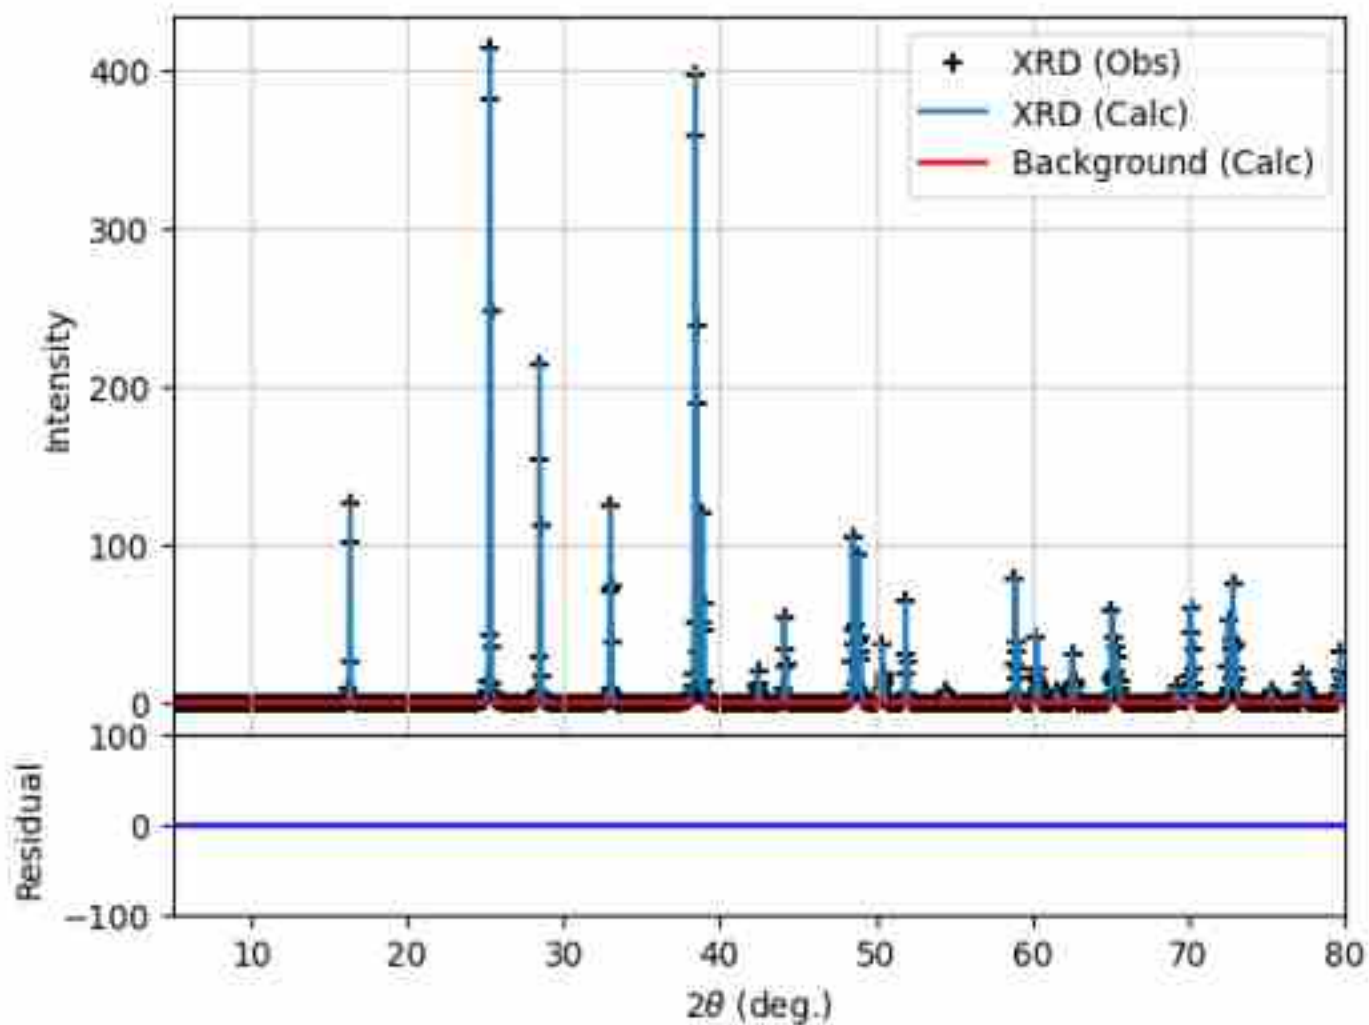

| RMSE before RR | Rwp     | RMSE after RR |
|----------------|---------|---------------|
| 0.012          | 0.00363 | 0.00111       |

# Dy<sub>2</sub>Cl<sub>2</sub>O<sub>2</sub>

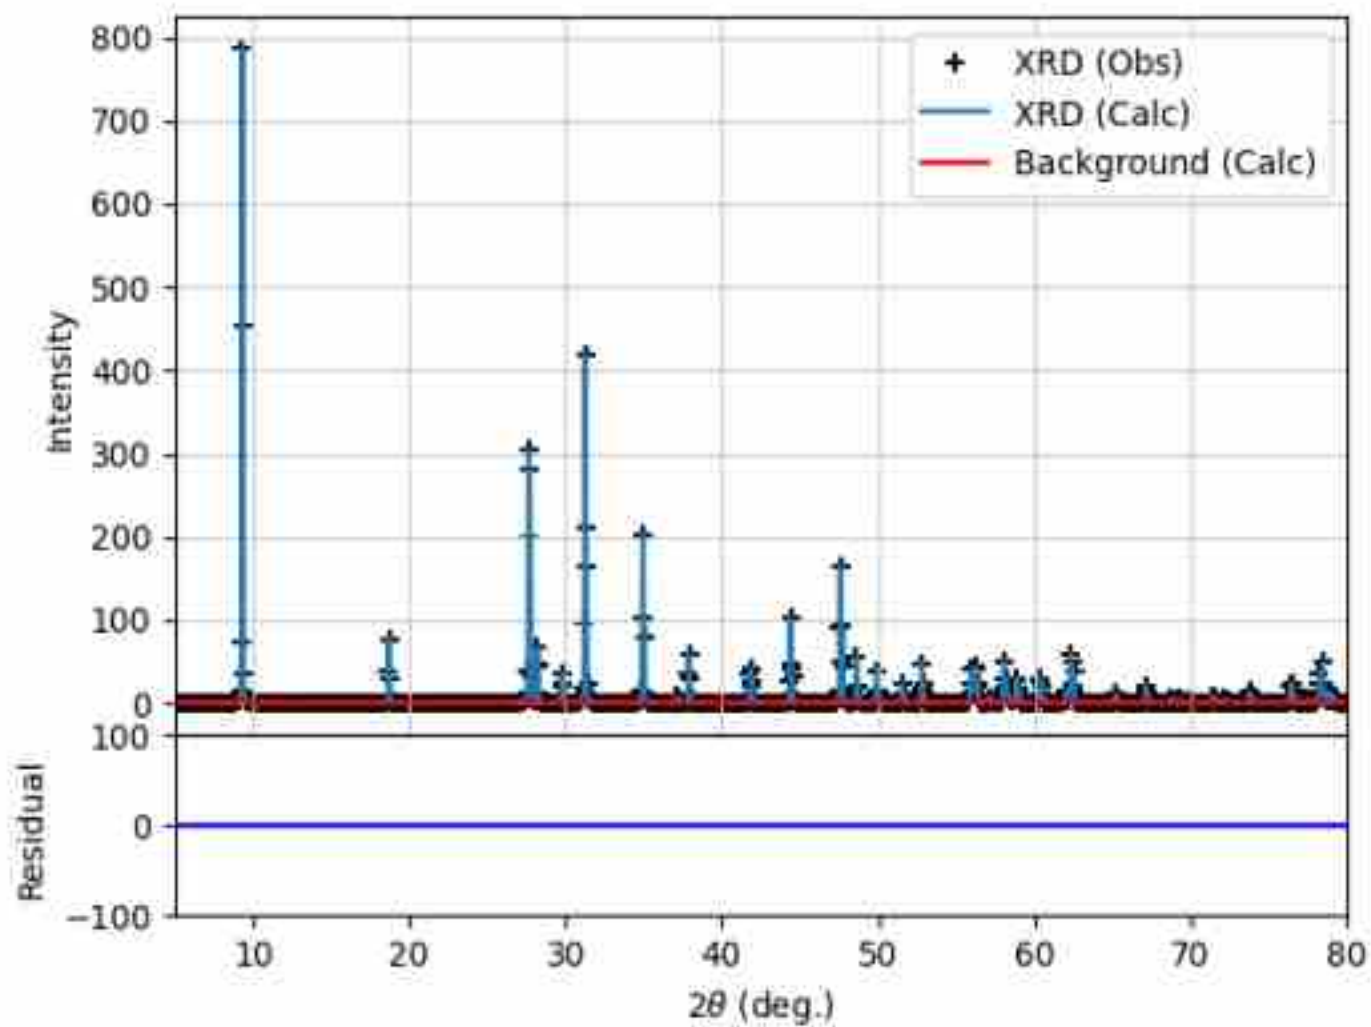

| RMSE before RR | Rwp     | RMSE after RR |
|----------------|---------|---------------|
| 0.012          | 0.00271 | 0.00146       |

# Dy<sub>2</sub>Ni<sub>1</sub>Sn<sub>6</sub>

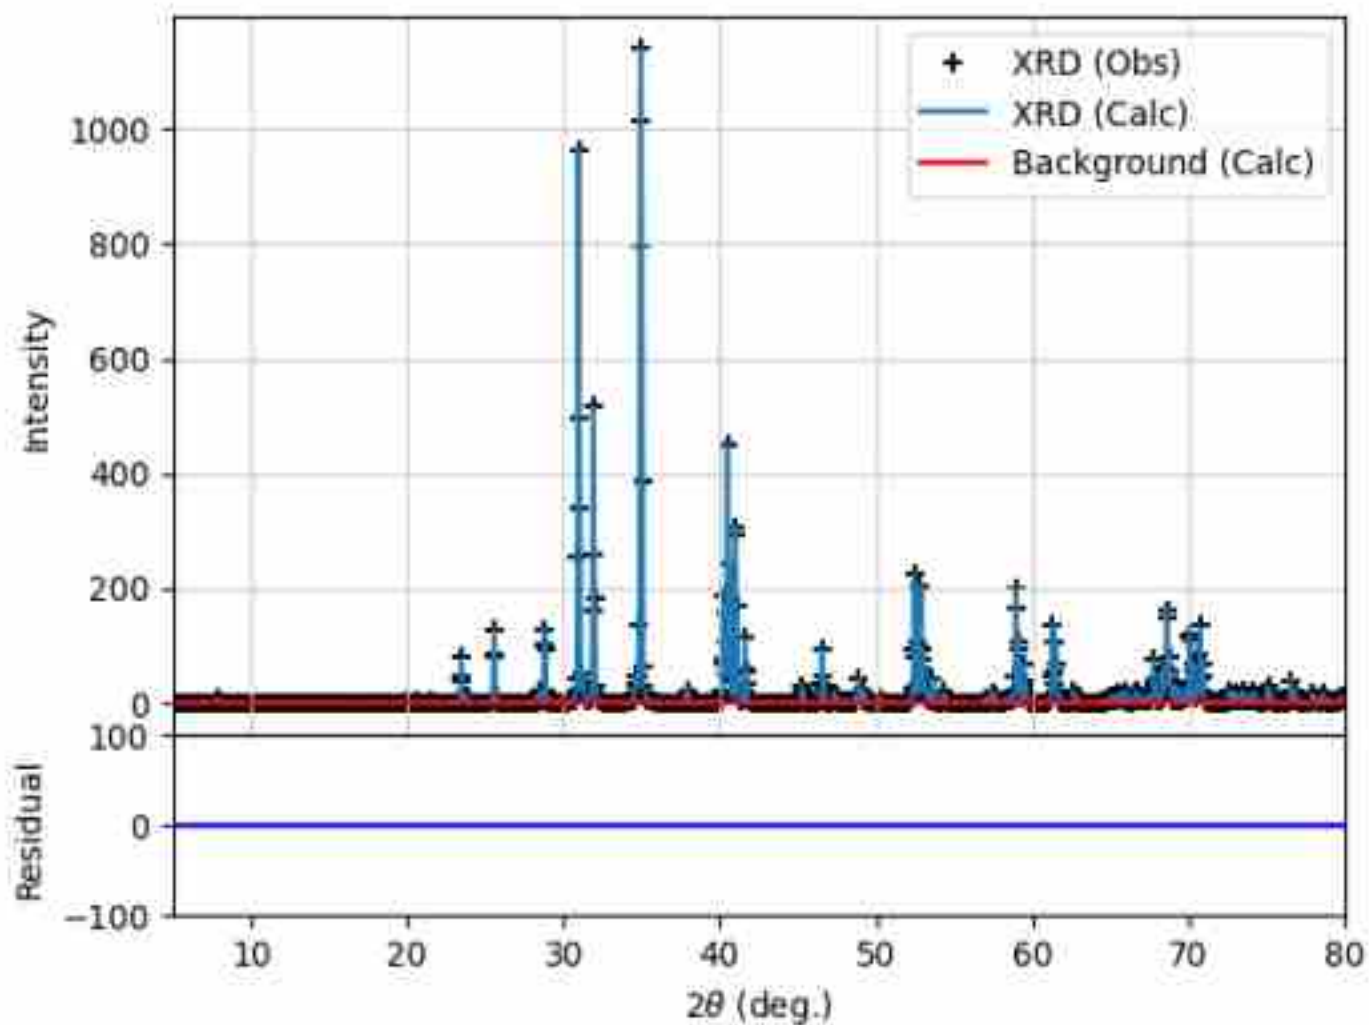

| RMSE before RR | Rwp     | RMSE after RR |
|----------------|---------|---------------|
| 0.012          | 0.00369 | 0.0003        |

# Dy<sub>4</sub>As<sub>4</sub>S<sub>4</sub>

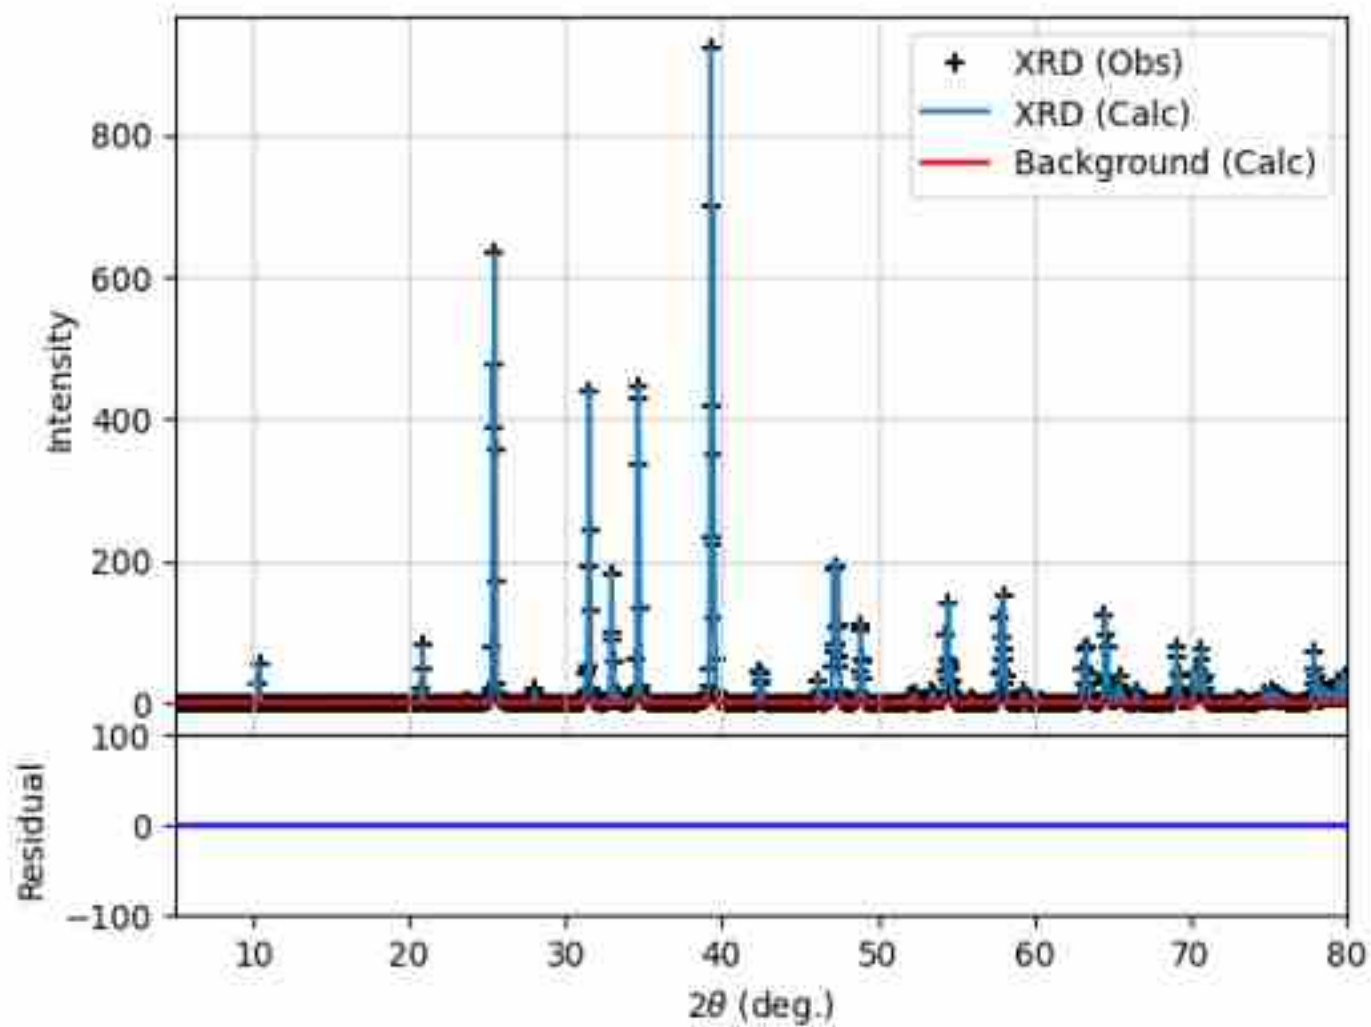

| RMSE before RR | Rwp     | RMSE after RR |
|----------------|---------|---------------|
| 0.012          | 0.00467 | 0.00053       |

# Dy<sub>4</sub>Mg<sub>2</sub>Se<sub>8</sub>

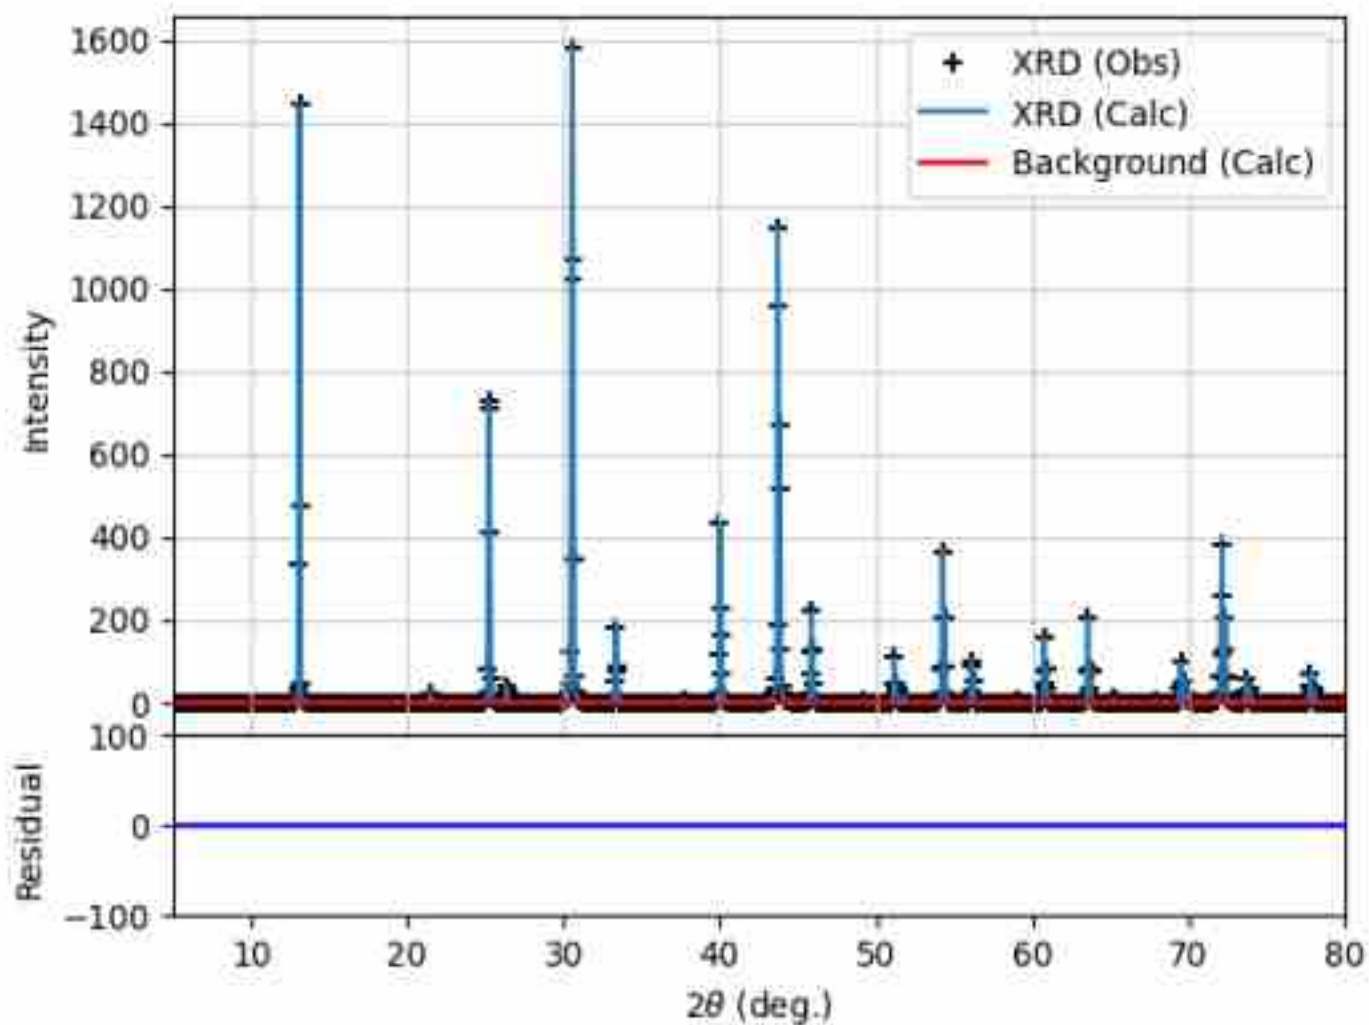

| RMSE before RR | Rwp     | RMSE after RR |
|----------------|---------|---------------|
| 0.012          | 0.02906 | 0.00219       |

# Dy<sub>4</sub>Pd<sub>2</sub>Pt<sub>2</sub>

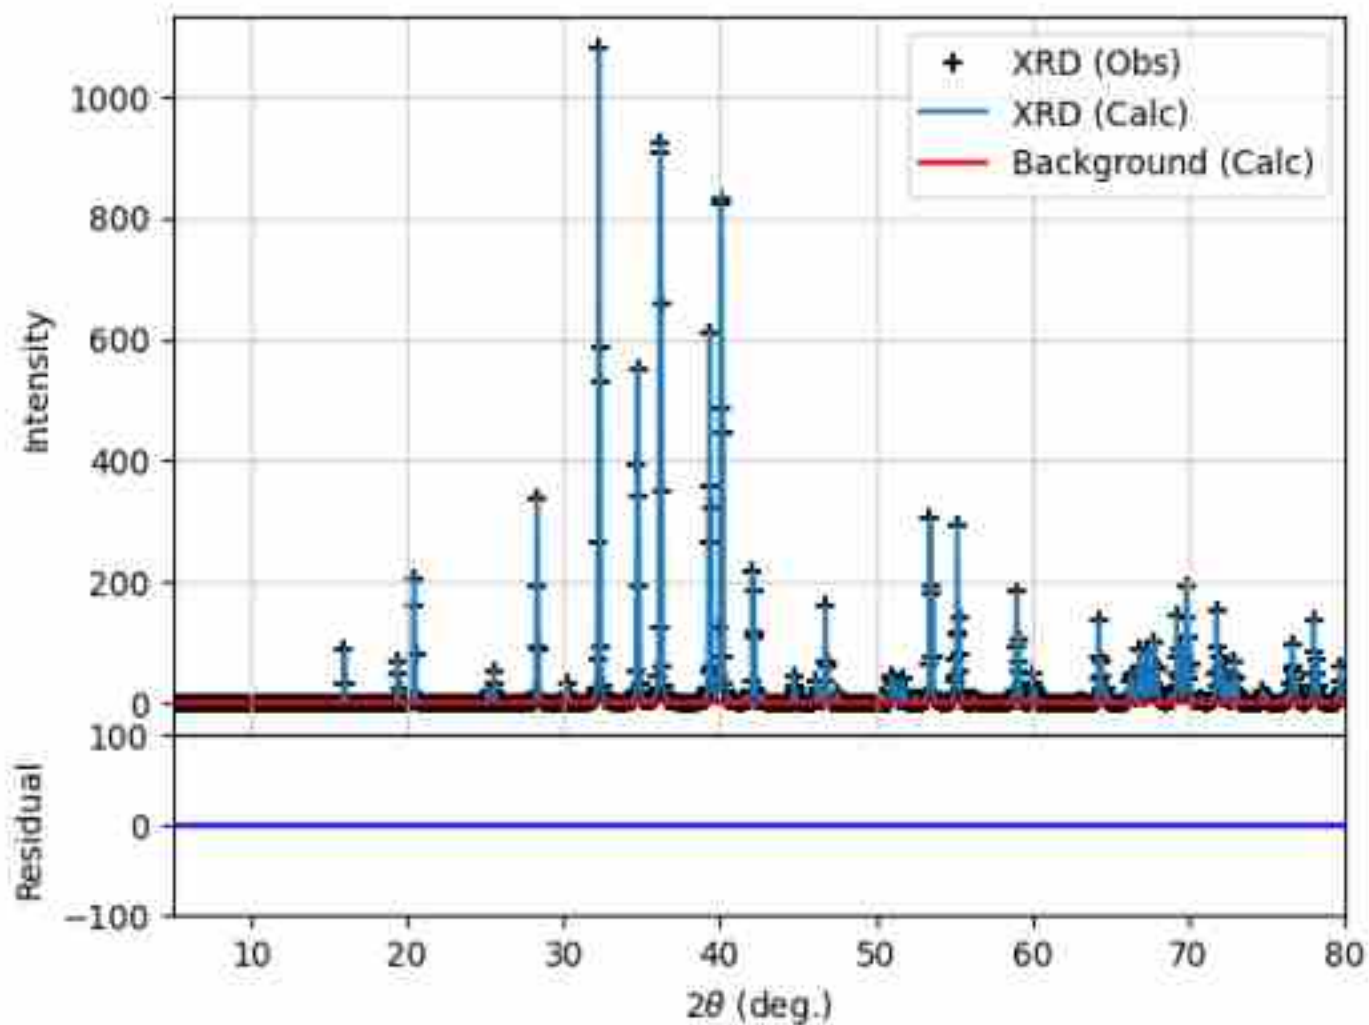

| RMSE before RR | Rwp    | RMSE after RR |
|----------------|--------|---------------|
| 0.012          | 0.0057 | 0.0003        |

# Dy<sub>8</sub>Au<sub>4</sub>

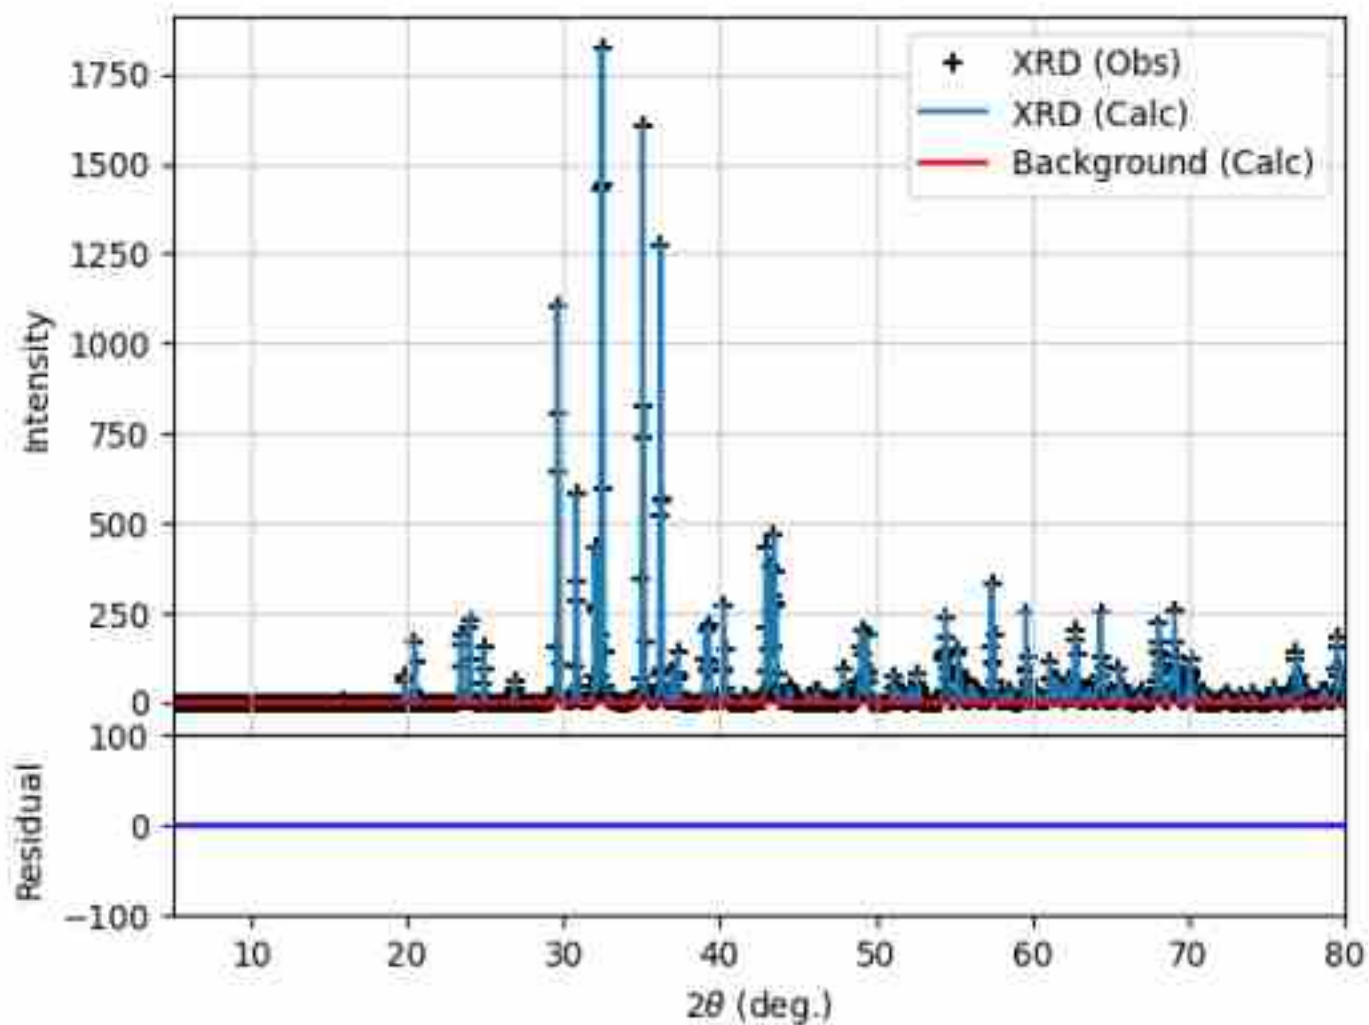

| RMSE before RR | Rwp     | RMSE after RR |
|----------------|---------|---------------|
| 0.012          | 0.00463 | 0.00039       |

# Er1Cd1Ni4

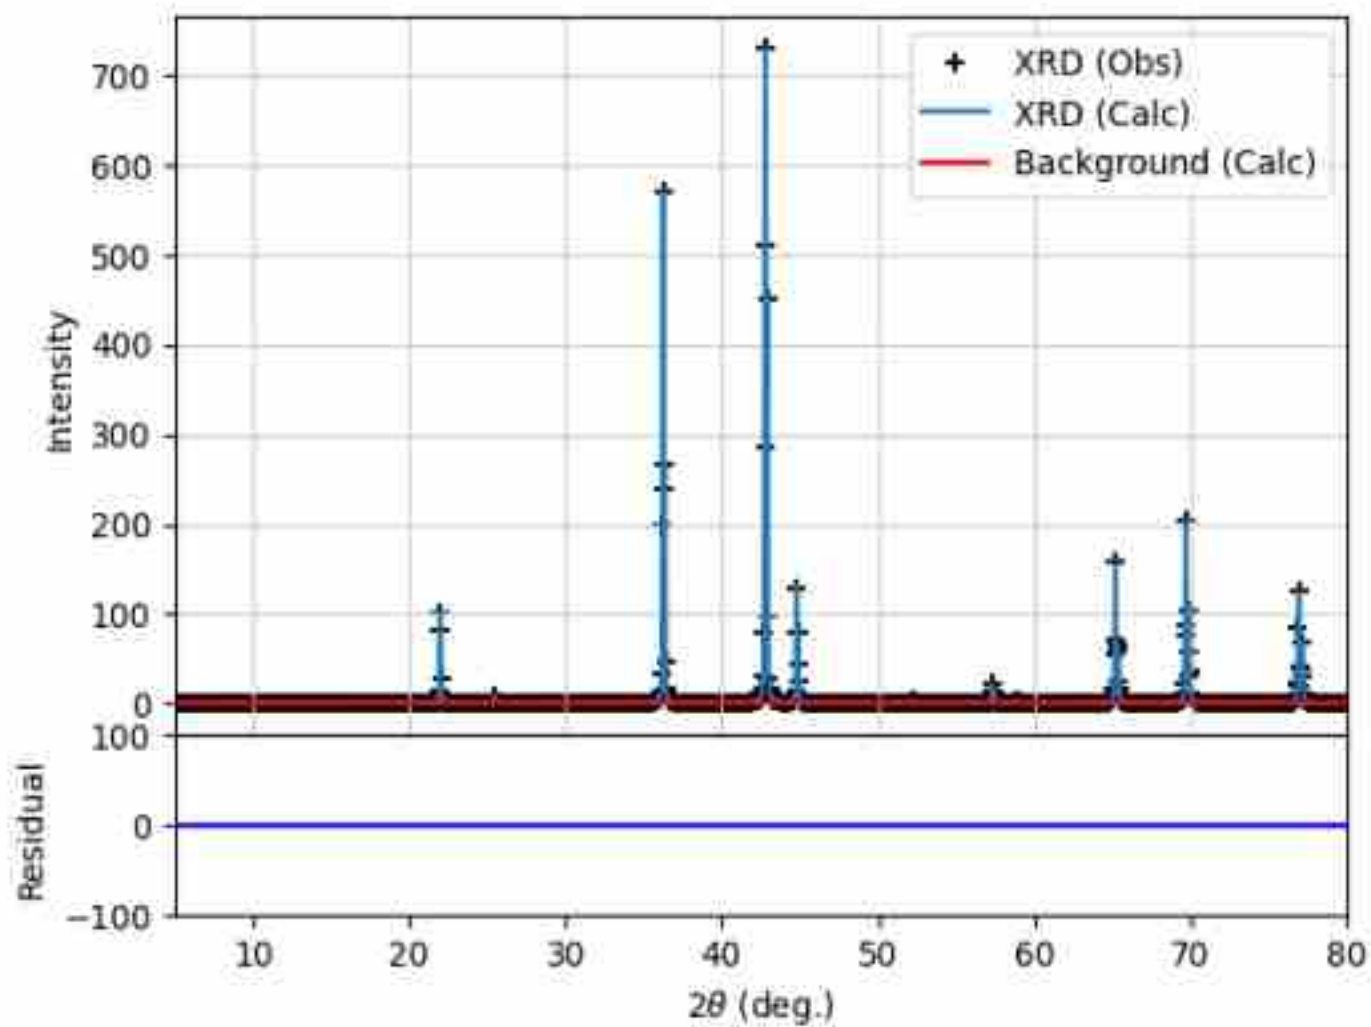

| RMSE before RR | Rwp     | RMSE after RR |
|----------------|---------|---------------|
| 0.012          | 0.04949 | 0.00372       |



# Er1Co1C2

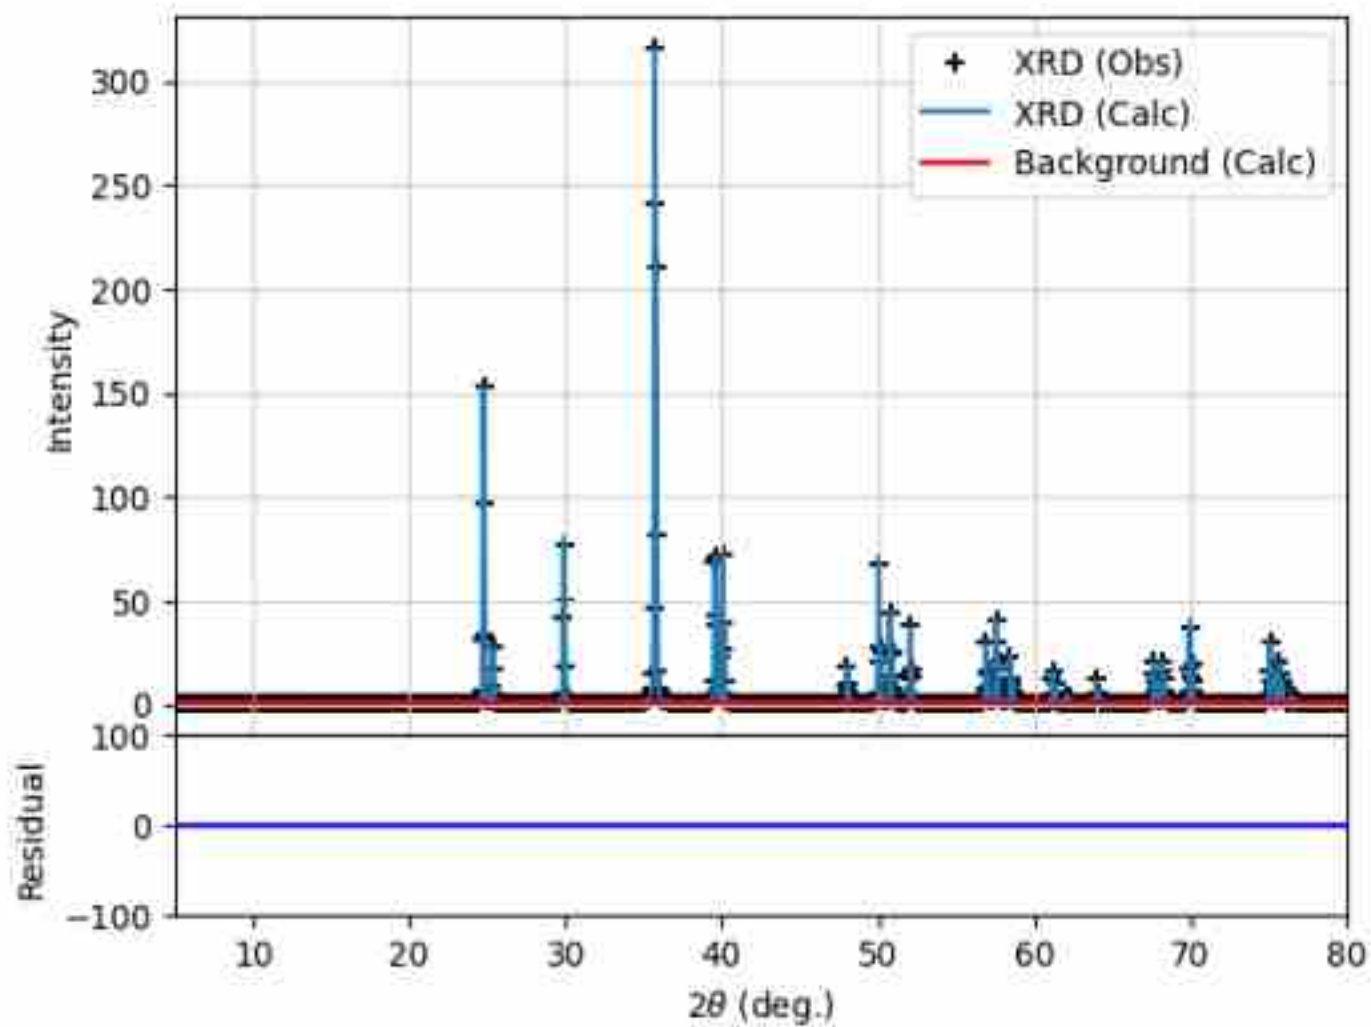

| RMSE before RR | Rwp     | RMSE after RR |
|----------------|---------|---------------|
| 0.012          | 0.00345 | 0.00079       |

# Er<sub>2</sub>Ni<sub>2</sub>B<sub>2</sub>C<sub>2</sub>

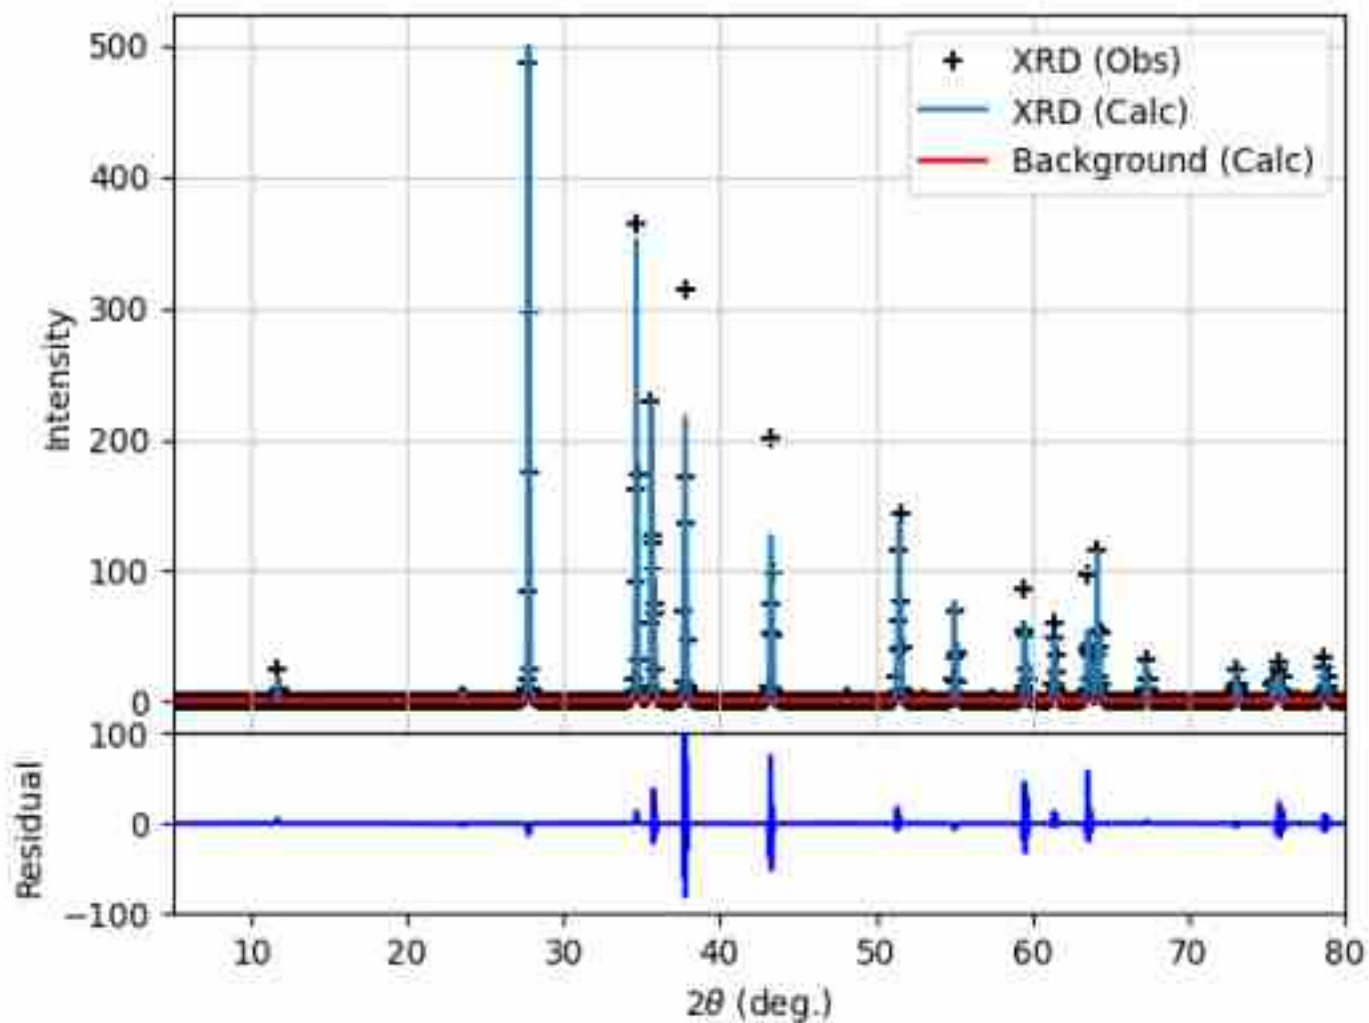

| RMSE before RR | Rwp      | RMSE after RR |
|----------------|----------|---------------|
| 0.012          | 28.58017 | 0.40225       |

# Er<sub>4</sub>Mg<sub>2</sub>Ge<sub>4</sub>

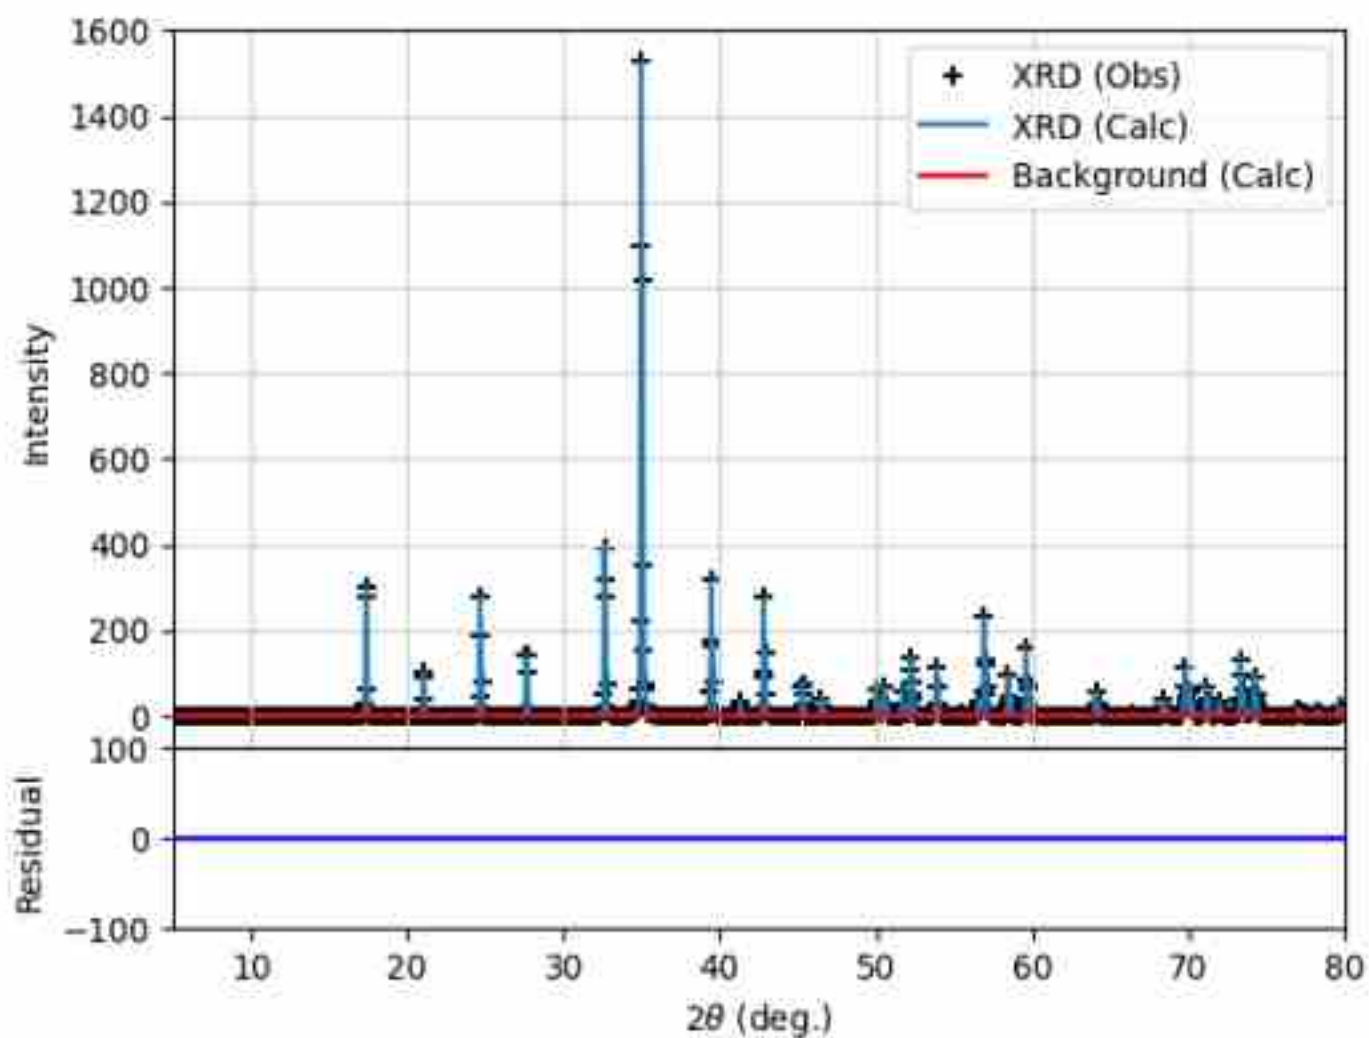

| RMSE before RR | Rwp     | RMSE after RR |
|----------------|---------|---------------|
| 0.012          | 0.00585 | 0.00069       |

# Er4Mg2

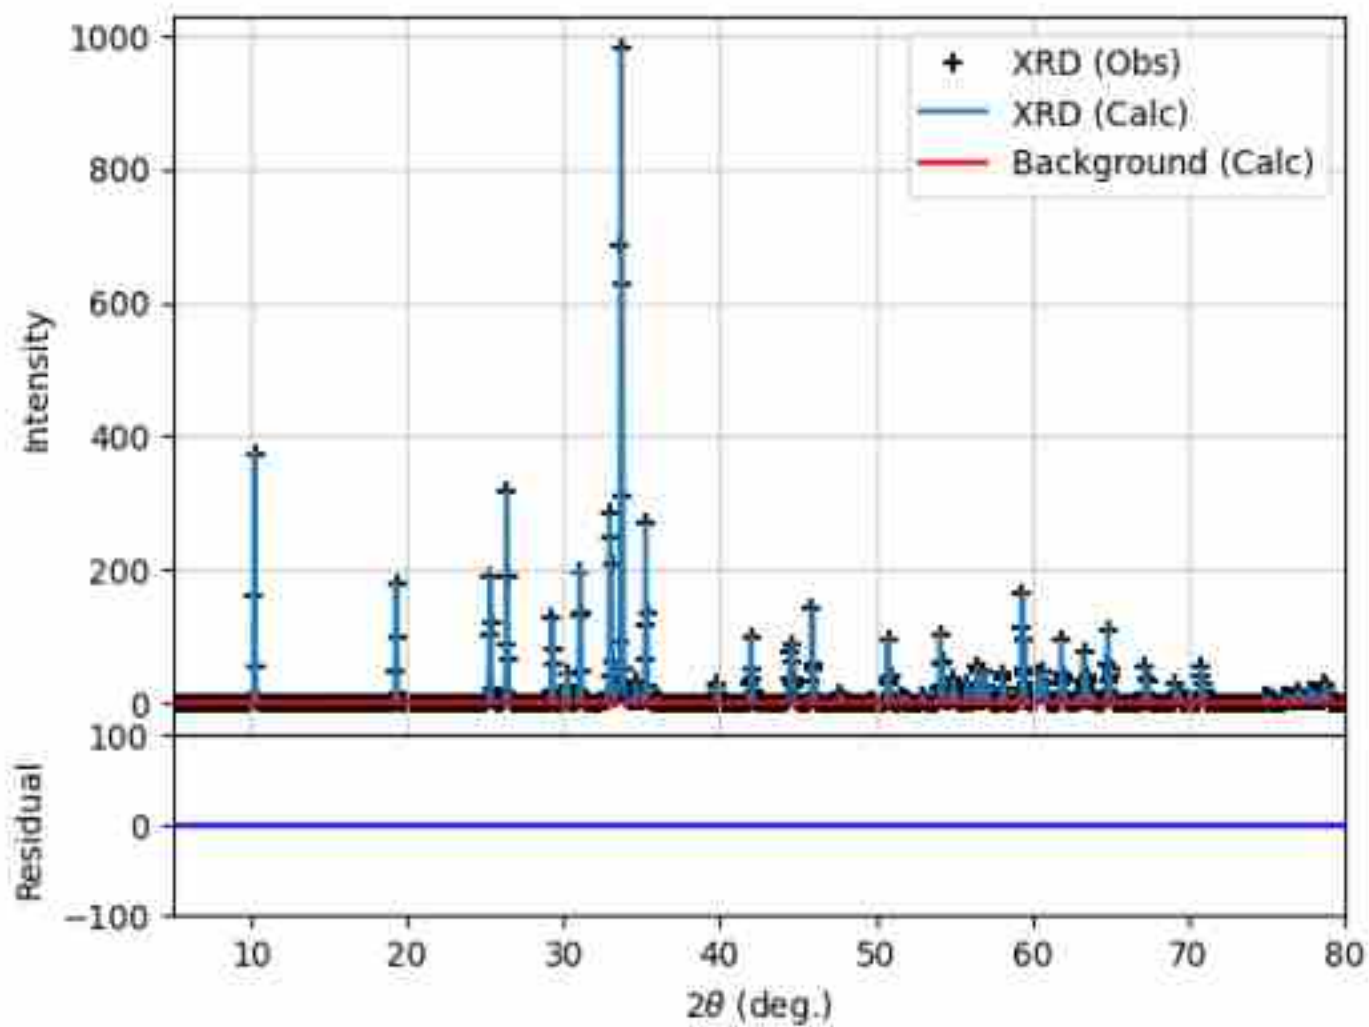

| RMSE before RR | Rwp     | RMSE after RR |
|----------------|---------|---------------|
| 0.012          | 0.00403 | 0.00038       |

# Er<sub>4</sub>Zn<sub>4</sub>Pt<sub>4</sub>

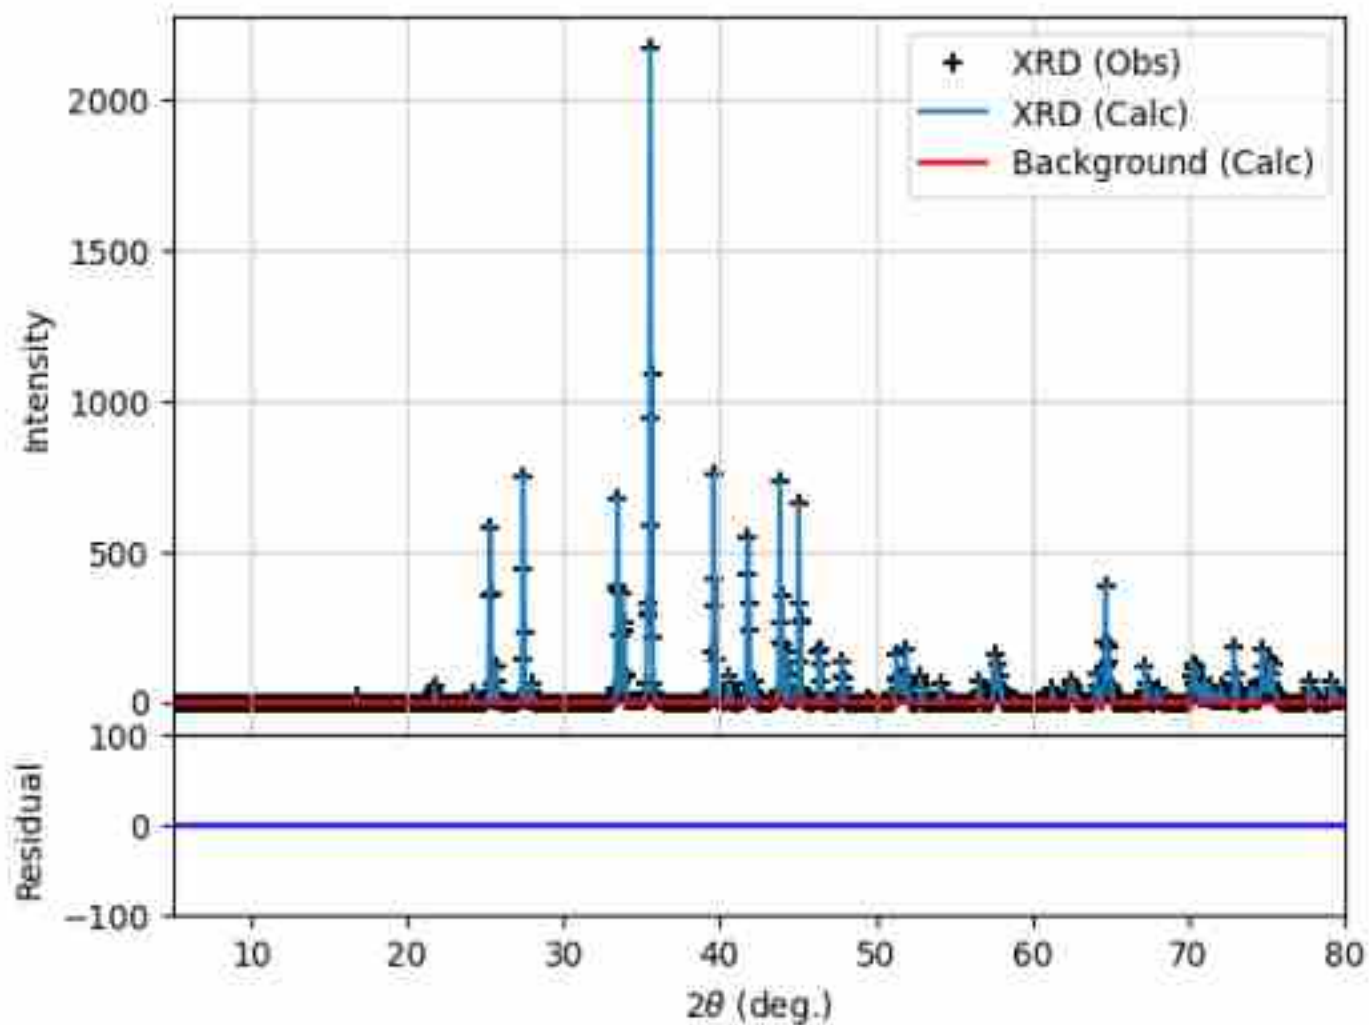

| RMSE before RR | Rwp     | RMSE after RR |
|----------------|---------|---------------|
| 0.012          | 0.00516 | 0.00047       |

# Eu<sub>4</sub>Mn<sub>2</sub>Rh<sub>2</sub>O<sub>12</sub>

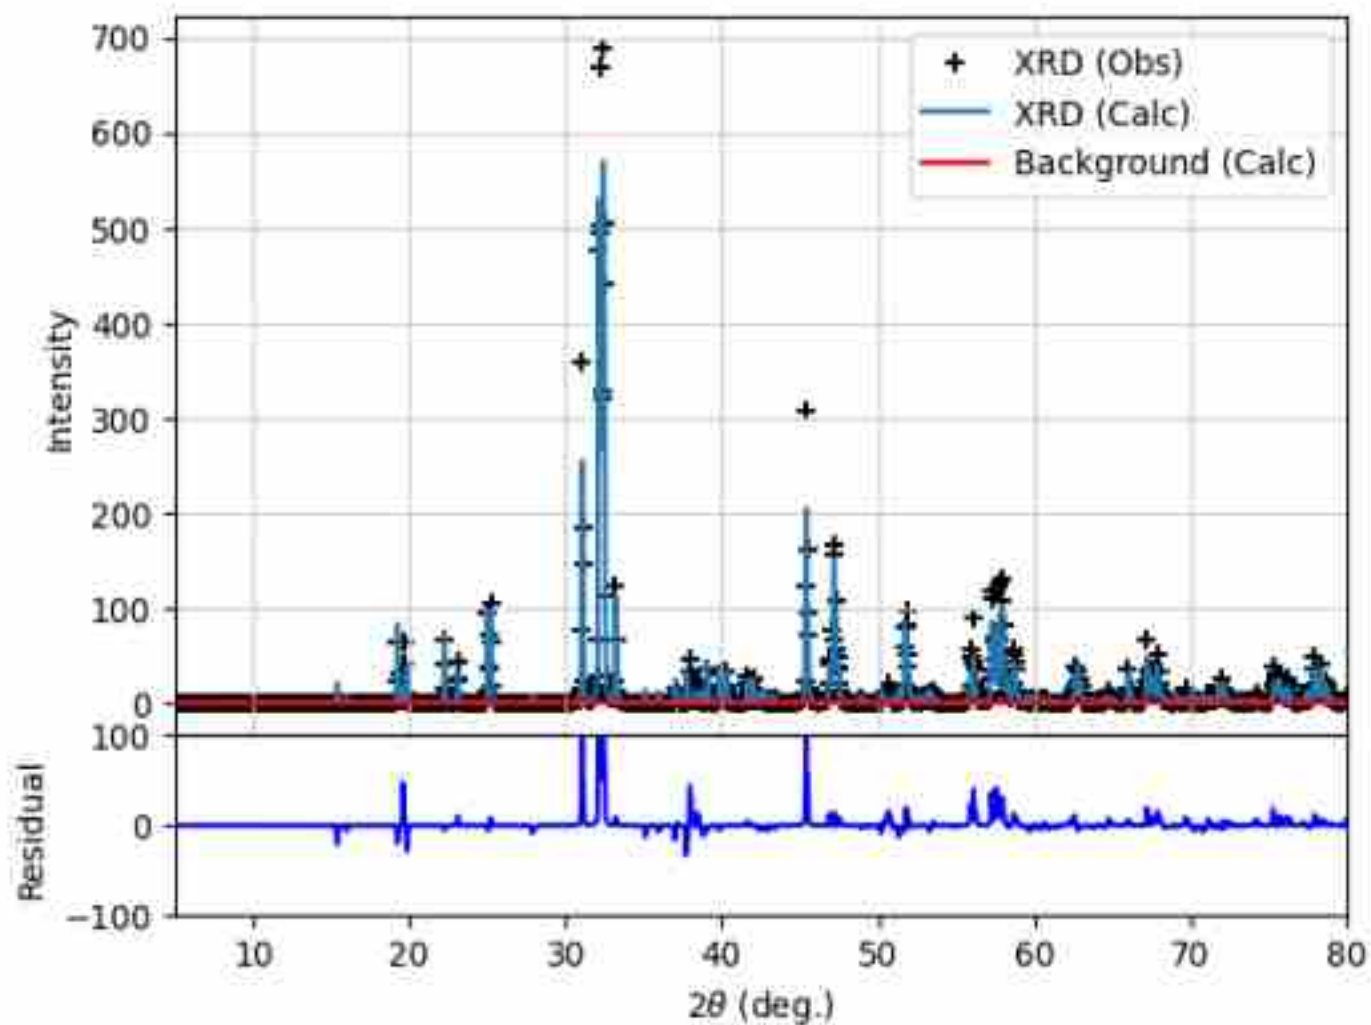

| RMSE before RR | Rwp      | RMSE after RR |
|----------------|----------|---------------|
| 0.012          | 45.25135 | 0.02014       |

# Fe<sub>2</sub>Cu<sub>2</sub>O<sub>4</sub>

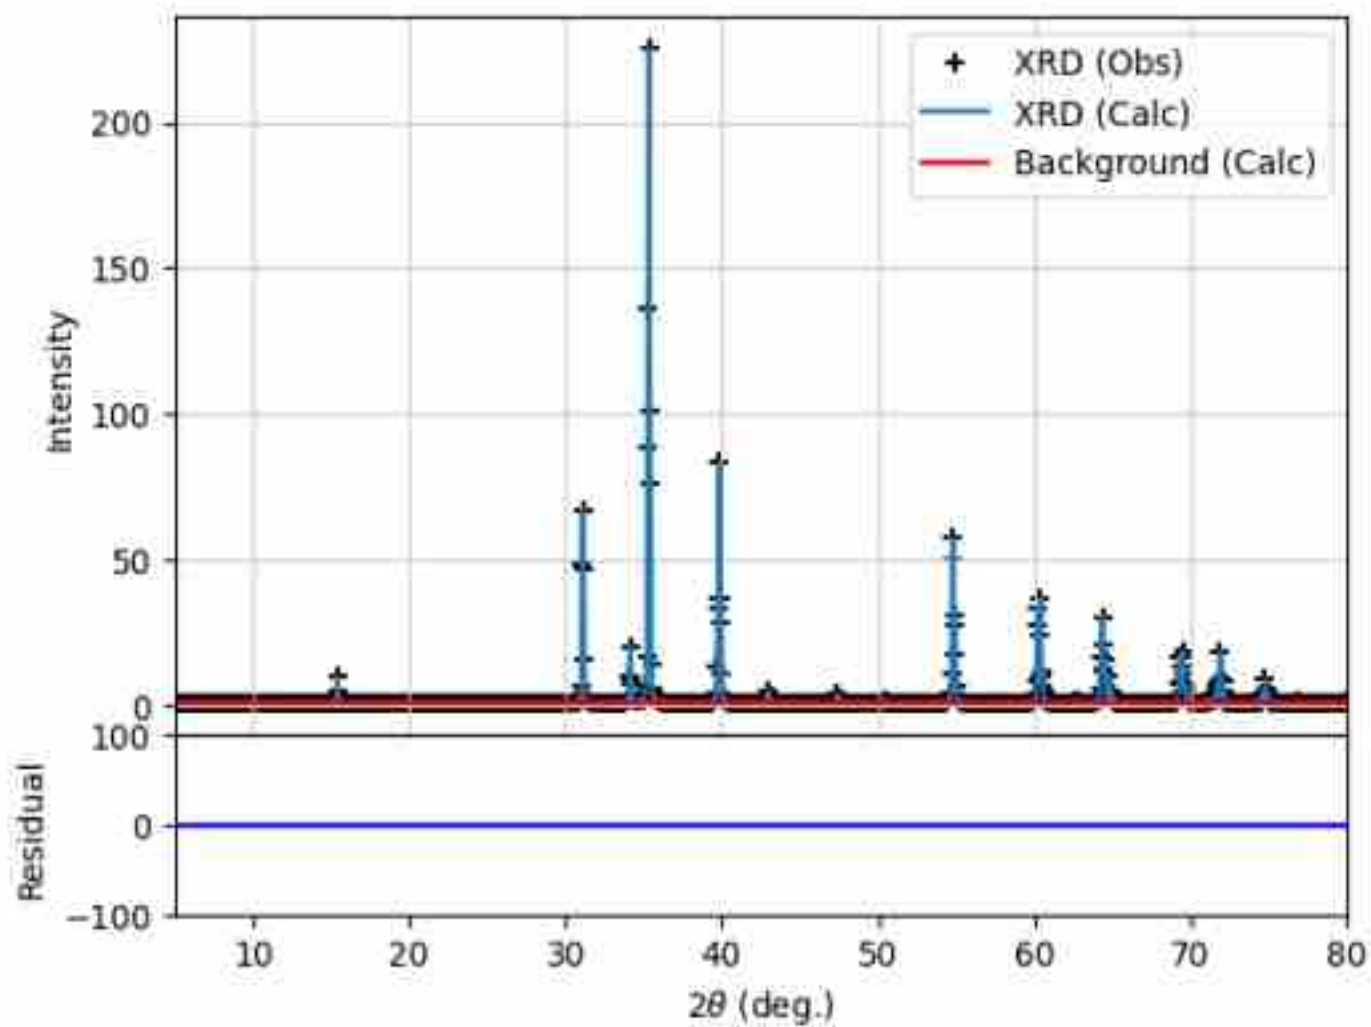

| RMSE before RR | Rwp    | RMSE after RR |
|----------------|--------|---------------|
| 0.012          | 0.0029 | 0.00044       |

# Gd1Tl1Te2

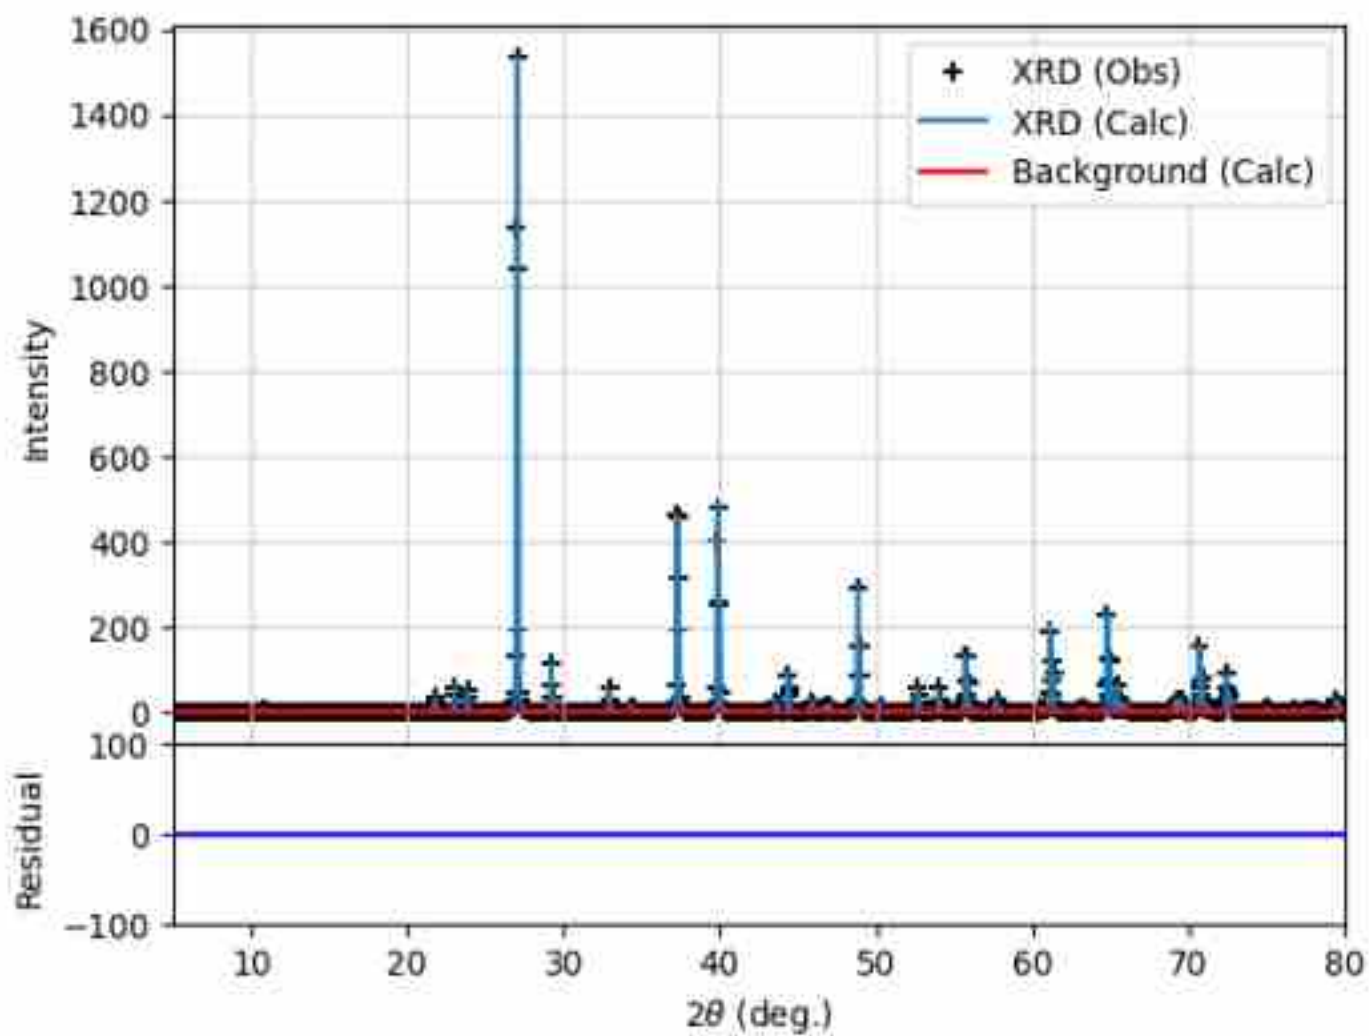

| RMSE before RR | Rwp     | RMSE after RR |
|----------------|---------|---------------|
| 0.012          | 0.00365 | 0.00023       |



# Gd<sub>2</sub>Lu<sub>6</sub>S<sub>12</sub>

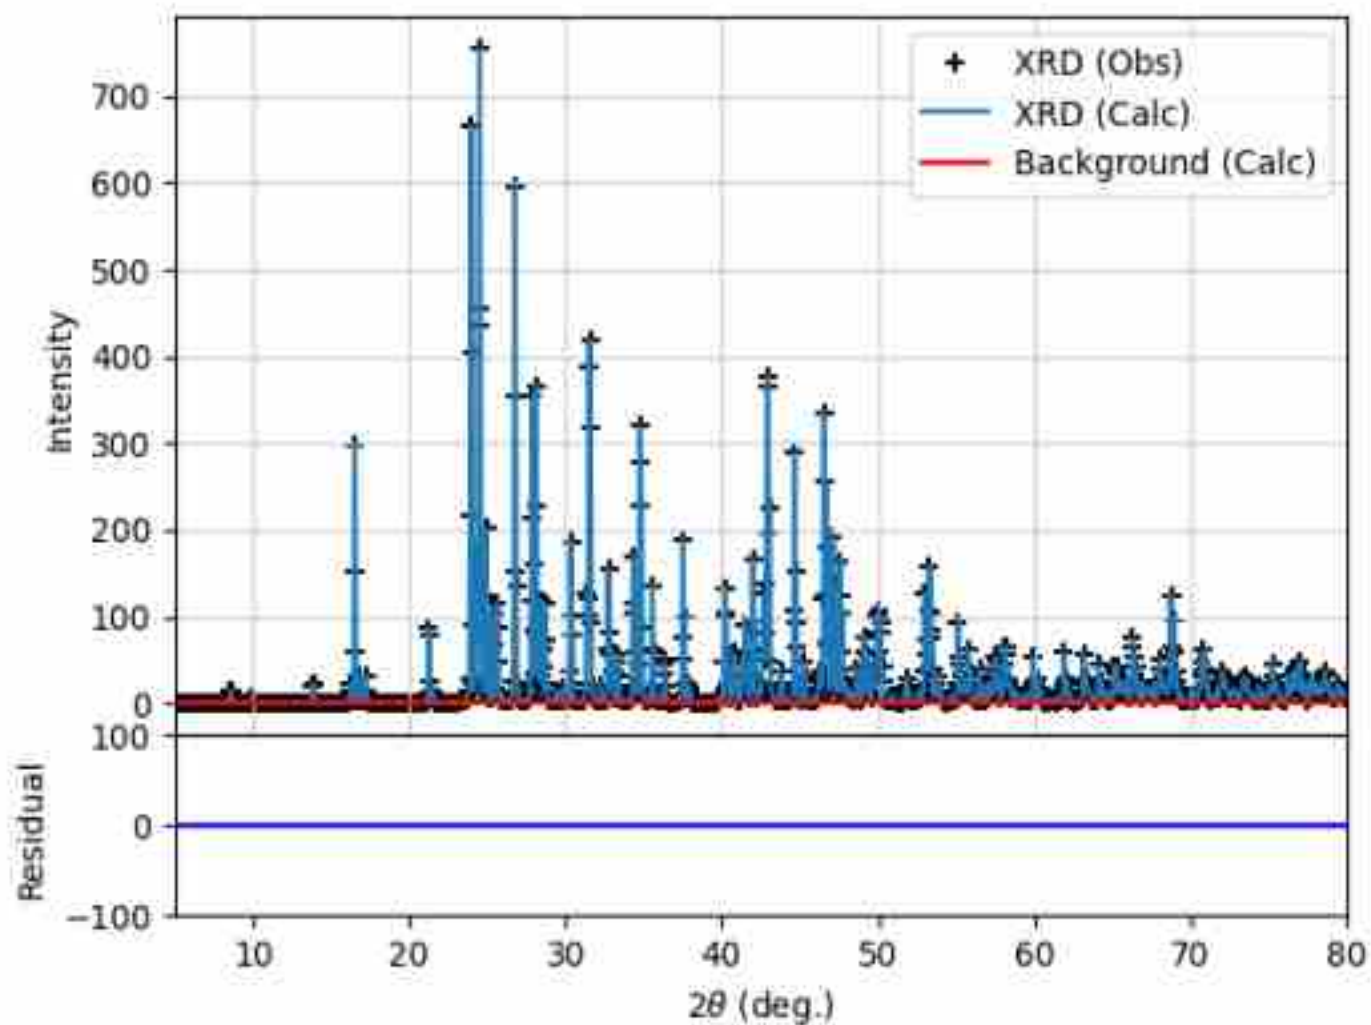

| RMSE before RR | Rwp     | RMSE after RR |
|----------------|---------|---------------|
| 0.012          | 0.00348 | 0.00059       |

# Ge<sub>2</sub>Mo<sub>6</sub>

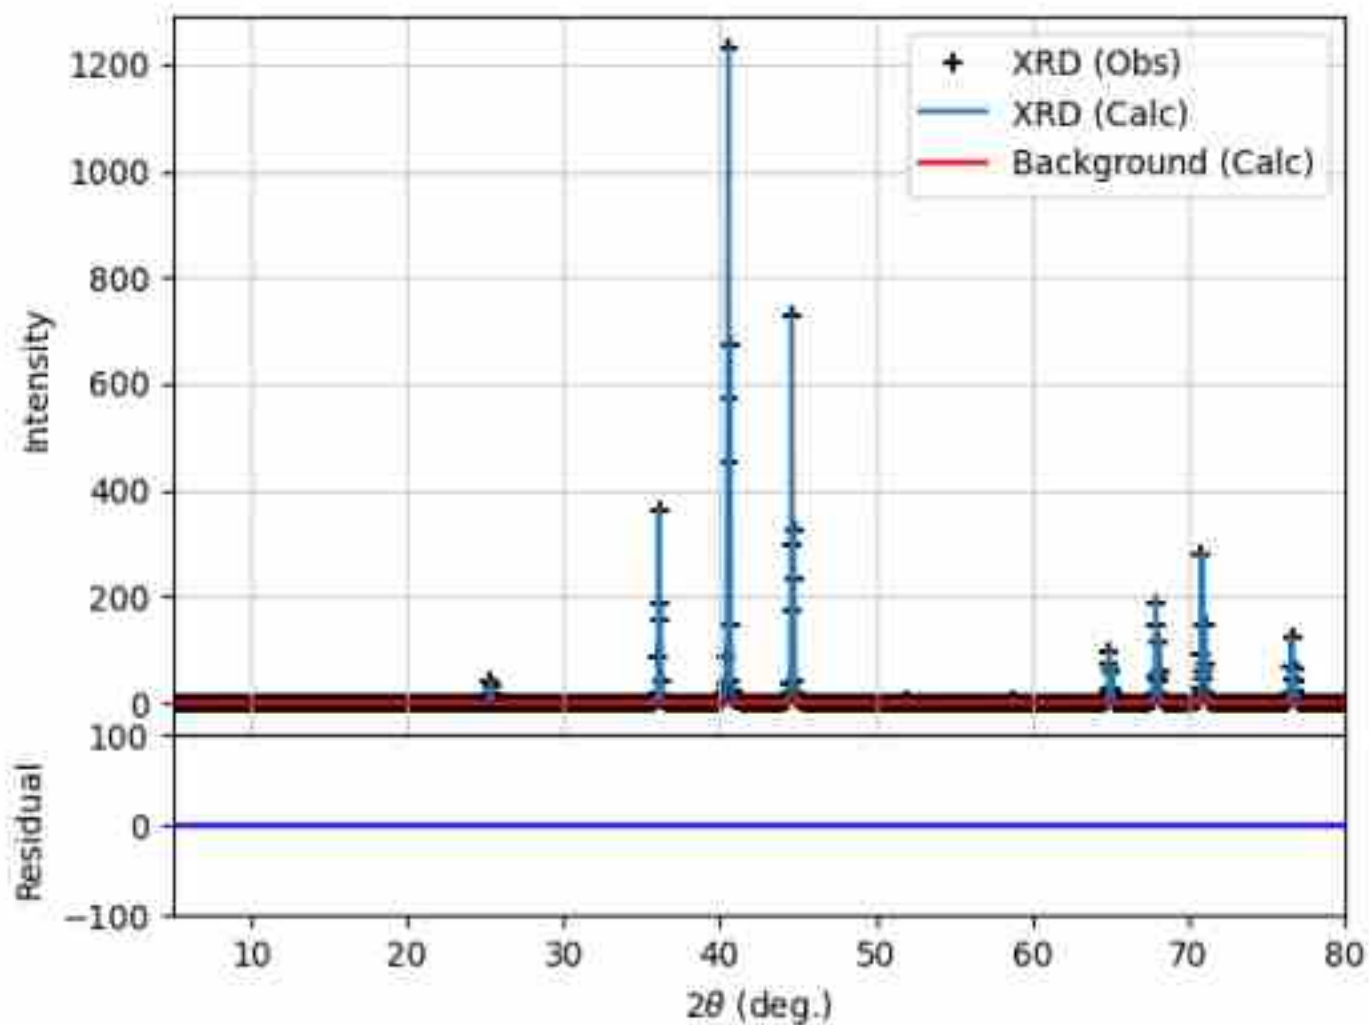

| RMSE before RR | Rwp     | RMSE after RR |
|----------------|---------|---------------|
| 0.012          | 0.00457 | 0.0003        |

# Hf1Zr1O4

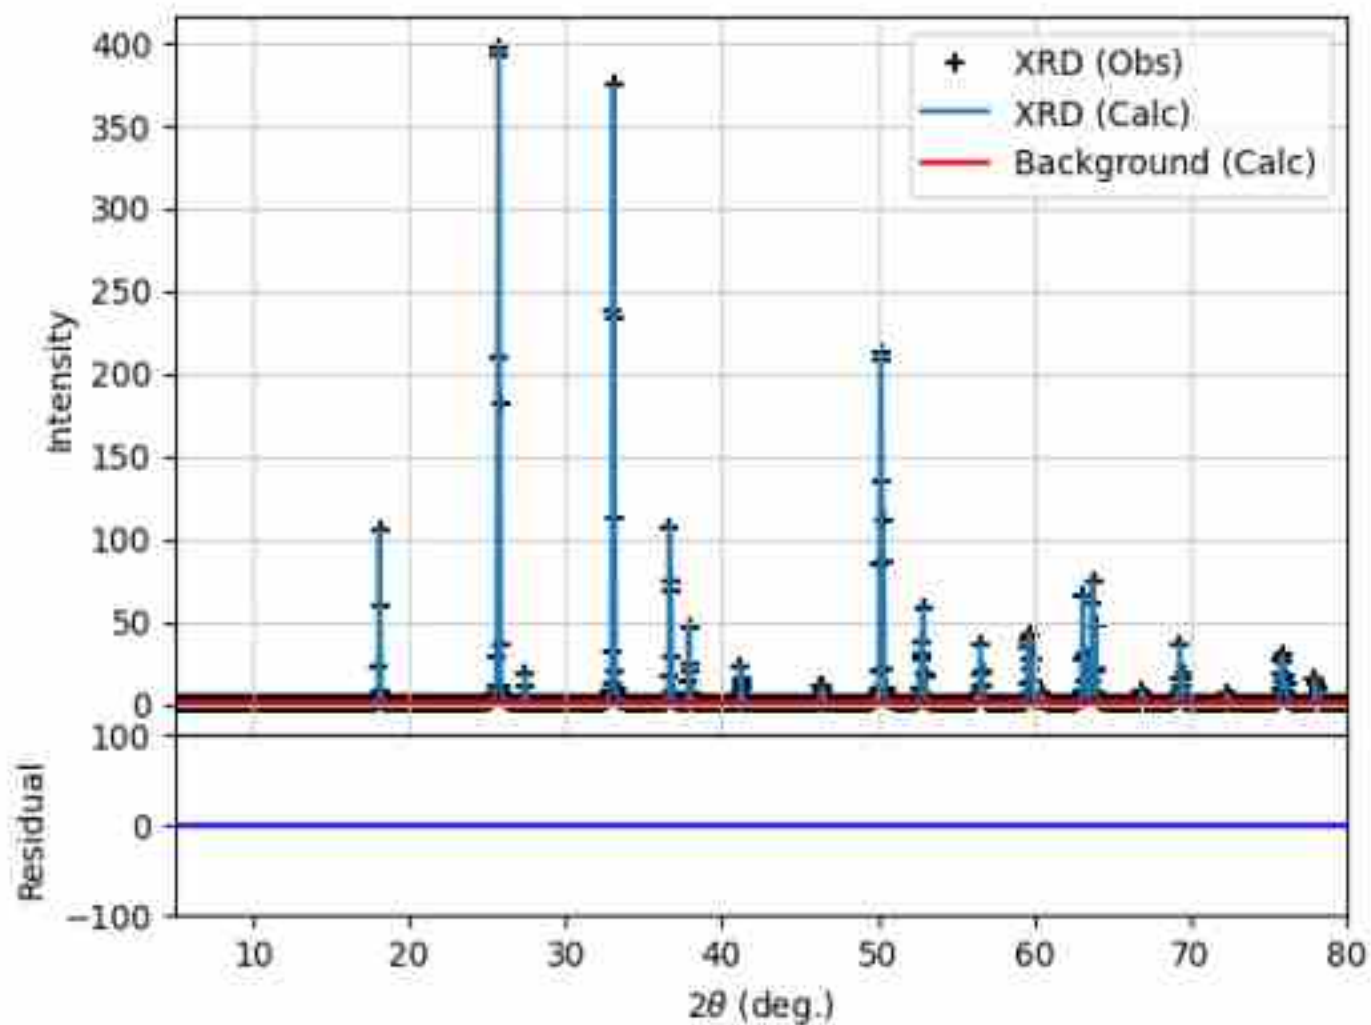

| RMSE before RR | Rwp     | RMSE after RR |
|----------------|---------|---------------|
| 0.012          | 0.00341 | 0.00147       |

# Hf4Cu4Ge4

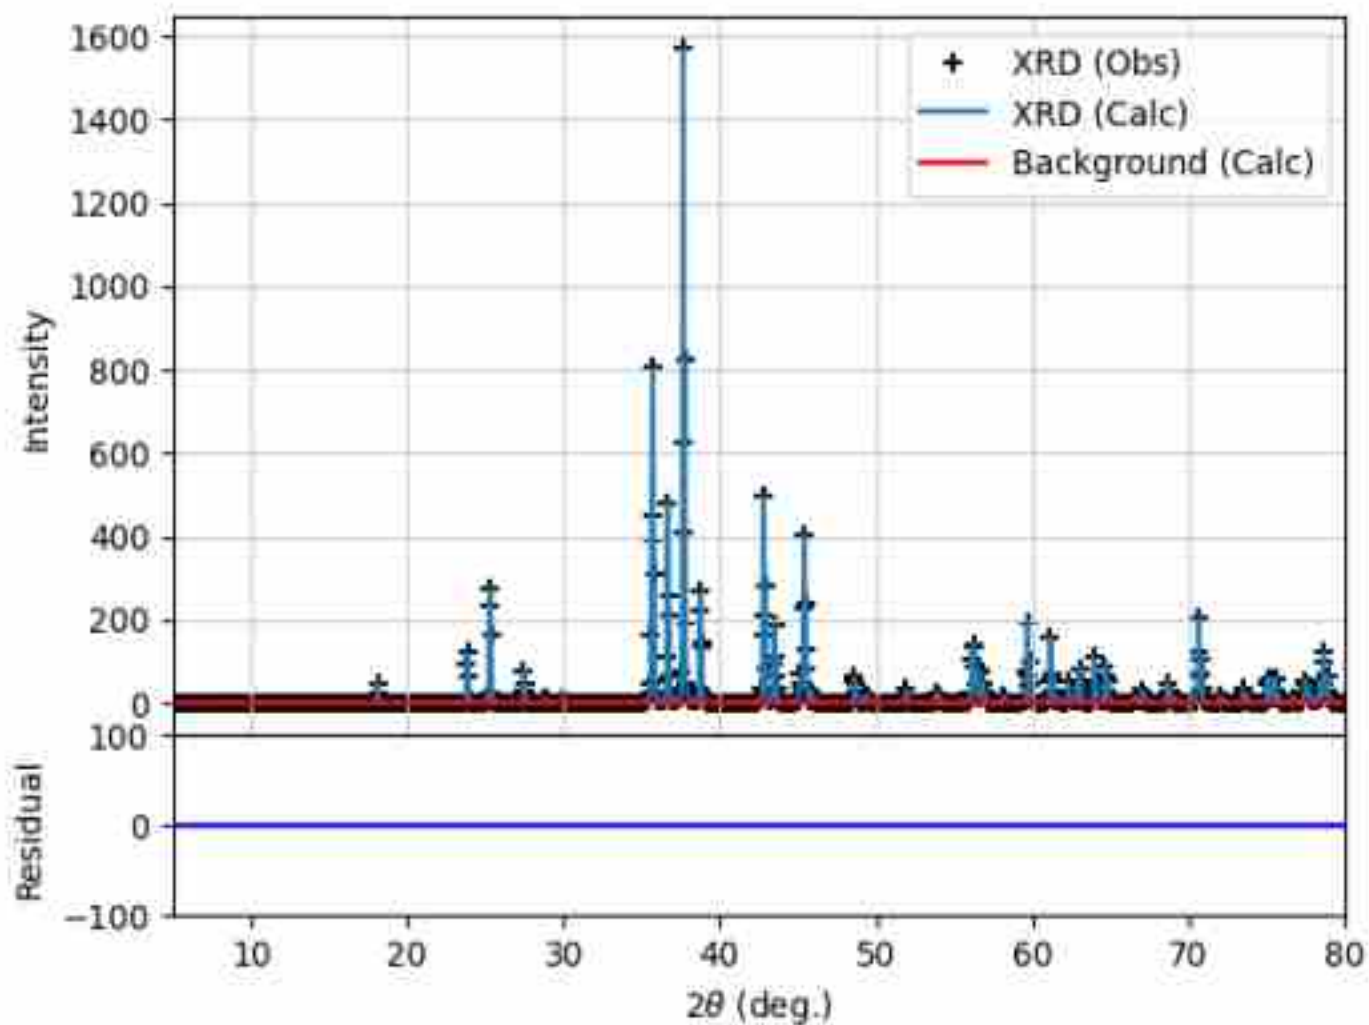

| RMSE before RR | Rwp     | RMSE after RR |
|----------------|---------|---------------|
| 0.012          | 0.00503 | 0.00045       |

# Ho1Al1Ni4

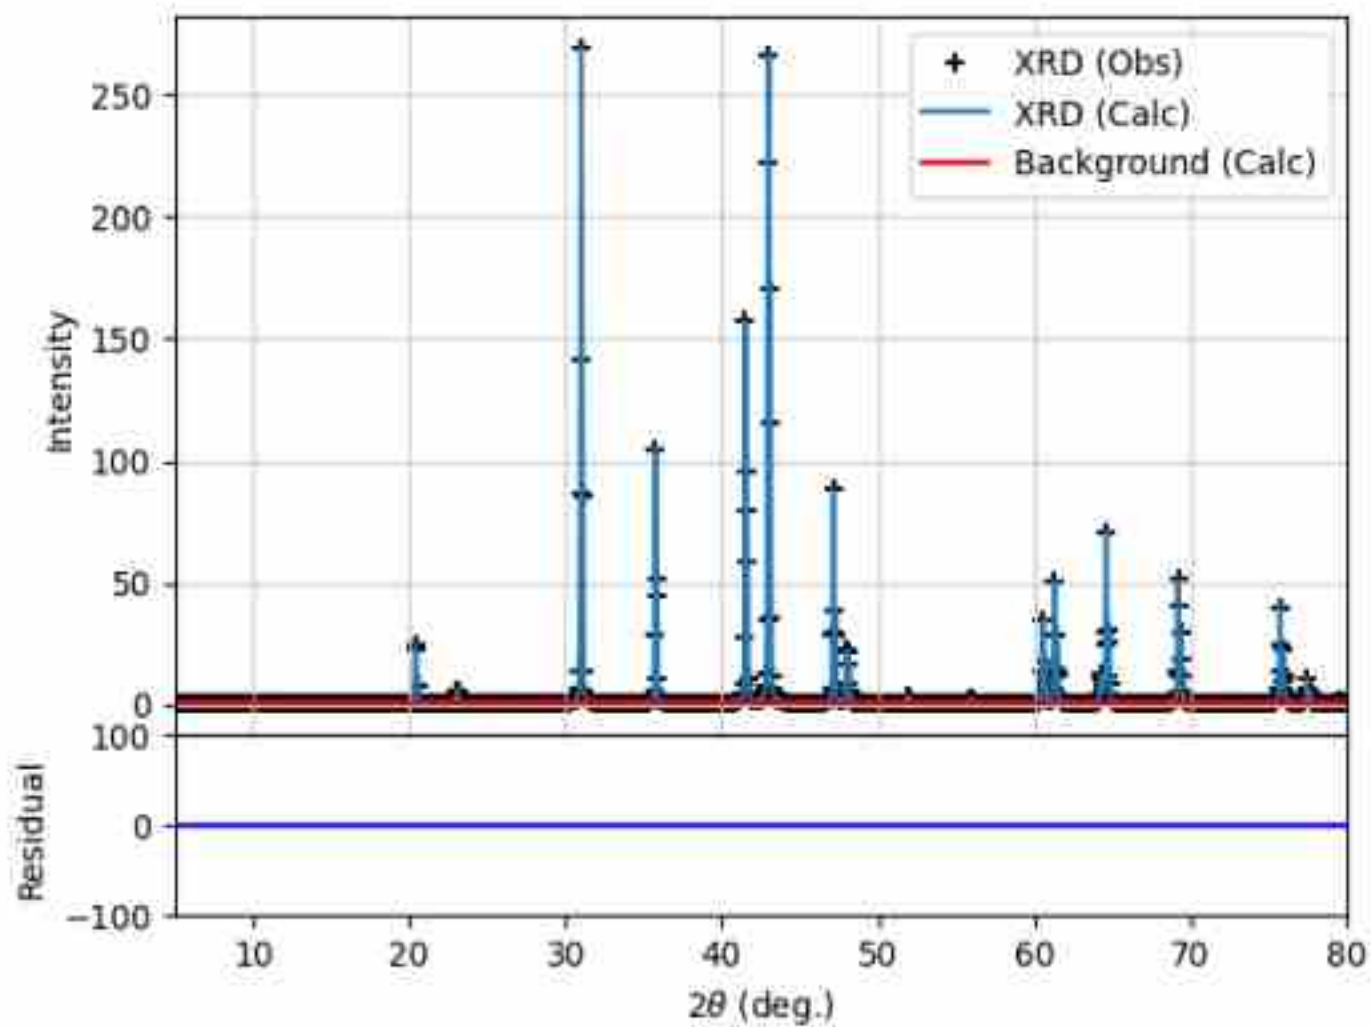

| RMSE before RR | Rwp     | RMSE after RR |
|----------------|---------|---------------|
| 0.012          | 0.02012 | 0.00216       |

# Ho1Co4Cu1

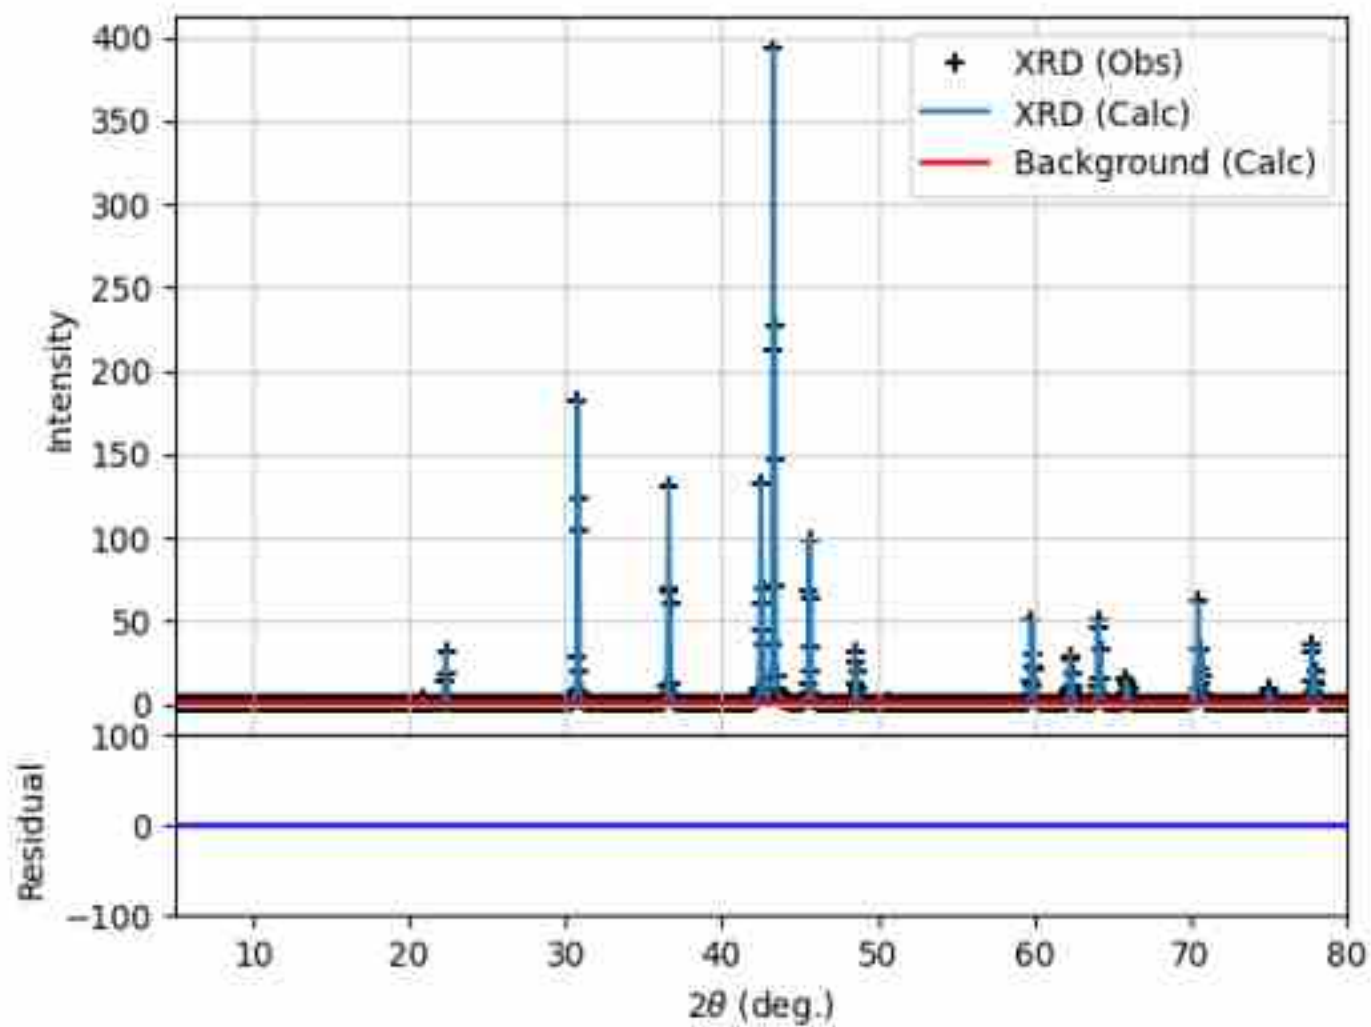

| RMSE before RR | Rwp     | RMSE after RR |
|----------------|---------|---------------|
| 0.012          | 0.00189 | 0.0003        |

# Ho1Co5

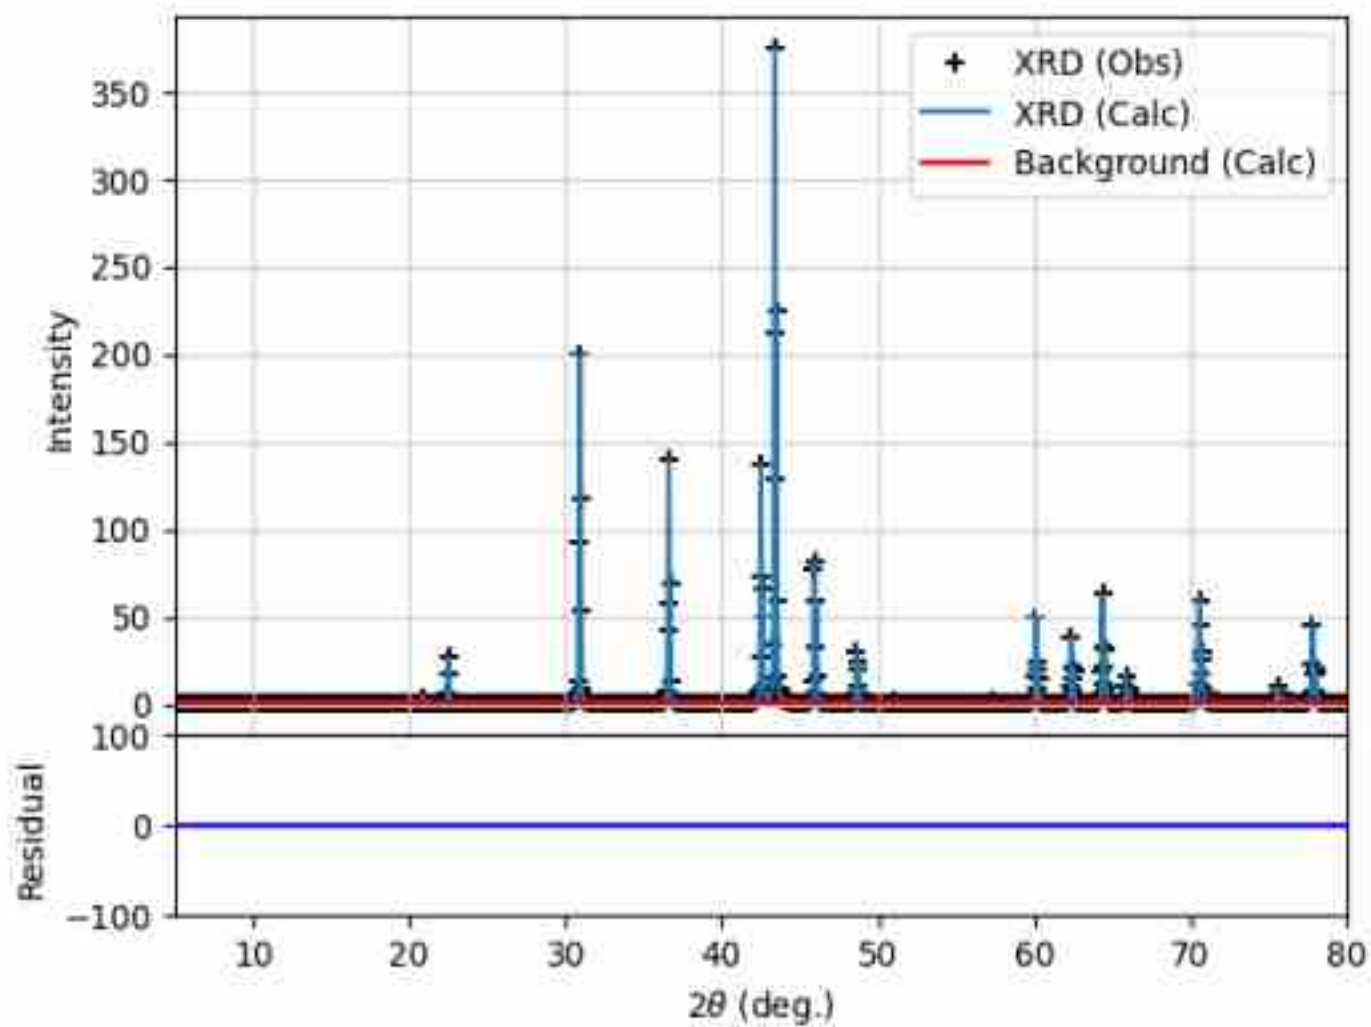

| RMSE before RR | Rwp     | RMSE after RR |
|----------------|---------|---------------|
| 0.012          | 0.00267 | 0.00051       |

# Ho1Co6Ge6

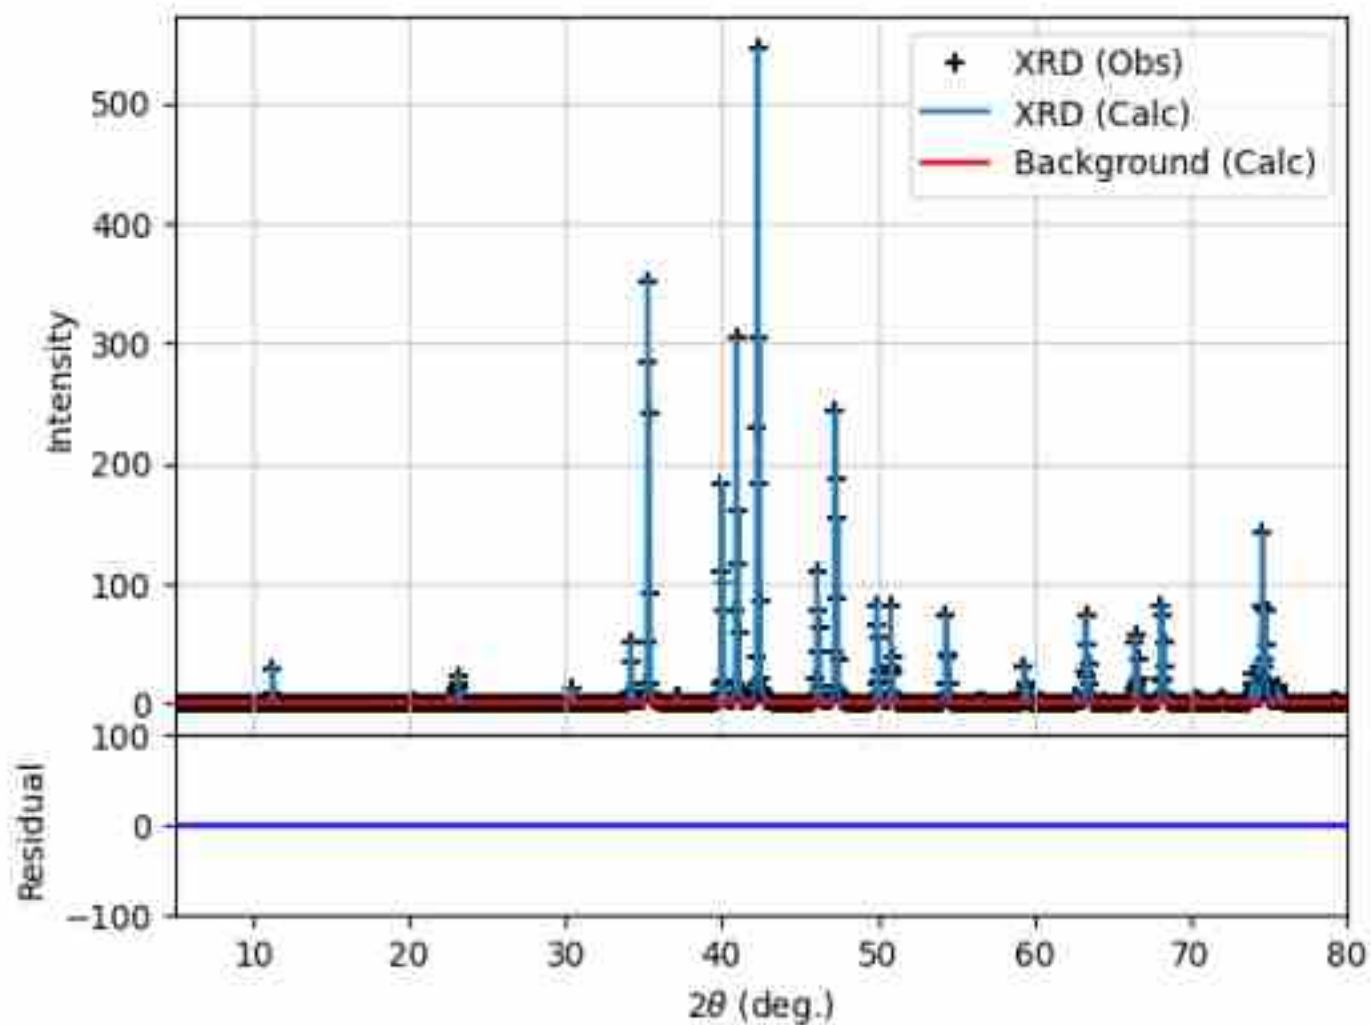

| RMSE before RR | Rwp     | RMSE after RR |
|----------------|---------|---------------|
| 0.012          | 0.00322 | 0.00044       |



# Ho1Fe5

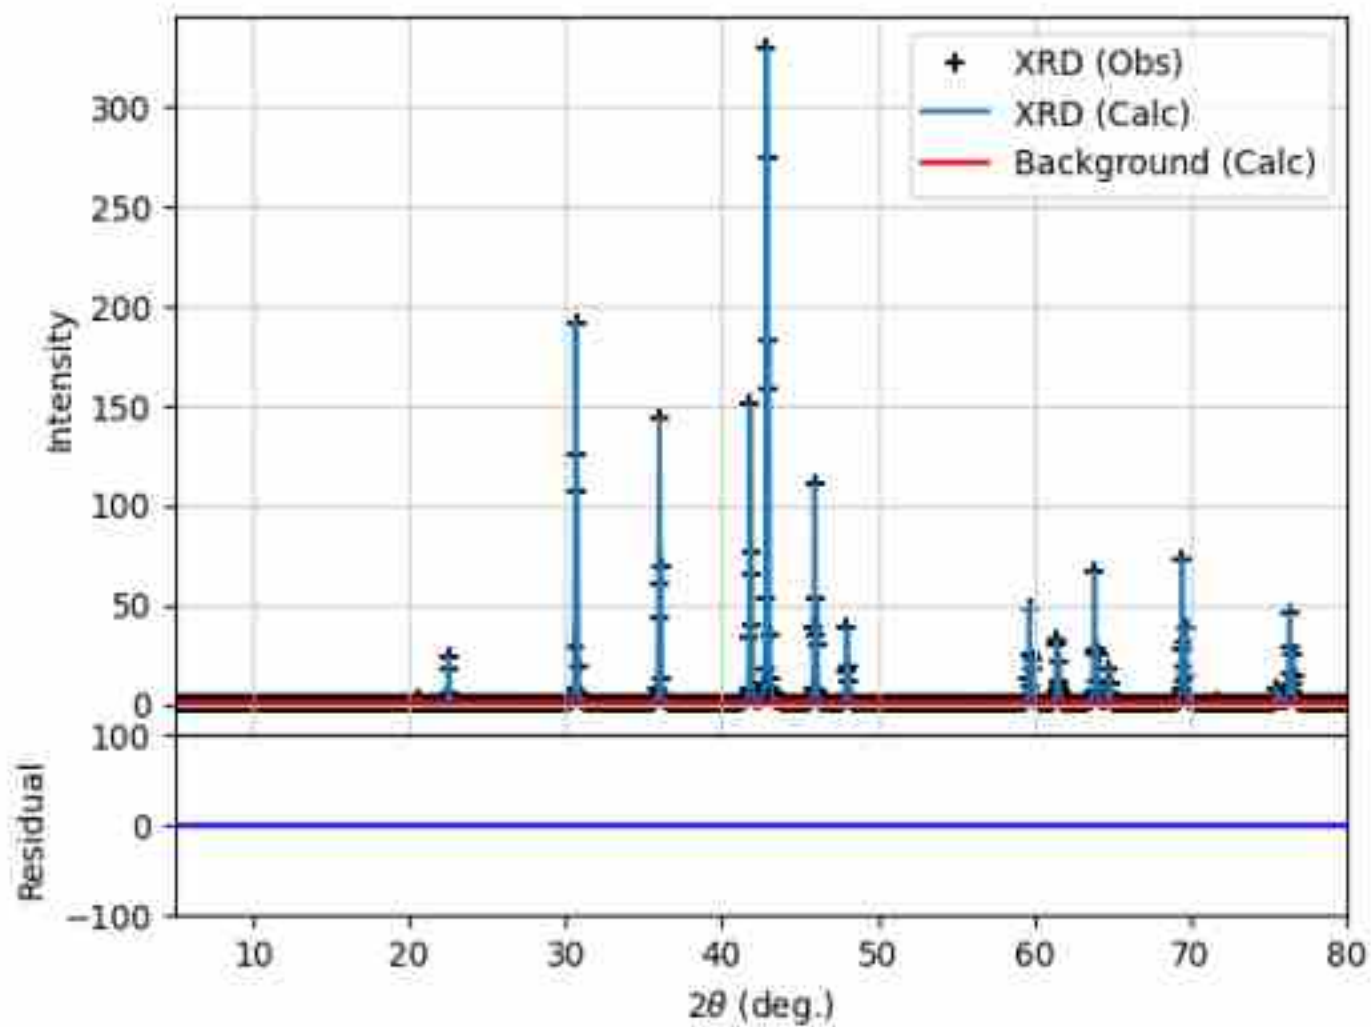

| RMSE before RR | Rwp    | RMSE after RR |
|----------------|--------|---------------|
| 0.012          | 0.0023 | 0.00051       |

# Ho<sub>2</sub>Ge<sub>2</sub>O<sub>7</sub>

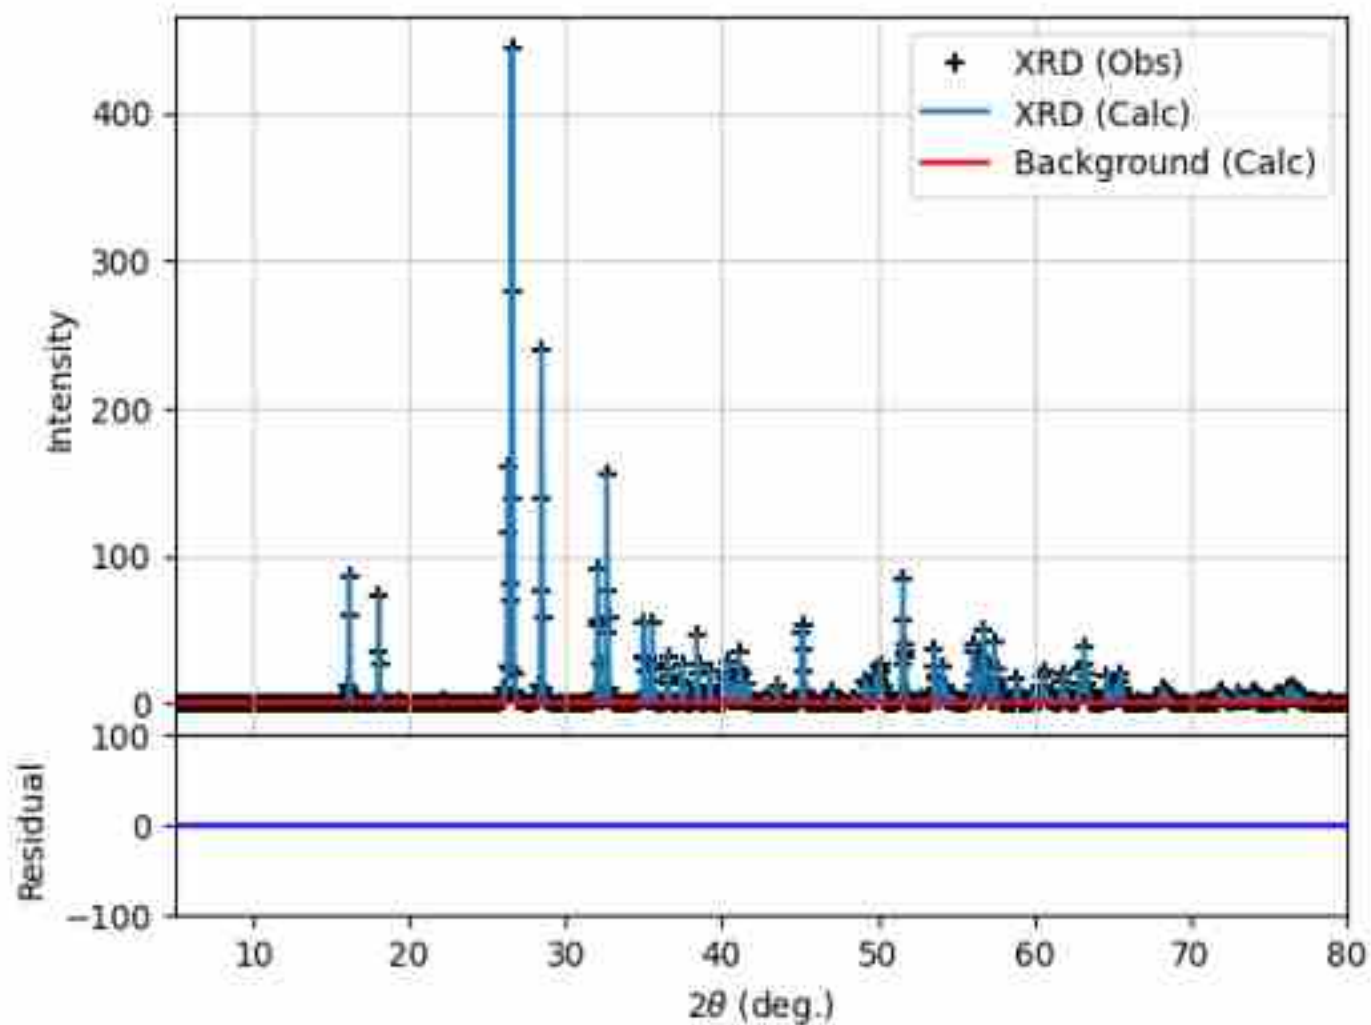

| RMSE before RR | Rwp     | RMSE after RR |
|----------------|---------|---------------|
| 0.012          | 0.00343 | 0.00079       |

# Ho<sub>2</sub>I<sub>2</sub>O<sub>2</sub>

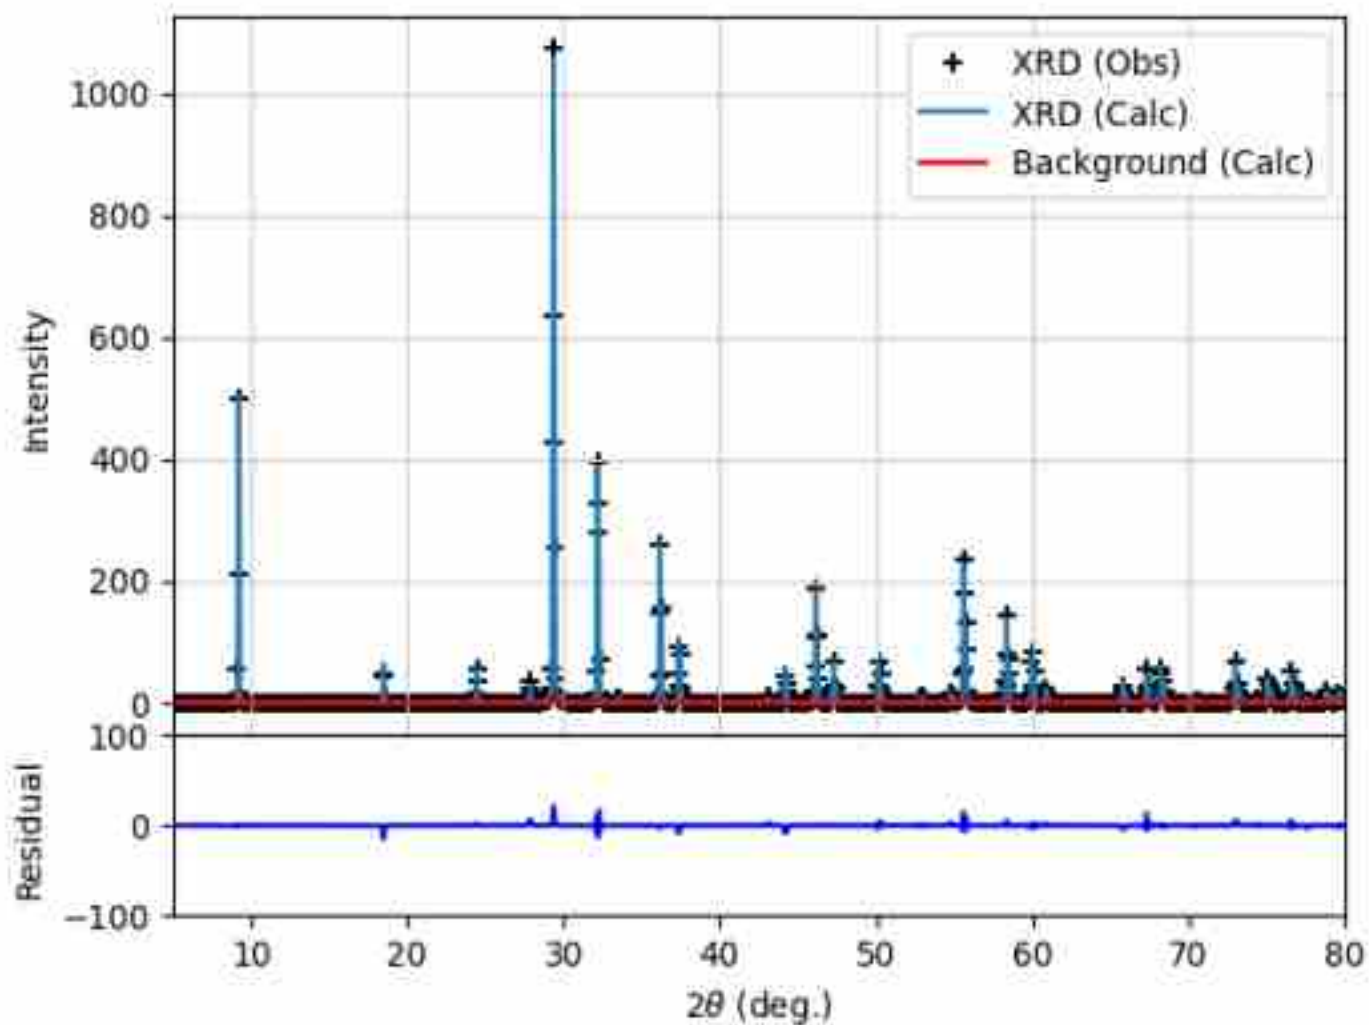

| RMSE before RR | Rwp     | RMSE after RR |
|----------------|---------|---------------|
| 0.012          | 7.16322 | 0.01751       |

# Ho<sub>2</sub>Ti<sub>2</sub>Ge<sub>2</sub>

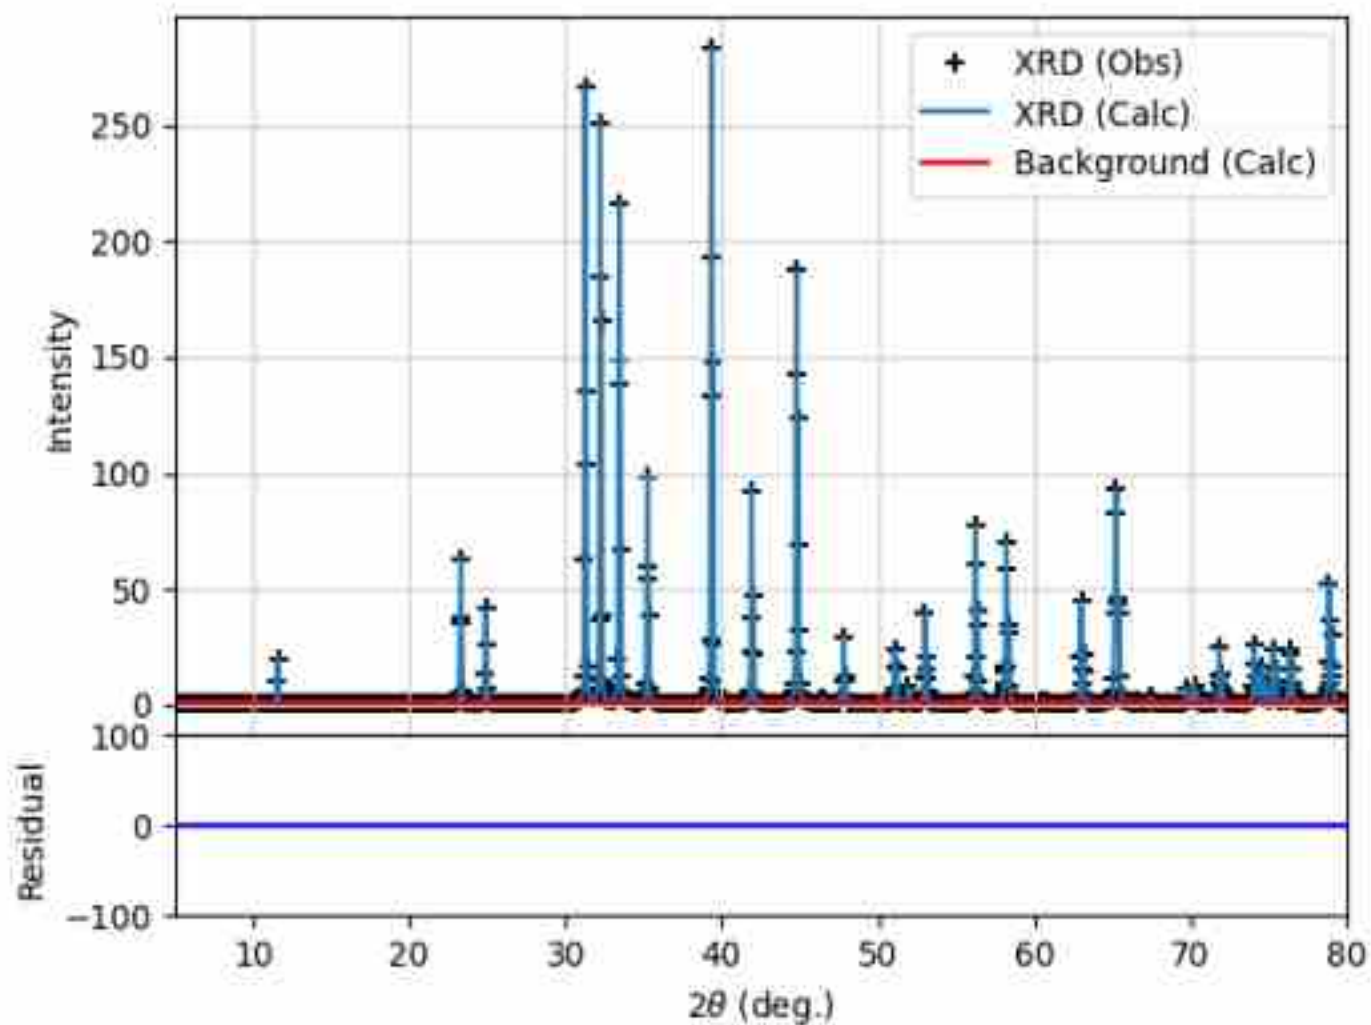

| RMSE before RR | Rwp     | RMSE after RR |
|----------------|---------|---------------|
| 0.012          | 0.00513 | 0.00057       |

# Ho<sub>4</sub>Mg<sub>1</sub>S<sub>7</sub>

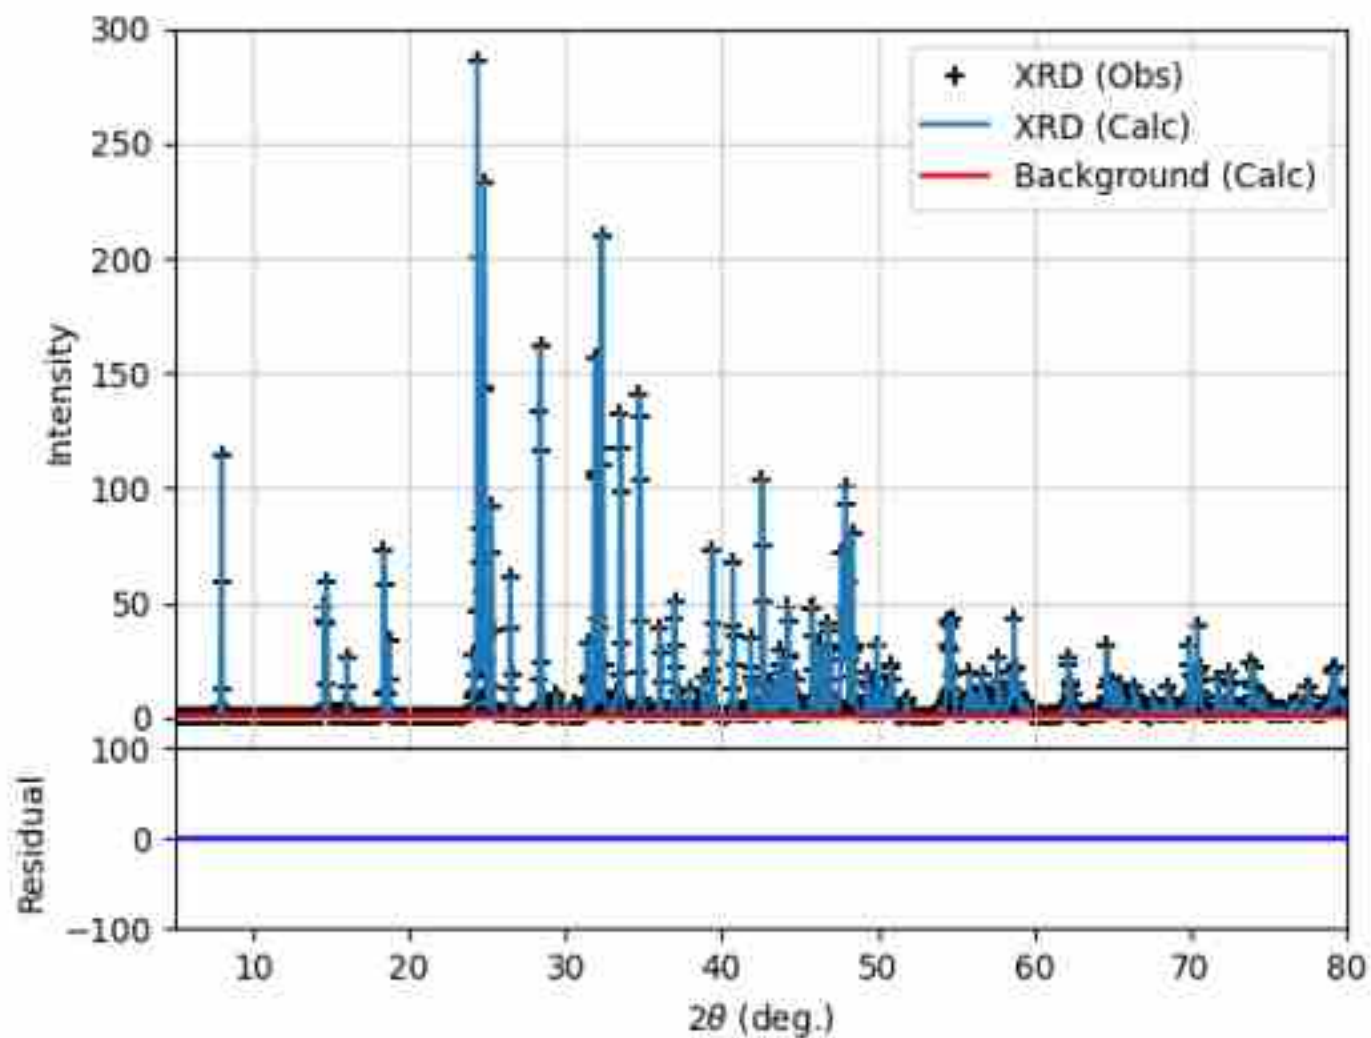

| RMSE before RR | Rwp     | RMSE after RR |
|----------------|---------|---------------|
| 0.012          | 0.00291 | 0.00031       |

# Ho6Mn1Bi2

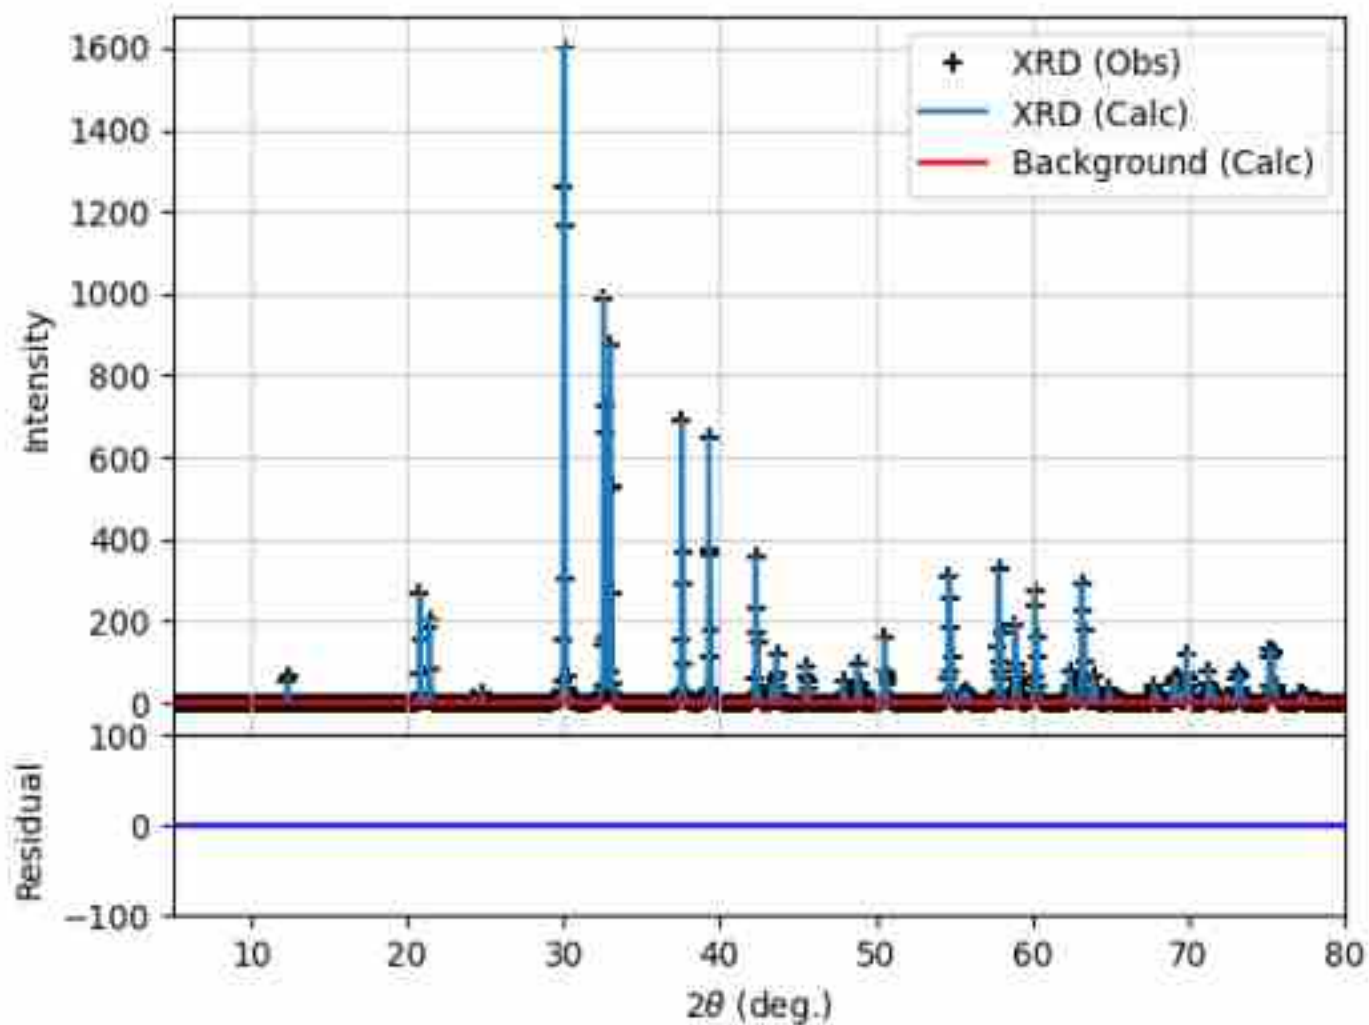

| RMSE before RR | Rwp     | RMSE after RR |
|----------------|---------|---------------|
| 0.012          | 0.00508 | 0.00059       |

# In2P2

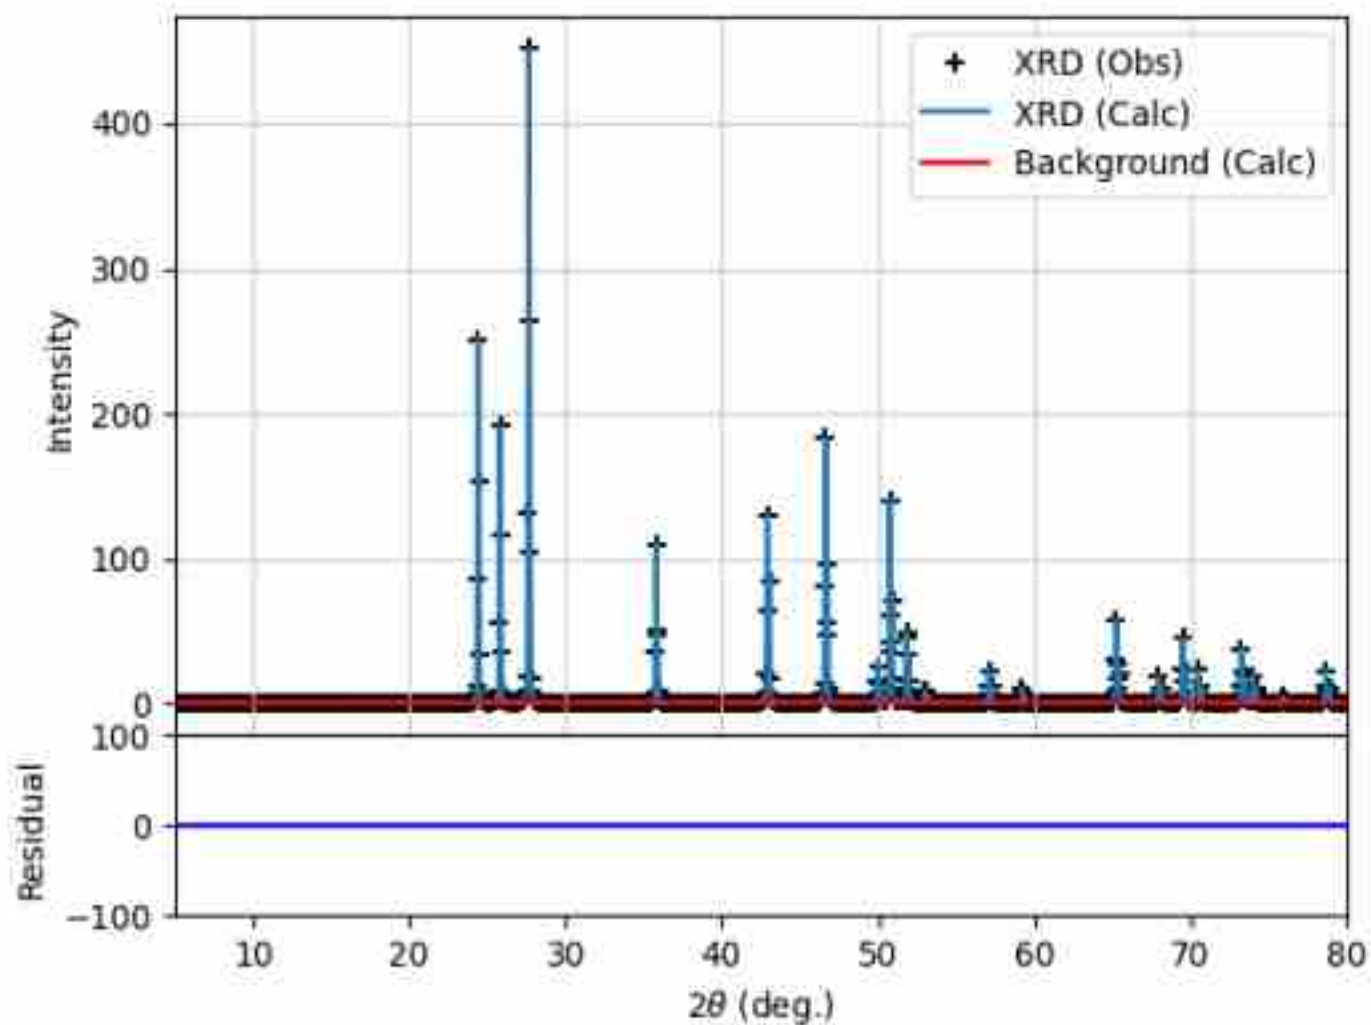

| RMSE before RR | Rwp     | RMSE after RR |
|----------------|---------|---------------|
| 0.012          | 0.00228 | 0.00054       |

# In2S3

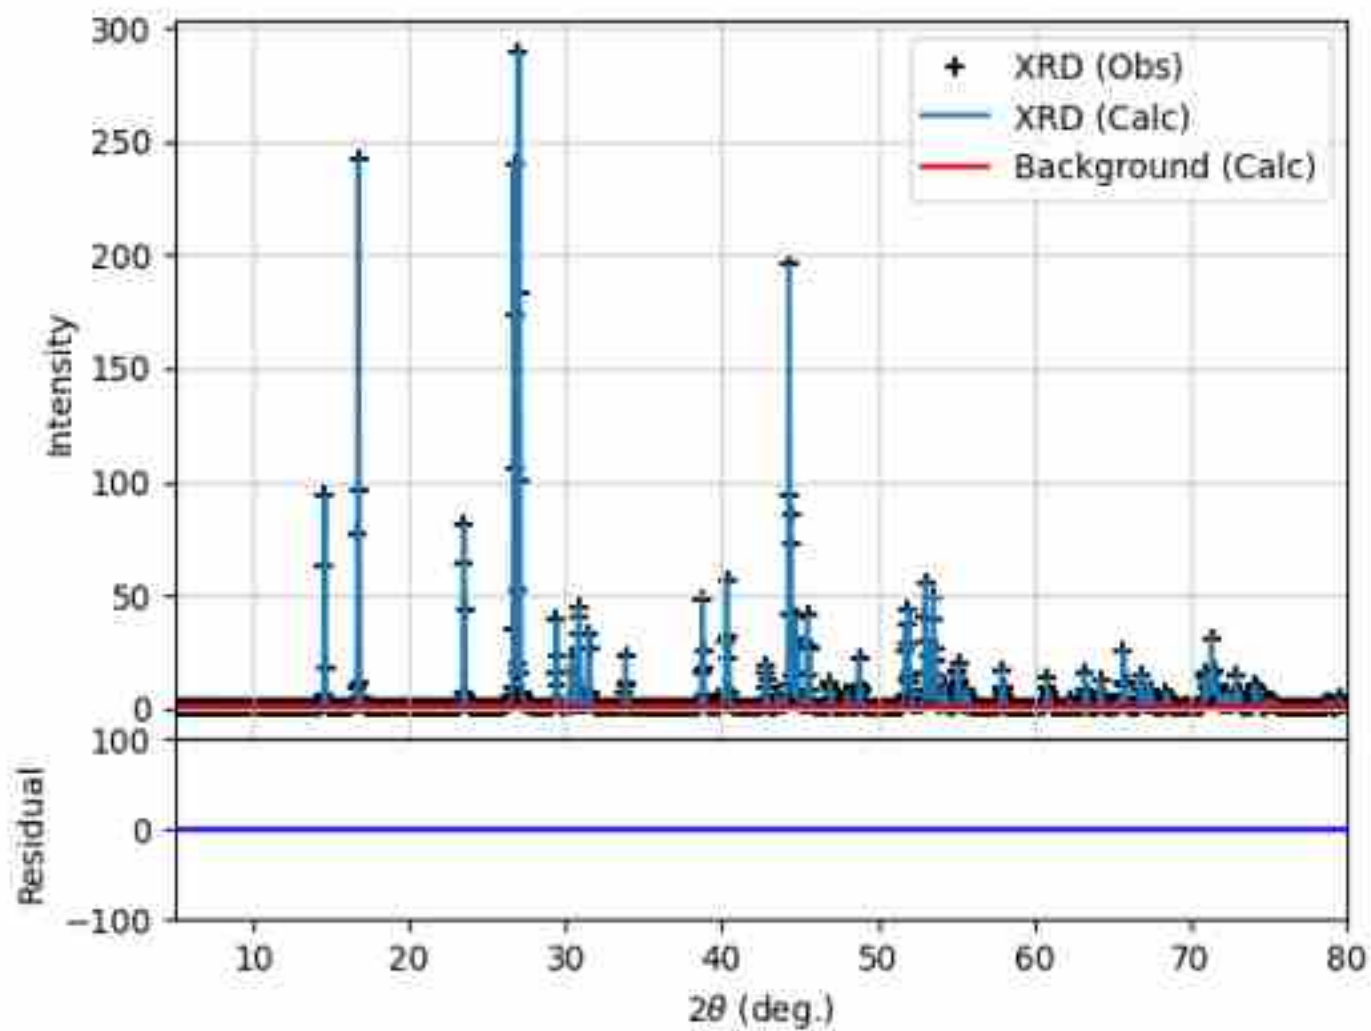

| RMSE before RR | Rwp     | RMSE after RR |
|----------------|---------|---------------|
| 0.012          | 0.00333 | 0.00071       |



# K1Ca1Zr1Nb1O6

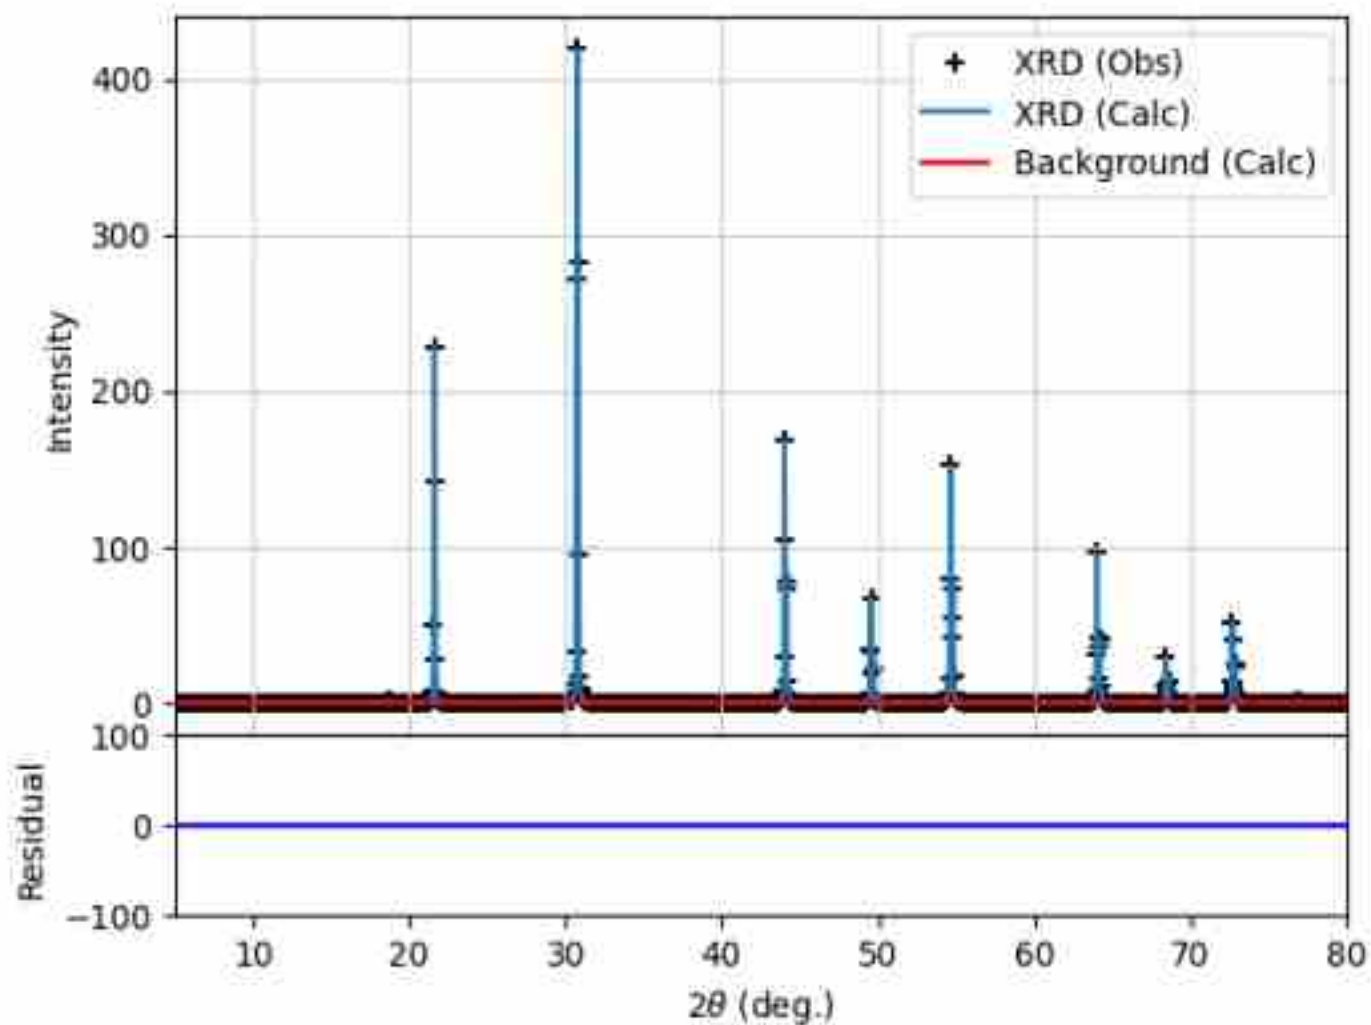

| RMSE before RR | Rwp     | RMSE after RR |
|----------------|---------|---------------|
| 0.012          | 0.00606 | 0.00268       |

# K1Cr1F3

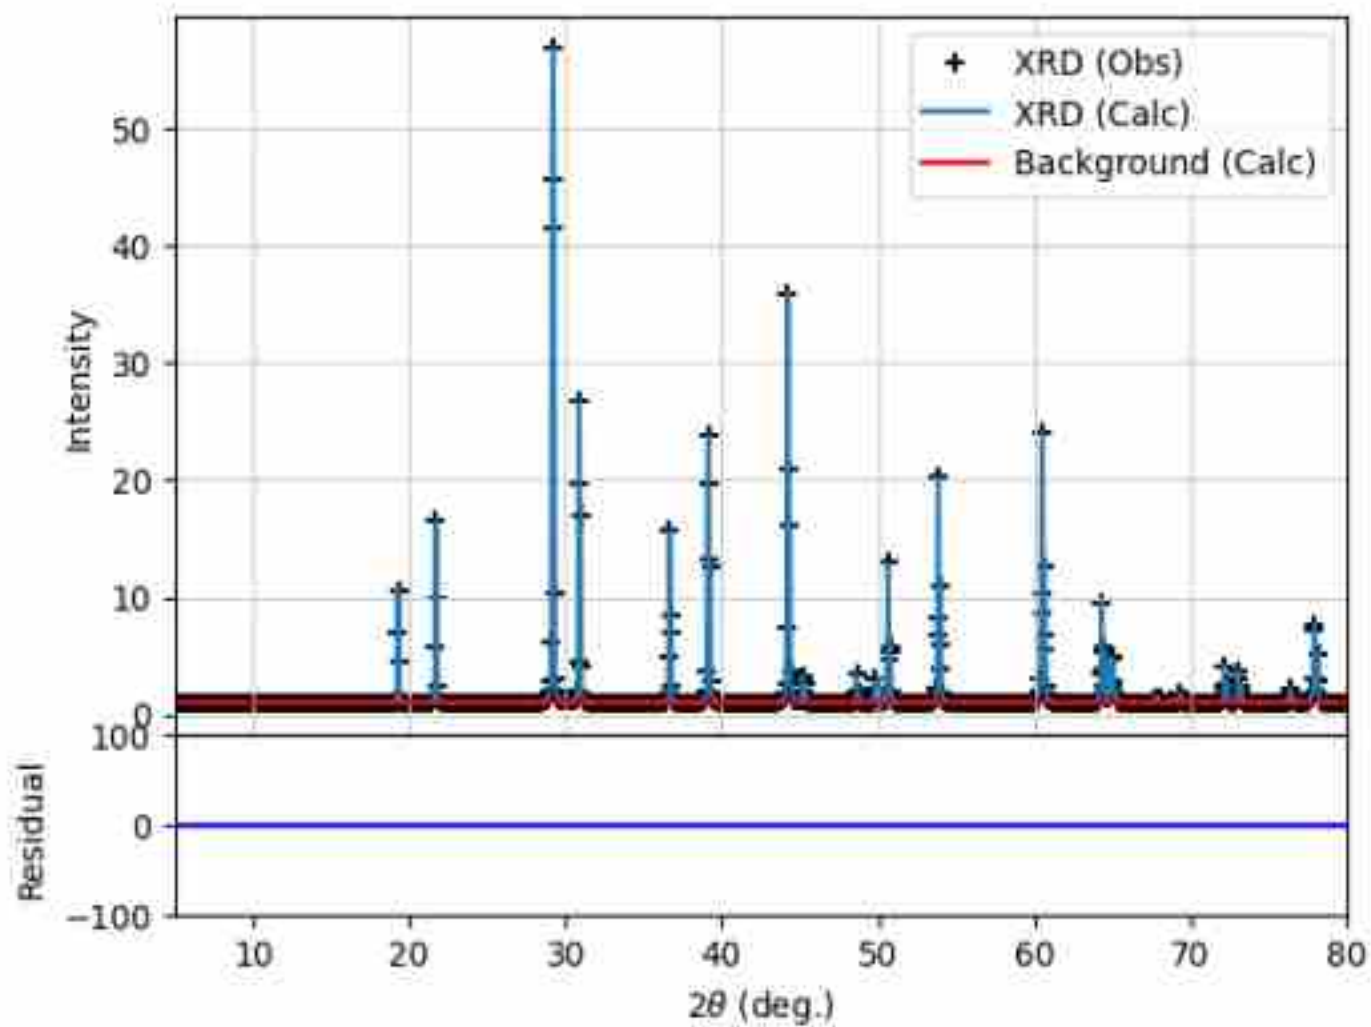

| RMSE before RR | Rwp     | RMSE after RR |
|----------------|---------|---------------|
| 0.012          | 0.00261 | 0.00049       |

# K1Ru1F6

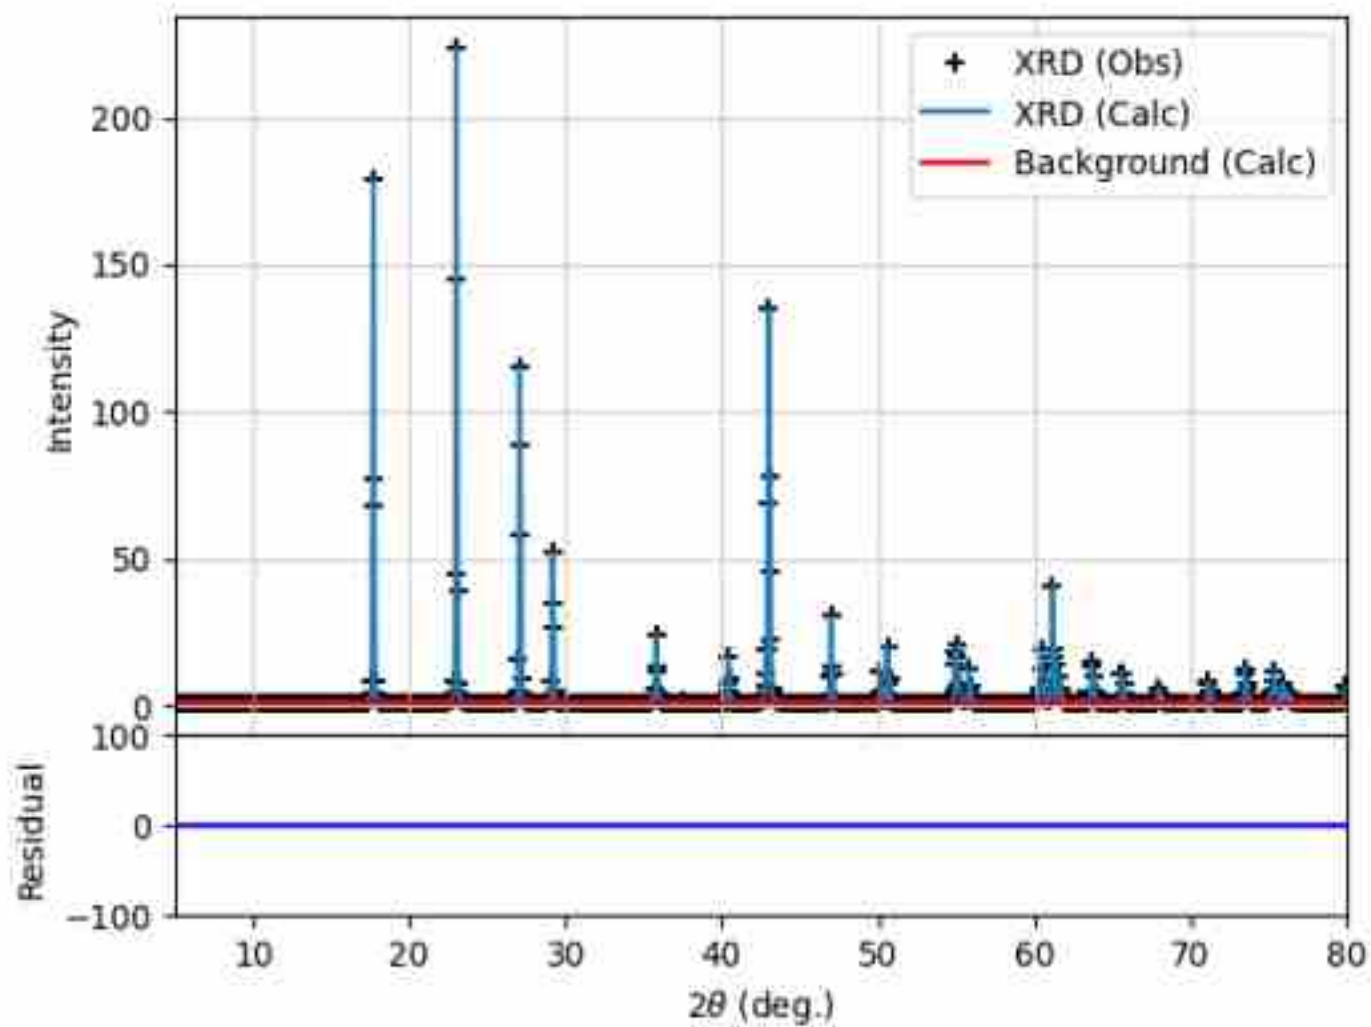

| RMSE before RR | Rwp     | RMSE after RR |
|----------------|---------|---------------|
| 0.012          | 0.00259 | 0.0008        |

# K1Sr1Pr1W1O6

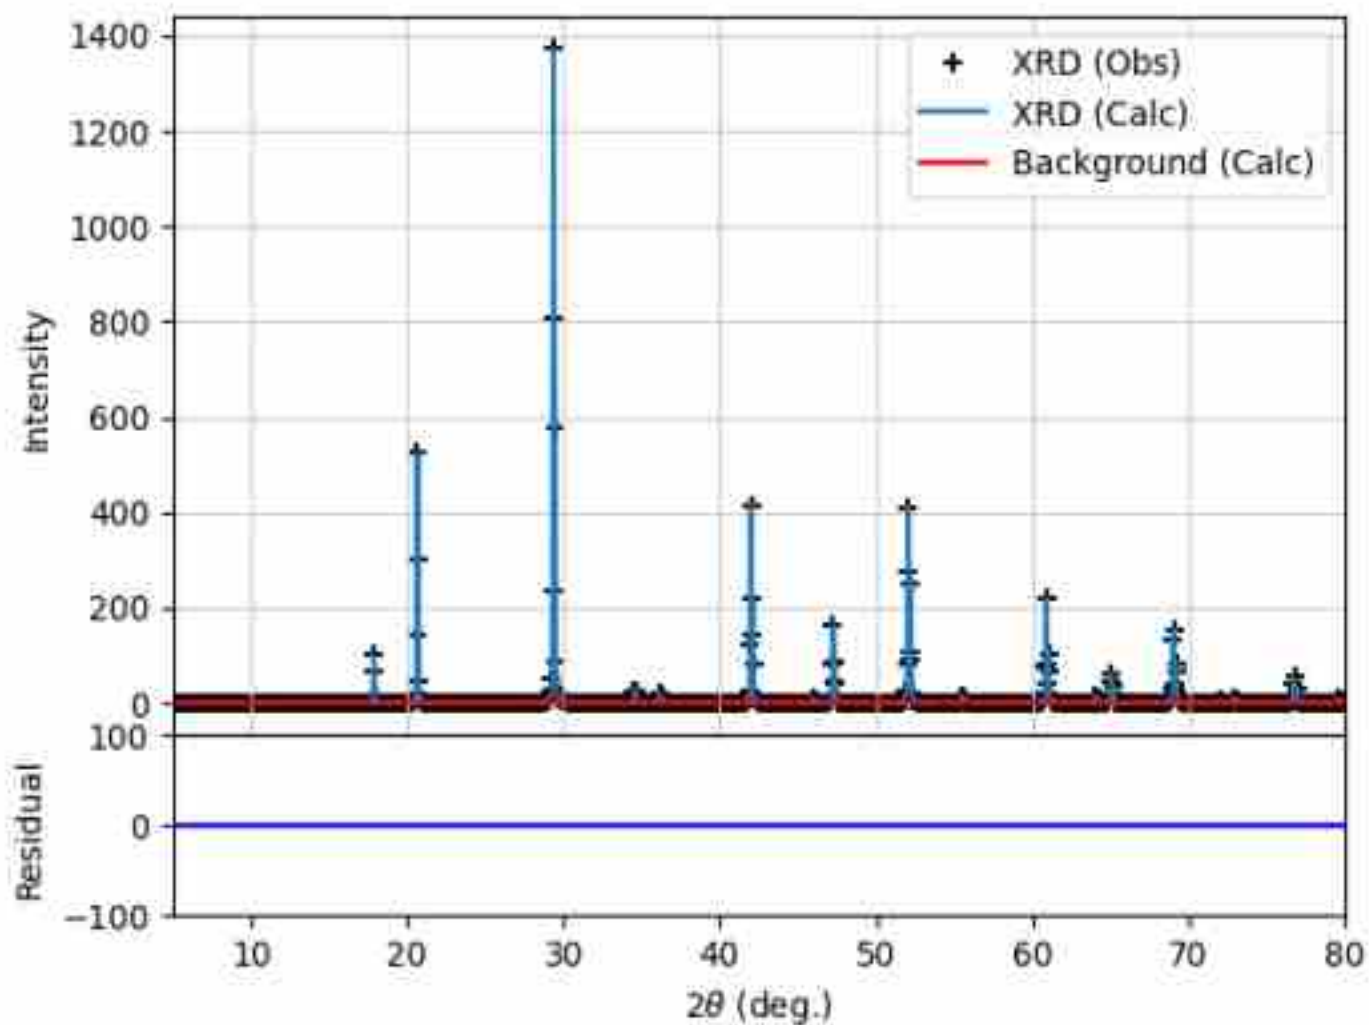

| RMSE before RR | Rwp     | RMSE after RR |
|----------------|---------|---------------|
| 0.012          | 0.02722 | 0.00614       |

# K1Ta1O3

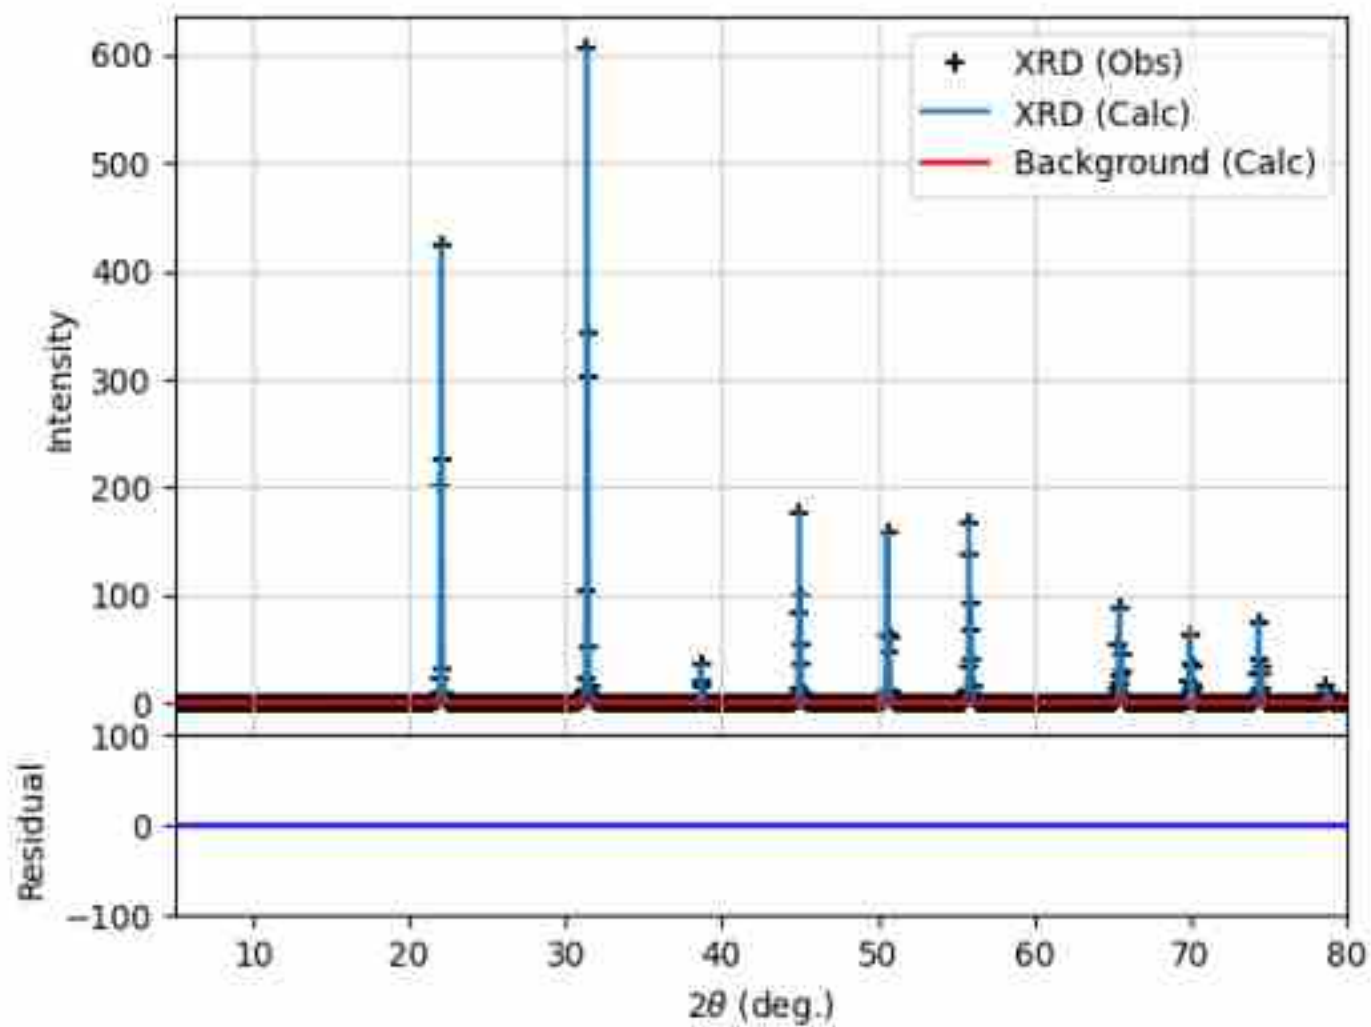

| RMSE before RR | Rwp     | RMSE after RR |
|----------------|---------|---------------|
| 0.012          | 0.03576 | 0.00655       |

# K<sub>2</sub>Ag<sub>1</sub>Bi<sub>1</sub>I<sub>6</sub>

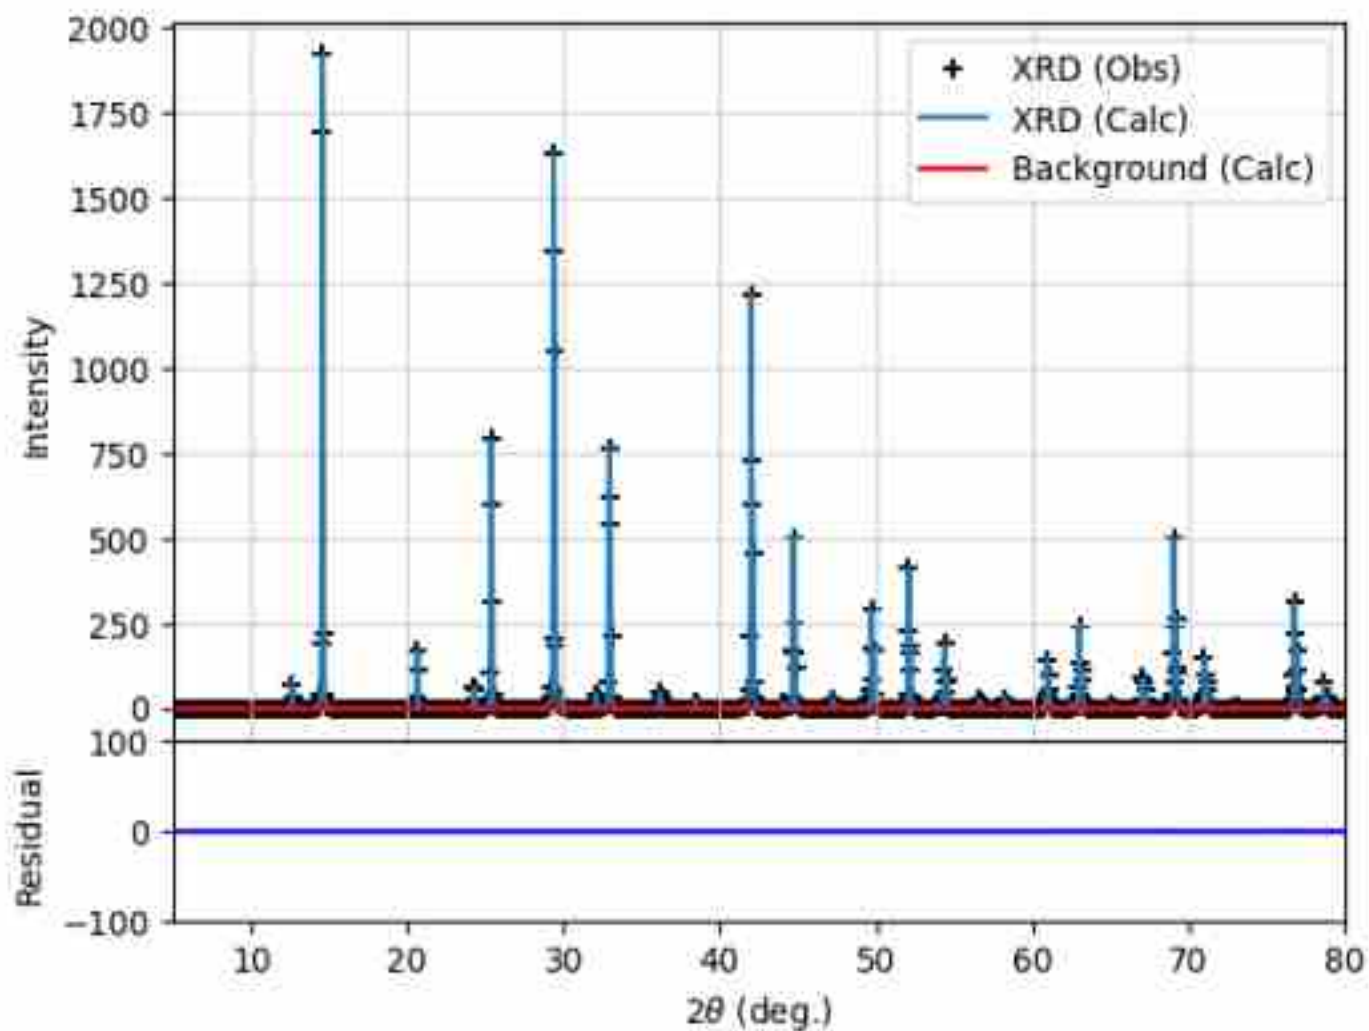

| RMSE before RR | Rwp     | RMSE after RR |
|----------------|---------|---------------|
| 0.012          | 0.11643 | 0.00343       |

# K2Br1Cl1

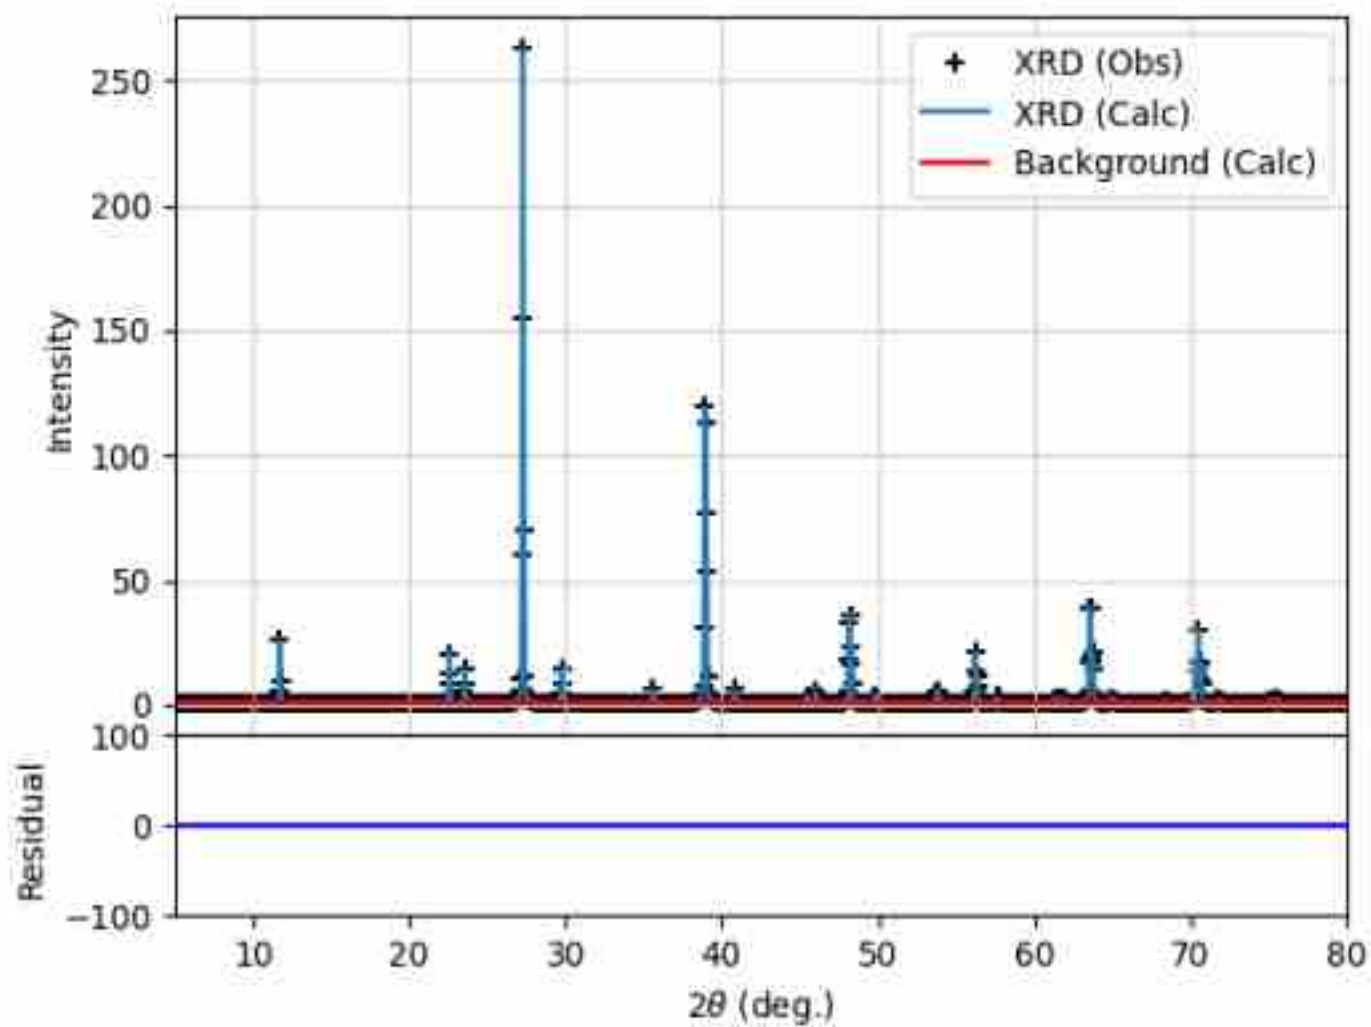

| RMSE before RR | Rwp     | RMSE after RR |
|----------------|---------|---------------|
| 0.012          | 0.00204 | 0.00017       |

# K<sub>2</sub>Ca<sub>2</sub>Cl<sub>6</sub>

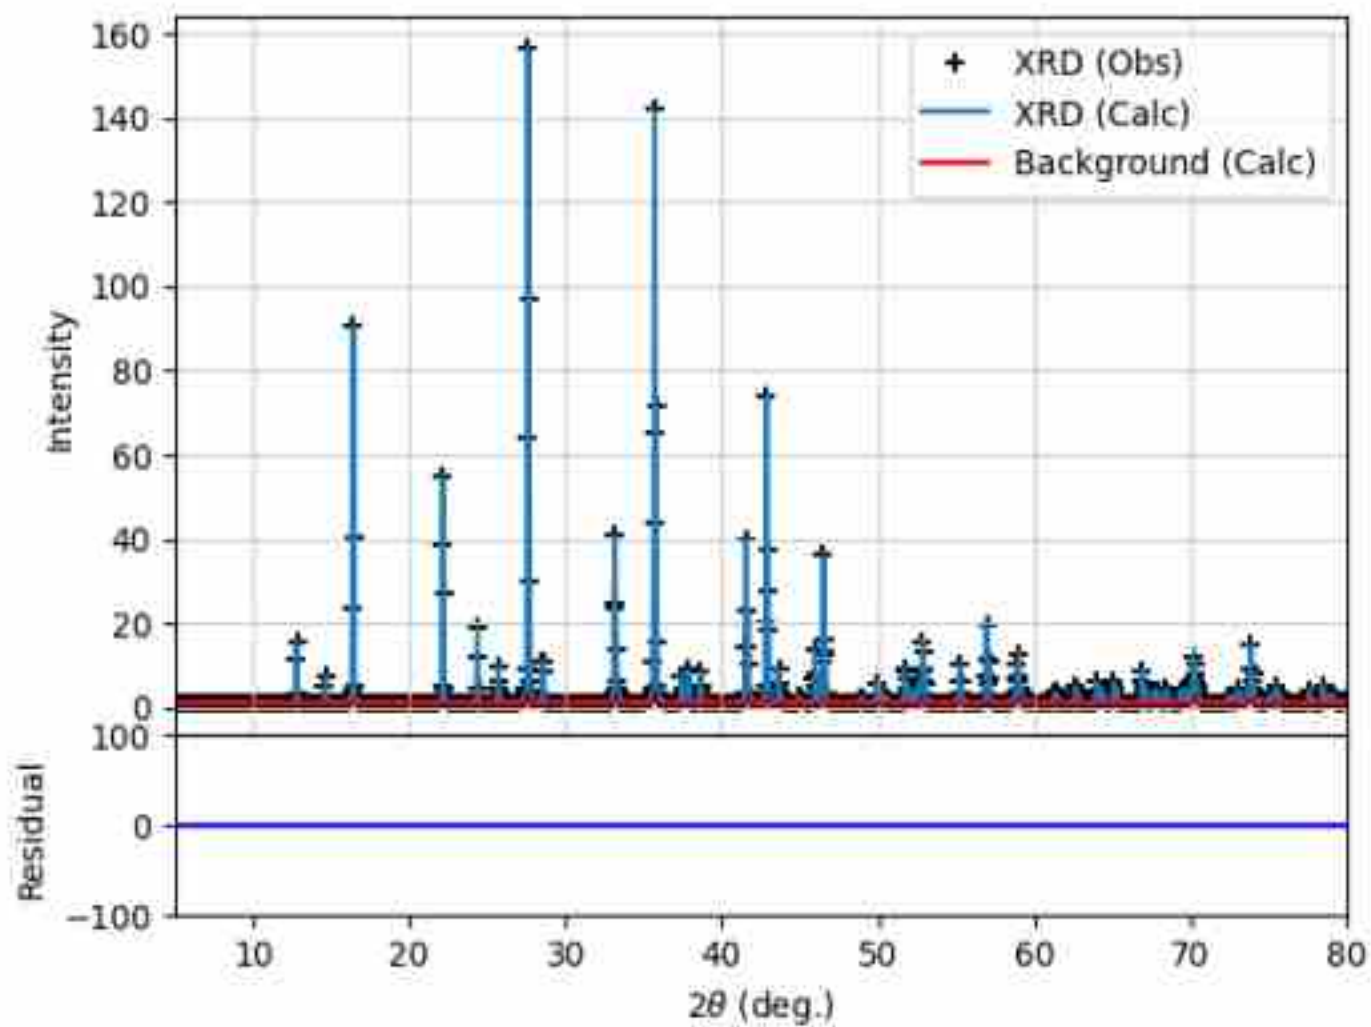

| RMSE before RR | Rwp     | RMSE after RR |
|----------------|---------|---------------|
| 0.012          | 0.00202 | 0.00054       |



# K<sub>2</sub>Mg<sub>1</sub>Cl<sub>4</sub>

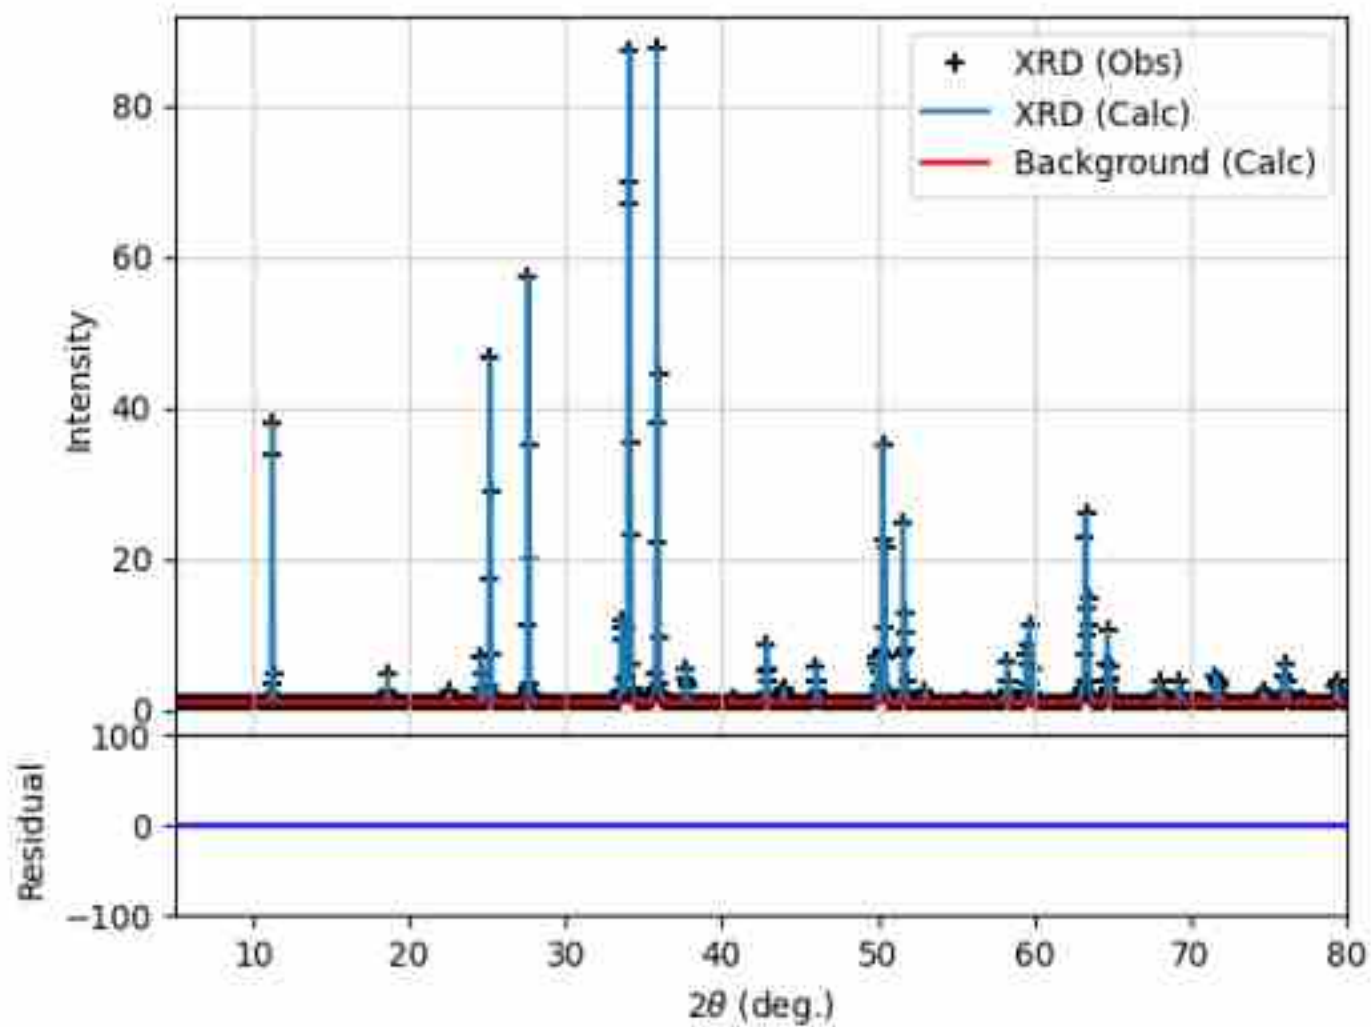

| RMSE before RR | Rwp     | RMSE after RR |
|----------------|---------|---------------|
| 0.012          | 0.00211 | 0.00059       |

# K<sub>2</sub>NaAlCl<sub>6</sub>

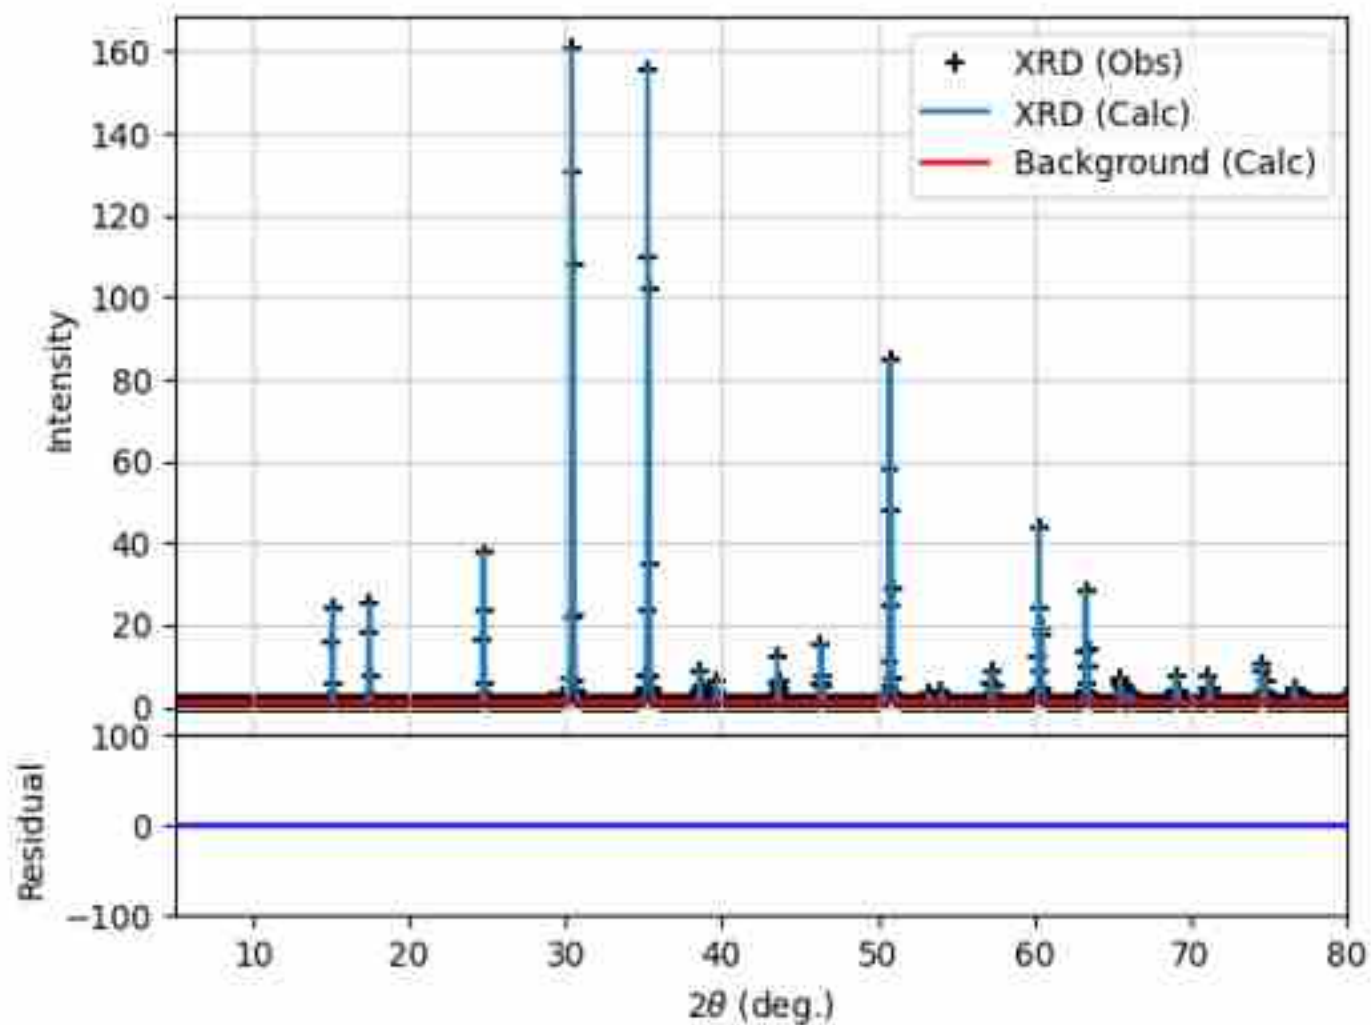

| RMSE before RR | Rwp     | RMSE after RR |
|----------------|---------|---------------|
| 0.012          | 0.03418 | 0.00281       |

# K<sub>2</sub>Na<sub>1</sub>Ti<sub>1</sub>F<sub>6</sub>

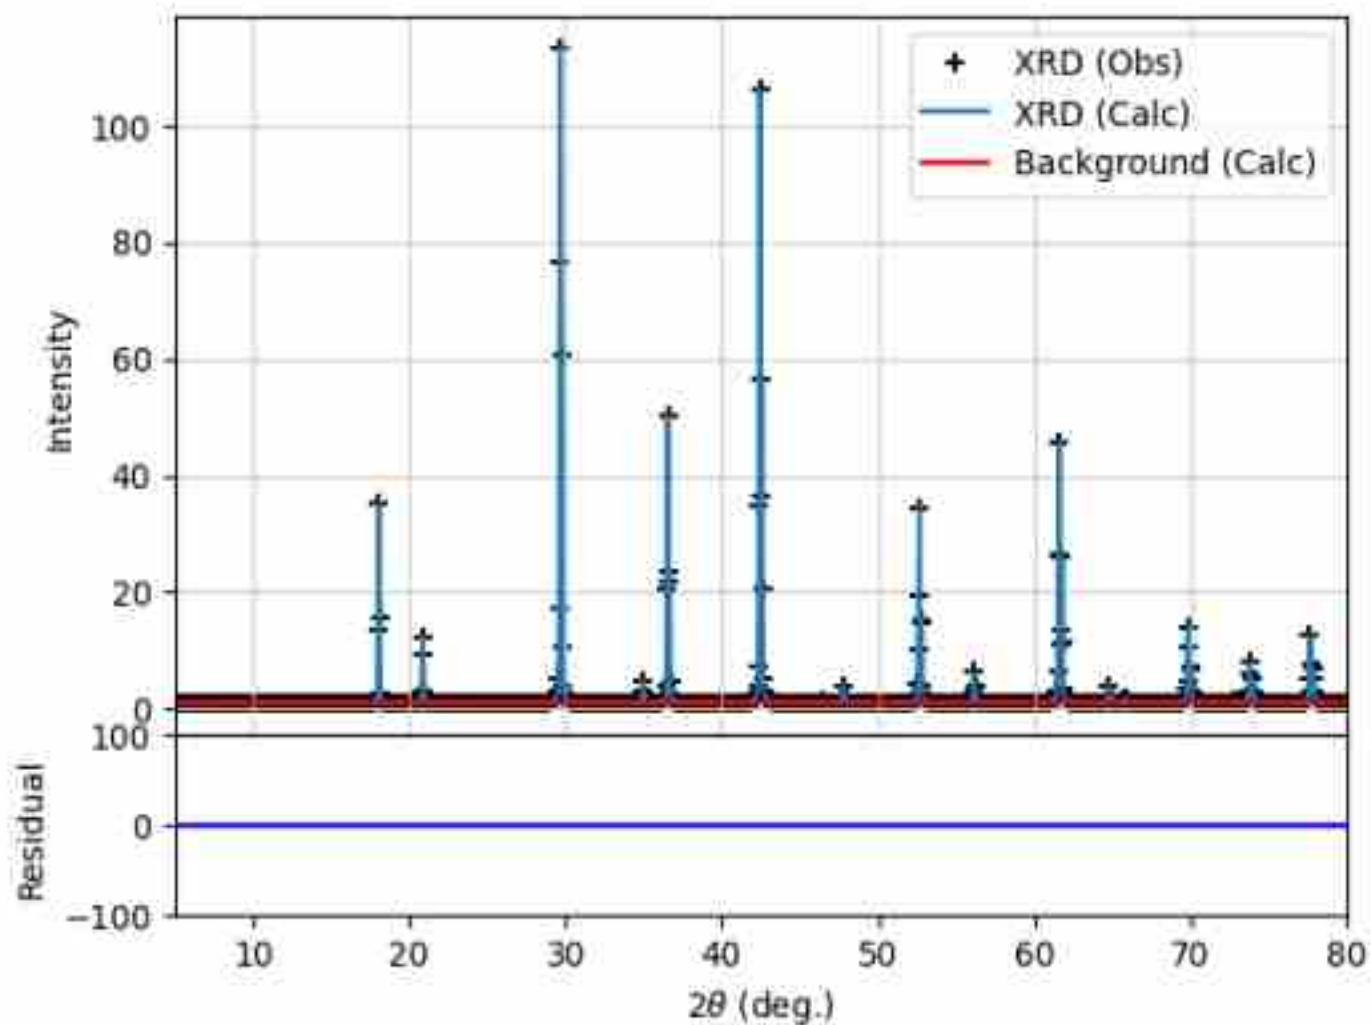

| RMSE before RR | Rwp     | RMSE after RR |
|----------------|---------|---------------|
| 0.012          | 0.04104 | 0.00475       |

# K<sub>2</sub>Ni<sub>1</sub>O<sub>2</sub>

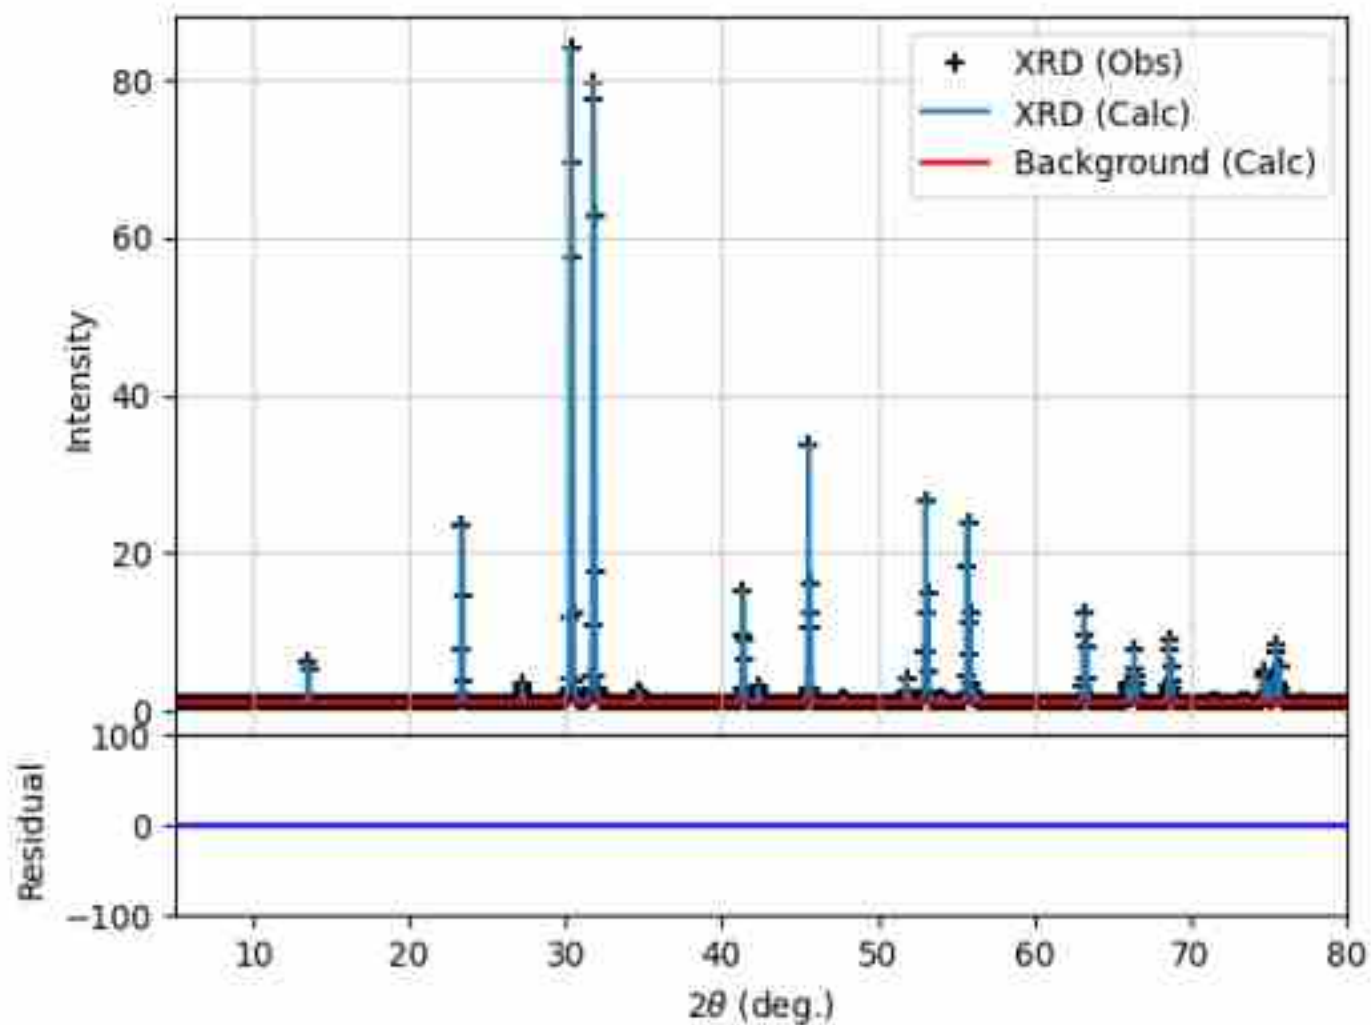

| RMSE before RR | Rwp     | RMSE after RR |
|----------------|---------|---------------|
| 0.012          | 0.00646 | 0.00213       |

# K<sub>2</sub>Pd<sub>1</sub>S<sub>2</sub>

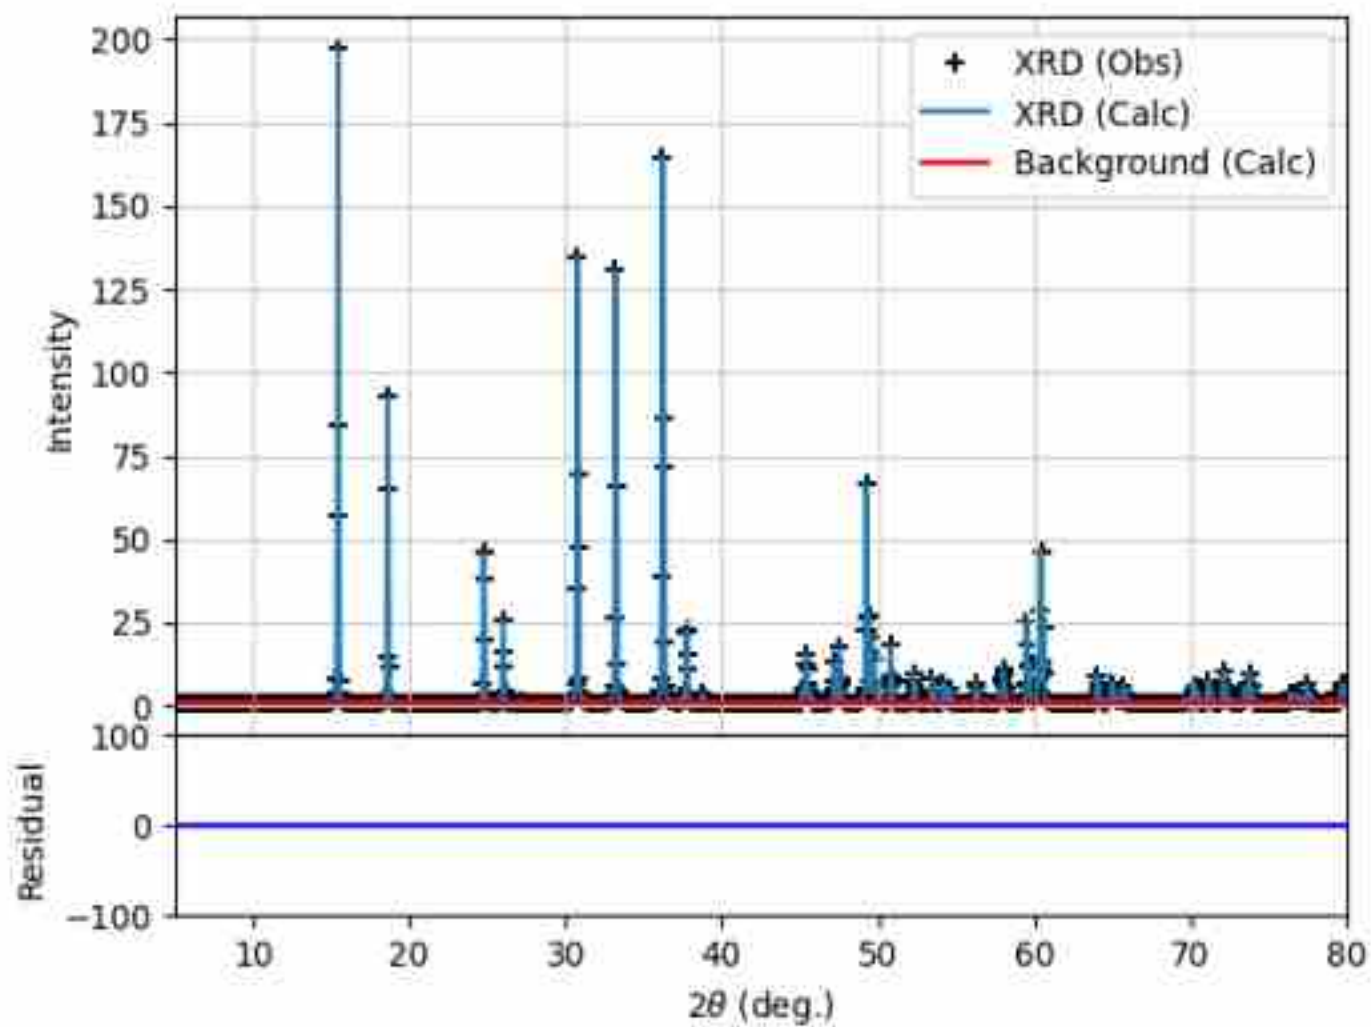

| RMSE before RR | Rwp     | RMSE after RR |
|----------------|---------|---------------|
| 0.012          | 0.00264 | 0.00017       |

# K3A11Cl6

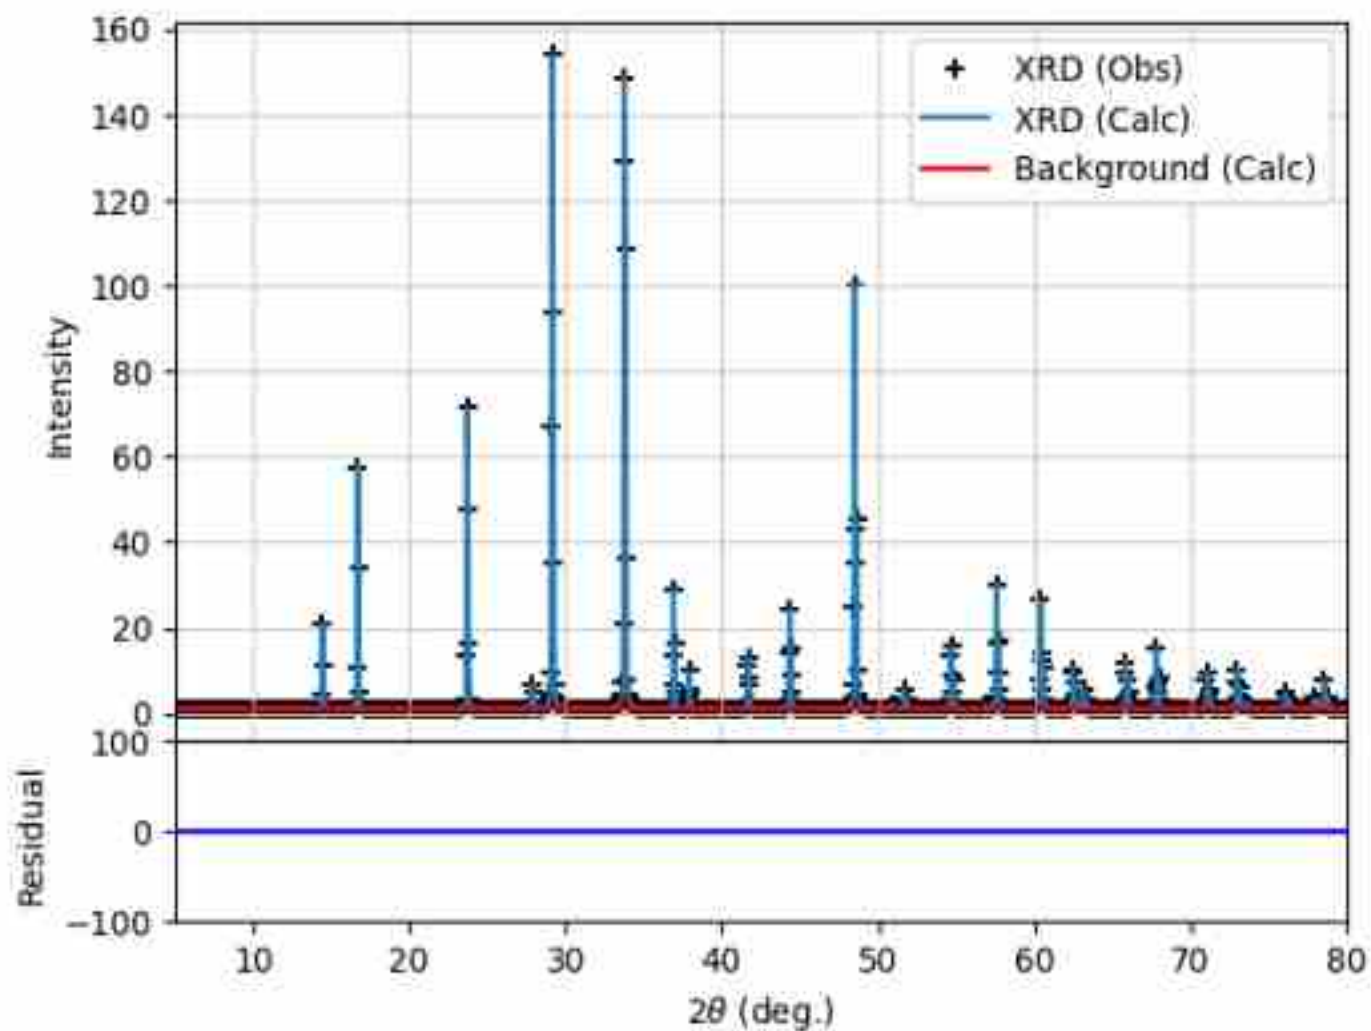

| RMSE before RR | Rwp     | RMSE after RR |
|----------------|---------|---------------|
| 0.012          | 0.02372 | 0.00304       |

# K4Cd1P2

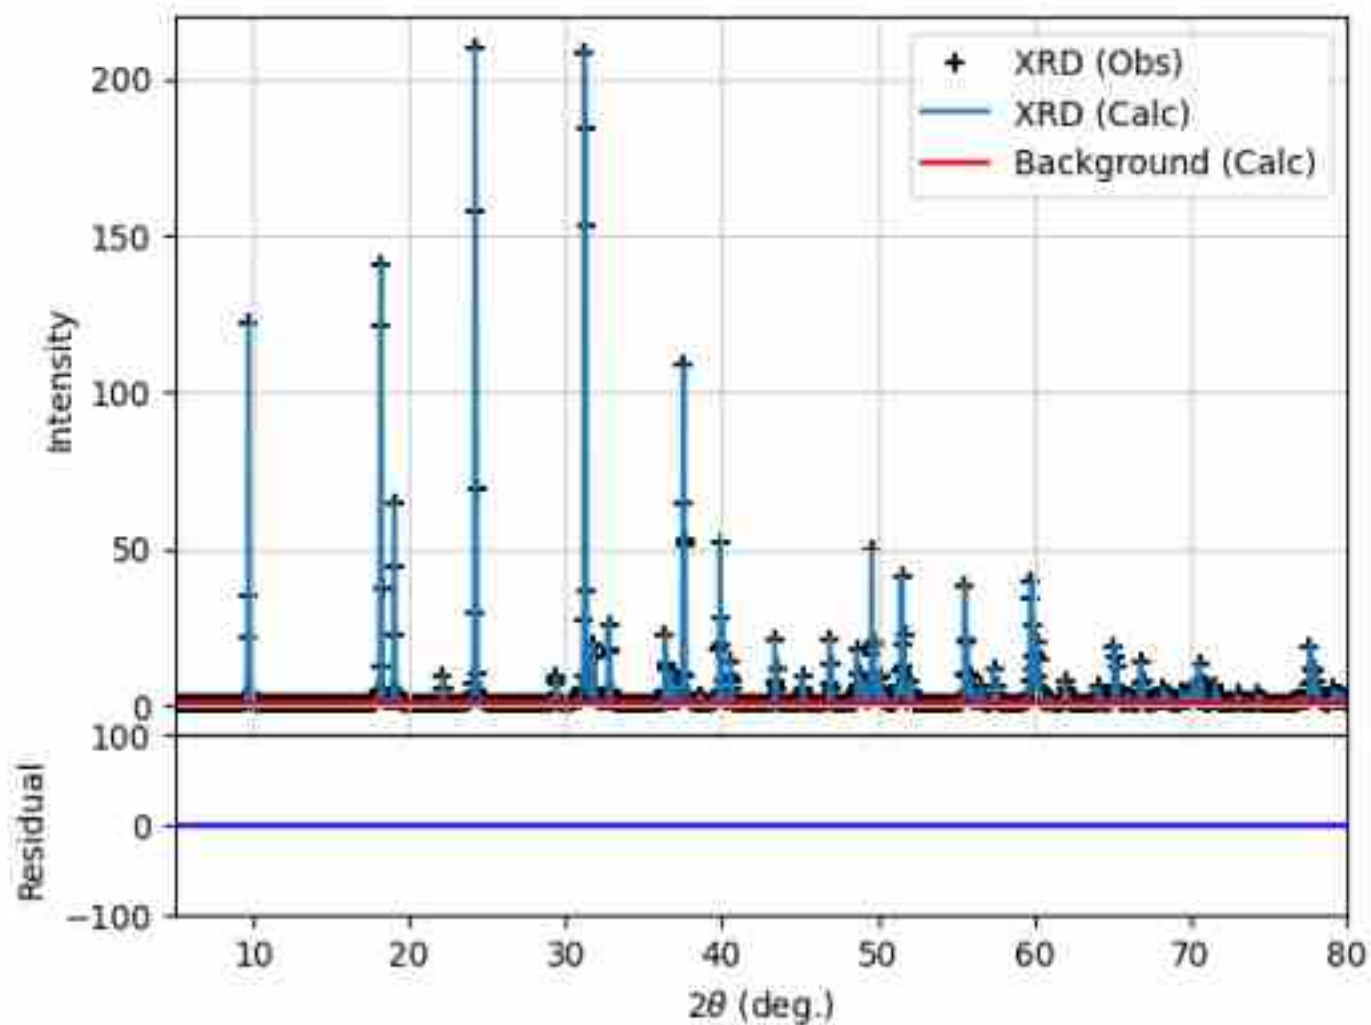

| RMSE before RR | Rwp    | RMSE after RR |
|----------------|--------|---------------|
| 0.012          | 0.0028 | 0.00056       |

# La1Co2As2

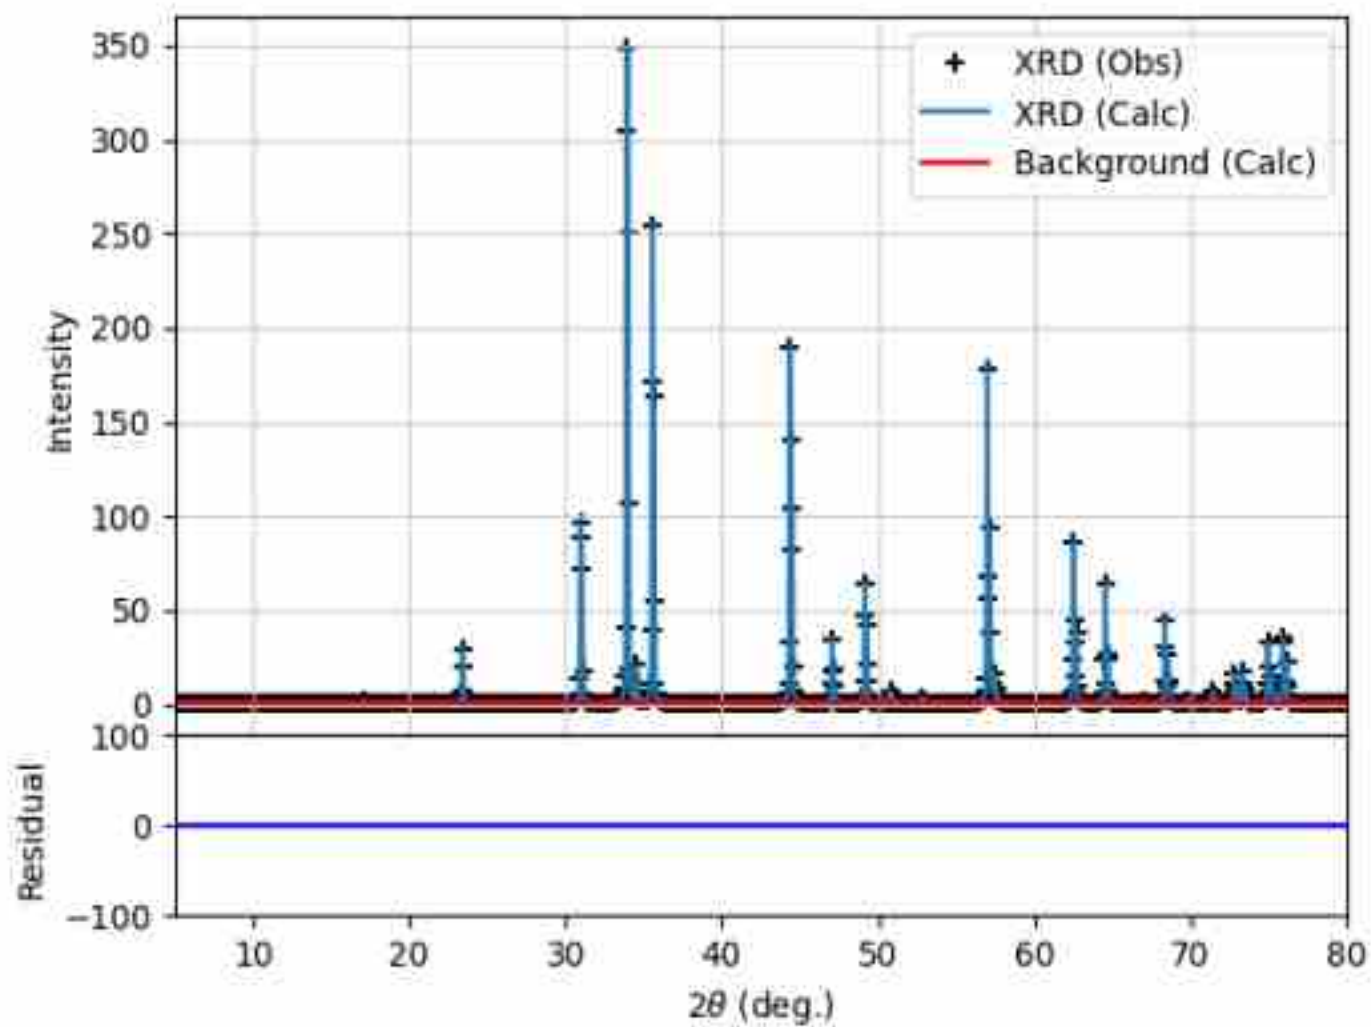

| RMSE before RR | Rwp   | RMSE after RR |
|----------------|-------|---------------|
| 0.012          | 0.003 | 0.00044       |



# La1U1S2

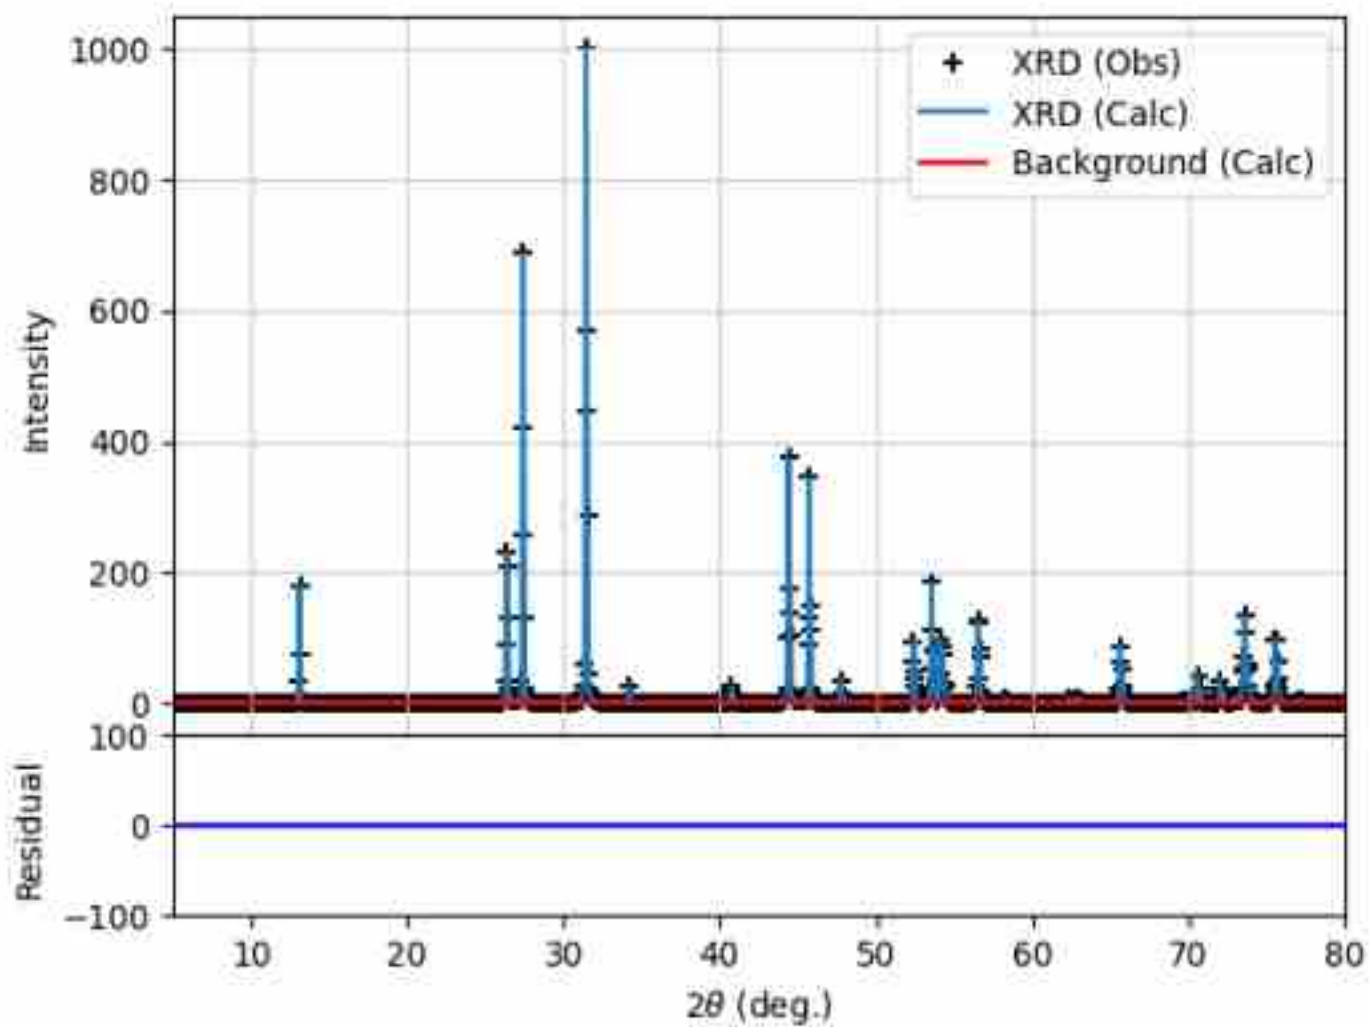

| RMSE before RR | Rwp    | RMSE after RR |
|----------------|--------|---------------|
| 0.012          | 0.0044 | 0.00083       |

# La<sub>1</sub>Zn<sub>3</sub>Ni<sub>2</sub>

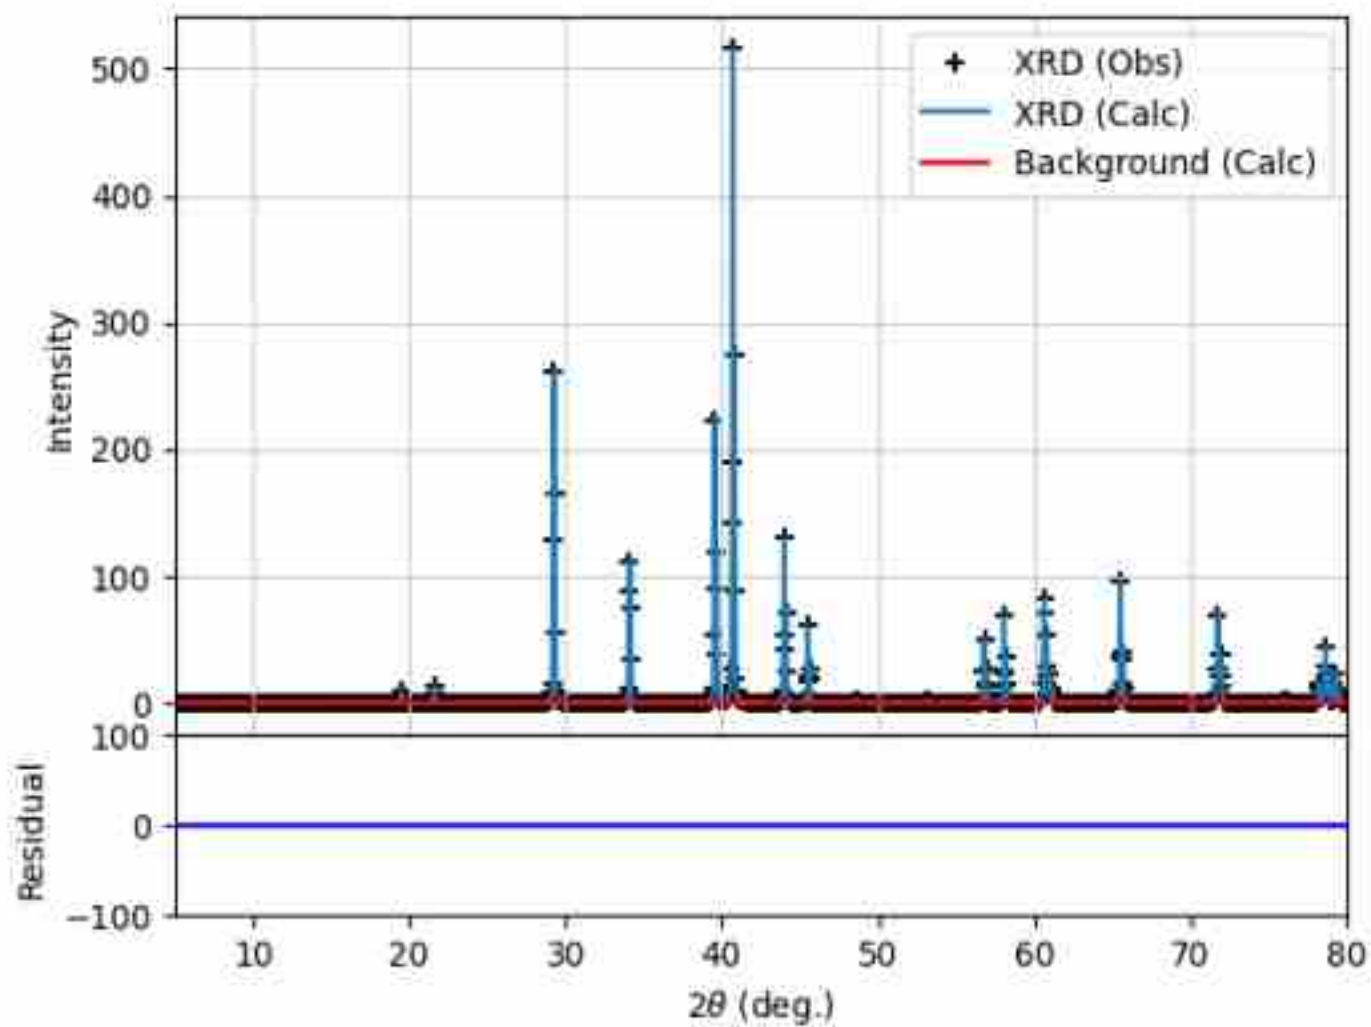

| RMSE before RR | Rwp     | RMSE after RR |
|----------------|---------|---------------|
| 0.012          | 0.00638 | 0.0007        |

# La<sub>2</sub>Mg<sub>1</sub>Fe<sub>1</sub>O<sub>6</sub>

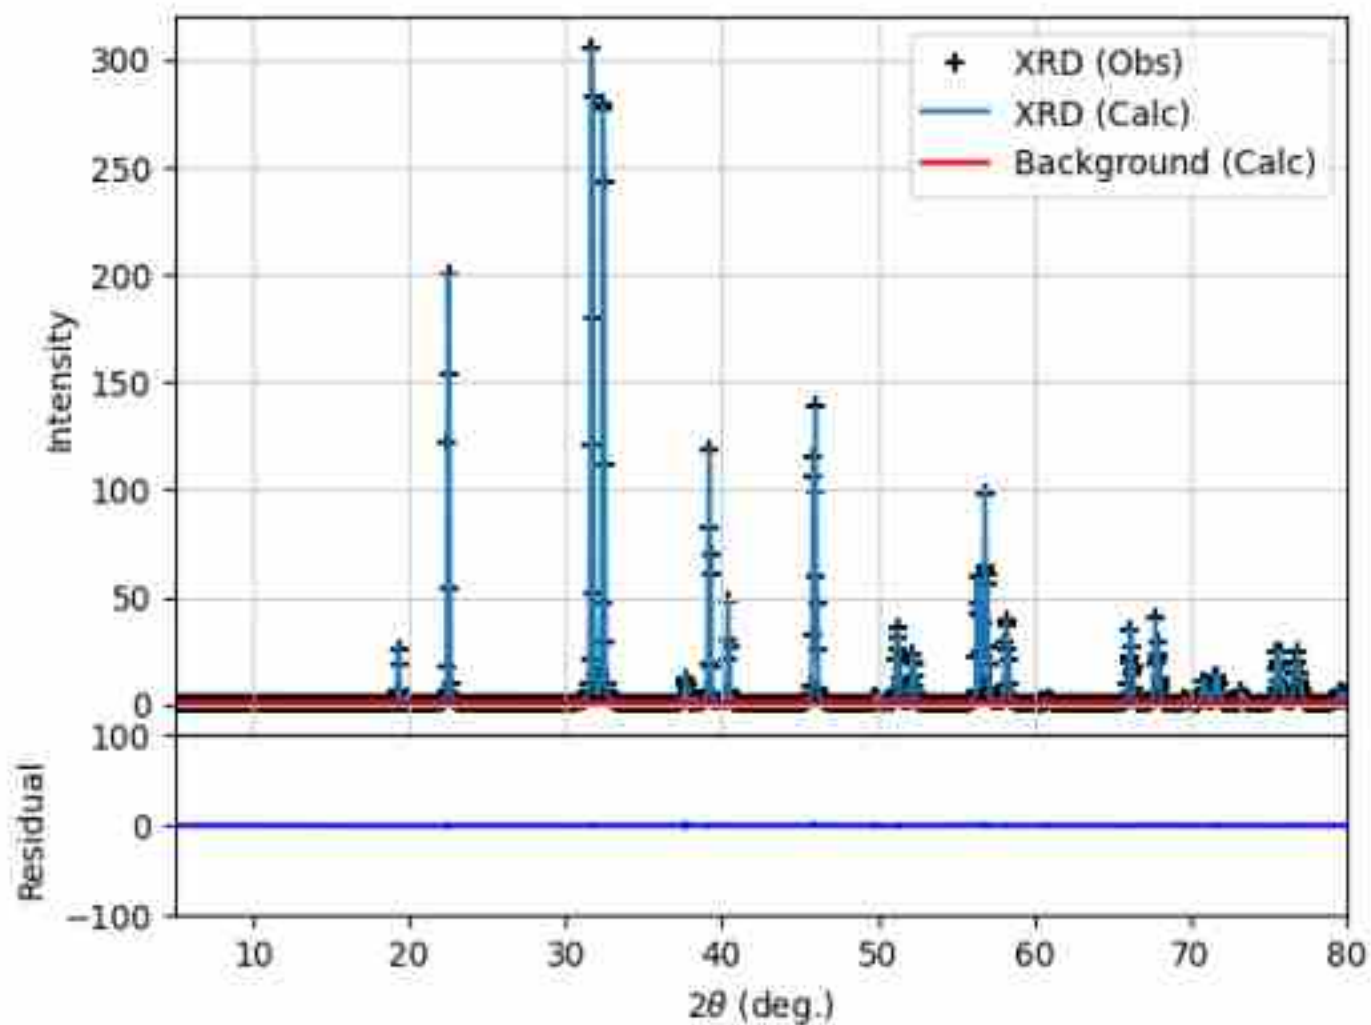

| RMSE before RR | Rwp     | RMSE after RR |
|----------------|---------|---------------|
| 0.012          | 2.54607 | 0.04306       |

# La<sub>2</sub>Mn<sub>2</sub>Si<sub>2</sub>

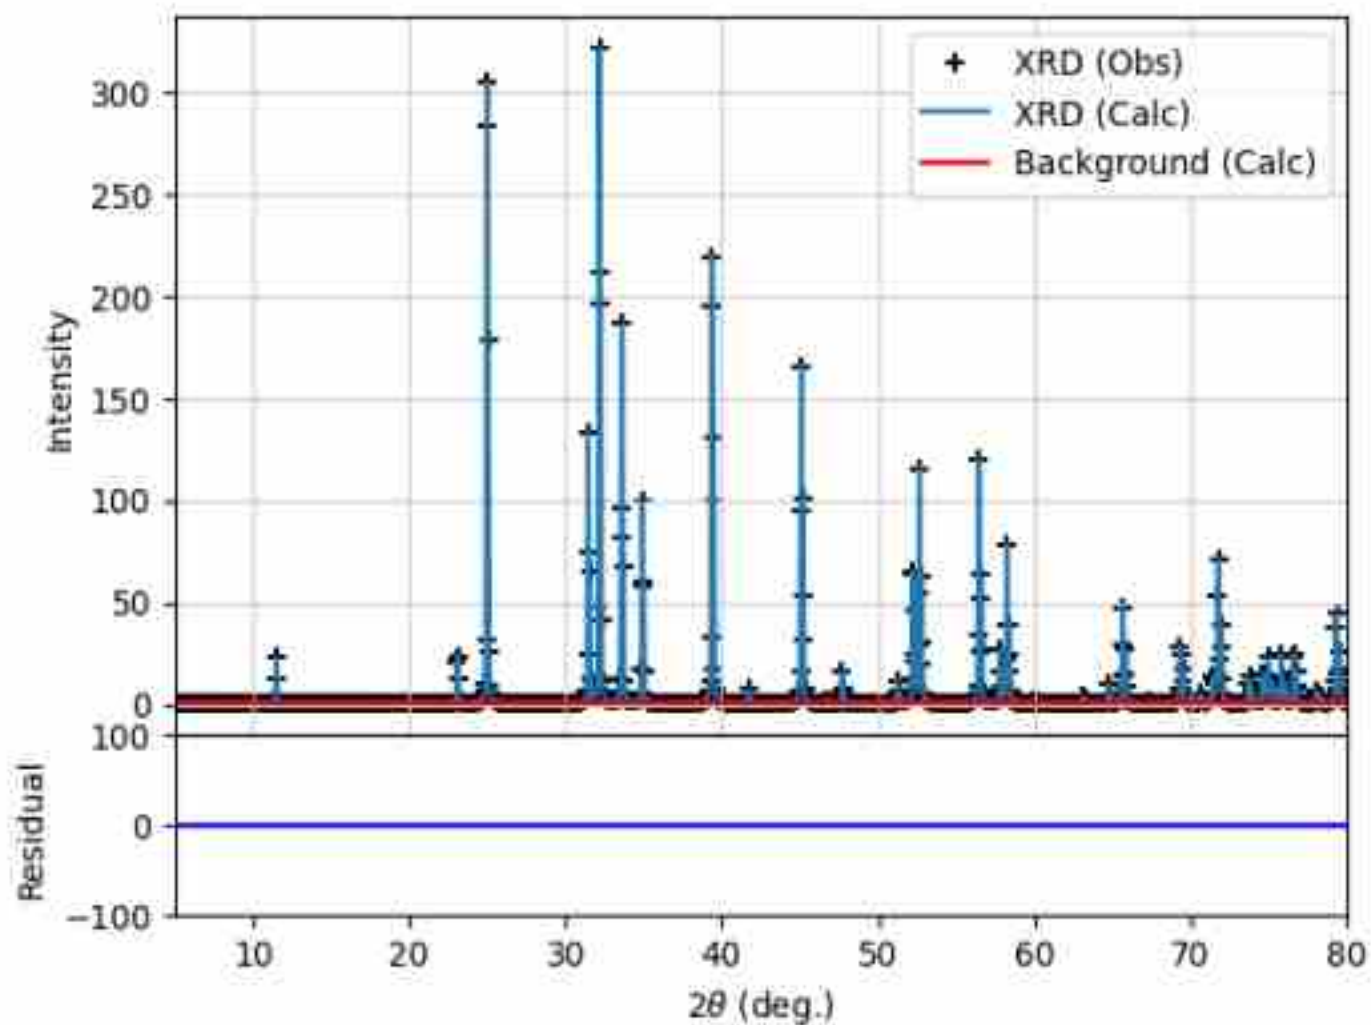

| RMSE before RR | Rwp     | RMSE after RR |
|----------------|---------|---------------|
| 0.012          | 0.00414 | 0.00066       |

# La2Nd6

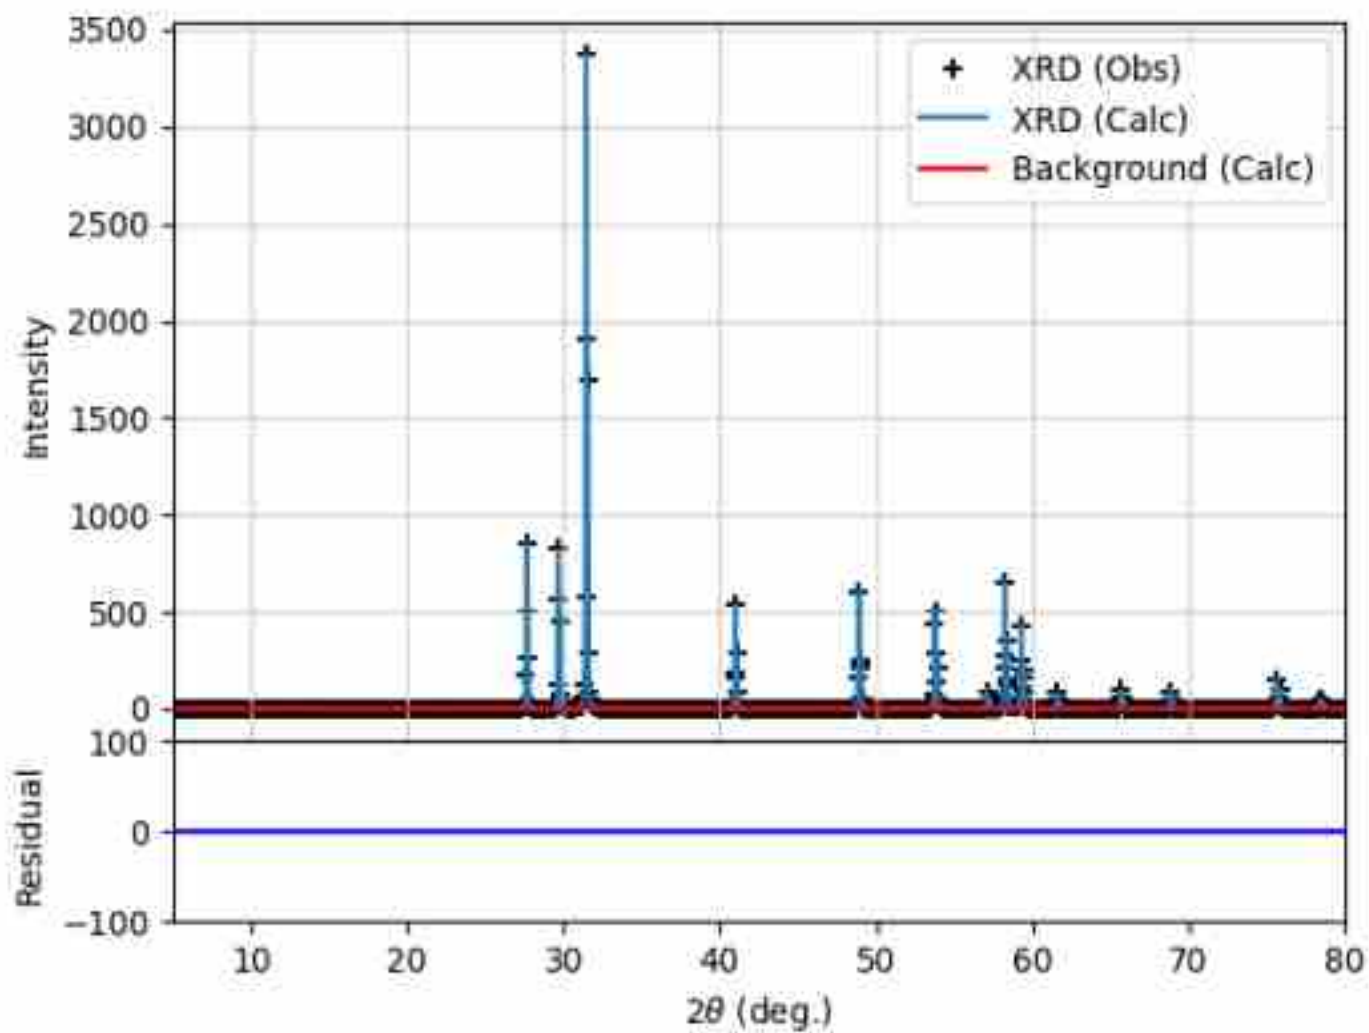

| RMSE before RR | Rwp    | RMSE after RR |
|----------------|--------|---------------|
| 0.012          | 0.0217 | 0.00086       |

# La<sub>2</sub>Sb<sub>4</sub>Au<sub>2</sub>

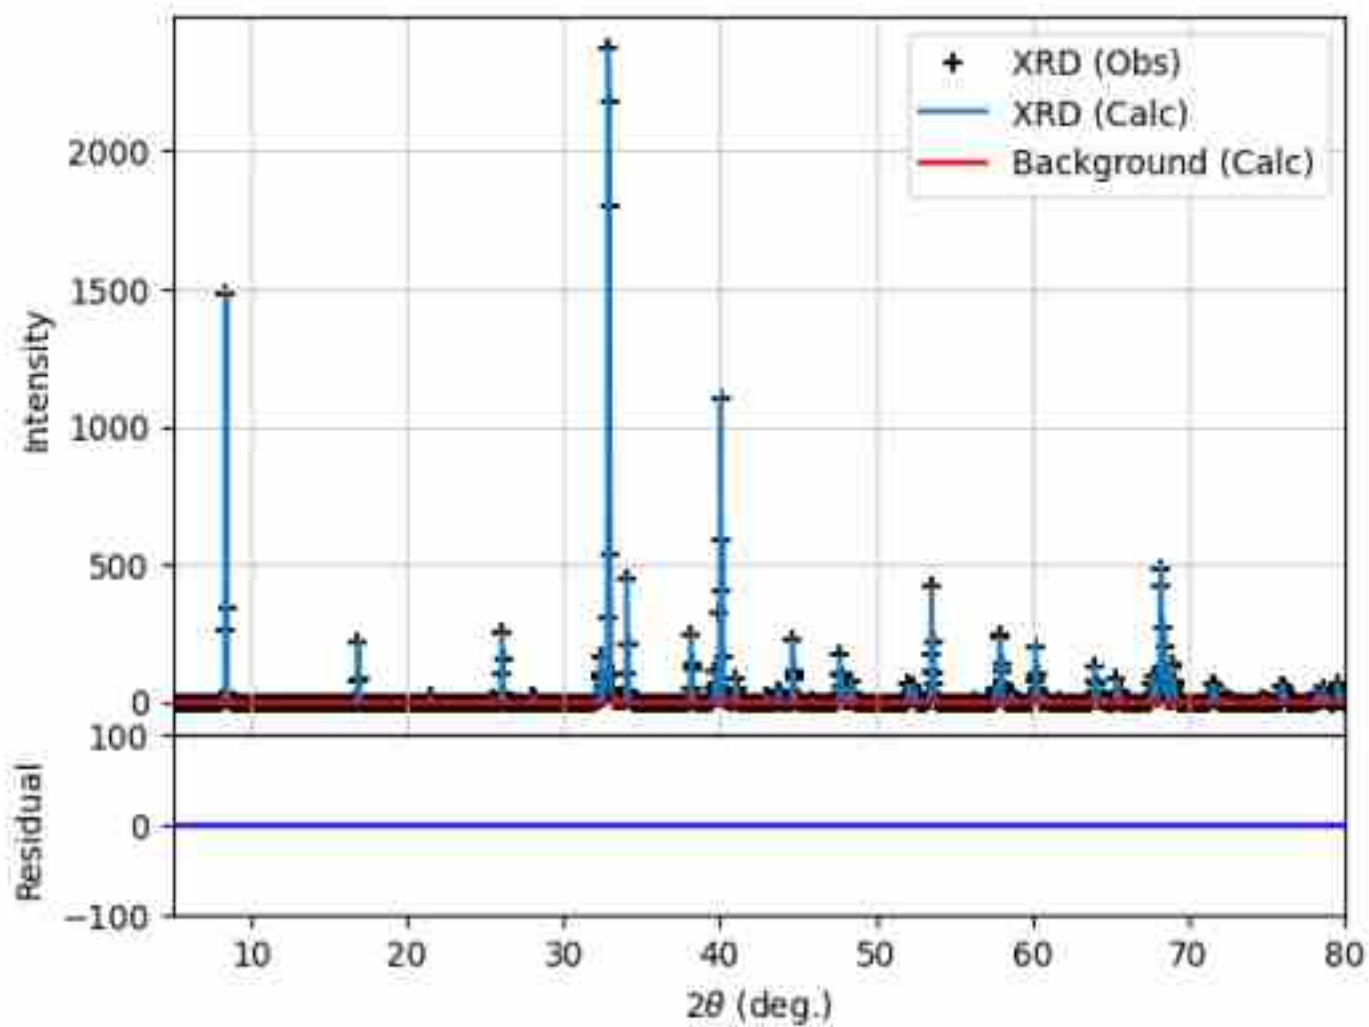

| RMSE before RR | Rwp     | RMSE after RR |
|----------------|---------|---------------|
| 0.012          | 0.00492 | 0.00018       |

# La<sub>2</sub>Si<sub>4</sub>Ir<sub>4</sub>

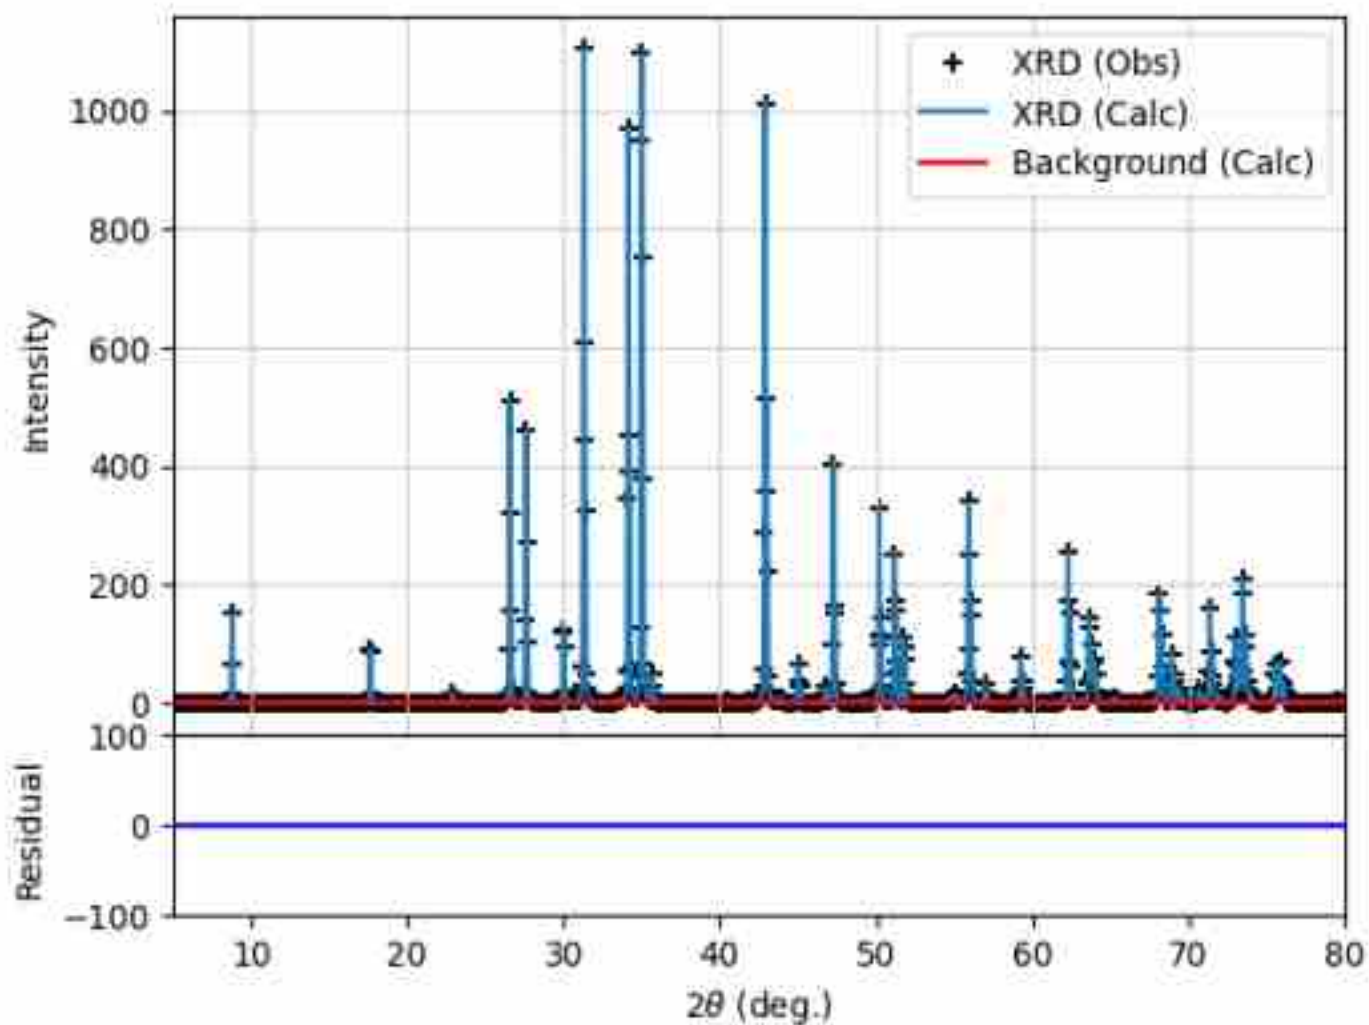

| RMSE before RR | Rwp    | RMSE after RR |
|----------------|--------|---------------|
| 0.012          | 0.0051 | 0.00071       |

# La<sub>3</sub>B<sub>3</sub>Pt<sub>6</sub>

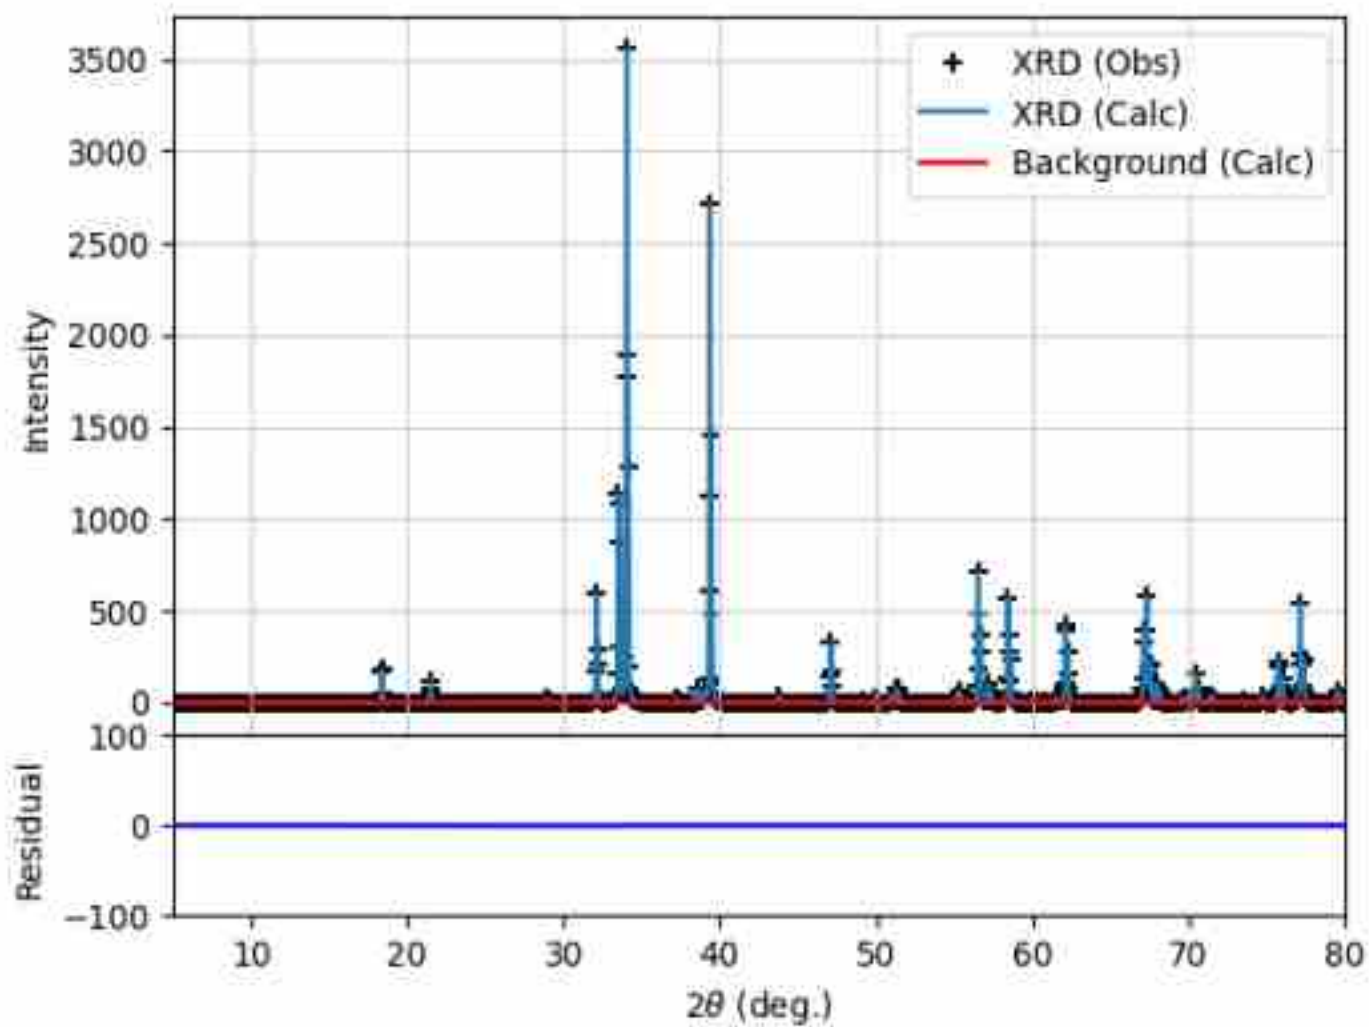

| RMSE before RR | Rwp     | RMSE after RR |
|----------------|---------|---------------|
| 0.012          | 0.02321 | 0.00431       |



# Li1Ce2H1O3

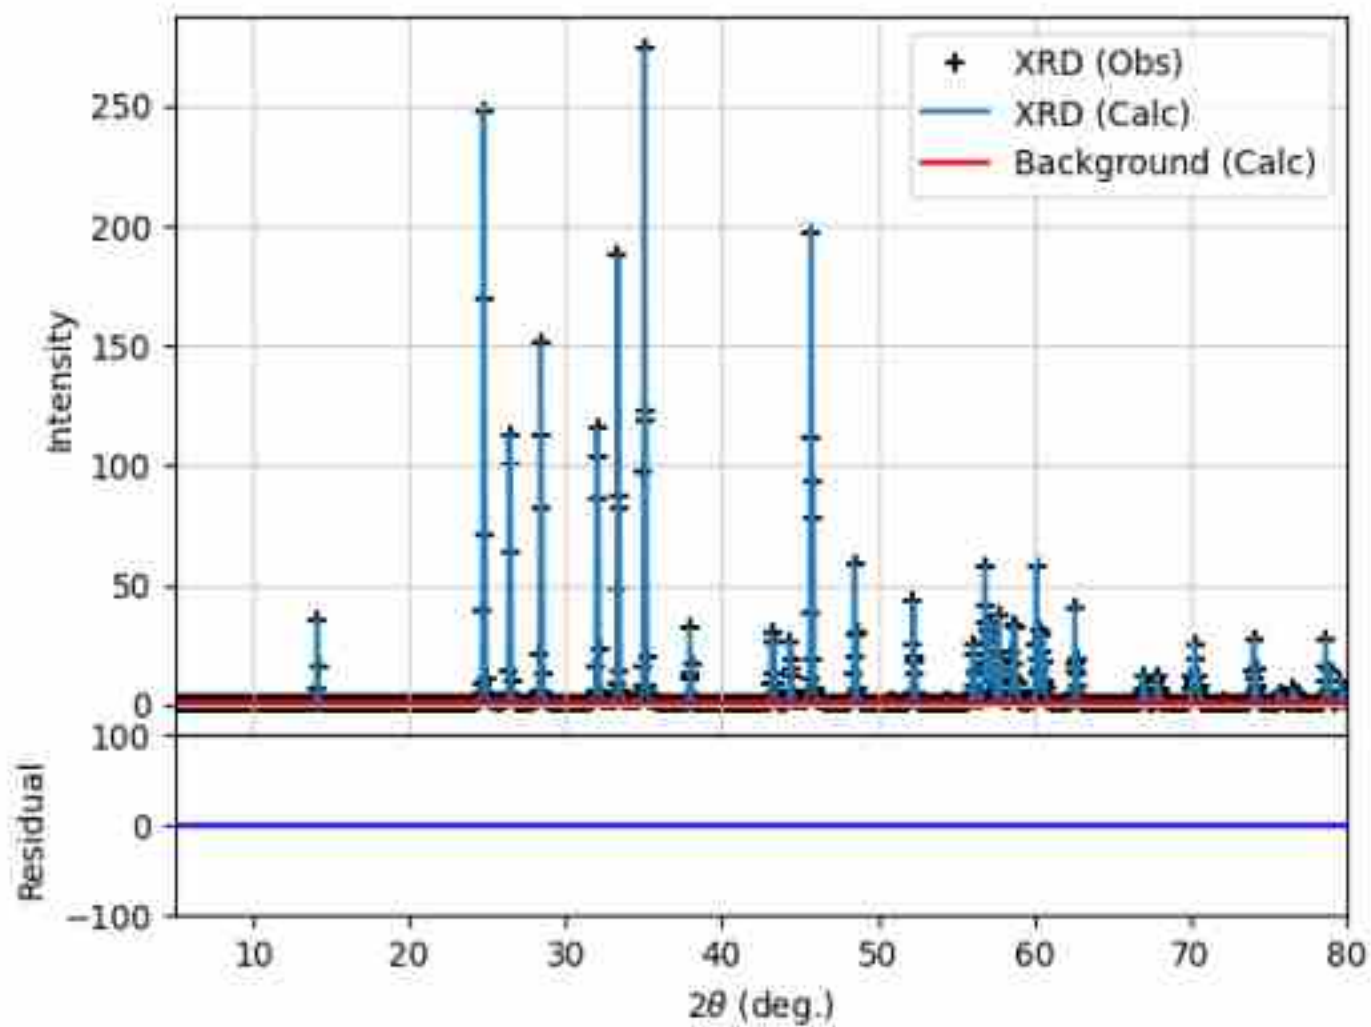

| RMSE before RR | Rwp     | RMSE after RR |
|----------------|---------|---------------|
| 0.012          | 0.00388 | 0.00176       |

# Li1Os1F6

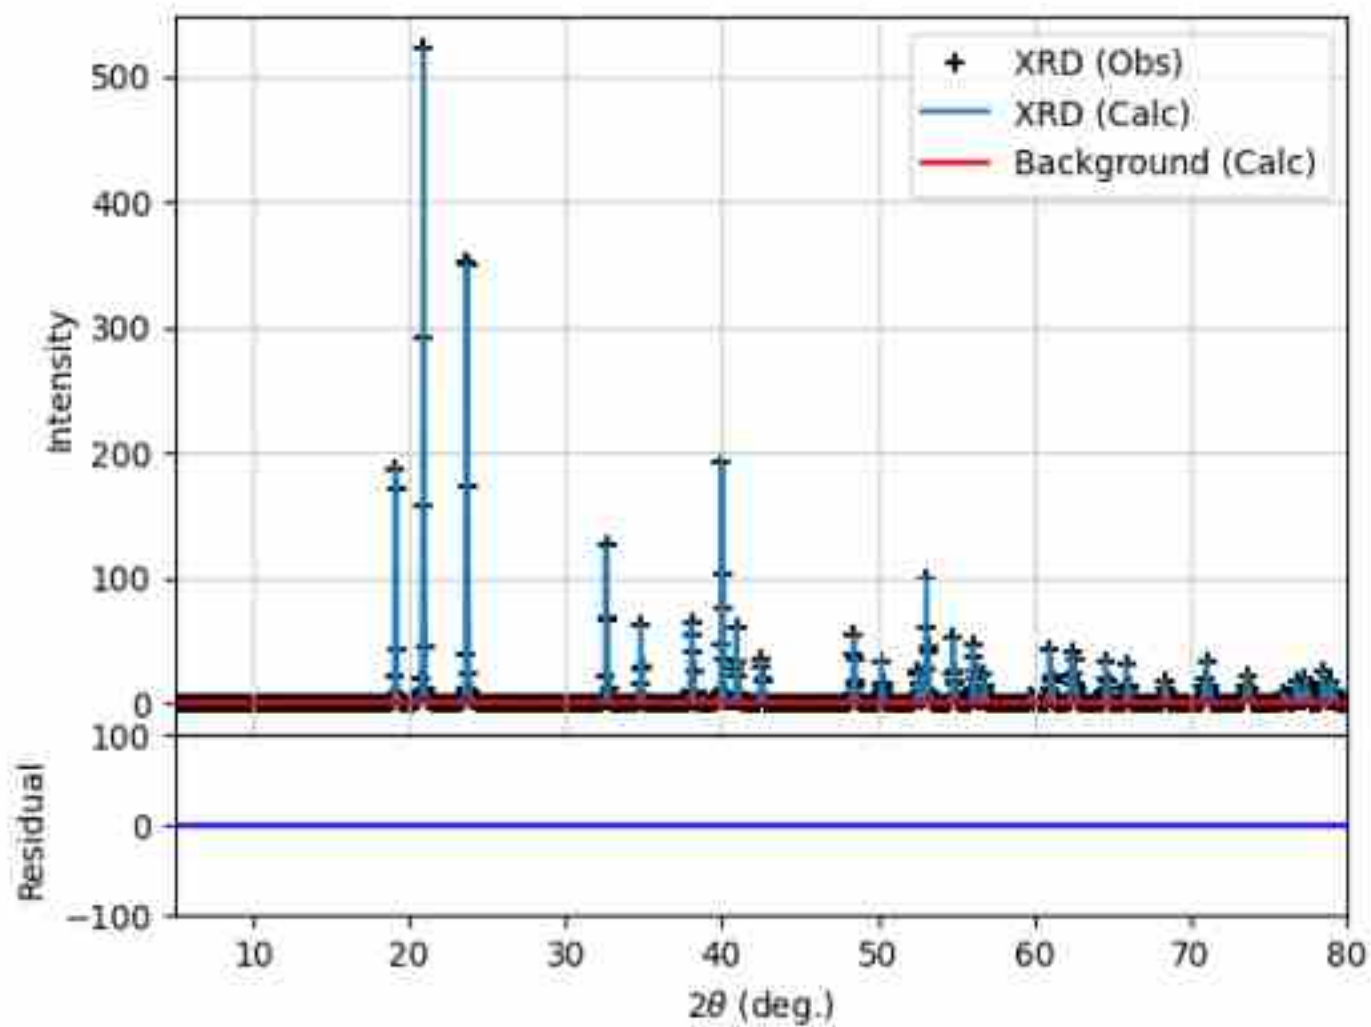

| RMSE before RR | Rwp    | RMSE after RR |
|----------------|--------|---------------|
| 0.012          | 0.0039 | 0.00238       |

# Li1Sb1S2

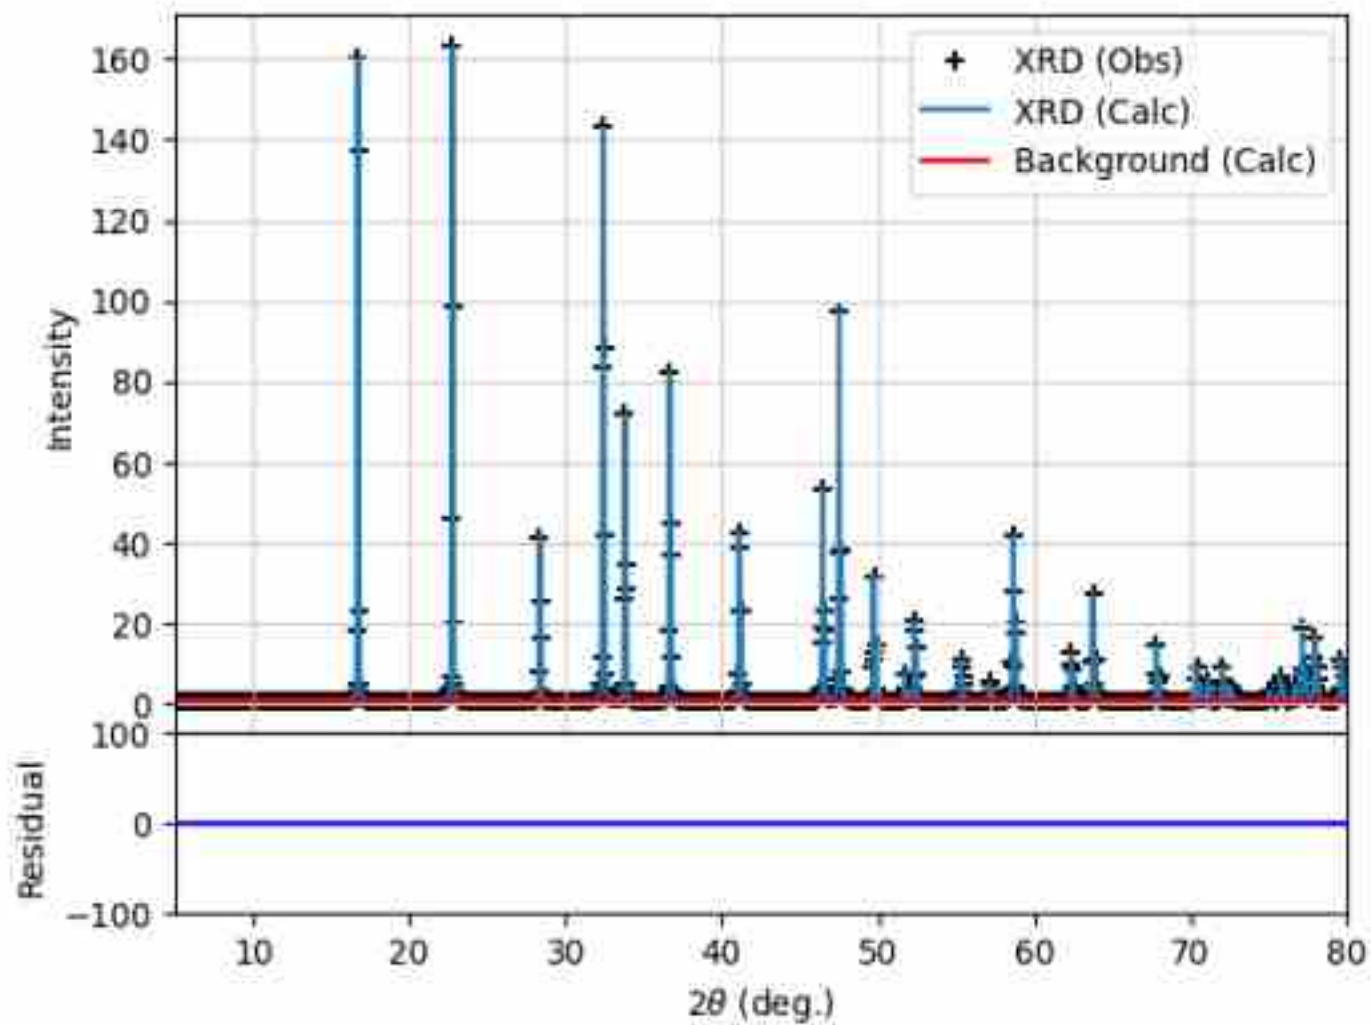

| RMSE before RR | Rwp     | RMSE after RR |
|----------------|---------|---------------|
| 0.012          | 0.00378 | 0.00196       |

# Li1Zn3

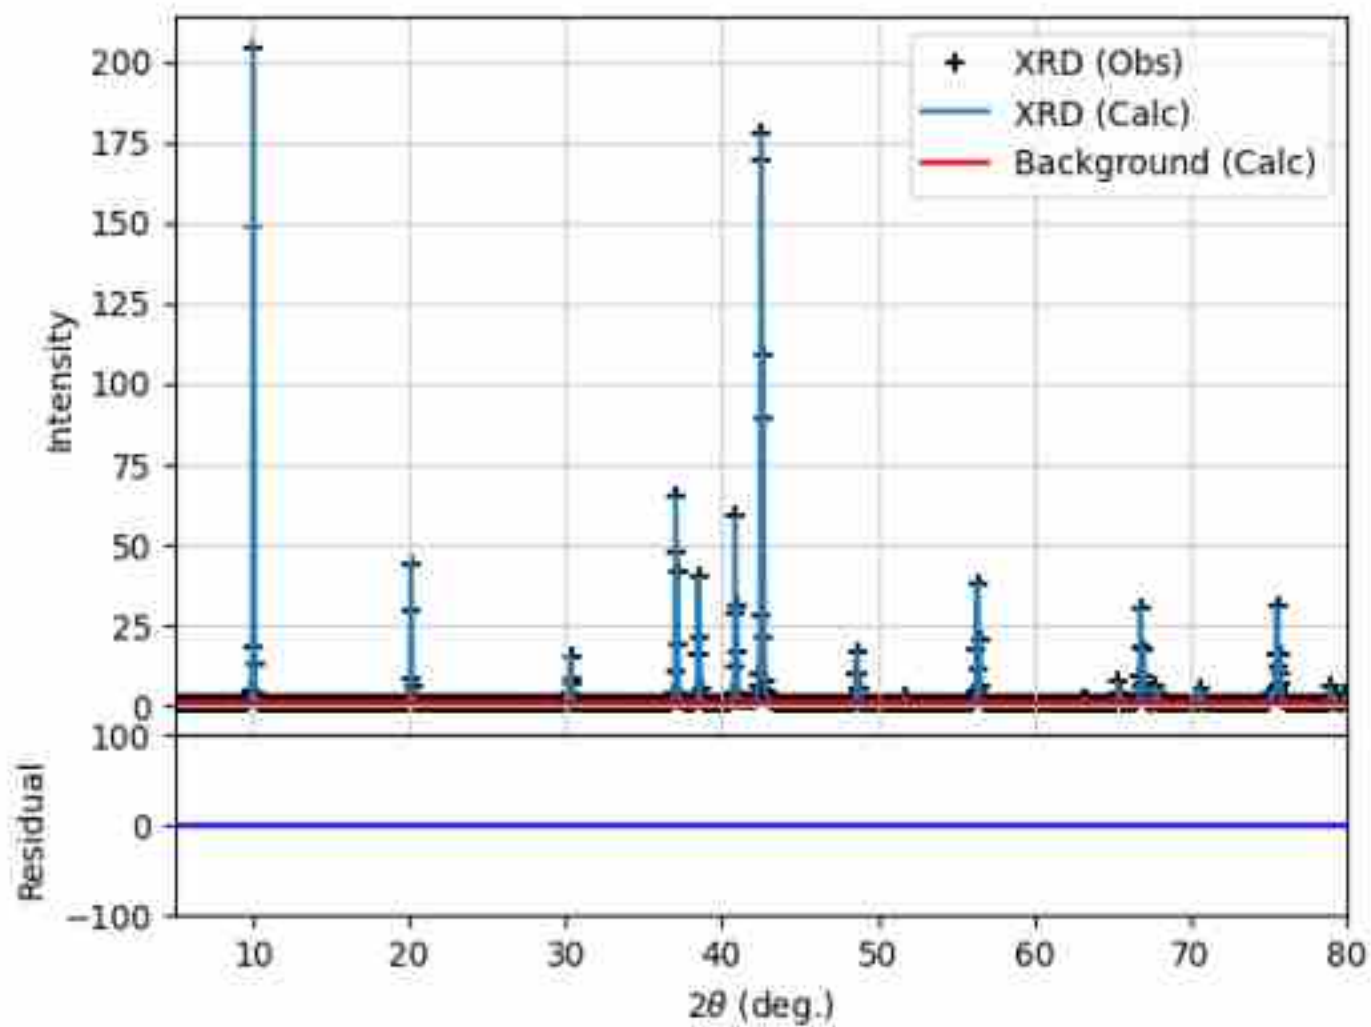

| RMSE before RR | Rwp     | RMSE after RR |
|----------------|---------|---------------|
| 0.012          | 0.00377 | 0.00139       |

# Li<sub>2</sub>Ta<sub>2</sub>S<sub>4</sub>

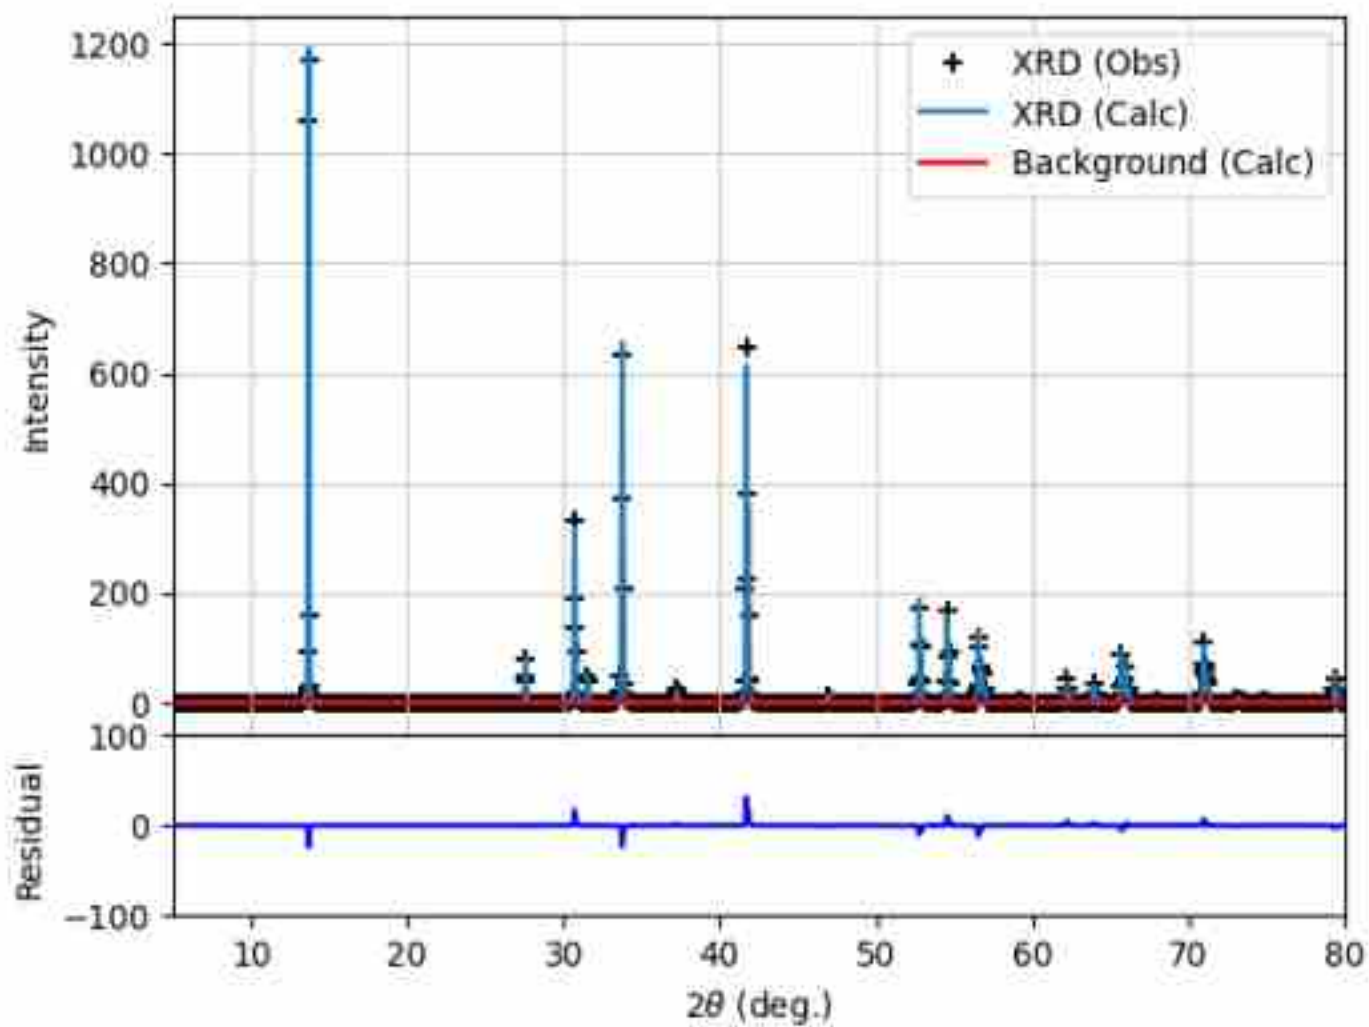

| RMSE before RR | Rwp     | RMSE after RR |
|----------------|---------|---------------|
| 0.012          | 4.50475 | 0.38079       |

# Li<sub>4</sub>Ti1Cr3O<sub>8</sub>

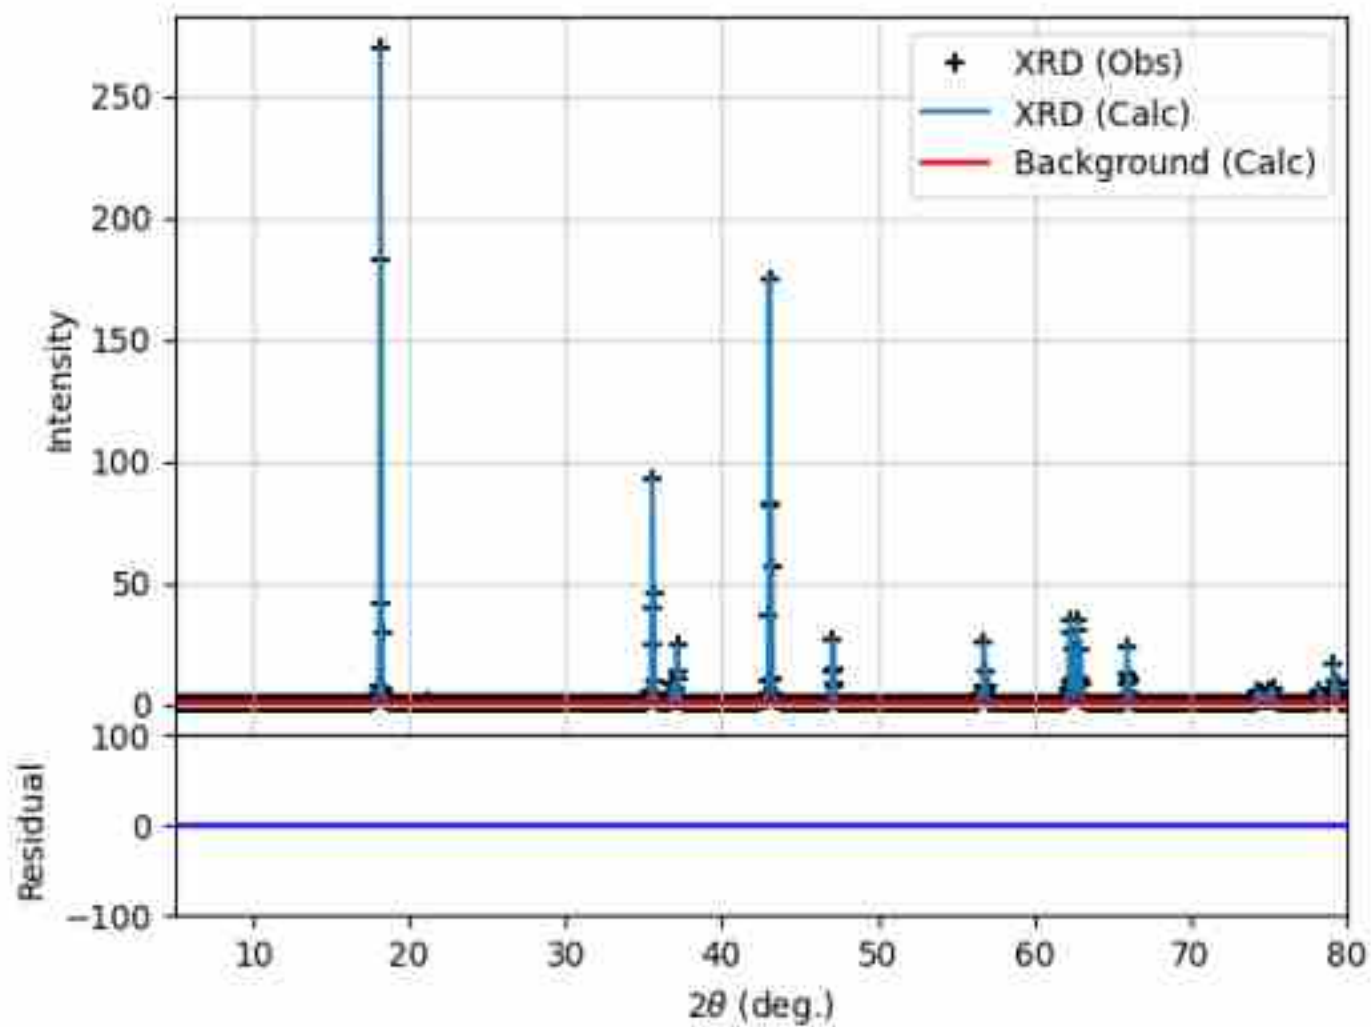

| RMSE before RR | Rwp     | RMSE after RR |
|----------------|---------|---------------|
| 0.012          | 0.00525 | 0.0021        |

# Li5Sb1S1

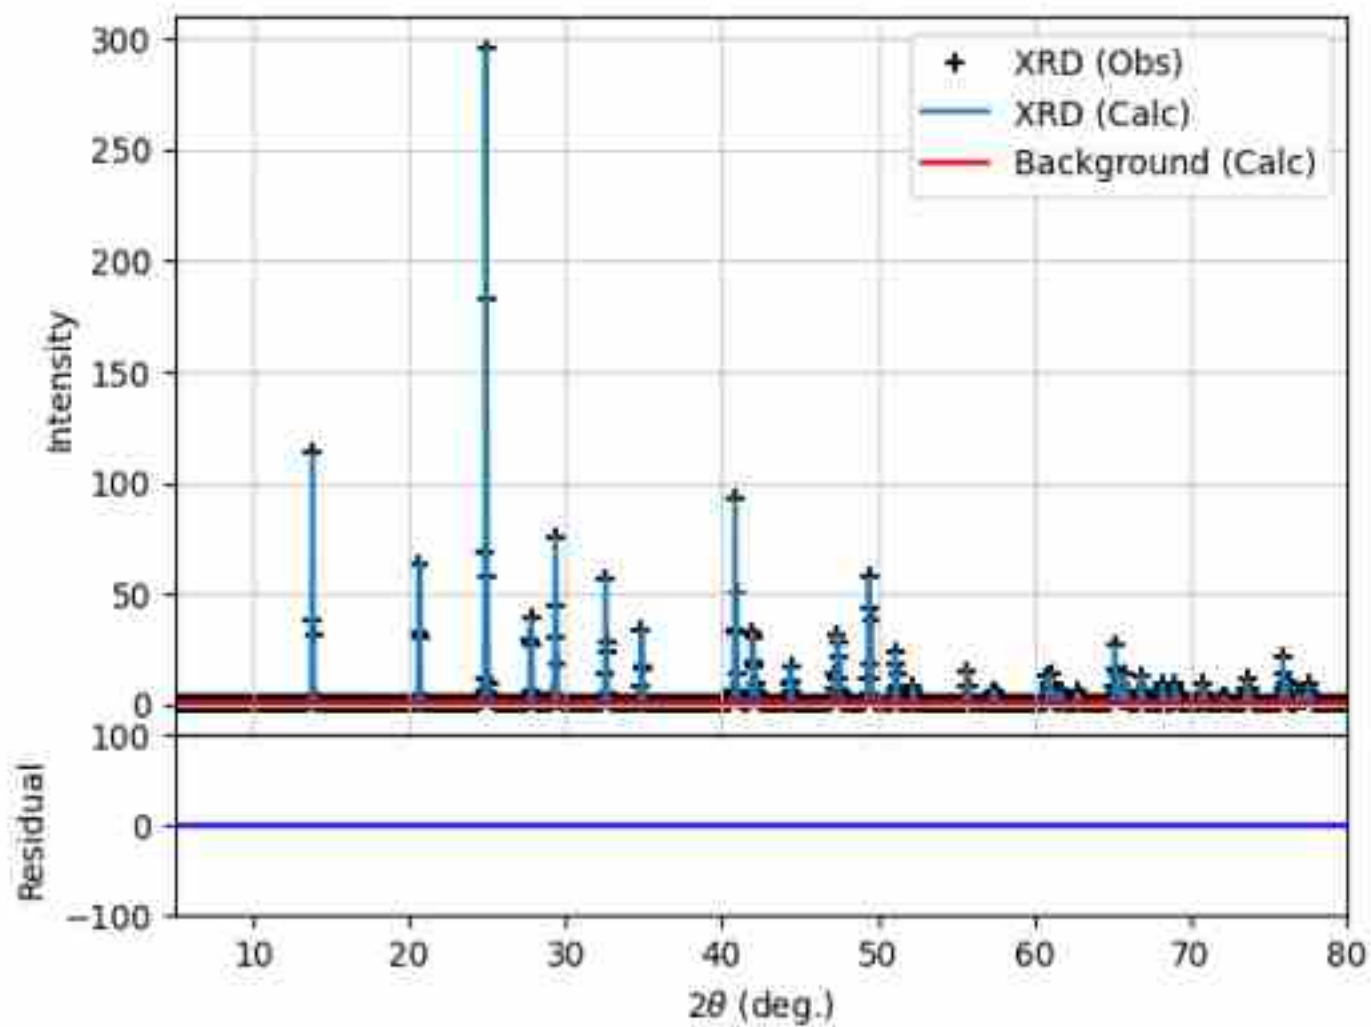

| RMSE before RR | Rwp     | RMSE after RR |
|----------------|---------|---------------|
| 0.012          | 0.01459 | 0.00497       |

# Li6Mg2

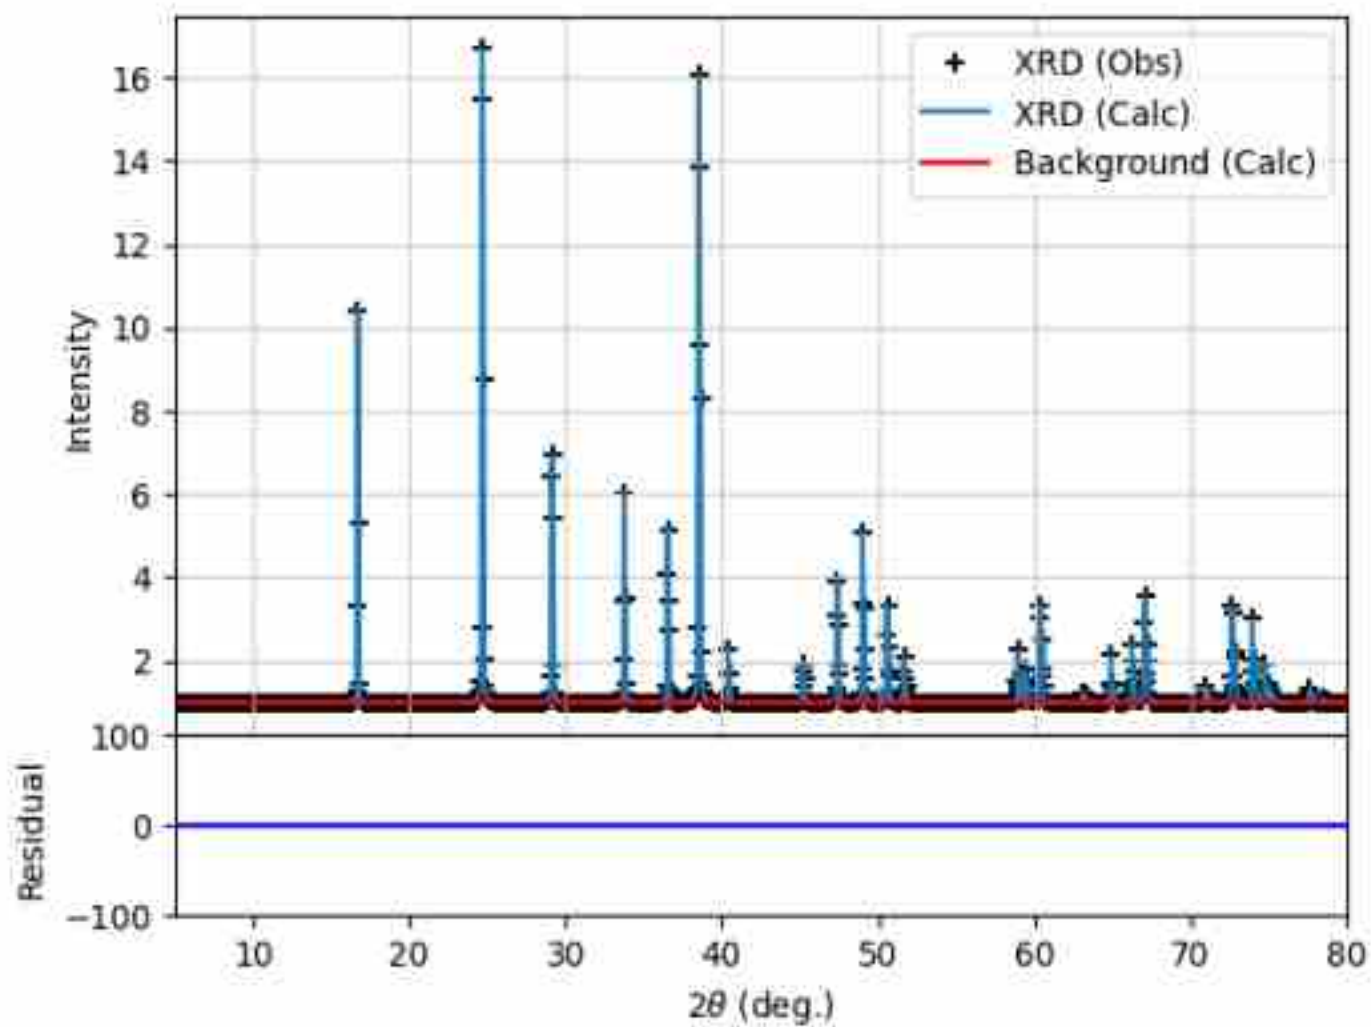

| RMSE before RR | Rwp    | RMSE after RR |
|----------------|--------|---------------|
| 0.012          | 0.0036 | 0.00423       |



# Lu<sub>4</sub>MnS<sub>7</sub>

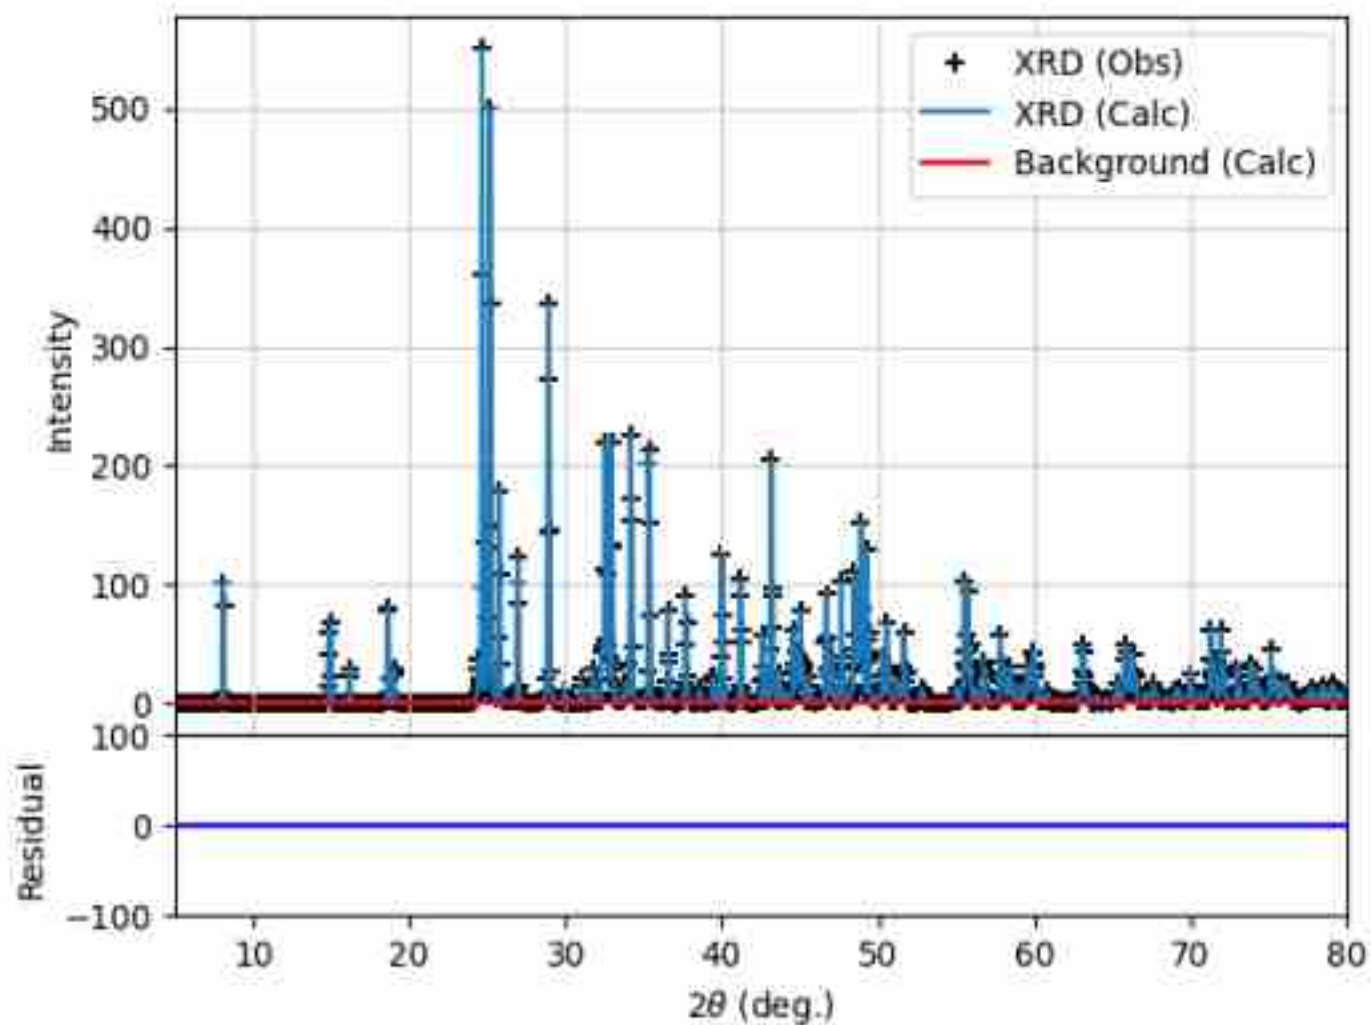

| RMSE before RR | Rwp     | RMSE after RR |
|----------------|---------|---------------|
| 0.012          | 0.00329 | 0.00035       |

# Mg<sub>1</sub>Hg<sub>2</sub>

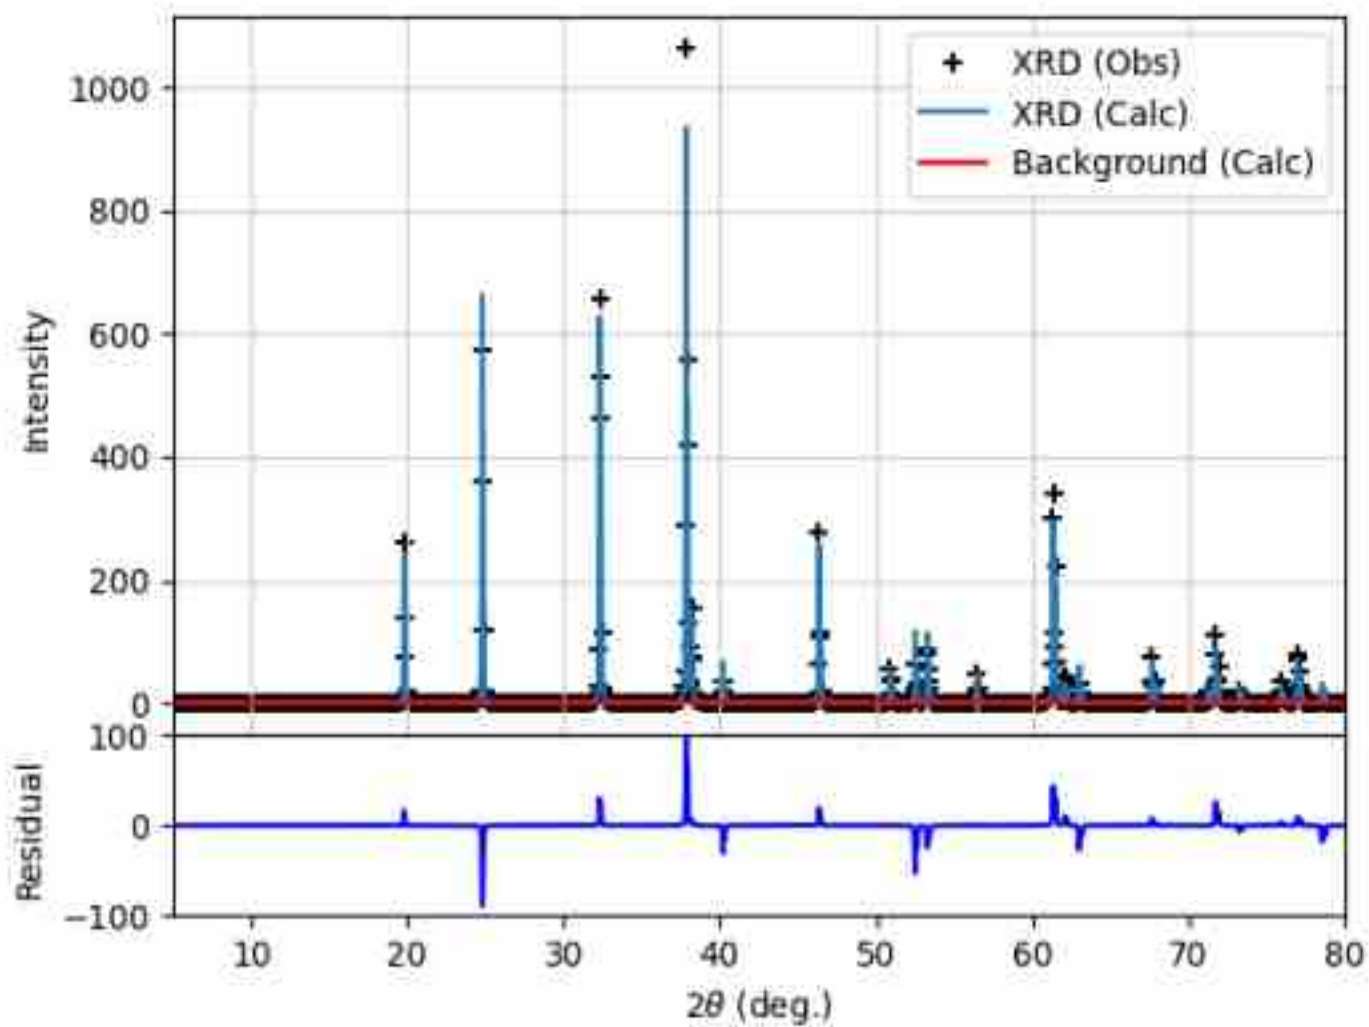

| RMSE before RR | Rwp      | RMSE after RR |
|----------------|----------|---------------|
| 0.012          | 19.64282 | 0.02472       |

# Mg<sub>1</sub>Zn<sub>3</sub>S<sub>4</sub>

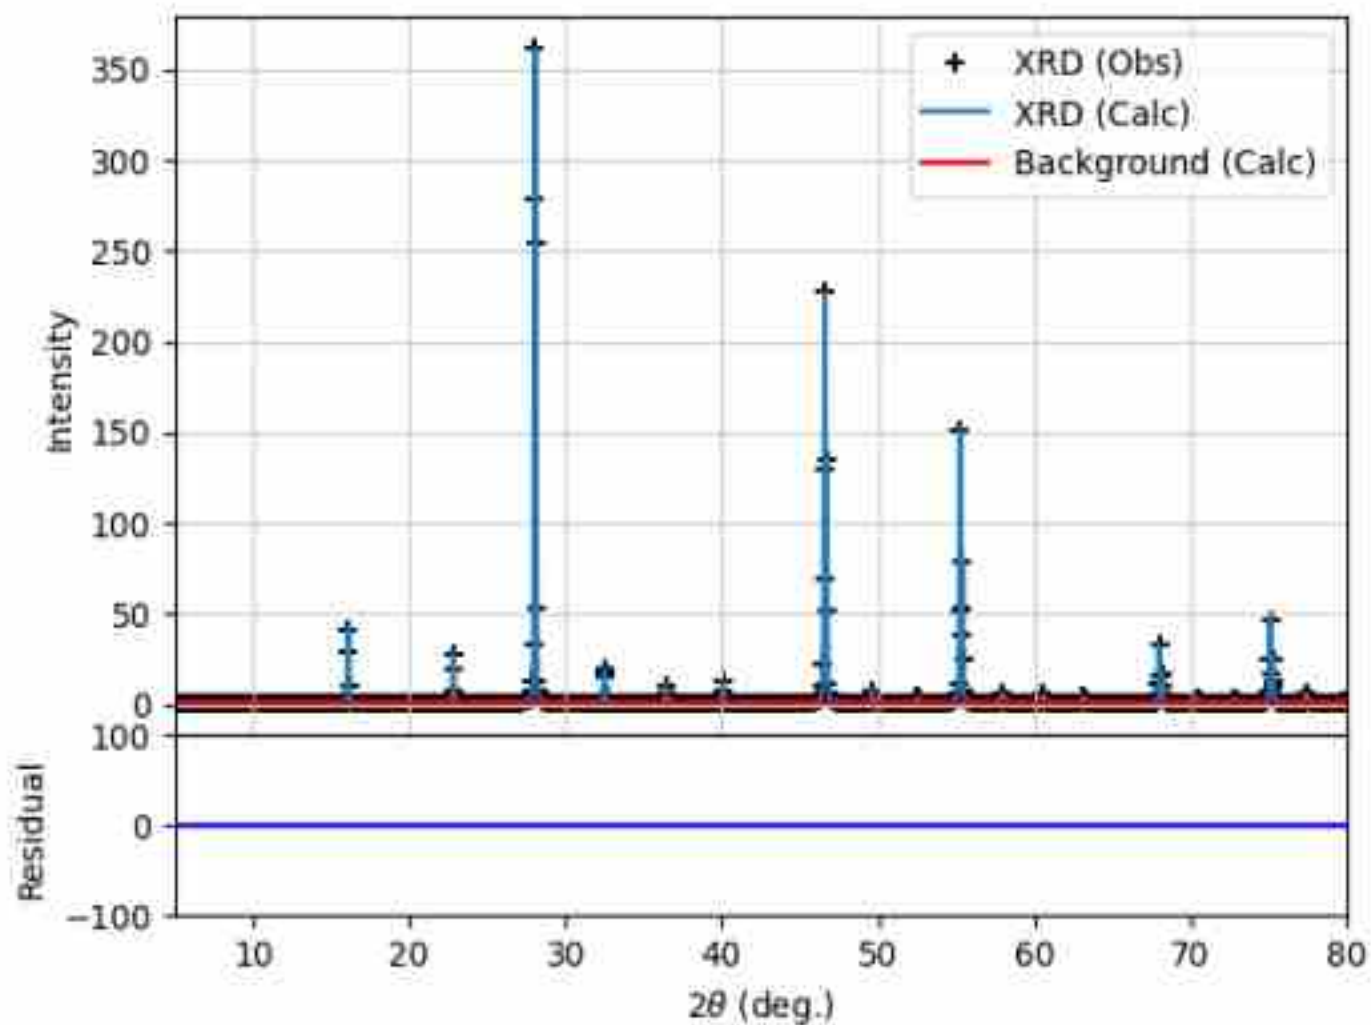

| RMSE before RR | Rwp     | RMSE after RR |
|----------------|---------|---------------|
| 0.012          | 0.02128 | 0.00186       |

# Mg5Pd1

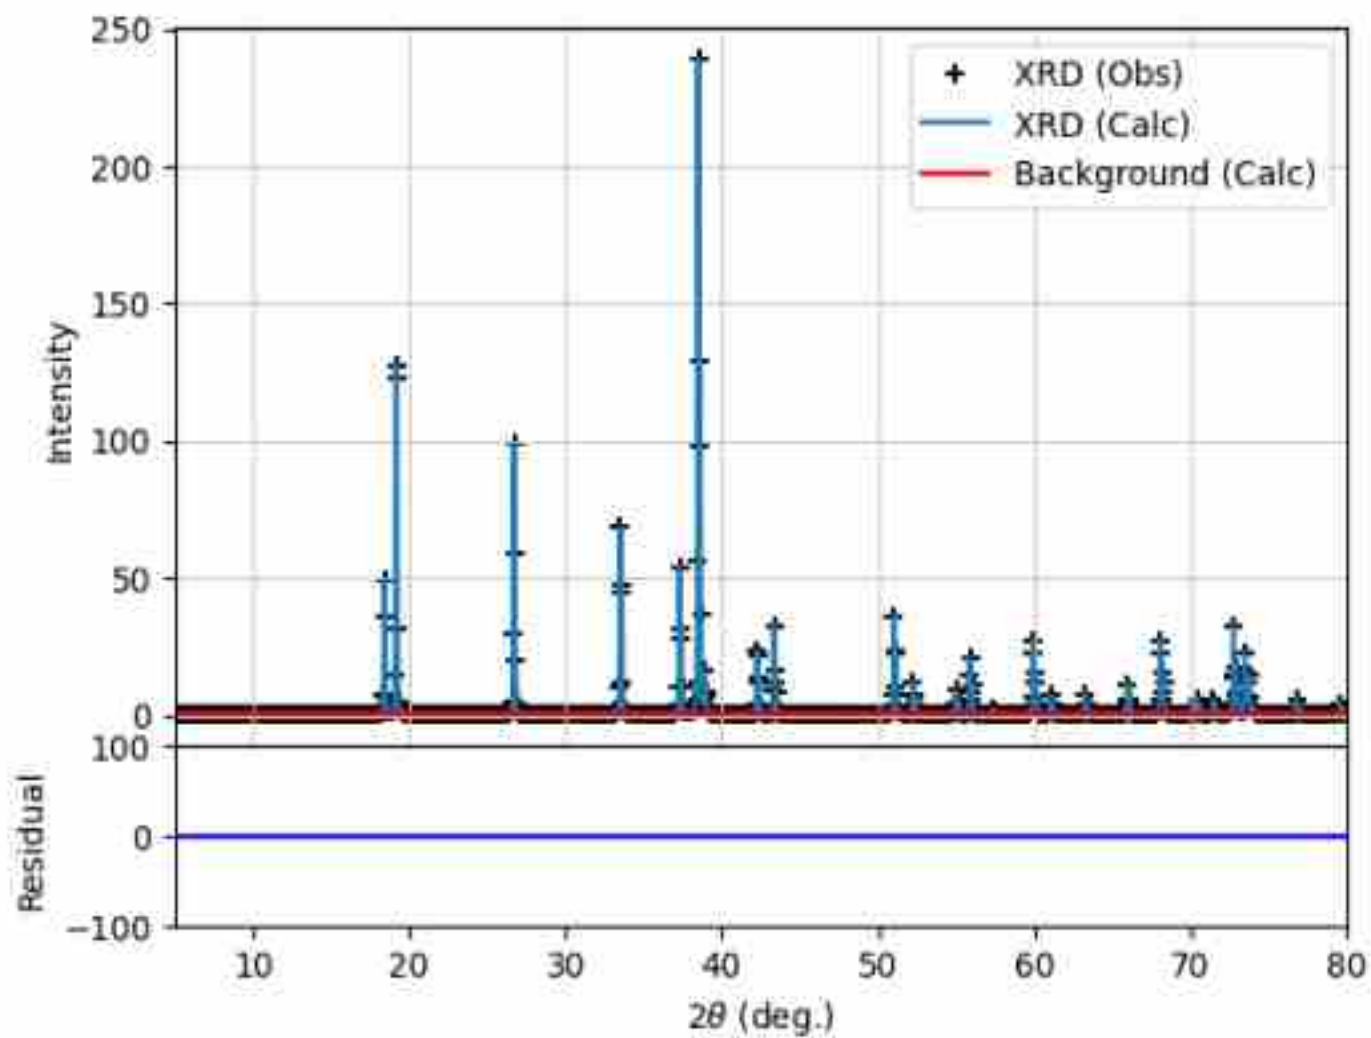

| RMSE before RR | Rwp     | RMSE after RR |
|----------------|---------|---------------|
| 0.012          | 0.01046 | 0.00246       |

# Mn1Cd2Te3

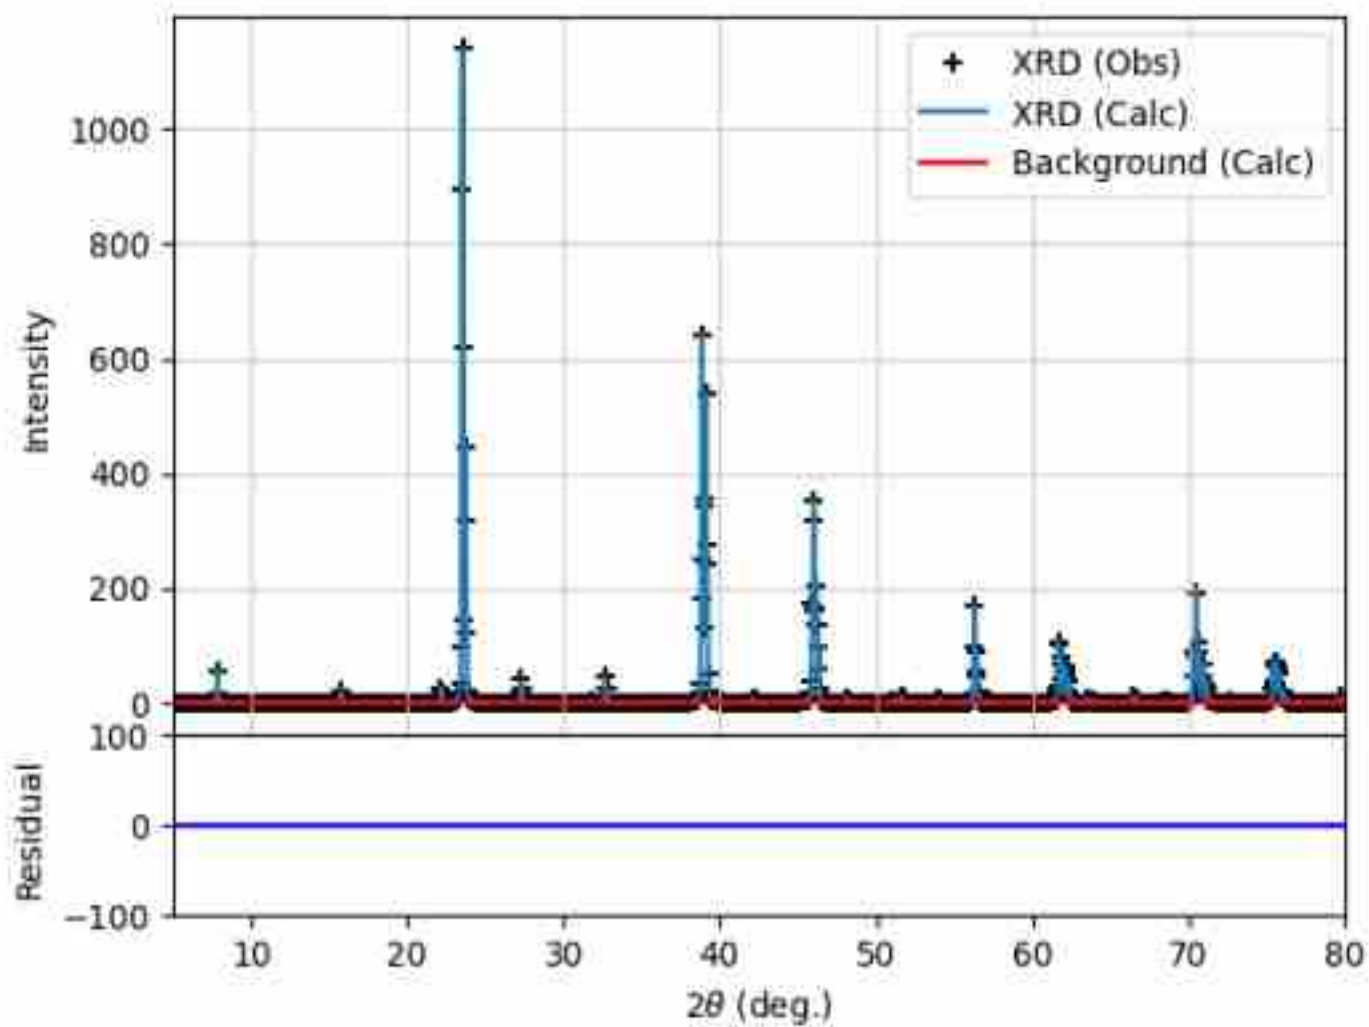

| RMSE before RR | Rwp     | RMSE after RR |
|----------------|---------|---------------|
| 0.012          | 0.00469 | 0.00039       |

# Na1Ce1S2

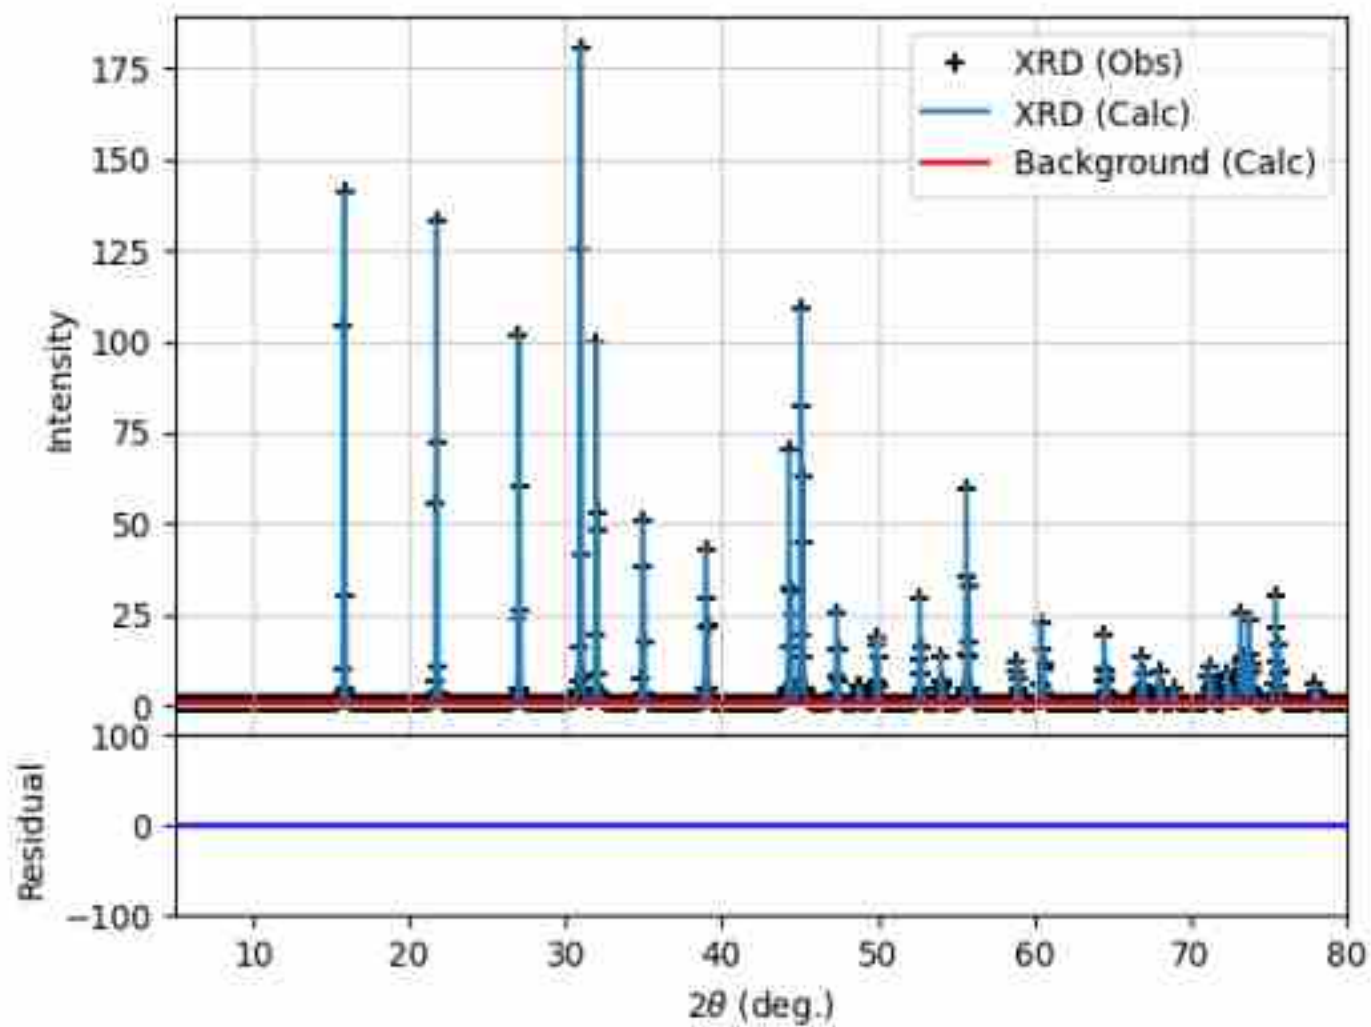

| RMSE before RR | Rwp     | RMSE after RR |
|----------------|---------|---------------|
| 0.012          | 0.00426 | 0.00074       |

# Na1Er1F4

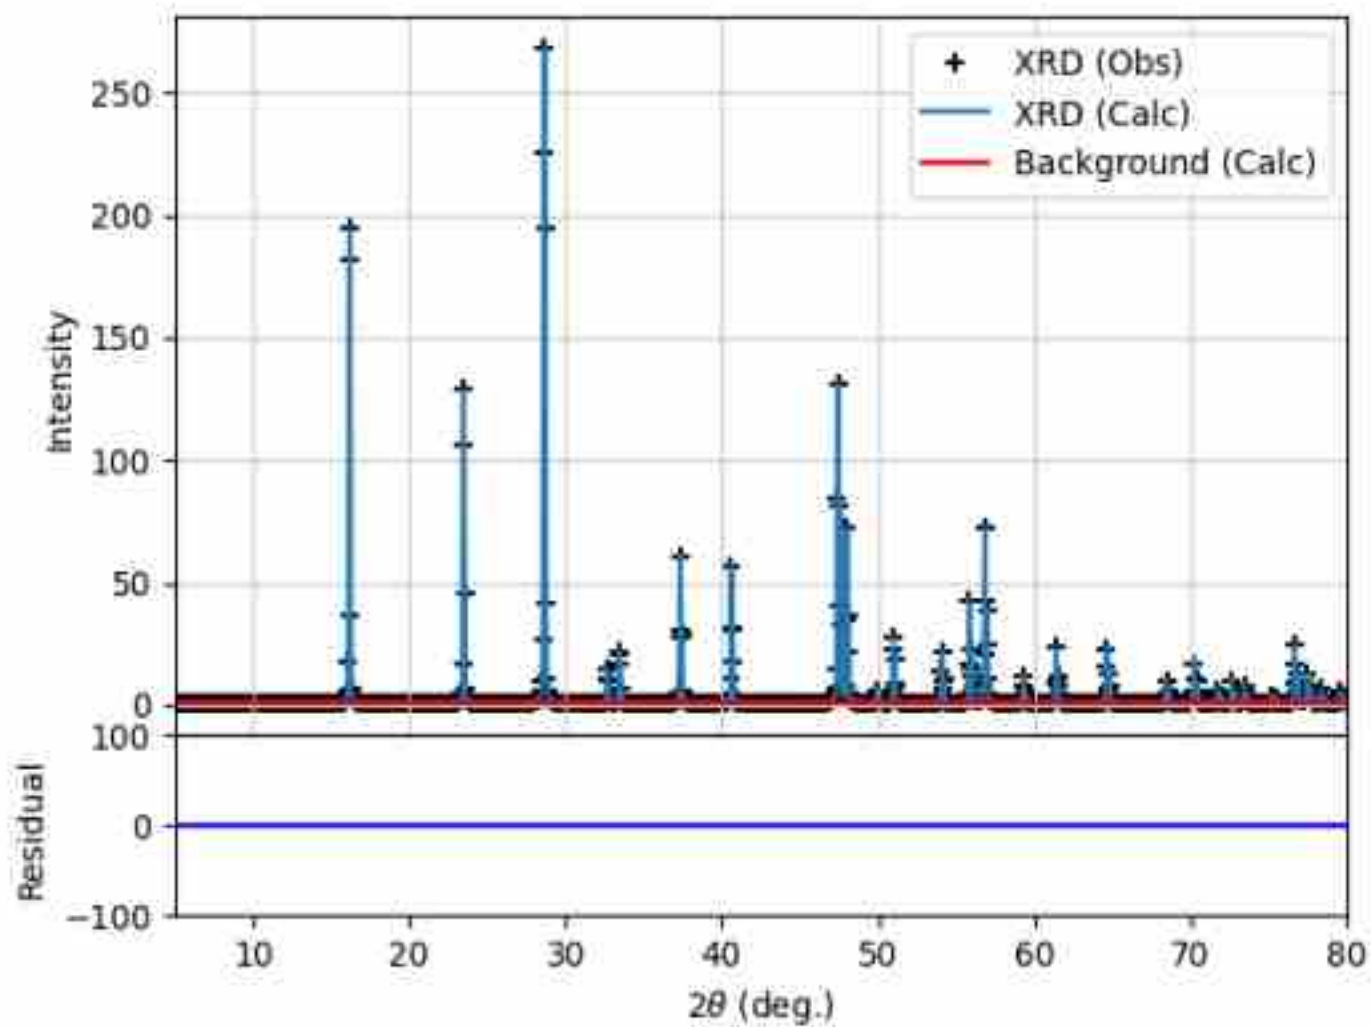

| RMSE before RR | Rwp     | RMSE after RR |
|----------------|---------|---------------|
| 0.012          | 0.00544 | 0.00228       |

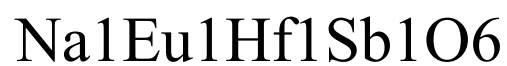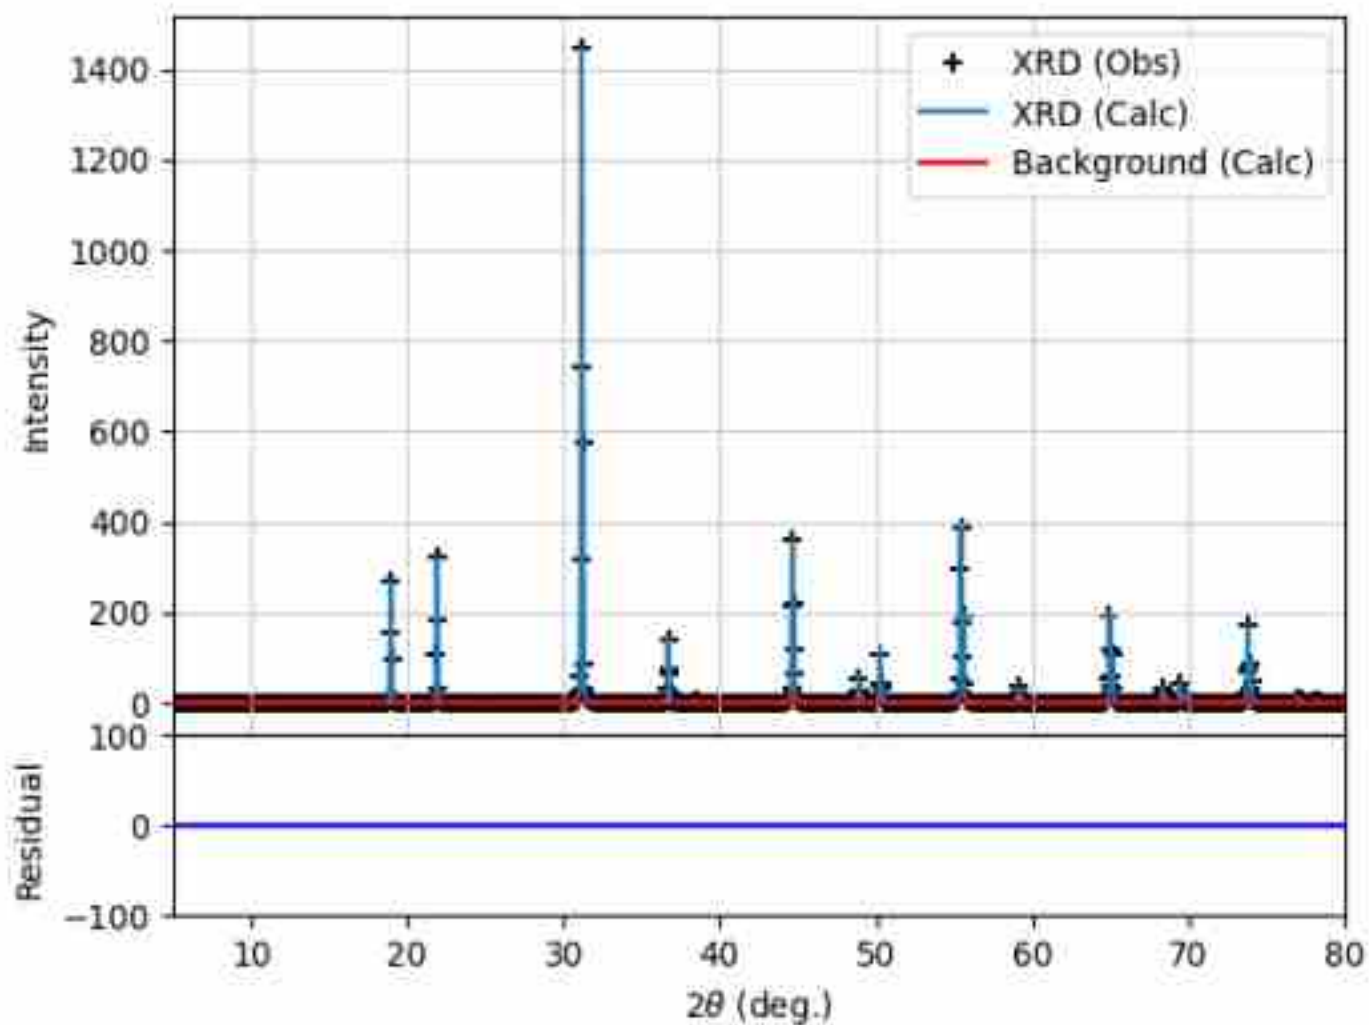

| RMSE before RR | Rwp     | RMSE after RR |
|----------------|---------|---------------|
| 0.012          | 0.00689 | 0.00332       |



Na1Sr1Hf1Sb1O6

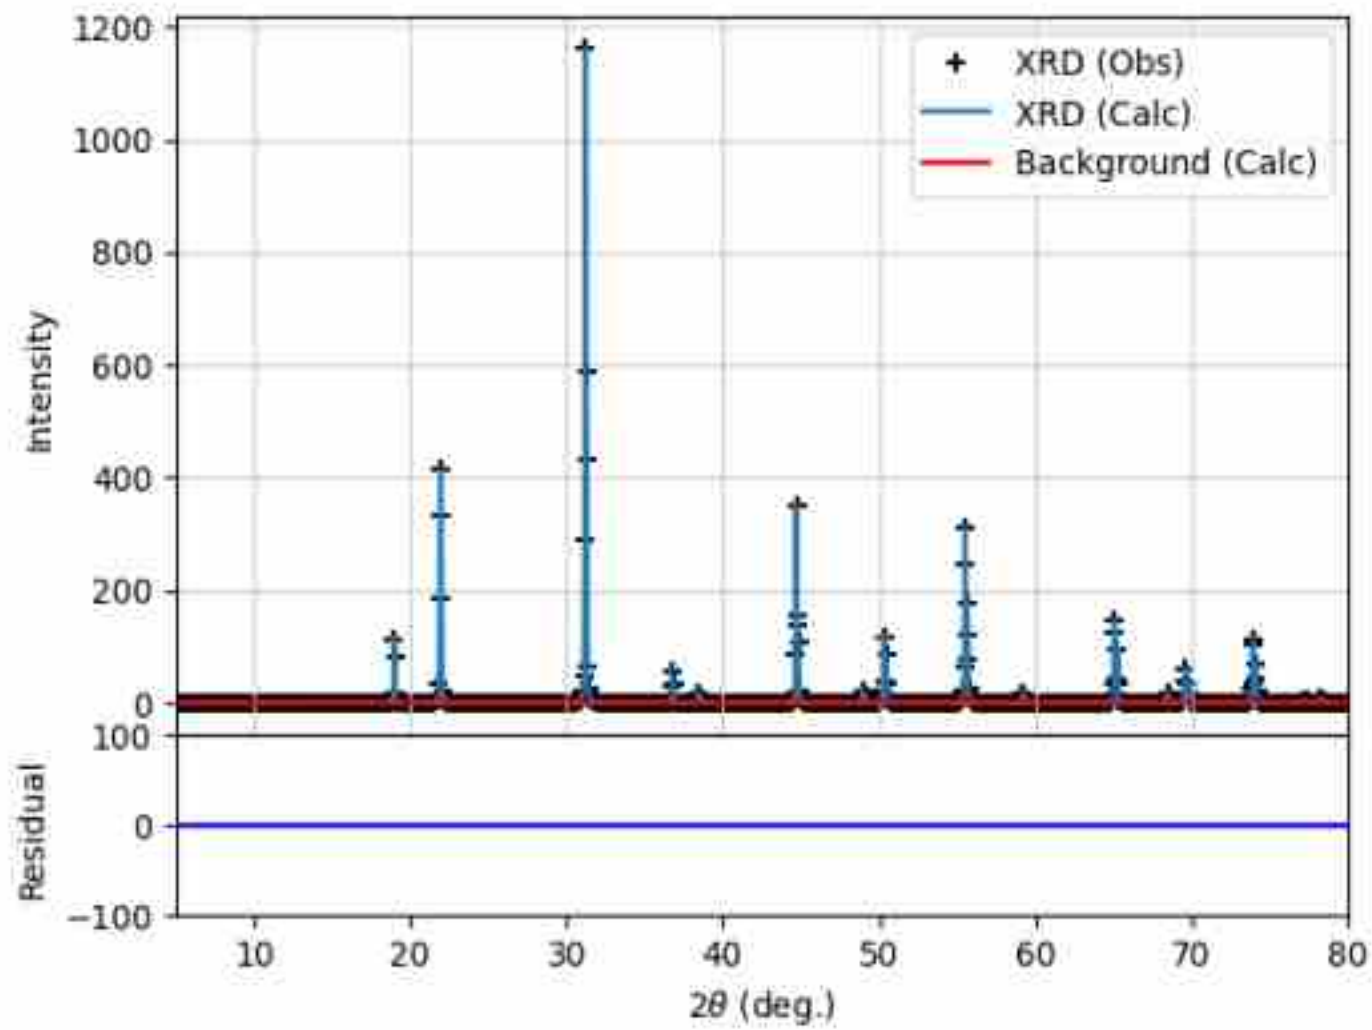

| RMSE before RR | Rwp     | RMSE after RR |
|----------------|---------|---------------|
| 0.012          | 0.01767 | 0.00464       |

# Na1Sr1Hf1W1O6

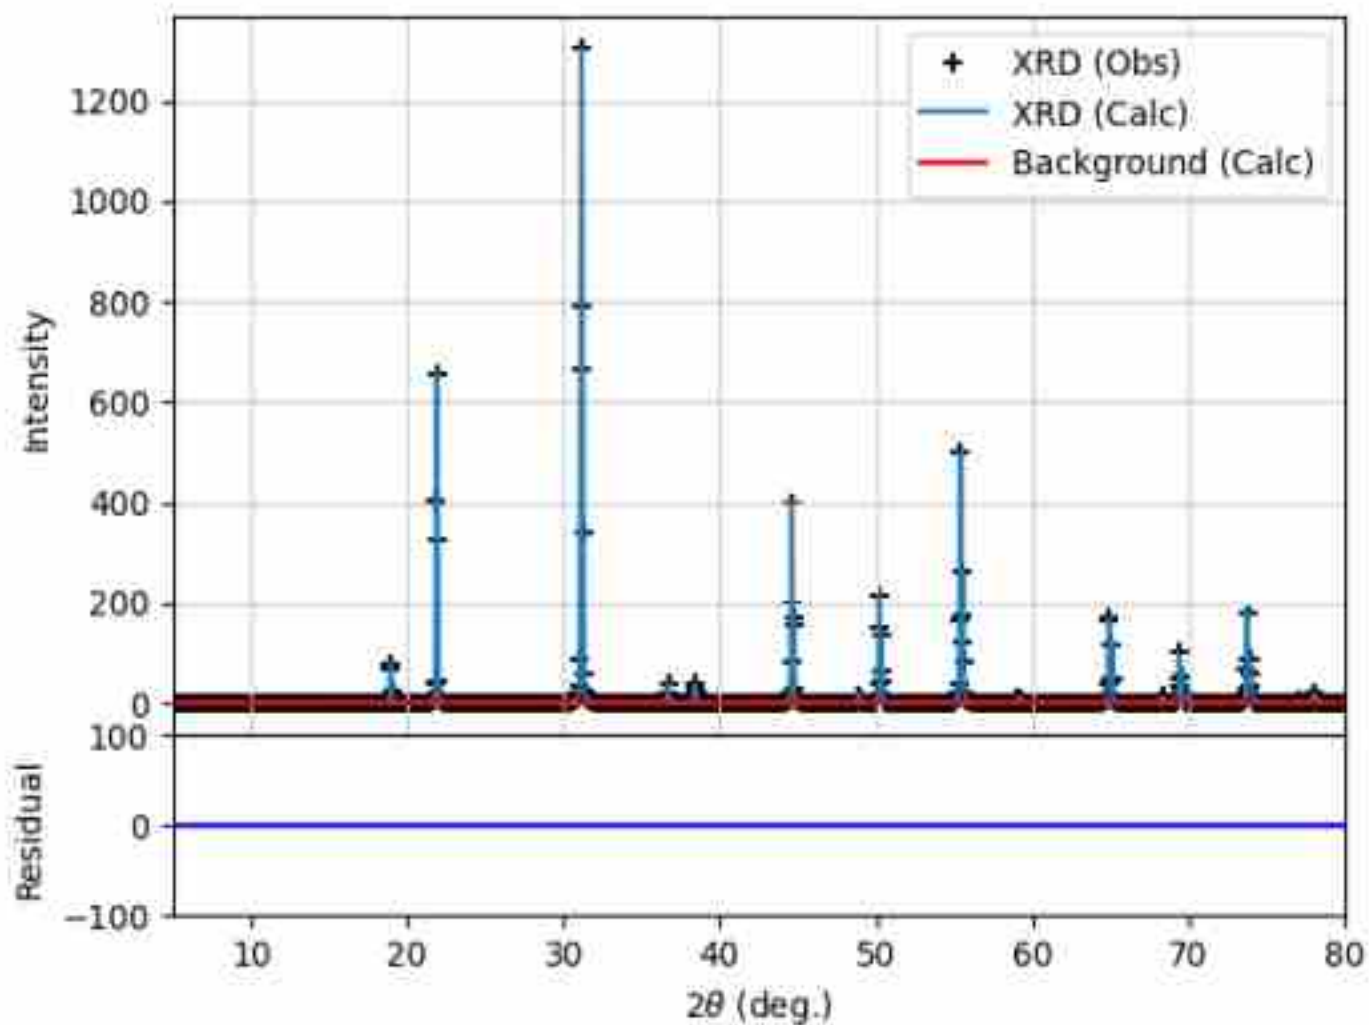

| RMSE before RR | Rwp     | RMSE after RR |
|----------------|---------|---------------|
| 0.012          | 0.00852 | 0.00425       |

# Na<sub>2</sub>Bi<sub>2</sub>O<sub>6</sub>

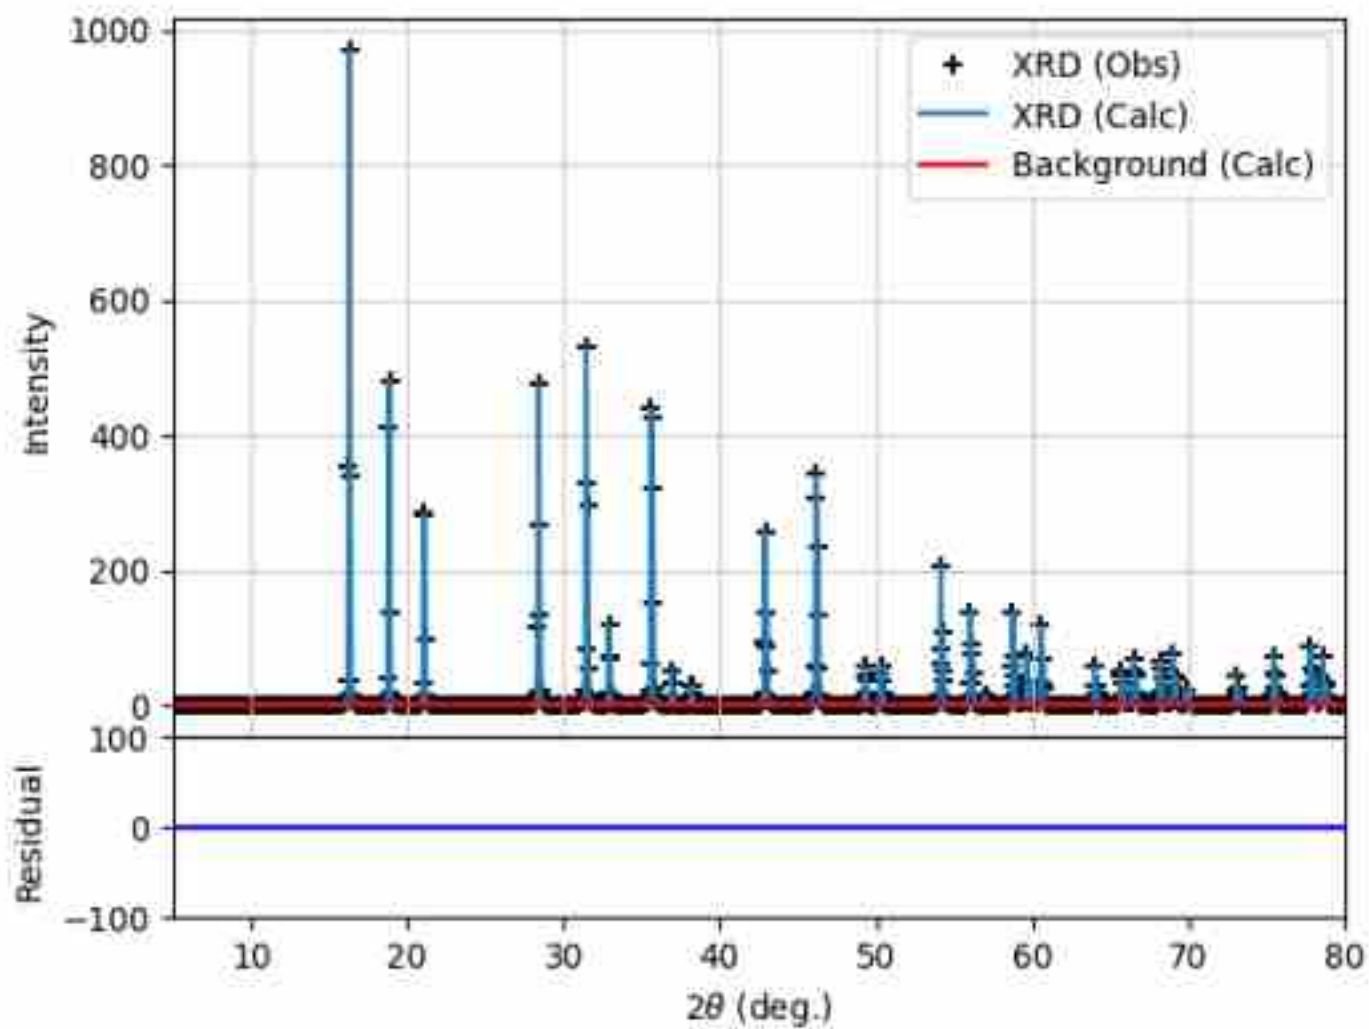

| RMSE before RR | Rwp     | RMSE after RR |
|----------------|---------|---------------|
| 0.012          | 0.00379 | 0.00207       |

# Na<sub>2</sub>Br<sub>1</sub>Cl<sub>1</sub>

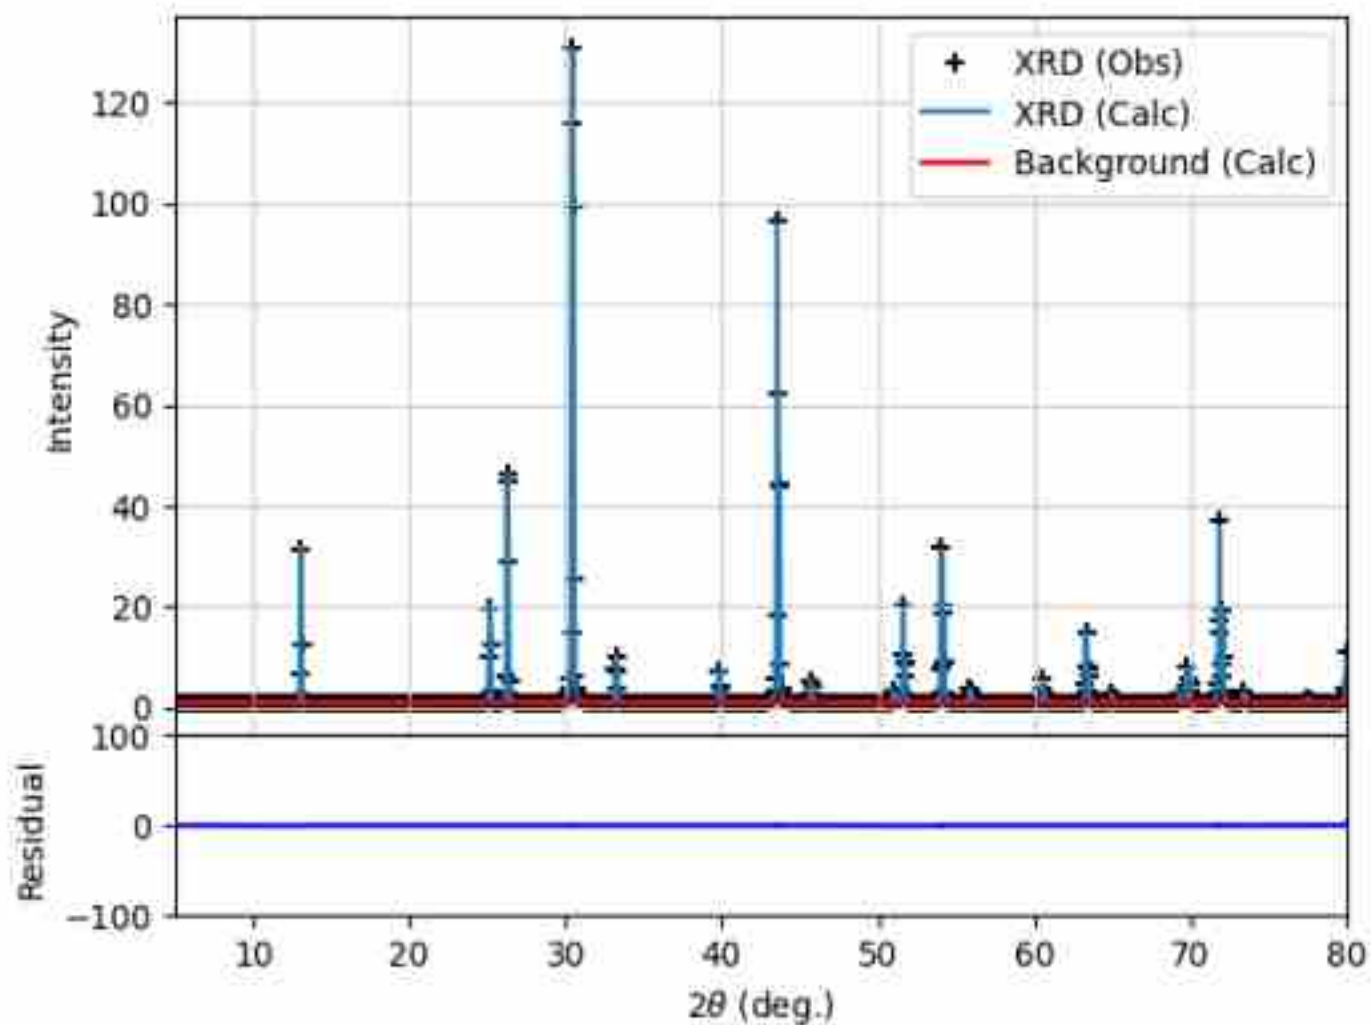

| RMSE before RR | Rwp     | RMSE after RR |
|----------------|---------|---------------|
| 0.012          | 3.09124 | 0.01137       |

# Na<sub>2</sub>Hg<sub>6</sub>

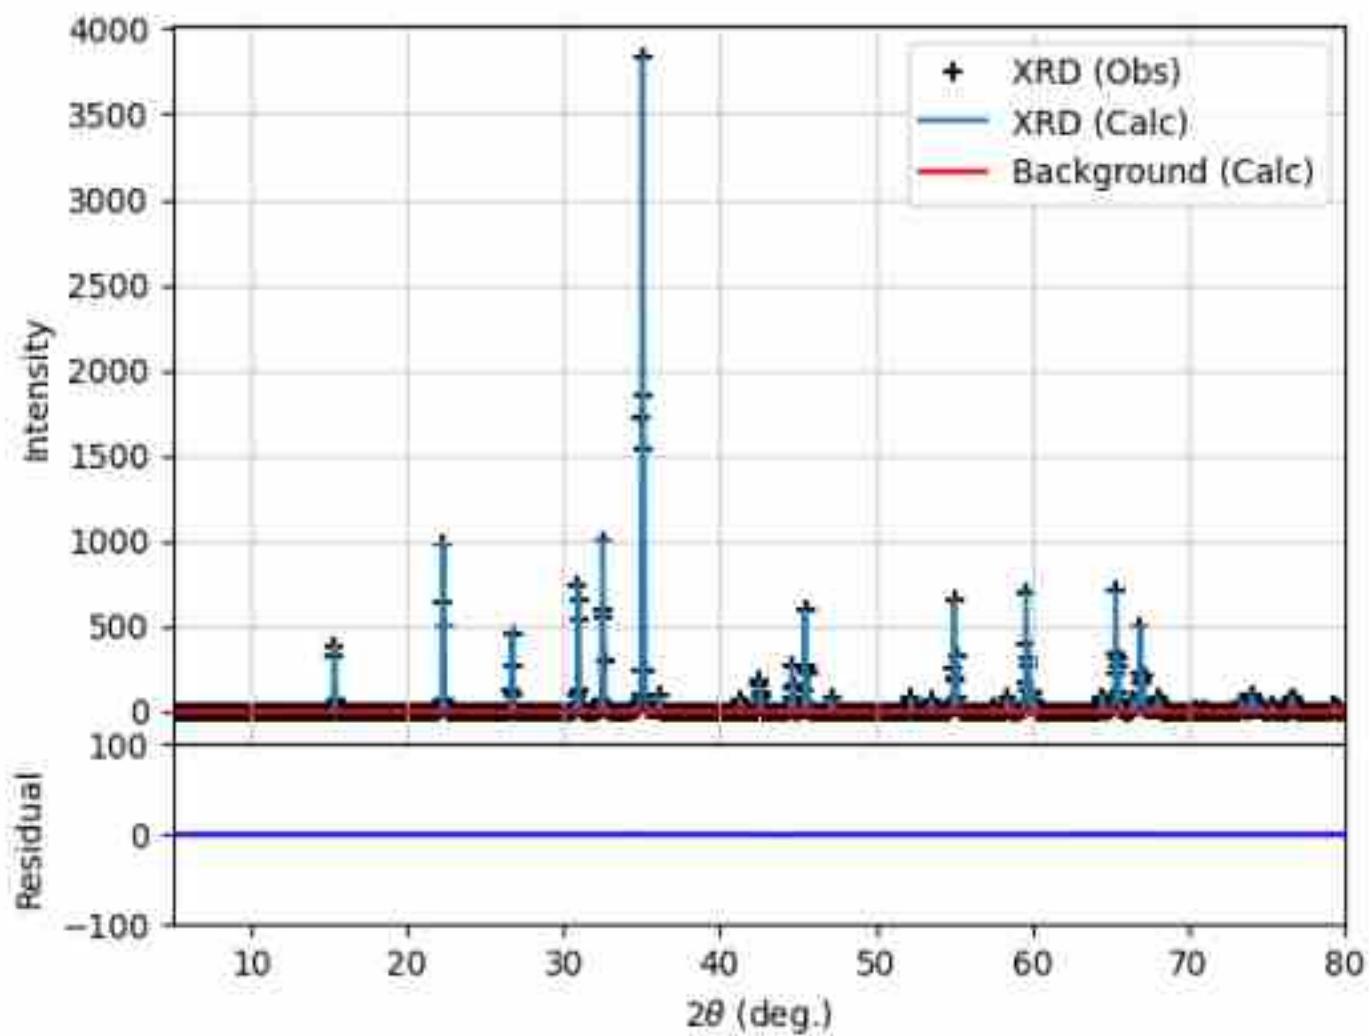

| RMSE before RR | Rwp     | RMSE after RR |
|----------------|---------|---------------|
| 0.012          | 0.05786 | 0.00357       |

# Nb1In1Se2

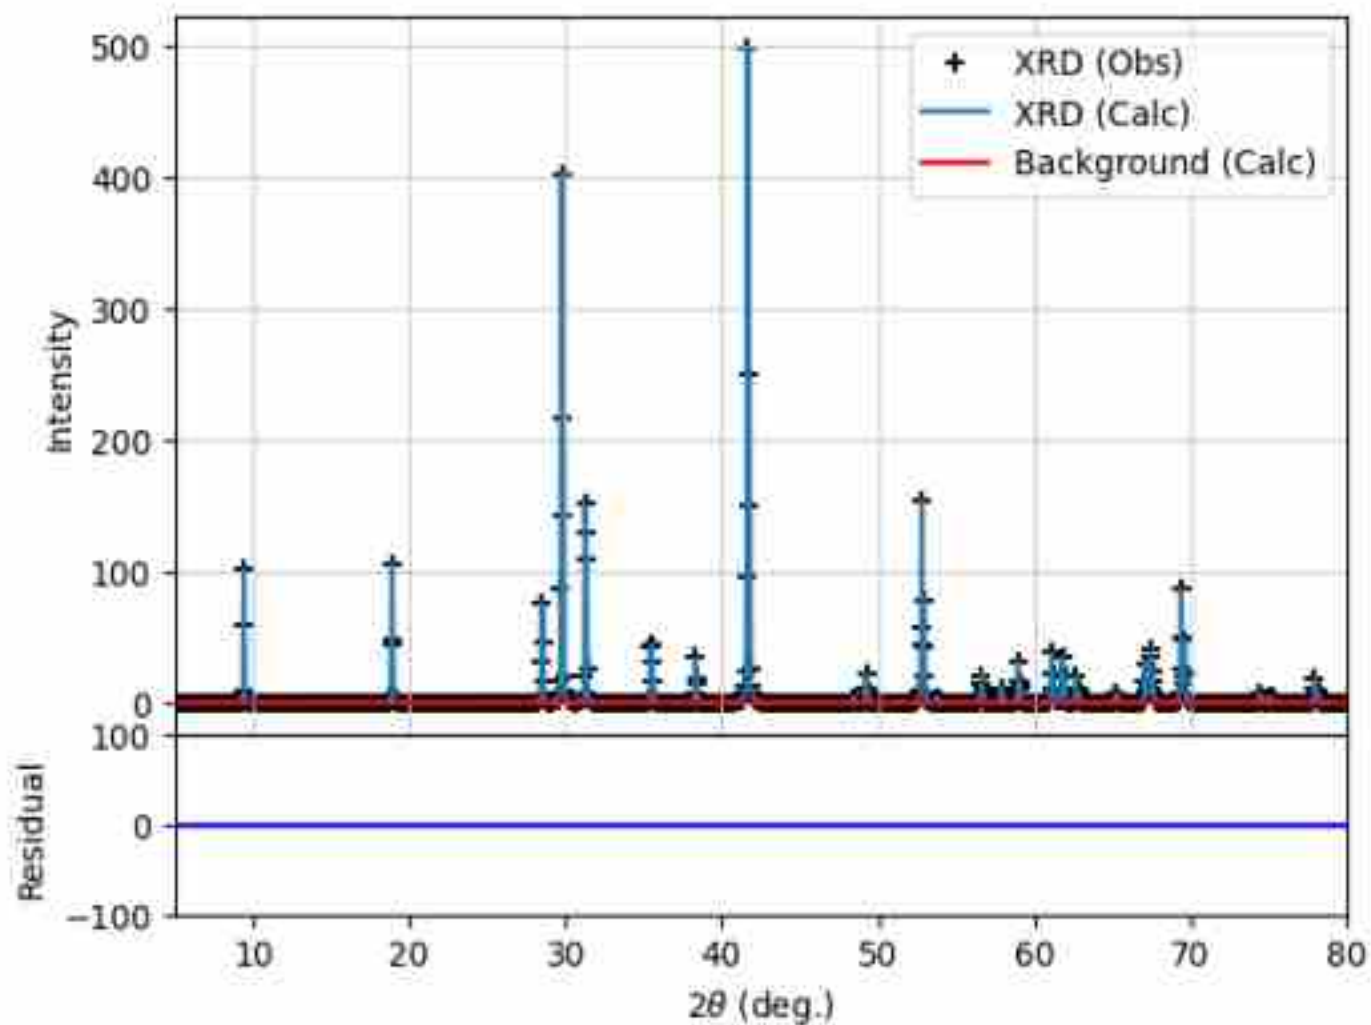

| RMSE before RR | Rwp     | RMSE after RR |
|----------------|---------|---------------|
| 0.012          | 0.00258 | 0.00027       |

# Nb<sub>2</sub>Ir<sub>6</sub>

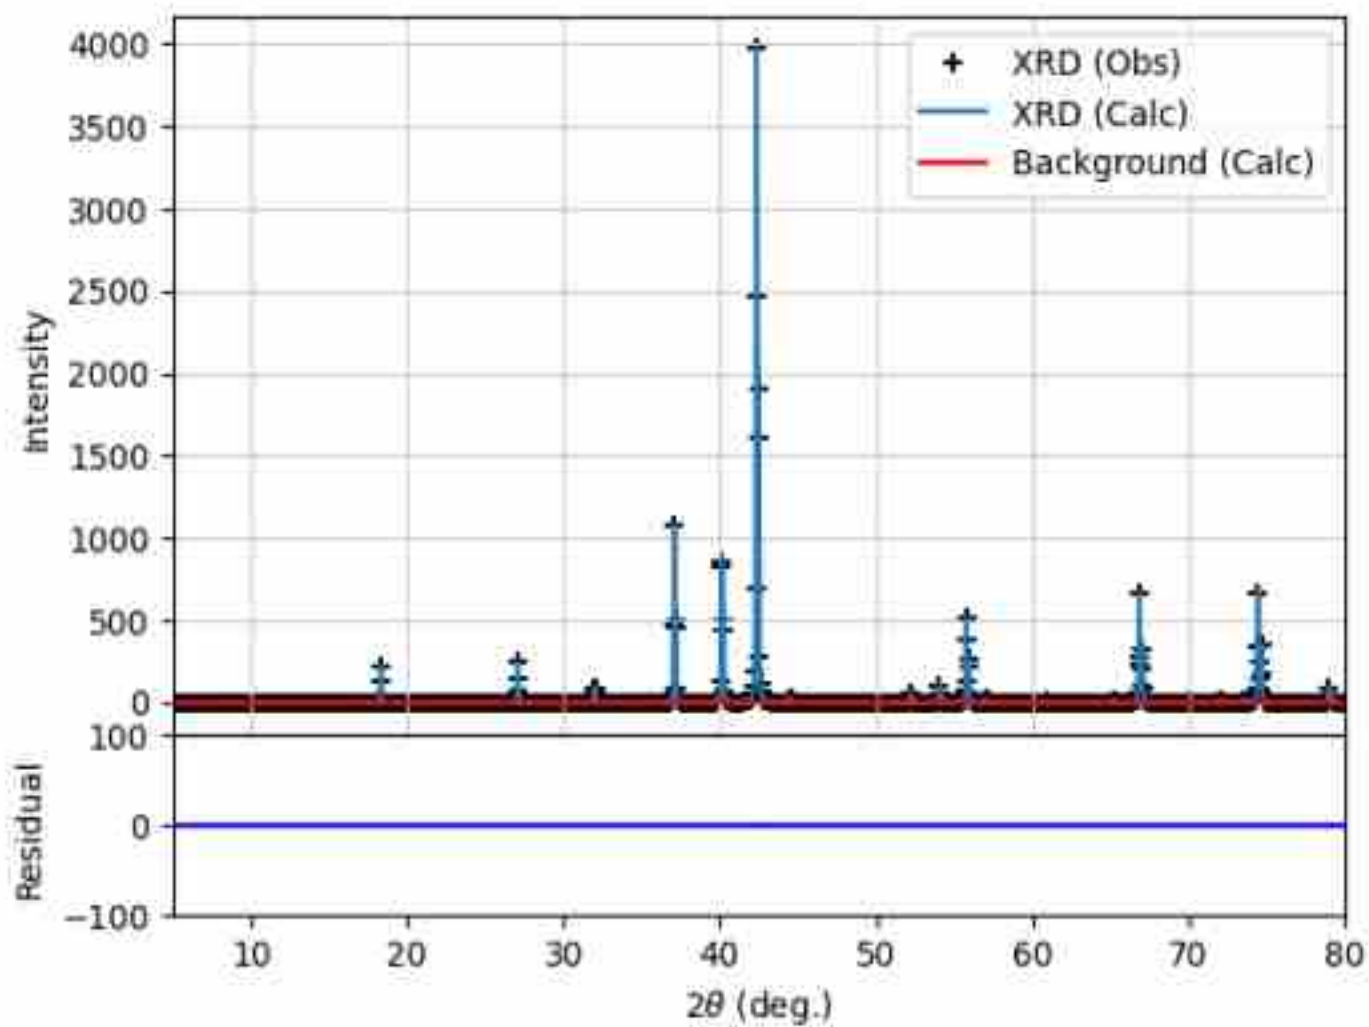

| RMSE before RR | Rwp     | RMSE after RR |
|----------------|---------|---------------|
| 0.012          | 0.05616 | 0.00178       |

# Nb2Tc1

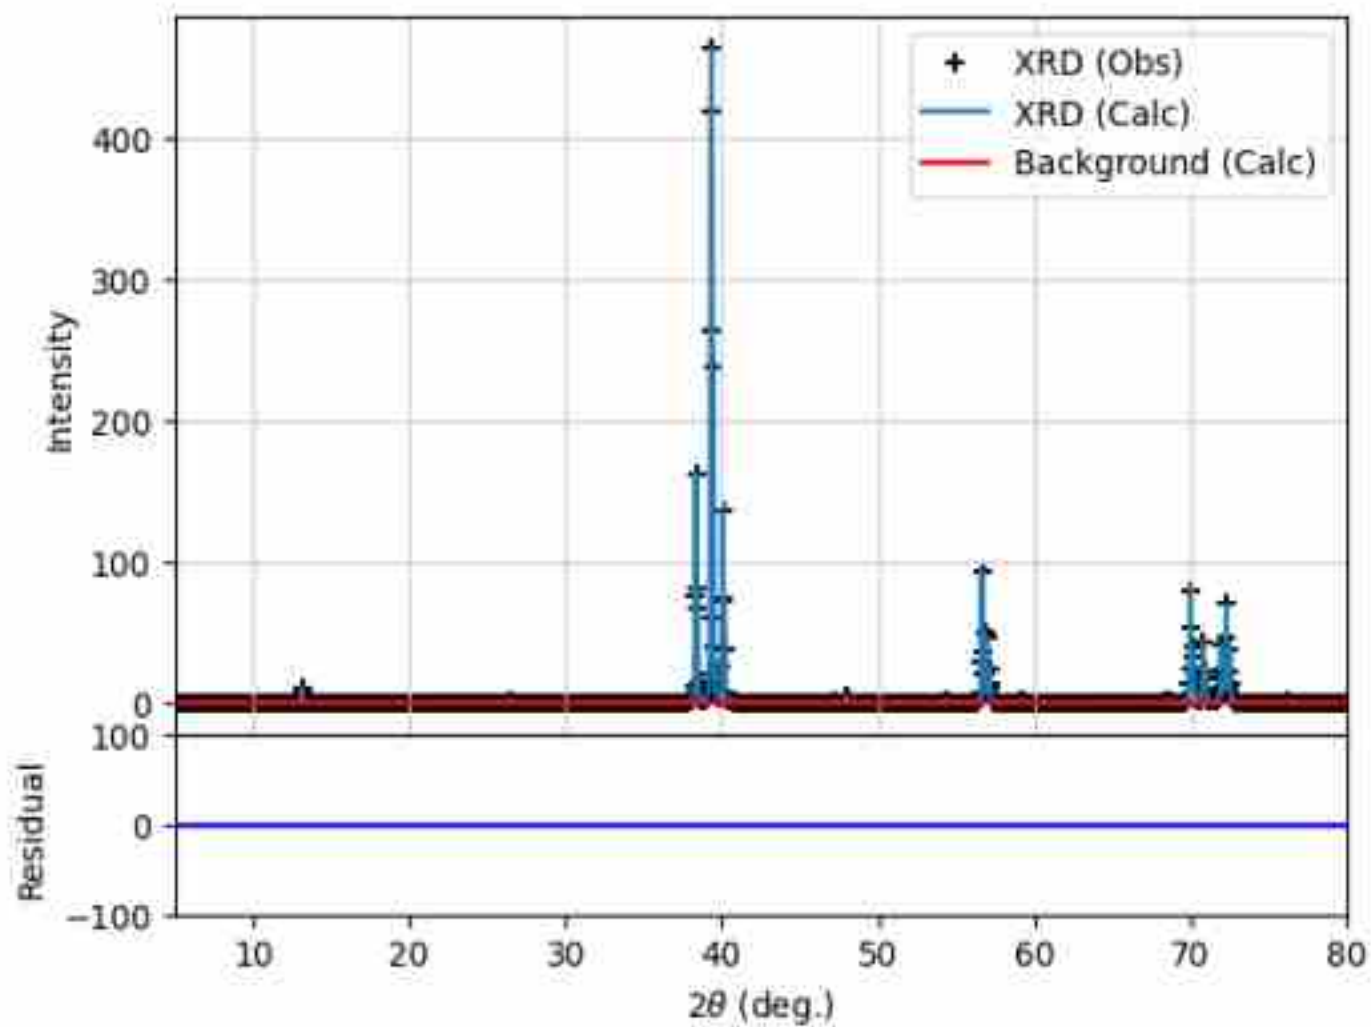

| RMSE before RR | Rwp     | RMSE after RR |
|----------------|---------|---------------|
| 0.012          | 0.00431 | 9e-05         |



# Nb6Os1Au1

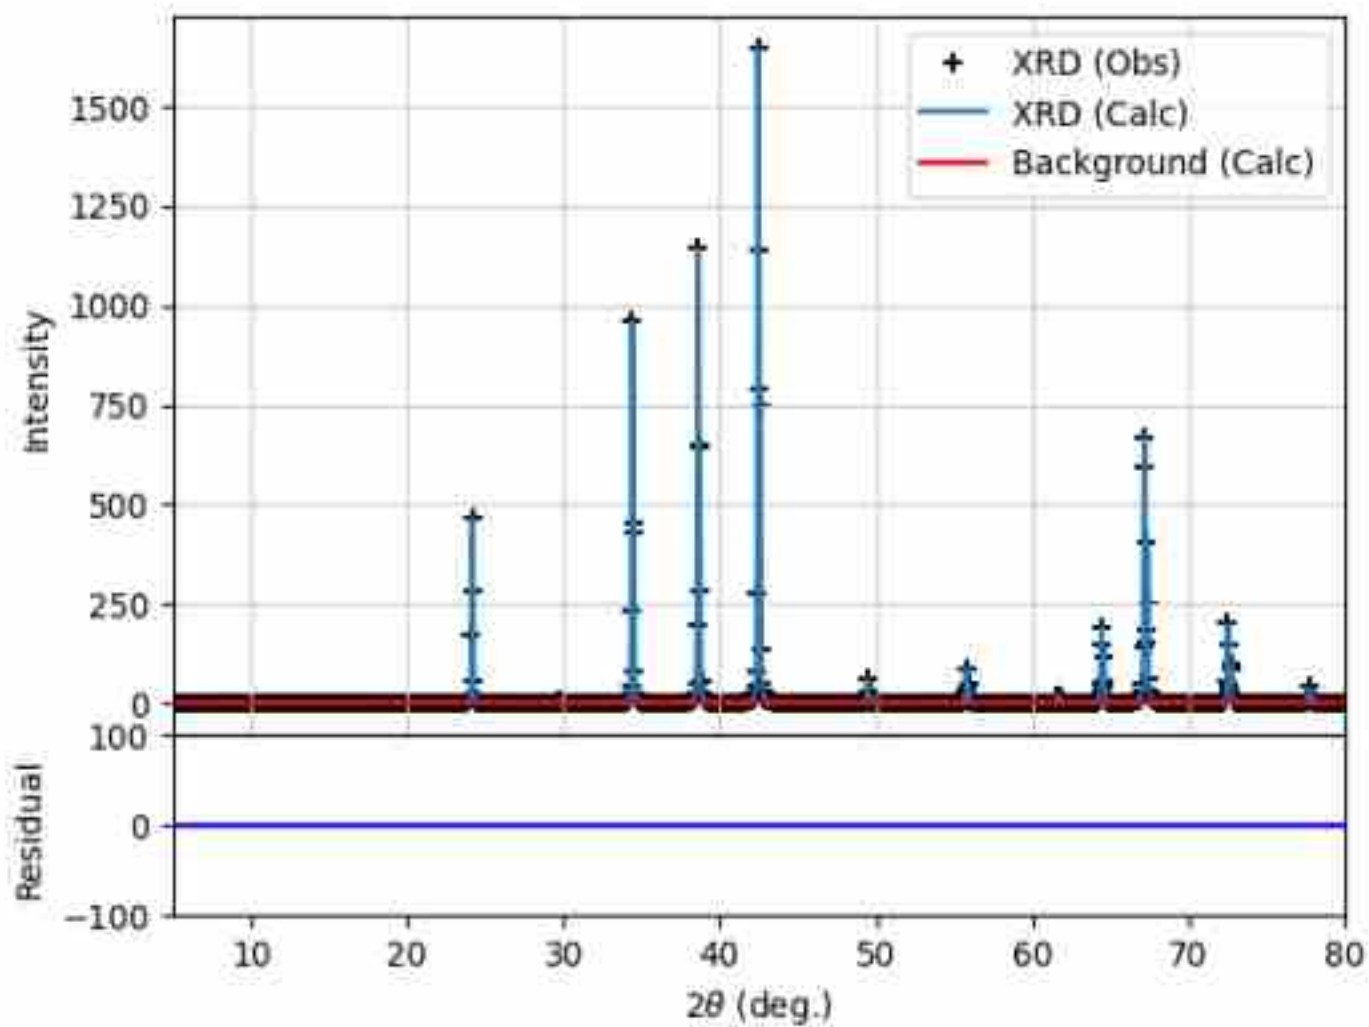

| RMSE before RR | Rwp     | RMSE after RR |
|----------------|---------|---------------|
| 0.012          | 0.00759 | 0.00065       |

# Nd1Mg1Cu4

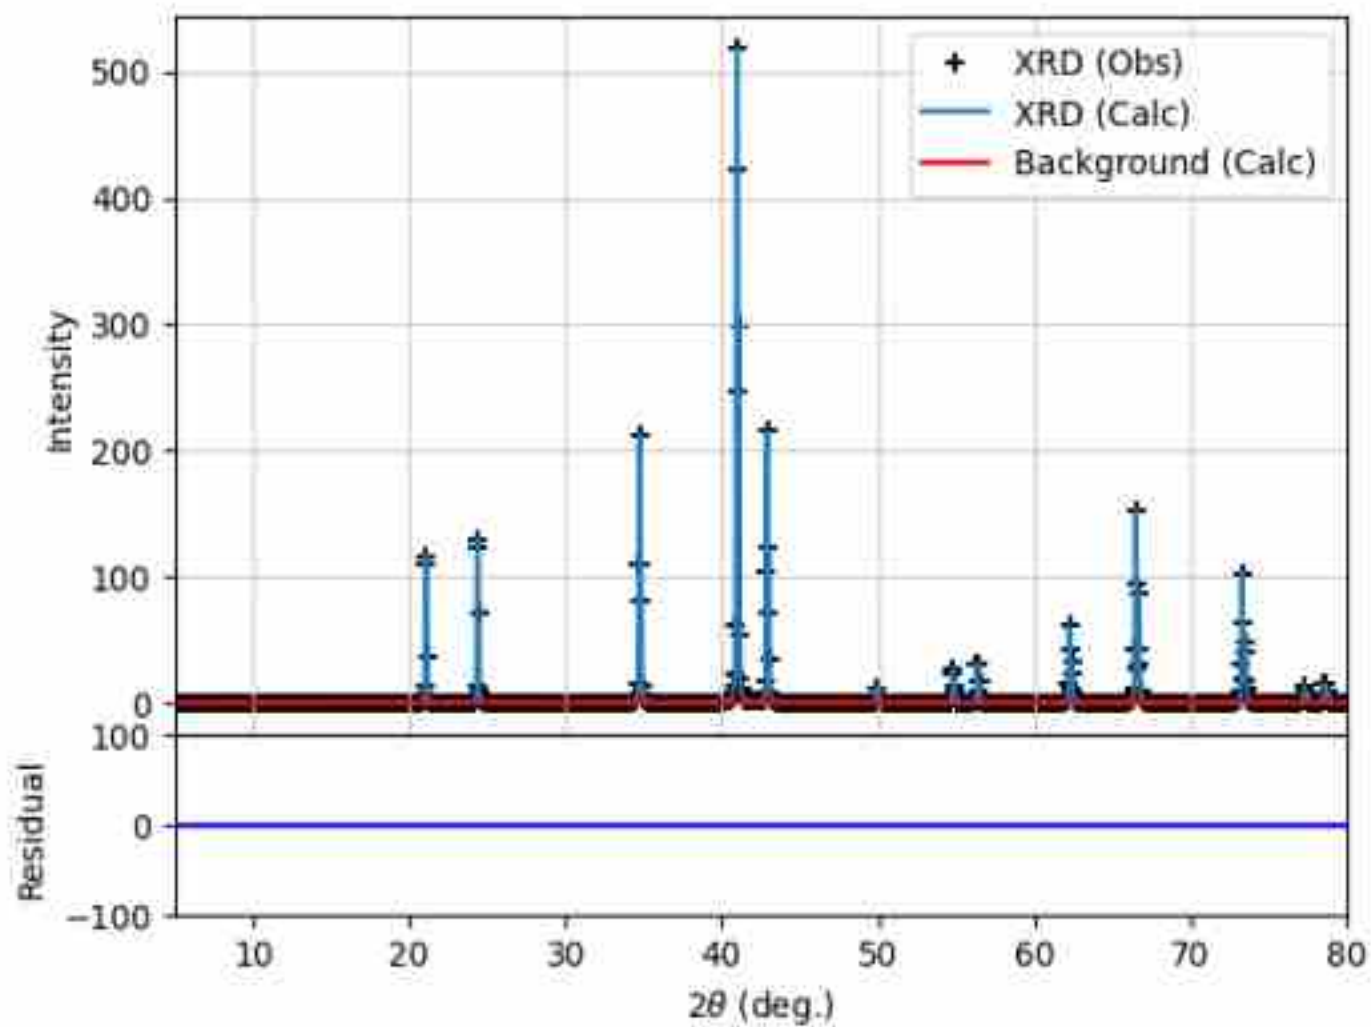

| RMSE before RR | Rwp     | RMSE after RR |
|----------------|---------|---------------|
| 0.012          | 0.00877 | 0.00159       |

# Nd1Mo6Se8

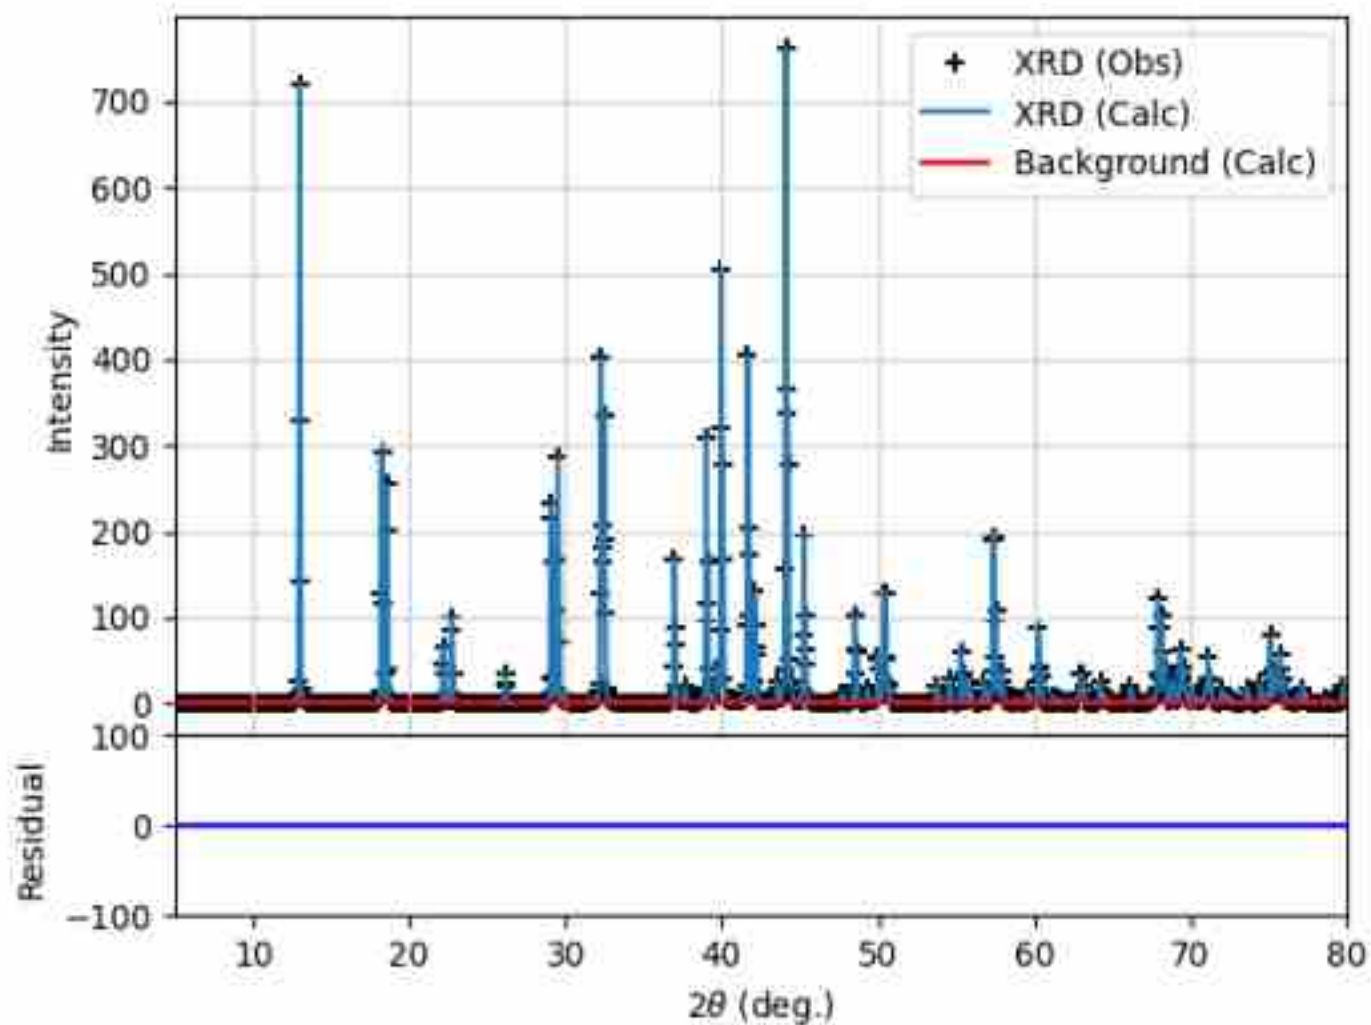

| RMSE before RR | Rwp     | RMSE after RR |
|----------------|---------|---------------|
| 0.012          | 0.00383 | 0.00036       |

# Nd<sub>2</sub>Pd<sub>1</sub>Ru<sub>3</sub>

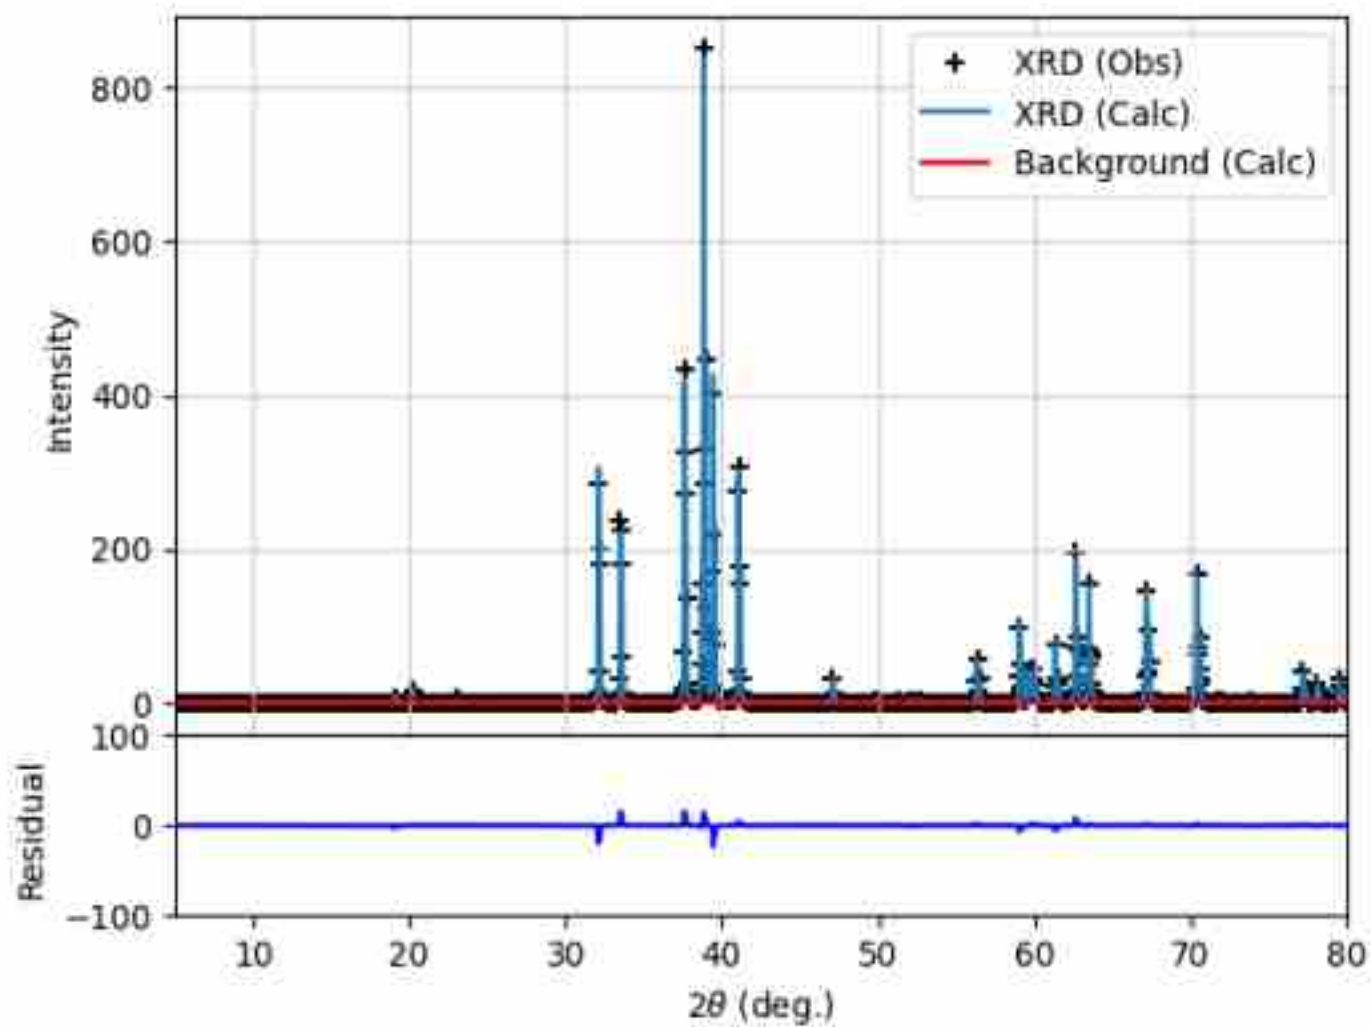

| RMSE before RR | Rwp    | RMSE after RR |
|----------------|--------|---------------|
| 0.012          | 4.1801 | 0.02002       |

# Ni1Br2

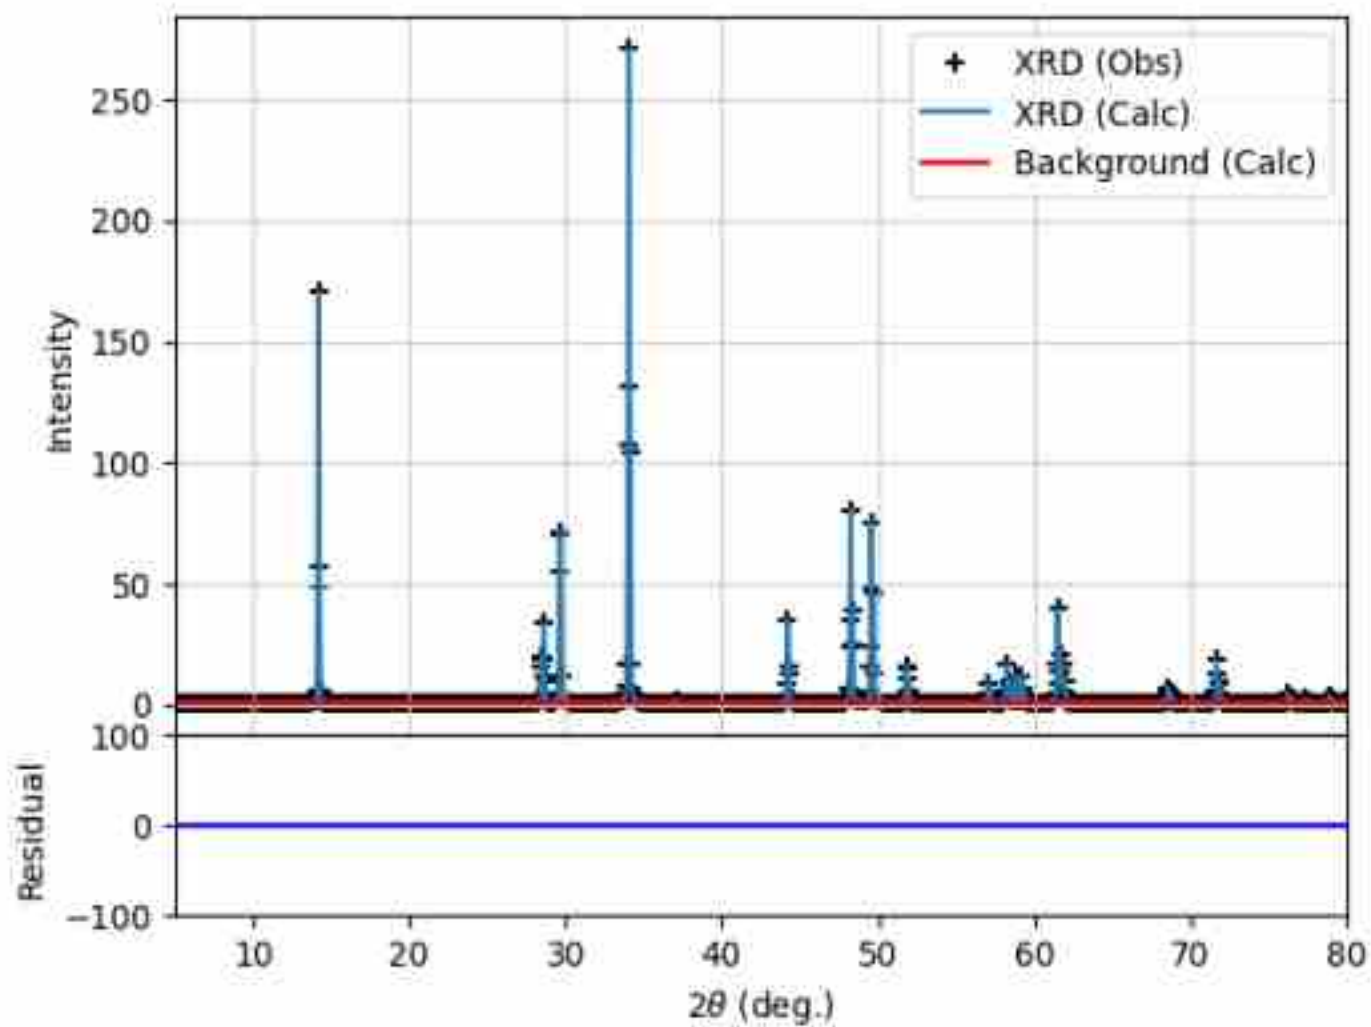

| RMSE before RR | Rwp     | RMSE after RR |
|----------------|---------|---------------|
| 0.012          | 0.00301 | 0.00029       |

Np1Si2Rh2

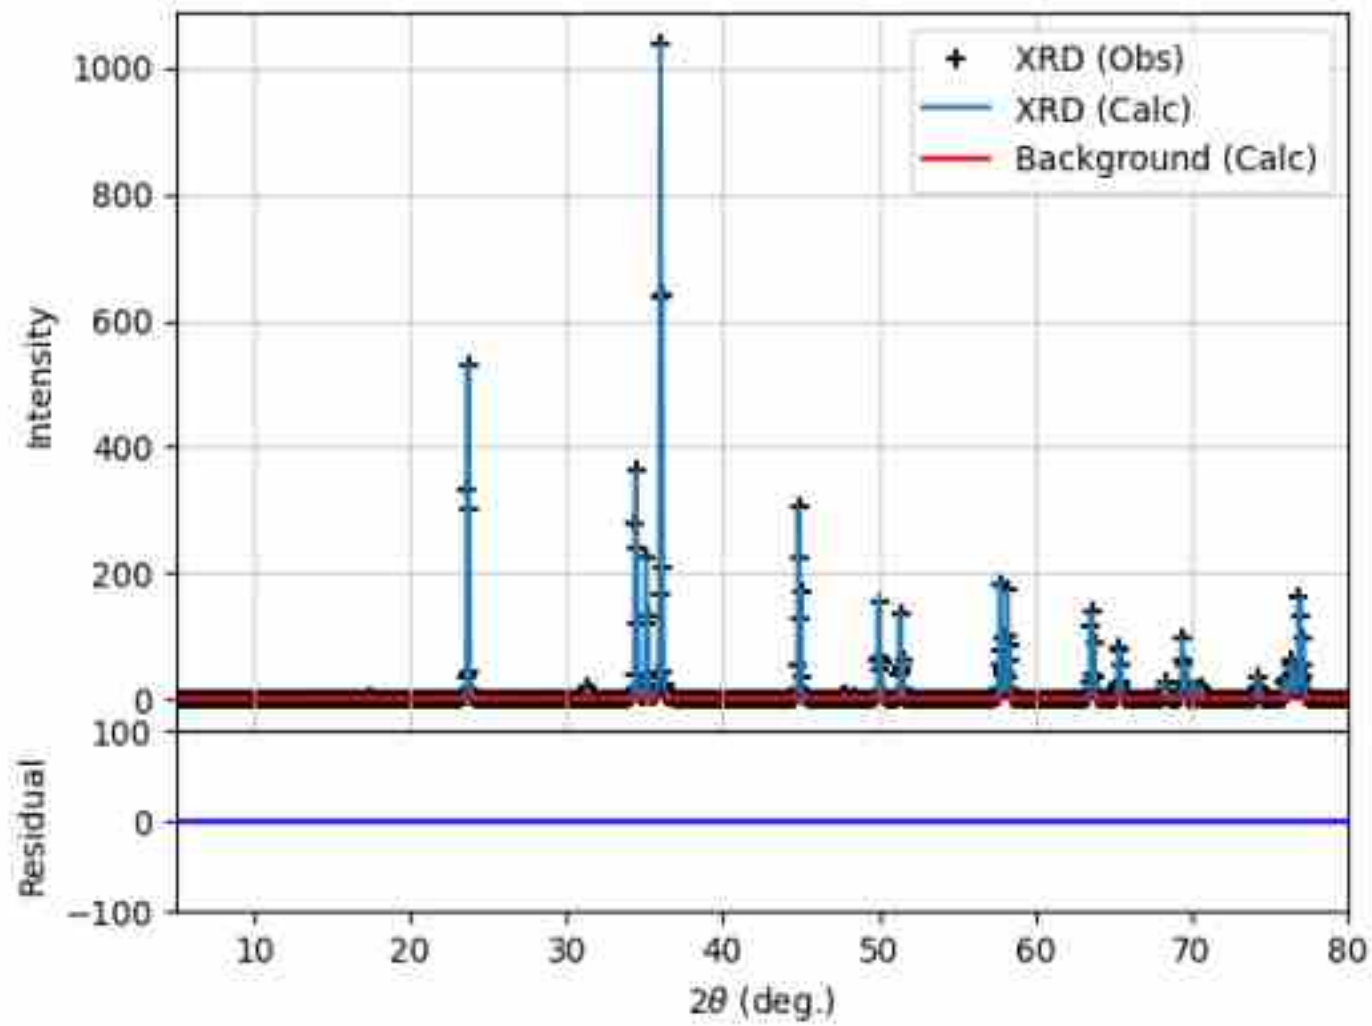

| RMSE before RR | Rwp     | RMSE after RR |
|----------------|---------|---------------|
| 0.012          | 0.00402 | 0.00102       |

# Pr<sub>1</sub>Bi<sub>2</sub>I<sub>10</sub>O<sub>4</sub>

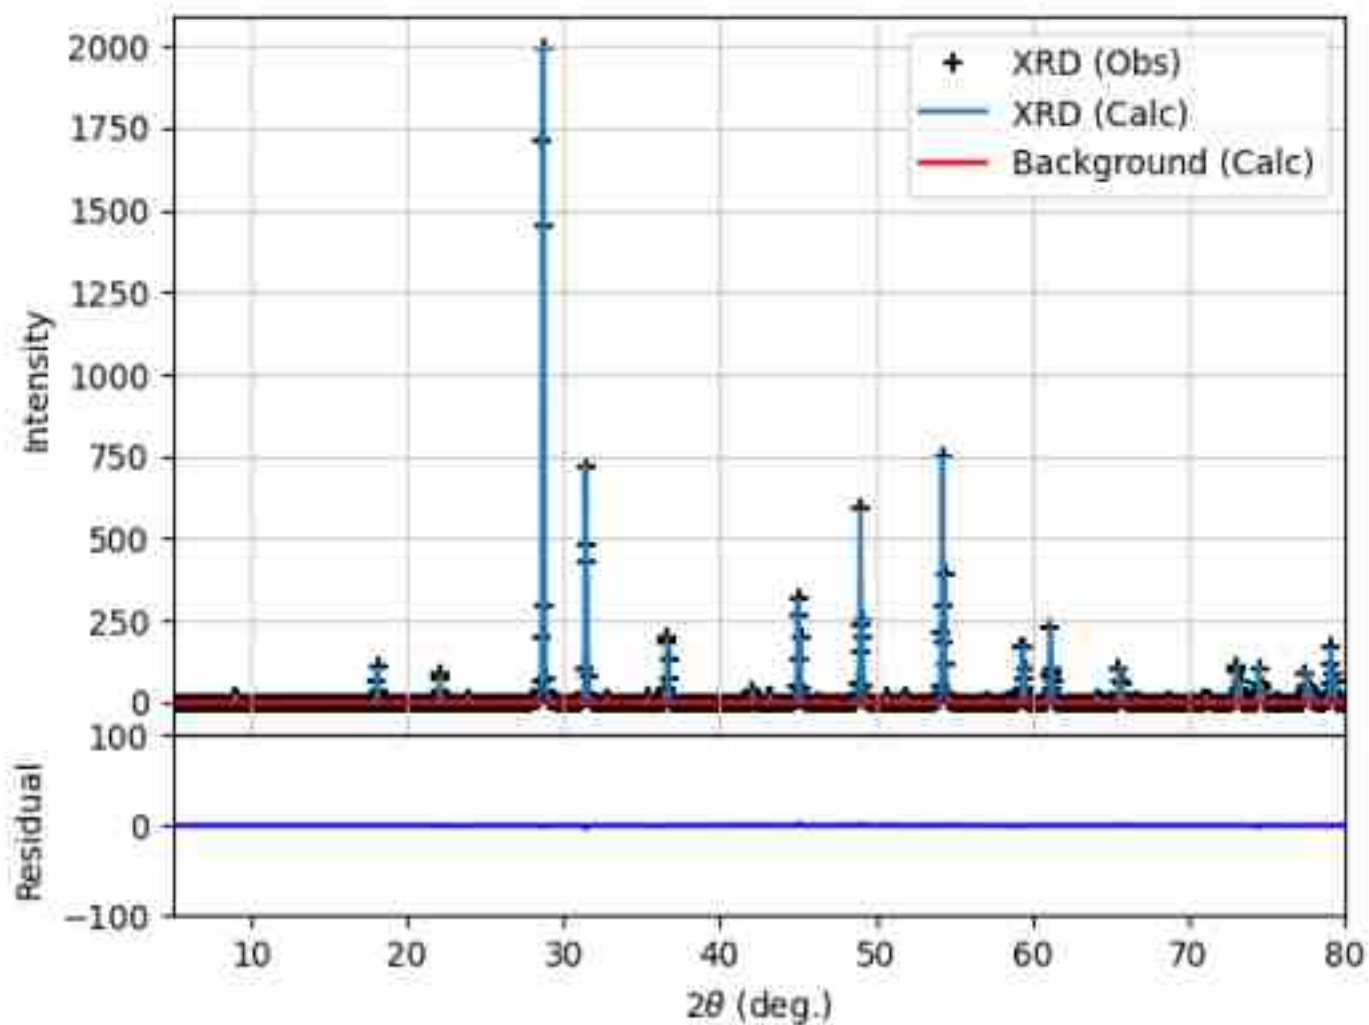

| RMSE before RR | Rwp    | RMSE after RR |
|----------------|--------|---------------|
| 0.012          | 0.5629 | 0.03195       |

# Pr<sub>1</sub>Si<sub>2</sub>Mo<sub>2</sub>C<sub>1</sub>

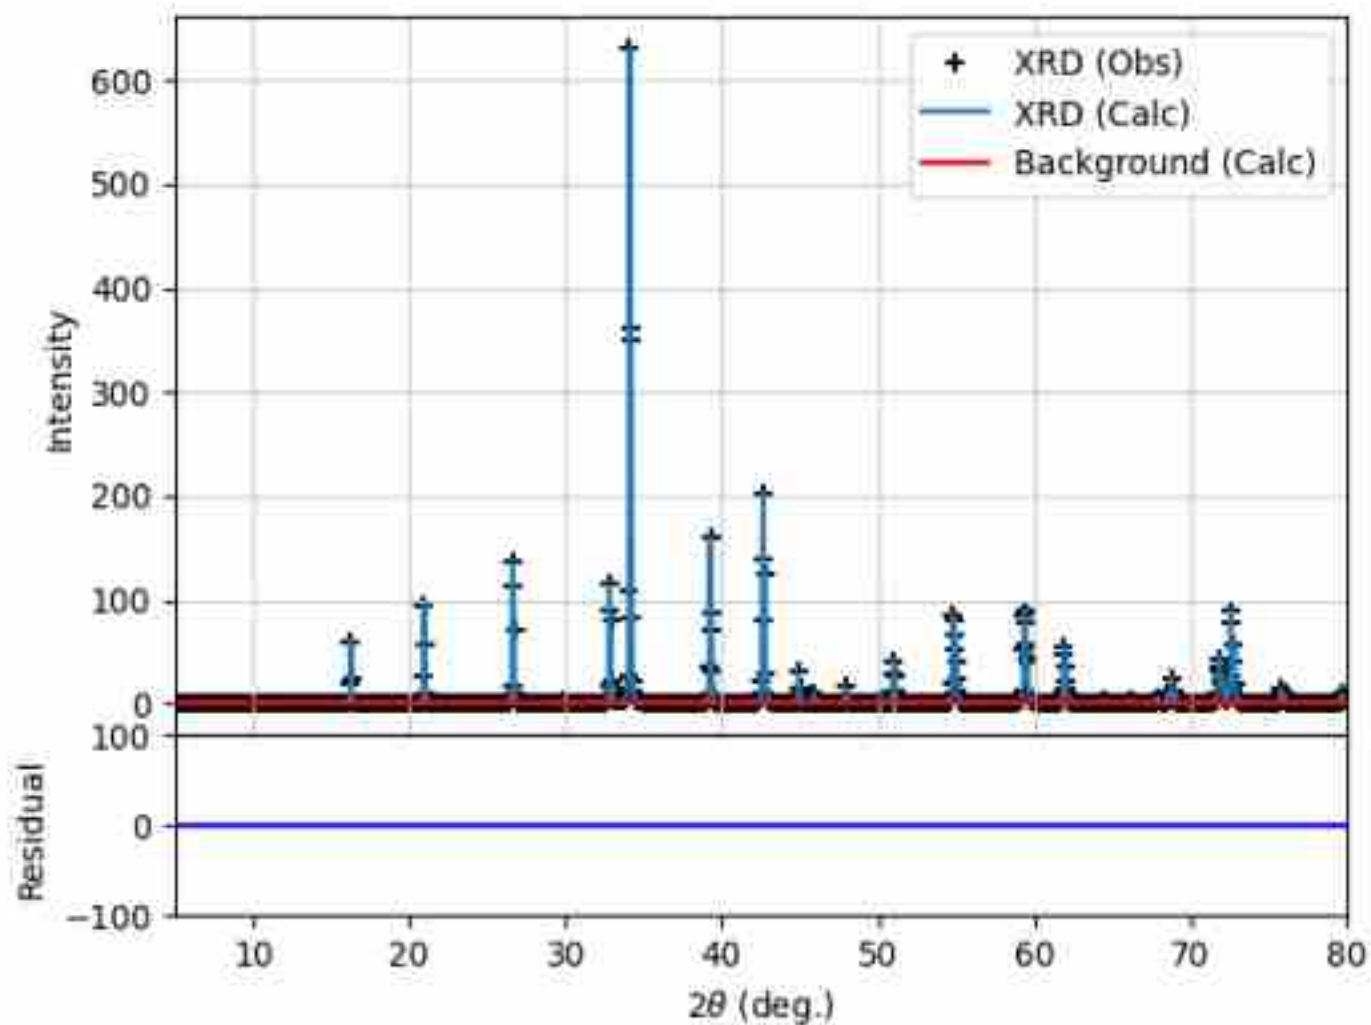

| RMSE before RR | Rwp     | RMSE after RR |
|----------------|---------|---------------|
| 0.012          | 0.00331 | 0.0009        |



# Pr<sub>2</sub>Co<sub>4</sub>

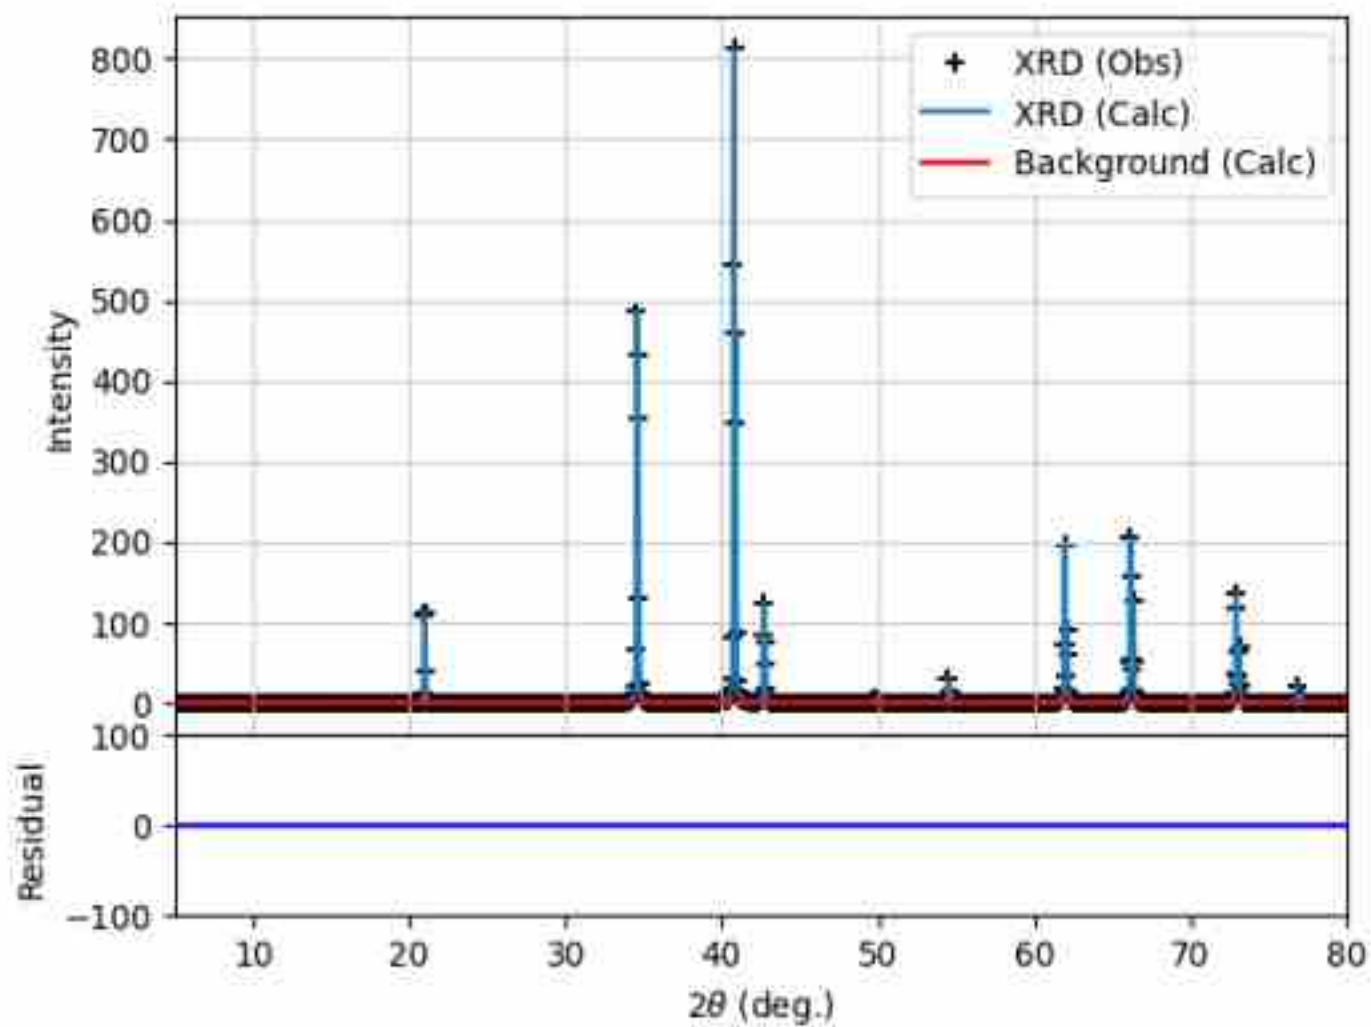

| RMSE before RR | Rwp     | RMSE after RR |
|----------------|---------|---------------|
| 0.012          | 0.00321 | 0.00018       |

# Pr<sub>2</sub>Si<sub>3</sub>

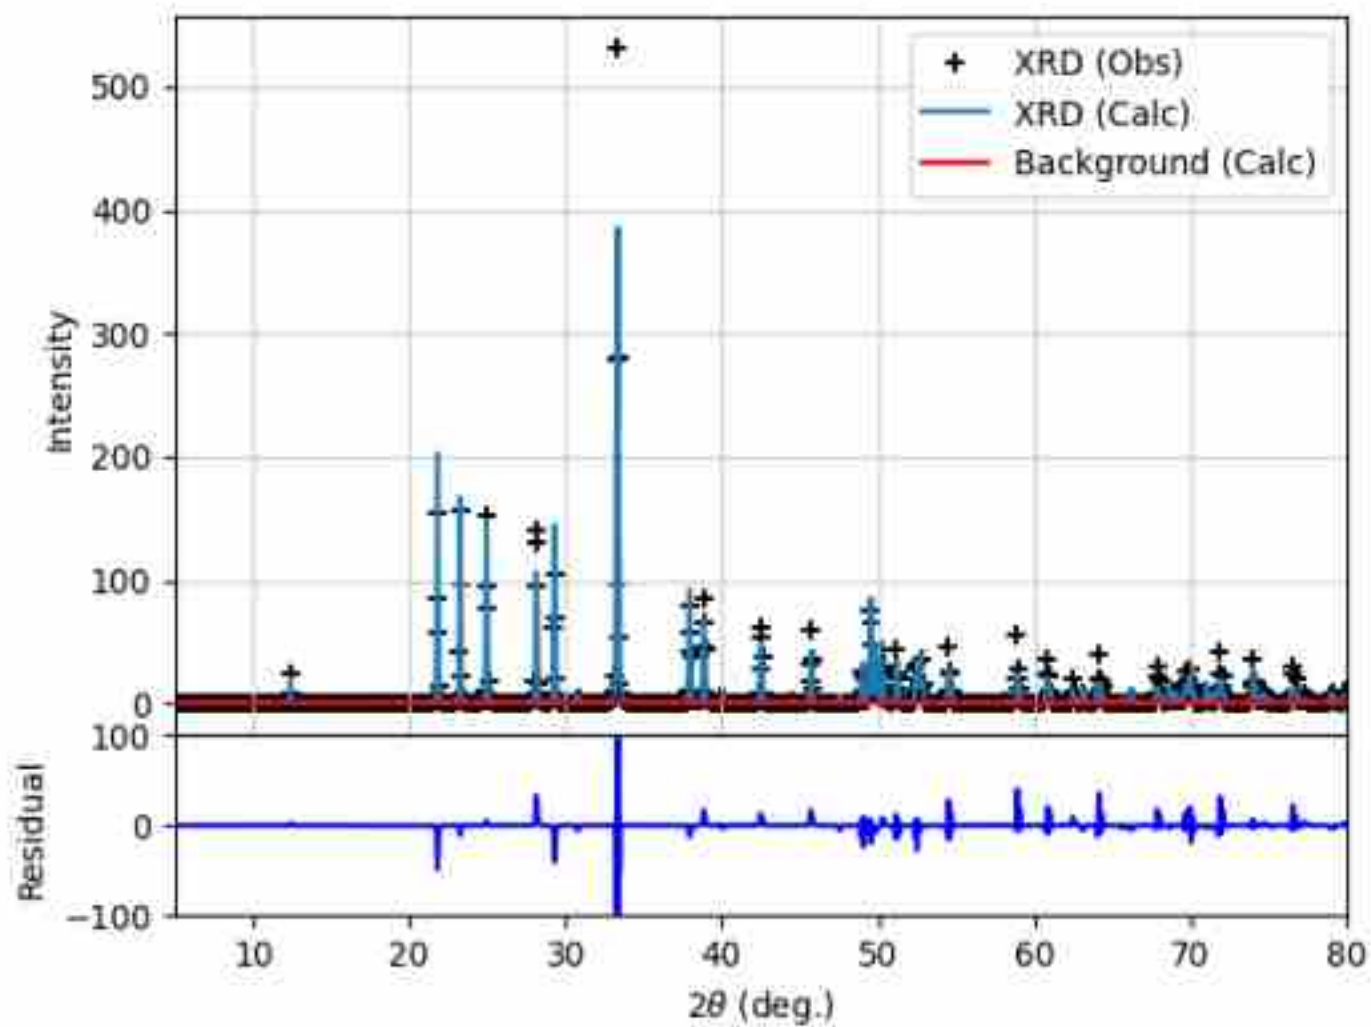

| RMSE before RR | Rwp      | RMSE after RR |
|----------------|----------|---------------|
| 0.012          | 42.23797 | 0.01639       |

# Pr<sub>3</sub>Zn<sub>3</sub>Ni<sub>3</sub>

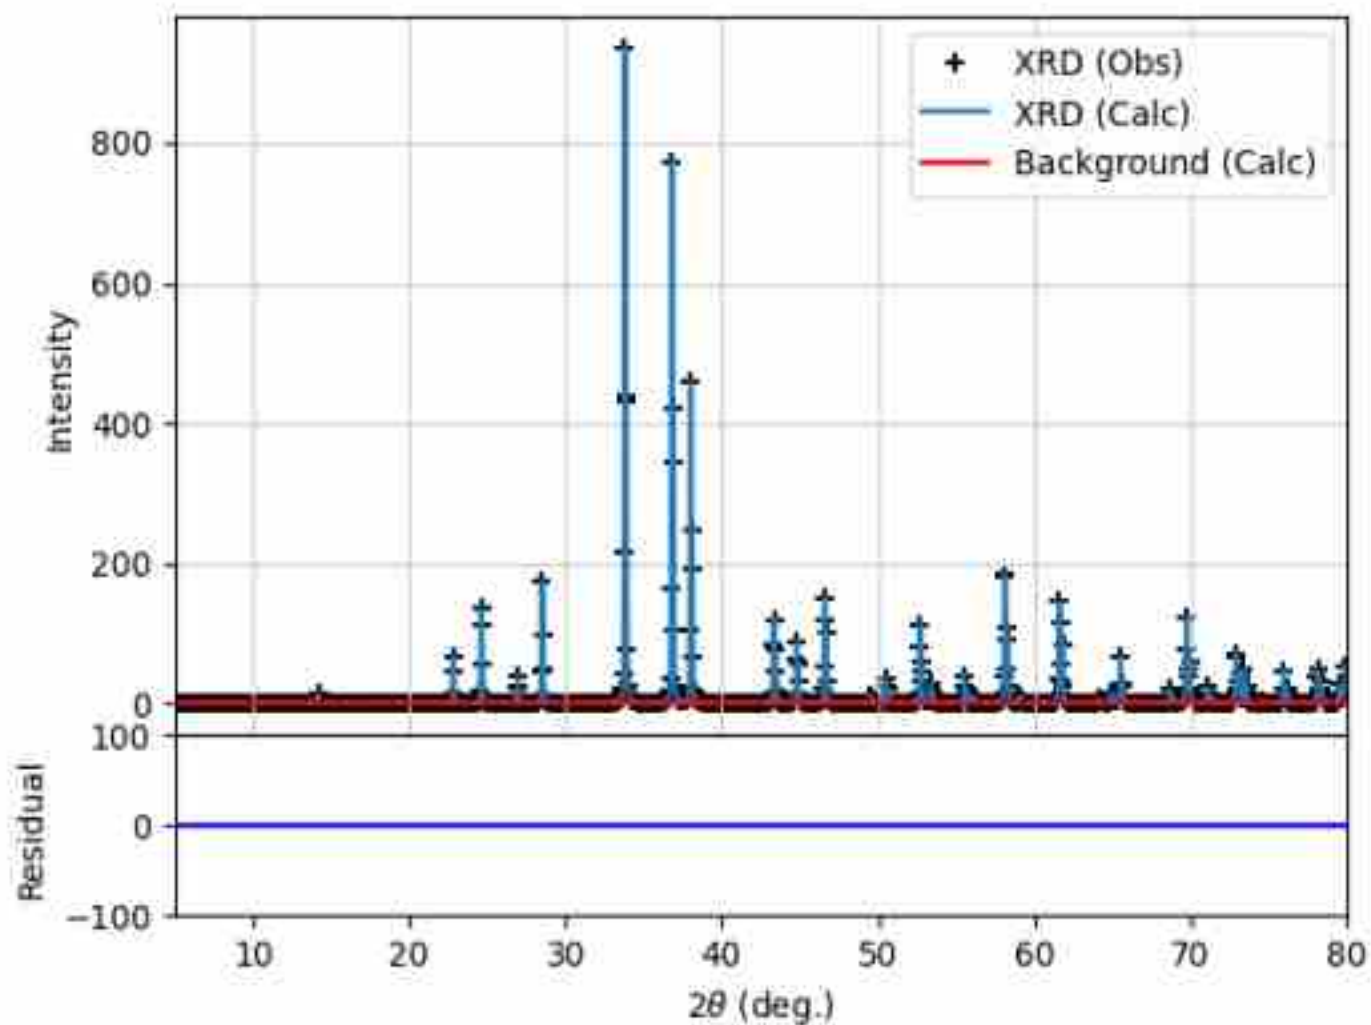

| RMSE before RR | Rwp     | RMSE after RR |
|----------------|---------|---------------|
| 0.012          | 0.00311 | 0.00076       |

# Pr<sub>4</sub>Mg<sub>2</sub>Pt<sub>2</sub>O<sub>12</sub>

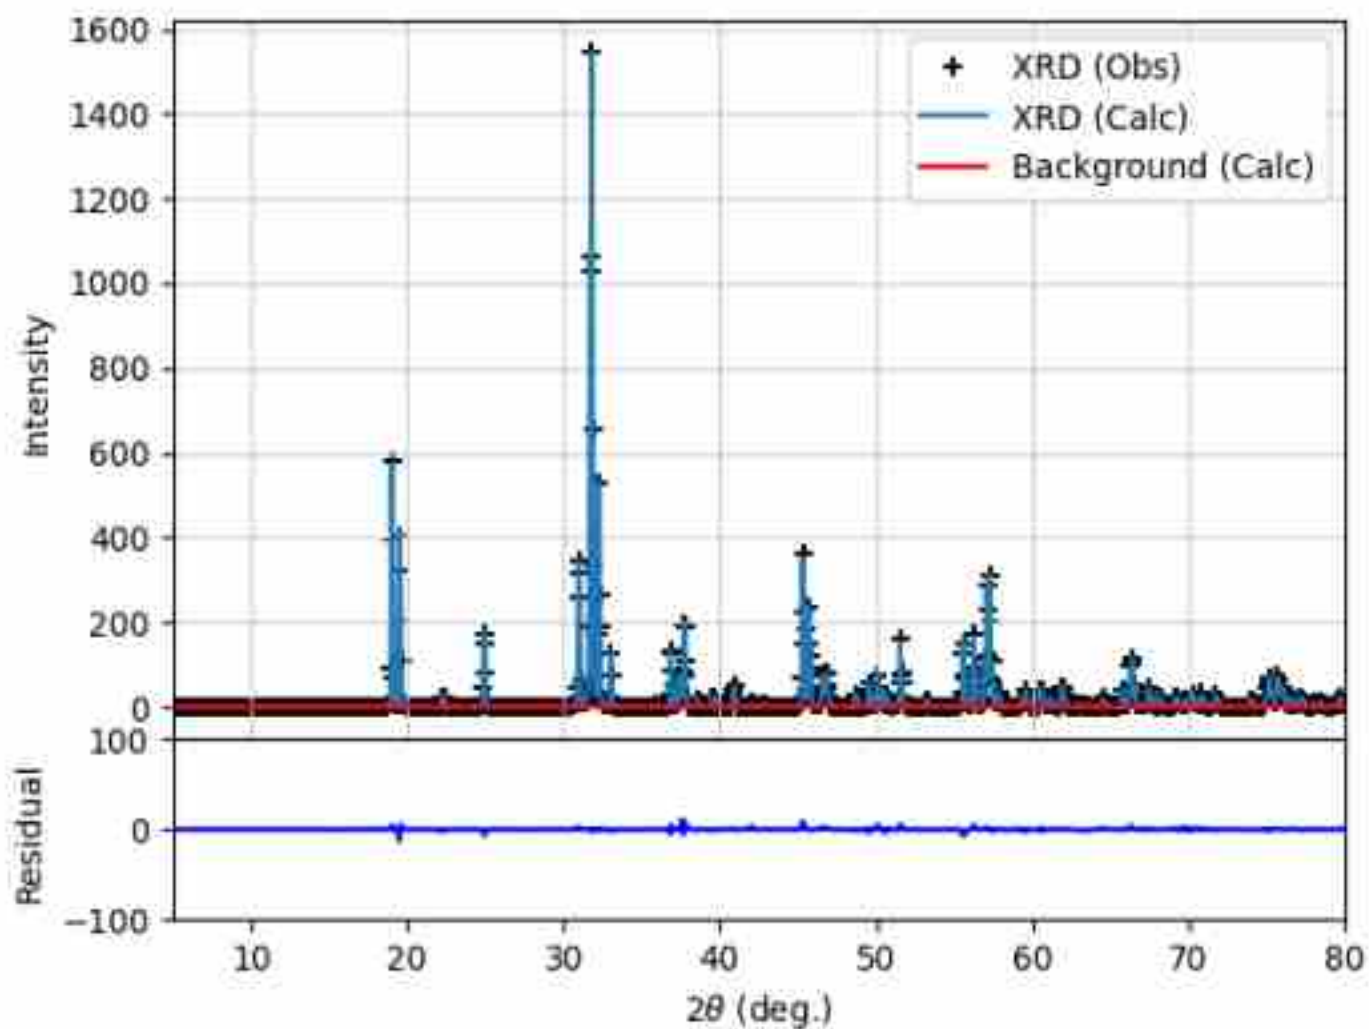

| RMSE before RR | Rwp     | RMSE after RR |
|----------------|---------|---------------|
| 0.012          | 3.64609 | 0.18202       |

# Rb1Ru1F6

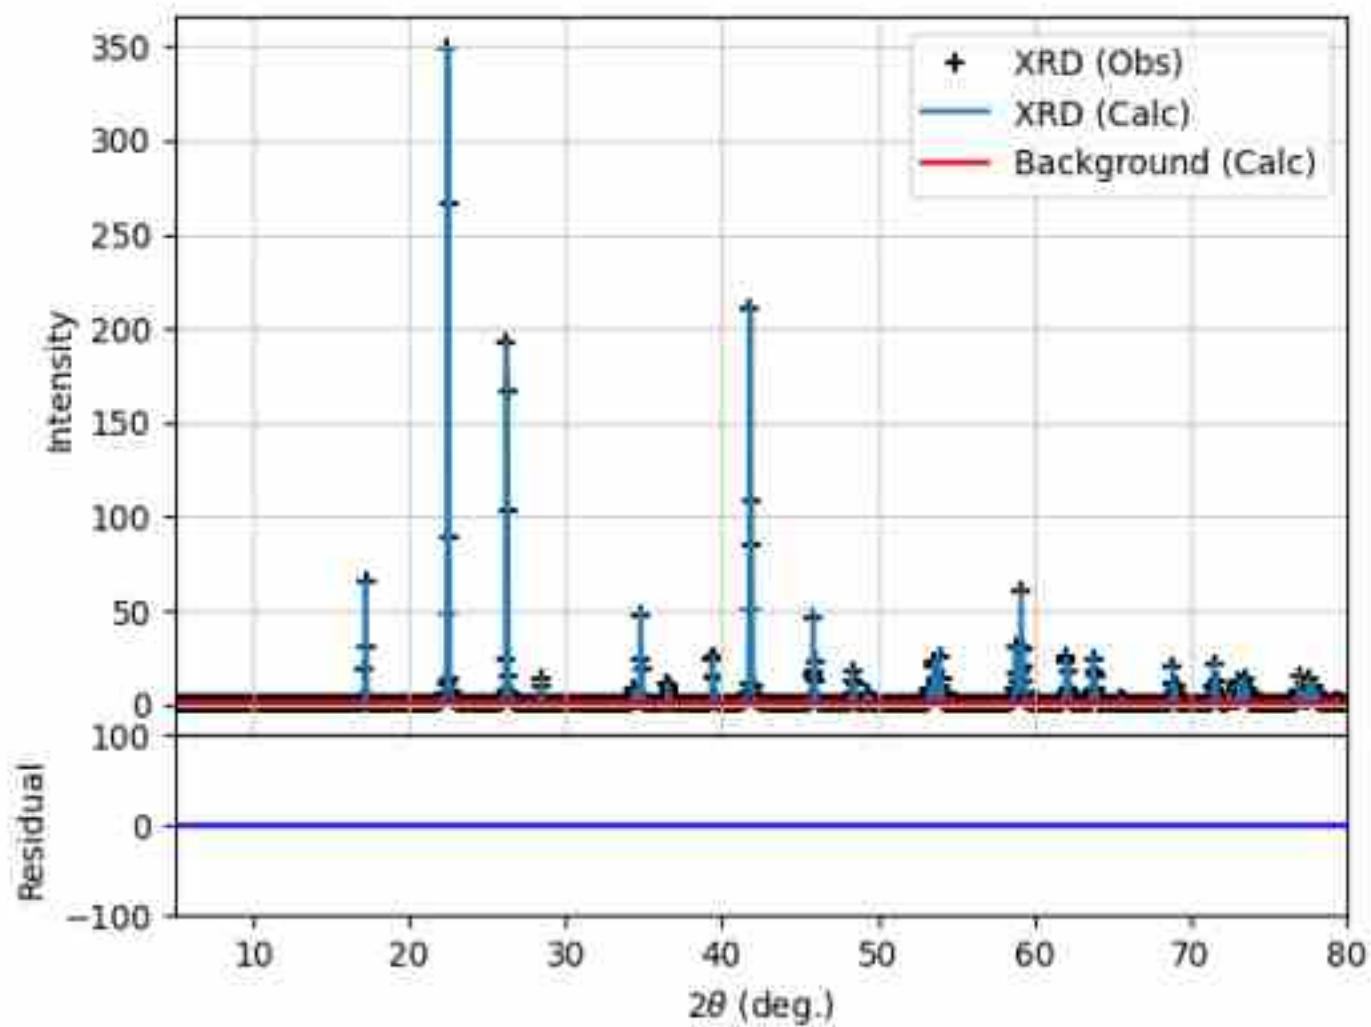

| RMSE before RR | Rwp     | RMSE after RR |
|----------------|---------|---------------|
| 0.012          | 0.00289 | 0.00113       |

# Rb<sub>2</sub>Ag<sub>1</sub>As<sub>1</sub>Cl<sub>6</sub>

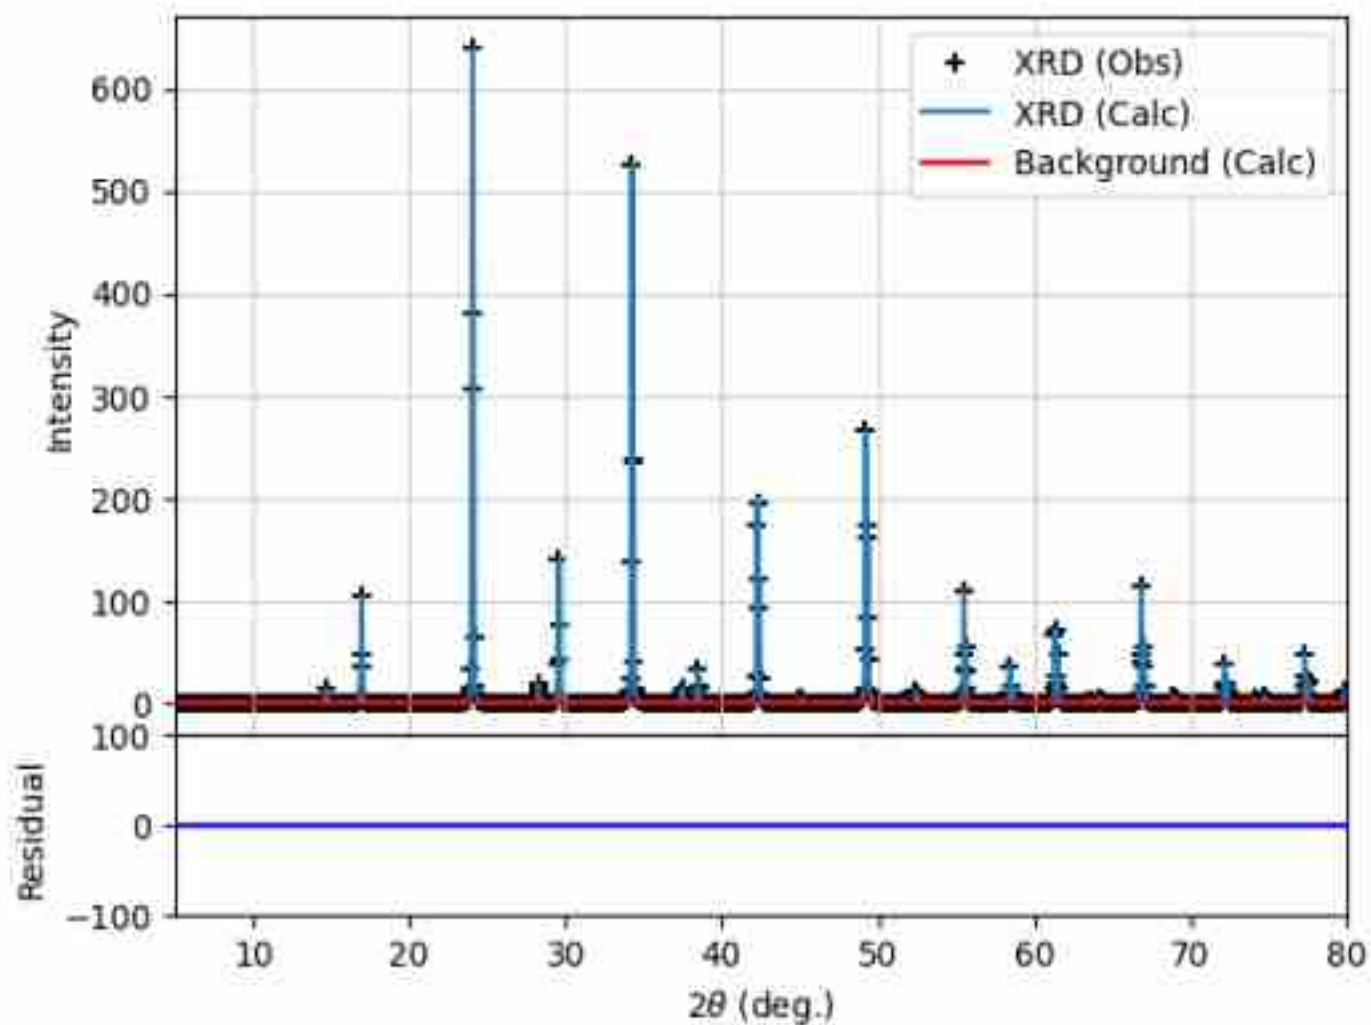

| RMSE before RR | Rwp     | RMSE after RR |
|----------------|---------|---------------|
| 0.012          | 0.02898 | 0.003         |

# Rb<sub>2</sub>Al<sub>11</sub>In<sub>1</sub>Cl<sub>16</sub>

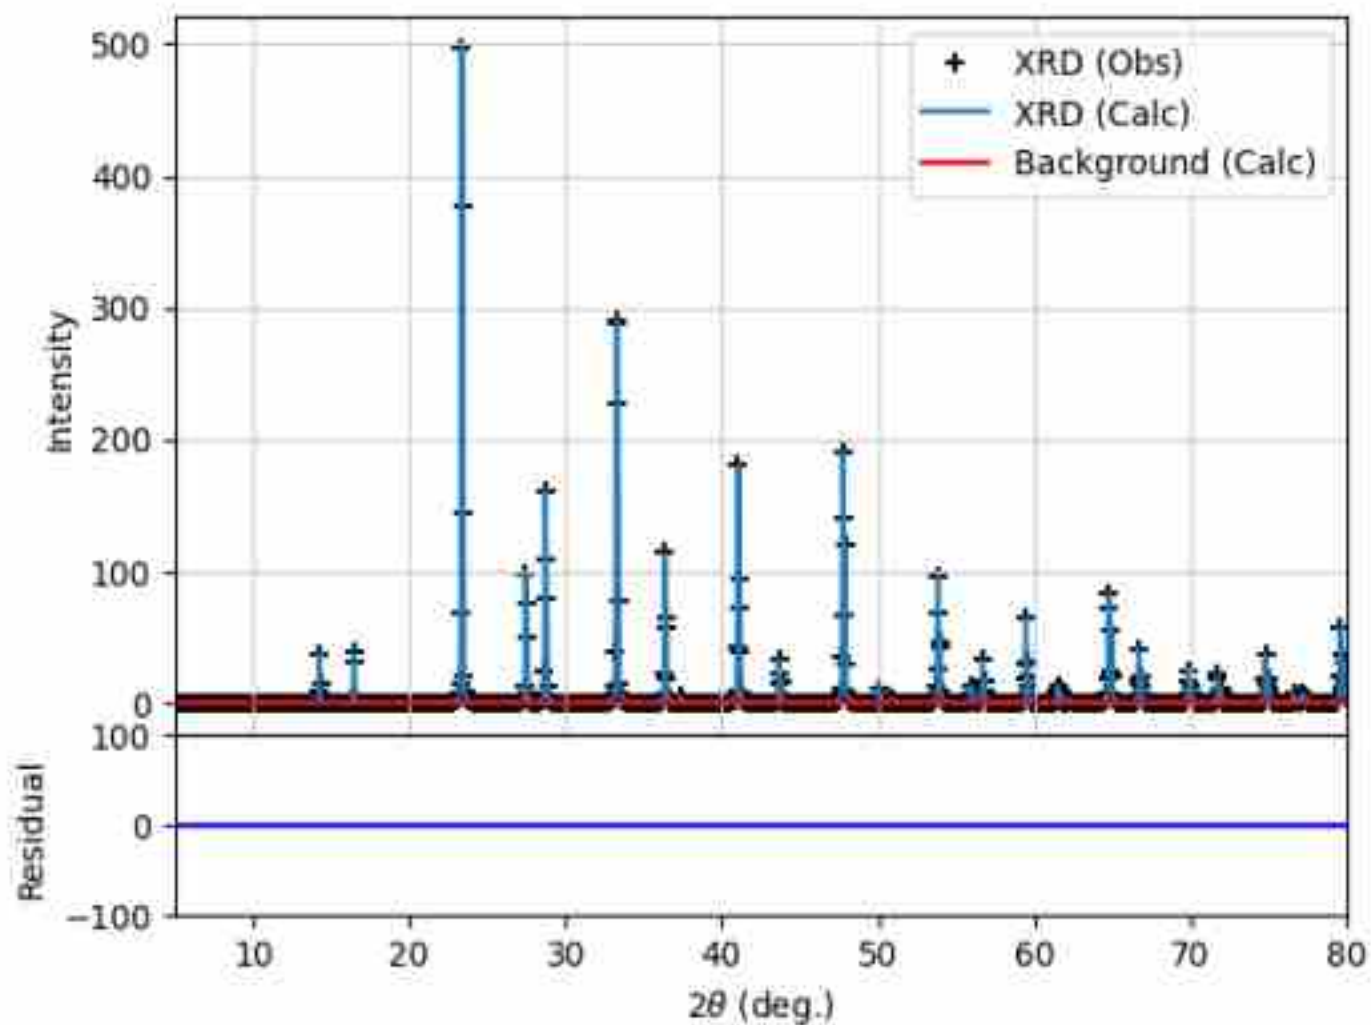

| RMSE before RR | Rwp     | RMSE after RR |
|----------------|---------|---------------|
| 0.012          | 0.01366 | 0.00249       |

# Rb<sub>2</sub>LiScF<sub>6</sub>

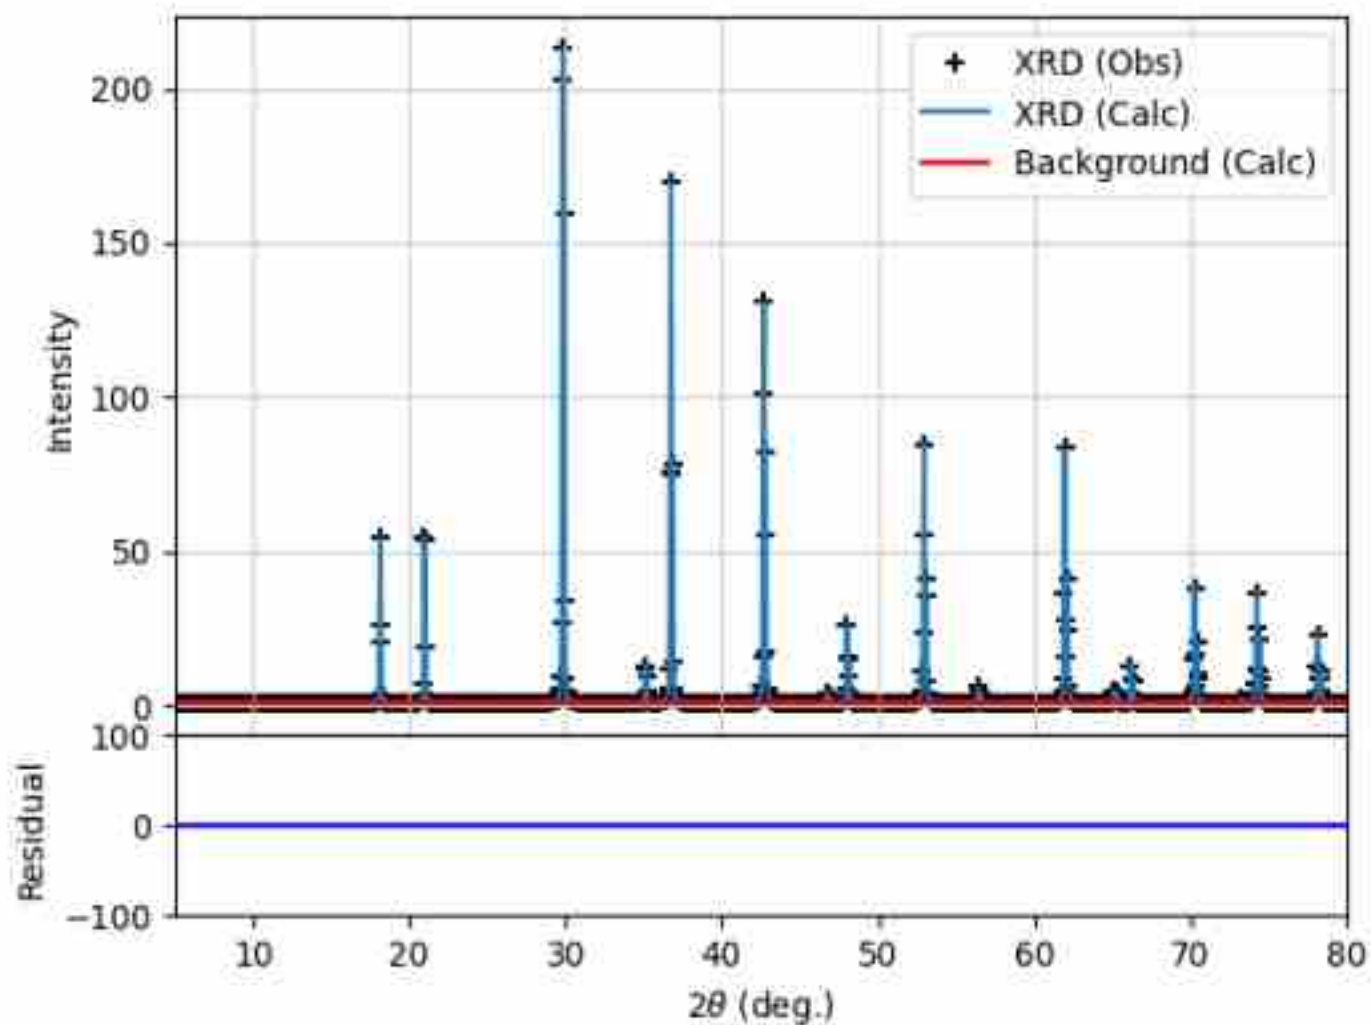

| RMSE before RR | Rwp     | RMSE after RR |
|----------------|---------|---------------|
| 0.012          | 0.07191 | 0.00681       |



# Rb<sub>2</sub>Na<sub>1</sub>Bi<sub>1</sub>Cl<sub>6</sub>

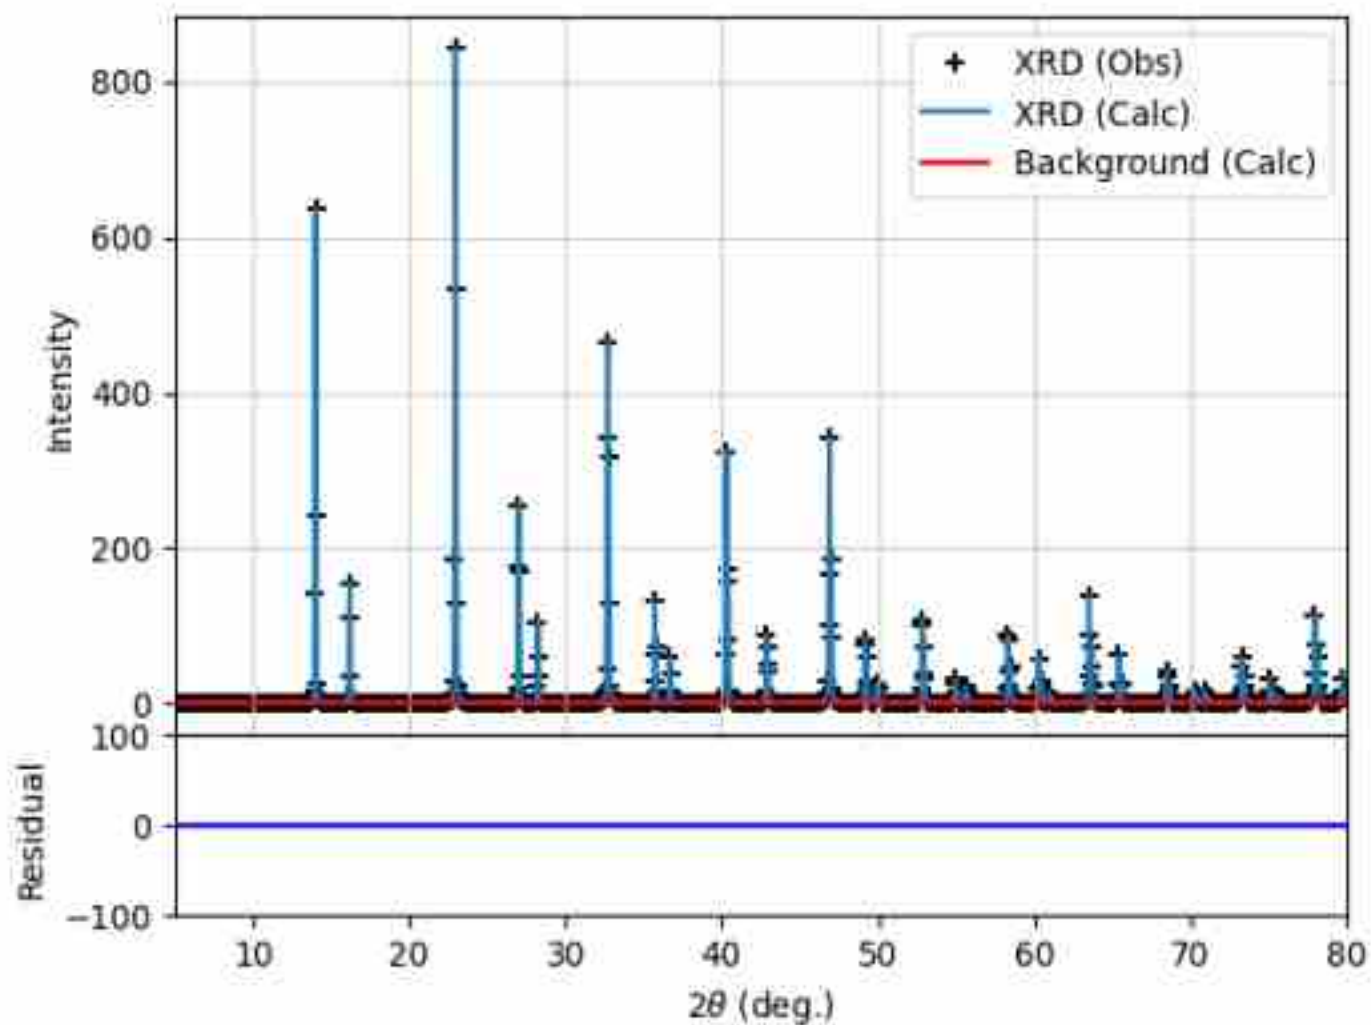

| RMSE before RR | Rwp    | RMSE after RR |
|----------------|--------|---------------|
| 0.012          | 0.0123 | 0.00259       |

# Rb<sub>2</sub>PdI<sub>6</sub>

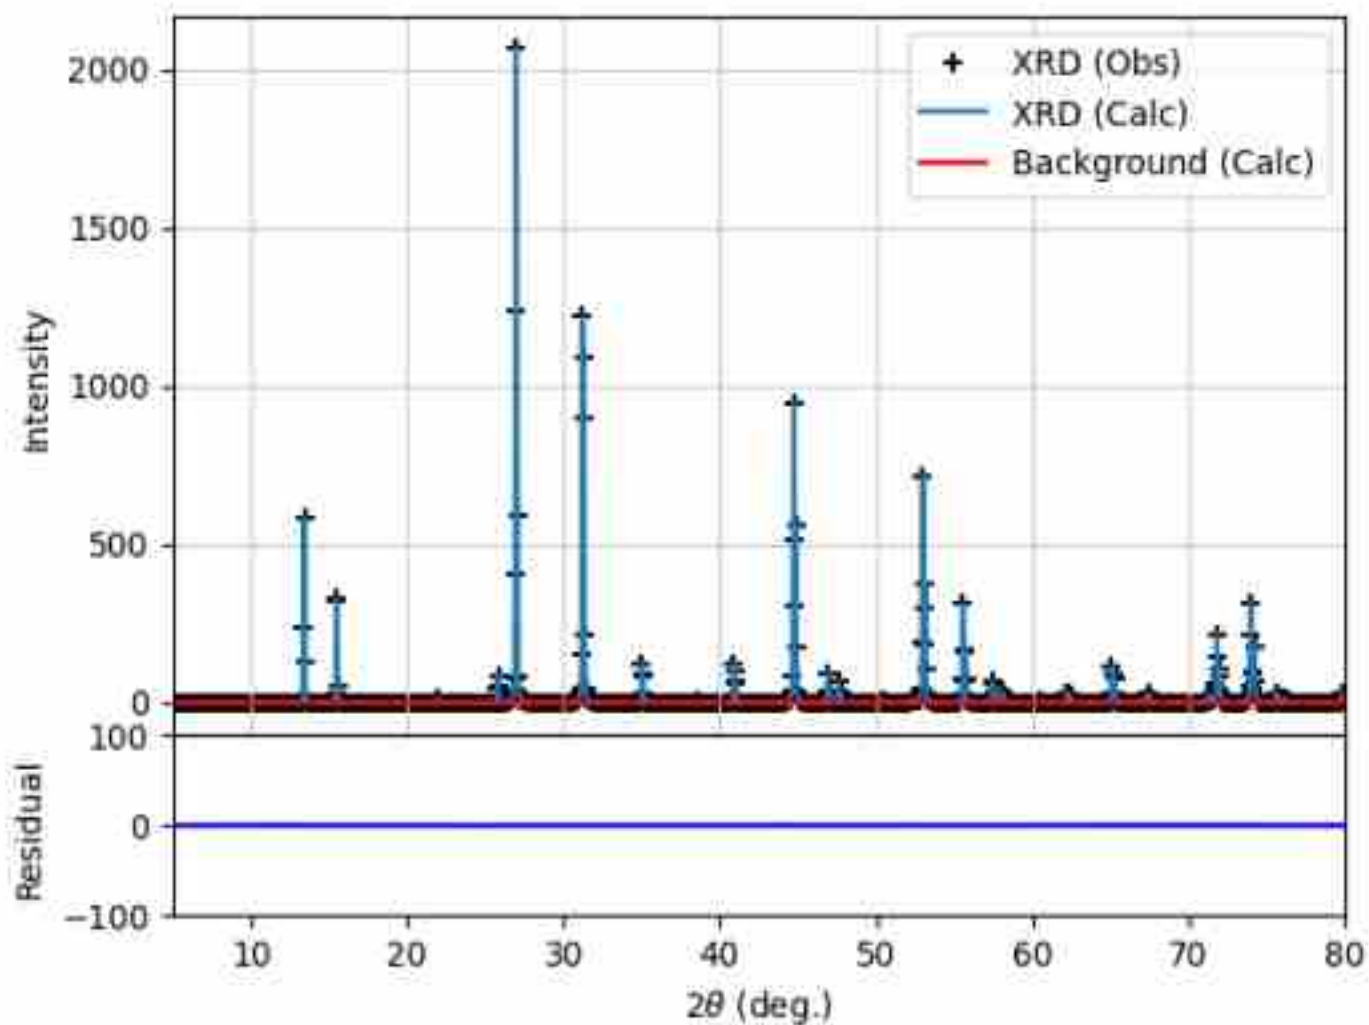

| RMSE before RR | Rwp     | RMSE after RR |
|----------------|---------|---------------|
| 0.012          | 0.19278 | 0.00324       |

# Rb2Sc1Ag1F6

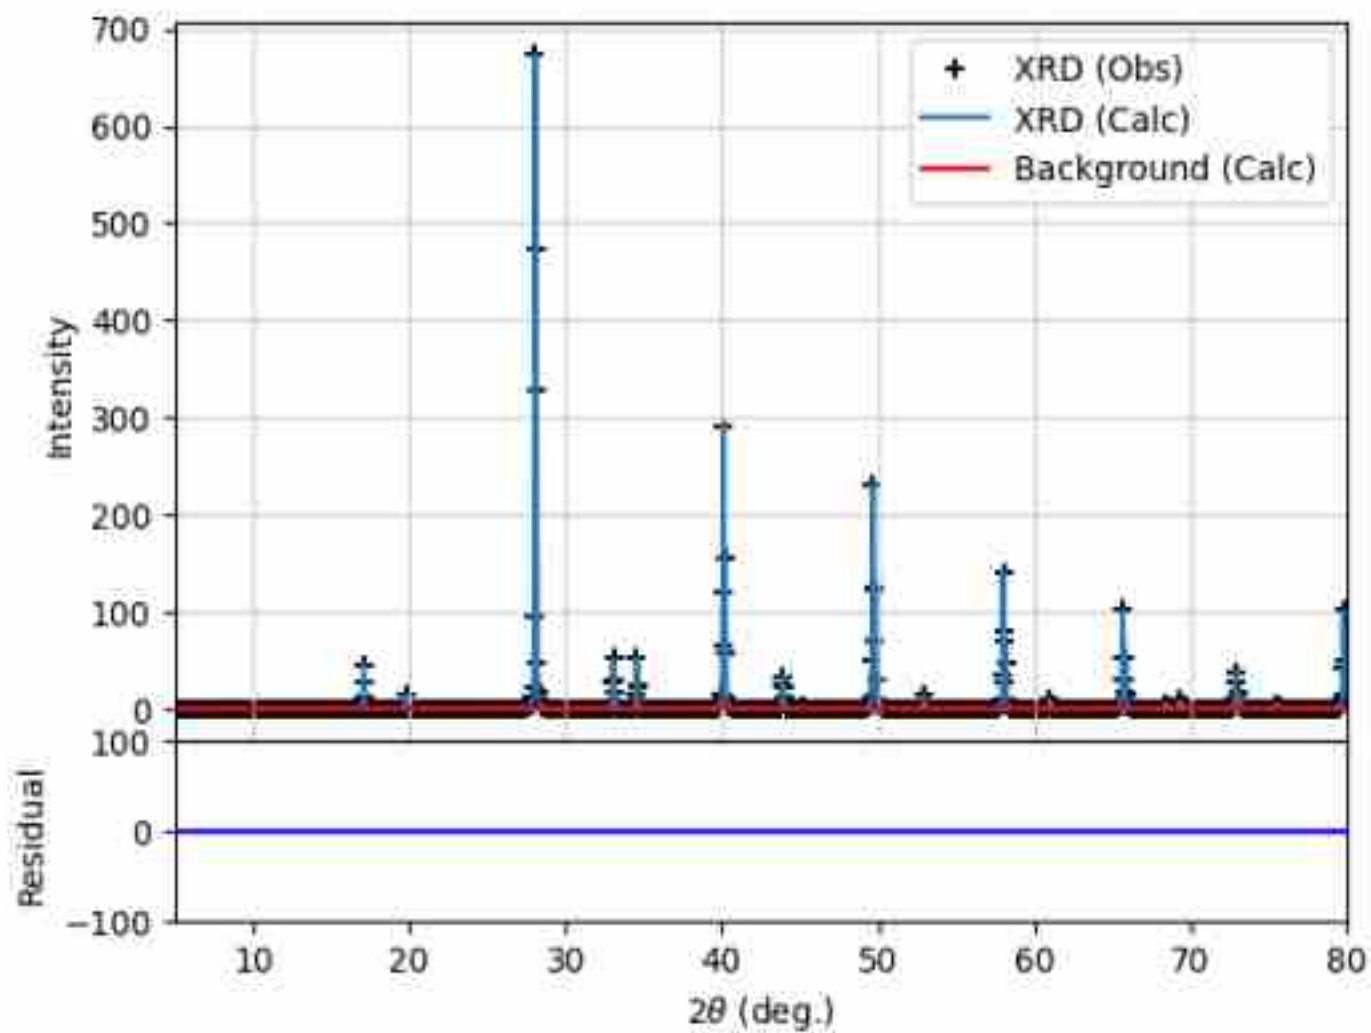

| RMSE before RR | Rwp     | RMSE after RR |
|----------------|---------|---------------|
| 0.012          | 0.00788 | 0.00299       |

# Rb<sub>2</sub>Tl<sub>11</sub>Hg<sub>1</sub>F<sub>6</sub>

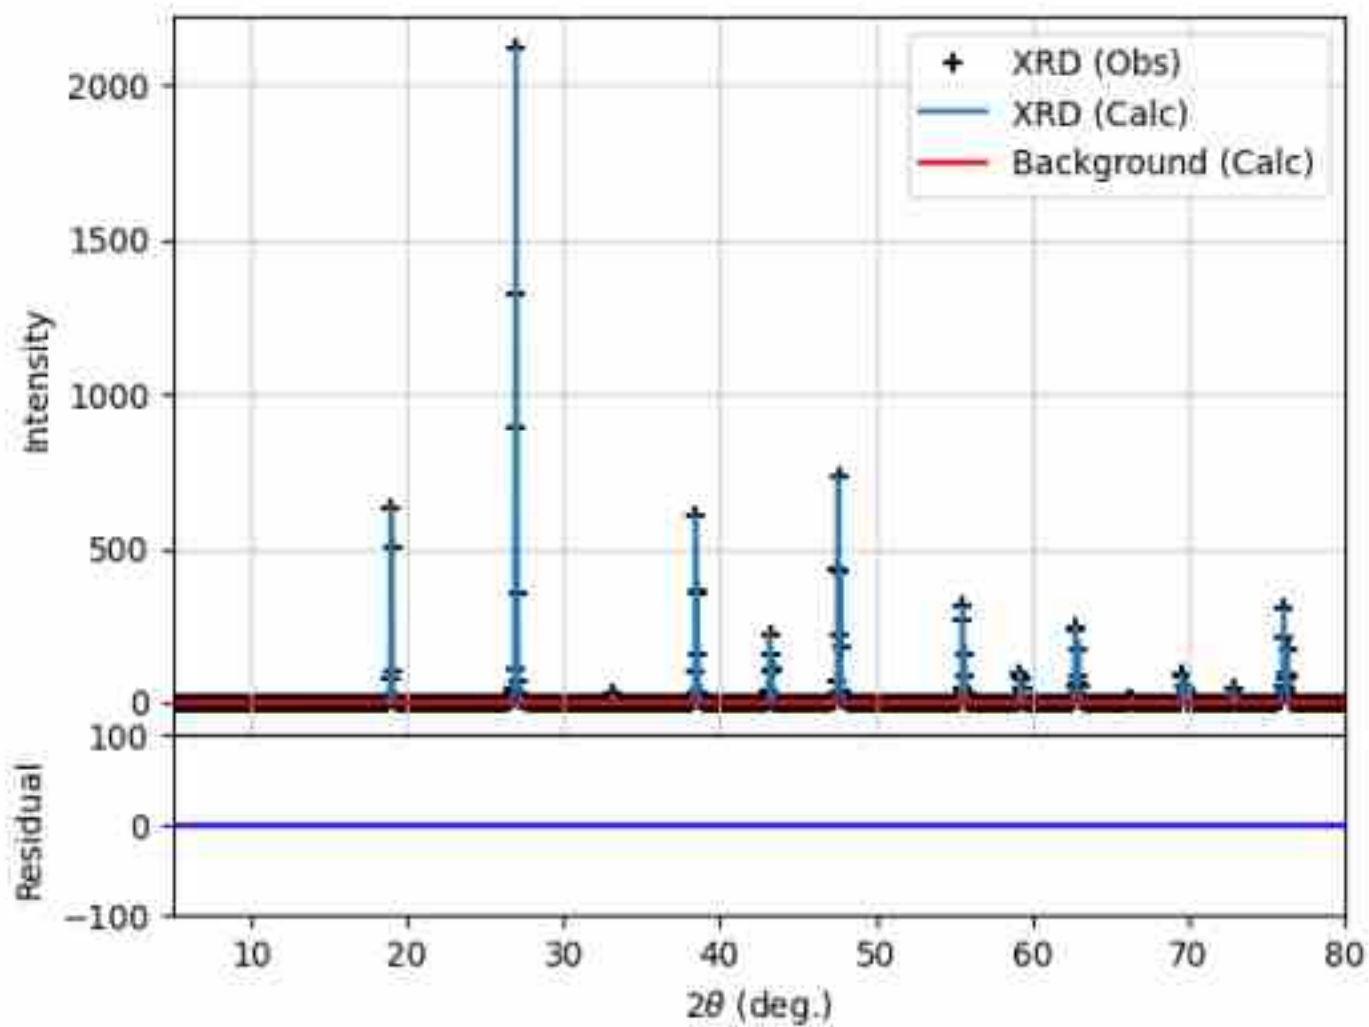

| RMSE before RR | Rwp    | RMSE after RR |
|----------------|--------|---------------|
| 0.012          | 0.1165 | 0.00606       |

# Rb<sub>2</sub>Y<sub>1</sub>Cu<sub>1</sub>Br<sub>6</sub>

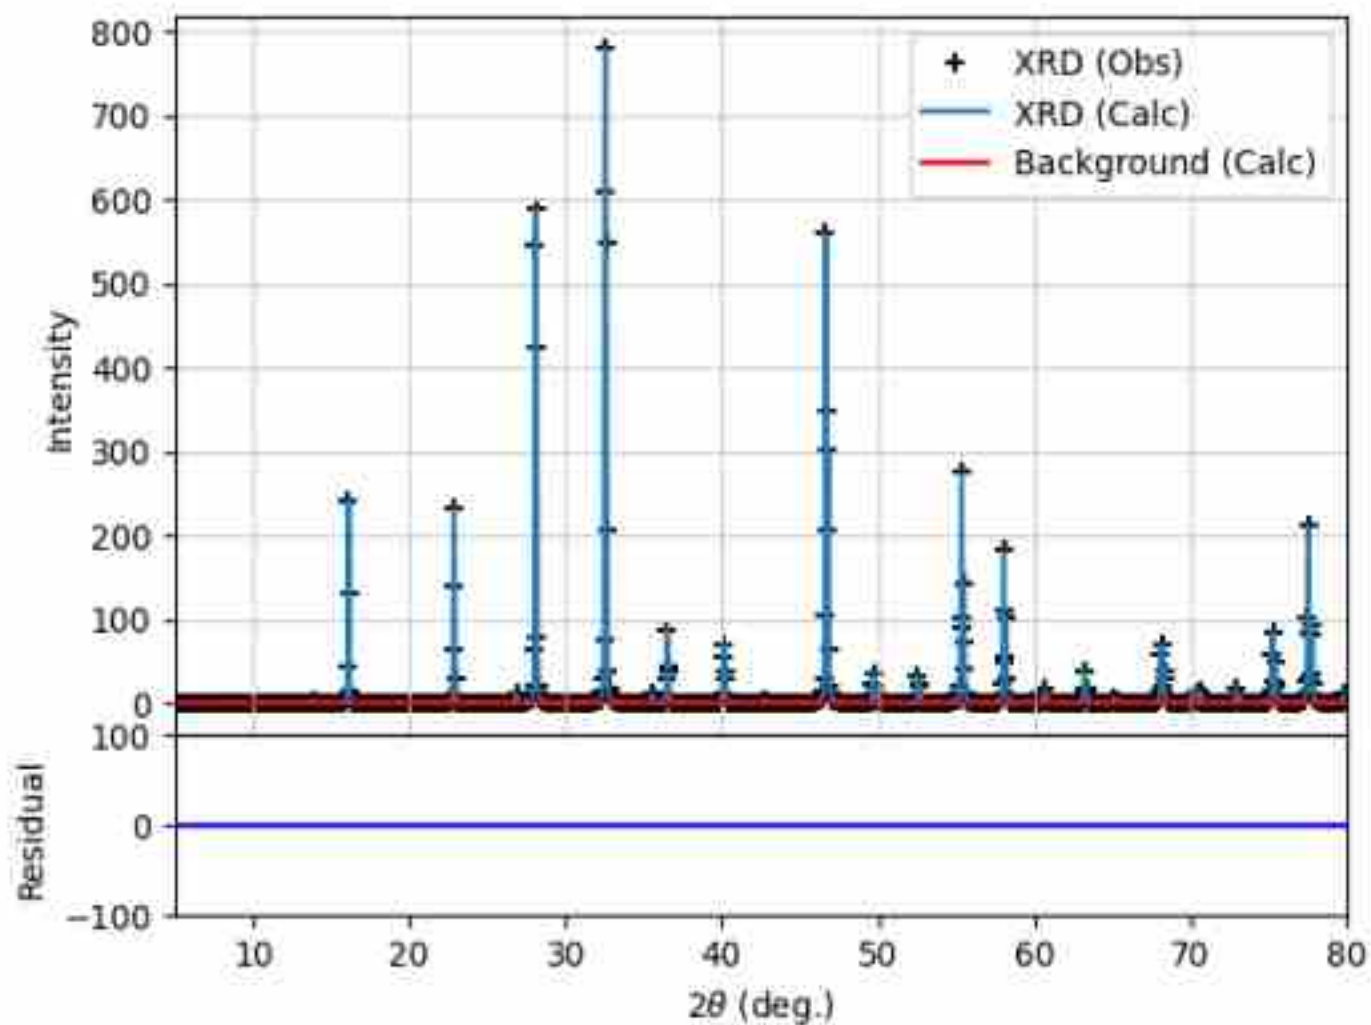

| RMSE before RR | Rwp     | RMSE after RR |
|----------------|---------|---------------|
| 0.012          | 0.02082 | 0.00158       |

# Rb<sub>2</sub>Y<sub>1</sub>In<sub>1</sub>F<sub>6</sub>

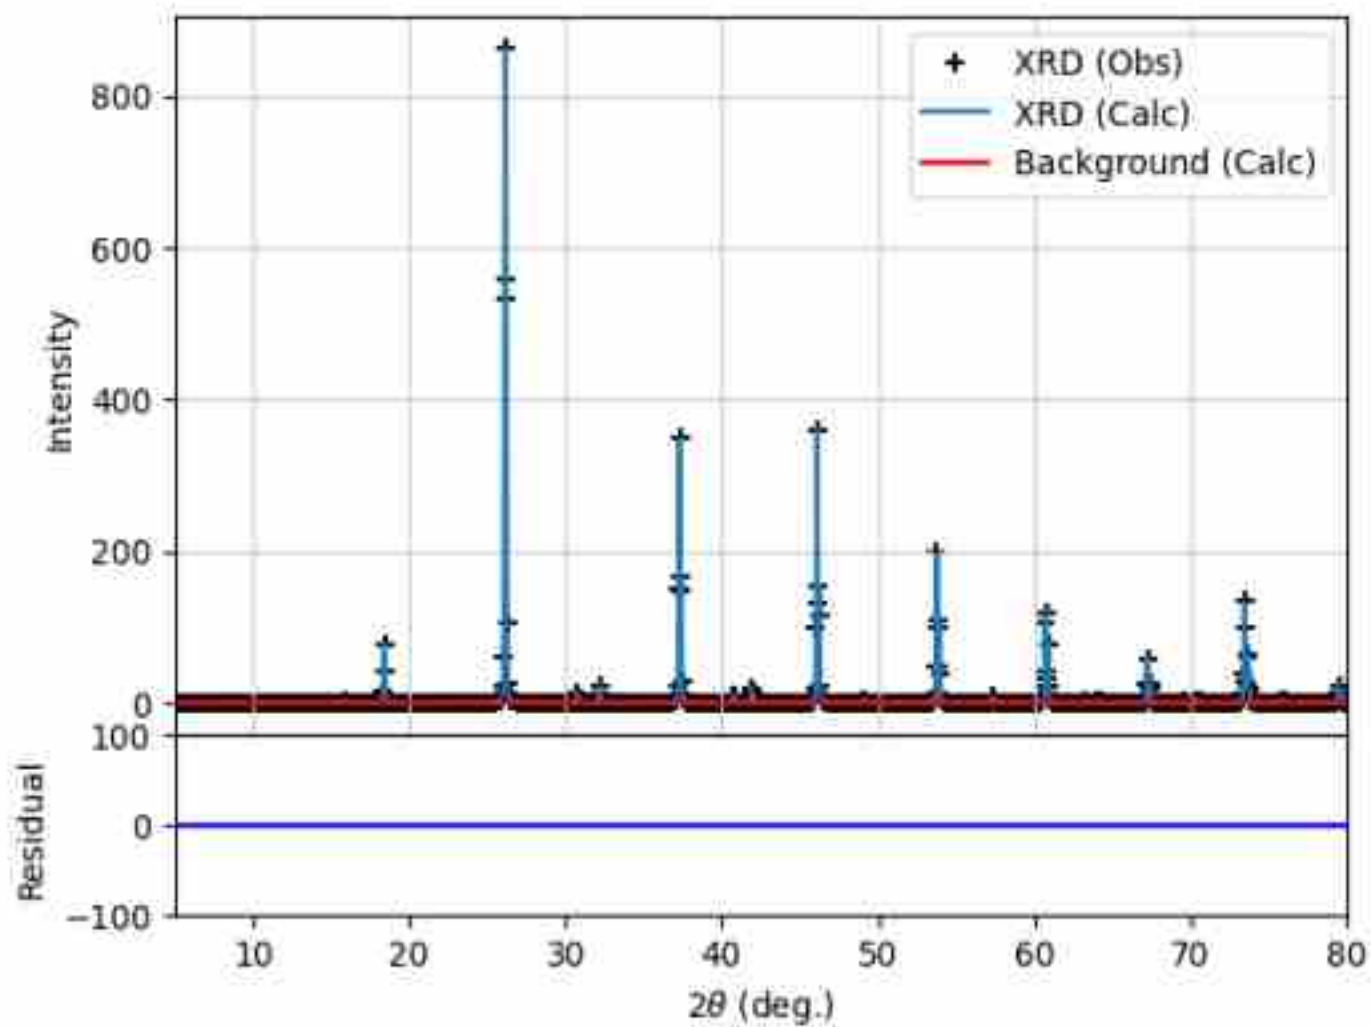

| RMSE before RR | Rwp    | RMSE after RR |
|----------------|--------|---------------|
| 0.012          | 0.0395 | 0.00439       |

# Rb<sub>3</sub>TlBr<sub>6</sub>

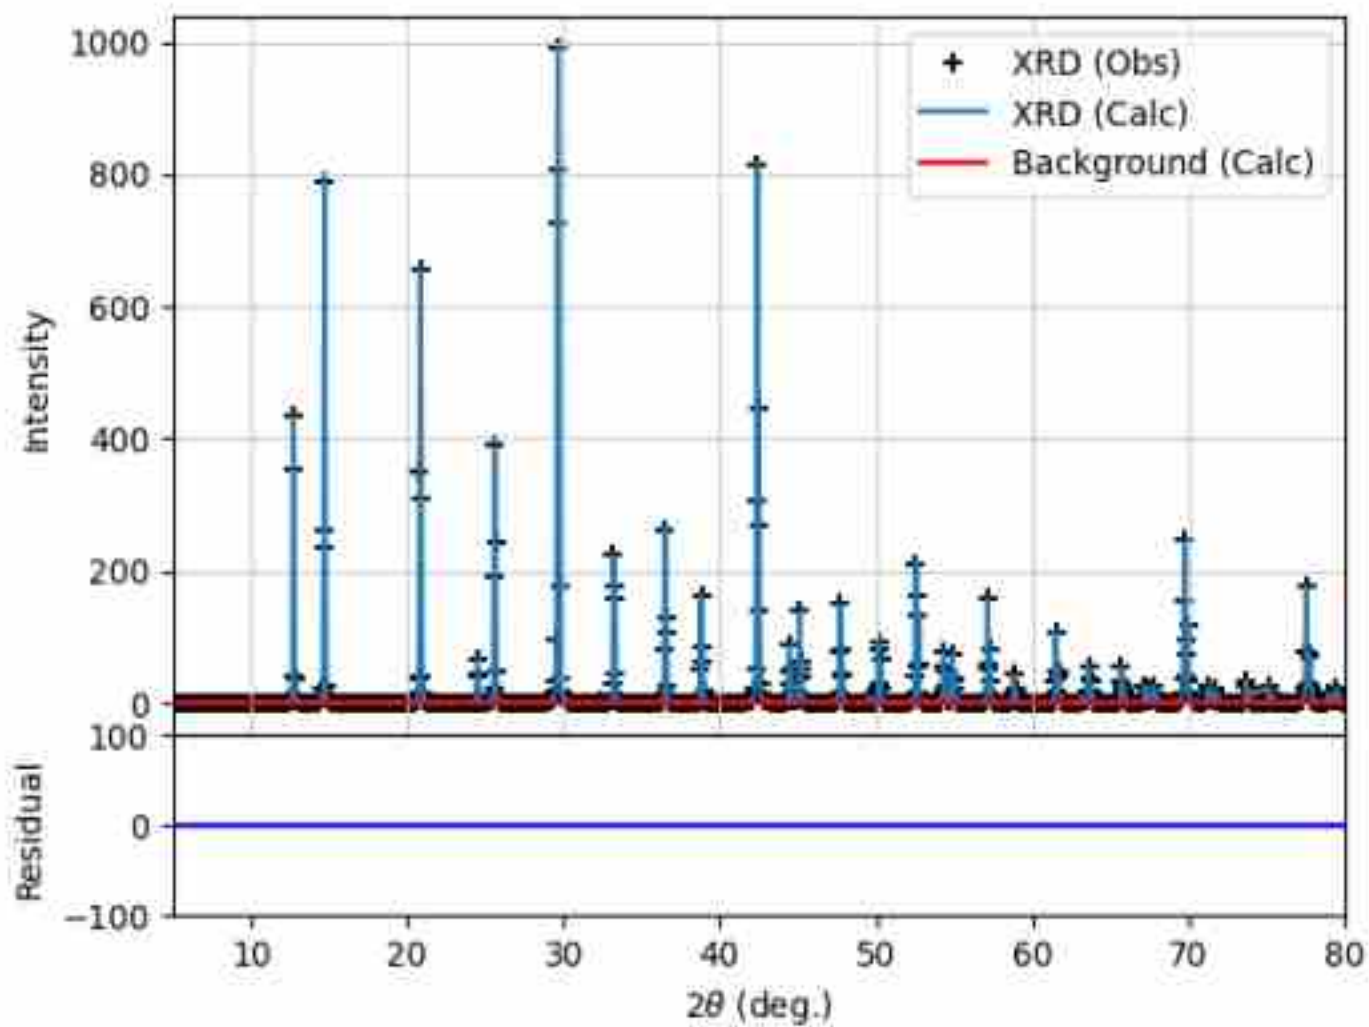

| RMSE before RR | Rwp     | RMSE after RR |
|----------------|---------|---------------|
| 0.012          | 0.05798 | 0.00344       |

# Ru6W2

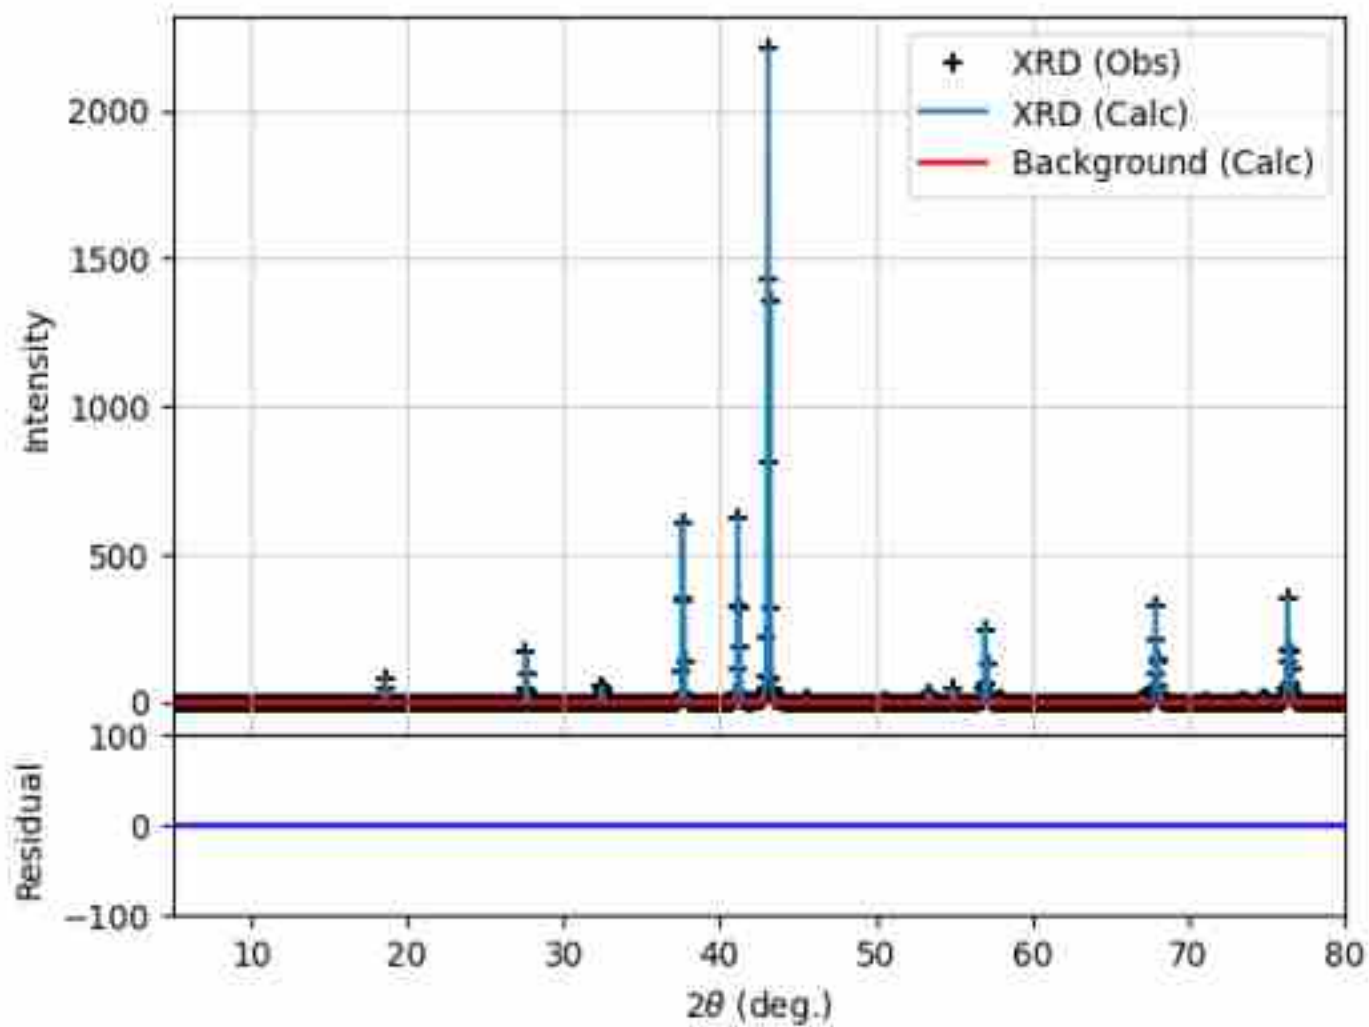

| RMSE before RR | Rwp     | RMSE after RR |
|----------------|---------|---------------|
| 0.012          | 0.01325 | 0.00131       |



# Sb<sub>2</sub>Pb<sub>10</sub>O<sub>6</sub>

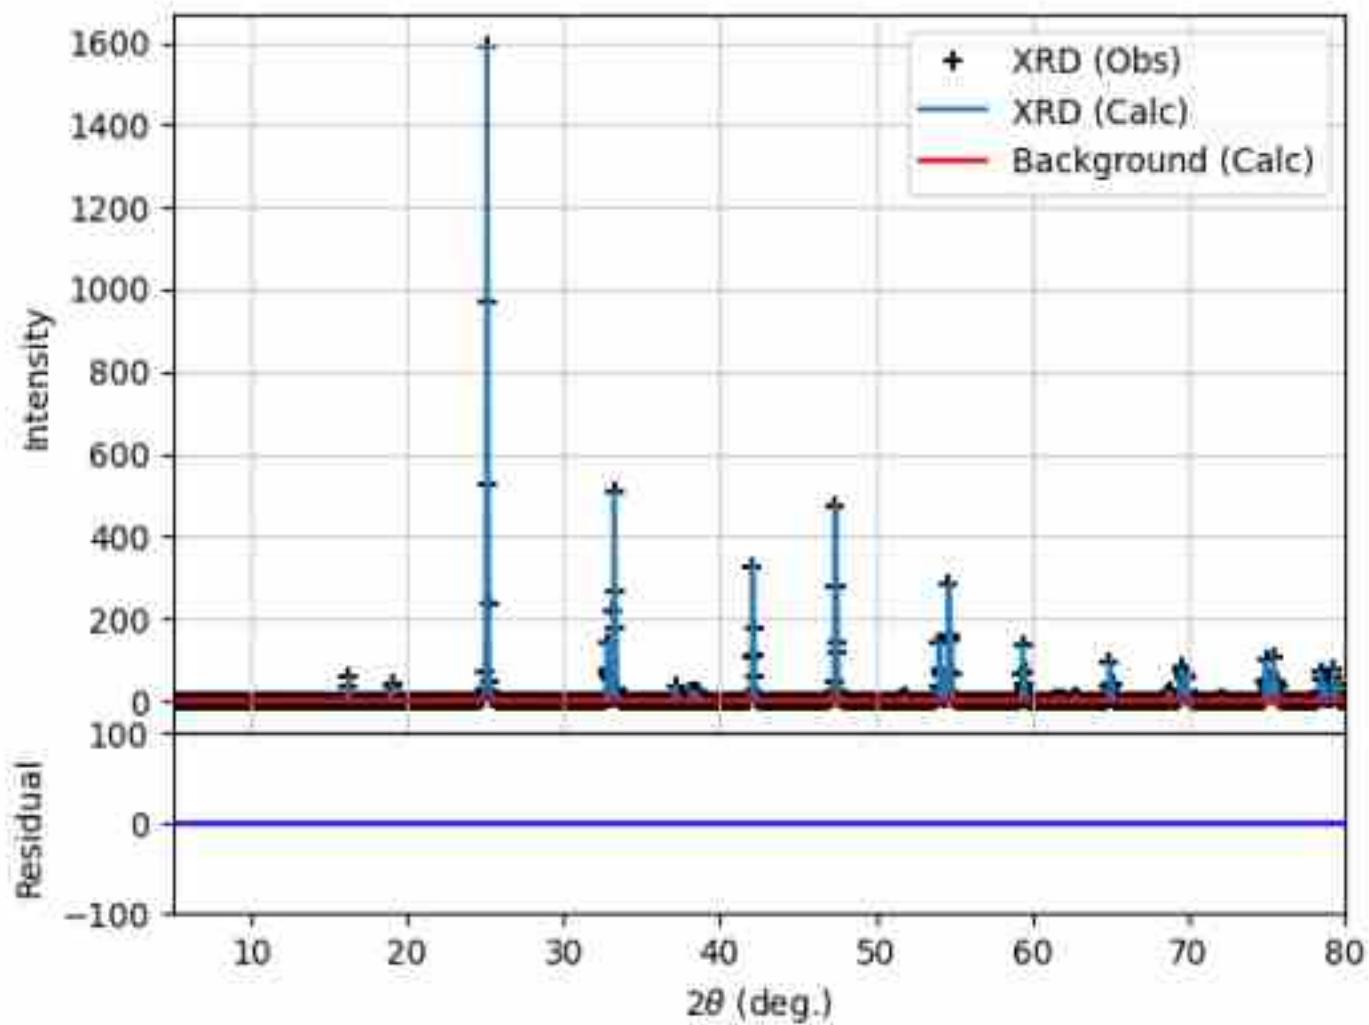

| RMSE before RR | Rwp     | RMSE after RR |
|----------------|---------|---------------|
| 0.012          | 0.00252 | 0.00113       |

# Sb4Os2

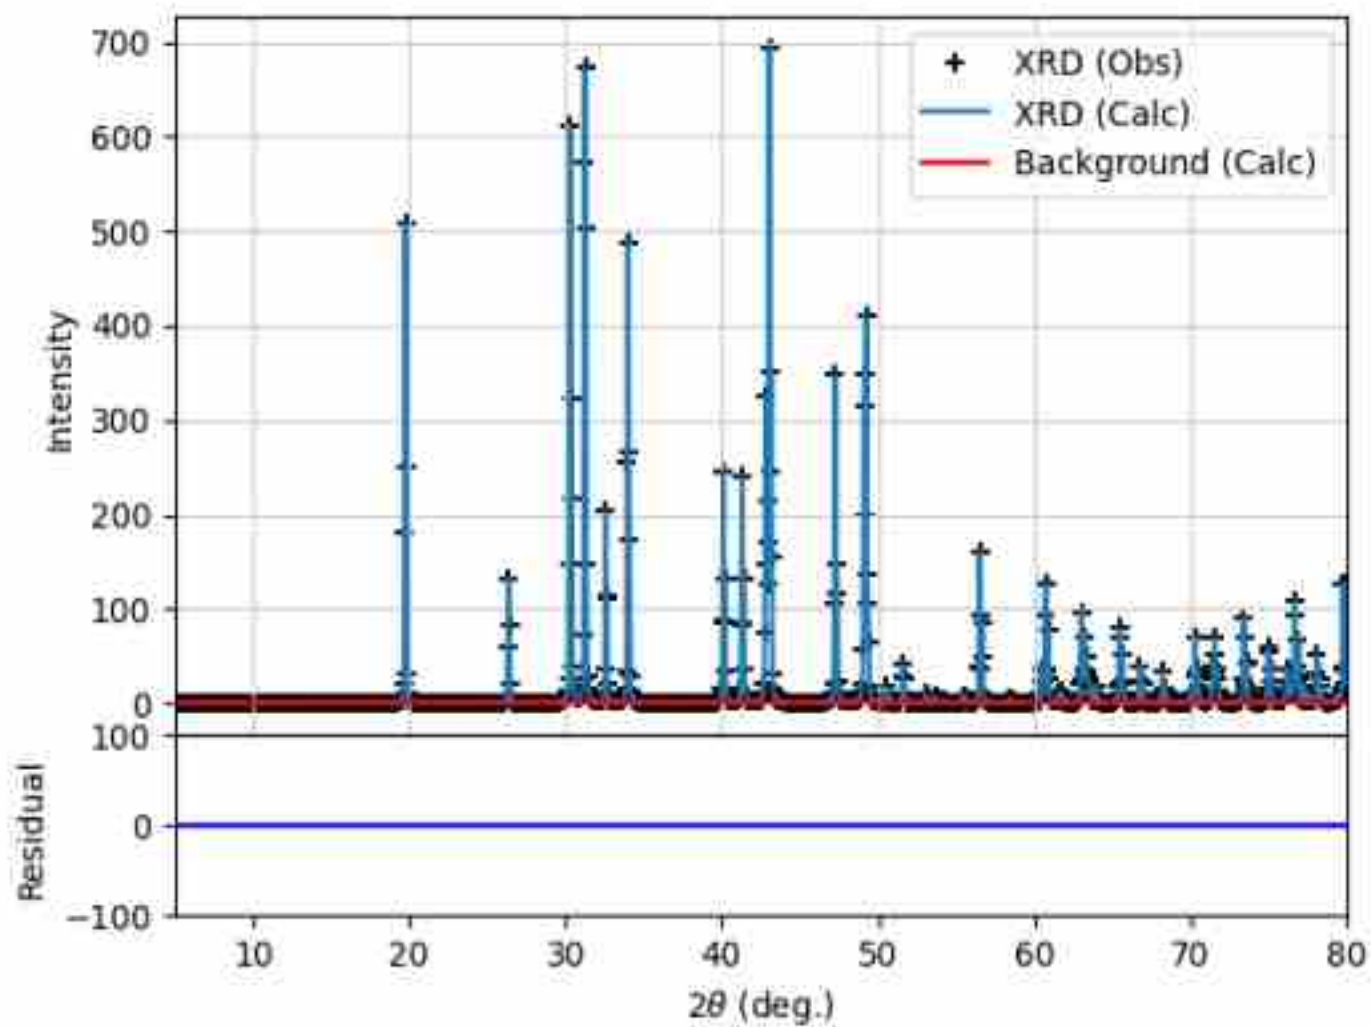

| RMSE before RR | Rwp     | RMSE after RR |
|----------------|---------|---------------|
| 0.012          | 0.00443 | 0.00028       |

# Sc1Fe6Sn6

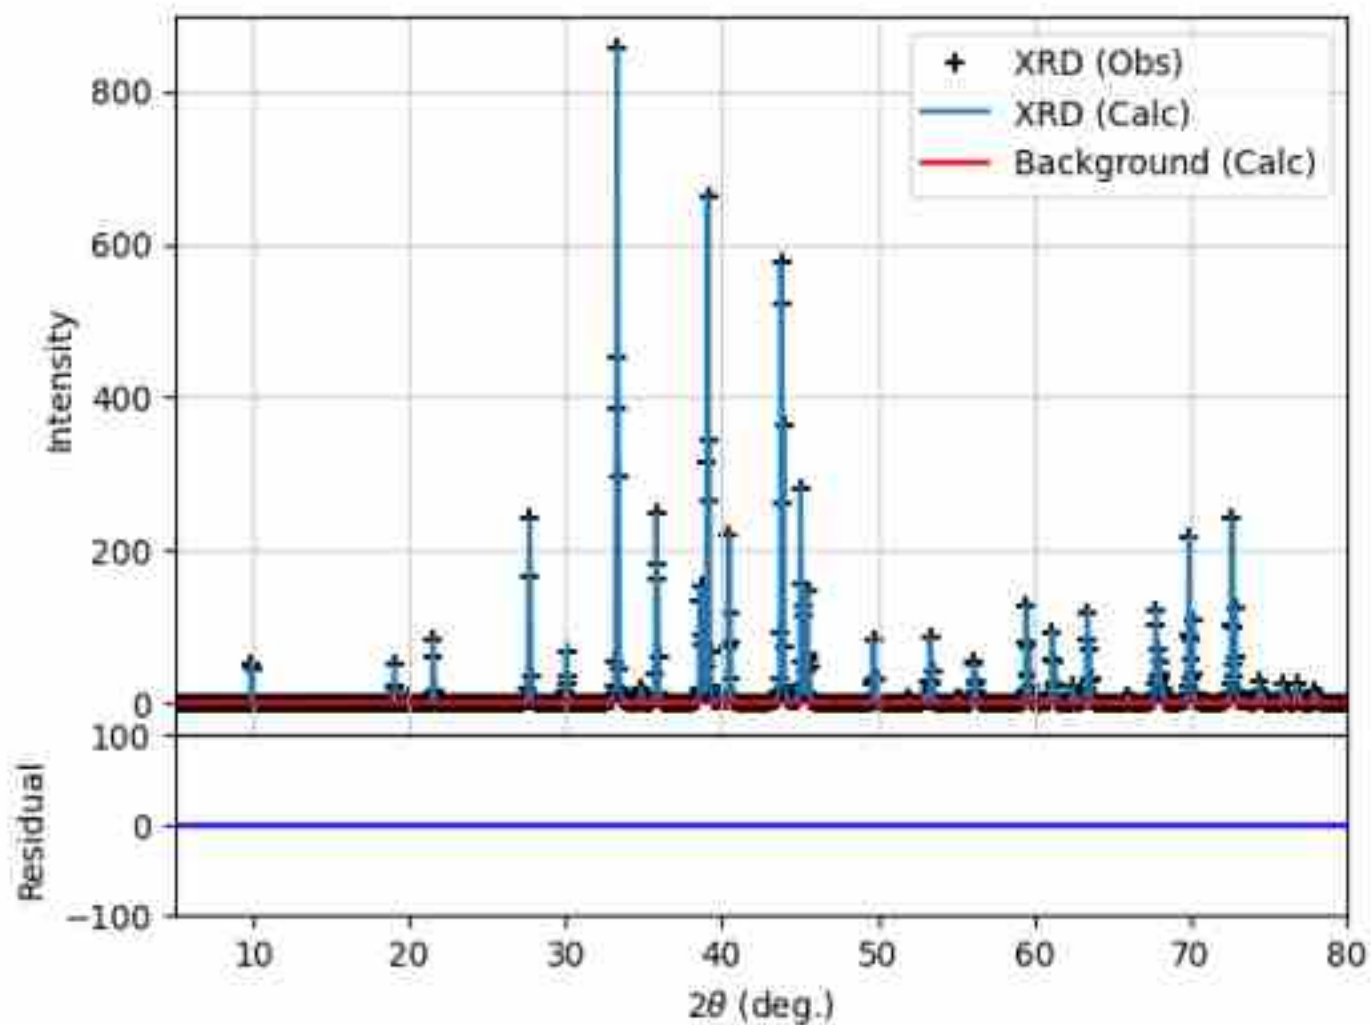

| RMSE before RR | Rwp     | RMSE after RR |
|----------------|---------|---------------|
| 0.012          | 0.00245 | 0.00036       |

# Sc1Mn6Ga1Ge5

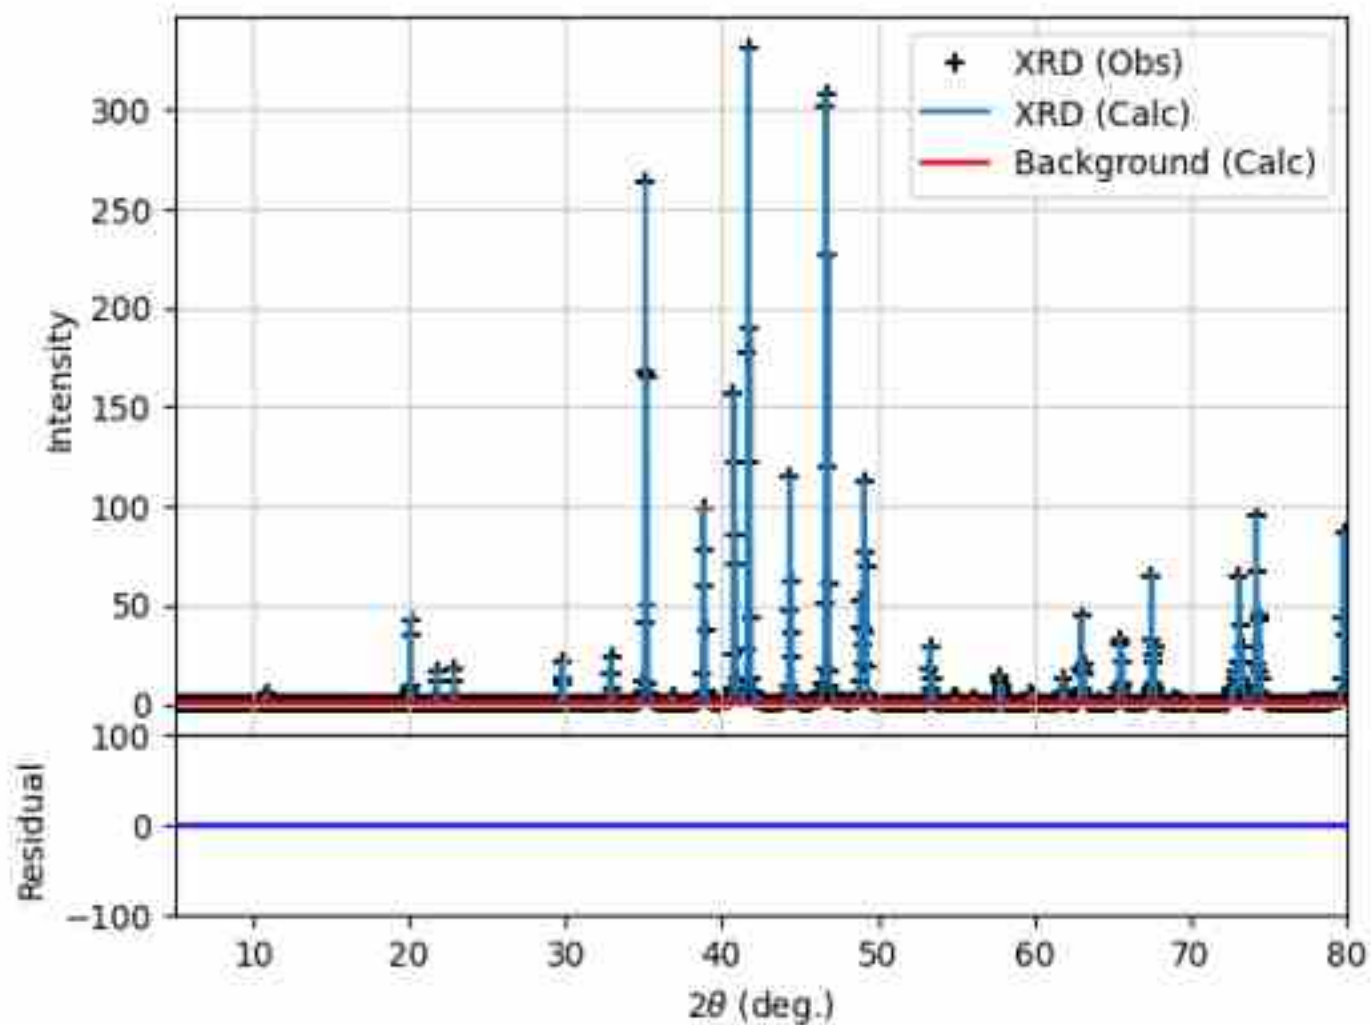

| RMSE before RR | Rwp     | RMSE after RR |
|----------------|---------|---------------|
| 0.012          | 0.00243 | 0.00031       |

# Sc<sub>4</sub>In<sub>2</sub>Cu<sub>4</sub>

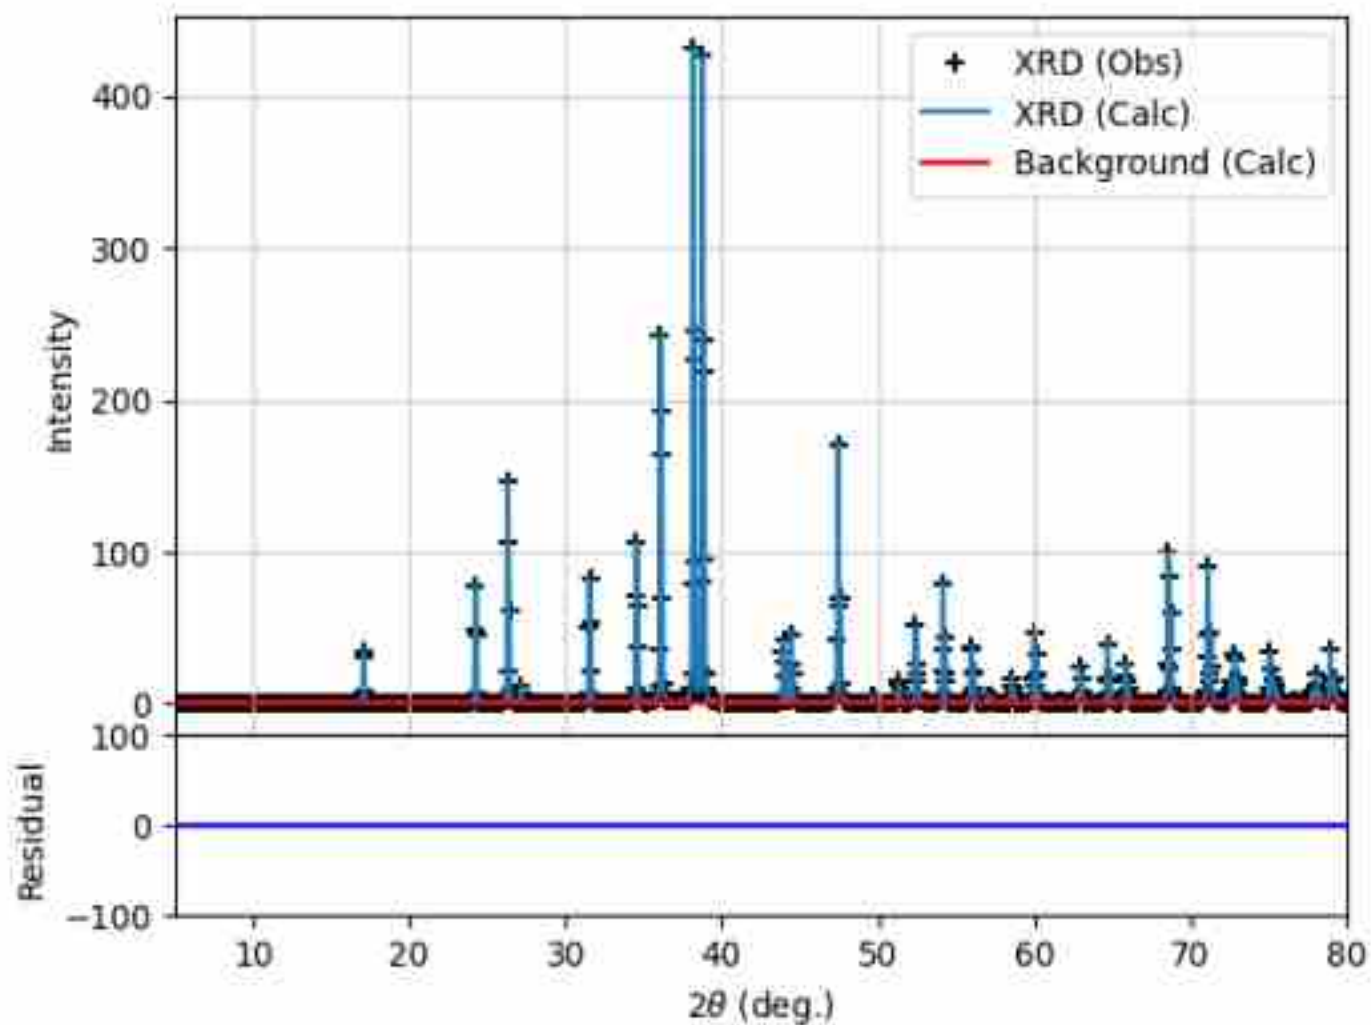

| RMSE before RR | Rwp     | RMSE after RR |
|----------------|---------|---------------|
| 0.012          | 0.00497 | 0.00057       |

# Sc4S2O4

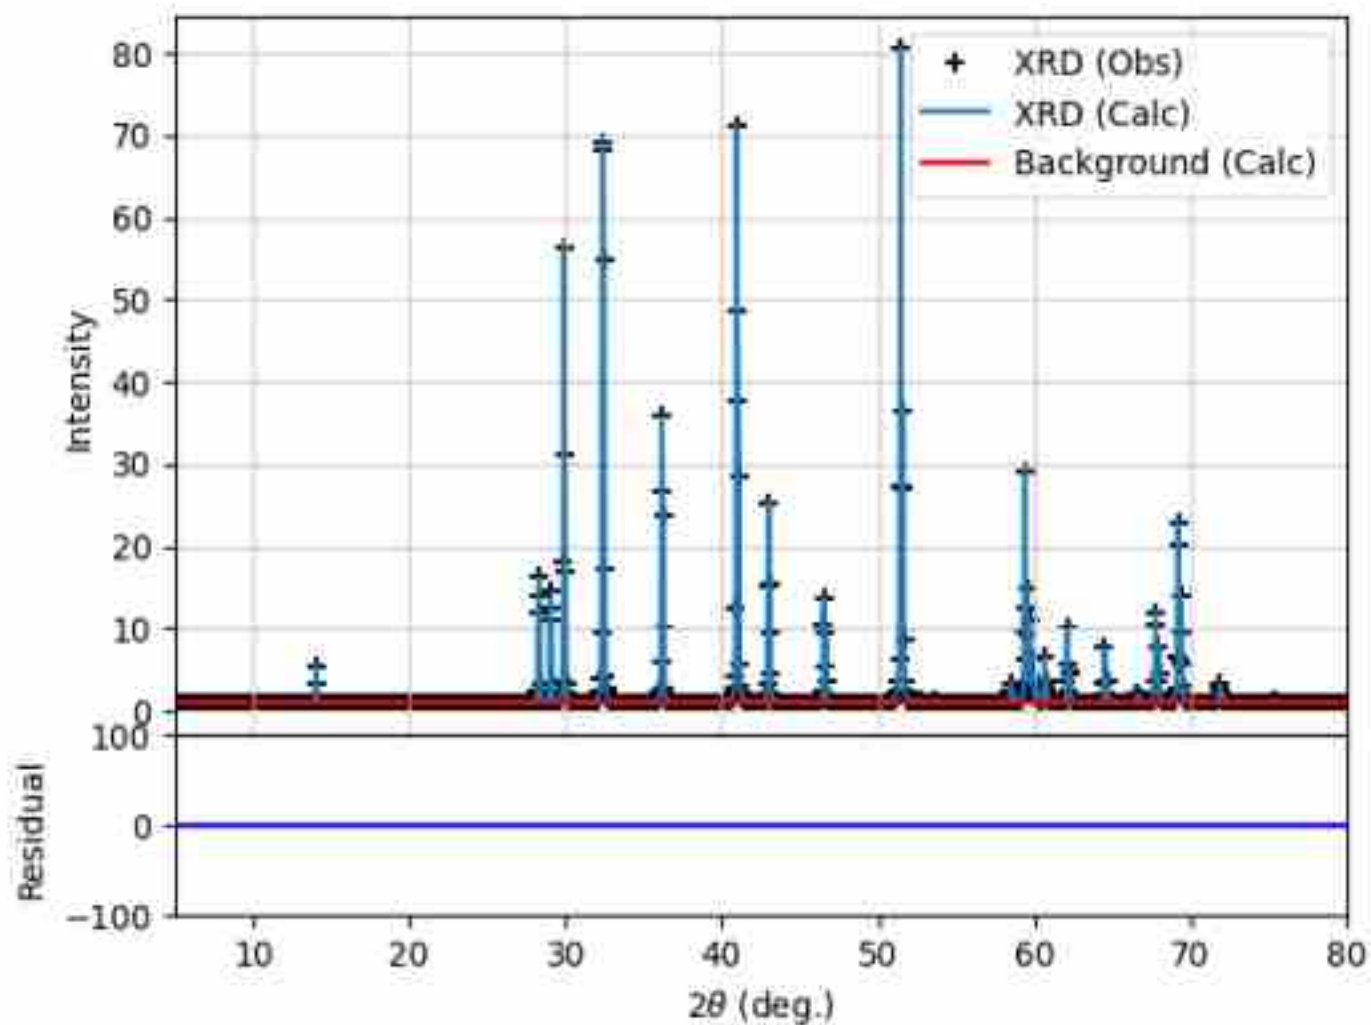

| RMSE before RR | Rwp     | RMSE after RR |
|----------------|---------|---------------|
| 0.012          | 0.00251 | 0.00079       |

# Sc6Fe1Sb2

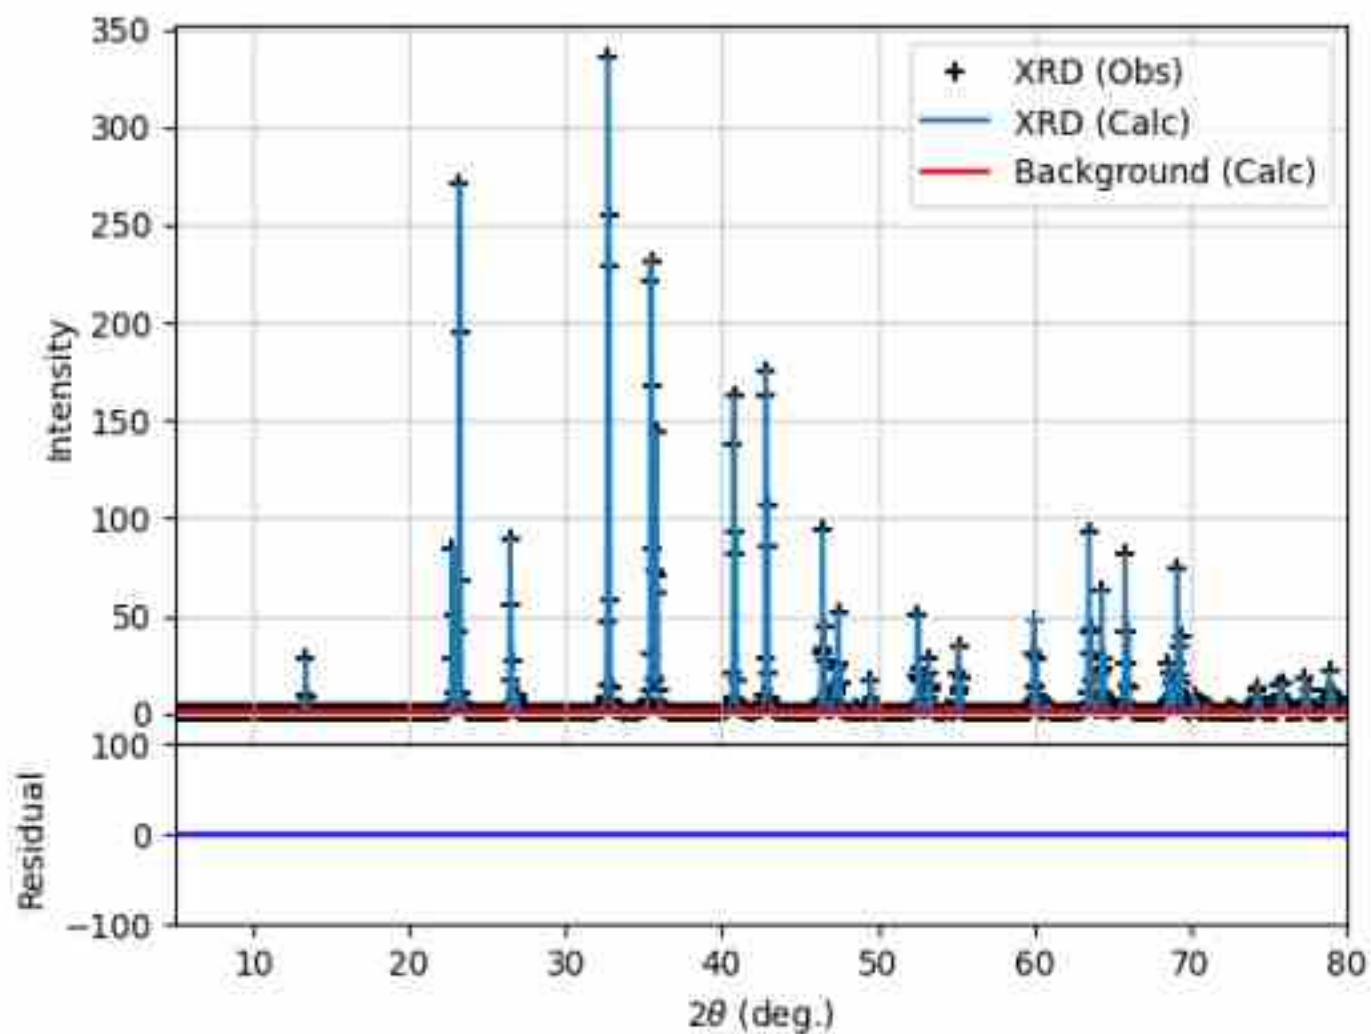

| RMSE before RR | Rwp     | RMSE after RR |
|----------------|---------|---------------|
| 0.012          | 0.00449 | 0.00147       |

# Si2Mo1

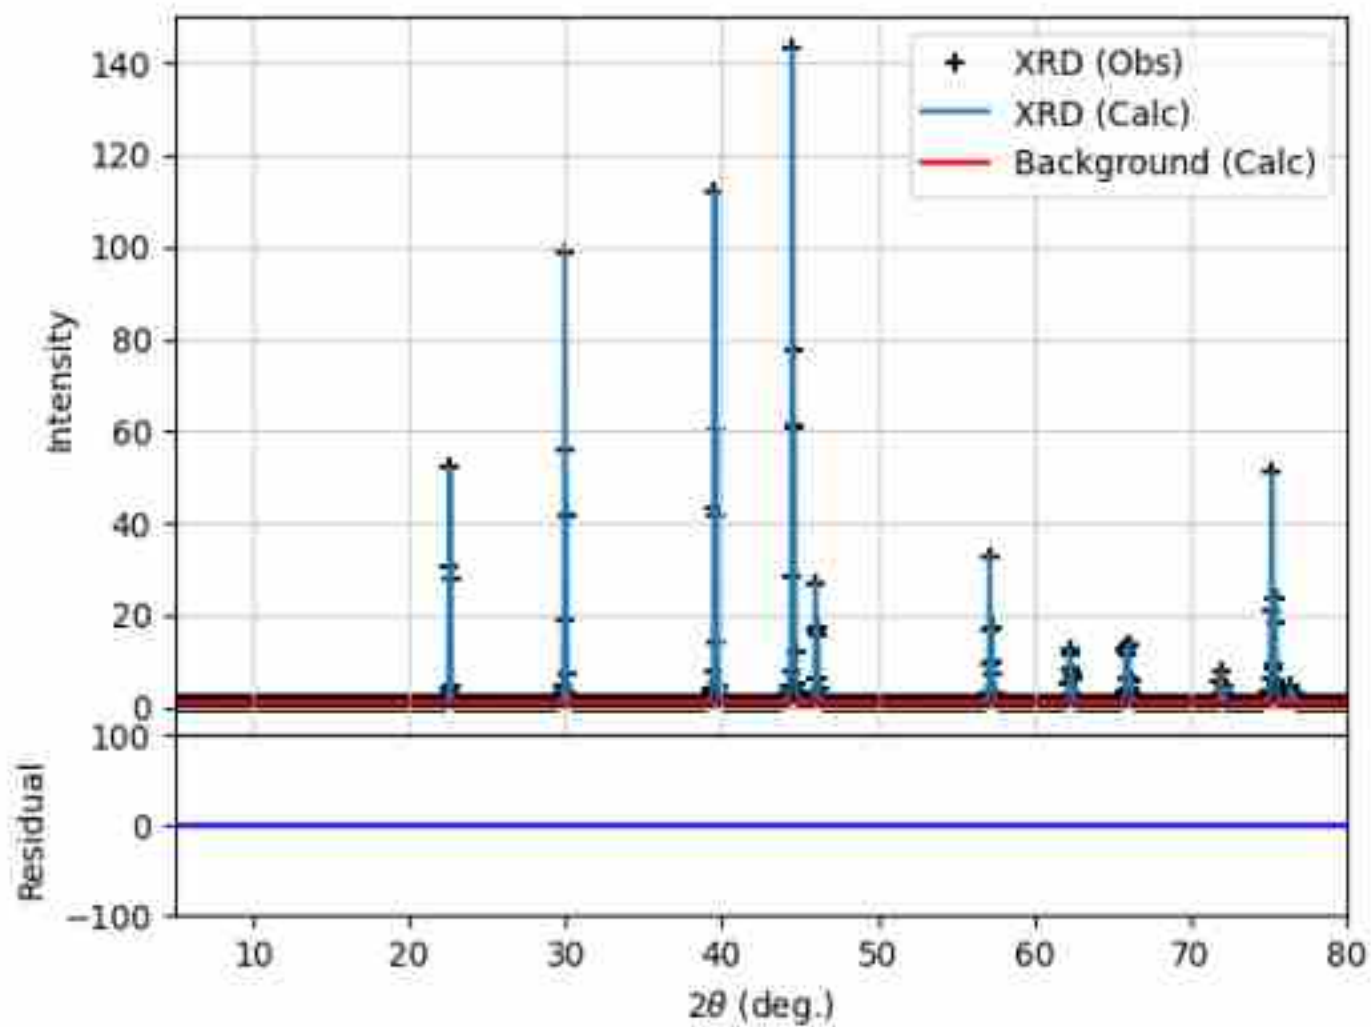

| RMSE before RR | Rwp     | RMSE after RR |
|----------------|---------|---------------|
| 0.012          | 0.11809 | 0.00475       |



# Si<sub>2</sub>Ni<sub>6</sub>Mo<sub>4</sub>

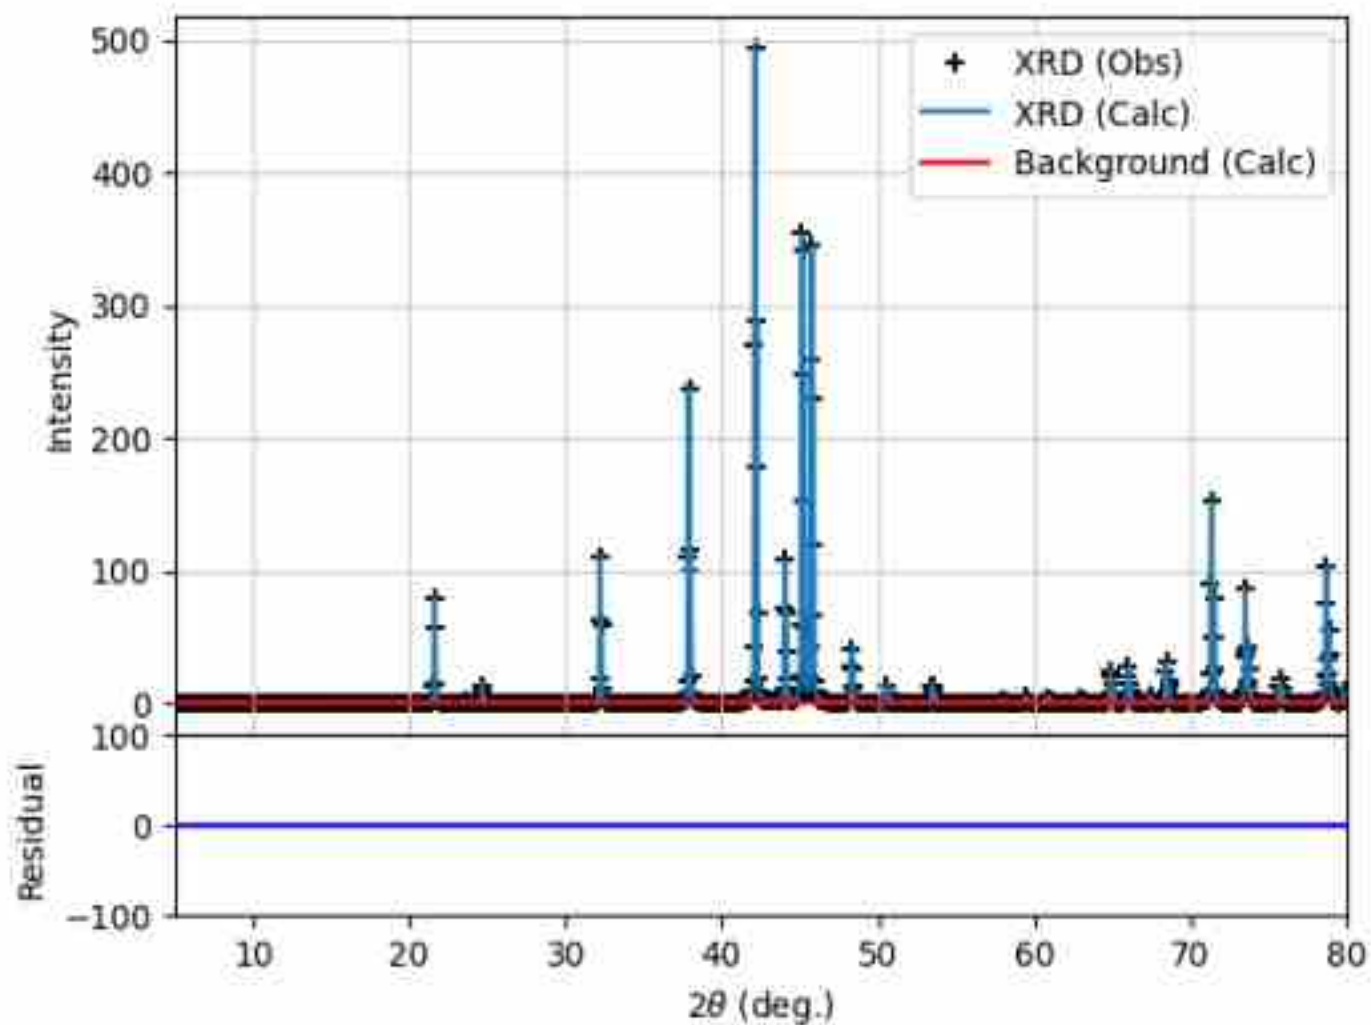

| RMSE before RR | Rwp     | RMSE after RR |
|----------------|---------|---------------|
| 0.012          | 0.02192 | 0.0023        |

# Sm1Bi2I1O4

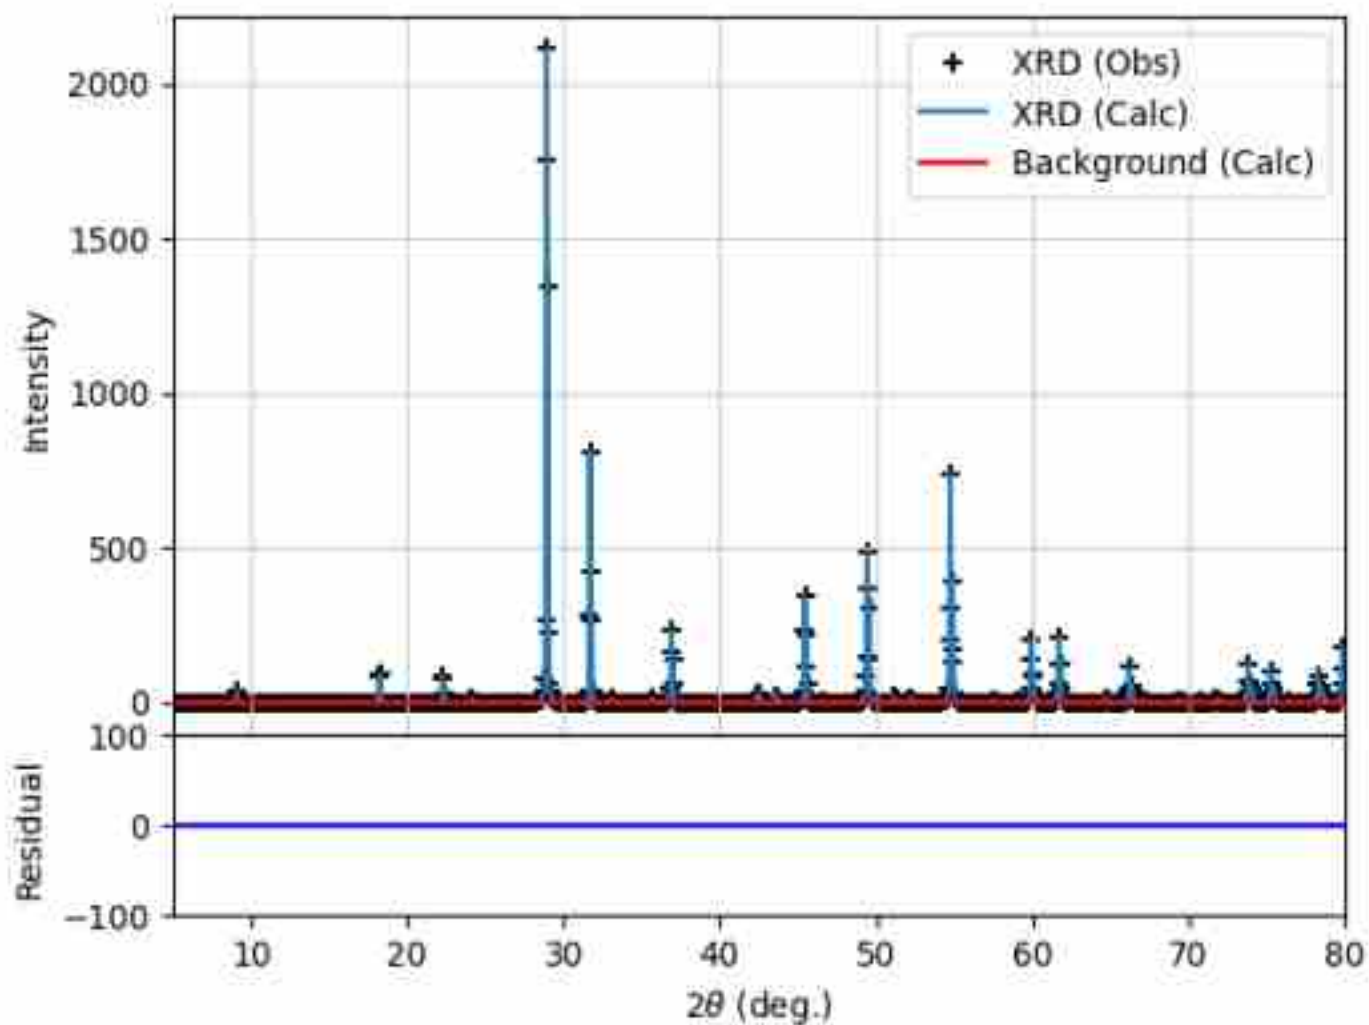

| RMSE before RR | Rwp     | RMSE after RR |
|----------------|---------|---------------|
| 0.012          | 0.00848 | 0.00254       |

# Sm1Ni2As2

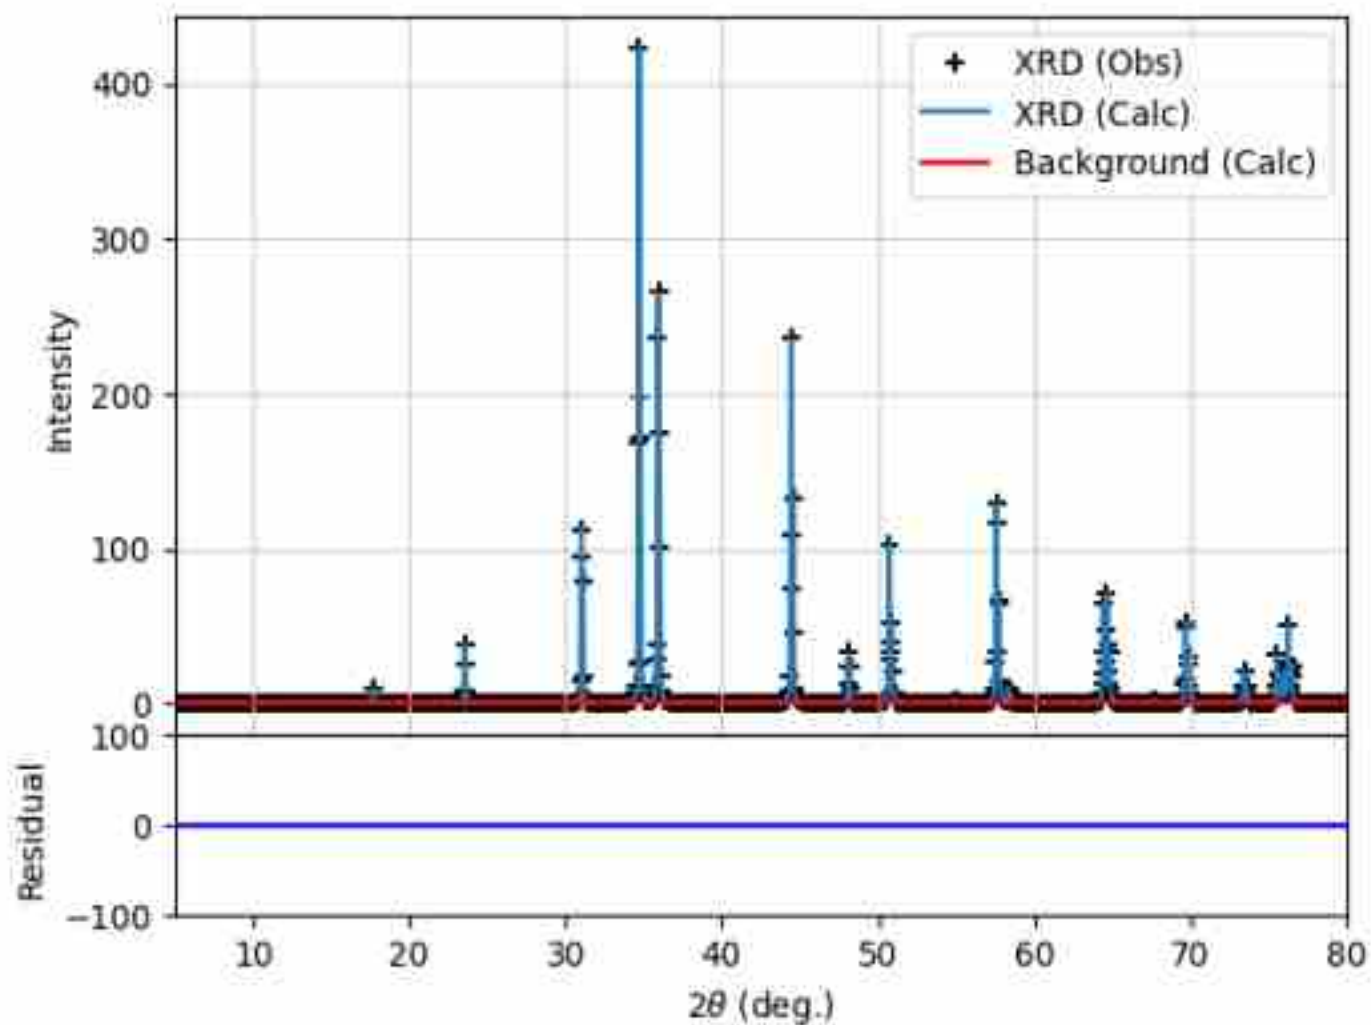

| RMSE before RR | Rwp     | RMSE after RR |
|----------------|---------|---------------|
| 0.012          | 0.00292 | 0.00027       |

# Sm2C1N2O2

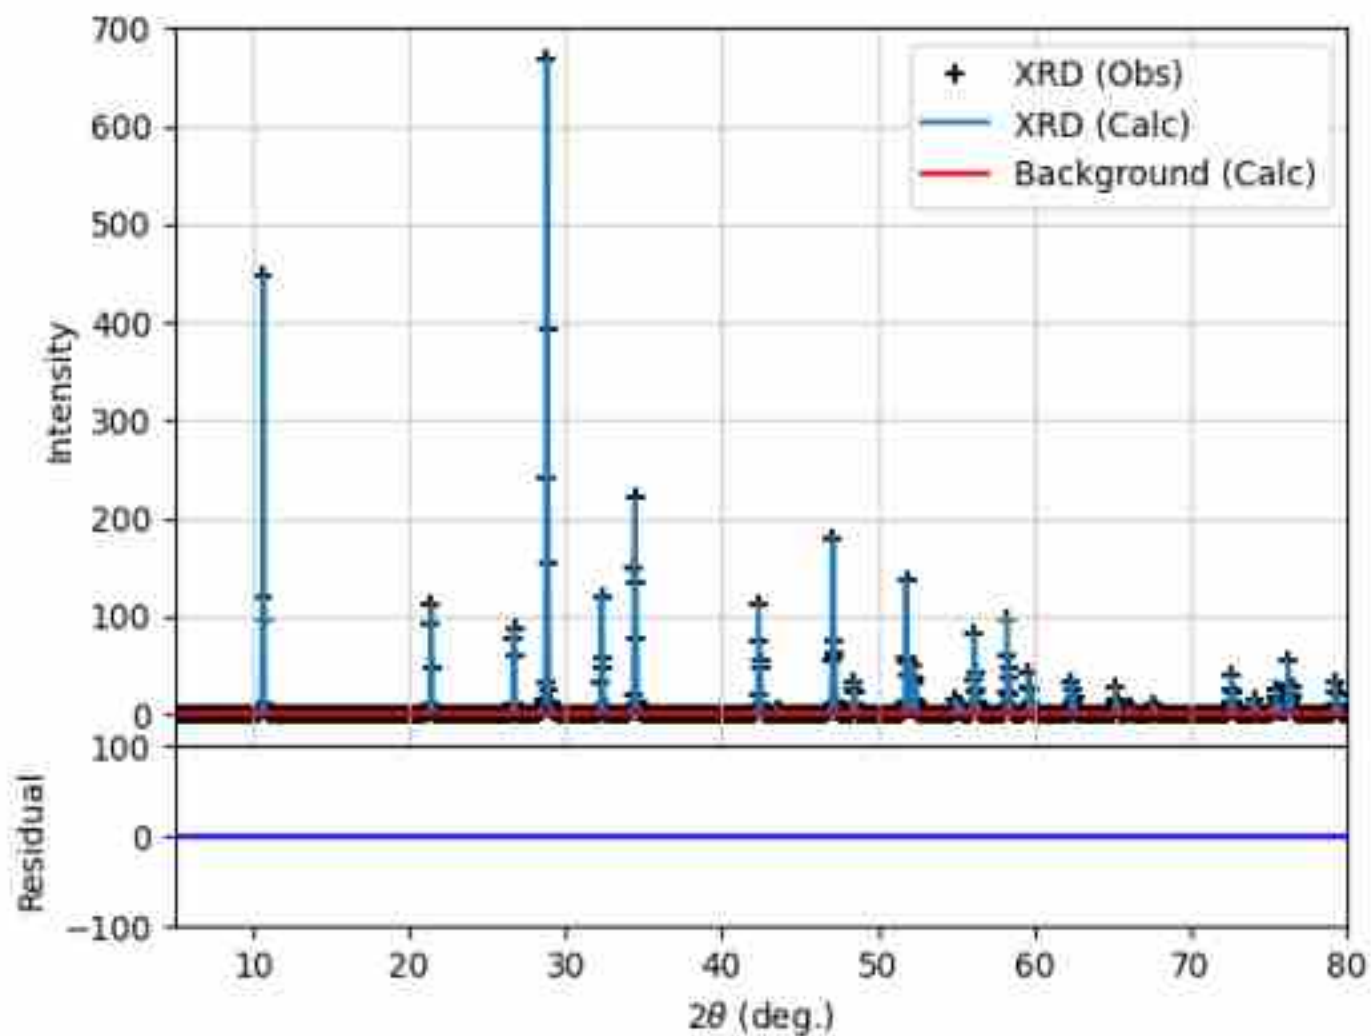

| RMSE before RR | Rwp     | RMSE after RR |
|----------------|---------|---------------|
| 0.012          | 0.02208 | 0.00826       |

# Sm<sub>2</sub>Cu<sub>10</sub>O<sub>4</sub>

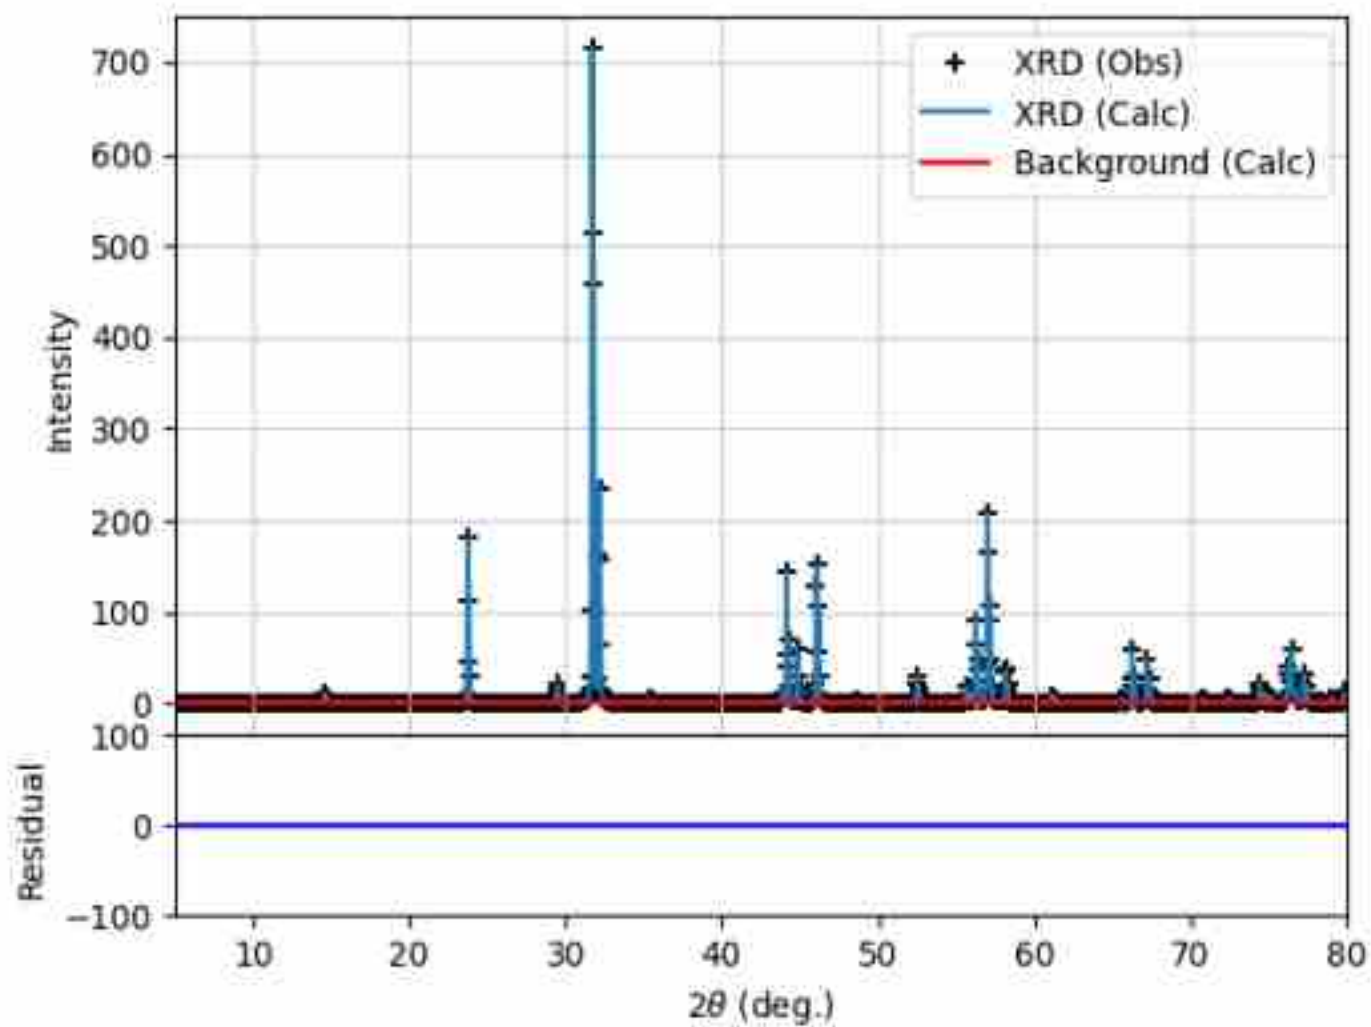

| RMSE before RR | Rwp     | RMSE after RR |
|----------------|---------|---------------|
| 0.012          | 0.00461 | 0.00196       |

# Sm2Ga8Co1

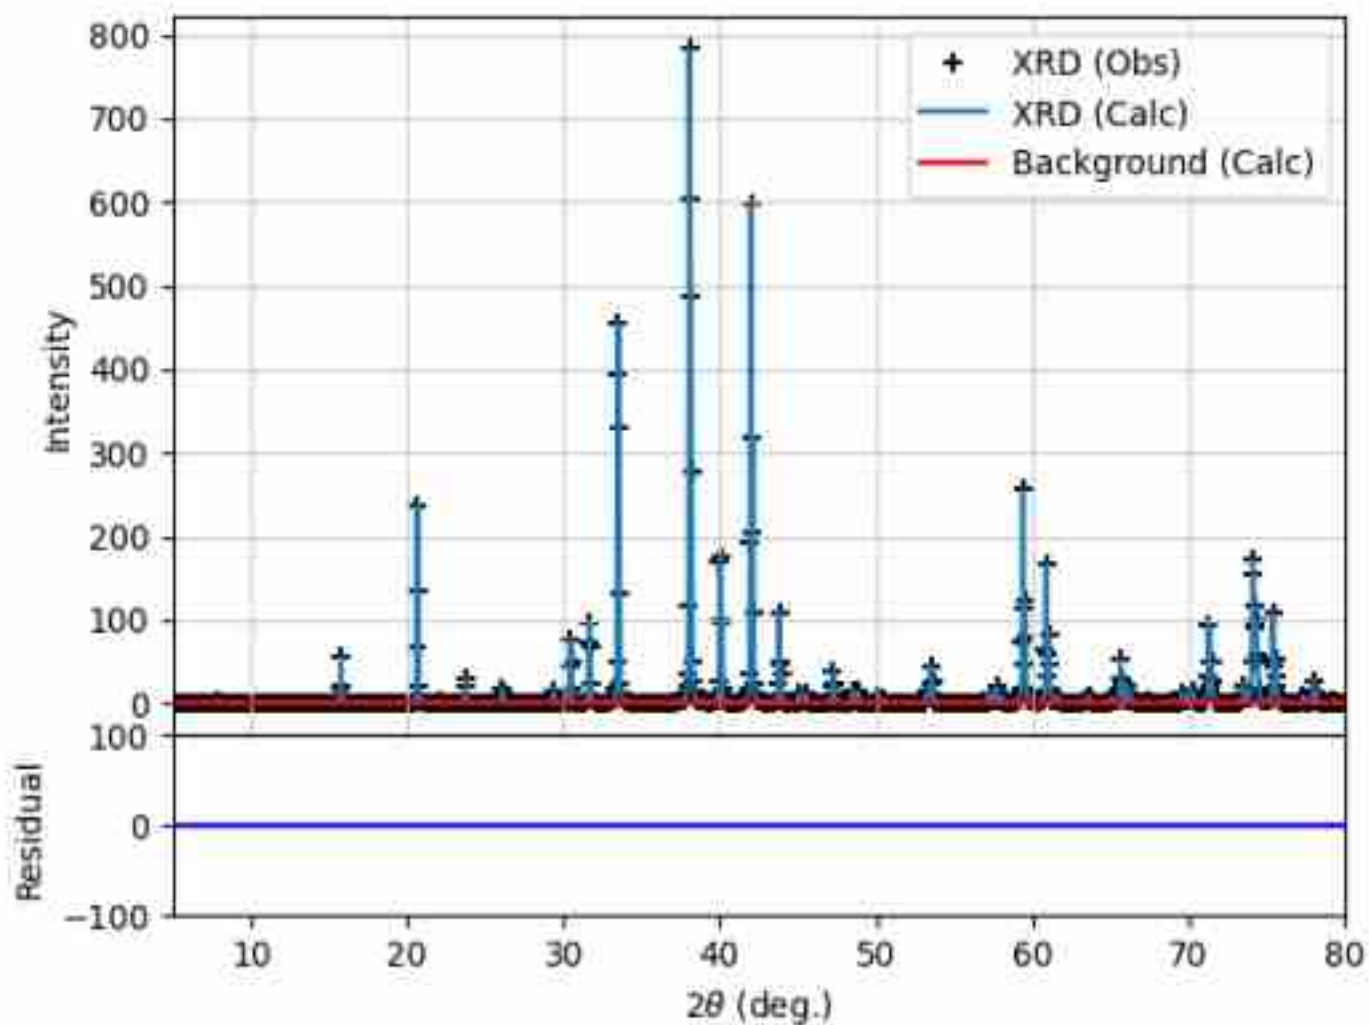

| RMSE before RR | Rwp     | RMSE after RR |
|----------------|---------|---------------|
| 0.012          | 0.00443 | 0.00071       |

# Sm4Cd2Cu4

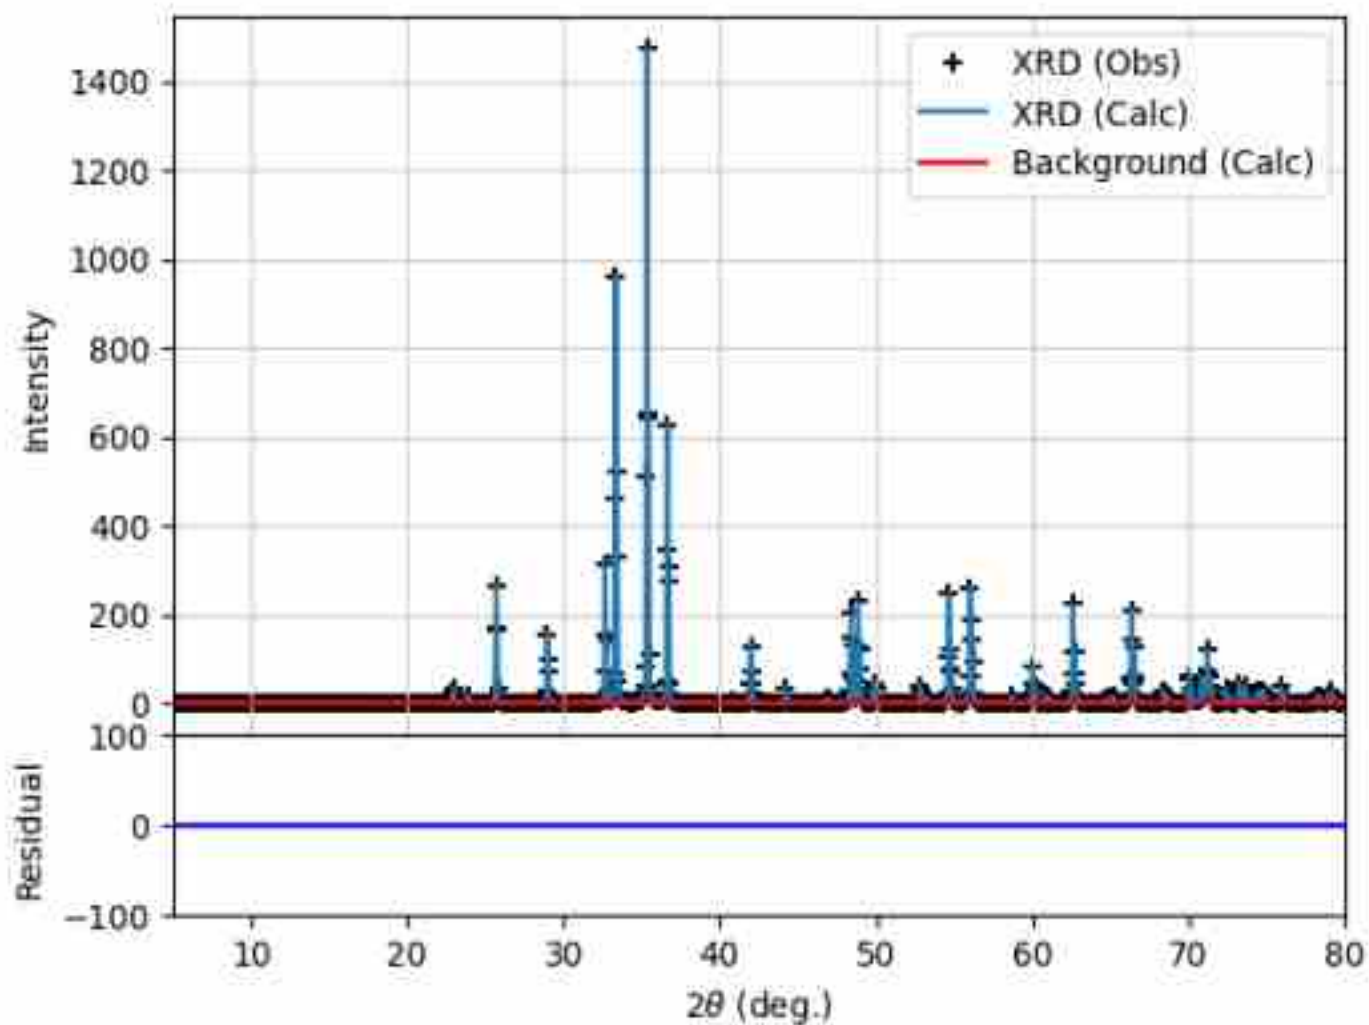

| RMSE before RR | Rwp     | RMSE after RR |
|----------------|---------|---------------|
| 0.012          | 0.00923 | 0.00099       |

# Sr1C1O3

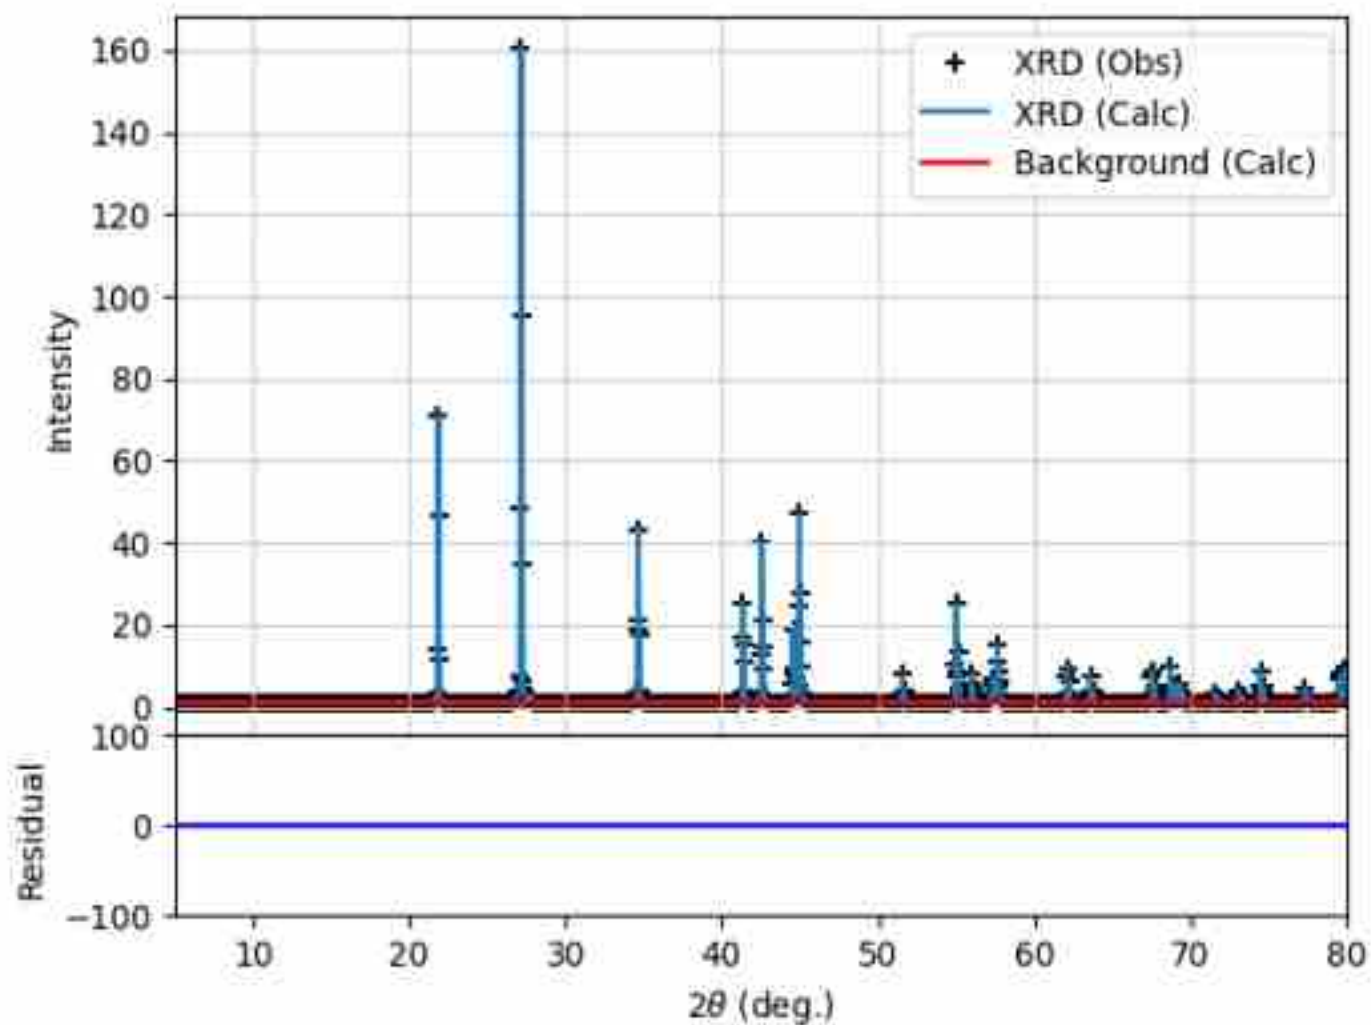

| RMSE before RR | Rwp     | RMSE after RR |
|----------------|---------|---------------|
| 0.012          | 0.00198 | 0.00075       |



# Sr1Ca1Si4

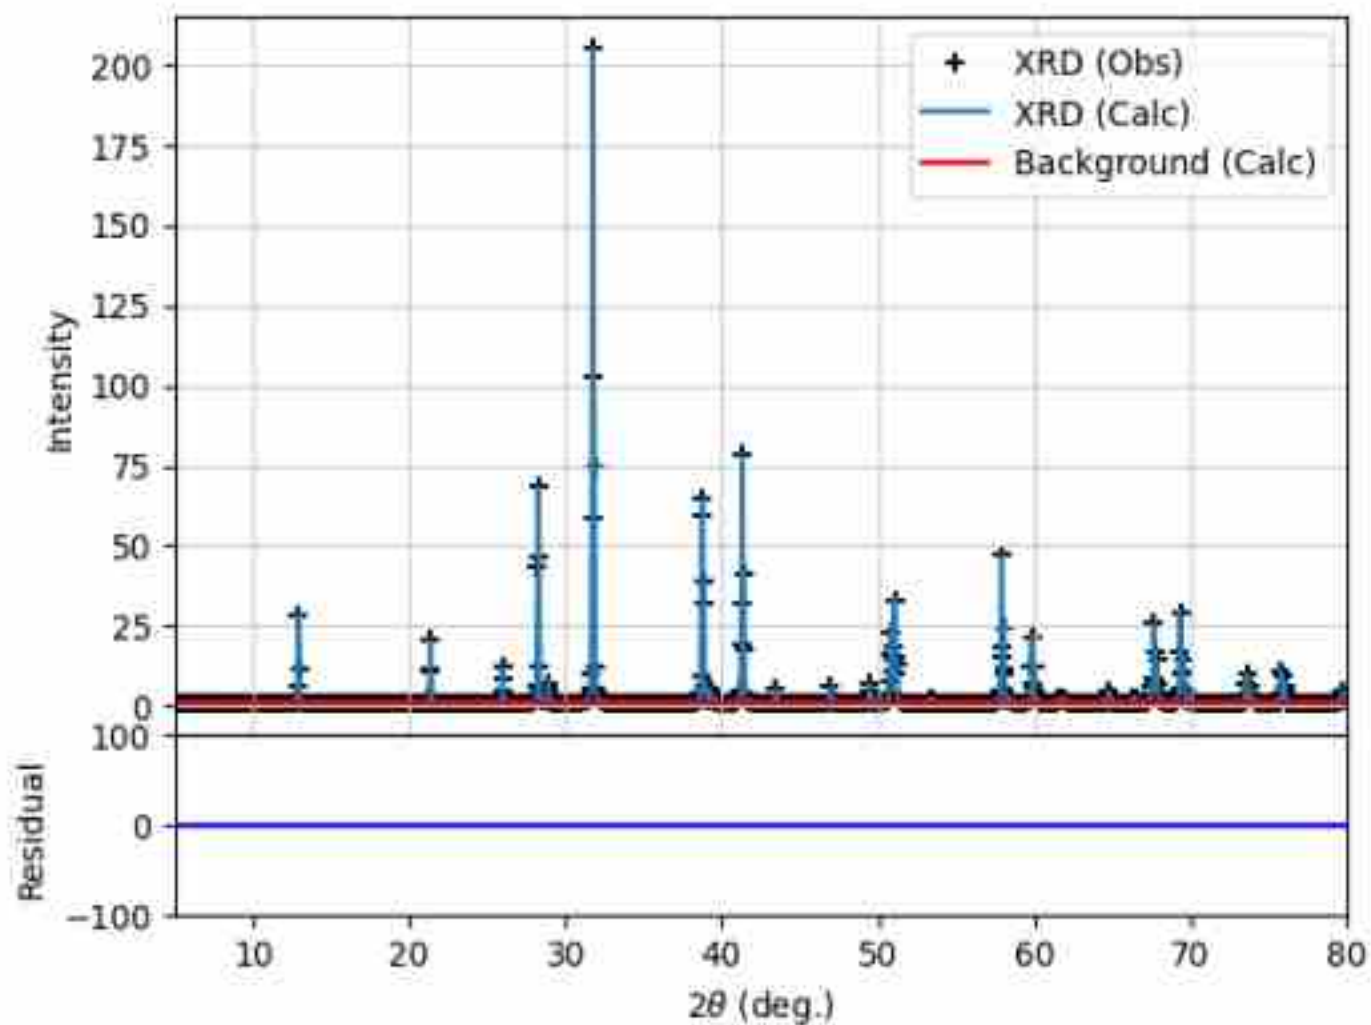

| RMSE before RR | Rwp     | RMSE after RR |
|----------------|---------|---------------|
| 0.012          | 0.00283 | 0.00085       |

# Sr1Cr1O3

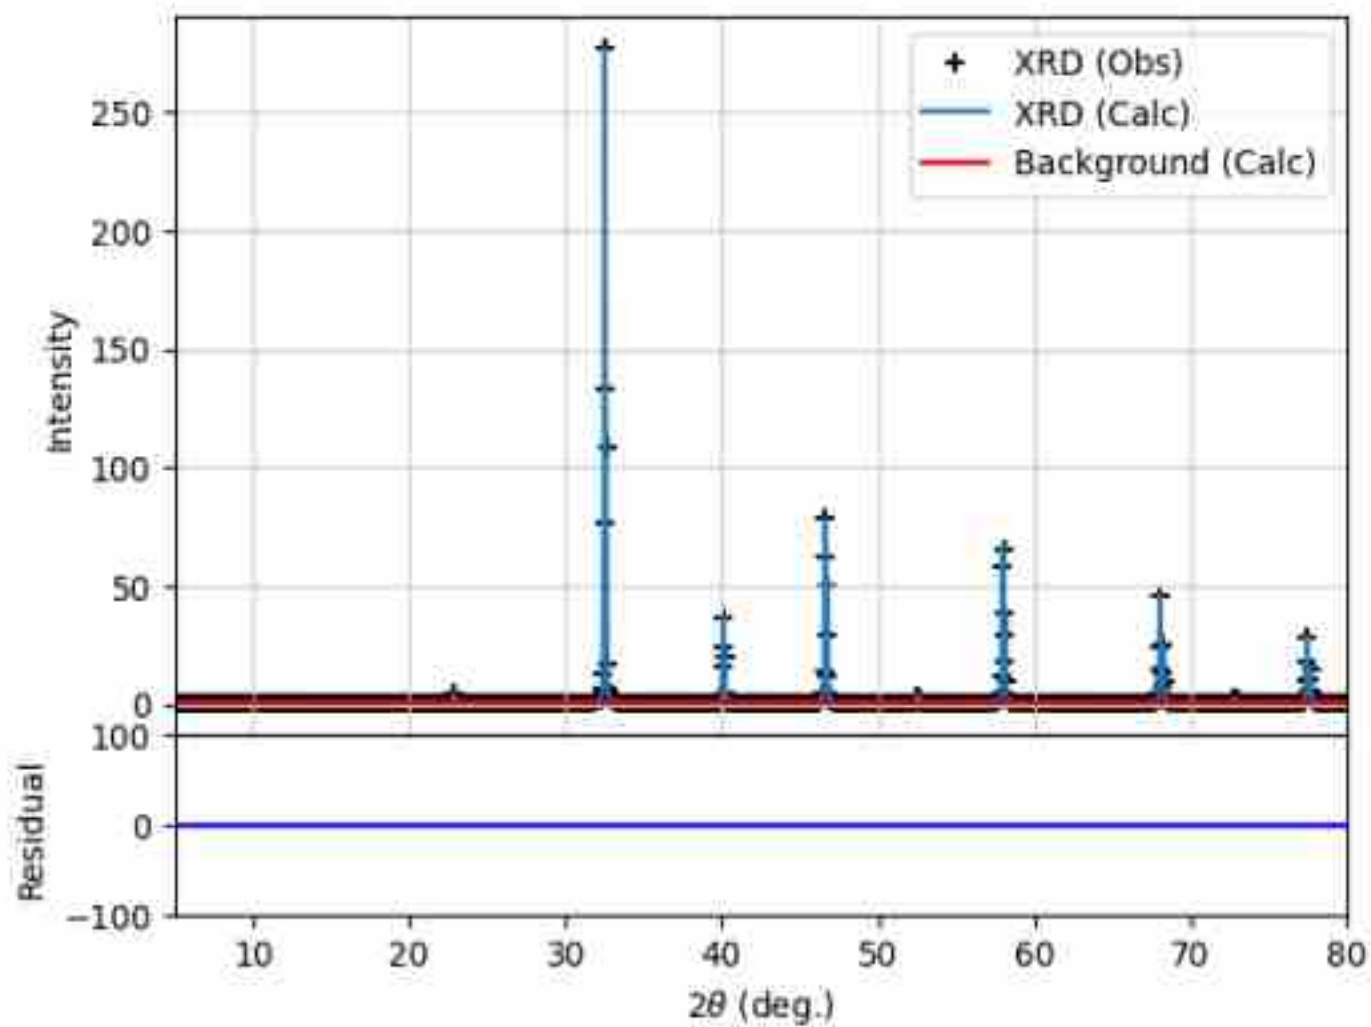

| RMSE before RR | Rwp     | RMSE after RR |
|----------------|---------|---------------|
| 0.012          | 0.00507 | 0.00137       |

# Sr1Gd1Ni1O4

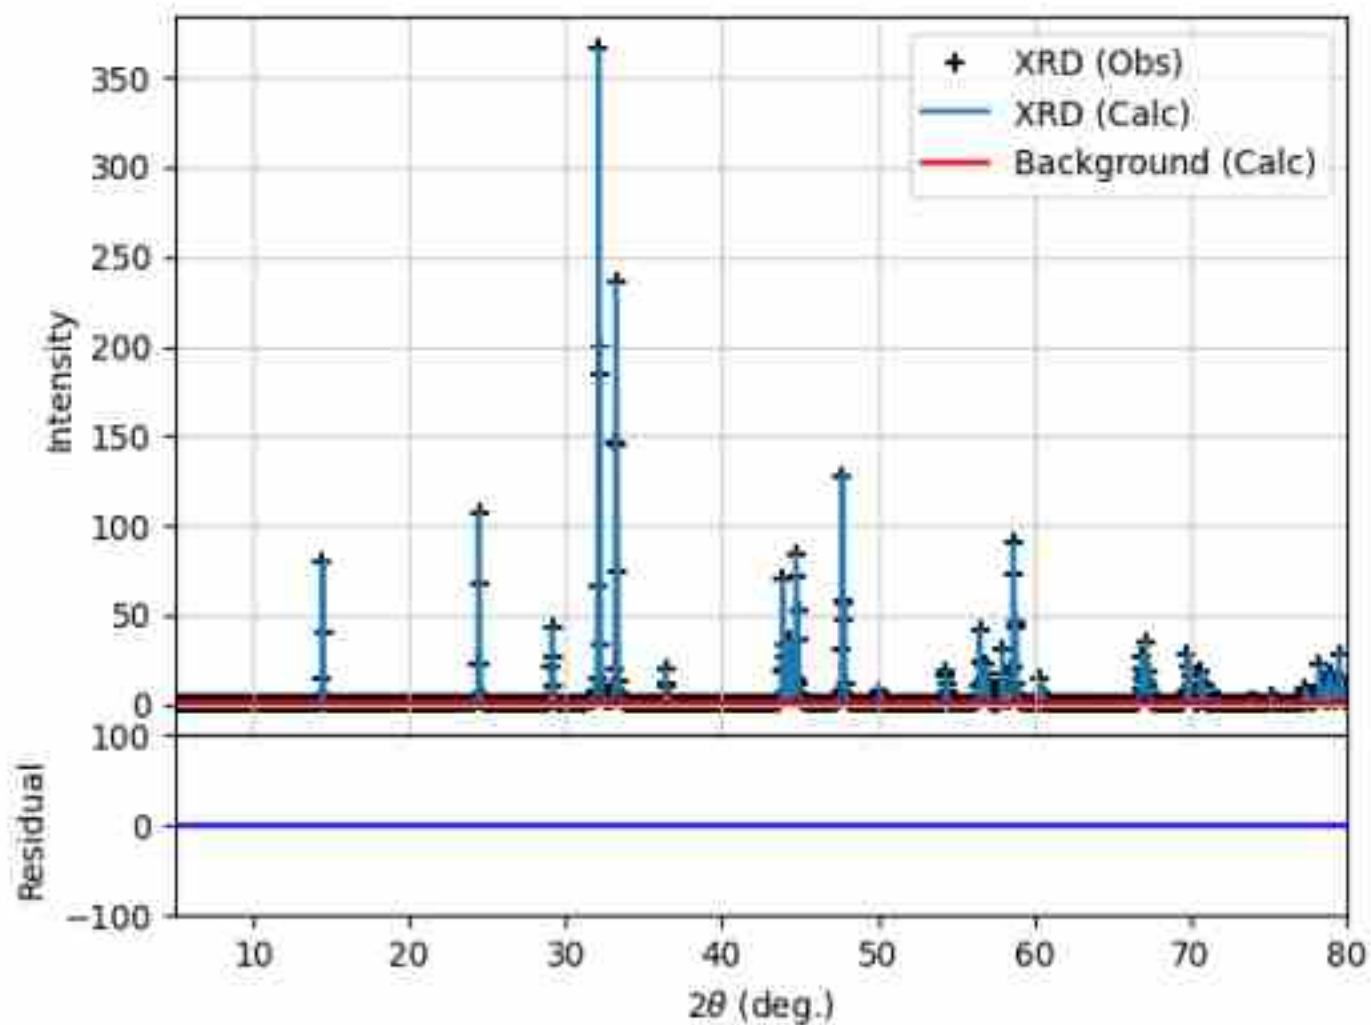

| RMSE before RR | Rwp     | RMSE after RR |
|----------------|---------|---------------|
| 0.012          | 0.00355 | 0.0014        |

# Sr1Sm1Co1O4

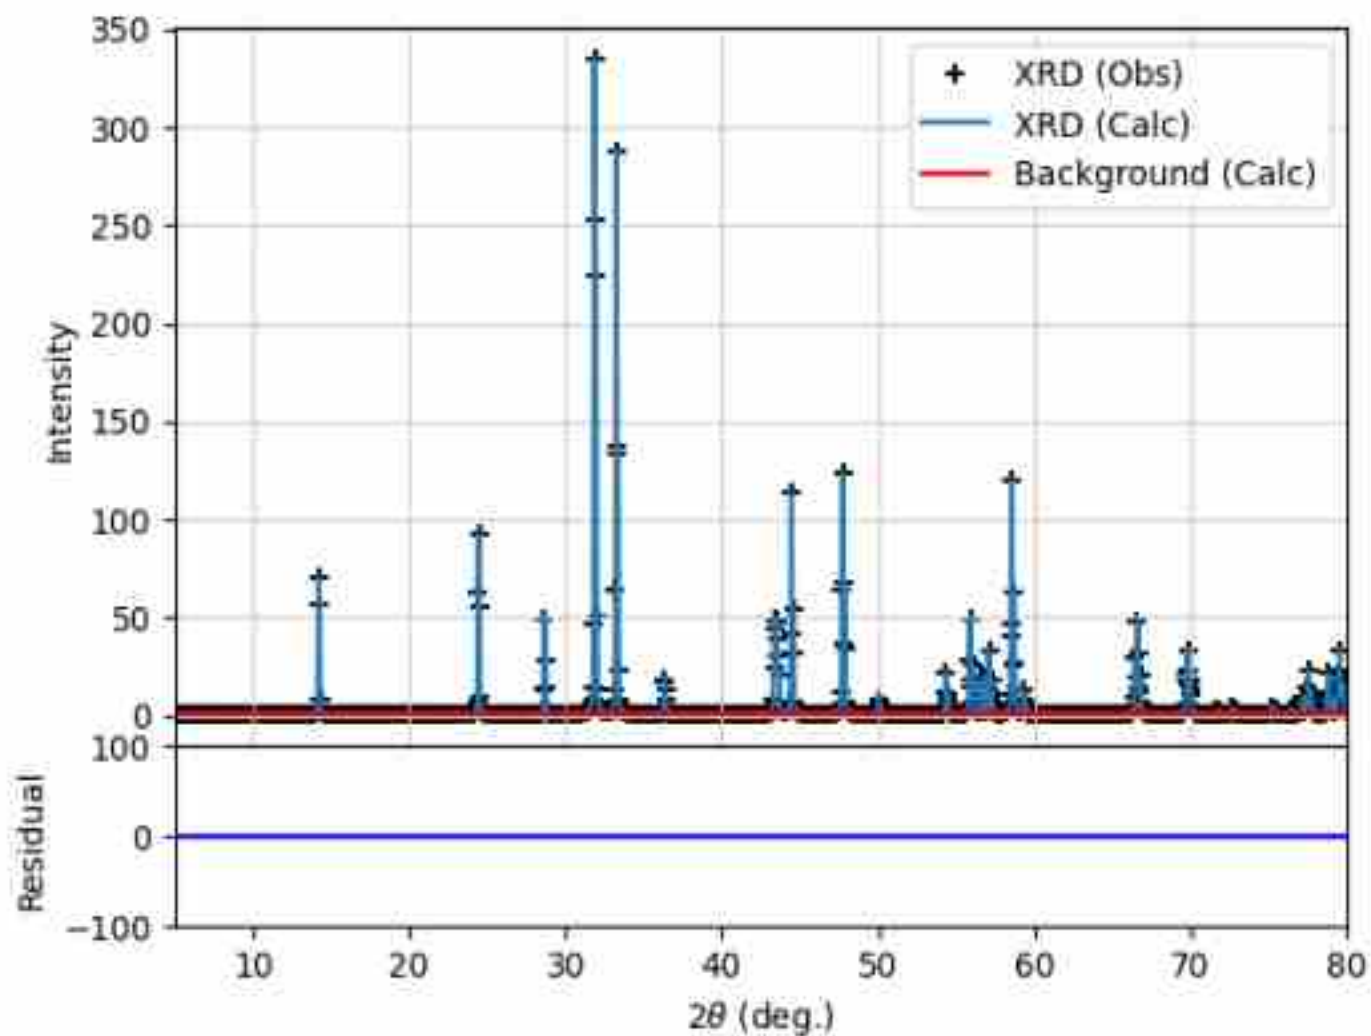

| RMSE before RR | Rwp     | RMSE after RR |
|----------------|---------|---------------|
| 0.012          | 0.00317 | 0.00117       |

# Sr1Zn1In3

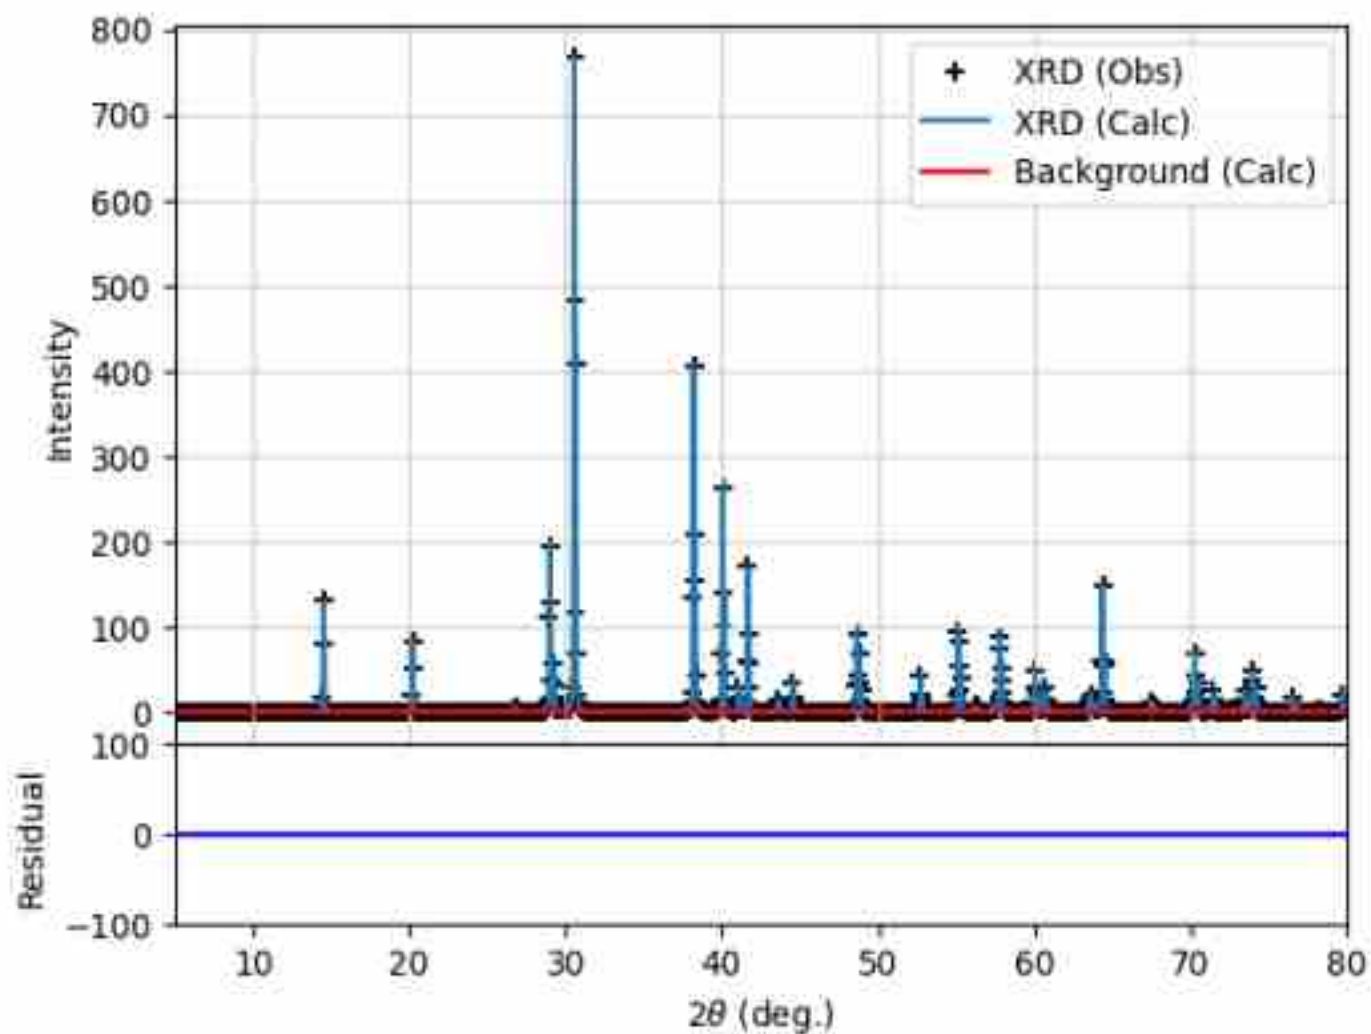

| RMSE before RR | Rwp     | RMSE after RR |
|----------------|---------|---------------|
| 0.012          | 0.00336 | 0.00033       |

# Sr<sub>2</sub>Ag<sub>2</sub>P<sub>2</sub>

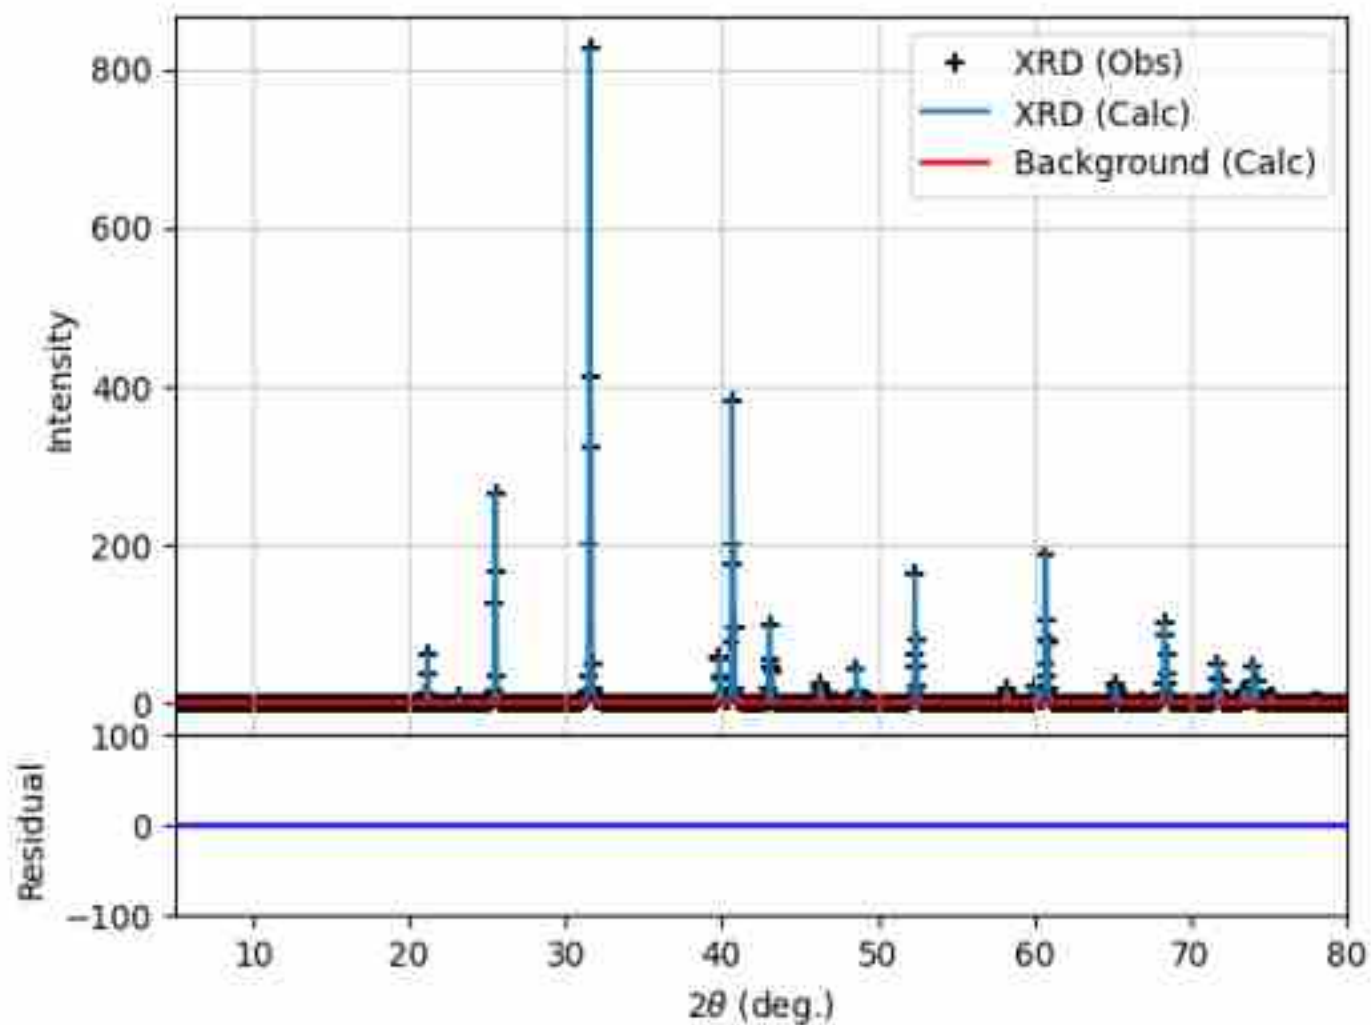

| RMSE before RR | Rwp    | RMSE after RR |
|----------------|--------|---------------|
| 0.012          | 0.0031 | 0.00064       |

# Sr<sub>2</sub>Cu<sub>2</sub>As<sub>2</sub>

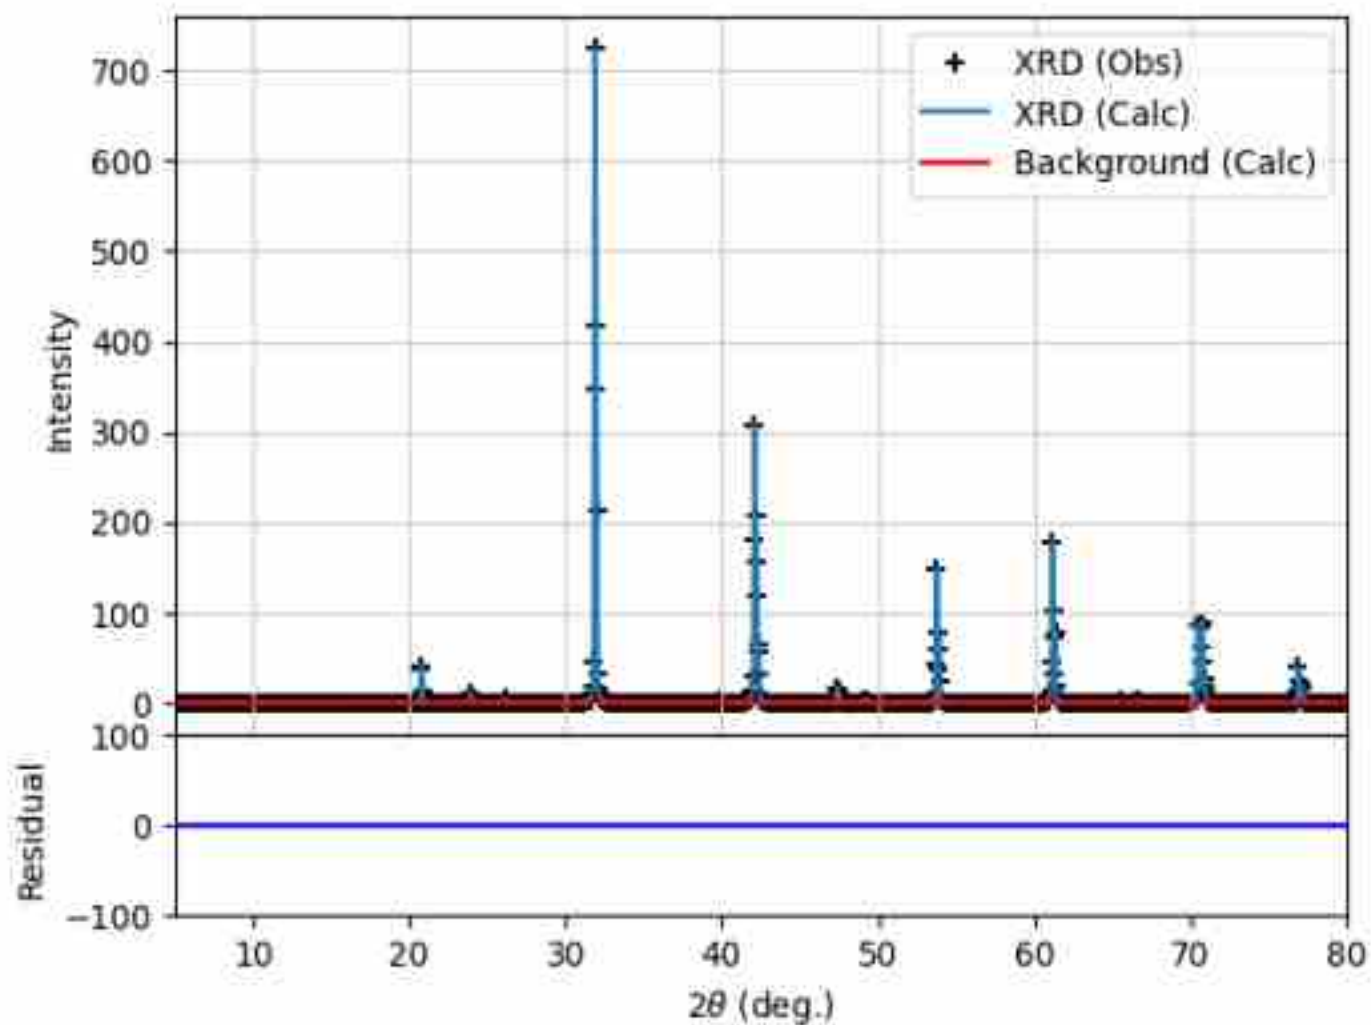

| RMSE before RR | Rwp     | RMSE after RR |
|----------------|---------|---------------|
| 0.012          | 0.00608 | 0.00058       |

# Sr<sub>2</sub>Mn<sub>1</sub>W<sub>1</sub>O<sub>6</sub>

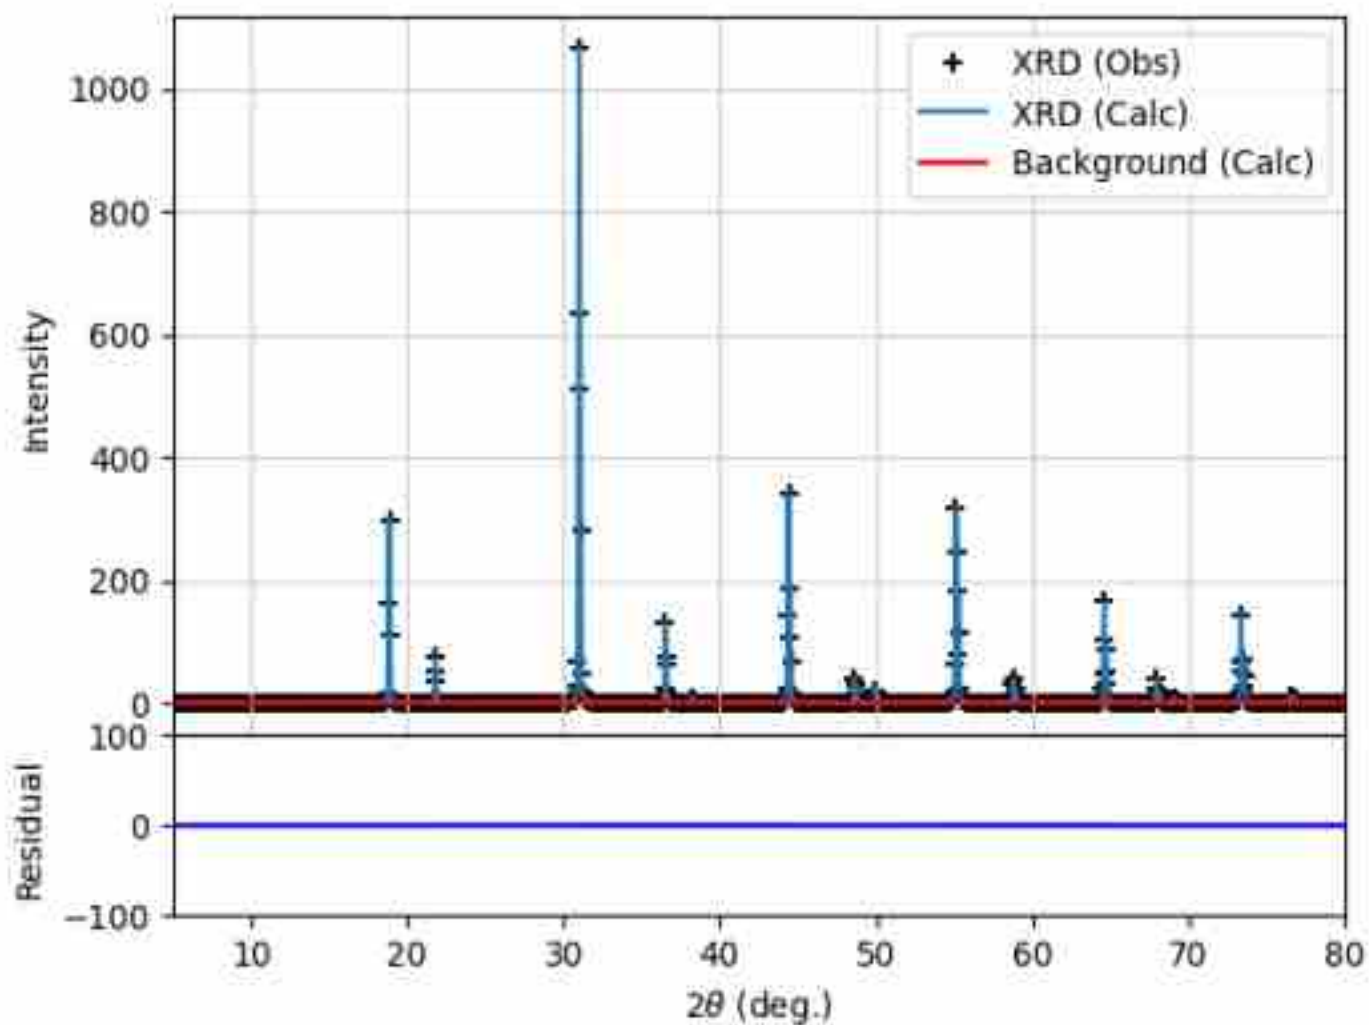

| RMSE before RR | Rwp     | RMSE after RR |
|----------------|---------|---------------|
| 0.012          | 0.07304 | 0.01149       |



# Sr<sub>2</sub>Ti<sub>1</sub>Sn<sub>1</sub>O<sub>6</sub>

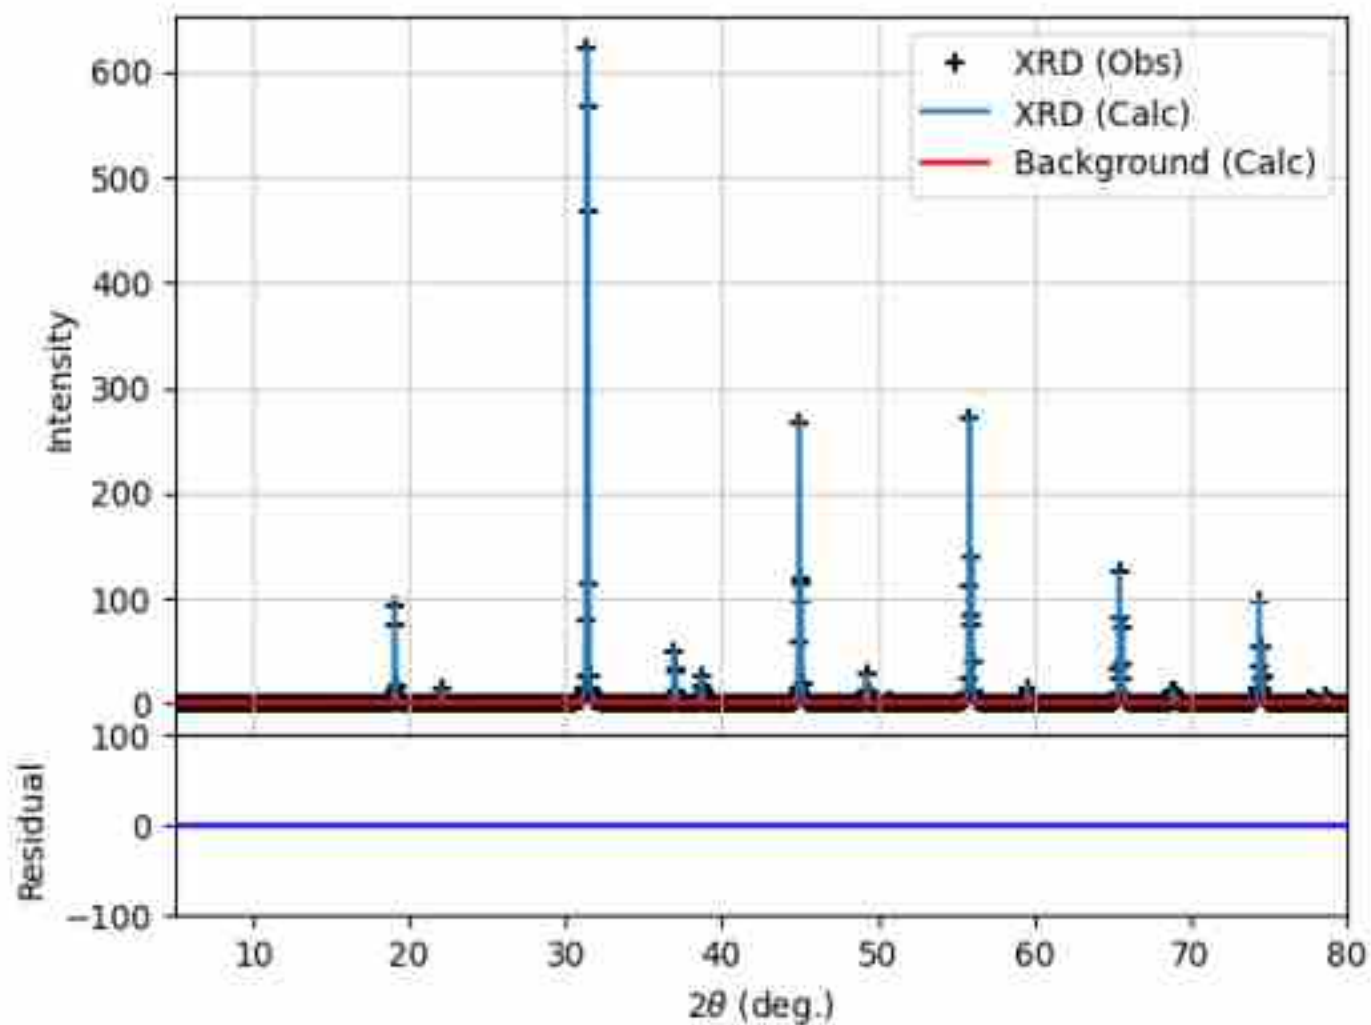

| RMSE before RR | Rwp     | RMSE after RR |
|----------------|---------|---------------|
| 0.012          | 0.02662 | 0.00662       |

# Sr<sub>2</sub>Zn<sub>5</sub>Si<sub>3</sub>

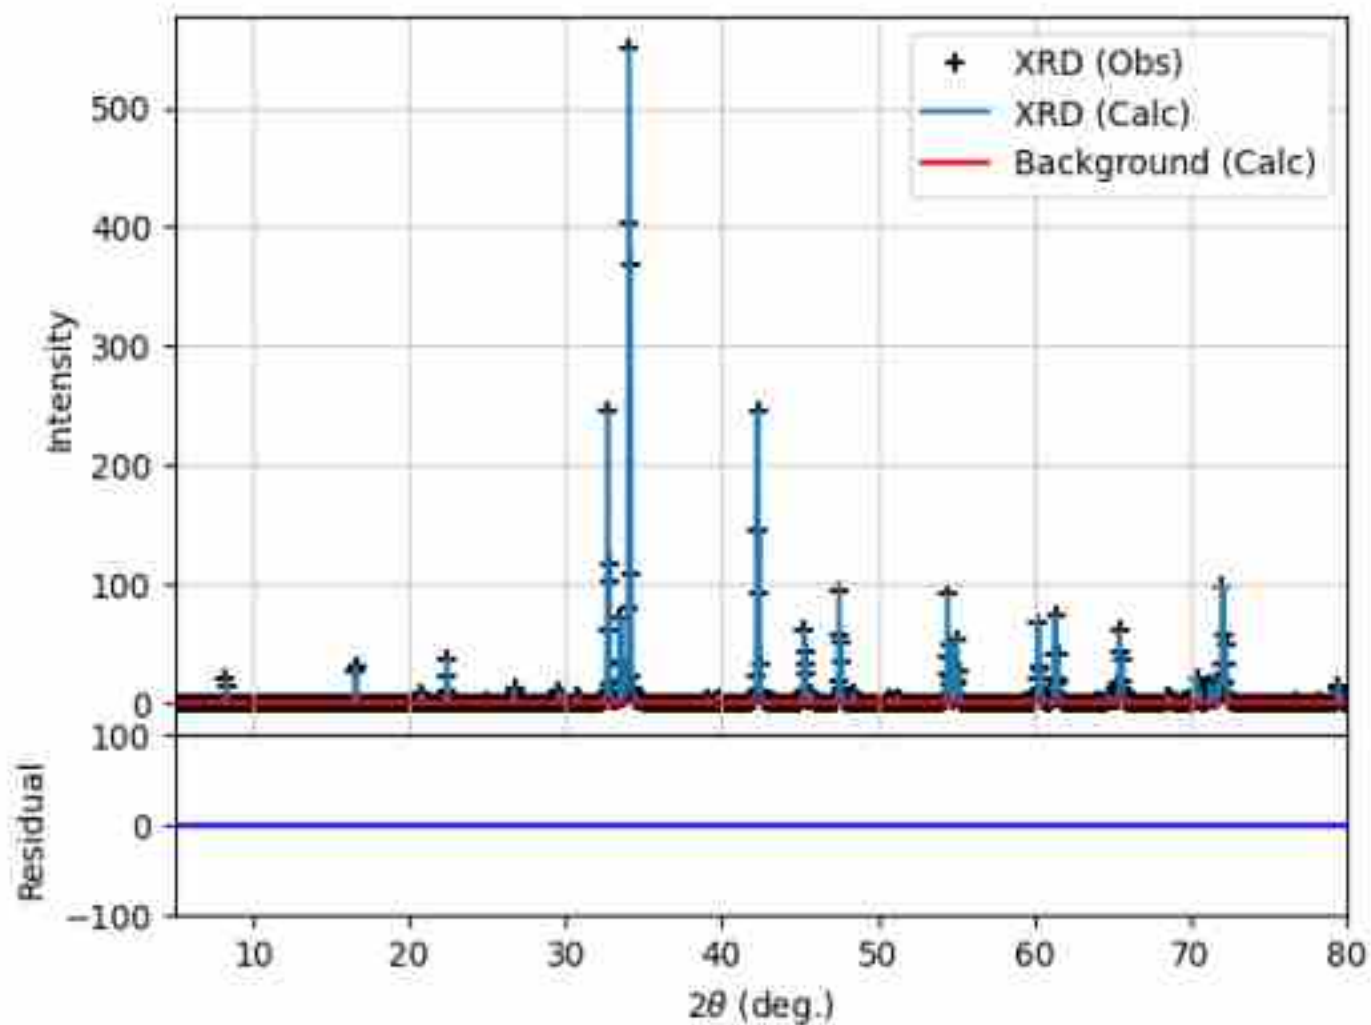

| RMSE before RR | Rwp     | RMSE after RR |
|----------------|---------|---------------|
| 0.012          | 0.00369 | 0.0004        |

# Sr4Ce2O8

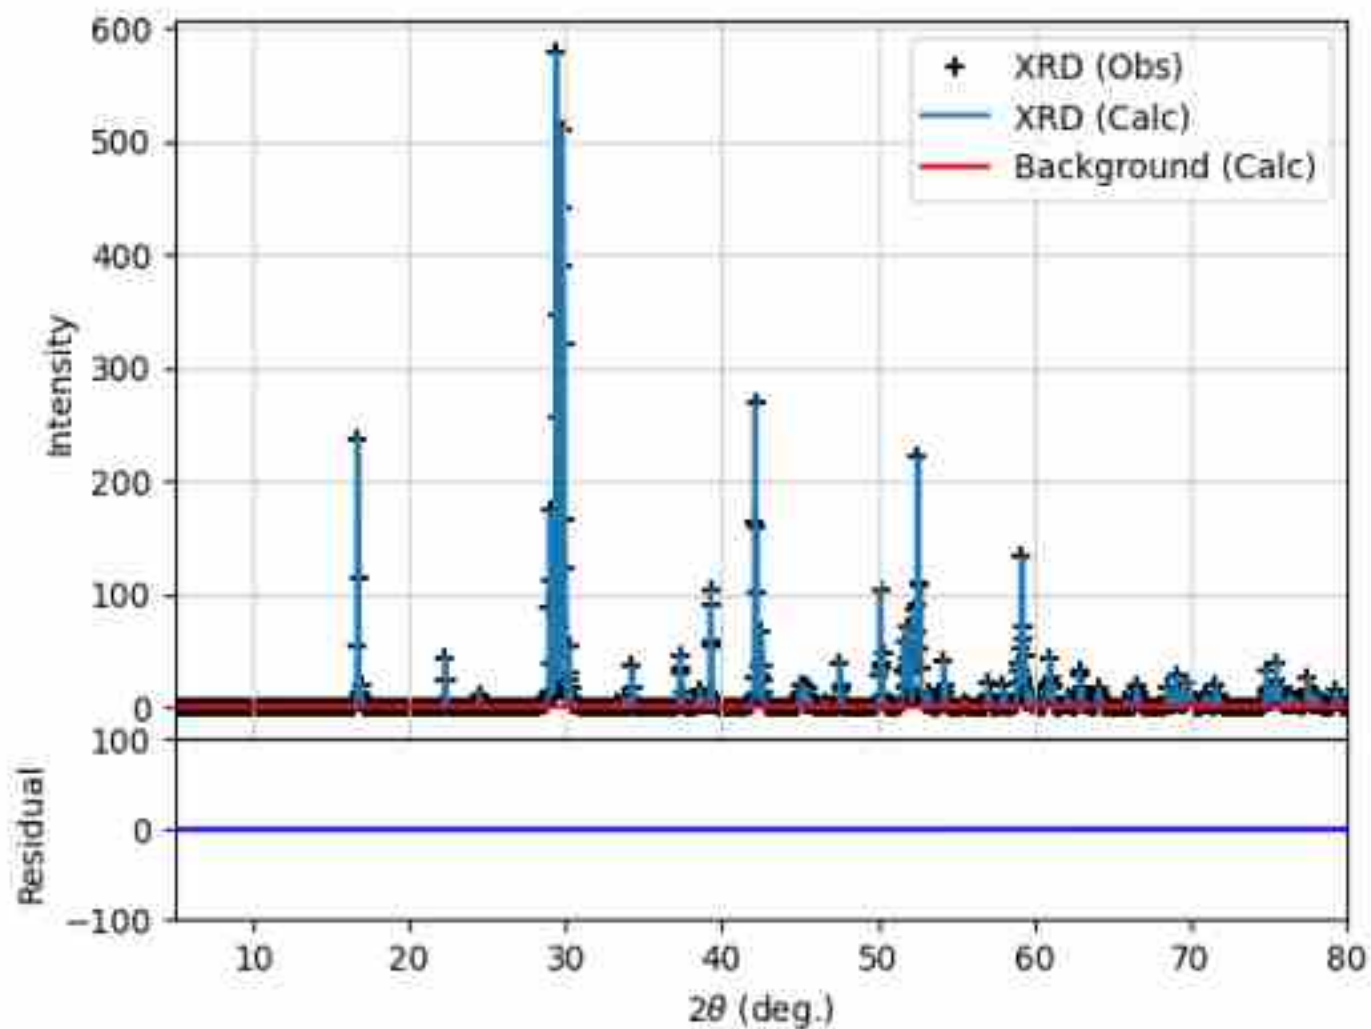

| RMSE before RR | Rwp     | RMSE after RR |
|----------------|---------|---------------|
| 0.012          | 0.51419 | 0.01624       |

# Sr4Mg8

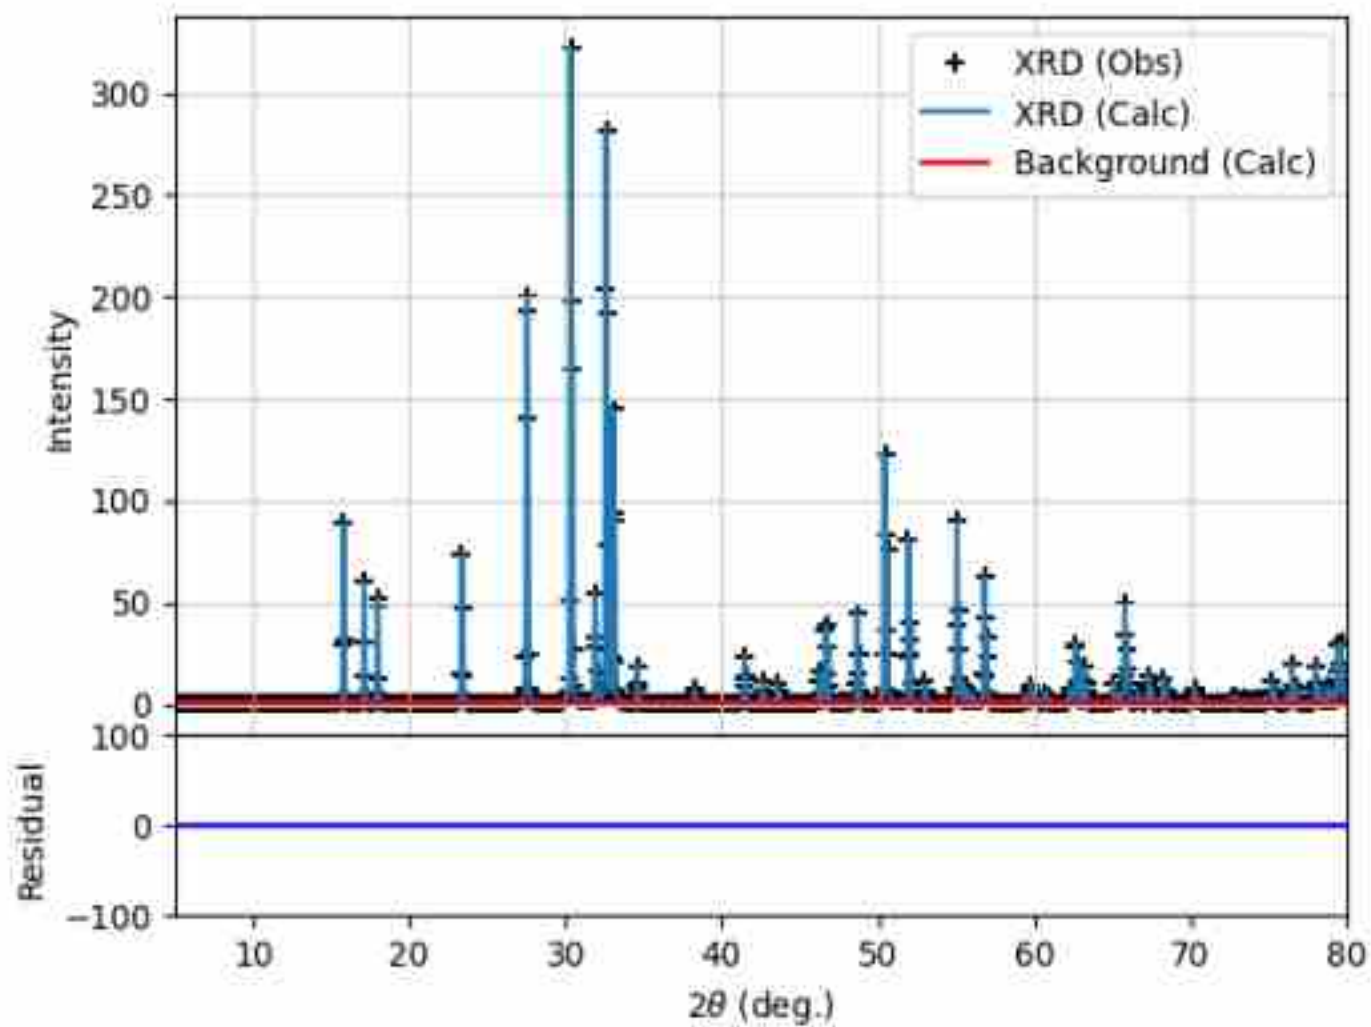

| RMSE before RR | Rwp     | RMSE after RR |
|----------------|---------|---------------|
| 0.012          | 0.00724 | 0.00062       |

# Sr<sub>4</sub>Si<sub>2</sub>

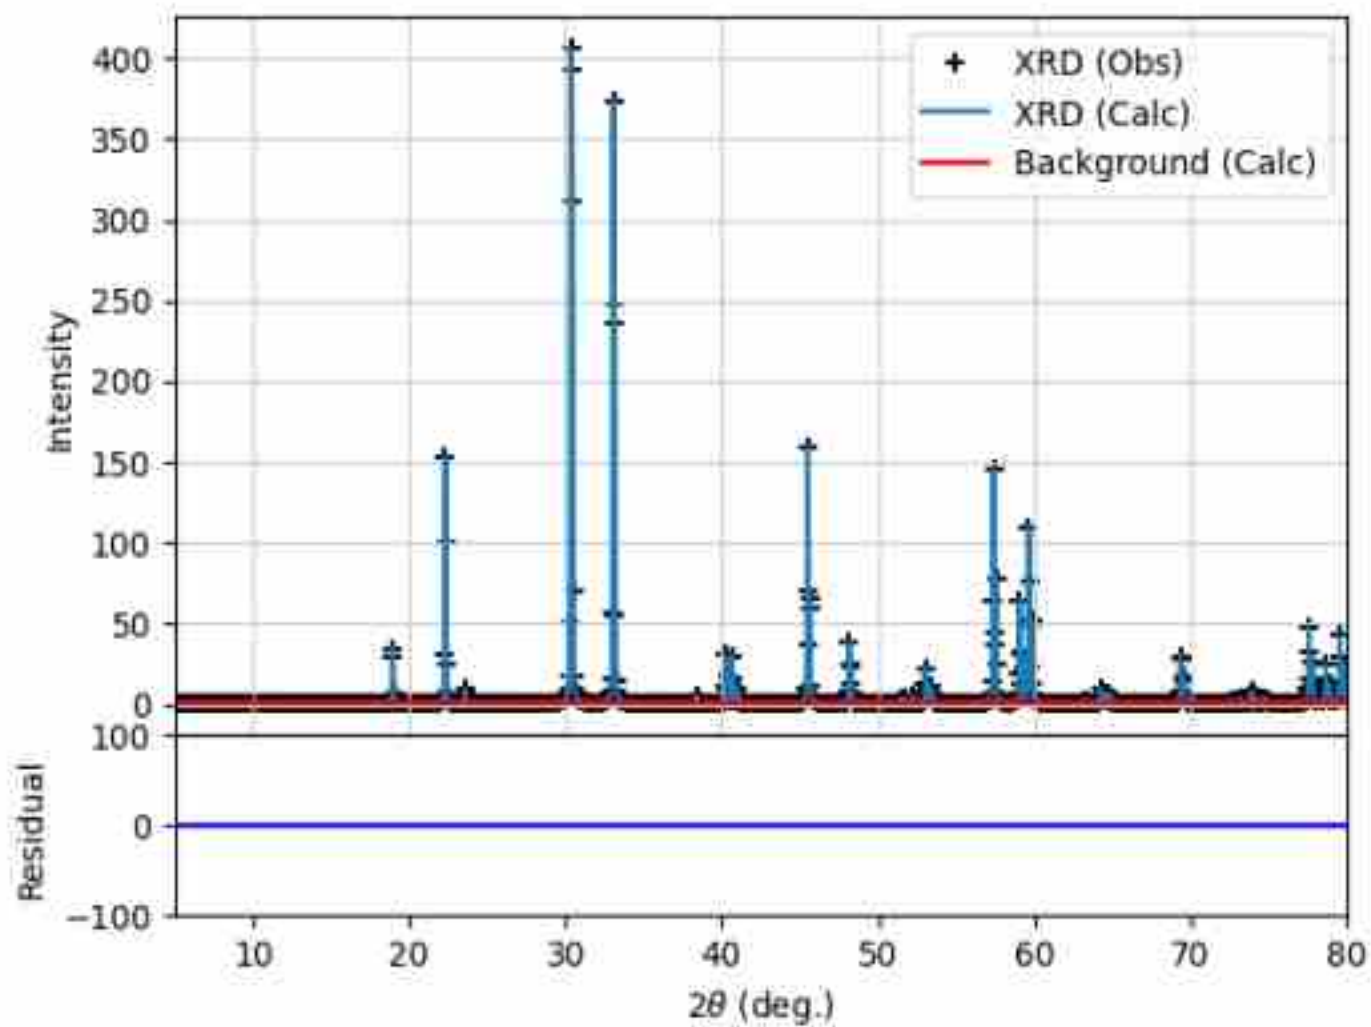

| RMSE before RR | Rwp    | RMSE after RR |
|----------------|--------|---------------|
| 0.012          | 0.0239 | 0.0015        |

# Ta<sub>1</sub>Cu<sub>3</sub>Te<sub>2</sub>Se<sub>2</sub>

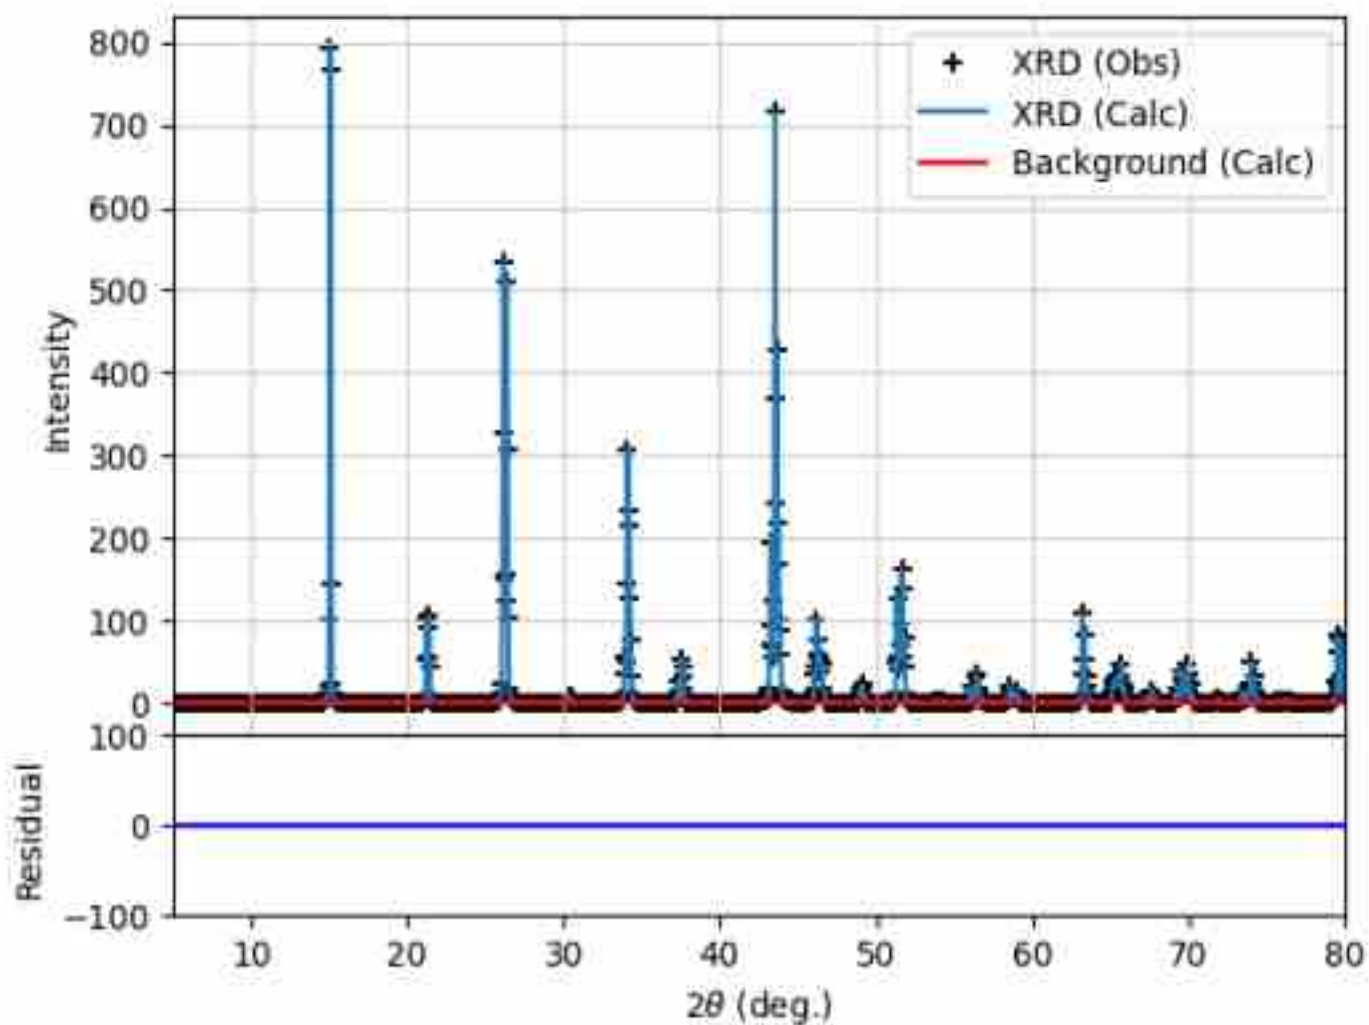

| RMSE before RR | Rwp    | RMSE after RR |
|----------------|--------|---------------|
| 0.012          | 0.0031 | 0.00038       |

# Ta1Ti1Al6

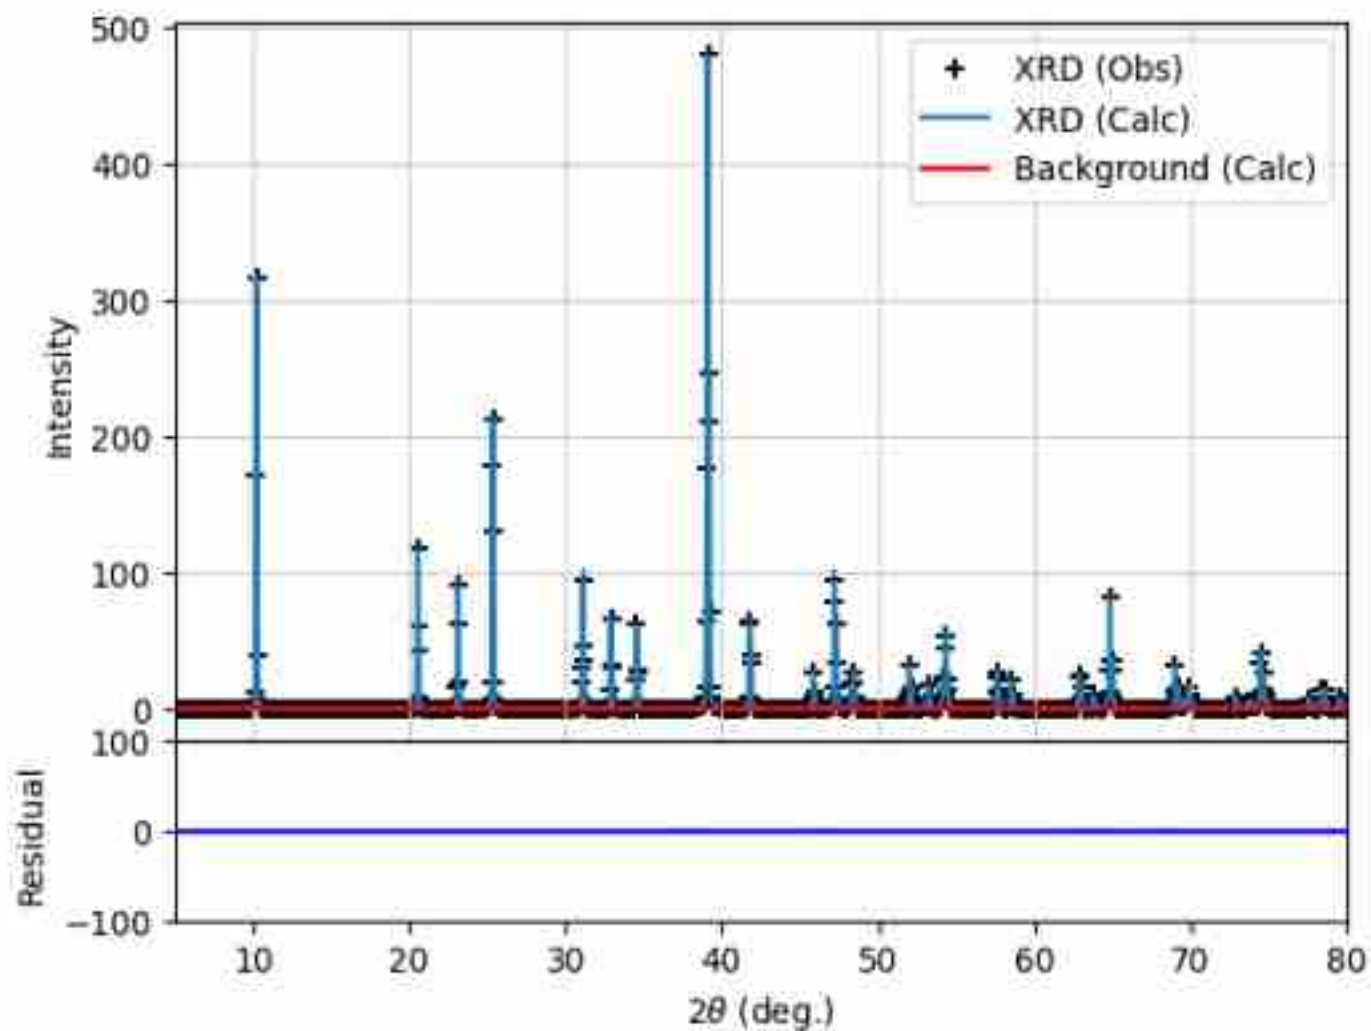

| RMSE before RR | Rwp     | RMSE after RR |
|----------------|---------|---------------|
| 0.012          | 0.36358 | 0.00786       |

# Ta<sub>2</sub>Fe<sub>8</sub>W<sub>2</sub>

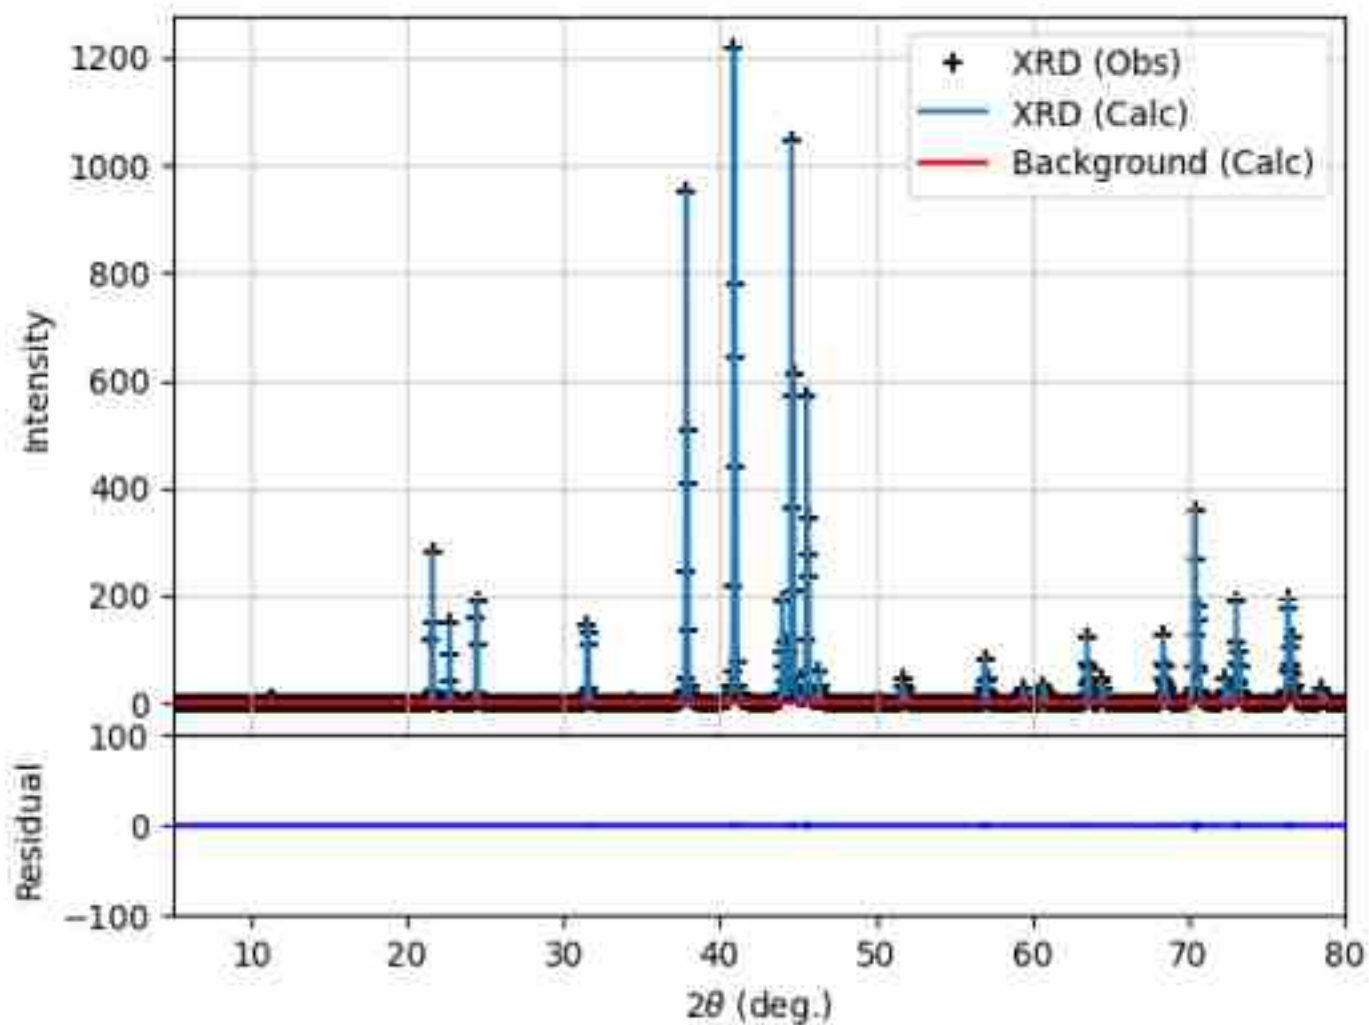

| RMSE before RR | Rwp     | RMSE after RR |
|----------------|---------|---------------|
| 0.012          | 0.38354 | 0.00612       |



# Ta<sub>3</sub>Mo<sub>3</sub>N<sub>4</sub>

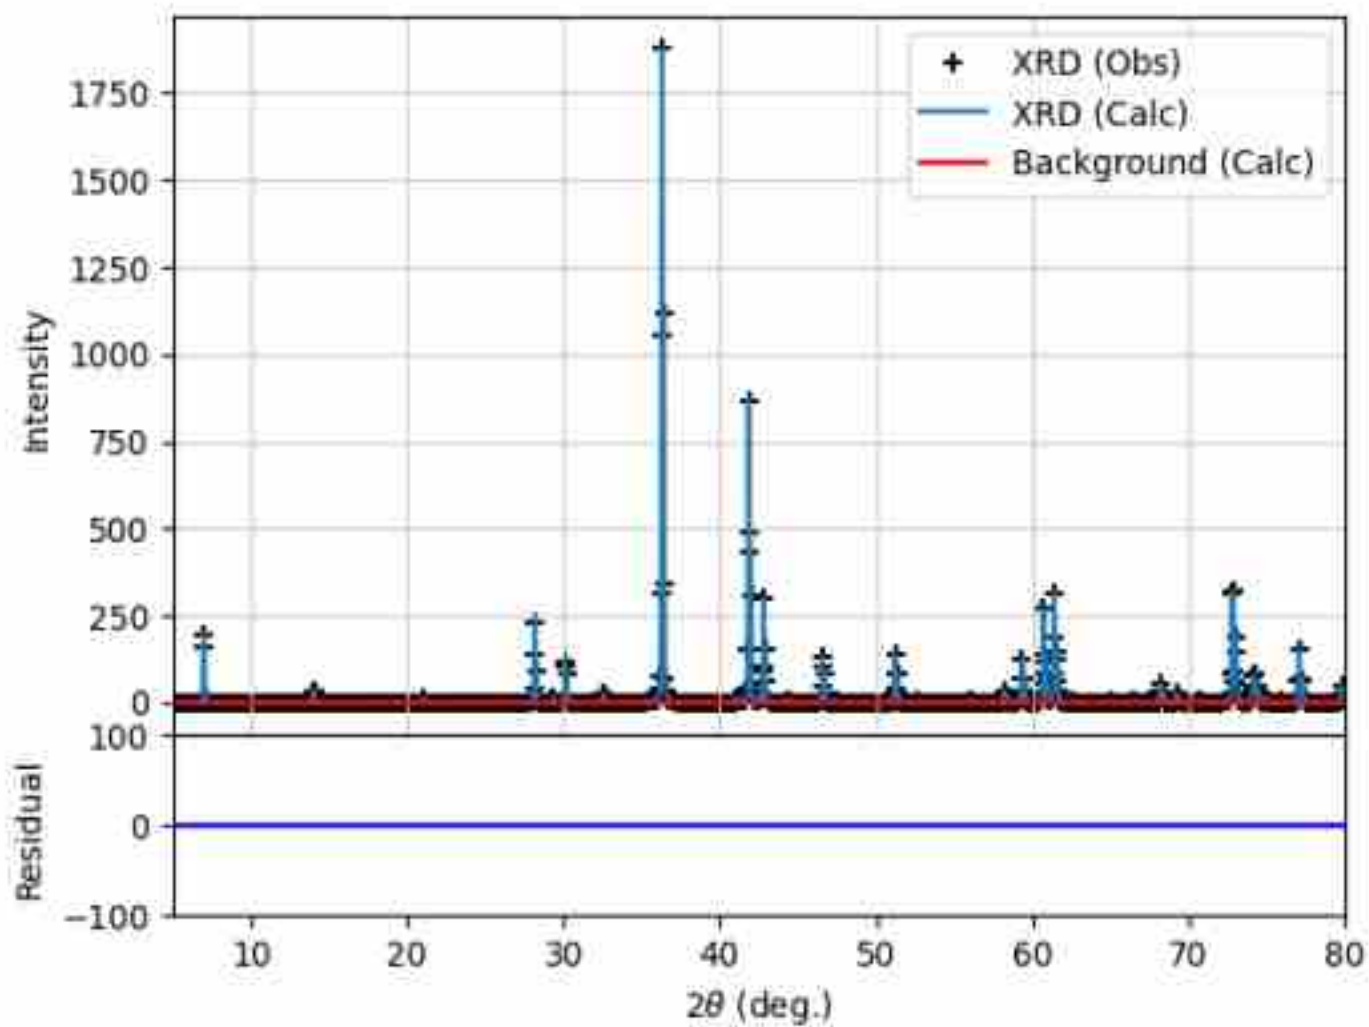

| RMSE before RR | Rwp   | RMSE after RR |
|----------------|-------|---------------|
| 0.012          | 0.004 | 0.00227       |

# Ta<sub>4</sub>Be<sub>2</sub>

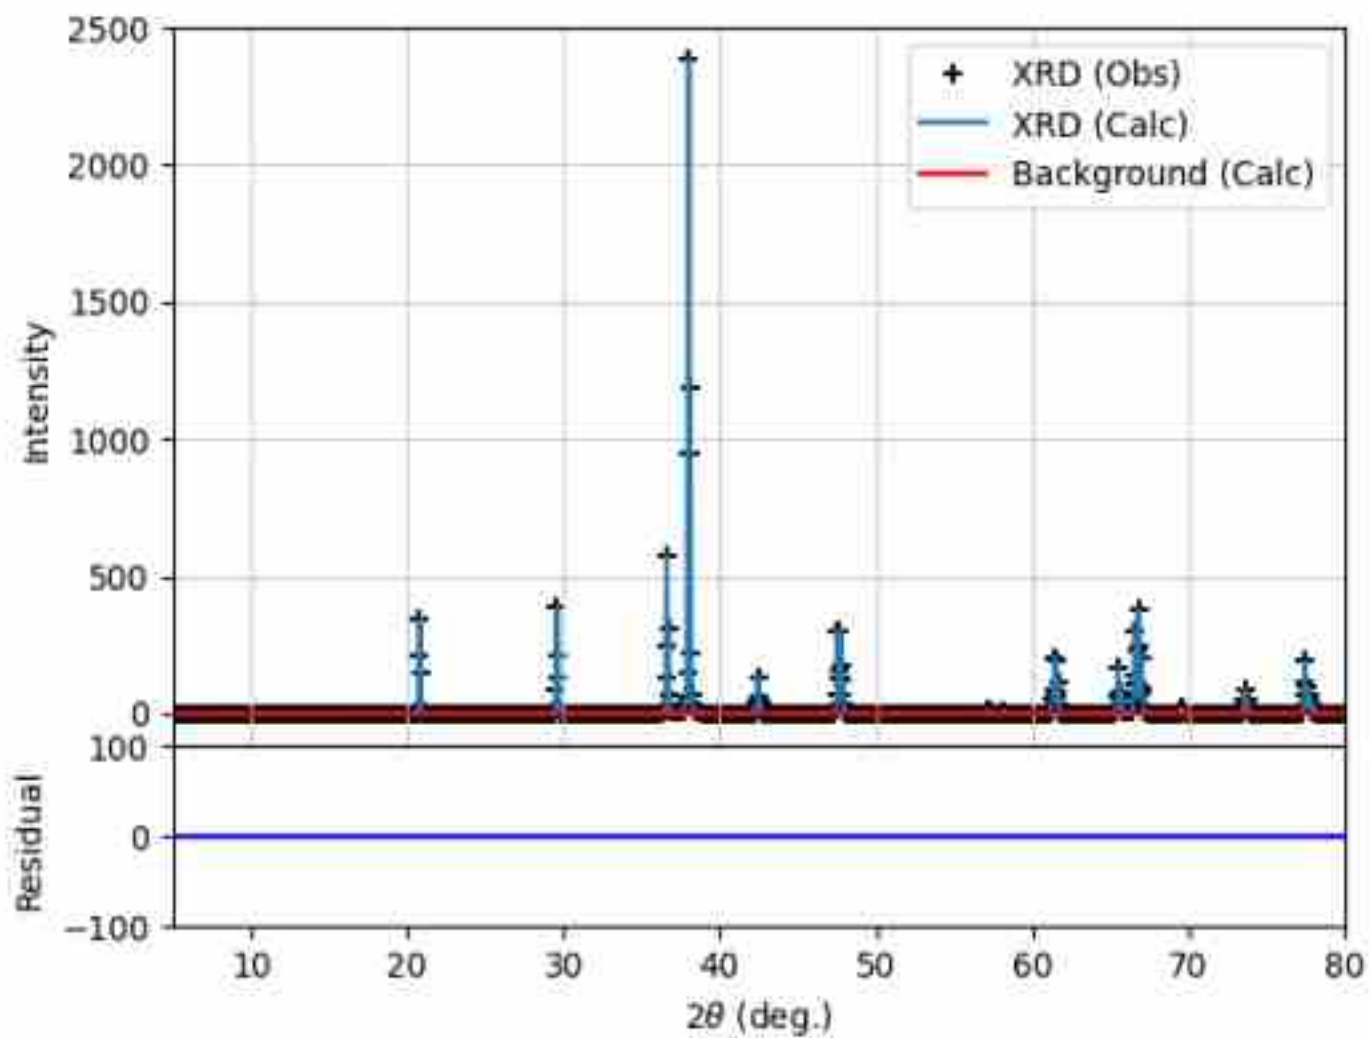

| RMSE before RR | Rwp     | RMSE after RR |
|----------------|---------|---------------|
| 0.012          | 0.00831 | 0.0052        |

# Tb1Nd1Ni2Ge4

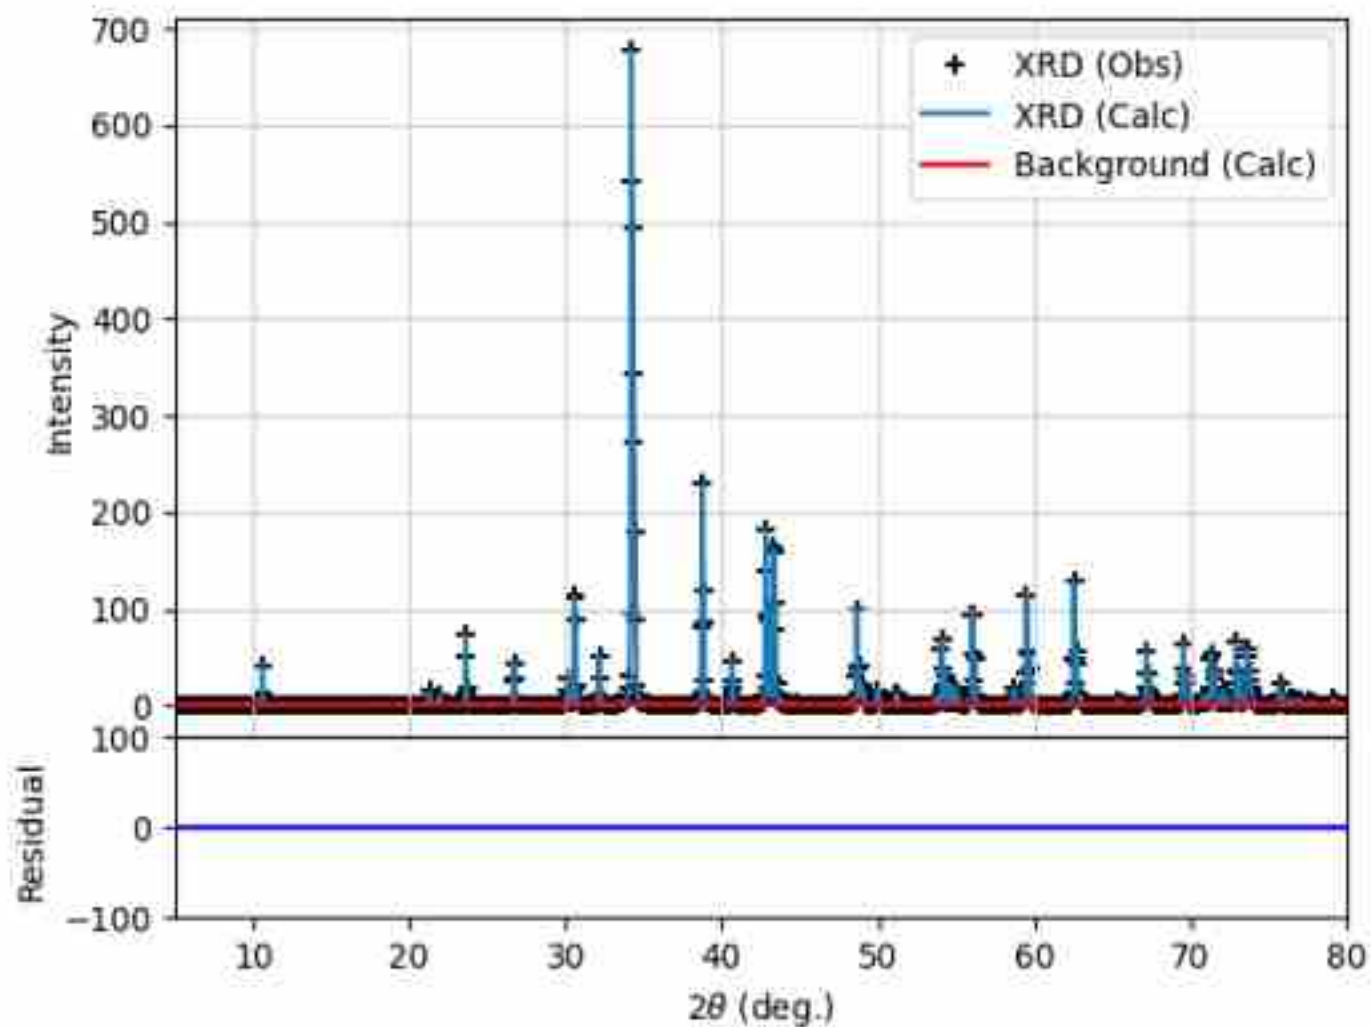

| RMSE before RR | Rwp     | RMSE after RR |
|----------------|---------|---------------|
| 0.012          | 0.00358 | 0.0003        |

# Tb<sub>2</sub>Al<sub>3</sub>Si<sub>2</sub>

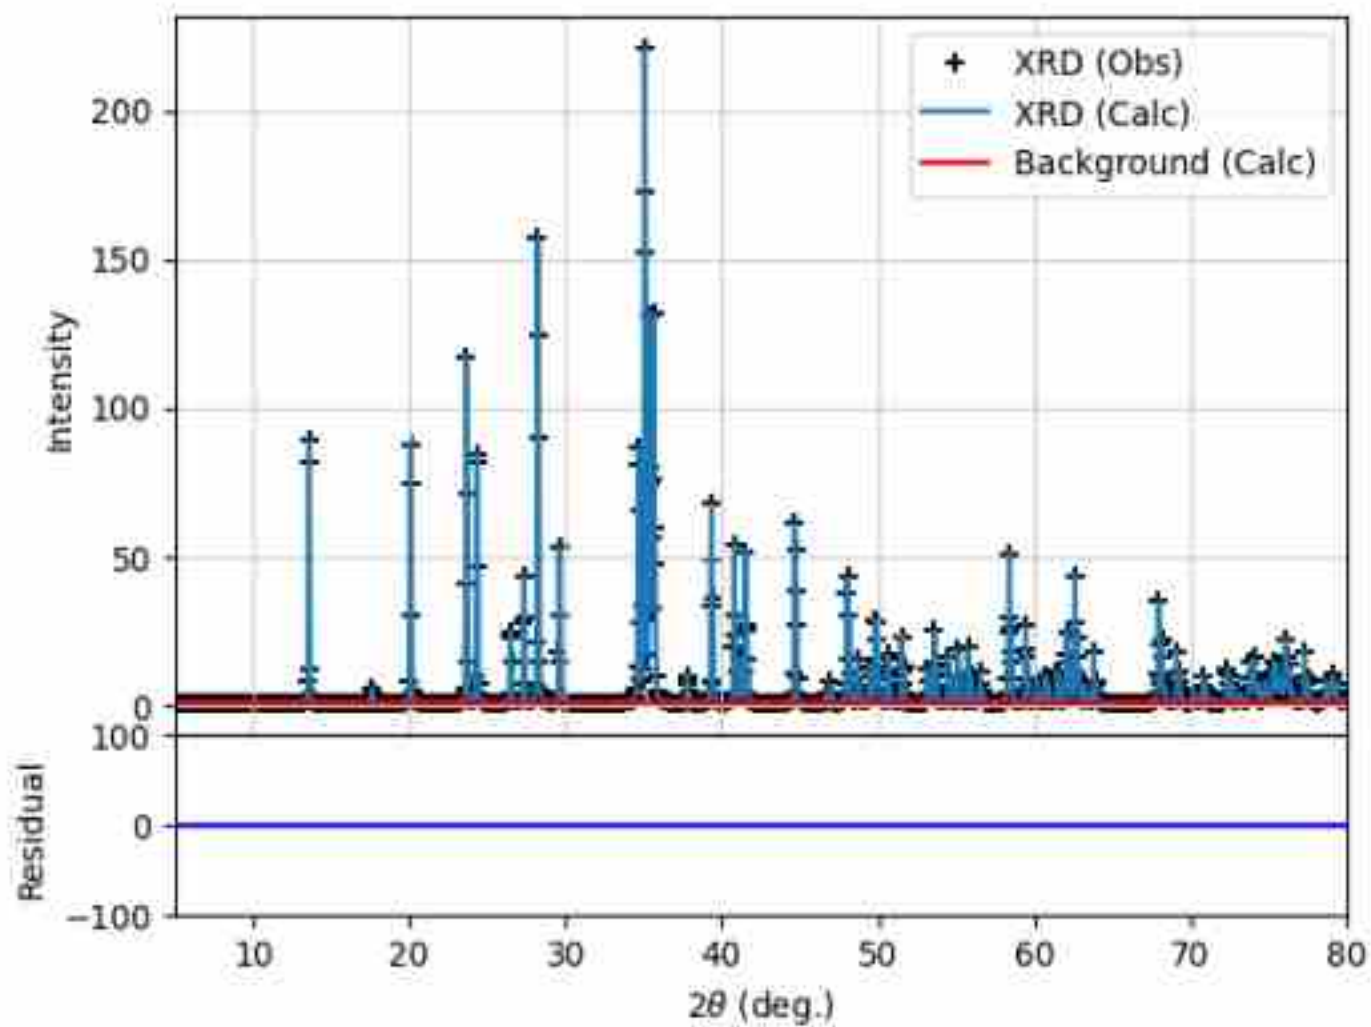

| RMSE before RR | Rwp     | RMSE after RR |
|----------------|---------|---------------|
| 0.012          | 0.00417 | 0.00072       |

# Tb12Os4

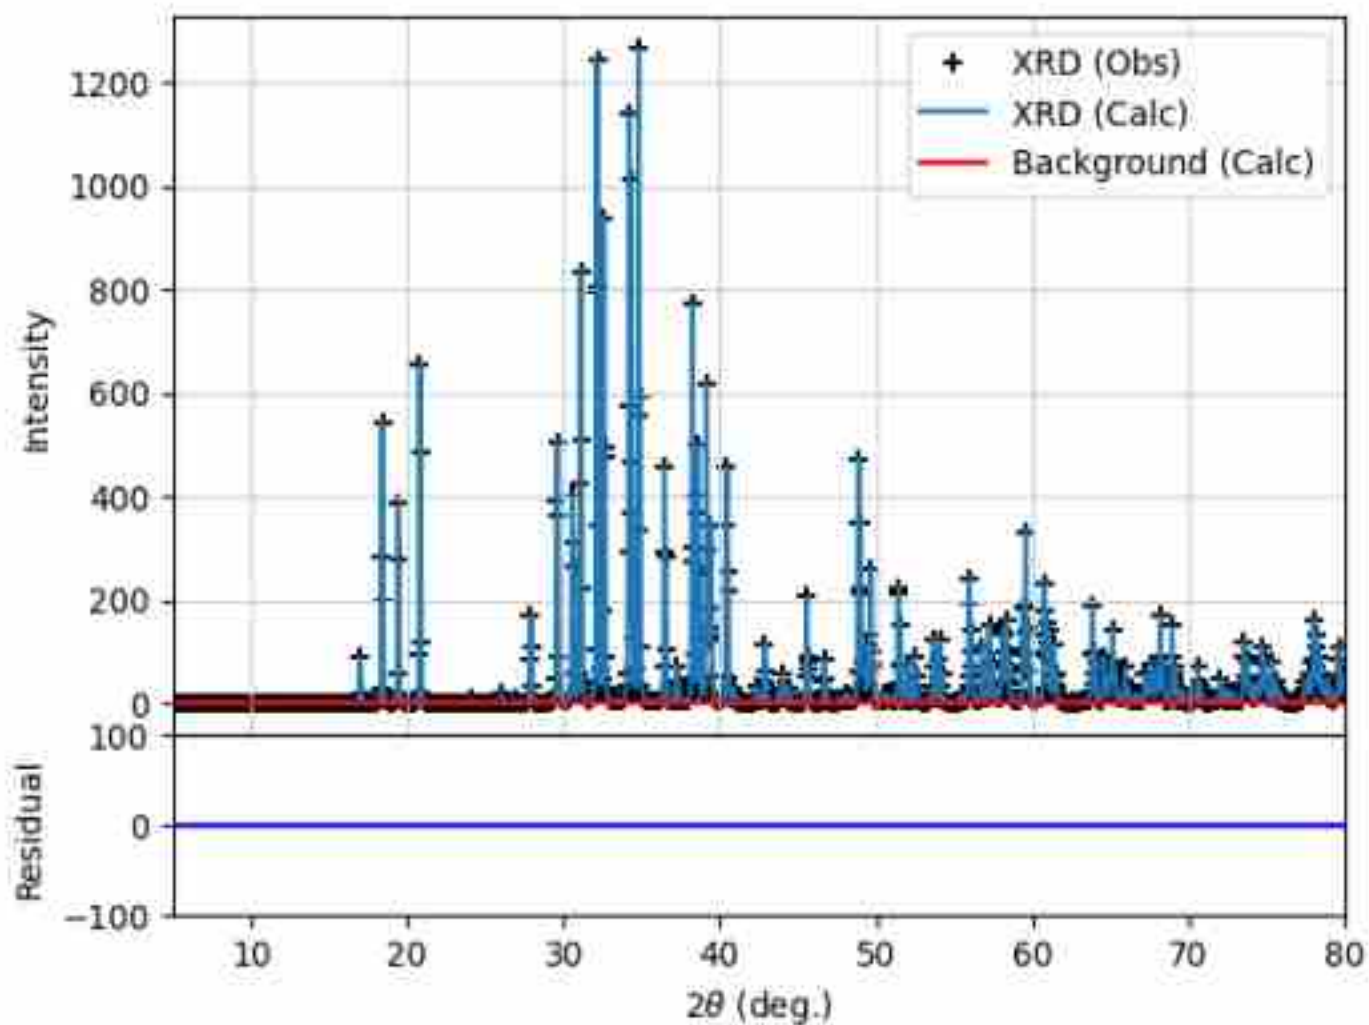

| RMSE before RR | Rwp     | RMSE after RR |
|----------------|---------|---------------|
| 0.012          | 0.00408 | 0.00031       |

Th1Co2Ni3

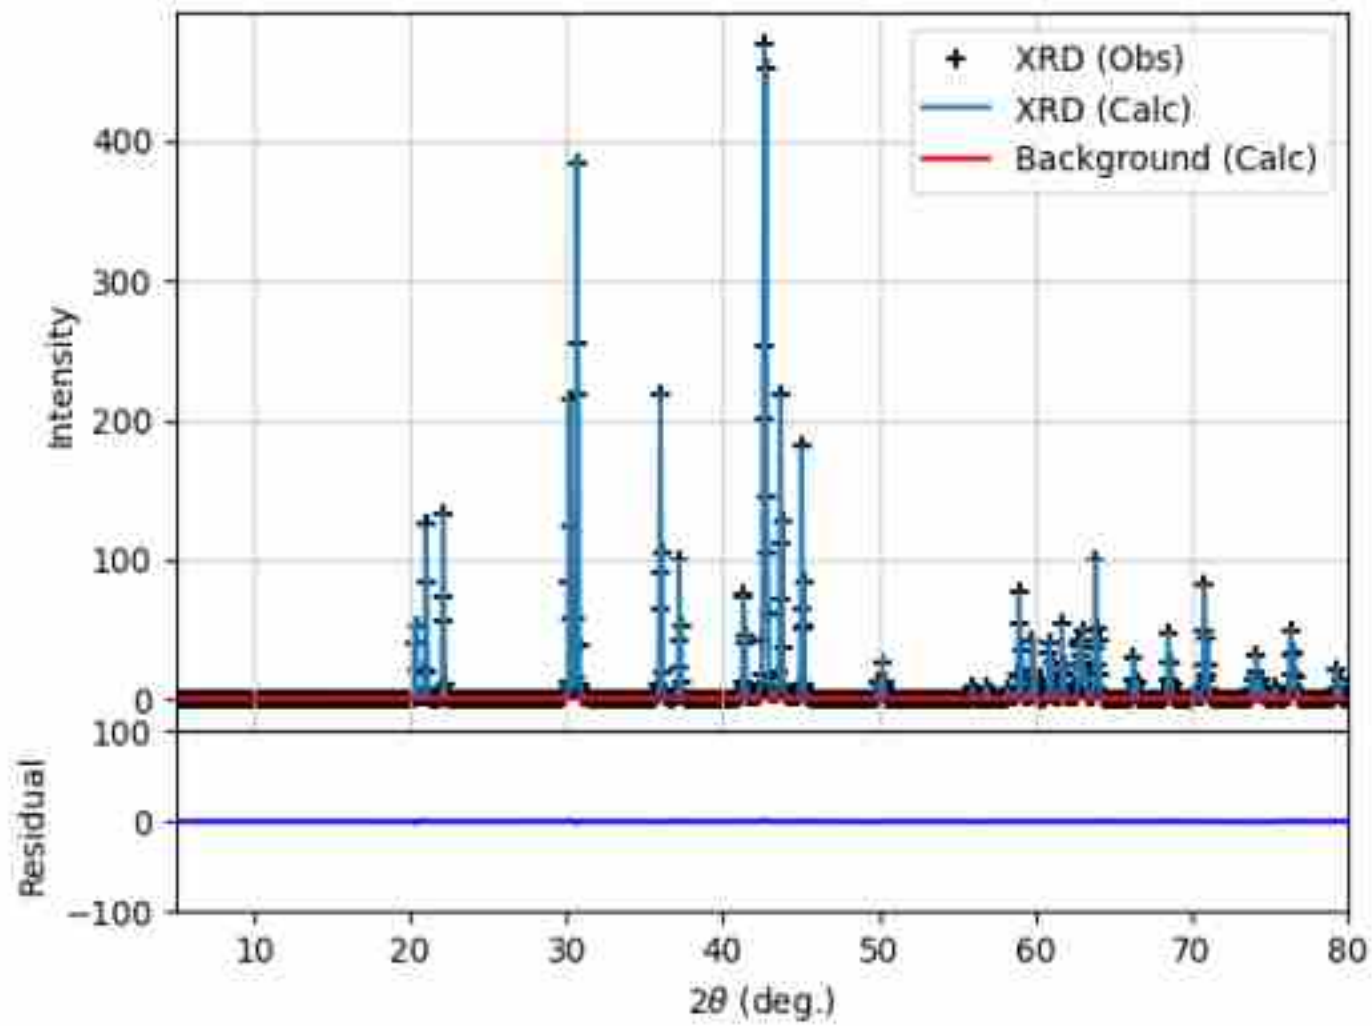

| RMSE before RR | Rwp     | RMSE after RR |
|----------------|---------|---------------|
| 0.012          | 0.70377 | 0.01587       |

# Th1Si2Tc2

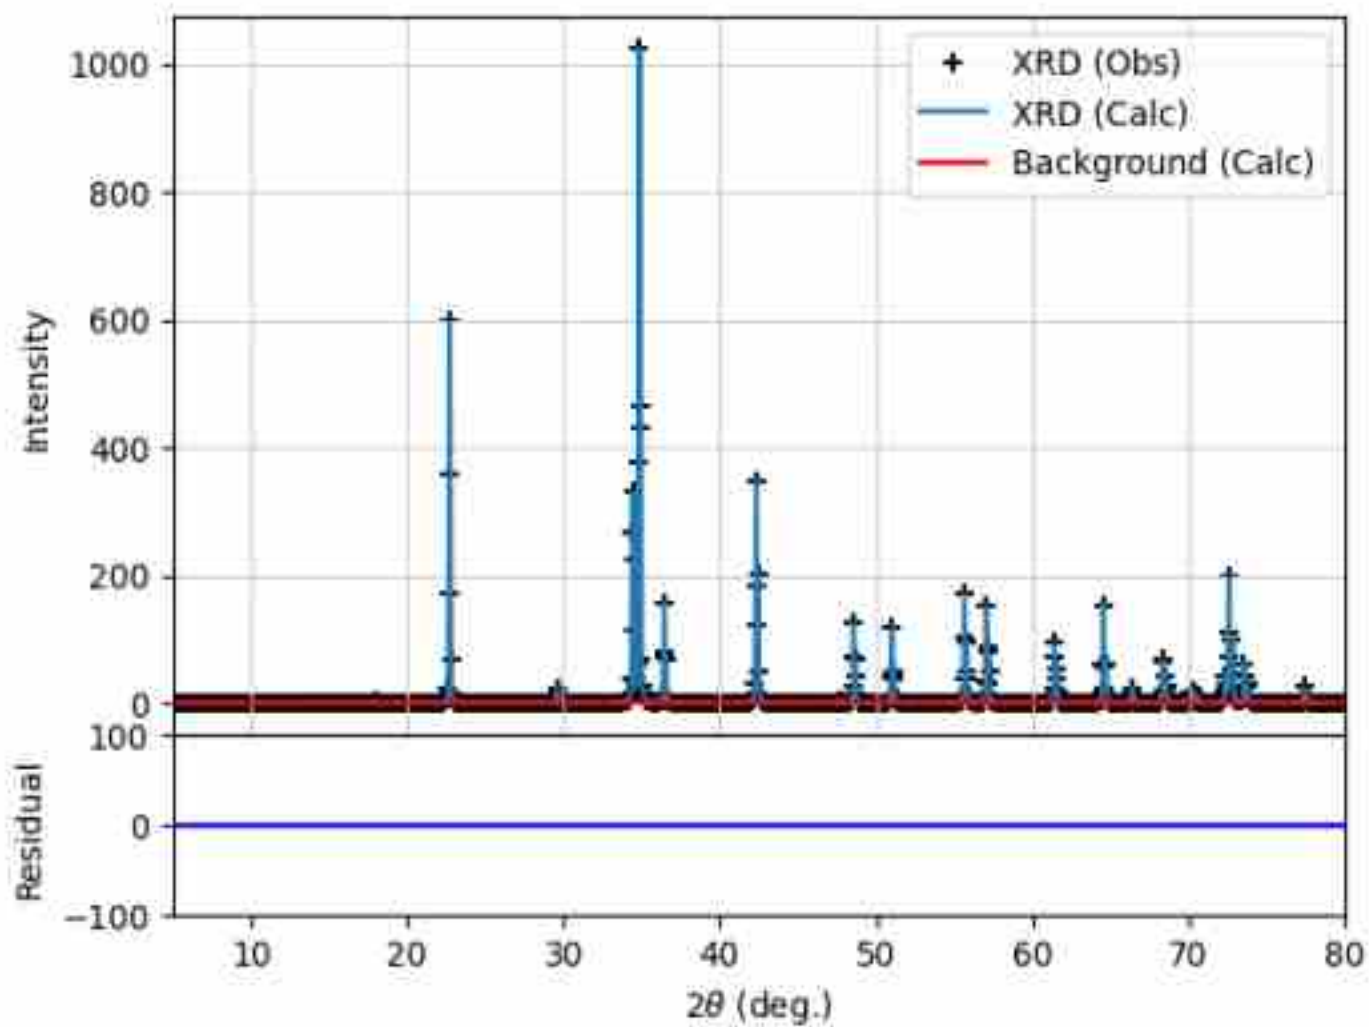

| RMSE before RR | Rwp     | RMSE after RR |
|----------------|---------|---------------|
| 0.012          | 0.00258 | 0.00022       |

# Th1U1Sb4

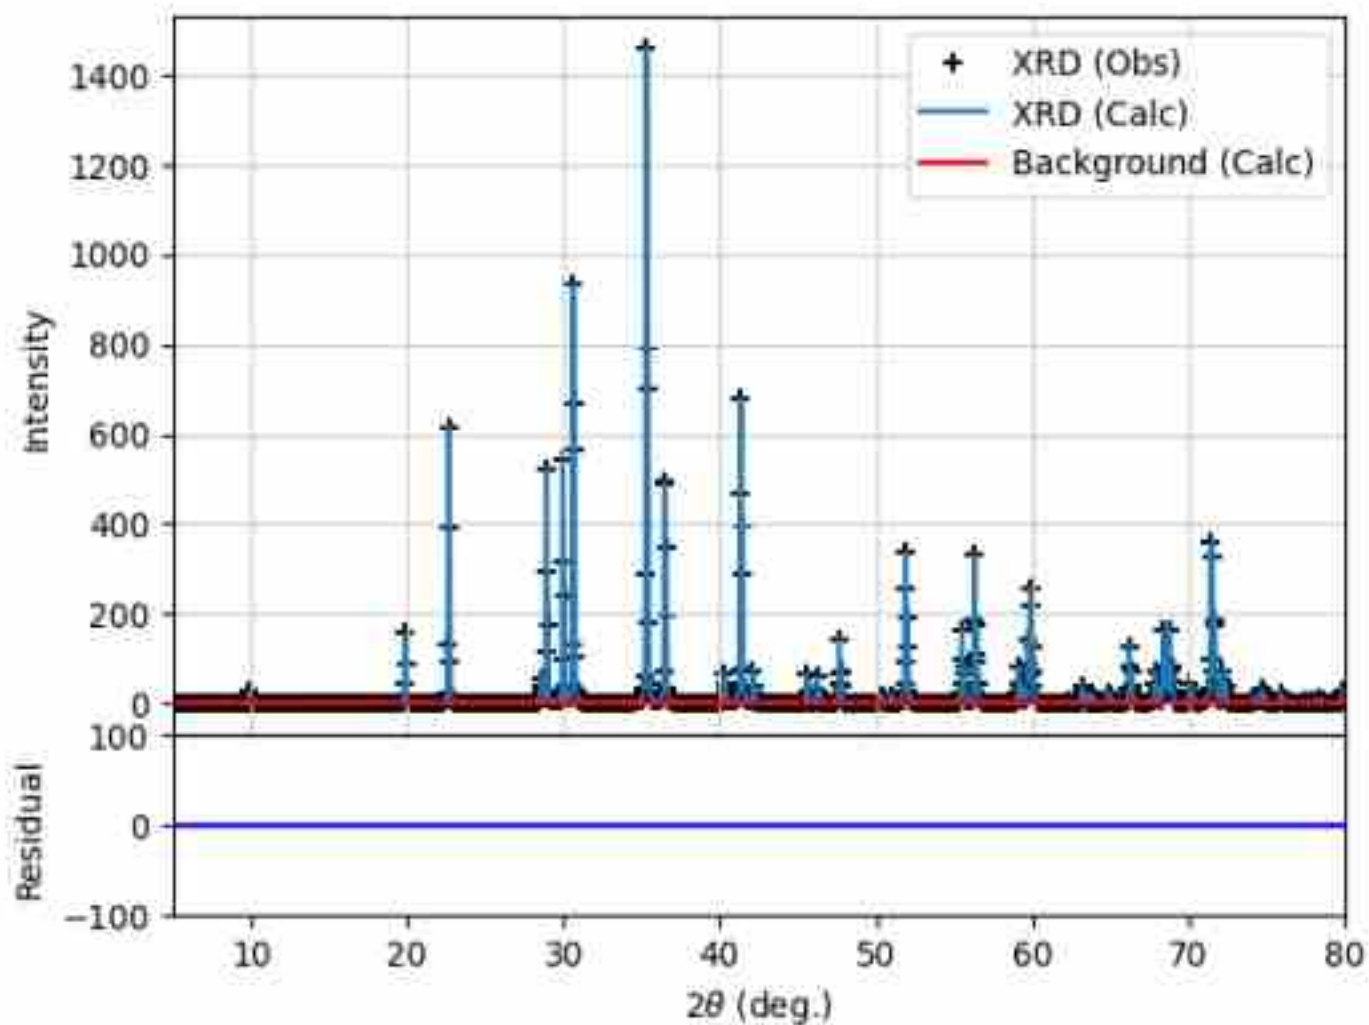

| RMSE before RR | Rwp     | RMSE after RR |
|----------------|---------|---------------|
| 0.012          | 0.00537 | 0.00033       |



# Th<sub>4</sub>AgPd<sub>1</sub>

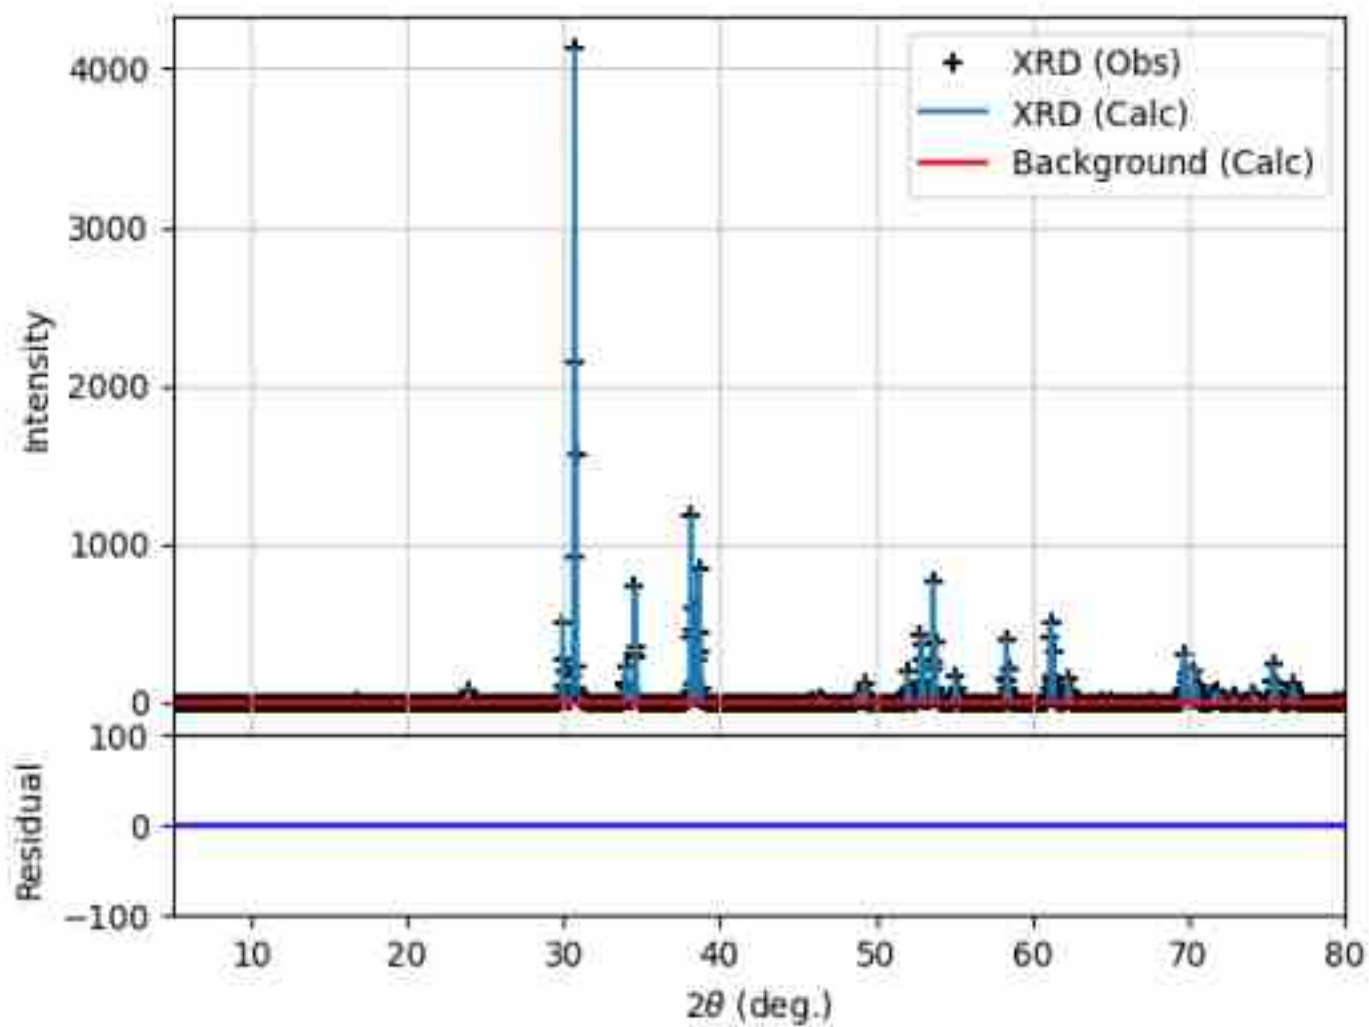

| RMSE before RR | Rwp     | RMSE after RR |
|----------------|---------|---------------|
| 0.012          | 0.00506 | 0.00057       |

# Ti2Pt2

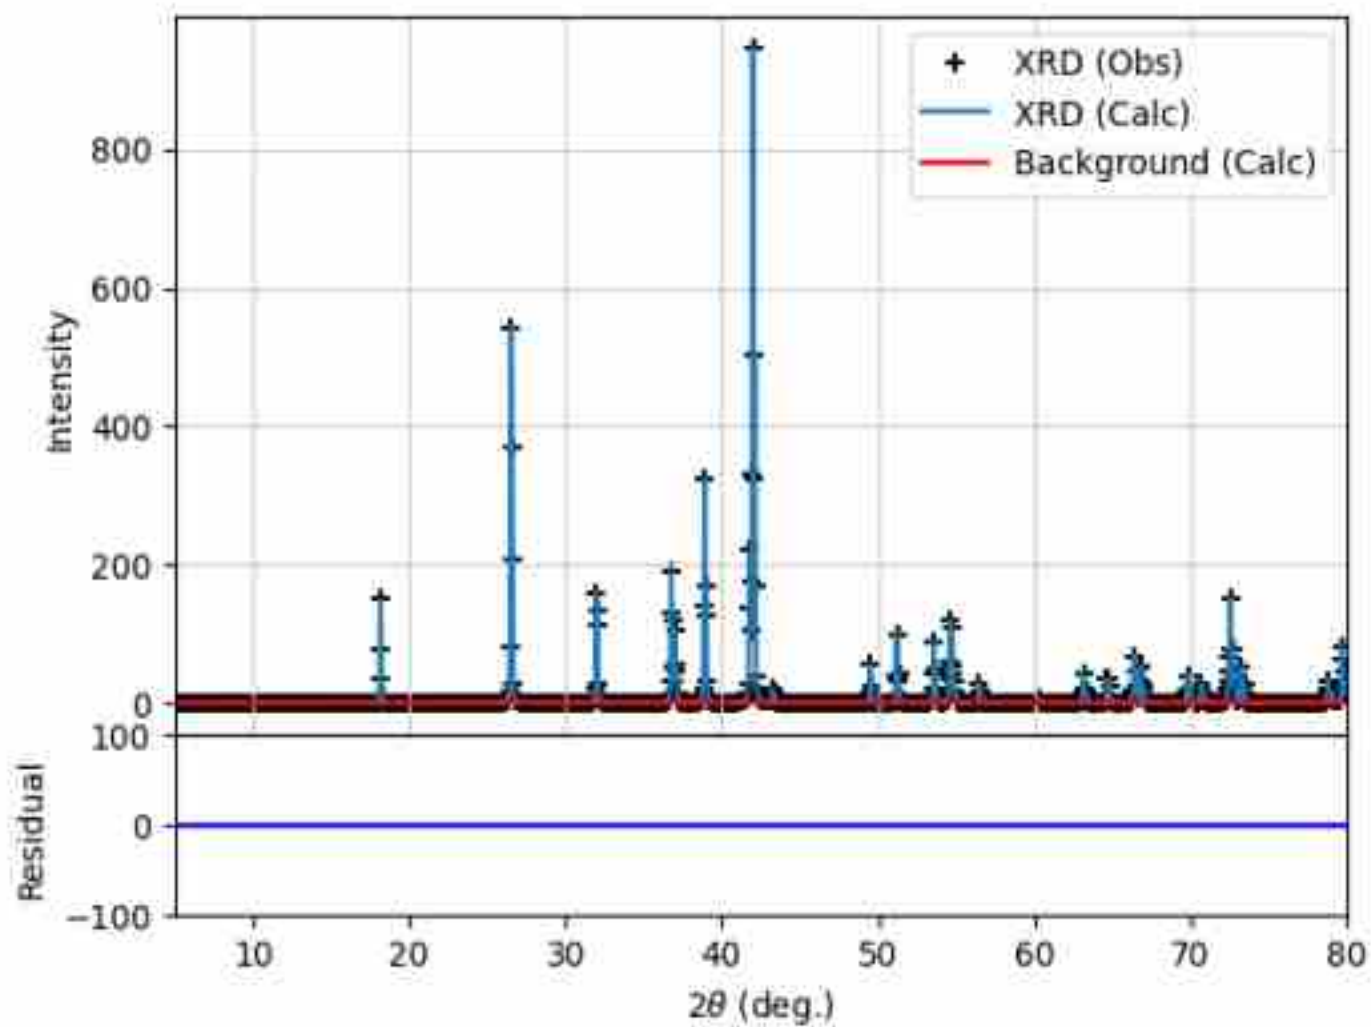

| RMSE before RR | Rwp     | RMSE after RR |
|----------------|---------|---------------|
| 0.012          | 0.00365 | 0.00078       |

# Ti<sub>3</sub>Fe<sub>3</sub>P<sub>3</sub>

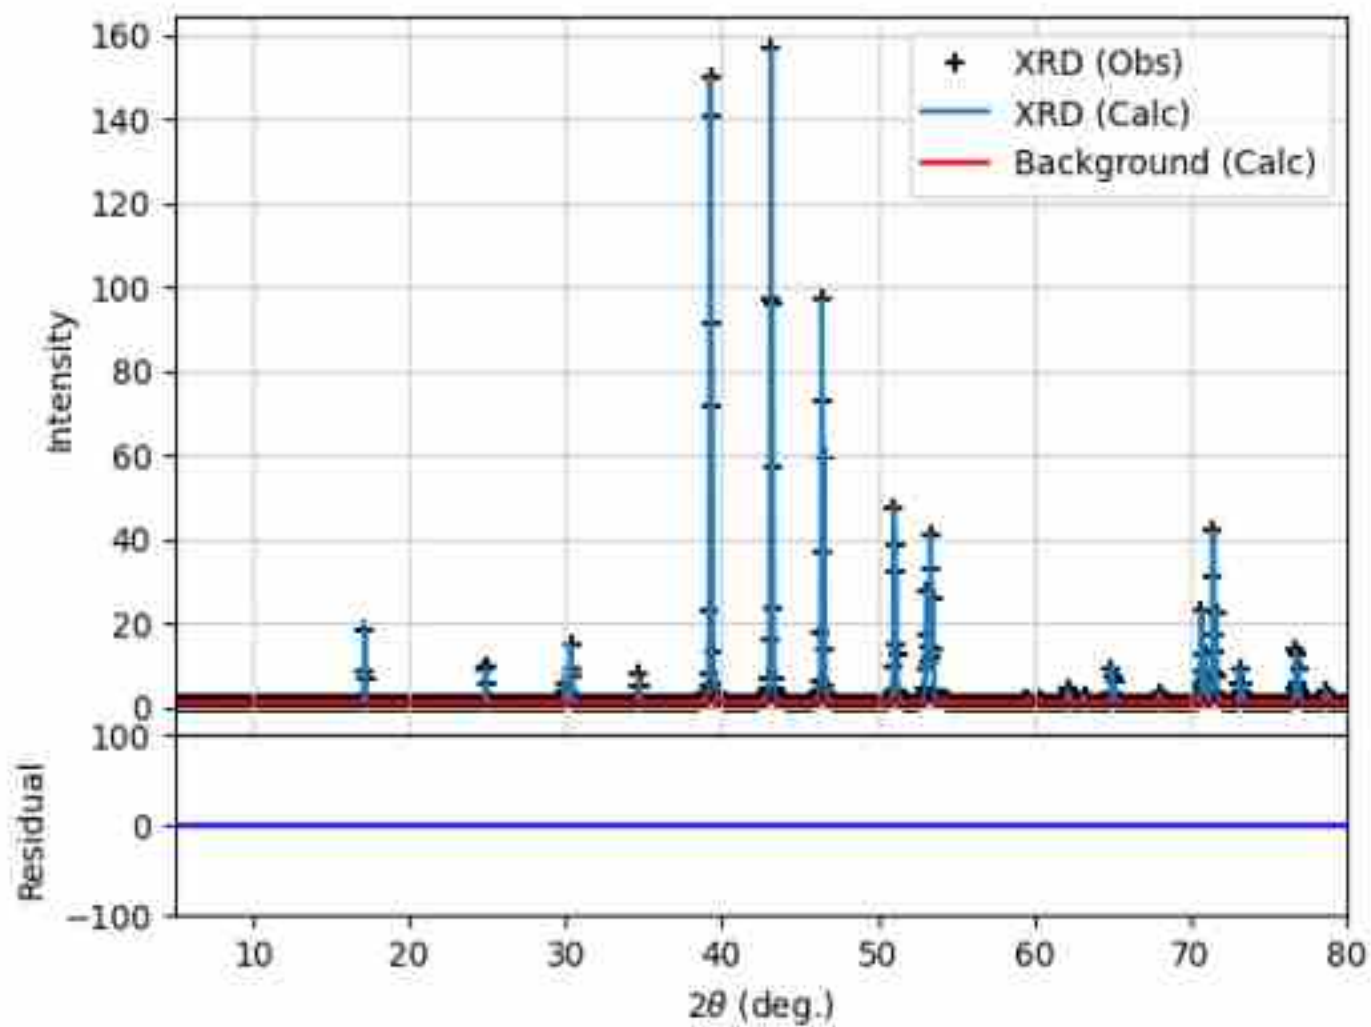

| RMSE before RR | Rwp     | RMSE after RR |
|----------------|---------|---------------|
| 0.012          | 0.00364 | 0.00117       |

# Ti4S8

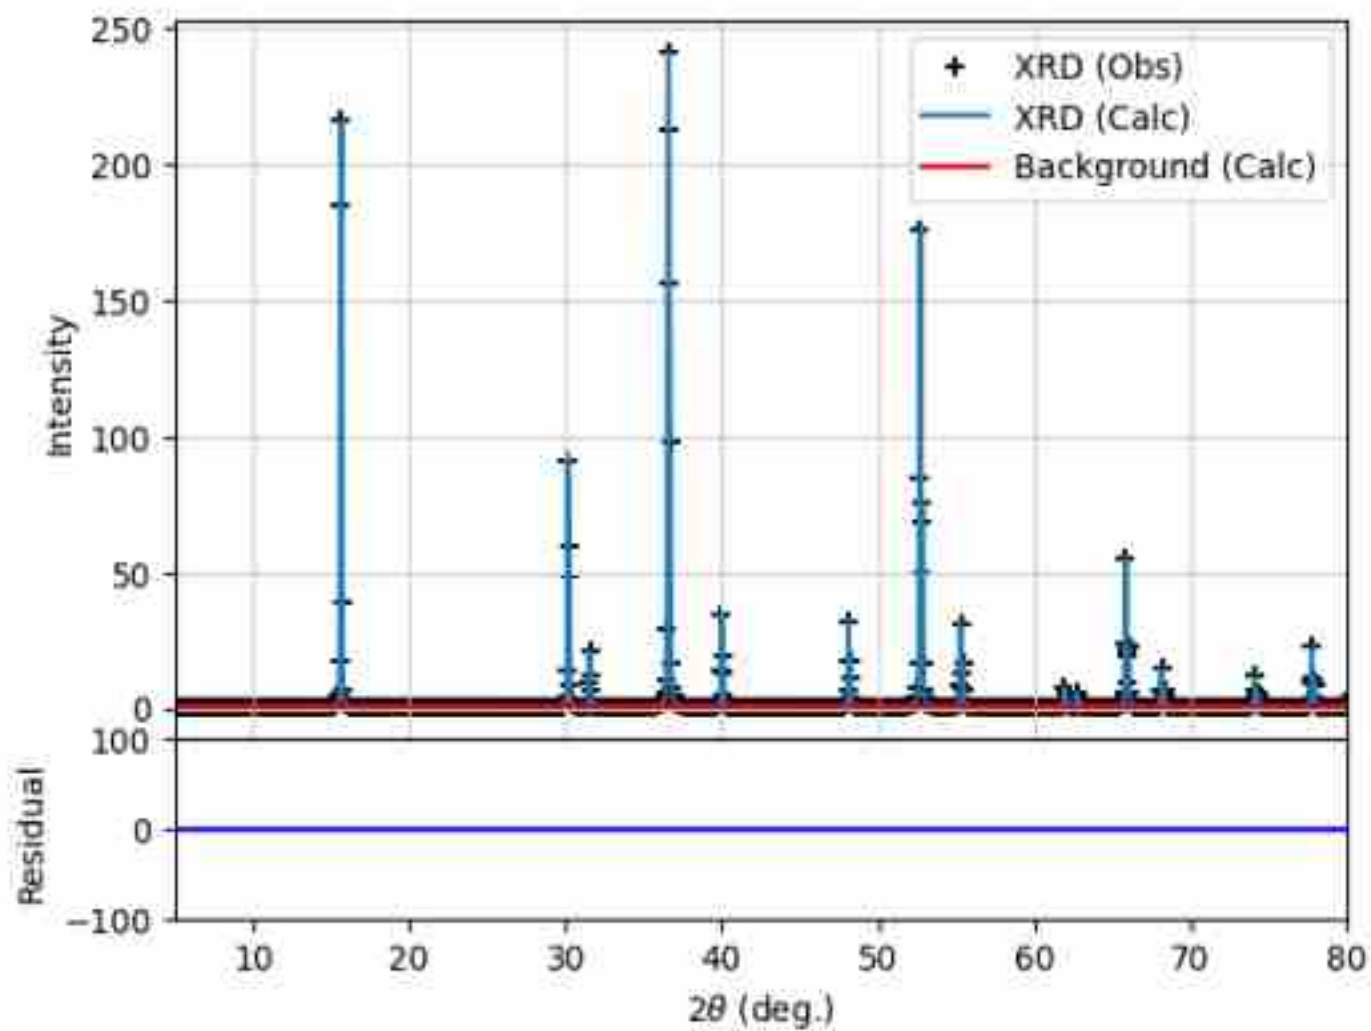

| RMSE before RR | Rwp     | RMSE after RR |
|----------------|---------|---------------|
| 0.012          | 0.05639 | 0.00315       |

# Tm1Mn6Sn6

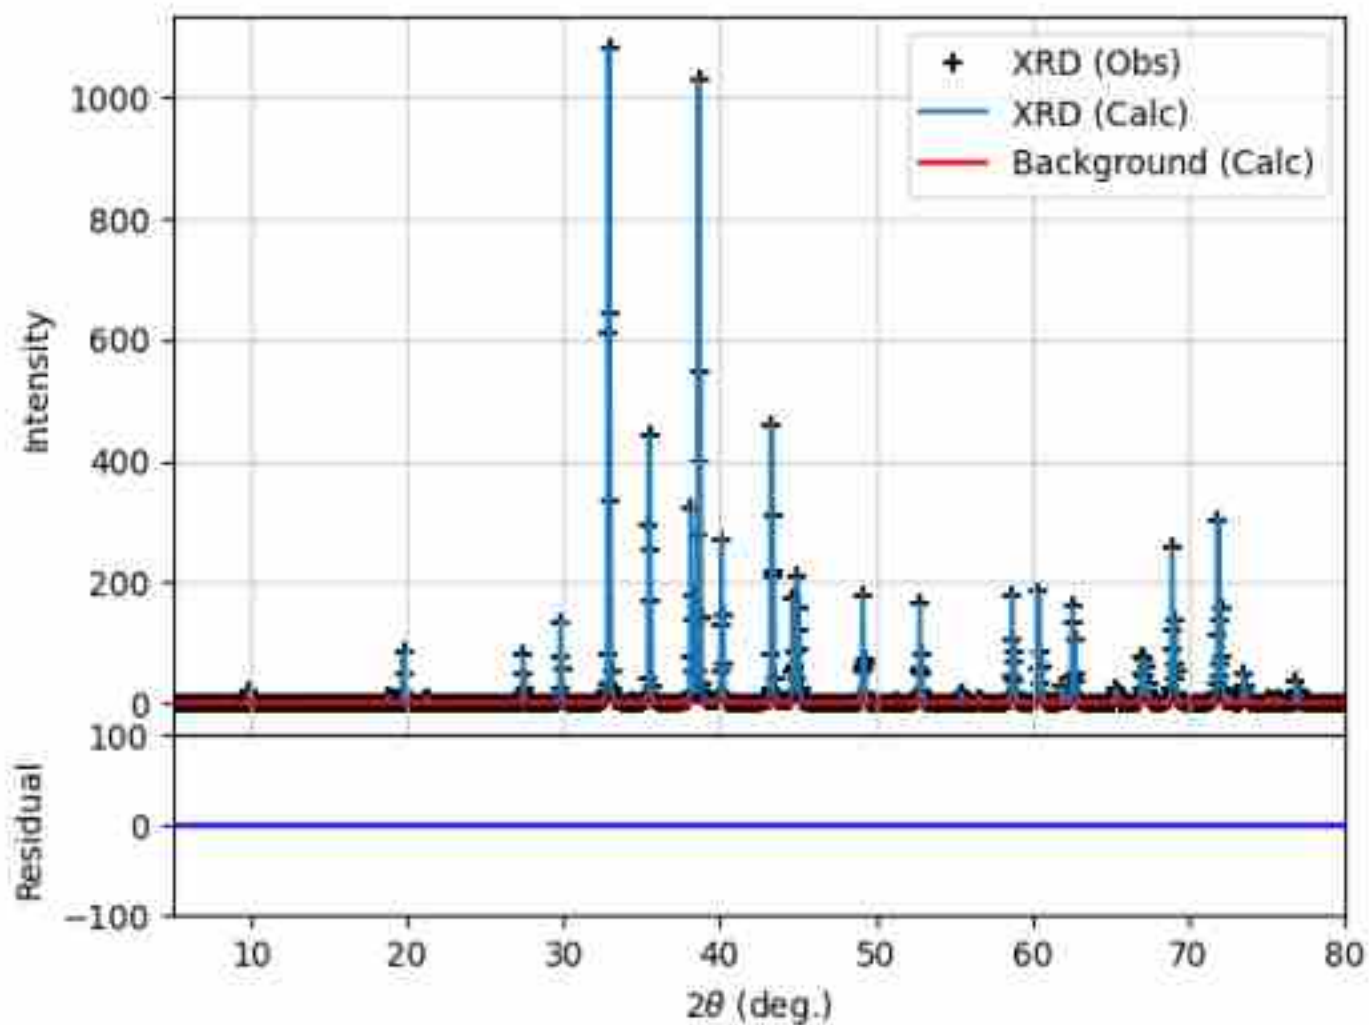

| RMSE before RR | Rwp     | RMSE after RR |
|----------------|---------|---------------|
| 0.012          | 0.00375 | 0.00051       |

# Tm1Ti2Ga4

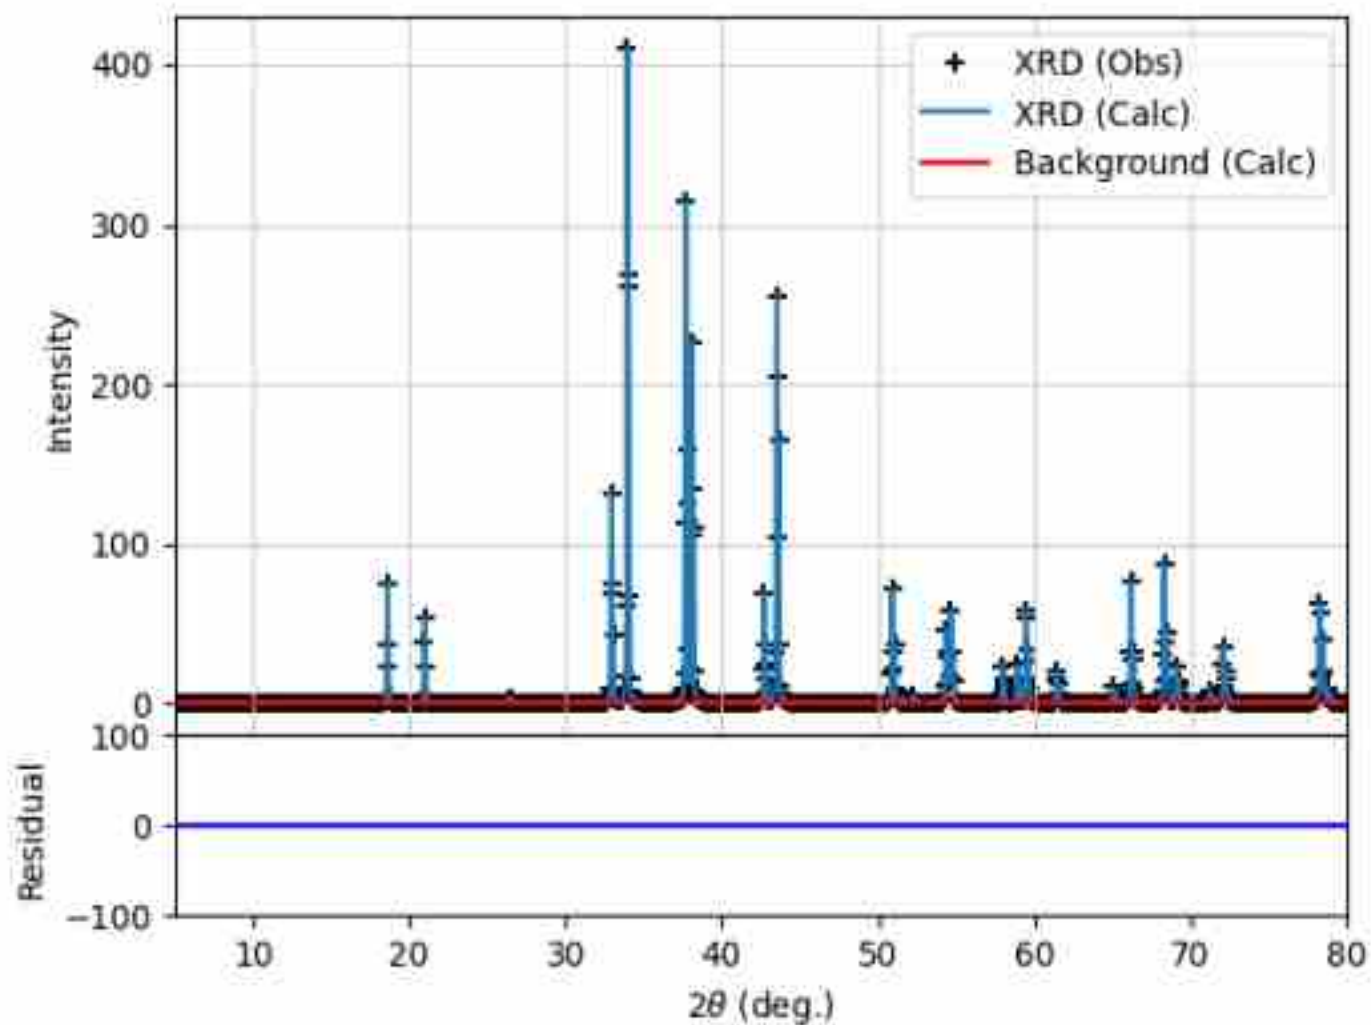

| RMSE before RR | Rwp     | RMSE after RR |
|----------------|---------|---------------|
| 0.012          | 0.00408 | 0.00054       |

# Tm<sub>2</sub>Al<sub>2</sub>Si<sub>2</sub>

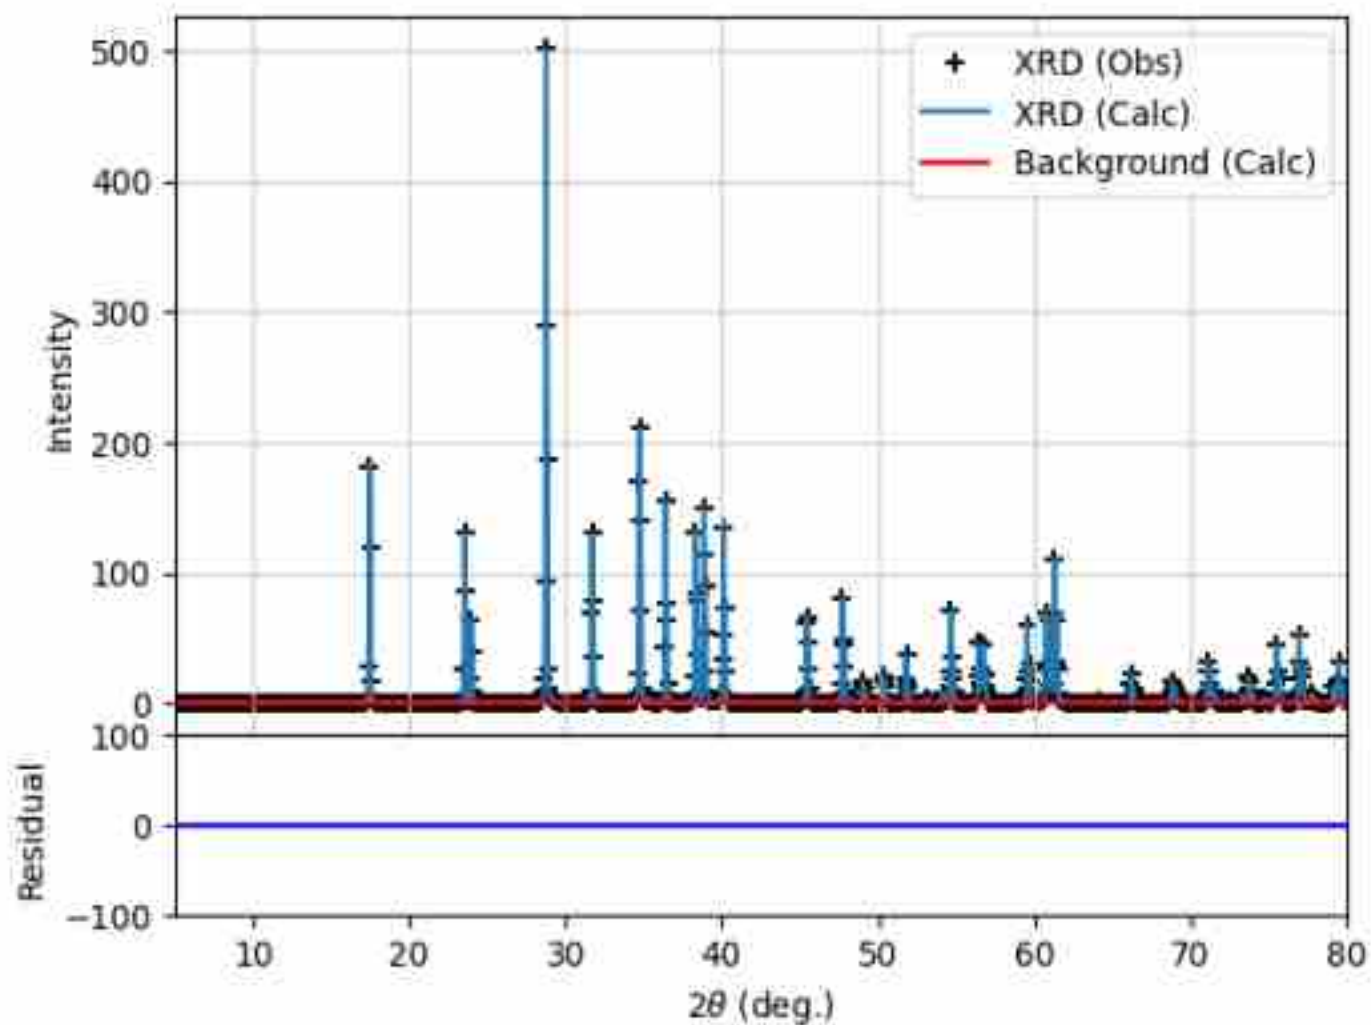

| RMSE before RR | Rwp     | RMSE after RR |
|----------------|---------|---------------|
| 0.012          | 0.00877 | 0.00204       |

# Tm<sub>2</sub>C<sub>1</sub>N<sub>2</sub>O<sub>2</sub>

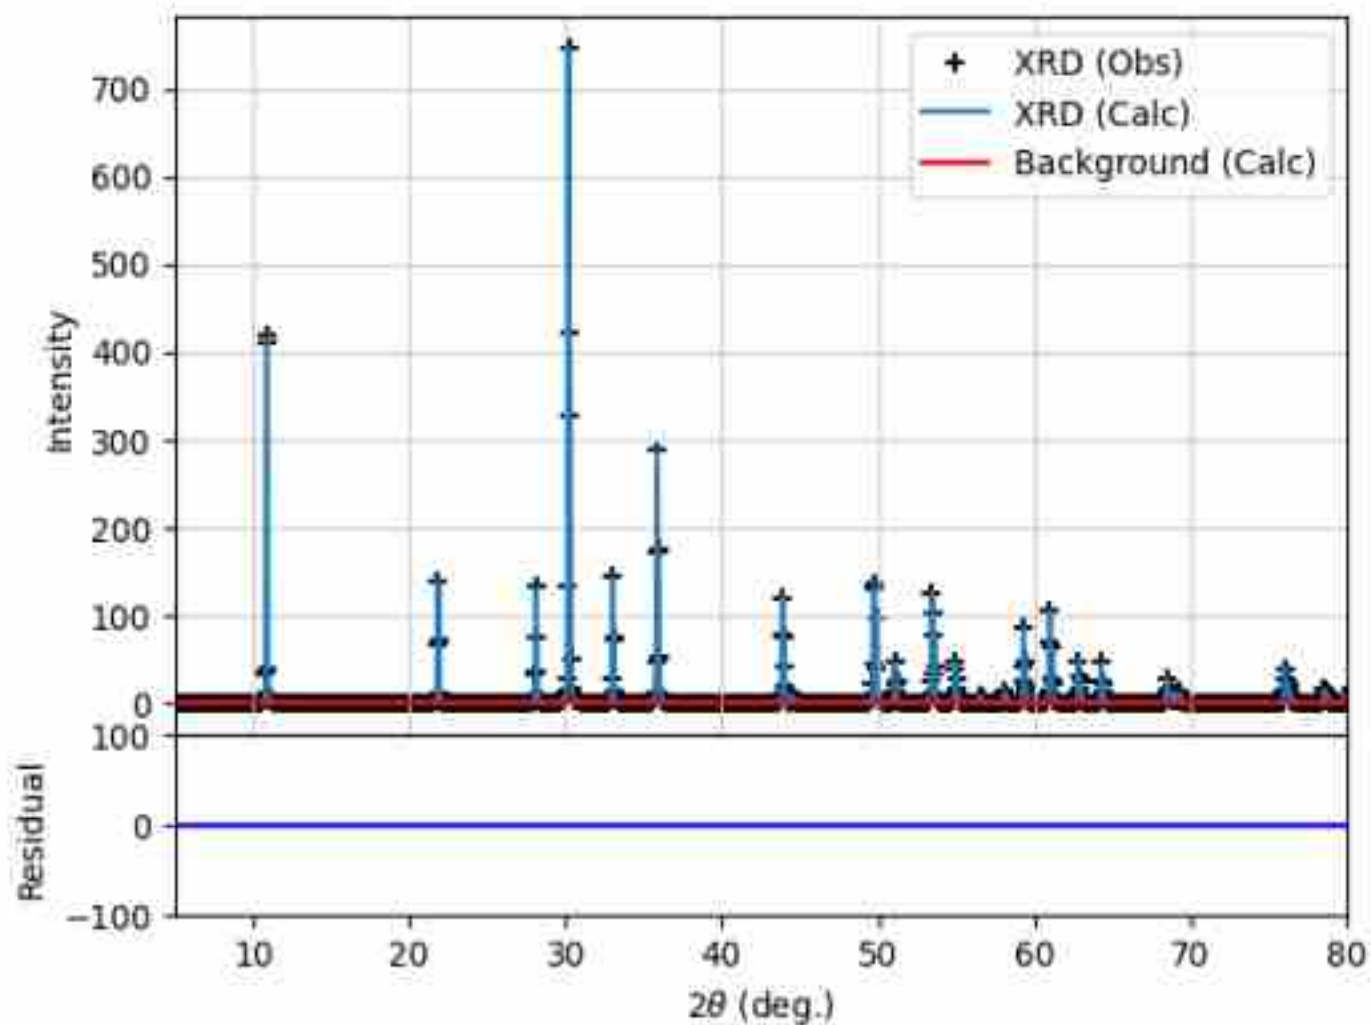

| RMSE before RR | Rwp    | RMSE after RR |
|----------------|--------|---------------|
| 0.012          | 0.0036 | 0.00357       |



# Tm<sub>2</sub>Hf<sub>2</sub>F<sub>14</sub>

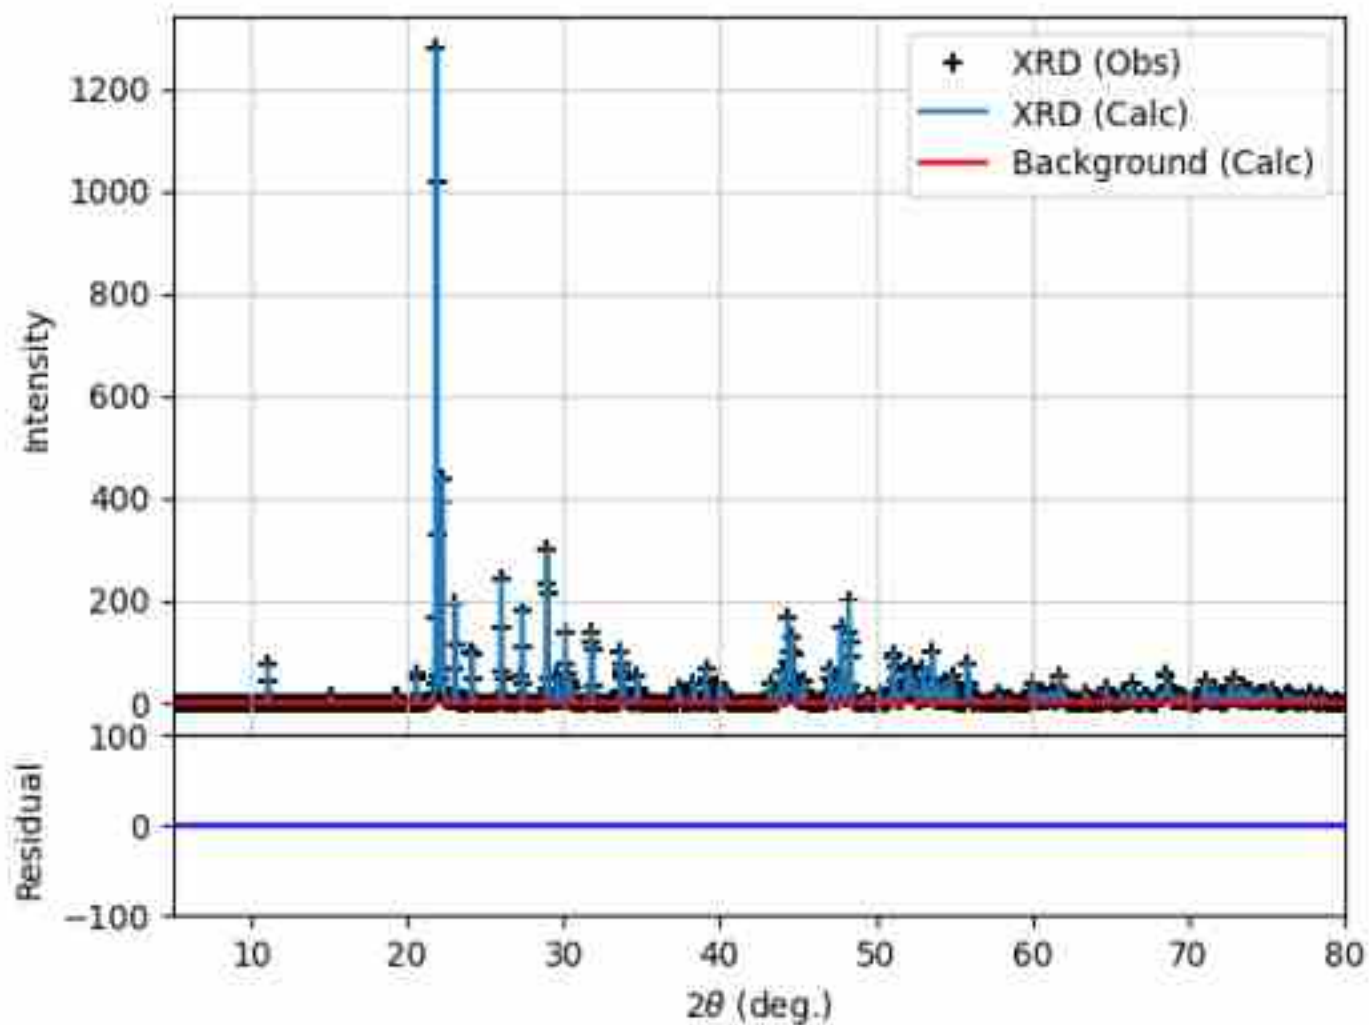

| RMSE before RR | Rwp     | RMSE after RR |
|----------------|---------|---------------|
| 0.012          | 0.00369 | 0.00088       |

# Tm<sub>2</sub>Si<sub>4</sub>Ni<sub>2</sub>

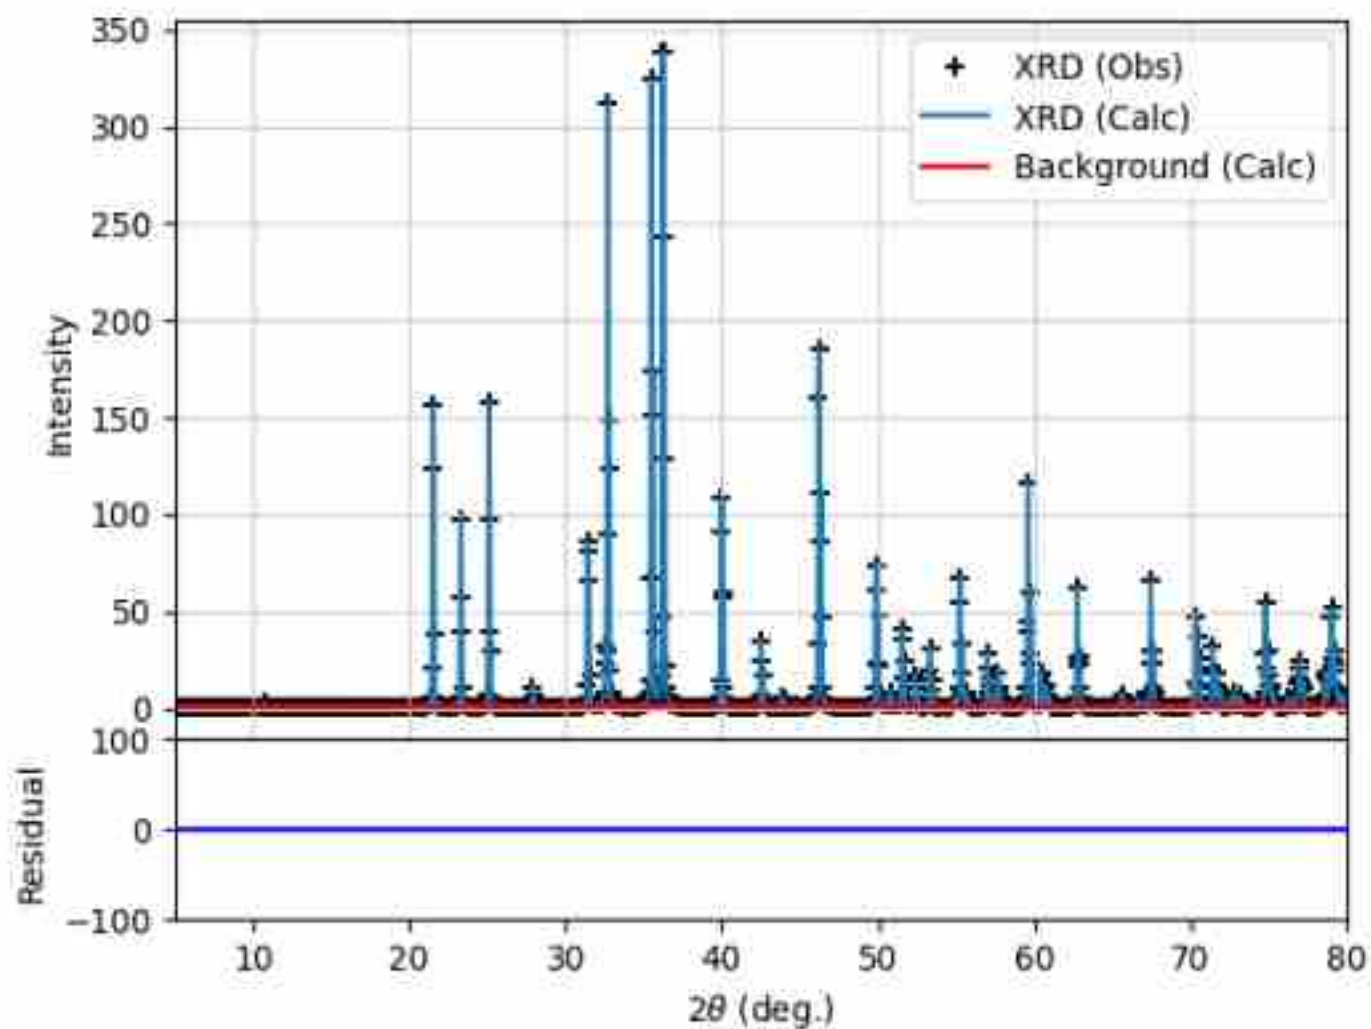

| RMSE before RR | Rwp     | RMSE after RR |
|----------------|---------|---------------|
| 0.012          | 0.00406 | 0.00084       |

# Tm6Co1Bi2

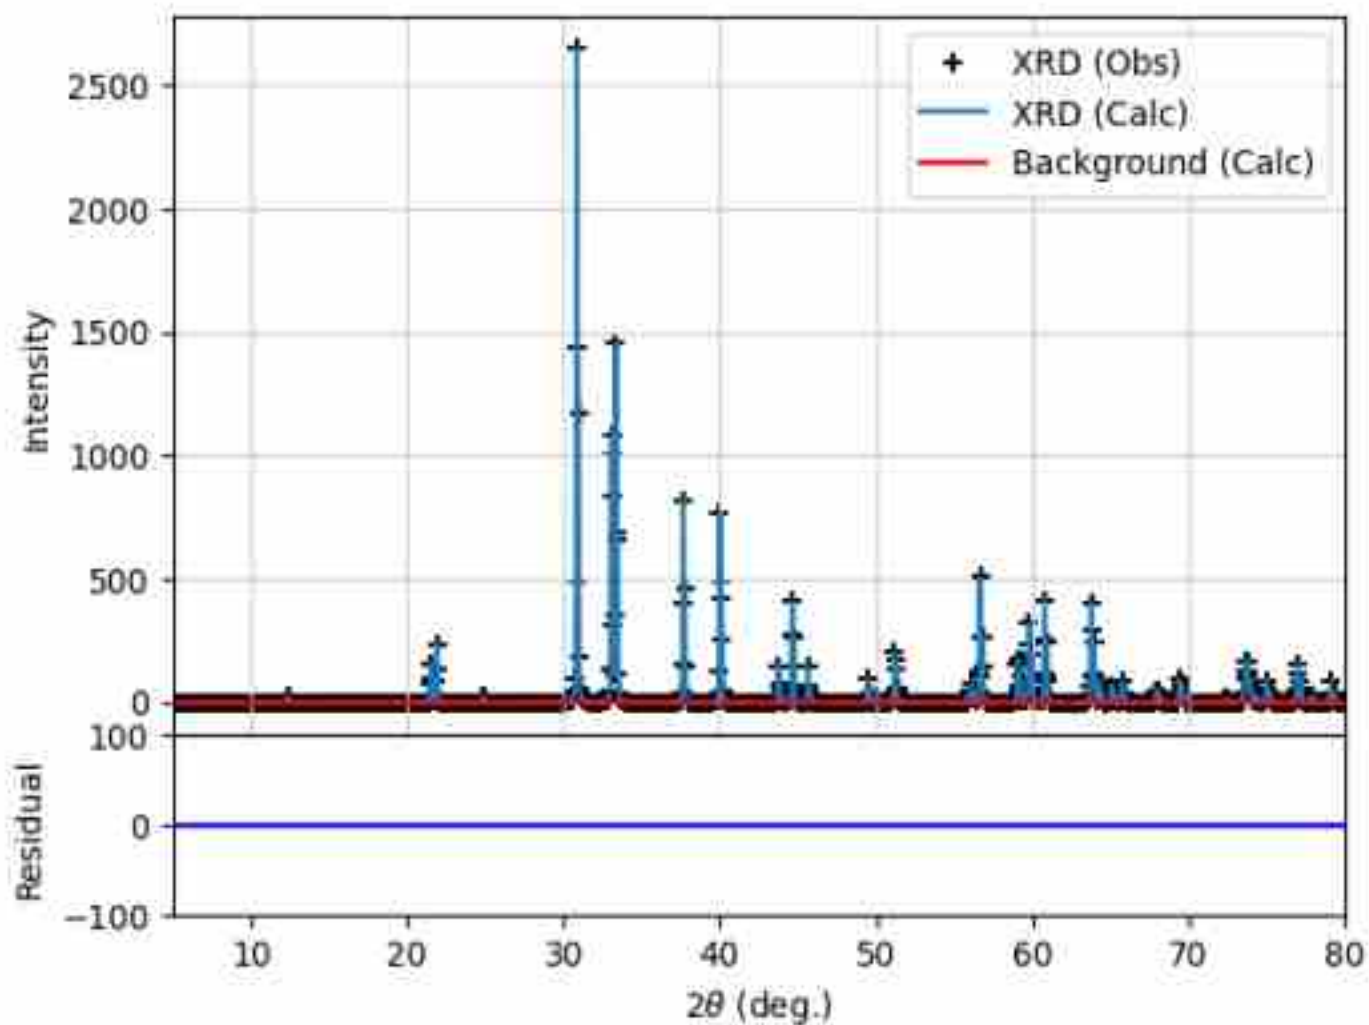

| RMSE before RR | Rwp     | RMSE after RR |
|----------------|---------|---------------|
| 0.012          | 0.00527 | 0.0006        |

# U<sub>2</sub>Si<sub>3</sub>Pt<sub>1</sub>

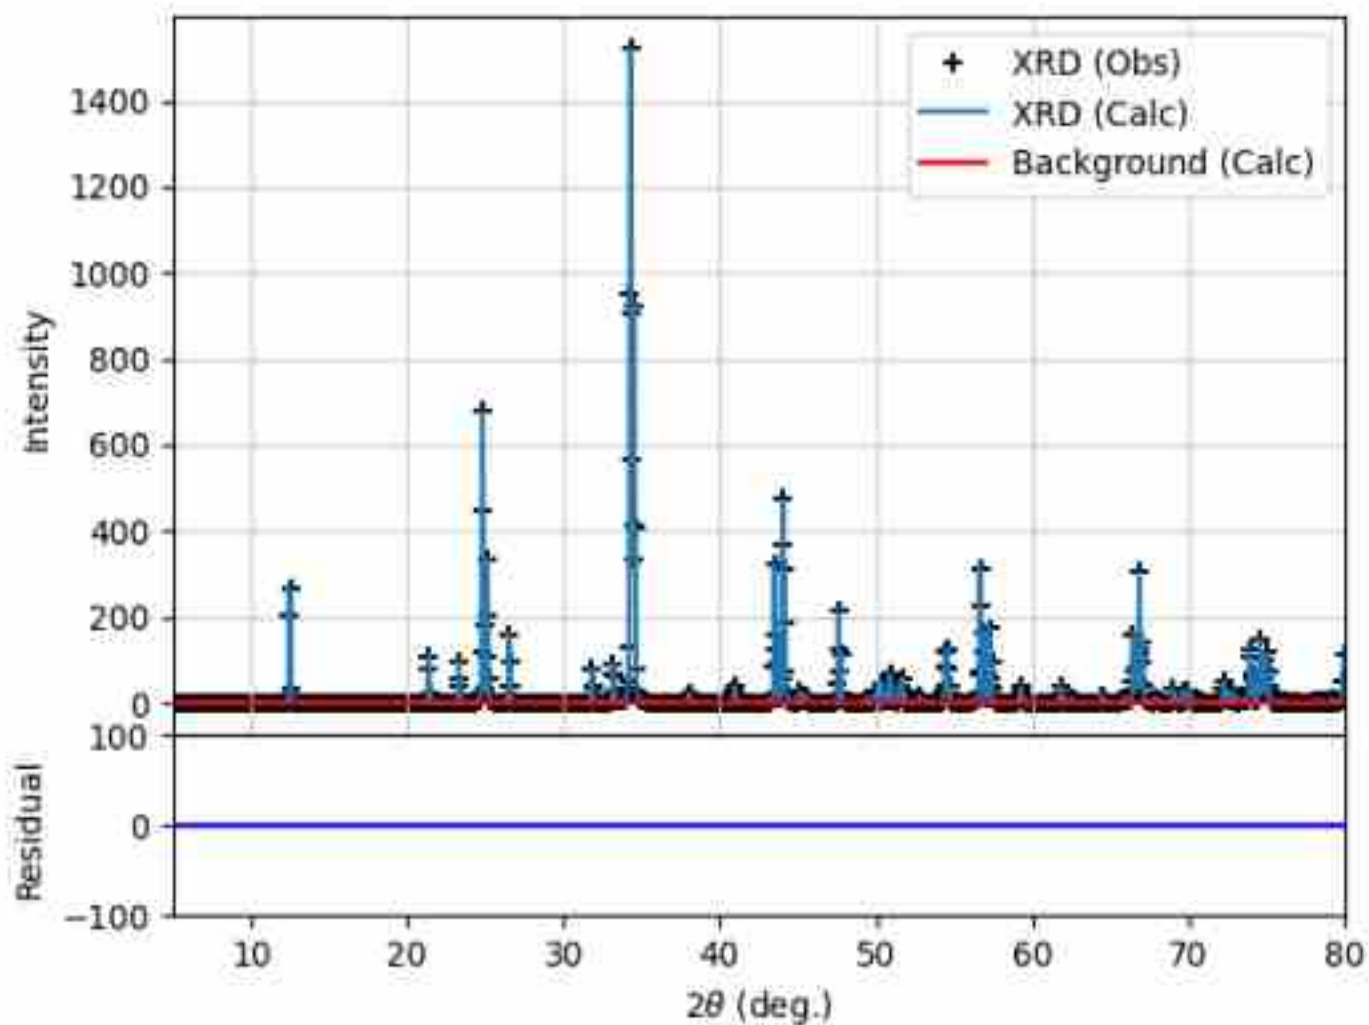

| RMSE before RR | Rwp     | RMSE after RR |
|----------------|---------|---------------|
| 0.012          | 0.00309 | 0.00061       |

# U<sub>3</sub>Ga<sub>3</sub>Ru<sub>3</sub>

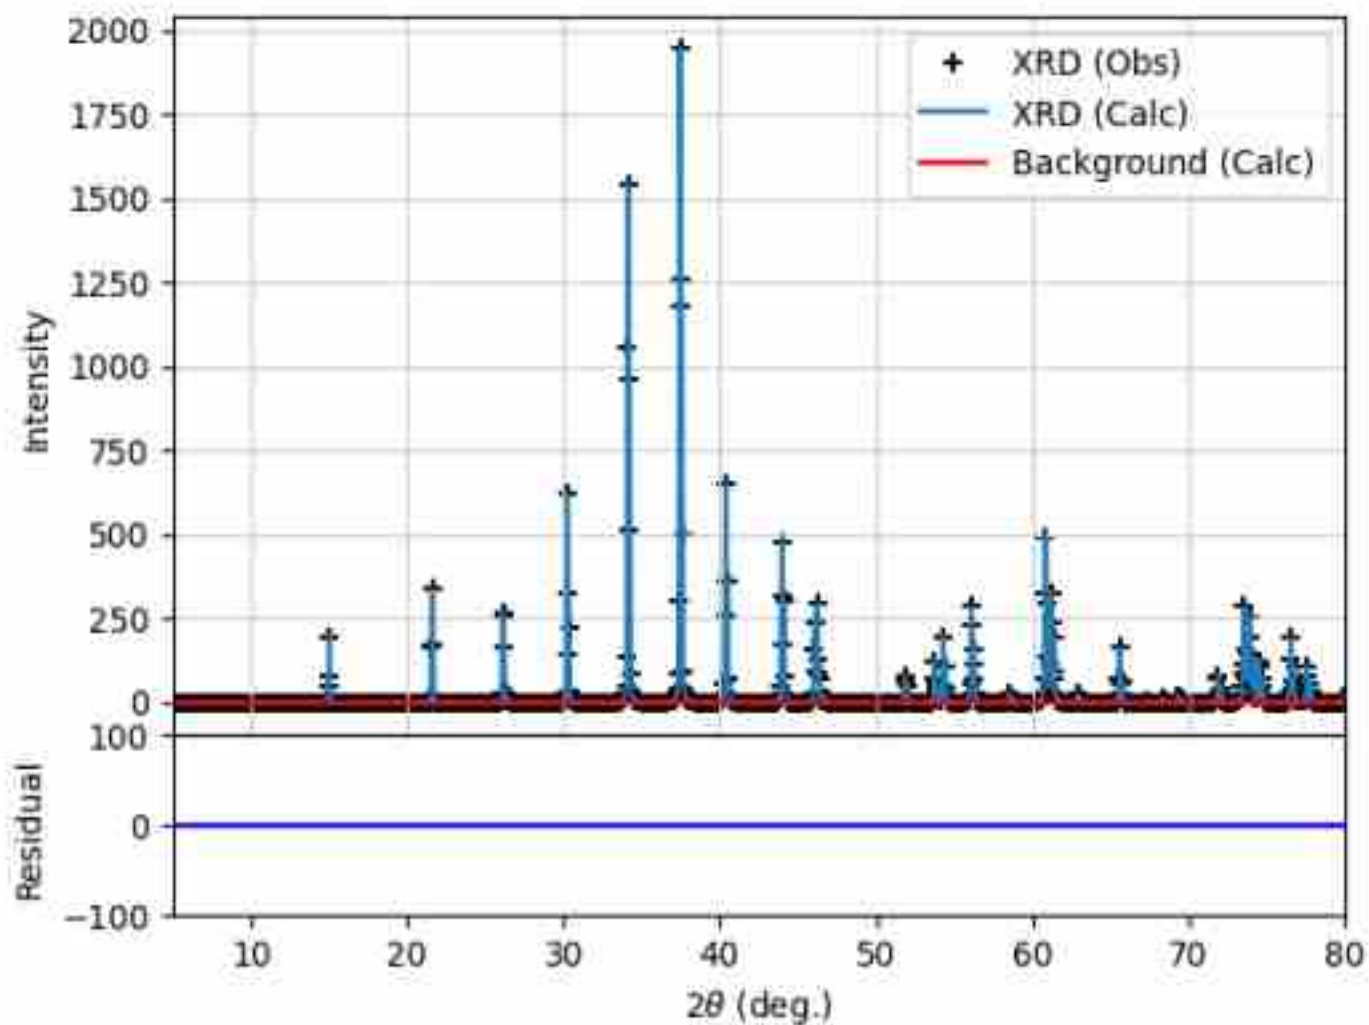

| RMSE before RR | Rwp     | RMSE after RR |
|----------------|---------|---------------|
| 0.012          | 0.00613 | 0.00117       |

# U4P2S2

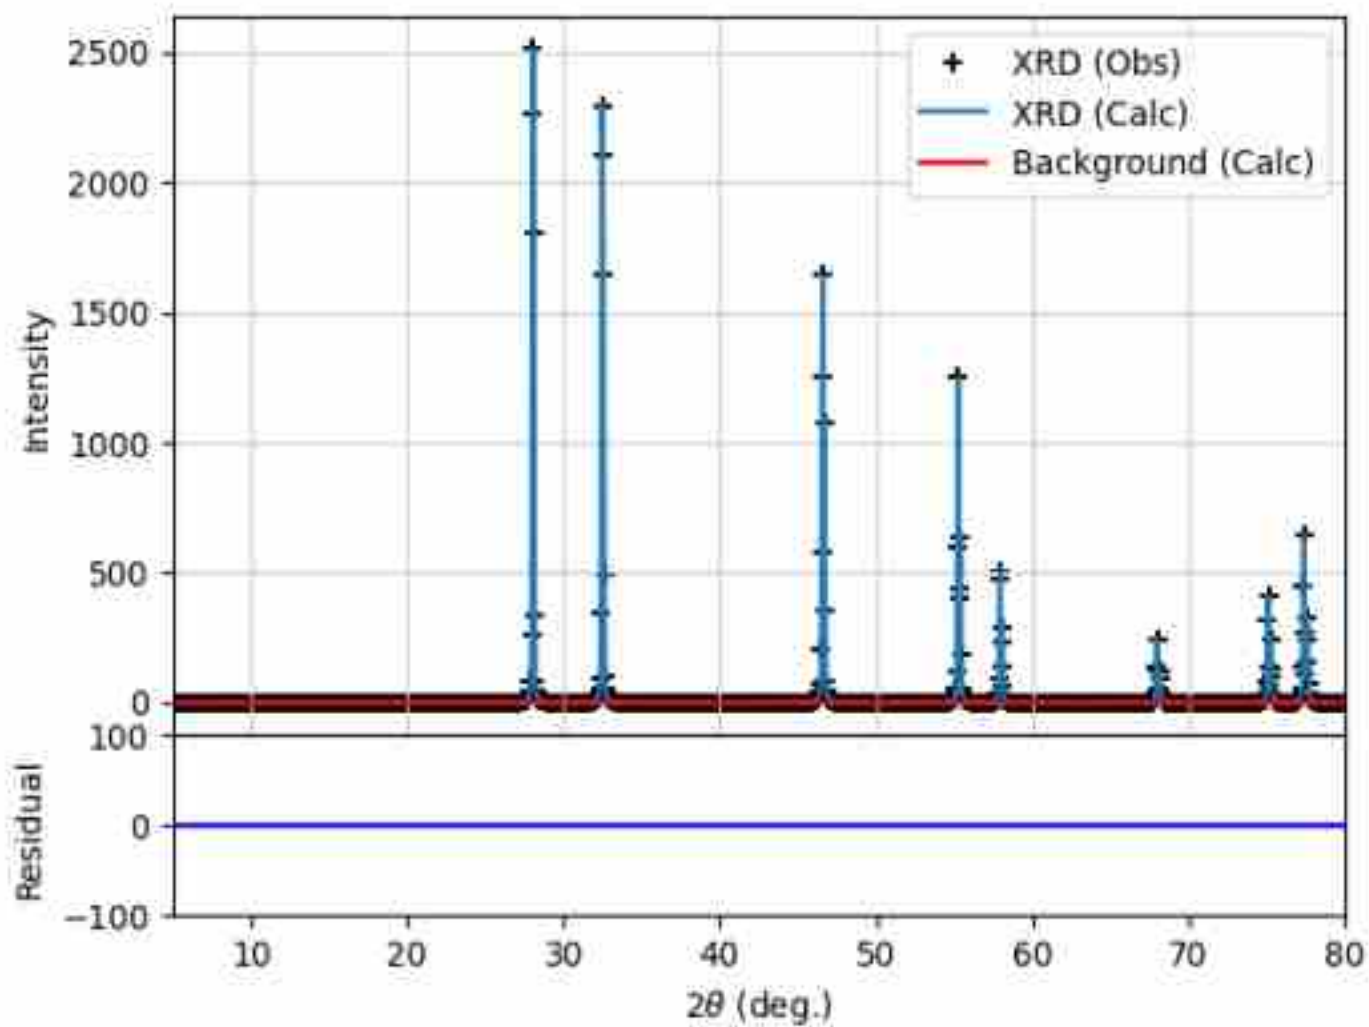

| RMSE before RR | Rwp     | RMSE after RR |
|----------------|---------|---------------|
| 0.012          | 0.00531 | 0.0012        |

# V4As2C2

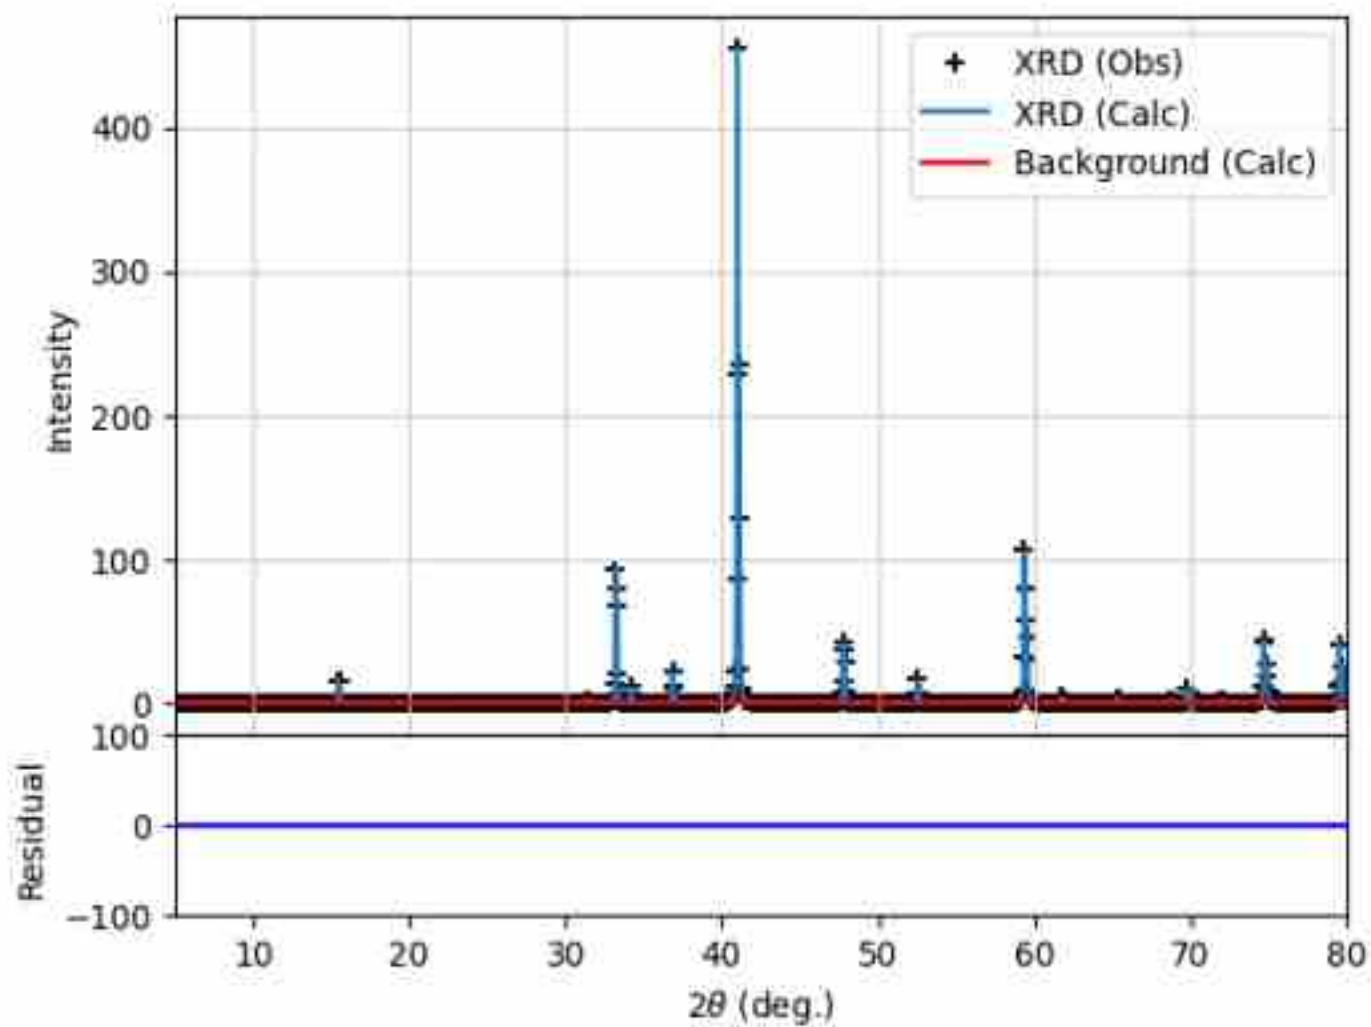

| RMSE before RR | Rwp     | RMSE after RR |
|----------------|---------|---------------|
| 0.012          | 0.00459 | 0.00143       |

# V6Fe1Ni1

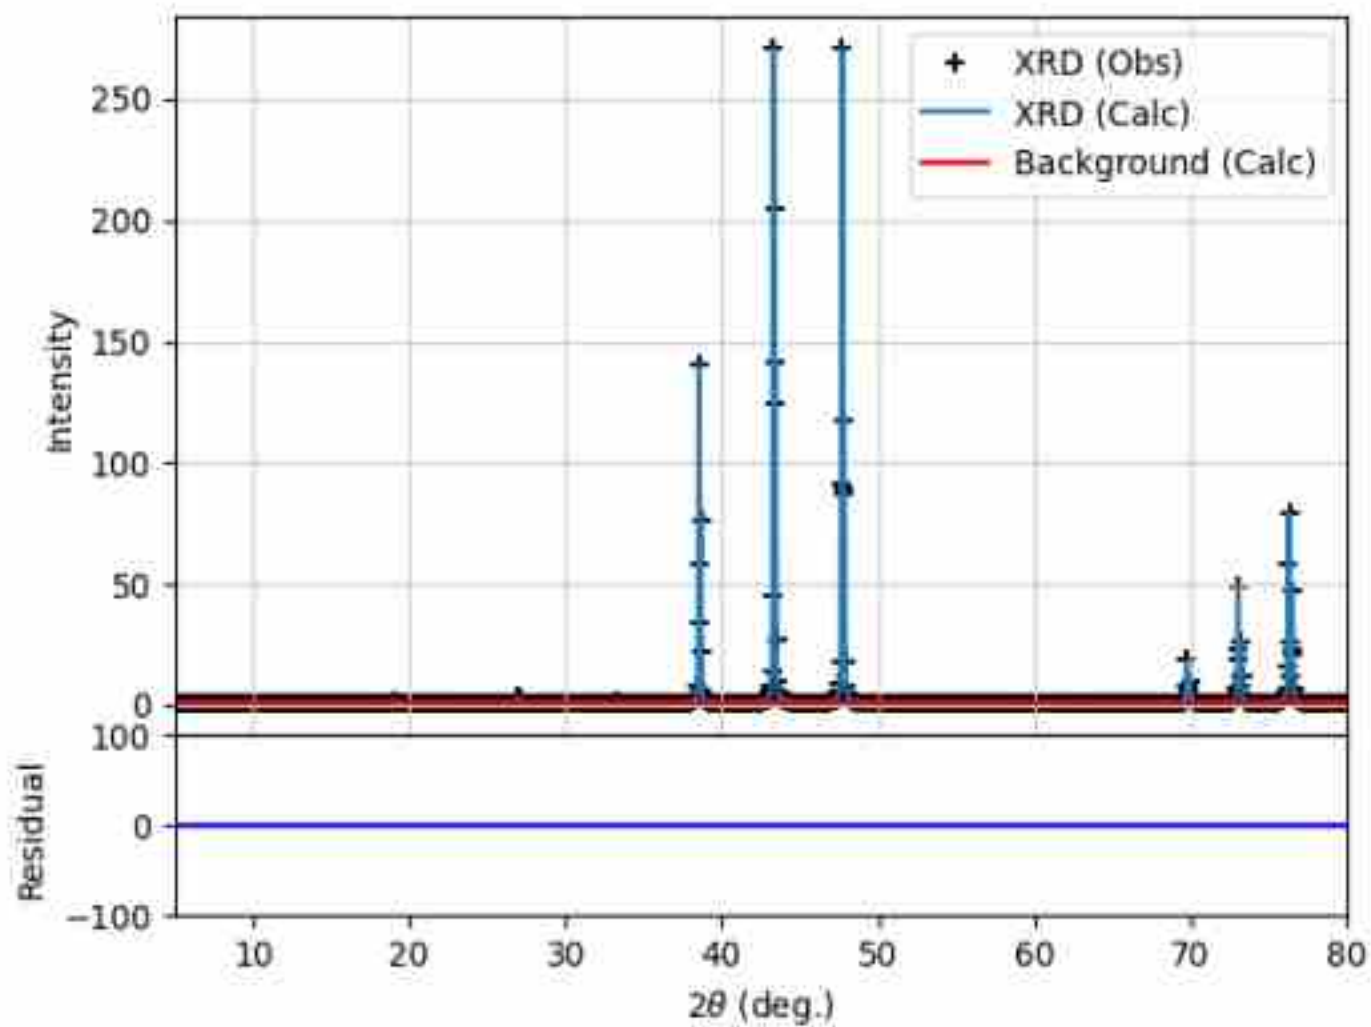

| RMSE before RR | Rwp    | RMSE after RR |
|----------------|--------|---------------|
| 0.012          | 0.0481 | 0.00787       |



# Y1Co3Ni2

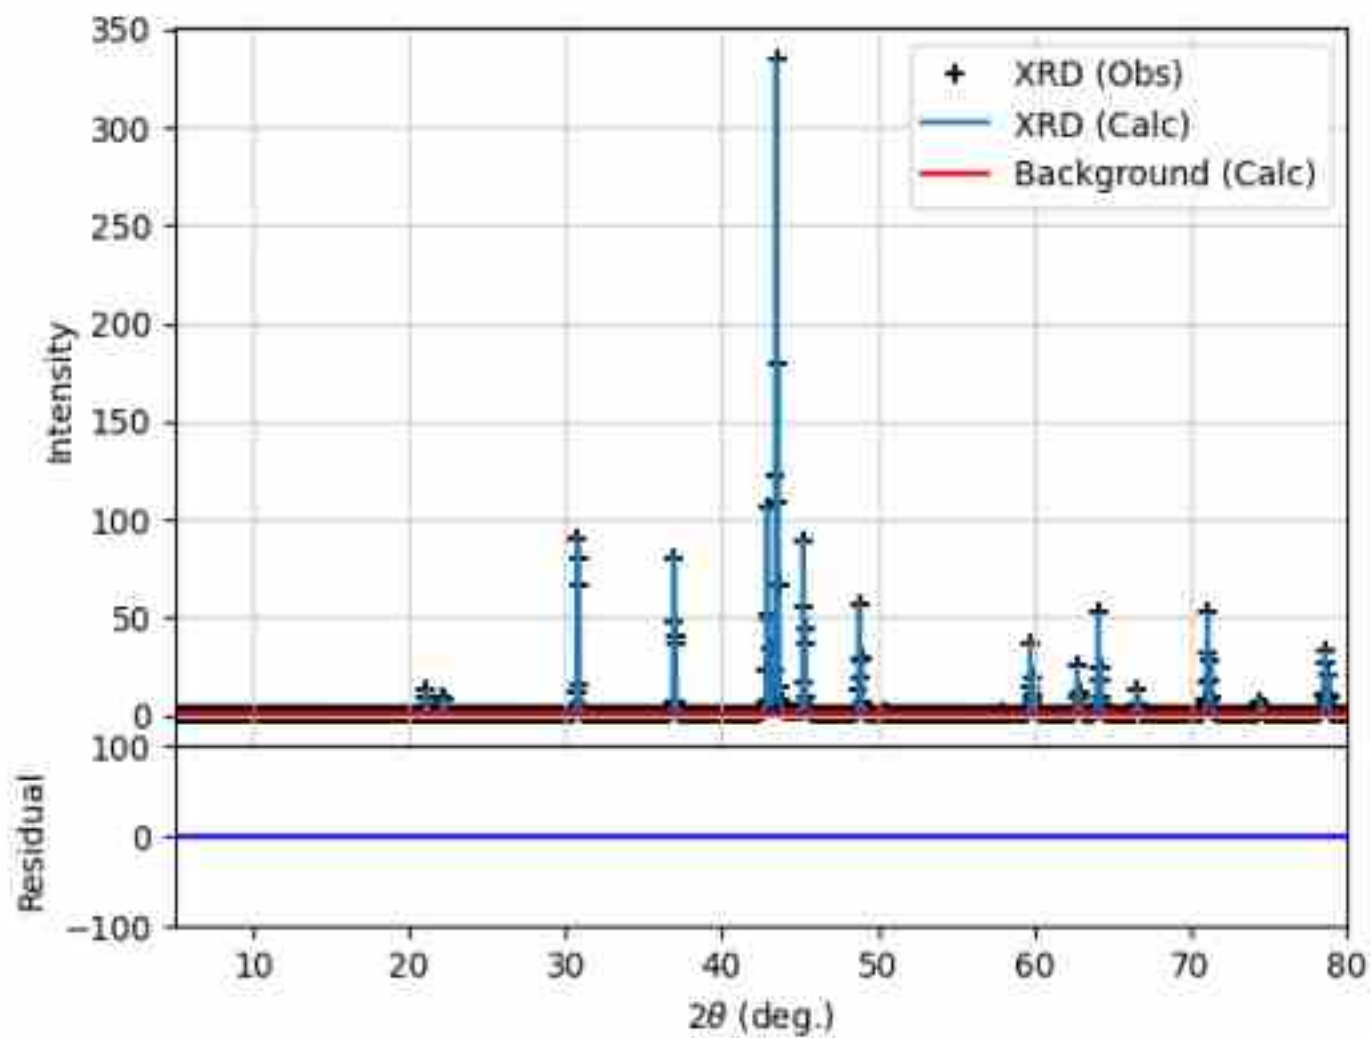

| RMSE before RR | Rwp     | RMSE after RR |
|----------------|---------|---------------|
| 0.012          | 0.00885 | 0.00119       |

# Y1Cr2Si2C1

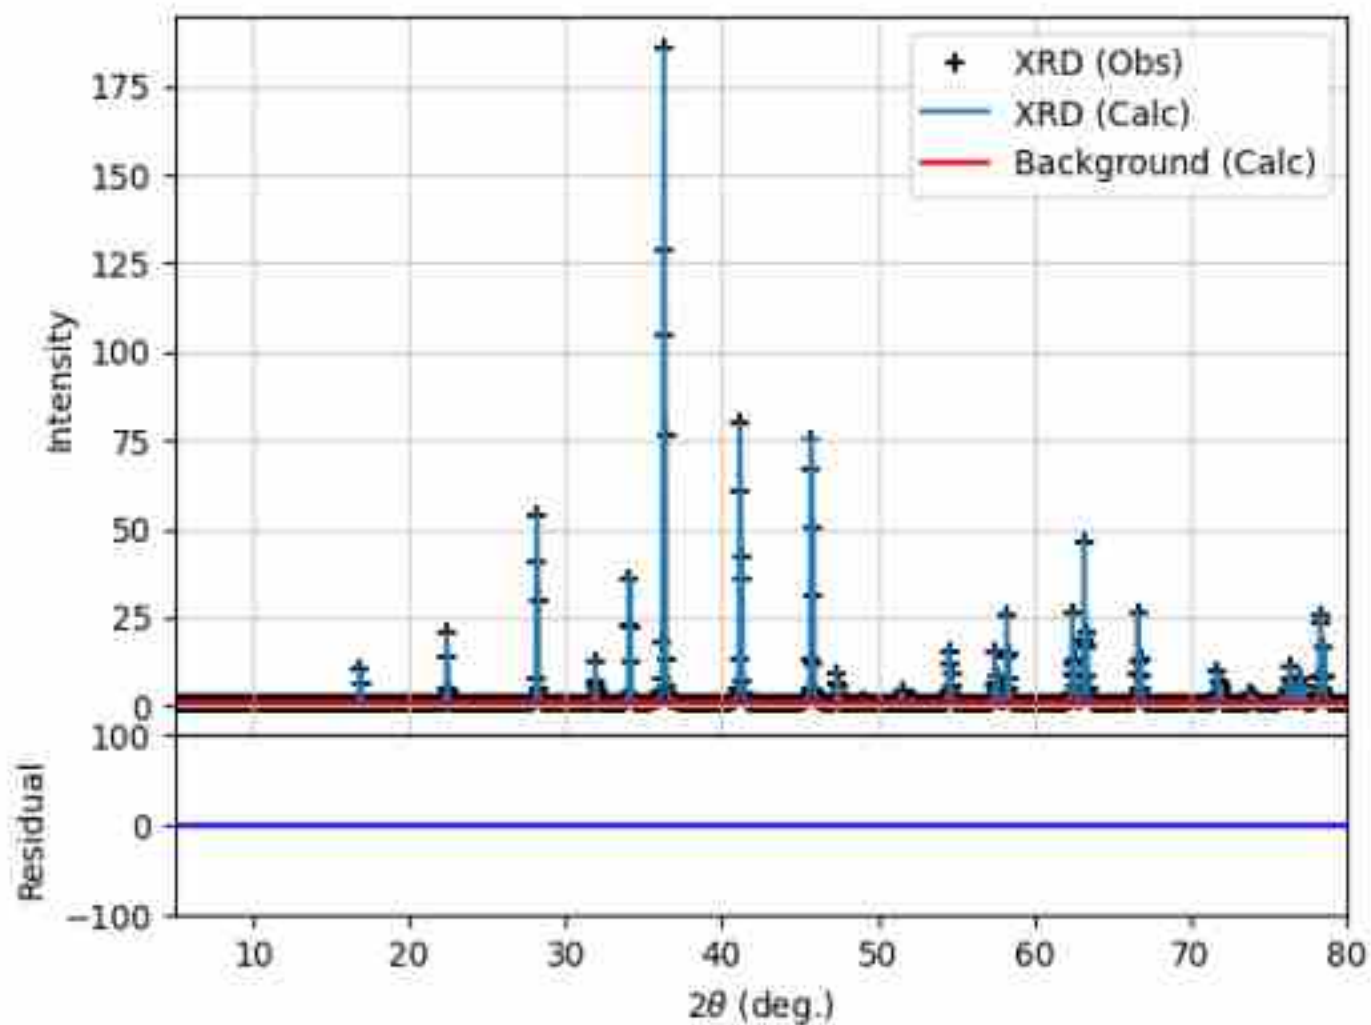

| RMSE before RR | Rwp    | RMSE after RR |
|----------------|--------|---------------|
| 0.012          | 0.0035 | 0.00044       |

# Y1Fe2Ge2

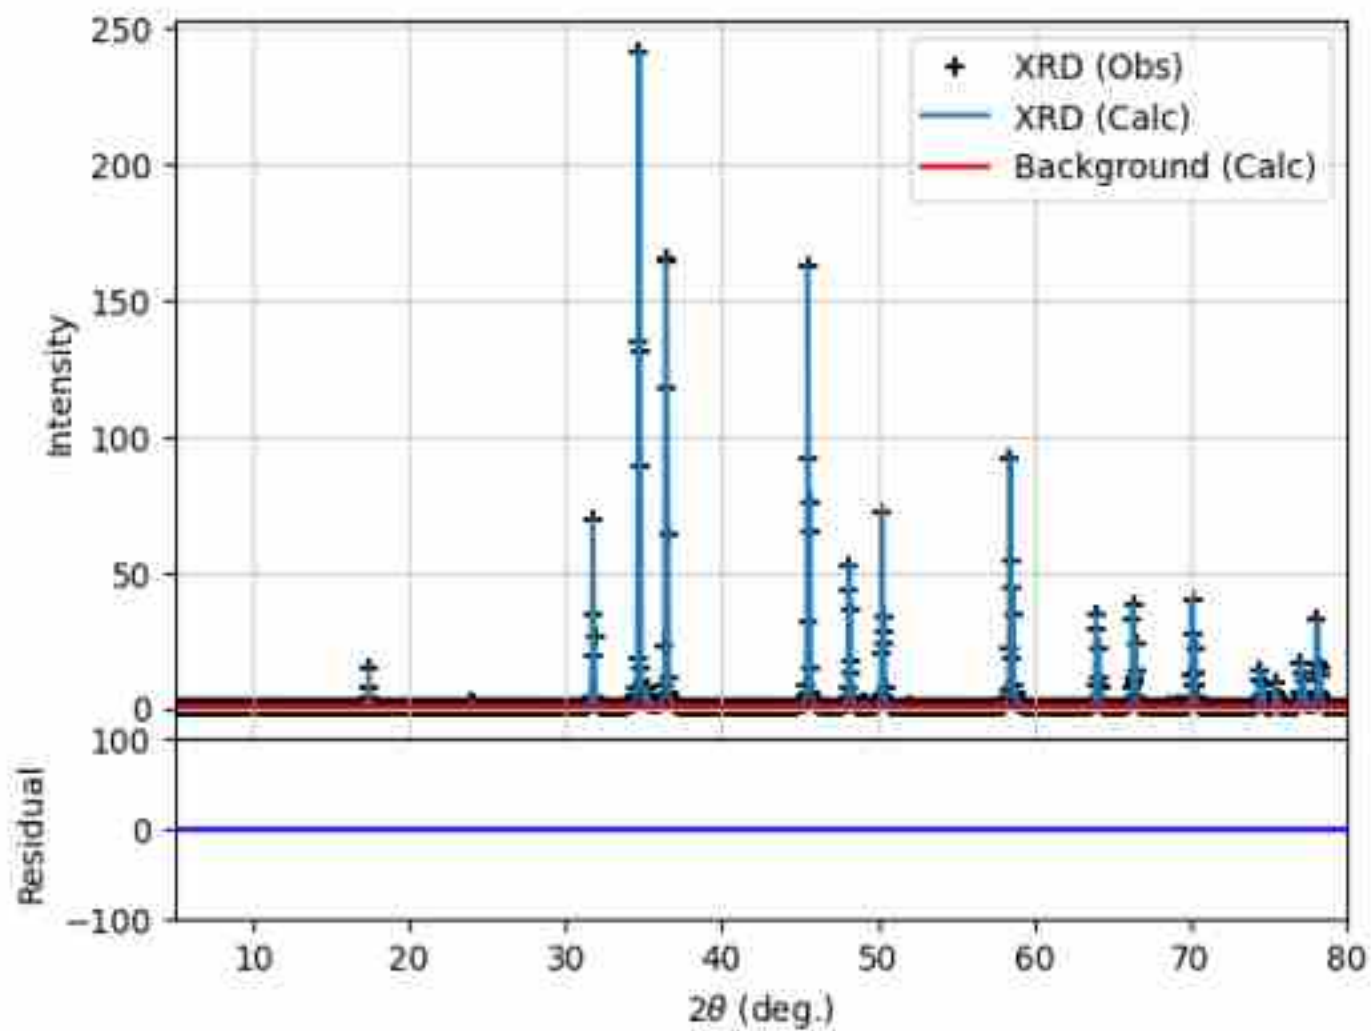

| RMSE before RR | Rwp     | RMSE after RR |
|----------------|---------|---------------|
| 0.012          | 0.00305 | 0.00026       |

# Y1Mo6S8

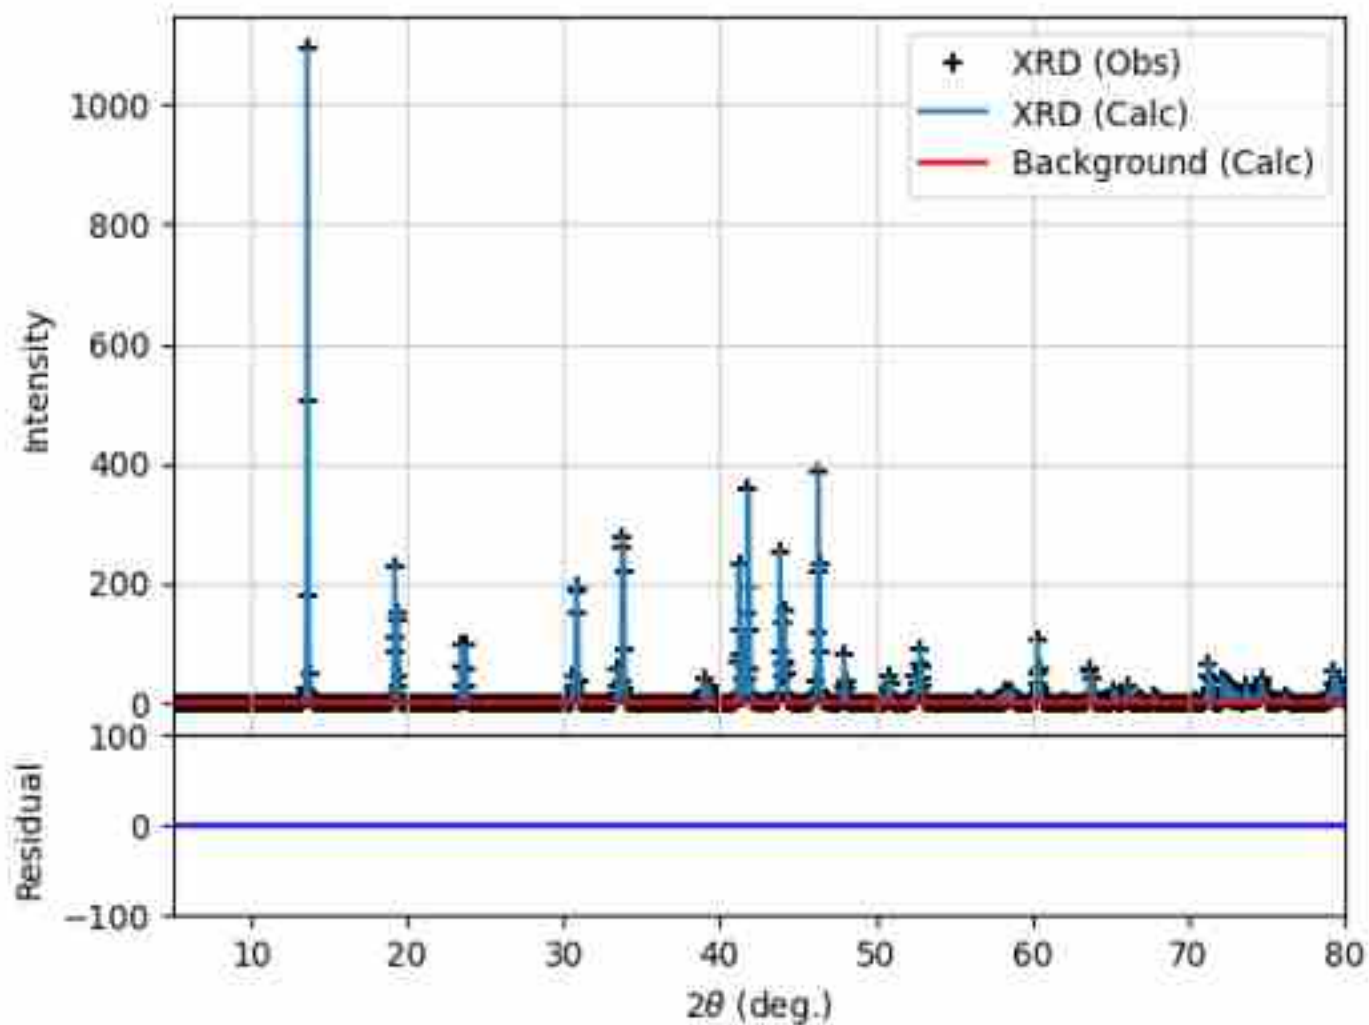

| RMSE before RR | Rwp    | RMSE after RR |
|----------------|--------|---------------|
| 0.012          | 0.0031 | 0.00058       |

# Y<sub>2</sub>Cu<sub>4</sub>Sn<sub>4</sub>

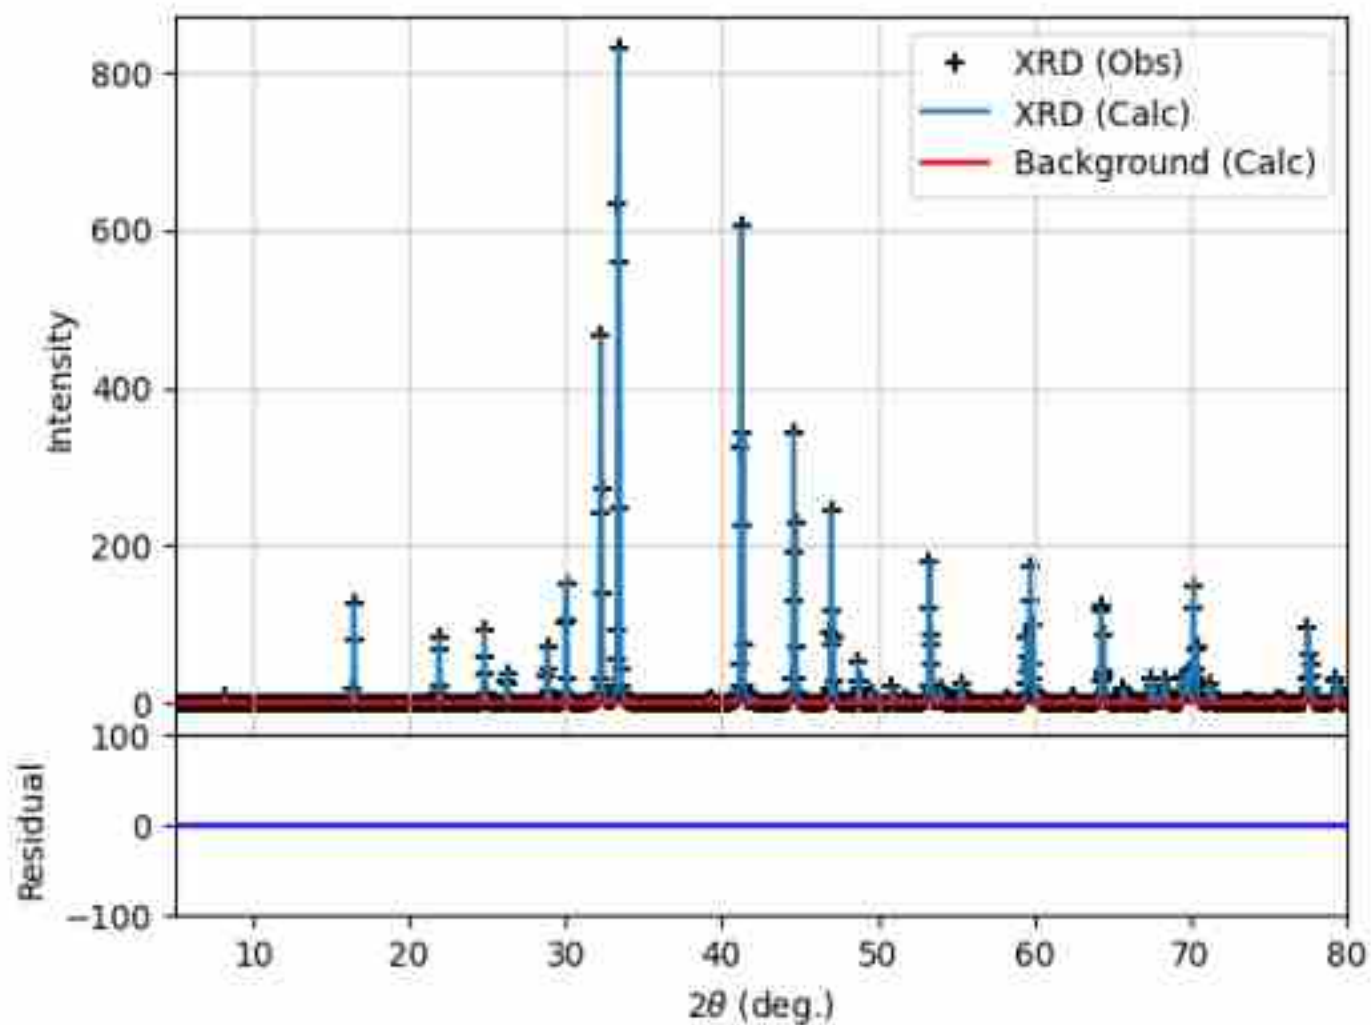

| RMSE before RR | Rwp     | RMSE after RR |
|----------------|---------|---------------|
| 0.012          | 0.00398 | 0.00027       |

# Y4As4S4

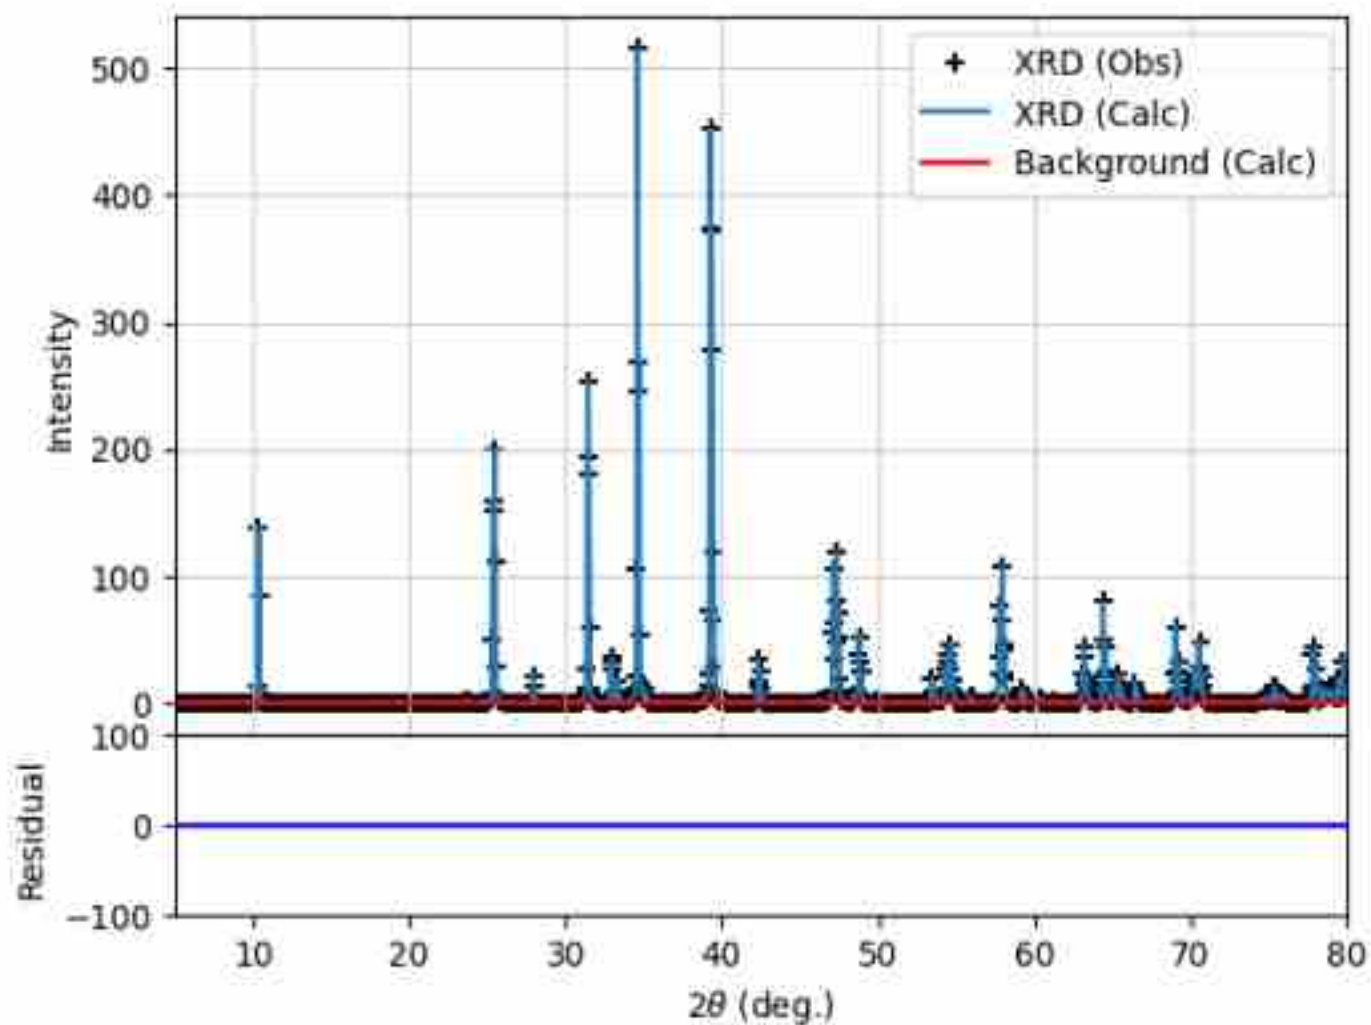

| RMSE before RR | Rwp     | RMSE after RR |
|----------------|---------|---------------|
| 0.012          | 0.00411 | 0.00033       |

# Y<sub>4</sub>Si<sub>4</sub>Ir<sub>4</sub>

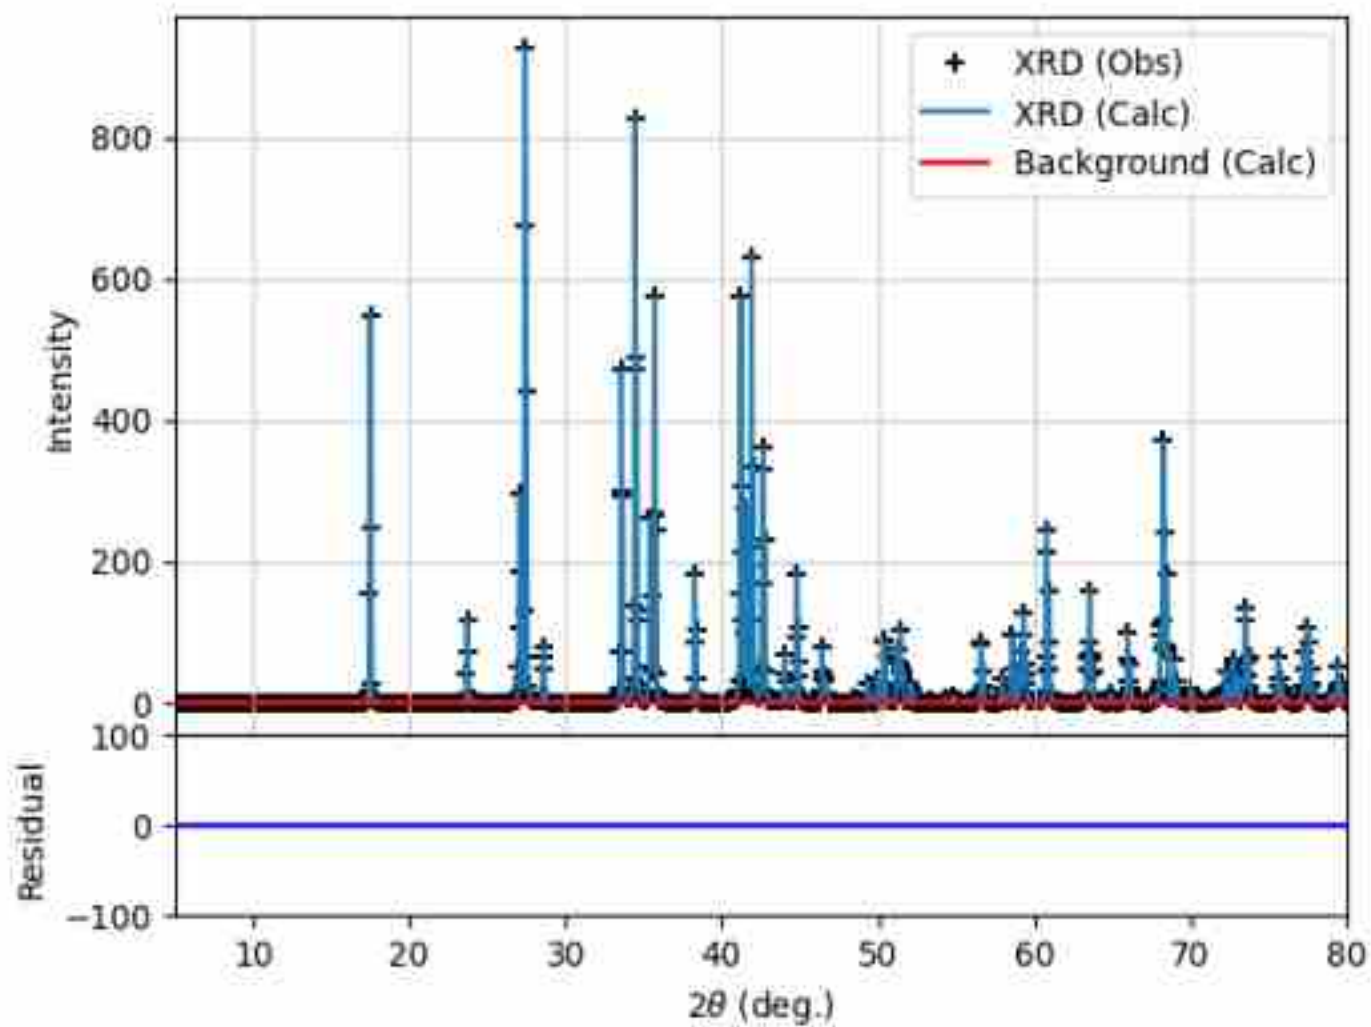

| RMSE before RR | Rwp     | RMSE after RR |
|----------------|---------|---------------|
| 0.012          | 0.00435 | 0.00045       |

# Y5Mg1

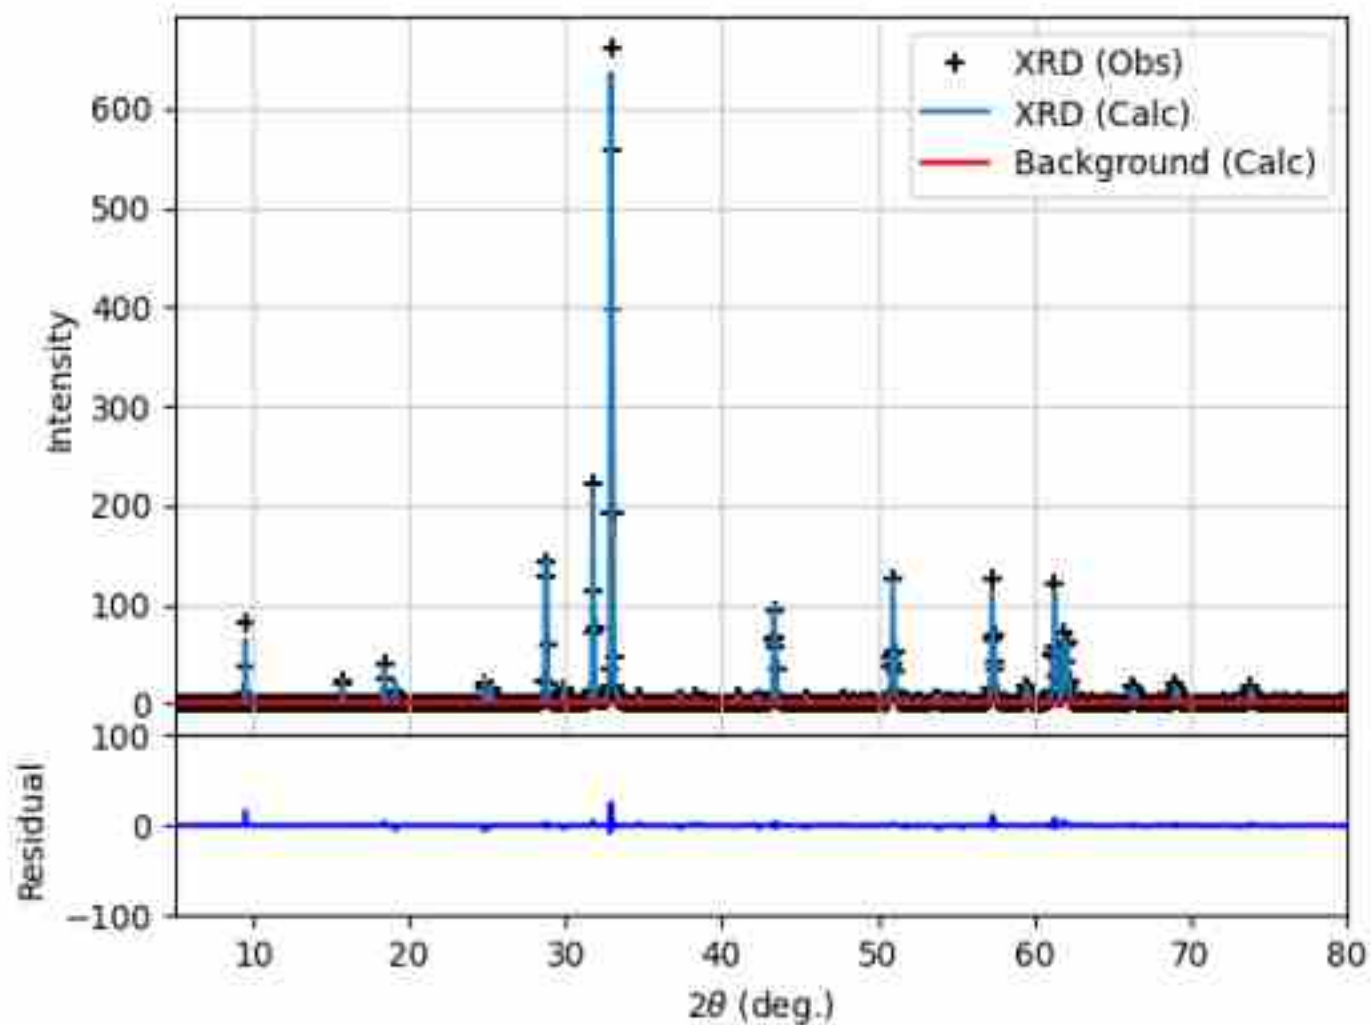

| RMSE before RR | Rwp     | RMSE after RR |
|----------------|---------|---------------|
| 0.012          | 9.11598 | 0.01316       |



# Yb1Co6Ge6

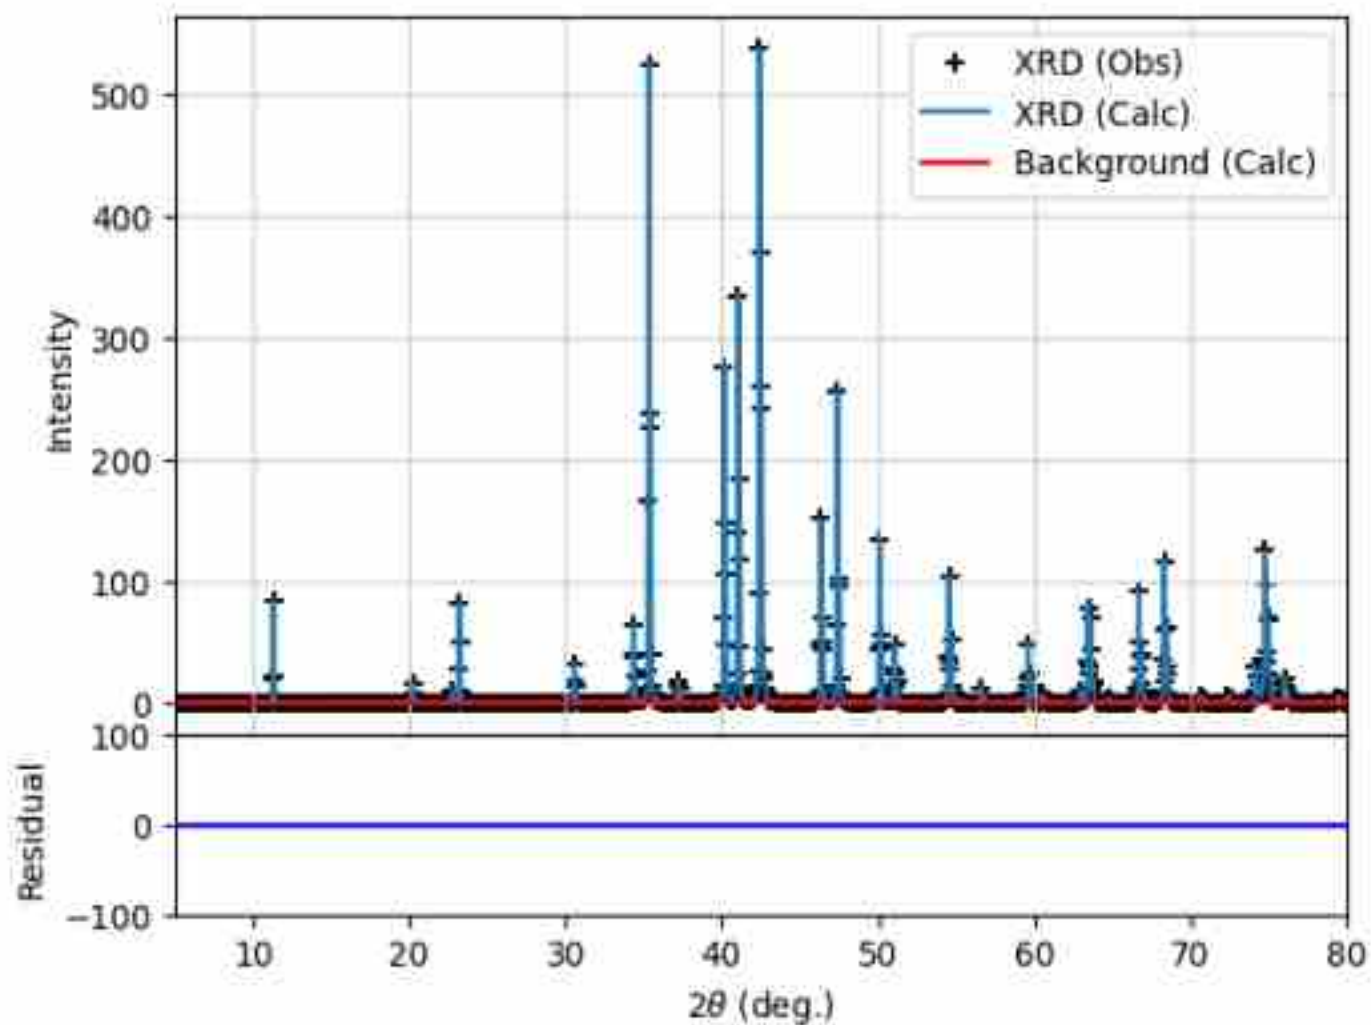

| RMSE before RR | Rwp     | RMSE after RR |
|----------------|---------|---------------|
| 0.012          | 0.00311 | 0.00042       |

# Yb1Mn2As2

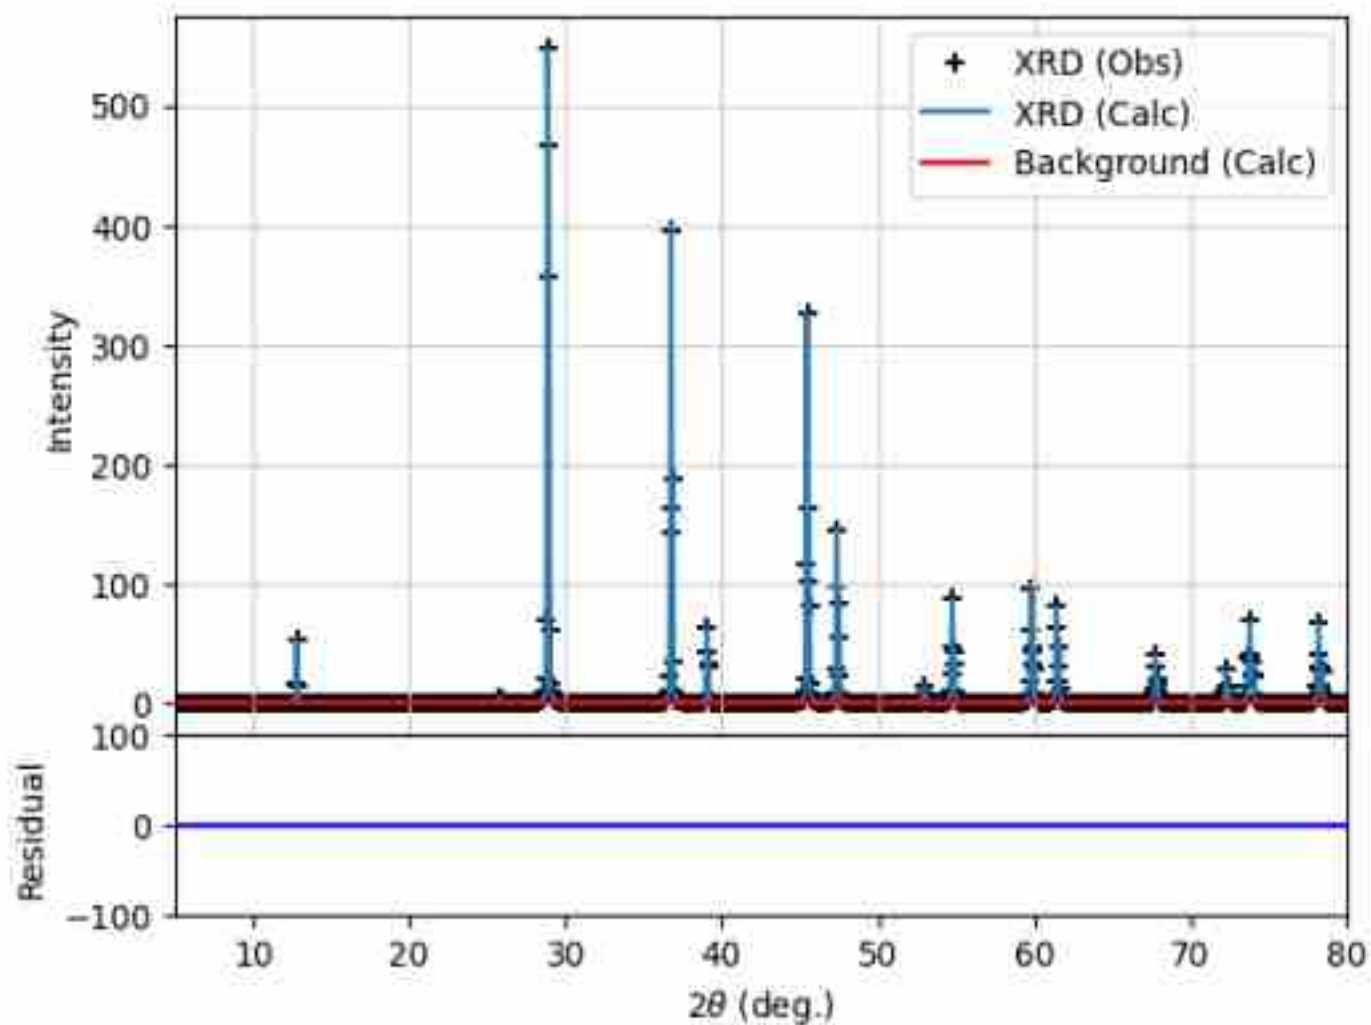

| RMSE before RR | Rwp     | RMSE after RR |
|----------------|---------|---------------|
| 0.012          | 0.00408 | 0.00075       |

# Yb<sub>2</sub>Ni<sub>8</sub>As<sub>4</sub>

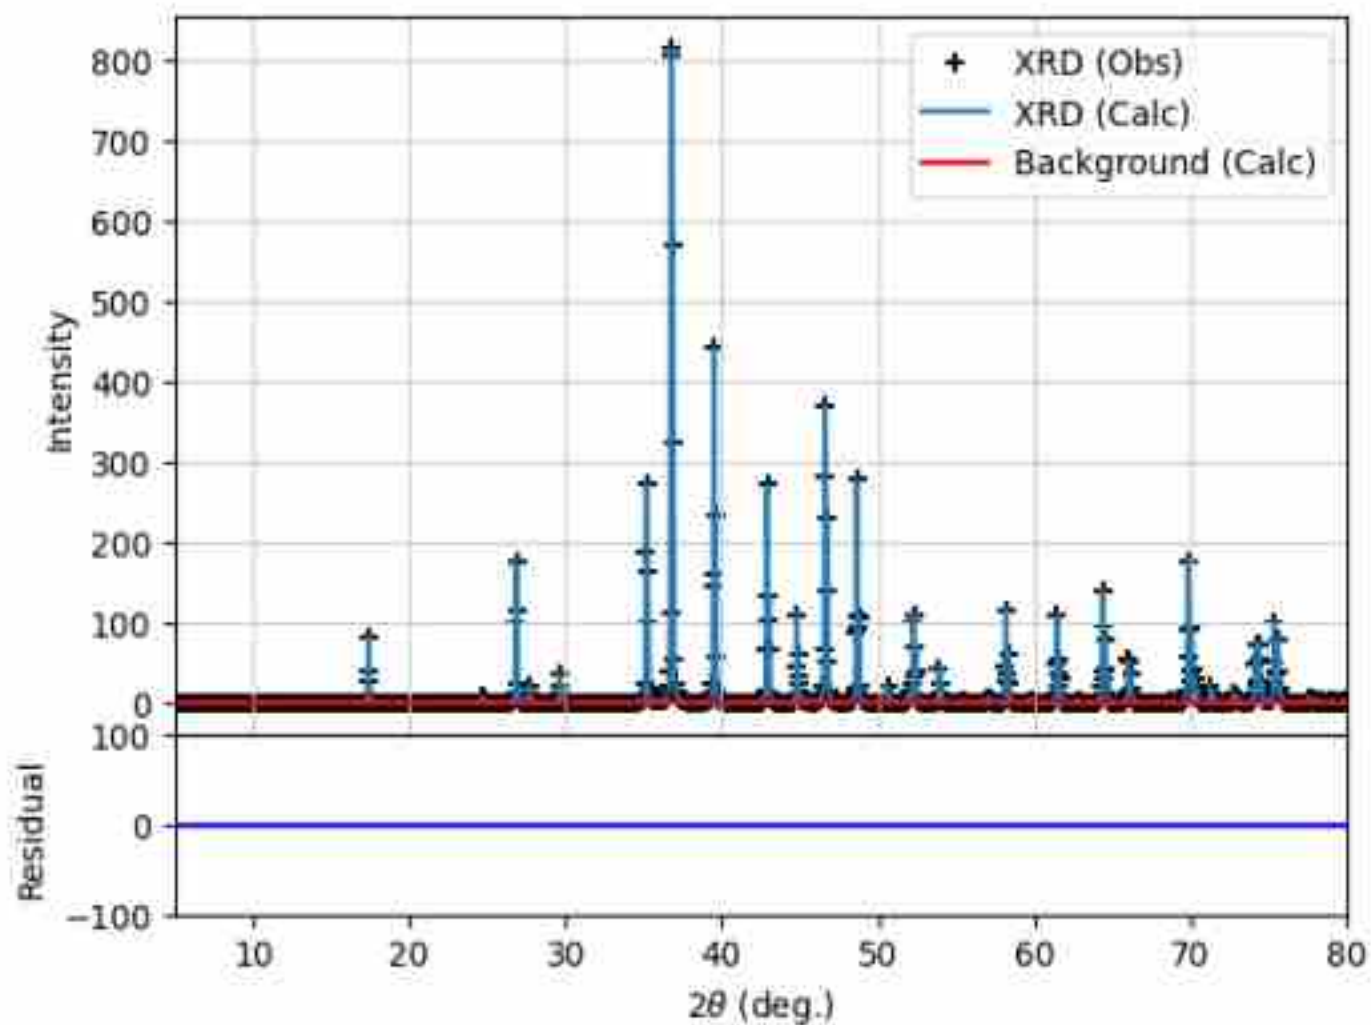

| RMSE before RR | Rwp     | RMSE after RR |
|----------------|---------|---------------|
| 0.012          | 0.01087 | 0.00136       |

# Zn1Cu2Sn1Te4

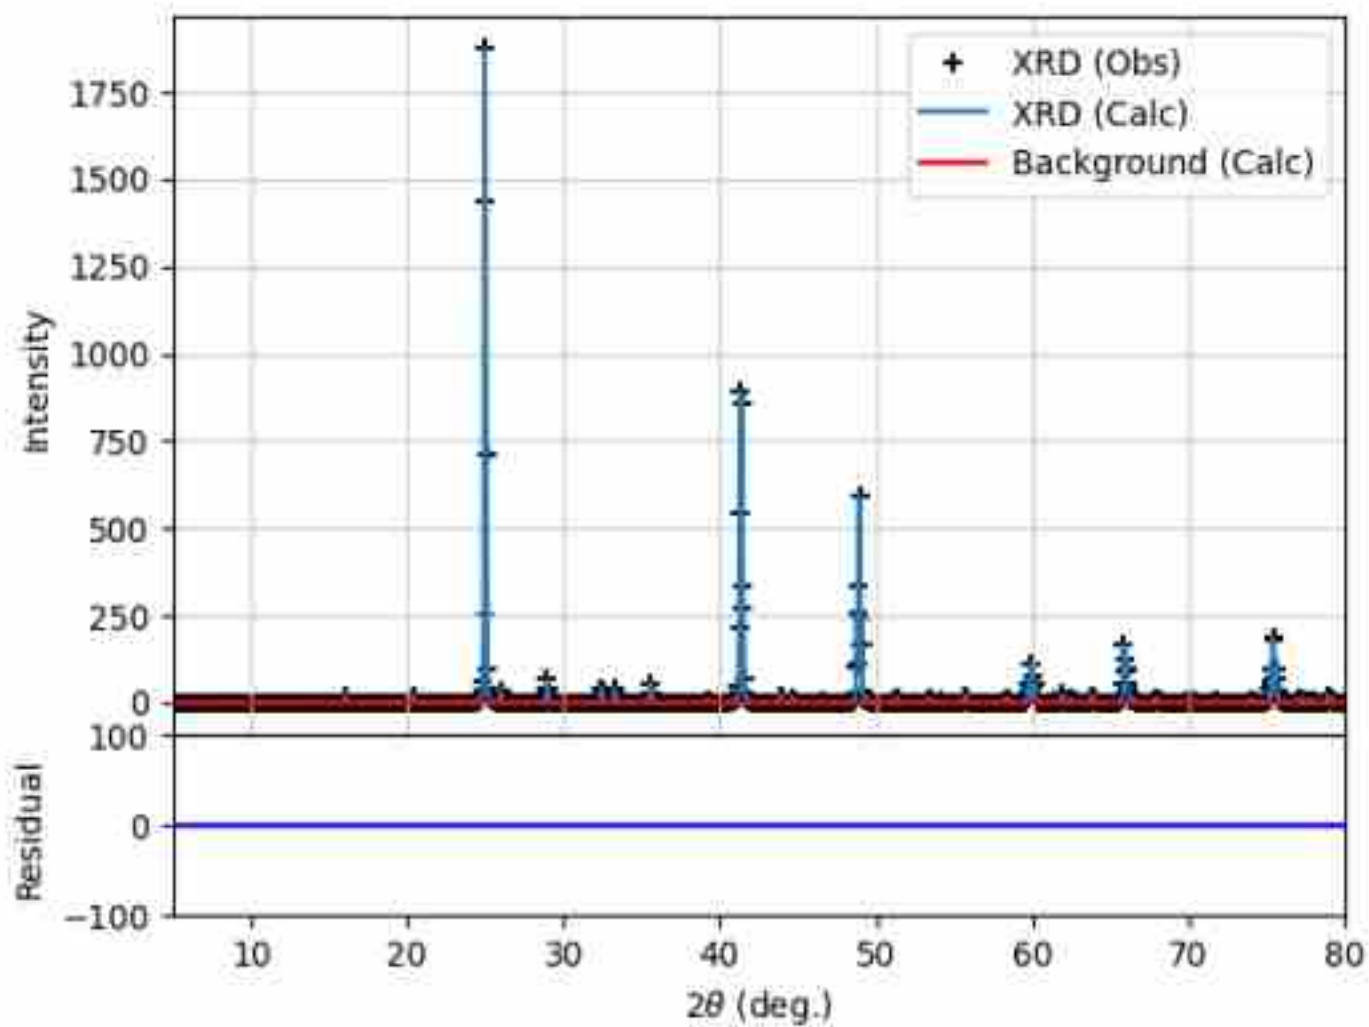

| RMSE before RR | Rwp     | RMSE after RR |
|----------------|---------|---------------|
| 0.012          | 0.00406 | 0.00055       |

# Zn1Cu3

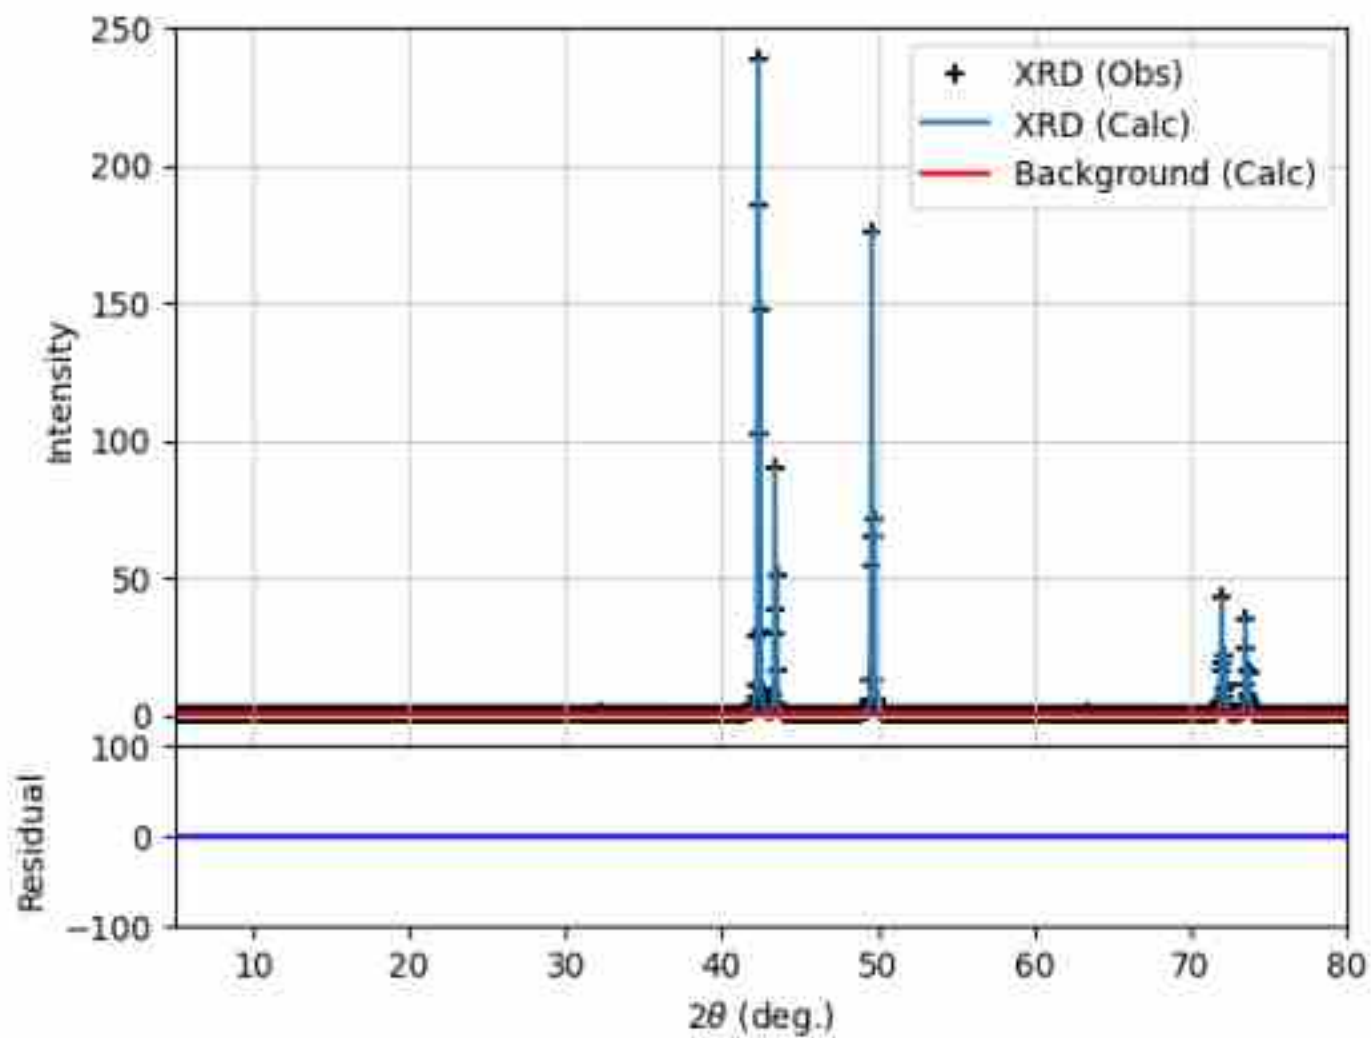

| RMSE before RR | Rwp     | RMSE after RR |
|----------------|---------|---------------|
| 0.012          | 0.00168 | 0.00012       |

# Zn1Fe1F6

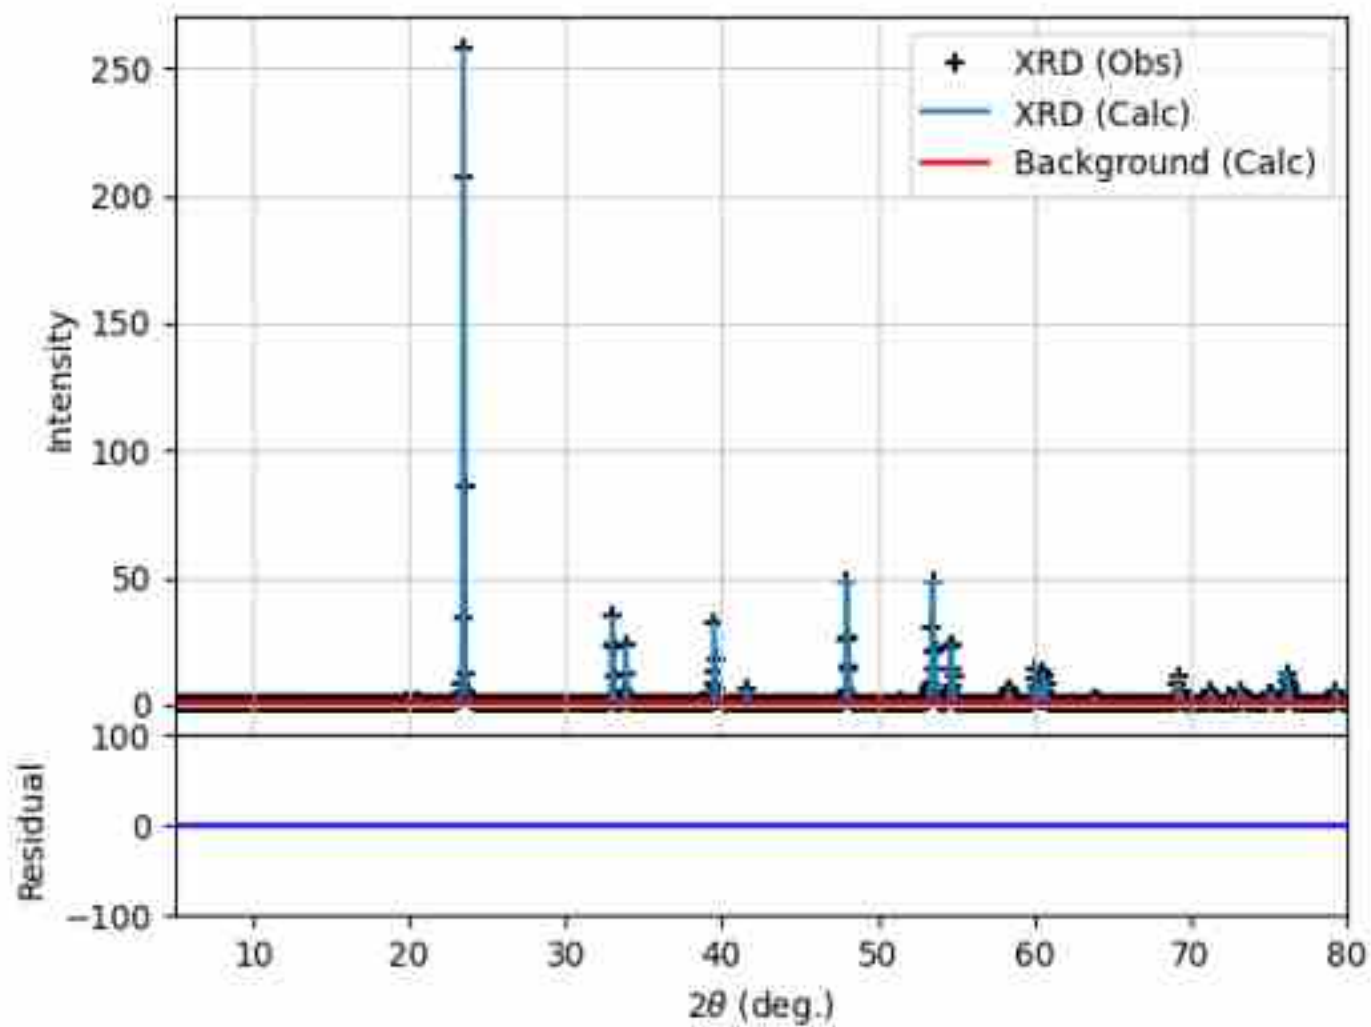

| RMSE before RR | Rwp     | RMSE after RR |
|----------------|---------|---------------|
| 0.012          | 0.00385 | 0.00151       |

# Zn<sub>2</sub>In<sub>1</sub>Ag<sub>1</sub>Te<sub>4</sub>

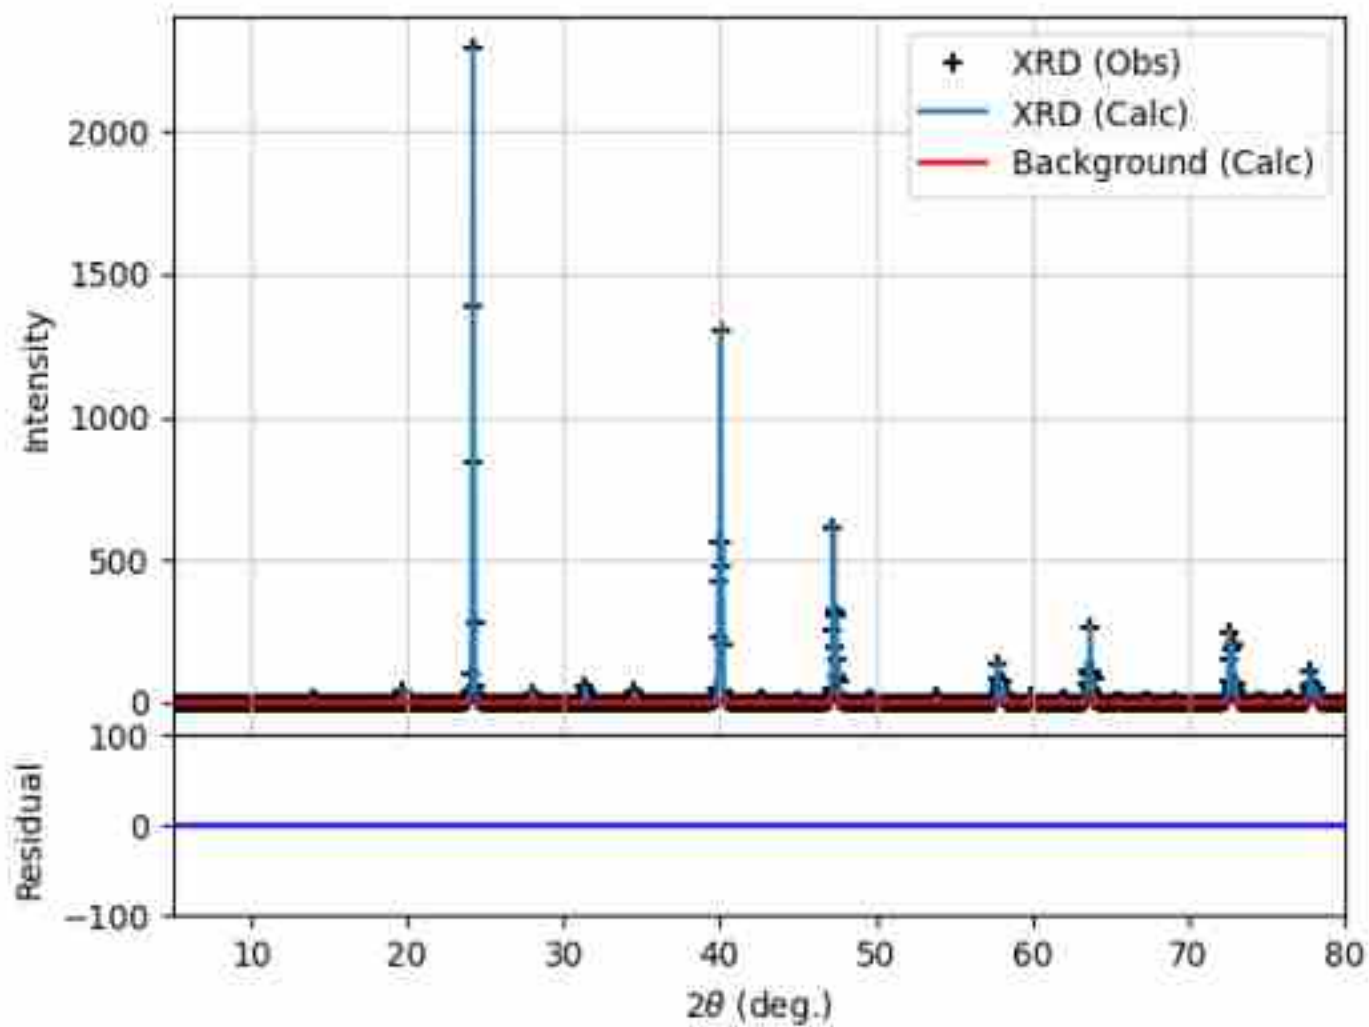

| RMSE before RR | Rwp    | RMSE after RR |
|----------------|--------|---------------|
| 0.012          | 0.0053 | 0.00054       |

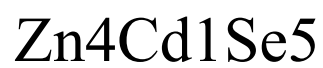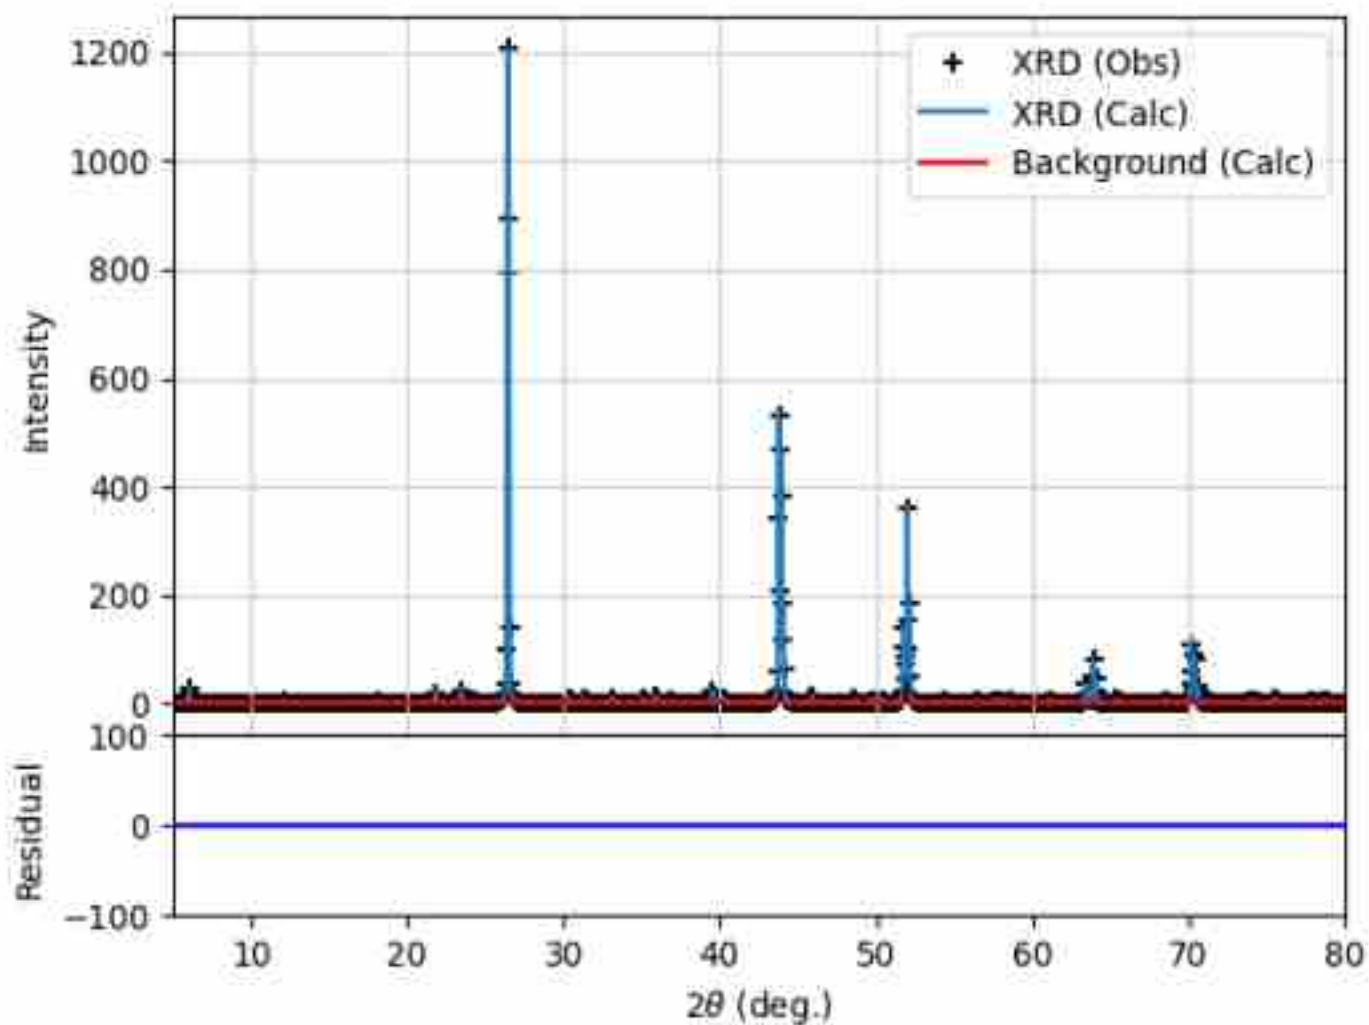

| RMSE before RR | Rwp     | RMSE after RR |
|----------------|---------|---------------|
| 0.012          | 0.00322 | 0.00031       |



# Zr1Mn6Sn6

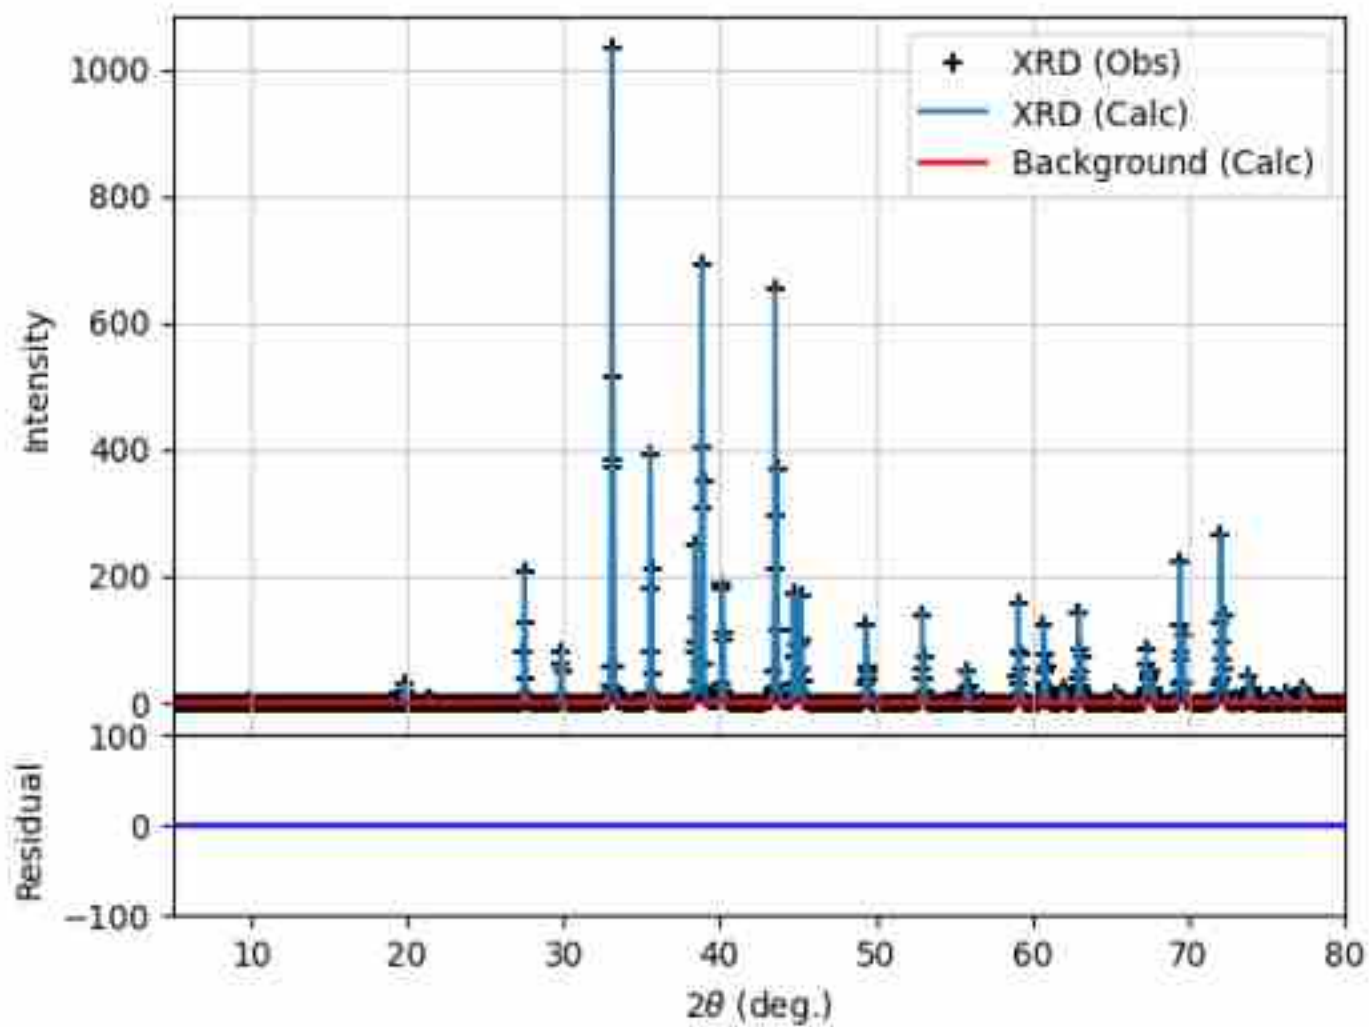

| RMSE before RR | Rwp    | RMSE after RR |
|----------------|--------|---------------|
| 0.012          | 0.0038 | 0.00052       |

# Zr<sub>2</sub>C<sub>1</sub>N<sub>1</sub>

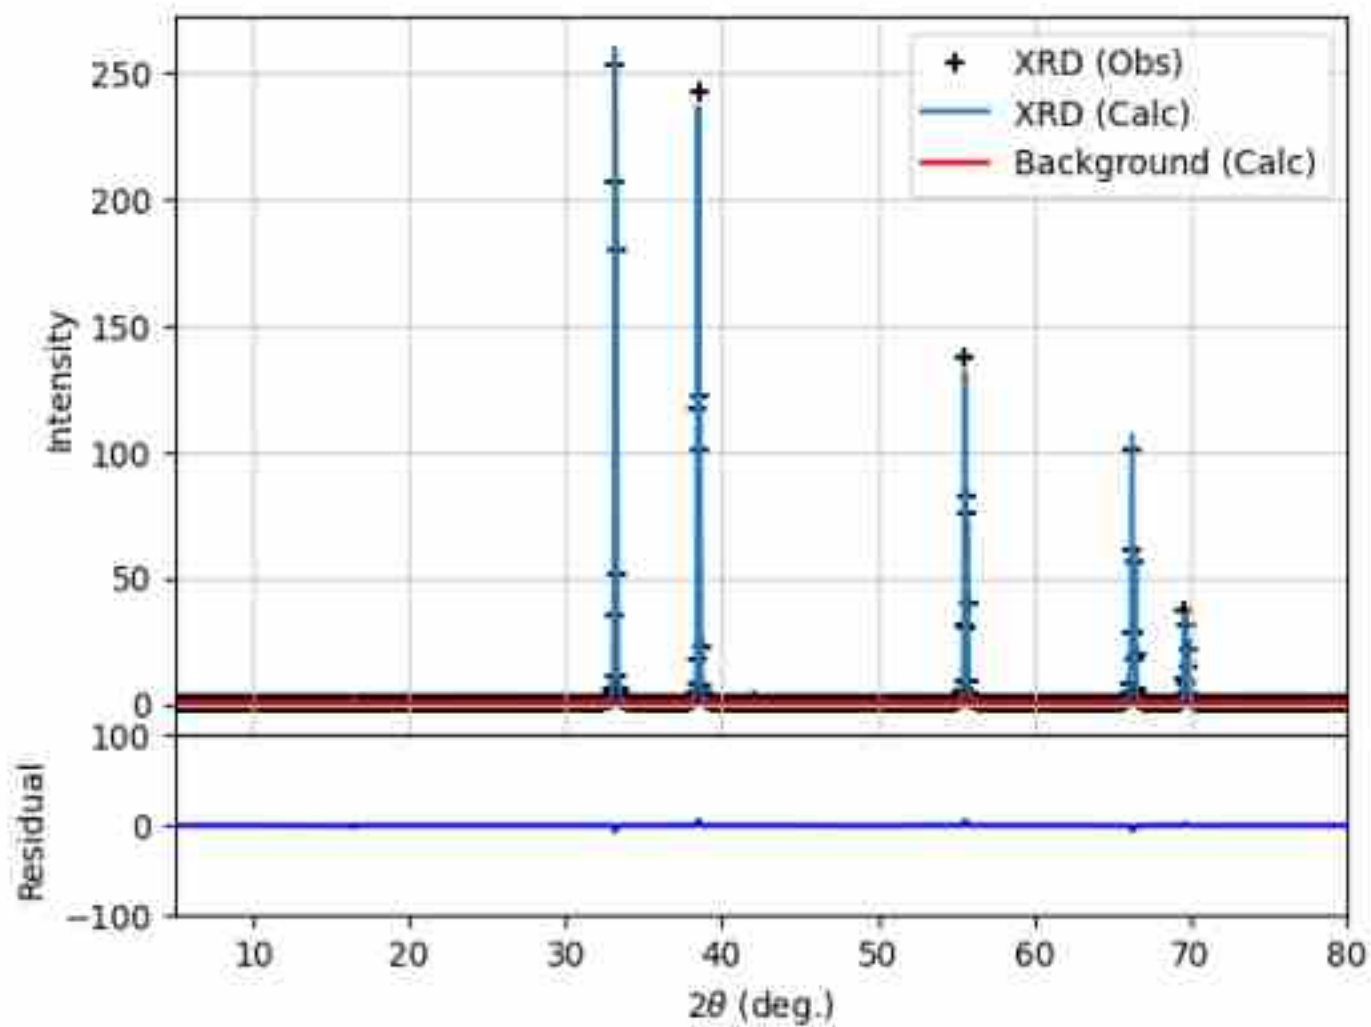

| RMSE before RR | Rwp     | RMSE after RR |
|----------------|---------|---------------|
| 0.012          | 5.41392 | 0.30433       |

# Zr<sub>2</sub>Ga<sub>3</sub>Cu<sub>1</sub>

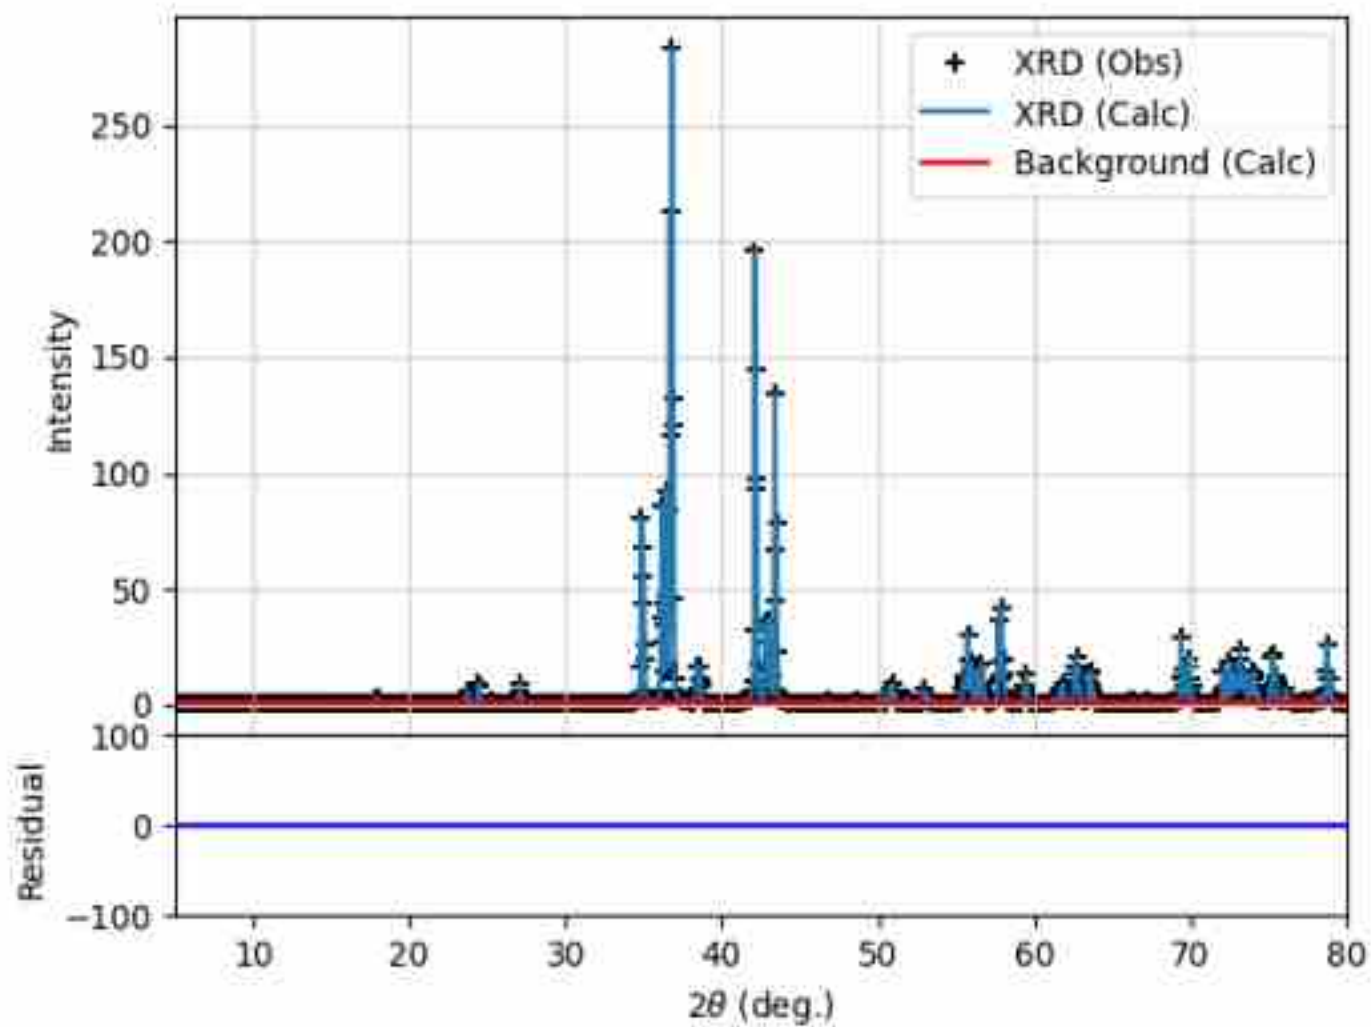

| RMSE before RR | Rwp     | RMSE after RR |
|----------------|---------|---------------|
| 0.012          | 0.00328 | 0.00021       |

# Zr<sub>4</sub>Ge<sub>4</sub>Pt<sub>4</sub>

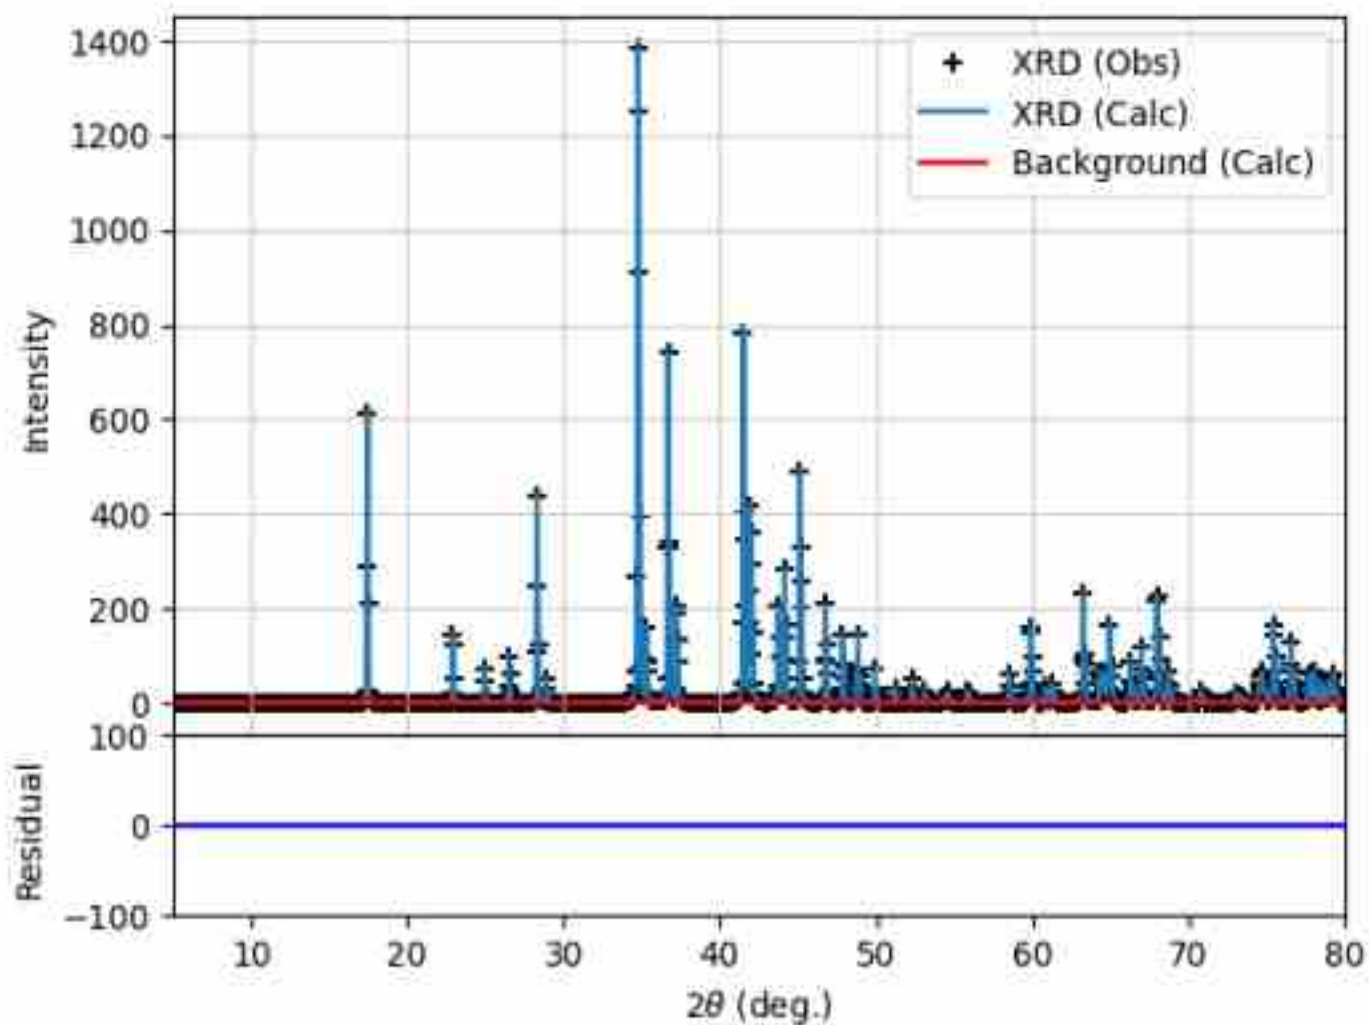

| RMSE before RR | Rwp     | RMSE after RR |
|----------------|---------|---------------|
| 0.012          | 0.00425 | 0.00033       |

# Zr<sub>4</sub>Si<sub>4</sub>Pt<sub>4</sub>

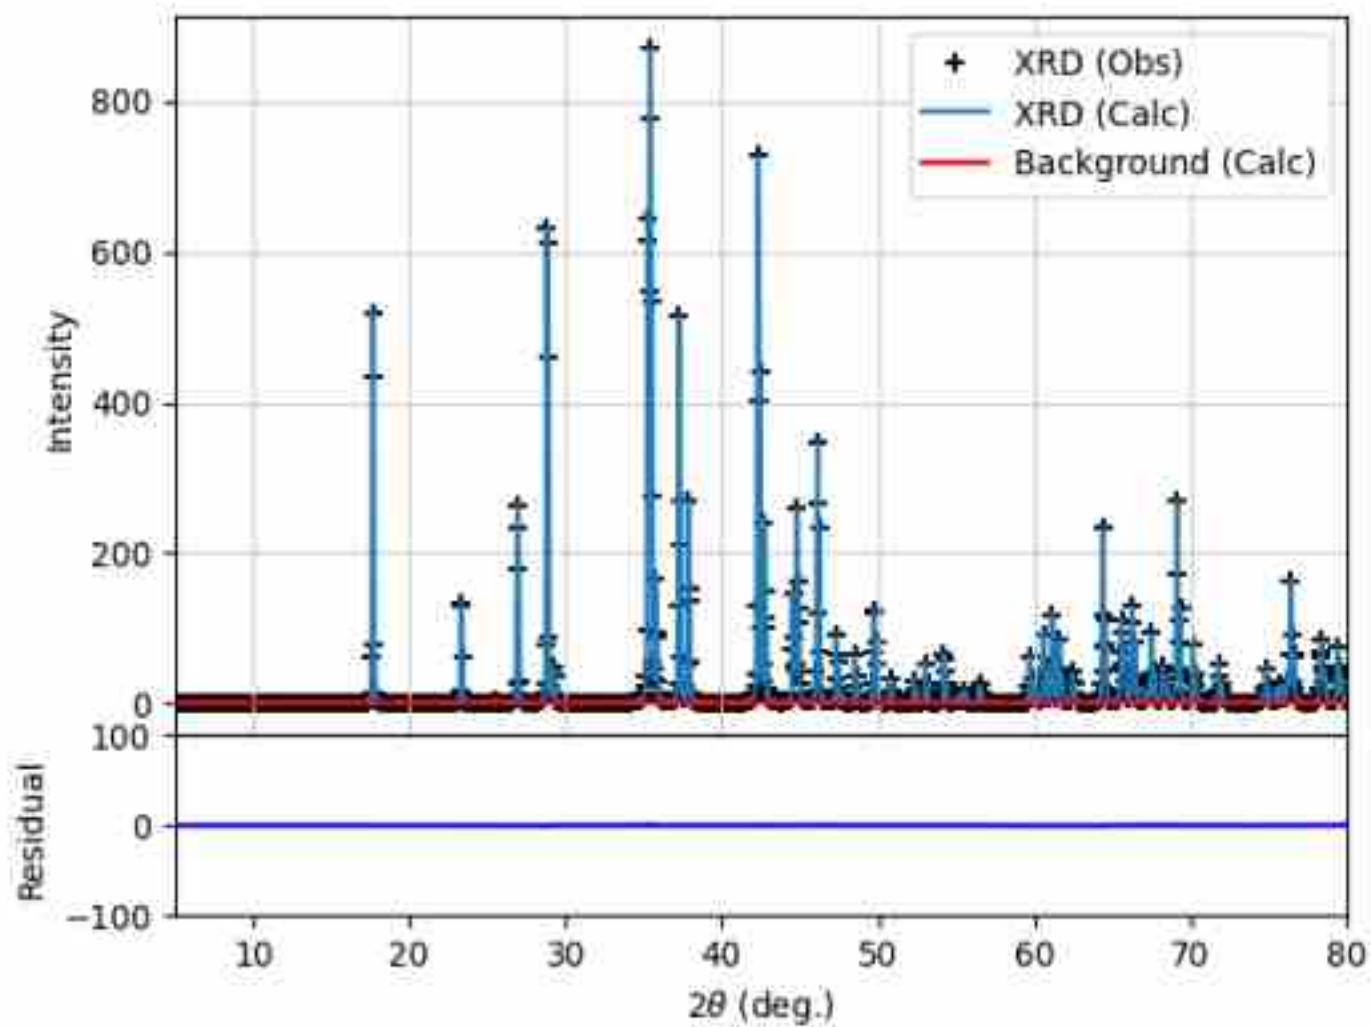

| RMSE before RR | Rwp     | RMSE after RR |
|----------------|---------|---------------|
| 0.012          | 0.51964 | 0.00966       |

# Al<sub>1</sub>Ga<sub>1</sub>Cu<sub>2</sub>S<sub>4</sub>

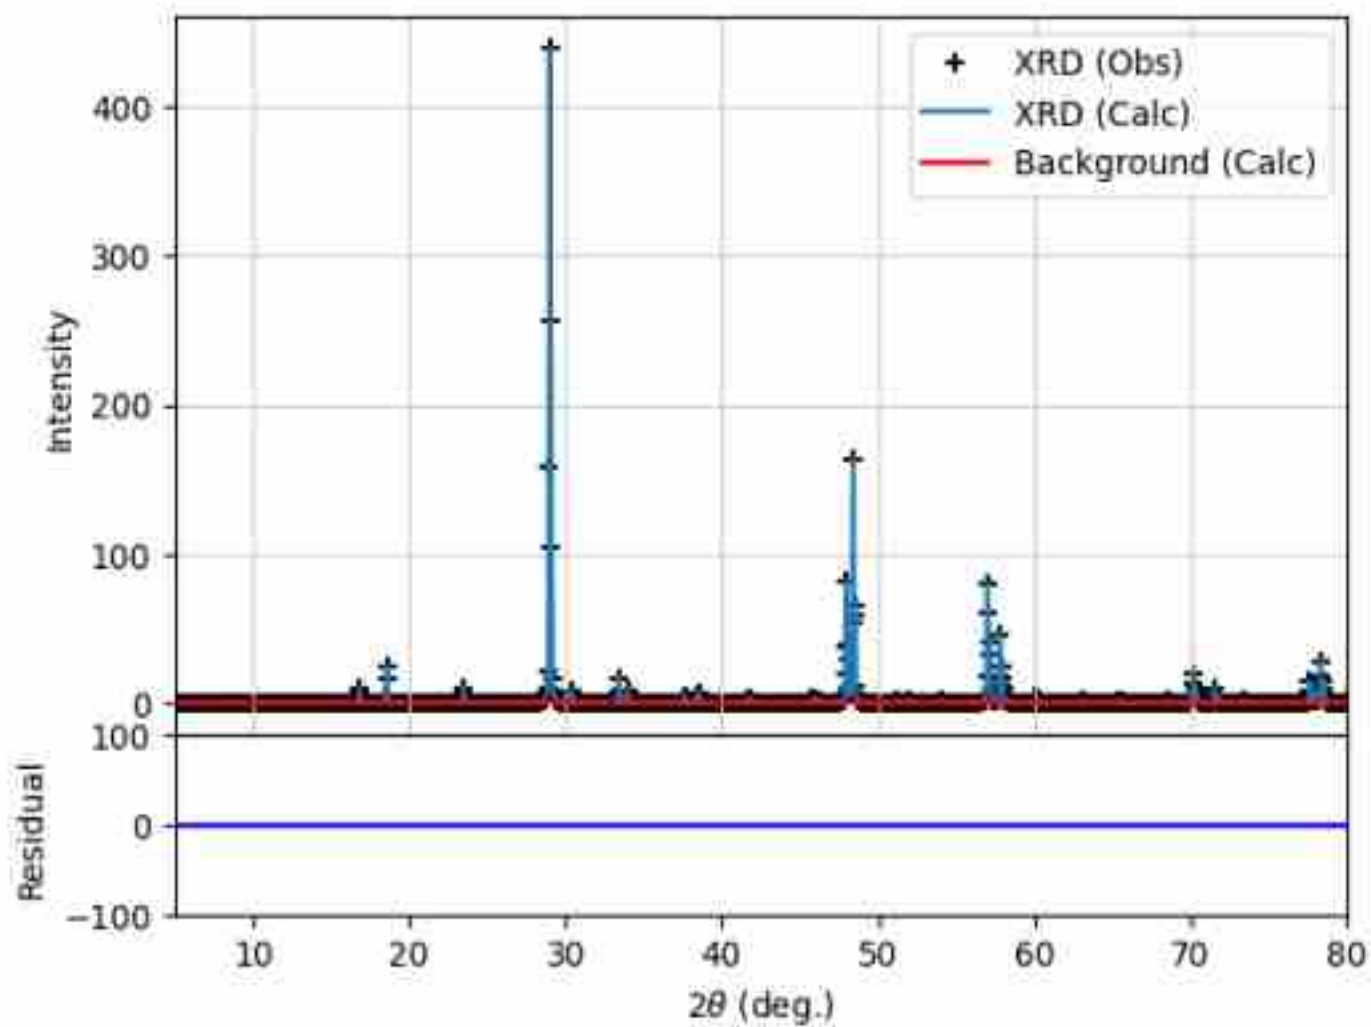

| RMSE before RR | Rwp     | RMSE after RR |
|----------------|---------|---------------|
| 0.013          | 0.00547 | 0.00096       |

# Al<sub>11</sub>Ni<sub>1</sub>F<sub>5</sub>

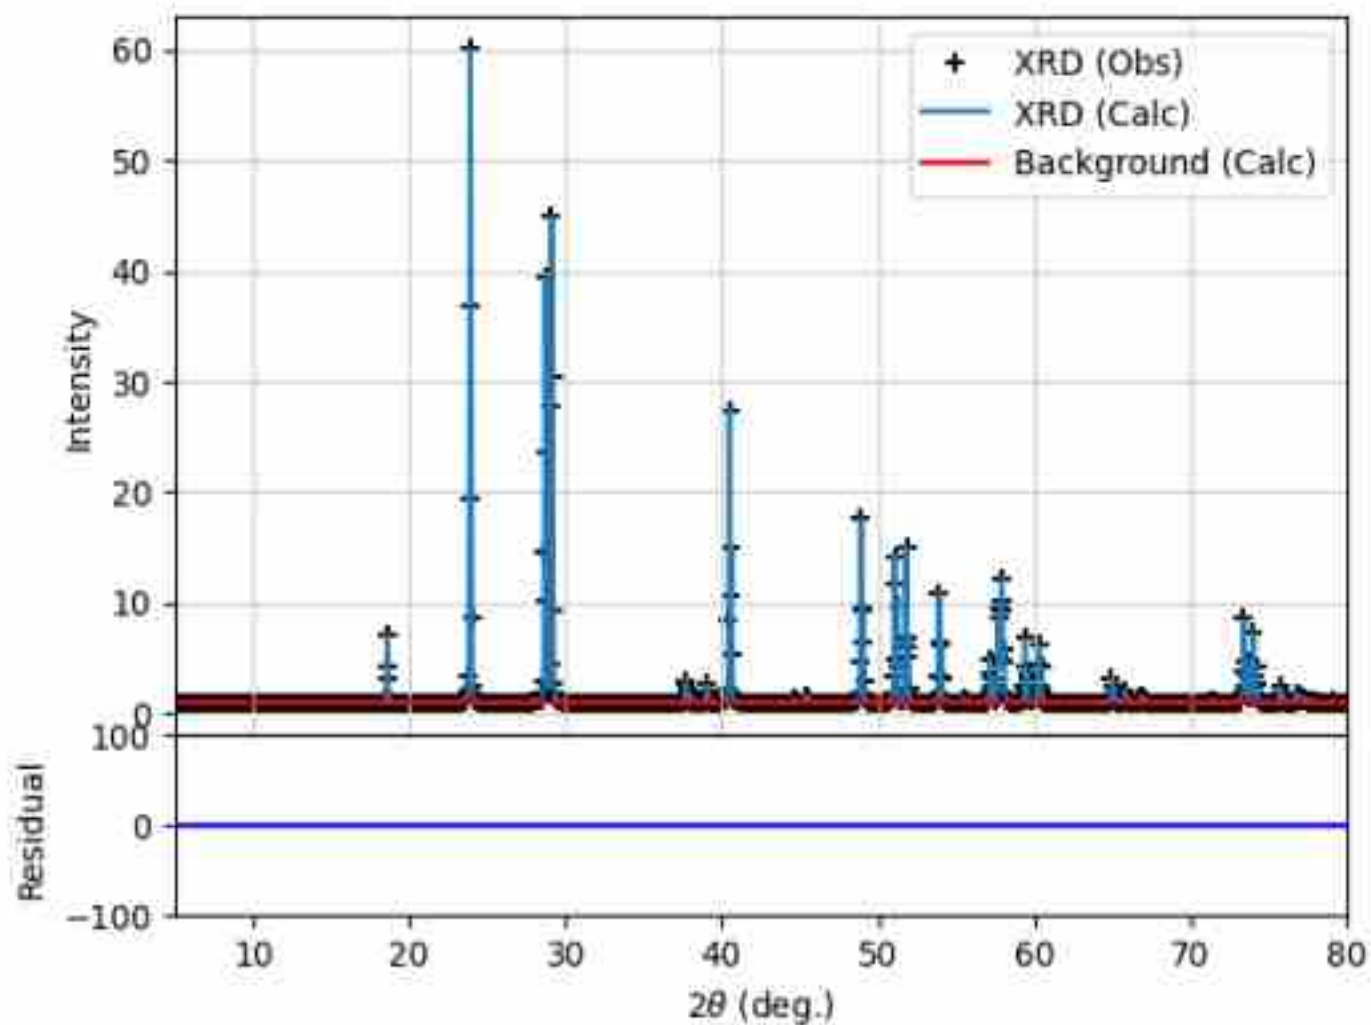

| RMSE before RR | Rwp     | RMSE after RR |
|----------------|---------|---------------|
| 0.013          | 0.00148 | 0.00045       |

# A11W1O4

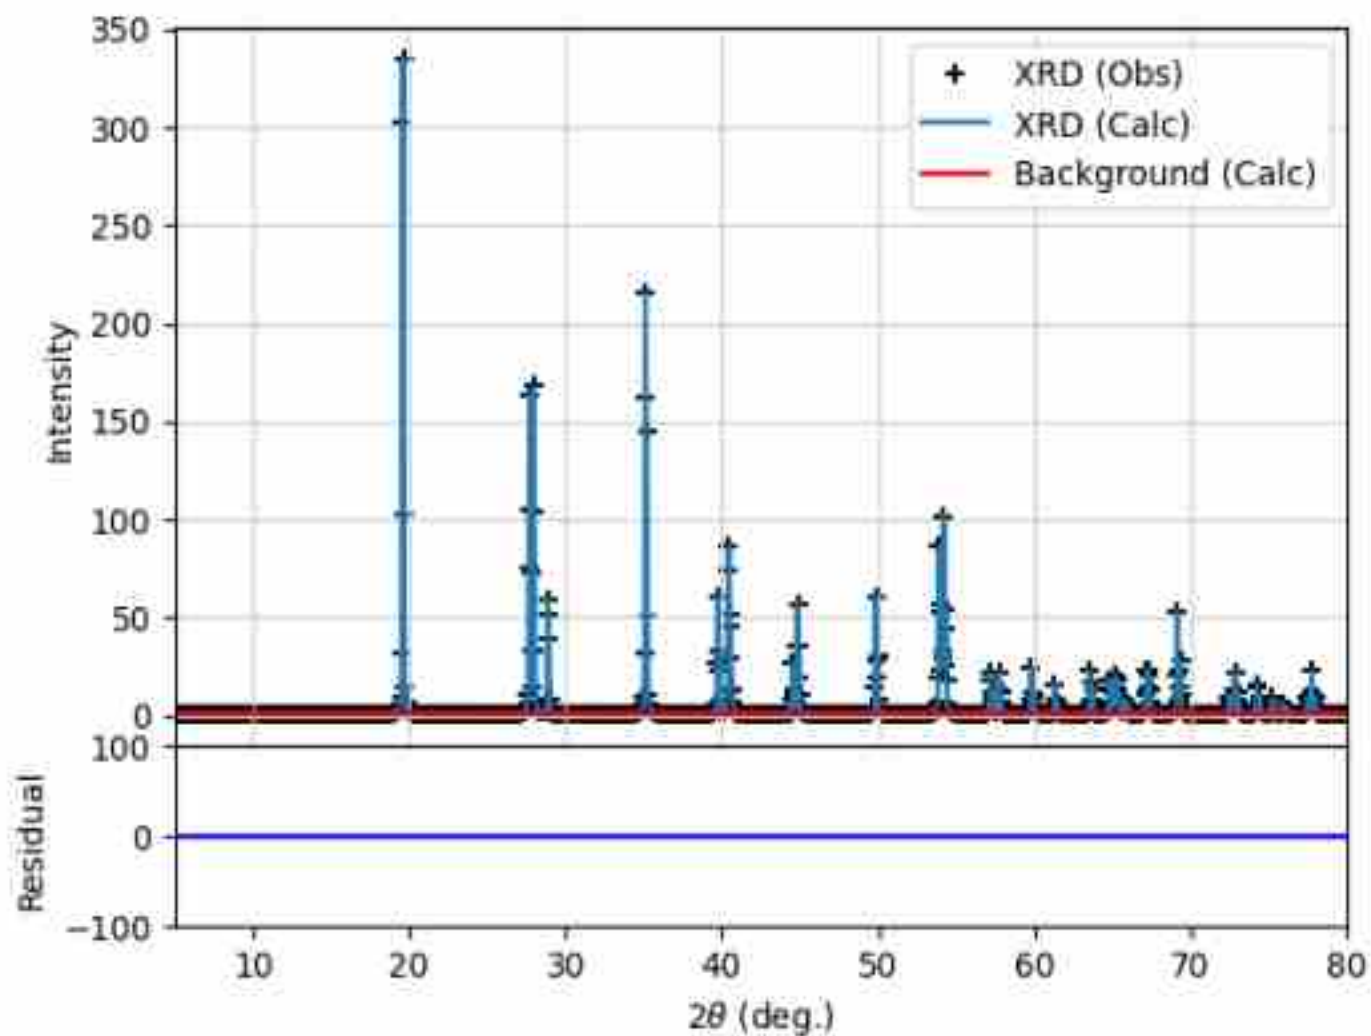

| RMSE before RR | Rwp     | RMSE after RR |
|----------------|---------|---------------|
| 0.013          | 0.00492 | 0.00256       |



# Al<sub>2</sub>ZnTe<sub>4</sub>

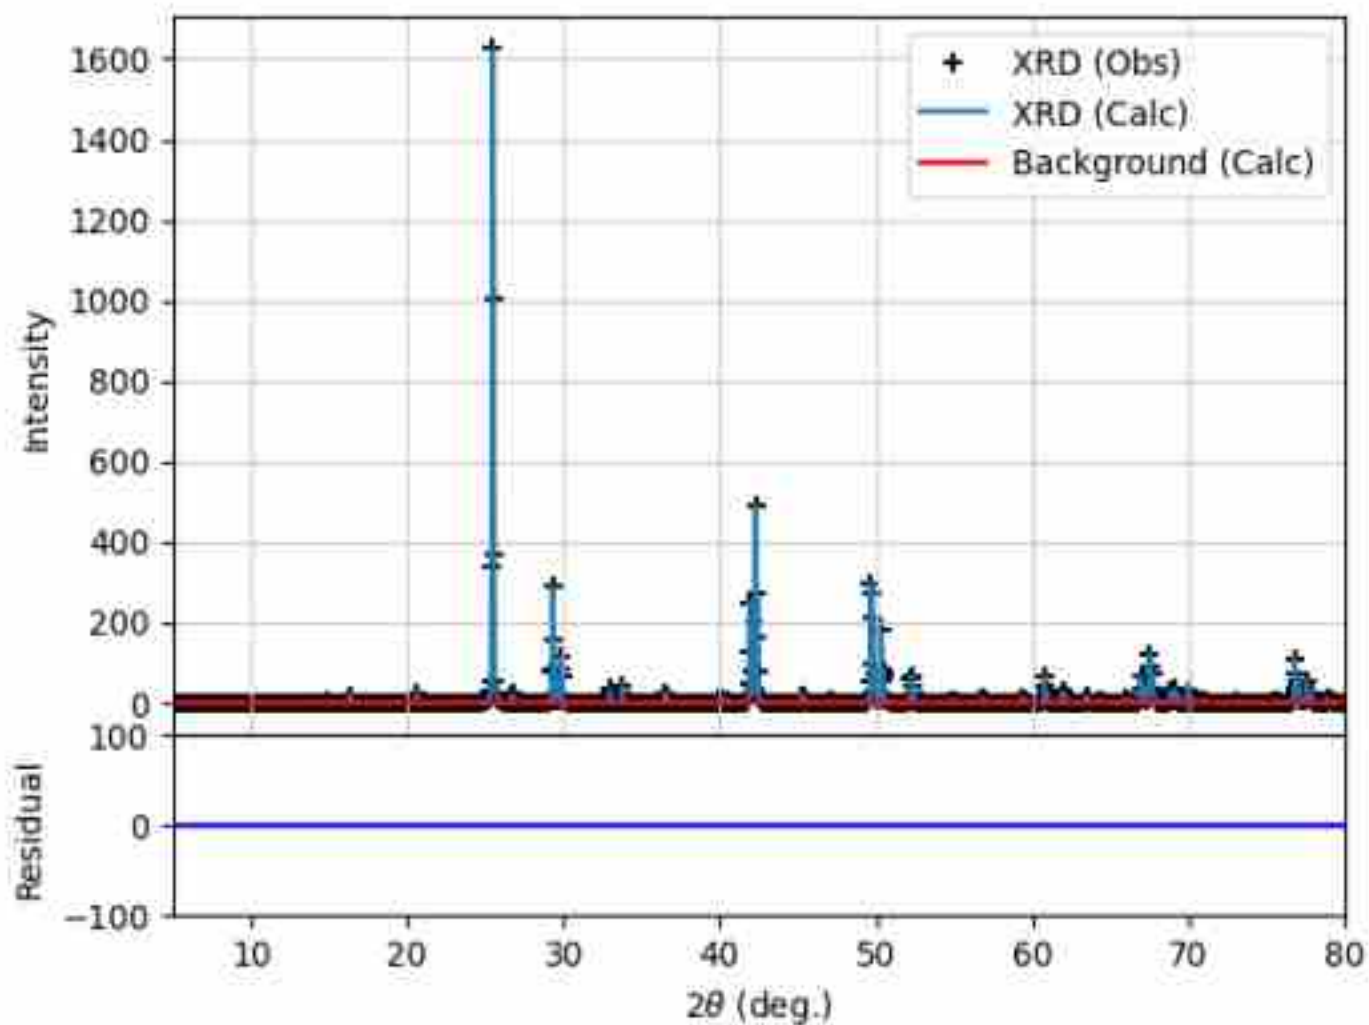

| RMSE before RR | Rwp     | RMSE after RR |
|----------------|---------|---------------|
| 0.013          | 0.00323 | 0.00035       |

# Al3Pd2

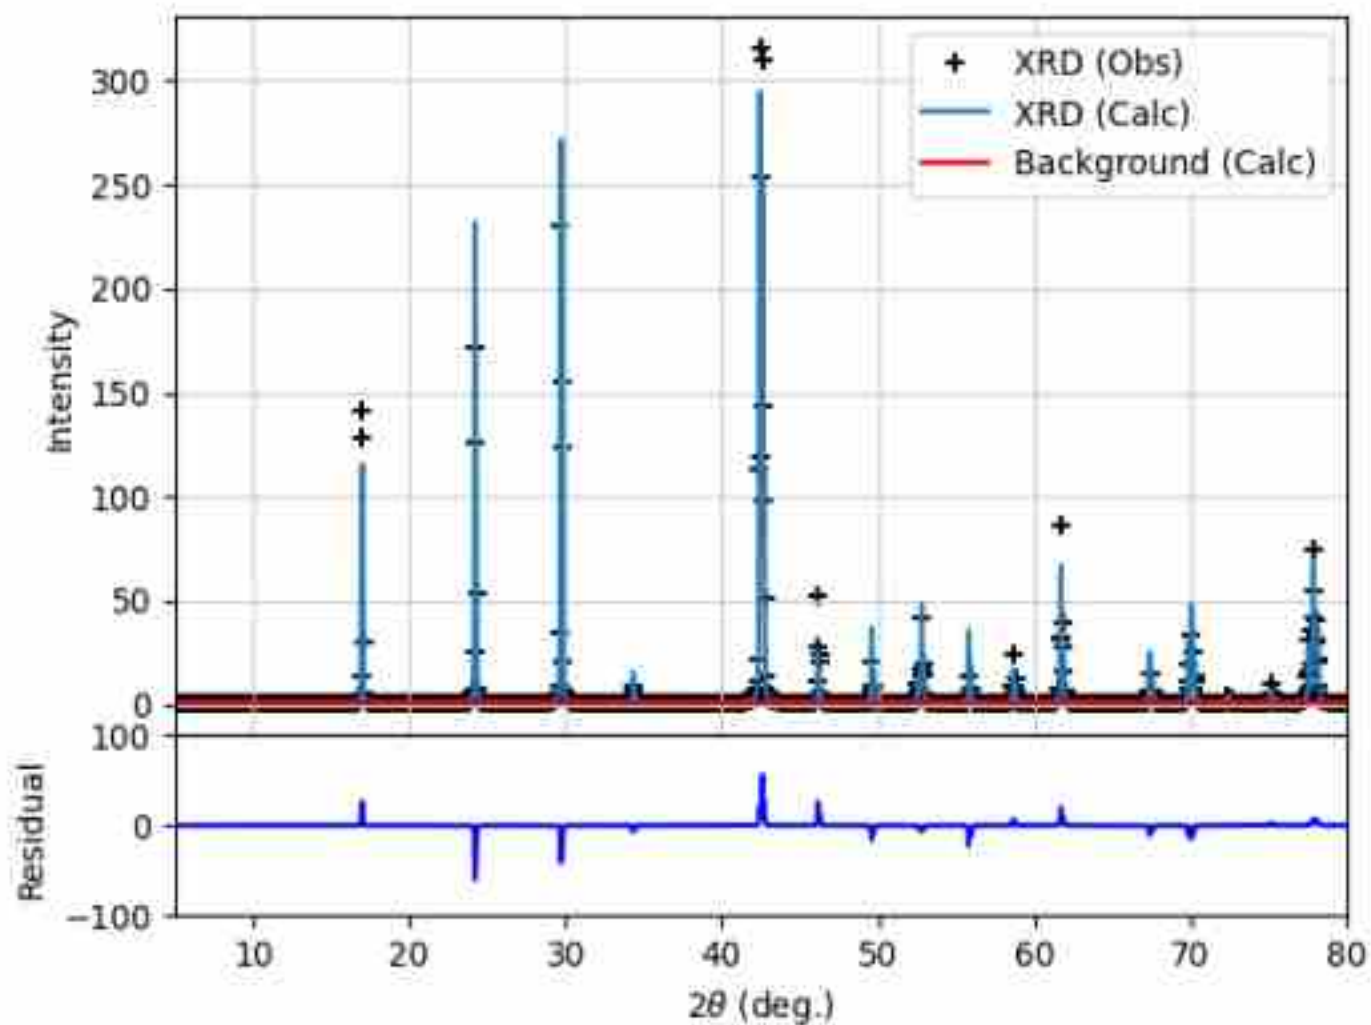

| RMSE before RR | Rwp      | RMSE after RR |
|----------------|----------|---------------|
| 0.013          | 25.27328 | 0.03649       |

# Ba1Sr1Zr1Sn1O6

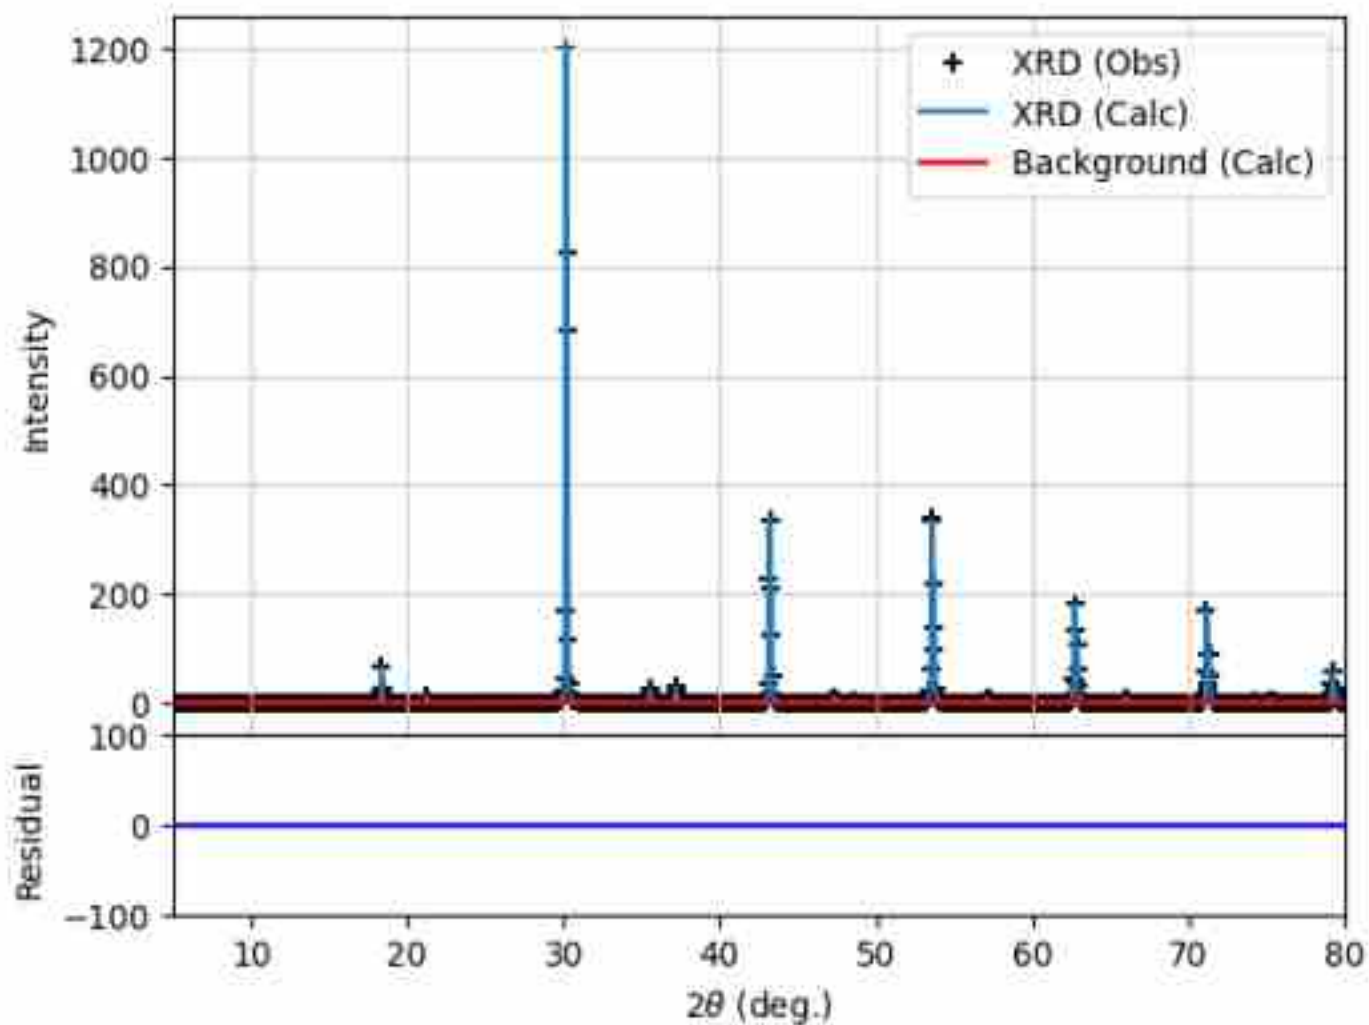

| RMSE before RR | Rwp    | RMSE after RR |
|----------------|--------|---------------|
| 0.013          | 0.0042 | 0.00189       |

# Ba1Sr3O4

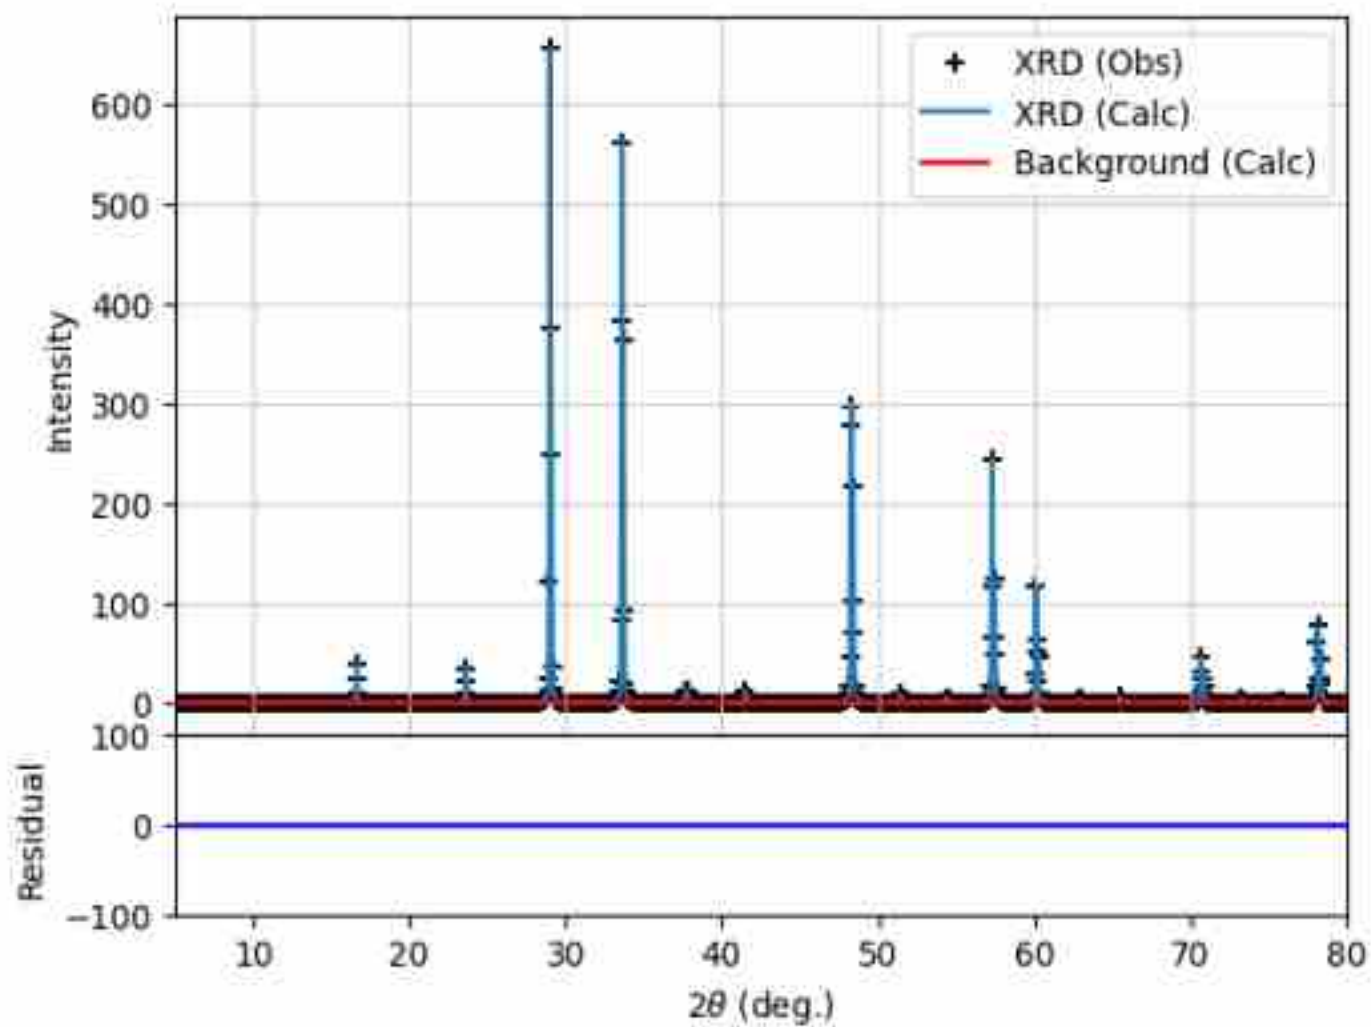

| RMSE before RR | Rwp     | RMSE after RR |
|----------------|---------|---------------|
| 0.013          | 0.01994 | 0.00298       |

# Ba1Y1Fe2O5

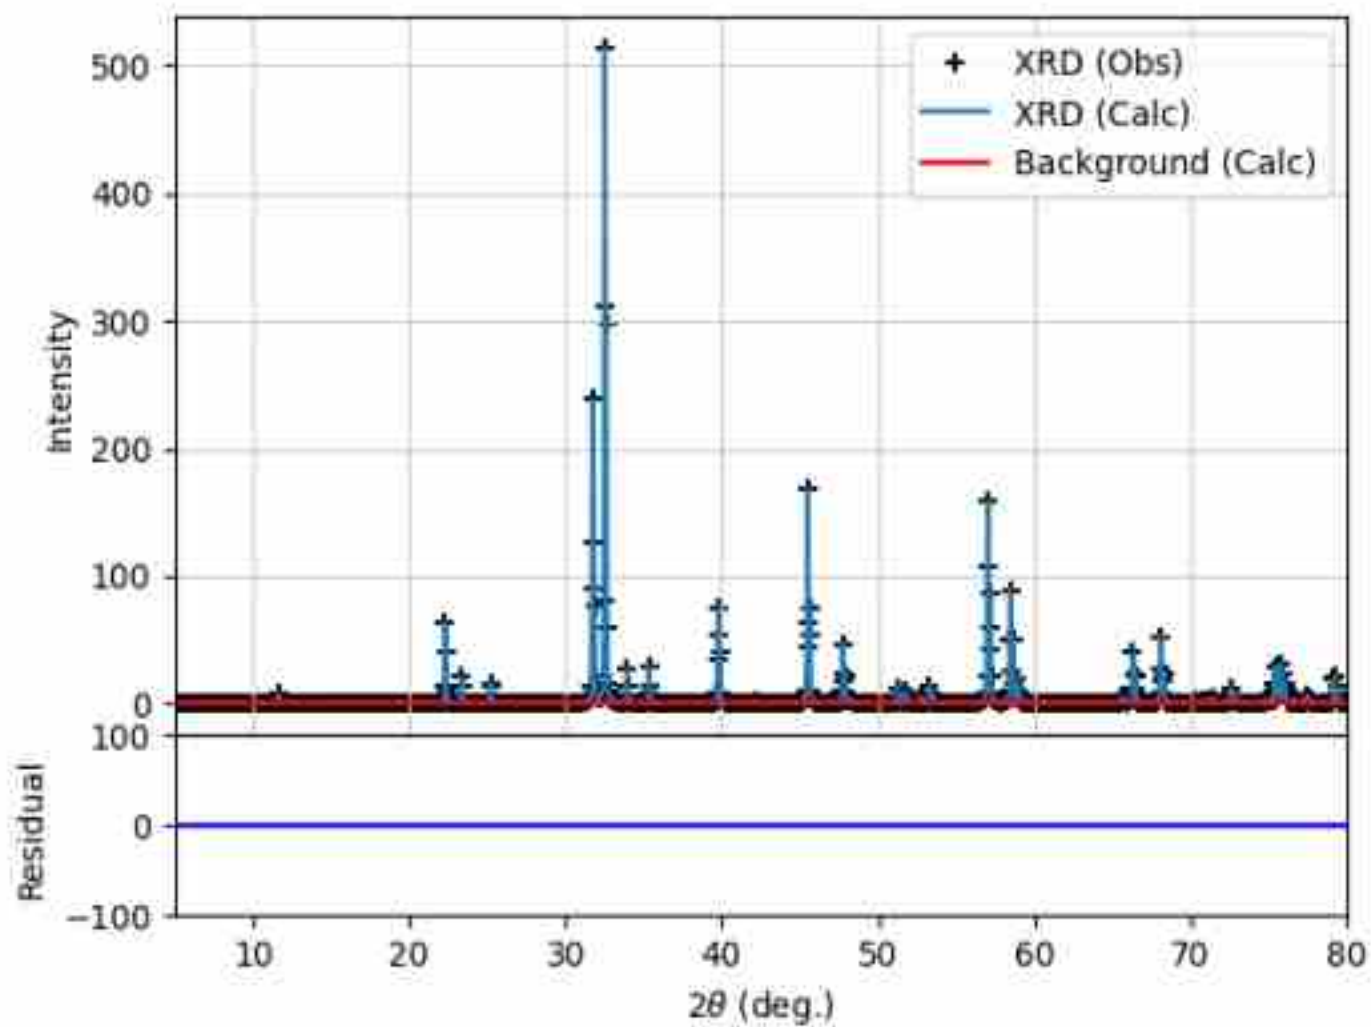

| RMSE before RR | Rwp     | RMSE after RR |
|----------------|---------|---------------|
| 0.013          | 0.00417 | 0.00109       |

# Ba<sub>2</sub>Cu<sub>1</sub>Te<sub>1</sub>O<sub>2</sub>

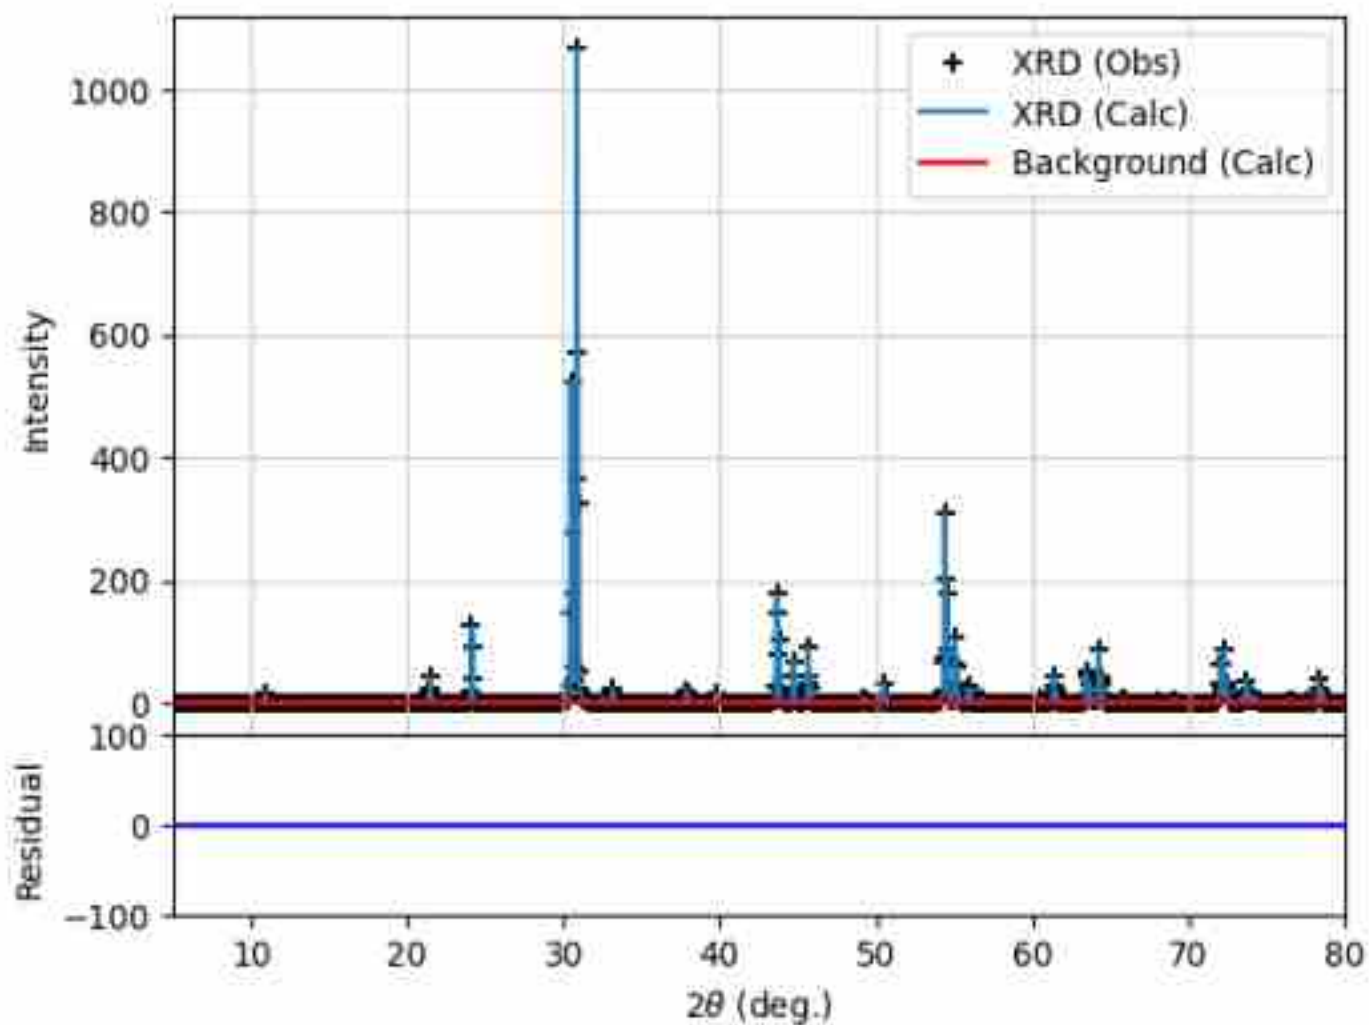

| RMSE before RR | Rwp     | RMSE after RR |
|----------------|---------|---------------|
| 0.013          | 0.00488 | 0.00048       |

# Ba<sub>2</sub>Hf<sub>1</sub>U<sub>1</sub>O<sub>6</sub>

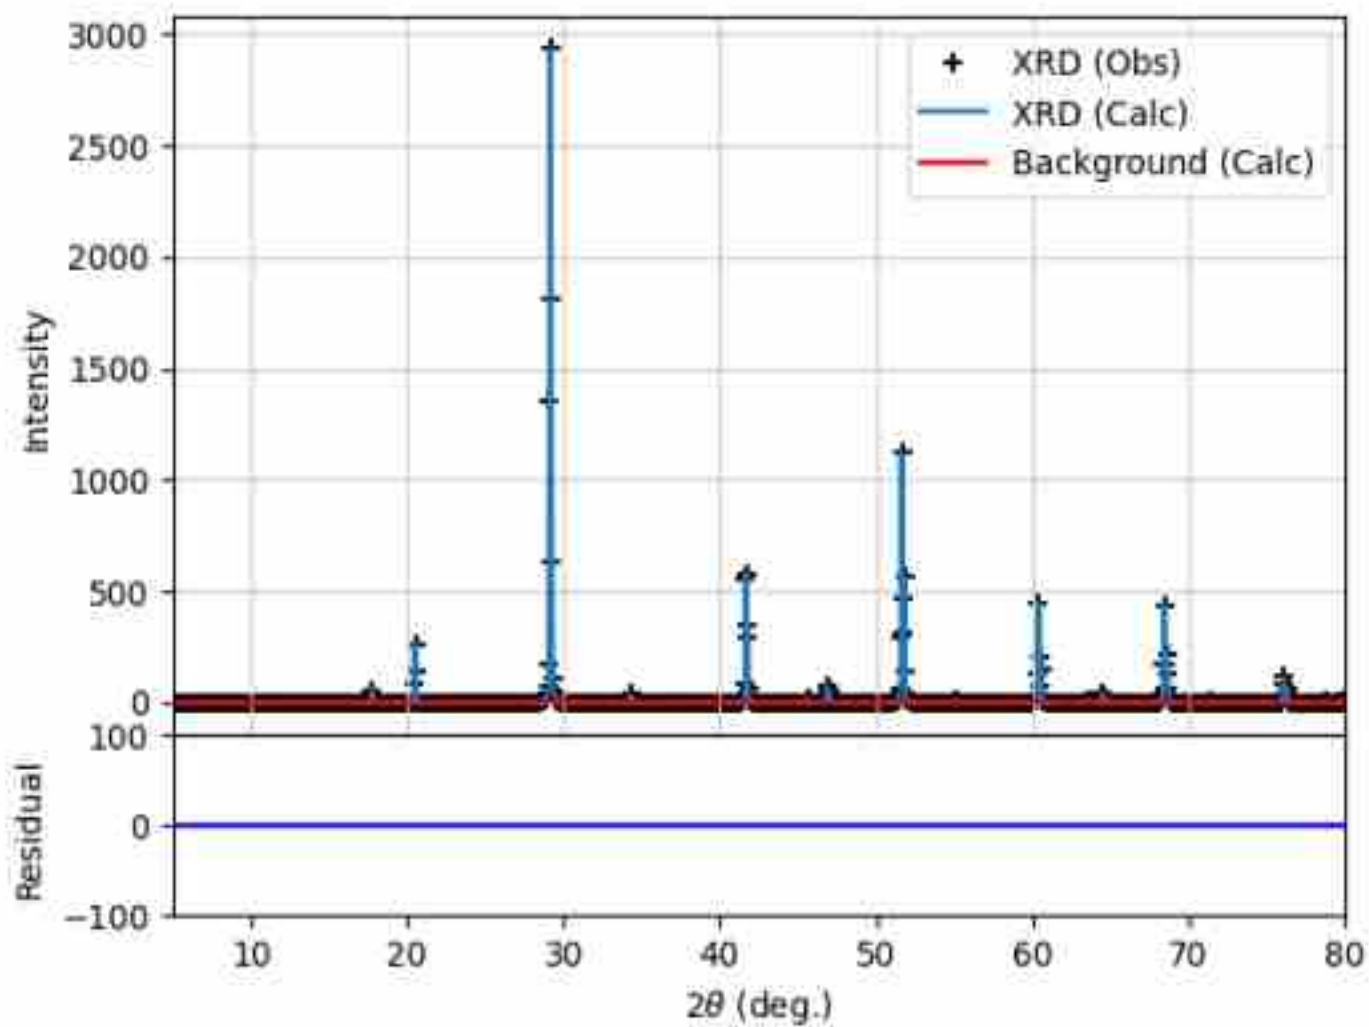

| RMSE before RR | Rwp     | RMSE after RR |
|----------------|---------|---------------|
| 0.013          | 0.01106 | 0.00472       |

# Ba<sub>2</sub>Mg<sub>2</sub>Si<sub>2</sub>

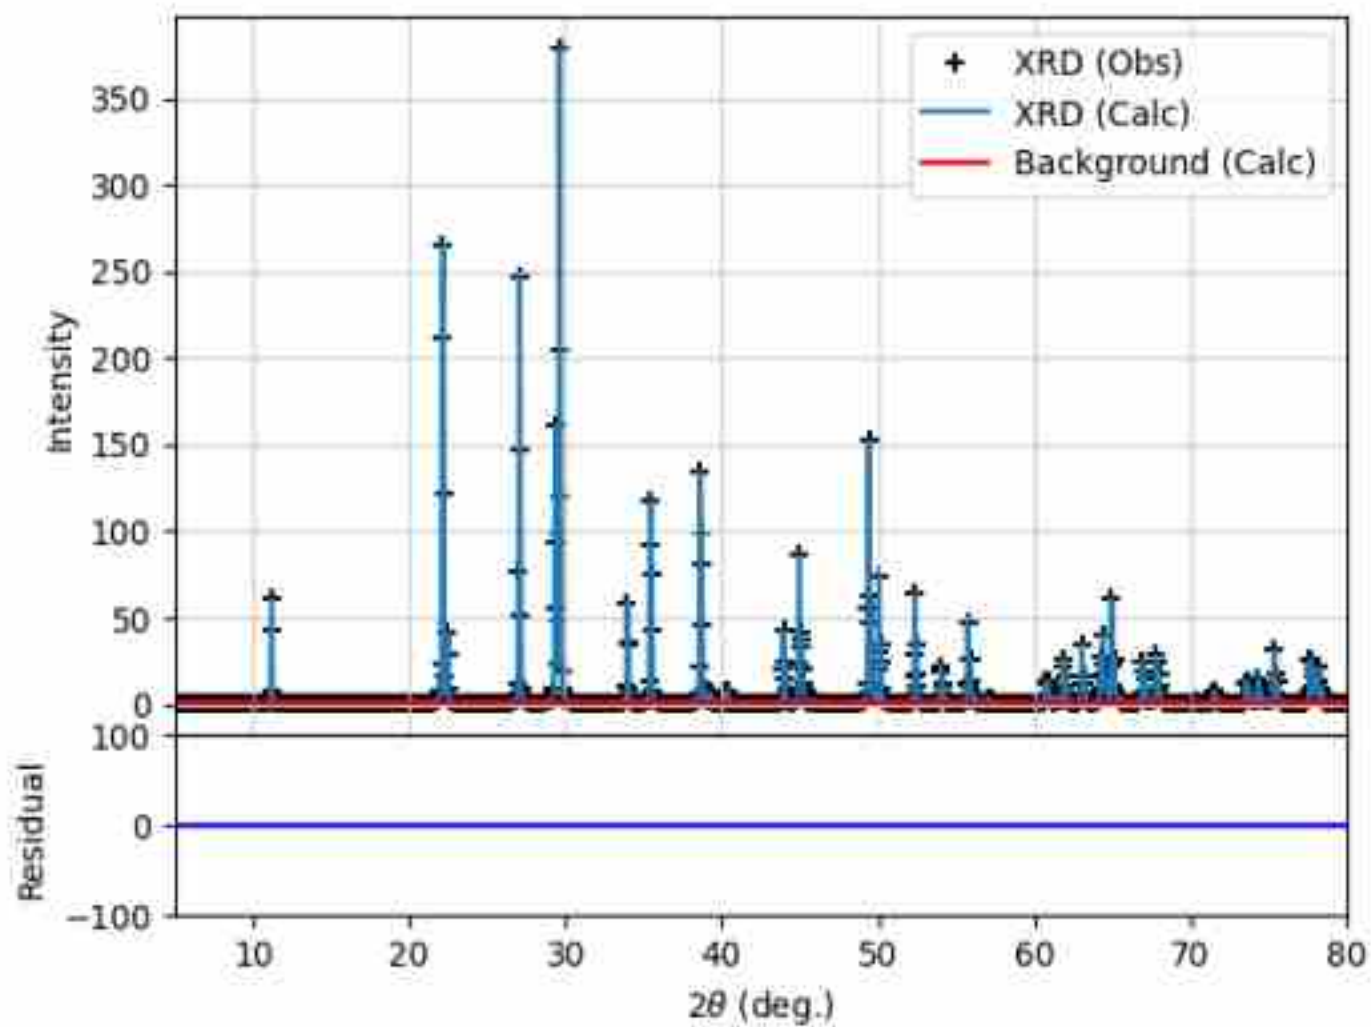

| RMSE before RR | Rwp     | RMSE after RR |
|----------------|---------|---------------|
| 0.013          | 0.00382 | 0.00088       |



# Ba2Sc1Os1O6

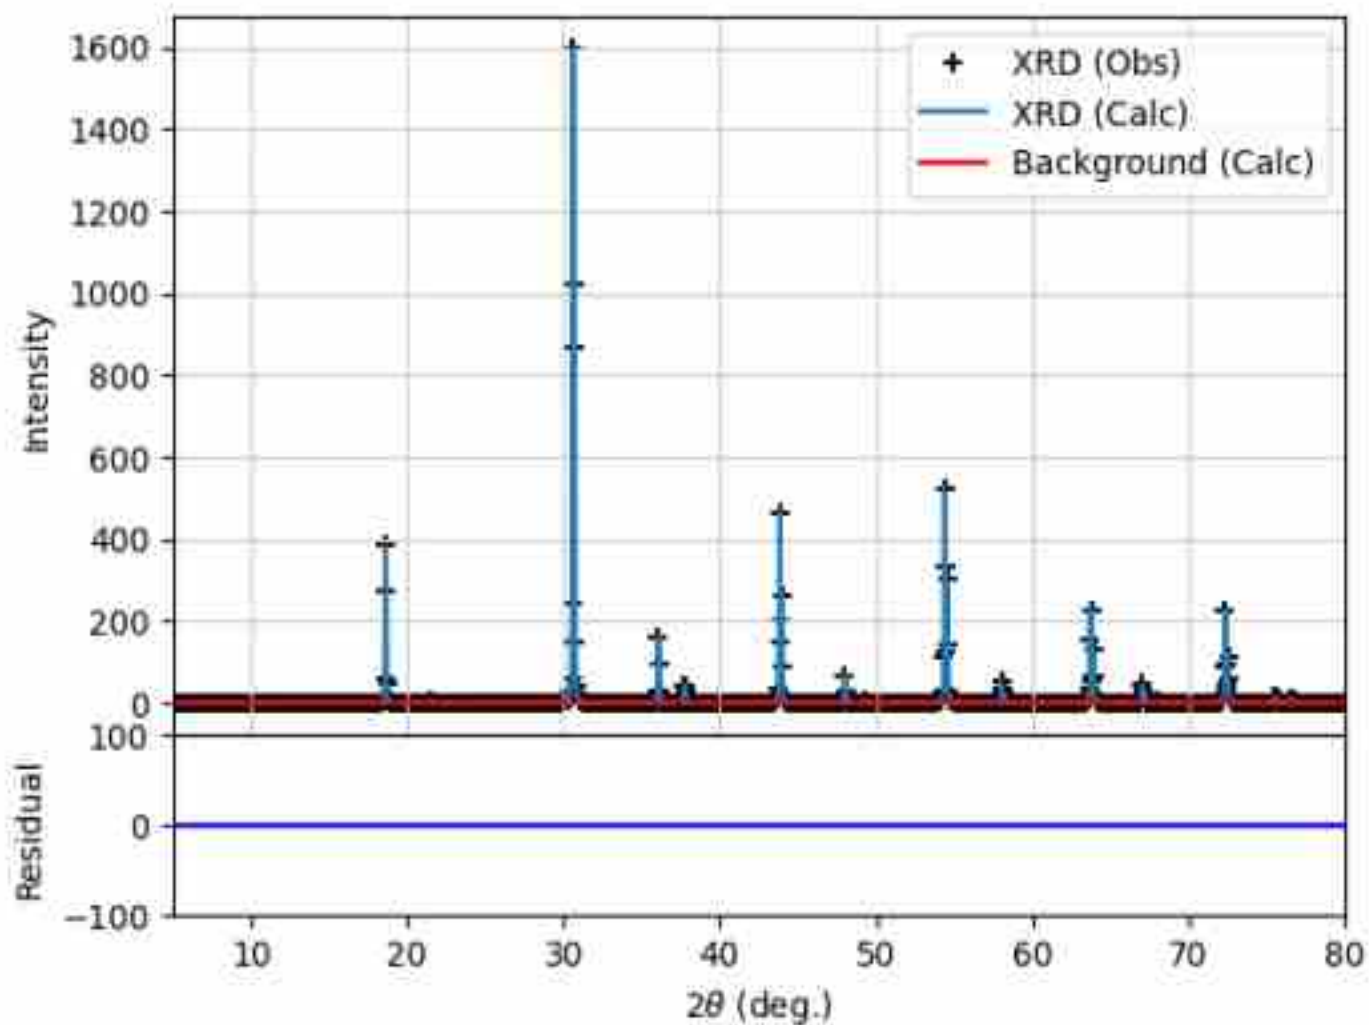

| RMSE before RR | Rwp     | RMSE after RR |
|----------------|---------|---------------|
| 0.013          | 0.01889 | 0.00613       |

# Ba<sub>2</sub>Sr<sub>2</sub>Gd<sub>2</sub>Sb<sub>2</sub>O<sub>12</sub>

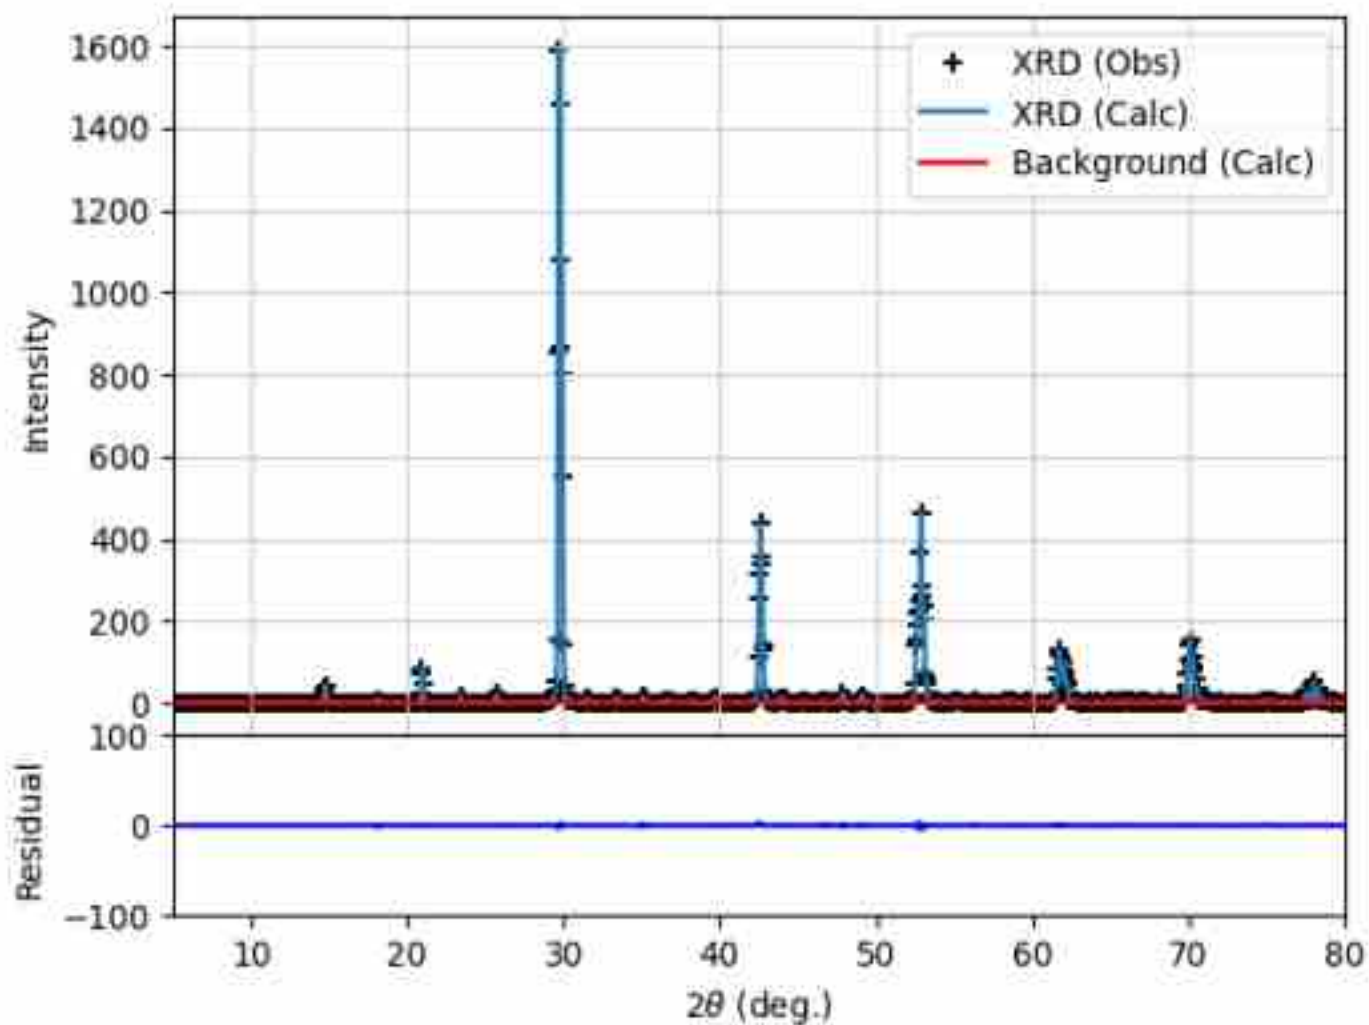

| RMSE before RR | Rwp     | RMSE after RR |
|----------------|---------|---------------|
| 0.013          | 1.98693 | 0.07057       |

# Ba<sub>2</sub>Sr<sub>2</sub>La<sub>2</sub>Sb<sub>2</sub>O<sub>12</sub>

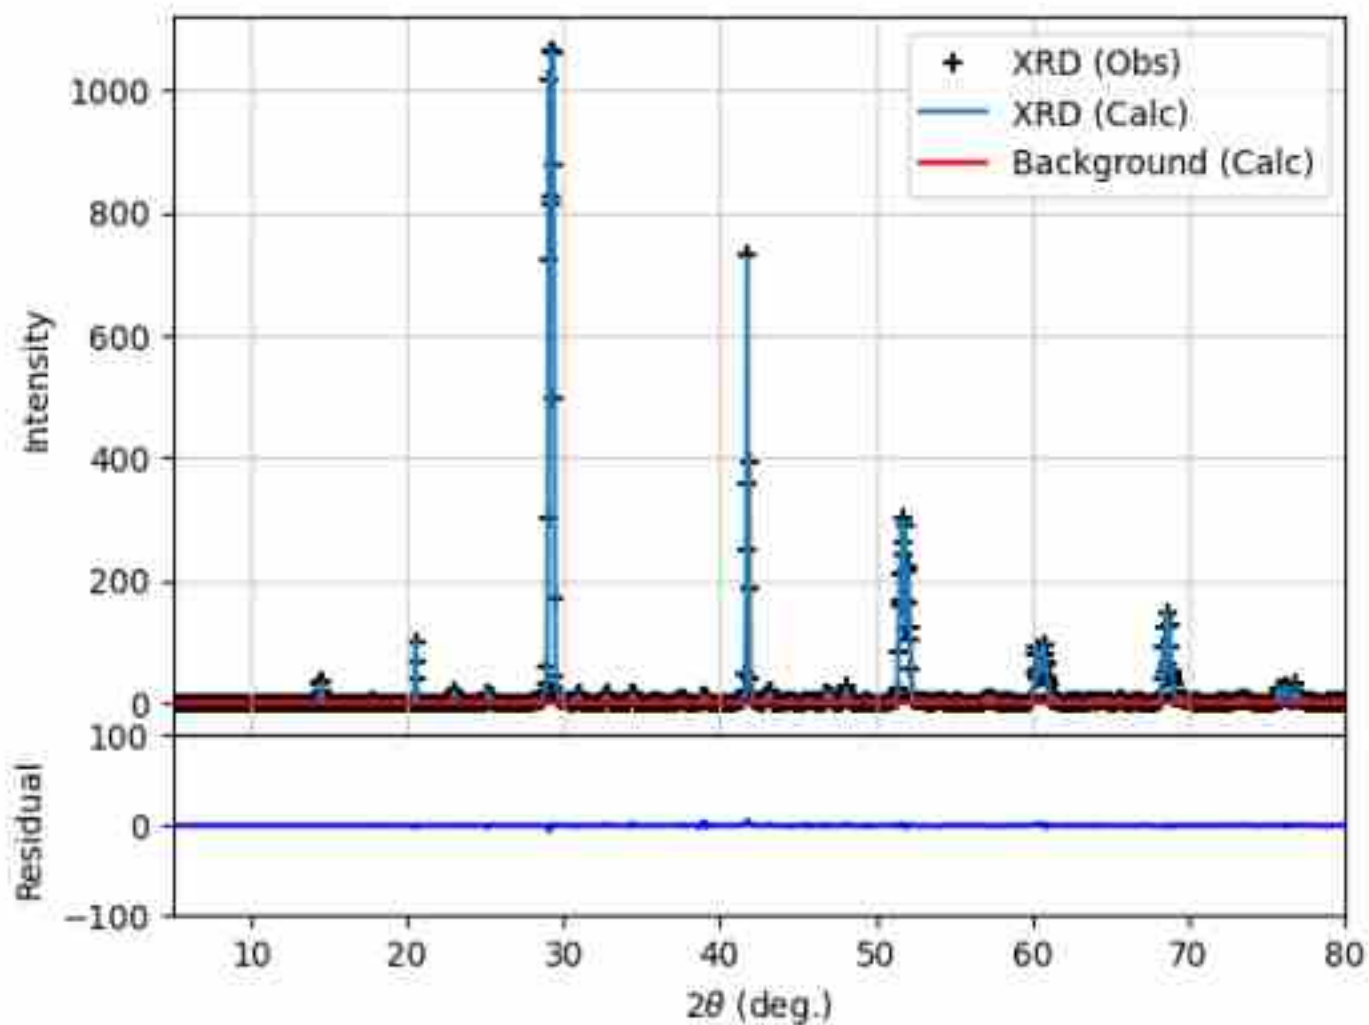

| RMSE before RR | Rwp     | RMSE after RR |
|----------------|---------|---------------|
| 0.013          | 3.69305 | 0.10498       |

# Ba<sub>2</sub>U<sub>1</sub>Ni<sub>1</sub>O<sub>6</sub>

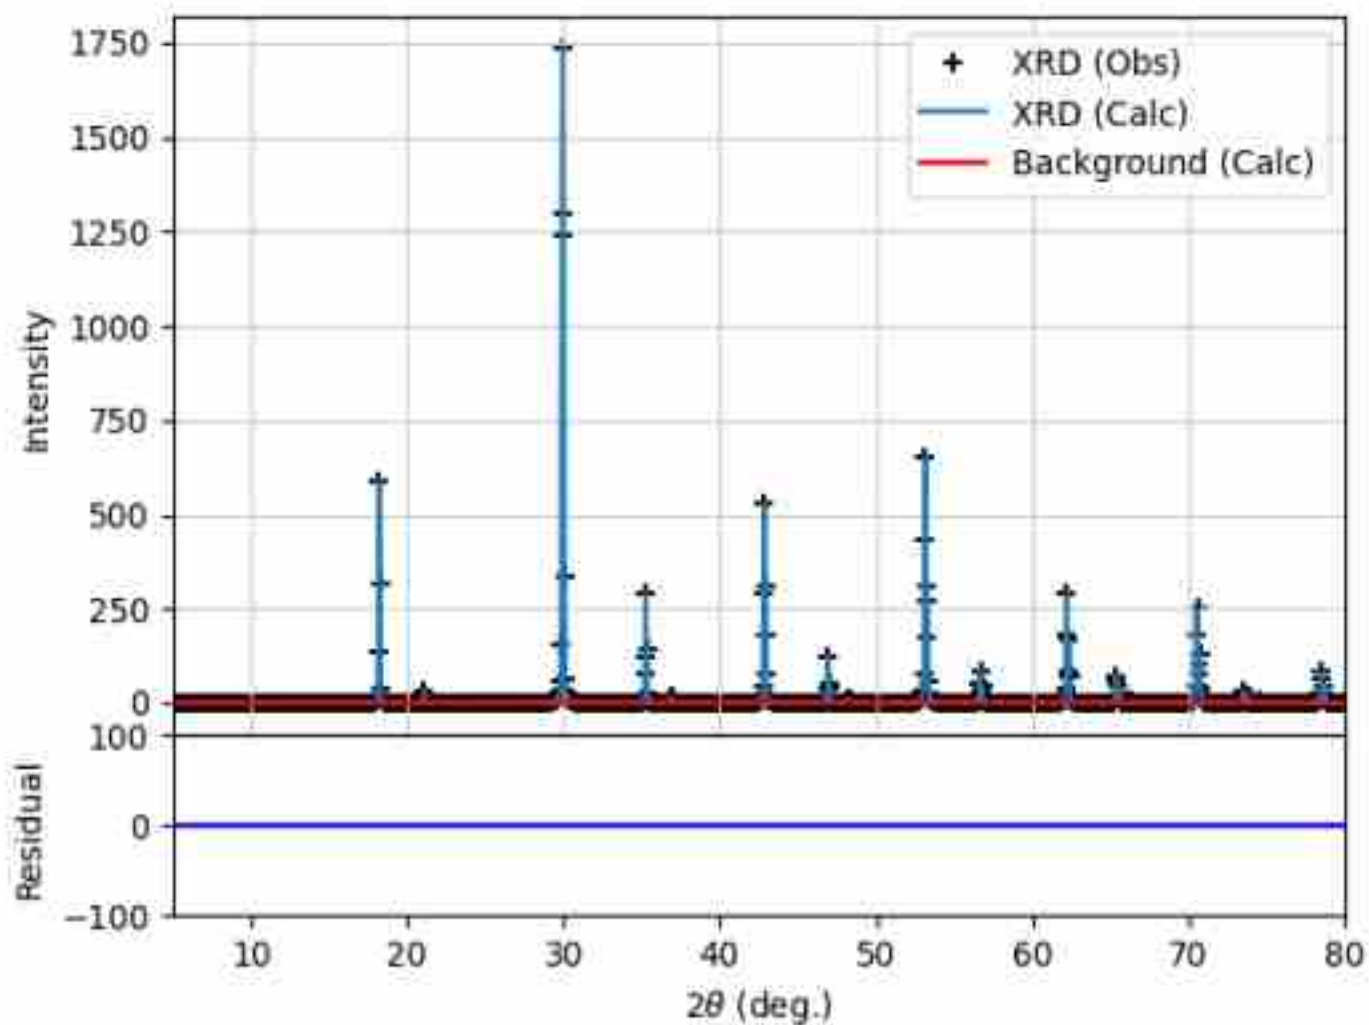

| RMSE before RR | Rwp     | RMSE after RR |
|----------------|---------|---------------|
| 0.013          | 0.01614 | 0.0063        |

# Bi1Sb1Te3

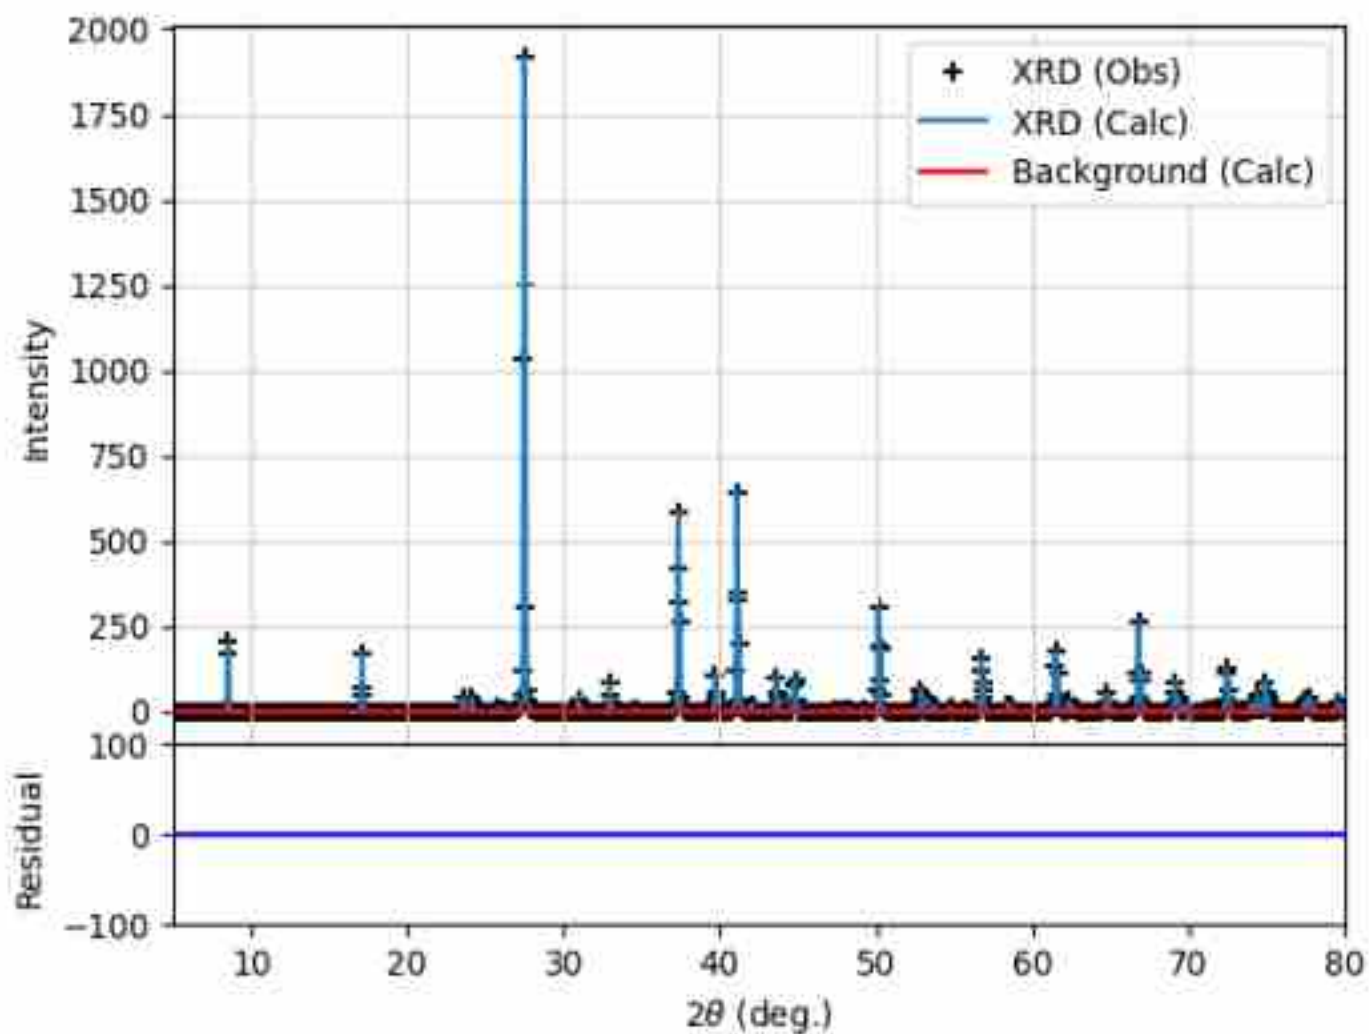

| RMSE before RR | Rwp     | RMSE after RR |
|----------------|---------|---------------|
| 0.013          | 0.00263 | 0.00012       |

Ca1Al2Ga2

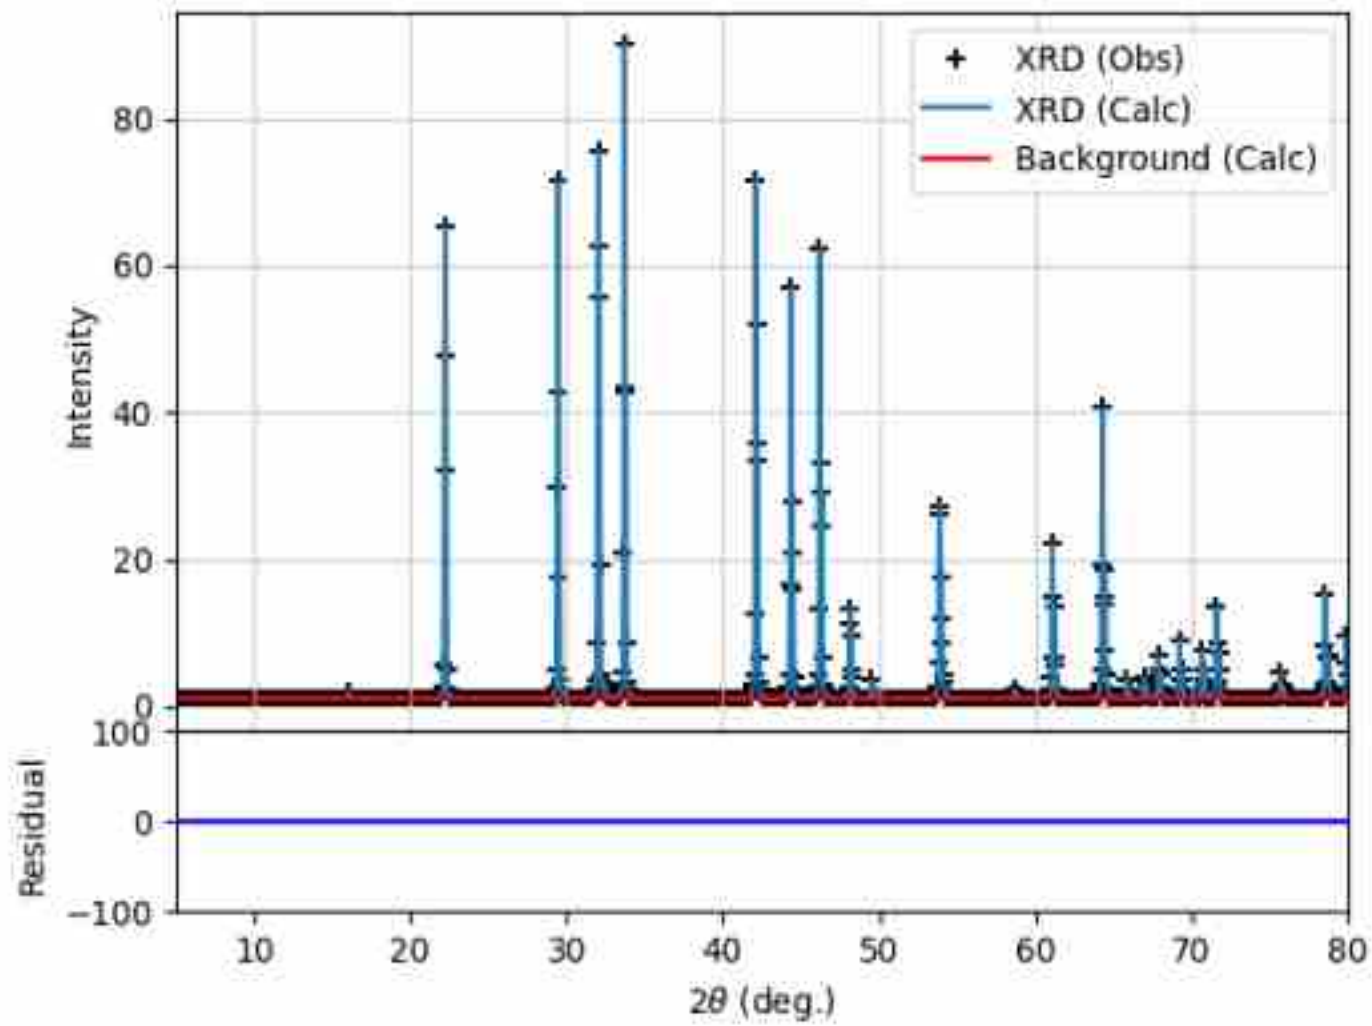

| RMSE before RR | Rwp     | RMSE after RR |
|----------------|---------|---------------|
| 0.013          | 0.00259 | 0.00068       |

# Ca1Al3Au1

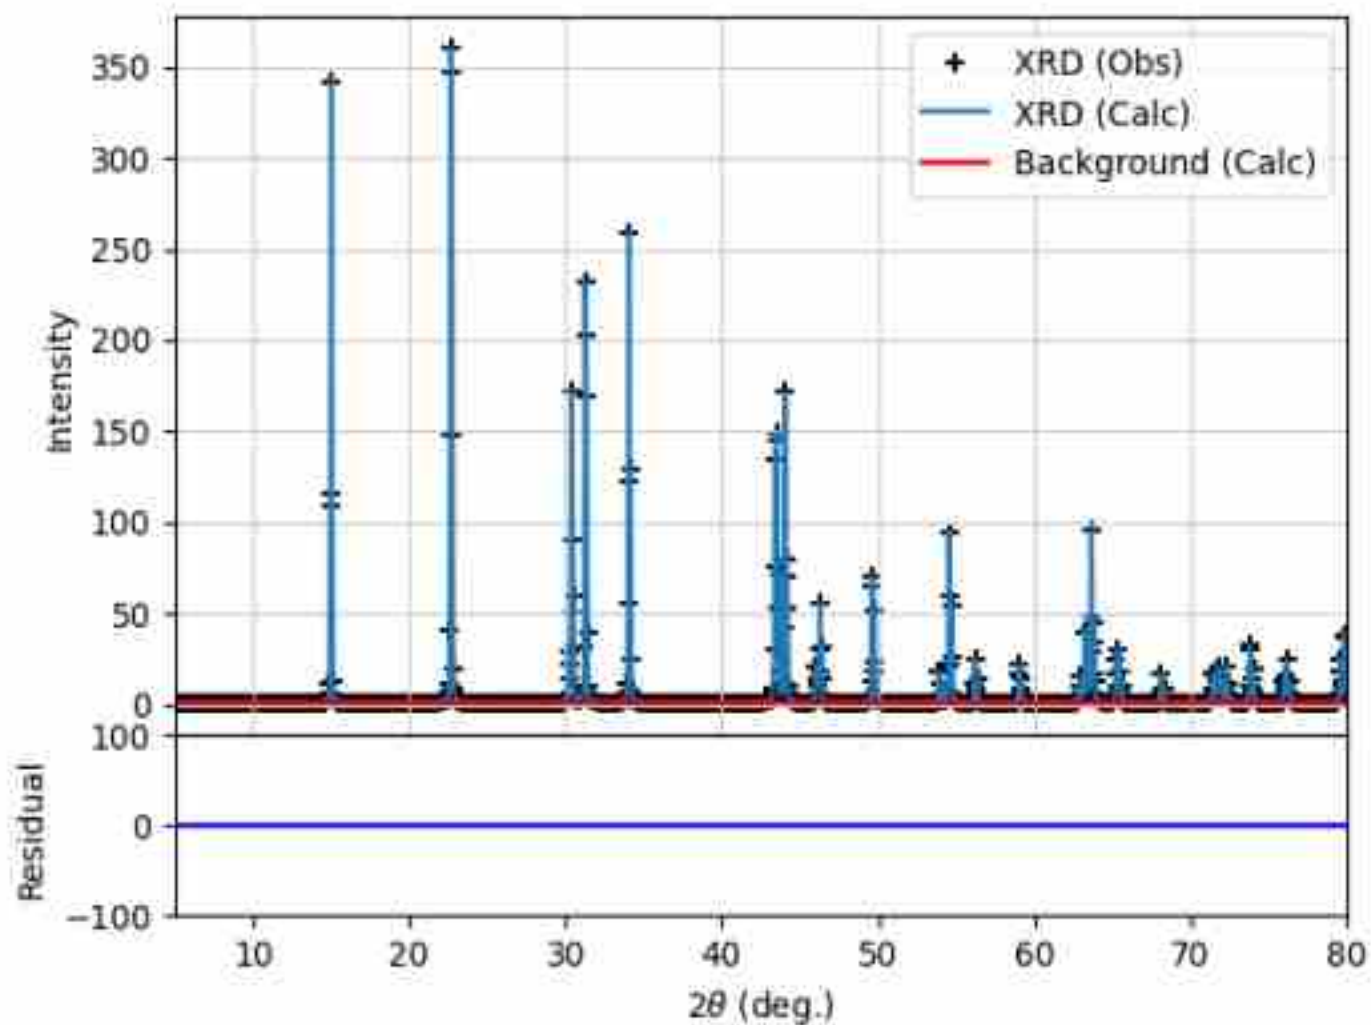

| RMSE before RR | Rwp     | RMSE after RR |
|----------------|---------|---------------|
| 0.013          | 0.00366 | 0.00124       |

# Ca1Bi1I1O2

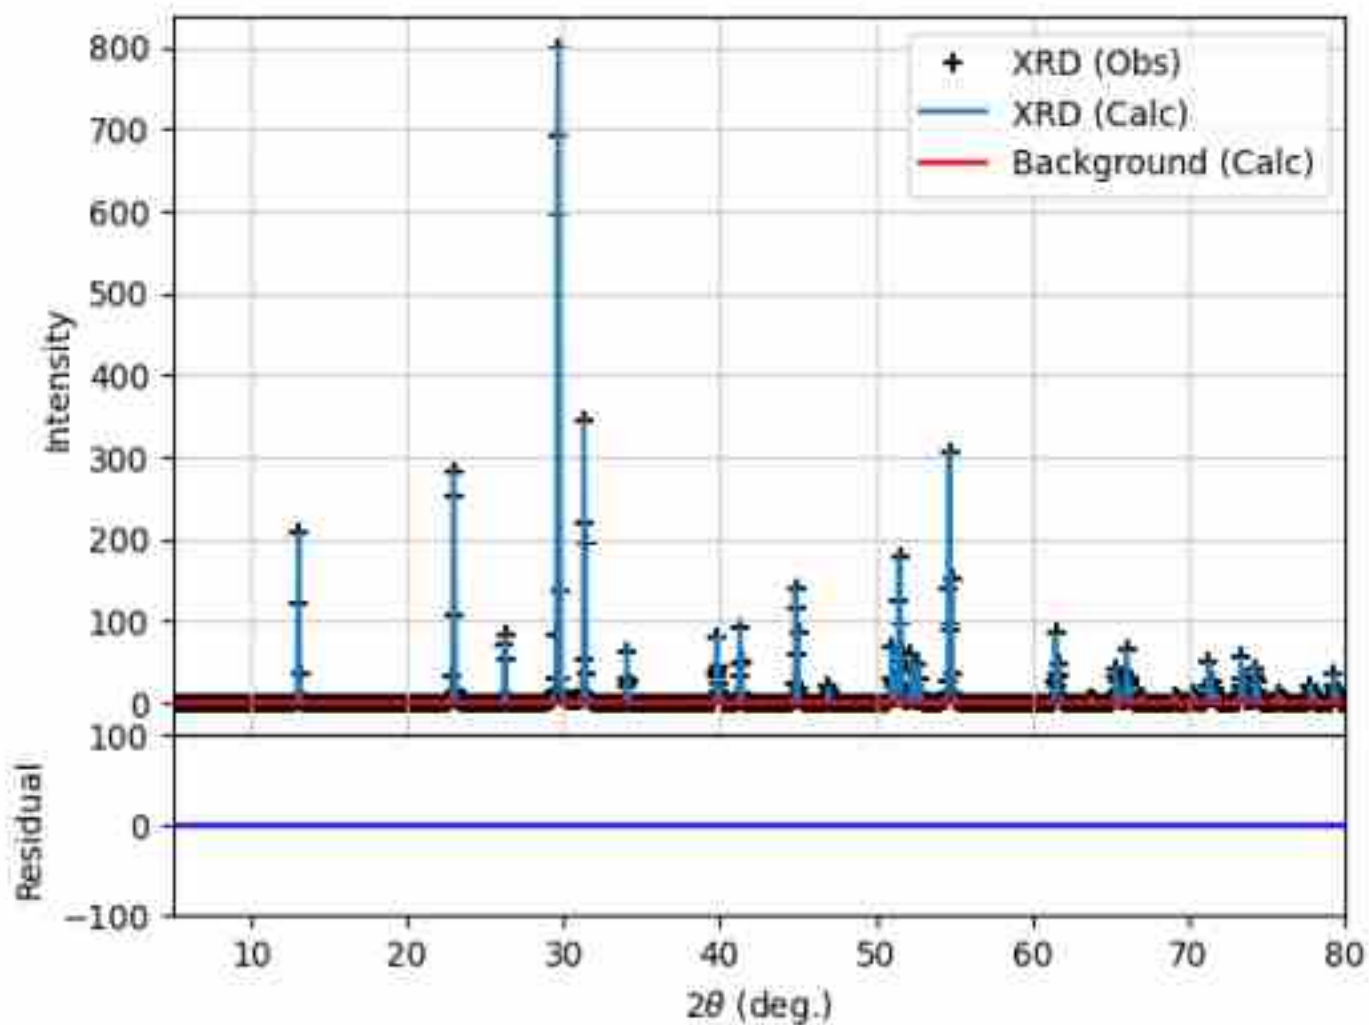

| RMSE before RR | Rwp     | RMSE after RR |
|----------------|---------|---------------|
| 0.013          | 0.00501 | 0.00117       |



# Ca1Ce1V2O8

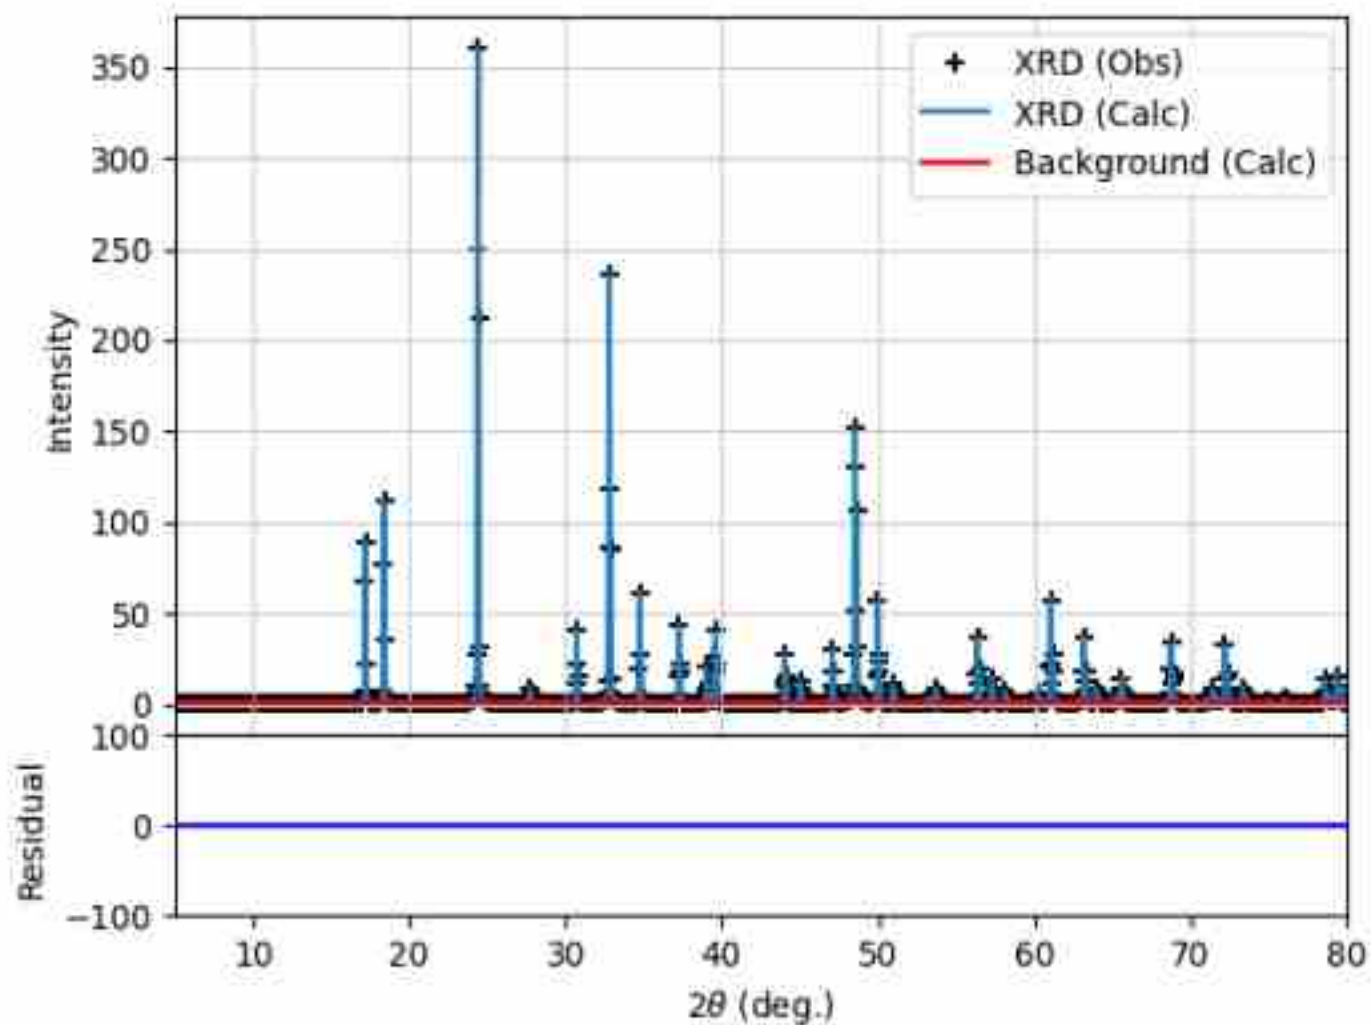

| RMSE before RR | Rwp     | RMSE after RR |
|----------------|---------|---------------|
| 0.013          | 0.00728 | 0.00206       |

# Ca<sub>1</sub>In<sub>6</sub>Cu<sub>6</sub>

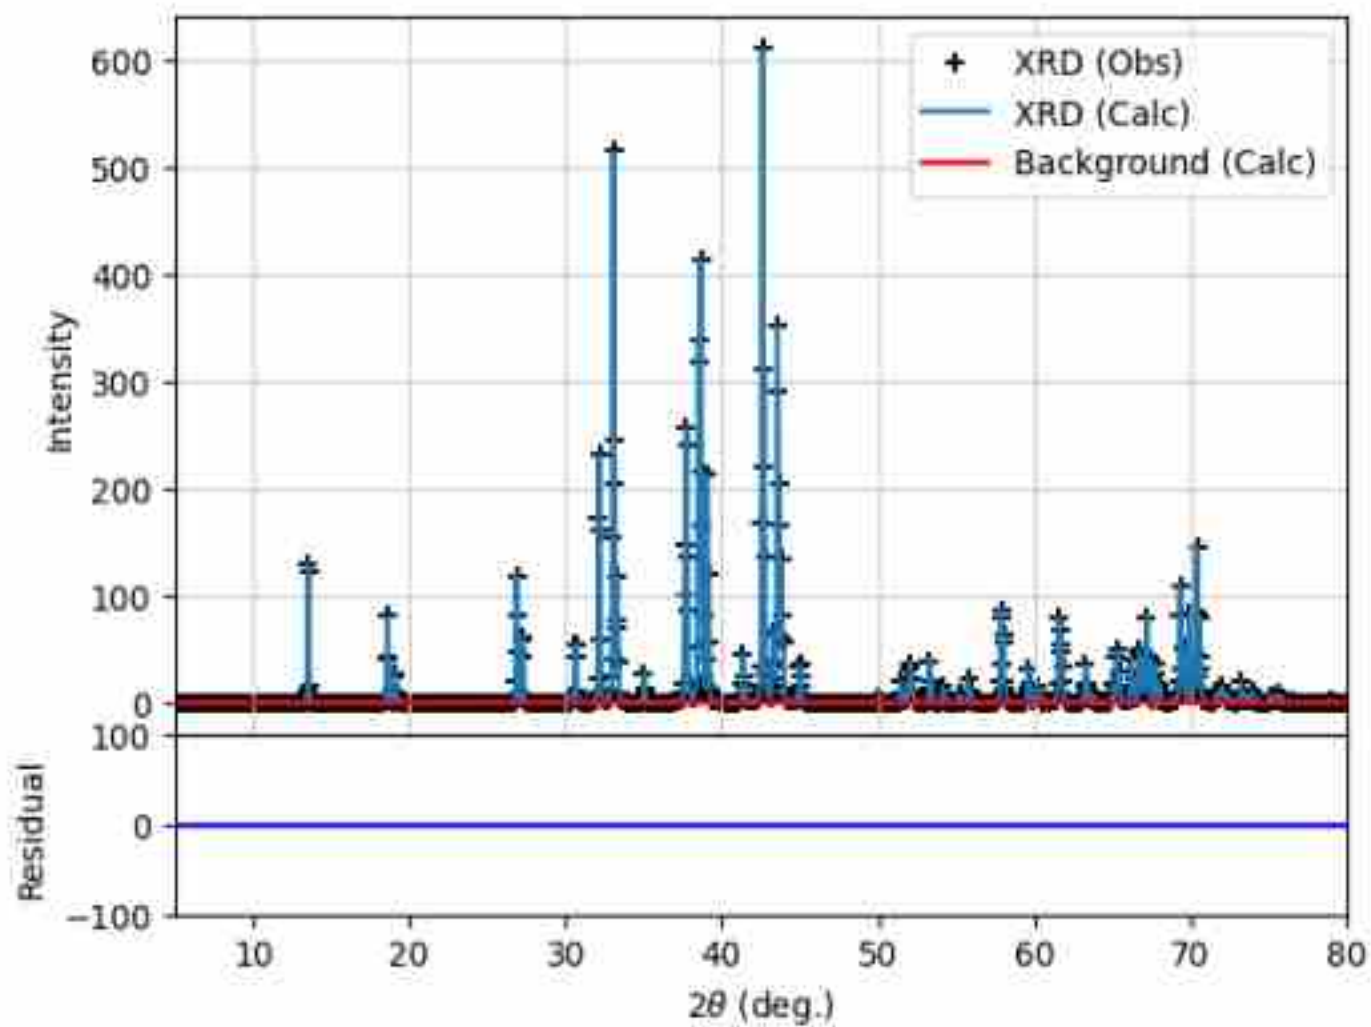

| RMSE before RR | Rwp     | RMSE after RR |
|----------------|---------|---------------|
| 0.013          | 0.00399 | 0.00031       |

# Ca1Nd1Co1O4

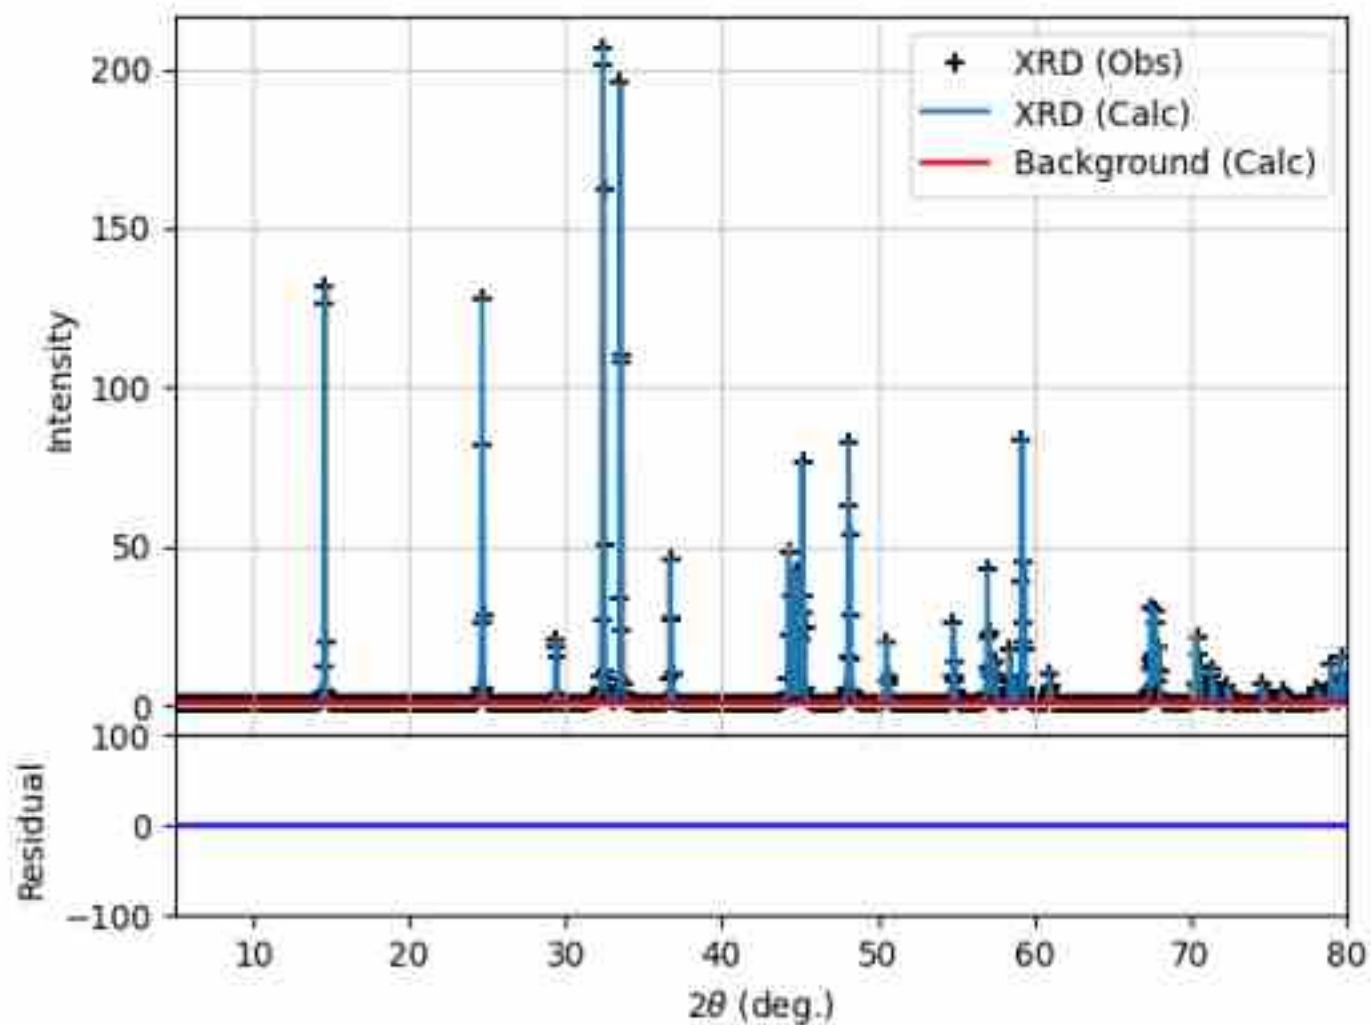

| RMSE before RR | Rwp     | RMSE after RR |
|----------------|---------|---------------|
| 0.013          | 0.00362 | 0.00099       |

# Ca1Rh1F6

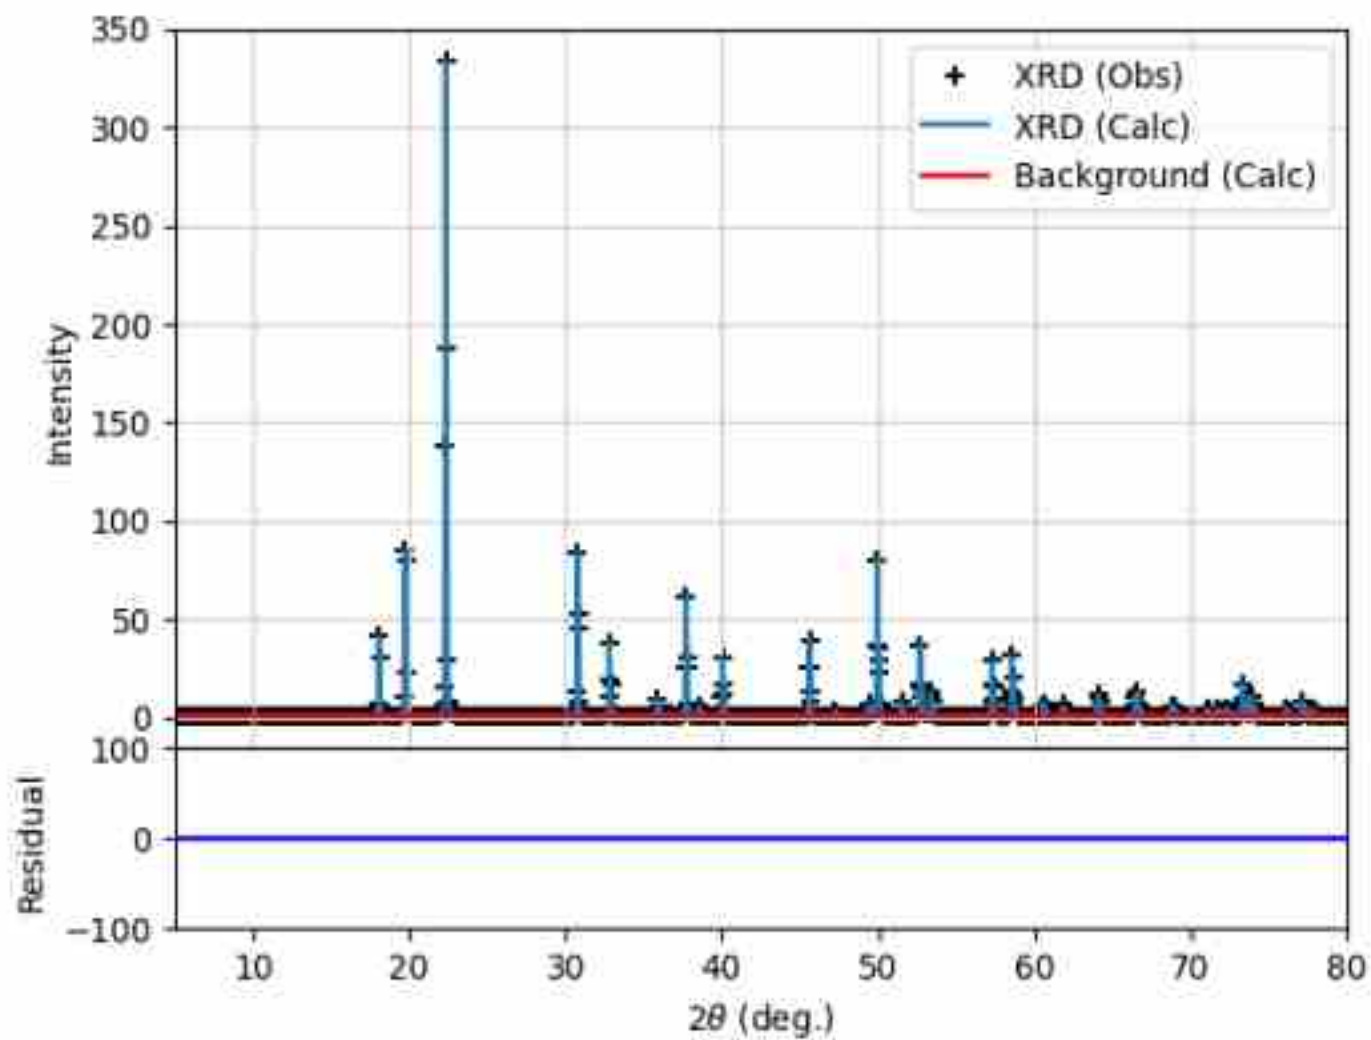

| RMSE before RR | Rwp     | RMSE after RR |
|----------------|---------|---------------|
| 0.013          | 0.00215 | 0.00079       |

# Ca1Si2

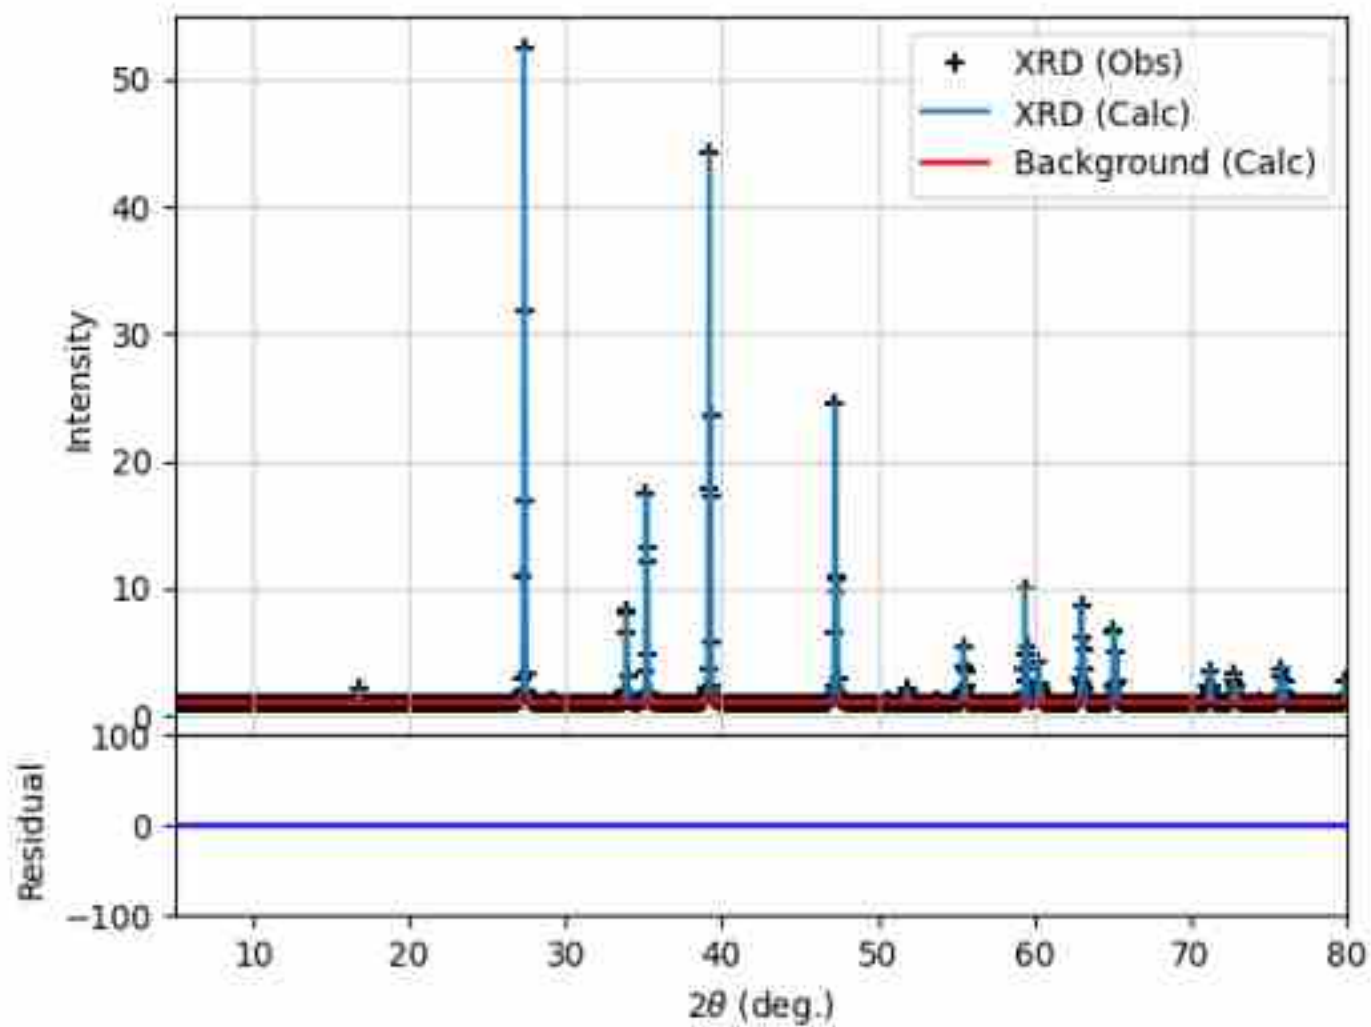

| RMSE before RR | Rwp     | RMSE after RR |
|----------------|---------|---------------|
| 0.013          | 0.00243 | 0.00058       |

# Ca<sub>2</sub>Ge<sub>4</sub>Pt<sub>4</sub>

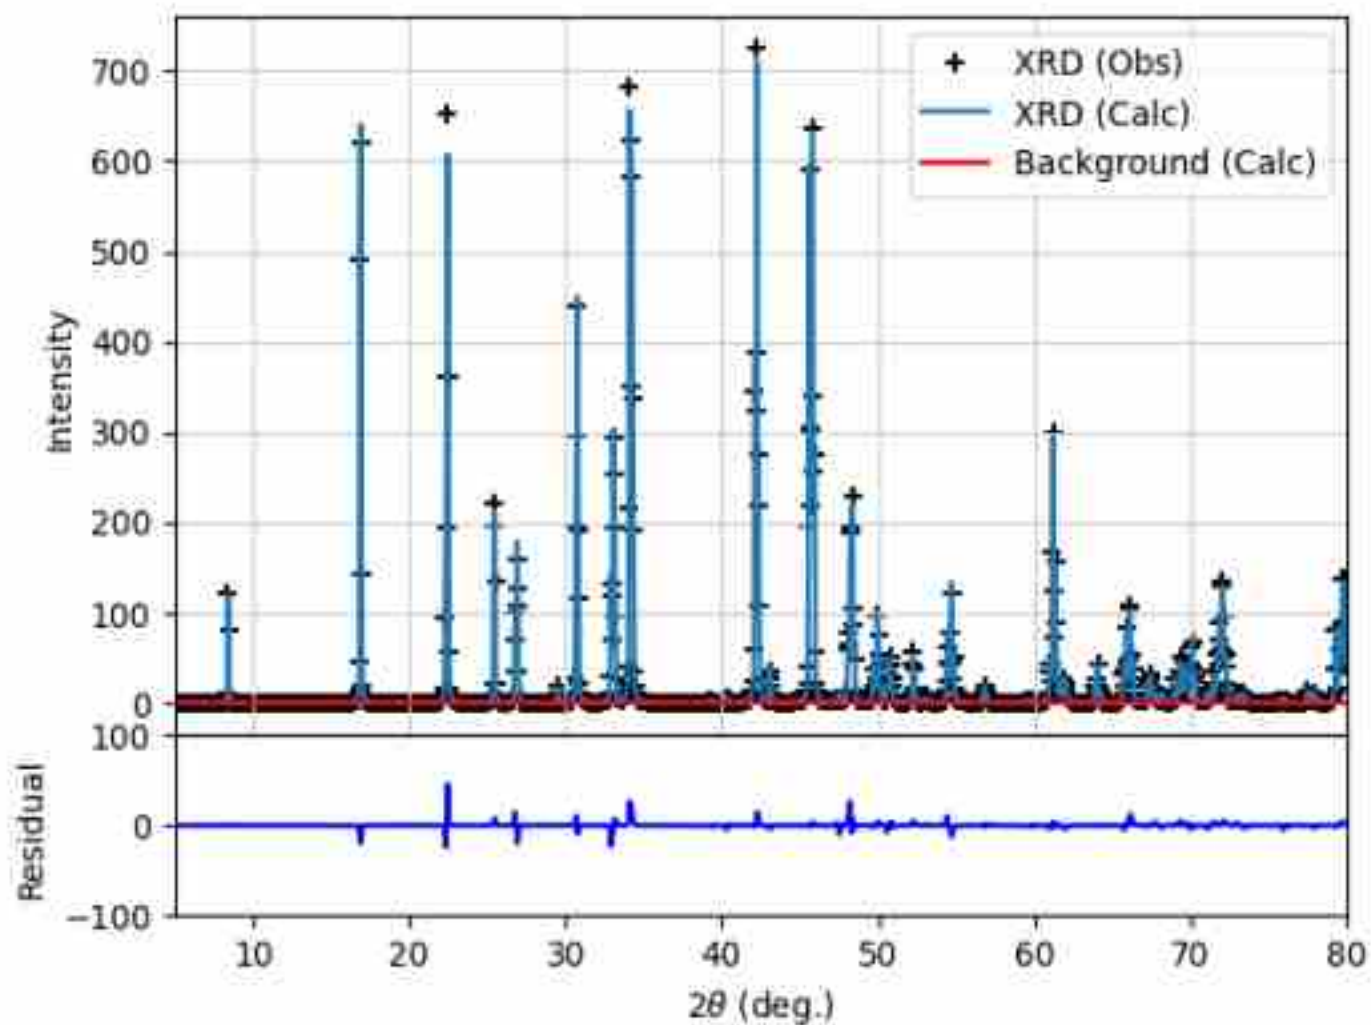

| RMSE before RR | Rwp     | RMSE after RR |
|----------------|---------|---------------|
| 0.013          | 8.13037 | 0.01431       |

# Ca<sub>2</sub>Hg<sub>6</sub>

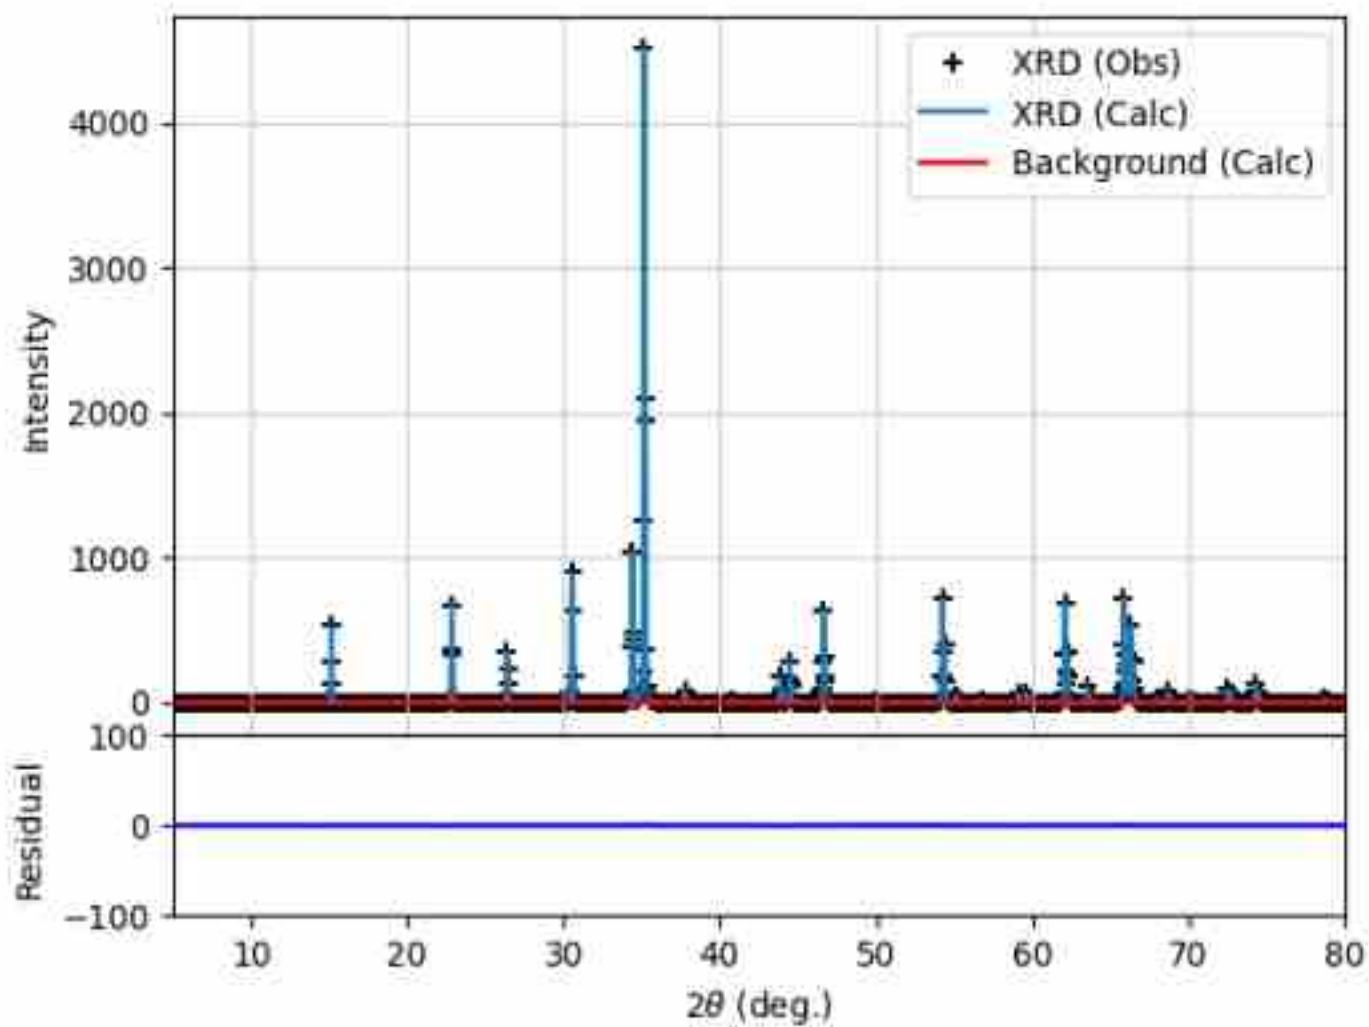

| RMSE before RR | Rwp     | RMSE after RR |
|----------------|---------|---------------|
| 0.013          | 0.11901 | 0.00477       |

# Ca<sub>4</sub>Ga<sub>1</sub>Sn<sub>3</sub>

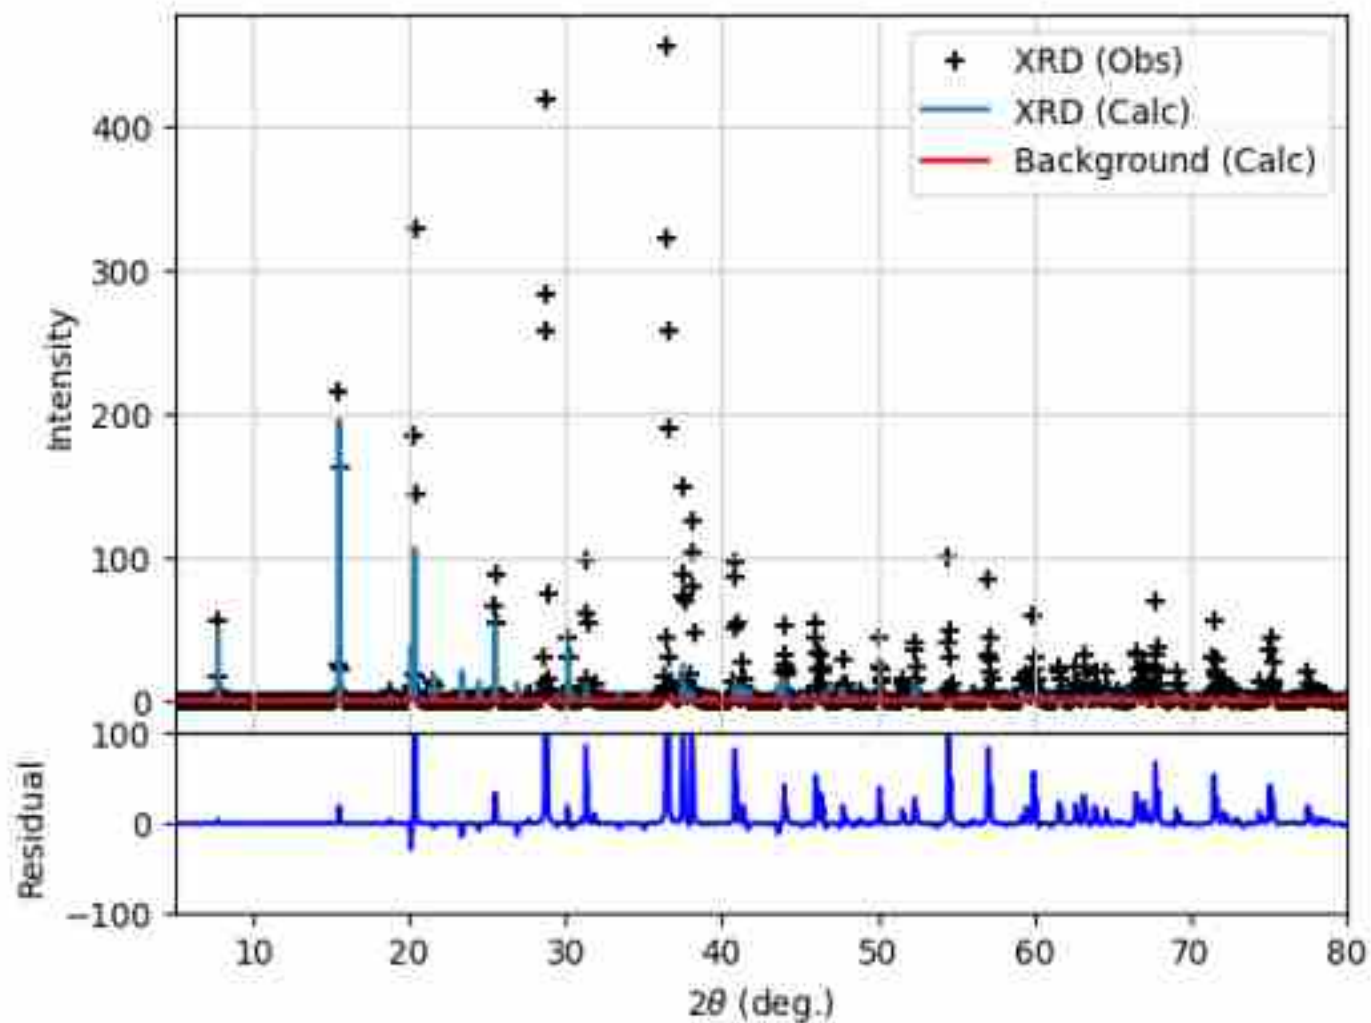

| RMSE before RR | Rwp      | RMSE after RR |
|----------------|----------|---------------|
| 0.013          | 83.16662 | None          |



# Cd<sub>2</sub>In<sub>1</sub>Ag<sub>1</sub>Te<sub>4</sub>

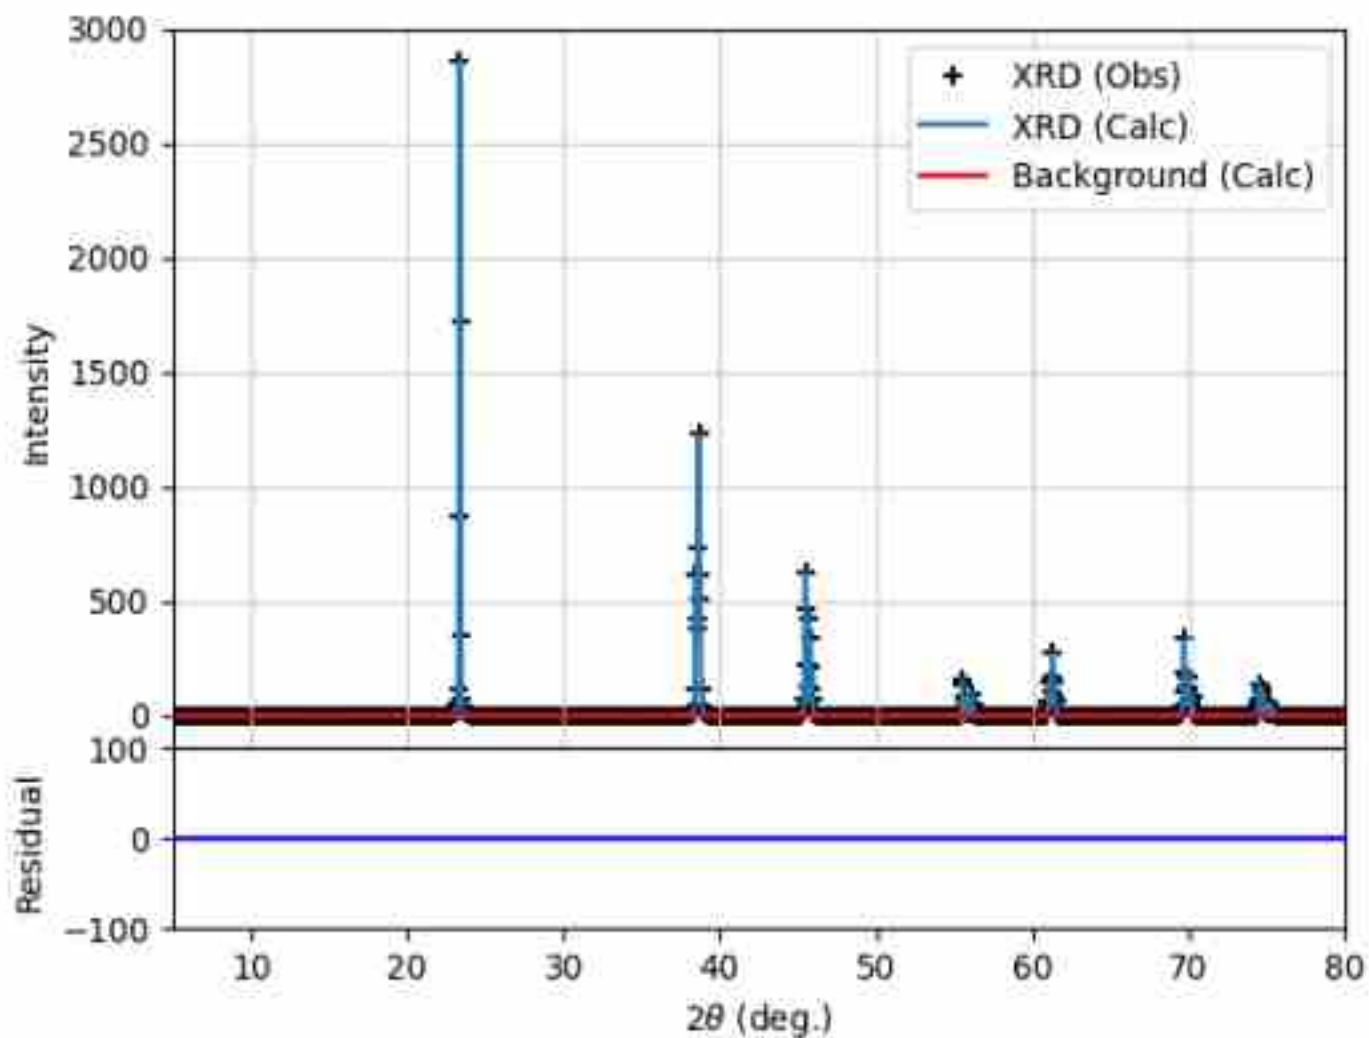

| RMSE before RR | Rwp     | RMSE after RR |
|----------------|---------|---------------|
| 0.013          | 0.00465 | 0.00038       |

# Ce1Al4Ge2Au1

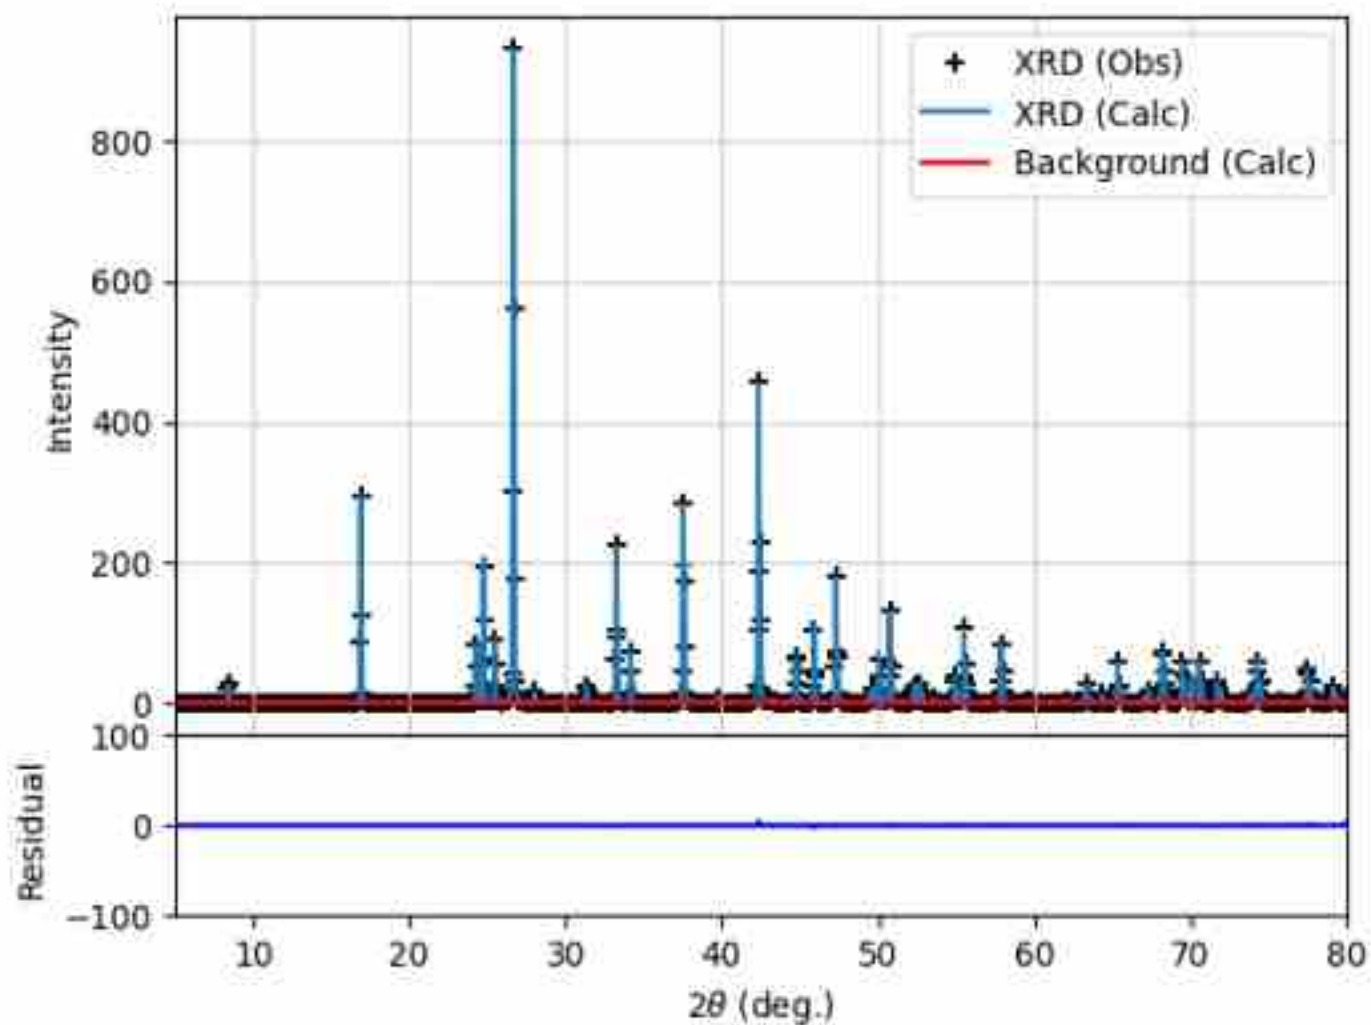

| RMSE before RR | Rwp     | RMSE after RR |
|----------------|---------|---------------|
| 0.013          | 1.51145 | 0.01895       |

# CeIn7Pt2

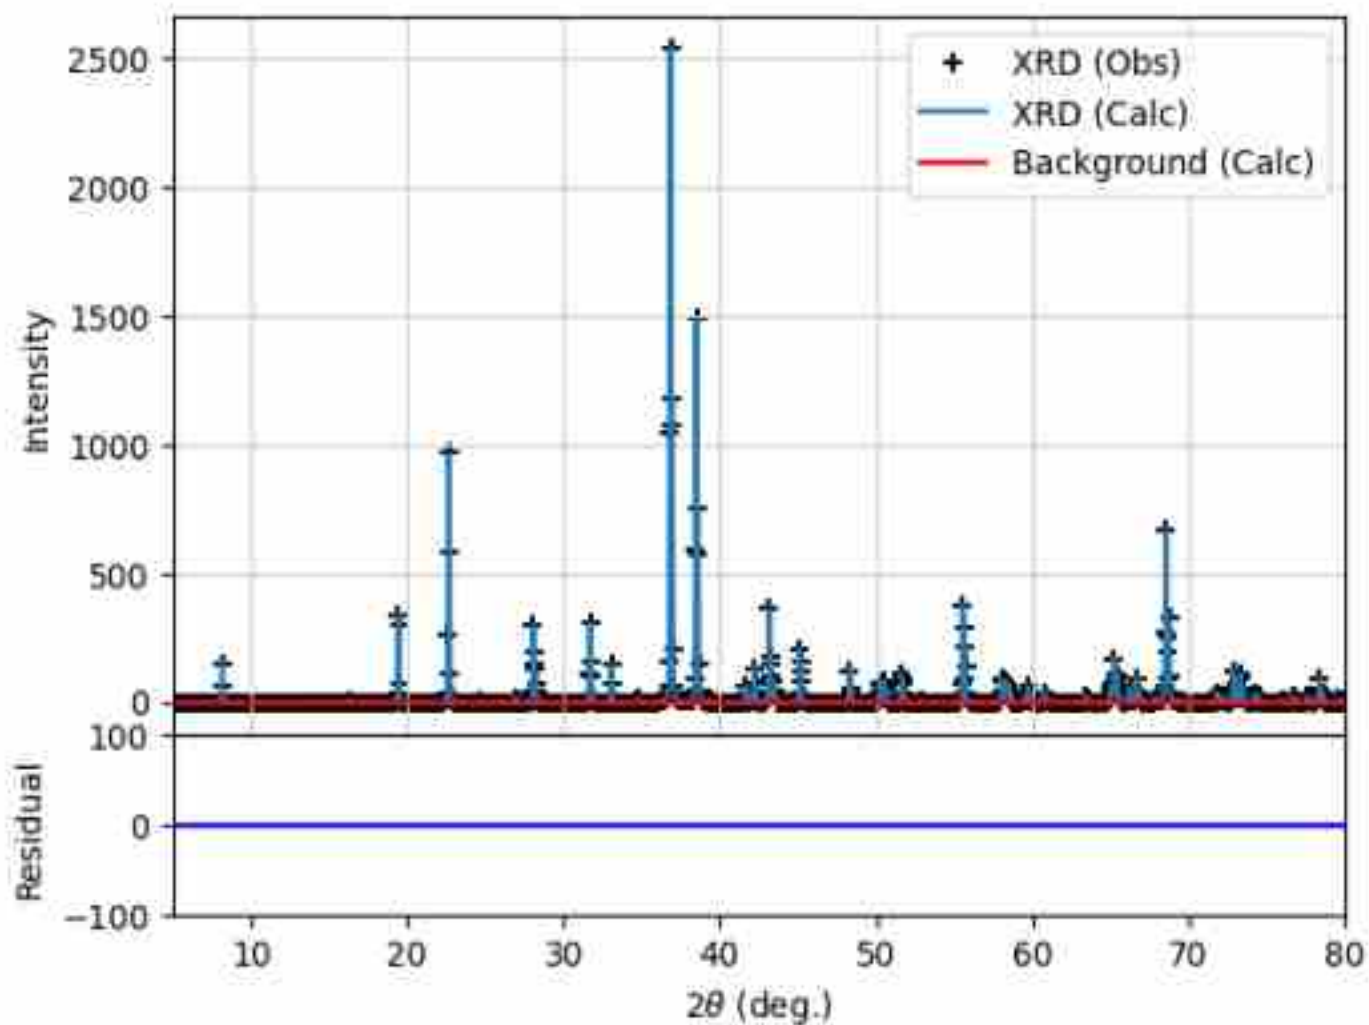

| RMSE before RR | Rwp     | RMSE after RR |
|----------------|---------|---------------|
| 0.013          | 0.00336 | 0.00024       |

# Ce1Nd1C4

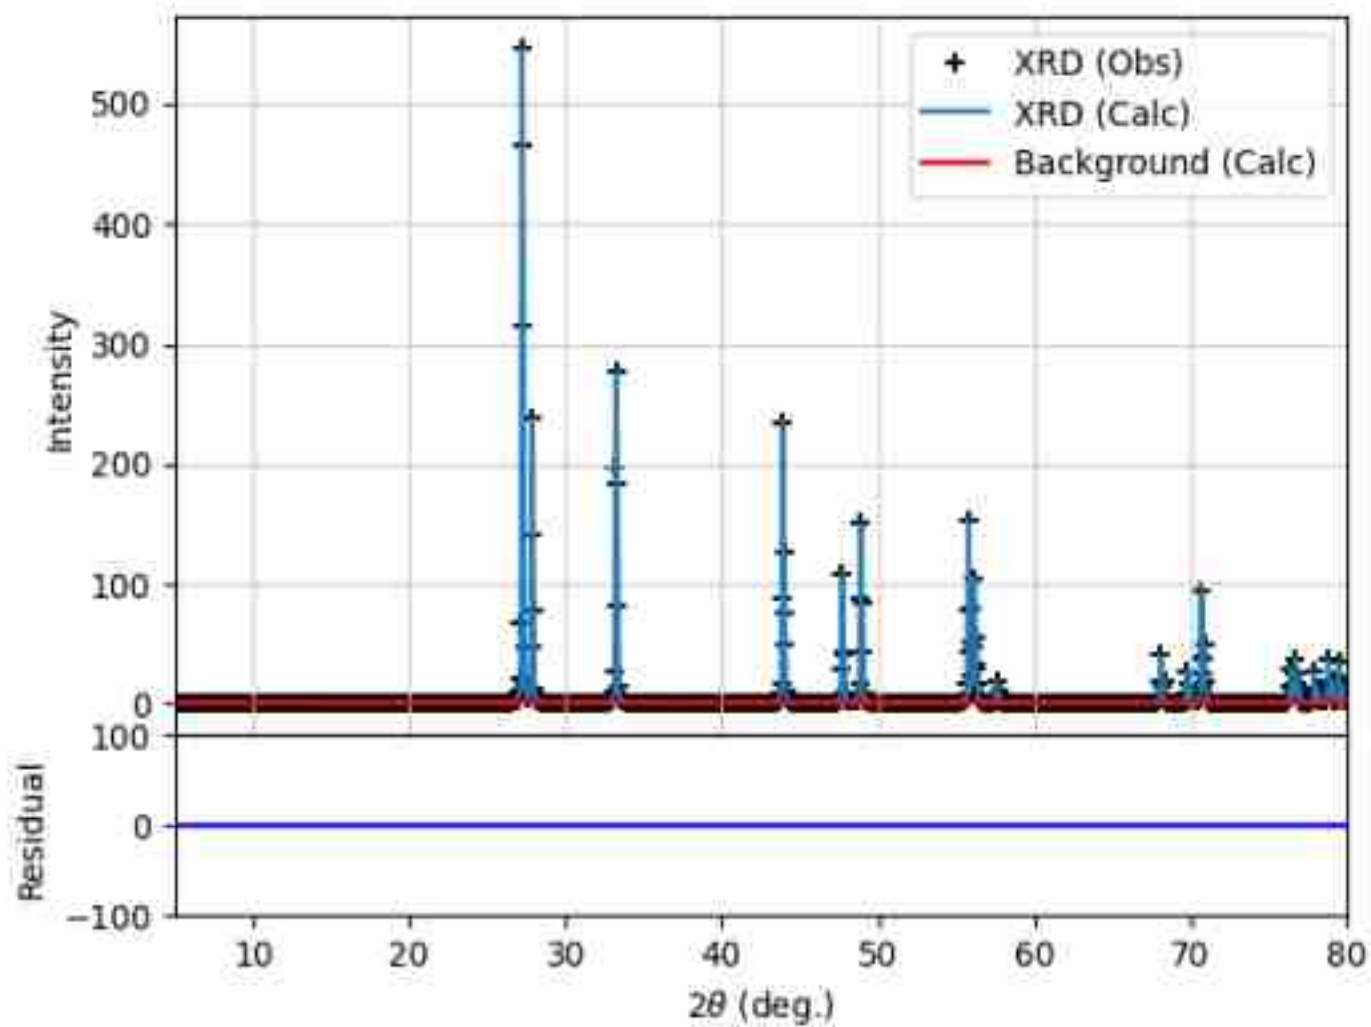

| RMSE before RR | Rwp     | RMSE after RR |
|----------------|---------|---------------|
| 0.013          | 0.00516 | 0.00205       |

# Ce1U3Al8

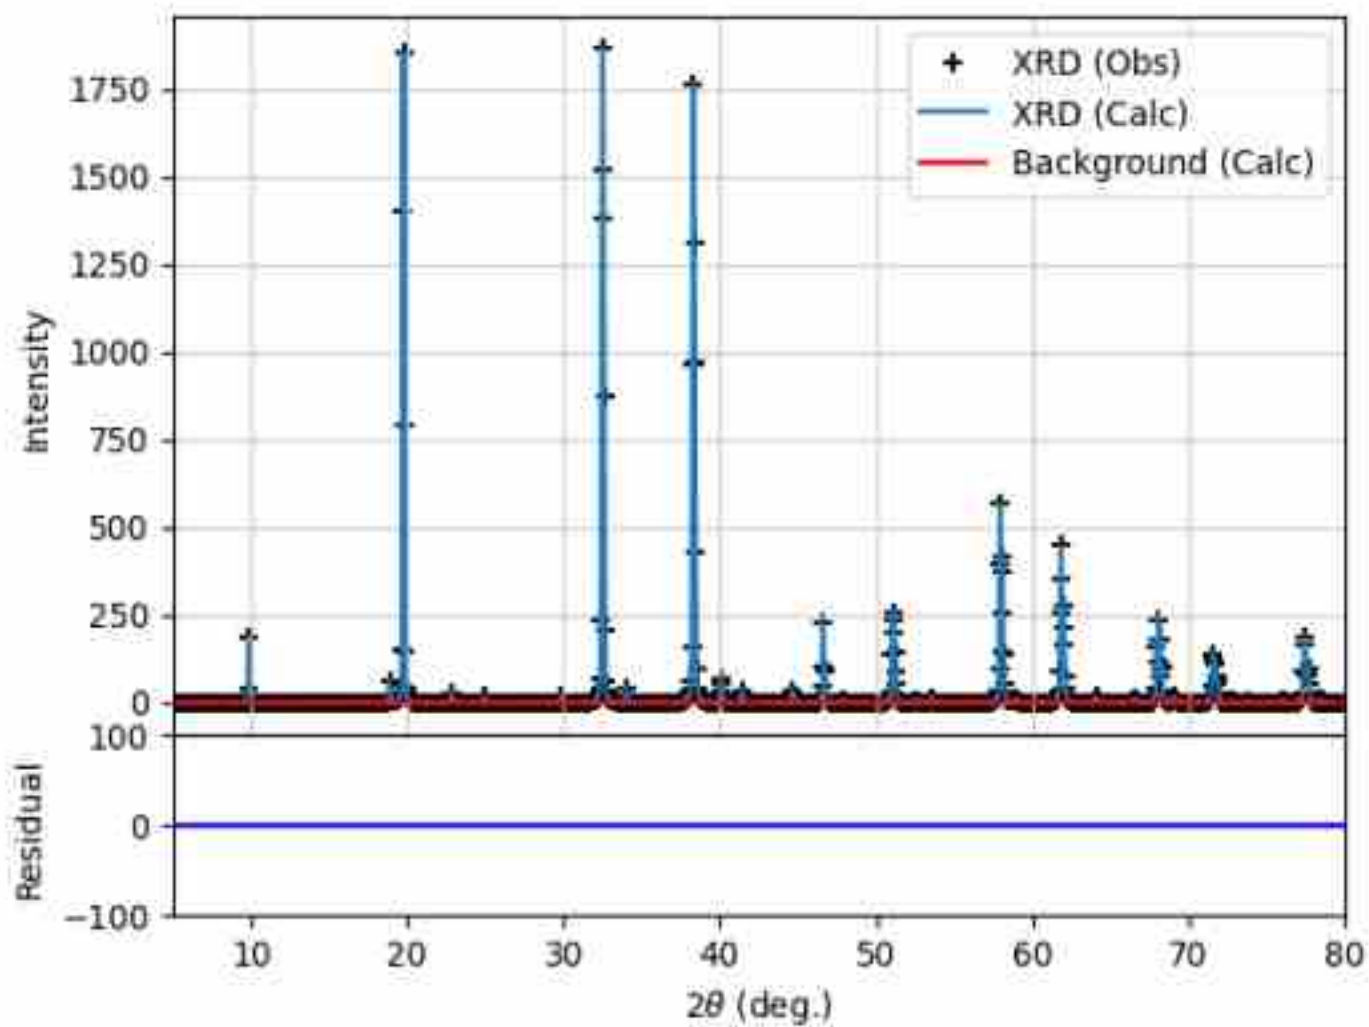

| RMSE before RR | Rwp     | RMSE after RR |
|----------------|---------|---------------|
| 0.013          | 0.00366 | 0.00111       |

# Ce1Zn2Ga2

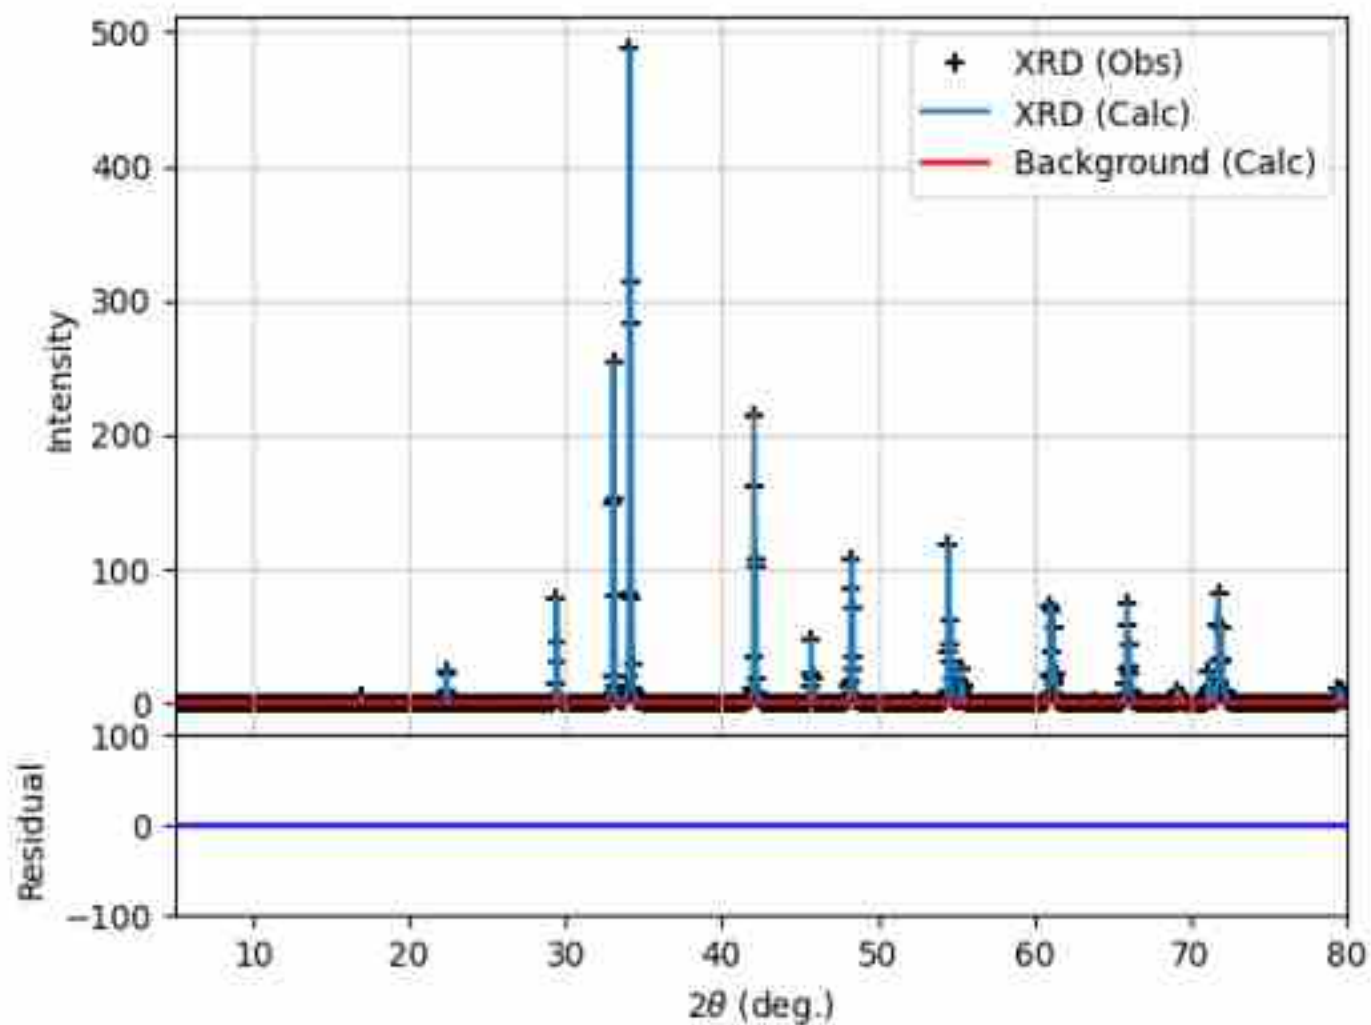

| RMSE before RR | Rwp     | RMSE after RR |
|----------------|---------|---------------|
| 0.013          | 0.00364 | 0.0006        |

# Ce<sub>1</sub>Zr<sub>4</sub>O<sub>10</sub>

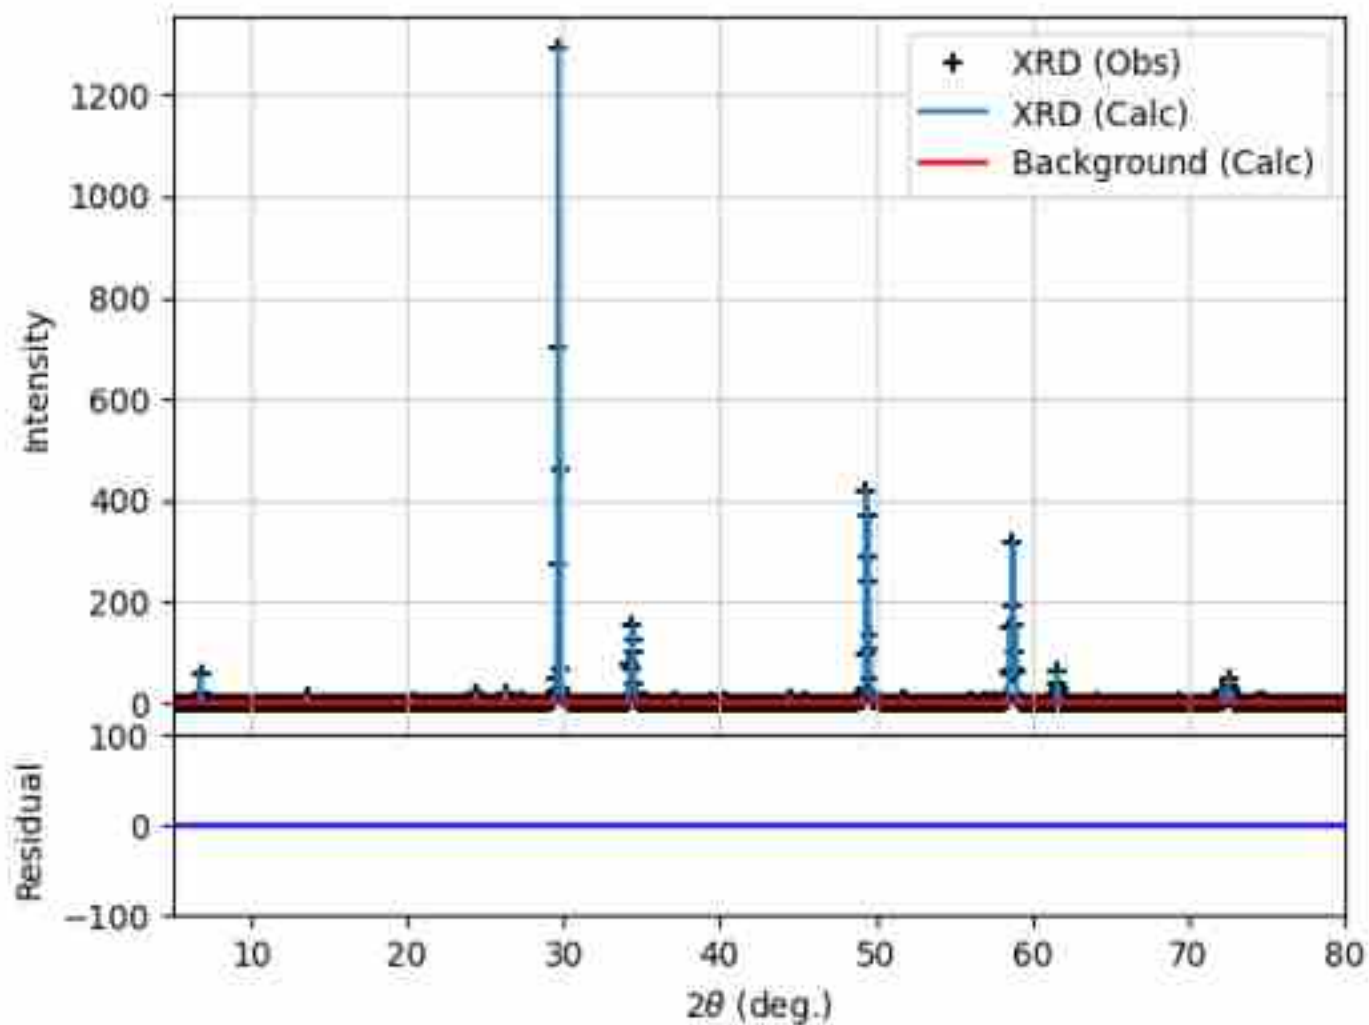

| RMSE before RR | Rwp     | RMSE after RR |
|----------------|---------|---------------|
| 0.013          | 0.00236 | 0.00106       |

# Ce<sub>2</sub>Co<sub>2</sub>Rh<sub>2</sub>

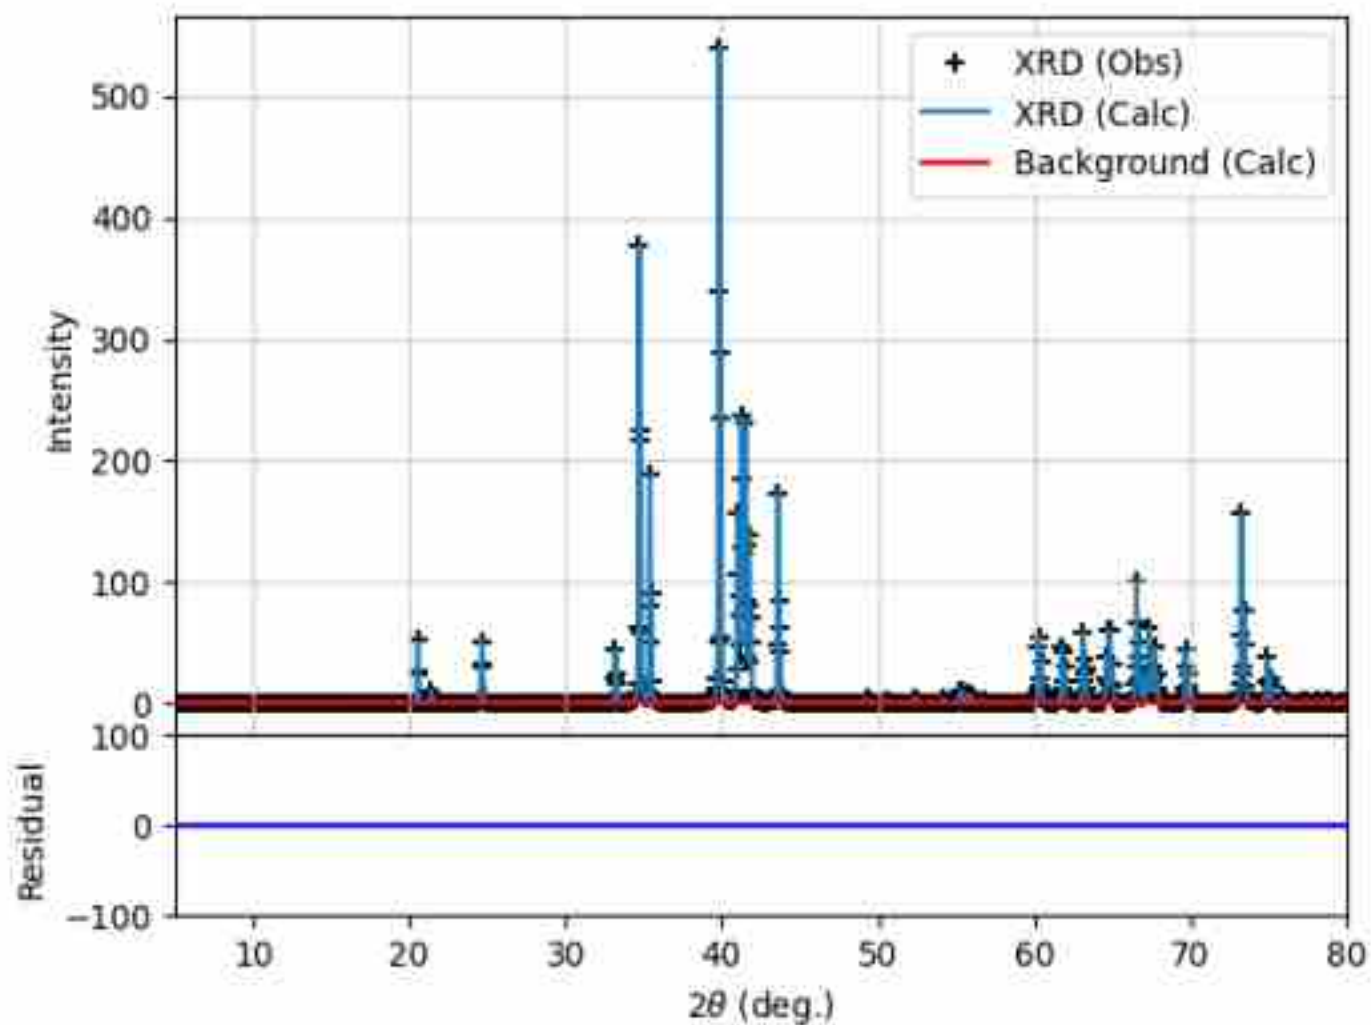

| RMSE before RR | Rwp     | RMSE after RR |
|----------------|---------|---------------|
| 0.013          | 0.00382 | 0.00022       |



# Ce<sub>2</sub>Ho<sub>6</sub>S<sub>12</sub>

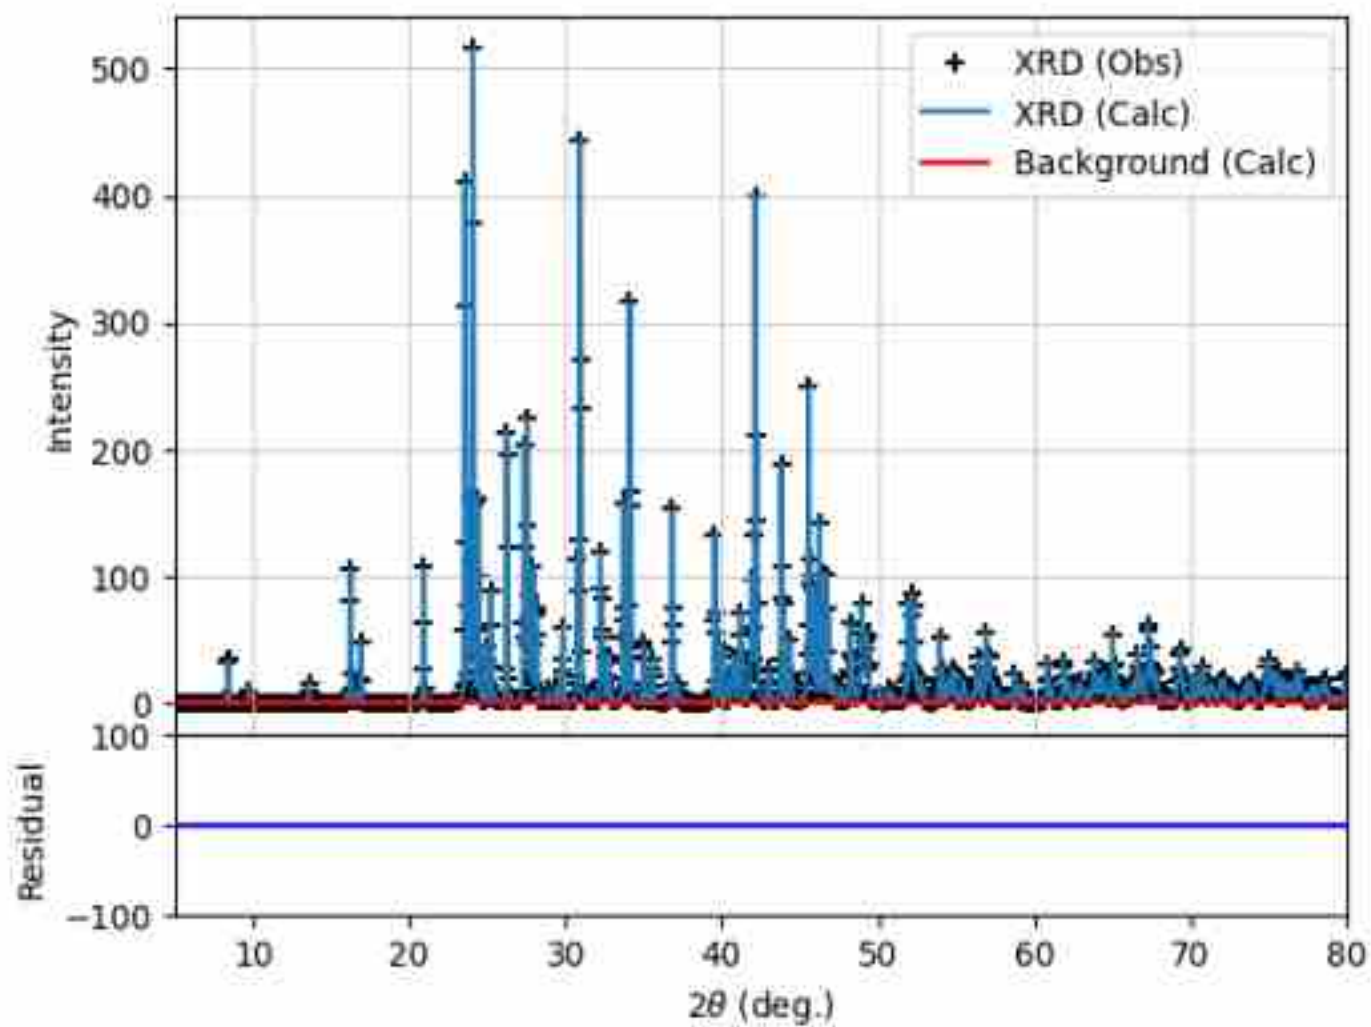

| RMSE before RR | Rwp     | RMSE after RR |
|----------------|---------|---------------|
| 0.013          | 0.00323 | 0.0005        |

# Ce2I6

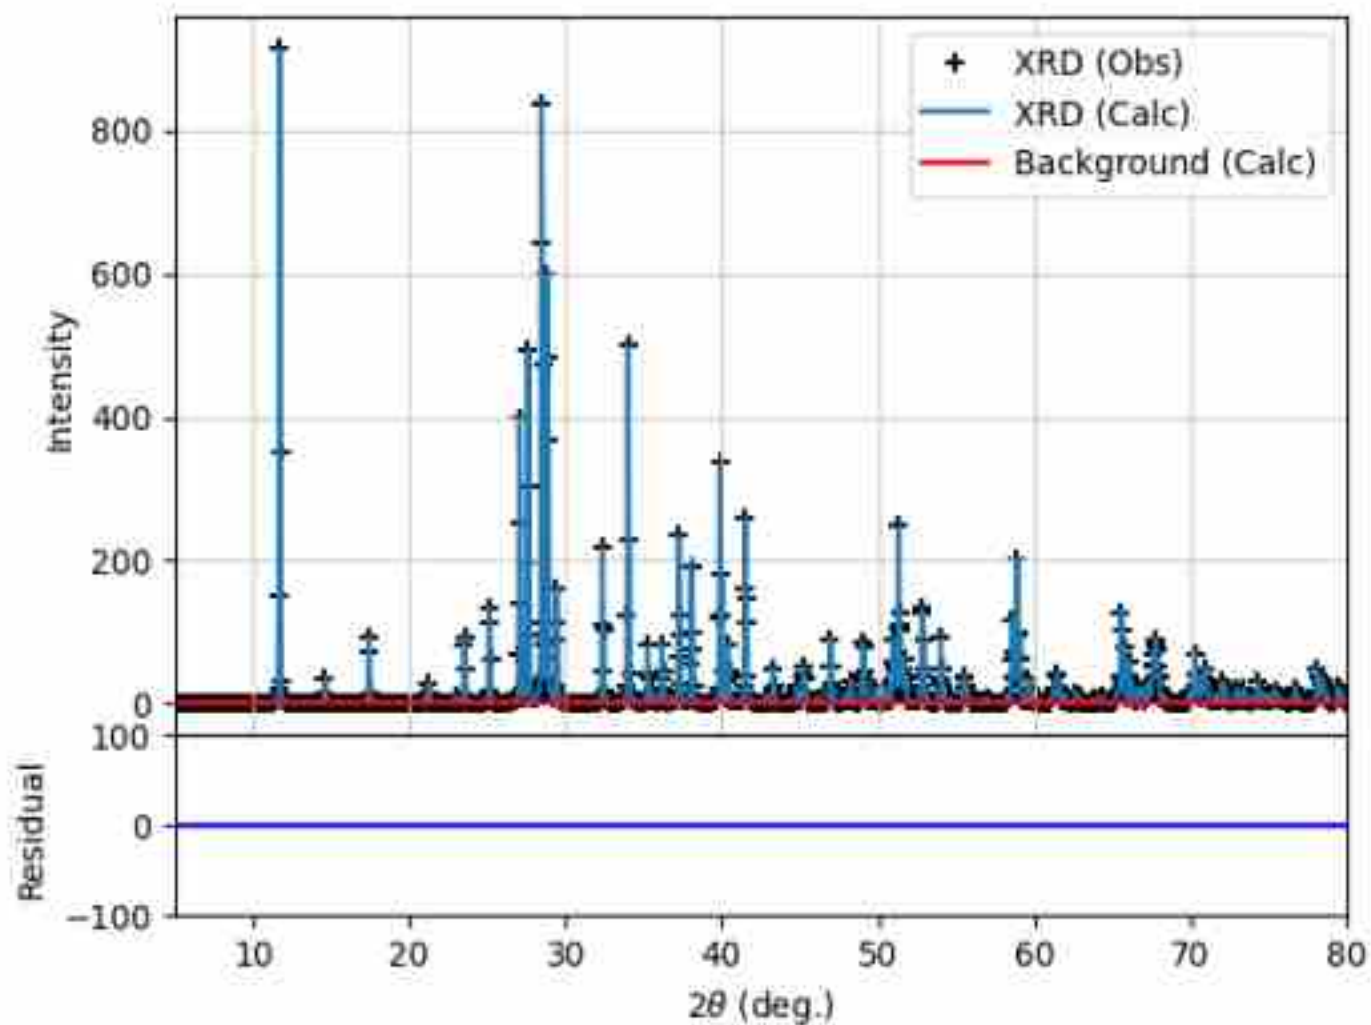

| RMSE before RR | Rwp     | RMSE after RR |
|----------------|---------|---------------|
| 0.013          | 0.00346 | 0.00036       |

# Ce<sub>2</sub>Ni<sub>2</sub>Sn<sub>2</sub>

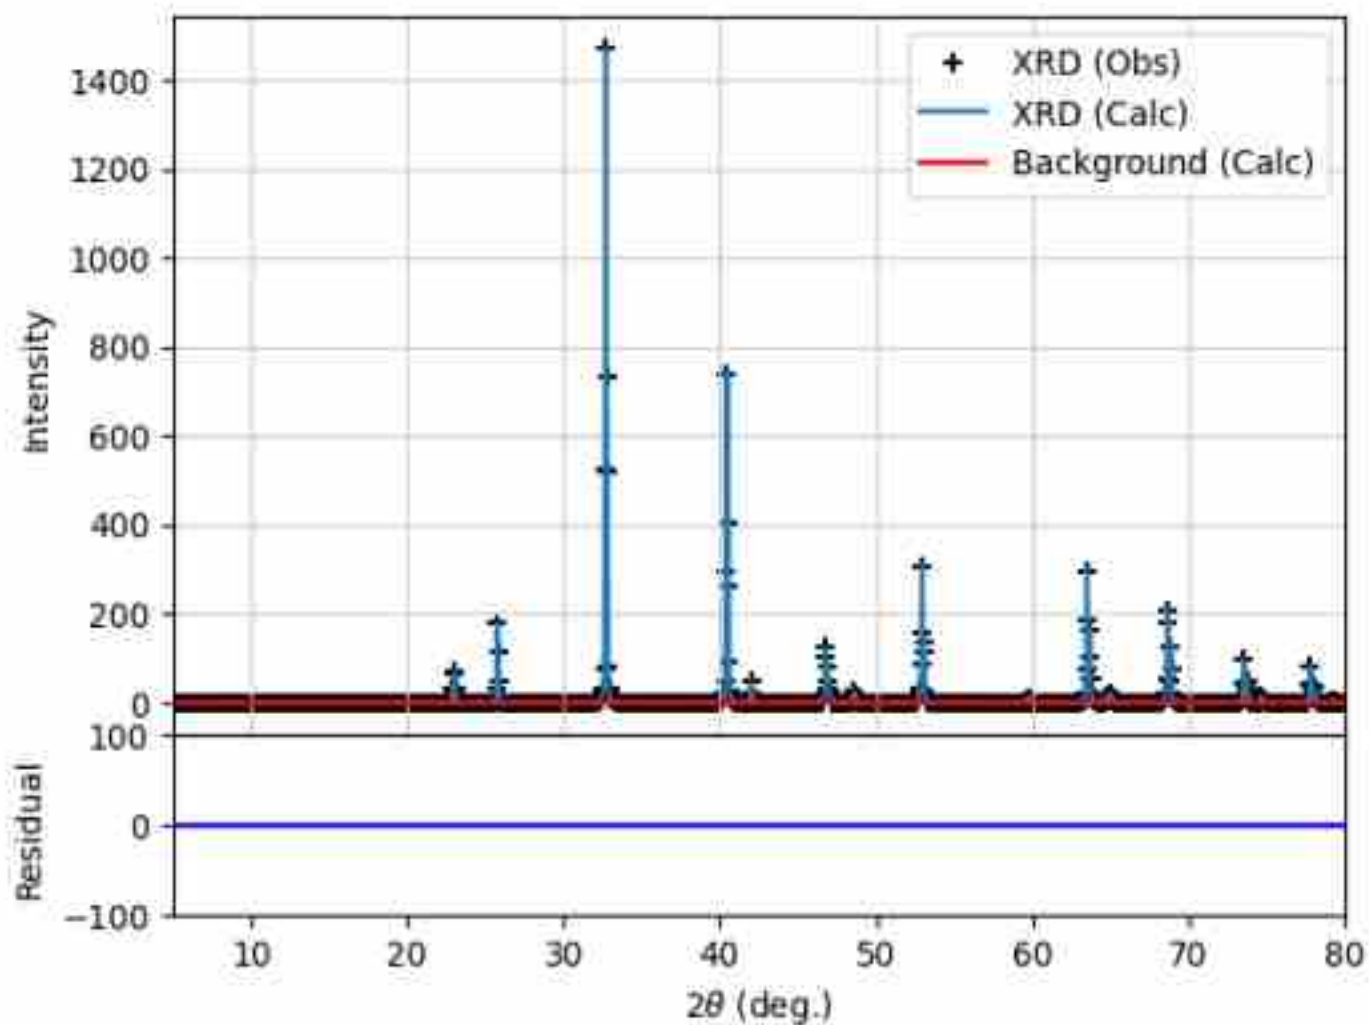

| RMSE before RR | Rwp     | RMSE after RR |
|----------------|---------|---------------|
| 0.013          | 0.01622 | 0.00102       |

# Ce4Sb2

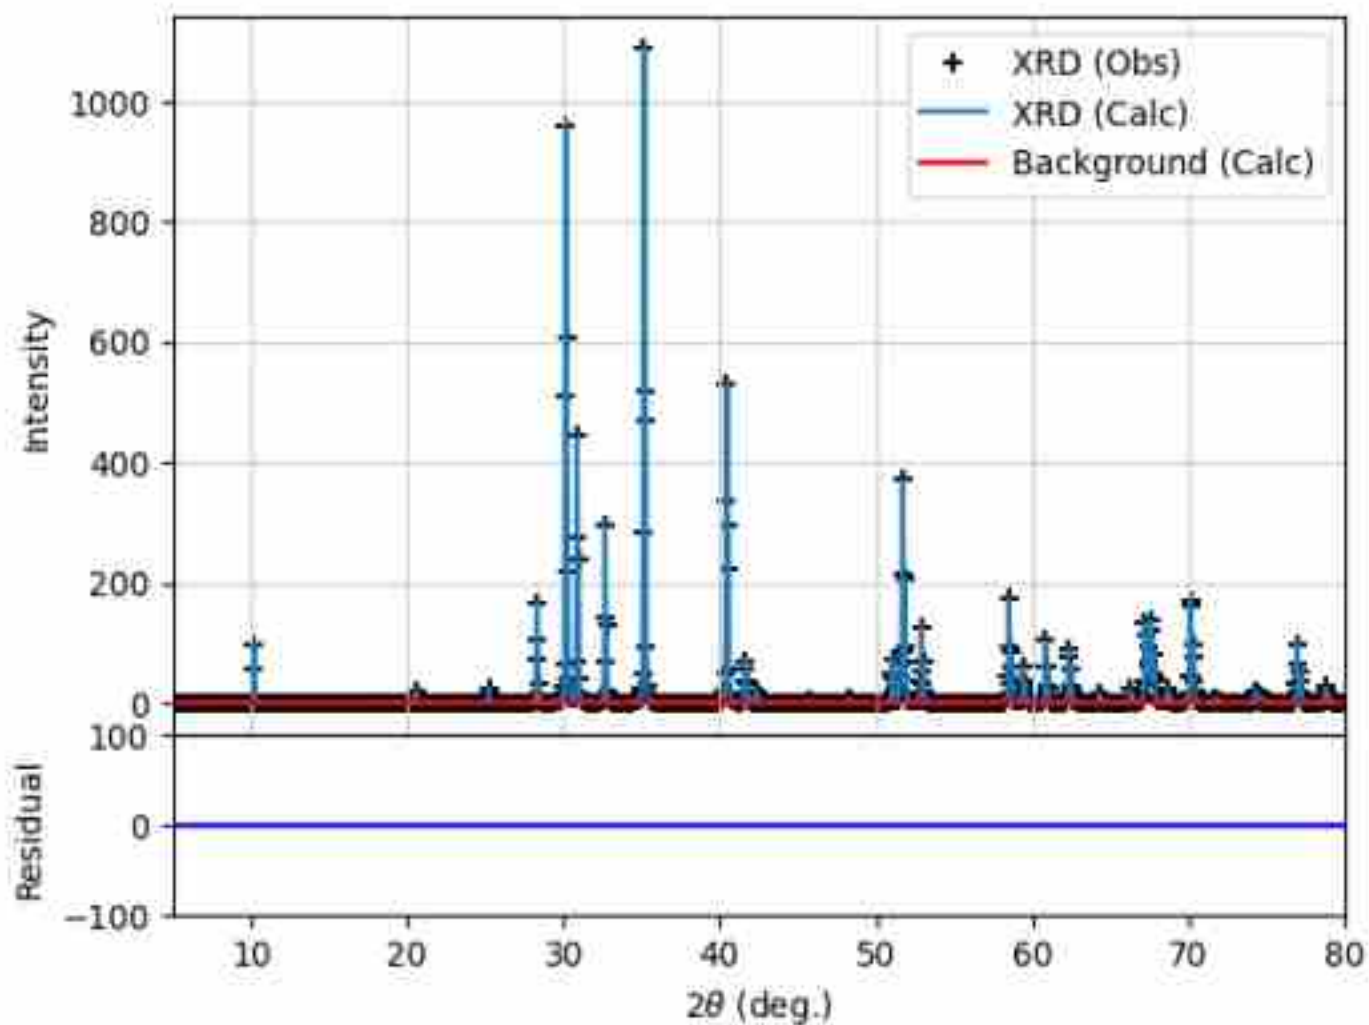

| RMSE before RR | Rwp     | RMSE after RR |
|----------------|---------|---------------|
| 0.013          | 0.00481 | 0.00036       |

# Ce4Sc4S12

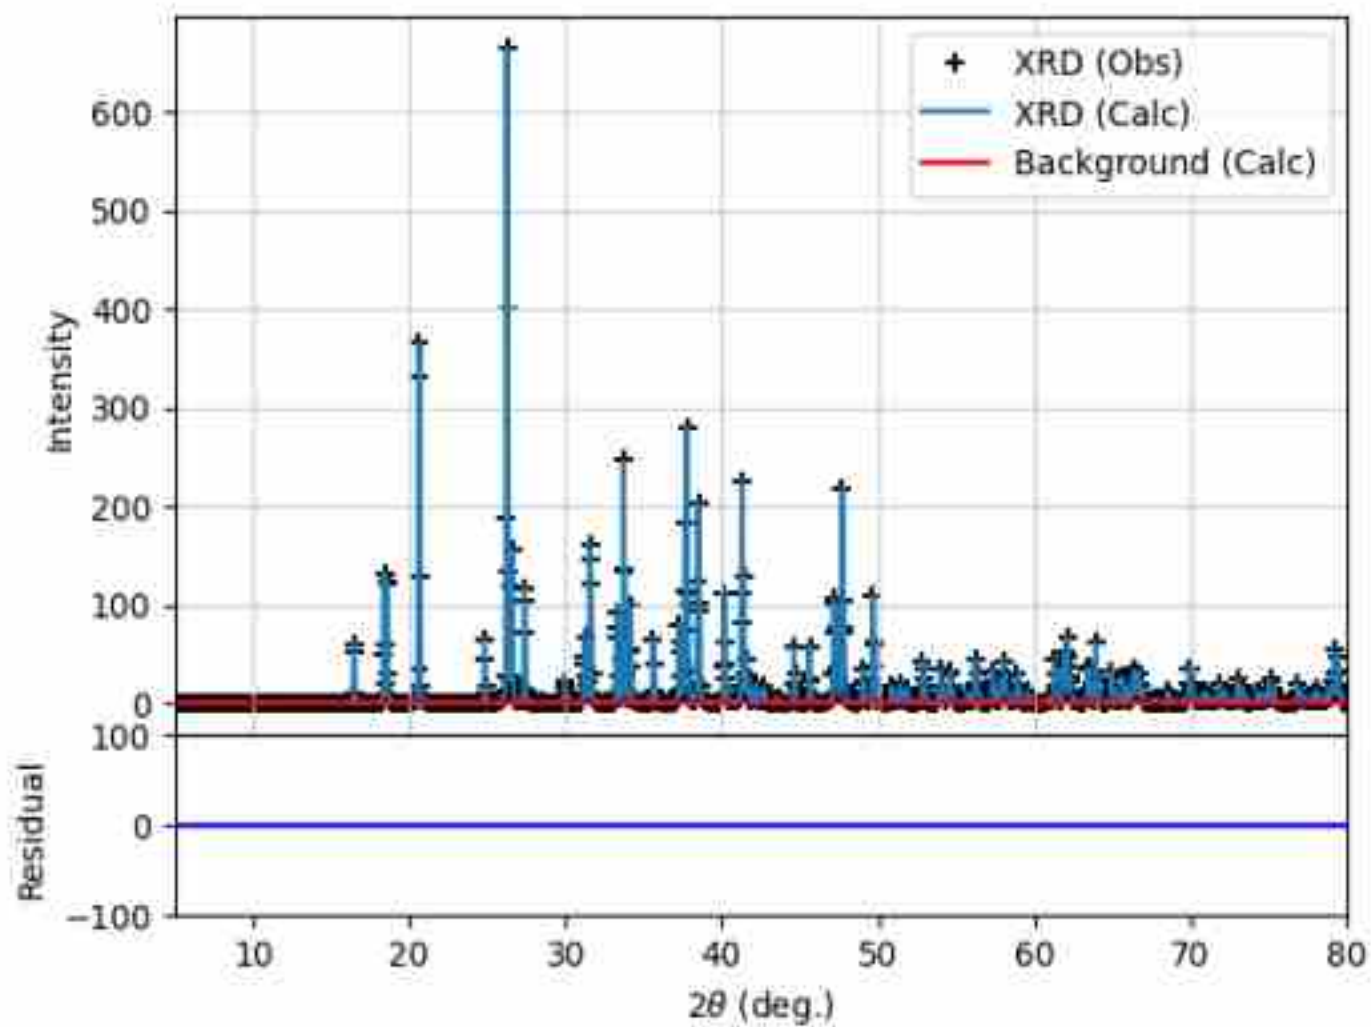

| RMSE before RR | Rwp    | RMSE after RR |
|----------------|--------|---------------|
| 0.013          | 0.0037 | 0.00059       |

# Ce<sub>4</sub>Si<sub>4</sub>

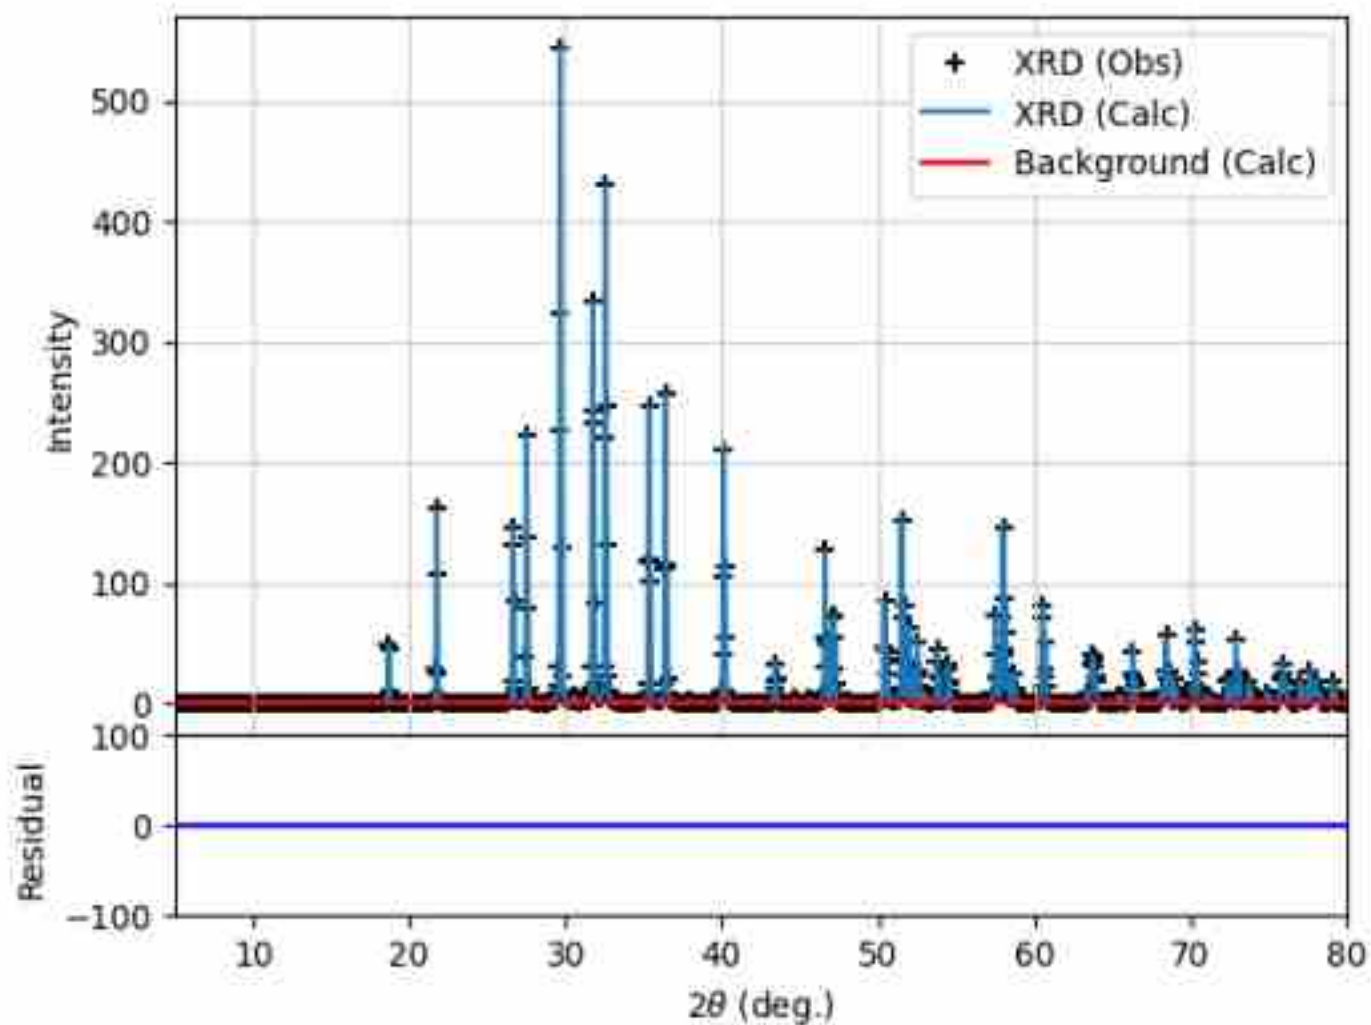

| RMSE before RR | Rwp     | RMSE after RR |
|----------------|---------|---------------|
| 0.013          | 0.00453 | 0.0005        |

# Cr<sub>2</sub>W<sub>2</sub>O<sub>8</sub>

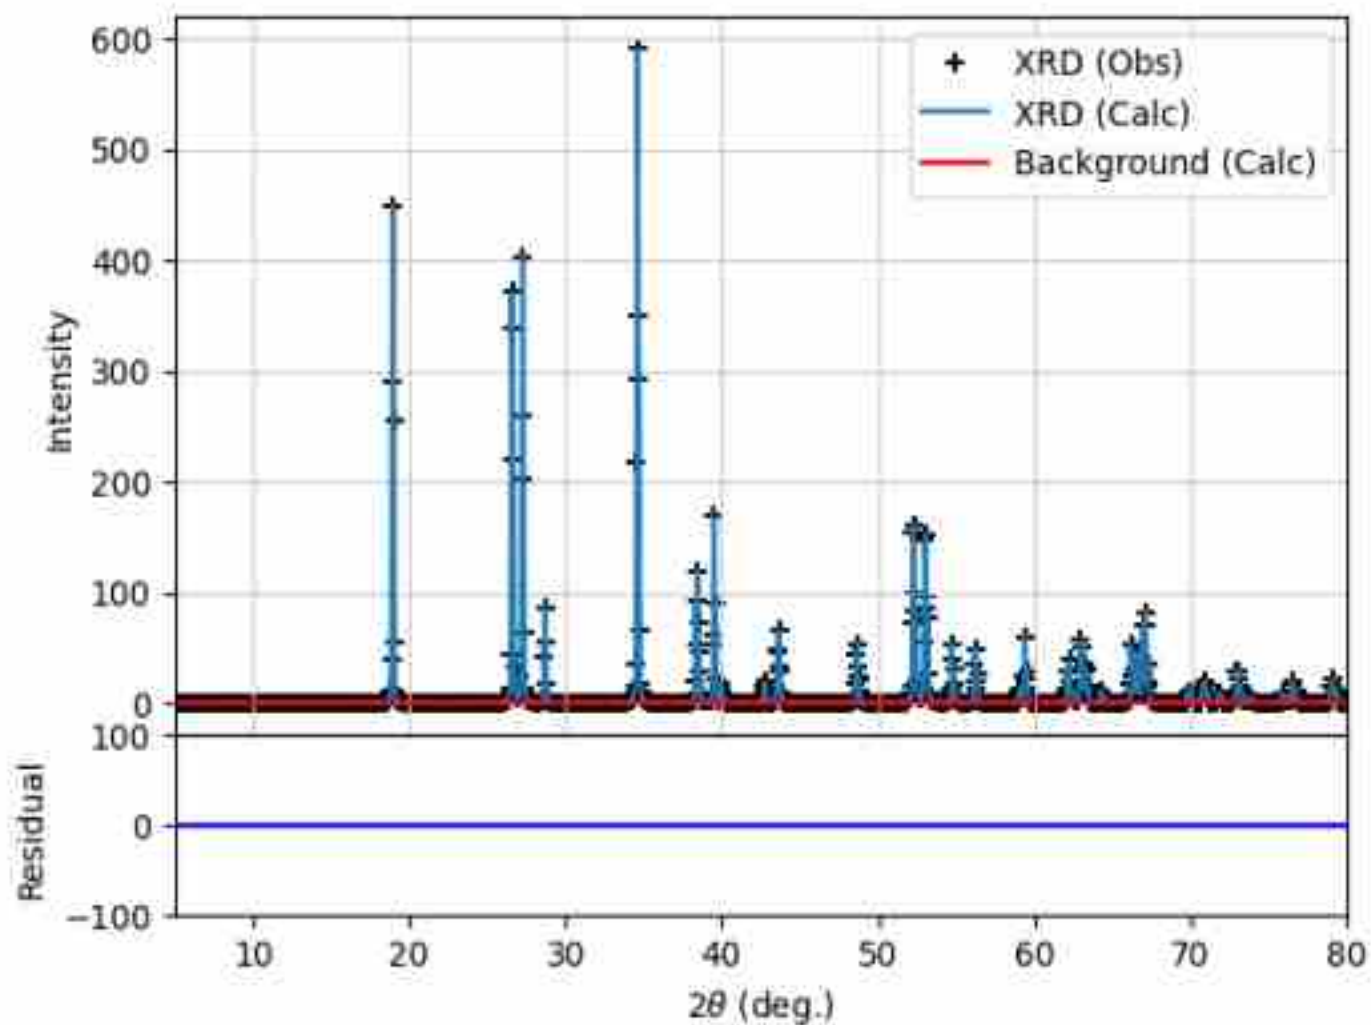

| RMSE before RR | Rwp     | RMSE after RR |
|----------------|---------|---------------|
| 0.013          | 0.00165 | 0.00053       |

# Cr6Os2

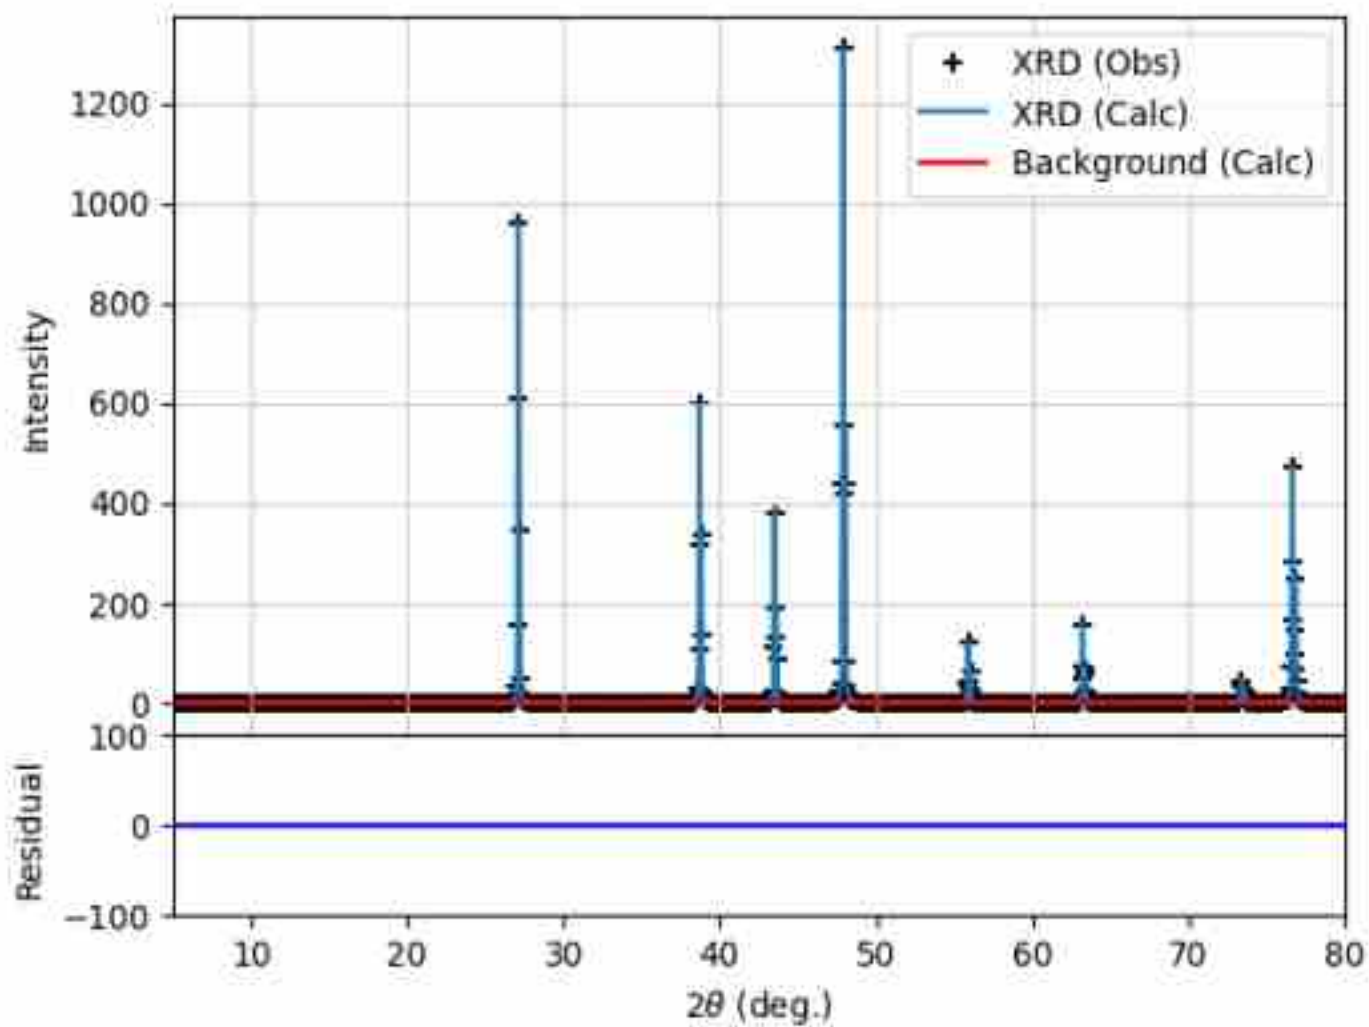

| RMSE before RR | Rwp     | RMSE after RR |
|----------------|---------|---------------|
| 0.013          | 0.00885 | 0.00124       |



# Cs1Gd1S2

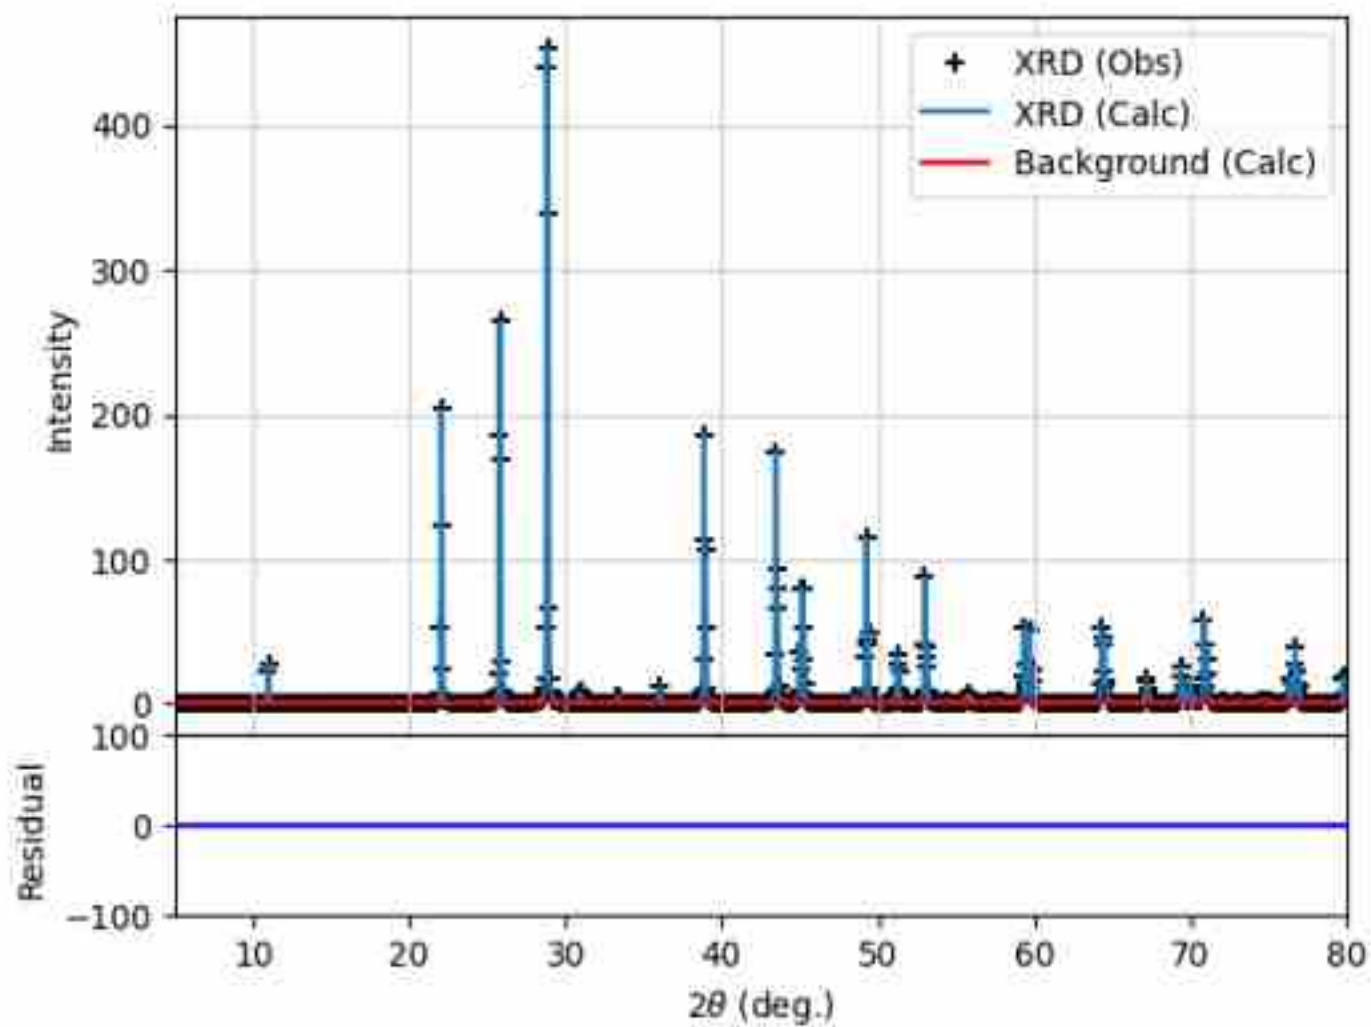

| RMSE before RR | Rwp     | RMSE after RR |
|----------------|---------|---------------|
| 0.013          | 0.00352 | 0.00067       |

# Cs<sub>2</sub>In<sub>1</sub>Ga<sub>1</sub>Br<sub>6</sub>

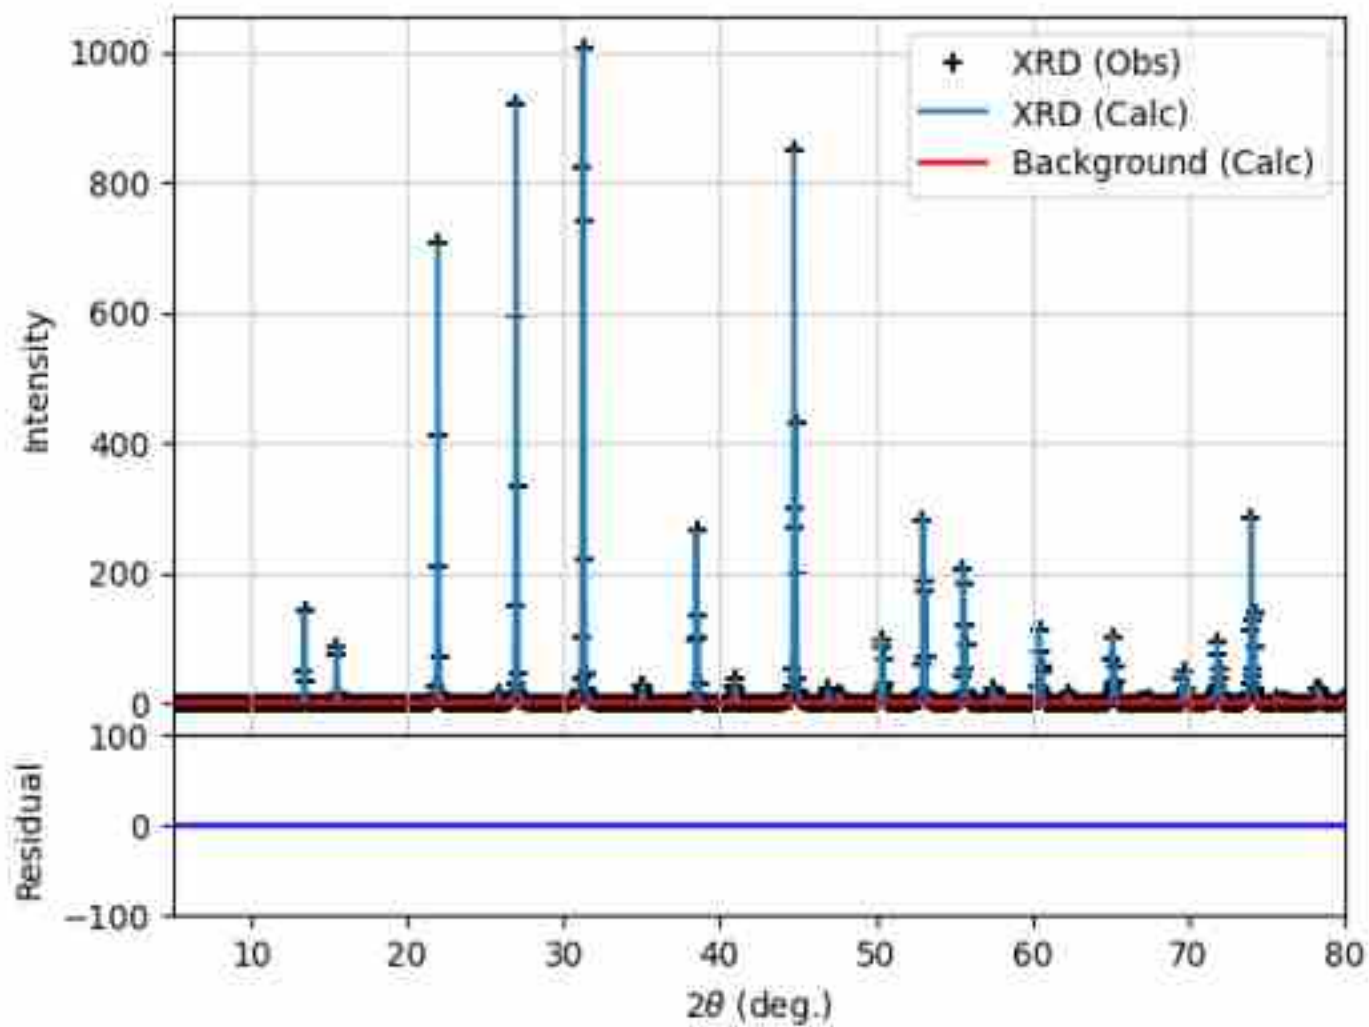

| RMSE before RR | Rwp     | RMSE after RR |
|----------------|---------|---------------|
| 0.013          | 0.13504 | 0.0039        |

# Cs<sub>2</sub>In<sub>2</sub>Cl<sub>6</sub>

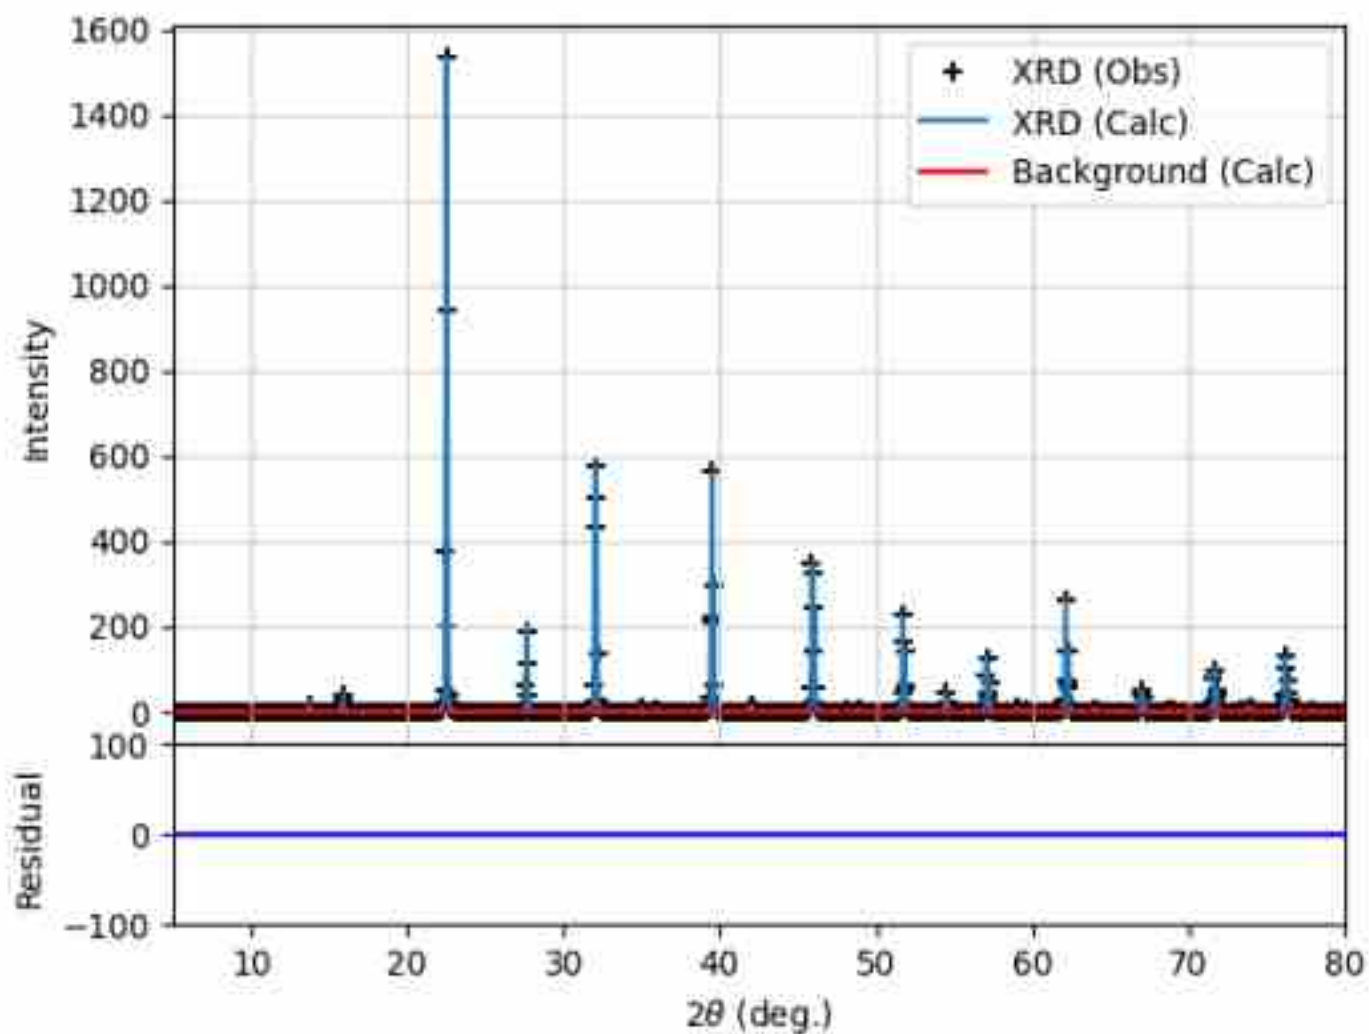

| RMSE before RR | Rwp    | RMSE after RR |
|----------------|--------|---------------|
| 0.013          | 0.0202 | 0.00241       |

# Cs<sub>2</sub>K<sub>1</sub>Cr<sub>1</sub>Cl<sub>6</sub>

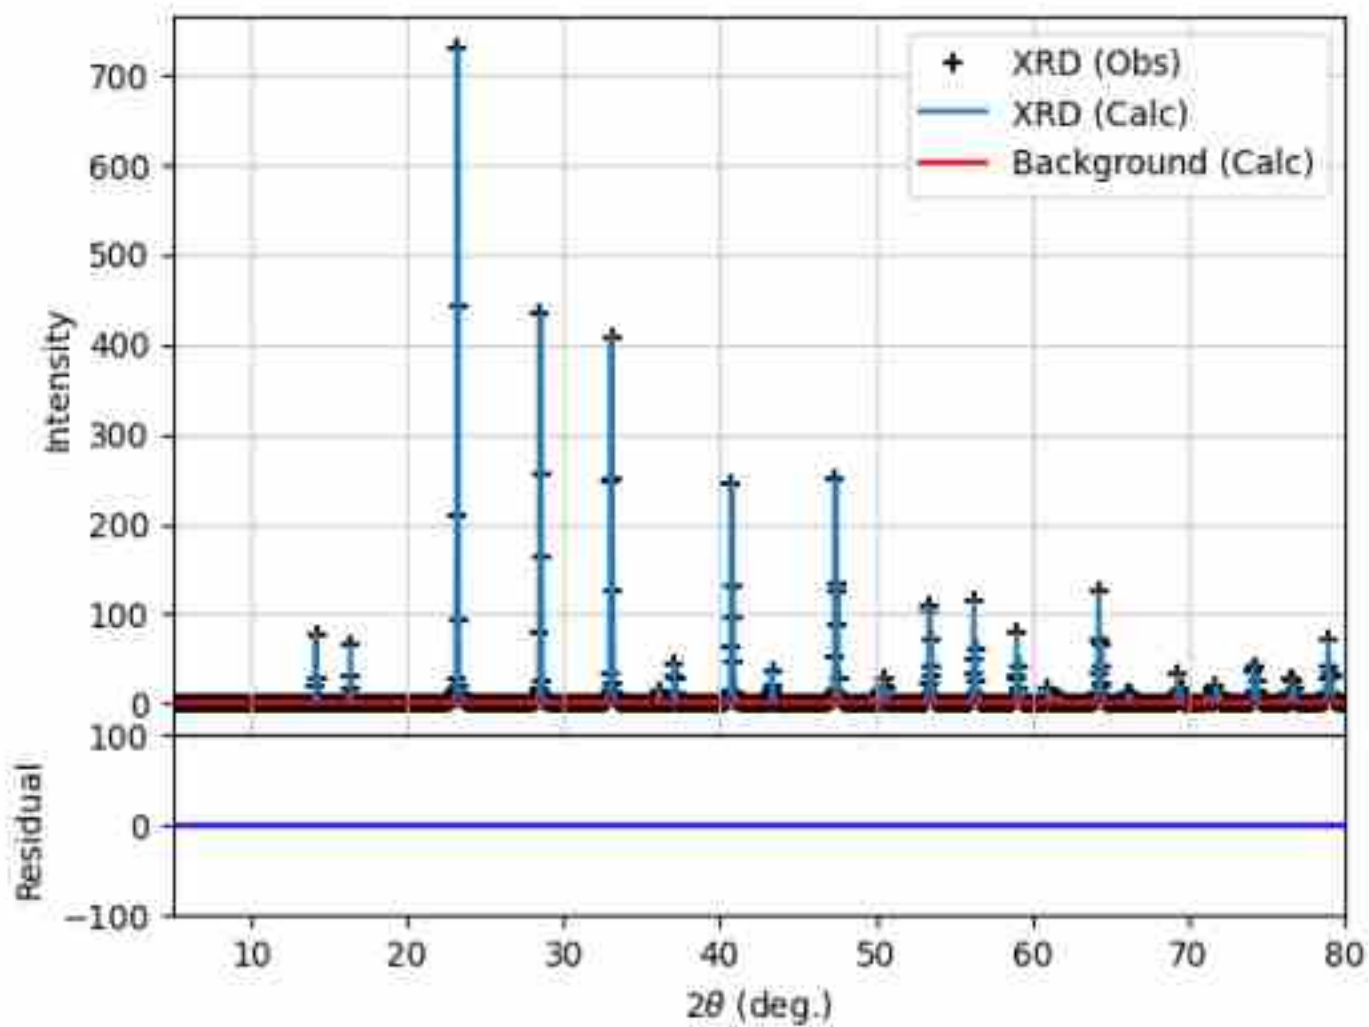

| RMSE before RR | Rwp     | RMSE after RR |
|----------------|---------|---------------|
| 0.013          | 0.08017 | 0.00591       |

# Cs<sub>2</sub>K<sub>1</sub>V<sub>1</sub>F<sub>6</sub>

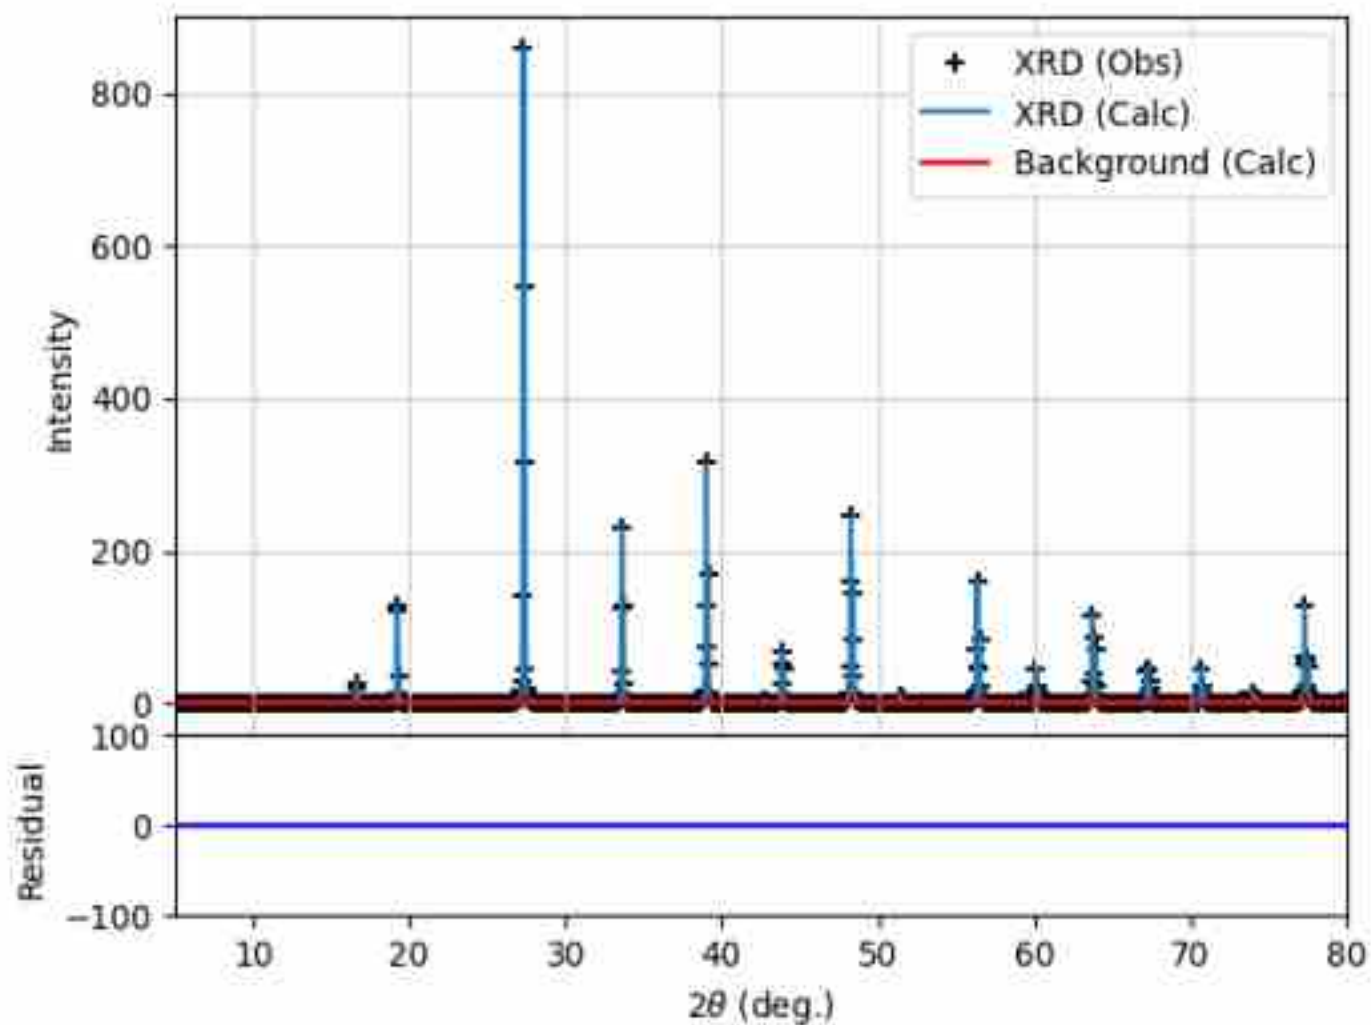

| RMSE before RR | Rwp     | RMSE after RR |
|----------------|---------|---------------|
| 0.013          | 0.01204 | 0.00336       |

# Cs<sub>2</sub>Mn<sub>2</sub>P<sub>2</sub>

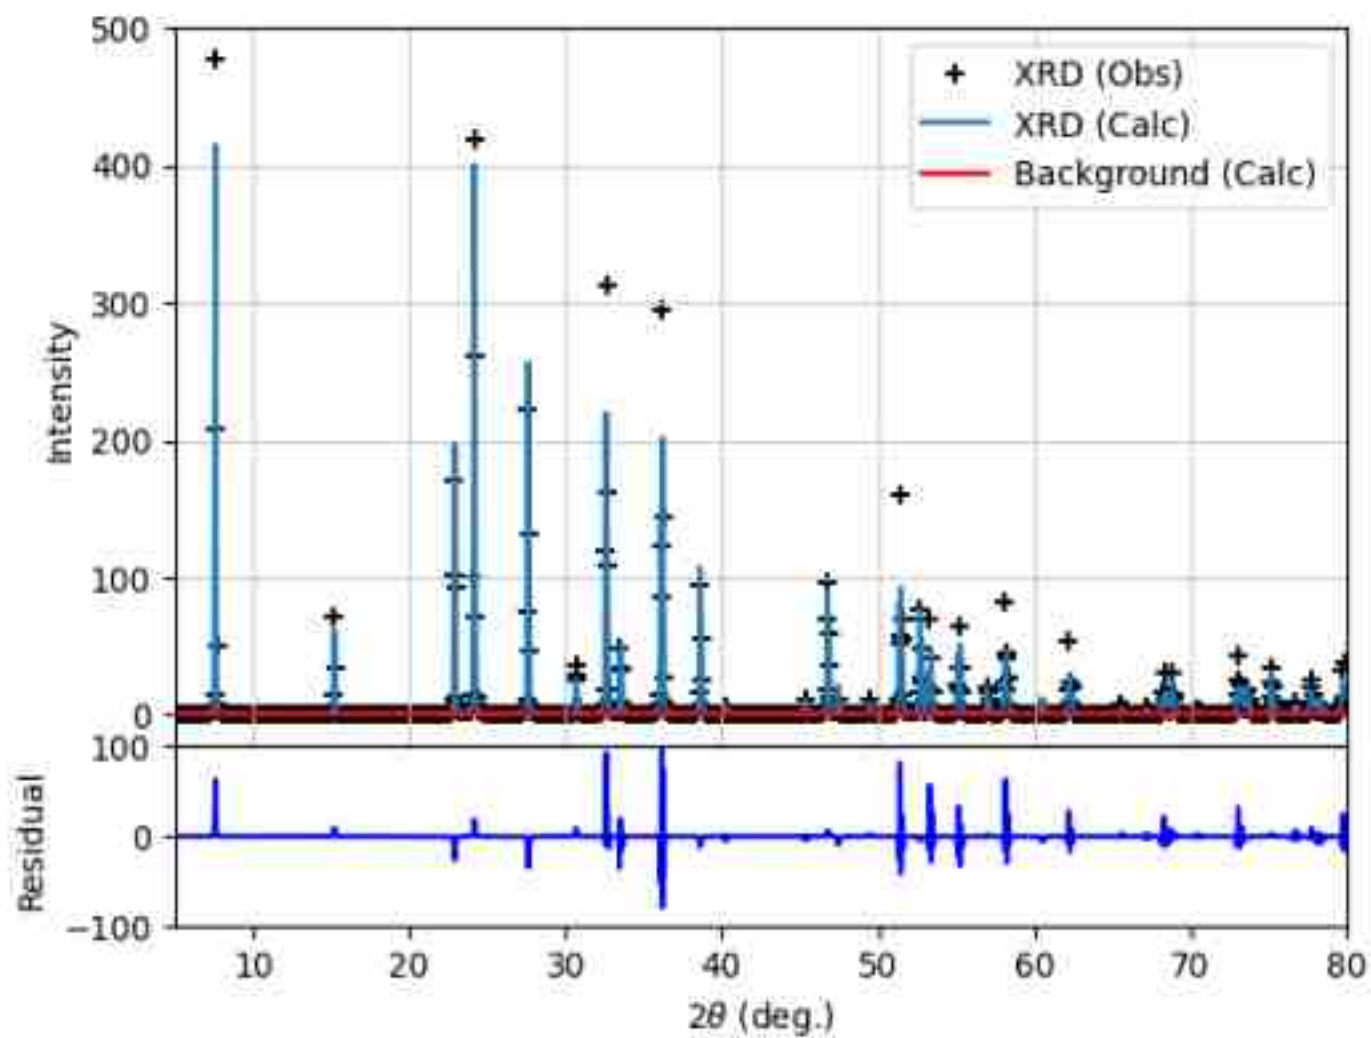

| RMSE before RR | Rwp      | RMSE after RR |
|----------------|----------|---------------|
| 0.013          | 44.96617 | 0.02232       |

# Cs<sub>2</sub>Pd<sub>1</sub>Cl<sub>6</sub>

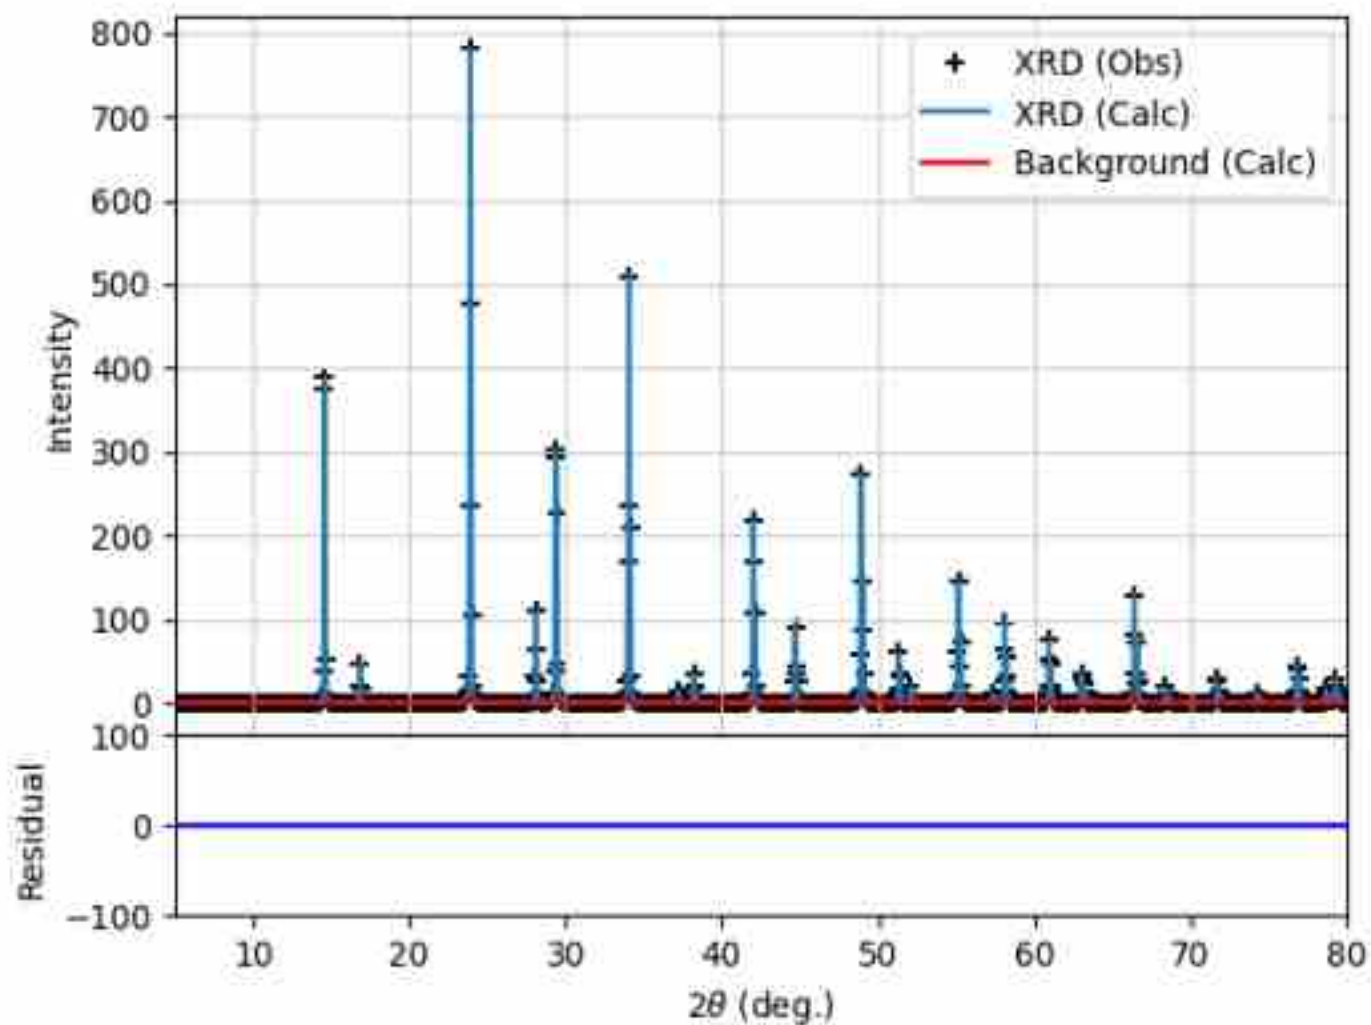

| RMSE before RR | Rwp    | RMSE after RR |
|----------------|--------|---------------|
| 0.013          | 0.0134 | 0.00231       |

# Cs<sub>2</sub>TlAgF<sub>6</sub>

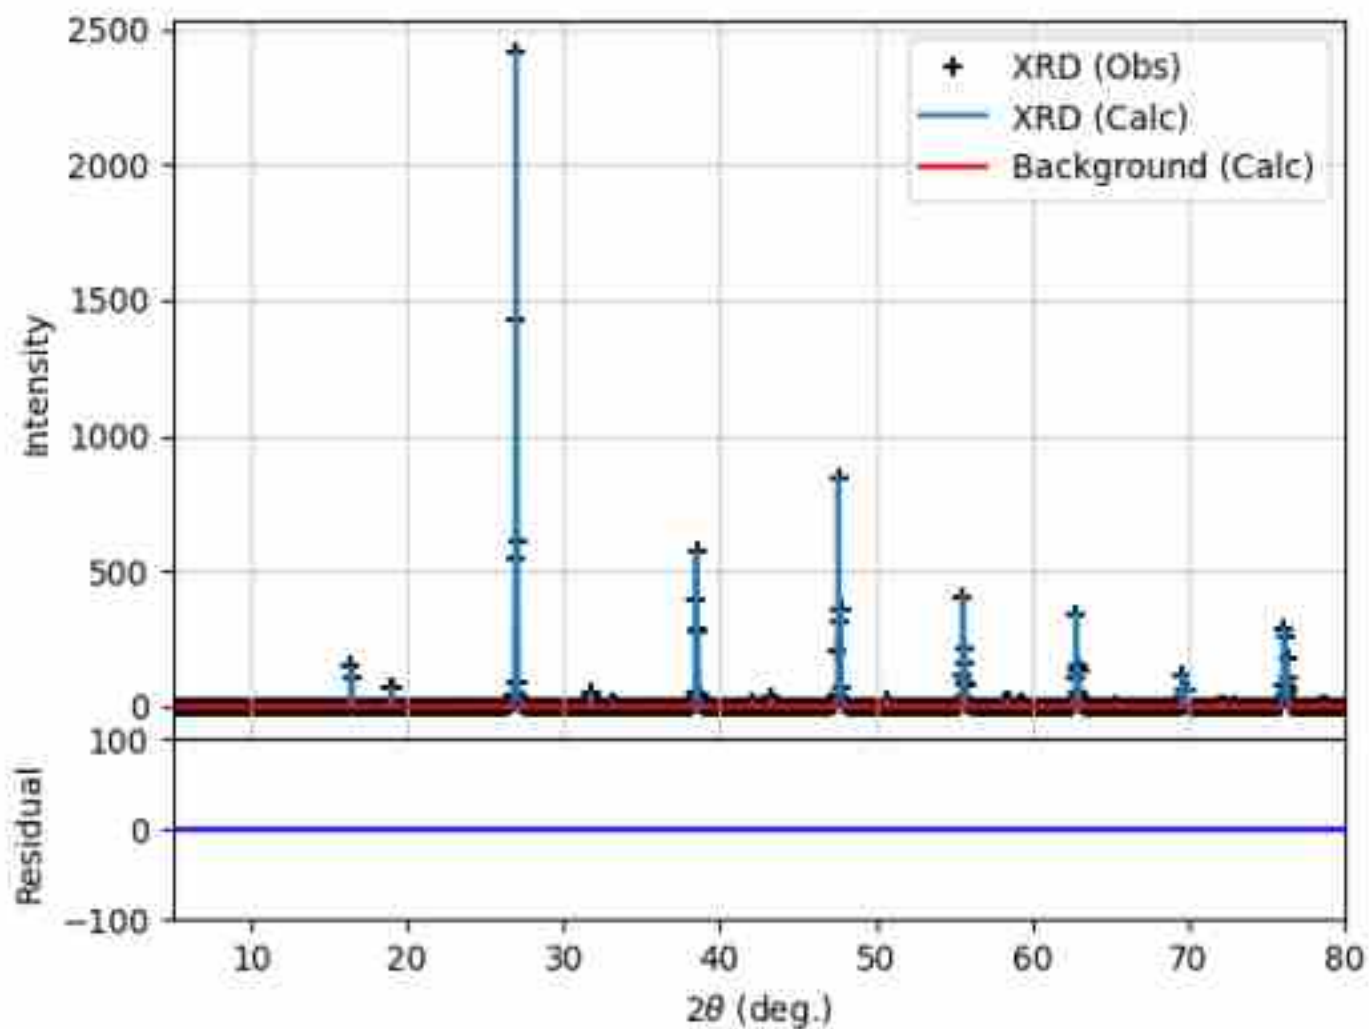

| RMSE before RR | Rwp     | RMSE after RR |
|----------------|---------|---------------|
| 0.013          | 0.00509 | 0.00188       |



# Cs<sub>2</sub>Tl<sub>1</sub>As<sub>1</sub>Cl<sub>6</sub>

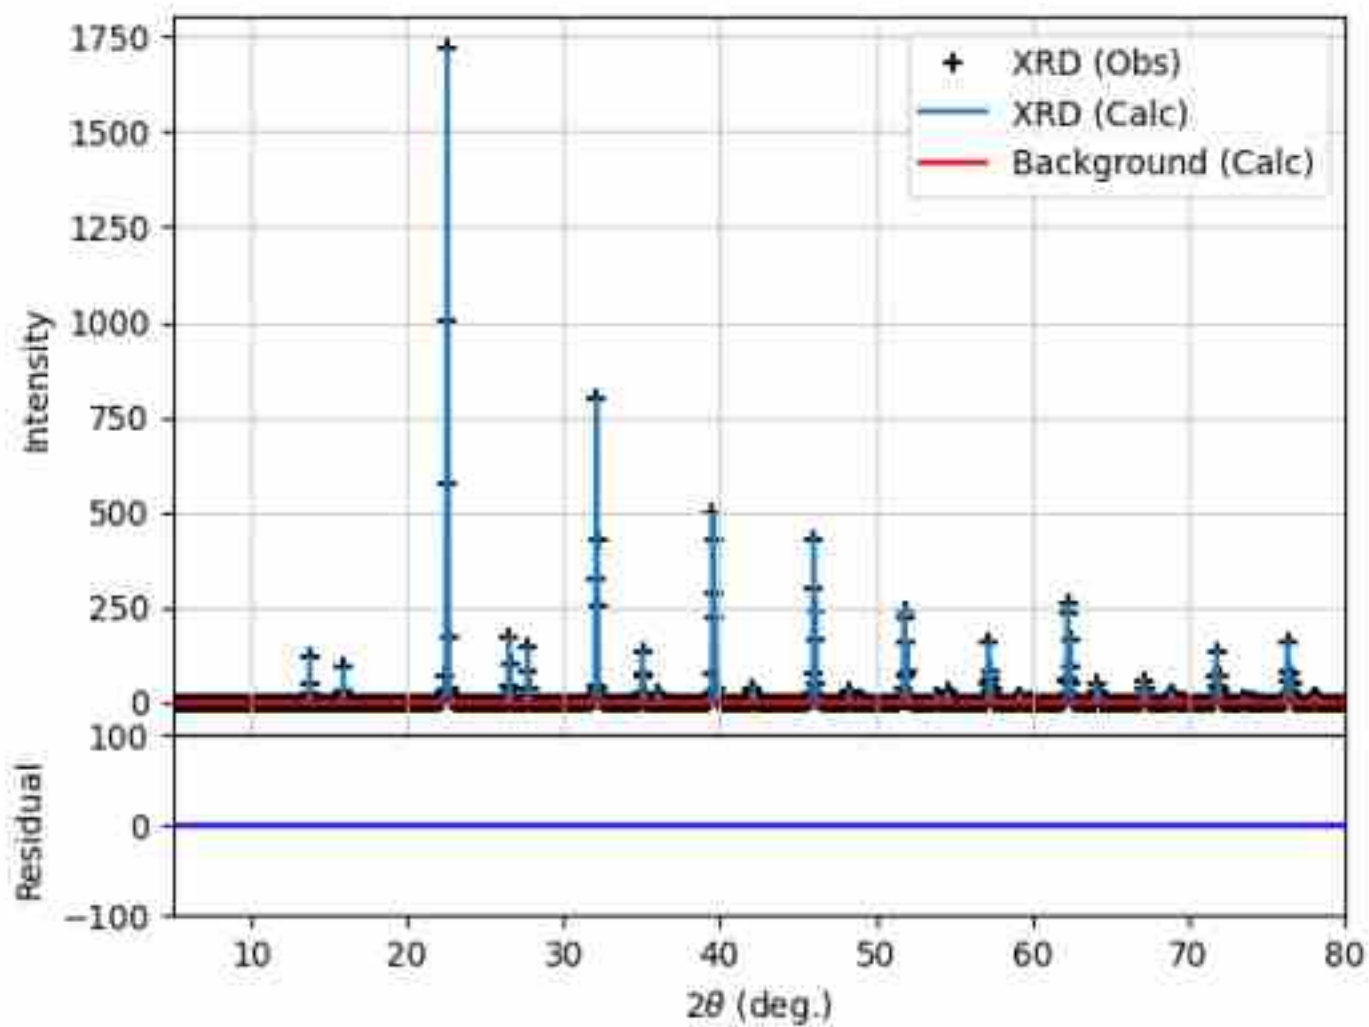

| RMSE before RR | Rwp     | RMSE after RR |
|----------------|---------|---------------|
| 0.013          | 0.01898 | 0.00335       |

# Cs<sub>2</sub>Tl<sub>1</sub>Bi<sub>1</sub>F<sub>6</sub>

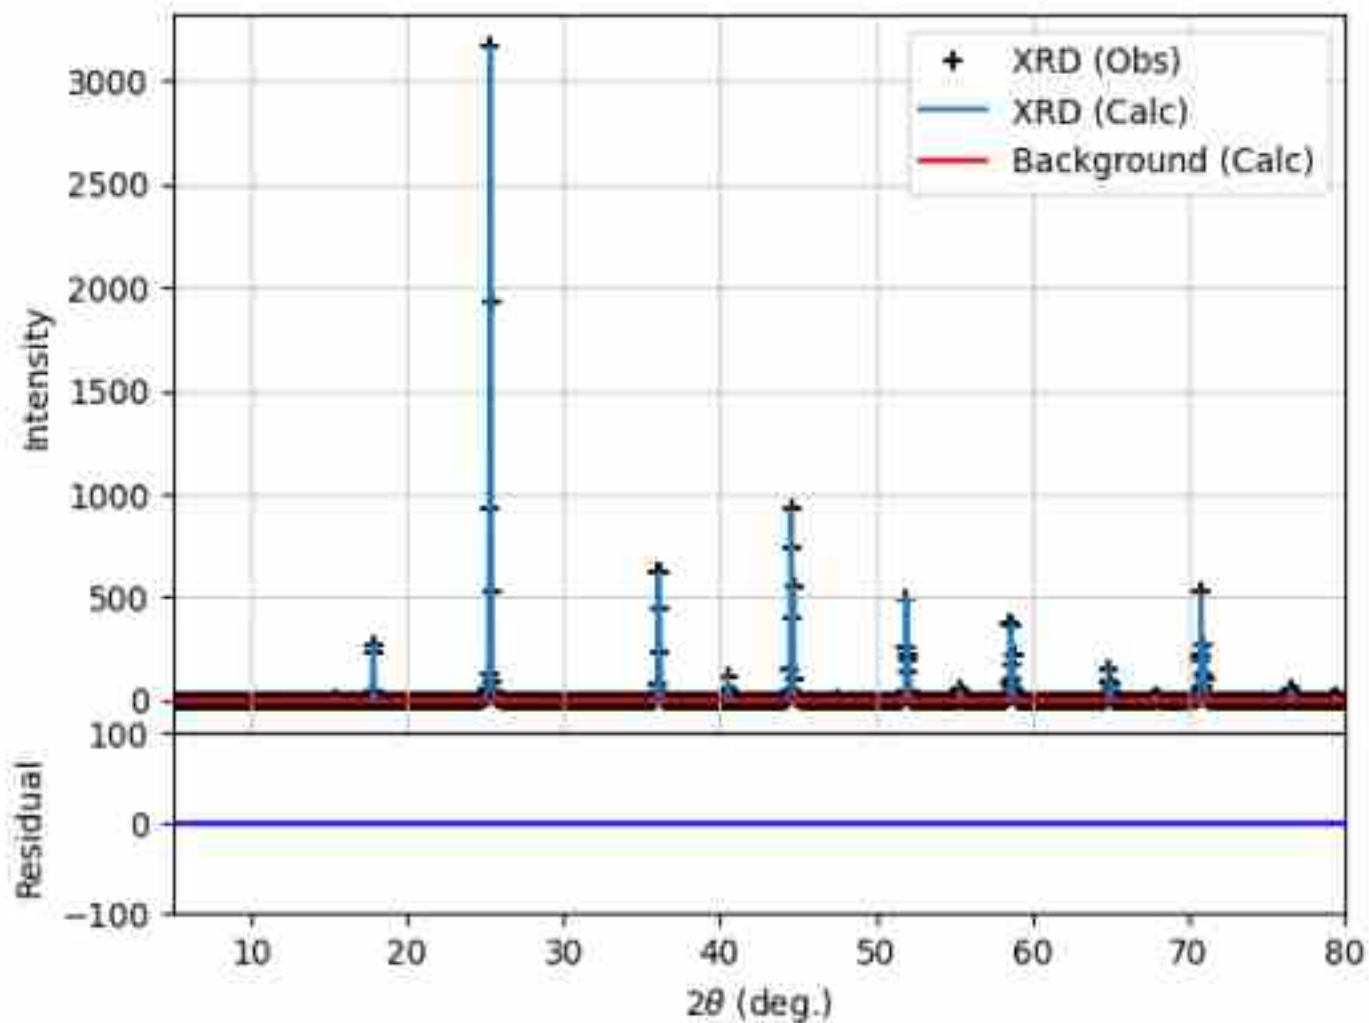

| RMSE before RR | Rwp     | RMSE after RR |
|----------------|---------|---------------|
| 0.013          | 0.02864 | 0.00273       |

# Cs<sub>2</sub>Tl<sub>1</sub>Cu<sub>1</sub>Cl<sub>6</sub>

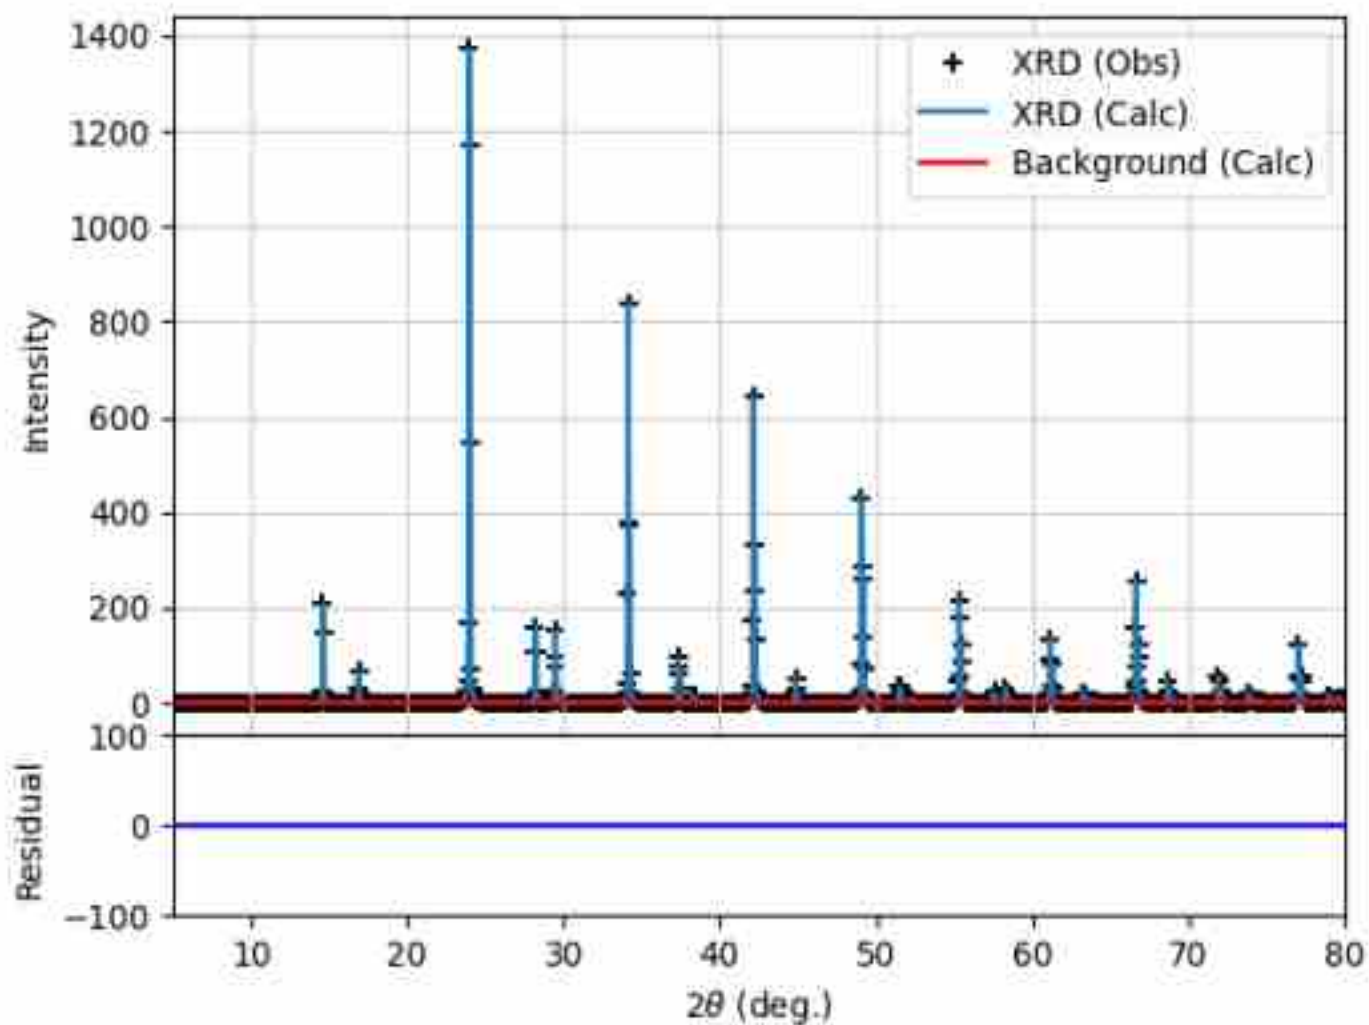

| RMSE before RR | Rwp     | RMSE after RR |
|----------------|---------|---------------|
| 0.013          | 0.00823 | 0.00203       |

# Cs<sub>3</sub>V<sub>1</sub>F<sub>6</sub>

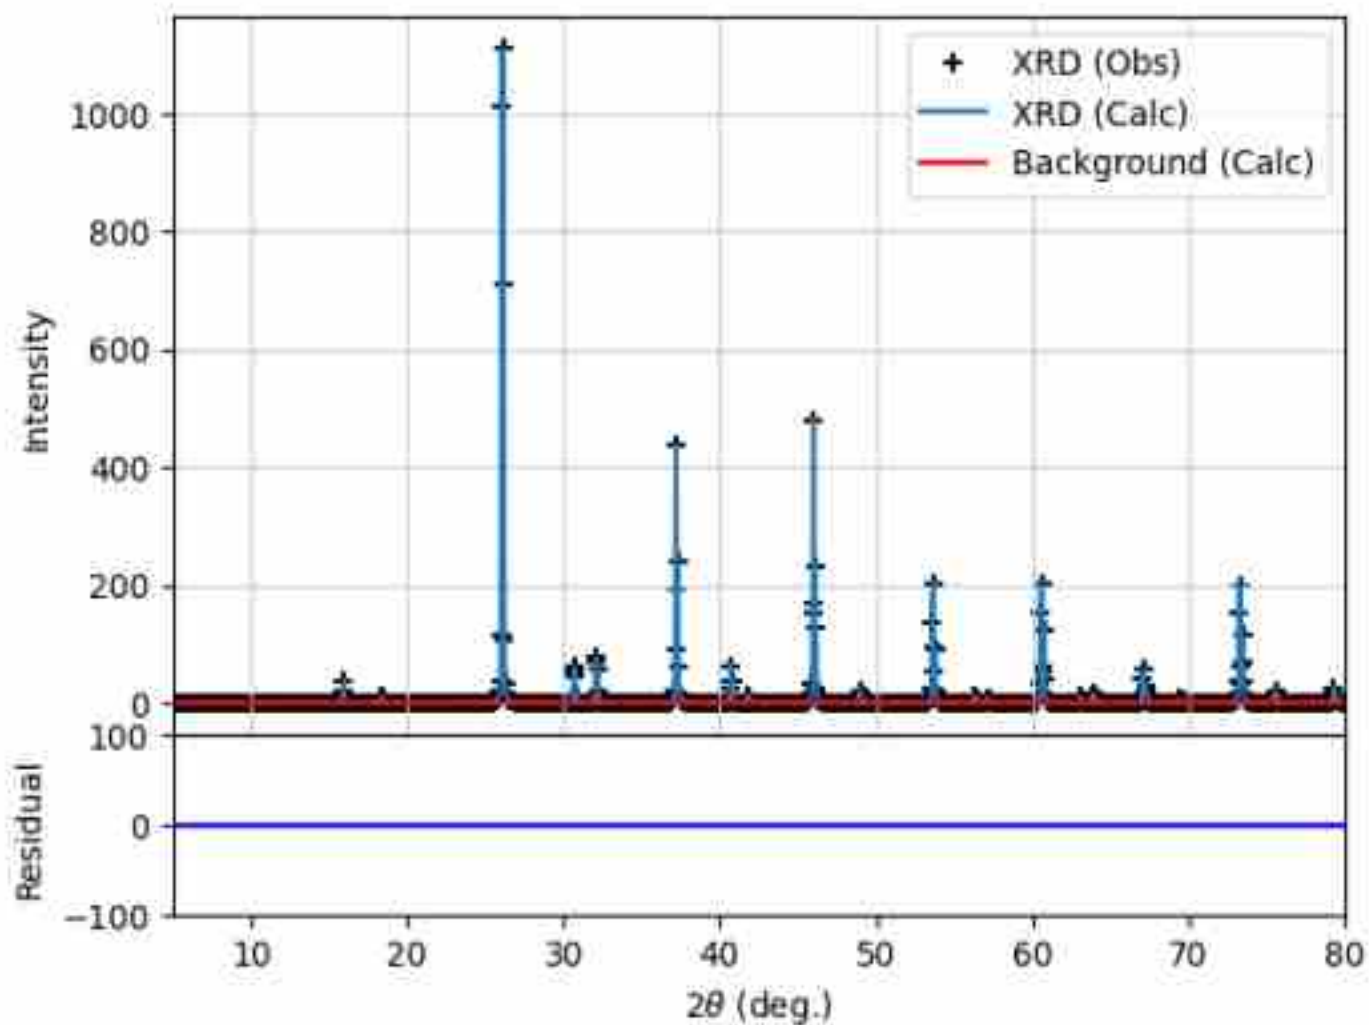

| RMSE before RR | Rwp     | RMSE after RR |
|----------------|---------|---------------|
| 0.013          | 0.01419 | 0.00424       |

# Cu<sub>2</sub>Ni<sub>1</sub>Sn<sub>1</sub>Se<sub>4</sub>

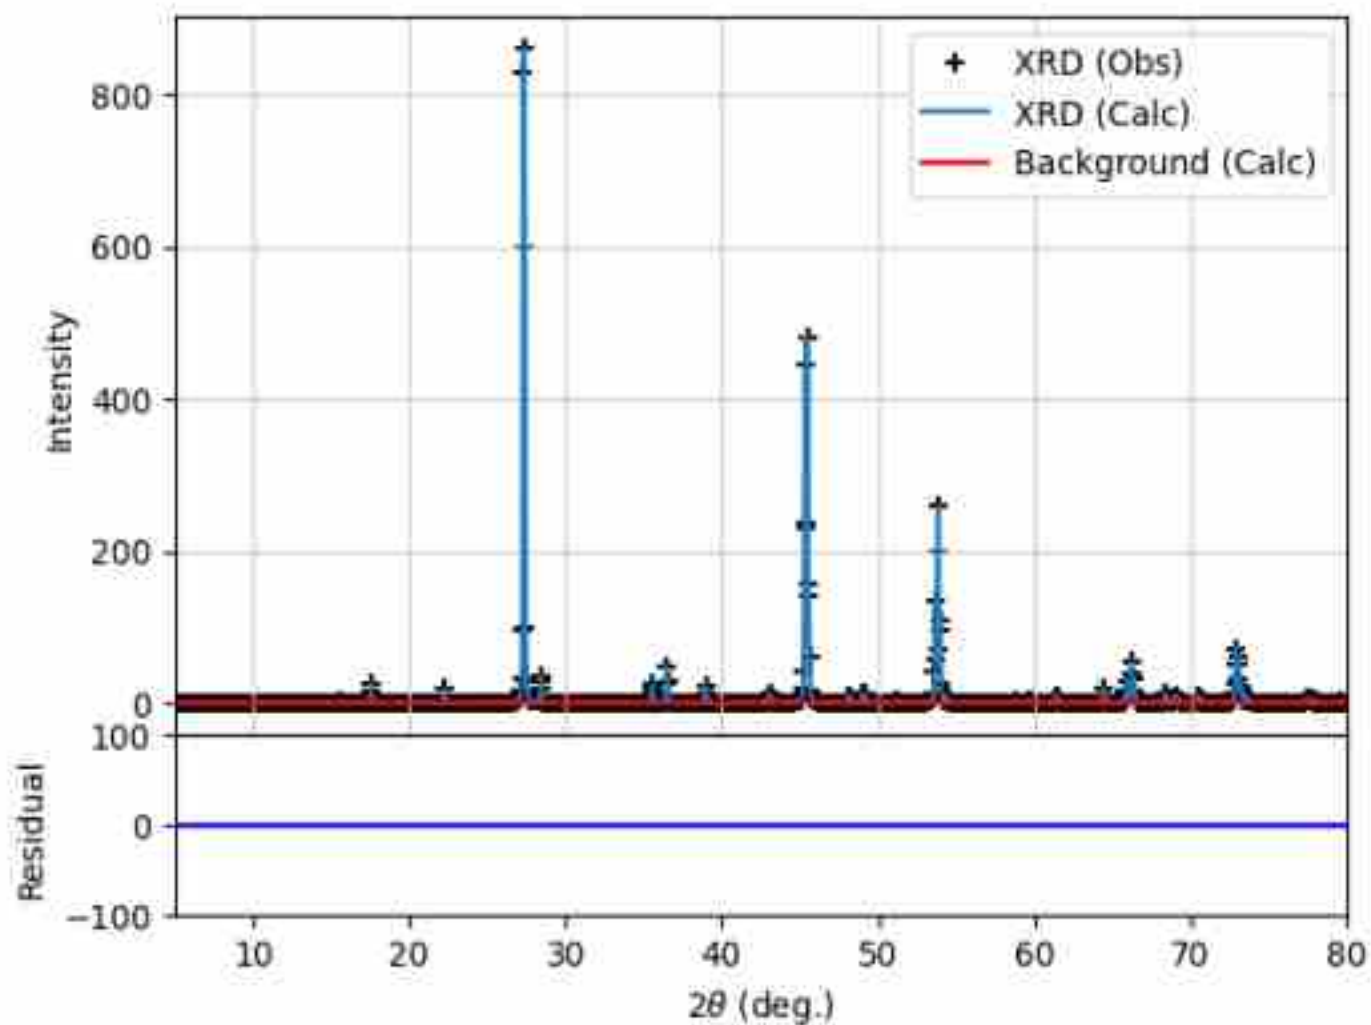

| RMSE before RR | Rwp     | RMSE after RR |
|----------------|---------|---------------|
| 0.013          | 0.00302 | 0.0004        |

# Cu<sub>2</sub>Sn<sub>1</sub>Se<sub>3</sub>

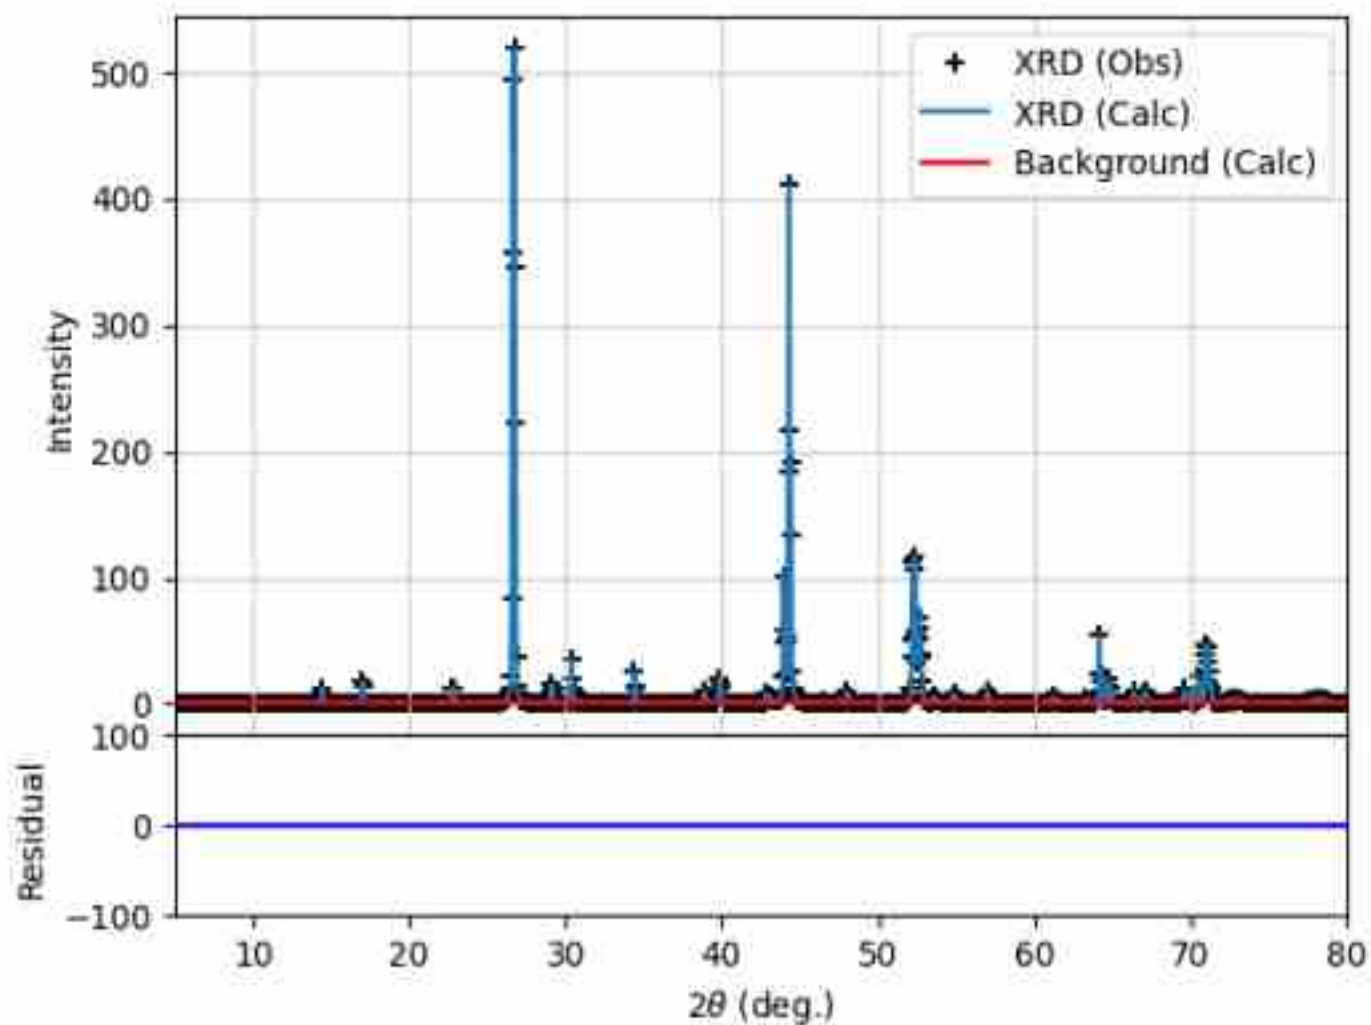

| RMSE before RR | Rwp     | RMSE after RR |
|----------------|---------|---------------|
| 0.013          | 0.00316 | 0.00032       |

# Dy1Al6Cu6

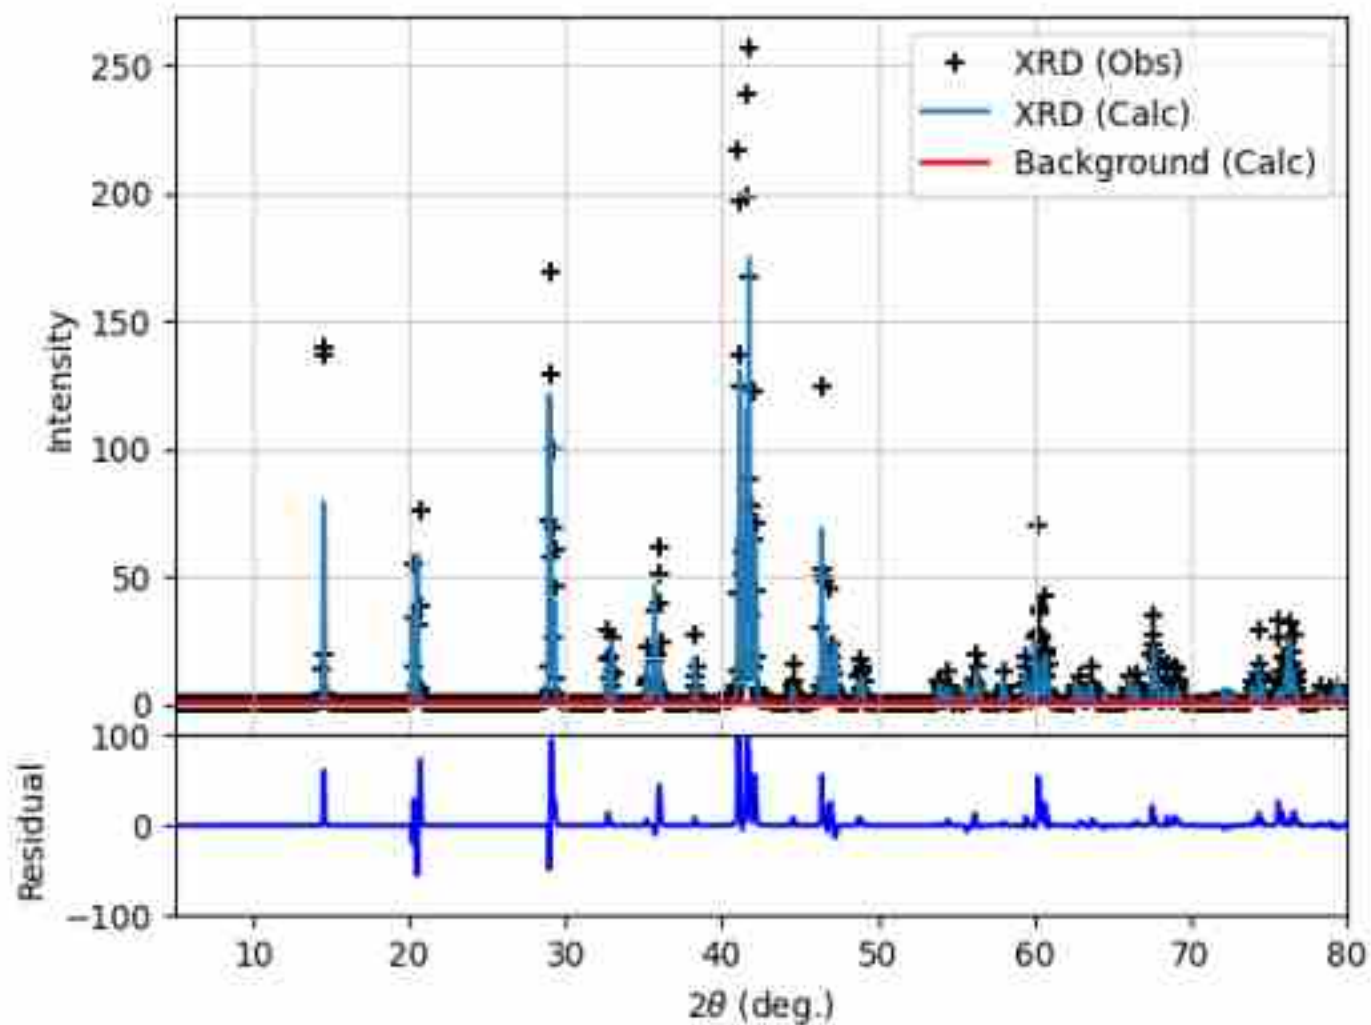

| RMSE before RR | Rwp      | RMSE after RR |
|----------------|----------|---------------|
| 0.013          | 61.32585 | 0.01538       |

# Dy1Ge2Rh2

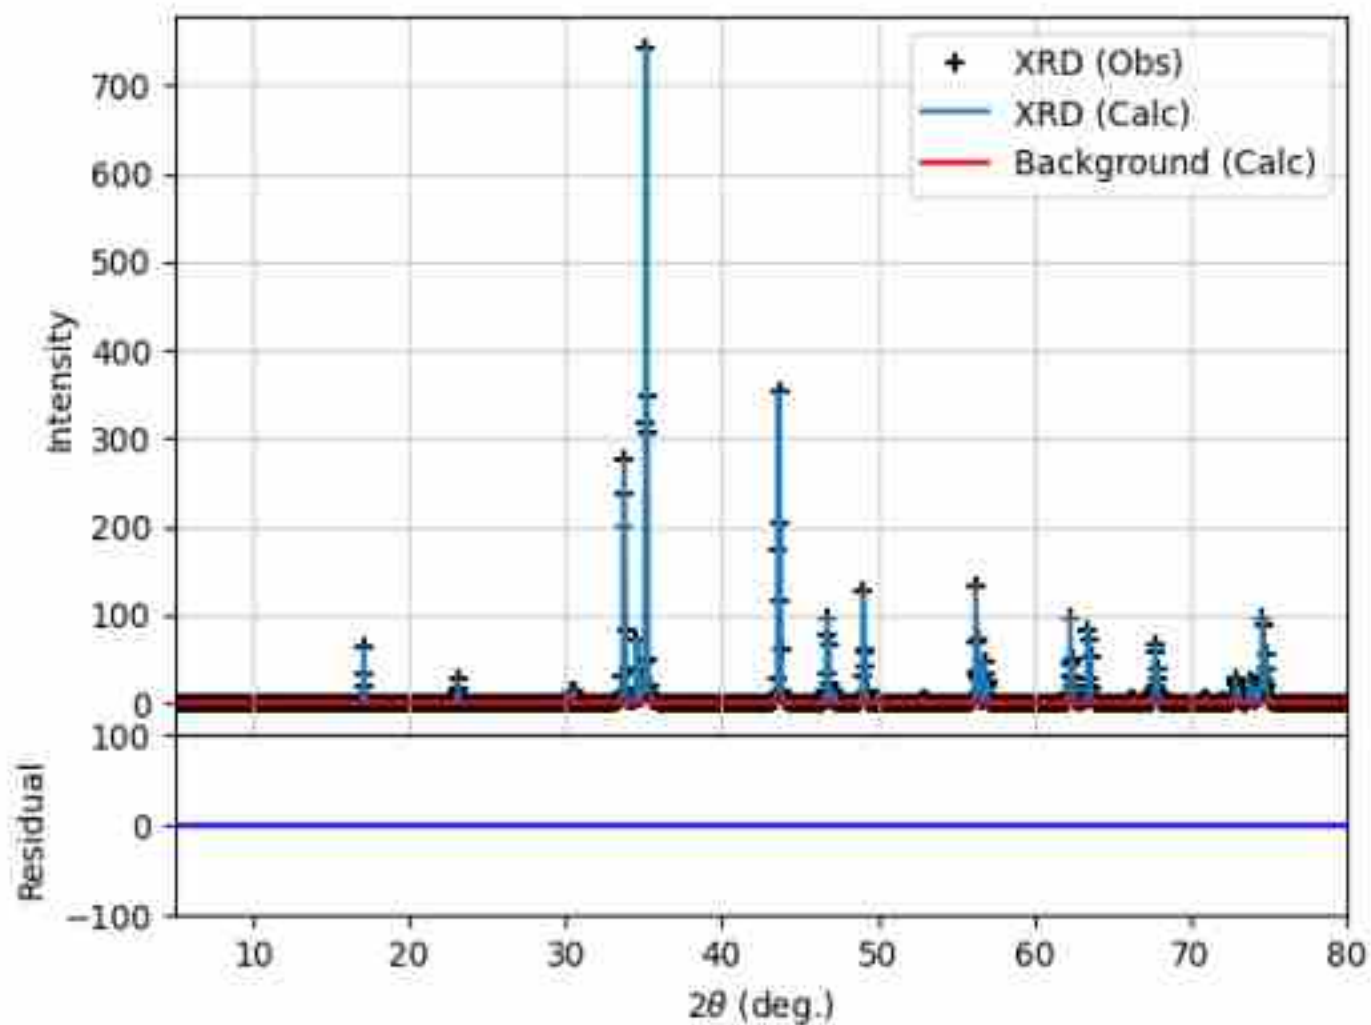

| RMSE before RR | Rwp     | RMSE after RR |
|----------------|---------|---------------|
| 0.013          | 0.00302 | 0.00025       |



# Er1Co3Ni2

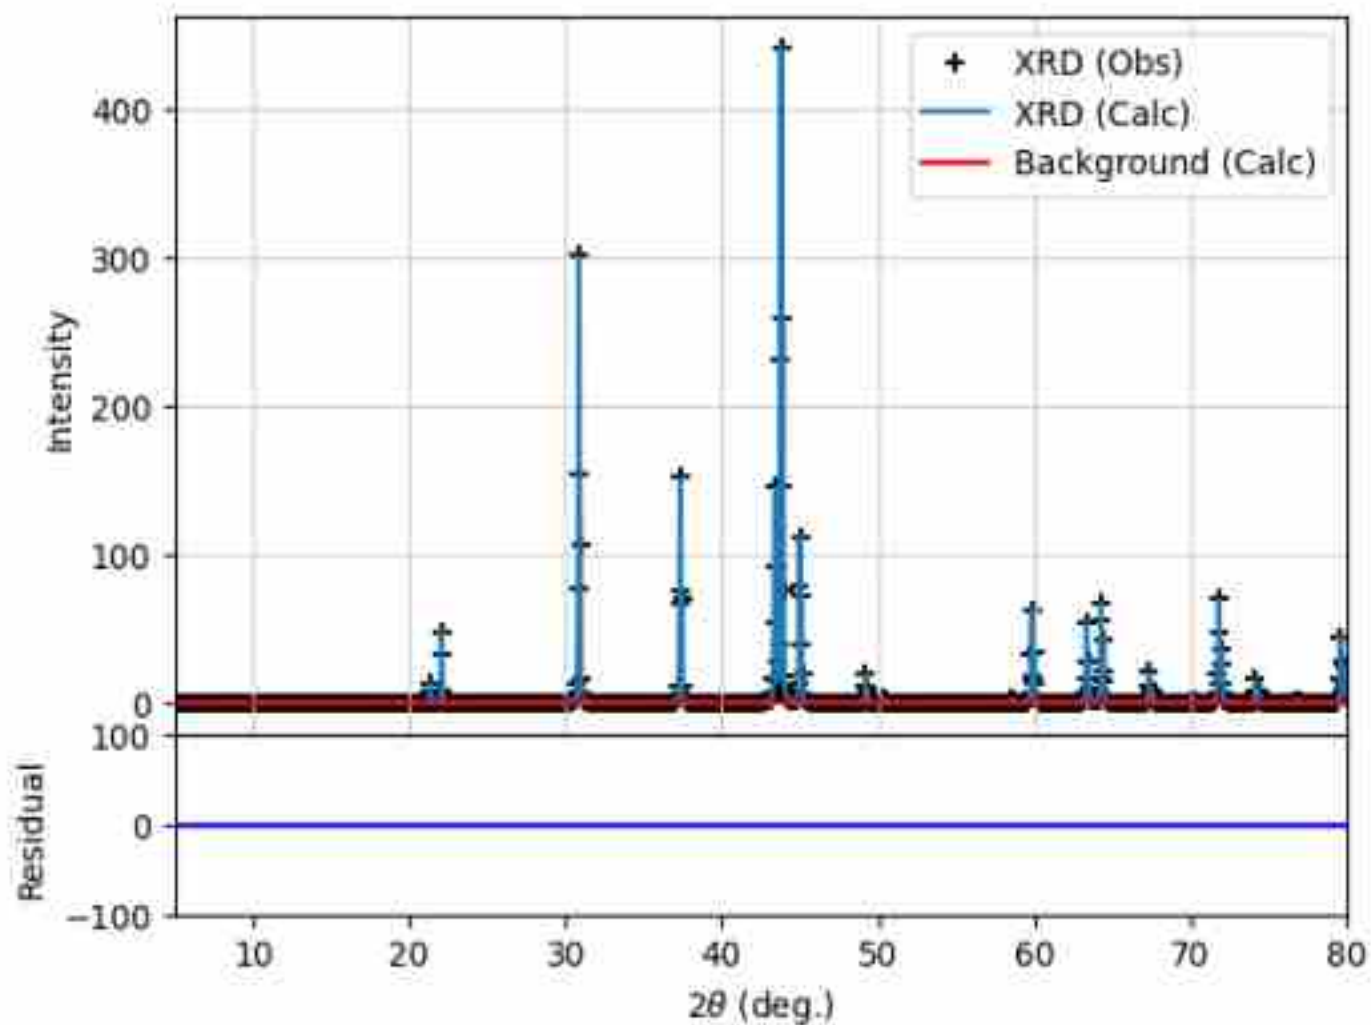

| RMSE before RR | Rwp    | RMSE after RR |
|----------------|--------|---------------|
| 0.013          | 0.0031 | 0.00049       |

# Er1Cr2Fe10

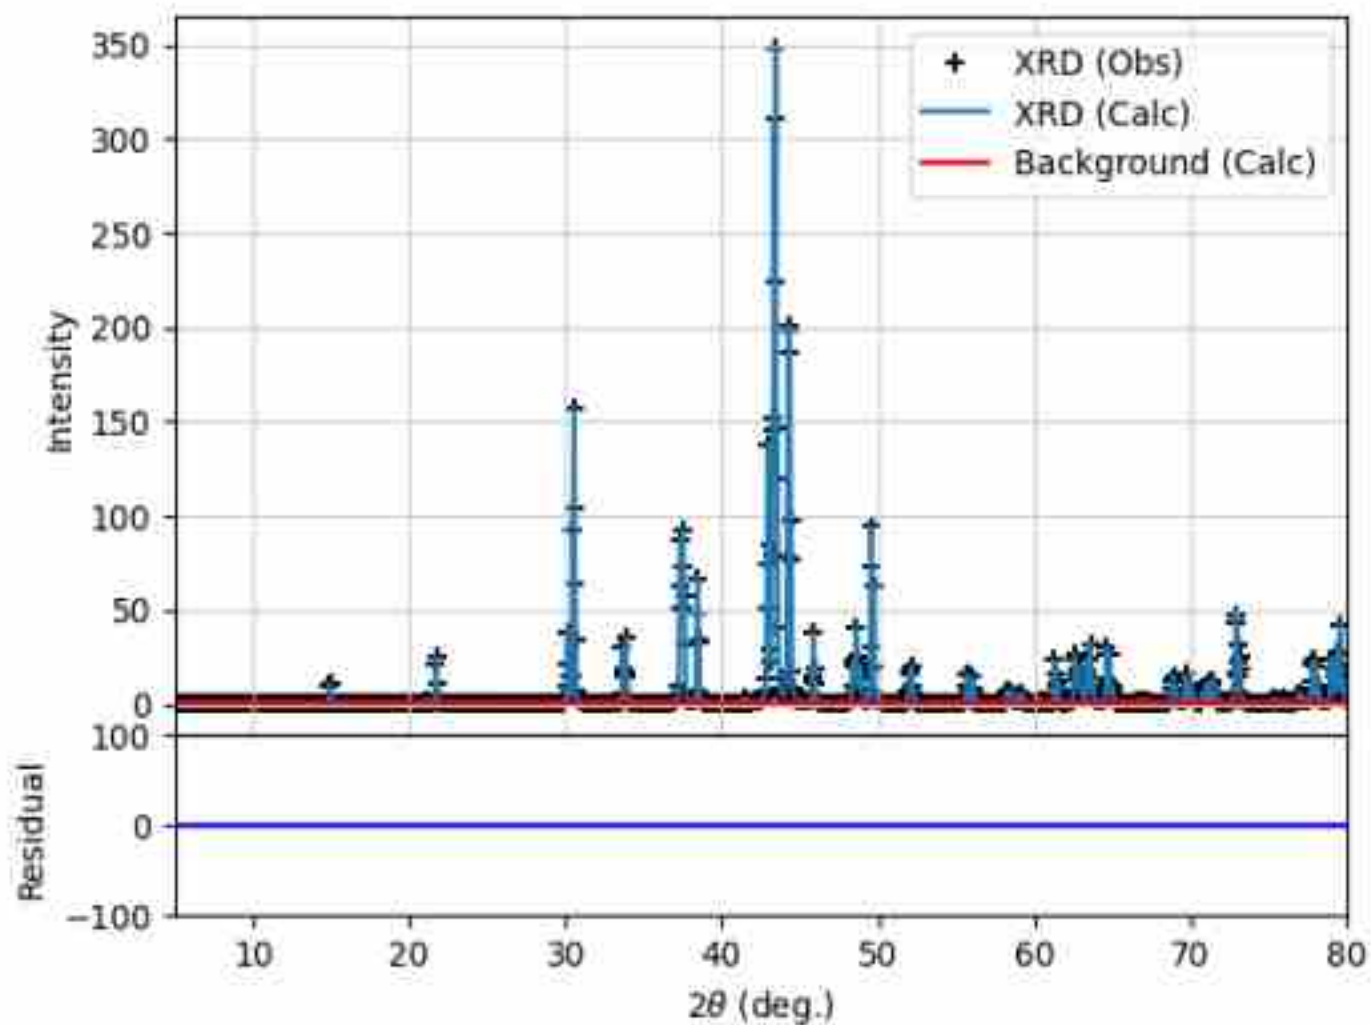

| RMSE before RR | Rwp    | RMSE after RR |
|----------------|--------|---------------|
| 0.013          | 0.0027 | 0.00031       |

# Er<sub>1</sub>Cr<sub>6</sub>Ge<sub>6</sub>

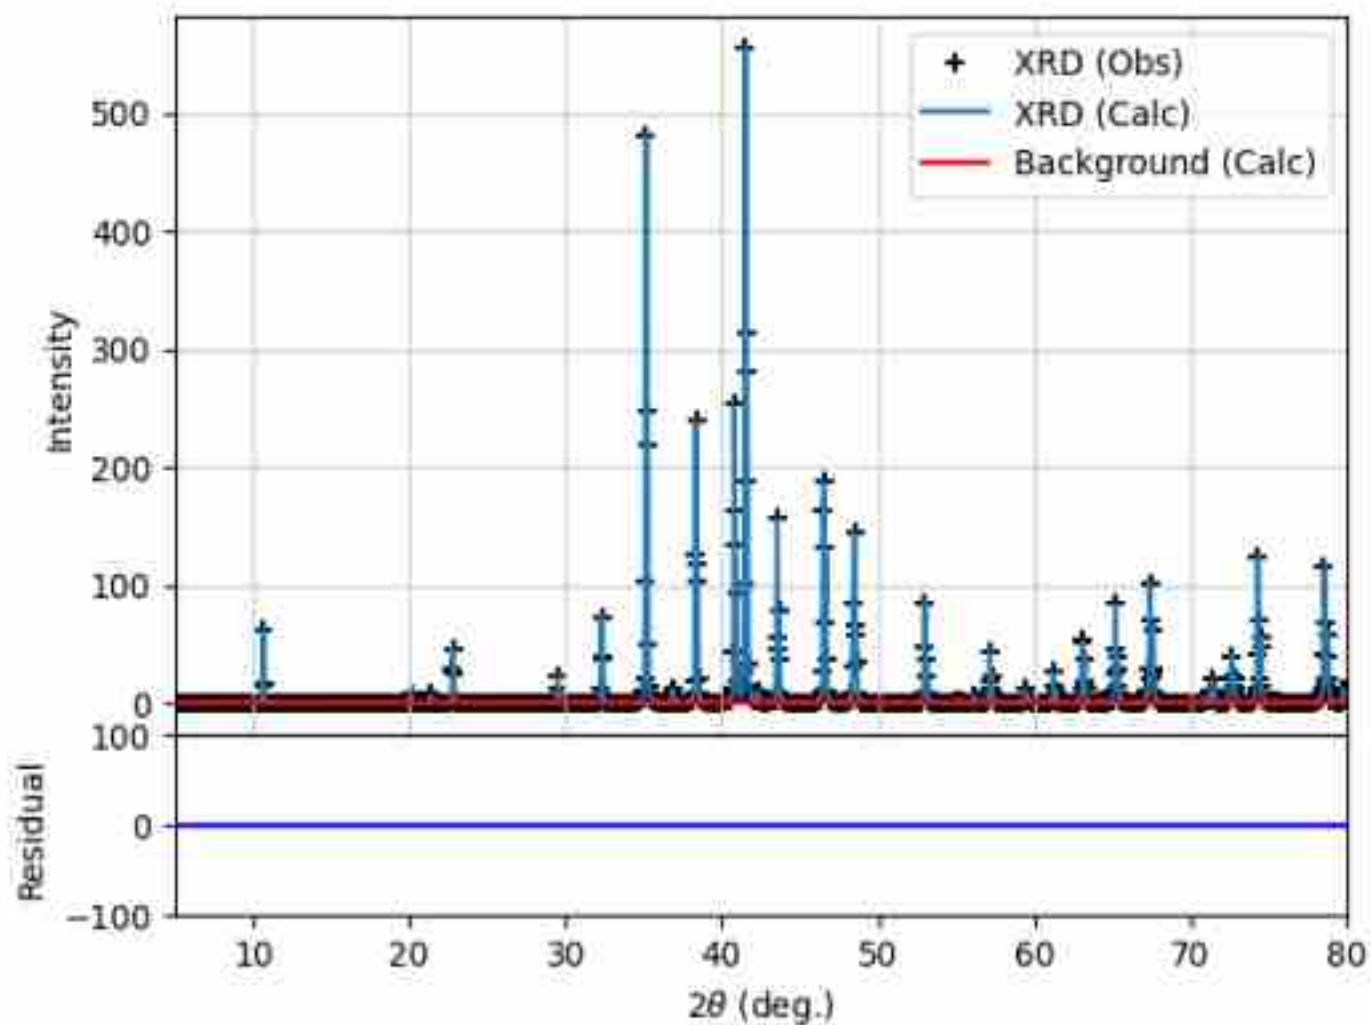

| RMSE before RR | Rwp     | RMSE after RR |
|----------------|---------|---------------|
| 0.013          | 0.00398 | 0.00105       |

# Er<sub>1</sub>Fe<sub>6</sub>Sn<sub>4</sub>Ge<sub>2</sub>

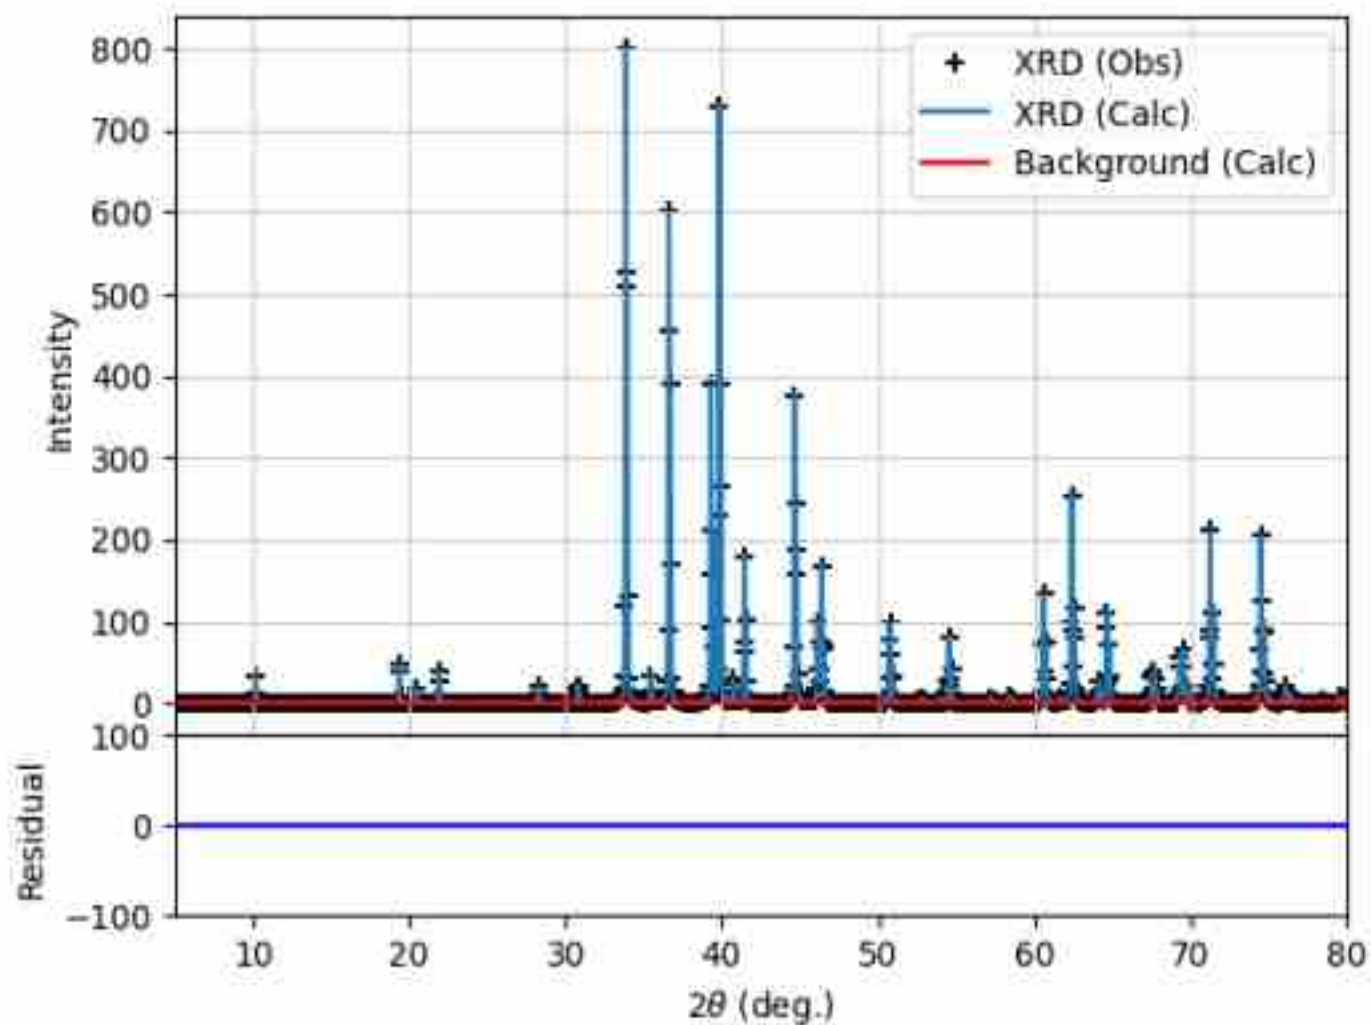

| RMSE before RR | Rwp     | RMSE after RR |
|----------------|---------|---------------|
| 0.013          | 0.00341 | 0.00058       |

# Er<sub>1</sub>V<sub>2</sub>Fe<sub>10</sub>

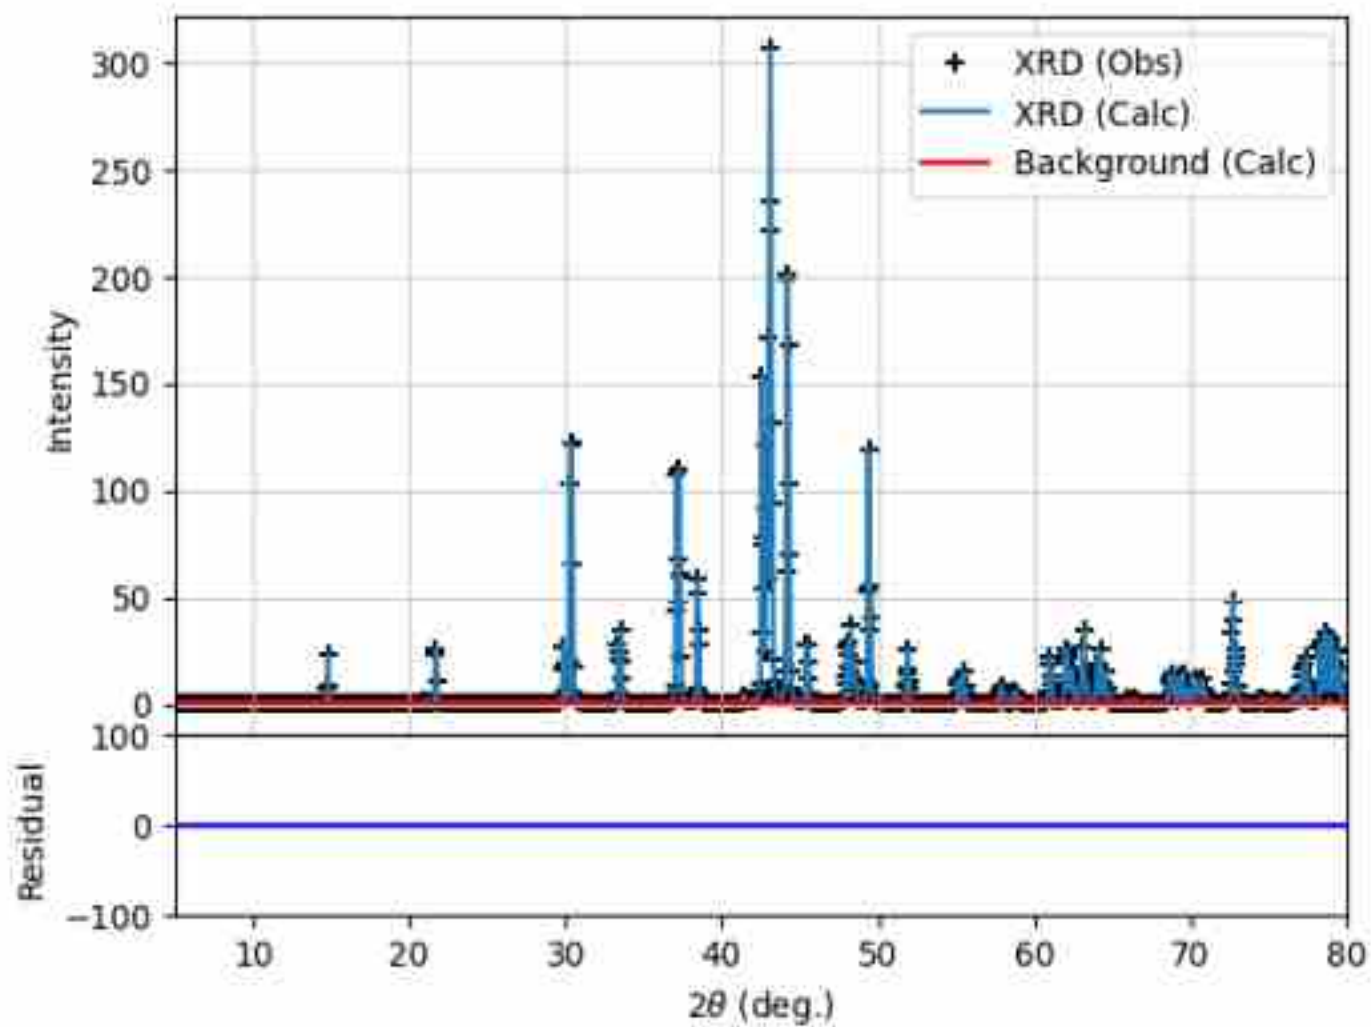

| RMSE before RR | Rwp     | RMSE after RR |
|----------------|---------|---------------|
| 0.013          | 0.00286 | 0.00053       |

# Er<sub>2</sub>Co<sub>3</sub>Cu<sub>1</sub>

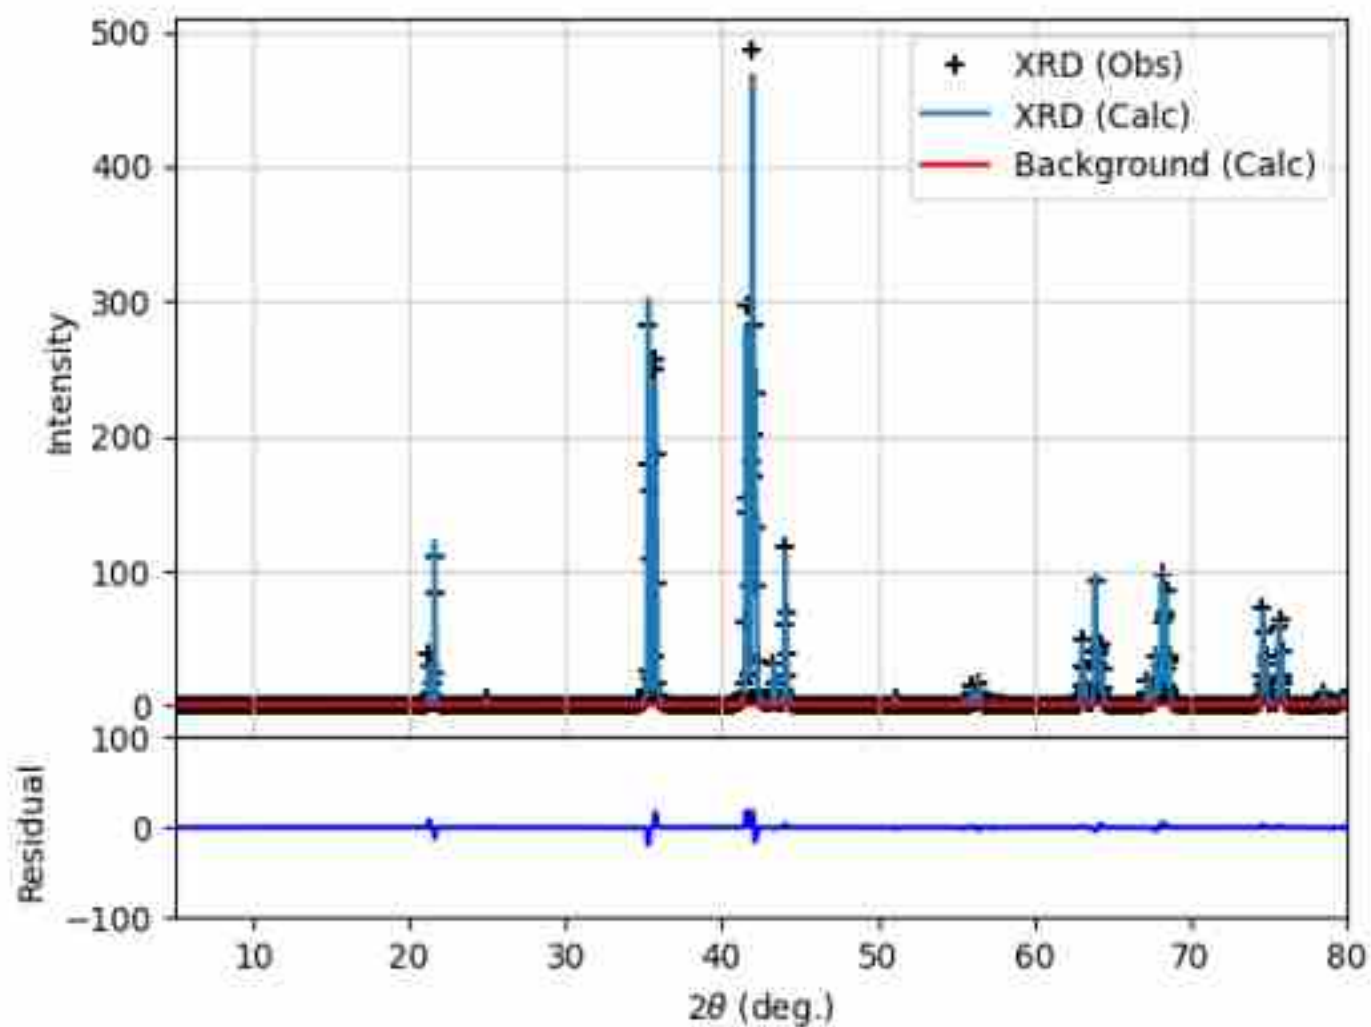

| RMSE before RR | Rwp     | RMSE after RR |
|----------------|---------|---------------|
| 0.013          | 6.07517 | 0.02659       |

# Er<sub>2</sub>Ge<sub>6</sub>

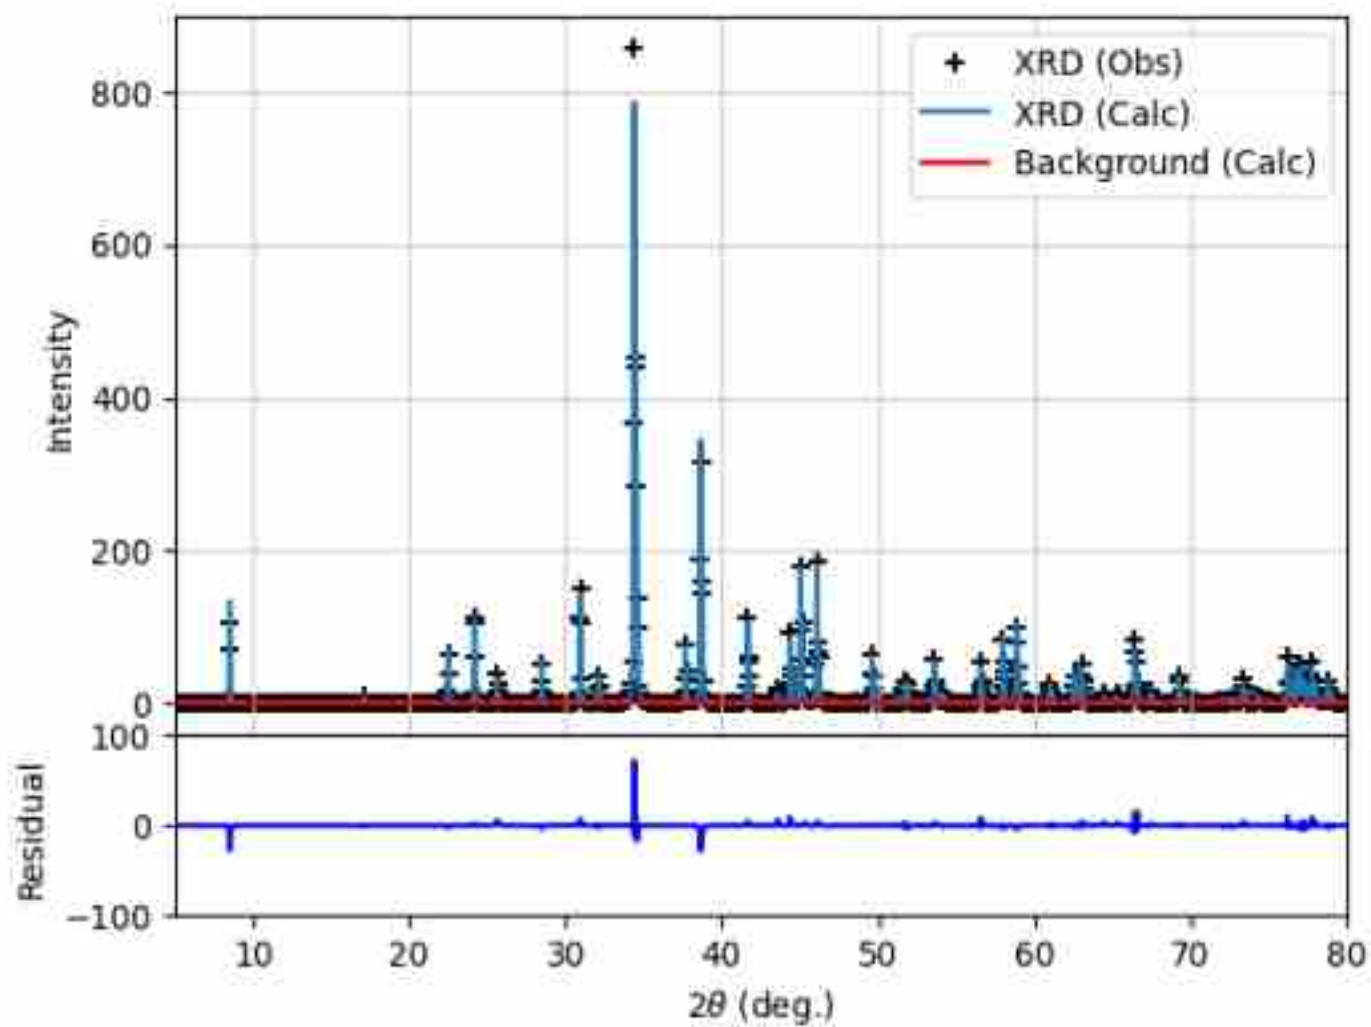

| RMSE before RR | Rwp     | RMSE after RR |
|----------------|---------|---------------|
| 0.013          | 9.14642 | 0.01246       |

# Er<sub>2</sub>Nb<sub>2</sub>O<sub>8</sub>

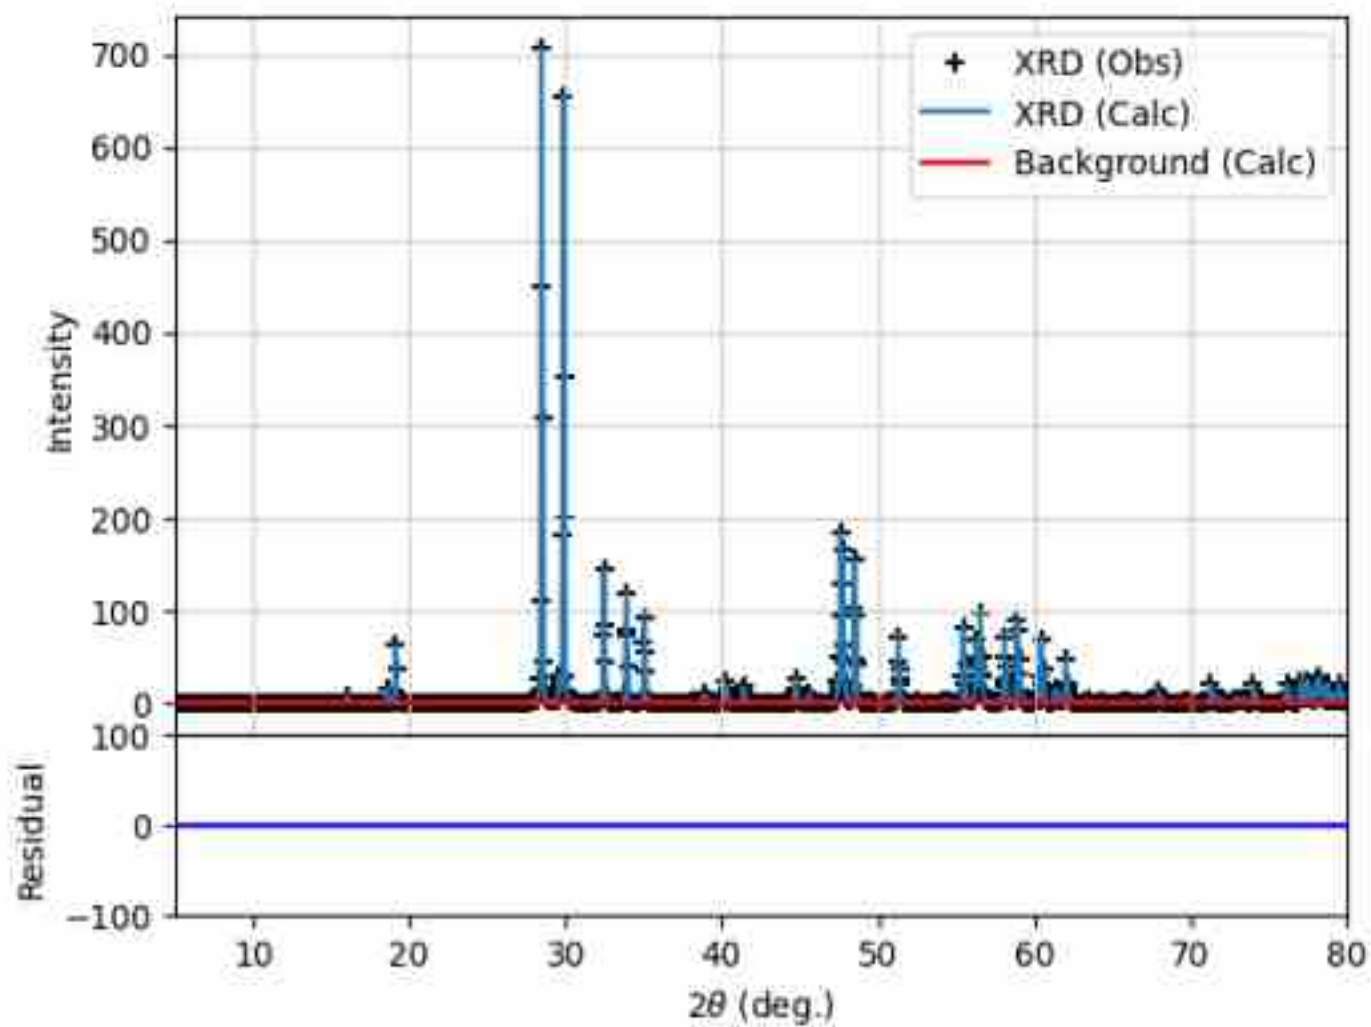

| RMSE before RR | Rwp    | RMSE after RR |
|----------------|--------|---------------|
| 0.013          | 0.0031 | 0.0007        |



# Er<sub>4</sub>Al<sub>4</sub>Fe<sub>4</sub>

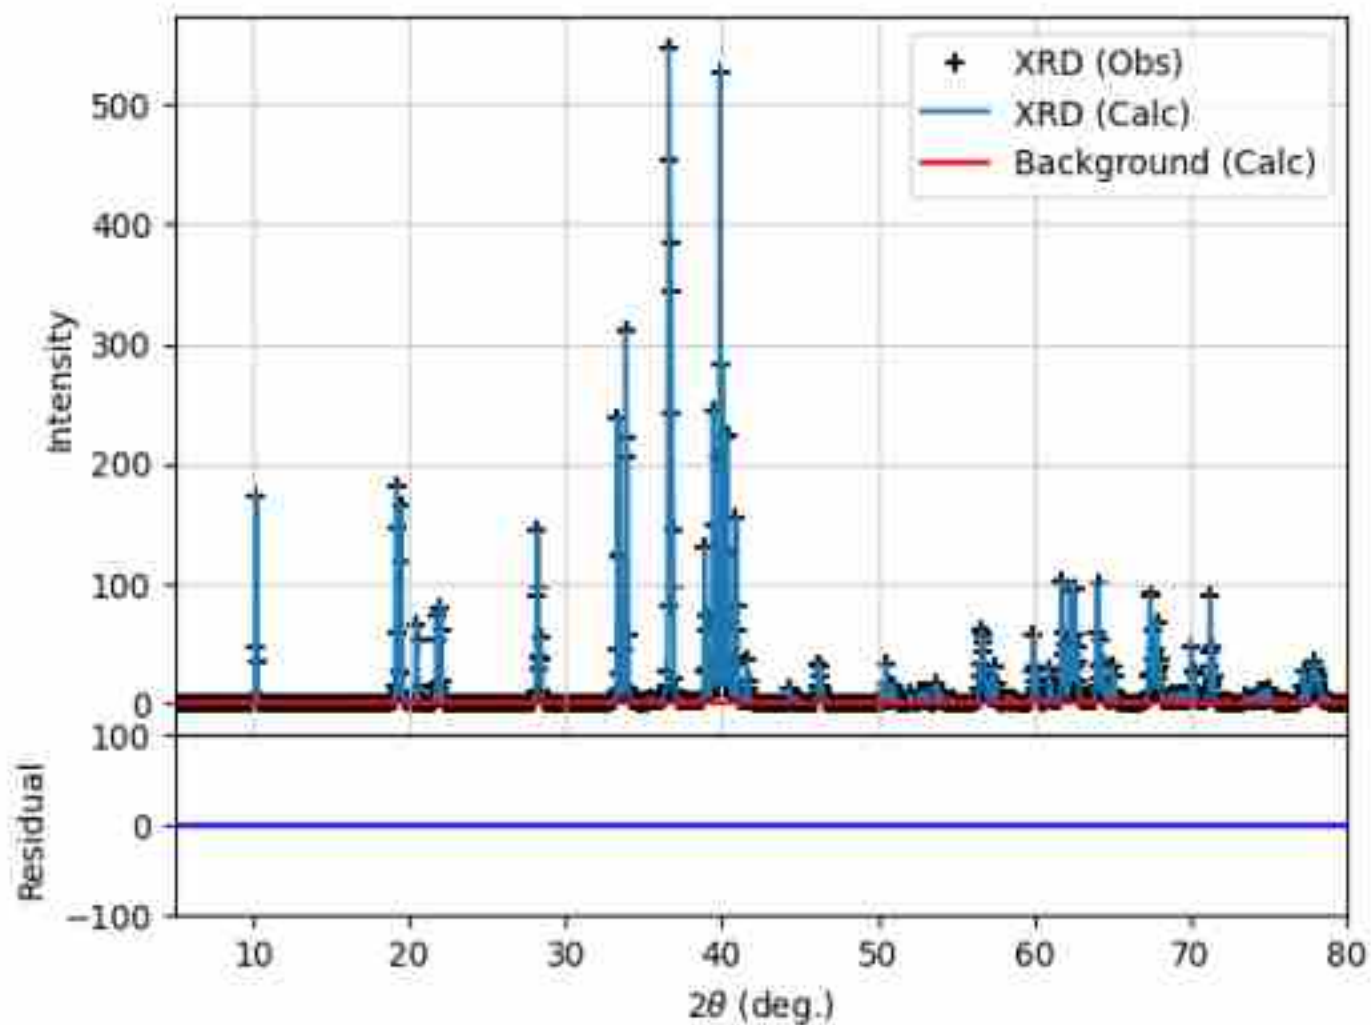

| RMSE before RR | Rwp     | RMSE after RR |
|----------------|---------|---------------|
| 0.013          | 0.00443 | 0.00052       |

# Er<sub>6</sub>Ga<sub>2</sub>O<sub>12</sub>

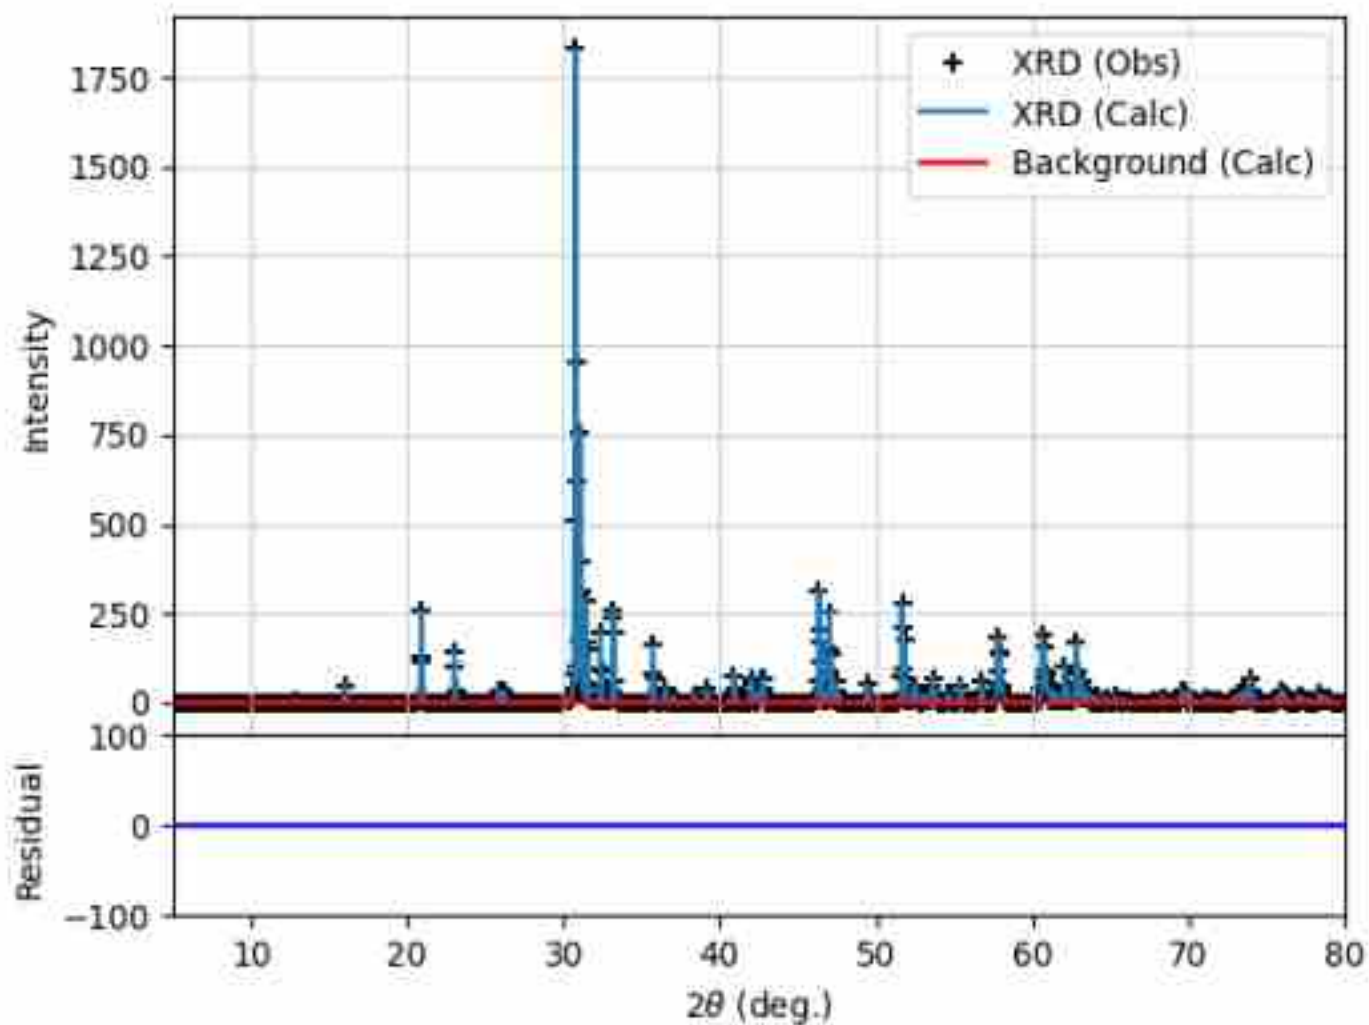

| RMSE before RR | Rwp     | RMSE after RR |
|----------------|---------|---------------|
| 0.013          | 0.00352 | 0.00117       |

# Eu1Al1Ag4

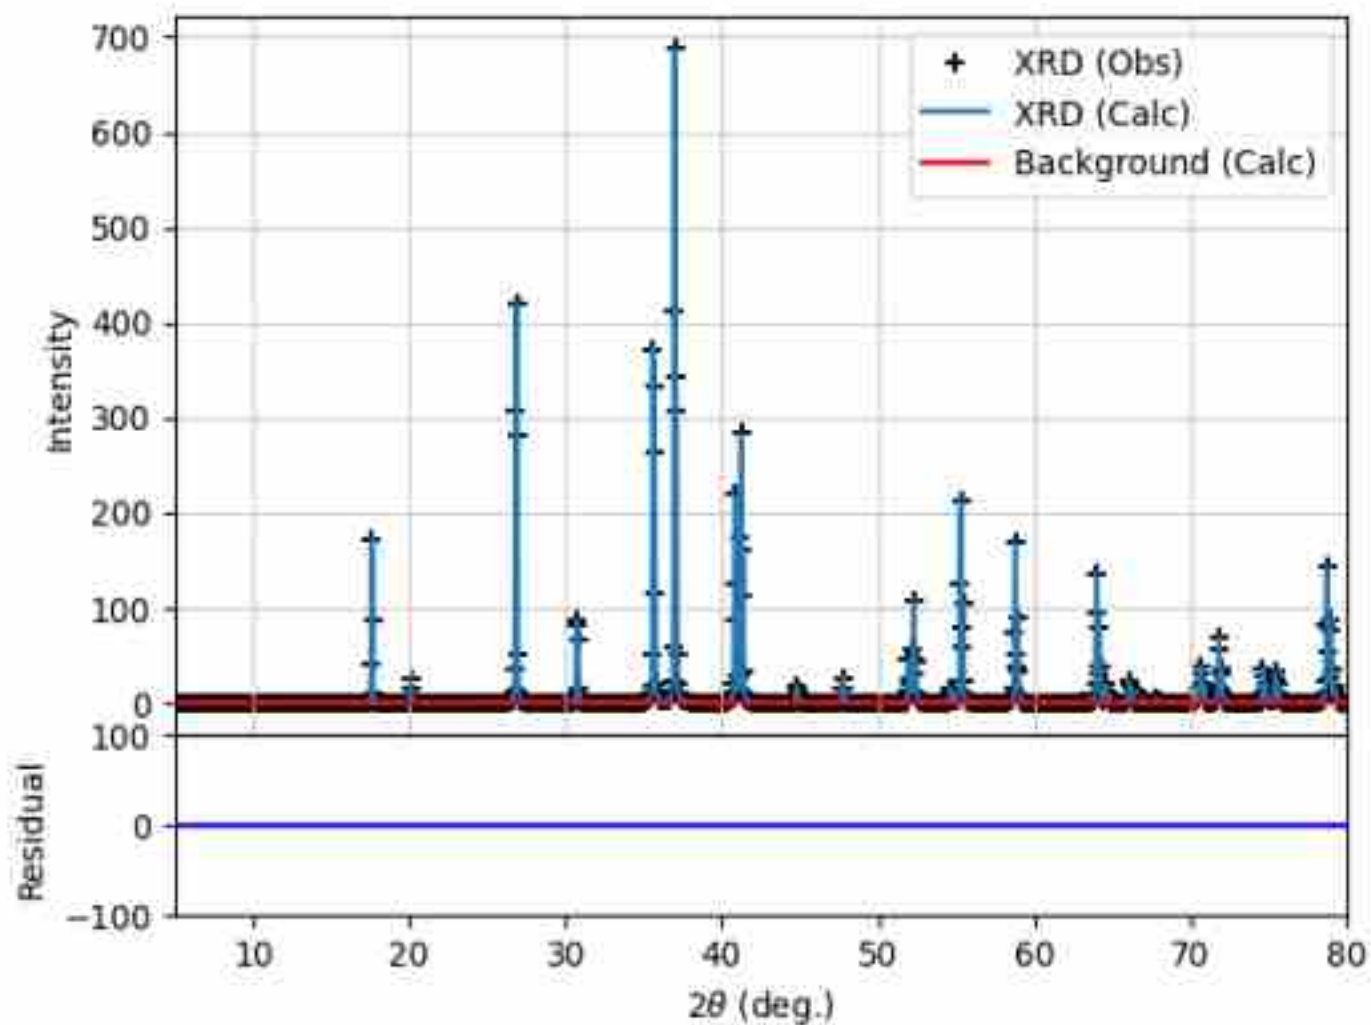

| RMSE before RR | Rwp     | RMSE after RR |
|----------------|---------|---------------|
| 0.013          | 0.03796 | 0.00175       |

# Eu1Cu4P3

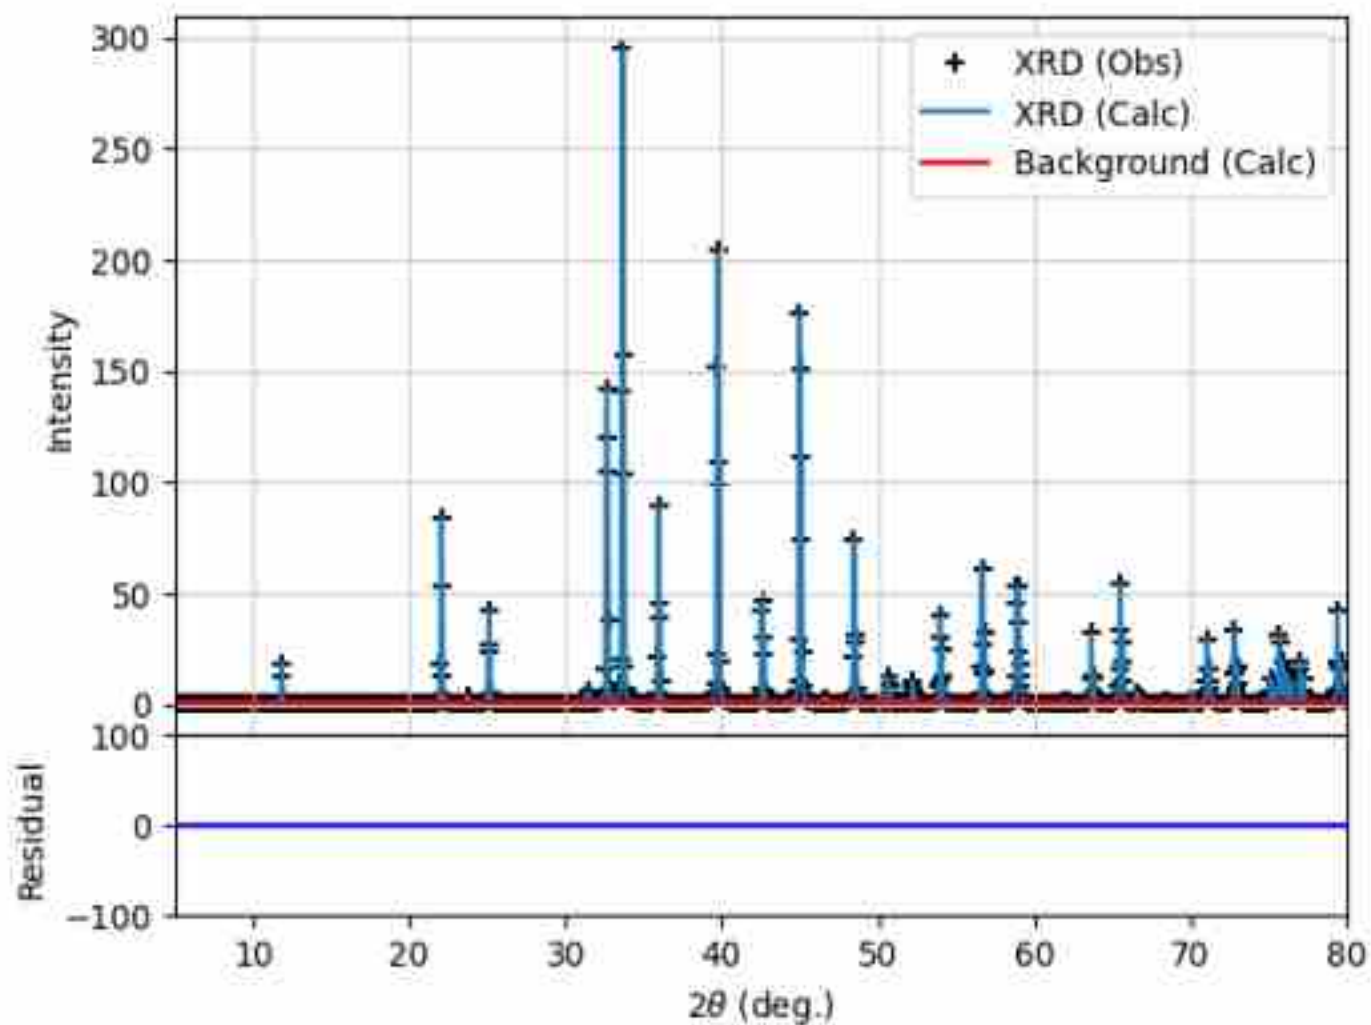

| RMSE before RR | Rwp     | RMSE after RR |
|----------------|---------|---------------|
| 0.013          | 0.00887 | 0.00145       |

# Eu1Si2Ir2

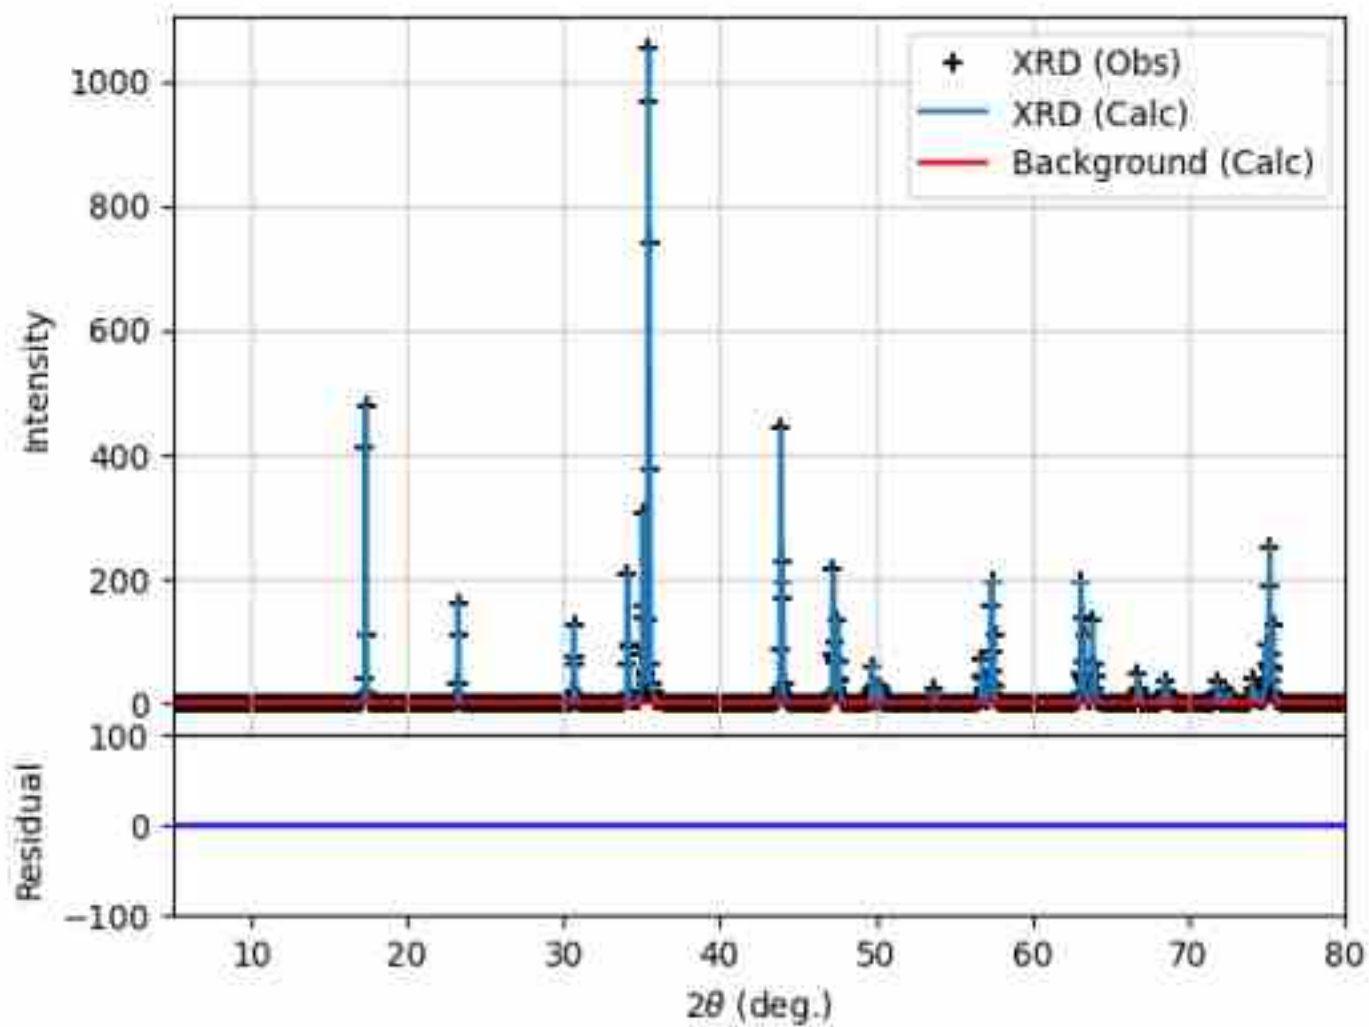

| RMSE before RR | Rwp     | RMSE after RR |
|----------------|---------|---------------|
| 0.013          | 0.00529 | 0.00033       |

Eu2Ge6

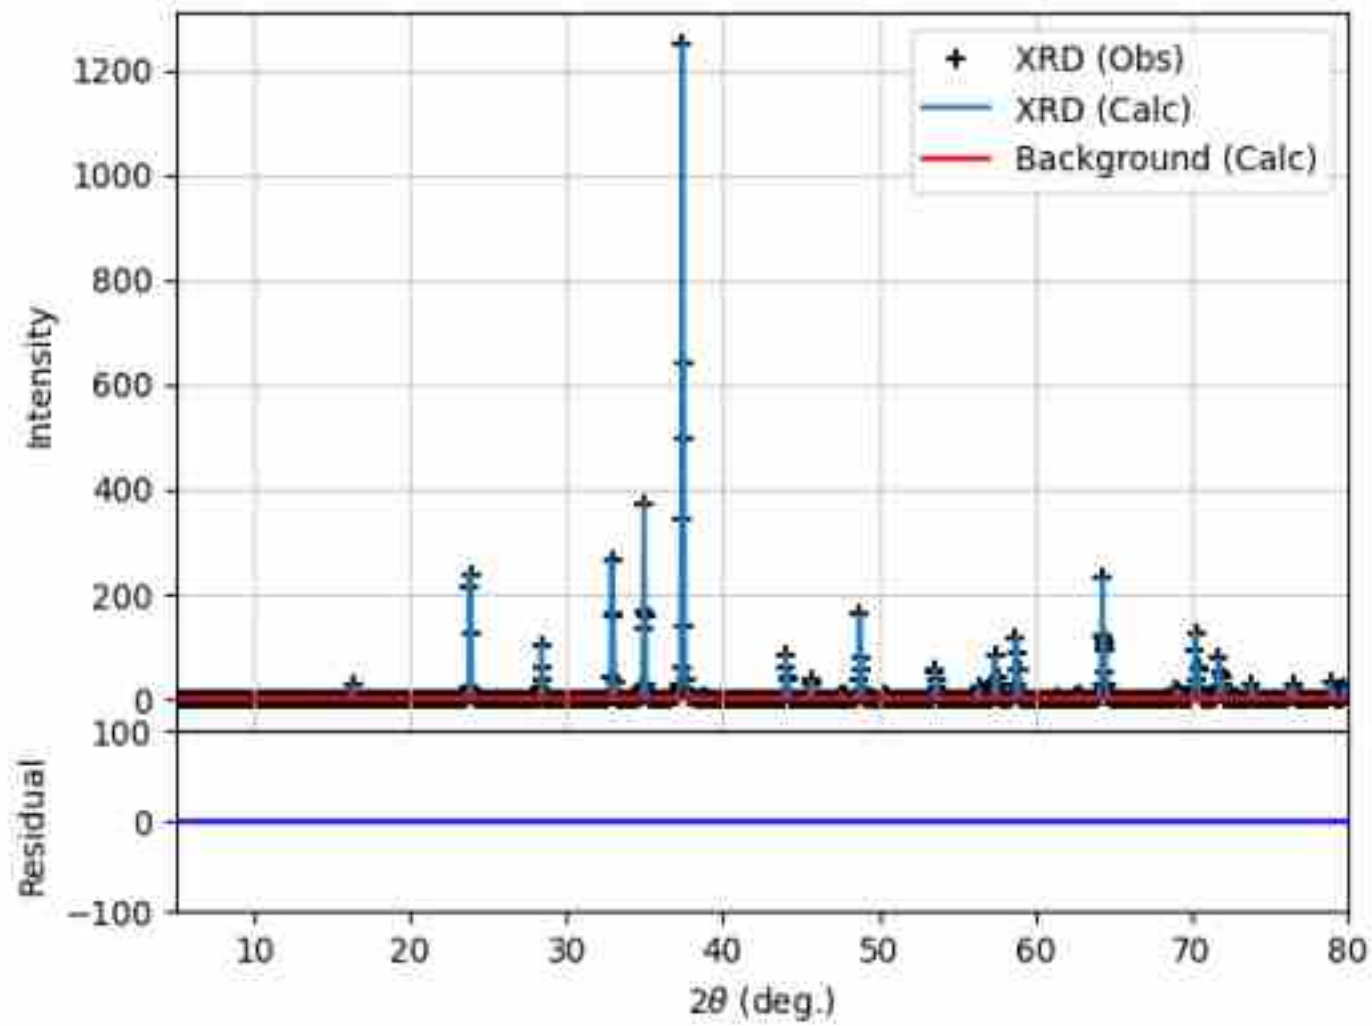

| RMSE before RR | Rwp     | RMSE after RR |
|----------------|---------|---------------|
| 0.013          | 0.01037 | 0.00126       |

# Eu<sub>2</sub>In<sub>4</sub>

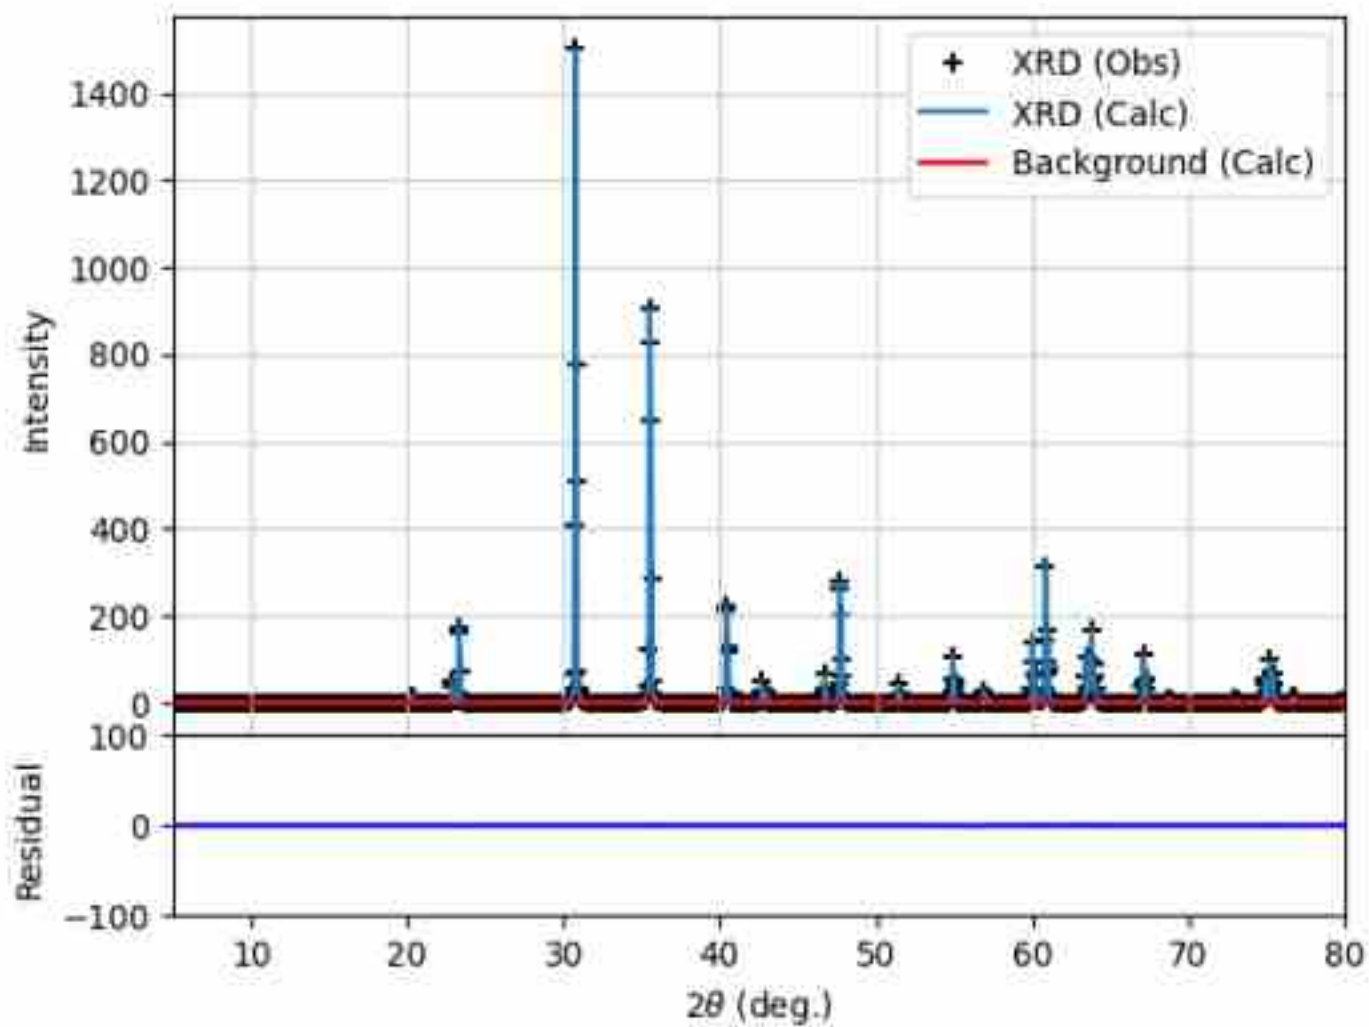

| RMSE before RR | Rwp     | RMSE after RR |
|----------------|---------|---------------|
| 0.013          | 0.37505 | 0.00517       |

# Eu<sub>2</sub>Ni<sub>3</sub>Sb<sub>4</sub>

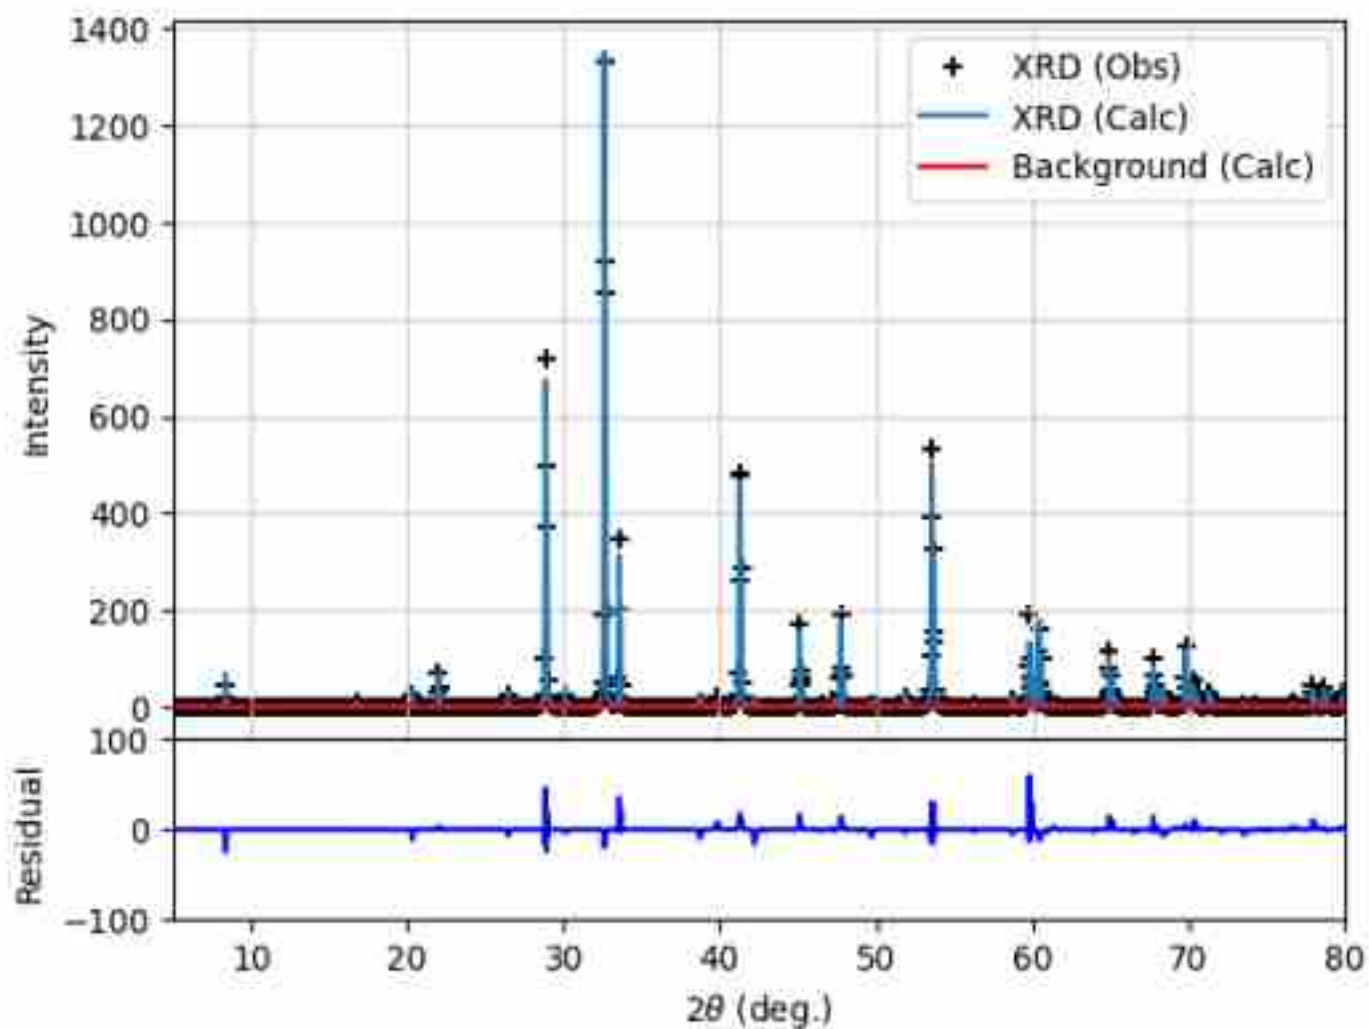

| RMSE before RR | Rwp      | RMSE after RR |
|----------------|----------|---------------|
| 0.013          | 16.52428 | 0.01407       |



# Eu<sub>2</sub>Se<sub>1</sub>O<sub>2</sub>

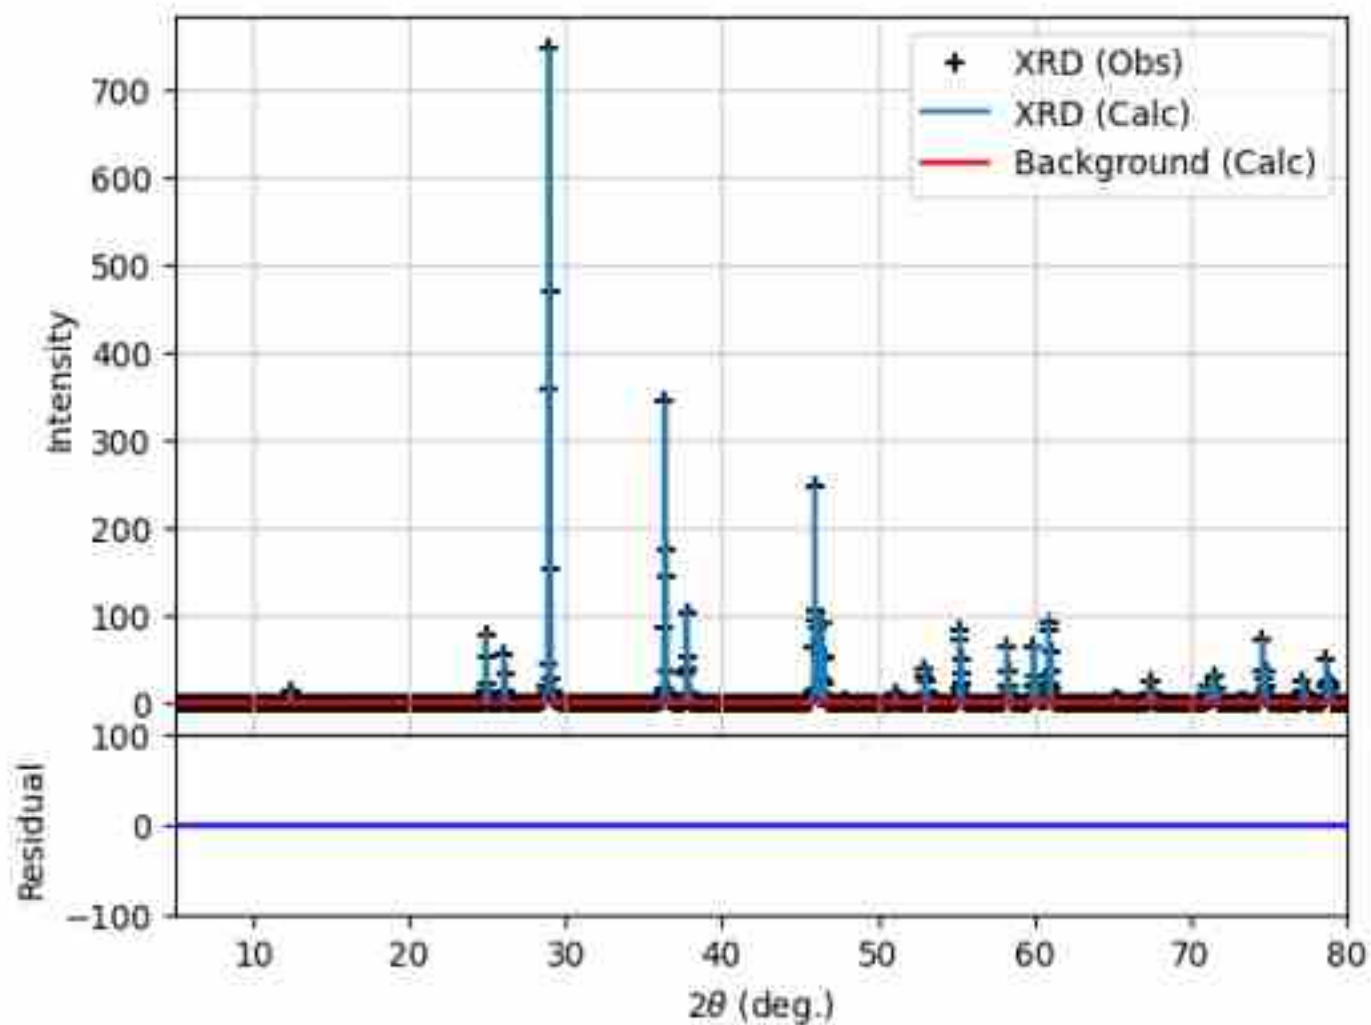

| RMSE before RR | Rwp     | RMSE after RR |
|----------------|---------|---------------|
| 0.013          | 0.00377 | 0.00159       |

# Eu<sub>2</sub>Ti<sub>10</sub>O<sub>4</sub>

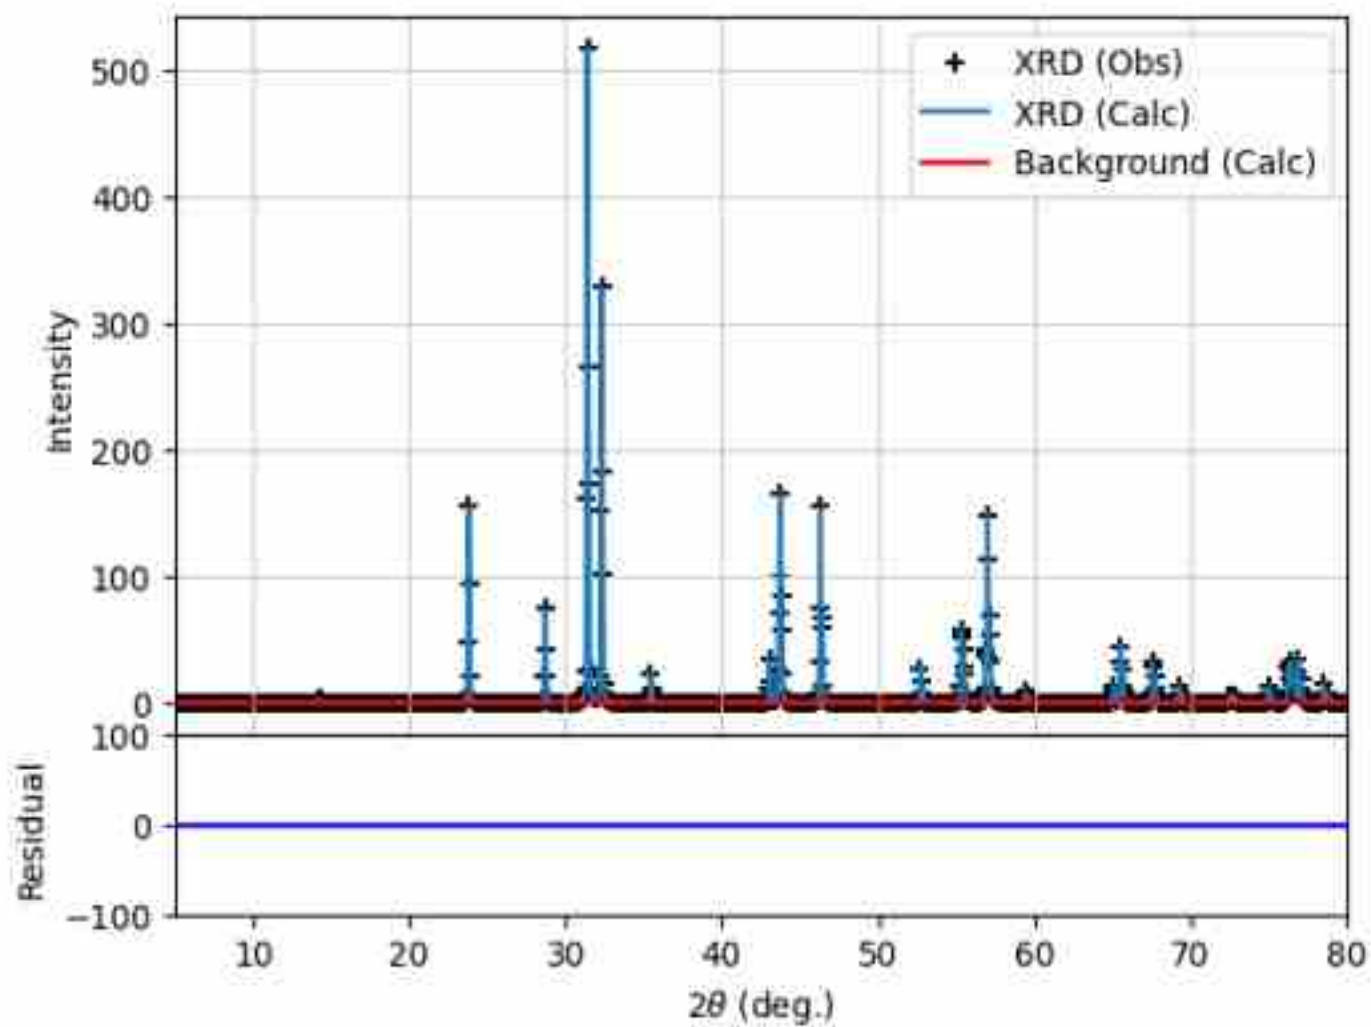

| RMSE before RR | Rwp     | RMSE after RR |
|----------------|---------|---------------|
| 0.013          | 0.00339 | 0.00115       |

# Eu10Pd4

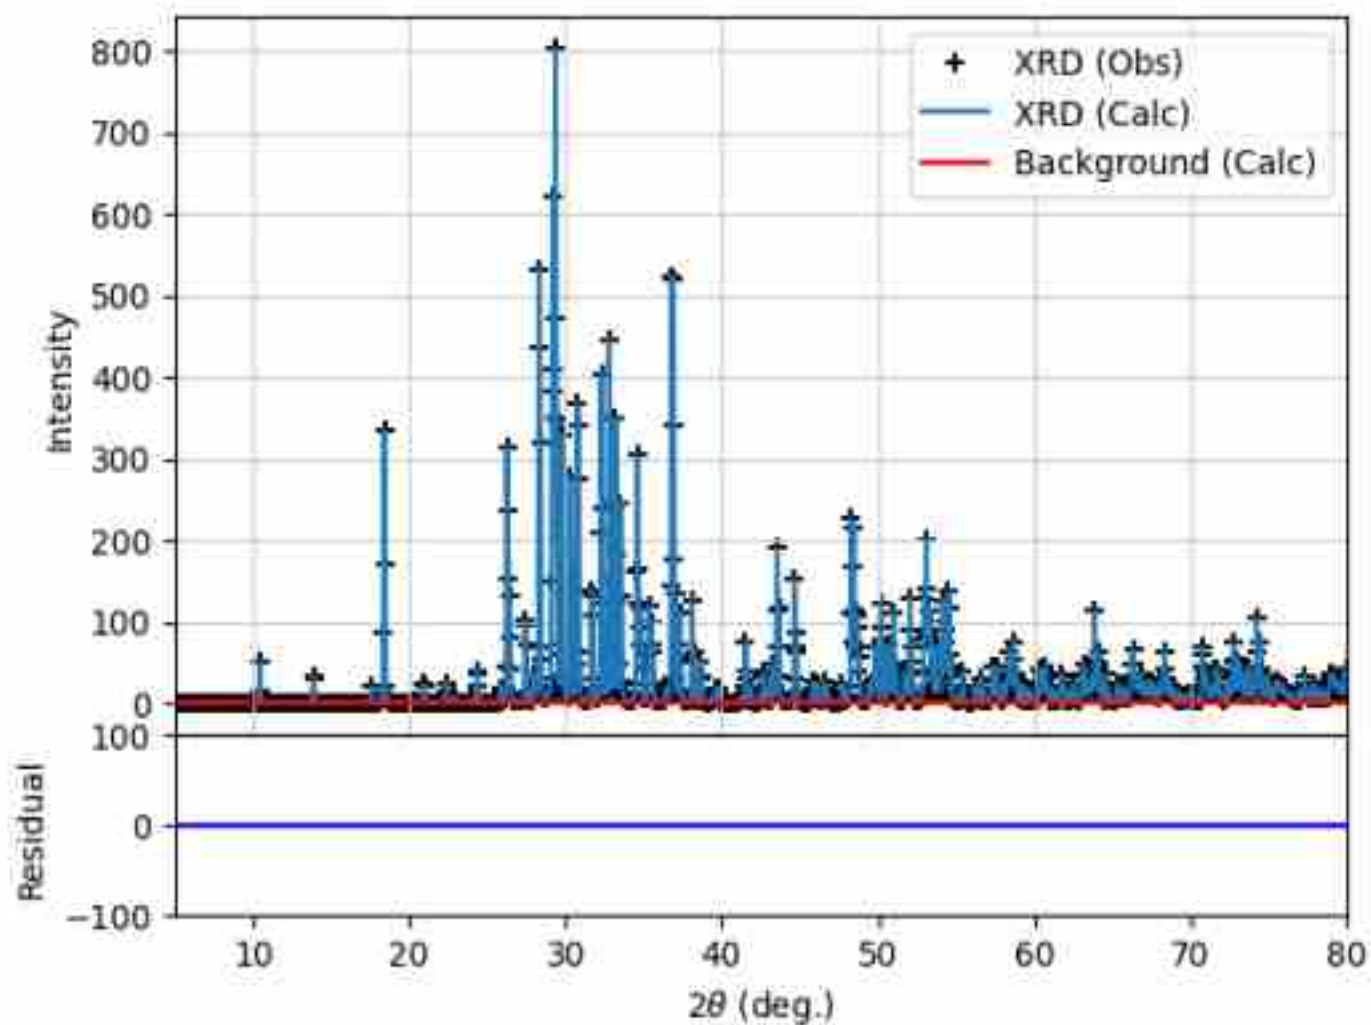

| RMSE before RR | Rwp     | RMSE after RR |
|----------------|---------|---------------|
| 0.013          | 0.00388 | 0.00025       |

# Fe<sub>4</sub>Ge<sub>4</sub>

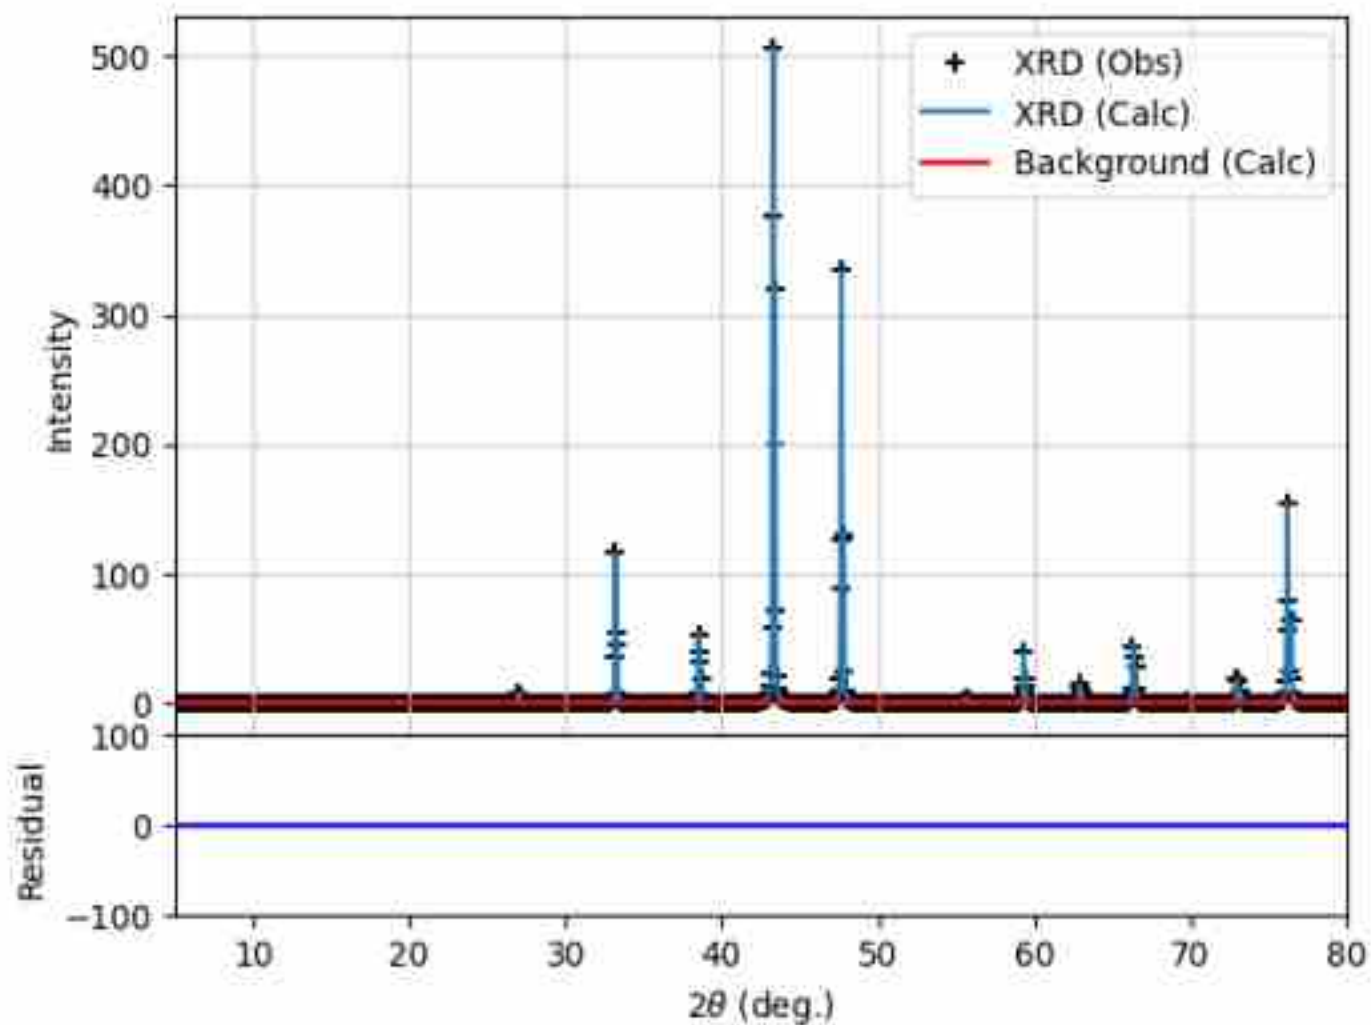

| RMSE before RR | Rwp     | RMSE after RR |
|----------------|---------|---------------|
| 0.013          | 0.00379 | 0.00057       |

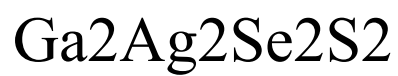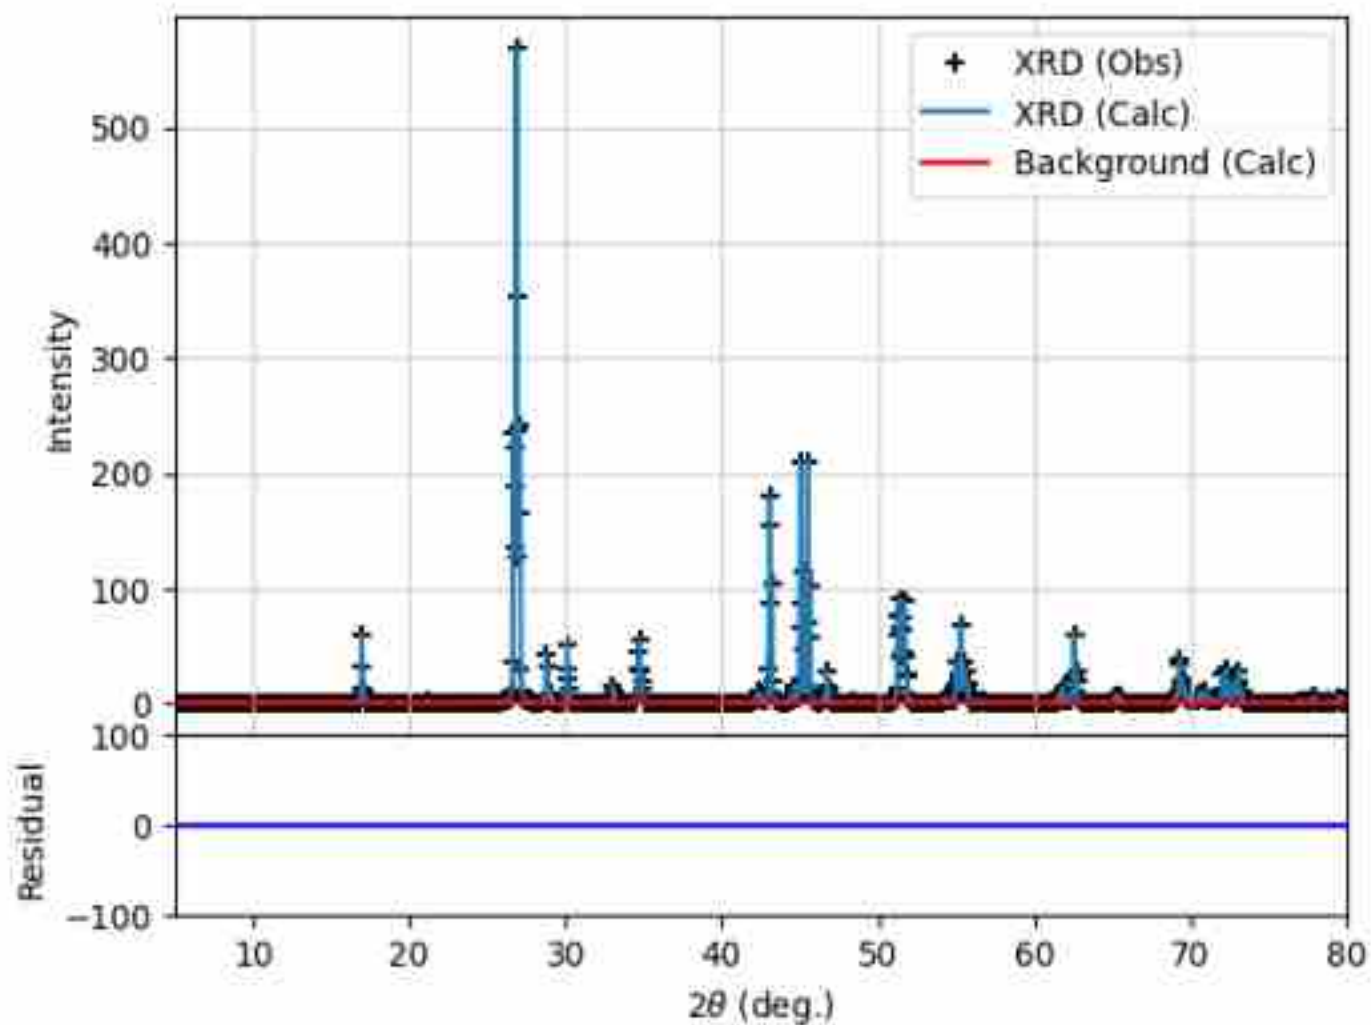

| RMSE before RR | Rwp     | RMSE after RR |
|----------------|---------|---------------|
| 0.013          | 0.00342 | 0.00021       |

# Ga<sub>2</sub>Ag<sub>2</sub>Te<sub>2</sub>Se<sub>2</sub>

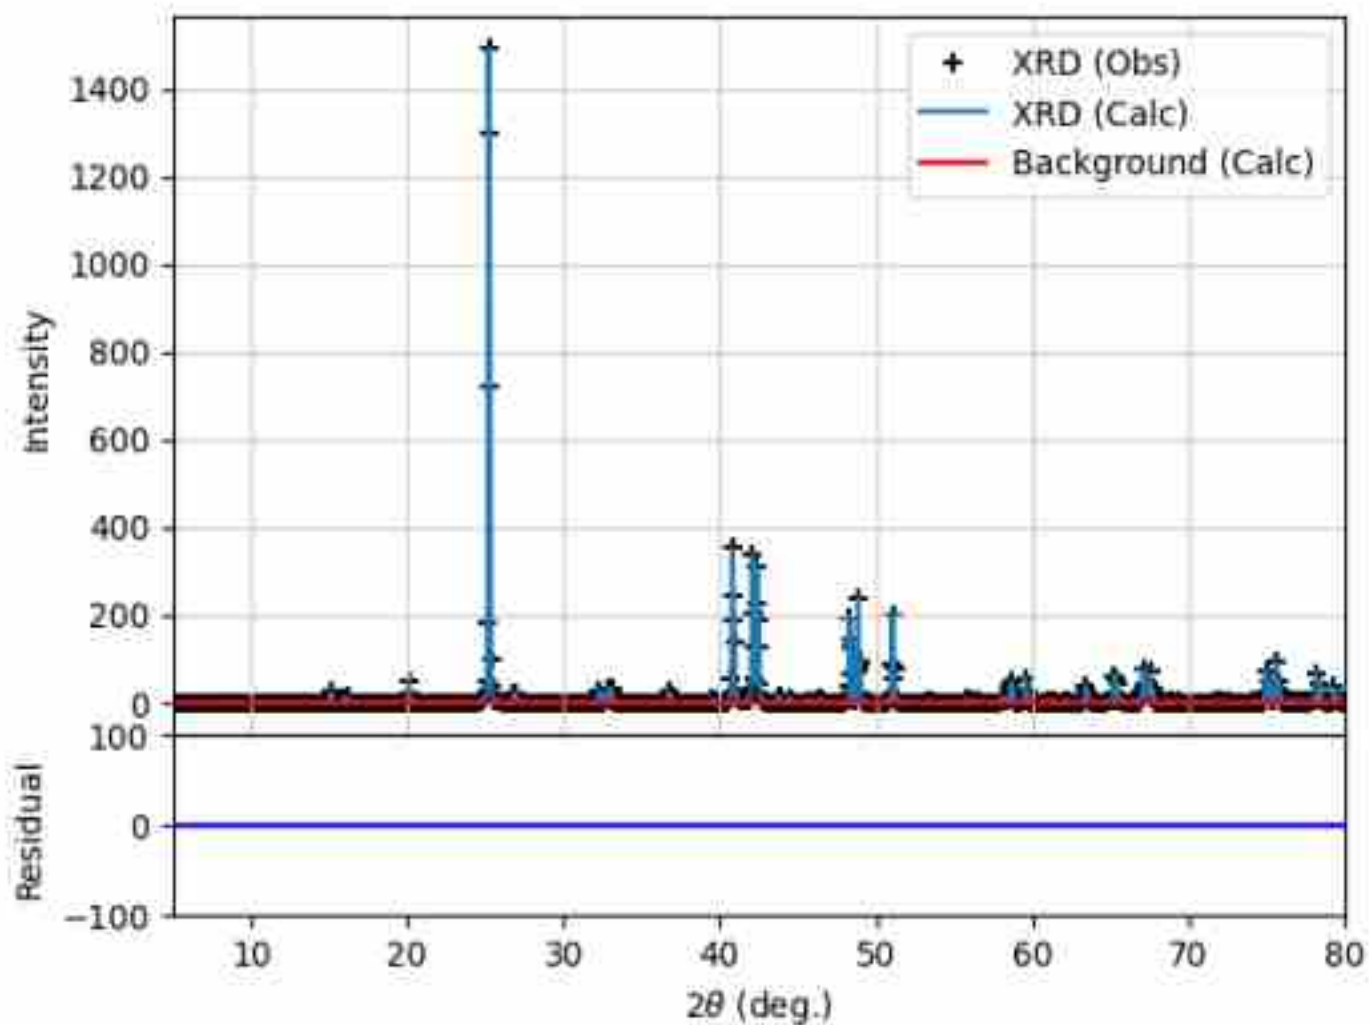

| RMSE before RR | Rwp     | RMSE after RR |
|----------------|---------|---------------|
| 0.013          | 0.00352 | 0.00026       |

# Ga<sub>2</sub>Sn<sub>6</sub>

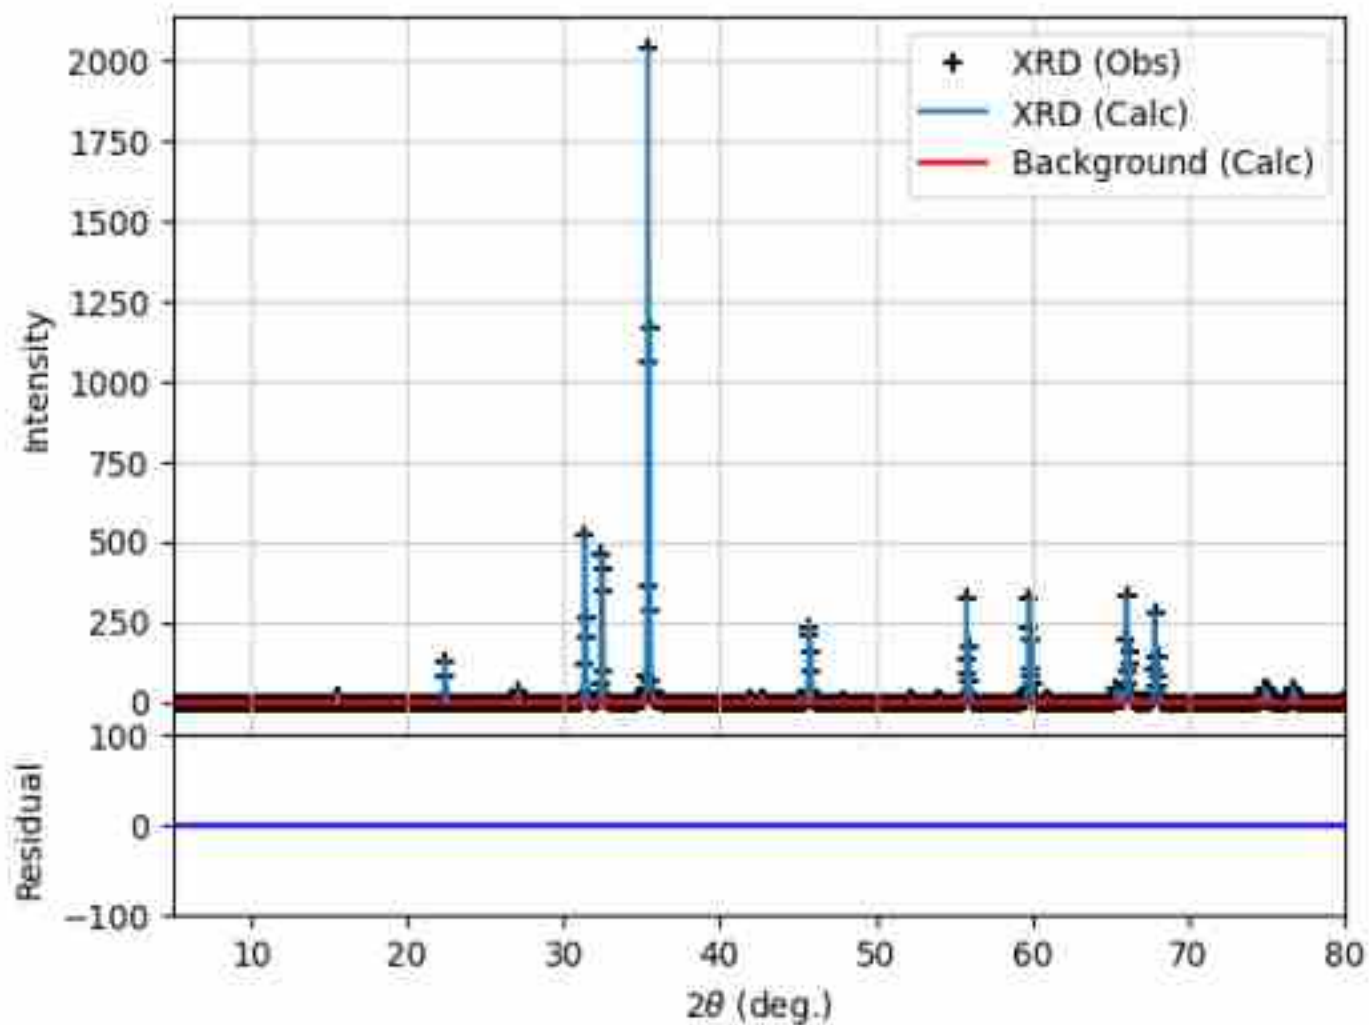

| RMSE before RR | Rwp     | RMSE after RR |
|----------------|---------|---------------|
| 0.013          | 0.00748 | 0.00062       |

# Gd1Al8Cu4

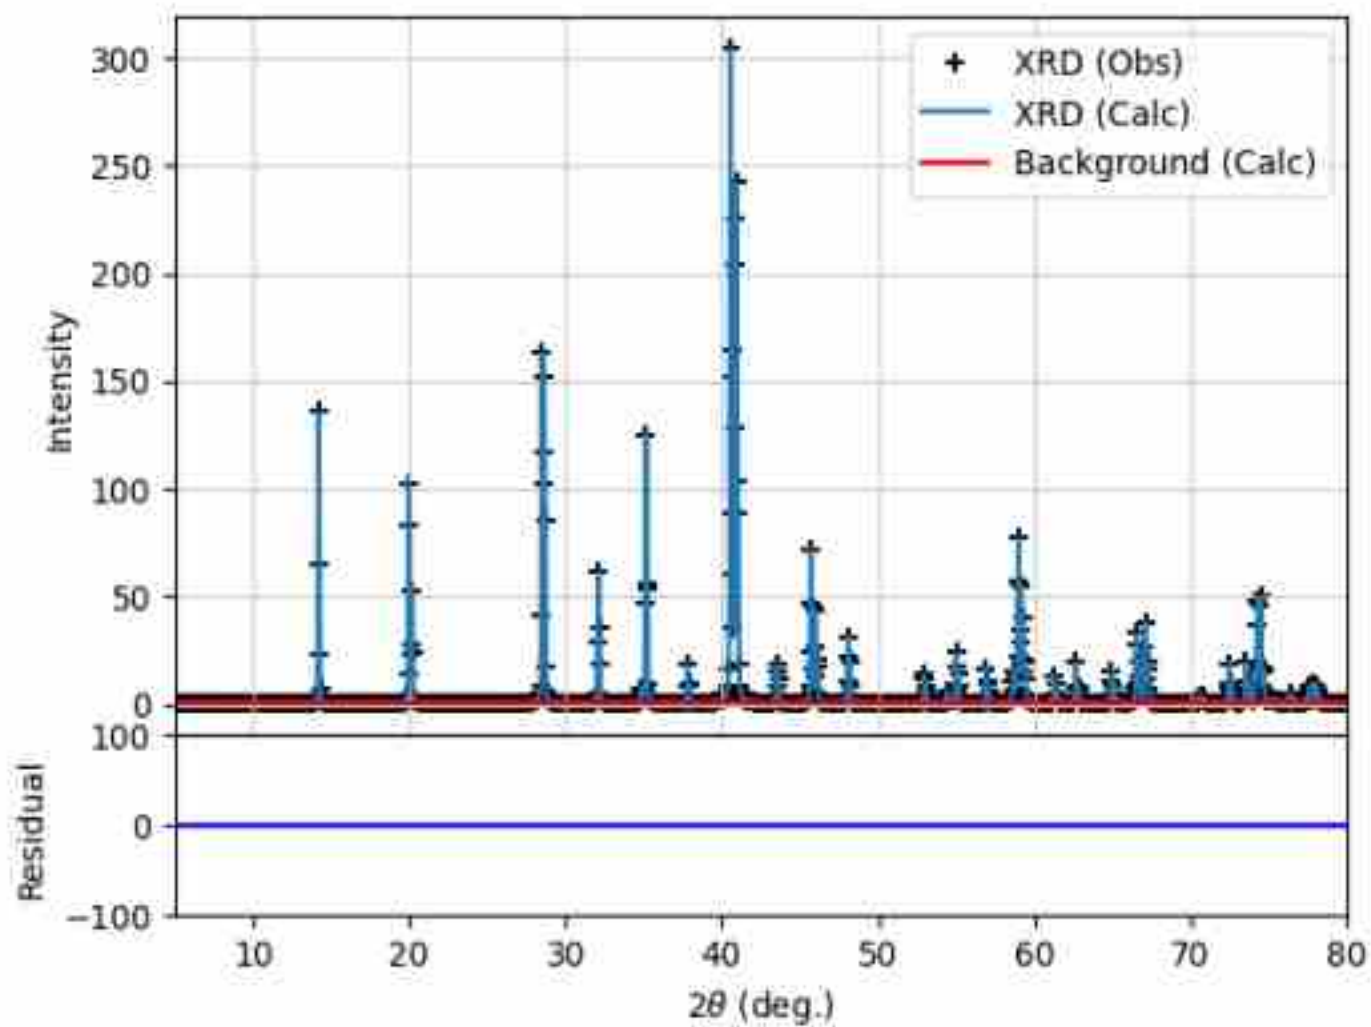

| RMSE before RR | Rwp     | RMSE after RR |
|----------------|---------|---------------|
| 0.013          | 0.00353 | 0.00076       |



# Gd<sub>2</sub>Br<sub>6</sub>

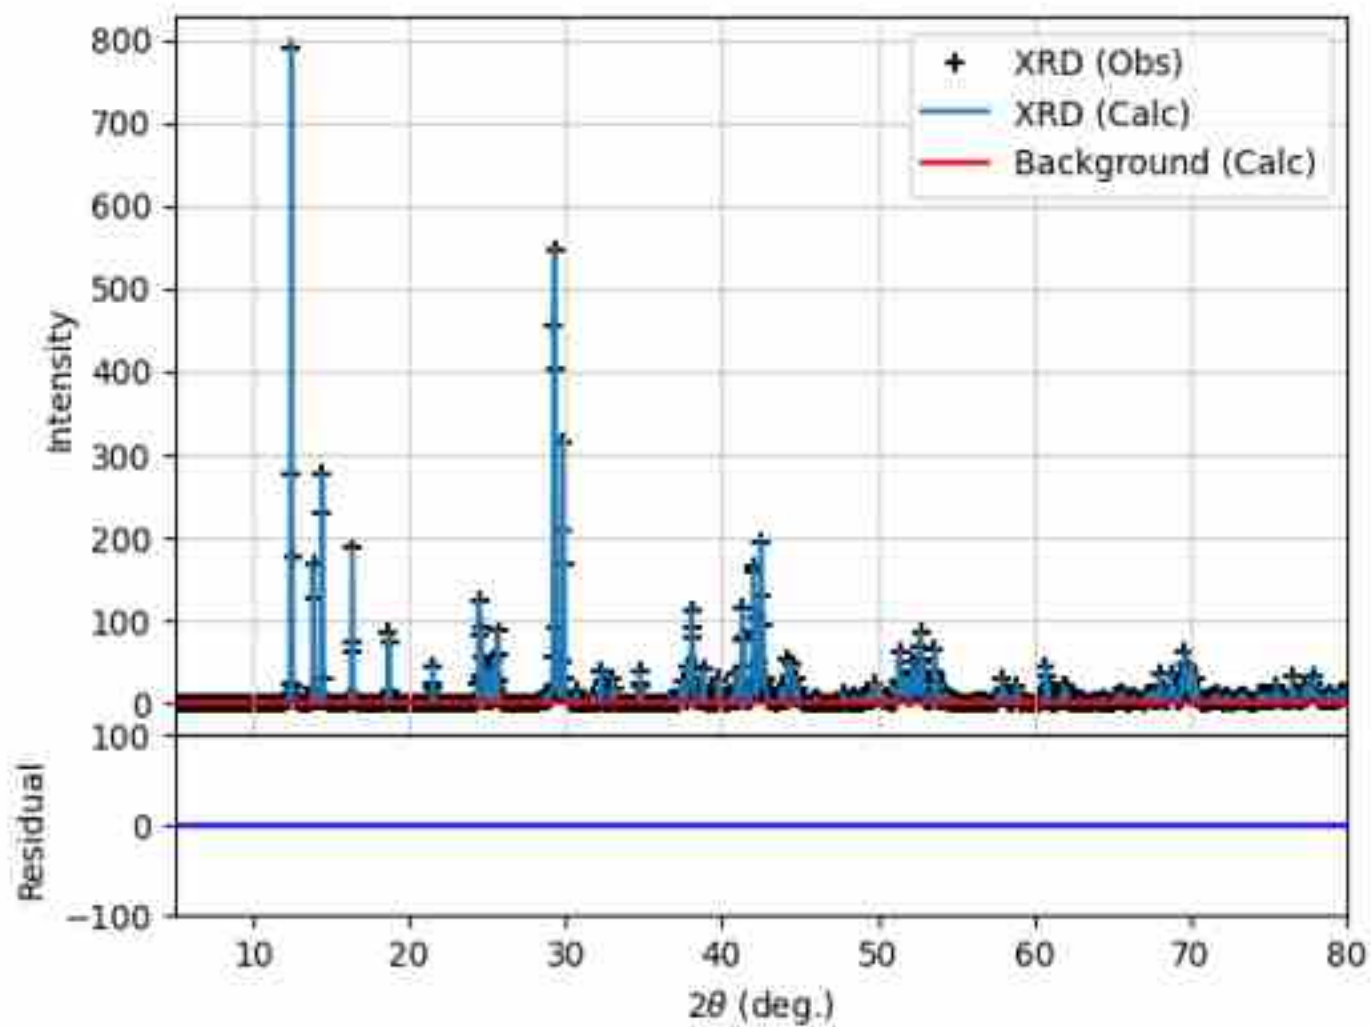

| RMSE before RR | Rwp     | RMSE after RR |
|----------------|---------|---------------|
| 0.013          | 0.00269 | 0.0003        |

# Gd<sub>2</sub>C<sub>1</sub>F<sub>2</sub>

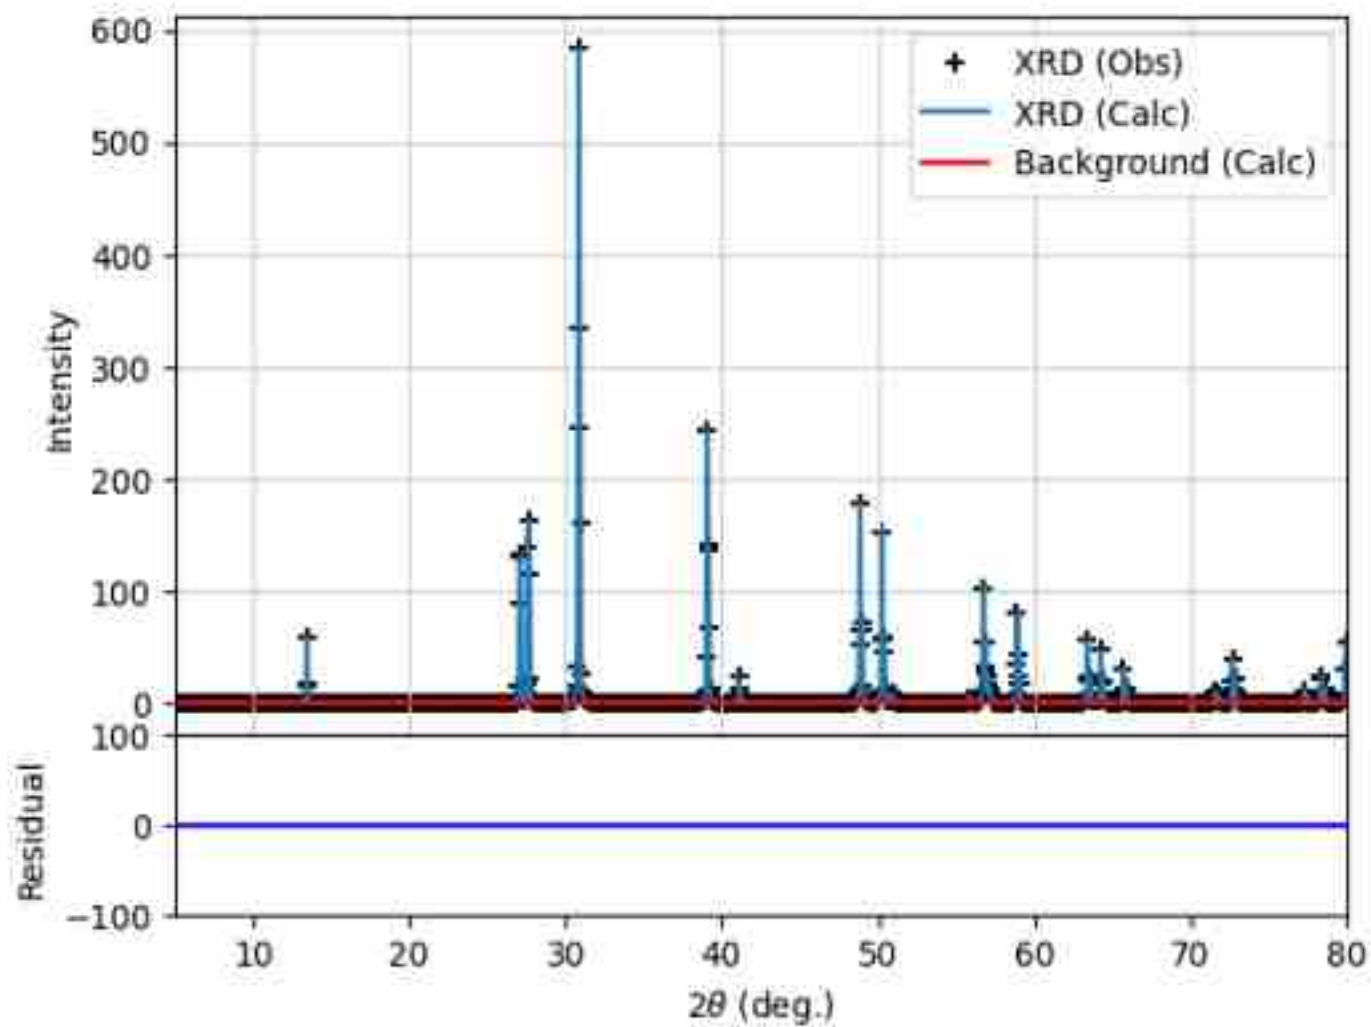

| RMSE before RR | Rwp     | RMSE after RR |
|----------------|---------|---------------|
| 0.013          | 0.00435 | 0.00232       |

# Gd<sub>2</sub>Hf<sub>2</sub>F<sub>14</sub>

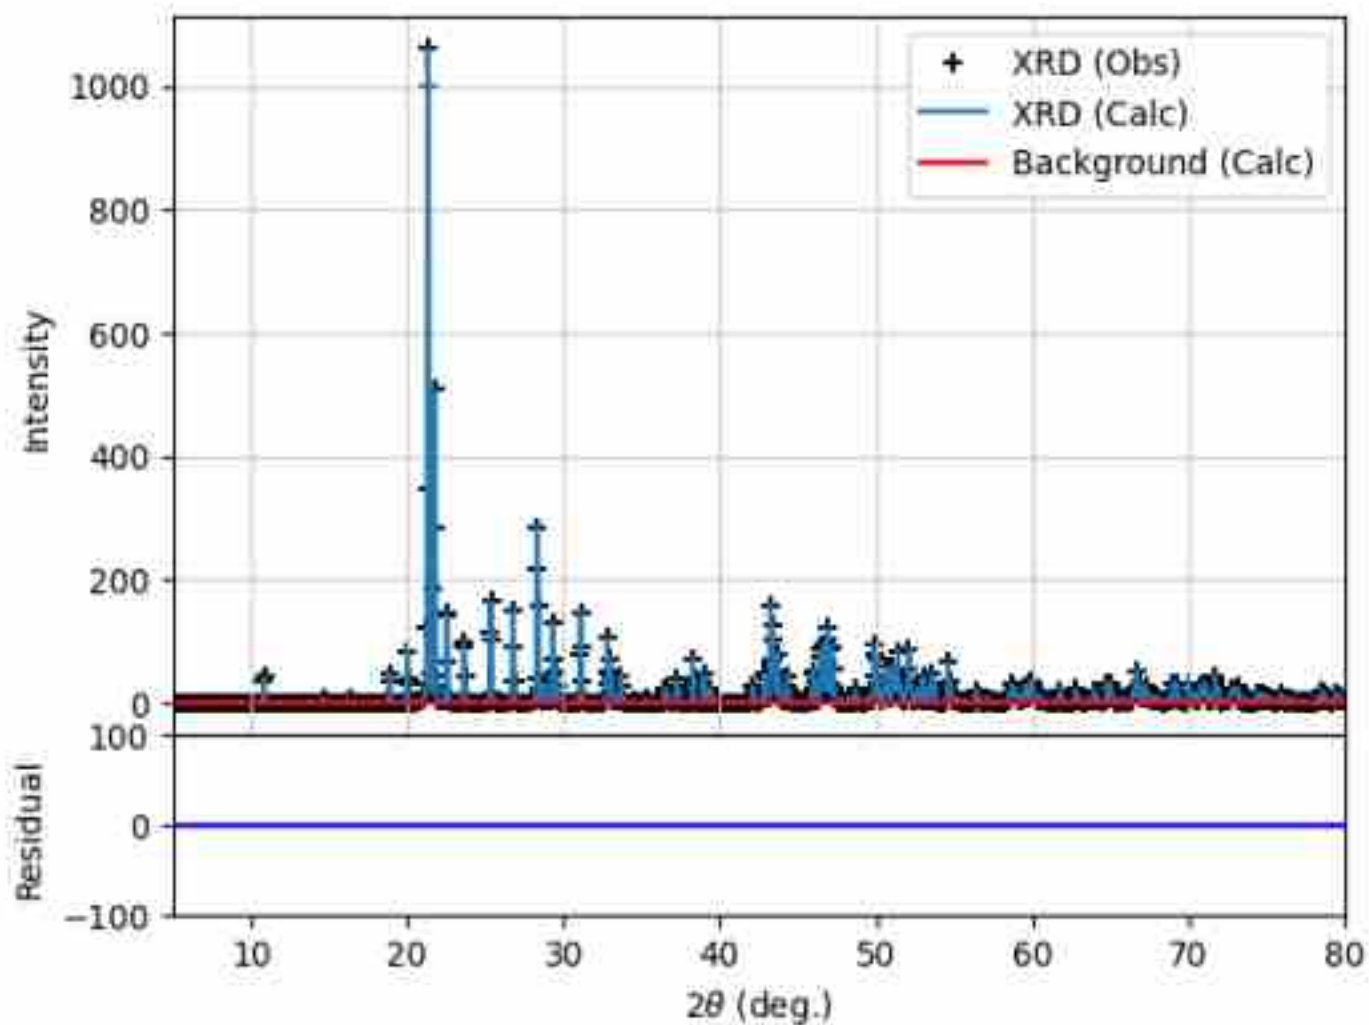

| RMSE before RR | Rwp     | RMSE after RR |
|----------------|---------|---------------|
| 0.013          | 0.00437 | 0.00077       |

# Gd<sub>4</sub>Cr<sub>4</sub>O<sub>12</sub>

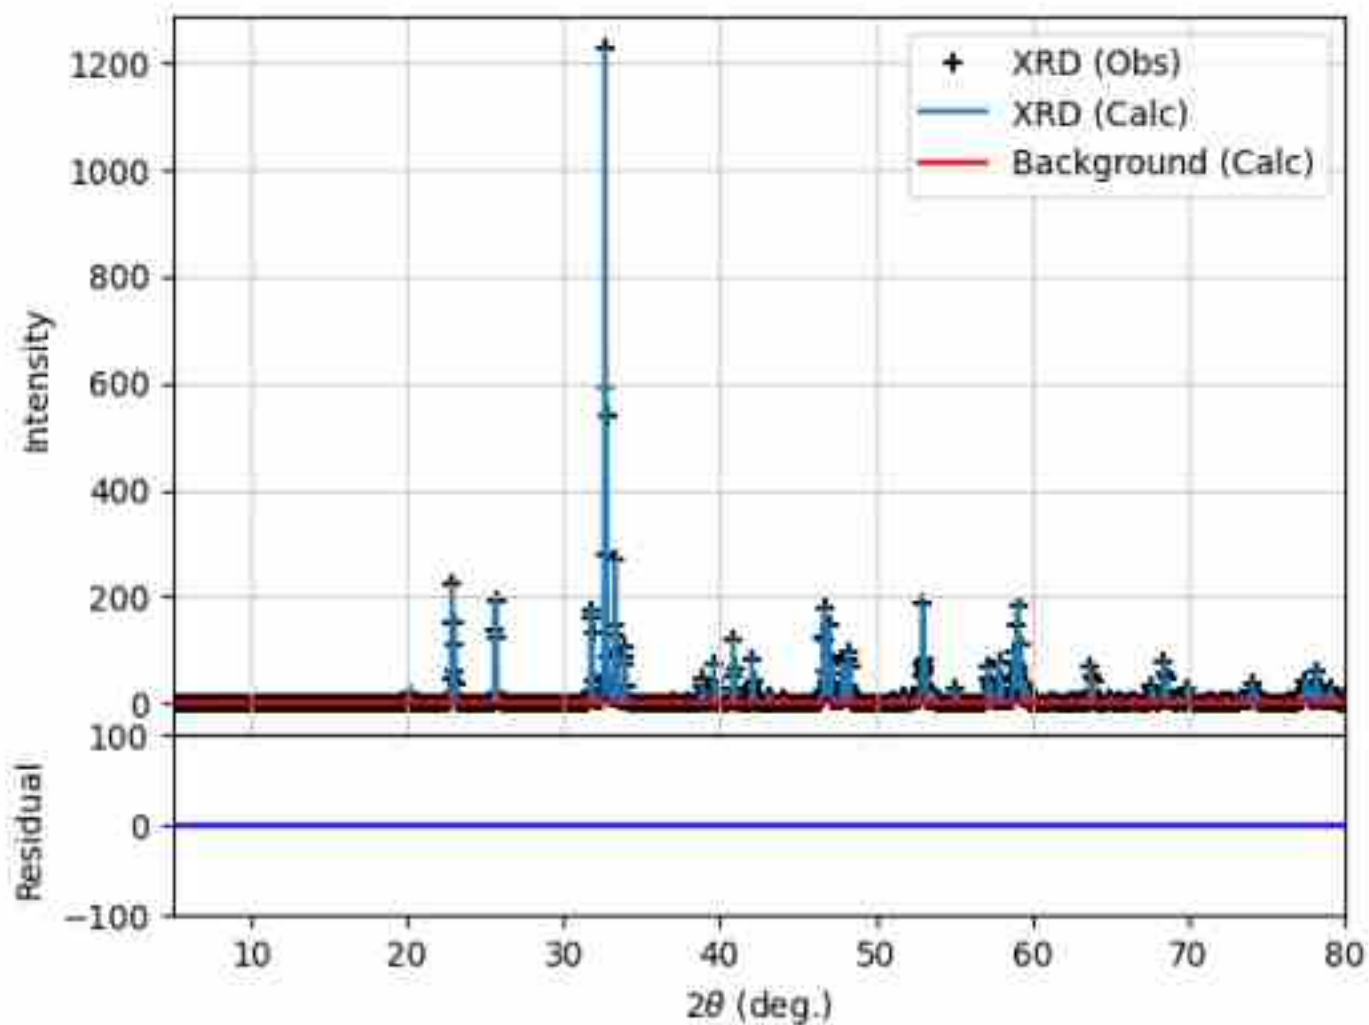

| RMSE before RR | Rwp     | RMSE after RR |
|----------------|---------|---------------|
| 0.013          | 0.00374 | 0.00145       |

# Gd6W1O12

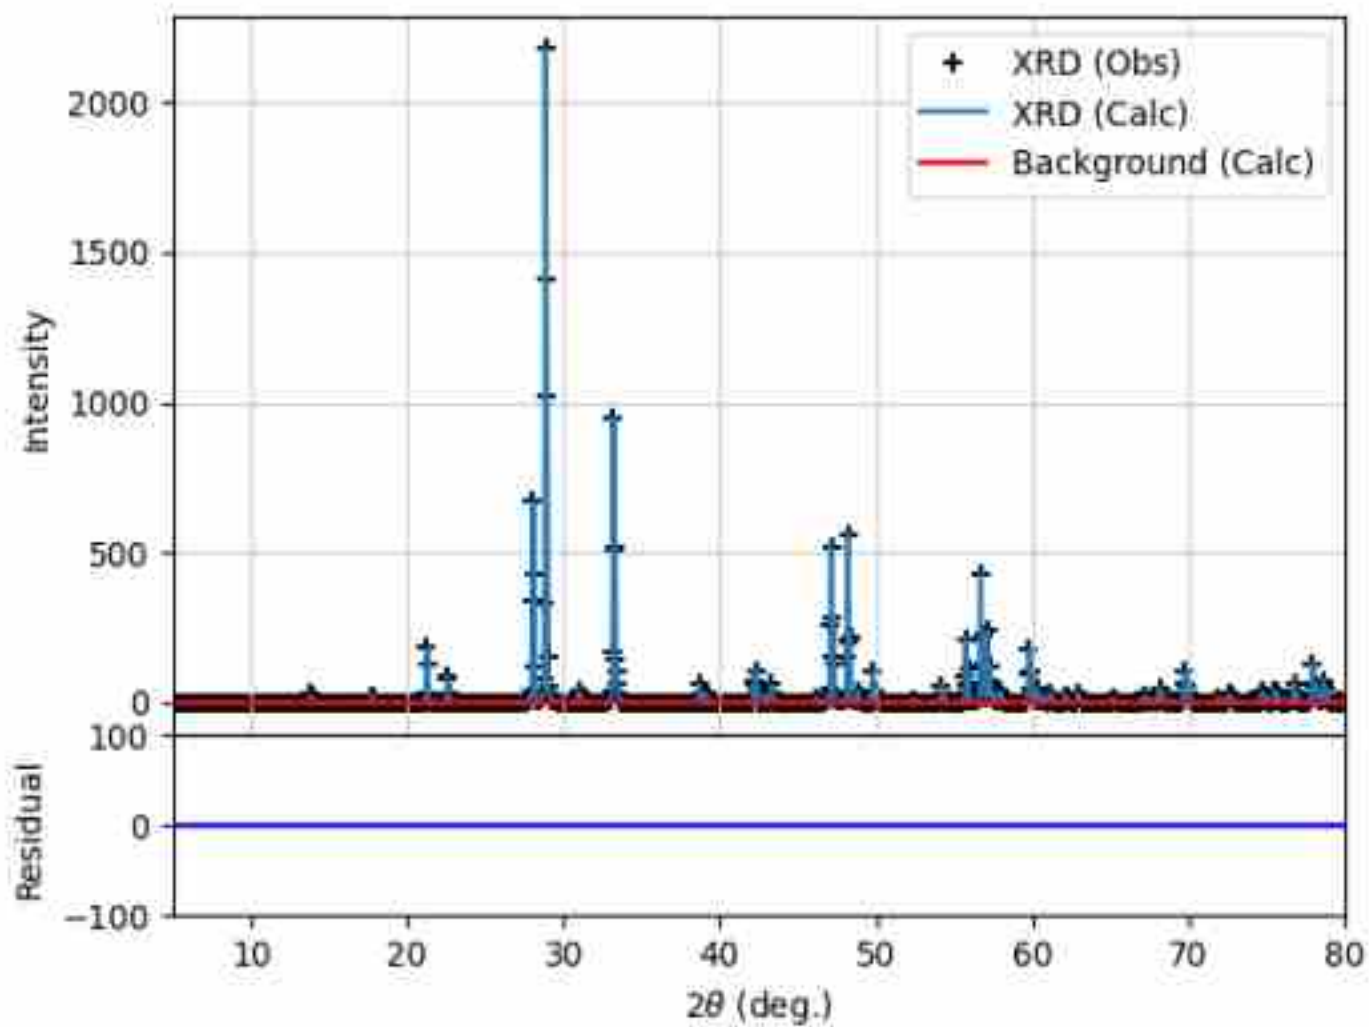

| RMSE before RR | Rwp     | RMSE after RR |
|----------------|---------|---------------|
| 0.013          | 0.00312 | 0.00201       |

# Hf1Al3Ni12

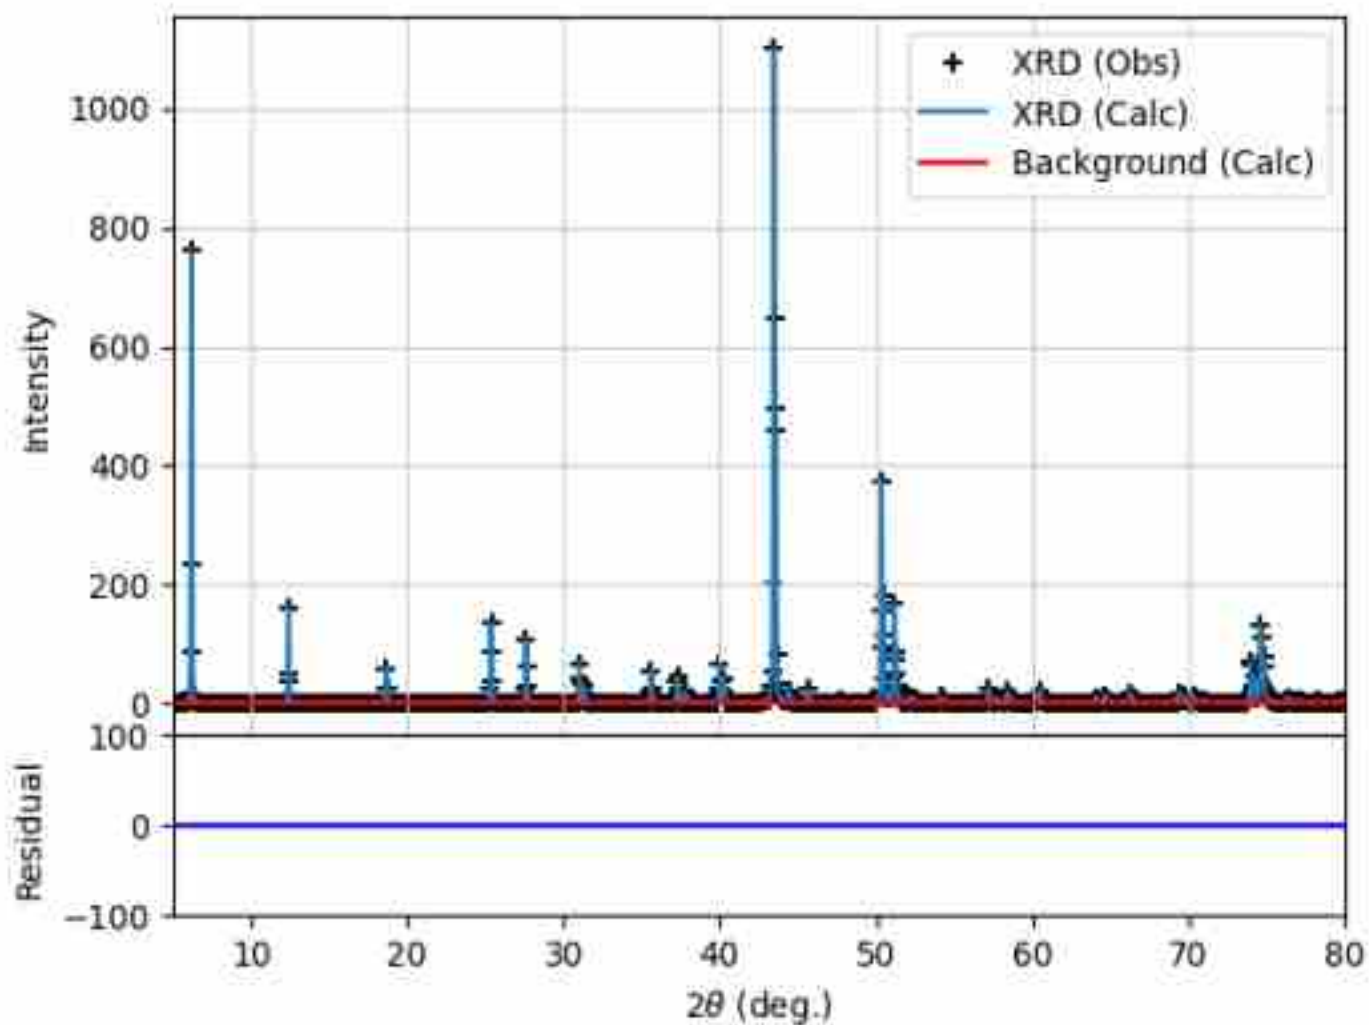

| RMSE before RR | Rwp    | RMSE after RR |
|----------------|--------|---------------|
| 0.013          | 0.0107 | 0.00116       |

# Hf1Fe6Ge6

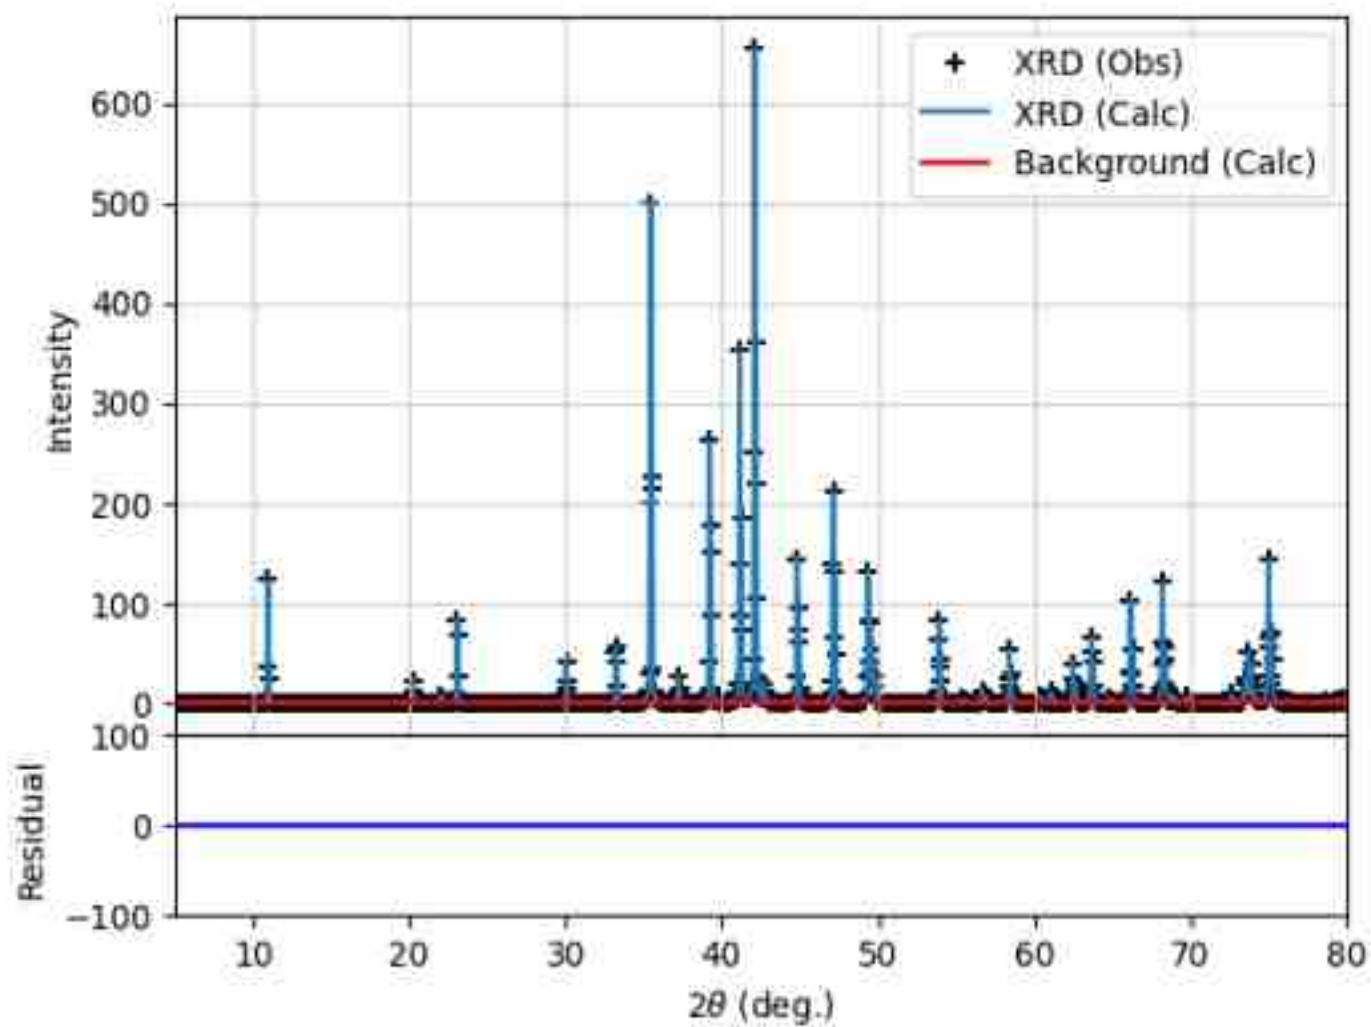

| RMSE before RR | Rwp     | RMSE after RR |
|----------------|---------|---------------|
| 0.013          | 0.00581 | 0.00148       |

# Hf4Pt16

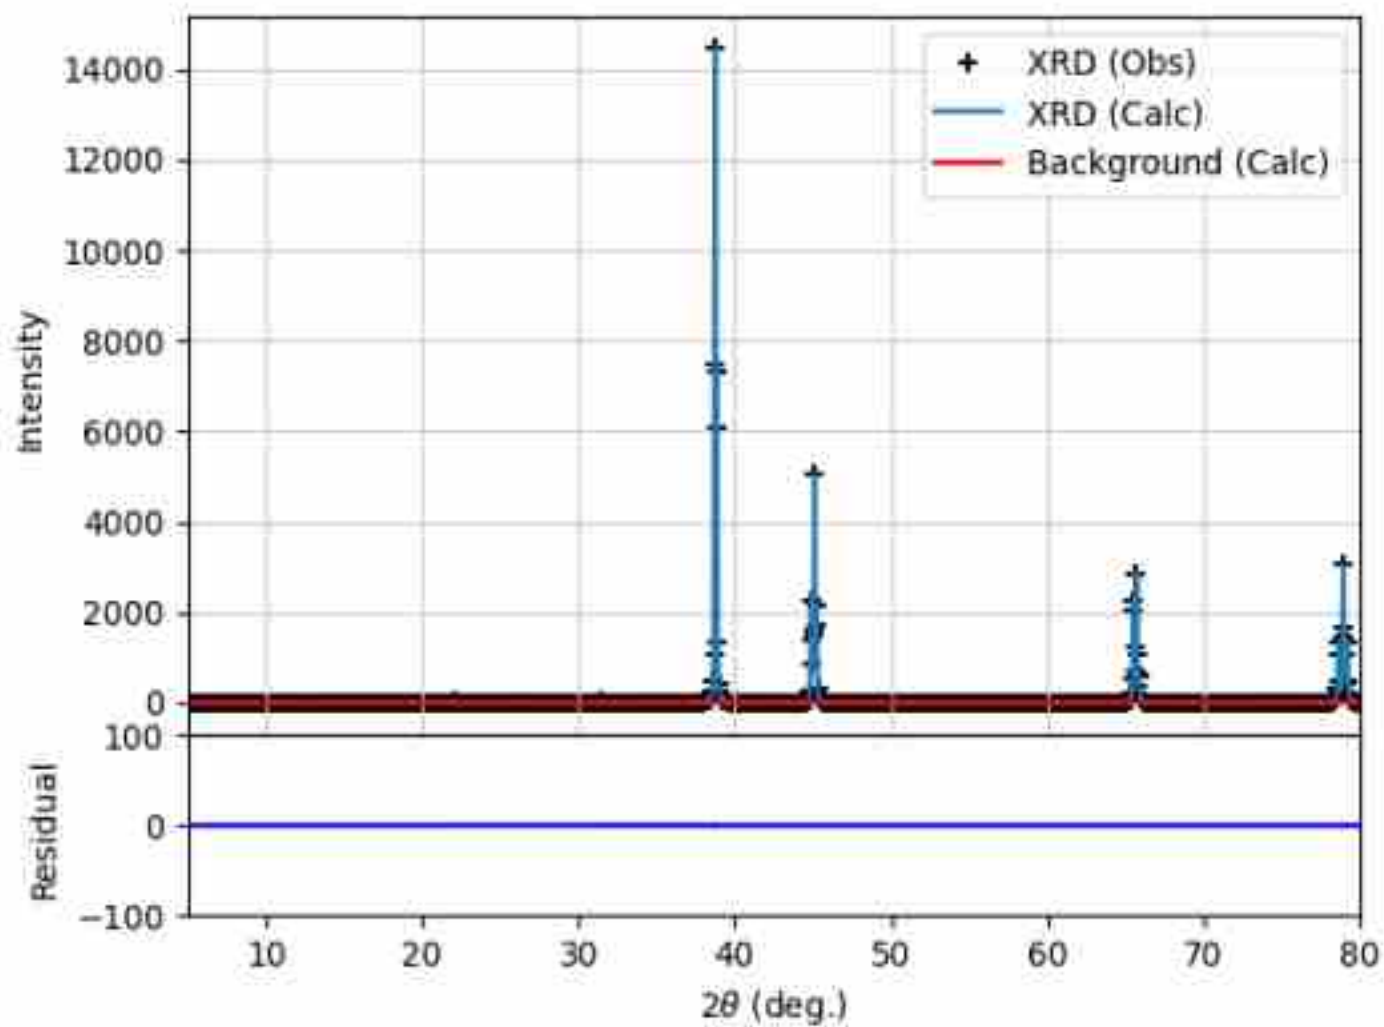

| RMSE before RR | Rwp    | RMSE after RR |
|----------------|--------|---------------|
| 0.013          | 0.0044 | 0.00031       |



# Hg1Pb3

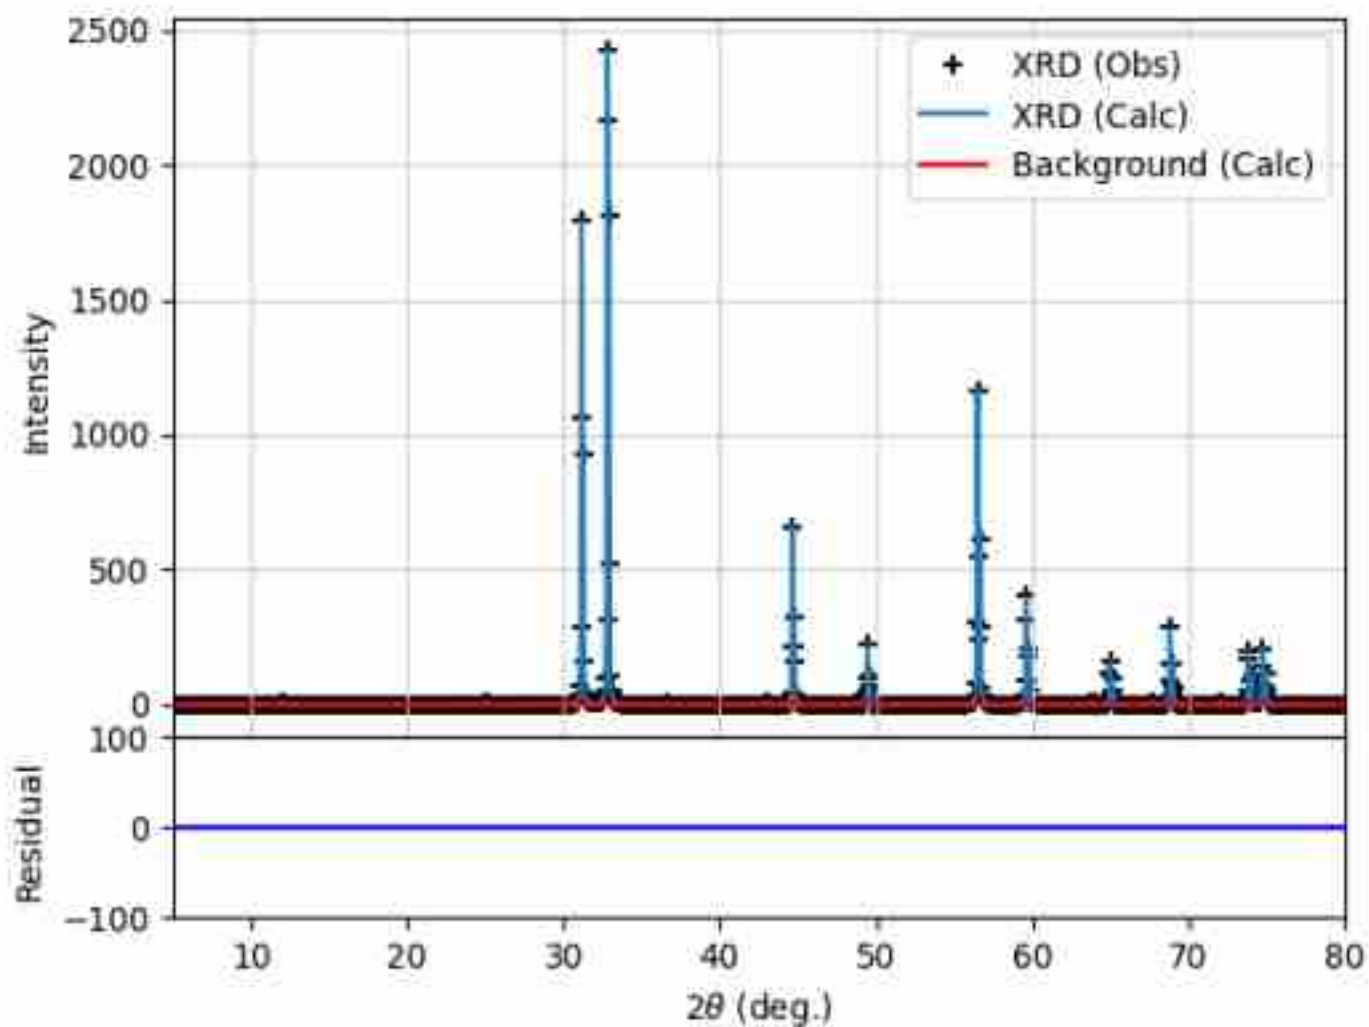

| RMSE before RR | Rwp     | RMSE after RR |
|----------------|---------|---------------|
| 0.013          | 0.00558 | 0.00021       |

# Hg<sub>2</sub>Se<sub>1</sub>S<sub>1</sub>

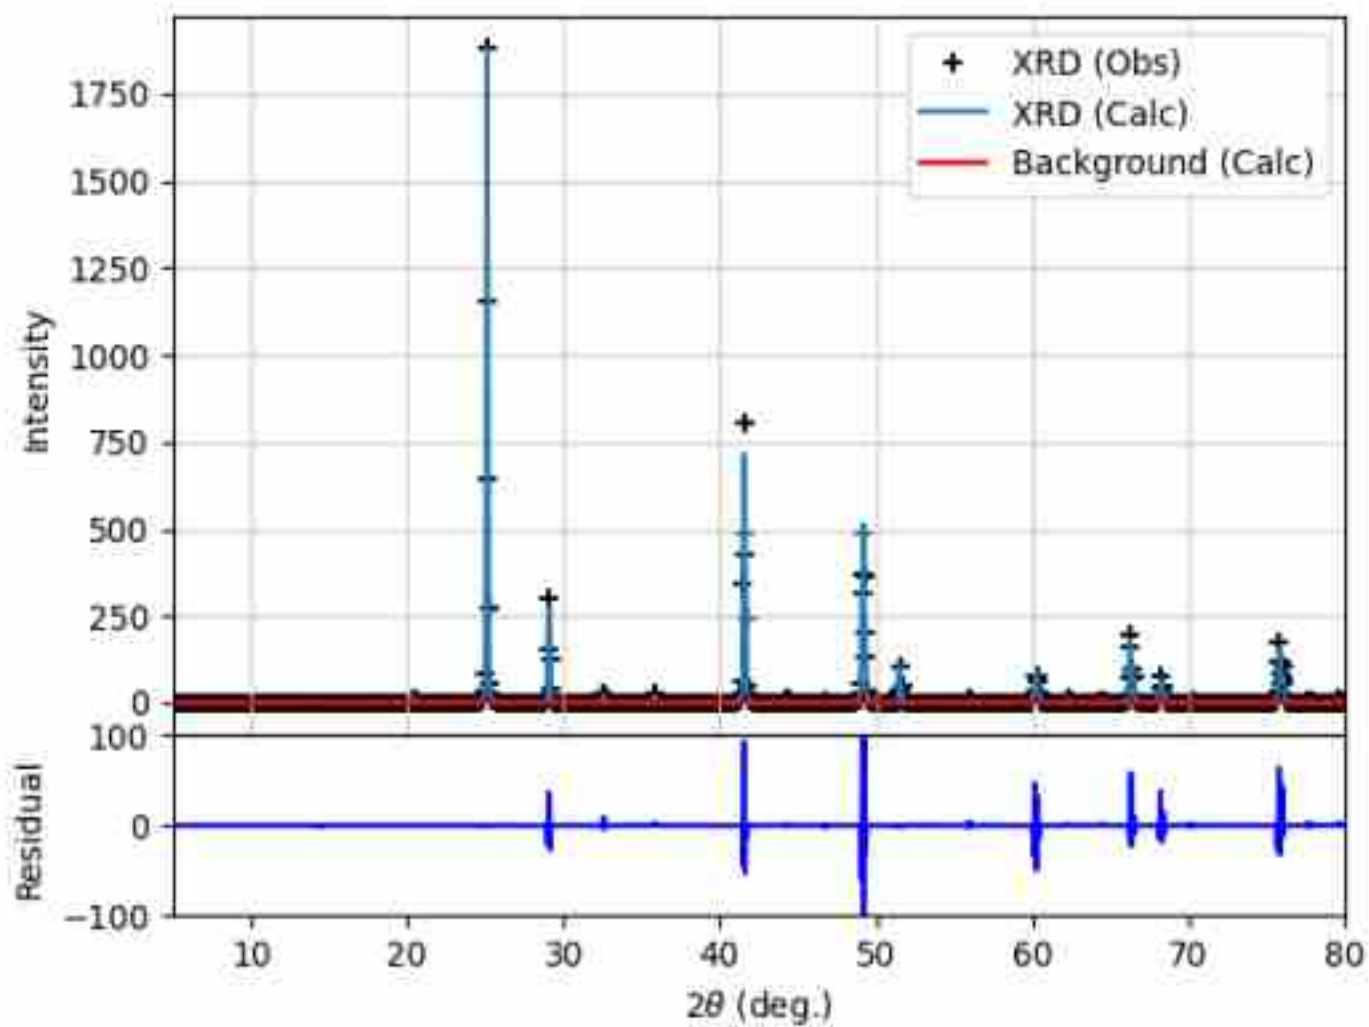

| RMSE before RR | Rwp      | RMSE after RR |
|----------------|----------|---------------|
| 0.013          | 22.39457 | 0.01468       |

# Ho1Ga2

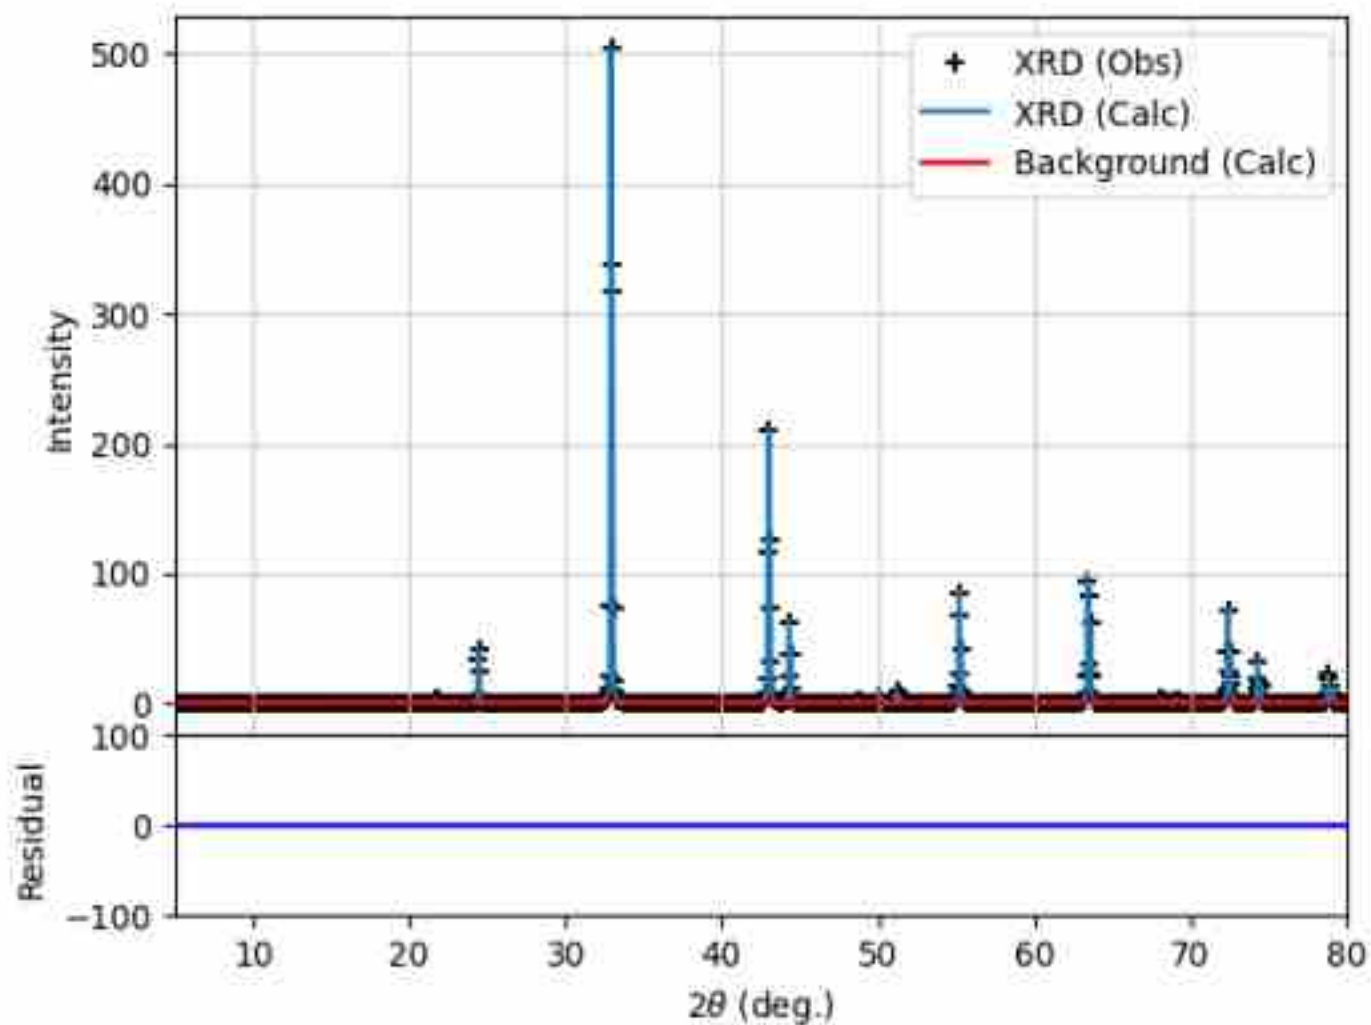

| RMSE before RR | Rwp     | RMSE after RR |
|----------------|---------|---------------|
| 0.013          | 0.00409 | 0.00045       |

# Ho<sub>2</sub>Ag<sub>2</sub>Se<sub>4</sub>

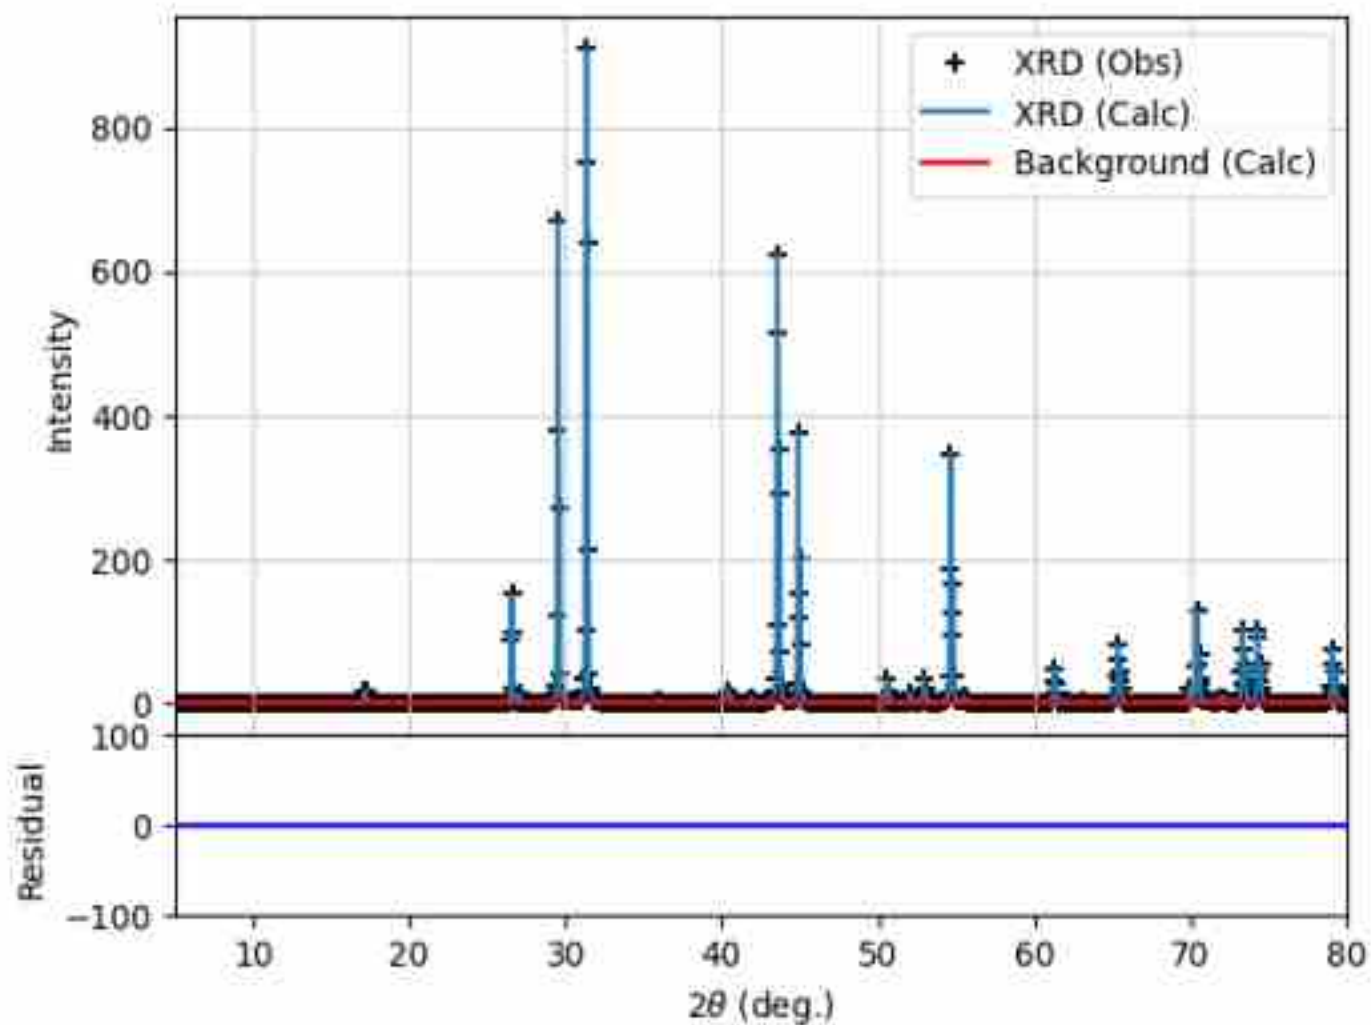

| RMSE before RR | Rwp     | RMSE after RR |
|----------------|---------|---------------|
| 0.013          | 0.00266 | 0.00027       |

# Ho<sub>2</sub>Ga<sub>3</sub>Ni<sub>1</sub>

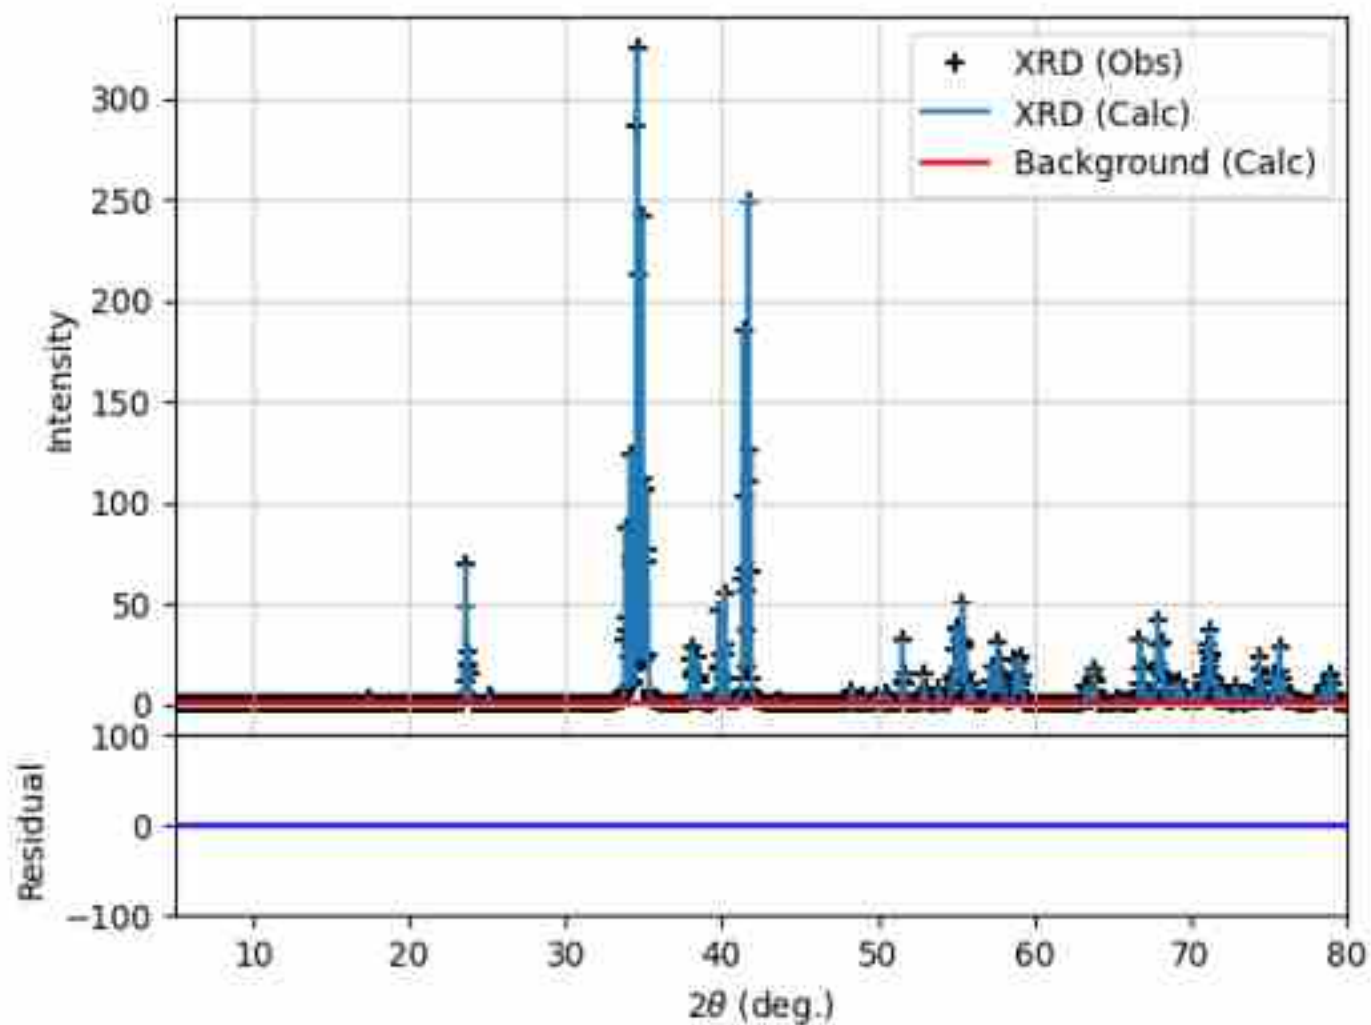

| RMSE before RR | Rwp     | RMSE after RR |
|----------------|---------|---------------|
| 0.013          | 0.00322 | 0.00018       |

# Ho<sub>4</sub>Si<sub>4</sub>Rh<sub>4</sub>

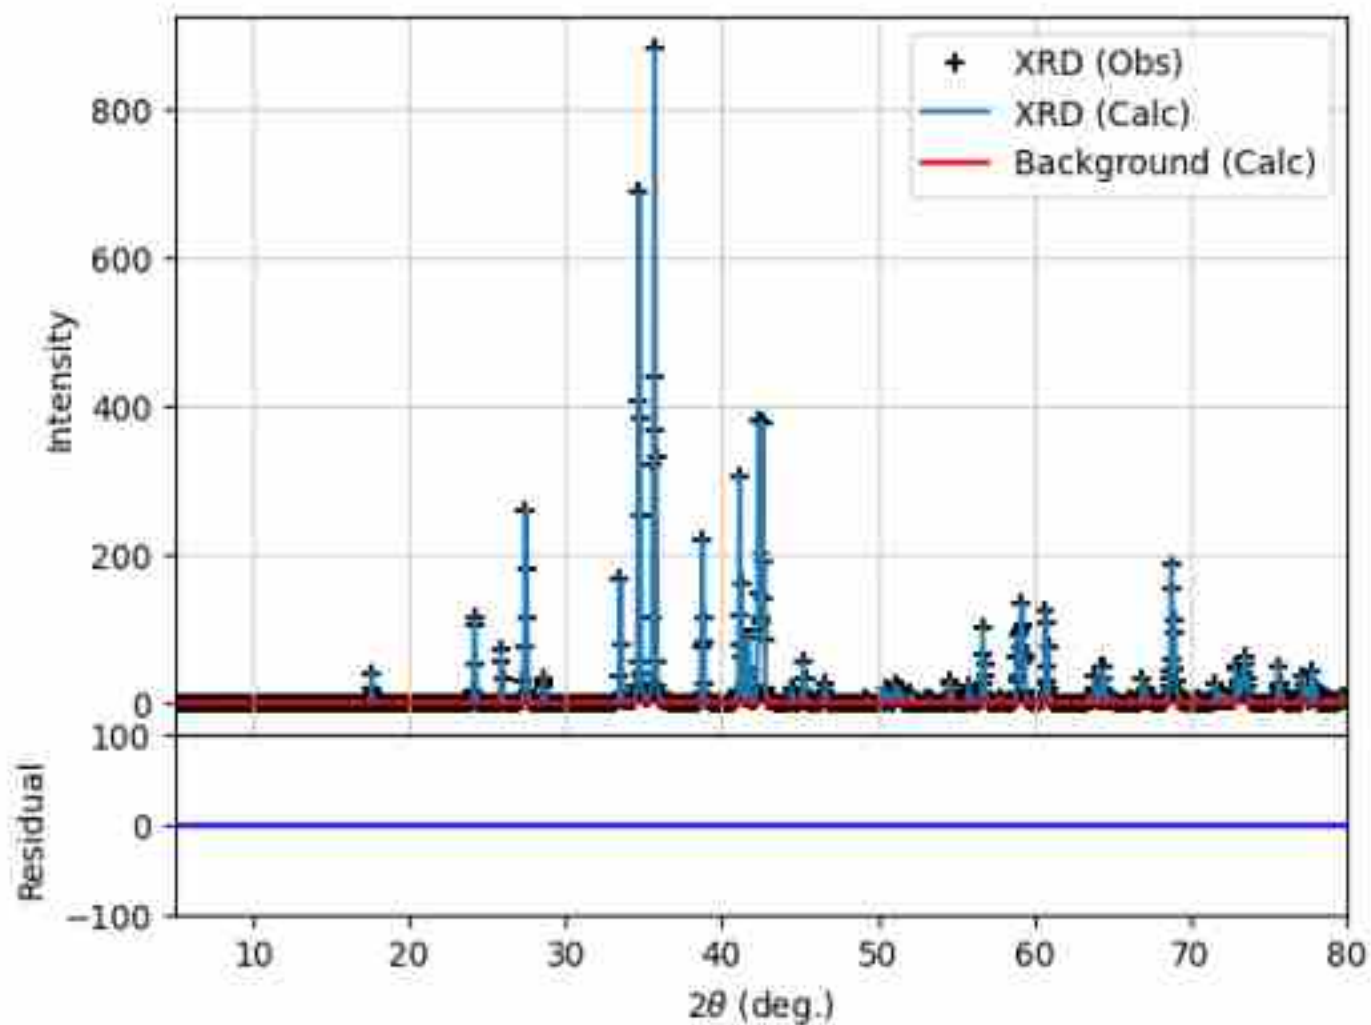

| RMSE before RR | Rwp     | RMSE after RR |
|----------------|---------|---------------|
| 0.013          | 0.00554 | 0.00085       |

# Ho<sub>4</sub>Zn<sub>4</sub>Rh<sub>4</sub>

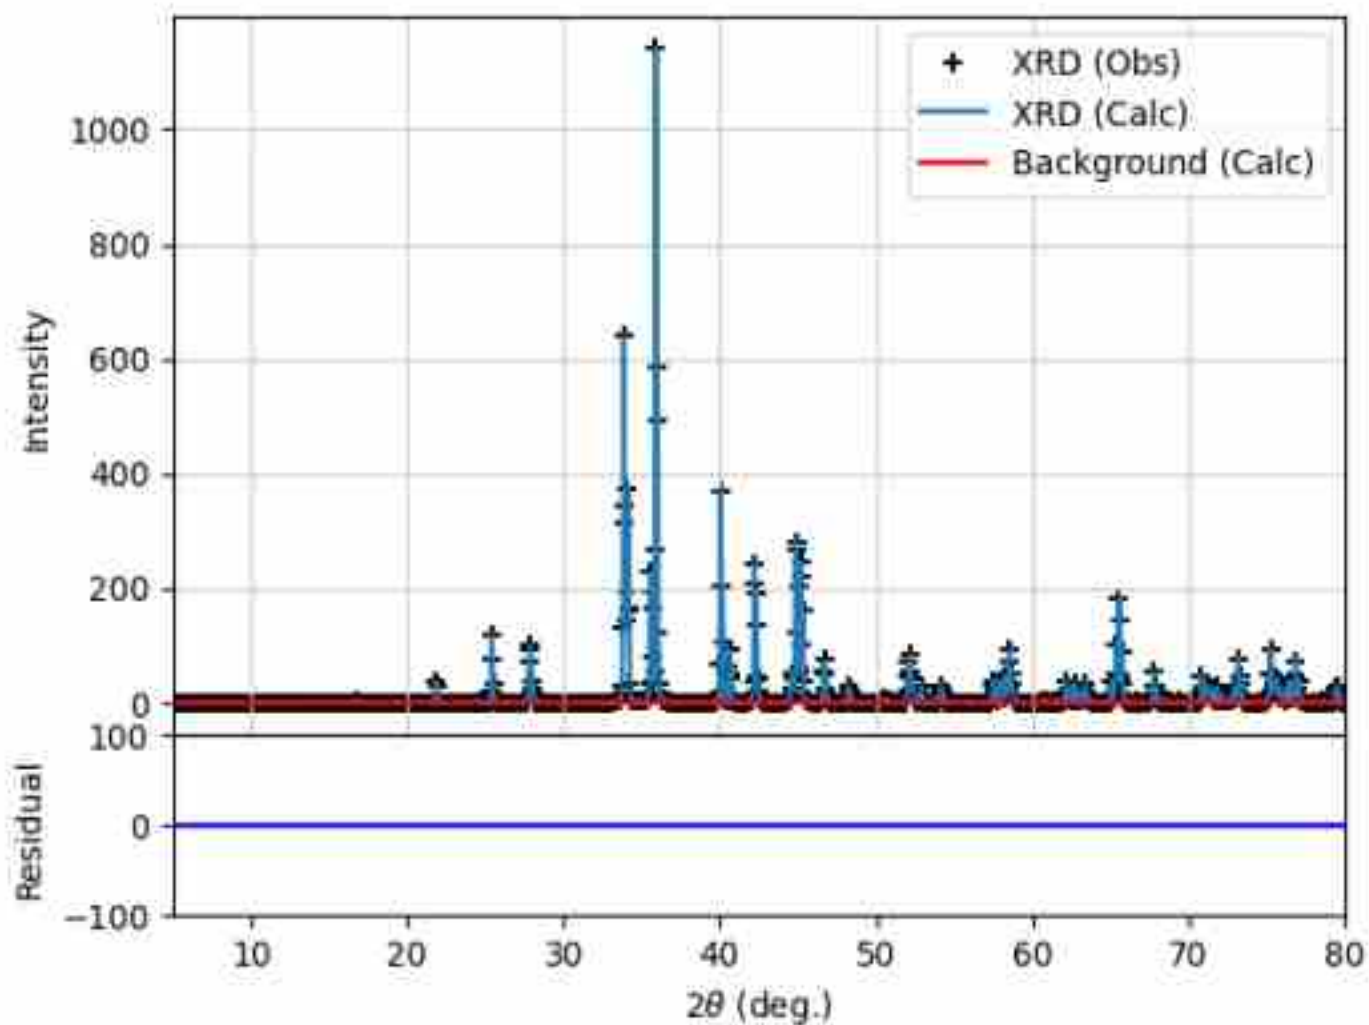

| RMSE before RR | Rwp     | RMSE after RR |
|----------------|---------|---------------|
| 0.013          | 0.00408 | 0.00029       |

# Ho6Ga2O12

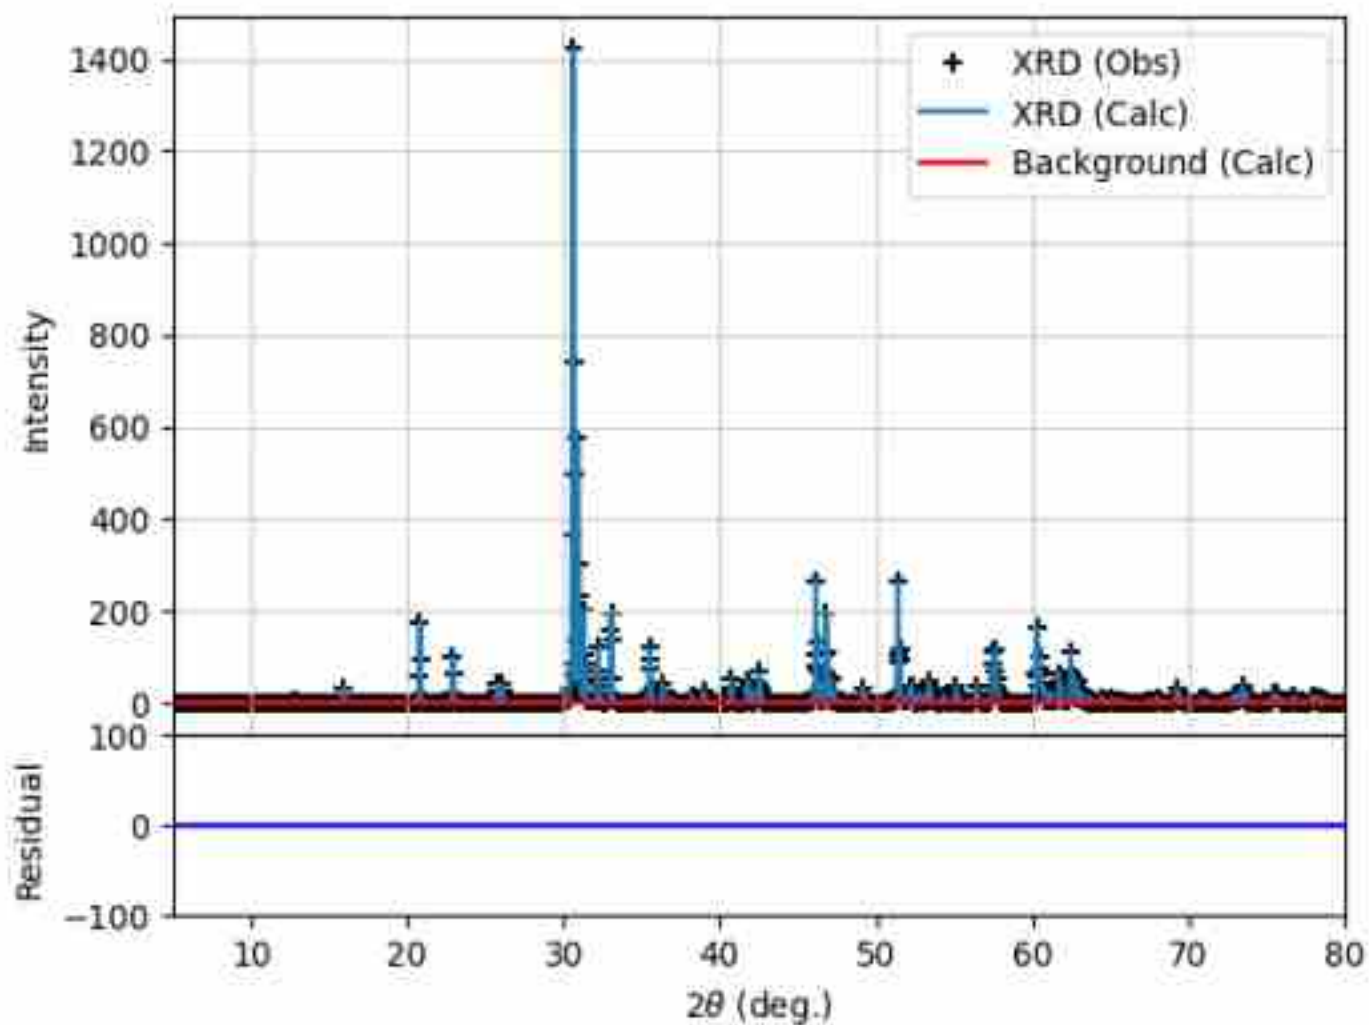

| RMSE before RR | Rwp     | RMSE after RR |
|----------------|---------|---------------|
| 0.013          | 0.00467 | 0.00099       |



# In<sub>2</sub>Cu<sub>2</sub>Se<sub>2</sub>S<sub>2</sub>

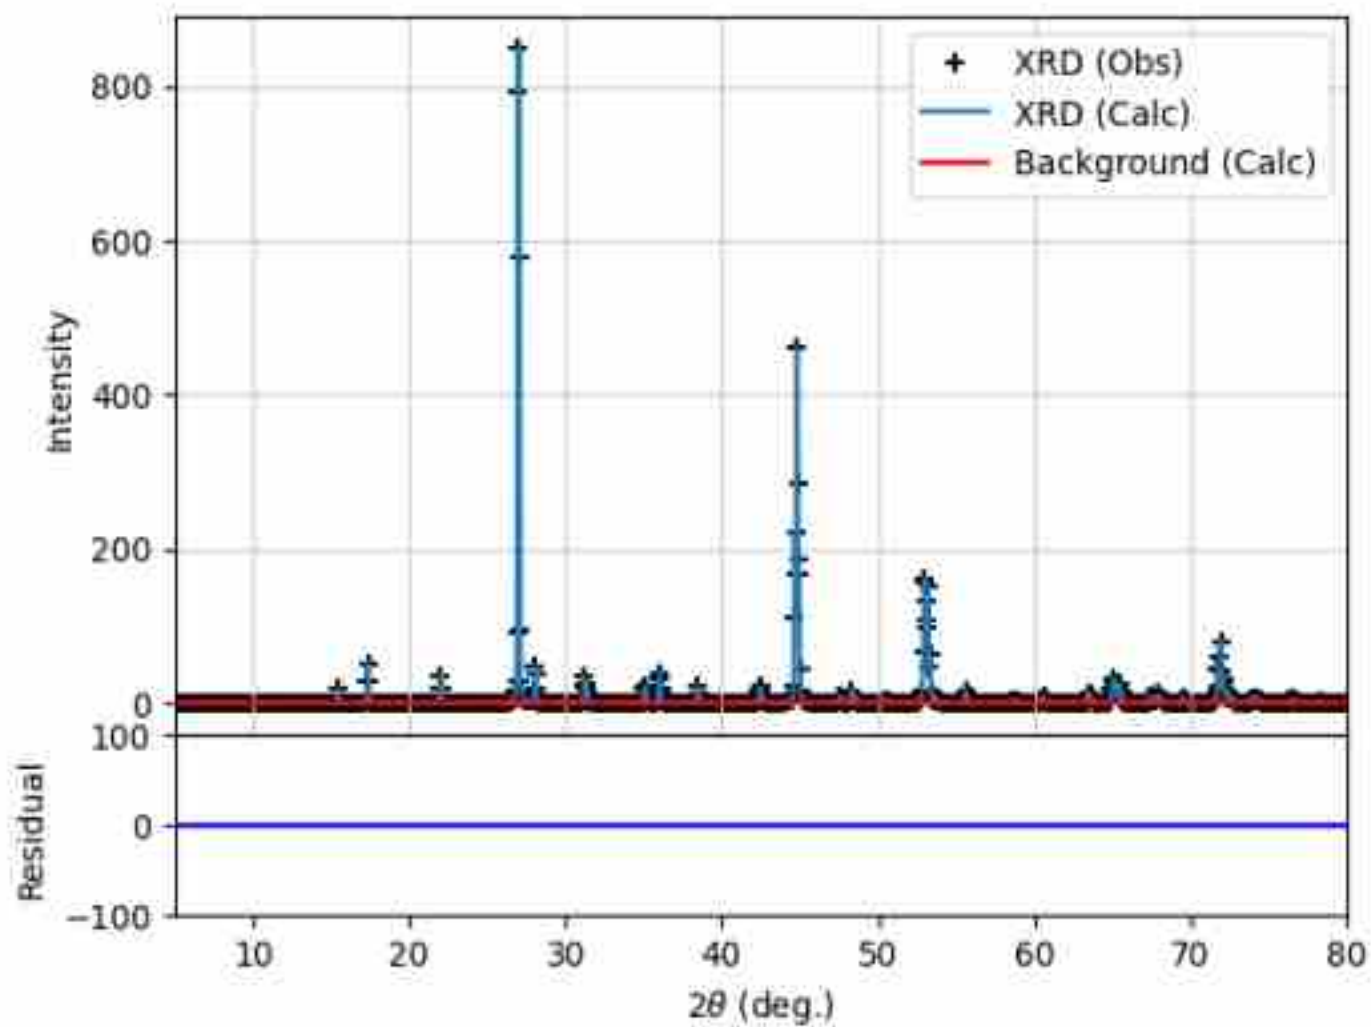

| RMSE before RR | Rwp     | RMSE after RR |
|----------------|---------|---------------|
| 0.013          | 0.00319 | 0.0005        |

# K1Bi1S2

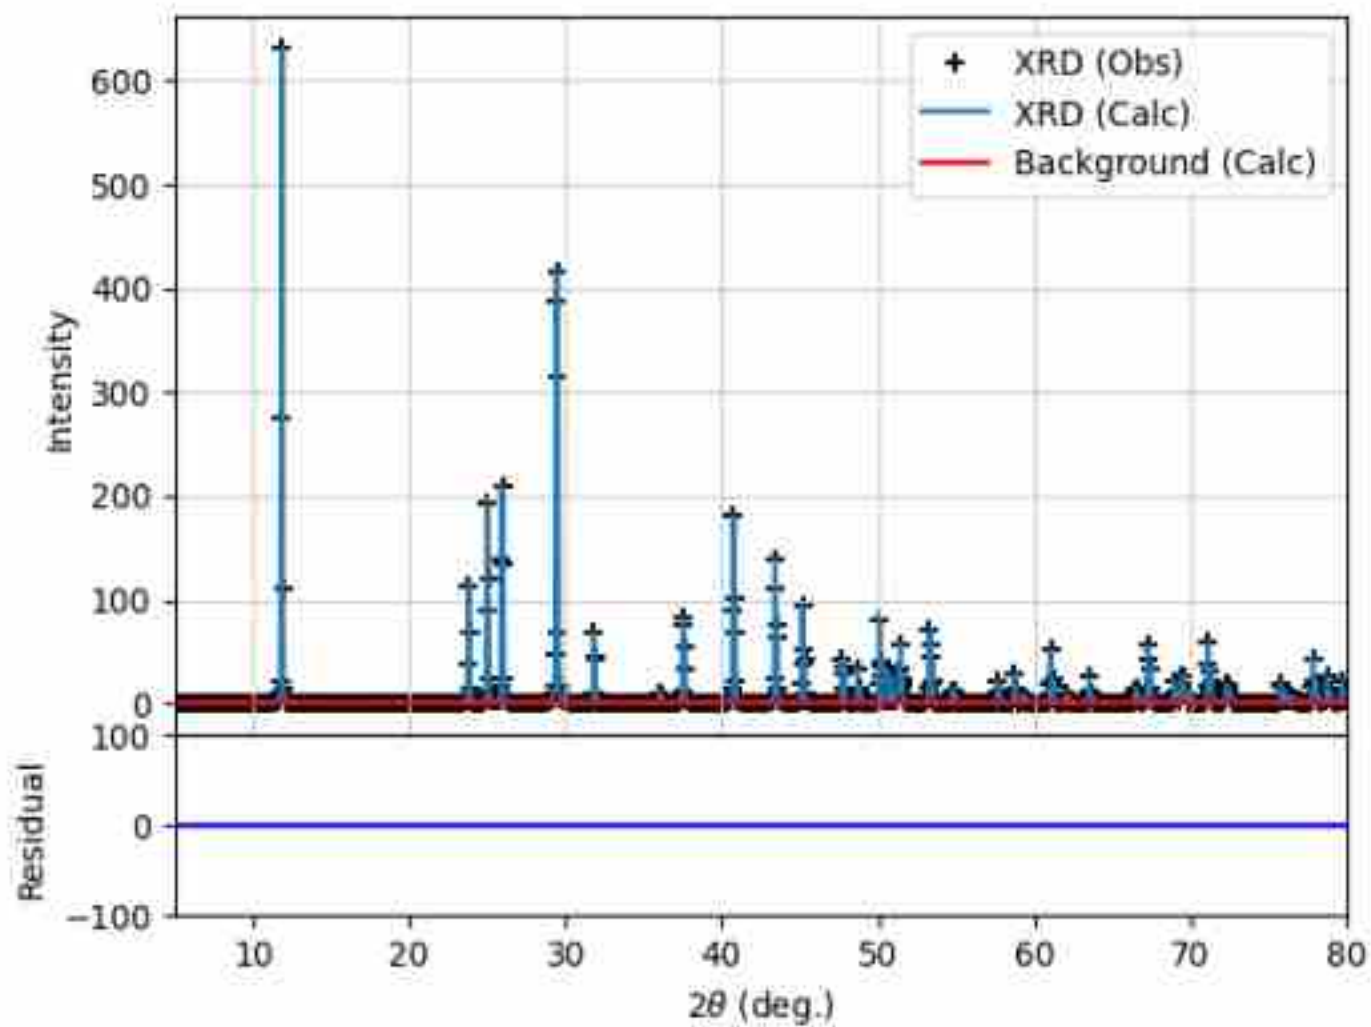

| RMSE before RR | Rwp     | RMSE after RR |
|----------------|---------|---------------|
| 0.013          | 0.00341 | 0.00214       |

# K1Ca1Br3

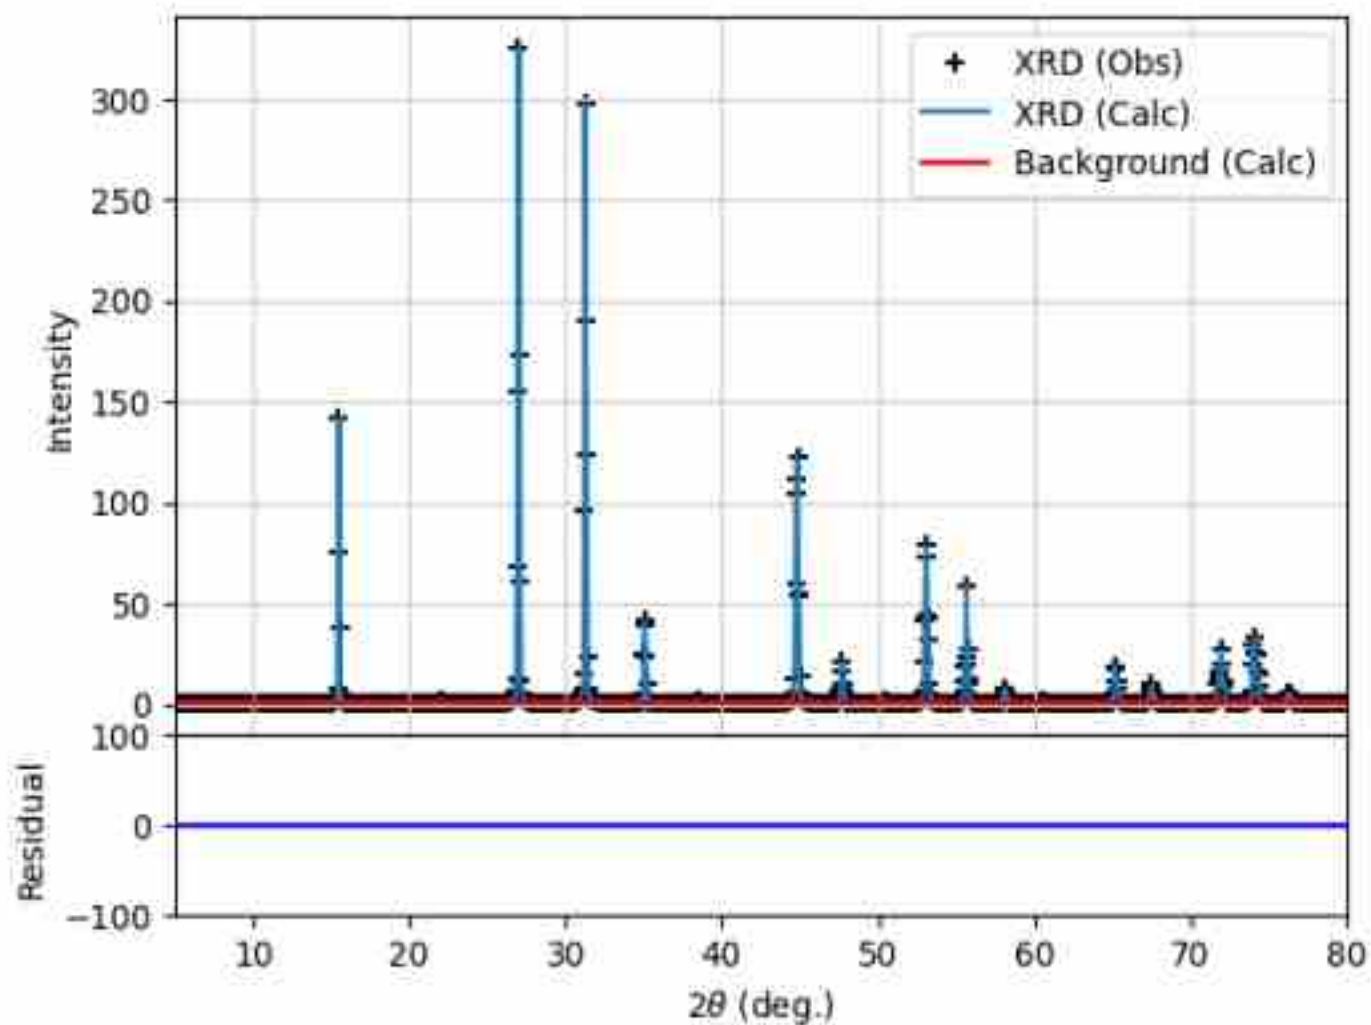

| RMSE before RR | Rwp     | RMSE after RR |
|----------------|---------|---------------|
| 0.013          | 0.28888 | 0.01228       |

# K1Na1Cl2

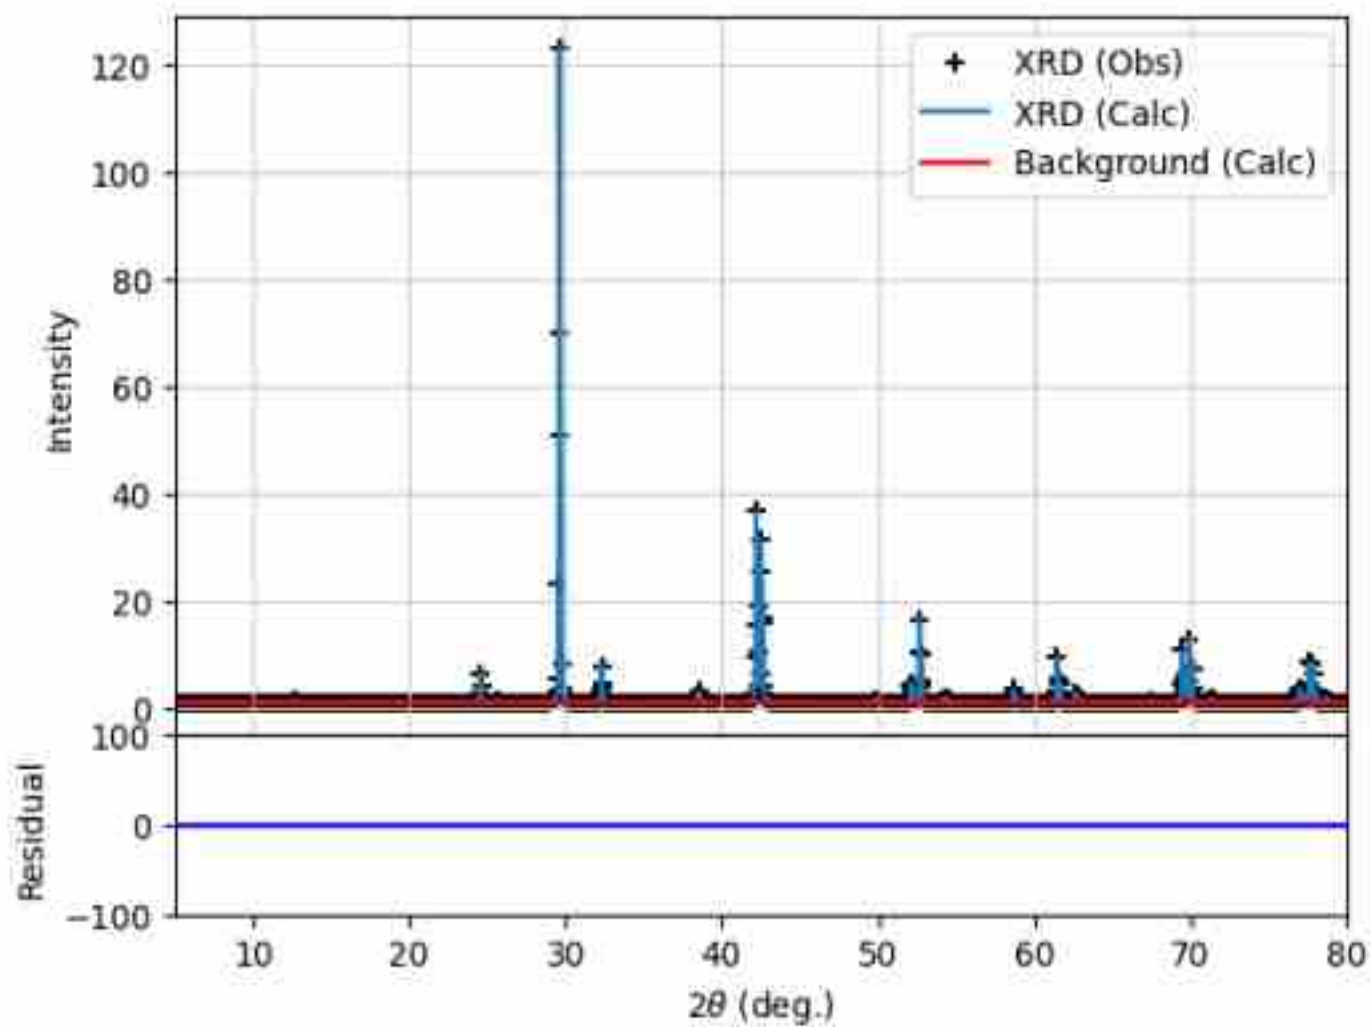

| RMSE before RR | Rwp     | RMSE after RR |
|----------------|---------|---------------|
| 0.013          | 0.00195 | 0.00023       |

K1Ti1Cu3Se4

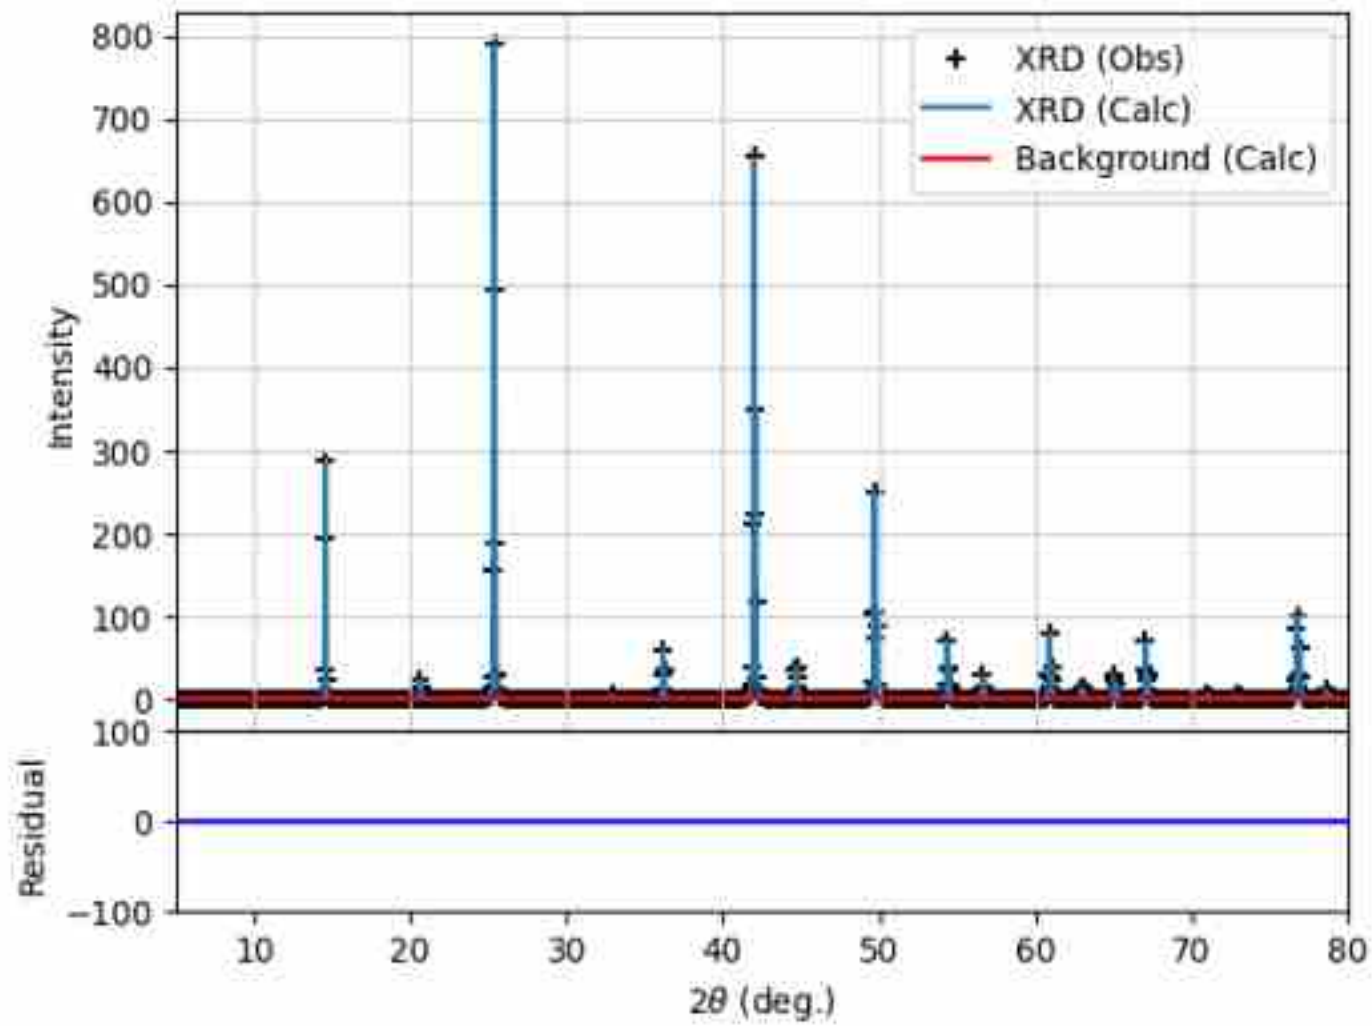

| RMSE before RR | Rwp     | RMSE after RR |
|----------------|---------|---------------|
| 0.013          | 0.00786 | 0.00113       |

# K<sub>2</sub>Al<sub>1</sub>Cu<sub>1</sub>F<sub>6</sub>

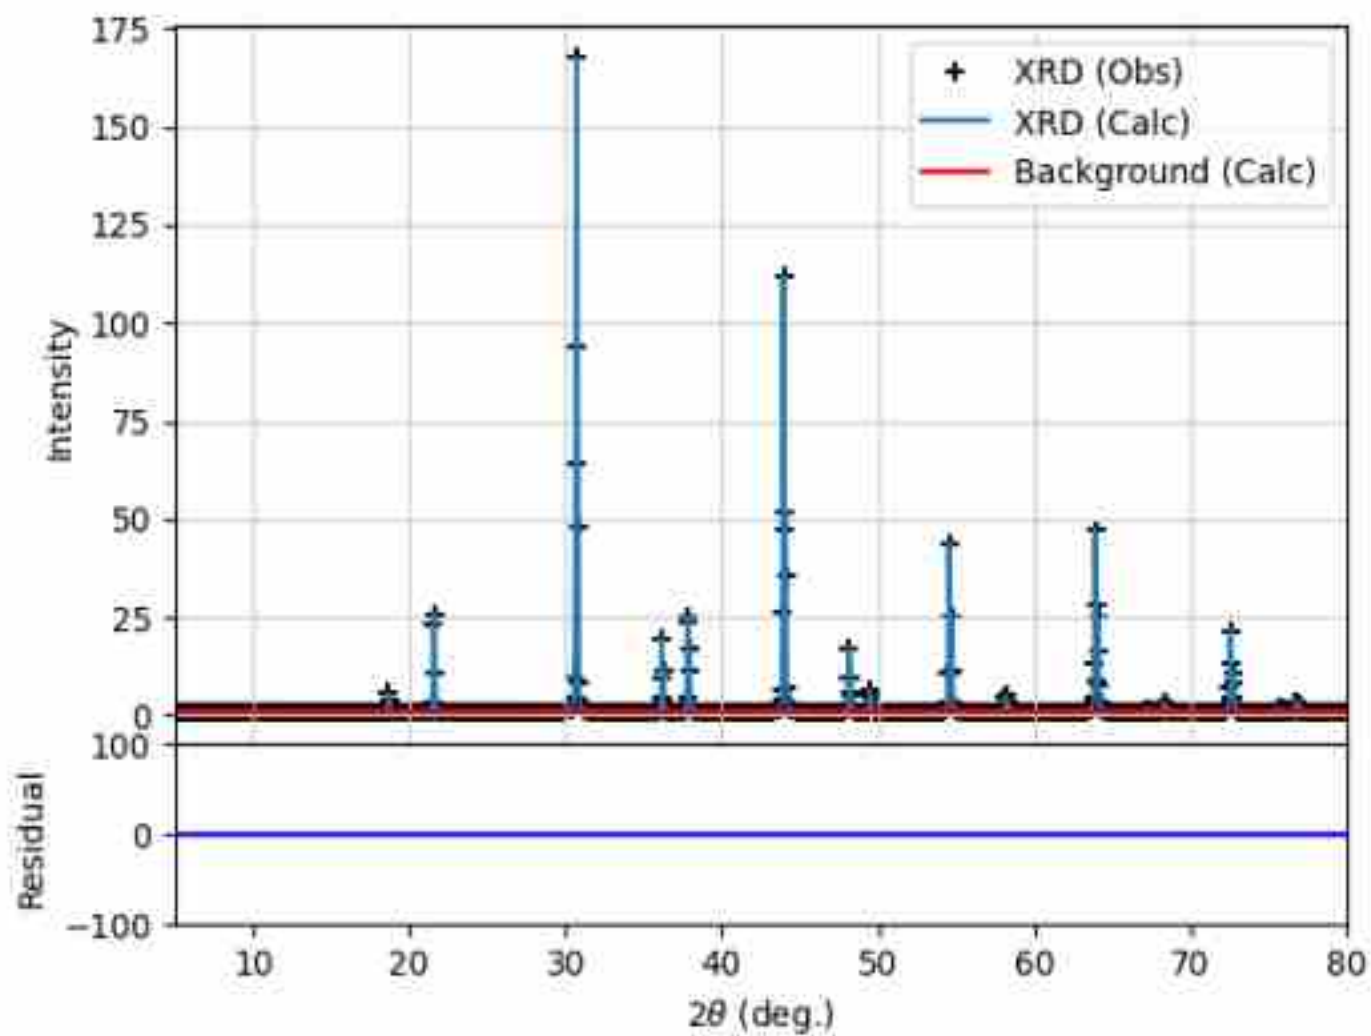

| RMSE before RR | Rwp     | RMSE after RR |
|----------------|---------|---------------|
| 0.013          | 0.01082 | 0.00293       |

# K<sub>2</sub>As<sub>1</sub>Au<sub>1</sub>Br<sub>6</sub>

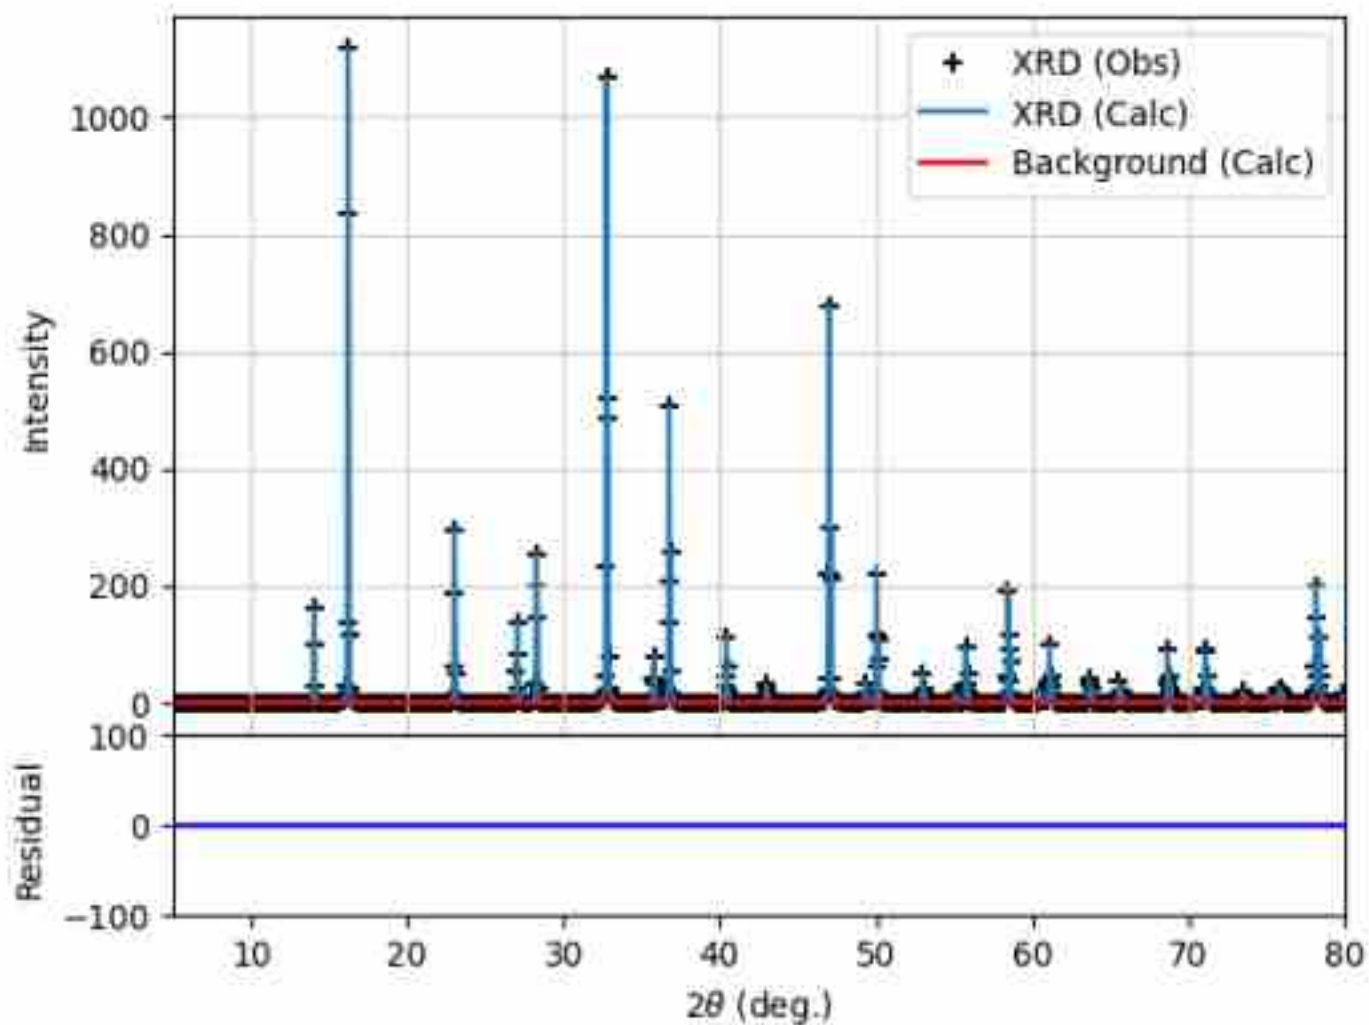

| RMSE before RR | Rwp    | RMSE after RR |
|----------------|--------|---------------|
| 0.013          | 0.0441 | 0.00328       |

# K<sub>2</sub>Ca<sub>1</sub>Pr<sub>1</sub>O<sub>4</sub>

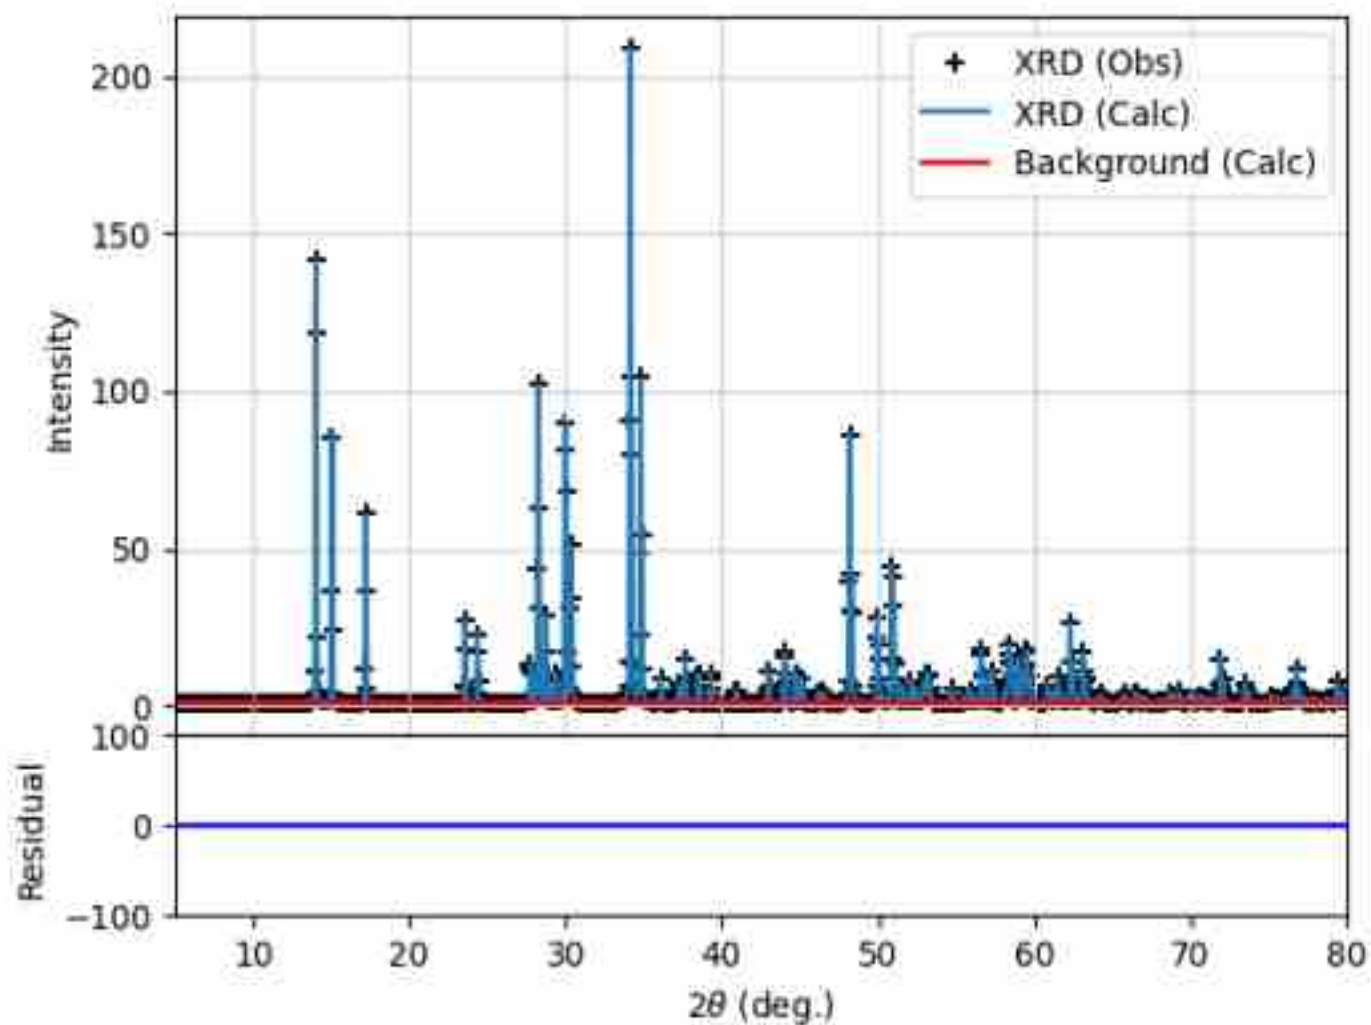

| RMSE before RR | Rwp     | RMSE after RR |
|----------------|---------|---------------|
| 0.013          | 0.00281 | 0.00086       |



# K<sub>2</sub>Ga<sub>1</sub>Ag<sub>1</sub>Cl<sub>6</sub>

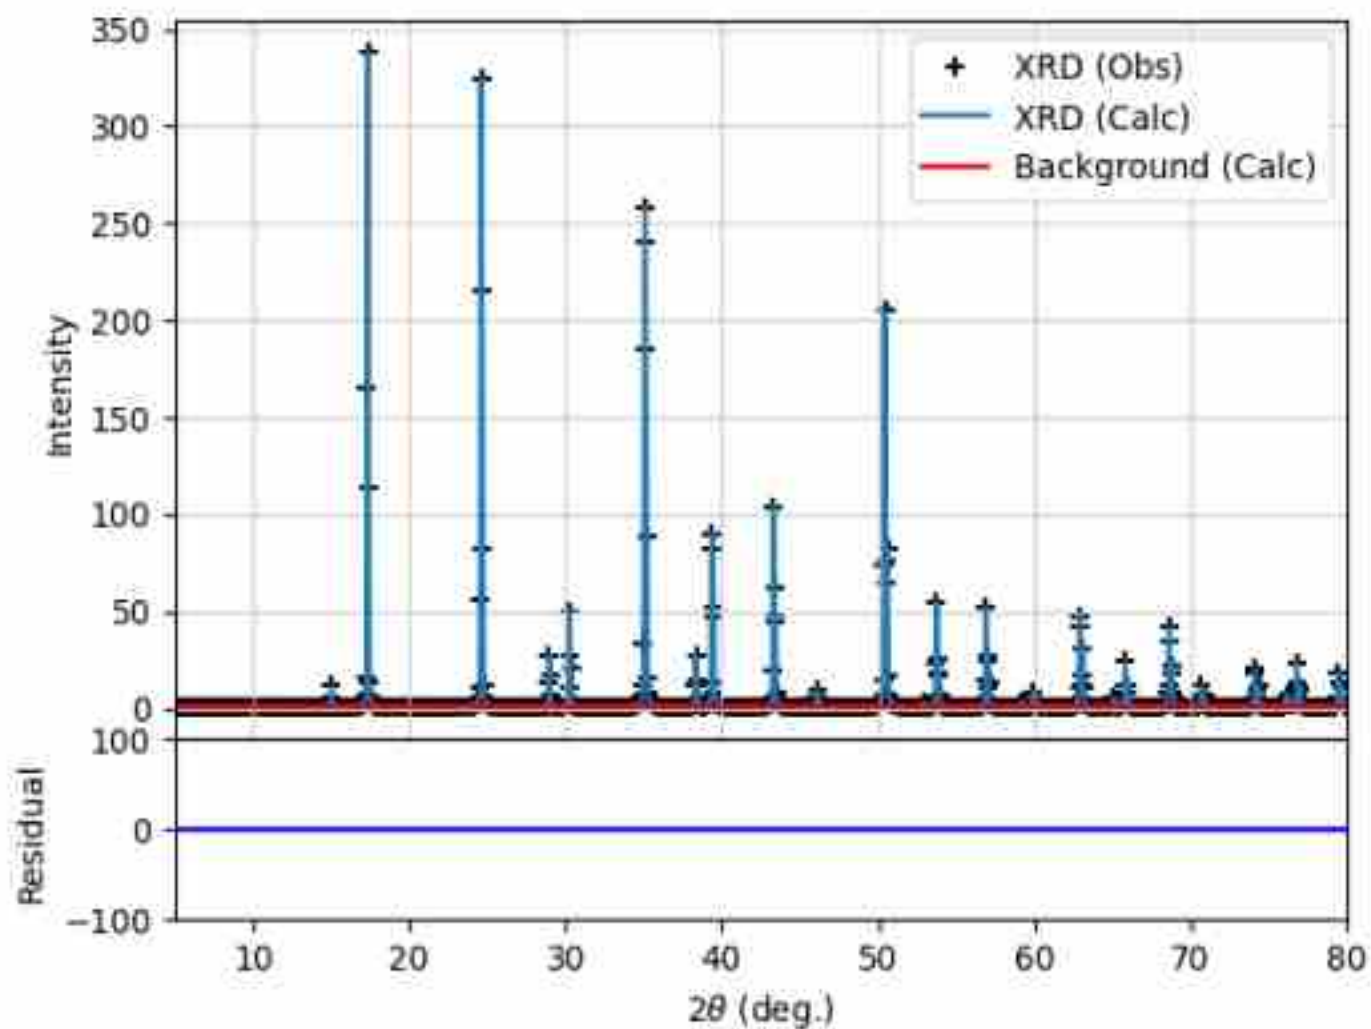

| RMSE before RR | Rwp     | RMSE after RR |
|----------------|---------|---------------|
| 0.013          | 0.00952 | 0.00179       |

# K<sub>2</sub>Hg<sub>1</sub>Pd<sub>1</sub>F<sub>6</sub>

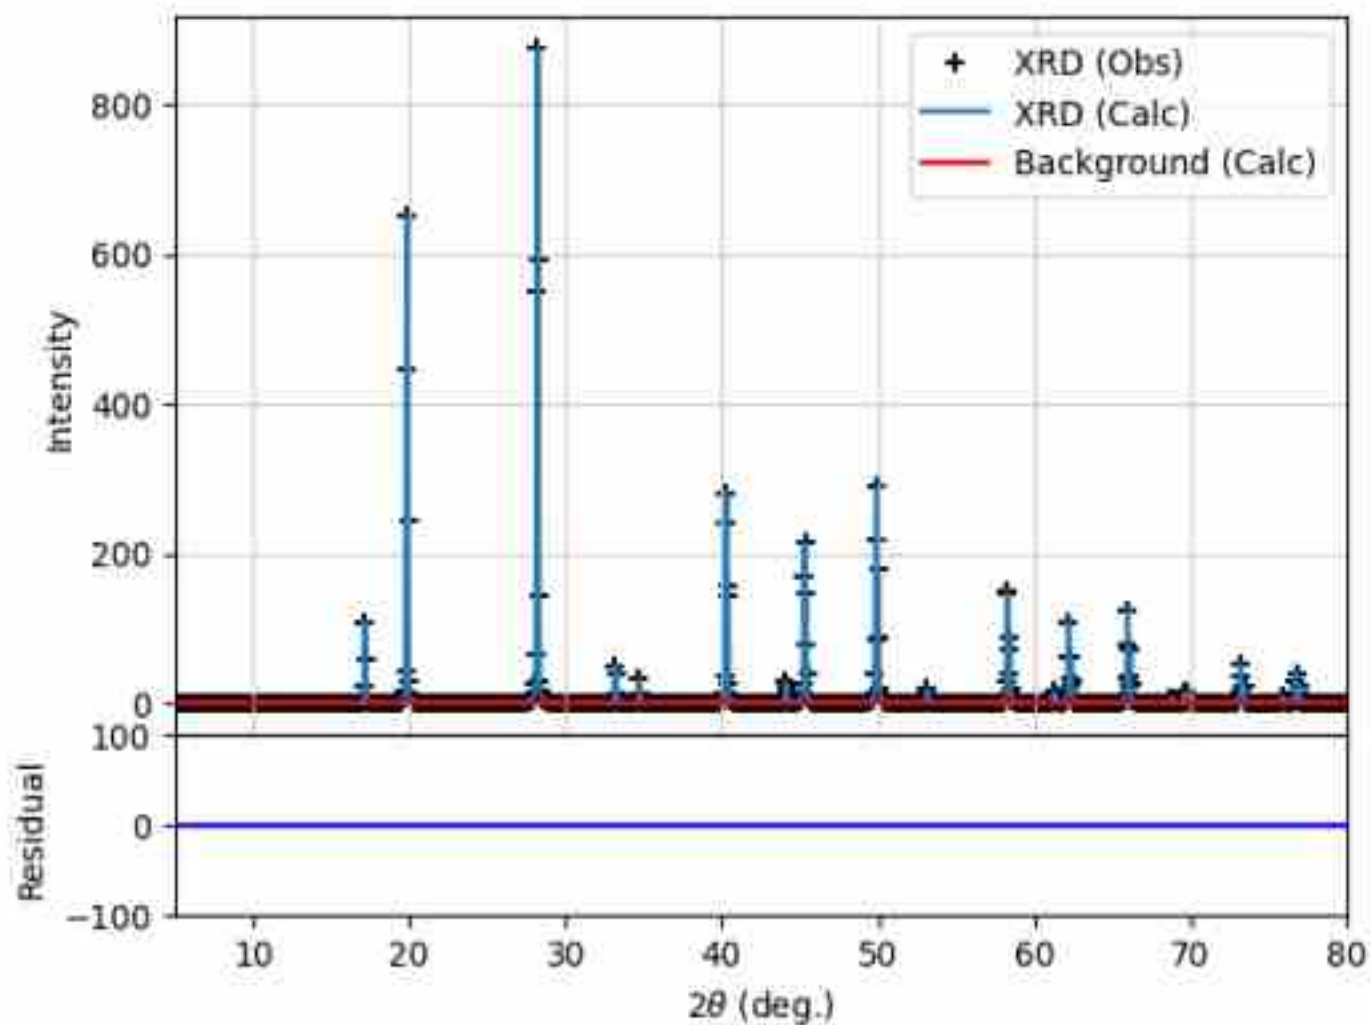

| RMSE before RR | Rwp     | RMSE after RR |
|----------------|---------|---------------|
| 0.013          | 0.02432 | 0.00473       |

# K2Li1Nd1I6

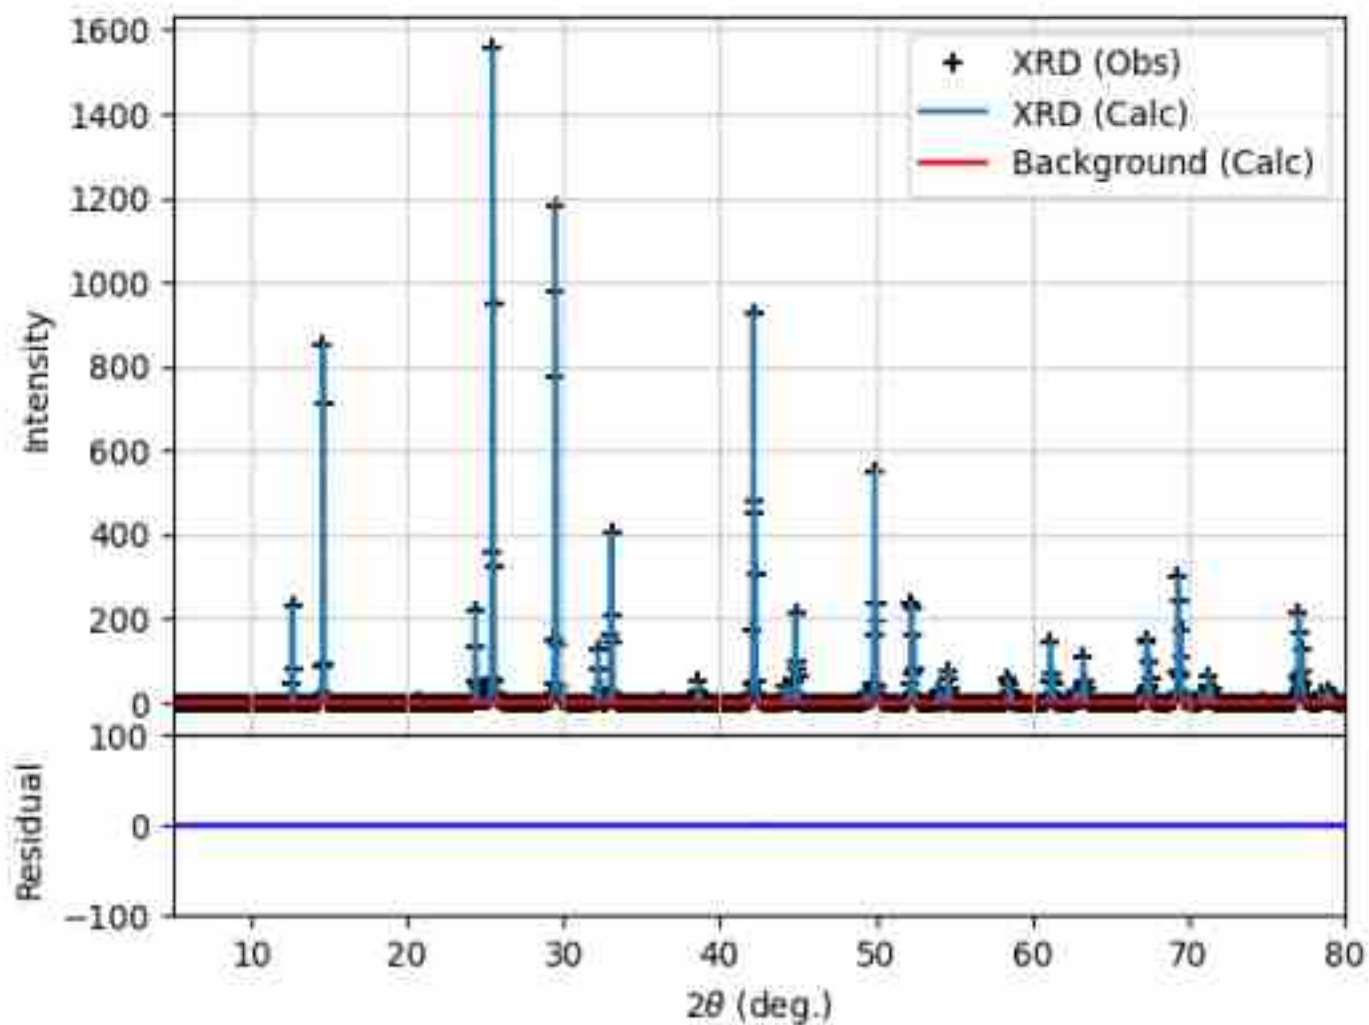

| RMSE before RR | Rwp     | RMSE after RR |
|----------------|---------|---------------|
| 0.013          | 0.10176 | 0.00593       |

# K<sub>2</sub>LiSbBr<sub>6</sub>

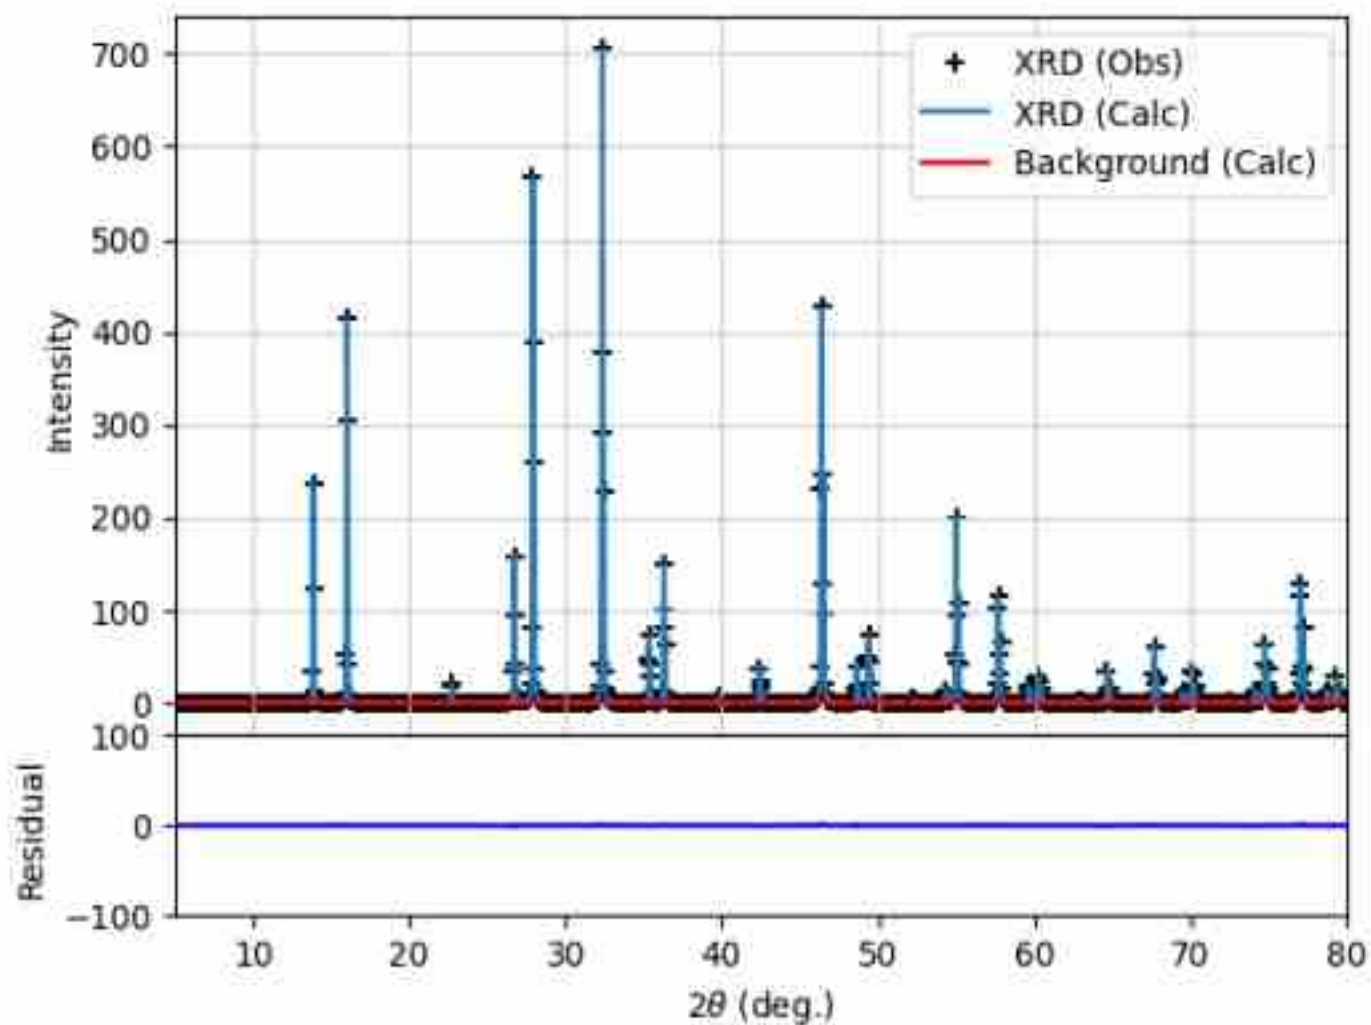

| RMSE before RR | Rwp     | RMSE after RR |
|----------------|---------|---------------|
| 0.013          | 0.82601 | 0.03038       |

# K<sub>2</sub>Mn<sub>1</sub>Tl<sub>1</sub>F<sub>6</sub>

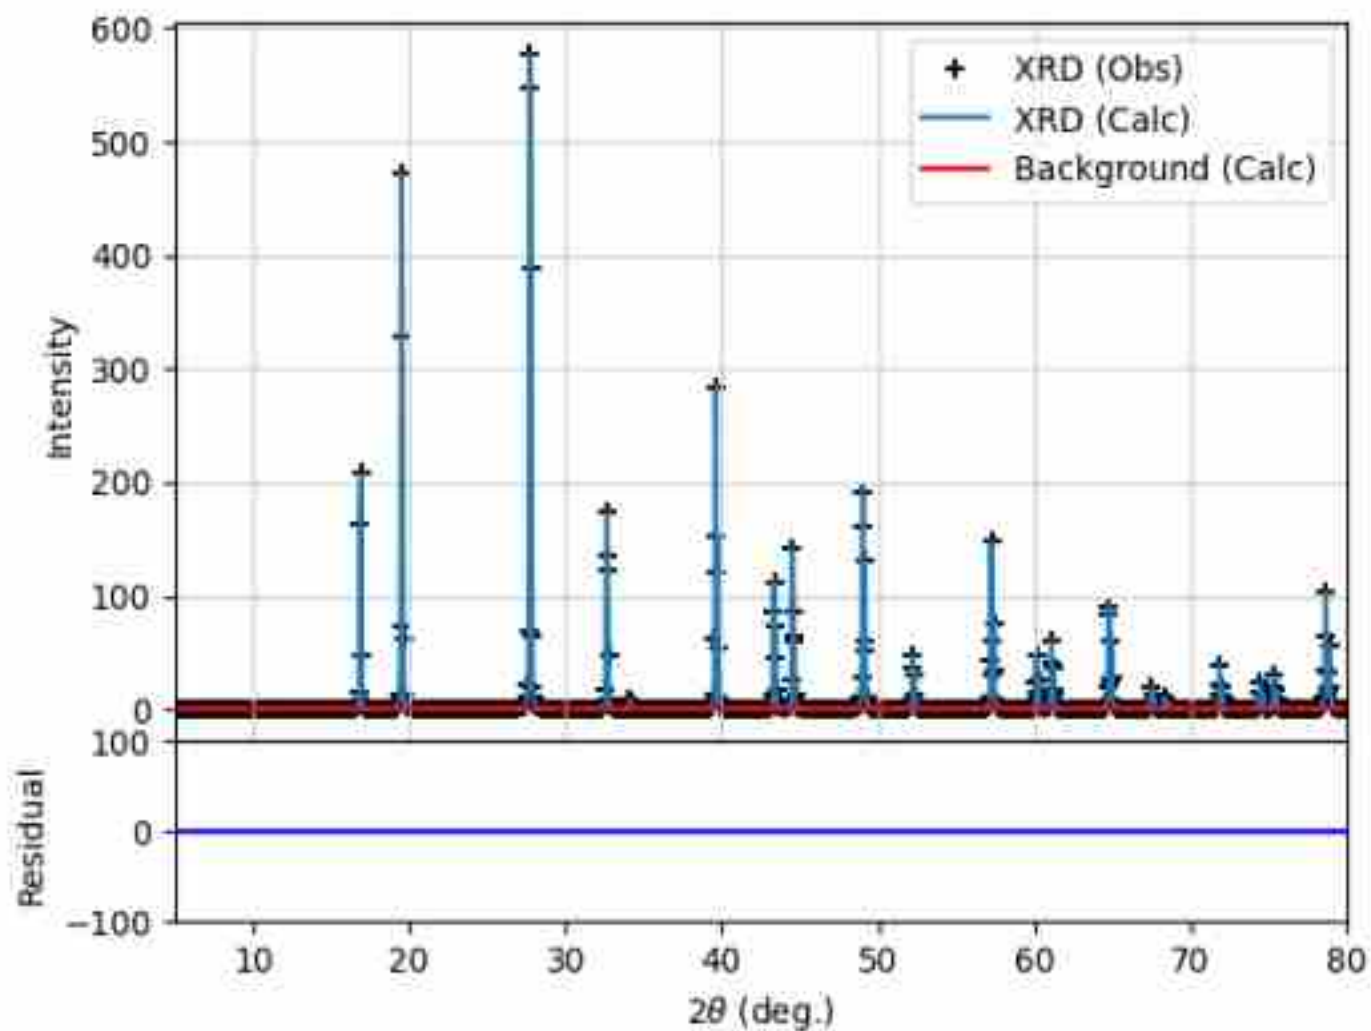

| RMSE before RR | Rwp     | RMSE after RR |
|----------------|---------|---------------|
| 0.013          | 0.01349 | 0.00344       |

# K<sub>2</sub>TlCl<sub>6</sub>

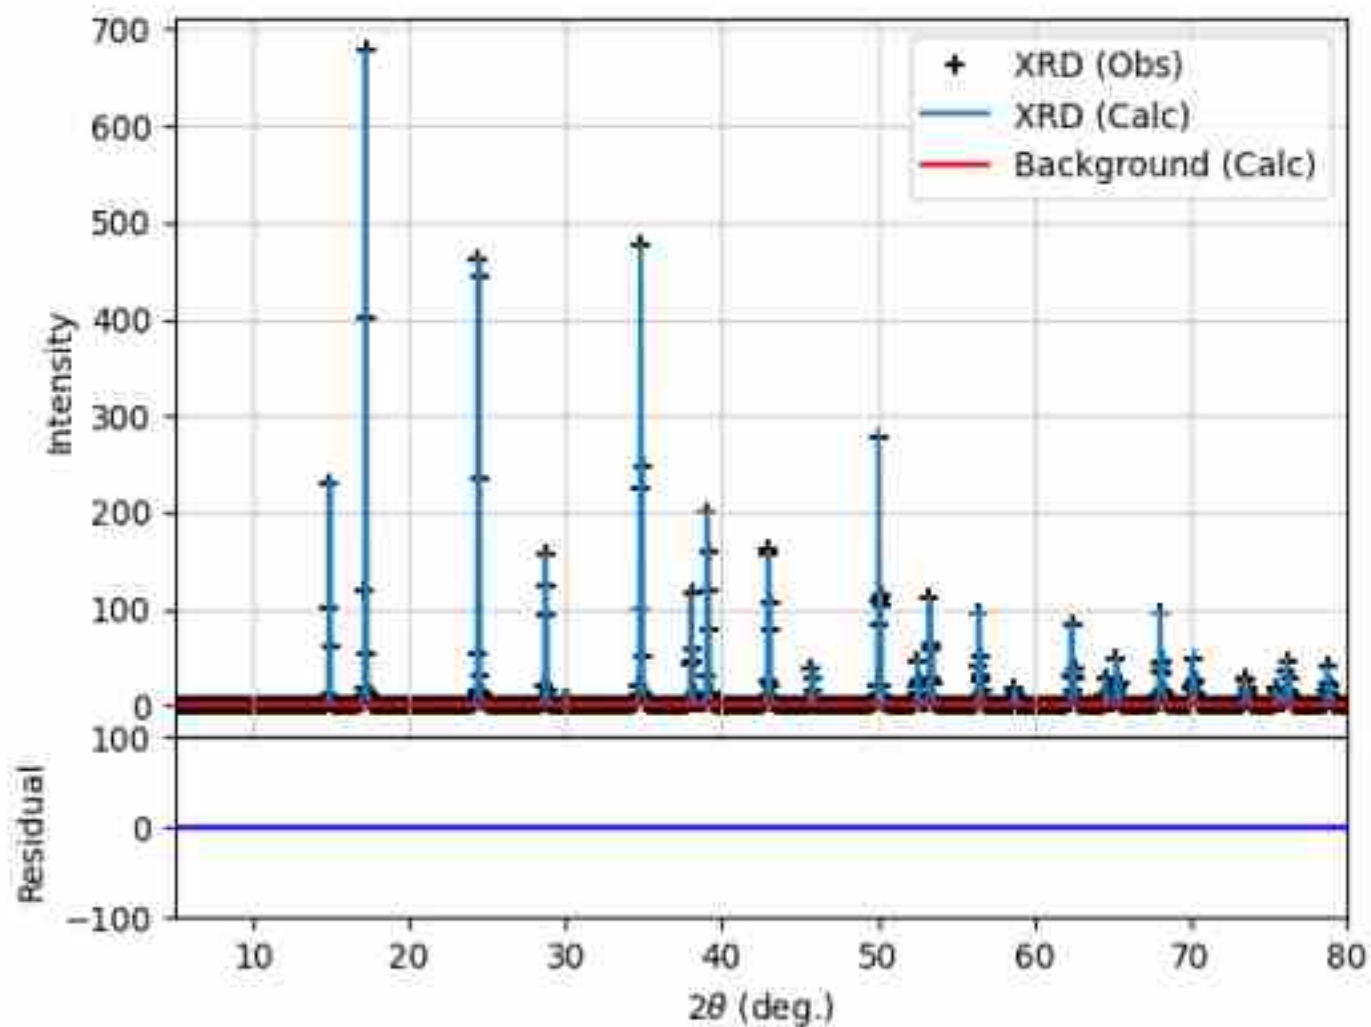

| RMSE before RR | Rwp     | RMSE after RR |
|----------------|---------|---------------|
| 0.013          | 0.05552 | 0.00601       |

# K<sub>2</sub>TlHgBr<sub>6</sub>

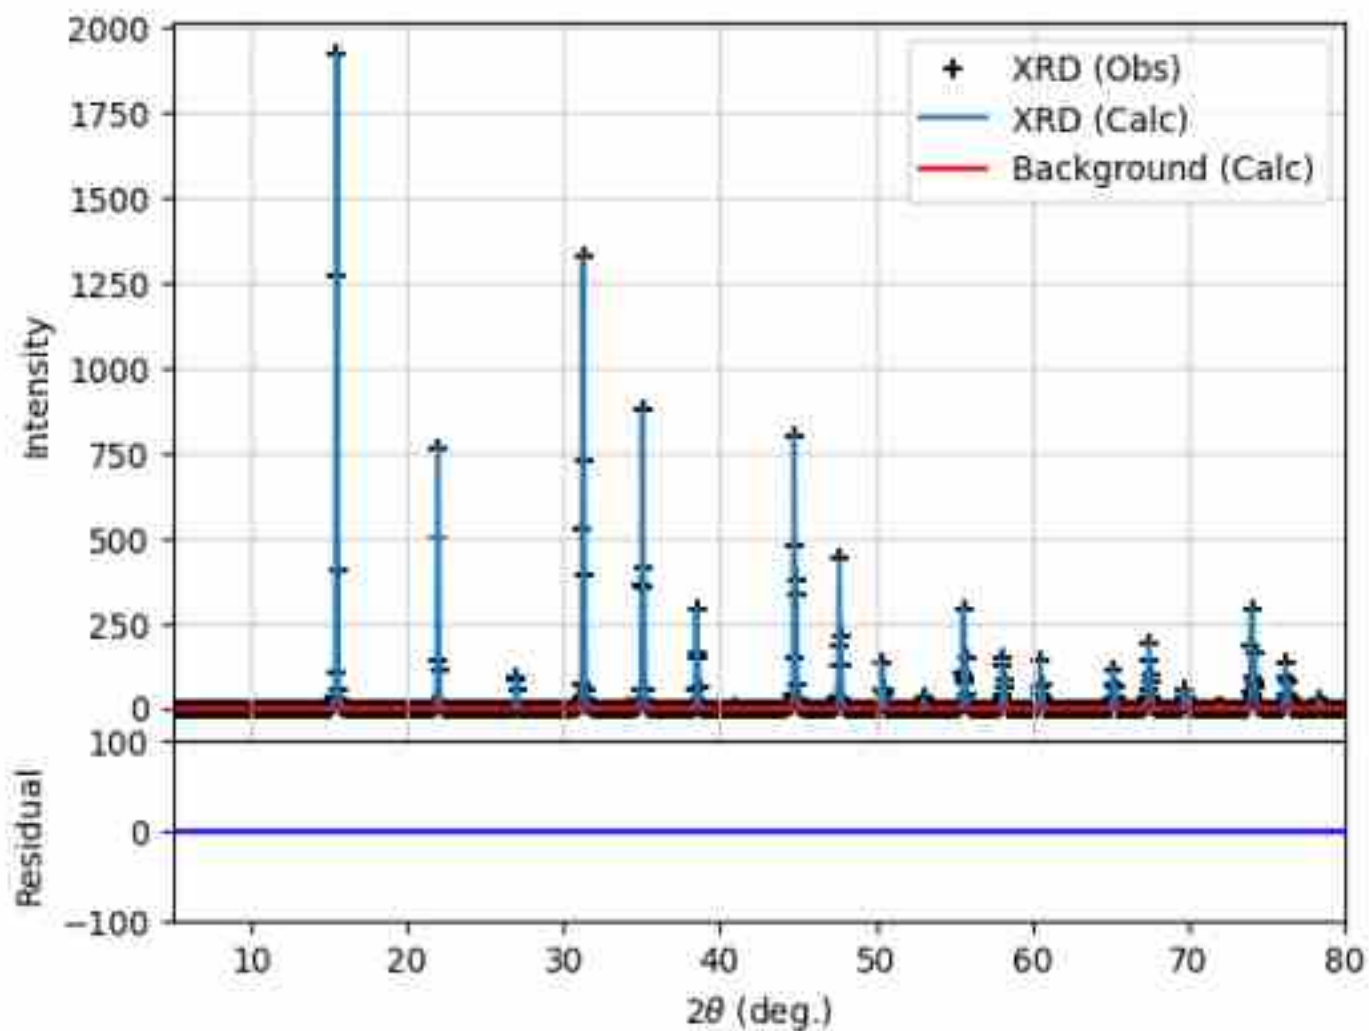

| RMSE before RR | Rwp     | RMSE after RR |
|----------------|---------|---------------|
| 0.013          | 0.01613 | 0.00105       |

# K2W1C16

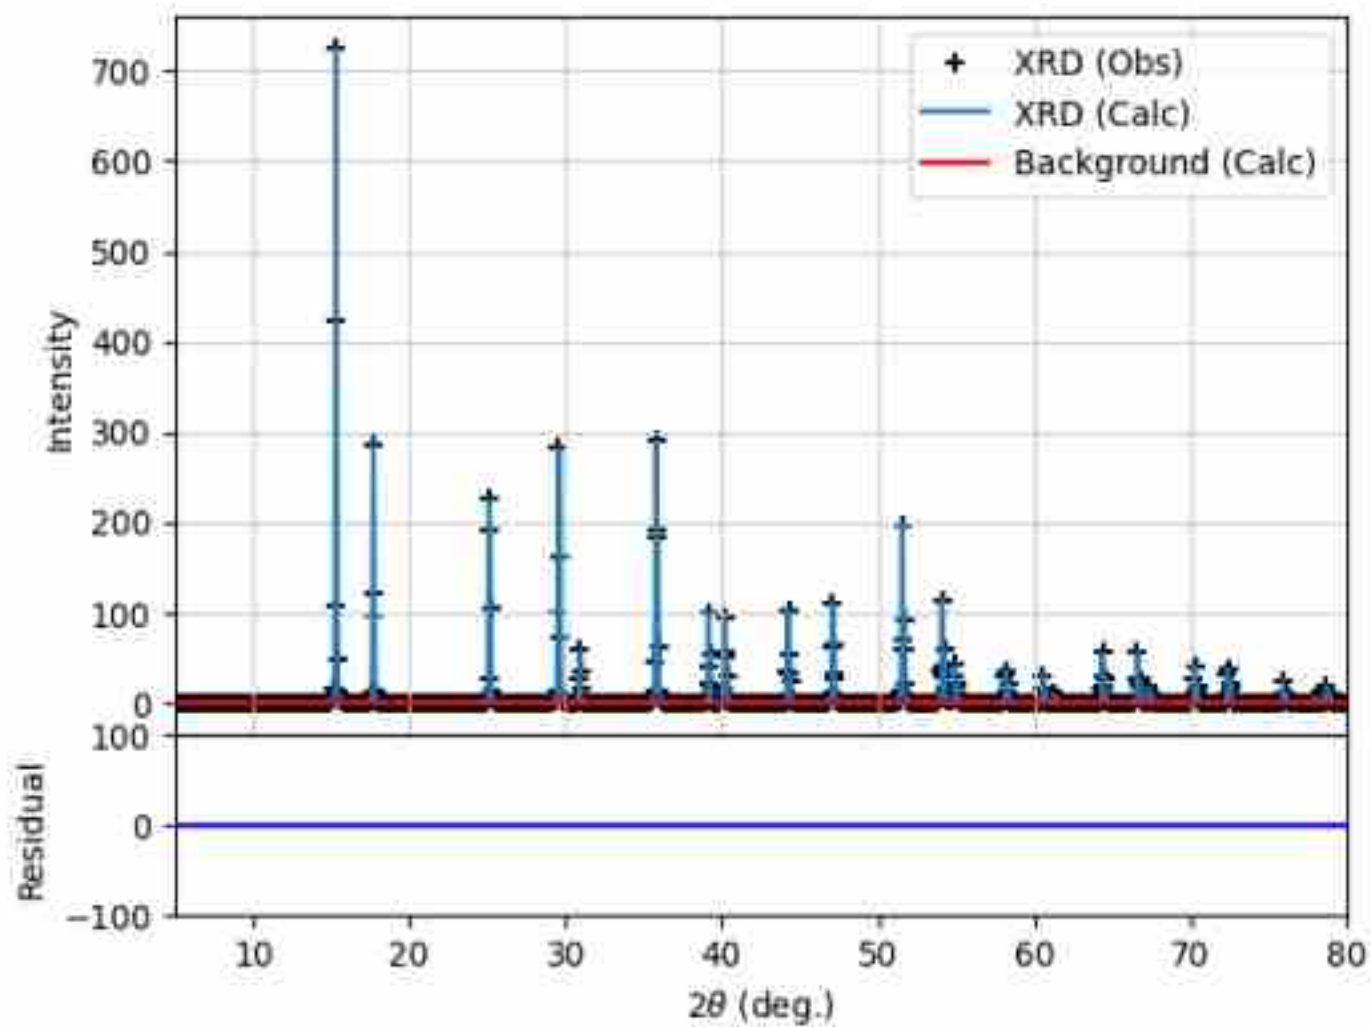

| RMSE before RR | Rwp     | RMSE after RR |
|----------------|---------|---------------|
| 0.013          | 0.01373 | 0.00288       |



# K<sub>2</sub>Y<sub>1</sub>Tl<sub>1</sub>Br<sub>6</sub>

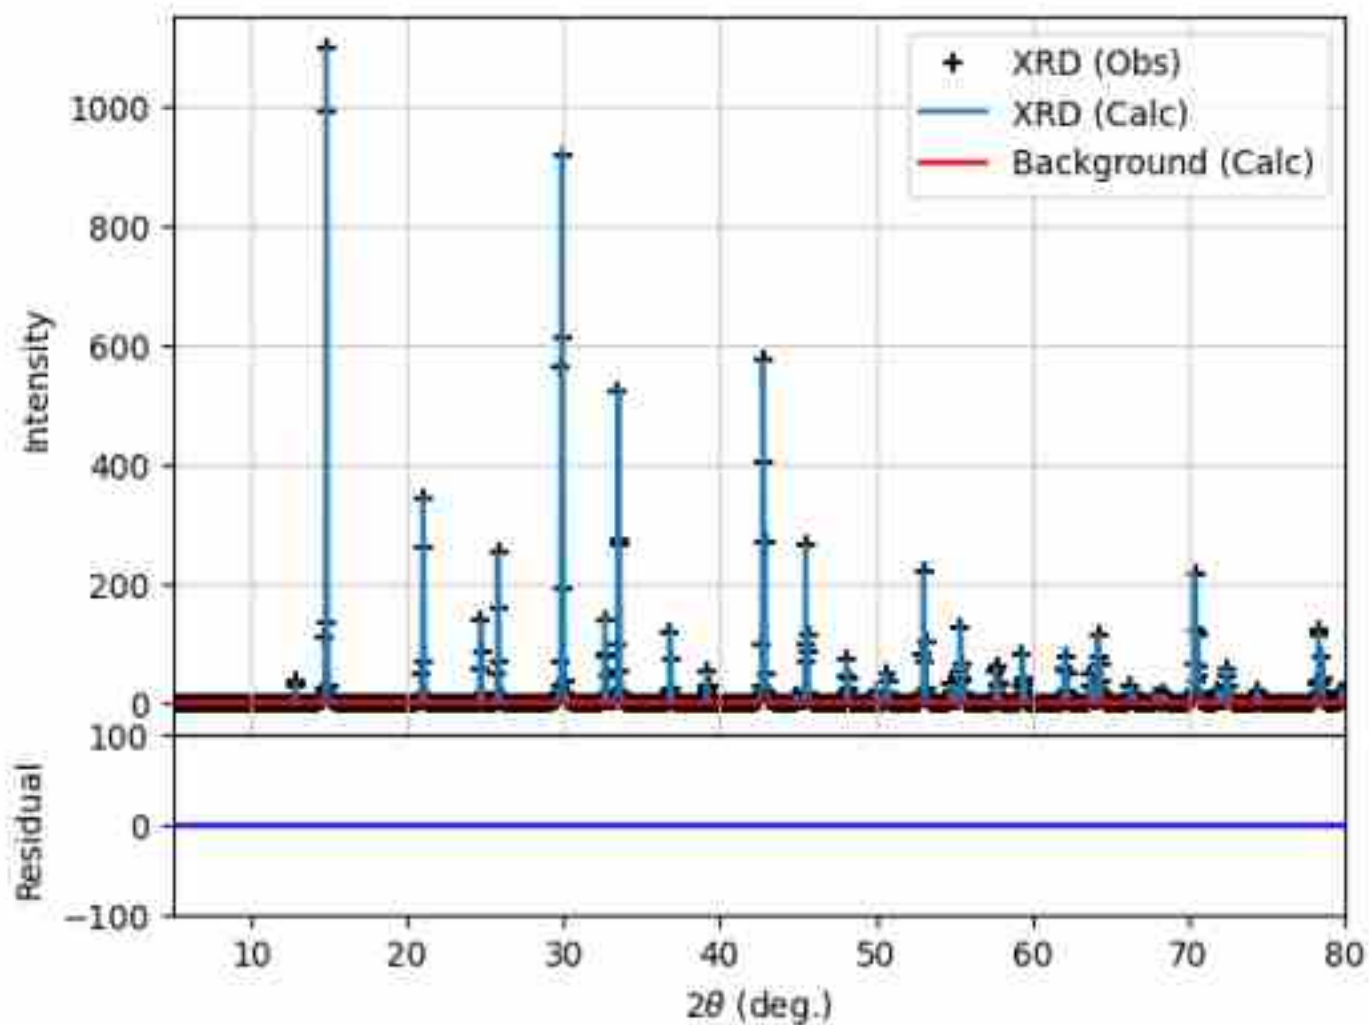

| RMSE before RR | Rwp     | RMSE after RR |
|----------------|---------|---------------|
| 0.013          | 0.01253 | 0.0015        |

# K<sub>3</sub>Ni<sub>2</sub>F<sub>7</sub>

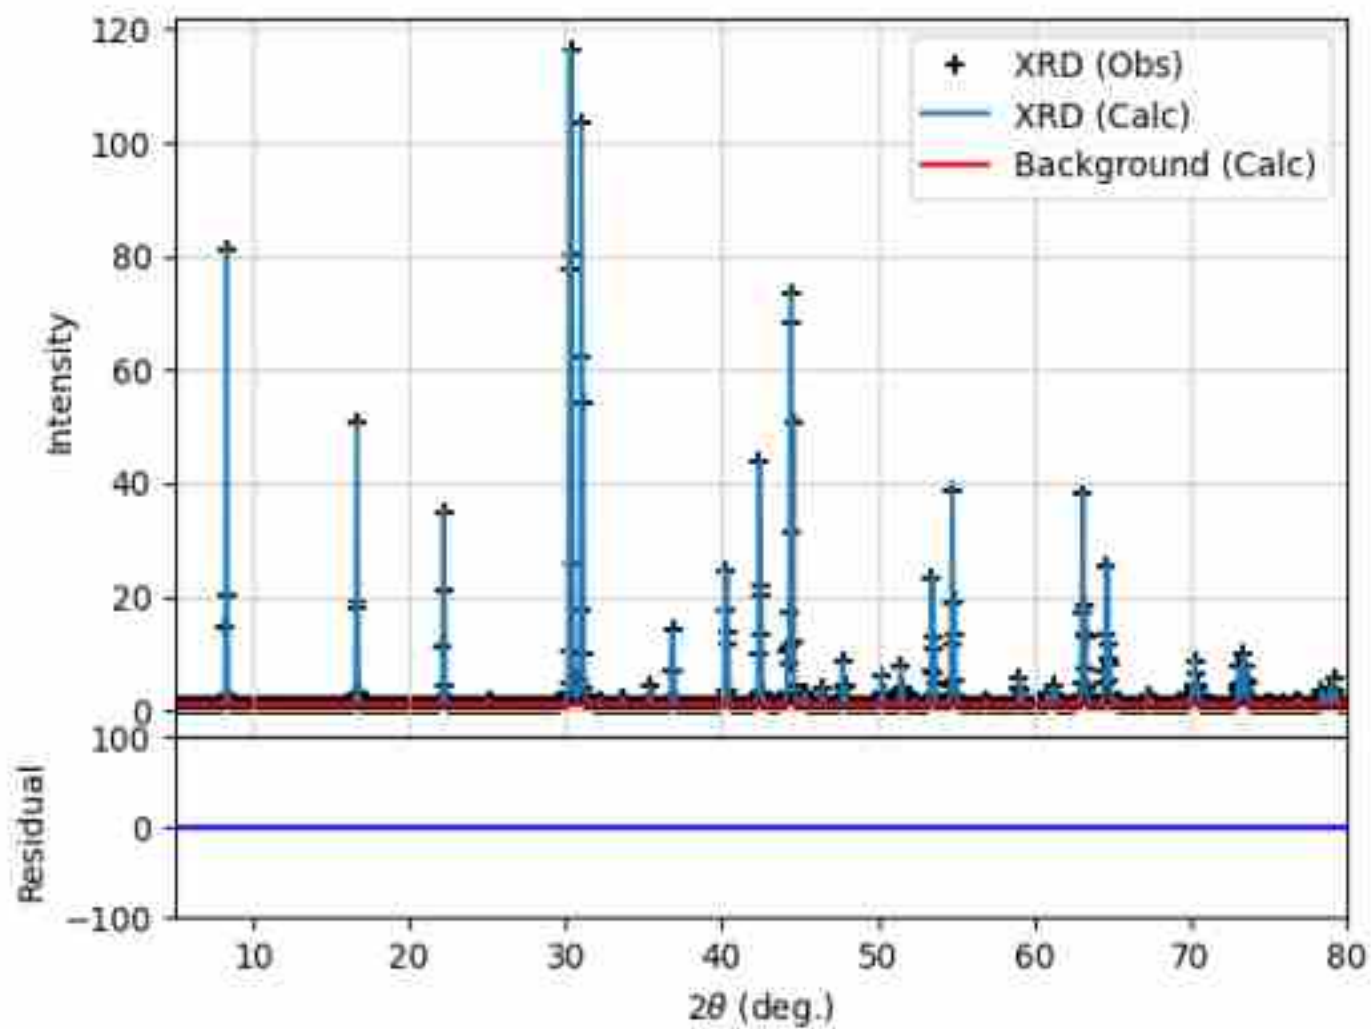

| RMSE before RR | Rwp     | RMSE after RR |
|----------------|---------|---------------|
| 0.013          | 0.00275 | 0.00079       |

# K4Ag2Bi2

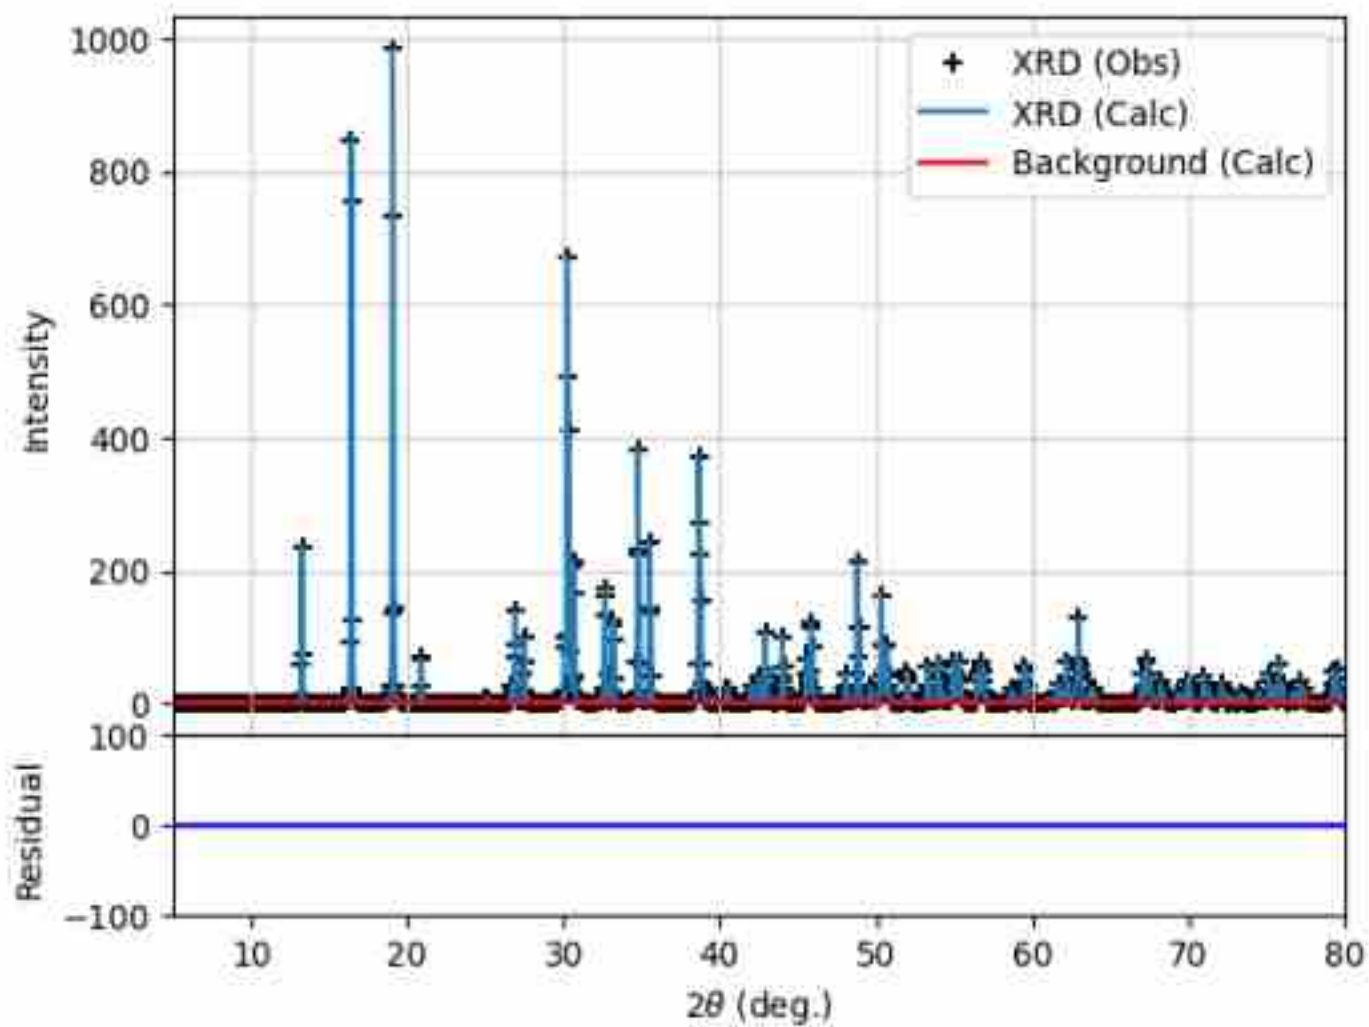

| RMSE before RR | Rwp     | RMSE after RR |
|----------------|---------|---------------|
| 0.013          | 0.00435 | 0.00049       |

# La1Co1Ge3

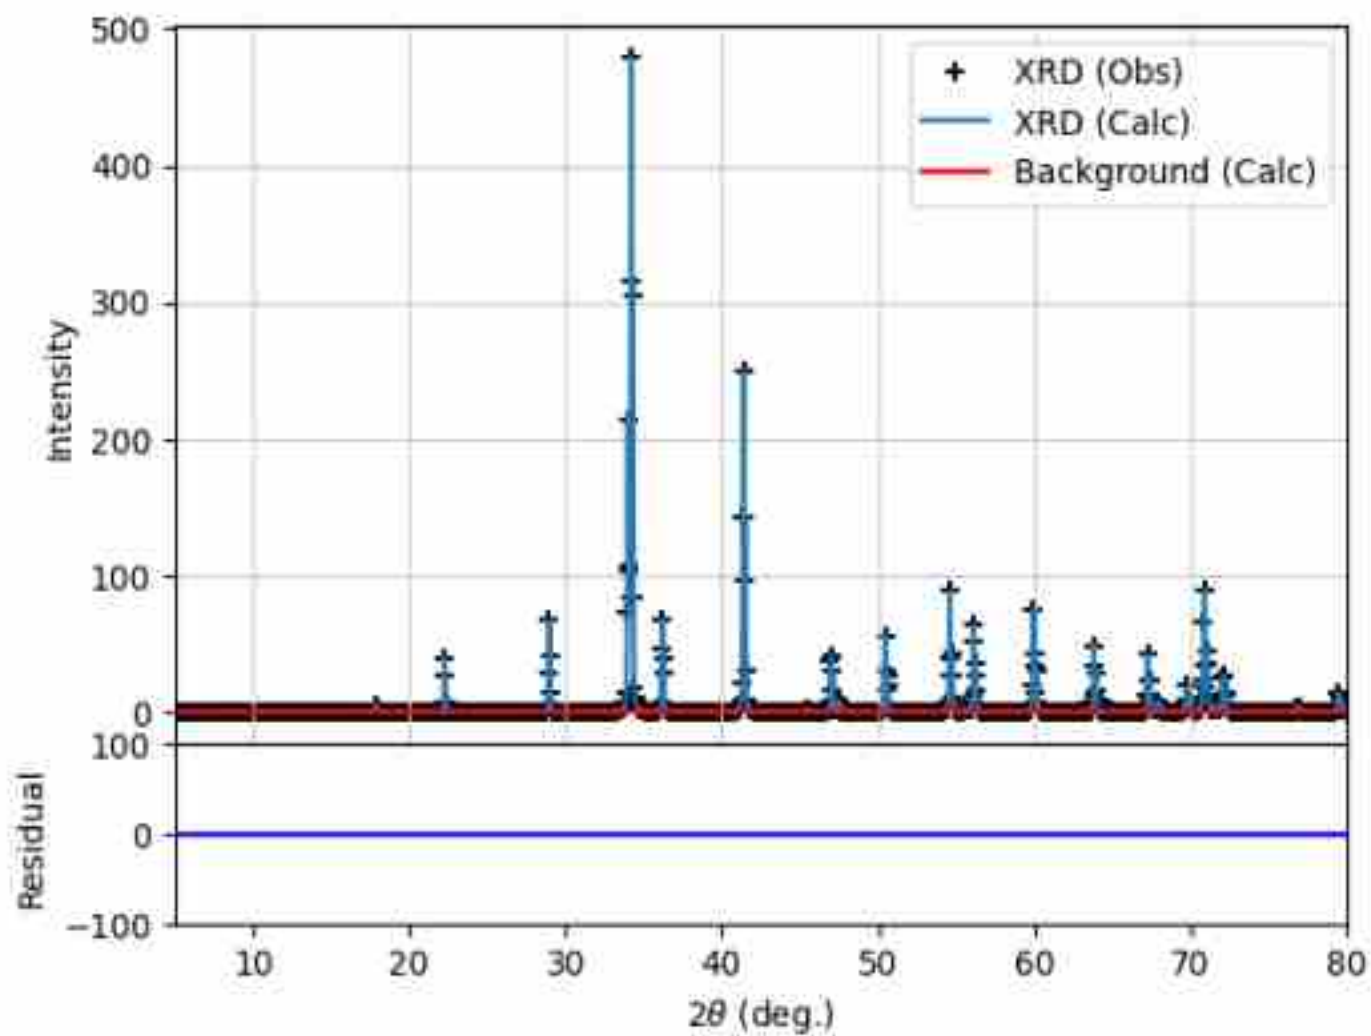

| RMSE before RR | Rwp     | RMSE after RR |
|----------------|---------|---------------|
| 0.013          | 0.00353 | 0.00031       |

# La1Pr3Ga4O12

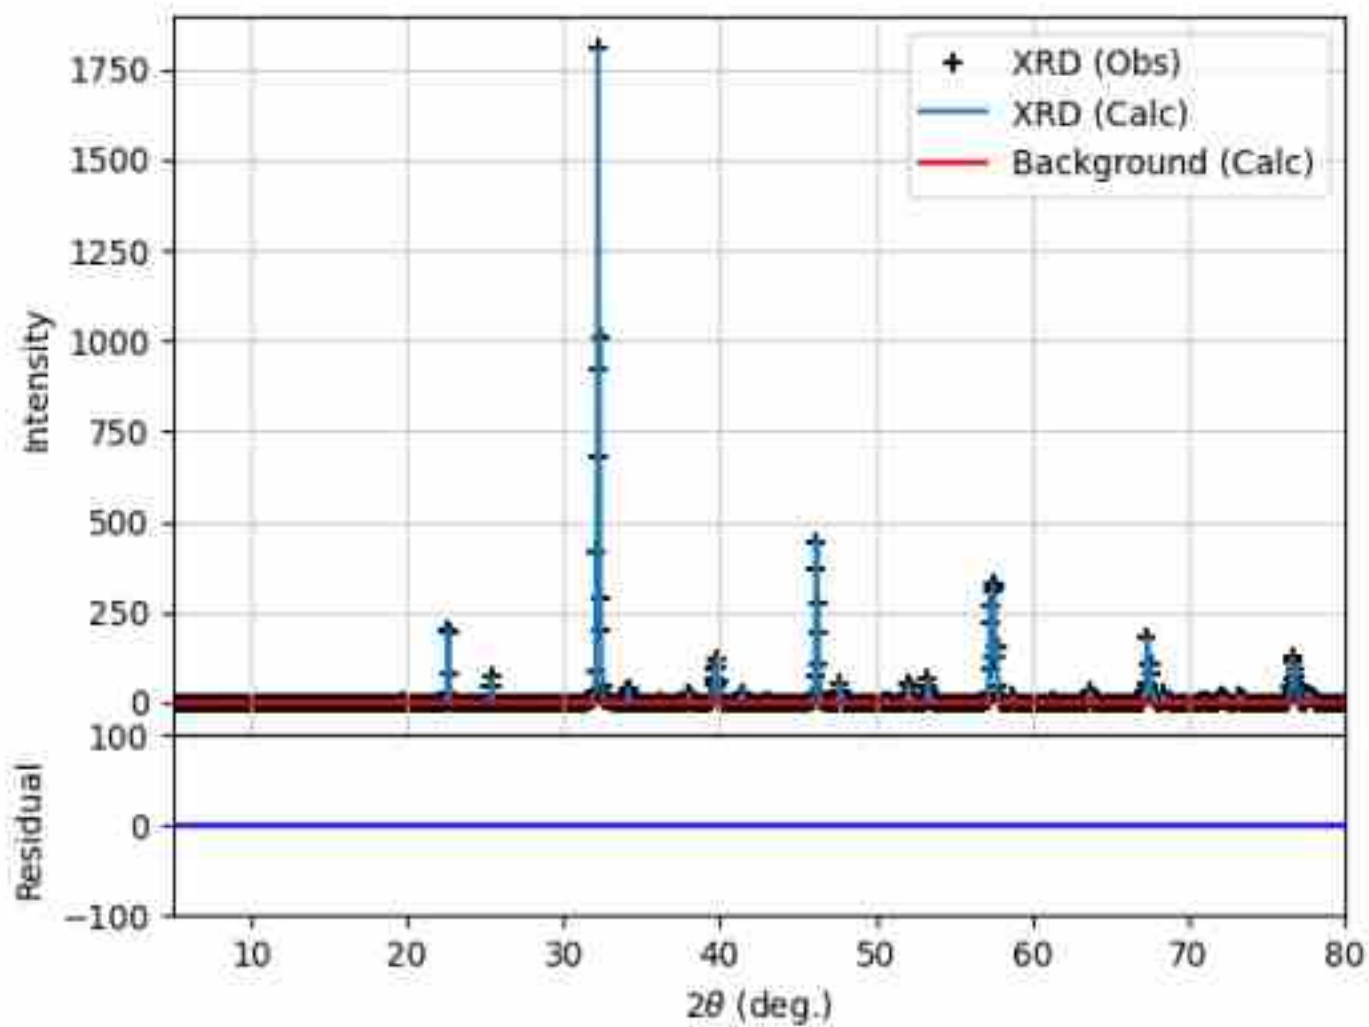

| RMSE before RR | Rwp     | RMSE after RR |
|----------------|---------|---------------|
| 0.013          | 0.14986 | 0.0127        |

# La<sub>2</sub>Ce<sub>2</sub>Si<sub>4</sub>

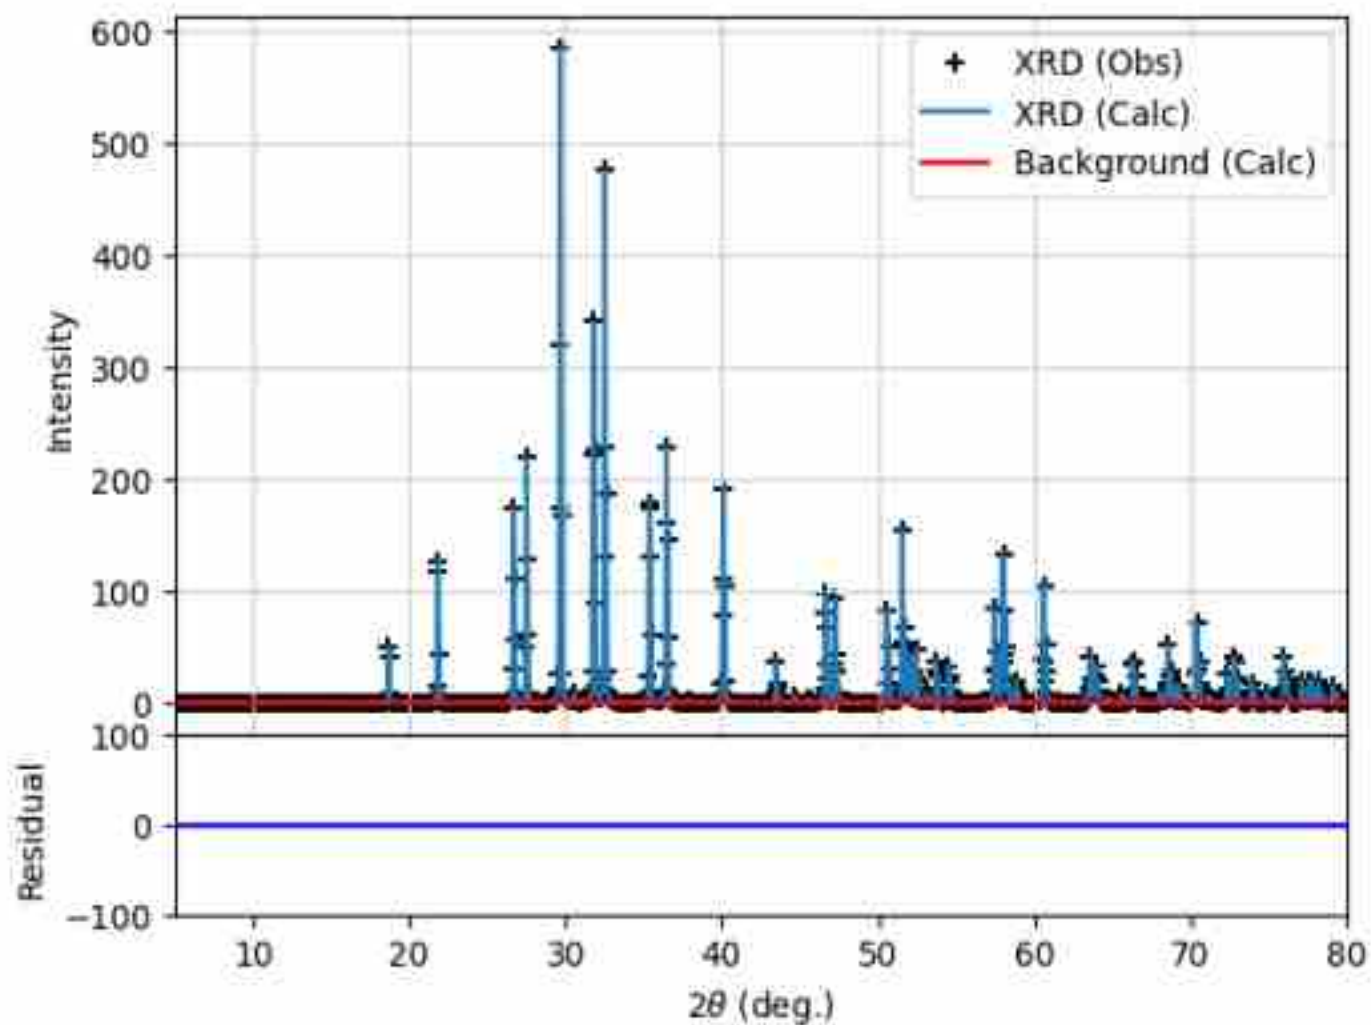

| RMSE before RR | Rwp     | RMSE after RR |
|----------------|---------|---------------|
| 0.013          | 0.00447 | 0.00075       |

# La2Rh2

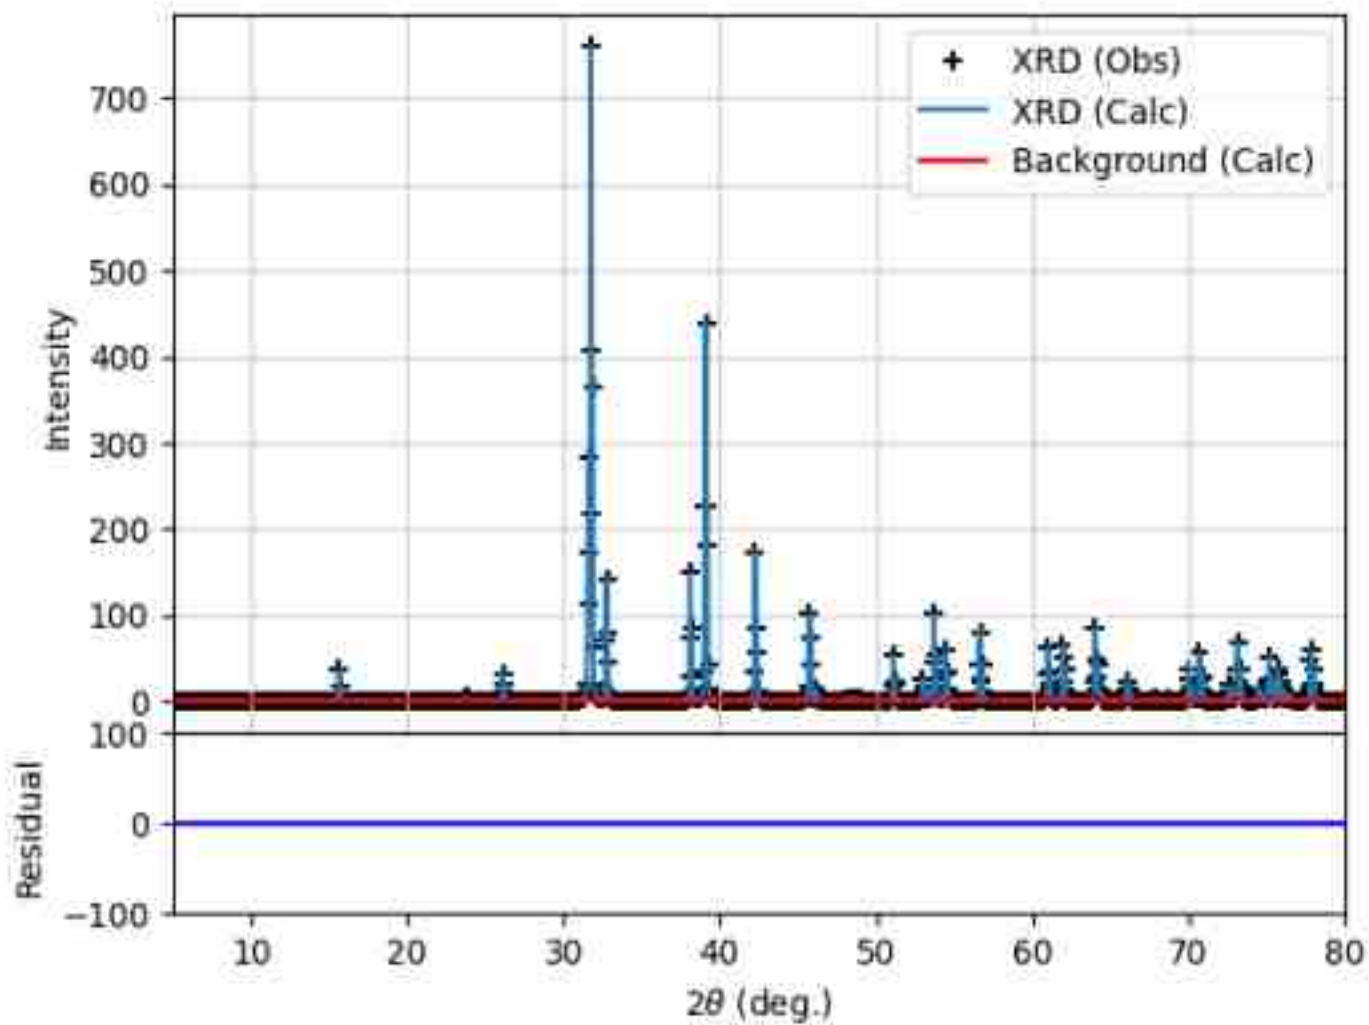

| RMSE before RR | Rwp     | RMSE after RR |
|----------------|---------|---------------|
| 0.013          | 0.00459 | 0.00031       |

# La<sub>4</sub>Mn<sub>2</sub>Ni<sub>2</sub>O<sub>12</sub>

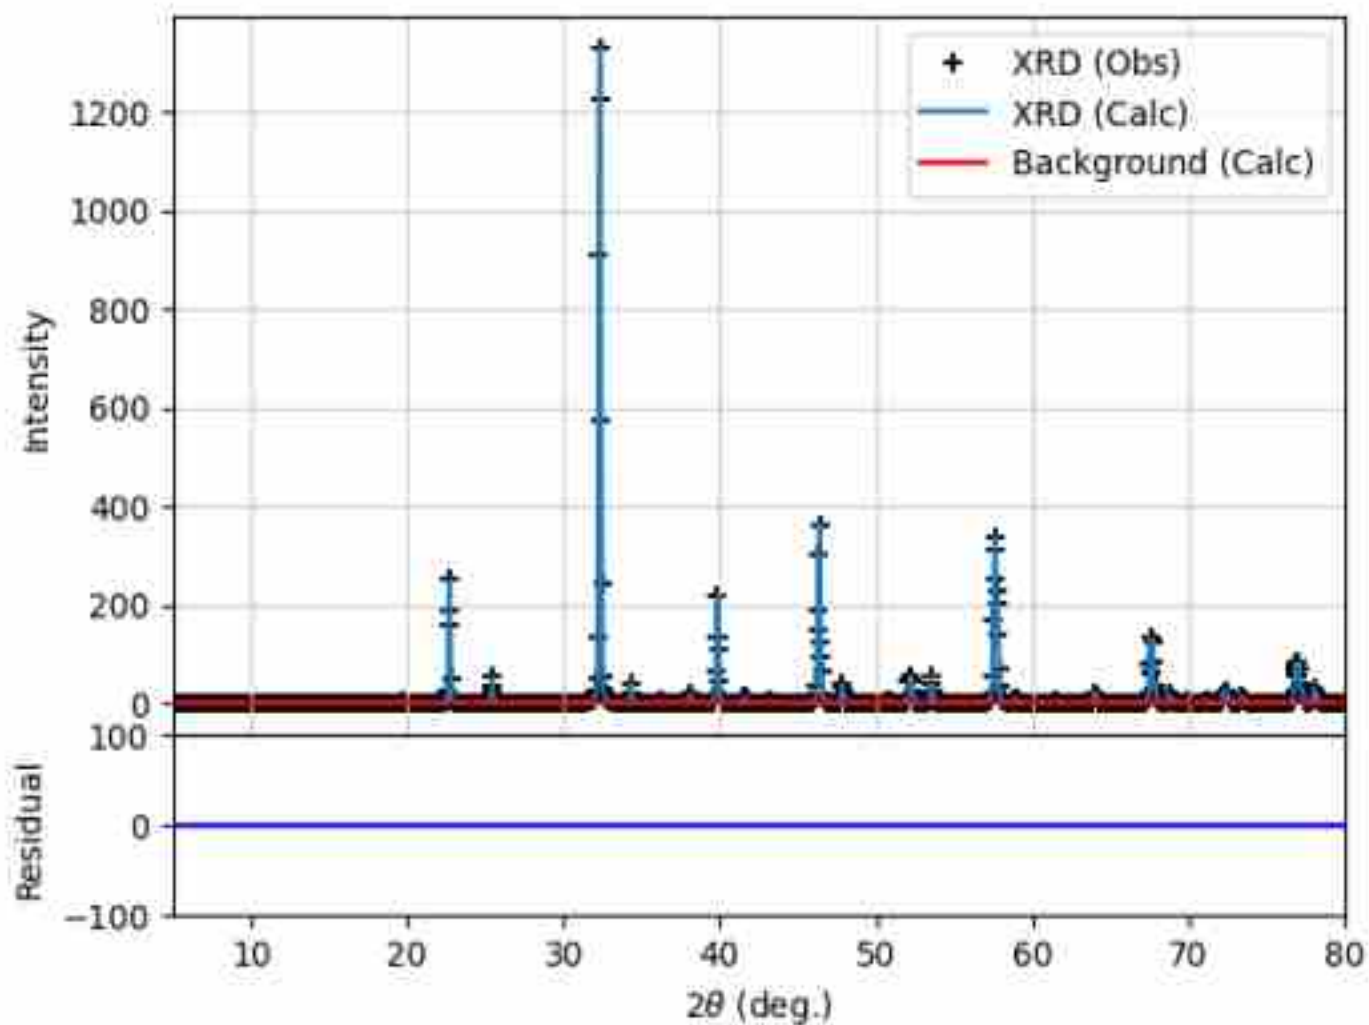

| RMSE before RR | Rwp     | RMSE after RR |
|----------------|---------|---------------|
| 0.013          | 0.00246 | 0.00084       |



# La5Mg1

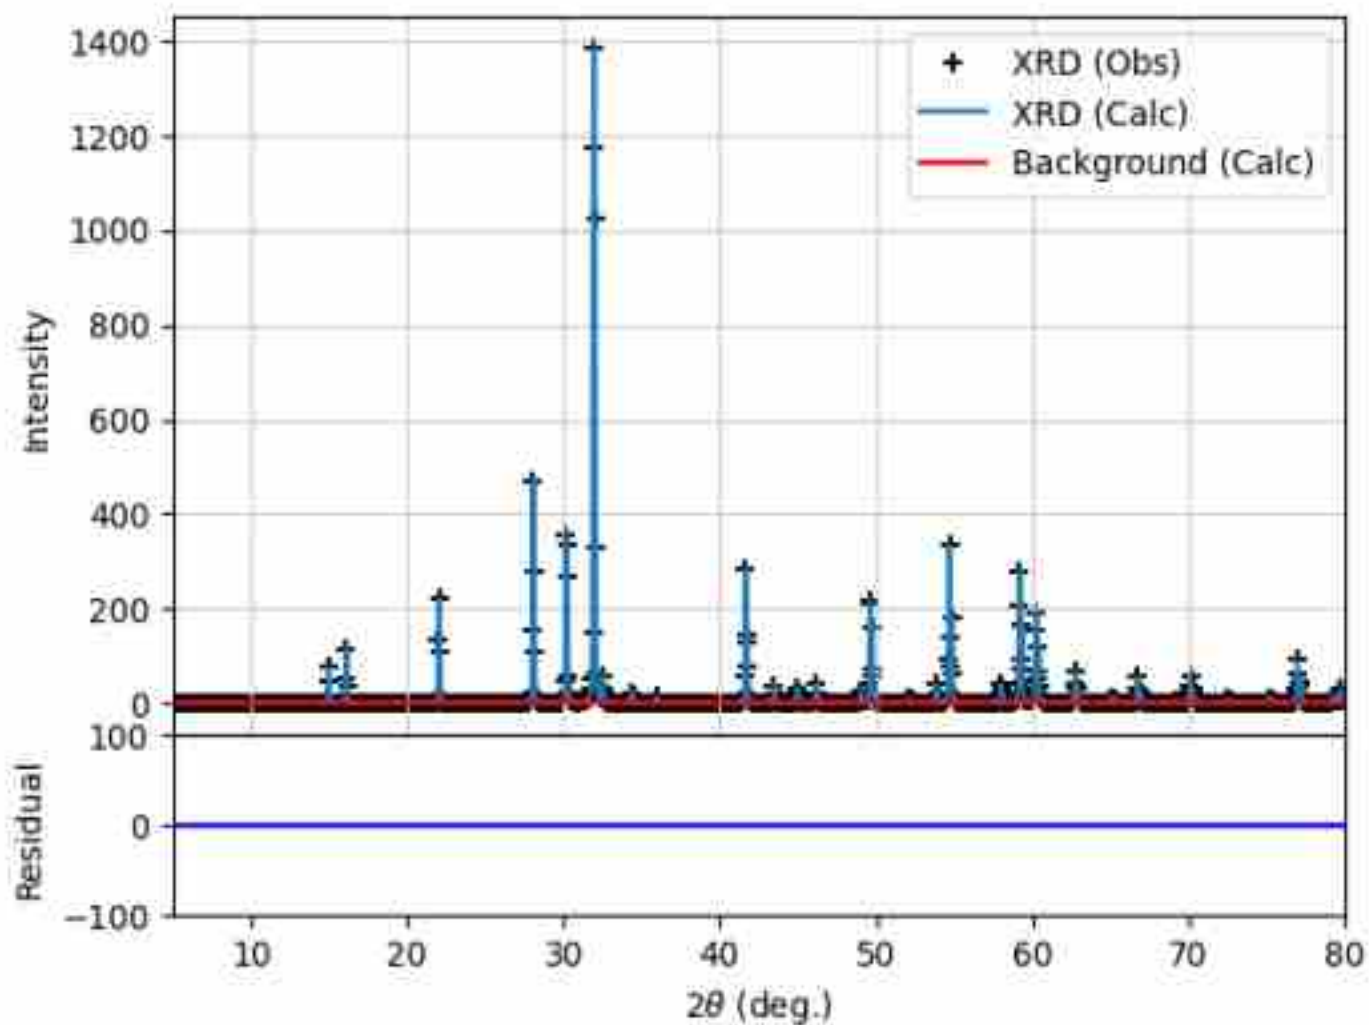

| RMSE before RR | Rwp     | RMSE after RR |
|----------------|---------|---------------|
| 0.013          | 0.00784 | 0.00104       |

# La6Fe2O12

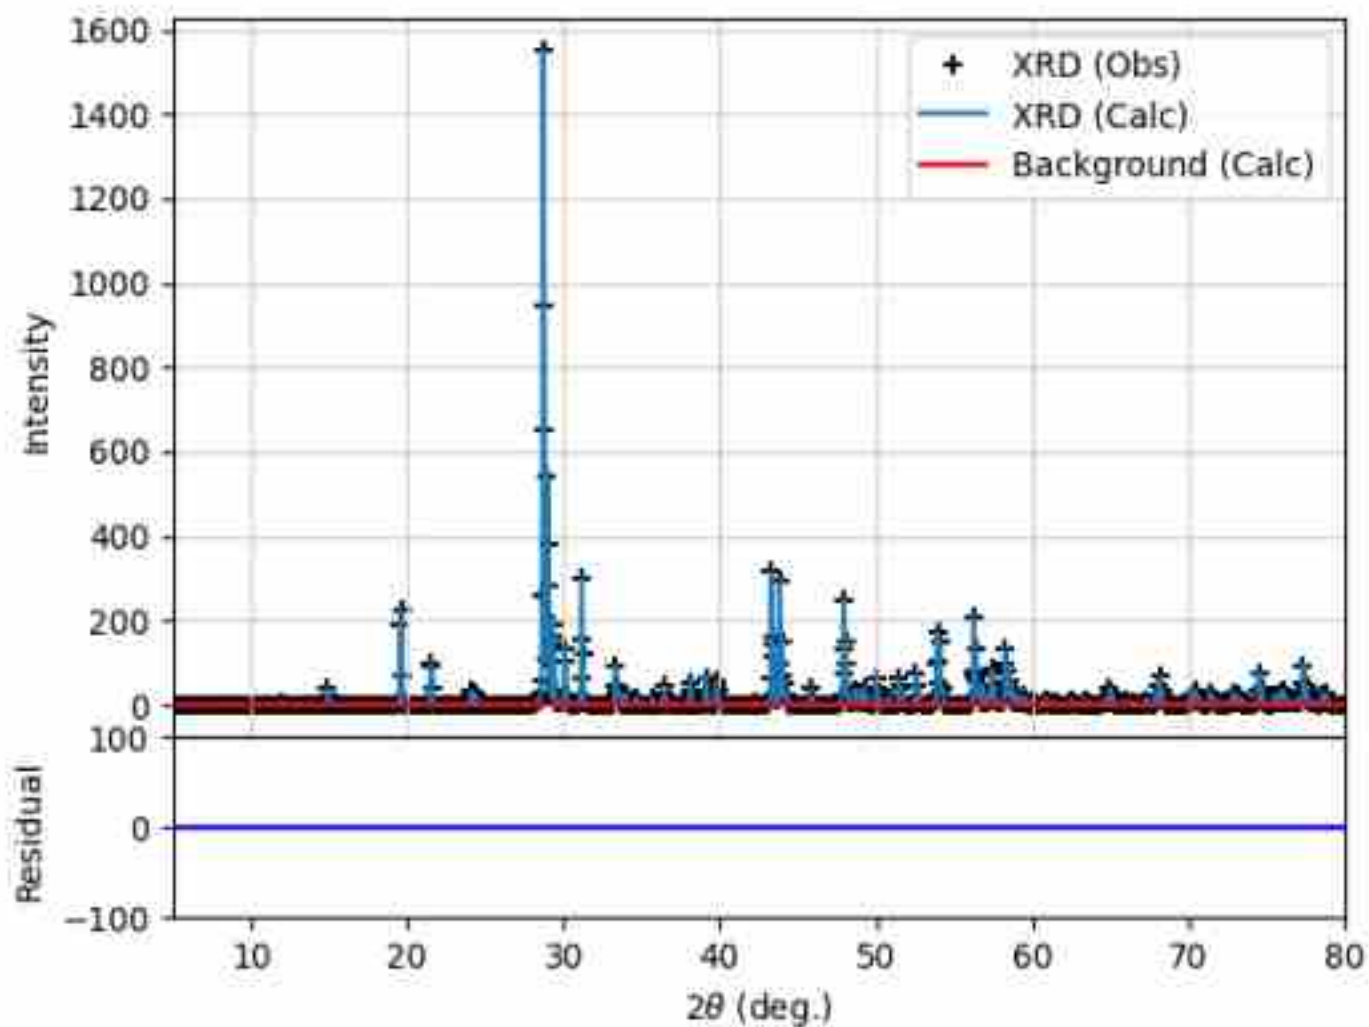

| RMSE before RR | Rwp     | RMSE after RR |
|----------------|---------|---------------|
| 0.013          | 0.00471 | 0.00077       |

# Li1Sc1Ti2Cl6

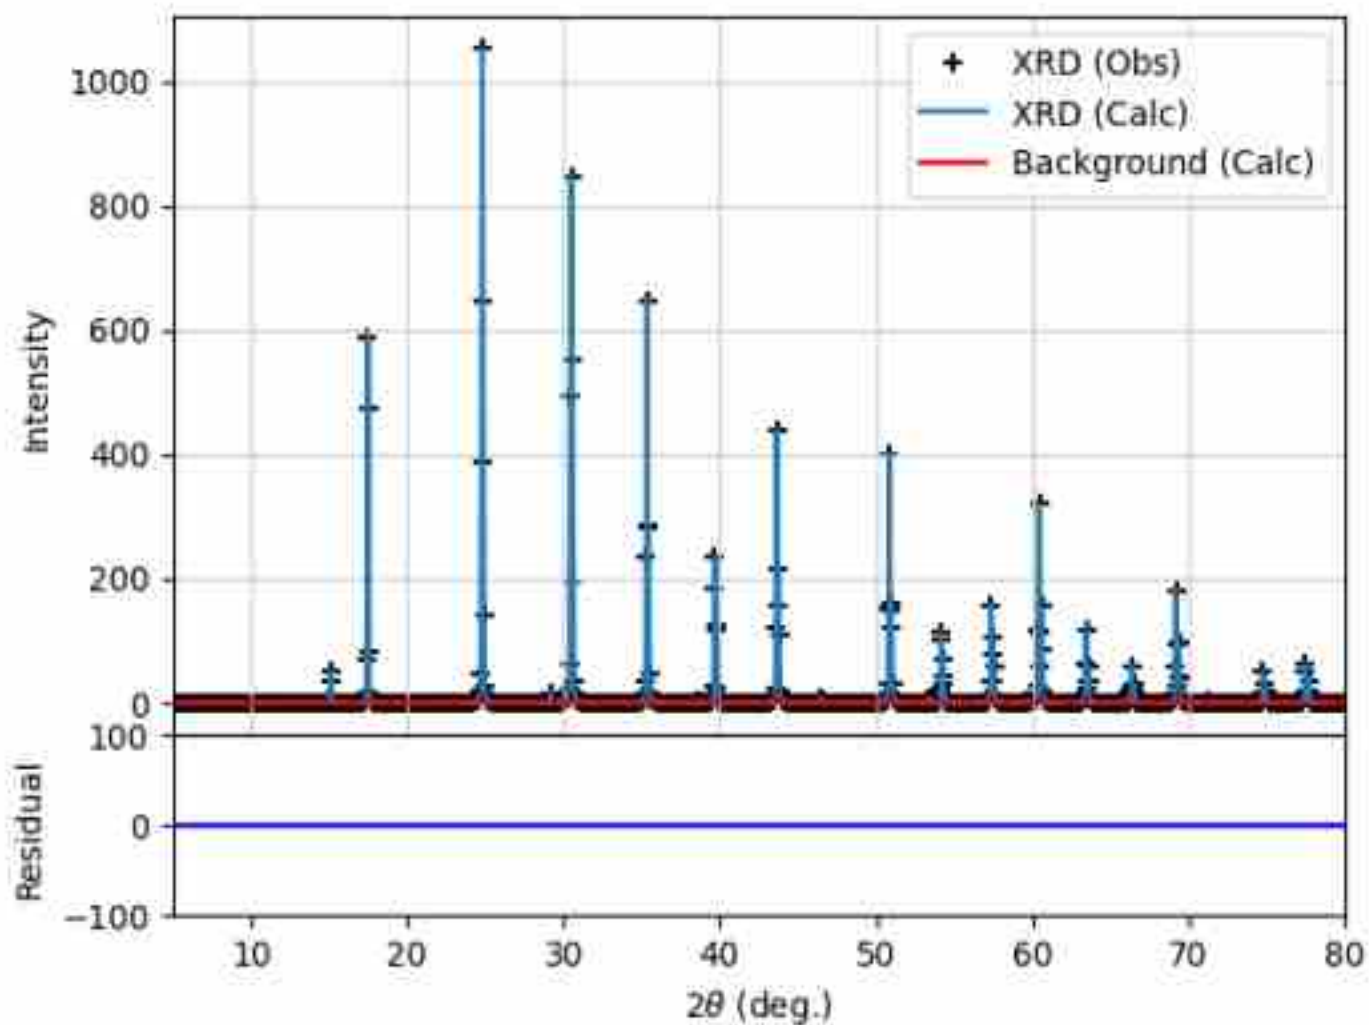

| RMSE before RR | Rwp     | RMSE after RR |
|----------------|---------|---------------|
| 0.013          | 0.01852 | 0.00248       |

# Li<sub>2</sub>Gd<sub>2</sub>Se<sub>4</sub>

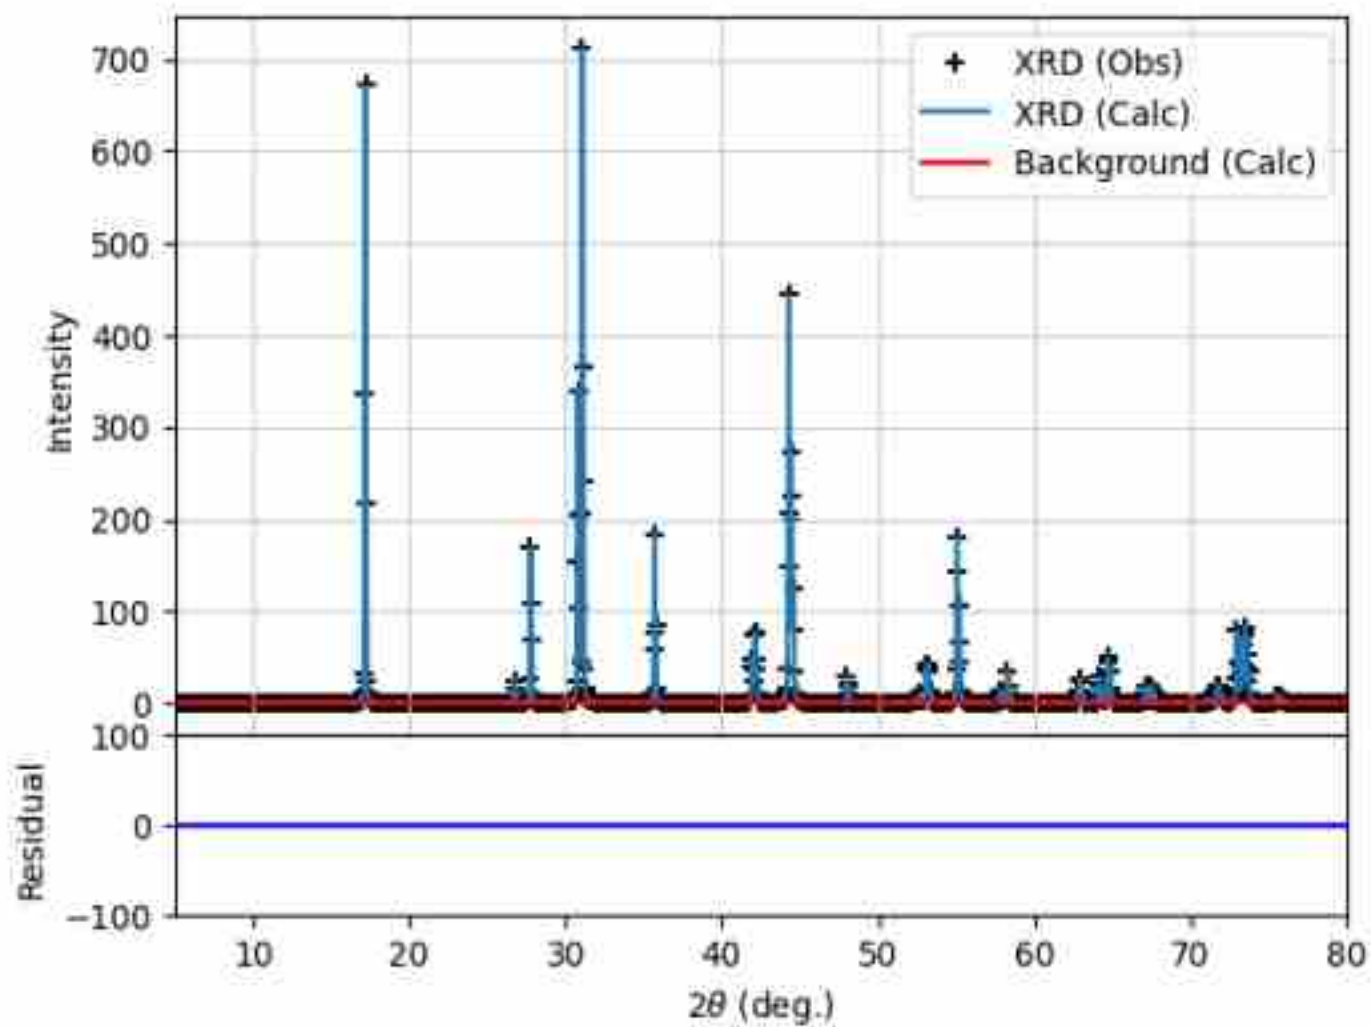

| RMSE before RR | Rwp     | RMSE after RR |
|----------------|---------|---------------|
| 0.013          | 0.02421 | 0.00816       |

# Li<sub>2</sub>Pr<sub>2</sub>Sn<sub>4</sub>

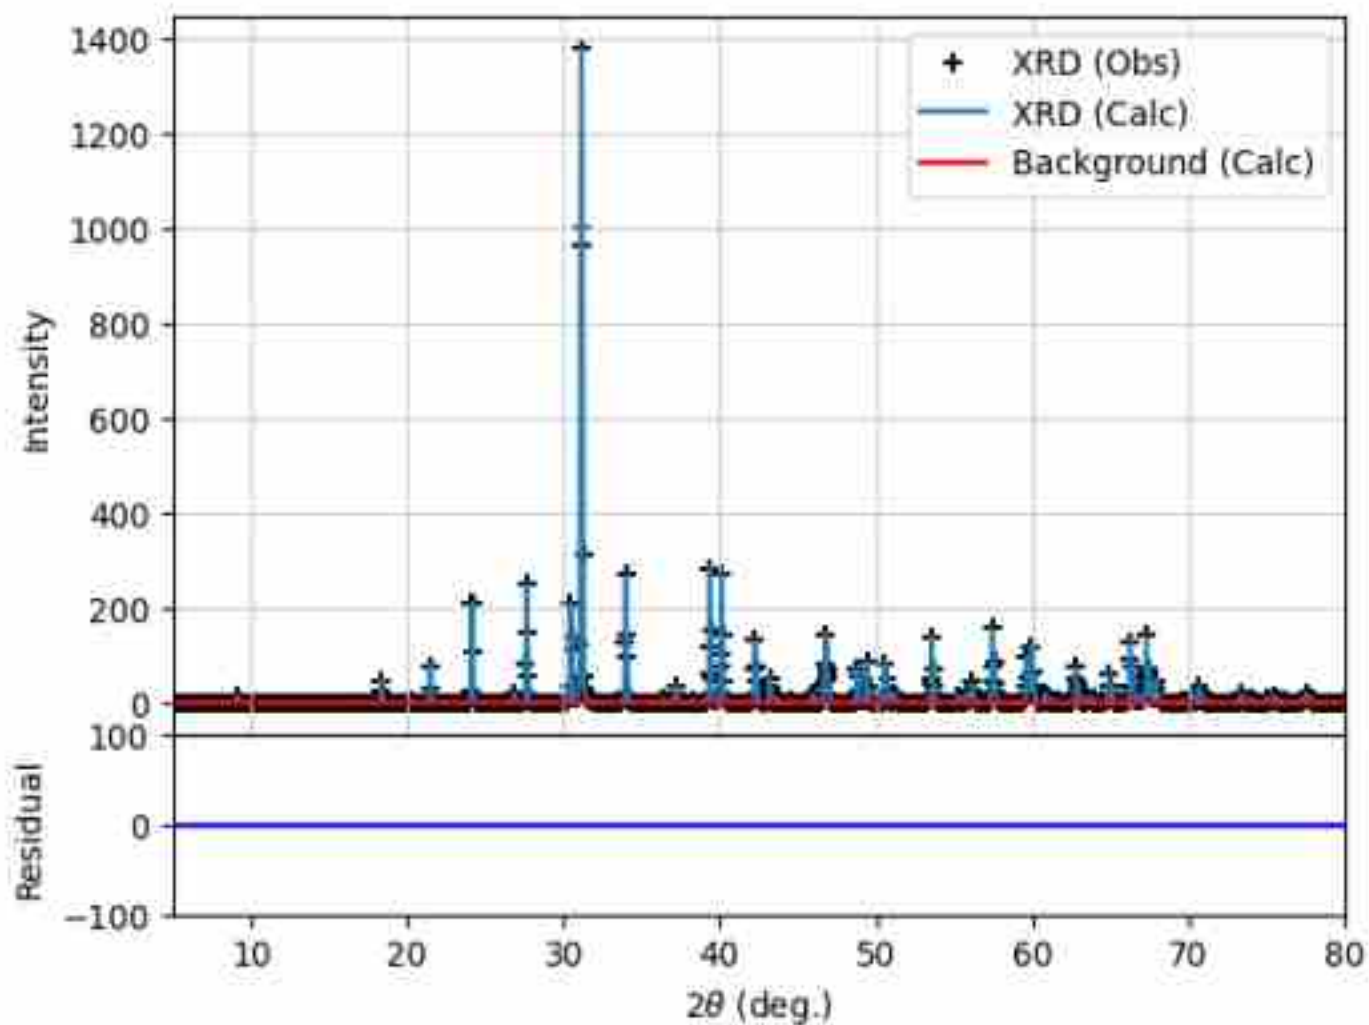

| RMSE before RR | Rwp     | RMSE after RR |
|----------------|---------|---------------|
| 0.013          | 0.00296 | 0.00052       |

# Li<sub>2</sub>Y<sub>2</sub>S<sub>4</sub>

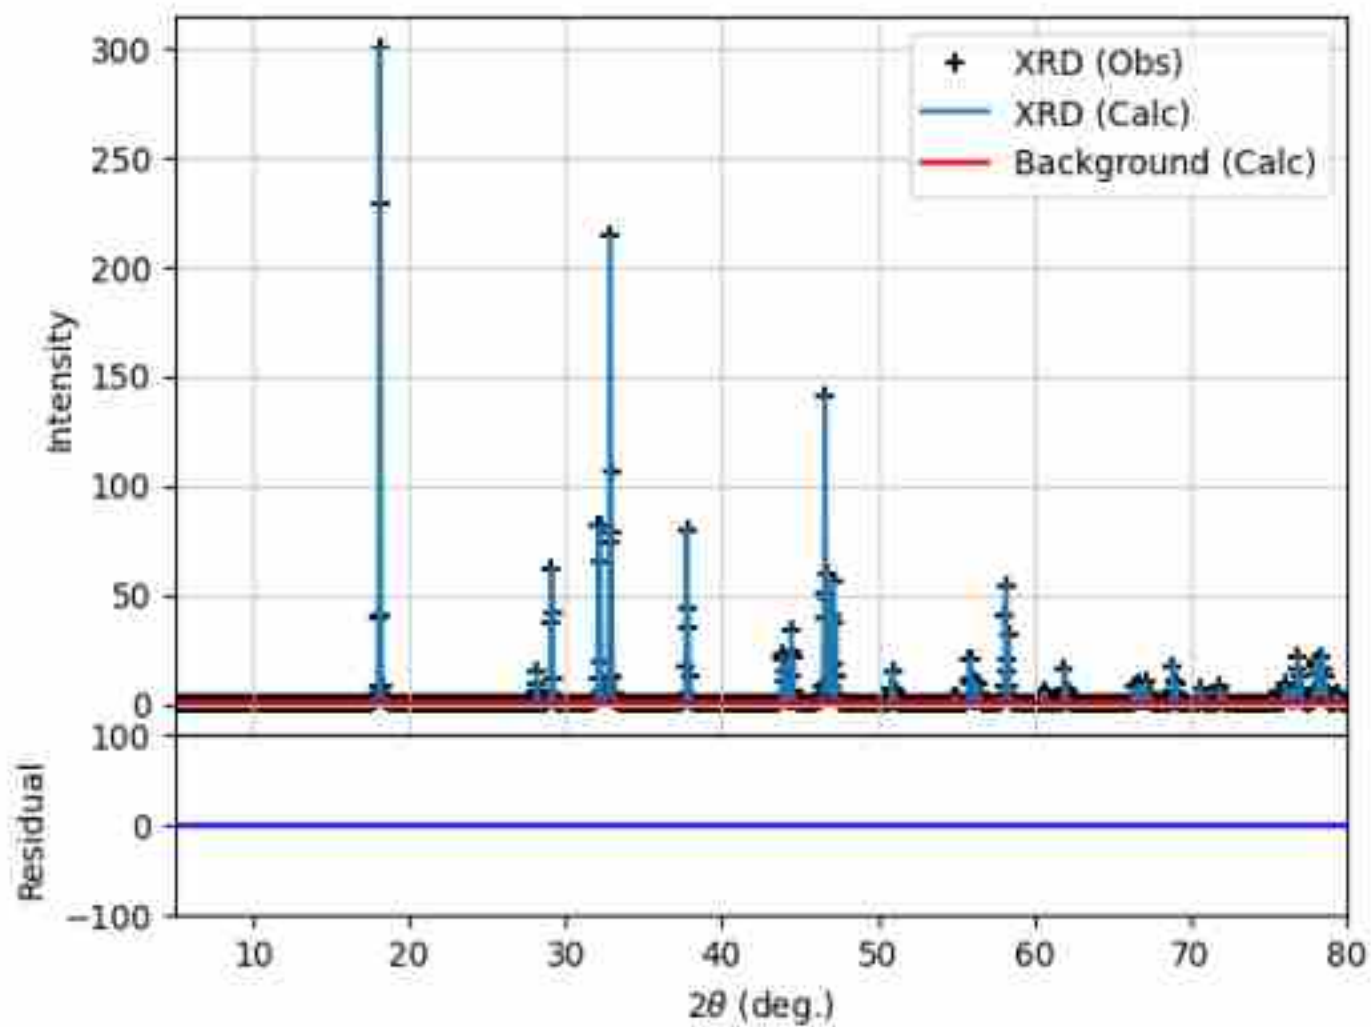

| RMSE before RR | Rwp     | RMSE after RR |
|----------------|---------|---------------|
| 0.013          | 0.00529 | 0.00109       |

# Li<sub>2</sub>Zr<sub>4</sub>N<sub>6</sub>

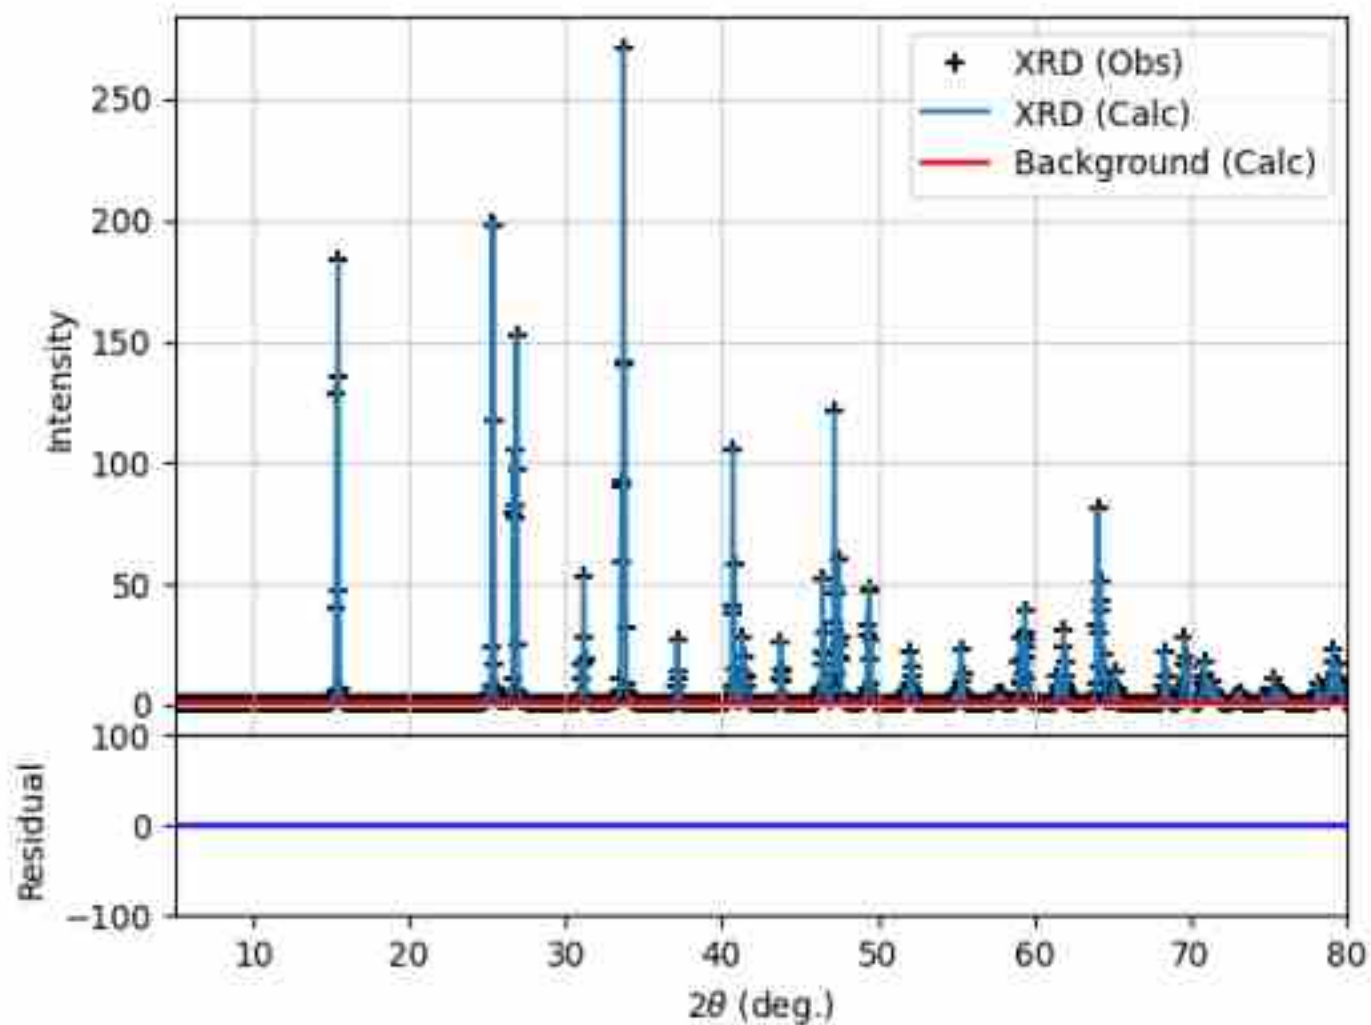

| RMSE before RR | Rwp     | RMSE after RR |
|----------------|---------|---------------|
| 0.013          | 0.00393 | 0.00267       |

# Li<sub>4</sub>Mg<sub>2</sub>

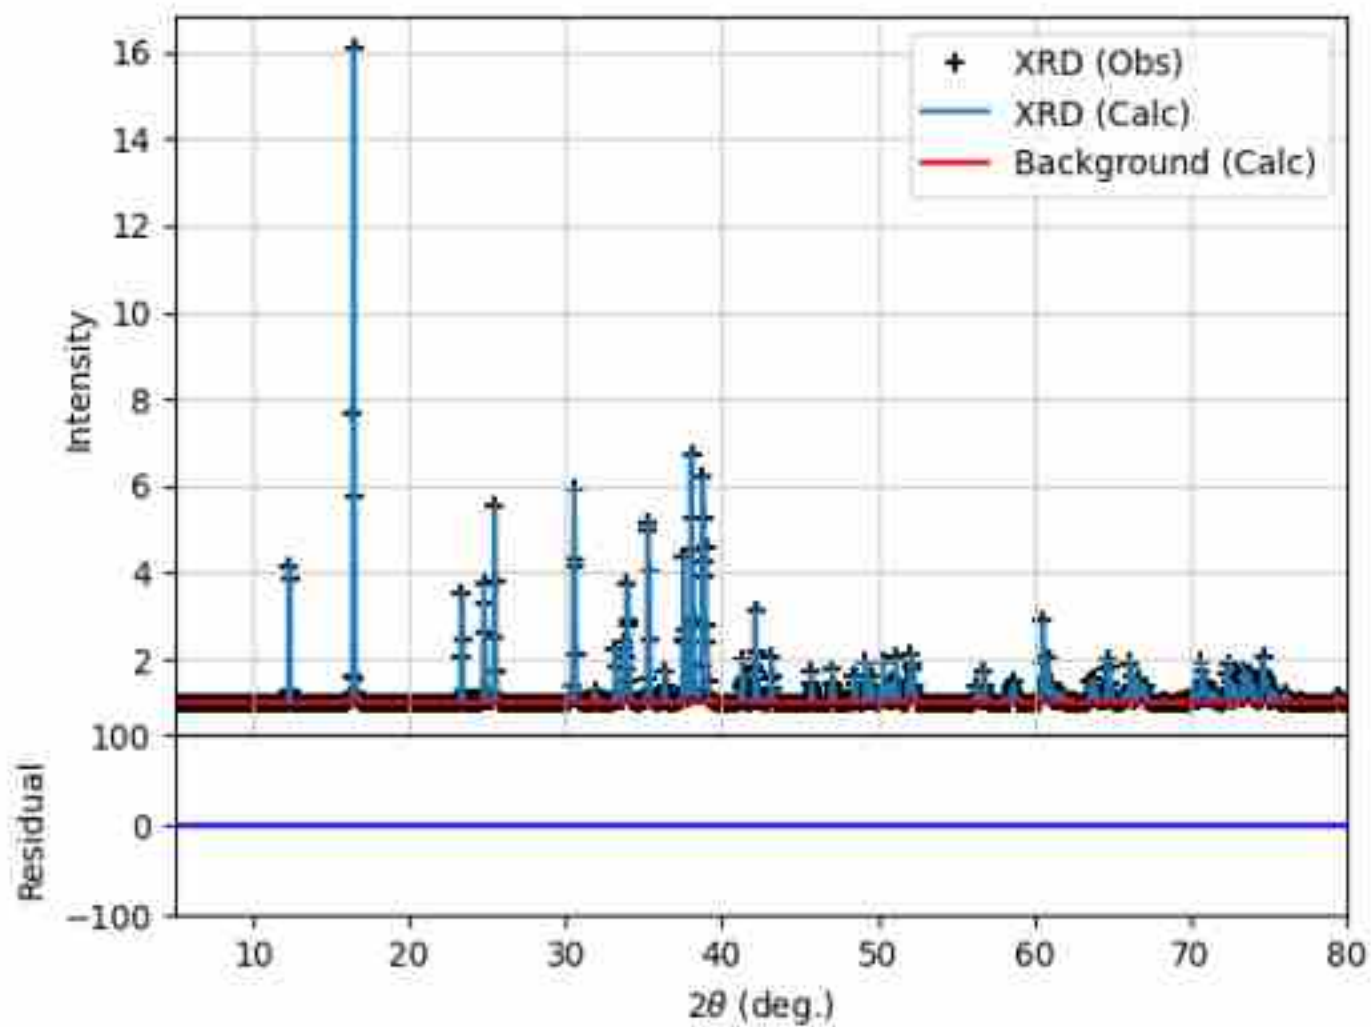

| RMSE before RR | Rwp     | RMSE after RR |
|----------------|---------|---------------|
| 0.013          | 0.00113 | 0.00072       |



# Lu1Al7Fe5

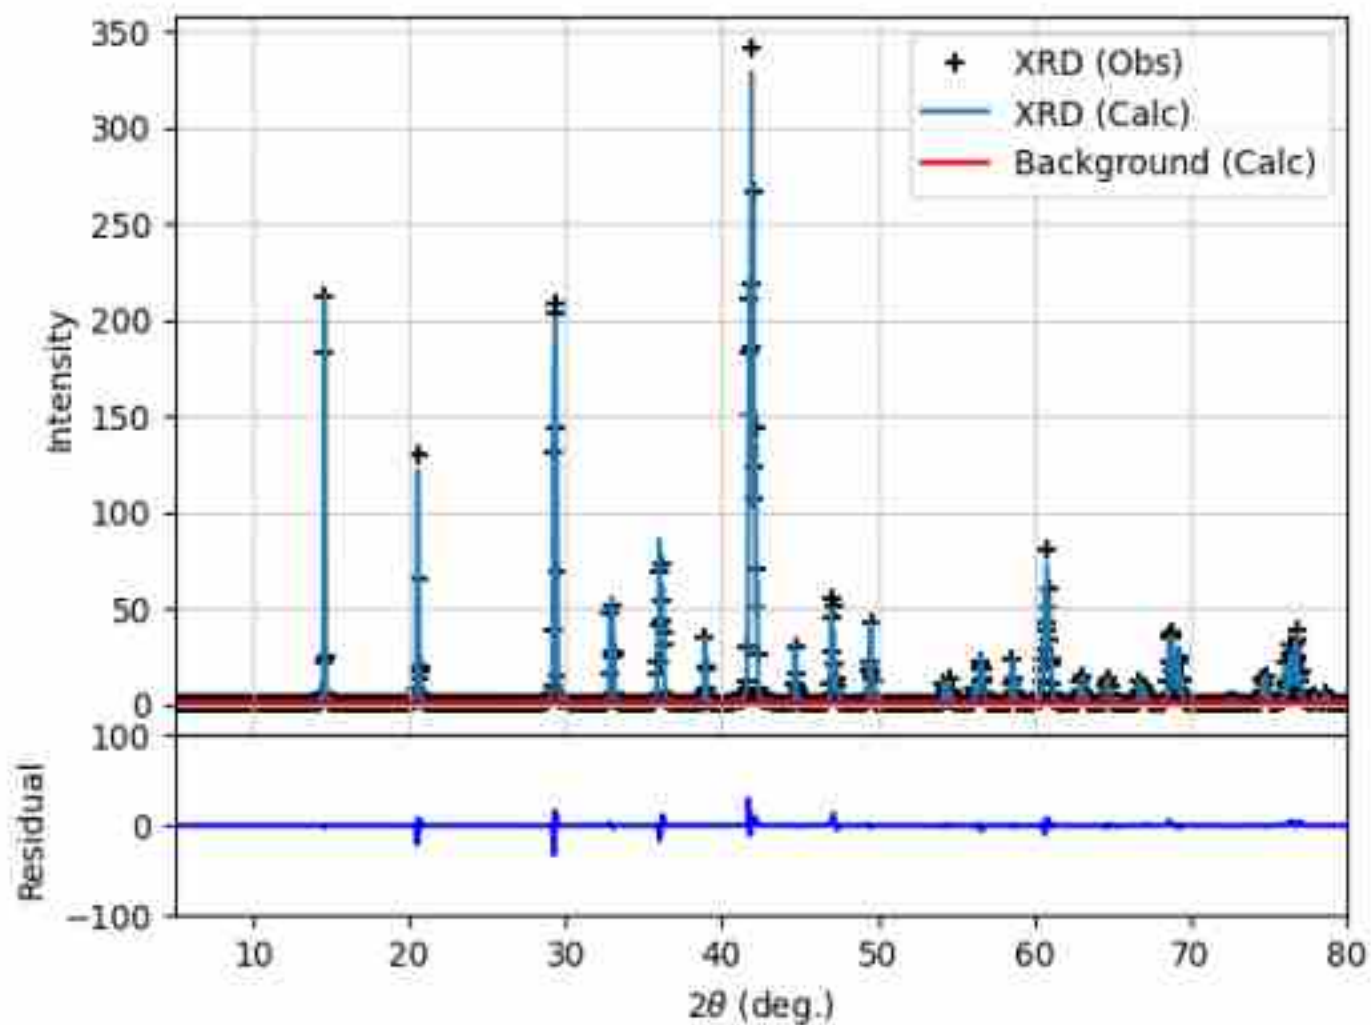

| RMSE before RR | Rwp      | RMSE after RR |
|----------------|----------|---------------|
| 0.013          | 10.30648 | 0.06381       |

# Lu<sub>2</sub>Hf<sub>2</sub>F<sub>14</sub>

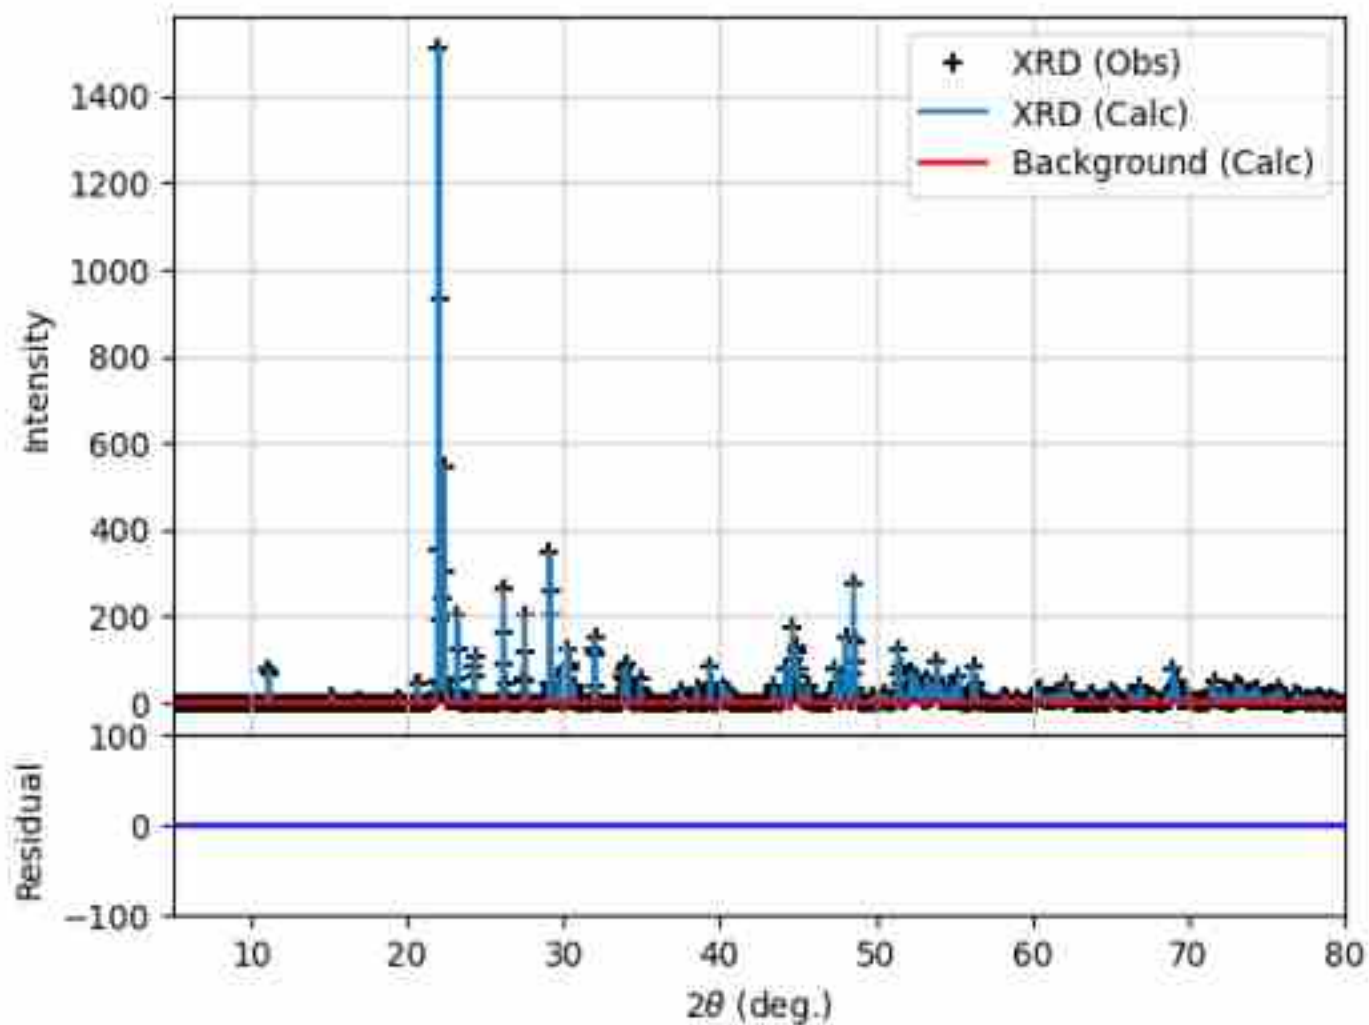

| RMSE before RR | Rwp     | RMSE after RR |
|----------------|---------|---------------|
| 0.013          | 0.00366 | 0.00078       |

# Lu6Fe1Sb2

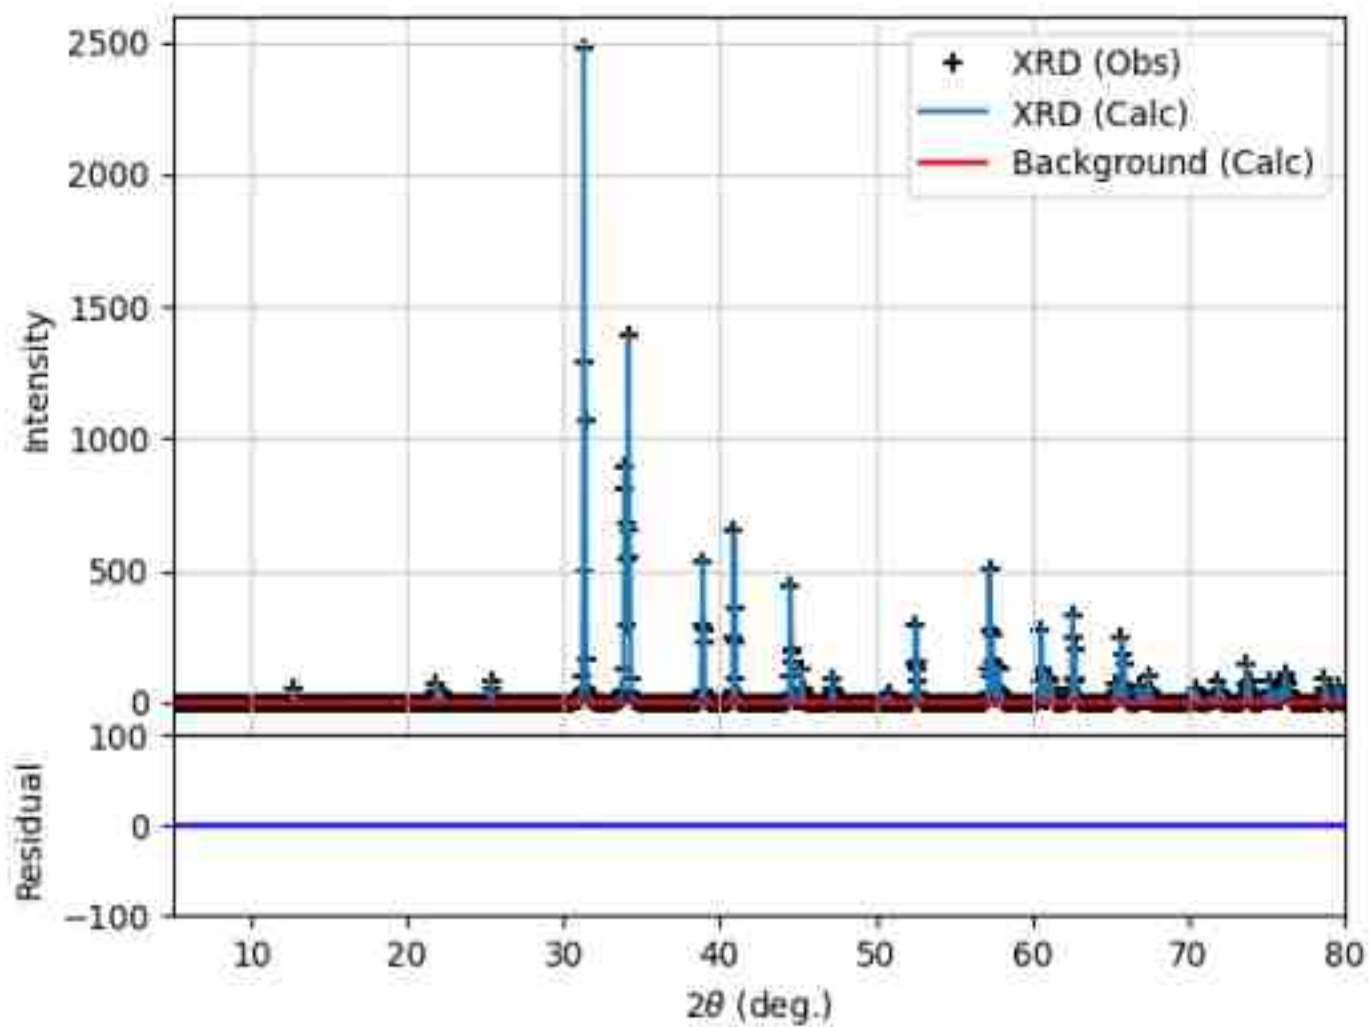

| RMSE before RR | Rwp     | RMSE after RR |
|----------------|---------|---------------|
| 0.013          | 0.01368 | 0.00075       |

# Mg1Co6Ge6

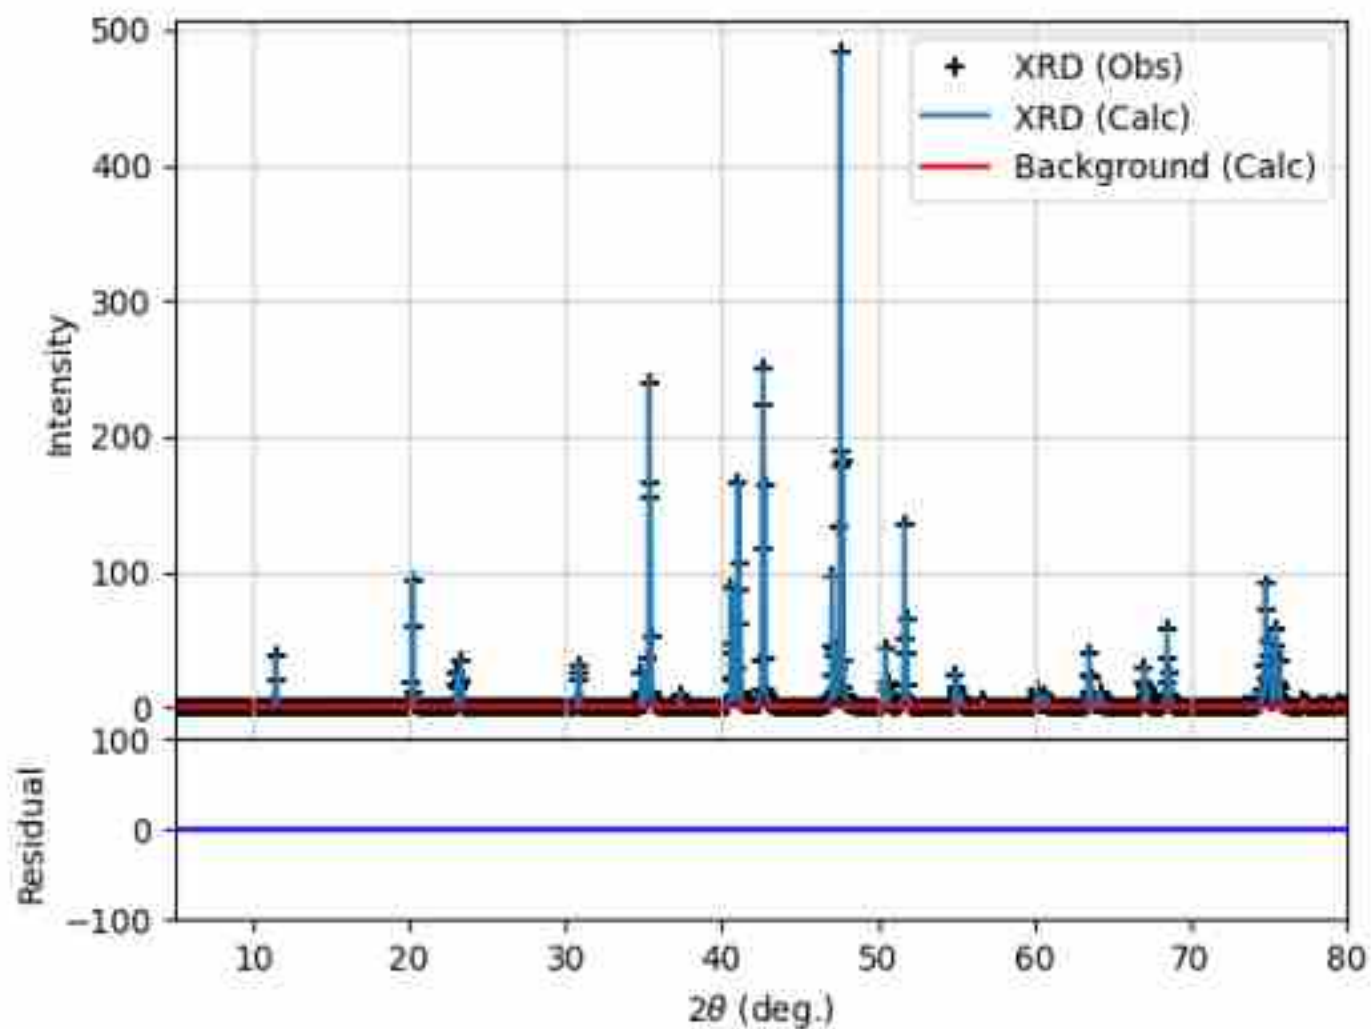

| RMSE before RR | Rwp    | RMSE after RR |
|----------------|--------|---------------|
| 0.013          | 0.0035 | 0.00061       |

# Mg<sub>2</sub>Al<sub>2</sub>

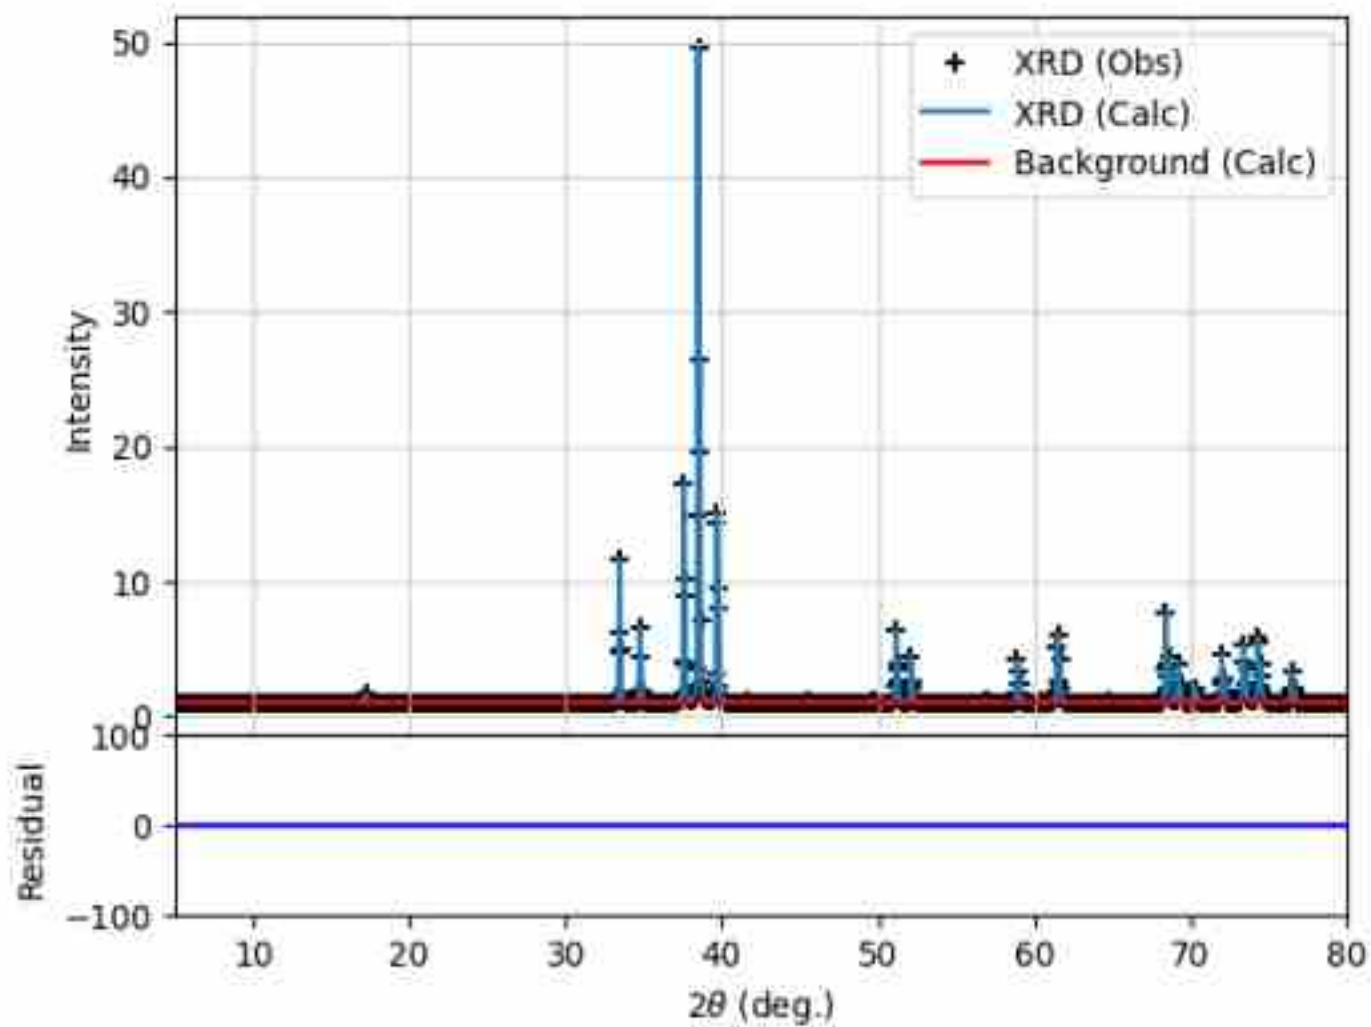

| RMSE before RR | Rwp     | RMSE after RR |
|----------------|---------|---------------|
| 0.013          | 0.00236 | 0.00028       |

# Mg<sub>2</sub>In<sub>4</sub>Se<sub>8</sub>

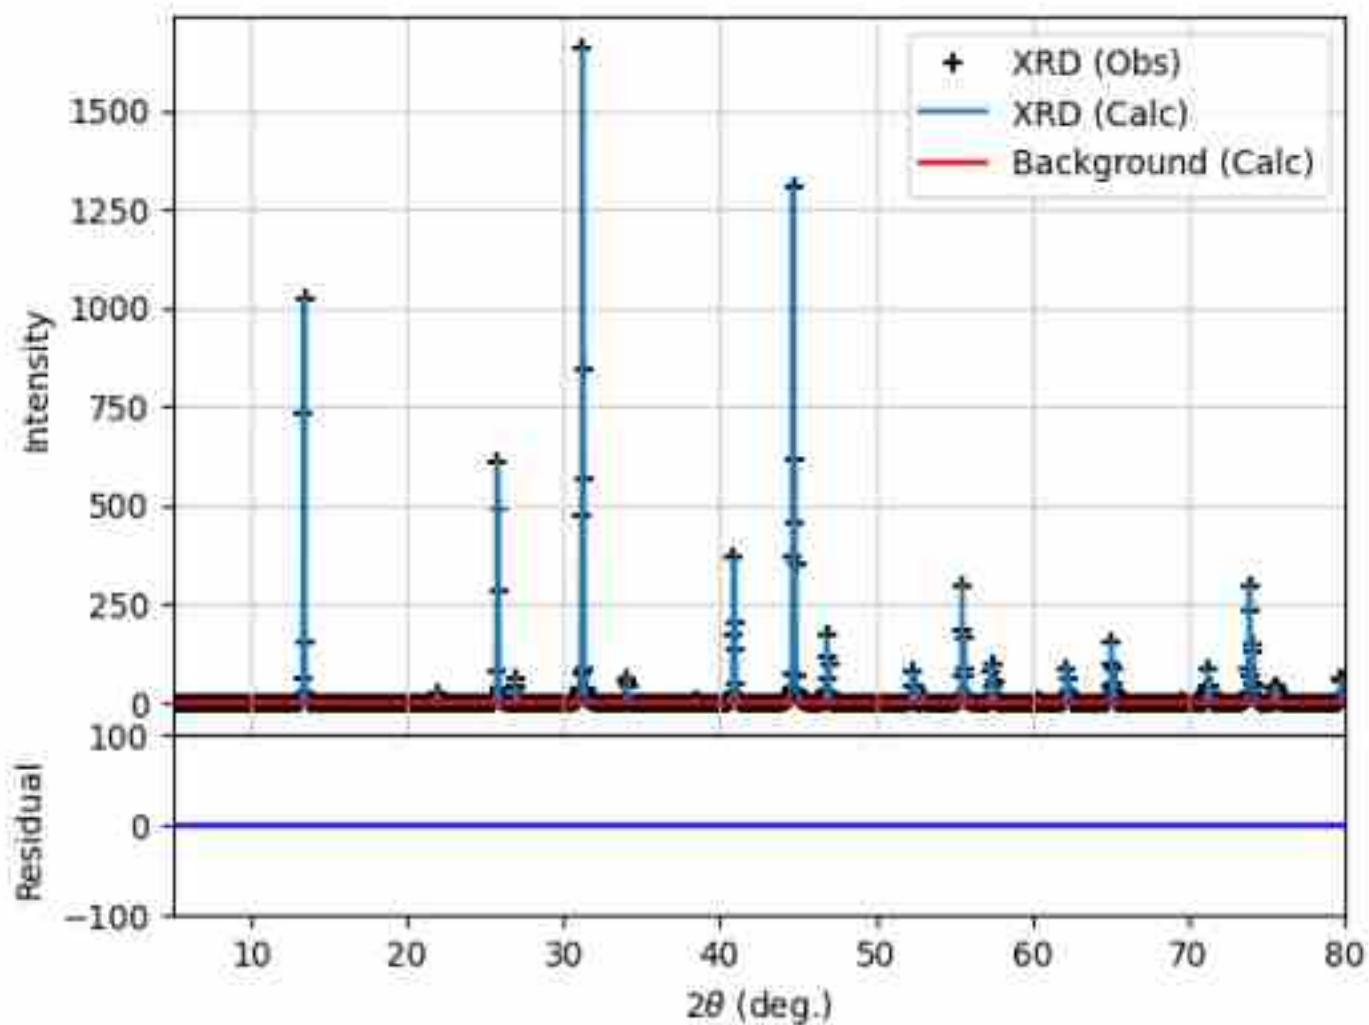

| RMSE before RR | Rwp     | RMSE after RR |
|----------------|---------|---------------|
| 0.013          | 0.01825 | 0.00178       |

# Mg<sub>4</sub>Al<sub>2</sub>B<sub>4</sub>Ir<sub>10</sub>

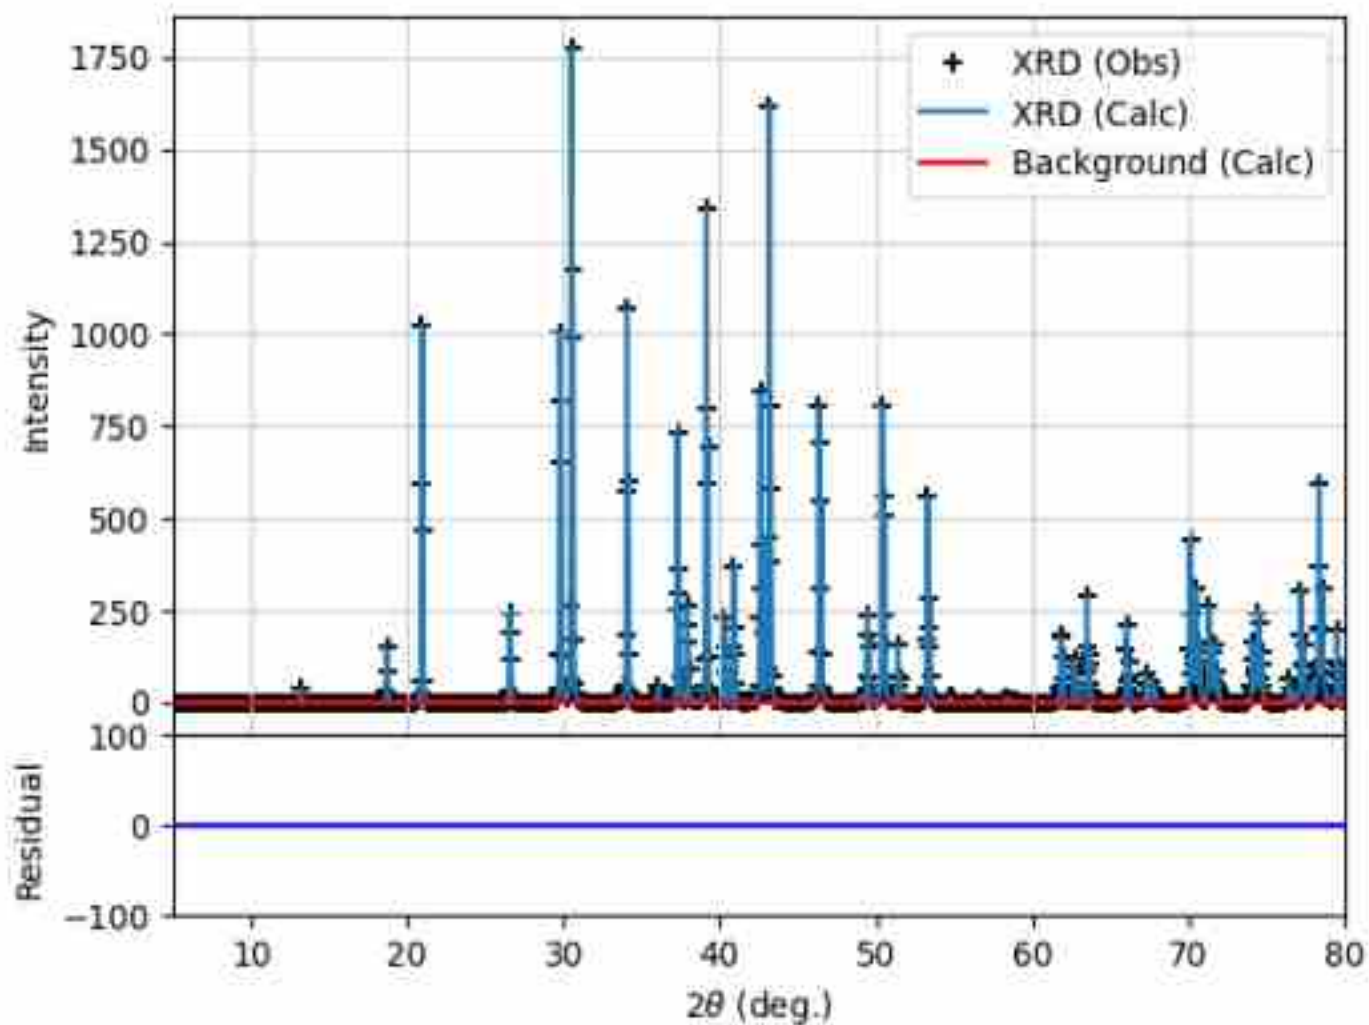

| RMSE before RR | Rwp     | RMSE after RR |
|----------------|---------|---------------|
| 0.013          | 0.00908 | 0.00289       |

# Mg<sub>4</sub>In<sub>2</sub>

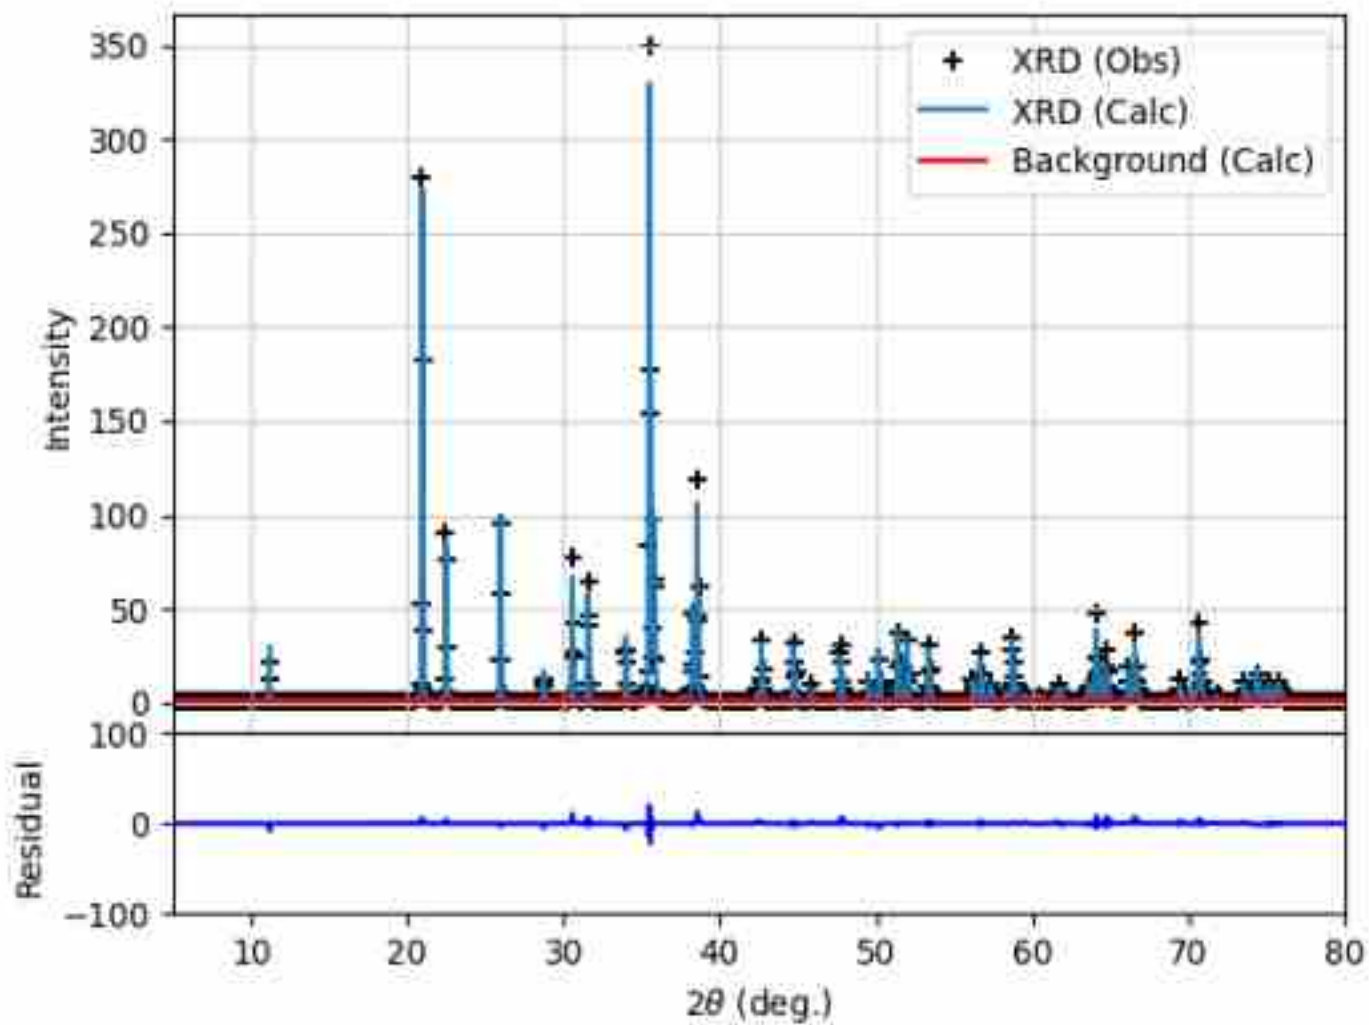

| RMSE before RR | Rwp     | RMSE after RR |
|----------------|---------|---------------|
| 0.013          | 11.0034 | 0.02343       |



# Mg<sub>6</sub>Fe<sub>4</sub>O<sub>10</sub>

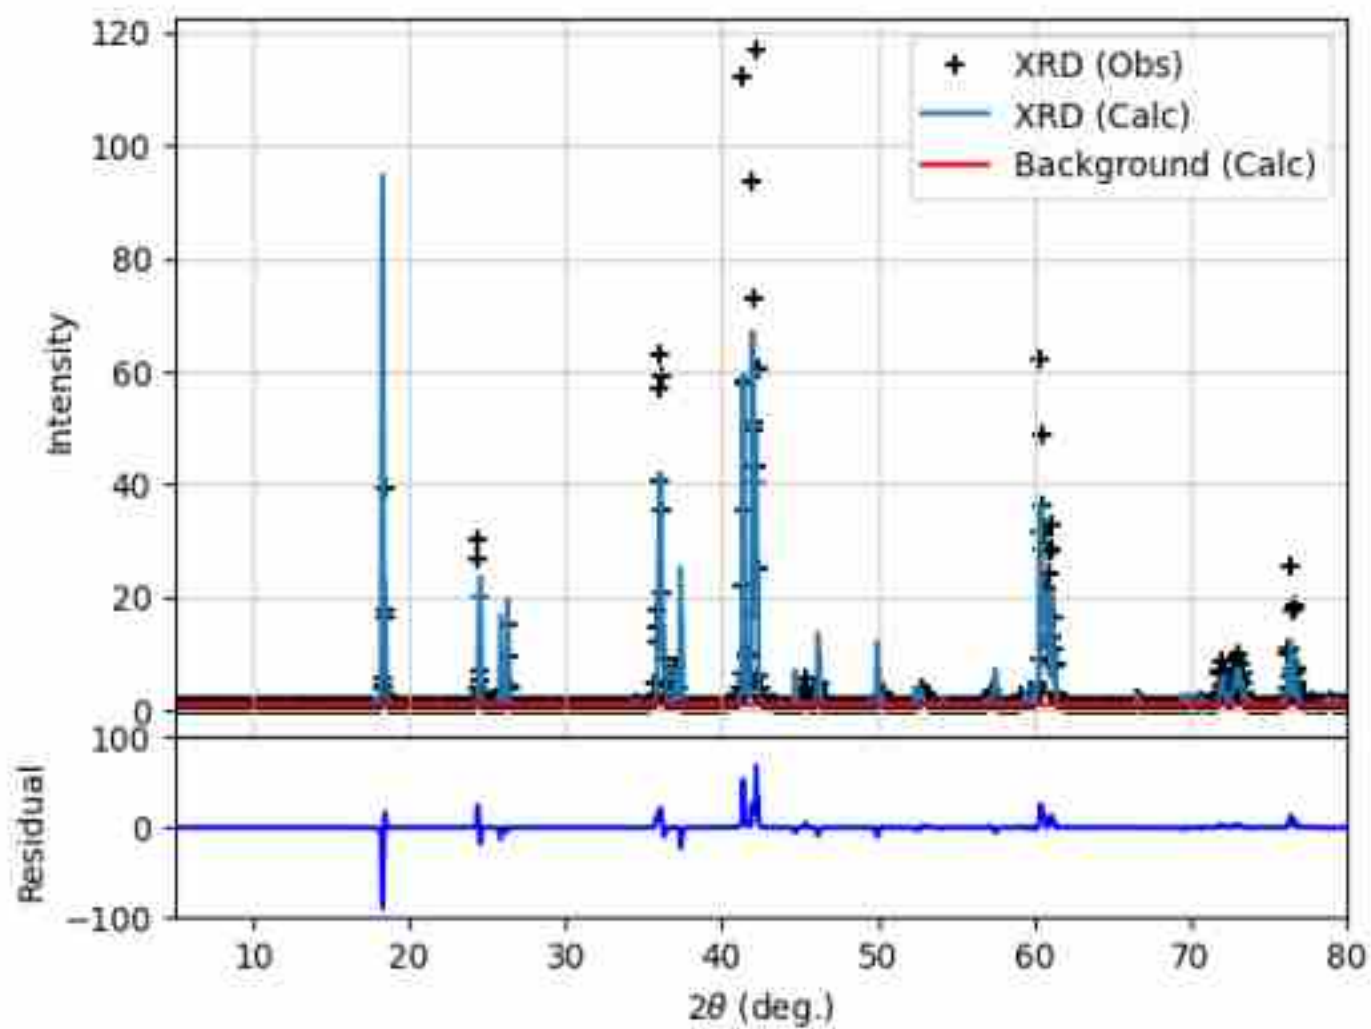

| RMSE before RR | Rwp   | RMSE after RR |
|----------------|-------|---------------|
| 0.013          | 100.0 | 0.09027       |

# Mg15Sb1

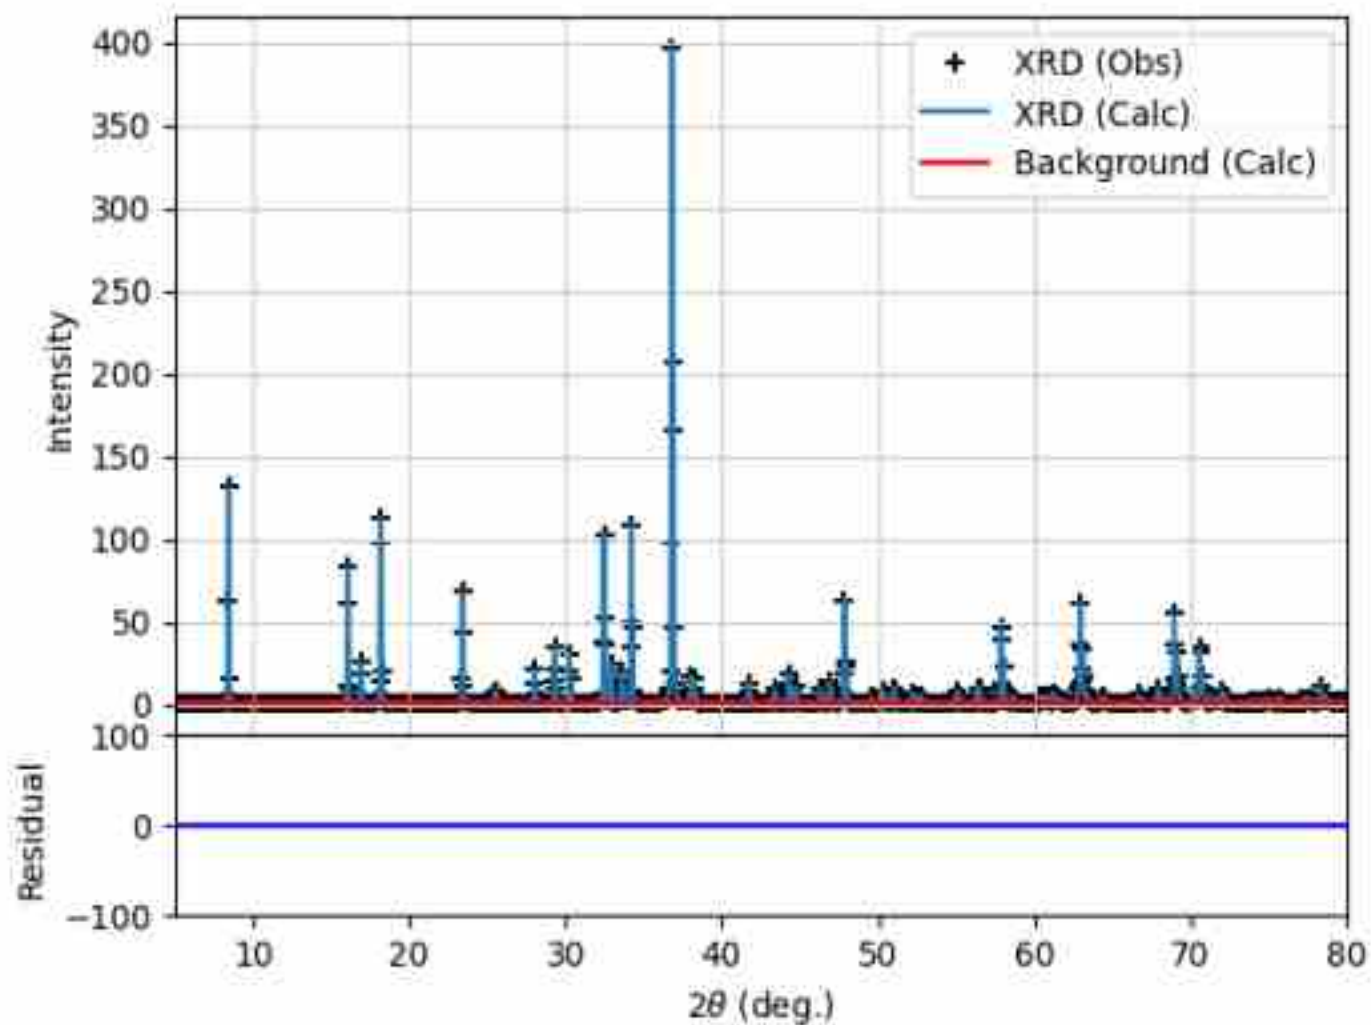

| RMSE before RR | Rwp     | RMSE after RR |
|----------------|---------|---------------|
| 0.013          | 0.04784 | 0.00478       |

# Mn1Ga2S4

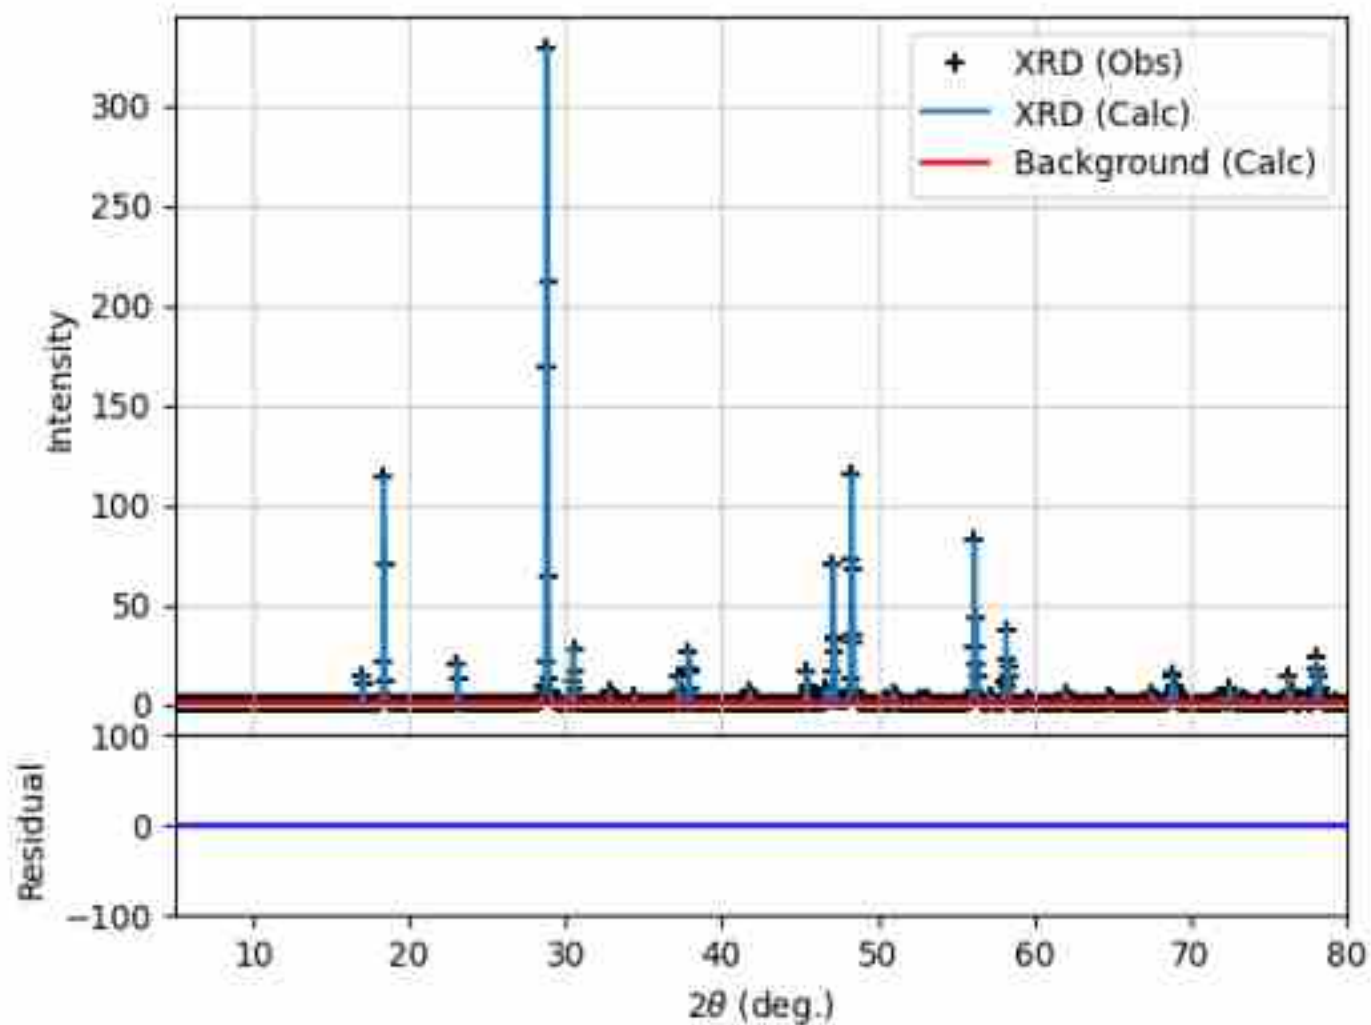

| RMSE before RR | Rwp     | RMSE after RR |
|----------------|---------|---------------|
| 0.013          | 0.00285 | 0.00088       |

# Mn<sub>2</sub>Cr<sub>2</sub>Si<sub>4</sub>

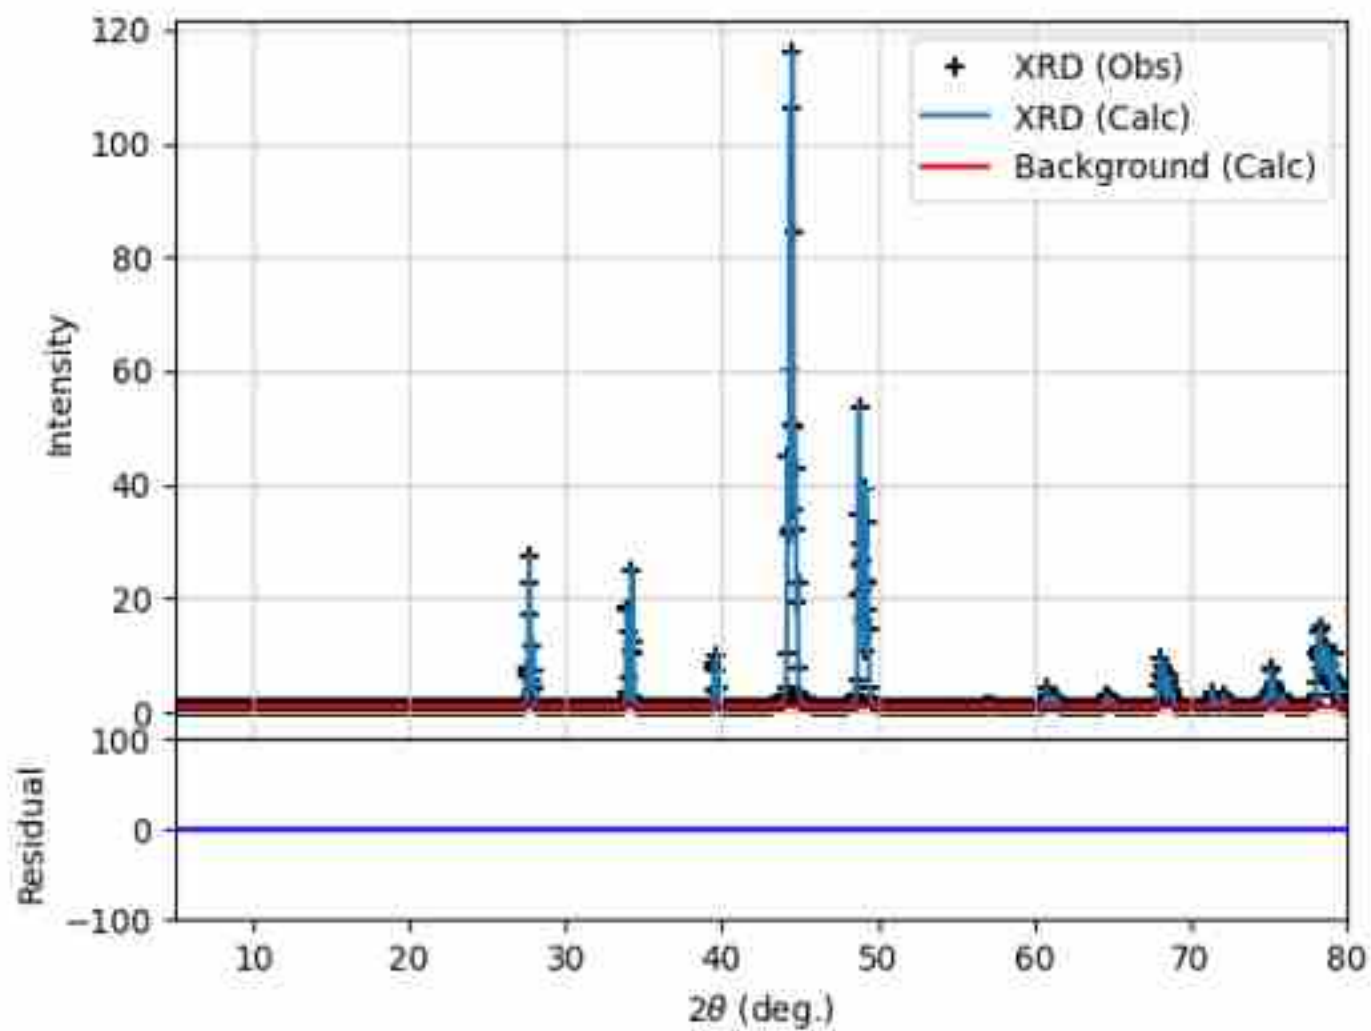

| RMSE before RR | Rwp     | RMSE after RR |
|----------------|---------|---------------|
| 0.013          | 0.00237 | 0.00048       |

# Mn<sub>2</sub>Zn<sub>2</sub>O<sub>6</sub>

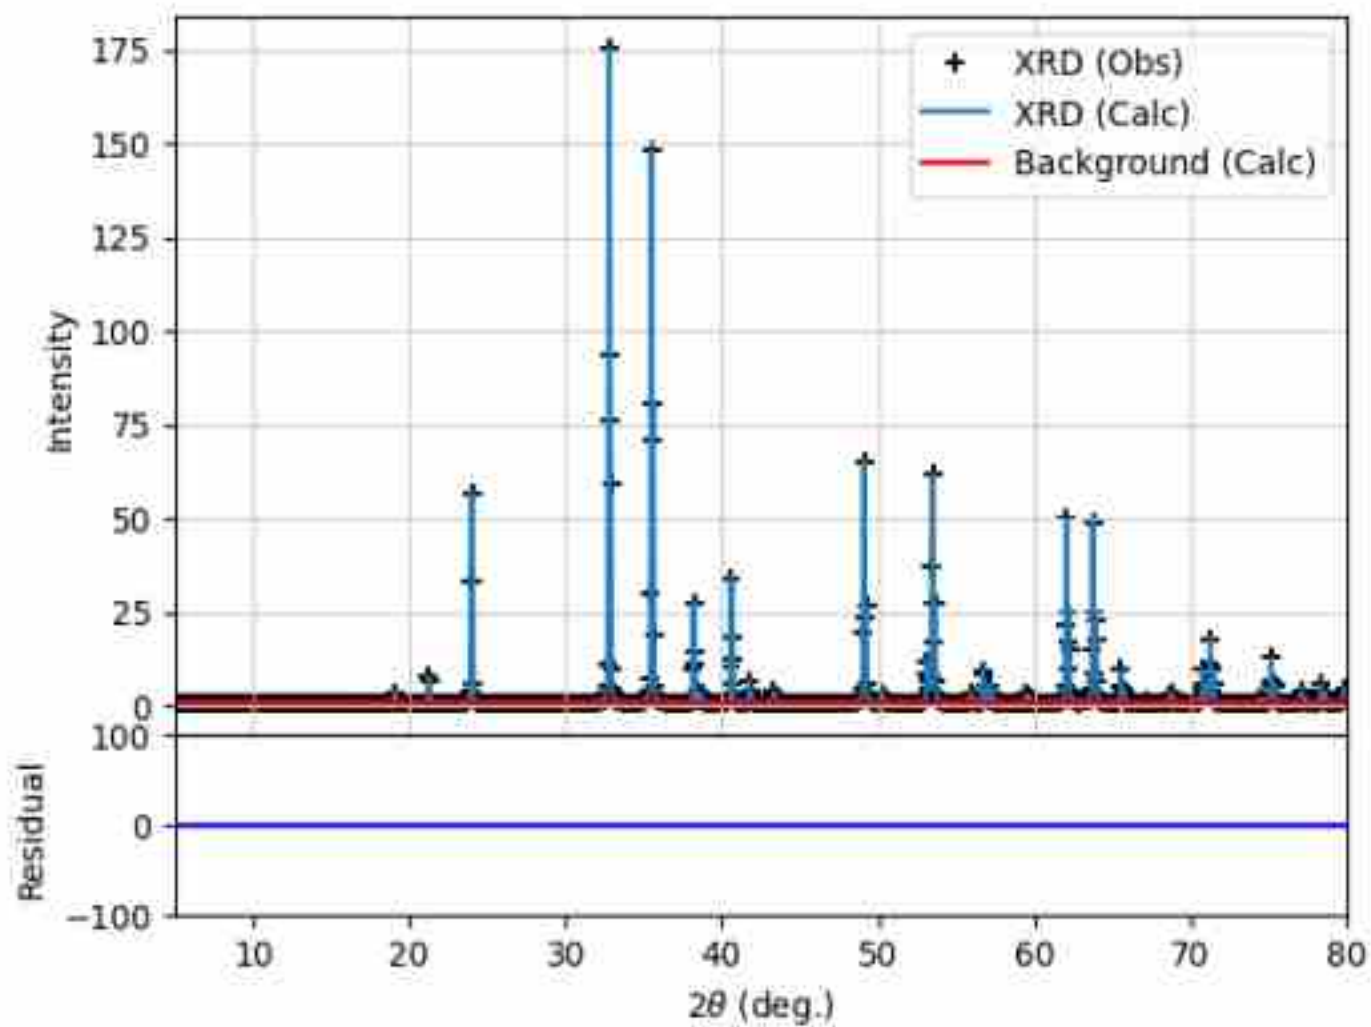

| RMSE before RR | Rwp     | RMSE after RR |
|----------------|---------|---------------|
| 0.013          | 0.00246 | 0.00109       |

# Mn<sub>4</sub>Sb<sub>3</sub>As<sub>1</sub>

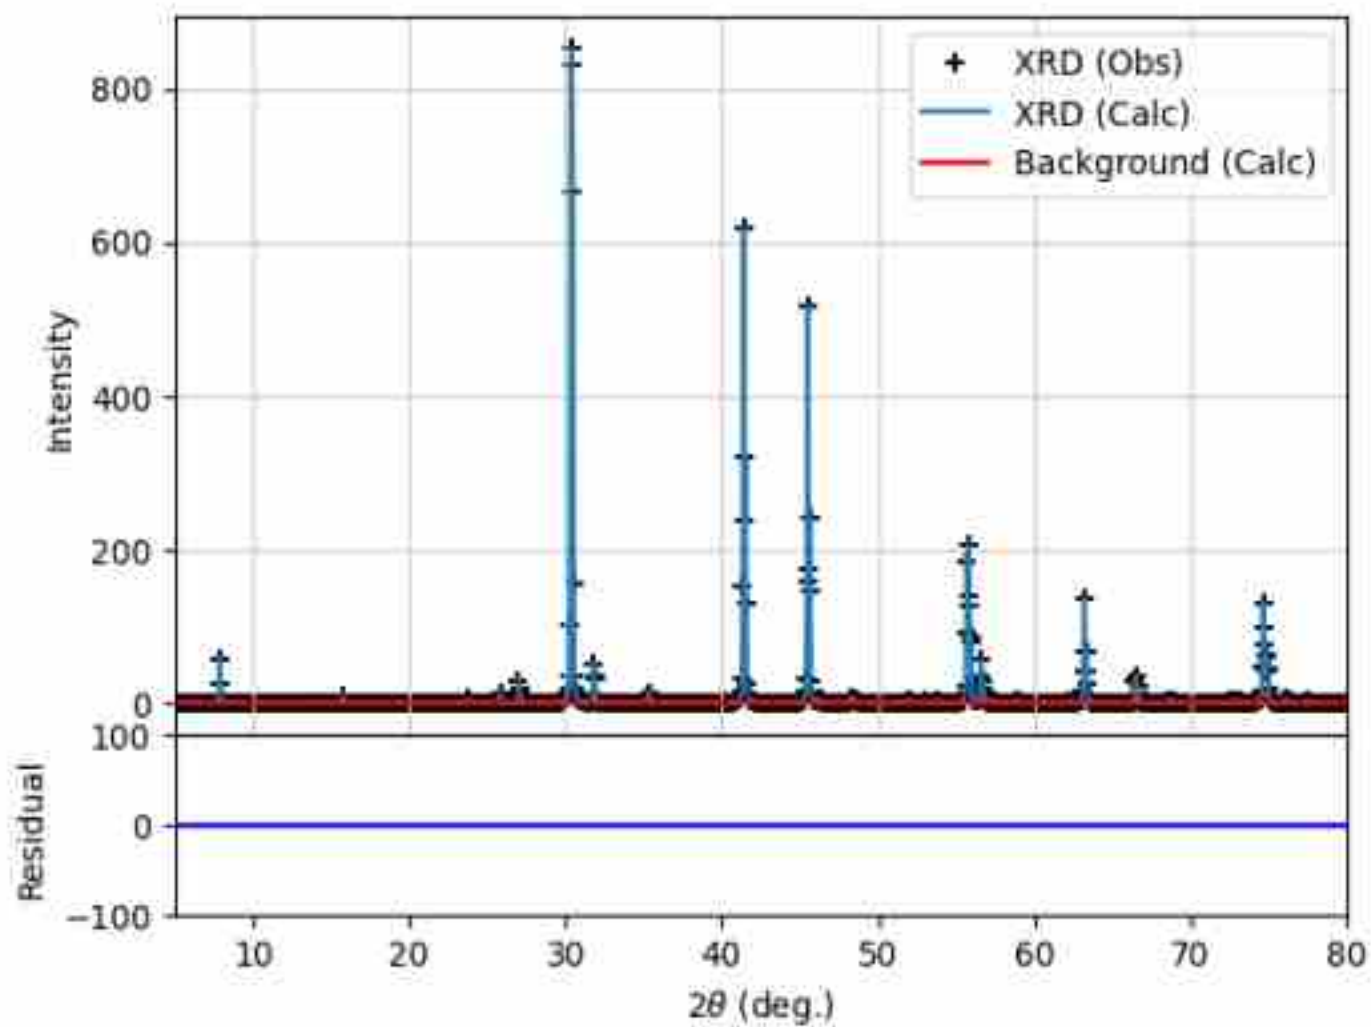

| RMSE before RR | Rwp     | RMSE after RR |
|----------------|---------|---------------|
| 0.013          | 0.00248 | 0.0003        |

# Mn11Al4V1

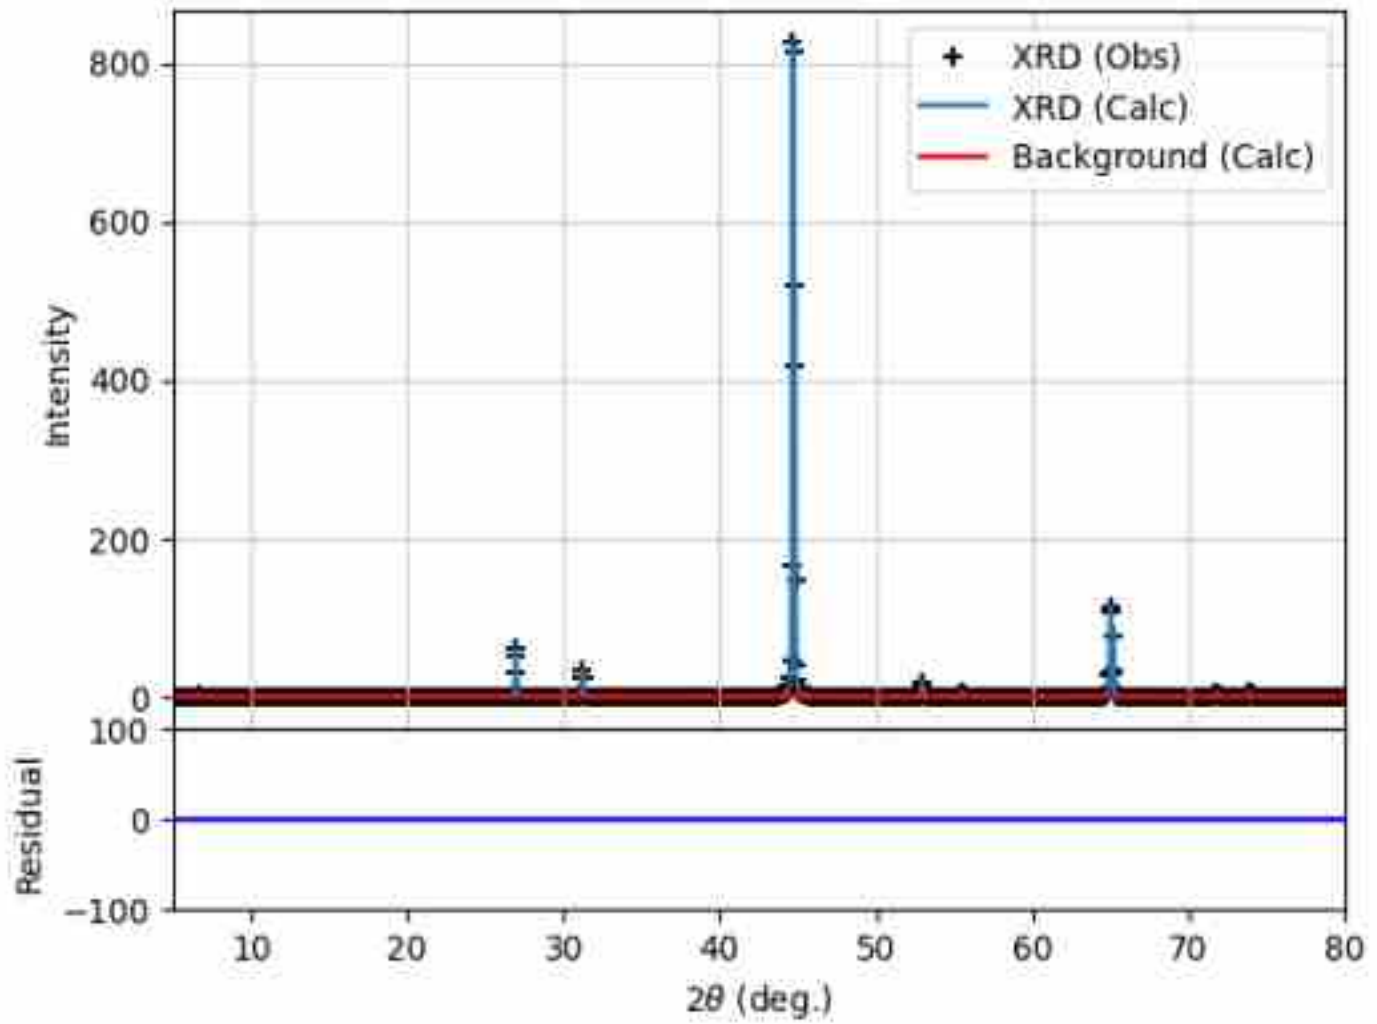

| RMSE before RR | Rwp     | RMSE after RR |
|----------------|---------|---------------|
| 0.013          | 0.00305 | 0.00049       |

# Mo<sub>2</sub>As<sub>3</sub>P<sub>1</sub>

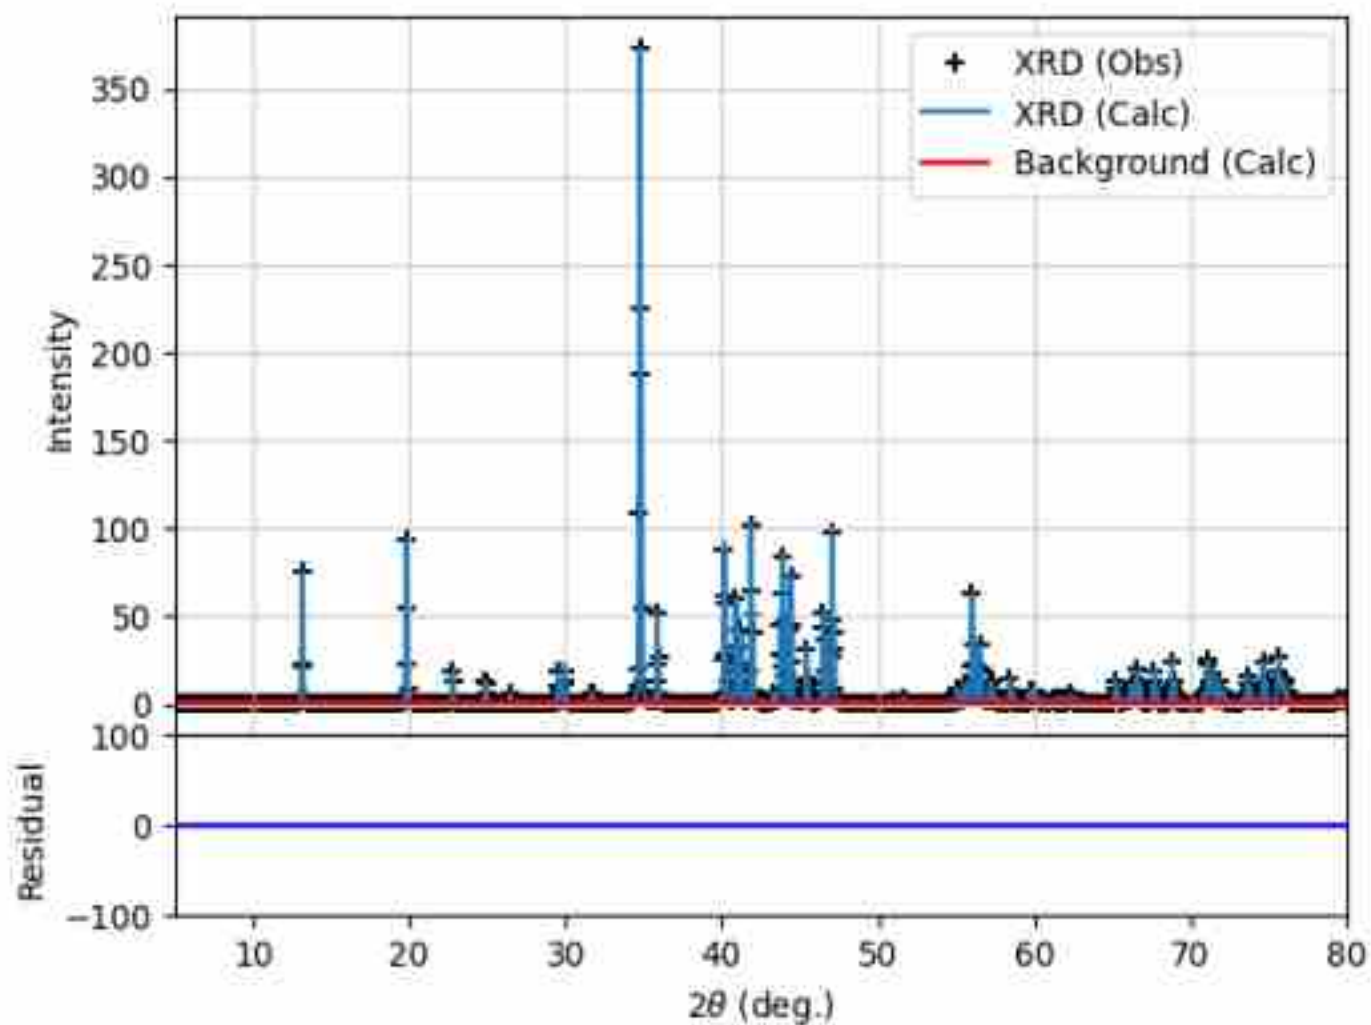

| RMSE before RR | Rwp     | RMSE after RR |
|----------------|---------|---------------|
| 0.013          | 0.00286 | 0.00019       |



# Mo6Pb1Se8

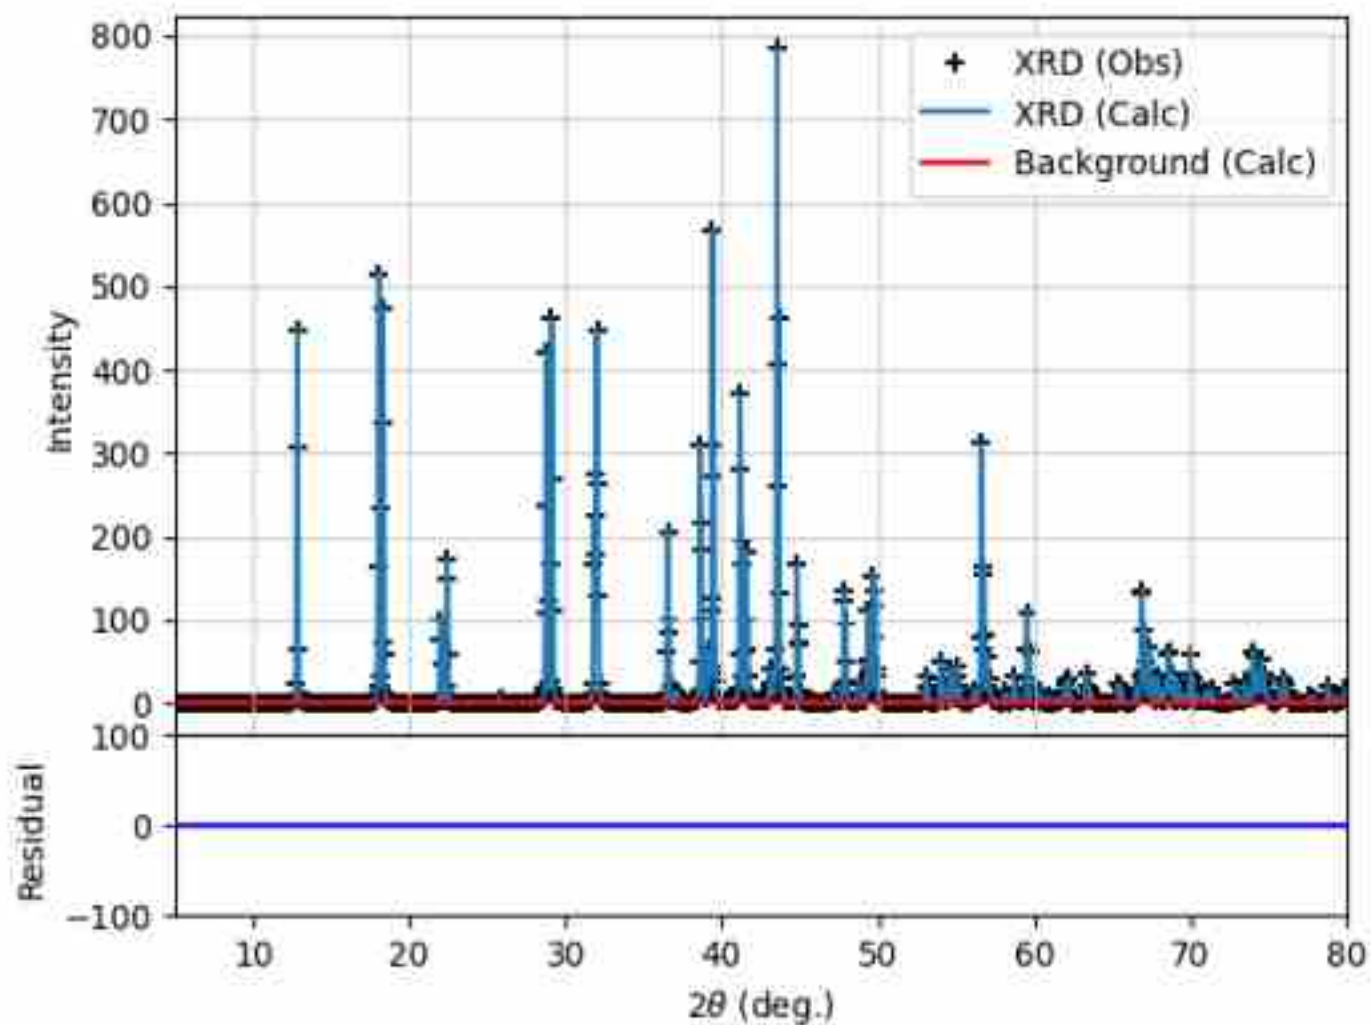

| RMSE before RR | Rwp     | RMSE after RR |
|----------------|---------|---------------|
| 0.013          | 0.00402 | 0.00068       |

# Na1Eu1Hf1W1O6

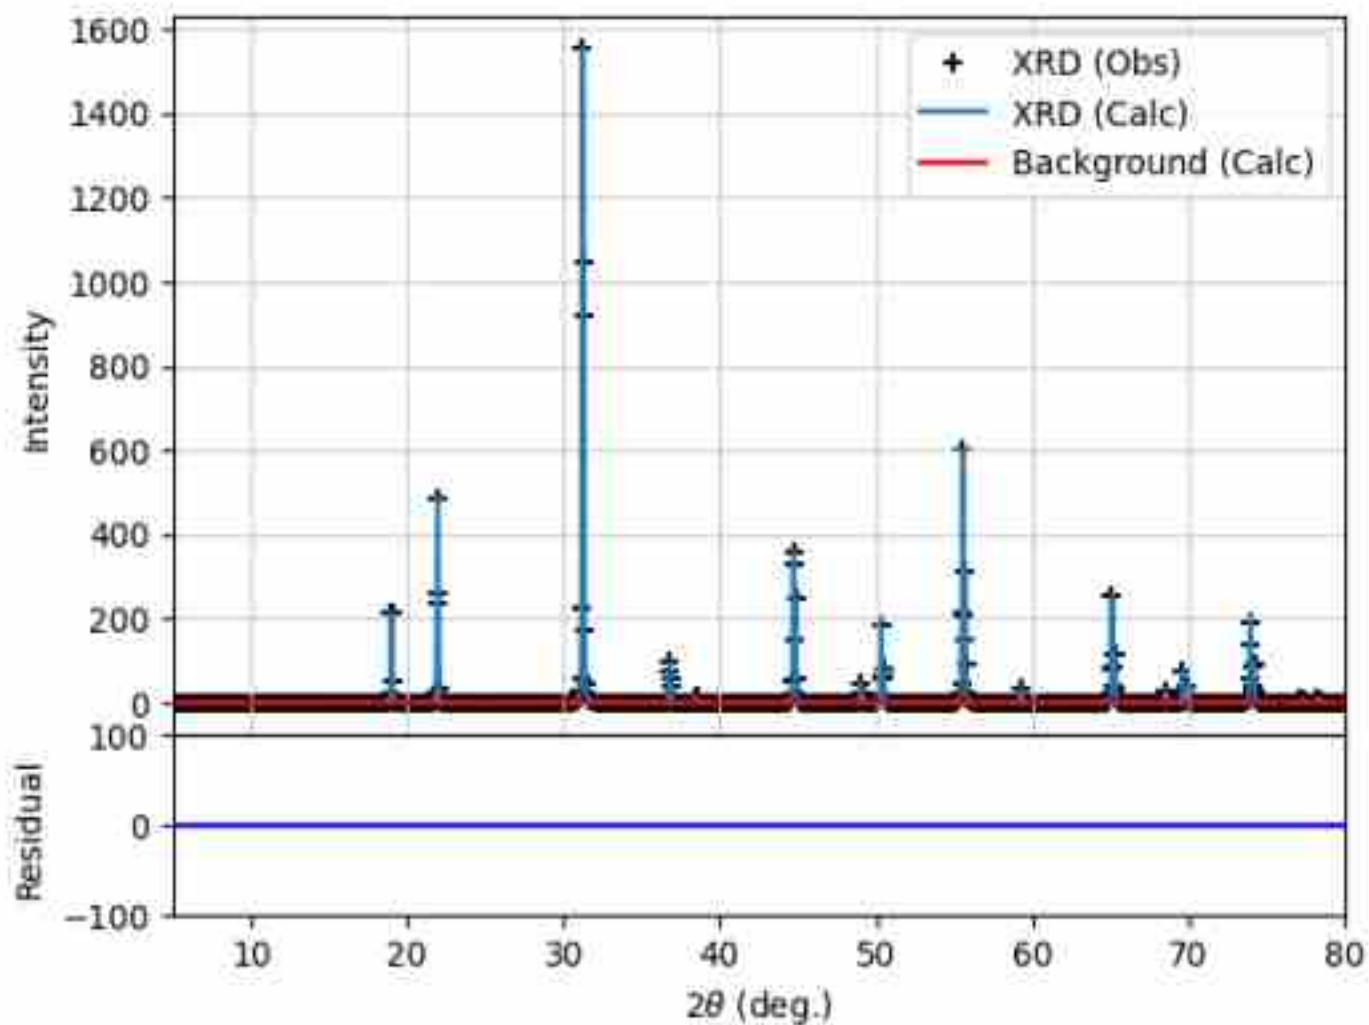

| RMSE before RR | Rwp     | RMSE after RR |
|----------------|---------|---------------|
| 0.013          | 0.01807 | 0.00592       |

# Na<sub>2</sub>U<sub>10</sub>O<sub>4</sub>

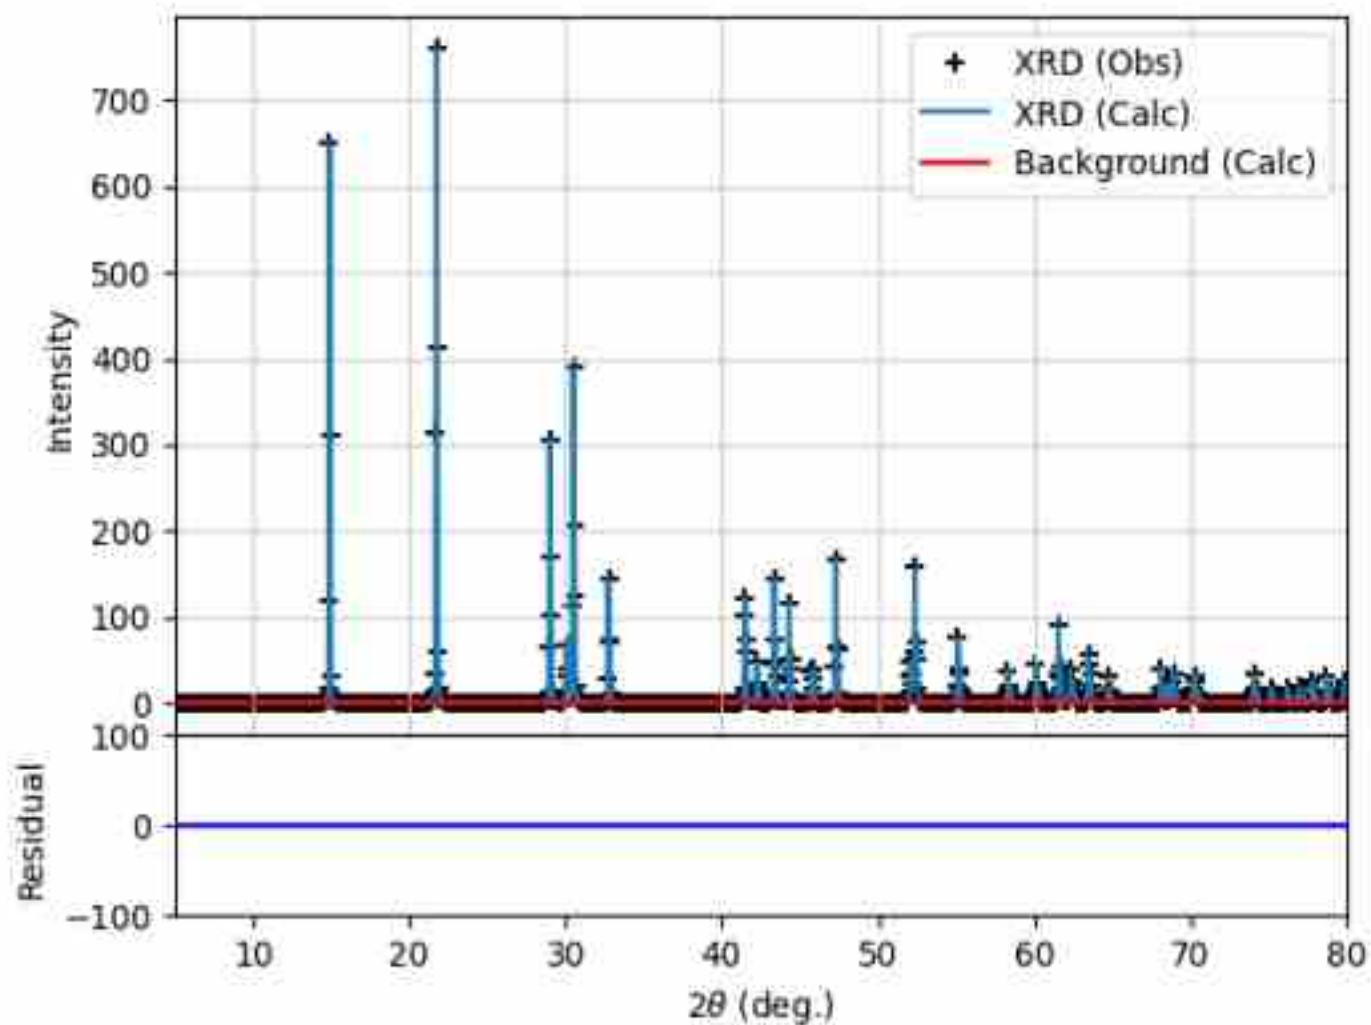

| RMSE before RR | Rwp    | RMSE after RR |
|----------------|--------|---------------|
| 0.013          | 0.0038 | 0.00194       |

# Na<sub>6</sub>Au<sub>2</sub>

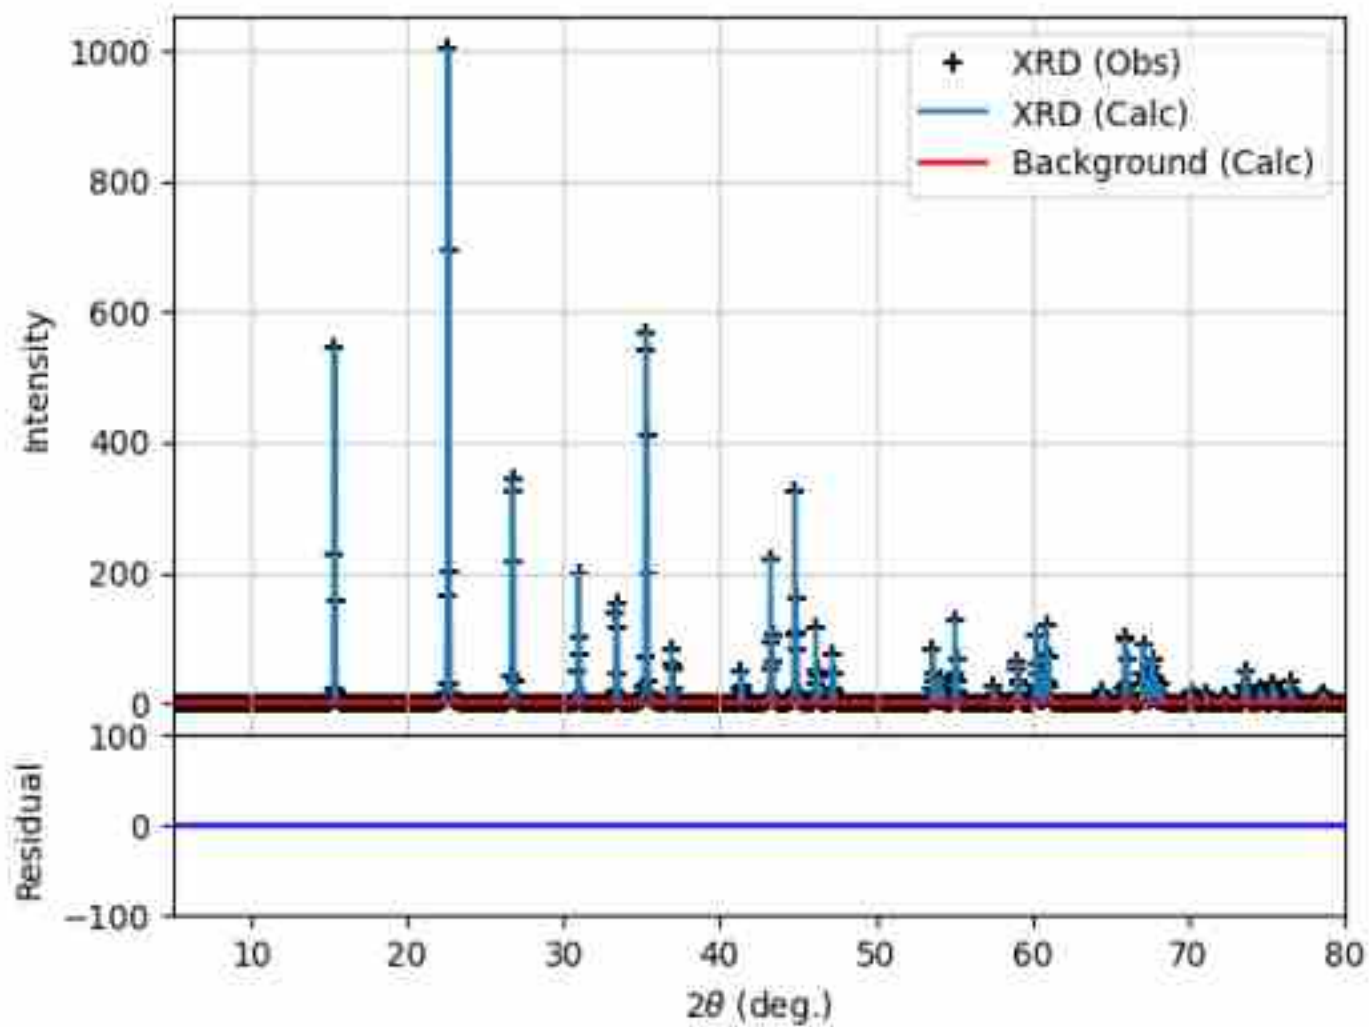

| RMSE before RR | Rwp     | RMSE after RR |
|----------------|---------|---------------|
| 0.013          | 0.00467 | 0.00129       |

# Nb1Pt2

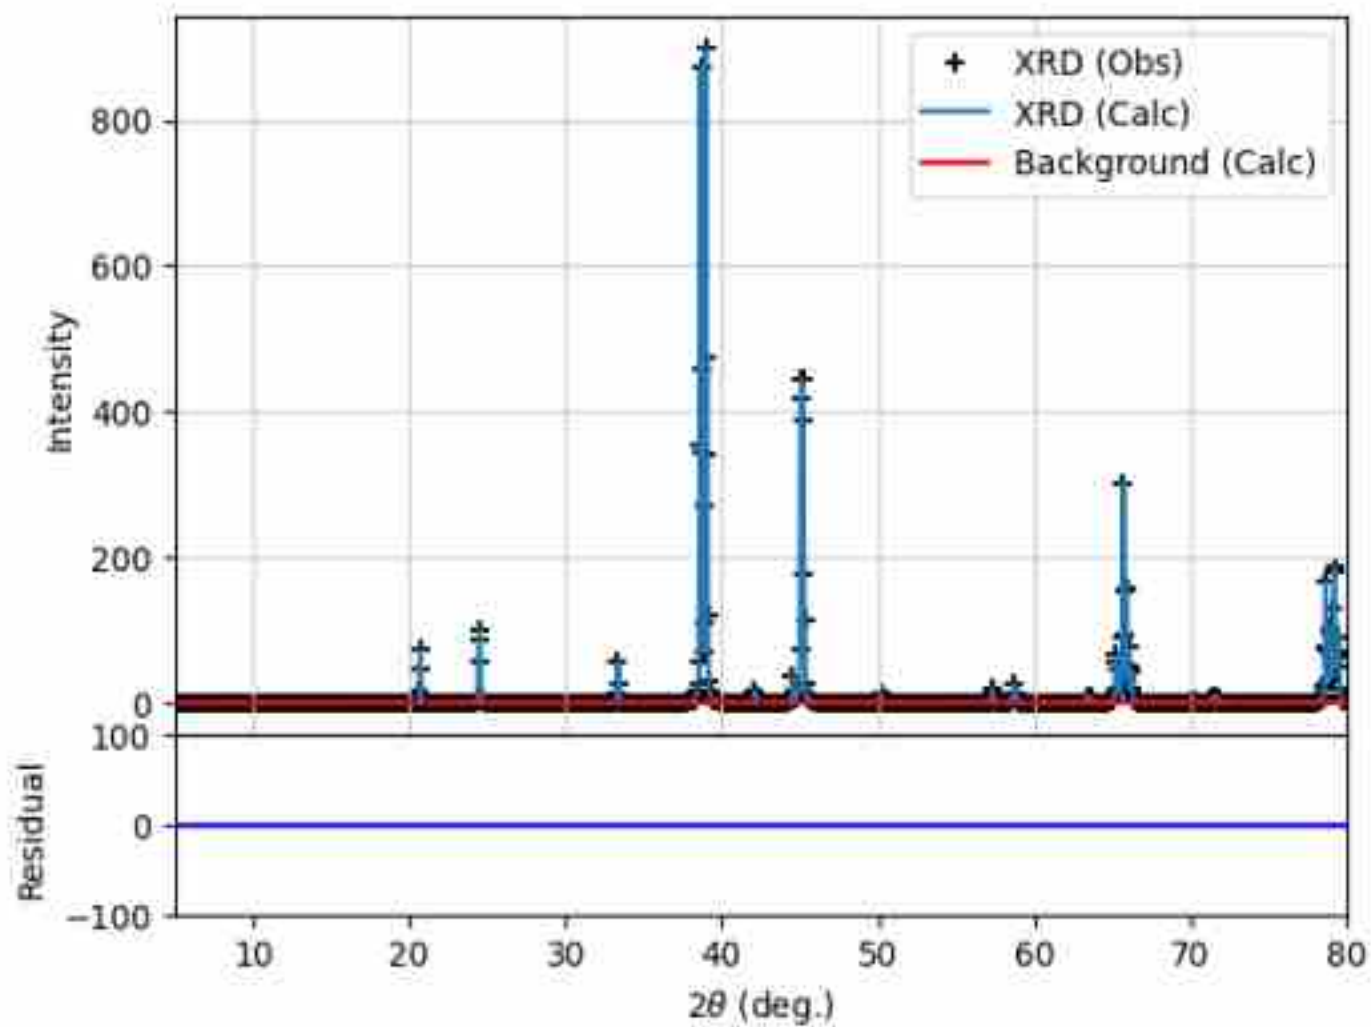

| RMSE before RR | Rwp     | RMSE after RR |
|----------------|---------|---------------|
| 0.013          | 0.00348 | 0.00027       |

# Nb2Rh6

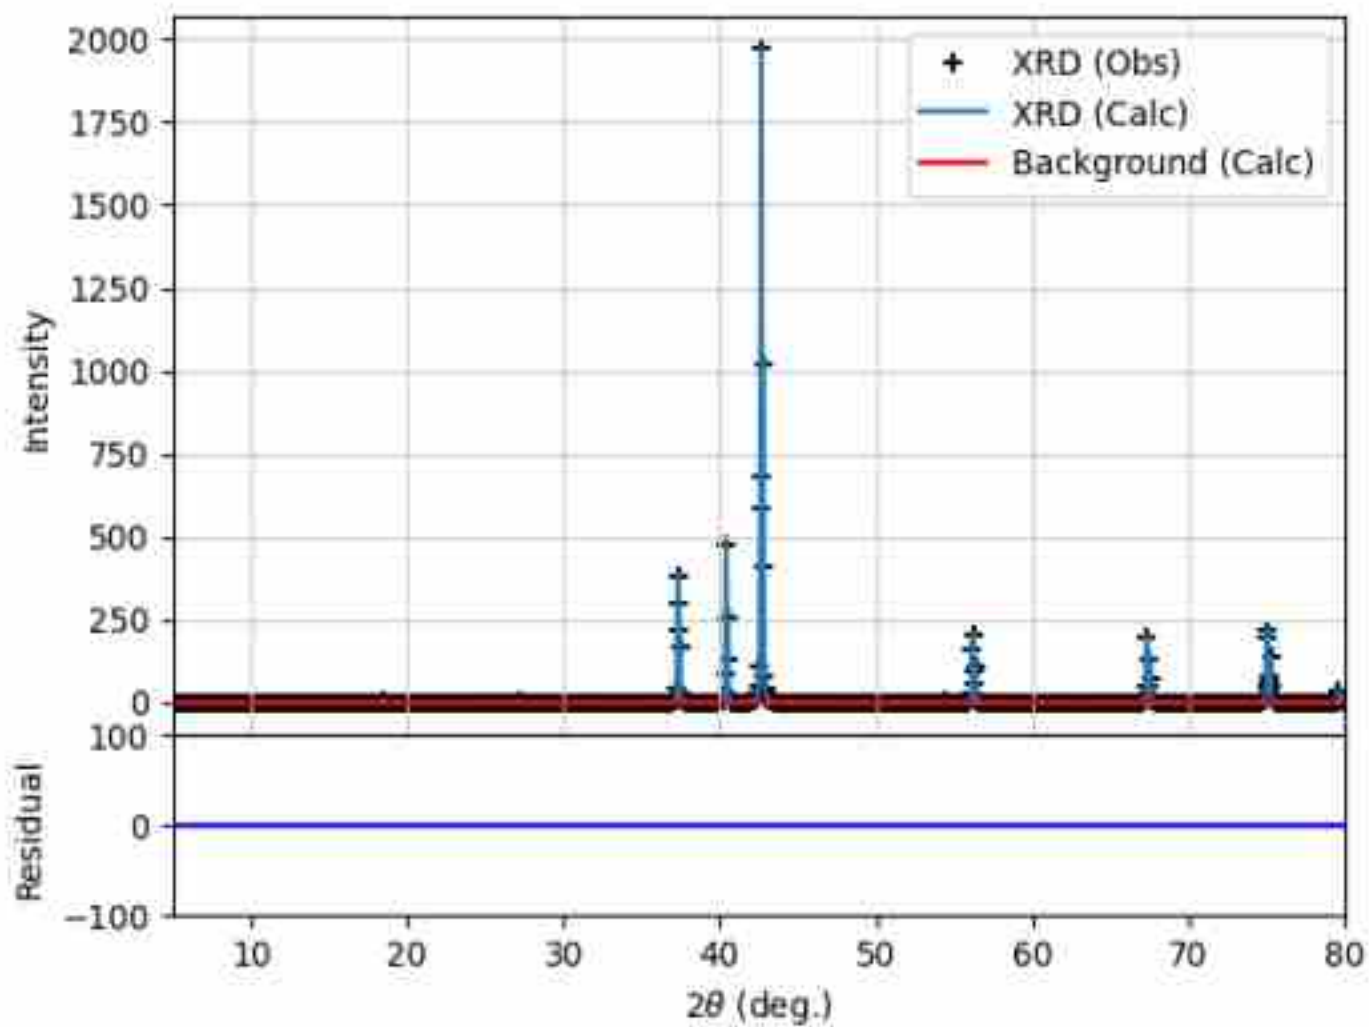

| RMSE before RR | Rwp     | RMSE after RR |
|----------------|---------|---------------|
| 0.013          | 0.02039 | 0.00104       |

Nd1Al3Ni2

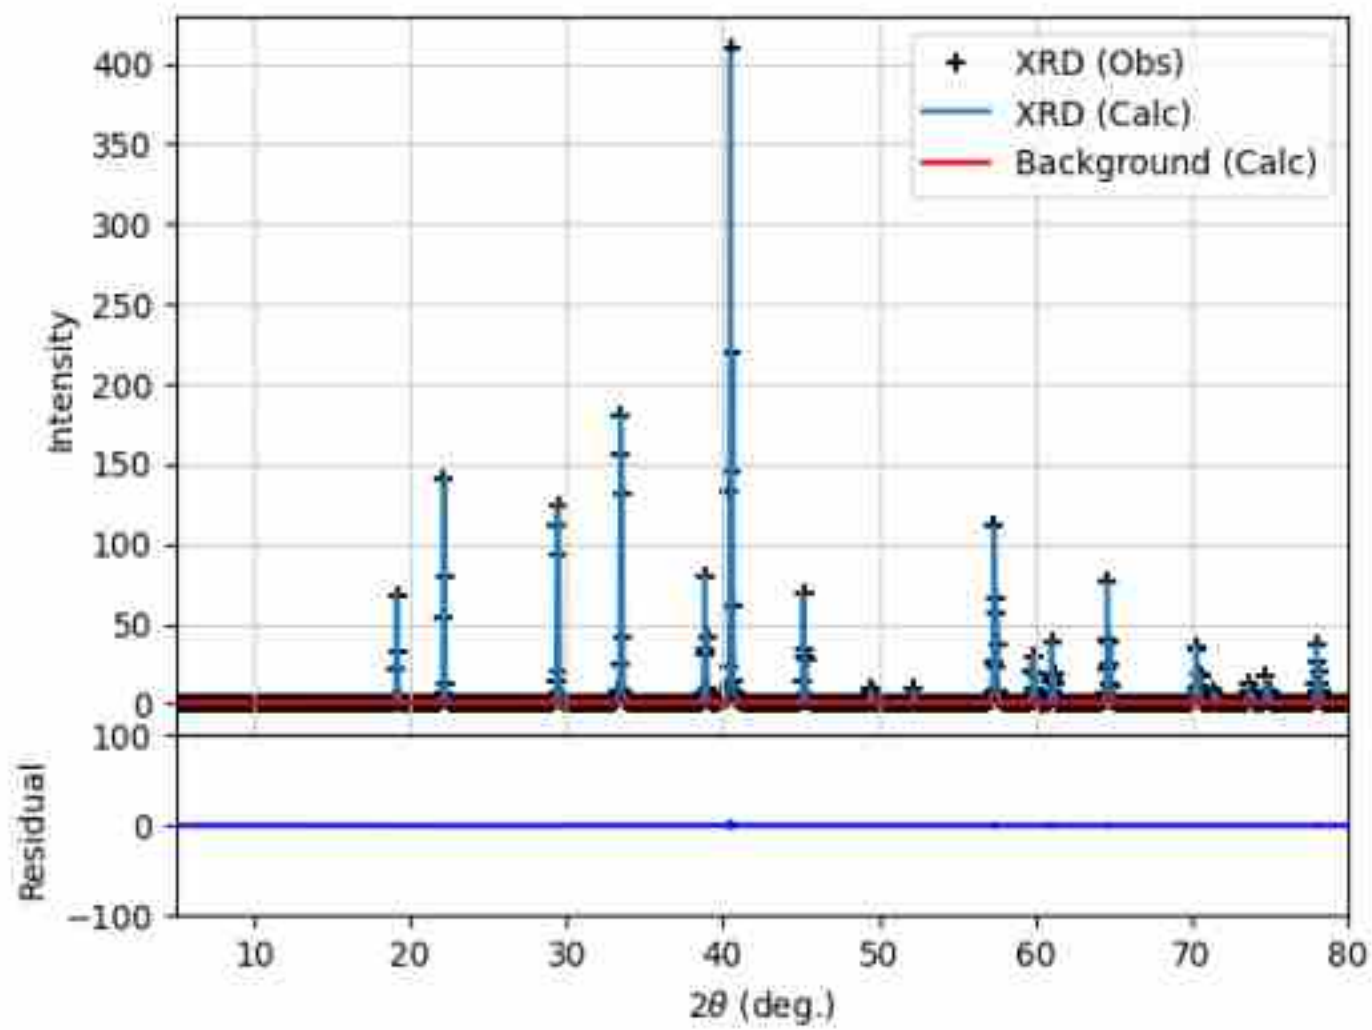

| RMSE before RR | Rwp     | RMSE after RR |
|----------------|---------|---------------|
| 0.013          | 0.69422 | 0.0027        |

# Nd1Er1Fe17

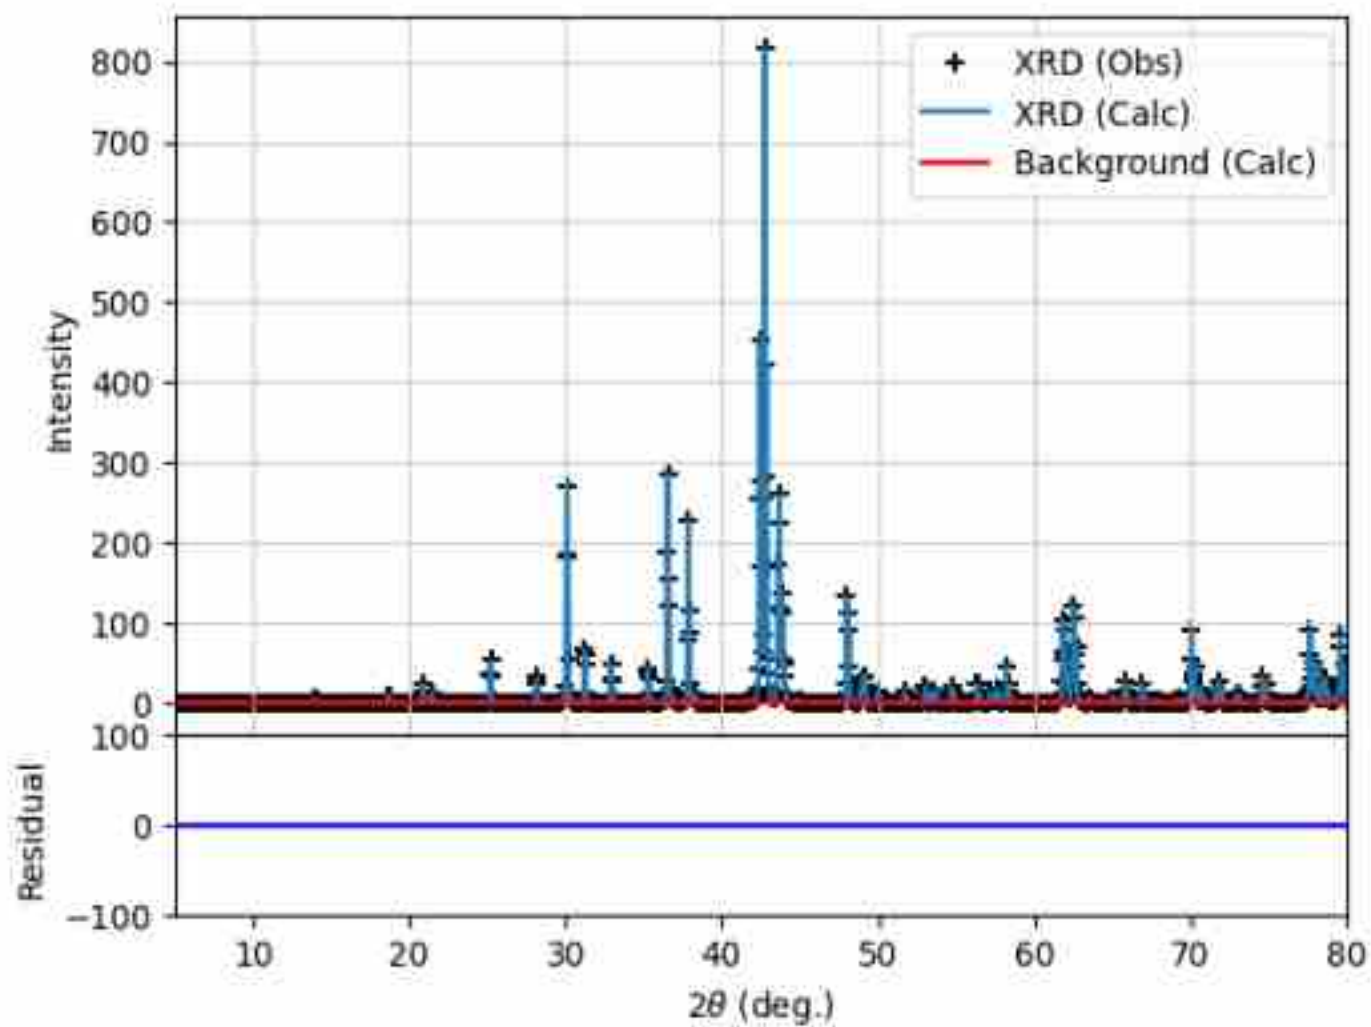

| RMSE before RR | Rwp     | RMSE after RR |
|----------------|---------|---------------|
| 0.013          | 0.00276 | 0.0005        |



# Nd1Fe1Co1Si2

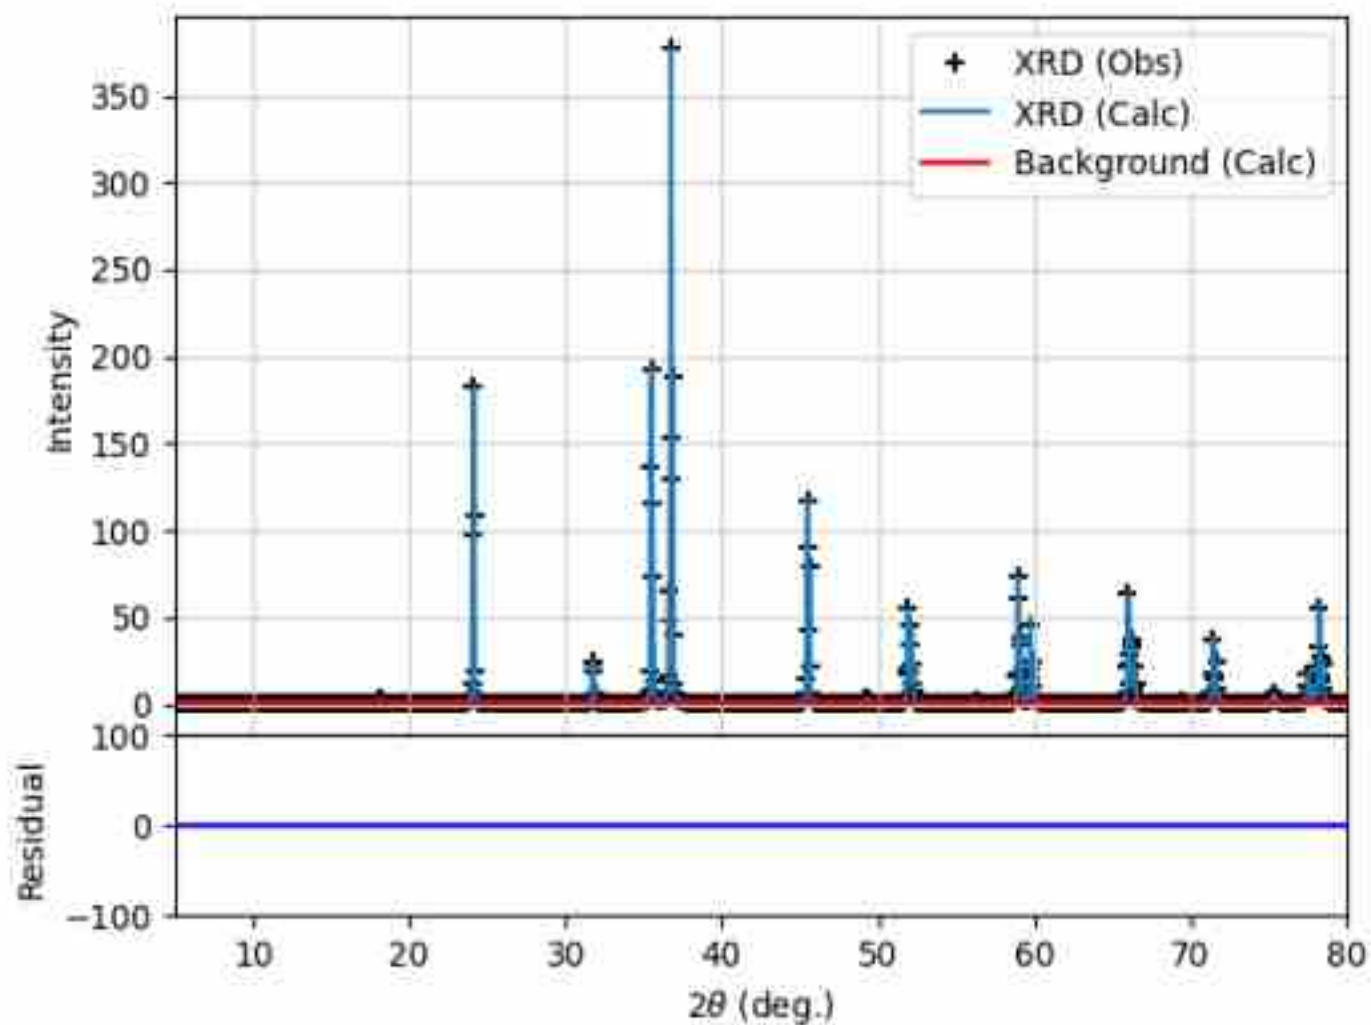

| RMSE before RR | Rwp     | RMSE after RR |
|----------------|---------|---------------|
| 0.013          | 0.00458 | 0.00094       |

# Nd<sub>1</sub>Fe<sub>2</sub>Si<sub>2</sub>

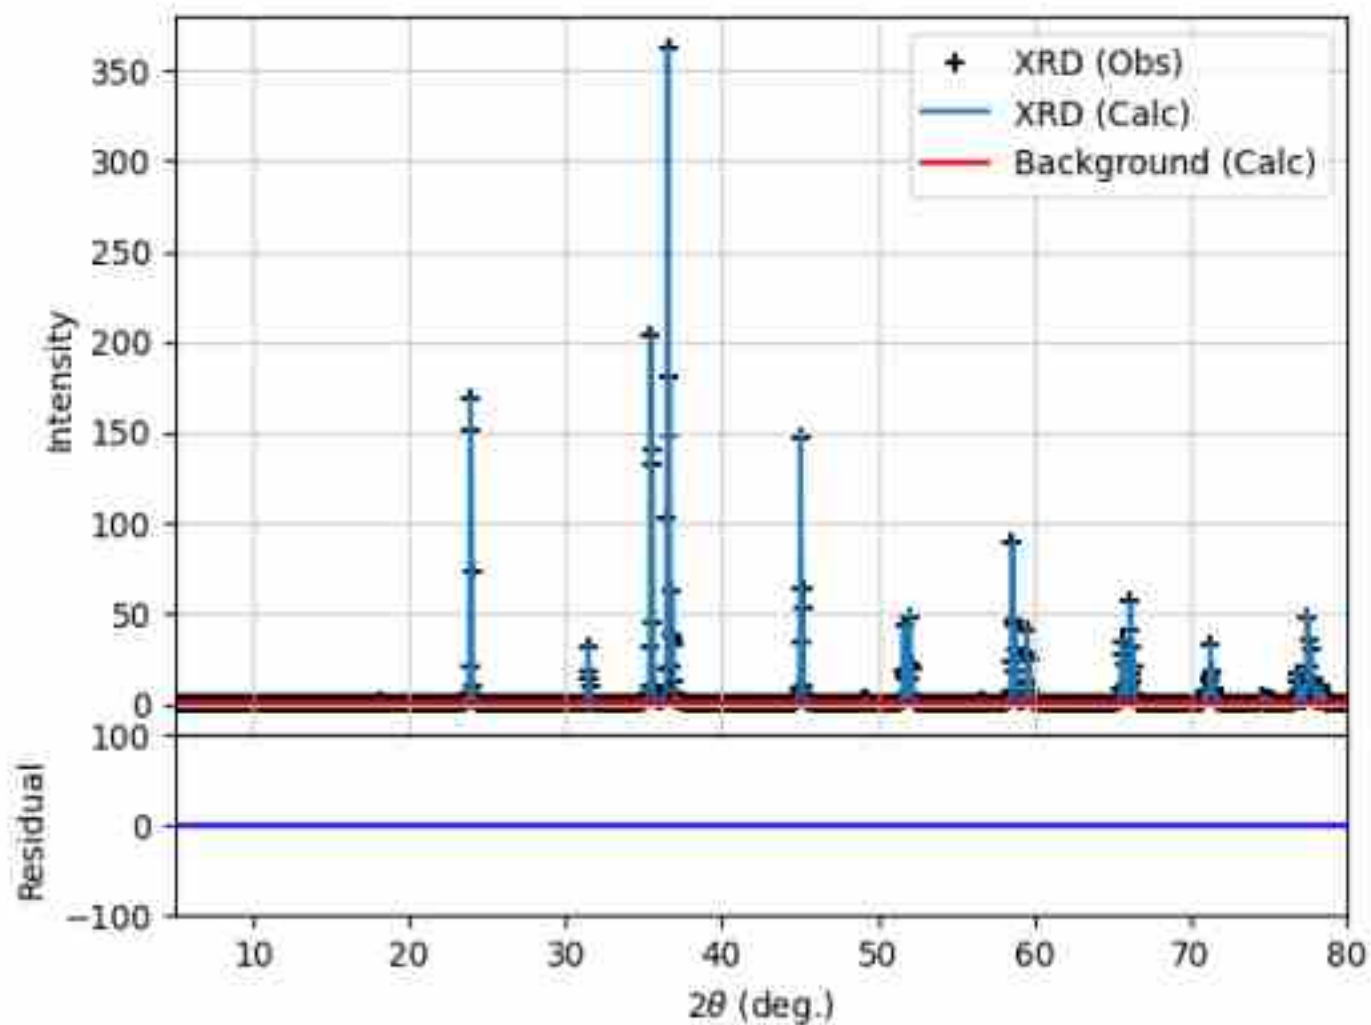

| RMSE before RR | Rwp     | RMSE after RR |
|----------------|---------|---------------|
| 0.013          | 0.00429 | 0.00085       |

# Nd<sub>2</sub>Al<sub>2</sub>Ge<sub>2</sub>

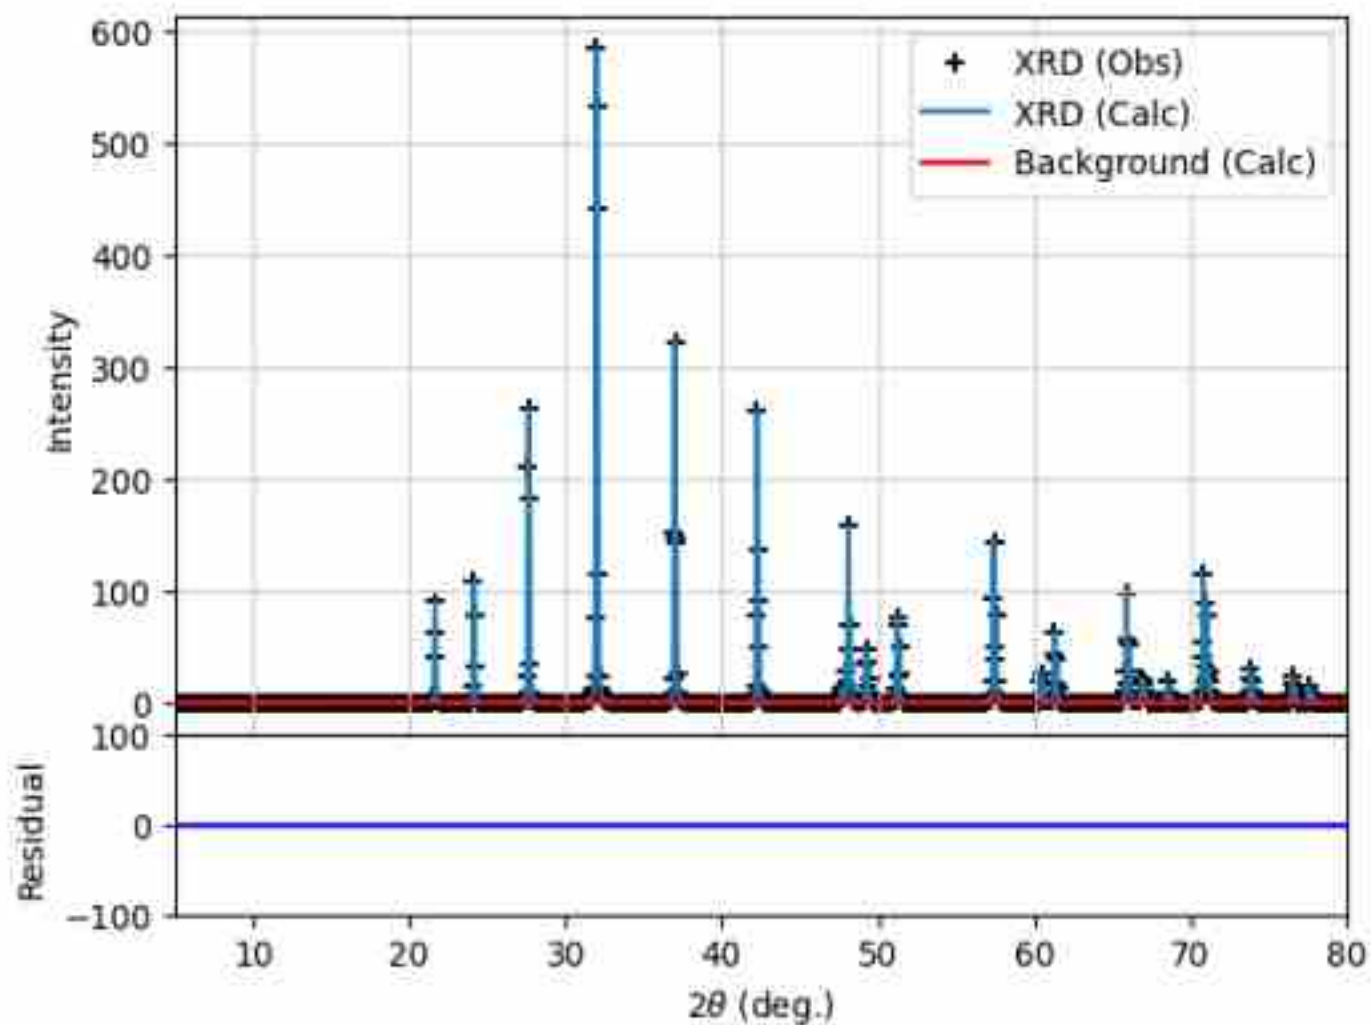

| RMSE before RR | Rwp     | RMSE after RR |
|----------------|---------|---------------|
| 0.013          | 0.00379 | 0.00077       |

# Nd<sub>2</sub>Ge<sub>4</sub>Rh<sub>2</sub>

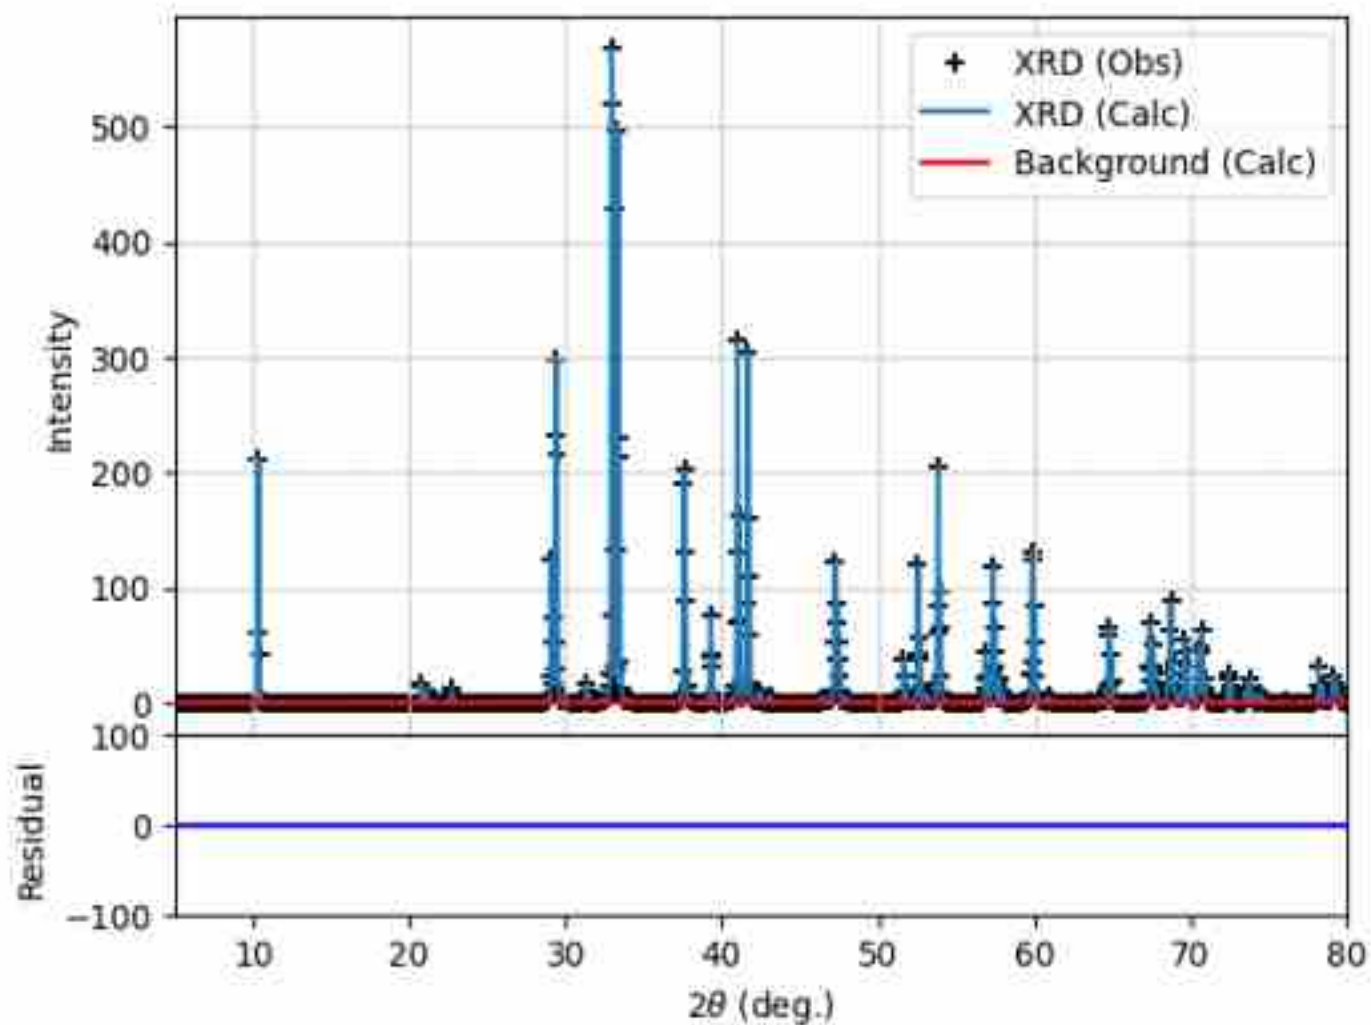

| RMSE before RR | Rwp     | RMSE after RR |
|----------------|---------|---------------|
| 0.013          | 0.00426 | 0.00041       |

# Nd<sub>2</sub>Sc<sub>2</sub>Sb<sub>2</sub>

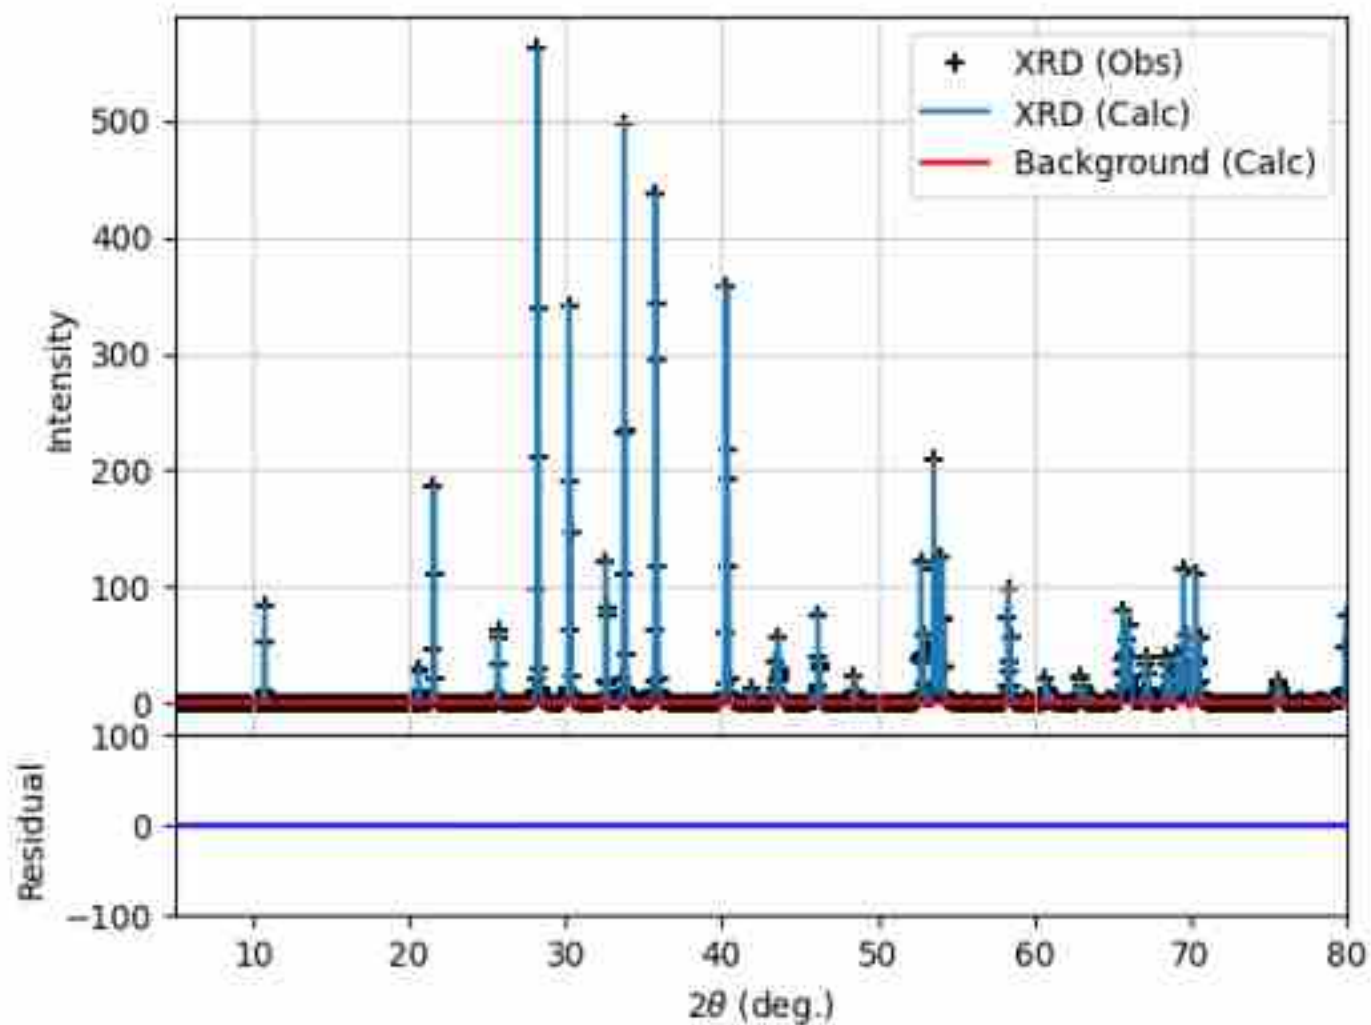

| RMSE before RR | Rwp     | RMSE after RR |
|----------------|---------|---------------|
| 0.013          | 0.05595 | 0.00024       |

# Nd<sub>3</sub>Al<sub>3</sub>Ni<sub>3</sub>

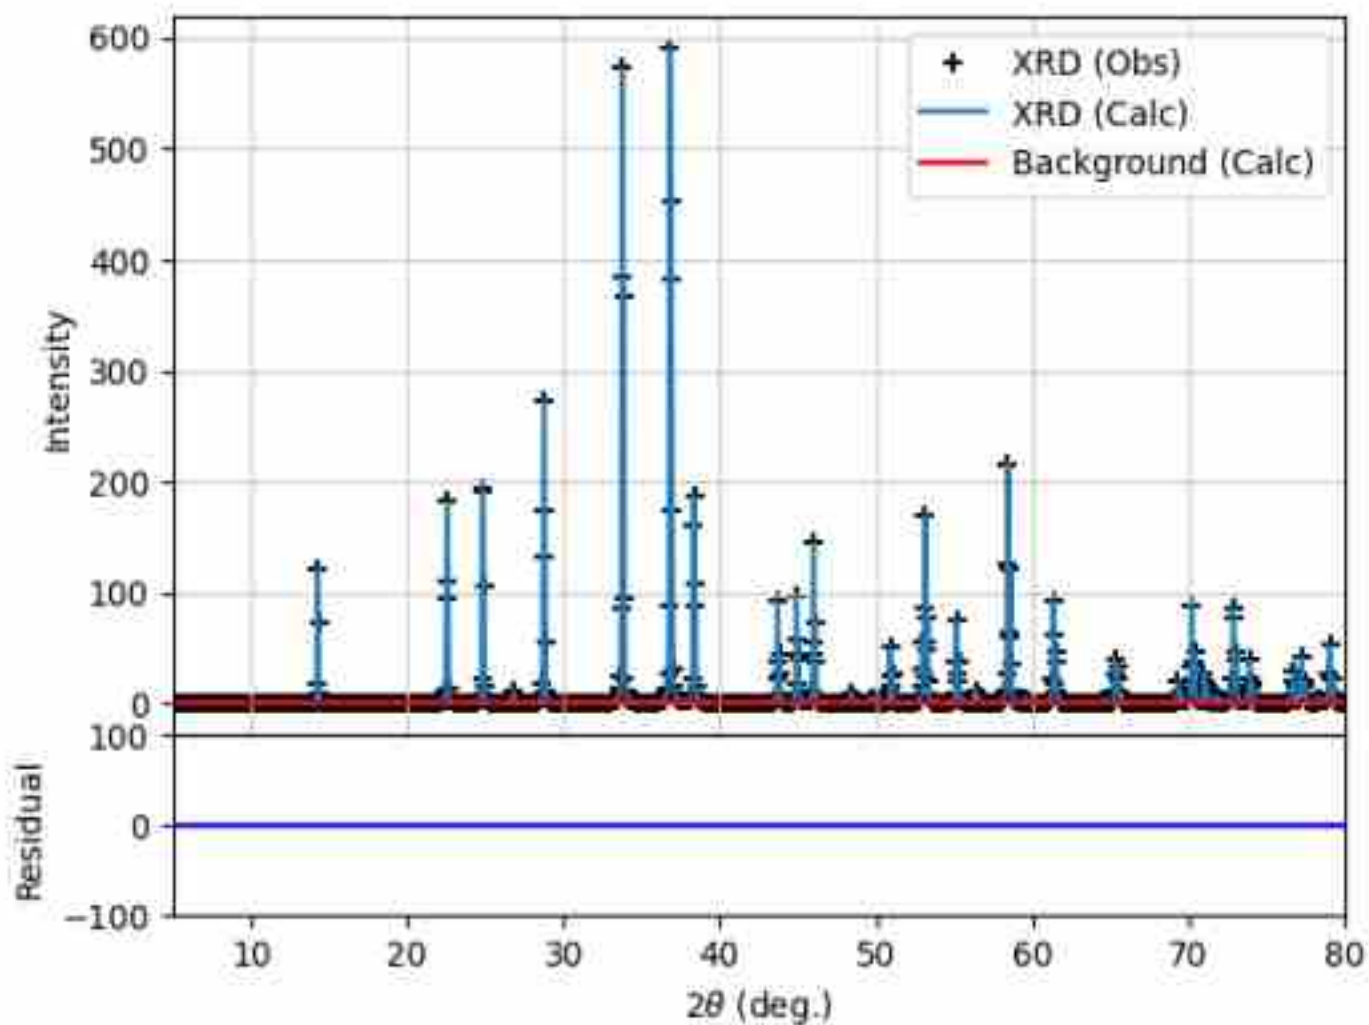

| RMSE before RR | Rwp     | RMSE after RR |
|----------------|---------|---------------|
| 0.013          | 0.00415 | 0.00133       |

# Nd<sub>3</sub>Al<sub>3</sub>Pd<sub>3</sub>

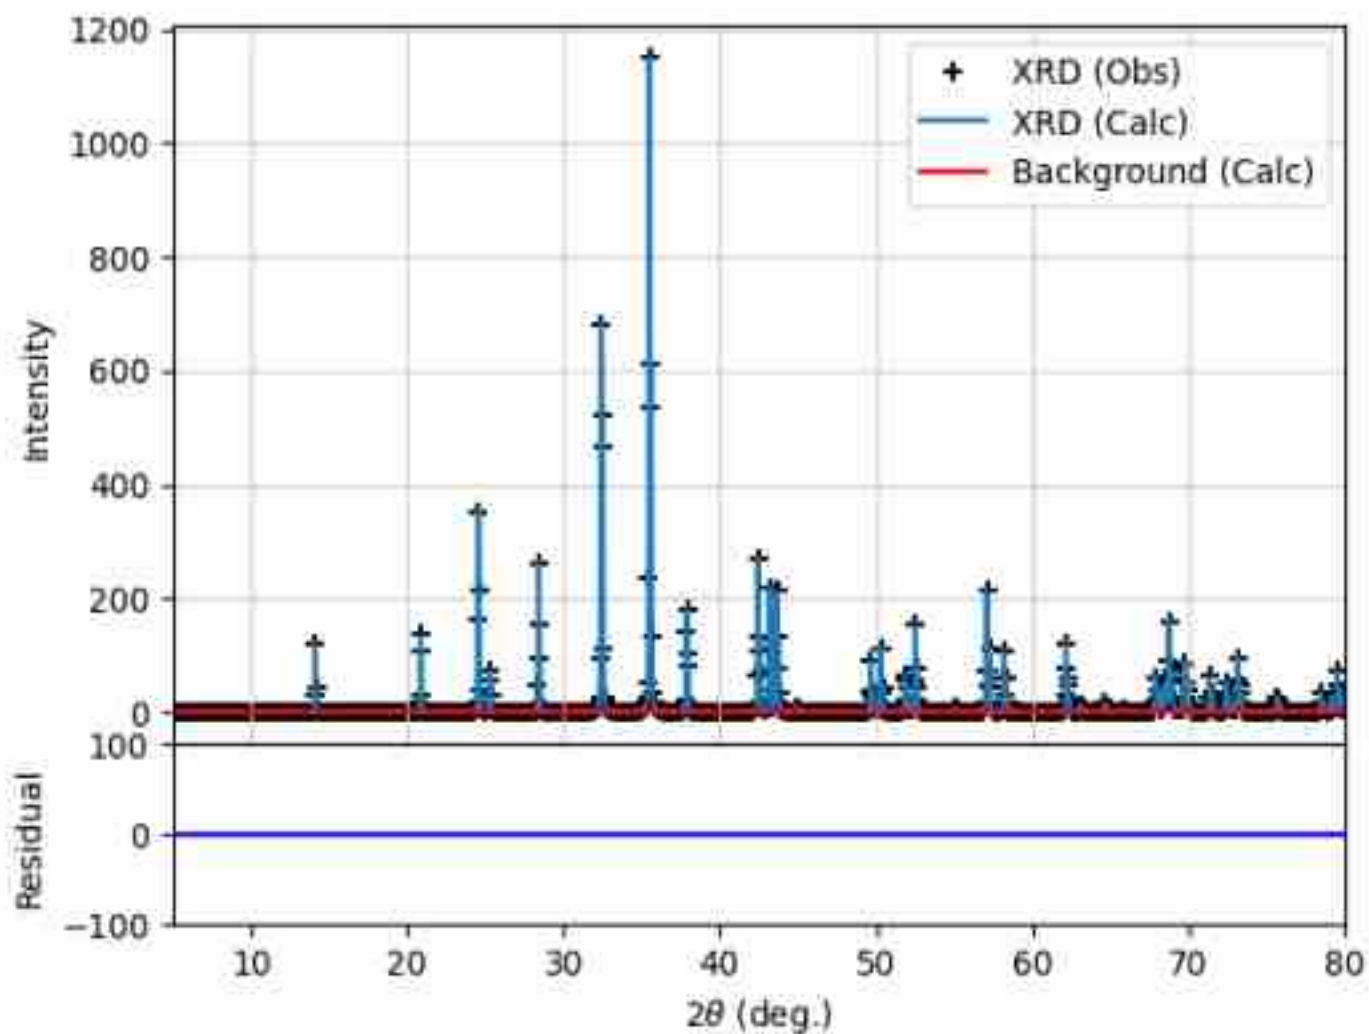

| RMSE before RR | Rwp    | RMSE after RR |
|----------------|--------|---------------|
| 0.013          | 0.0038 | 0.00062       |

# Nd<sub>3</sub>Mg<sub>3</sub>Au<sub>3</sub>

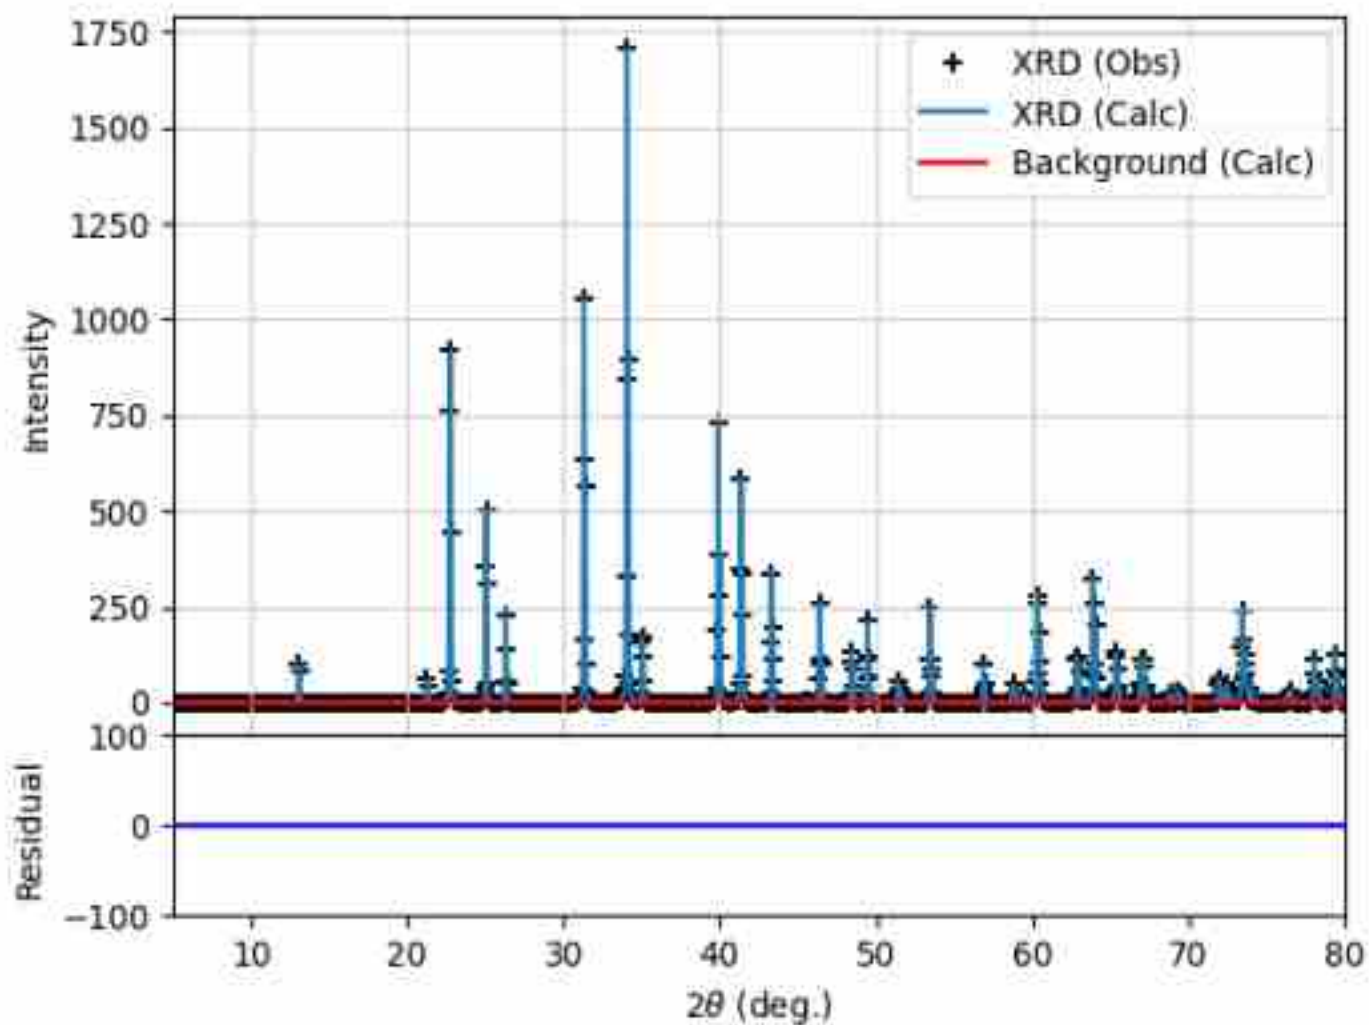

| RMSE before RR | Rwp     | RMSE after RR |
|----------------|---------|---------------|
| 0.013          | 0.00339 | 0.0014        |



# Nd<sub>3</sub>Sn<sub>7</sub>

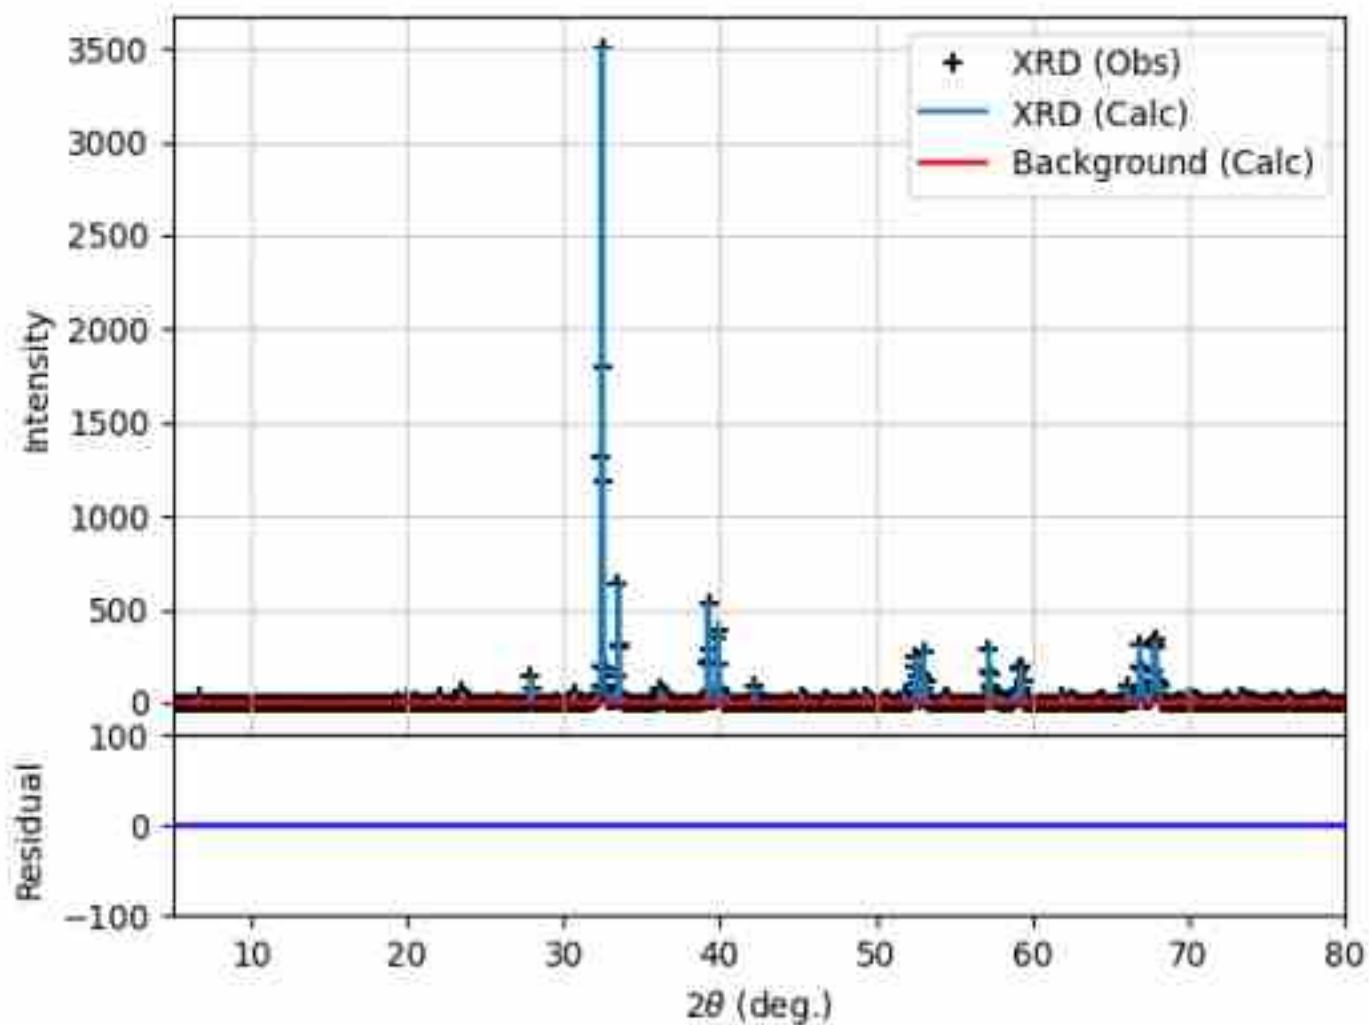

| RMSE before RR | Rwp     | RMSE after RR |
|----------------|---------|---------------|
| 0.013          | 0.00334 | 0.0003        |

# Nd<sub>4</sub>Mg<sub>2</sub>Ge<sub>4</sub>

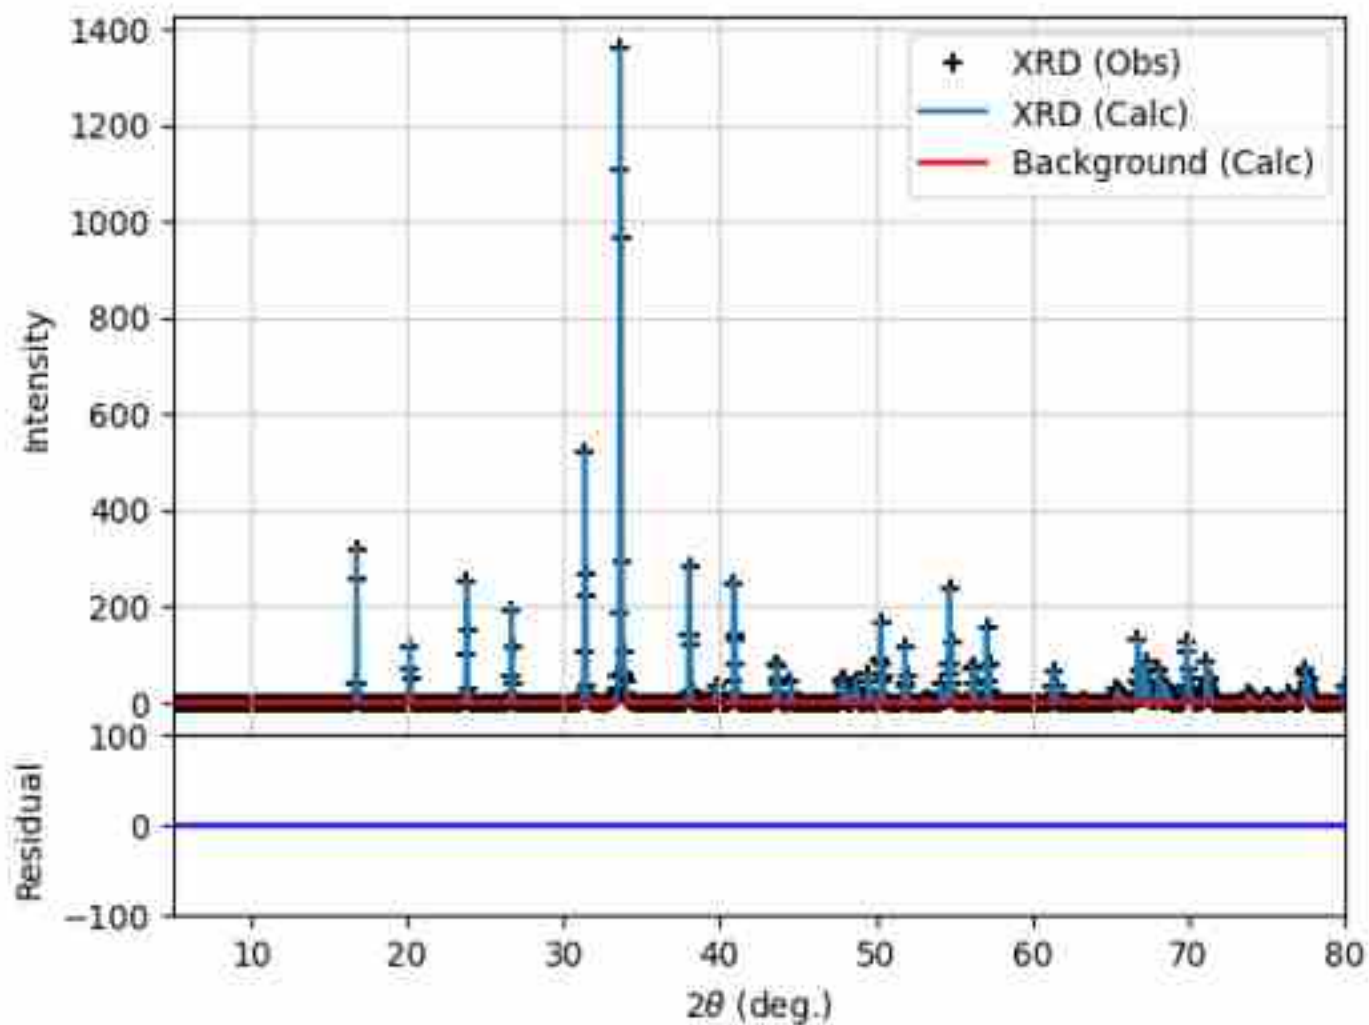

| RMSE before RR | Rwp     | RMSE after RR |
|----------------|---------|---------------|
| 0.013          | 0.00571 | 0.00055       |

# Nd4Ni4P4

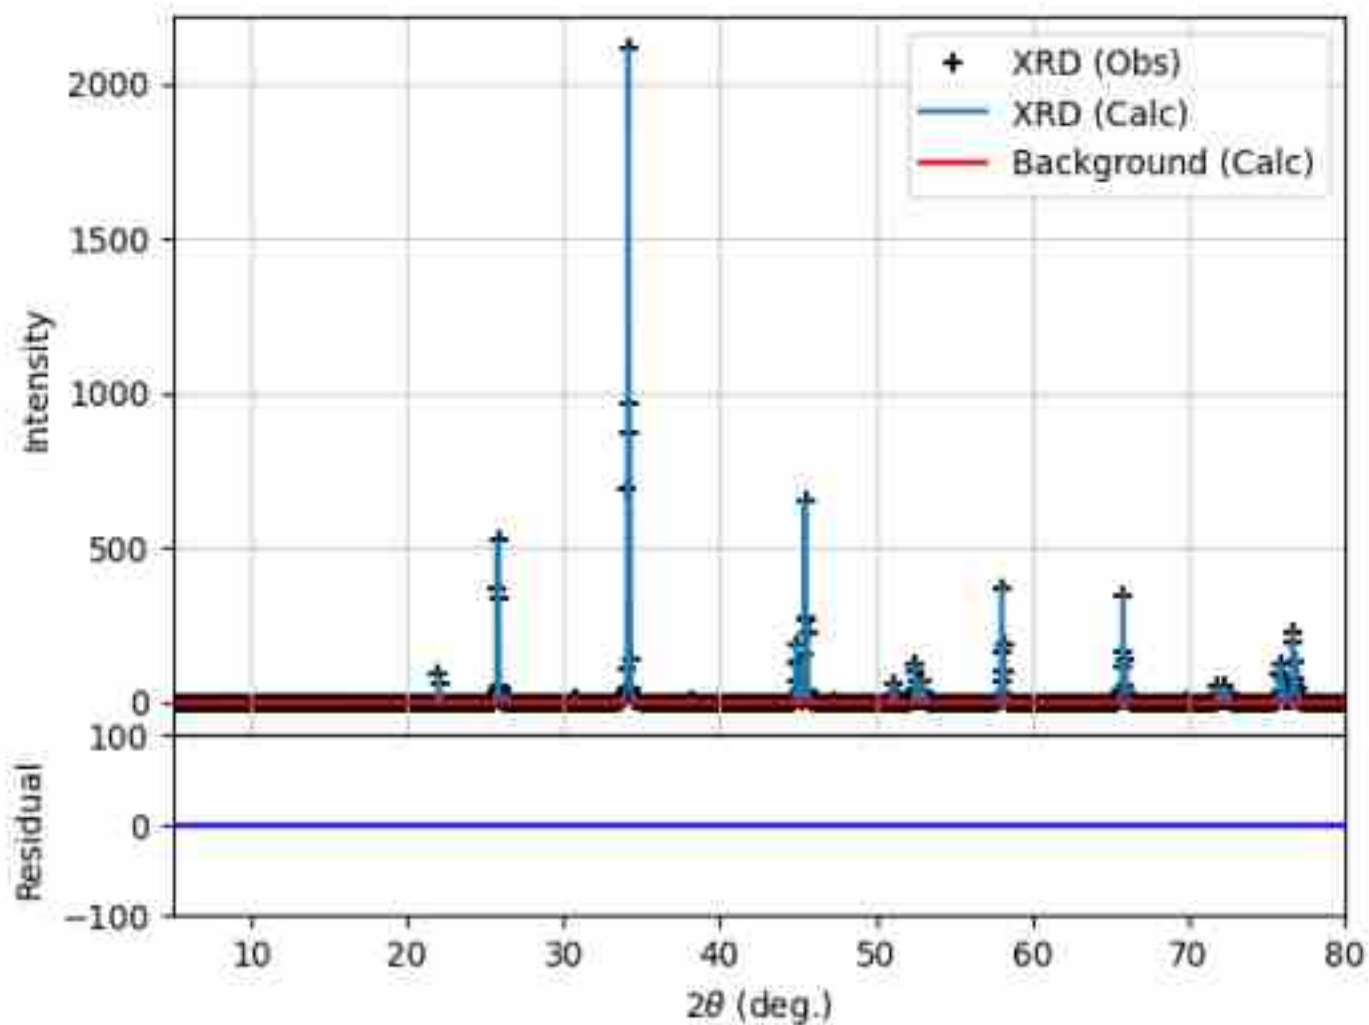

| RMSE before RR | Rwp     | RMSE after RR |
|----------------|---------|---------------|
| 0.013          | 0.00395 | 0.00041       |

# Nd6Ga2O12

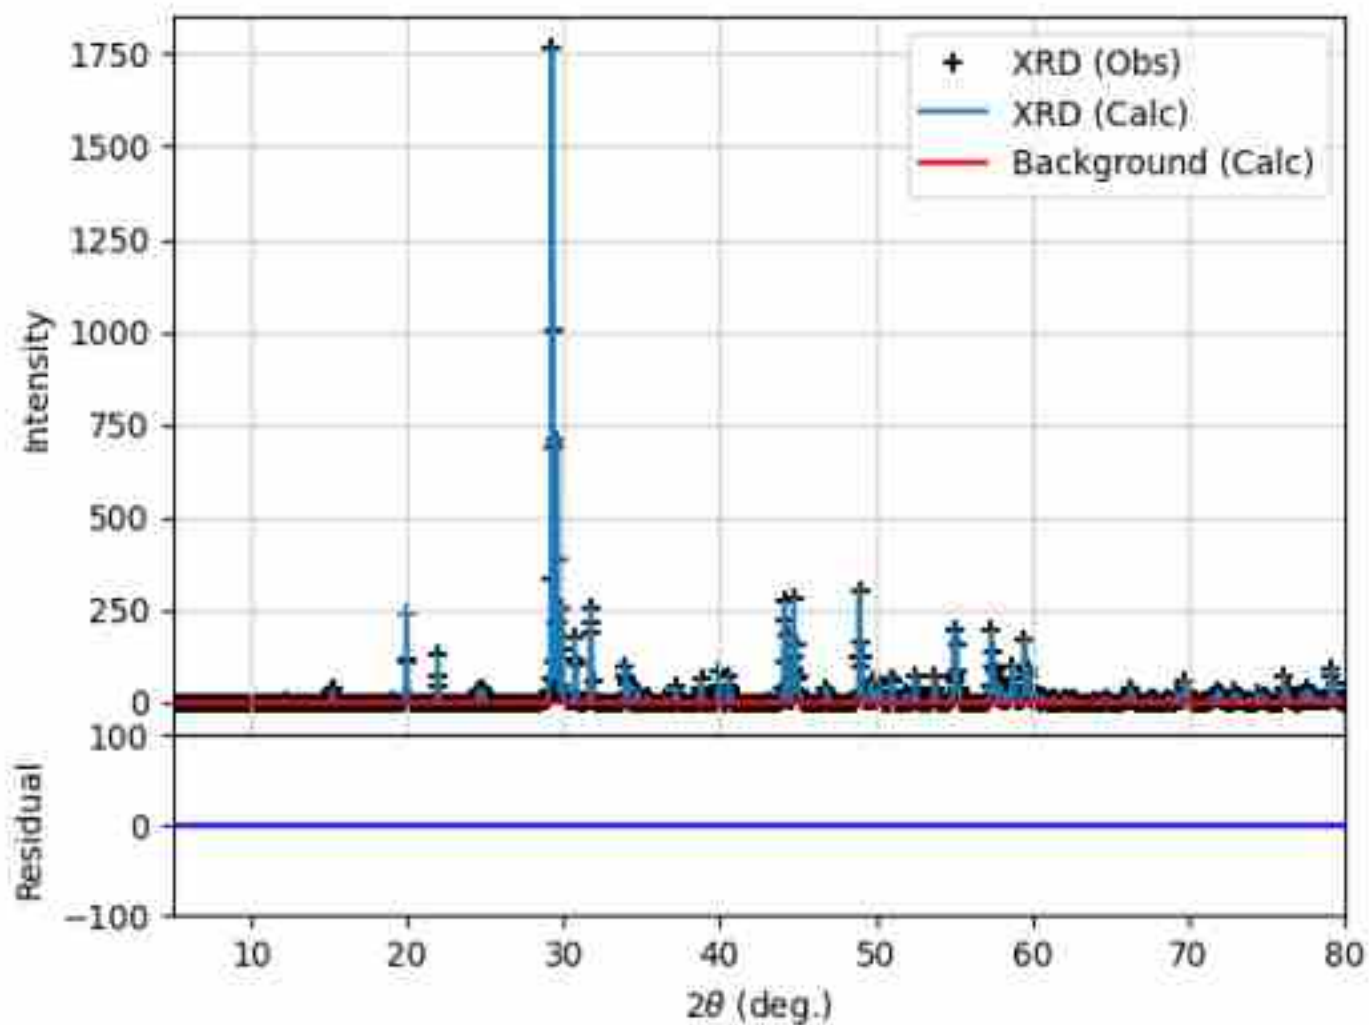

| RMSE before RR | Rwp     | RMSE after RR |
|----------------|---------|---------------|
| 0.013          | 0.00325 | 0.00115       |

# Ni<sub>2</sub>W<sub>2</sub>O<sub>8</sub>

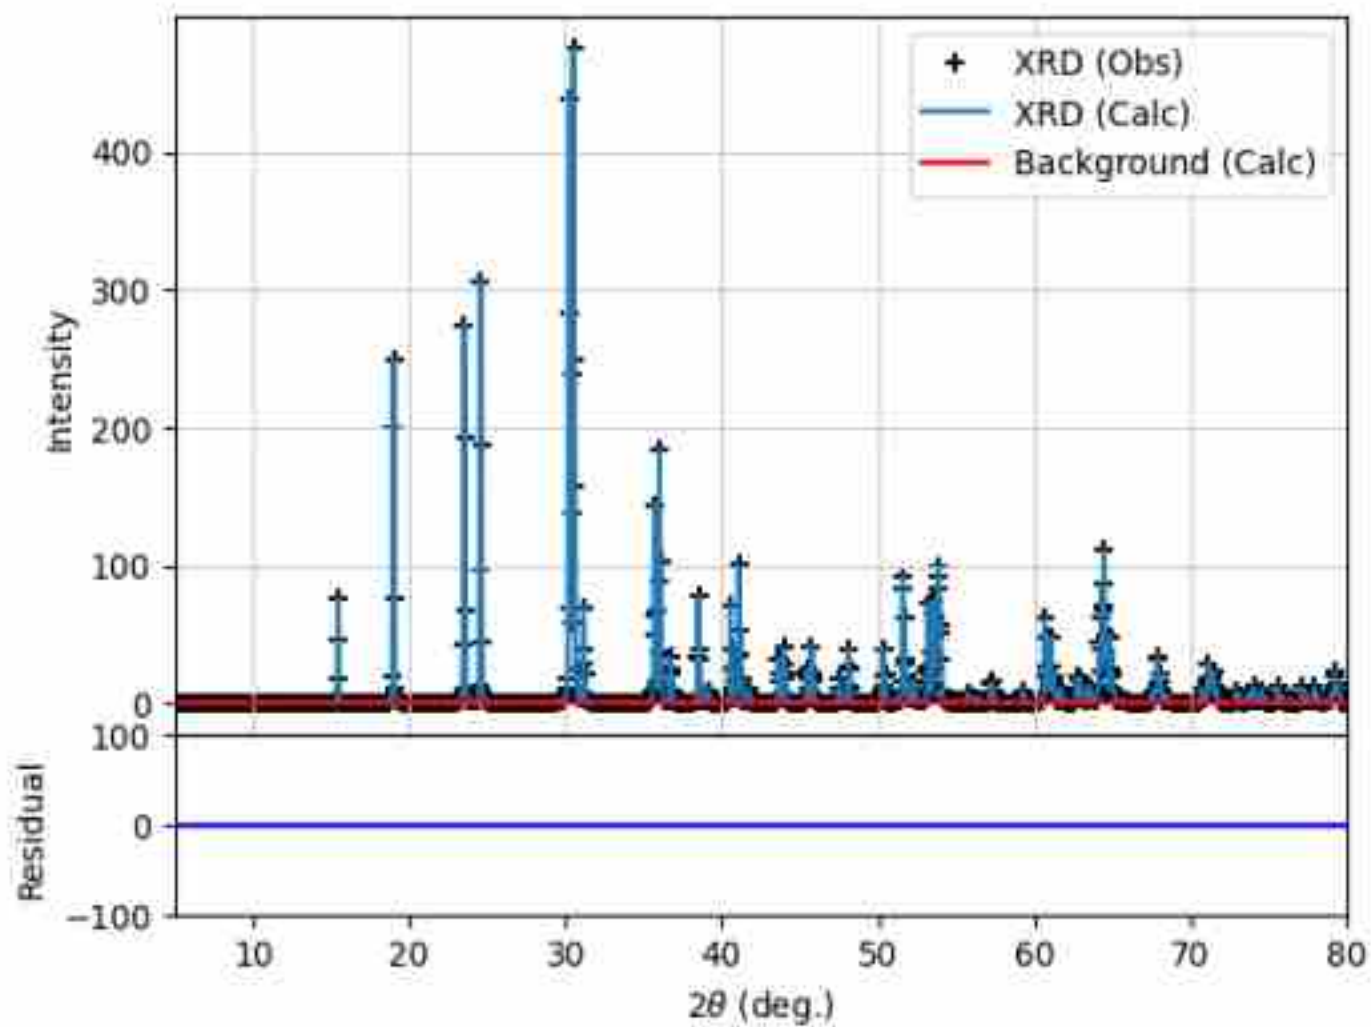

| RMSE before RR | Rwp     | RMSE after RR |
|----------------|---------|---------------|
| 0.013          | 0.00283 | 0.0008        |

# Ni<sub>4</sub>Pt<sub>4</sub>O<sub>8</sub>

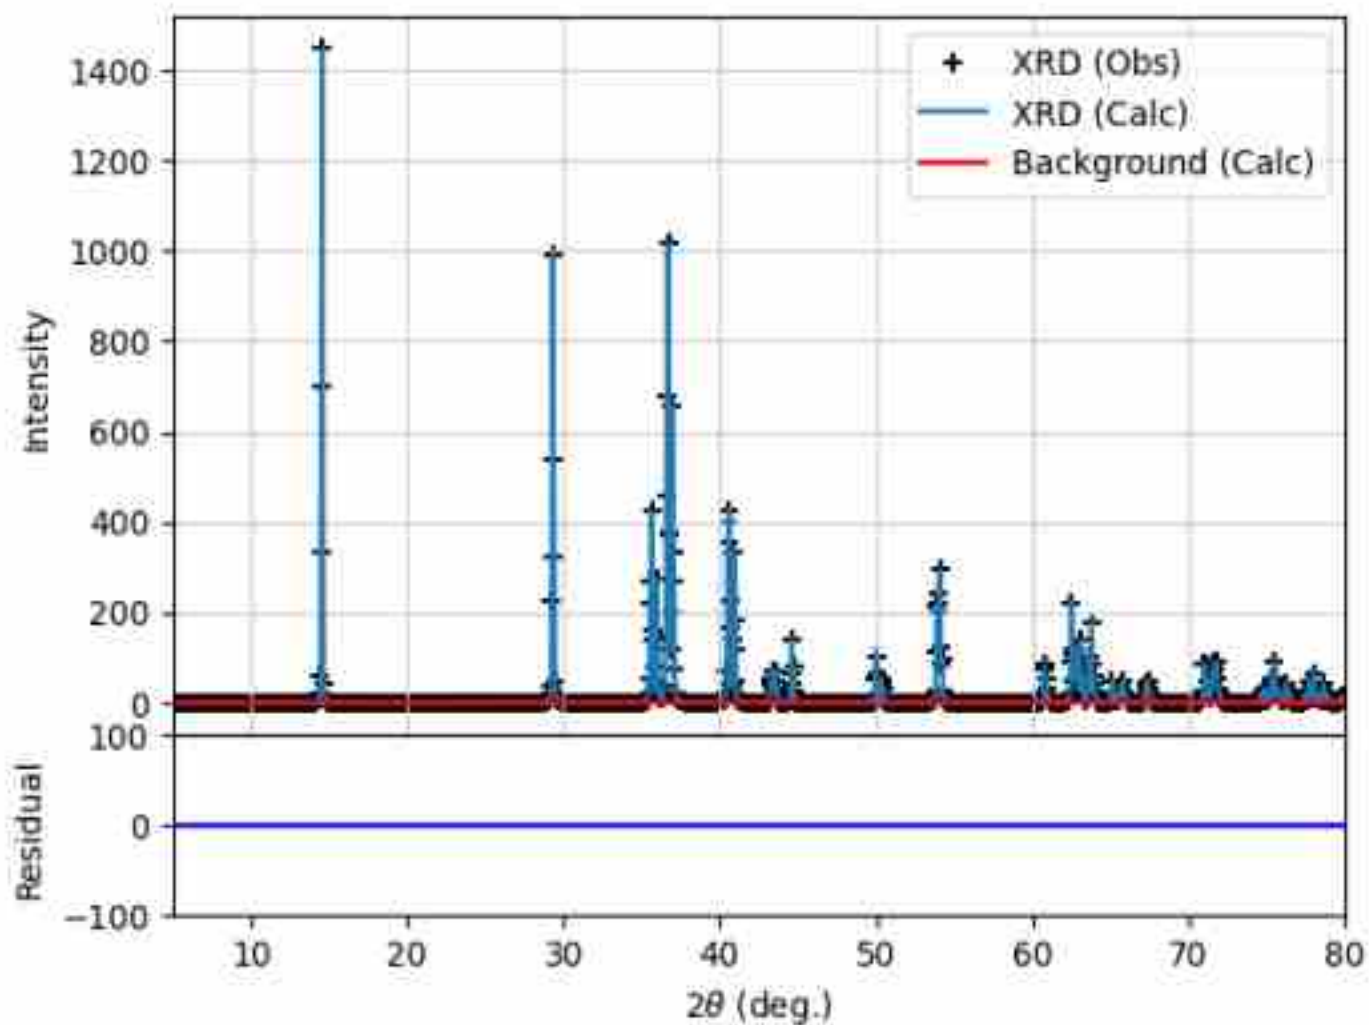

| RMSE before RR | Rwp     | RMSE after RR |
|----------------|---------|---------------|
| 0.013          | 0.00126 | 0.00023       |

# Np1Ge2Rh2

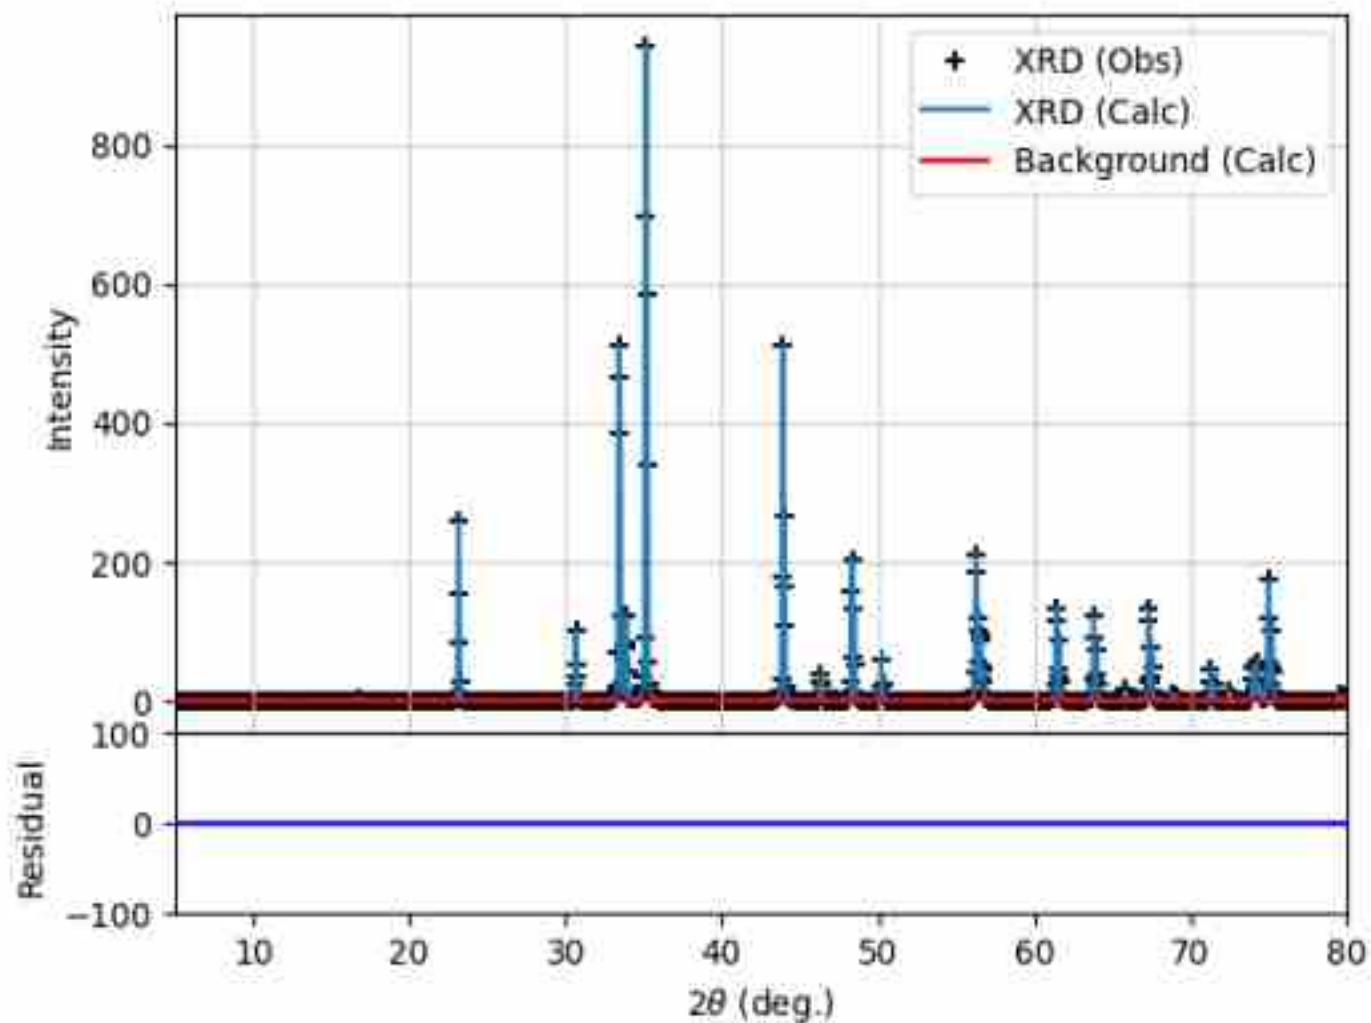

| RMSE before RR | Rwp     | RMSE after RR |
|----------------|---------|---------------|
| 0.013          | 0.00401 | 0.00024       |

# Pr<sub>2</sub>Al<sub>2</sub>Zn<sub>2</sub>

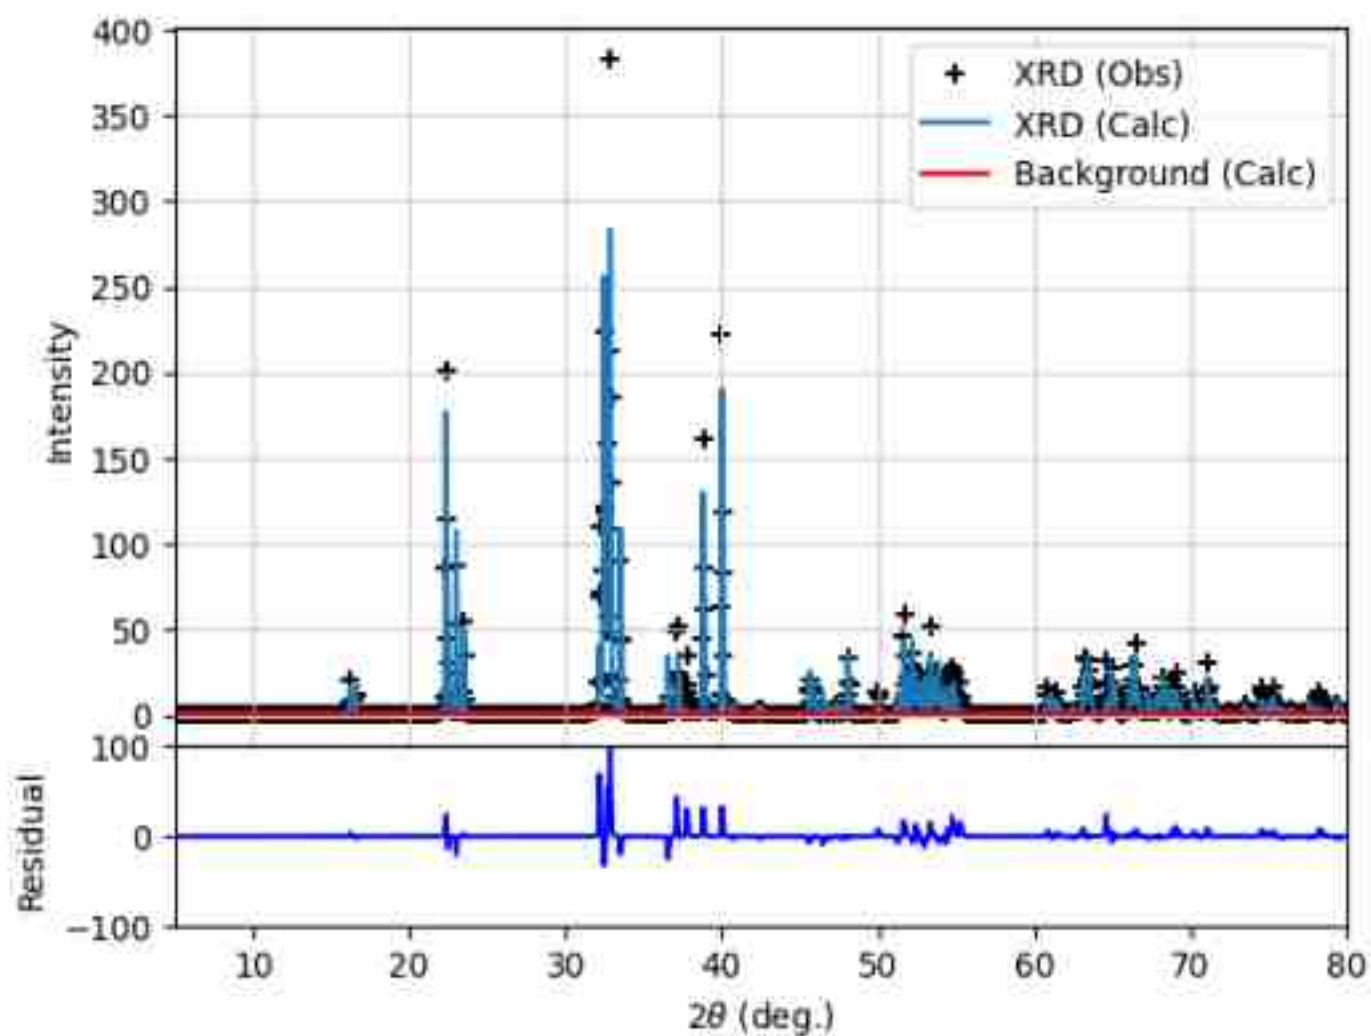

| RMSE before RR | Rwp      | RMSE after RR |
|----------------|----------|---------------|
| 0.013          | 32.74345 | 0.0823        |



# Pr2Al6

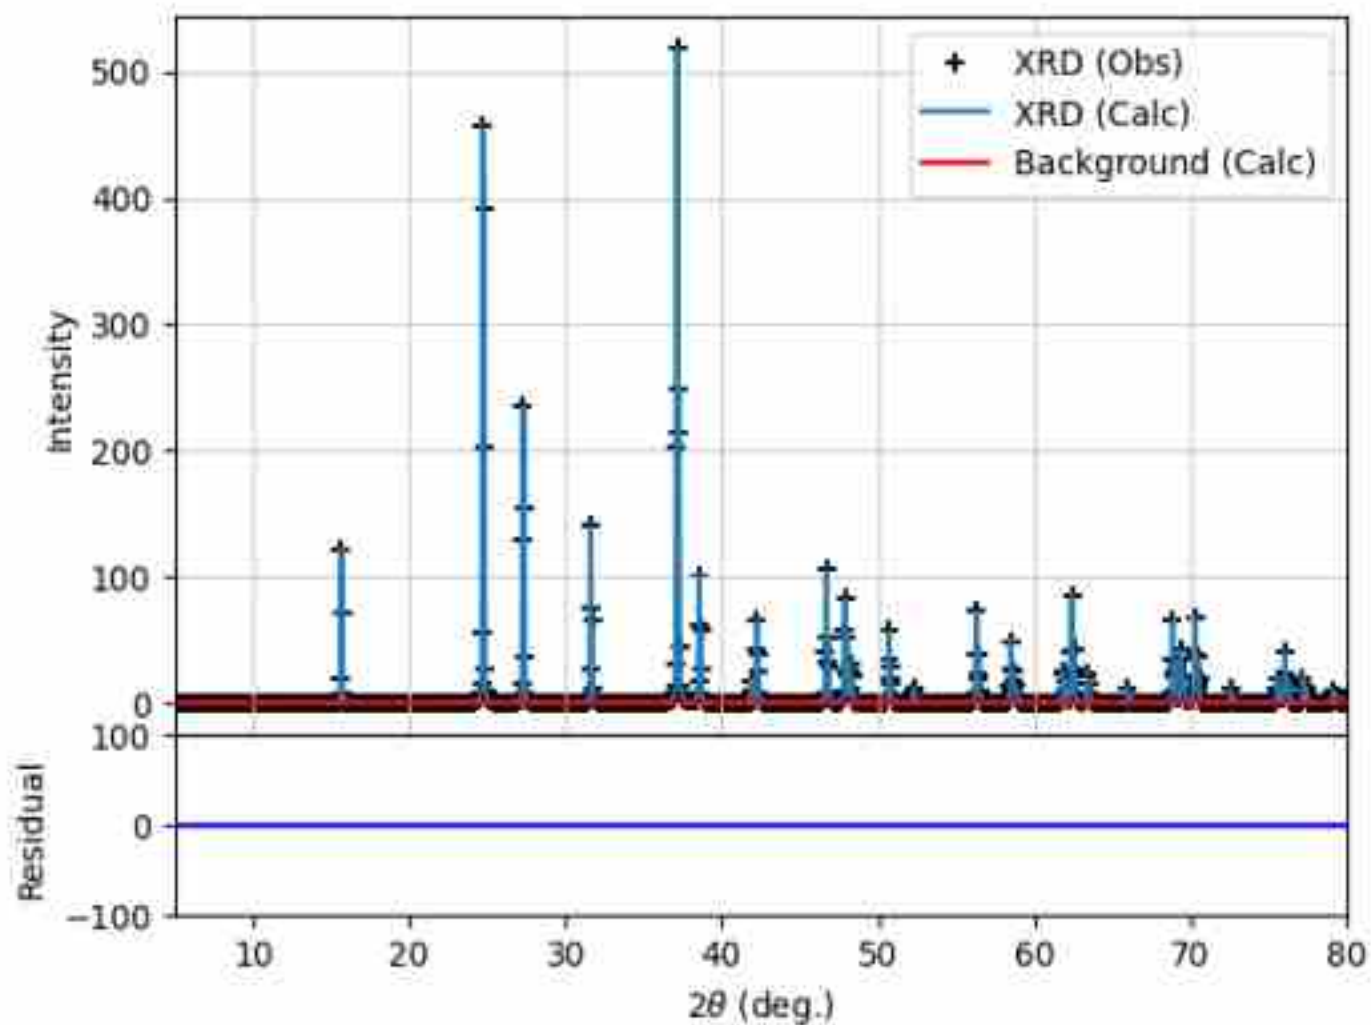

| RMSE before RR | Rwp     | RMSE after RR |
|----------------|---------|---------------|
| 0.013          | 0.00959 | 0.0026        |

# Pr<sub>2</sub>Bi<sub>4</sub>Au<sub>2</sub>

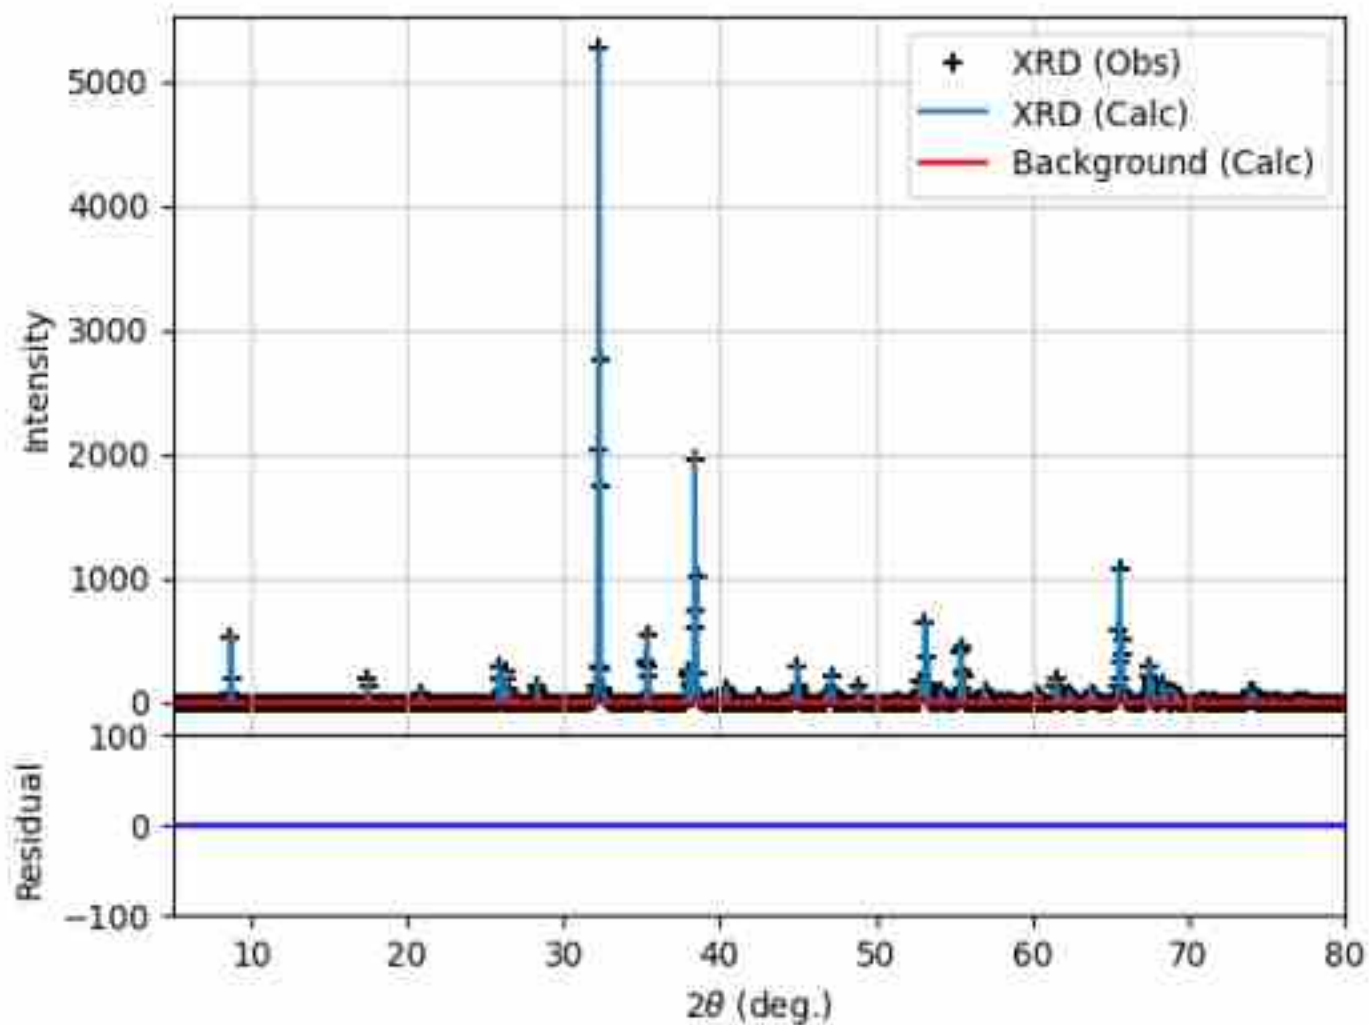

| RMSE before RR | Rwp     | RMSE after RR |
|----------------|---------|---------------|
| 0.013          | 0.00549 | 0.00017       |

# Pr<sub>2</sub>Co<sub>2</sub>Si<sub>1</sub>C<sub>1</sub>

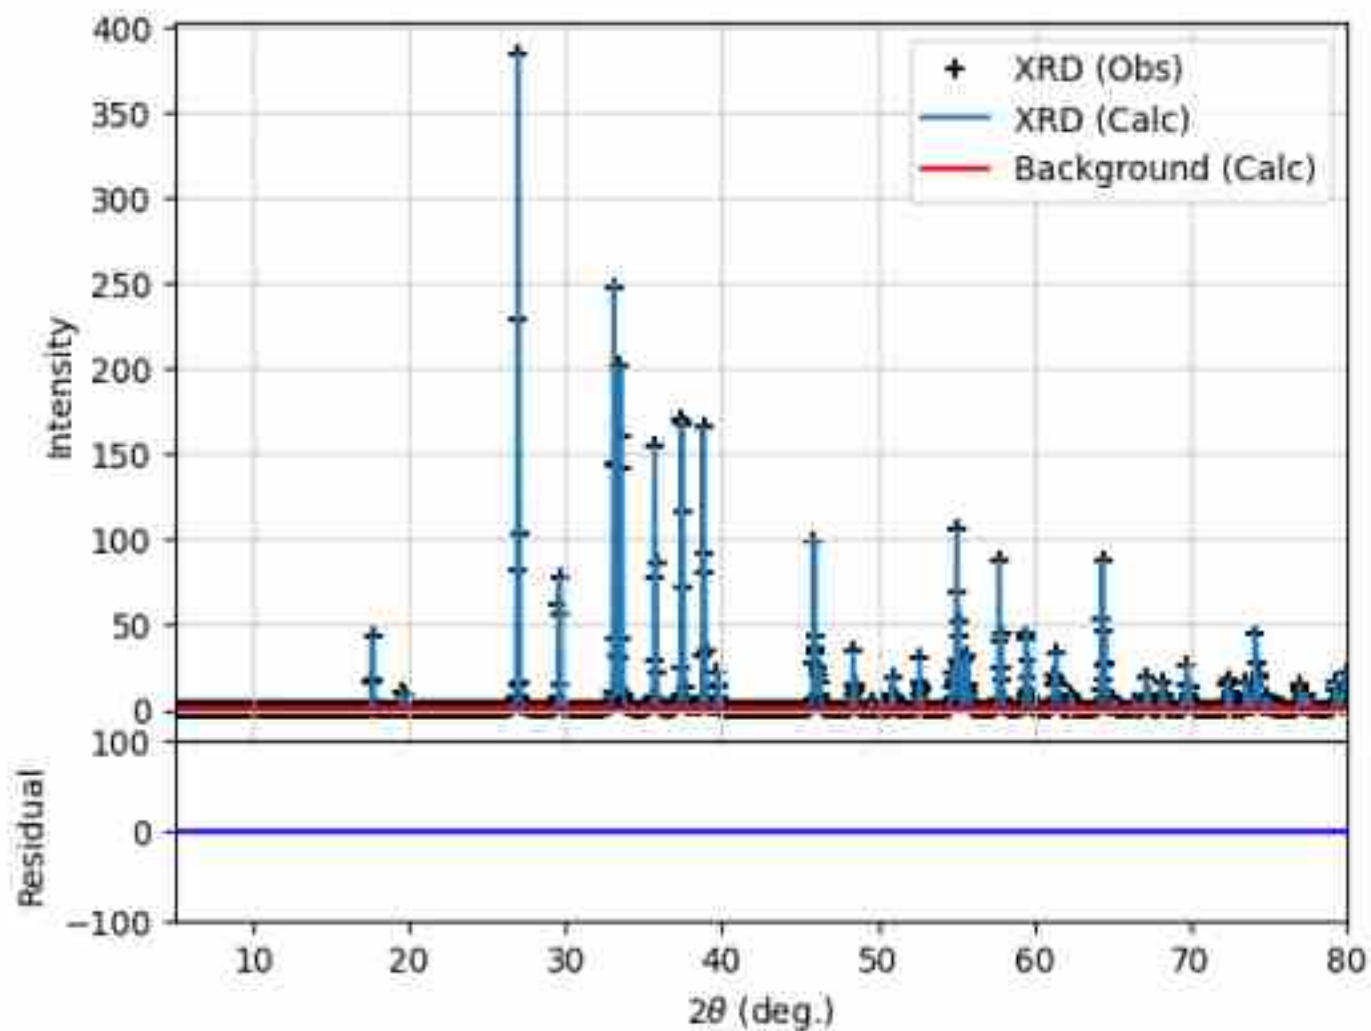

| RMSE before RR | Rwp     | RMSE after RR |
|----------------|---------|---------------|
| 0.013          | 0.00445 | 0.00052       |

# Pr<sub>2</sub>Nb<sub>2</sub>O<sub>8</sub>

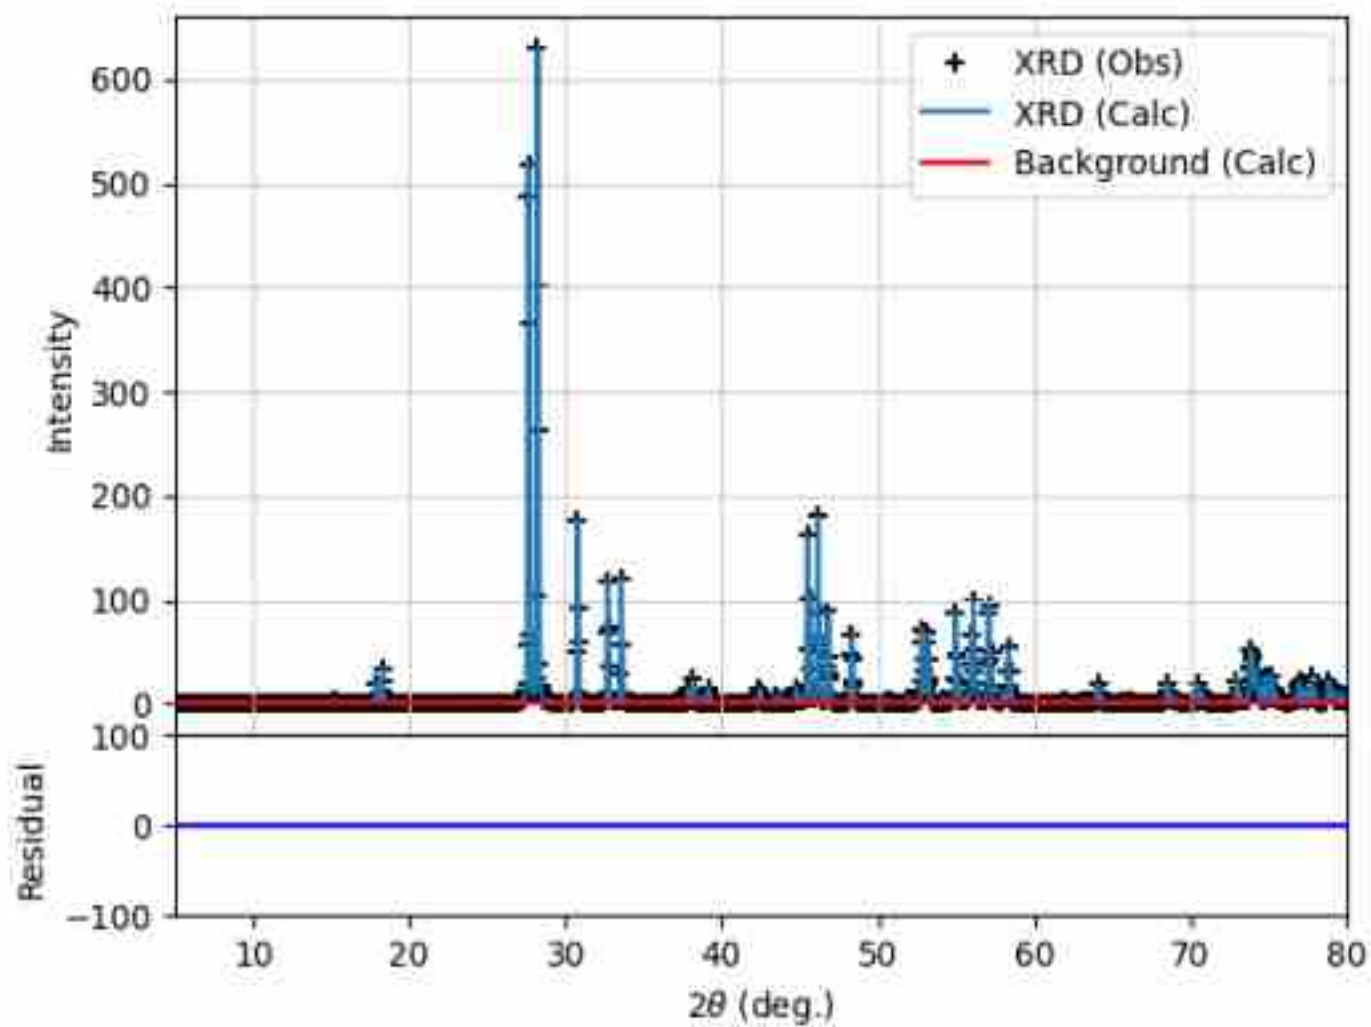

| RMSE before RR | Rwp     | RMSE after RR |
|----------------|---------|---------------|
| 0.013          | 0.00316 | 0.00139       |

# Pr5Mg1

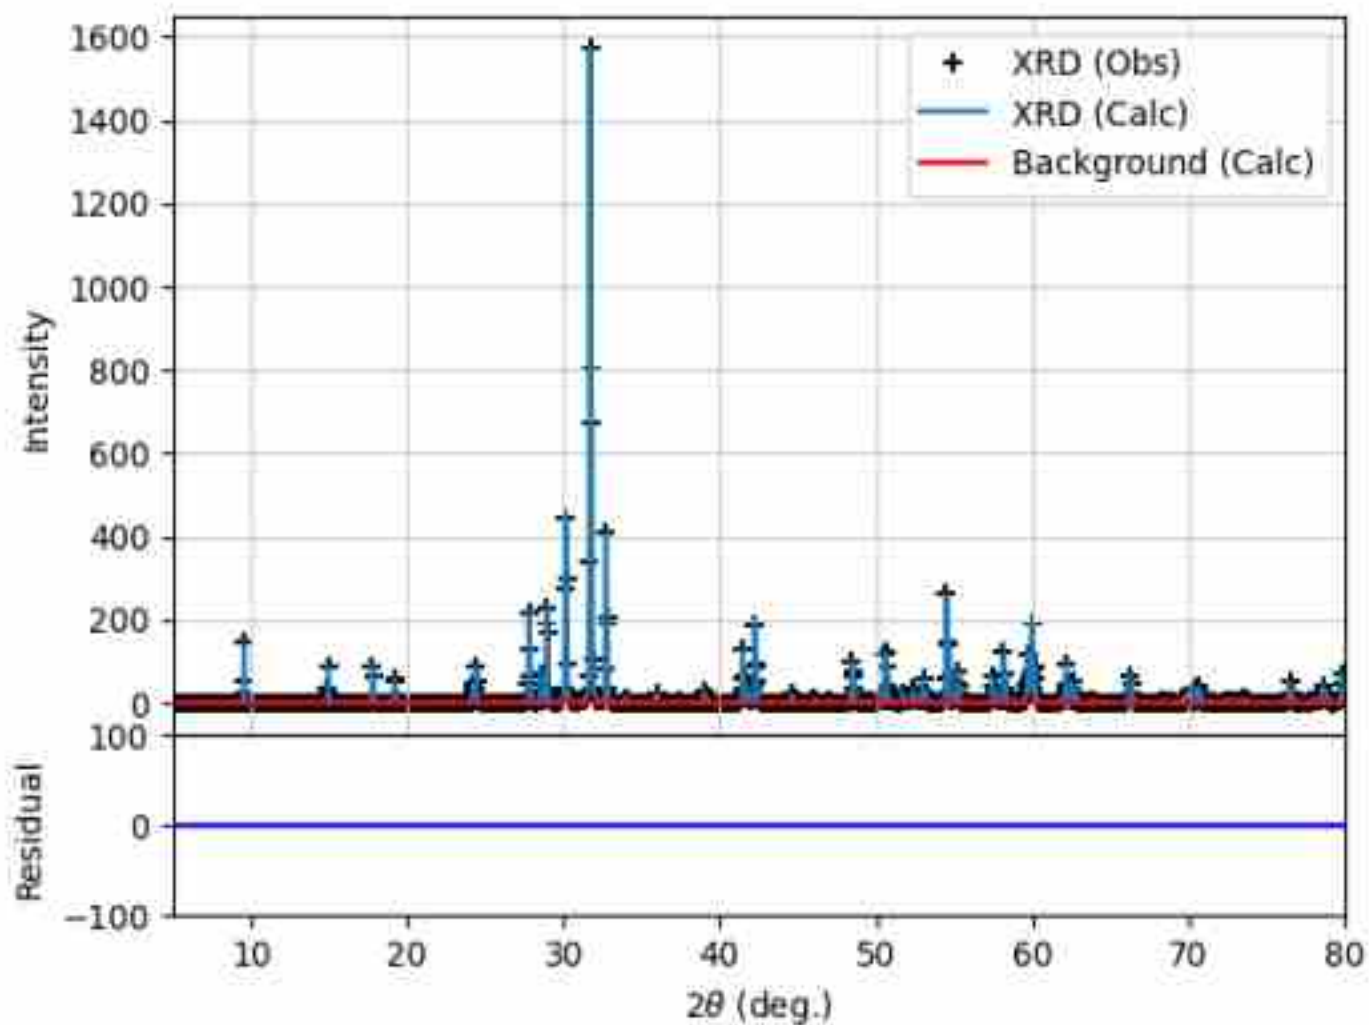

| RMSE before RR | Rwp     | RMSE after RR |
|----------------|---------|---------------|
| 0.013          | 0.00392 | 0.00049       |

# Pr6Al2

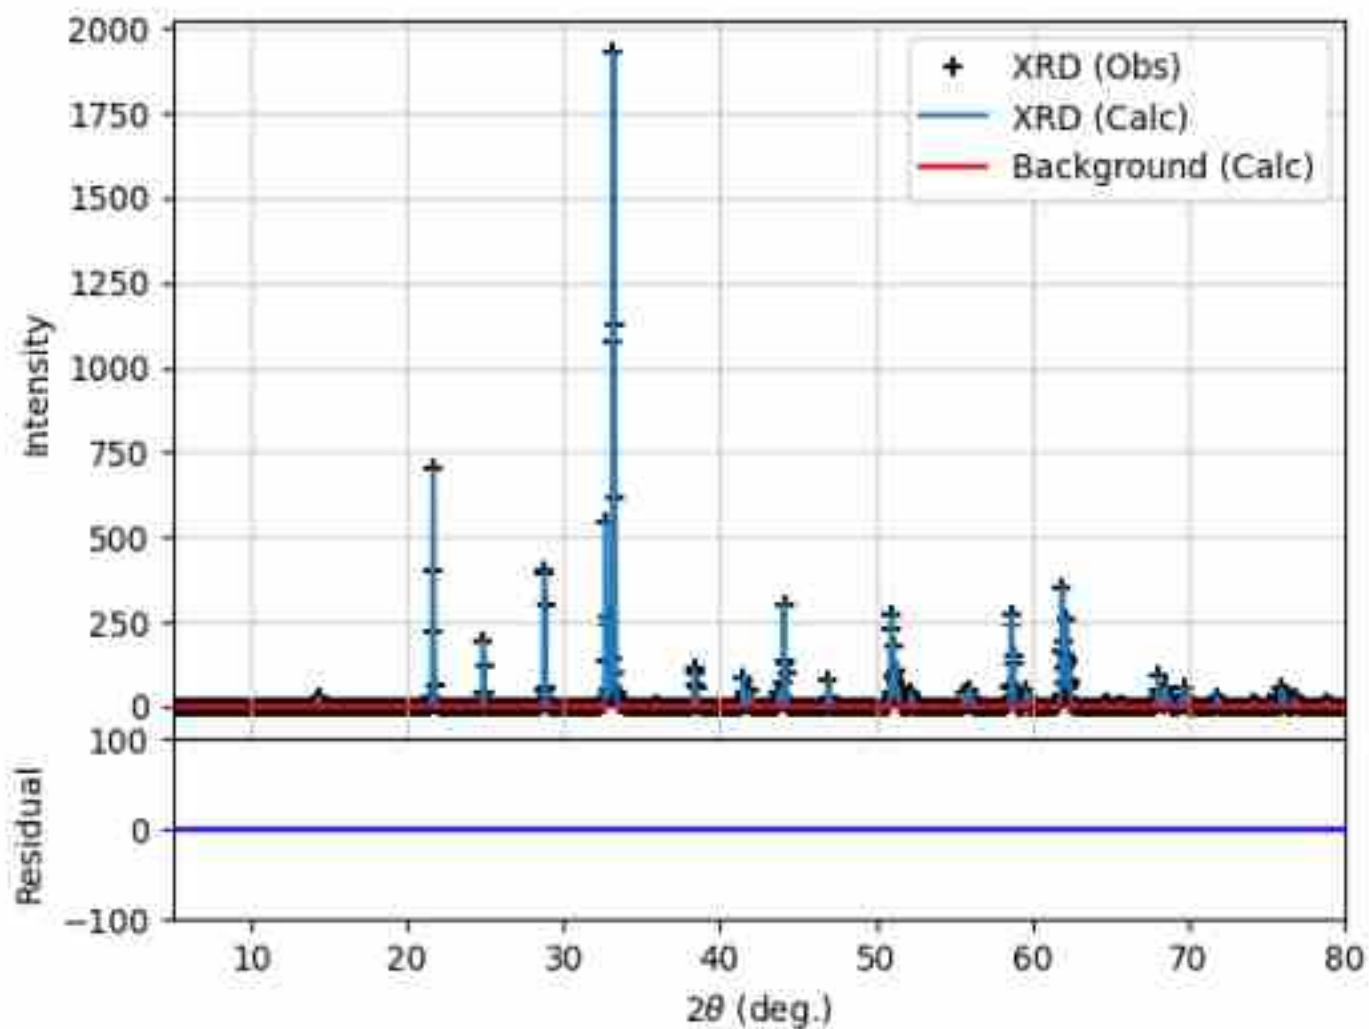

| RMSE before RR | Rwp     | RMSE after RR |
|----------------|---------|---------------|
| 0.013          | 0.02377 | 0.00185       |

# Pu1Ni1C2

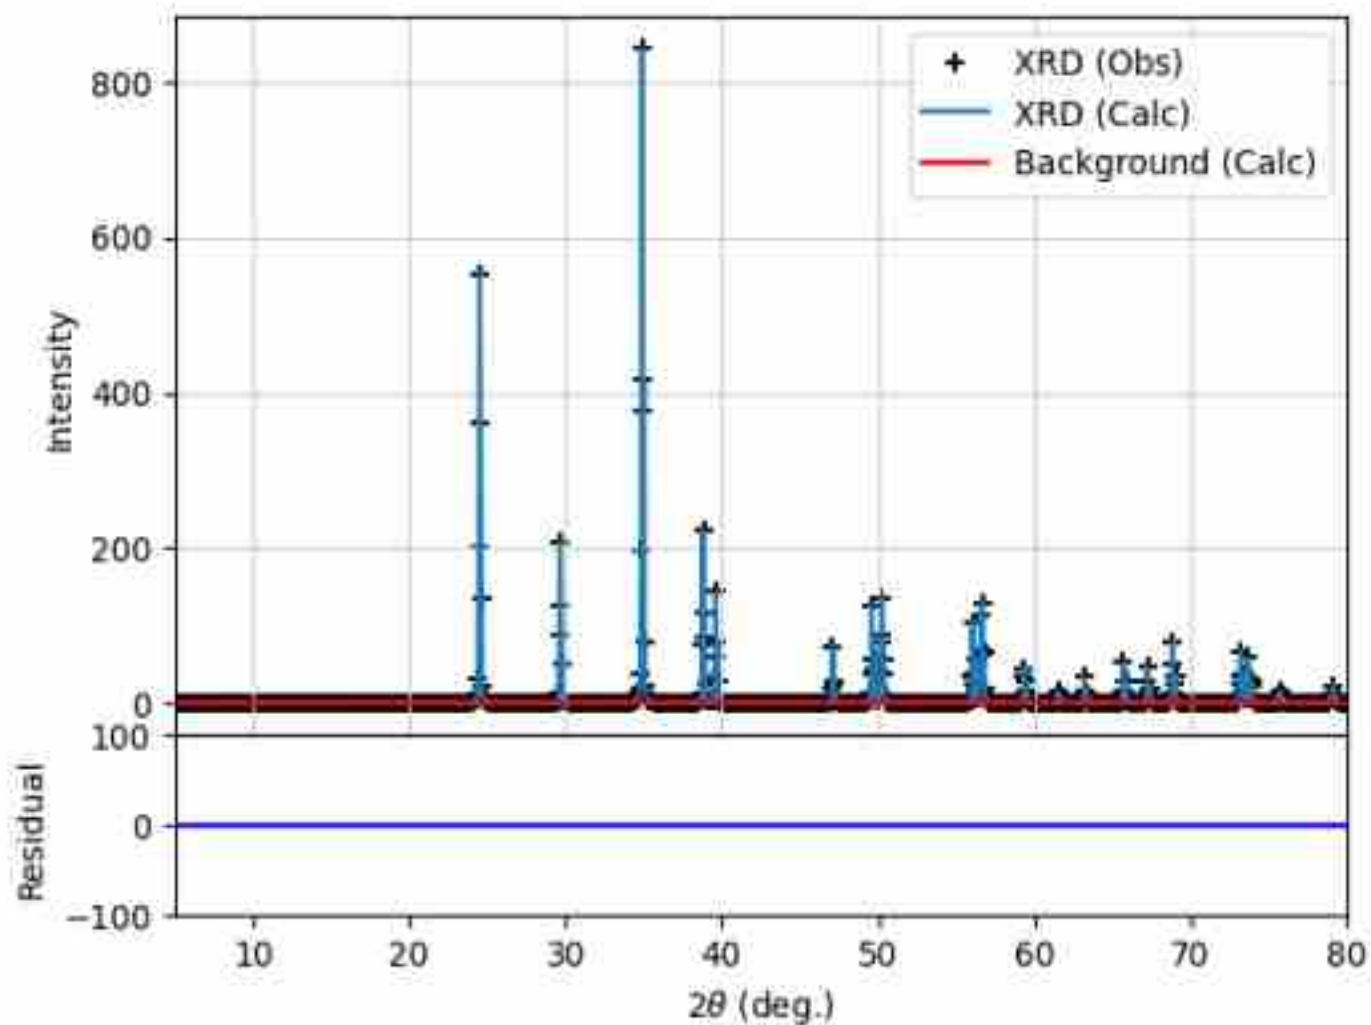

| RMSE before RR | Rwp     | RMSE after RR |
|----------------|---------|---------------|
| 0.013          | 0.00376 | 0.00203       |

# Pu<sub>2</sub>Te<sub>6</sub>

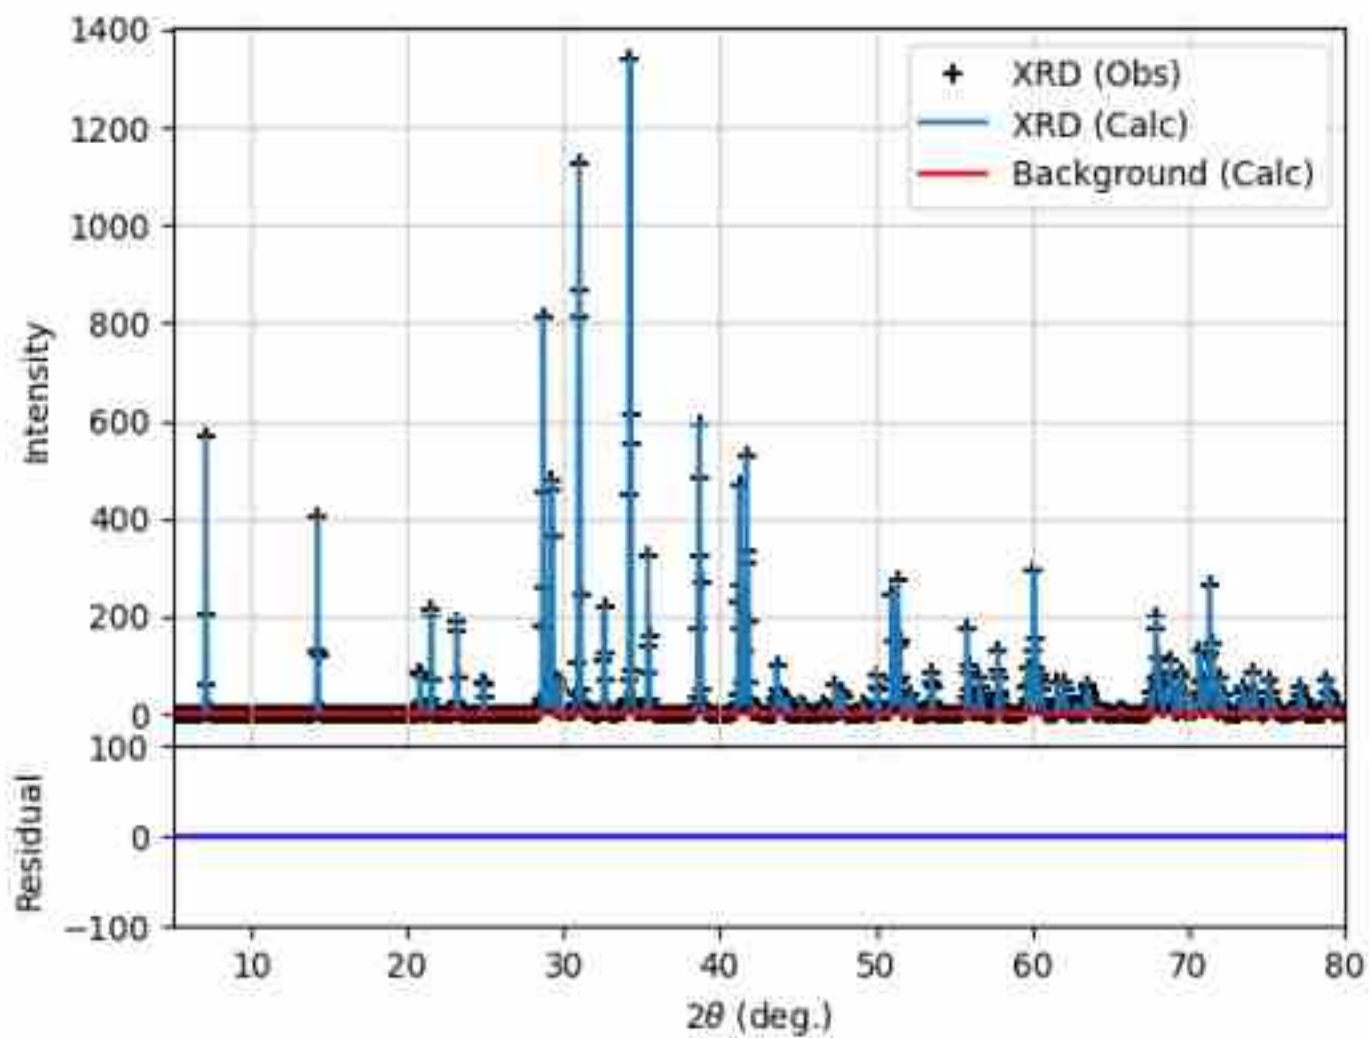

| RMSE before RR | Rwp    | RMSE after RR |
|----------------|--------|---------------|
| 0.013          | 0.0038 | 0.00037       |



# Rb1N1O3

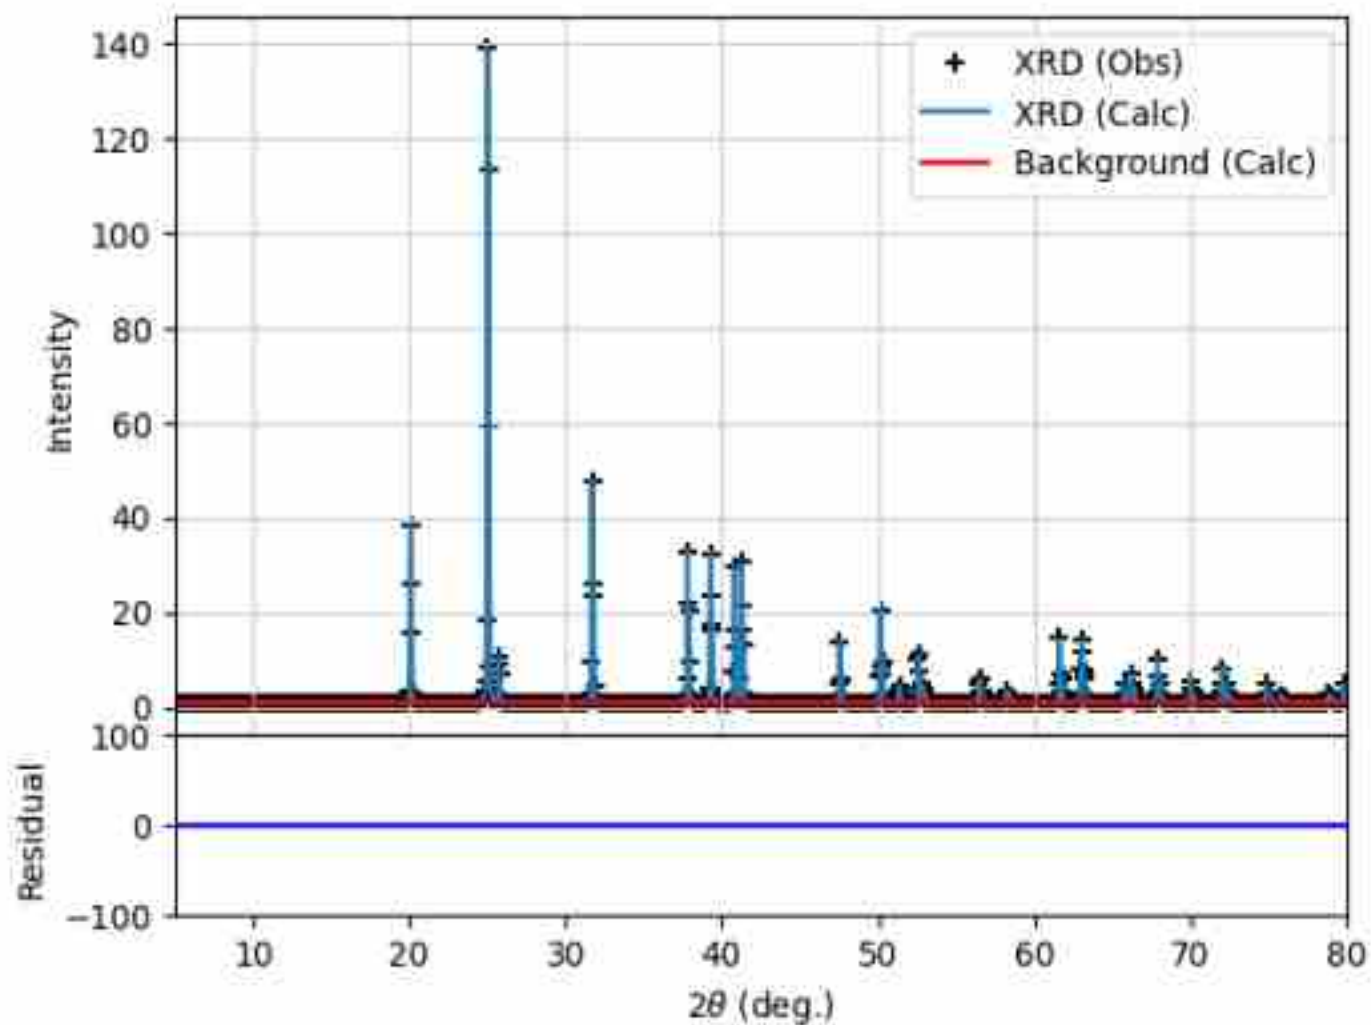

| RMSE before RR | Rwp     | RMSE after RR |
|----------------|---------|---------------|
| 0.013          | 0.00148 | 0.00044       |

# Rb<sub>2</sub>Ag<sub>1</sub>Bi<sub>1</sub>F<sub>6</sub>

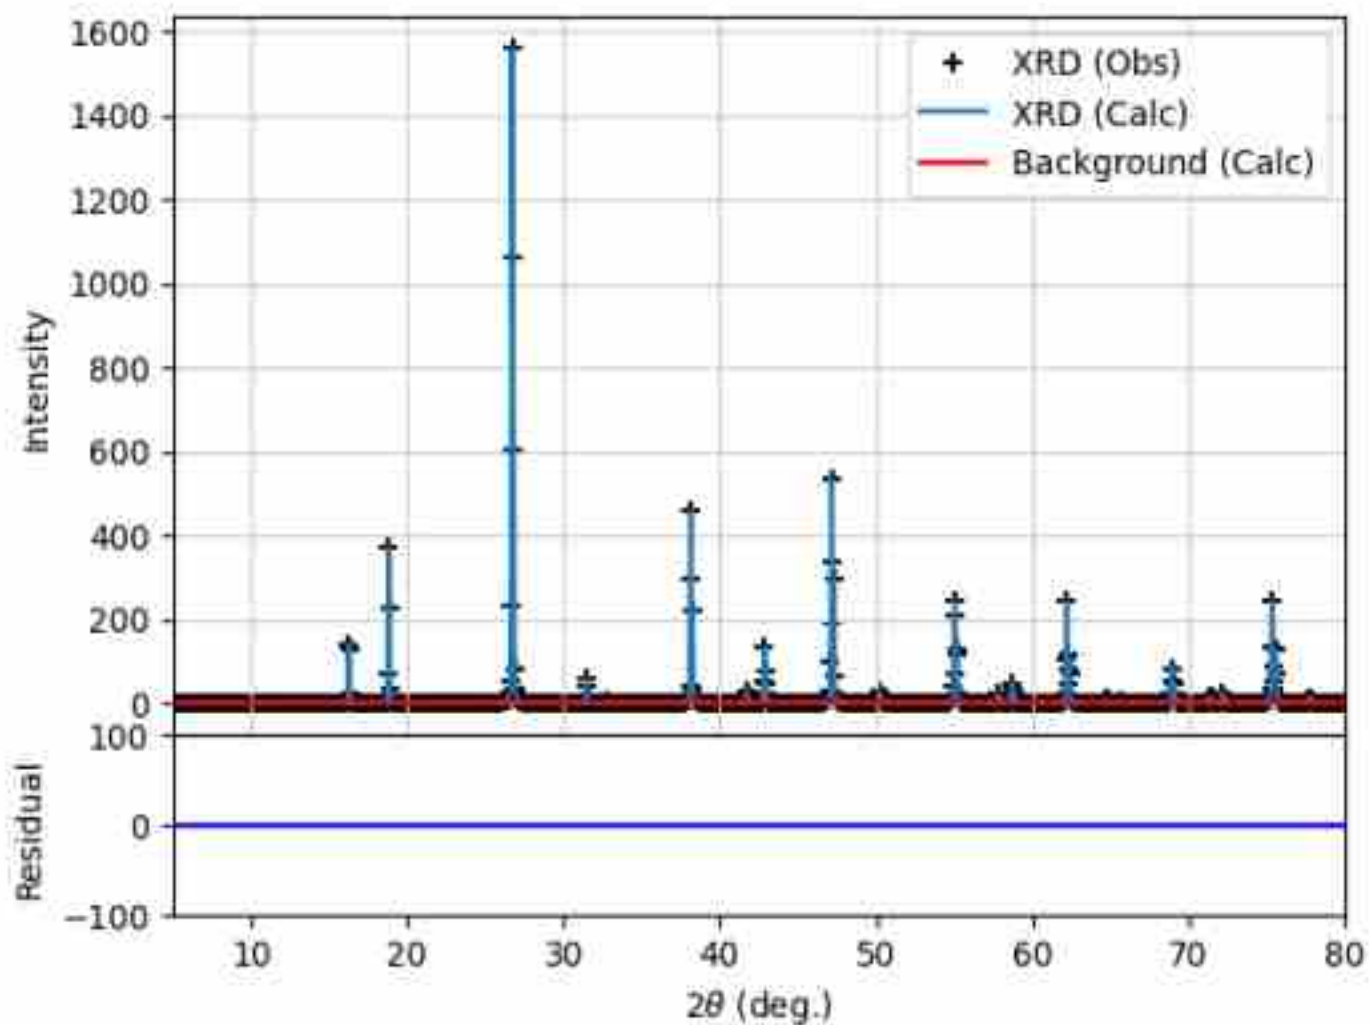

| RMSE before RR | Rwp     | RMSE after RR |
|----------------|---------|---------------|
| 0.013          | 0.00893 | 0.00263       |

# Rb<sub>2</sub>CuCl<sub>4</sub>

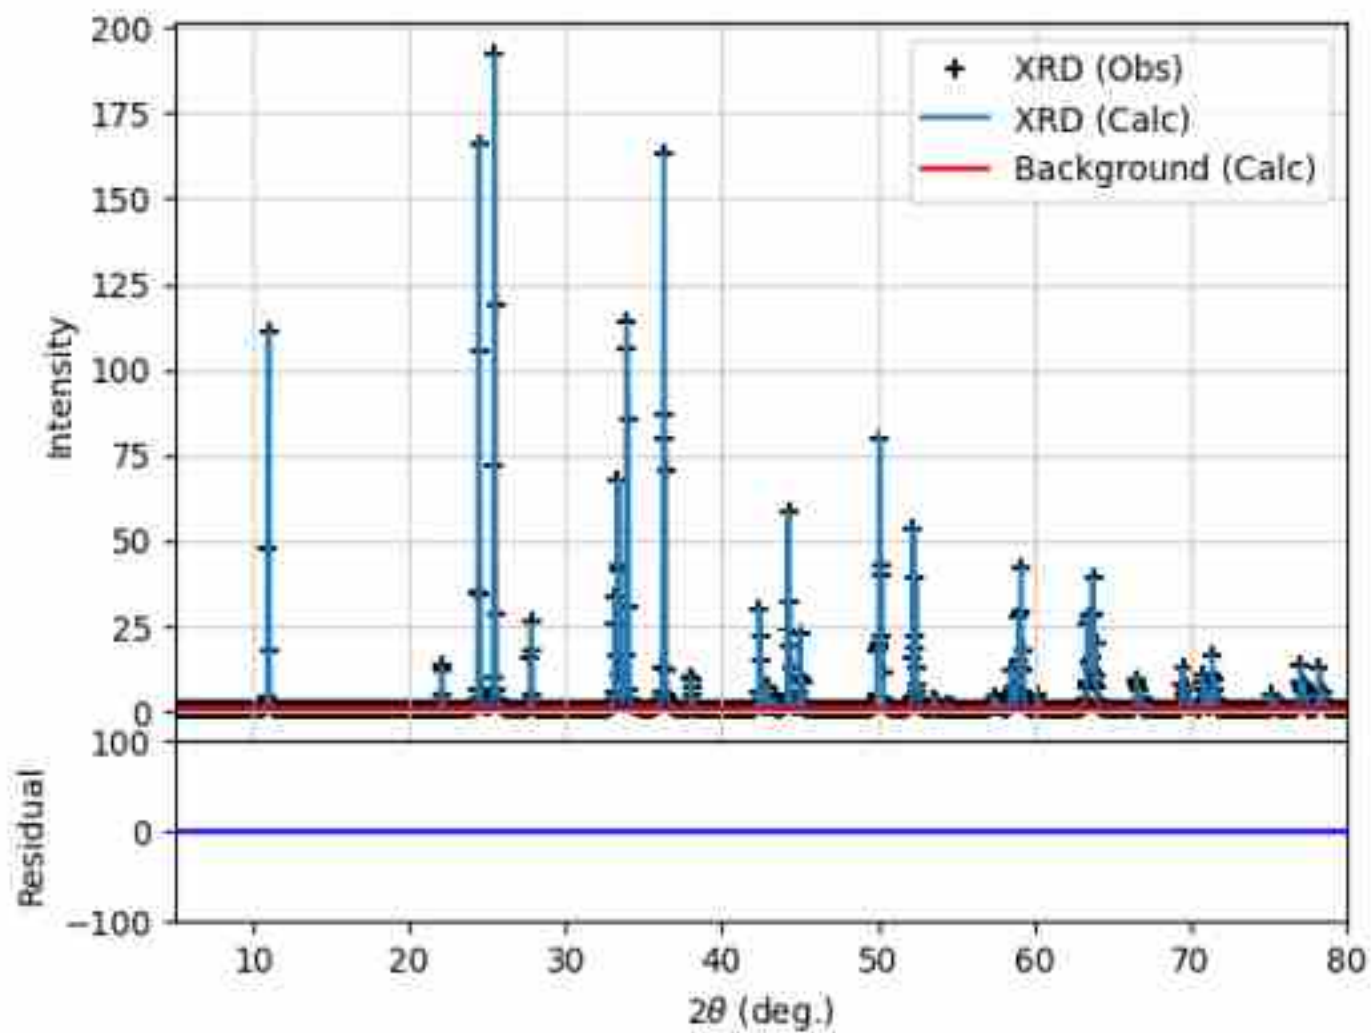

| RMSE before RR | Rwp     | RMSE after RR |
|----------------|---------|---------------|
| 0.013          | 0.02126 | 0.00121       |

# Rb<sub>2</sub>Cu<sub>1</sub>Sb<sub>1</sub>Br<sub>6</sub>

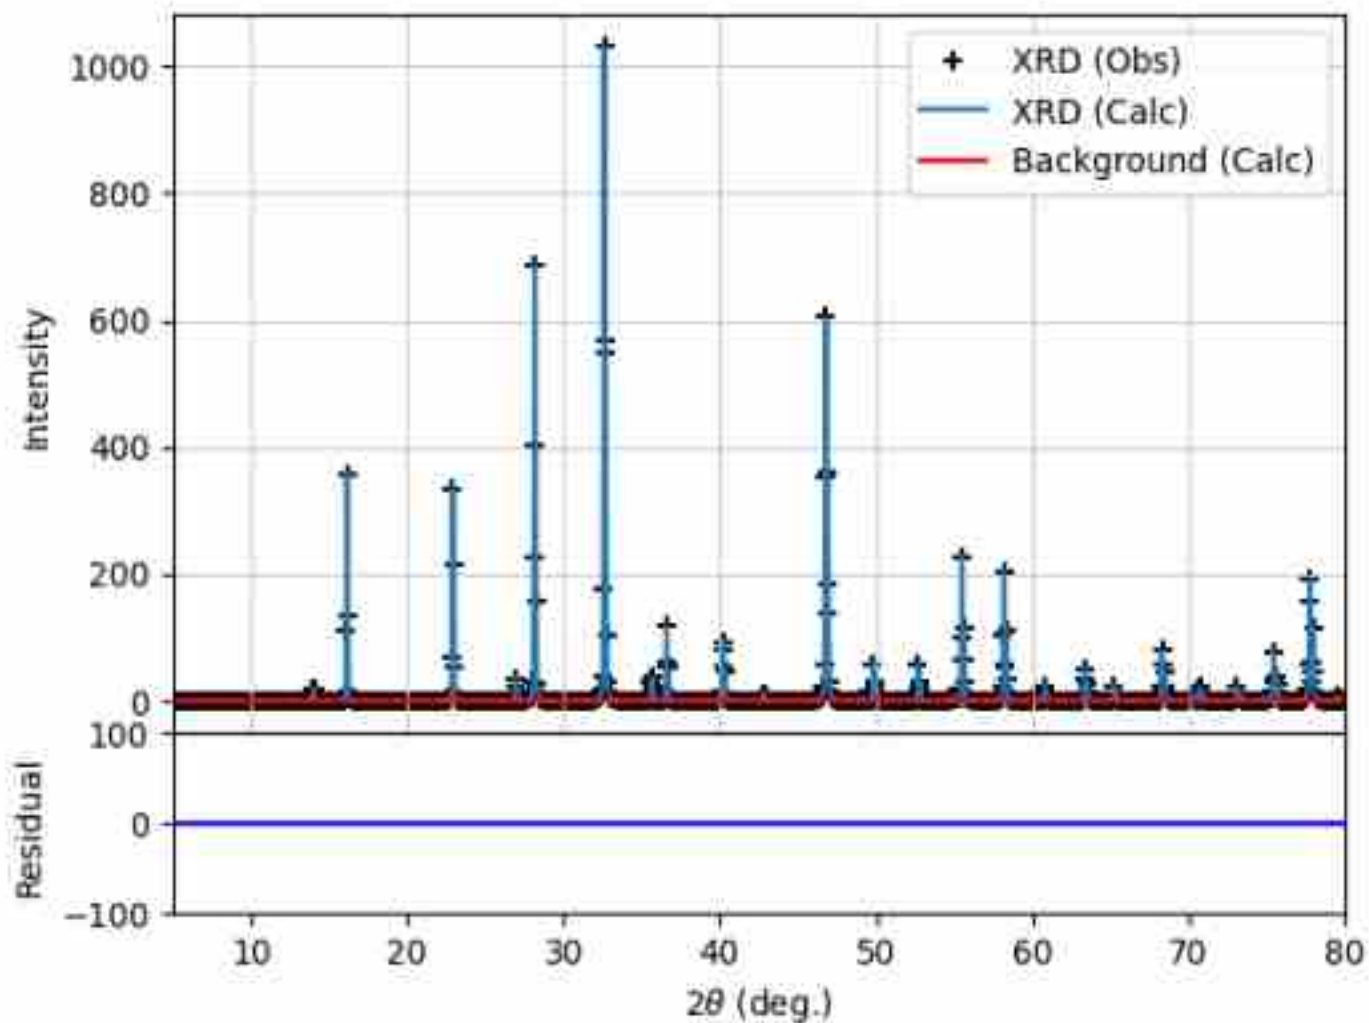

| RMSE before RR | Rwp     | RMSE after RR |
|----------------|---------|---------------|
| 0.013          | 0.10944 | 0.00363       |

# Rb<sub>2</sub>U<sub>1</sub>O<sub>4</sub>

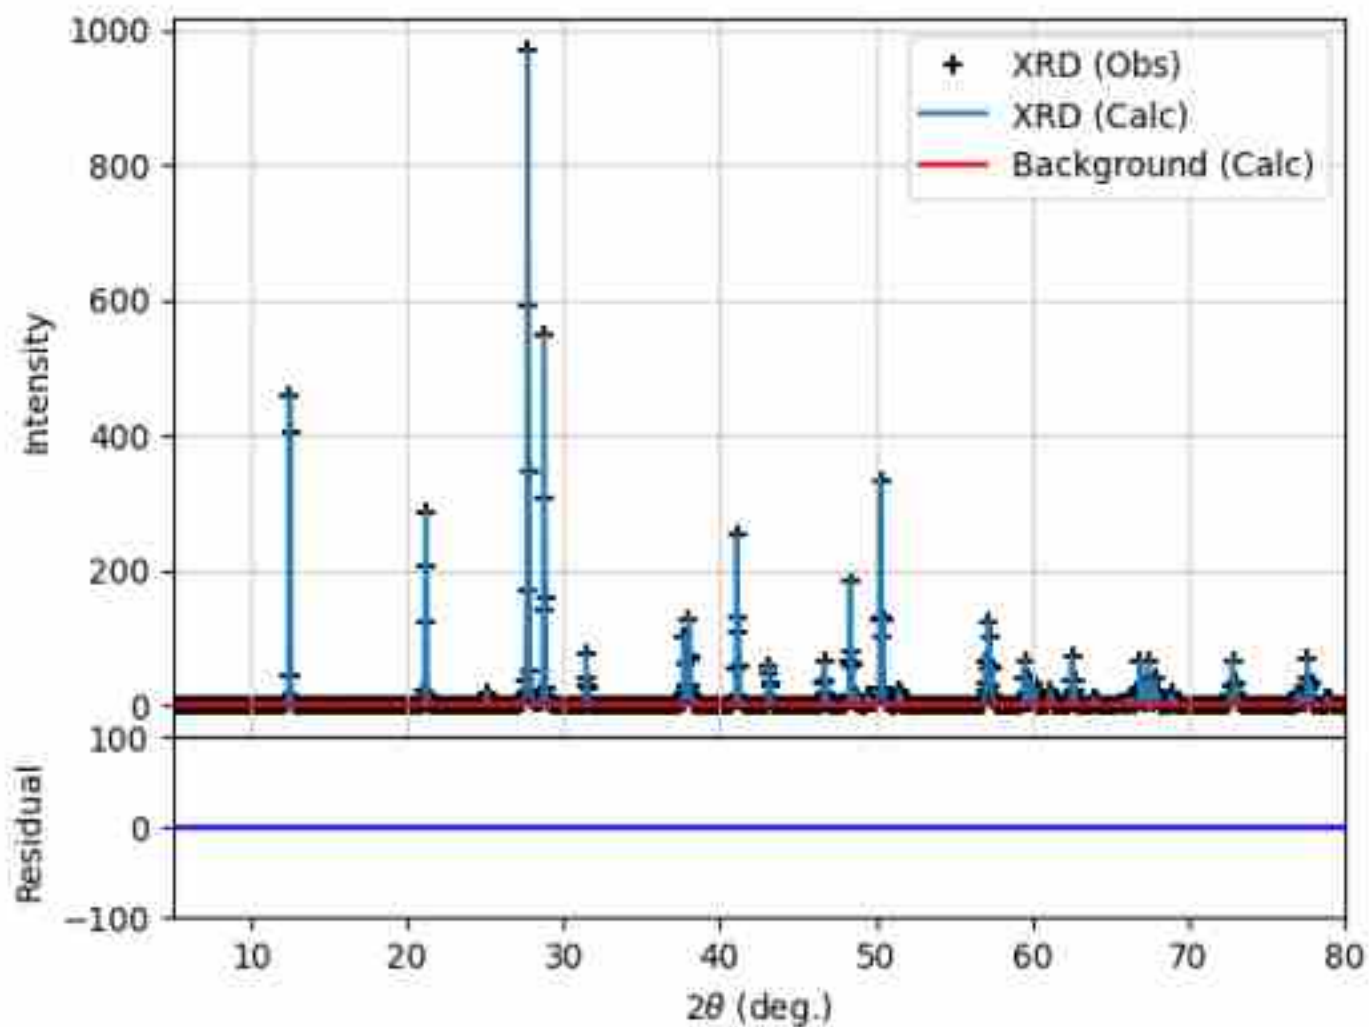

| RMSE before RR | Rwp     | RMSE after RR |
|----------------|---------|---------------|
| 0.013          | 0.01618 | 0.00474       |

# Rb<sub>2</sub>W<sub>1</sub>C<sub>16</sub>

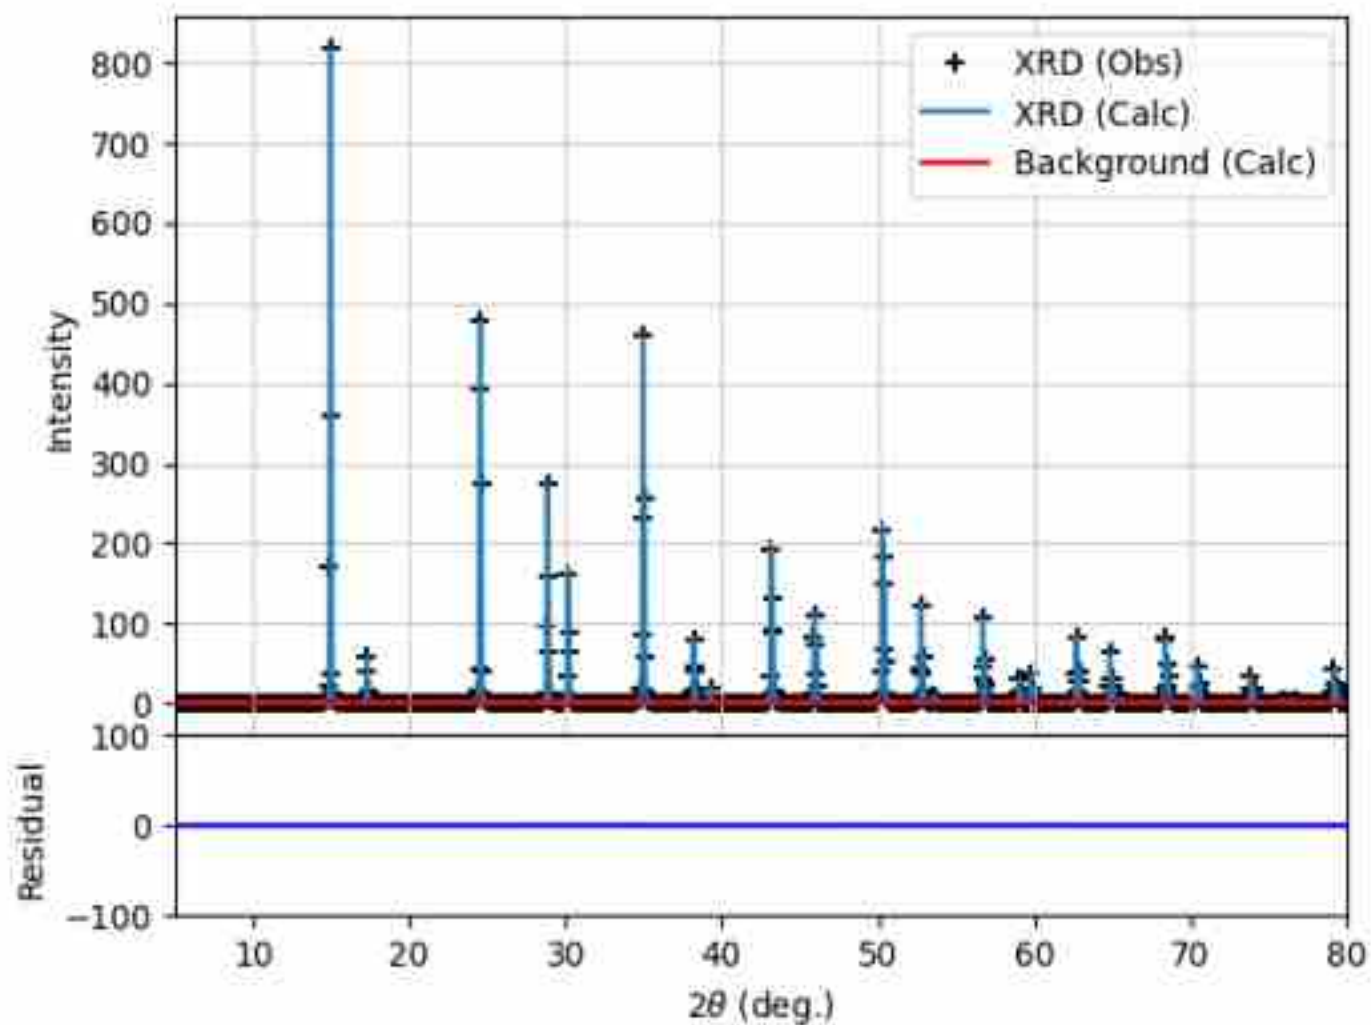

| RMSE before RR | Rwp     | RMSE after RR |
|----------------|---------|---------------|
| 0.013          | 0.11984 | 0.00883       |

# Rb3As1F6

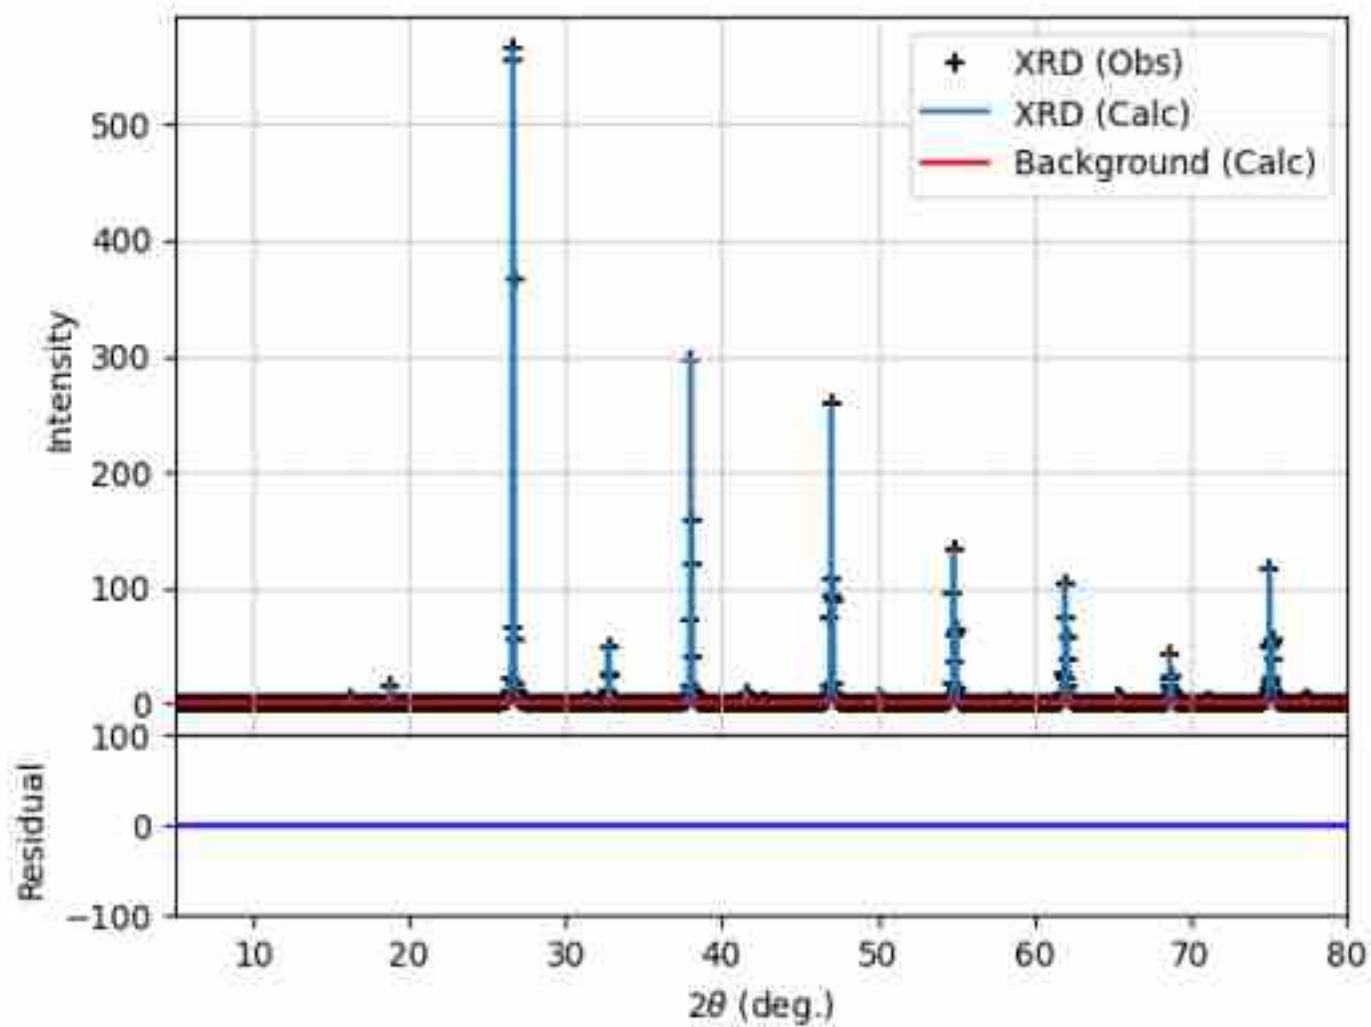

| RMSE before RR | Rwp     | RMSE after RR |
|----------------|---------|---------------|
| 0.013          | 0.00603 | 0.00204       |

# Re<sub>2</sub>Ge<sub>4</sub>

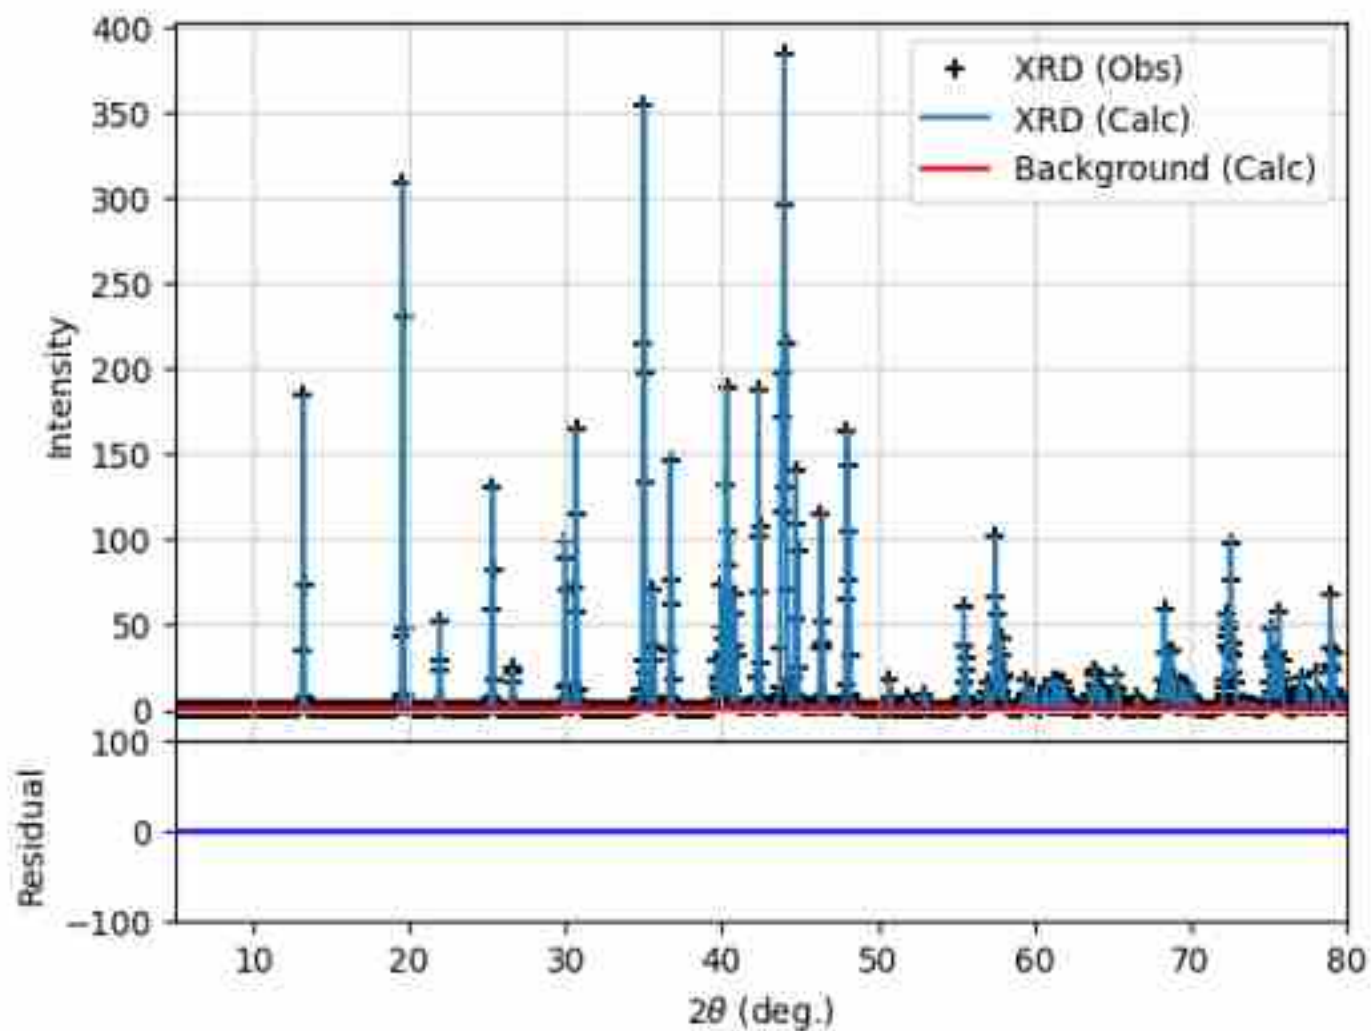

| RMSE before RR | Rwp     | RMSE after RR |
|----------------|---------|---------------|
| 0.013          | 0.00287 | 0.0003        |



# Re2Tc6

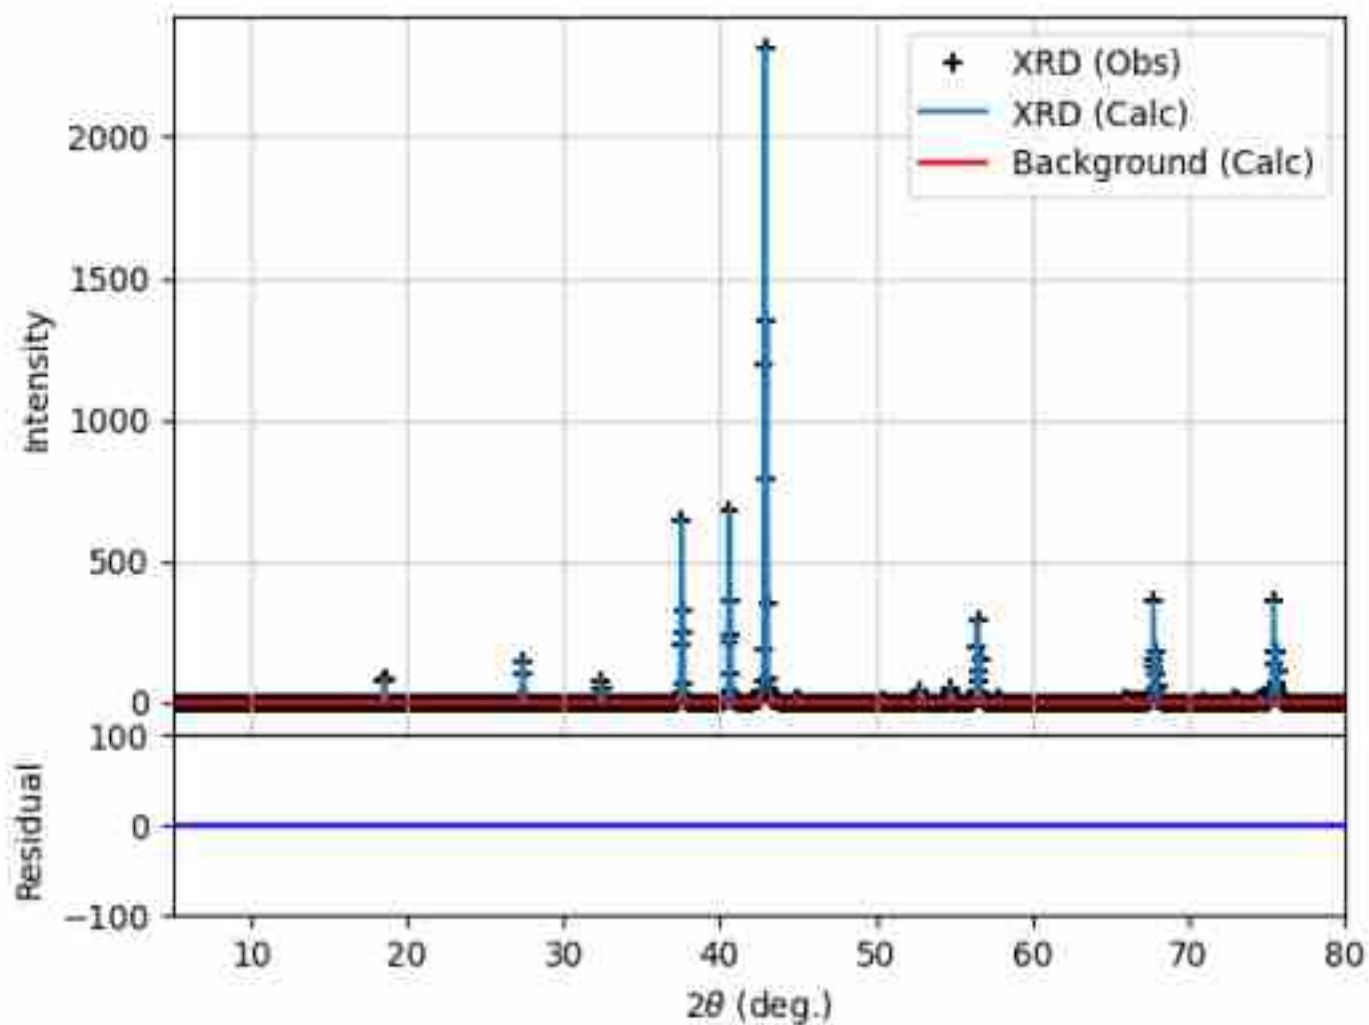

| RMSE before RR | Rwp     | RMSE after RR |
|----------------|---------|---------------|
| 0.013          | 0.03057 | 0.00195       |

# Re6Rh2

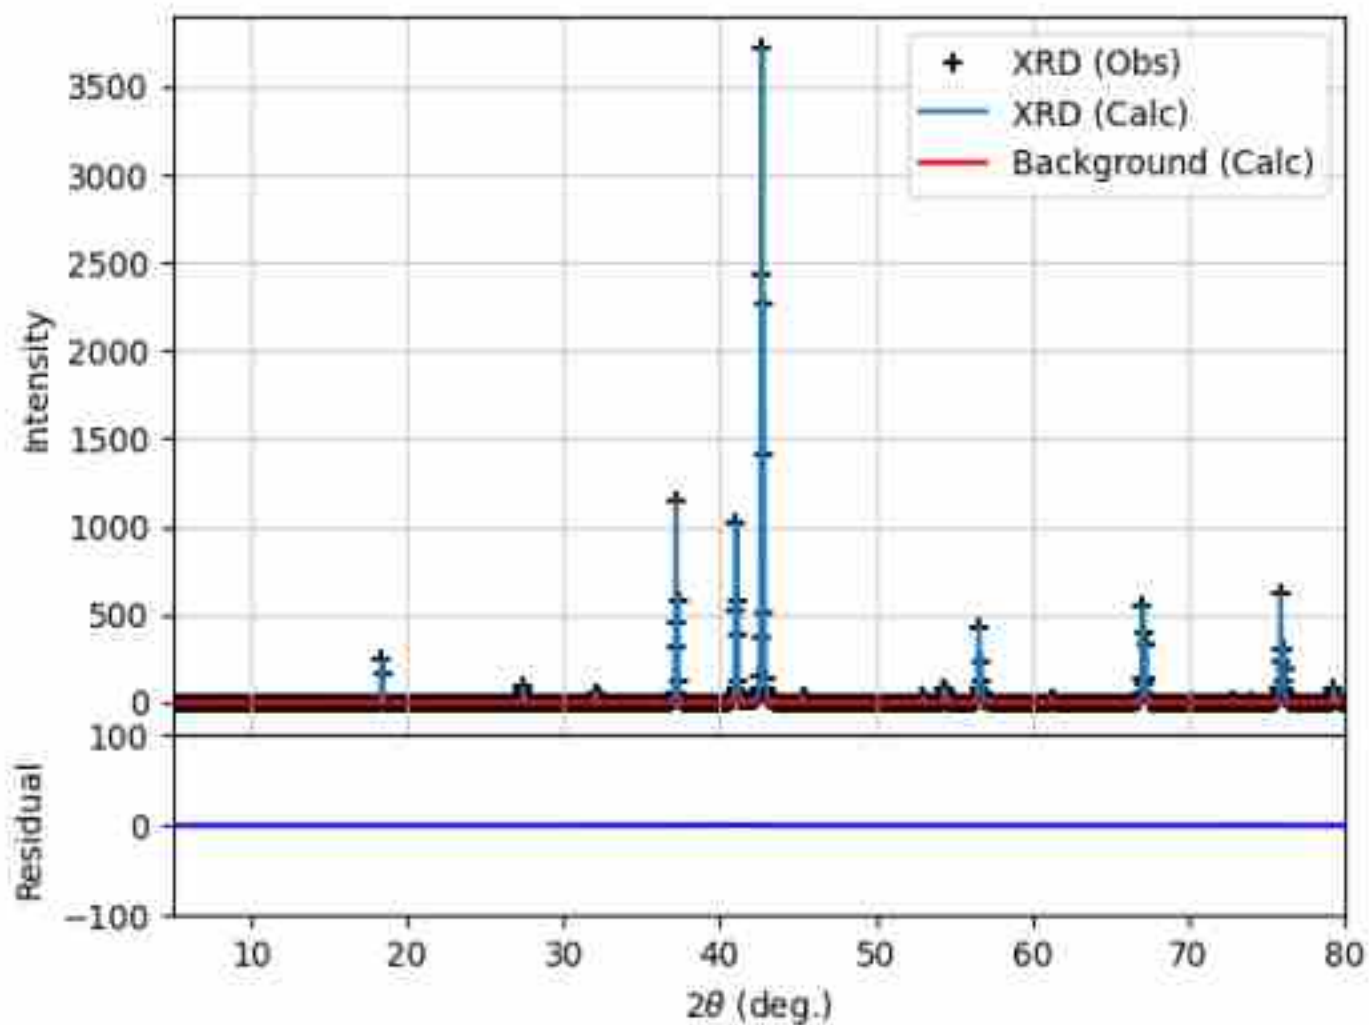

| RMSE before RR | Rwp     | RMSE after RR |
|----------------|---------|---------------|
| 0.013          | 0.10703 | 0.00188       |

# Sb<sub>2</sub>Te<sub>2</sub>Se<sub>1</sub>

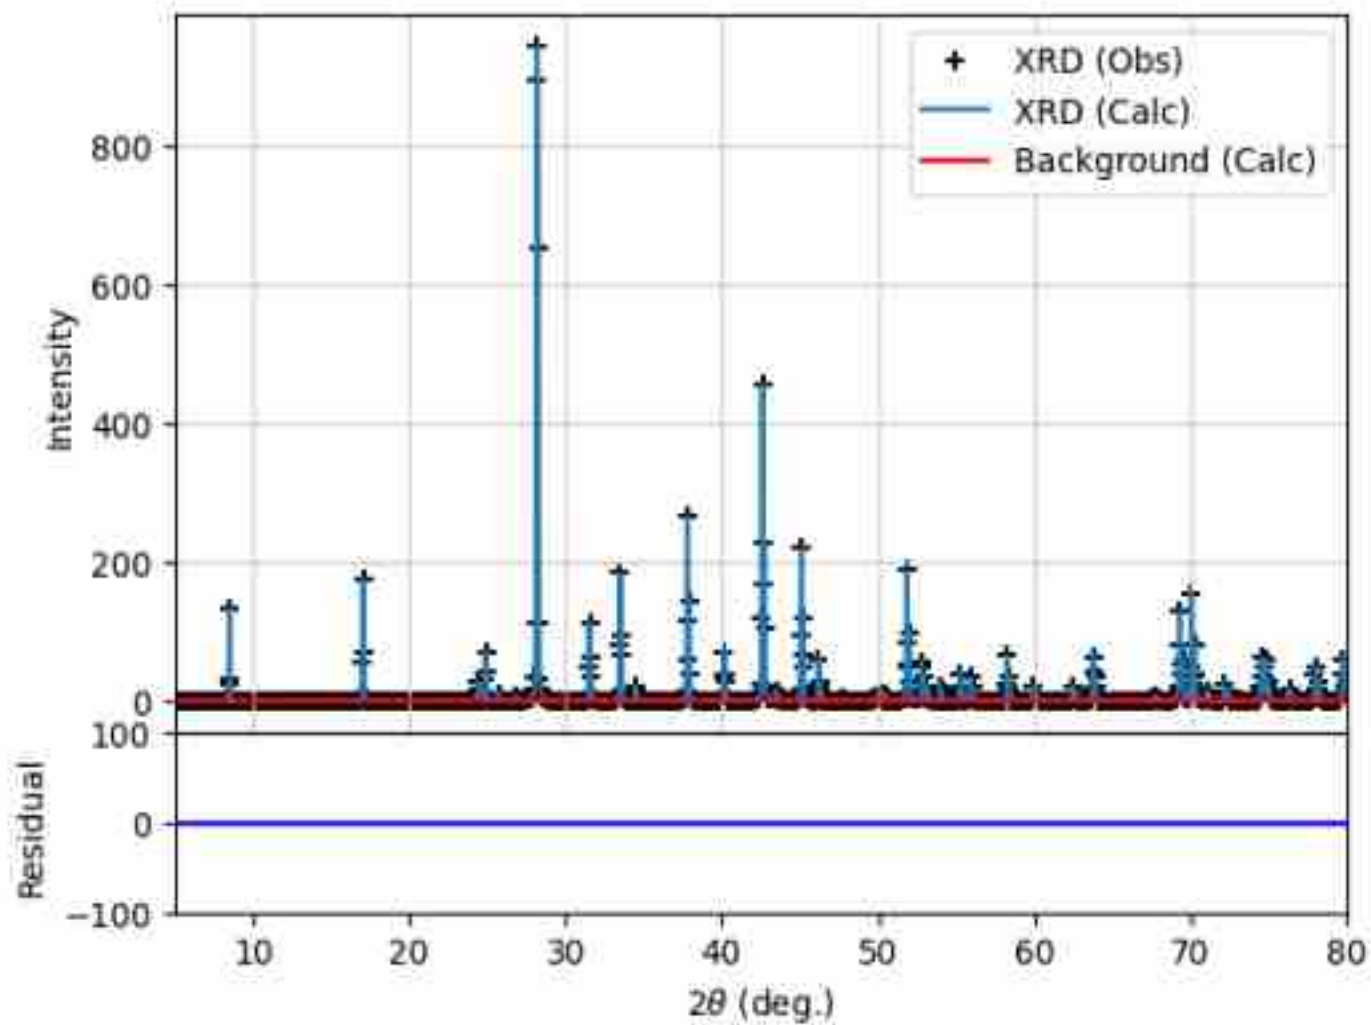

| RMSE before RR | Rwp     | RMSE after RR |
|----------------|---------|---------------|
| 0.013          | 0.00384 | 0.0002        |

# Sc<sub>2</sub>Fe<sub>8</sub>P<sub>4</sub>

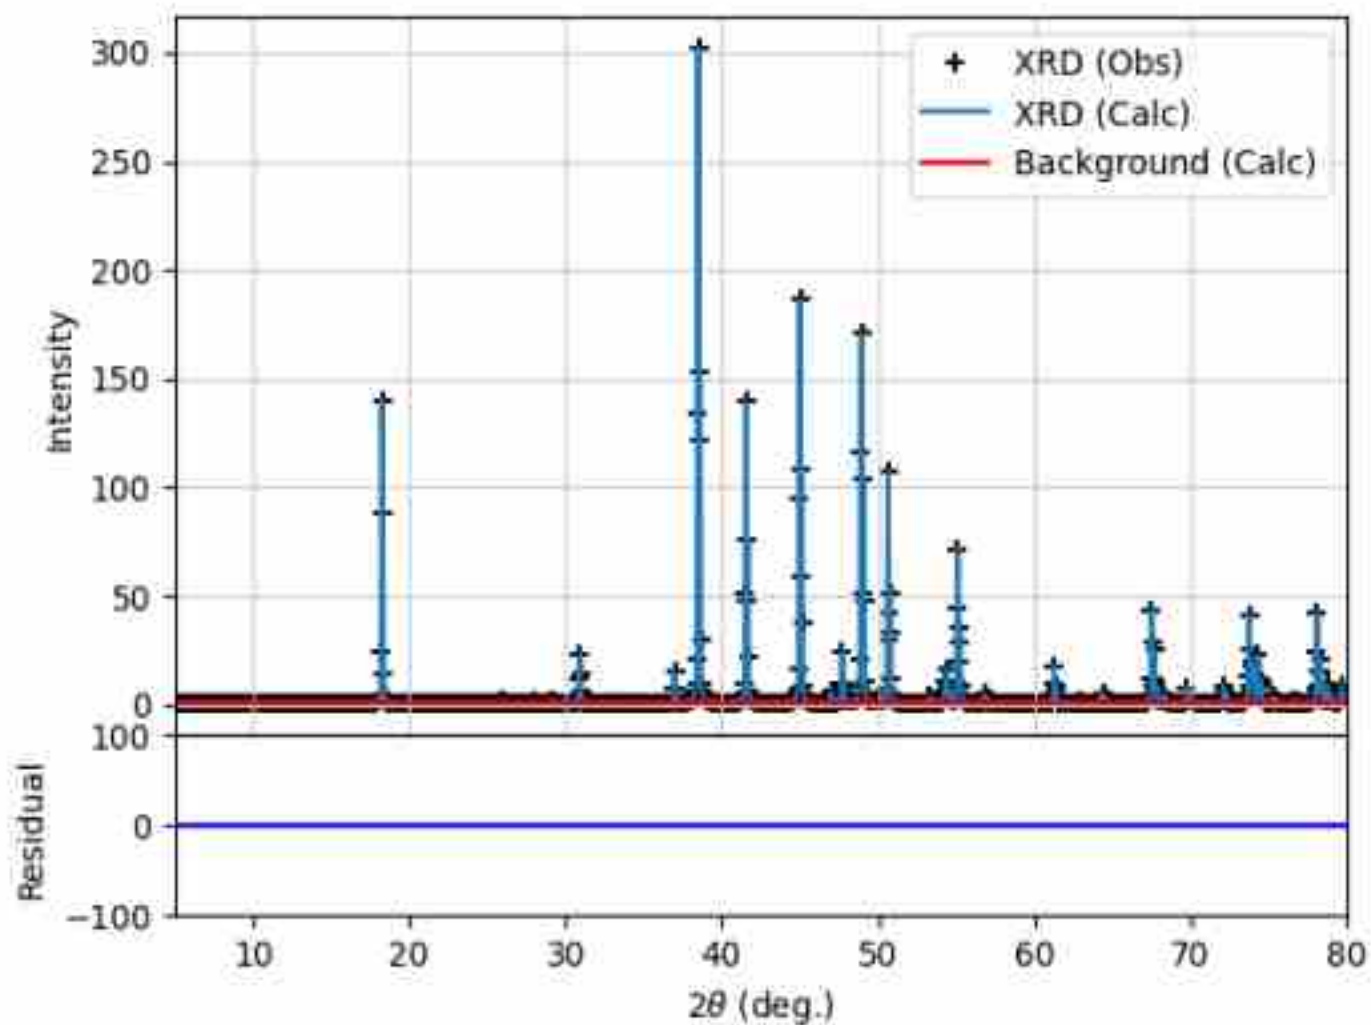

| RMSE before RR | Rwp     | RMSE after RR |
|----------------|---------|---------------|
| 0.013          | 0.00583 | 0.00095       |

# Sc<sub>4</sub>Co<sub>2</sub>B<sub>4</sub>Ir<sub>10</sub>

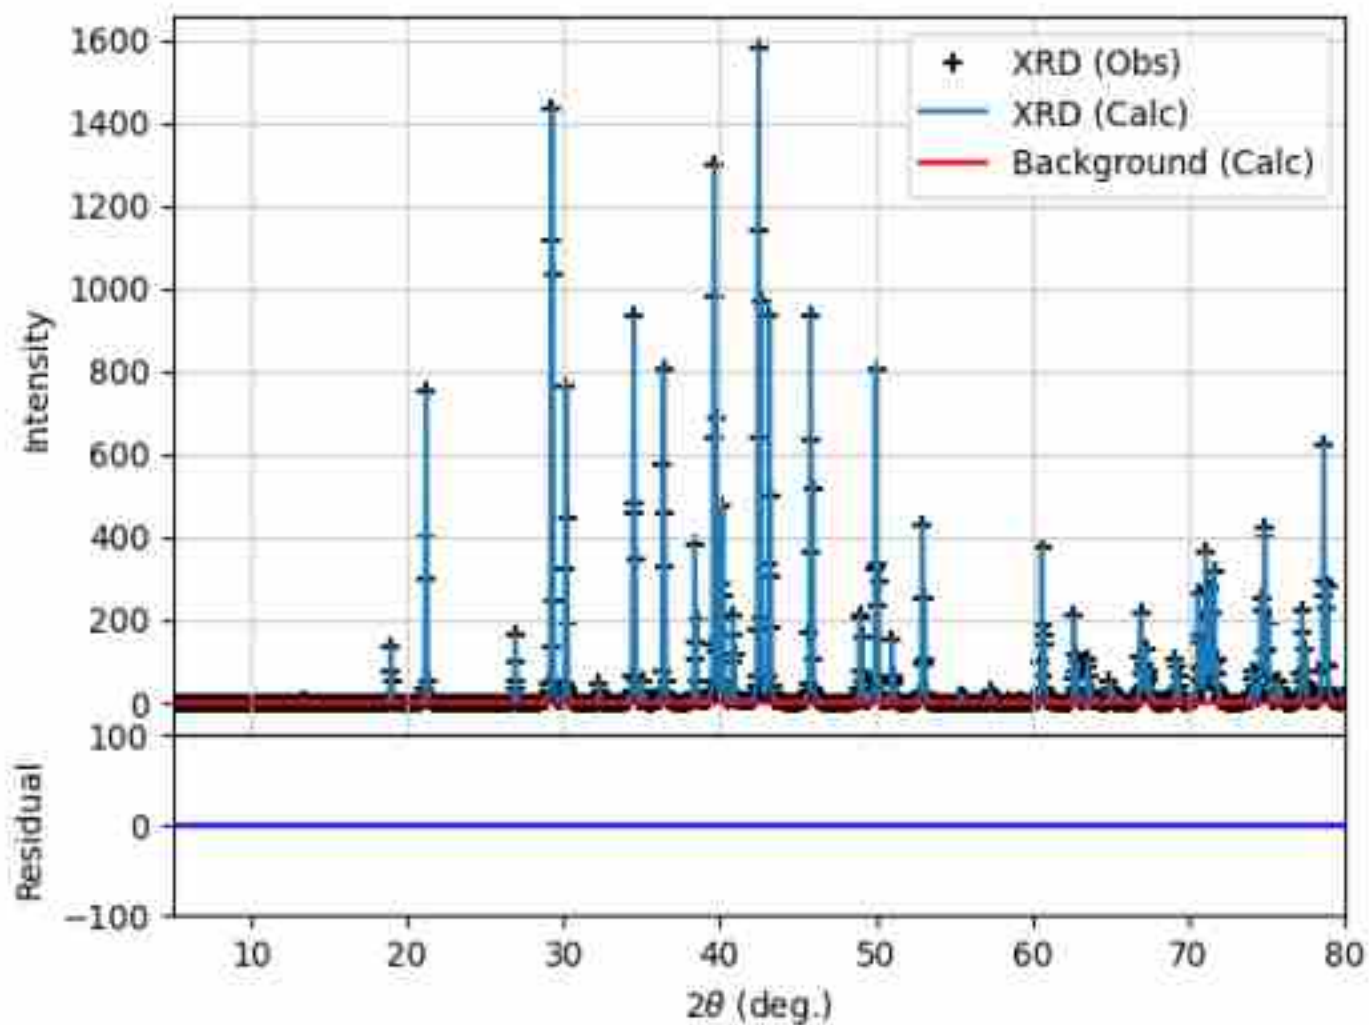

| RMSE before RR | Rwp     | RMSE after RR |
|----------------|---------|---------------|
| 0.013          | 0.00493 | 0.0015        |

# Sm1Gd1S2

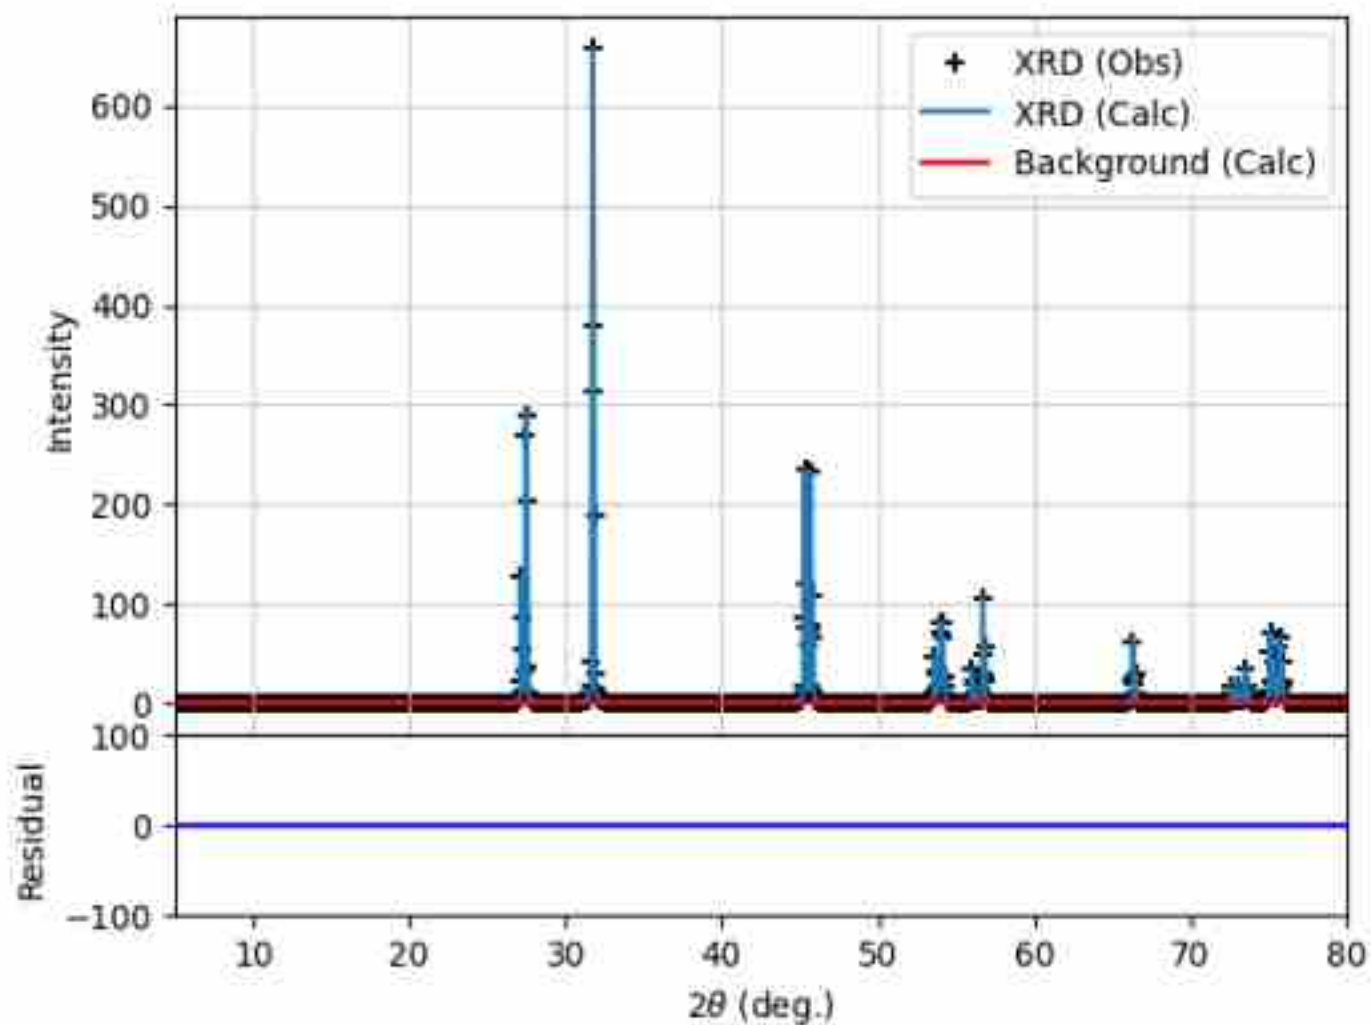

| RMSE before RR | Rwp     | RMSE after RR |
|----------------|---------|---------------|
| 0.013          | 0.00318 | 0.00055       |

# Sm1Mn2Ni3

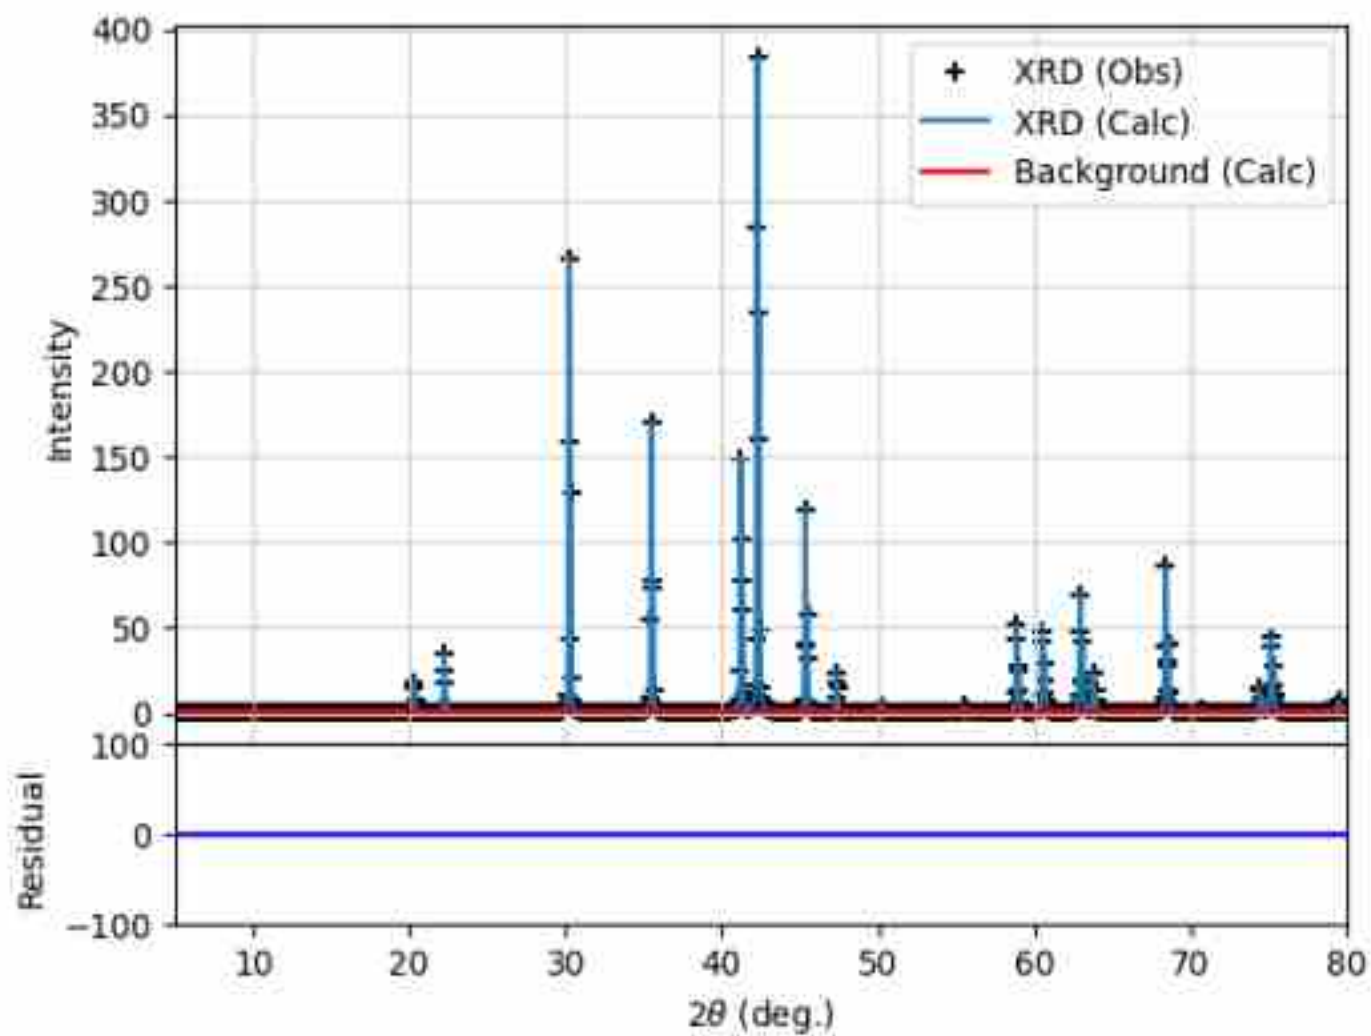

| RMSE before RR | Rwp     | RMSE after RR |
|----------------|---------|---------------|
| 0.013          | 0.00293 | 0.00044       |

# Sm1Mn2Si2

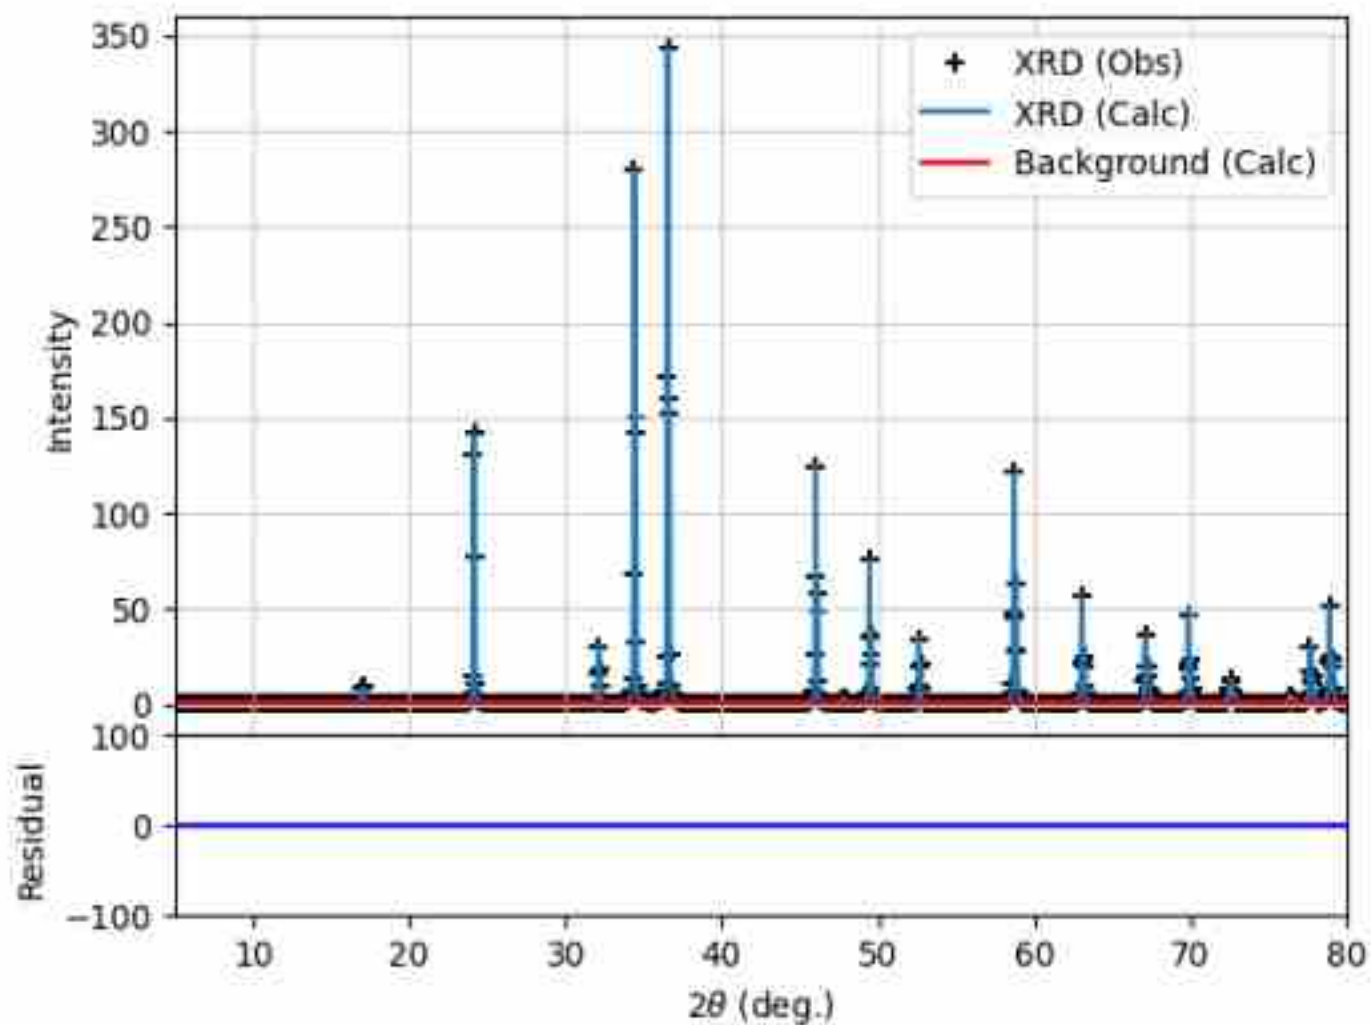

| RMSE before RR | Rwp     | RMSE after RR |
|----------------|---------|---------------|
| 0.013          | 0.00351 | 0.00105       |



# Sm1Zn12

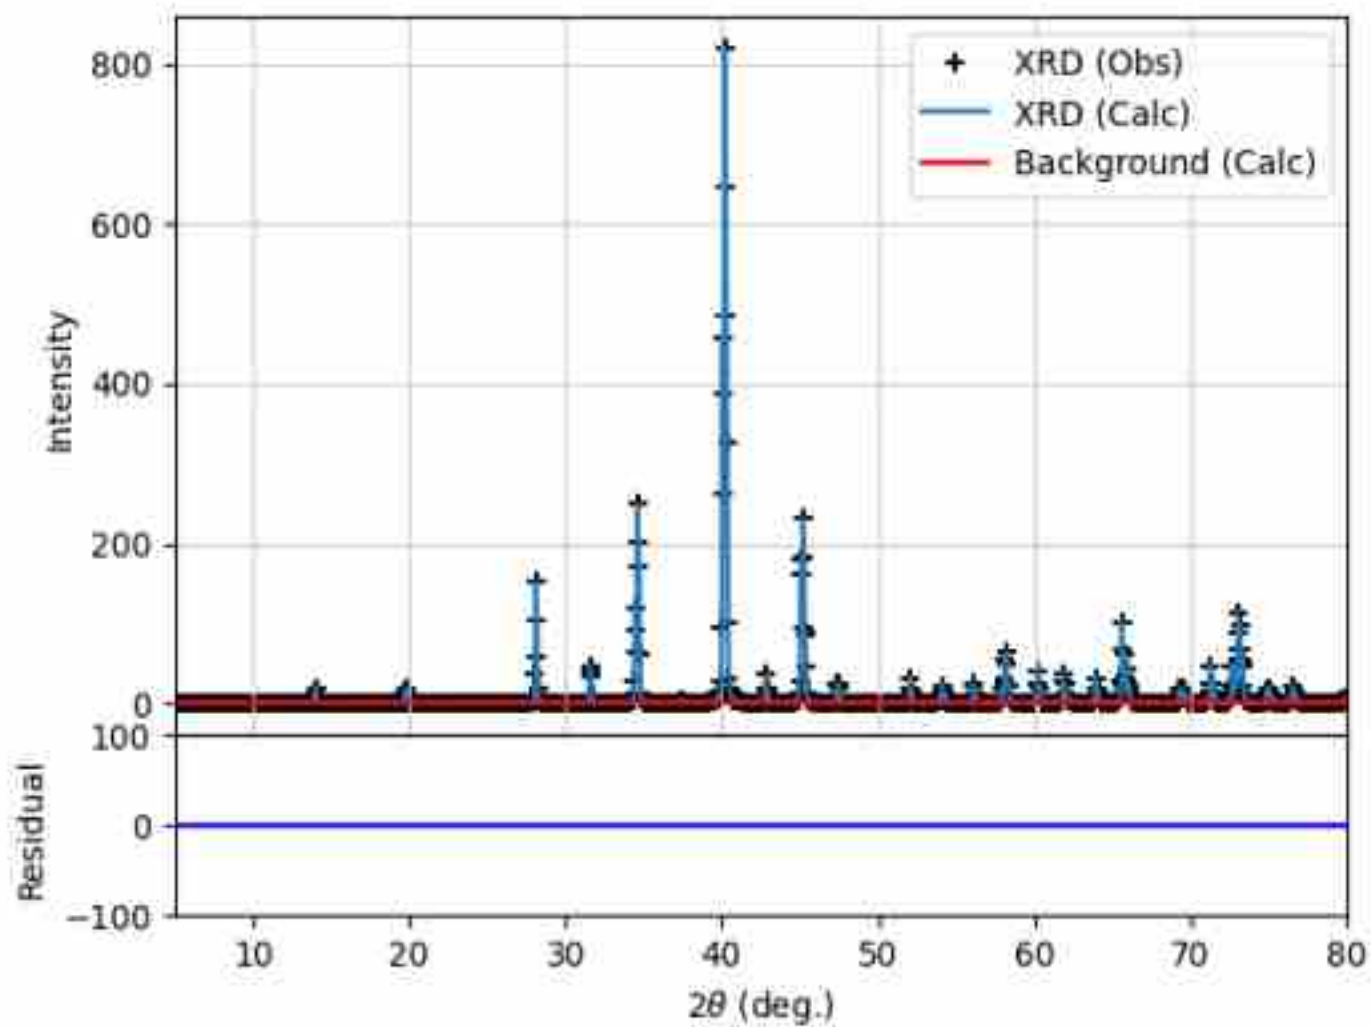

| RMSE before RR | Rwp    | RMSE after RR |
|----------------|--------|---------------|
| 0.013          | 0.0042 | 0.00079       |

# Sm2Dy6

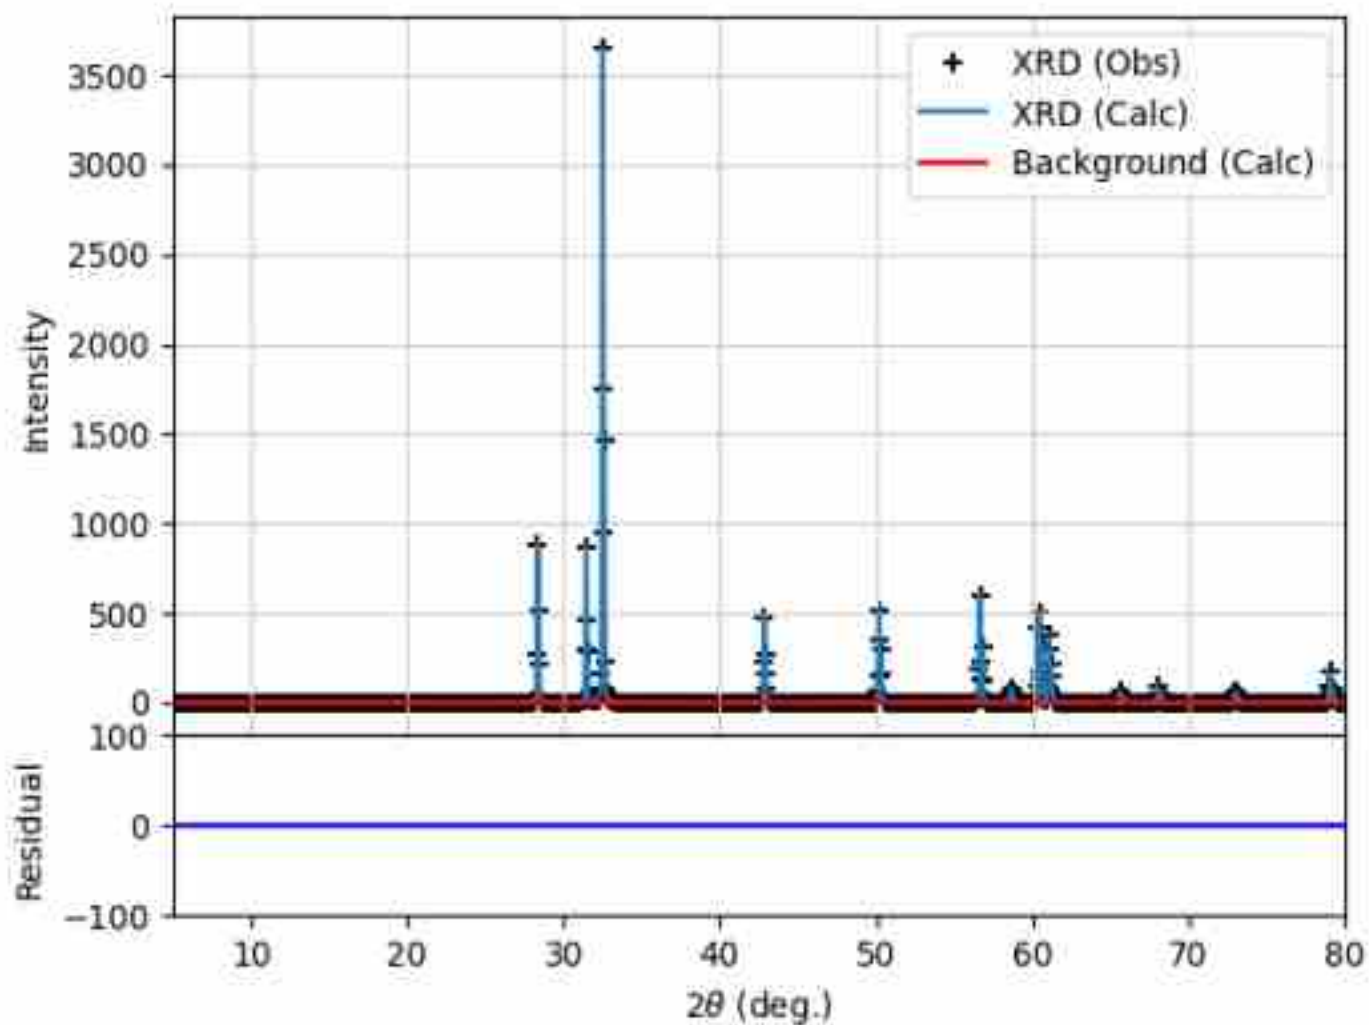

| RMSE before RR | Rwp     | RMSE after RR |
|----------------|---------|---------------|
| 0.013          | 0.00408 | 0.00039       |

# Sm2Ge4

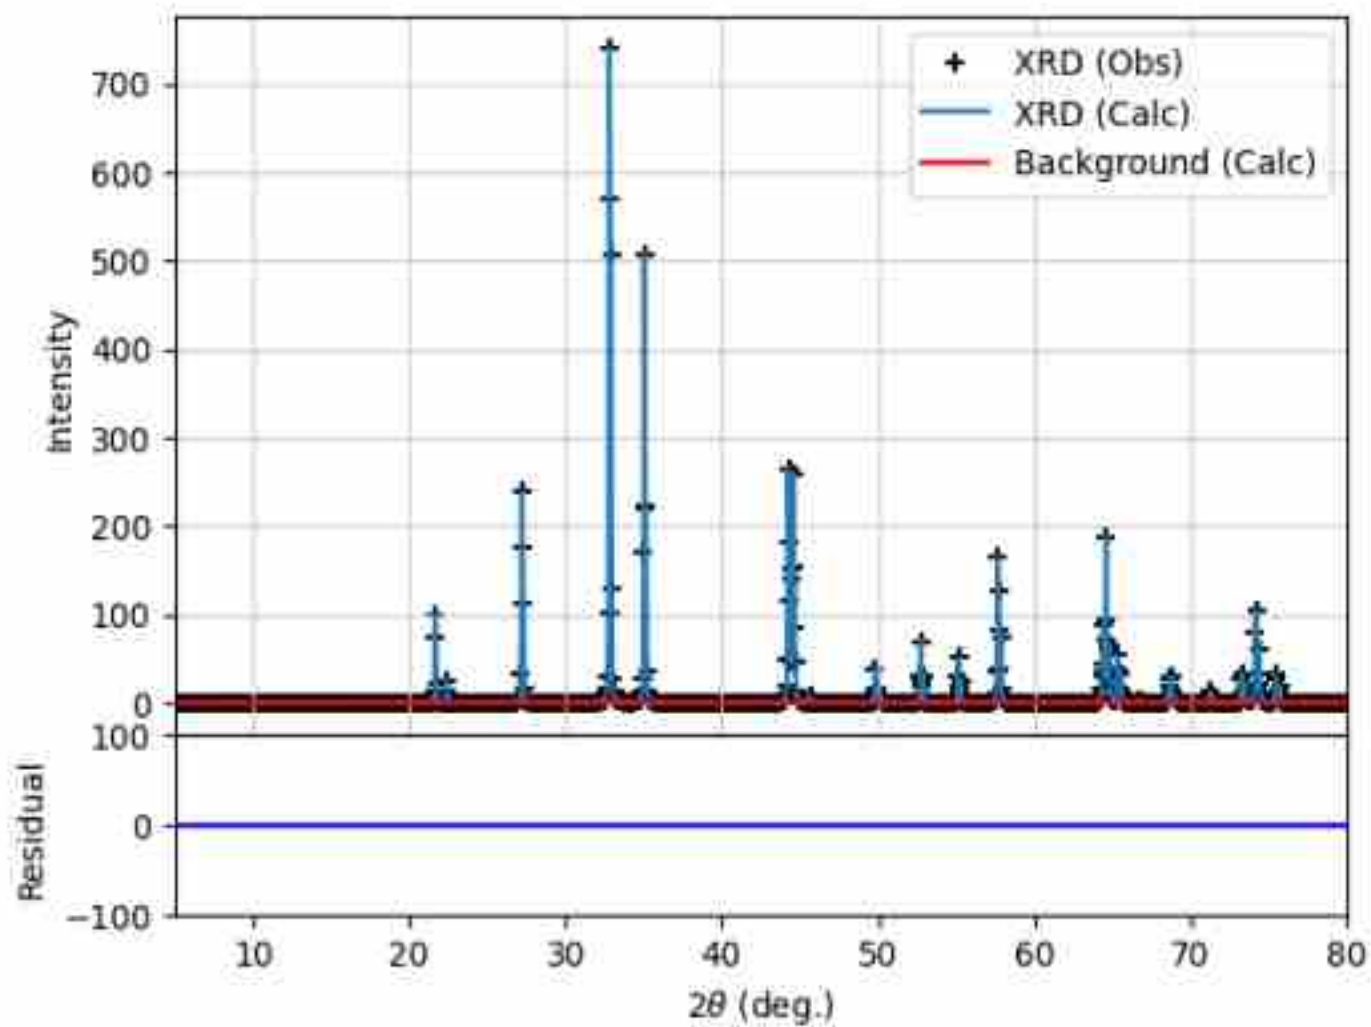

| RMSE before RR | Rwp    | RMSE after RR |
|----------------|--------|---------------|
| 0.013          | 0.0029 | 0.00037       |

# Sm<sub>2</sub>I<sub>2</sub>O<sub>2</sub>

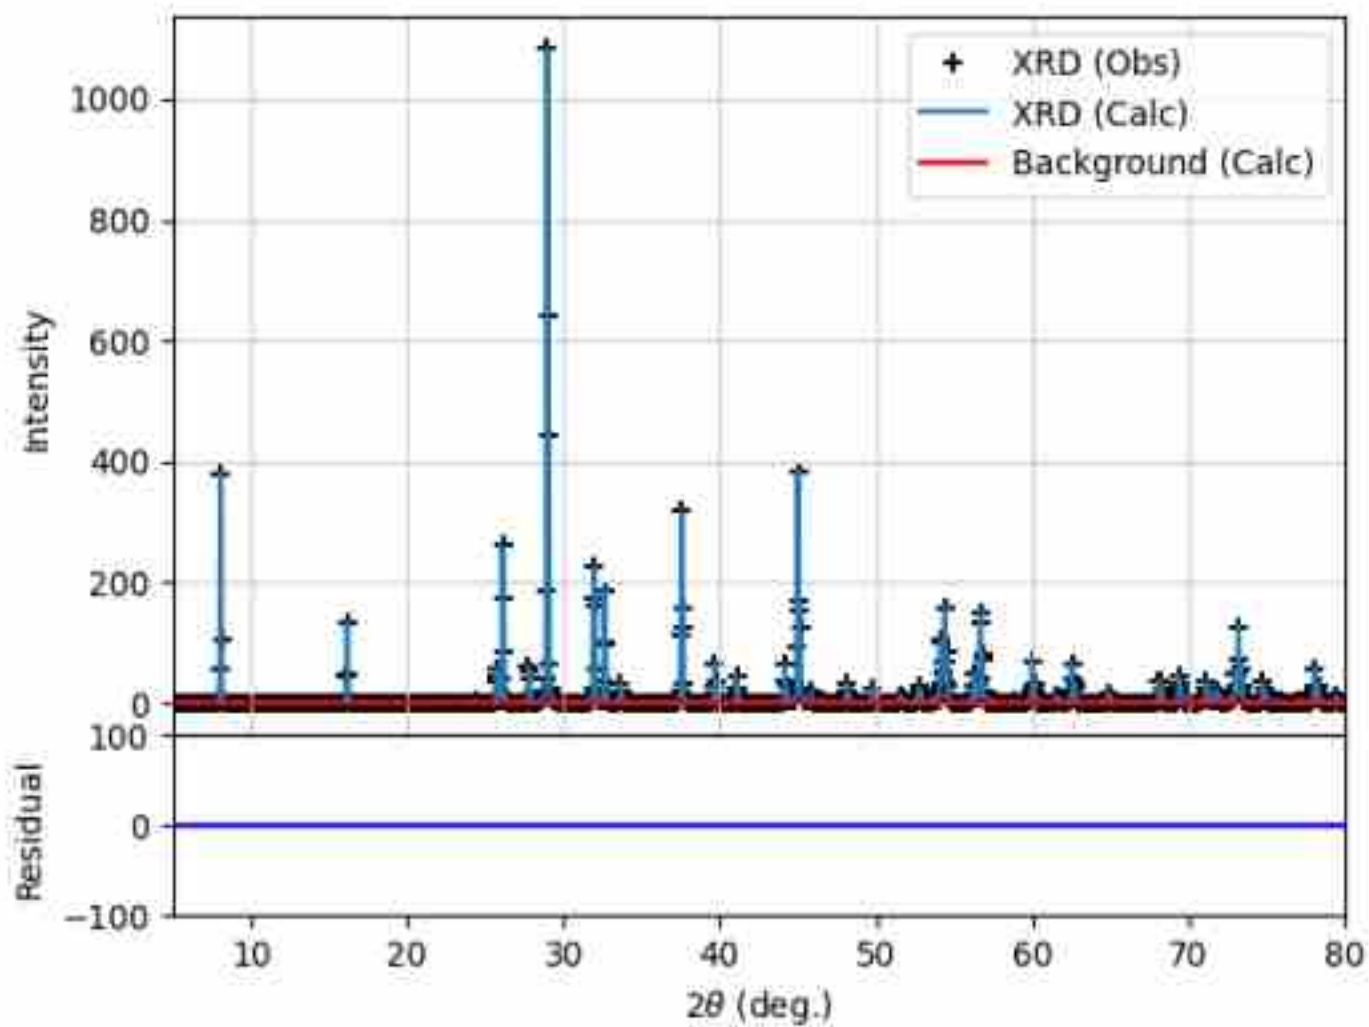

| RMSE before RR | Rwp     | RMSE after RR |
|----------------|---------|---------------|
| 0.013          | 0.00309 | 0.00087       |

# Sm<sub>2</sub>Ni<sub>2</sub>Ge<sub>6</sub>

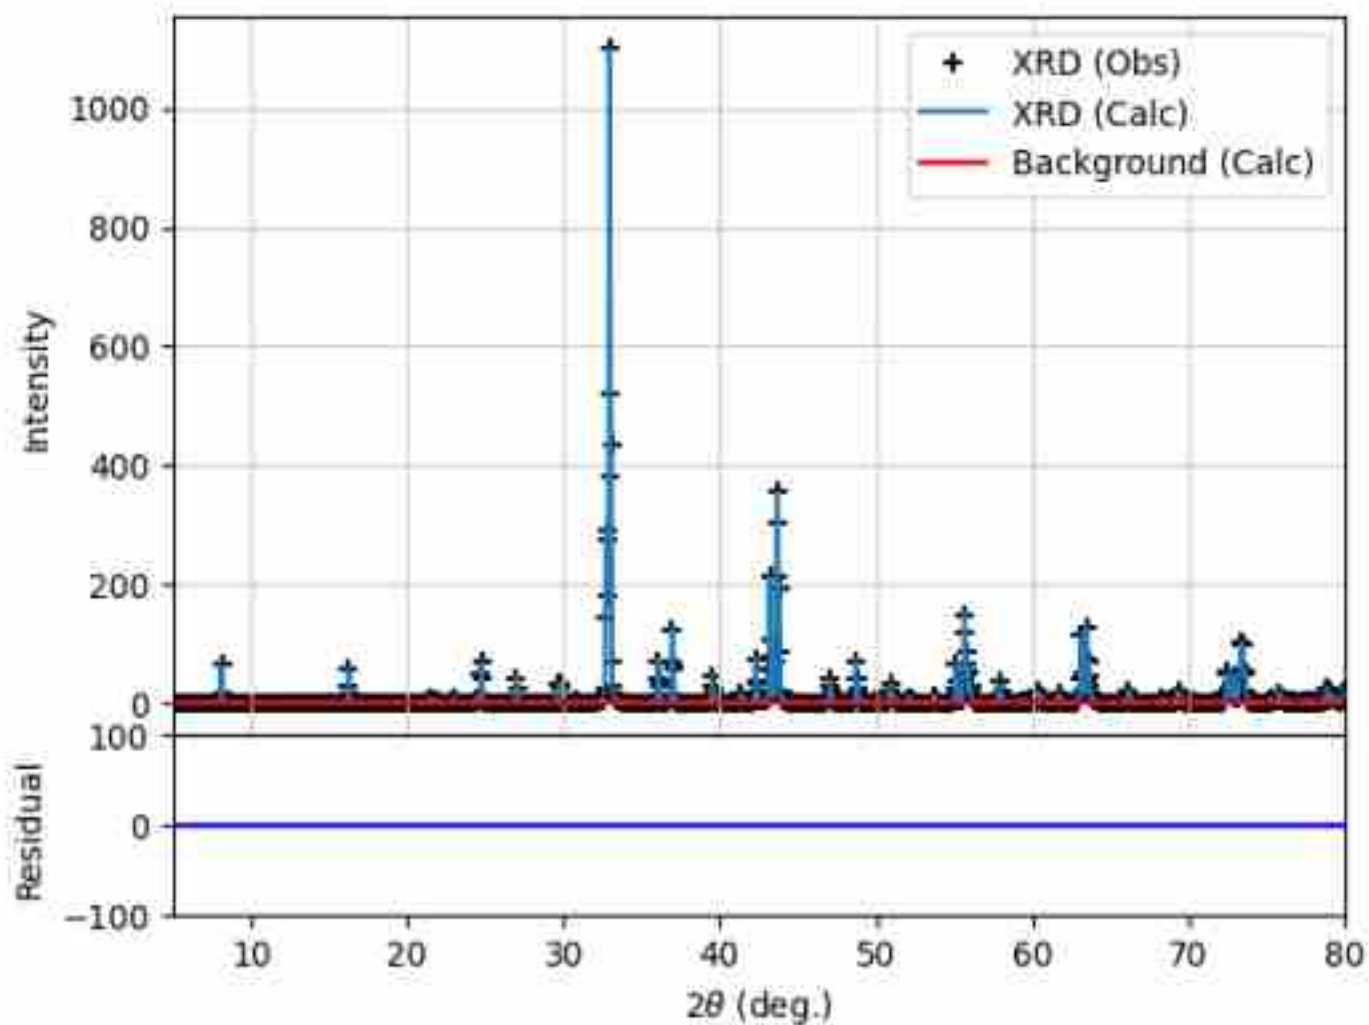

| RMSE before RR | Rwp    | RMSE after RR |
|----------------|--------|---------------|
| 0.013          | 0.0027 | 0.00026       |

# Sm3Er1S4

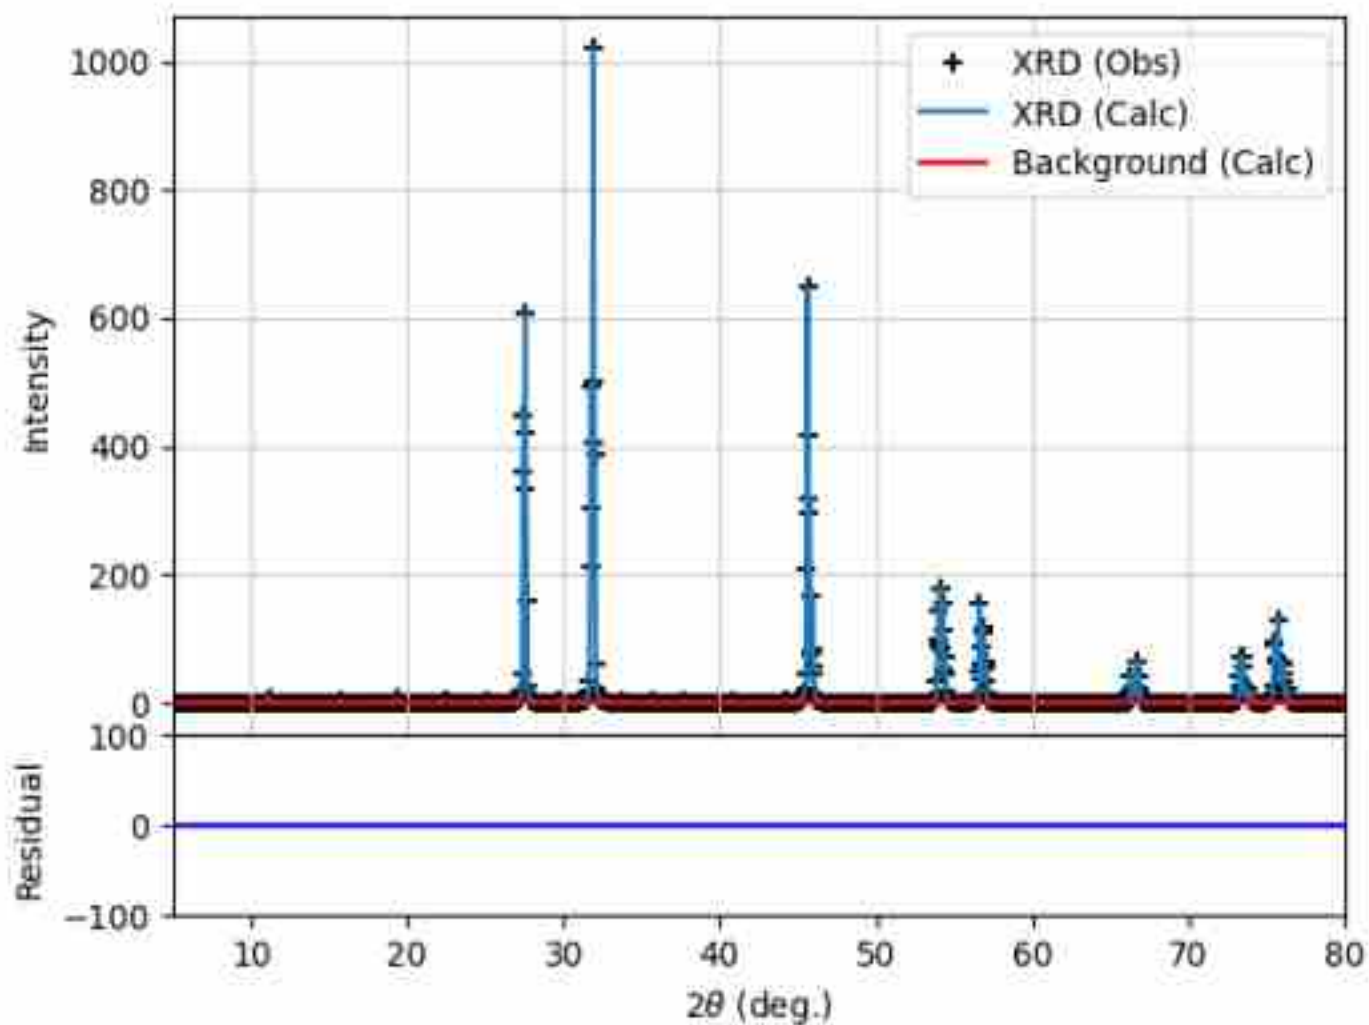

| RMSE before RR | Rwp     | RMSE after RR |
|----------------|---------|---------------|
| 0.013          | 0.05043 | 0.00712       |

# Sn4O4

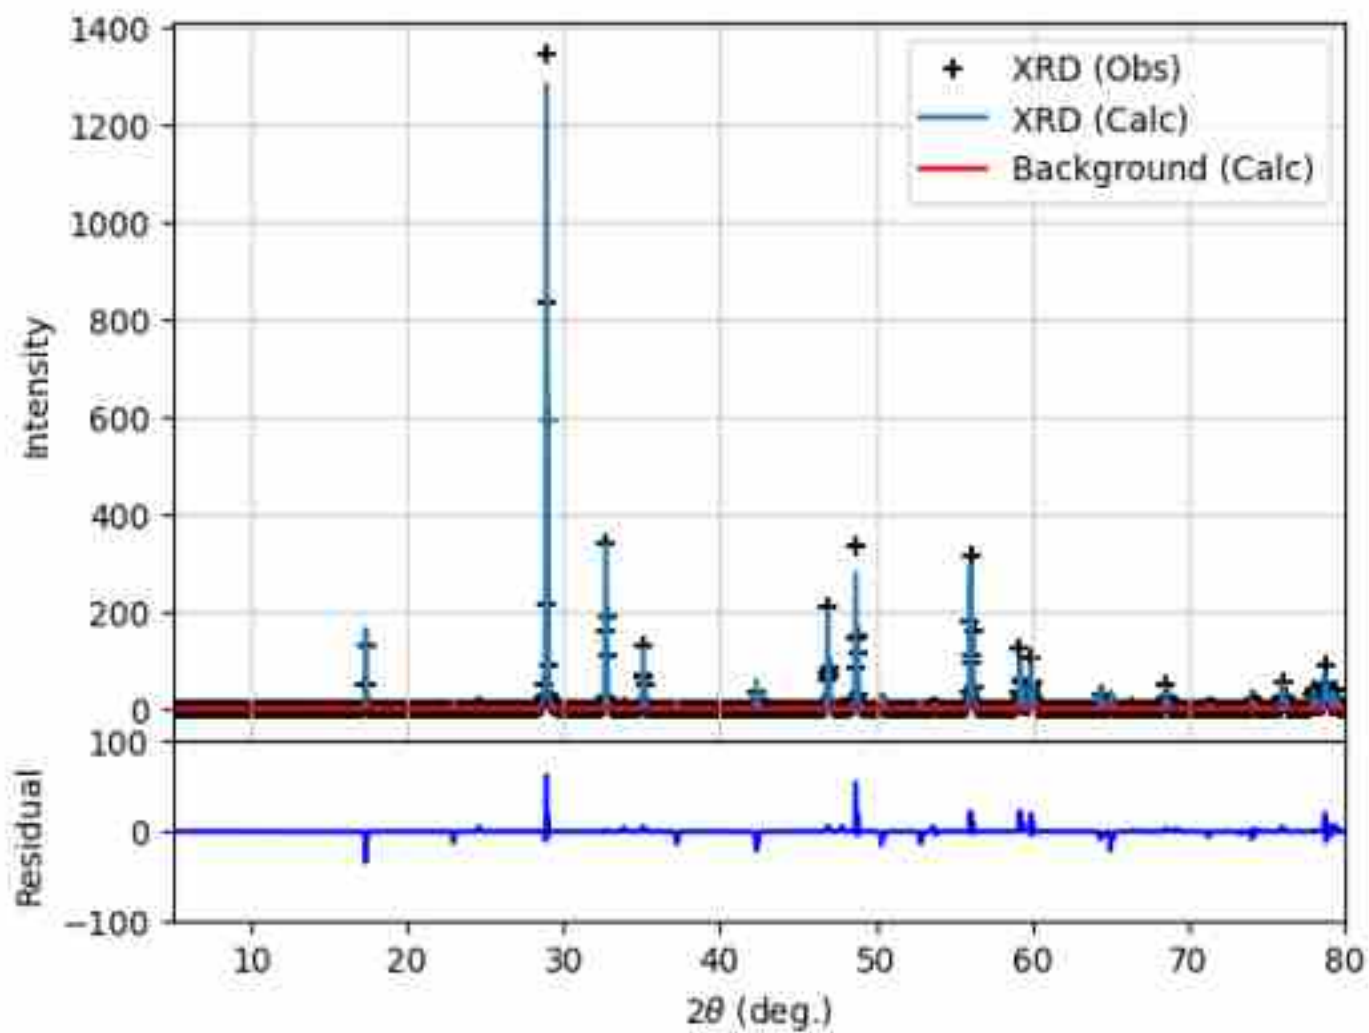

| RMSE before RR | Rwp     | RMSE after RR |
|----------------|---------|---------------|
| 0.013          | 32.2444 | None          |

# Sr1Al9Ni2

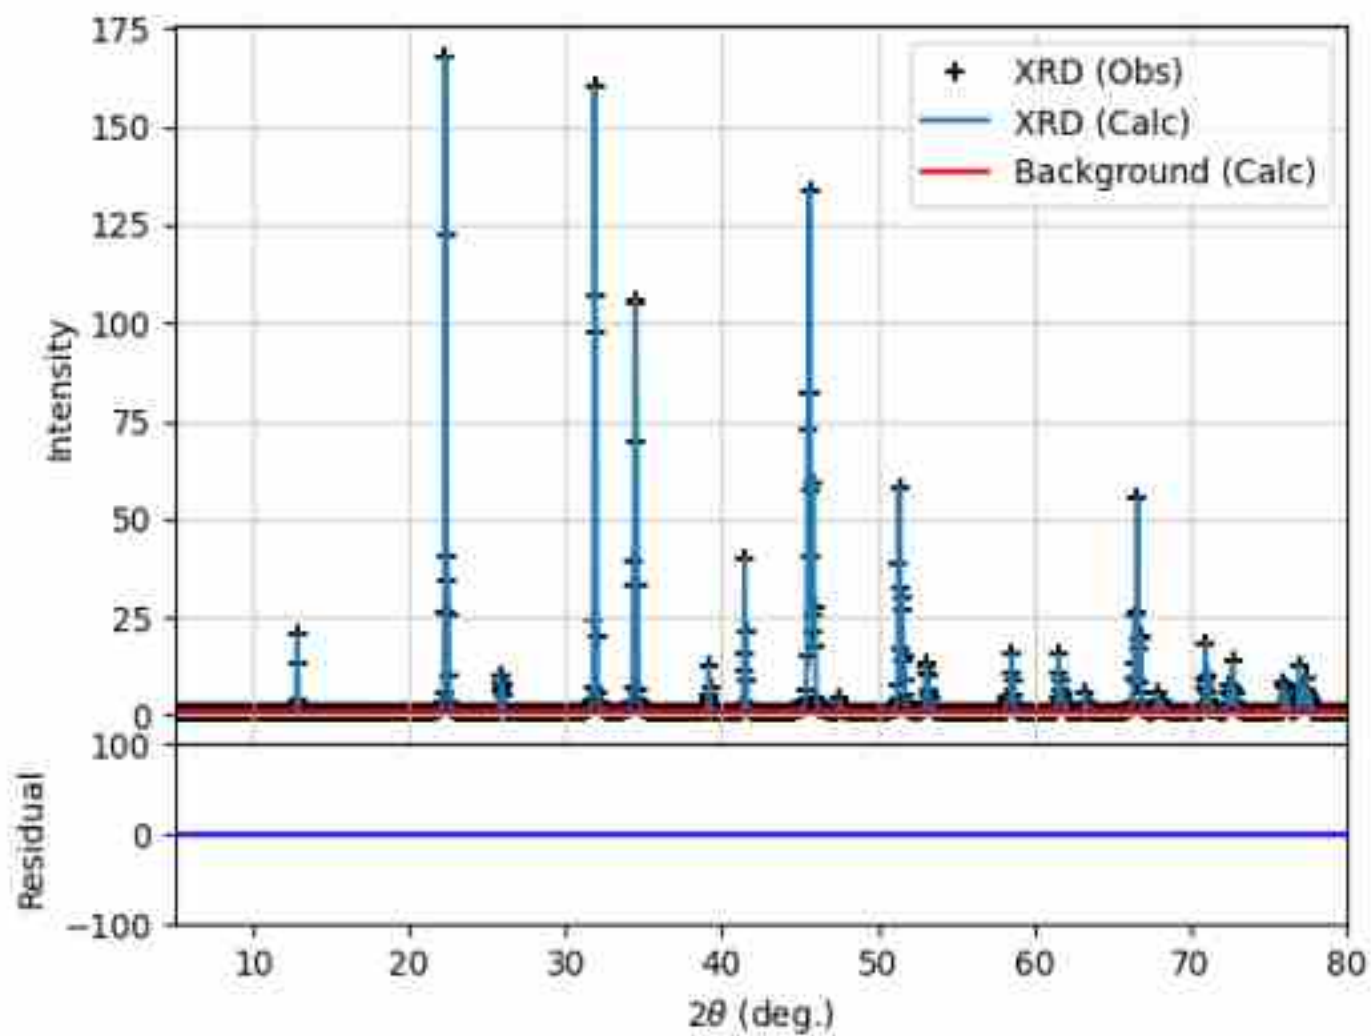

| RMSE before RR | Rwp     | RMSE after RR |
|----------------|---------|---------------|
| 0.013          | 0.00621 | 0.00209       |



# Sr1Nd1Fe1O4

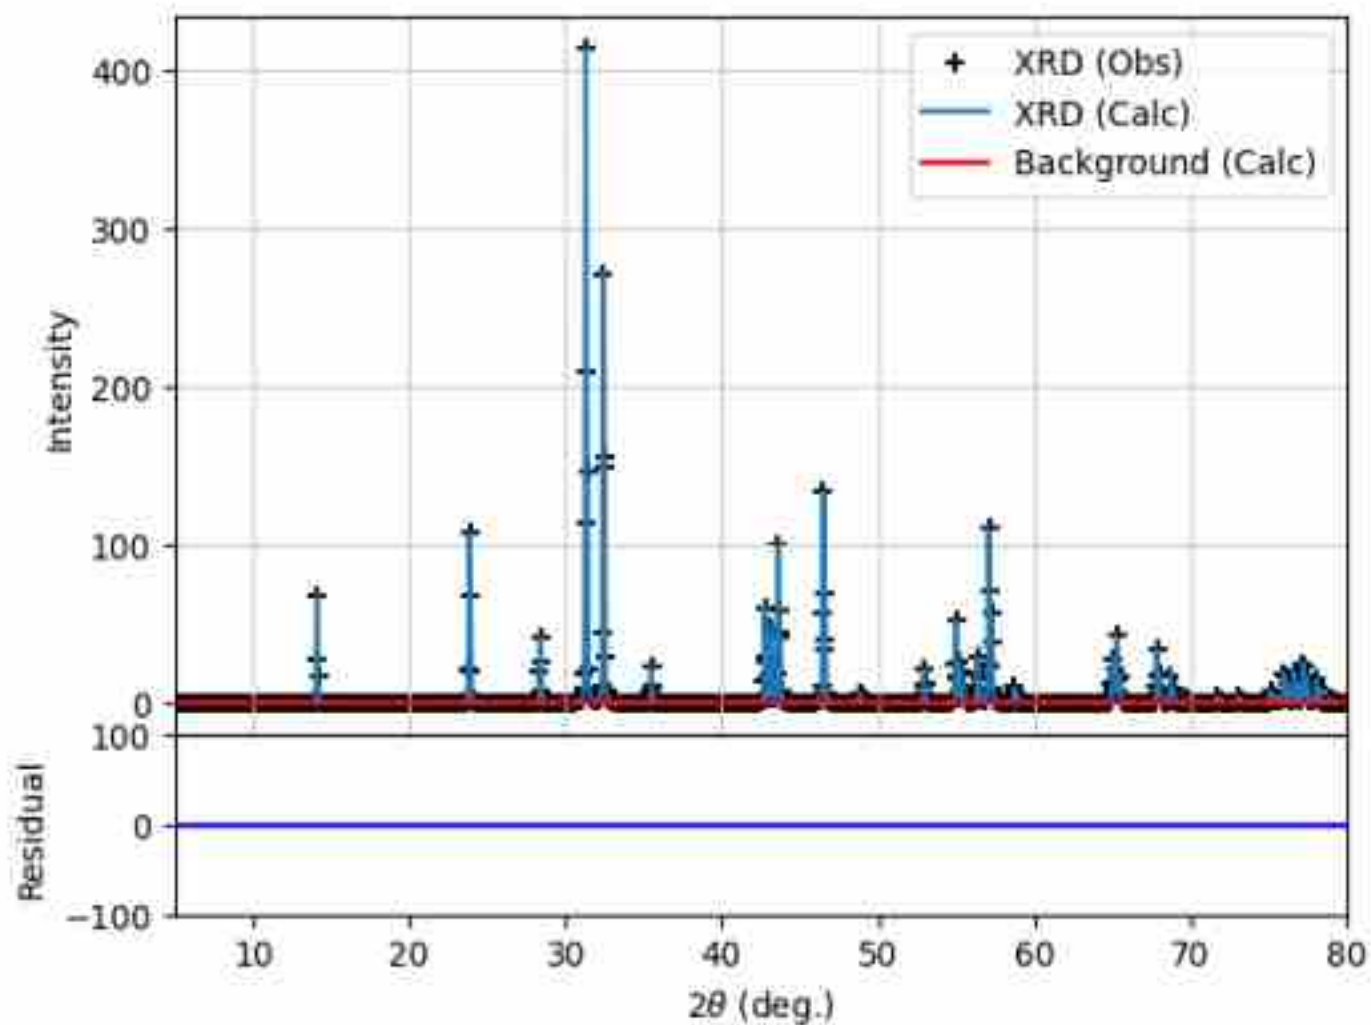

| RMSE before RR | Rwp     | RMSE after RR |
|----------------|---------|---------------|
| 0.013          | 0.00437 | 0.00128       |

# Sr2Ca6

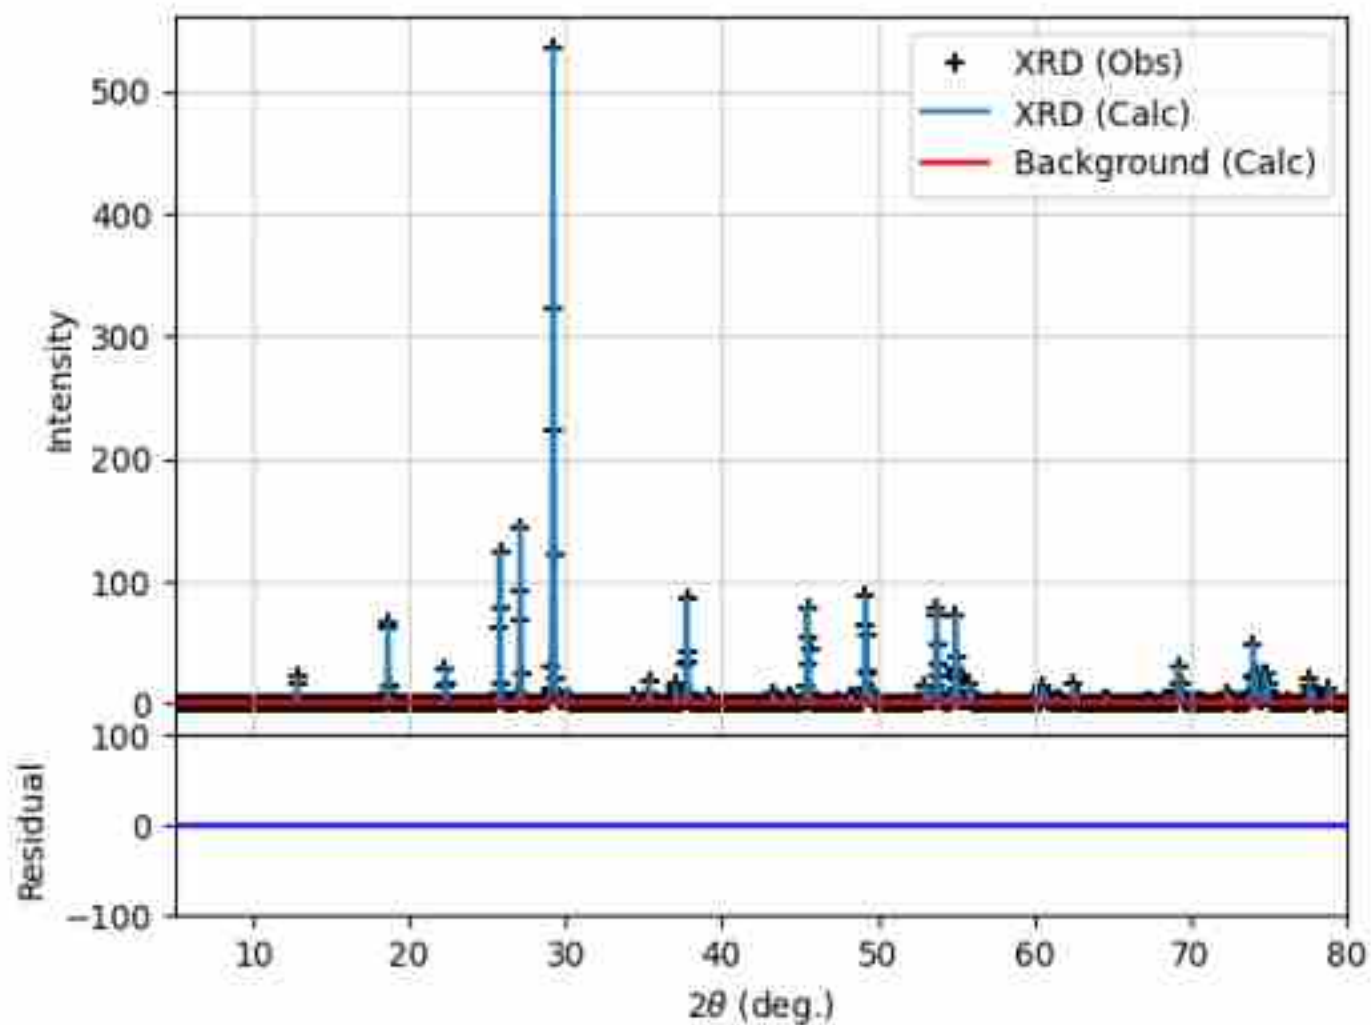

| RMSE before RR | Rwp     | RMSE after RR |
|----------------|---------|---------------|
| 0.013          | 0.01182 | 0.00131       |

# Sr<sub>2</sub>Ti<sub>2</sub>O<sub>5</sub>

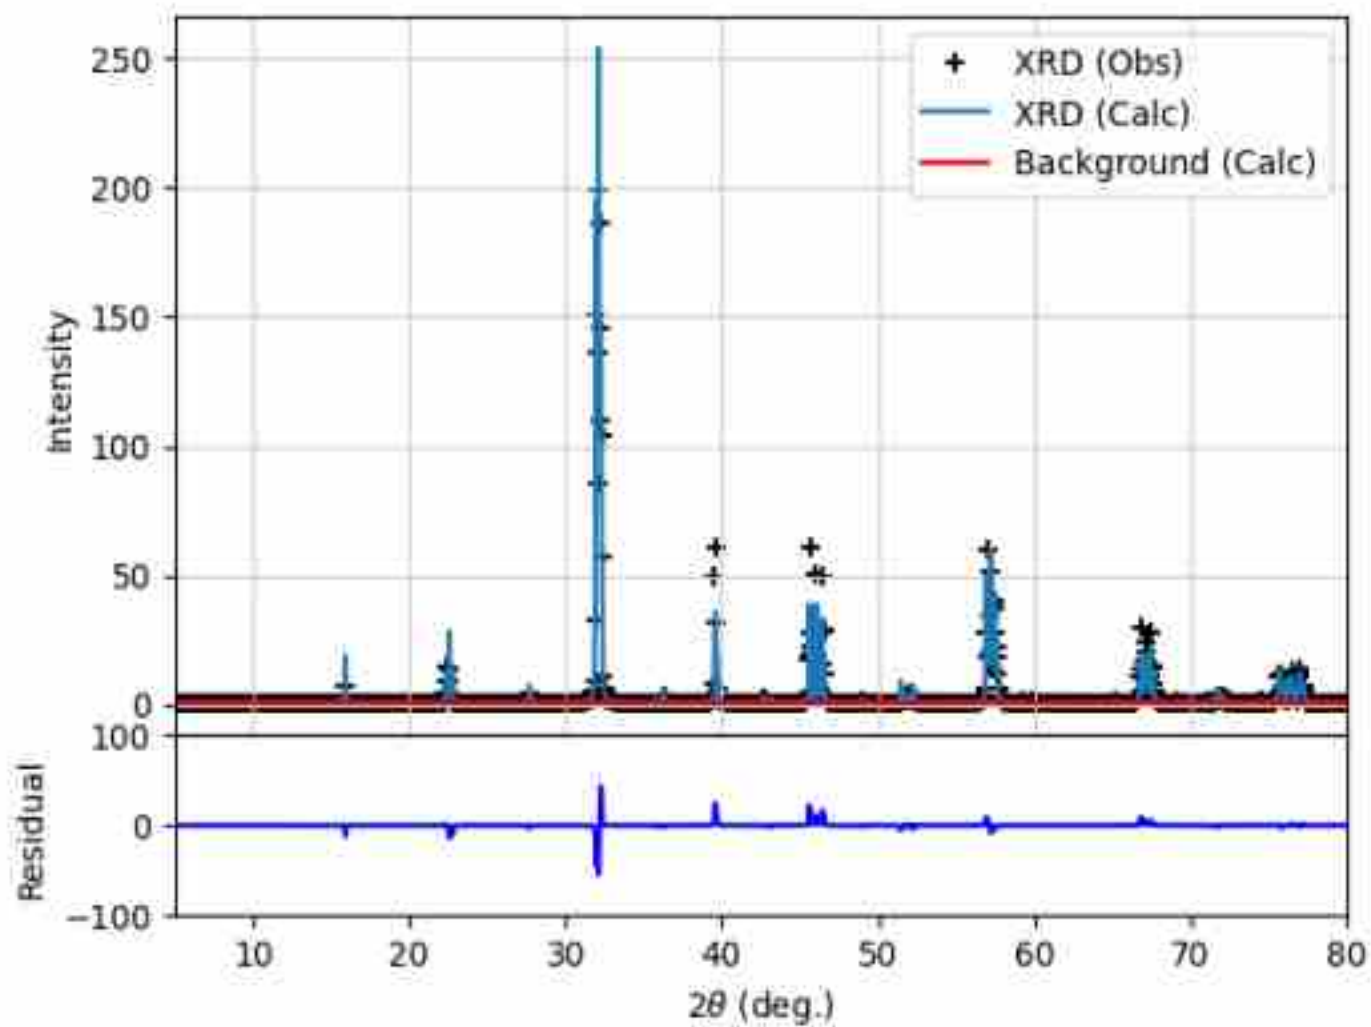

| RMSE before RR | Rwp      | RMSE after RR |
|----------------|----------|---------------|
| 0.013          | 28.32263 | 0.01904       |

# Sr<sub>2</sub>Ti<sub>2</sub>O<sub>6</sub>

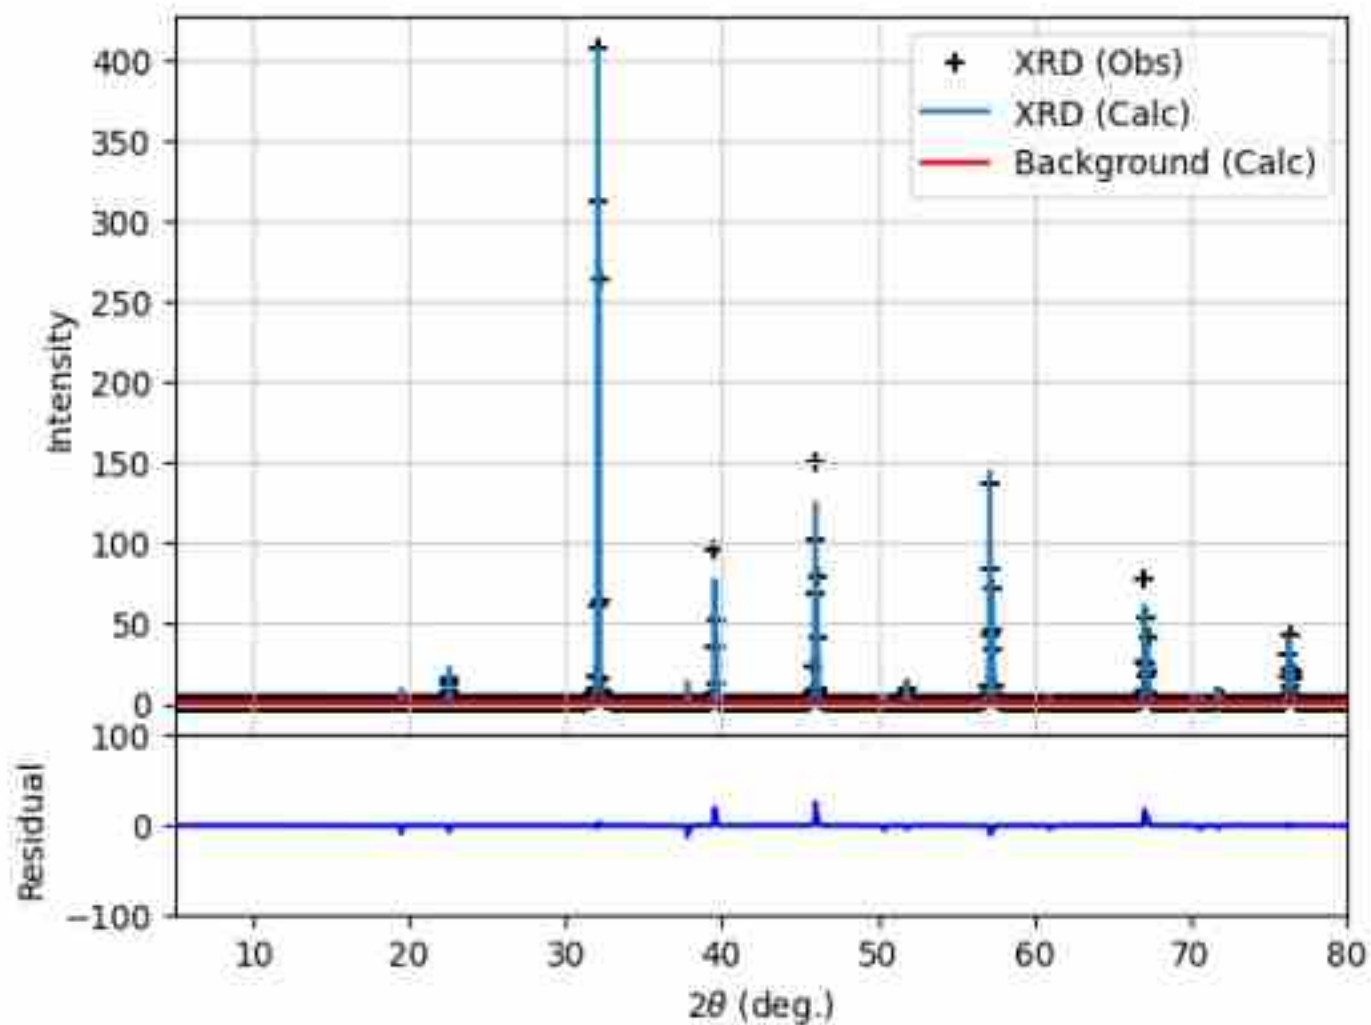

| RMSE before RR | Rwp      | RMSE after RR |
|----------------|----------|---------------|
| 0.013          | 32.12219 | 0.0248        |

# Sr<sub>2</sub>Tl<sub>4</sub>Pt<sub>2</sub>

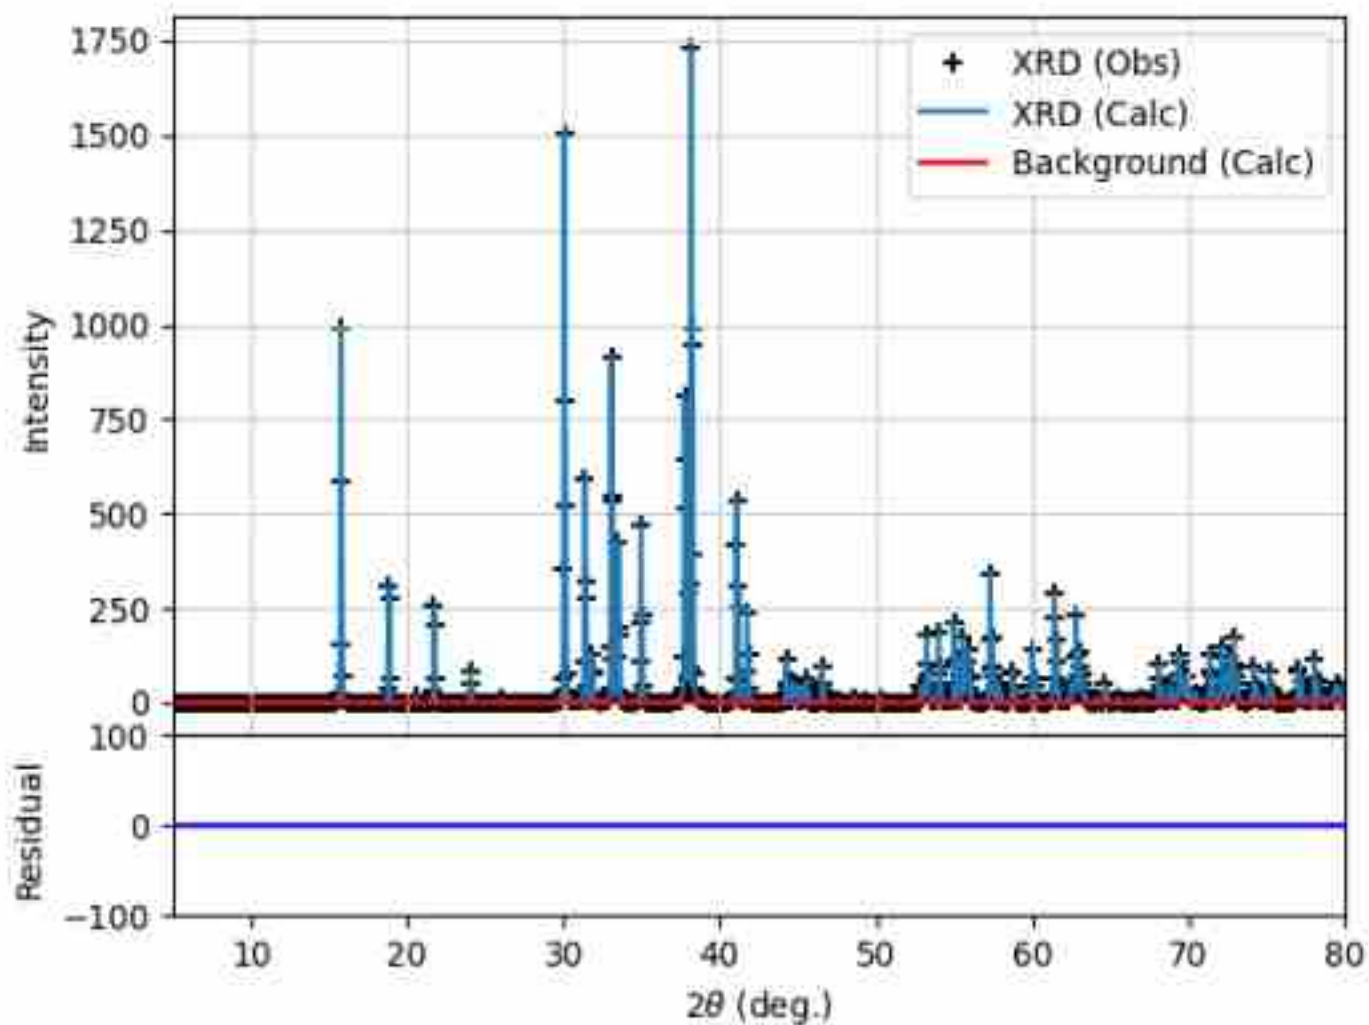

| RMSE before RR | Rwp     | RMSE after RR |
|----------------|---------|---------------|
| 0.013          | 0.00376 | 0.00024       |

# Sr<sub>2</sub>Yb<sub>6</sub>

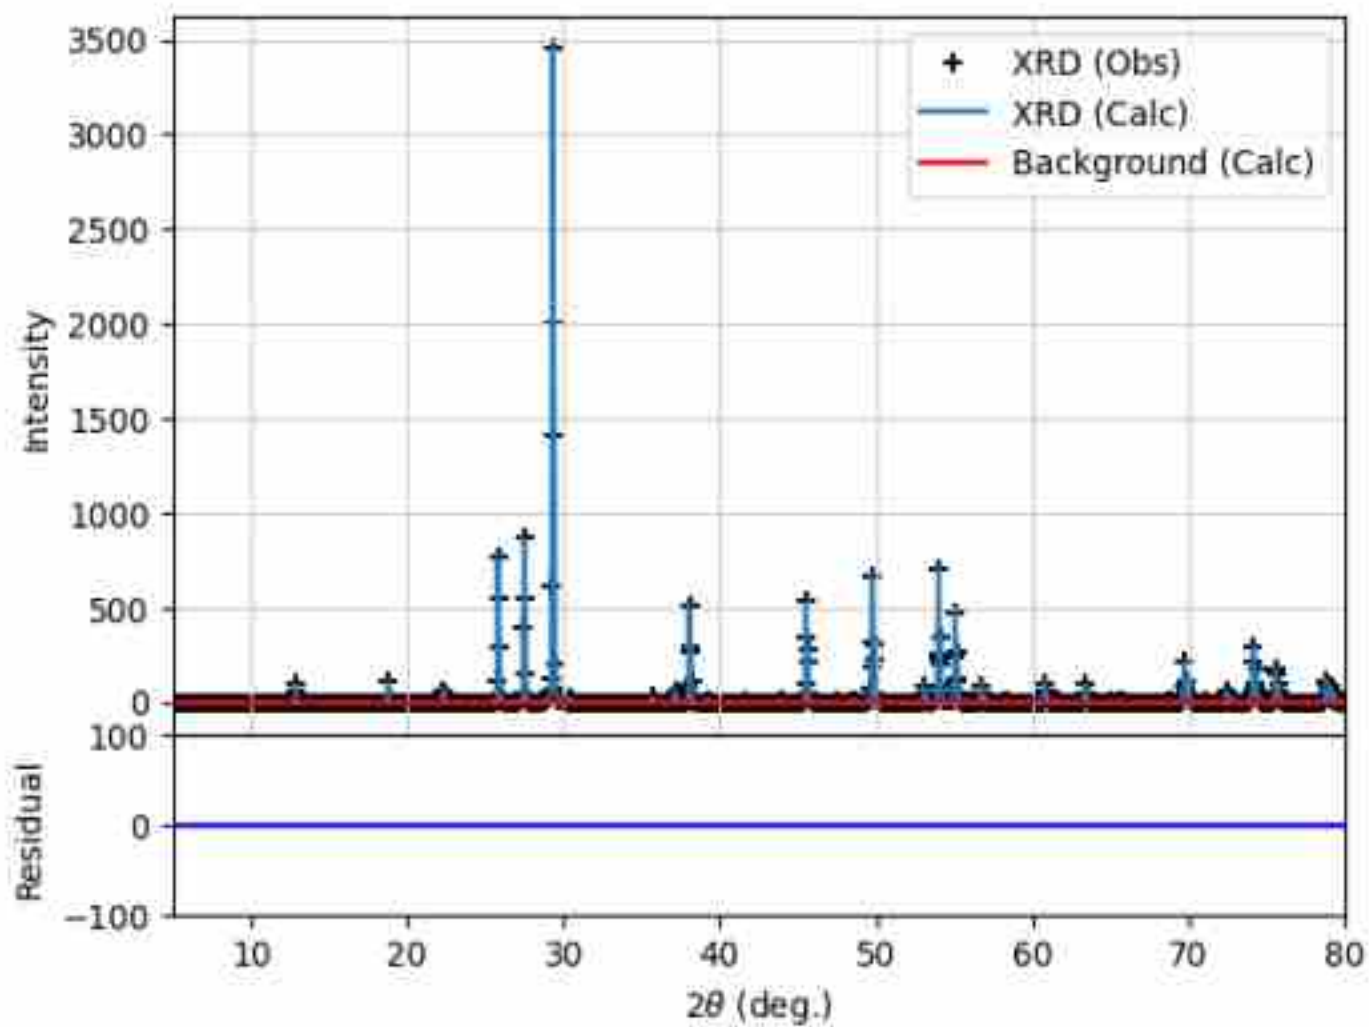

| RMSE before RR | Rwp     | RMSE after RR |
|----------------|---------|---------------|
| 0.013          | 0.04837 | 0.00161       |

# Sr<sub>2</sub>ZnW<sub>10</sub>O<sub>6</sub>

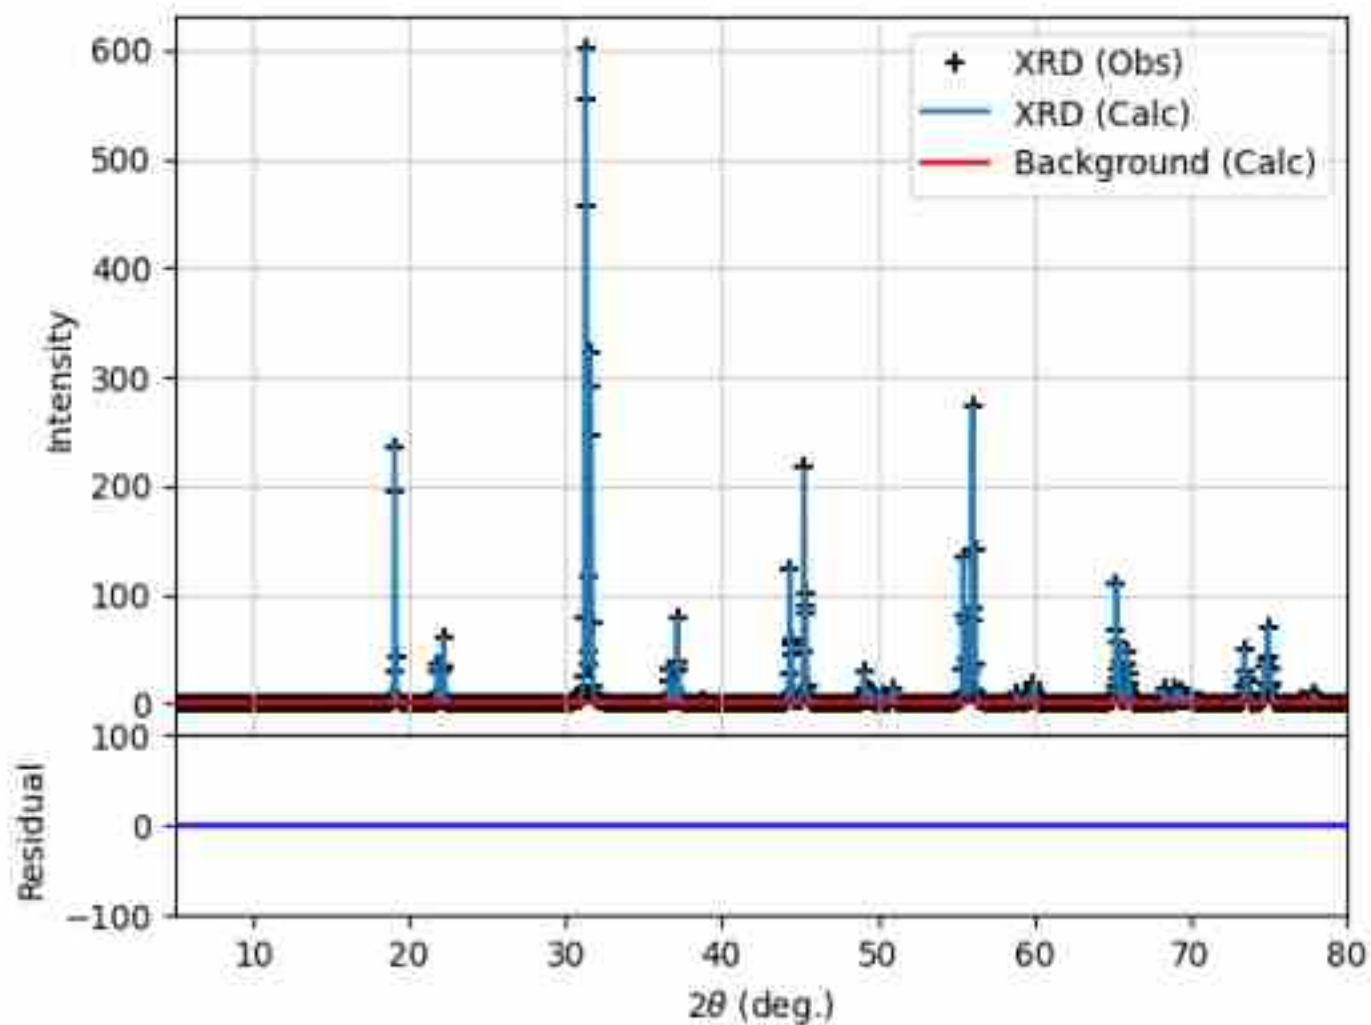

| RMSE before RR | Rwp     | RMSE after RR |
|----------------|---------|---------------|
| 0.013          | 0.00424 | 0.00192       |

# Sr<sub>2</sub>Zr<sub>1</sub>Fe<sub>1</sub>O<sub>6</sub>

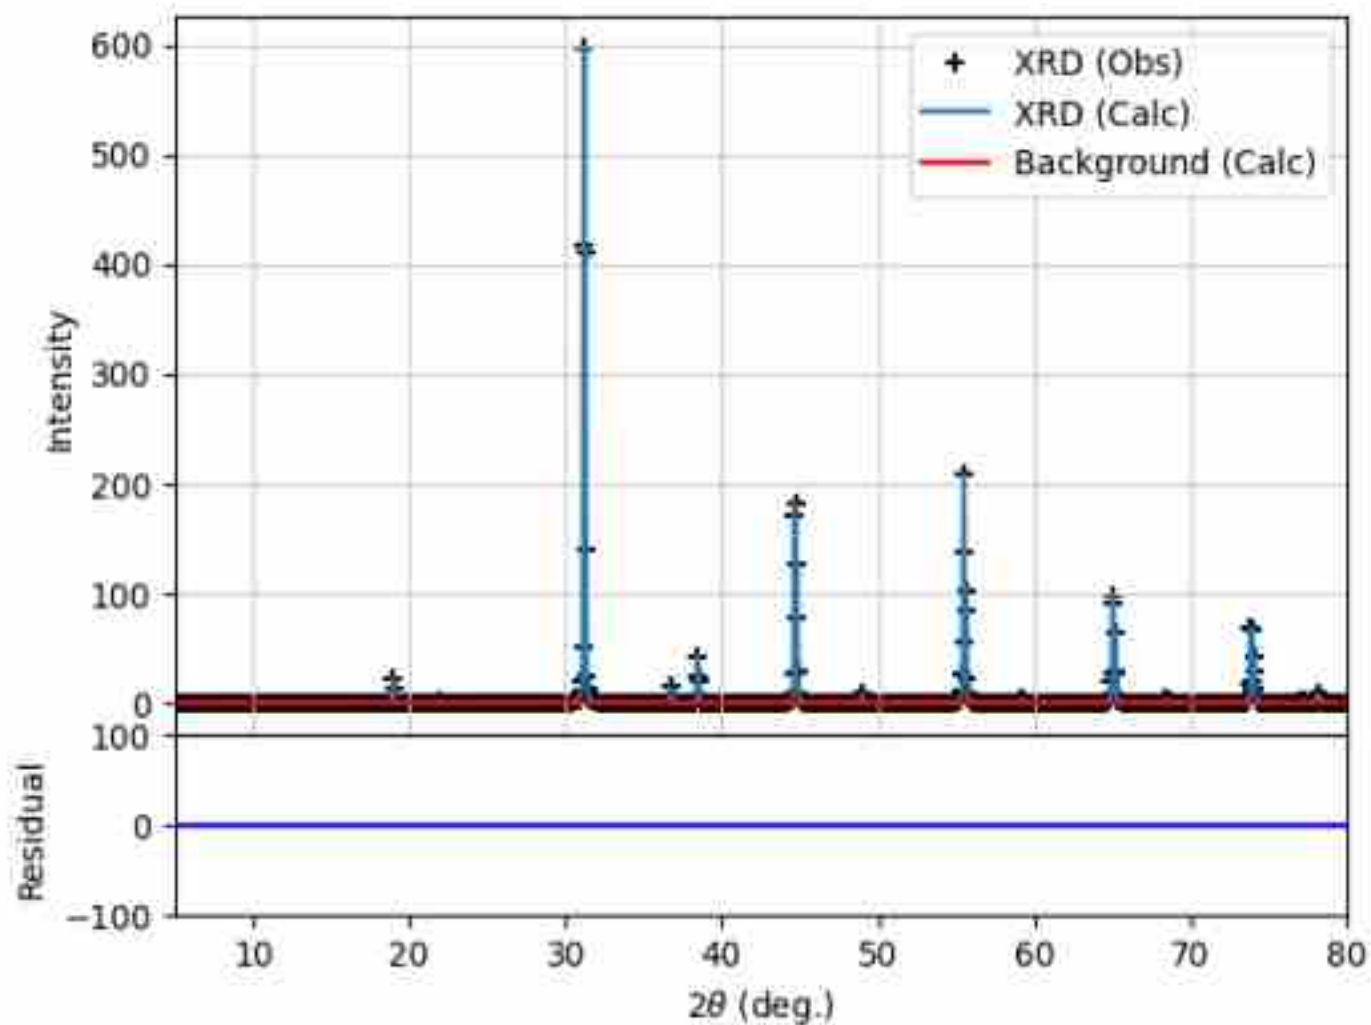

| RMSE before RR | Rwp     | RMSE after RR |
|----------------|---------|---------------|
| 0.013          | 0.01193 | 0.00368       |



# Sr<sub>4</sub>Bi<sub>2</sub>O<sub>1</sub>

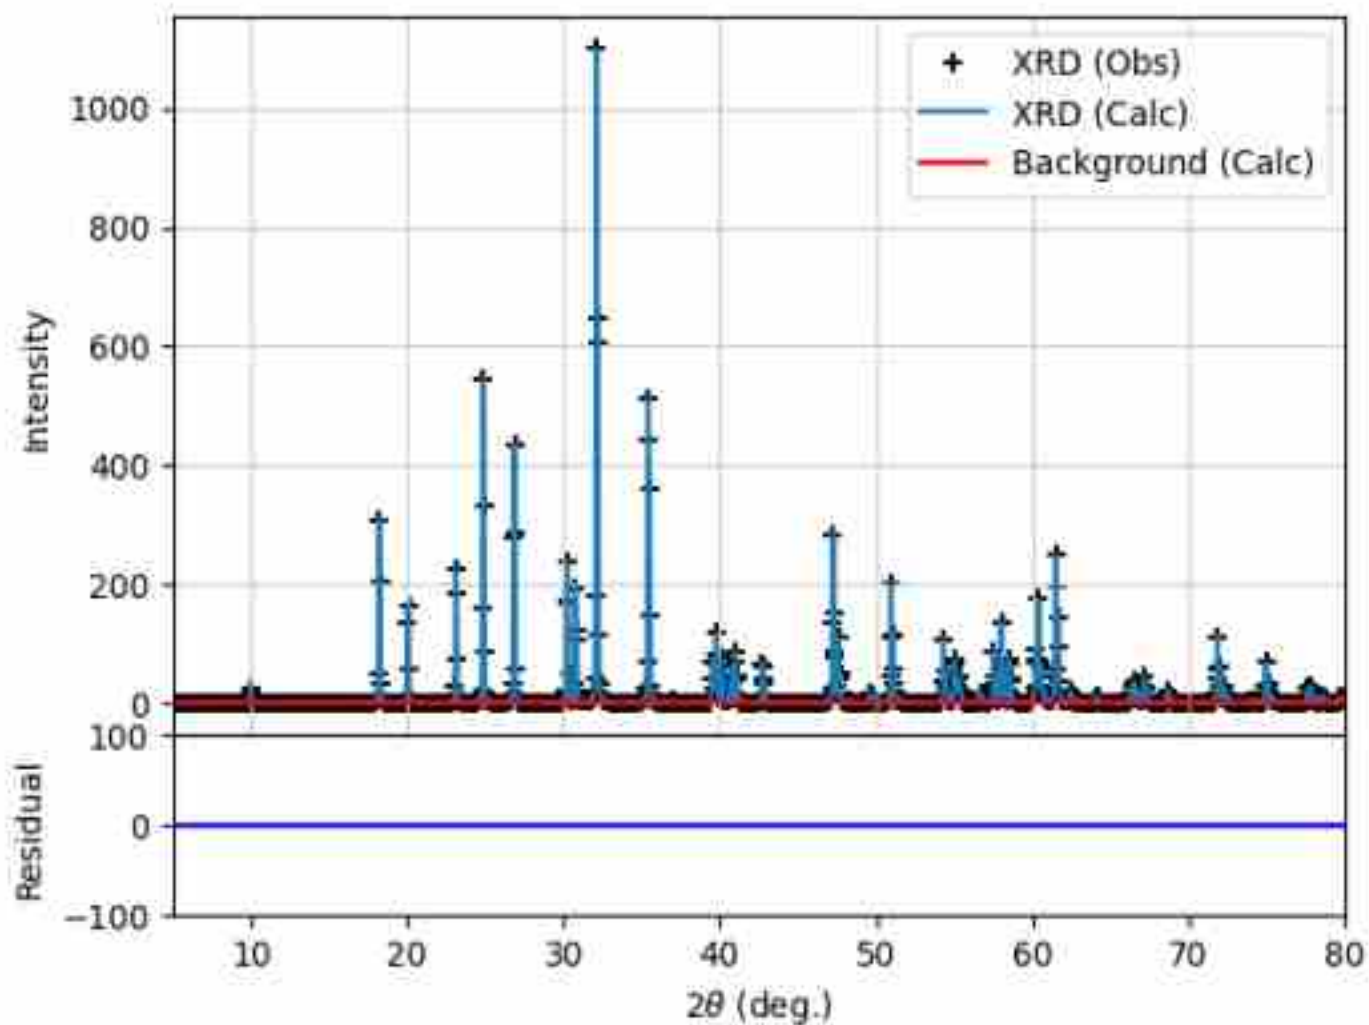

| RMSE before RR | Rwp     | RMSE after RR |
|----------------|---------|---------------|
| 0.013          | 0.00646 | 0.00106       |

# Sr<sub>4</sub>Hf<sub>4</sub>S<sub>12</sub>

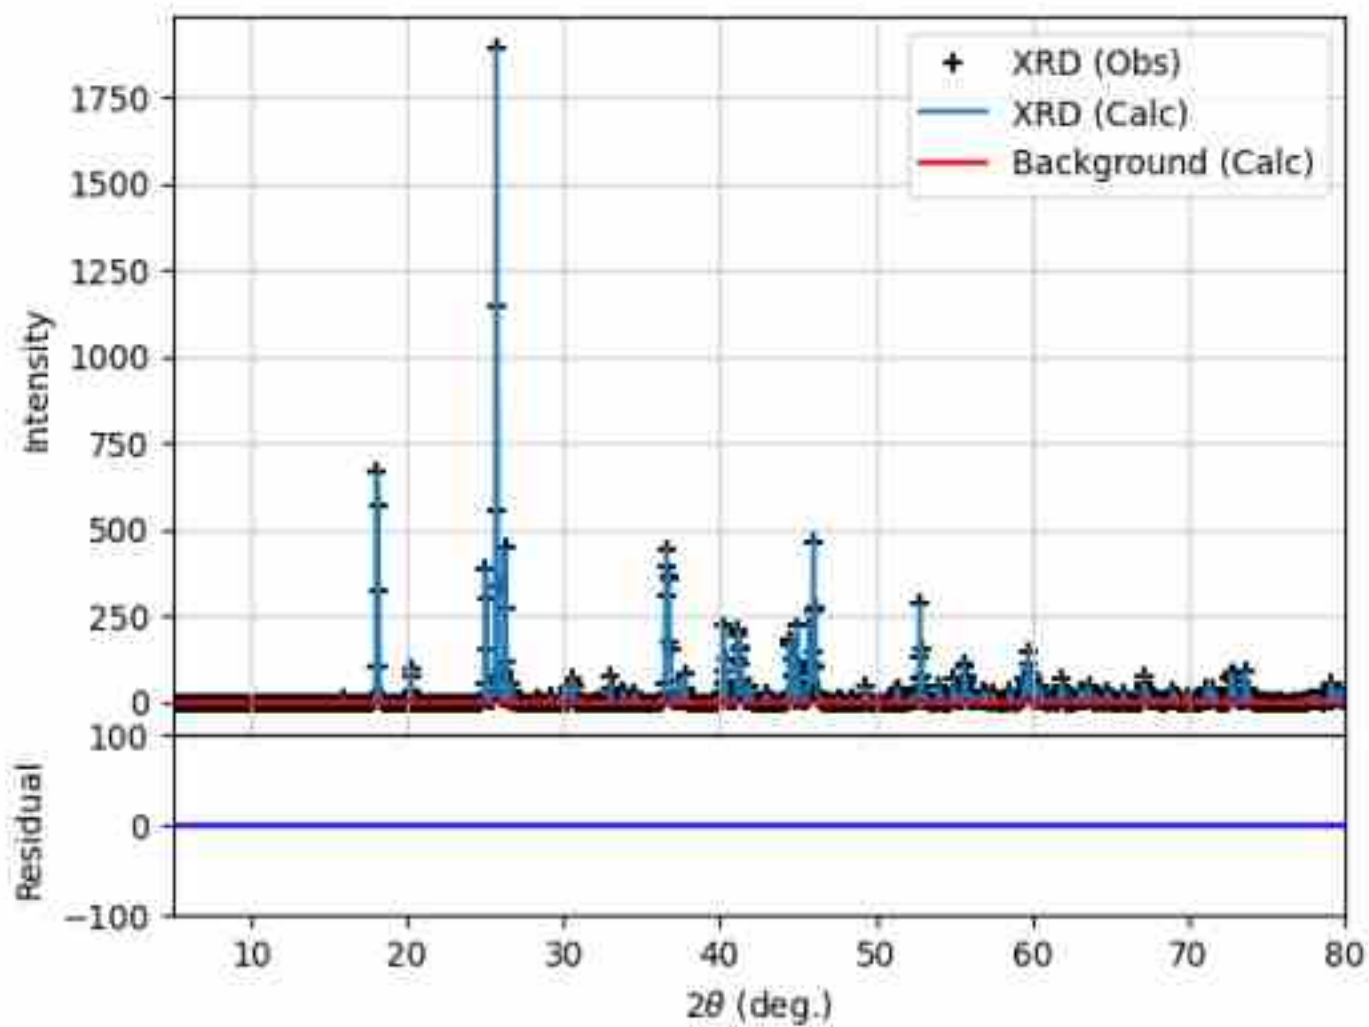

| RMSE before RR | Rwp     | RMSE after RR |
|----------------|---------|---------------|
| 0.013          | 0.00409 | 0.00064       |

# Sr<sub>4</sub>Ni<sub>2</sub>Ru<sub>2</sub>O<sub>12</sub>

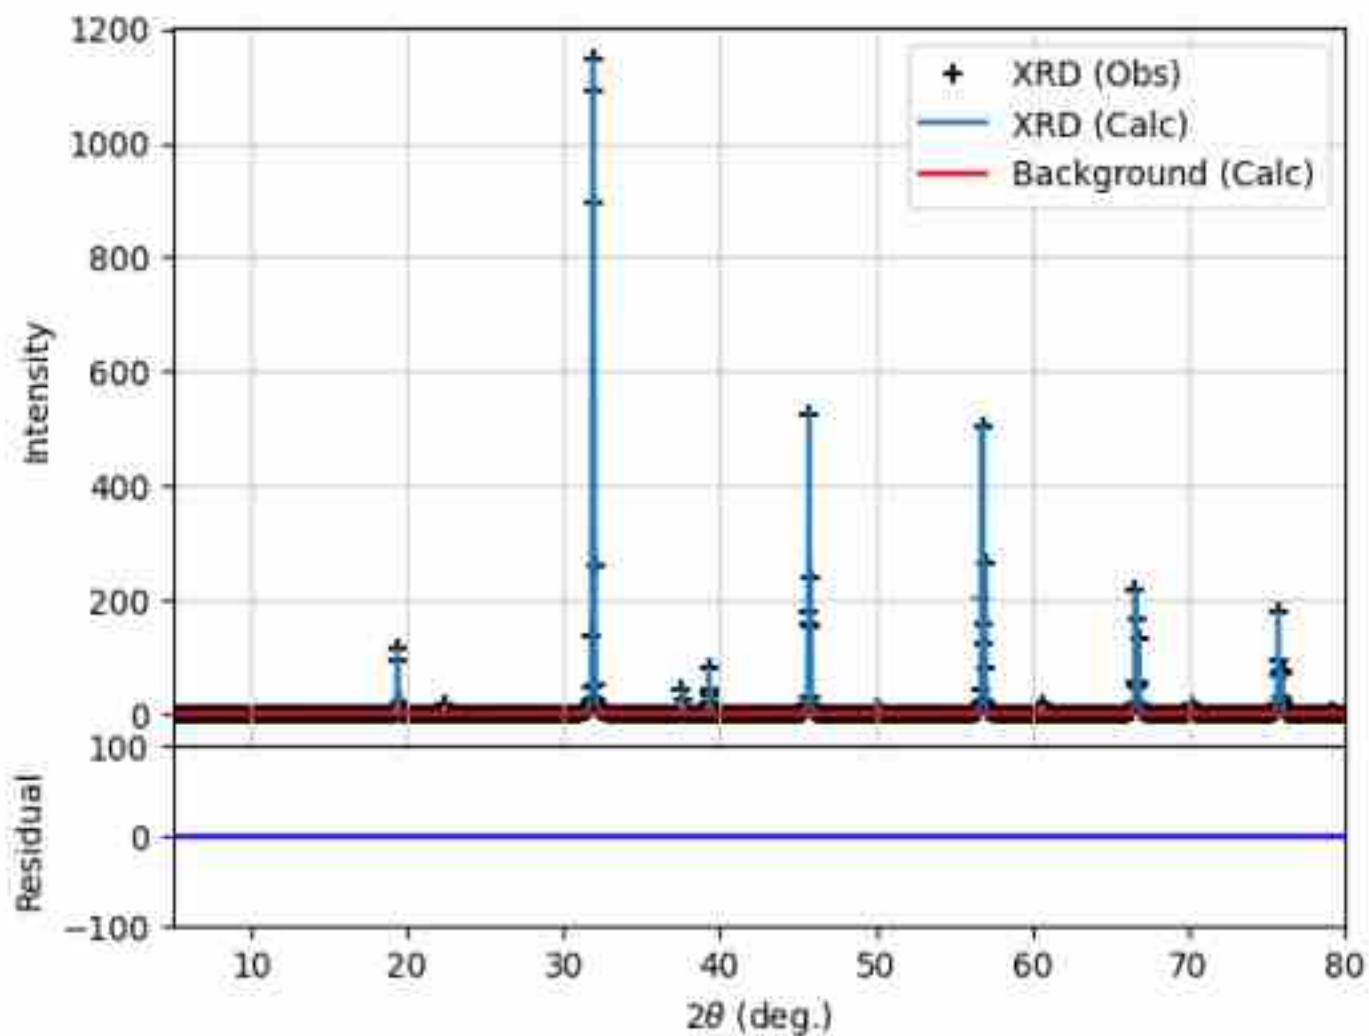

| RMSE before RR | Rwp    | RMSE after RR |
|----------------|--------|---------------|
| 0.013          | 0.0033 | 0.00144       |

# Sr6Eu2

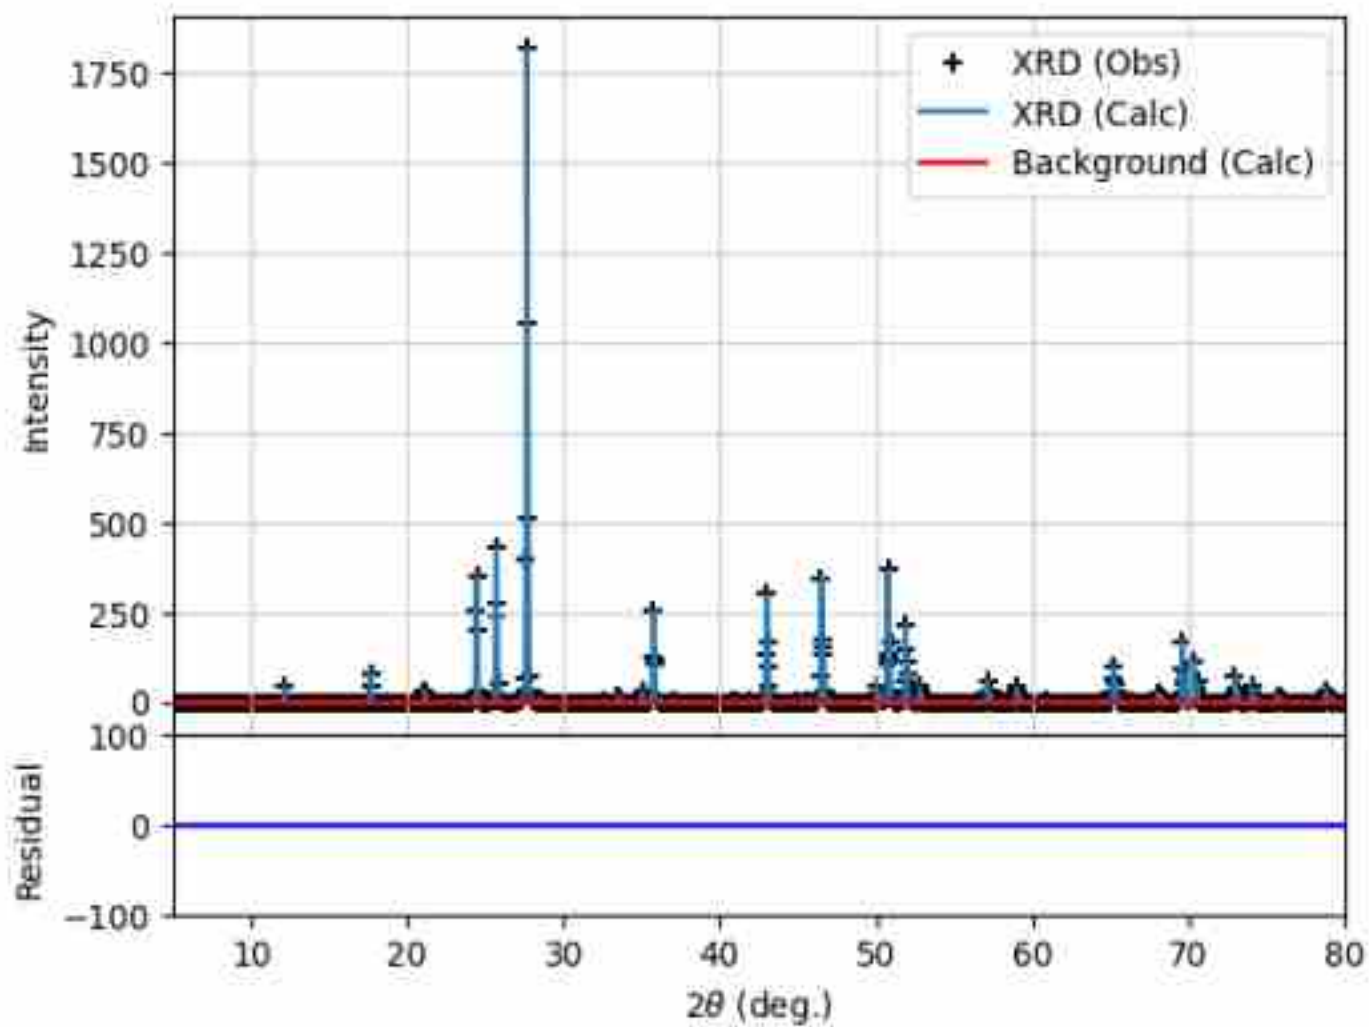

| RMSE before RR | Rwp     | RMSE after RR |
|----------------|---------|---------------|
| 0.013          | 0.00491 | 0.00055       |

# Ta<sub>2</sub>Co<sub>2</sub>Ni<sub>4</sub>

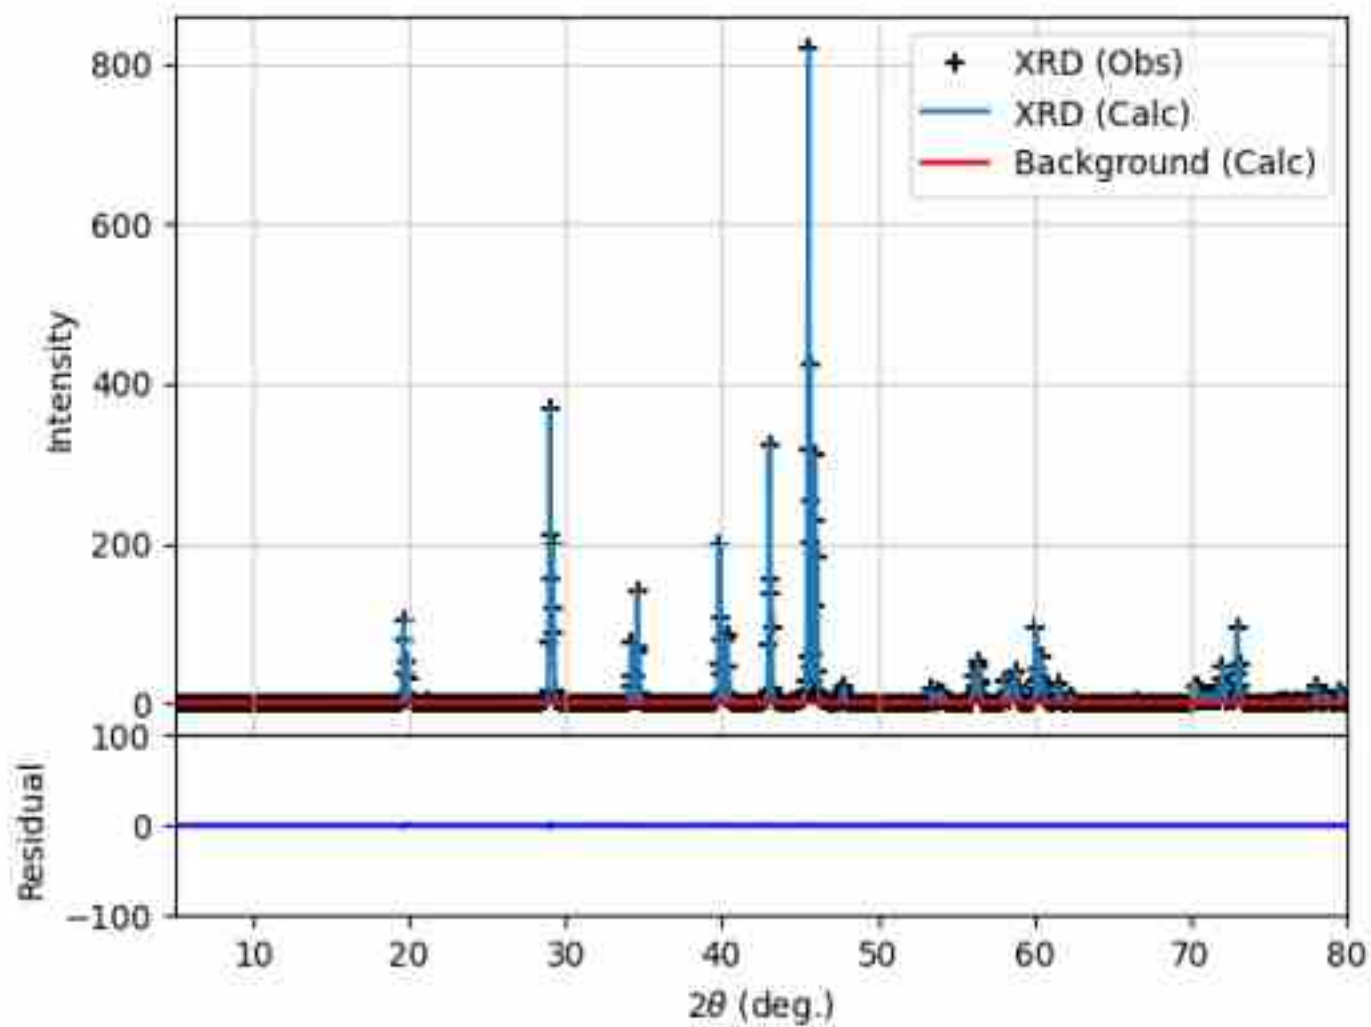

| RMSE before RR | Rwp     | RMSE after RR |
|----------------|---------|---------------|
| 0.013          | 0.77686 | 0.01309       |

# Ta<sub>3</sub>Si<sub>3</sub>Ge<sub>3</sub>

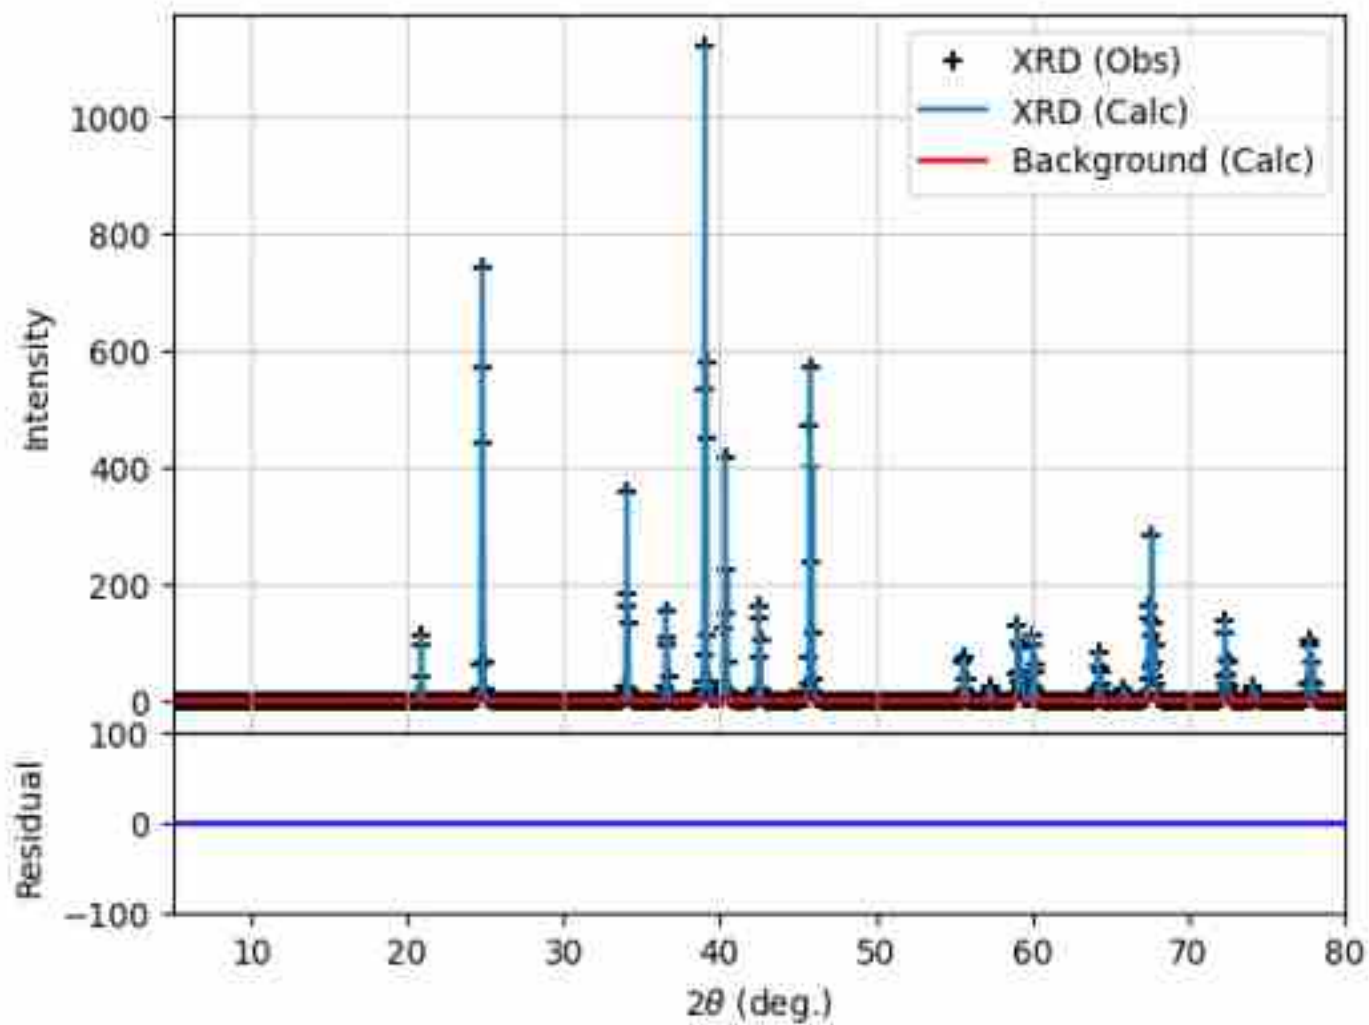

| RMSE before RR | Rwp     | RMSE after RR |
|----------------|---------|---------------|
| 0.013          | 0.03365 | 0.00282       |

# Tb1Al8Cr4

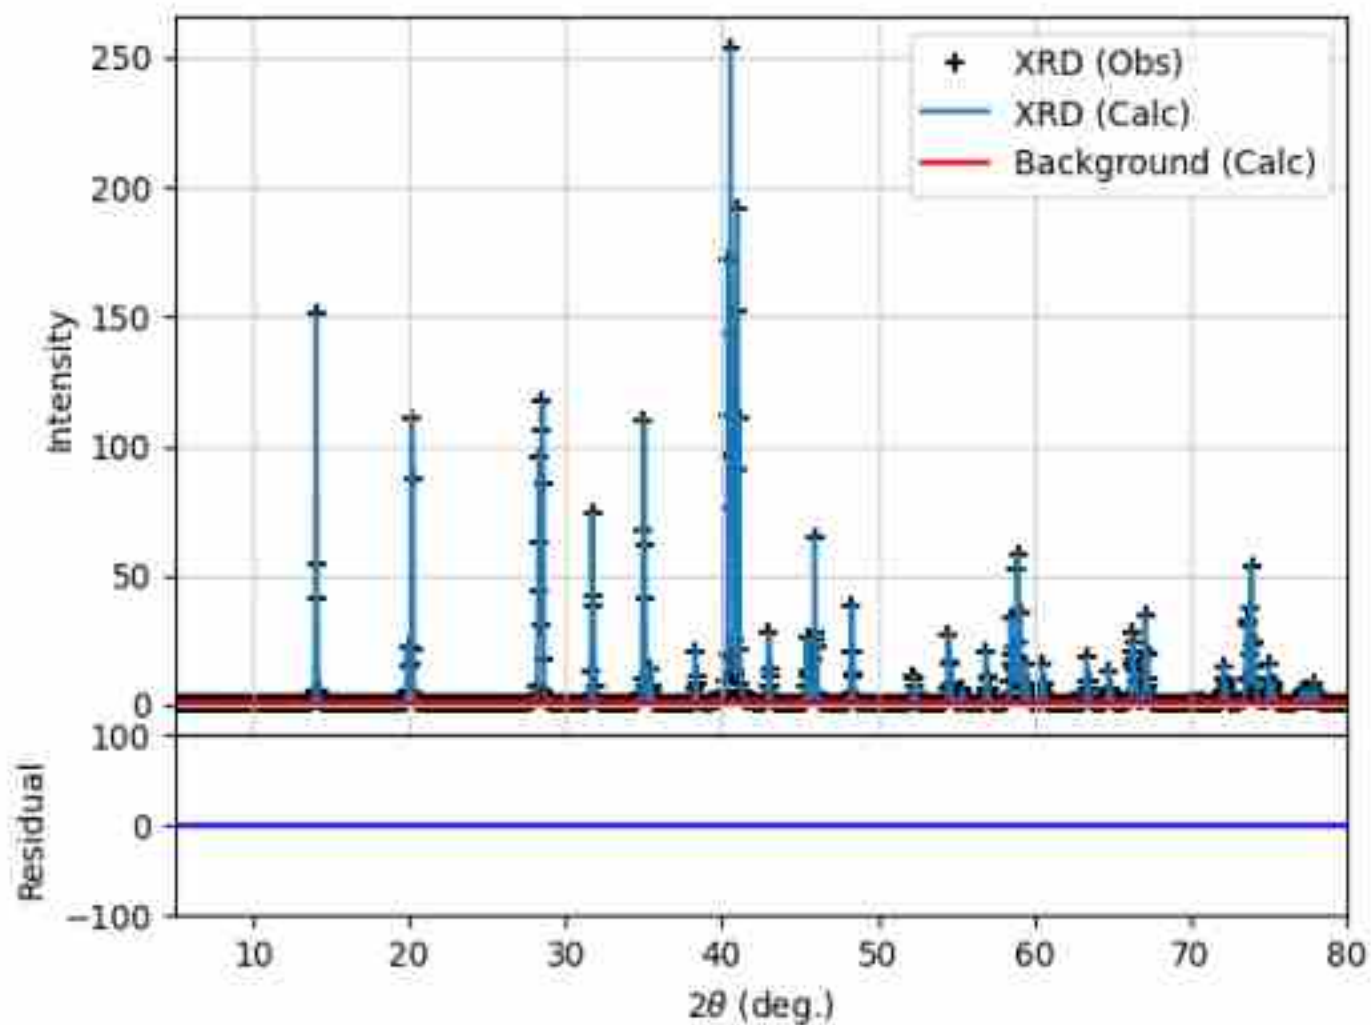

| RMSE before RR | Rwp     | RMSE after RR |
|----------------|---------|---------------|
| 0.013          | 0.00344 | 0.00089       |

Tb1Al8Cu4

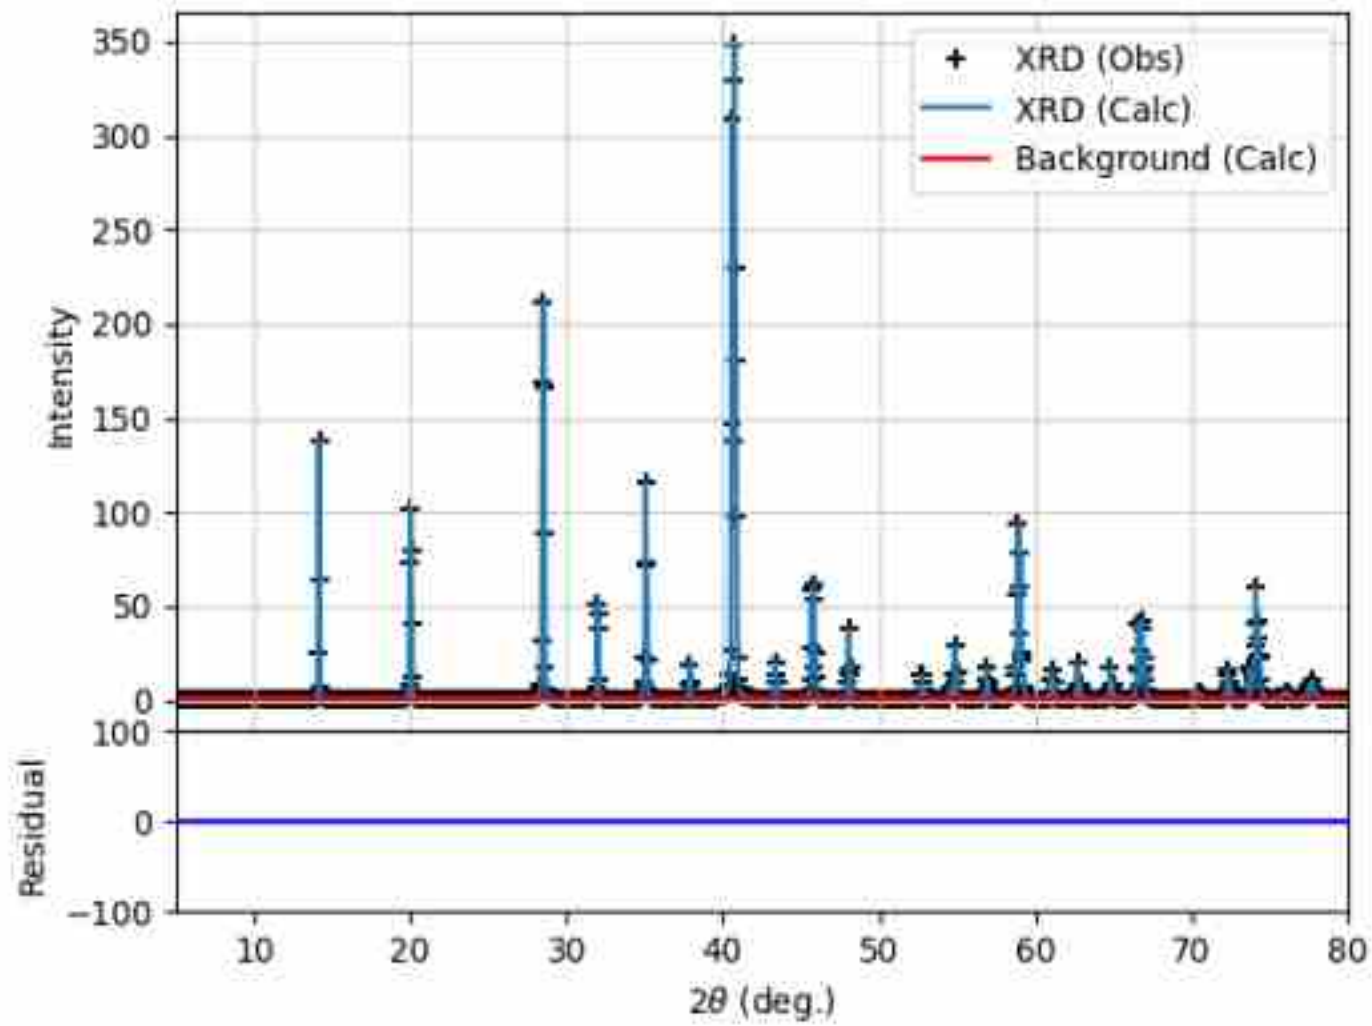

| RMSE before RR | Rwp     | RMSE after RR |
|----------------|---------|---------------|
| 0.013          | 0.00304 | 0.00085       |



# Tb1Au2

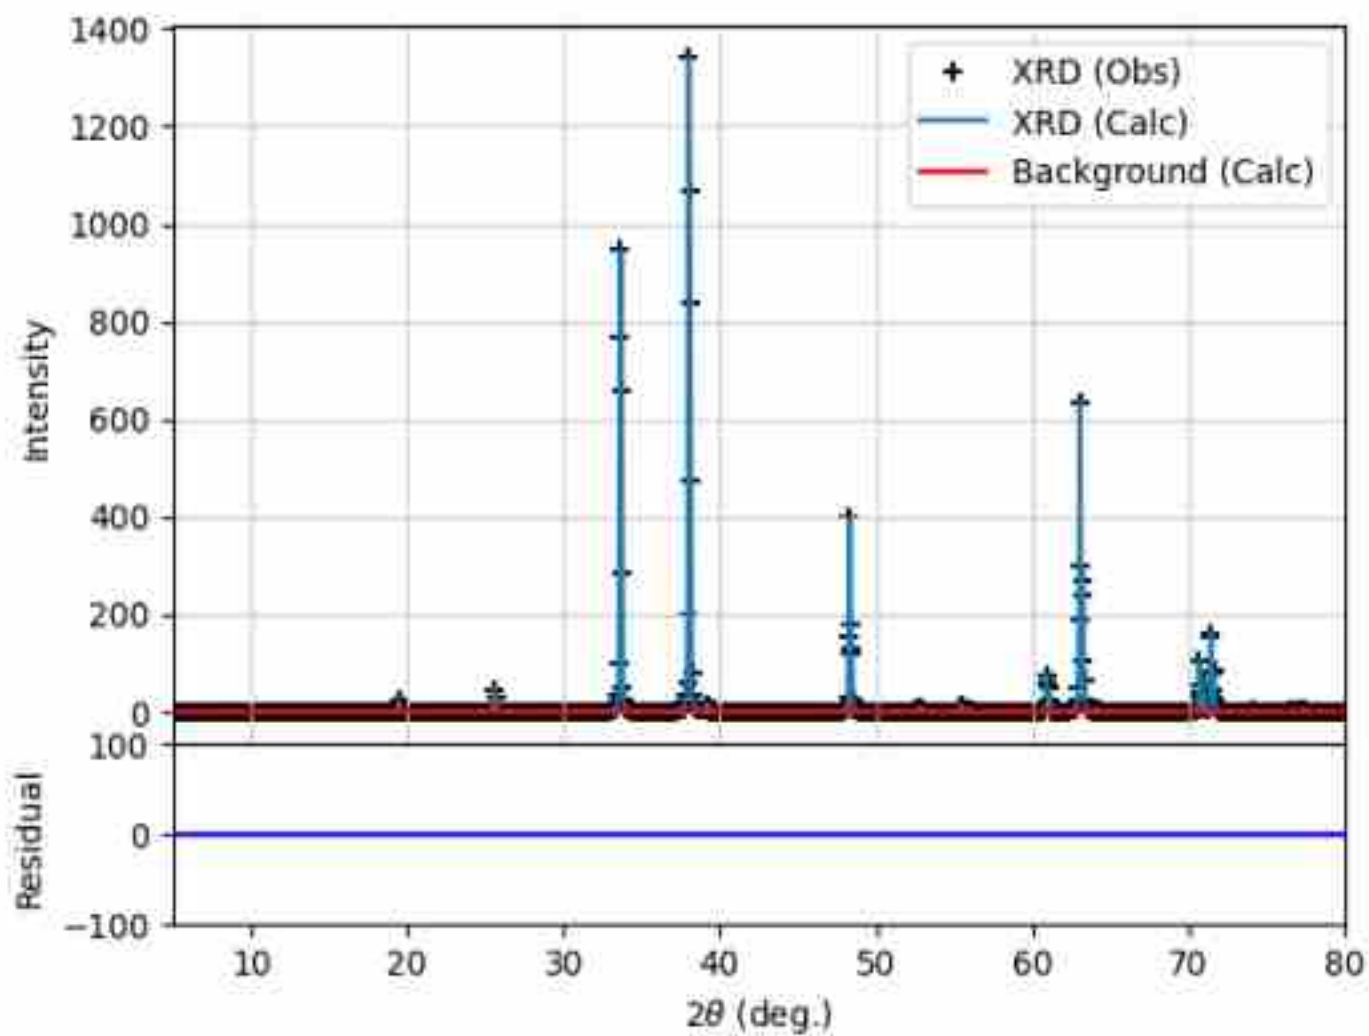

| RMSE before RR | Rwp     | RMSE after RR |
|----------------|---------|---------------|
| 0.013          | 0.01784 | 0.00065       |

# Tb1Cu2Ni3

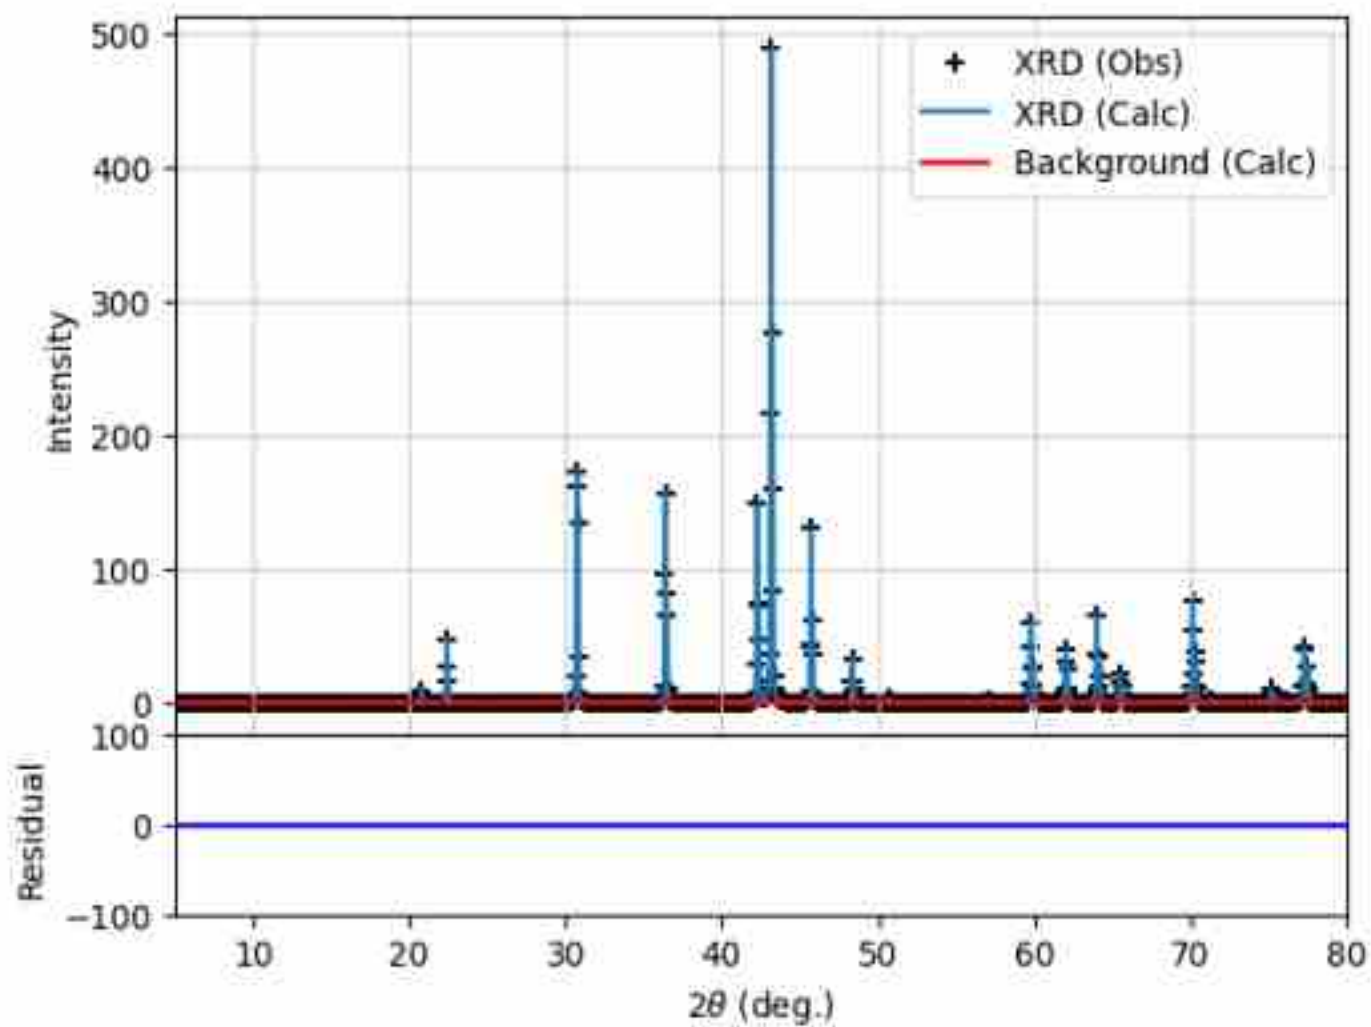

| RMSE before RR | Rwp     | RMSE after RR |
|----------------|---------|---------------|
| 0.013          | 0.25589 | 0.01043       |

# Tb1Mn6Al6

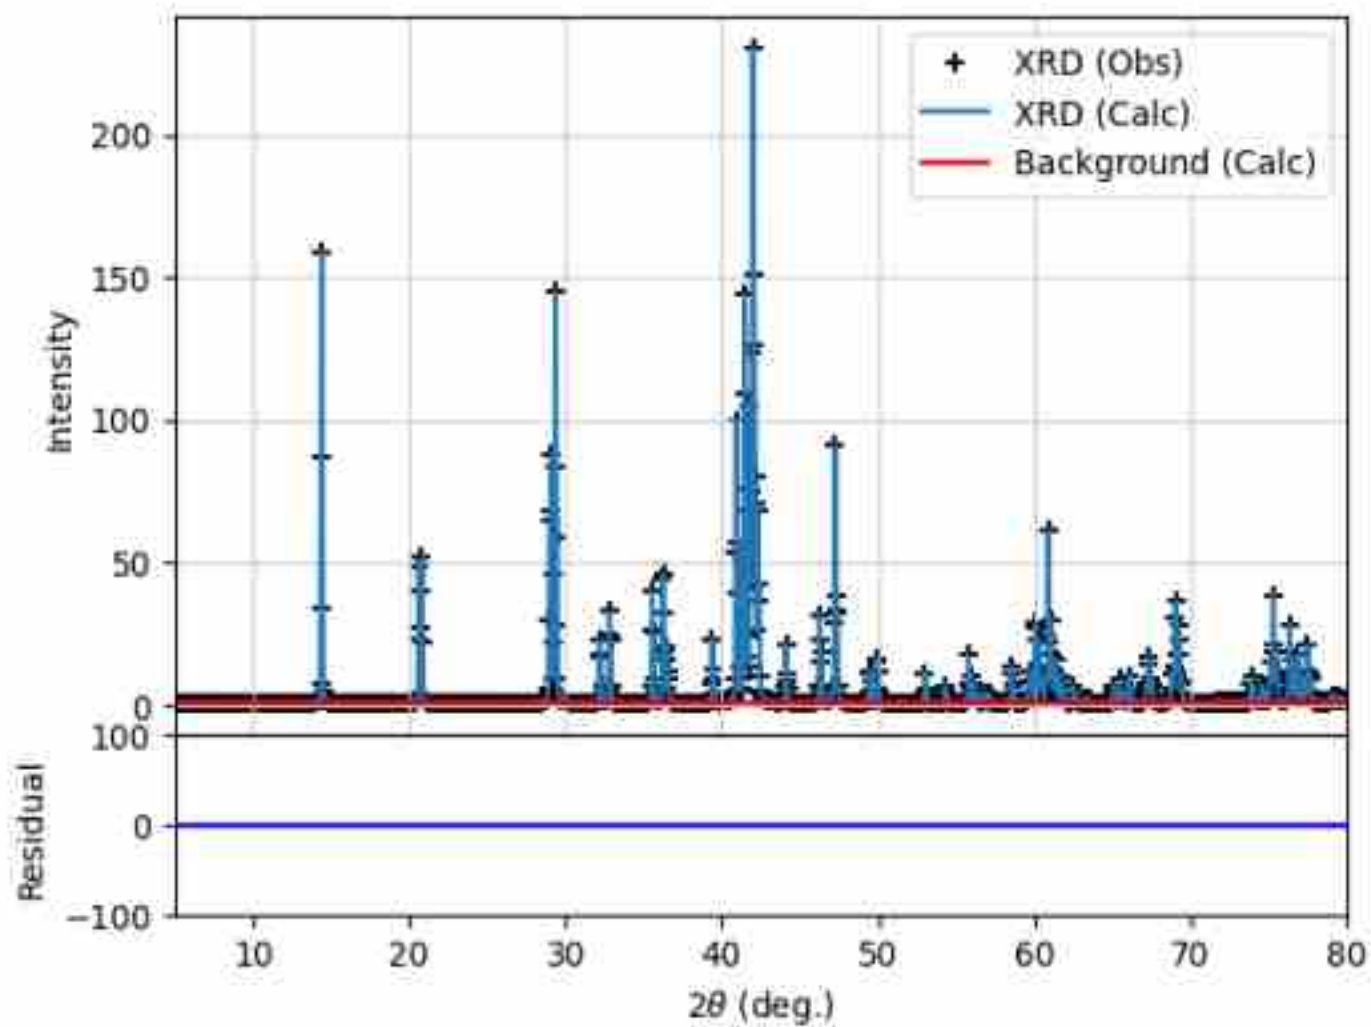

| RMSE before RR | Rwp     | RMSE after RR |
|----------------|---------|---------------|
| 0.013          | 0.00379 | 0.00058       |

# Tb1Nb6Sn6

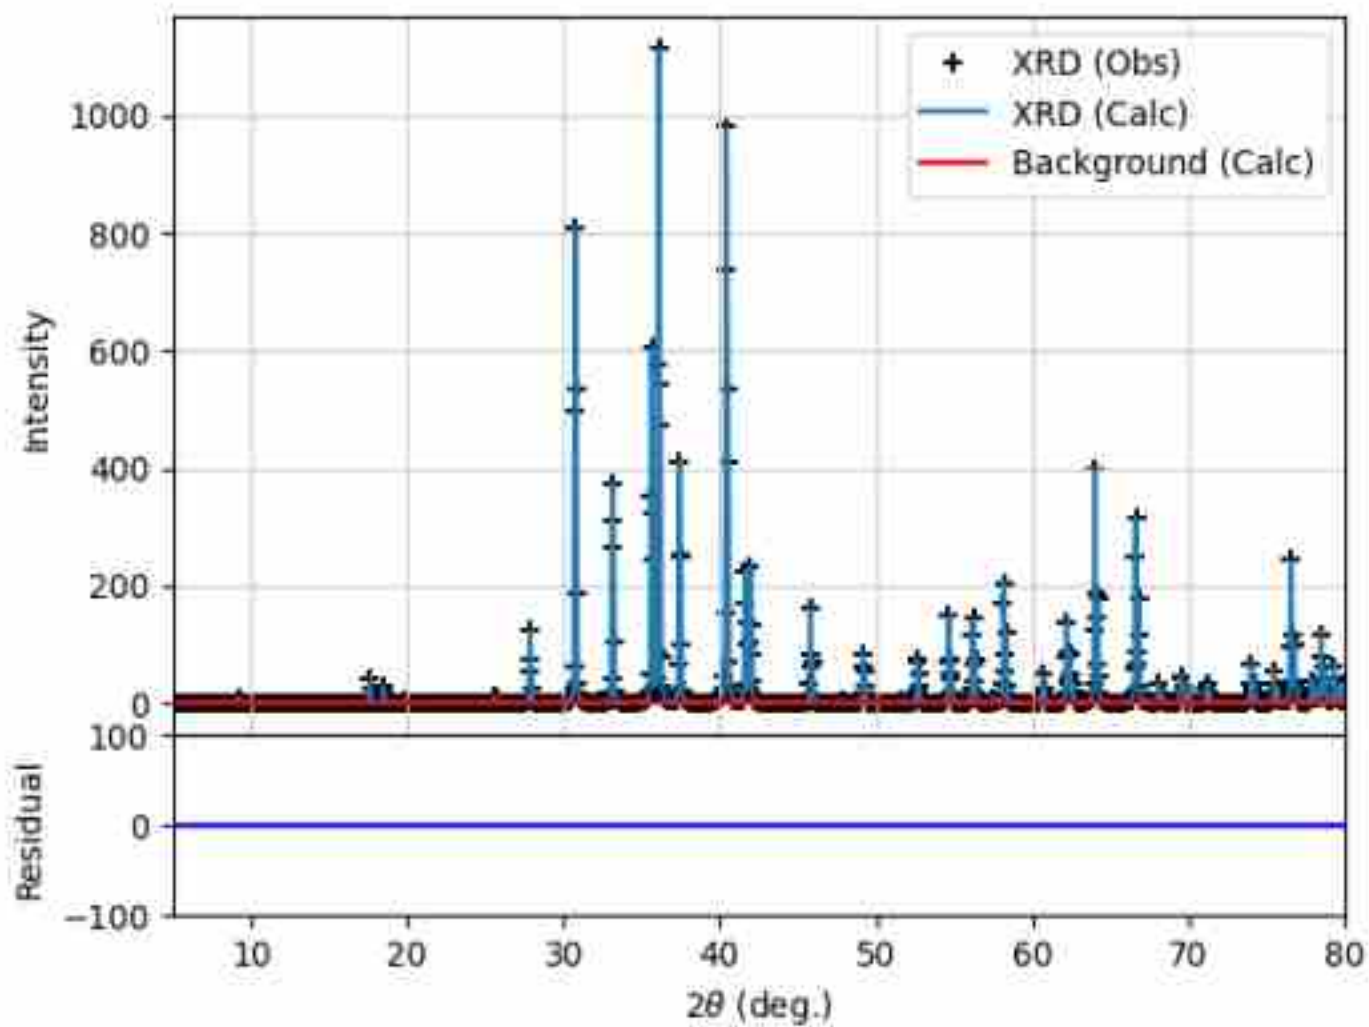

| RMSE before RR | Rwp     | RMSE after RR |
|----------------|---------|---------------|
| 0.013          | 0.00633 | 0.00094       |

# Tb1P2Ru2

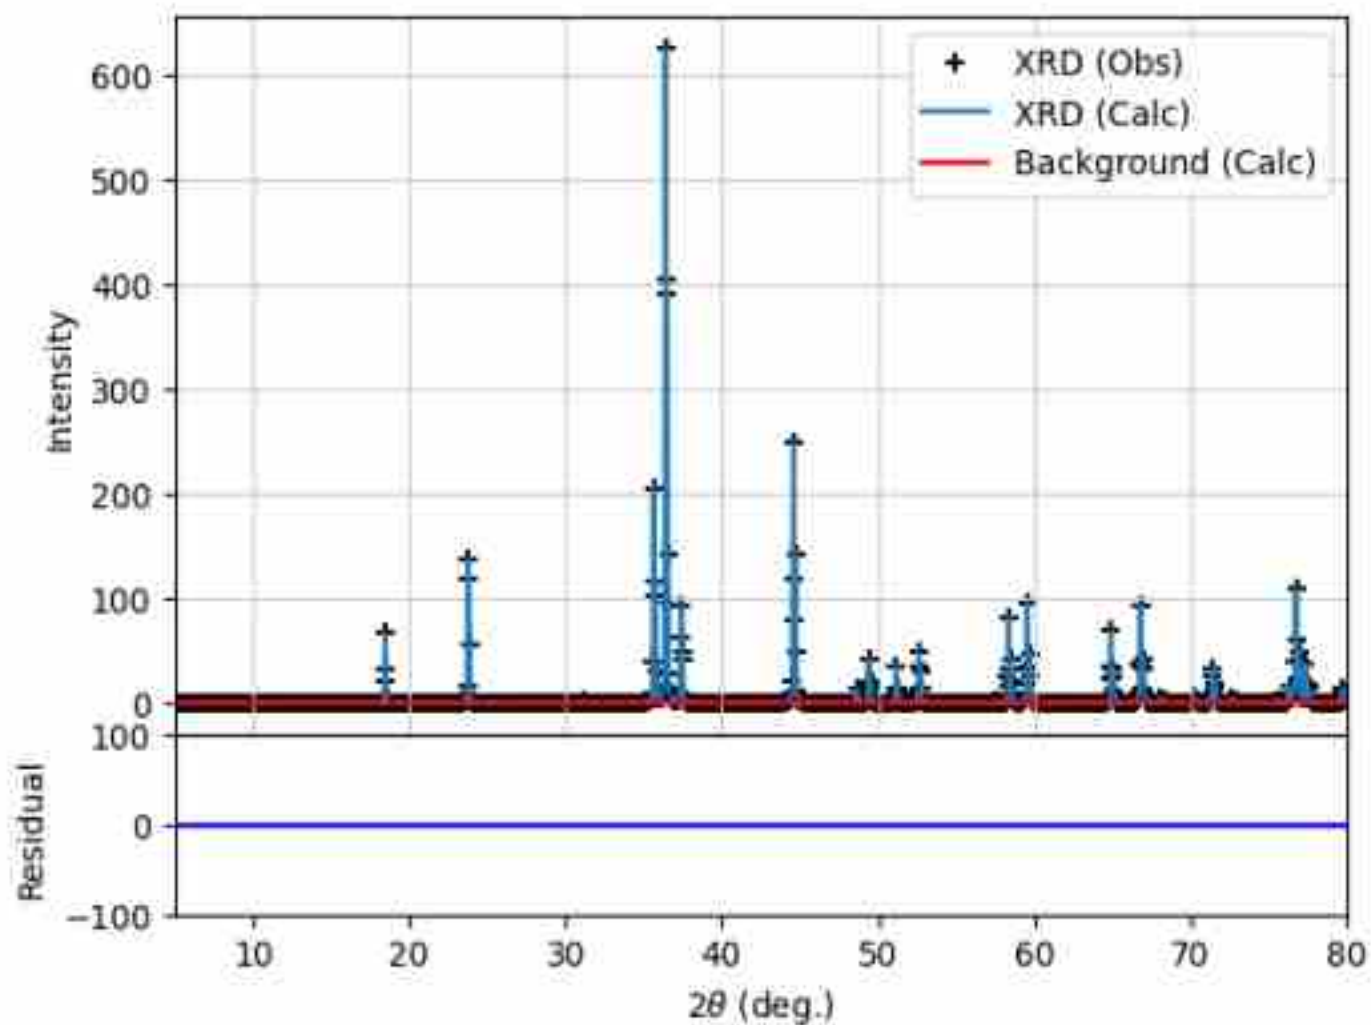

| RMSE before RR | Rwp     | RMSE after RR |
|----------------|---------|---------------|
| 0.013          | 0.00429 | 0.00483       |

# Tb<sub>3</sub>Zn<sub>3</sub>Ni<sub>3</sub>

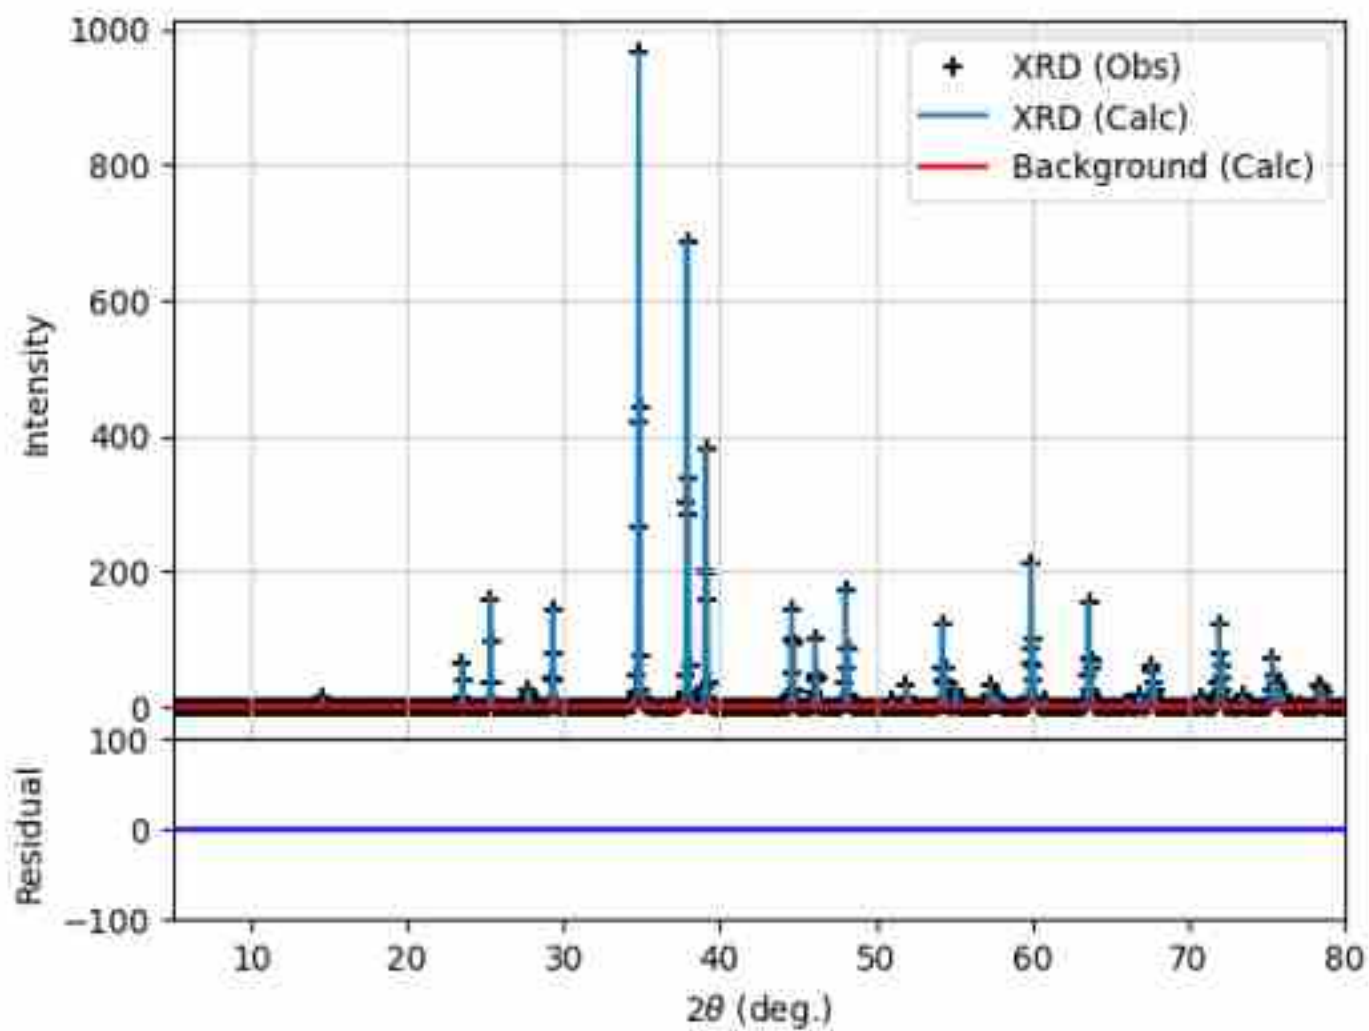

| RMSE before RR | Rwp     | RMSE after RR |
|----------------|---------|---------------|
| 0.013          | 0.01016 | 0.00179       |

# Tb<sub>4</sub>In<sub>4</sub>O<sub>12</sub>

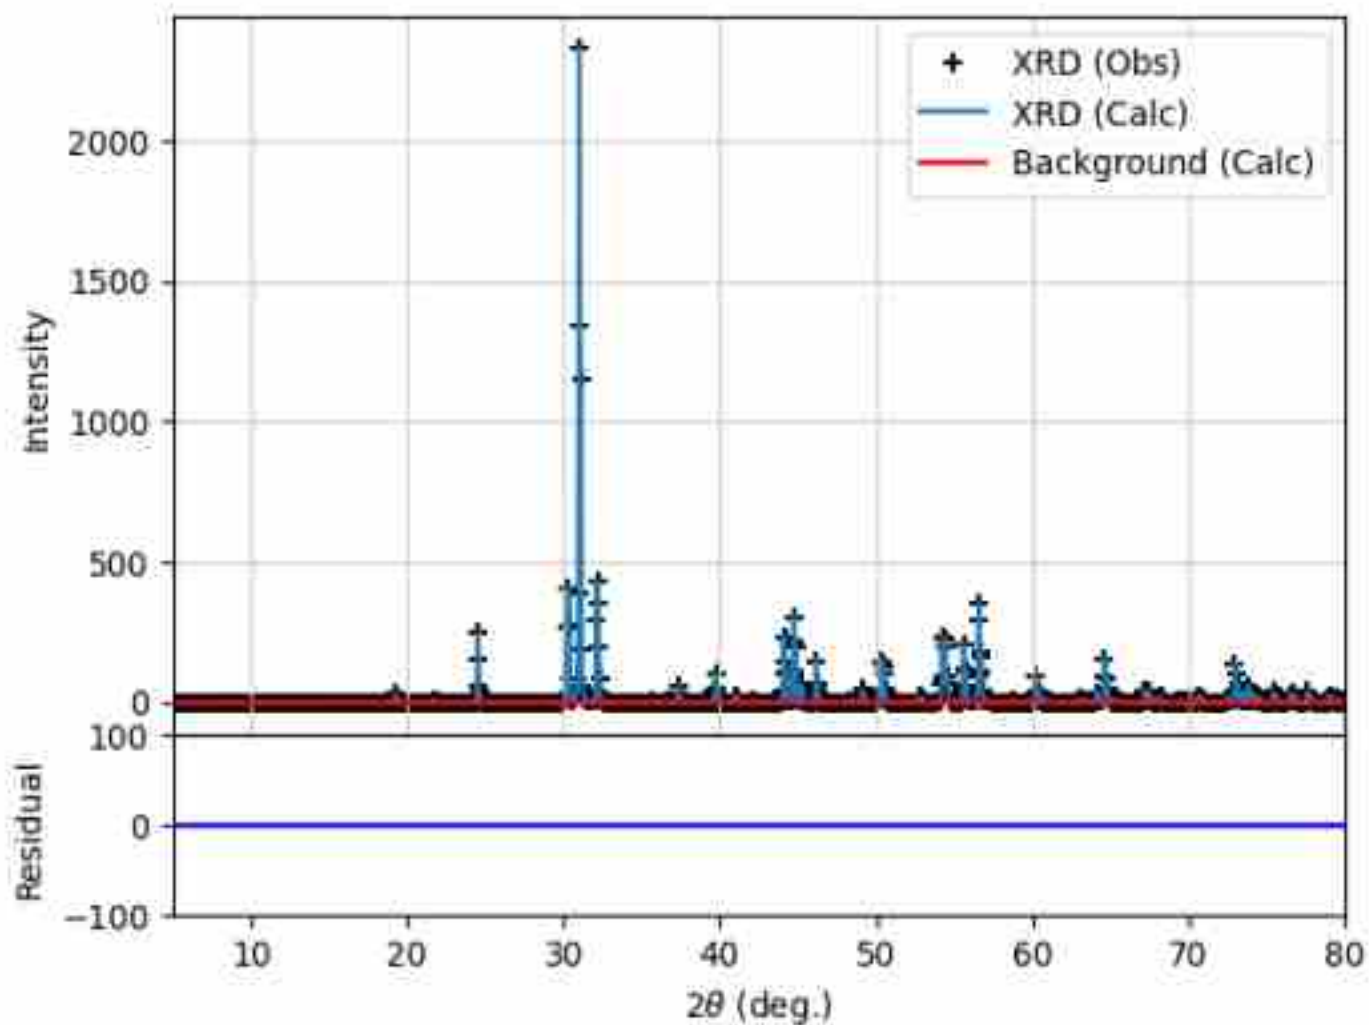

| RMSE before RR | Rwp     | RMSE after RR |
|----------------|---------|---------------|
| 0.013          | 0.00387 | 0.00116       |

# Tb<sub>4</sub>Zn<sub>4</sub>Sn<sub>4</sub>

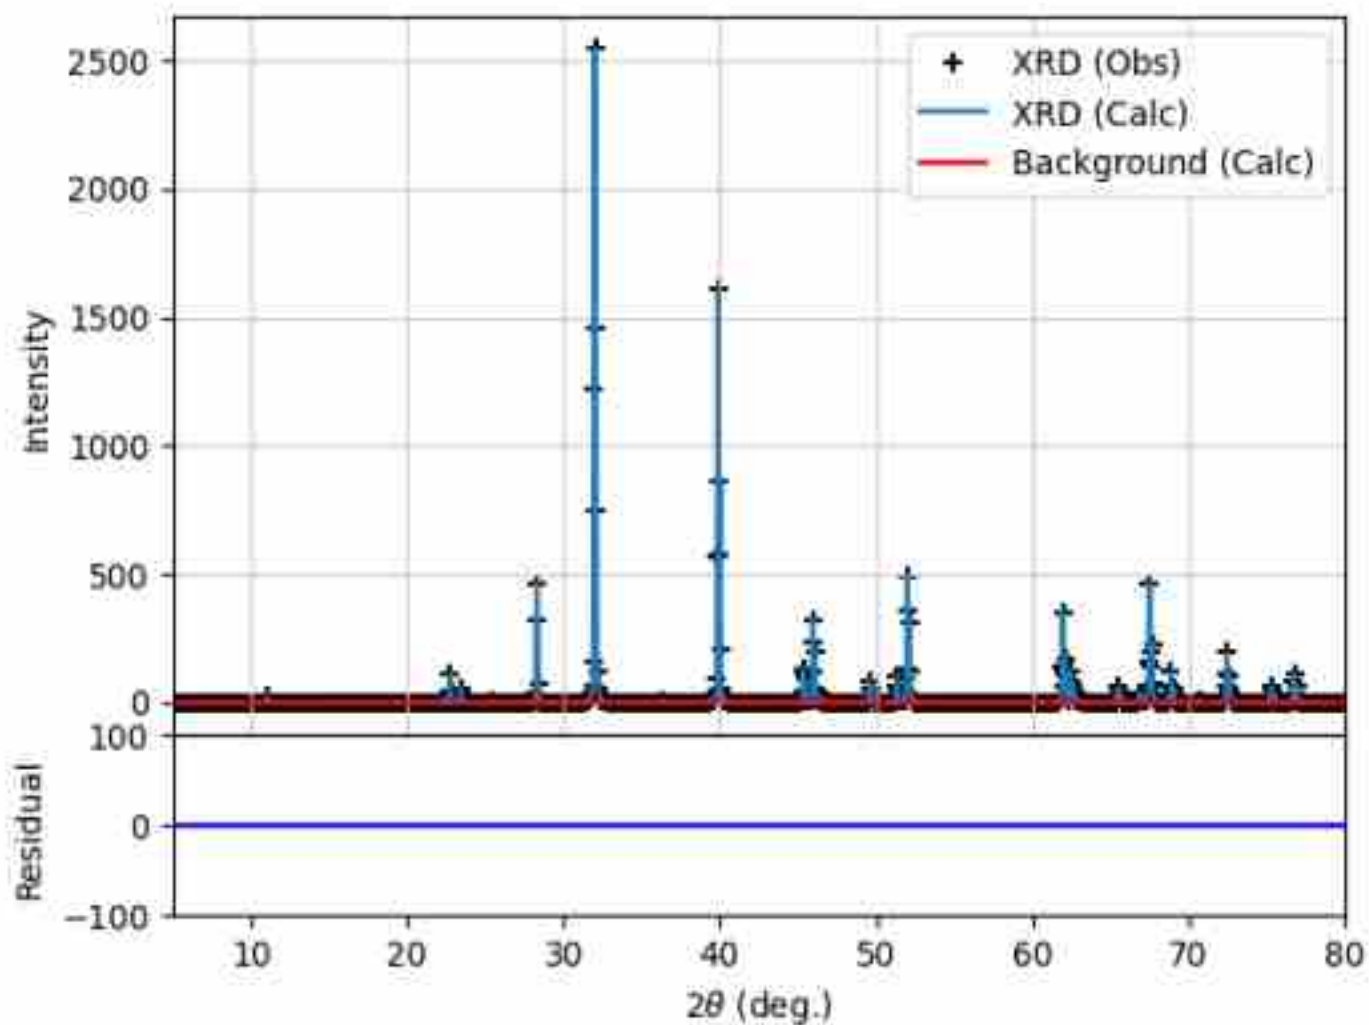

| RMSE before RR | Rwp     | RMSE after RR |
|----------------|---------|---------------|
| 0.013          | 0.00477 | 0.00072       |



# Th1U1Al6

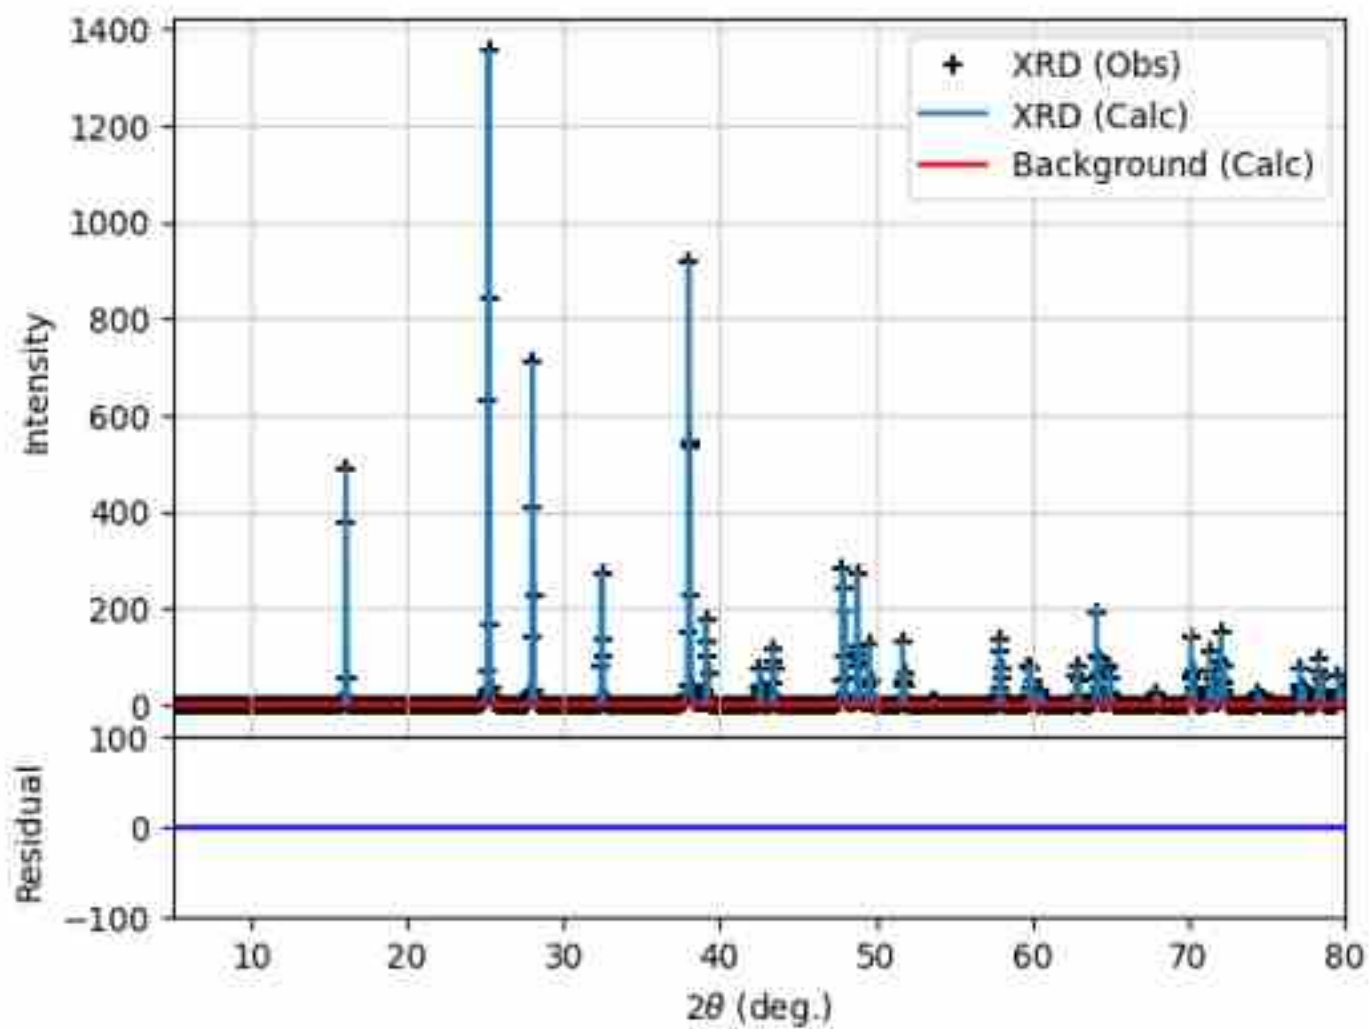

| RMSE before RR | Rwp     | RMSE after RR |
|----------------|---------|---------------|
| 0.013          | 0.00836 | 0.00251       |

# Th1Zr3

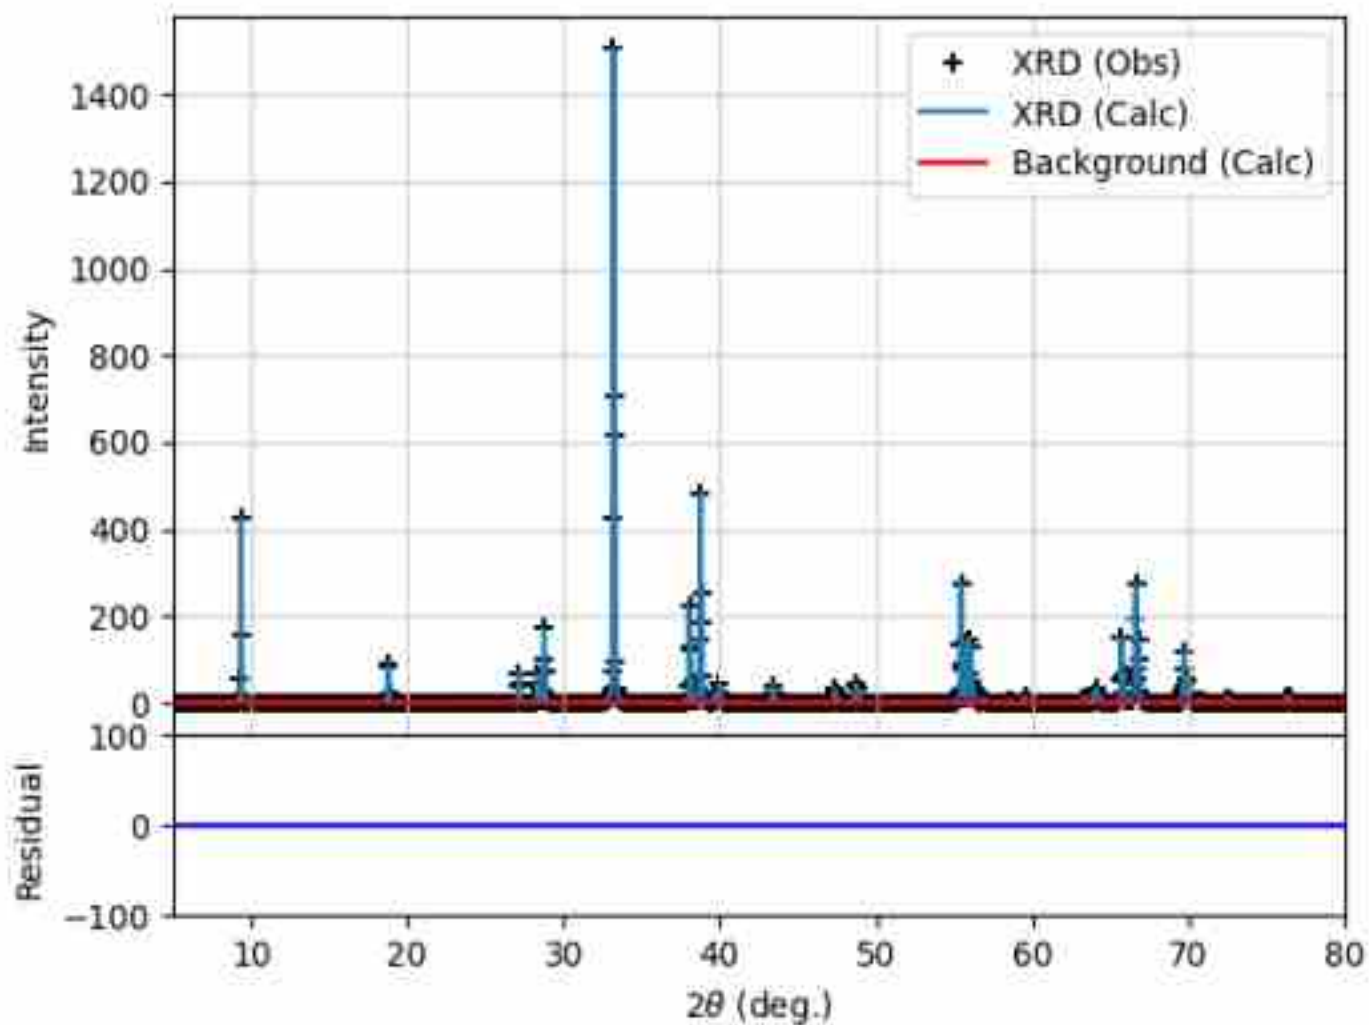

| RMSE before RR | Rwp    | RMSE after RR |
|----------------|--------|---------------|
| 0.013          | 0.0044 | 0.00027       |

# Th4Pd12

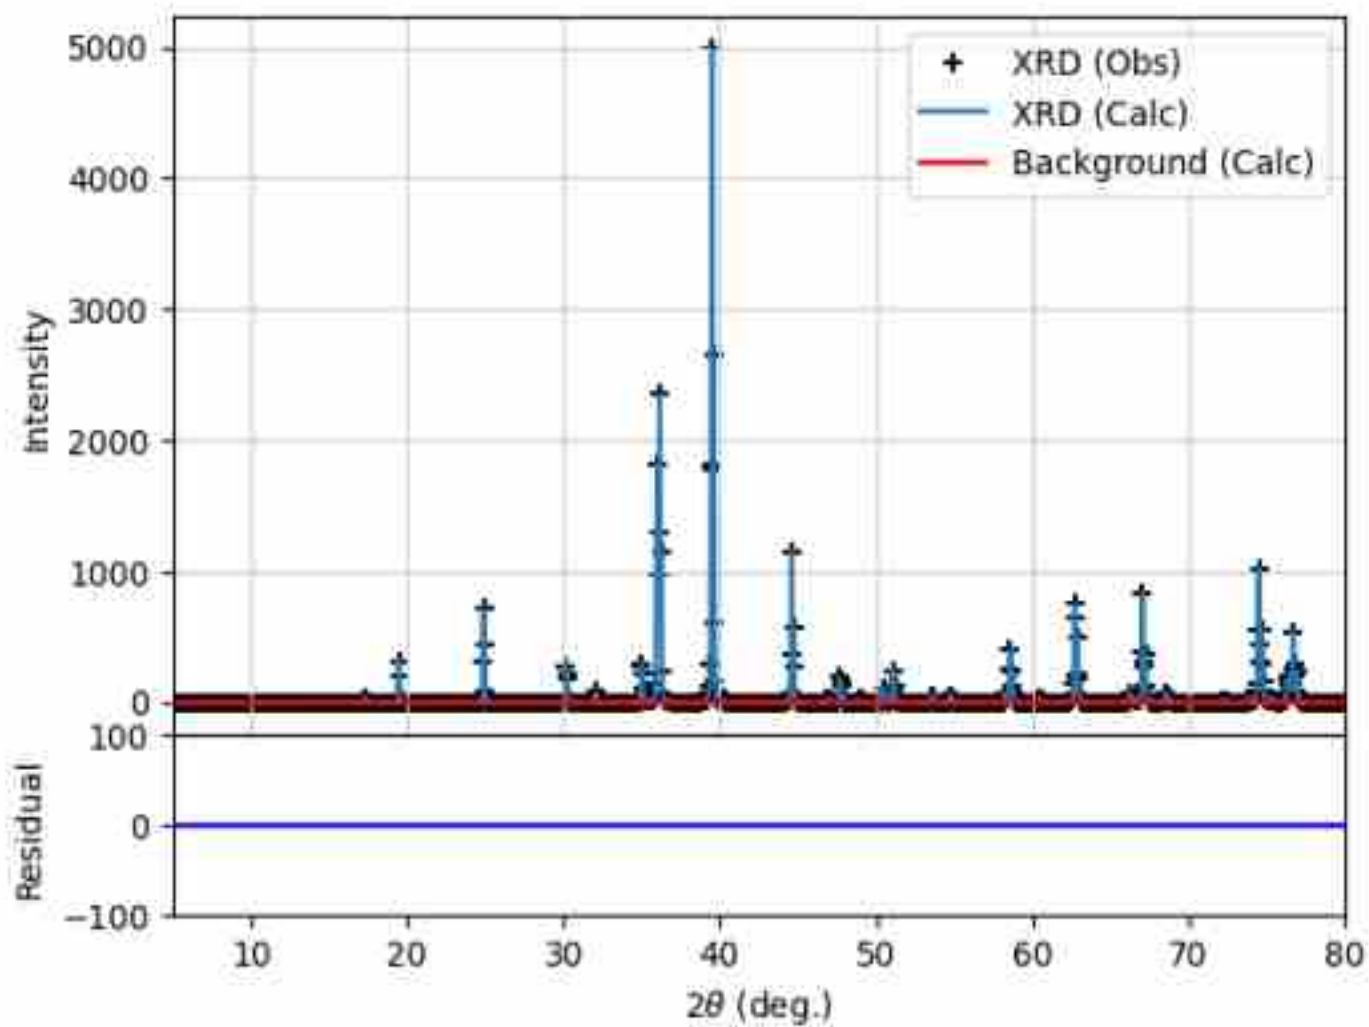

| RMSE before RR | Rwp     | RMSE after RR |
|----------------|---------|---------------|
| 0.013          | 0.00789 | 0.00085       |

# Ti1Cr2S4

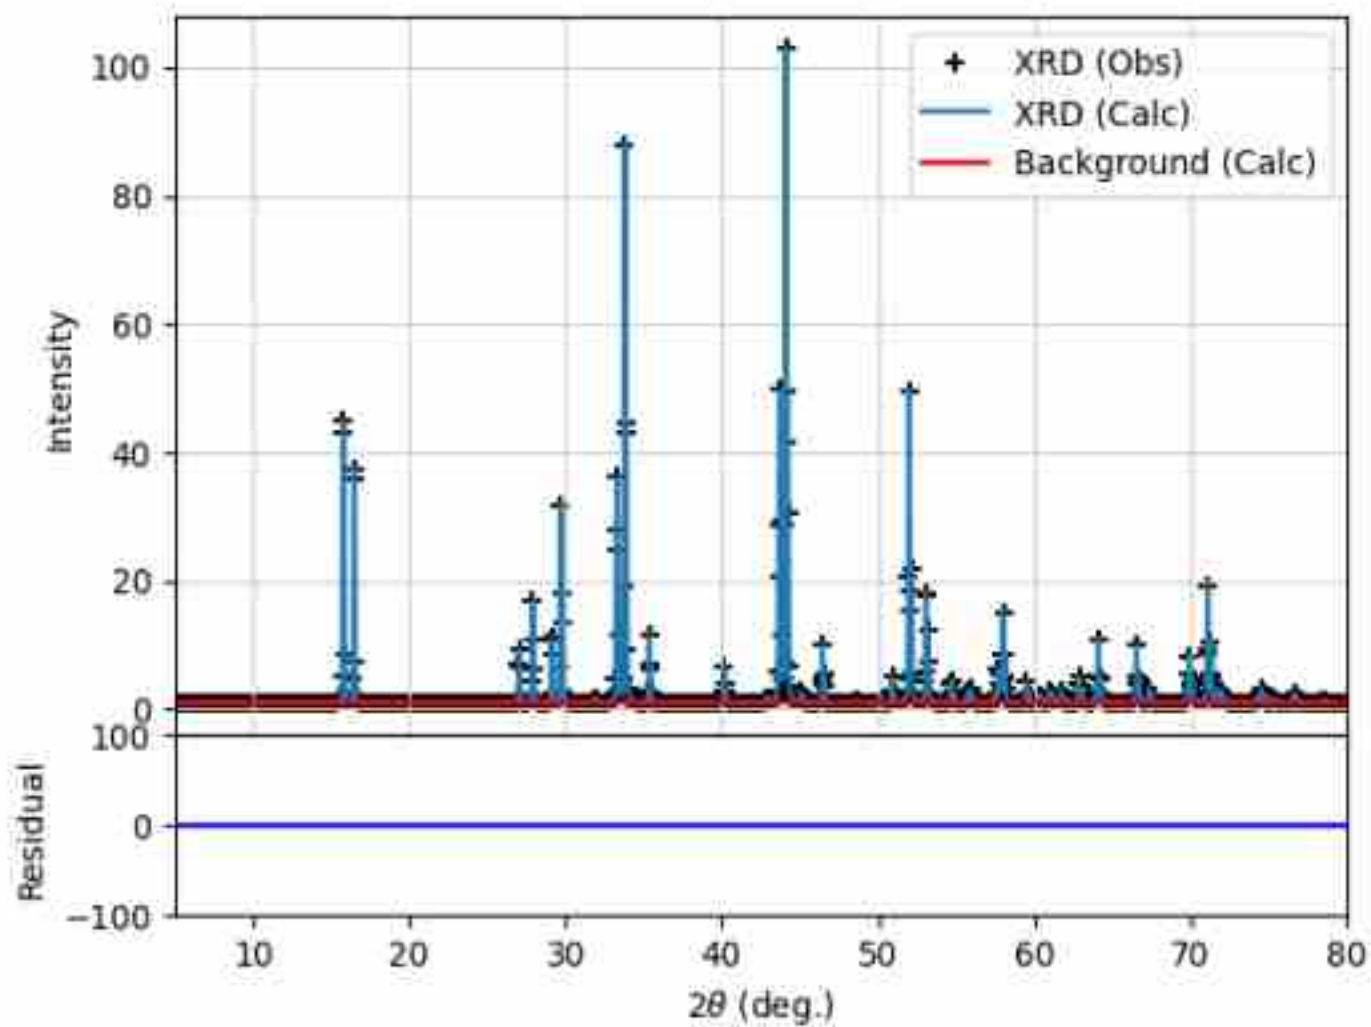

| RMSE before RR | Rwp     | RMSE after RR |
|----------------|---------|---------------|
| 0.013          | 0.00196 | 0.00031       |

# Ti4Al2C1N1

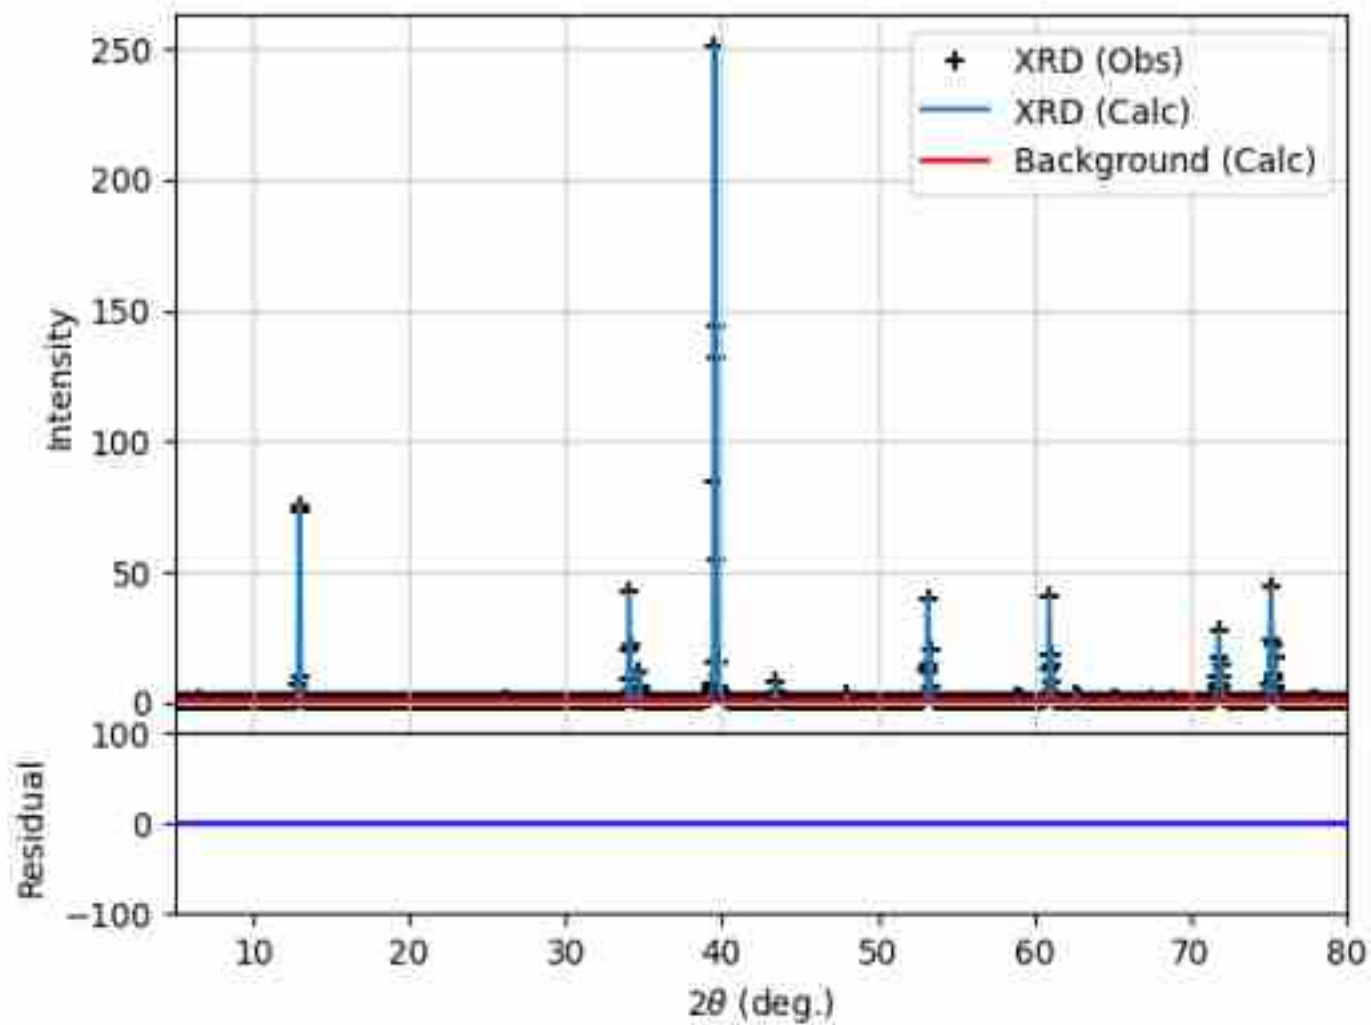

| RMSE before RR | Rwp     | RMSE after RR |
|----------------|---------|---------------|
| 0.013          | 0.11514 | 0.01293       |

# Ti4Ga2N2

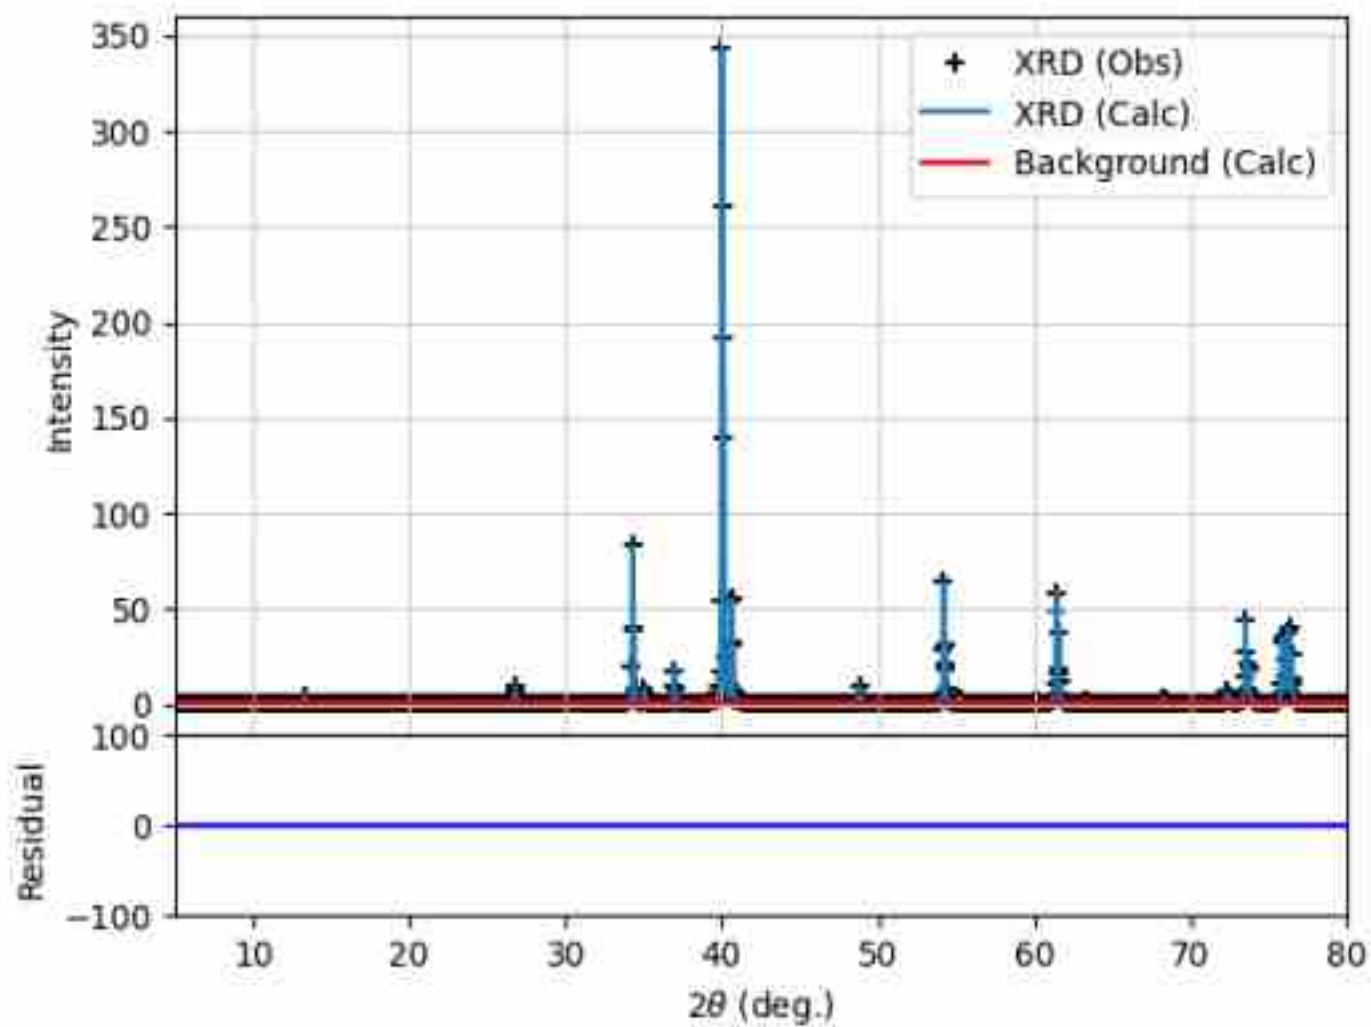

| RMSE before RR | Rwp     | RMSE after RR |
|----------------|---------|---------------|
| 0.013          | 0.00284 | 0.00044       |

# Ti6Nb2

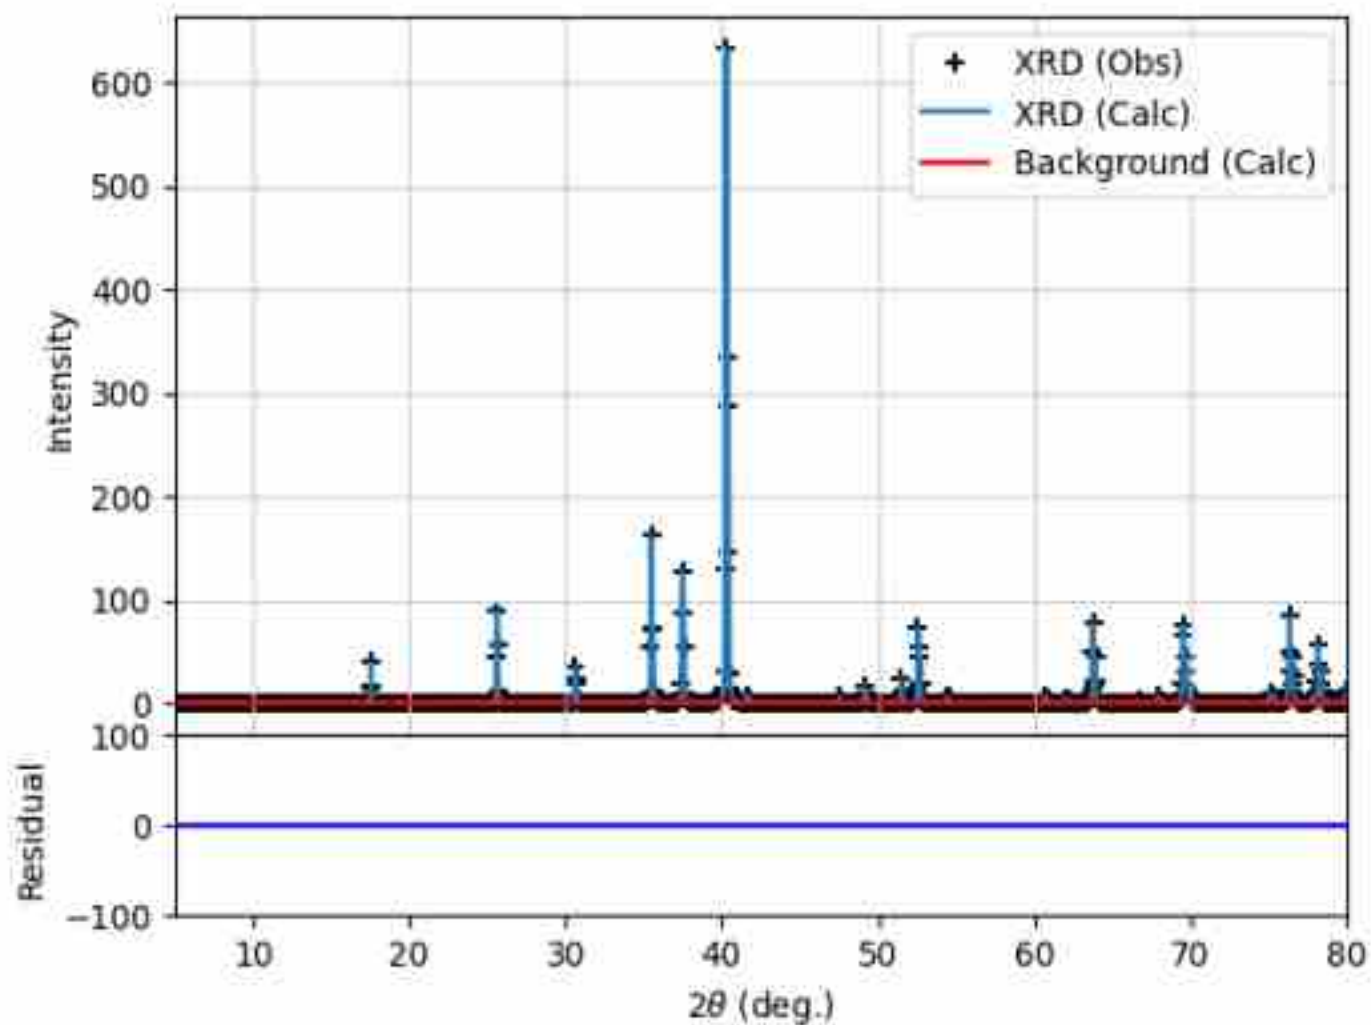

| RMSE before RR | Rwp     | RMSE after RR |
|----------------|---------|---------------|
| 0.013          | 0.03136 | 0.00239       |

# Tl3

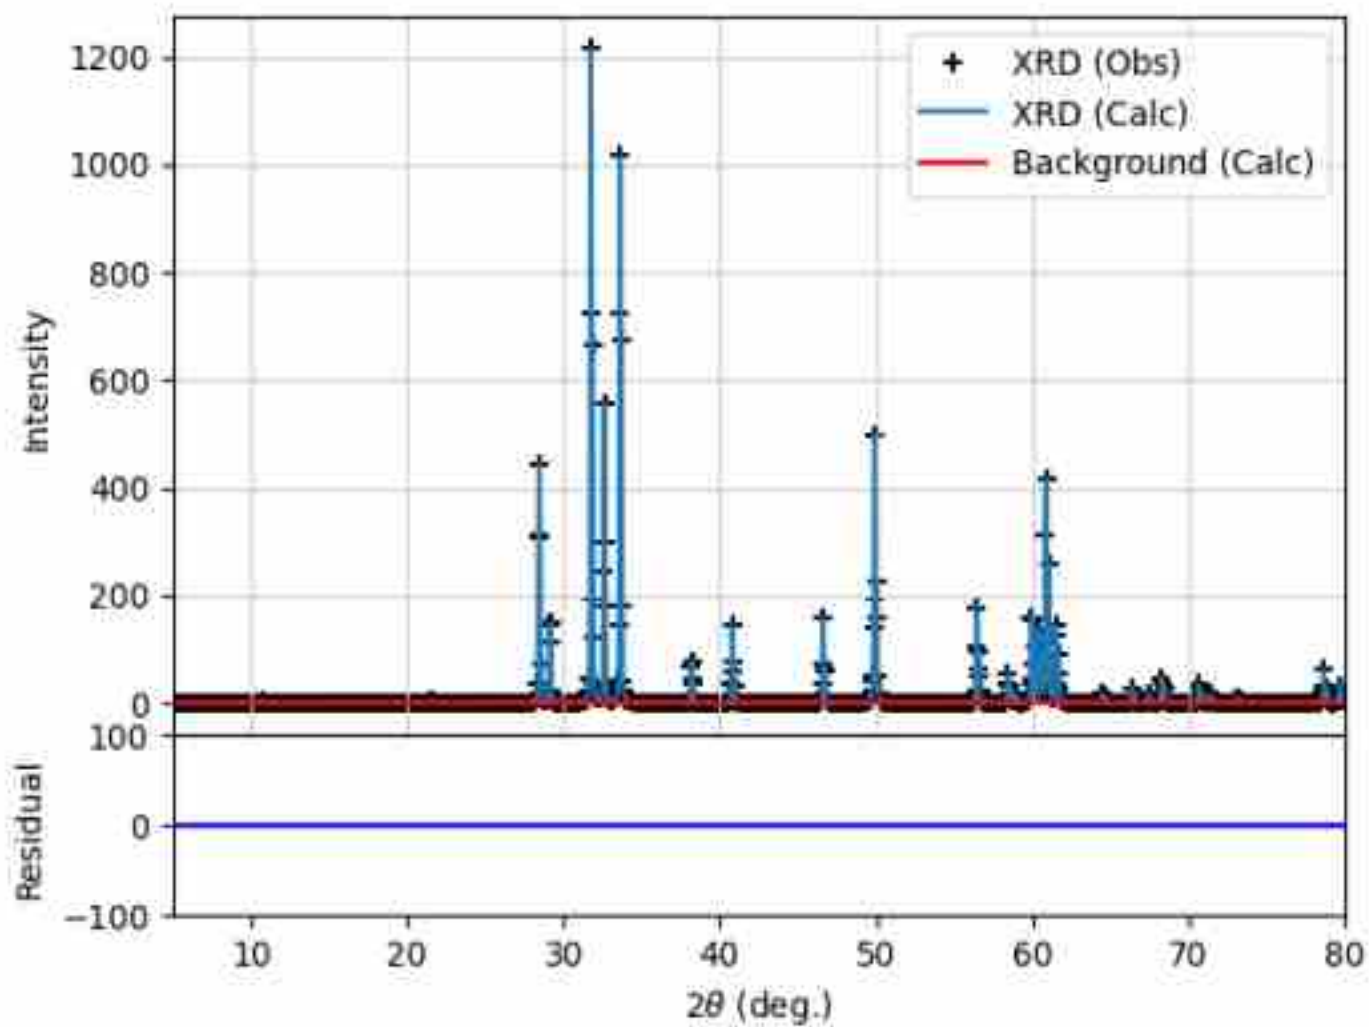

| RMSE before RR | Rwp     | RMSE after RR |
|----------------|---------|---------------|
| 0.013          | 0.00588 | 0.00186       |



# Tm1Al1Ni4

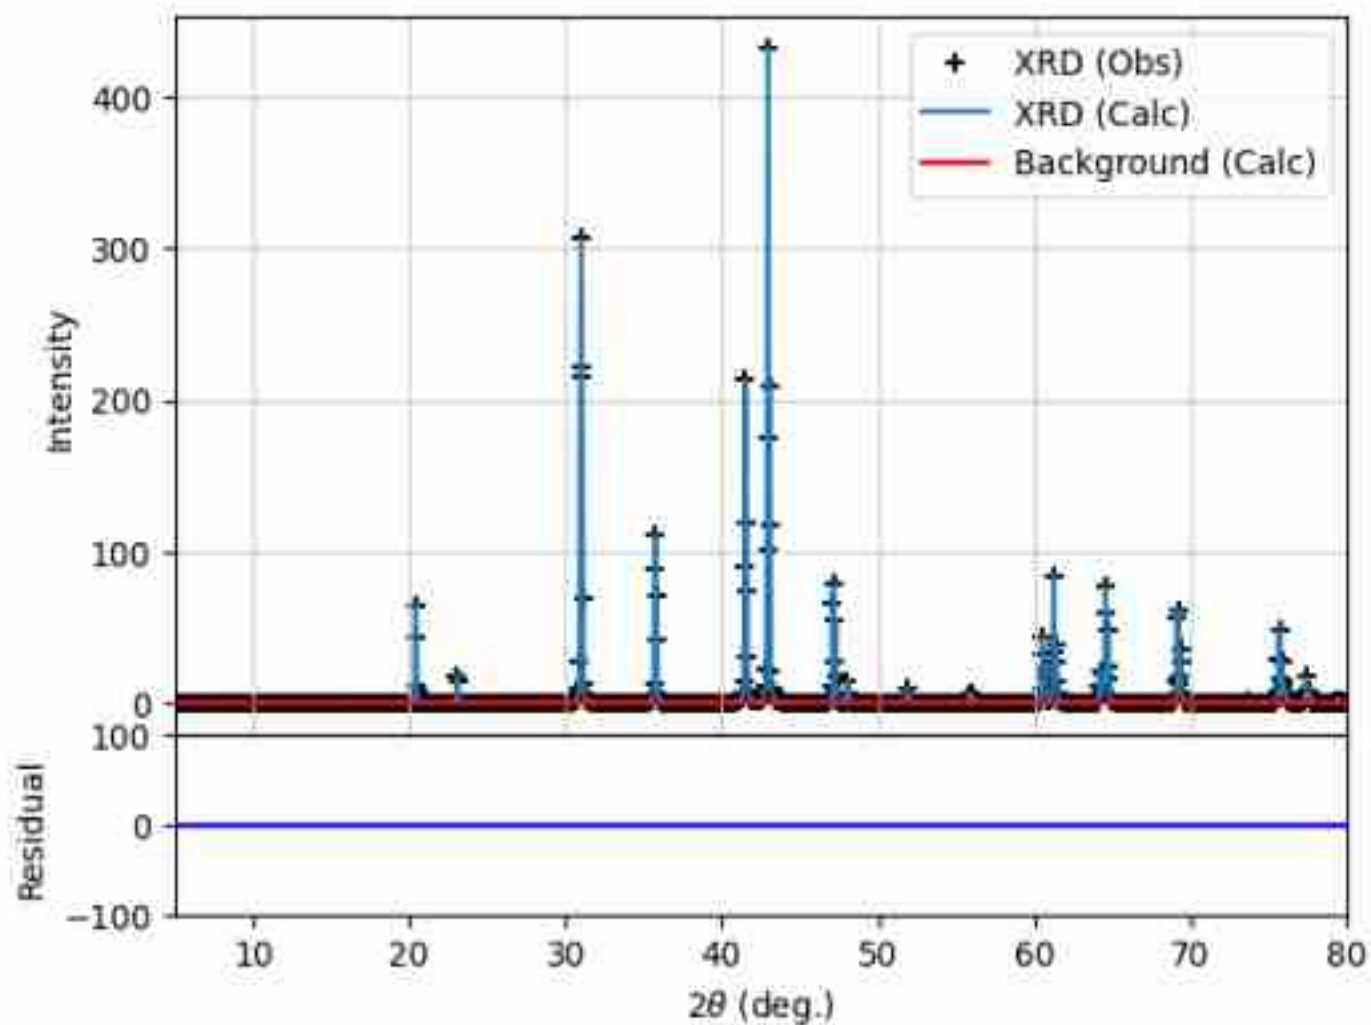

| RMSE before RR | Rwp     | RMSE after RR |
|----------------|---------|---------------|
| 0.013          | 0.02735 | 0.00325       |

# Tm1Cu1Te2

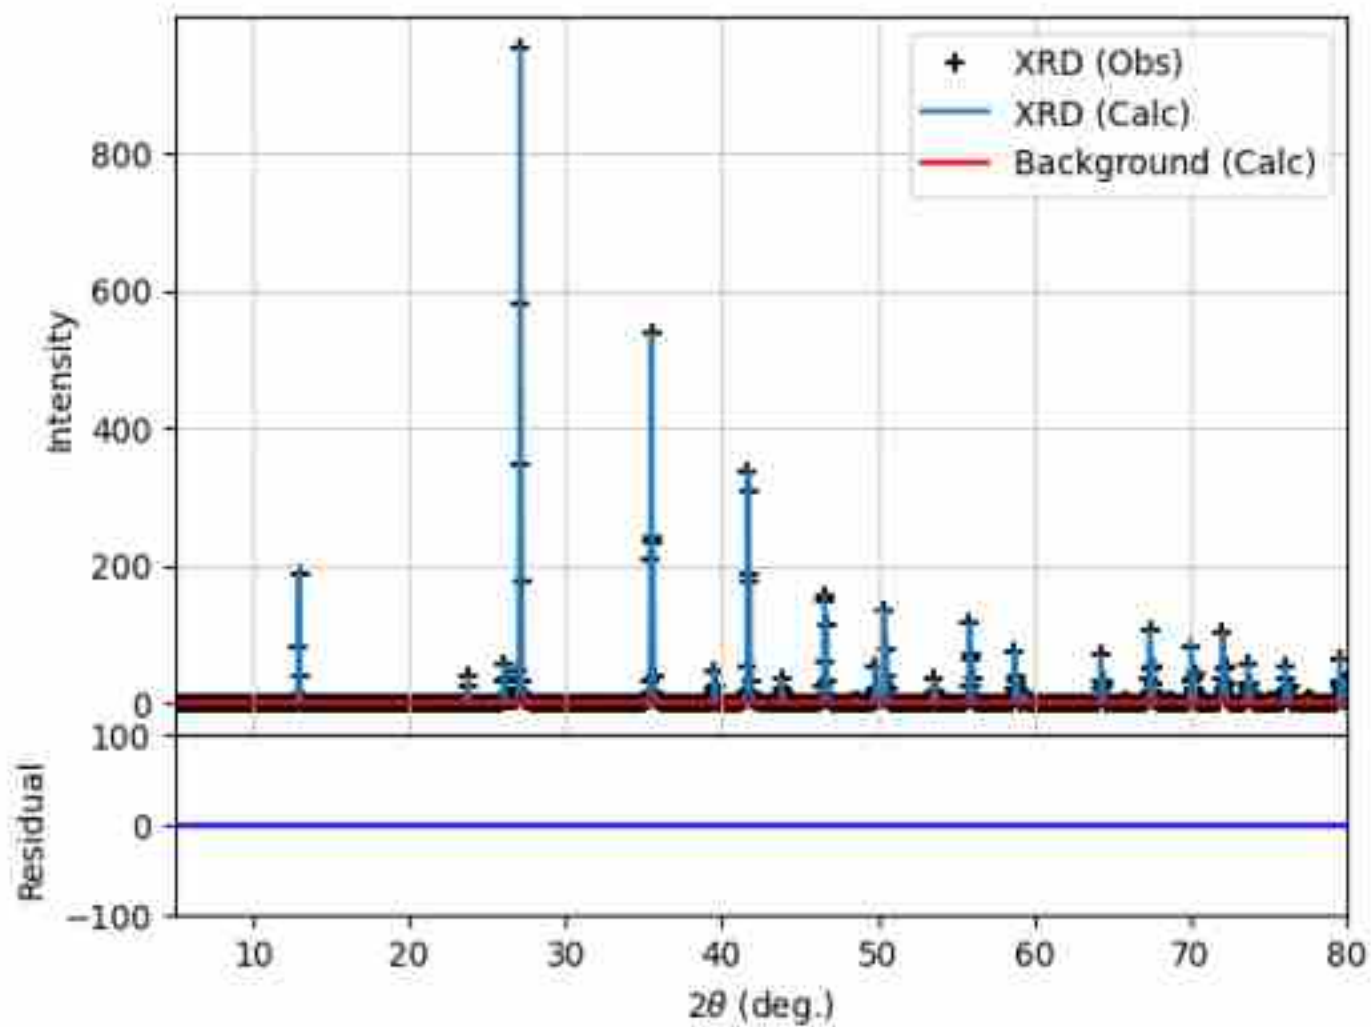

| RMSE before RR | Rwp     | RMSE after RR |
|----------------|---------|---------------|
| 0.013          | 0.00302 | 0.00041       |

# Tm1Ti1Fe11

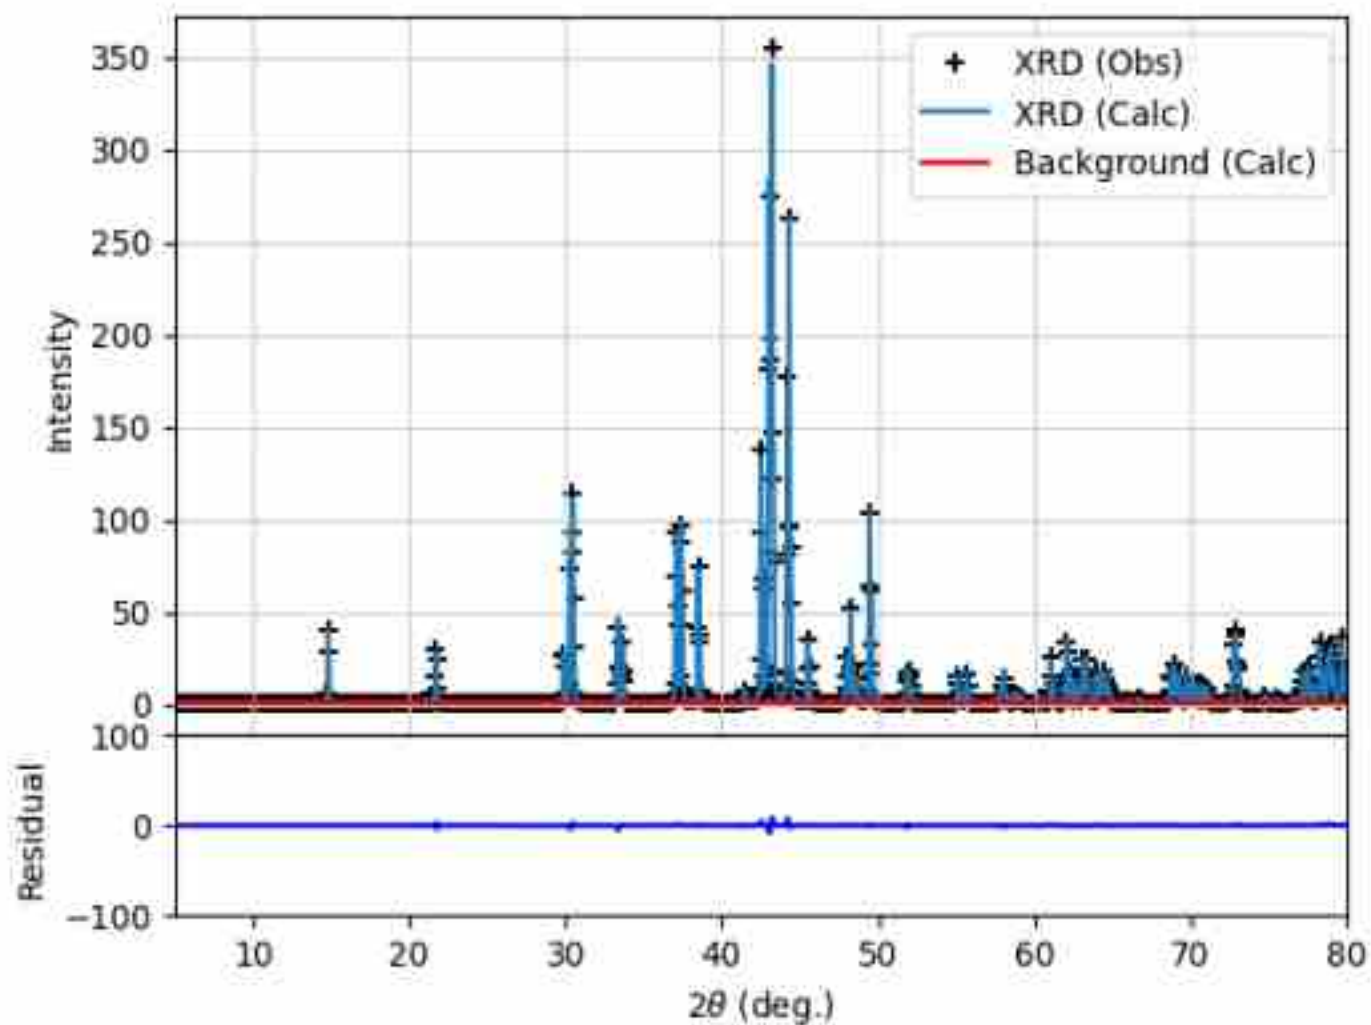

| RMSE before RR | Rwp     | RMSE after RR |
|----------------|---------|---------------|
| 0.013          | 3.52903 | 0.04236       |

# Tm<sub>2</sub>Al<sub>4</sub>Ni<sub>2</sub>

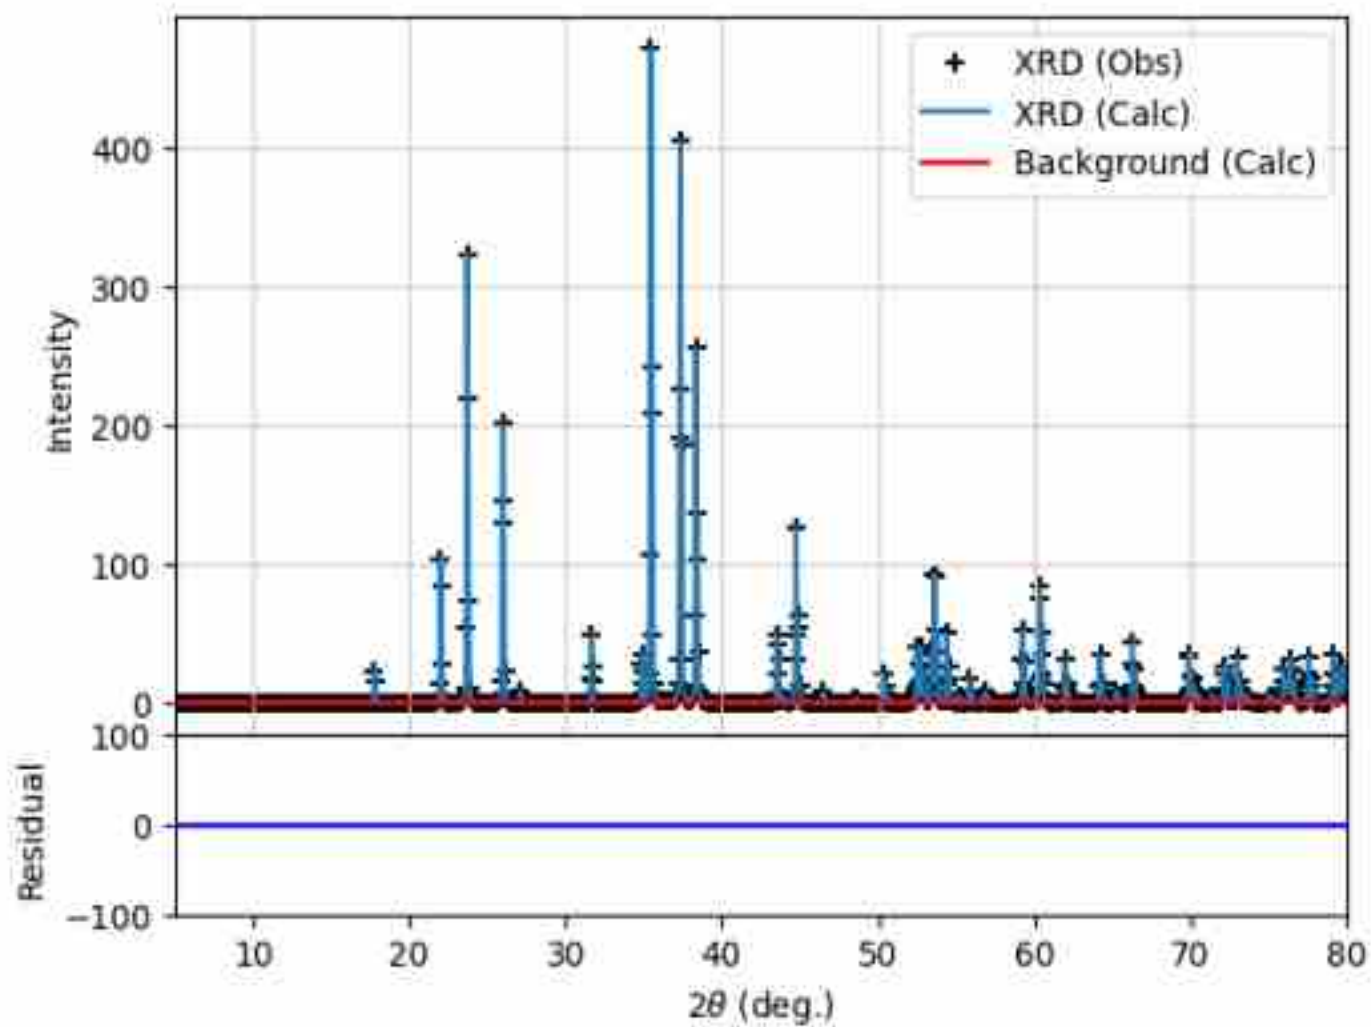

| RMSE before RR | Rwp     | RMSE after RR |
|----------------|---------|---------------|
| 0.013          | 0.00431 | 0.00078       |

# Tm<sub>2</sub>Sn<sub>2</sub>Ge<sub>2</sub>

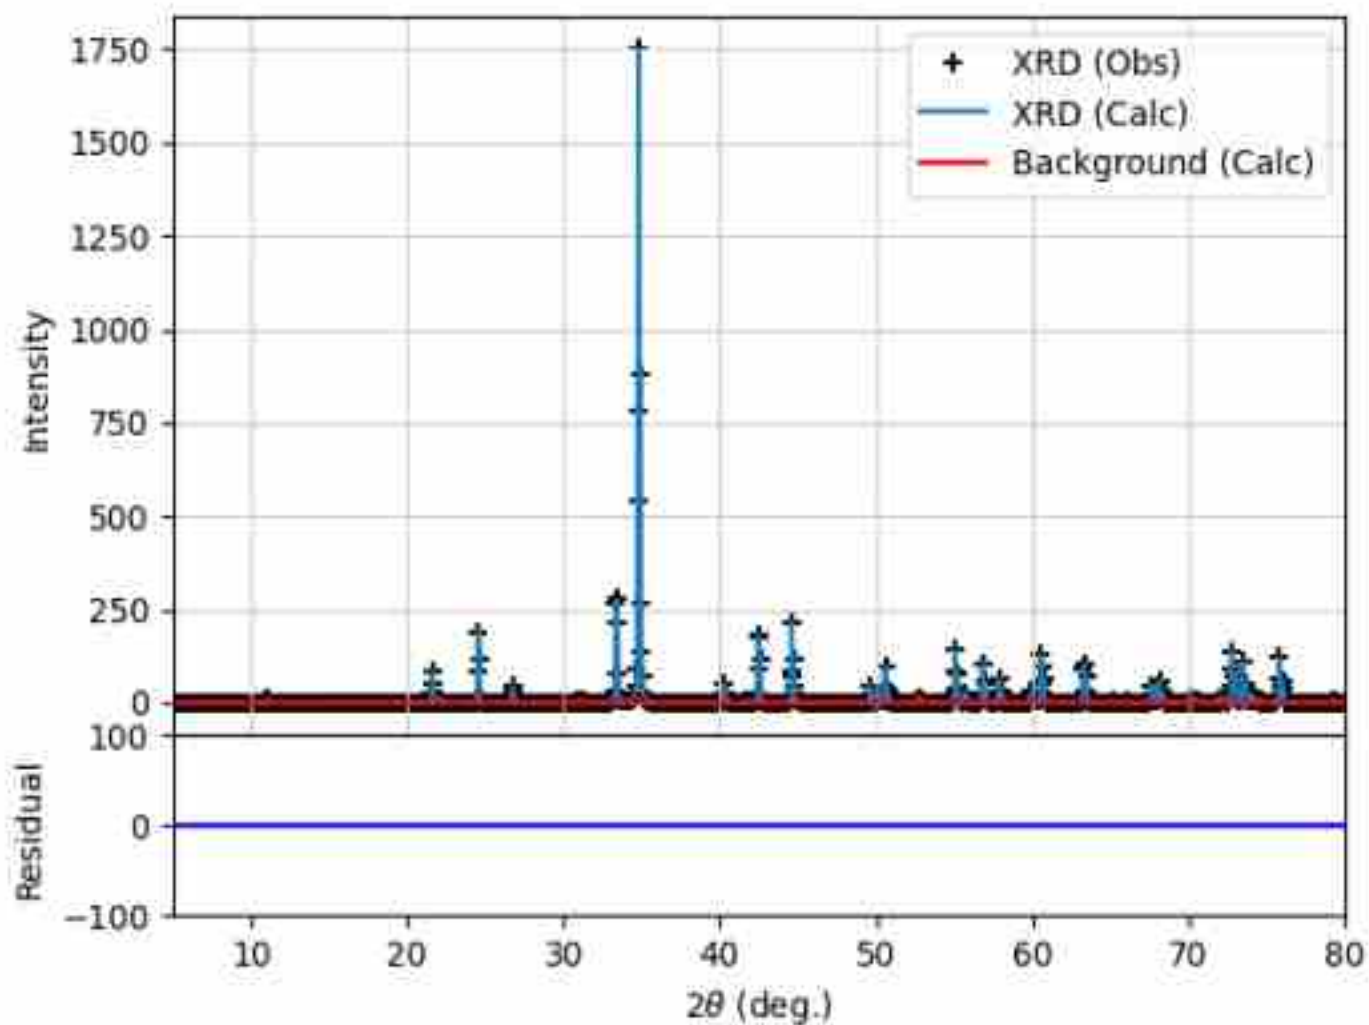

| RMSE before RR | Rwp     | RMSE after RR |
|----------------|---------|---------------|
| 0.013          | 0.00358 | 0.00025       |

# Tm<sub>4</sub>Cd<sub>2</sub>Ge<sub>4</sub>

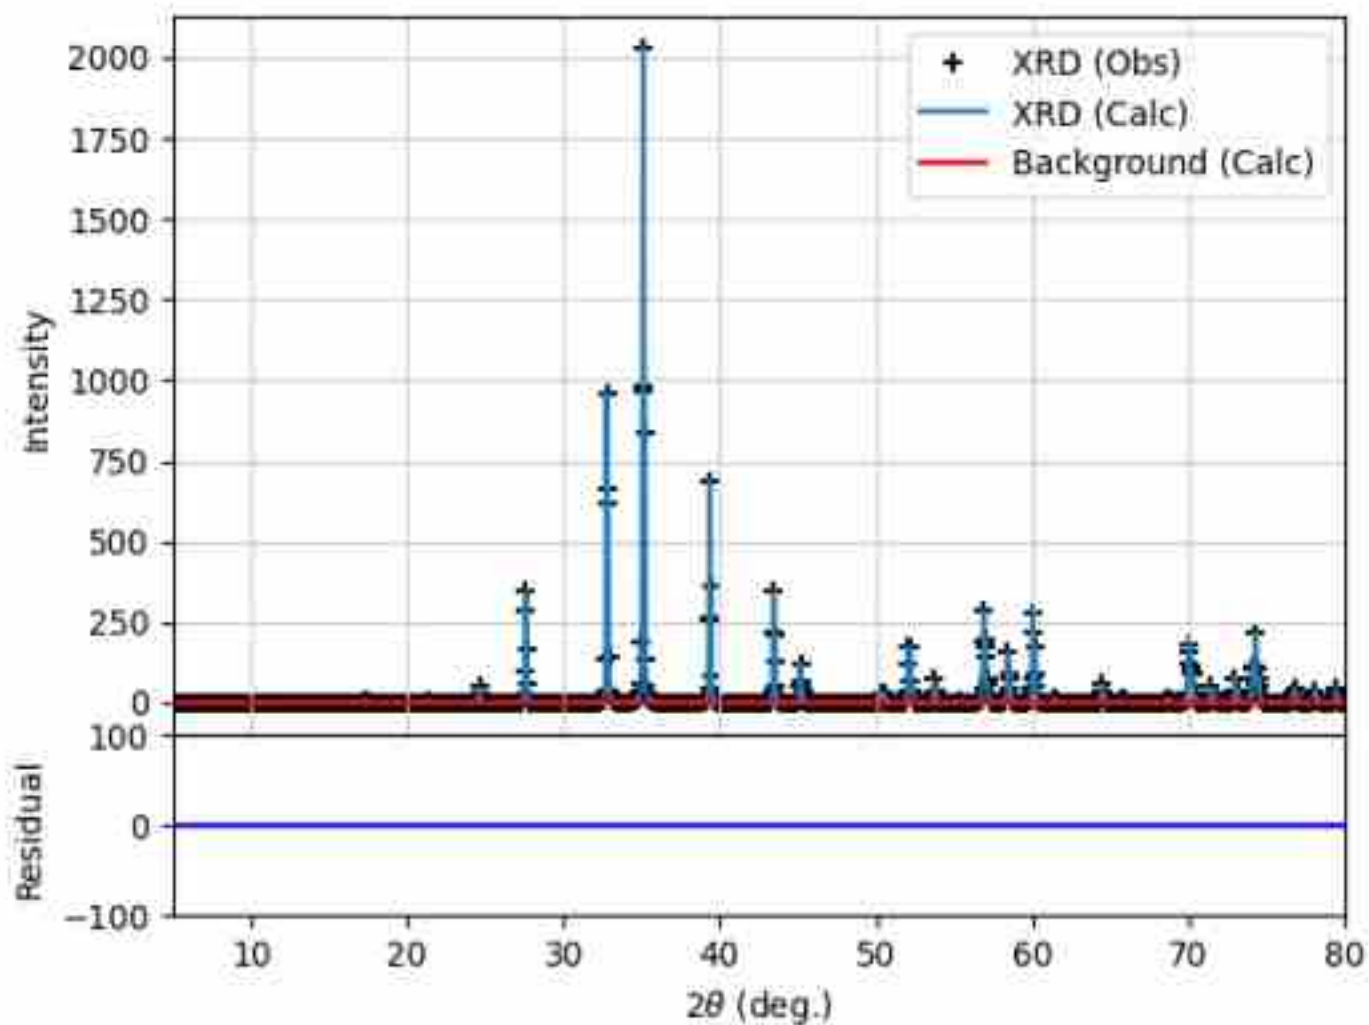

| RMSE before RR | Rwp     | RMSE after RR |
|----------------|---------|---------------|
| 0.013          | 0.00456 | 0.00057       |

# Tm<sub>4</sub>Zr<sub>3</sub>O<sub>12</sub>

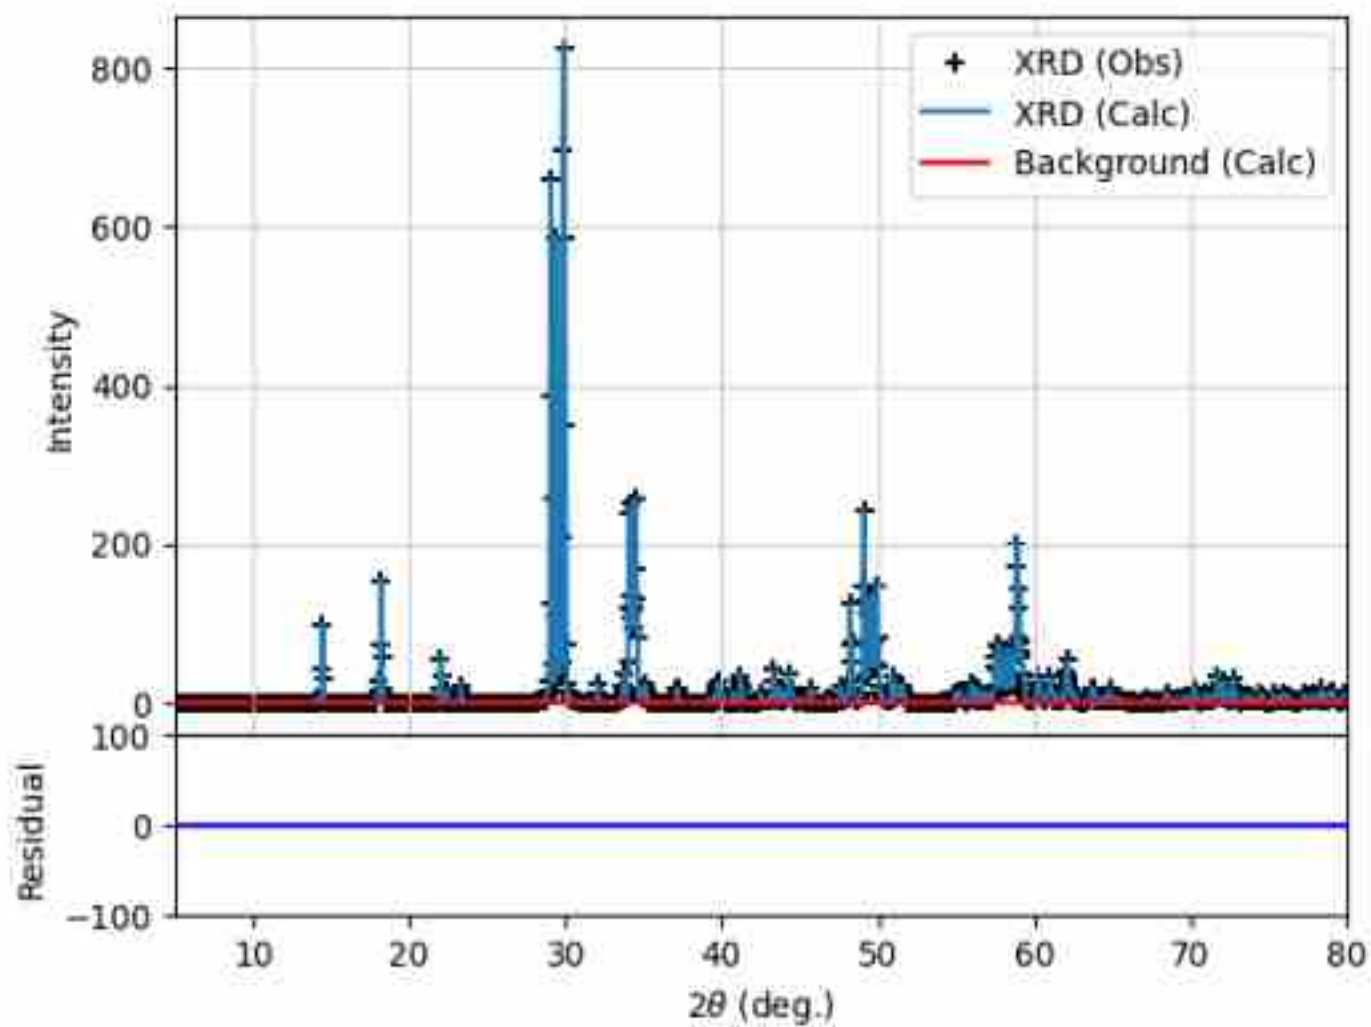

| RMSE before RR | Rwp     | RMSE after RR |
|----------------|---------|---------------|
| 0.013          | 0.00021 | 0.00023       |

# Tm6Fe1Sb2

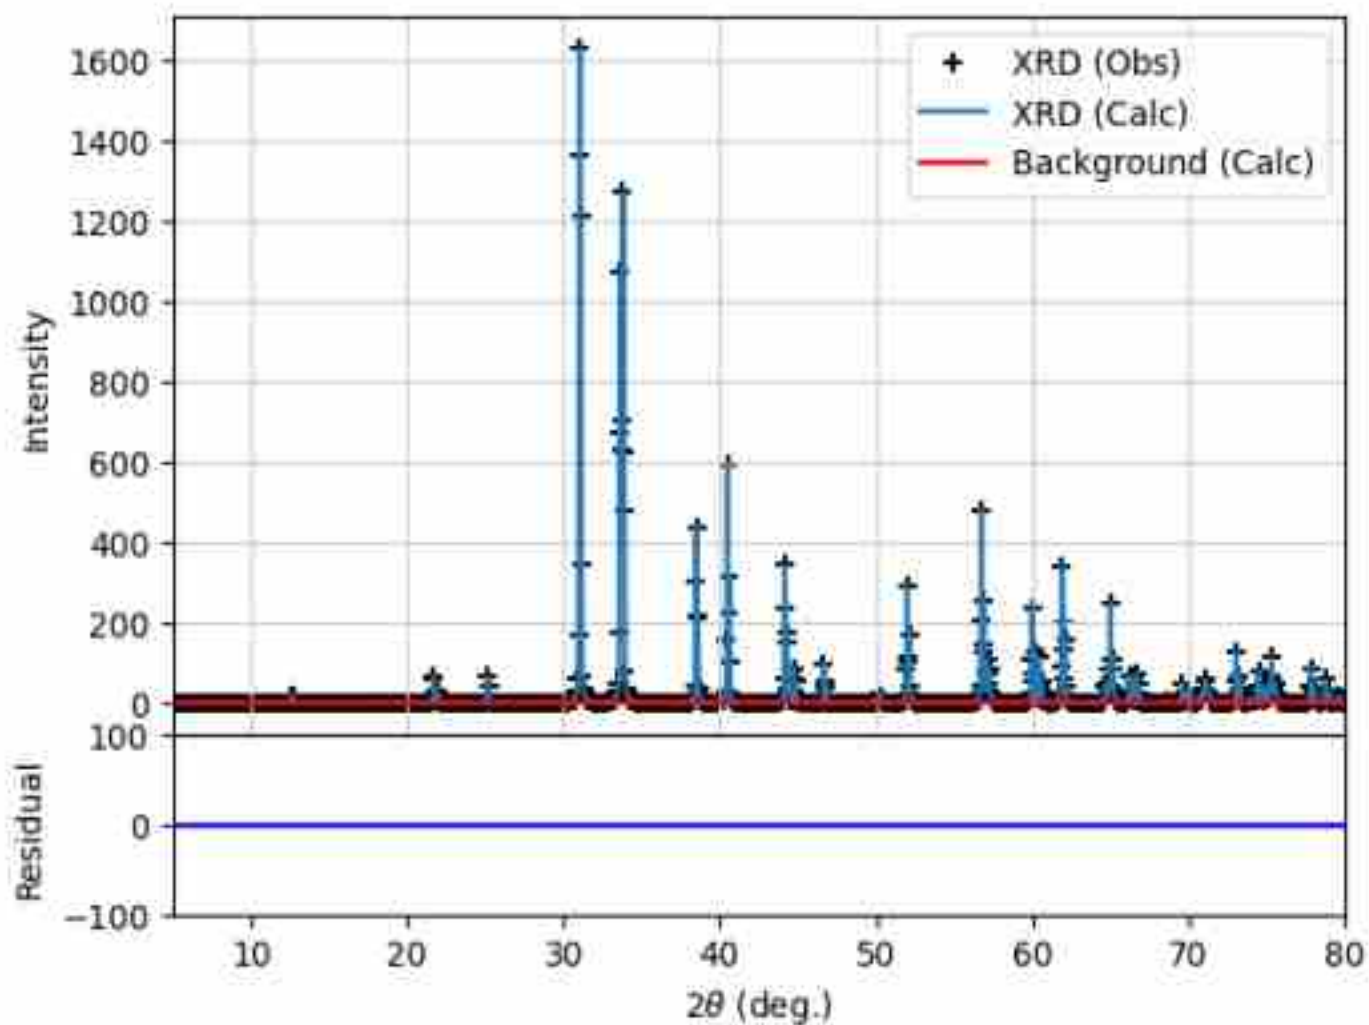

| RMSE before RR | Rwp     | RMSE after RR |
|----------------|---------|---------------|
| 0.013          | 0.00634 | 0.00053       |



# Tm6Pt8

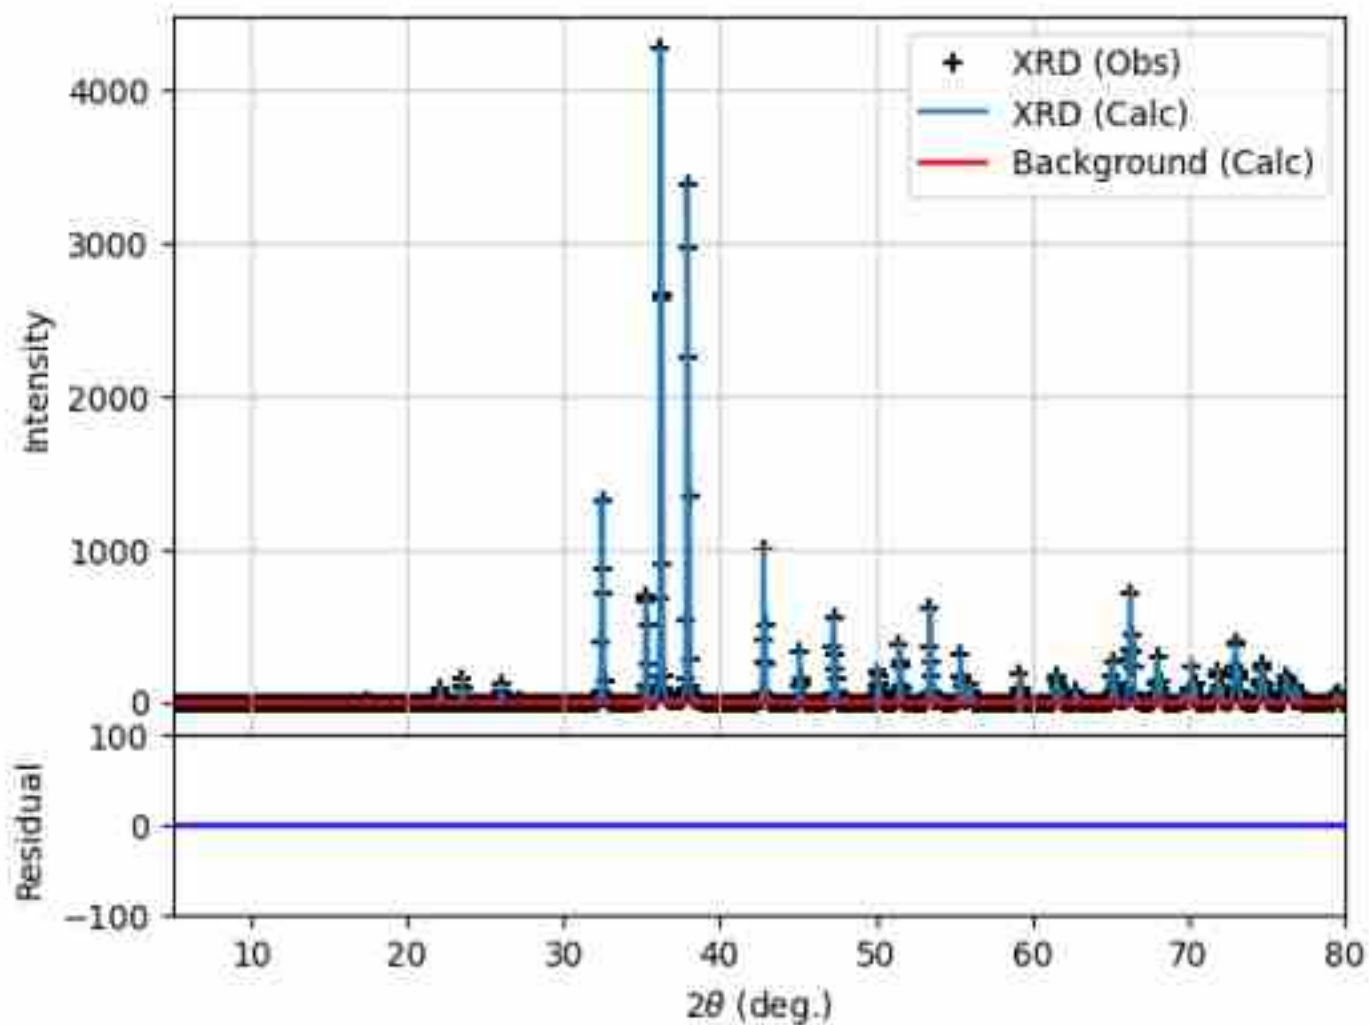

| RMSE before RR | Rwp     | RMSE after RR |
|----------------|---------|---------------|
| 0.013          | 0.00474 | 0.00059       |

# Tm<sub>6</sub>W<sub>10</sub>O<sub>12</sub>

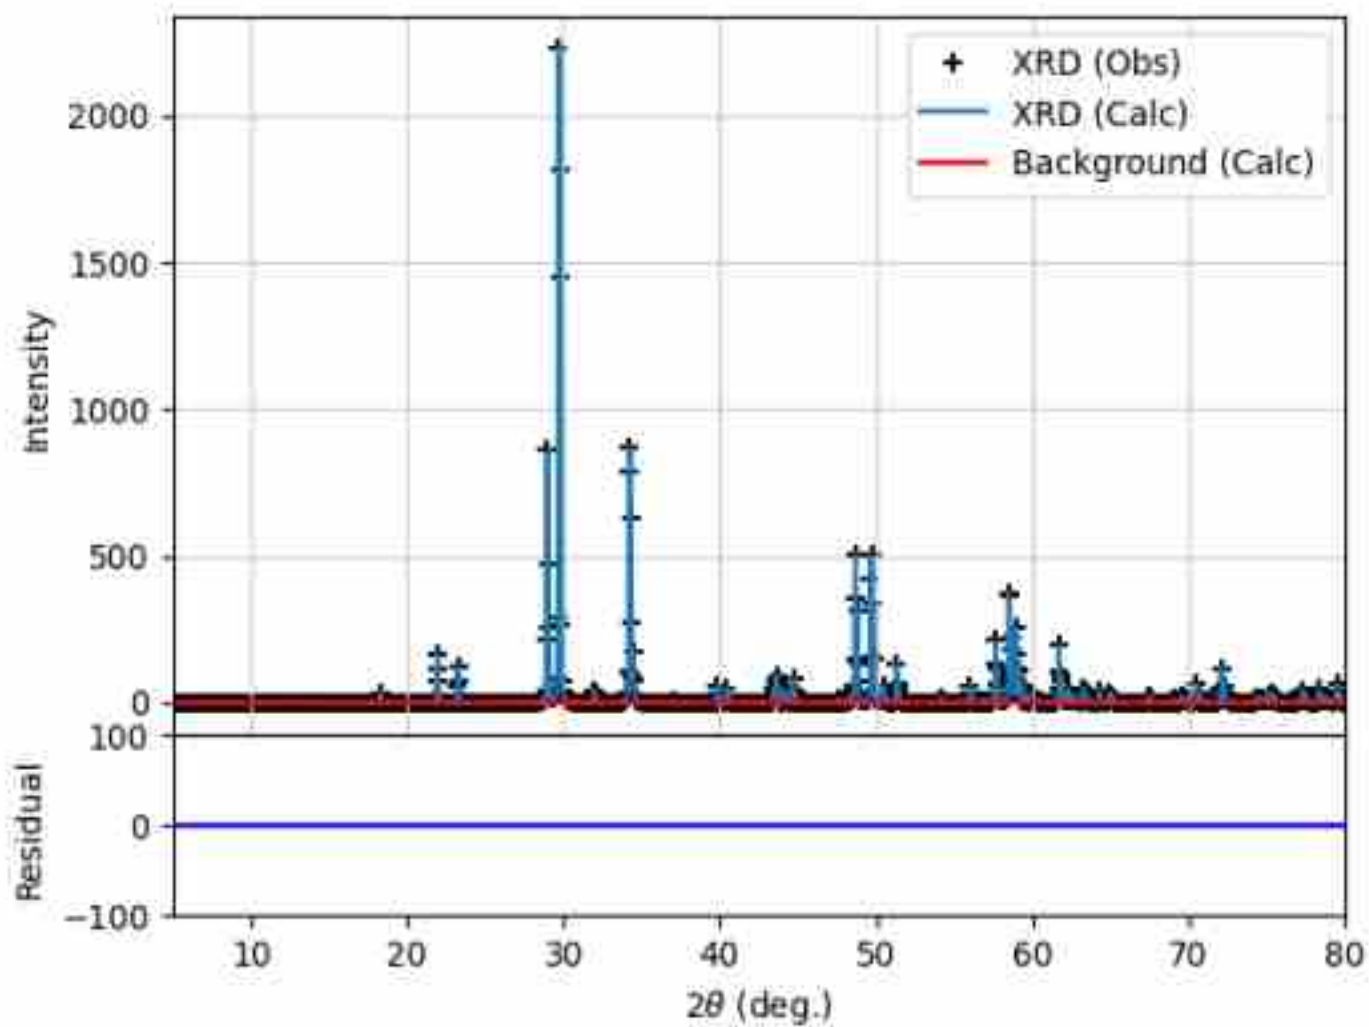

| RMSE before RR | Rwp    | RMSE after RR |
|----------------|--------|---------------|
| 0.013          | 0.0027 | 0.00102       |

# U2P4

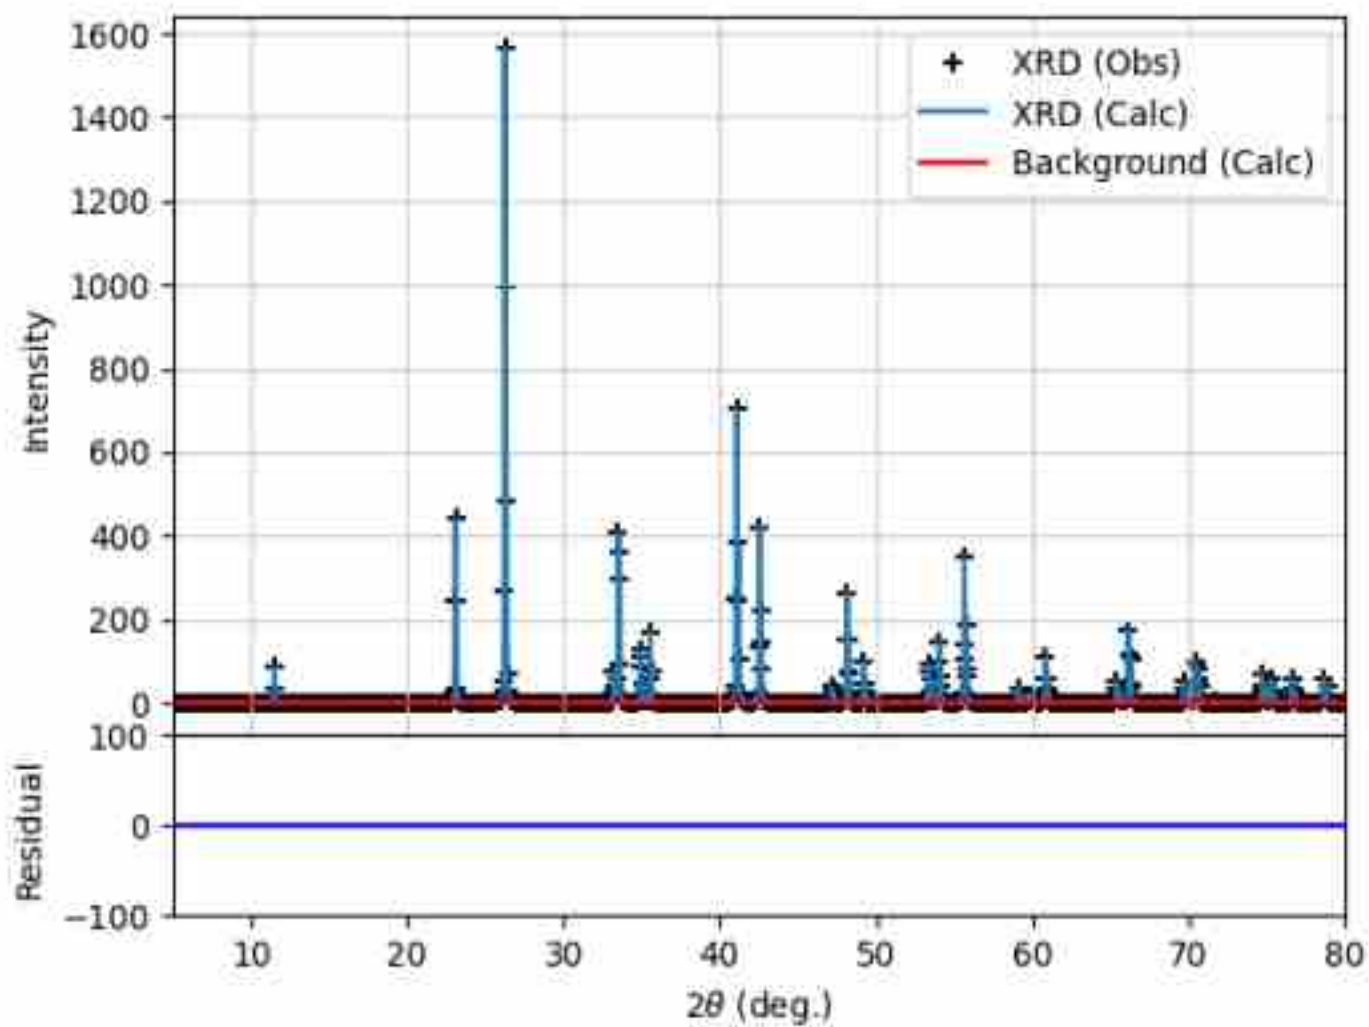

| RMSE before RR | Rwp     | RMSE after RR |
|----------------|---------|---------------|
| 0.013          | 0.00778 | 0.00122       |

# U<sub>2</sub>Si<sub>3</sub>Ru<sub>1</sub>

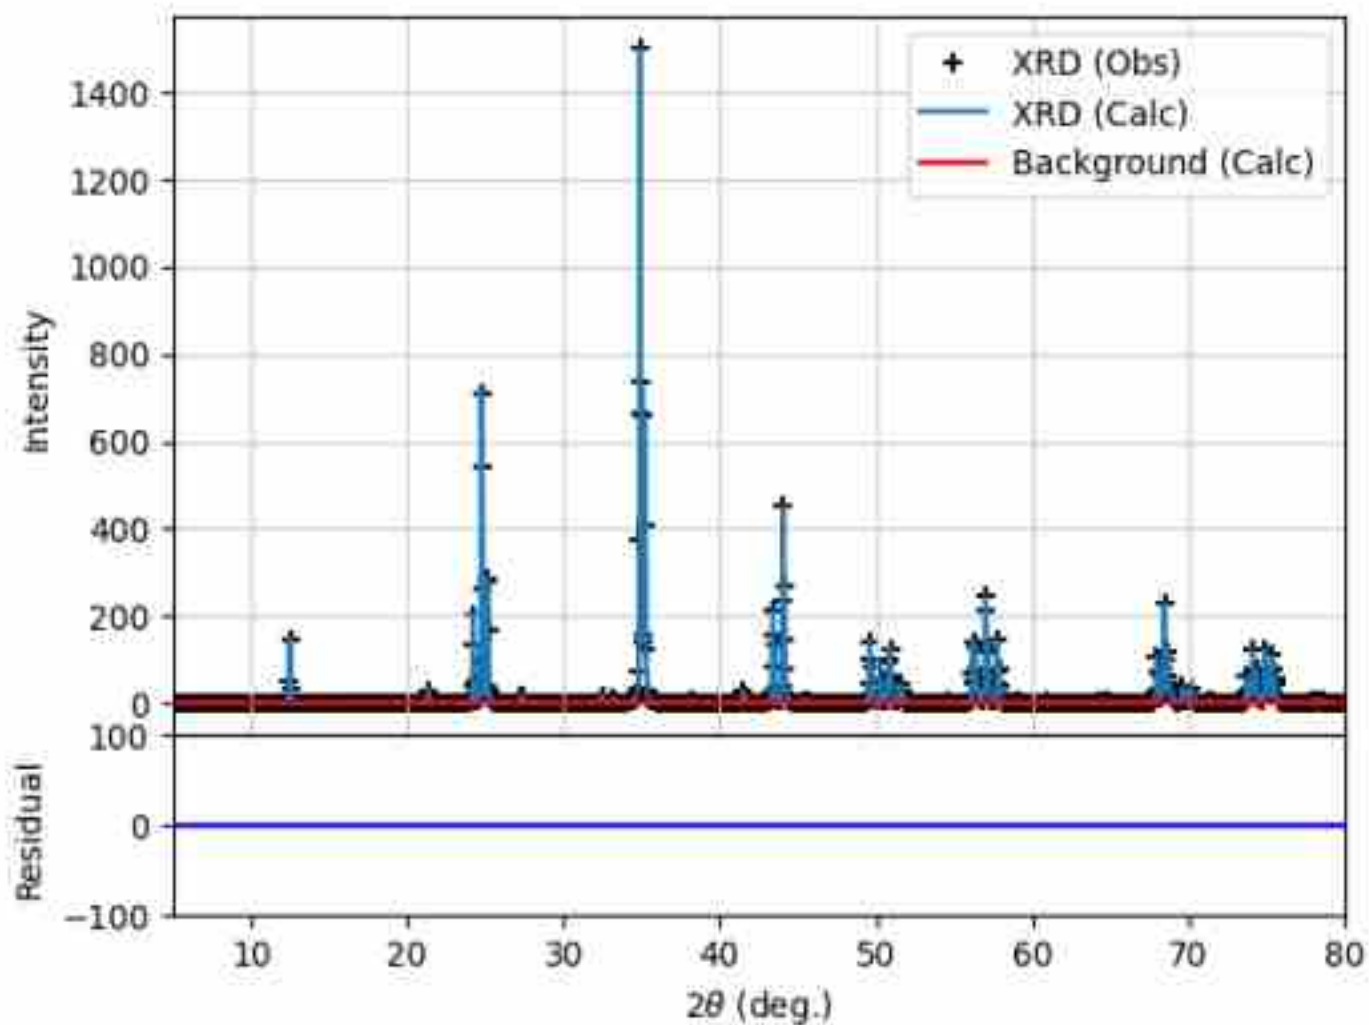

| RMSE before RR | Rwp     | RMSE after RR |
|----------------|---------|---------------|
| 0.013          | 0.00392 | 0.00093       |

# V1Cu3Te4

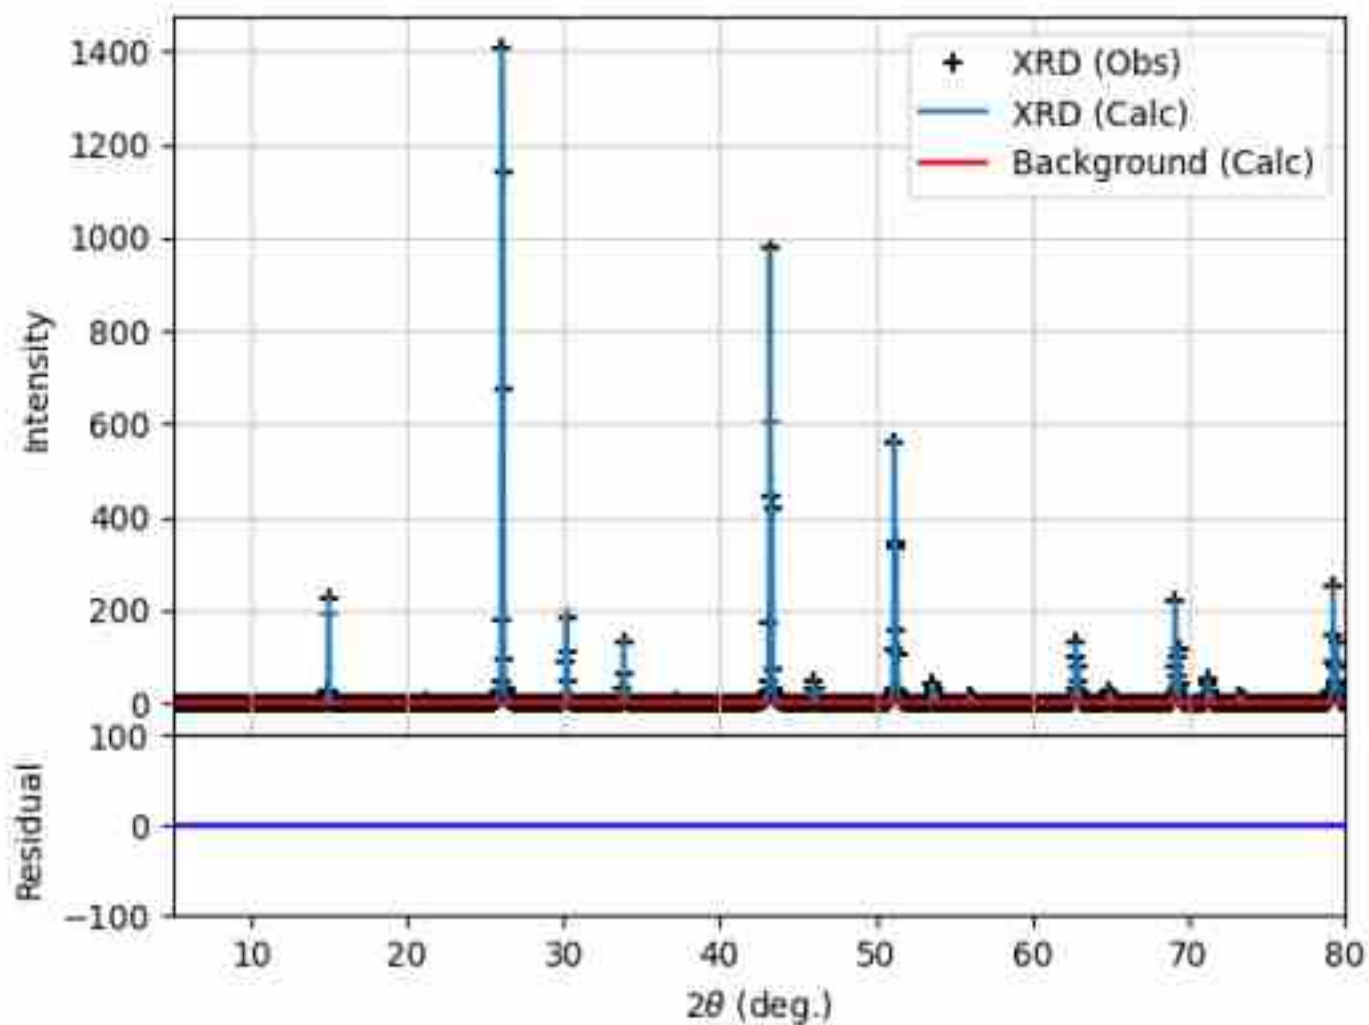

| RMSE before RR | Rwp     | RMSE after RR |
|----------------|---------|---------------|
| 0.013          | 0.01166 | 0.00101       |

# V6P2C2

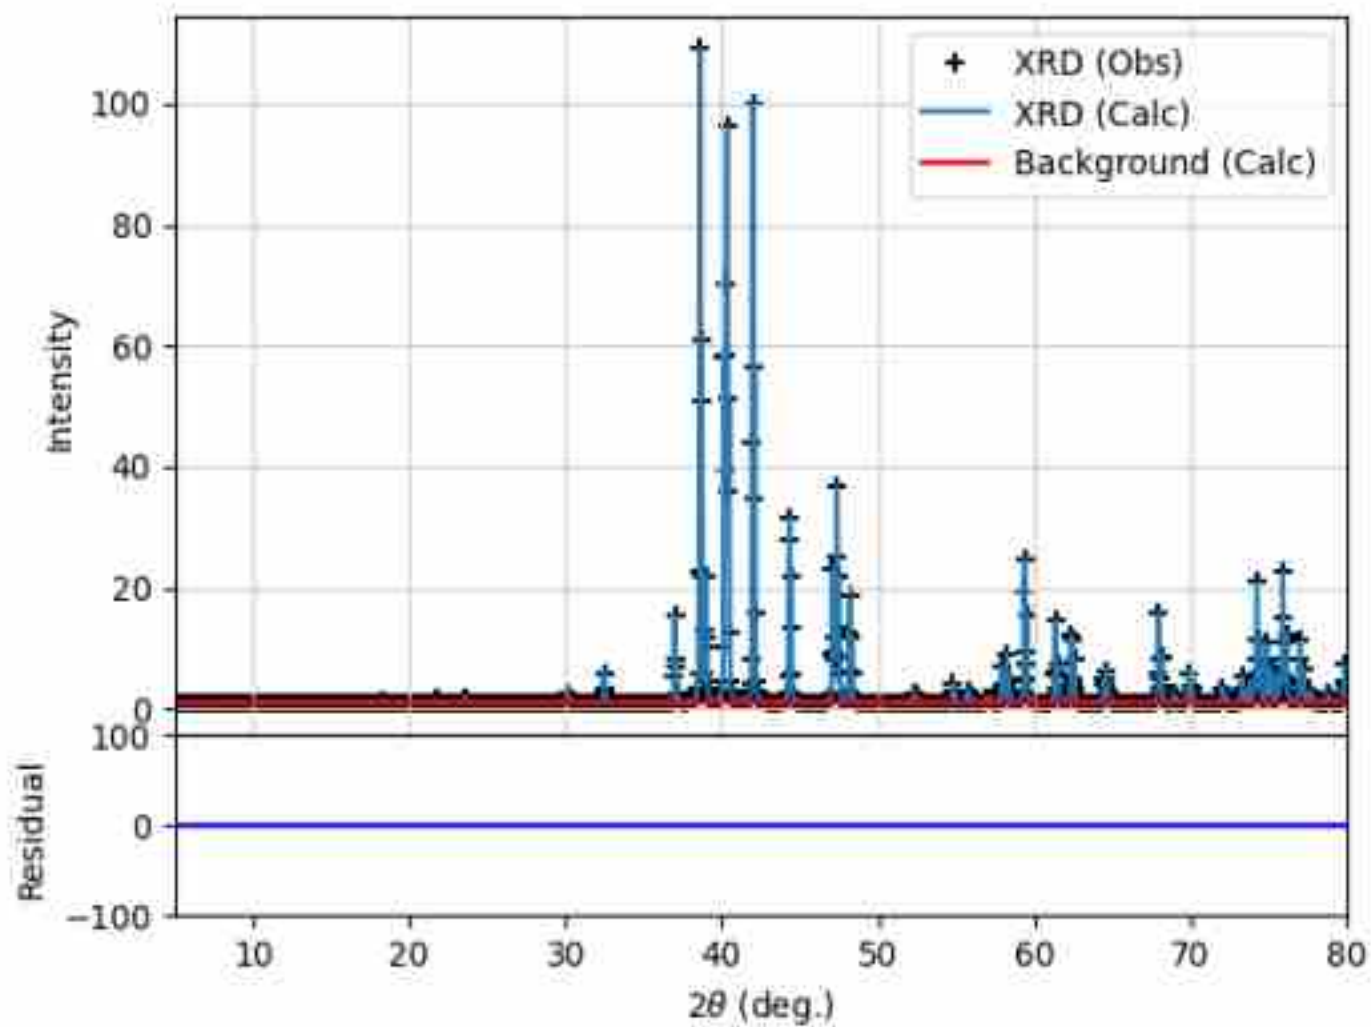

| RMSE before RR | Rwp     | RMSE after RR |
|----------------|---------|---------------|
| 0.013          | 0.00279 | 0.00059       |

# V6Sb2

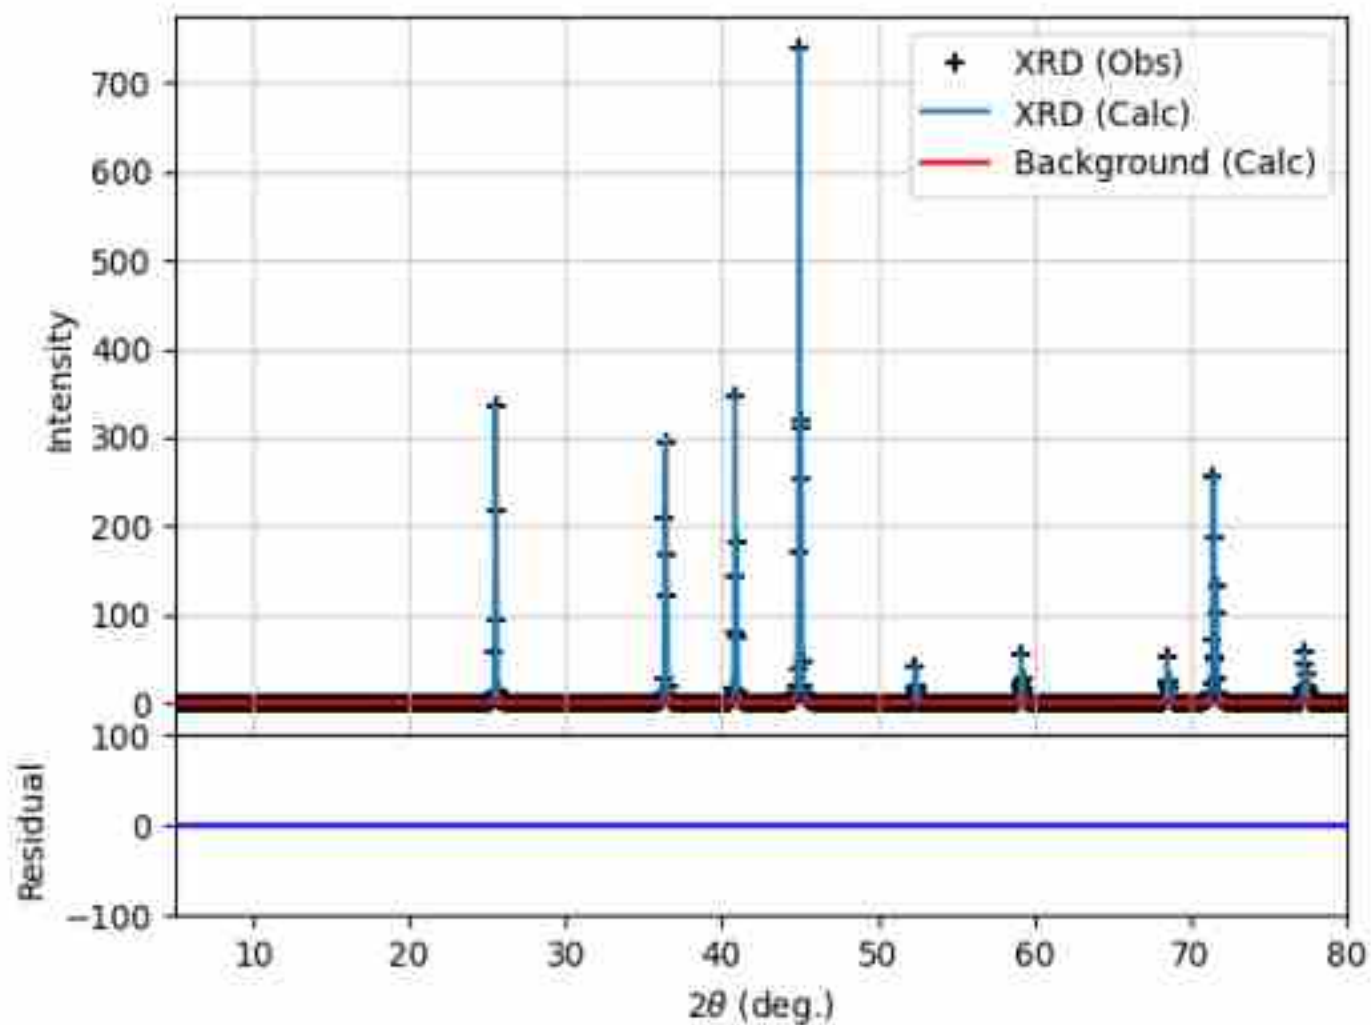

| RMSE before RR | Rwp     | RMSE after RR |
|----------------|---------|---------------|
| 0.013          | 0.00729 | 0.0009        |

# Y1Al7Fe5

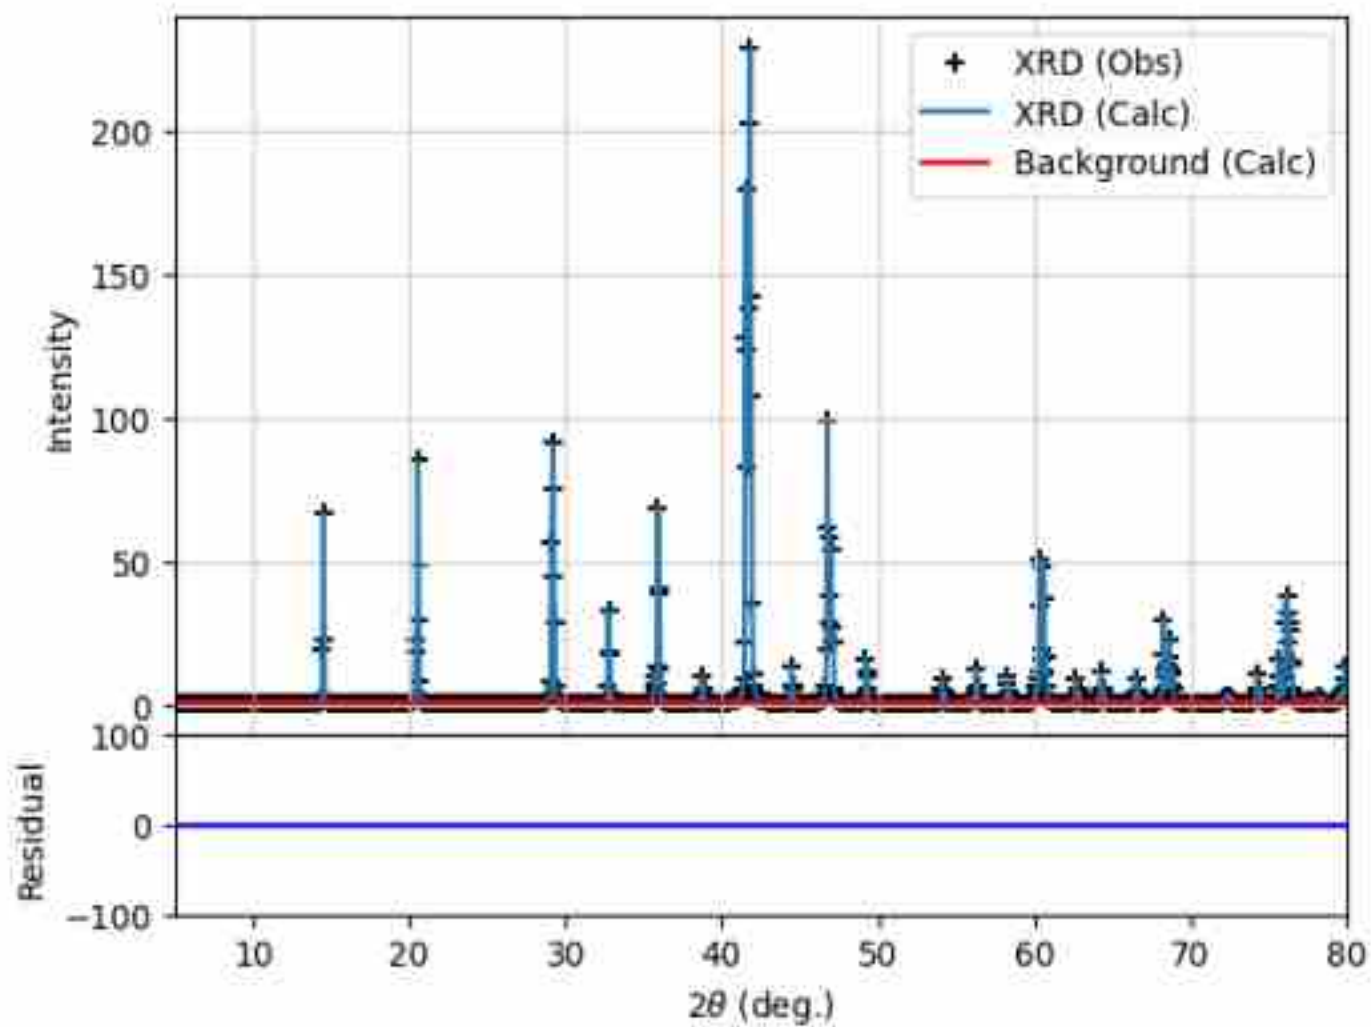

| RMSE before RR | Rwp     | RMSE after RR |
|----------------|---------|---------------|
| 0.013          | 0.00238 | 0.00062       |



# Y1Cu1W2O8

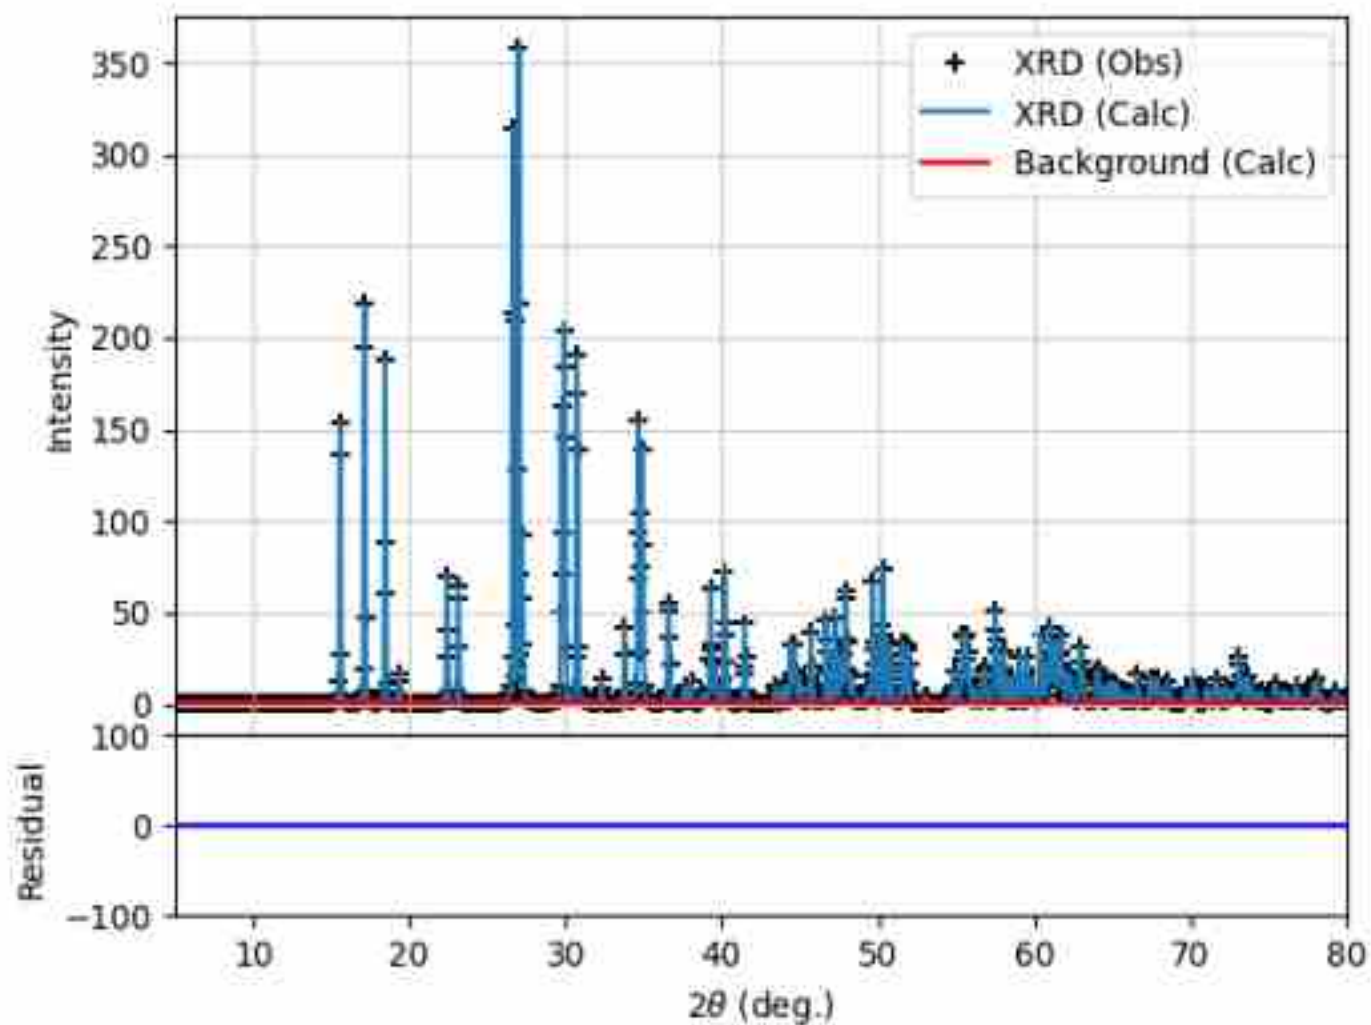

| RMSE before RR | Rwp     | RMSE after RR |
|----------------|---------|---------------|
| 0.013          | 0.00073 | 1e-05         |

# Y<sub>2</sub>Ni<sub>1</sub>Ge<sub>6</sub>

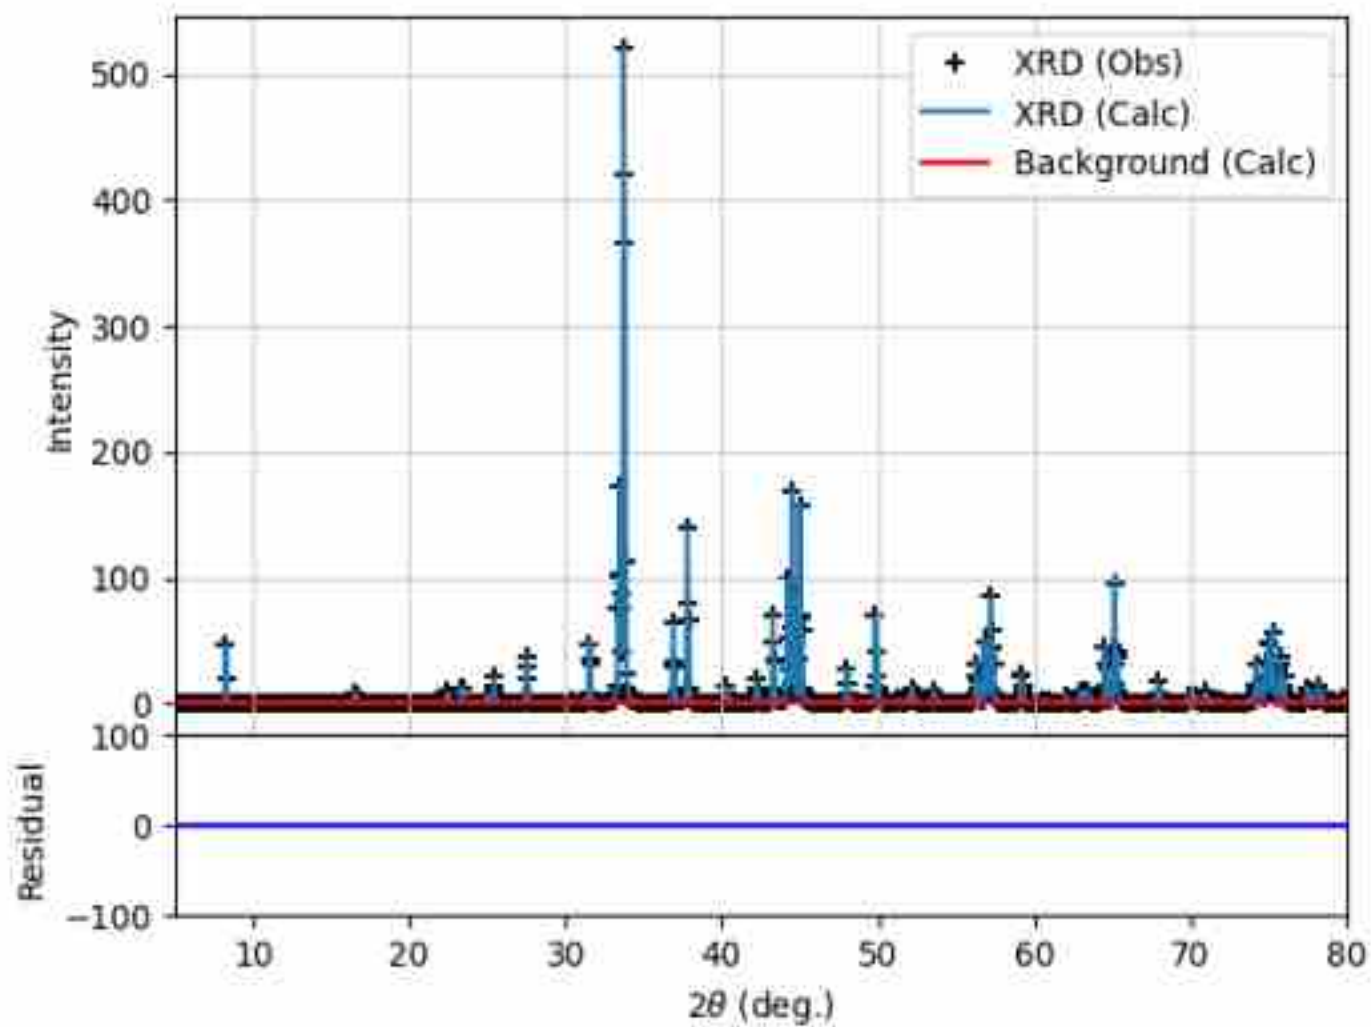

| RMSE before RR | Rwp     | RMSE after RR |
|----------------|---------|---------------|
| 0.013          | 0.00343 | 0.00022       |

# Y<sub>2</sub>Sn<sub>2</sub>Ge<sub>2</sub>

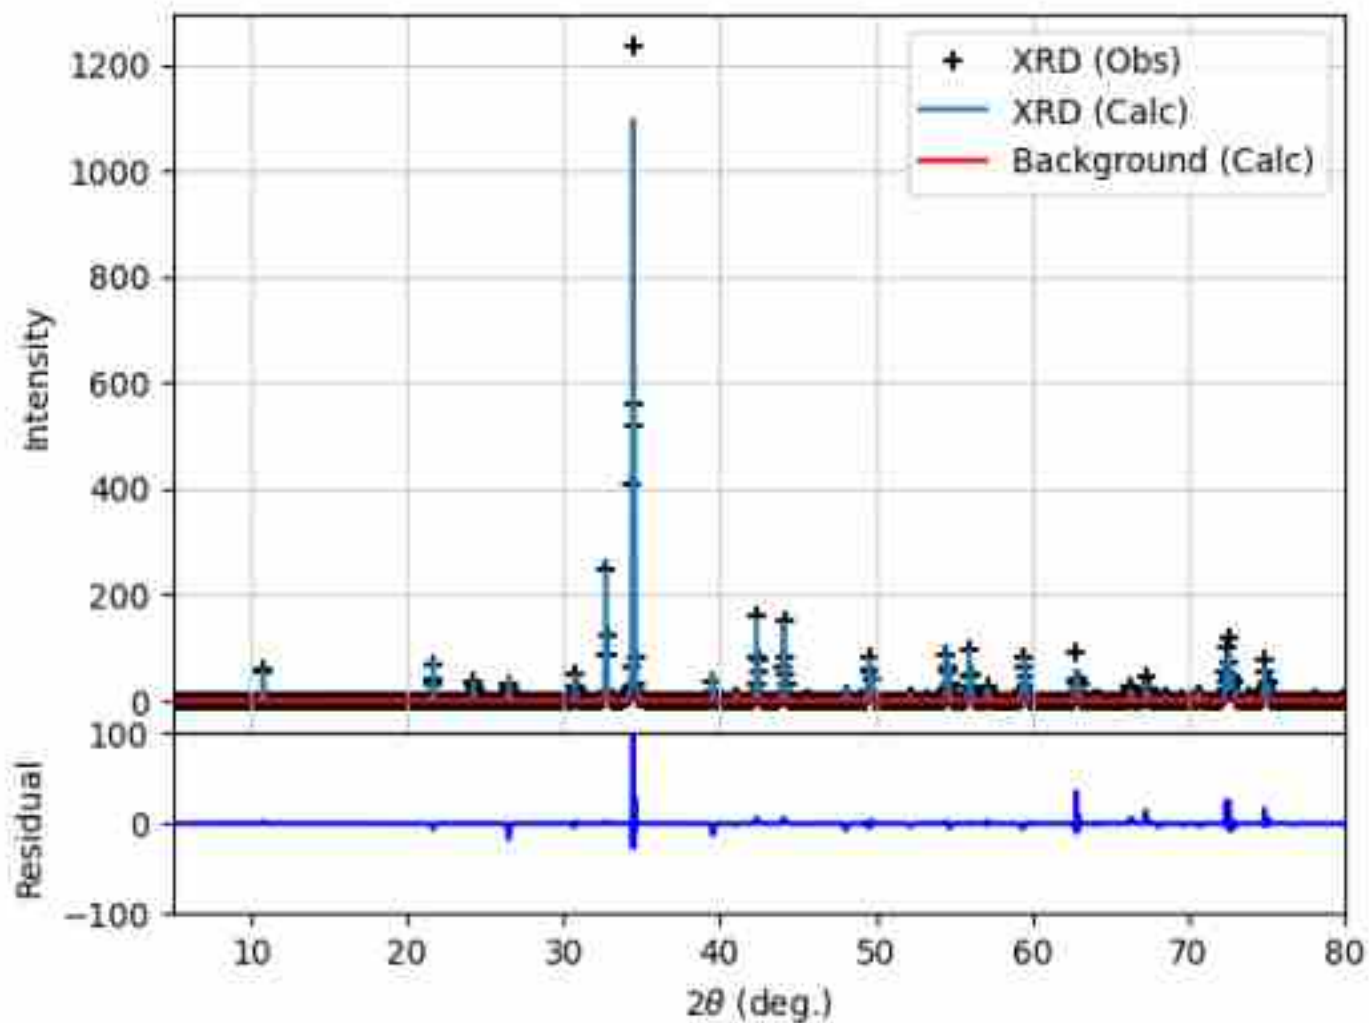

| RMSE before RR | Rwp      | RMSE after RR |
|----------------|----------|---------------|
| 0.013          | 13.33504 | 0.01373       |

# Y<sub>4</sub>Ga<sub>4</sub>Ni<sub>4</sub>

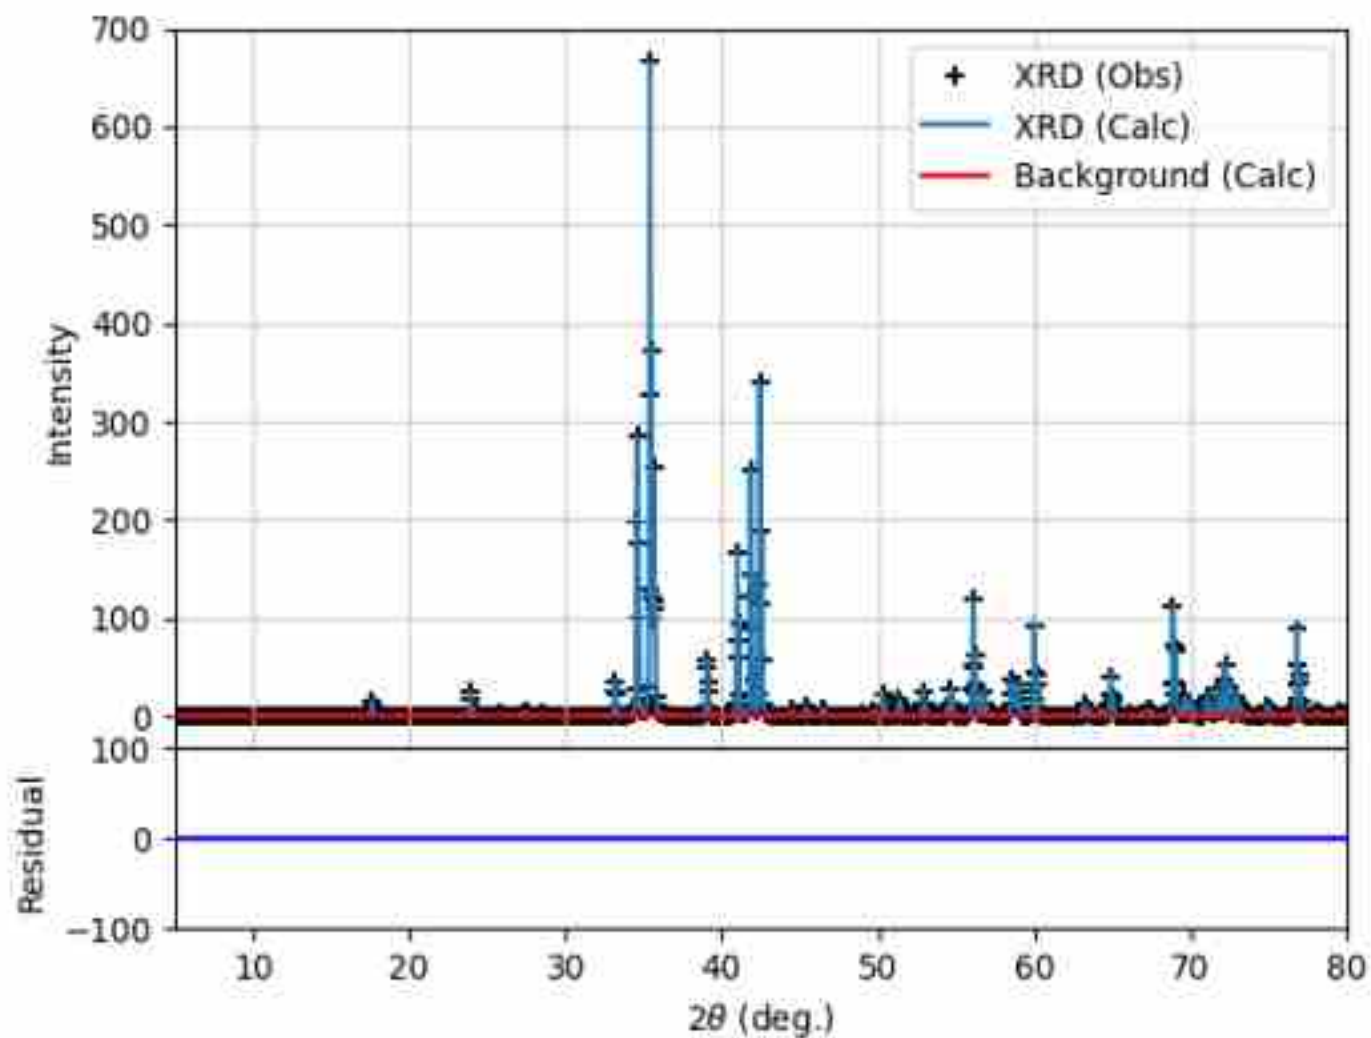

| RMSE before RR | Rwp    | RMSE after RR |
|----------------|--------|---------------|
| 0.013          | 0.0046 | 0.00037       |

# Y4Ge4Ir4

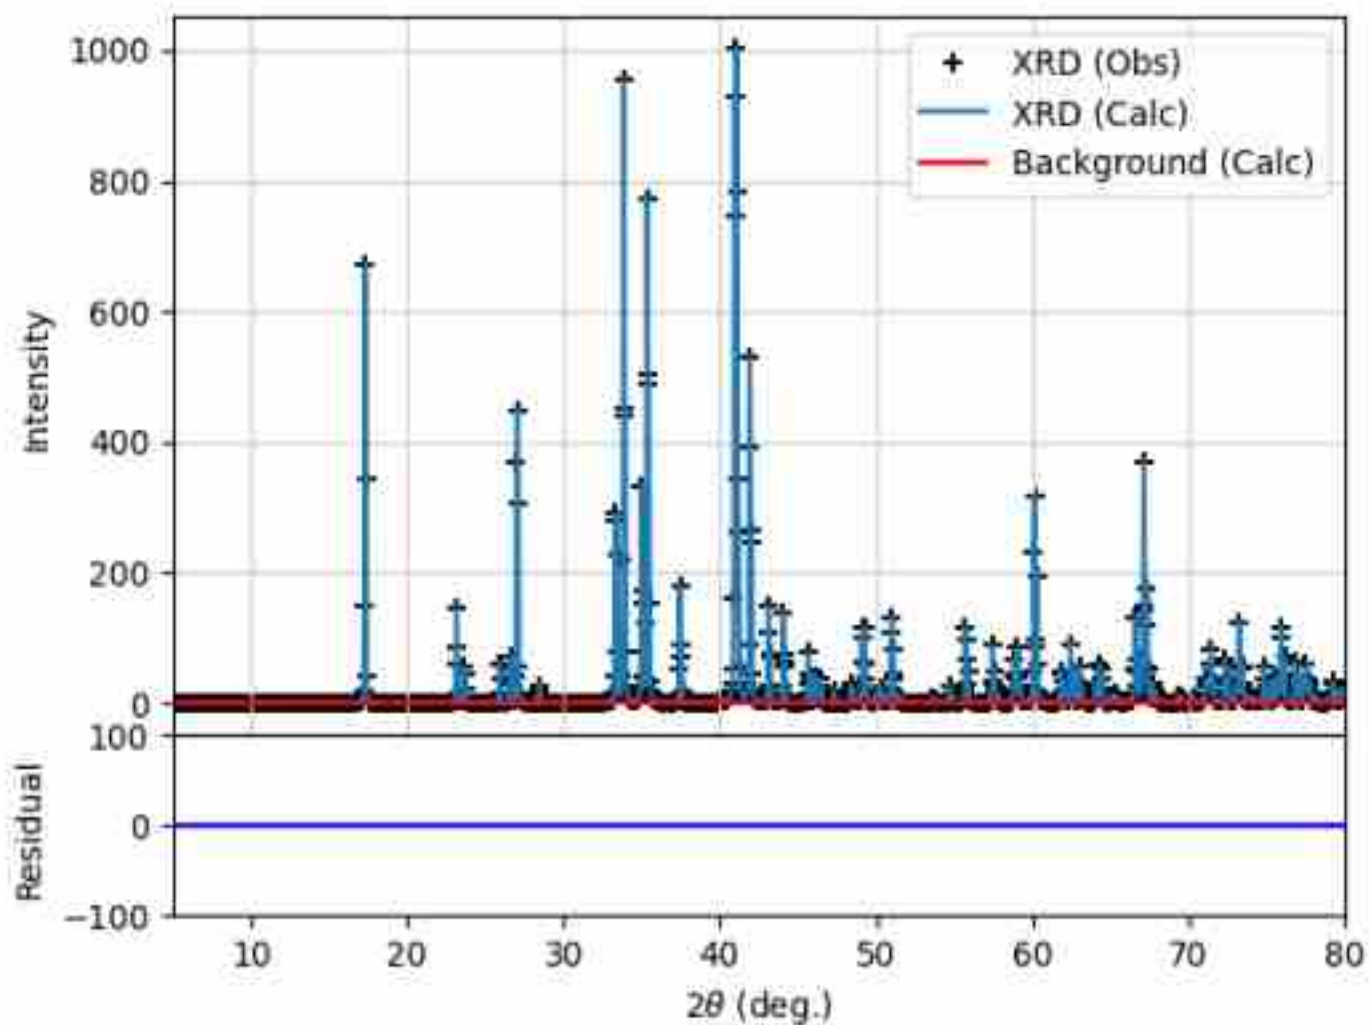

| RMSE before RR | Rwp     | RMSE after RR |
|----------------|---------|---------------|
| 0.013          | 0.00449 | 0.00028       |

# Y4S3N2

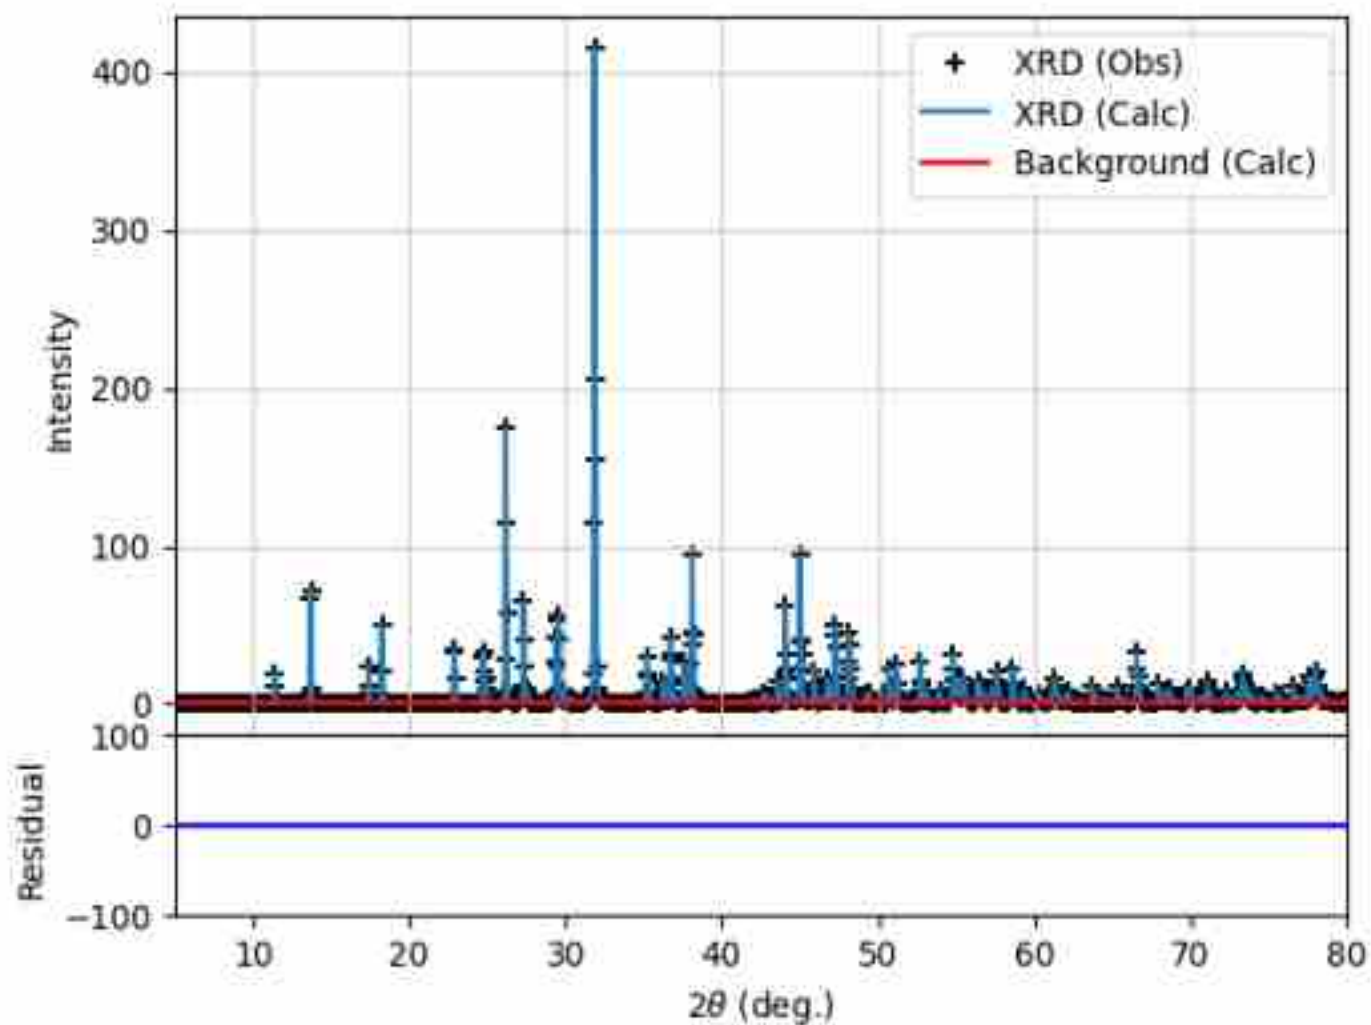

| RMSE before RR | Rwp     | RMSE after RR |
|----------------|---------|---------------|
| 0.013          | 0.00267 | 0.00041       |

# Y6Co1I10

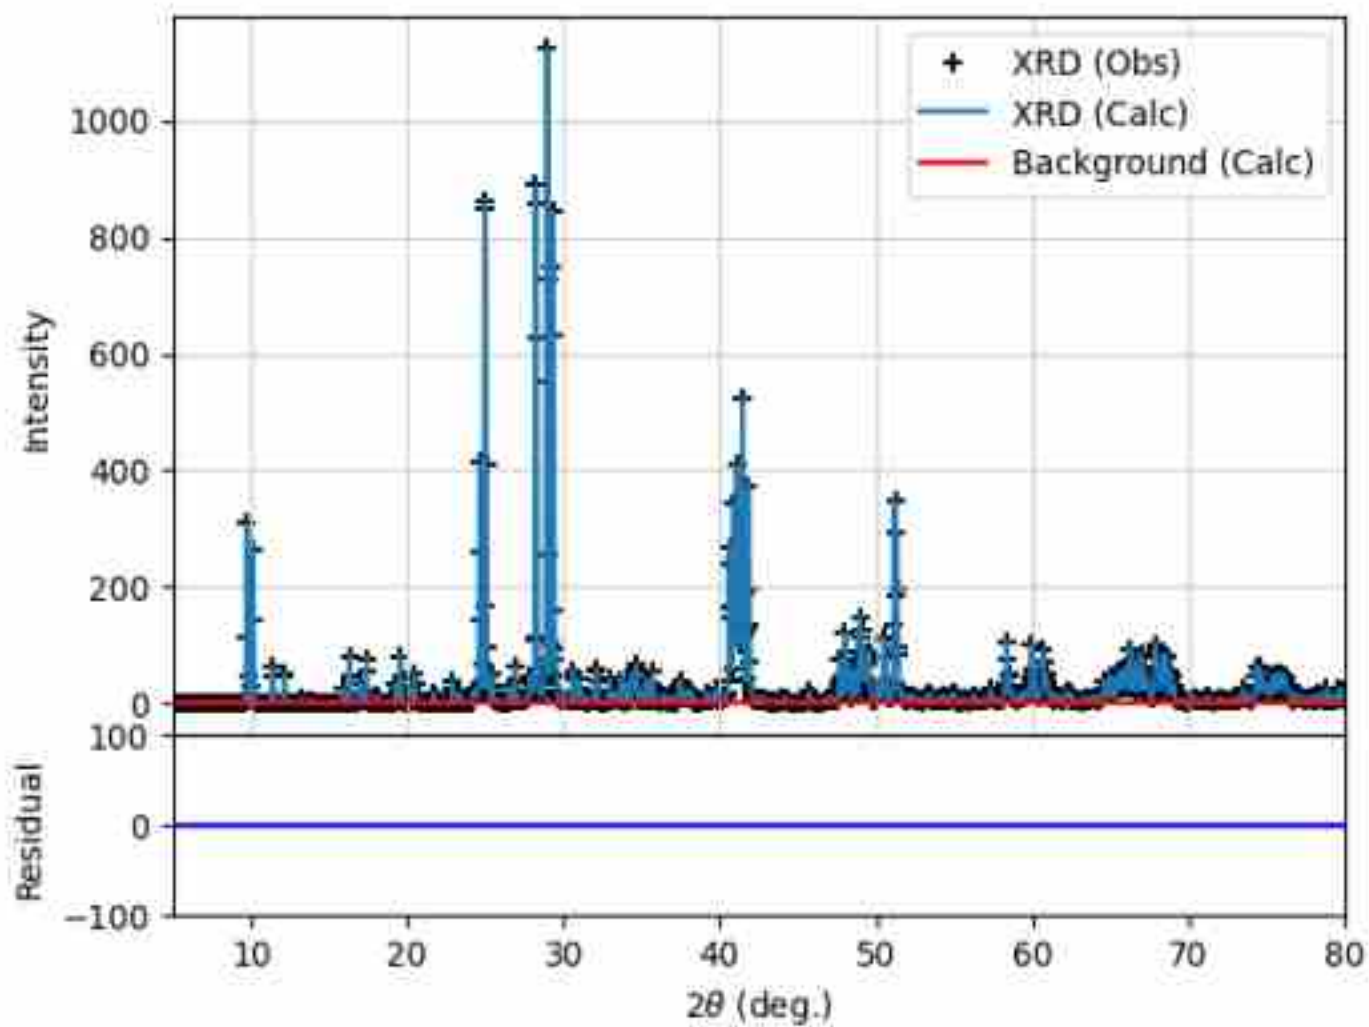

| RMSE before RR | Rwp     | RMSE after RR |
|----------------|---------|---------------|
| 0.013          | 0.00022 | 8e-05         |

# Yb1Cu2Ni3

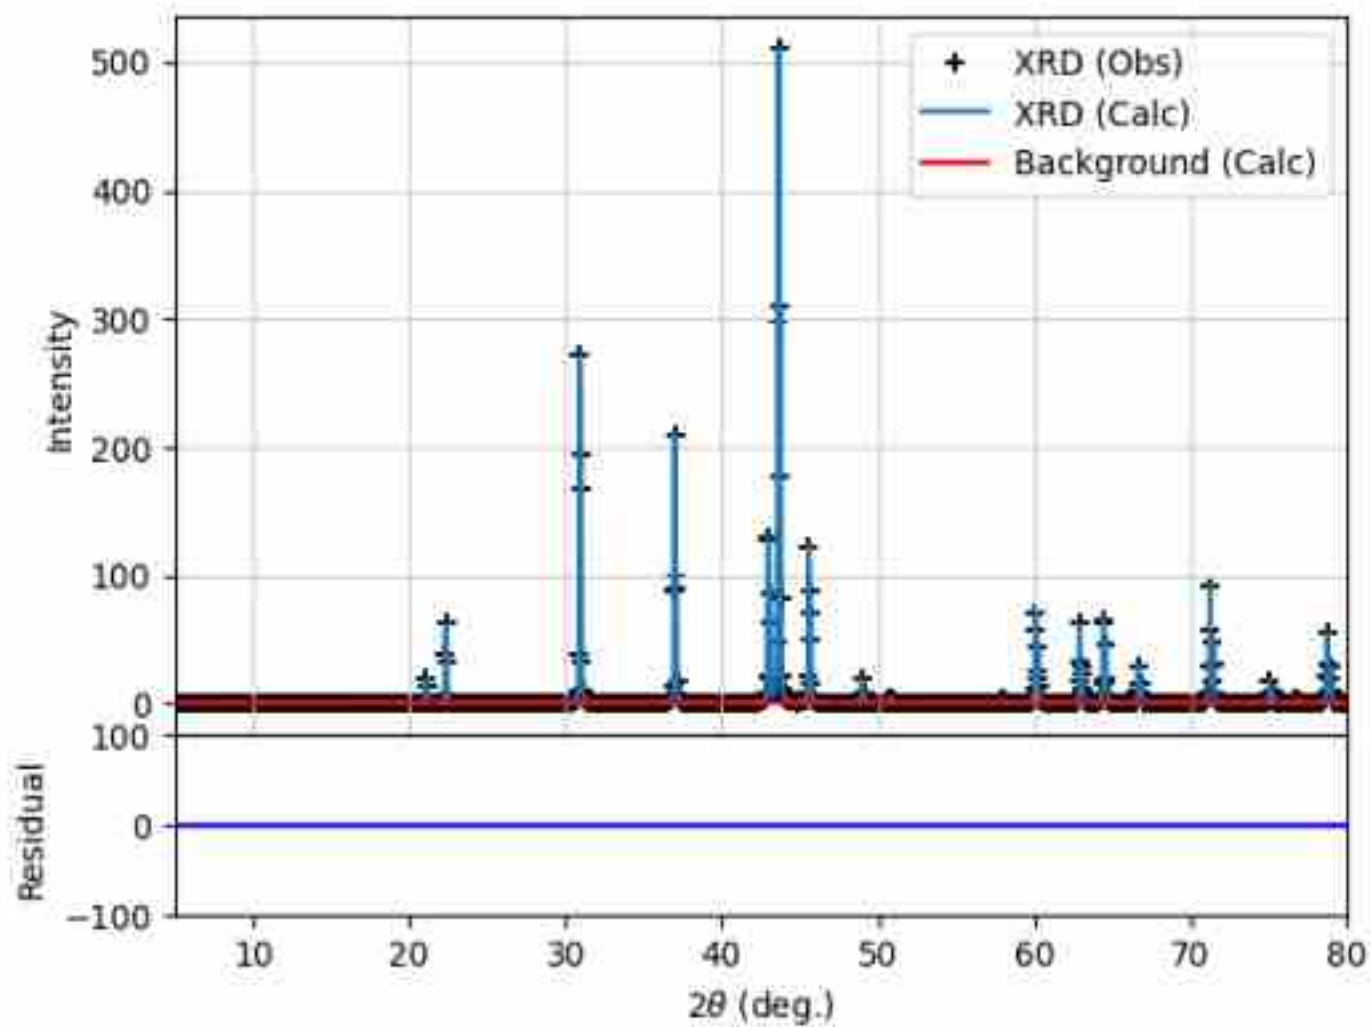

| RMSE before RR | Rwp     | RMSE after RR |
|----------------|---------|---------------|
| 0.013          | 0.00516 | 0.00063       |



# Zn1Ga1P1S1

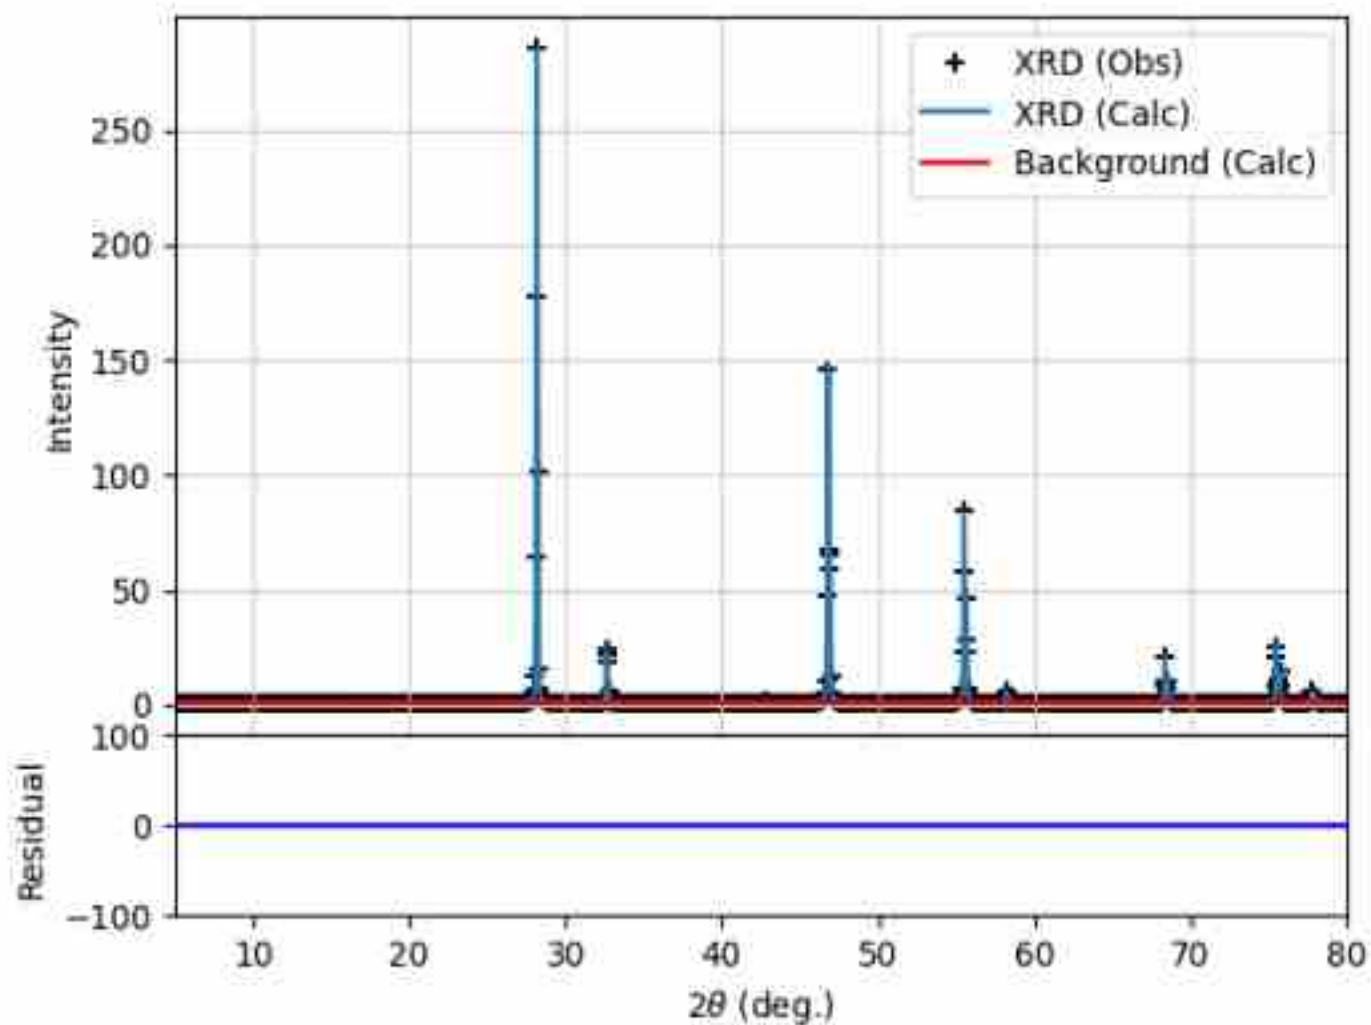

| RMSE before RR | Rwp     | RMSE after RR |
|----------------|---------|---------------|
| 0.013          | 0.00183 | 0.00021       |

# Zn<sub>1</sub>Ni<sub>4</sub>O<sub>5</sub>

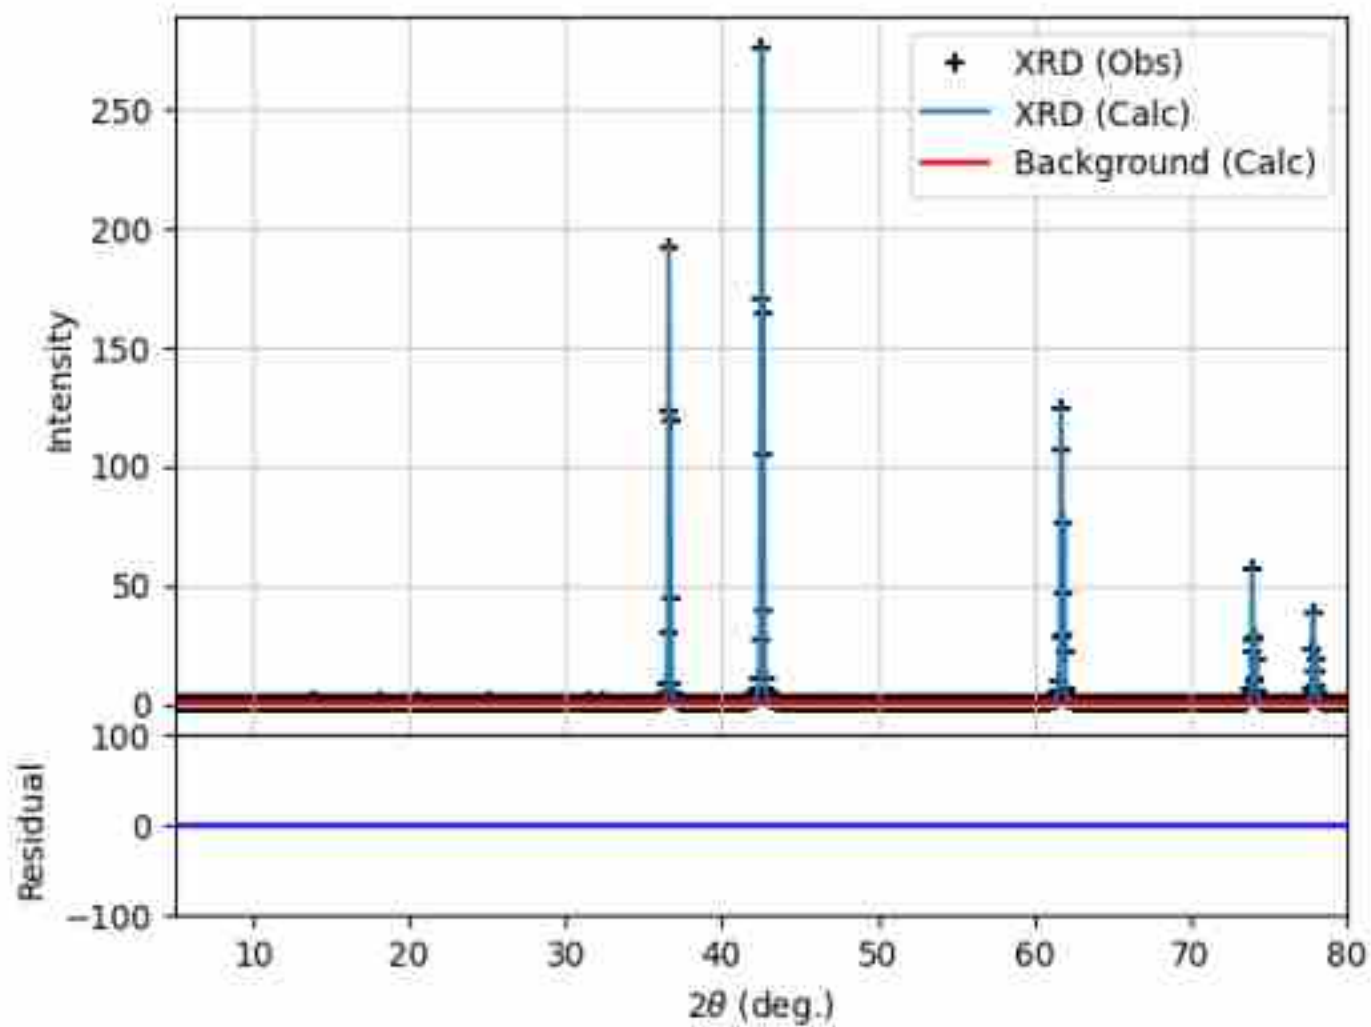

| RMSE before RR | Rwp     | RMSE after RR |
|----------------|---------|---------------|
| 0.013          | 0.00167 | 0.00059       |

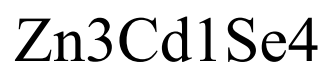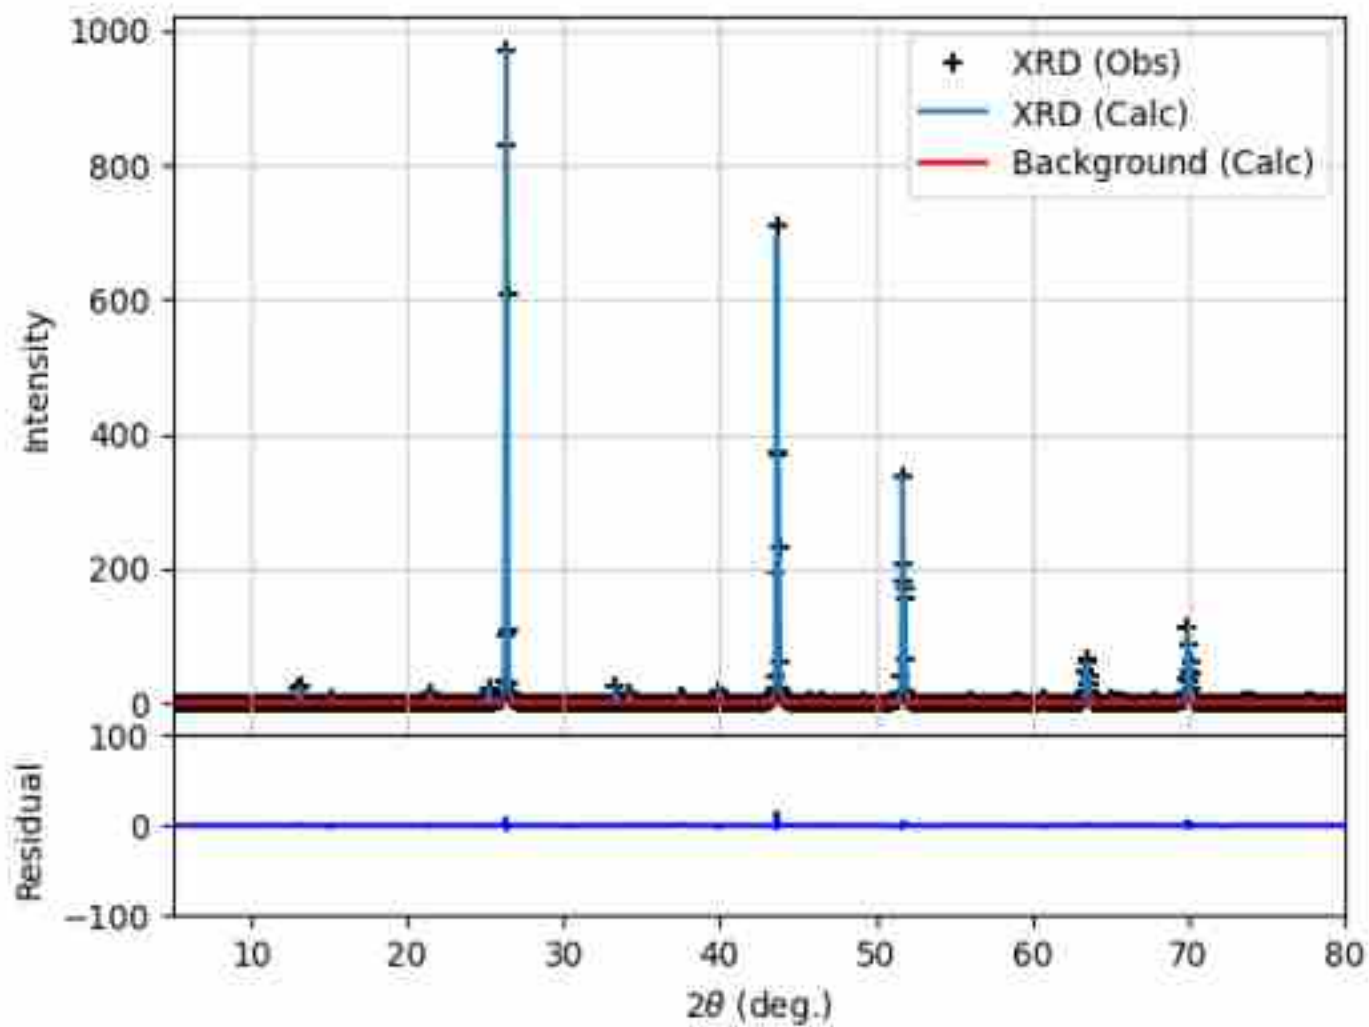

| RMSE before RR | Rwp     | RMSE after RR |
|----------------|---------|---------------|
| 0.013          | 3.60709 | 0.01372       |

# Zr<sub>2</sub>N<sub>2</sub>Cl<sub>2</sub>

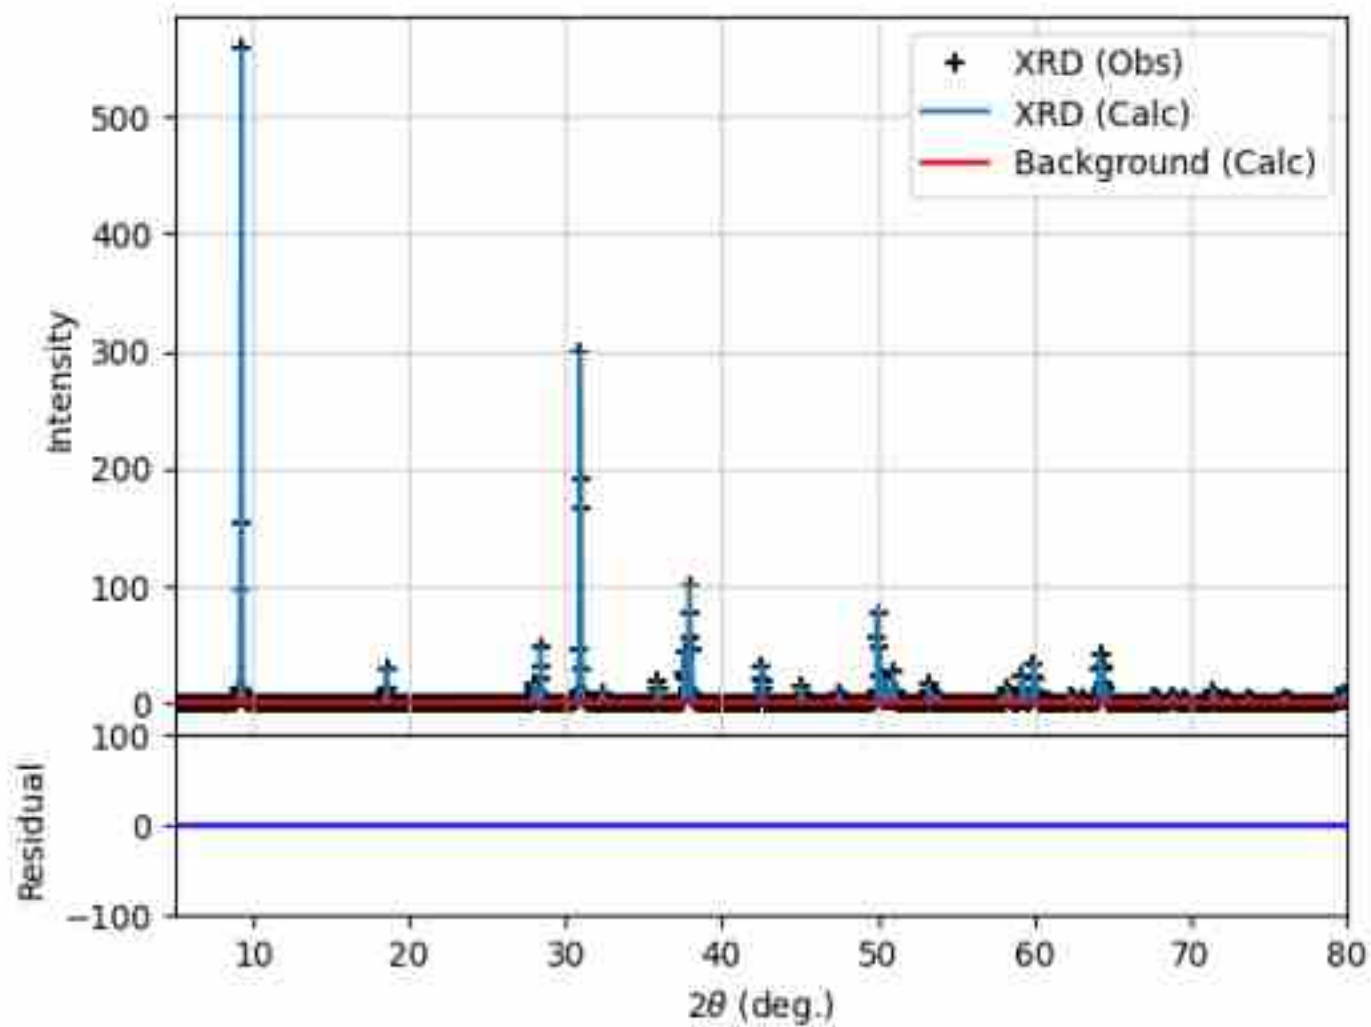

| RMSE before RR | Rwp     | RMSE after RR |
|----------------|---------|---------------|
| 0.013          | 0.00225 | 0.00043       |

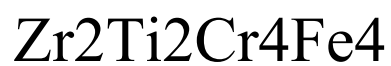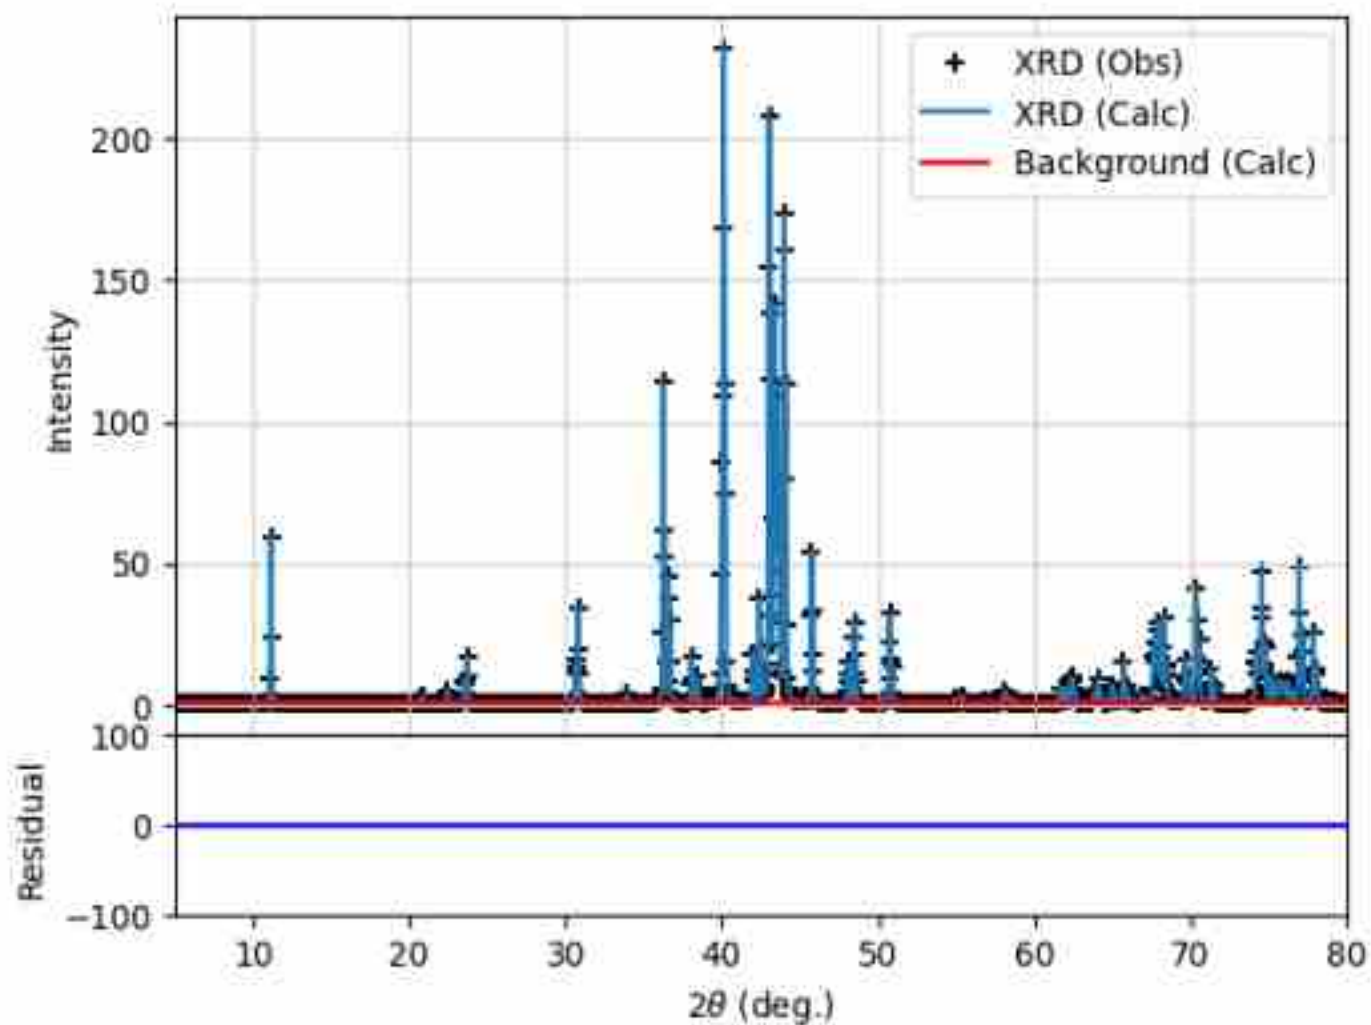

| RMSE before RR | Rwp     | RMSE after RR |
|----------------|---------|---------------|
| 0.013          | 0.00099 | 4e-05         |

# Zr<sub>2</sub>Zn<sub>6</sub>

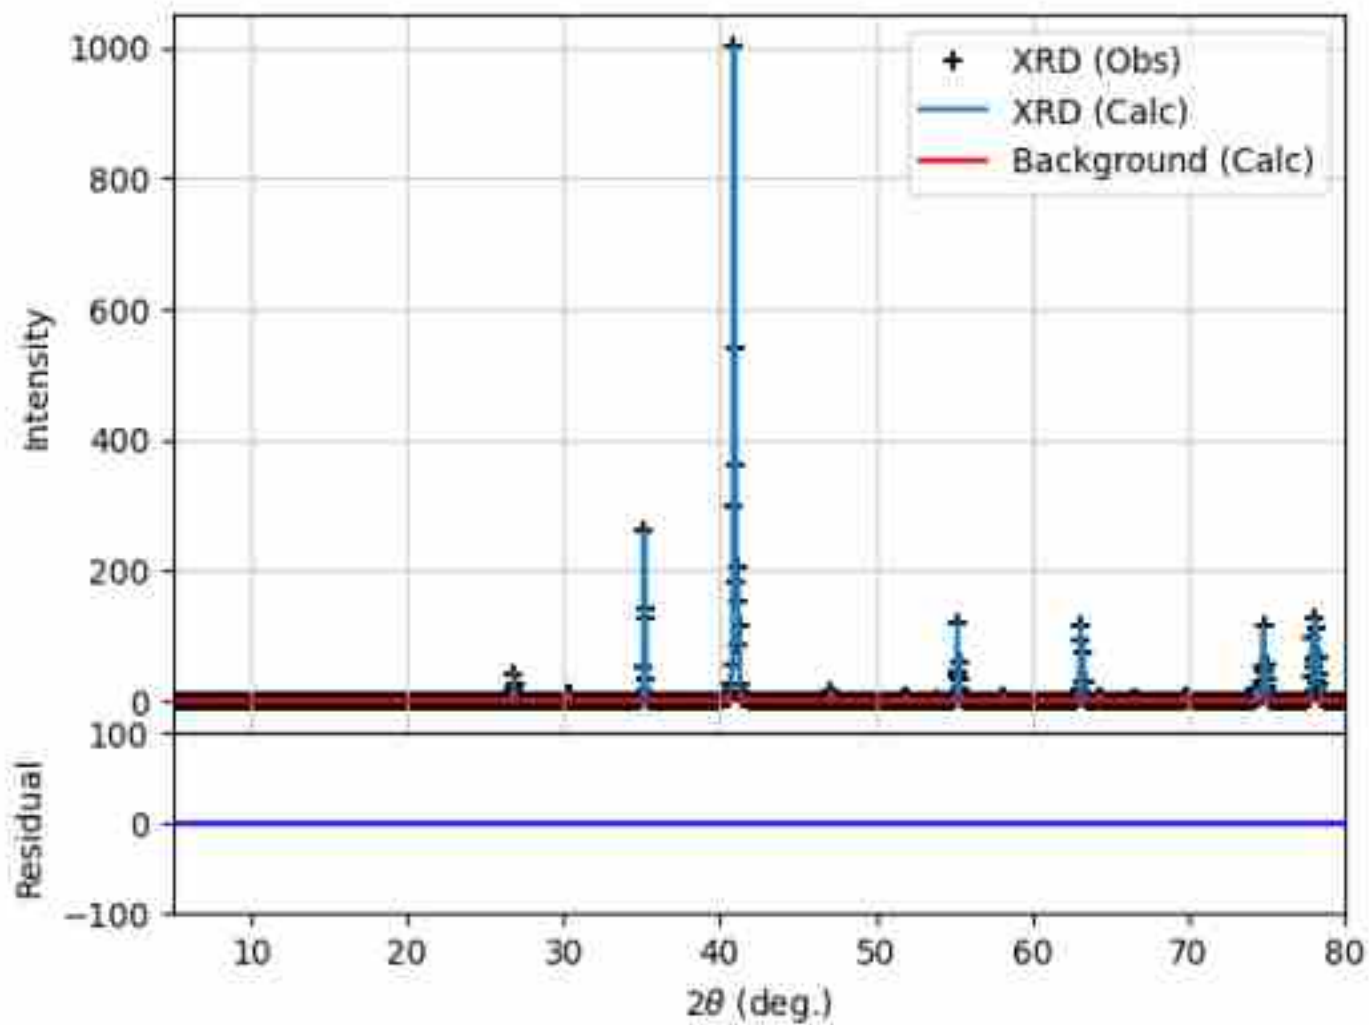

| RMSE before RR | Rwp     | RMSE after RR |
|----------------|---------|---------------|
| 0.013          | 0.00826 | 0.0007        |

# Zr<sub>3</sub>Ga<sub>3</sub>Co<sub>3</sub>

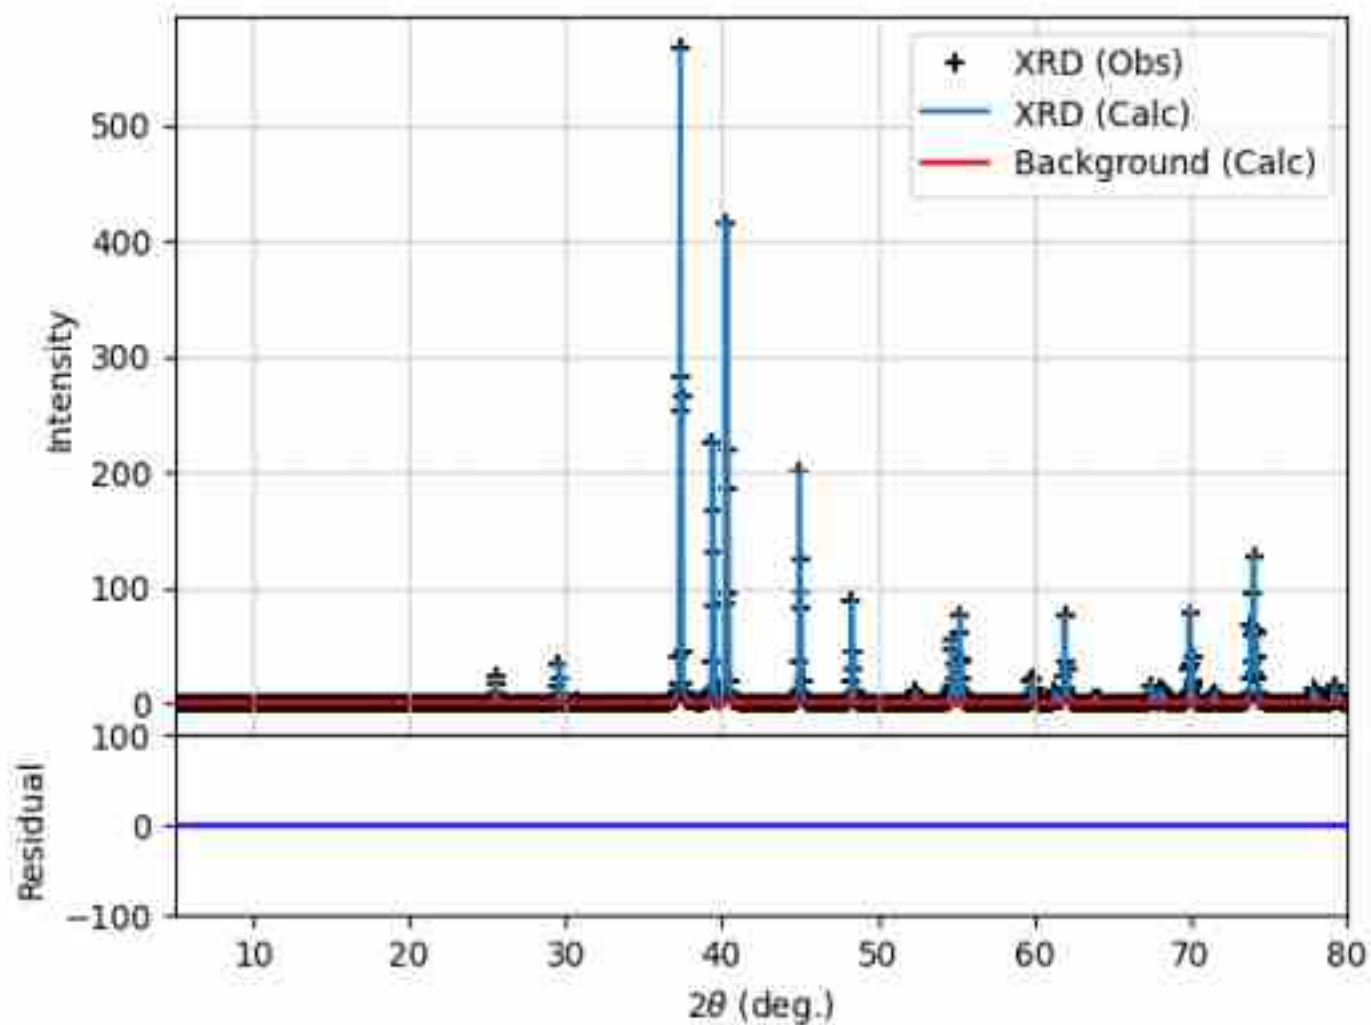

| RMSE before RR | Rwp     | RMSE after RR |
|----------------|---------|---------------|
| 0.013          | 0.00503 | 0.00102       |

# Zr<sub>4</sub>Ni<sub>2</sub>P<sub>2</sub>

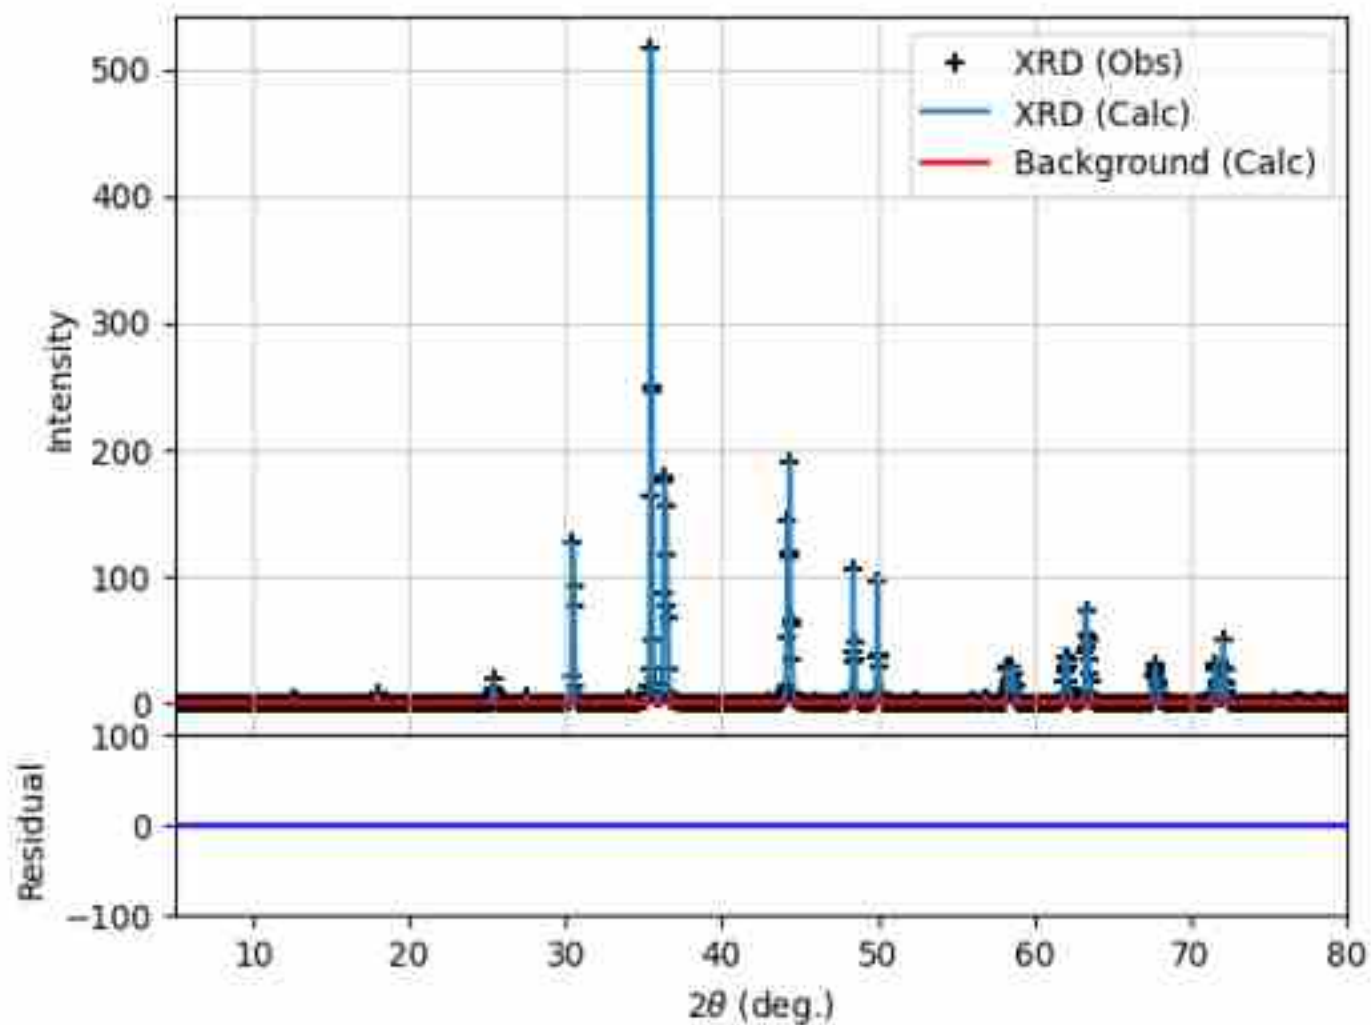

| RMSE before RR | Rwp     | RMSE after RR |
|----------------|---------|---------------|
| 0.013          | 0.00307 | 0.00035       |



# Ag1Pt4

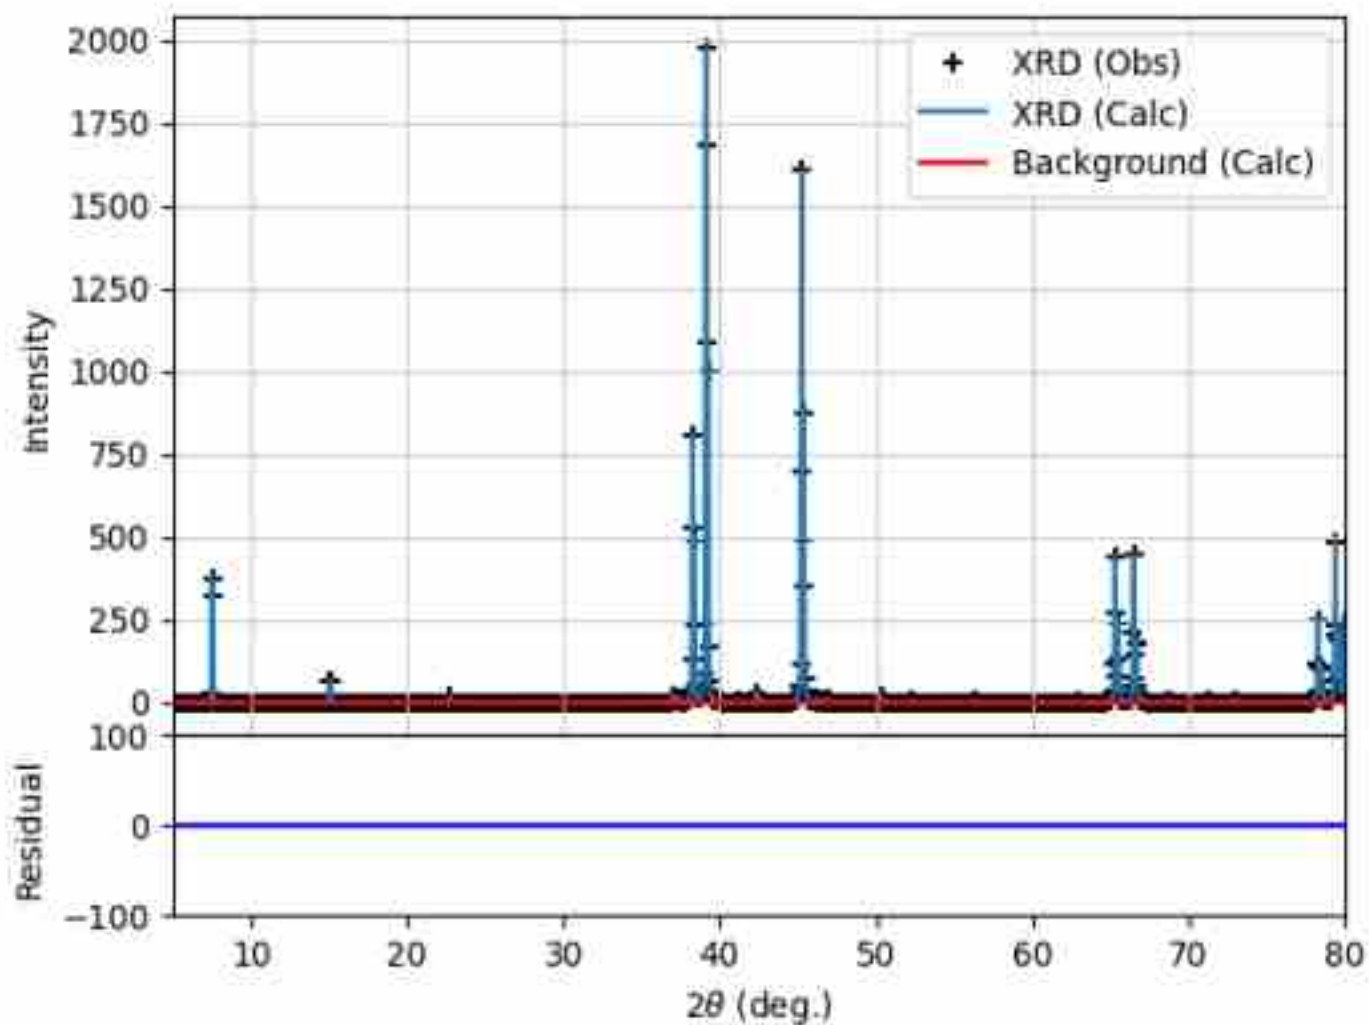

| RMSE before RR | Rwp     | RMSE after RR |
|----------------|---------|---------------|
| 0.014          | 0.00368 | 0.00036       |

# Ag<sub>4</sub>Se<sub>2</sub>

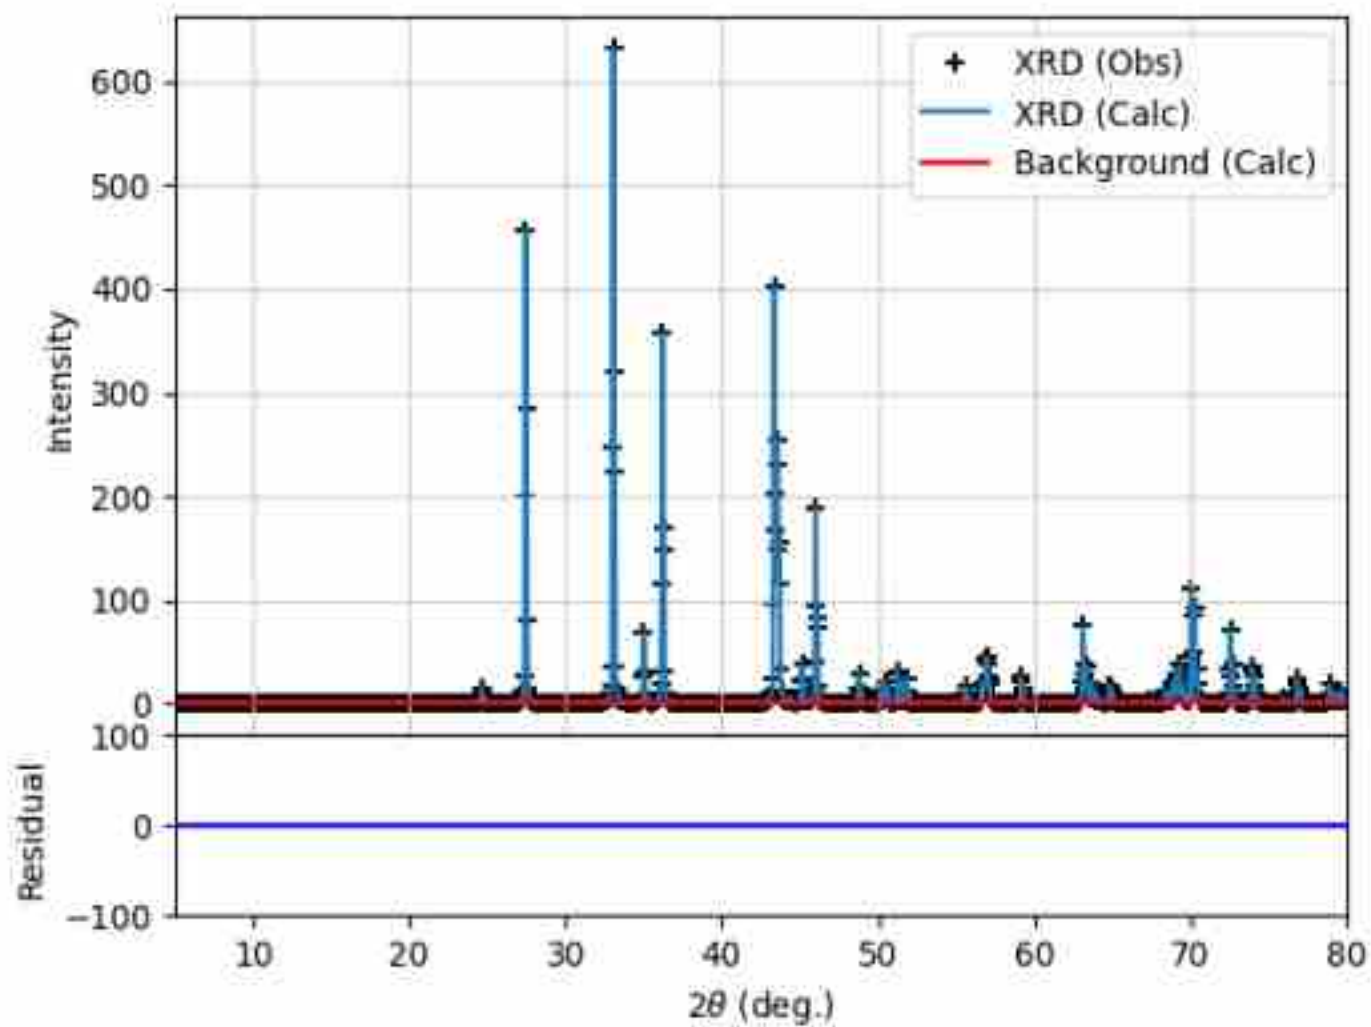

| RMSE before RR | Rwp    | RMSE after RR |
|----------------|--------|---------------|
| 0.014          | 0.0044 | 0.00052       |

# Ba1Sb2Ru2

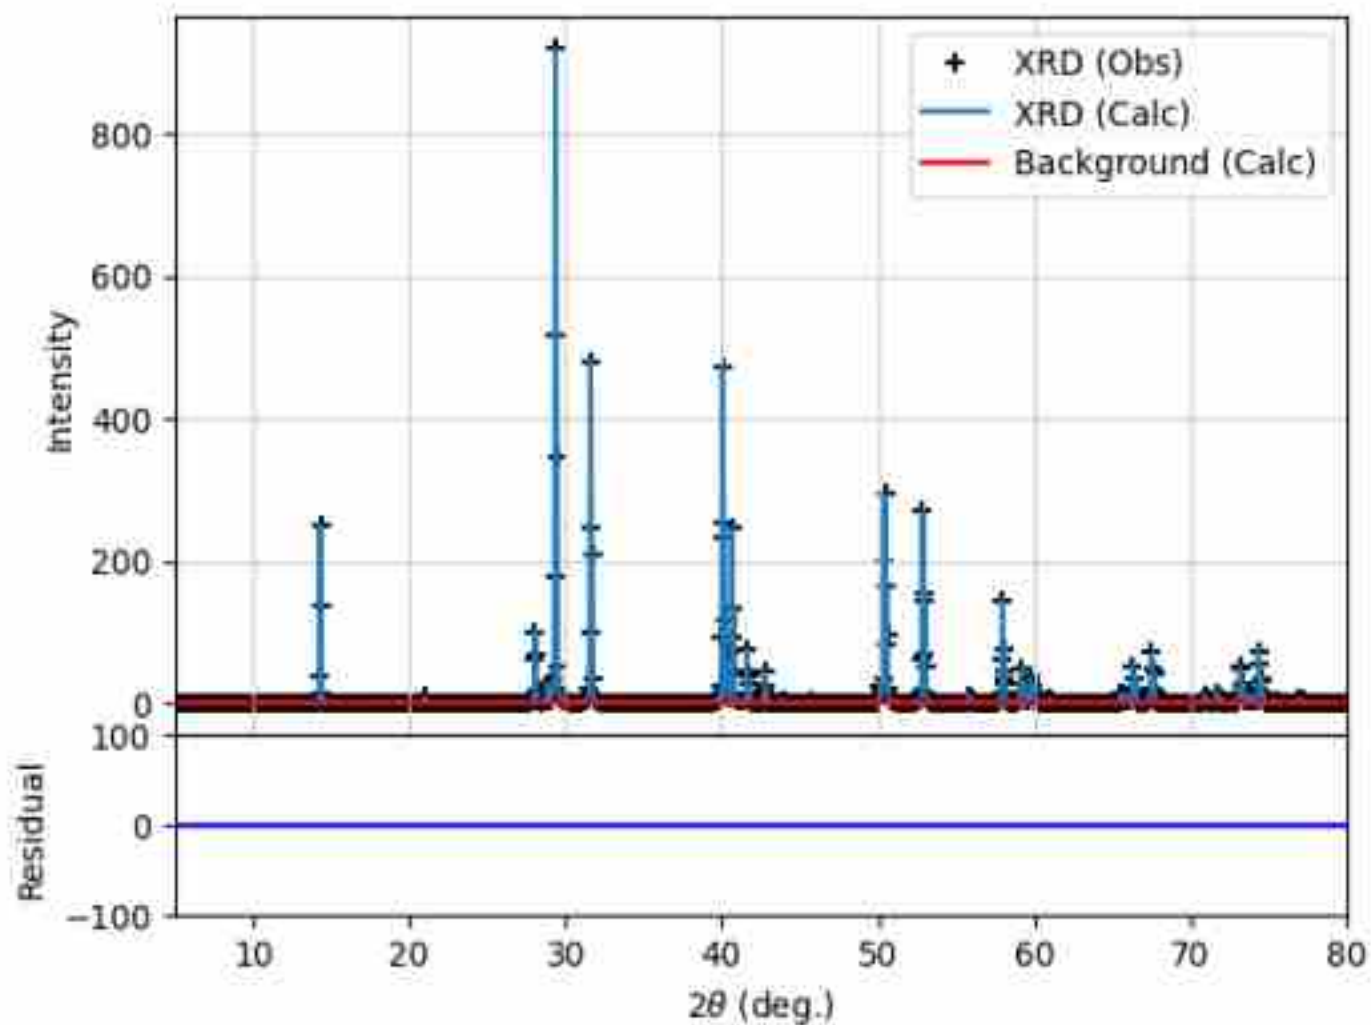

| RMSE before RR | Rwp     | RMSE after RR |
|----------------|---------|---------------|
| 0.014          | 0.00294 | 0.00025       |

# Ba1Tl1In3

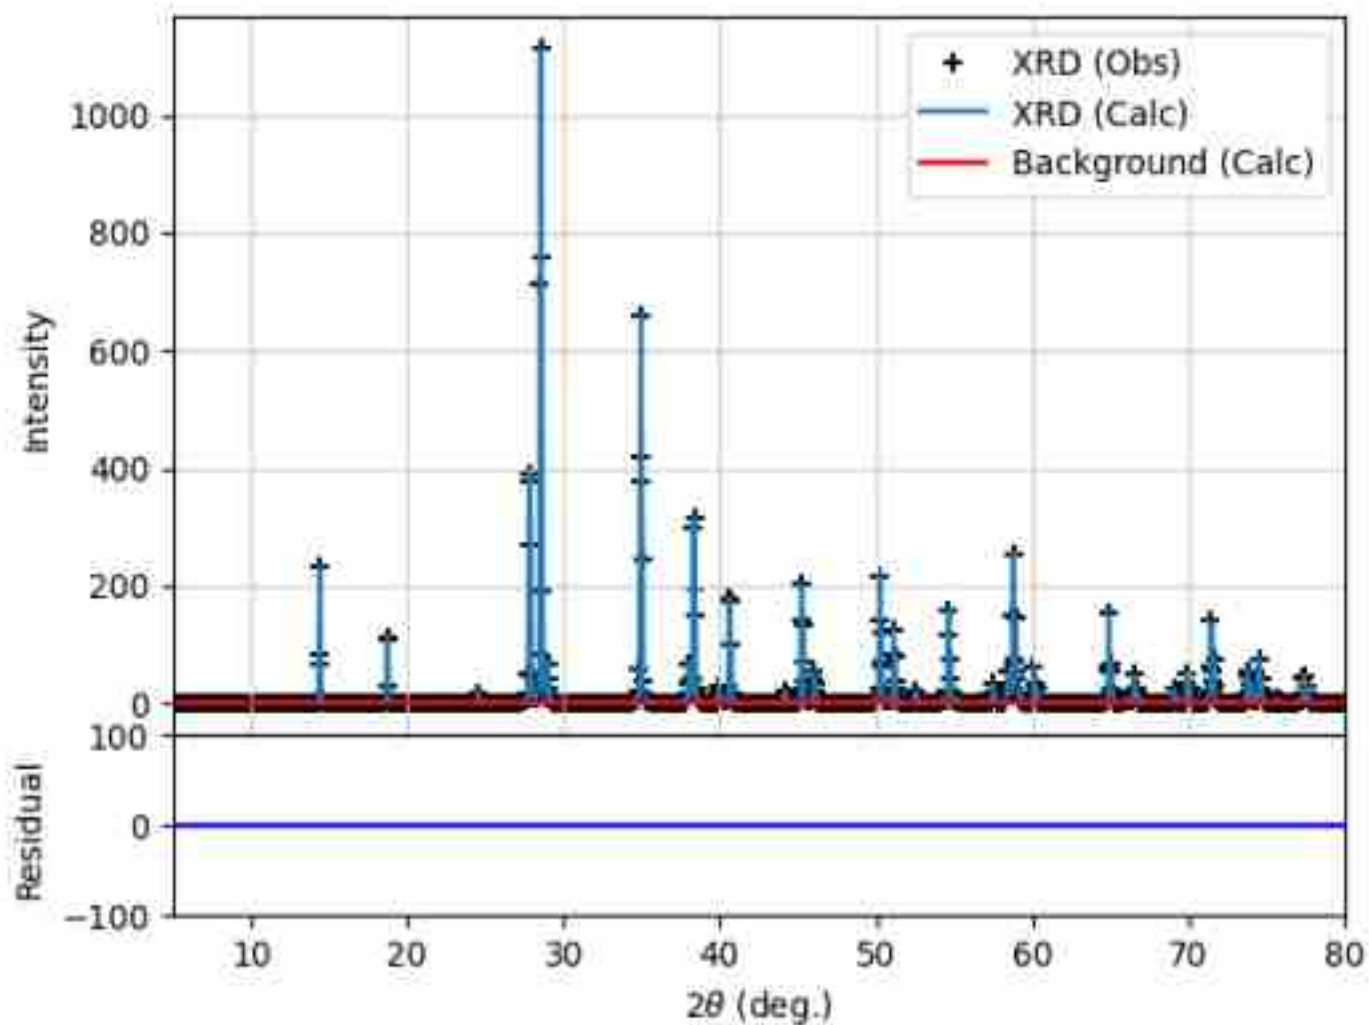

| RMSE before RR | Rwp    | RMSE after RR |
|----------------|--------|---------------|
| 0.014          | 0.0035 | 0.00014       |

# Ba<sub>2</sub>AlIn<sub>3</sub>

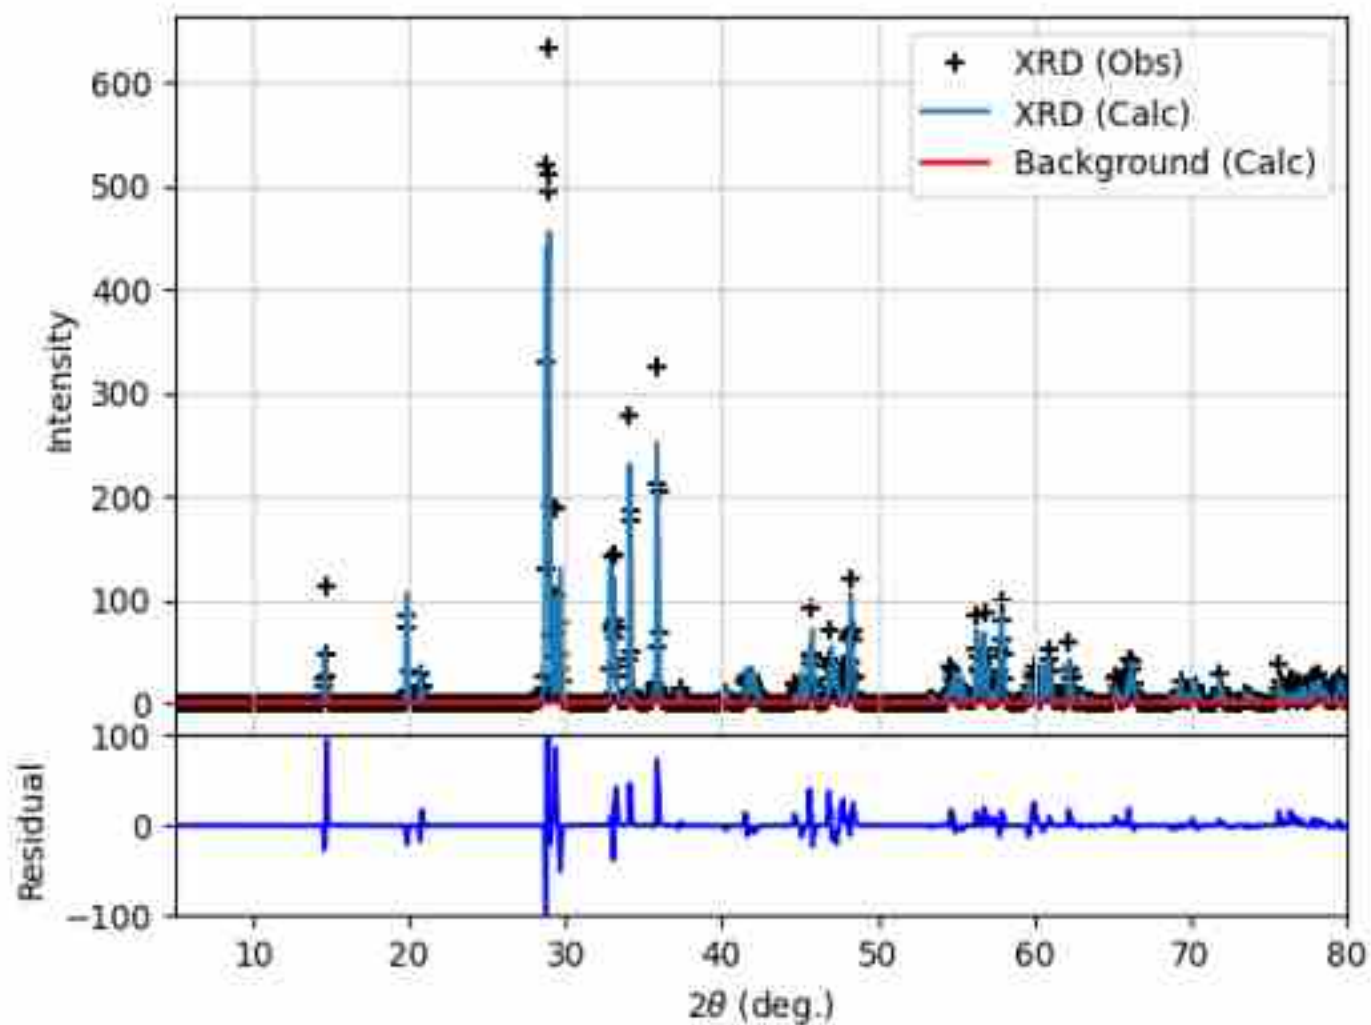

| RMSE before RR | Rwp      | RMSE after RR |
|----------------|----------|---------------|
| 0.014          | 32.94926 | 0.04812       |

# Ba2Br2F2

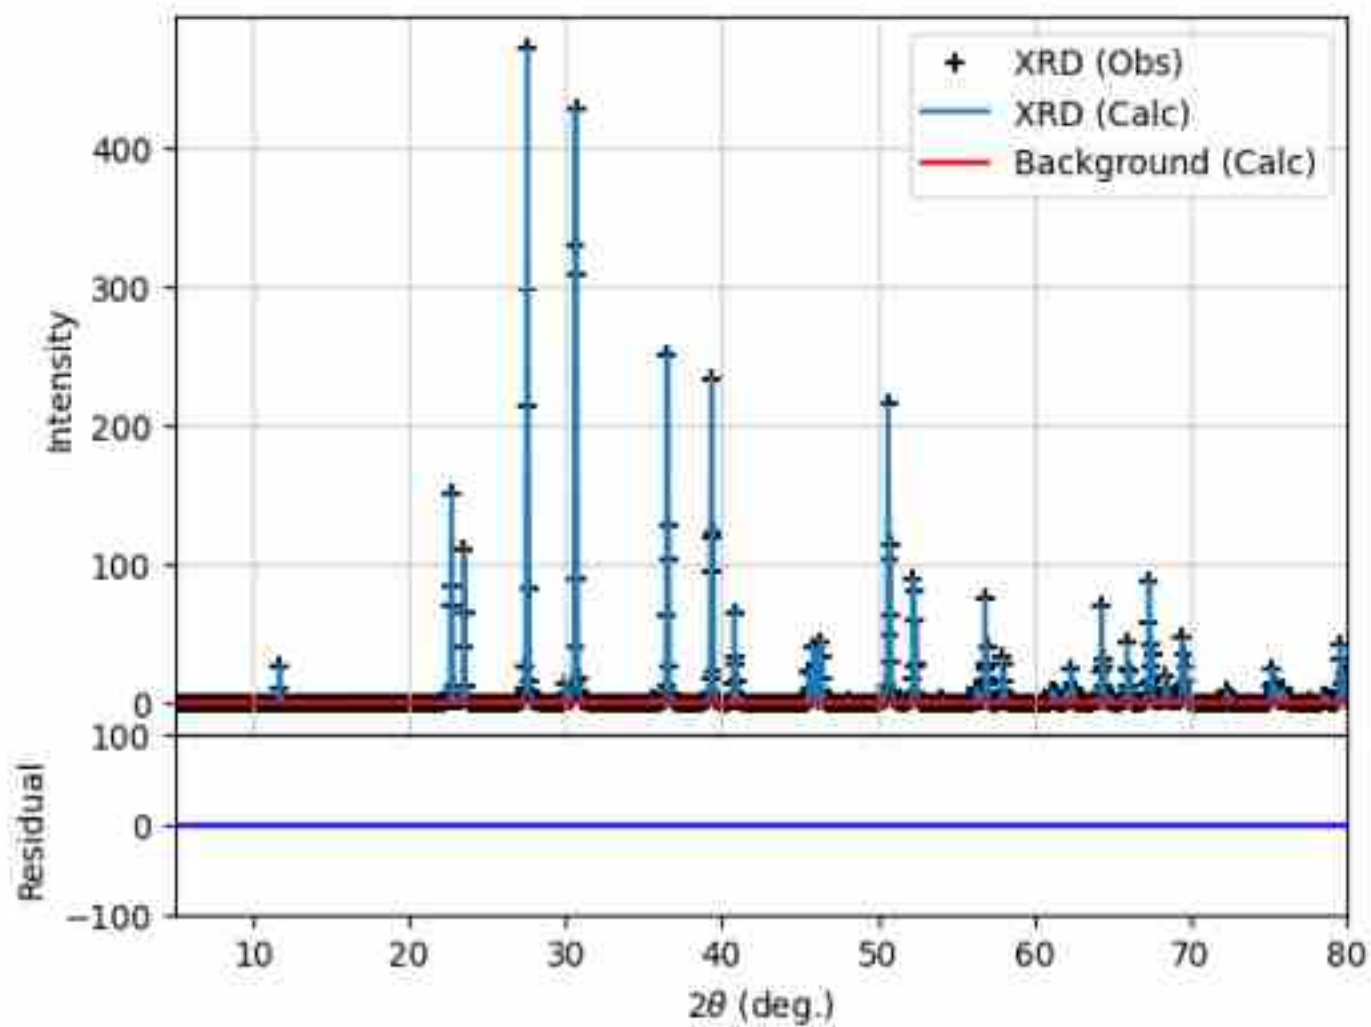

| RMSE before RR | Rwp    | RMSE after RR |
|----------------|--------|---------------|
| 0.014          | 0.0047 | 0.00112       |

# Ba<sub>2</sub>CaSe<sub>10</sub>O<sub>6</sub>

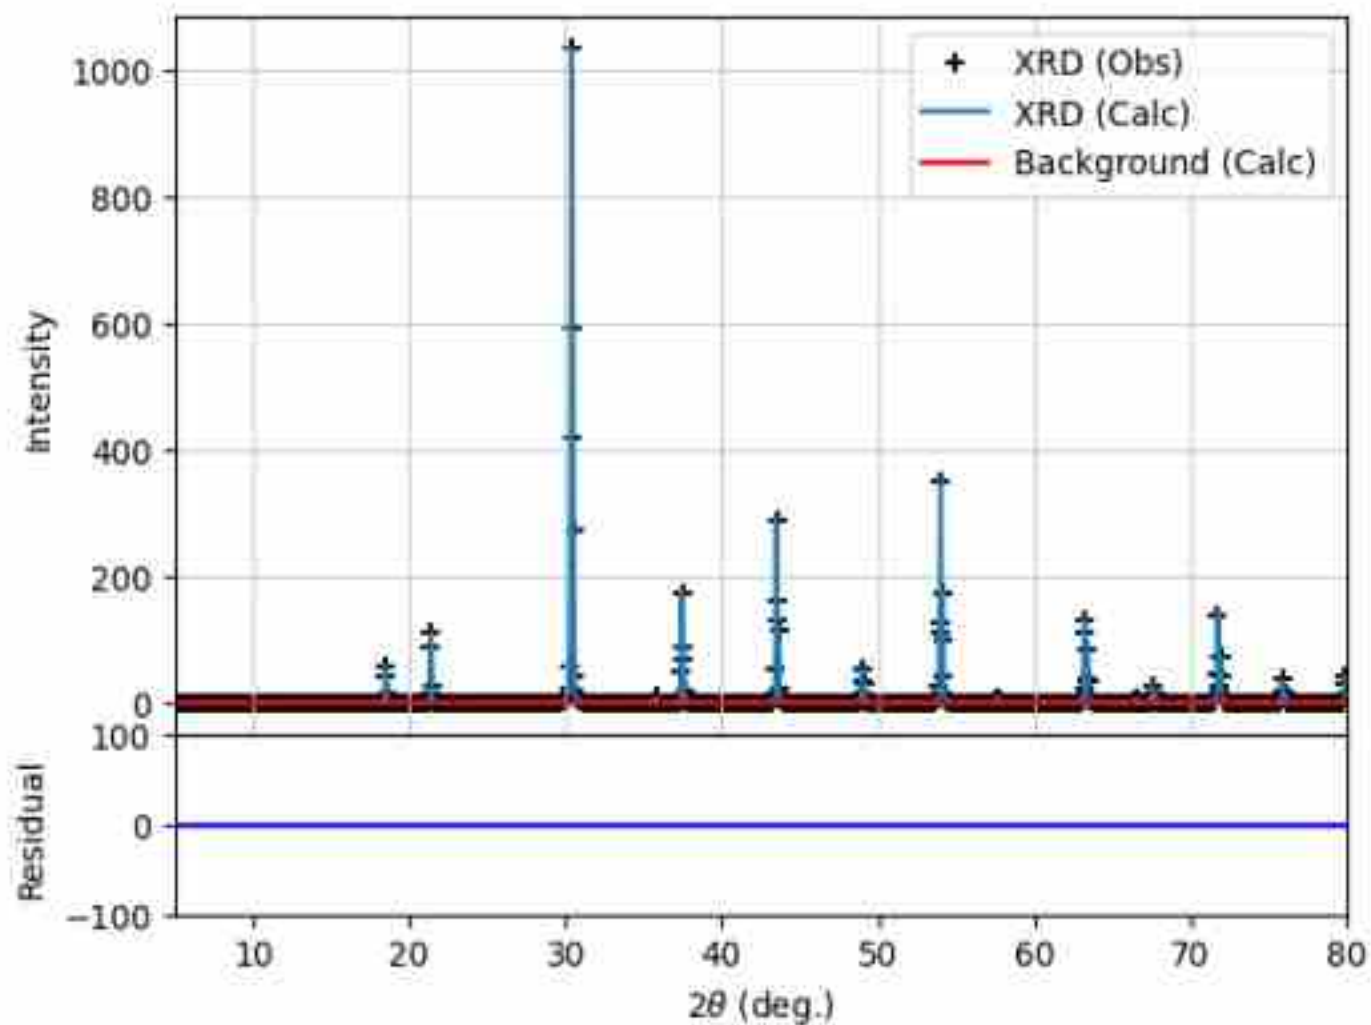

| RMSE before RR | Rwp     | RMSE after RR |
|----------------|---------|---------------|
| 0.014          | 0.01461 | 0.00401       |

# Ba<sub>2</sub>CeNb<sub>10</sub>O<sub>6</sub>

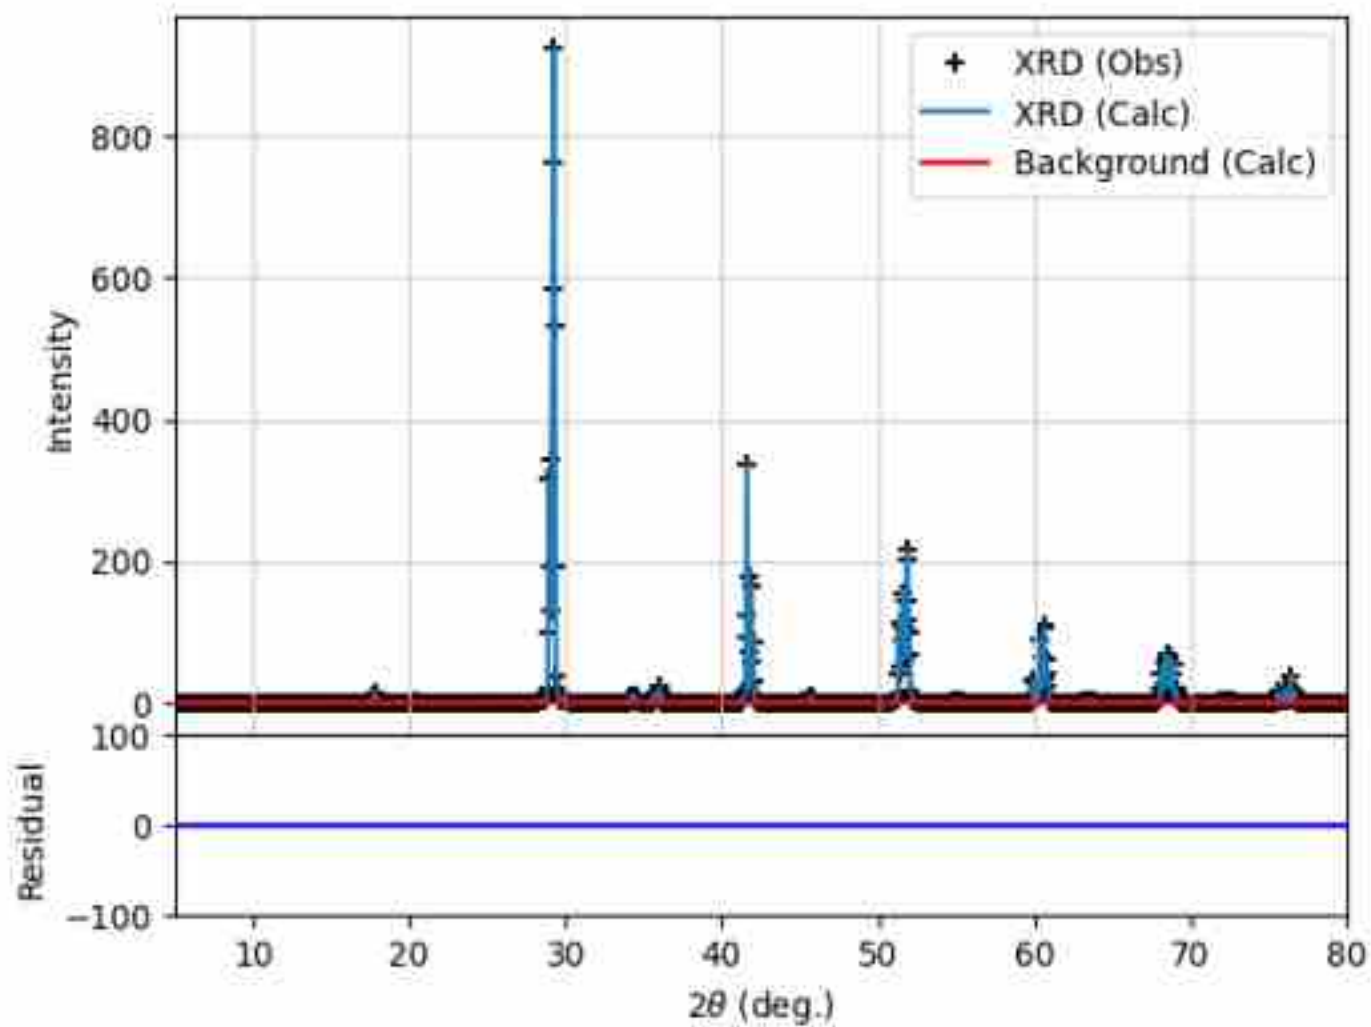

| RMSE before RR | Rwp     | RMSE after RR |
|----------------|---------|---------------|
| 0.014          | 0.00302 | 0.00107       |



# Ba<sub>2</sub>Dy<sub>2</sub>Fe<sub>4</sub>O<sub>10</sub>

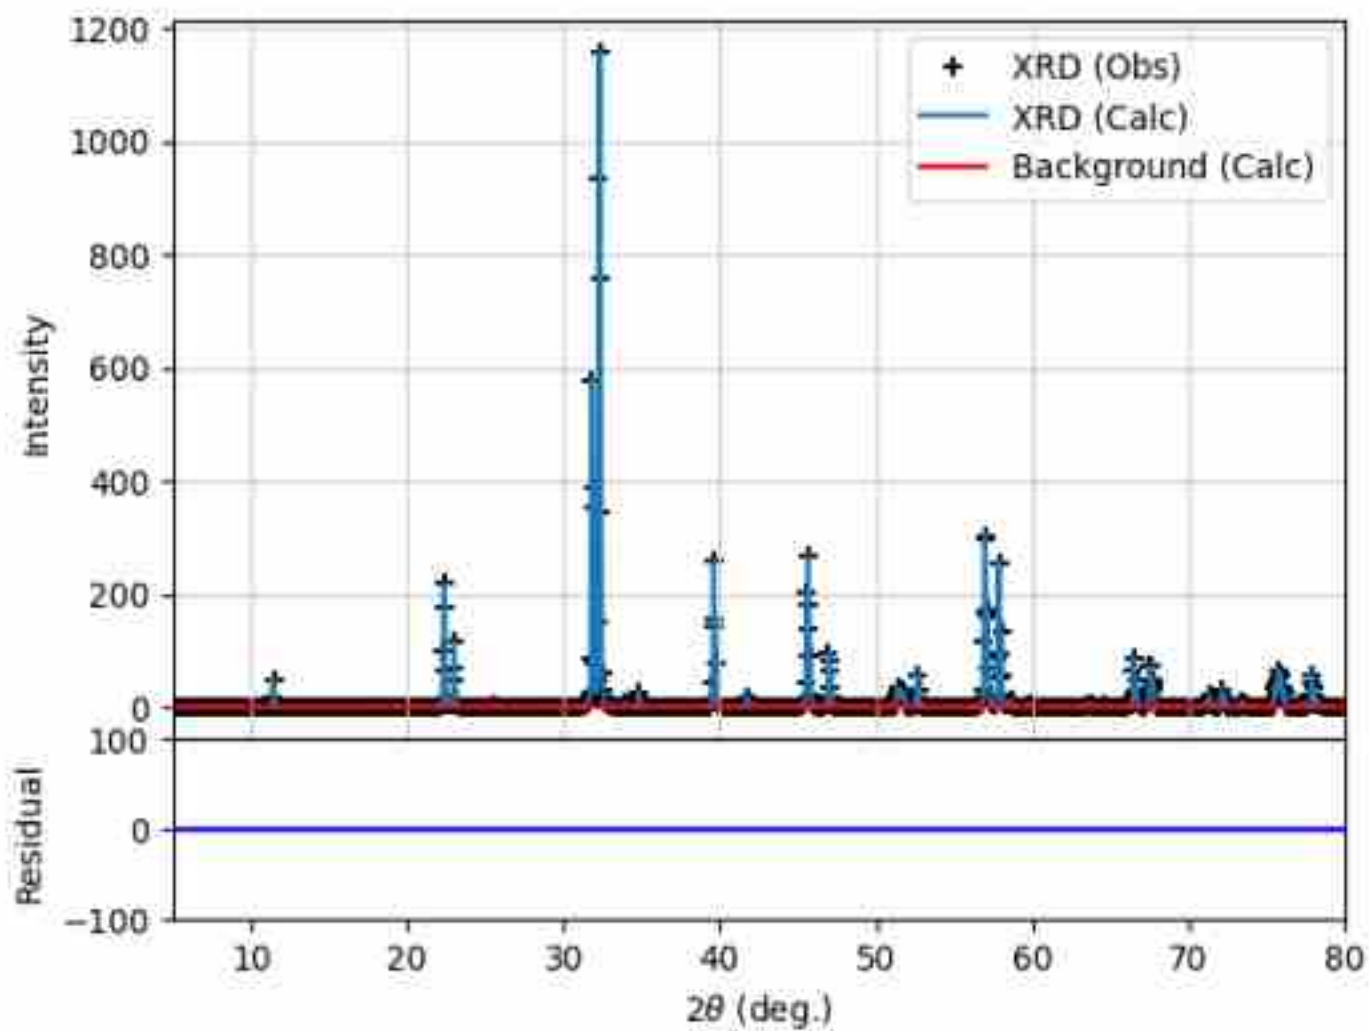

| RMSE before RR | Rwp     | RMSE after RR |
|----------------|---------|---------------|
| 0.014          | 0.00437 | 0.00088       |

# Ba<sub>2</sub>Gd<sub>2</sub>Cu<sub>2</sub>S<sub>6</sub>

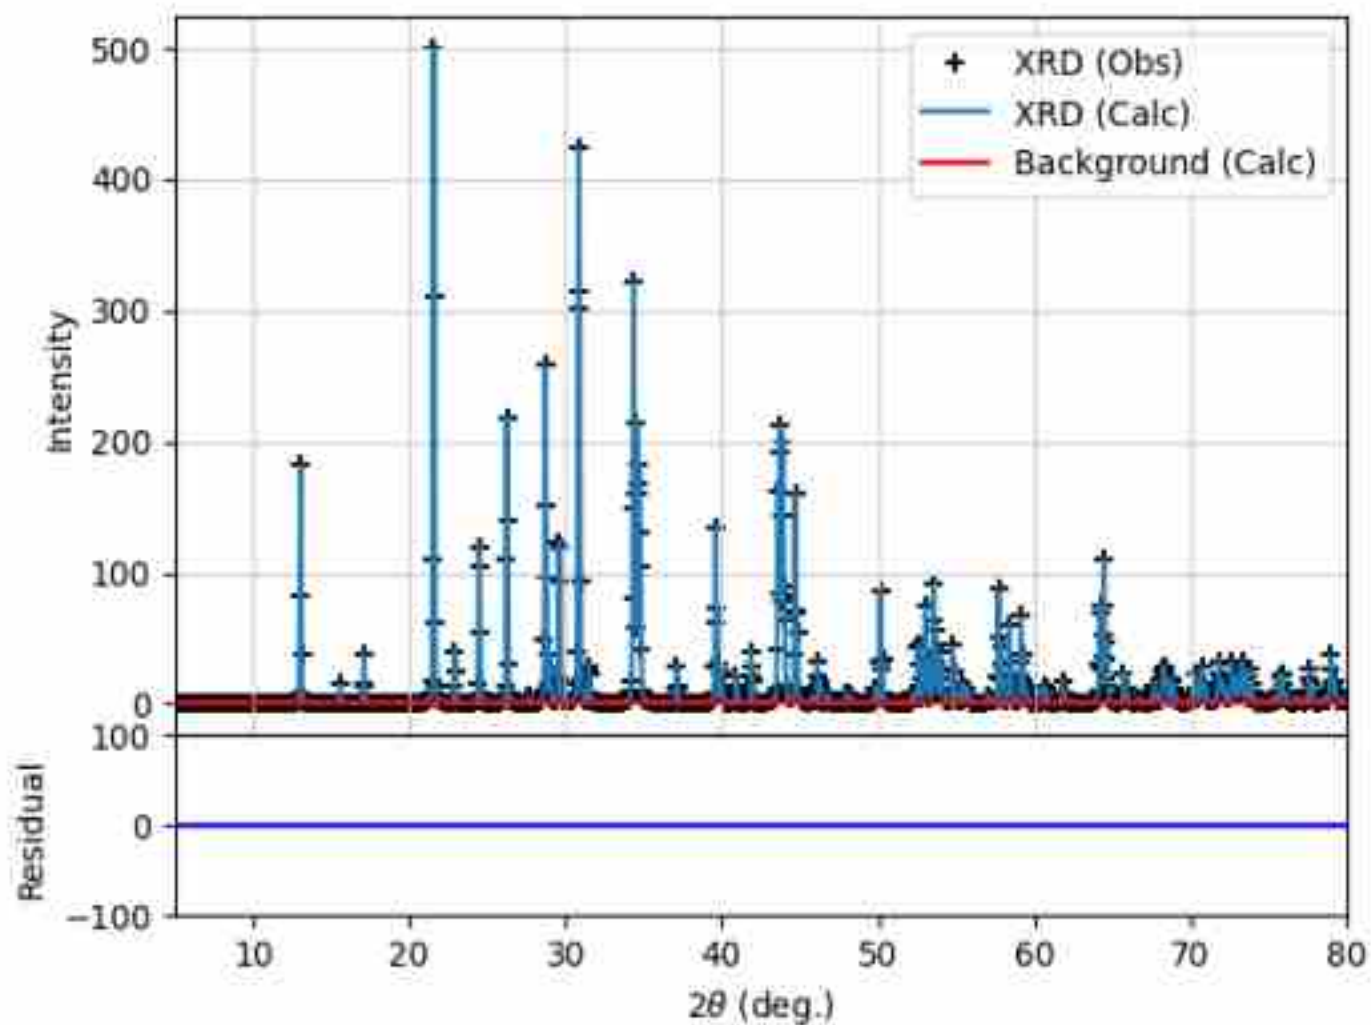

| RMSE before RR | Rwp     | RMSE after RR |
|----------------|---------|---------------|
| 0.014          | 0.00336 | 0.00038       |

# Ba<sub>2</sub>In<sub>3</sub>Au<sub>1</sub>

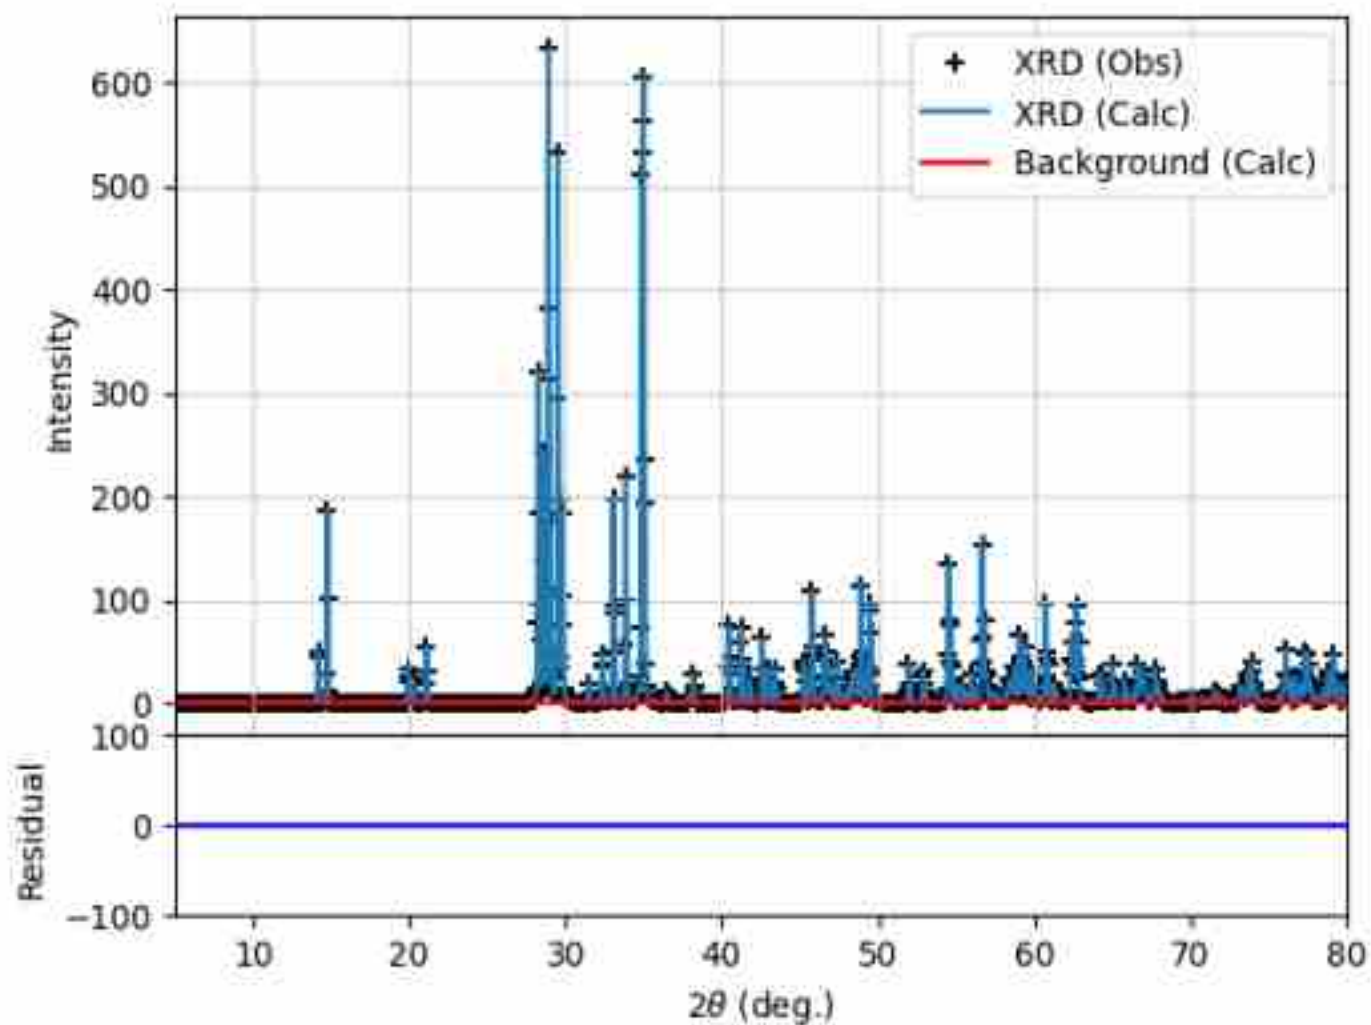

| RMSE before RR | Rwp     | RMSE after RR |
|----------------|---------|---------------|
| 0.014          | 0.00282 | 0.0001        |

# Ba<sub>2</sub>Mn<sub>2</sub>Sb<sub>2</sub>F<sub>2</sub>

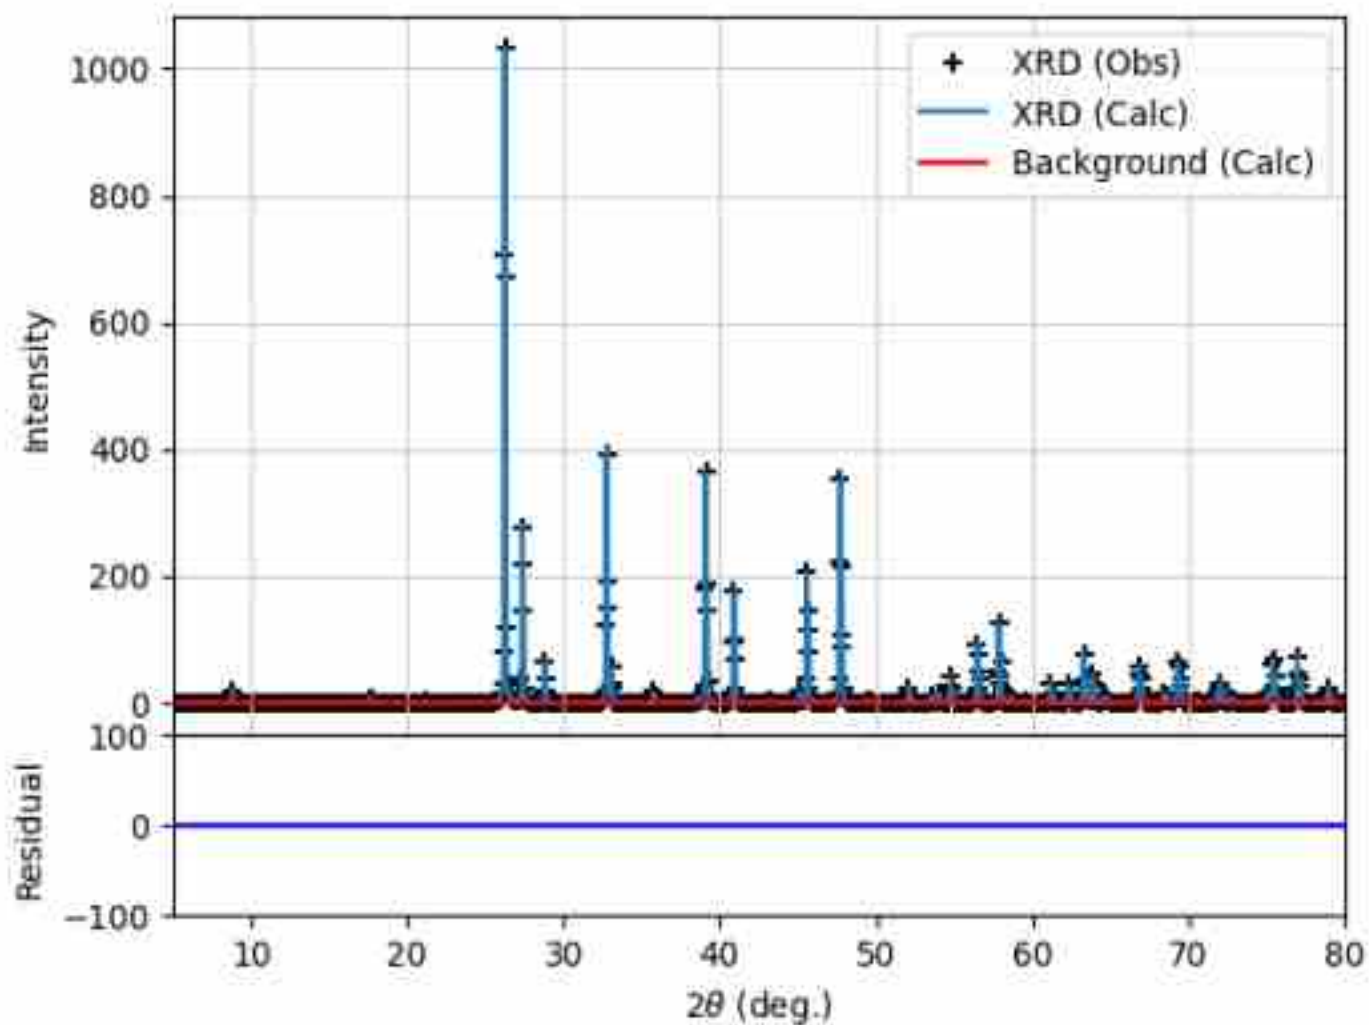

| RMSE before RR | Rwp     | RMSE after RR |
|----------------|---------|---------------|
| 0.014          | 0.00423 | 0.0005        |

# Ba<sub>2</sub>SmCoCu<sub>2</sub>O<sub>7</sub>

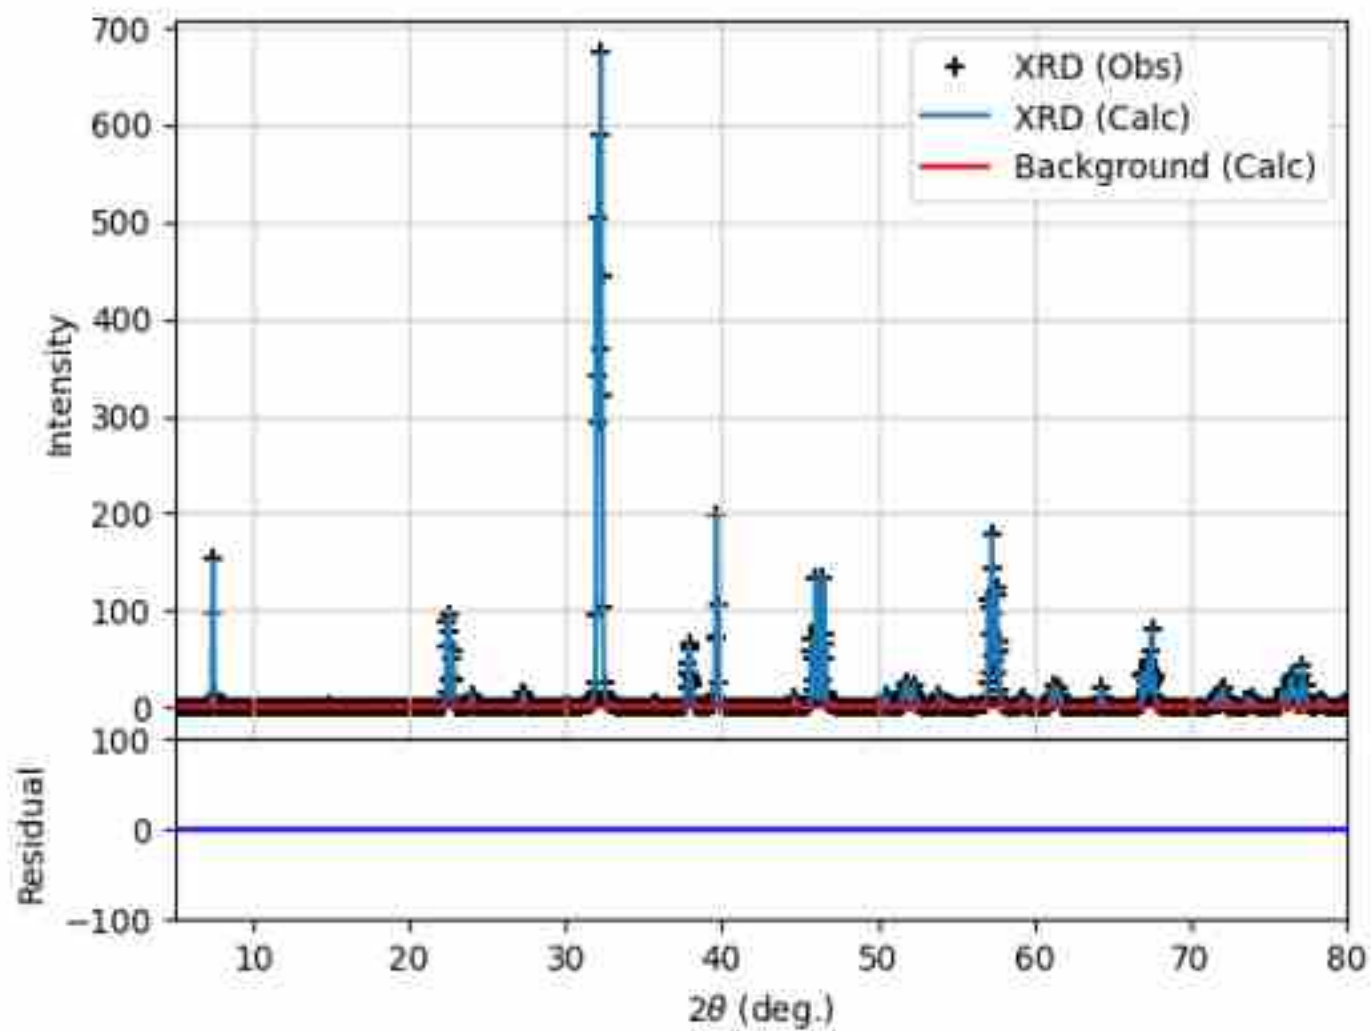

| RMSE before RR | Rwp     | RMSE after RR |
|----------------|---------|---------------|
| 0.014          | 0.00429 | 0.00121       |

# Ba<sub>2</sub>Sr<sub>2</sub>Ce<sub>2</sub>Zr<sub>2</sub>O<sub>12</sub>

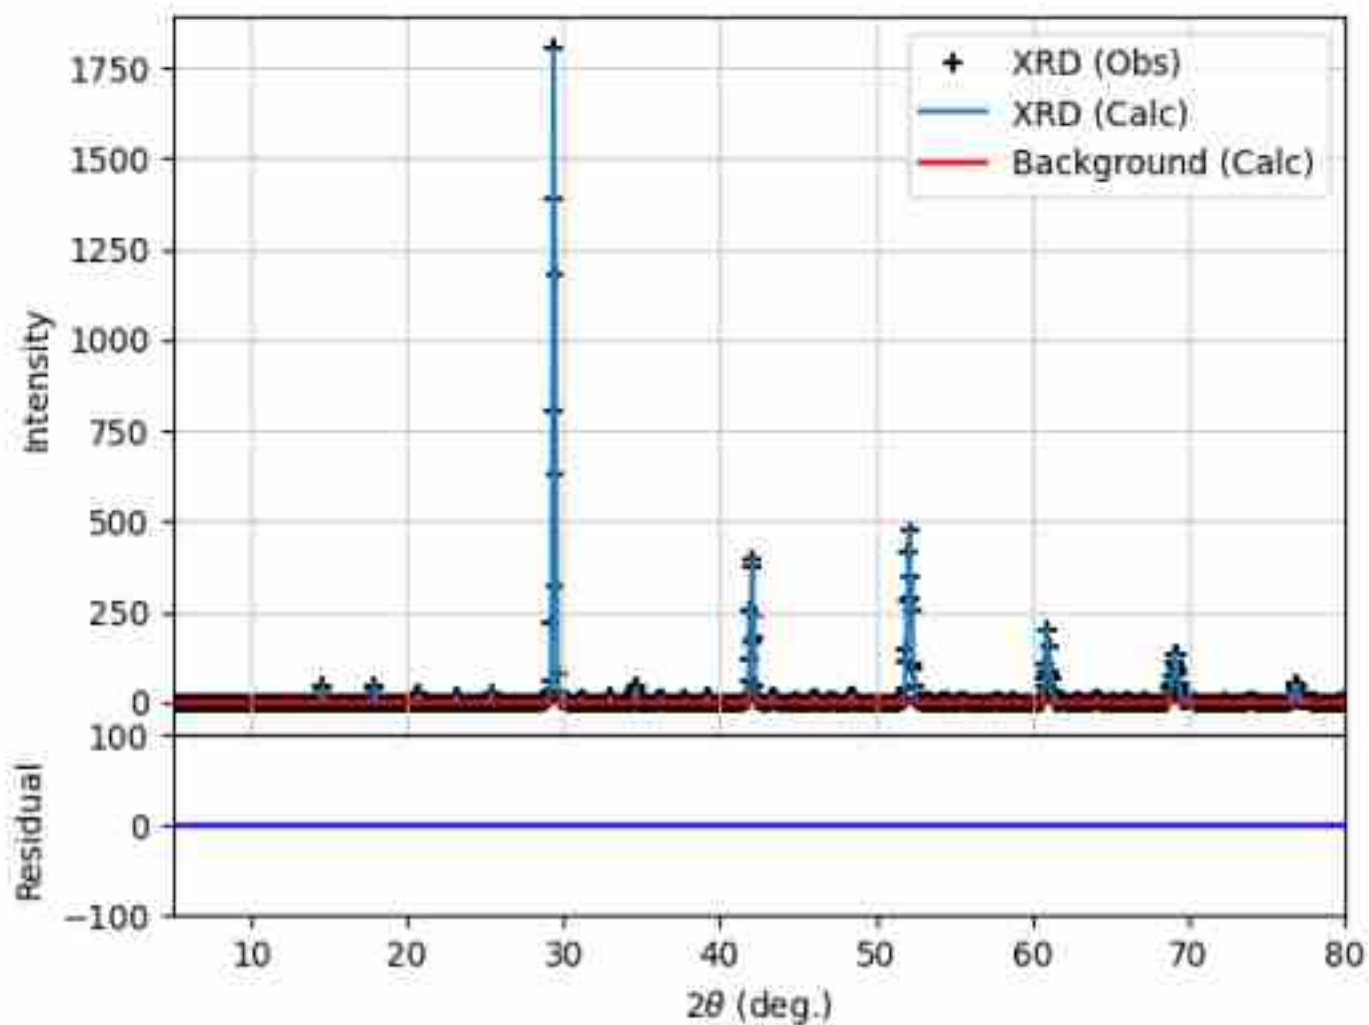

| RMSE before RR | Rwp     | RMSE after RR |
|----------------|---------|---------------|
| 0.014          | 0.00177 | 0.00036       |

# Ba<sub>3</sub>Ca<sub>1</sub>Nb<sub>2</sub>O<sub>9</sub>

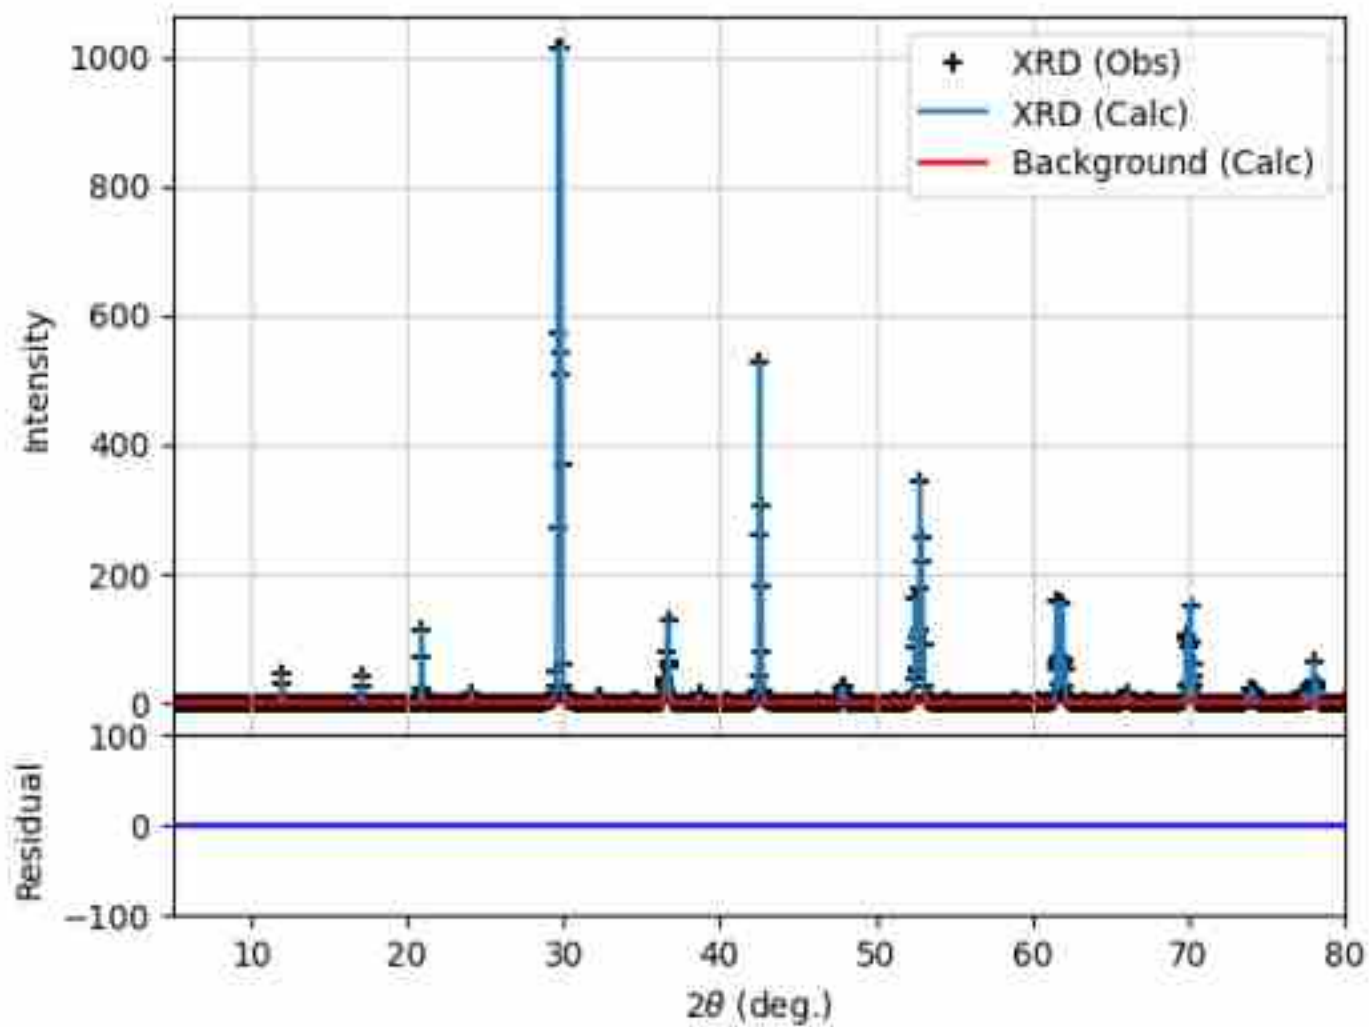

| RMSE before RR | Rwp     | RMSE after RR |
|----------------|---------|---------------|
| 0.014          | 0.00254 | 0.00137       |

# Ba<sub>3</sub>U<sub>1</sub>O<sub>6</sub>

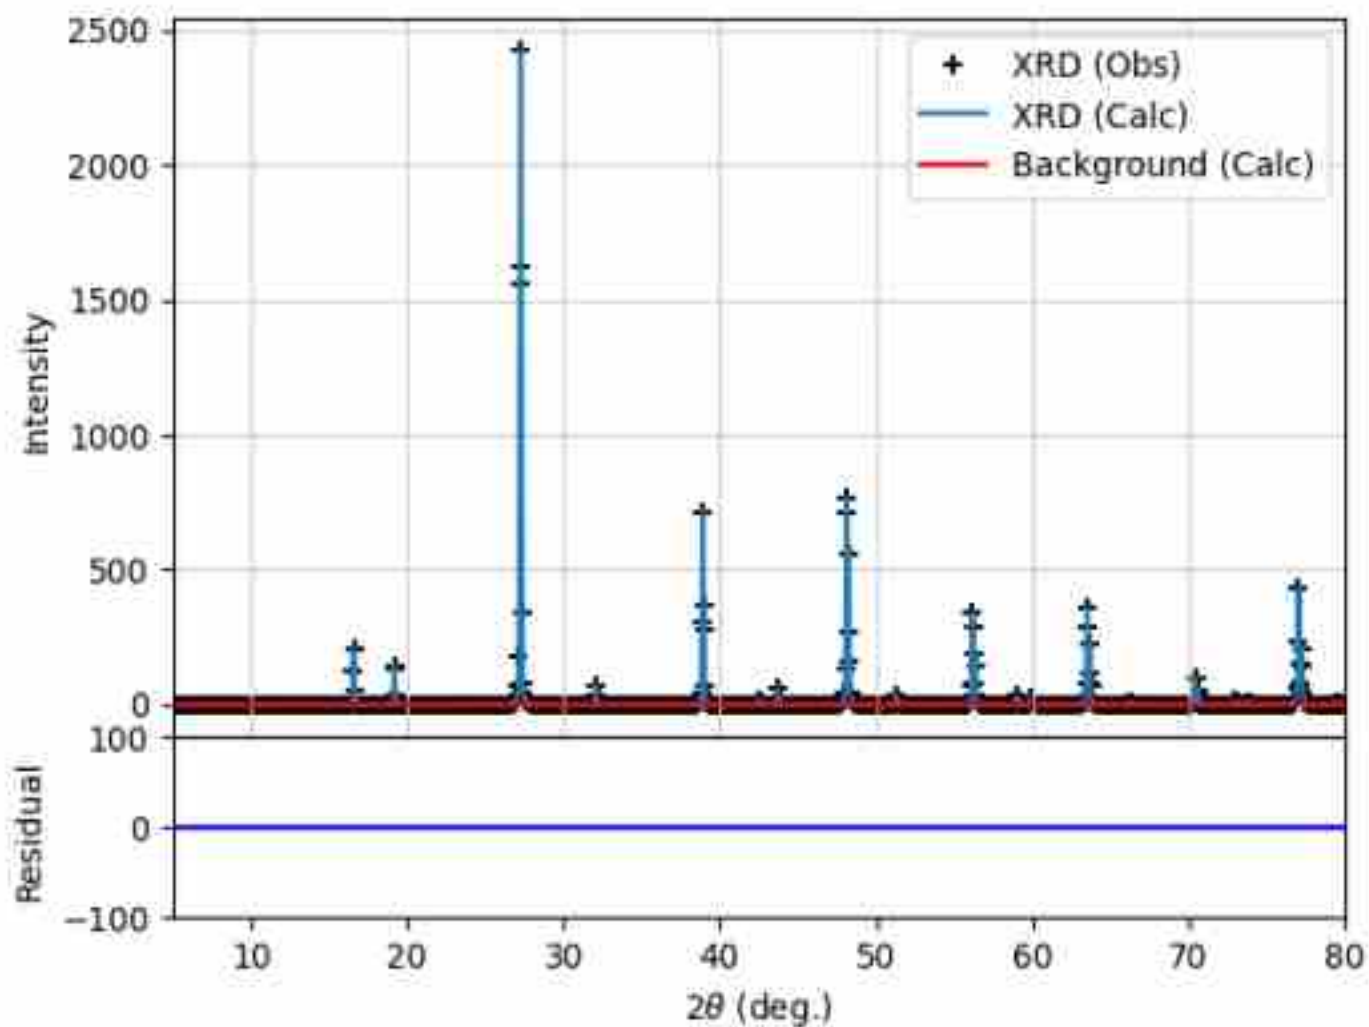

| RMSE before RR | Rwp     | RMSE after RR |
|----------------|---------|---------------|
| 0.014          | 0.00756 | 0.00389       |



# Bi<sub>2</sub>Se<sub>3</sub>

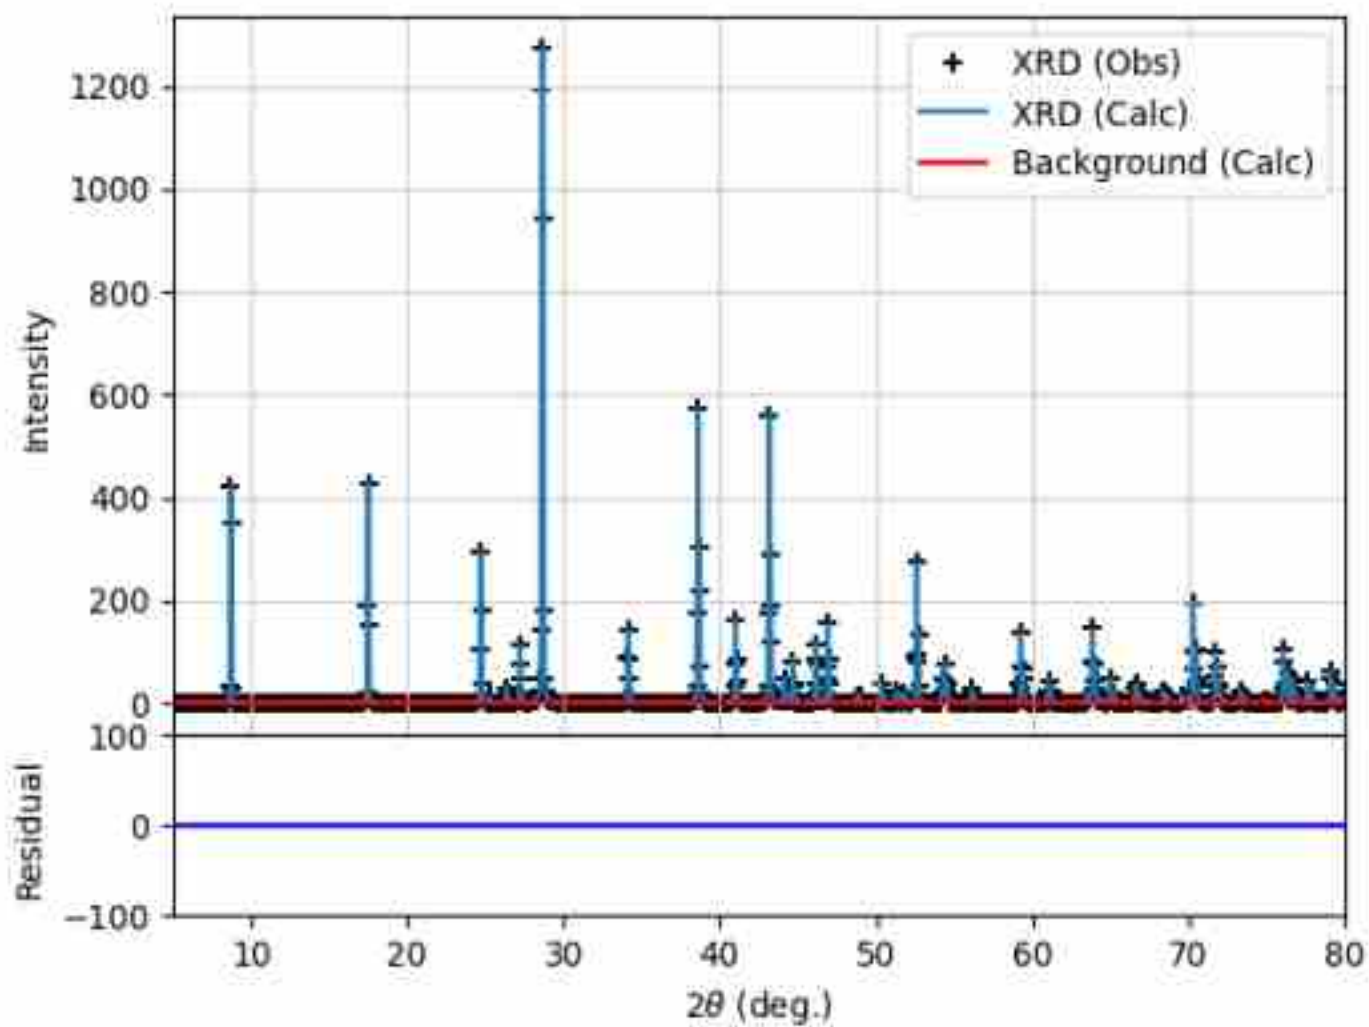

| RMSE before RR | Rwp     | RMSE after RR |
|----------------|---------|---------------|
| 0.014          | 0.00473 | 0.00038       |

# Ca1Cu5

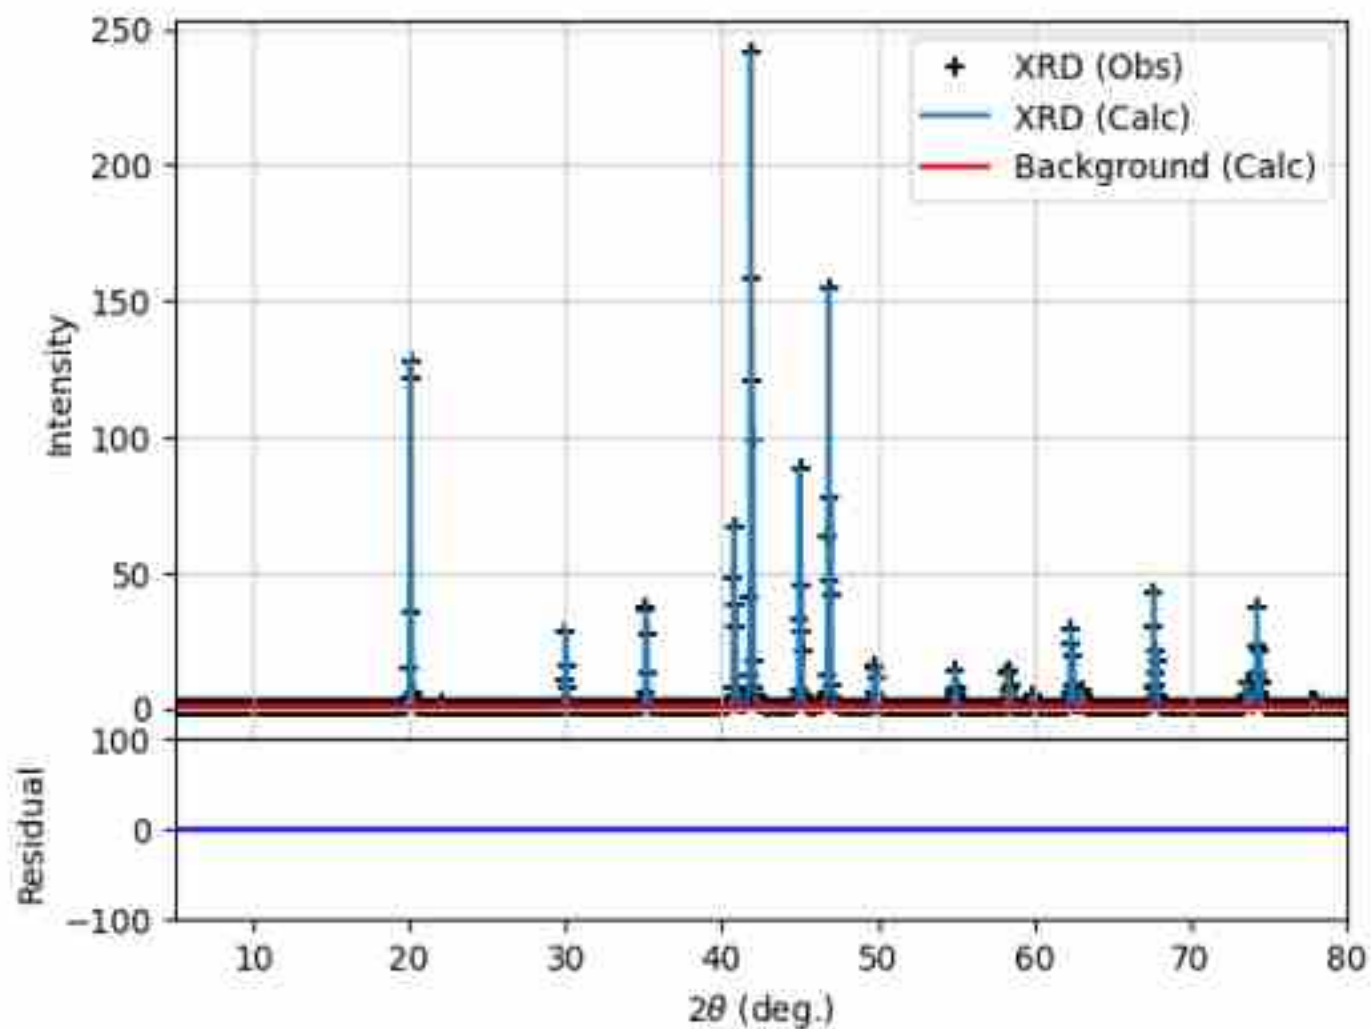

| RMSE before RR | Rwp     | RMSE after RR |
|----------------|---------|---------------|
| 0.014          | 0.00185 | 0.00153       |

# Ca1Fe1F6

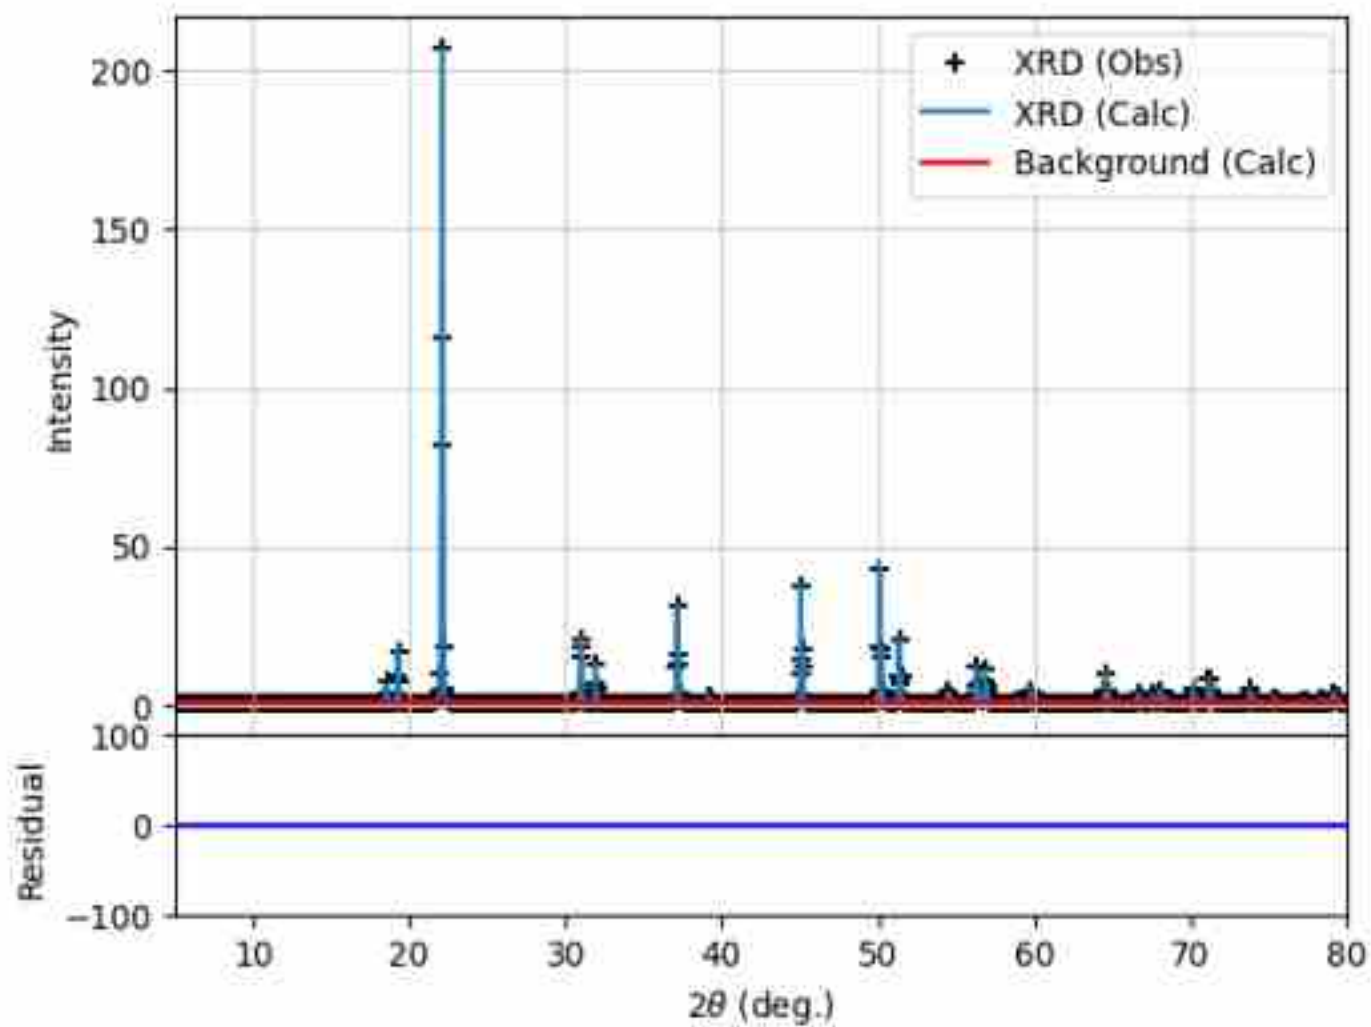

| RMSE before RR | Rwp     | RMSE after RR |
|----------------|---------|---------------|
| 0.014          | 0.00168 | 0.00054       |

# Ca<sub>1</sub>La<sub>3</sub>Fe<sub>4</sub>O<sub>12</sub>

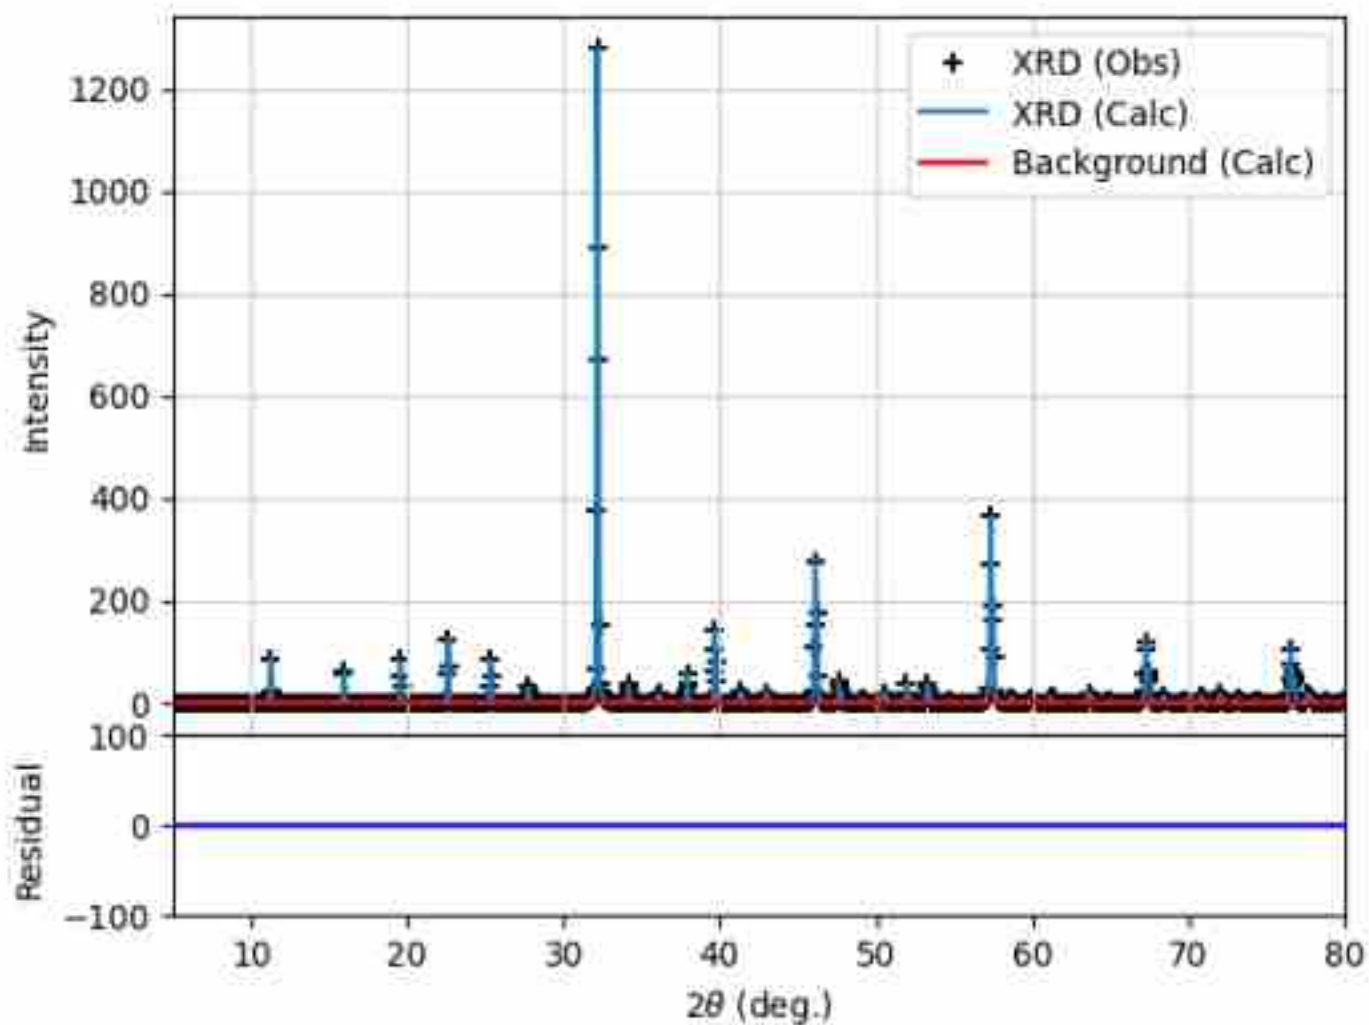

| RMSE before RR | Rwp     | RMSE after RR |
|----------------|---------|---------------|
| 0.014          | 0.00305 | 0.00158       |

# Ca<sub>1</sub>Lu<sub>2</sub>Te<sub>4</sub>

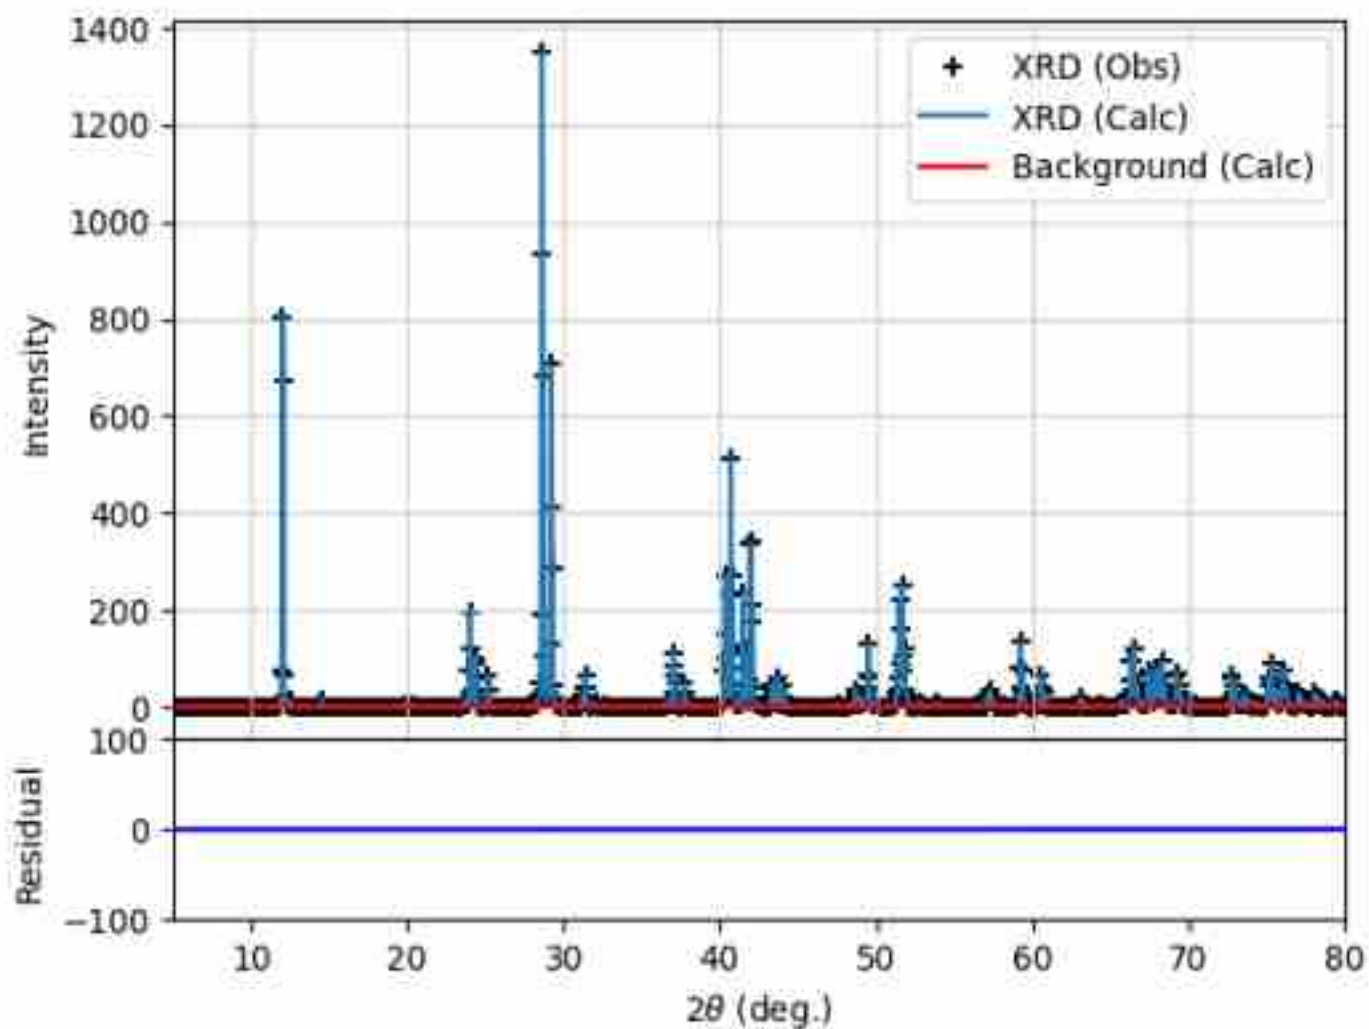

| RMSE before RR | Rwp     | RMSE after RR |
|----------------|---------|---------------|
| 0.014          | 0.20731 | 0.00279       |

# Ca<sub>1</sub>Tb<sub>3</sub>Mn<sub>4</sub>O<sub>12</sub>

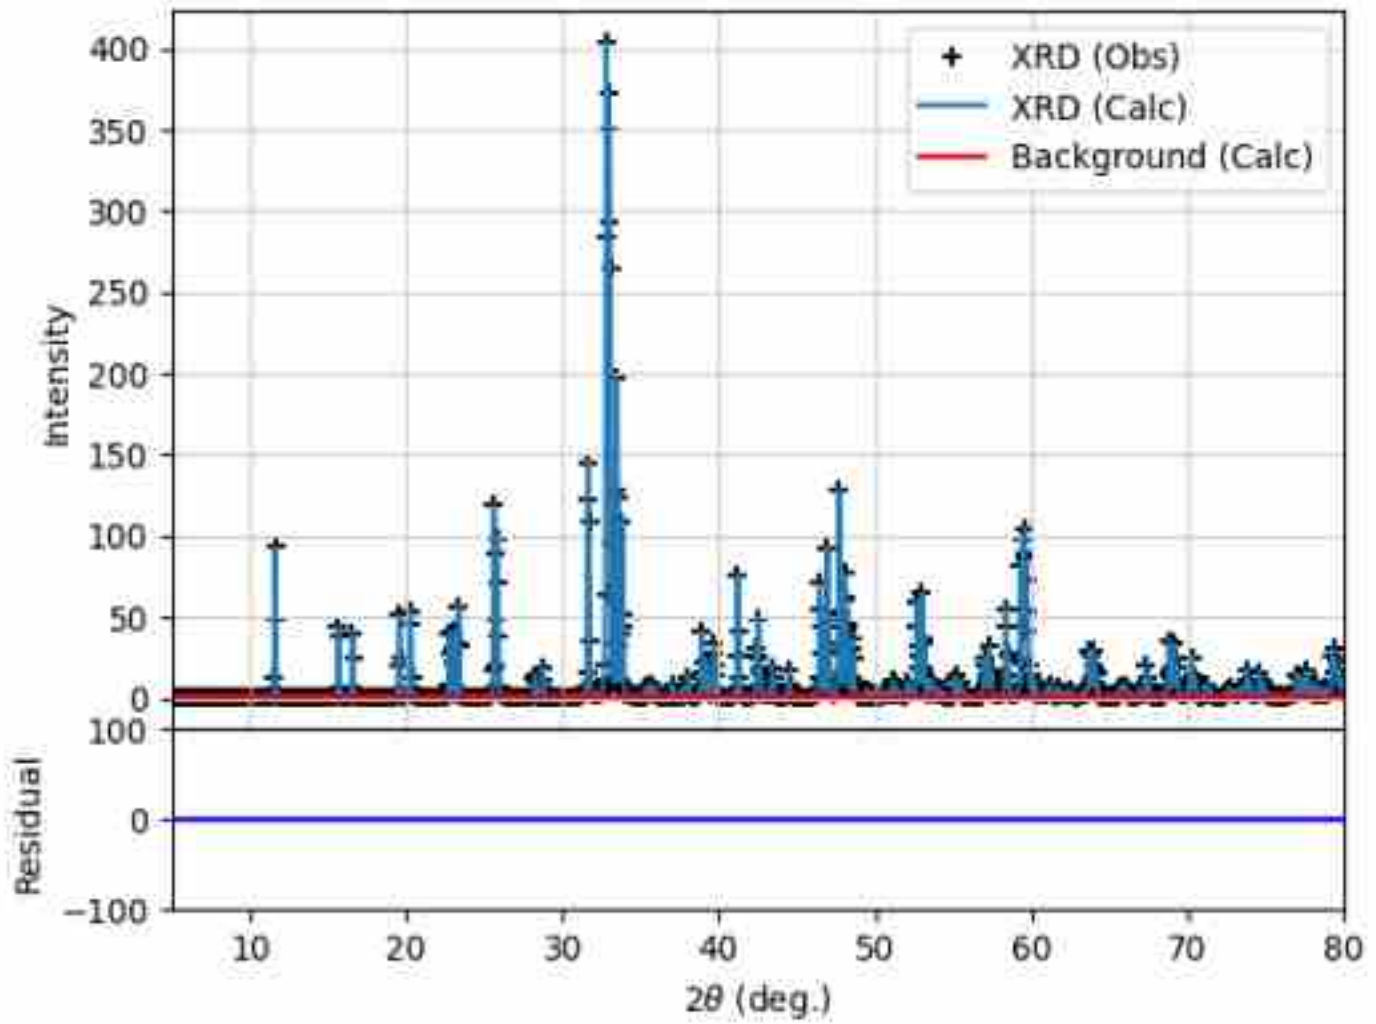

| RMSE before RR | Rwp     | RMSE after RR |
|----------------|---------|---------------|
| 0.014          | 0.00373 | 0.00124       |

# Ca<sub>1</sub>Y<sub>3</sub>Ti<sub>4</sub>O<sub>12</sub>

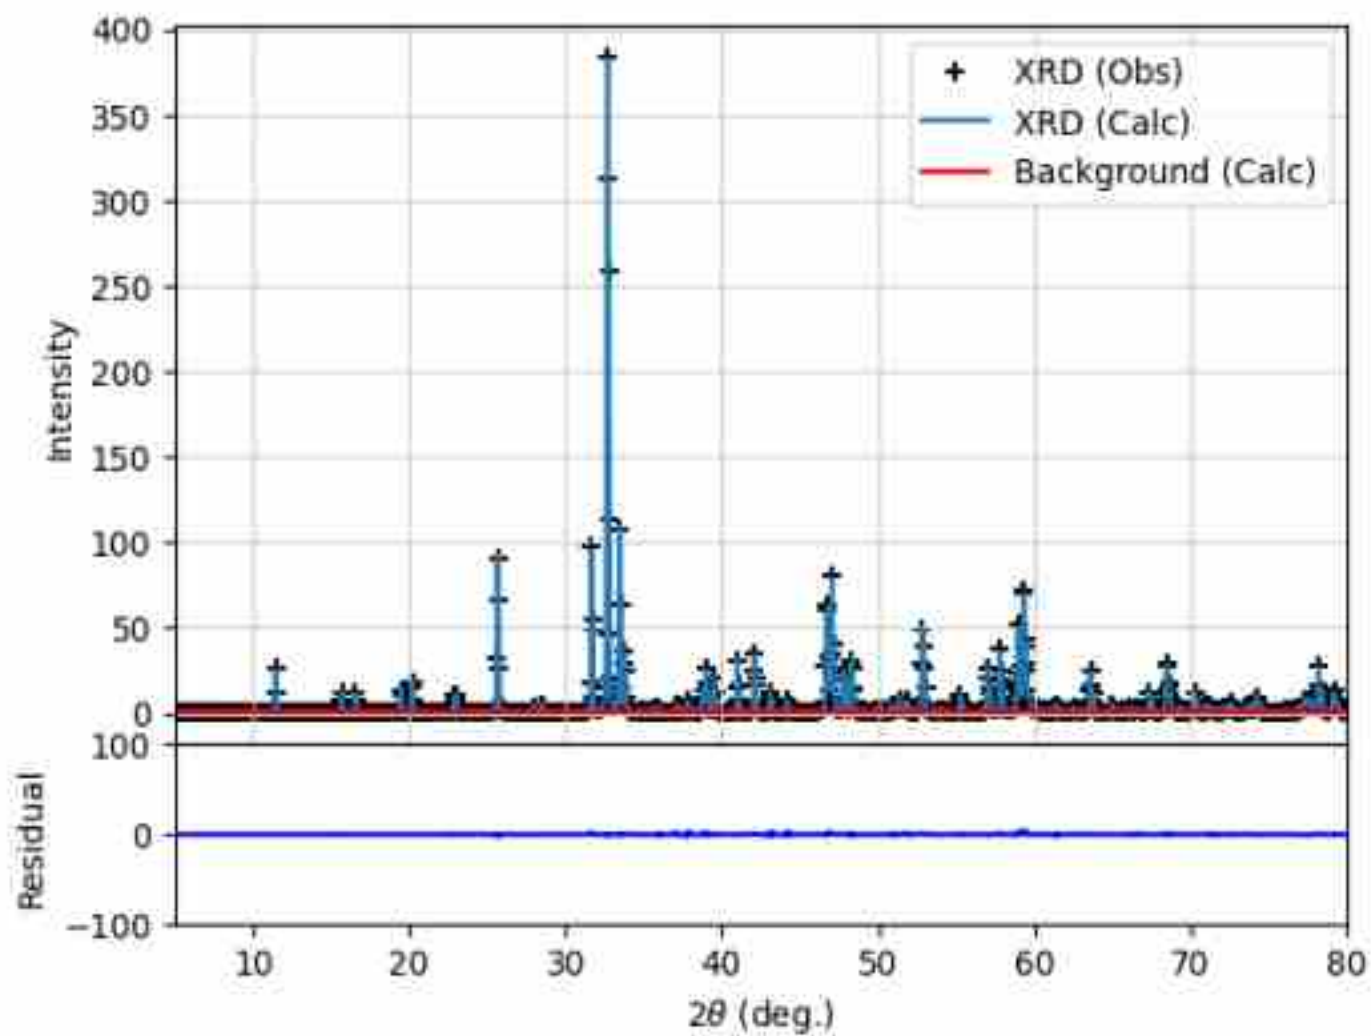

| RMSE before RR | Rwp     | RMSE after RR |
|----------------|---------|---------------|
| 0.014          | 7.40916 | 0.05843       |

# Ca<sub>2</sub>Ti<sub>10</sub>O<sub>4</sub>

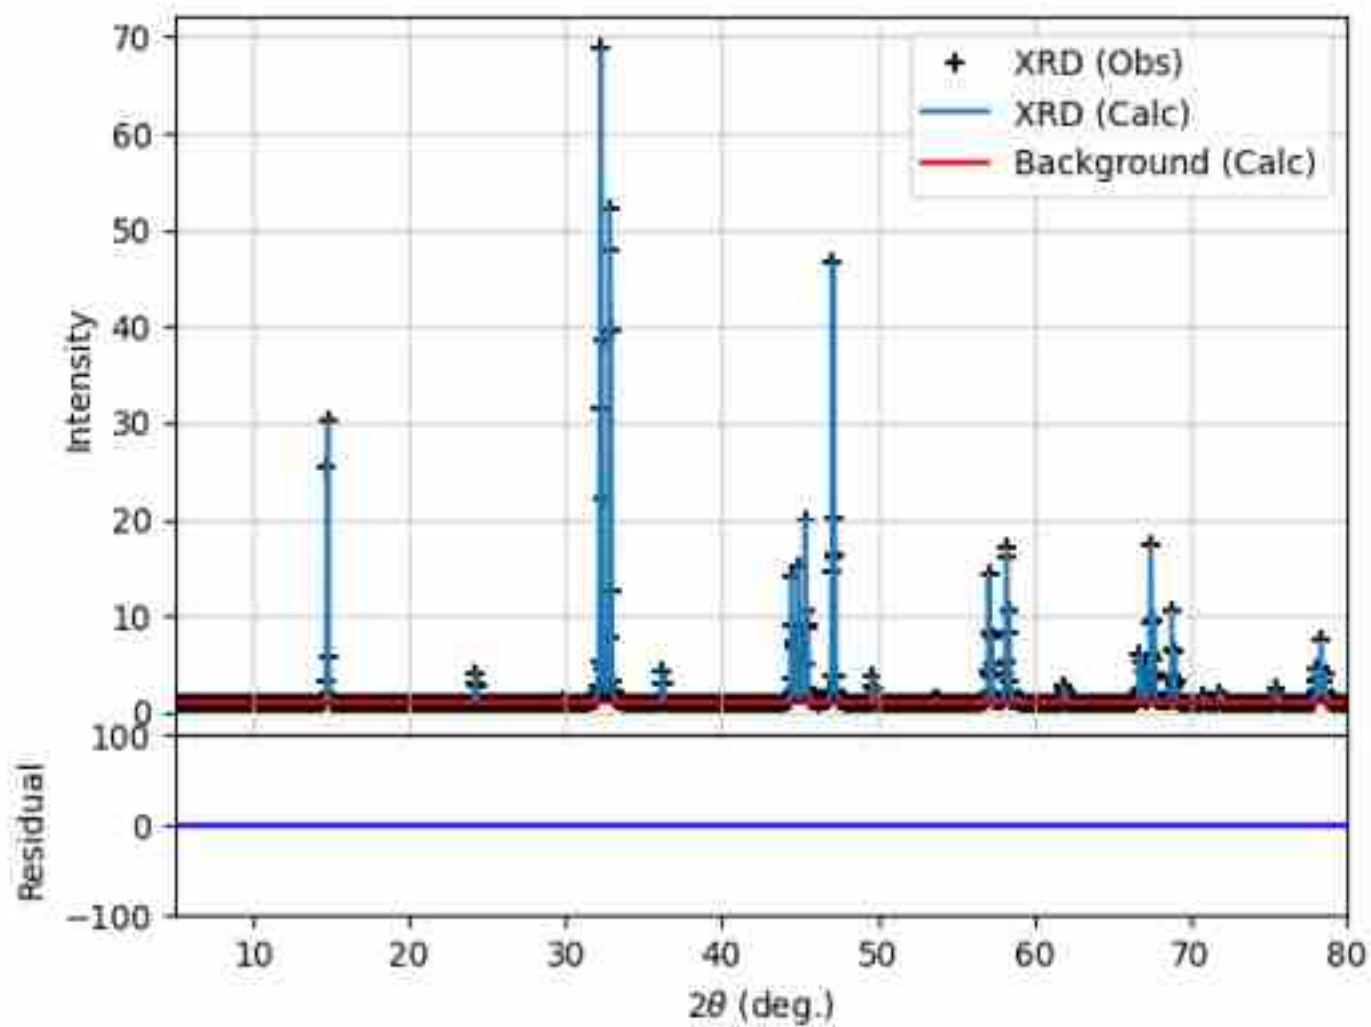

| RMSE before RR | Rwp     | RMSE after RR |
|----------------|---------|---------------|
| 0.014          | 0.00325 | 0.00059       |



# Ca<sub>4</sub>Ge<sub>2</sub>Pt<sub>4</sub>

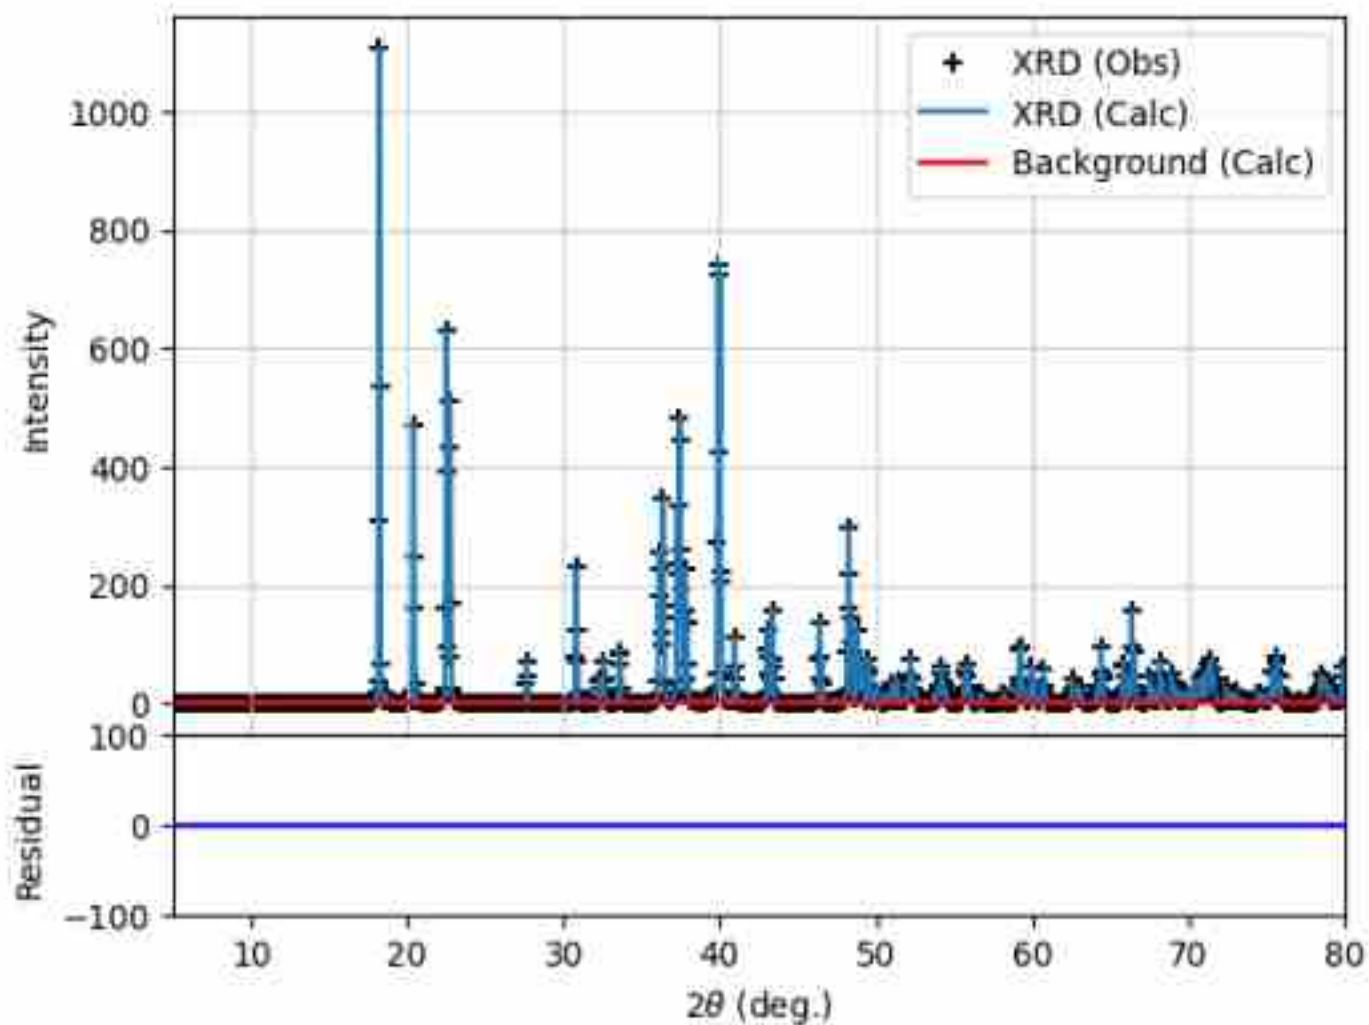

| RMSE before RR | Rwp     | RMSE after RR |
|----------------|---------|---------------|
| 0.014          | 0.00474 | 0.00042       |

# Ca<sub>4</sub>Mg<sub>4</sub>Ge<sub>4</sub>

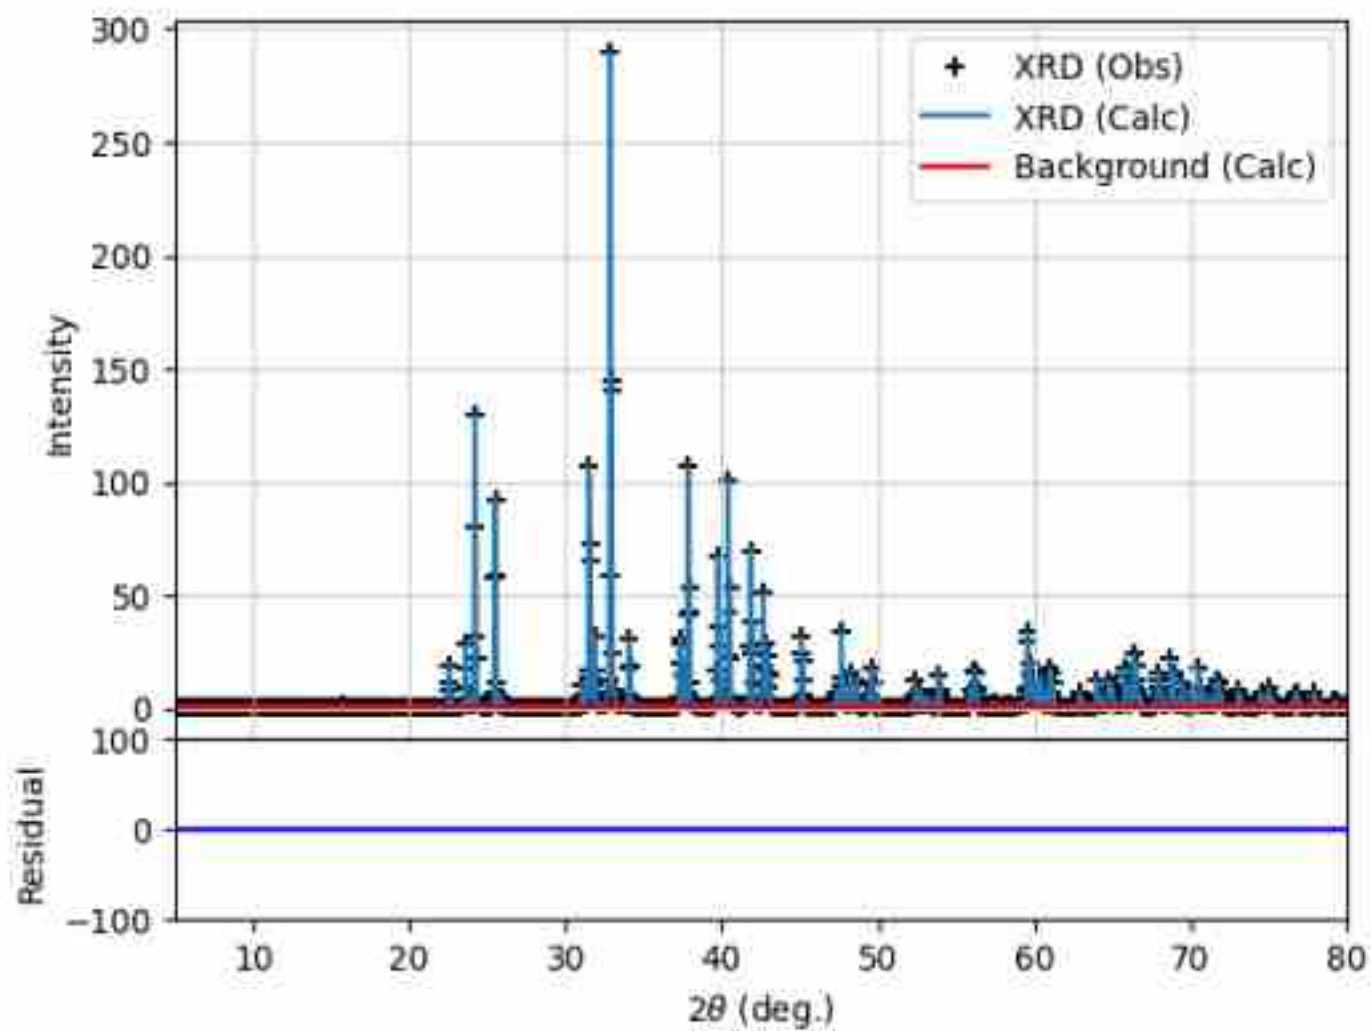

| RMSE before RR | Rwp    | RMSE after RR |
|----------------|--------|---------------|
| 0.014          | 0.0038 | 0.00053       |

# Ca<sub>4</sub>Mg<sub>4</sub>Pd<sub>4</sub>

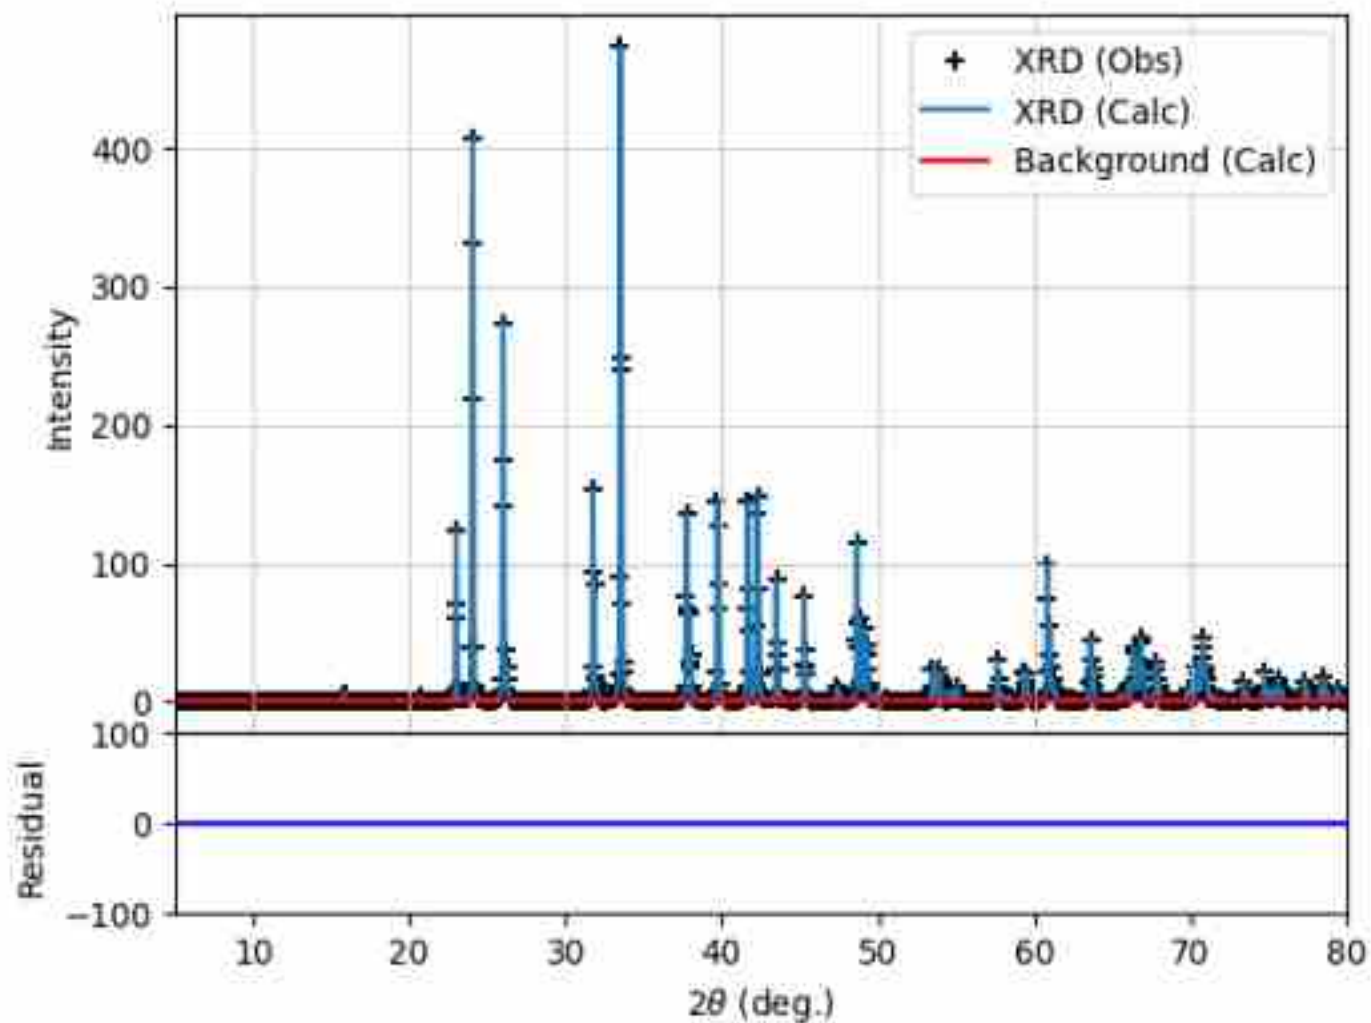

| RMSE before RR | Rwp     | RMSE after RR |
|----------------|---------|---------------|
| 0.014          | 0.00377 | 0.00056       |

# Ca<sub>4</sub>Sc<sub>2</sub>O<sub>s</sub>2O<sub>12</sub>

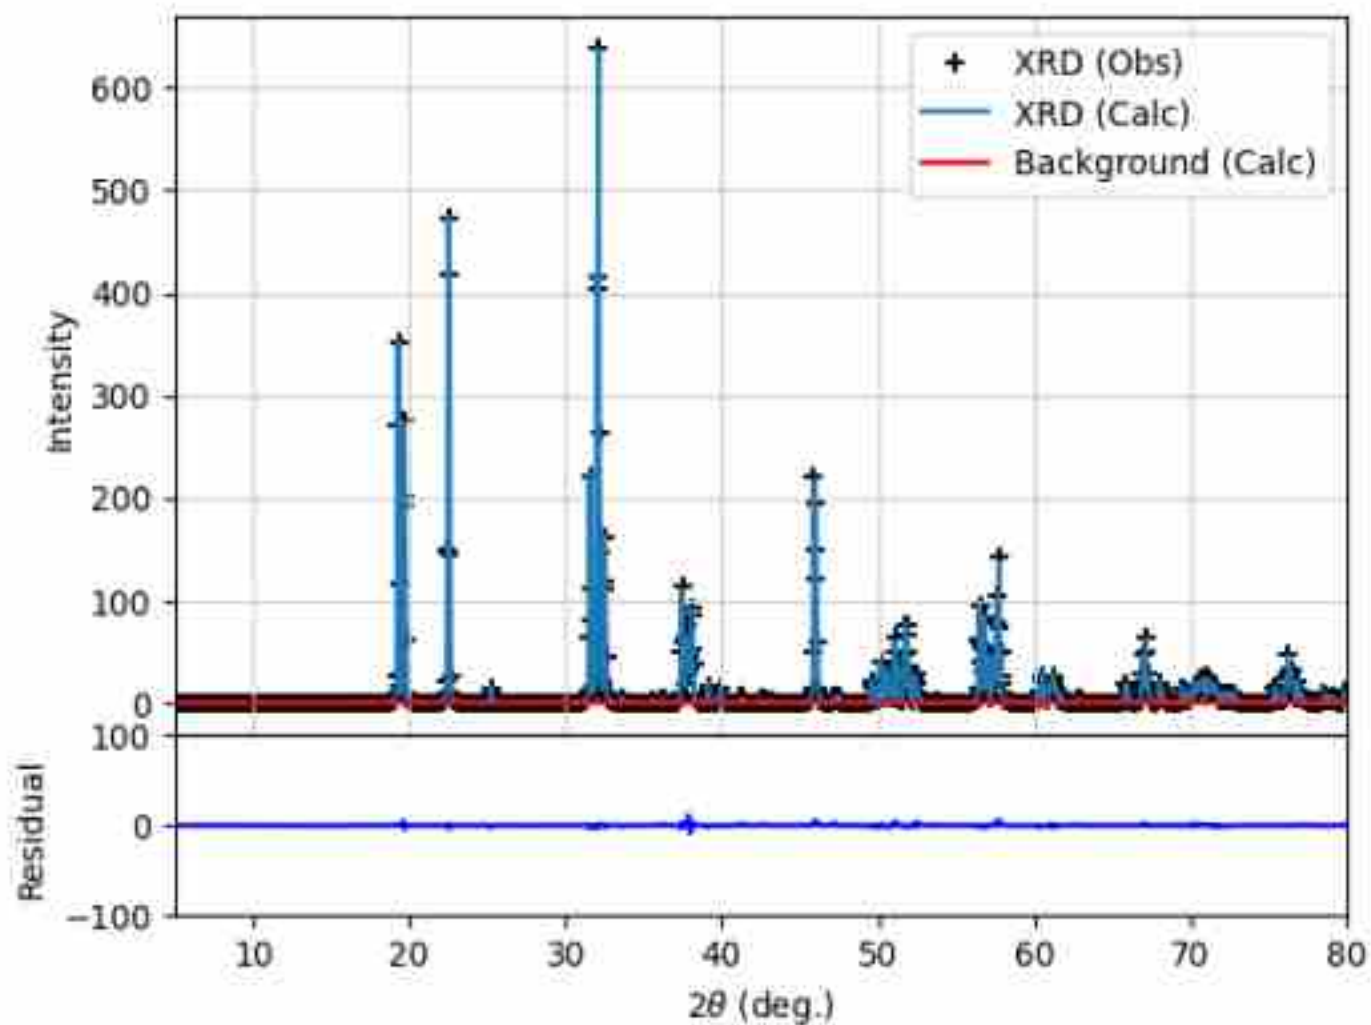

| RMSE before RR | Rwp     | RMSE after RR |
|----------------|---------|---------------|
| 0.014          | 4.96361 | 0.21268       |

# Ca<sub>4</sub>Si<sub>4</sub>Pt<sub>4</sub>

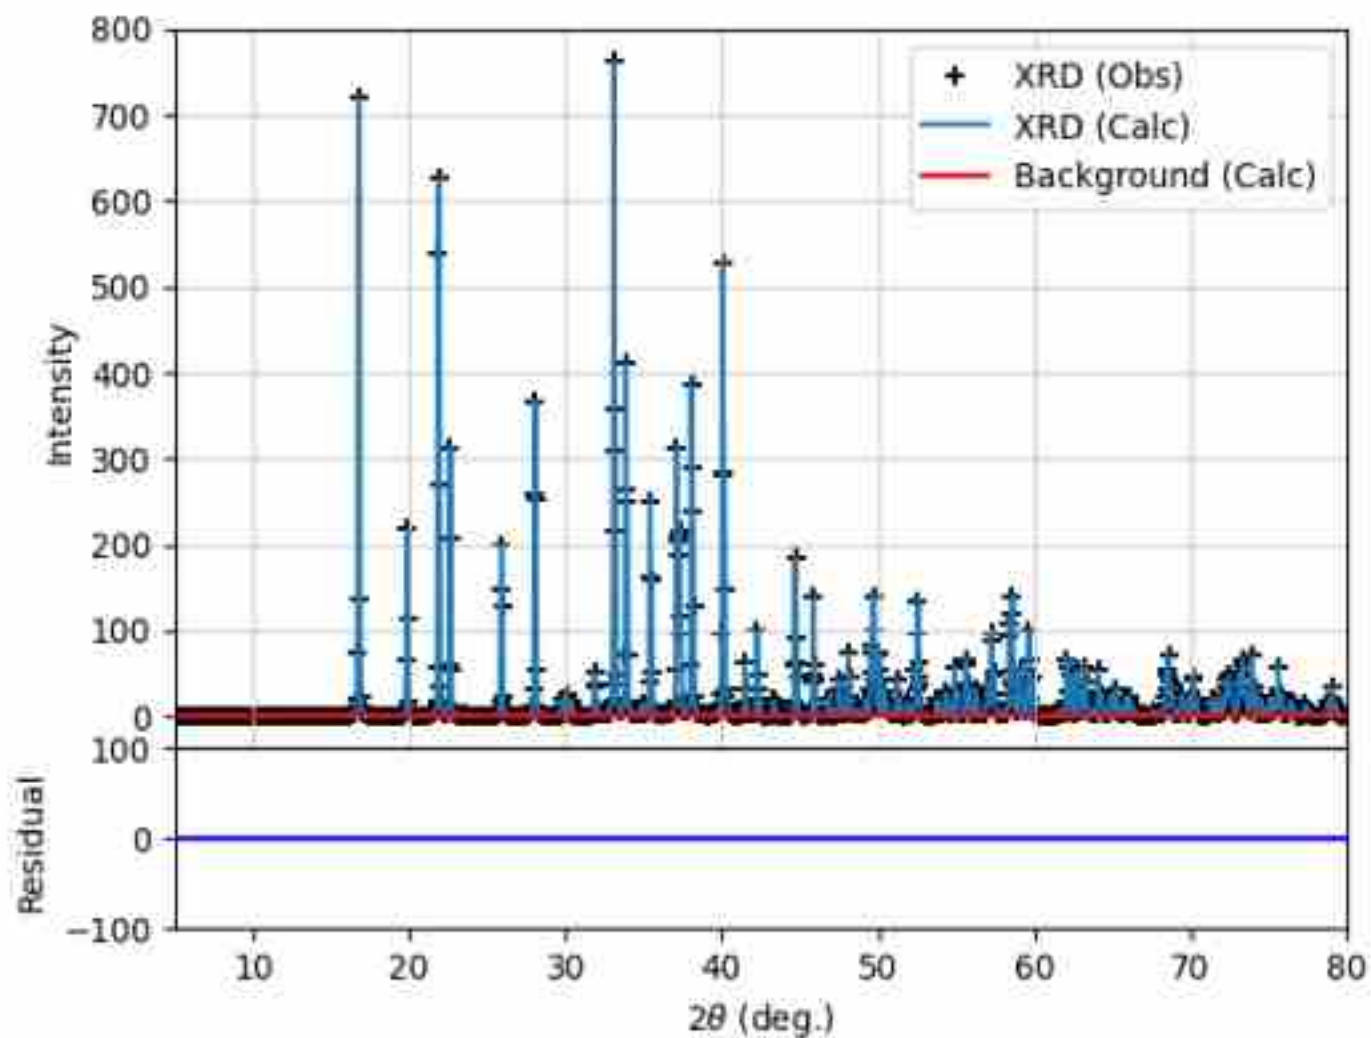

| RMSE before RR | Rwp     | RMSE after RR |
|----------------|---------|---------------|
| 0.014          | 0.00496 | 0.00086       |

# Cd<sub>2</sub>Ge<sub>2</sub>P<sub>4</sub>

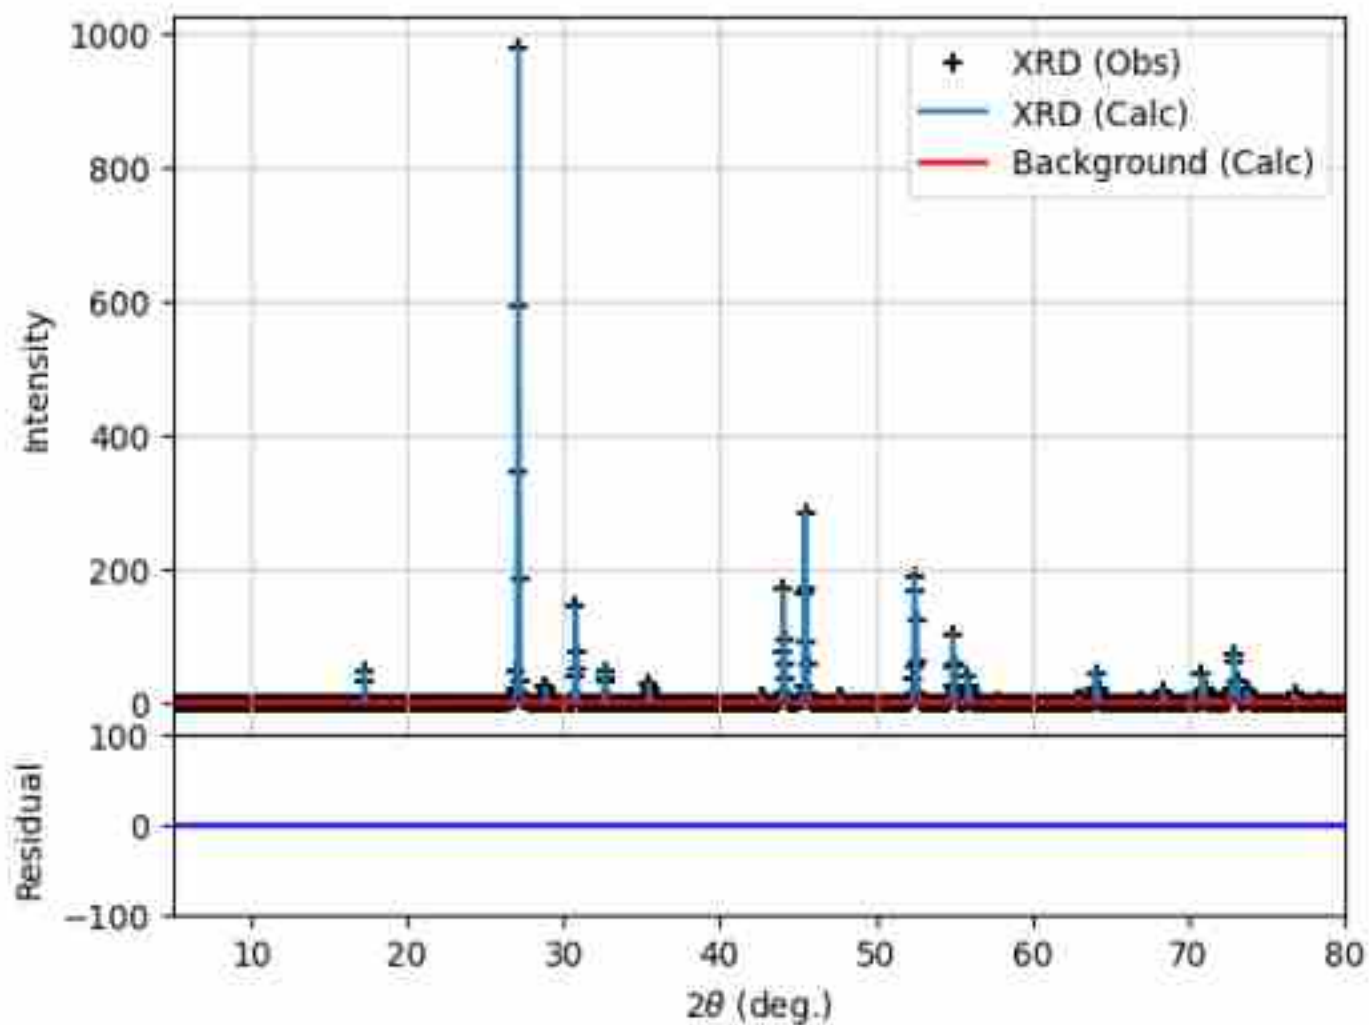

| RMSE before RR | Rwp     | RMSE after RR |
|----------------|---------|---------------|
| 0.014          | 0.00317 | 0.00075       |

# Ce1Ge2Rh2

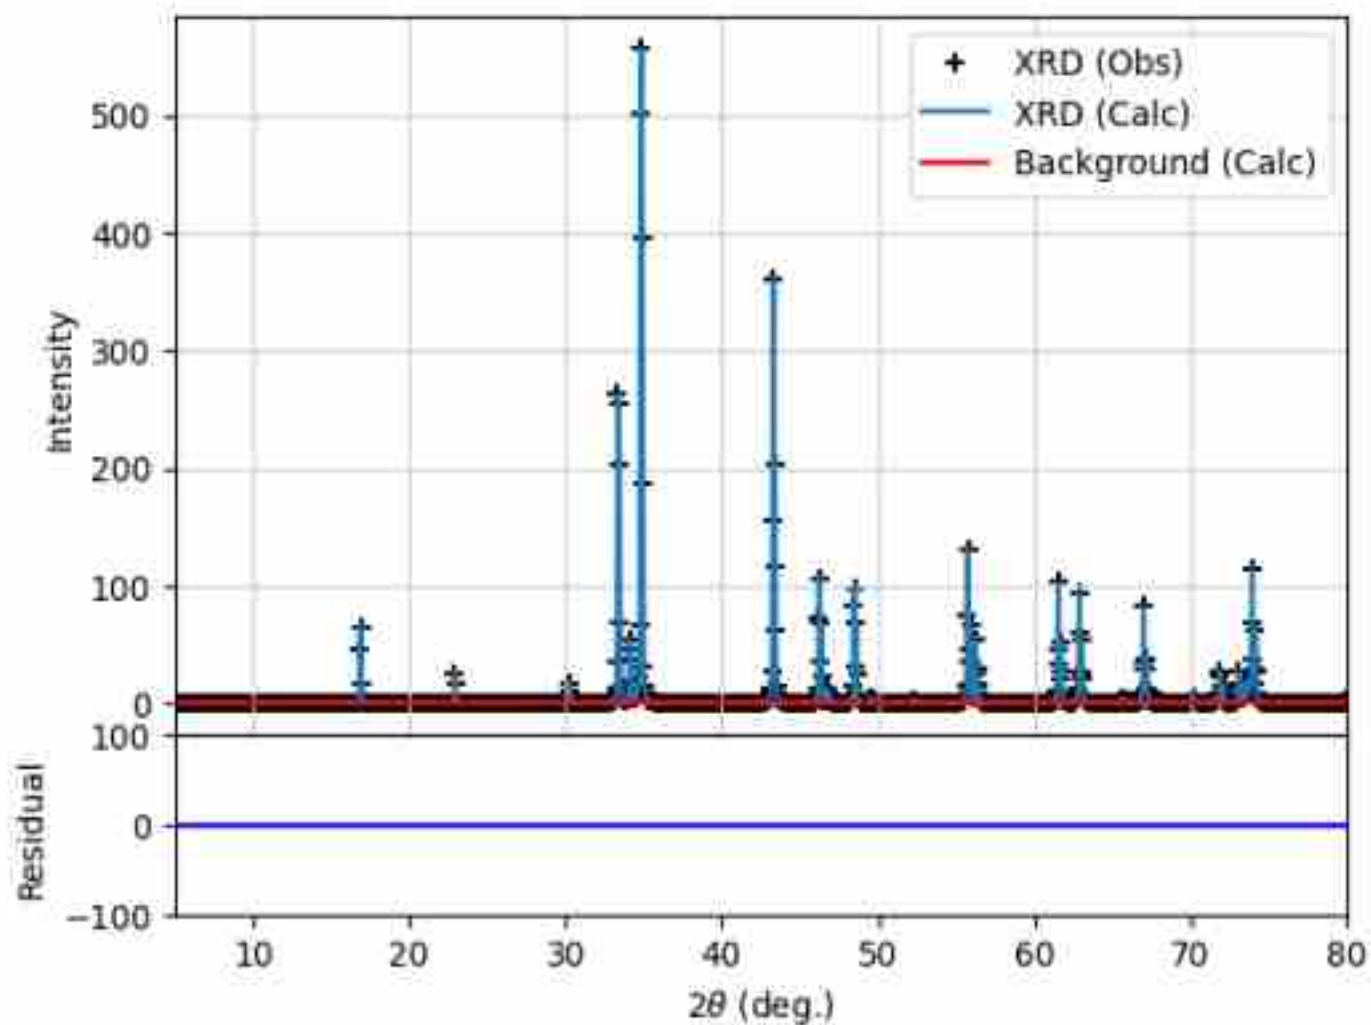

| RMSE before RR | Rwp     | RMSE after RR |
|----------------|---------|---------------|
| 0.014          | 0.00262 | 0.00031       |

# Ce1Sb12Ru4

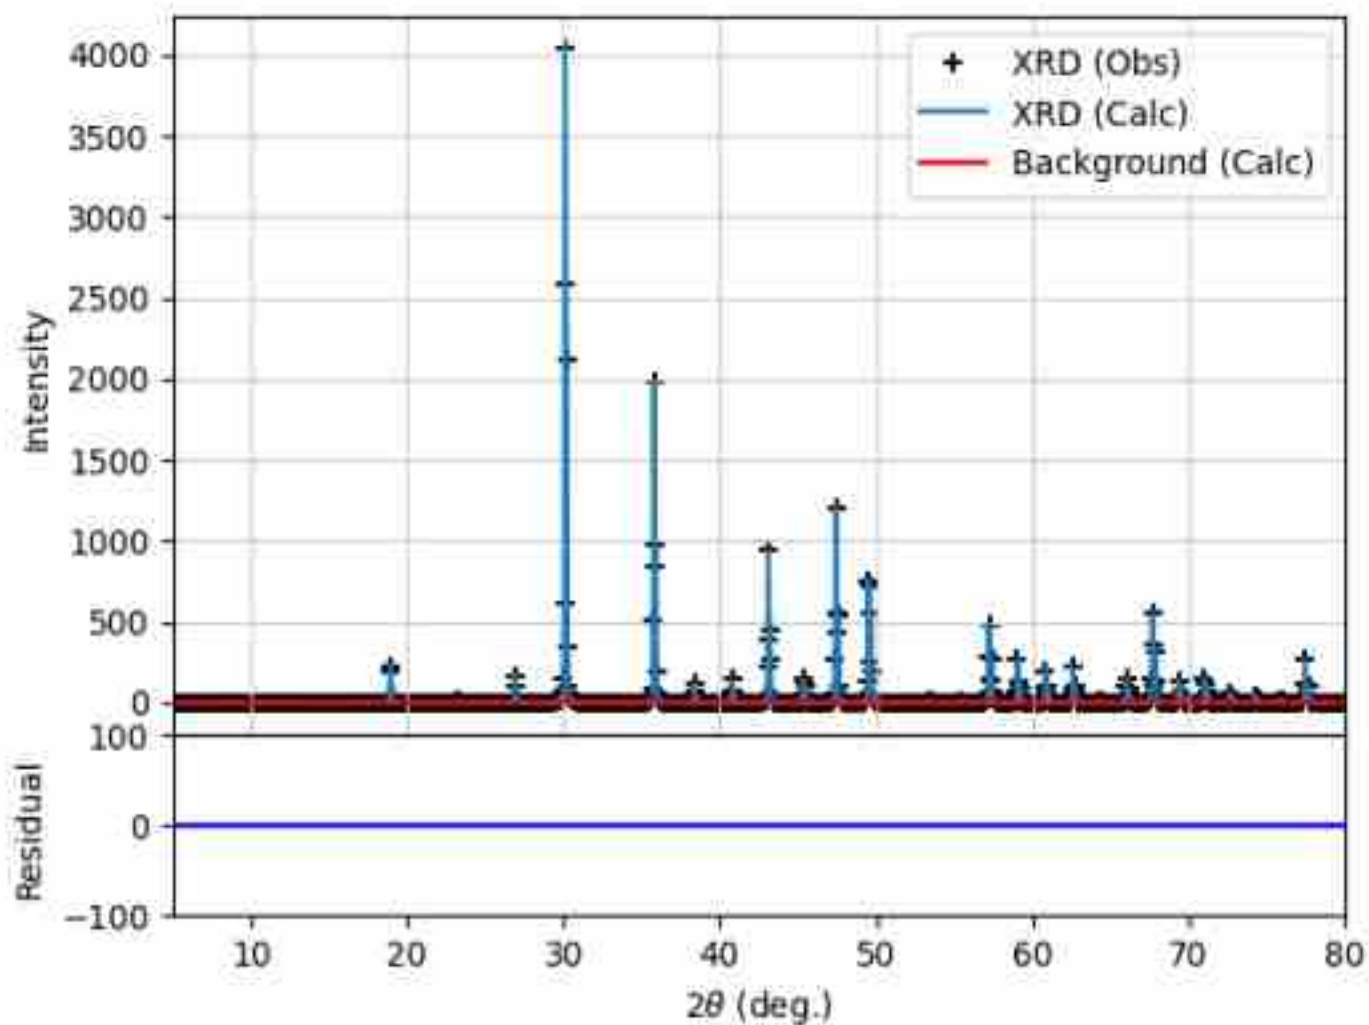

| RMSE before RR | Rwp     | RMSE after RR |
|----------------|---------|---------------|
| 0.014          | 0.01798 | 0.00158       |



# Ce<sub>1</sub>Zn<sub>2</sub>Au<sub>4</sub>

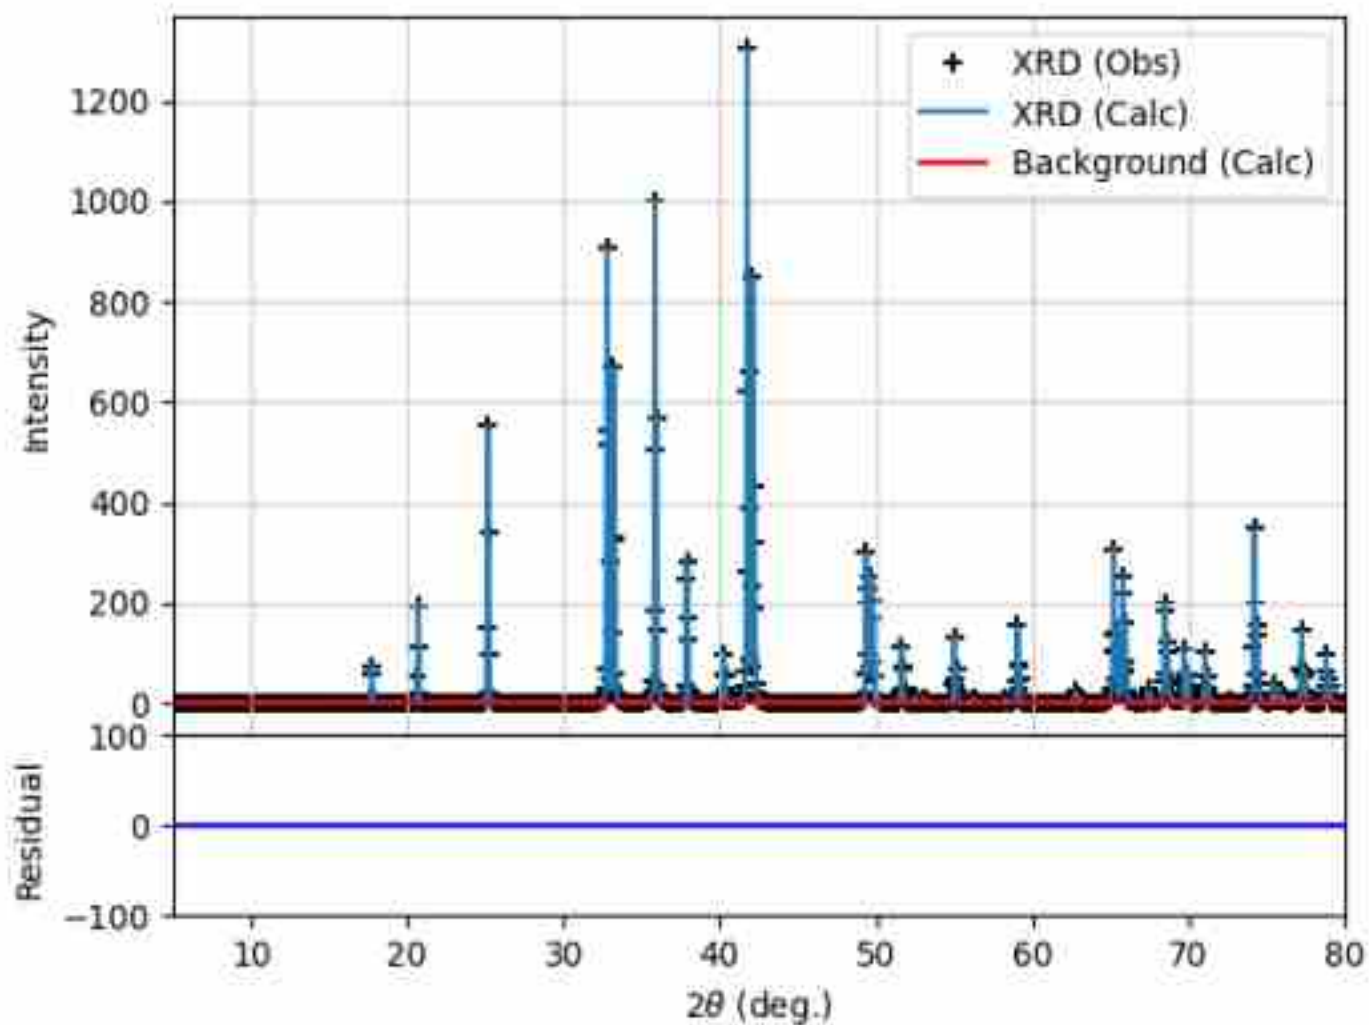

| RMSE before RR | Rwp     | RMSE after RR |
|----------------|---------|---------------|
| 0.014          | 0.00347 | 0.00038       |

# Ce<sub>2</sub>Al<sub>2</sub>Si<sub>4</sub>

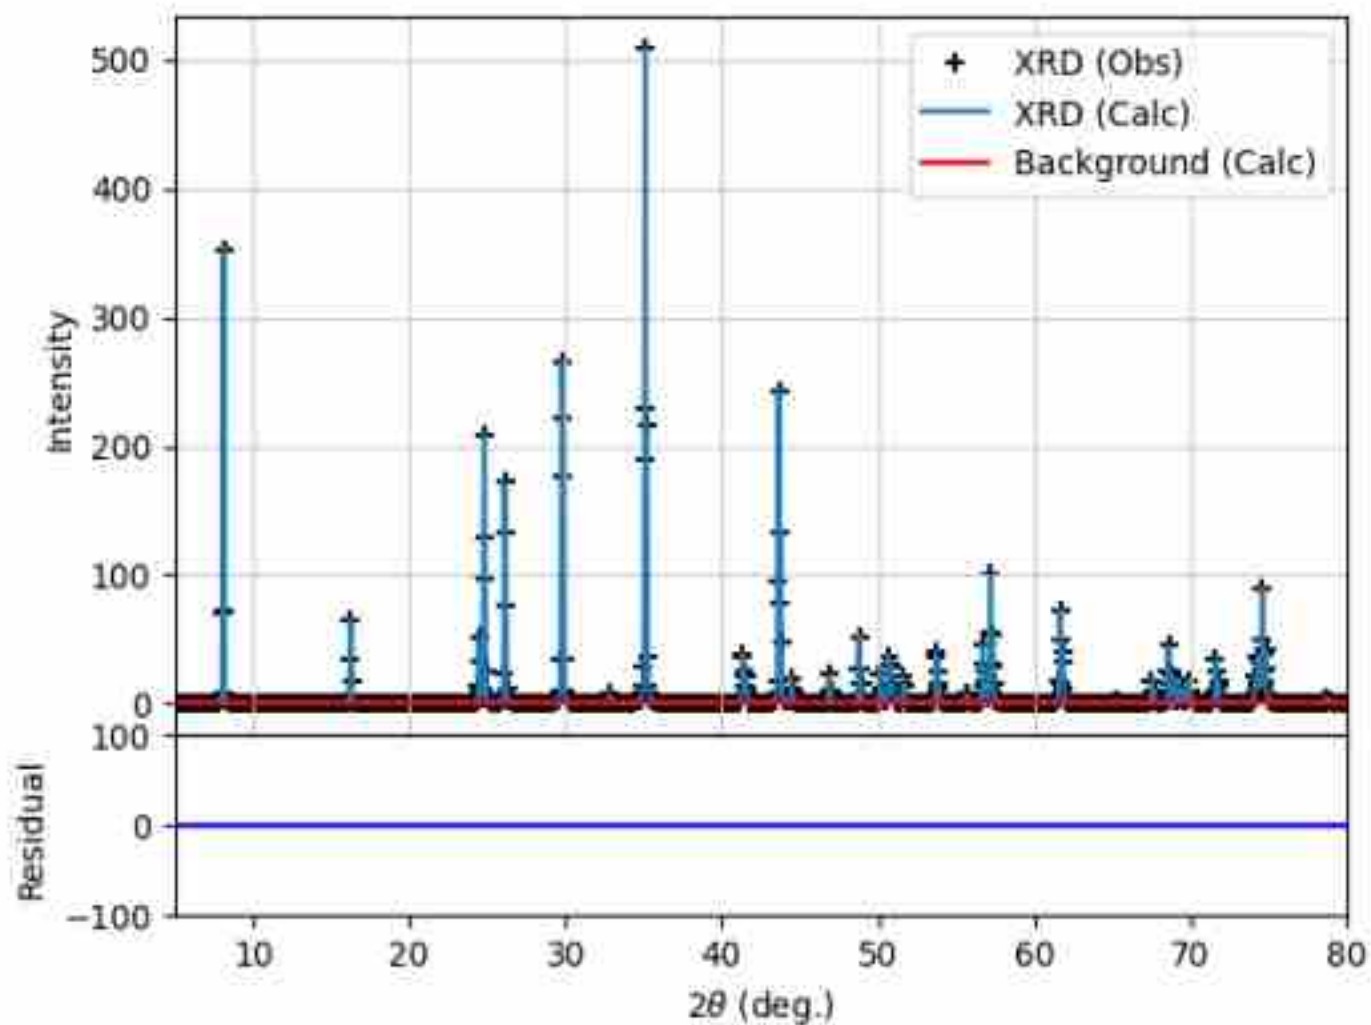

| RMSE before RR | Rwp    | RMSE after RR |
|----------------|--------|---------------|
| 0.014          | 0.0045 | 0.00079       |

Ce<sub>2</sub>Al<sub>8</sub>Co<sub>2</sub>

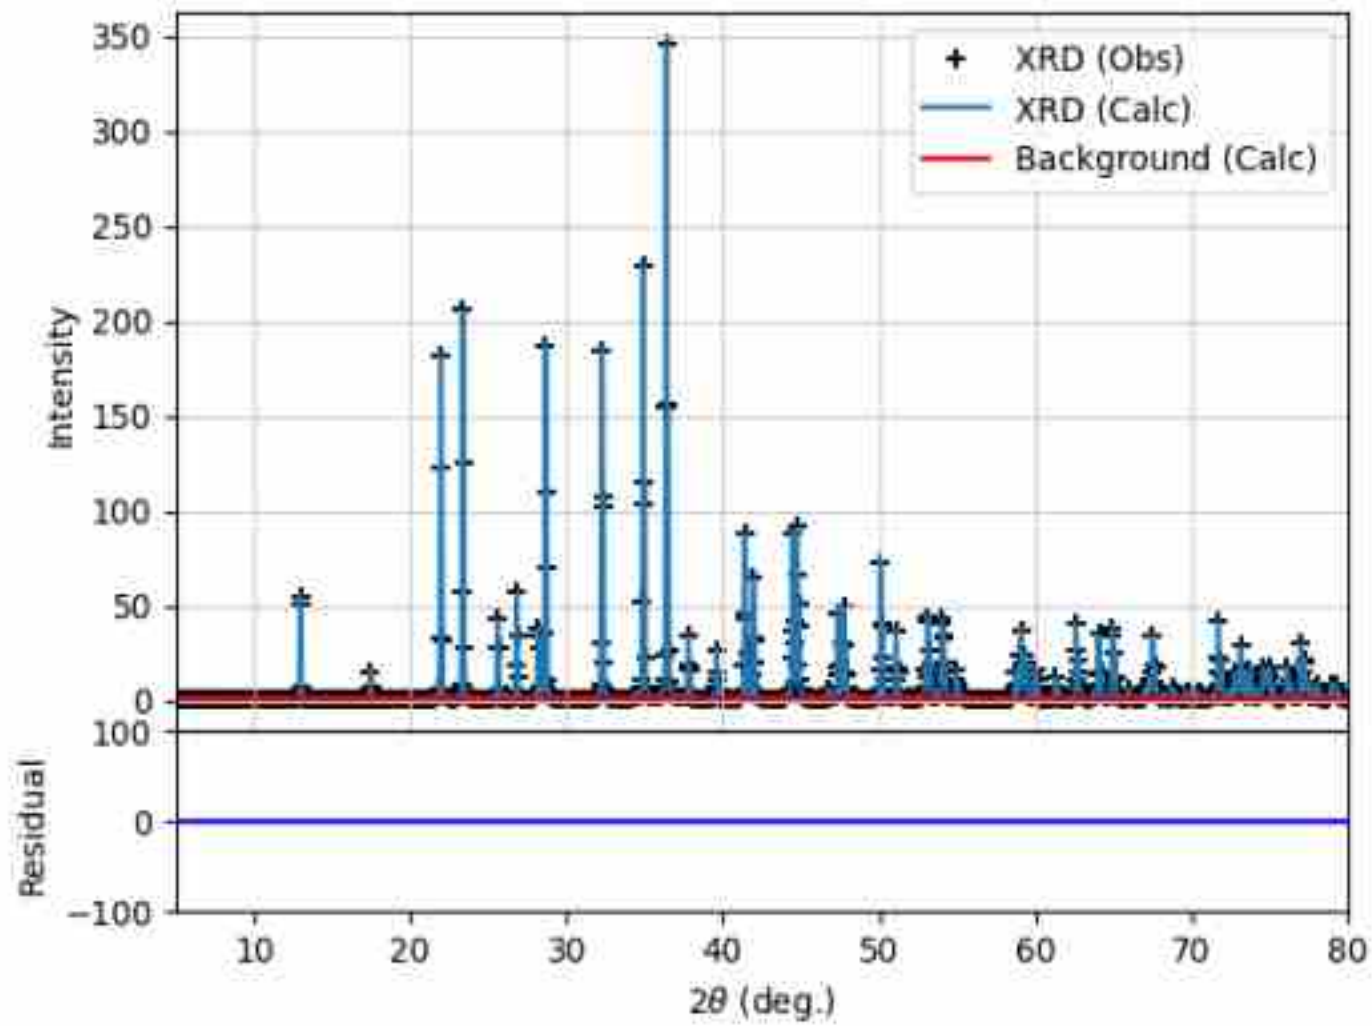

| RMSE before RR | Rwp     | RMSE after RR |
|----------------|---------|---------------|
| 0.014          | 0.00402 | 0.00069       |

Ce<sub>2</sub>Cr<sub>2</sub>Ge<sub>6</sub>

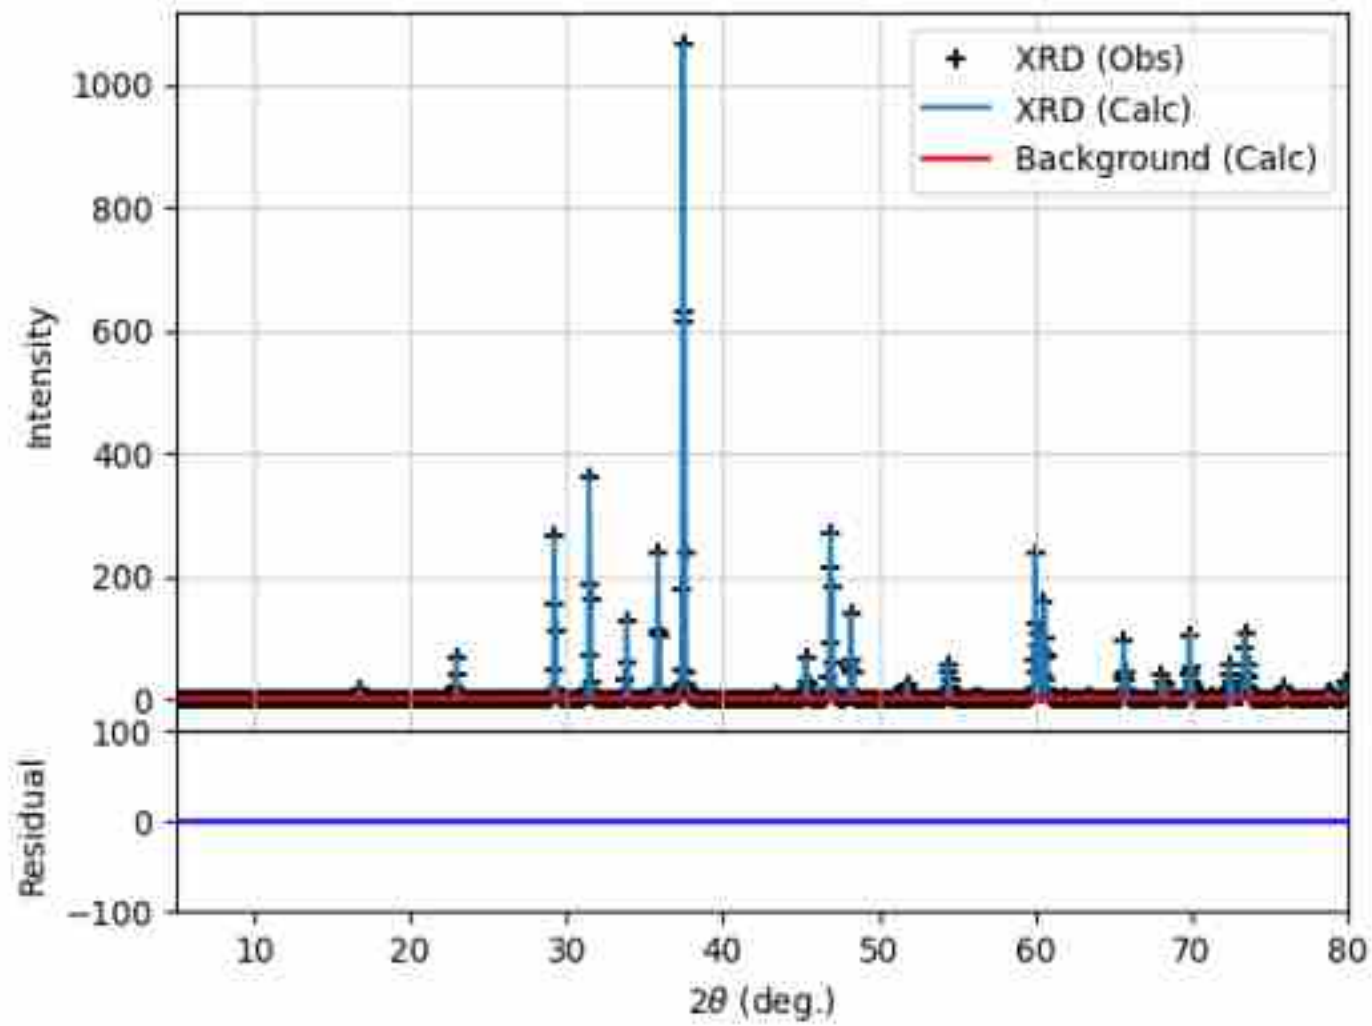

| RMSE before RR | Rwp     | RMSE after RR |
|----------------|---------|---------------|
| 0.014          | 0.00858 | 0.0014        |

# Ce2In8Pt1

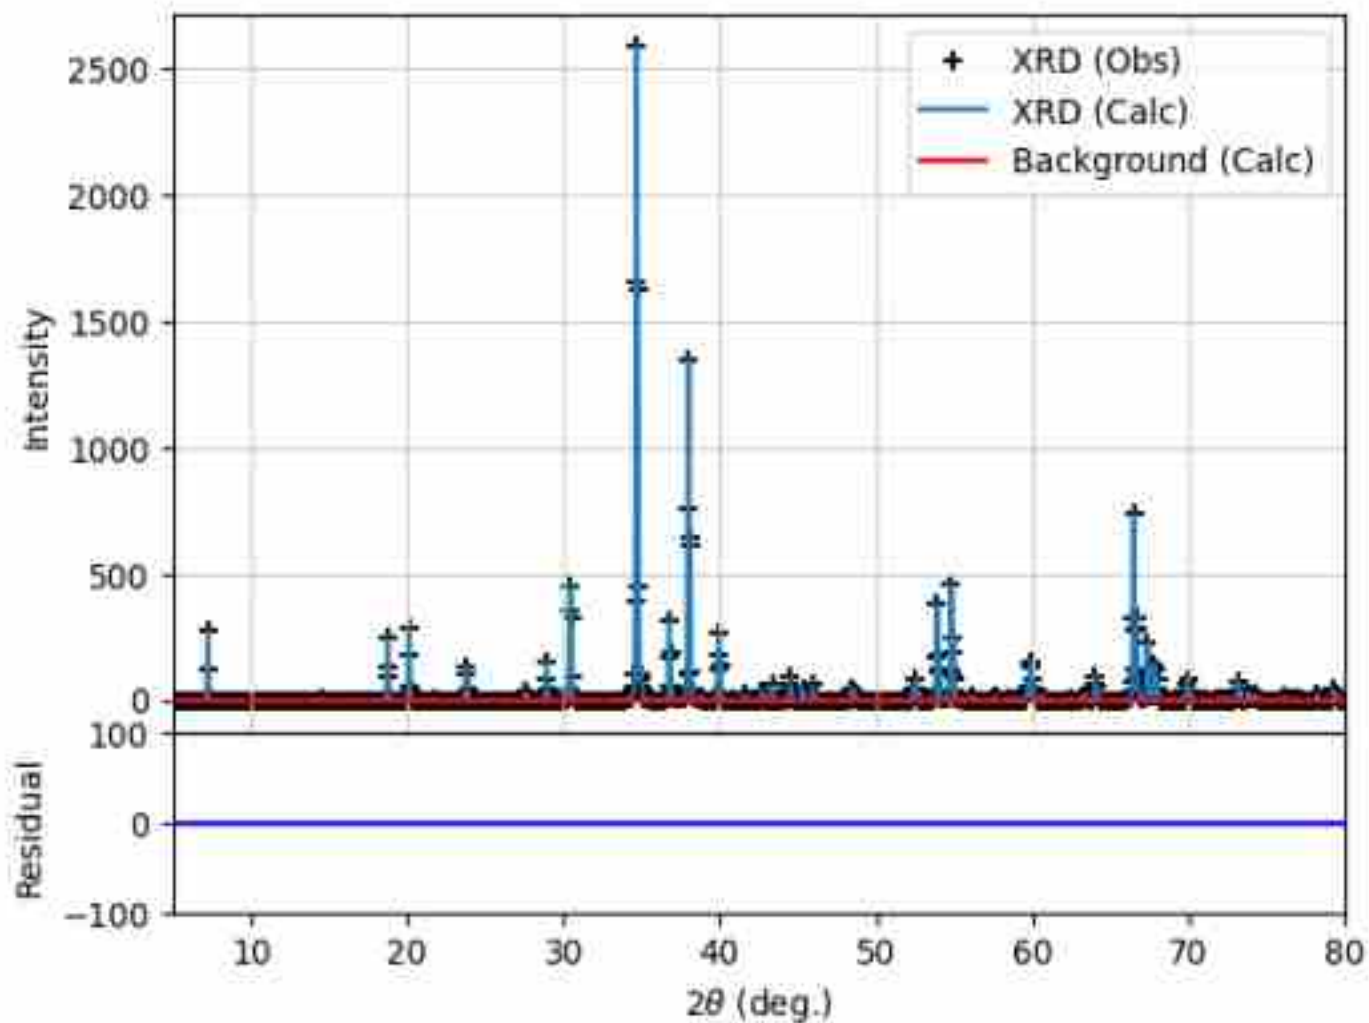

| RMSE before RR | Rwp     | RMSE after RR |
|----------------|---------|---------------|
| 0.014          | 0.00525 | 0.00064       |

# Ce2O2F2

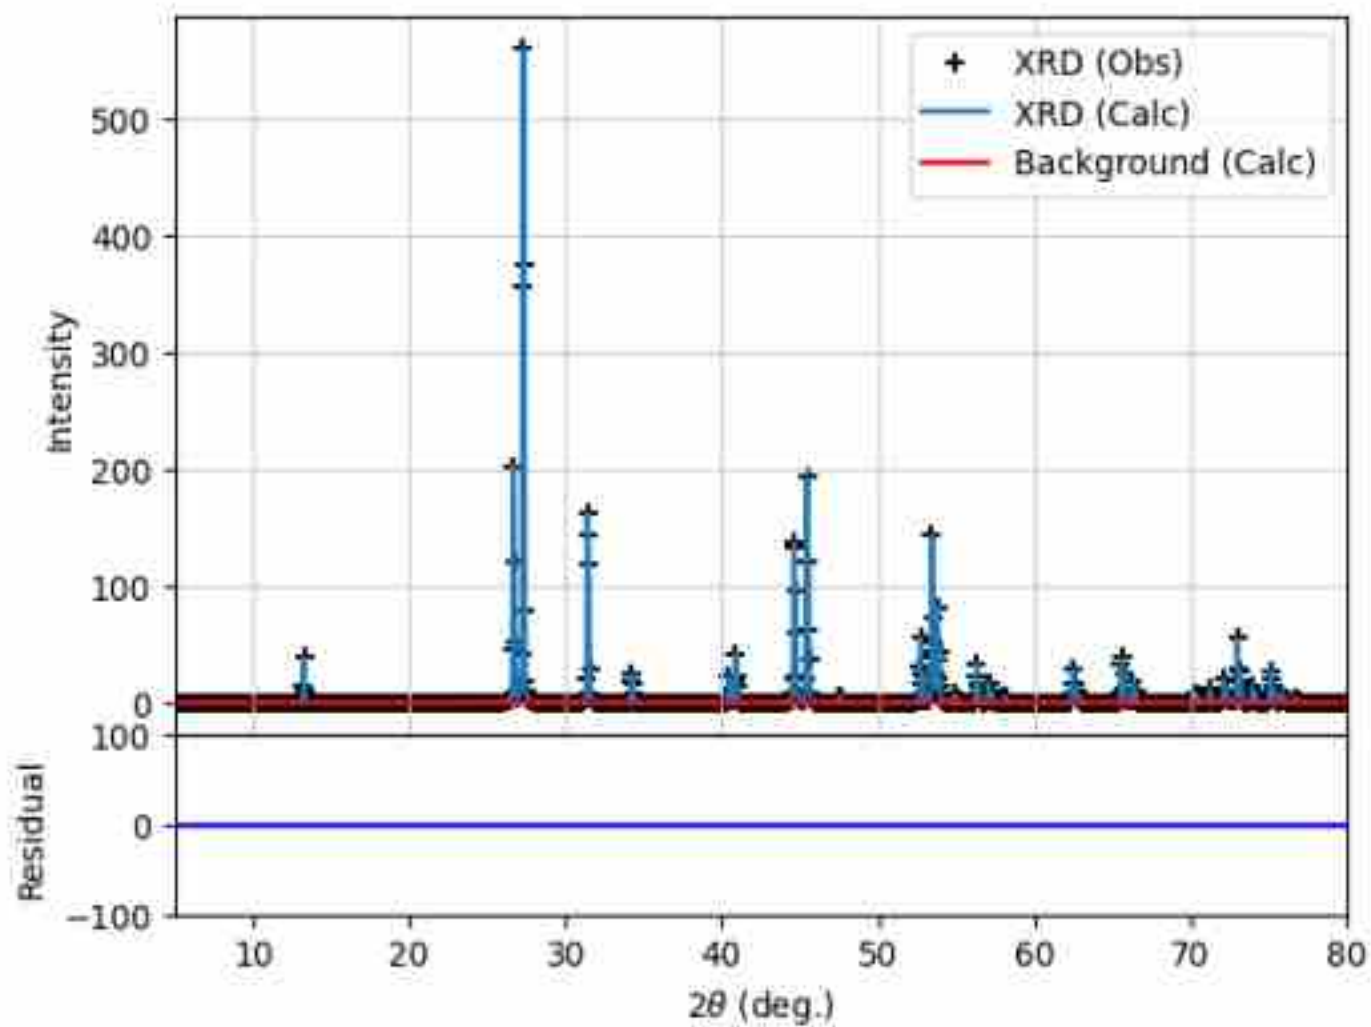

| RMSE before RR | Rwp     | RMSE after RR |
|----------------|---------|---------------|
| 0.014          | 0.00251 | 0.00084       |

# Ce2Sc2Si2

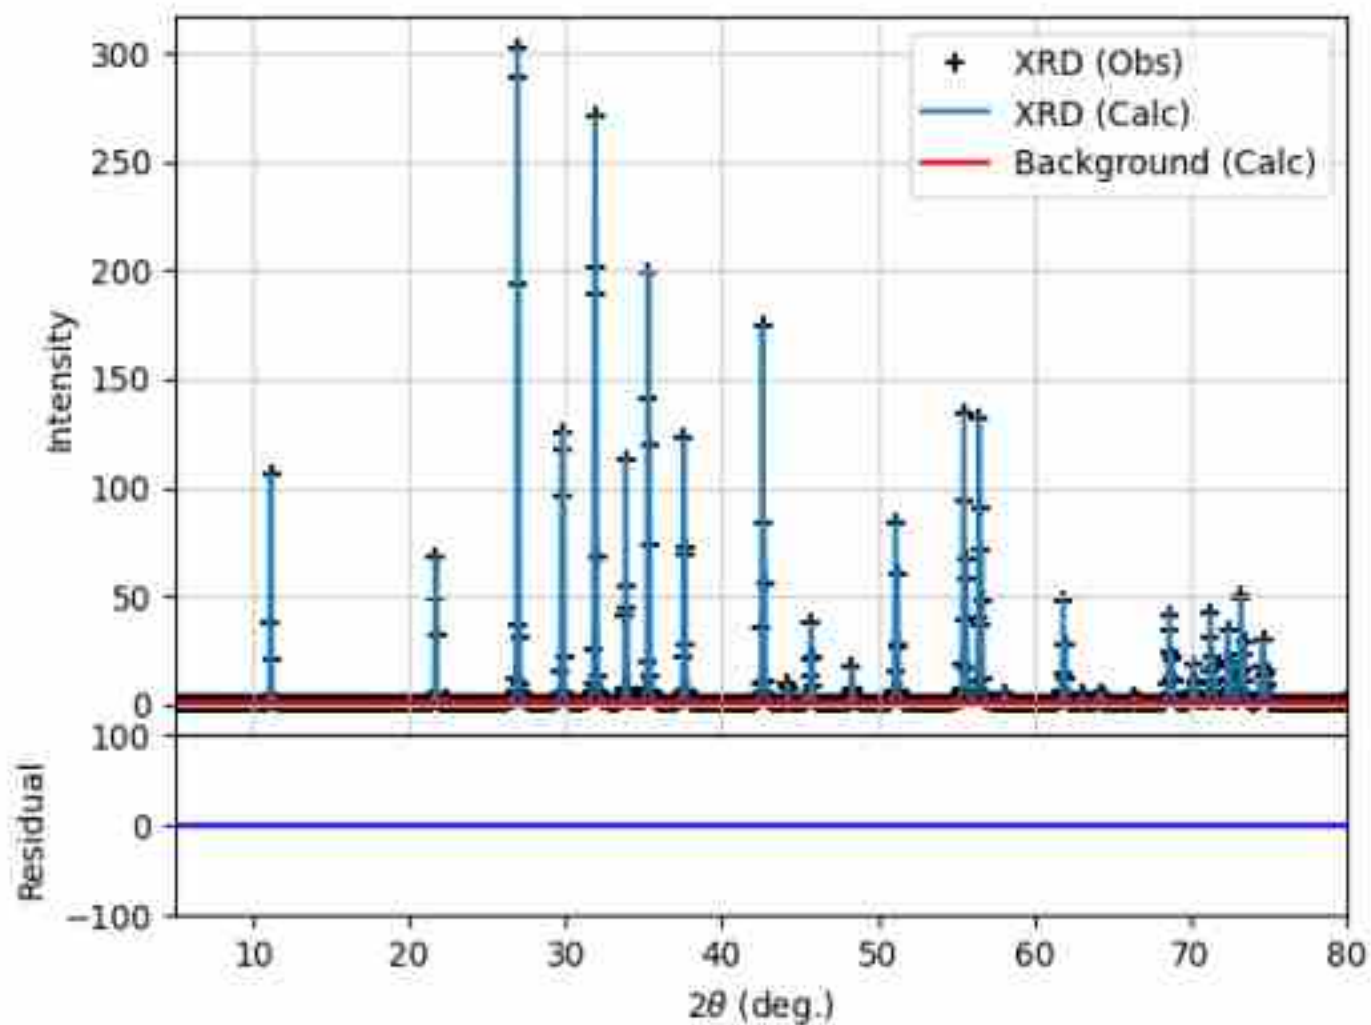

| RMSE before RR | Rwp     | RMSE after RR |
|----------------|---------|---------------|
| 0.014          | 0.06696 | 0.00064       |

# Ce<sub>3</sub>B<sub>6</sub>C<sub>3</sub>

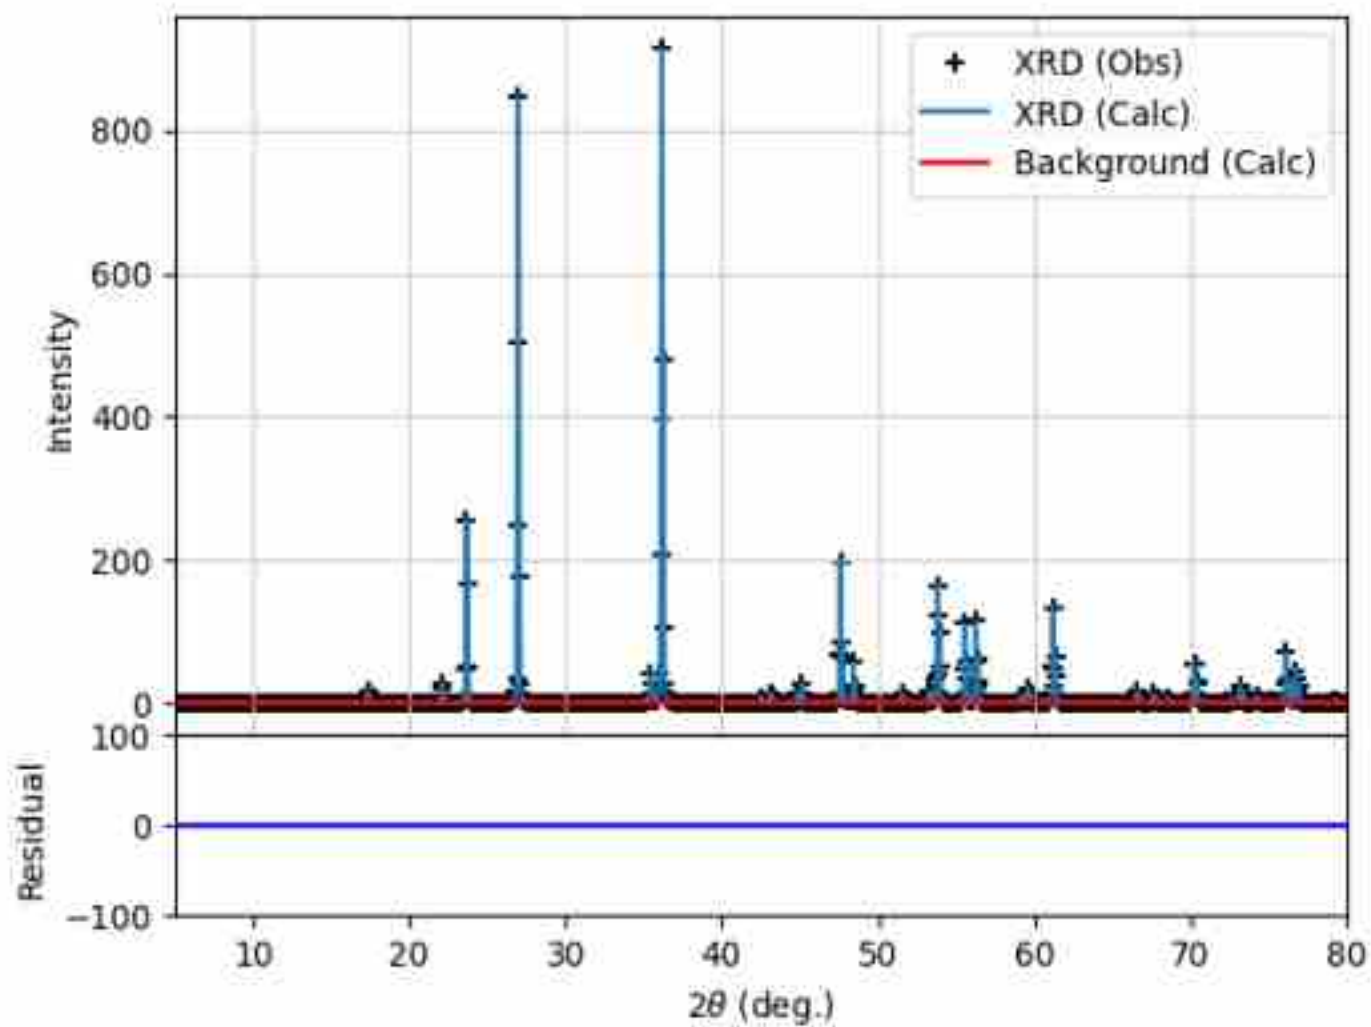

| RMSE before RR | Rwp     | RMSE after RR |
|----------------|---------|---------------|
| 0.014          | 0.00421 | 0.00255       |



# Cr<sub>2</sub>Ir<sub>2</sub>C<sub>1</sub>

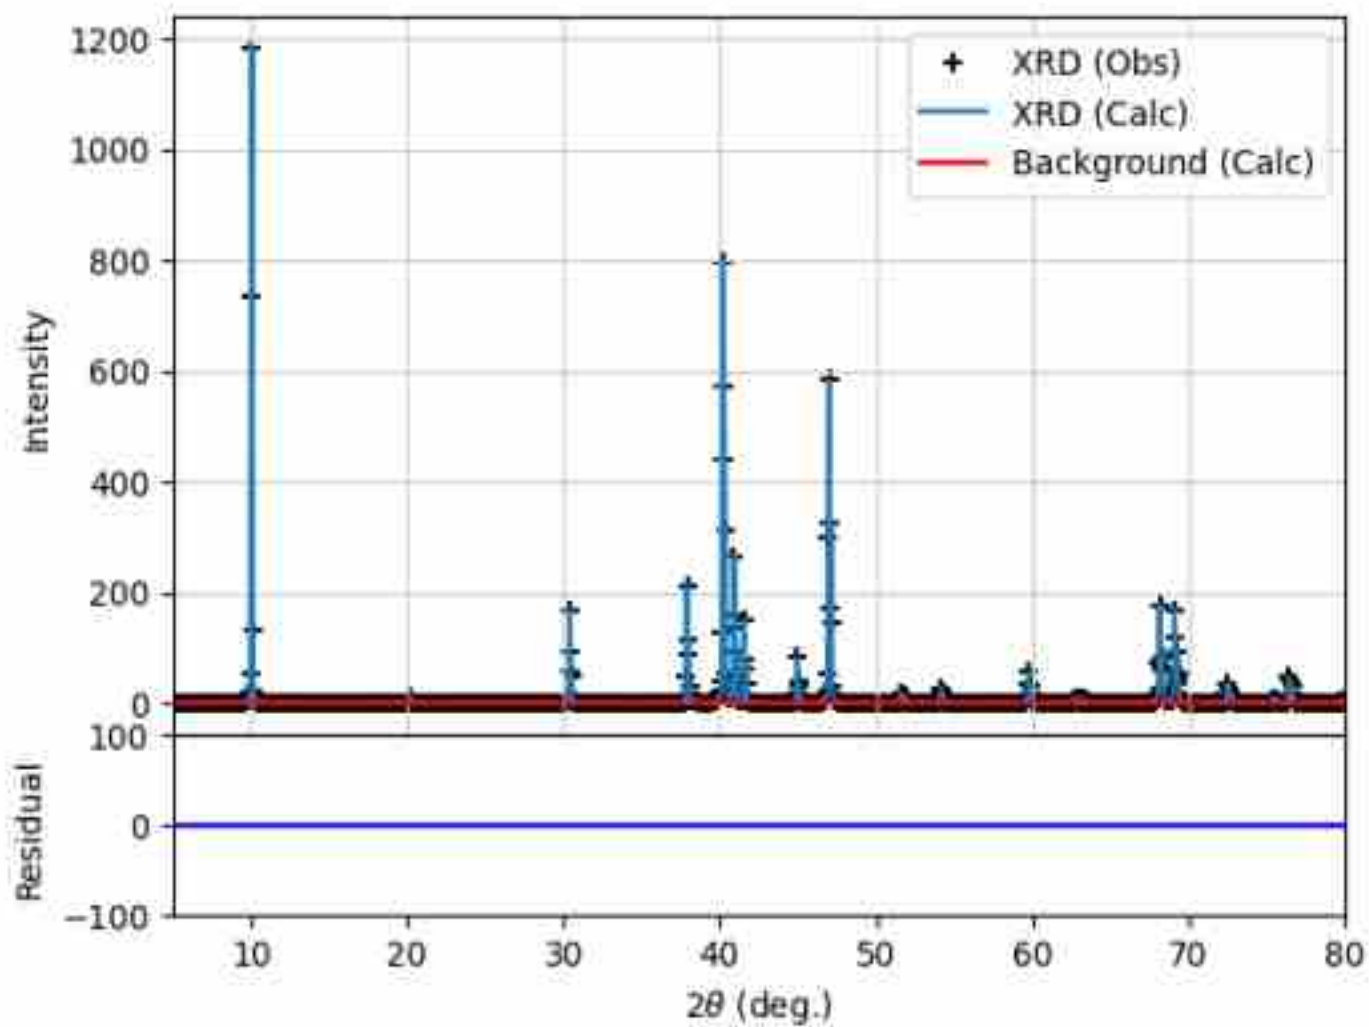

| RMSE before RR | Rwp    | RMSE after RR |
|----------------|--------|---------------|
| 0.014          | 0.0029 | 0.00068       |

# Cs<sub>1</sub>Rb<sub>2</sub>TlF<sub>6</sub>

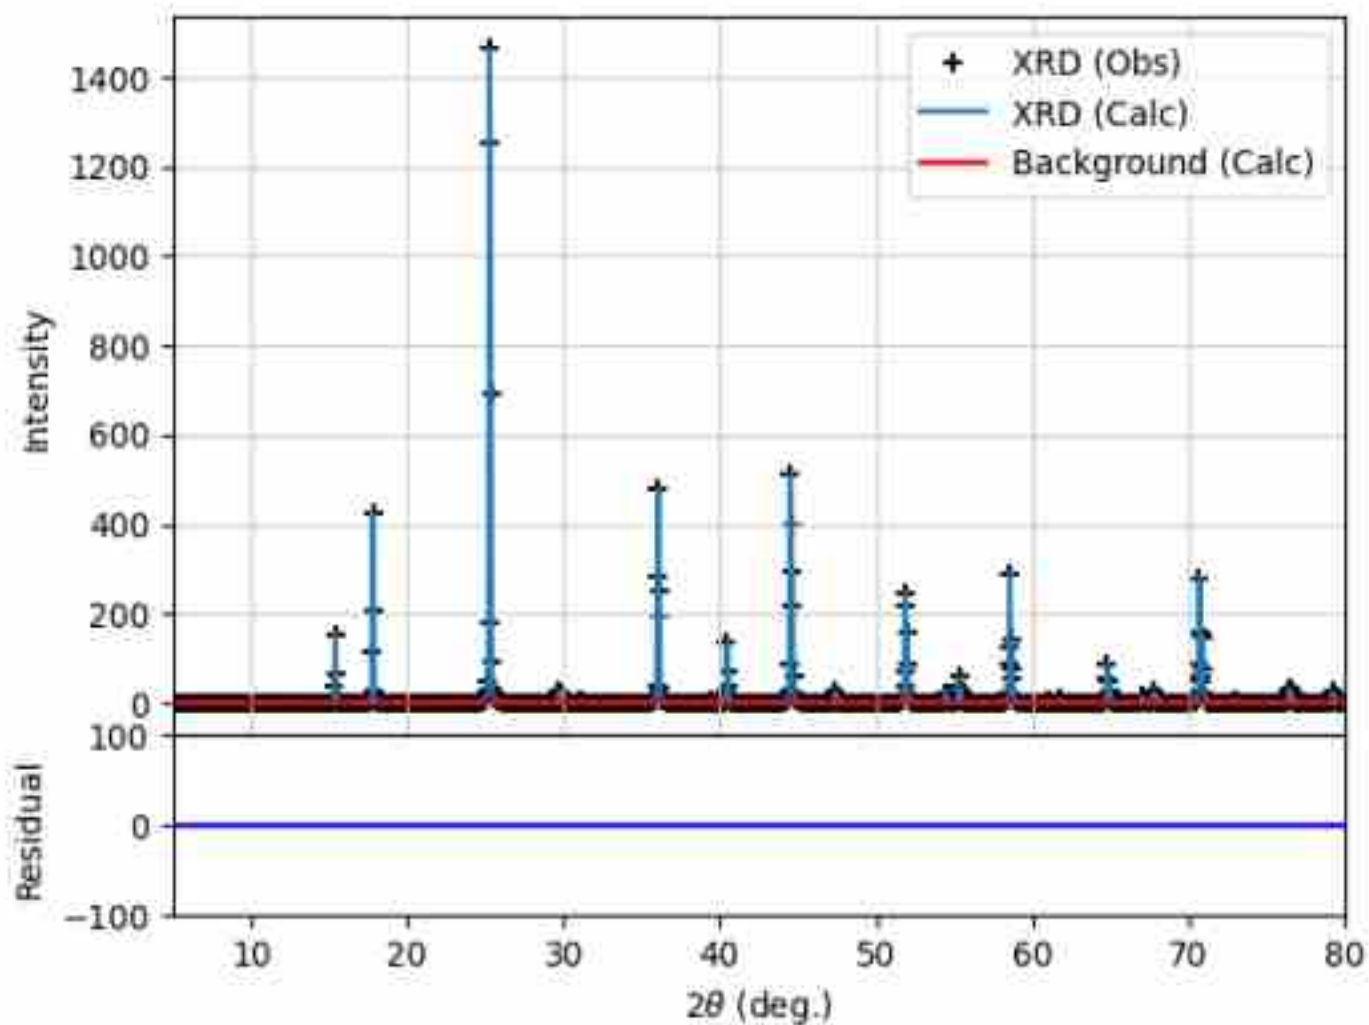

| RMSE before RR | Rwp    | RMSE after RR |
|----------------|--------|---------------|
| 0.014          | 0.0216 | 0.00514       |

# Cs<sub>2</sub>Ag<sub>6</sub>Se<sub>4</sub>

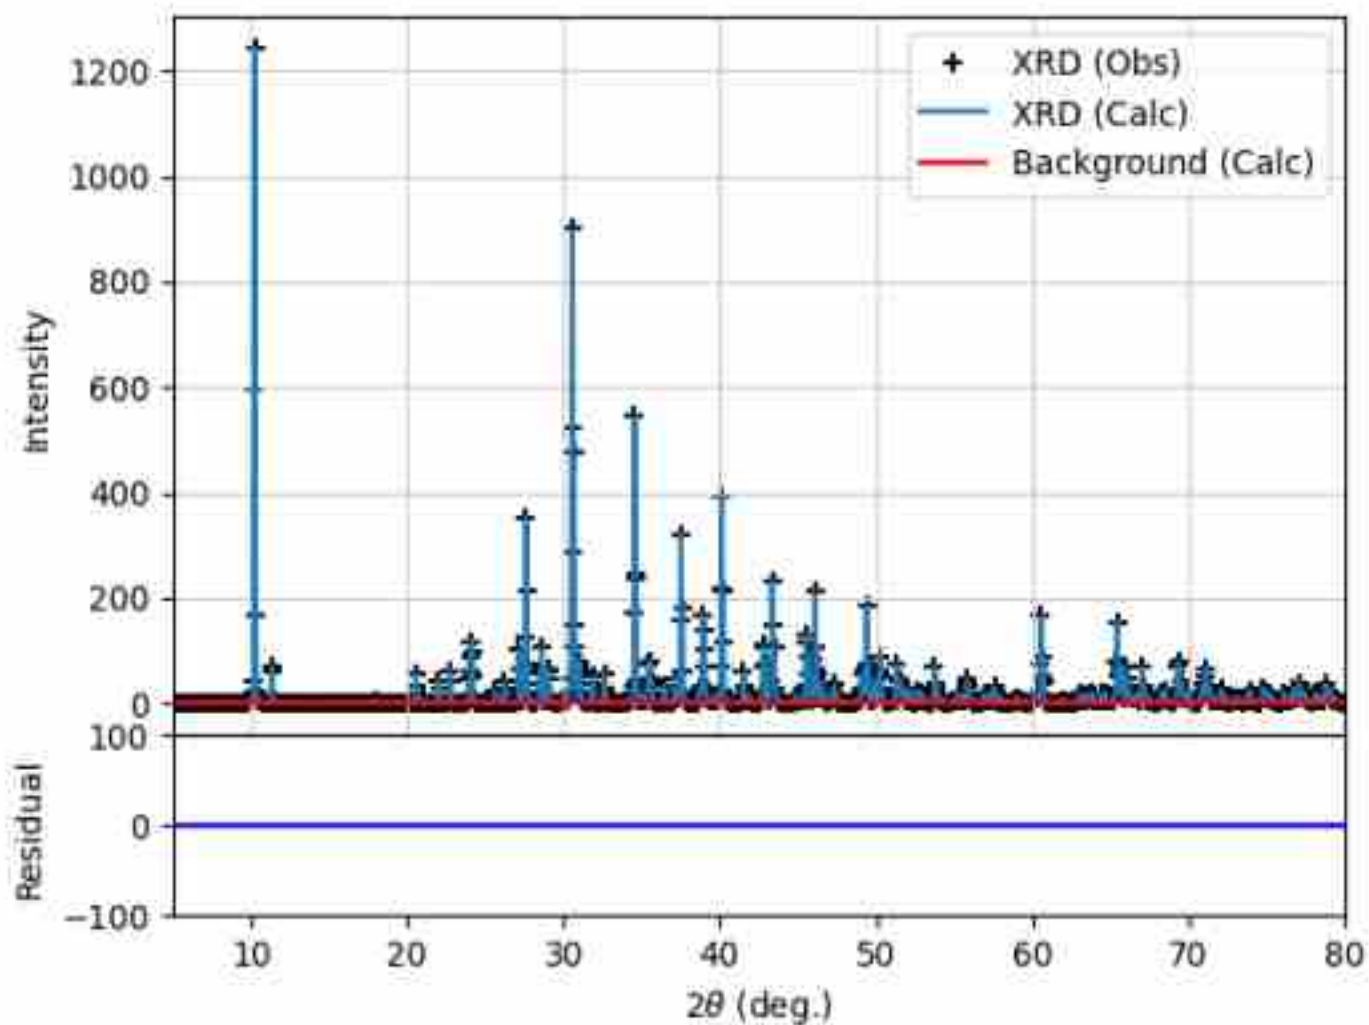

| RMSE before RR | Rwp     | RMSE after RR |
|----------------|---------|---------------|
| 0.014          | 0.00369 | 0.00031       |

# Cs<sub>2</sub>K<sub>1</sub>Al<sub>1</sub>Cl<sub>6</sub>

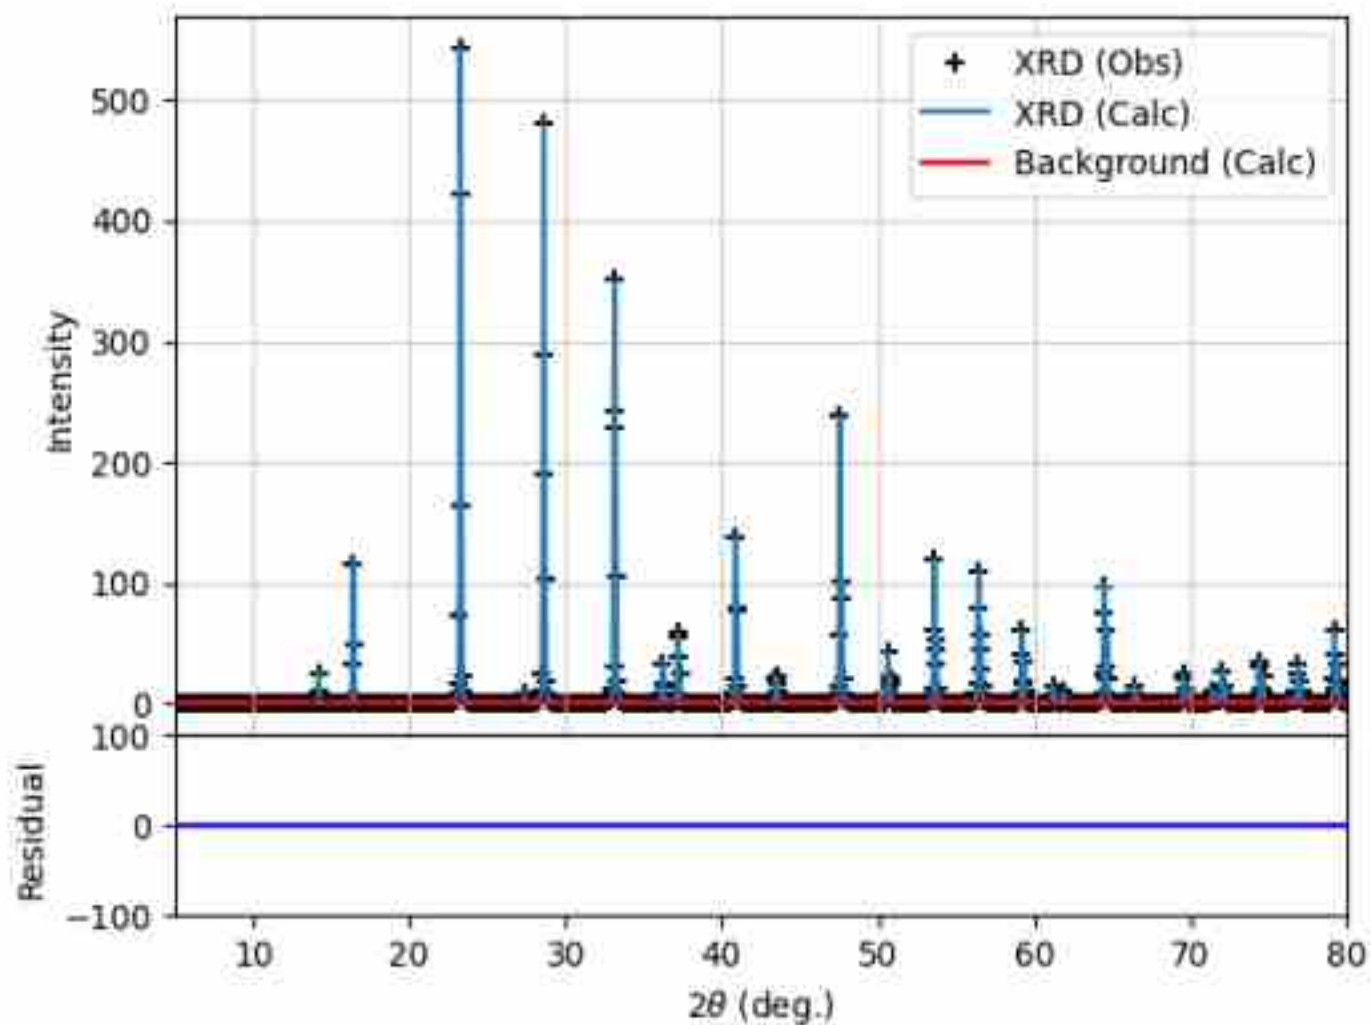

| RMSE before RR | Rwp     | RMSE after RR |
|----------------|---------|---------------|
| 0.014          | 0.02454 | 0.00309       |

# Cs<sub>2</sub>KGaF<sub>6</sub>

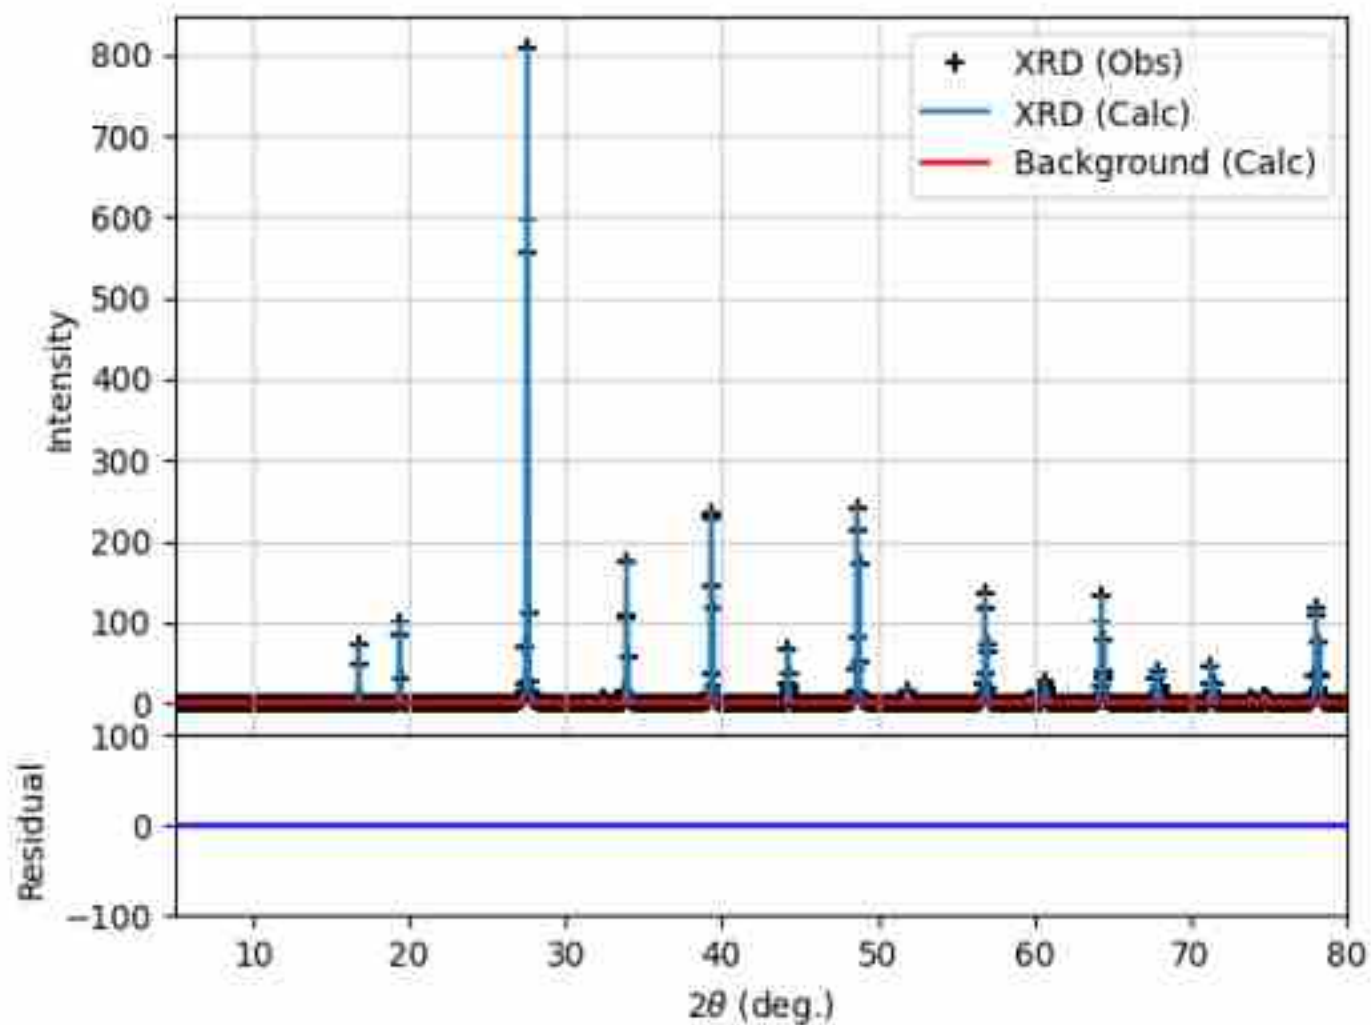

| RMSE before RR | Rwp     | RMSE after RR |
|----------------|---------|---------------|
| 0.014          | 0.00699 | 0.00233       |

# Cs<sub>2</sub>Li<sub>1</sub>Tl<sub>1</sub>Cl<sub>6</sub>

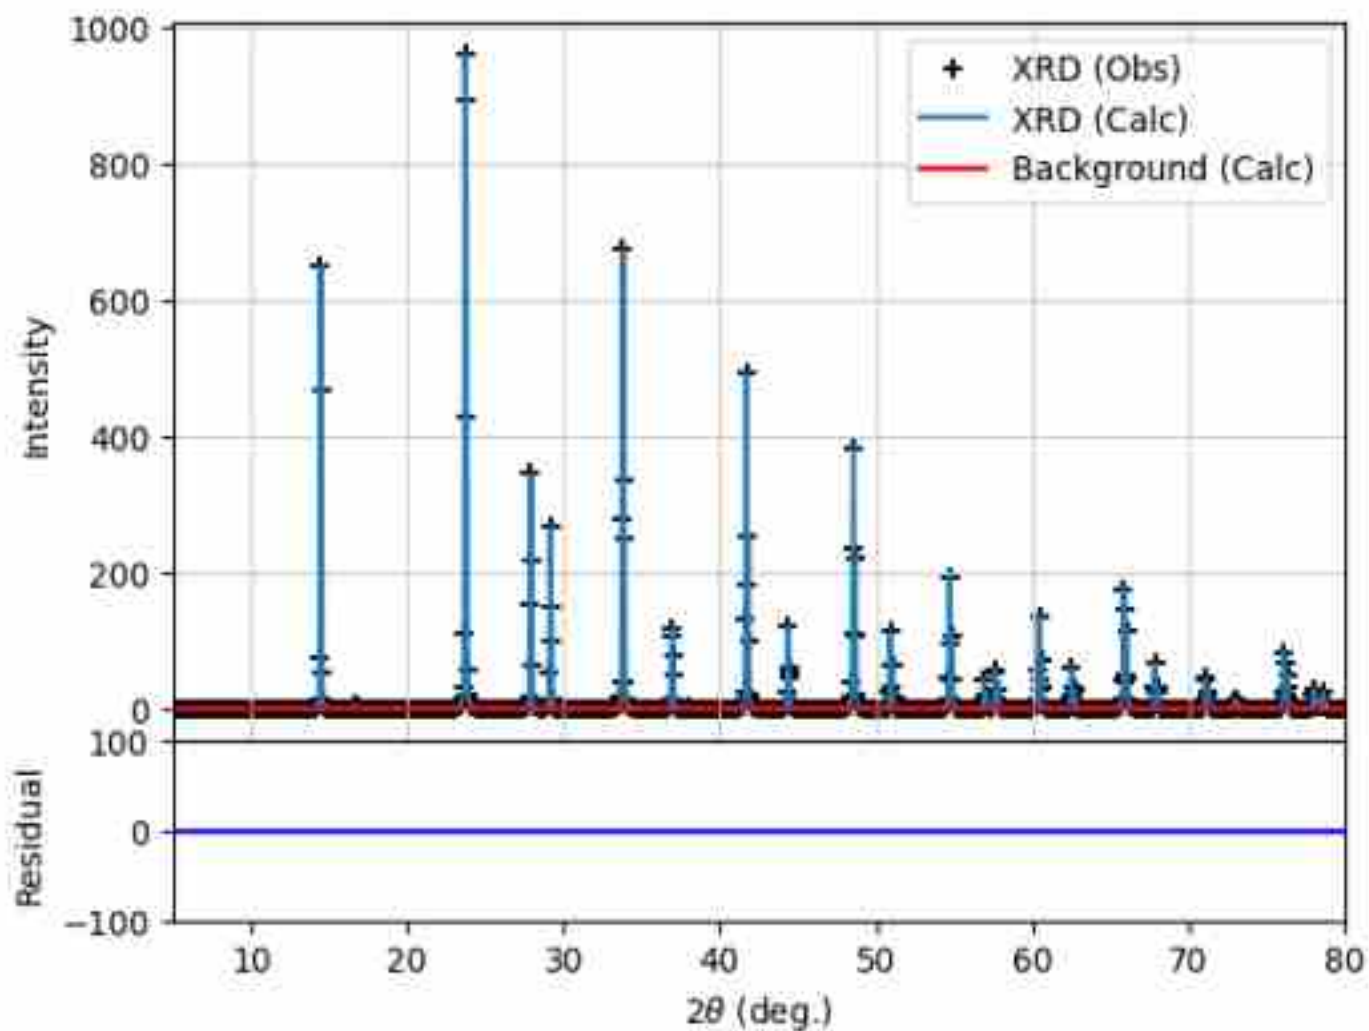

| RMSE before RR | Rwp     | RMSE after RR |
|----------------|---------|---------------|
| 0.014          | 0.02891 | 0.00352       |

# Cs<sub>2</sub>PdI<sub>6</sub>

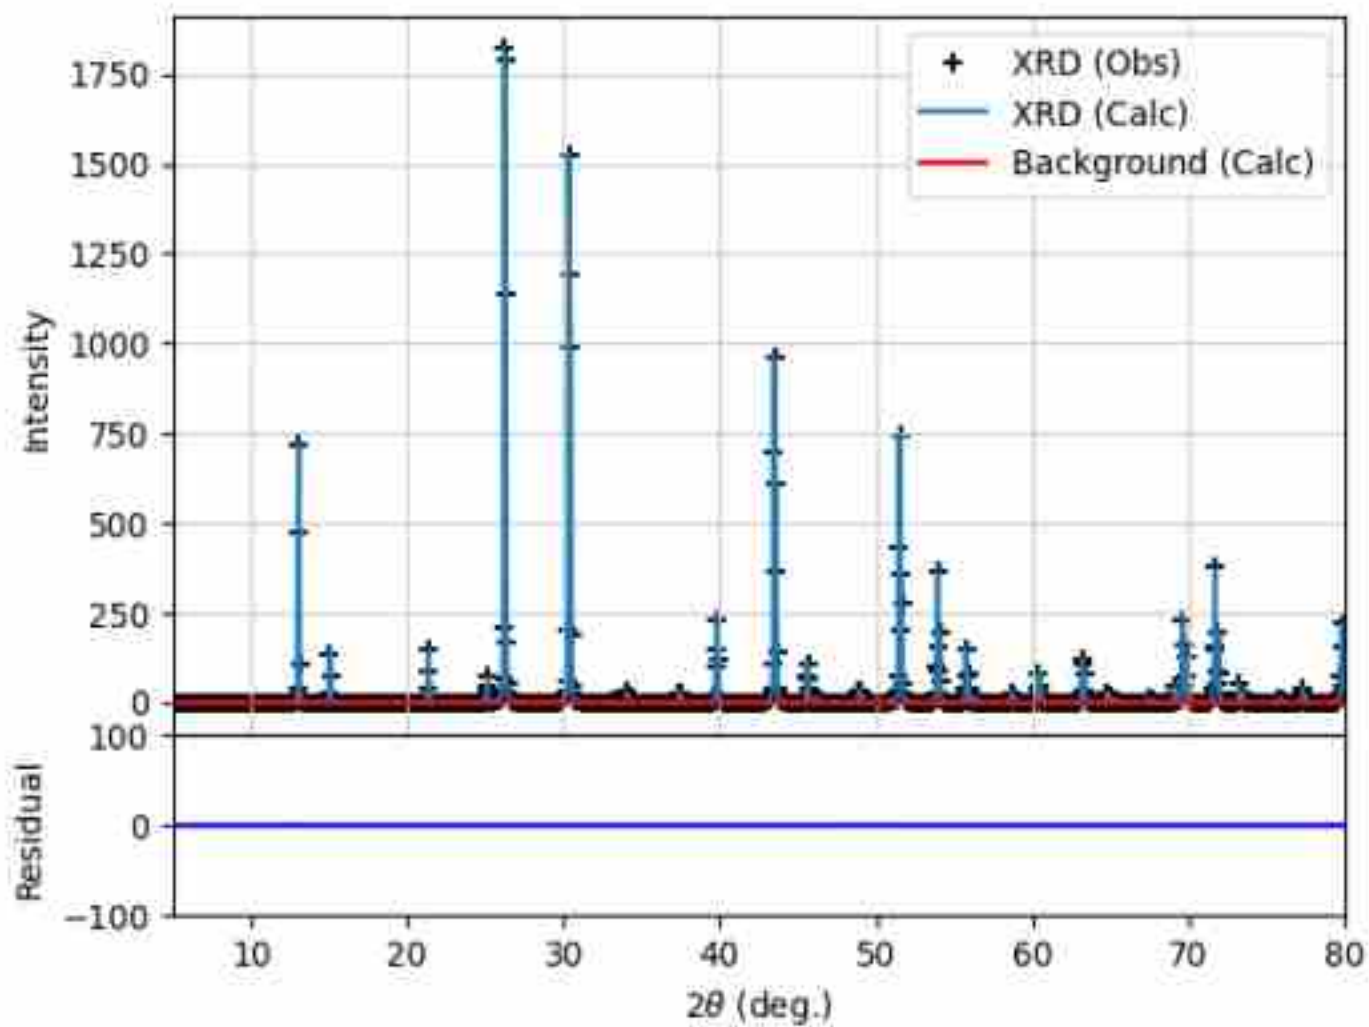

| RMSE before RR | Rwp     | RMSE after RR |
|----------------|---------|---------------|
| 0.014          | 0.15899 | 0.00361       |

# Cs<sub>3</sub>Fe<sub>1</sub>F<sub>6</sub>

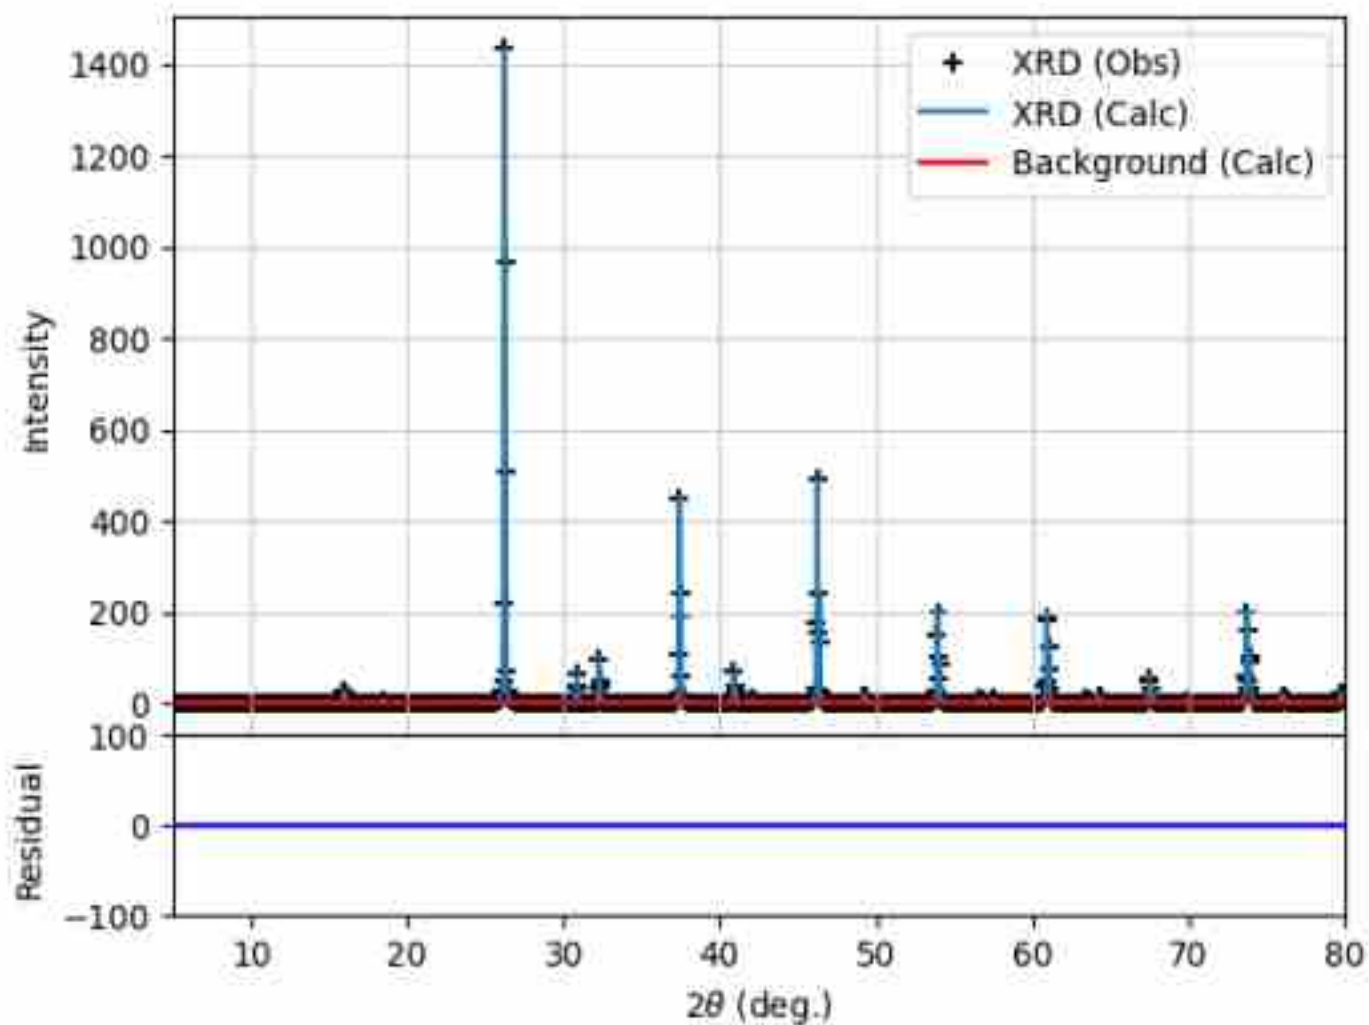

| RMSE before RR | Rwp    | RMSE after RR |
|----------------|--------|---------------|
| 0.014          | 0.0191 | 0.0045        |



# Cs<sub>3</sub>TiF<sub>6</sub>

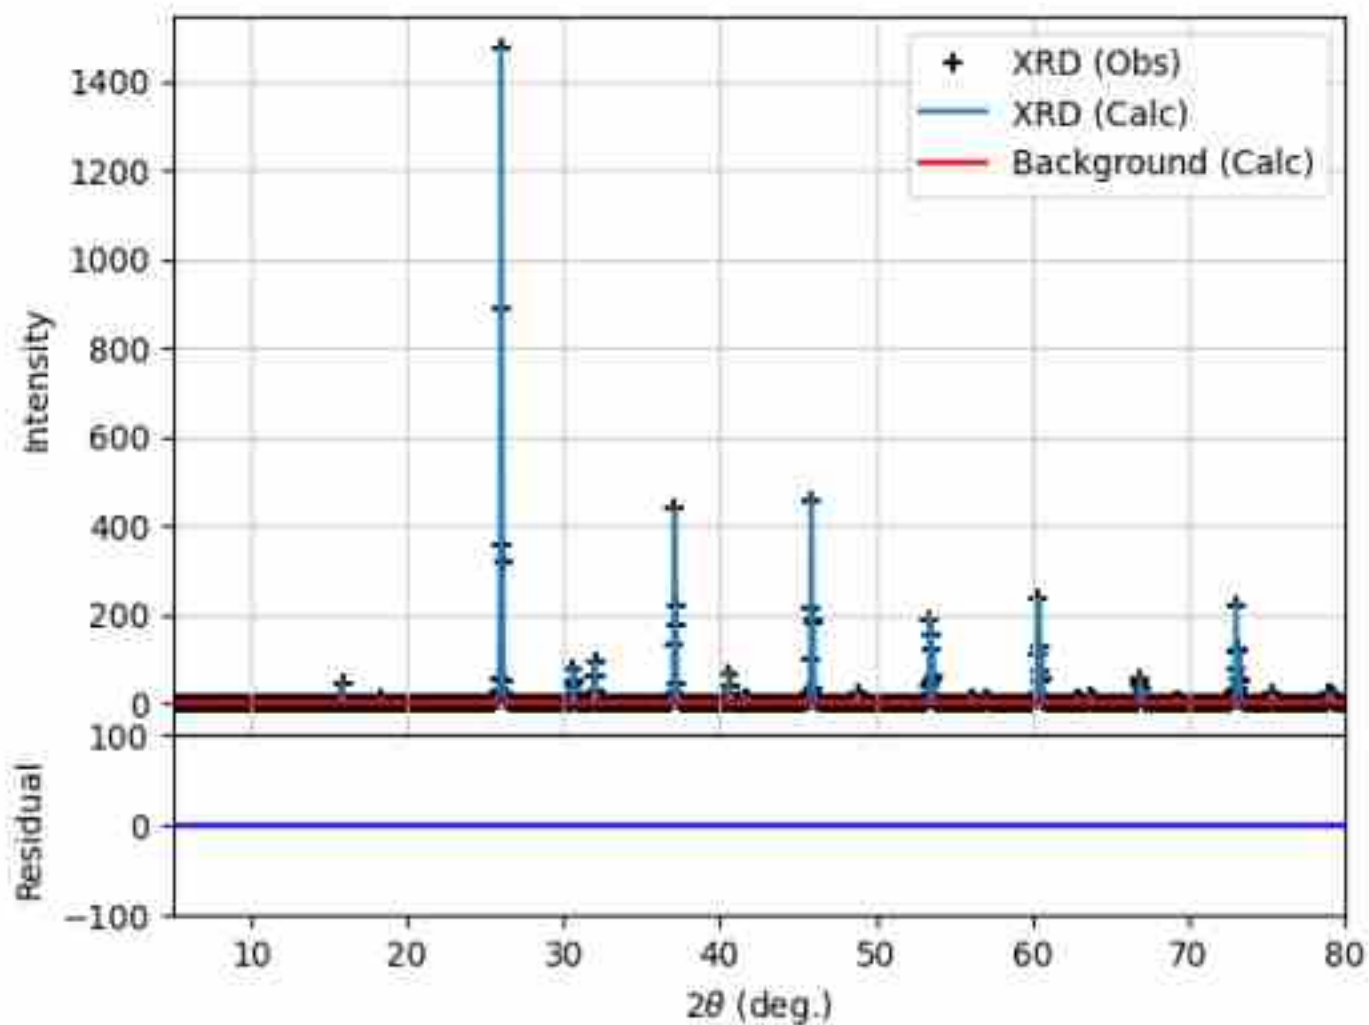

| RMSE before RR | Rwp     | RMSE after RR |
|----------------|---------|---------------|
| 0.014          | 0.01629 | 0.0047        |

# Cs<sub>4</sub>Hf<sub>2</sub>O<sub>6</sub>

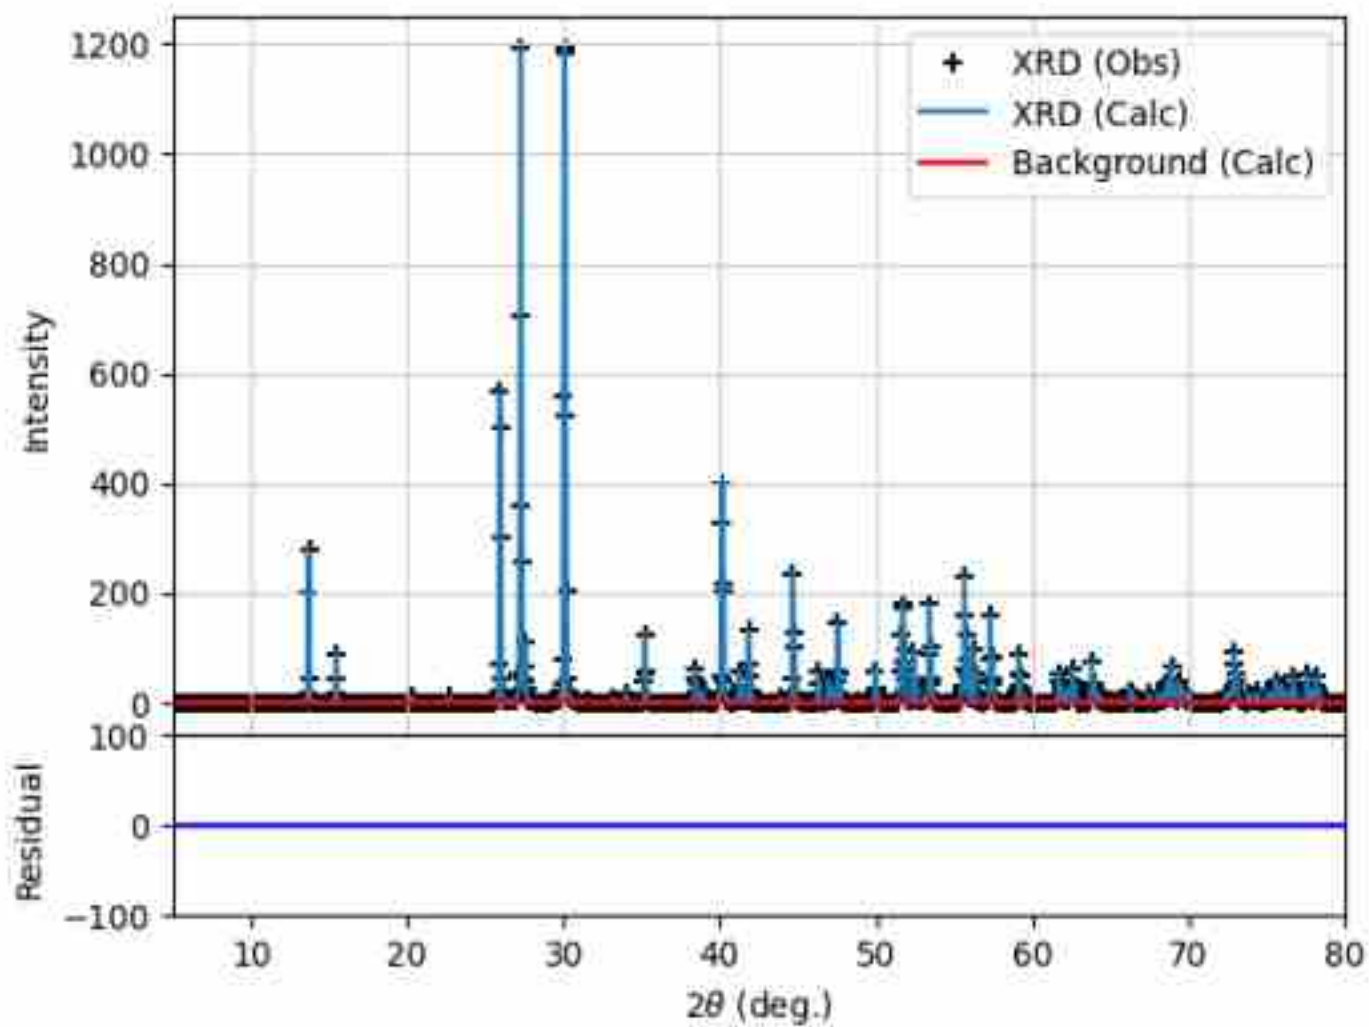

| RMSE before RR | Rwp    | RMSE after RR |
|----------------|--------|---------------|
| 0.014          | 0.0048 | 0.00146       |

# Cs<sub>4</sub>Li<sub>2</sub>Br<sub>6</sub>

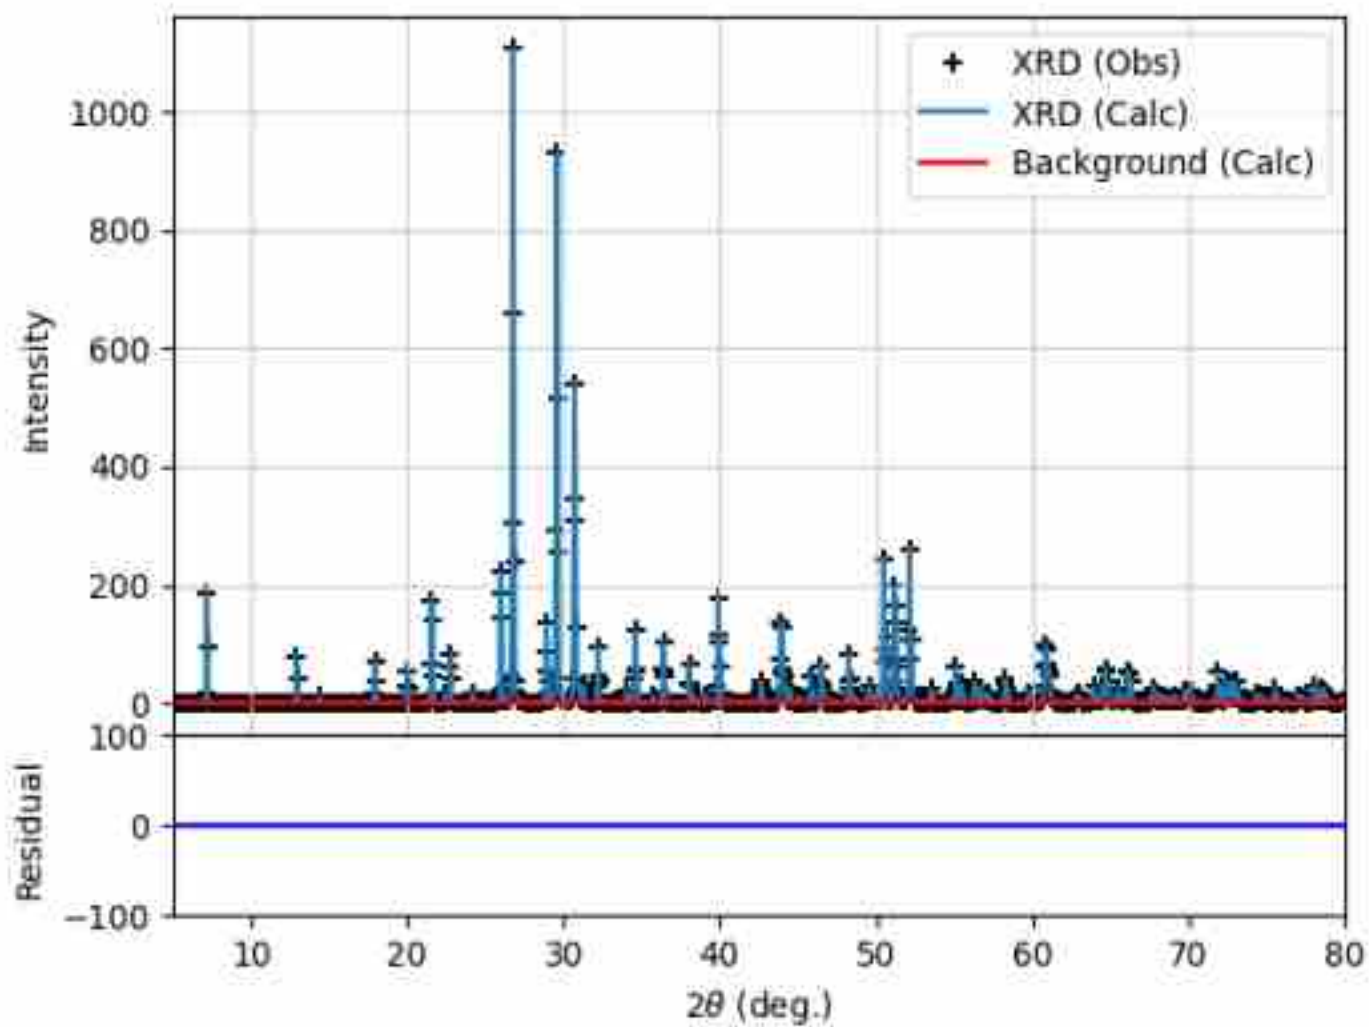

| RMSE before RR | Rwp     | RMSE after RR |
|----------------|---------|---------------|
| 0.014          | 0.00381 | 0.00106       |

# Dy<sub>2</sub>Cu<sub>10</sub>O<sub>4</sub>

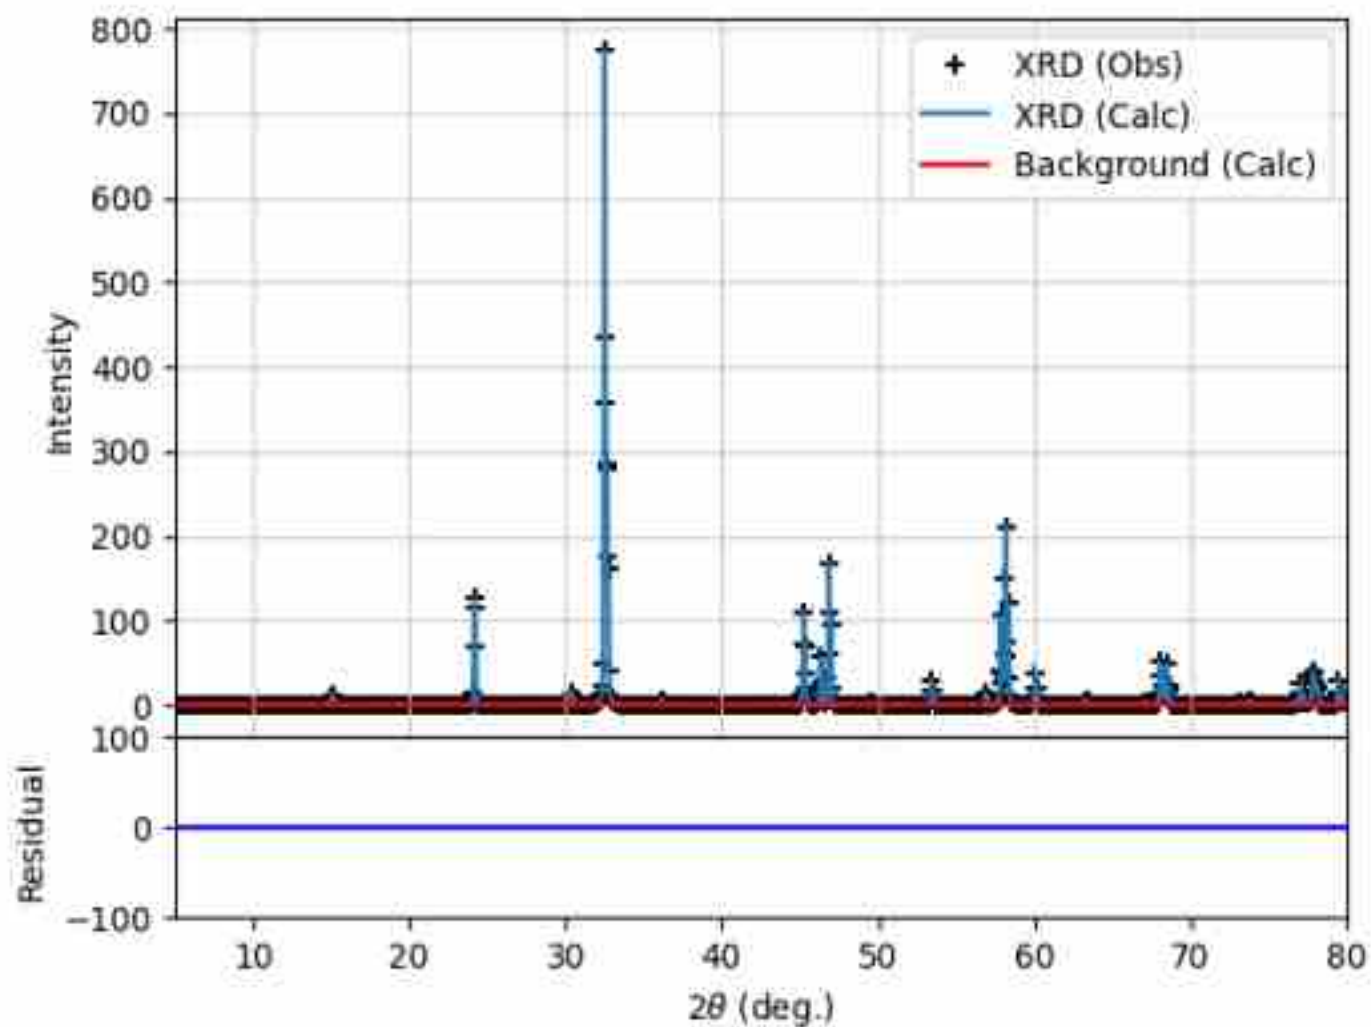

| RMSE before RR | Rwp     | RMSE after RR |
|----------------|---------|---------------|
| 0.014          | 0.00465 | 0.00117       |

# Dy<sub>2</sub>Ga<sub>3</sub>Ni<sub>1</sub>

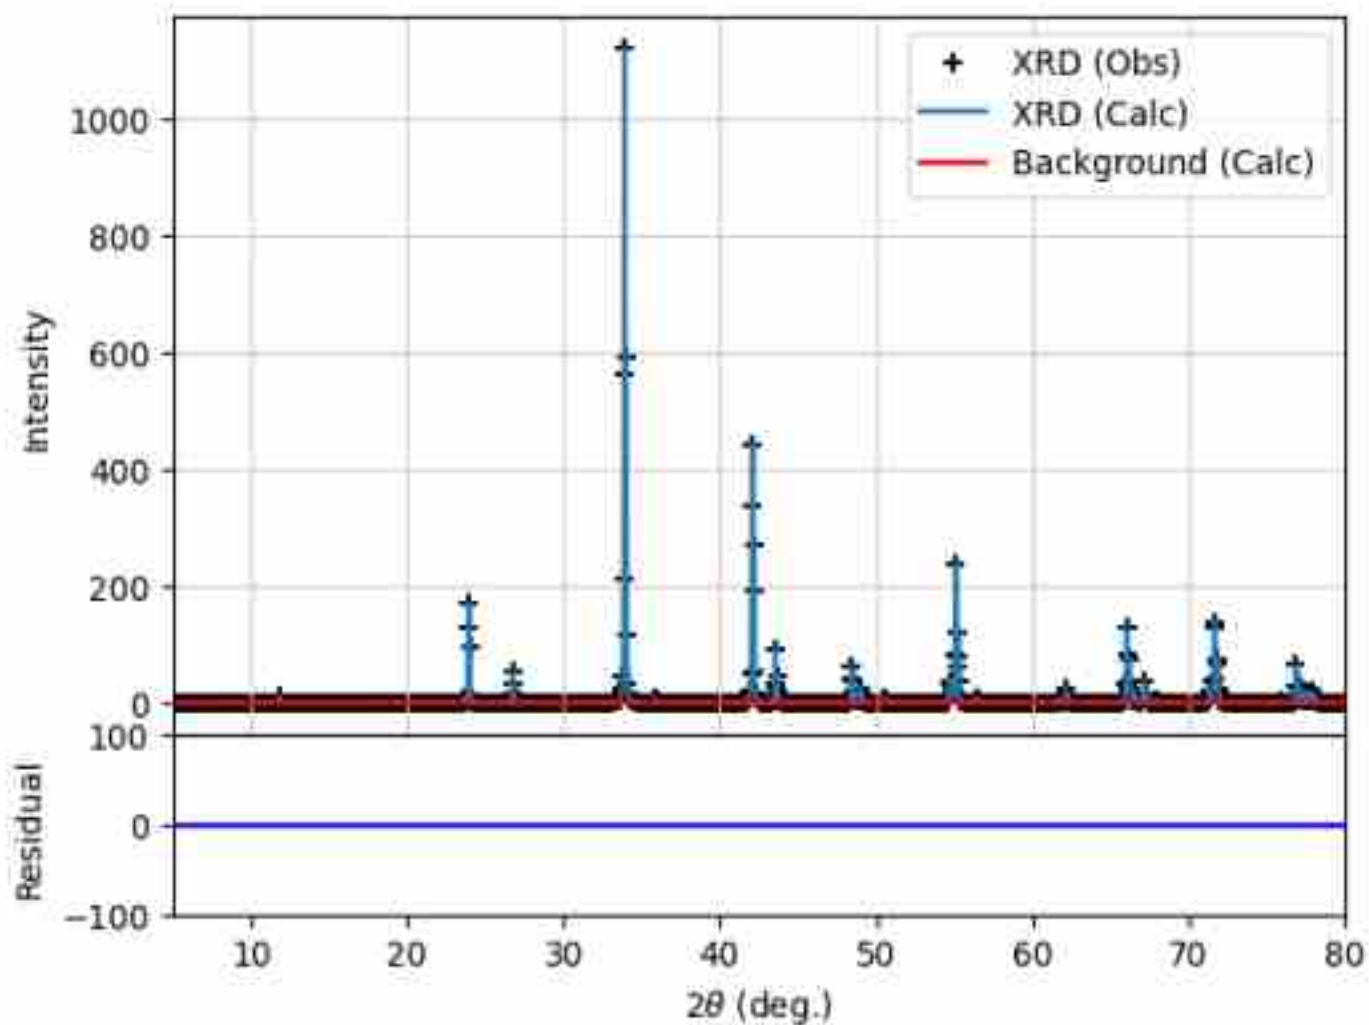

| RMSE before RR | Rwp     | RMSE after RR |
|----------------|---------|---------------|
| 0.014          | 0.00765 | 0.00056       |

# Dy<sub>2</sub>Ga<sub>8</sub>Fe<sub>1</sub>

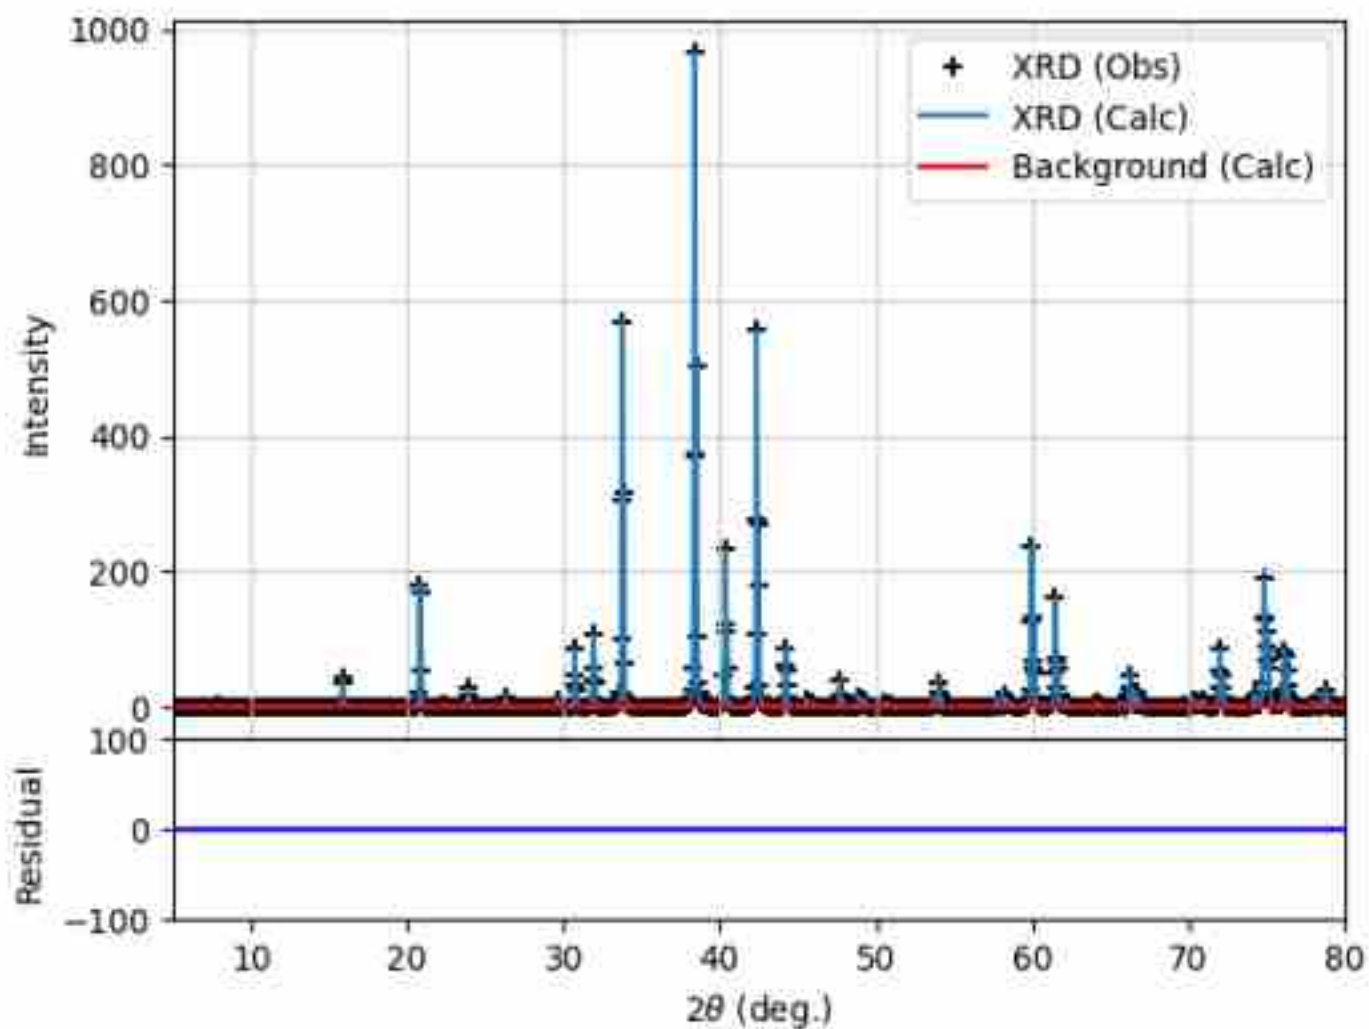

| RMSE before RR | Rwp     | RMSE after RR |
|----------------|---------|---------------|
| 0.014          | 0.01164 | 0.00118       |

# Dy<sub>2</sub>Mo<sub>2</sub>C<sub>3</sub>

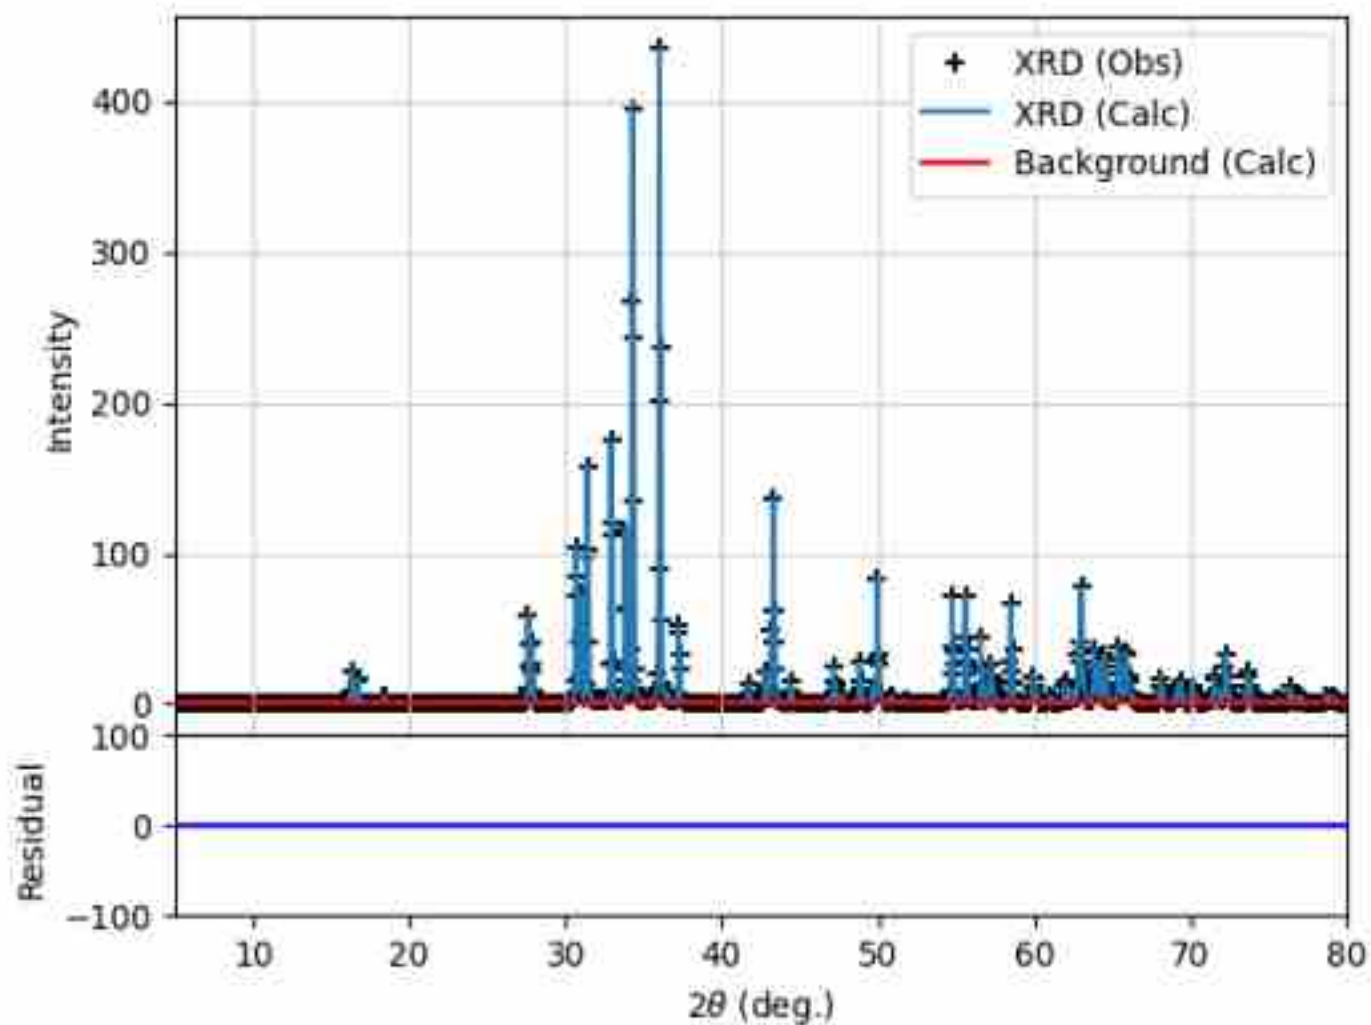

| RMSE before RR | Rwp    | RMSE after RR |
|----------------|--------|---------------|
| 0.014          | 0.0036 | 0.00102       |

# Dy<sub>2</sub>Y<sub>2</sub>Fe<sub>4</sub>O<sub>12</sub>

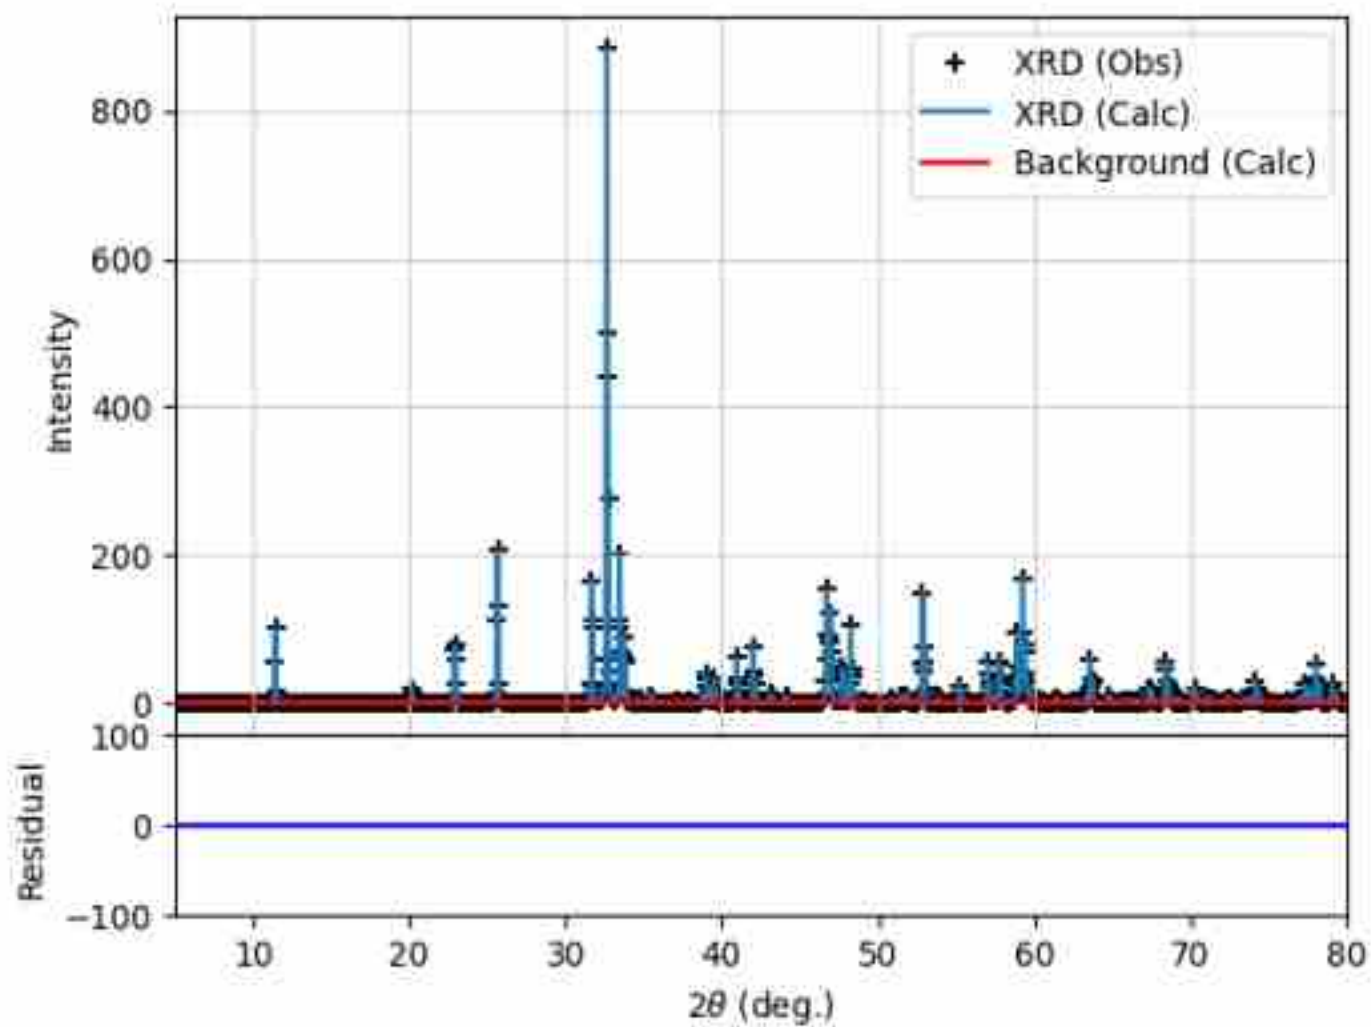

| RMSE before RR | Rwp     | RMSE after RR |
|----------------|---------|---------------|
| 0.014          | 0.00397 | 0.0012        |



# Dy<sub>4</sub>Cd<sub>2</sub>Te<sub>8</sub>

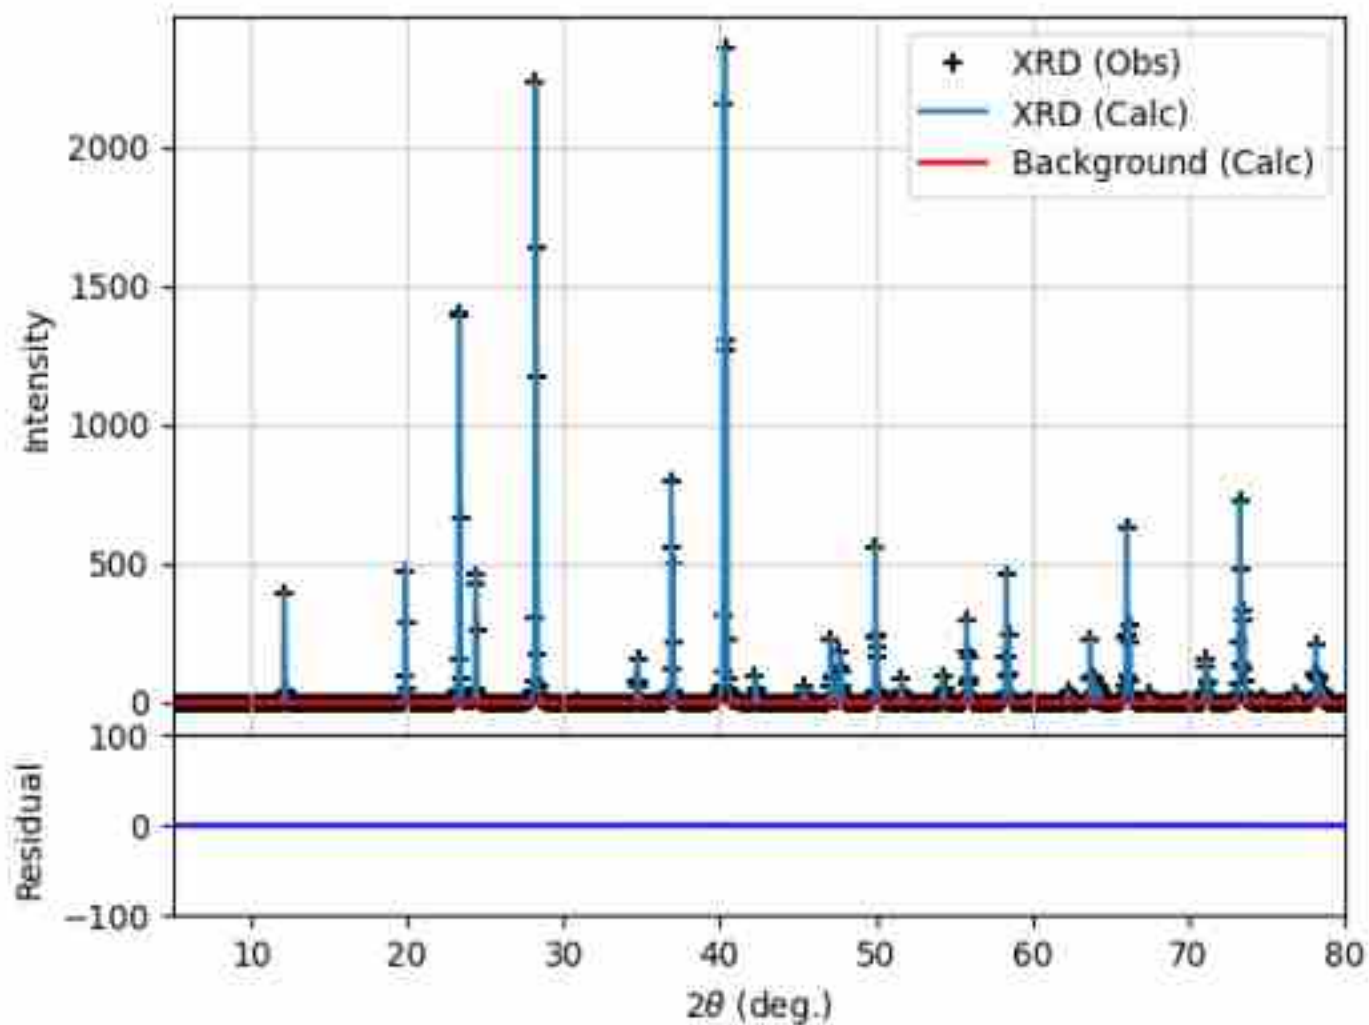

| RMSE before RR | Rwp     | RMSE after RR |
|----------------|---------|---------------|
| 0.014          | 0.17087 | 0.00203       |

# Dy6Pd8

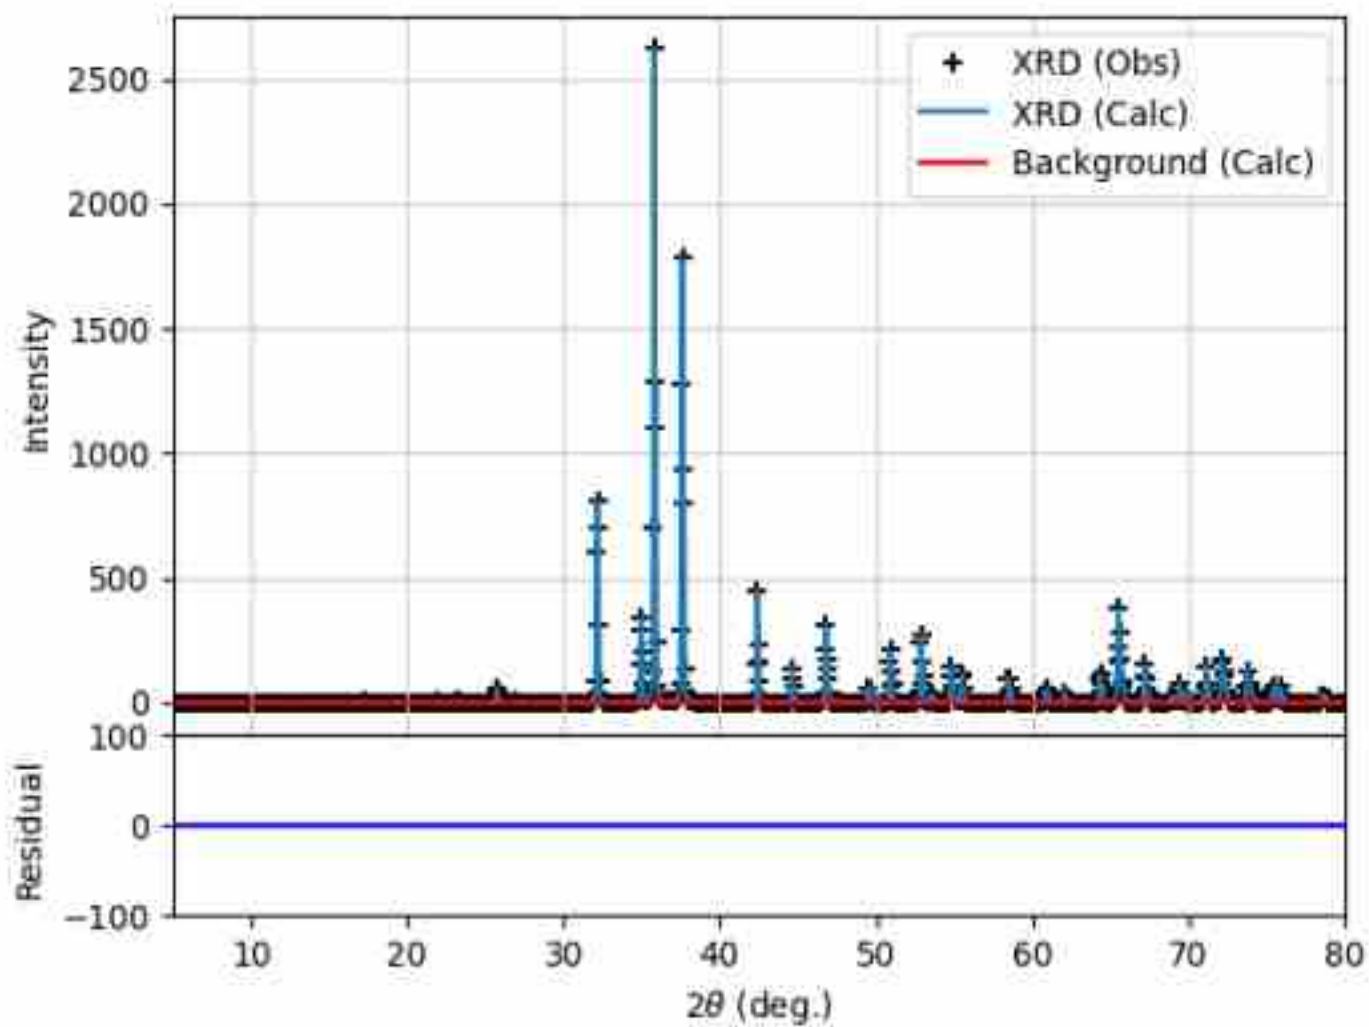

| RMSE before RR | Rwp     | RMSE after RR |
|----------------|---------|---------------|
| 0.014          | 0.00367 | 0.00047       |

# Eu<sub>2</sub>Fe<sub>2</sub>O<sub>5</sub>

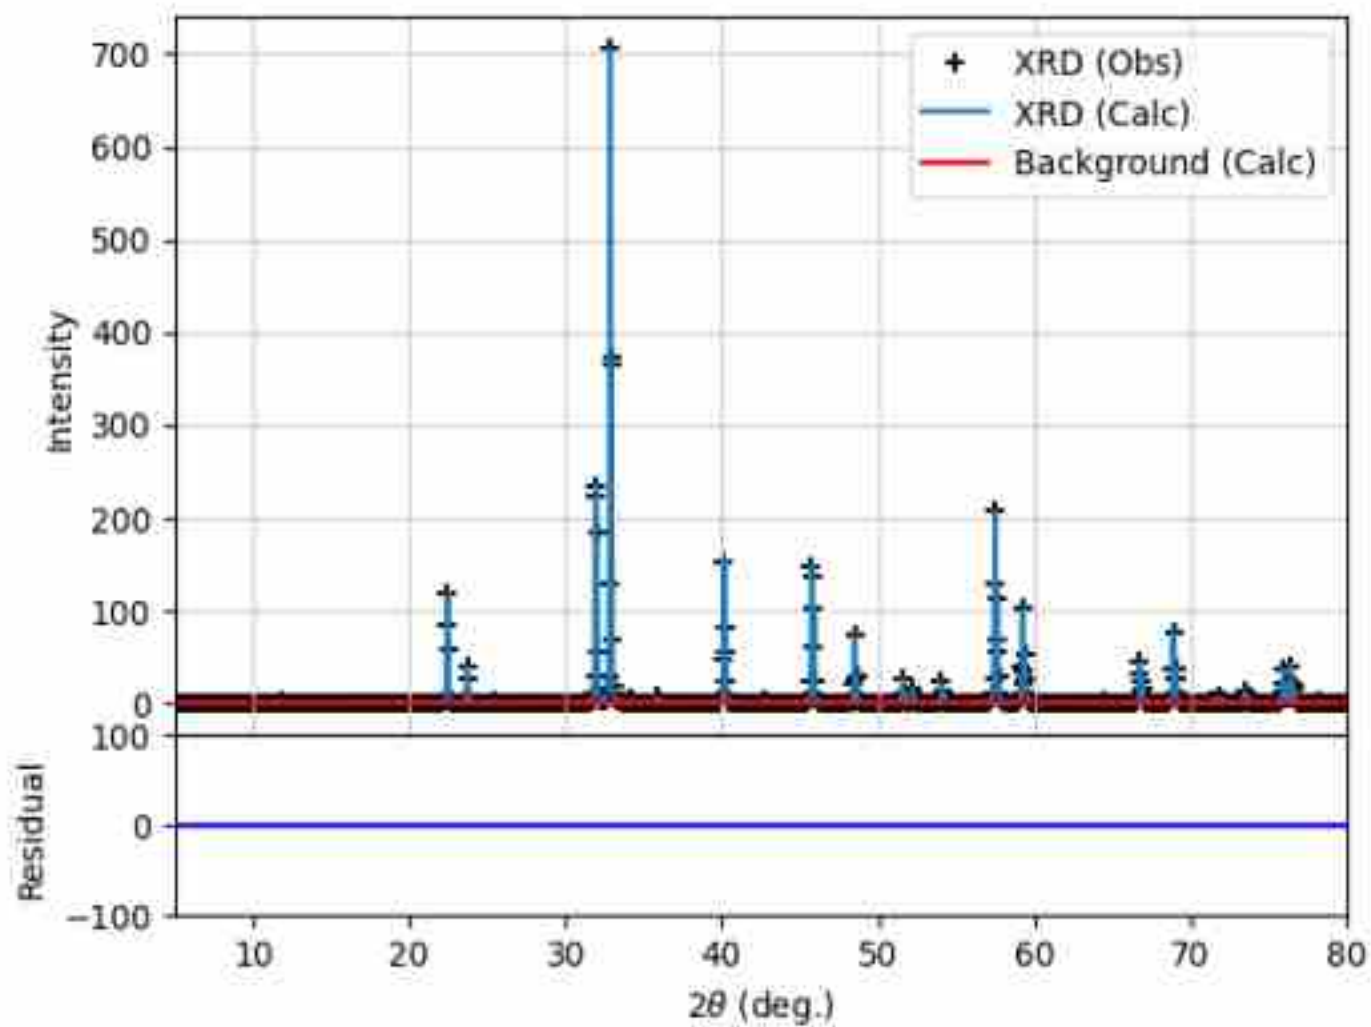

| RMSE before RR | Rwp     | RMSE after RR |
|----------------|---------|---------------|
| 0.014          | 0.00465 | 0.00121       |

# Eu<sub>2</sub>Ge<sub>4</sub>Pt<sub>4</sub>

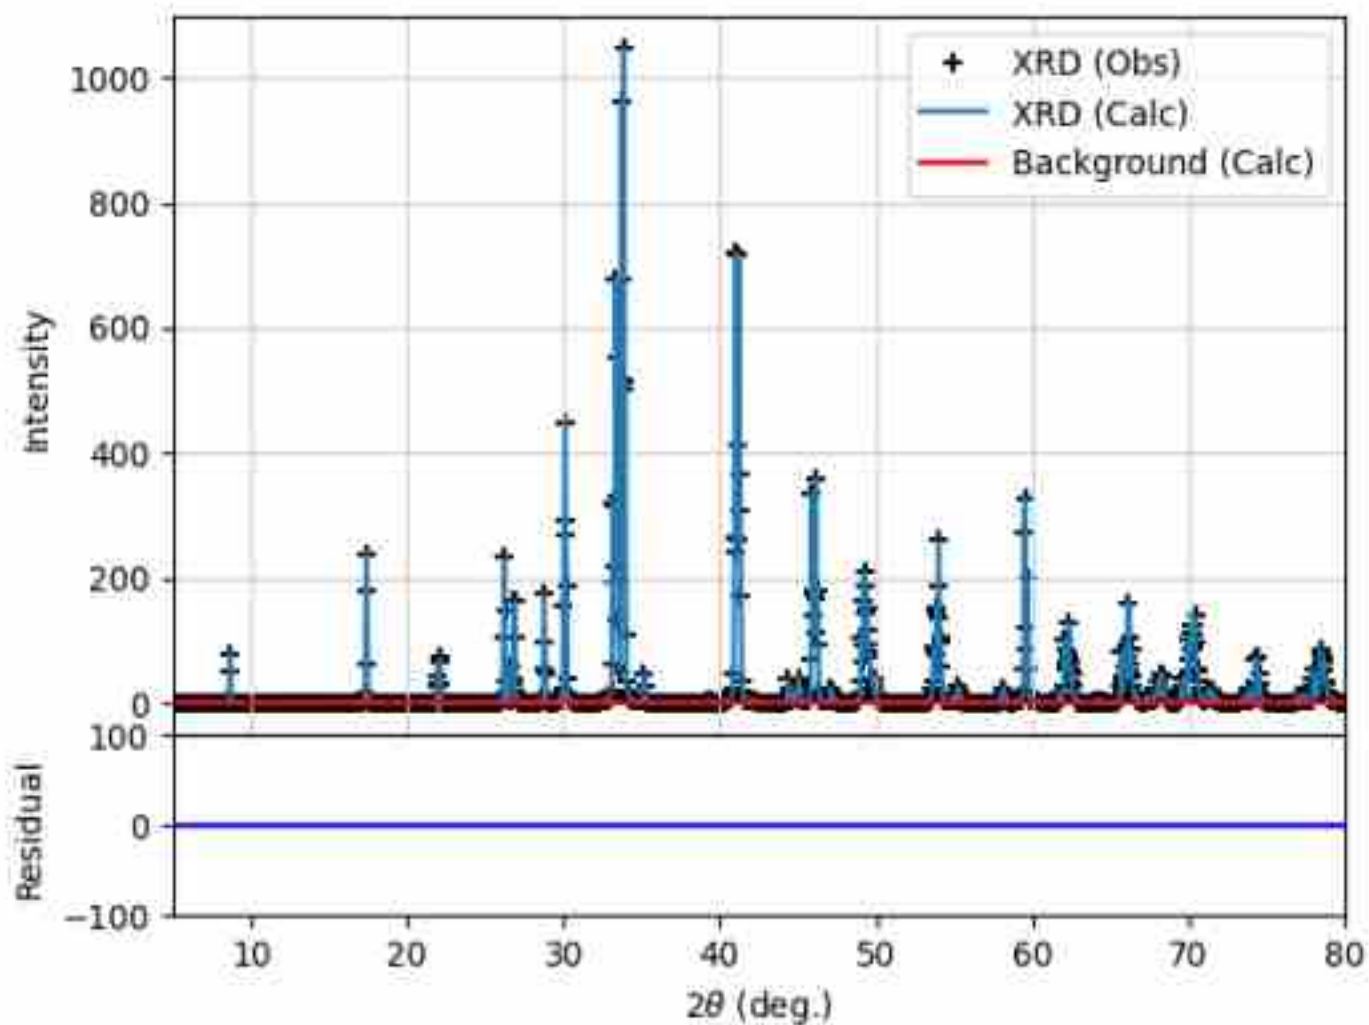

| RMSE before RR | Rwp     | RMSE after RR |
|----------------|---------|---------------|
| 0.014          | 0.00311 | 0.00022       |

# Eu<sub>2</sub>V<sub>10</sub>O<sub>4</sub>

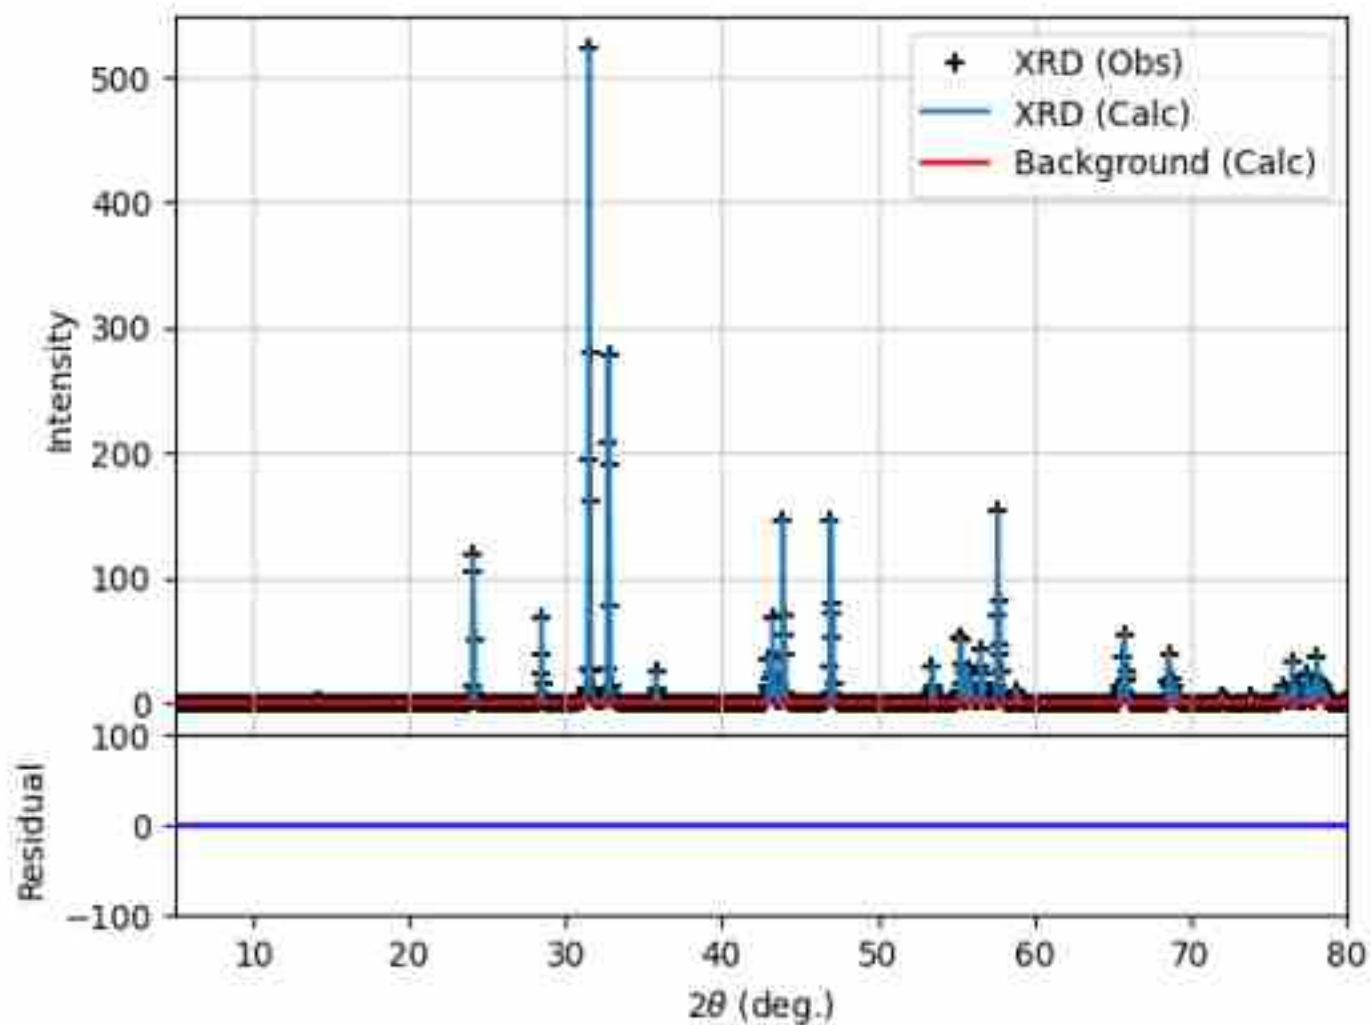

| RMSE before RR | Rwp     | RMSE after RR |
|----------------|---------|---------------|
| 0.014          | 0.00315 | 0.00083       |

# Fe1Ni1Sb4

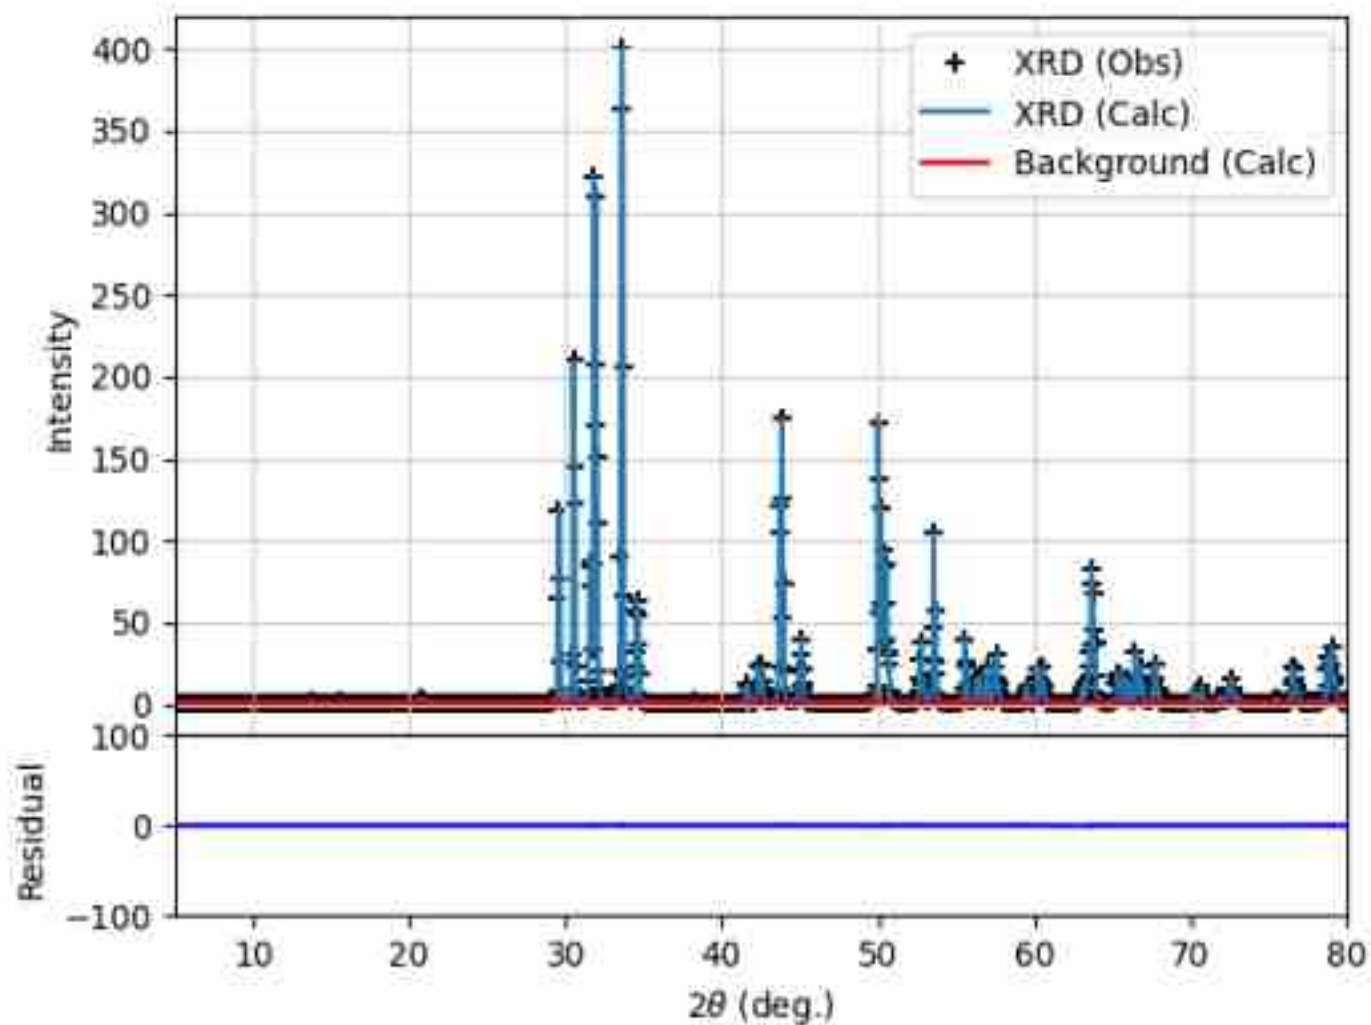

| RMSE before RR | Rwp    | RMSE after RR |
|----------------|--------|---------------|
| 0.014          | 0.5126 | 0.01605       |

# Ga<sub>4</sub>Ni<sub>3</sub>Pd<sub>1</sub>

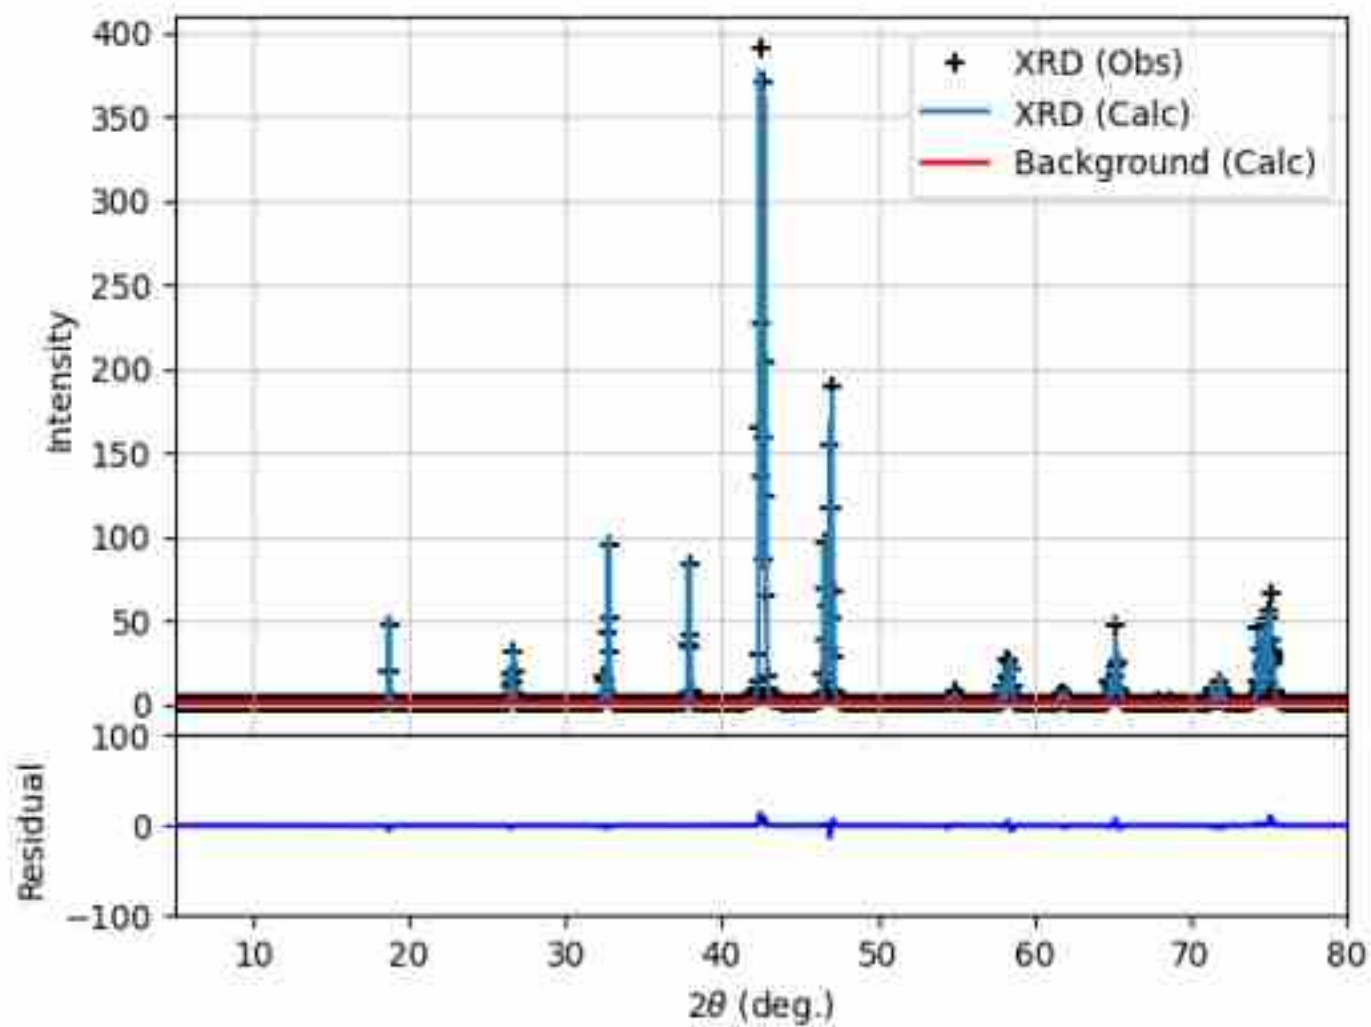

| RMSE before RR | Rwp     | RMSE after RR |
|----------------|---------|---------------|
| 0.014          | 7.93752 | 0.06679       |

Gd<sub>2</sub>Mo<sub>2</sub>C<sub>3</sub>

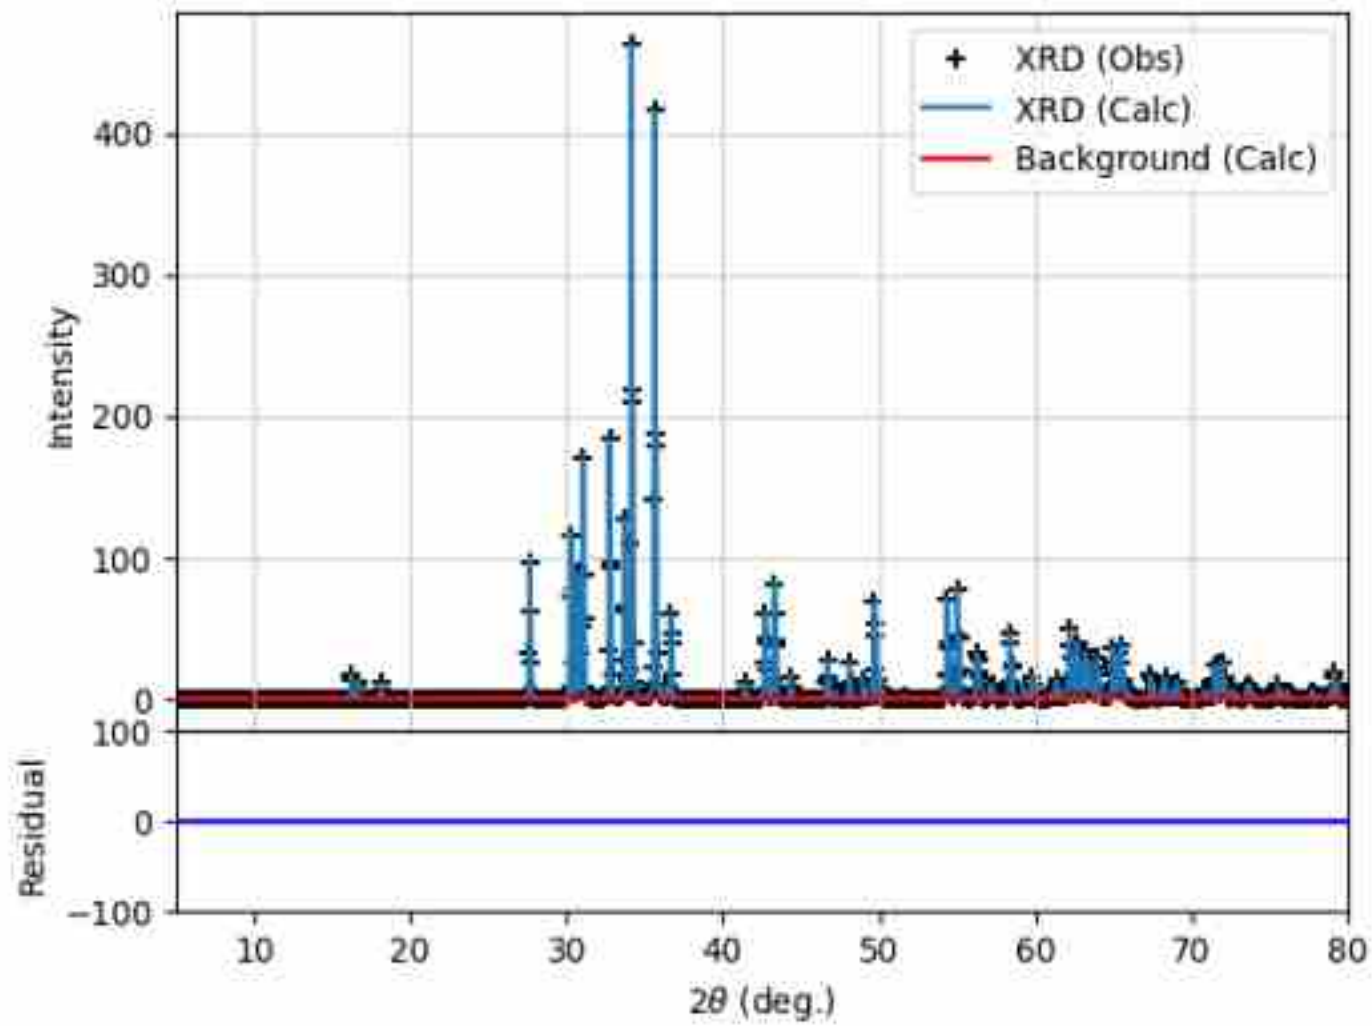

| RMSE before RR | Rwp     | RMSE after RR |
|----------------|---------|---------------|
| 0.014          | 0.00355 | 0.00103       |



# Gd<sub>2</sub>W<sub>2</sub>C<sub>12</sub>O<sub>8</sub>

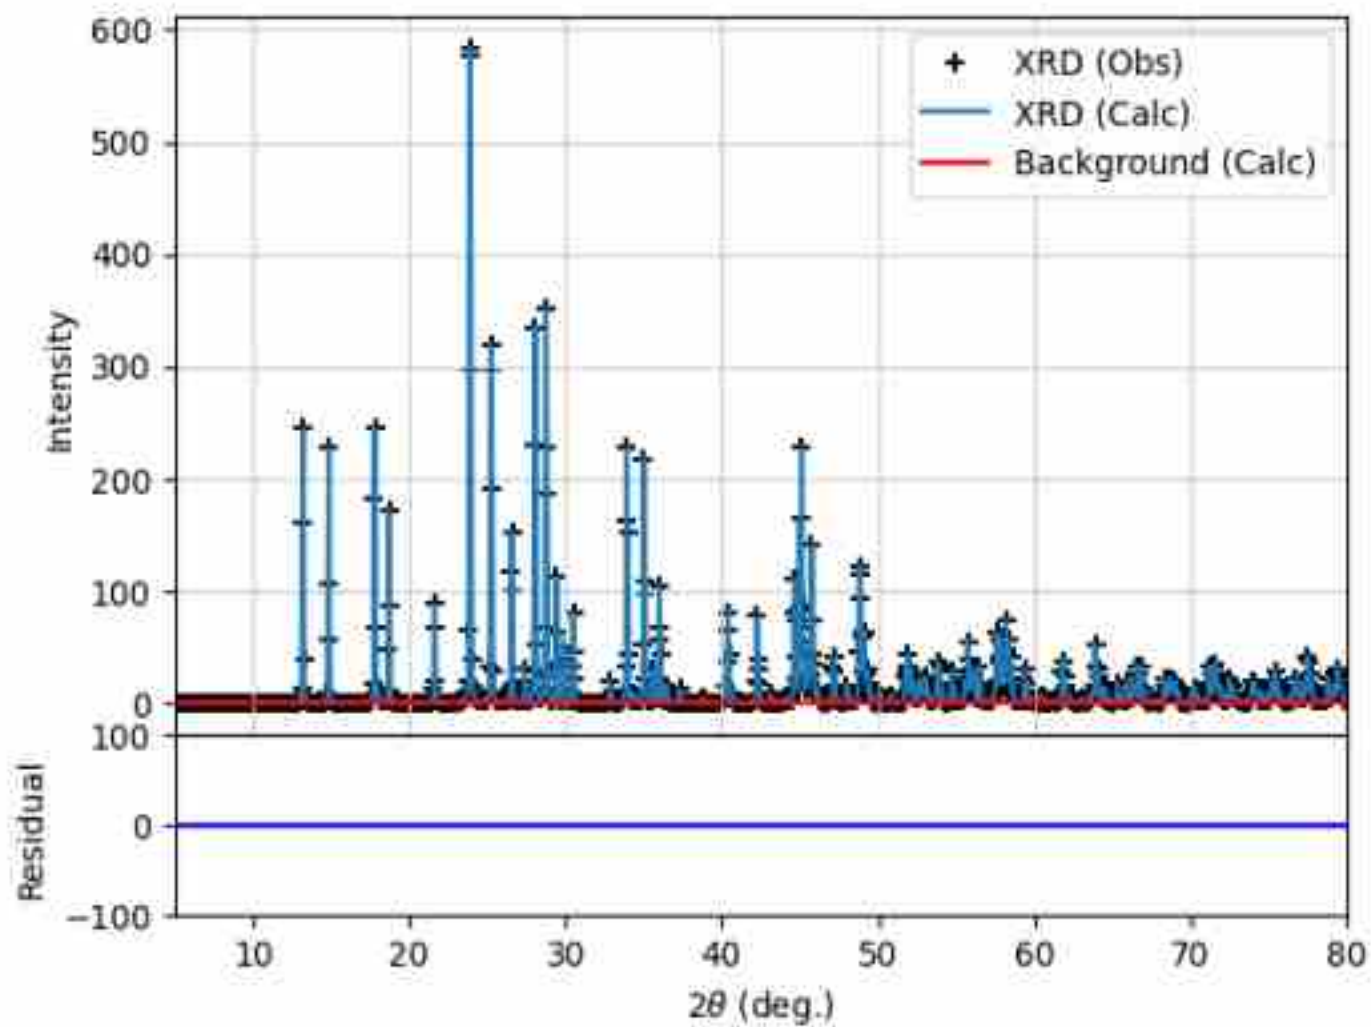

| RMSE before RR | Rwp     | RMSE after RR |
|----------------|---------|---------------|
| 0.014          | 0.00325 | 0.0008        |

# Gd<sub>3</sub>Tl<sub>3</sub>Pd<sub>3</sub>

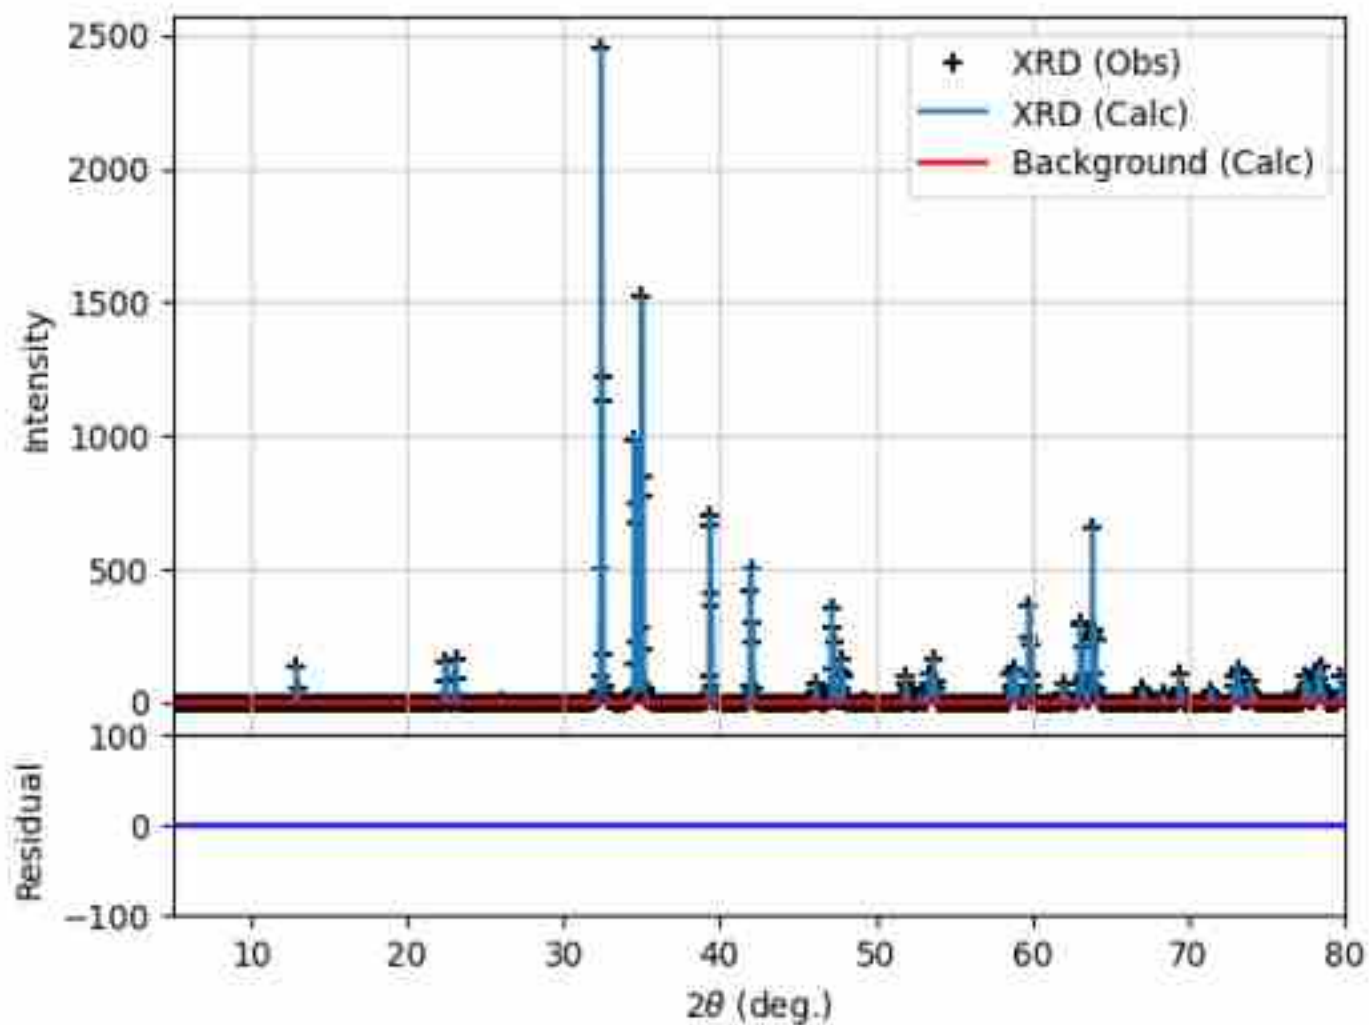

| RMSE before RR | Rwp     | RMSE after RR |
|----------------|---------|---------------|
| 0.014          | 0.00401 | 0.00069       |

# Hf1Se1S1

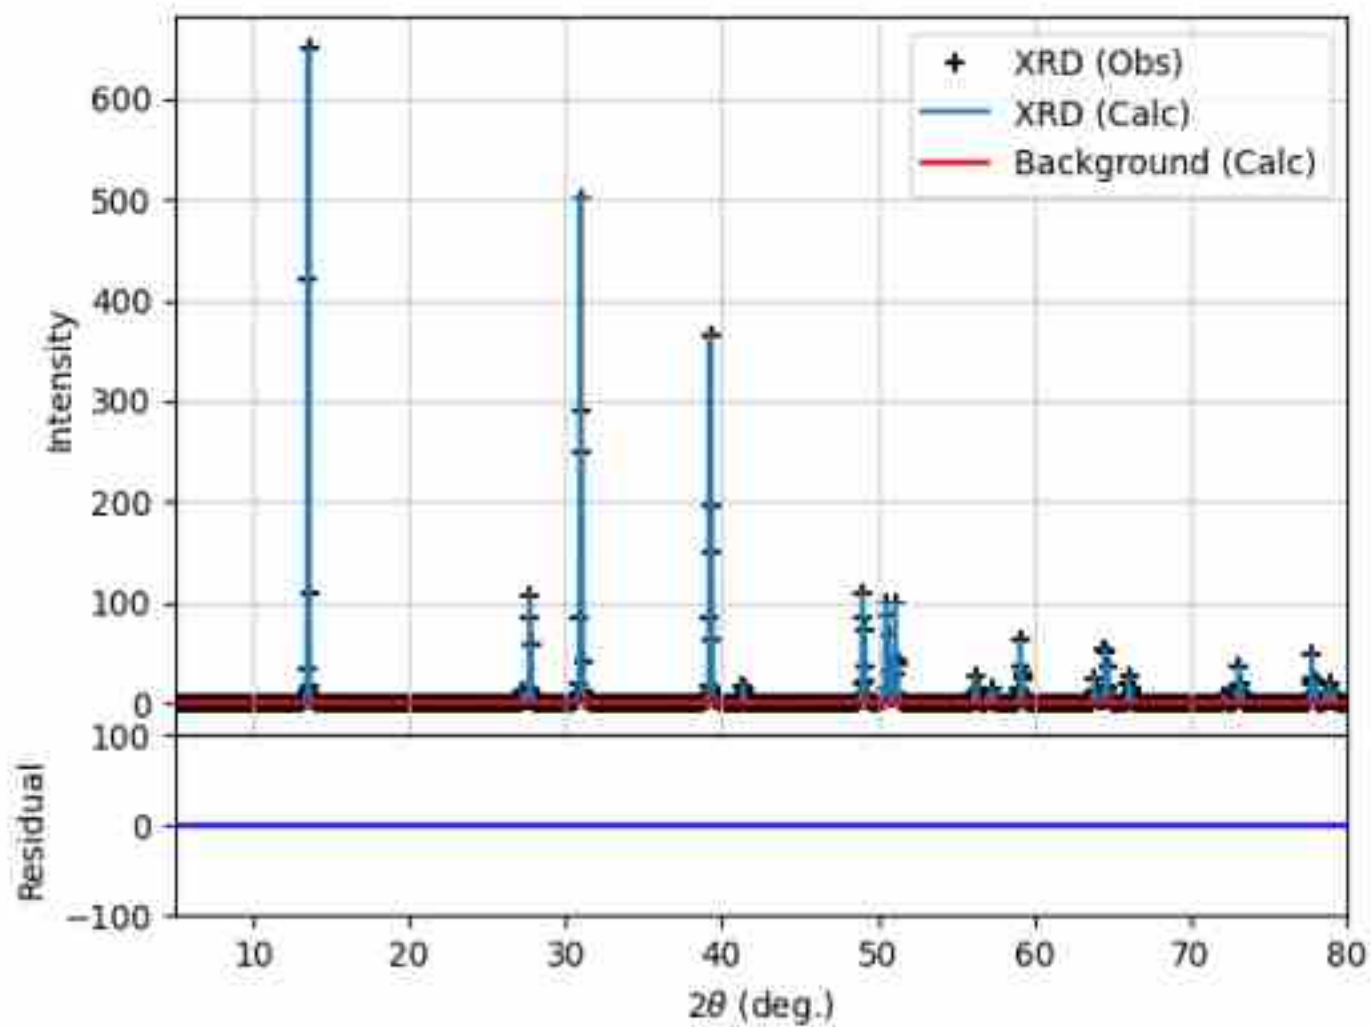

| RMSE before RR | Rwp     | RMSE after RR |
|----------------|---------|---------------|
| 0.014          | 0.00197 | 0.00017       |

# Hf2Zr6

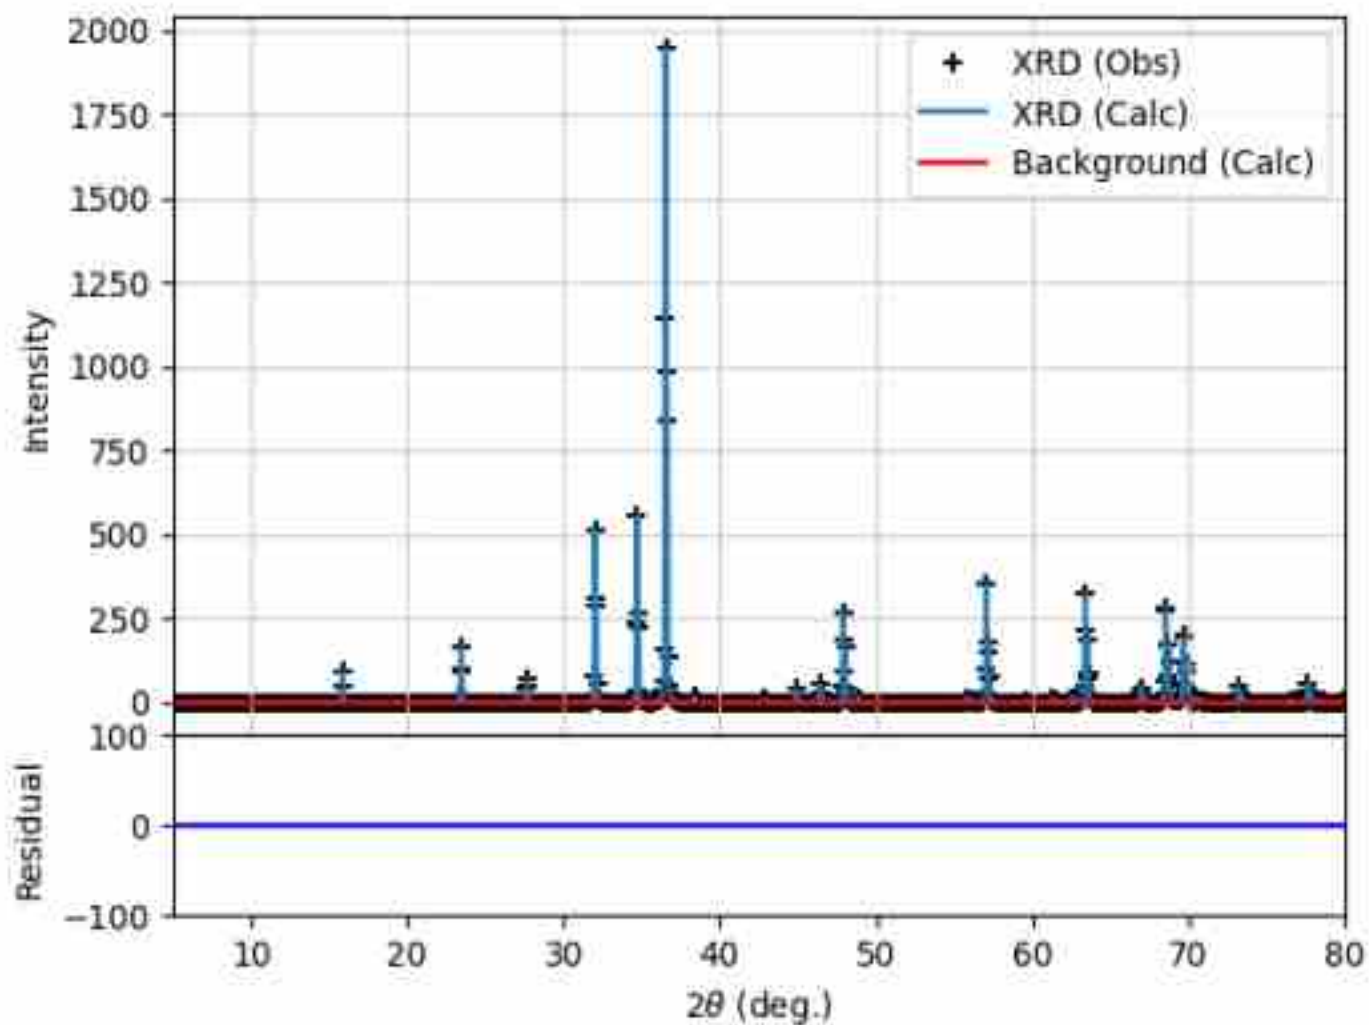

| RMSE before RR | Rwp     | RMSE after RR |
|----------------|---------|---------------|
| 0.014          | 0.08447 | 0.00277       |

# Hf<sub>3</sub>Fe<sub>3</sub>Ge<sub>3</sub>

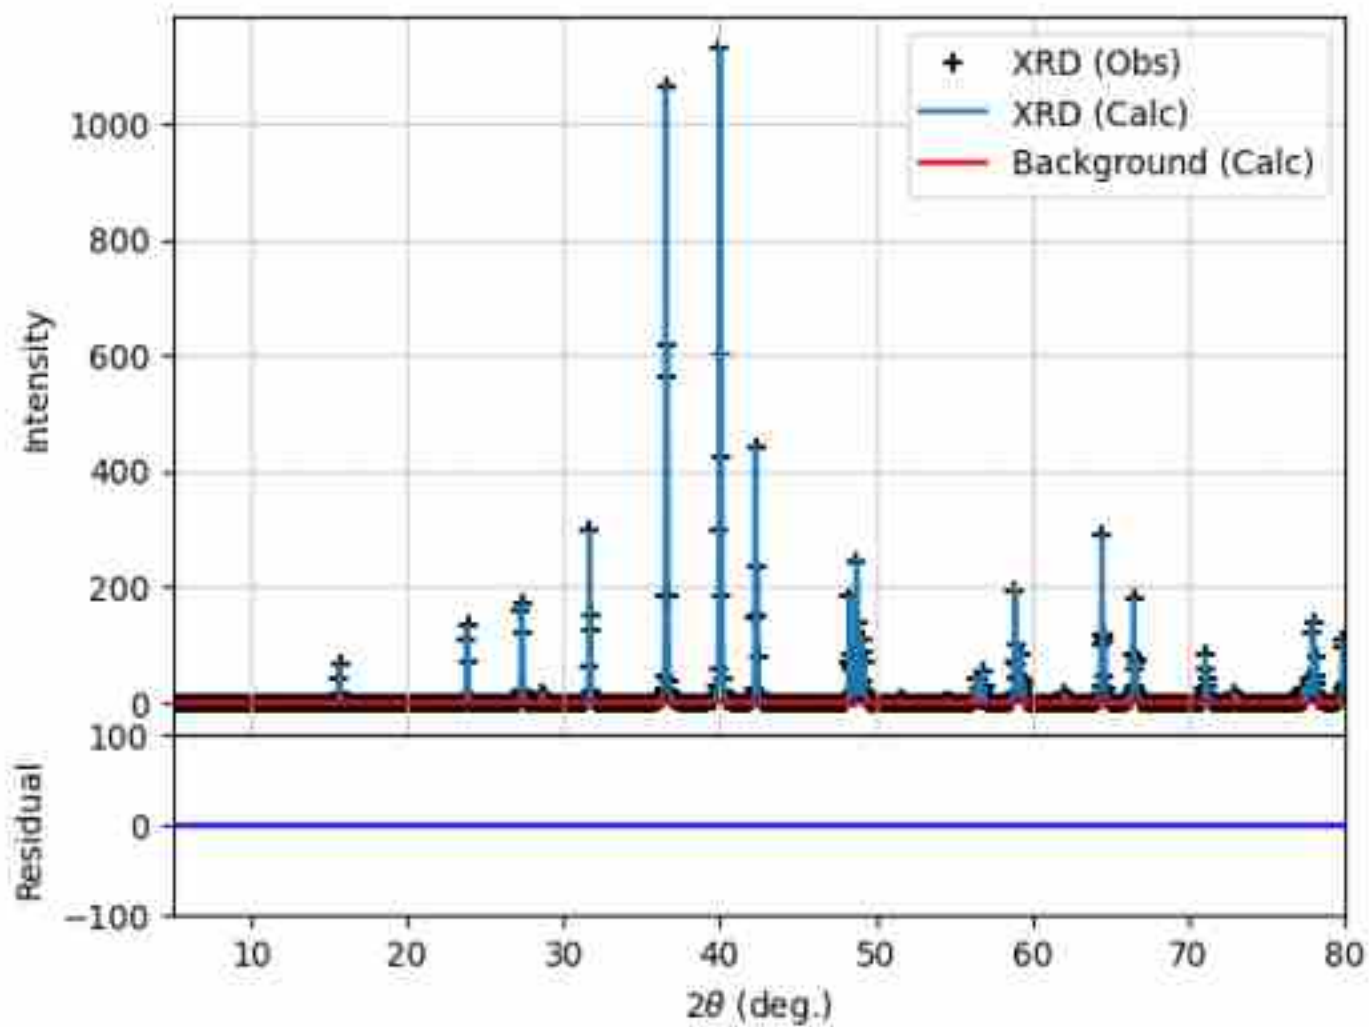

| RMSE before RR | Rwp     | RMSE after RR |
|----------------|---------|---------------|
| 0.014          | 0.00824 | 0.0007        |

# Hf6Al2Pt1

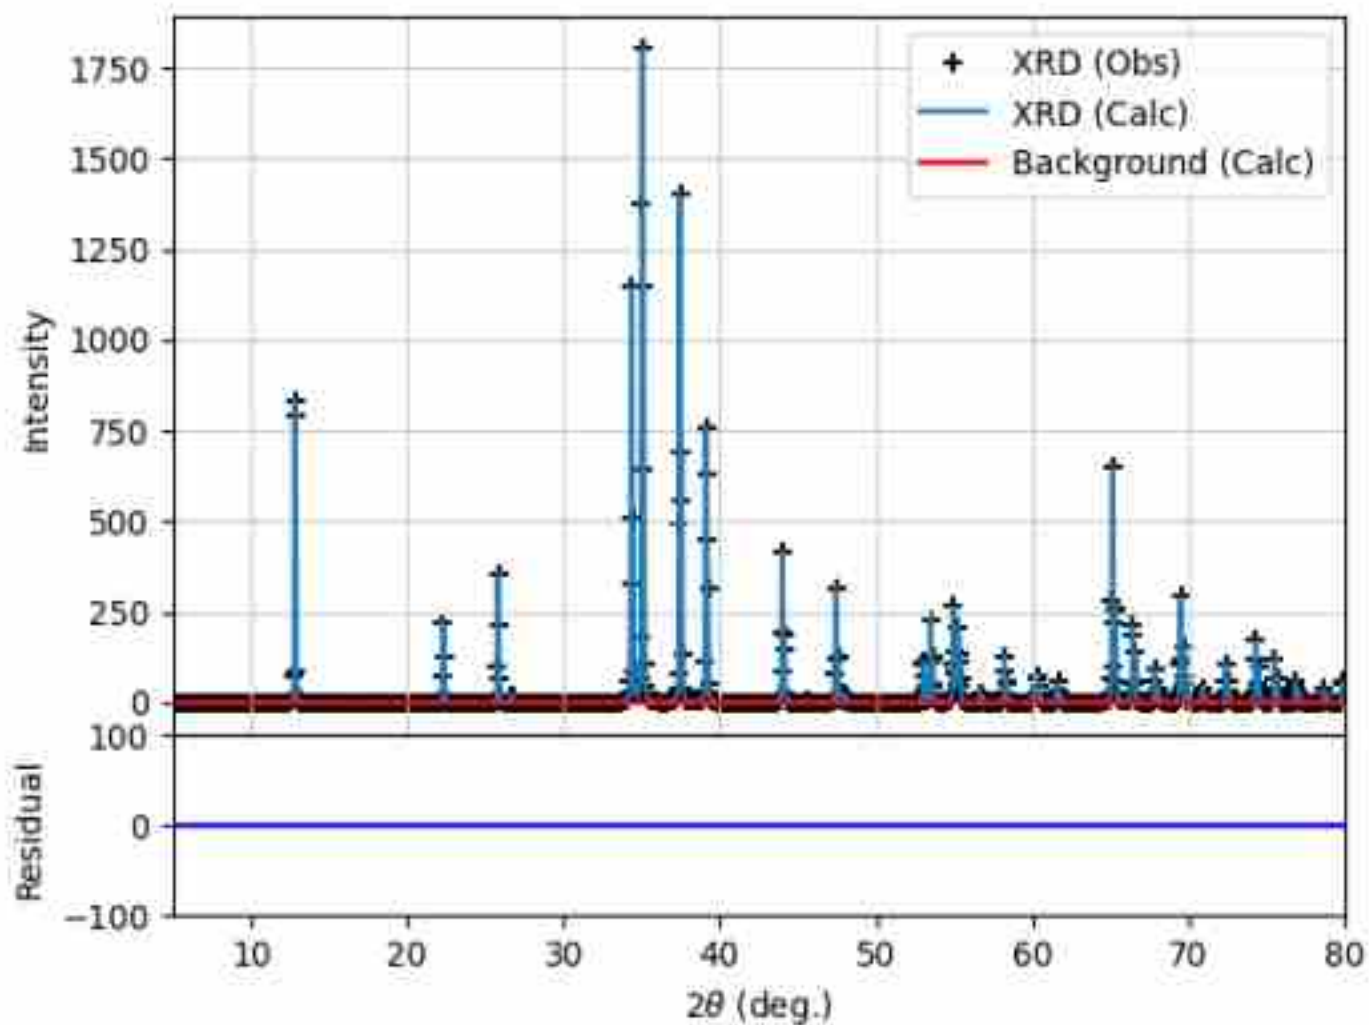

| RMSE before RR | Rwp     | RMSE after RR |
|----------------|---------|---------------|
| 0.014          | 0.00473 | 0.00078       |

# Hf6Sc2

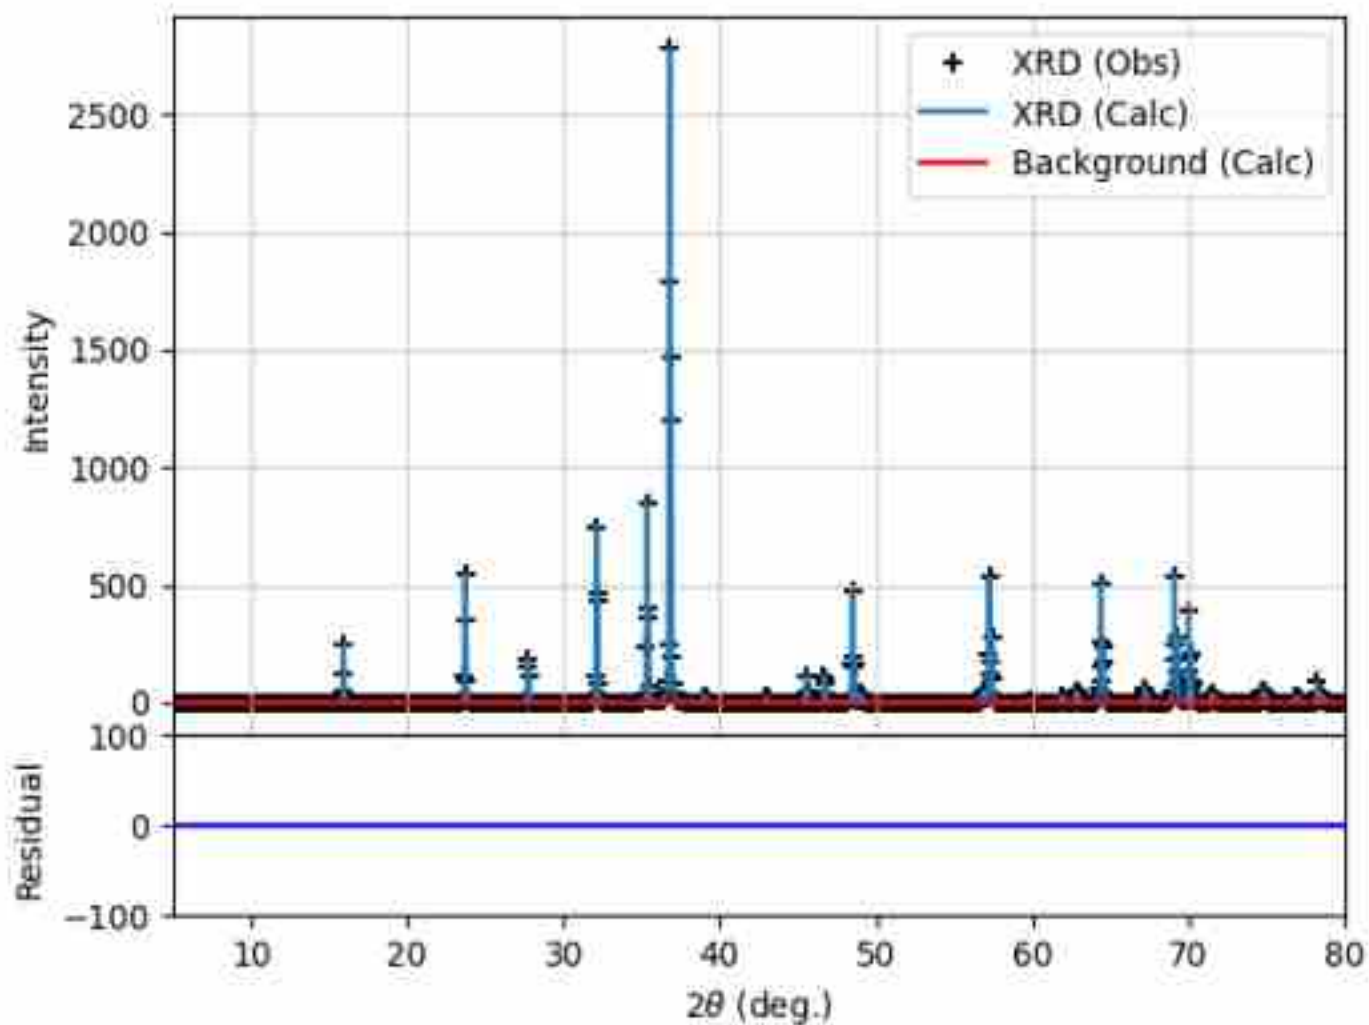

| RMSE before RR | Rwp    | RMSE after RR |
|----------------|--------|---------------|
| 0.014          | 0.0527 | 0.00223       |

# Ho<sub>2</sub>V<sub>2</sub>O<sub>8</sub>

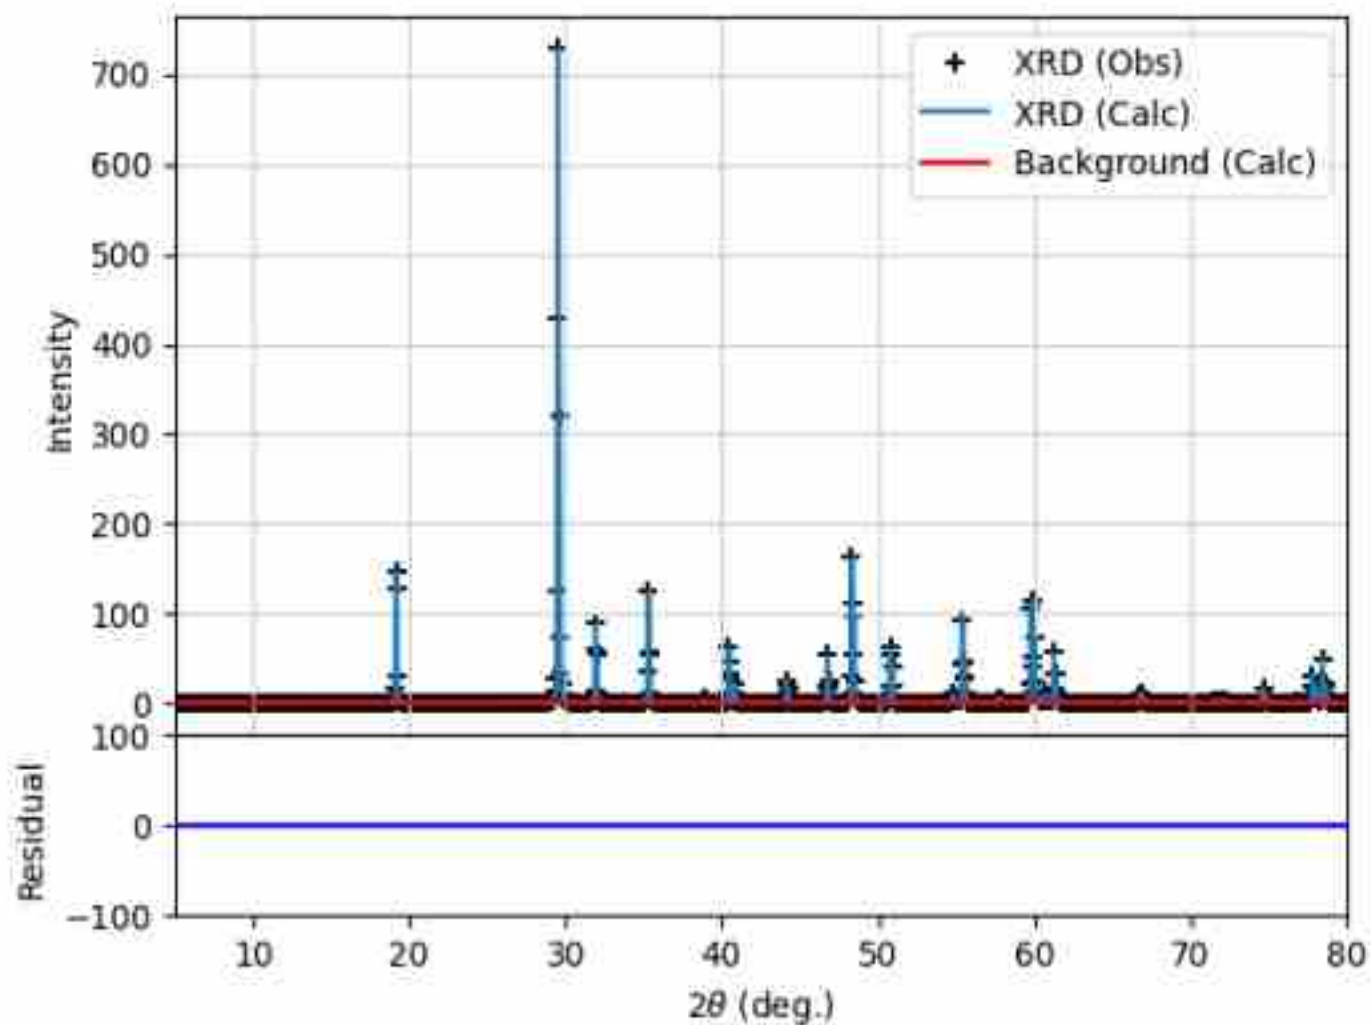

| RMSE before RR | Rwp     | RMSE after RR |
|----------------|---------|---------------|
| 0.014          | 0.00281 | 0.00116       |



# Ho<sub>3</sub>Ga<sub>8</sub>Ag<sub>3</sub>

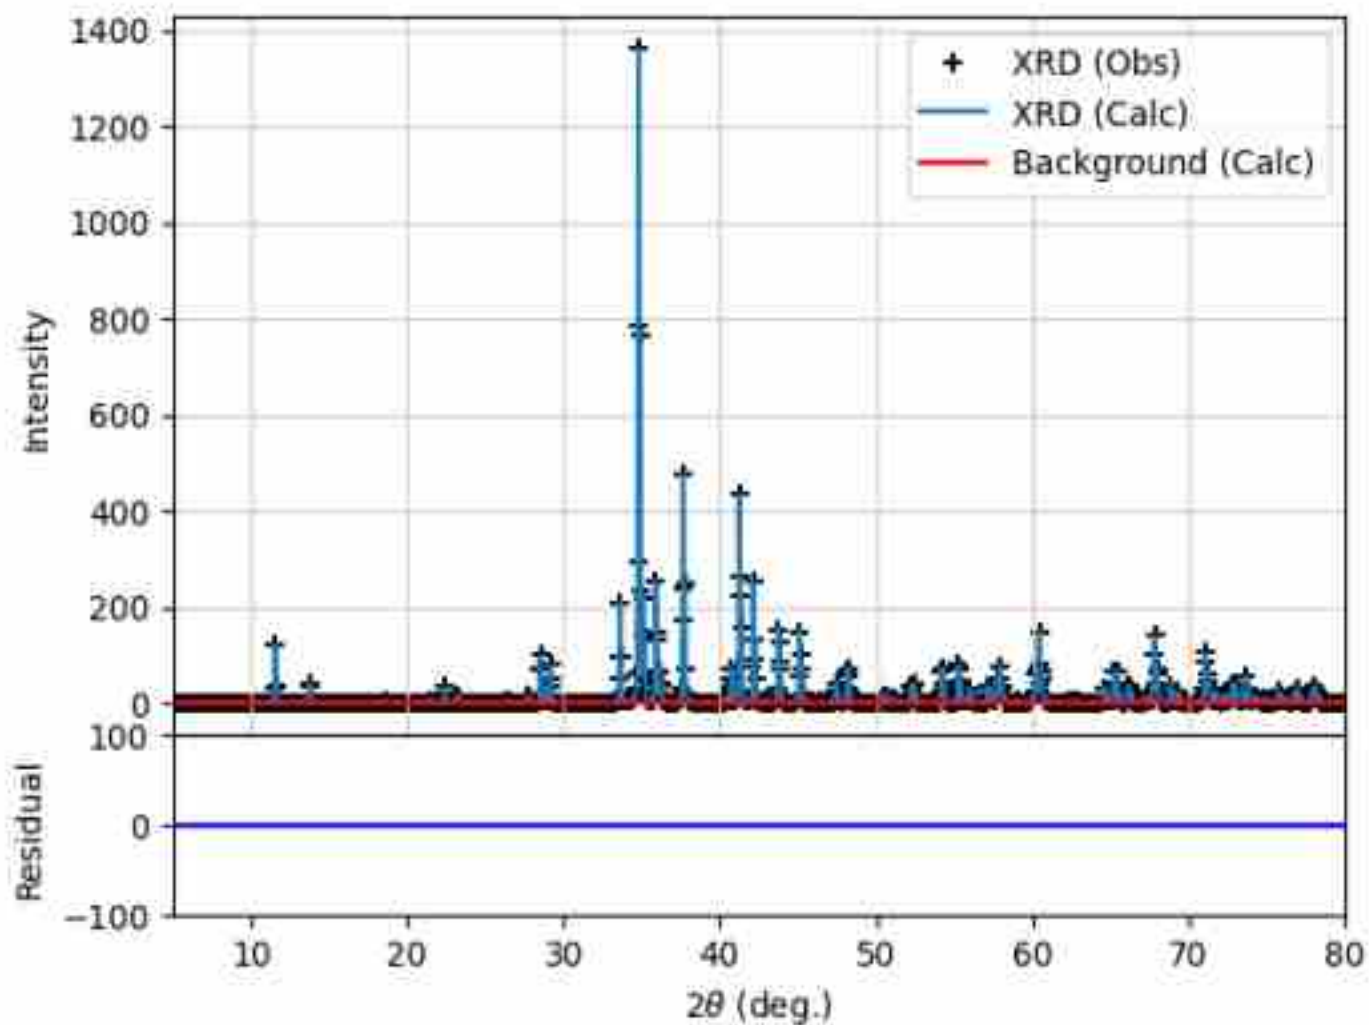

| RMSE before RR | Rwp     | RMSE after RR |
|----------------|---------|---------------|
| 0.014          | 0.00368 | 0.00046       |

# Ho<sub>3</sub>In<sub>3</sub>Ni<sub>3</sub>

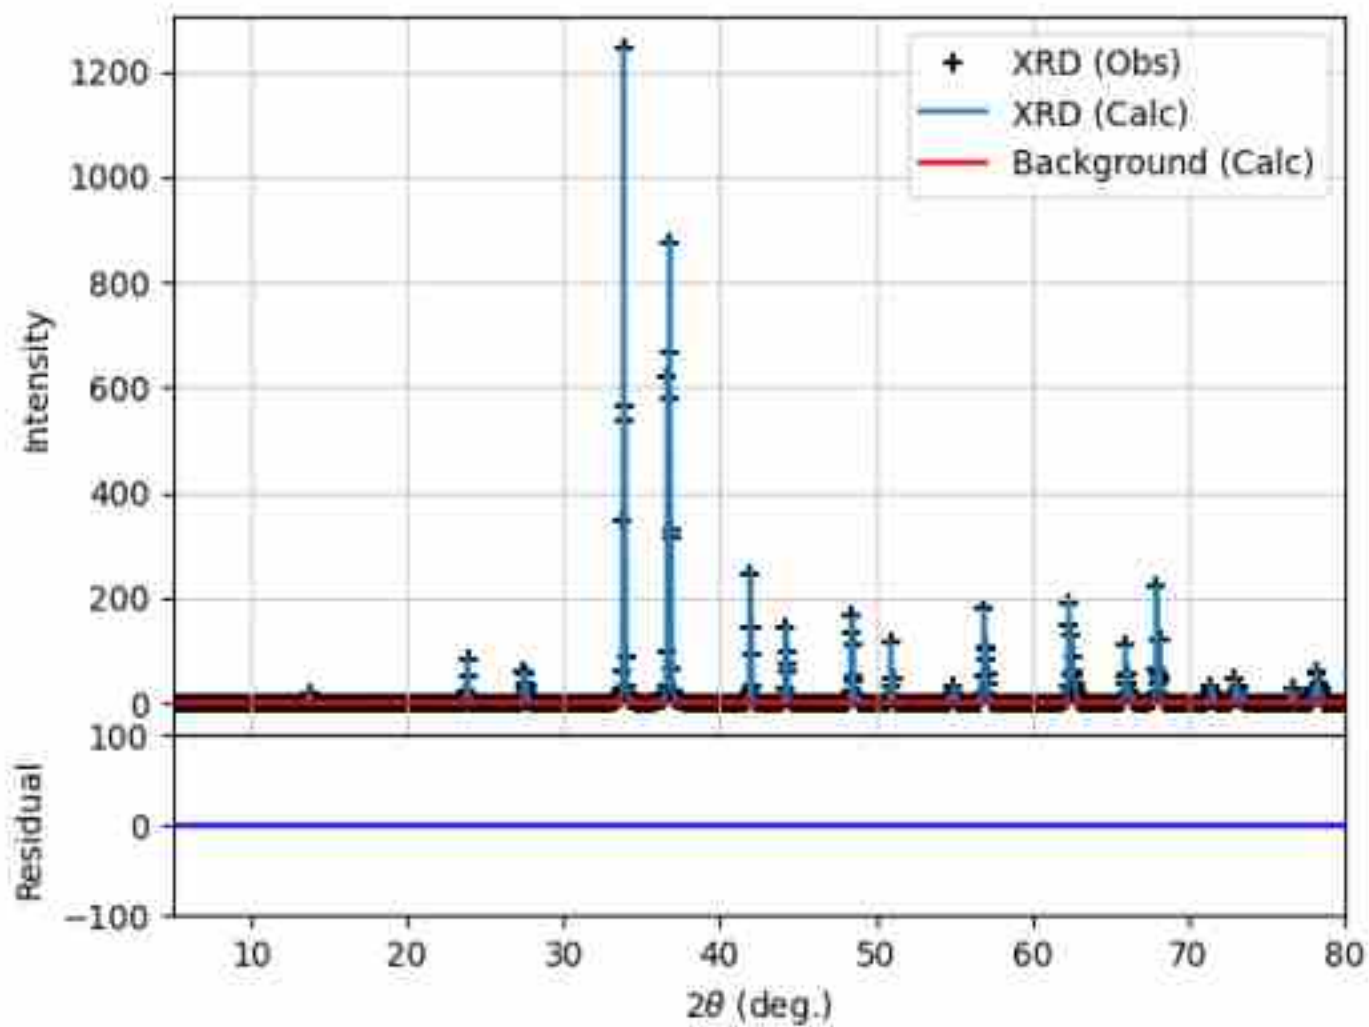

| RMSE before RR | Rwp     | RMSE after RR |
|----------------|---------|---------------|
| 0.014          | 0.00467 | 0.00097       |

# Ho<sub>3</sub>Tl<sub>3</sub>Pd<sub>3</sub>

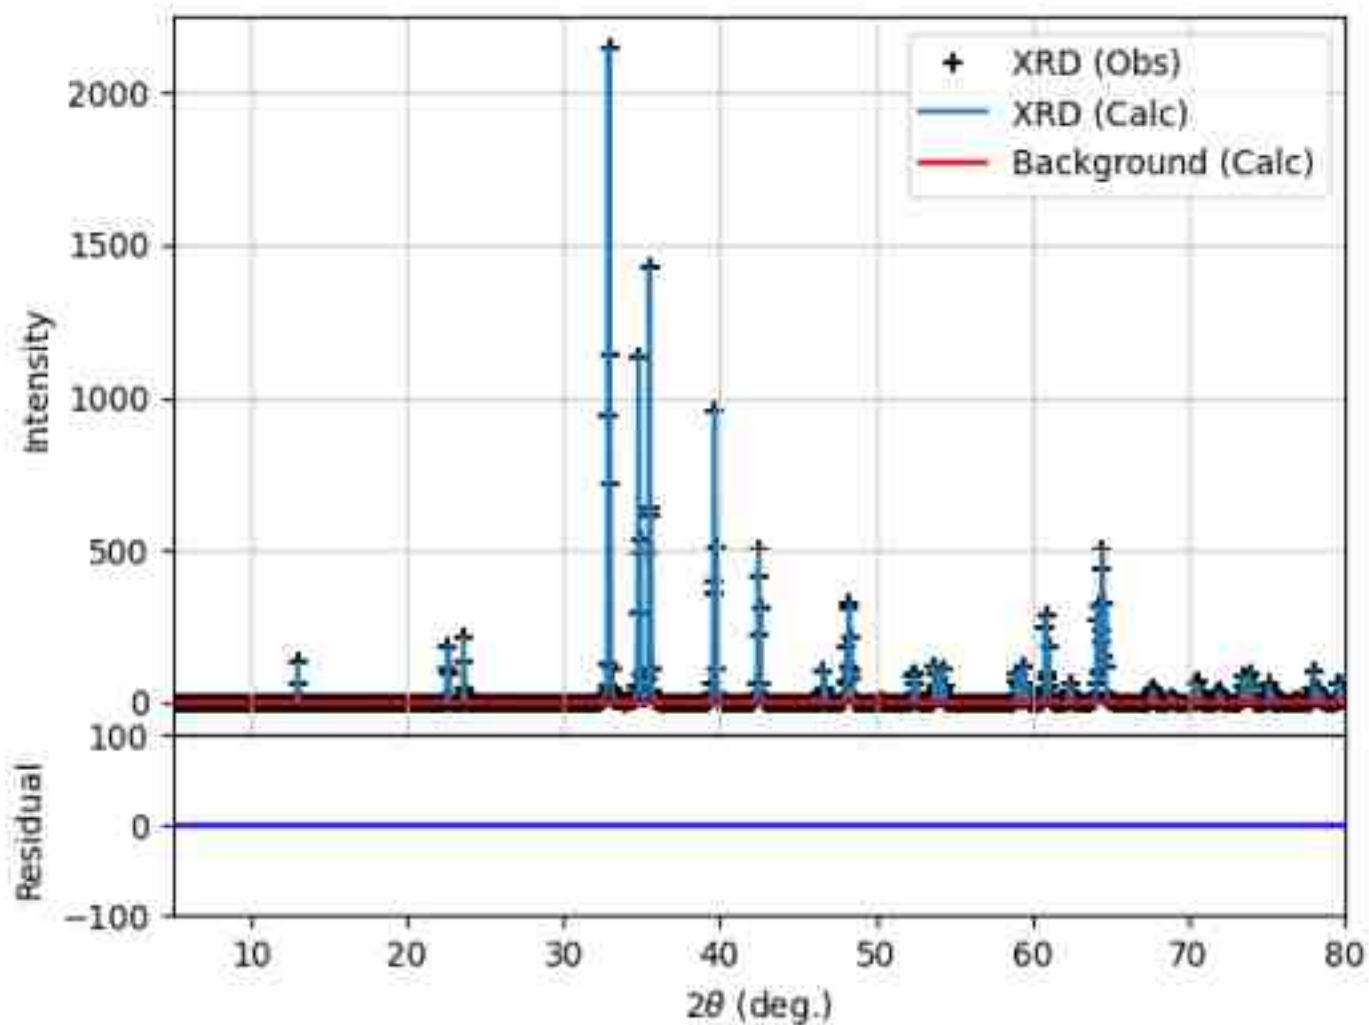

| RMSE before RR | Rwp     | RMSE after RR |
|----------------|---------|---------------|
| 0.014          | 0.00431 | 0.00045       |

# In1Ga1As2

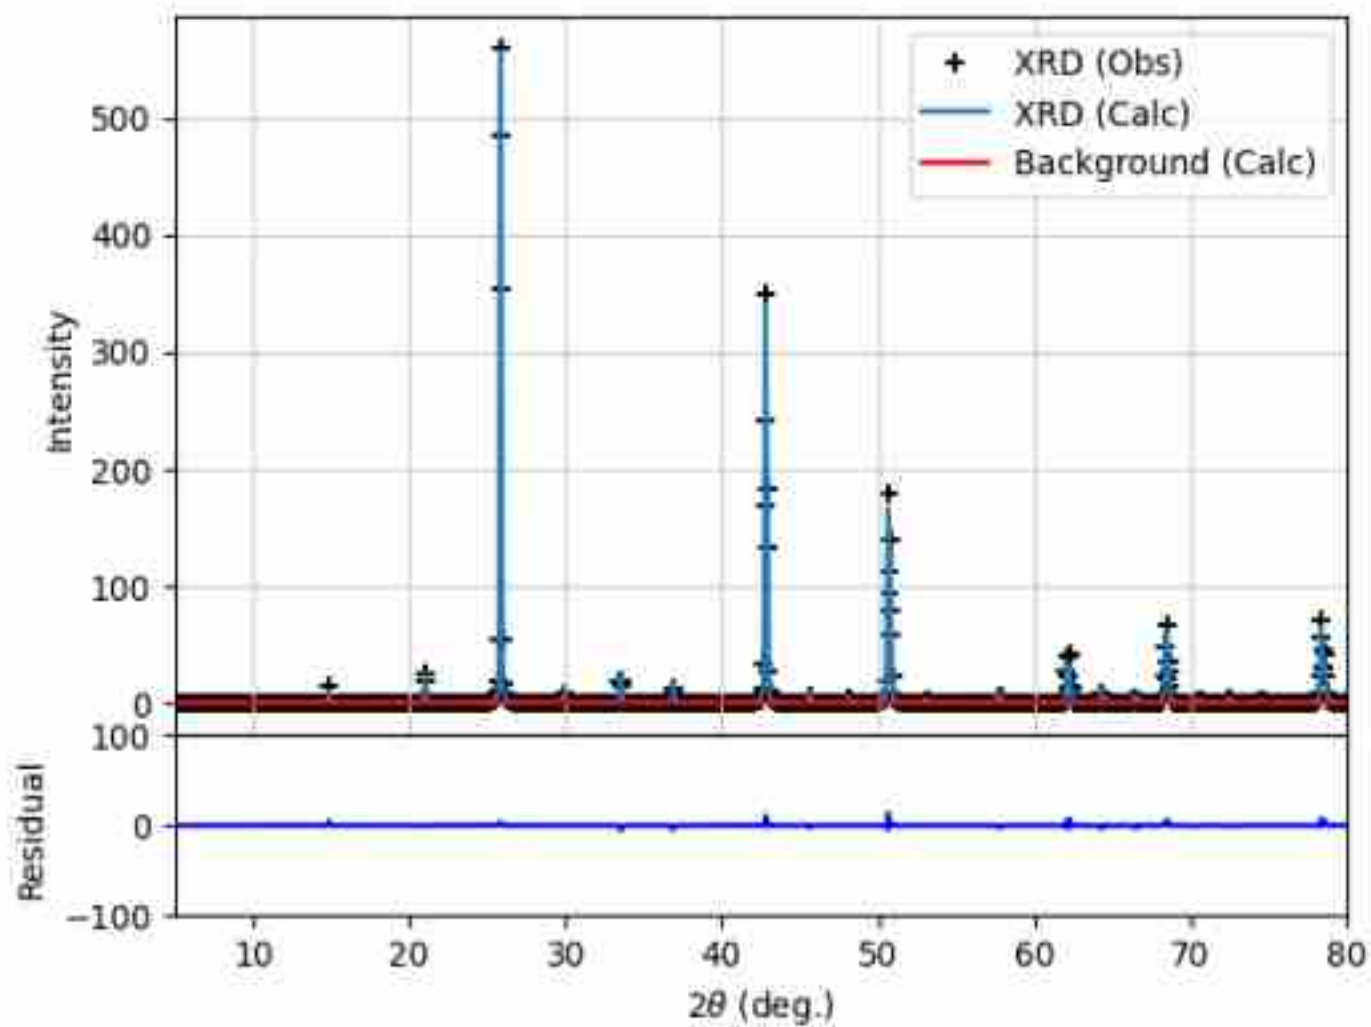

| RMSE before RR | Rwp     | RMSE after RR |
|----------------|---------|---------------|
| 0.014          | 7.42469 | 0.02699       |

# In1Ga1P2

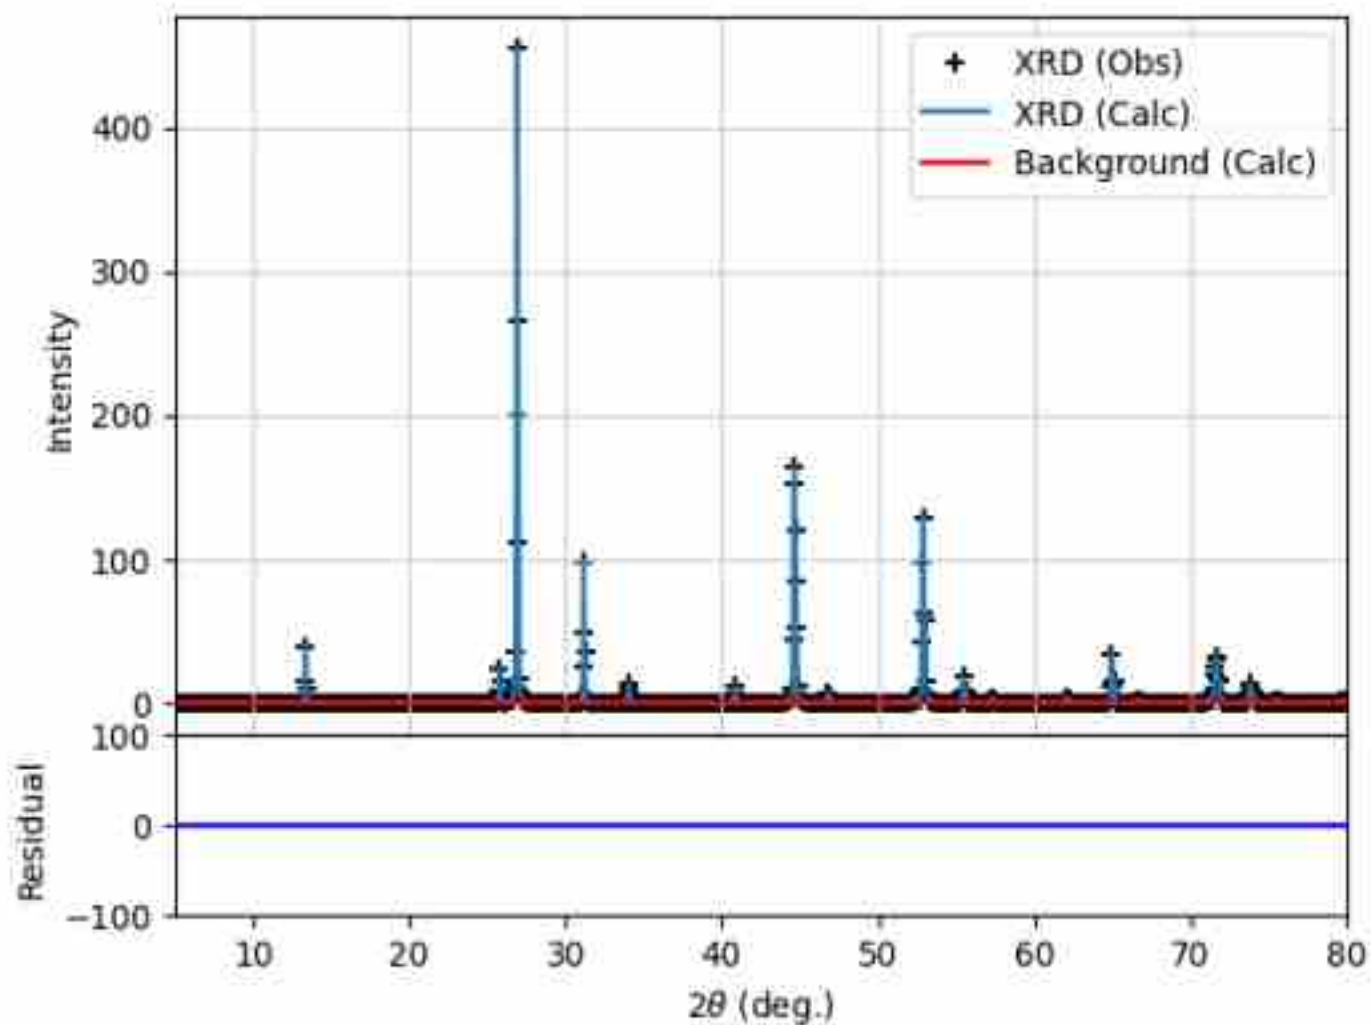

| RMSE before RR | Rwp     | RMSE after RR |
|----------------|---------|---------------|
| 0.014          | 0.00166 | 0.00017       |

# In<sub>2</sub>Ag<sub>2</sub>Te<sub>4</sub>

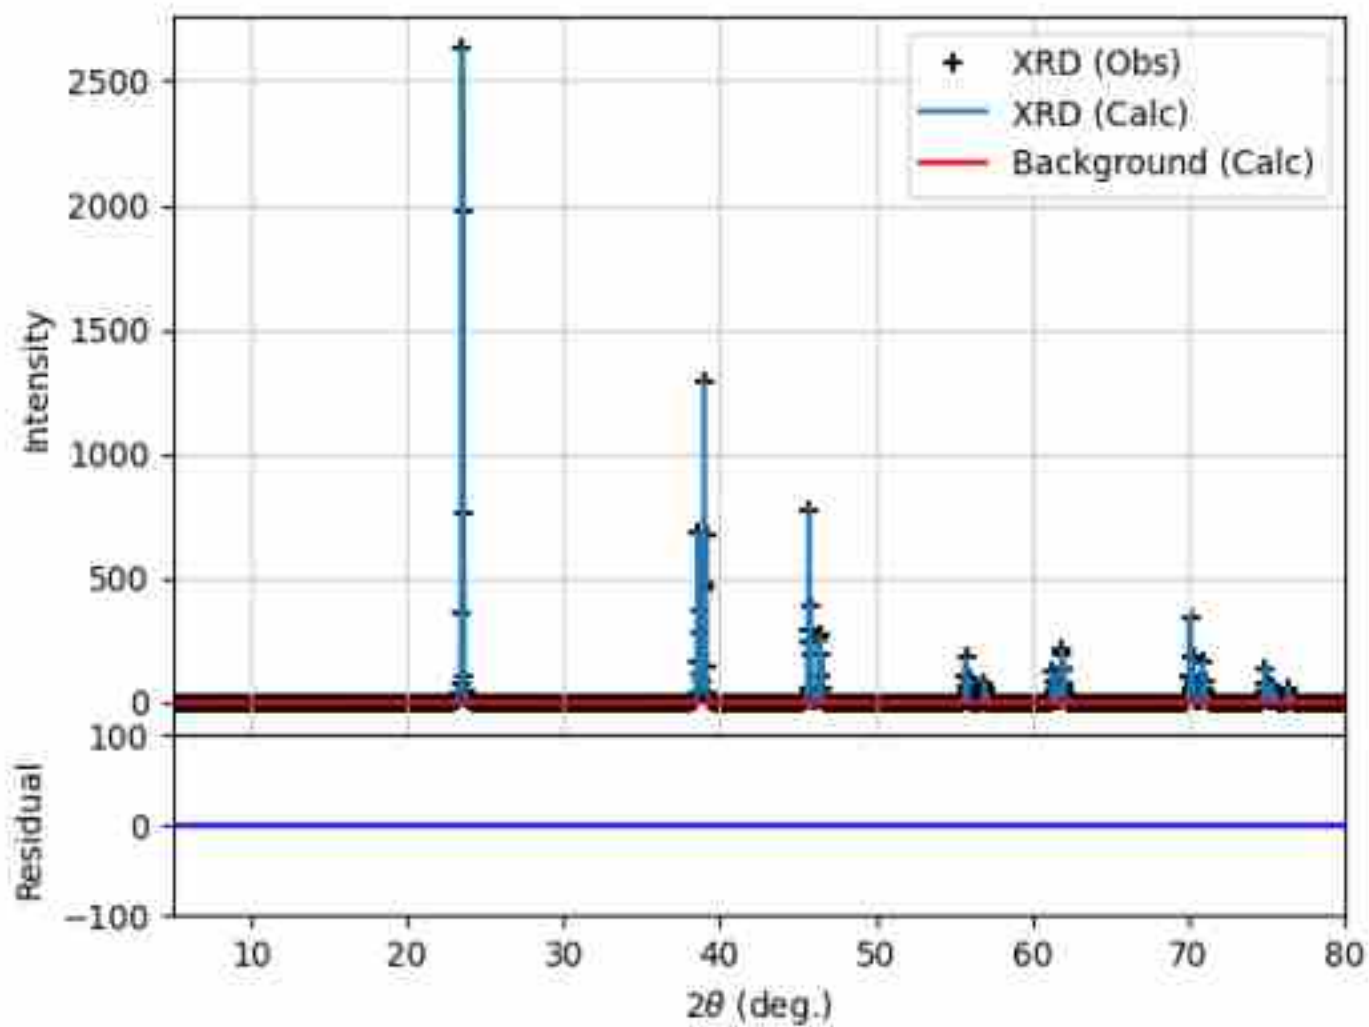

| RMSE before RR | Rwp     | RMSE after RR |
|----------------|---------|---------------|
| 0.014          | 0.00474 | 0.00023       |

# In<sub>2</sub>Br<sub>2</sub>

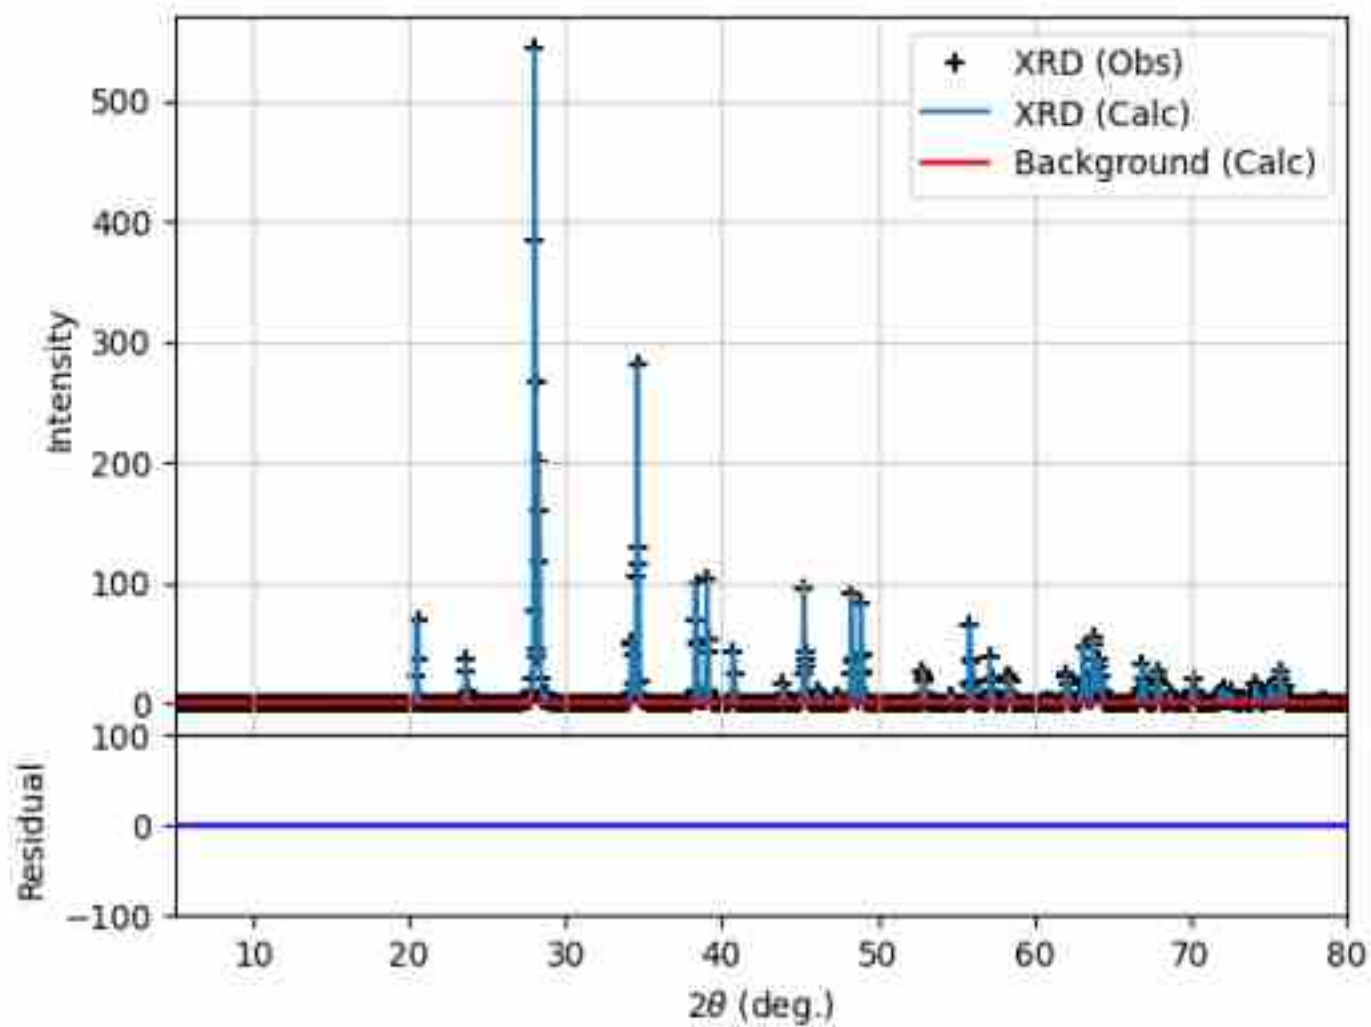

| RMSE before RR | Rwp     | RMSE after RR |
|----------------|---------|---------------|
| 0.014          | 0.00372 | 0.00017       |

# K<sub>2</sub>CuF<sub>4</sub>

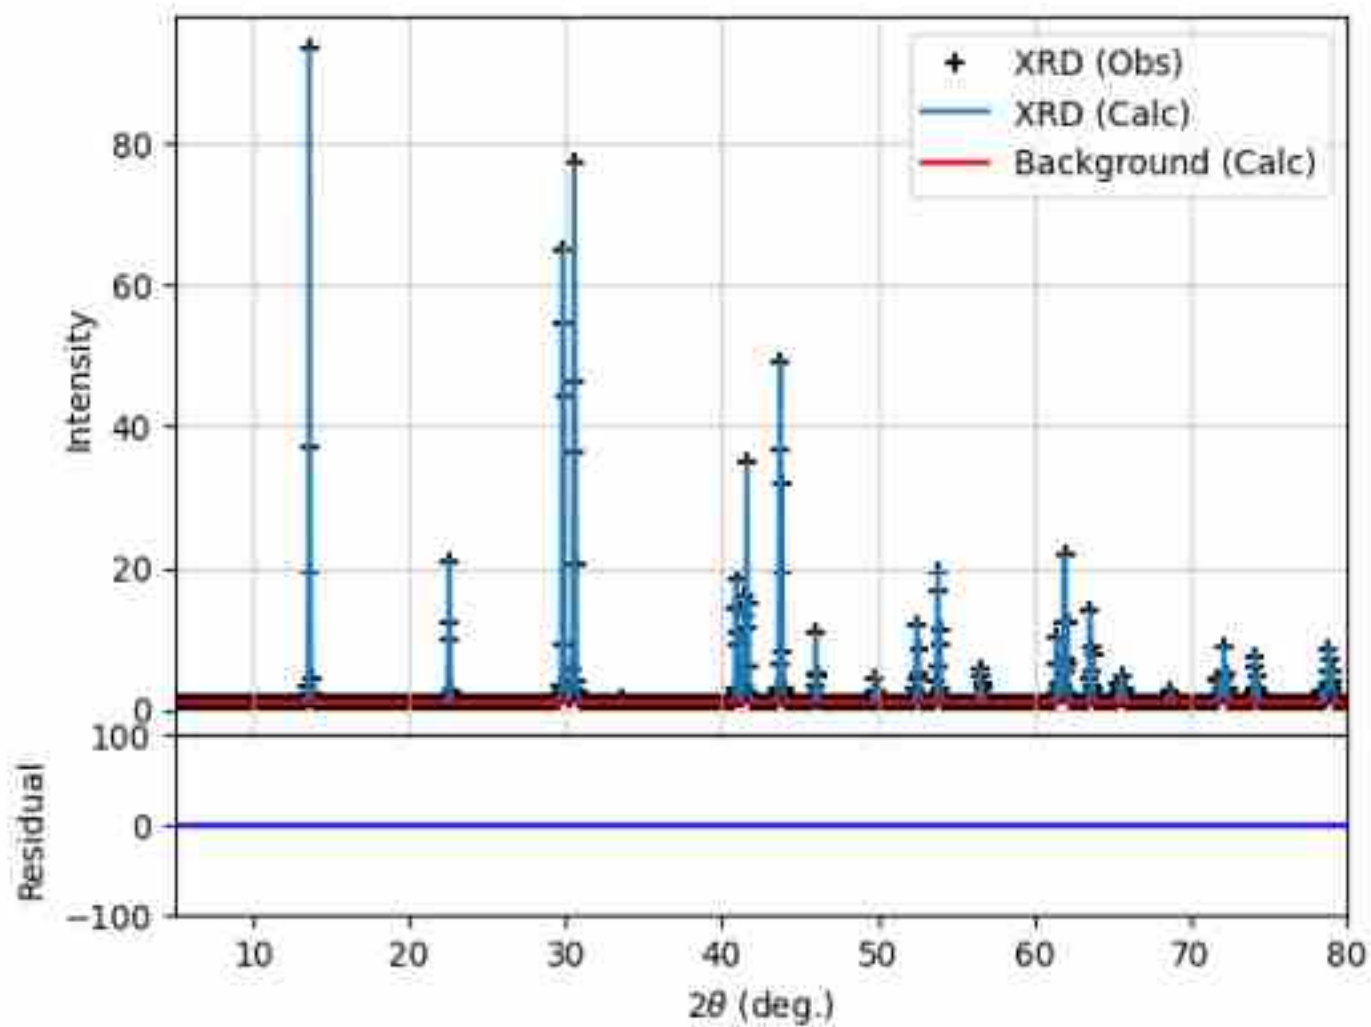

| RMSE before RR | Rwp     | RMSE after RR |
|----------------|---------|---------------|
| 0.014          | 0.00246 | 0.00073       |



# K<sub>2</sub>In<sub>1</sub>Cu<sub>1</sub>Cl<sub>6</sub>

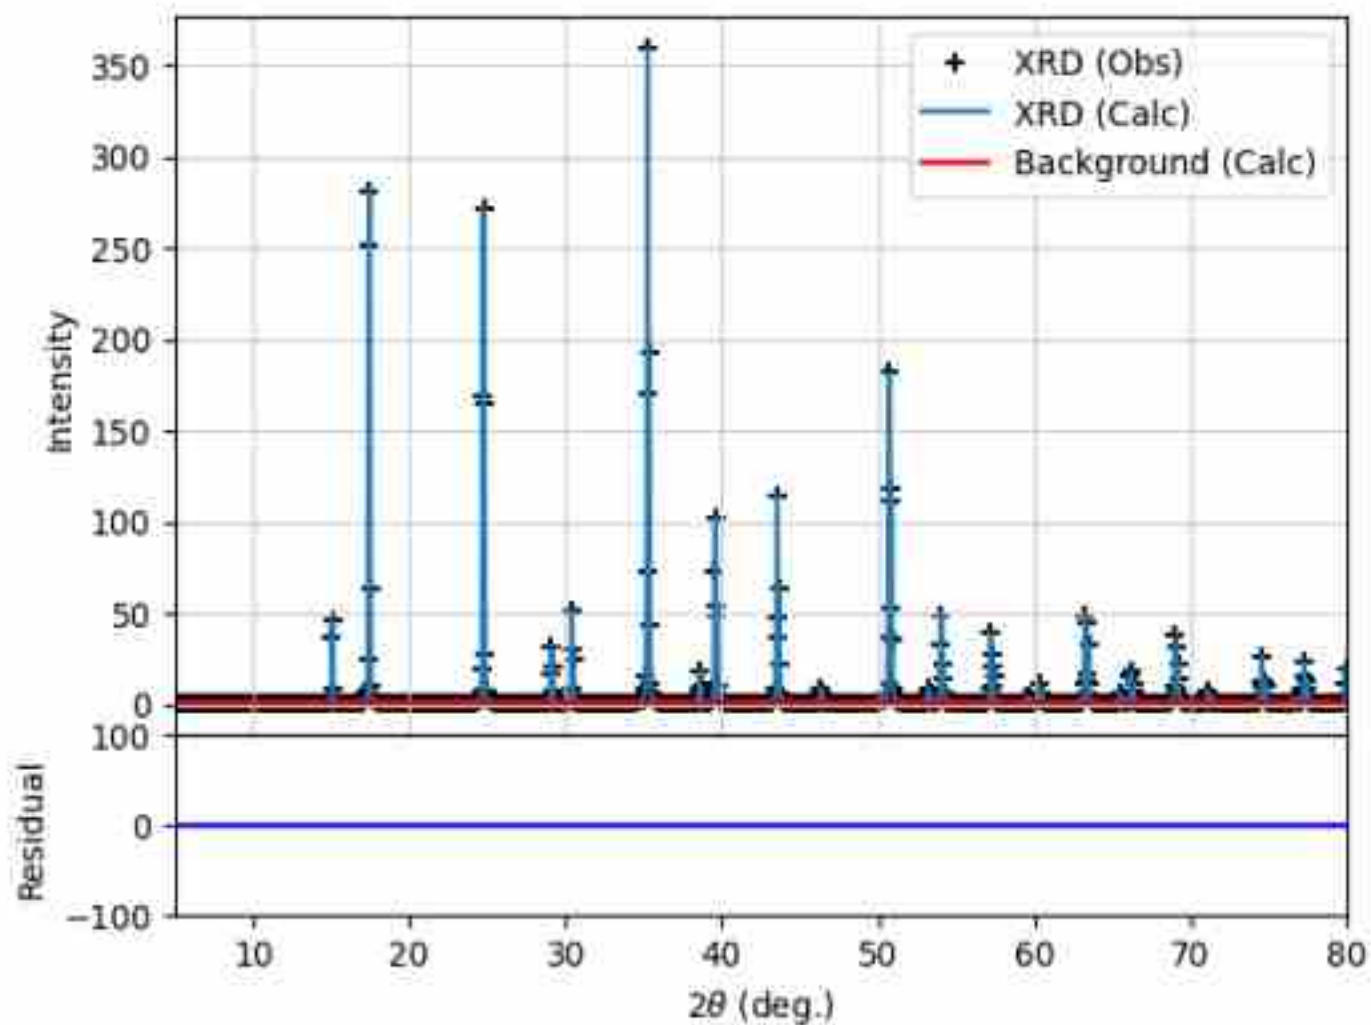

| RMSE before RR | Rwp     | RMSE after RR |
|----------------|---------|---------------|
| 0.014          | 0.02915 | 0.00376       |

# K<sub>2</sub>Li<sub>1</sub>Tl<sub>1</sub>Br<sub>6</sub>

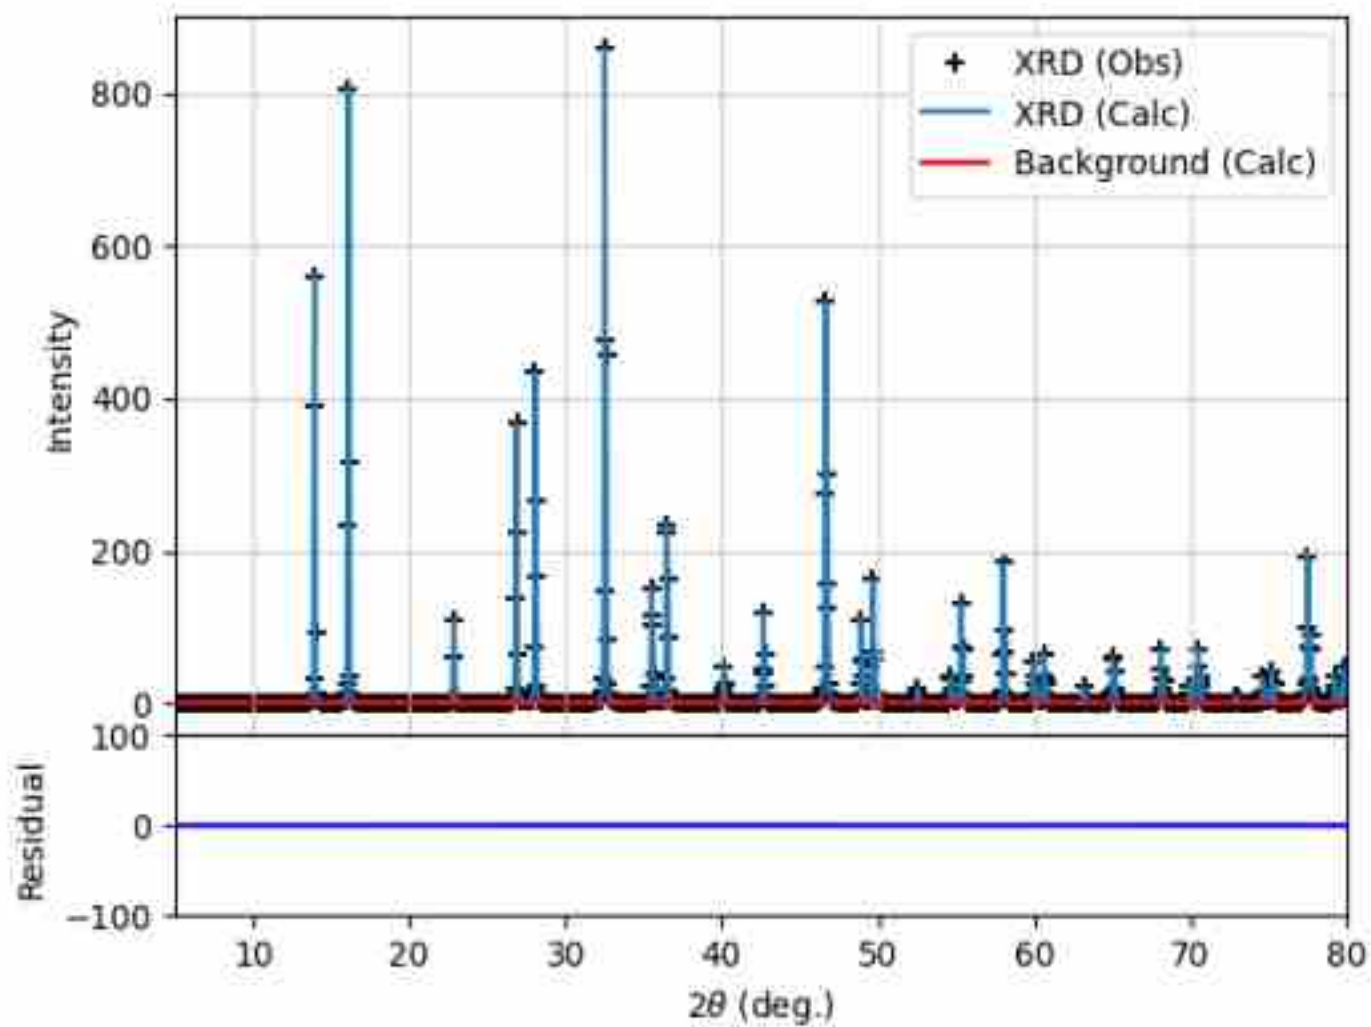

| RMSE before RR | Rwp     | RMSE after RR |
|----------------|---------|---------------|
| 0.014          | 0.07116 | 0.00852       |

# K2Pt1C2

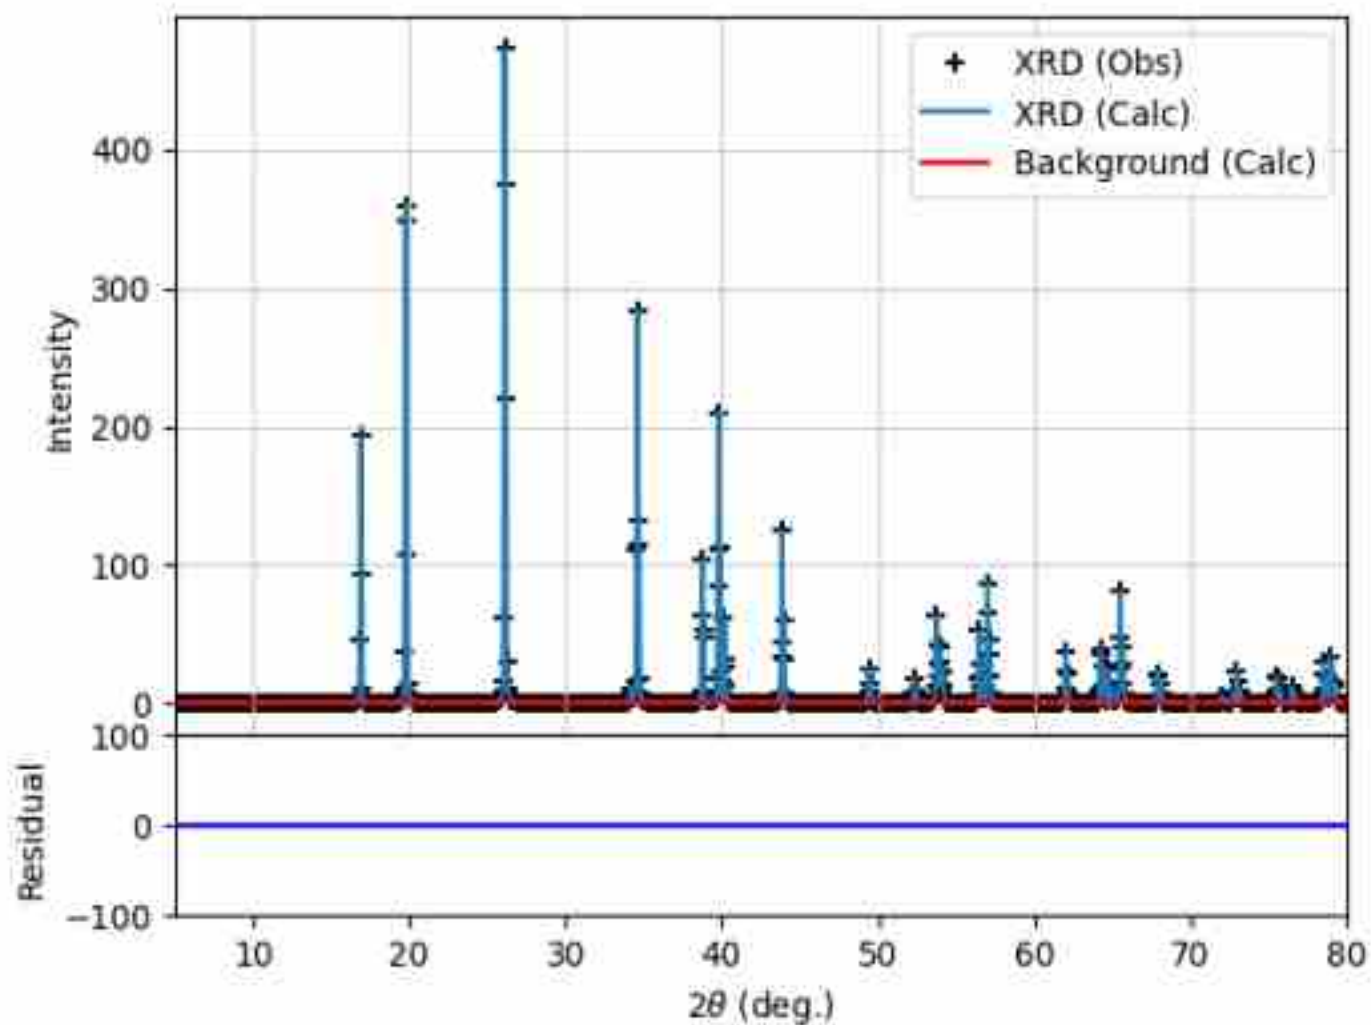

| RMSE before RR | Rwp     | RMSE after RR |
|----------------|---------|---------------|
| 0.014          | 0.00303 | 0.00143       |

# K<sub>2</sub>Sm<sub>2</sub>Pd<sub>2</sub>O<sub>6</sub>

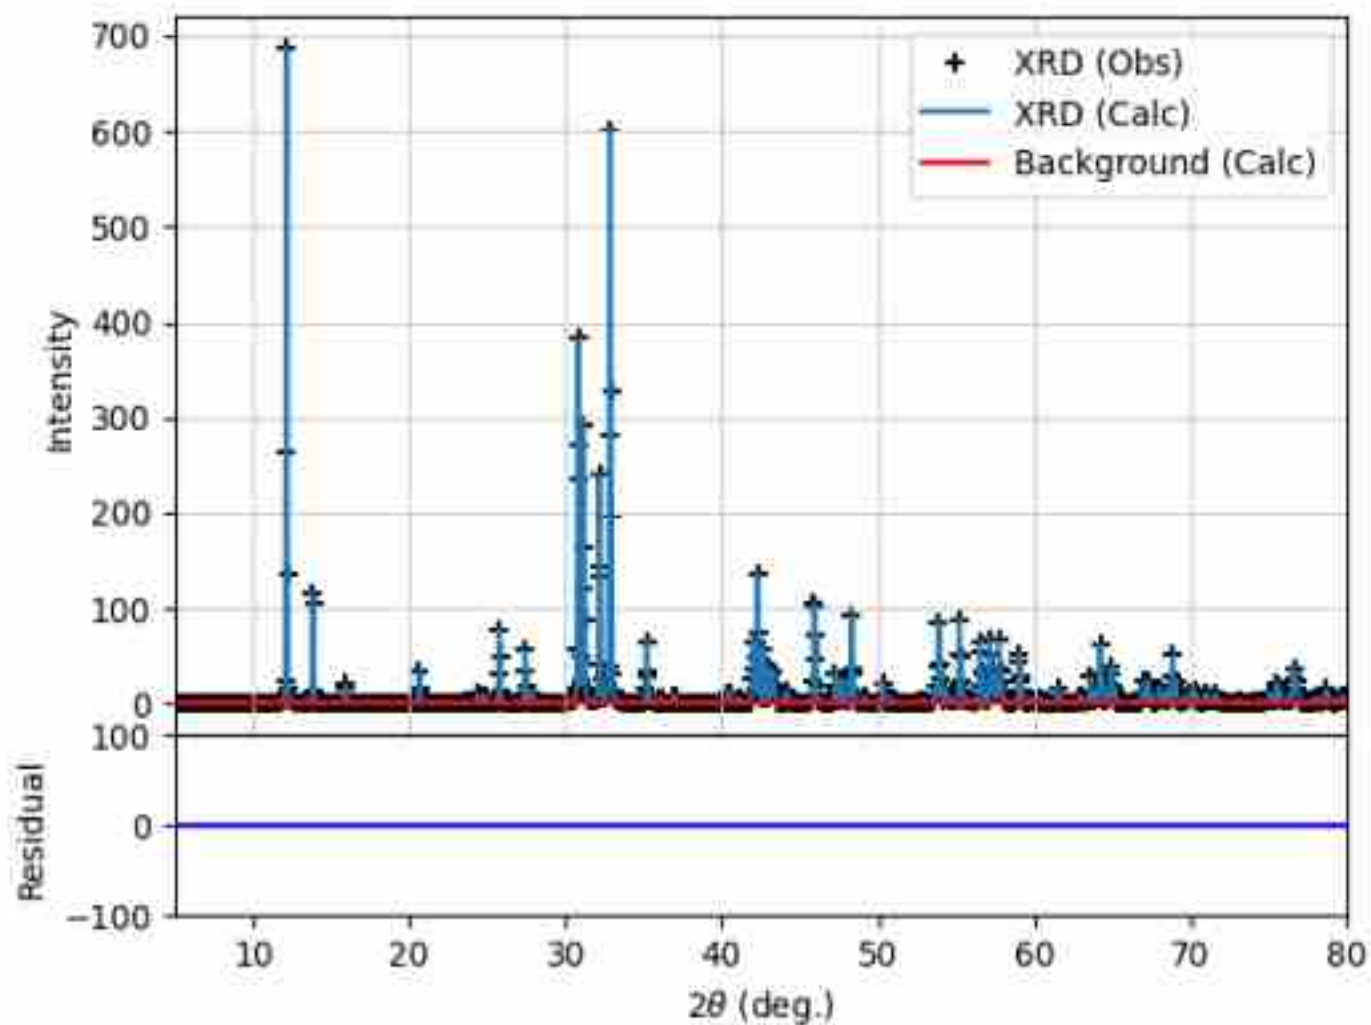

| RMSE before RR | Rwp    | RMSE after RR |
|----------------|--------|---------------|
| 0.014          | 0.0036 | 0.00055       |

# K<sub>2</sub>TlCuBr<sub>6</sub>

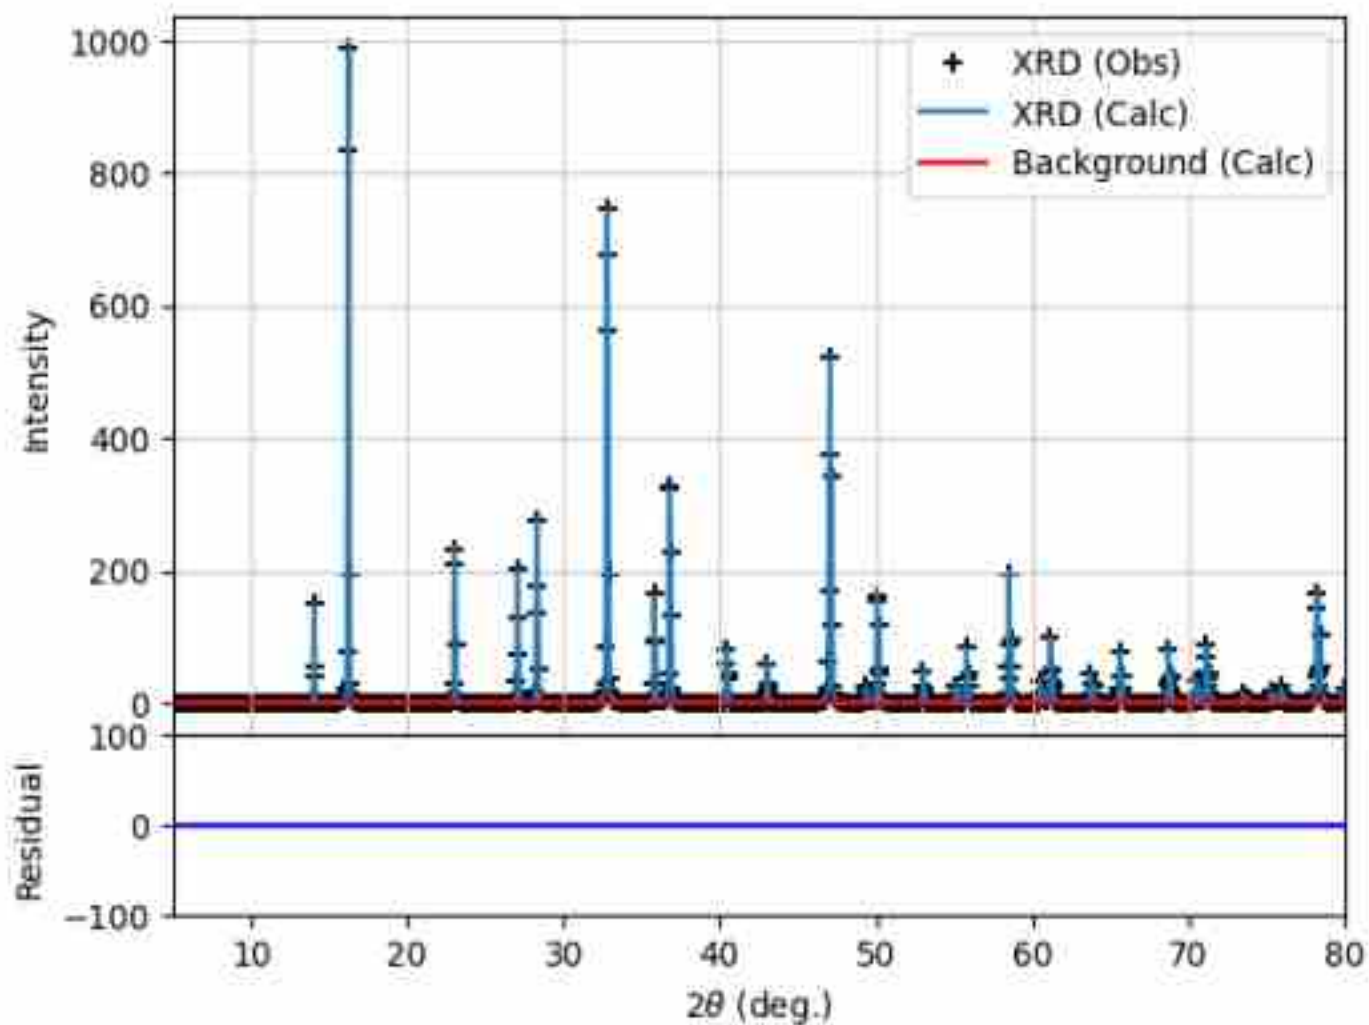

| RMSE before RR | Rwp     | RMSE after RR |
|----------------|---------|---------------|
| 0.014          | 0.05807 | 0.00381       |

# K<sub>2</sub>TlCuF<sub>6</sub>

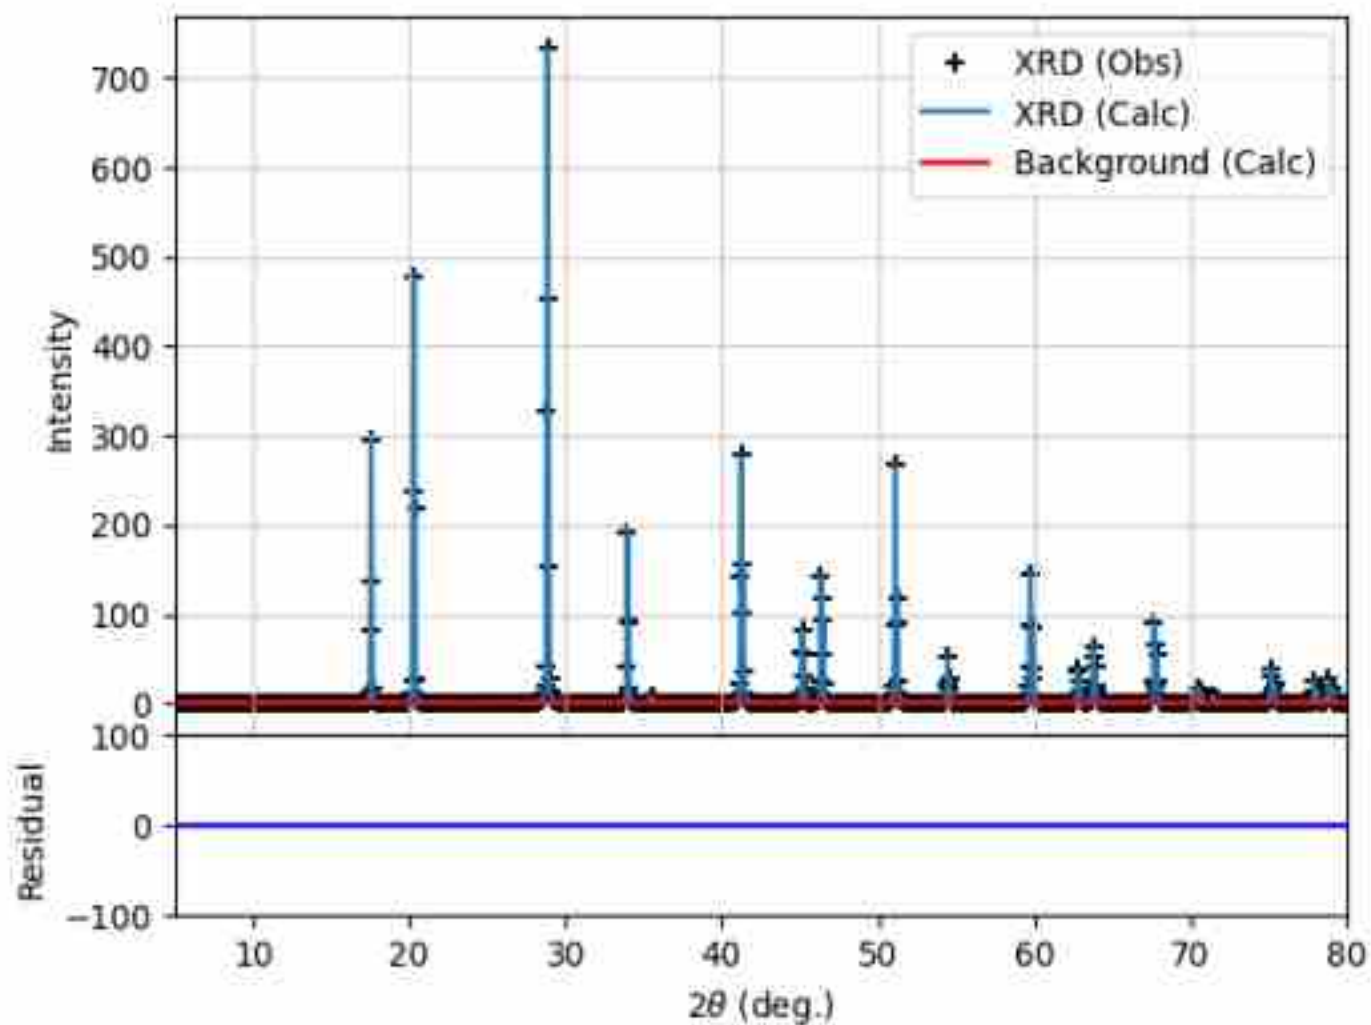

| RMSE before RR | Rwp     | RMSE after RR |
|----------------|---------|---------------|
| 0.014          | 0.01088 | 0.00344       |

# K3Sb2Au3

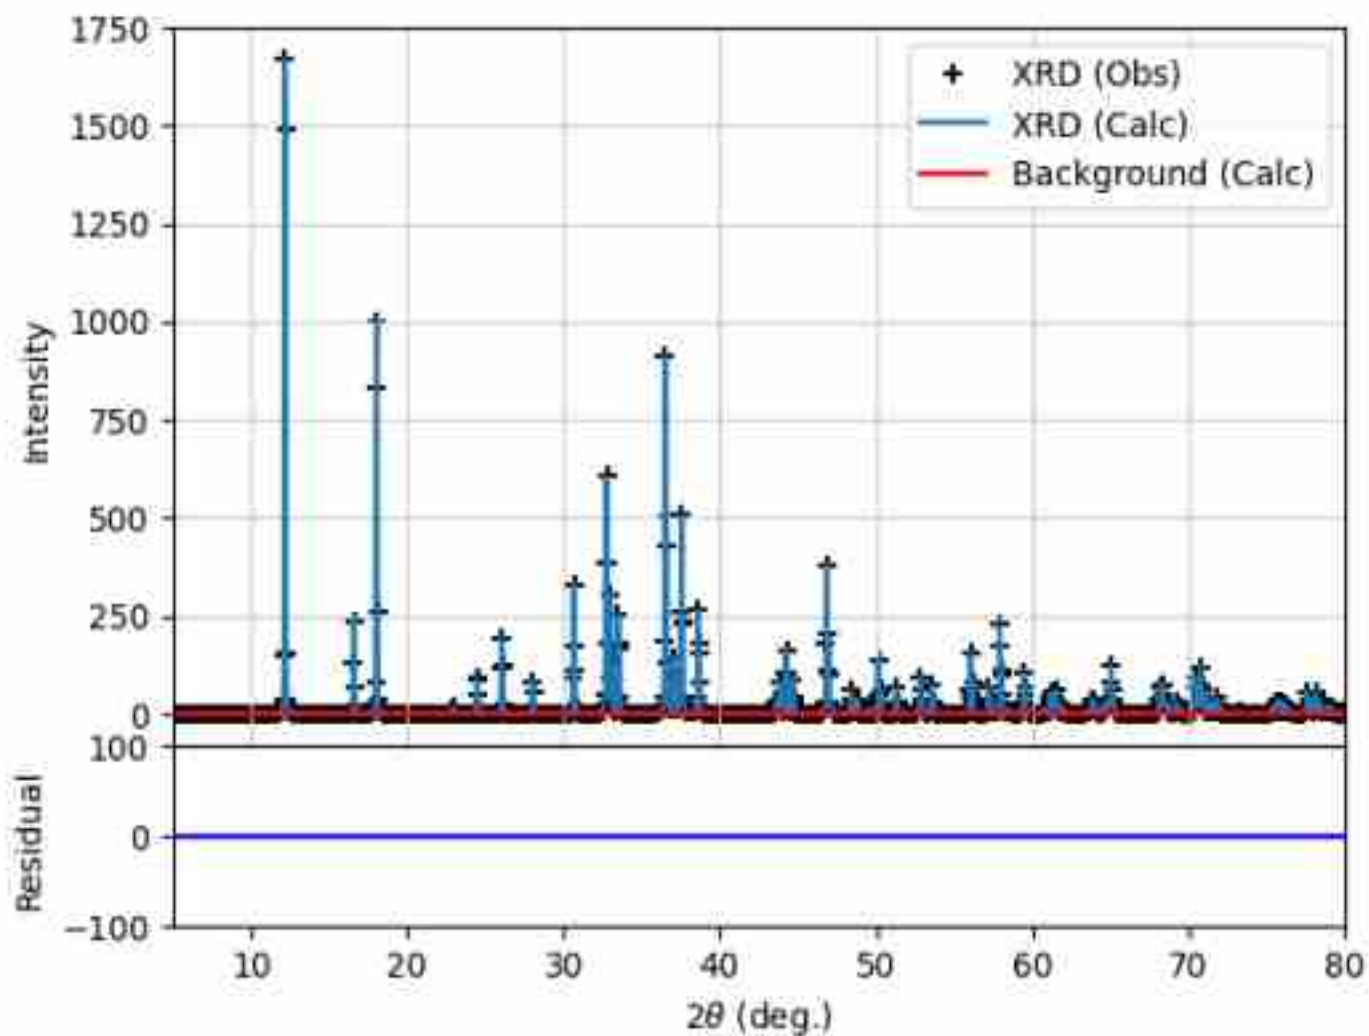

| RMSE before RR | Rwp     | RMSE after RR |
|----------------|---------|---------------|
| 0.014          | 0.00322 | 0.00047       |

# K<sub>4</sub>Cu<sub>2</sub>P<sub>2</sub>

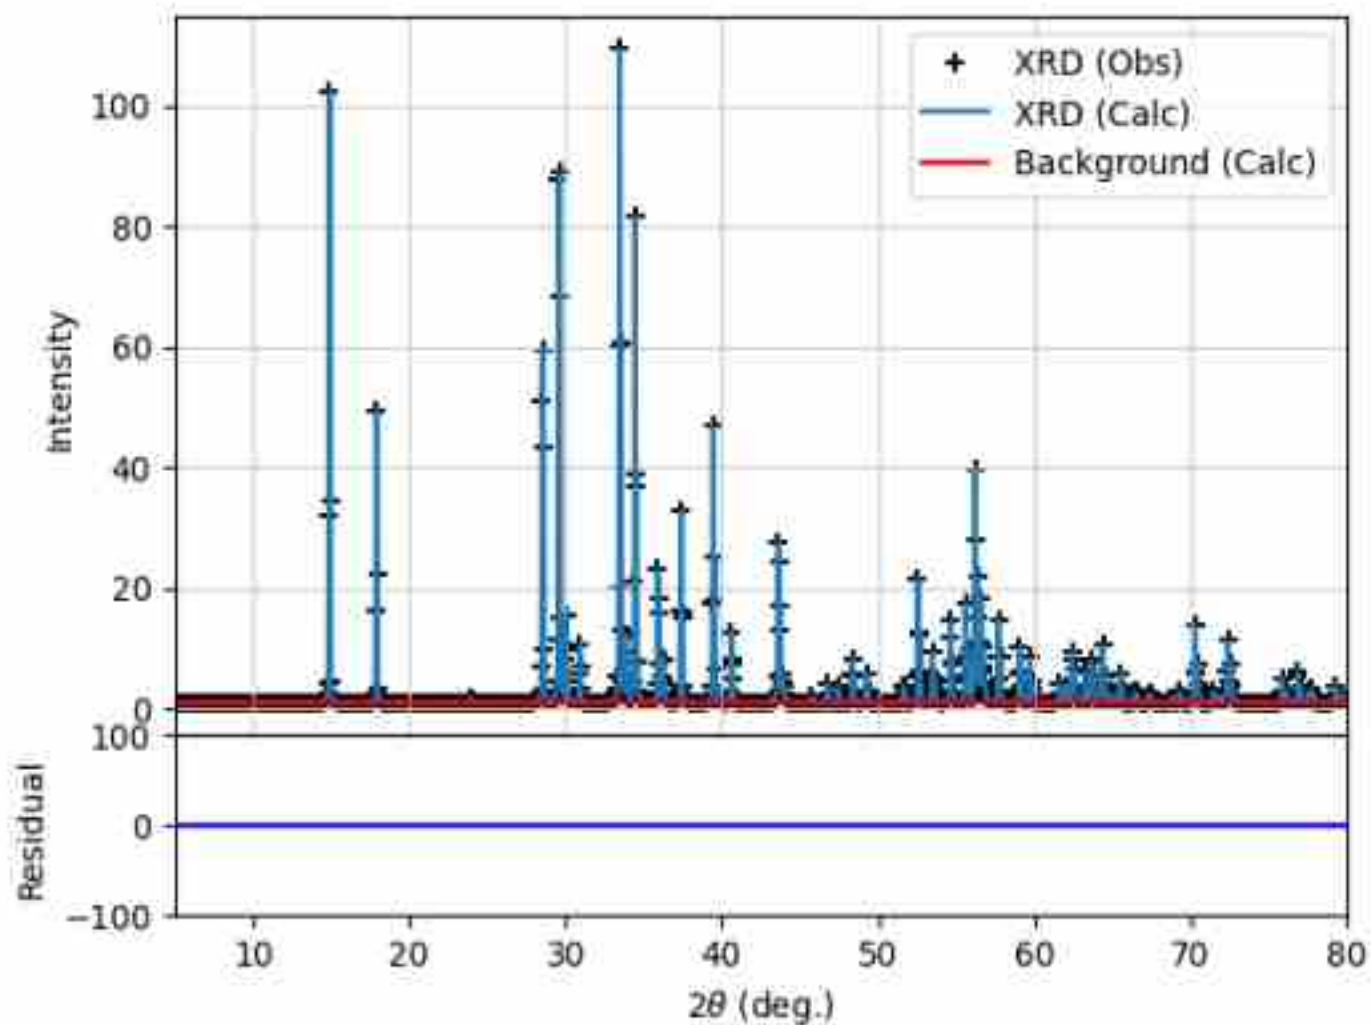

| RMSE before RR | Rwp     | RMSE after RR |
|----------------|---------|---------------|
| 0.014          | 0.00294 | 0.00045       |



# K<sub>4</sub>Hg<sub>1</sub>P<sub>2</sub>

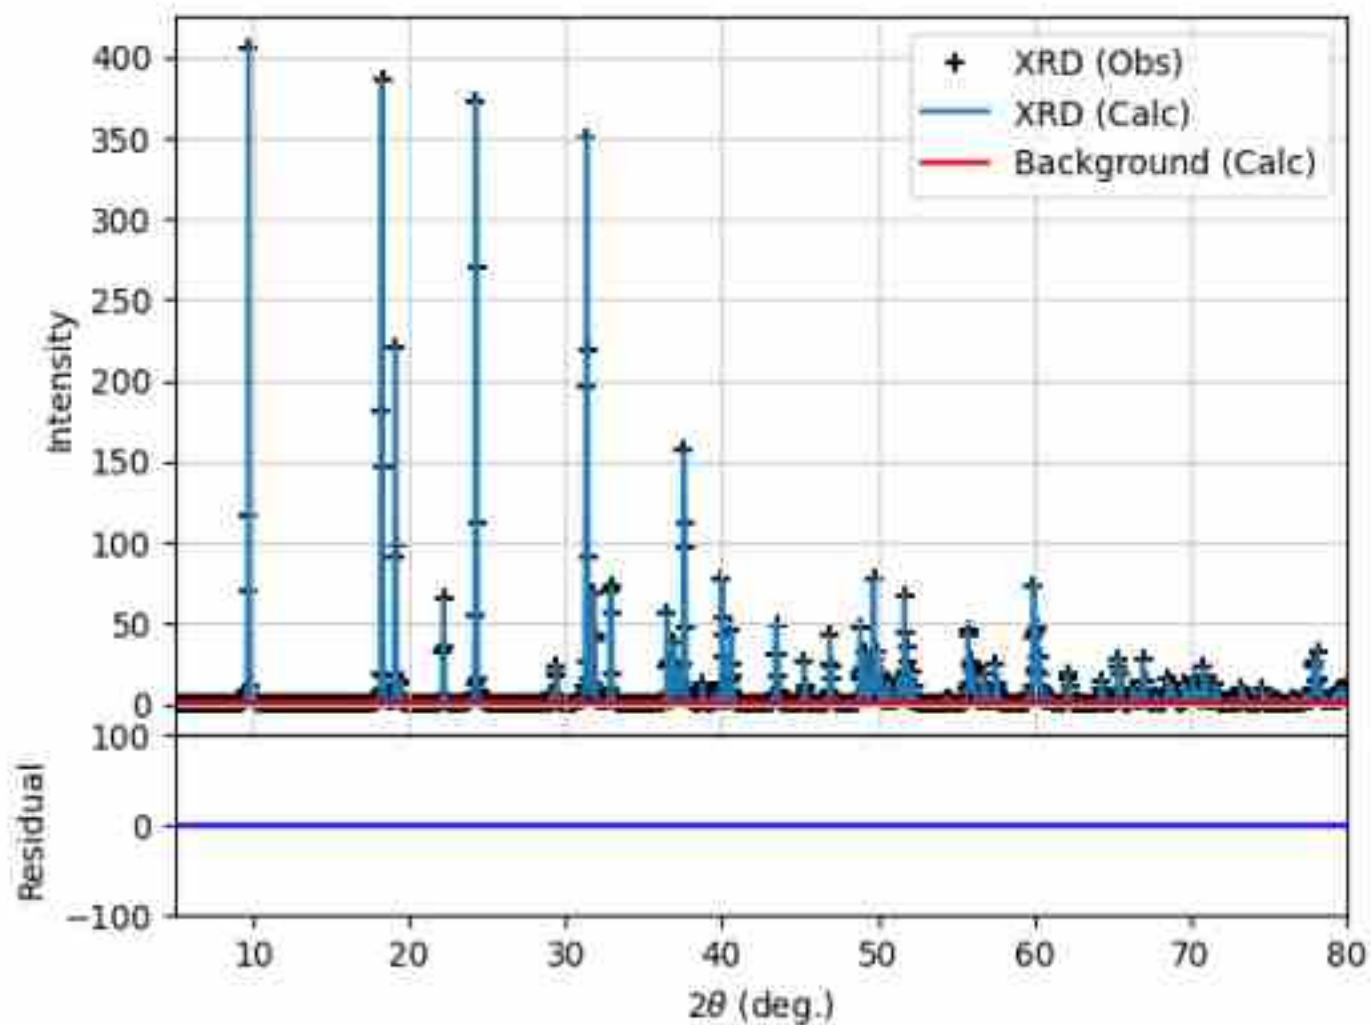

| RMSE before RR | Rwp     | RMSE after RR |
|----------------|---------|---------------|
| 0.014          | 0.00326 | 0.00069       |

# La1Co3Ni2

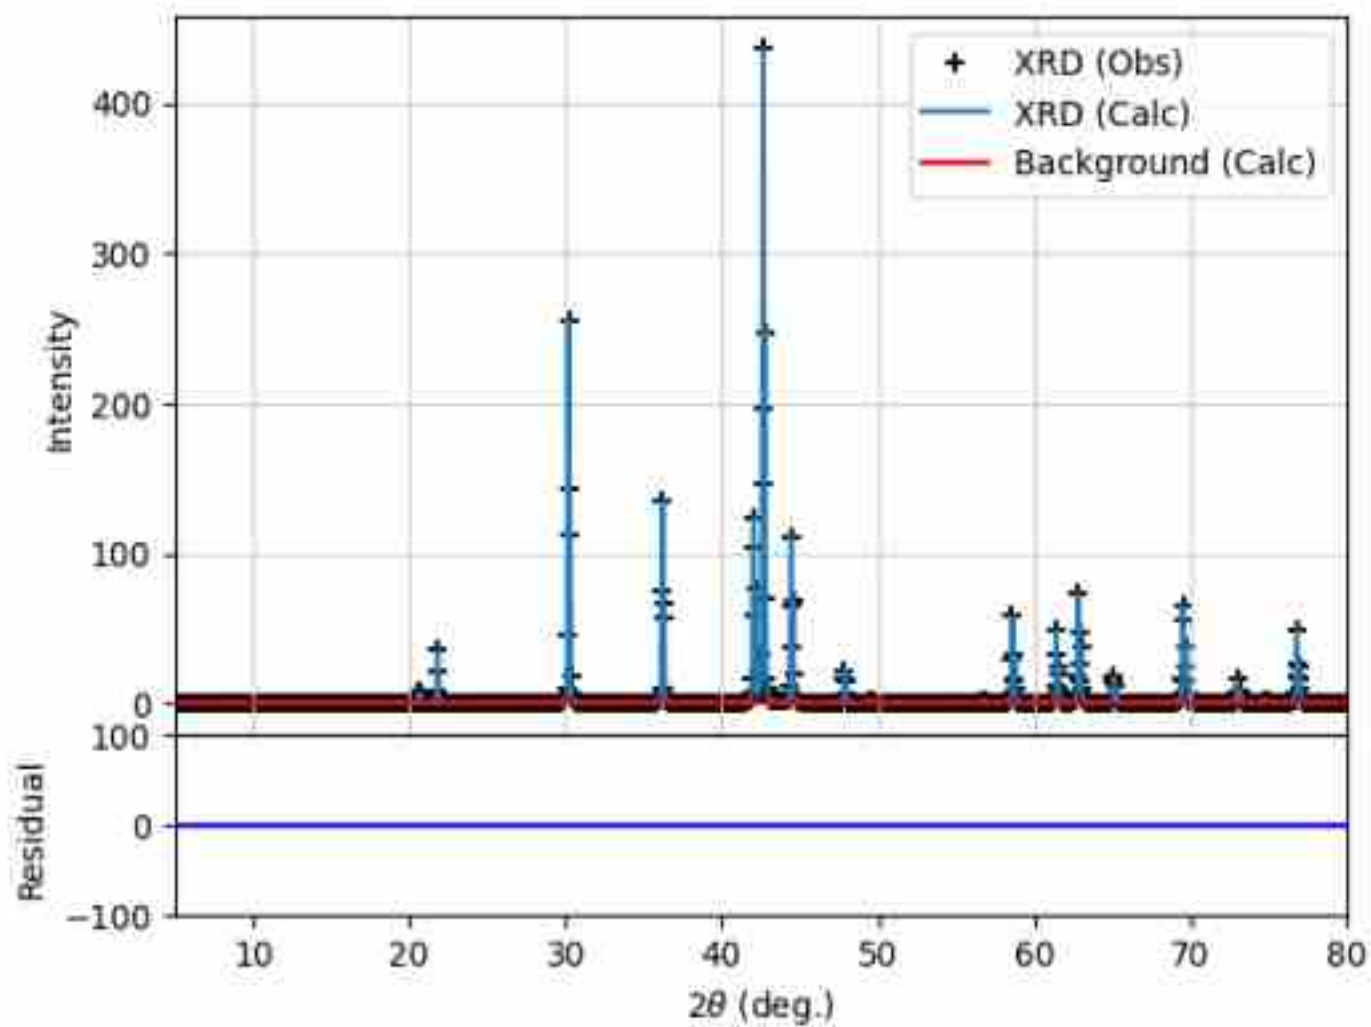

| RMSE before RR | Rwp     | RMSE after RR |
|----------------|---------|---------------|
| 0.014          | 0.00287 | 0.00067       |

# La1Fe1Cu1Ni3

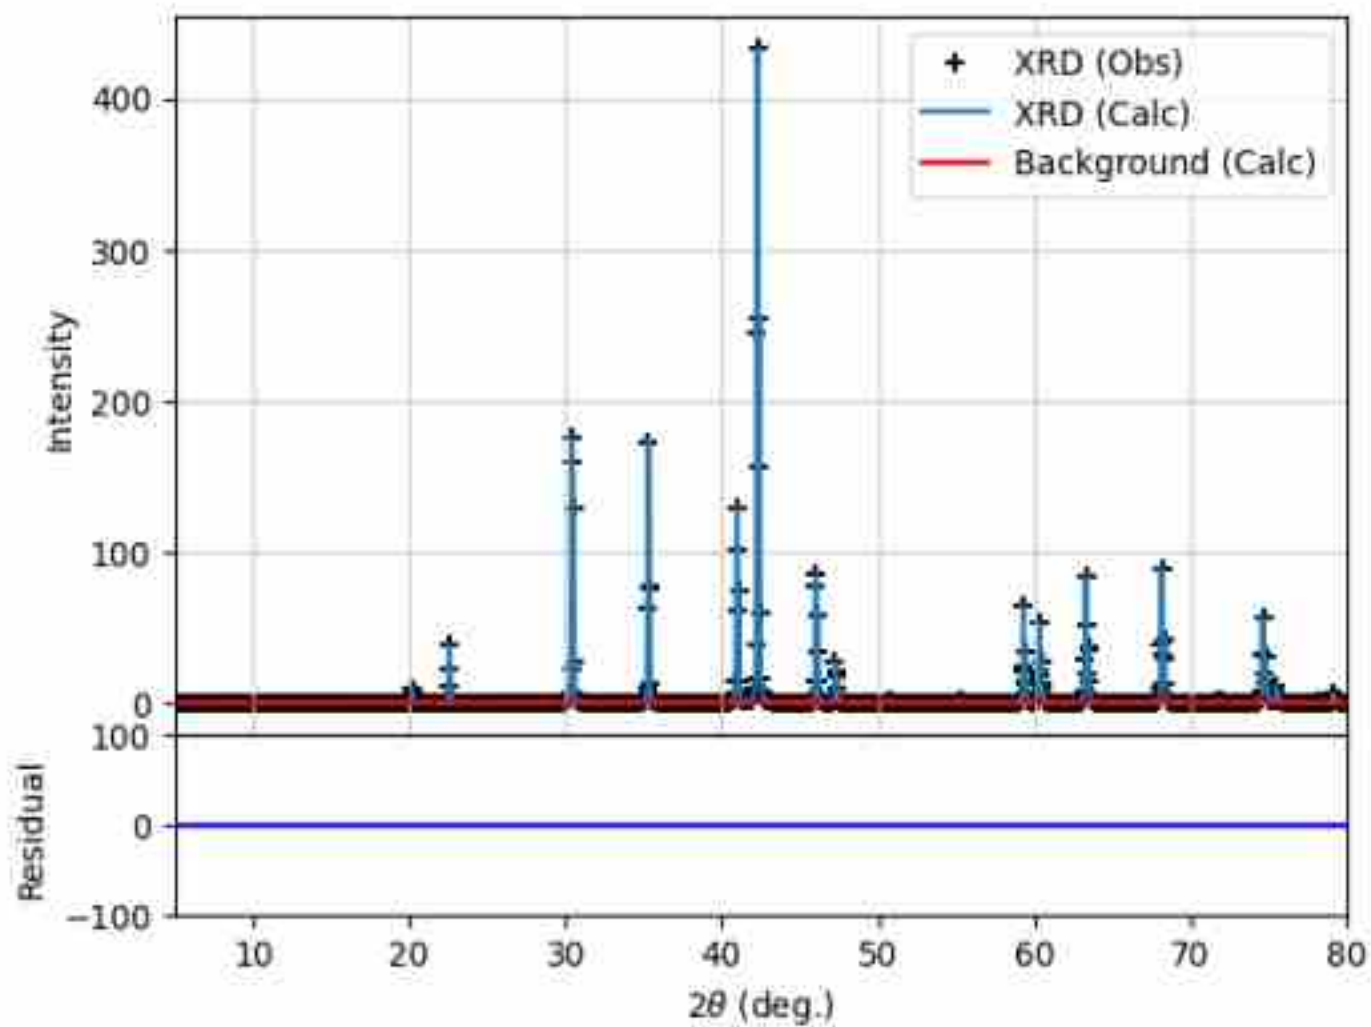

| RMSE before RR | Rwp     | RMSE after RR |
|----------------|---------|---------------|
| 0.014          | 0.05161 | 0.00094       |

# LaMn<sub>2</sub>Si<sub>2</sub>

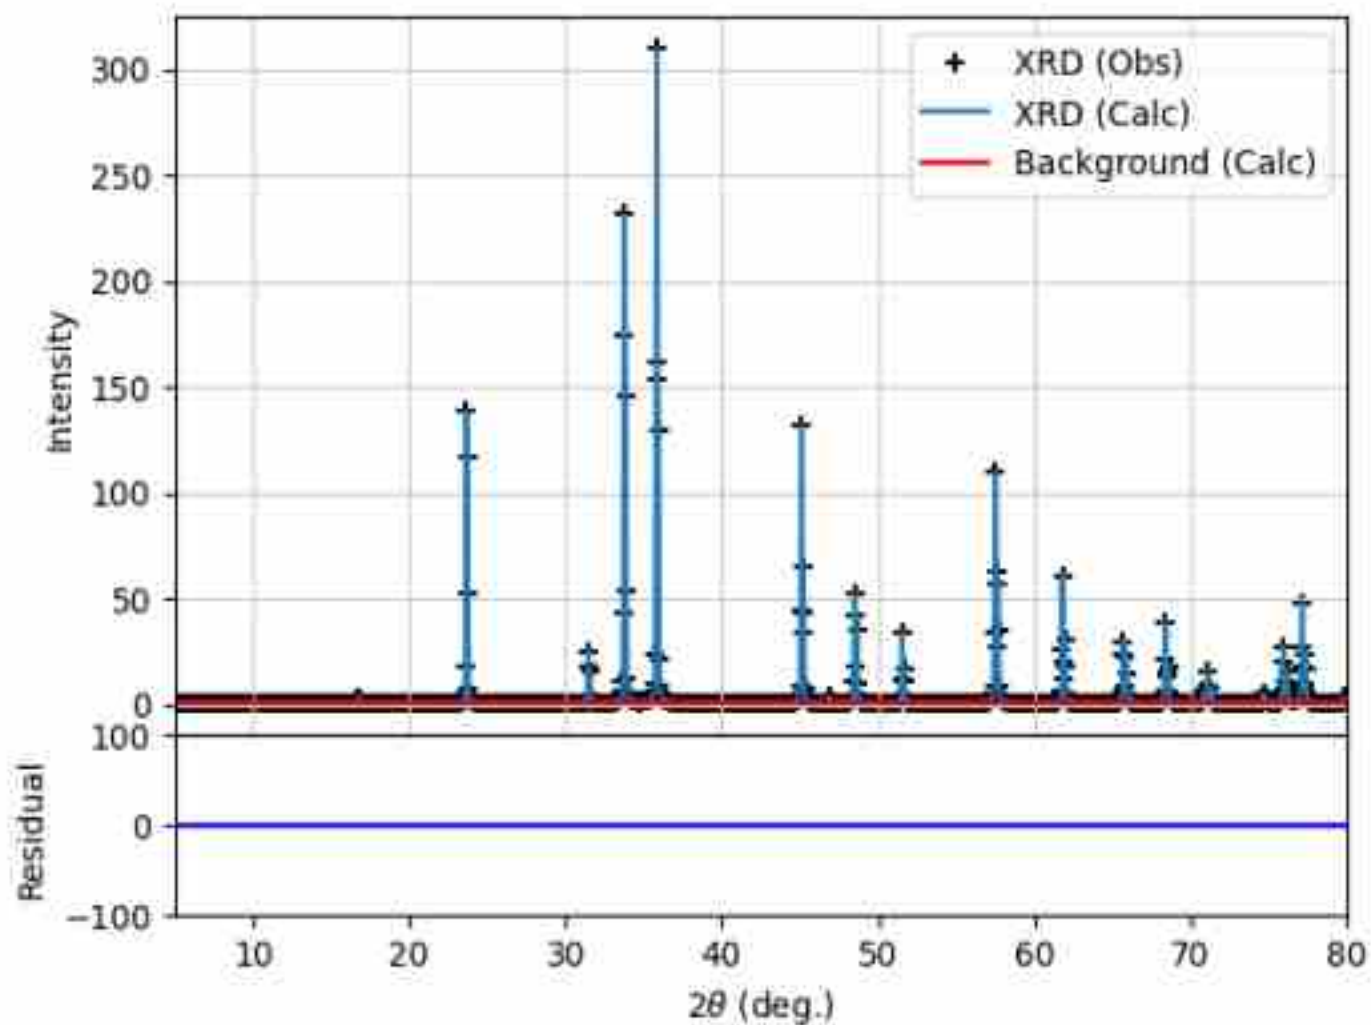

| RMSE before RR | Rwp     | RMSE after RR |
|----------------|---------|---------------|
| 0.014          | 0.00319 | 0.0008        |

# La1Si1Pt3

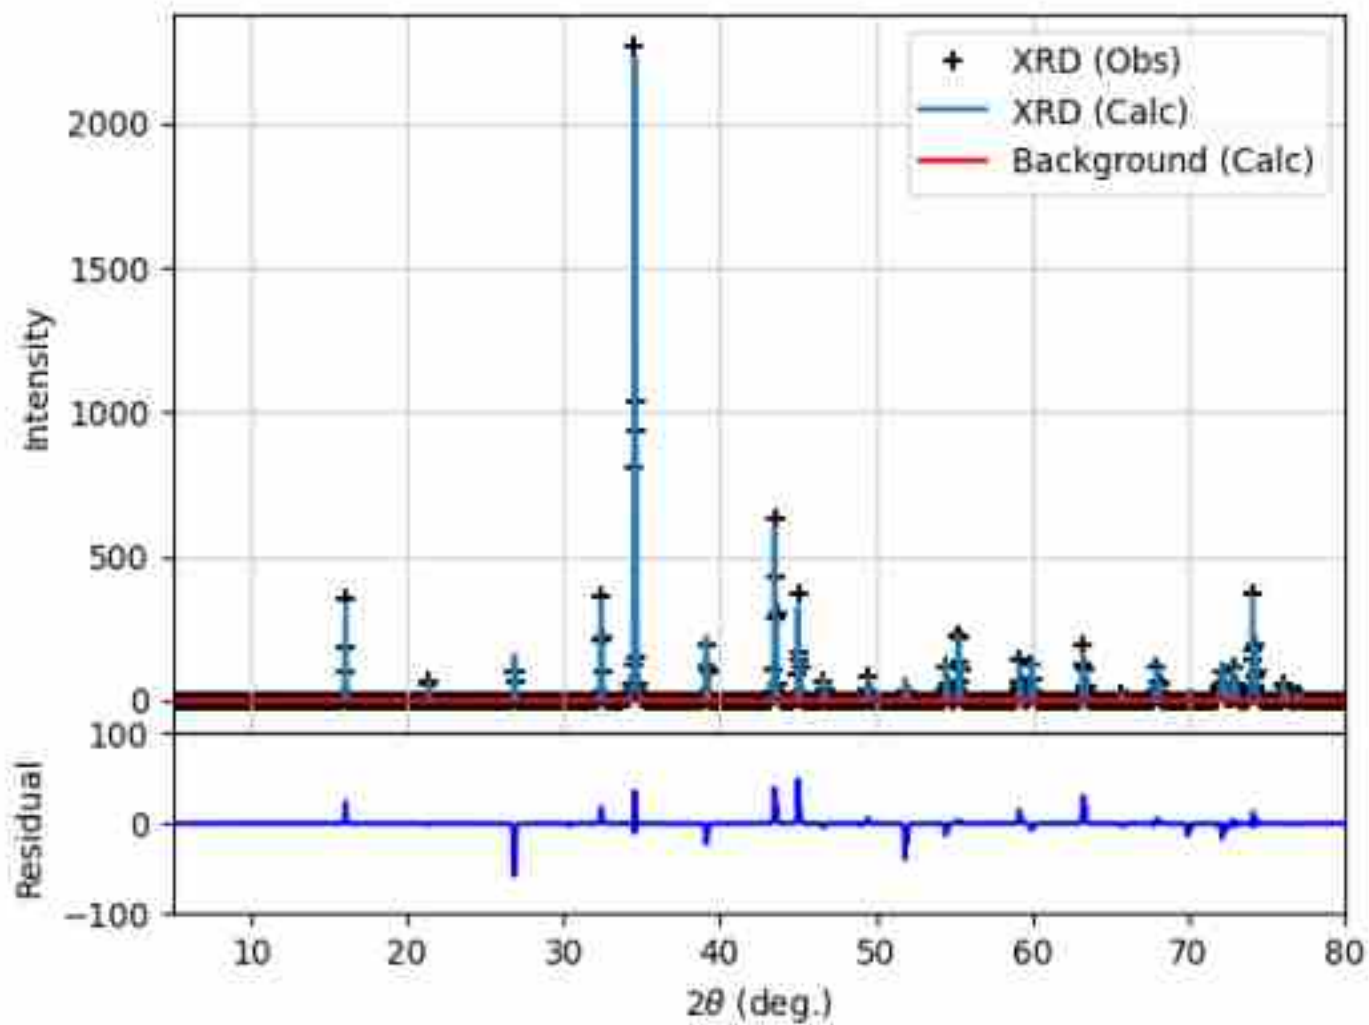

| RMSE before RR | Rwp      | RMSE after RR |
|----------------|----------|---------------|
| 0.014          | 13.56943 | 0.01398       |

# La<sub>1</sub>Y<sub>1</sub>Ni<sub>10</sub>

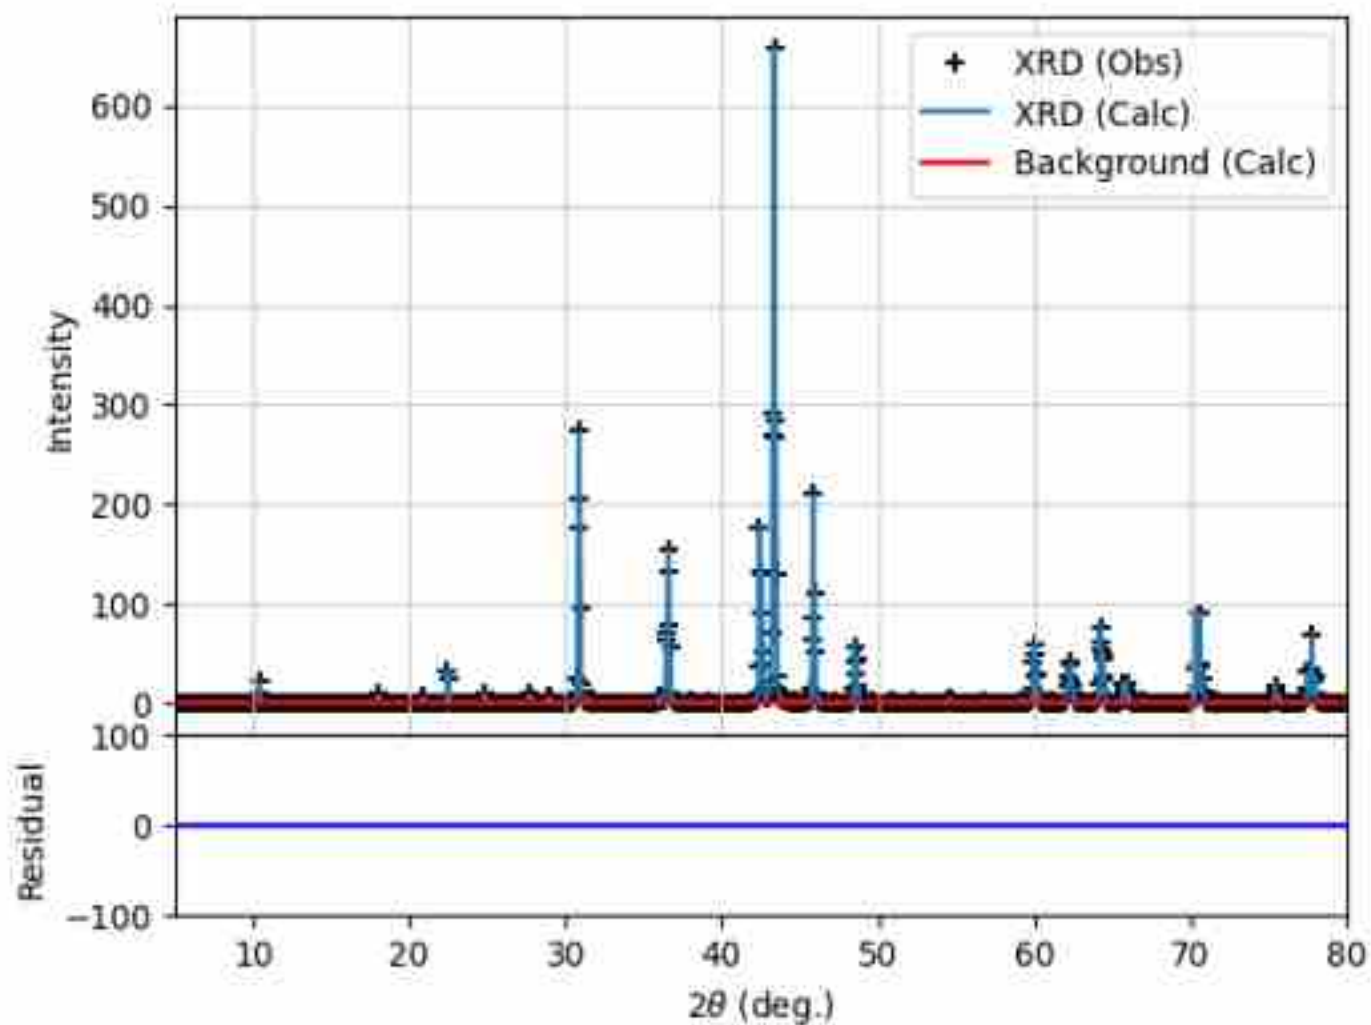

| RMSE before RR | Rwp     | RMSE after RR |
|----------------|---------|---------------|
| 0.014          | 0.00307 | 0.00045       |

# La<sub>2</sub>Ag<sub>2</sub>Sb<sub>4</sub>

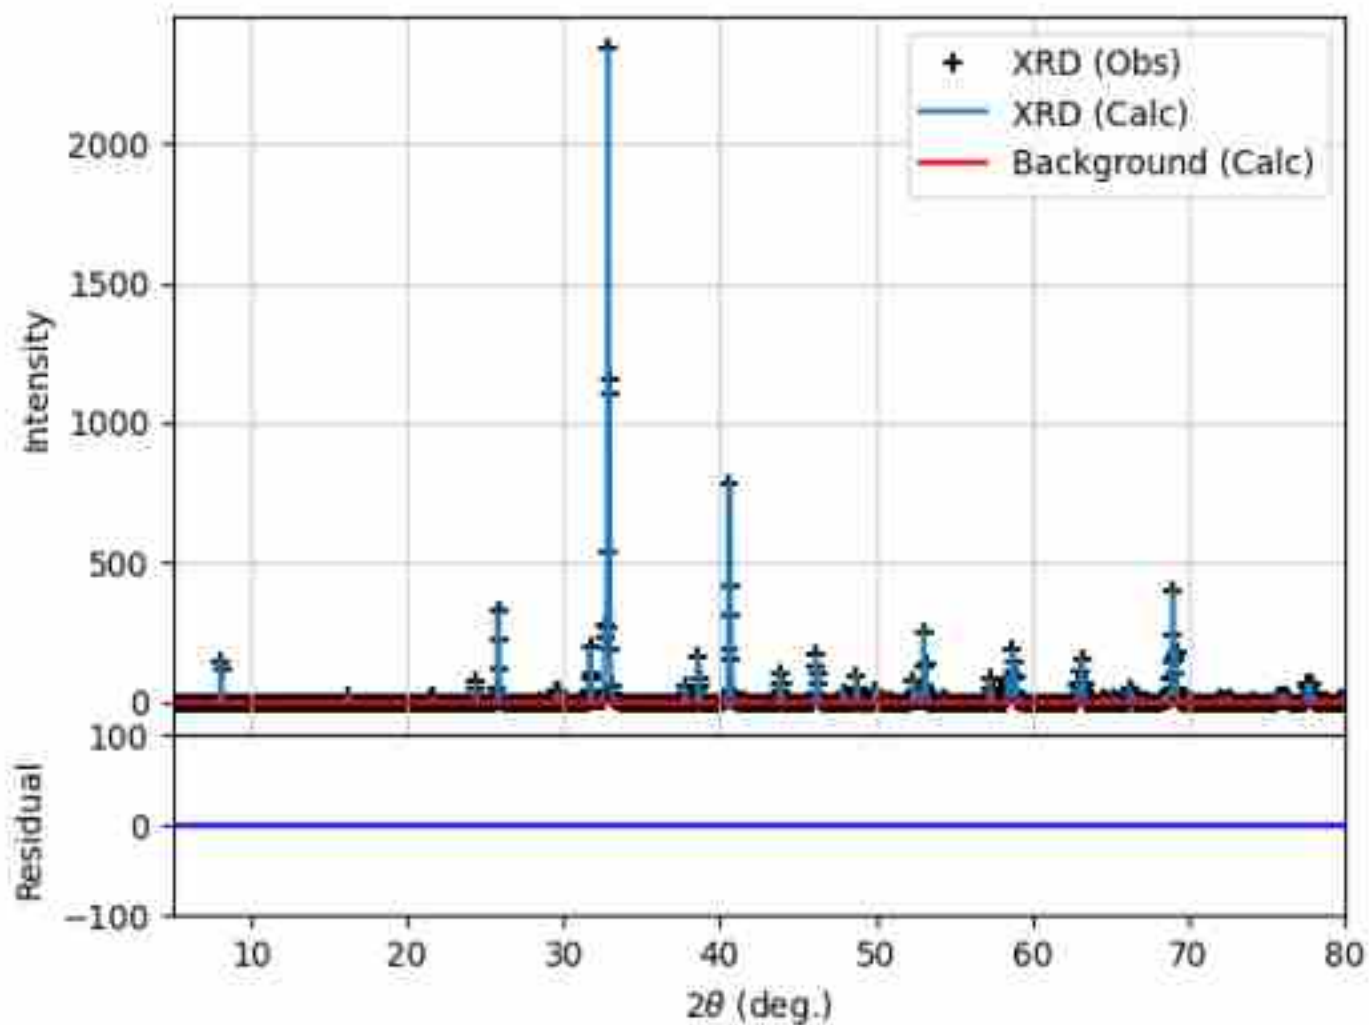

| RMSE before RR | Rwp     | RMSE after RR |
|----------------|---------|---------------|
| 0.014          | 0.00824 | 0.00129       |

# La<sub>2</sub>Cu<sub>2</sub>S<sub>2</sub>O<sub>2</sub>

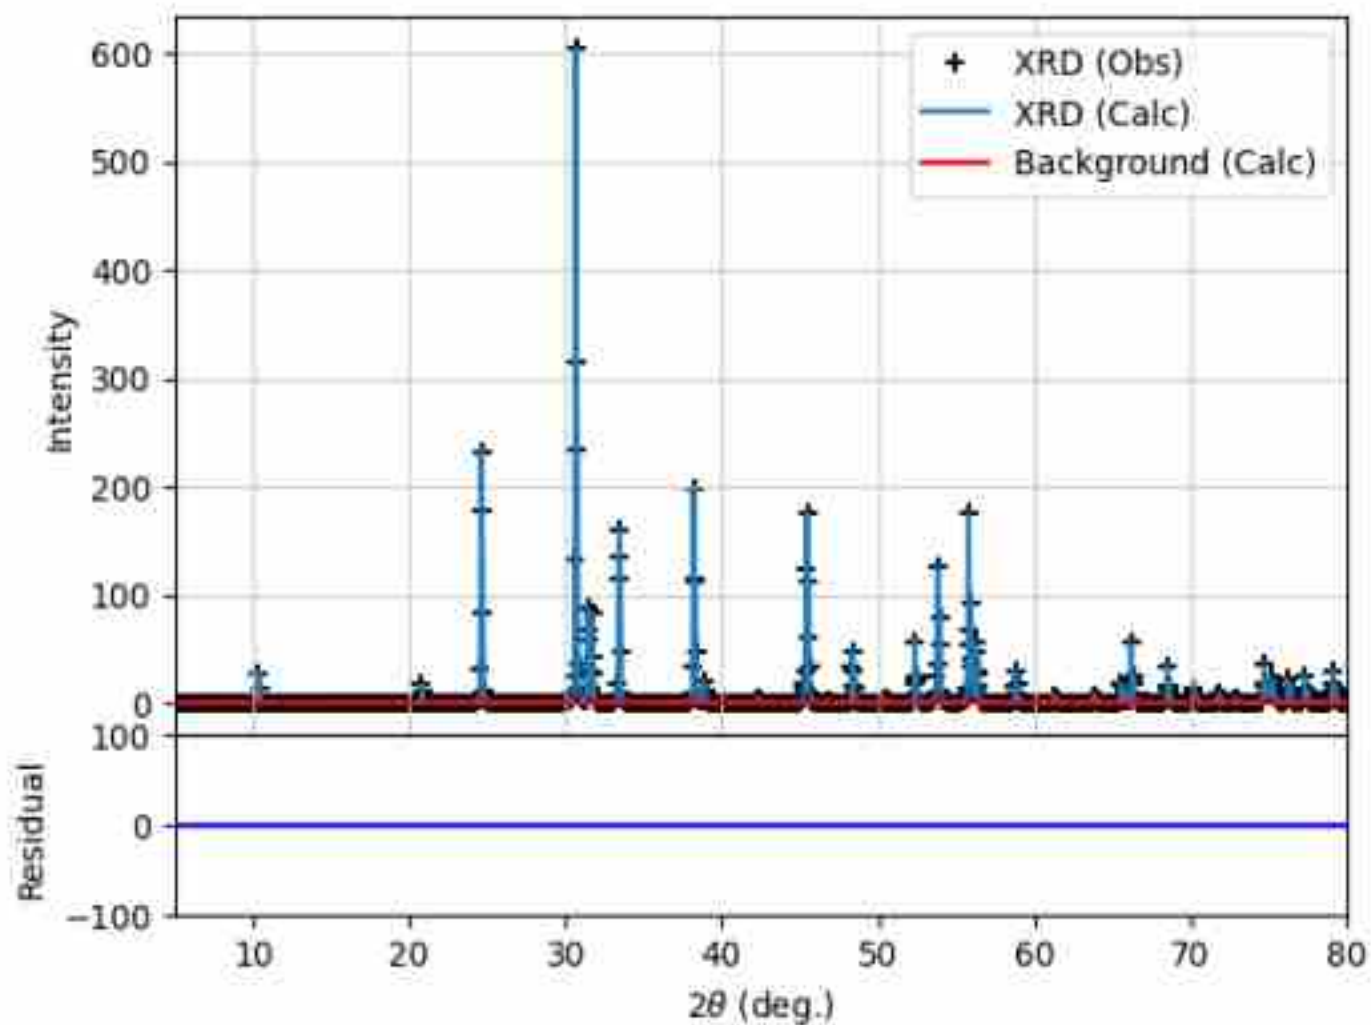

| RMSE before RR | Rwp     | RMSE after RR |
|----------------|---------|---------------|
| 0.014          | 0.00429 | 0.00083       |



# La<sub>2</sub>Ga<sub>5</sub>Au<sub>3</sub>

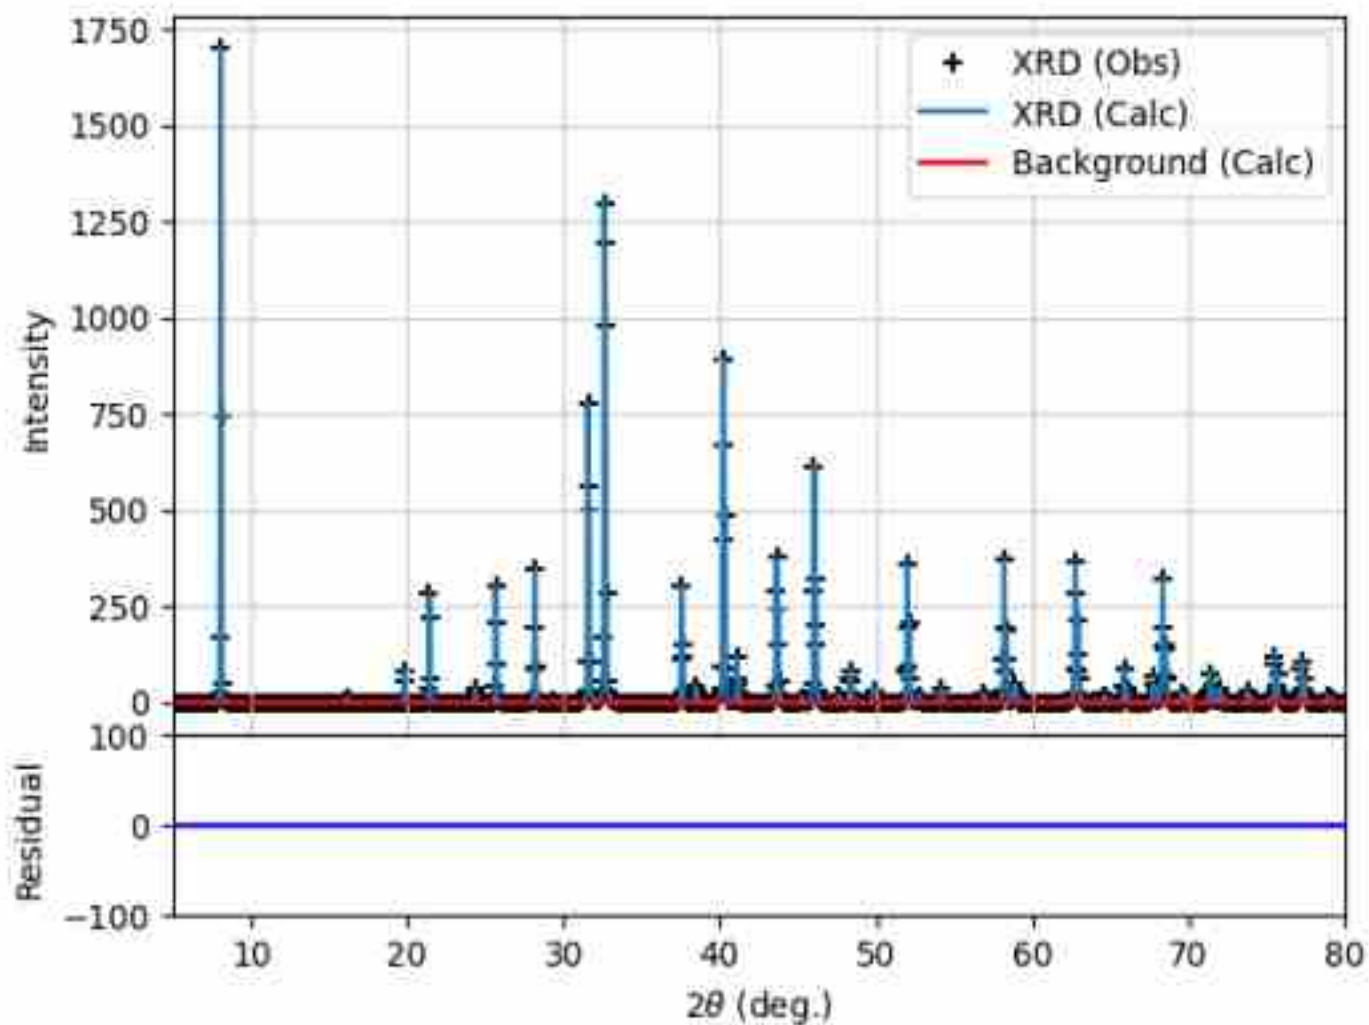

| RMSE before RR | Rwp     | RMSE after RR |
|----------------|---------|---------------|
| 0.014          | 0.00406 | 0.00079       |

# La<sub>2</sub>Ti<sub>2</sub>Ge<sub>6</sub>

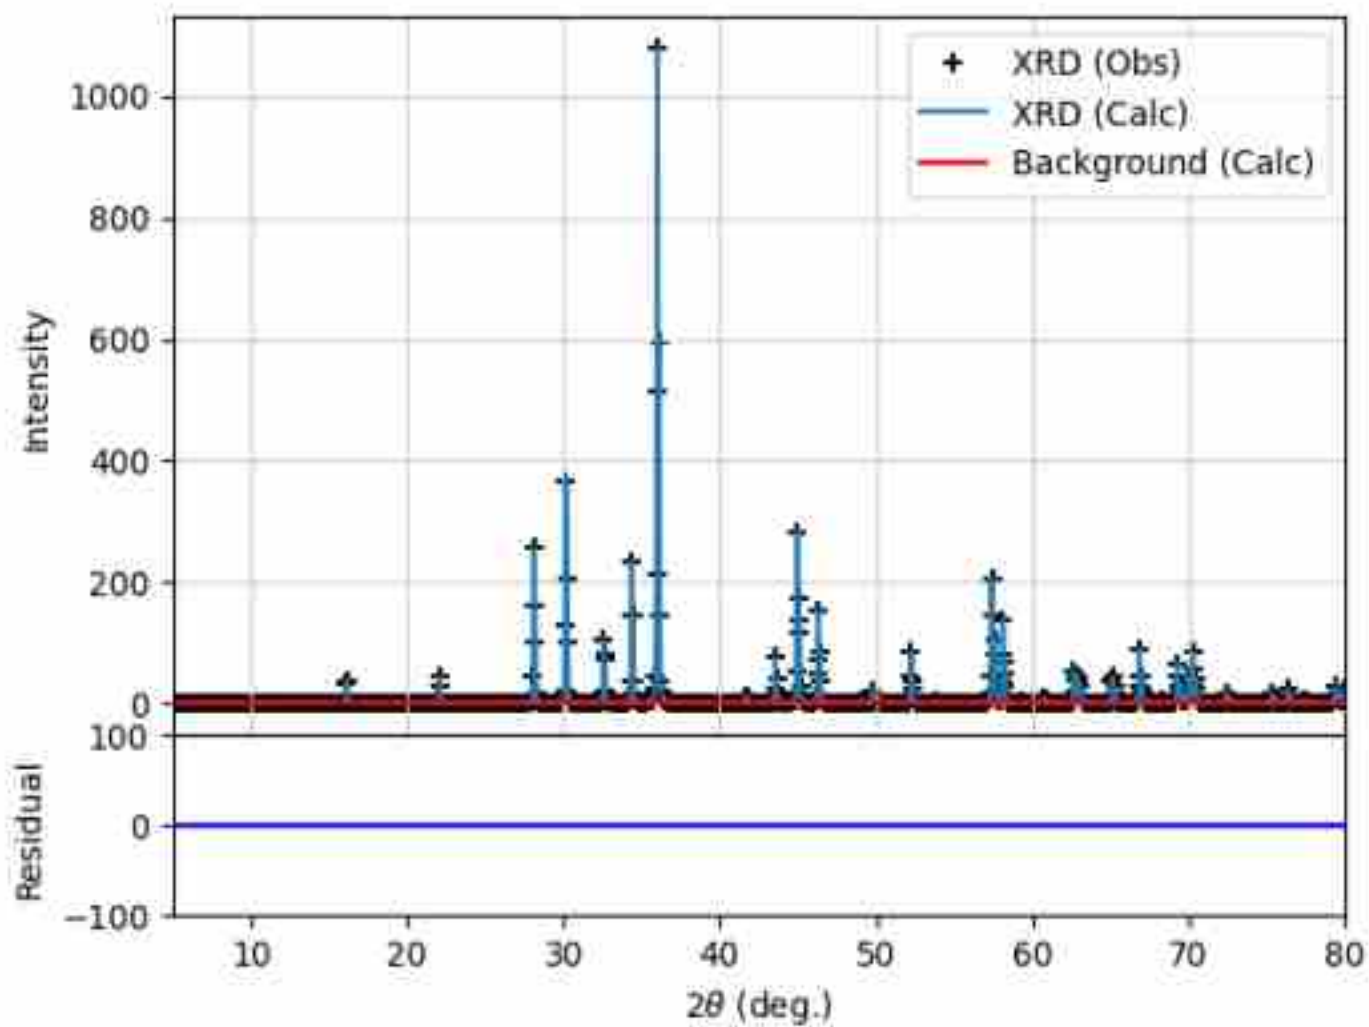

| RMSE before RR | Rwp     | RMSE after RR |
|----------------|---------|---------------|
| 0.014          | 0.01772 | 0.0017        |

# La<sub>2</sub>V<sub>1</sub>Zn<sub>1</sub>O<sub>6</sub>

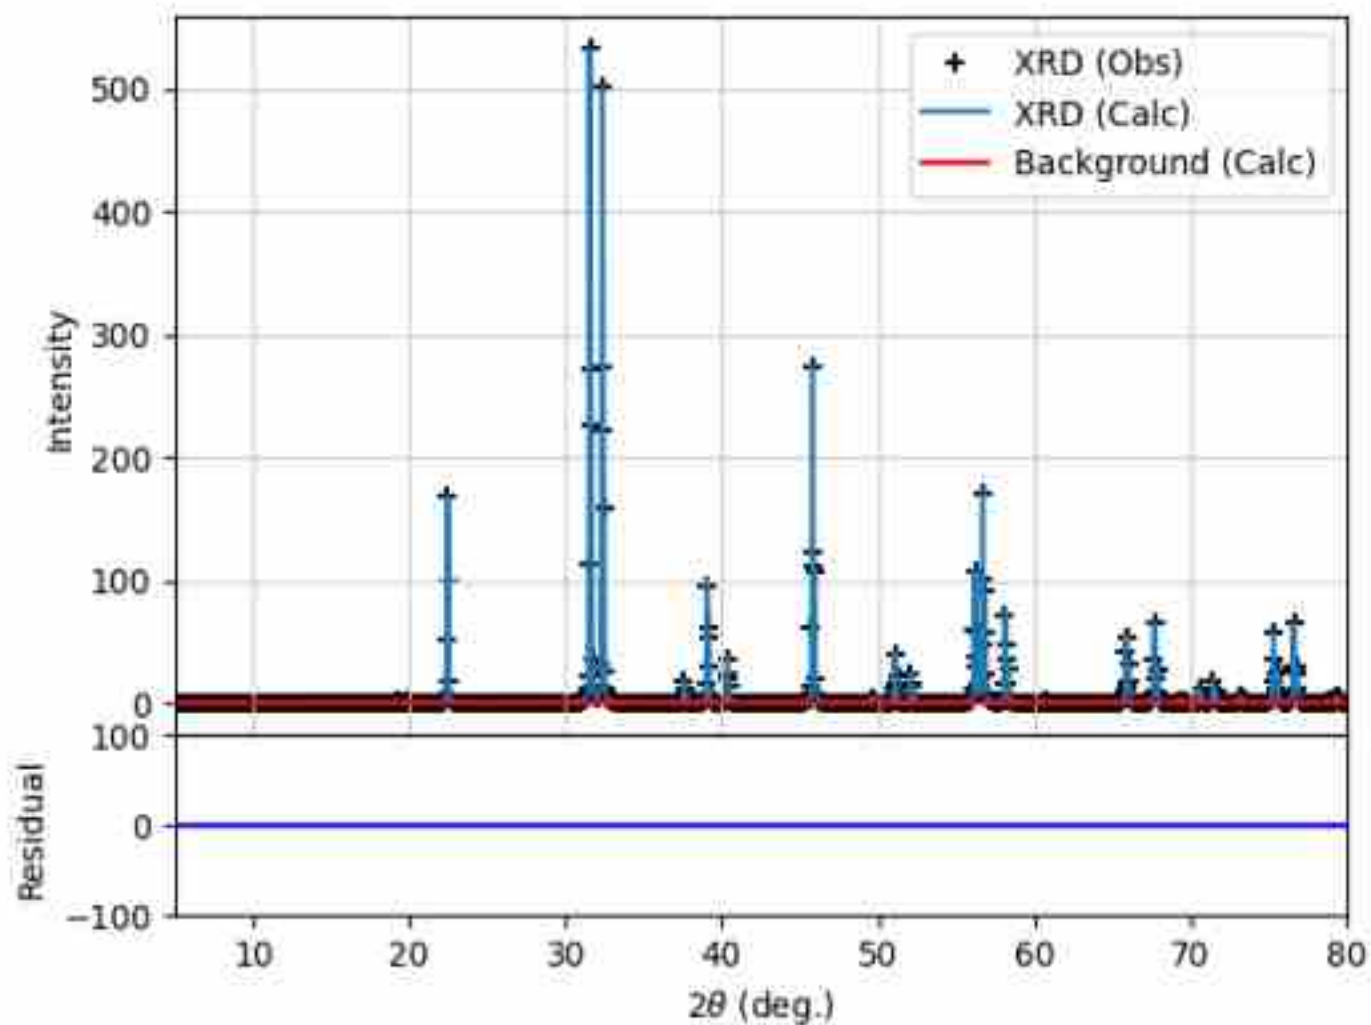

| RMSE before RR | Rwp     | RMSE after RR |
|----------------|---------|---------------|
| 0.014          | 0.00312 | 0.00094       |

# La<sub>3</sub>Mg<sub>3</sub>Tl<sub>3</sub>

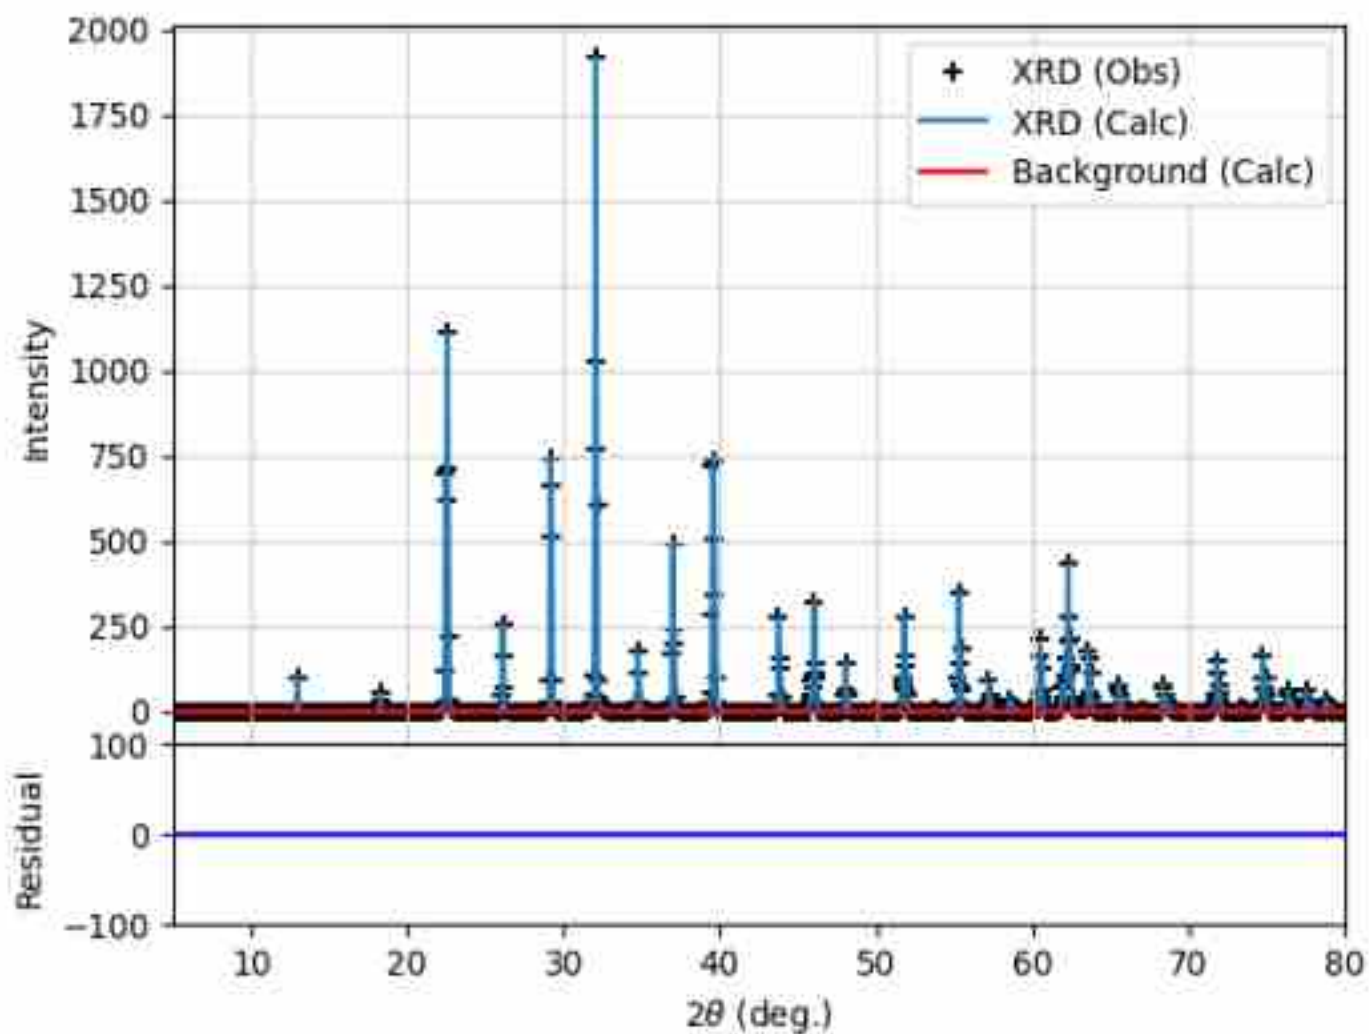

| RMSE before RR | Rwp     | RMSE after RR |
|----------------|---------|---------------|
| 0.014          | 0.00564 | 0.00162       |

# La4Sc4S12

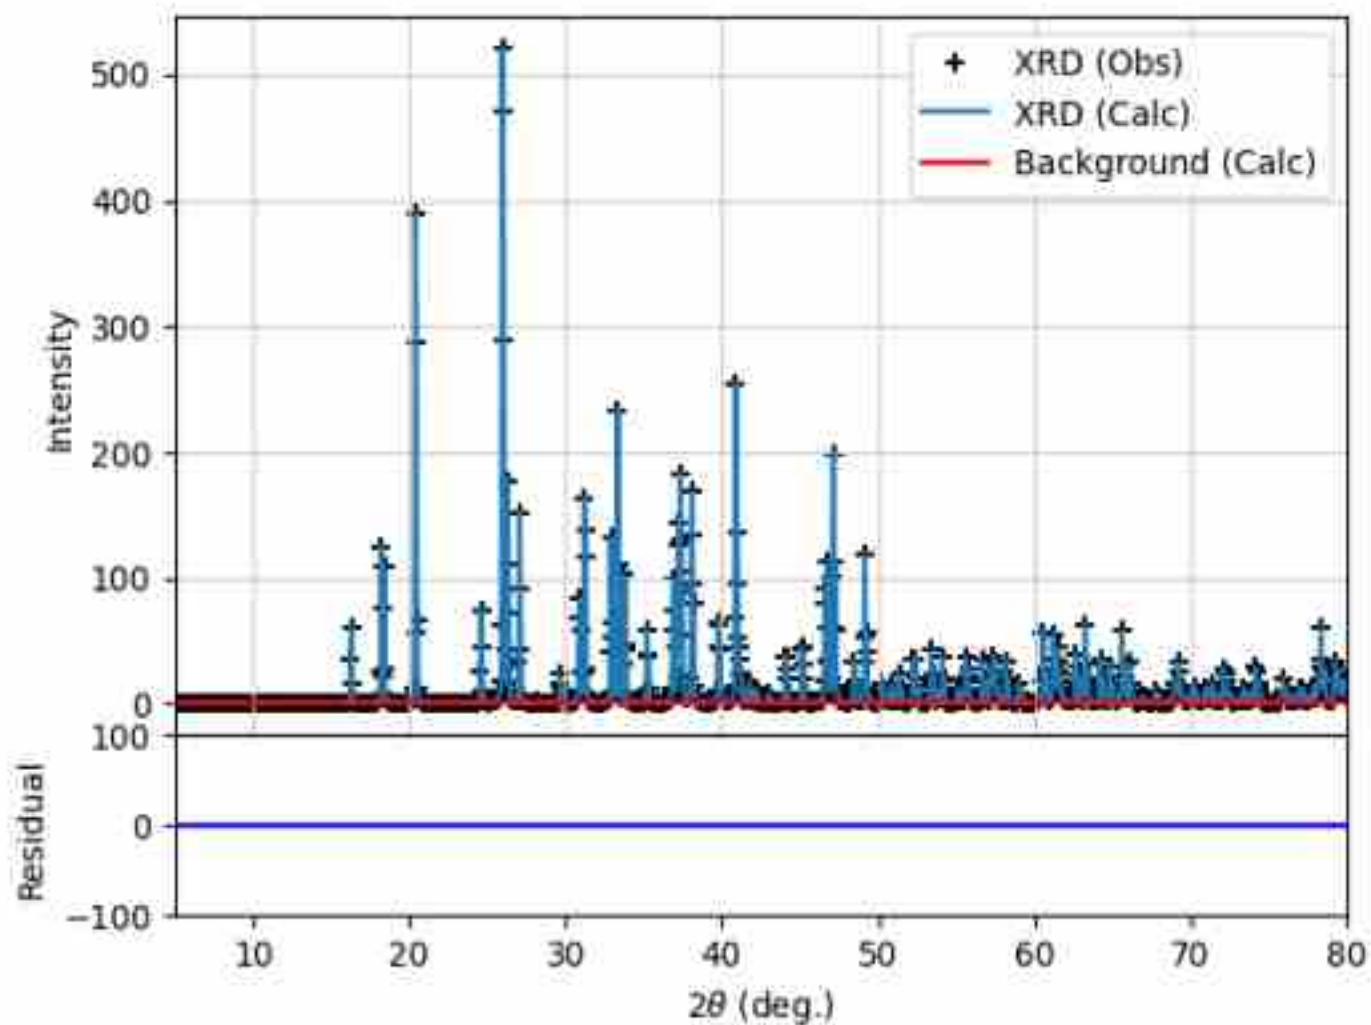

| RMSE before RR | Rwp     | RMSE after RR |
|----------------|---------|---------------|
| 0.014          | 0.00414 | 0.00071       |

# La<sub>4</sub>Zn<sub>2</sub>Ir<sub>2</sub>O<sub>12</sub>

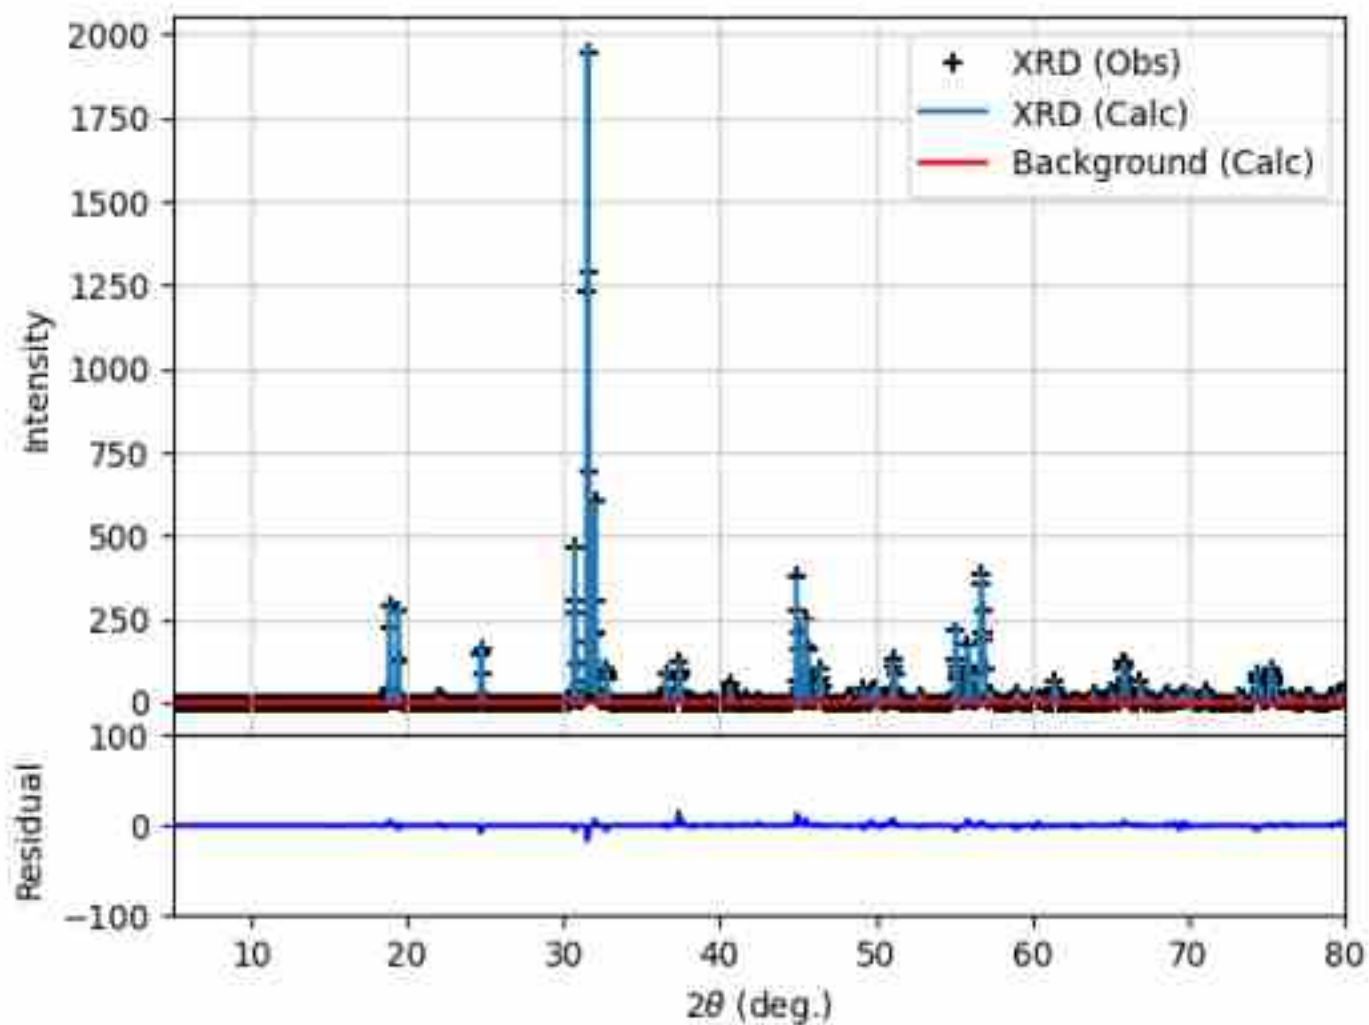

| RMSE before RR | Rwp     | RMSE after RR |
|----------------|---------|---------------|
| 0.014          | 5.00154 | 0.28206       |

# La5Tl1S8

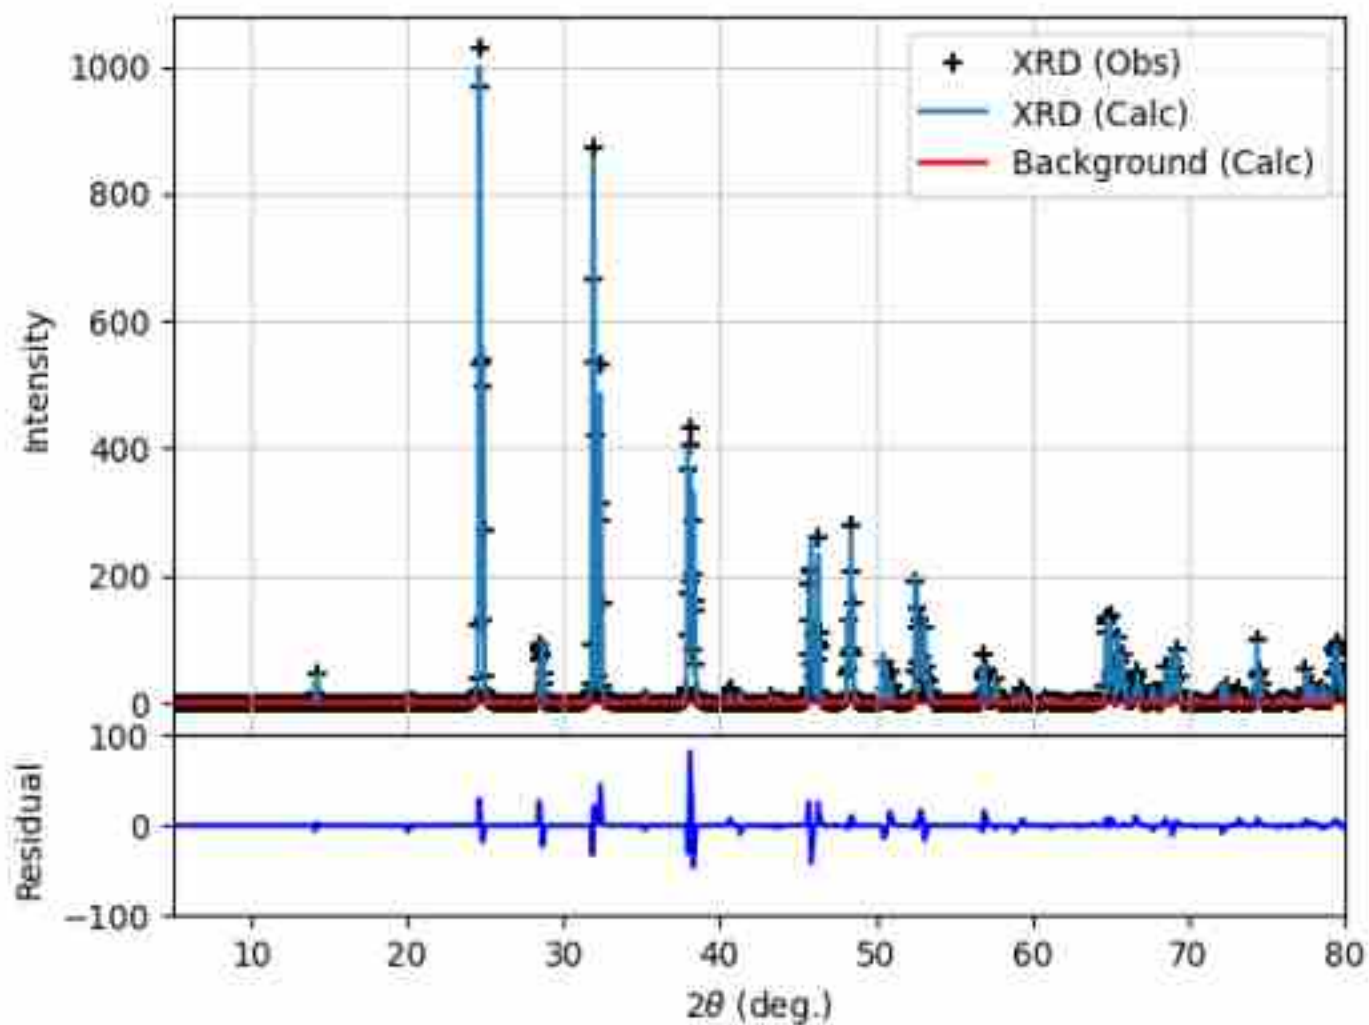

| RMSE before RR | Rwp      | RMSE after RR |
|----------------|----------|---------------|
| 0.014          | 12.12256 | 0.06454       |

# Li1Ag1F2

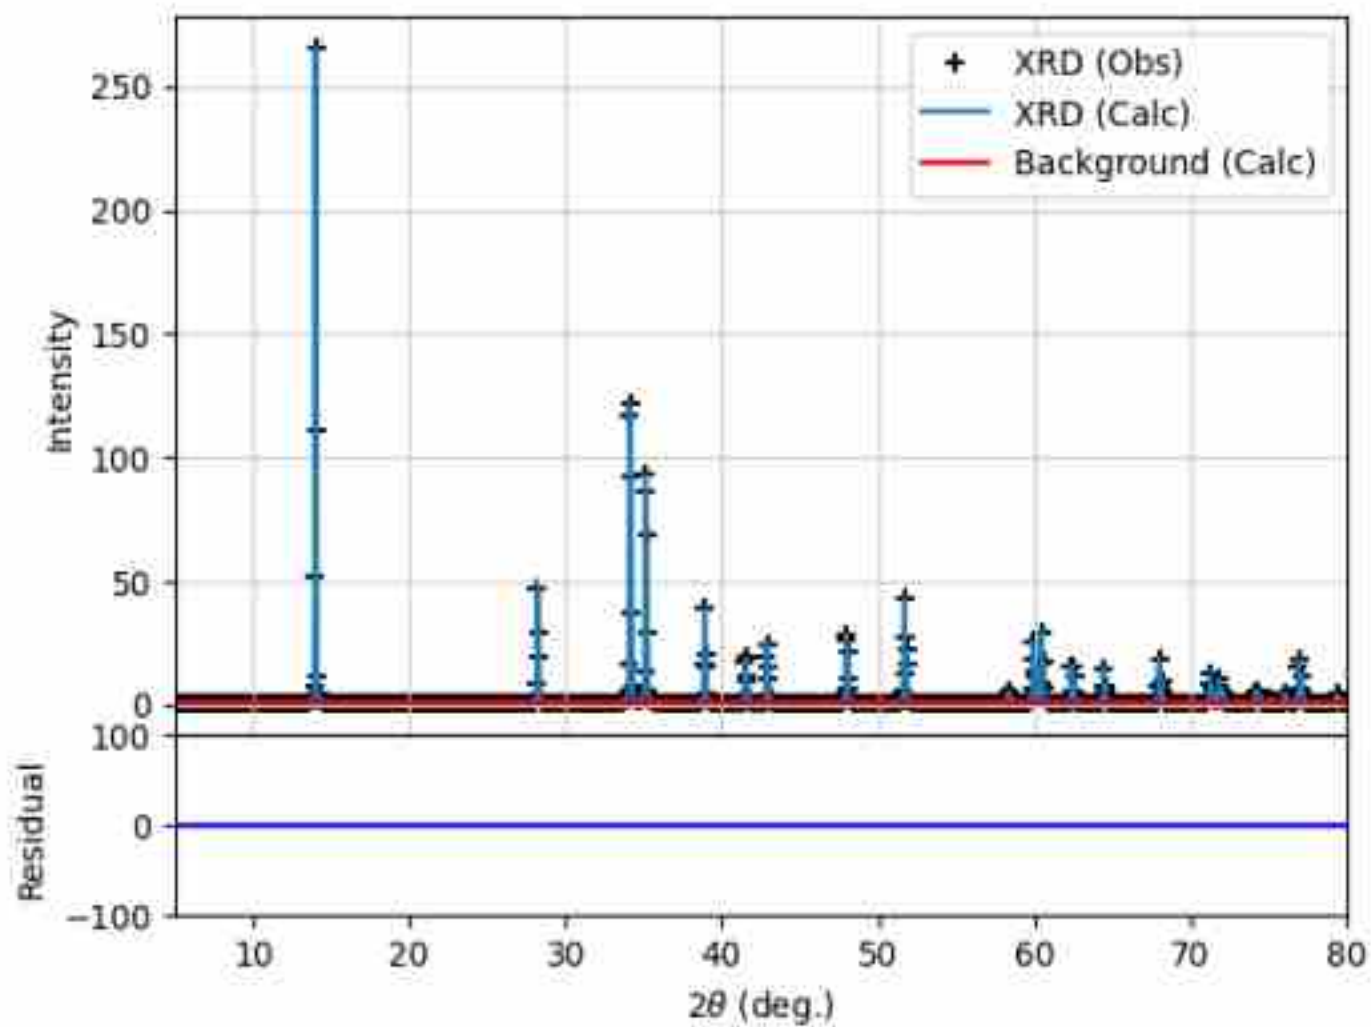

| RMSE before RR | Rwp     | RMSE after RR |
|----------------|---------|---------------|
| 0.014          | 0.00265 | 0.00107       |



# Li1Ni5O5F1

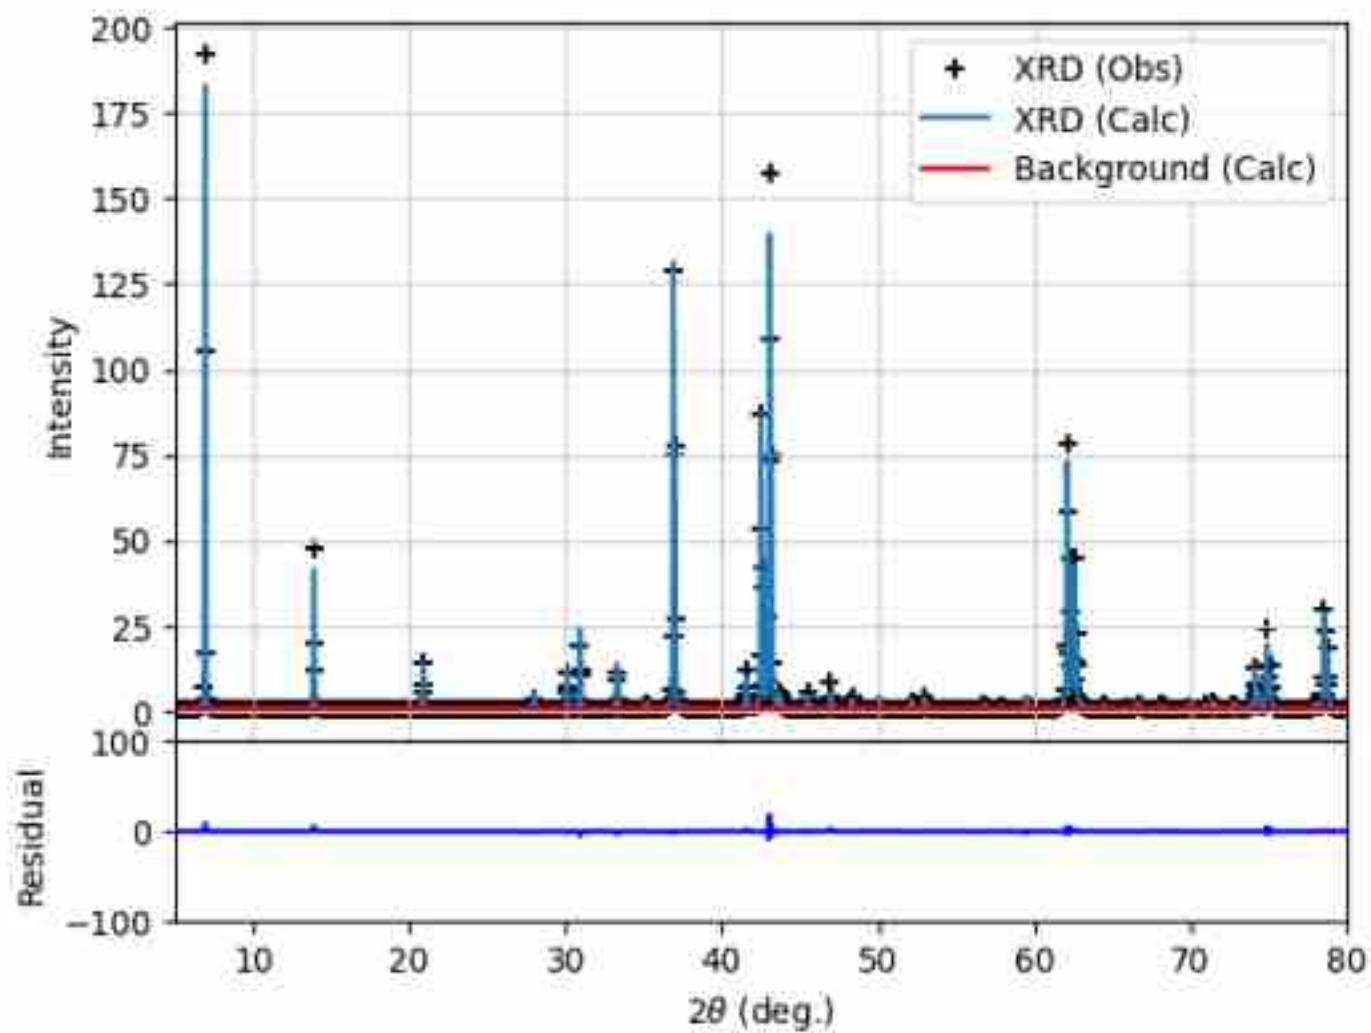

| RMSE before RR | Rwp     | RMSE after RR |
|----------------|---------|---------------|
| 0.014          | 9.32879 | None          |

# Li<sub>2</sub>ZnCu<sub>3</sub>

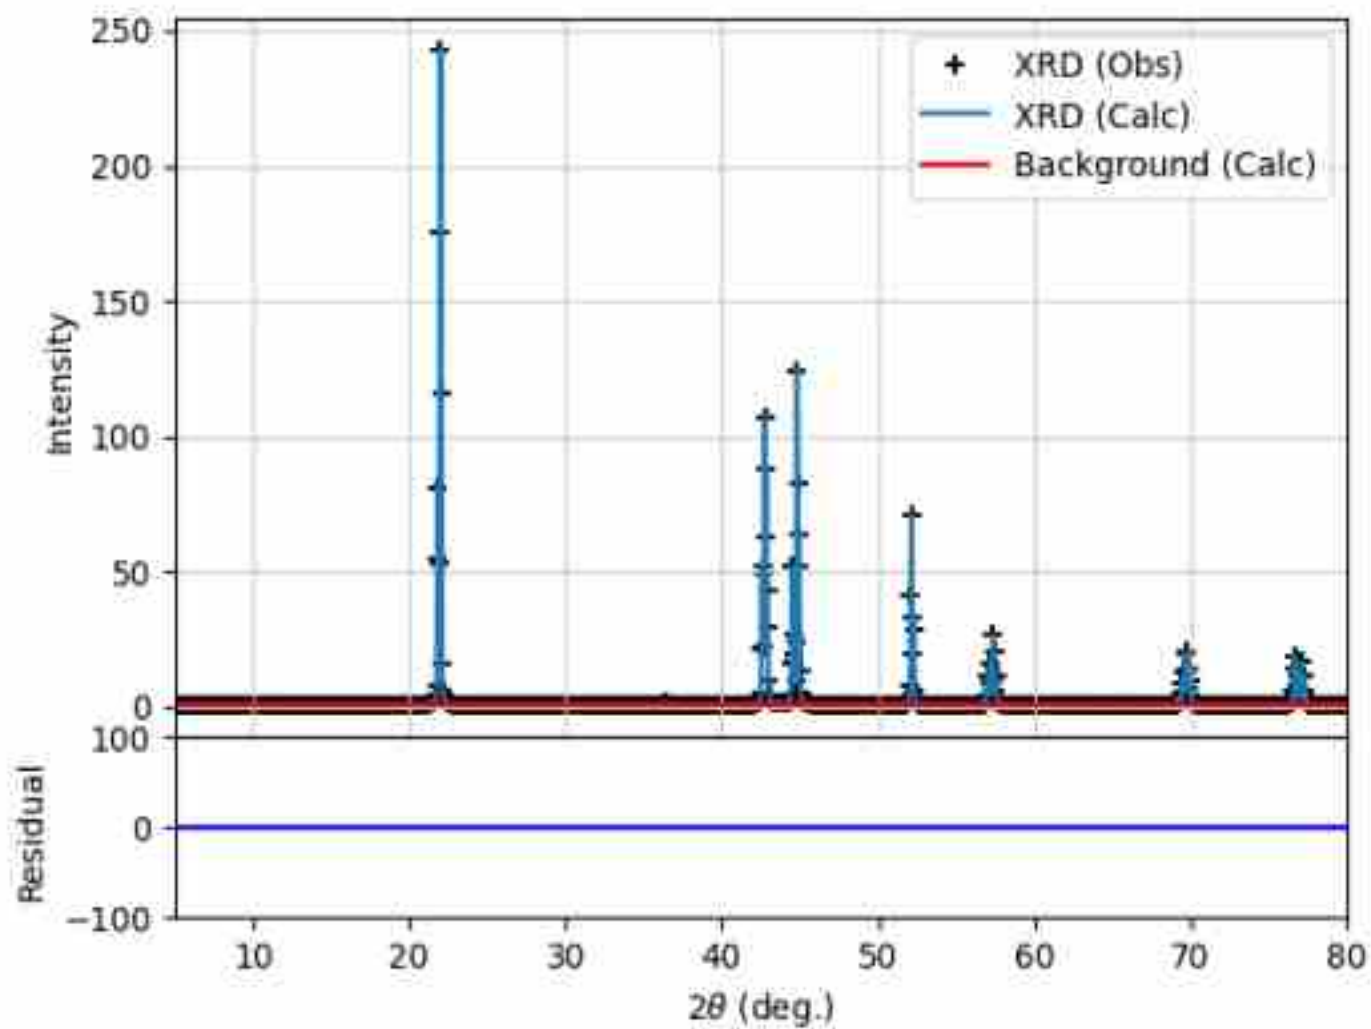

| RMSE before RR | Rwp     | RMSE after RR |
|----------------|---------|---------------|
| 0.014          | 0.00218 | 0.00079       |

# Li<sub>4</sub>Mn<sub>2</sub>F<sub>8</sub>

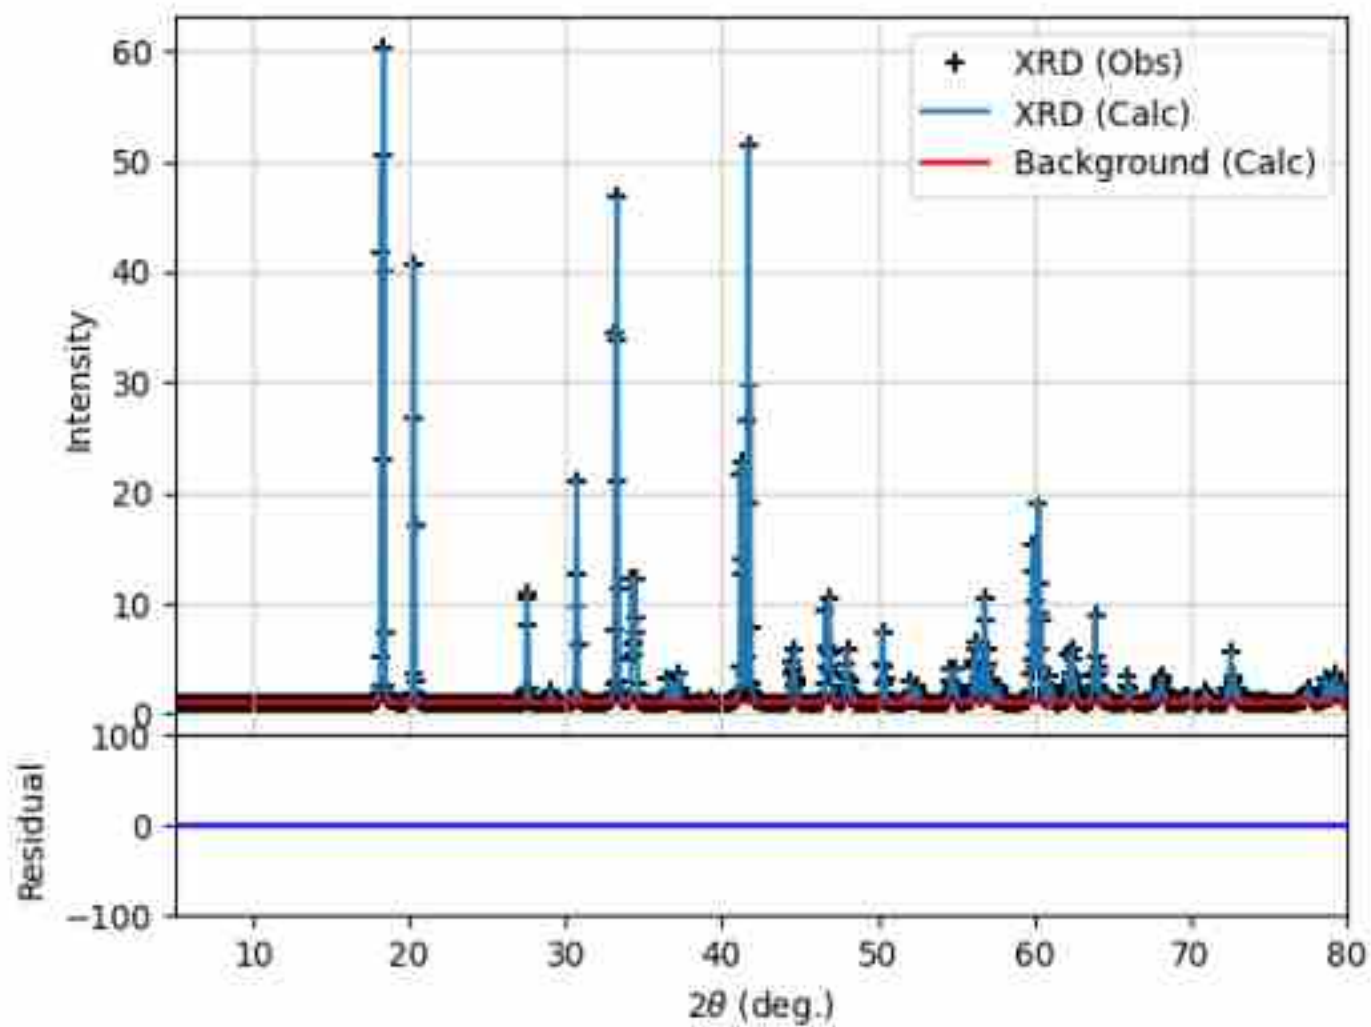

| RMSE before RR | Rwp     | RMSE after RR |
|----------------|---------|---------------|
| 0.014          | 0.00214 | 0.00061       |

# Li5Re1O6

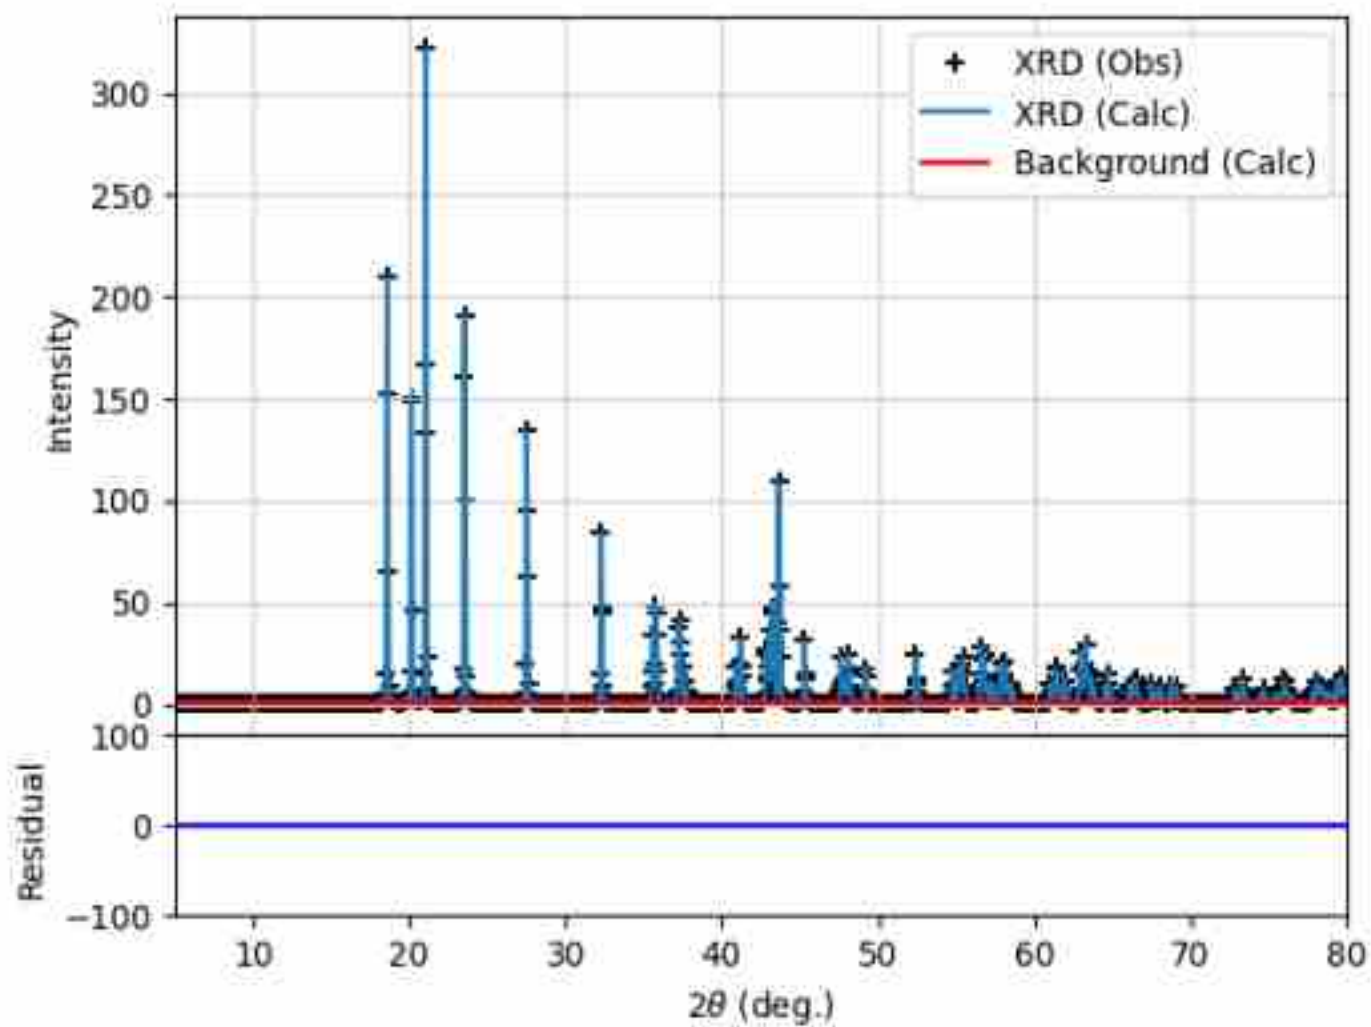

| RMSE before RR | Rwp     | RMSE after RR |
|----------------|---------|---------------|
| 0.014          | 0.00309 | 0.0013        |

# Lu1Al6Cu6

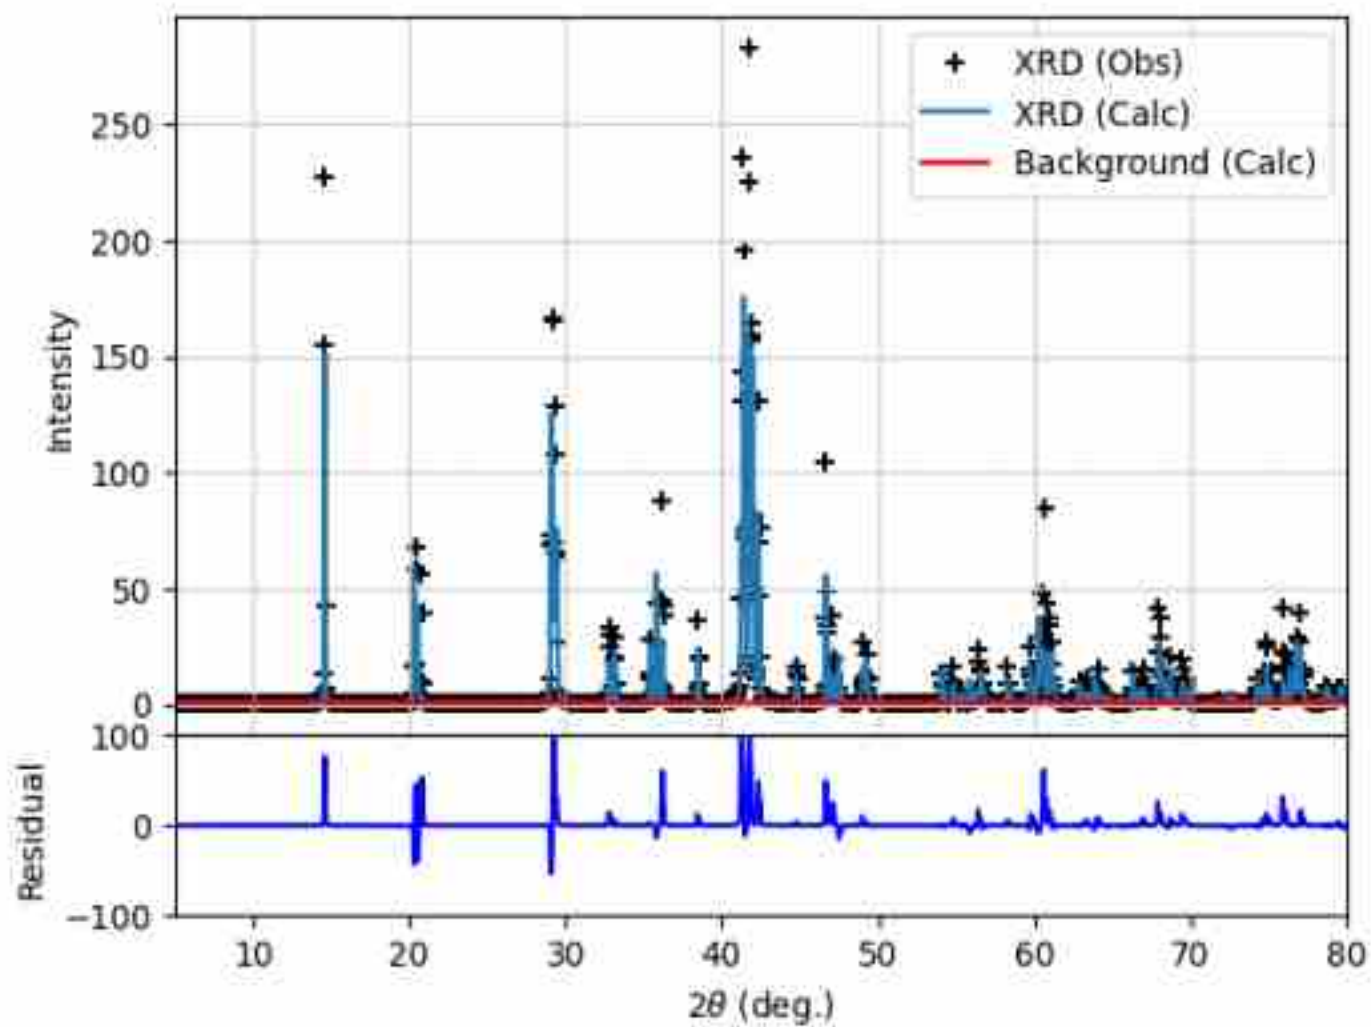

| RMSE before RR | Rwp      | RMSE after RR |
|----------------|----------|---------------|
| 0.014          | 53.49268 | 0.01579       |

# Lu<sub>1</sub>Fe<sub>6</sub>Ge<sub>6</sub>

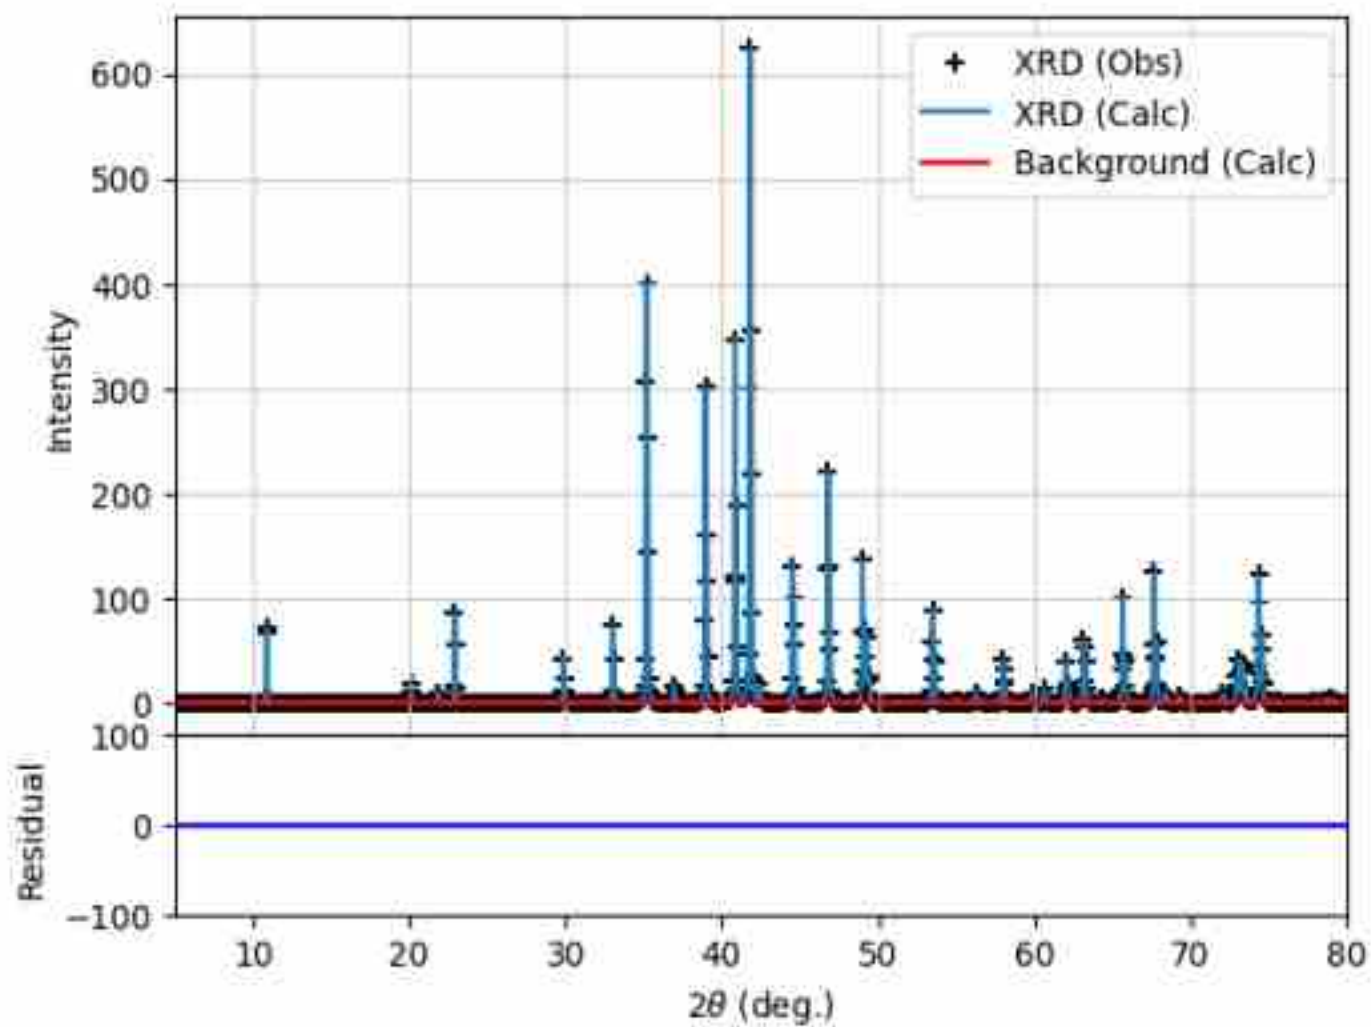

| RMSE before RR | Rwp     | RMSE after RR |
|----------------|---------|---------------|
| 0.014          | 0.00221 | 0.00042       |

# Lu<sub>2</sub>Mo<sub>2</sub>C<sub>3</sub>

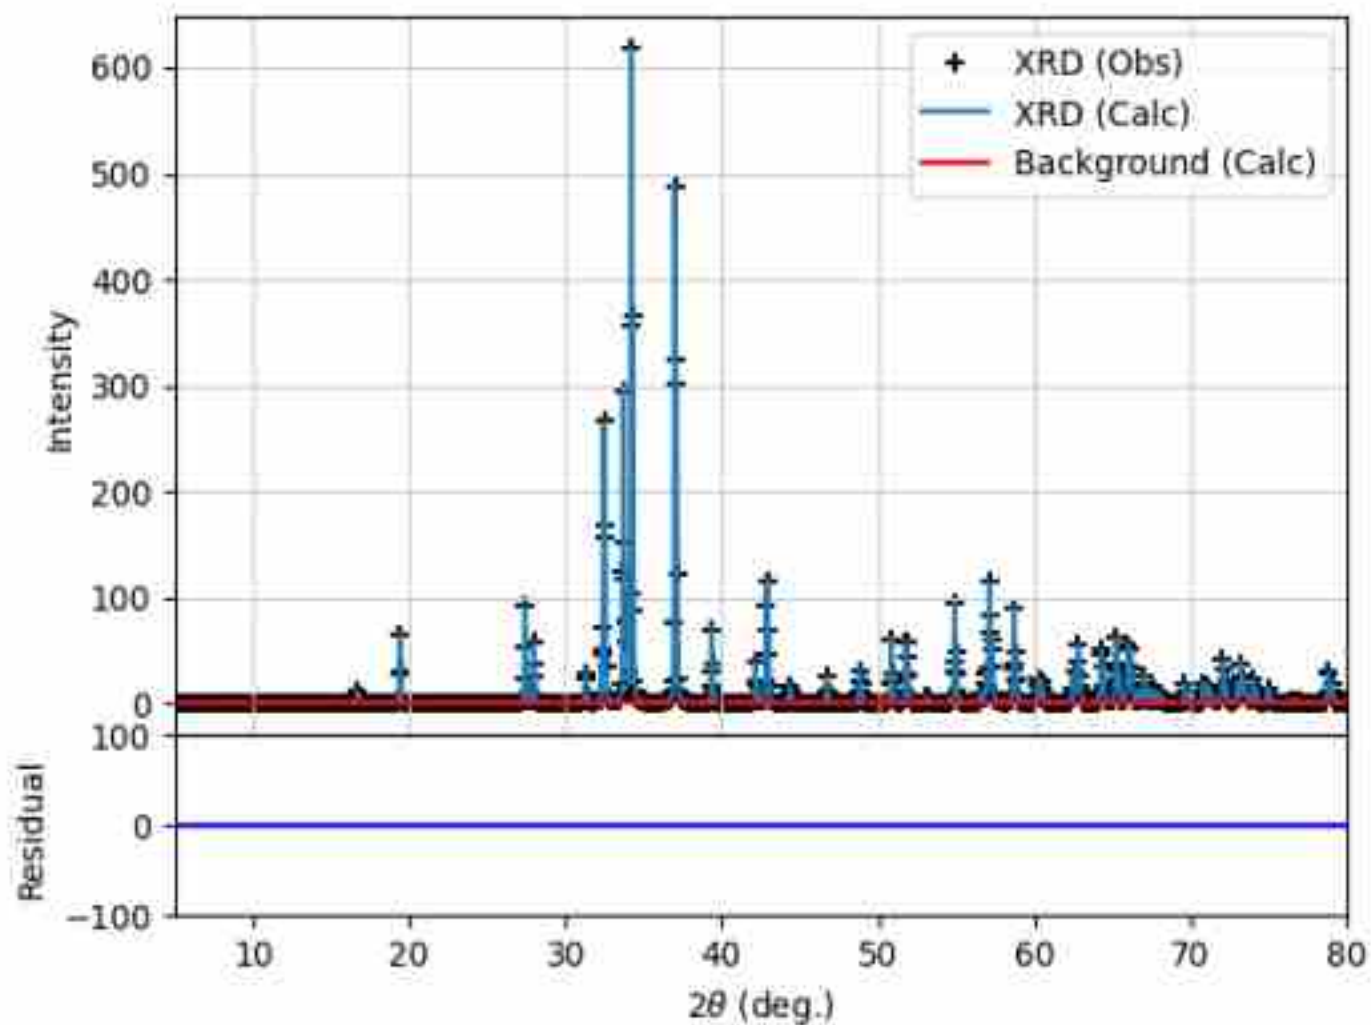

| RMSE before RR | Rwp     | RMSE after RR |
|----------------|---------|---------------|
| 0.014          | 0.00307 | 0.00094       |

# Lu<sub>2</sub>Nb<sub>2</sub>O<sub>8</sub>

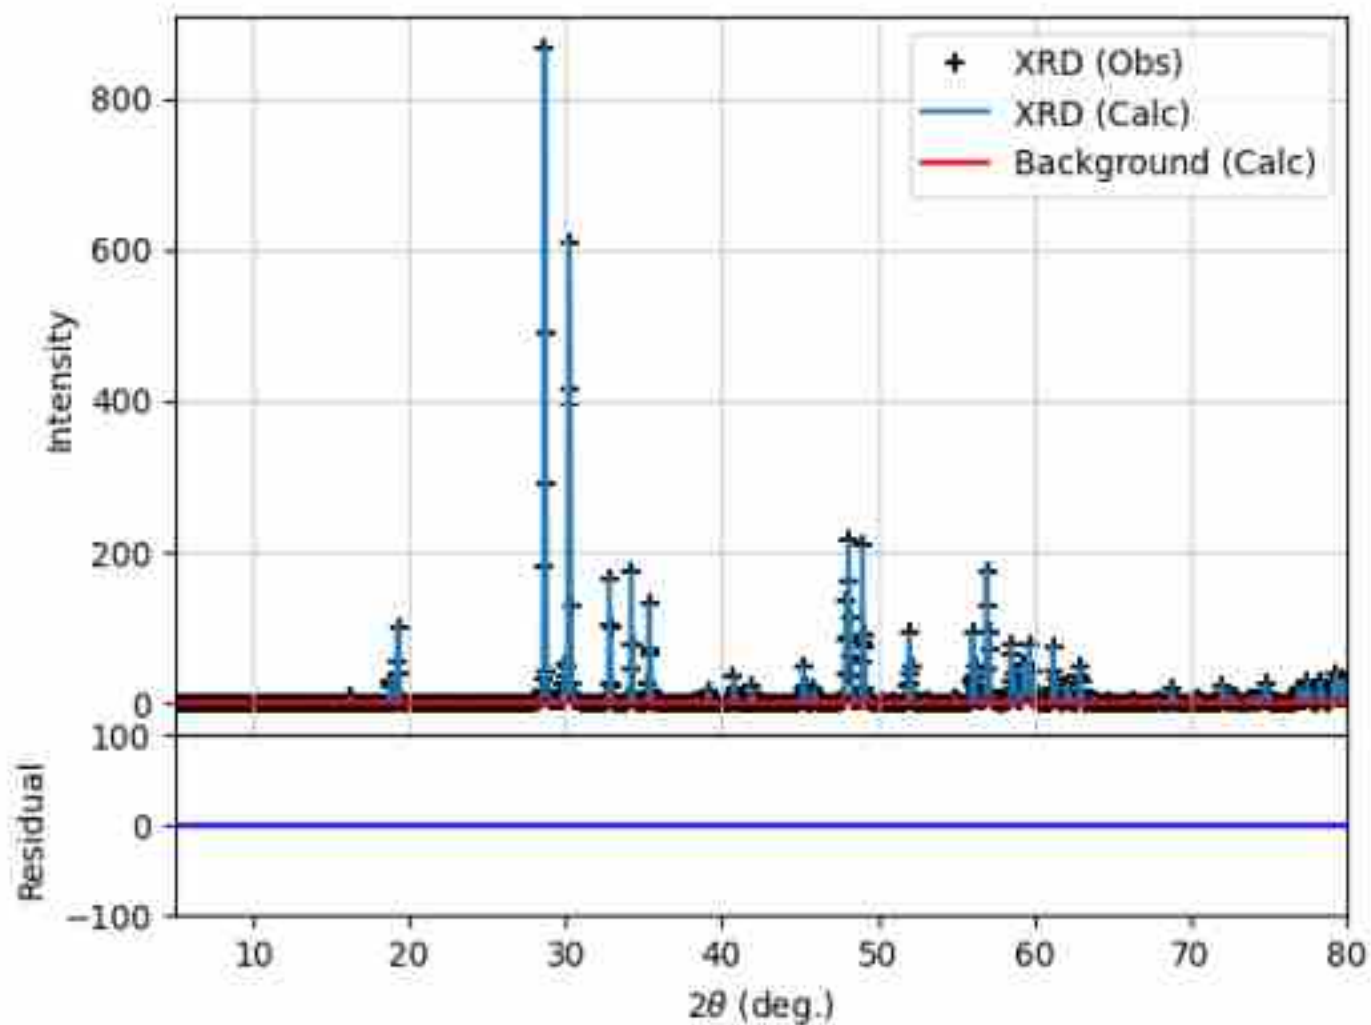

| RMSE before RR | Rwp     | RMSE after RR |
|----------------|---------|---------------|
| 0.014          | 0.00324 | 0.00119       |



# Lu<sub>3</sub>Ga<sub>5</sub>Ni<sub>1</sub>

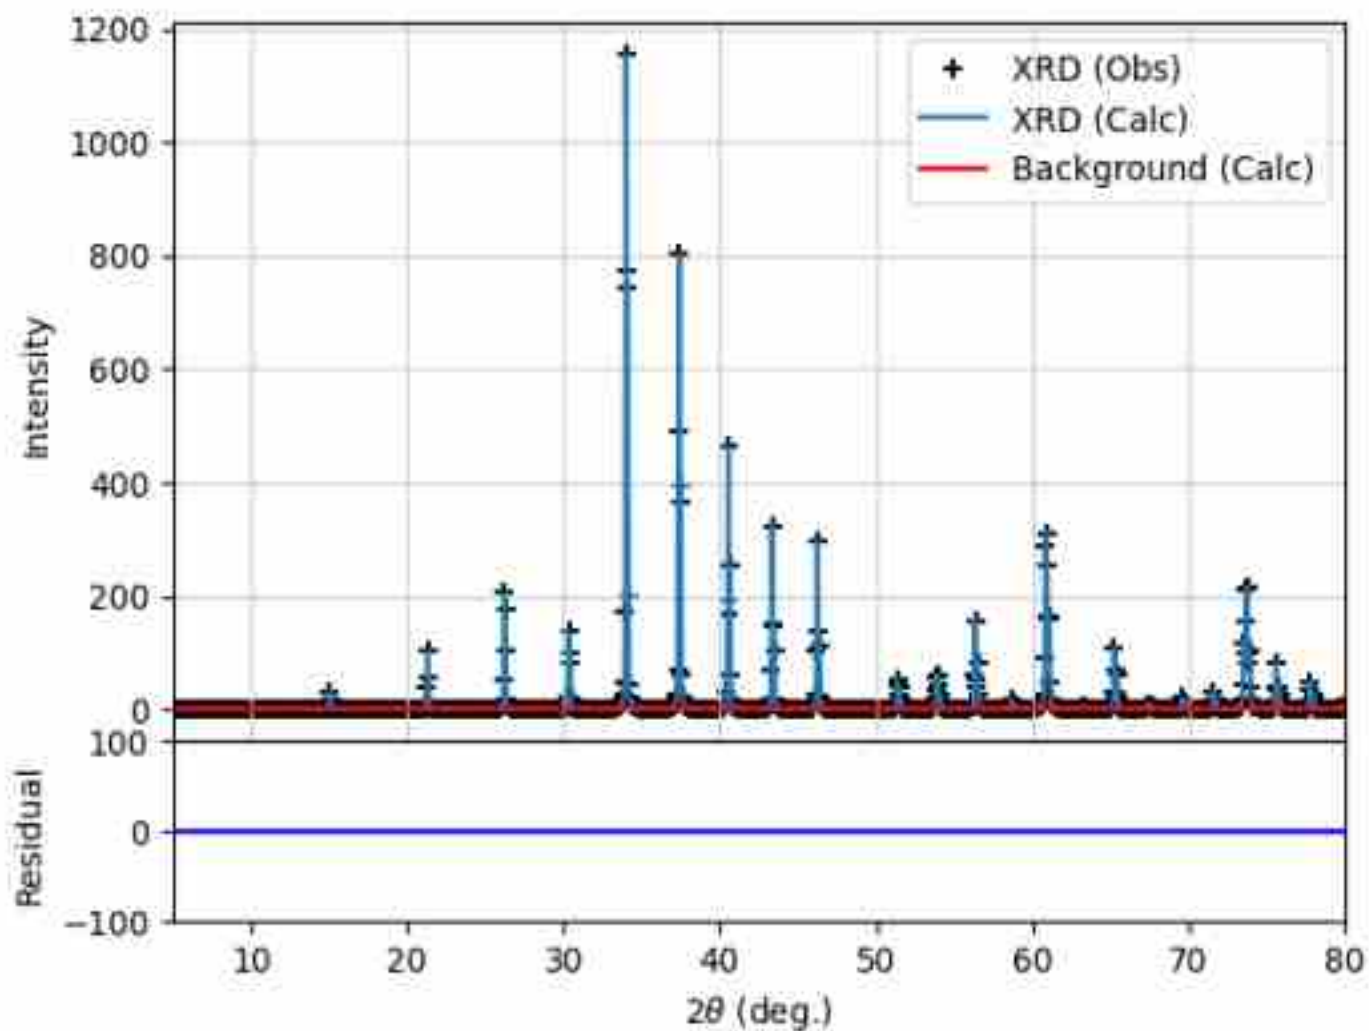

| RMSE before RR | Rwp     | RMSE after RR |
|----------------|---------|---------------|
| 0.014          | 0.00355 | 0.00091       |

# Lu<sub>4</sub>Al<sub>4</sub>Fe<sub>4</sub>

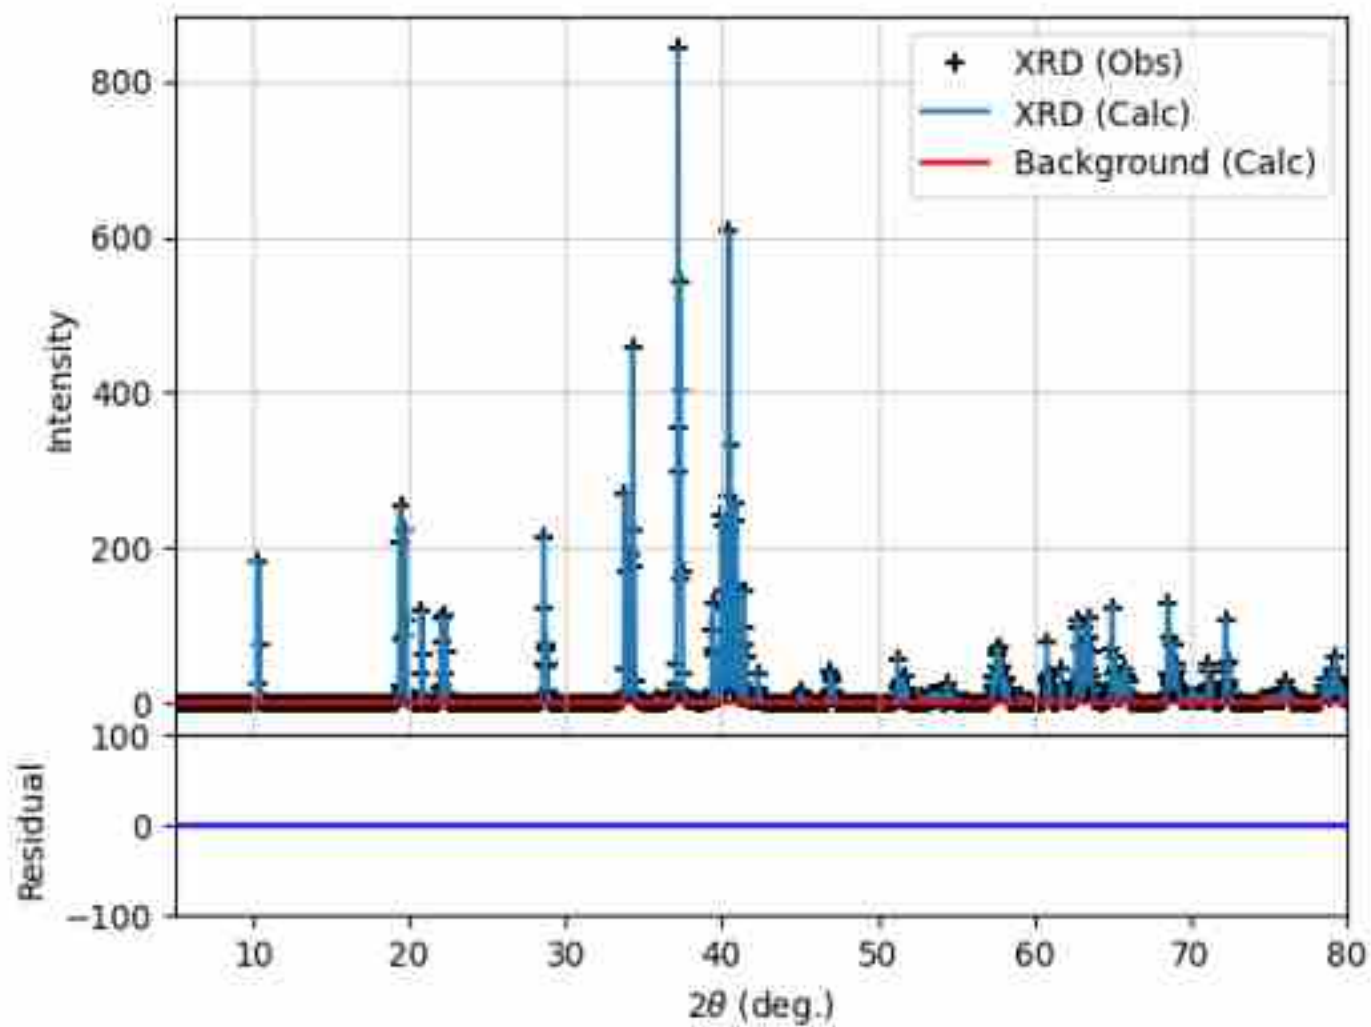

| RMSE before RR | Rwp     | RMSE after RR |
|----------------|---------|---------------|
| 0.014          | 0.00353 | 0.00038       |

# Lu6Fe1Bi2

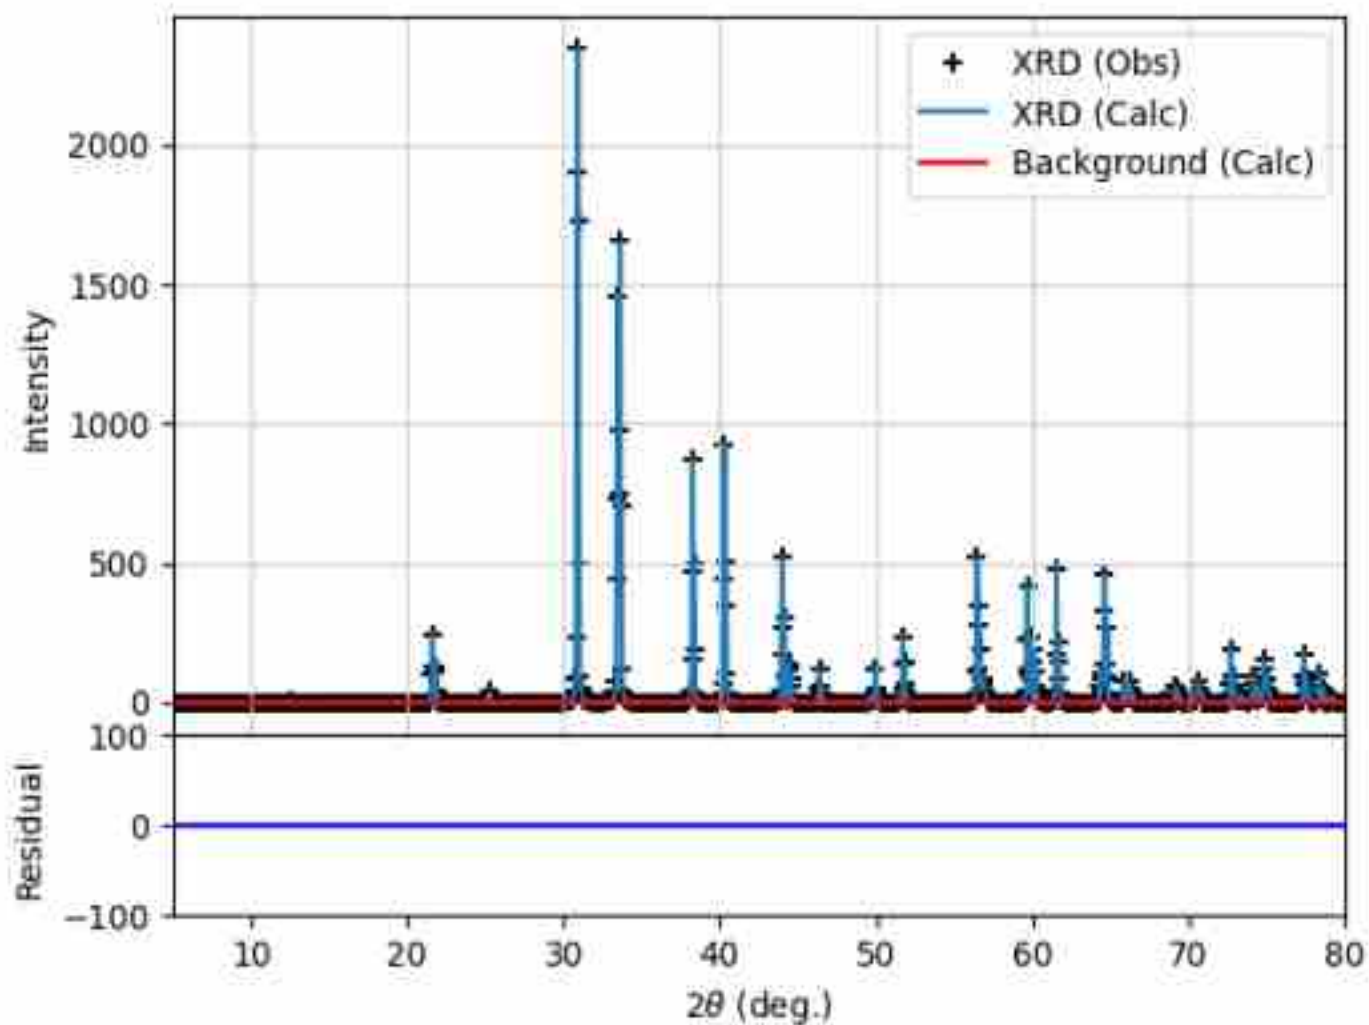

| RMSE before RR | Rwp     | RMSE after RR |
|----------------|---------|---------------|
| 0.014          | 0.00379 | 0.00077       |

# Mg1Zn1Ag2

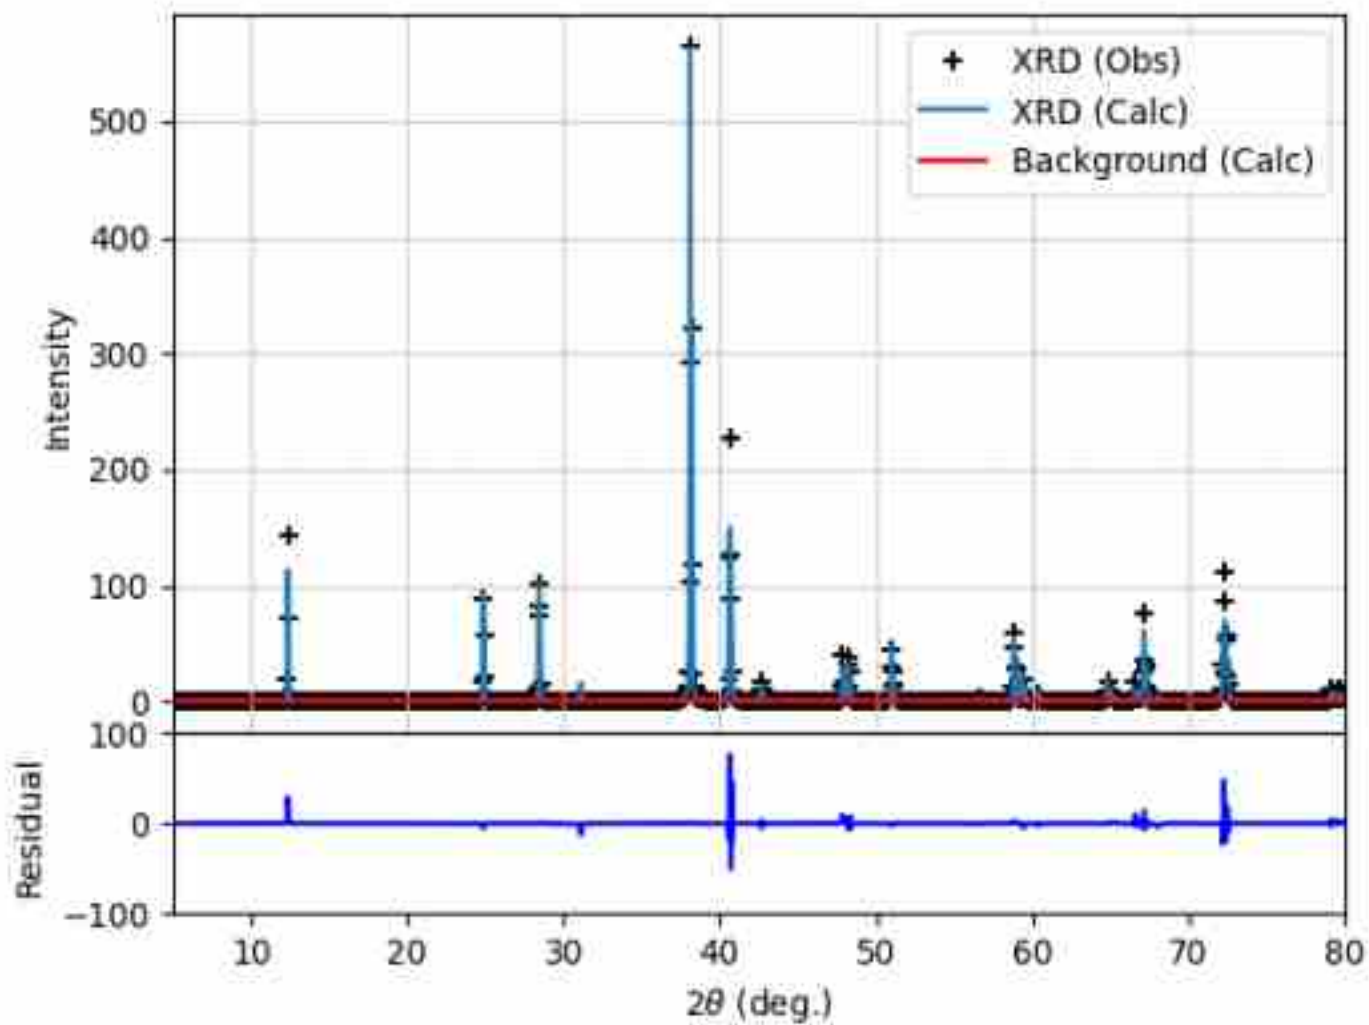

| RMSE before RR | Rwp      | RMSE after RR |
|----------------|----------|---------------|
| 0.014          | 24.89824 | 0.22192       |

# Mg<sub>2</sub>Co<sub>2</sub>Ge<sub>2</sub>

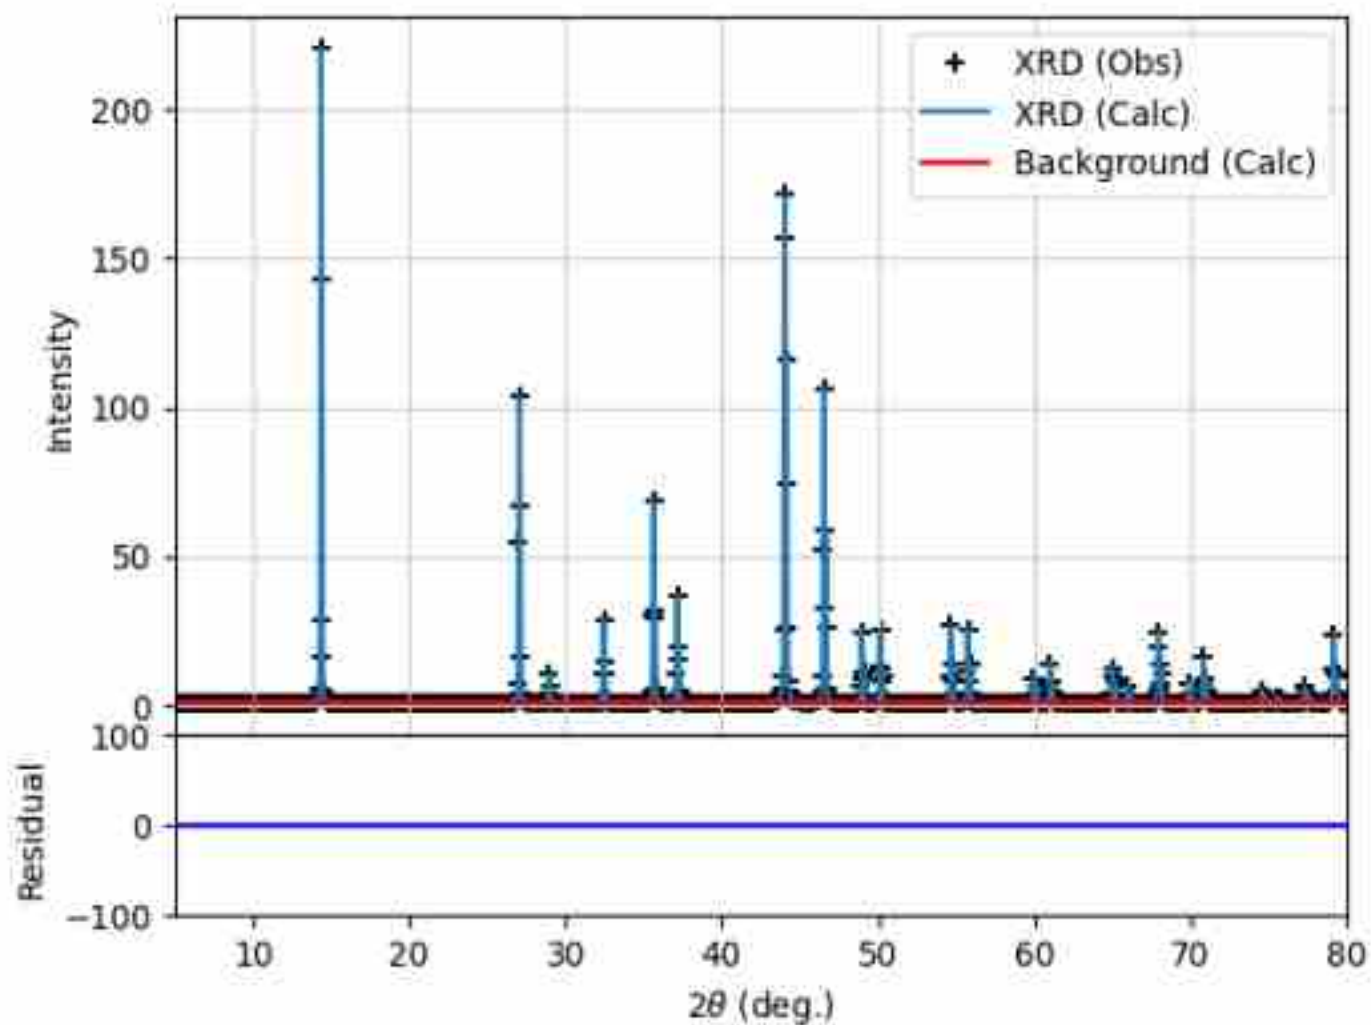

| RMSE before RR | Rwp     | RMSE after RR |
|----------------|---------|---------------|
| 0.014          | 0.00349 | 0.00043       |

# Mg<sub>2</sub>W<sub>2</sub>O<sub>8</sub>

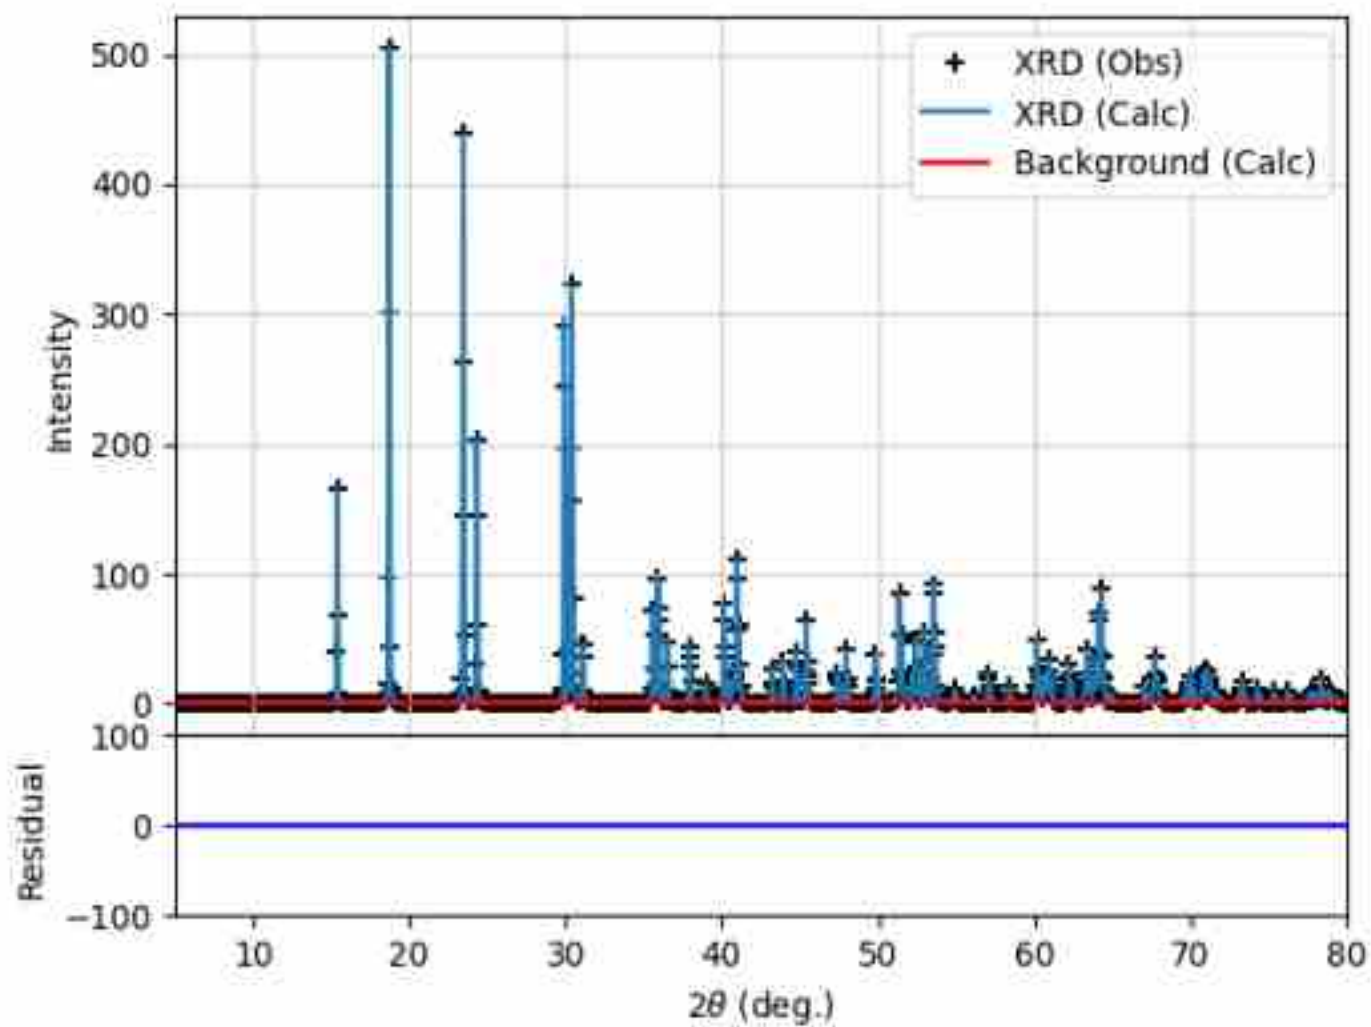

| RMSE before RR | Rwp     | RMSE after RR |
|----------------|---------|---------------|
| 0.014          | 0.00378 | 0.00105       |

# Mg<sub>3</sub>Ni<sub>3</sub>

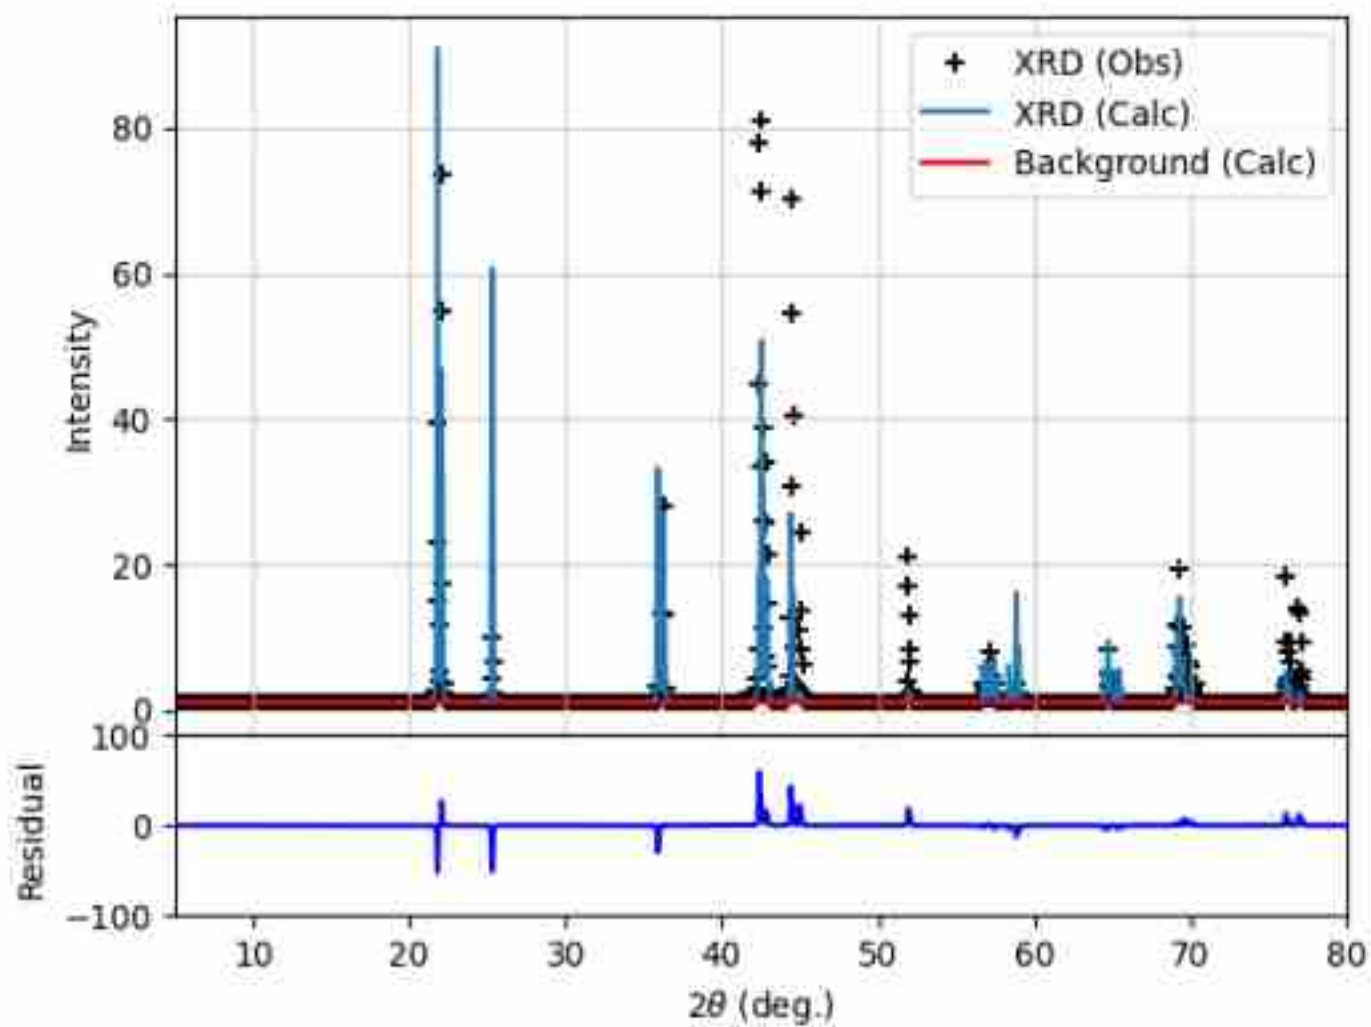

| RMSE before RR | Rwp      | RMSE after RR |
|----------------|----------|---------------|
| 0.014          | 76.74289 | 0.01716       |

# Mg<sub>4</sub>Si<sub>2</sub>B<sub>4</sub>Ir<sub>10</sub>

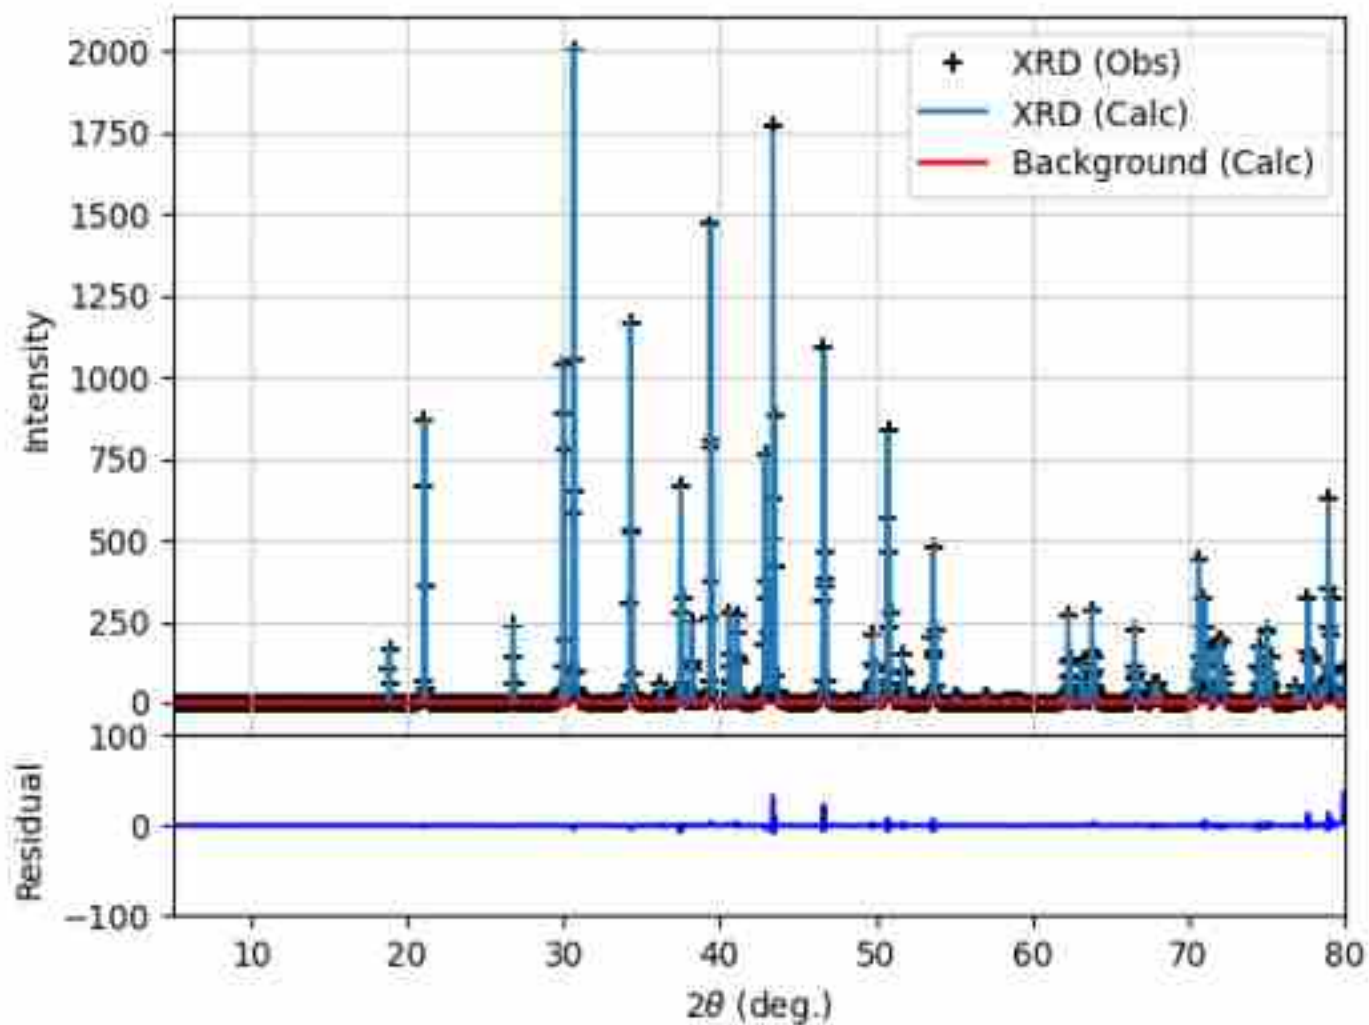

| RMSE before RR | Rwp     | RMSE after RR |
|----------------|---------|---------------|
| 0.014          | 2.88717 | 0.04334       |



# Mg<sub>4</sub>Sn<sub>4</sub>N<sub>8</sub>

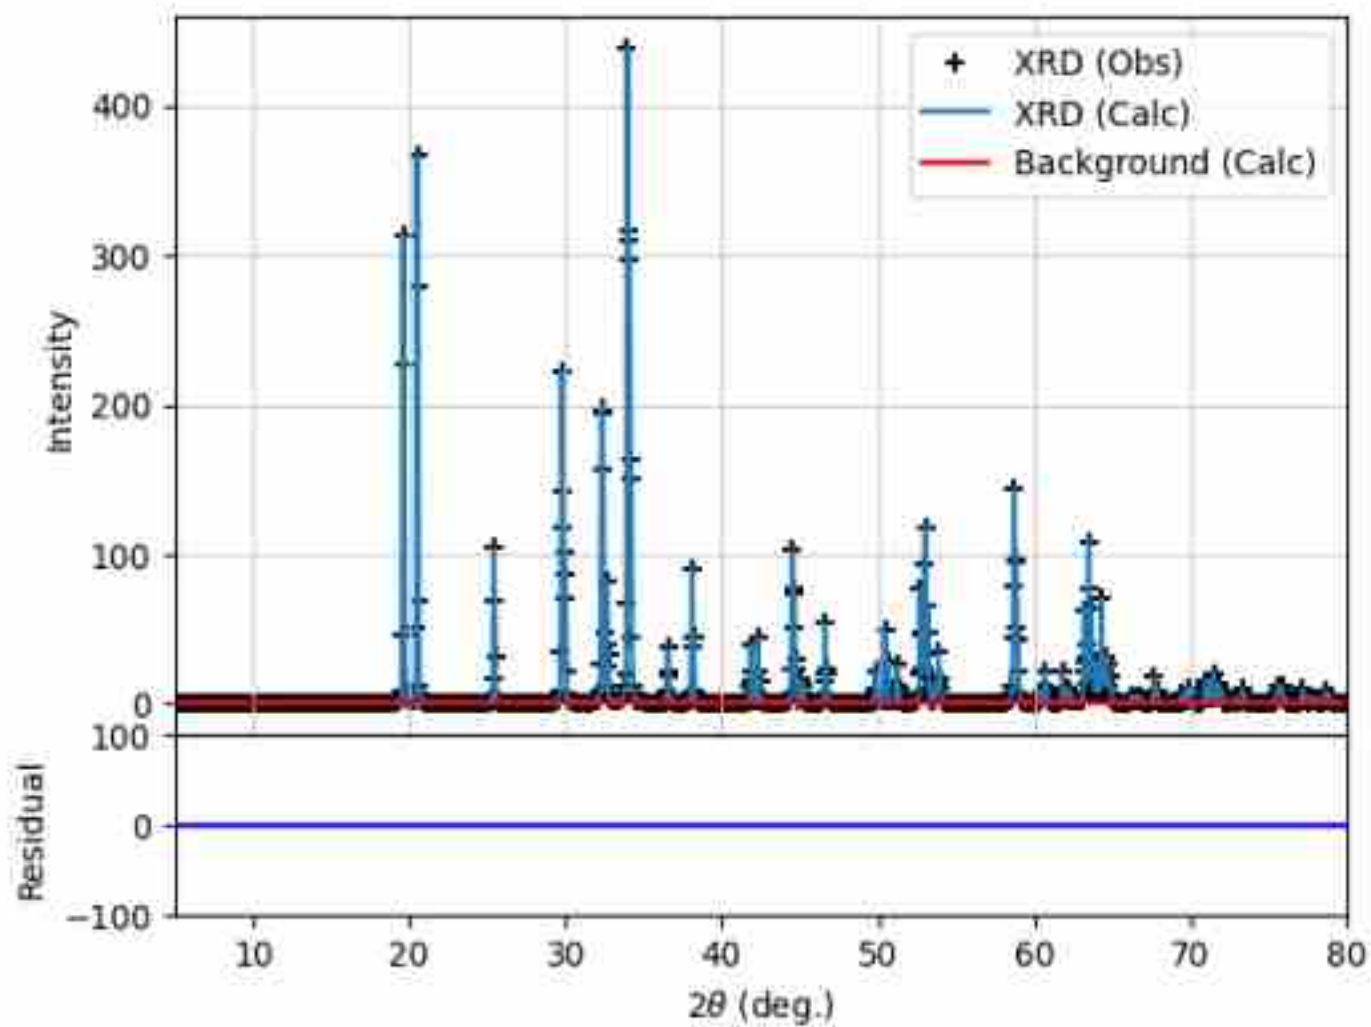

| RMSE before RR | Rwp     | RMSE after RR |
|----------------|---------|---------------|
| 0.014          | 0.00354 | 0.00122       |

# Mn<sub>2</sub>Ga<sub>1</sub>Co<sub>4</sub>Ge<sub>1</sub>

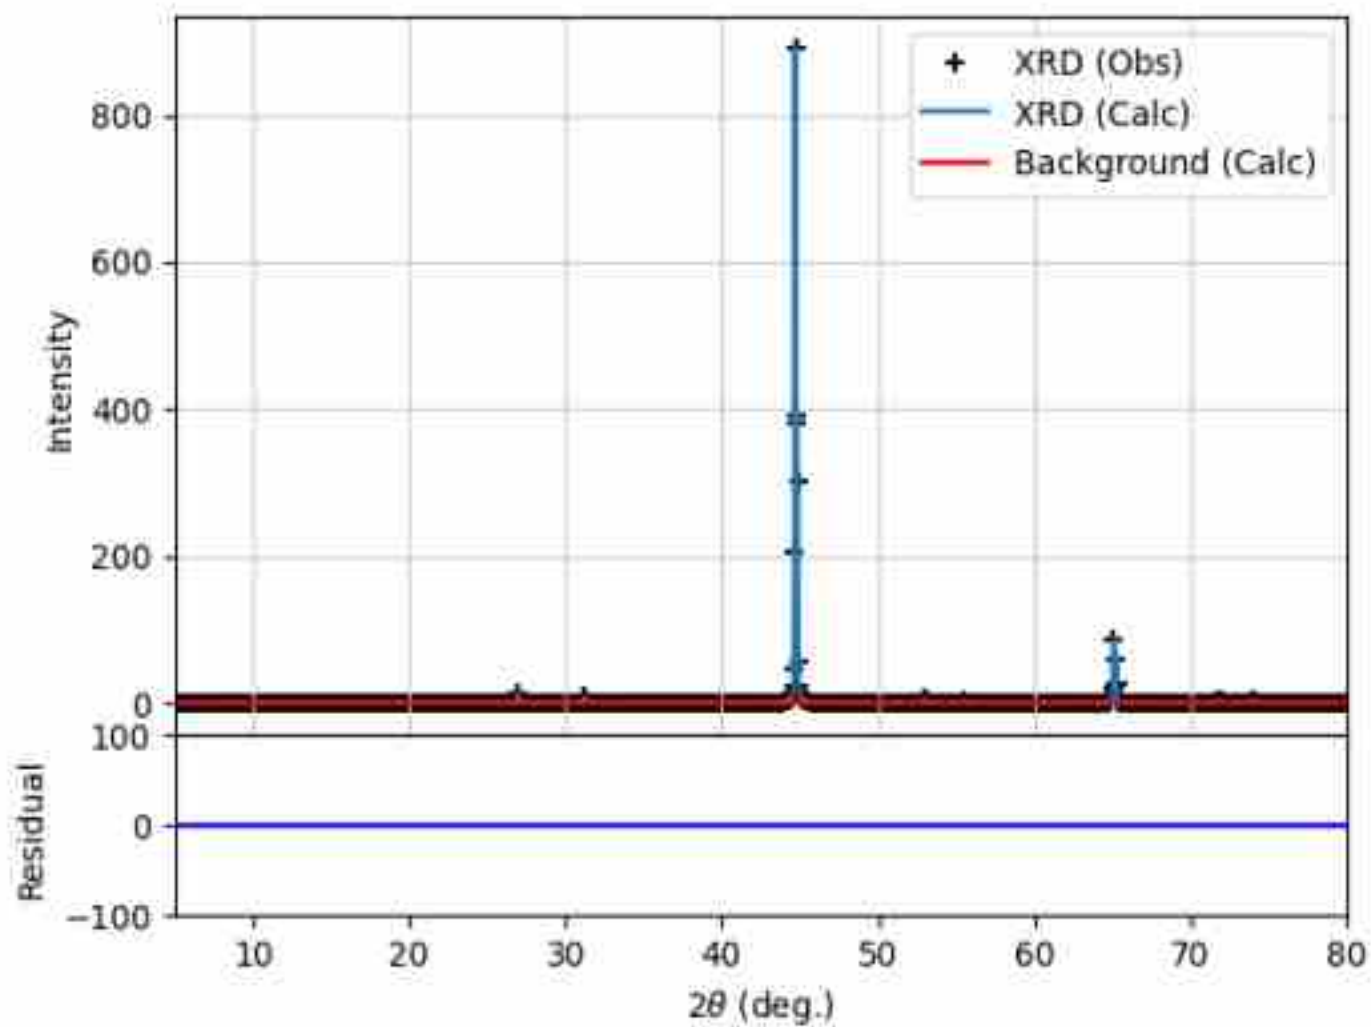

| RMSE before RR | Rwp     | RMSE after RR |
|----------------|---------|---------------|
| 0.014          | 0.00264 | 0.00046       |

# Mn<sub>6</sub>O<sub>2</sub>F<sub>10</sub>

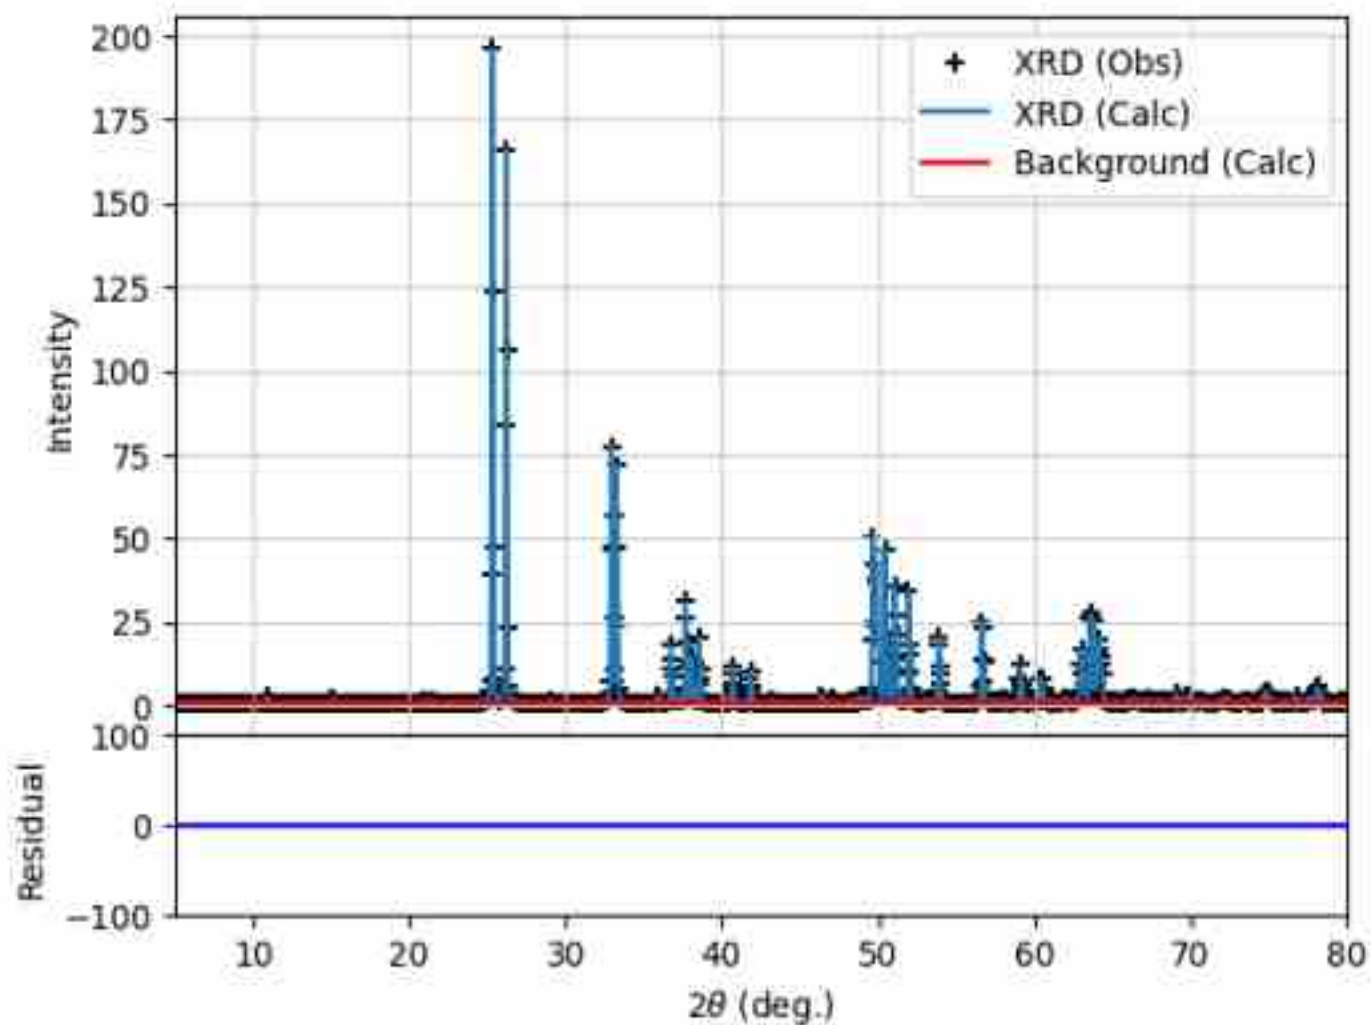

| RMSE before RR | Rwp     | RMSE after RR |
|----------------|---------|---------------|
| 0.014          | 0.00093 | 0.00017       |

# Na<sub>1</sub>Dy<sub>1</sub>W<sub>2</sub>O<sub>8</sub>

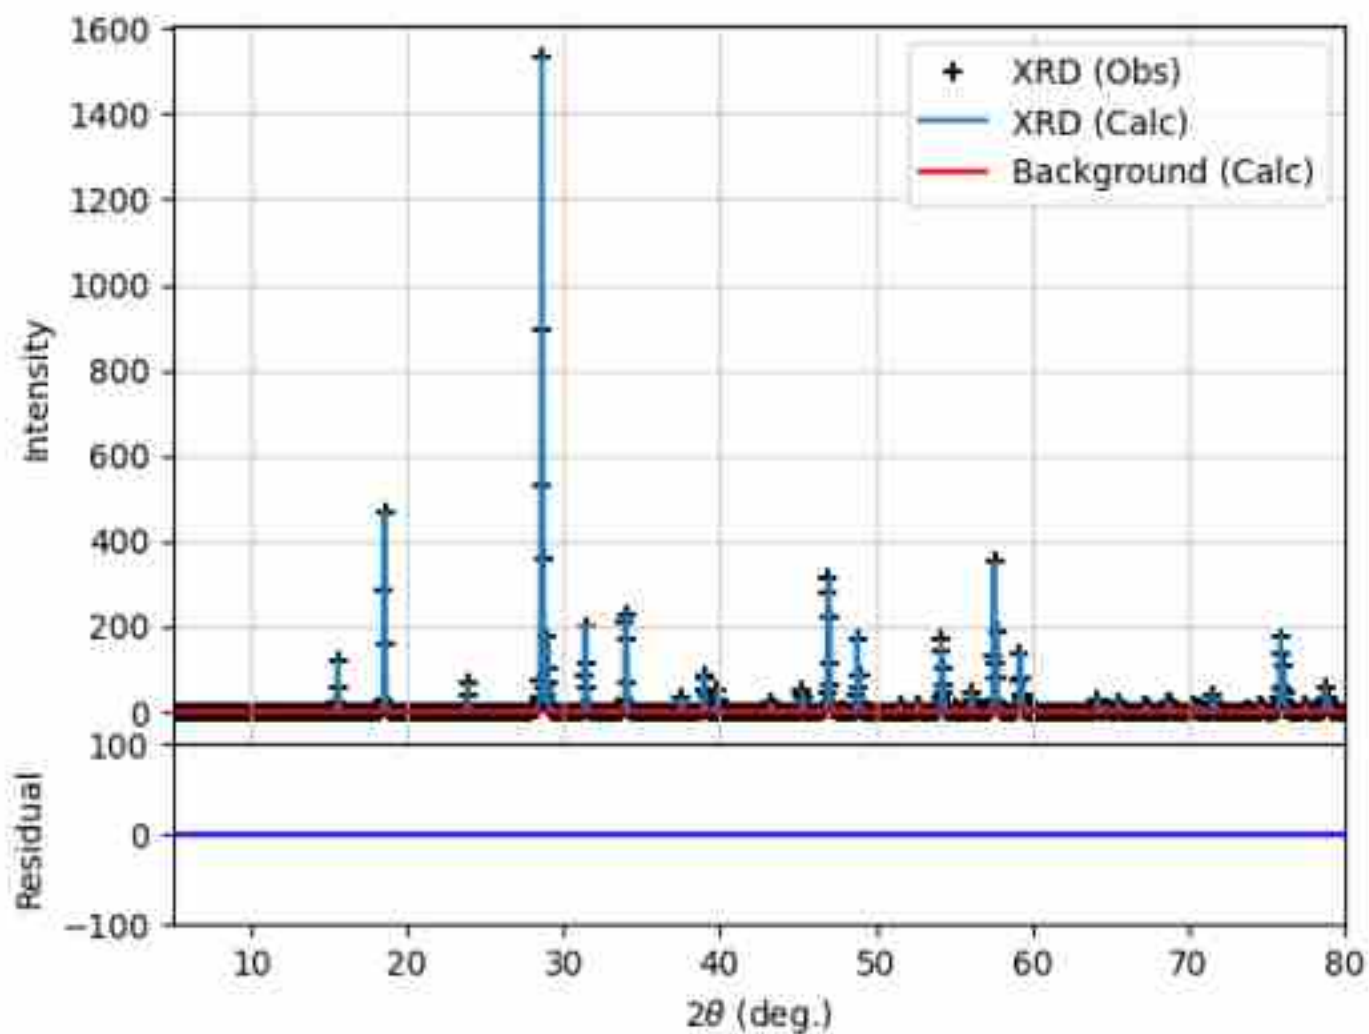

| RMSE before RR | Rwp     | RMSE after RR |
|----------------|---------|---------------|
| 0.014          | 0.00332 | 0.00192       |

# Na1Sc1Ti2F6

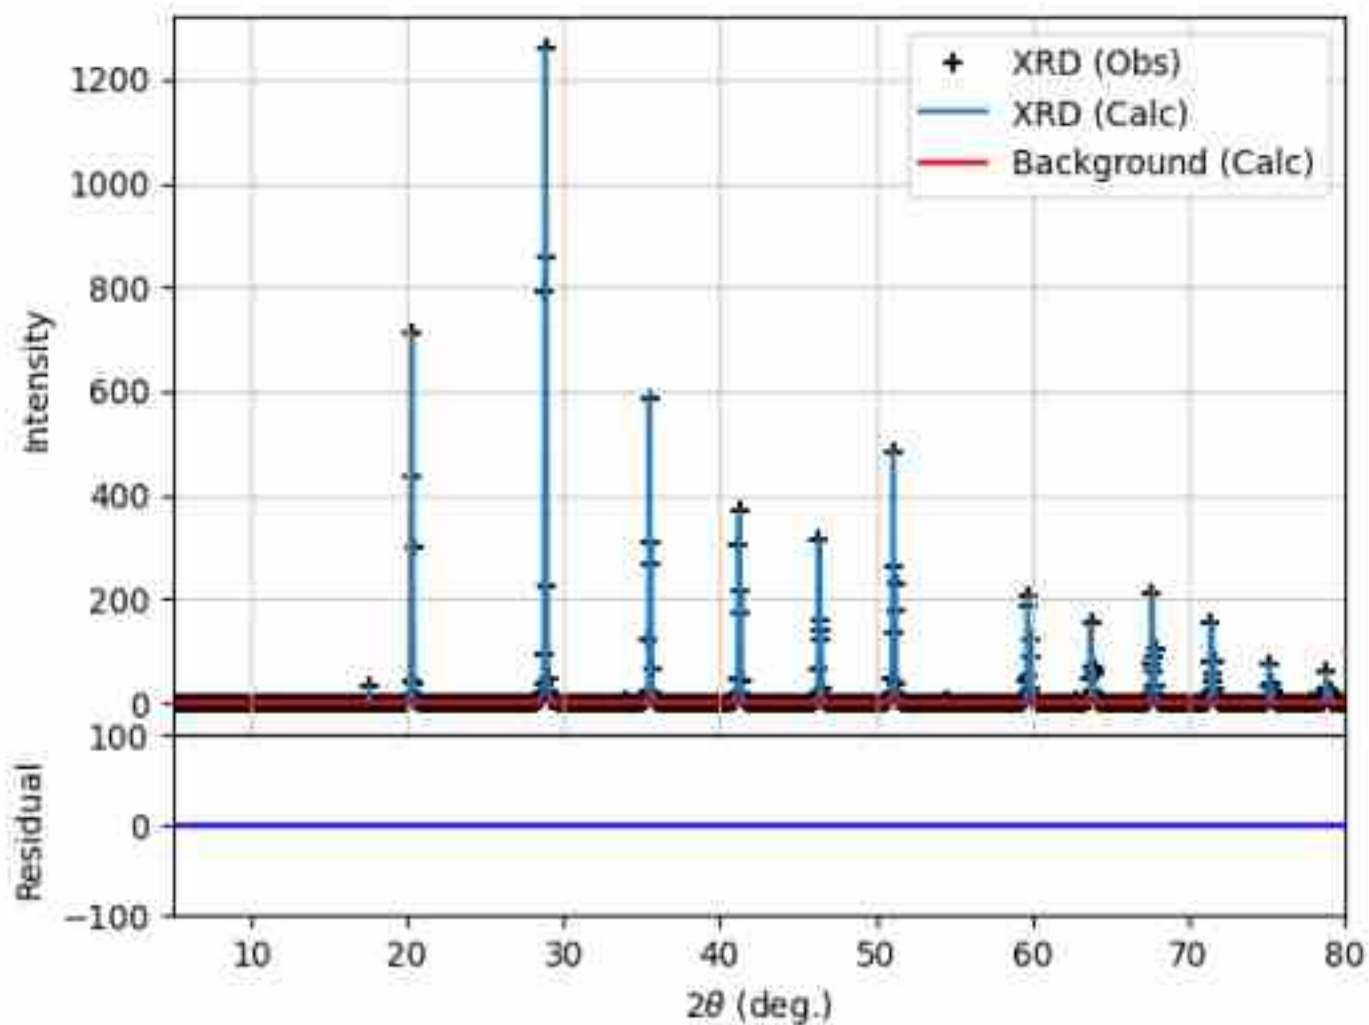

| RMSE before RR | Rwp     | RMSE after RR |
|----------------|---------|---------------|
| 0.014          | 0.01006 | 0.0033        |

# Na<sub>2</sub>Co<sub>2</sub>O<sub>4</sub>

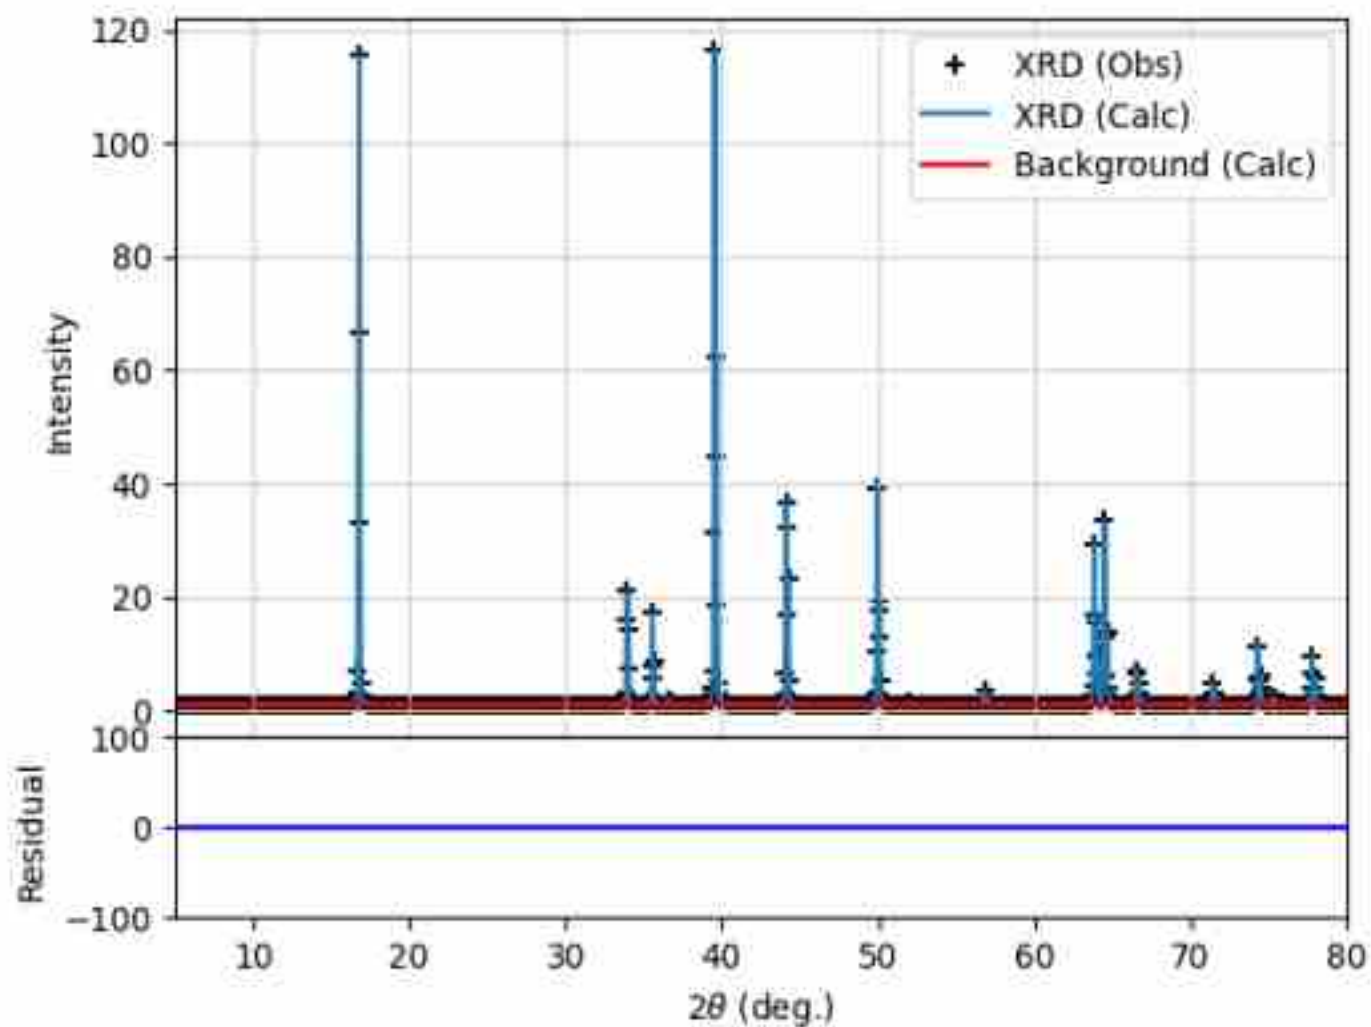

| RMSE before RR | Rwp     | RMSE after RR |
|----------------|---------|---------------|
| 0.014          | 0.00221 | 0.00103       |

# Na<sub>2</sub>Nd<sub>2</sub>O<sub>4</sub>

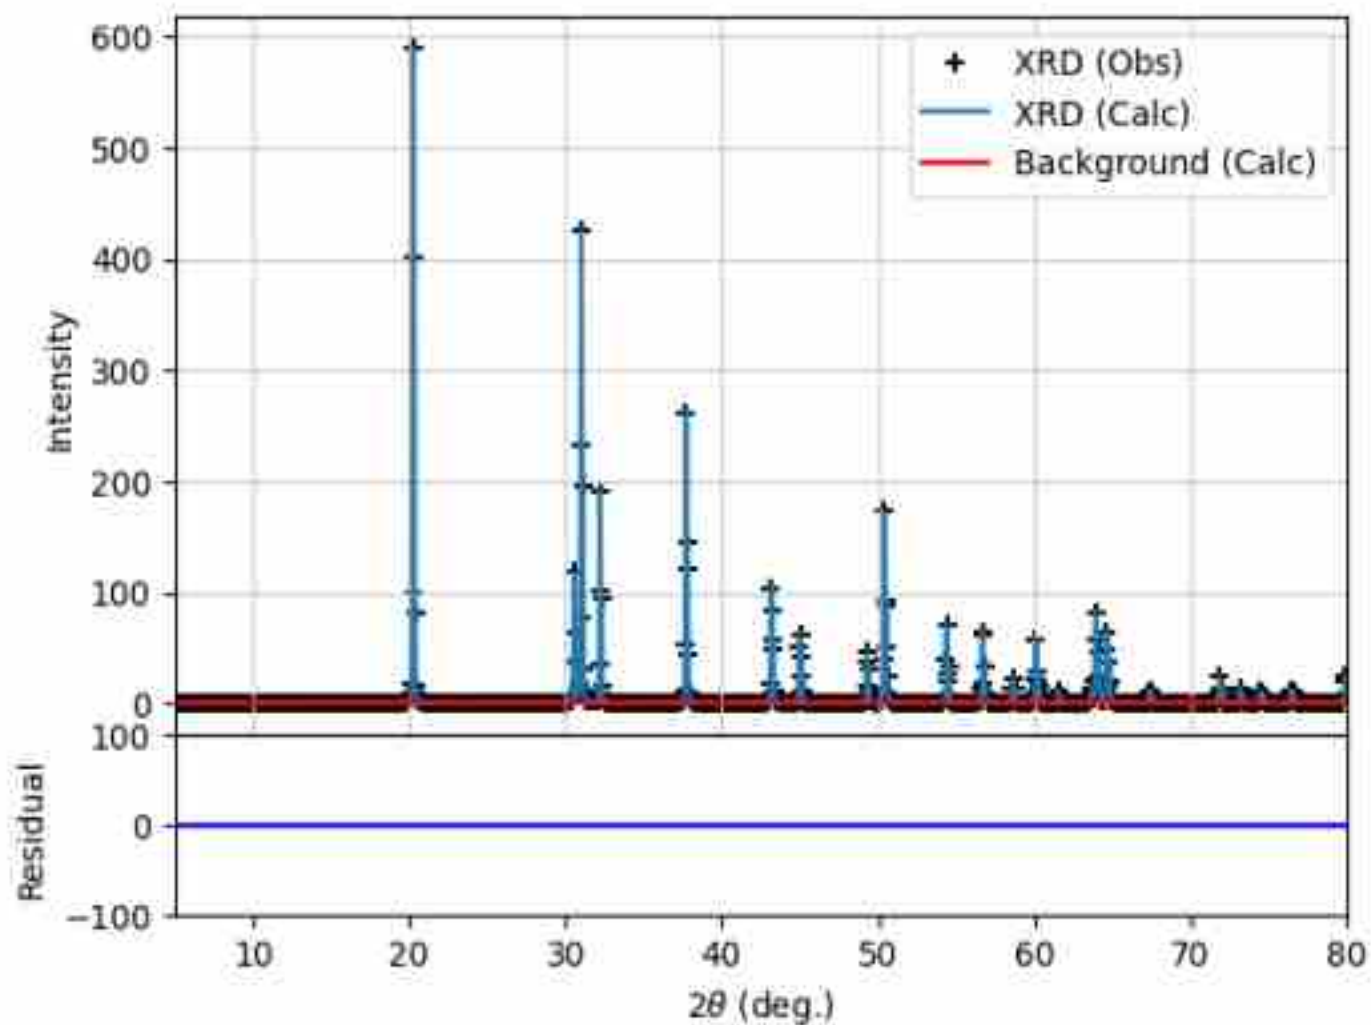

| RMSE before RR | Rwp     | RMSE after RR |
|----------------|---------|---------------|
| 0.014          | 0.00354 | 0.00074       |

Na<sub>3</sub>AlF<sub>6</sub>

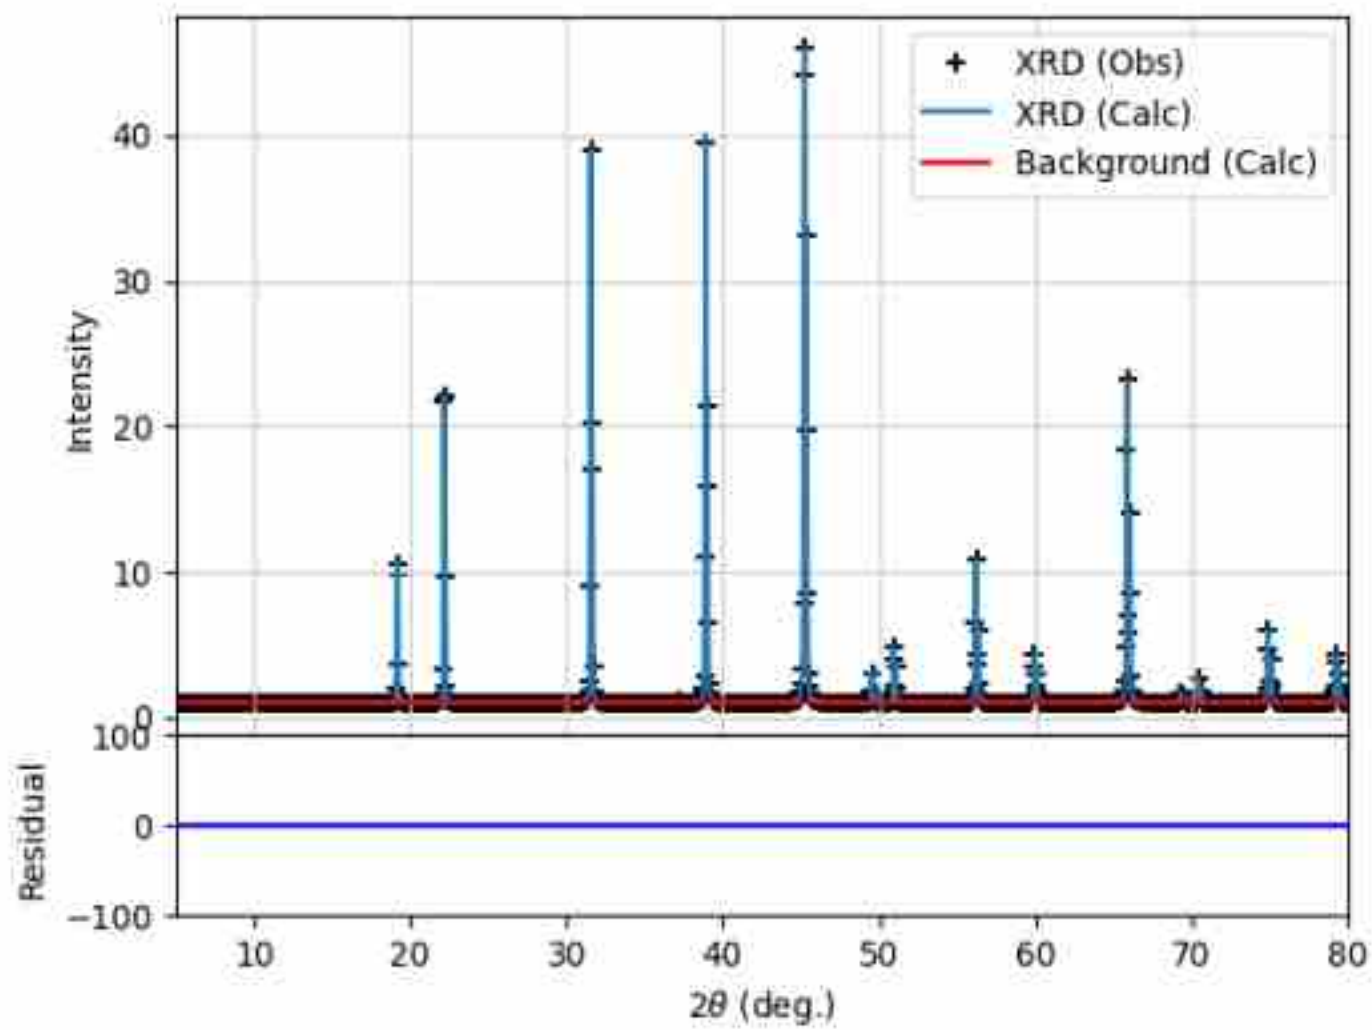

| RMSE before RR | Rwp     | RMSE after RR |
|----------------|---------|---------------|
| 0.014          | 0.01708 | 0.00245       |



# Na<sub>3</sub>Bi1O<sub>4</sub>

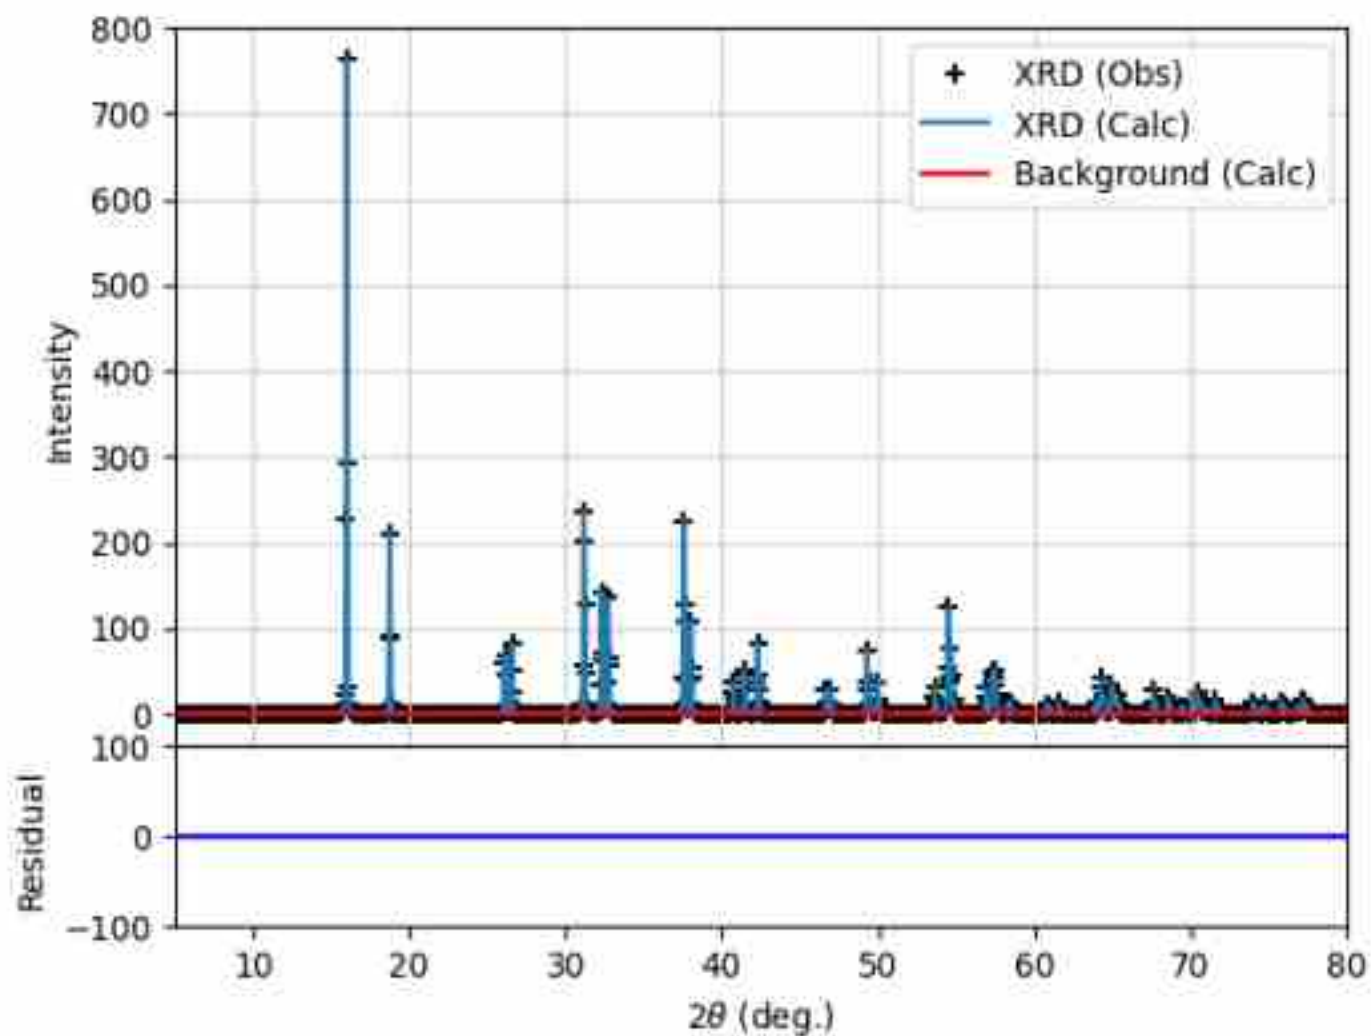

| RMSE before RR | Rwp     | RMSE after RR |
|----------------|---------|---------------|
| 0.014          | 0.00399 | 0.00145       |

# Na<sub>4</sub>Sb<sub>2</sub>Au<sub>2</sub>

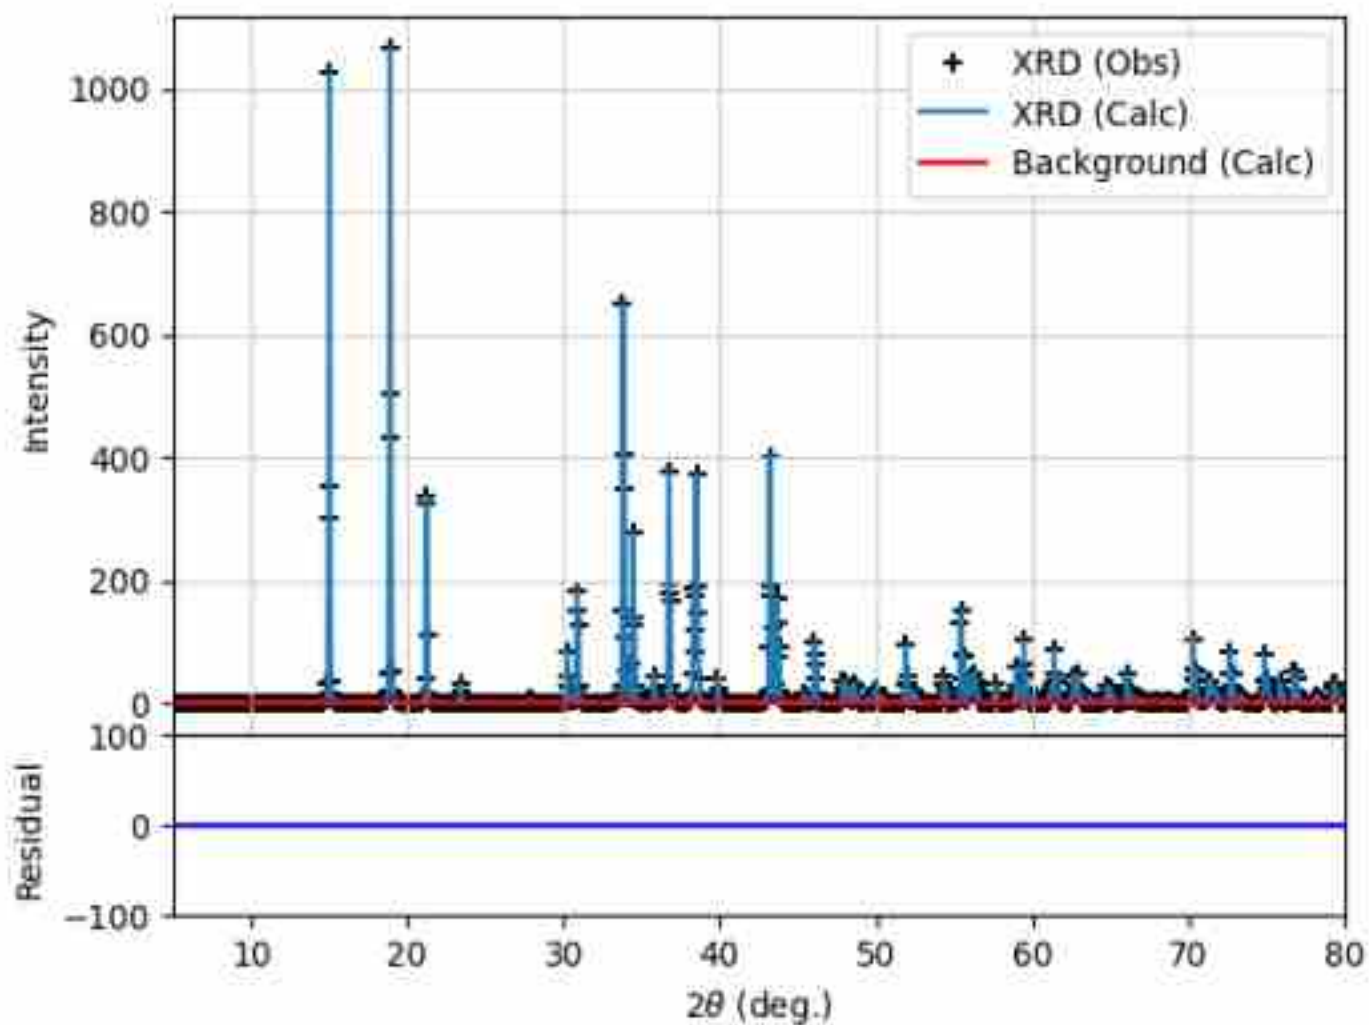

| RMSE before RR | Rwp     | RMSE after RR |
|----------------|---------|---------------|
| 0.014          | 0.00404 | 0.00066       |

# Nb<sub>2</sub>CrSe<sub>4</sub>

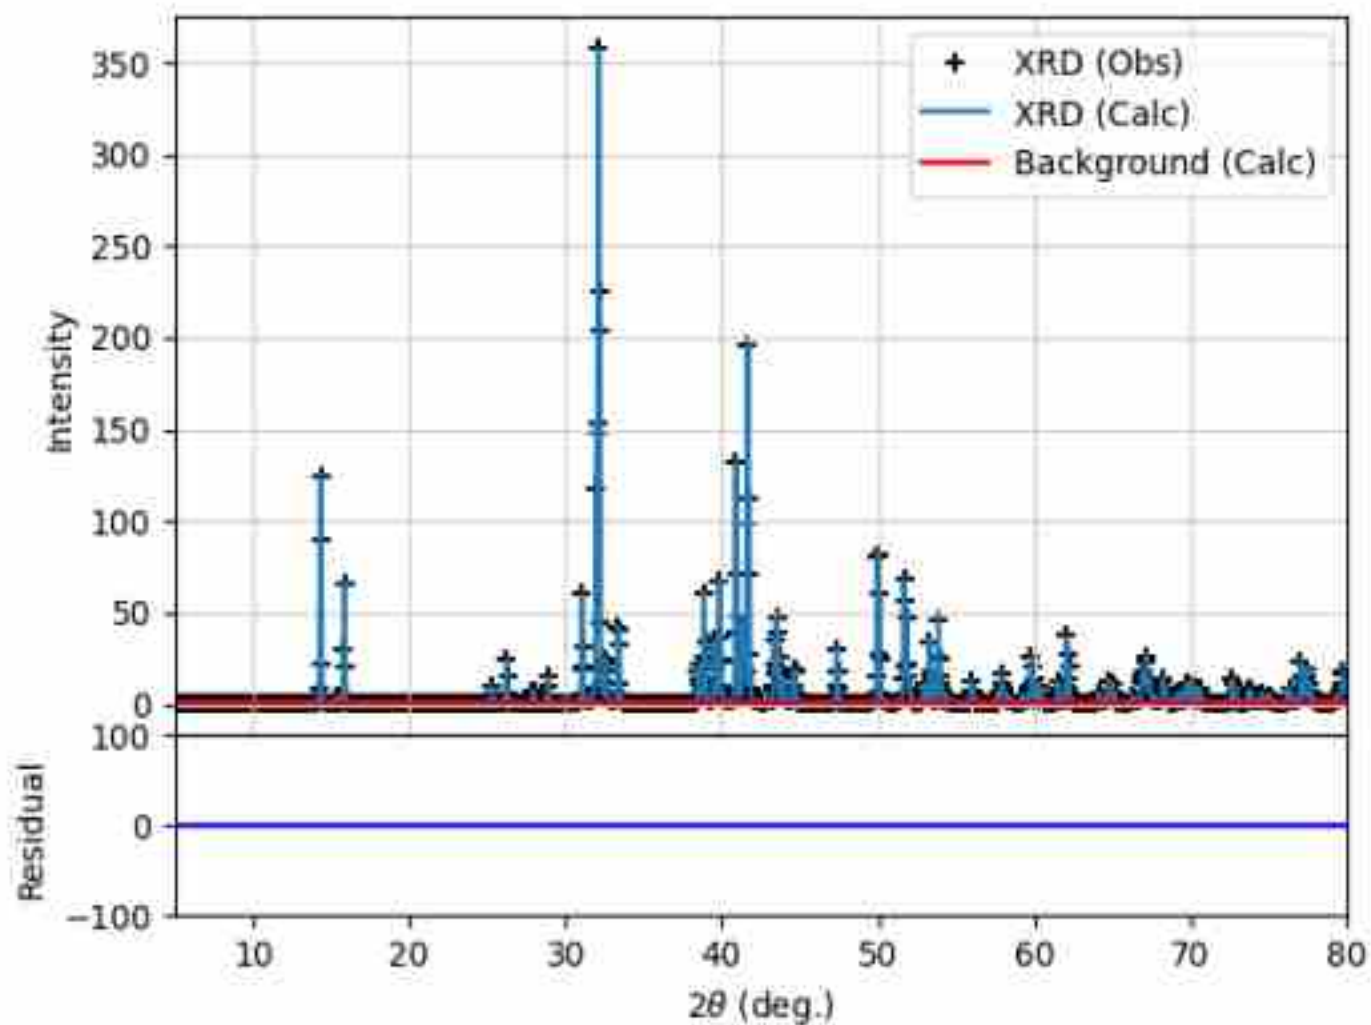

| RMSE before RR | Rwp     | RMSE after RR |
|----------------|---------|---------------|
| 0.014          | 0.00375 | 0.00024       |

# Nd1Ga3B4O12

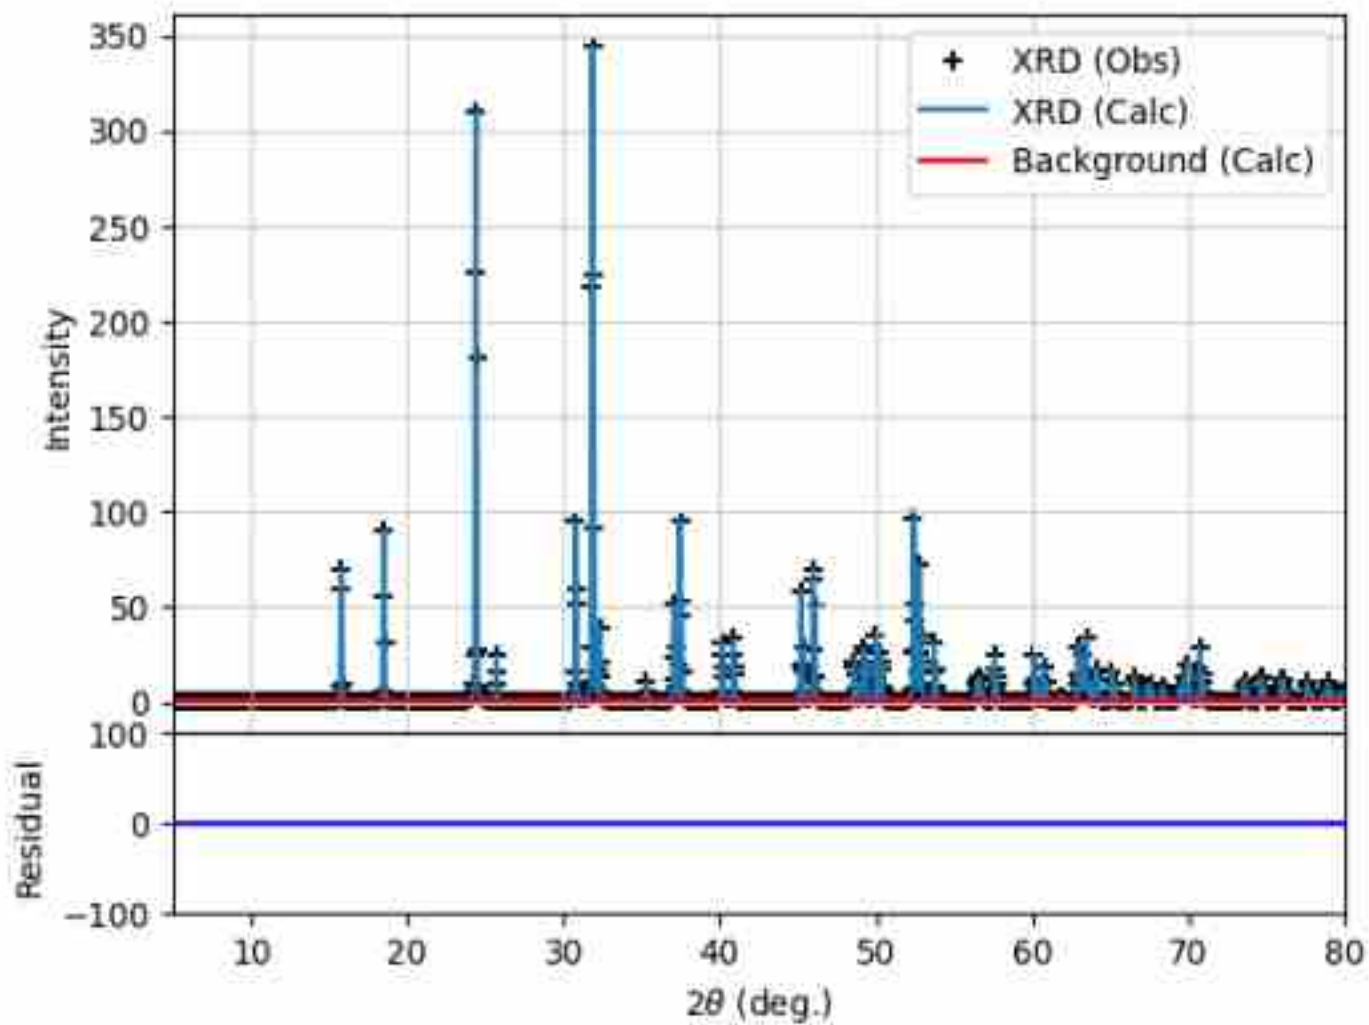

| RMSE before RR | Rwp     | RMSE after RR |
|----------------|---------|---------------|
| 0.014          | 0.00333 | 0.00264       |

# Nd<sub>2</sub>Zn<sub>2</sub>Sb<sub>2</sub>O<sub>2</sub>

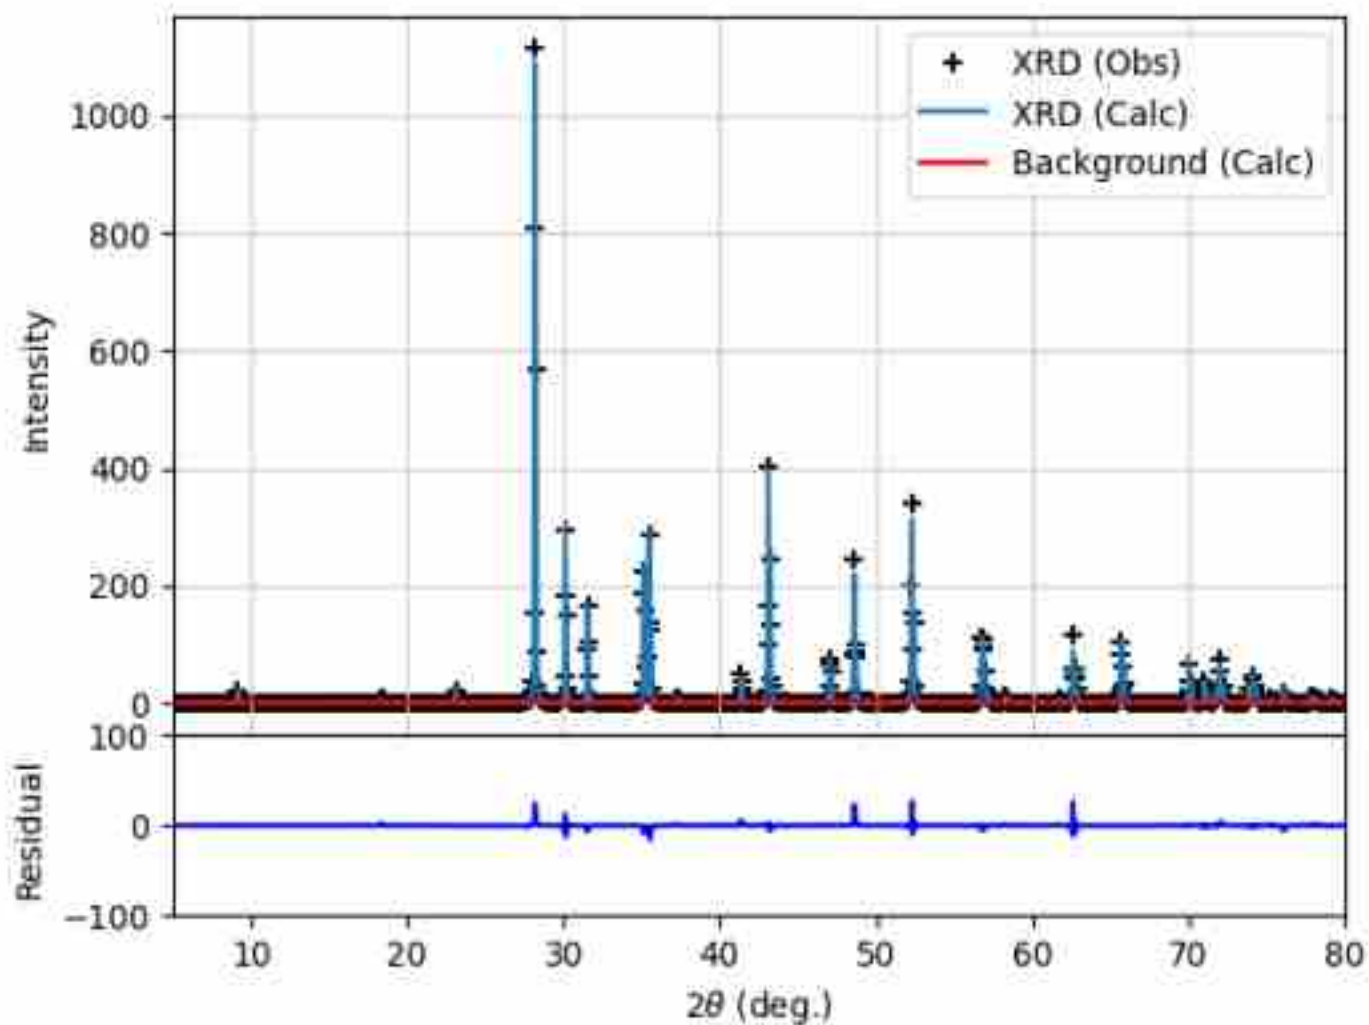

| RMSE before RR | Rwp     | RMSE after RR |
|----------------|---------|---------------|
| 0.014          | 6.22272 | 0.01932       |

# Nd3Al11

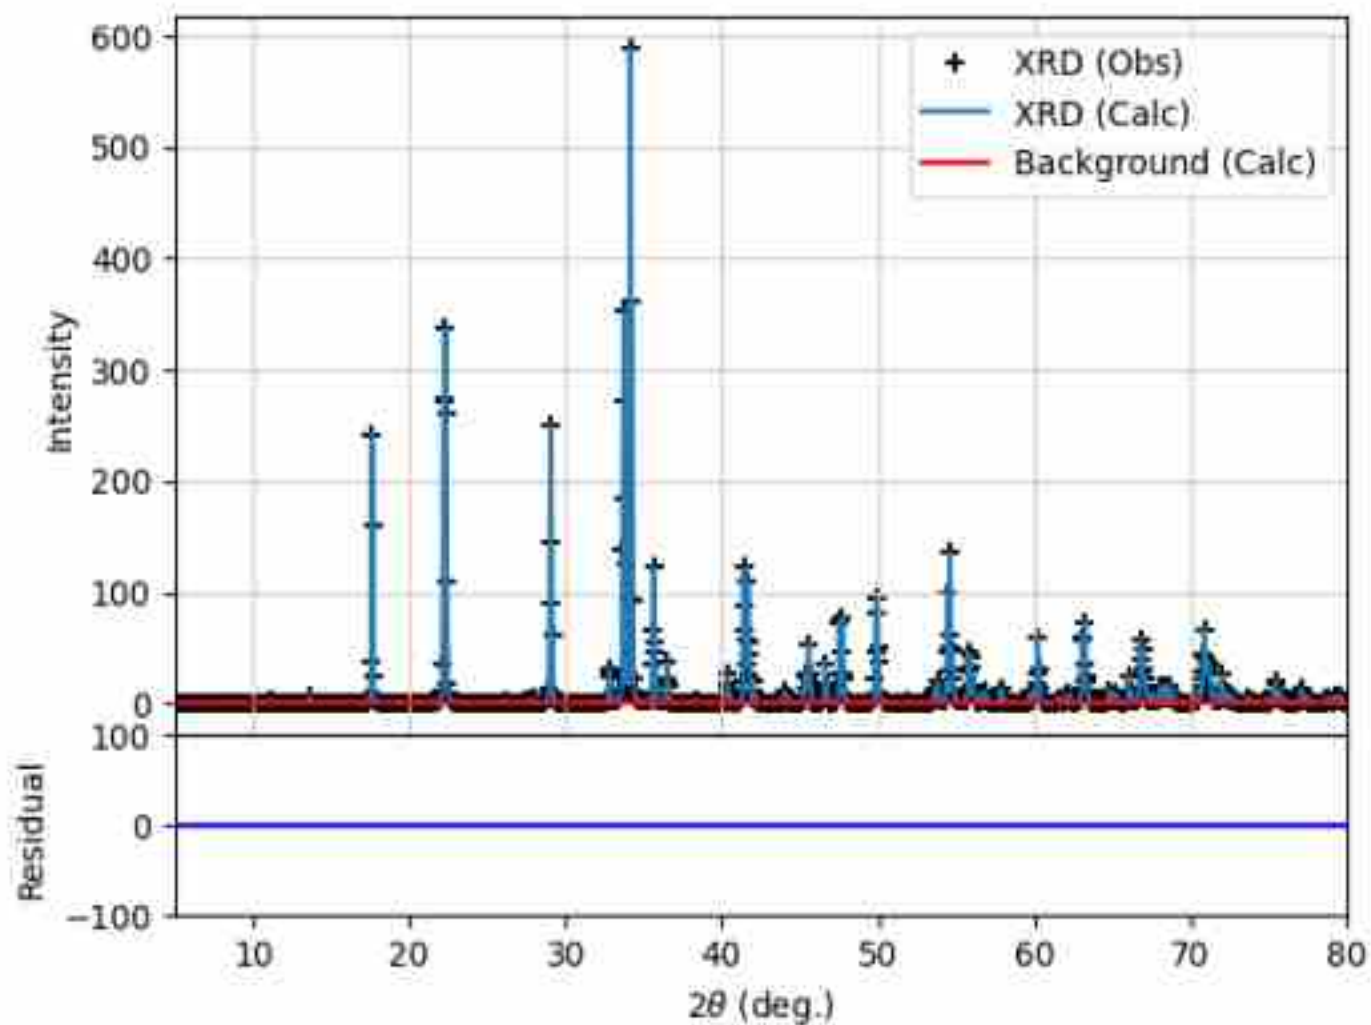

| RMSE before RR | Rwp     | RMSE after RR |
|----------------|---------|---------------|
| 0.014          | 0.00322 | 0.00051       |

# Nd<sub>3</sub>Sn<sub>3</sub>Ir<sub>3</sub>

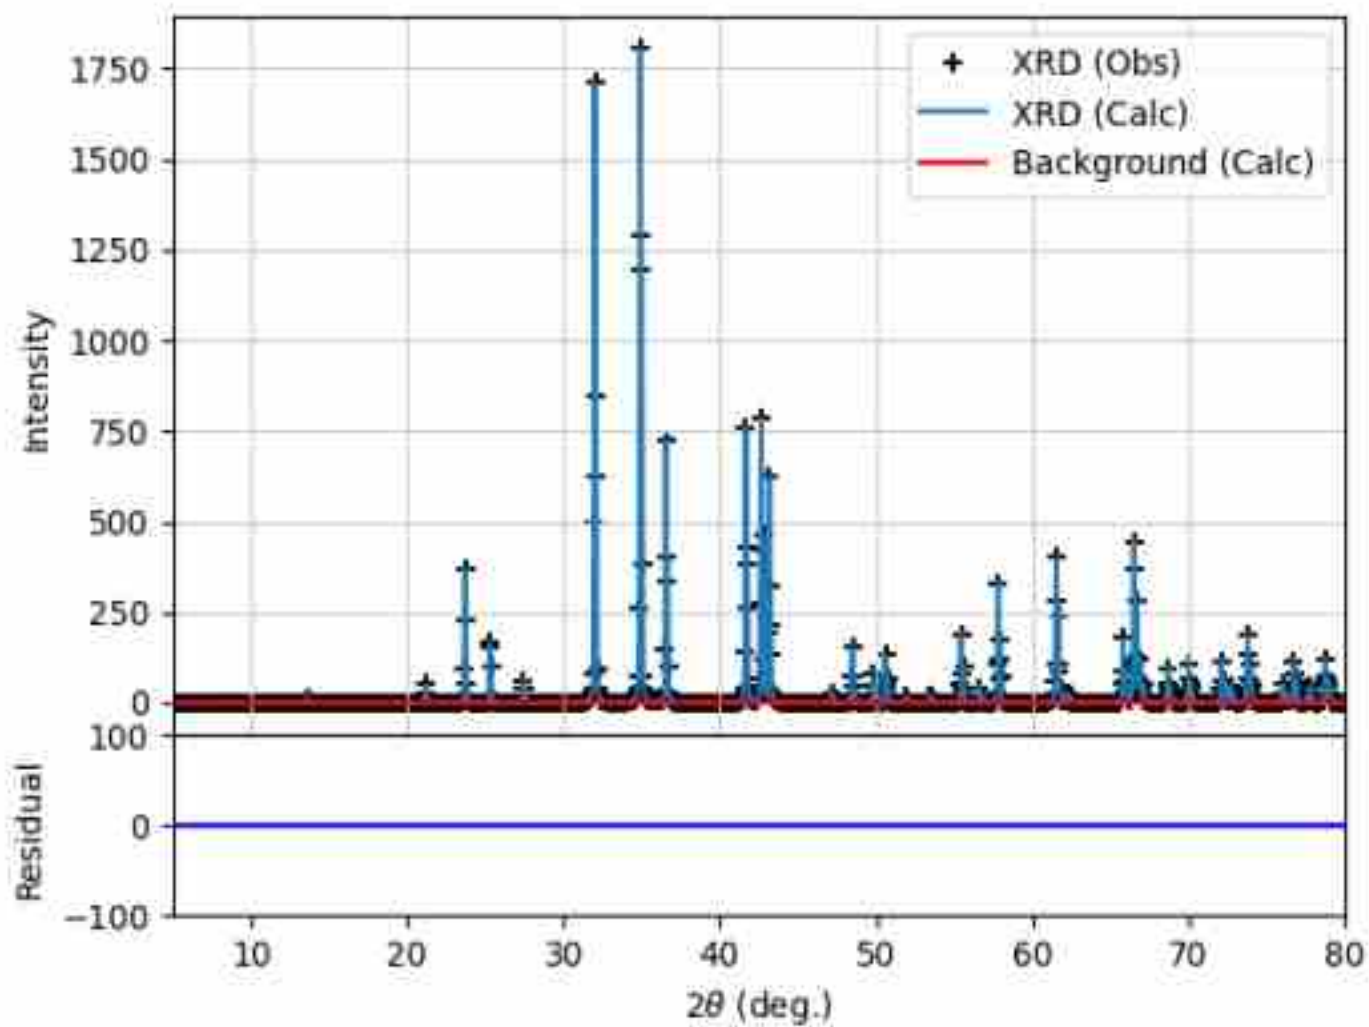

| RMSE before RR | Rwp     | RMSE after RR |
|----------------|---------|---------------|
| 0.014          | 0.00417 | 0.00079       |

# Nd4Cr4O12

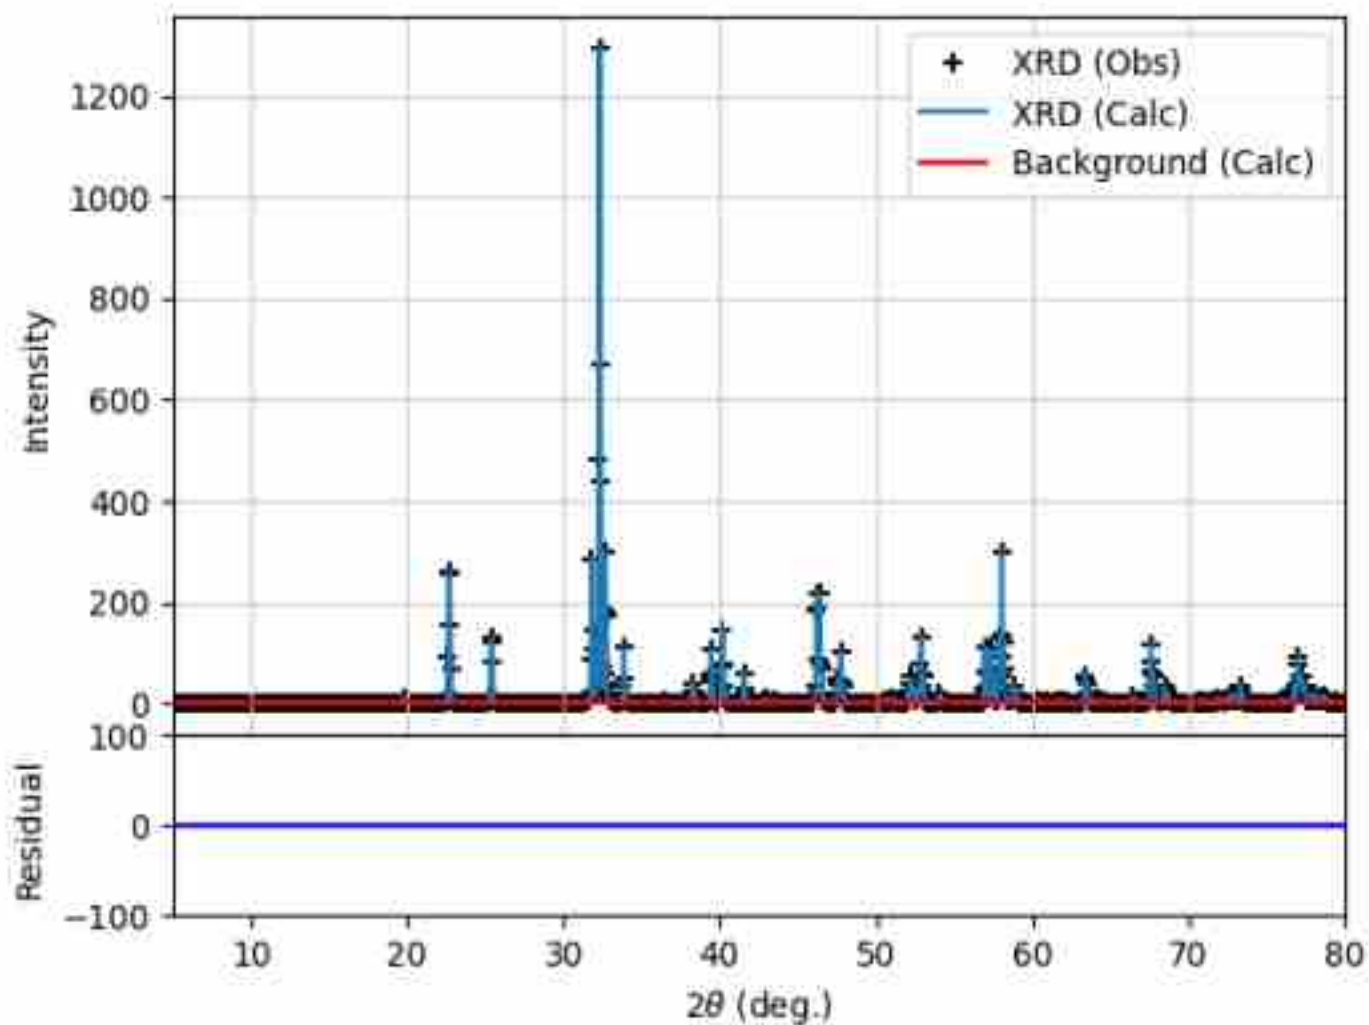

| RMSE before RR | Rwp     | RMSE after RR |
|----------------|---------|---------------|
| 0.014          | 0.00492 | 0.00107       |



# Nd<sub>4</sub>Mg<sub>2</sub>Se<sub>8</sub>

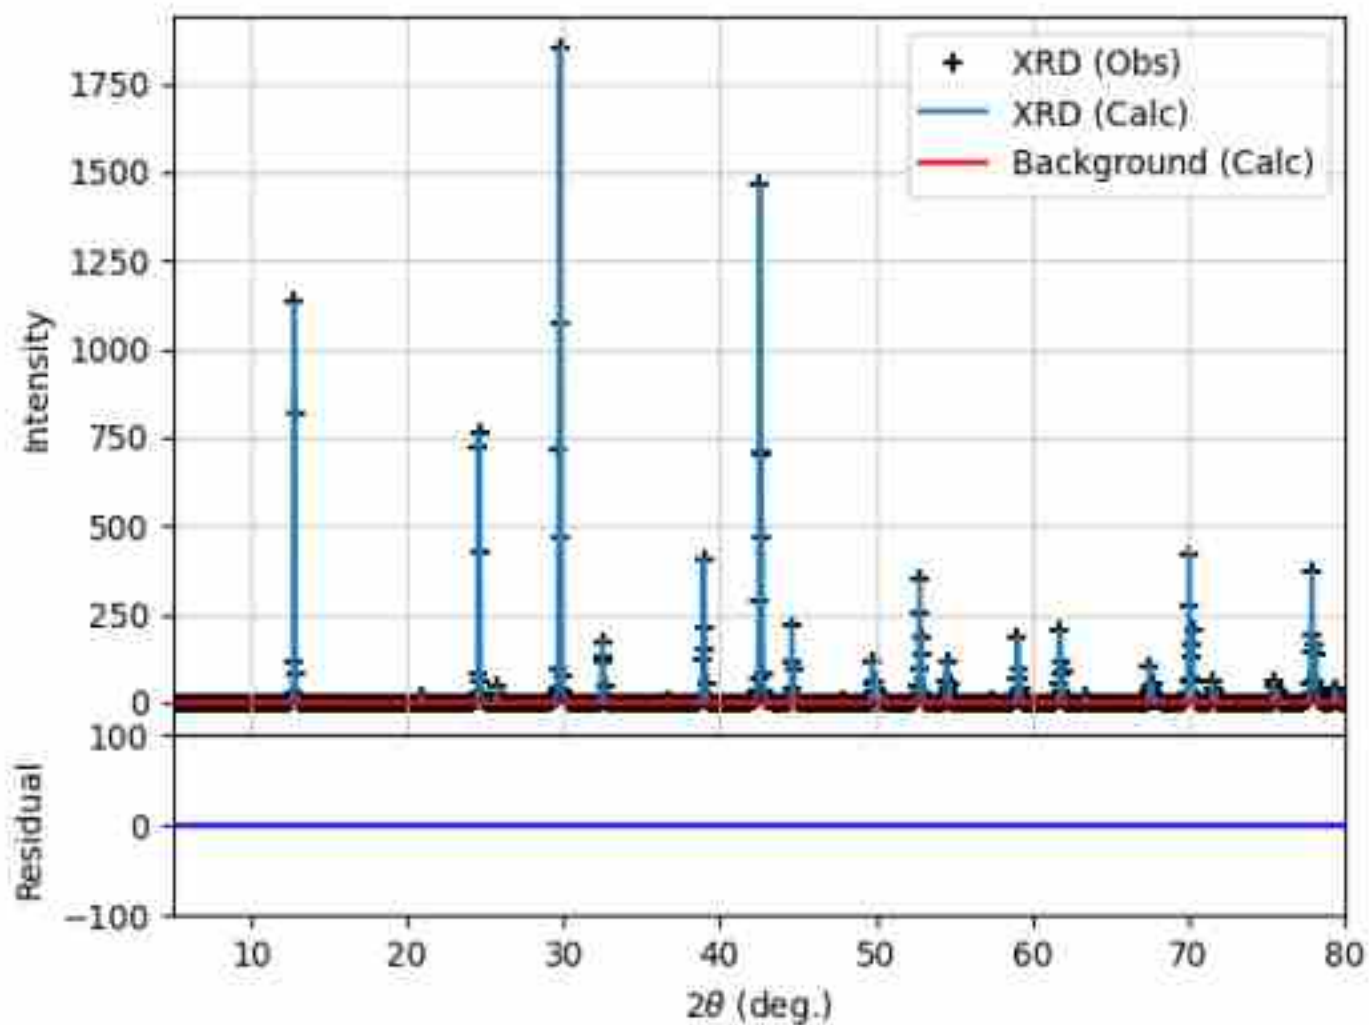

| RMSE before RR | Rwp     | RMSE after RR |
|----------------|---------|---------------|
| 0.014          | 0.01225 | 0.00165       |

# Nd9Pt6

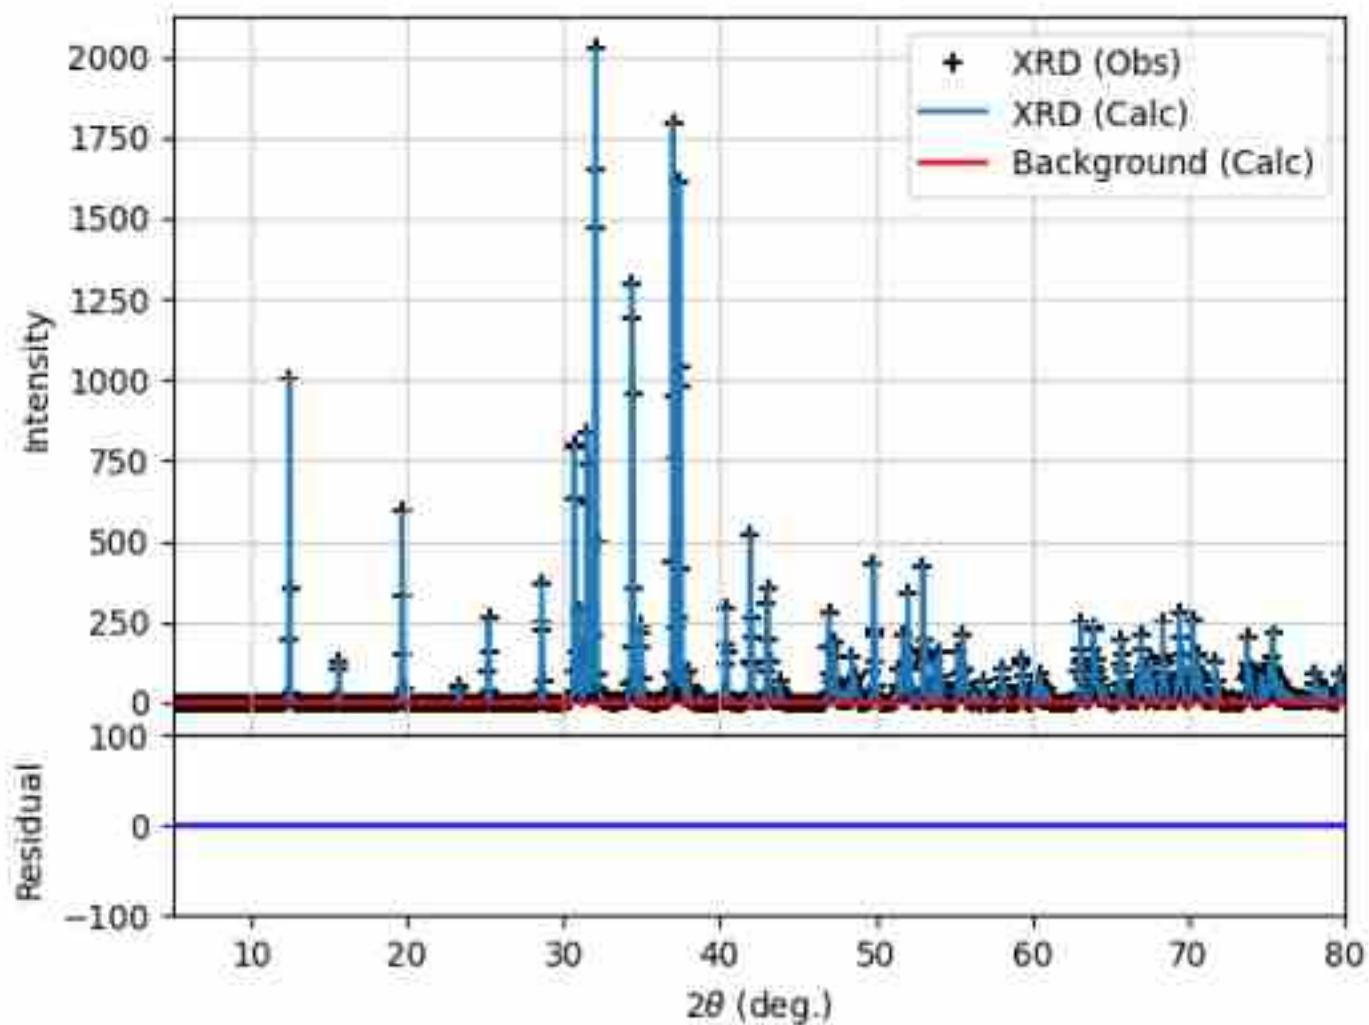

| RMSE before RR | Rwp     | RMSE after RR |
|----------------|---------|---------------|
| 0.014          | 0.00399 | 0.00042       |

# Nd12Os4

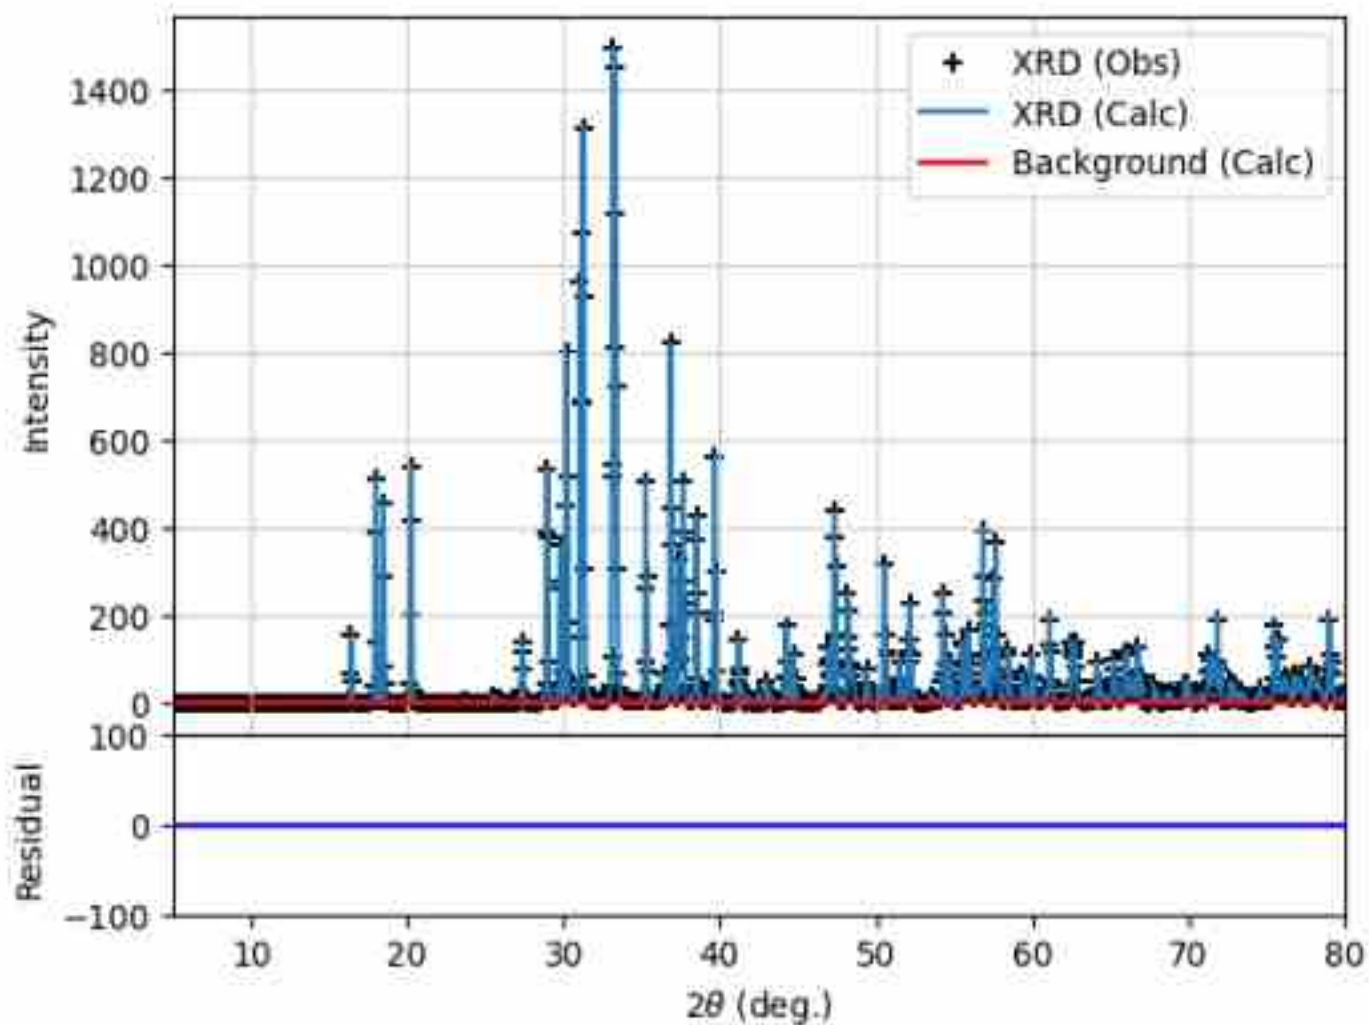

| RMSE before RR | Rwp    | RMSE after RR |
|----------------|--------|---------------|
| 0.014          | 0.0041 | 0.00035       |

# Ni1Cl2

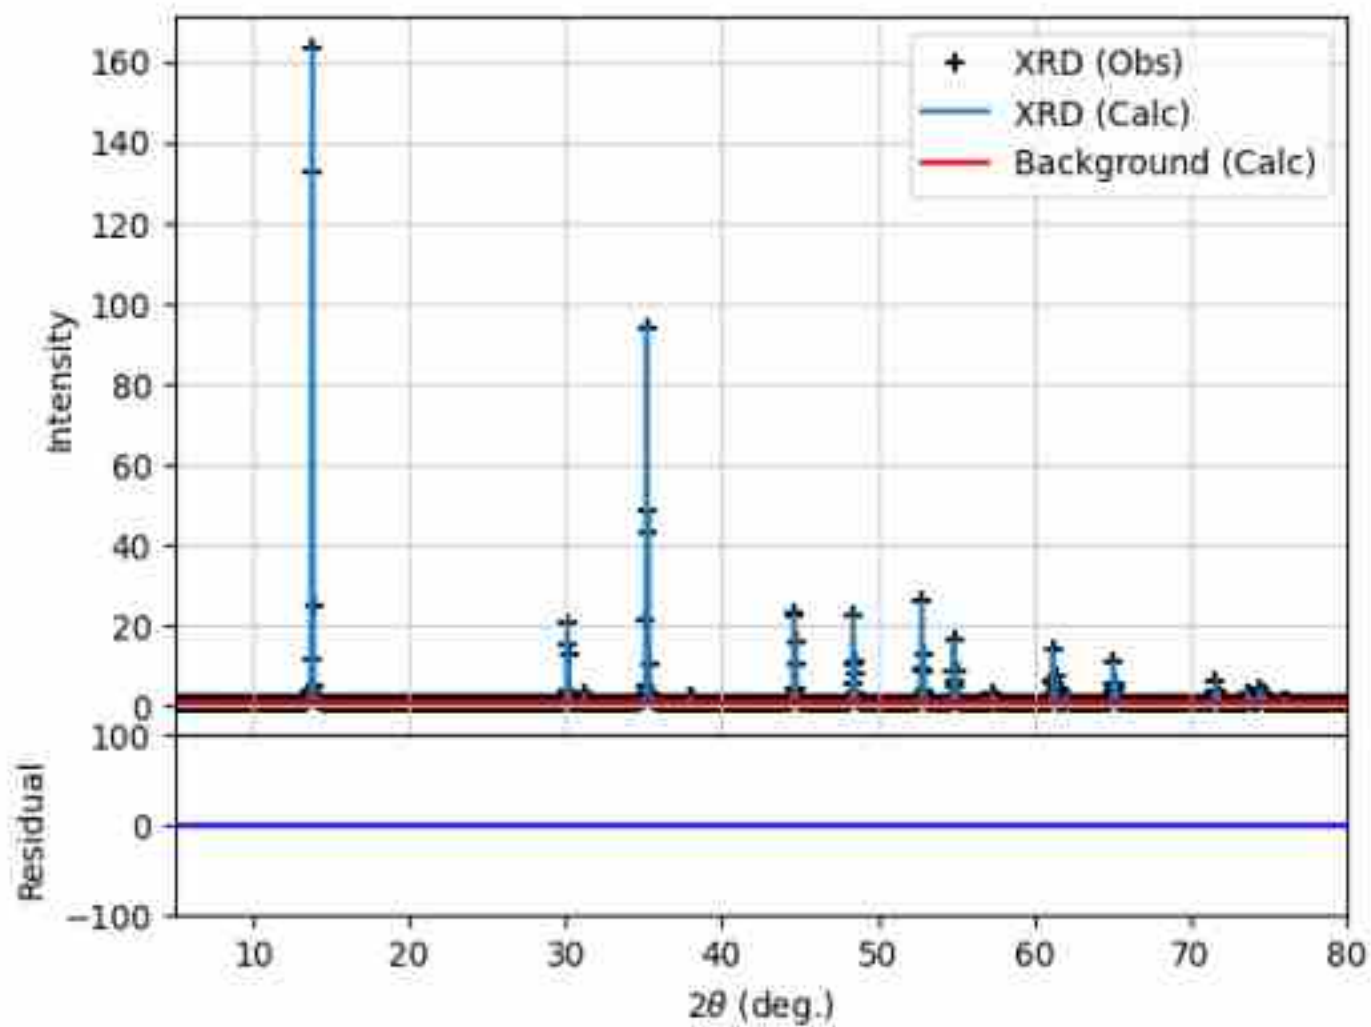

| RMSE before RR | Rwp     | RMSE after RR |
|----------------|---------|---------------|
| 0.014          | 0.00227 | 0.0008        |

# Ni1Te1Se1

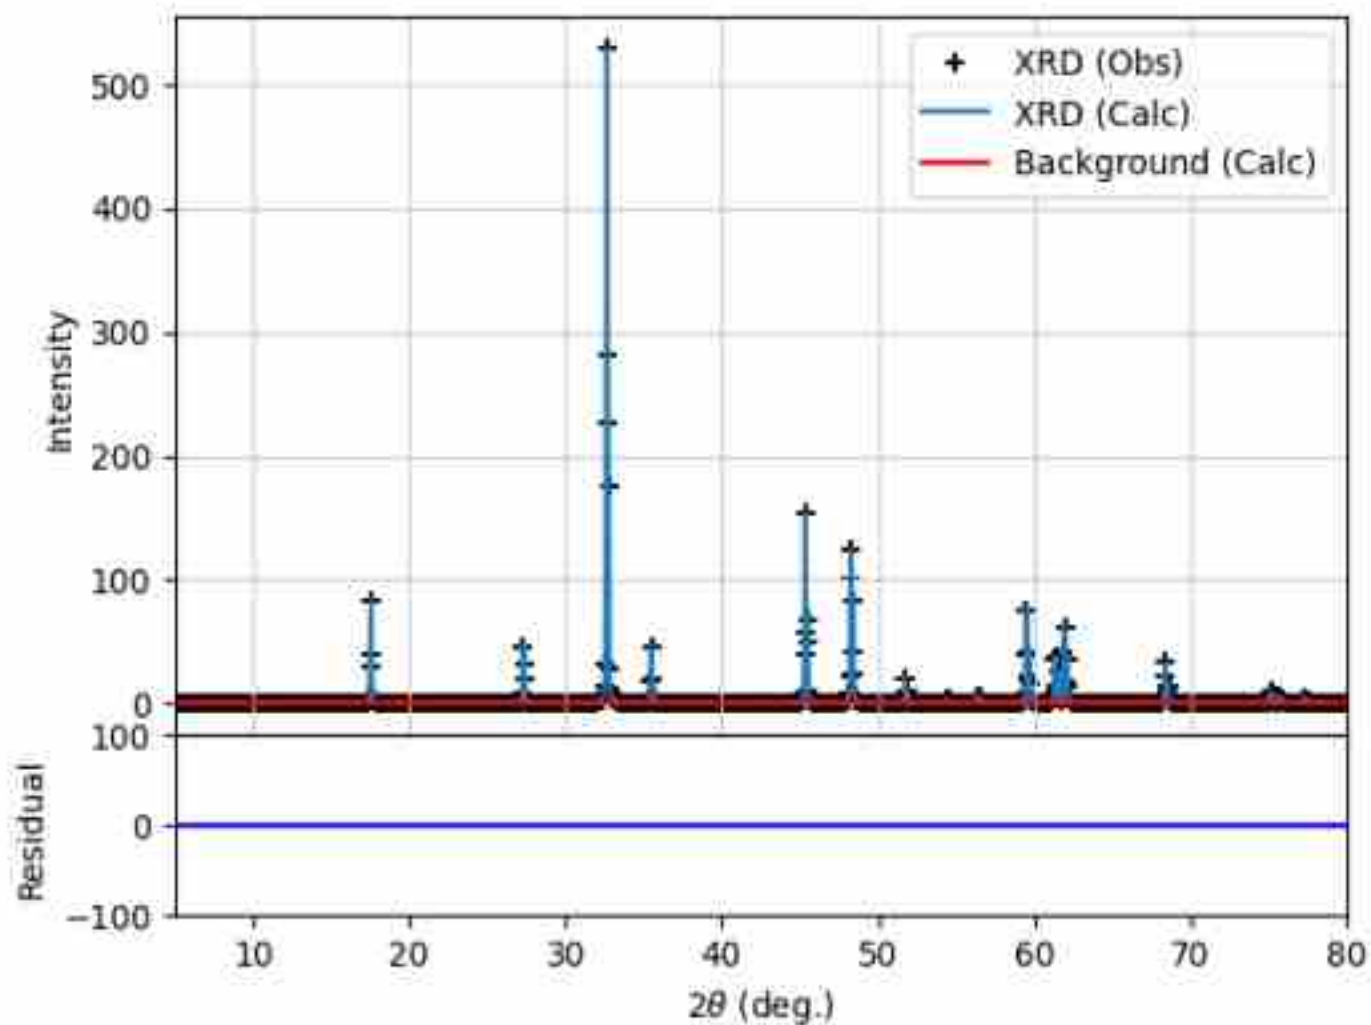

| RMSE before RR | Rwp     | RMSE after RR |
|----------------|---------|---------------|
| 0.014          | 0.00314 | 0.00032       |

# Np<sub>1</sub>Si<sub>2</sub>O<sub>s2</sub>

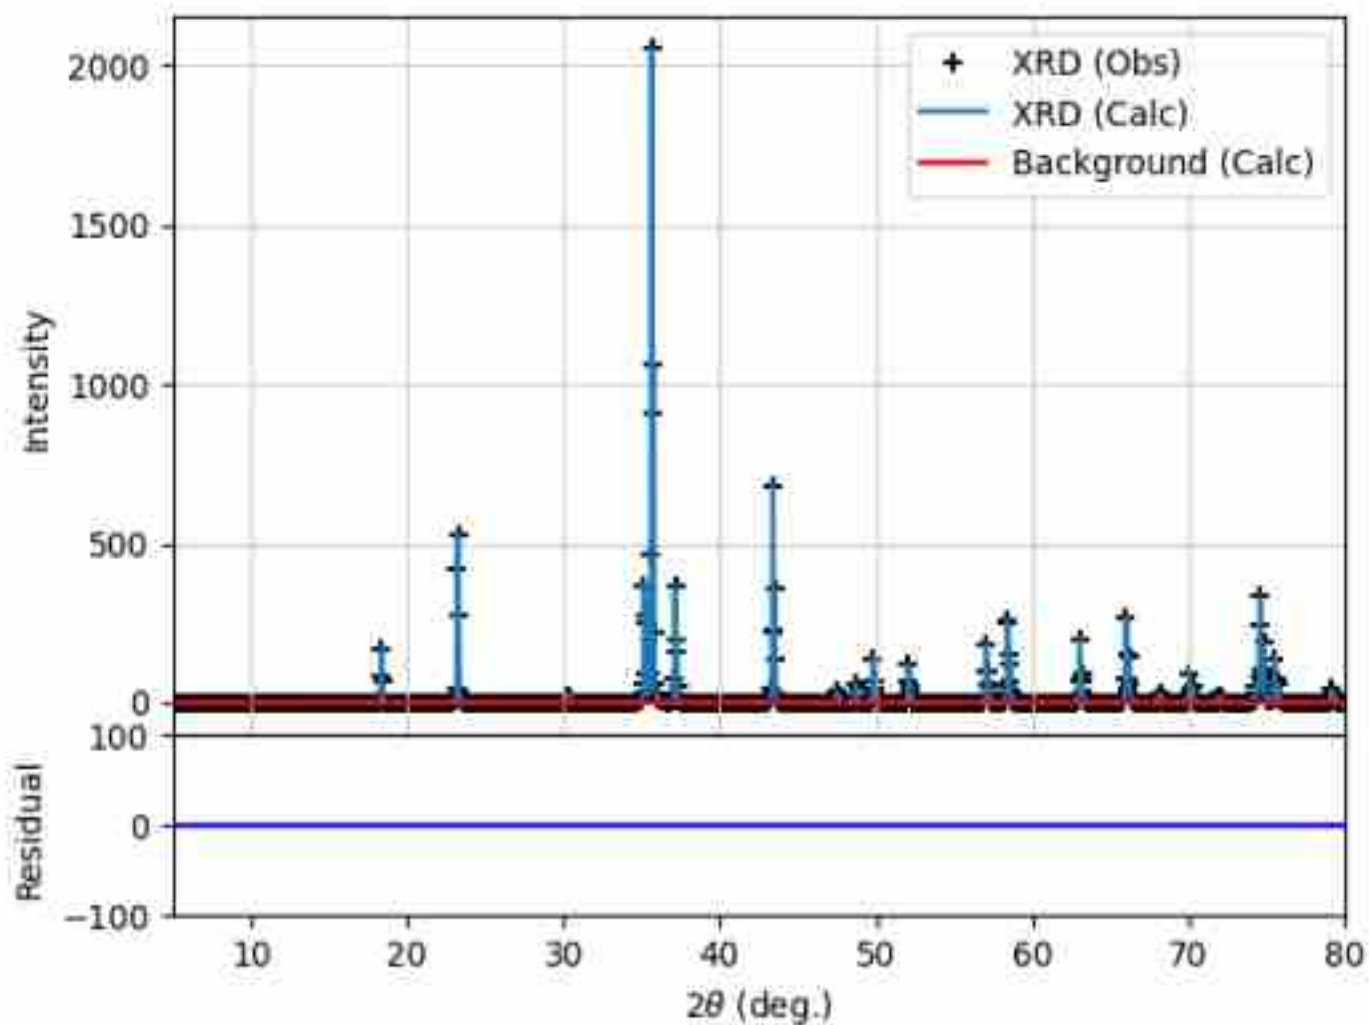

| RMSE before RR | Rwp     | RMSE after RR |
|----------------|---------|---------------|
| 0.014          | 0.00351 | 0.0007        |

# Np<sub>2</sub>Te<sub>2</sub>As<sub>2</sub>

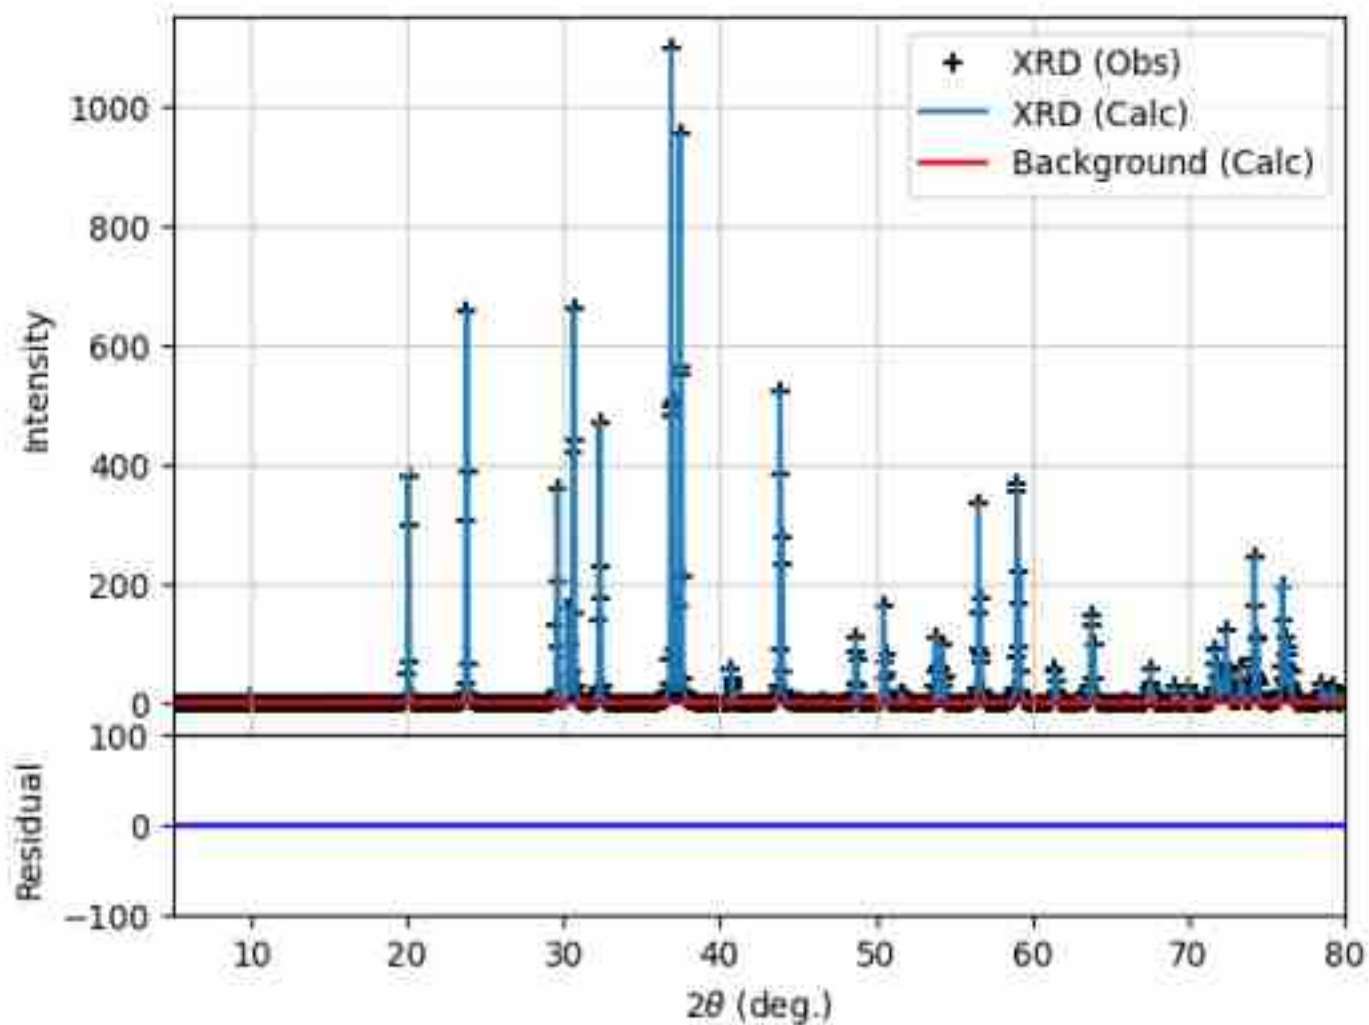

| RMSE before RR | Rwp     | RMSE after RR |
|----------------|---------|---------------|
| 0.014          | 0.00522 | 0.00033       |

# Pa1C2

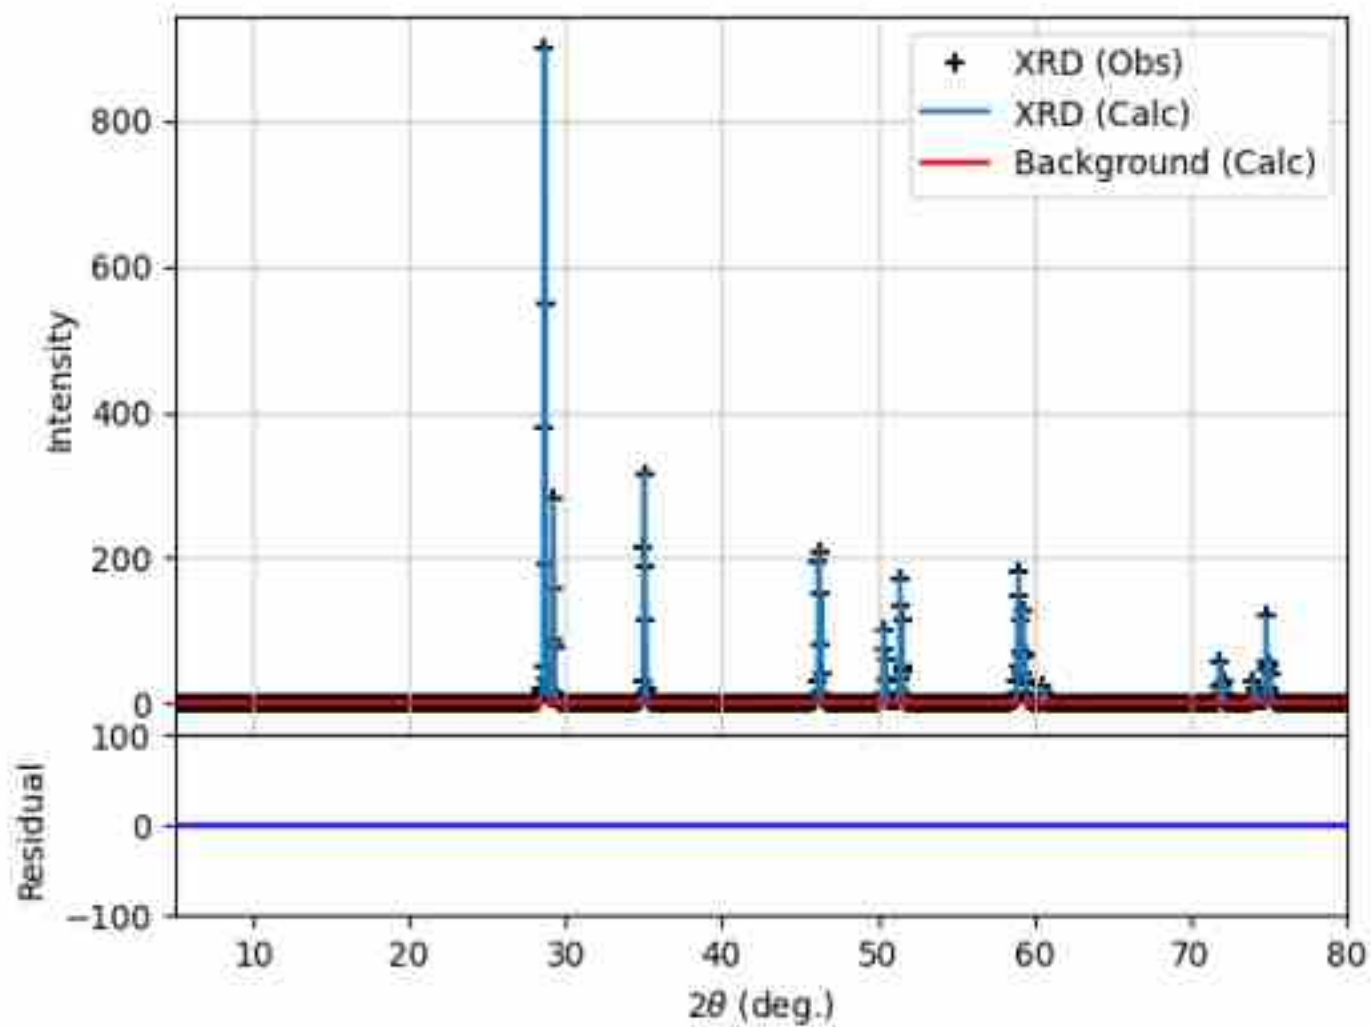

| RMSE before RR | Rwp     | RMSE after RR |
|----------------|---------|---------------|
| 0.014          | 0.00594 | 0.00395       |



# Pa2Ni6

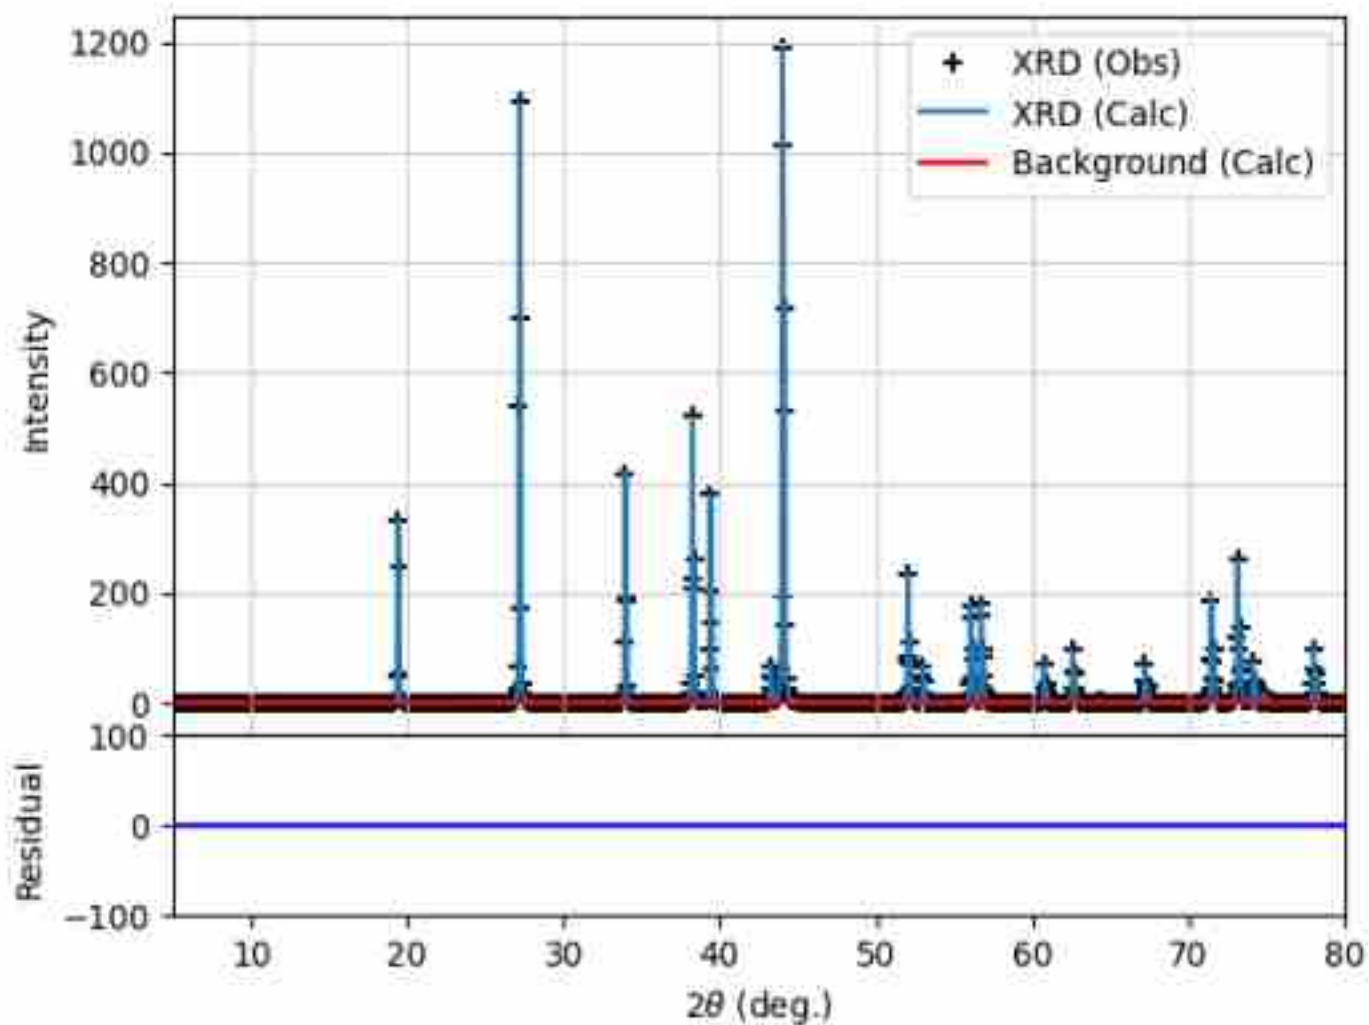

| RMSE before RR | Rwp     | RMSE after RR |
|----------------|---------|---------------|
| 0.014          | 0.01529 | 0.00565       |

# Pm2Ge6

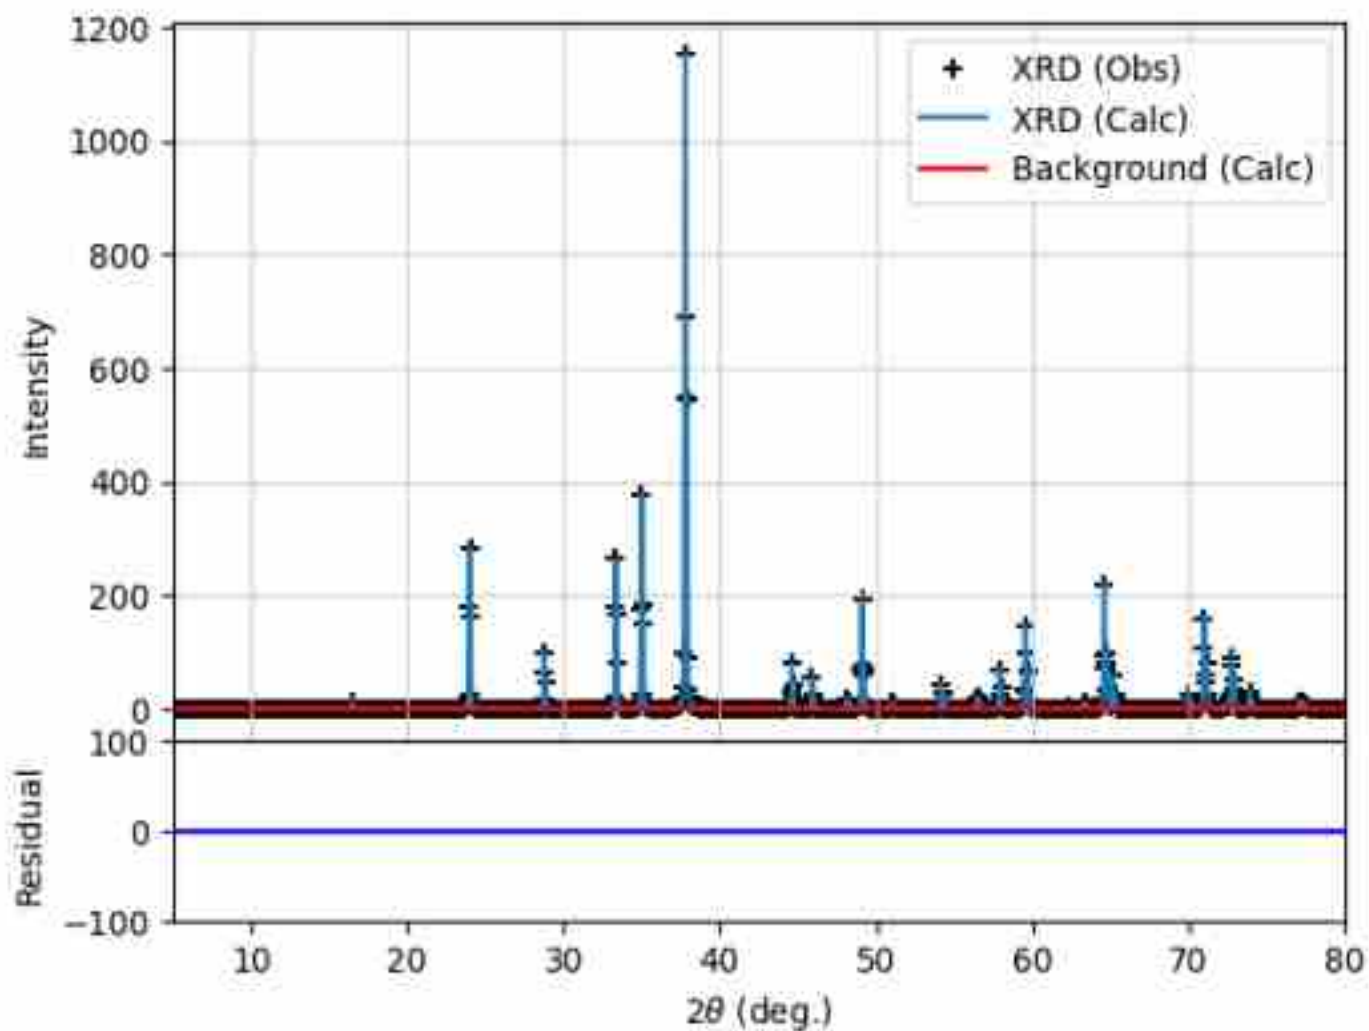

| RMSE before RR | Rwp     | RMSE after RR |
|----------------|---------|---------------|
| 0.014          | 0.01784 | 0.00185       |

# Pr<sub>2</sub>B<sub>4</sub>Ru<sub>4</sub>

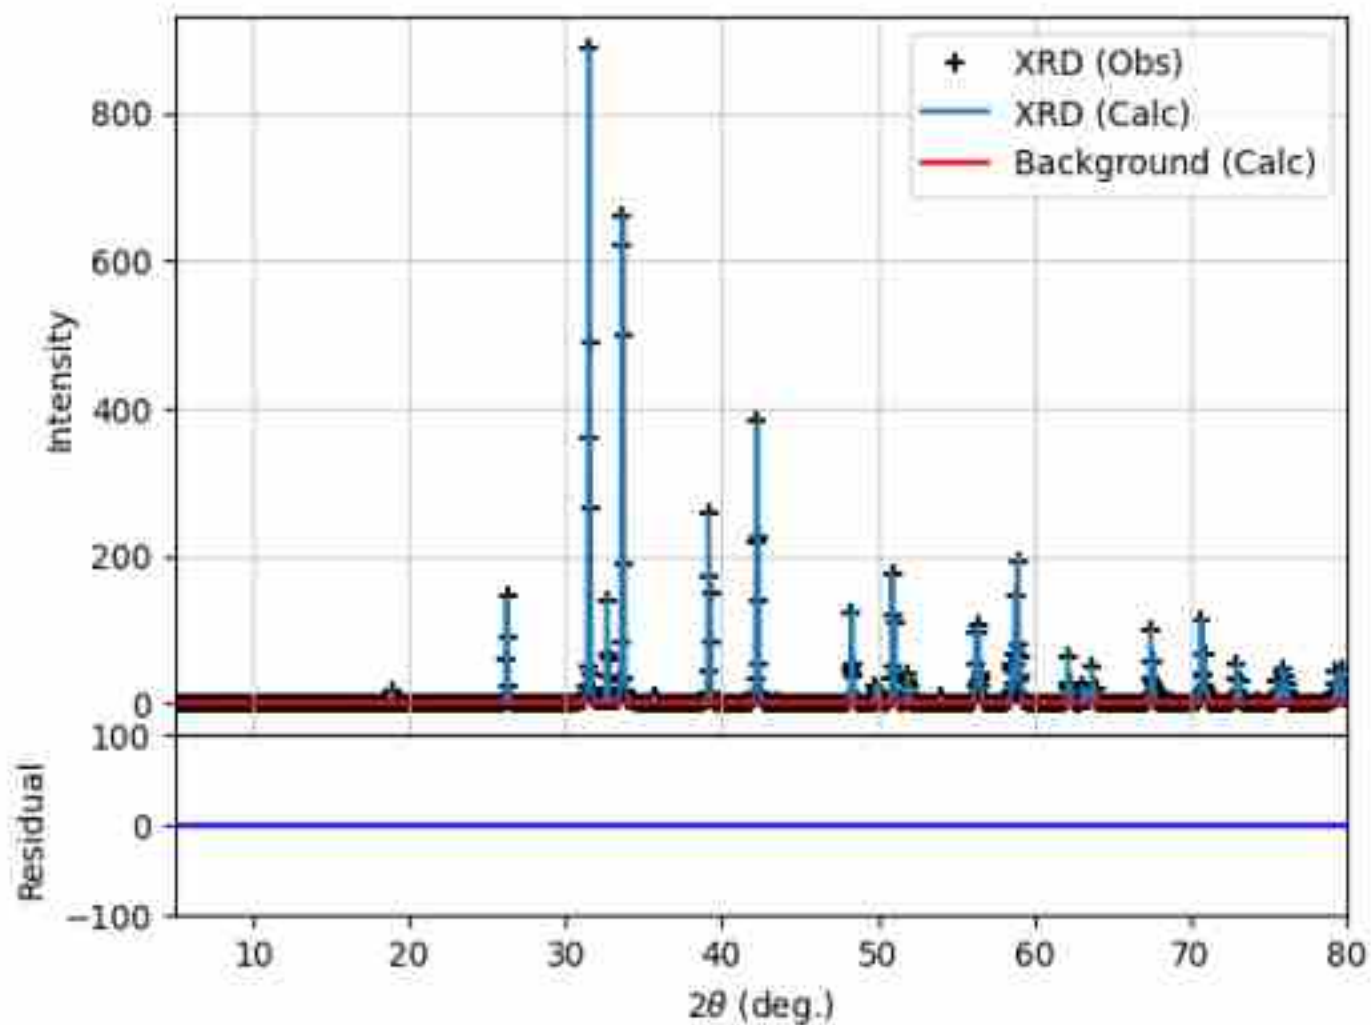

| RMSE before RR | Rwp     | RMSE after RR |
|----------------|---------|---------------|
| 0.014          | 0.00389 | 0.00156       |

# Pr<sub>2</sub>Sc<sub>2</sub>Ge<sub>2</sub>

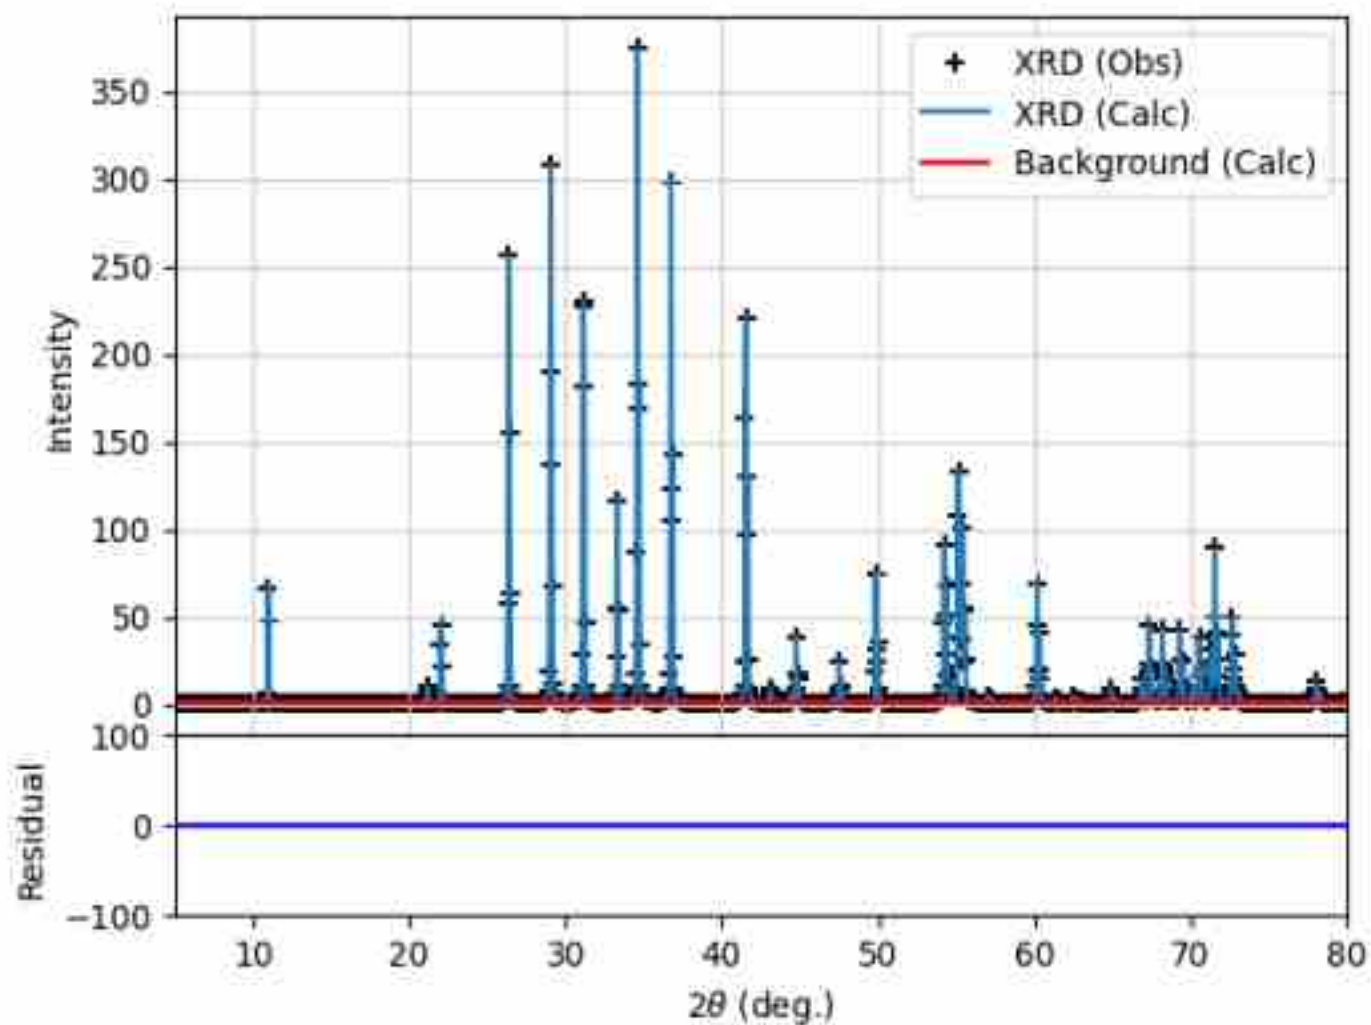

| RMSE before RR | Rwp    | RMSE after RR |
|----------------|--------|---------------|
| 0.014          | 0.0034 | 0.00069       |

# Pr<sub>2</sub>Sn<sub>4</sub>

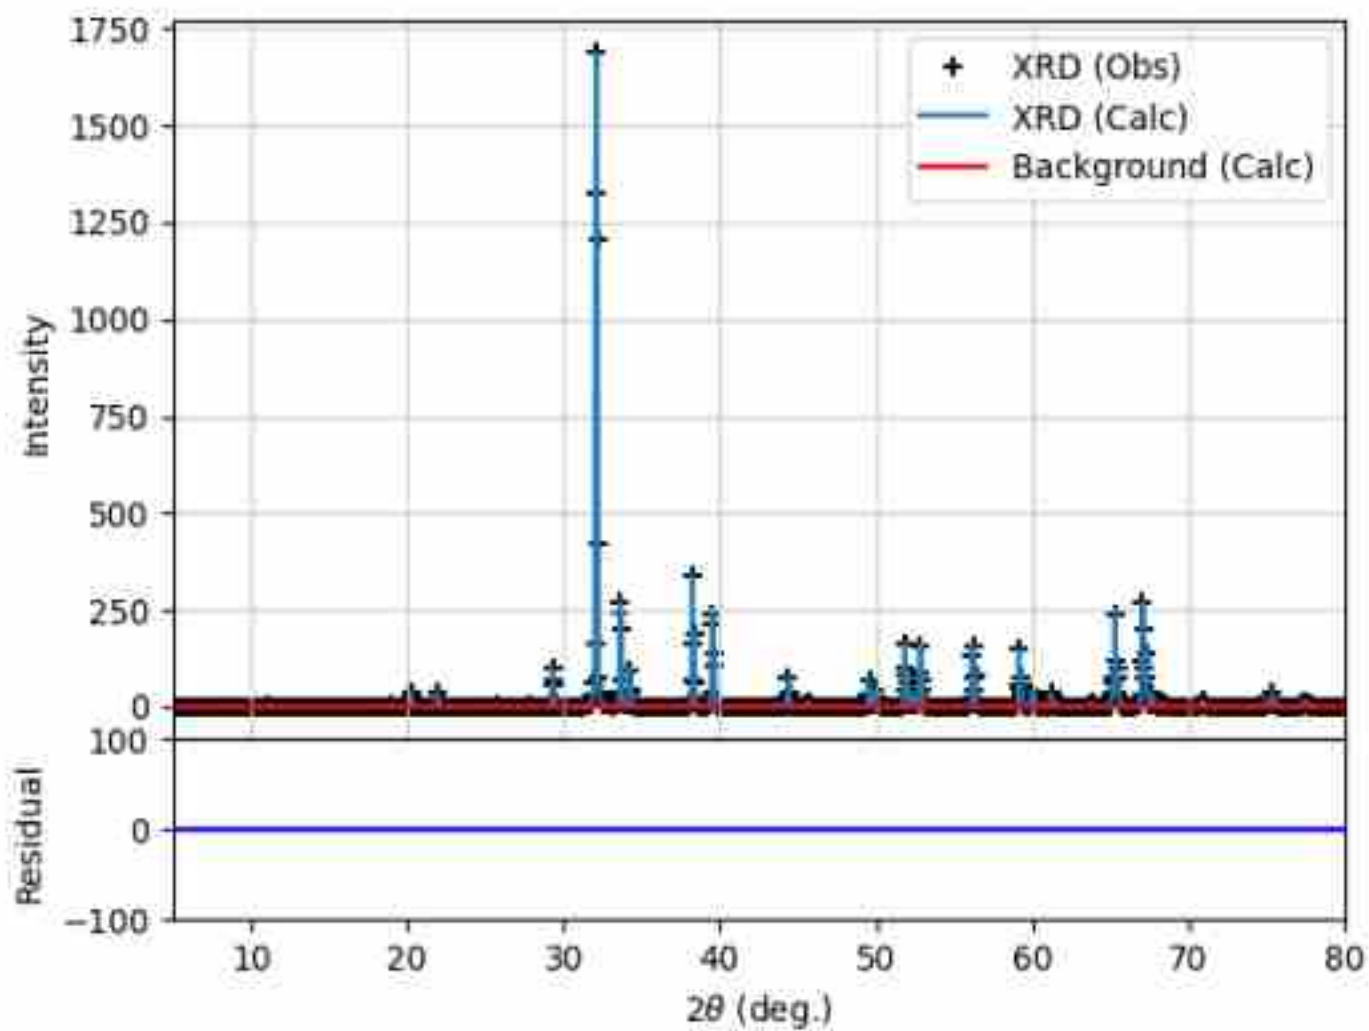

| RMSE before RR | Rwp     | RMSE after RR |
|----------------|---------|---------------|
| 0.014          | 0.00441 | 0.00024       |

# Pr<sub>4</sub>Zn<sub>10</sub>Pb<sub>2</sub>

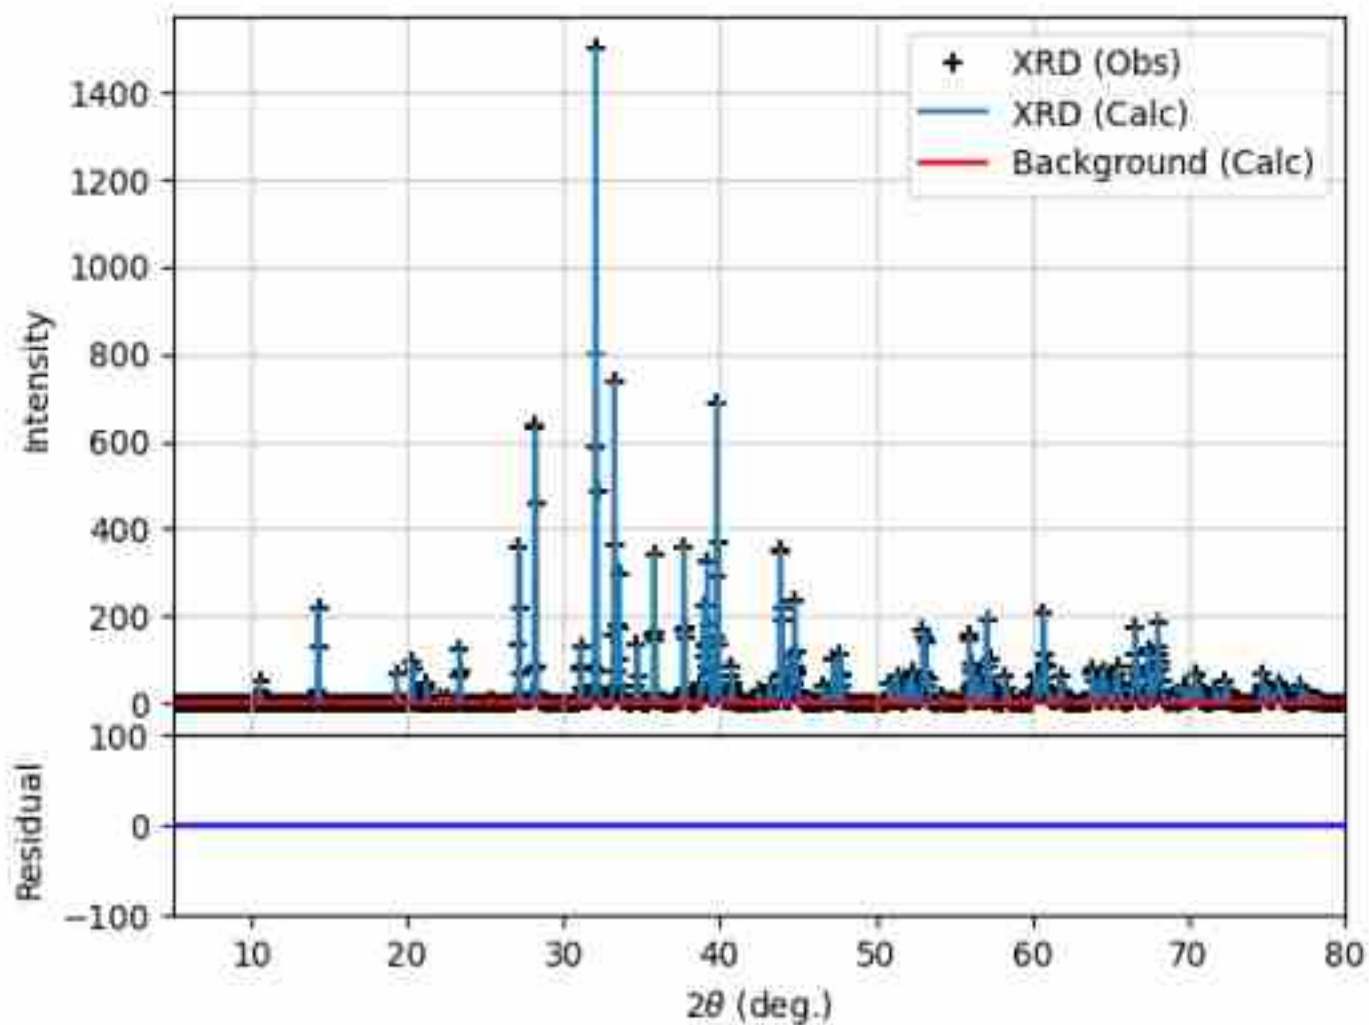

| RMSE before RR | Rwp     | RMSE after RR |
|----------------|---------|---------------|
| 0.014          | 0.00409 | 0.0004        |

# Pu<sub>2</sub>Te<sub>1</sub>O<sub>2</sub>

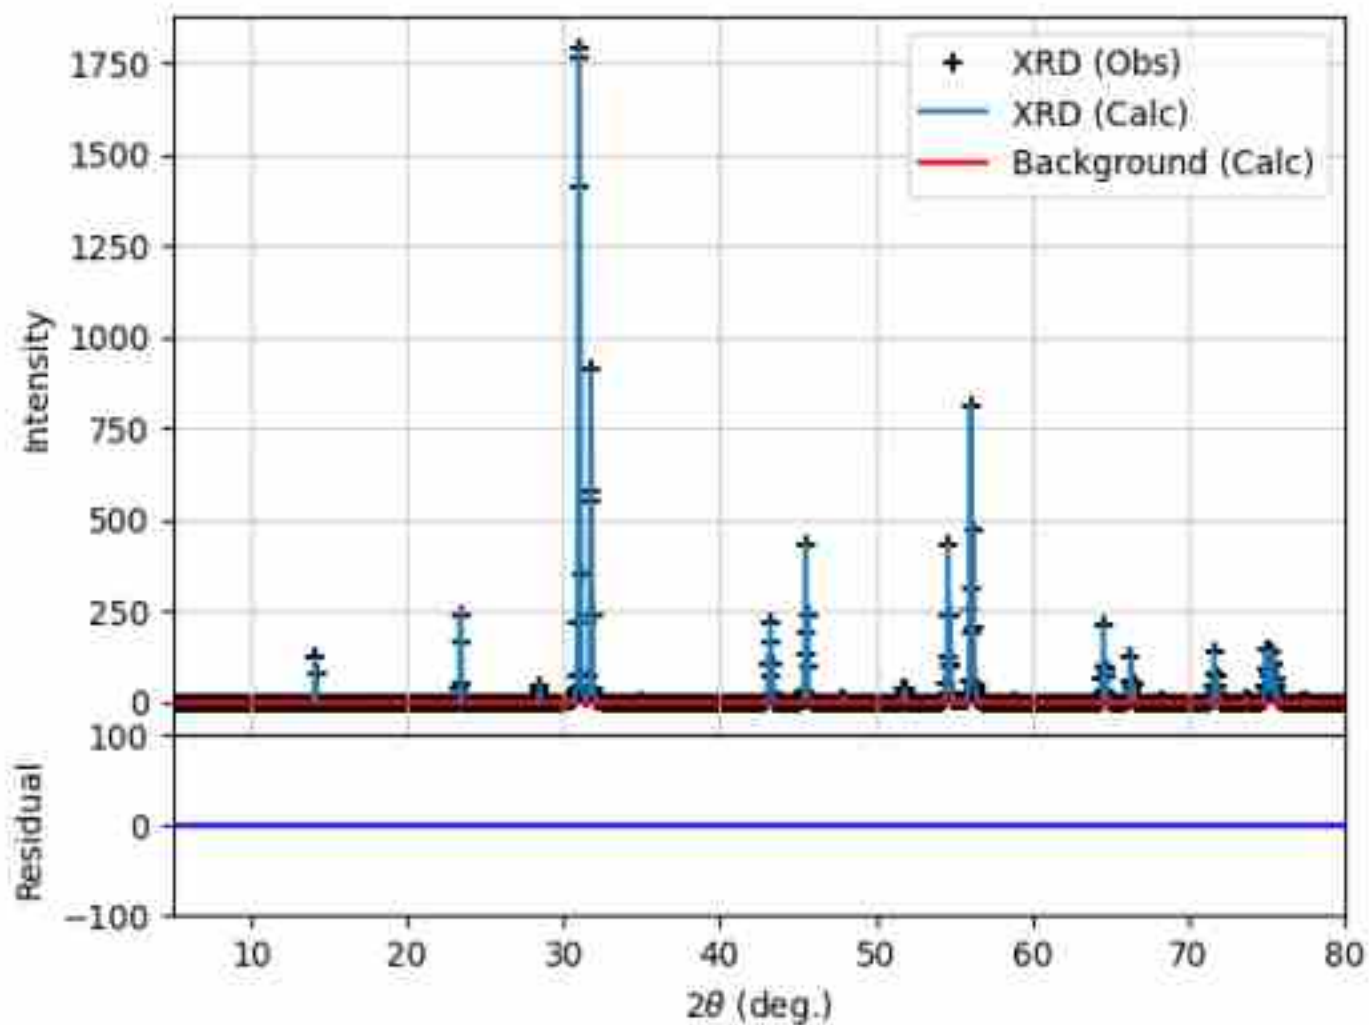

| RMSE before RR | Rwp     | RMSE after RR |
|----------------|---------|---------------|
| 0.014          | 0.00367 | 0.00096       |

# Rb1I1O3

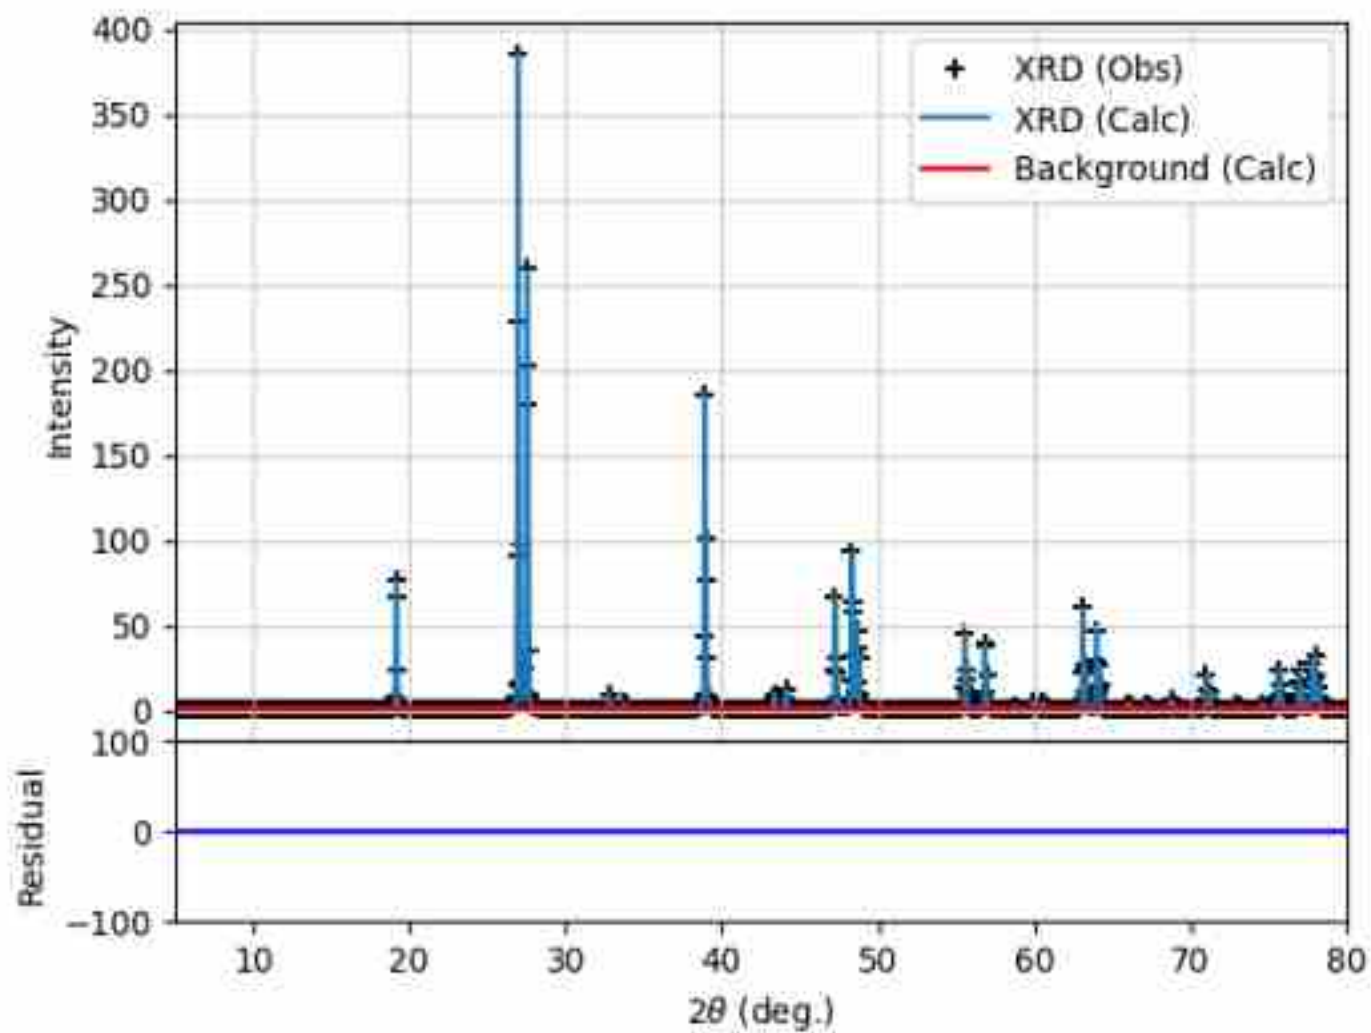

| RMSE before RR | Rwp     | RMSE after RR |
|----------------|---------|---------------|
| 0.014          | 0.00252 | 0.00061       |



# Rb<sub>2</sub>Cu<sub>2</sub>Cl<sub>6</sub>

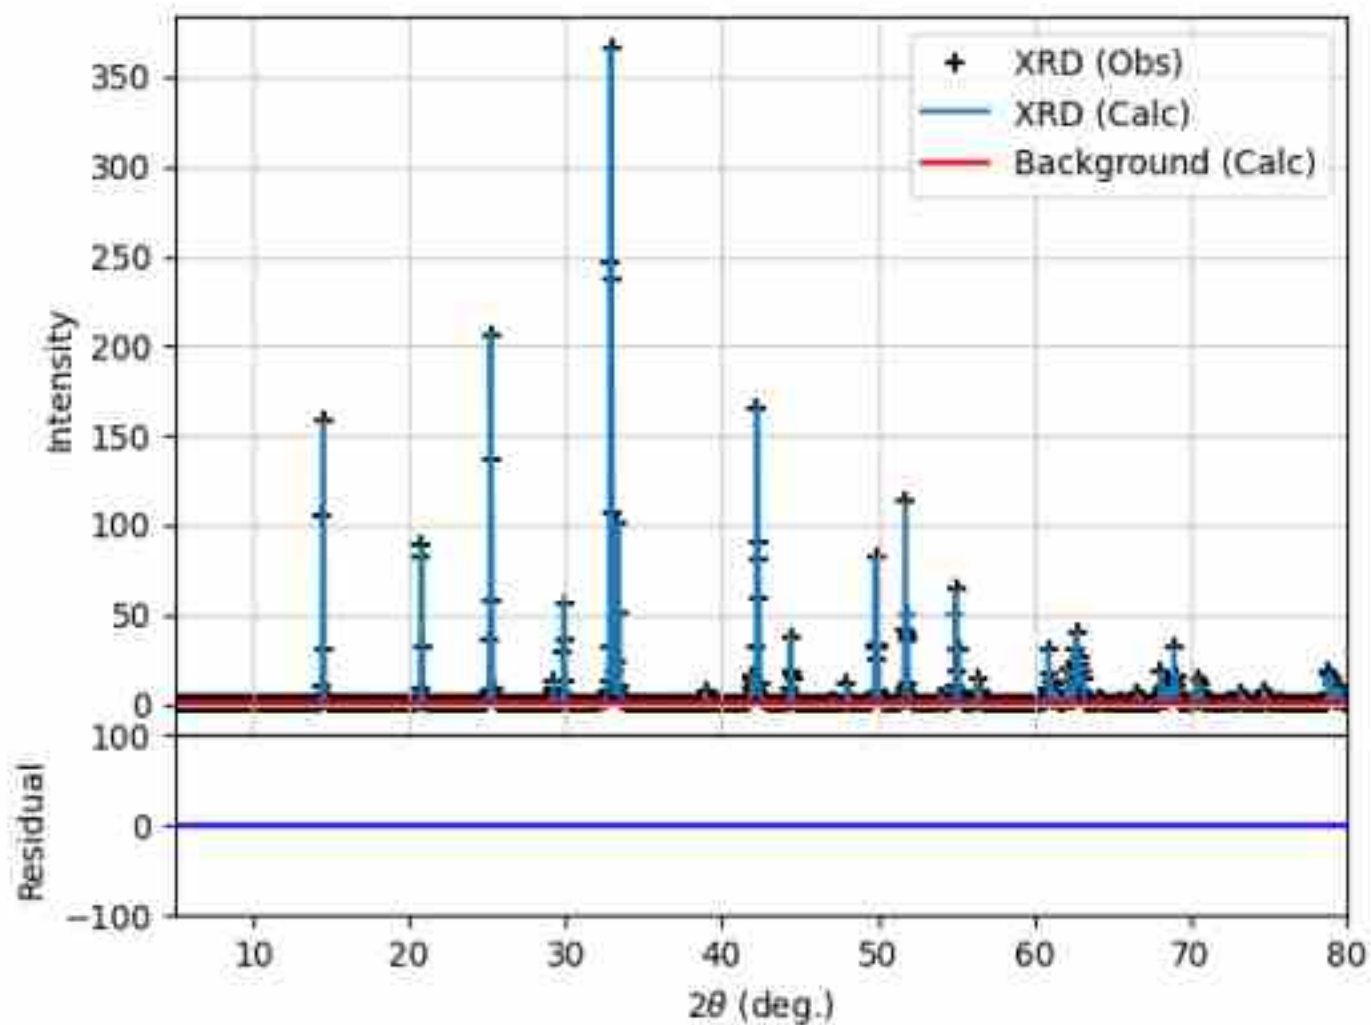

| RMSE before RR | Rwp     | RMSE after RR |
|----------------|---------|---------------|
| 0.014          | 0.00549 | 0.00105       |

# Rb<sub>2</sub>Cu<sub>2</sub>O<sub>4</sub>

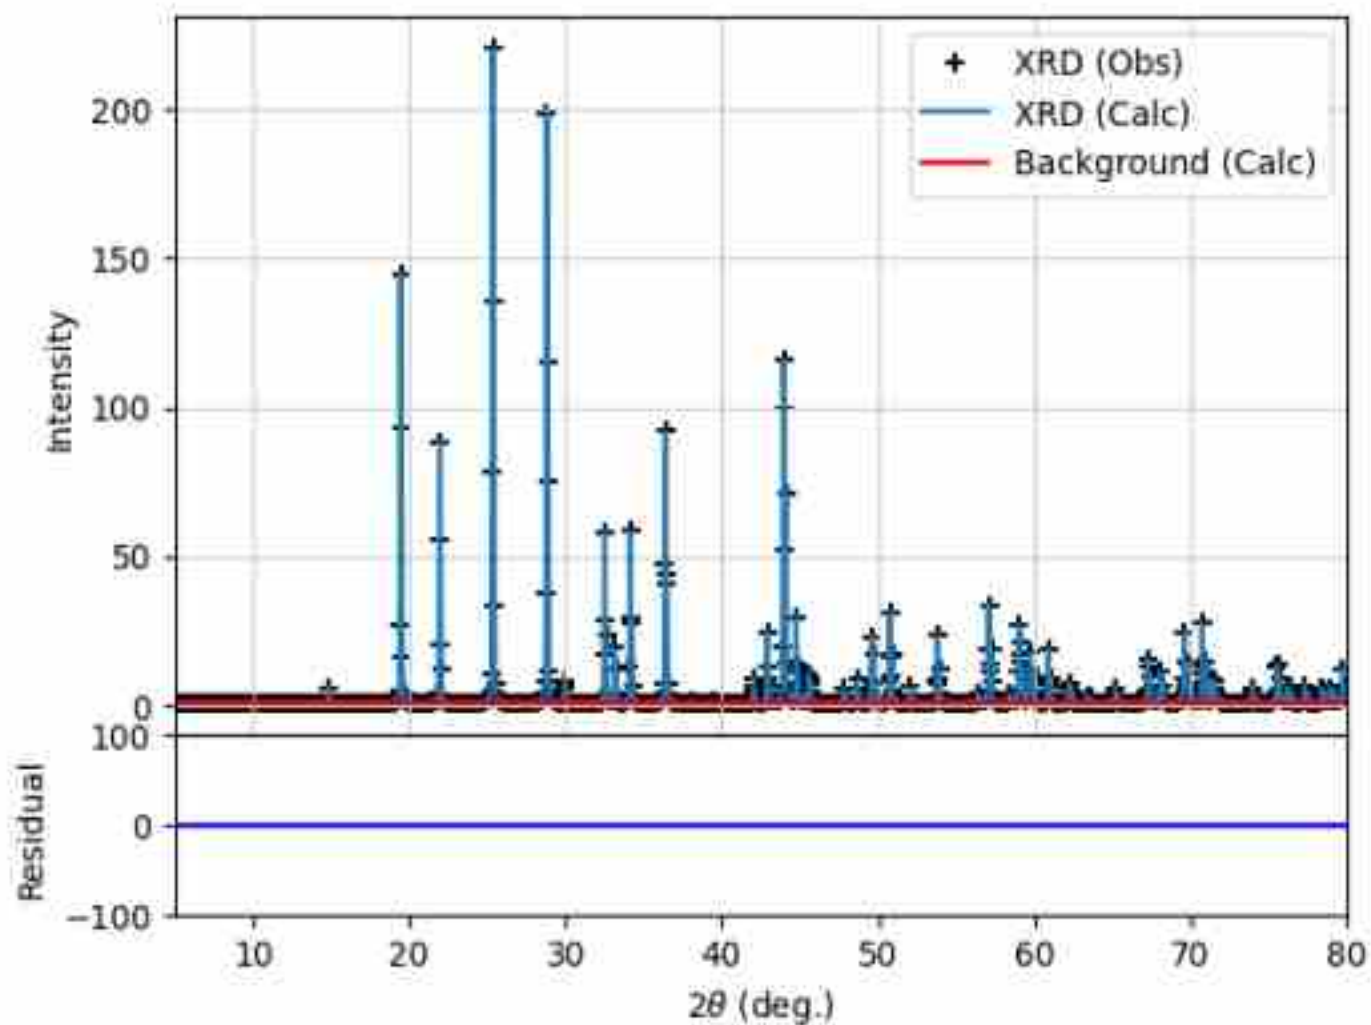

| RMSE before RR | Rwp    | RMSE after RR |
|----------------|--------|---------------|
| 0.014          | 0.0029 | 0.00078       |

# Rb<sub>2</sub>In<sub>1</sub>Cu<sub>1</sub>Br<sub>6</sub>

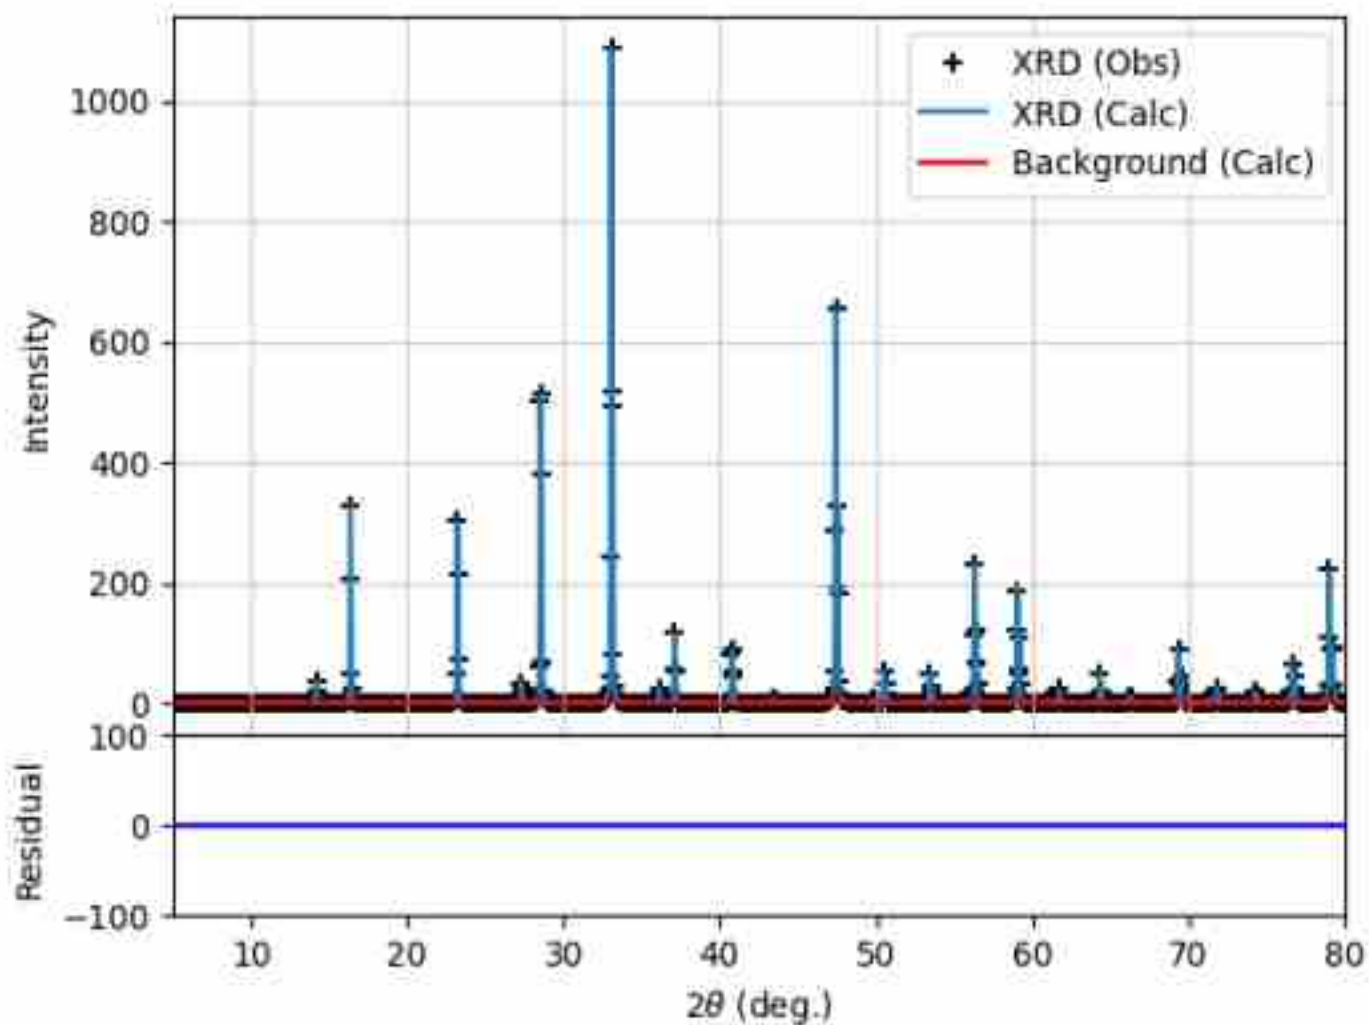

| RMSE before RR | Rwp     | RMSE after RR |
|----------------|---------|---------------|
| 0.014          | 0.06042 | 0.00279       |

# Rb<sub>2</sub>Mn<sub>1</sub>Tl<sub>1</sub>F<sub>6</sub>

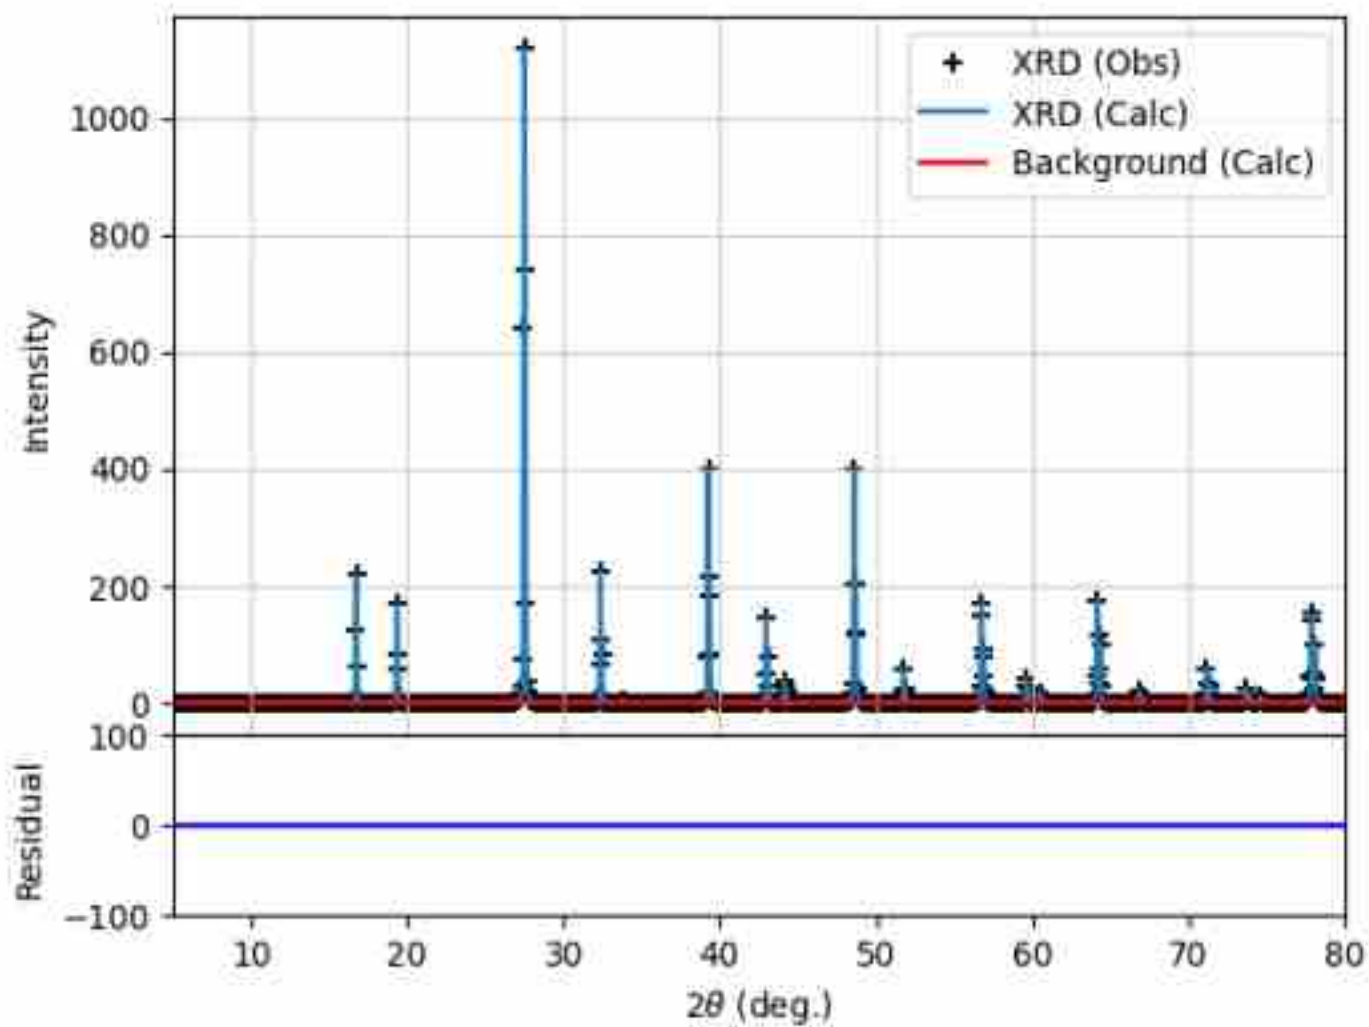

| RMSE before RR | Rwp     | RMSE after RR |
|----------------|---------|---------------|
| 0.014          | 0.00713 | 0.00336       |

# Rb<sub>2</sub>Tl<sub>11</sub>In<sub>1</sub>F<sub>6</sub>

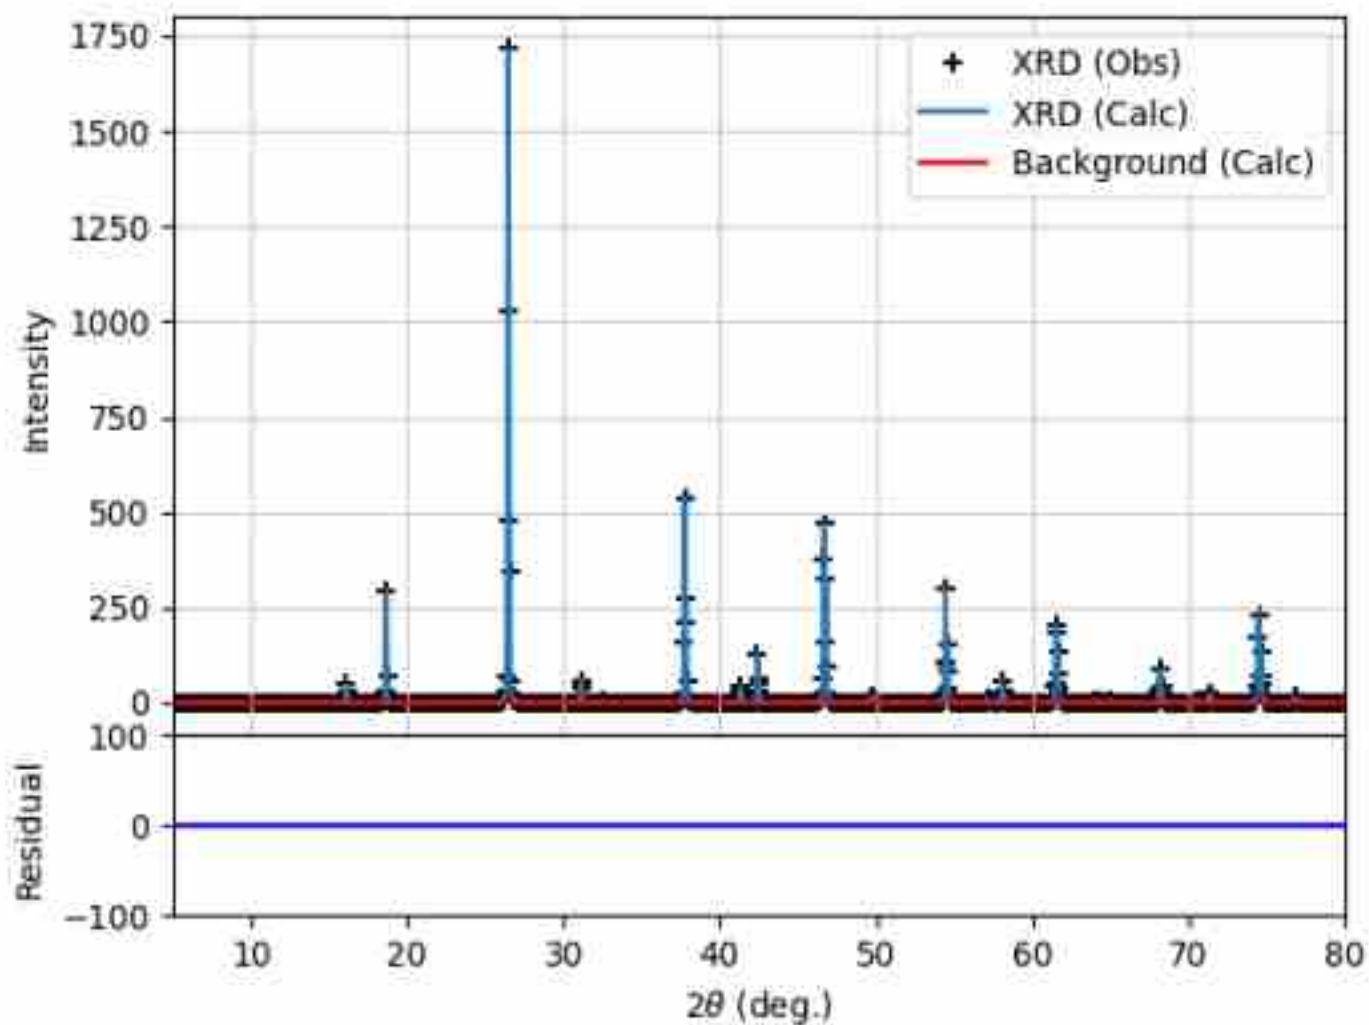

| RMSE before RR | Rwp     | RMSE after RR |
|----------------|---------|---------------|
| 0.014          | 0.02829 | 0.00587       |

# Rb<sub>2</sub>Tl<sub>11</sub>Pd<sub>1</sub>F<sub>6</sub>

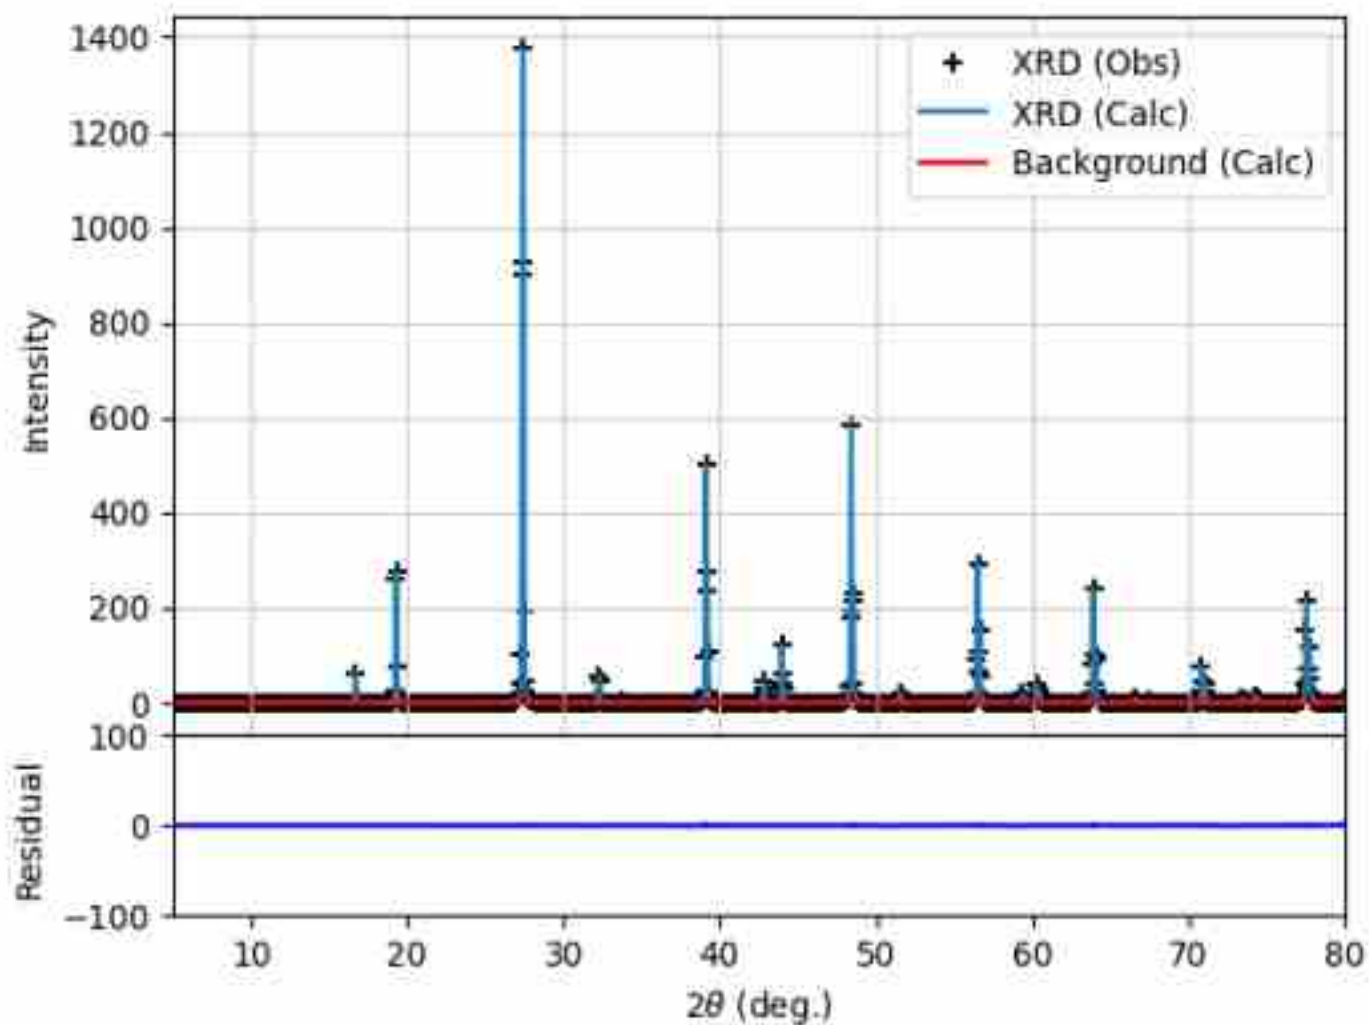

| RMSE before RR | Rwp     | RMSE after RR |
|----------------|---------|---------------|
| 0.014          | 1.14078 | 0.01499       |

# Rb<sub>2</sub>Tl<sub>1</sub>Rh<sub>1</sub>F<sub>6</sub>

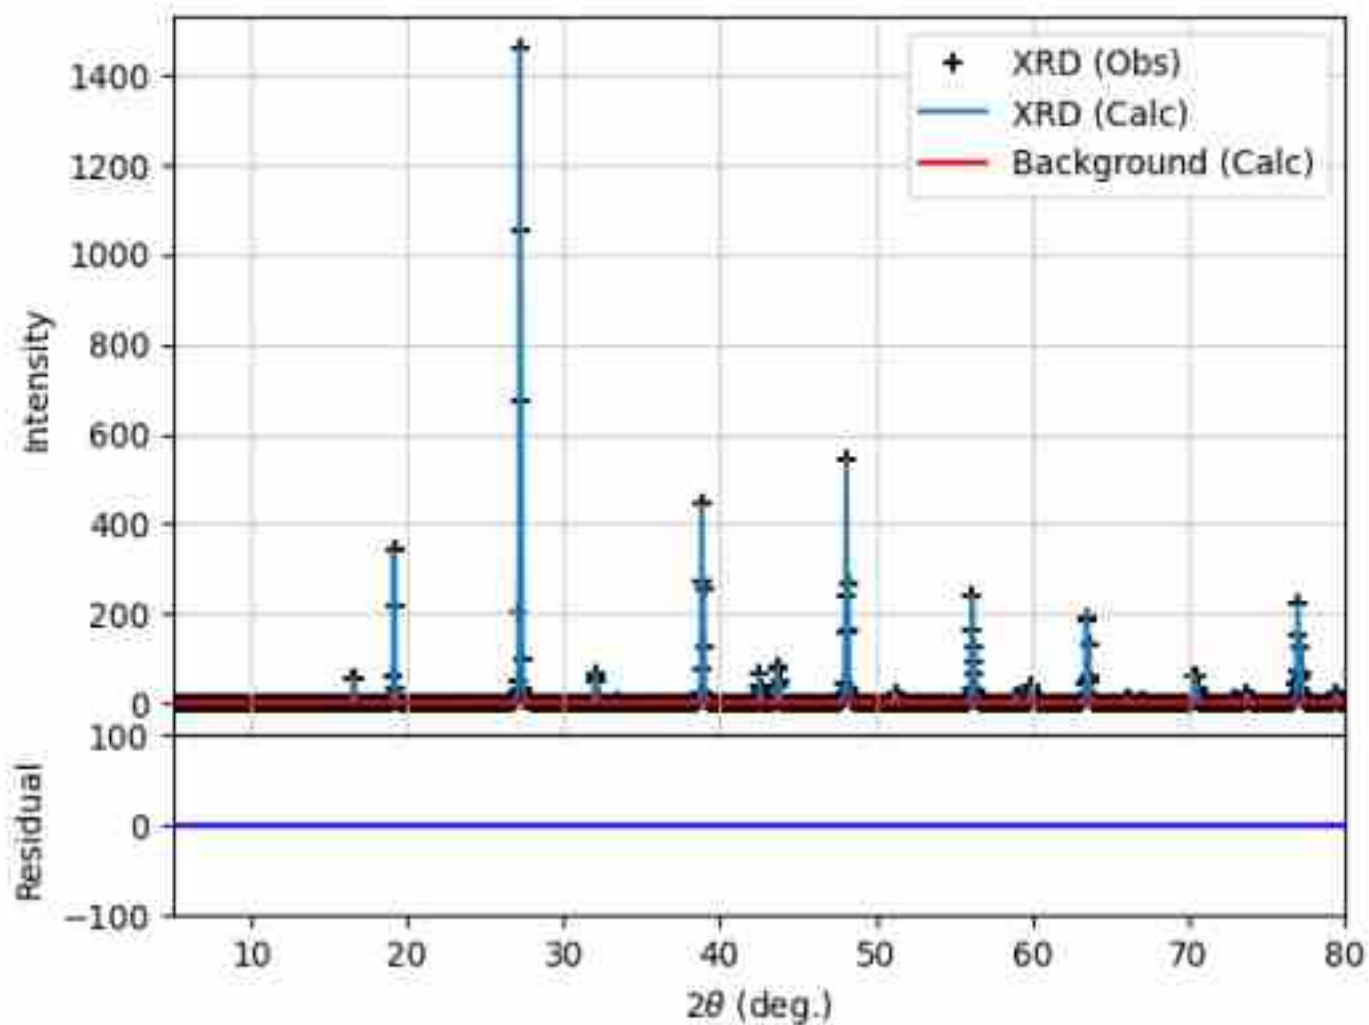

| RMSE before RR | Rwp     | RMSE after RR |
|----------------|---------|---------------|
| 0.014          | 0.02687 | 0.00464       |

# Rb<sub>4</sub>Co<sub>2</sub>O<sub>6</sub>

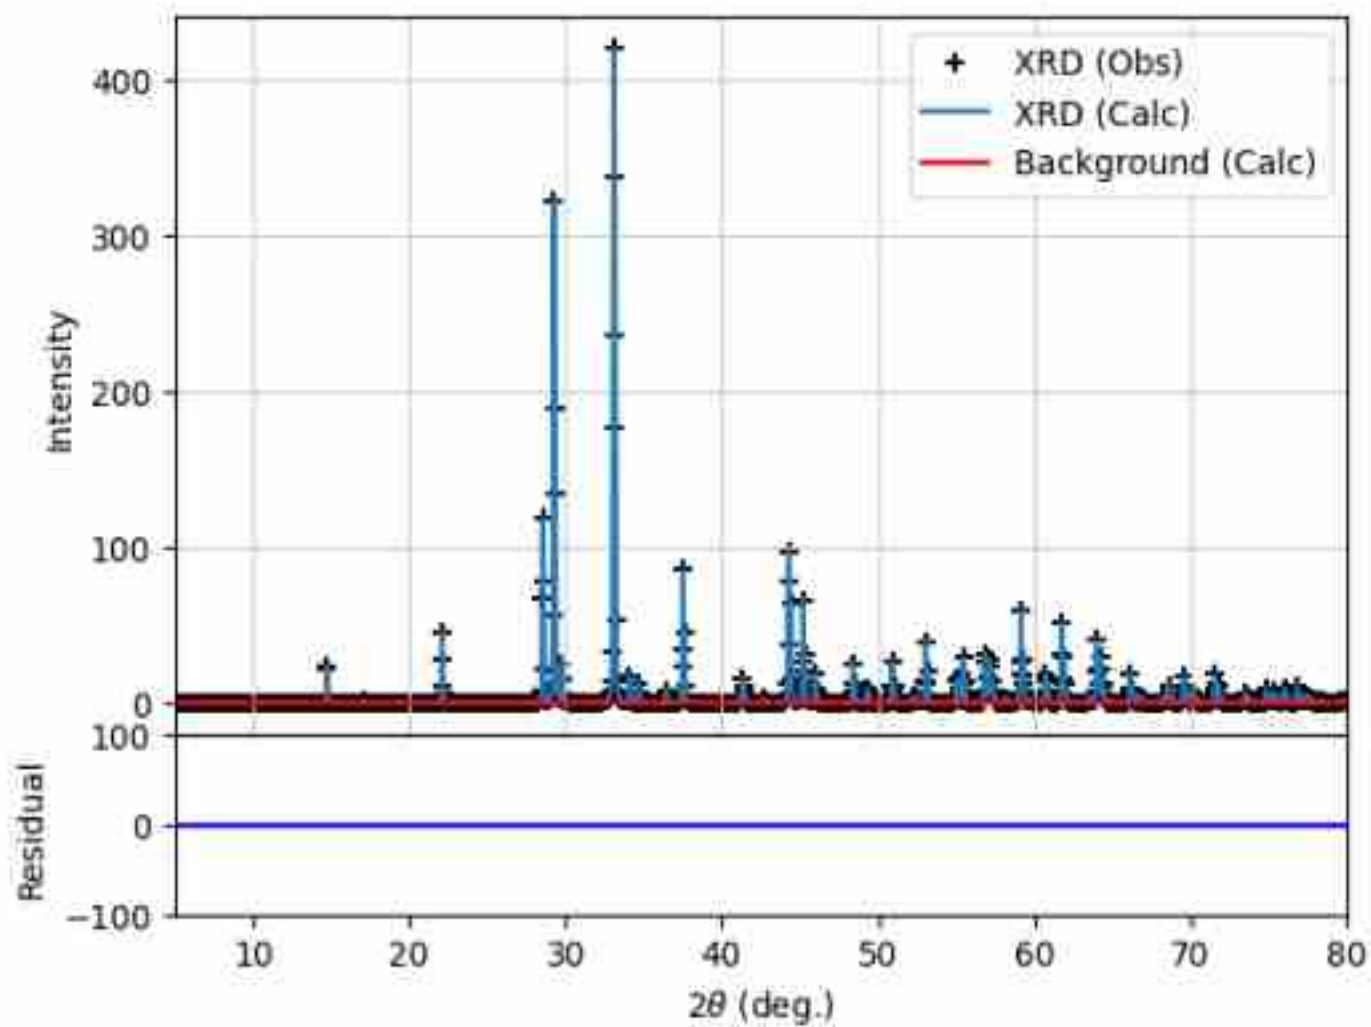

| RMSE before RR | Rwp     | RMSE after RR |
|----------------|---------|---------------|
| 0.014          | 0.00249 | 0.00072       |



# Sb<sub>2</sub>Te<sub>2</sub>Se<sub>1</sub>

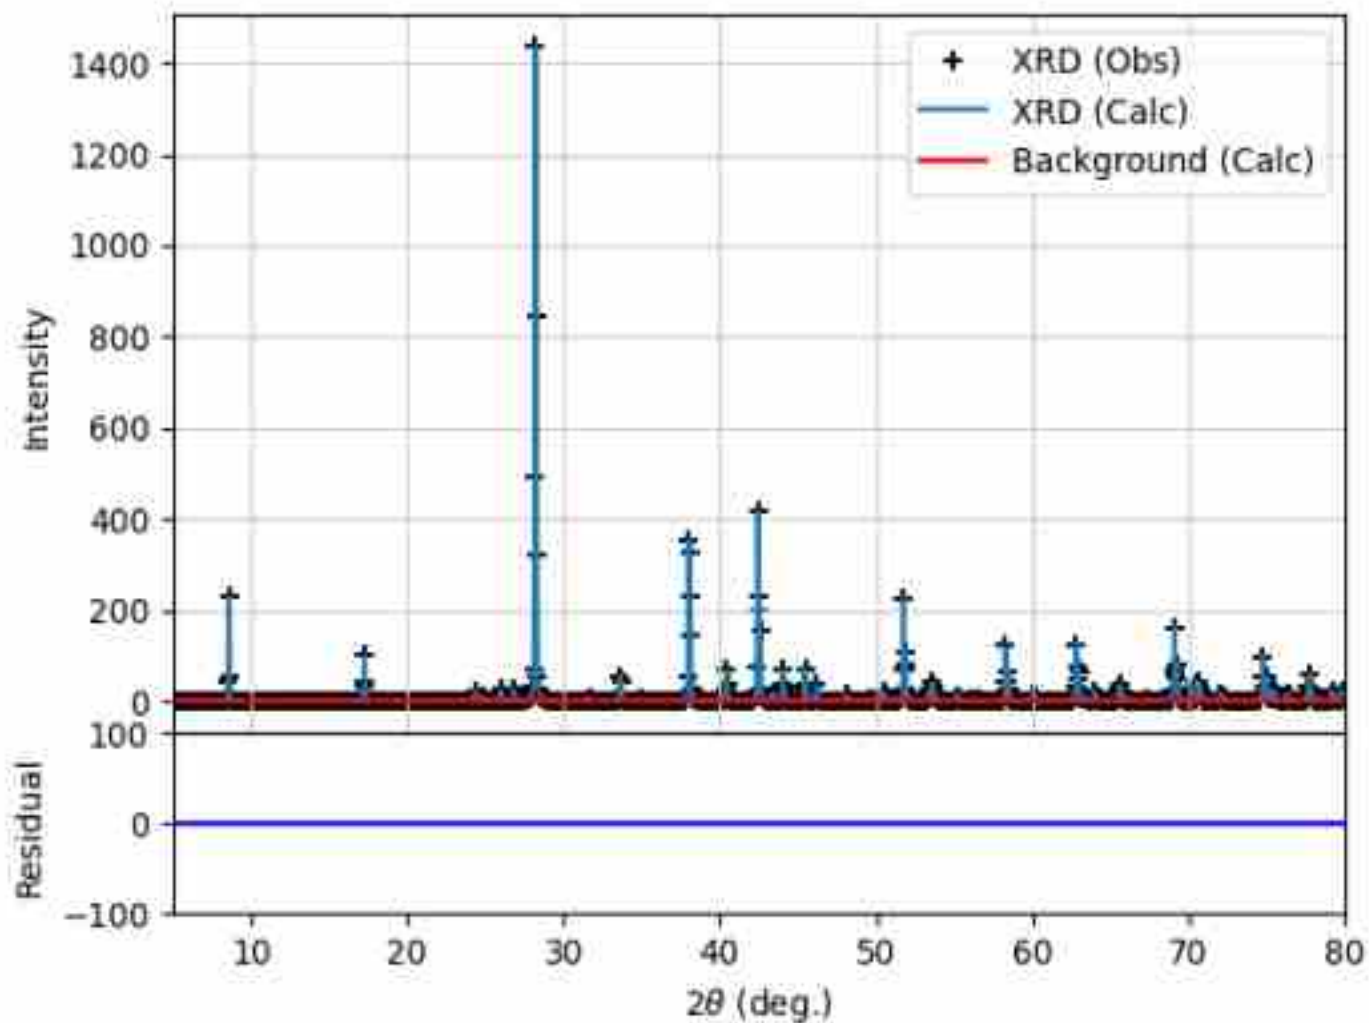

| RMSE before RR | Rwp     | RMSE after RR |
|----------------|---------|---------------|
| 0.014          | 0.00324 | 0.00018       |

# Sc1F3

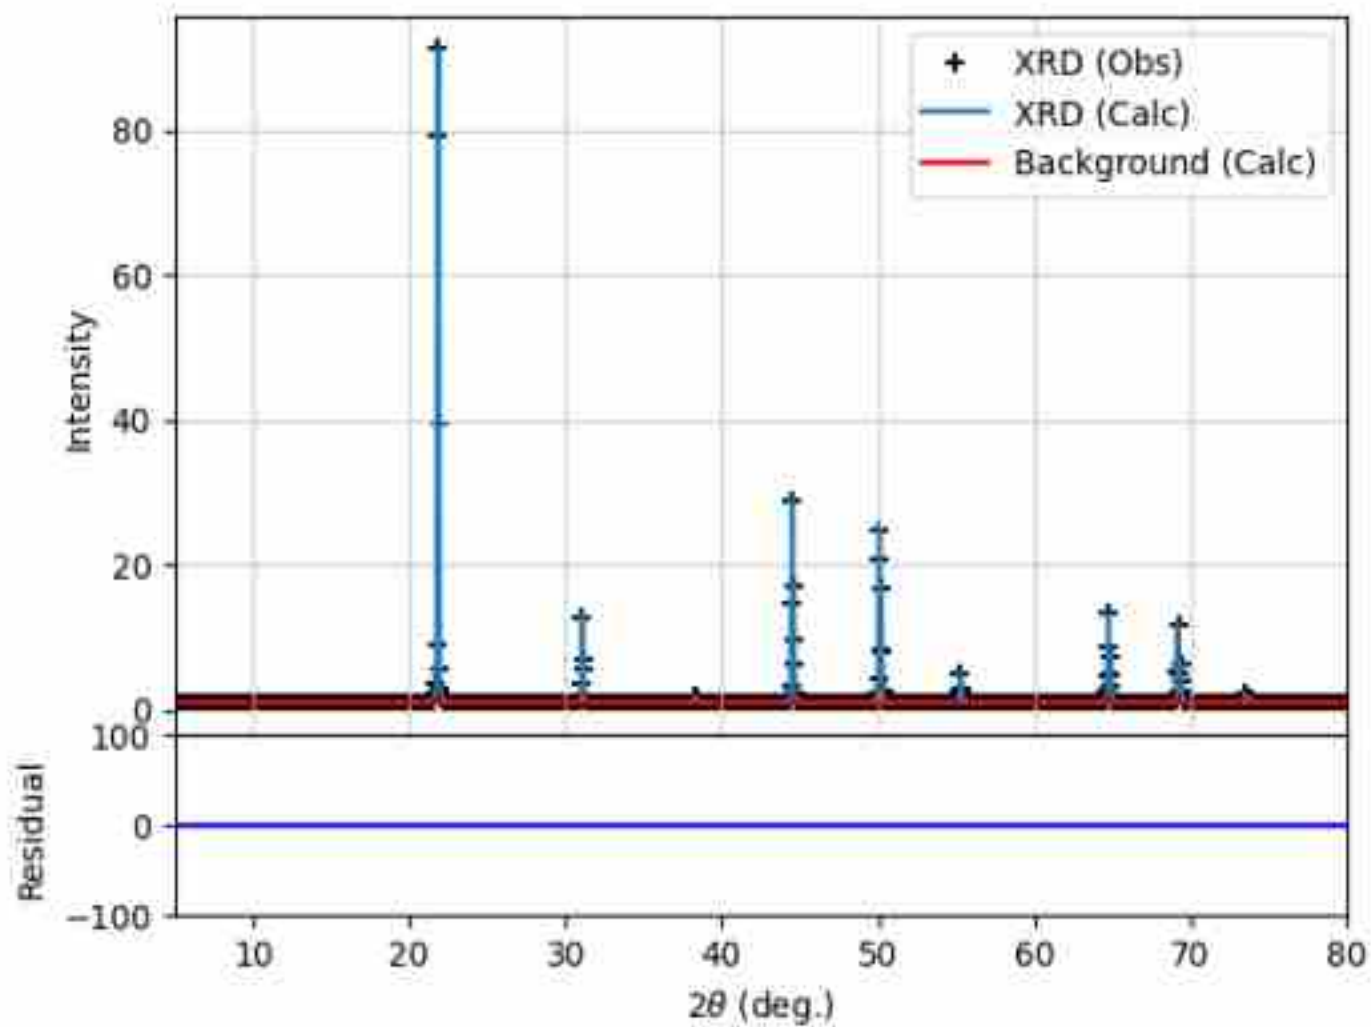

| RMSE before RR | Rwp    | RMSE after RR |
|----------------|--------|---------------|
| 0.014          | 0.0038 | 0.00095       |

# Sc<sub>2</sub>Si<sub>2</sub>O<sub>7</sub>

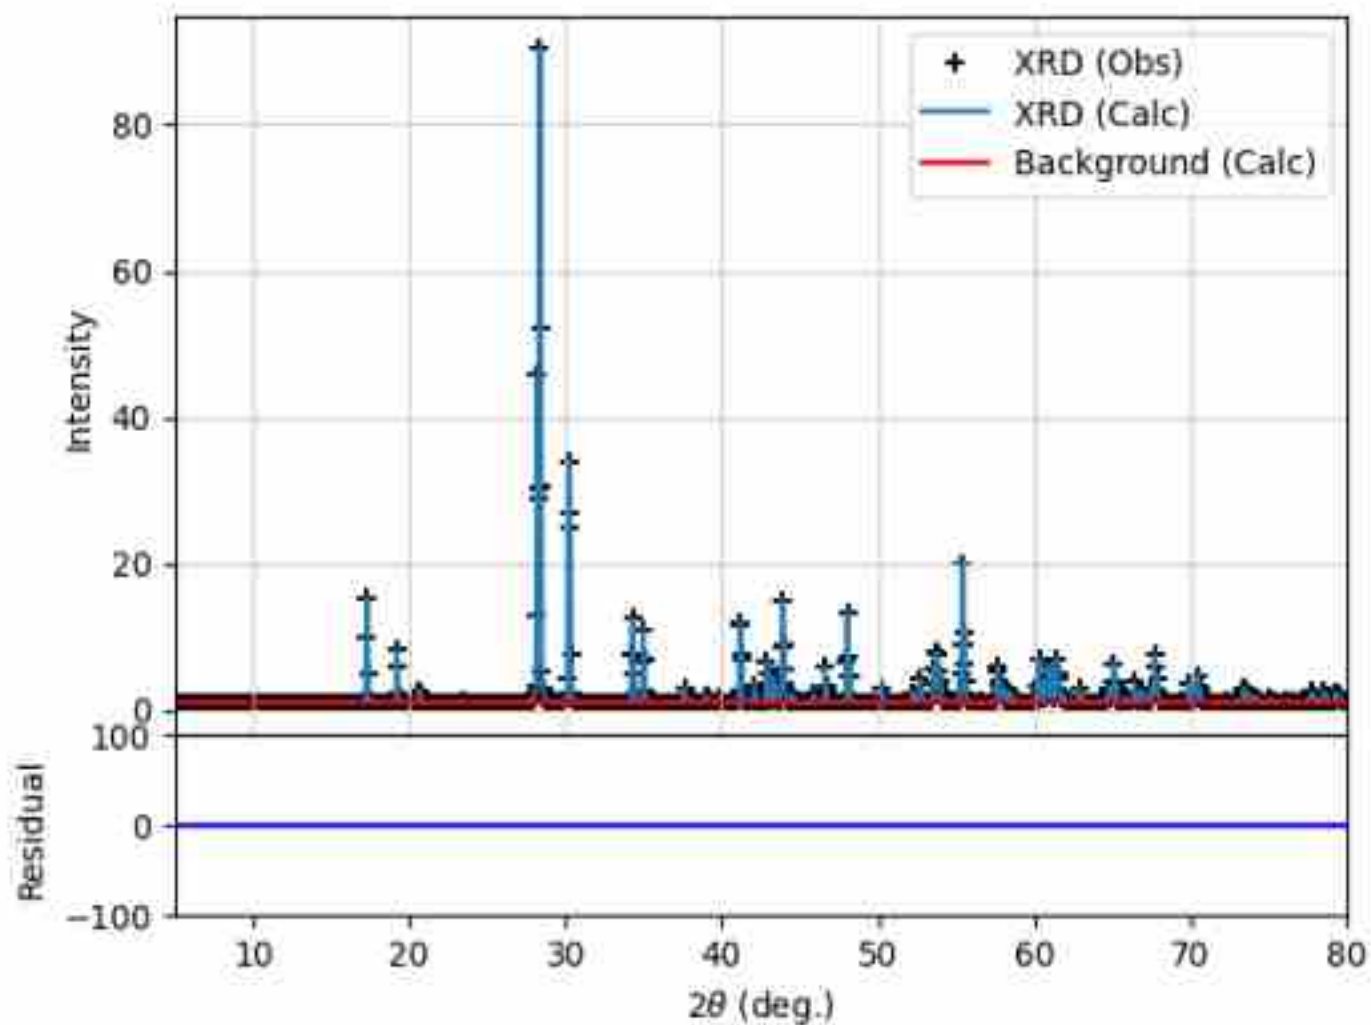

| RMSE before RR | Rwp     | RMSE after RR |
|----------------|---------|---------------|
| 0.014          | 0.00228 | 0.00086       |

# Sc<sub>4</sub>Co<sub>6</sub>Si<sub>2</sub>

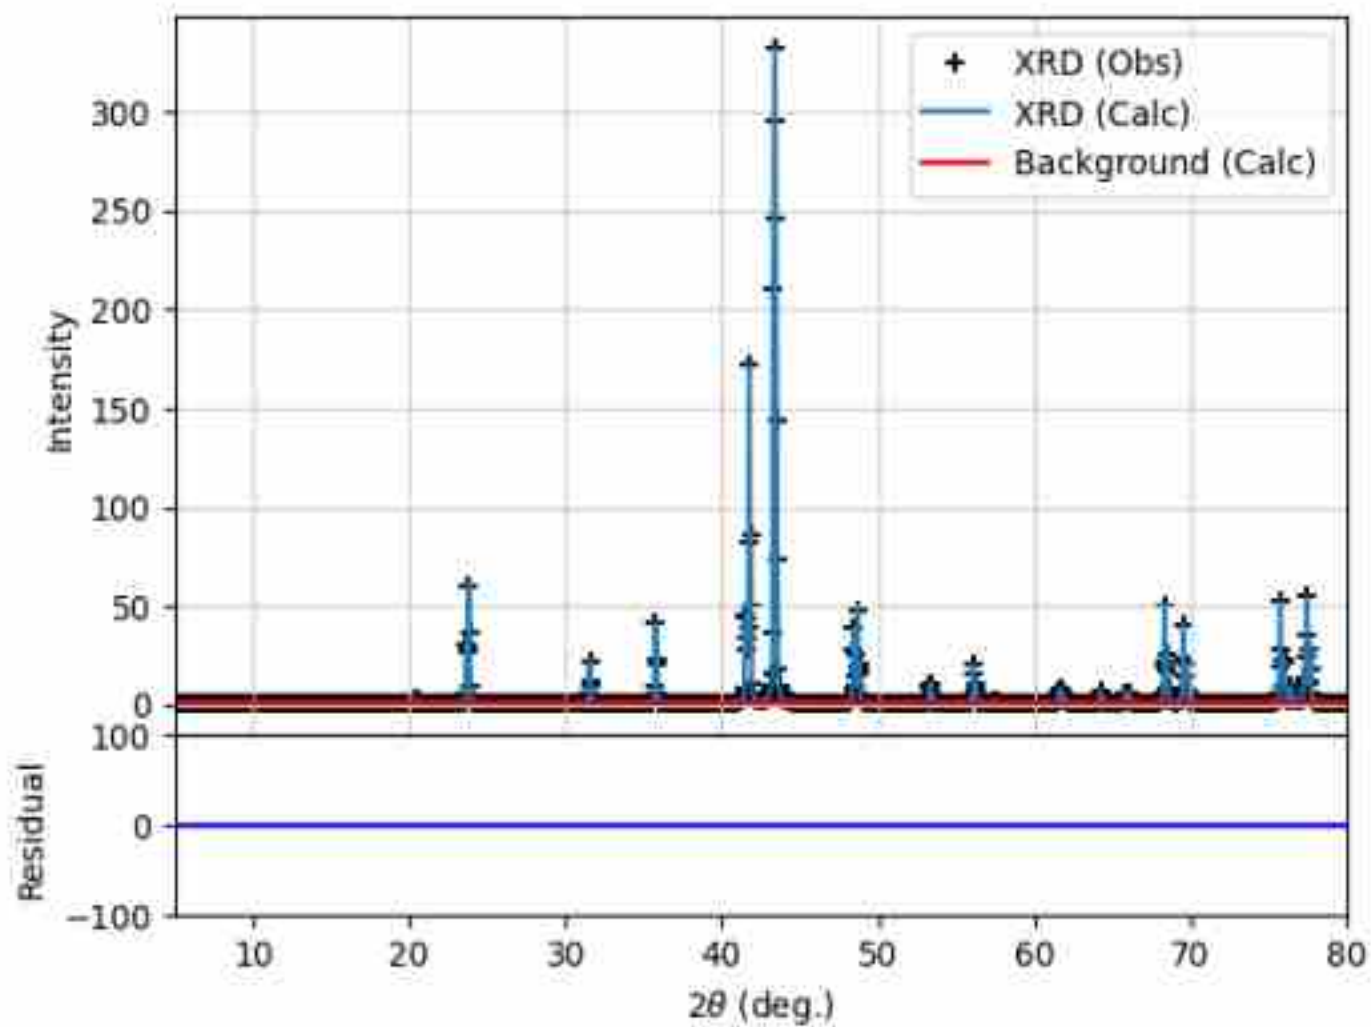

| RMSE before RR | Rwp     | RMSE after RR |
|----------------|---------|---------------|
| 0.014          | 0.00695 | 0.00082       |

# Sc6Ga2

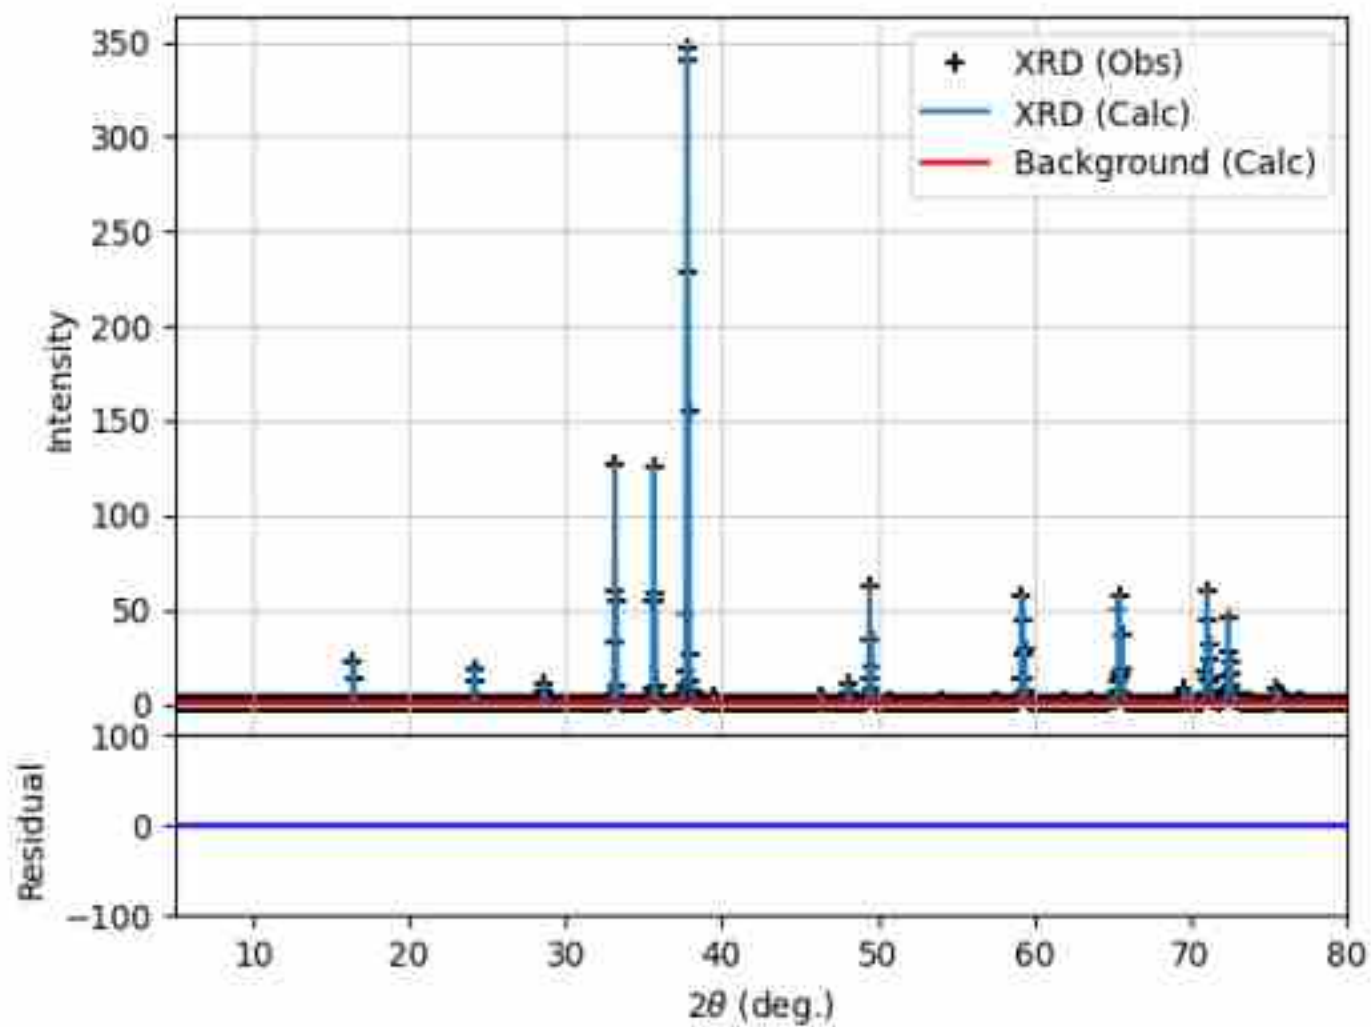

| RMSE before RR | Rwp     | RMSE after RR |
|----------------|---------|---------------|
| 0.014          | 0.02323 | 0.00191       |

# Sc6In2

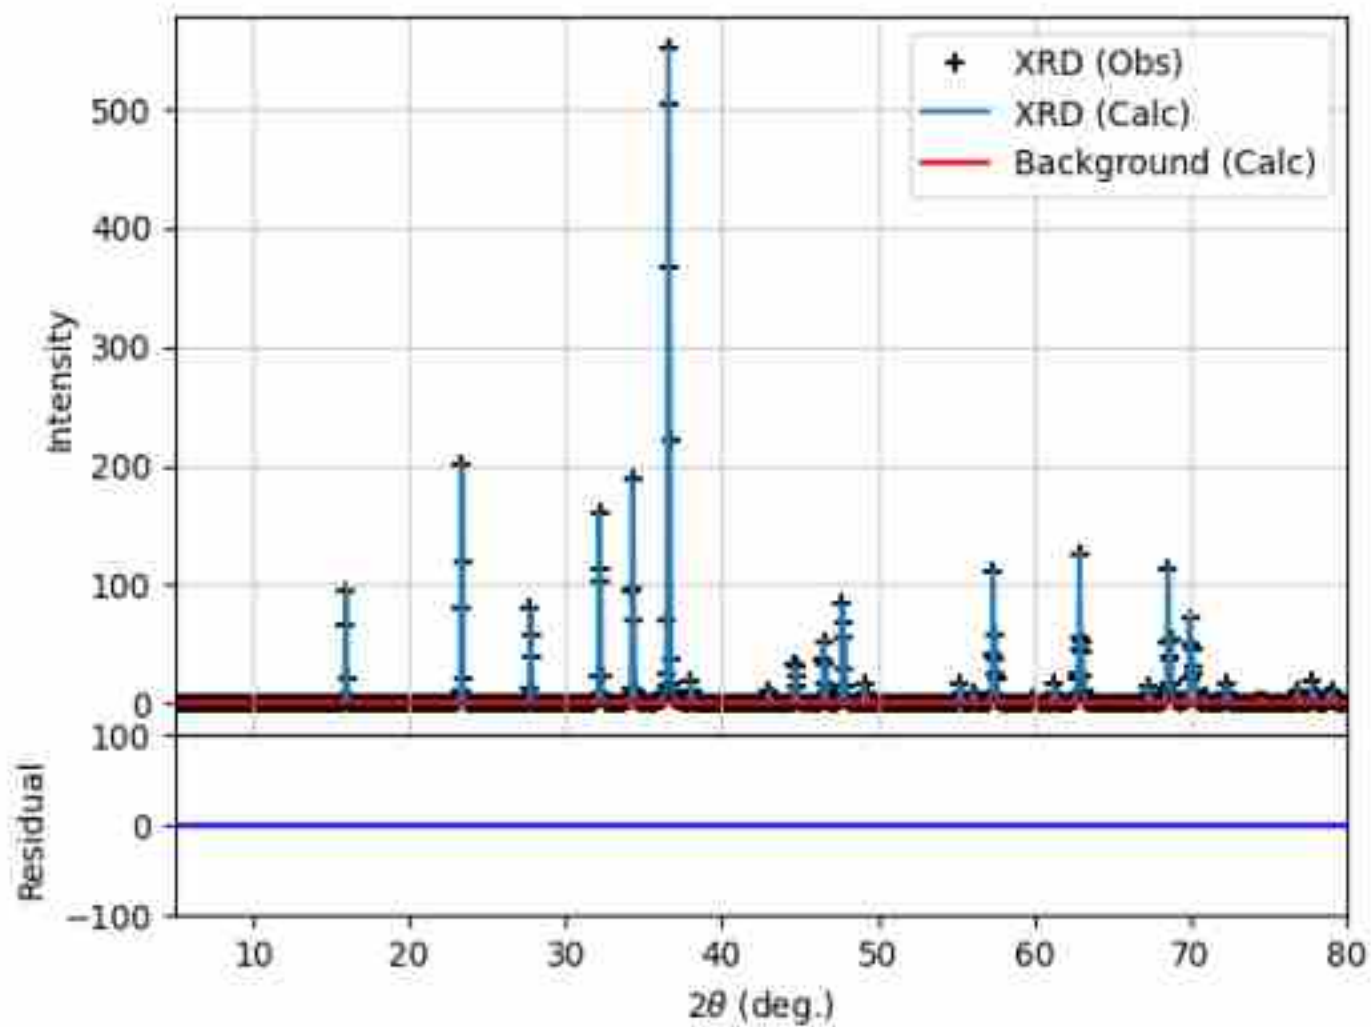

| RMSE before RR | Rwp     | RMSE after RR |
|----------------|---------|---------------|
| 0.014          | 0.00749 | 0.00132       |

# Sm1Gd3Al4O12

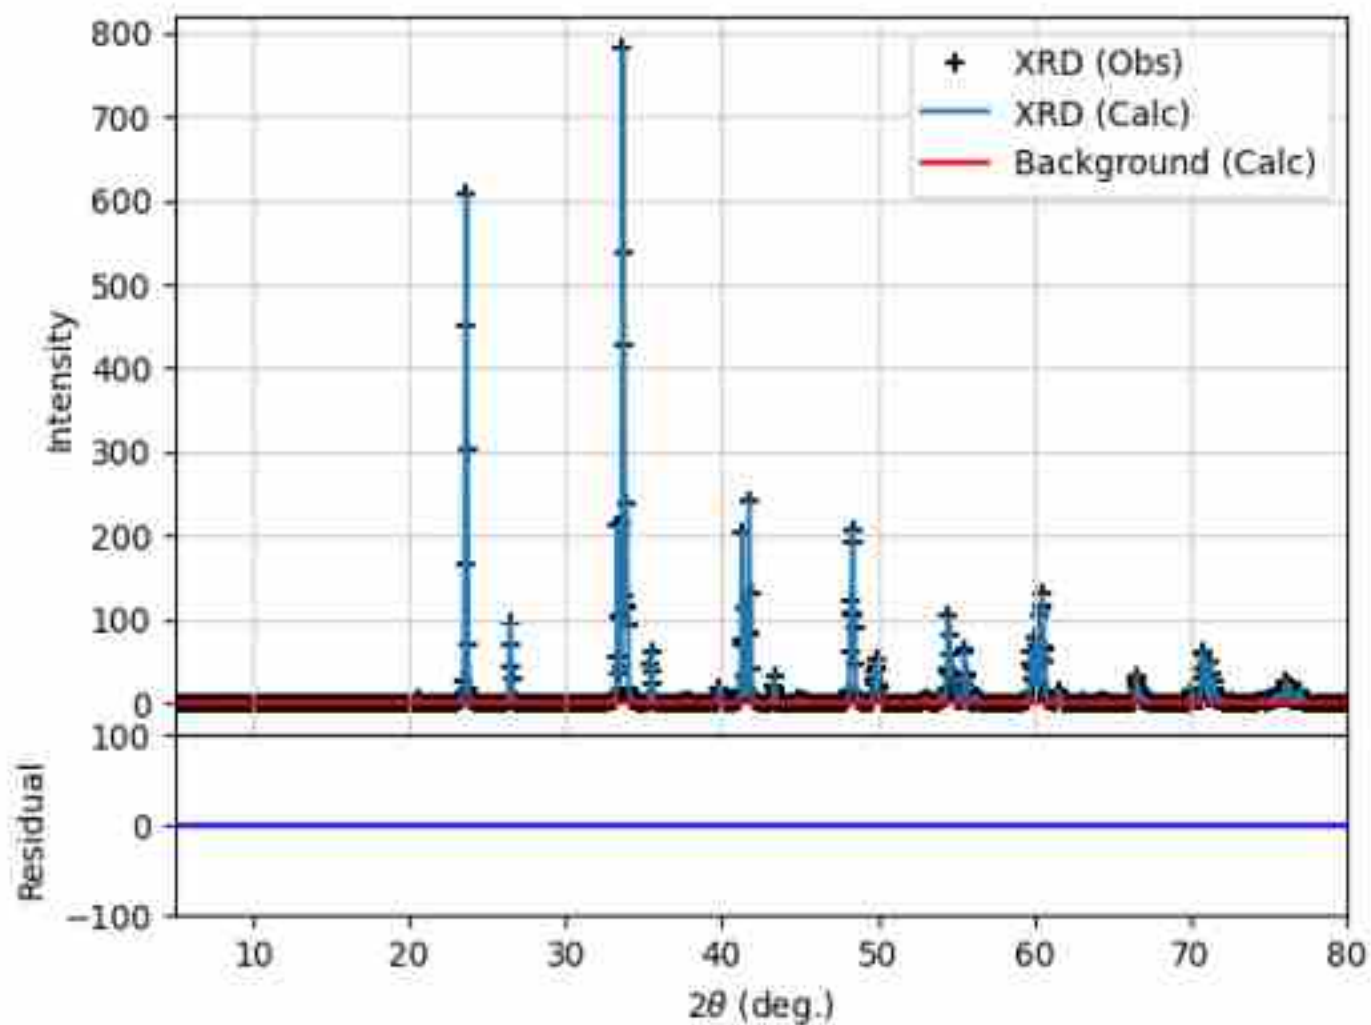

| RMSE before RR | Rwp     | RMSE after RR |
|----------------|---------|---------------|
| 0.014          | 0.03158 | 0.00649       |

# Sm<sub>2</sub>Al<sub>2</sub>Ge<sub>2</sub>

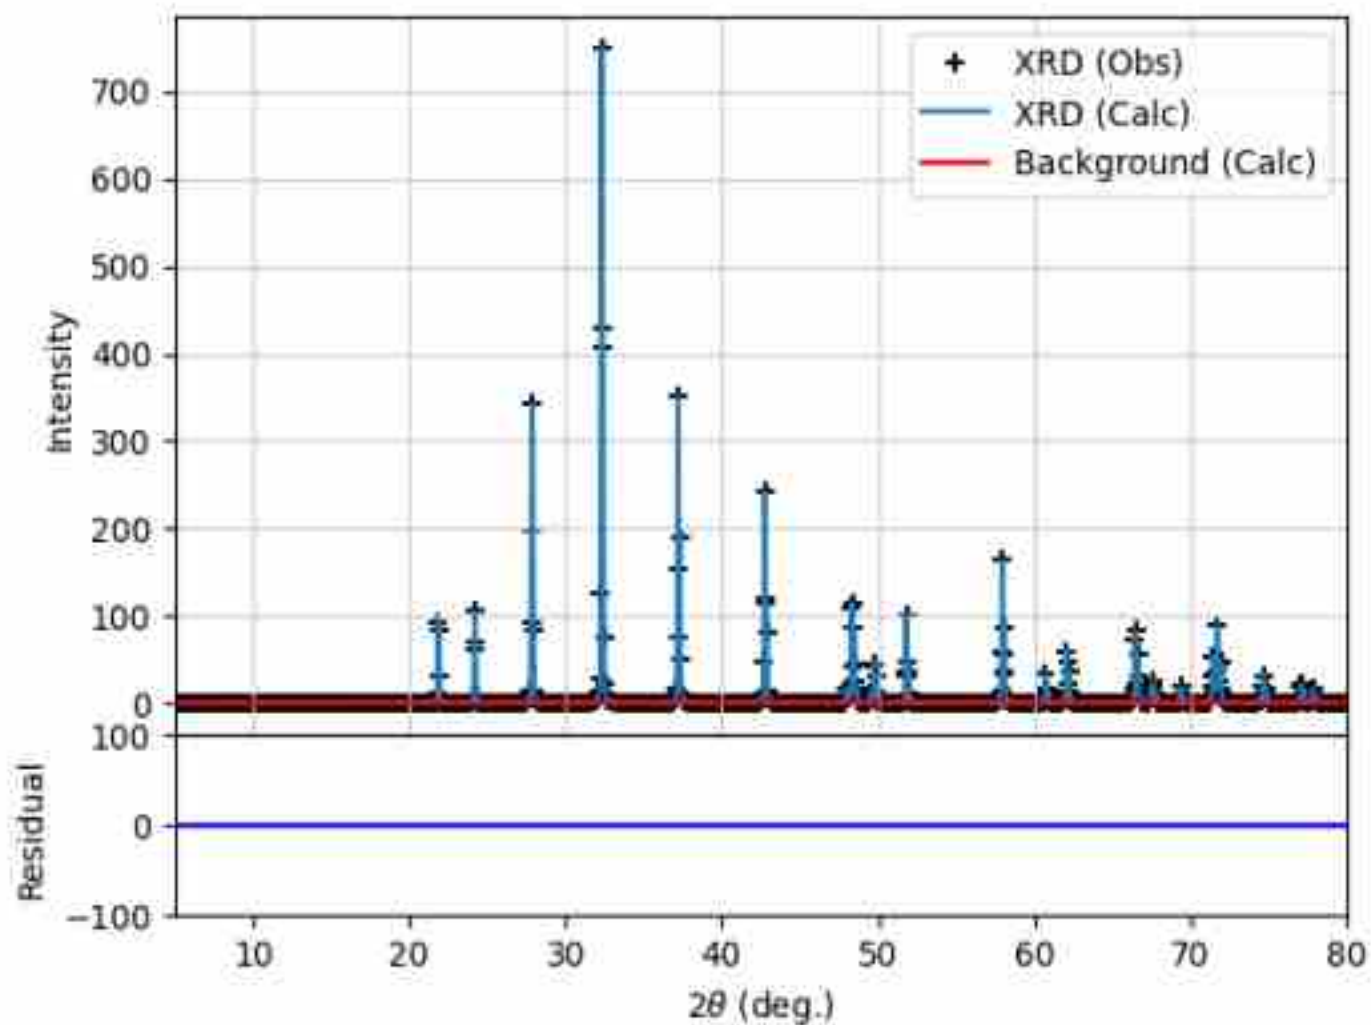

| RMSE before RR | Rwp     | RMSE after RR |
|----------------|---------|---------------|
| 0.014          | 0.00421 | 0.00069       |



# Sm<sub>2</sub>Zn<sub>17</sub>

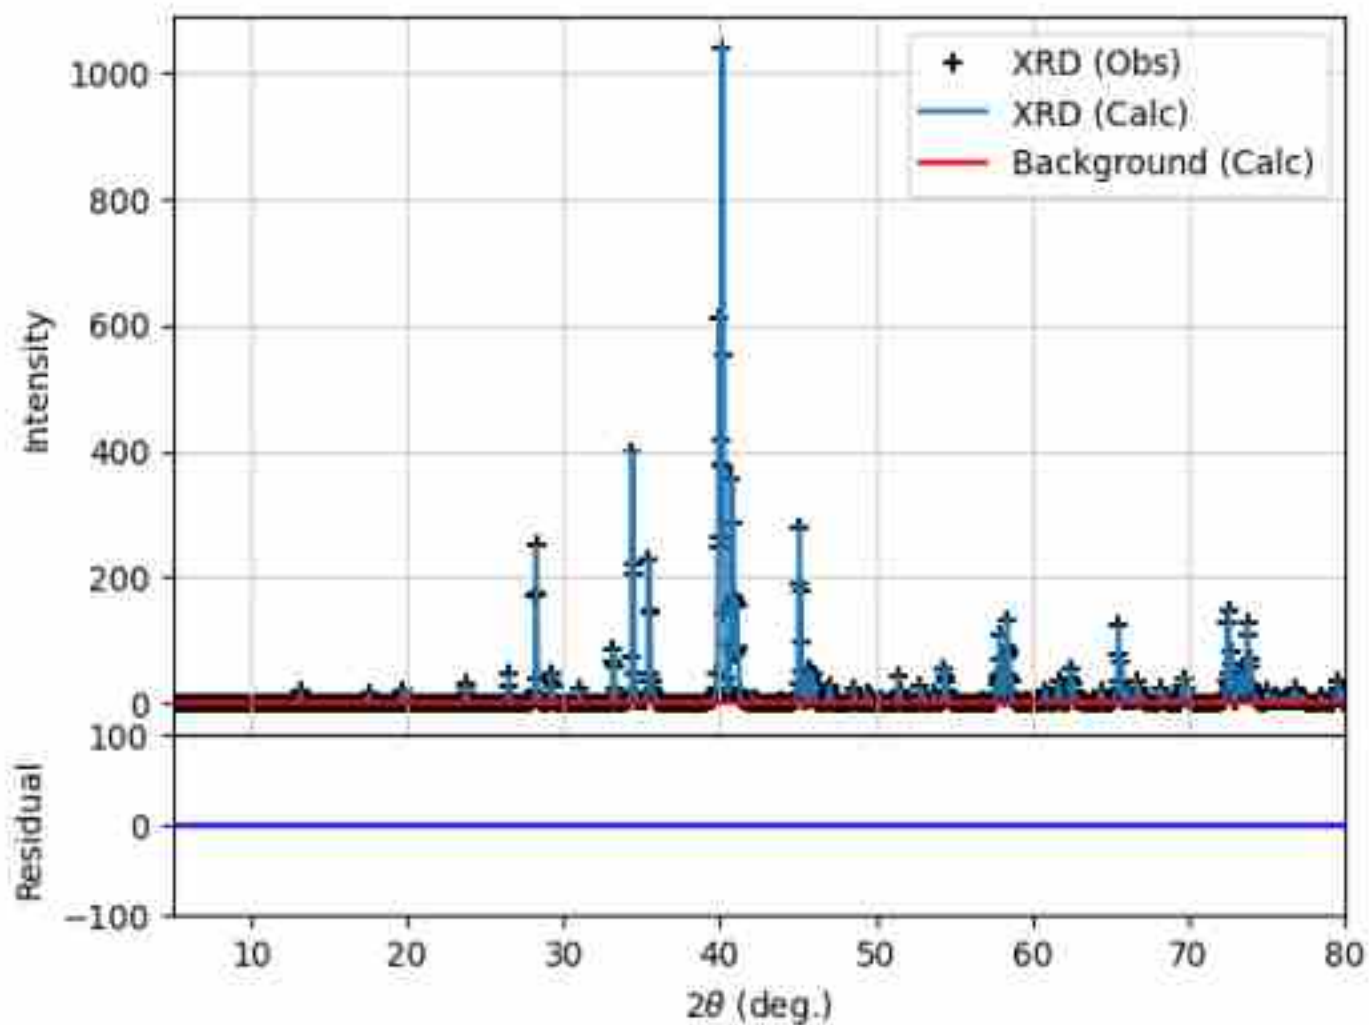

| RMSE before RR | Rwp     | RMSE after RR |
|----------------|---------|---------------|
| 0.014          | 0.00256 | 0.00035       |

# Sm<sub>3</sub>Al<sub>3</sub>Cu<sub>3</sub>

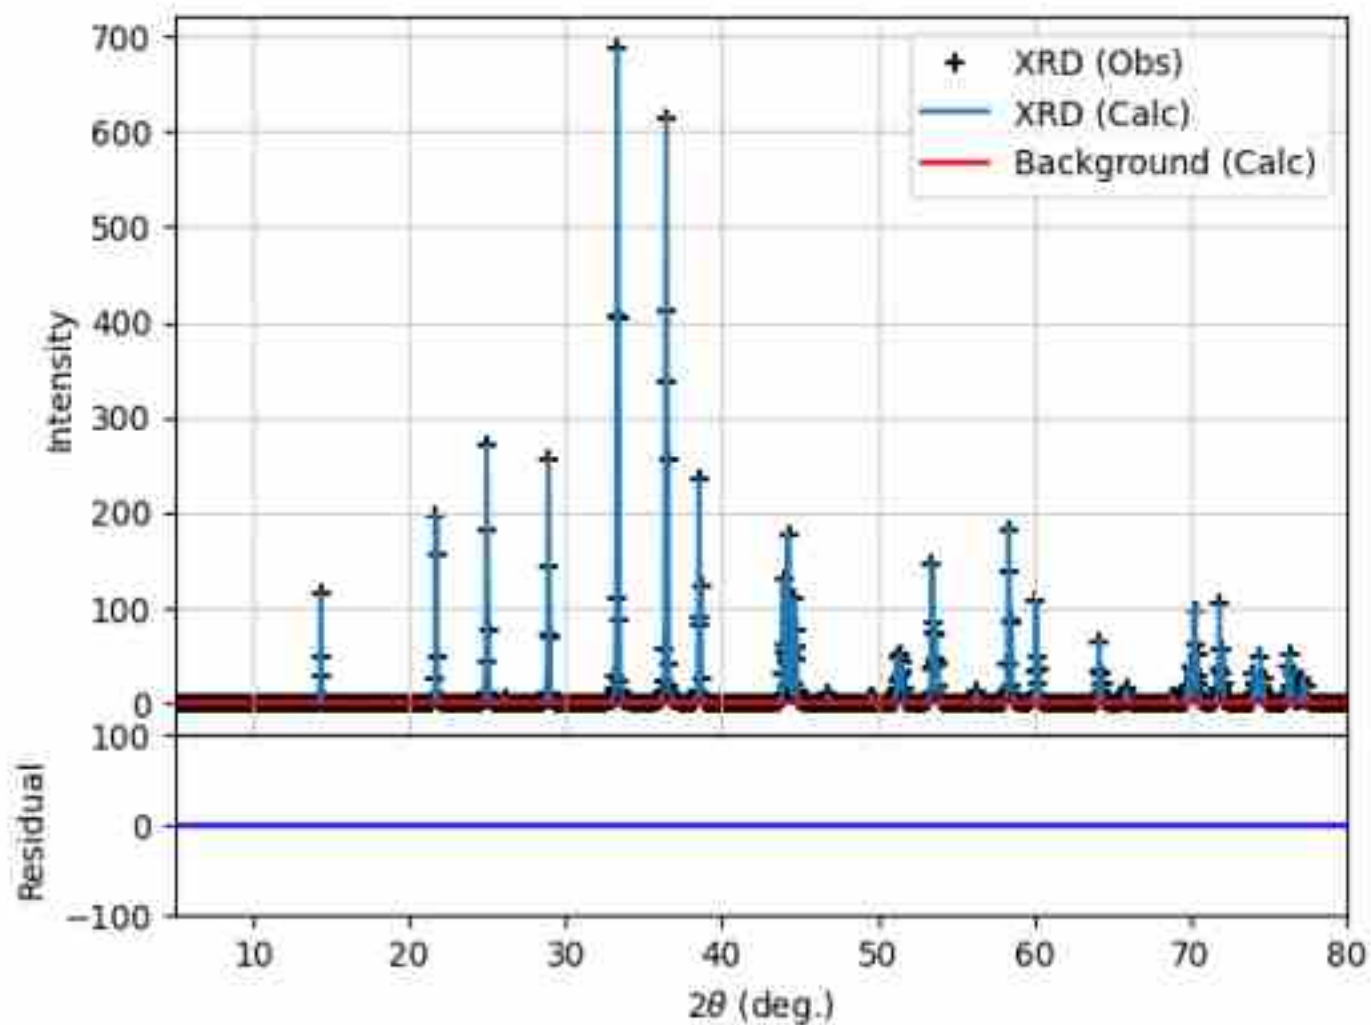

| RMSE before RR | Rwp     | RMSE after RR |
|----------------|---------|---------------|
| 0.014          | 0.00476 | 0.00083       |

# Sm<sub>3</sub>In<sub>3</sub>Ni<sub>3</sub>

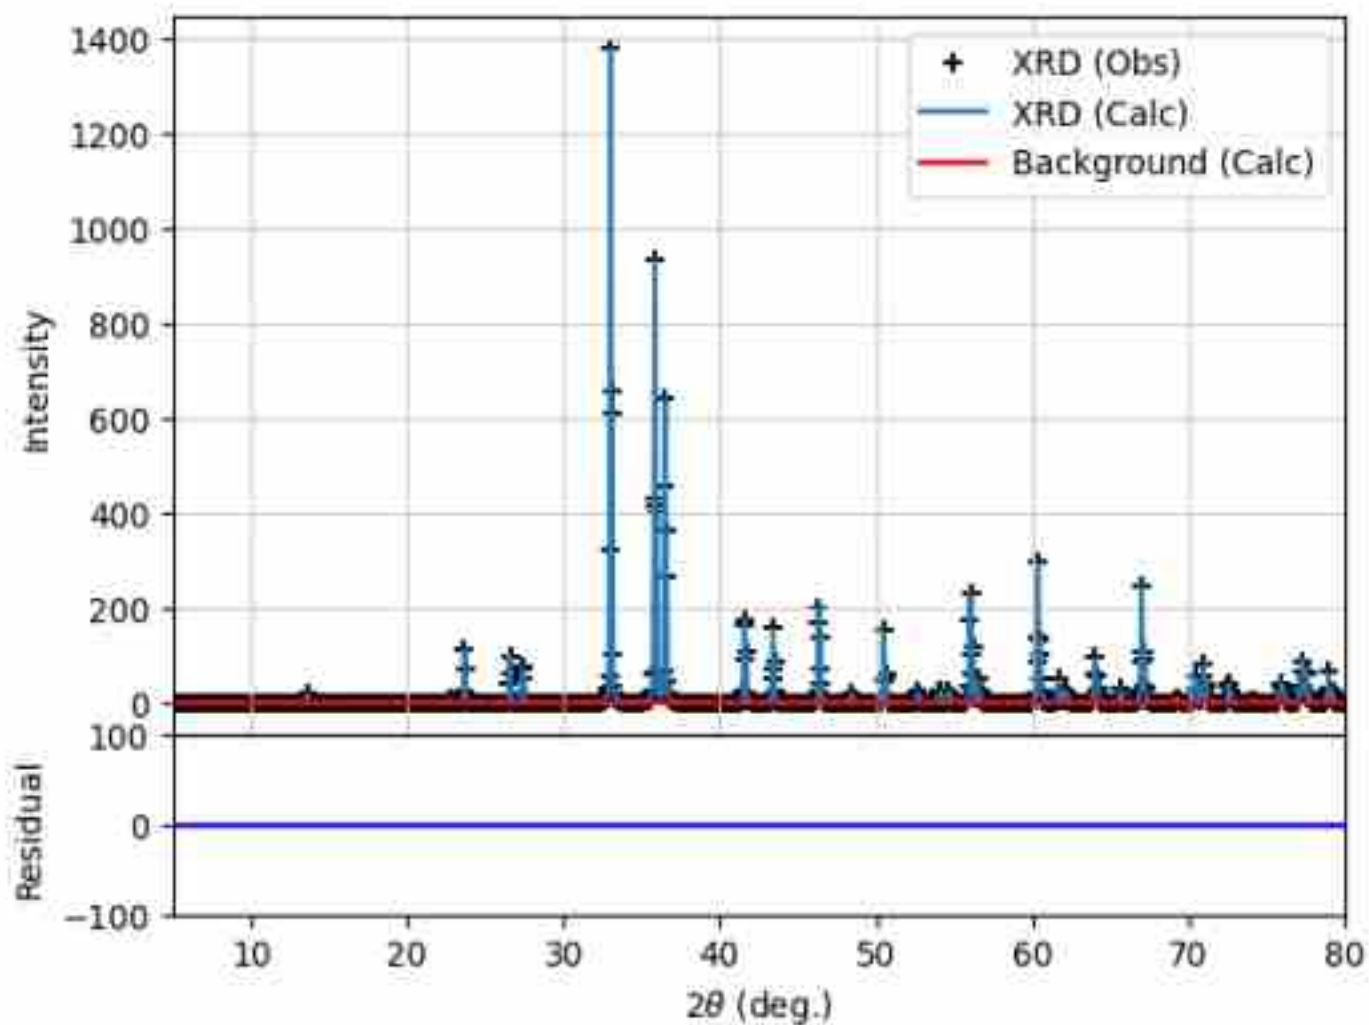

| RMSE before RR | Rwp     | RMSE after RR |
|----------------|---------|---------------|
| 0.014          | 0.02025 | 0.00263       |

# Sm4Sc4S12

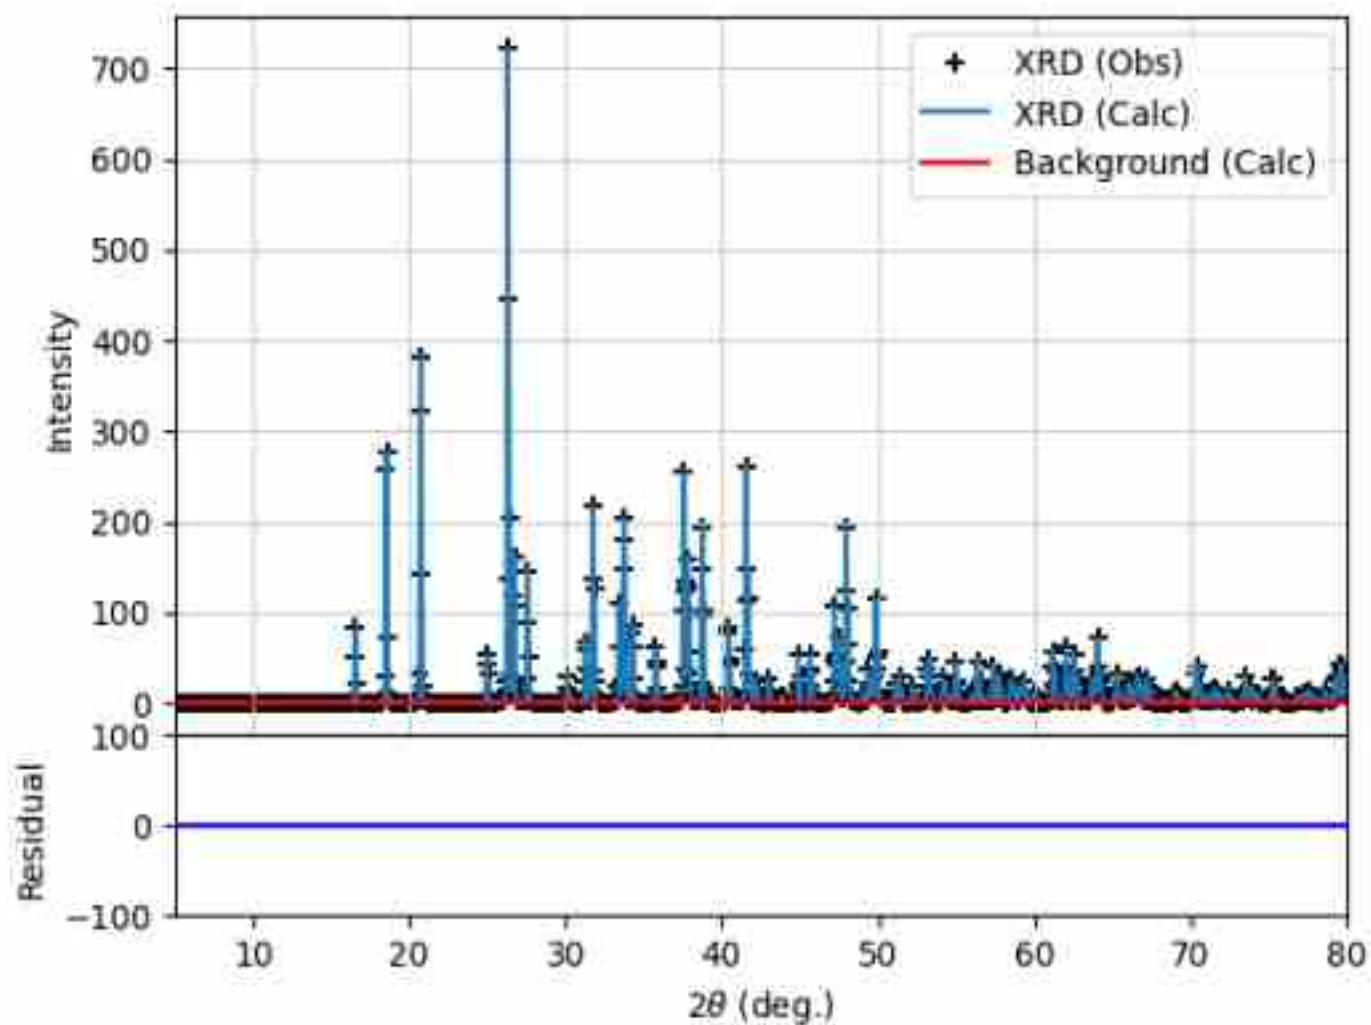

| RMSE before RR | Rwp     | RMSE after RR |
|----------------|---------|---------------|
| 0.014          | 0.00341 | 0.0005        |

# Sn2Br4

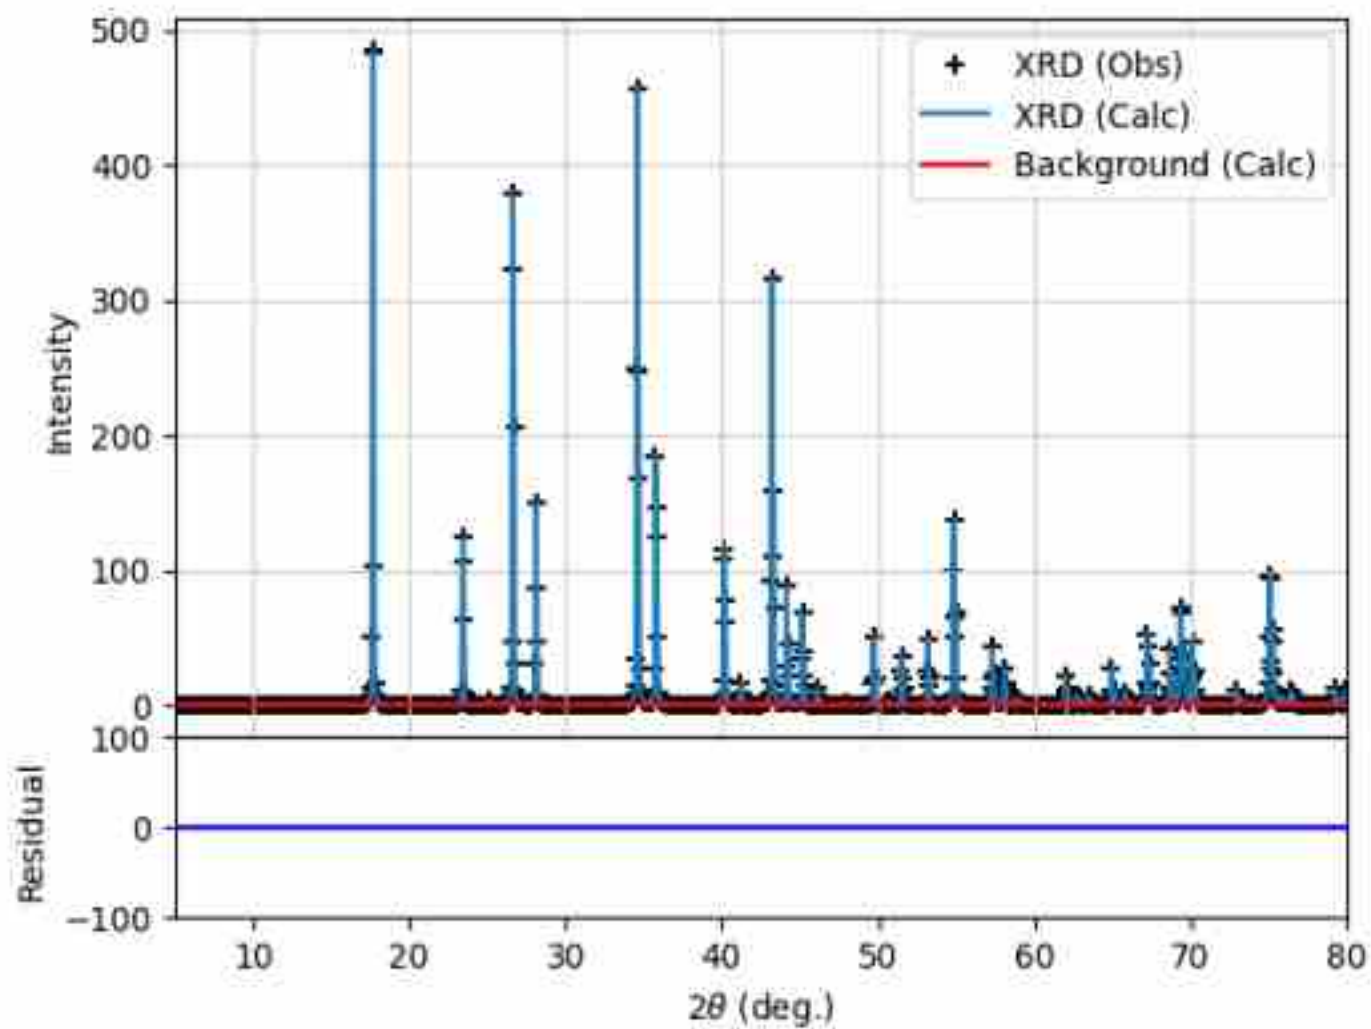

| RMSE before RR | Rwp     | RMSE after RR |
|----------------|---------|---------------|
| 0.014          | 0.00494 | 0.00045       |

# Sr1Cu1O3

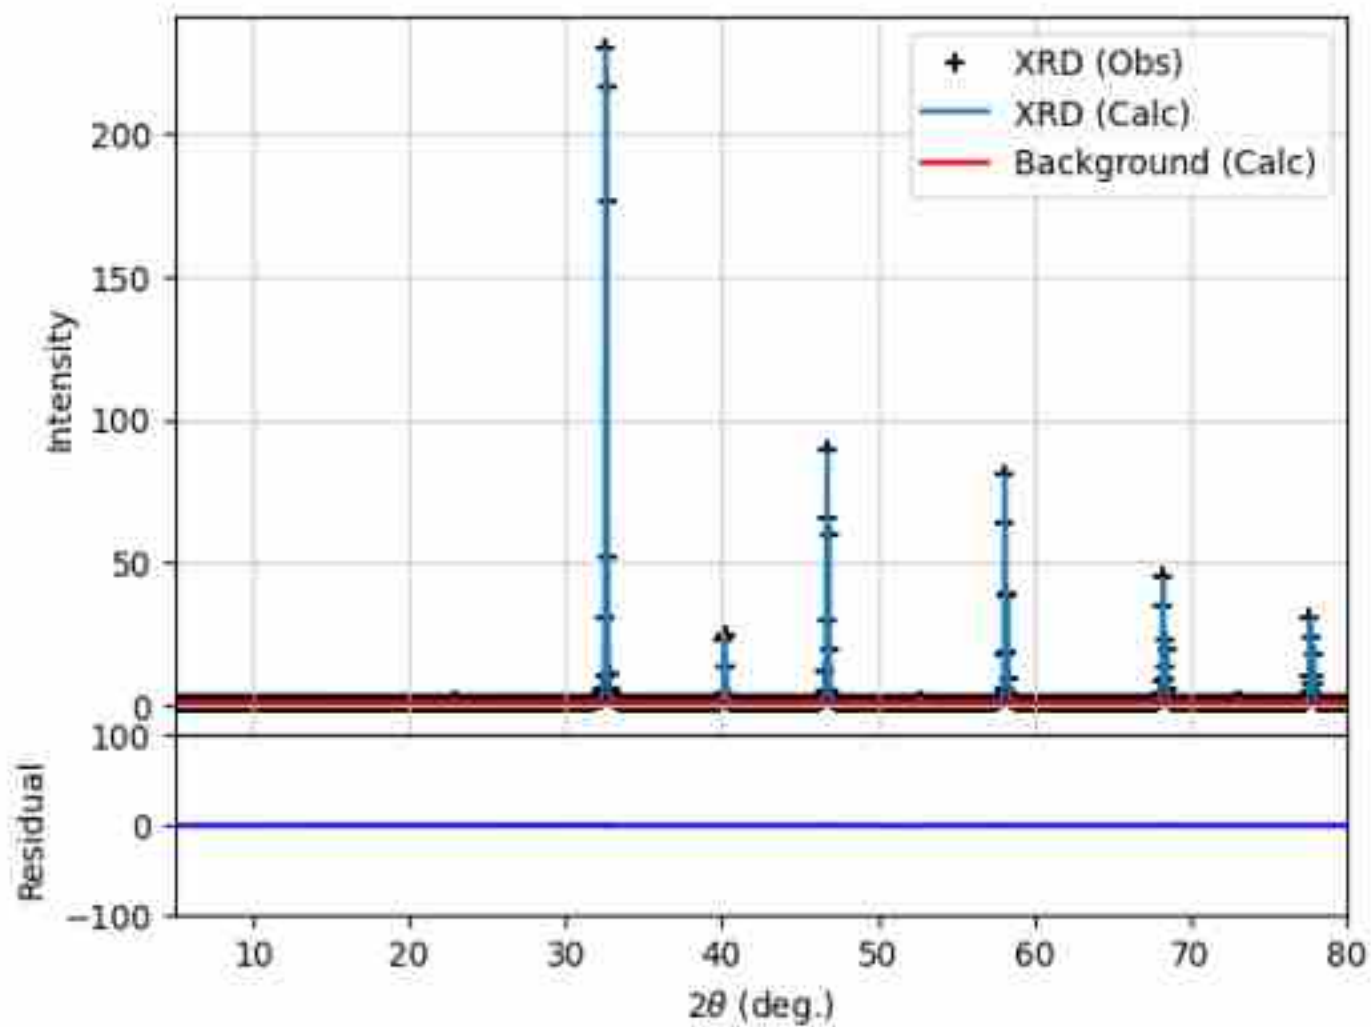

| RMSE before RR | Rwp     | RMSE after RR |
|----------------|---------|---------------|
| 0.014          | 1.45878 | 0.00997       |

# Sr1Nd1Cr1O4

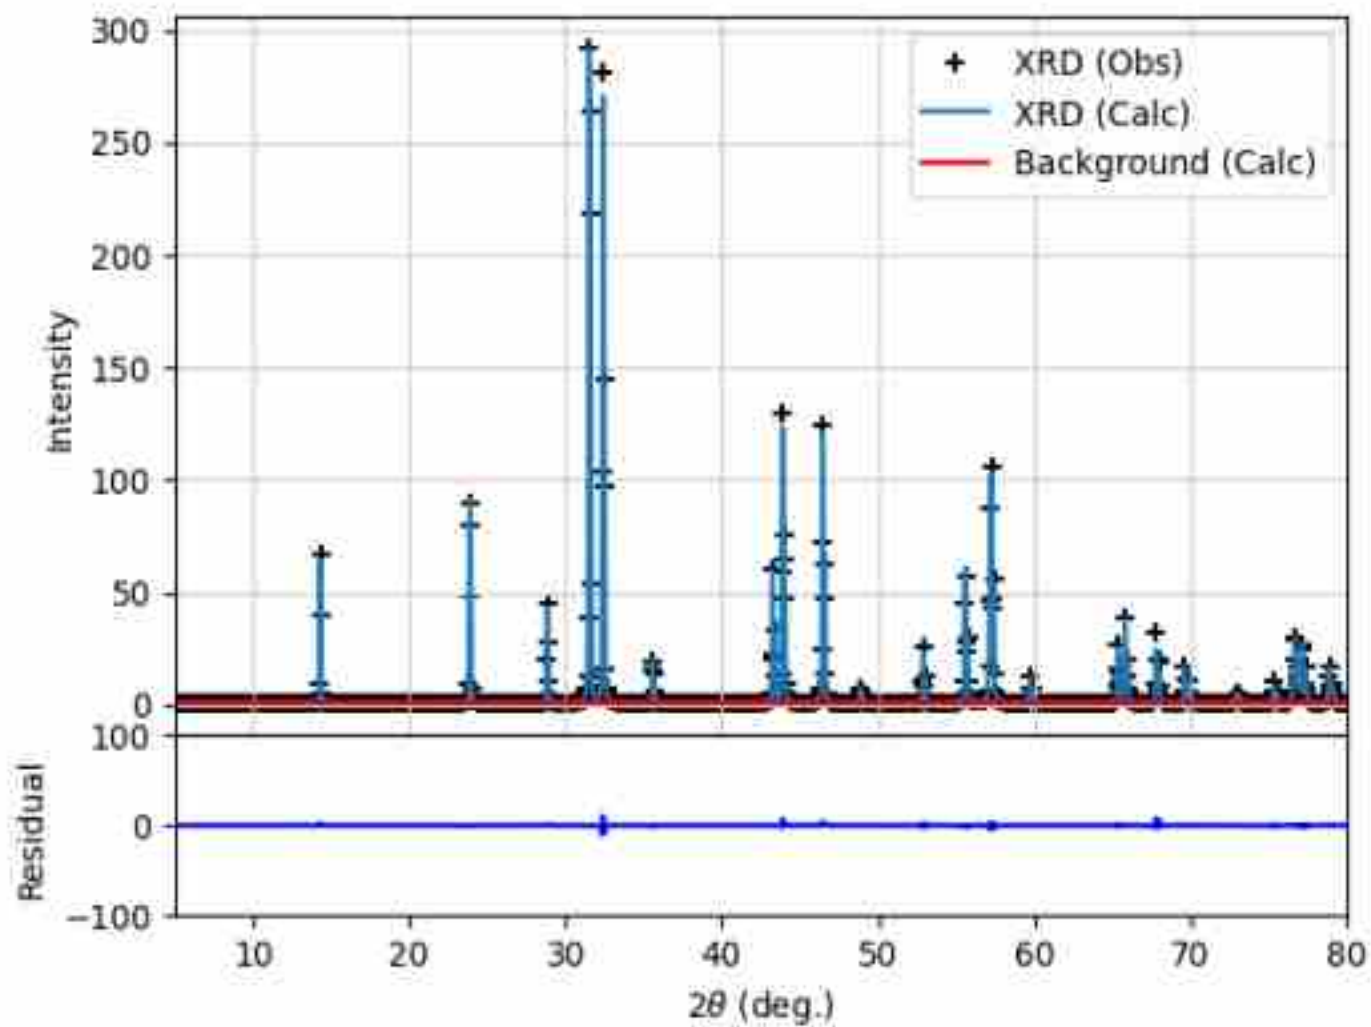

| RMSE before RR | Rwp     | RMSE after RR |
|----------------|---------|---------------|
| 0.014          | 4.90627 | 0.01343       |

# Sr2Al4

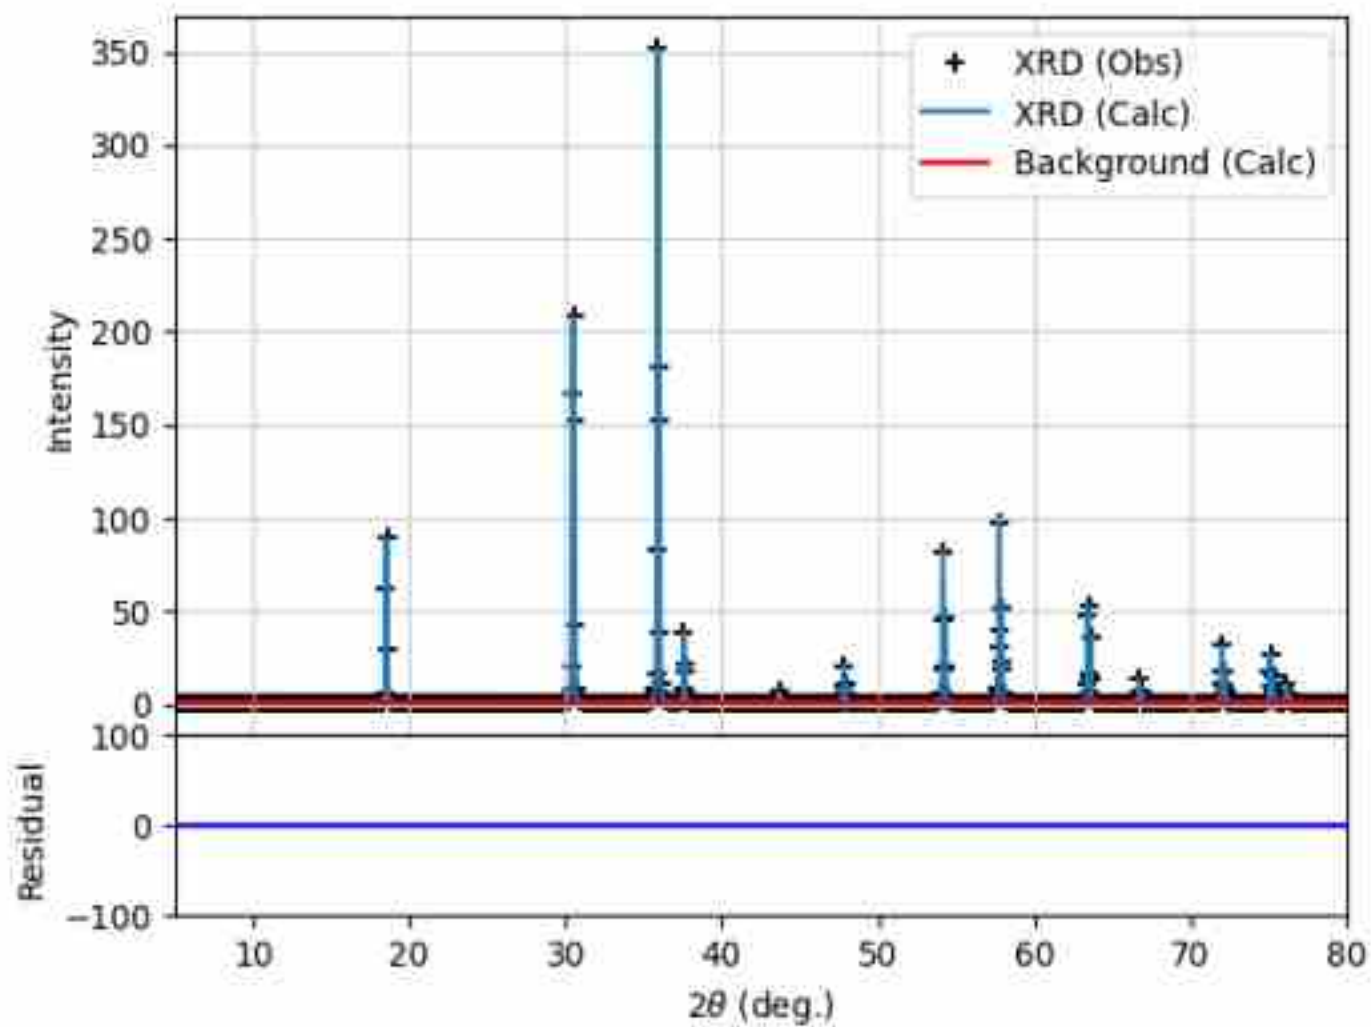

| RMSE before RR | Rwp     | RMSE after RR |
|----------------|---------|---------------|
| 0.014          | 0.00296 | 0.00364       |



# Sr<sub>2</sub>Fe<sub>1</sub>Co<sub>1</sub>O<sub>6</sub>

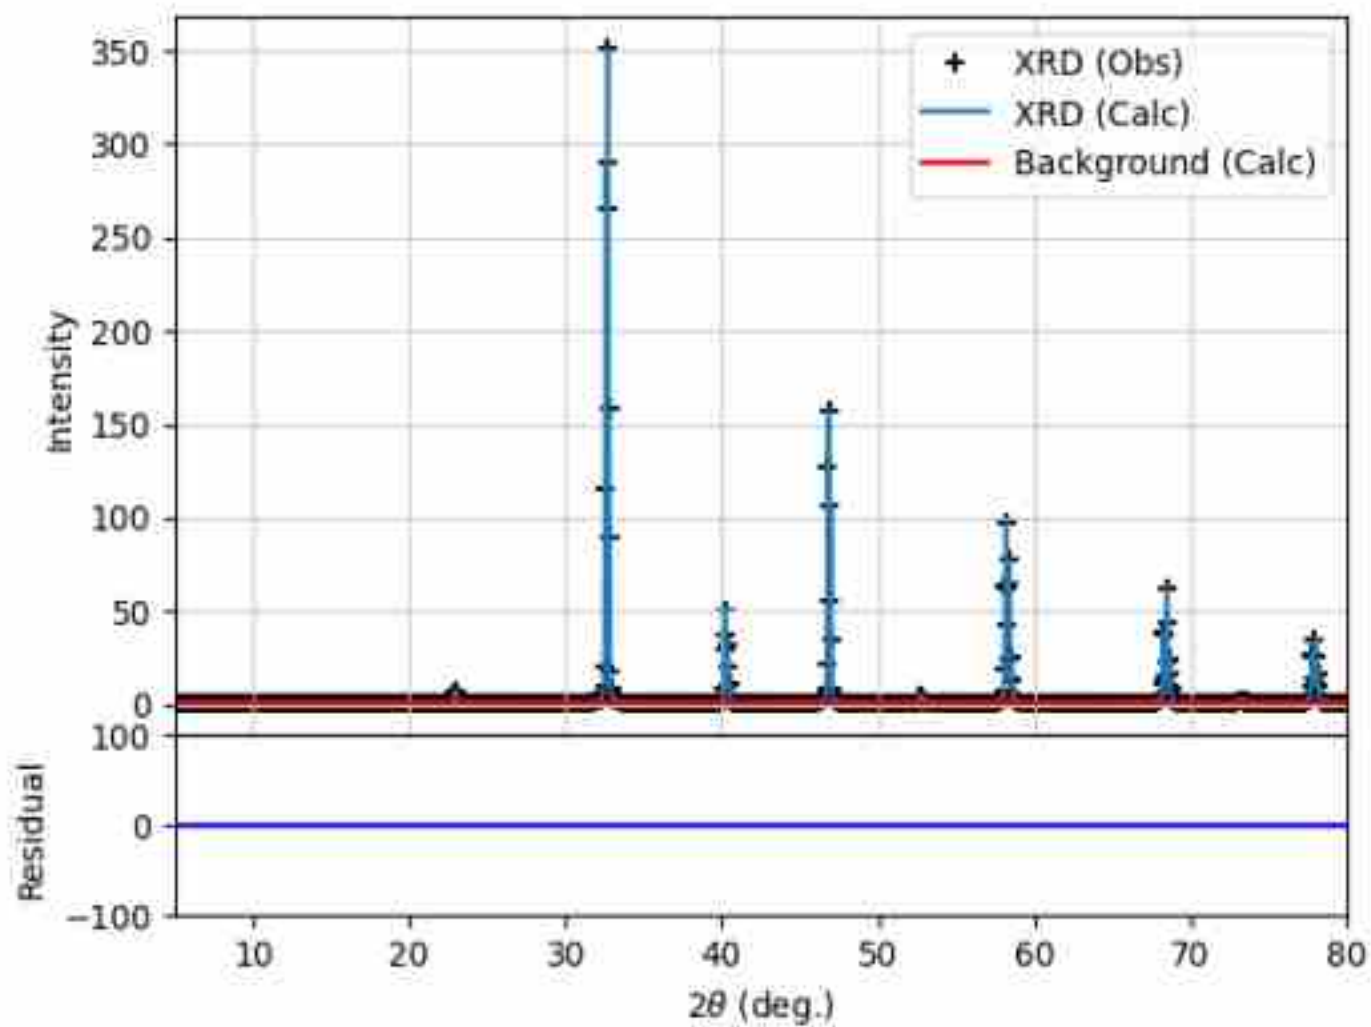

| RMSE before RR | Rwp    | RMSE after RR |
|----------------|--------|---------------|
| 0.014          | 0.0018 | 0.00032       |

# Sr<sub>2</sub>LaMn<sub>2</sub>O<sub>7</sub>

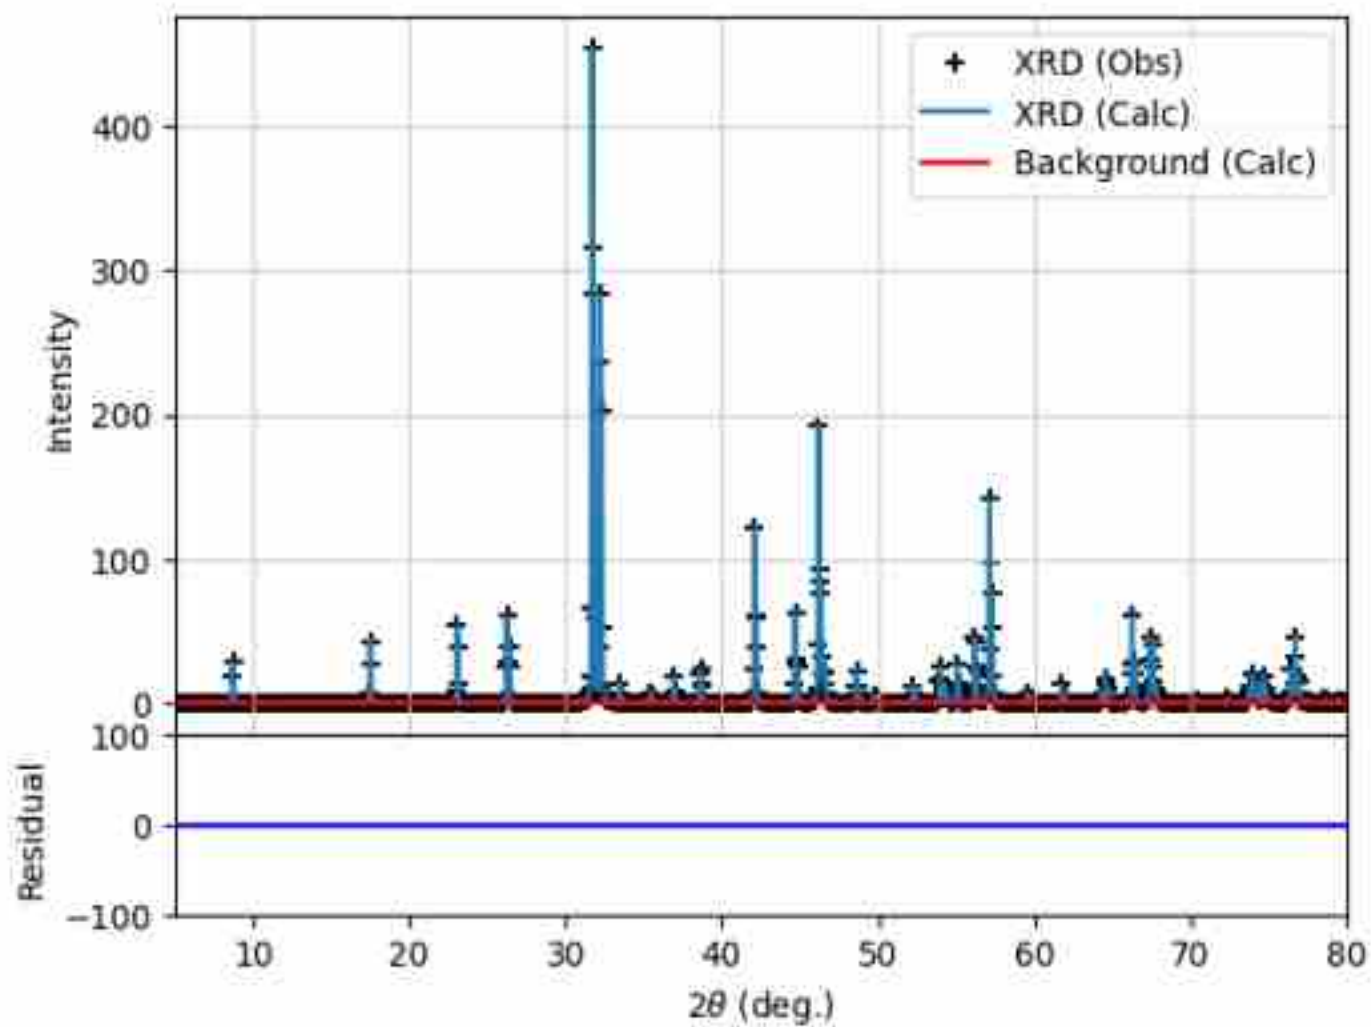

| RMSE before RR | Rwp    | RMSE after RR |
|----------------|--------|---------------|
| 0.014          | 0.0033 | 0.00101       |

# Sr<sub>2</sub>Tc<sub>10</sub>O<sub>4</sub>

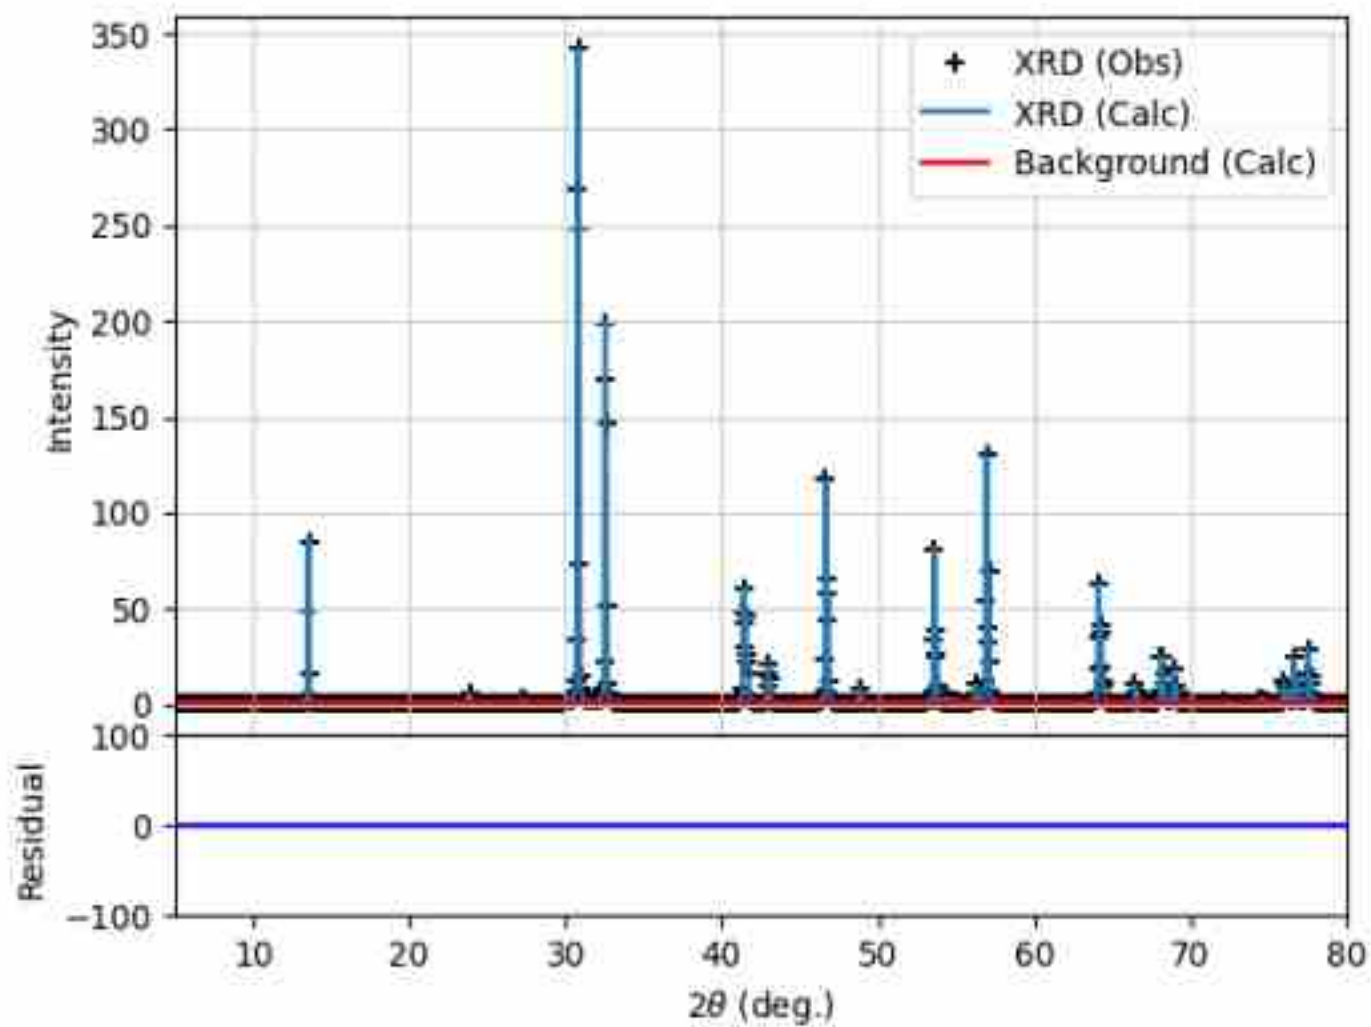

| RMSE before RR | Rwp     | RMSE after RR |
|----------------|---------|---------------|
| 0.014          | 0.00345 | 0.00252       |

# Sr6Mg2

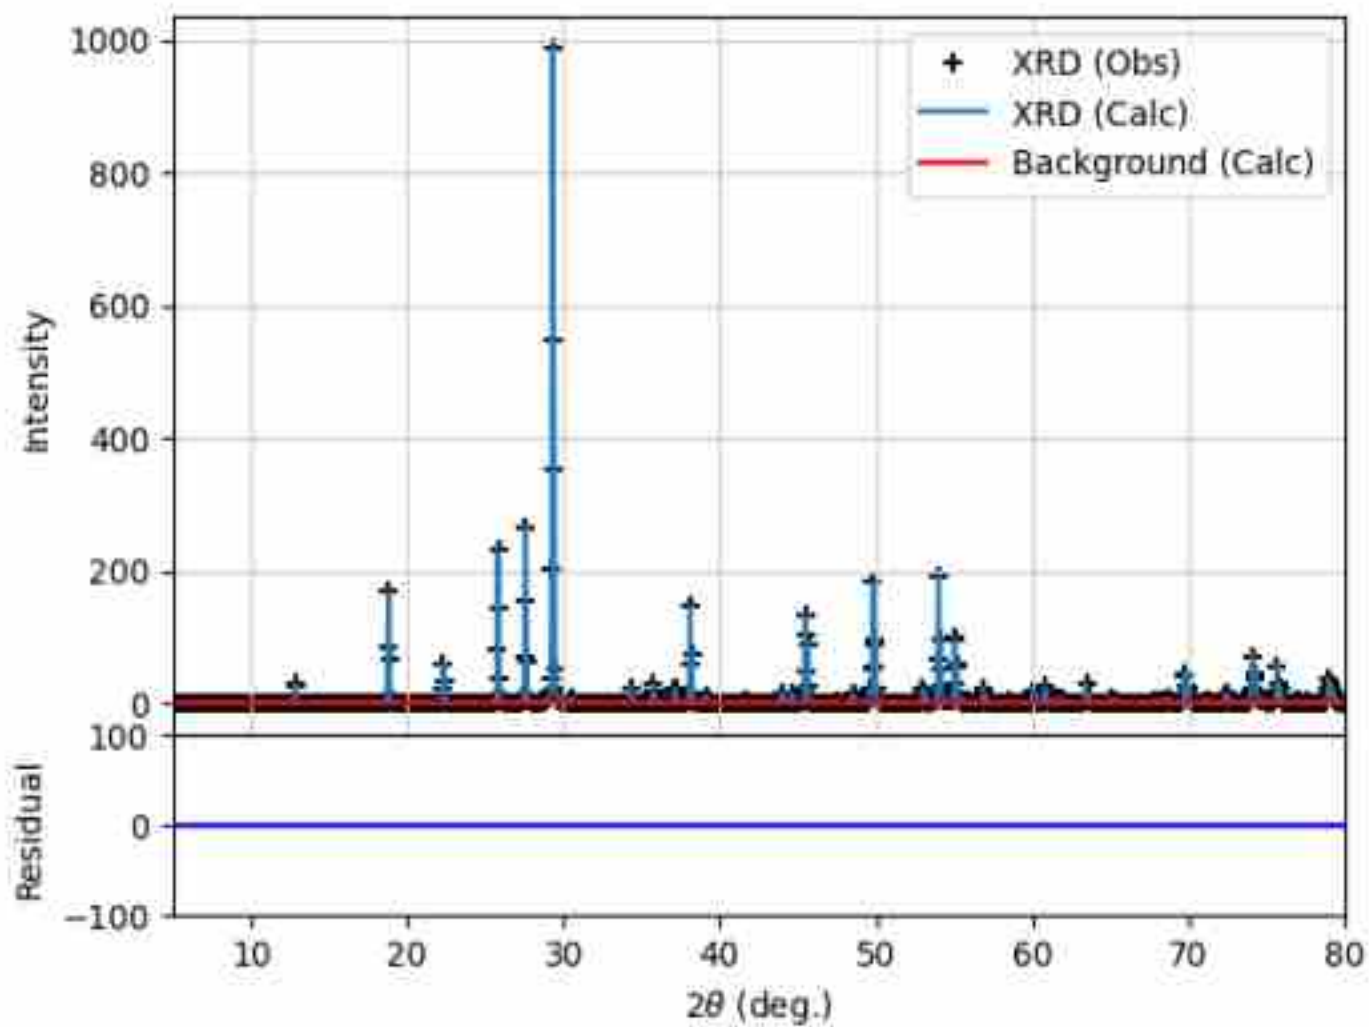

| RMSE before RR | Rwp     | RMSE after RR |
|----------------|---------|---------------|
| 0.014          | 0.00747 | 0.00076       |

# Ta<sub>4</sub>Co<sub>1</sub>Ni<sub>1</sub>

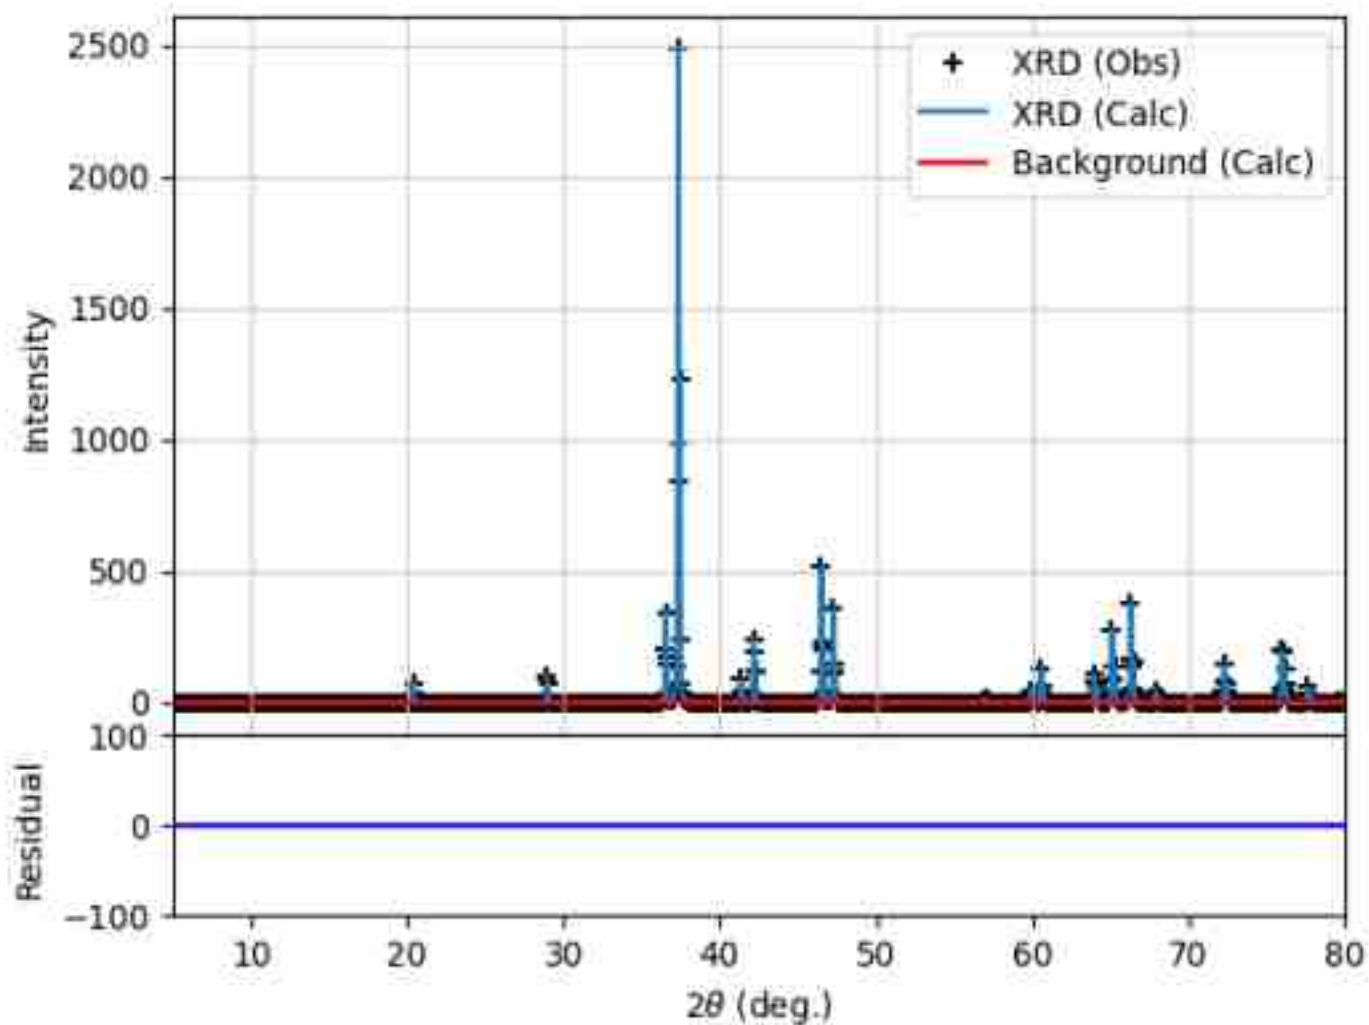

| RMSE before RR | Rwp     | RMSE after RR |
|----------------|---------|---------------|
| 0.014          | 0.00406 | 0.00047       |

# Tb2Ge6

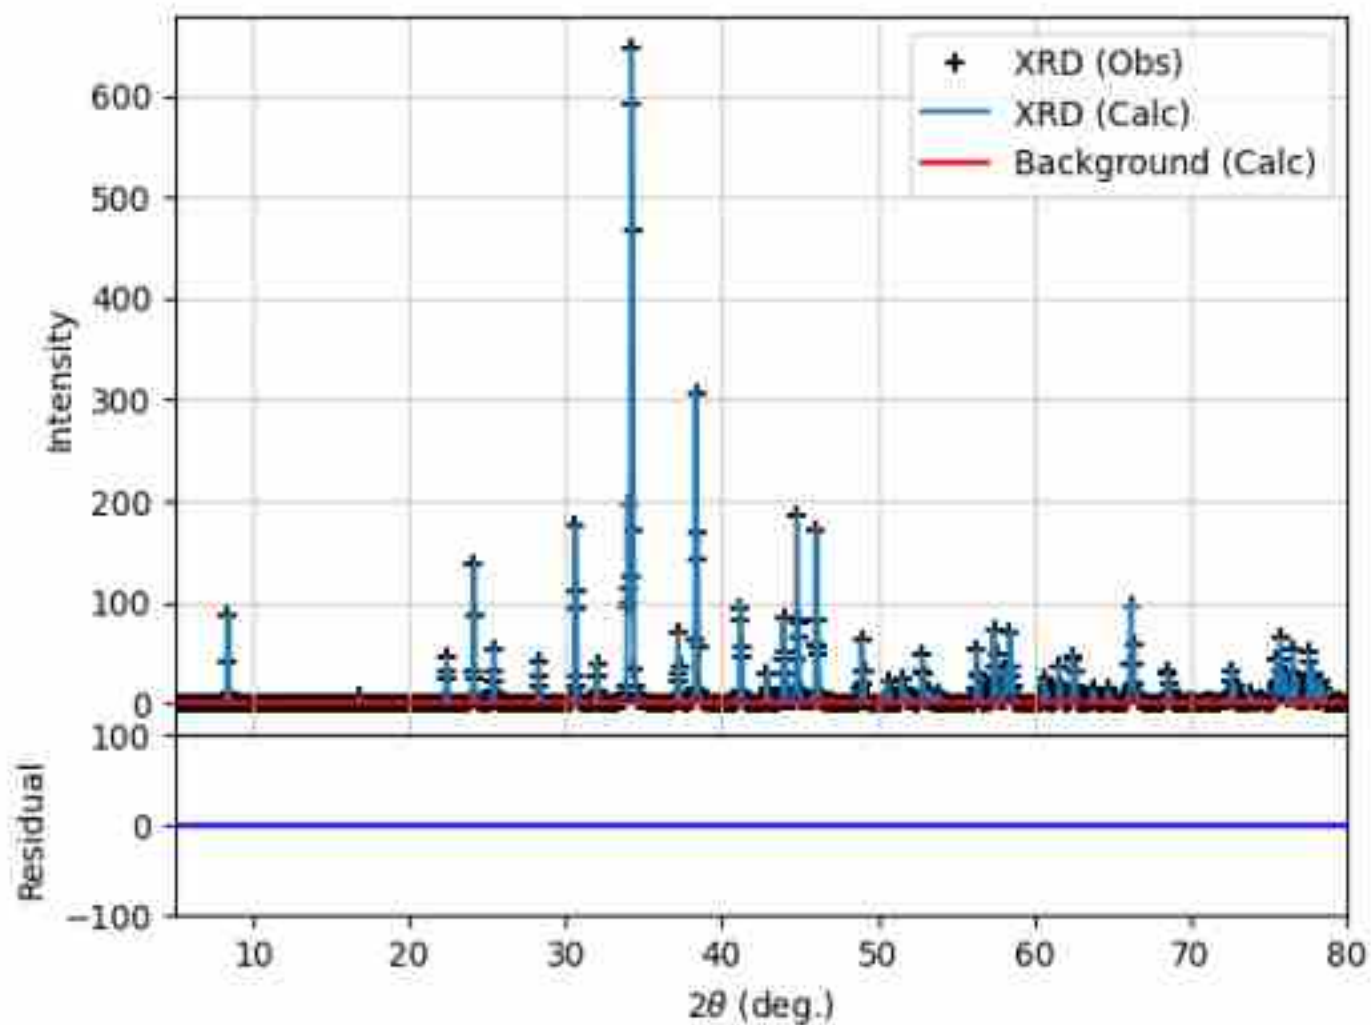

| RMSE before RR | Rwp     | RMSE after RR |
|----------------|---------|---------------|
| 0.014          | 0.00328 | 0.00032       |

# Tb<sub>2</sub>Mo<sub>2</sub>C<sub>3</sub>

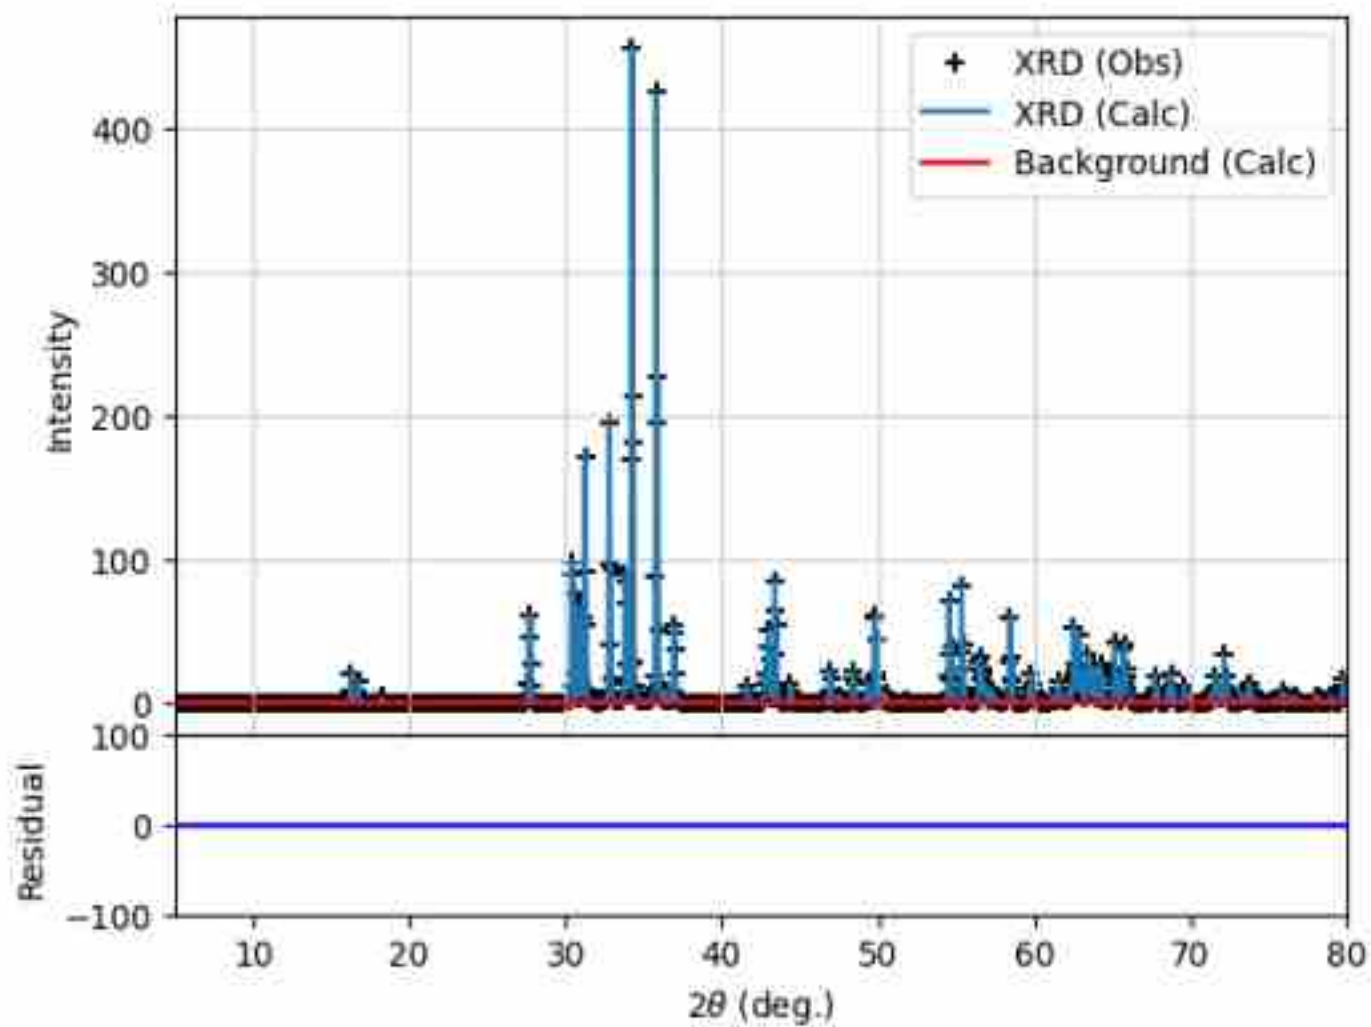

| RMSE before RR | Rwp     | RMSE after RR |
|----------------|---------|---------------|
| 0.014          | 0.00372 | 0.00073       |

# Tb<sub>2</sub>Si<sub>2</sub>O<sub>8</sub>C<sub>2</sub>

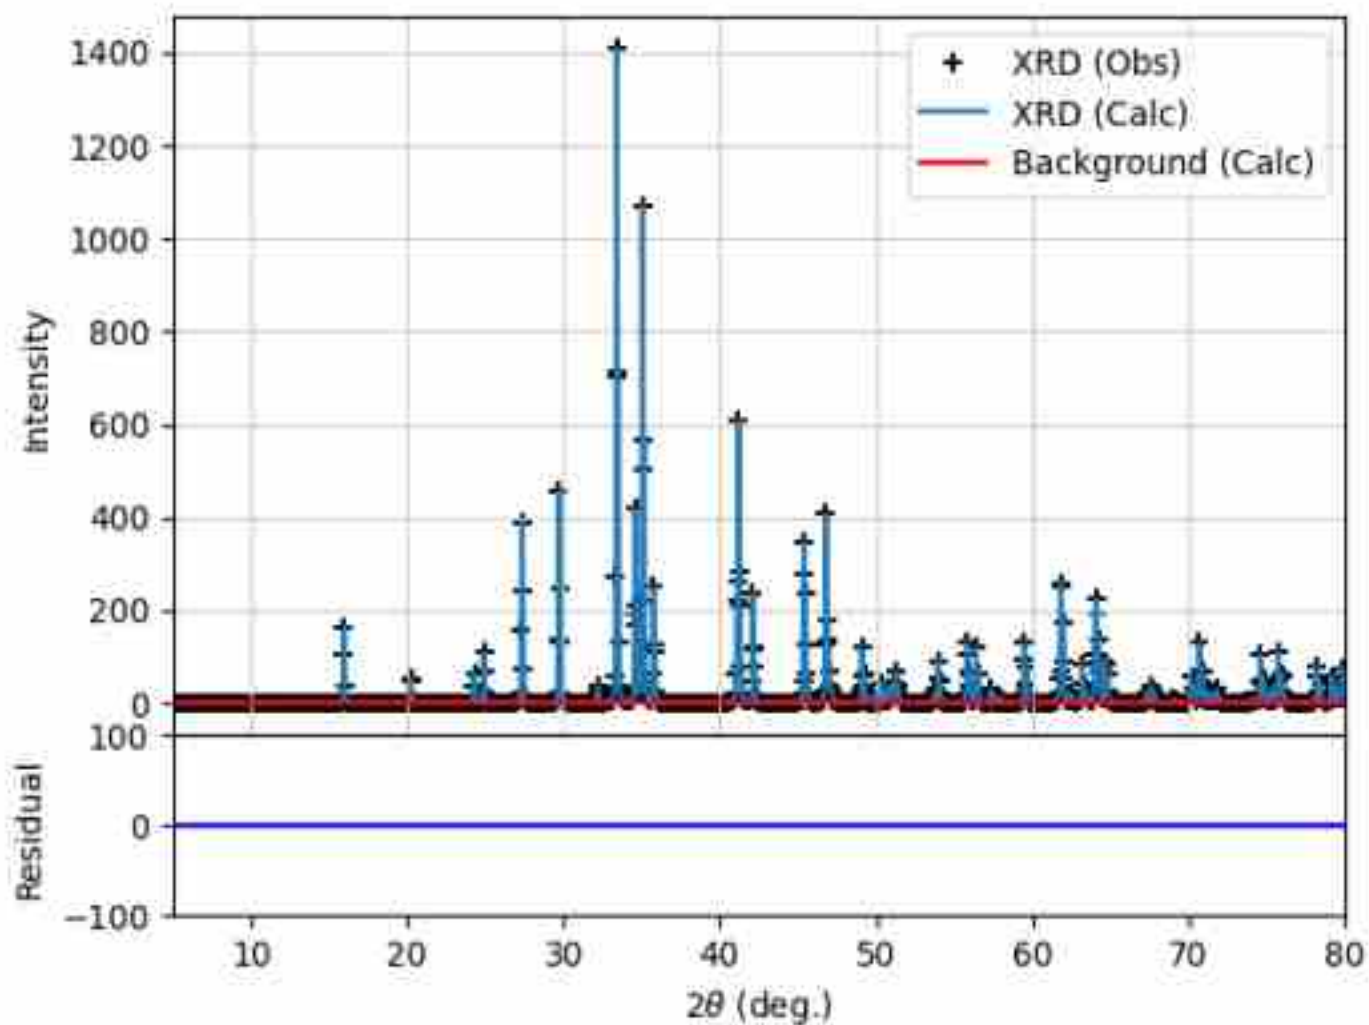

| RMSE before RR | Rwp     | RMSE after RR |
|----------------|---------|---------------|
| 0.014          | 0.00421 | 0.00128       |



# Tb<sub>4</sub>Mn<sub>2</sub>Ni<sub>2</sub>O<sub>12</sub>

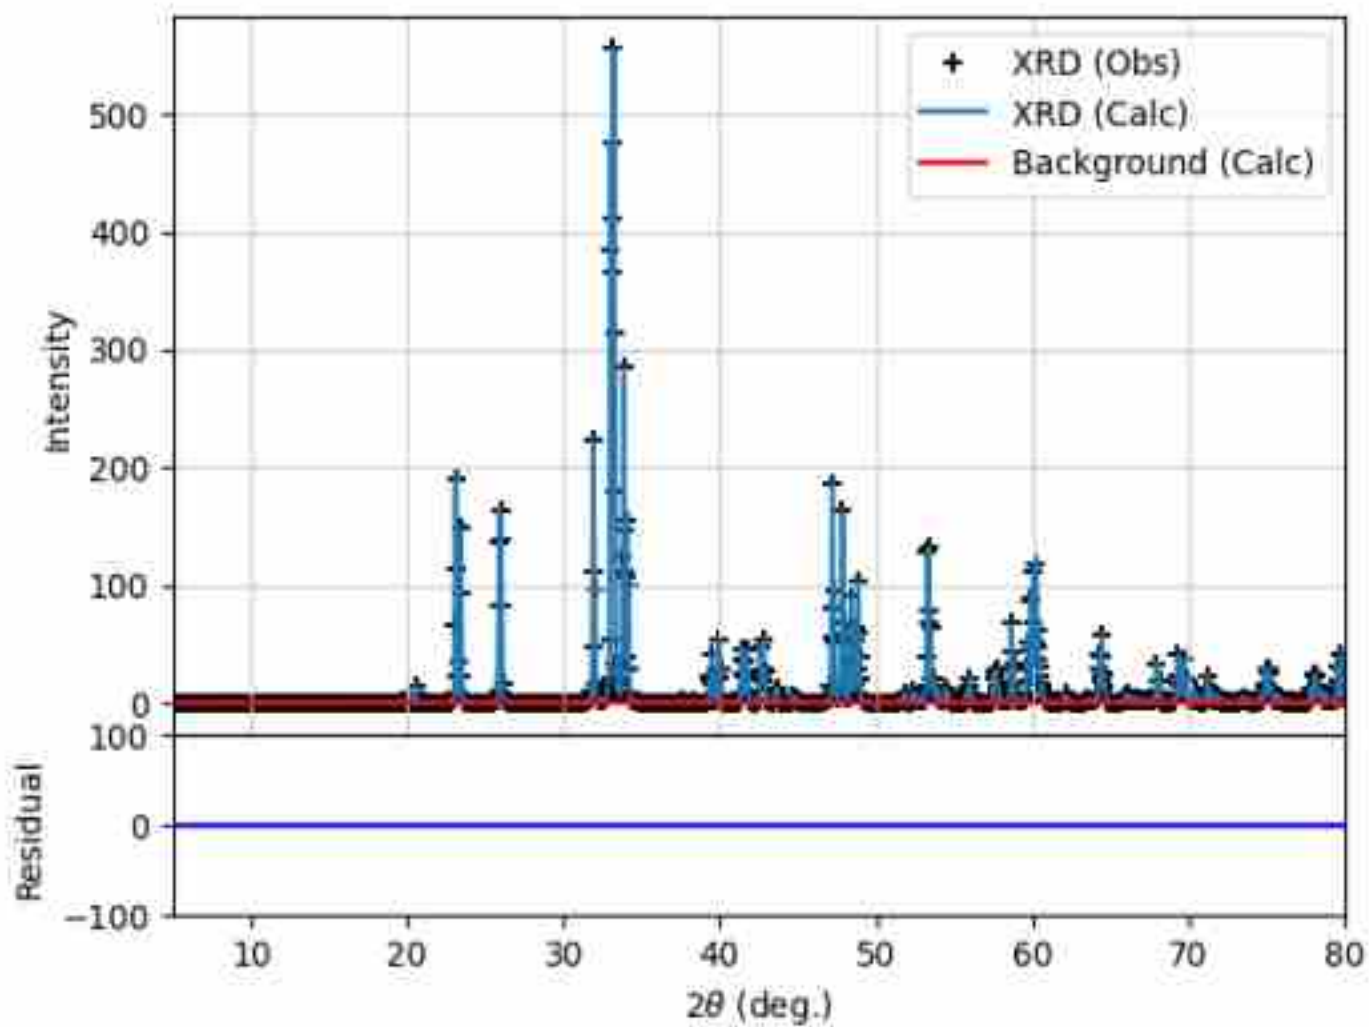

| RMSE before RR | Rwp     | RMSE after RR |
|----------------|---------|---------------|
| 0.014          | 0.00425 | 0.00101       |

# Tb4Pd4

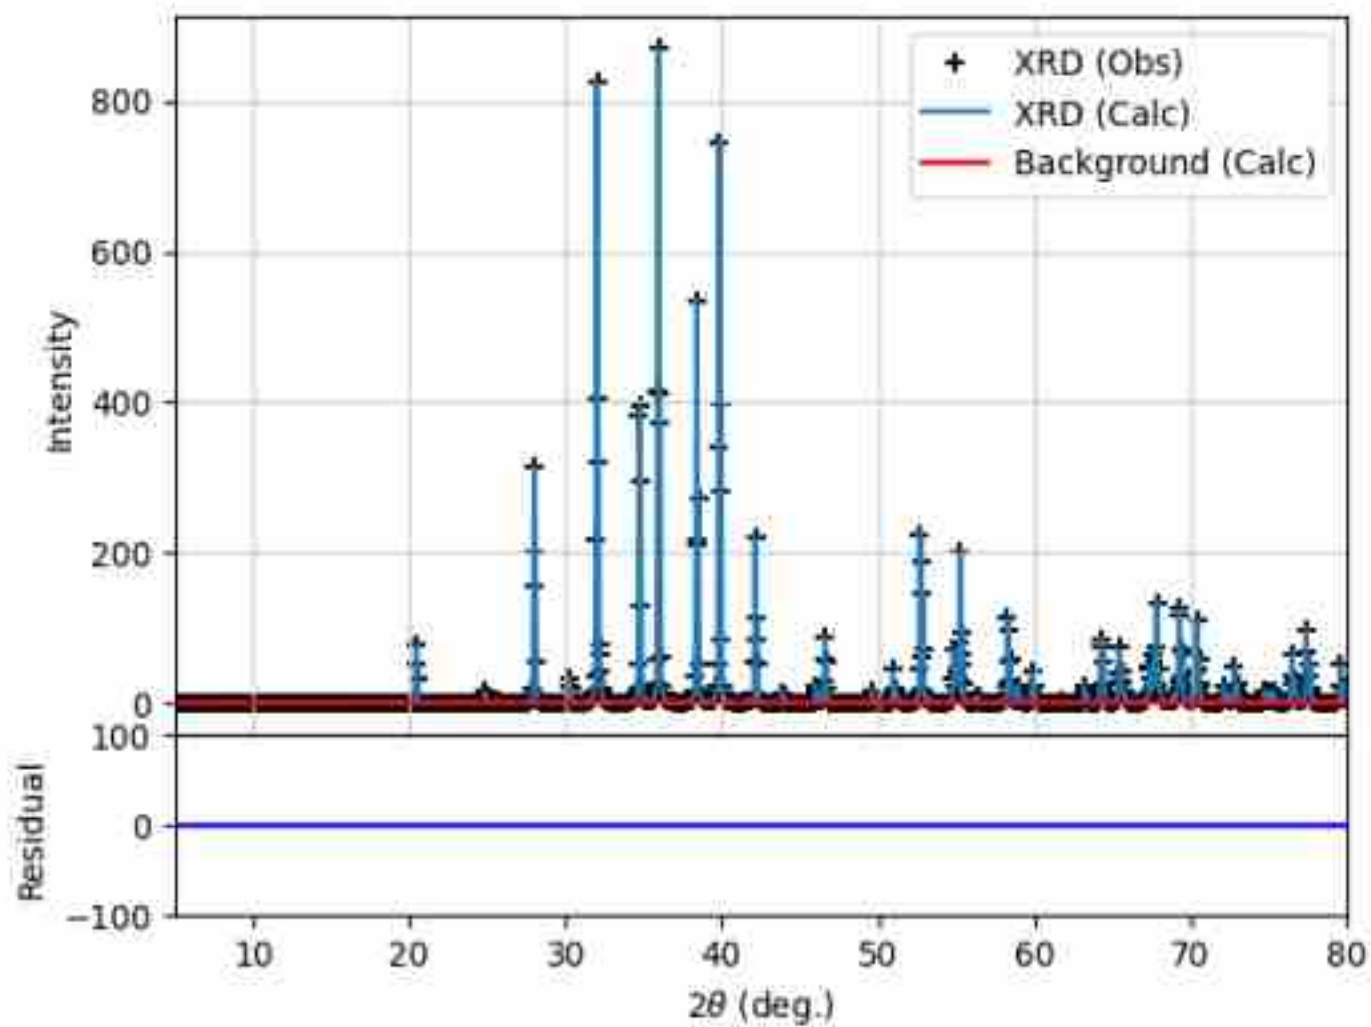

| RMSE before RR | Rwp     | RMSE after RR |
|----------------|---------|---------------|
| 0.014          | 0.00471 | 0.0003        |

# Th1Mn1Co4

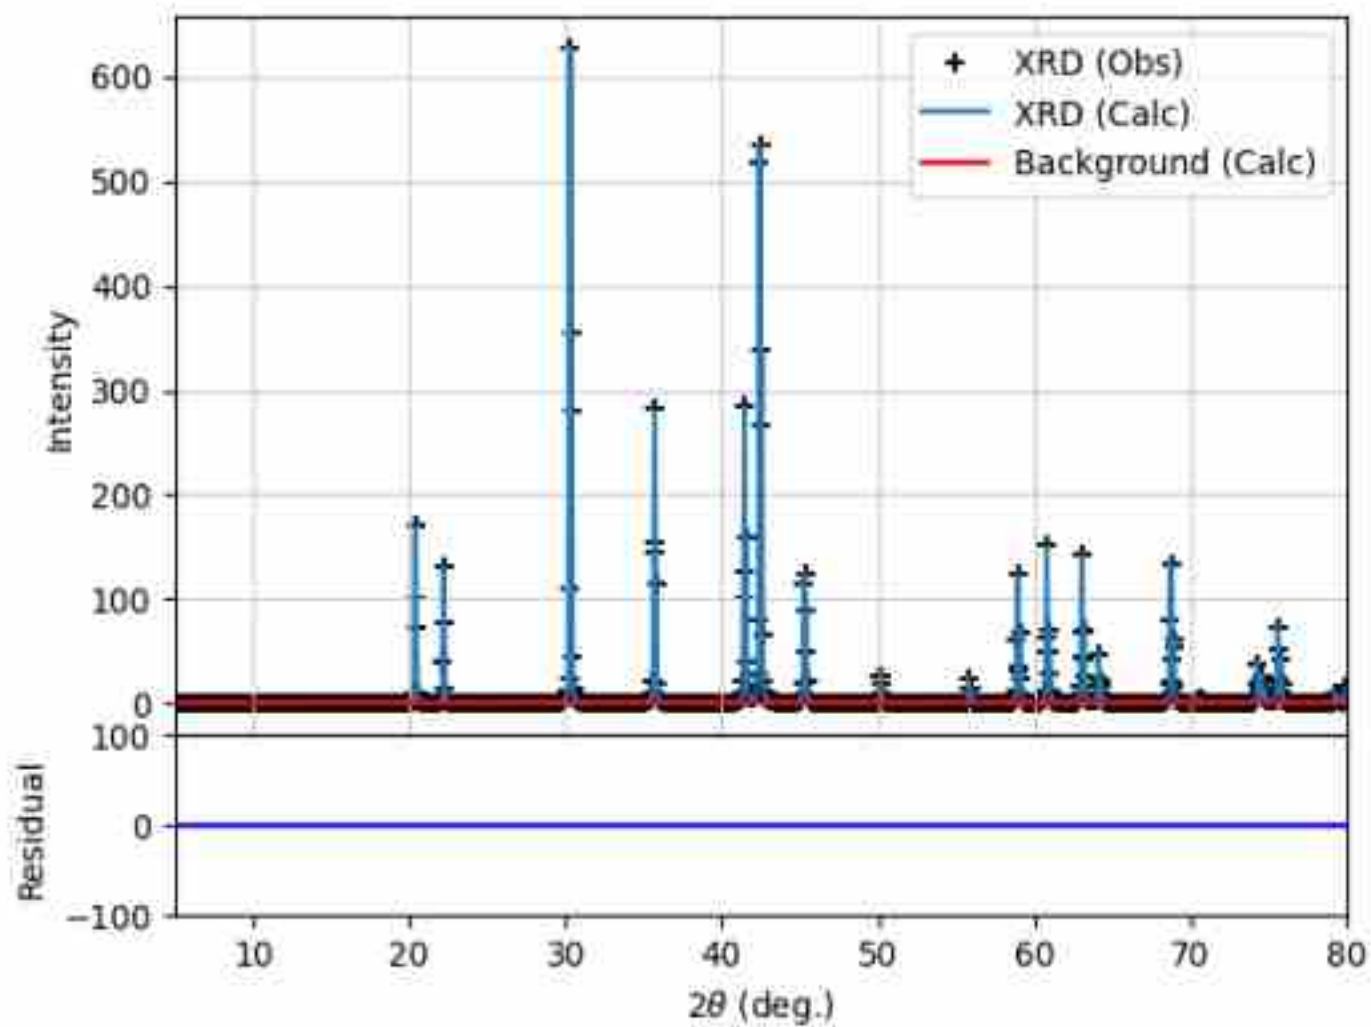

| RMSE before RR | Rwp     | RMSE after RR |
|----------------|---------|---------------|
| 0.014          | 0.00256 | 0.00052       |

# Th4Au2

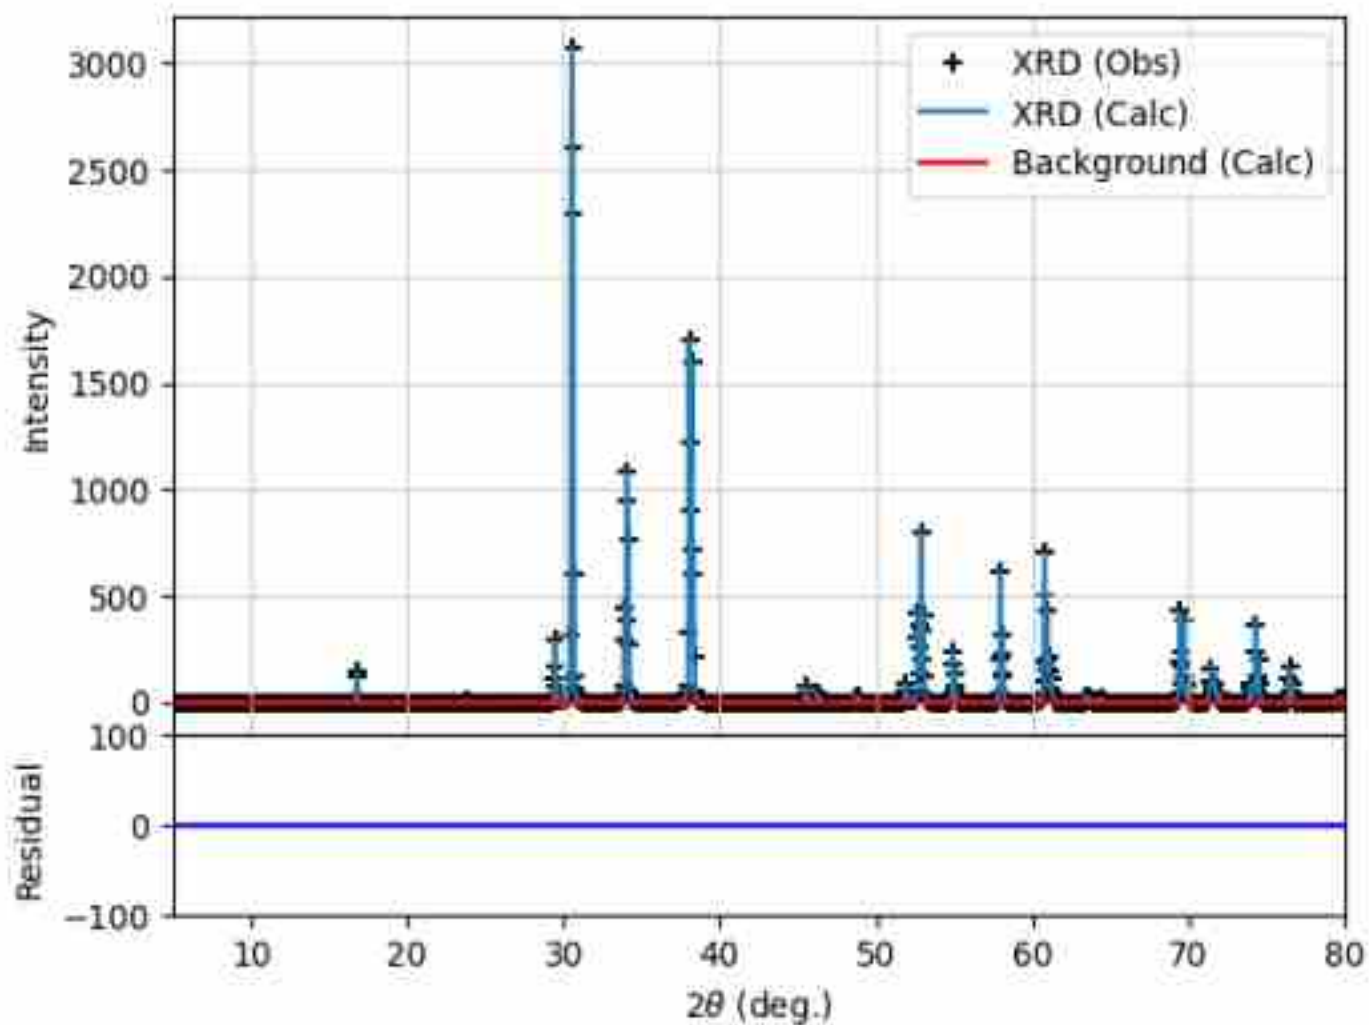

| RMSE before RR | Rwp     | RMSE after RR |
|----------------|---------|---------------|
| 0.014          | 0.00659 | 0.00051       |

# Th4Tl2

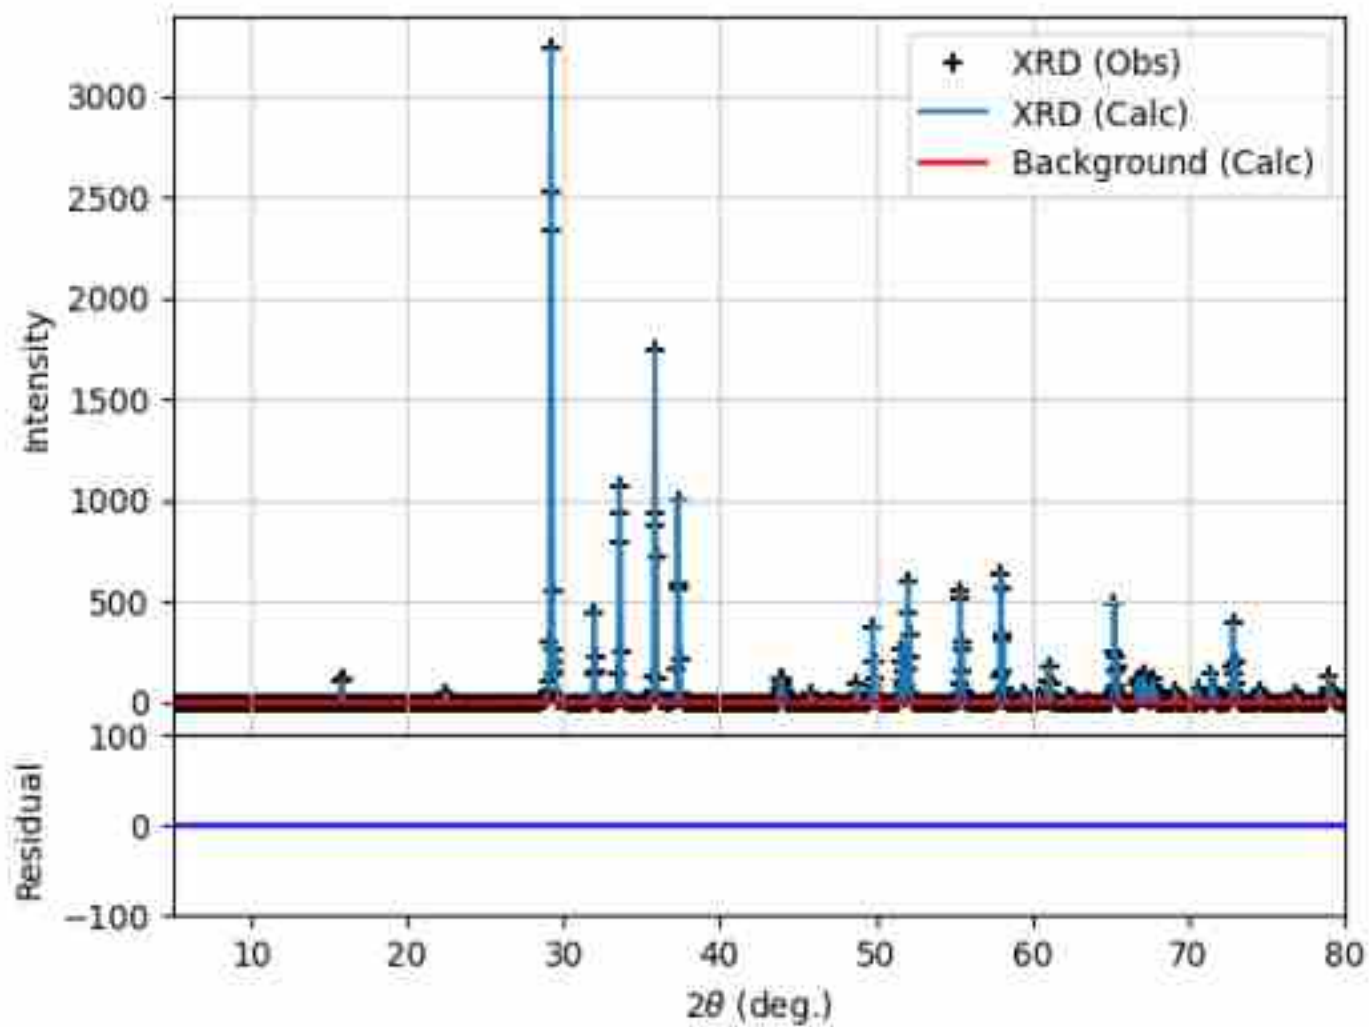

| RMSE before RR | Rwp     | RMSE after RR |
|----------------|---------|---------------|
| 0.014          | 0.00311 | 0.00062       |

# Ti1Cr2Si6

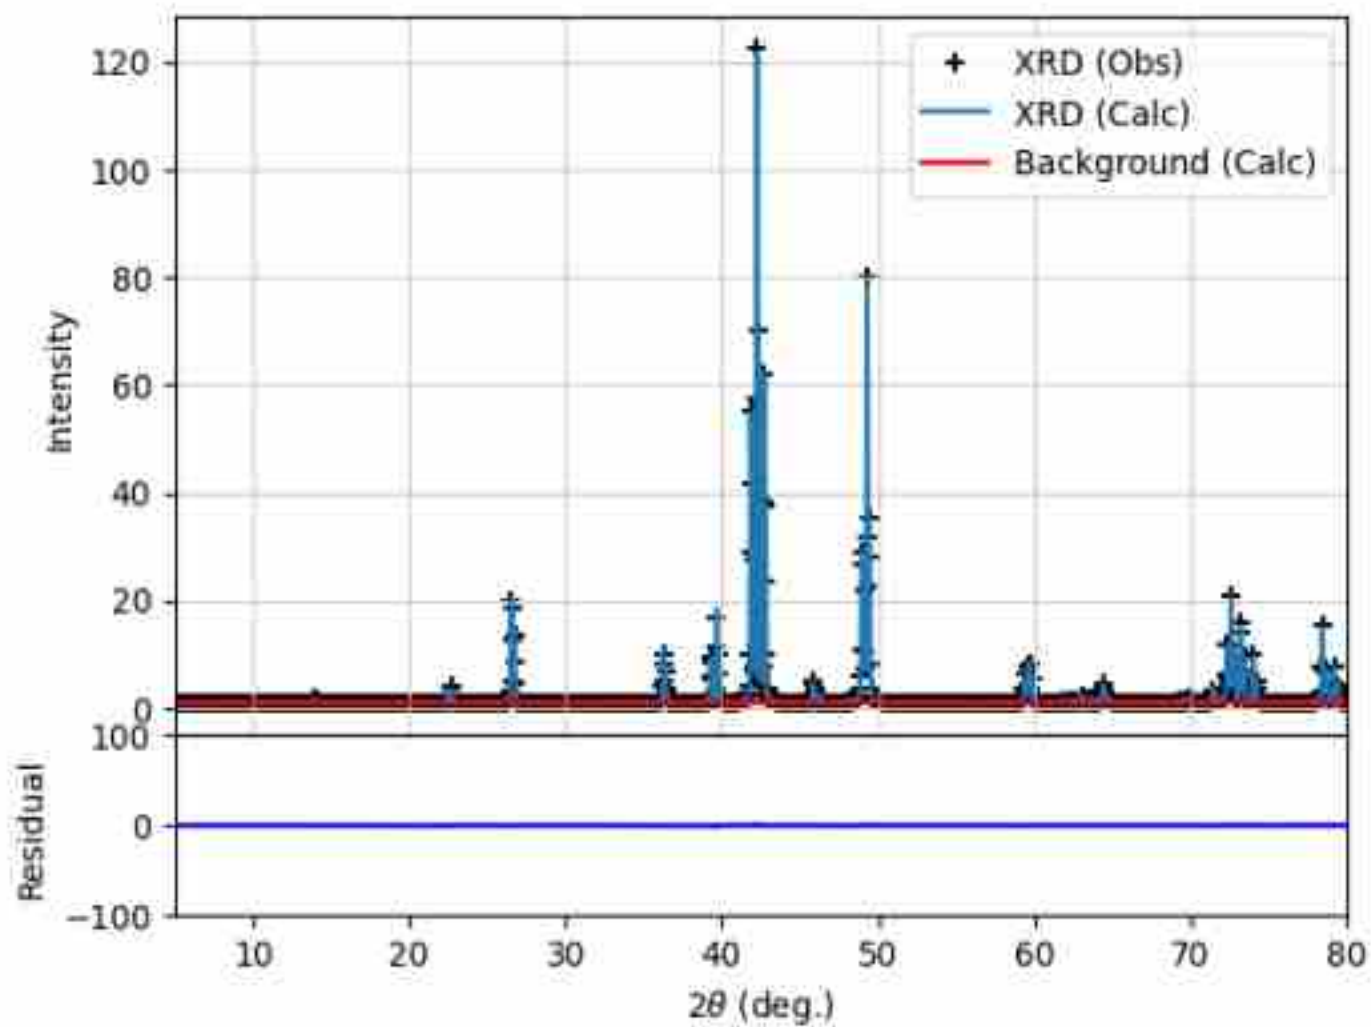

| RMSE before RR | Rwp     | RMSE after RR |
|----------------|---------|---------------|
| 0.014          | 2.91346 | 0.03782       |

# Ti1Te1Se1

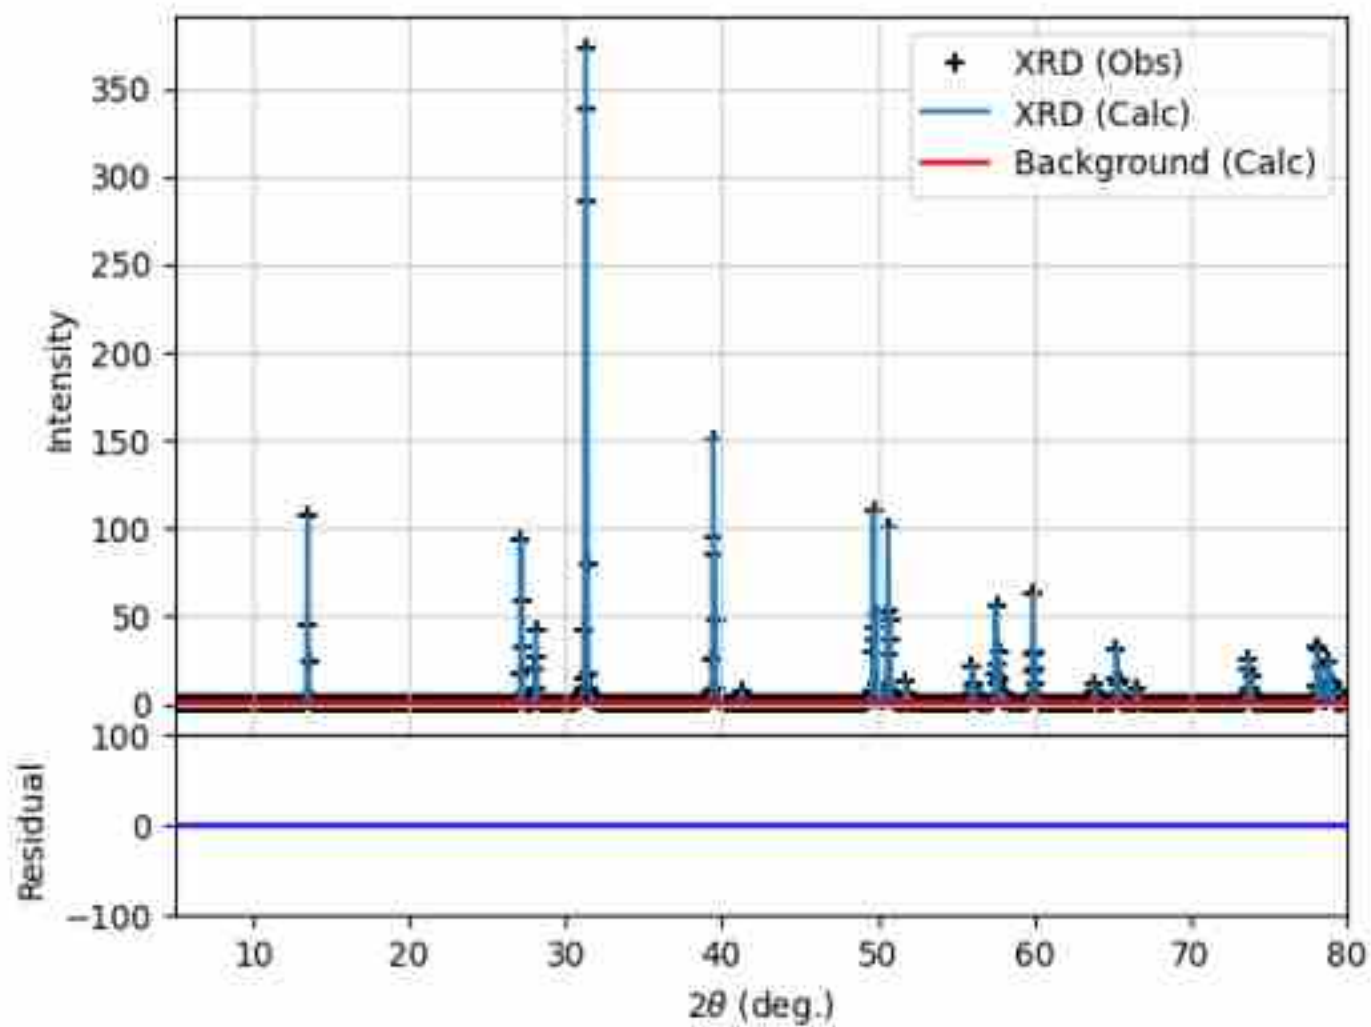

| RMSE before RR | Rwp     | RMSE after RR |
|----------------|---------|---------------|
| 0.014          | 0.00251 | 0.00019       |

# Ti<sub>3</sub>MnCu<sub>2</sub>S<sub>8</sub>

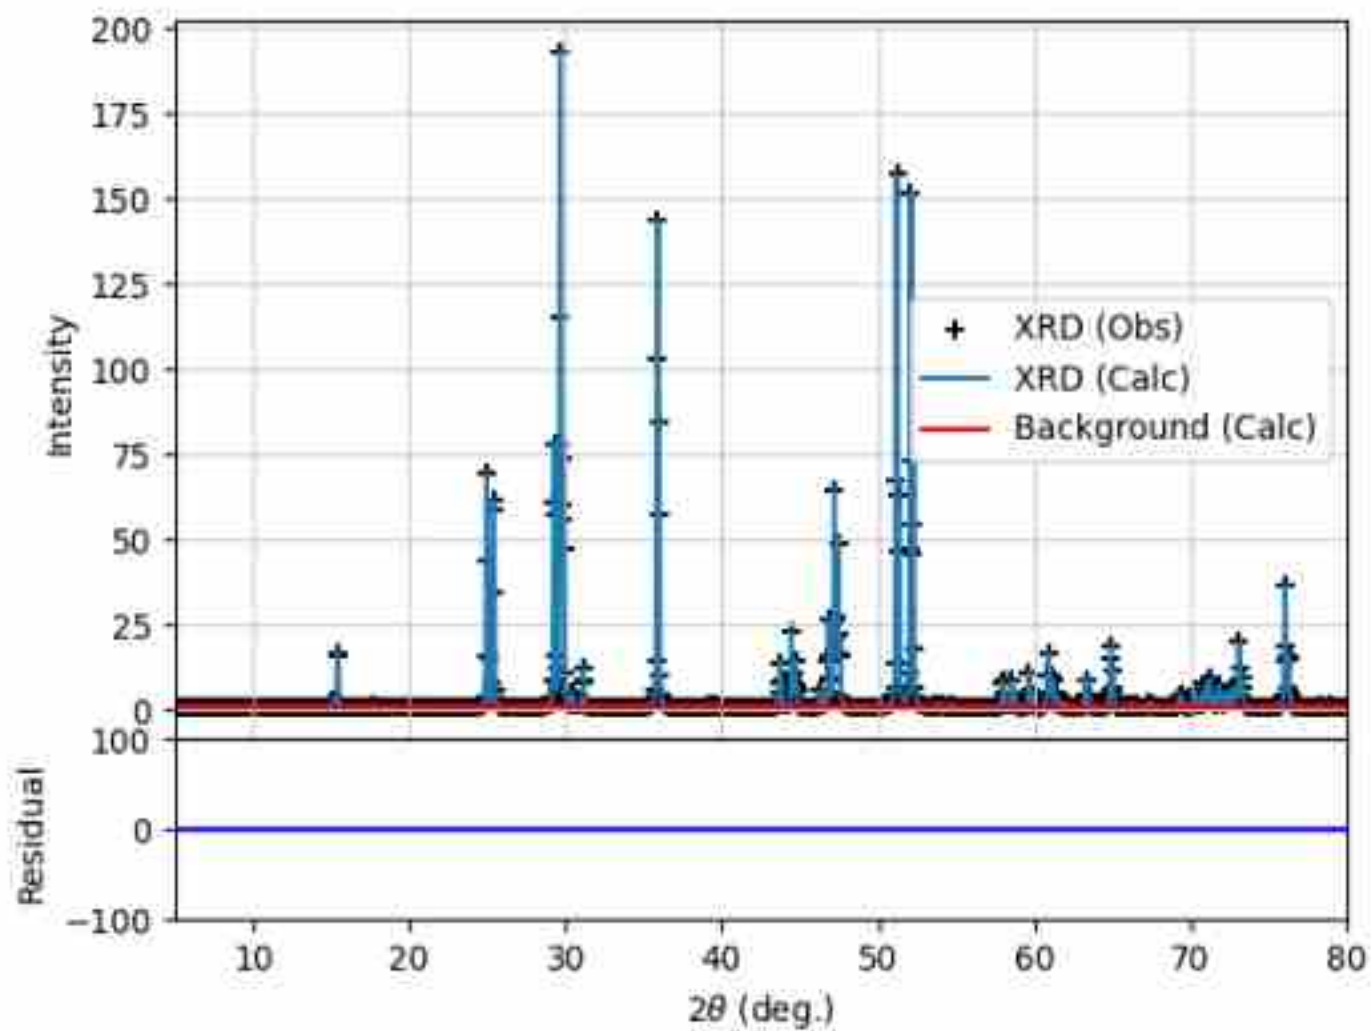

| RMSE before RR | Rwp     | RMSE after RR |
|----------------|---------|---------------|
| 0.014          | 0.00322 | 0.0007        |



# Ti<sub>3</sub>Re<sub>3</sub>Si<sub>3</sub>

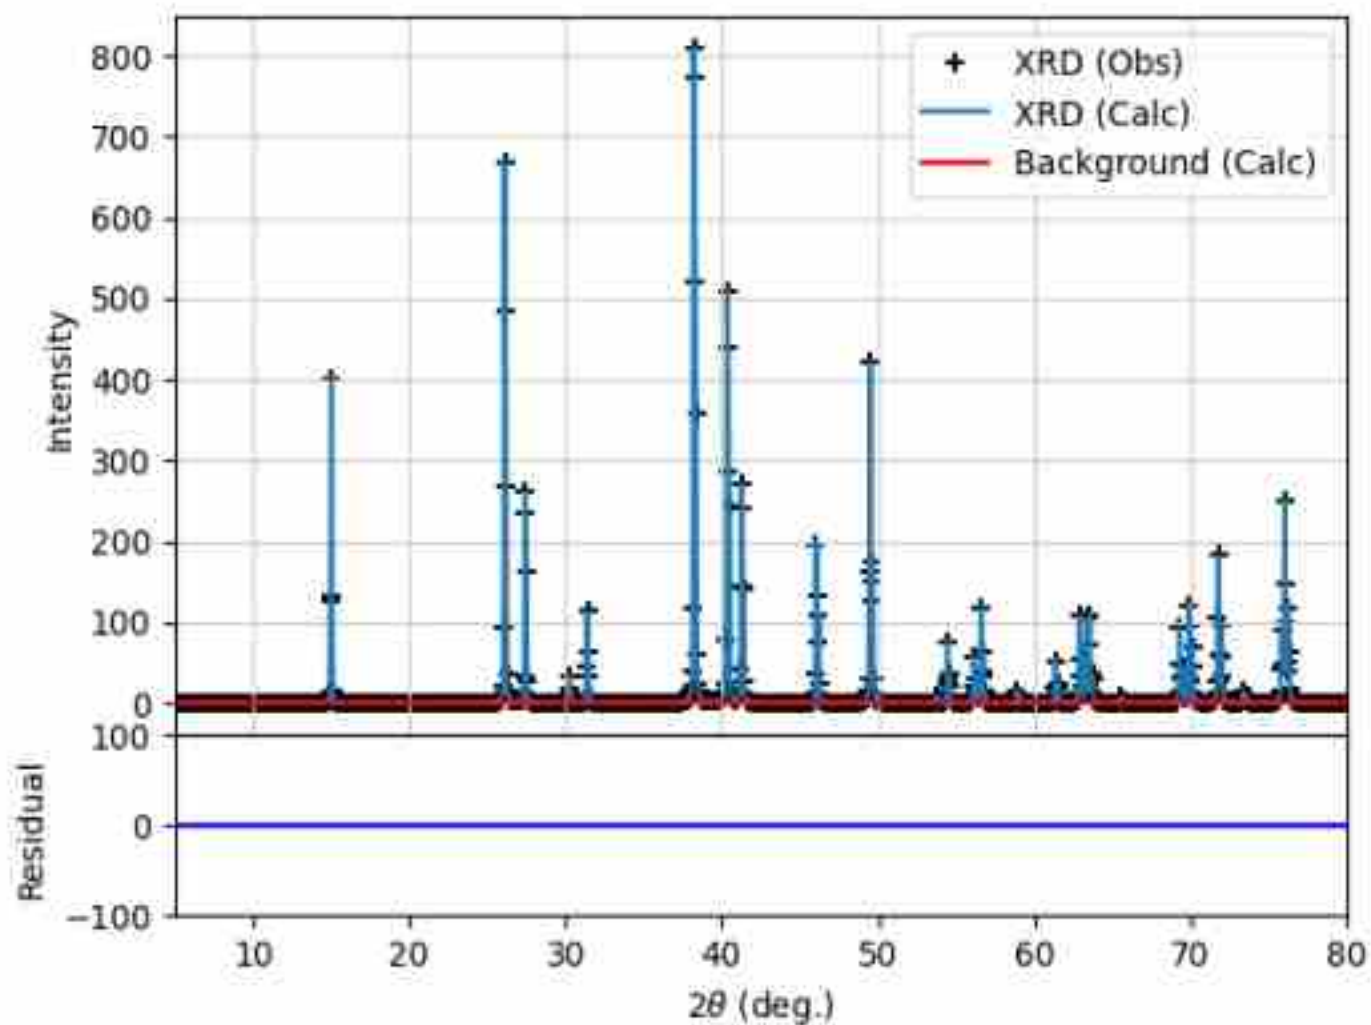

| RMSE before RR | Rwp     | RMSE after RR |
|----------------|---------|---------------|
| 0.014          | 0.00577 | 0.00173       |

# Tl1Bi1Te2

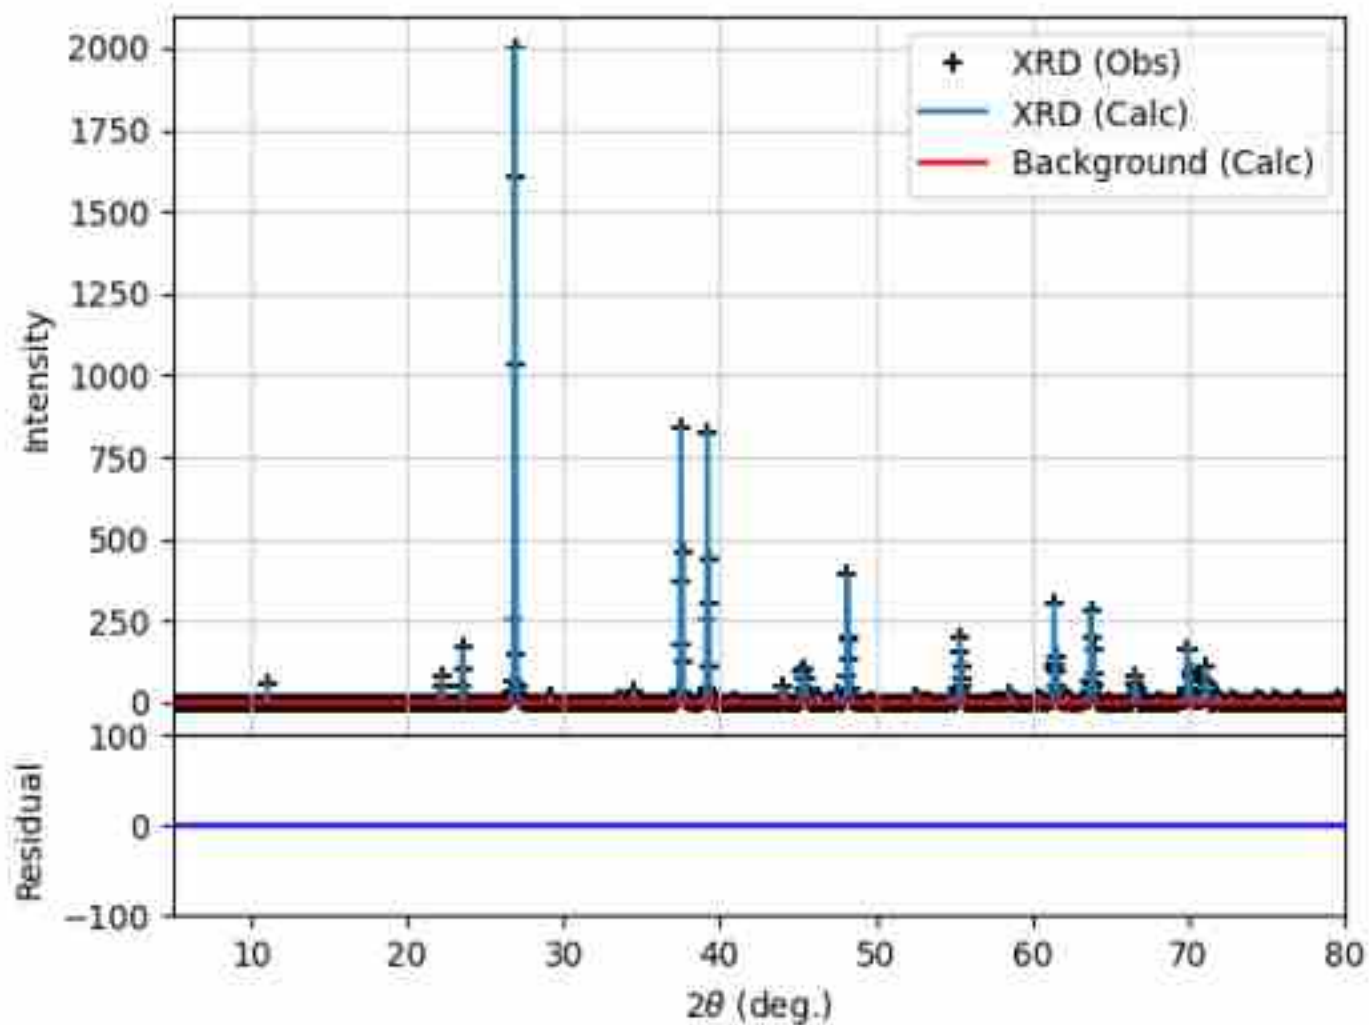

| RMSE before RR | Rwp     | RMSE after RR |
|----------------|---------|---------------|
| 0.014          | 0.01415 | 0.00316       |

# Tm1Mn4Al8

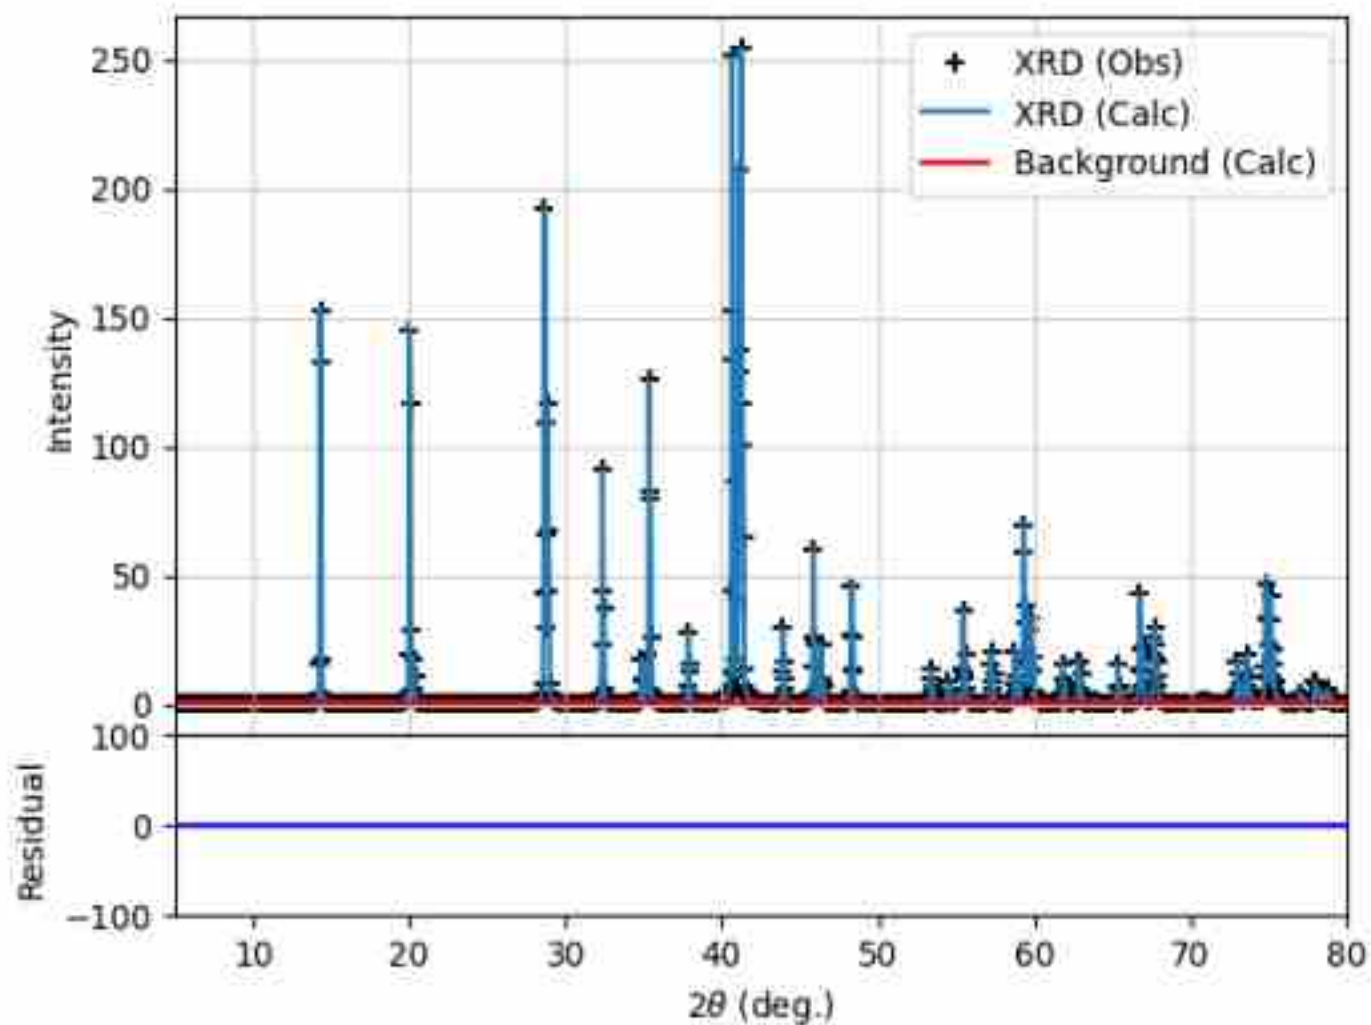

| RMSE before RR | Rwp     | RMSE after RR |
|----------------|---------|---------------|
| 0.014          | 0.00401 | 0.00064       |

# Tm<sub>2</sub>Cr<sub>2</sub>O<sub>8</sub>

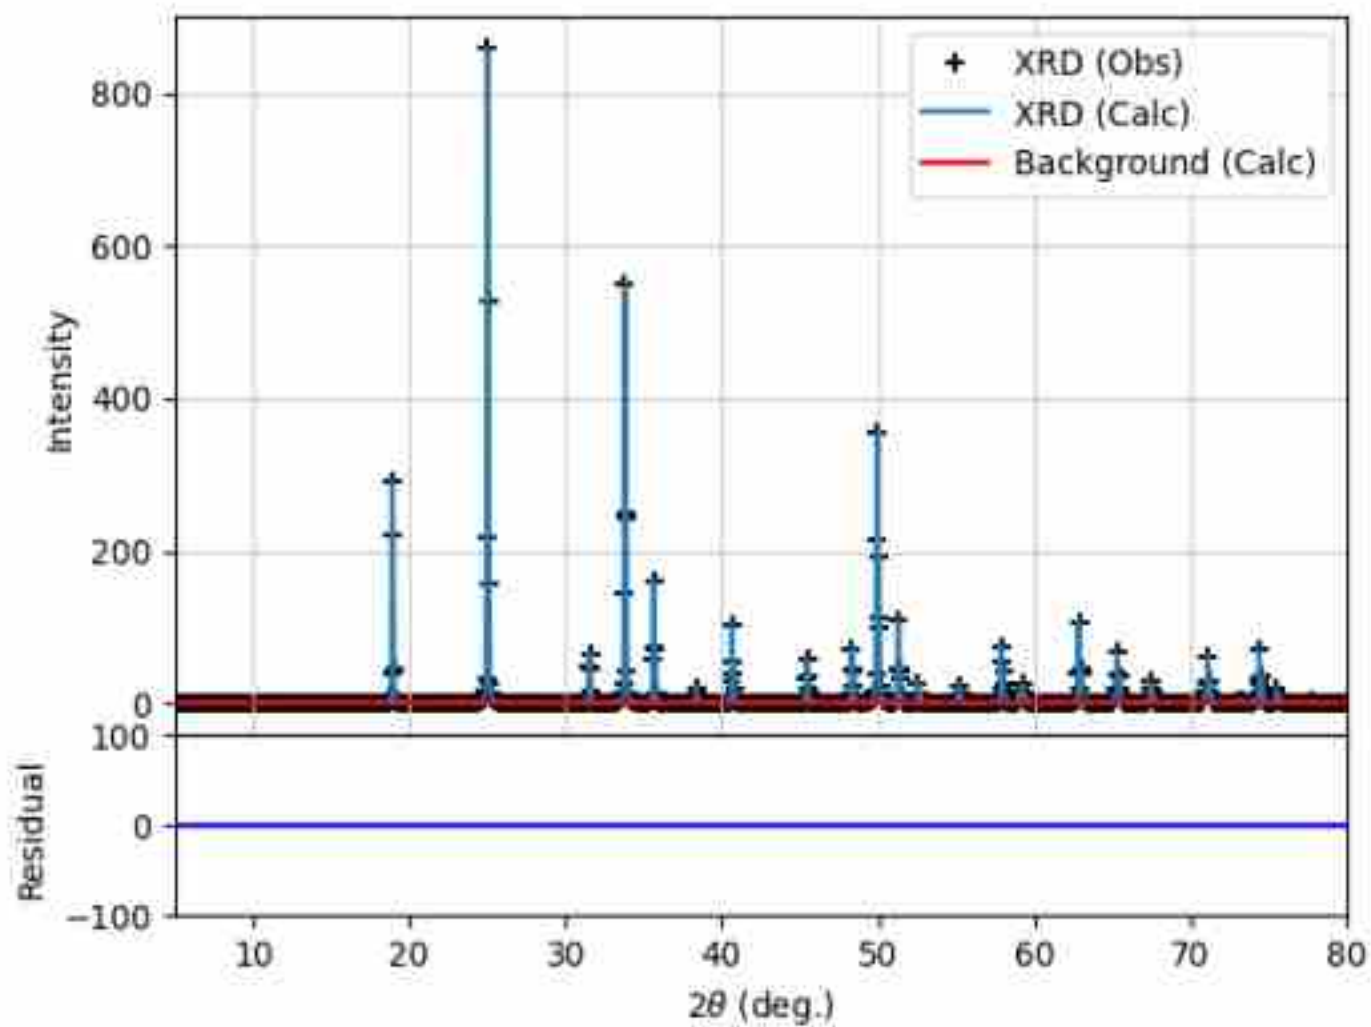

| RMSE before RR | Rwp     | RMSE after RR |
|----------------|---------|---------------|
| 0.014          | 0.00325 | 0.00086       |

# Tm<sub>4</sub>In<sub>1</sub>Ni<sub>2</sub>Ge<sub>4</sub>

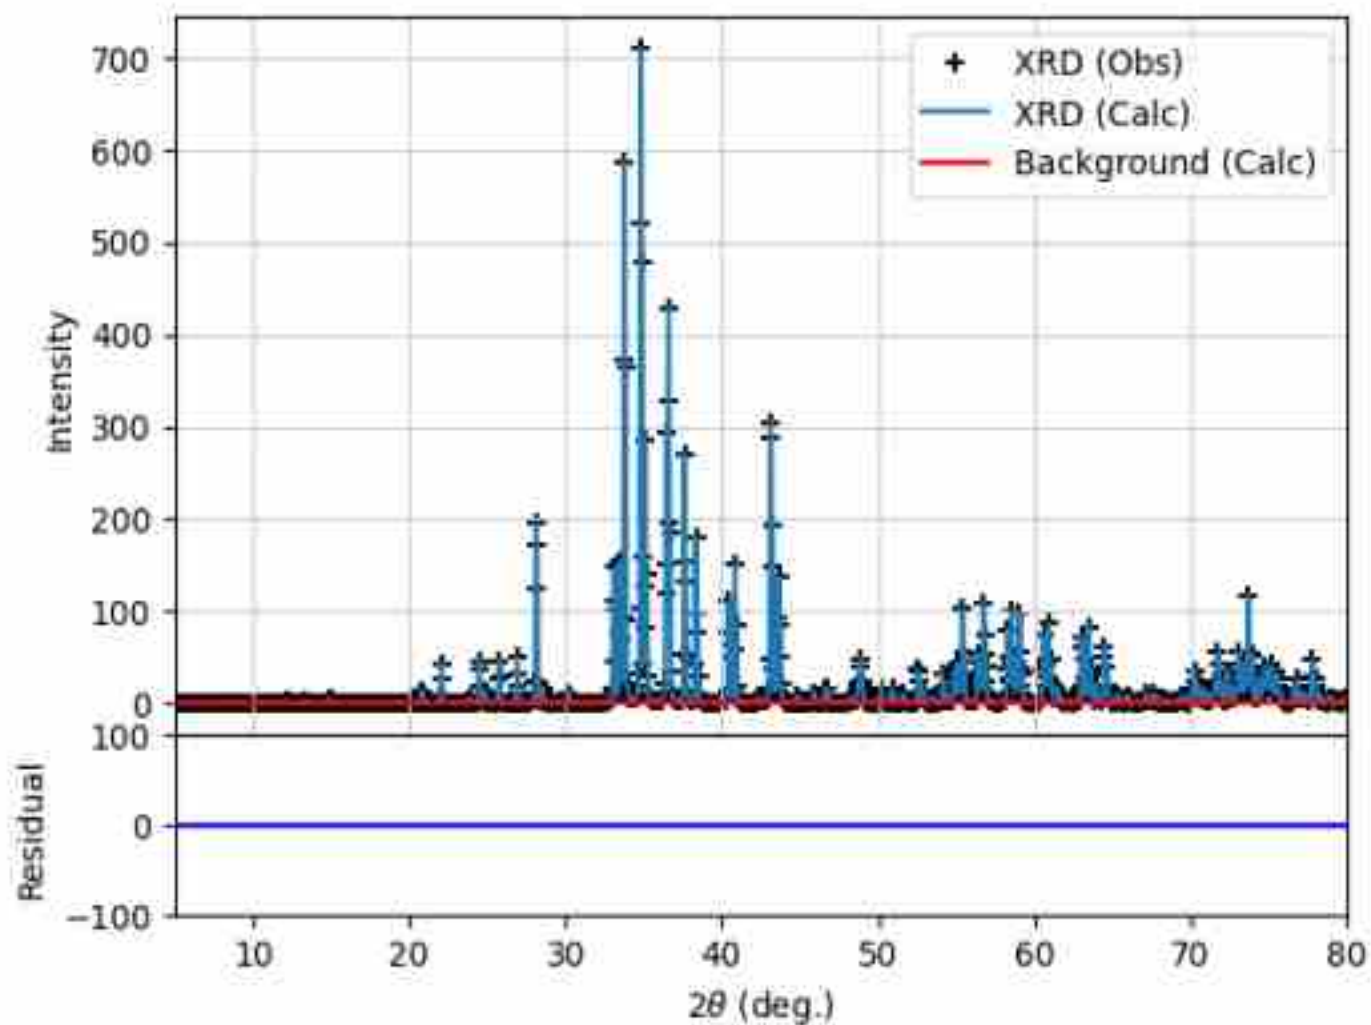

| RMSE before RR | Rwp    | RMSE after RR |
|----------------|--------|---------------|
| 0.014          | 0.0035 | 0.00035       |

# U2As4

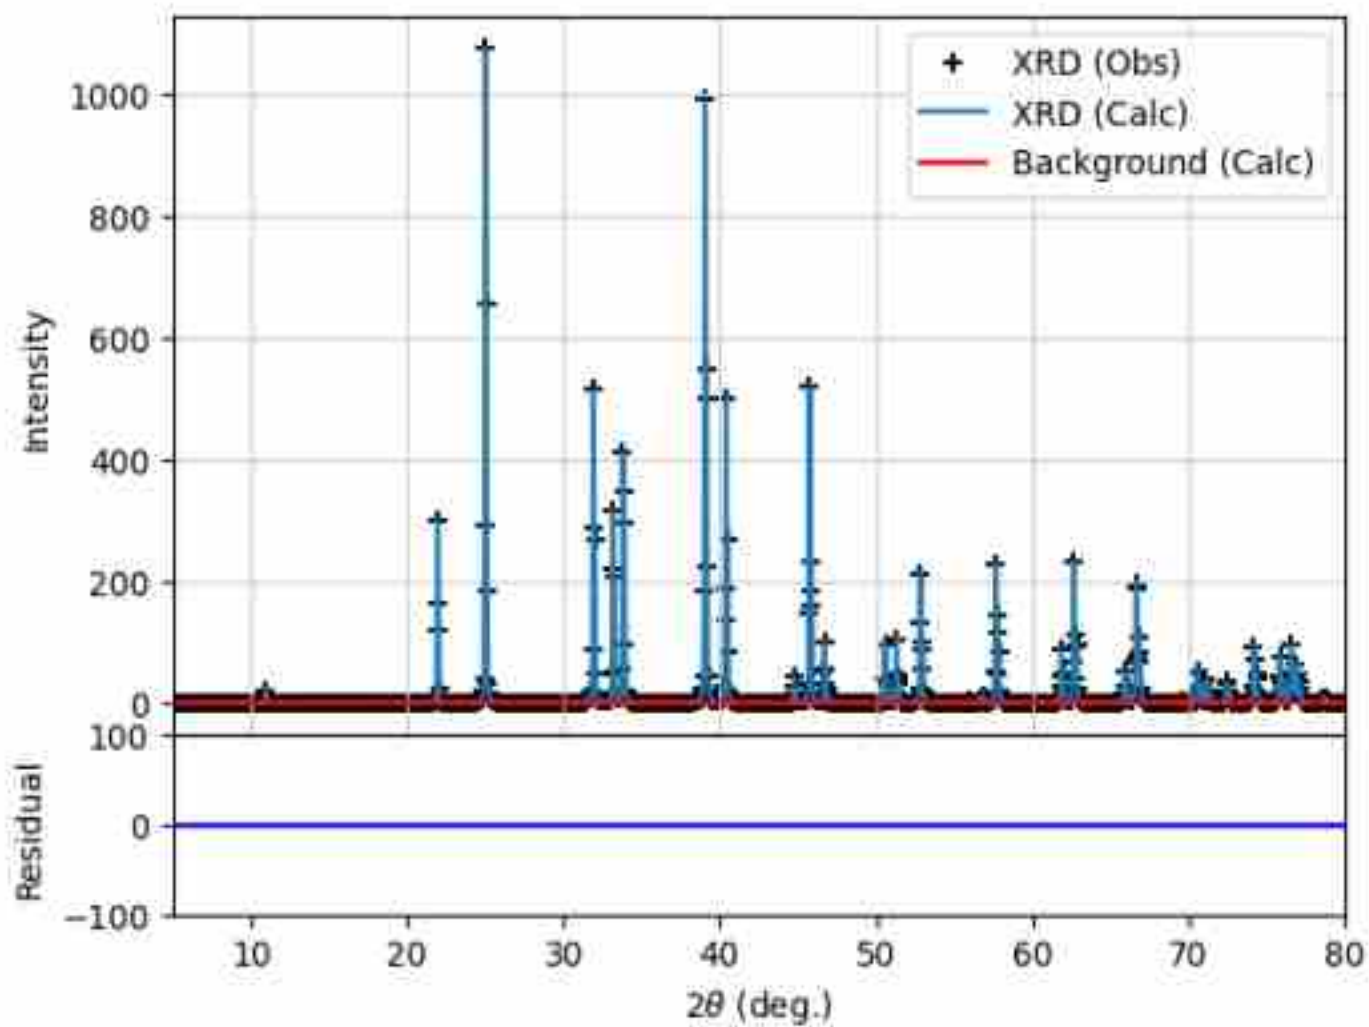

| RMSE before RR | Rwp     | RMSE after RR |
|----------------|---------|---------------|
| 0.014          | 0.00395 | 0.00041       |

# U<sub>2</sub>Co<sub>2</sub>Si<sub>4</sub>

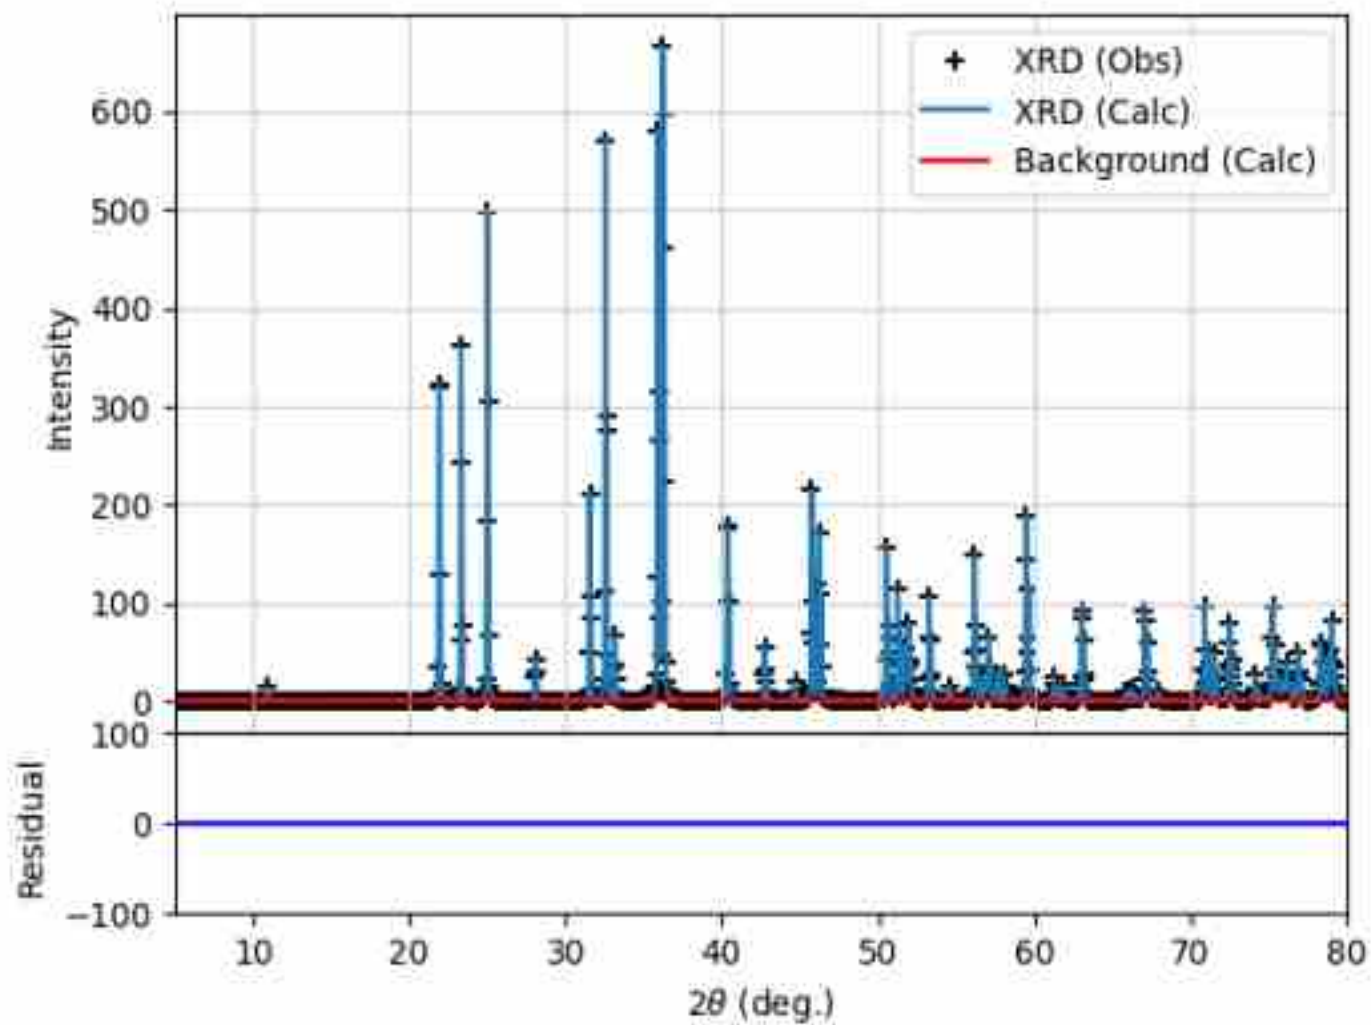

| RMSE before RR | Rwp    | RMSE after RR |
|----------------|--------|---------------|
| 0.014          | 0.0039 | 0.00063       |

# U<sub>2</sub>Co<sub>4</sub>

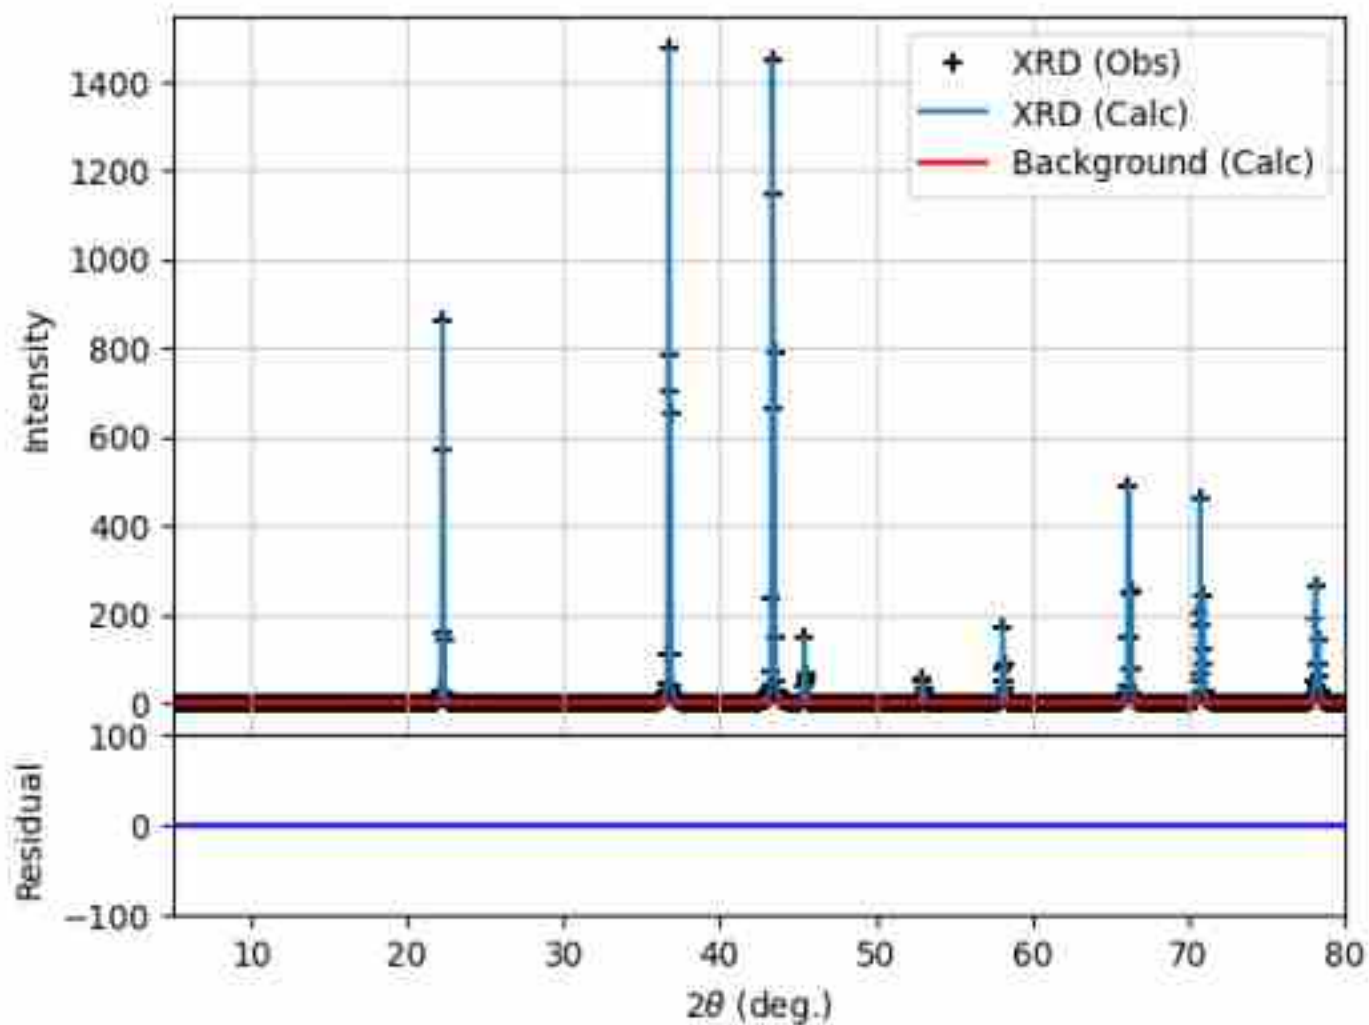

| RMSE before RR | Rwp     | RMSE after RR |
|----------------|---------|---------------|
| 0.014          | 0.03531 | 0.00167       |



# U<sub>2</sub>Cu<sub>2</sub>Bi<sub>4</sub>

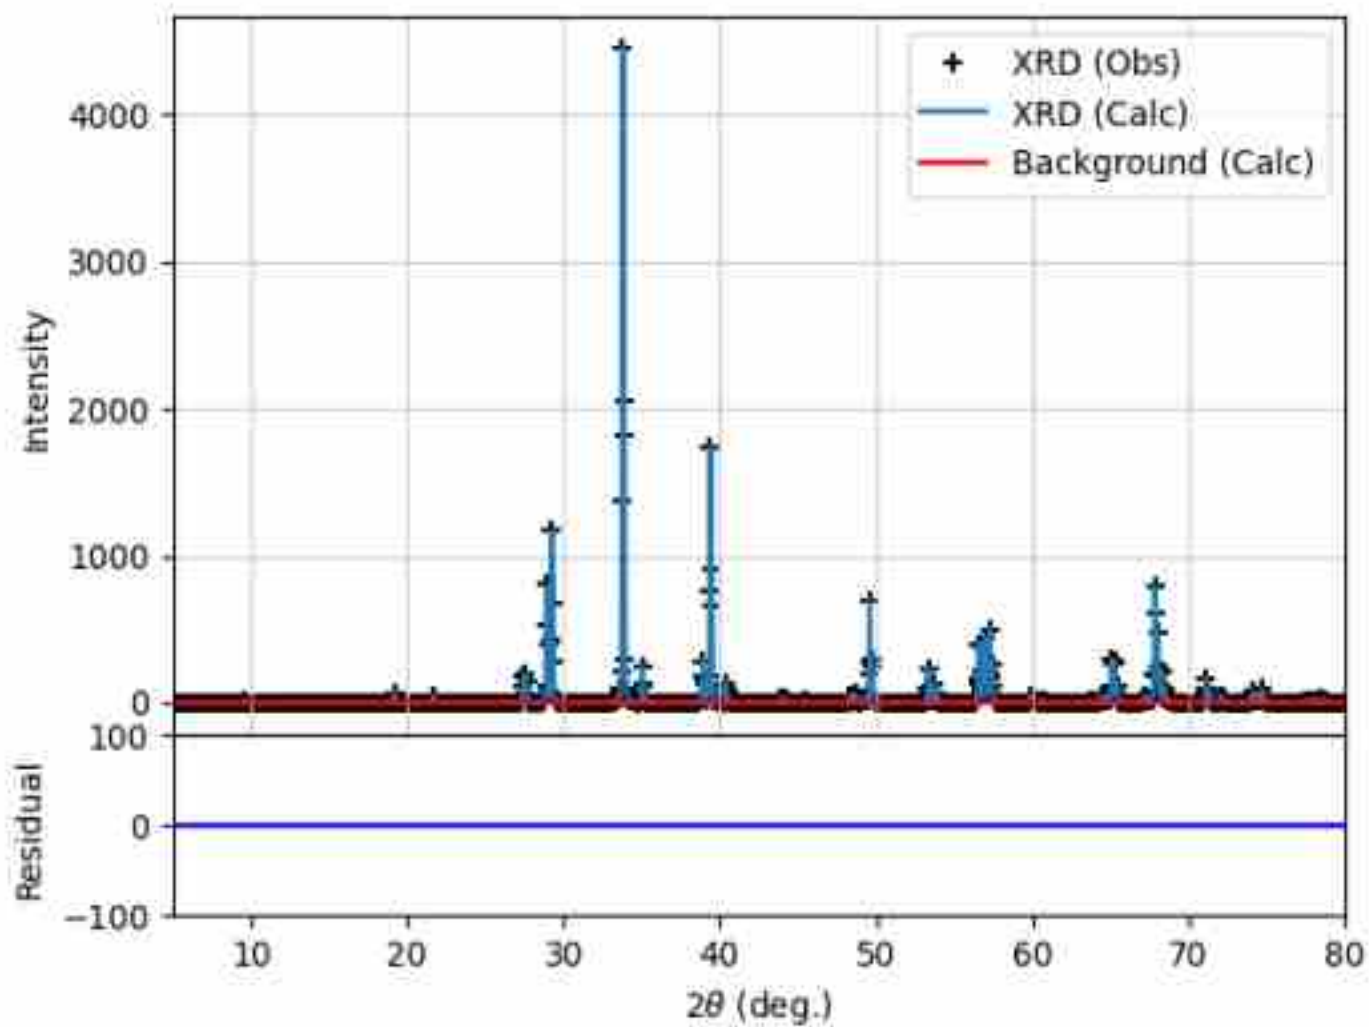

| RMSE before RR | Rwp     | RMSE after RR |
|----------------|---------|---------------|
| 0.014          | 0.00428 | 0.00049       |

# V4Ga2C2

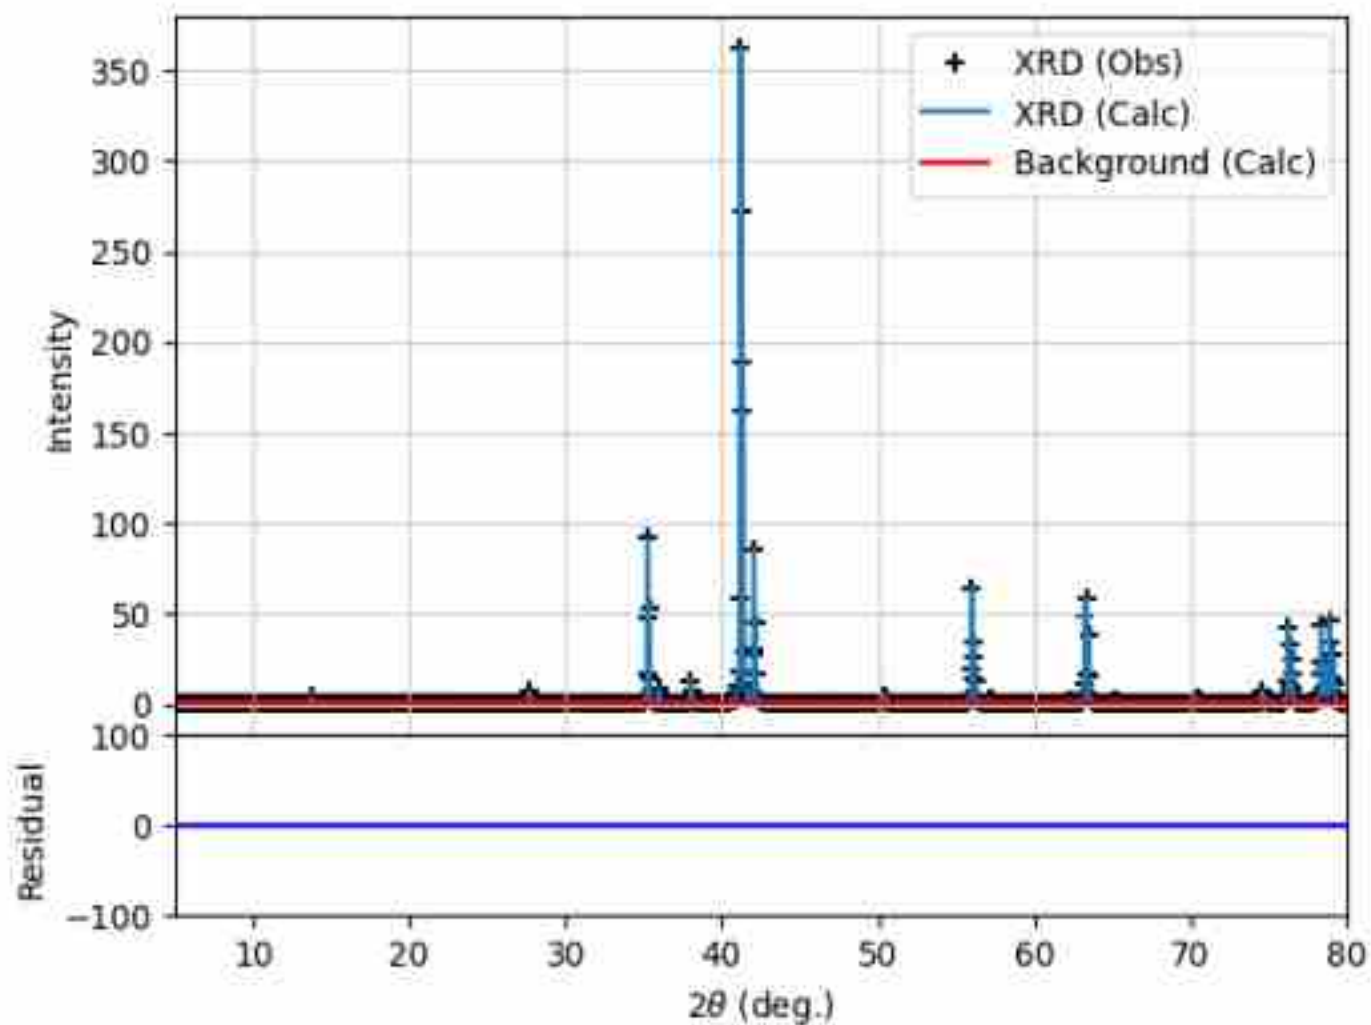

| RMSE before RR | Rwp     | RMSE after RR |
|----------------|---------|---------------|
| 0.014          | 0.00273 | 0.00168       |

# V6Pd2

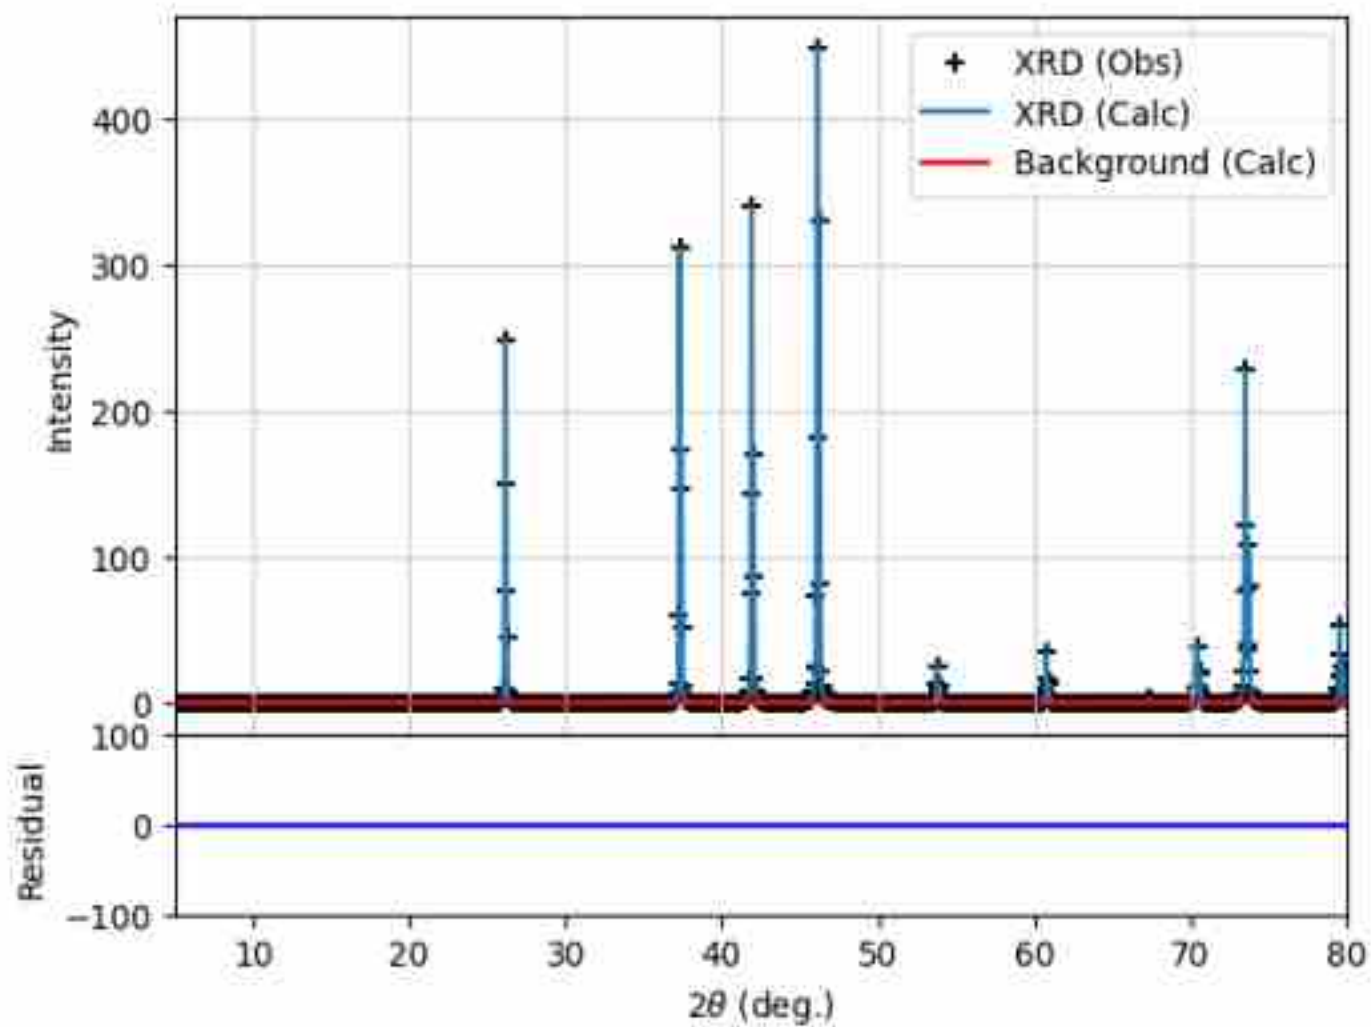

| RMSE before RR | Rwp     | RMSE after RR |
|----------------|---------|---------------|
| 0.014          | 0.00463 | 0.00062       |

# Y1Bi2Br1O4

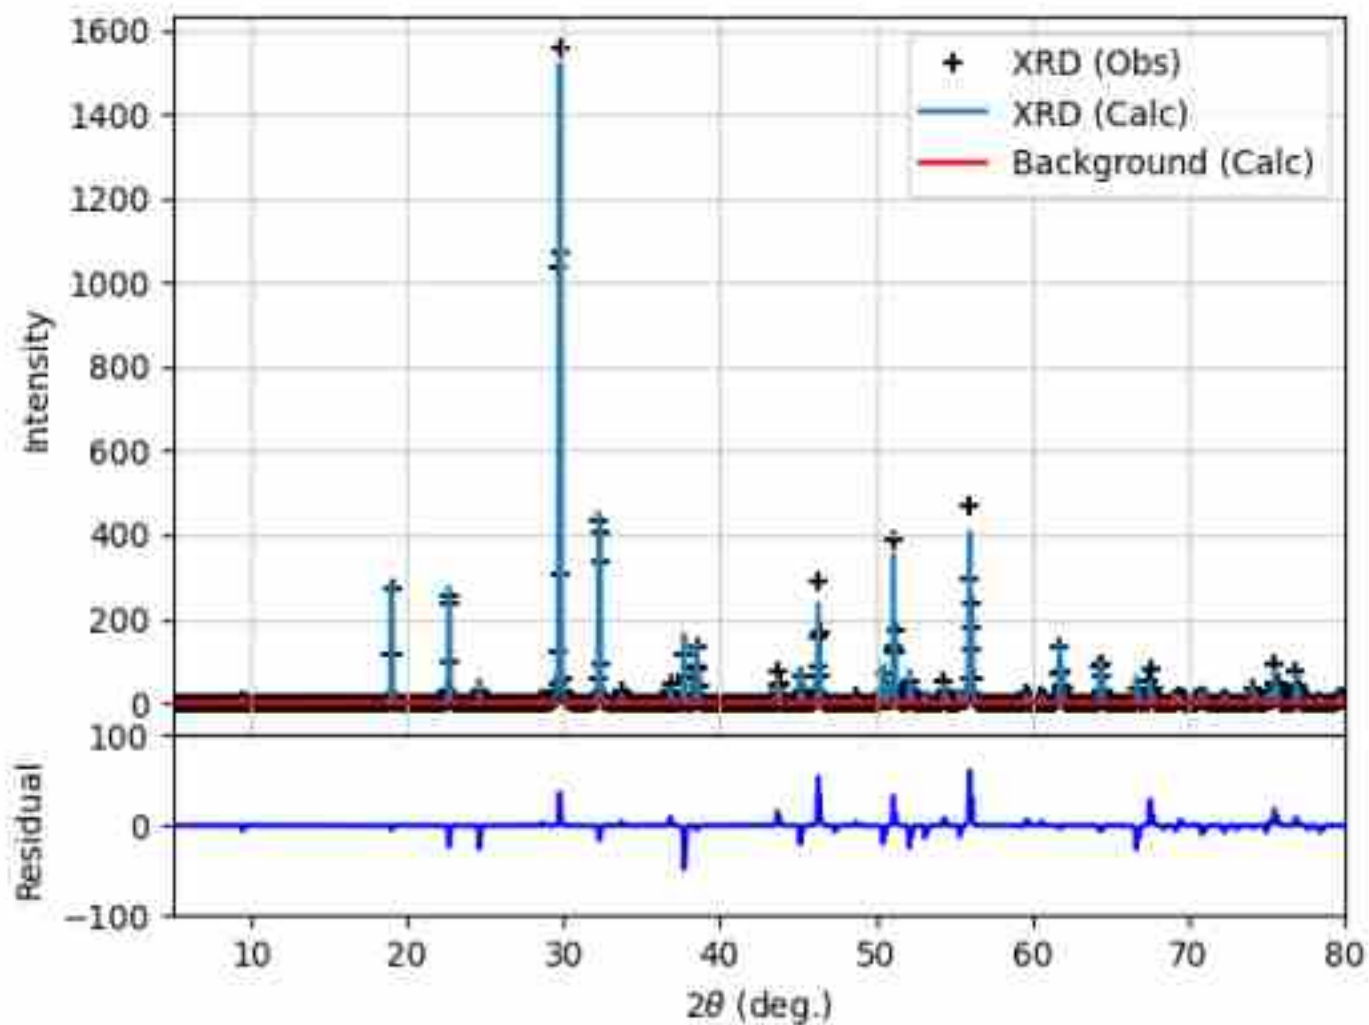

| RMSE before RR | Rwp      | RMSE after RR |
|----------------|----------|---------------|
| 0.014          | 20.85745 | 0.25988       |

# Y2H6O6

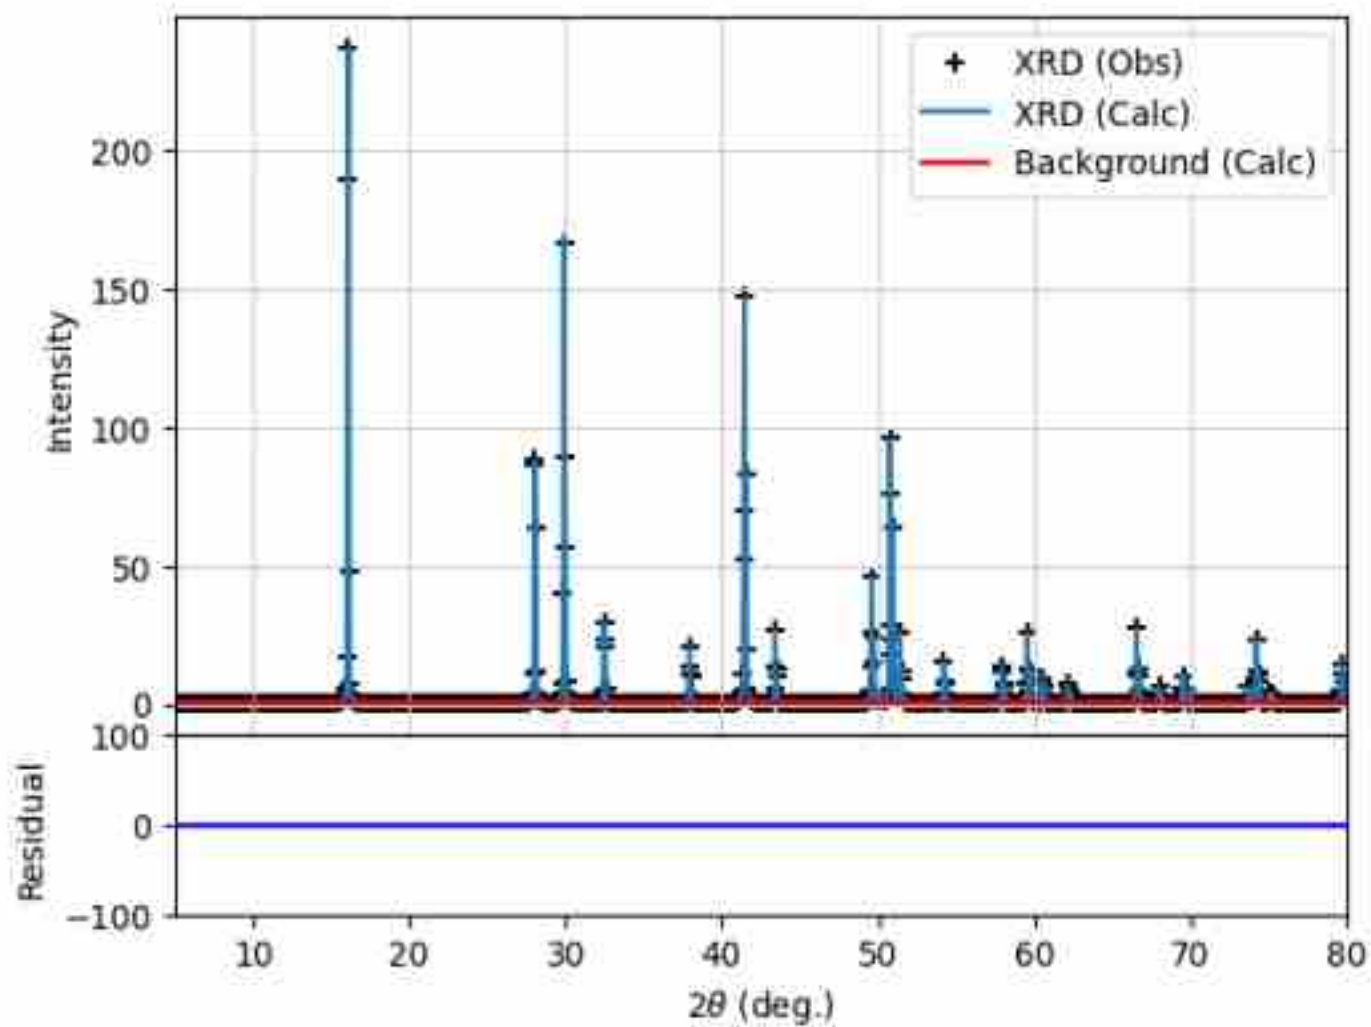

| RMSE before RR | Rwp     | RMSE after RR |
|----------------|---------|---------------|
| 0.014          | 0.00398 | 0.00727       |

# Y<sub>2</sub>Mg<sub>2</sub>Al<sub>8</sub>

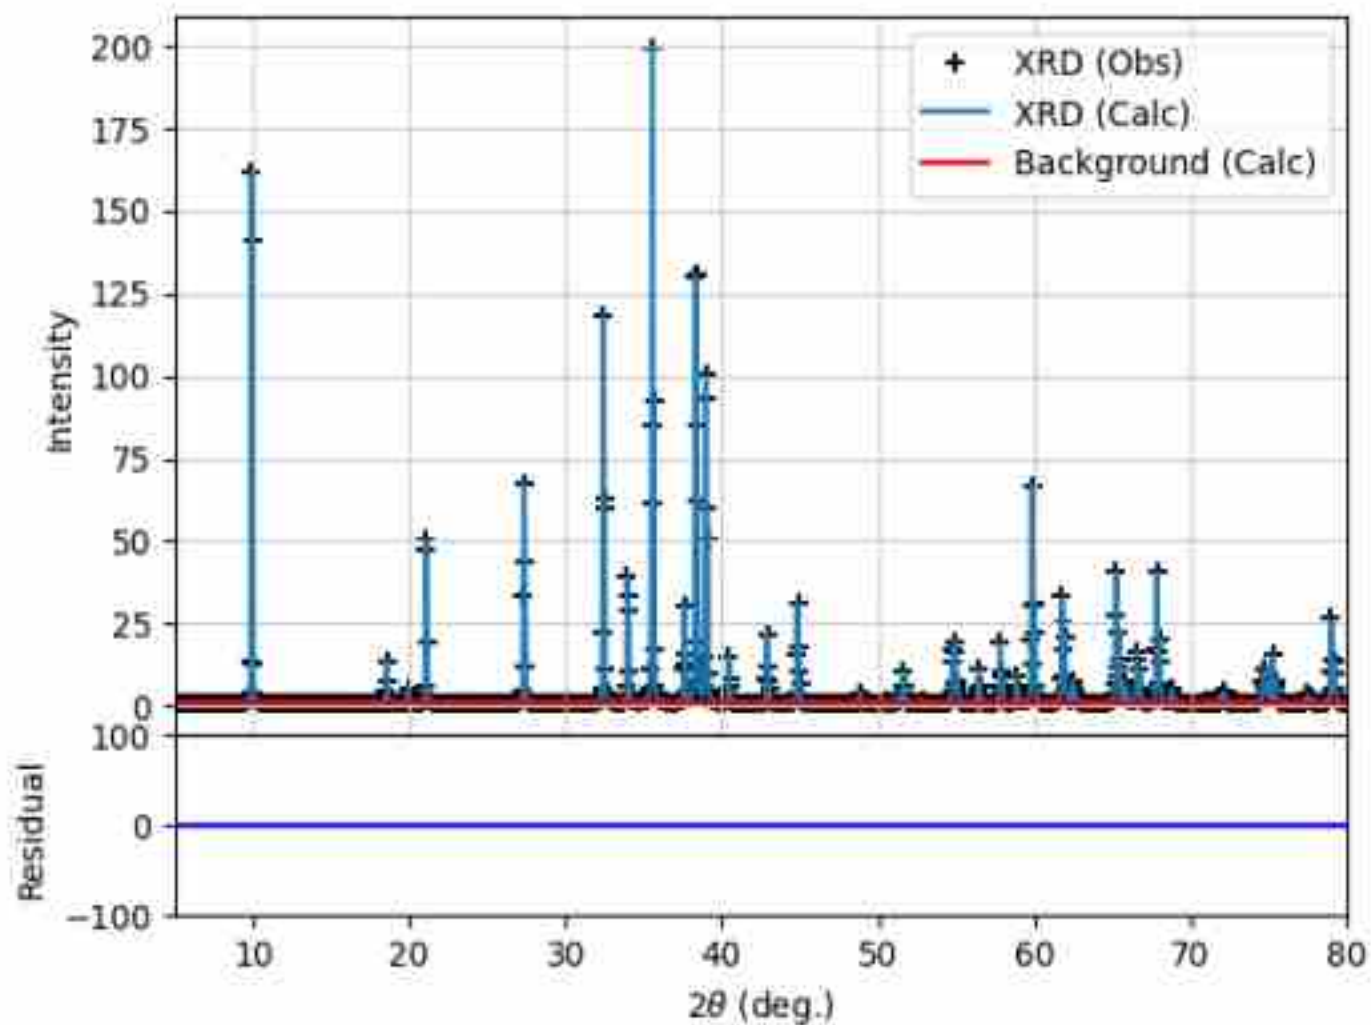

| RMSE before RR | Rwp     | RMSE after RR |
|----------------|---------|---------------|
| 0.014          | 0.00251 | 0.0005        |

# Y3Ag3Pb3

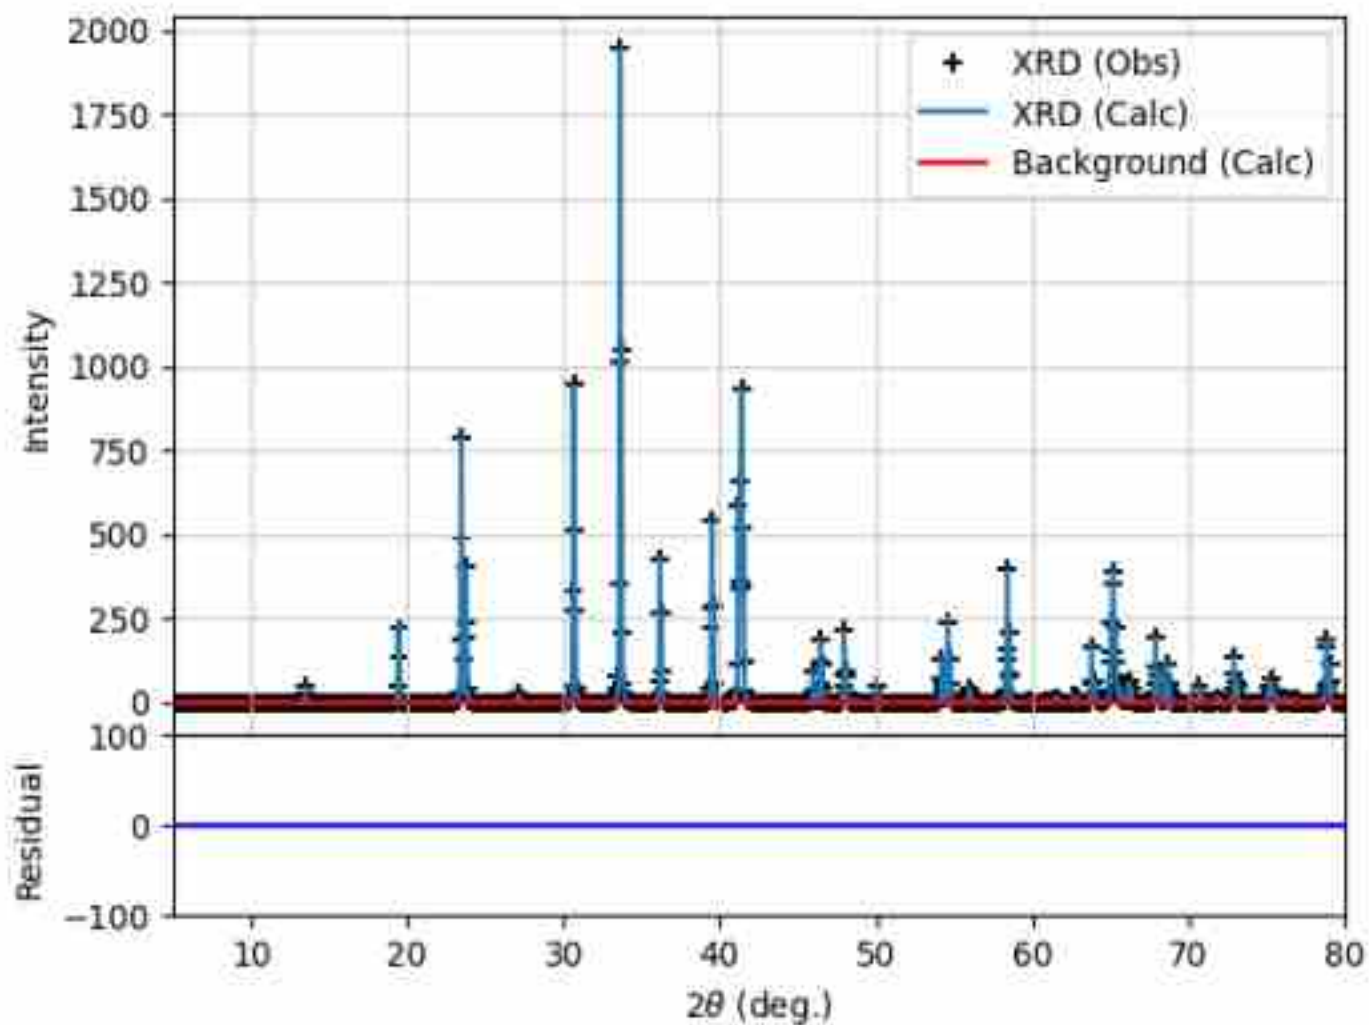

| RMSE before RR | Rwp     | RMSE after RR |
|----------------|---------|---------------|
| 0.014          | 0.00266 | 0.00078       |

# Y<sub>4</sub>Co<sub>2</sub>Si<sub>4</sub>

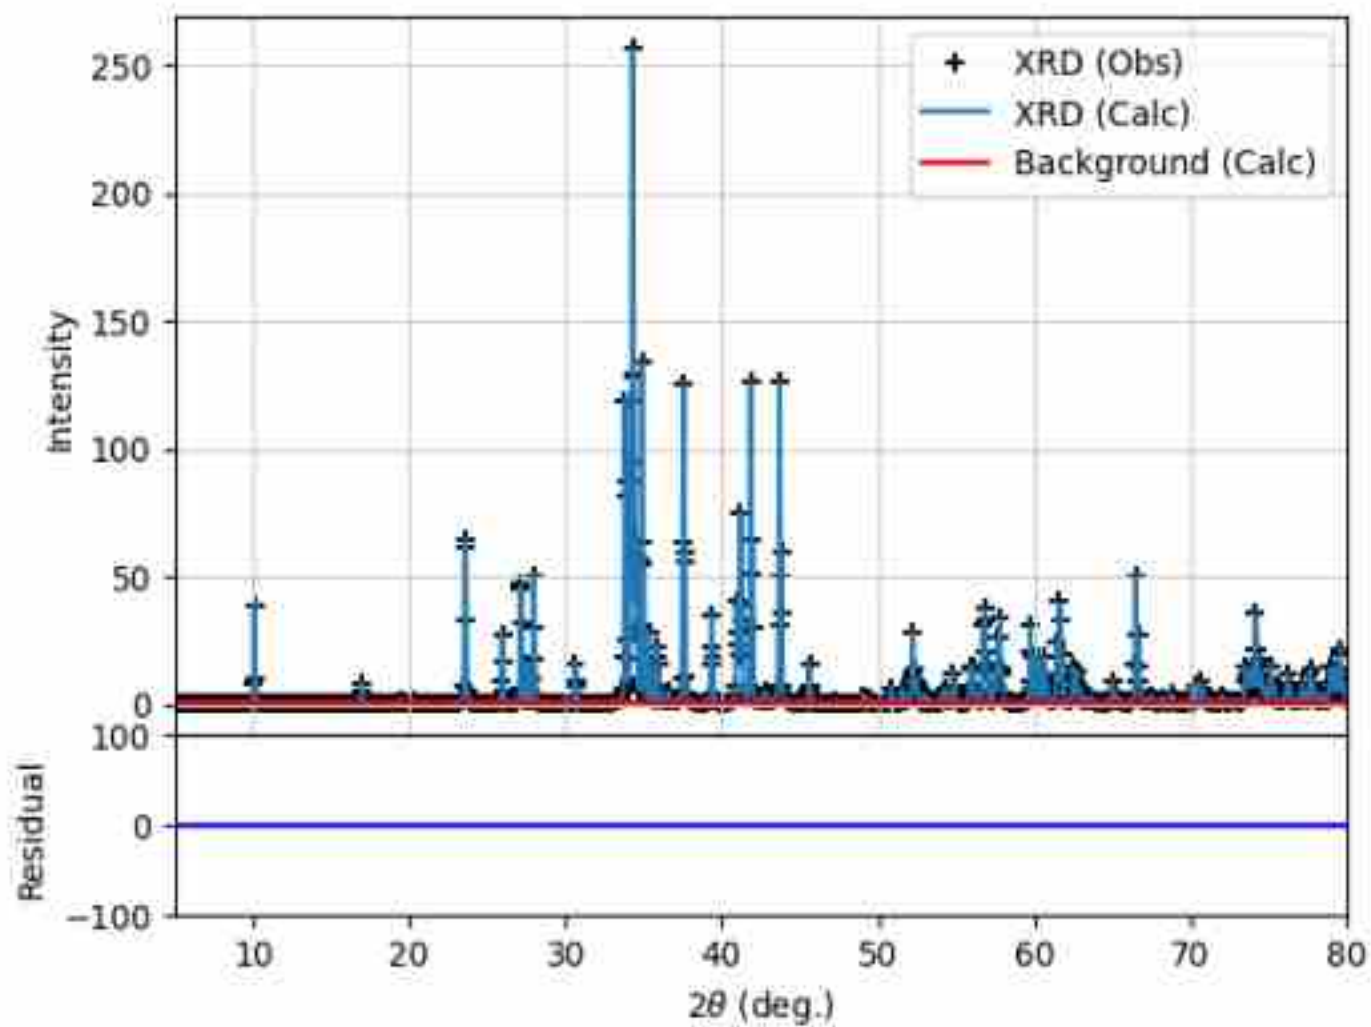

| RMSE before RR | Rwp     | RMSE after RR |
|----------------|---------|---------------|
| 0.014          | 0.00343 | 0.0003        |



# Yb1Ni5

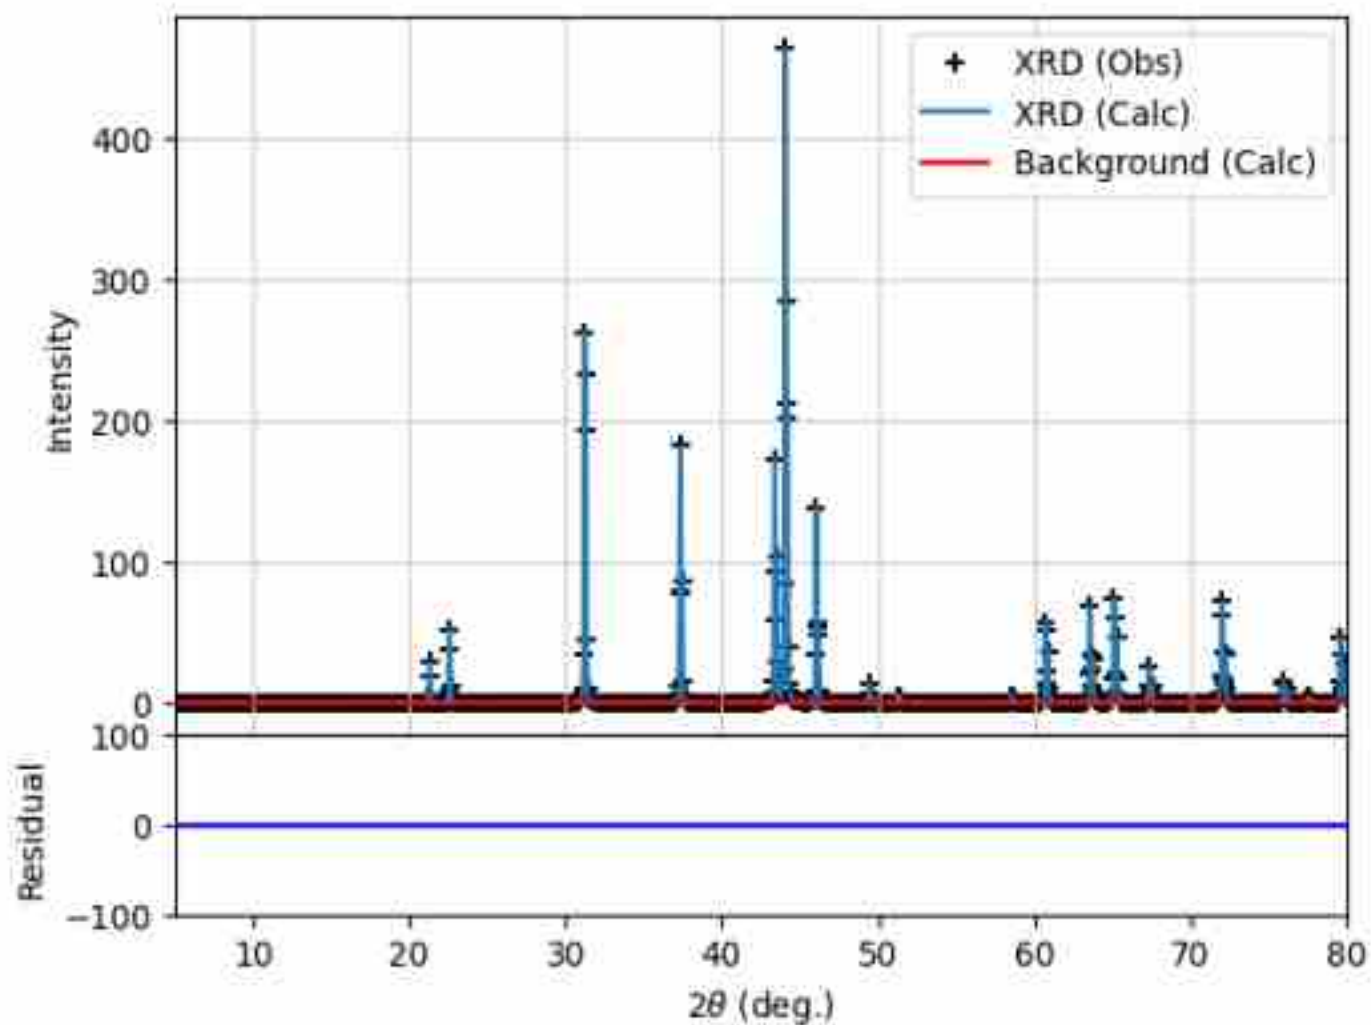

| RMSE before RR | Rwp     | RMSE after RR |
|----------------|---------|---------------|
| 0.014          | 0.02049 | 0.00182       |

# Yb1Tm1Se2

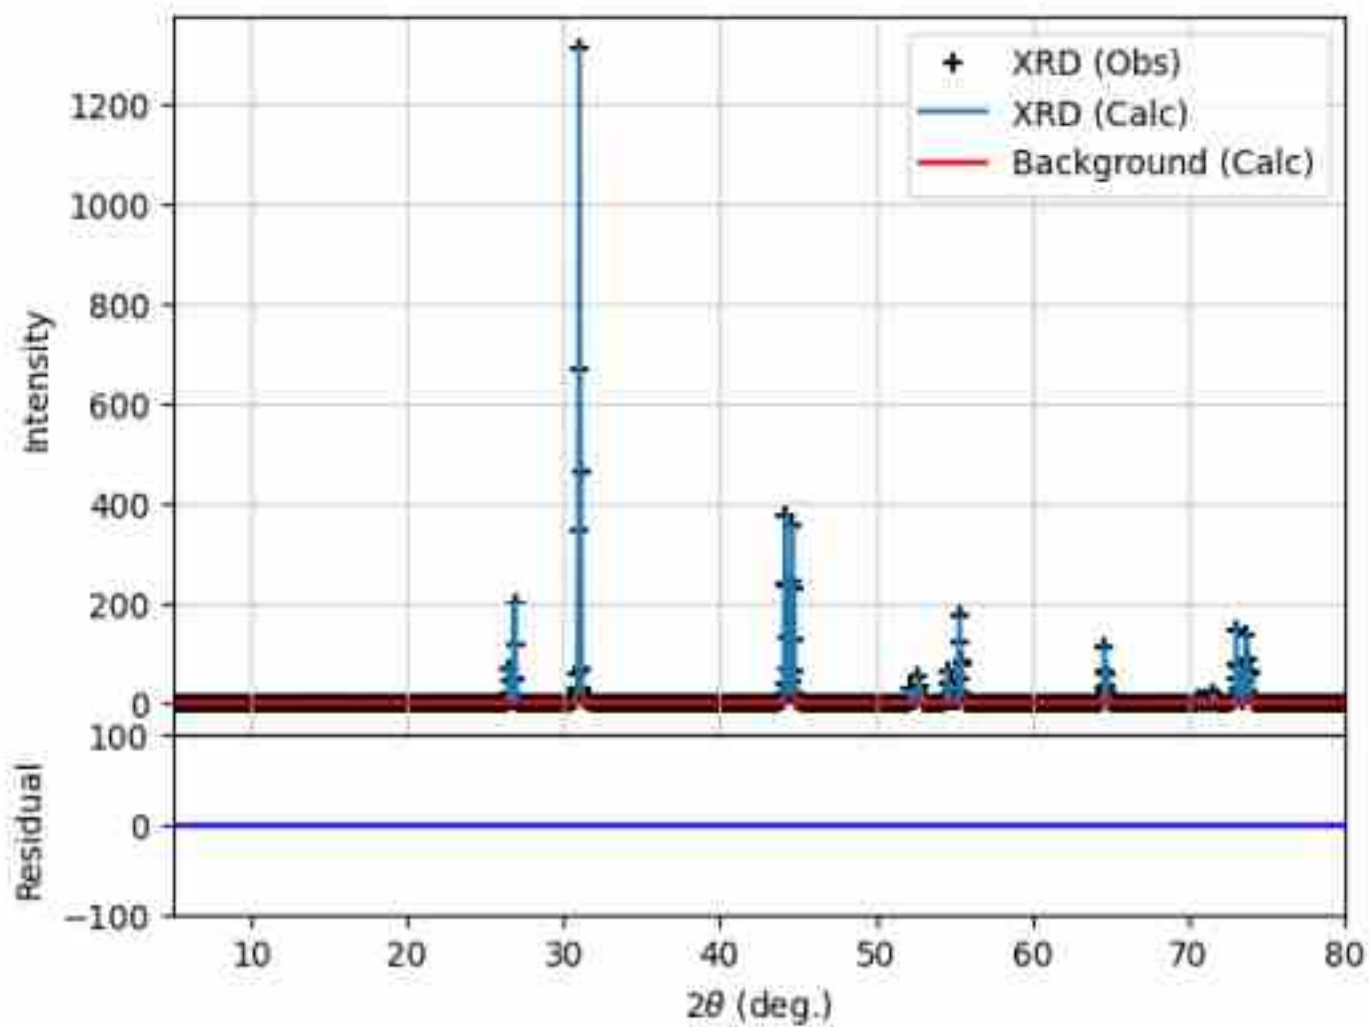

| RMSE before RR | Rwp     | RMSE after RR |
|----------------|---------|---------------|
| 0.014          | 0.00962 | 0.00063       |

# Yb<sub>2</sub>Cu<sub>2</sub>Ge<sub>2</sub>

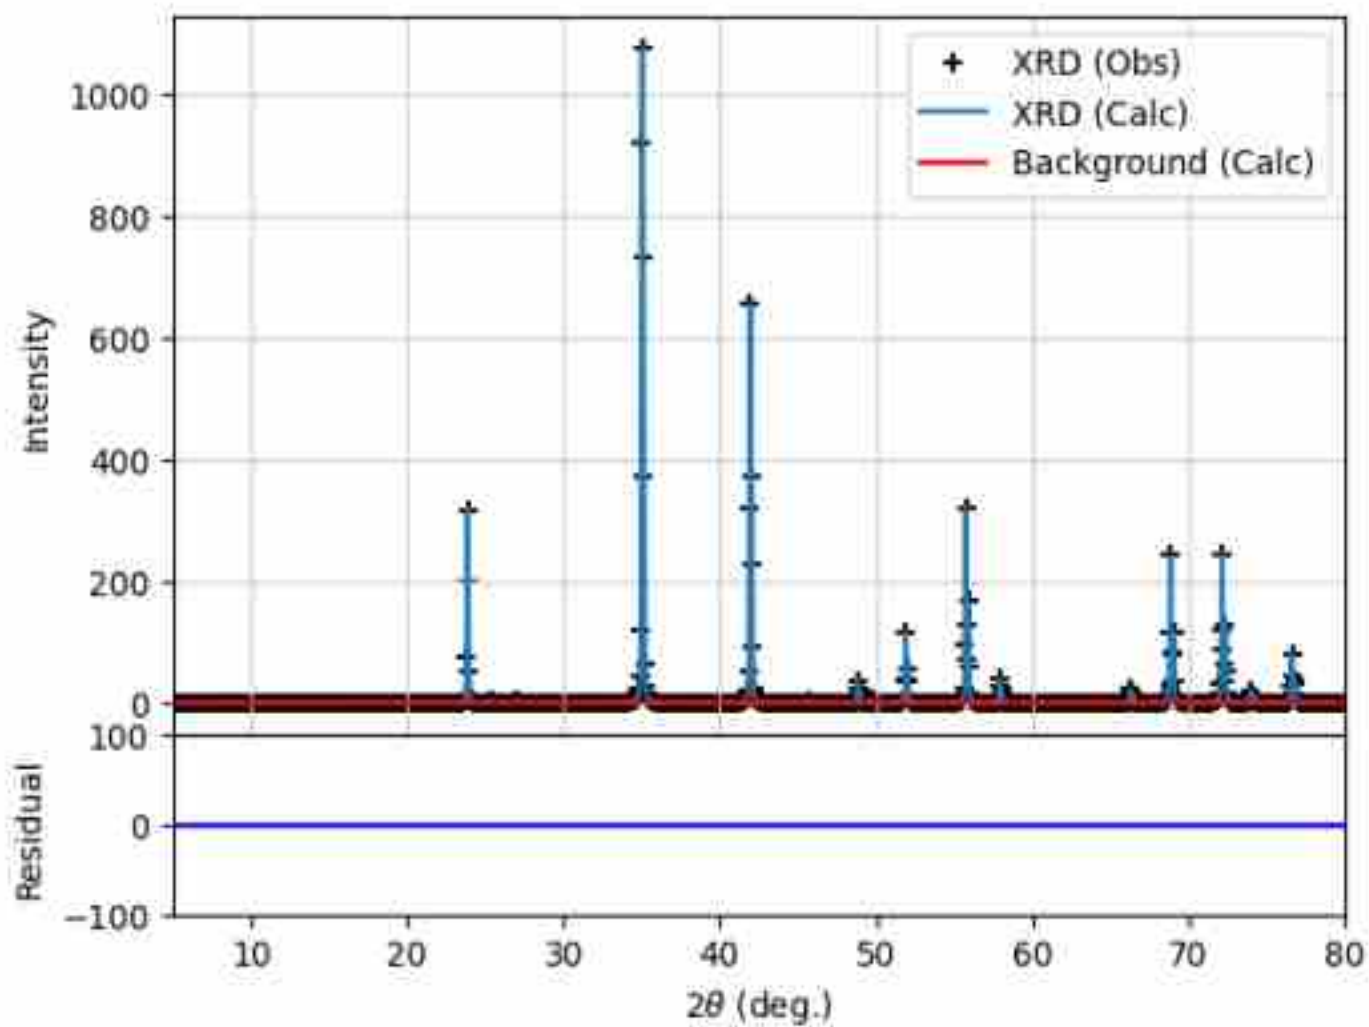

| RMSE before RR | Rwp     | RMSE after RR |
|----------------|---------|---------------|
| 0.014          | 0.00388 | 0.0004        |

# Yb<sub>4</sub>Ga<sub>4</sub>Pt<sub>4</sub>

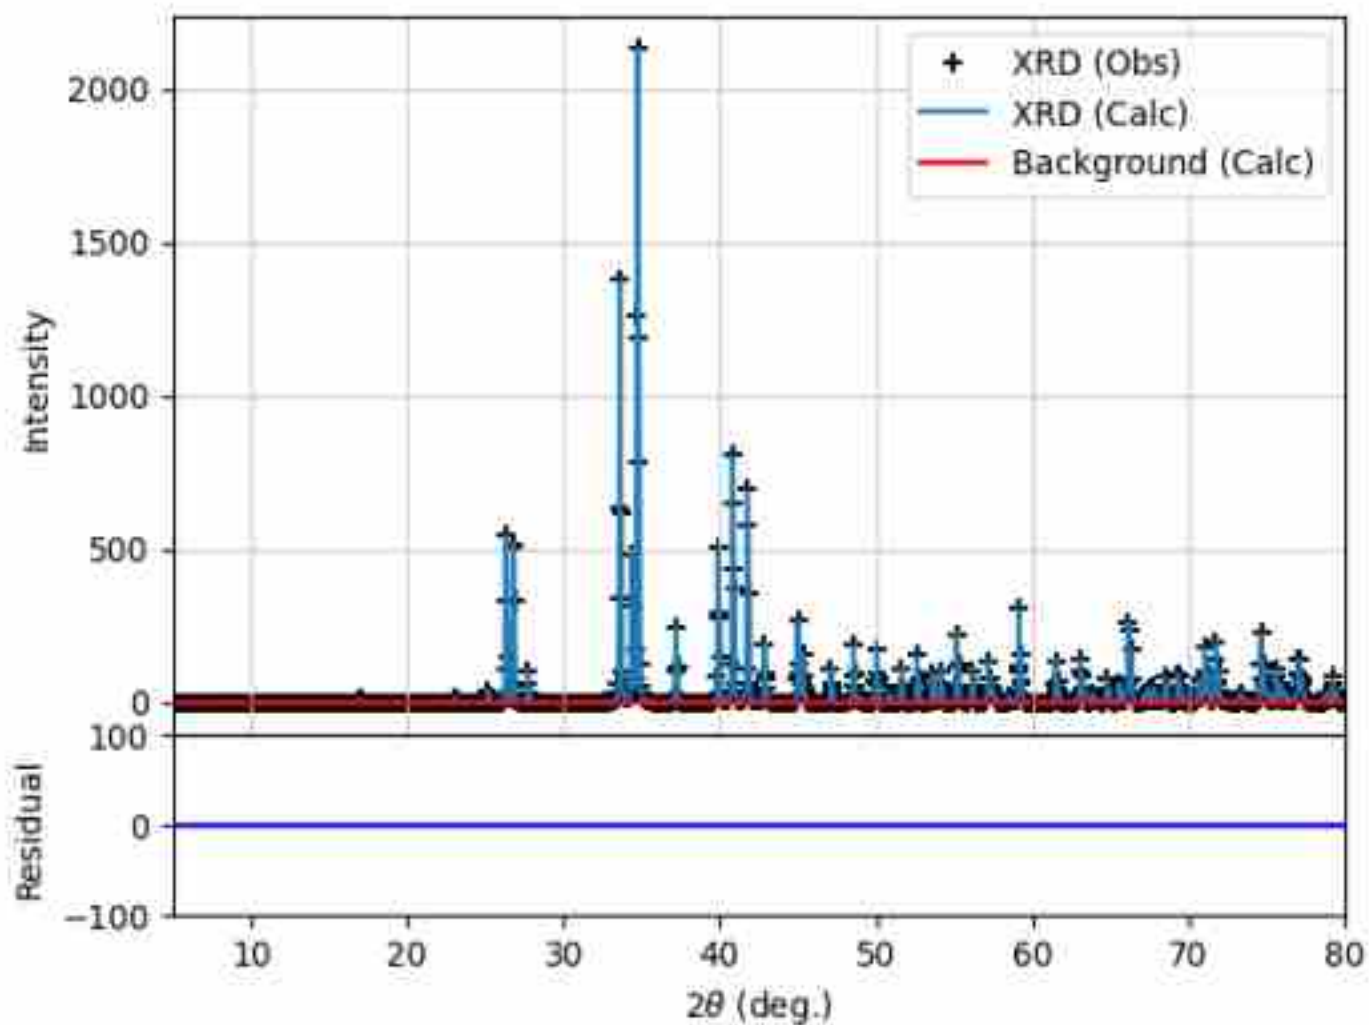

| RMSE before RR | Rwp    | RMSE after RR |
|----------------|--------|---------------|
| 0.014          | 0.0045 | 0.0004        |

# Zn<sub>2</sub>P<sub>2</sub>S<sub>6</sub>

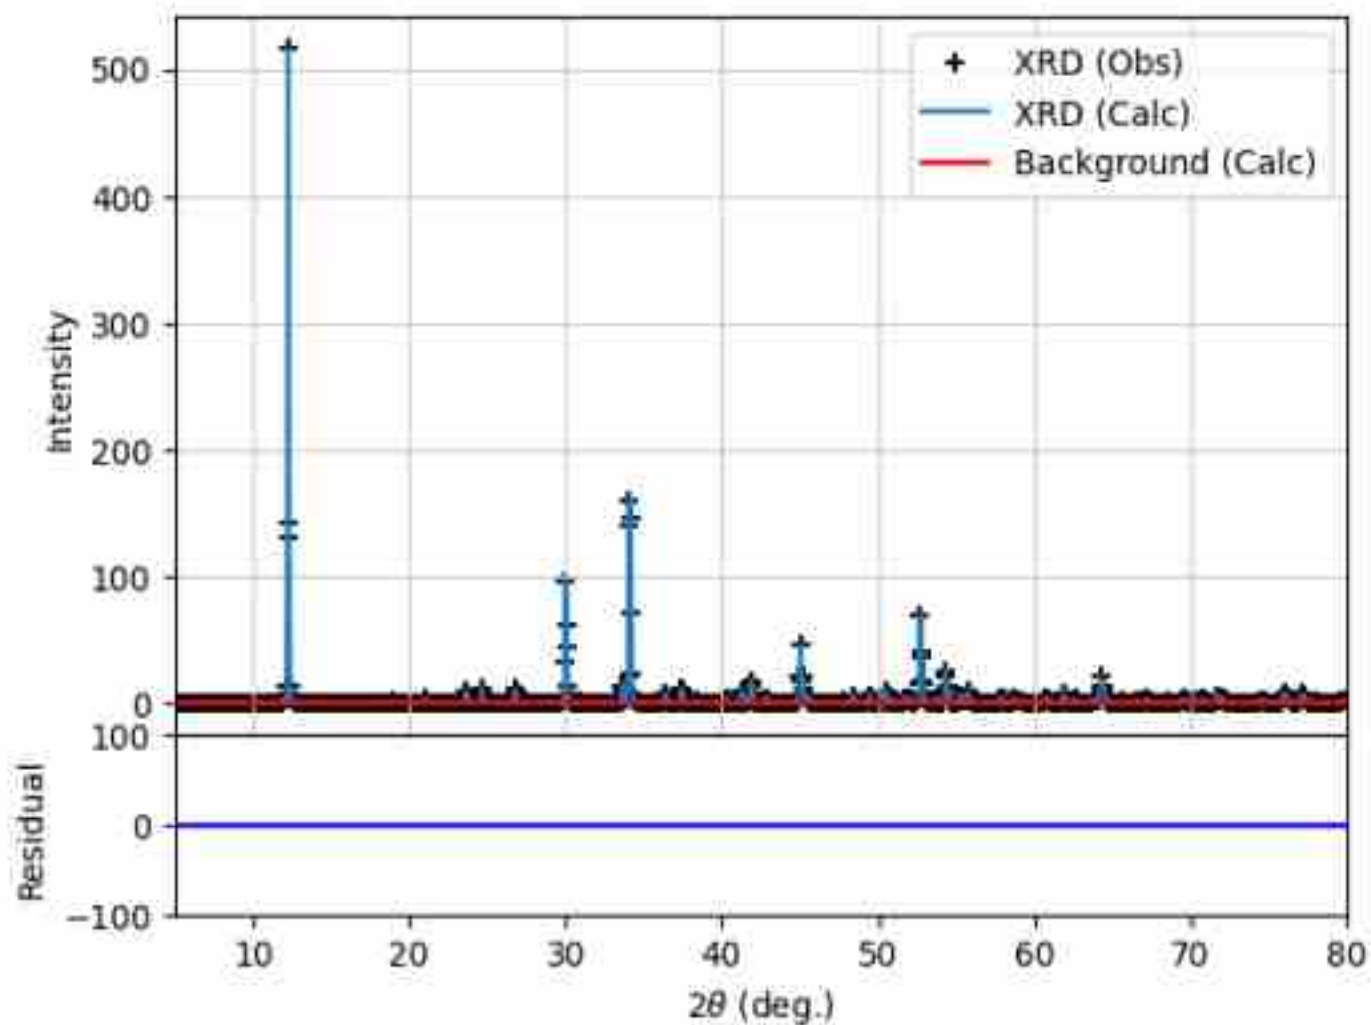

| RMSE before RR | Rwp     | RMSE after RR |
|----------------|---------|---------------|
| 0.014          | 0.00183 | 0.00024       |

# Zn6Mo1

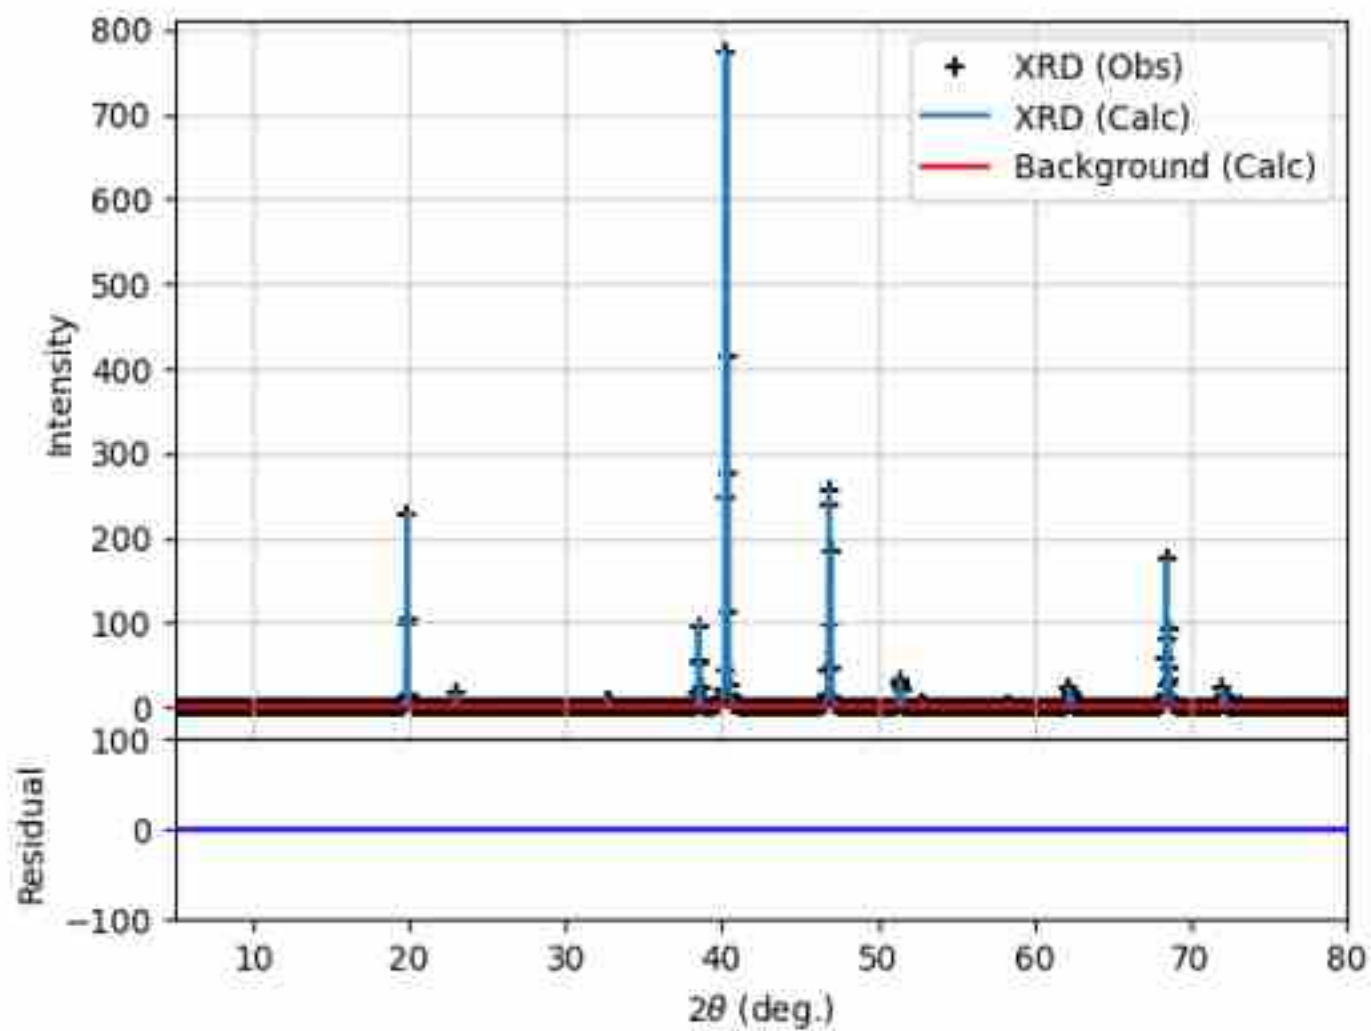

| RMSE before RR | Rwp     | RMSE after RR |
|----------------|---------|---------------|
| 0.014          | 0.00292 | 0.00034       |

# Zr1Cu1F6

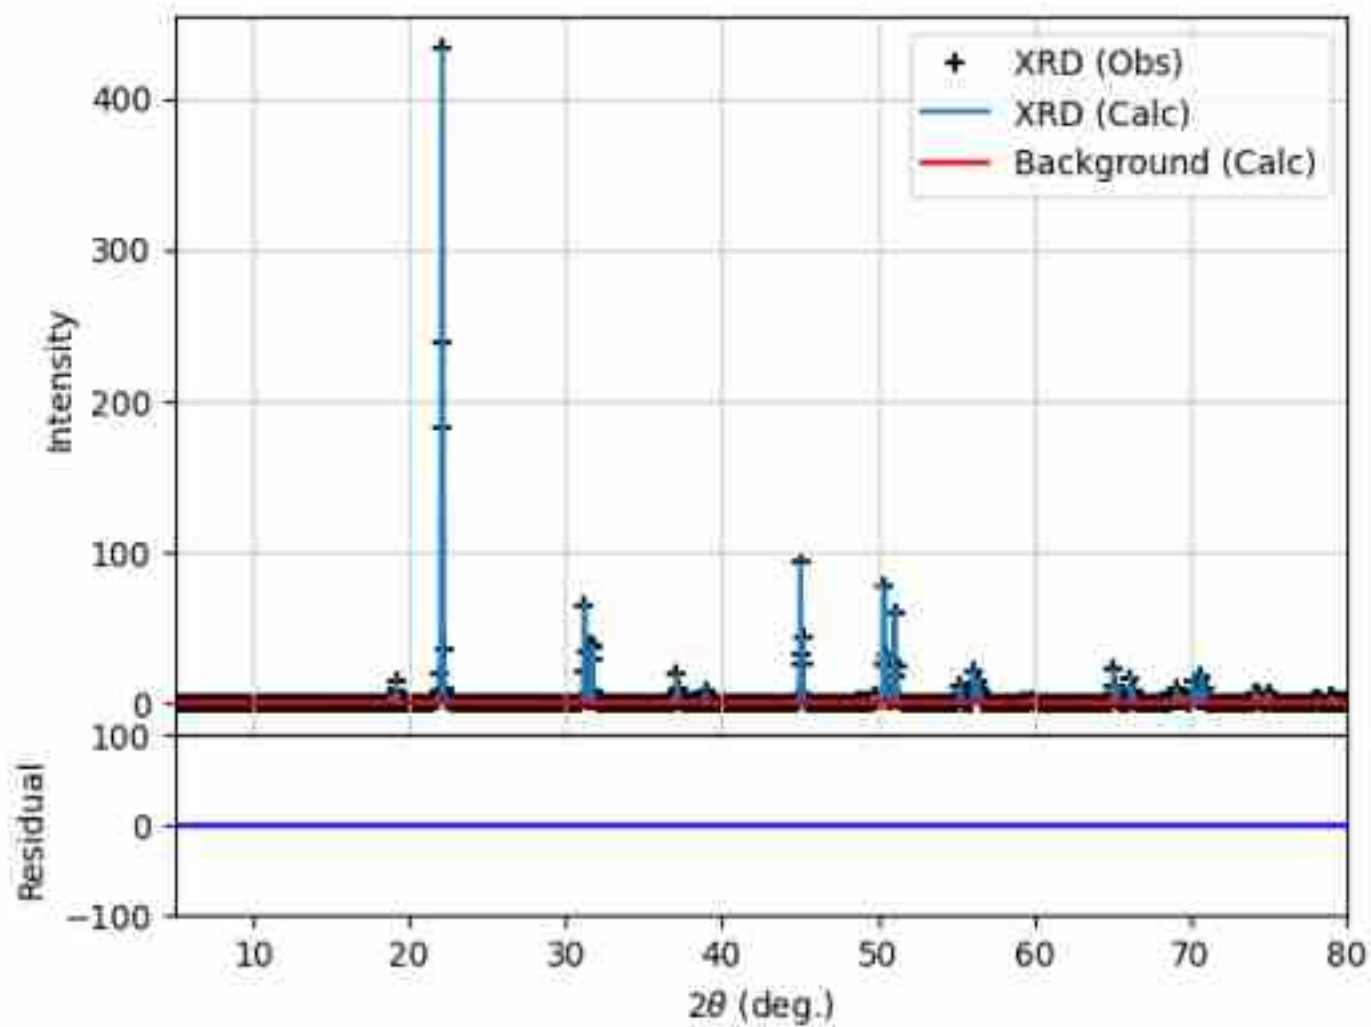

| RMSE before RR | Rwp   | RMSE after RR |
|----------------|-------|---------------|
| 0.014          | 0.004 | 0.00125       |

# Zr1Ti1W4

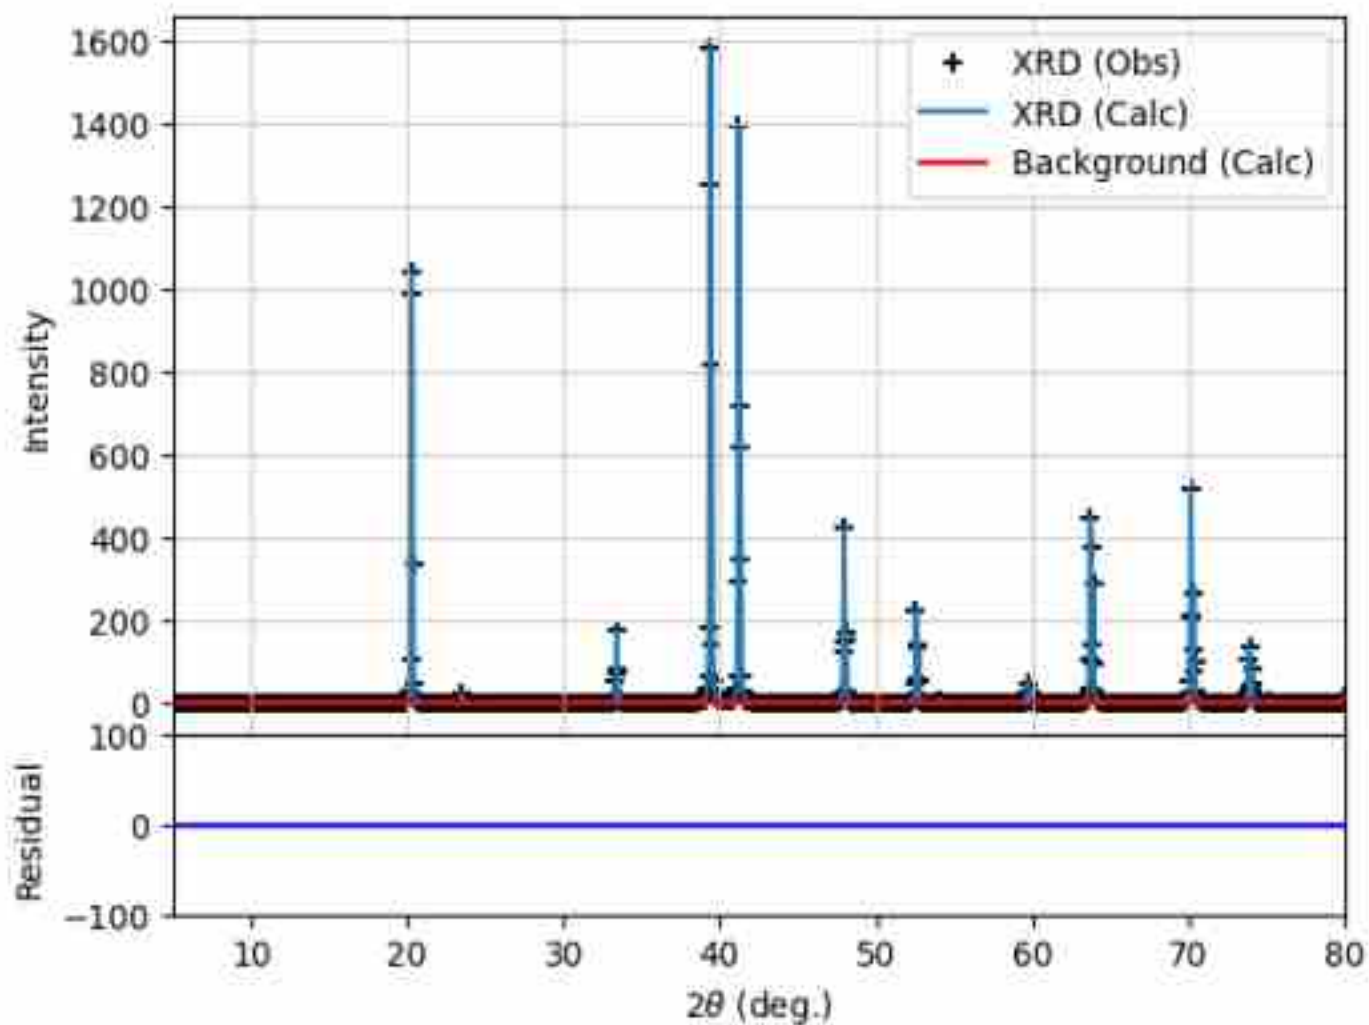

| RMSE before RR | Rwp     | RMSE after RR |
|----------------|---------|---------------|
| 0.014          | 0.00511 | 0.00075       |



# Zr<sub>4</sub>Cu<sub>2</sub>S<sub>8</sub>

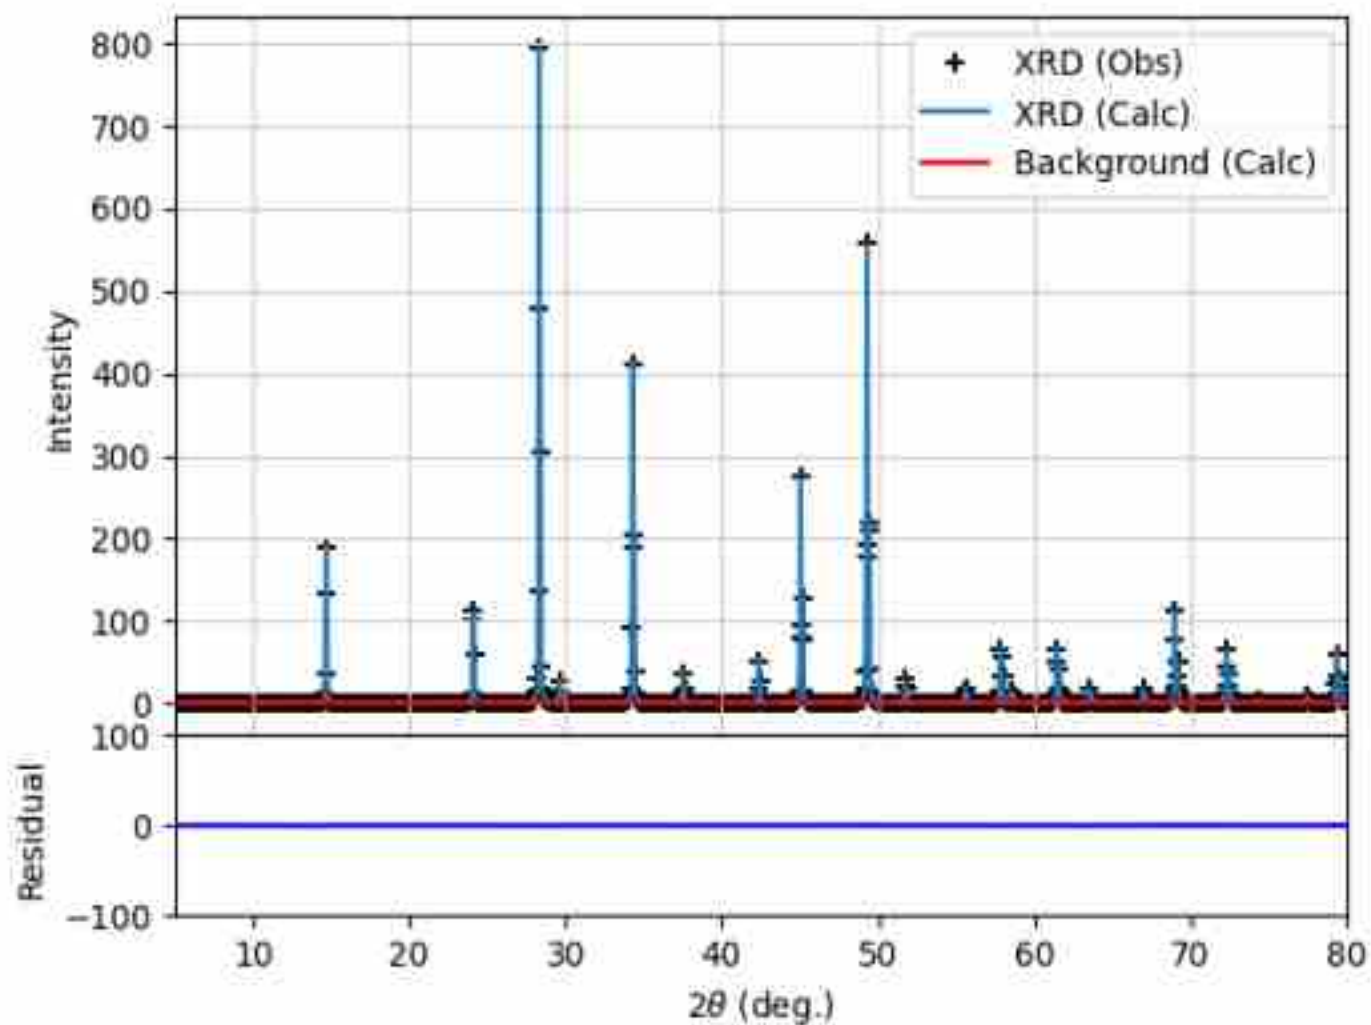

| RMSE before RR | Rwp    | RMSE after RR |
|----------------|--------|---------------|
| 0.014          | 0.7183 | 0.01066       |

# Ac<sub>2</sub>Ga<sub>6</sub>

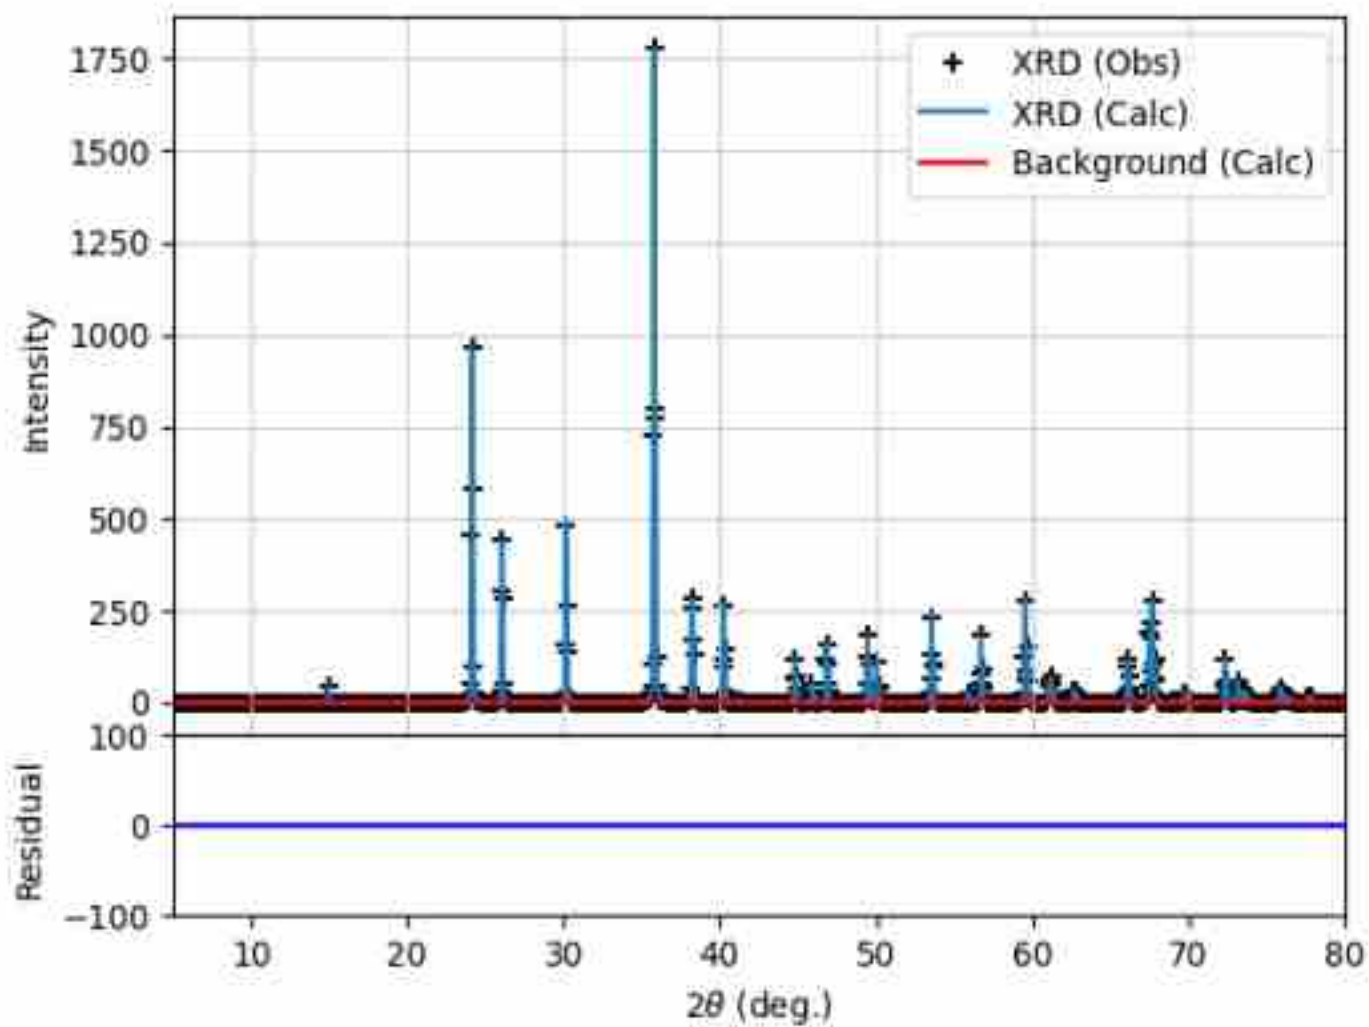

| RMSE before RR | Rwp     | RMSE after RR |
|----------------|---------|---------------|
| 0.015          | 0.01658 | 0.00191       |

# AgI1

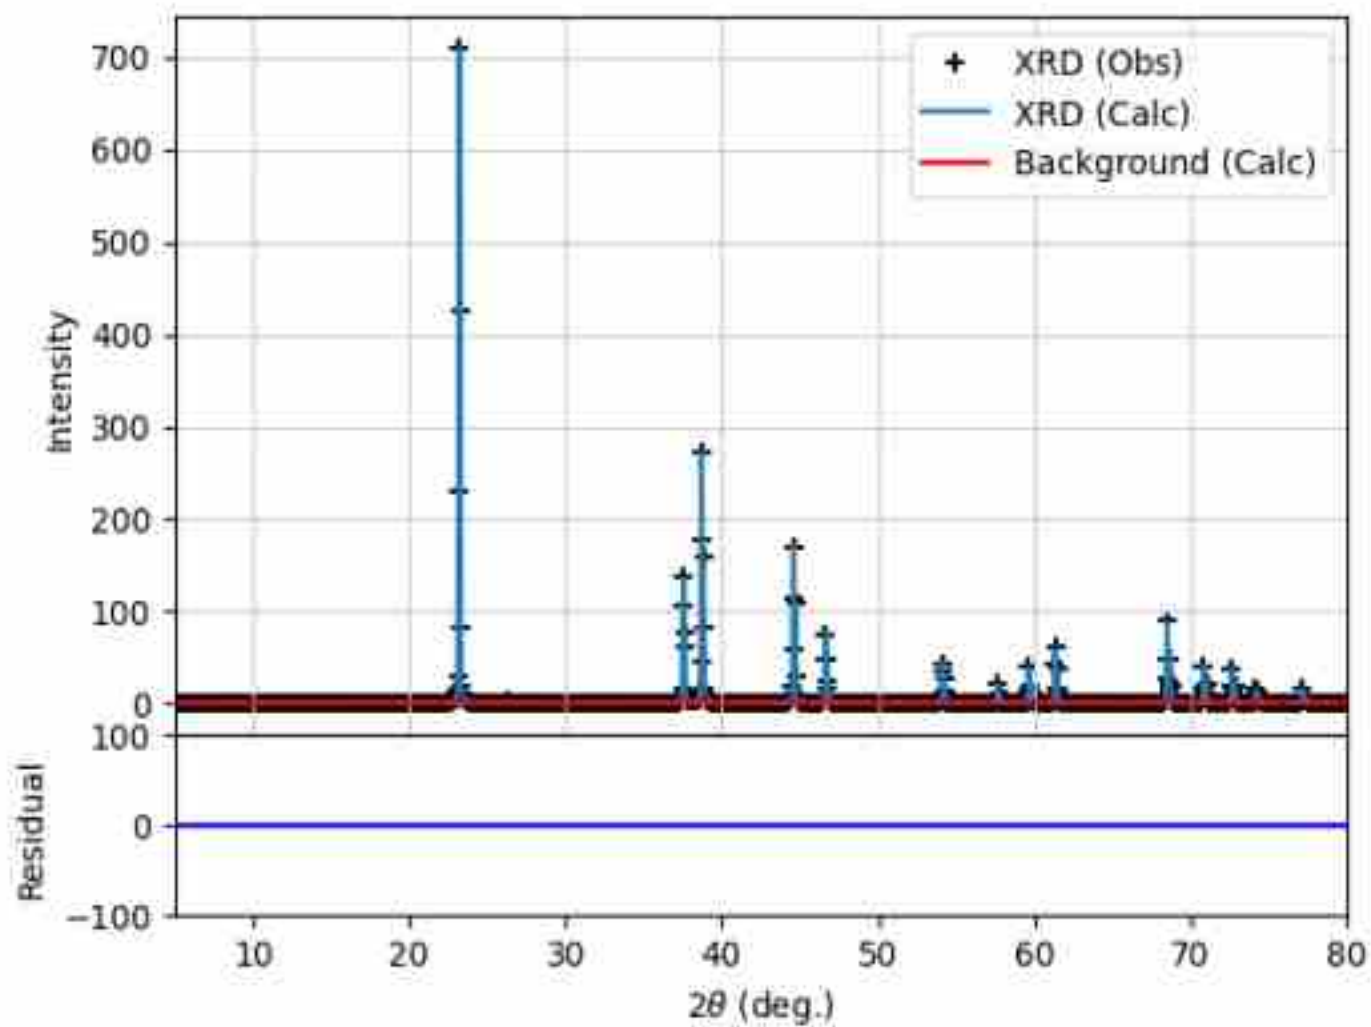

| RMSE before RR | Rwp     | RMSE after RR |
|----------------|---------|---------------|
| 0.015          | 0.00367 | 0.00012       |

# Ag<sub>2</sub>Bi<sub>1</sub>Sb<sub>1</sub>Se<sub>4</sub>

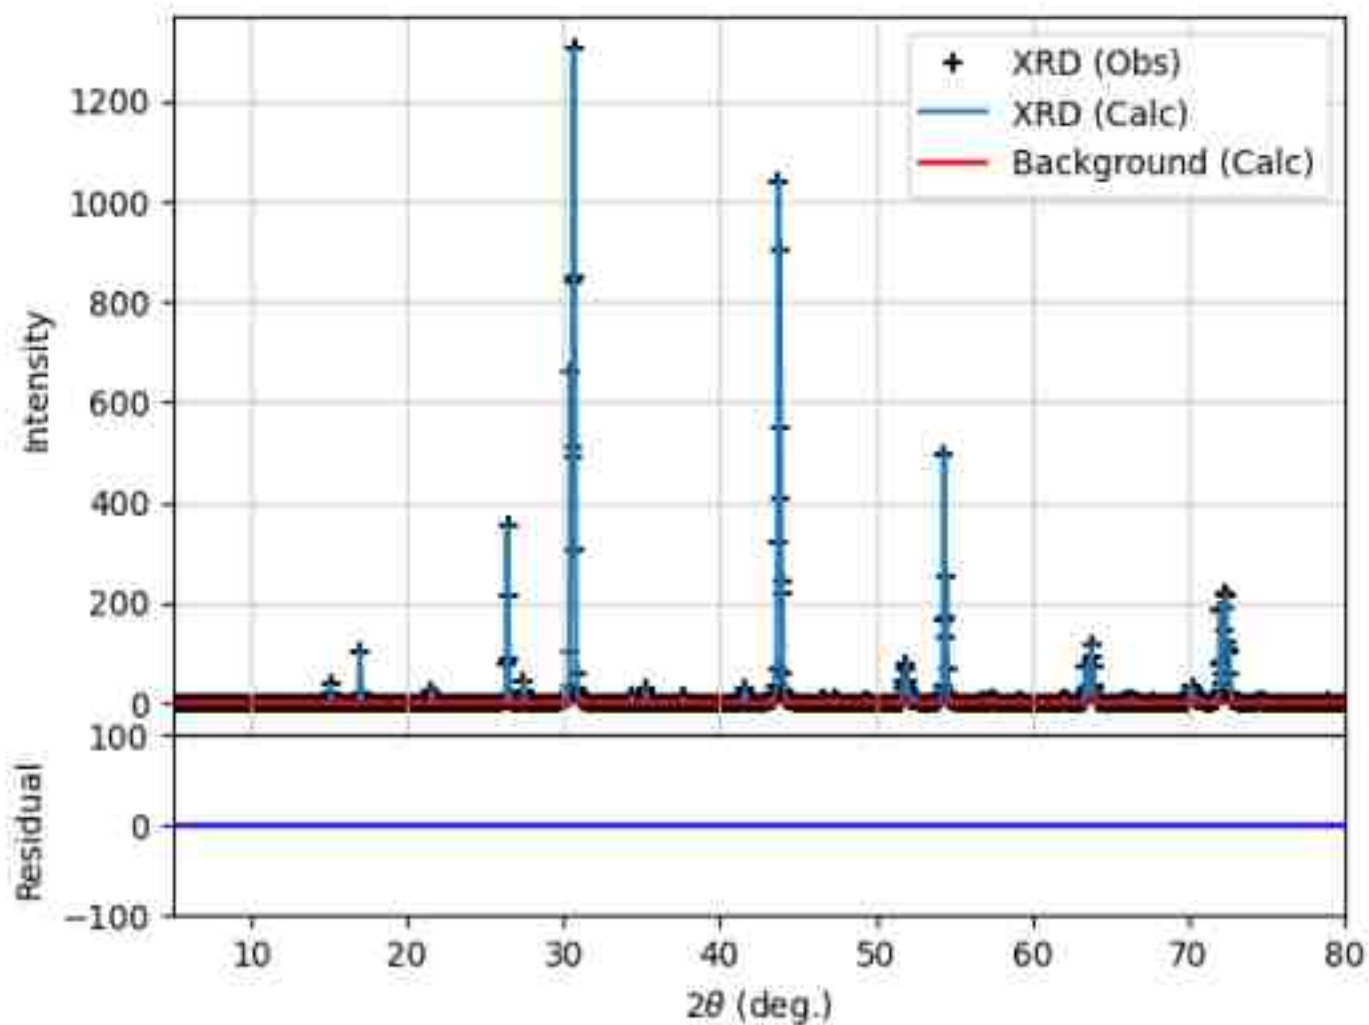

| RMSE before RR | Rwp     | RMSE after RR |
|----------------|---------|---------------|
| 0.015          | 0.00431 | 0.00071       |

# Al1Cd1Sb1Te1

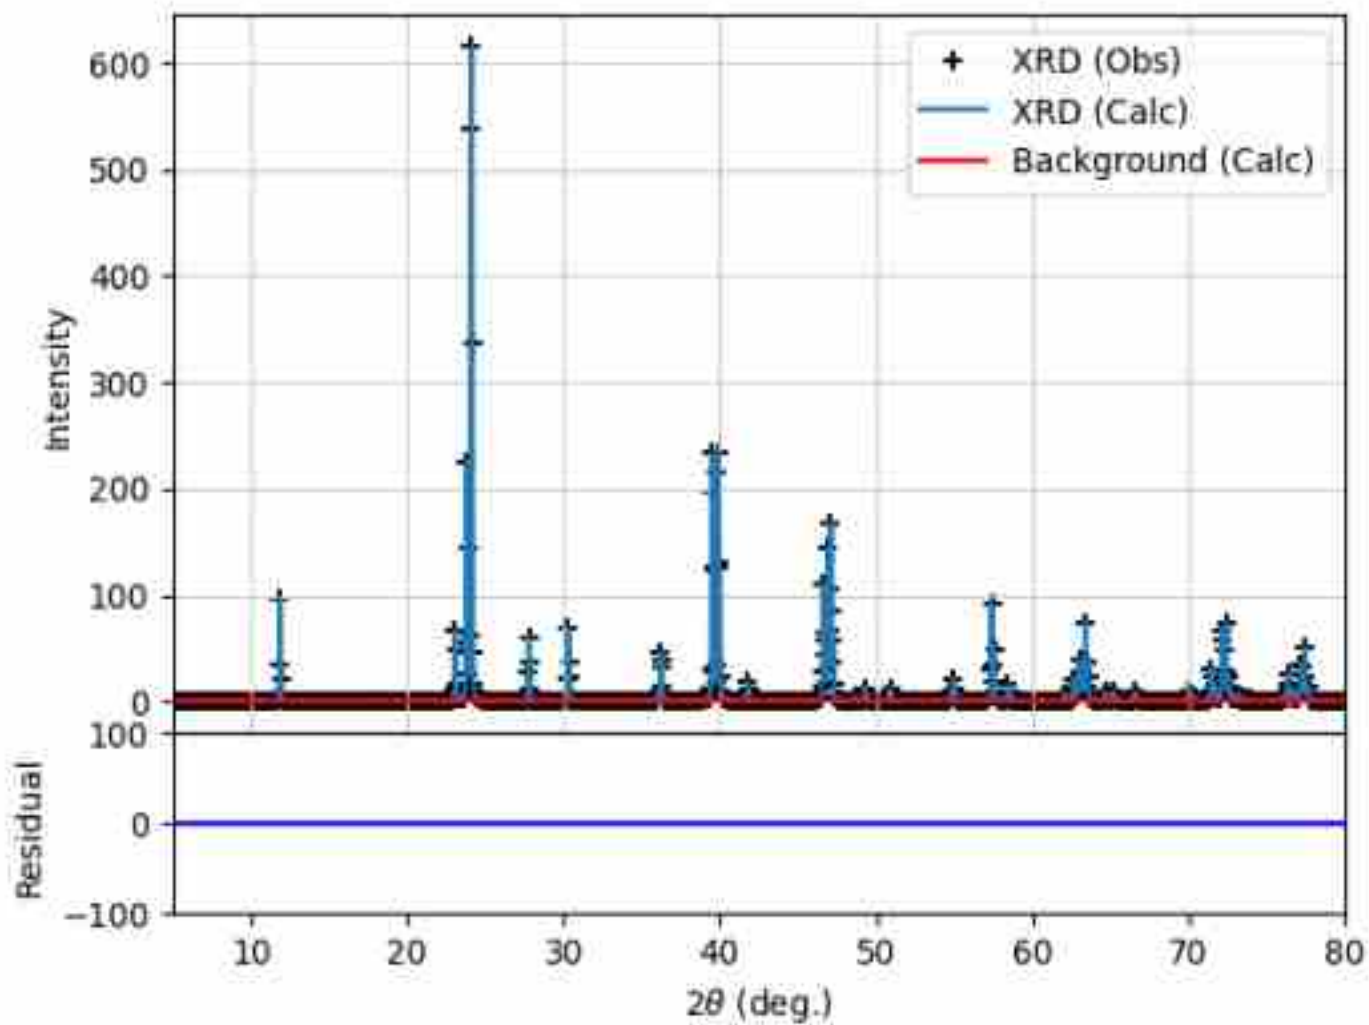

| RMSE before RR | Rwp     | RMSE after RR |
|----------------|---------|---------------|
| 0.015          | 0.00295 | 0.00021       |

# Al1Cr3Si1Mo3

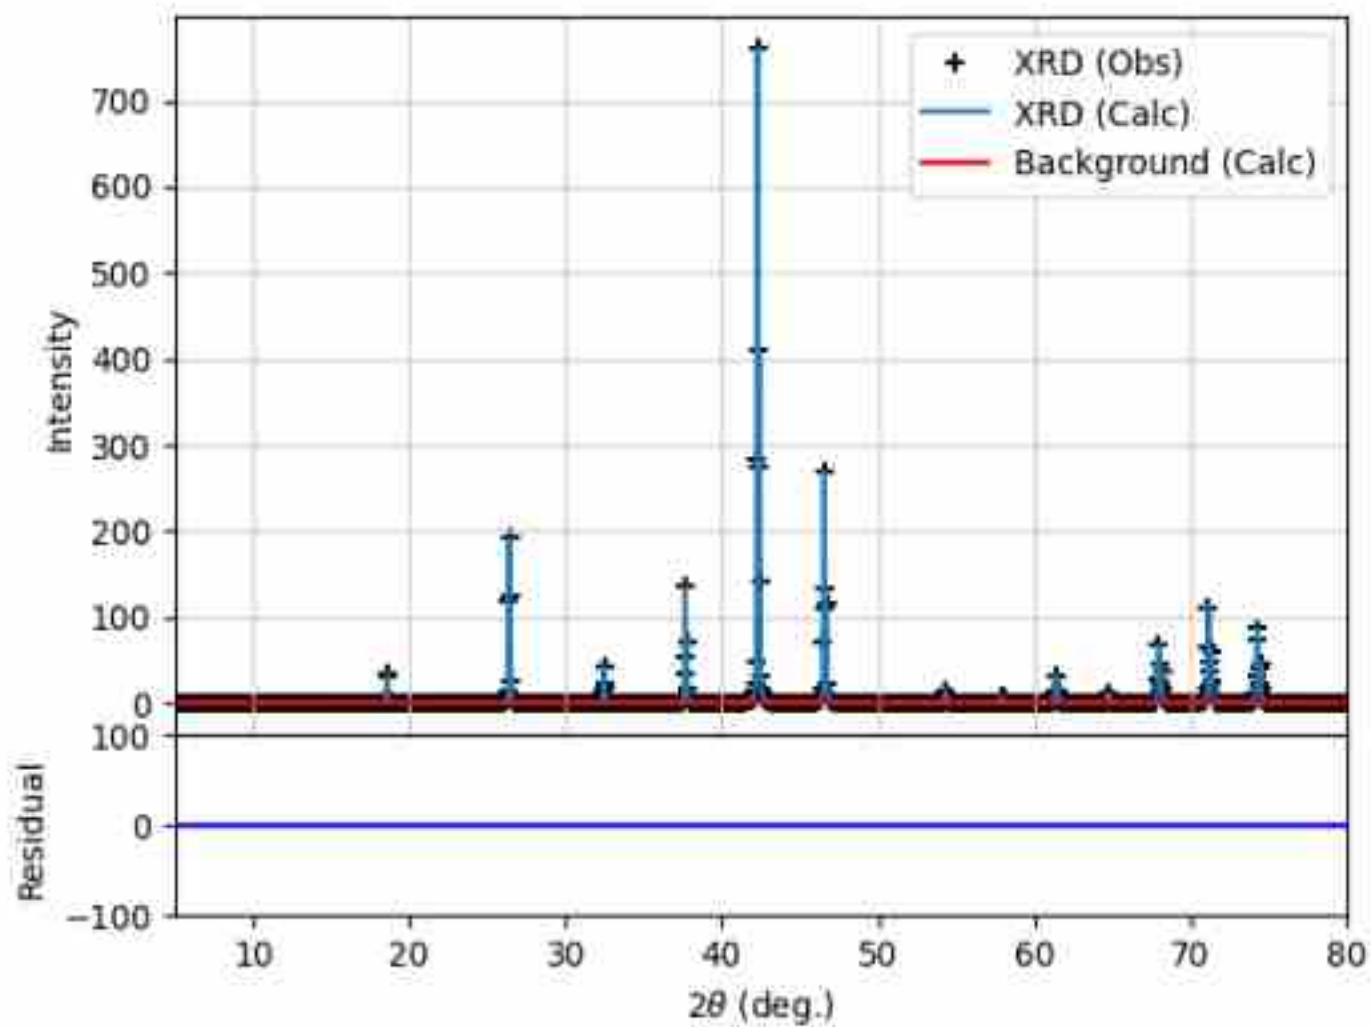

| RMSE before RR | Rwp     | RMSE after RR |
|----------------|---------|---------------|
| 0.015          | 0.00266 | 0.00047       |

# Al1Re1Ge1

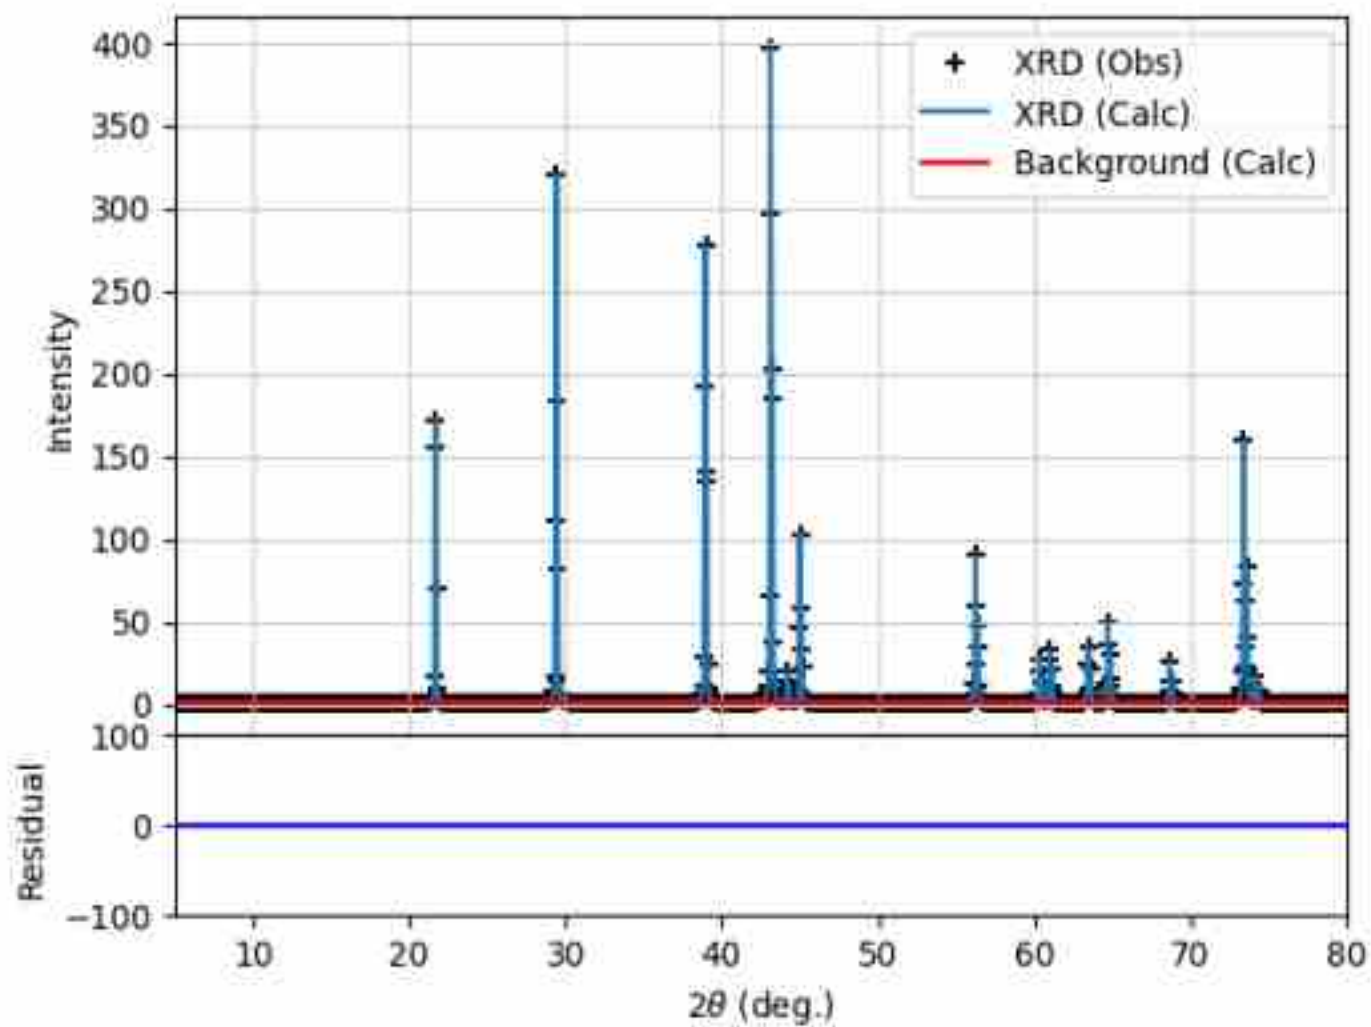

| RMSE before RR | Rwp     | RMSE after RR |
|----------------|---------|---------------|
| 0.015          | 0.01942 | 0.00772       |

# Al<sub>4</sub>Ni<sub>15</sub>Ge<sub>1</sub>

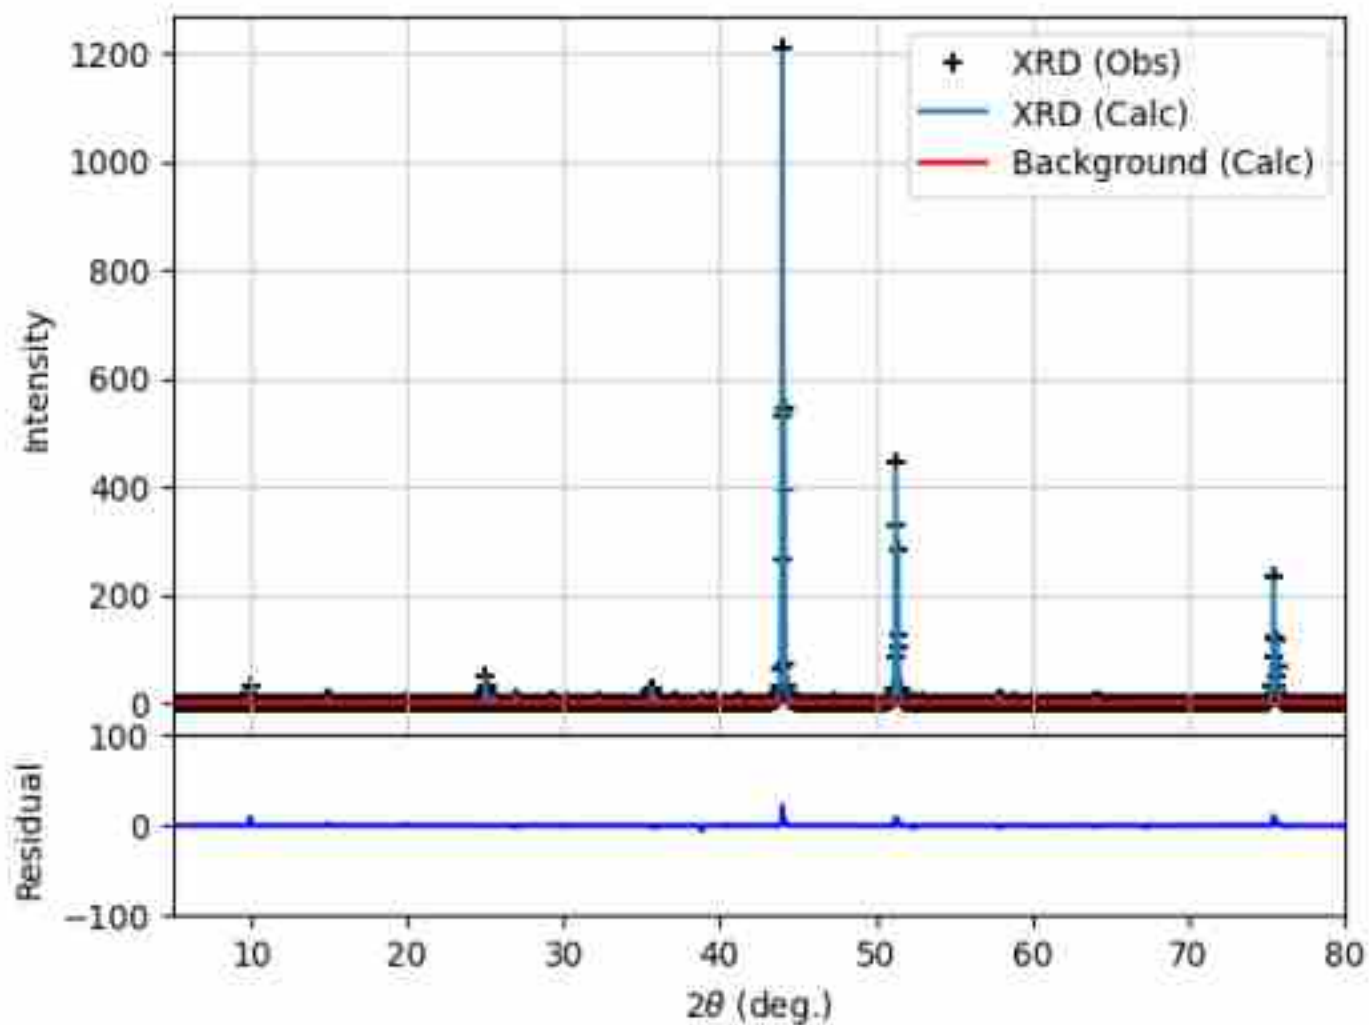

| RMSE before RR | Rwp     | RMSE after RR |
|----------------|---------|---------------|
| 0.015          | 9.16332 | 0.16407       |



# Al4O6

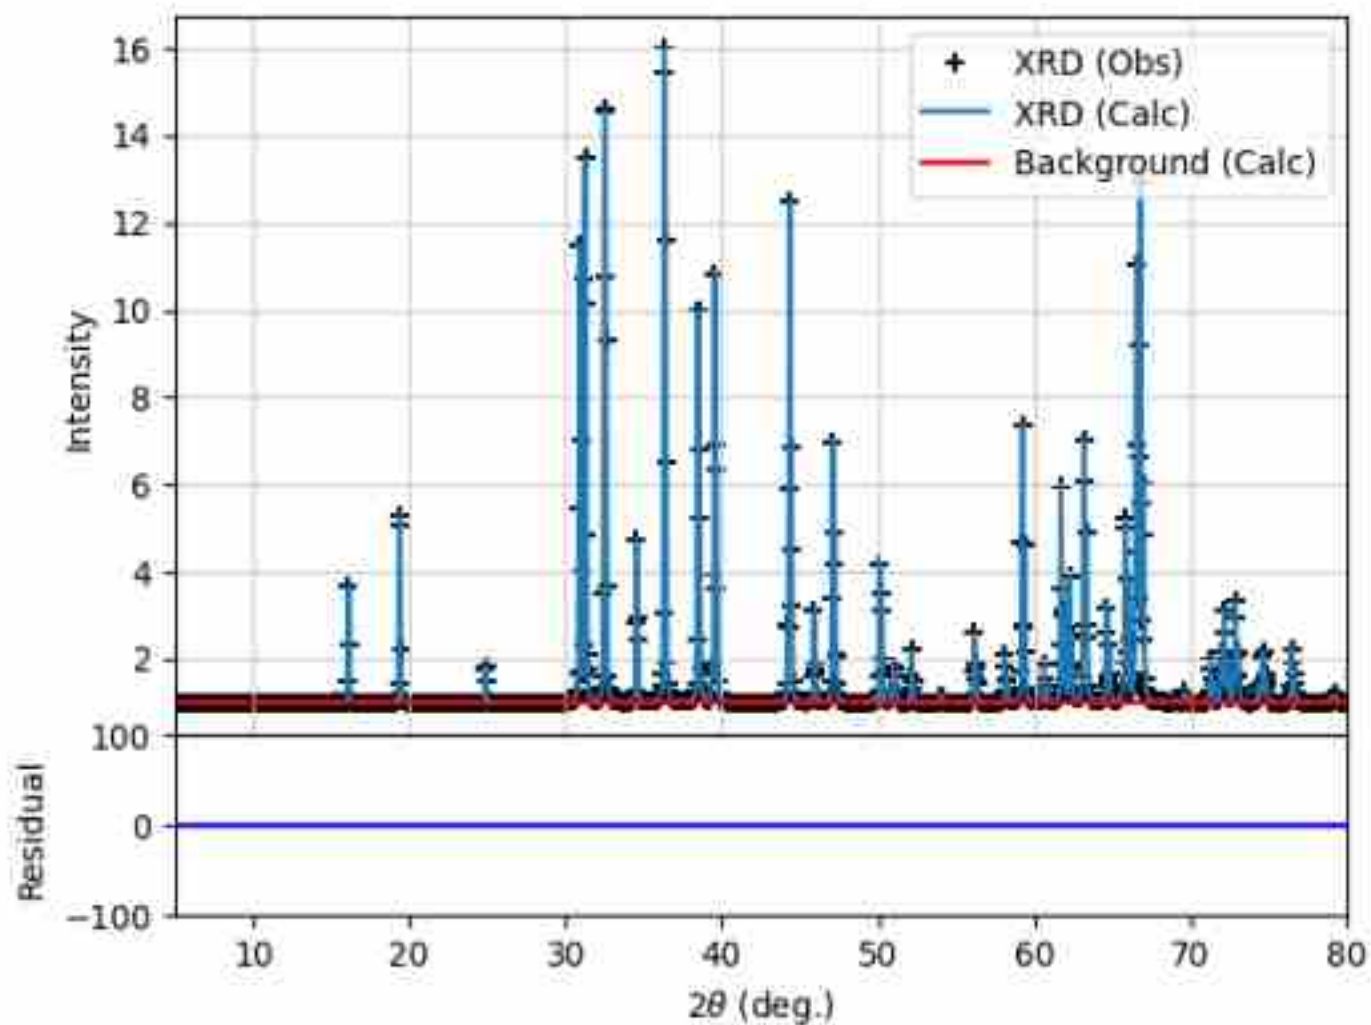

| RMSE before RR | Rwp     | RMSE after RR |
|----------------|---------|---------------|
| 0.015          | 0.00126 | 0.00048       |

# Ba1Ho2Ni1O5

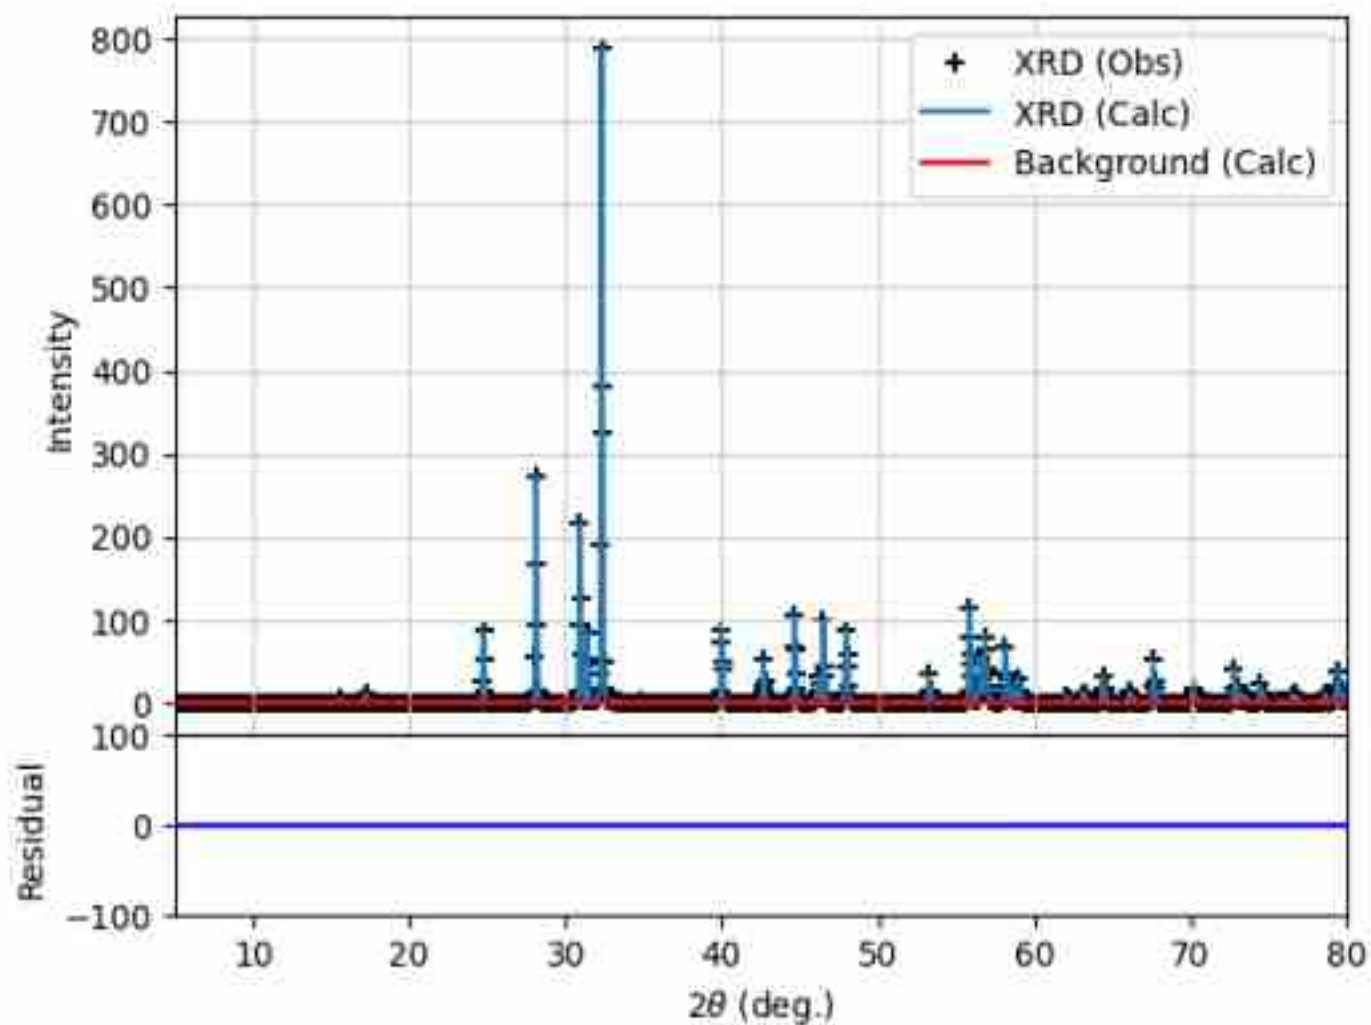

| RMSE before RR | Rwp     | RMSE after RR |
|----------------|---------|---------------|
| 0.015          | 0.07102 | 0.00416       |

# Ba1Sr1Cu2O4

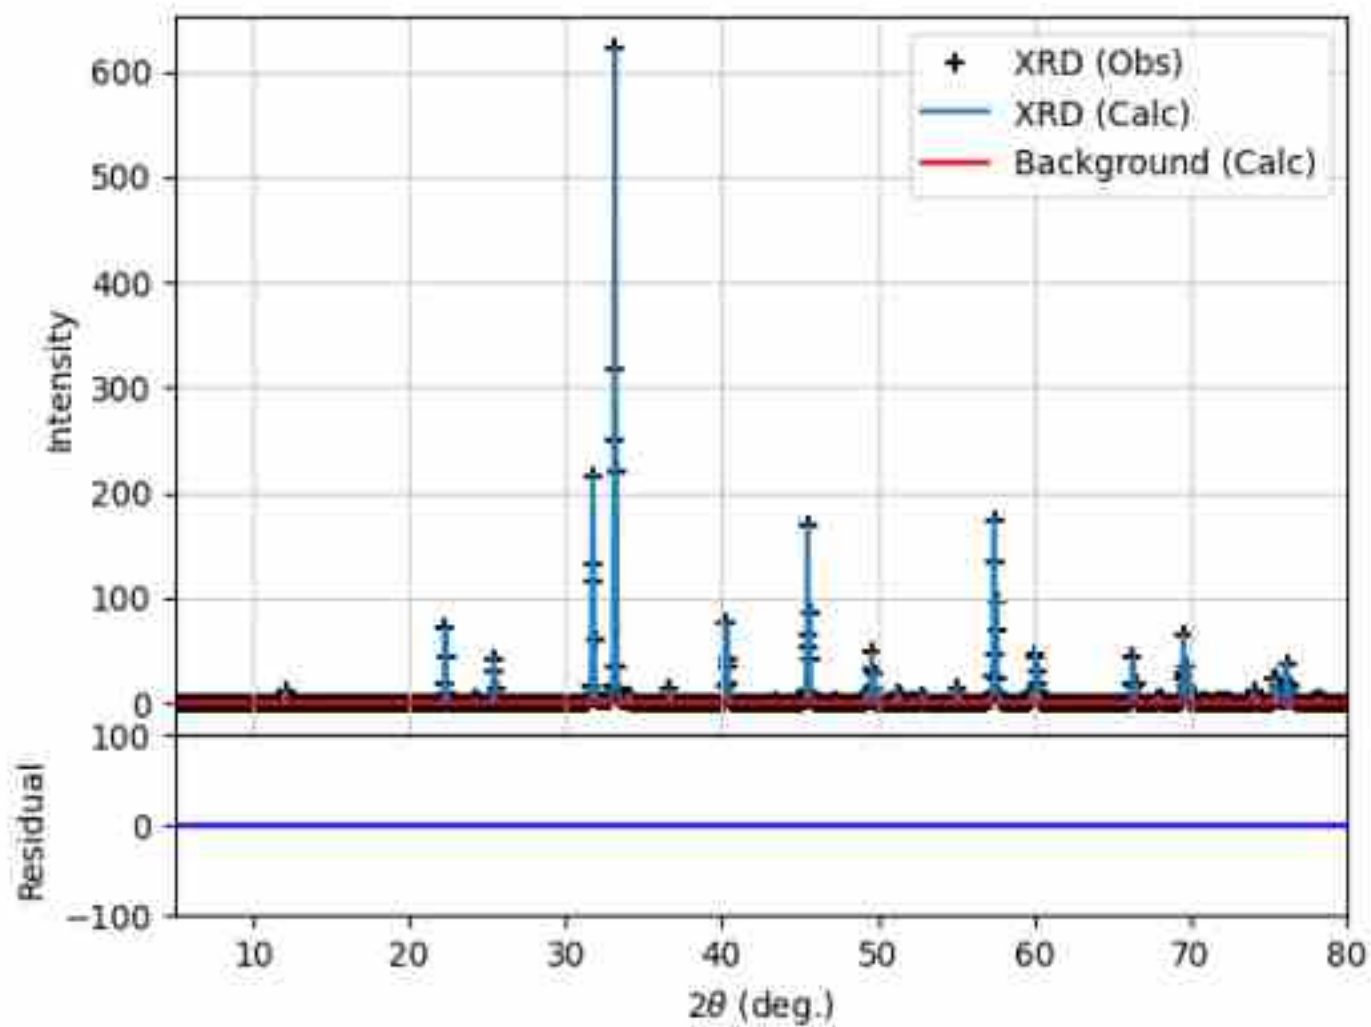

| RMSE before RR | Rwp     | RMSE after RR |
|----------------|---------|---------------|
| 0.015          | 0.00425 | 0.0009        |

# Ba1Sr1N1

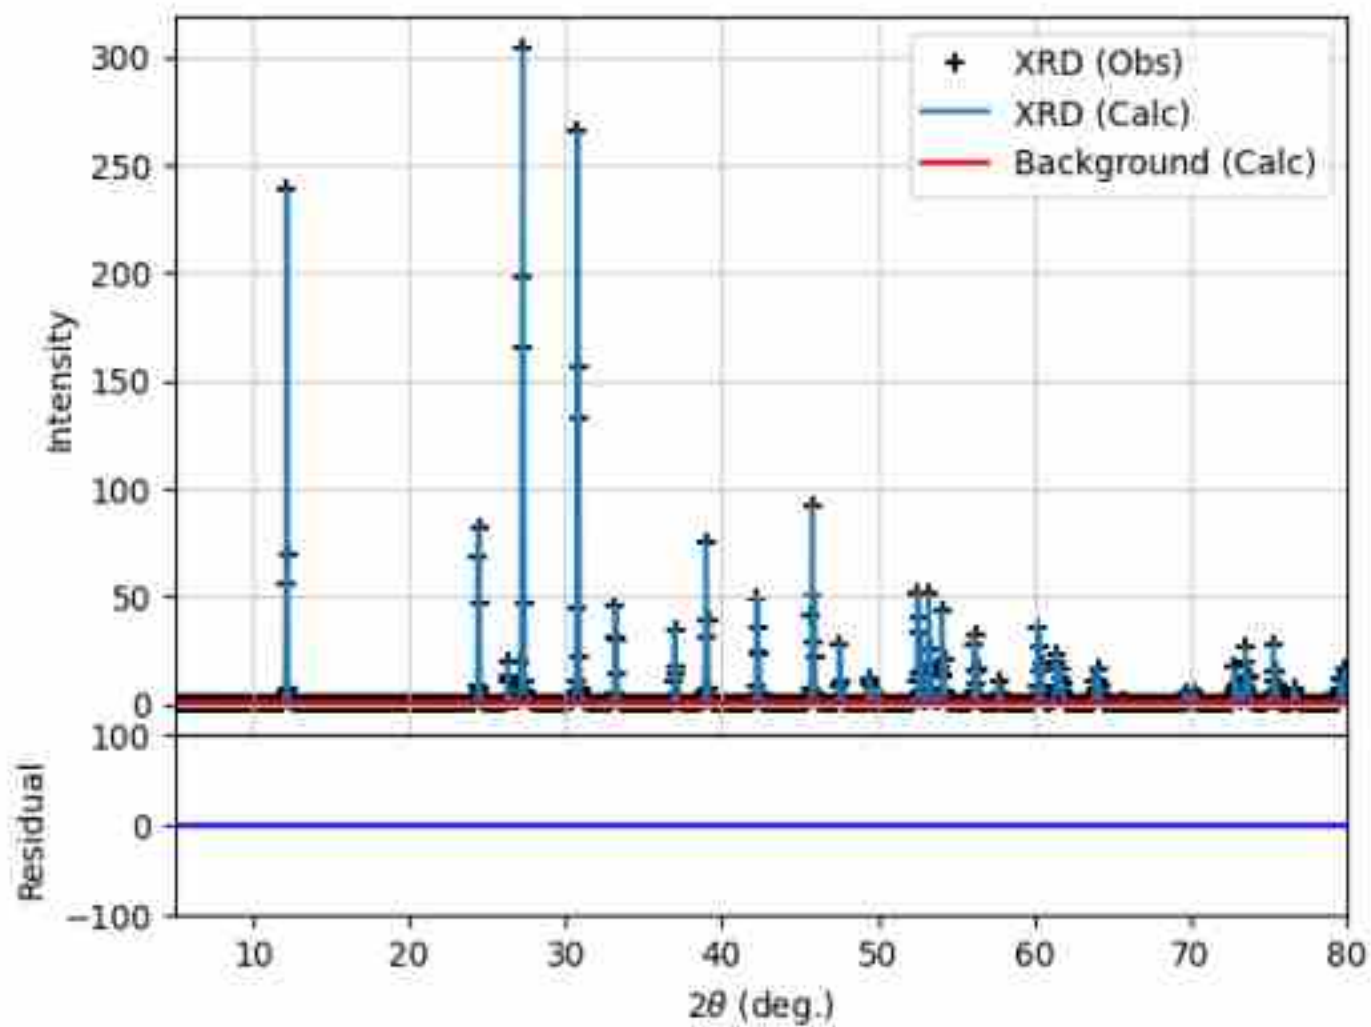

| RMSE before RR | Rwp     | RMSE after RR |
|----------------|---------|---------------|
| 0.015          | 0.00264 | 0.00038       |

# Ba<sub>2</sub>FeReO<sub>6</sub>

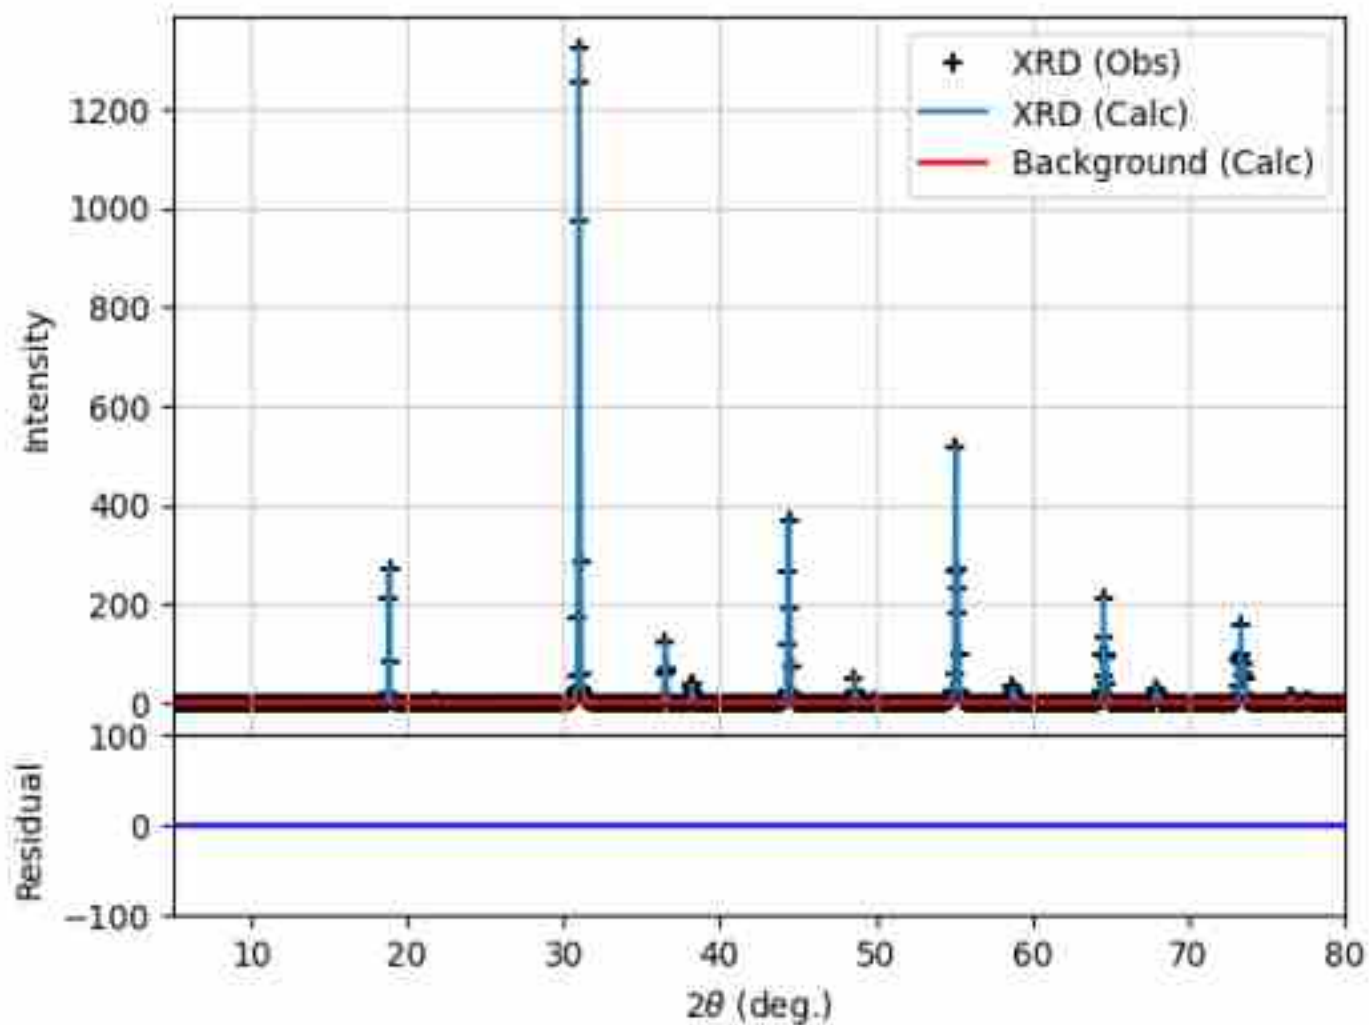

| RMSE before RR | Rwp     | RMSE after RR |
|----------------|---------|---------------|
| 0.015          | 0.00473 | 0.00296       |

# Ba<sub>2</sub>MnNbO<sub>6</sub>

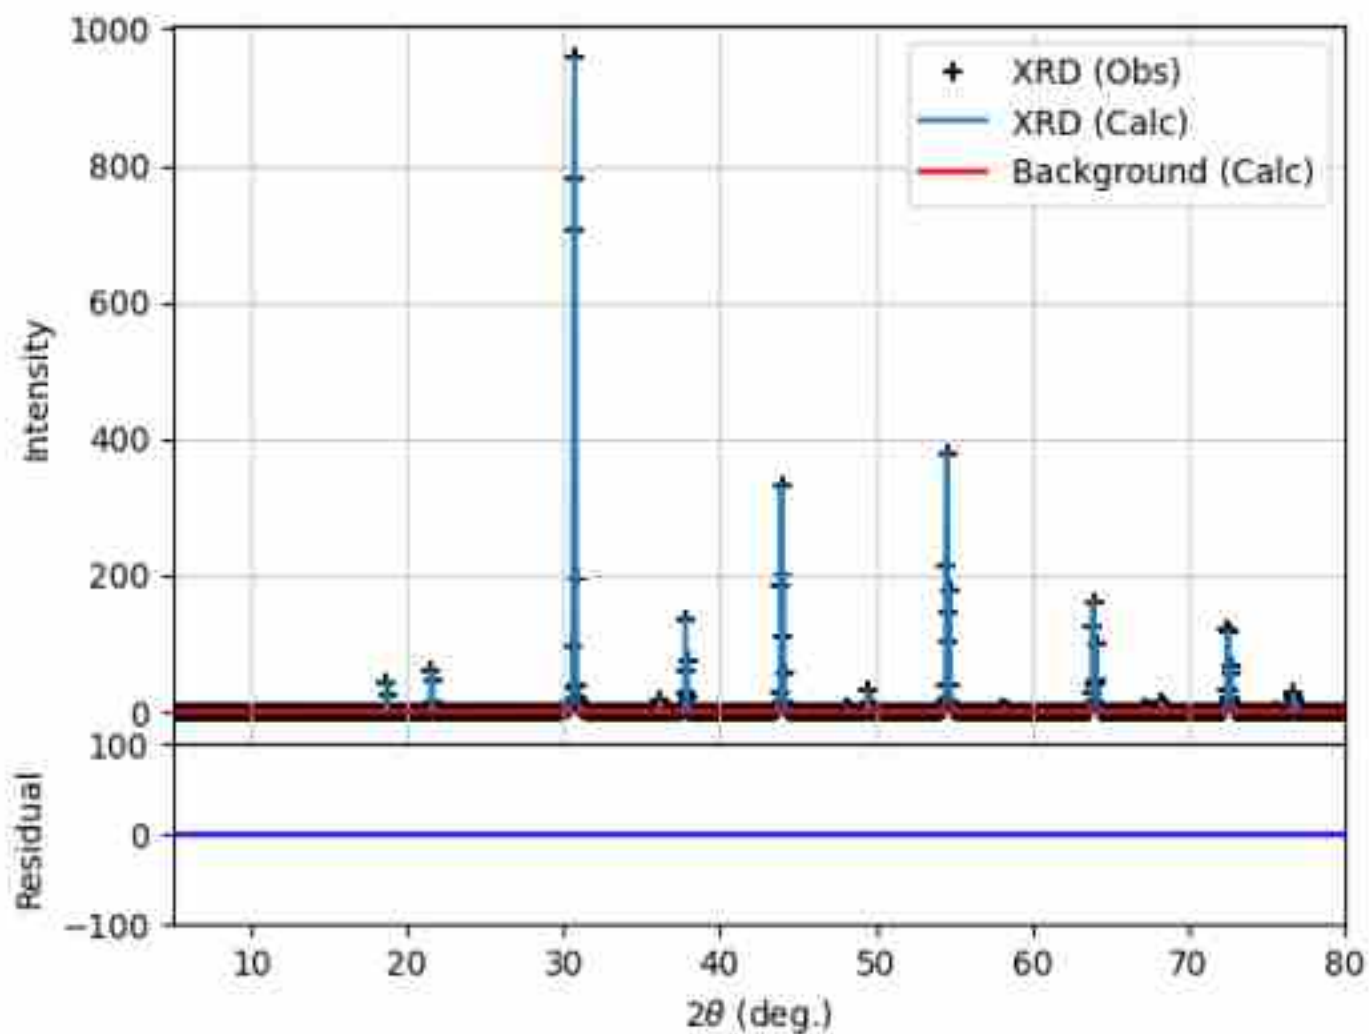

| RMSE before RR | Rwp    | RMSE after RR |
|----------------|--------|---------------|
| 0.015          | 0.0354 | 0.00654       |

# Ba<sub>3</sub>Sr<sub>1</sub>Zn<sub>2</sub>W<sub>2</sub>O<sub>12</sub>

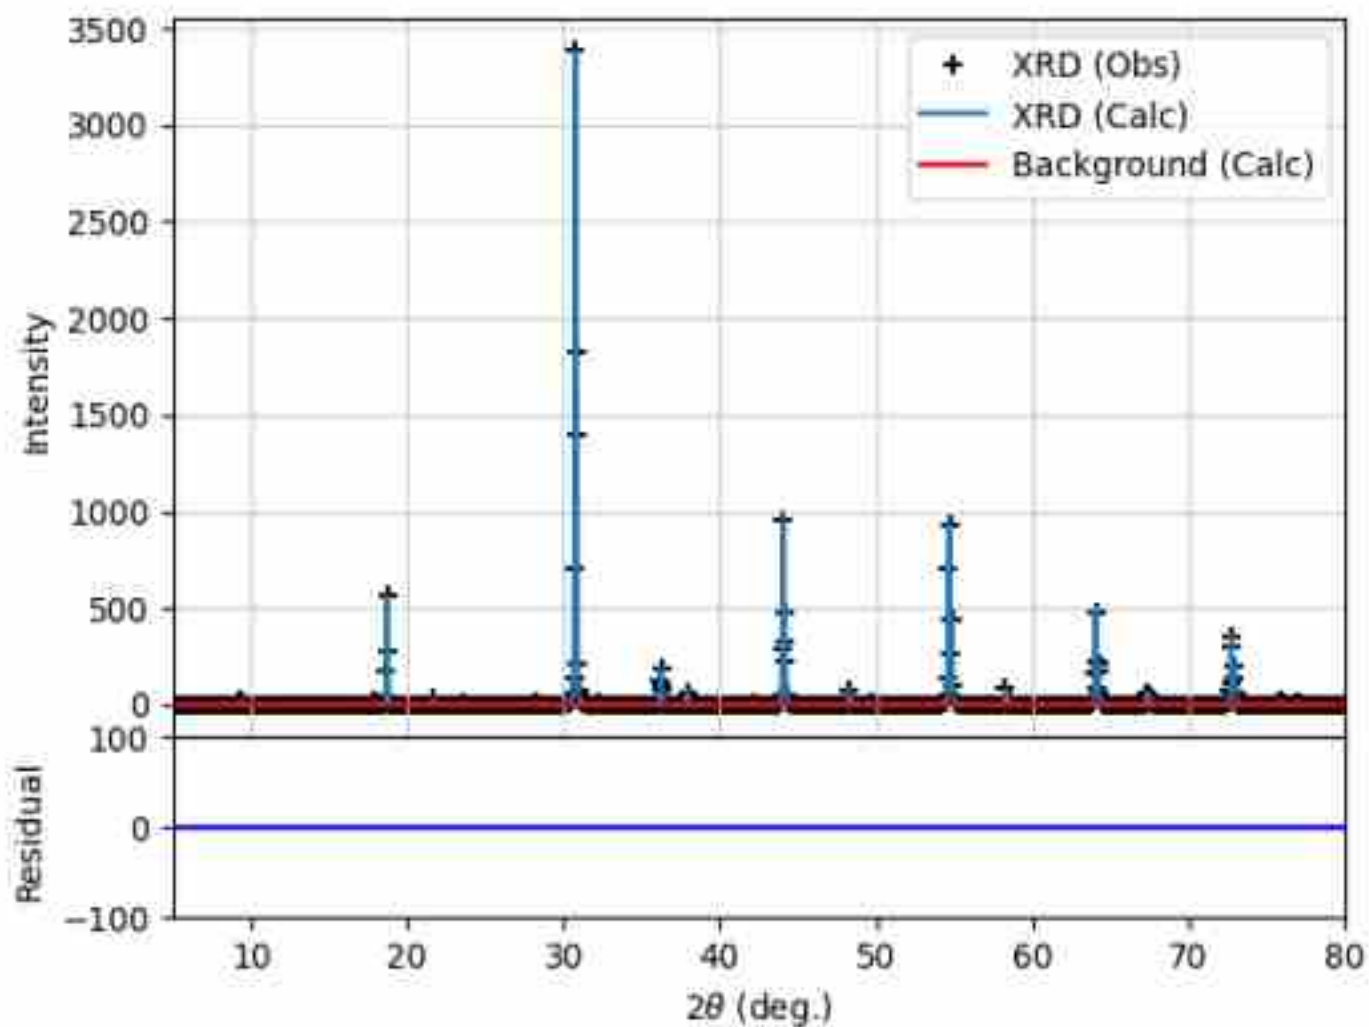

| RMSE before RR | Rwp     | RMSE after RR |
|----------------|---------|---------------|
| 0.015          | 0.02986 | 0.00581       |

# Ba4C18

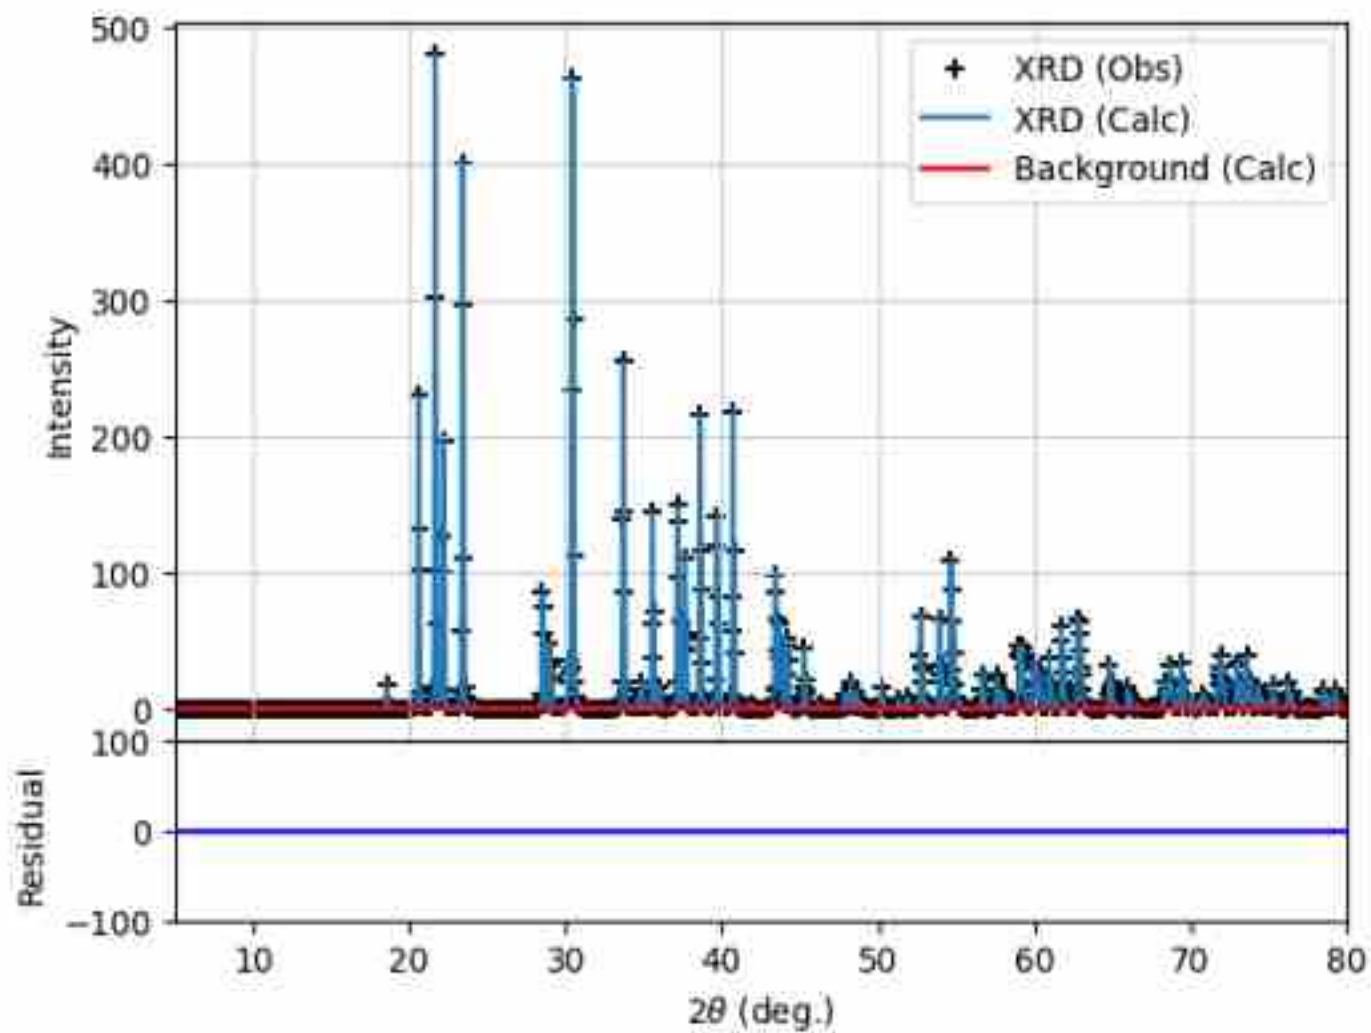

| RMSE before RR | Rwp     | RMSE after RR |
|----------------|---------|---------------|
| 0.015          | 0.00515 | 0.00043       |



# Be<sub>8</sub>V<sub>4</sub>

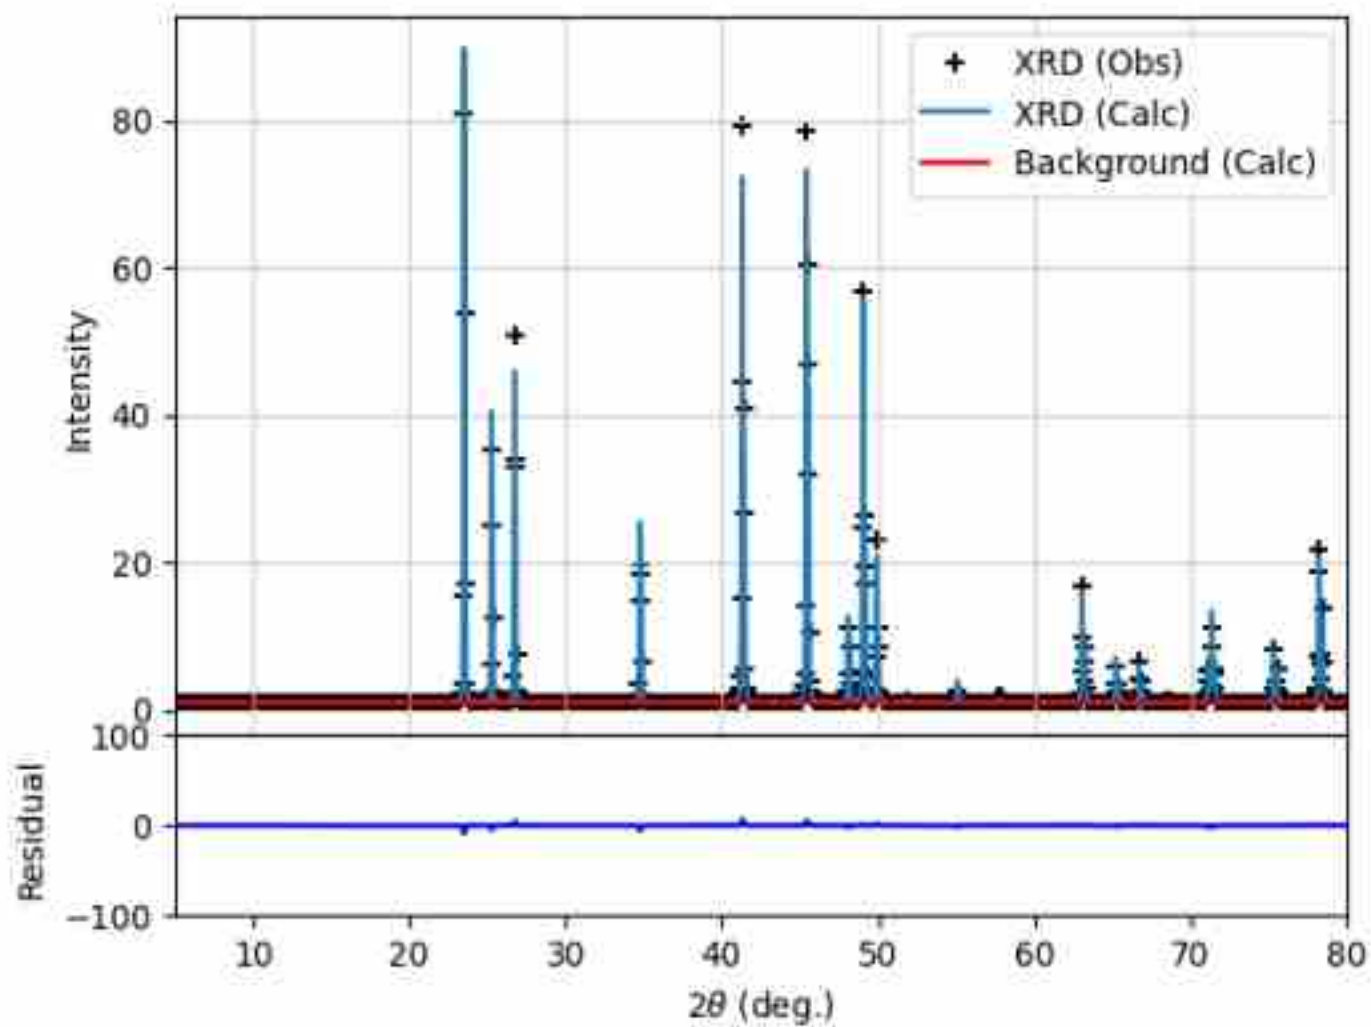

| RMSE before RR | Rwp     | RMSE after RR |
|----------------|---------|---------------|
| 0.015          | 8.19873 | 0.08          |

# Ca<sub>2</sub>AsI<sub>4</sub>

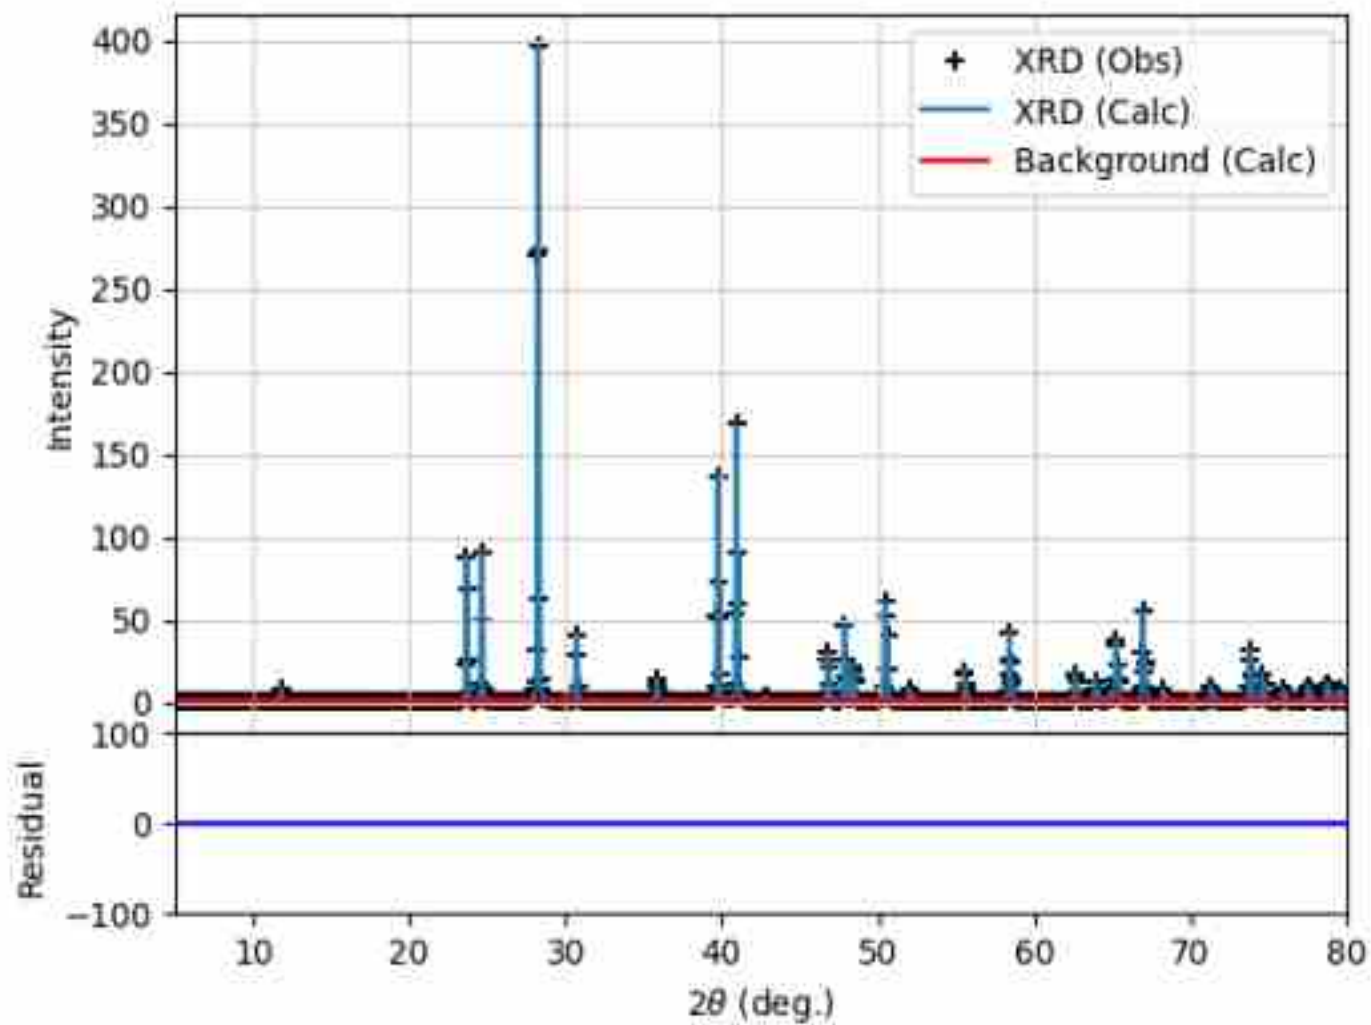

| RMSE before RR | Rwp     | RMSE after RR |
|----------------|---------|---------------|
| 0.015          | 0.00283 | 0.00041       |

# Ca<sub>3</sub>Ni<sub>9</sub>

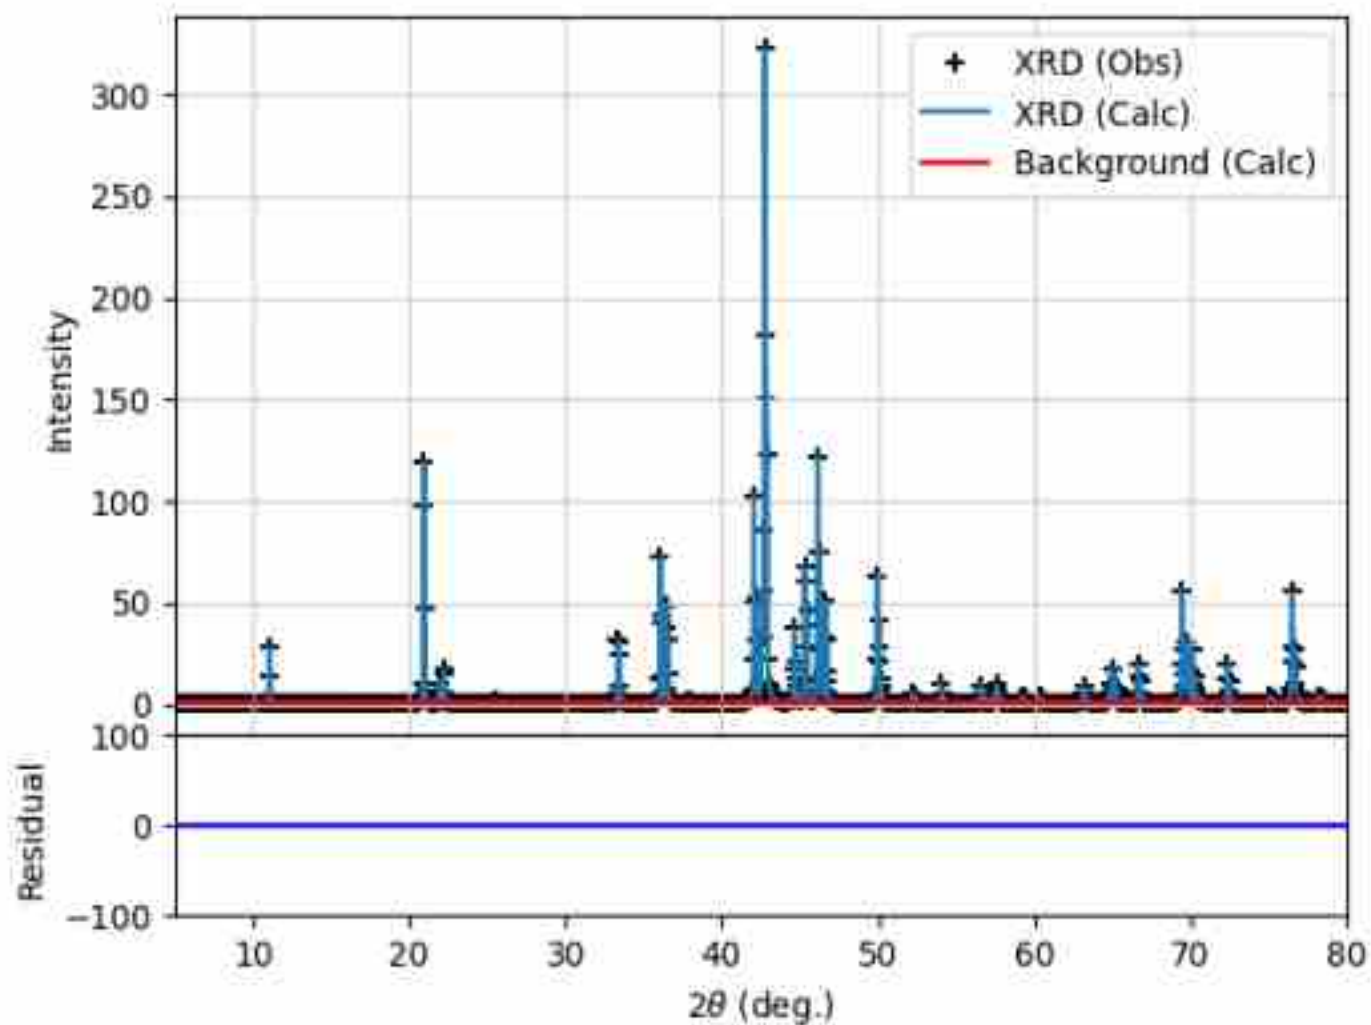

| RMSE before RR | Rwp     | RMSE after RR |
|----------------|---------|---------------|
| 0.015          | 0.00316 | 0.00027       |

# Ca<sub>3</sub>Y<sub>1</sub>Ti<sub>4</sub>O<sub>12</sub>

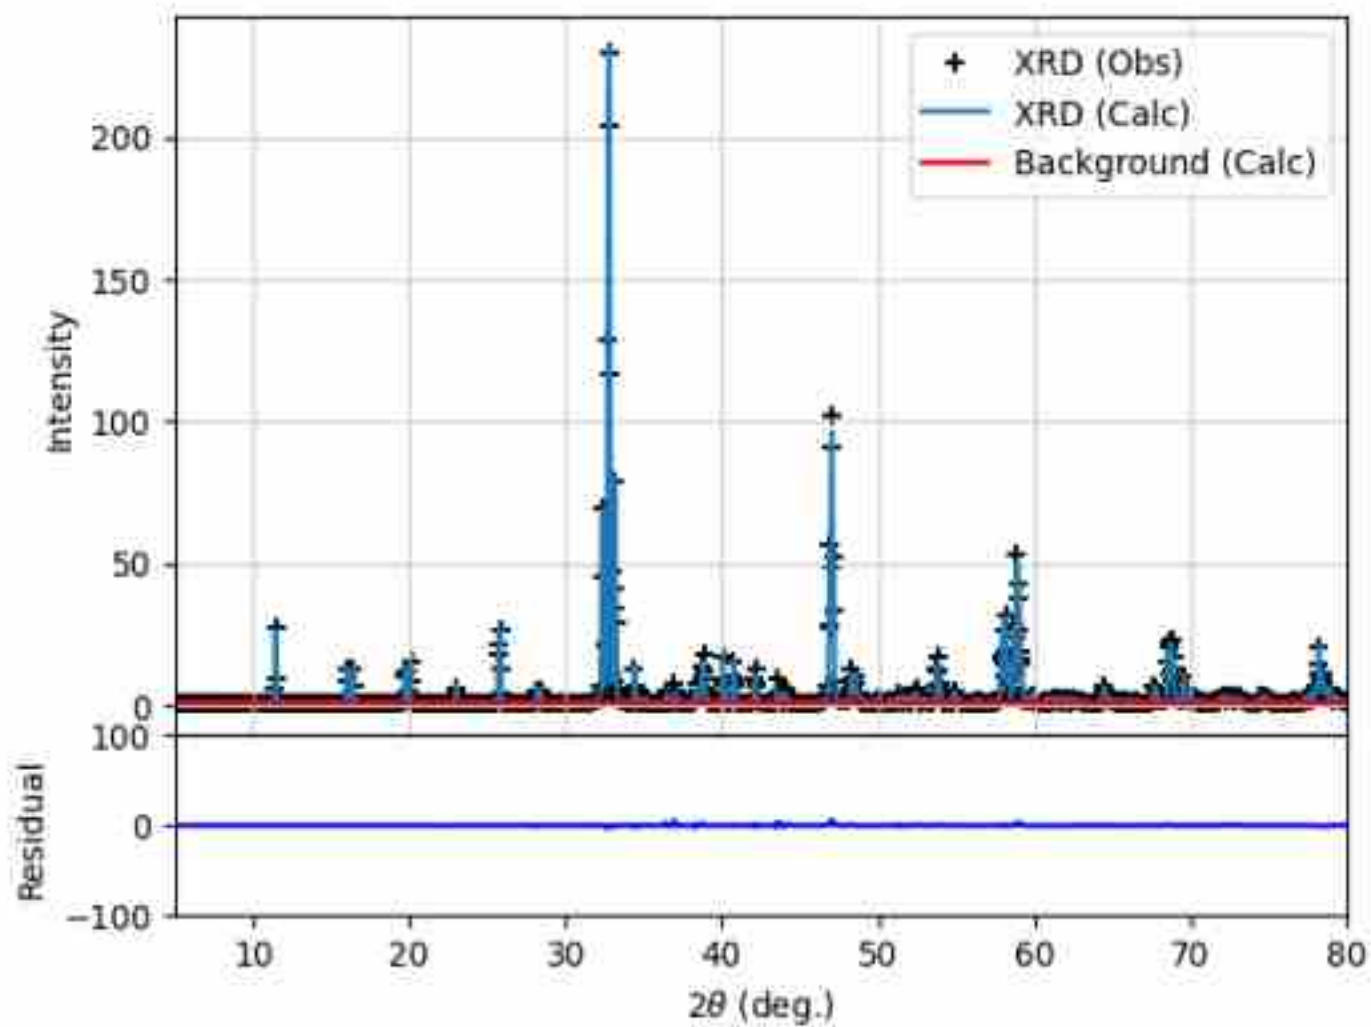

| RMSE before RR | Rwp     | RMSE after RR |
|----------------|---------|---------------|
| 0.015          | 8.70529 | 0.12237       |

# Ca<sub>4</sub>Pb<sub>2</sub>Au<sub>4</sub>

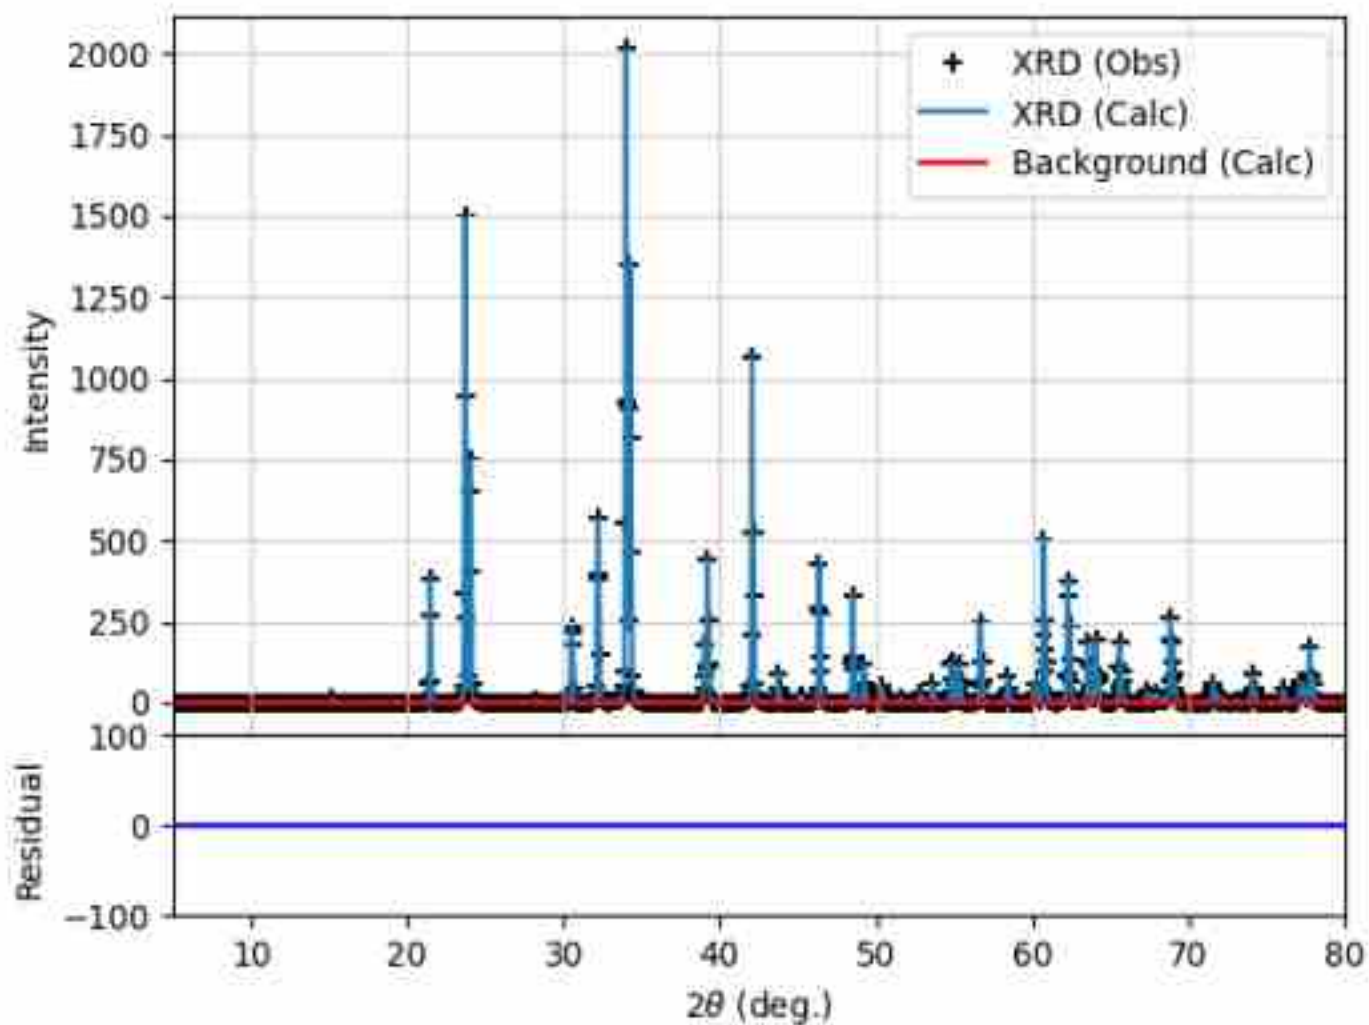

| RMSE before RR | Rwp     | RMSE after RR |
|----------------|---------|---------------|
| 0.015          | 0.01048 | 0.00113       |

# Ca6Nb2O12

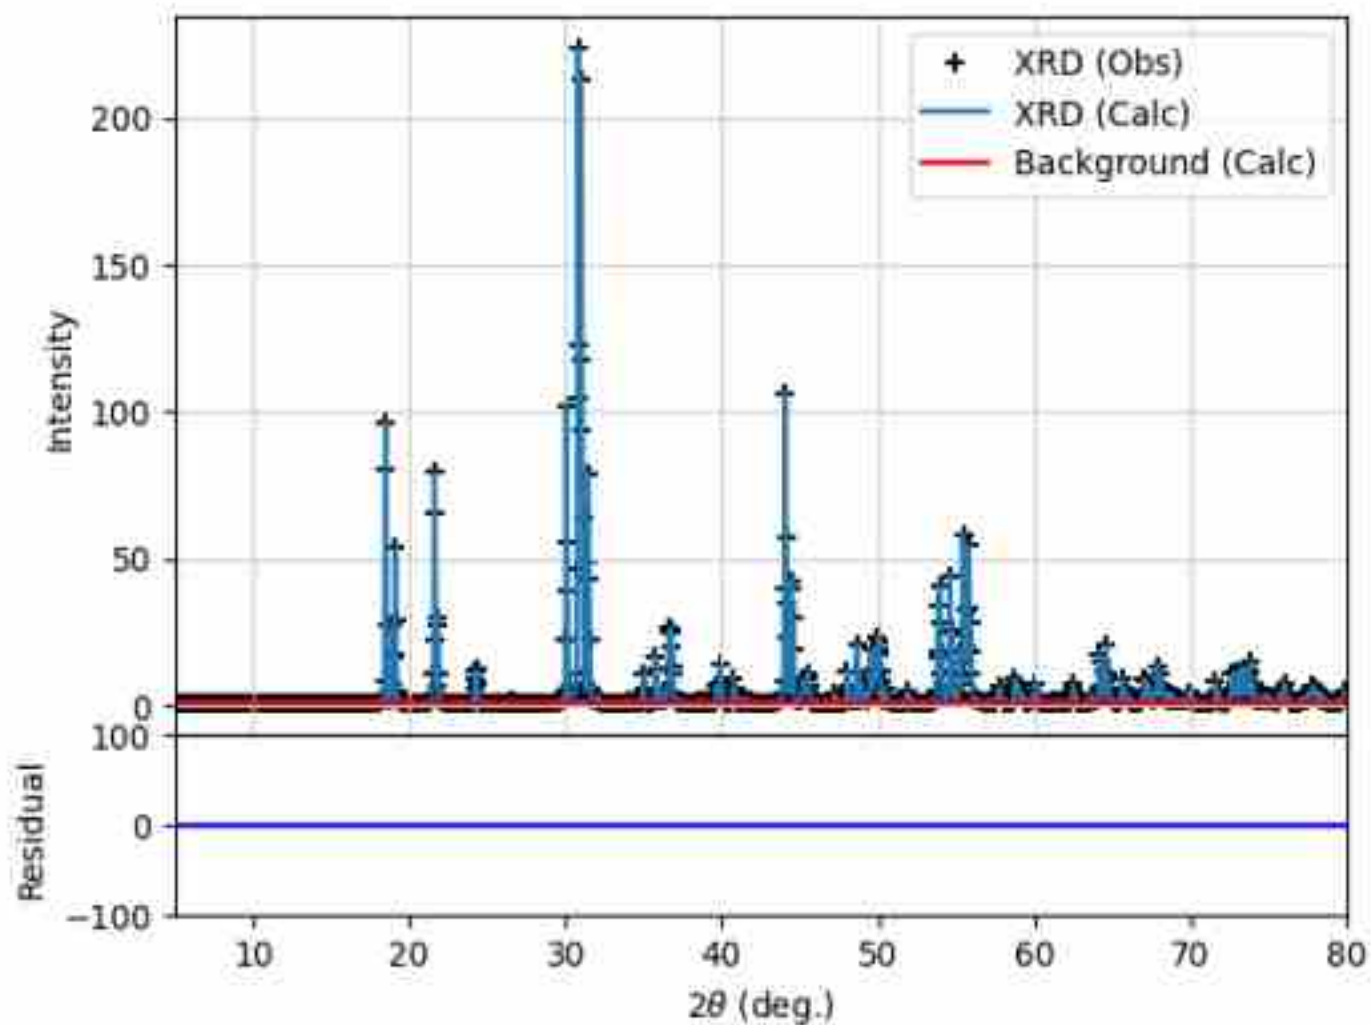

| RMSE before RR | Rwp    | RMSE after RR |
|----------------|--------|---------------|
| 0.015          | 0.0029 | 0.00073       |

# Cd<sub>3</sub>HgI

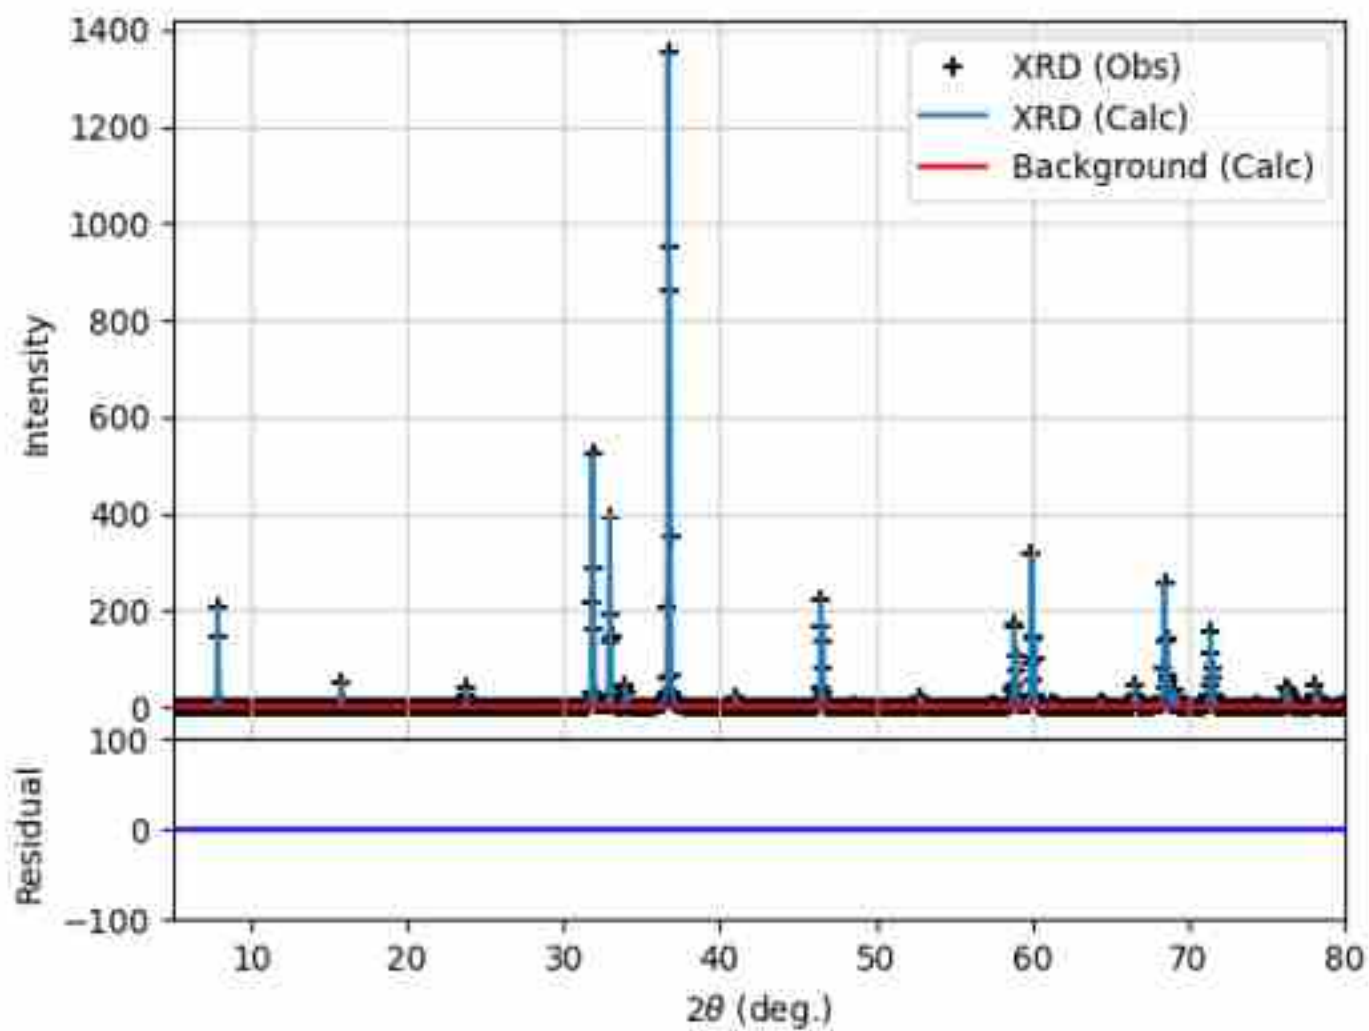

| RMSE before RR | Rwp     | RMSE after RR |
|----------------|---------|---------------|
| 0.015          | 0.00823 | 0.00045       |

# Ce1Dy4S7

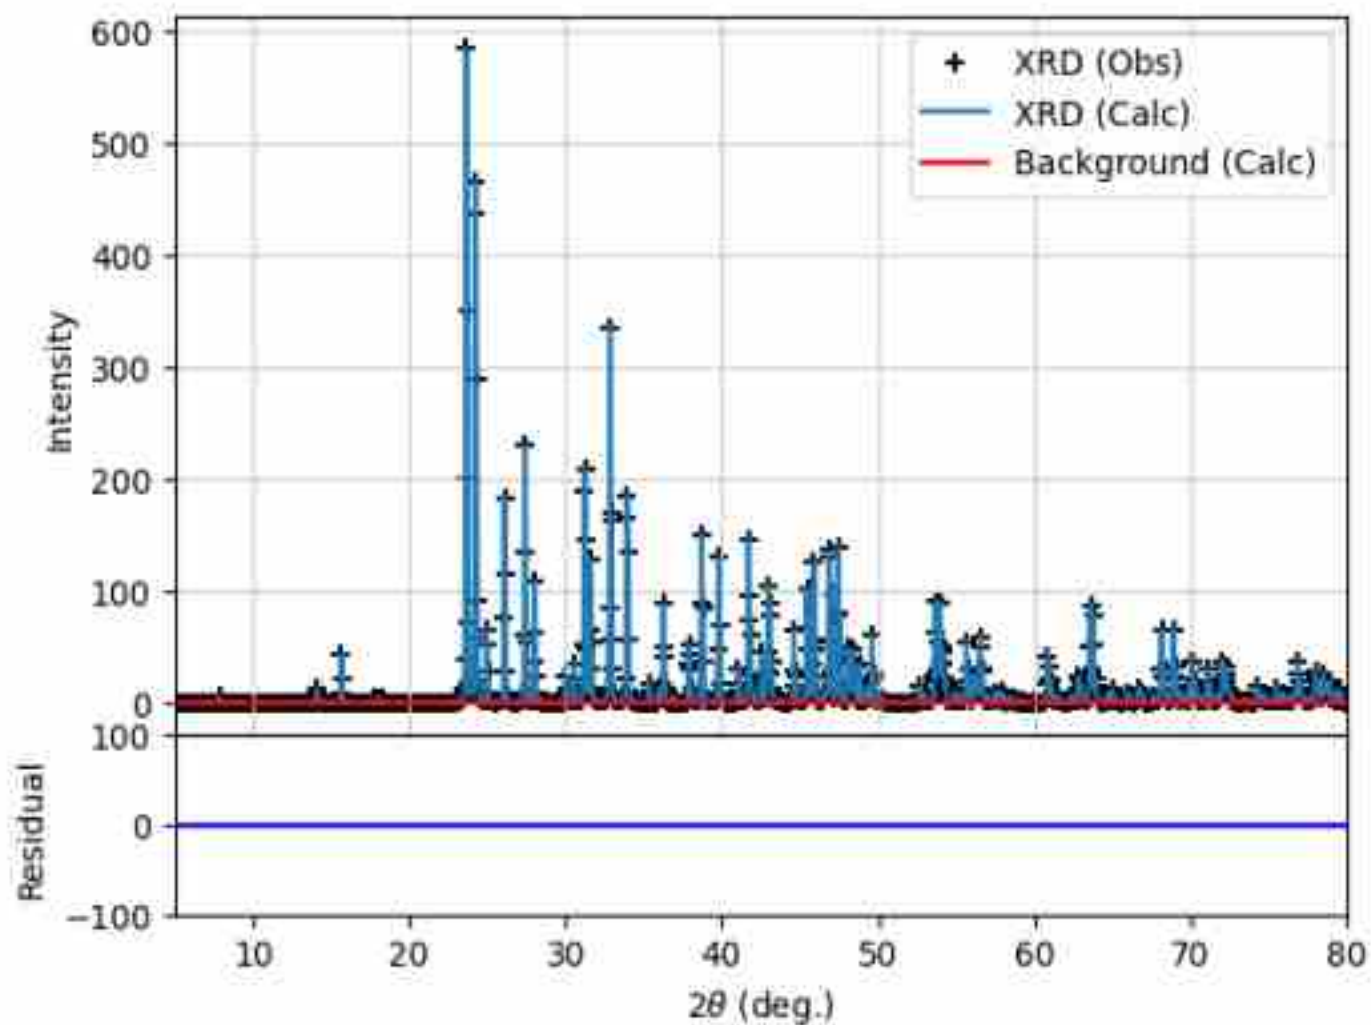

| RMSE before RR | Rwp     | RMSE after RR |
|----------------|---------|---------------|
| 0.015          | 0.00333 | 0.0004        |



# Ce1U1Zn17

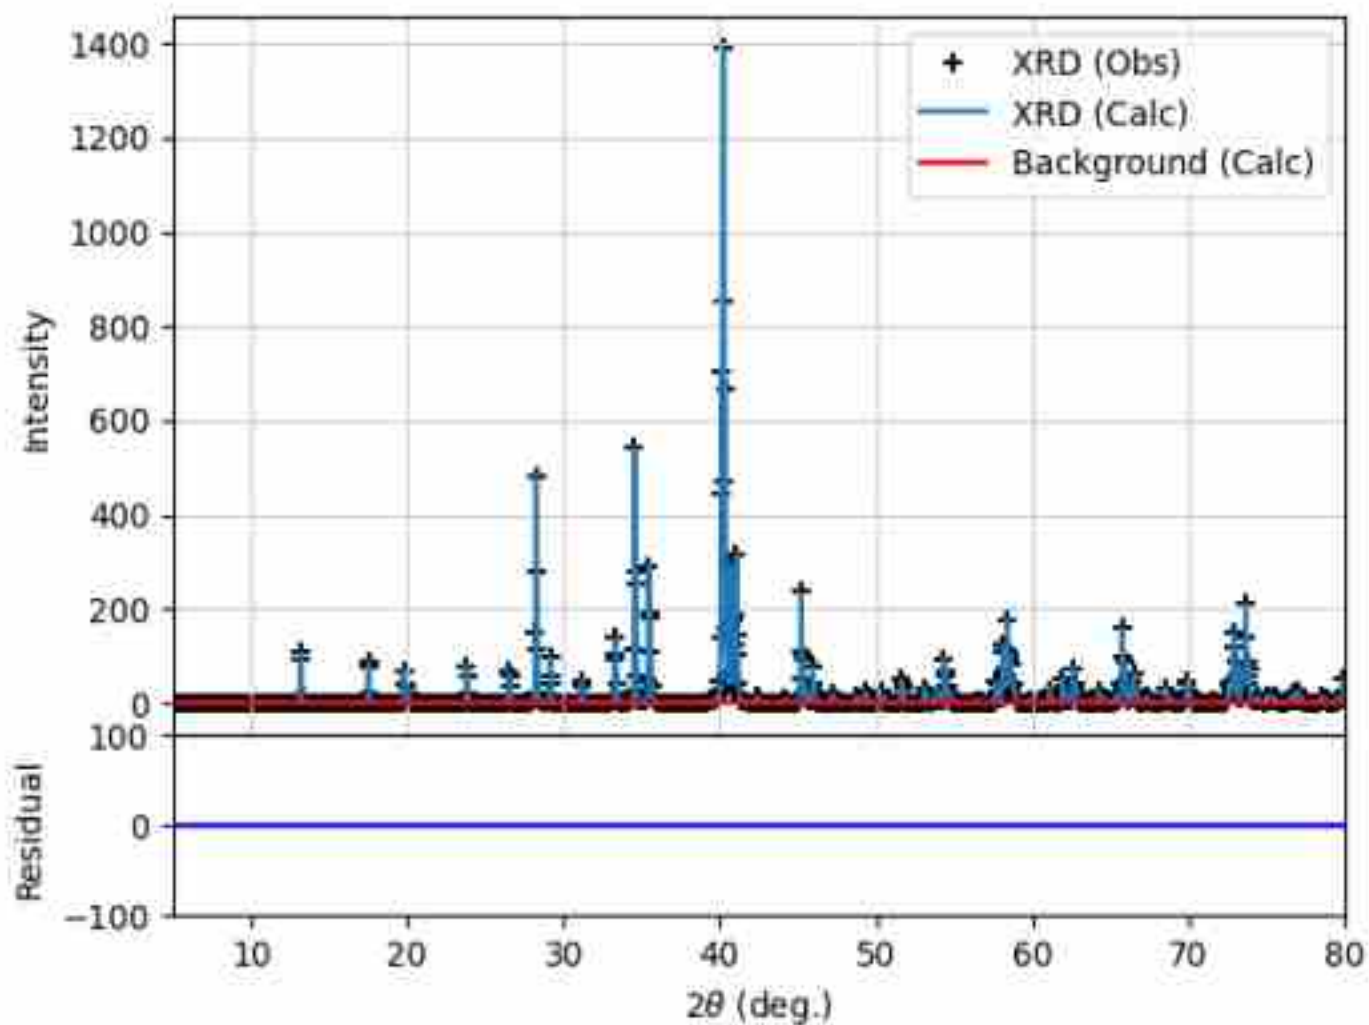

| RMSE before RR | Rwp     | RMSE after RR |
|----------------|---------|---------------|
| 0.015          | 0.00333 | 0.00062       |

# Ce1Zn1Ag1As2

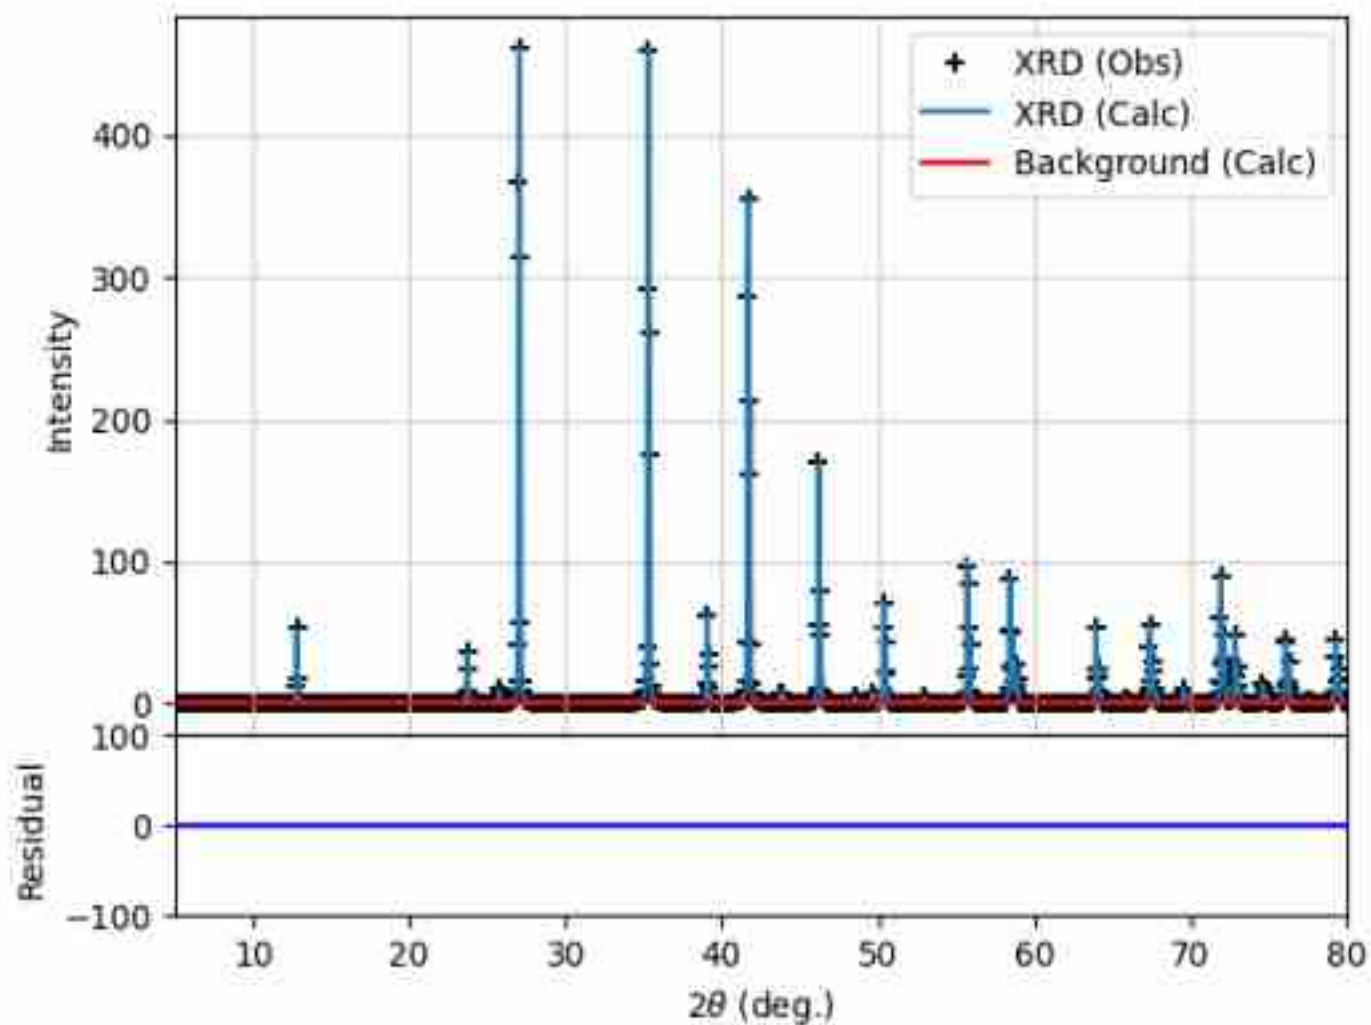

| RMSE before RR | Rwp    | RMSE after RR |
|----------------|--------|---------------|
| 0.015          | 0.0035 | 0.00038       |

# Ce<sub>1</sub>Zr<sub>3</sub>Mn<sub>8</sub>

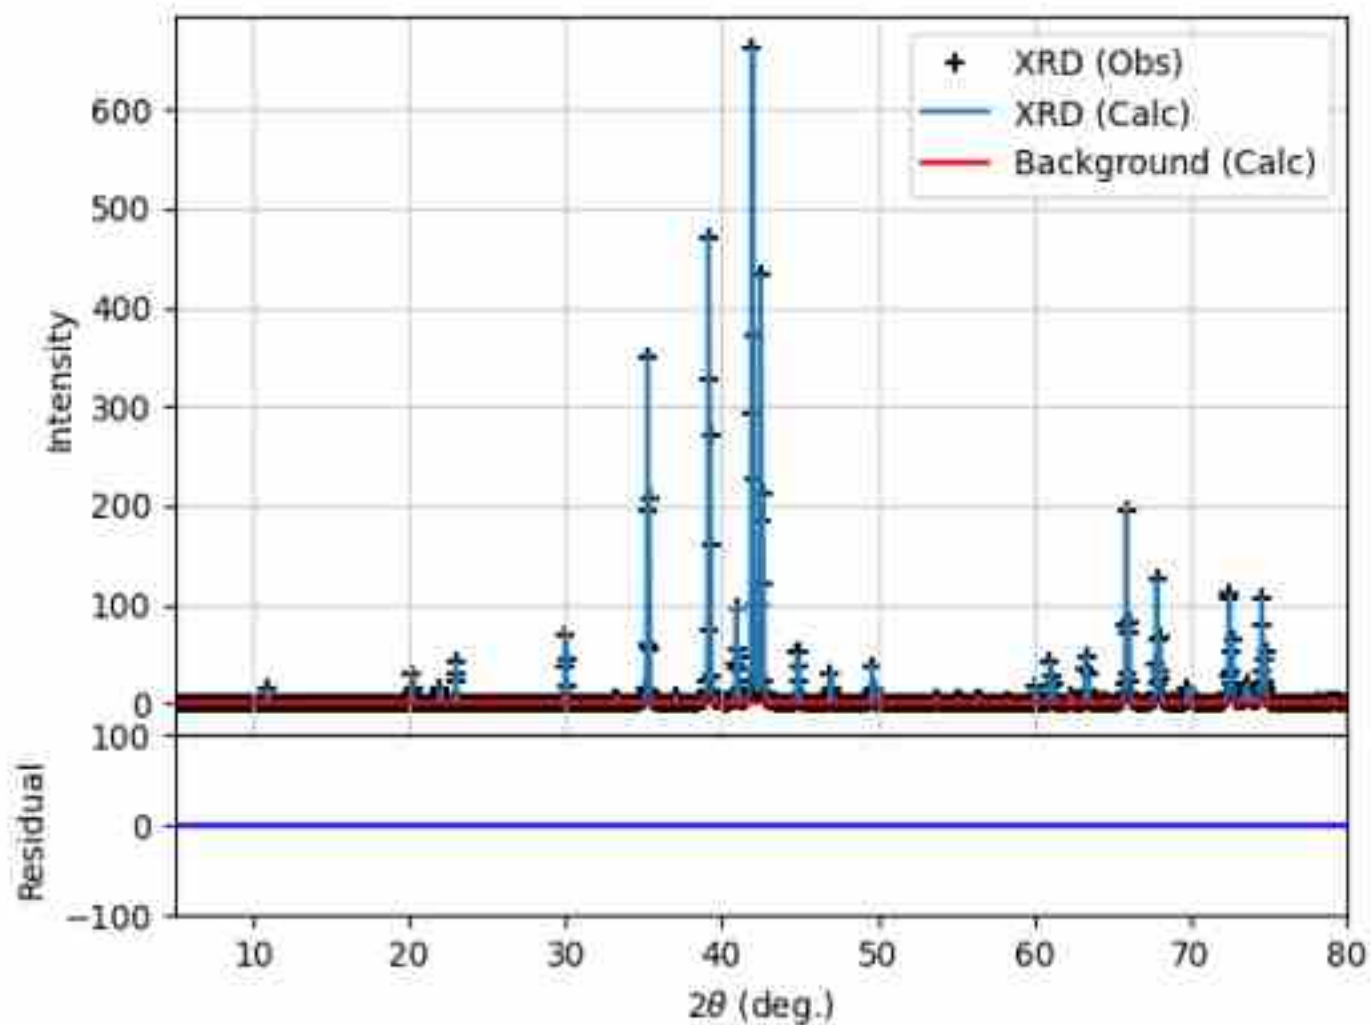

| RMSE before RR | Rwp    | RMSE after RR |
|----------------|--------|---------------|
| 0.015          | 0.0024 | 0.00048       |

# Ce<sub>2</sub>Ge<sub>3</sub>Rh<sub>1</sub>

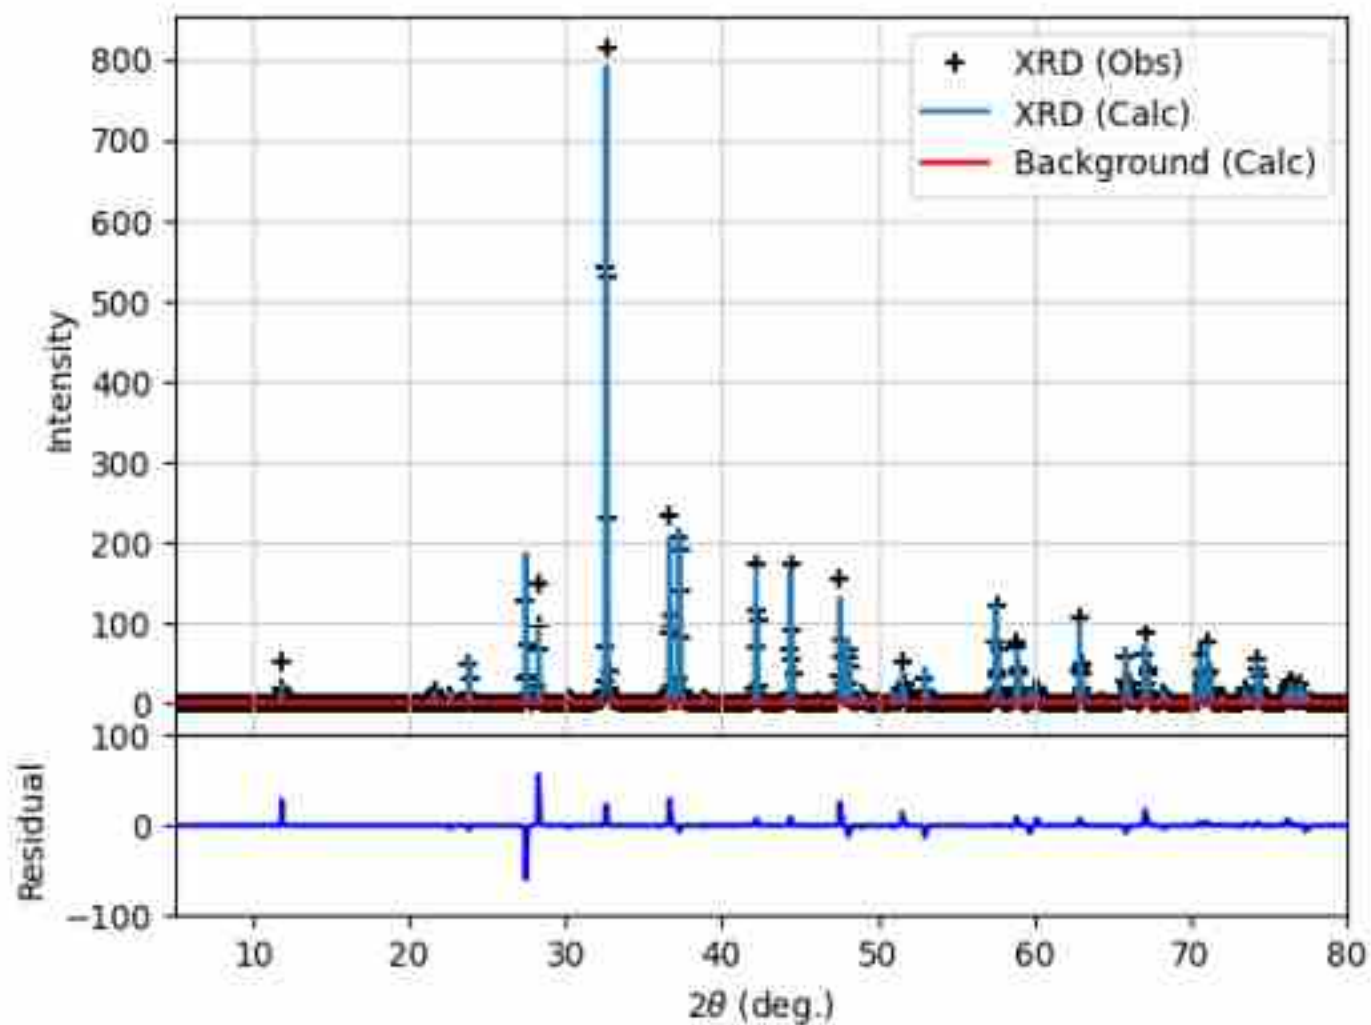

| RMSE before RR | Rwp      | RMSE after RR |
|----------------|----------|---------------|
| 0.015          | 16.17228 | 0.04181       |

# Ce<sub>3</sub>Hg<sub>3</sub>Pd<sub>3</sub>

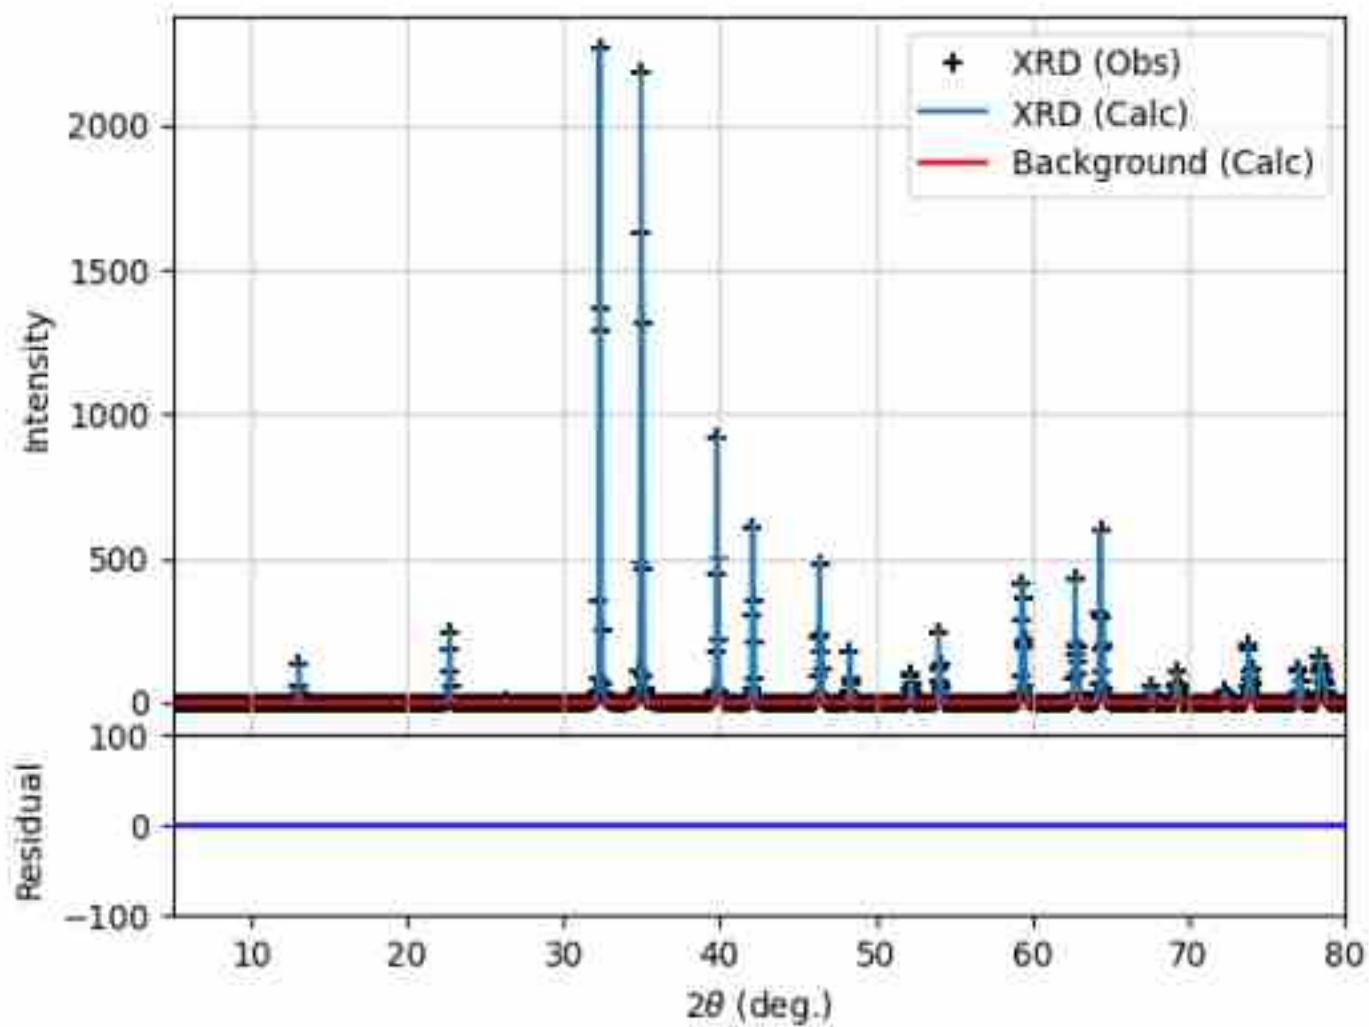

| RMSE before RR | Rwp     | RMSE after RR |
|----------------|---------|---------------|
| 0.015          | 0.01287 | 0.00135       |

# Ce<sub>3</sub>In<sub>3</sub>Ir<sub>3</sub>

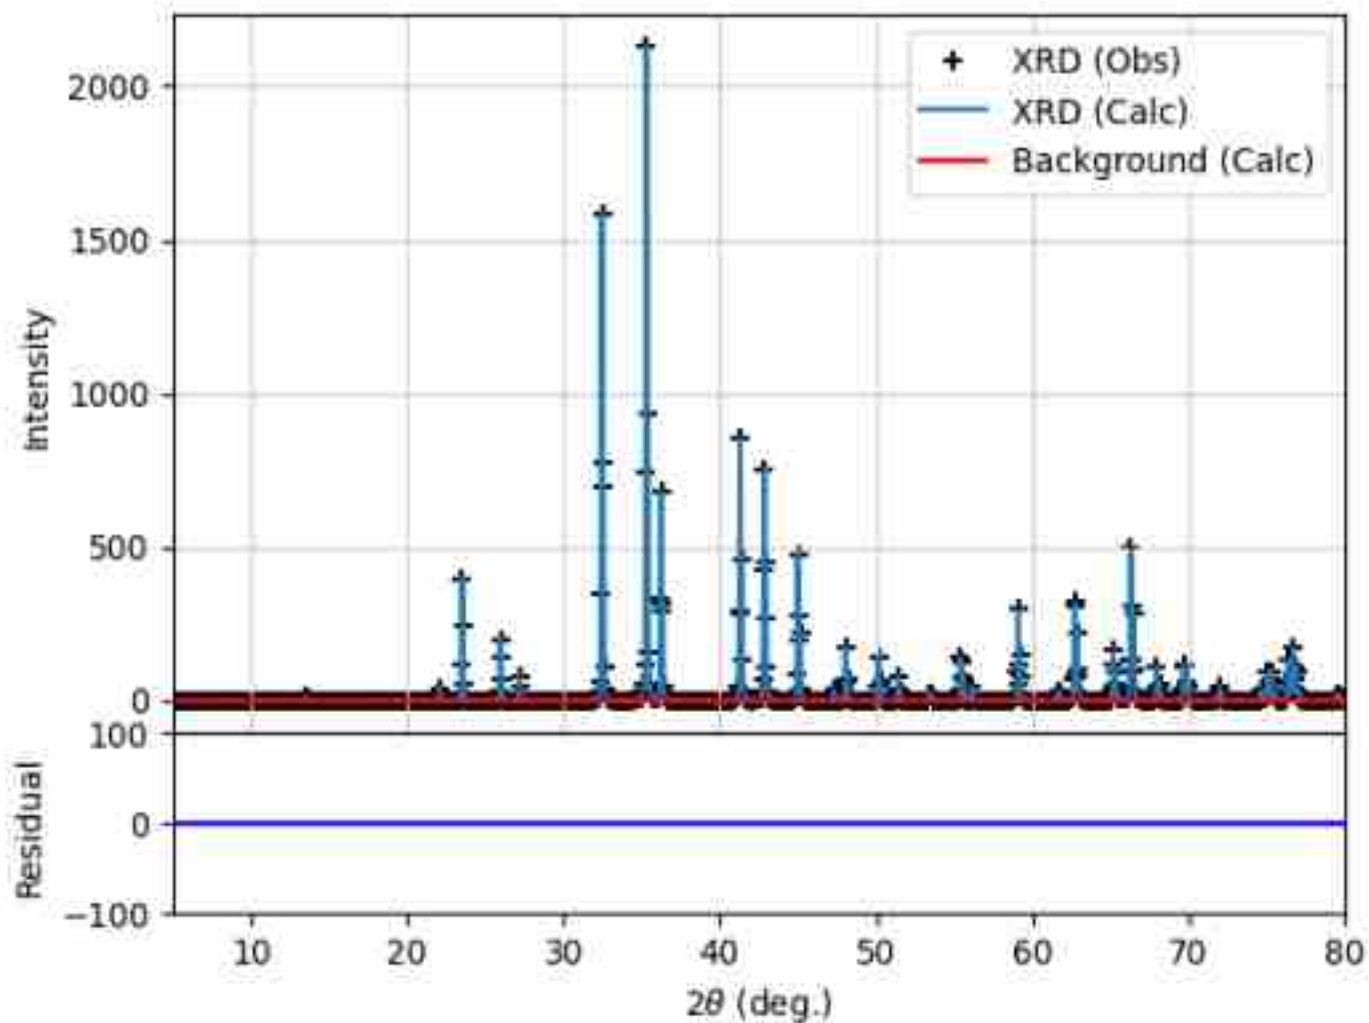

| RMSE before RR | Rwp     | RMSE after RR |
|----------------|---------|---------------|
| 0.015          | 0.00641 | 0.00117       |

# Ce<sub>3</sub>Ta<sub>2</sub>N<sub>6</sub>

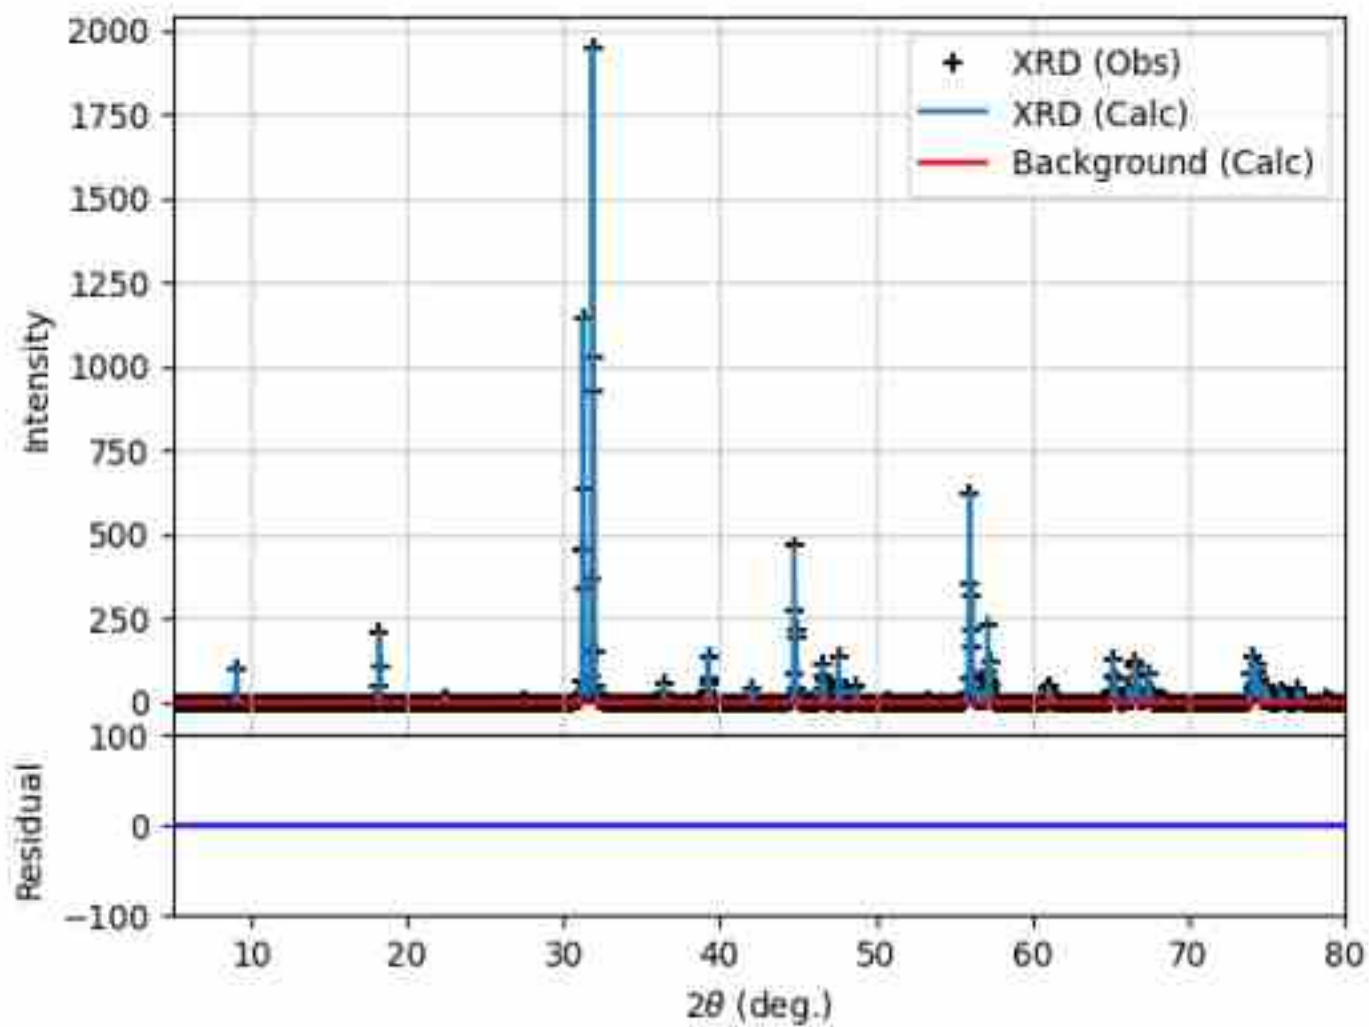

| RMSE before RR | Rwp     | RMSE after RR |
|----------------|---------|---------------|
| 0.015          | 0.00348 | 0.00225       |

# Ce<sub>4</sub>In<sub>2</sub>Rh<sub>4</sub>

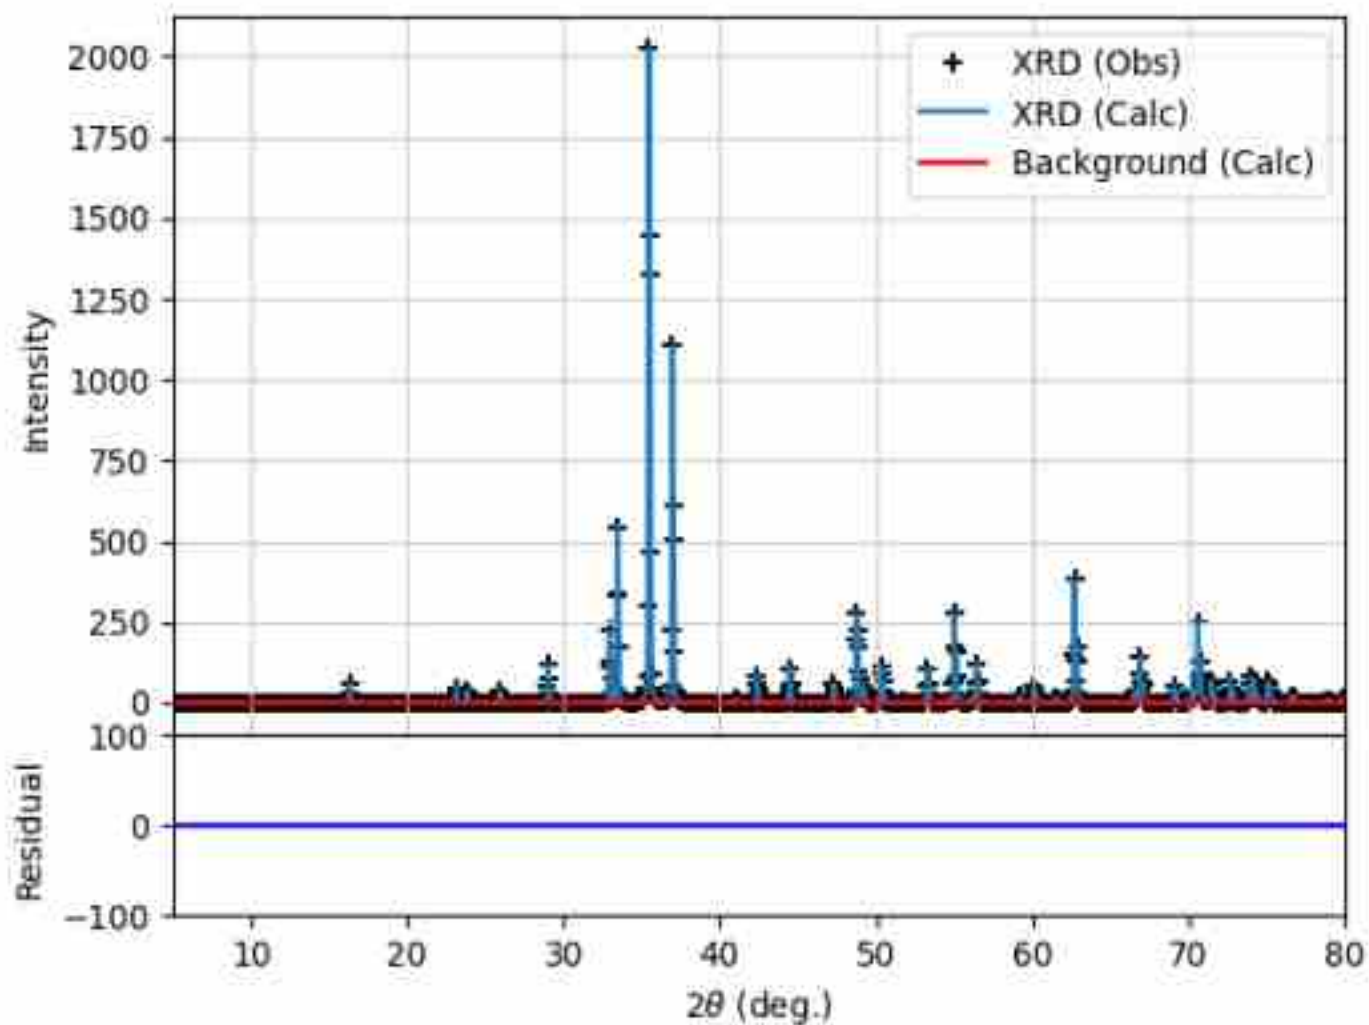

| RMSE before RR | Rwp    | RMSE after RR |
|----------------|--------|---------------|
| 0.015          | 0.0098 | 0.00044       |



# Ce4Ni4P4

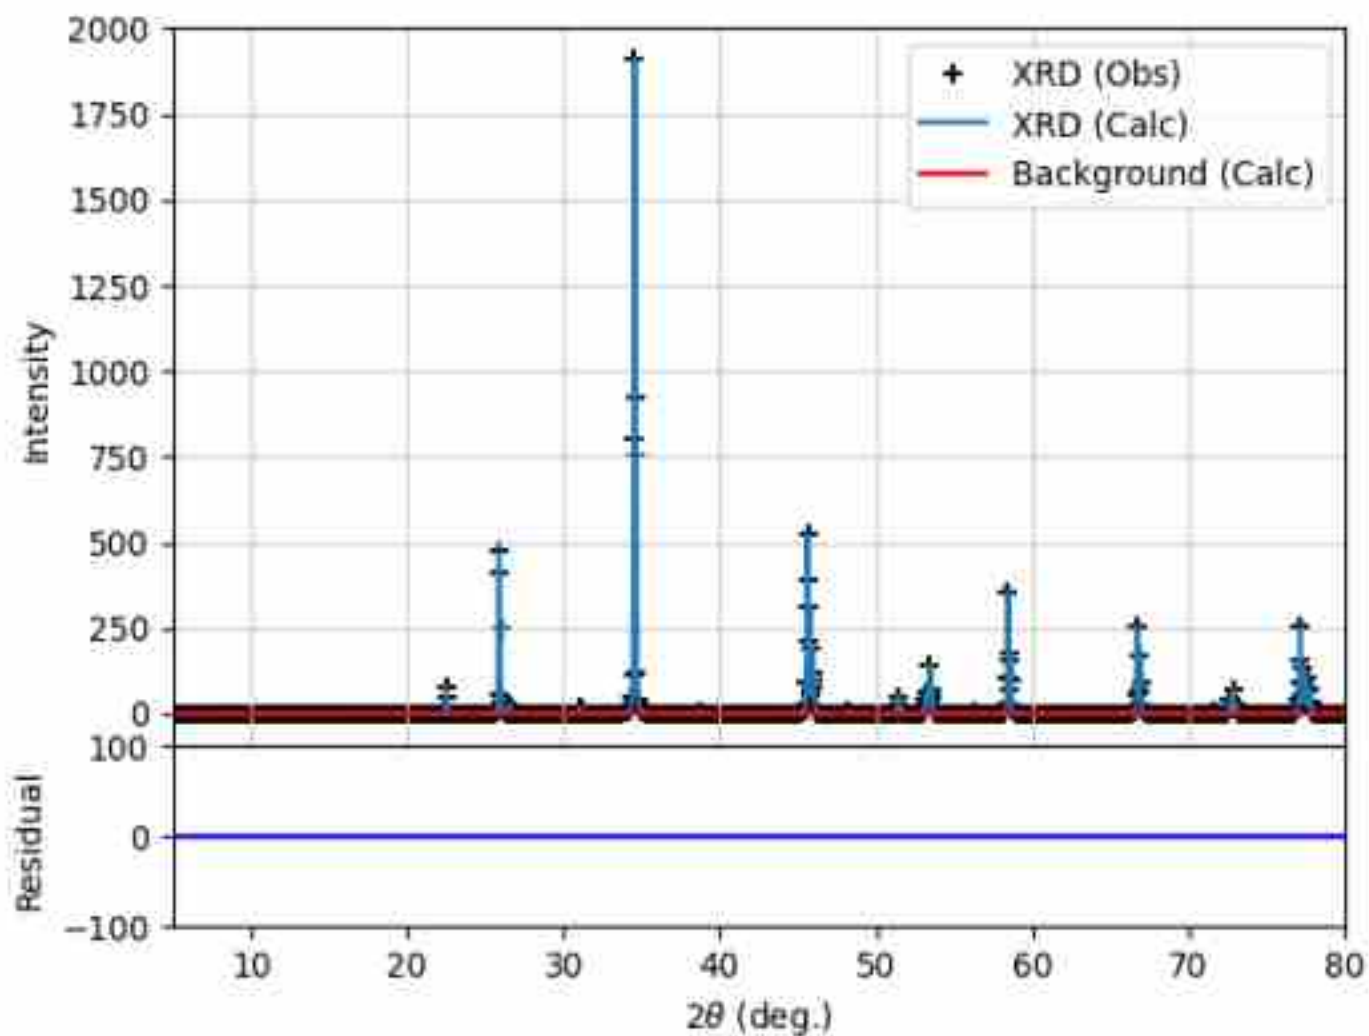

| RMSE before RR | Rwp     | RMSE after RR |
|----------------|---------|---------------|
| 0.015          | 0.00343 | 0.00043       |

# Ce6Ga2

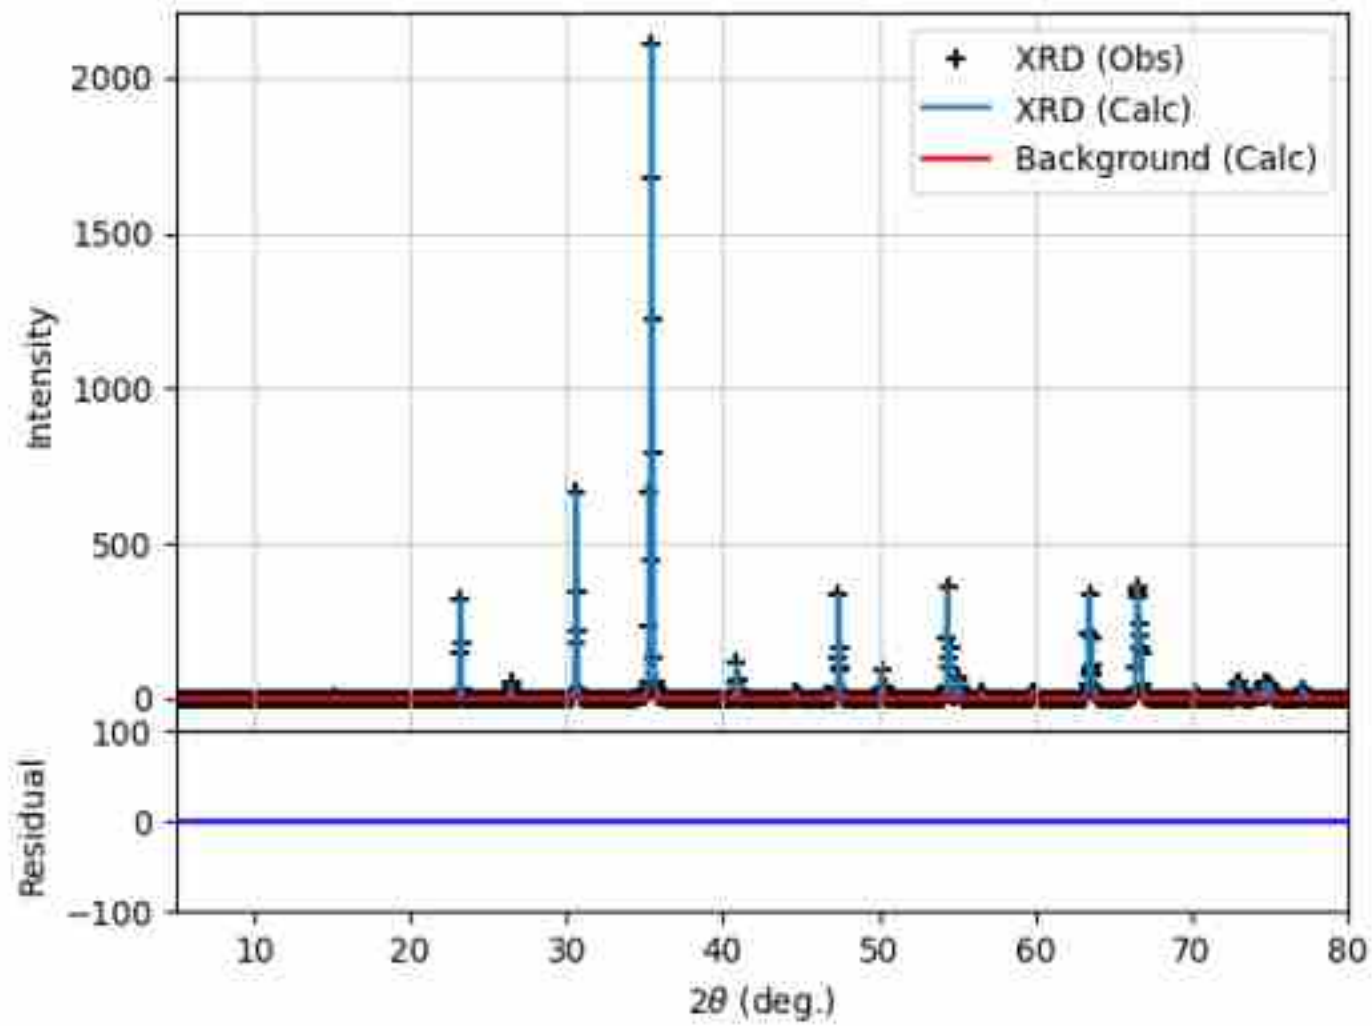

| RMSE before RR | Rwp    | RMSE after RR |
|----------------|--------|---------------|
| 0.015          | 0.0163 | 0.00113       |

# Co2Pd6

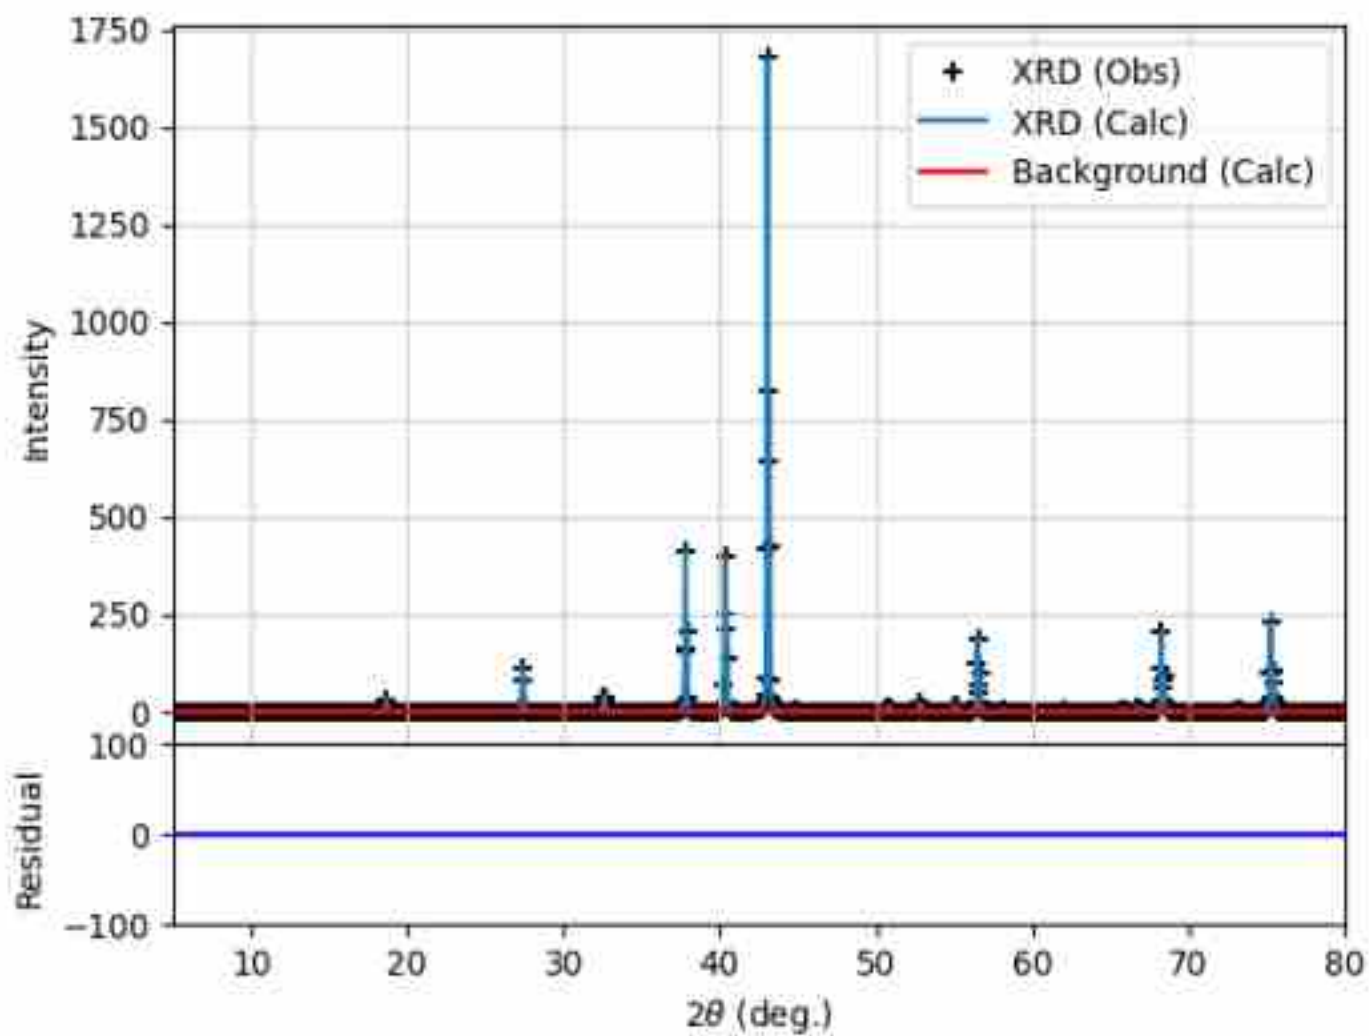

| RMSE before RR | Rwp     | RMSE after RR |
|----------------|---------|---------------|
| 0.015          | 0.01722 | 0.00263       |

# Co8P4

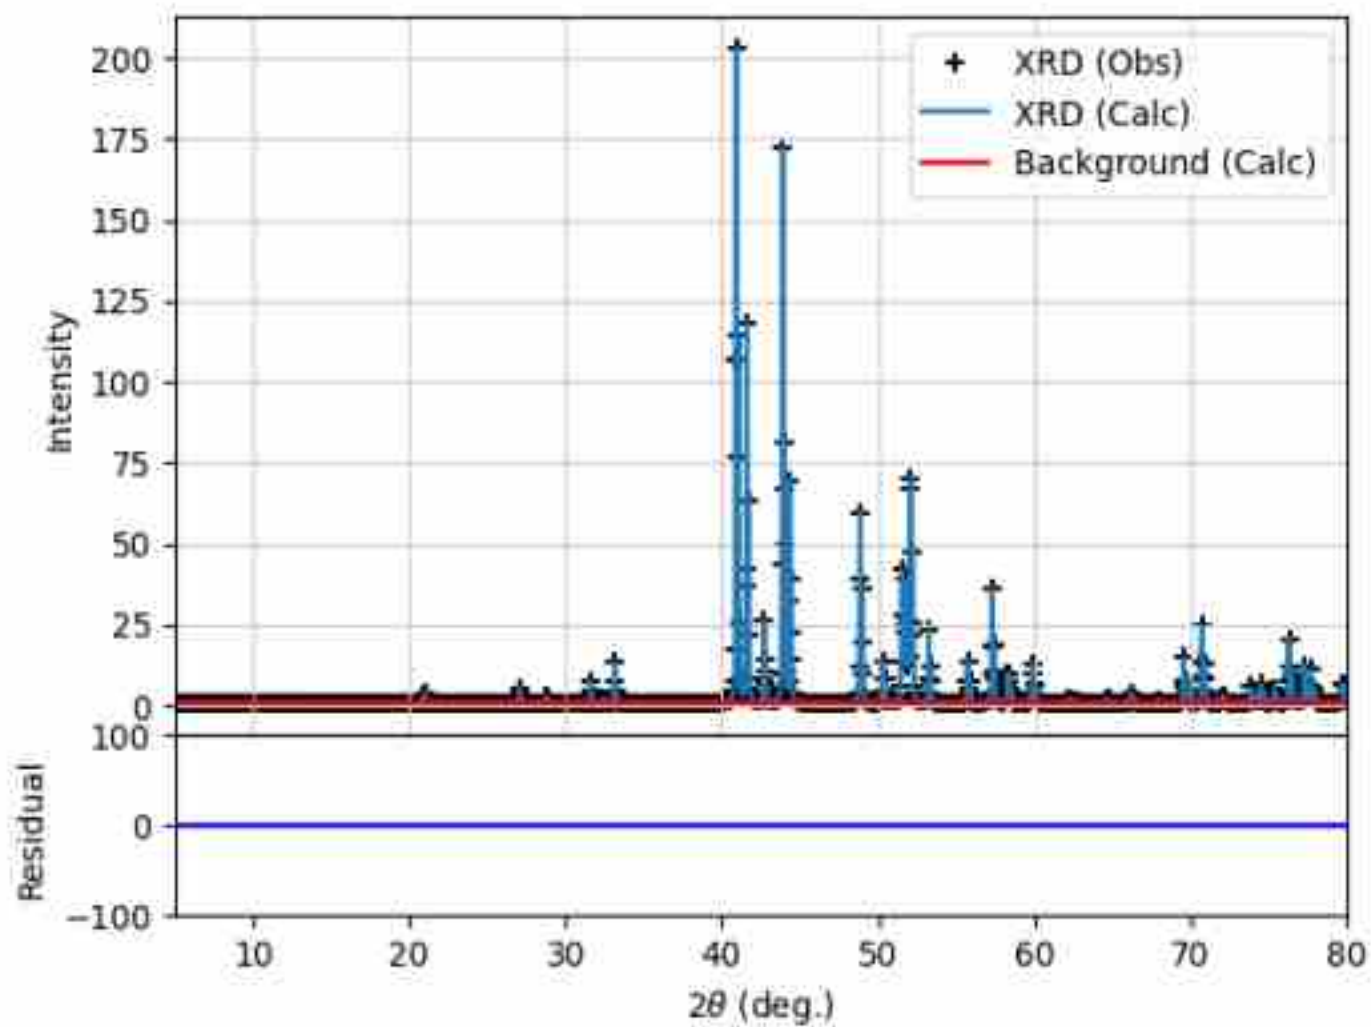

| RMSE before RR | Rwp     | RMSE after RR |
|----------------|---------|---------------|
| 0.015          | 0.00311 | 0.00036       |

# Cr1Sb1O4

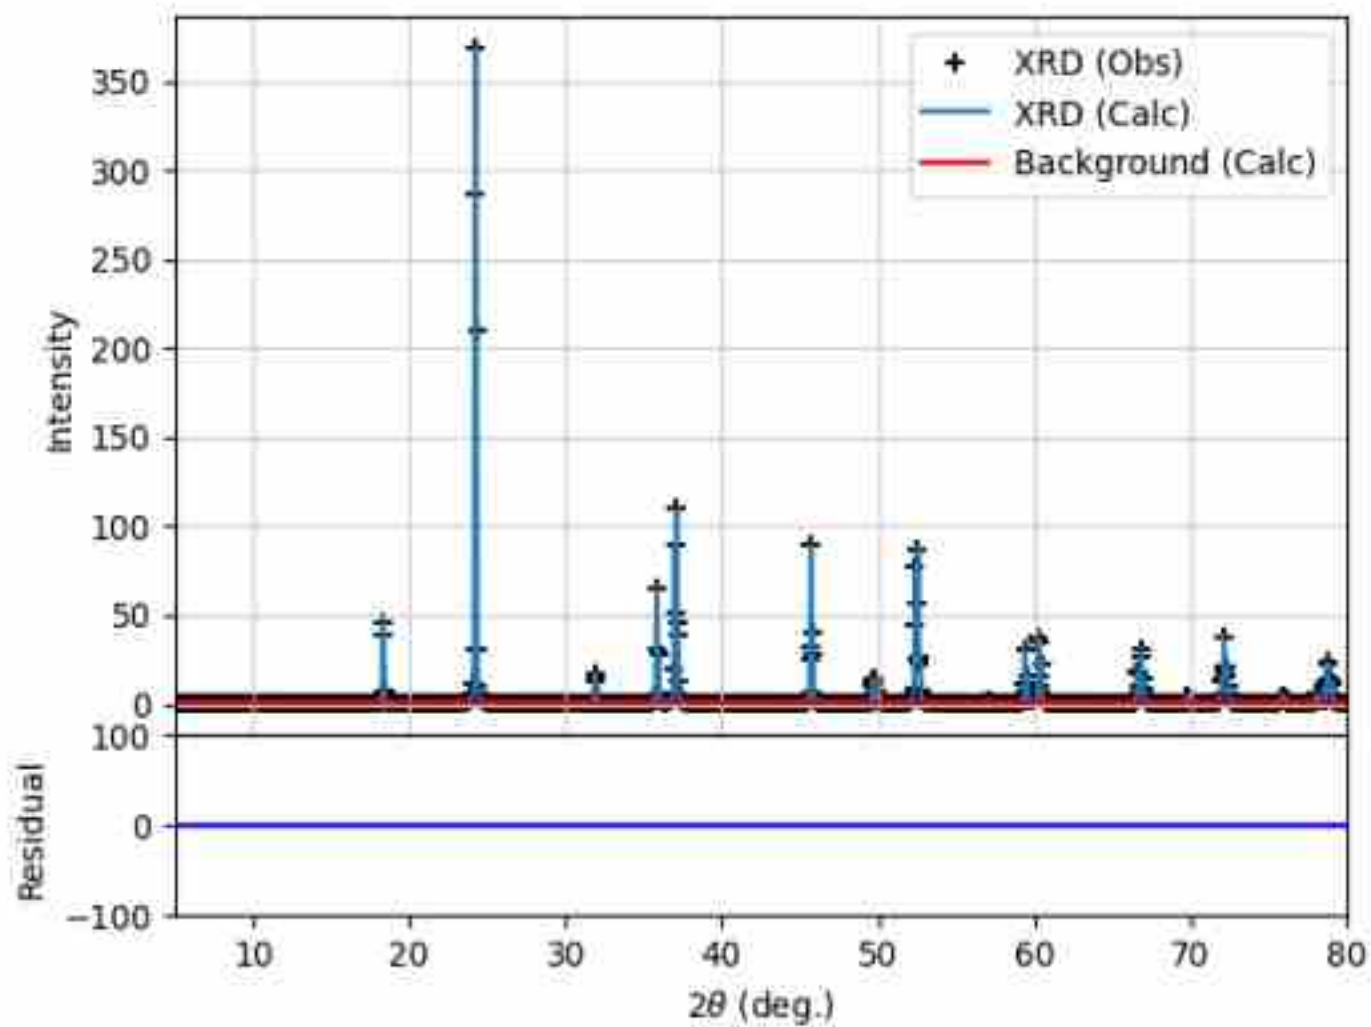

| RMSE before RR | Rwp     | RMSE after RR |
|----------------|---------|---------------|
| 0.015          | 0.00207 | 0.00087       |

# Cr<sub>2</sub>Cl<sub>6</sub>

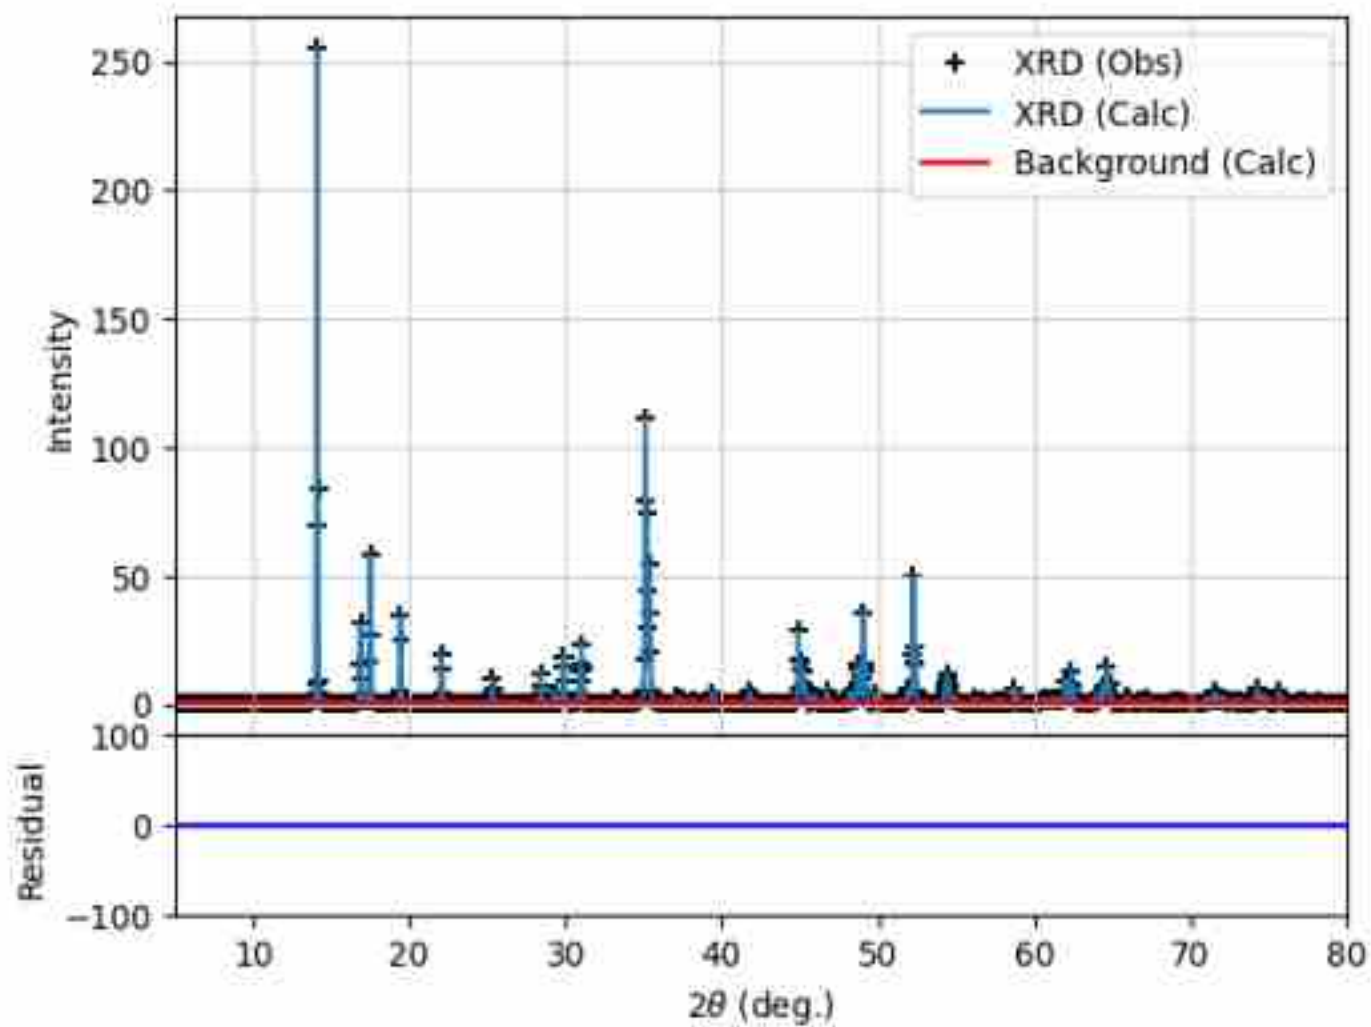

| RMSE before RR | Rwp     | RMSE after RR |
|----------------|---------|---------------|
| 0.015          | 0.00252 | 0.00044       |

# Cr<sub>3</sub>Fe<sub>3</sub>Ge<sub>1</sub>As<sub>2</sub>

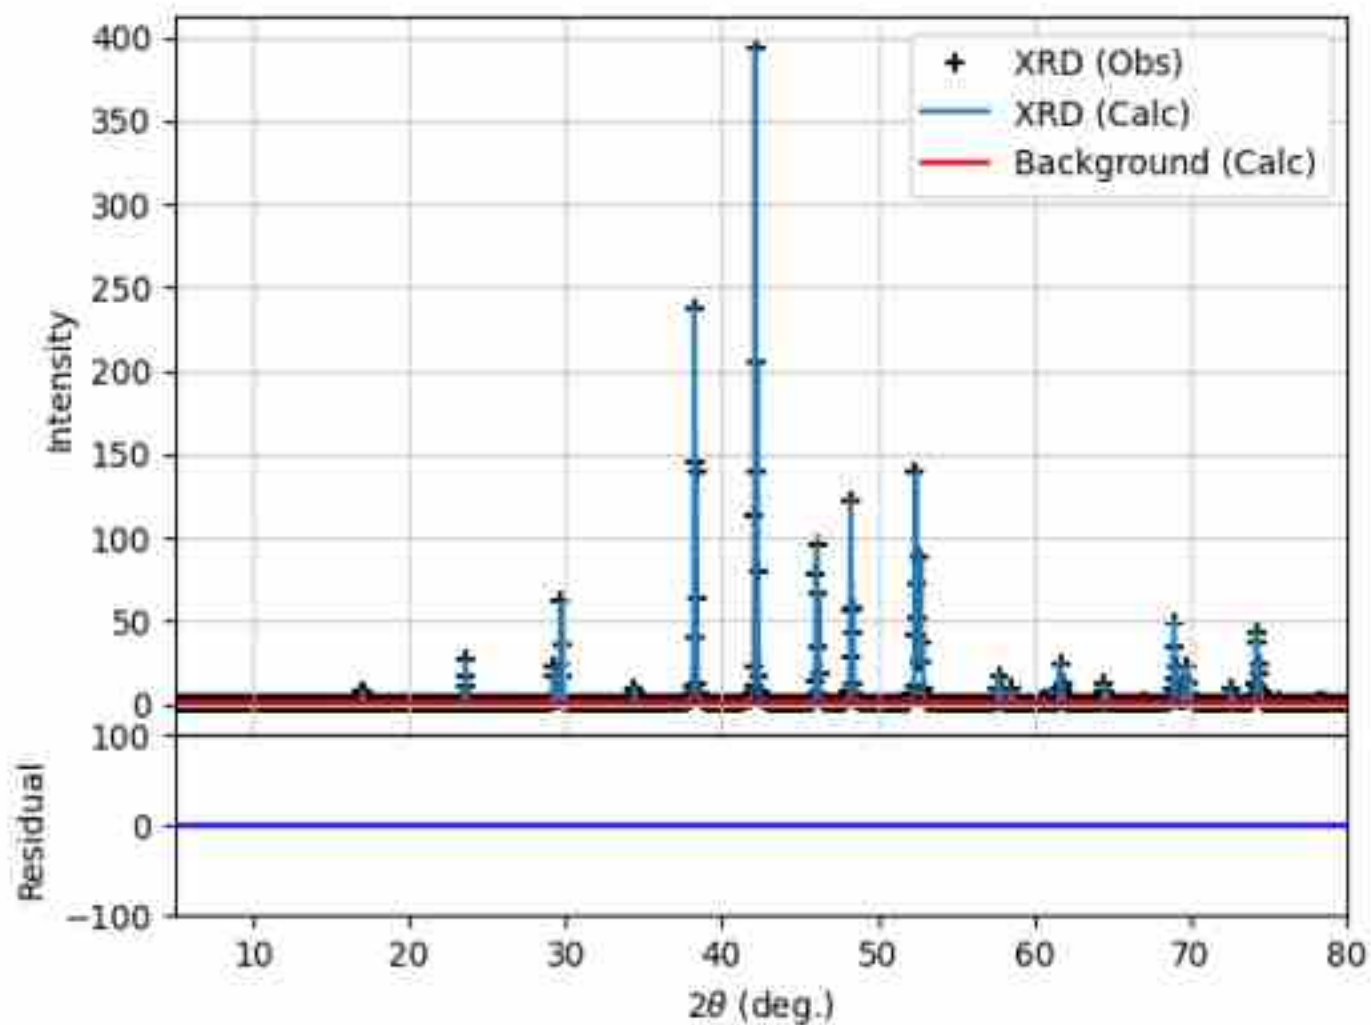

| RMSE before RR | Rwp     | RMSE after RR |
|----------------|---------|---------------|
| 0.015          | 0.01035 | 0.00153       |

# Cr6As2

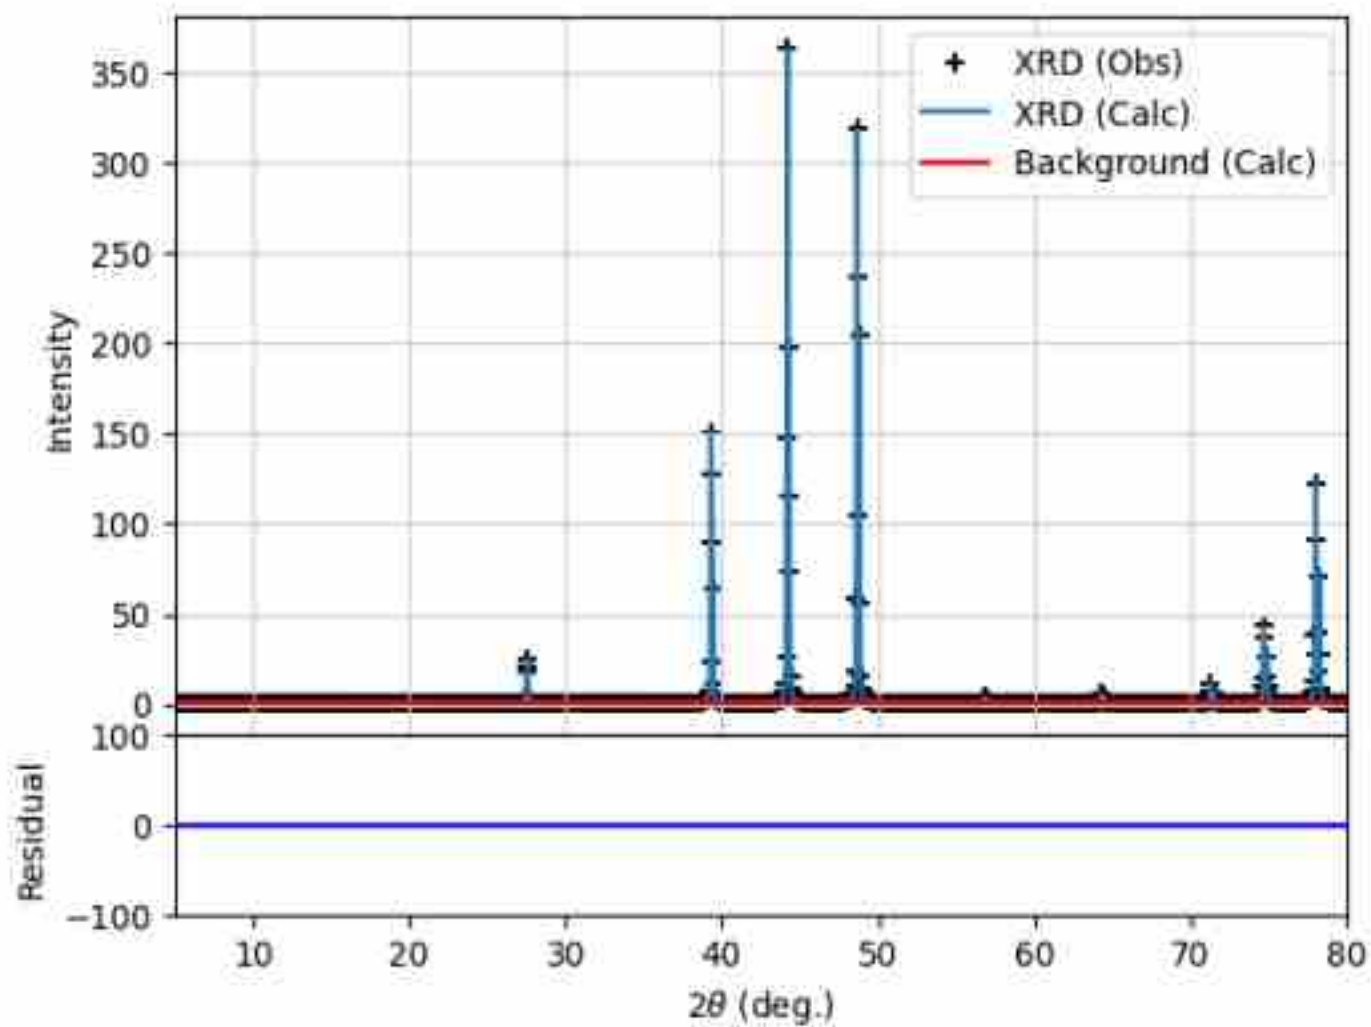

| RMSE before RR | Rwp     | RMSE after RR |
|----------------|---------|---------------|
| 0.015          | 0.00797 | 0.00076       |



# Cs1Sr1I3

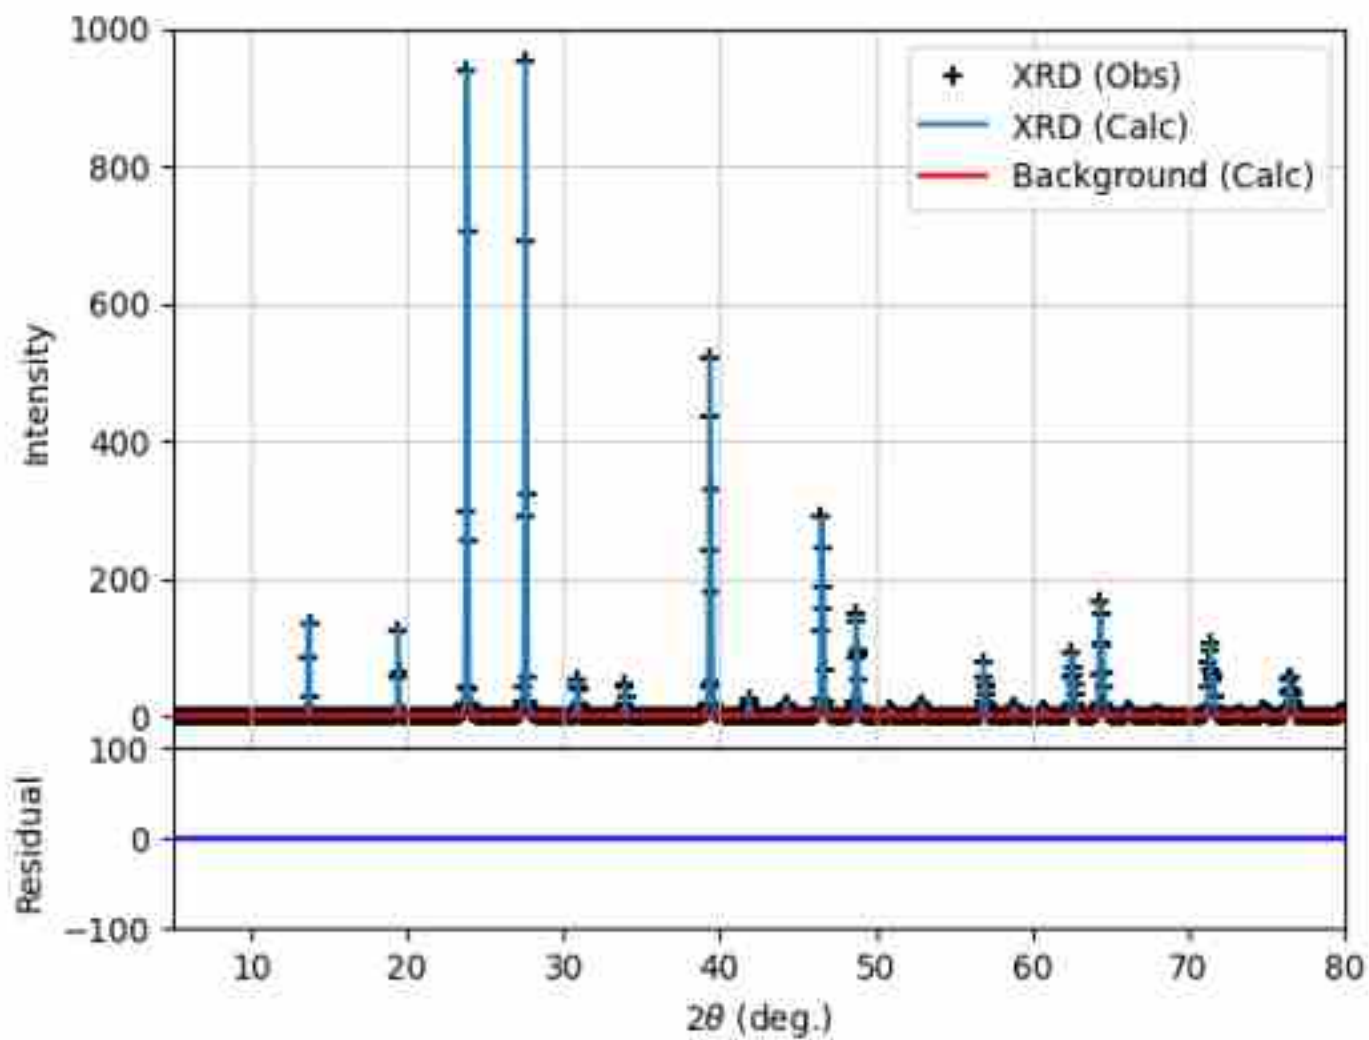

| RMSE before RR | Rwp     | RMSE after RR |
|----------------|---------|---------------|
| 0.015          | 0.00251 | 0.00014       |

# Cs<sub>2</sub>Na<sub>1</sub>In<sub>1</sub>H<sub>6</sub>

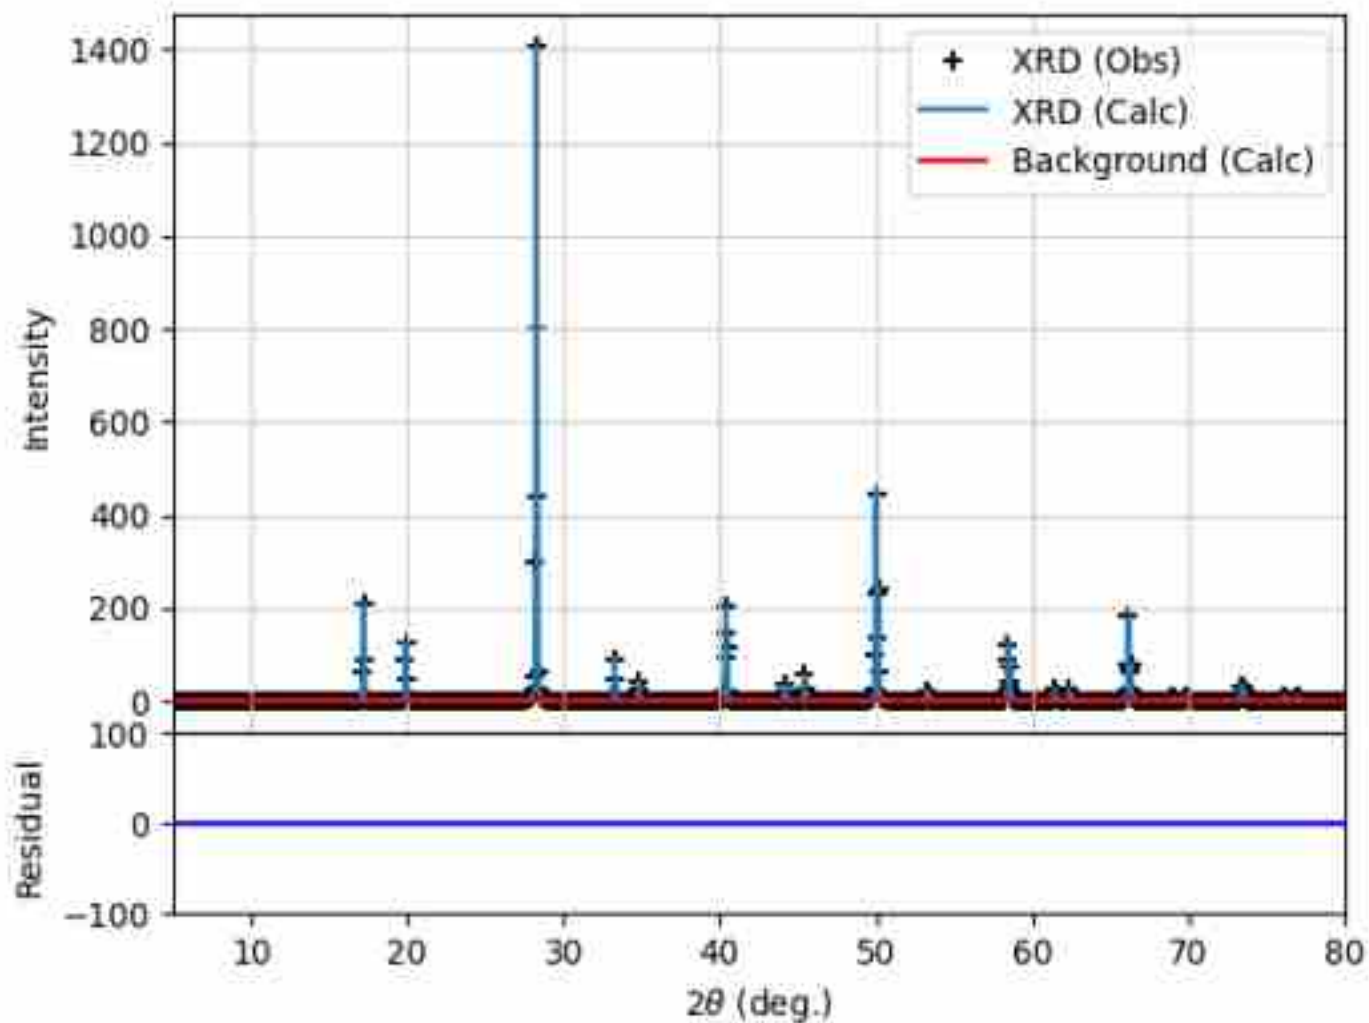

| RMSE before RR | Rwp     | RMSE after RR |
|----------------|---------|---------------|
| 0.015          | 0.00498 | 0.00824       |

# Cs<sub>2</sub>RbAuF<sub>6</sub>

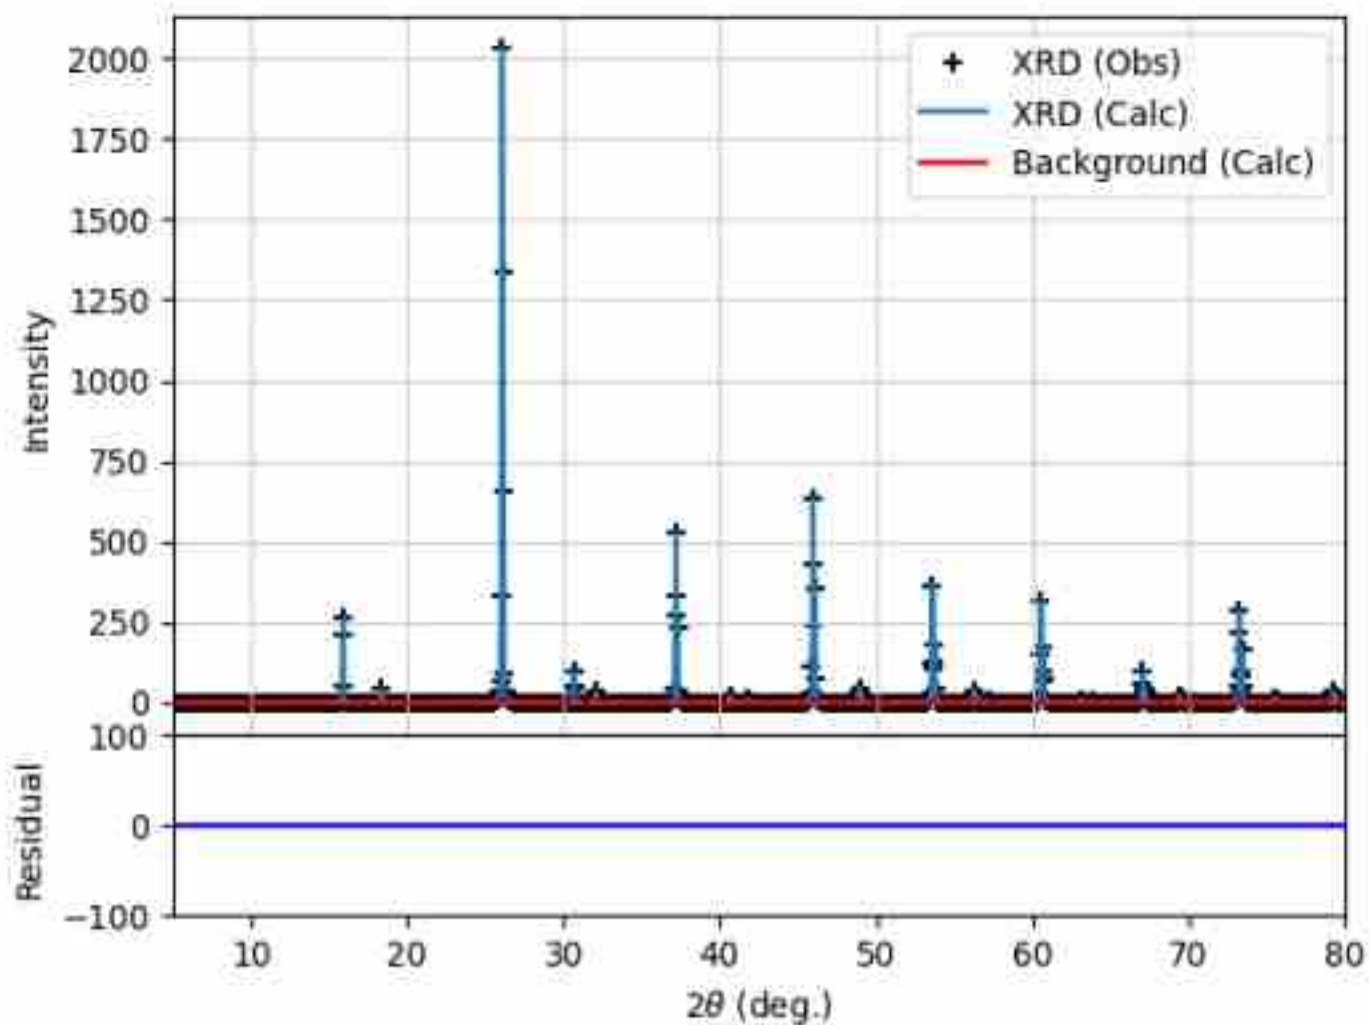

| RMSE before RR | Rwp     | RMSE after RR |
|----------------|---------|---------------|
| 0.015          | 0.00558 | 0.00224       |

# Cs<sub>2</sub>Te<sub>1</sub>Cl<sub>6</sub>

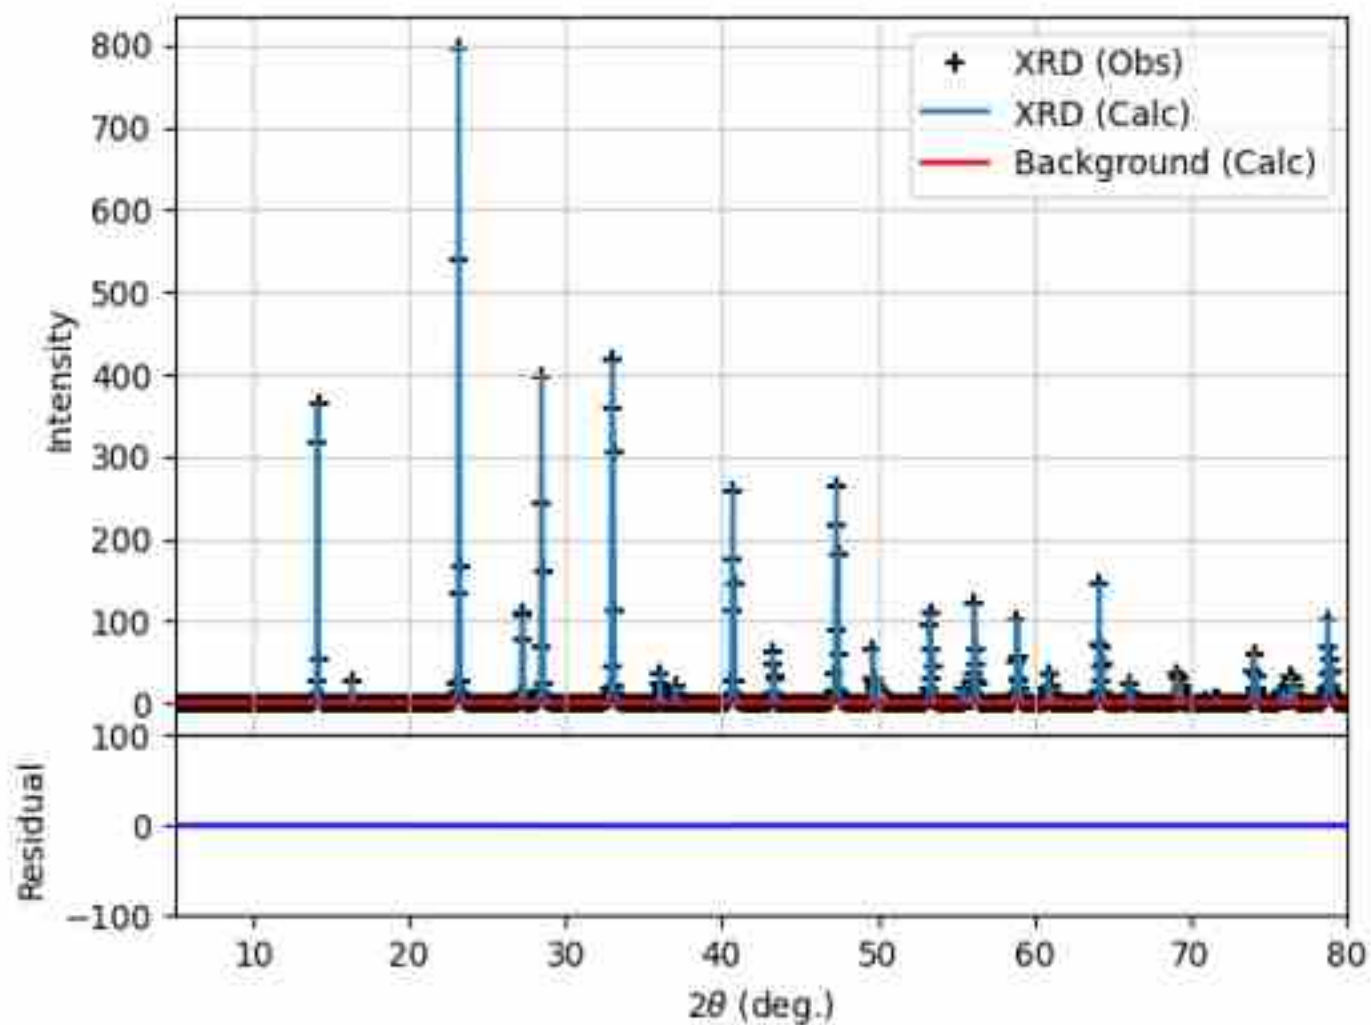

| RMSE before RR | Rwp     | RMSE after RR |
|----------------|---------|---------------|
| 0.015          | 0.18298 | 0.00873       |

# Cs<sub>2</sub>Tl<sub>1</sub>Ru<sub>1</sub>F<sub>6</sub>

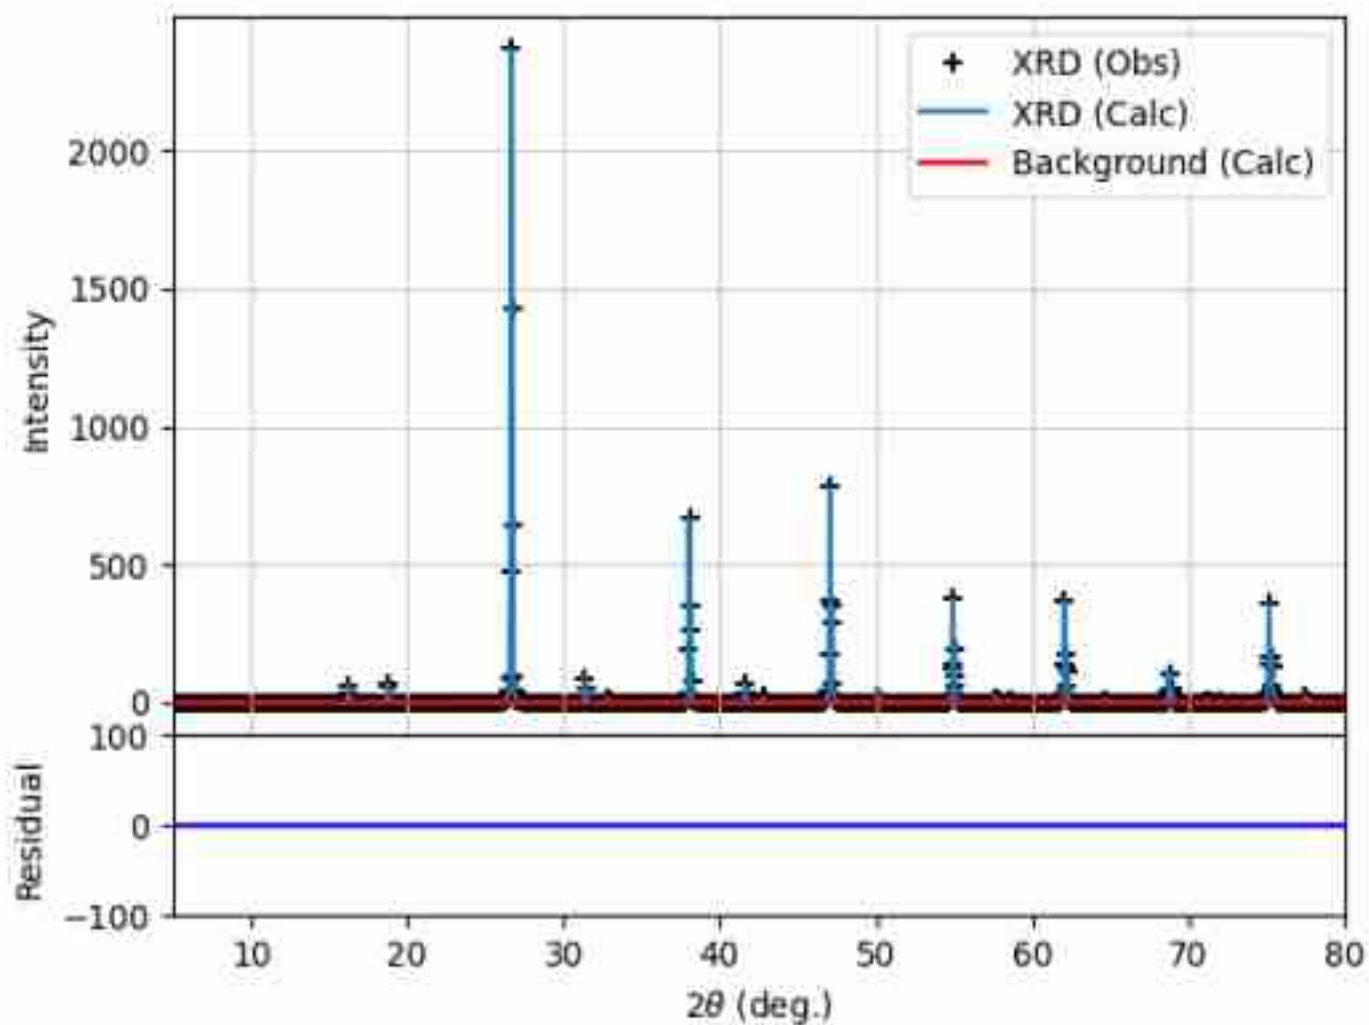

| RMSE before RR | Rwp     | RMSE after RR |
|----------------|---------|---------------|
| 0.015          | 0.01442 | 0.00509       |

# Cs8

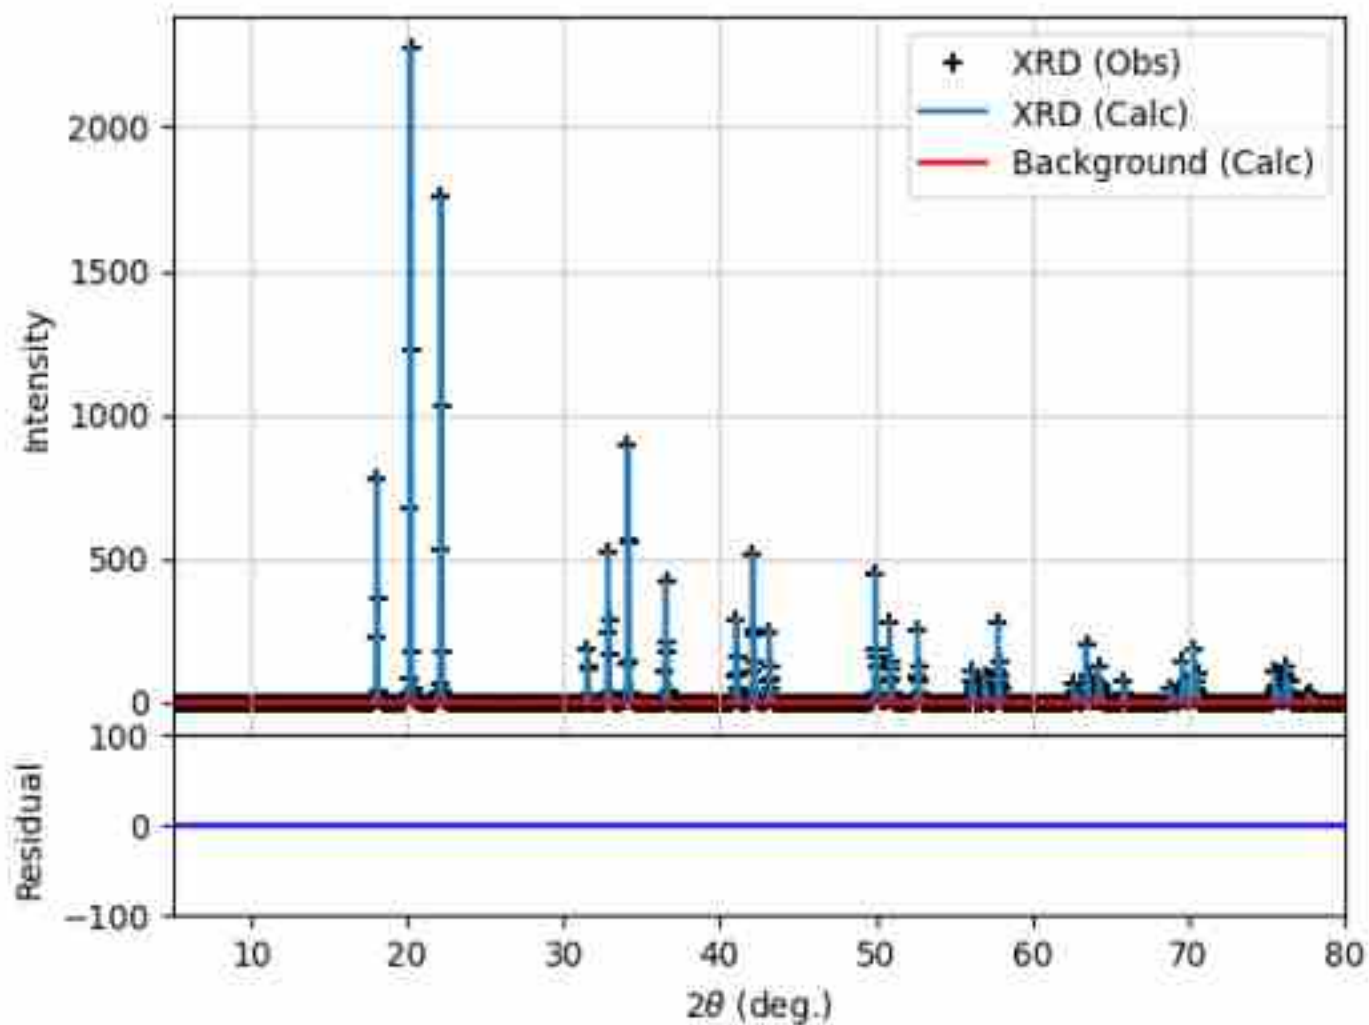

| RMSE before RR | Rwp     | RMSE after RR |
|----------------|---------|---------------|
| 0.015          | 0.00483 | 0.00044       |

# Cu<sub>2</sub>W<sub>1</sub>Se<sub>4</sub>

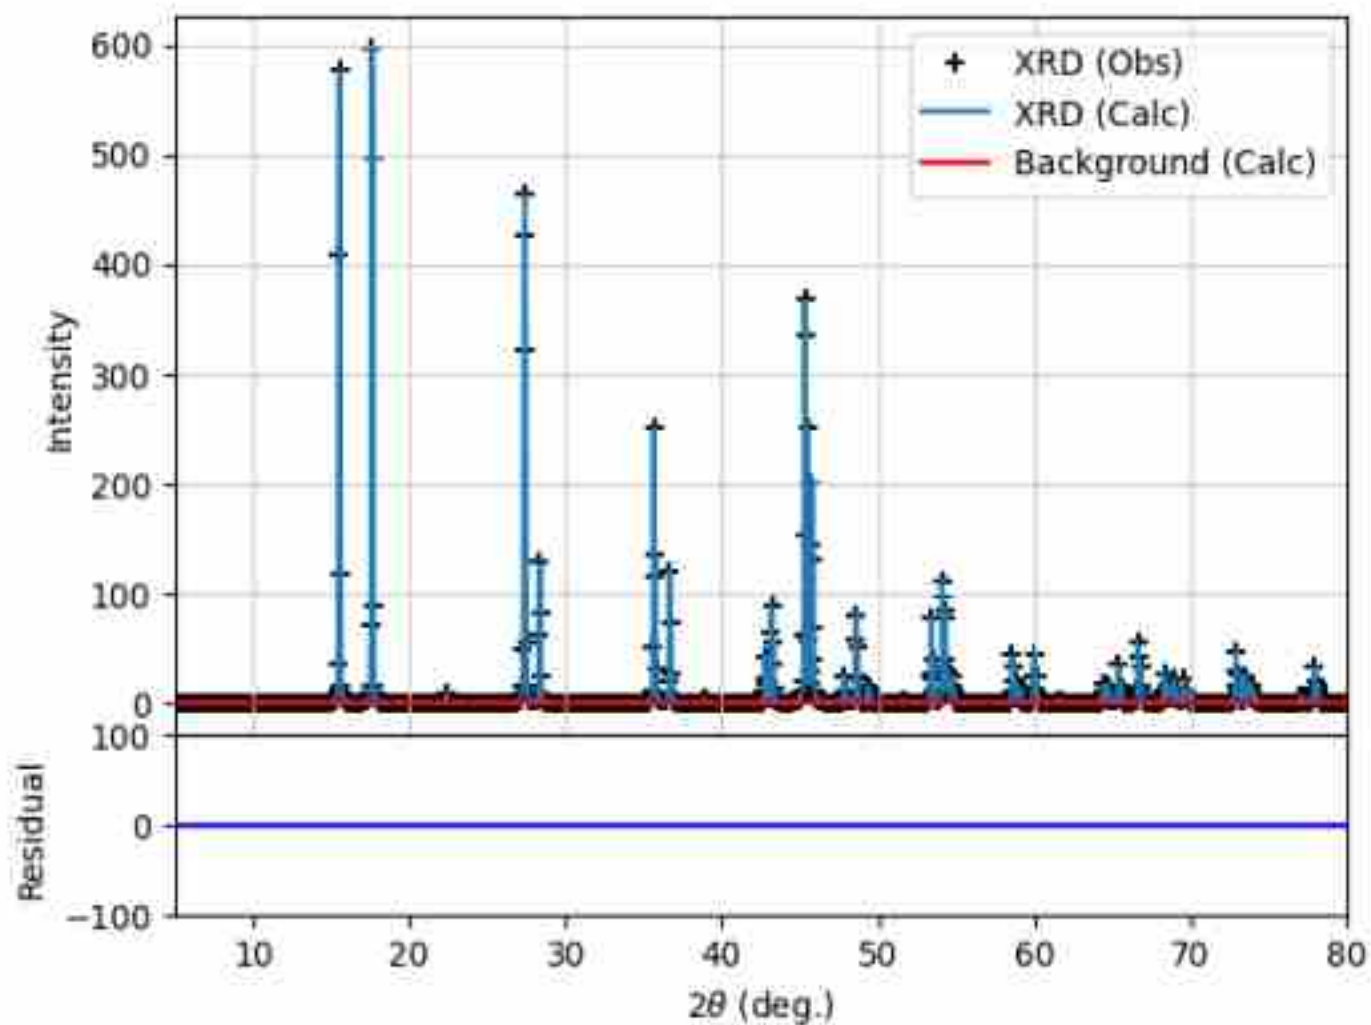

| RMSE before RR | Rwp     | RMSE after RR |
|----------------|---------|---------------|
| 0.015          | 0.00376 | 0.00075       |

# Cu<sub>4</sub>Te<sub>8</sub>

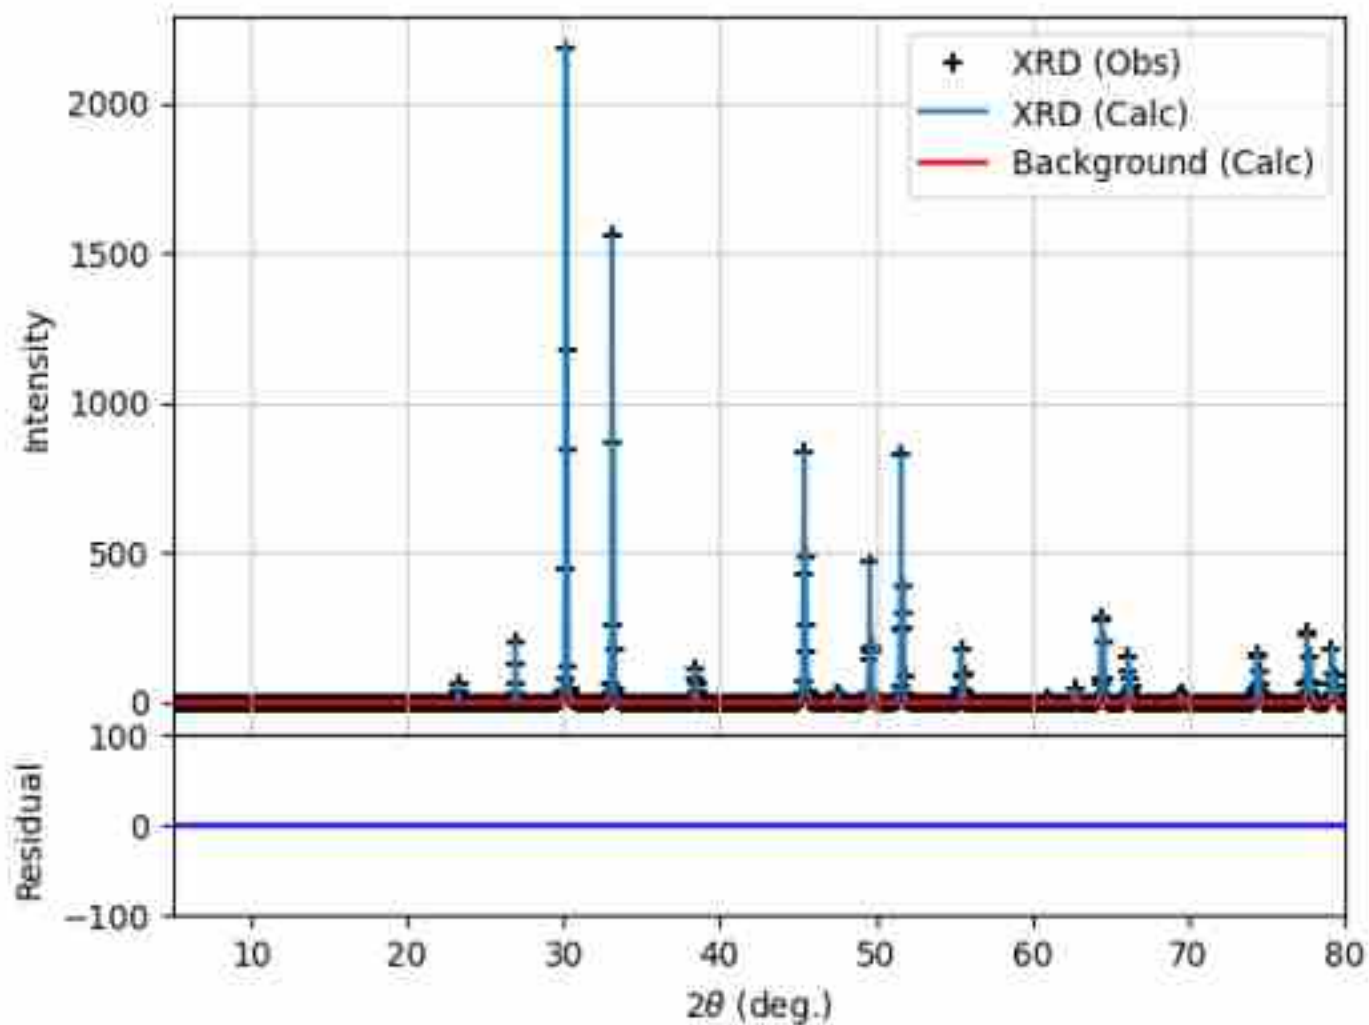

| RMSE before RR | Rwp     | RMSE after RR |
|----------------|---------|---------------|
| 0.015          | 0.00642 | 0.00041       |



# Dy1Al6Fe6

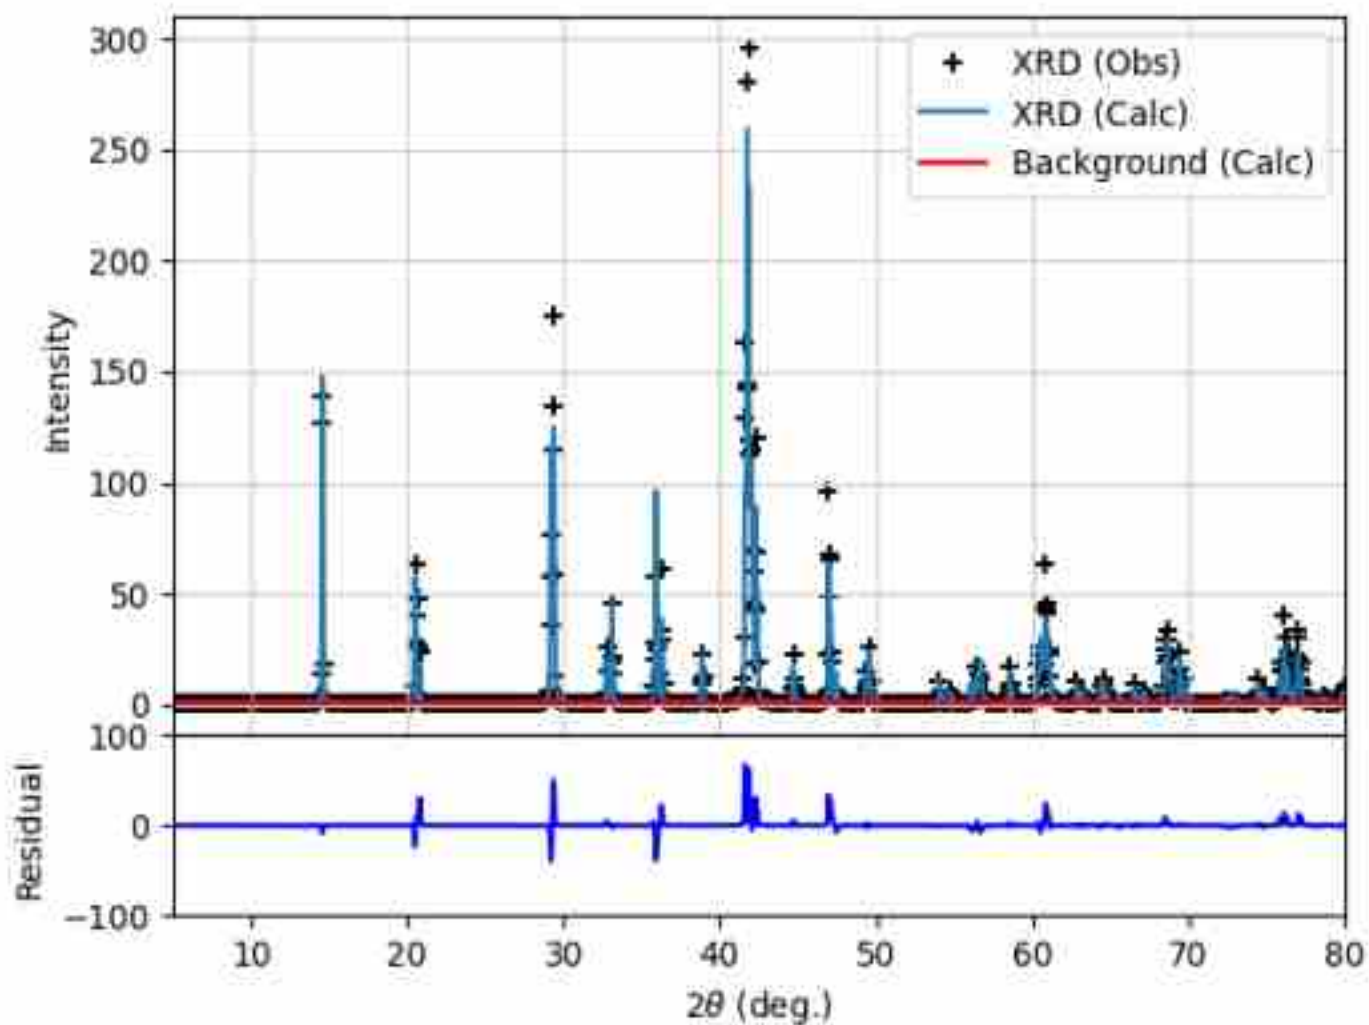

| RMSE before RR | Rwp      | RMSE after RR |
|----------------|----------|---------------|
| 0.015          | 28.65266 | 0.11519       |

# Dy1Al8Cr4

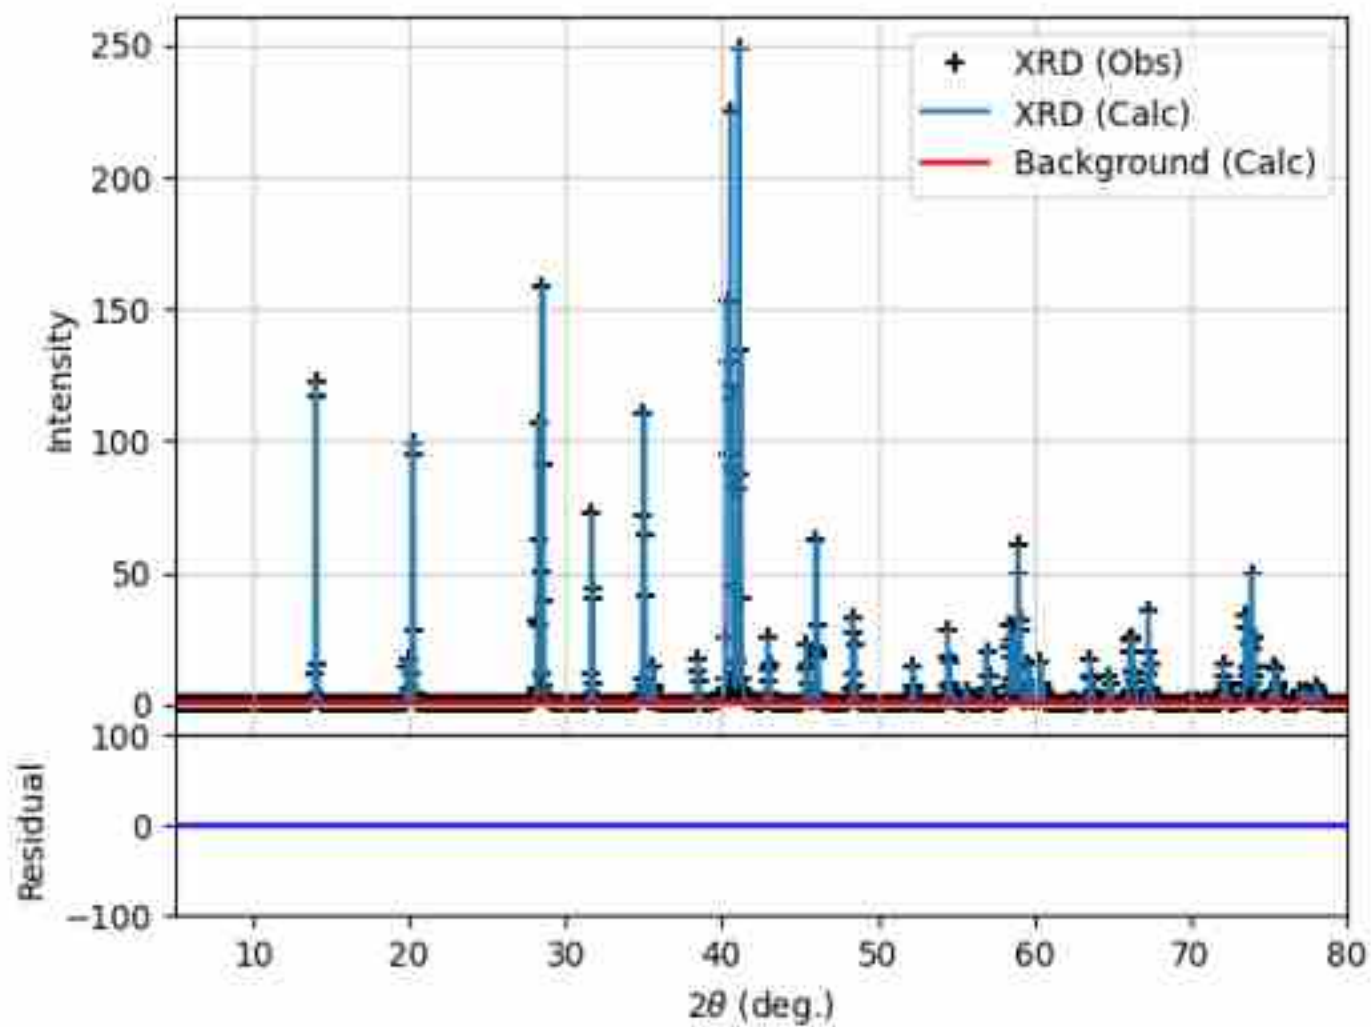

| RMSE before RR | Rwp     | RMSE after RR |
|----------------|---------|---------------|
| 0.015          | 0.00393 | 0.00108       |

# Dy1Fe10Re2

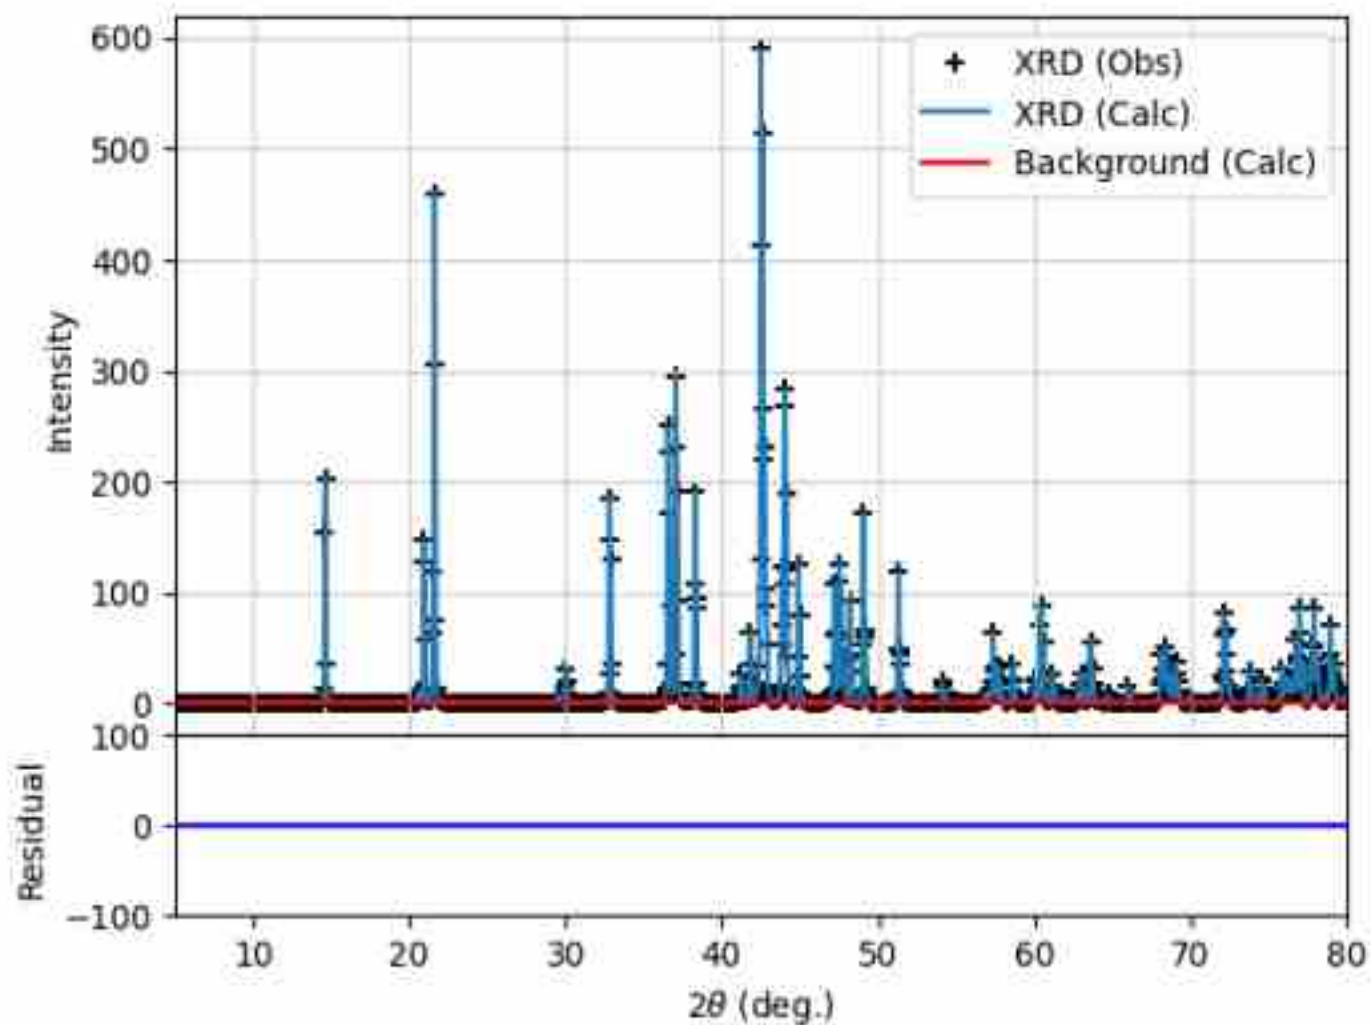

| RMSE before RR | Rwp     | RMSE after RR |
|----------------|---------|---------------|
| 0.015          | 0.00376 | 0.00068       |

# Dy1Si3Ir1

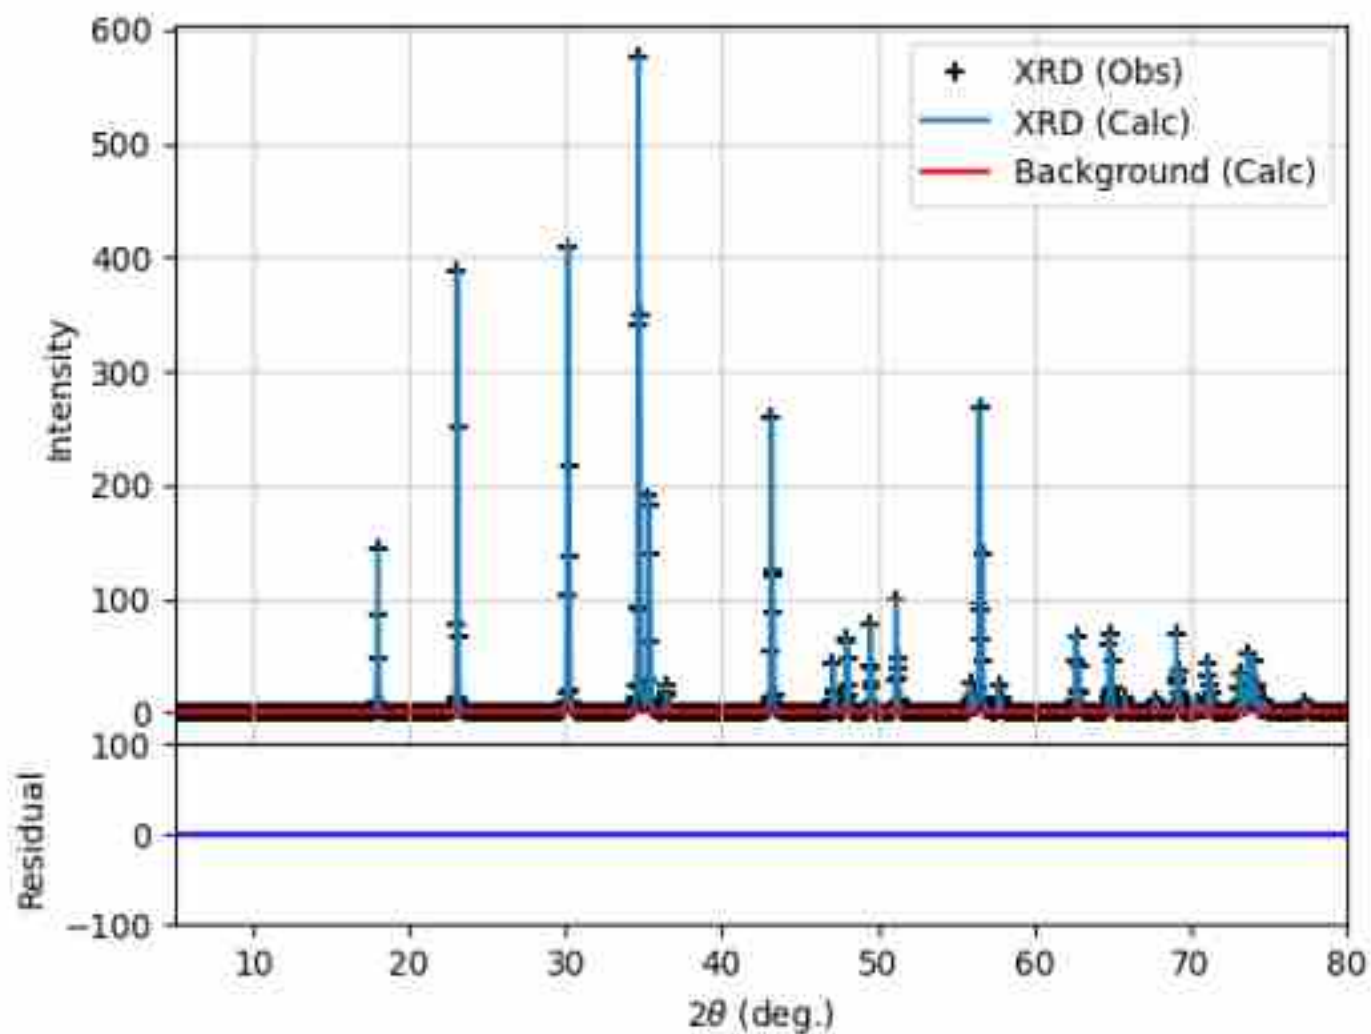

| RMSE before RR | Rwp     | RMSE after RR |
|----------------|---------|---------------|
| 0.015          | 0.00394 | 0.00124       |

# Dy8S12

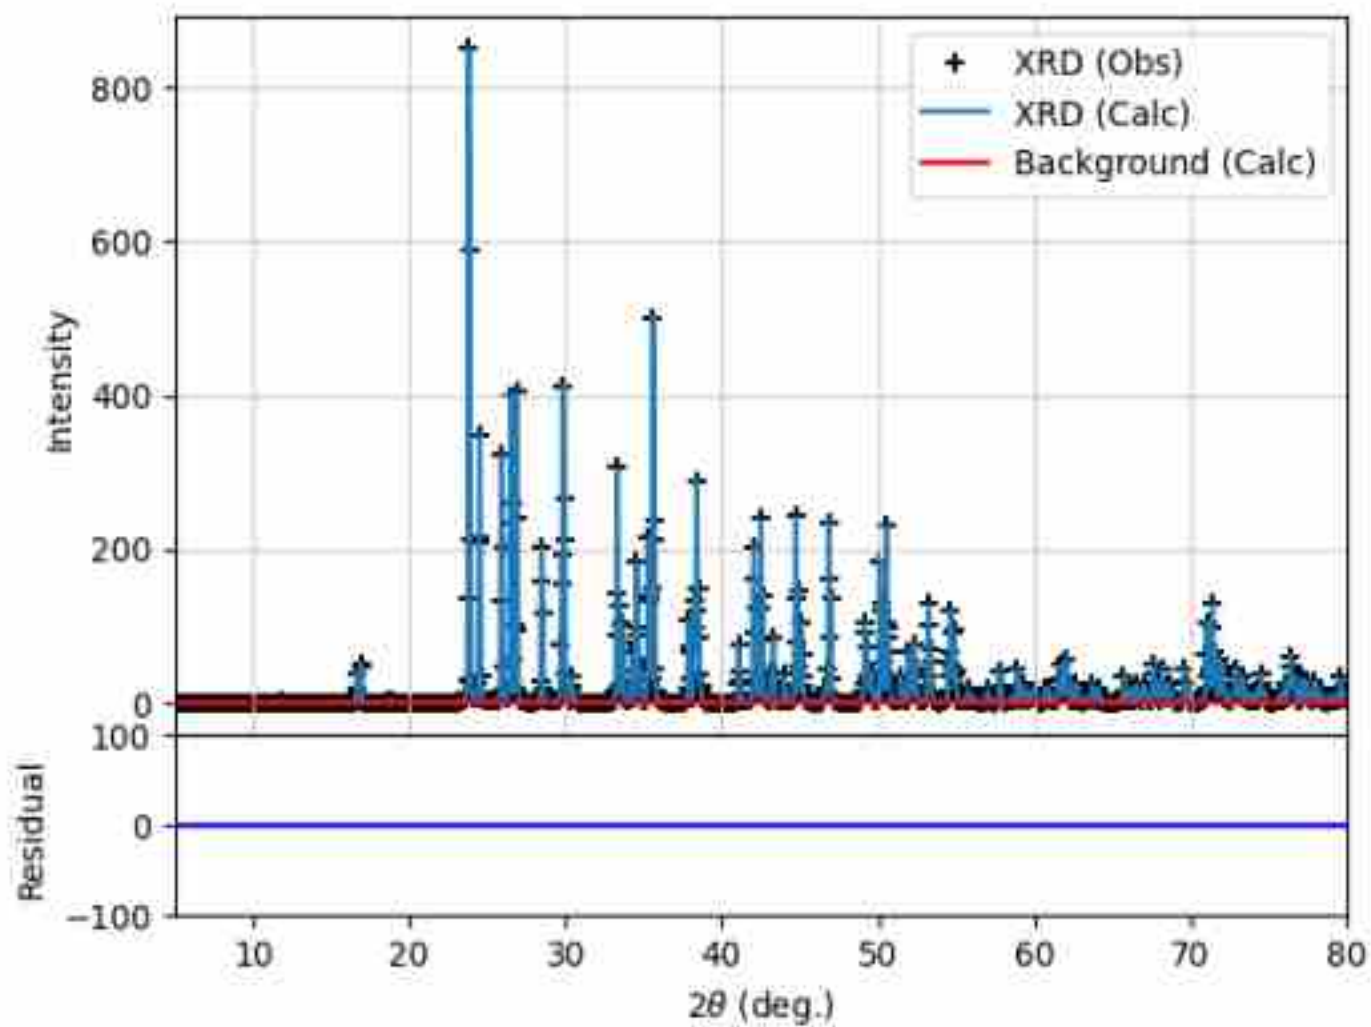

| RMSE before RR | Rwp     | RMSE after RR |
|----------------|---------|---------------|
| 0.015          | 0.00432 | 0.00076       |

# Dy12Ru4

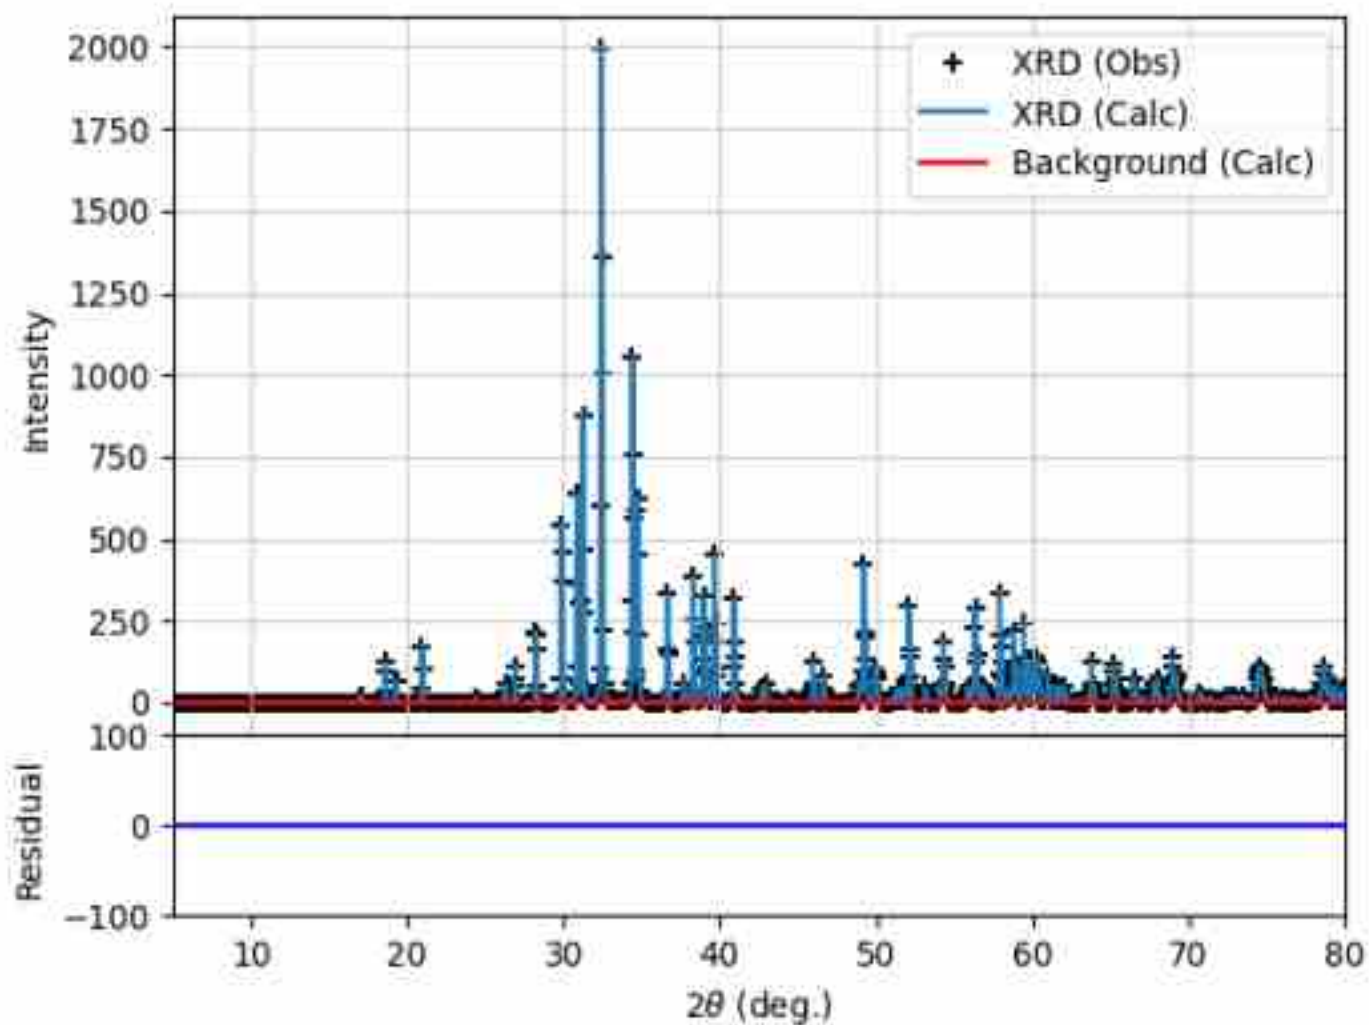

| RMSE before RR | Rwp     | RMSE after RR |
|----------------|---------|---------------|
| 0.015          | 0.00452 | 0.00039       |

# Er<sub>2</sub>Al<sub>4</sub>Ni<sub>1</sub>Ge<sub>2</sub>

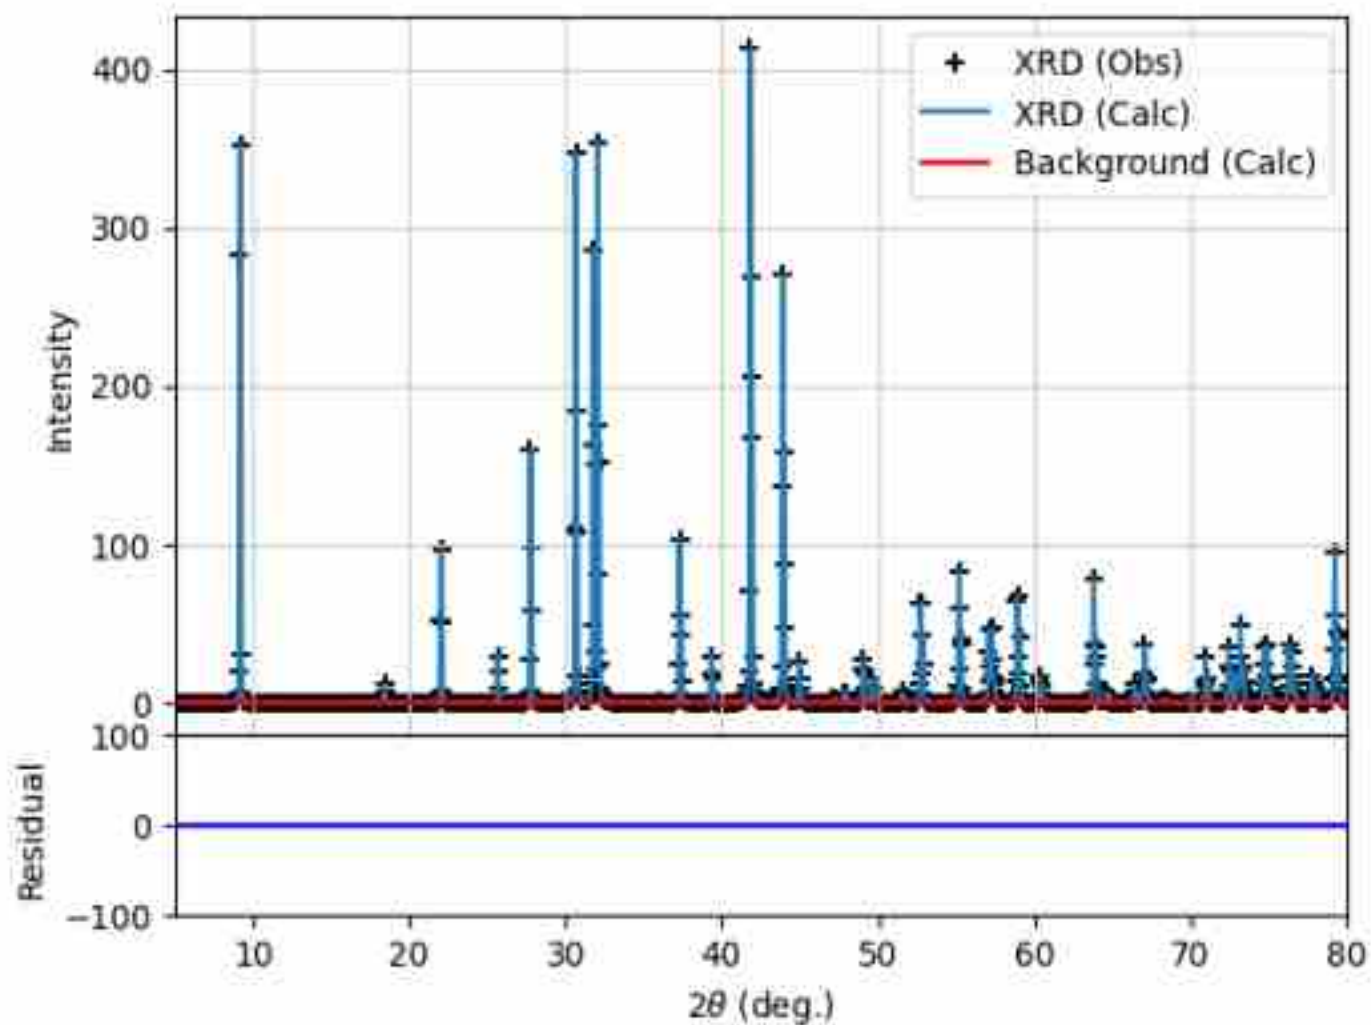

| RMSE before RR | Rwp    | RMSE after RR |
|----------------|--------|---------------|
| 0.015          | 0.0031 | 0.00045       |

# Er<sub>3</sub>Cu<sub>4</sub>Ge<sub>4</sub>

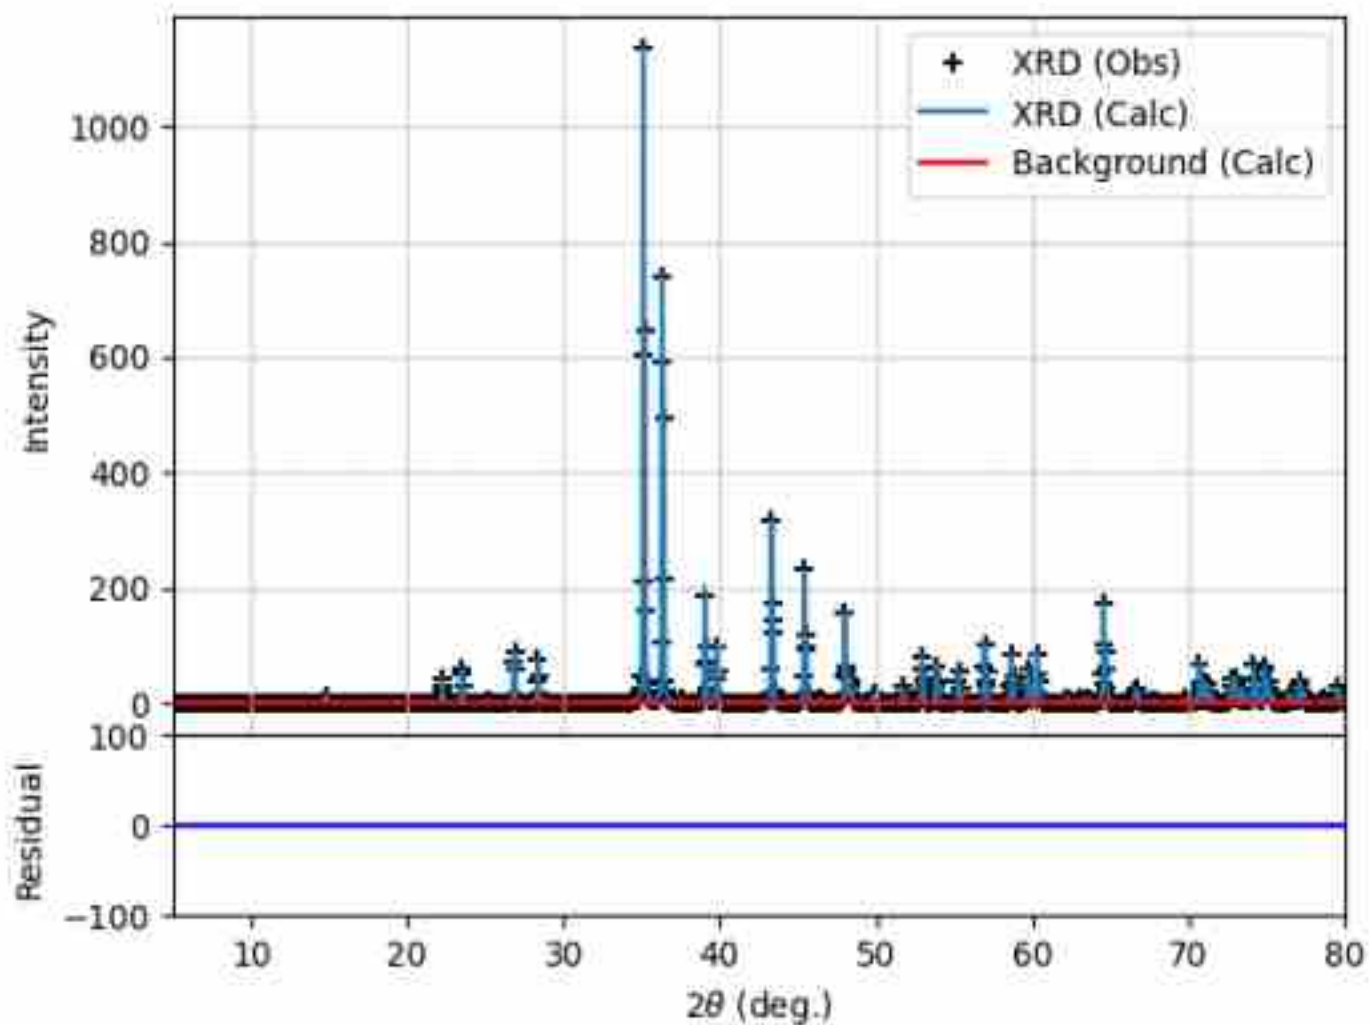

| RMSE before RR | Rwp     | RMSE after RR |
|----------------|---------|---------------|
| 0.015          | 0.00355 | 0.00054       |



# Er<sub>3</sub>Fe<sub>4</sub>Ge<sub>4</sub>

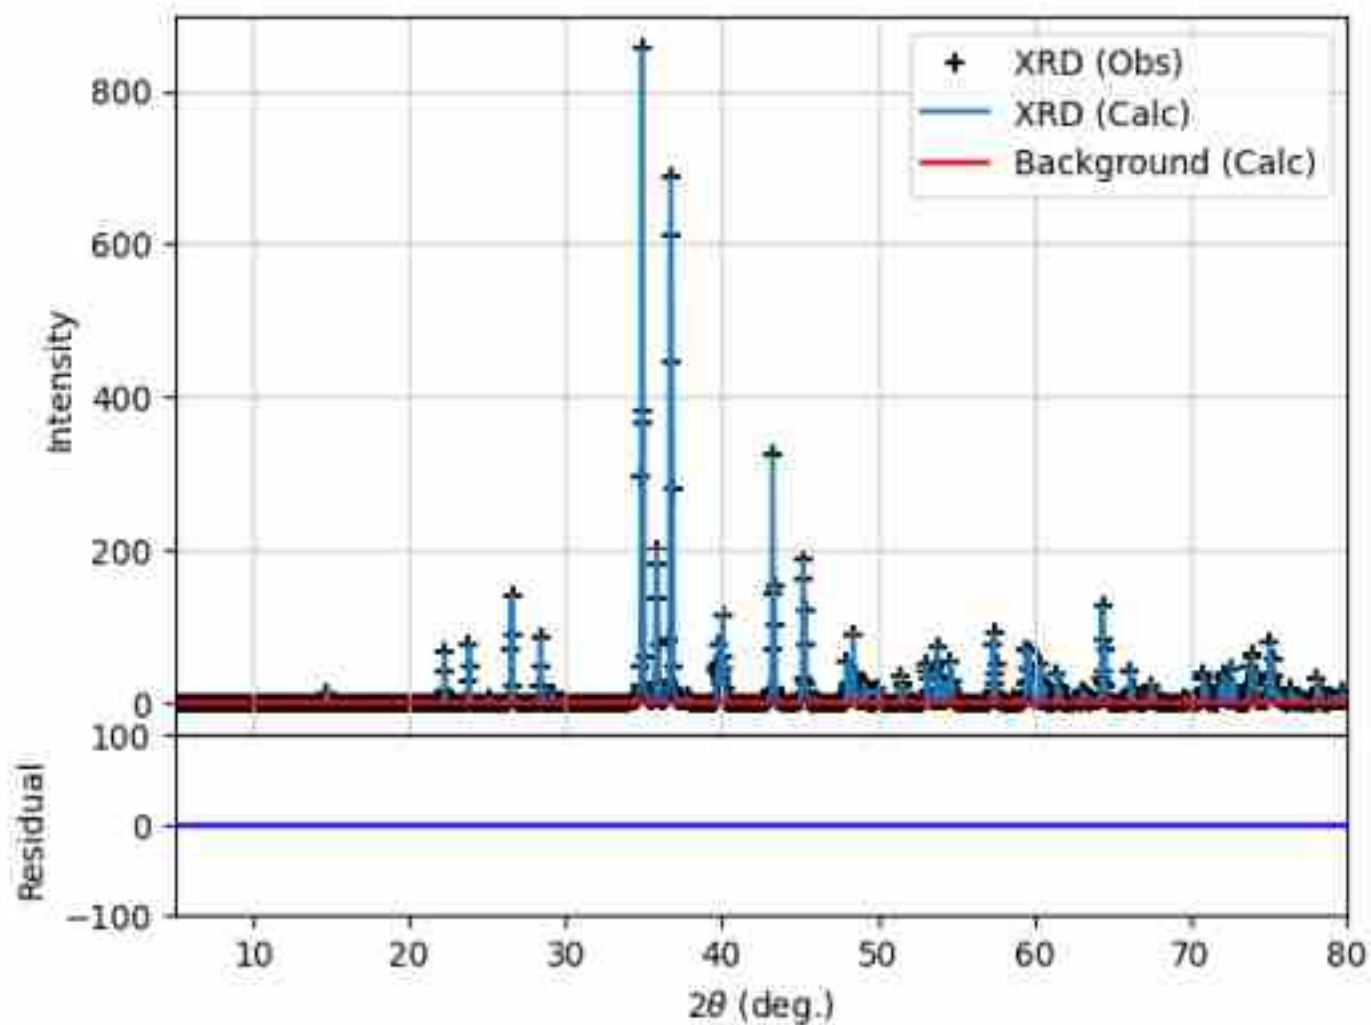

| RMSE before RR | Rwp     | RMSE after RR |
|----------------|---------|---------------|
| 0.015          | 0.00406 | 0.00042       |

# Er<sub>3</sub>In<sub>3</sub>Ni<sub>3</sub>

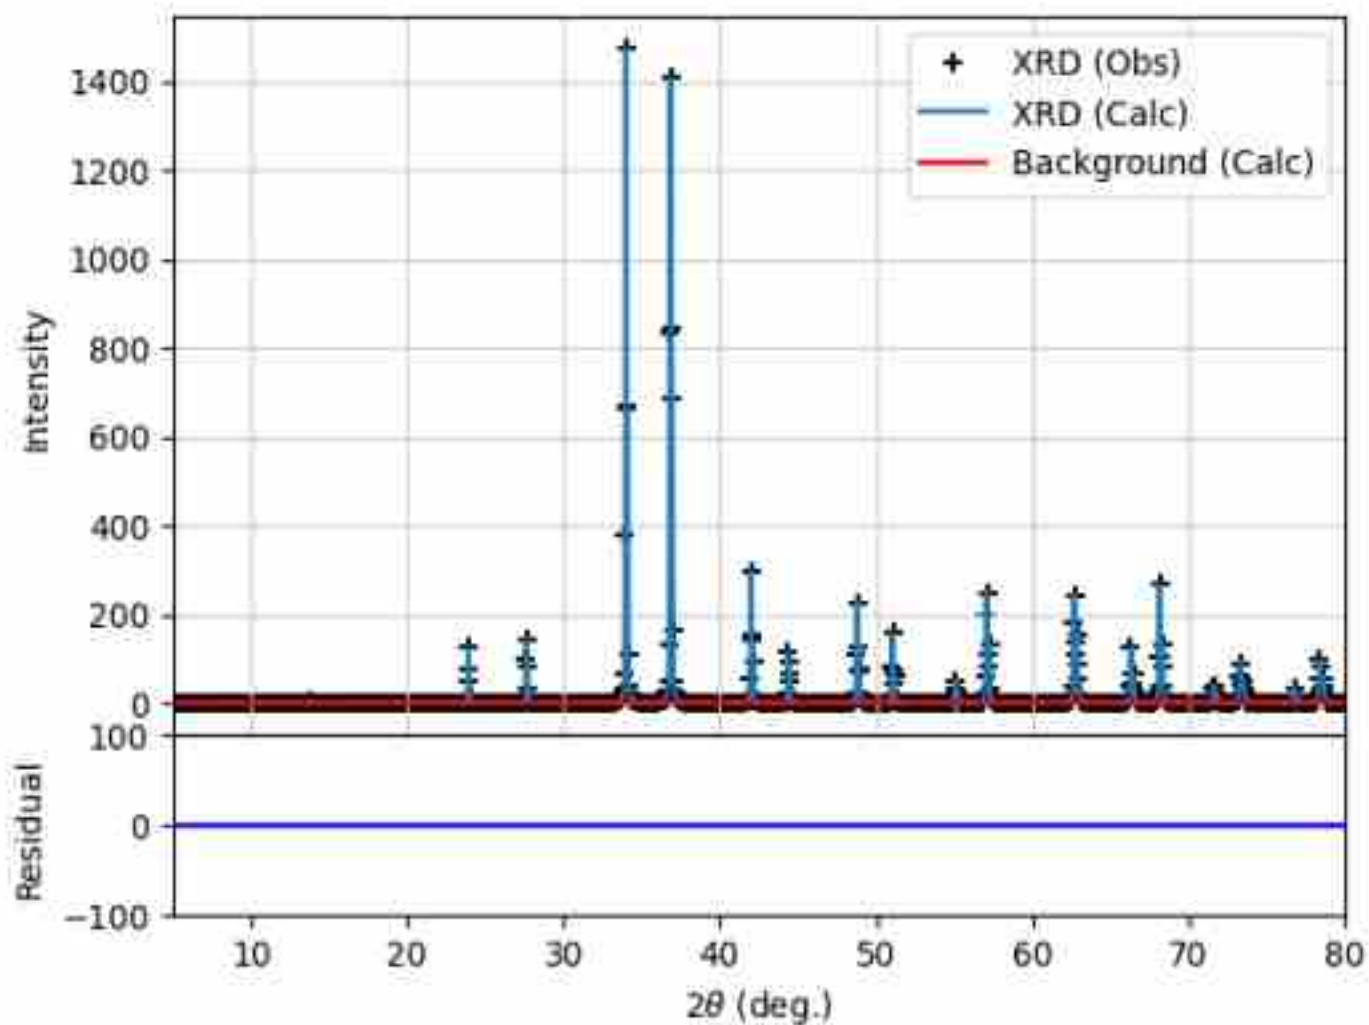

| RMSE before RR | Rwp     | RMSE after RR |
|----------------|---------|---------------|
| 0.015          | 0.00757 | 0.00161       |

# Er6Ru4

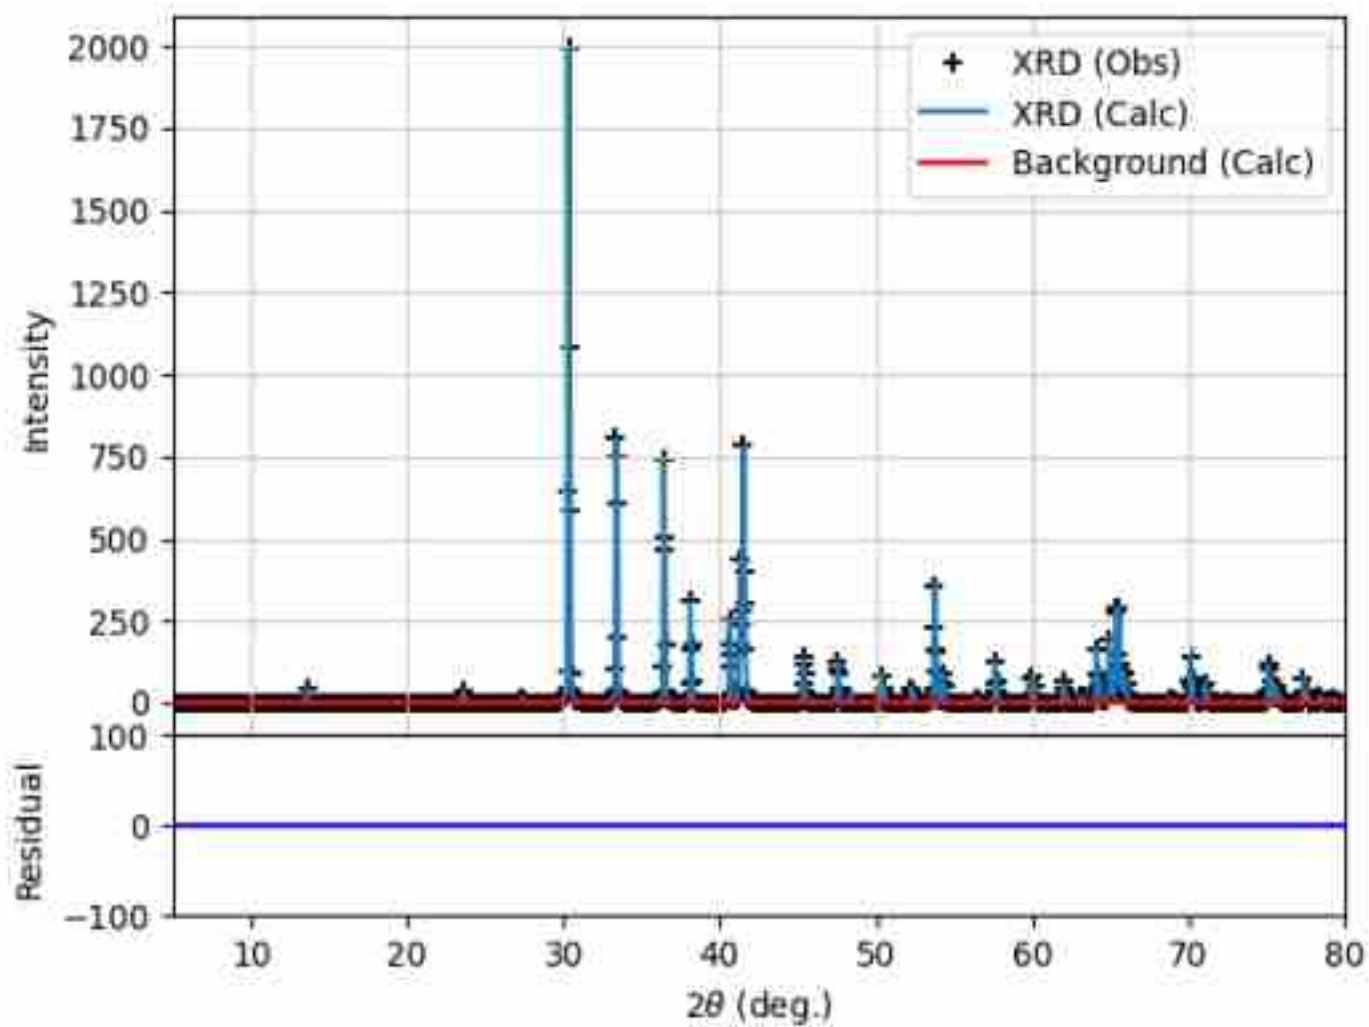

| RMSE before RR | Rwp     | RMSE after RR |
|----------------|---------|---------------|
| 0.015          | 0.00497 | 0.00082       |

# Eu<sub>2</sub>Zn<sub>2</sub>Pb<sub>2</sub>

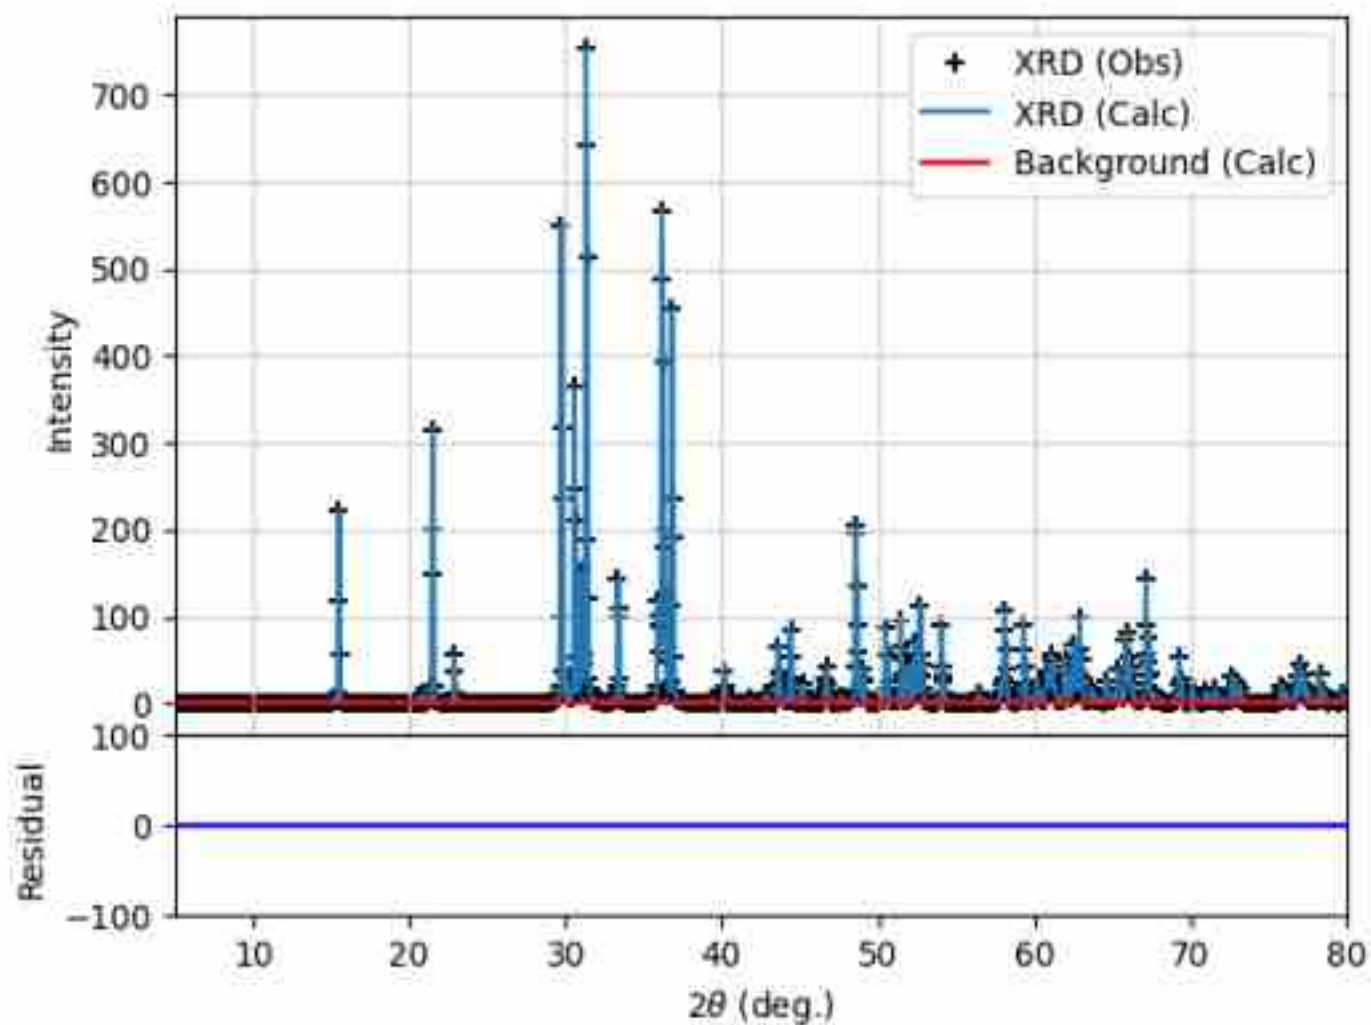

| RMSE before RR | Rwp     | RMSE after RR |
|----------------|---------|---------------|
| 0.015          | 0.00321 | 0.00032       |

# Eu<sub>4</sub>Mg<sub>2</sub>Ir<sub>2</sub>O<sub>12</sub>

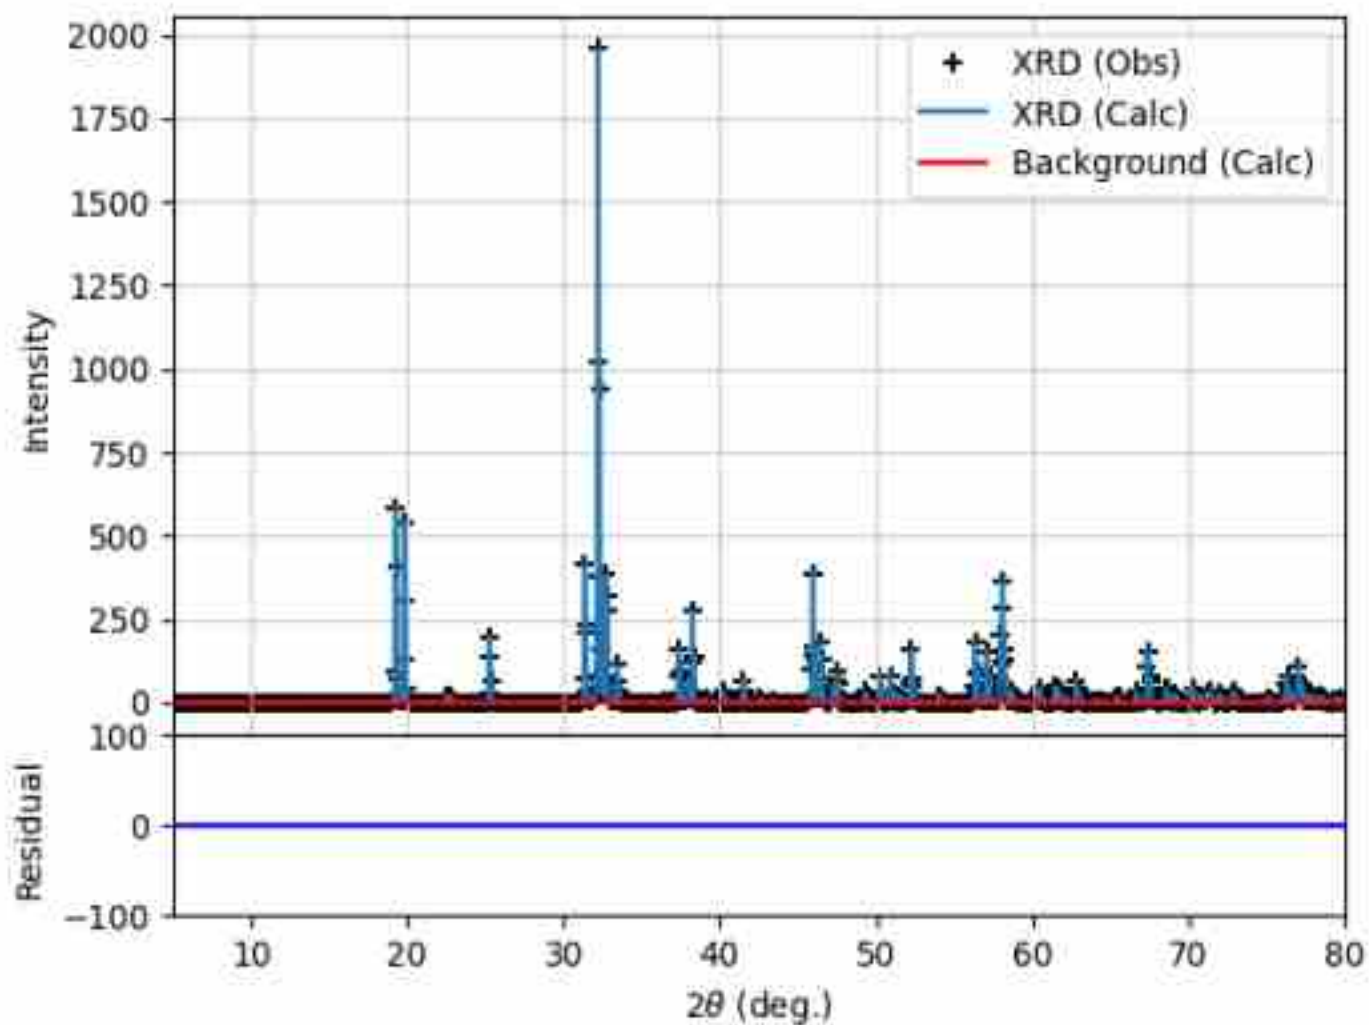

| RMSE before RR | Rwp     | RMSE after RR |
|----------------|---------|---------------|
| 0.015          | 0.00386 | 0.00136       |

# Eu4Mg4Sn4

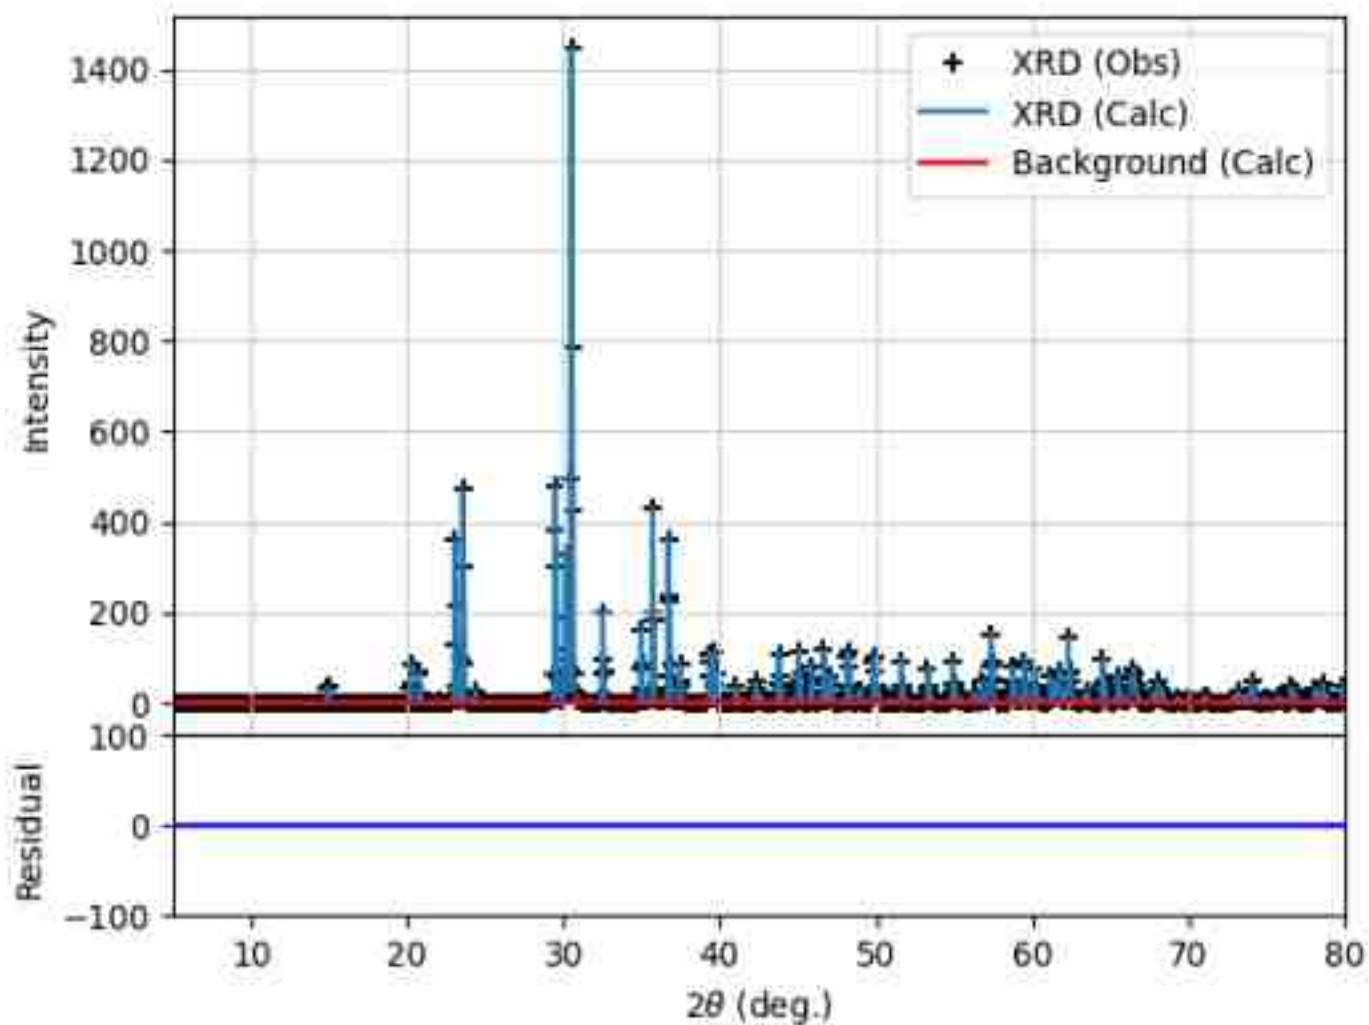

| RMSE before RR | Rwp     | RMSE after RR |
|----------------|---------|---------------|
| 0.015          | 0.00429 | 0.00098       |

# Fe<sub>2</sub>Se<sub>4</sub>

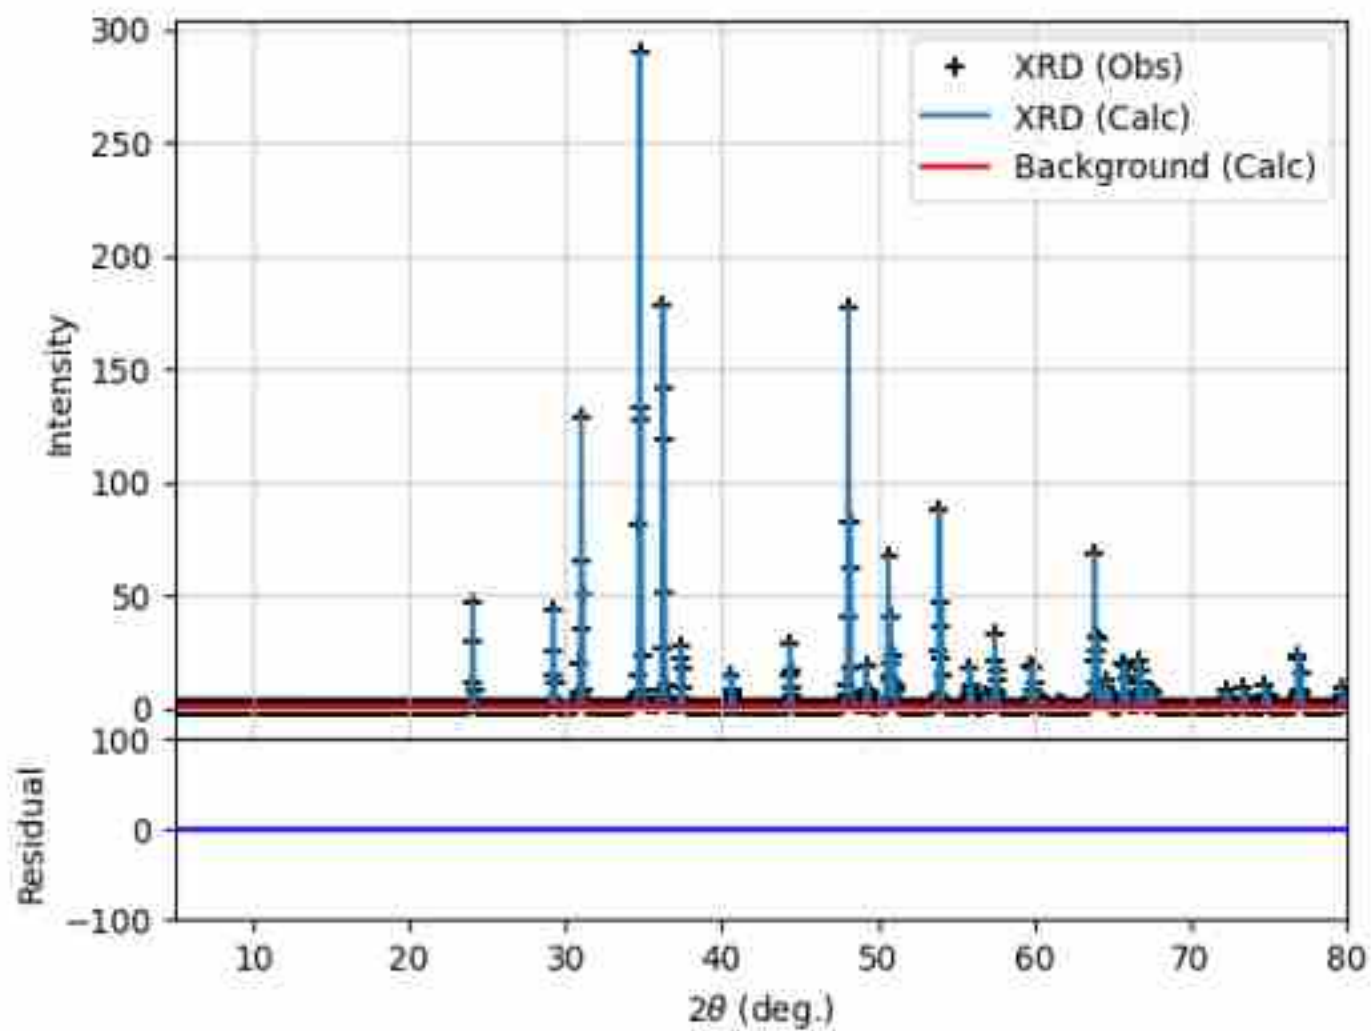

| RMSE before RR | Rwp    | RMSE after RR |
|----------------|--------|---------------|
| 0.015          | 0.0034 | 0.00027       |

# Ga<sub>2</sub>Fe<sub>6</sub>

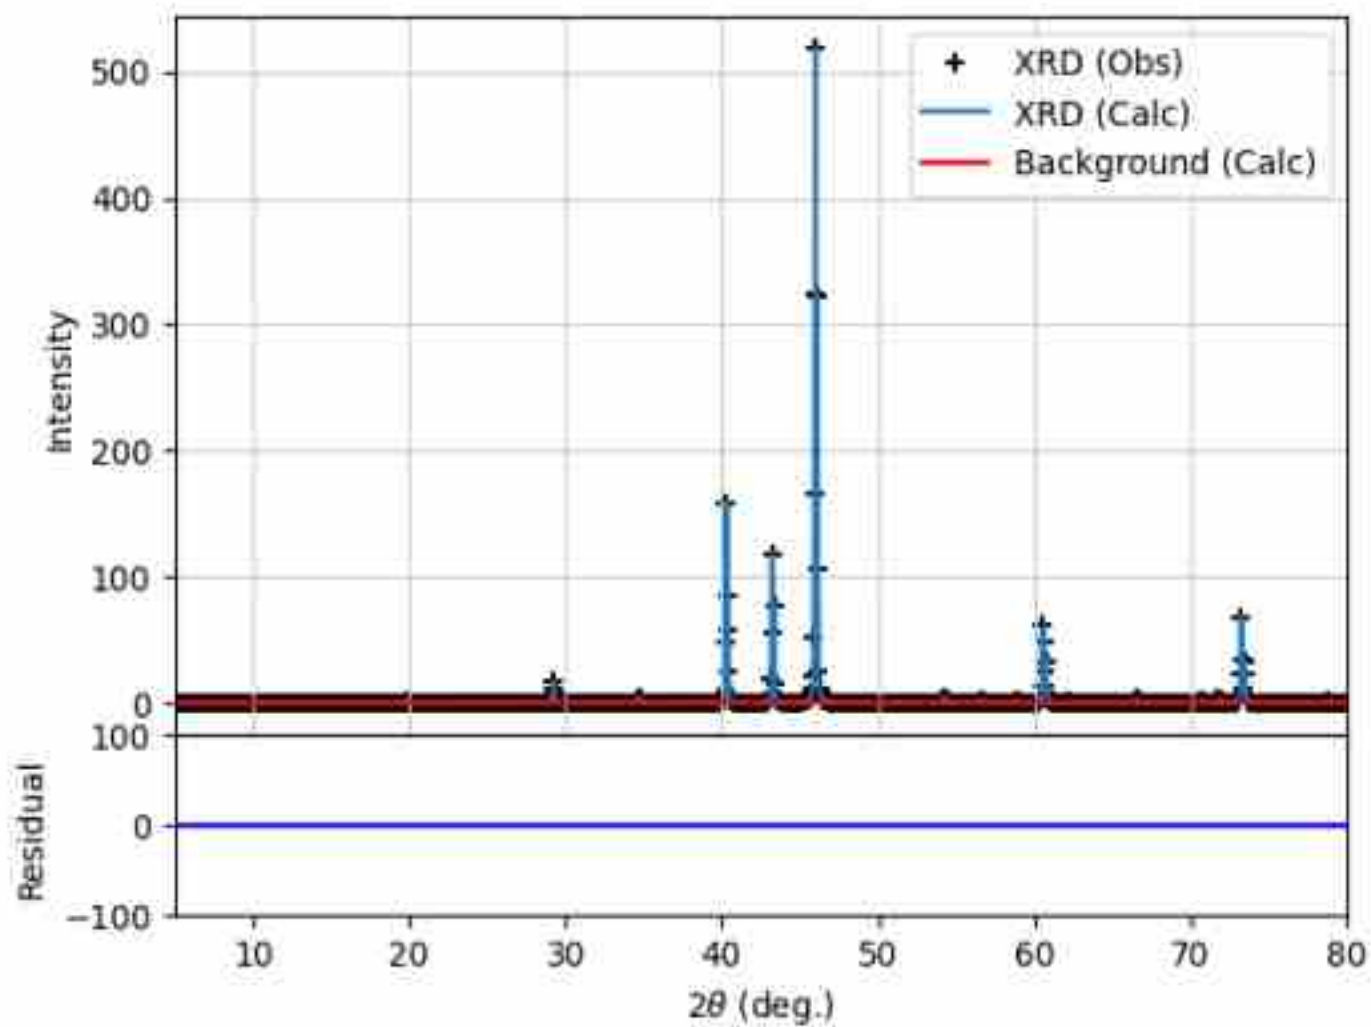

| RMSE before RR | Rwp     | RMSE after RR |
|----------------|---------|---------------|
| 0.015          | 0.00834 | 0.00099       |



# Gd<sub>3</sub>Er<sub>1</sub>Ni<sub>4</sub>

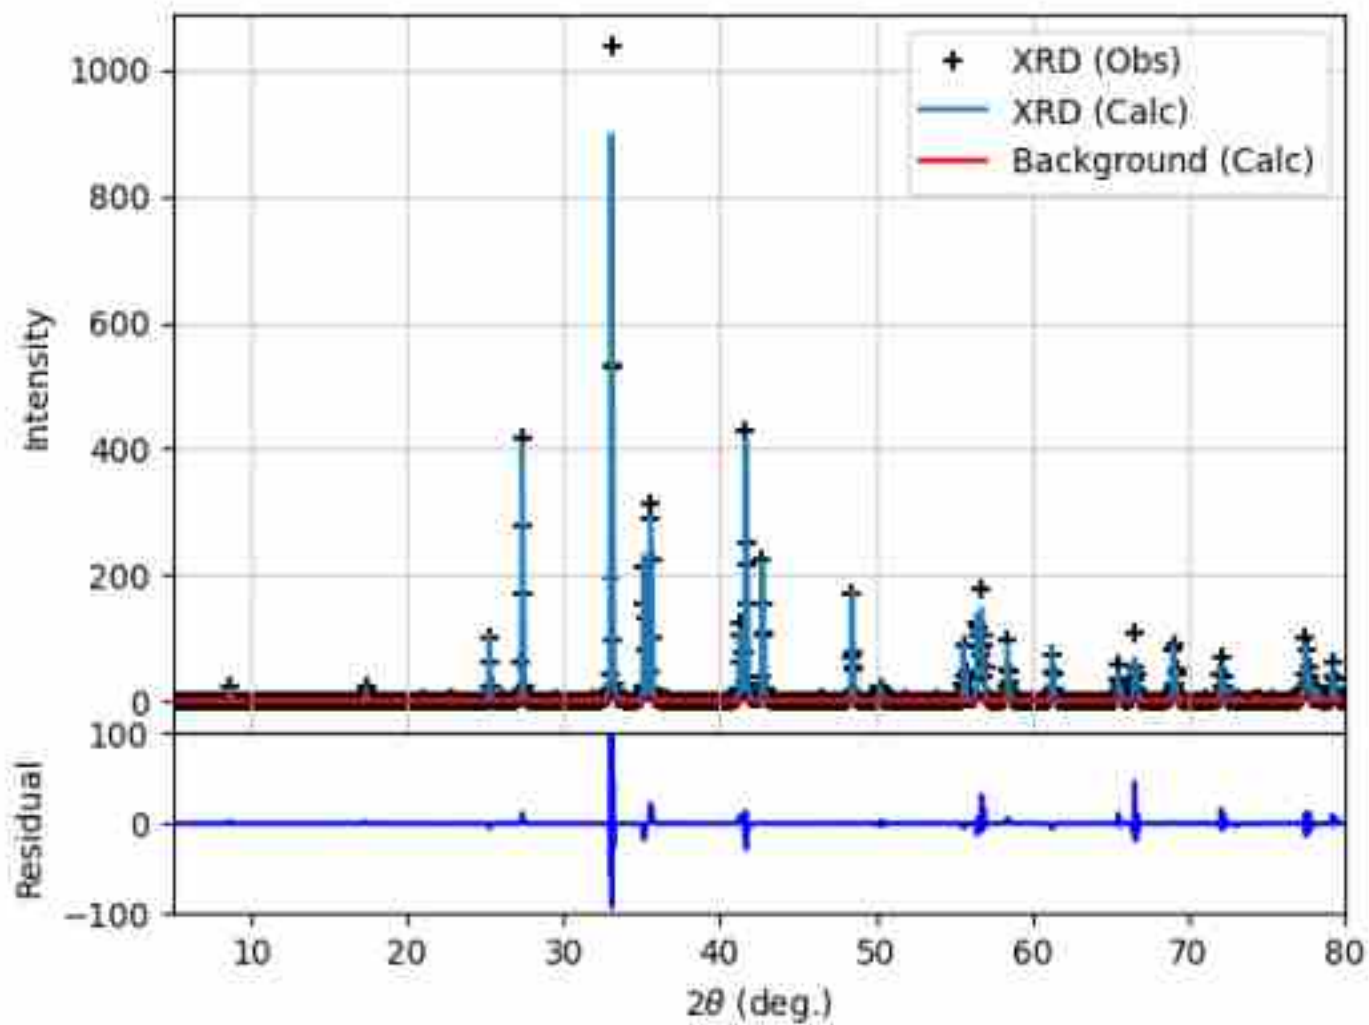

| RMSE before RR | Rwp      | RMSE after RR |
|----------------|----------|---------------|
| 0.015          | 11.56247 | 0.01591       |

# Gd<sub>3</sub>Mg<sub>3</sub>In<sub>3</sub>

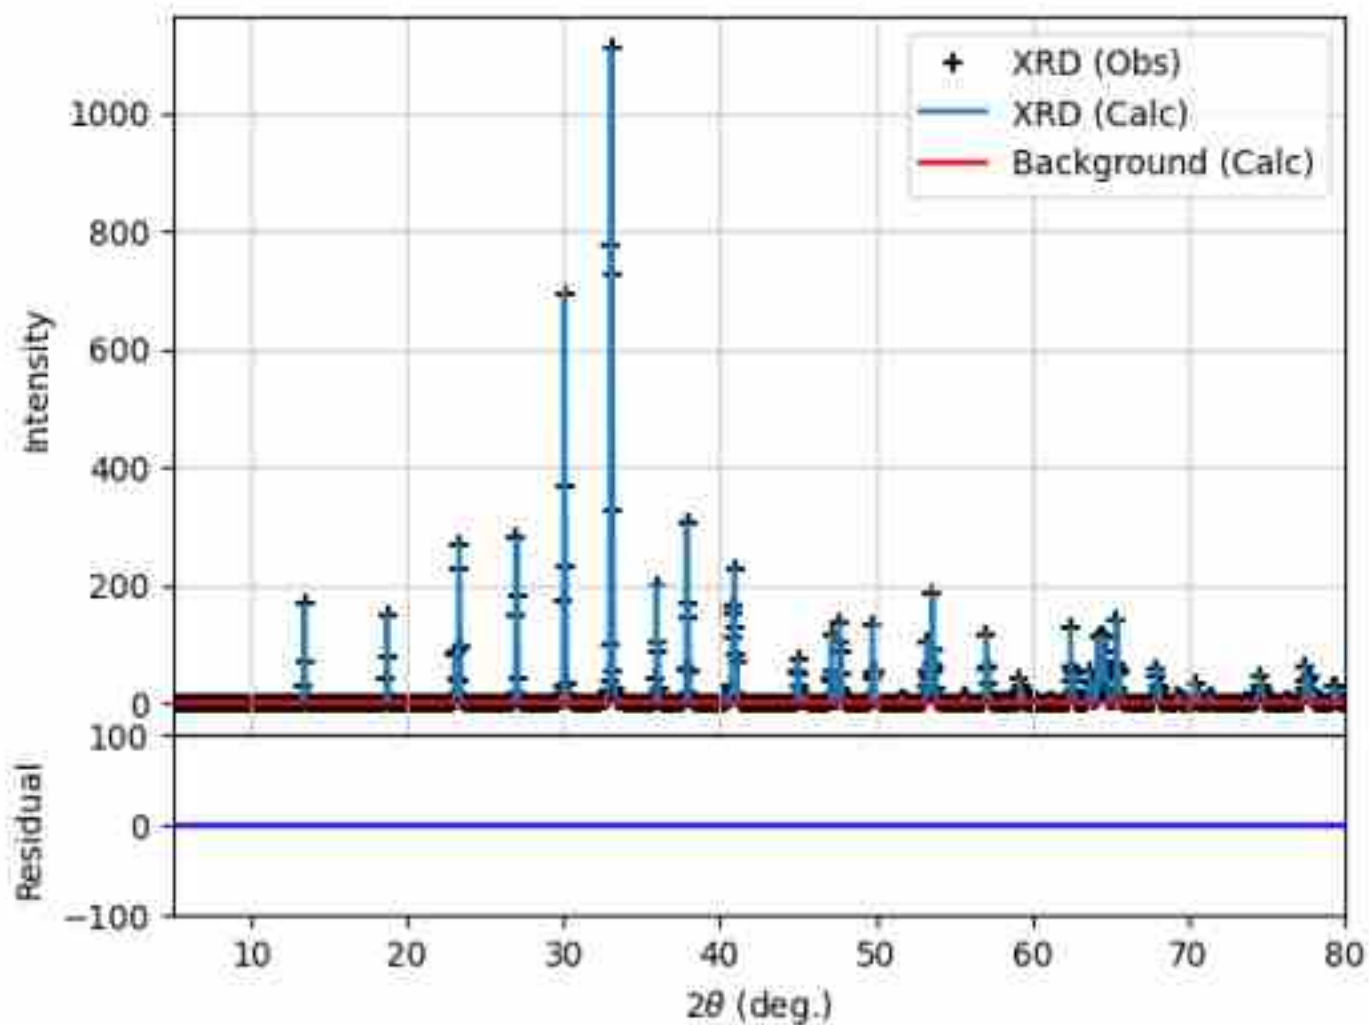

| RMSE before RR | Rwp     | RMSE after RR |
|----------------|---------|---------------|
| 0.015          | 0.00412 | 0.00119       |

# Gd<sub>4</sub>Mg<sub>2</sub>S<sub>8</sub>

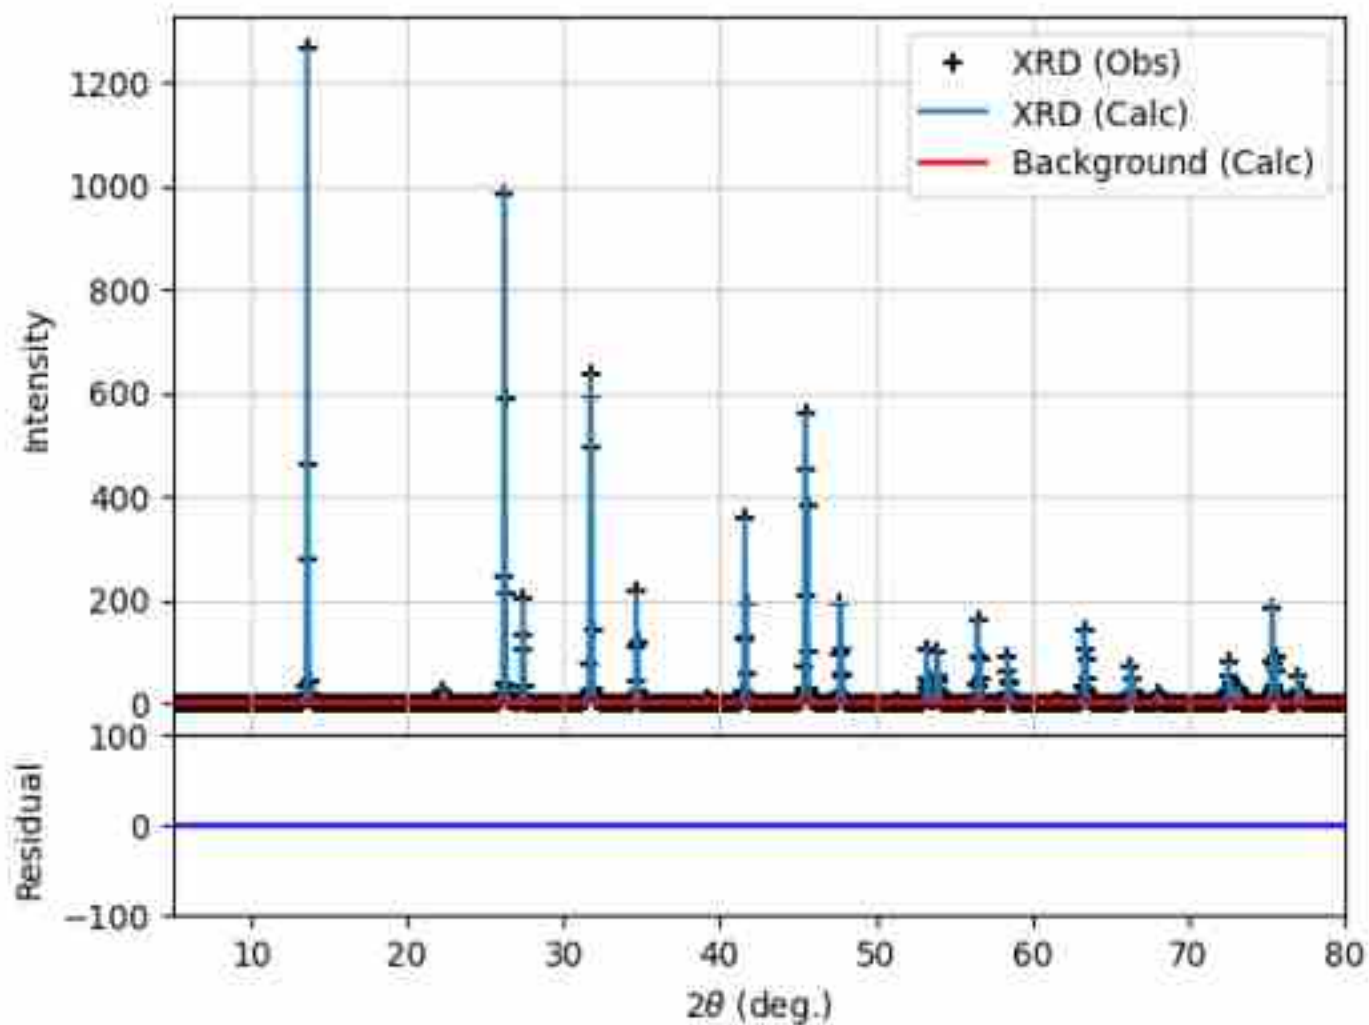

| RMSE before RR | Rwp     | RMSE after RR |
|----------------|---------|---------------|
| 0.015          | 0.02121 | 0.00331       |

# Hf3Ga3Ni3

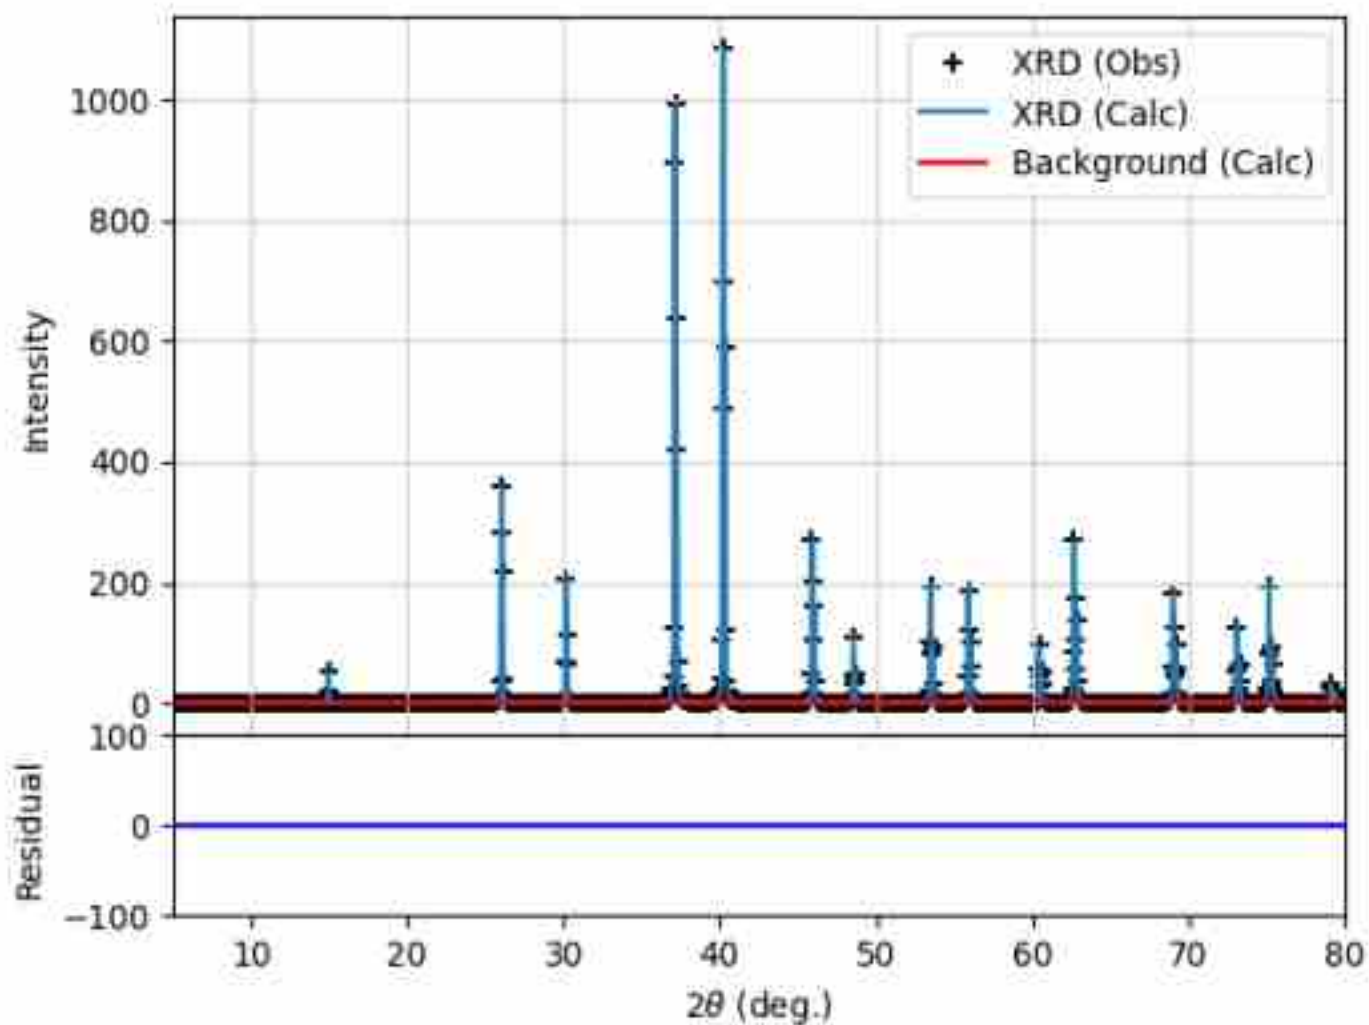

| RMSE before RR | Rwp     | RMSE after RR |
|----------------|---------|---------------|
| 0.015          | 0.00696 | 0.00222       |

# Hf3P3Ru3

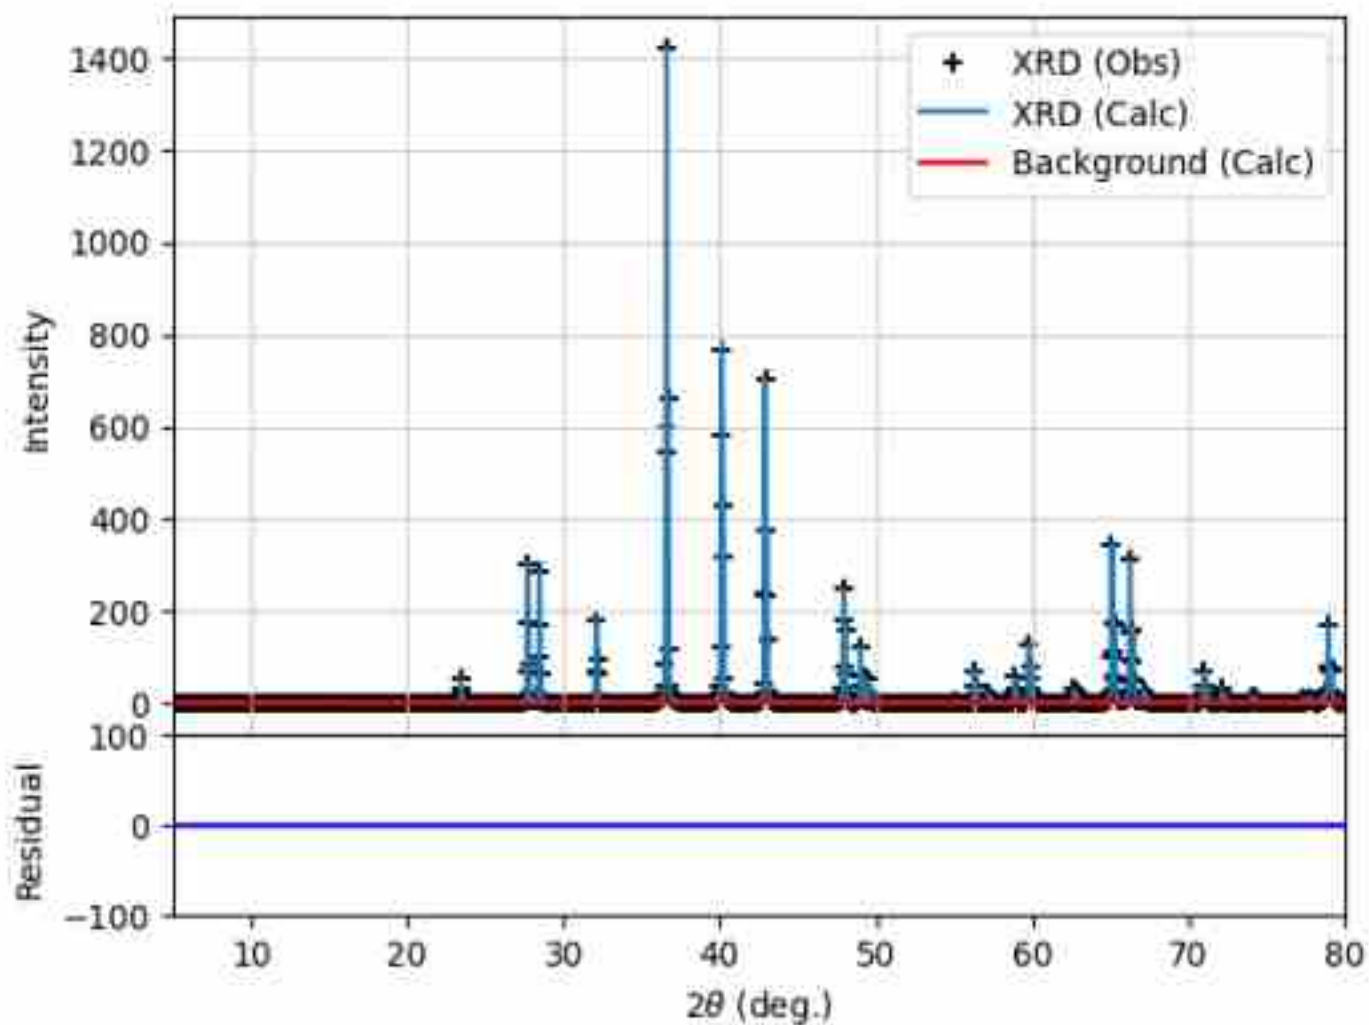

| RMSE before RR | Rwp     | RMSE after RR |
|----------------|---------|---------------|
| 0.015          | 0.00536 | 0.00163       |

# Hf<sub>3</sub>Sn<sub>3</sub>Rh<sub>3</sub>

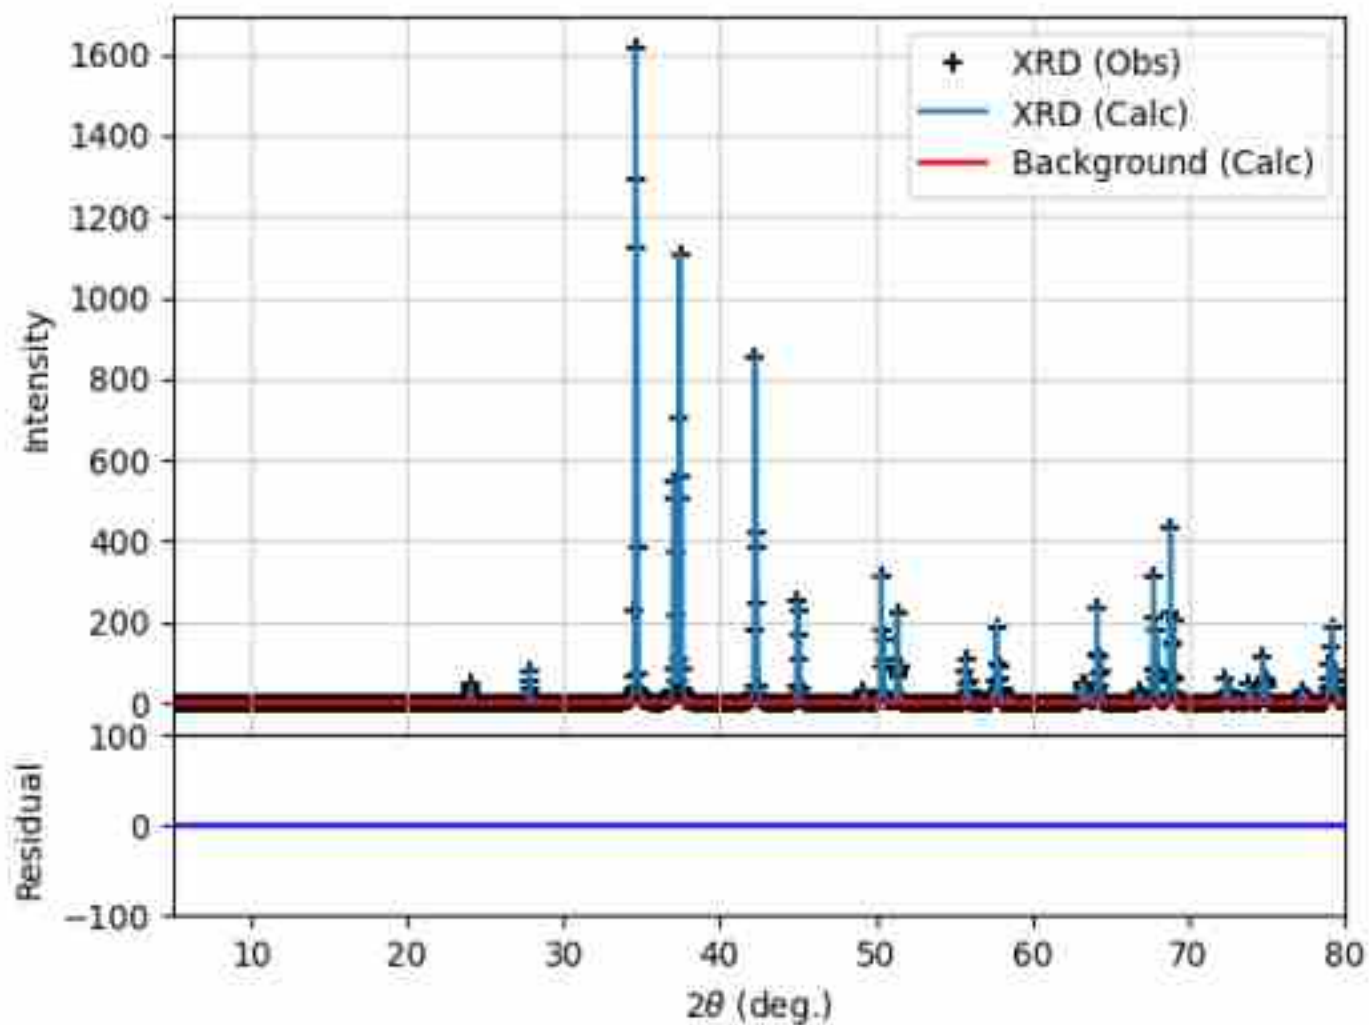

| RMSE before RR | Rwp     | RMSE after RR |
|----------------|---------|---------------|
| 0.015          | 0.00592 | 0.00047       |

# Hf<sub>4</sub>Fe<sub>4</sub>As<sub>4</sub>

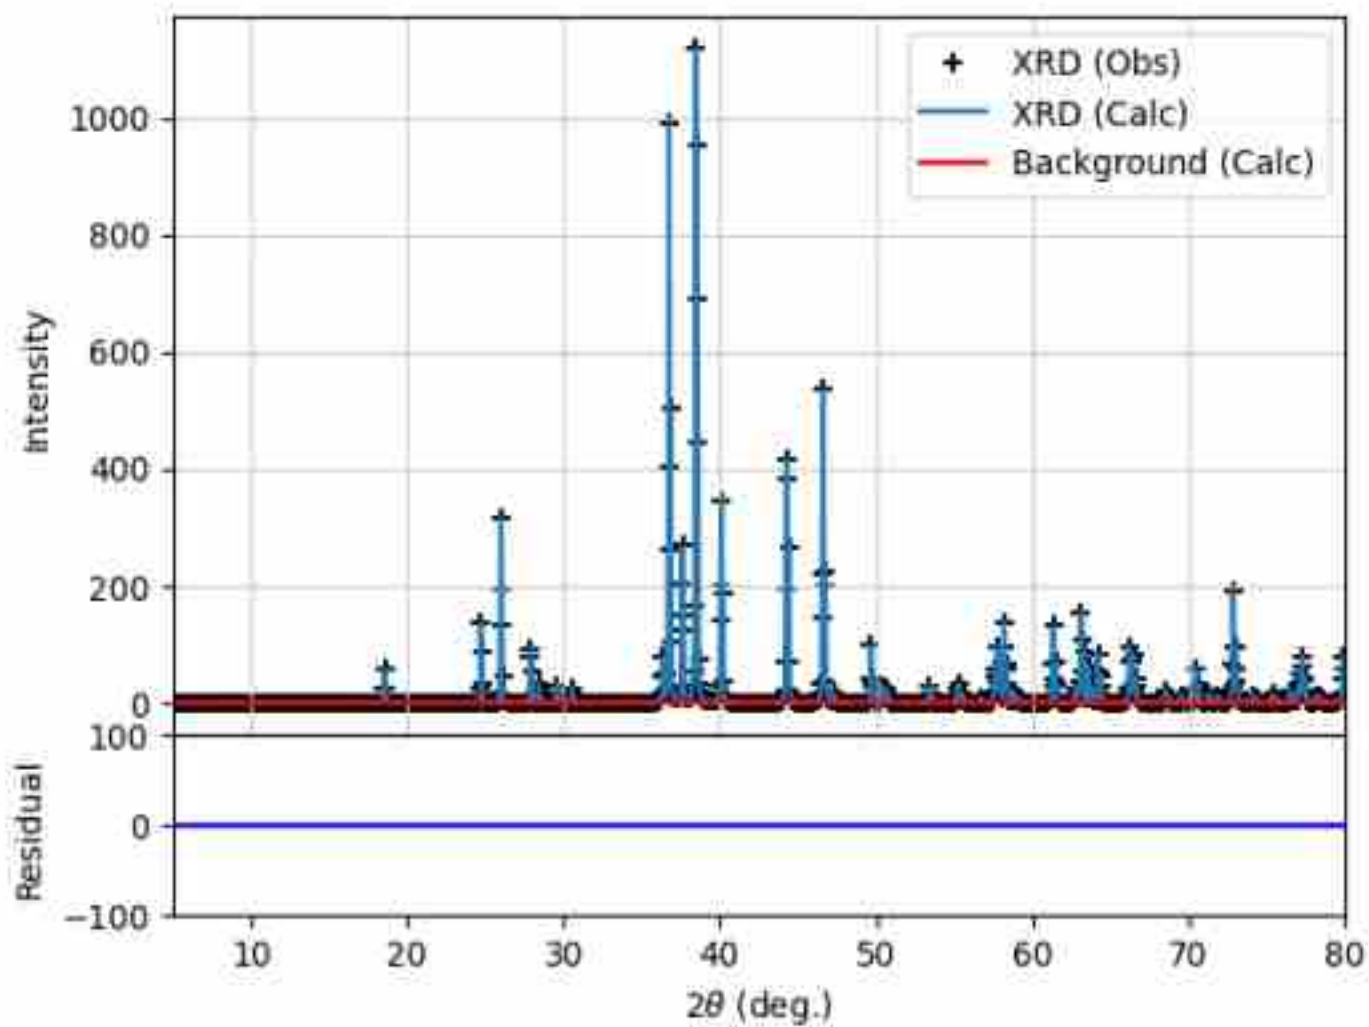

| RMSE before RR | Rwp    | RMSE after RR |
|----------------|--------|---------------|
| 0.015          | 0.0044 | 0.00068       |

# Ho1Fe1Ni4

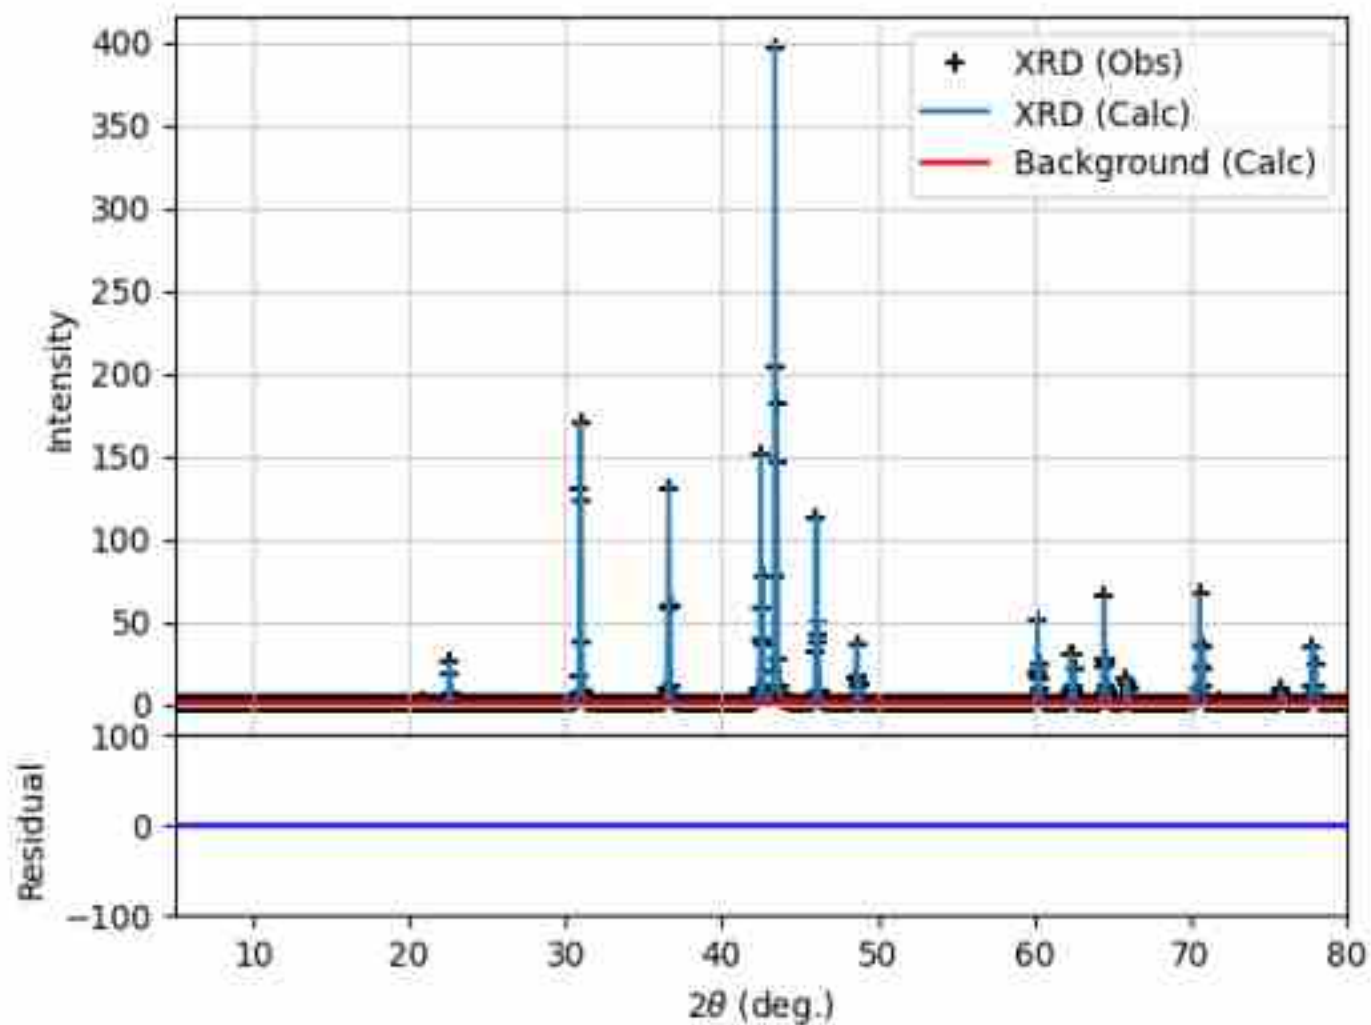

| RMSE before RR | Rwp     | RMSE after RR |
|----------------|---------|---------------|
| 0.015          | 0.00291 | 0.00052       |



# Ho1Ni5

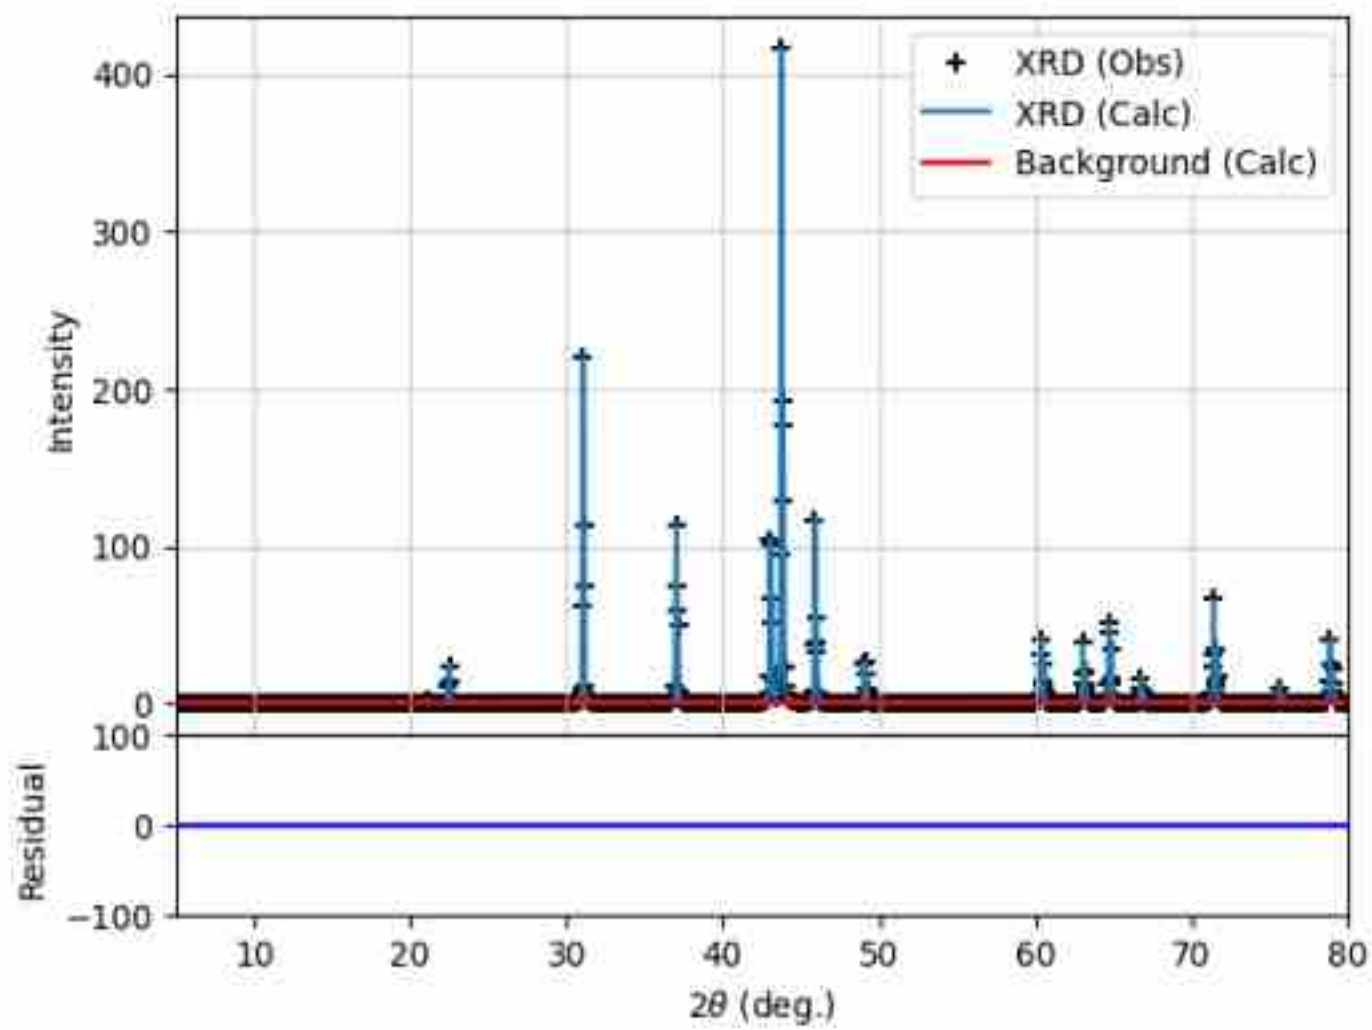

| RMSE before RR | Rwp     | RMSE after RR |
|----------------|---------|---------------|
| 0.015          | 0.01621 | 0.00141       |

# Ho1Sc1B2O6

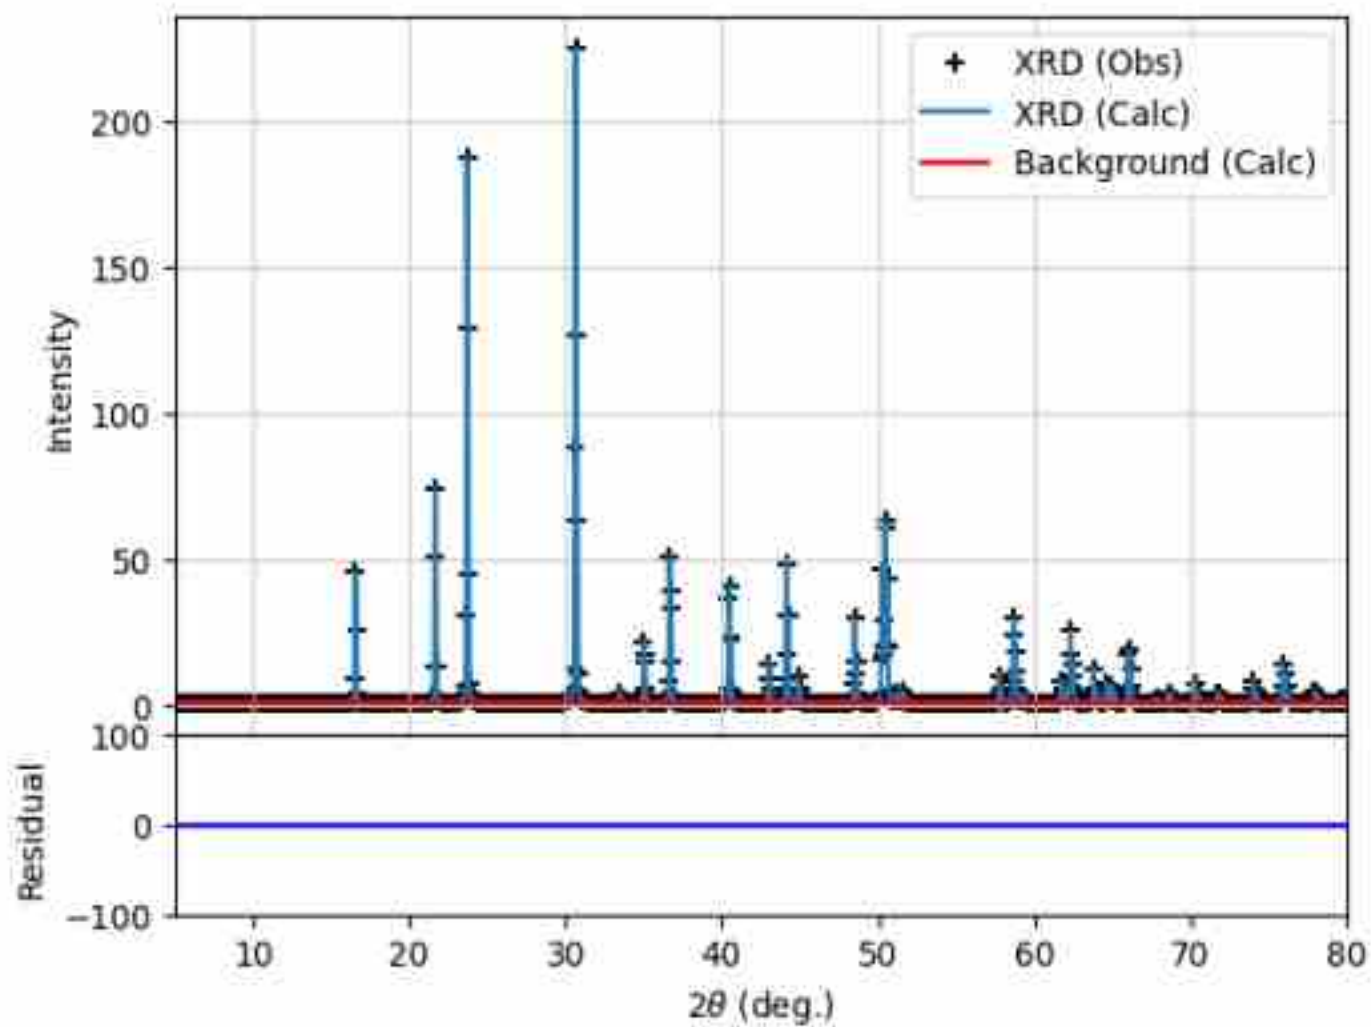

| RMSE before RR | Rwp     | RMSE after RR |
|----------------|---------|---------------|
| 0.015          | 0.00371 | 0.00198       |

# Ho<sub>2</sub>Ag<sub>2</sub>Pb<sub>2</sub>

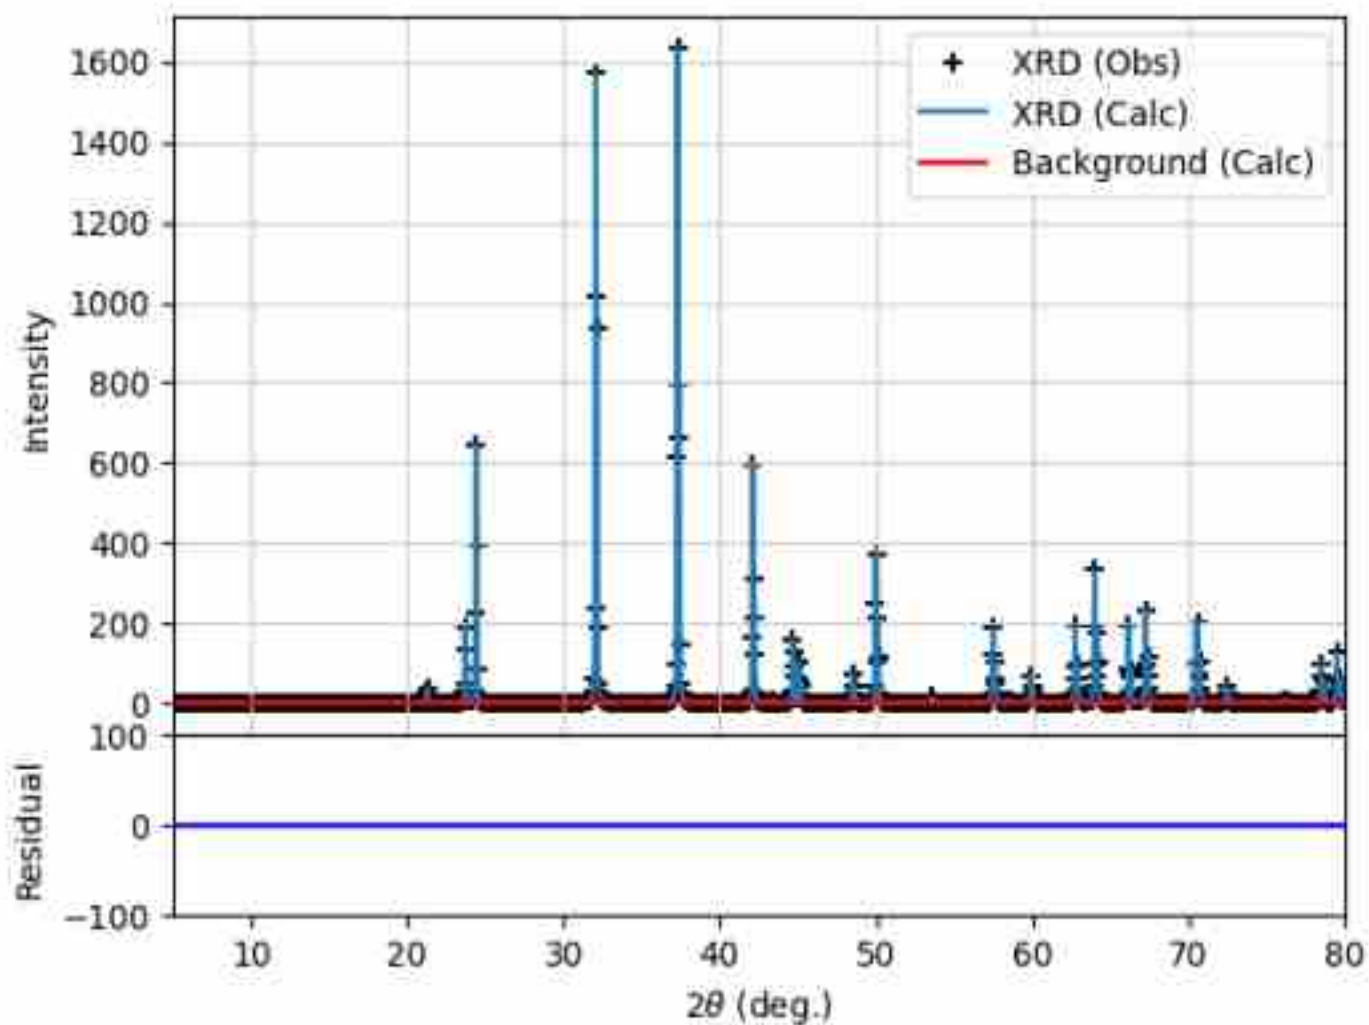

| RMSE before RR | Rwp     | RMSE after RR |
|----------------|---------|---------------|
| 0.015          | 0.00319 | 0.00037       |

# Ho<sub>2</sub>Ga<sub>4</sub>Pd<sub>2</sub>

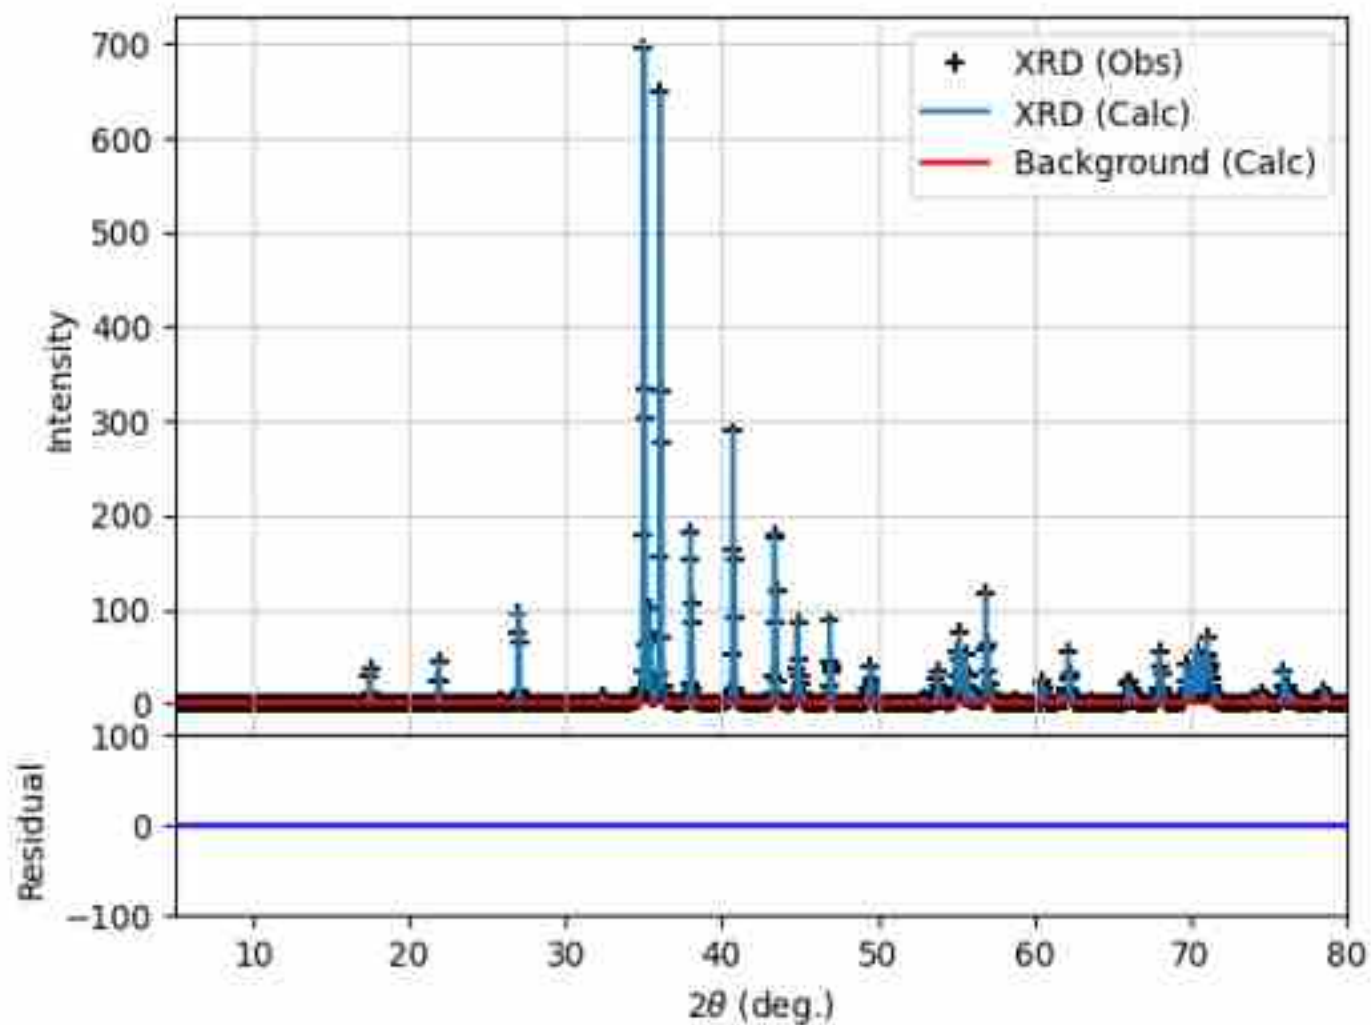

| RMSE before RR | Rwp     | RMSE after RR |
|----------------|---------|---------------|
| 0.015          | 0.00438 | 0.00039       |

# Ho<sub>2</sub>NiGe<sub>6</sub>

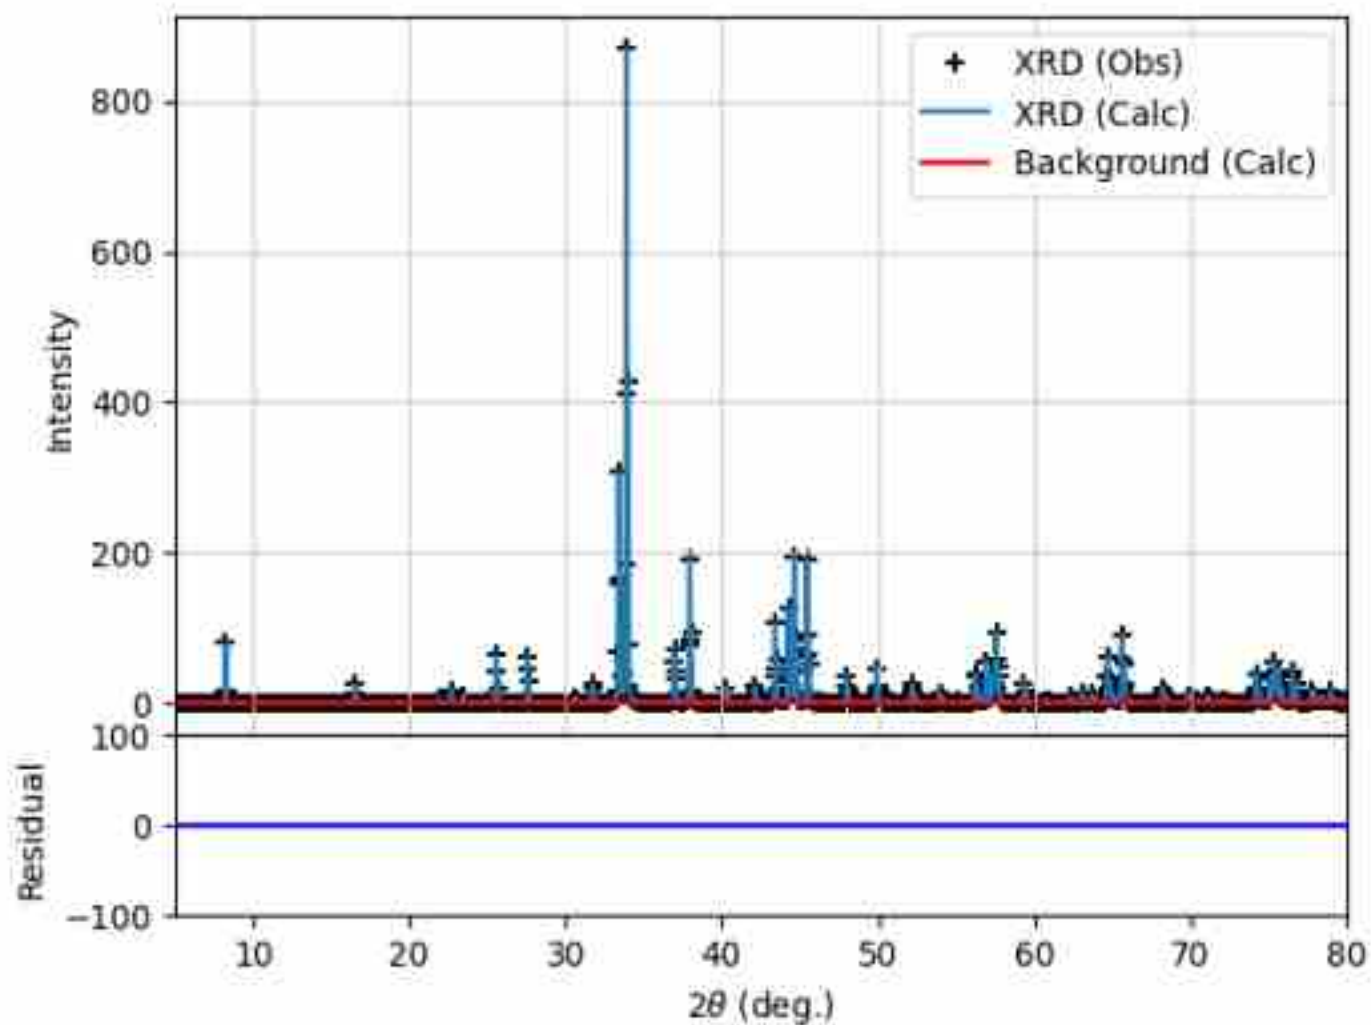

| RMSE before RR | Rwp     | RMSE after RR |
|----------------|---------|---------------|
| 0.015          | 0.00336 | 0.00022       |

# Ho<sub>2</sub>Zn<sub>17</sub>

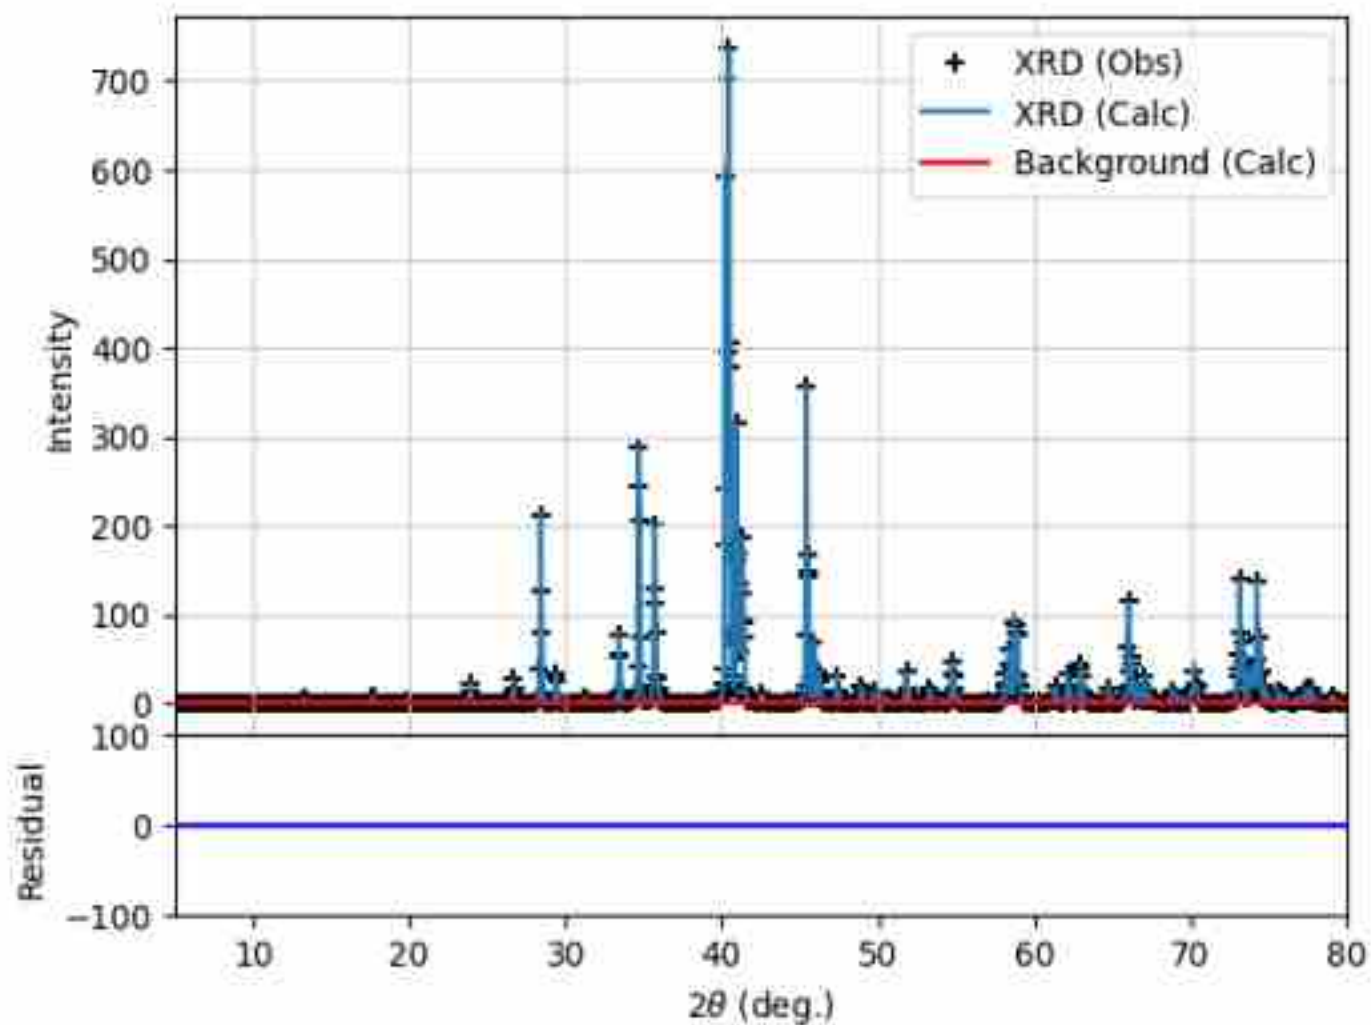

| RMSE before RR | Rwp     | RMSE after RR |
|----------------|---------|---------------|
| 0.015          | 0.00357 | 0.00034       |

# Ho<sub>3</sub>Cd<sub>3</sub>Au<sub>3</sub>

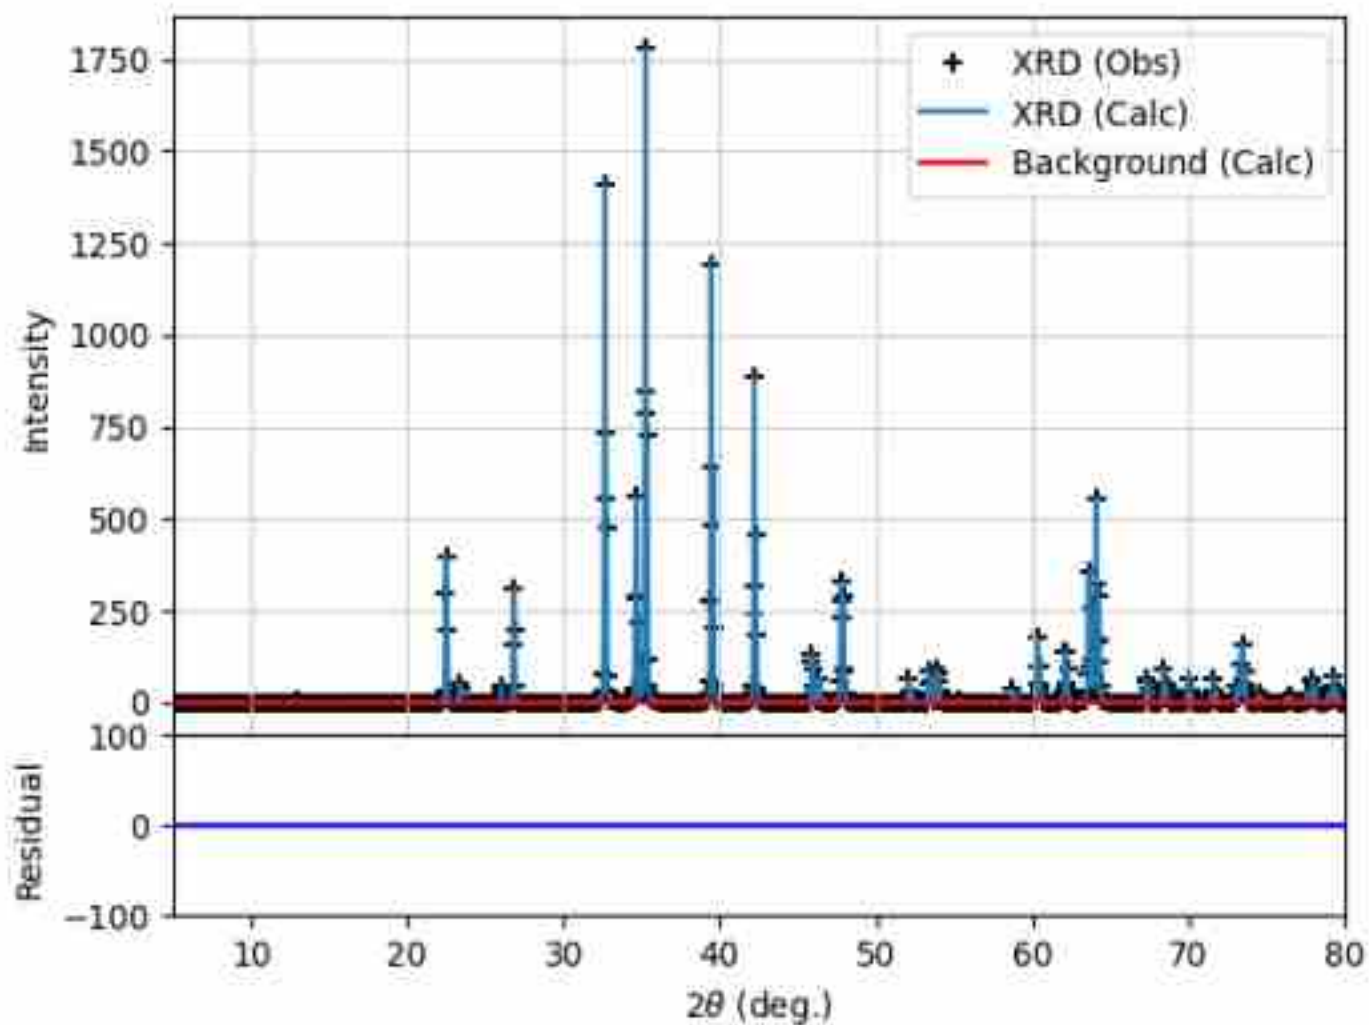

| RMSE before RR | Rwp     | RMSE after RR |
|----------------|---------|---------------|
| 0.015          | 0.00437 | 0.00054       |

# In1Te5Pb4

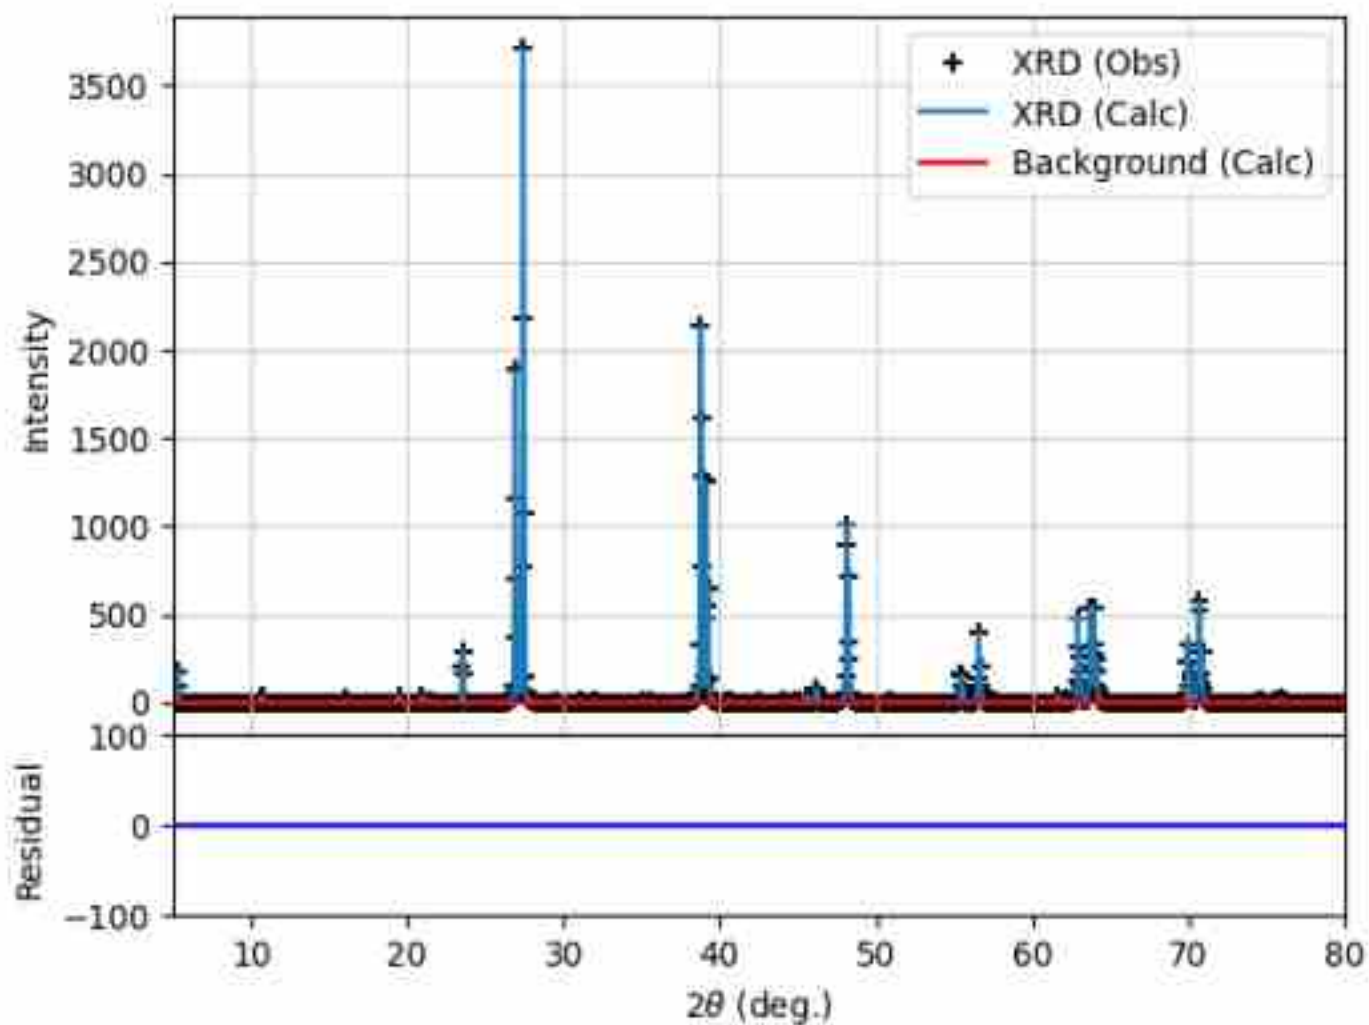

| RMSE before RR | Rwp     | RMSE after RR |
|----------------|---------|---------------|
| 0.015          | 0.00493 | 0.00022       |



# K1Lu1Mo2O8

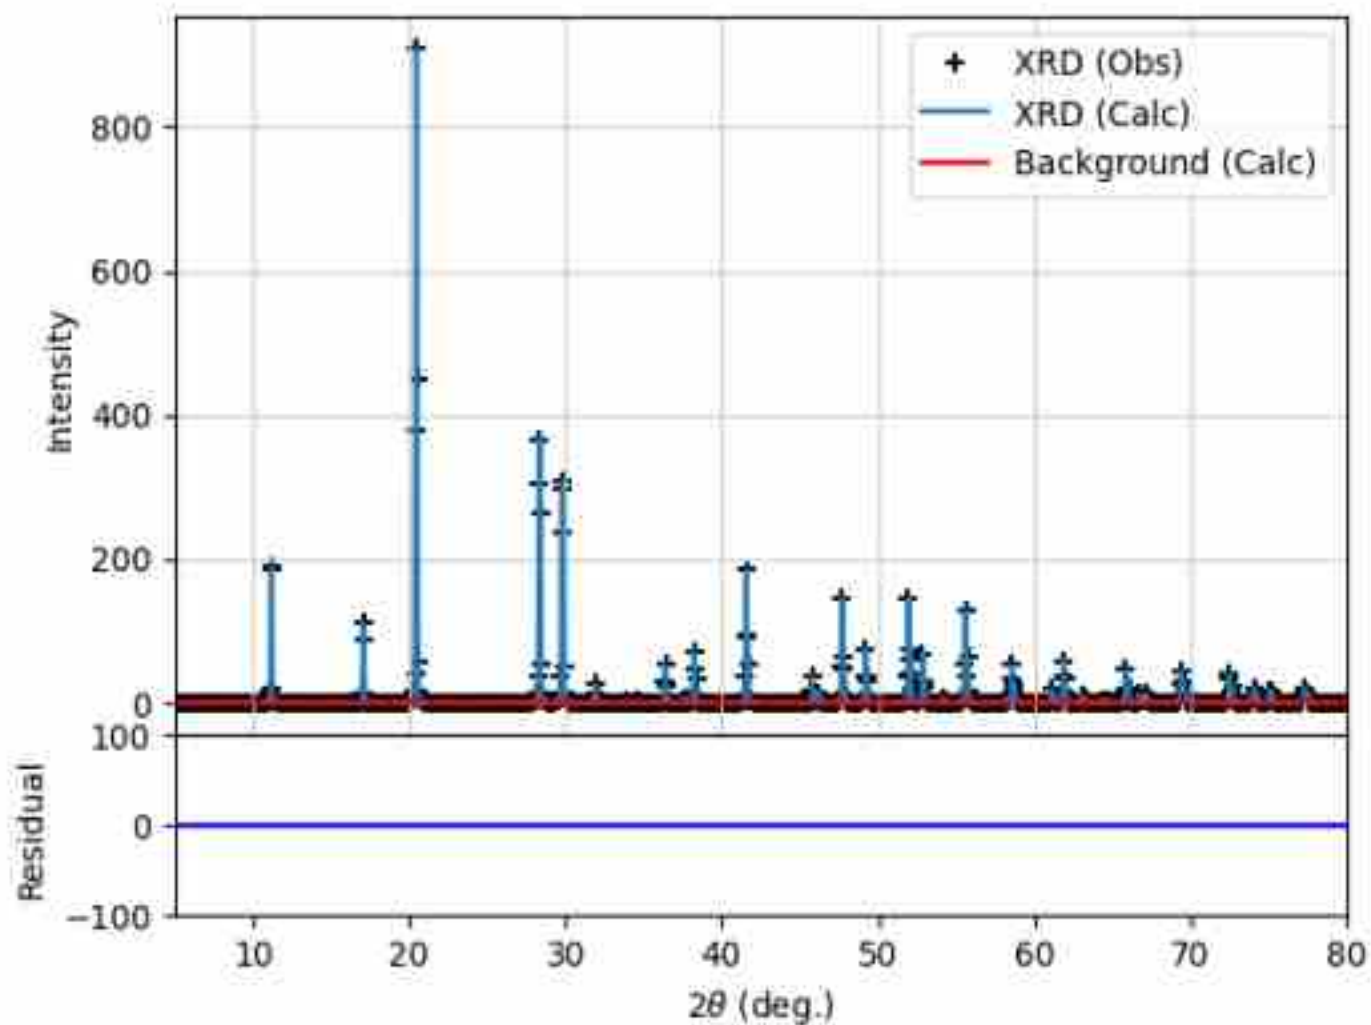

| RMSE before RR | Rwp     | RMSE after RR |
|----------------|---------|---------------|
| 0.015          | 0.00331 | 0.00185       |

# K<sub>2</sub>Li<sub>1</sub>Bi<sub>1</sub>I<sub>6</sub>

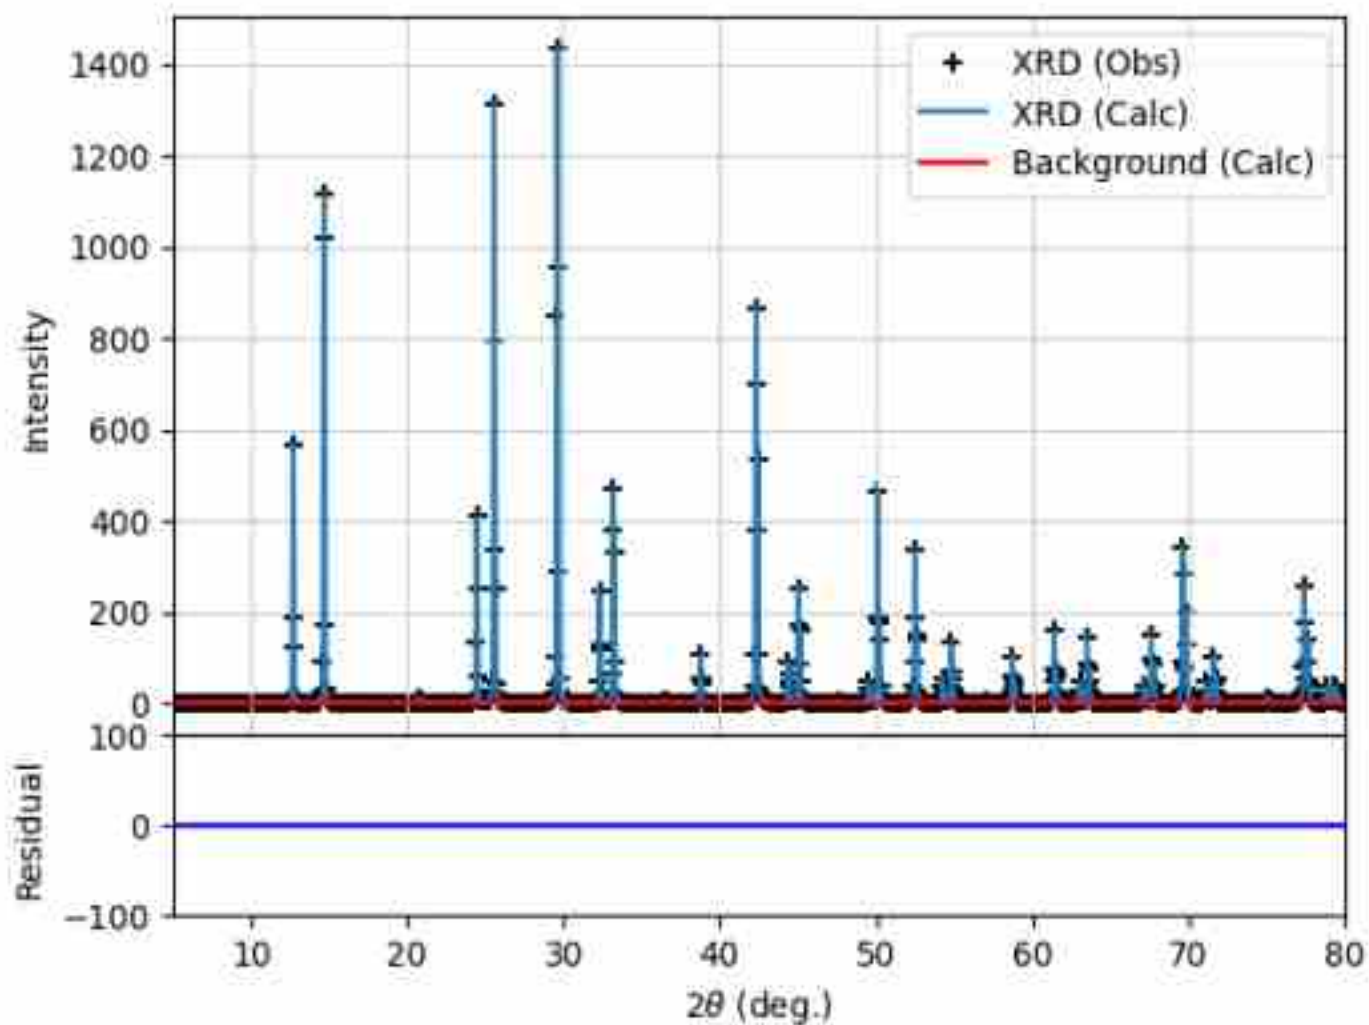

| RMSE before RR | Rwp     | RMSE after RR |
|----------------|---------|---------------|
| 0.015          | 0.04168 | 0.00566       |

# La1Ag1O2

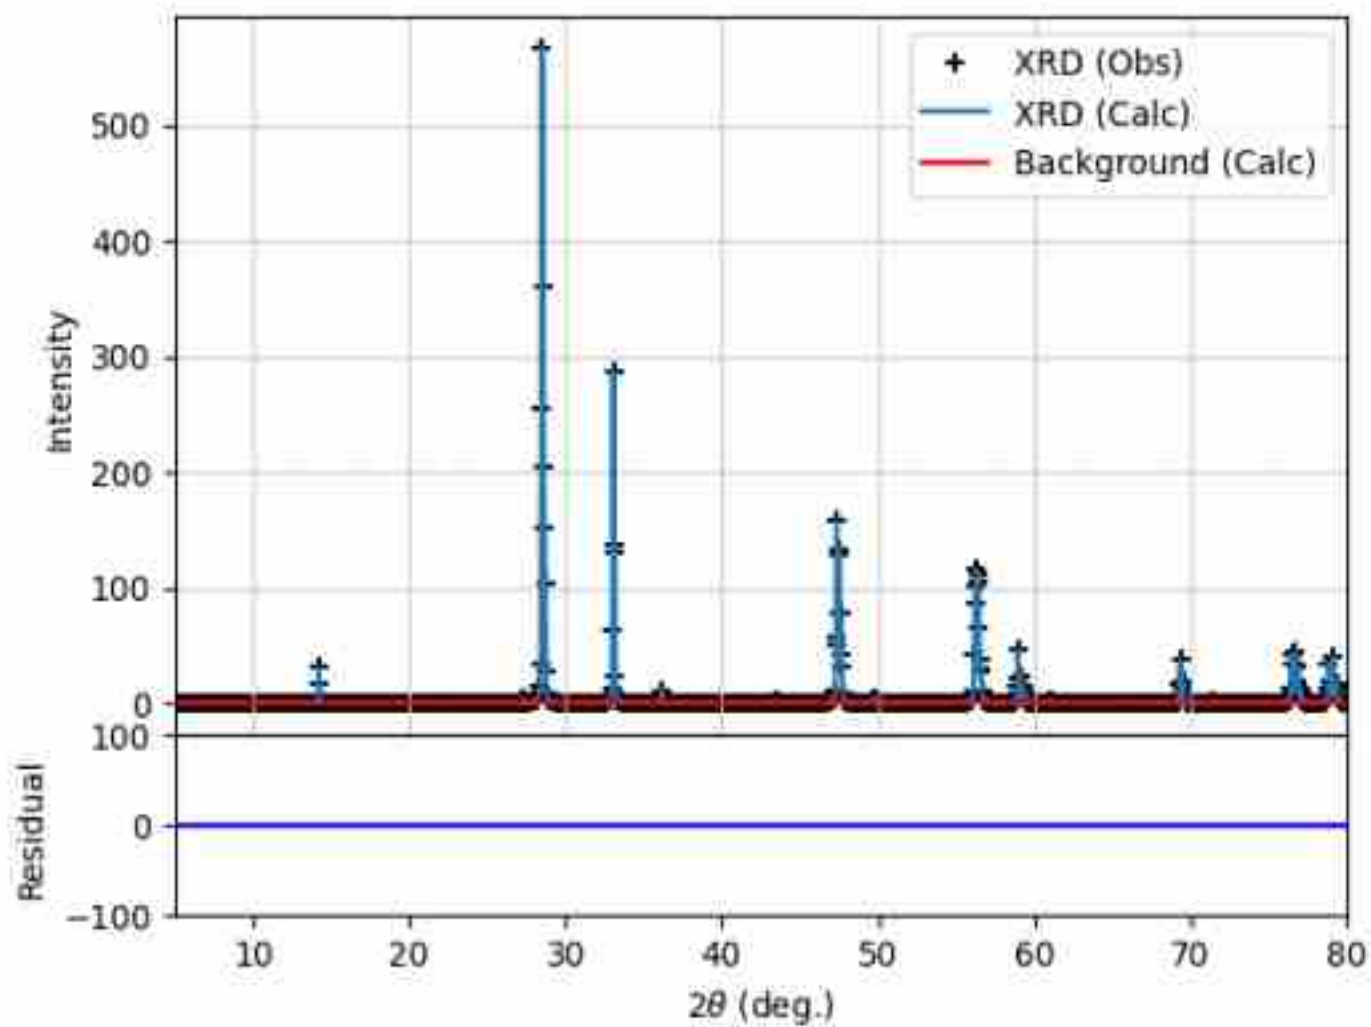

| RMSE before RR | Rwp     | RMSE after RR |
|----------------|---------|---------------|
| 0.015          | 0.00247 | 0.00252       |

# La1Ge5

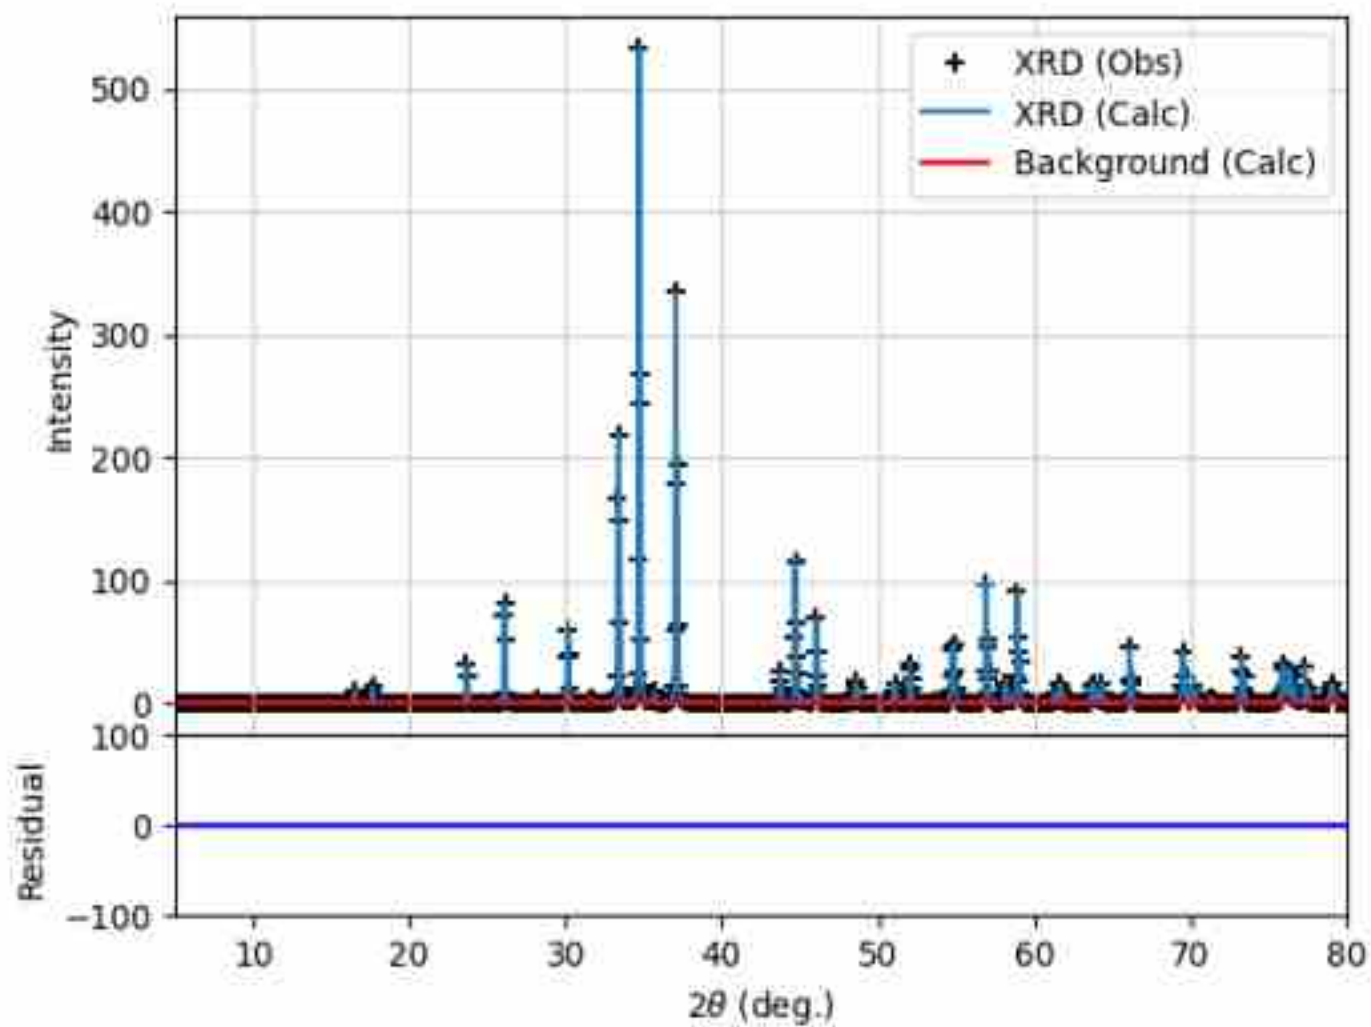

| RMSE before RR | Rwp     | RMSE after RR |
|----------------|---------|---------------|
| 0.015          | 0.00349 | 0.00058       |

# La1Th3Ru8

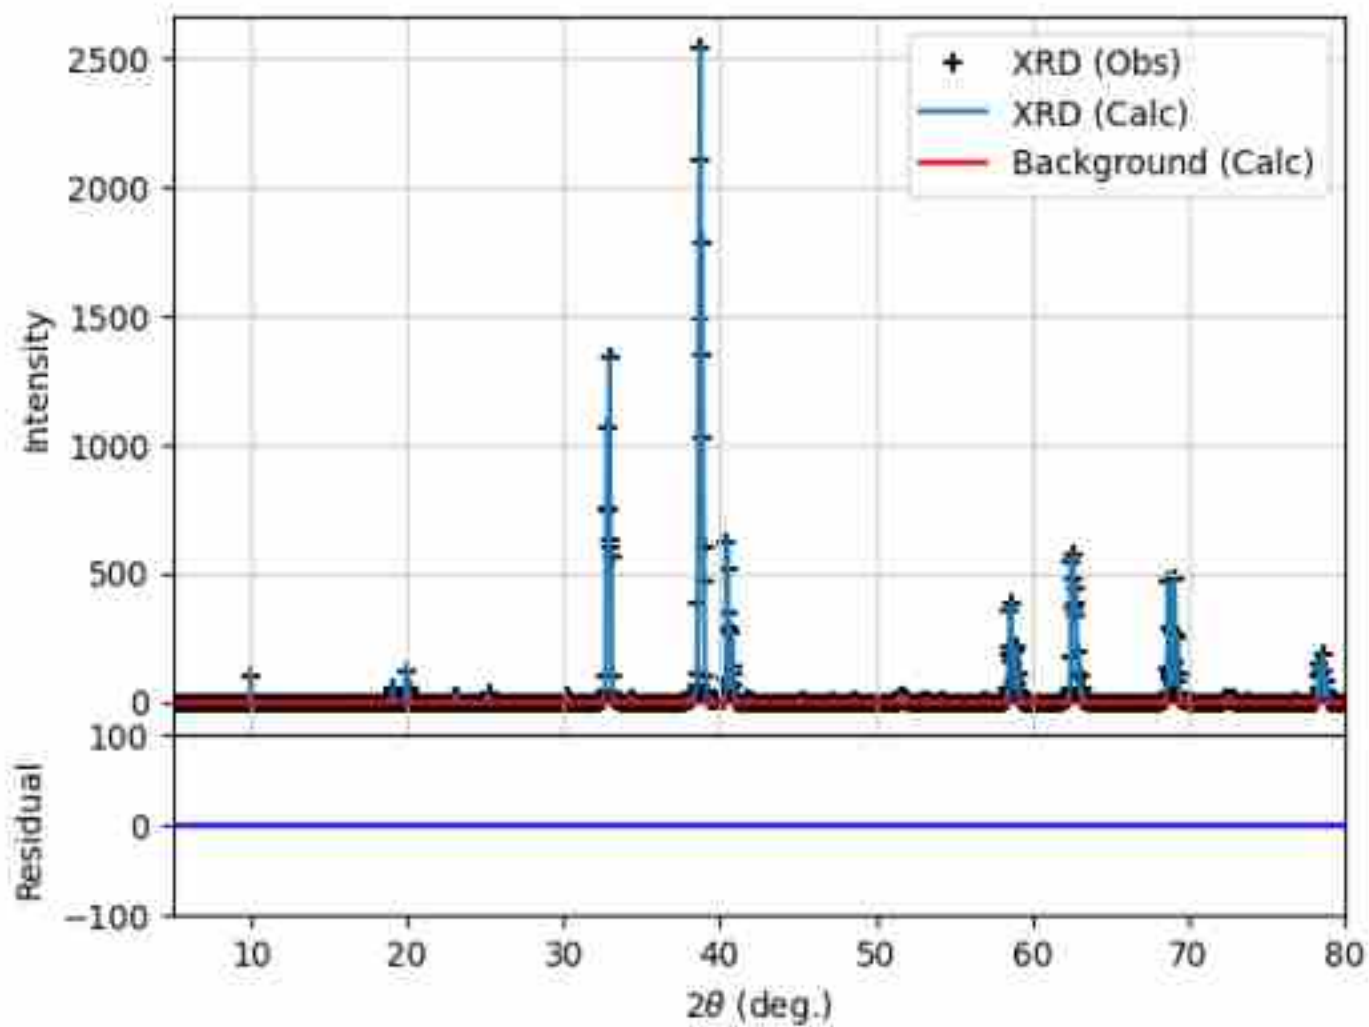

| RMSE before RR | Rwp     | RMSE after RR |
|----------------|---------|---------------|
| 0.015          | 0.00311 | 0.00024       |

# La<sub>1</sub>Y<sub>3</sub>Sc<sub>4</sub>O<sub>12</sub>

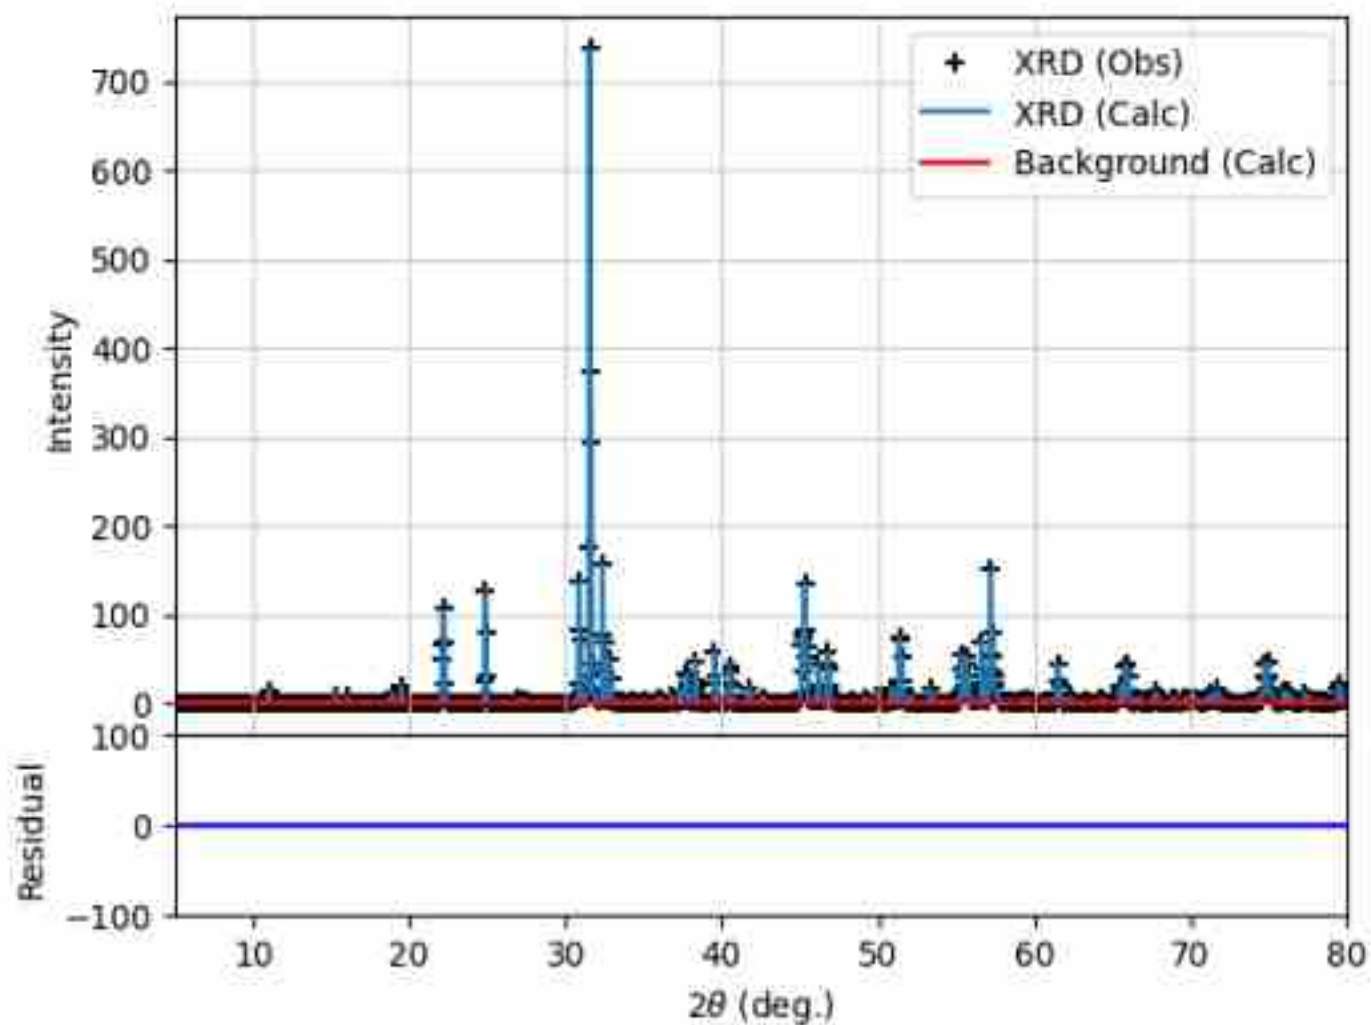

| RMSE before RR | Rwp     | RMSE after RR |
|----------------|---------|---------------|
| 0.015          | 0.00323 | 0.00134       |

# La<sub>1</sub>Y<sub>3</sub>Ti<sub>4</sub>O<sub>12</sub>

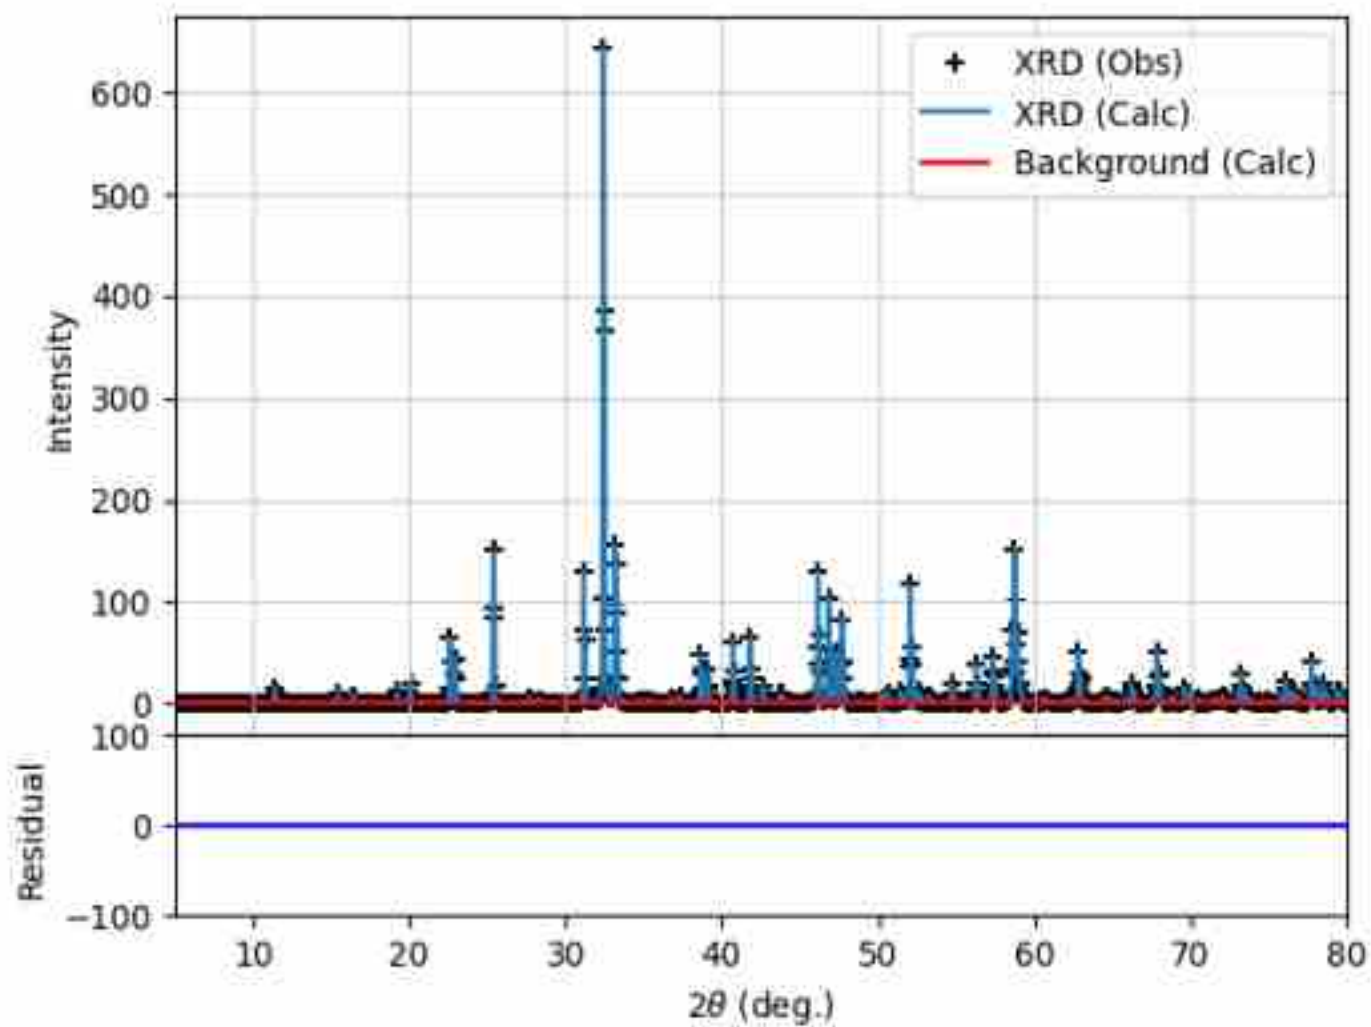

| RMSE before RR | Rwp     | RMSE after RR |
|----------------|---------|---------------|
| 0.015          | 0.00333 | 0.00135       |

# La<sub>2</sub>In<sub>2</sub>Ni<sub>4</sub>

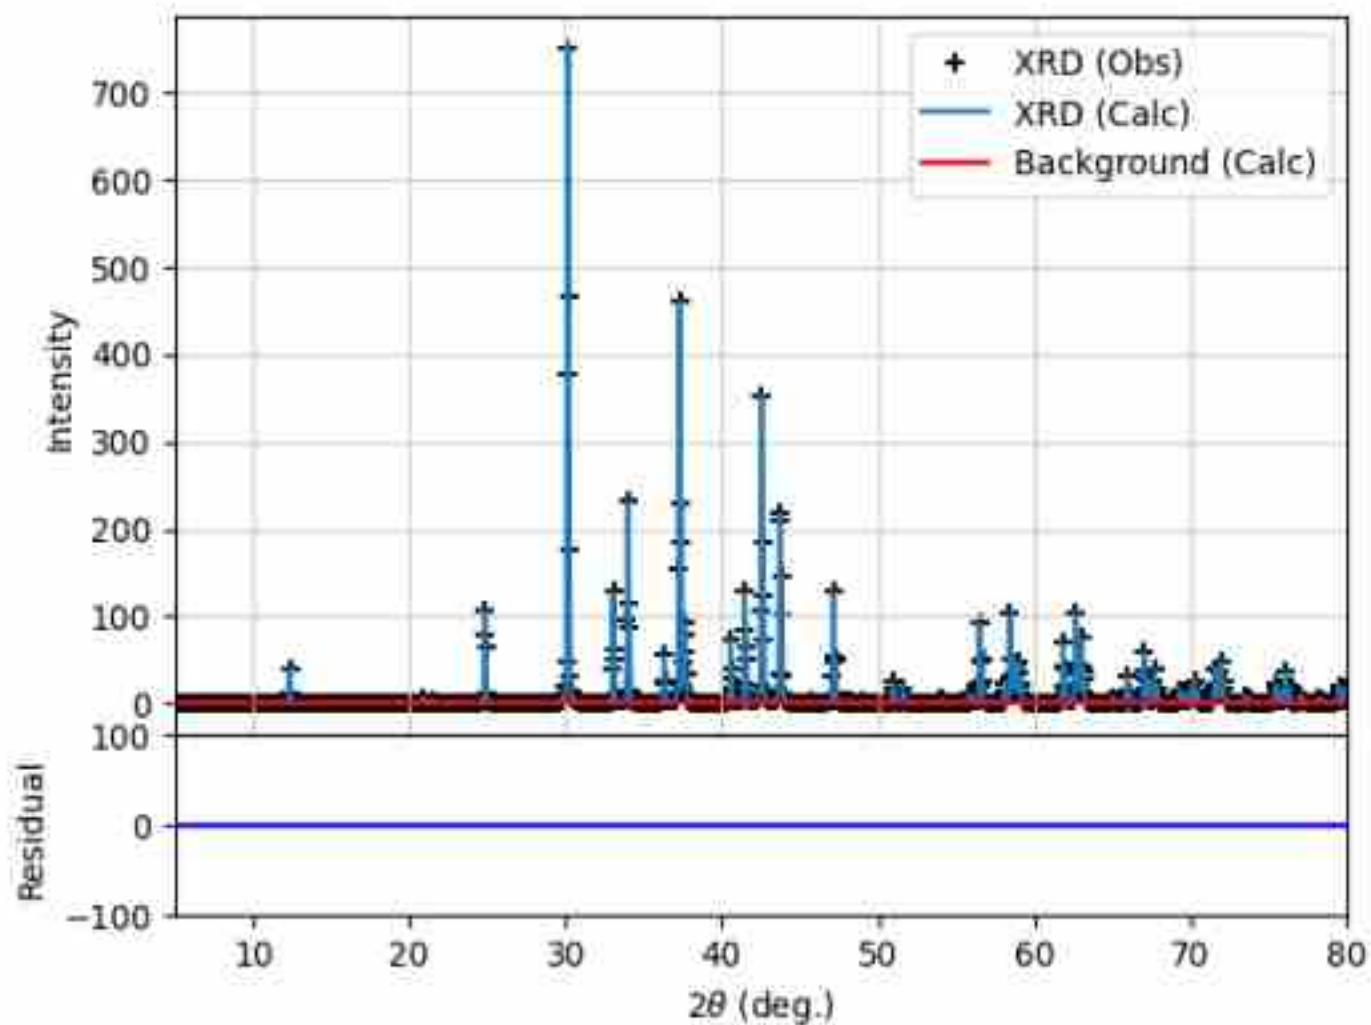

| RMSE before RR | Rwp     | RMSE after RR |
|----------------|---------|---------------|
| 0.015          | 0.00528 | 0.00062       |



# La<sub>2</sub>MgAl<sub>3</sub>

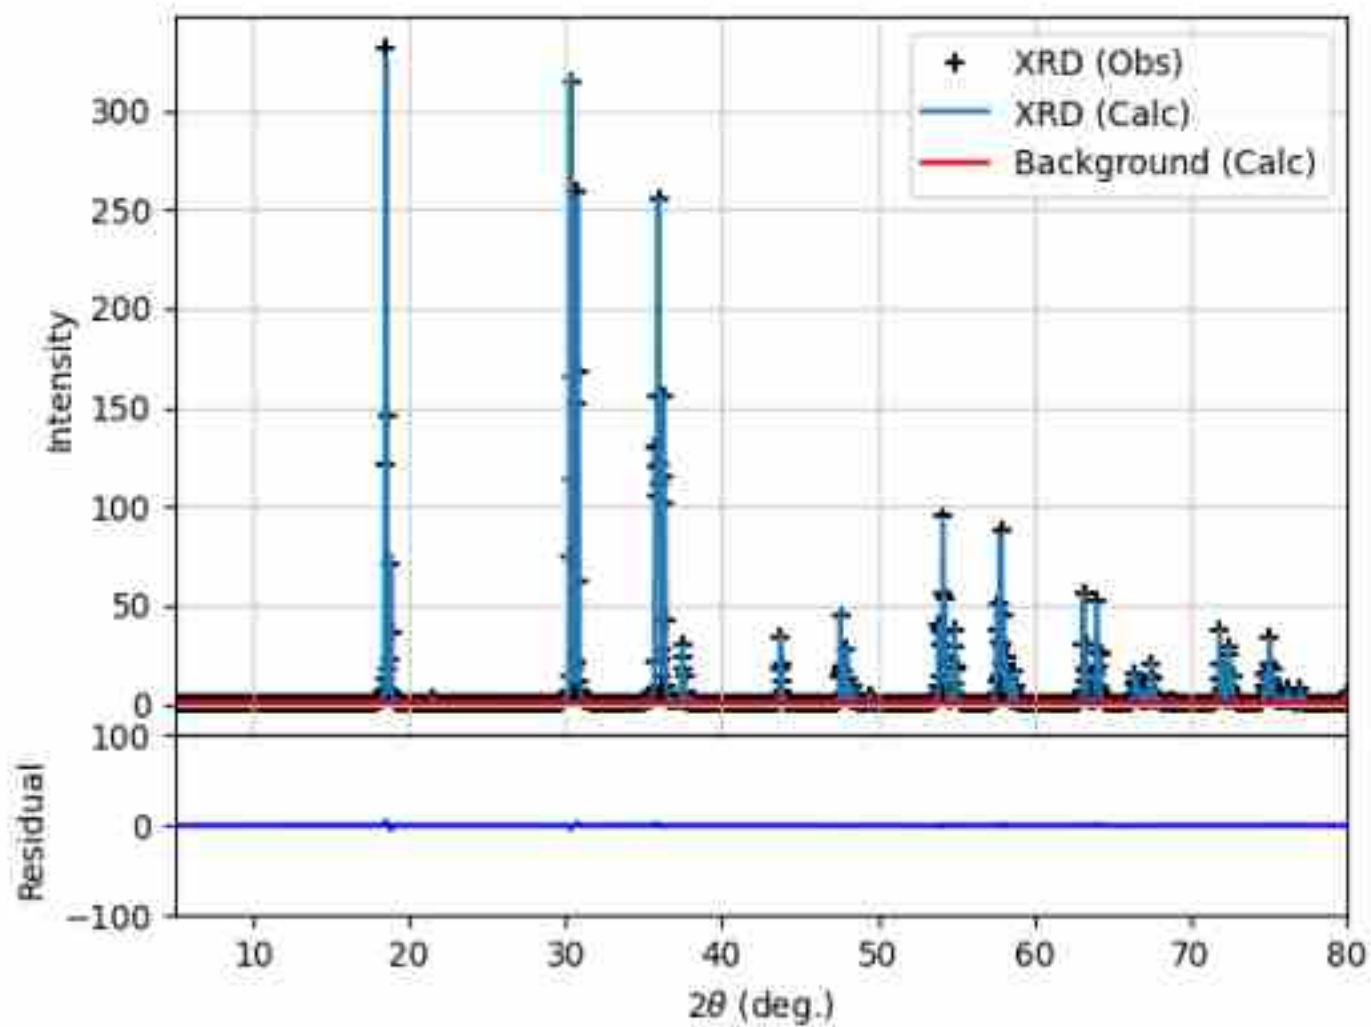

| RMSE before RR | Rwp     | RMSE after RR |
|----------------|---------|---------------|
| 0.015          | 1.56742 | 0.03104       |

# La2N2

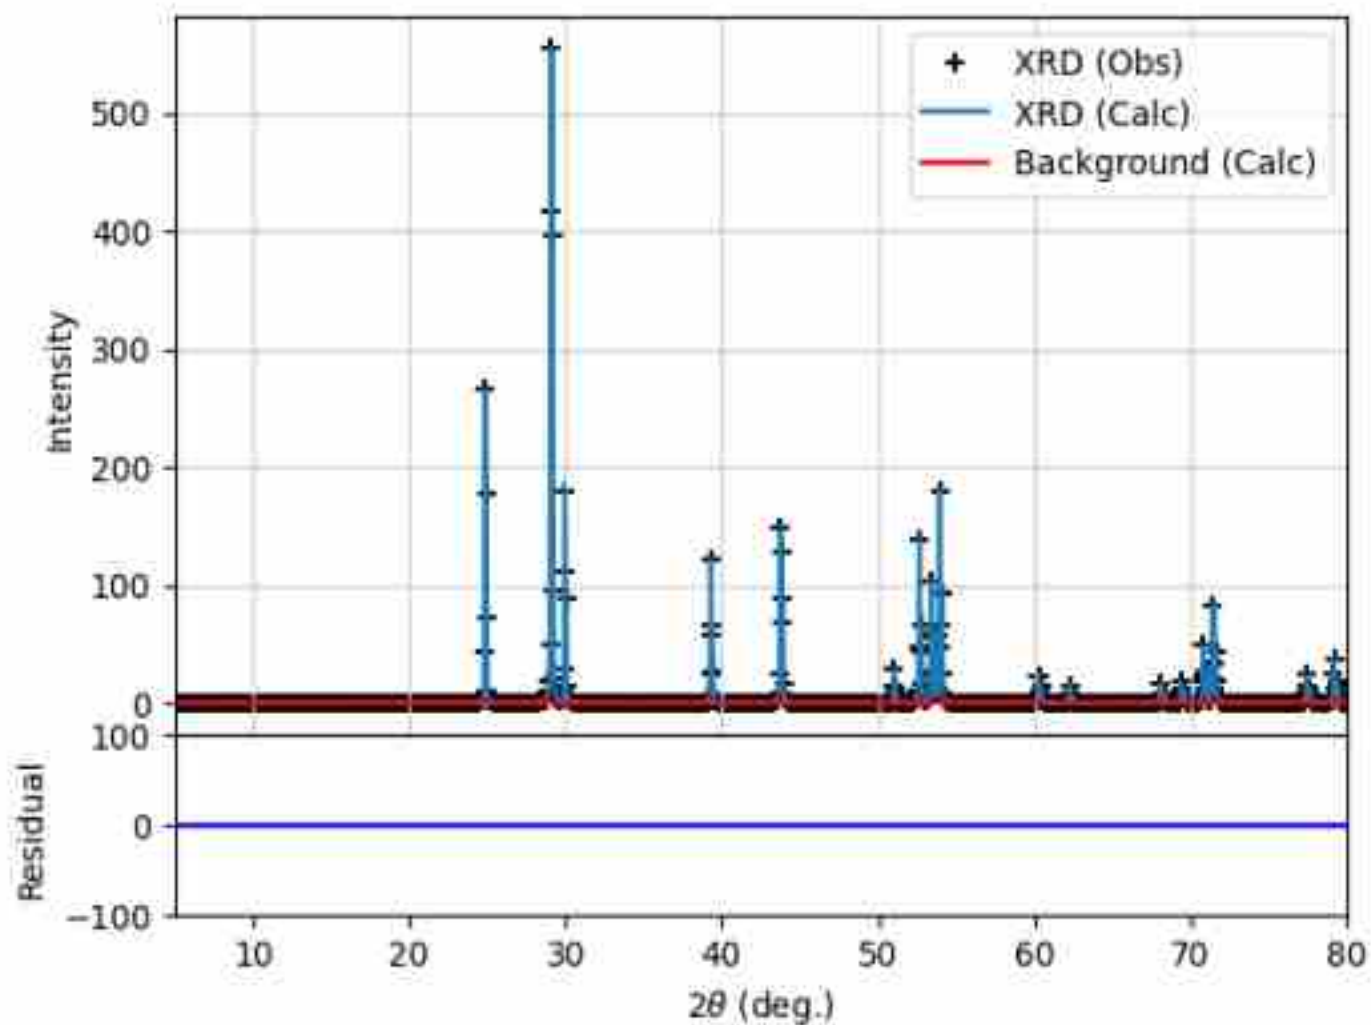

| RMSE before RR | Rwp     | RMSE after RR |
|----------------|---------|---------------|
| 0.015          | 0.00268 | 0.00095       |

# La<sub>2</sub>Ni<sub>2</sub>Sn<sub>2</sub>H<sub>4</sub>

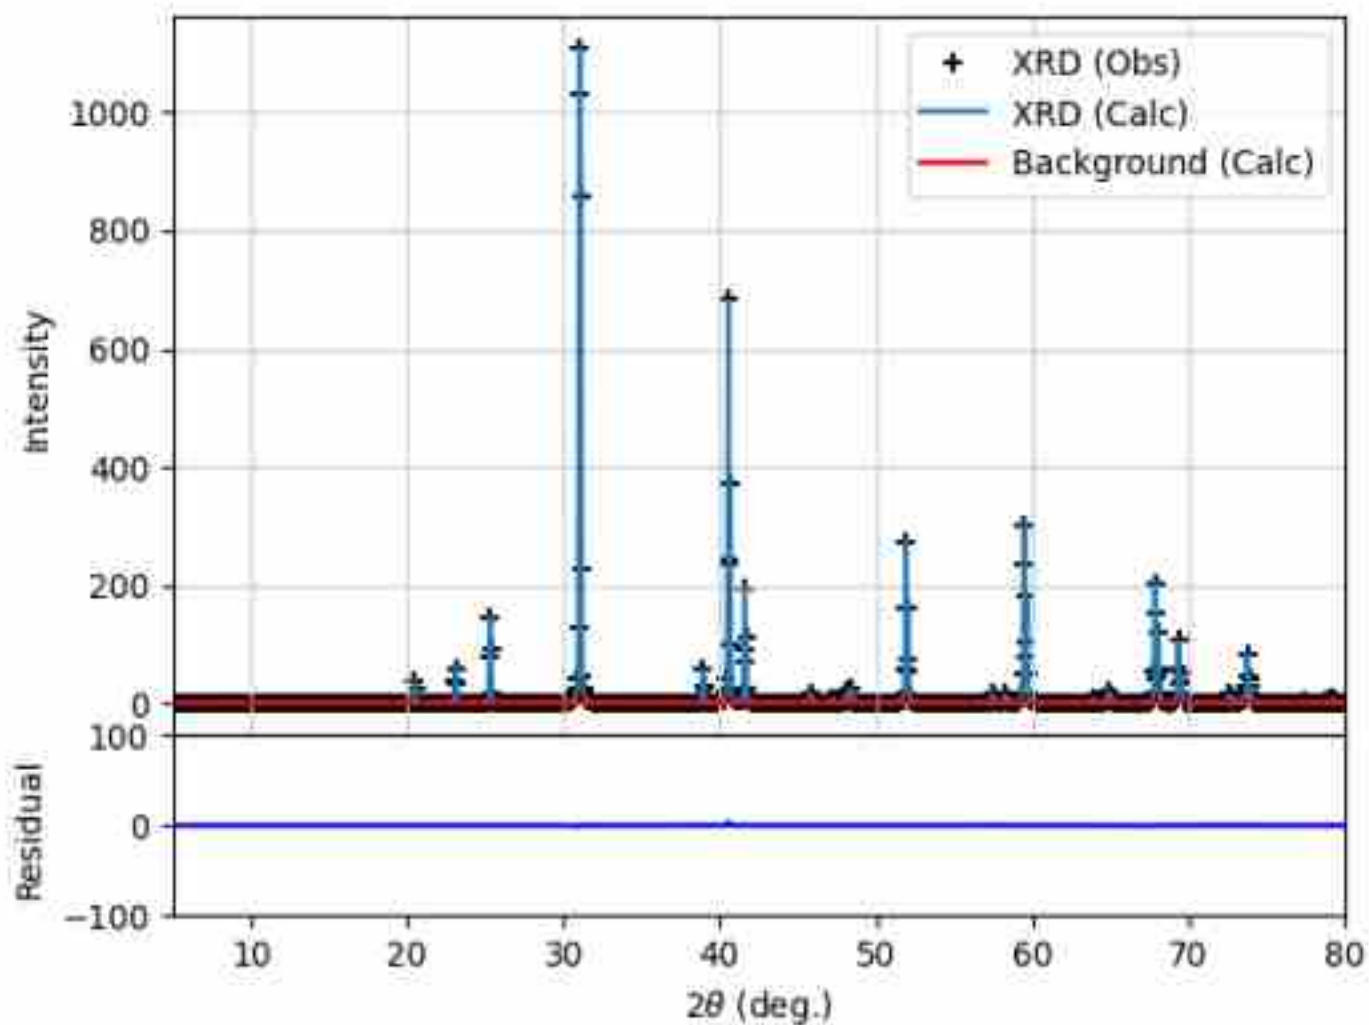

| RMSE before RR | Rwp     | RMSE after RR |
|----------------|---------|---------------|
| 0.015          | 0.43739 | 0.09855       |

# La<sub>2</sub>Si<sub>2</sub>O<sub>8</sub>C<sub>2</sub>

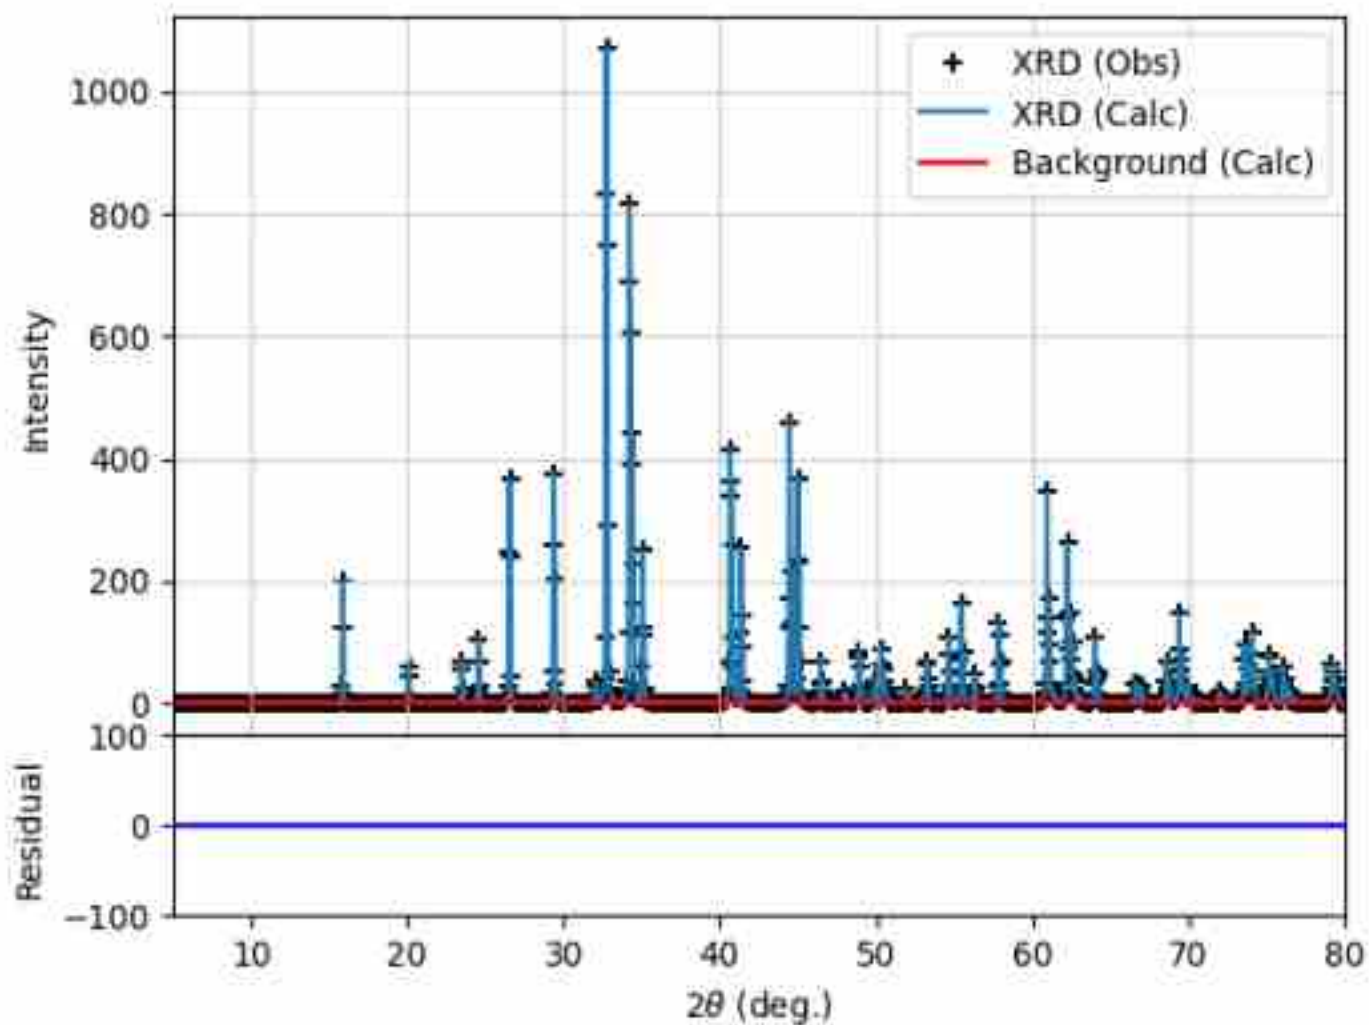

| RMSE before RR | Rwp     | RMSE after RR |
|----------------|---------|---------------|
| 0.015          | 0.00436 | 0.0021        |

# La<sub>2</sub>Si<sub>2</sub>Pt<sub>2</sub>

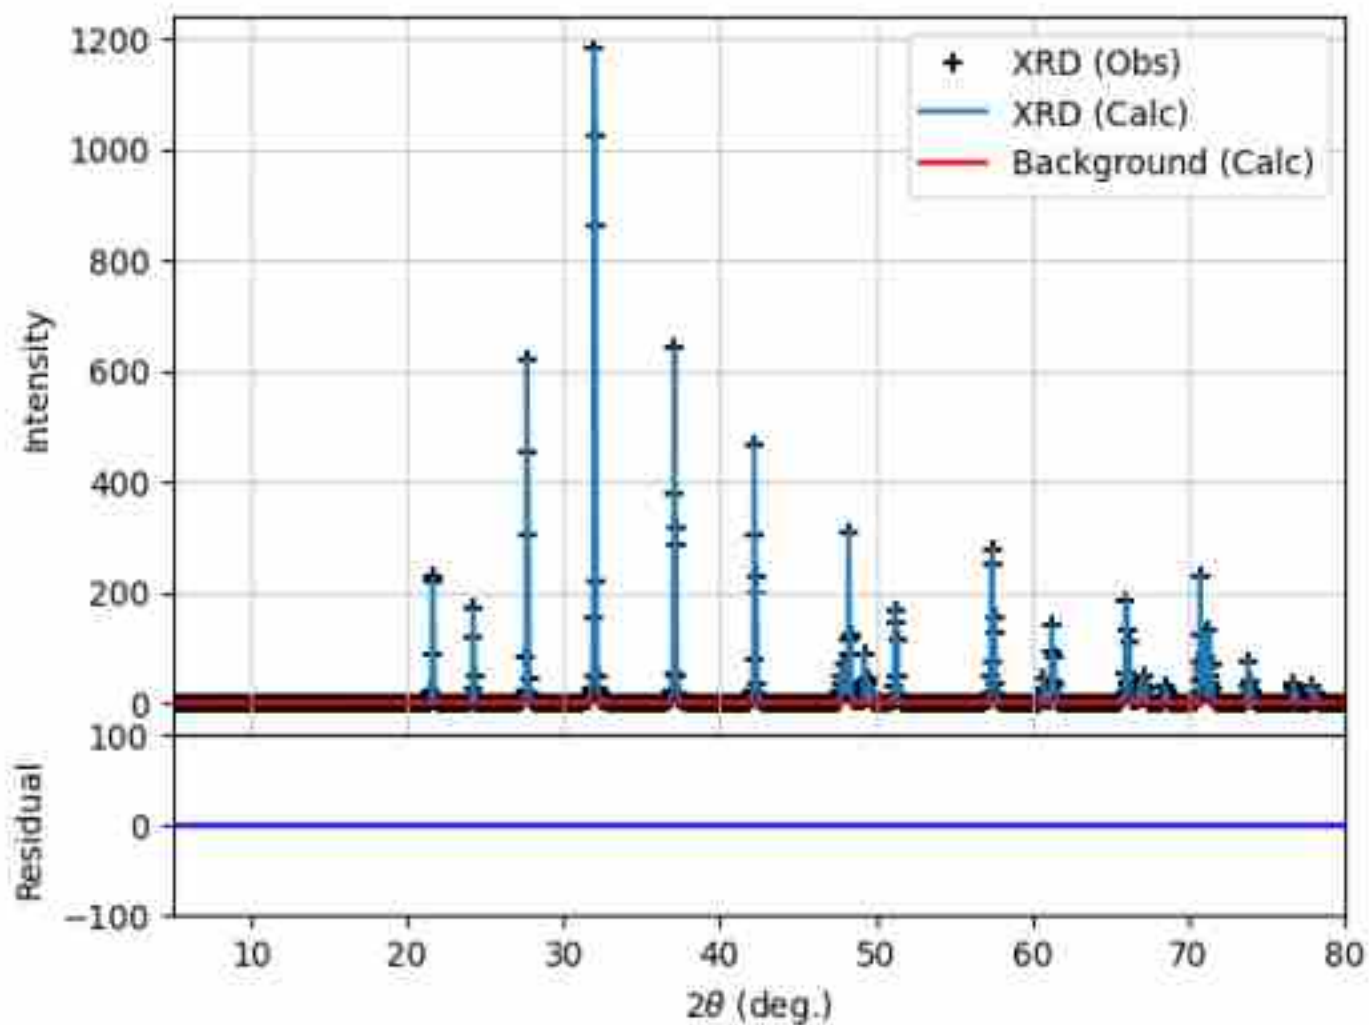

| RMSE before RR | Rwp     | RMSE after RR |
|----------------|---------|---------------|
| 0.015          | 0.00422 | 0.00066       |

# La<sub>2</sub>Ta<sub>2</sub>O<sub>8</sub>

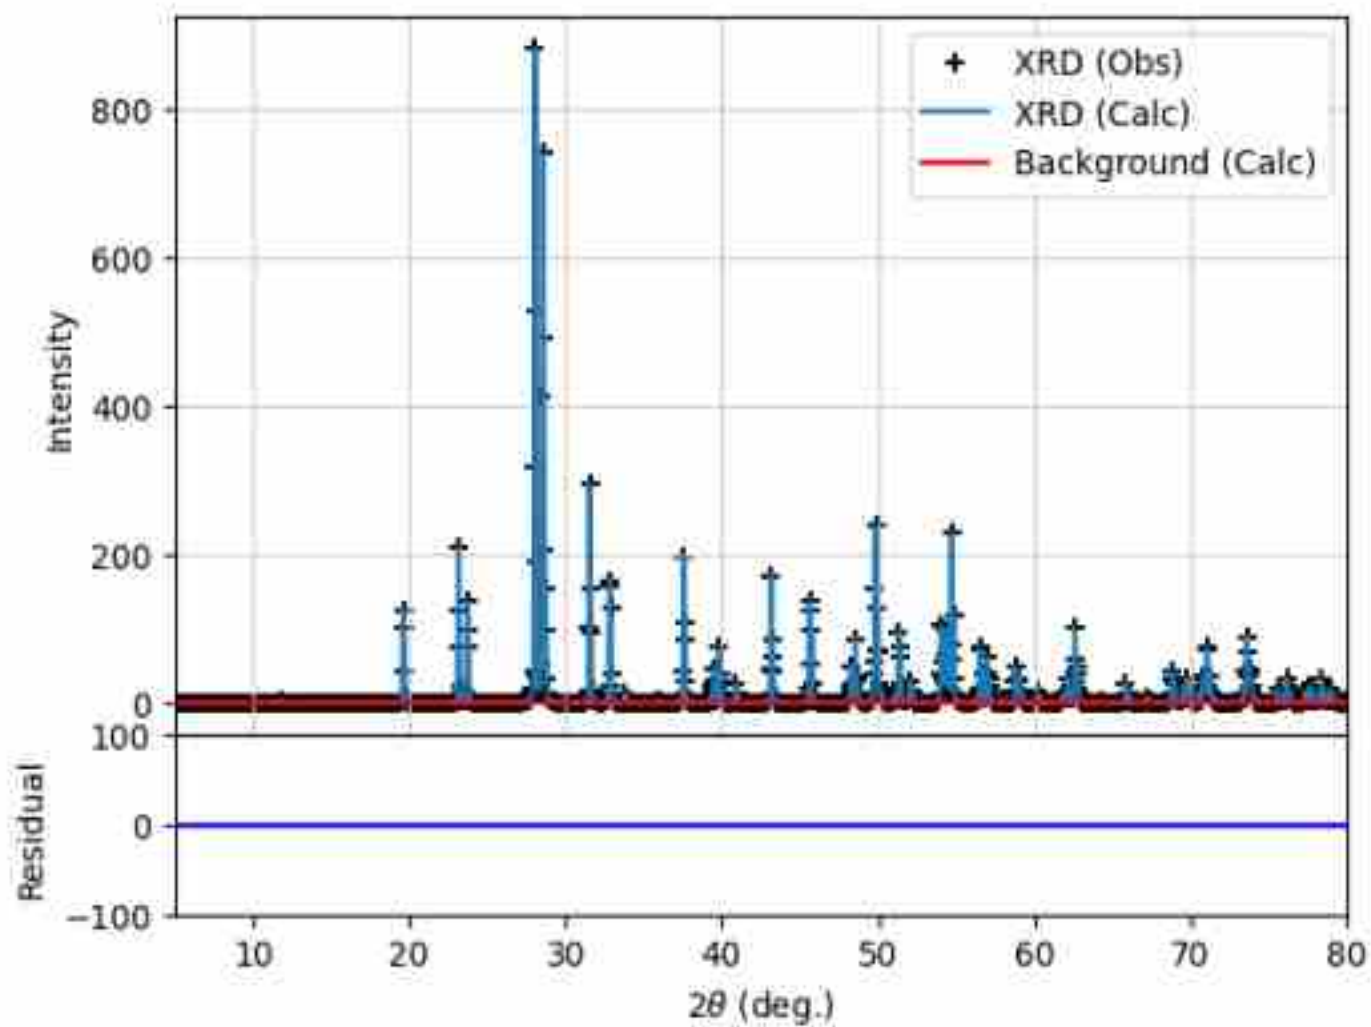

| RMSE before RR | Rwp     | RMSE after RR |
|----------------|---------|---------------|
| 0.015          | 0.00406 | 0.00094       |

# La<sub>3</sub>Zn<sub>4</sub>Pt<sub>4</sub>

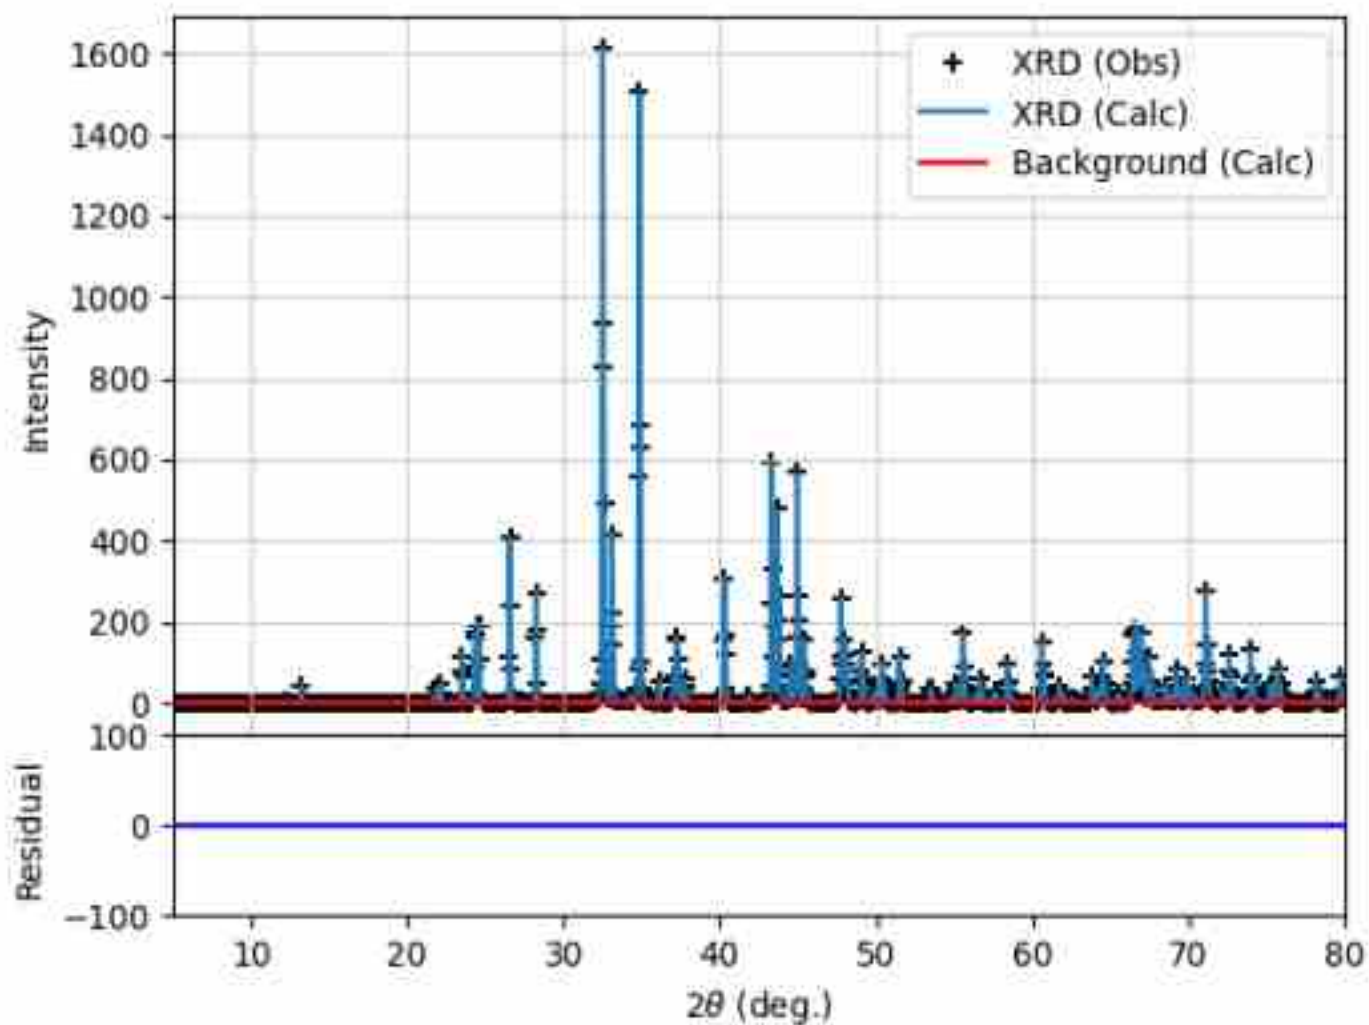

| RMSE before RR | Rwp     | RMSE after RR |
|----------------|---------|---------------|
| 0.015          | 0.00455 | 0.00068       |

# La<sub>4</sub>Ga<sub>4</sub>Pt<sub>4</sub>

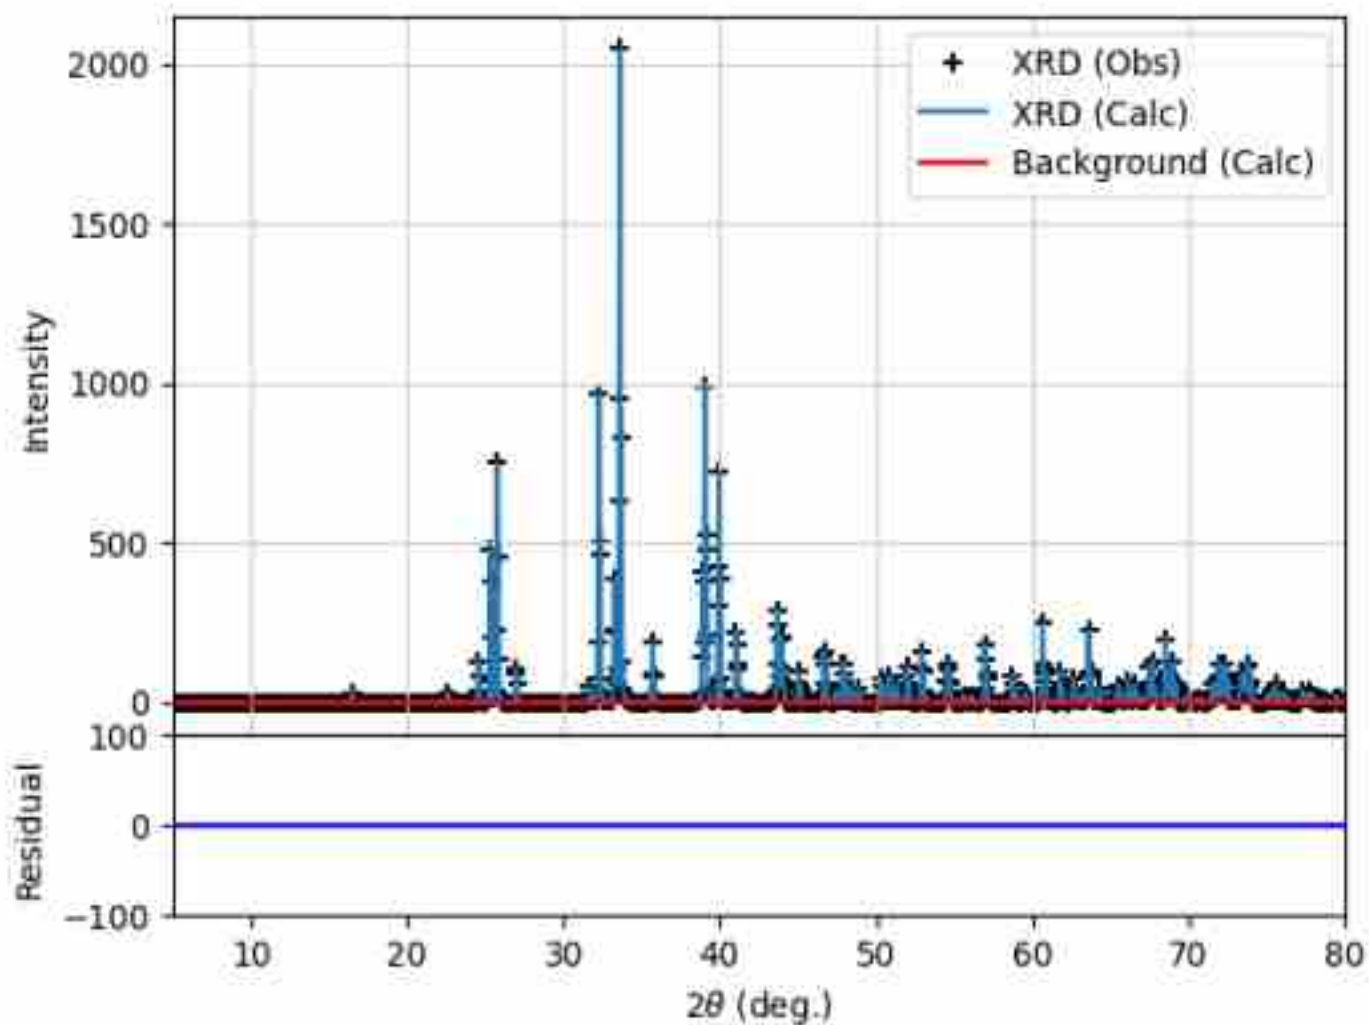

| RMSE before RR | Rwp    | RMSE after RR |
|----------------|--------|---------------|
| 0.015          | 0.0047 | 0.00056       |



# La<sub>4</sub>In<sub>2</sub>Pd<sub>4</sub>

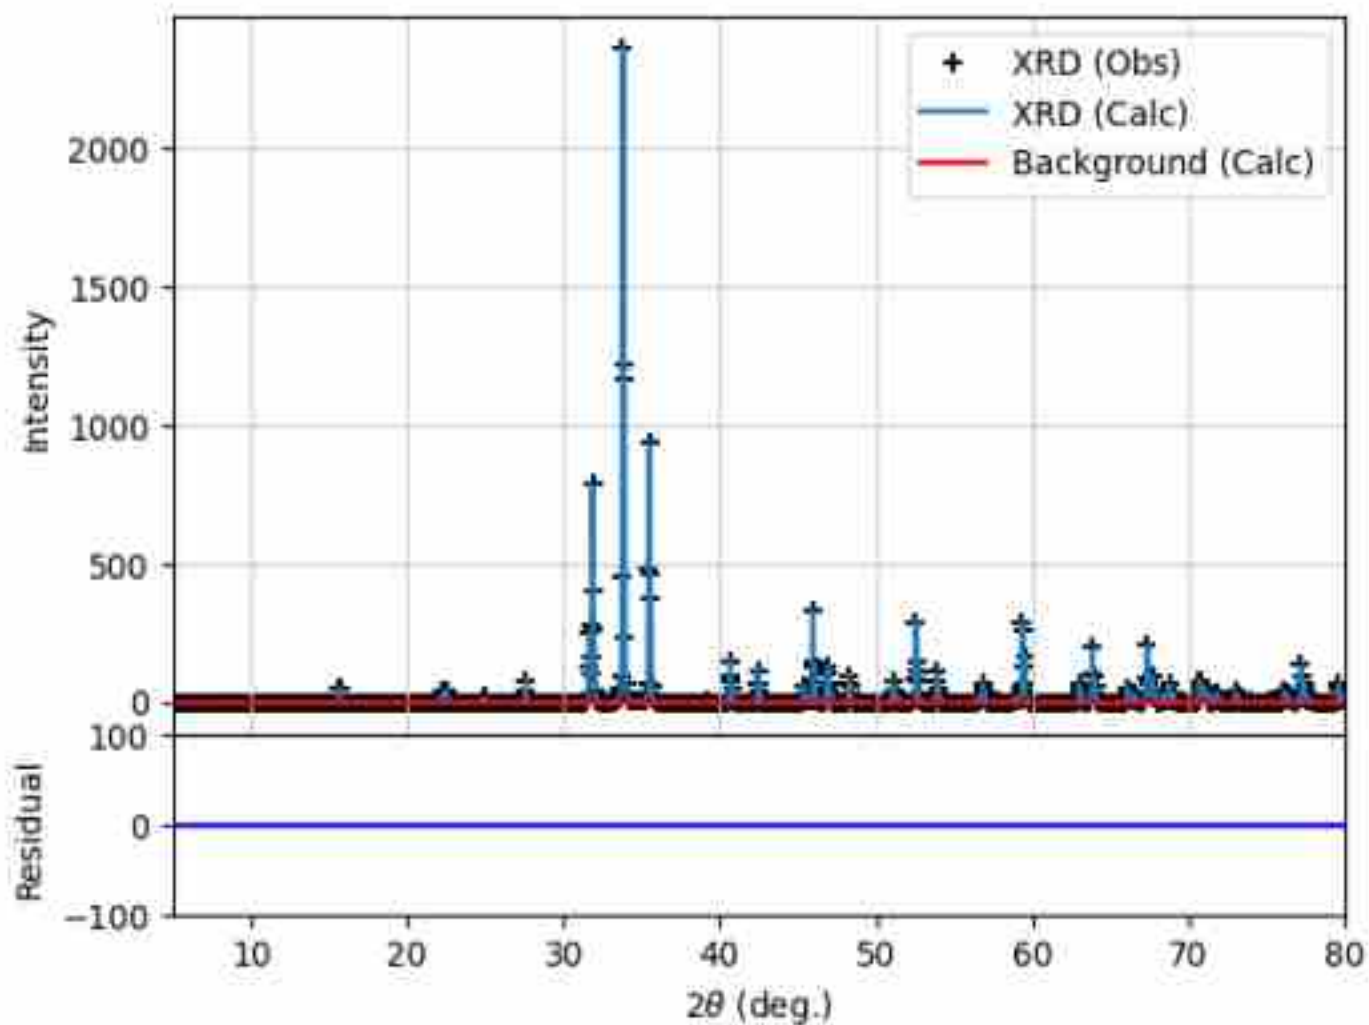

| RMSE before RR | Rwp     | RMSE after RR |
|----------------|---------|---------------|
| 0.015          | 0.00538 | 0.00043       |

# La<sub>4</sub>Ti<sub>2</sub>Zn<sub>2</sub>O<sub>12</sub>

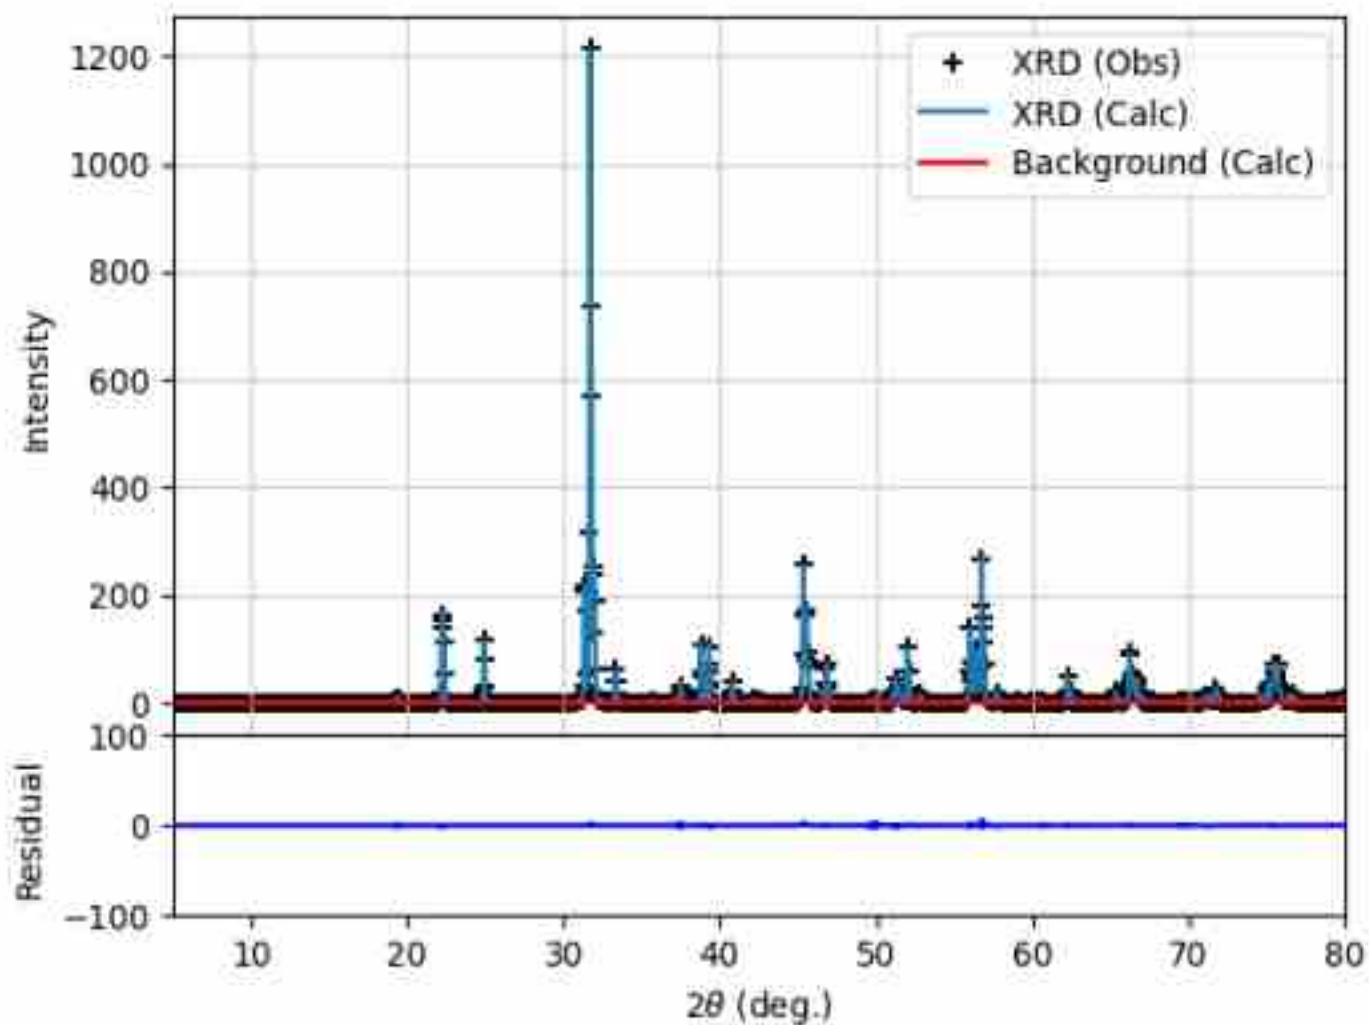

| RMSE before RR | Rwp     | RMSE after RR |
|----------------|---------|---------------|
| 0.015          | 3.46757 | 0.04044       |

# La<sub>6</sub>Hg<sub>2</sub>

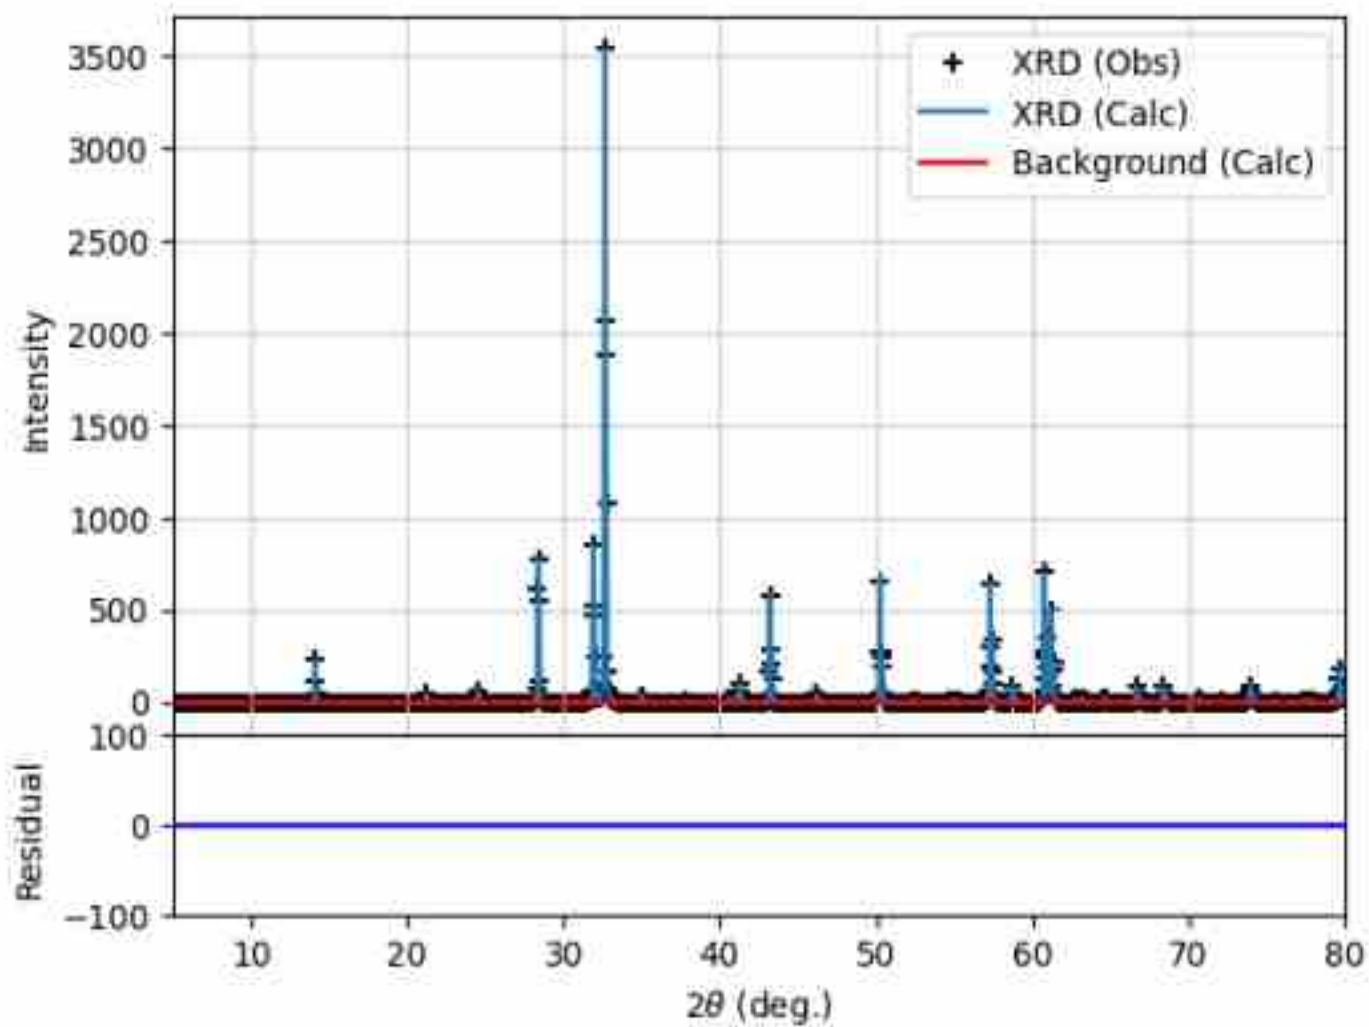

| RMSE before RR | Rwp     | RMSE after RR |
|----------------|---------|---------------|
| 0.015          | 0.00628 | 0.00075       |

# La10Sn6

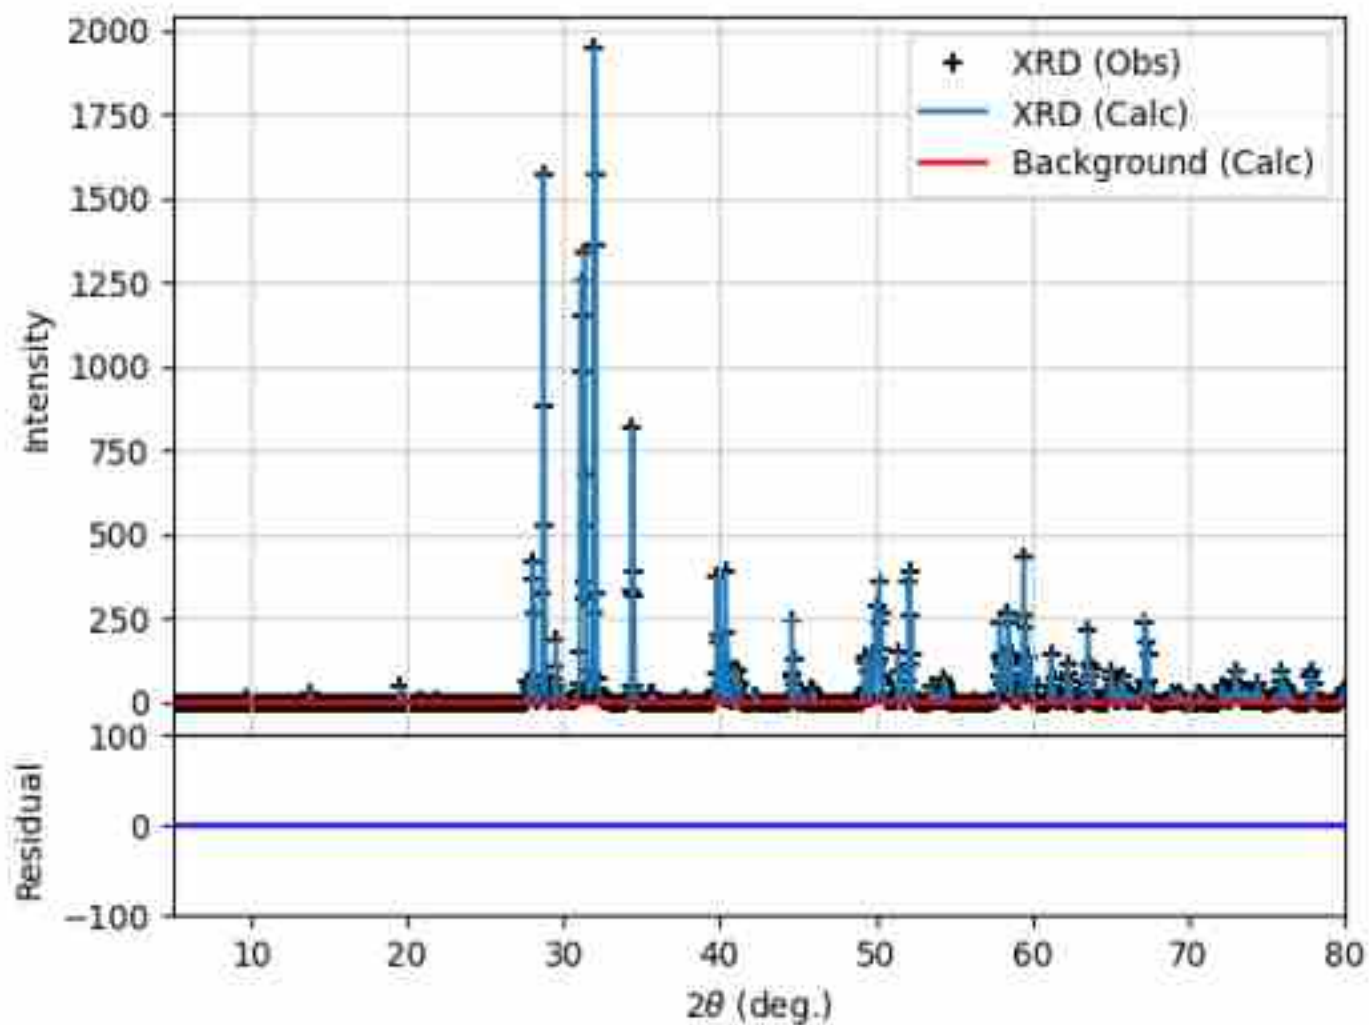

| RMSE before RR | Rwp     | RMSE after RR |
|----------------|---------|---------------|
| 0.015          | 0.00287 | 0.00025       |

# Li<sub>2</sub>Er<sub>2</sub>O<sub>4</sub>

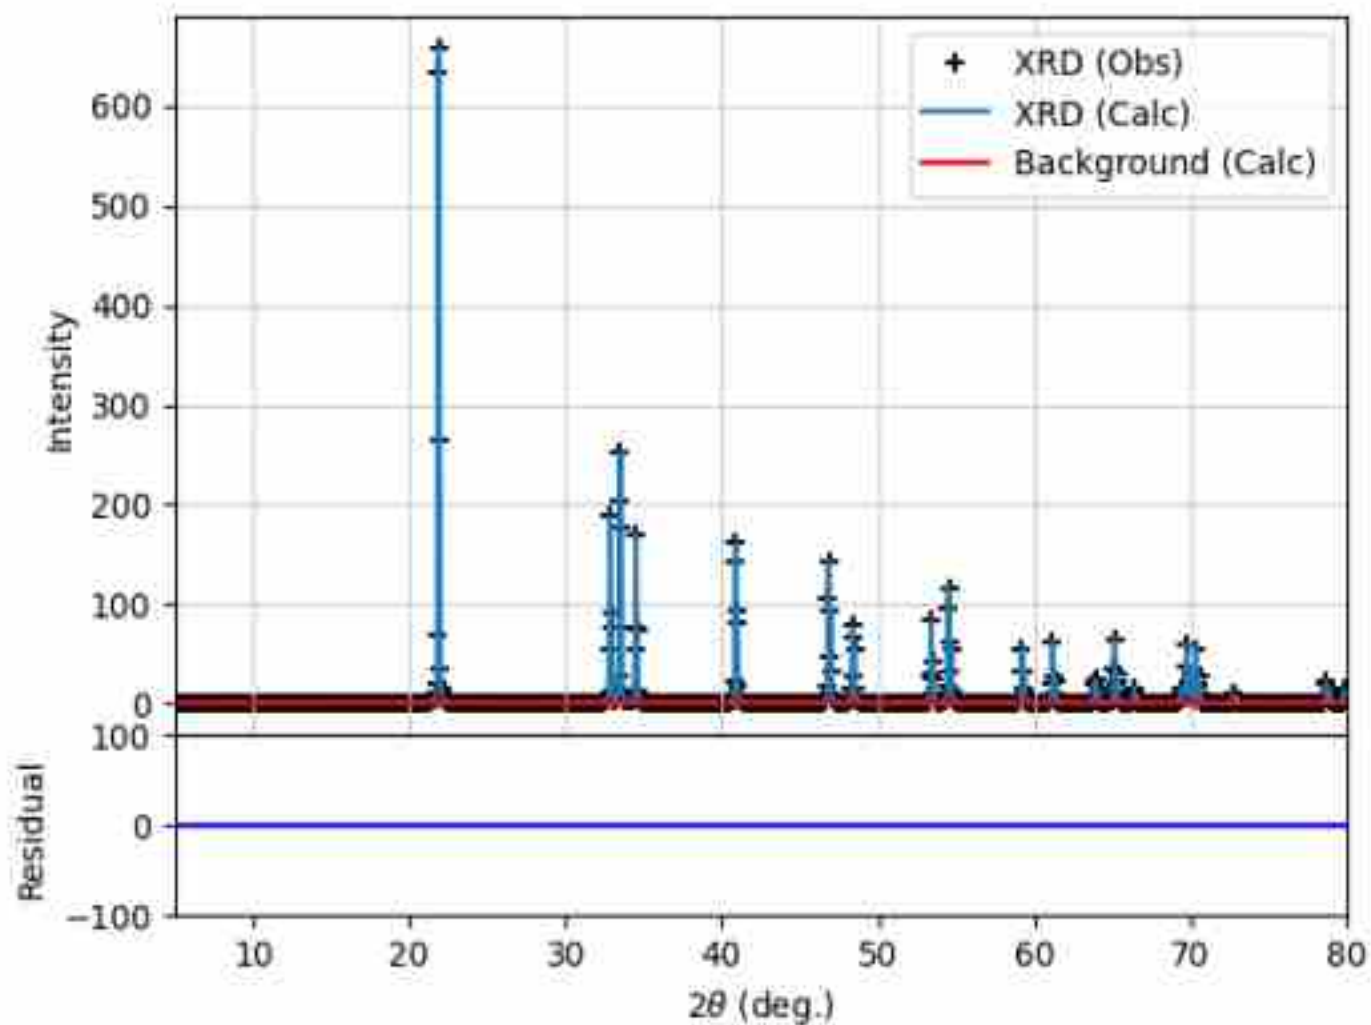

| RMSE before RR | Rwp     | RMSE after RR |
|----------------|---------|---------------|
| 0.015          | 0.00404 | 0.0028        |

# Li<sub>2</sub>La<sub>4</sub>Sb<sub>2</sub>O<sub>12</sub>

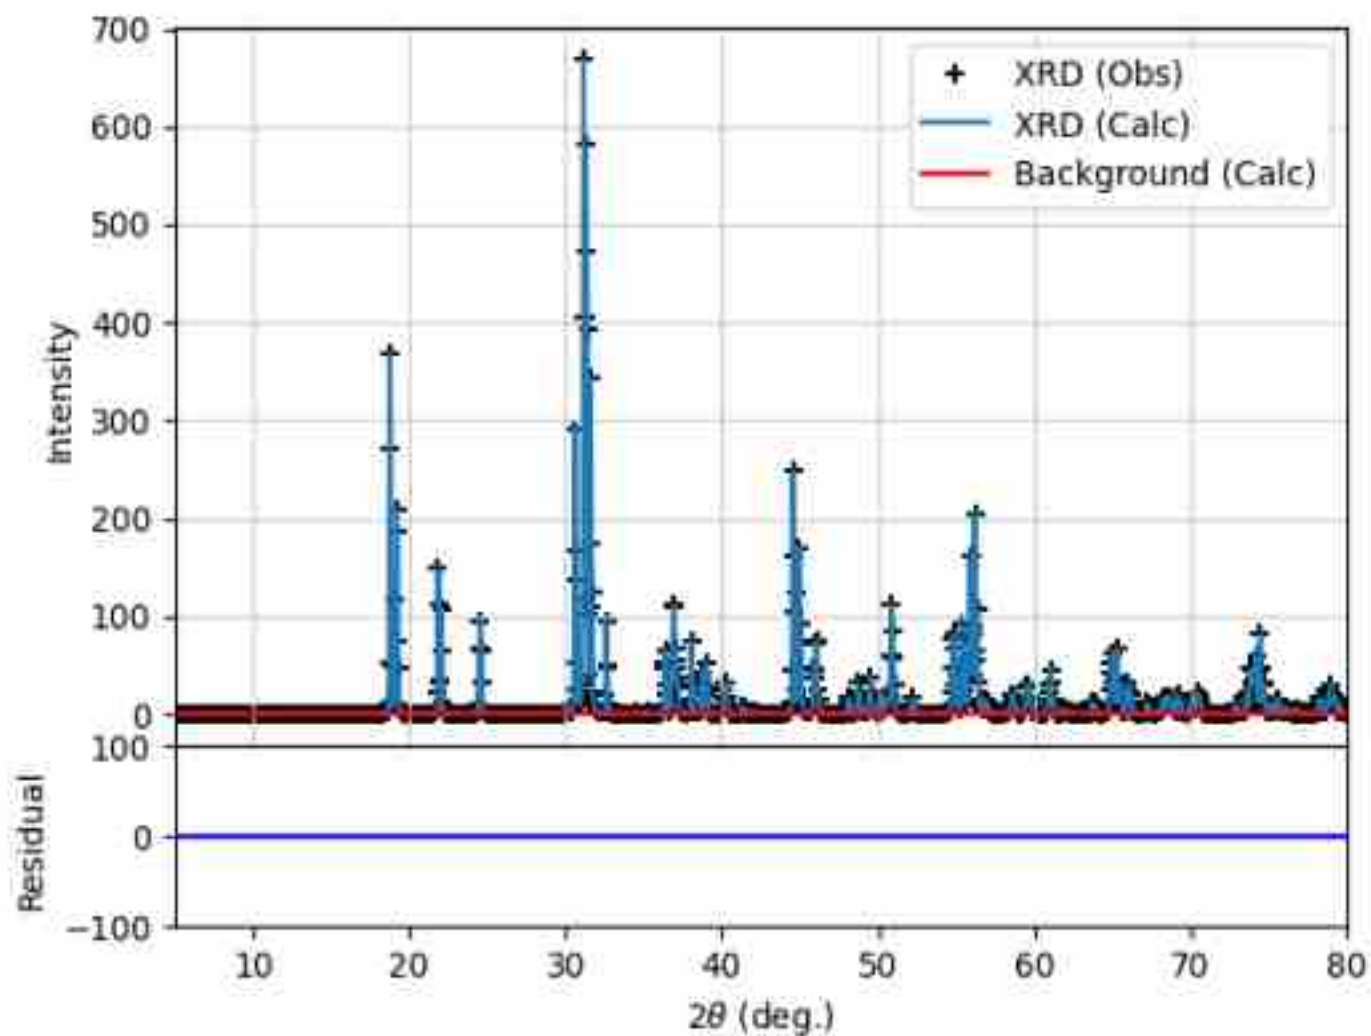

| RMSE before RR | Rwp     | RMSE after RR |
|----------------|---------|---------------|
| 0.015          | 0.00341 | 0.00124       |

# Li<sub>2</sub>Ni<sub>1</sub>N<sub>1</sub>

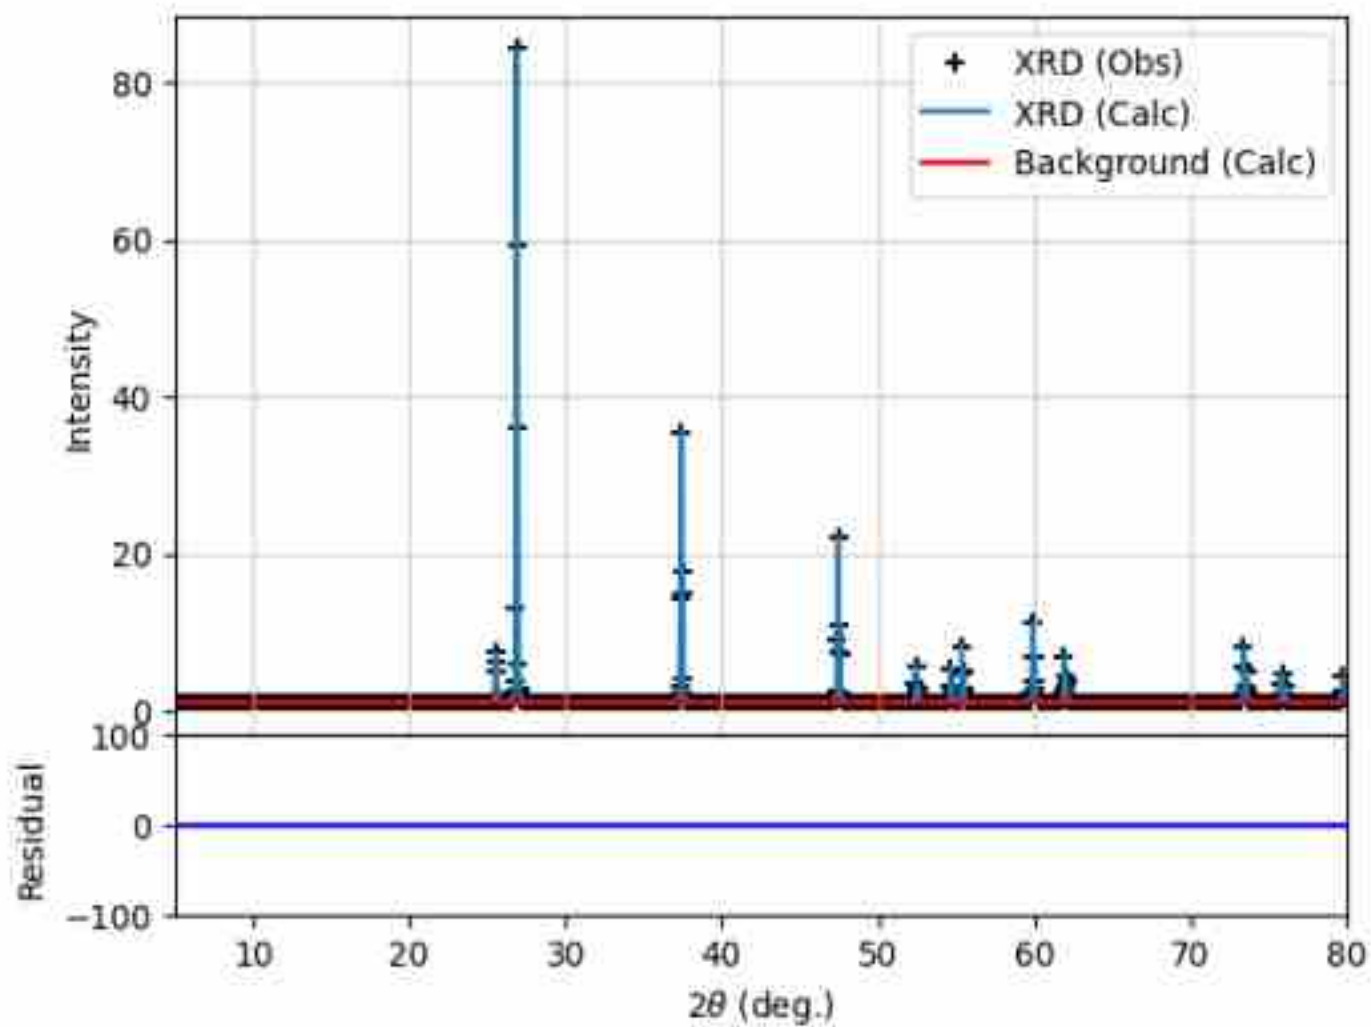

| RMSE before RR | Rwp     | RMSE after RR |
|----------------|---------|---------------|
| 0.015          | 0.19756 | 0.01382       |

# Li<sub>2</sub>Pr<sub>4</sub>O<sub>8</sub>2O<sub>12</sub>

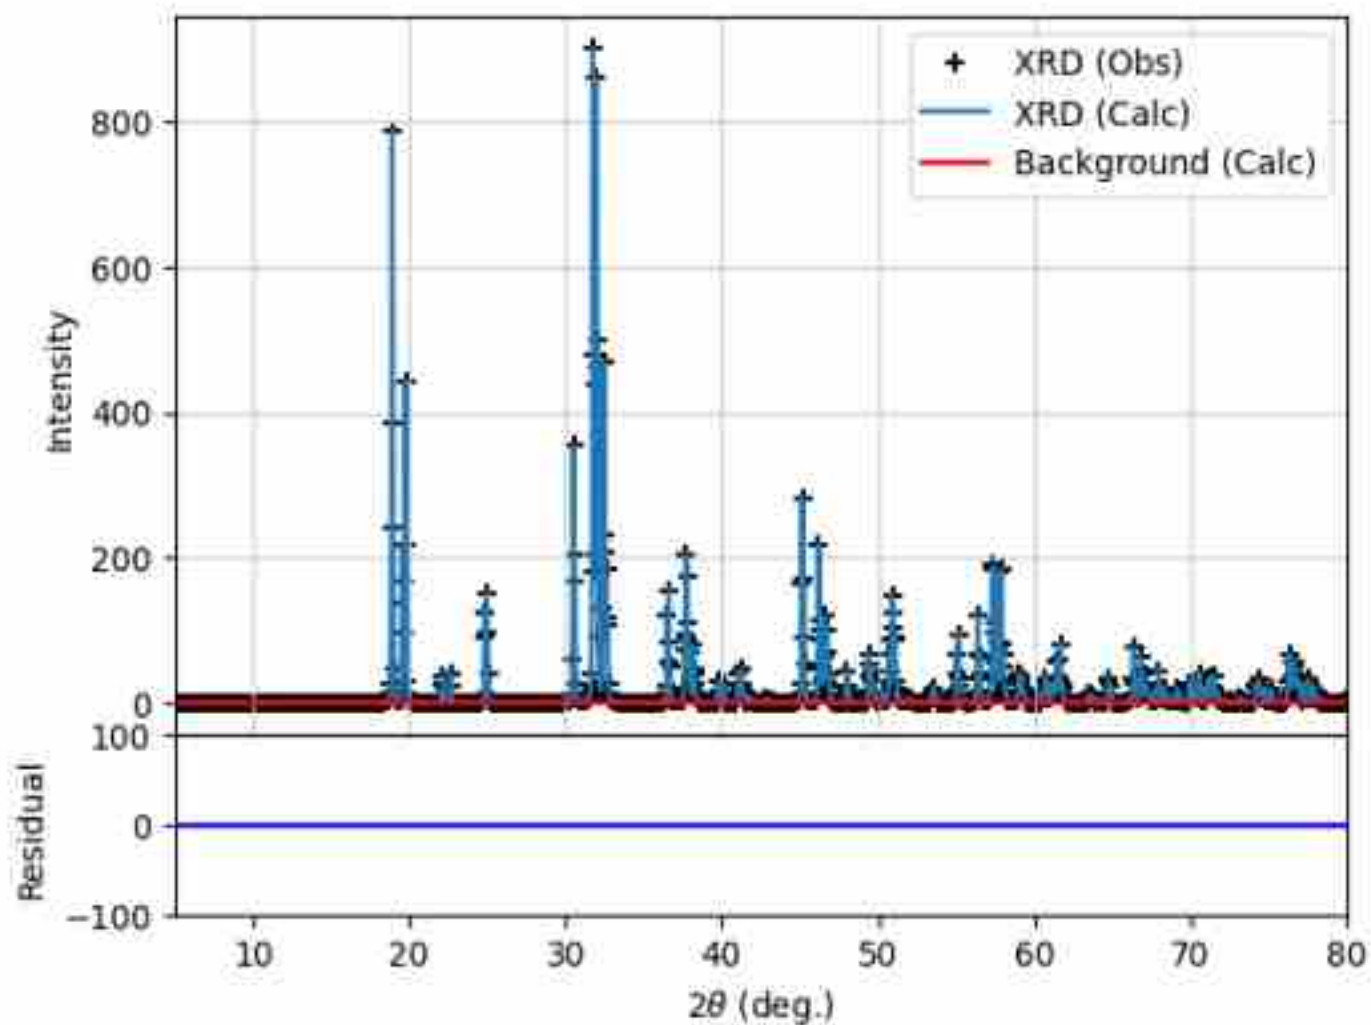

| RMSE before RR | Rwp     | RMSE after RR |
|----------------|---------|---------------|
| 0.015          | 0.00398 | 0.00144       |



# Li2V1Cr1S4

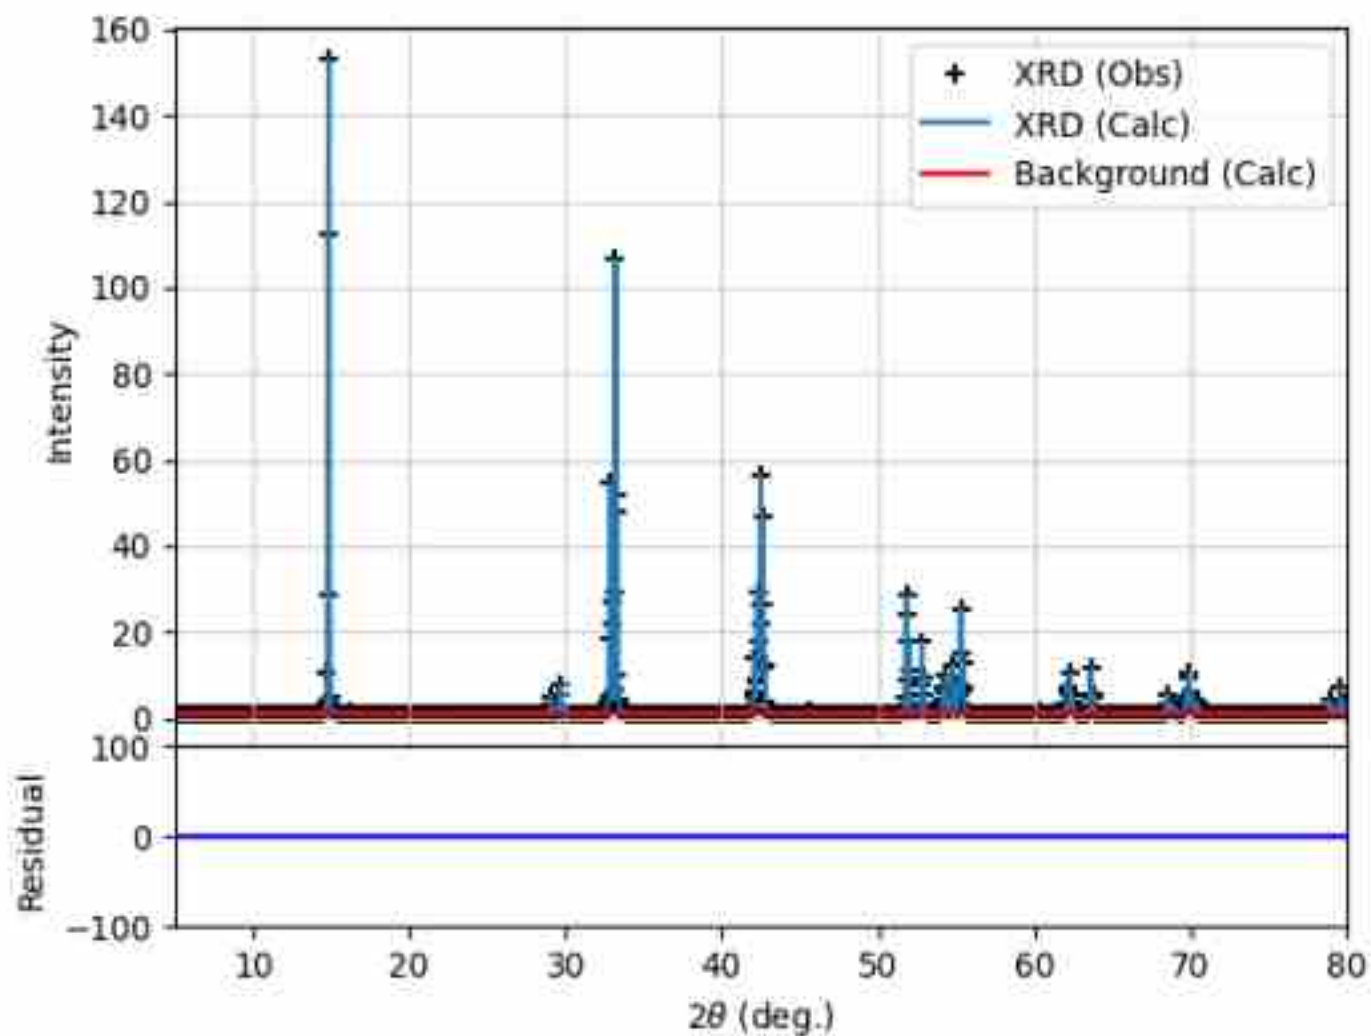

| RMSE before RR | Rwp     | RMSE after RR |
|----------------|---------|---------------|
| 0.015          | 0.00227 | 0.00051       |

# Li<sub>3</sub>Fe<sub>1</sub>O<sub>4</sub>

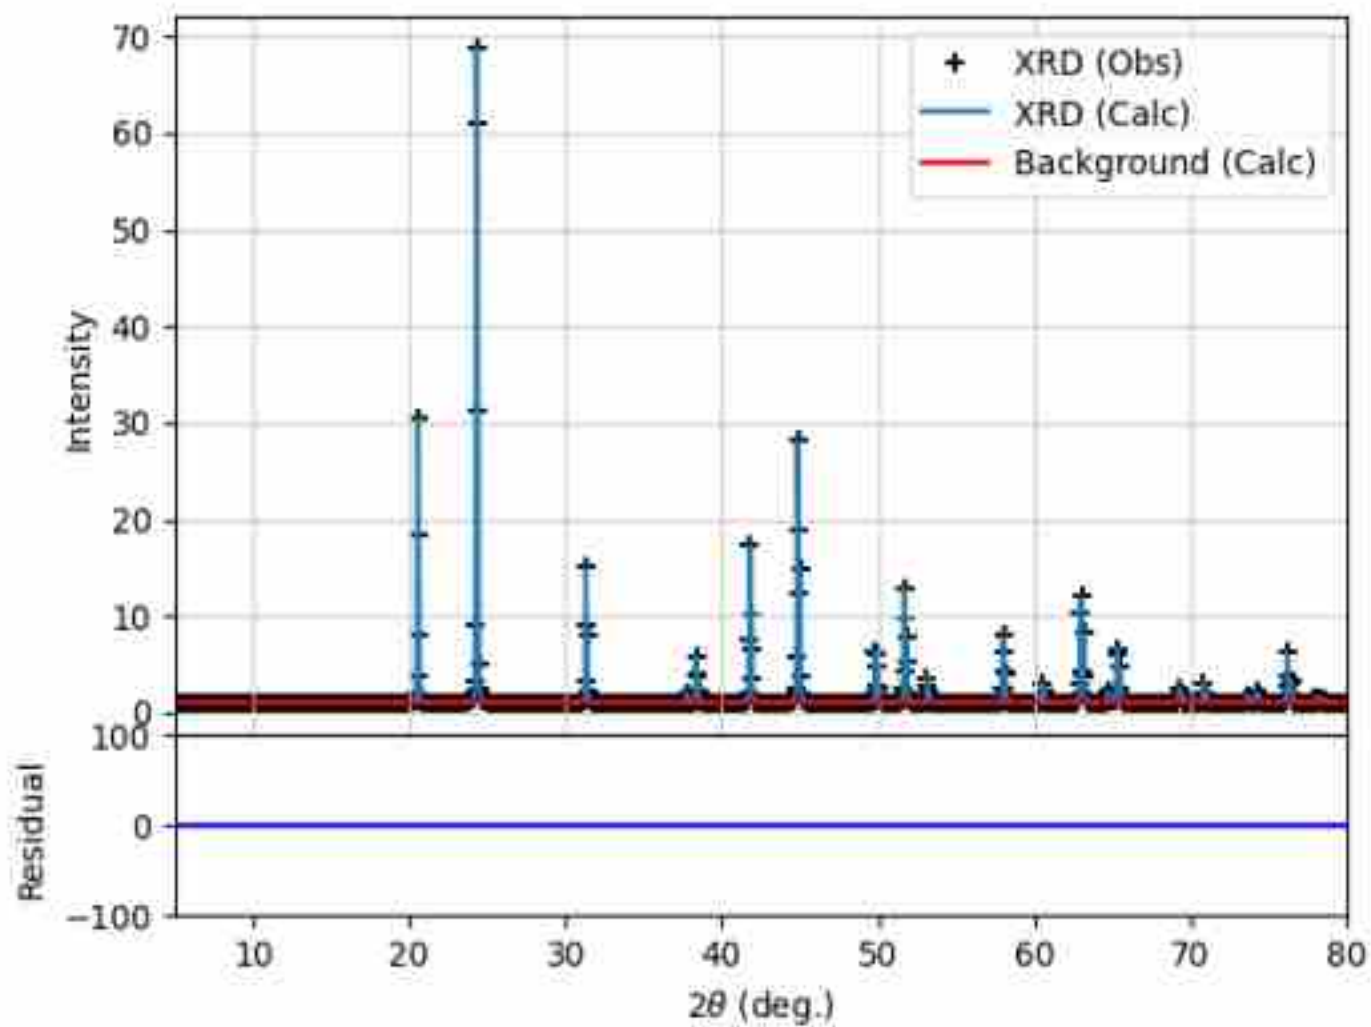

| RMSE before RR | Rwp    | RMSE after RR |
|----------------|--------|---------------|
| 0.015          | 0.0019 | 0.00102       |

# Li<sub>4</sub>Ti<sub>2</sub>O<sub>6</sub>

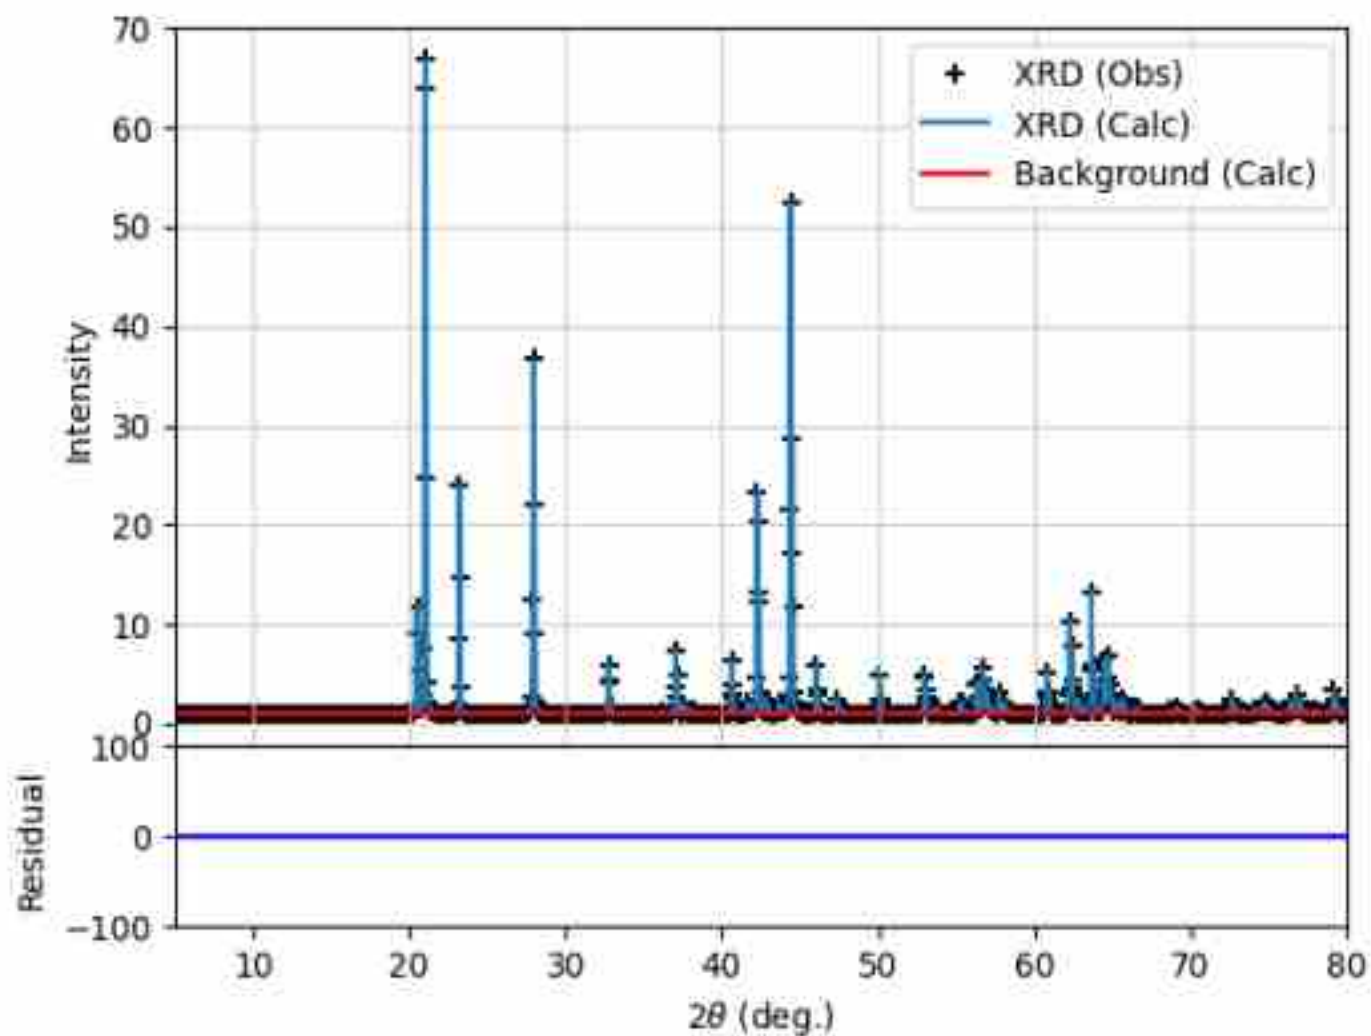

| RMSE before RR | Rwp     | RMSE after RR |
|----------------|---------|---------------|
| 0.015          | 0.00196 | 0.00089       |

# Li<sub>4</sub>V<sub>3</sub>Cr<sub>10</sub>O<sub>8</sub>

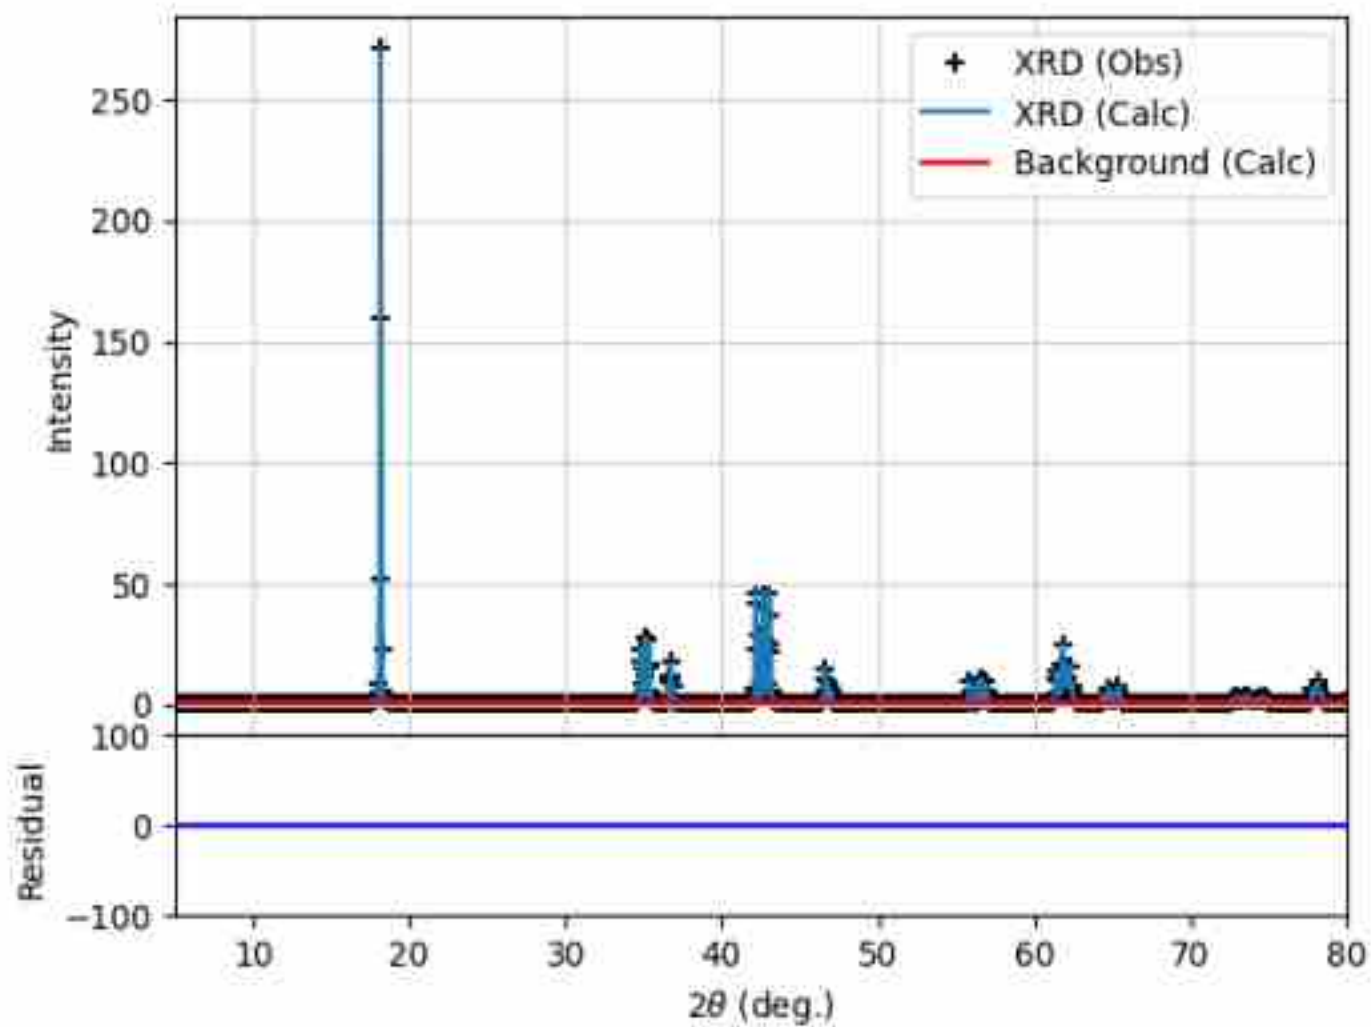

| RMSE before RR | Rwp     | RMSE after RR |
|----------------|---------|---------------|
| 0.015          | 0.00201 | 0.00059       |

# Lu<sub>2</sub>Ga<sub>3</sub>Ni<sub>1</sub>

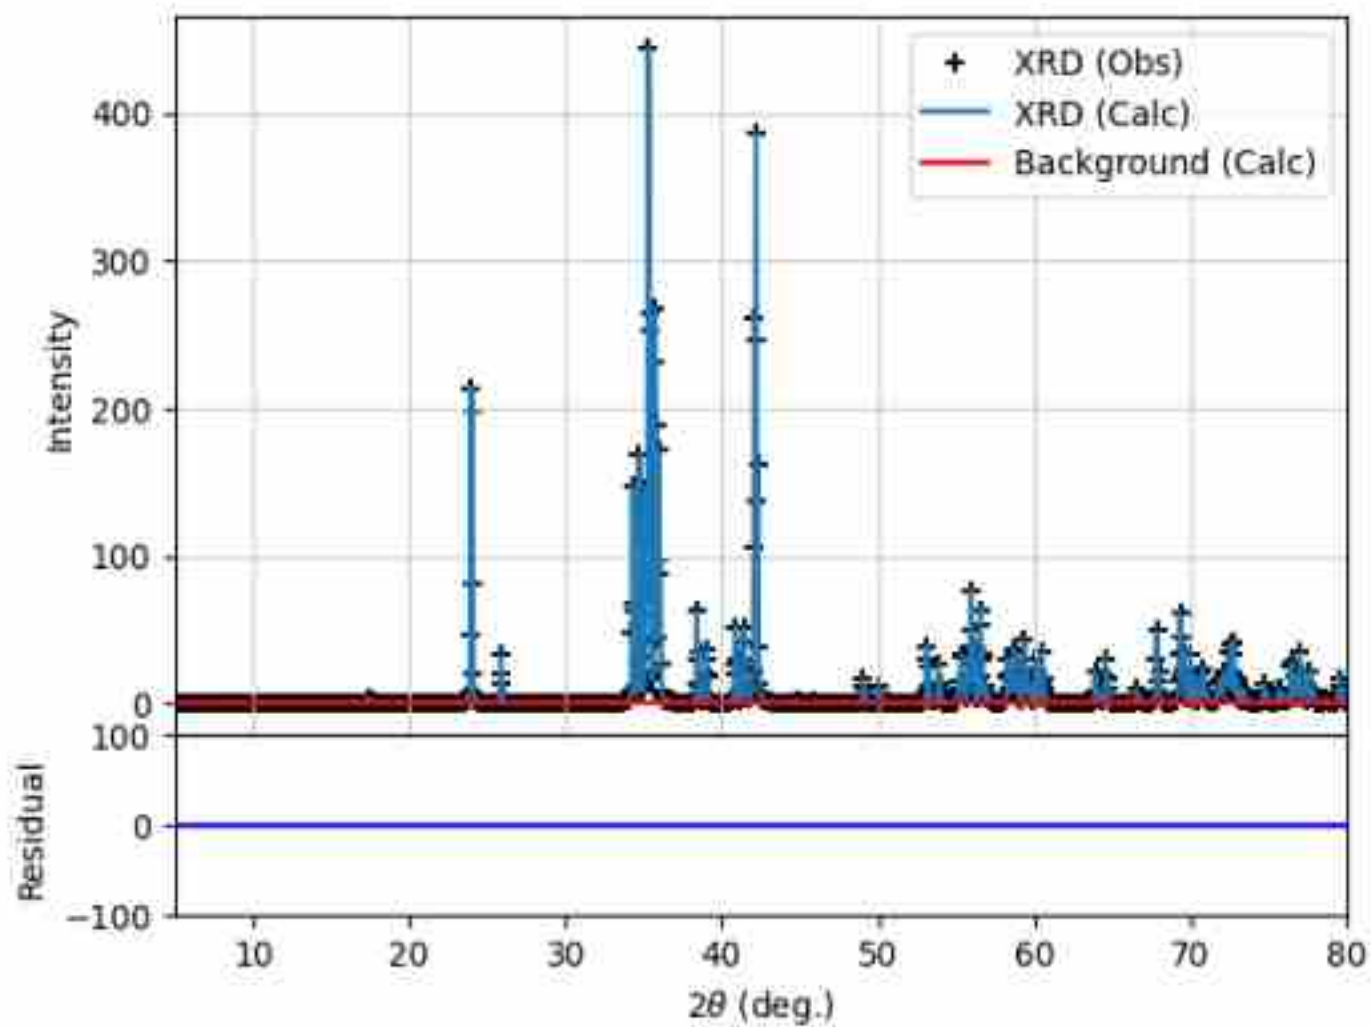

| RMSE before RR | Rwp   | RMSE after RR |
|----------------|-------|---------------|
| 0.015          | 0.004 | 0.00021       |

# Lu<sub>2</sub>Ni<sub>4</sub>

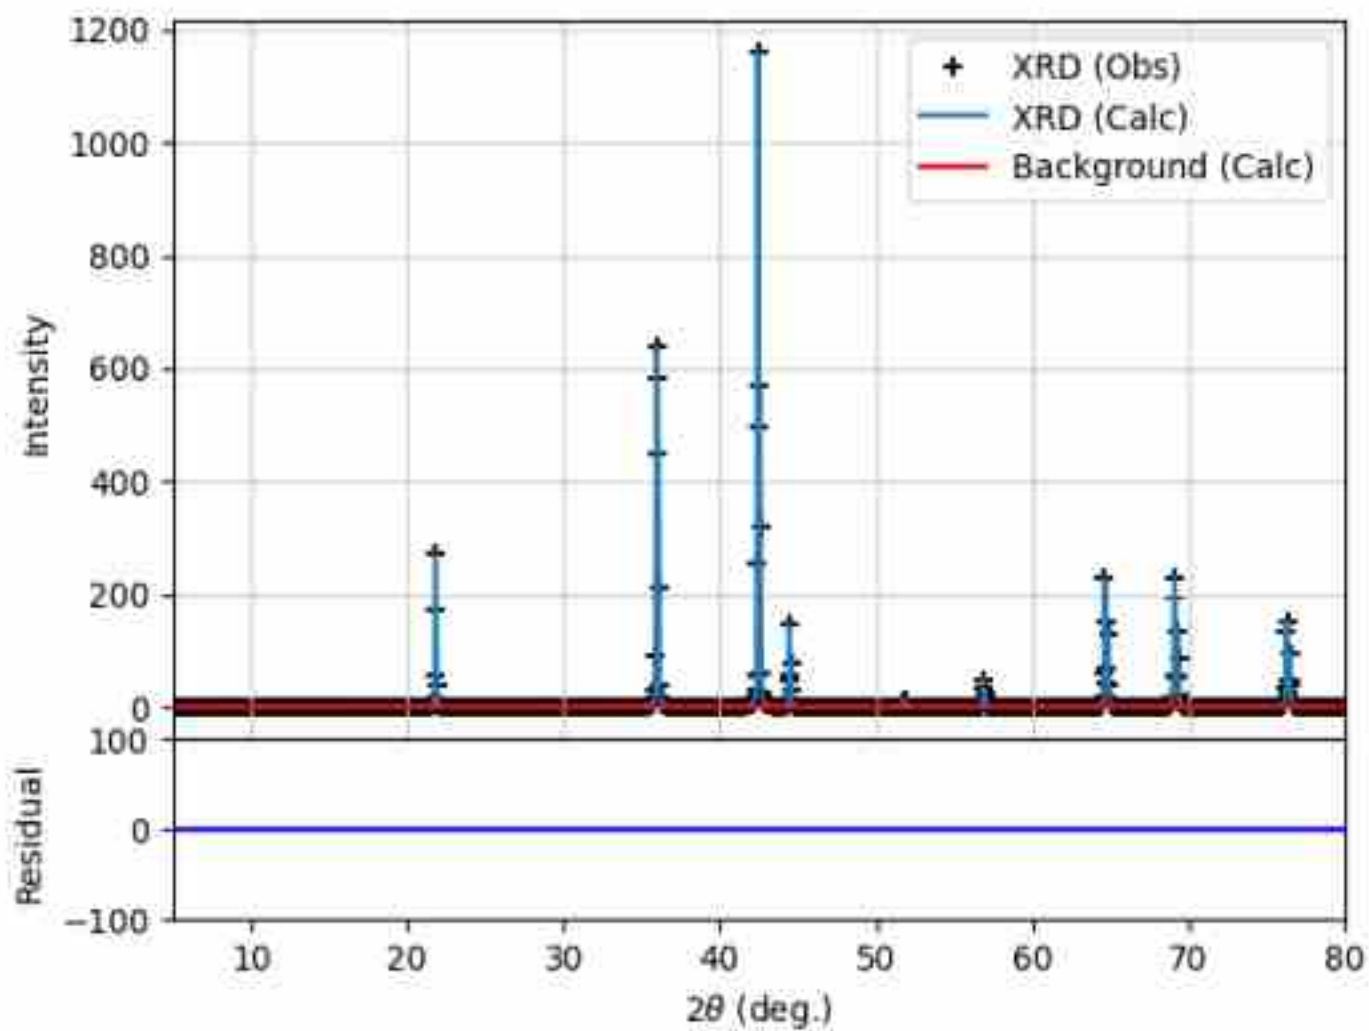

| RMSE before RR | Rwp     | RMSE after RR |
|----------------|---------|---------------|
| 0.015          | 0.00529 | 0.00051       |

# Lu<sub>3</sub>Al<sub>3</sub>Ni<sub>3</sub>

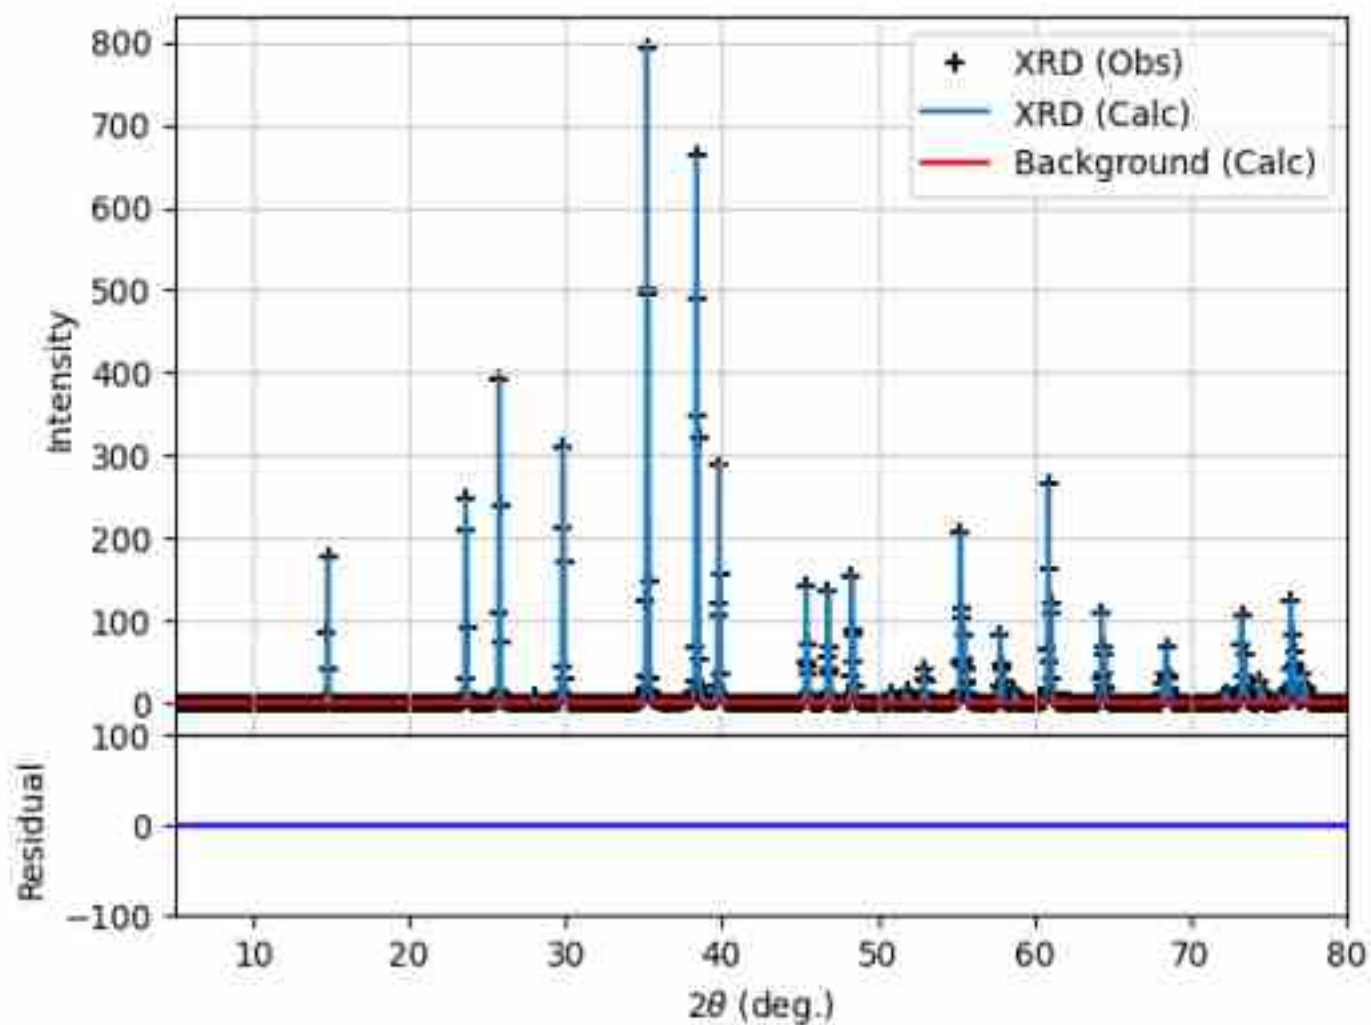

| RMSE before RR | Rwp     | RMSE after RR |
|----------------|---------|---------------|
| 0.015          | 0.00458 | 0.00111       |

# Lu<sub>3</sub>Ga<sub>5</sub>Co<sub>1</sub>

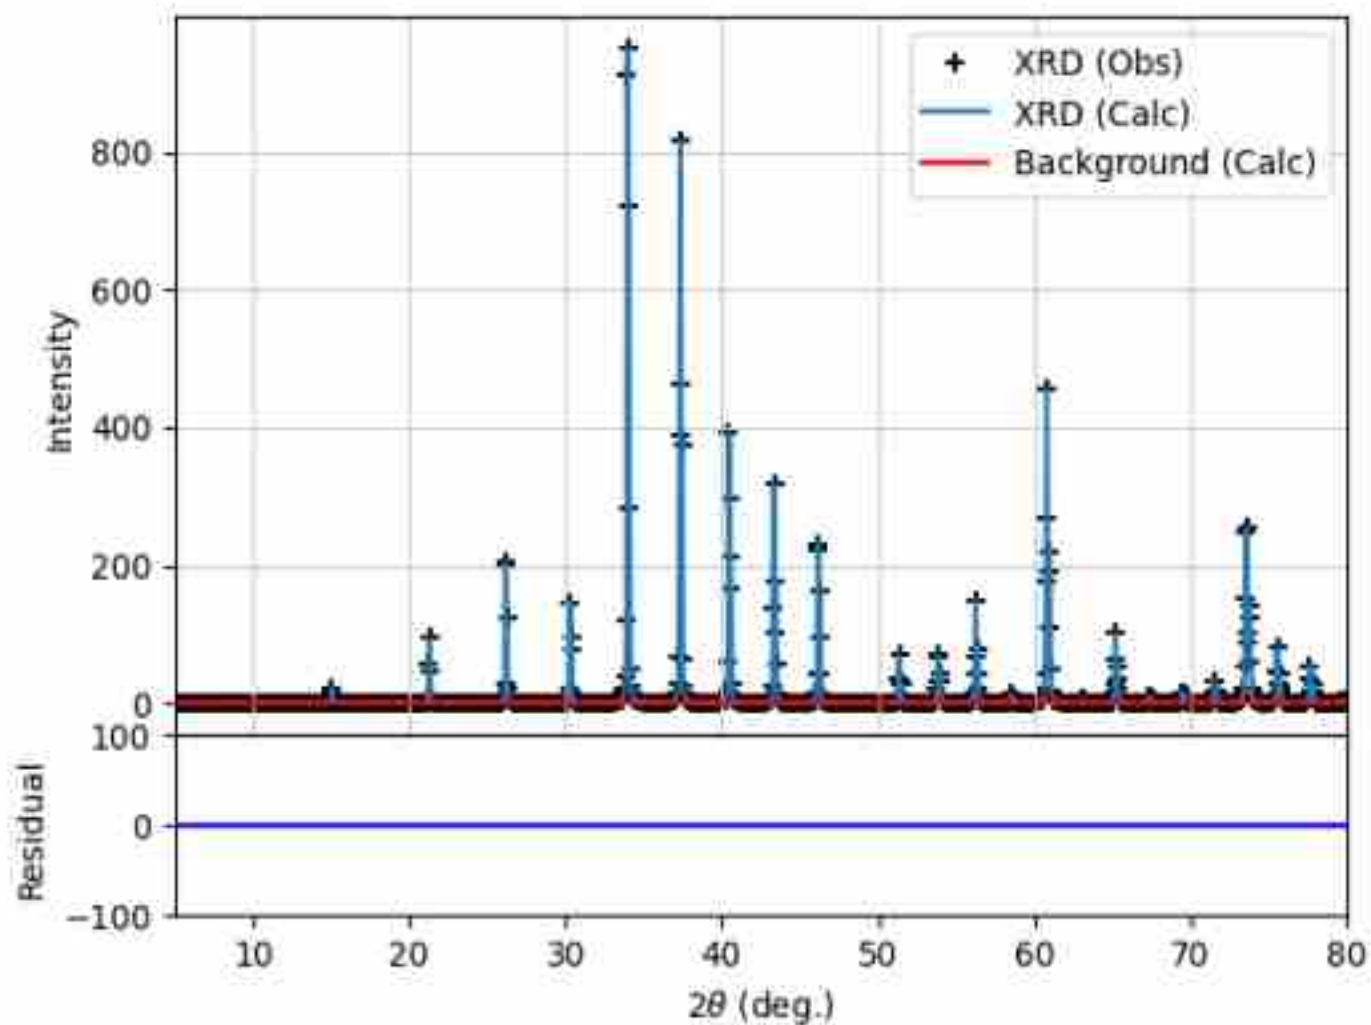

| RMSE before RR | Rwp     | RMSE after RR |
|----------------|---------|---------------|
| 0.015          | 0.00302 | 0.00078       |



# Mg<sub>4</sub>Ni<sub>2</sub>B<sub>4</sub>Ir<sub>10</sub>

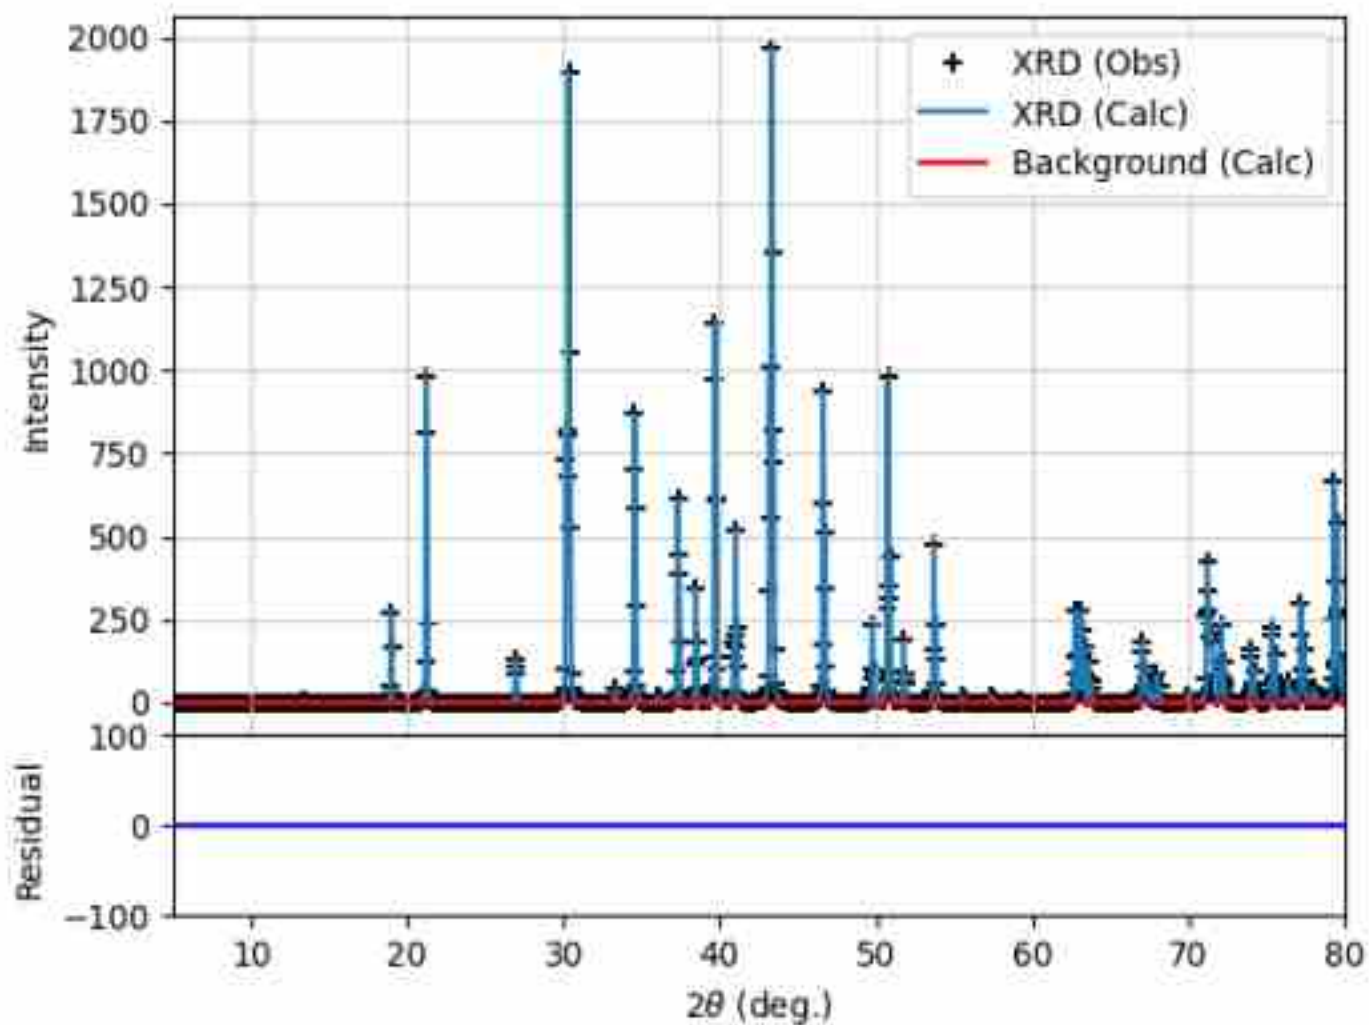

| RMSE before RR | Rwp     | RMSE after RR |
|----------------|---------|---------------|
| 0.015          | 0.00392 | 0.00133       |

# Mg<sub>4</sub>Zn<sub>2</sub>B<sub>4</sub>Ir<sub>10</sub>

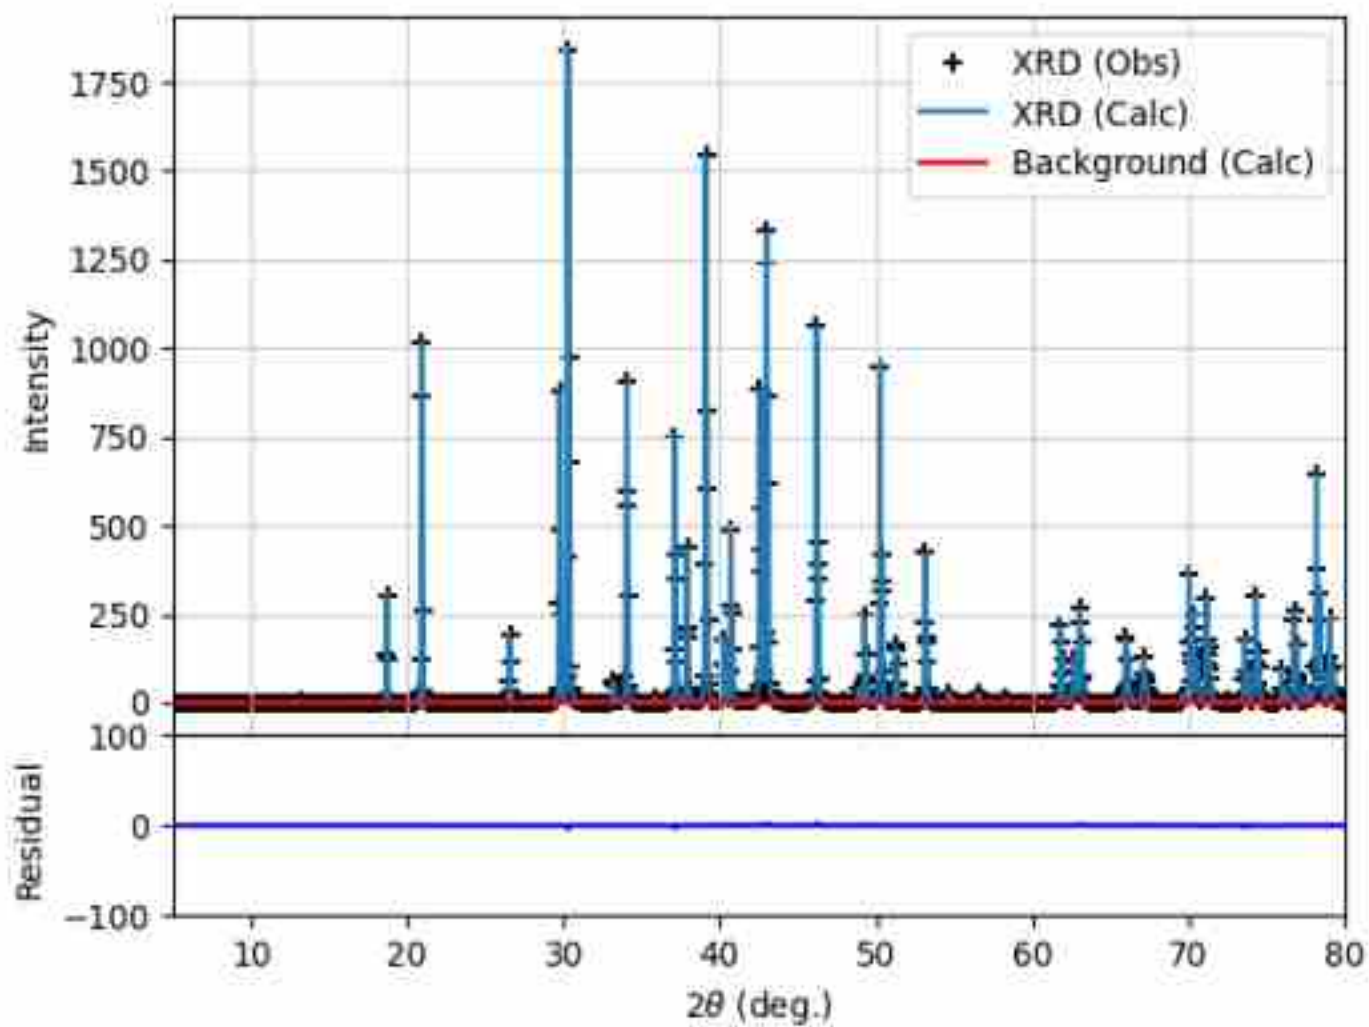

| RMSE before RR | Rwp     | RMSE after RR |
|----------------|---------|---------------|
| 0.015          | 0.23572 | 0.02641       |

# Mg<sub>6</sub>Hg<sub>2</sub>

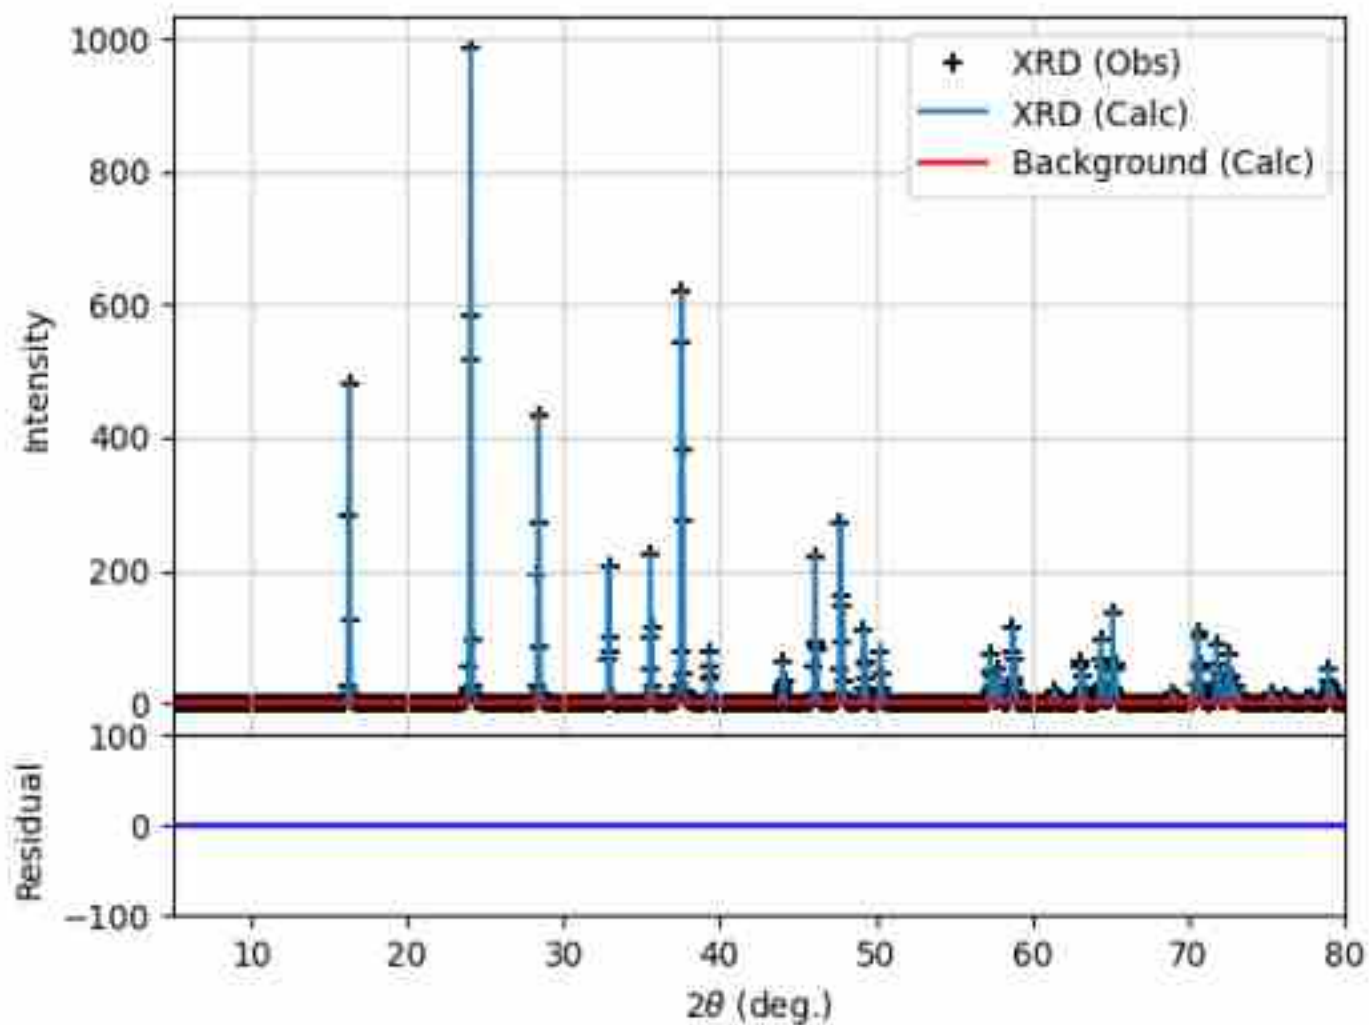

| RMSE before RR | Rwp     | RMSE after RR |
|----------------|---------|---------------|
| 0.015          | 0.03788 | 0.00475       |

# Mn1Al12

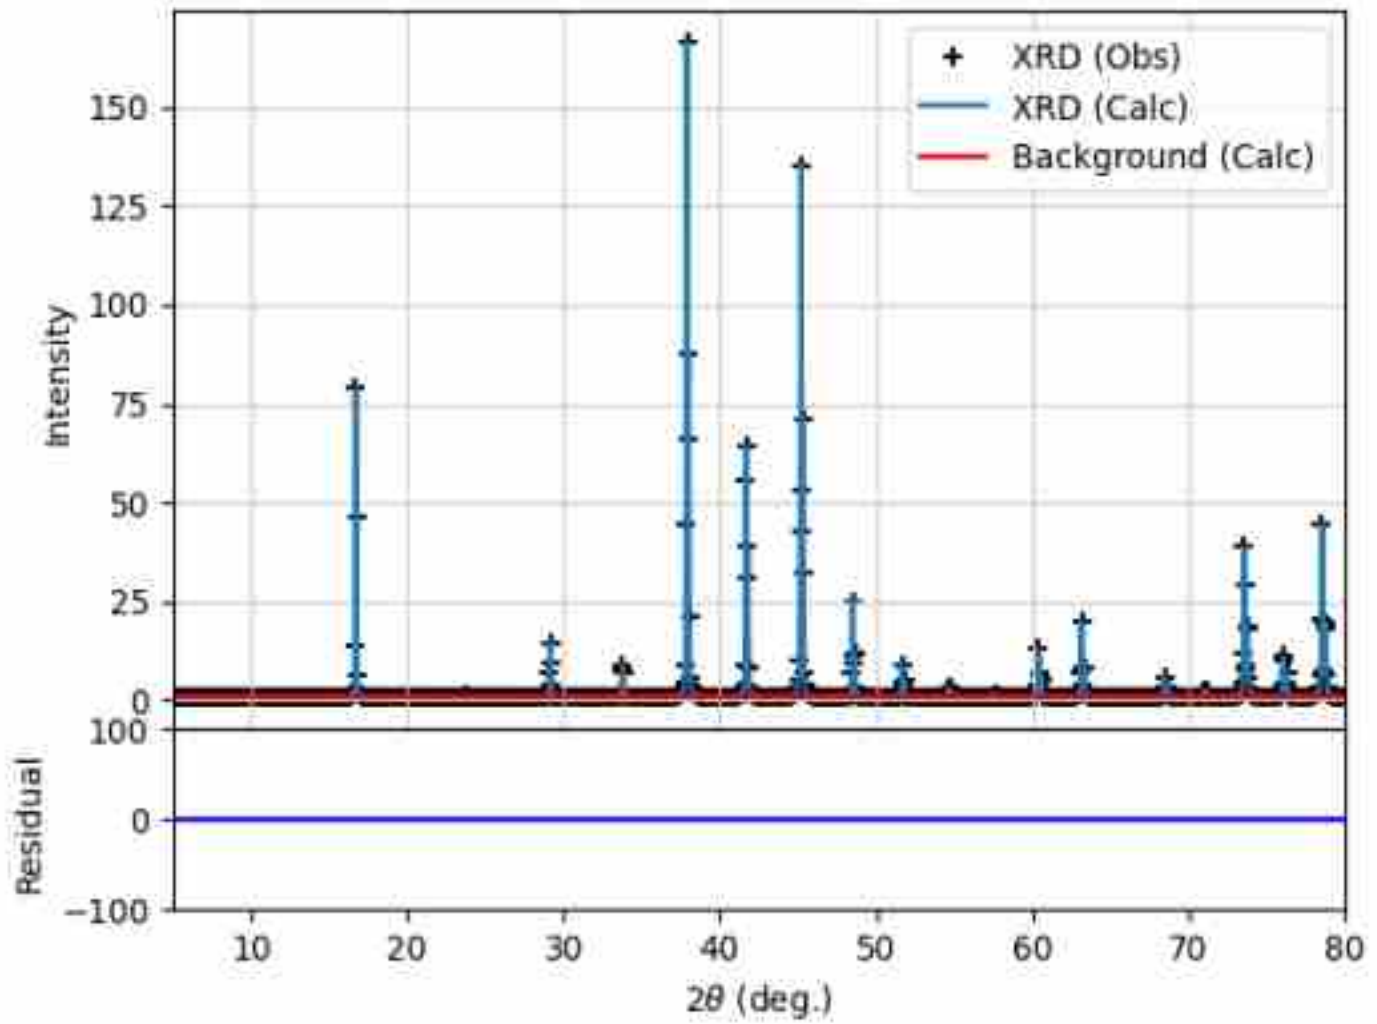

| RMSE before RR | Rwp     | RMSE after RR |
|----------------|---------|---------------|
| 0.015          | 0.00242 | 0.0006        |

# Mn1Cr4Cd1S8

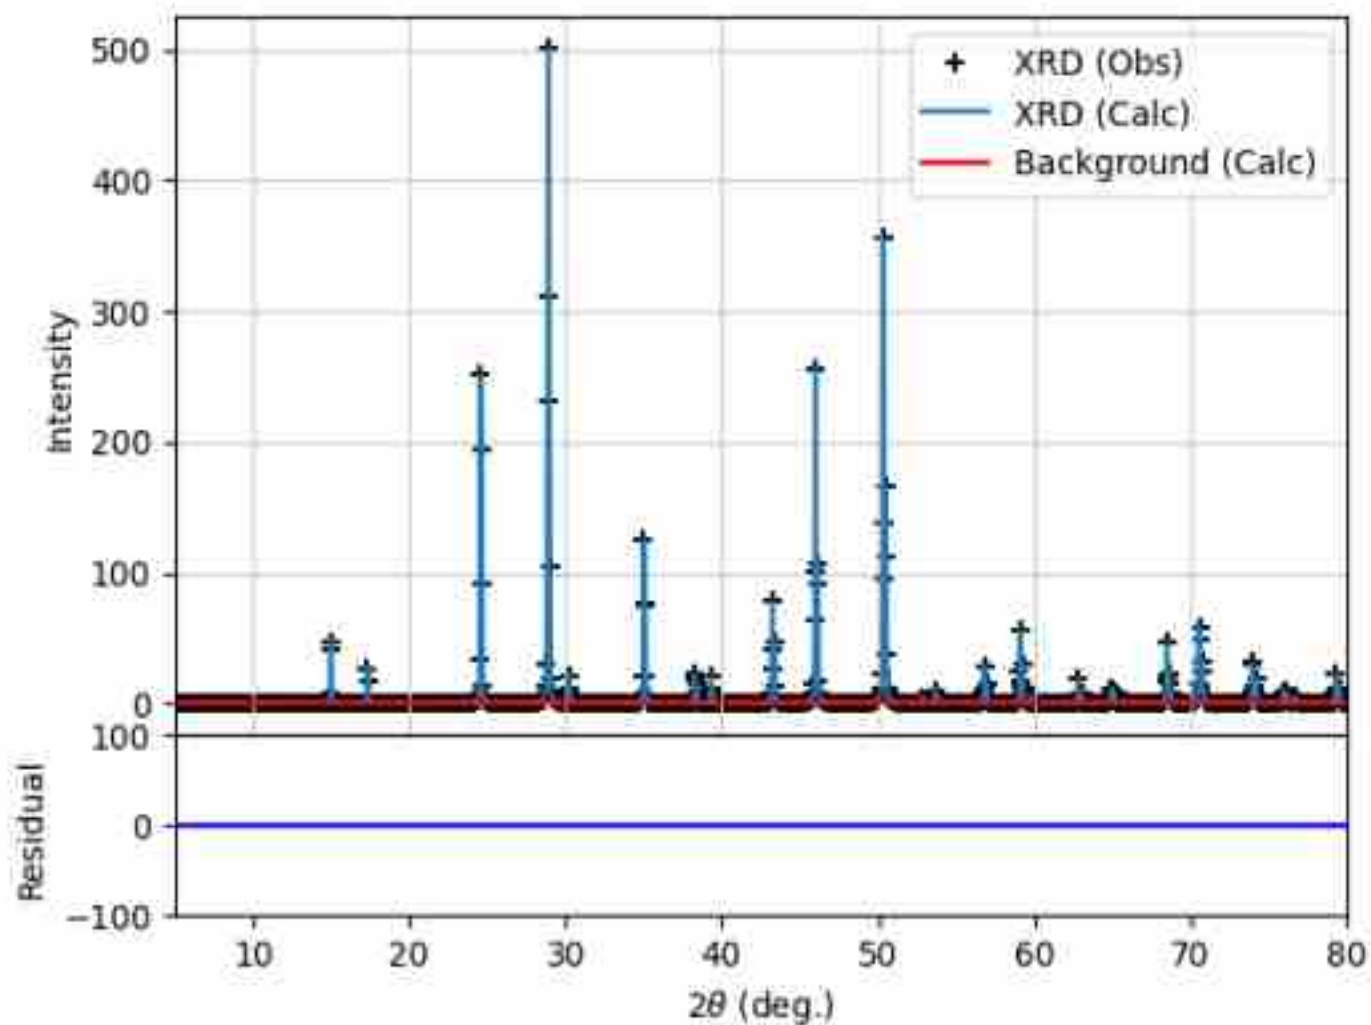

| RMSE before RR | Rwp     | RMSE after RR |
|----------------|---------|---------------|
| 0.015          | 0.14436 | 0.00572       |

# Mn1Cr4Cd1Se8

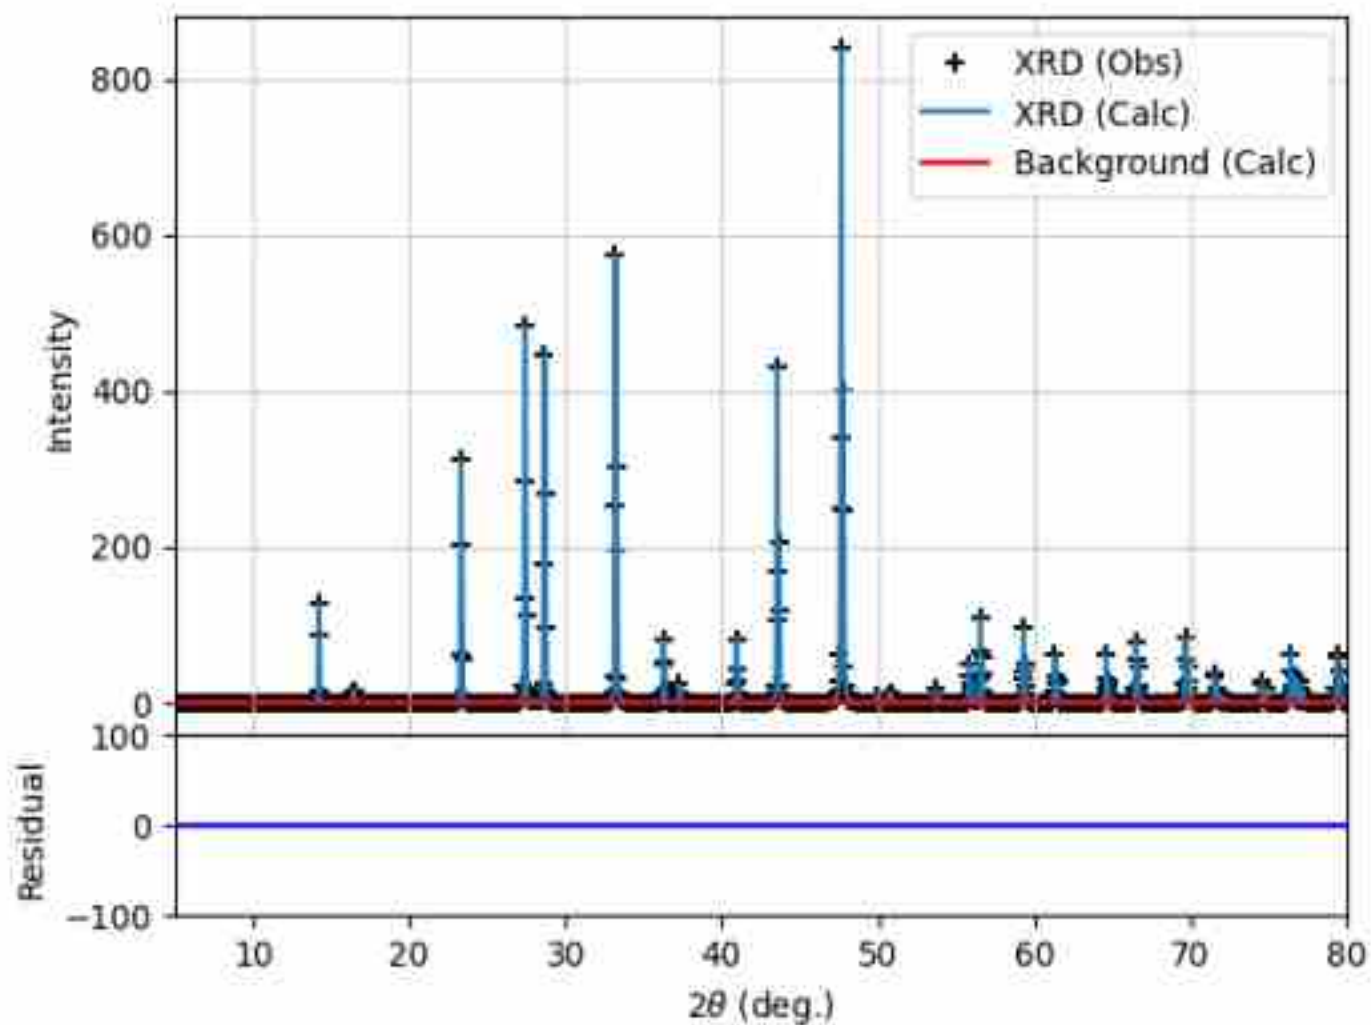

| RMSE before RR | Rwp     | RMSE after RR |
|----------------|---------|---------------|
| 0.015          | 0.02588 | 0.00229       |

# Mn<sub>3</sub>Fe<sub>3</sub>As<sub>3</sub>

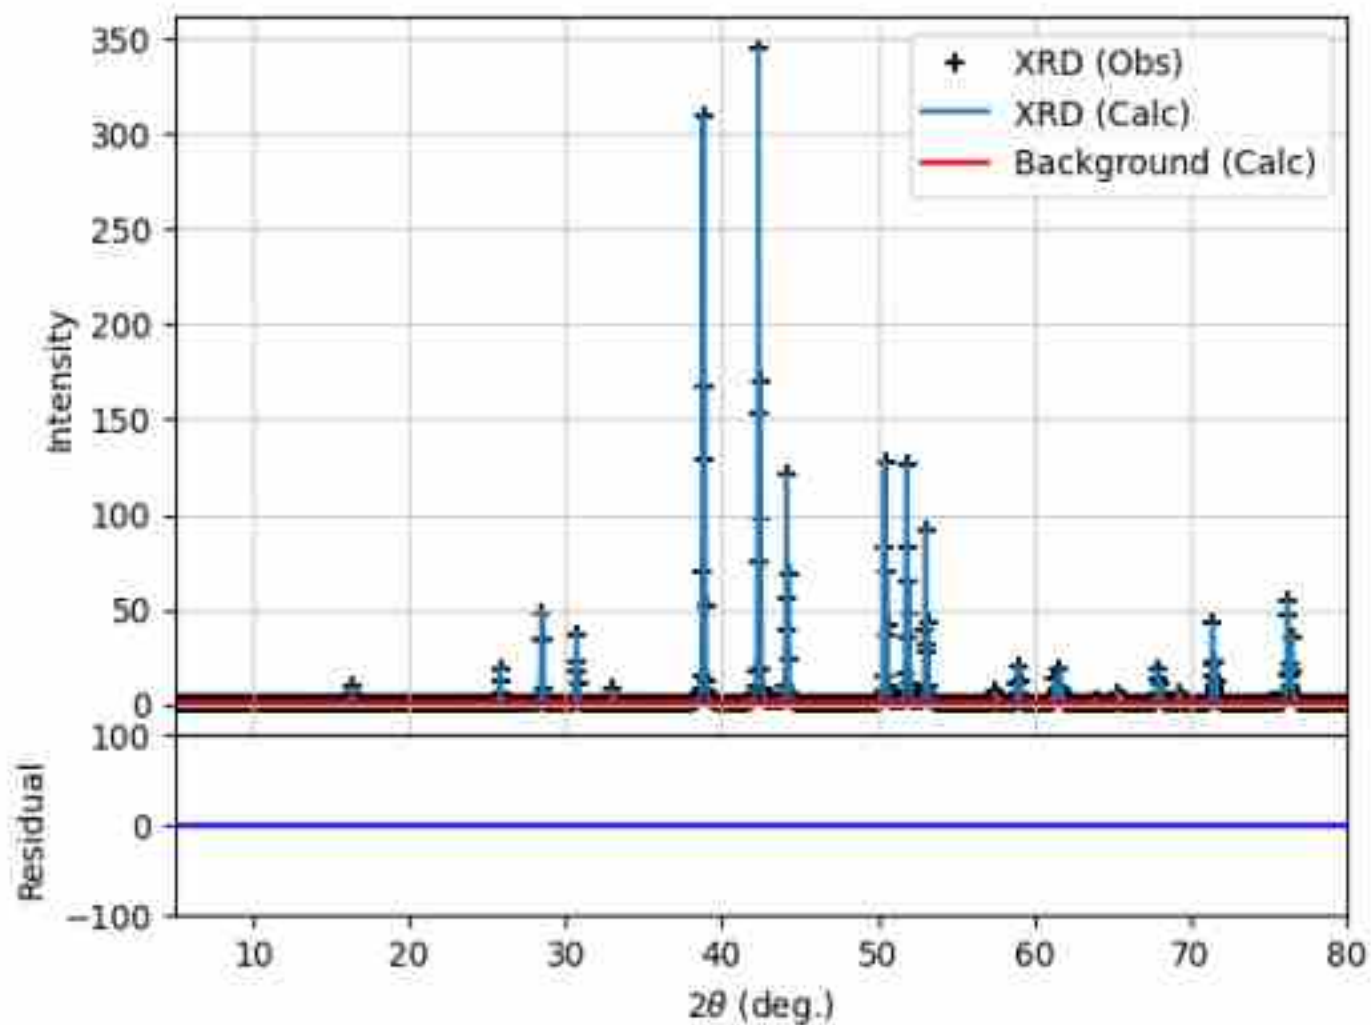

| RMSE before RR | Rwp     | RMSE after RR |
|----------------|---------|---------------|
| 0.015          | 0.00394 | 0.00099       |

# Na1Ca1Y1Cd1F8

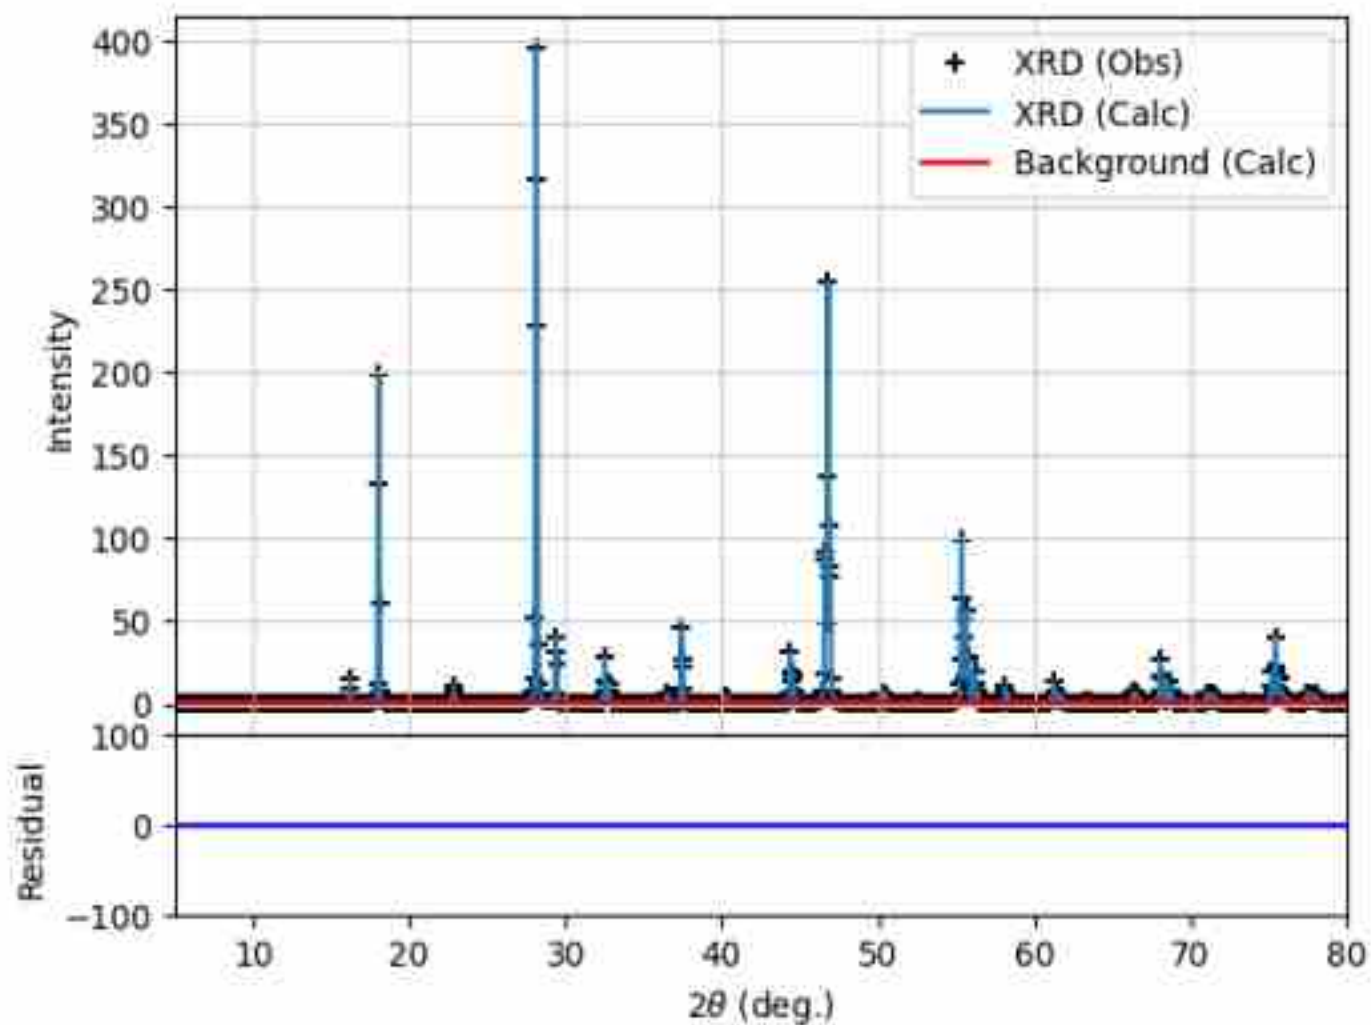

| RMSE before RR | Rwp     | RMSE after RR |
|----------------|---------|---------------|
| 0.015          | 0.00427 | 0.00243       |



# Na1Ti1V1S4

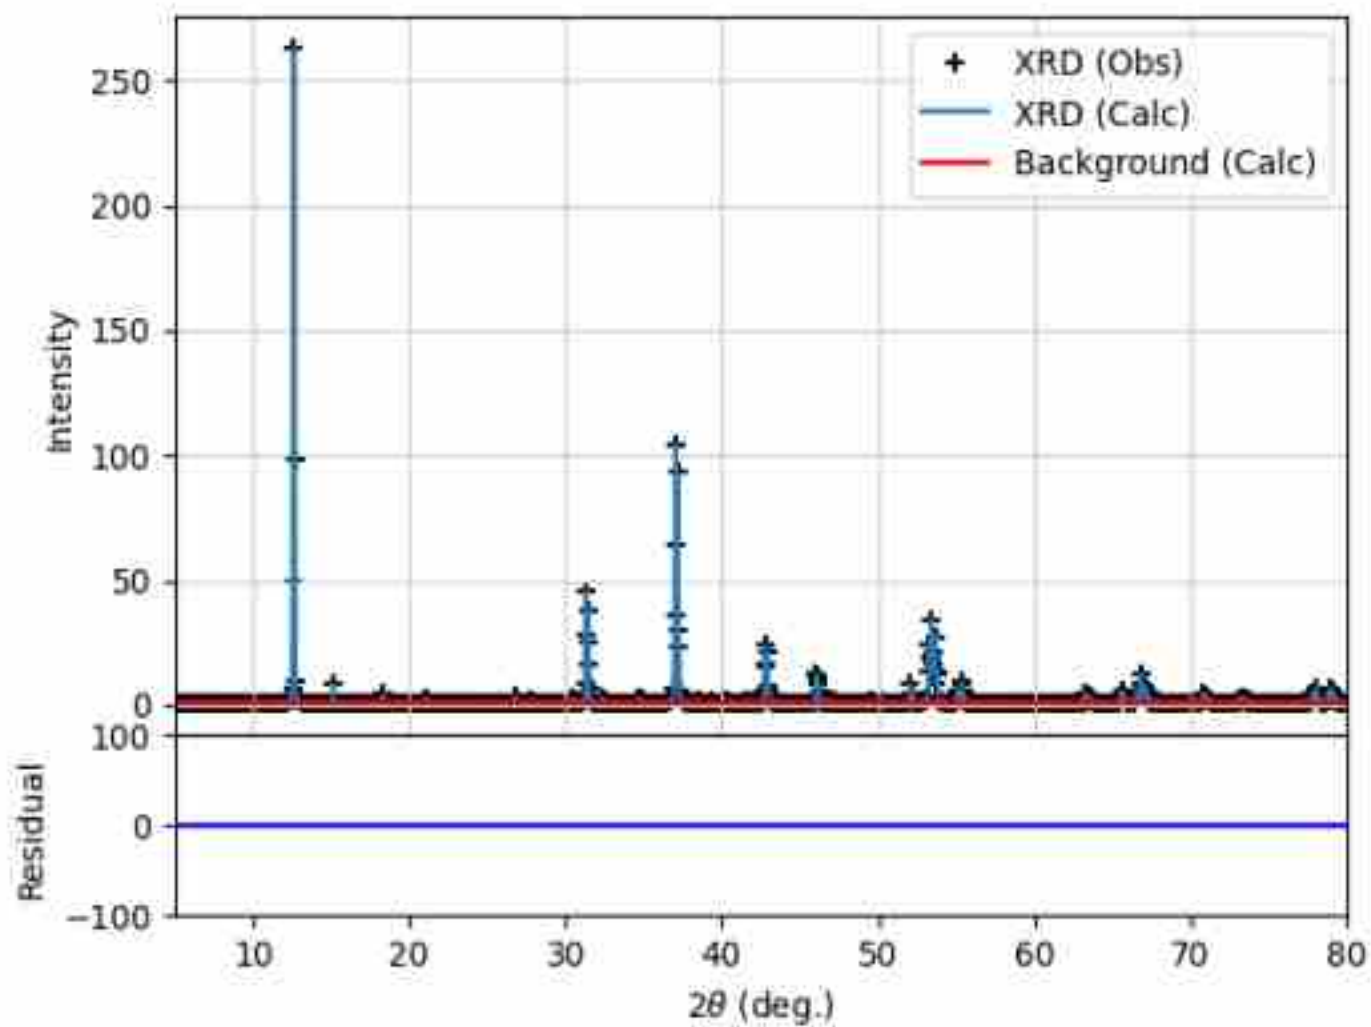

| RMSE before RR | Rwp     | RMSE after RR |
|----------------|---------|---------------|
| 0.015          | 0.00187 | 0.00033       |

# Na<sub>2</sub>Au<sub>4</sub>

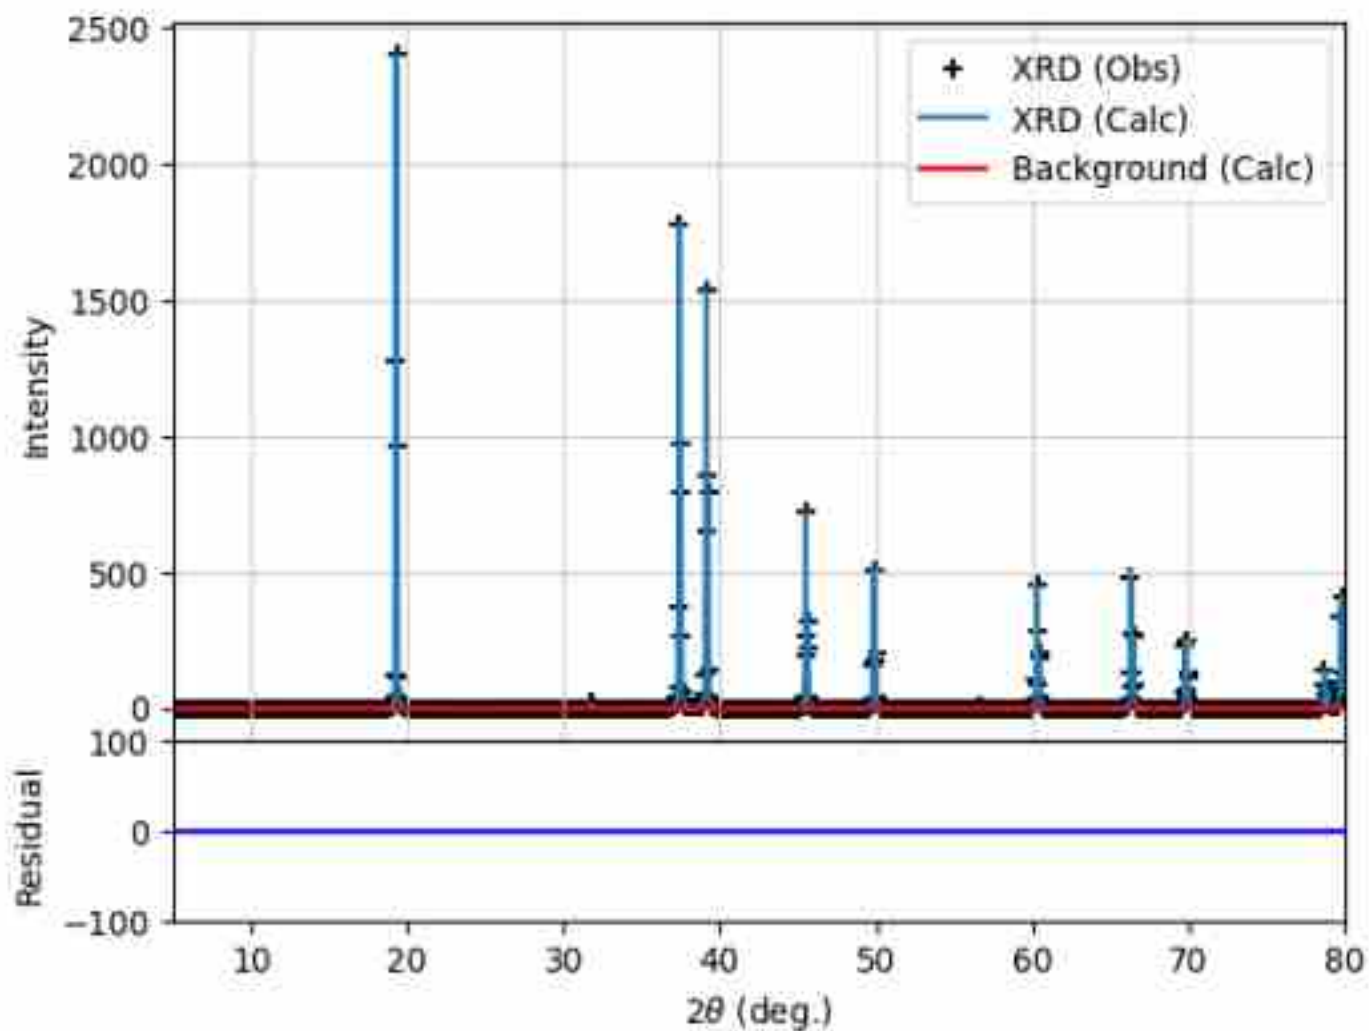

| RMSE before RR | Rwp     | RMSE after RR |
|----------------|---------|---------------|
| 0.015          | 0.02523 | 0.00407       |

# Na<sub>2</sub>Hf<sub>2</sub>O<sub>5</sub>

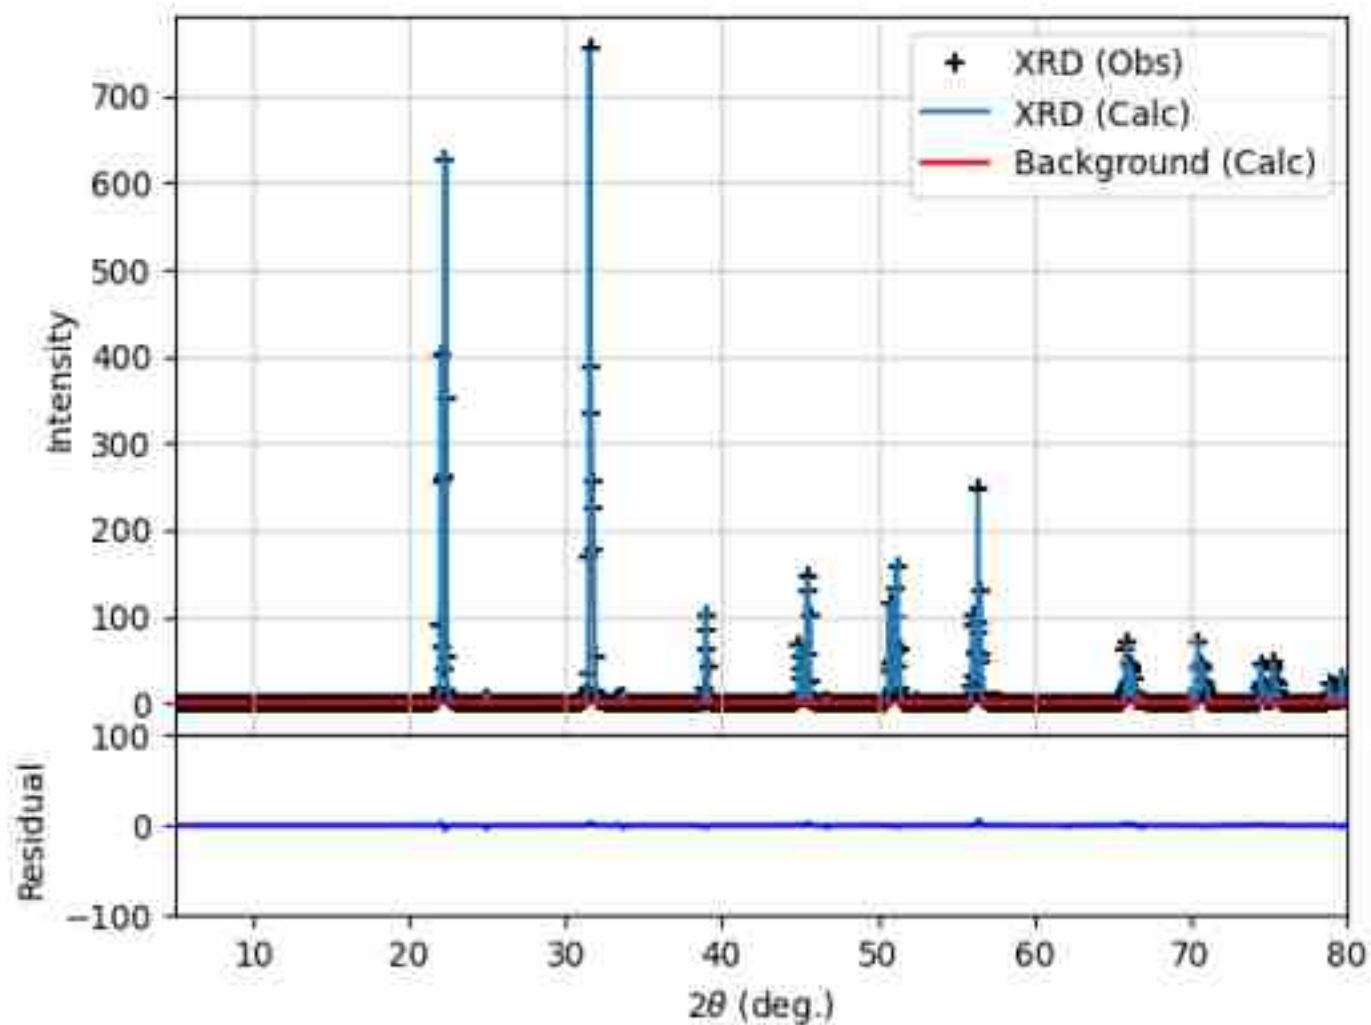

| RMSE before RR | Rwp     | RMSE after RR |
|----------------|---------|---------------|
| 0.015          | 4.35573 | 0.03063       |

# Na<sub>2</sub>La<sub>4</sub>Ru<sub>2</sub>O<sub>12</sub>

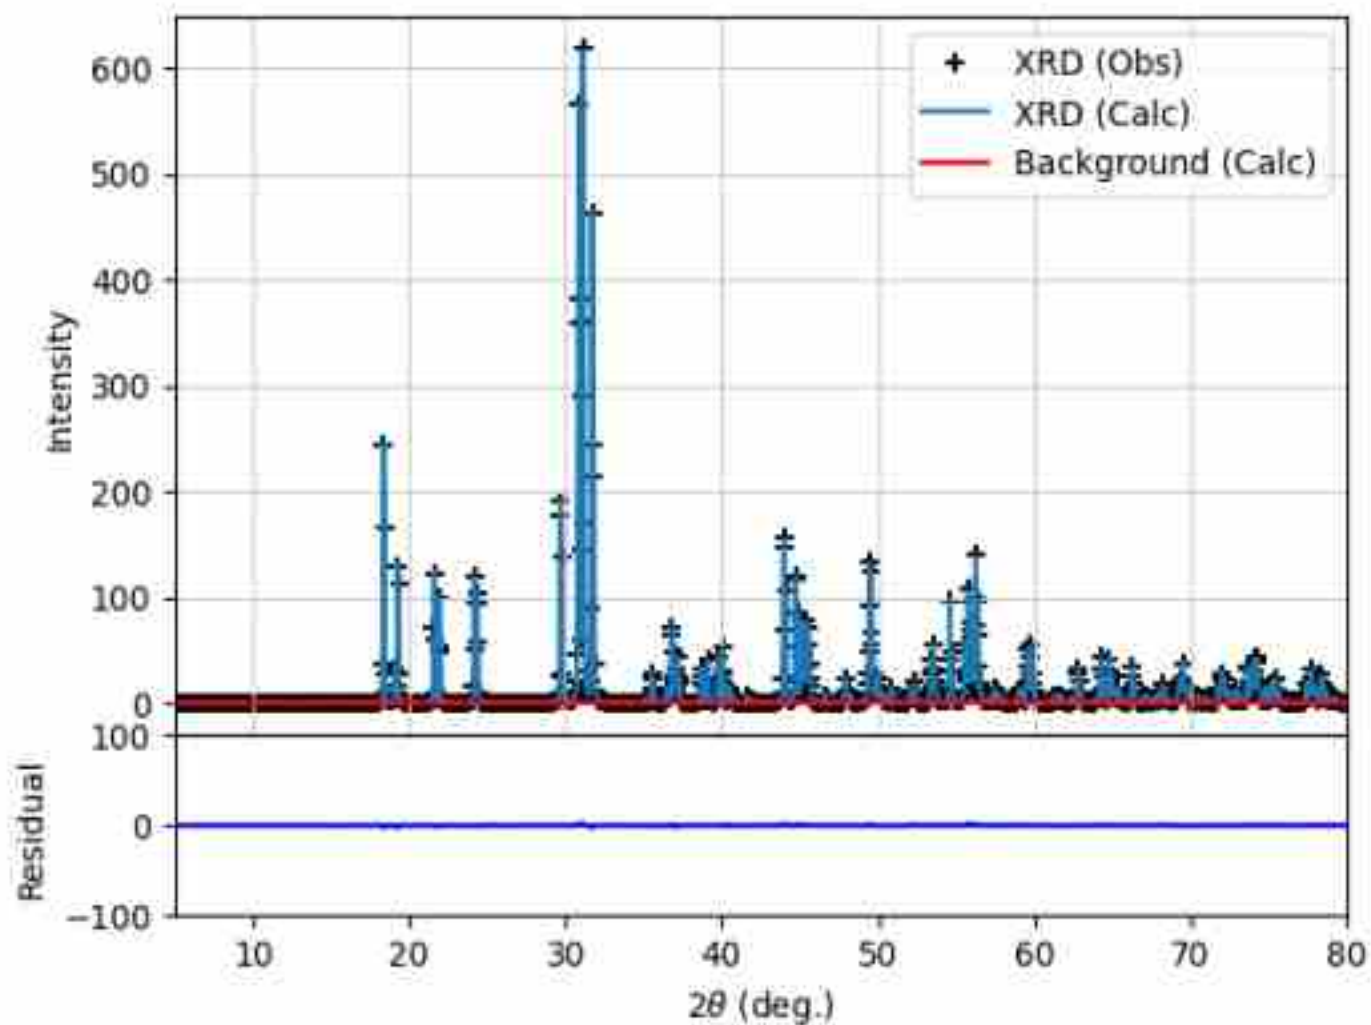

| RMSE before RR | Rwp    | RMSE after RR |
|----------------|--------|---------------|
| 0.015          | 2.1565 | 0.27776       |

# Na<sub>2</sub>Nd<sub>4</sub>Ru<sub>2</sub>O<sub>12</sub>

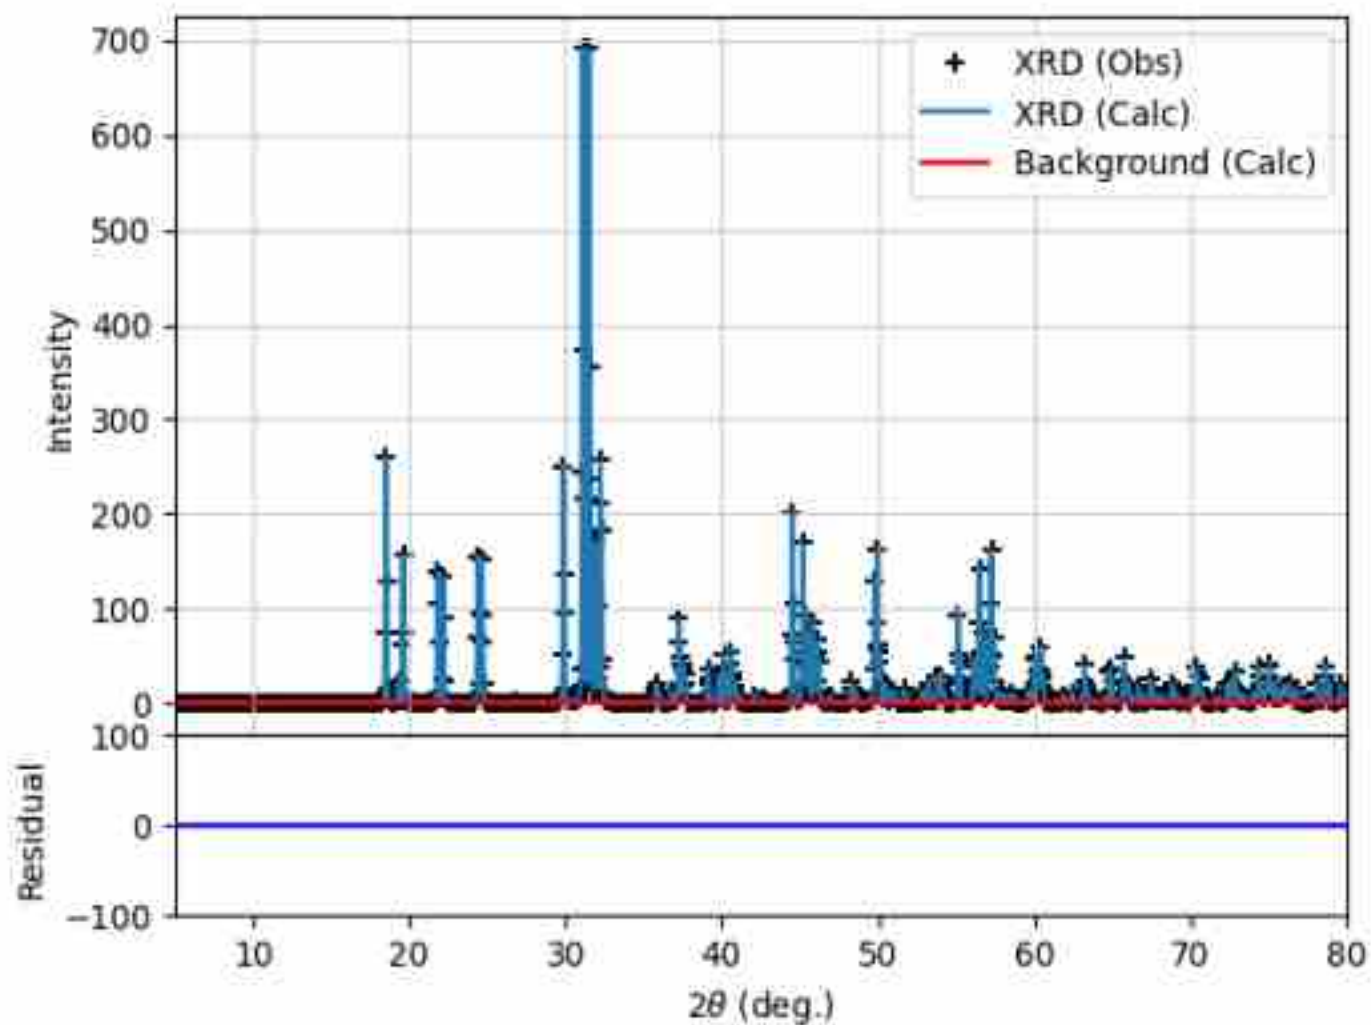

| RMSE before RR | Rwp     | RMSE after RR |
|----------------|---------|---------------|
| 0.015          | 0.00499 | 0.00133       |

# Na<sub>4</sub>Cu<sub>2</sub>P<sub>2</sub>

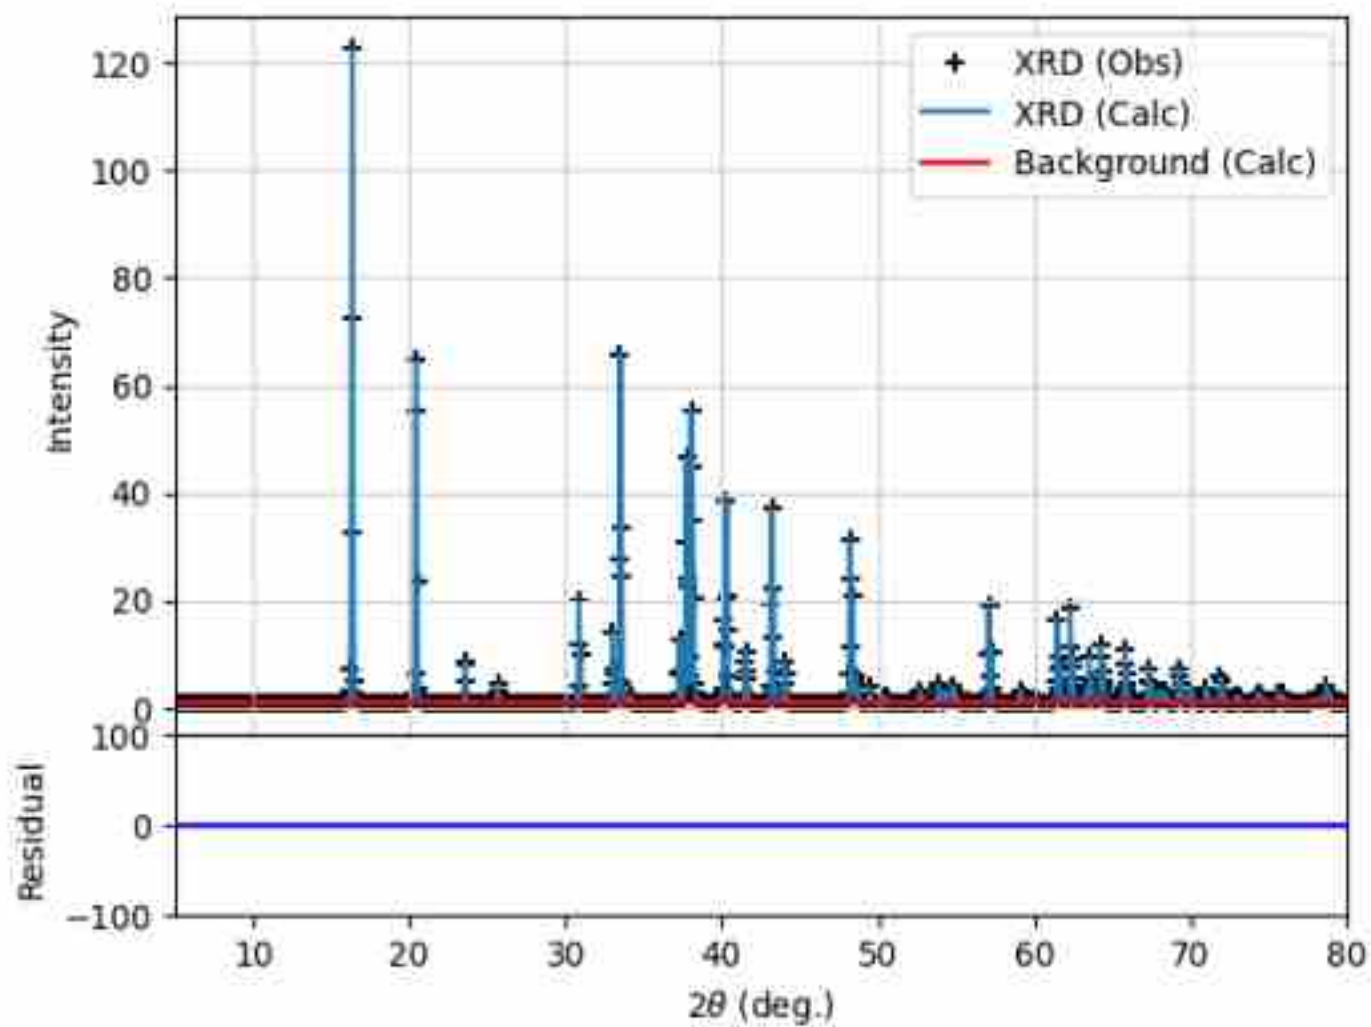

| RMSE before RR | Rwp    | RMSE after RR |
|----------------|--------|---------------|
| 0.015          | 0.0031 | 0.00043       |

# Na<sub>4</sub>Dy<sub>4</sub>O<sub>8</sub>

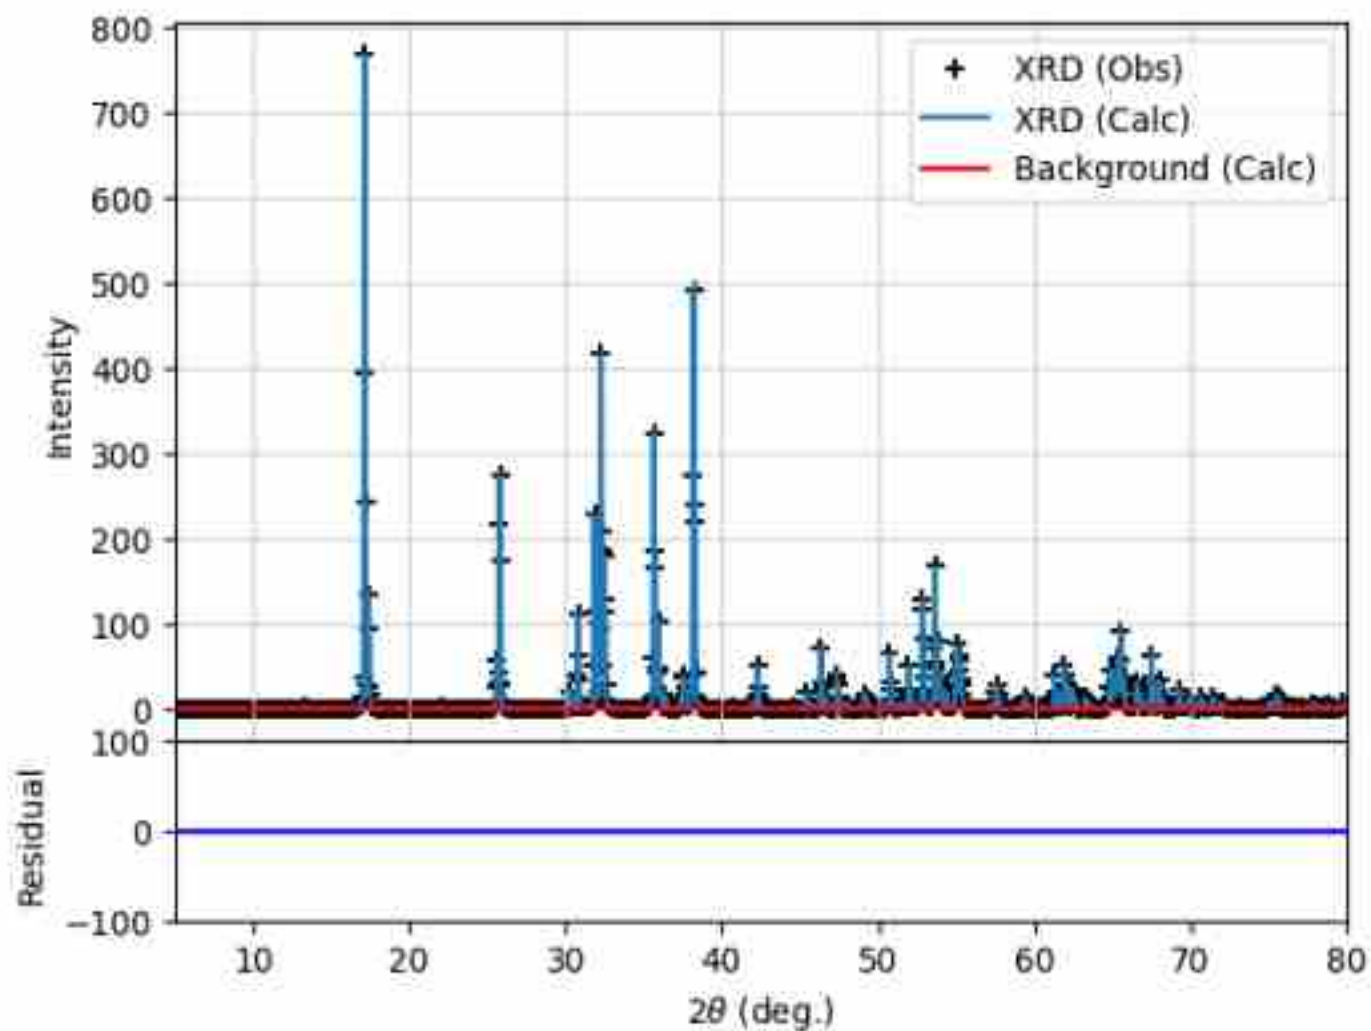

| RMSE before RR | Rwp     | RMSE after RR |
|----------------|---------|---------------|
| 0.015          | 0.00376 | 0.0011        |

# Nb2N2

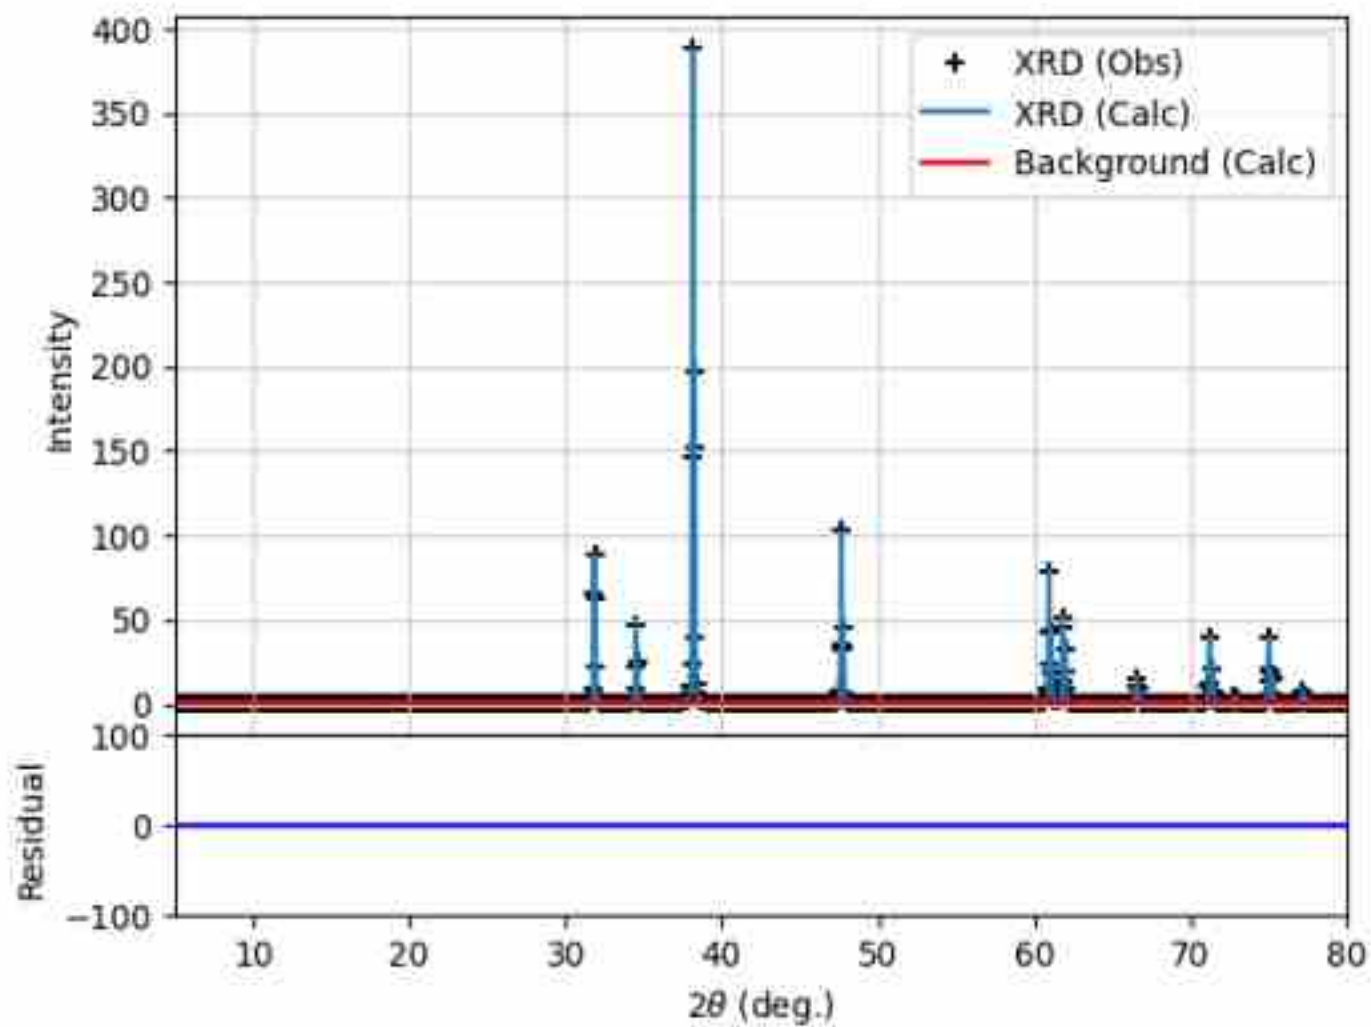

| RMSE before RR | Rwp     | RMSE after RR |
|----------------|---------|---------------|
| 0.015          | 0.00422 | 0.00248       |



# Nb<sub>3</sub>AlCr<sub>8</sub>

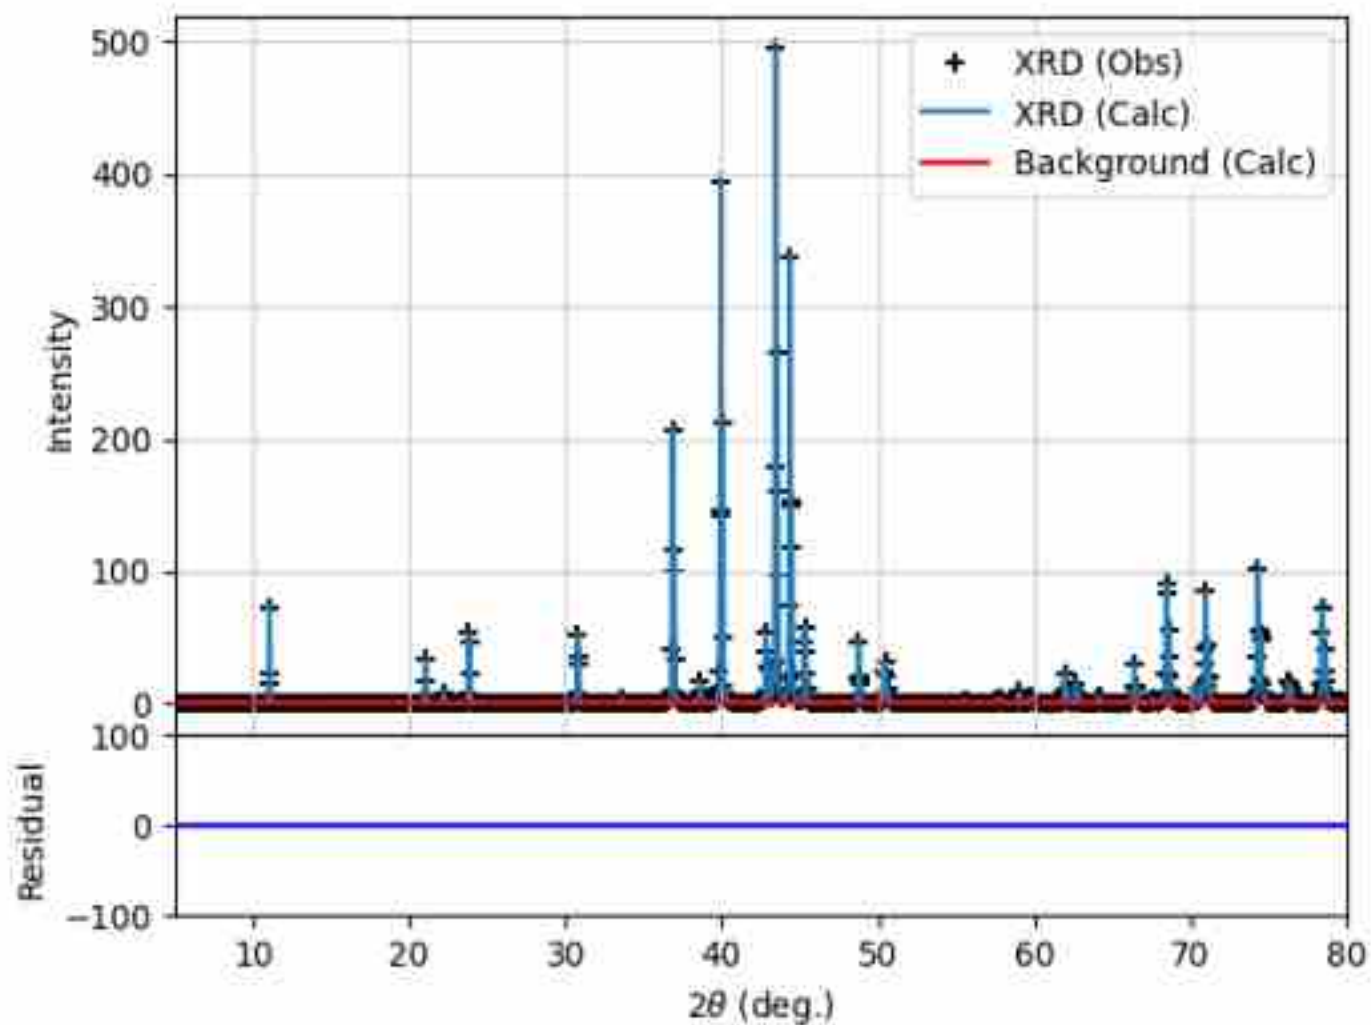

| RMSE before RR | Rwp     | RMSE after RR |
|----------------|---------|---------------|
| 0.015          | 0.00339 | 0.00075       |

# Nb<sub>4</sub>Al<sub>4</sub>Cu<sub>4</sub>

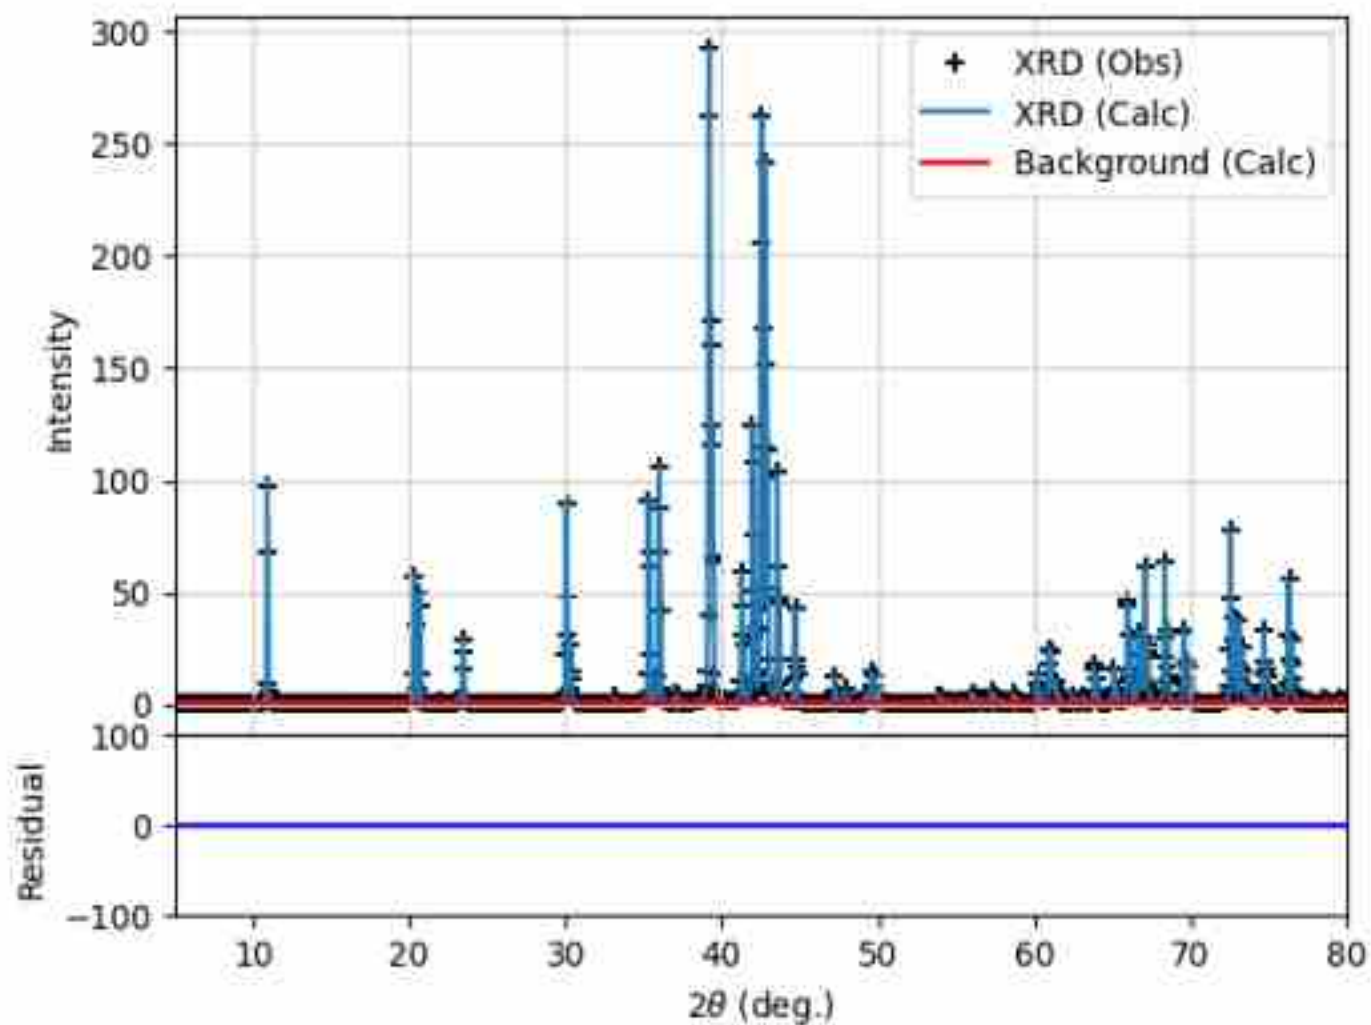

| RMSE before RR | Rwp     | RMSE after RR |
|----------------|---------|---------------|
| 0.015          | 0.00319 | 0.00053       |

# Nd1Ga3Au1

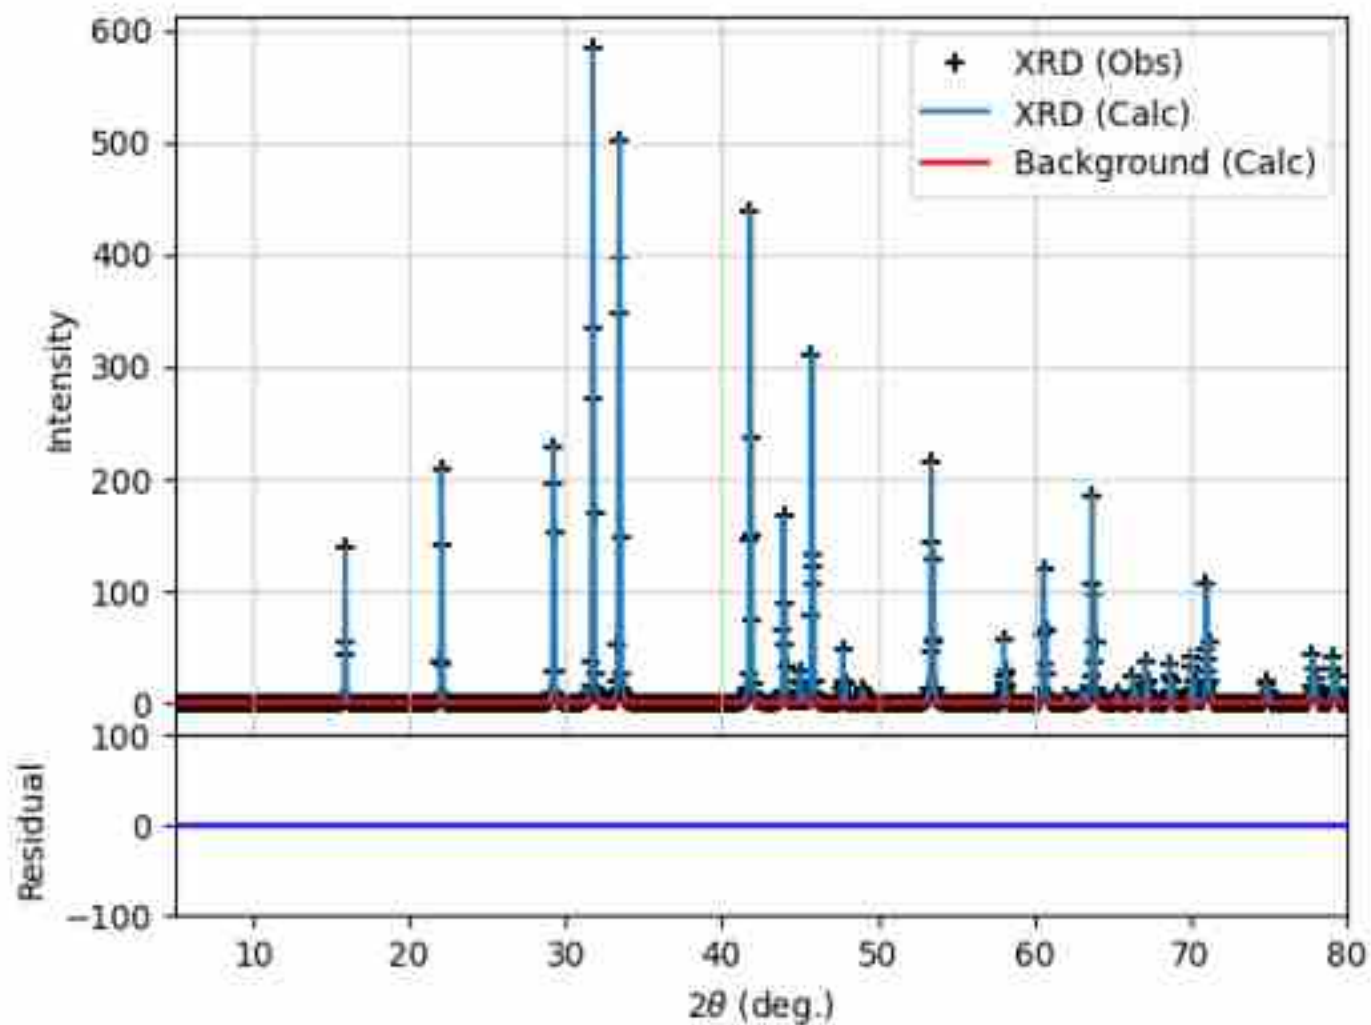

| RMSE before RR | Rwp     | RMSE after RR |
|----------------|---------|---------------|
| 0.015          | 0.00277 | 0.00031       |

# Nd<sub>2</sub>Ga<sub>1</sub>Ni<sub>2</sub>

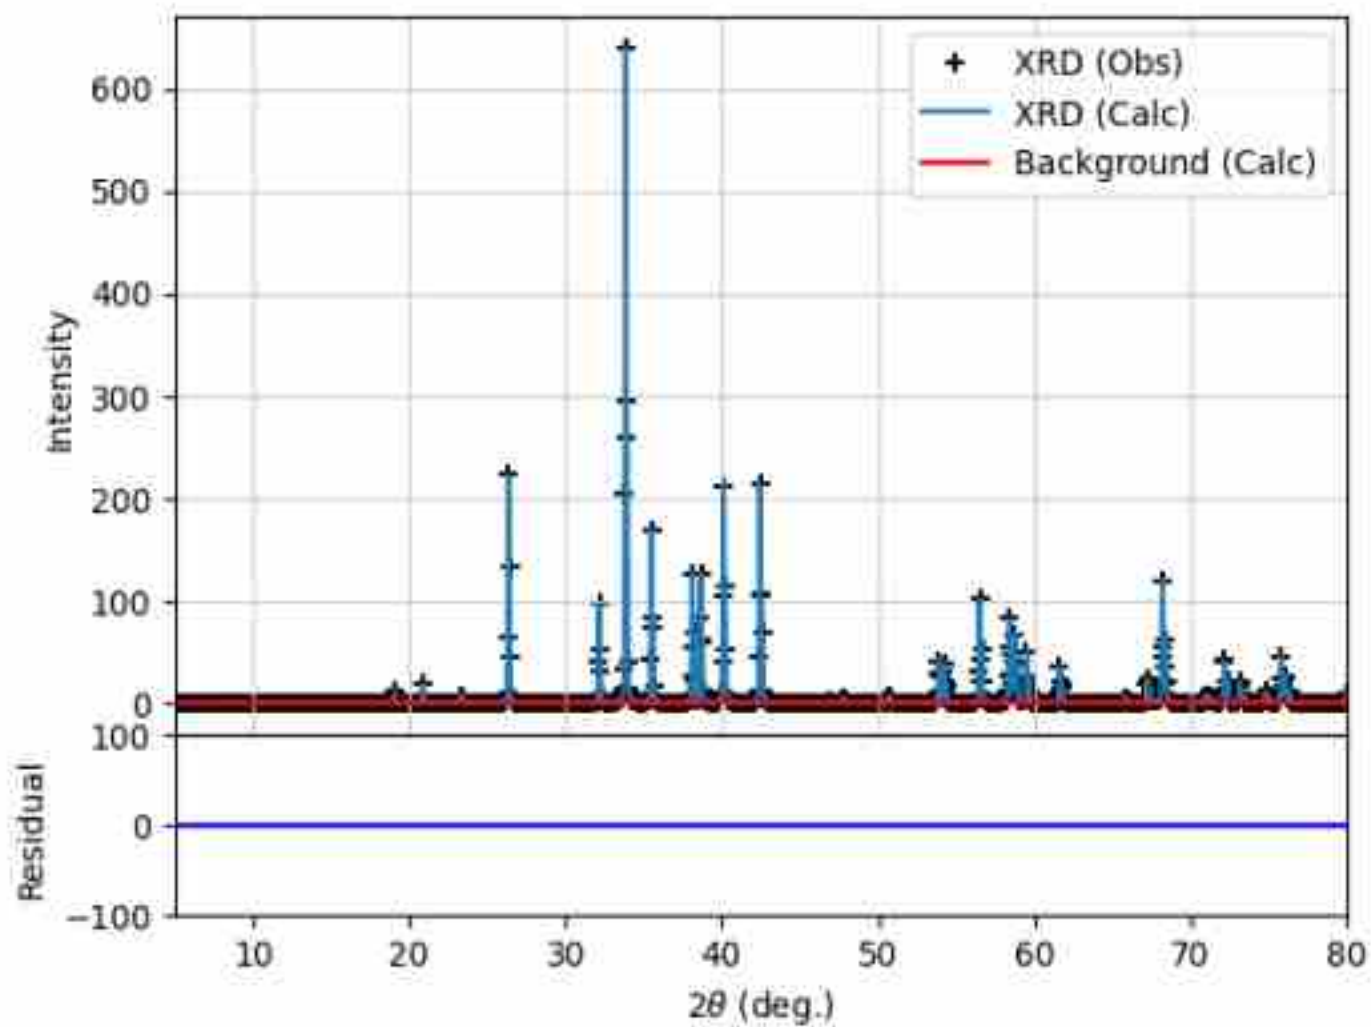

| RMSE before RR | Rwp     | RMSE after RR |
|----------------|---------|---------------|
| 0.015          | 0.00333 | 0.00039       |

# Nd<sub>2</sub>H<sub>6</sub>O<sub>6</sub>

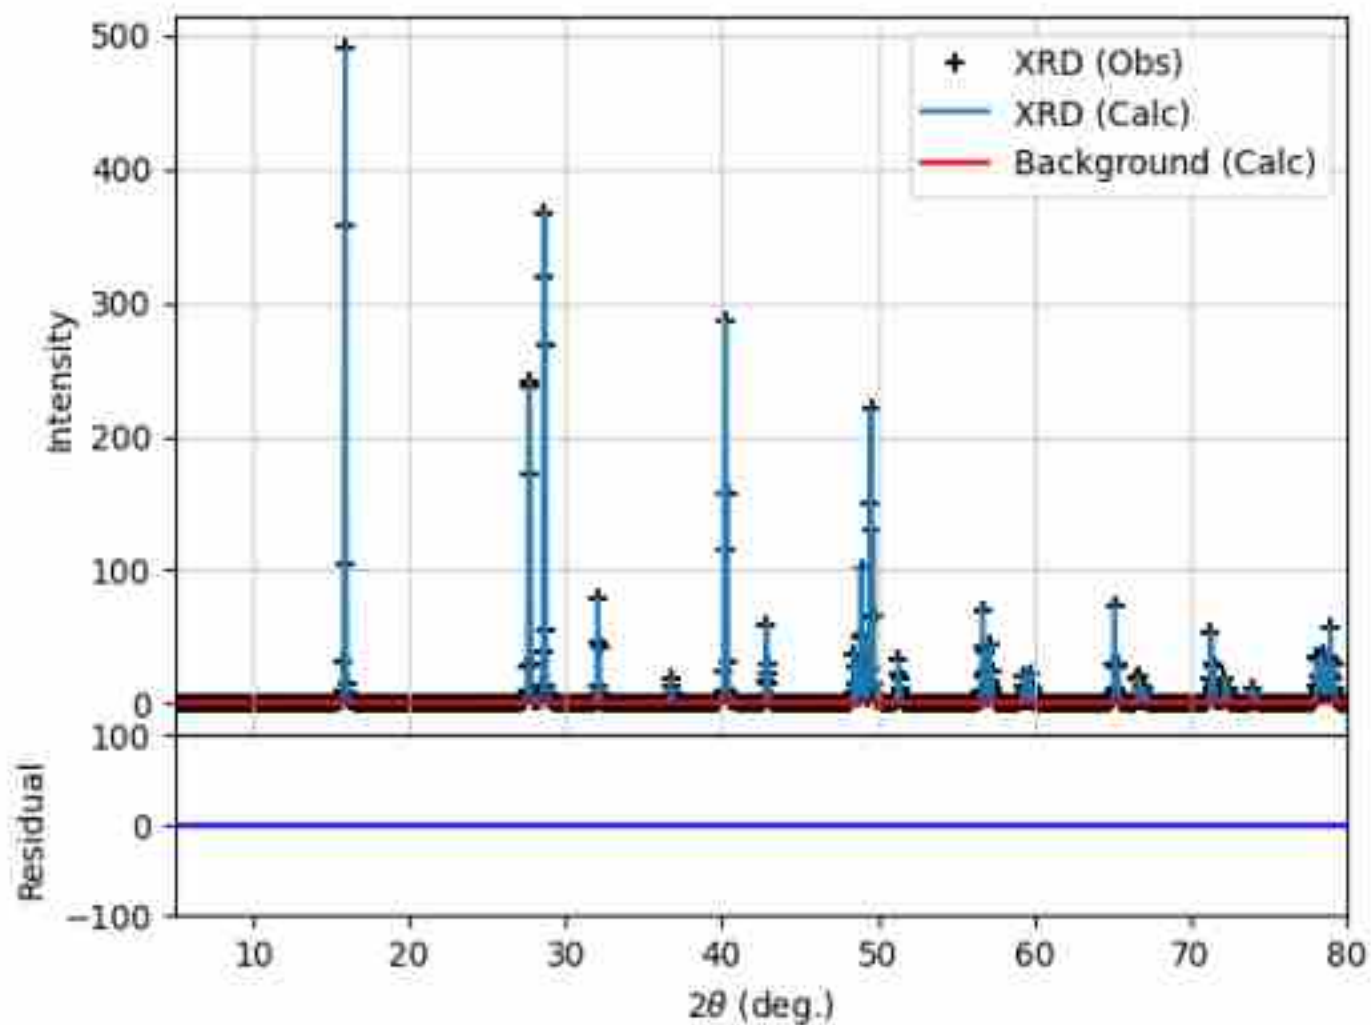

| RMSE before RR | Rwp     | RMSE after RR |
|----------------|---------|---------------|
| 0.015          | 0.00428 | 0.00937       |

# Nd<sub>2</sub>Sn<sub>4</sub>

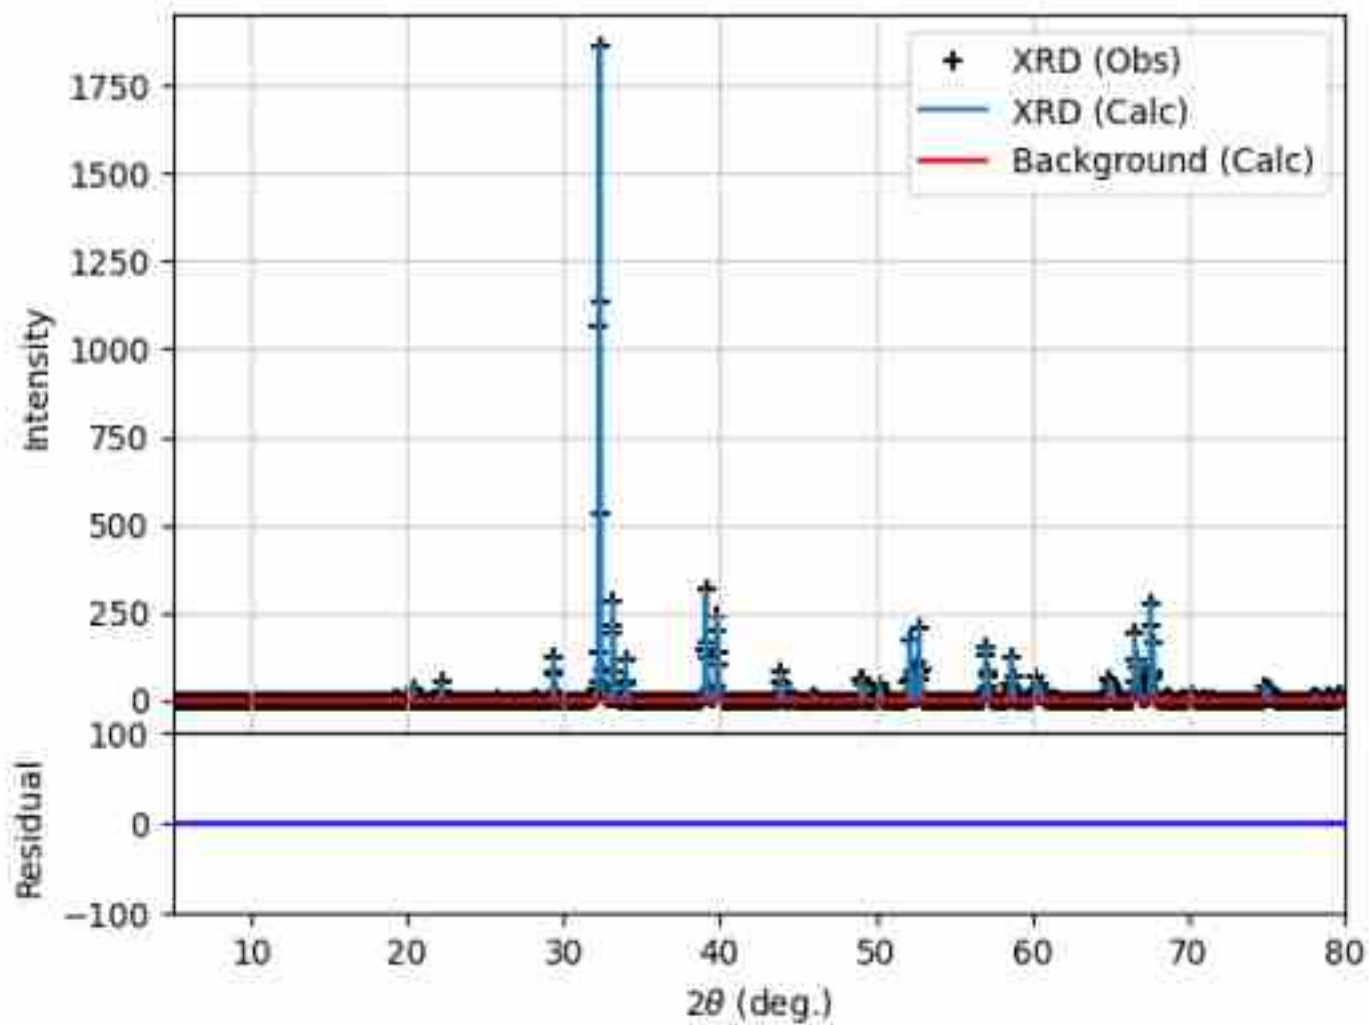

| RMSE before RR | Rwp     | RMSE after RR |
|----------------|---------|---------------|
| 0.015          | 0.00421 | 0.00026       |

# Nd<sub>4</sub>Fe<sub>2</sub>Ni<sub>2</sub>O<sub>12</sub>

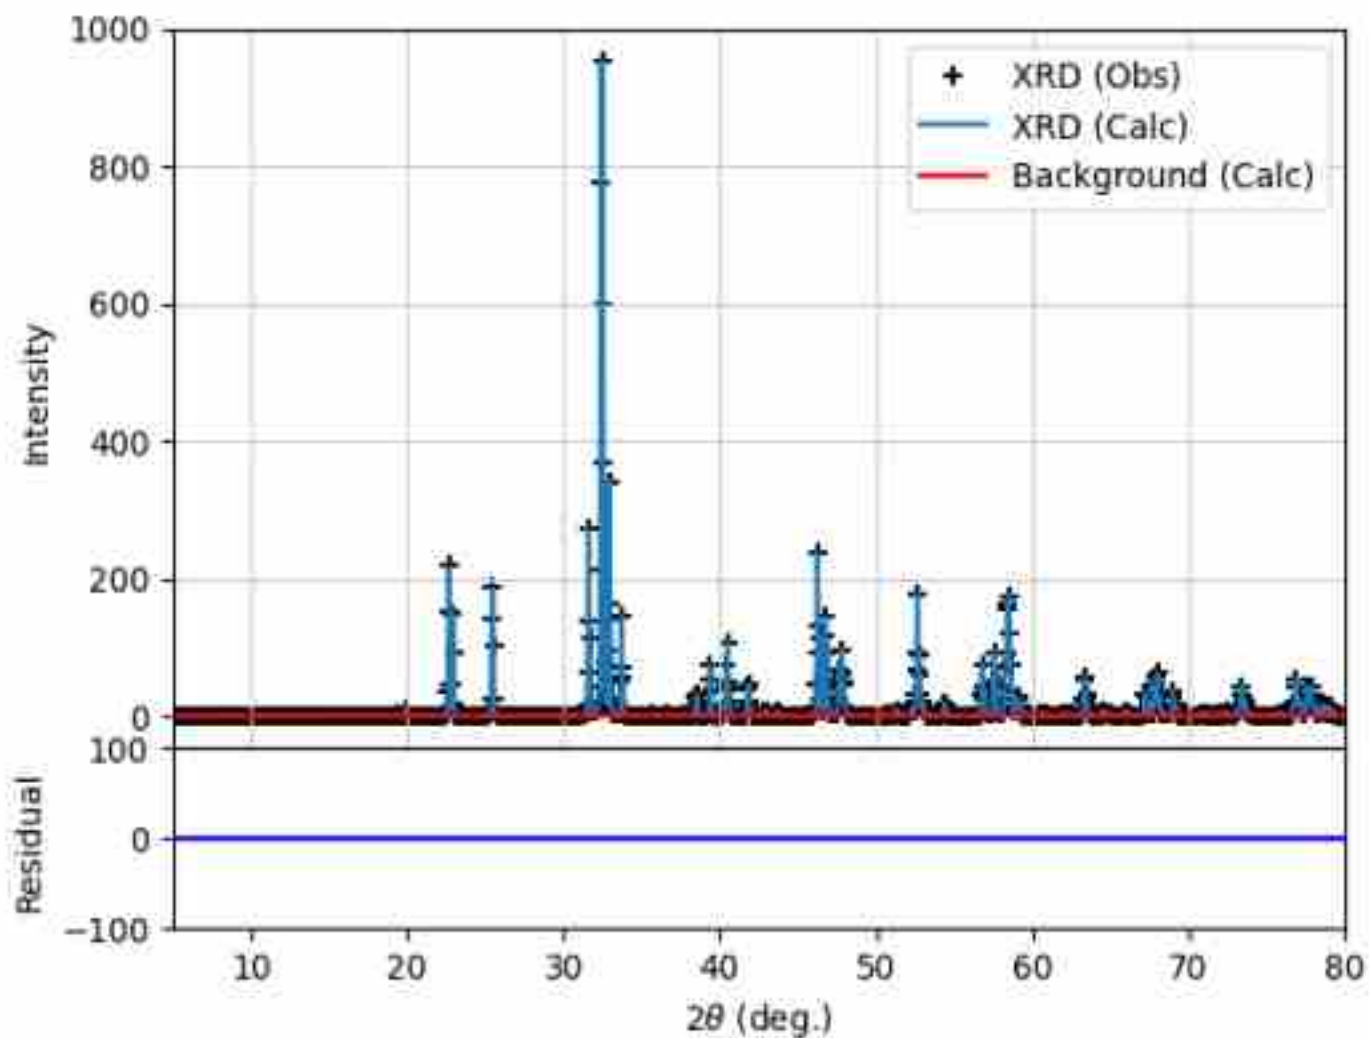

| RMSE before RR | Rwp    | RMSE after RR |
|----------------|--------|---------------|
| 0.015          | 0.0037 | 0.0012        |

# Nd6Fe2O12

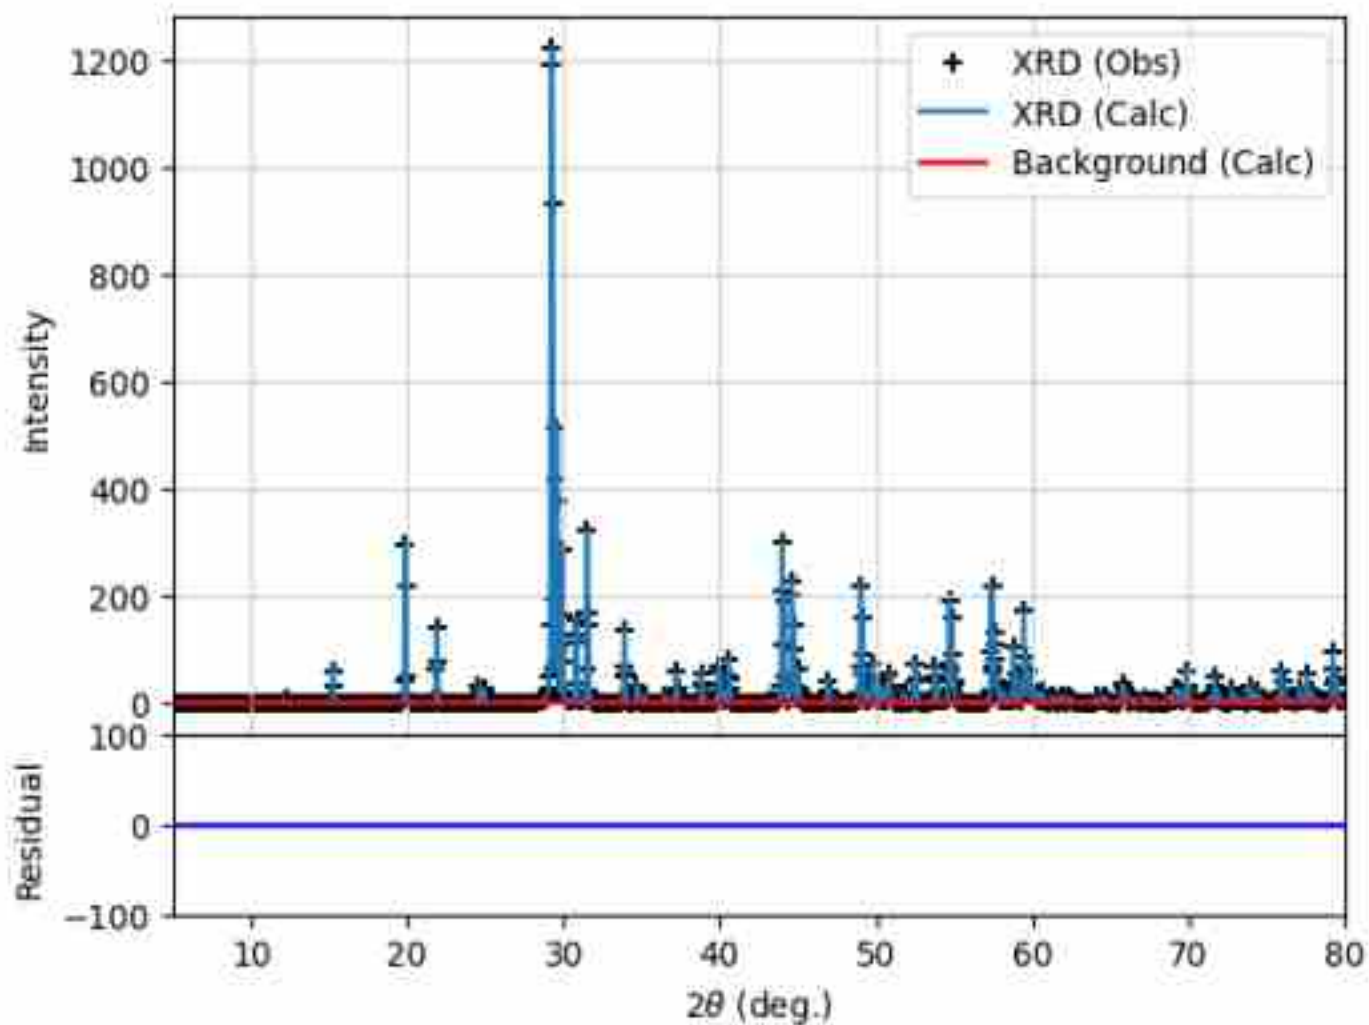

| RMSE before RR | Rwp     | RMSE after RR |
|----------------|---------|---------------|
| 0.015          | 0.00376 | 0.0012        |



# Ni6Mo2

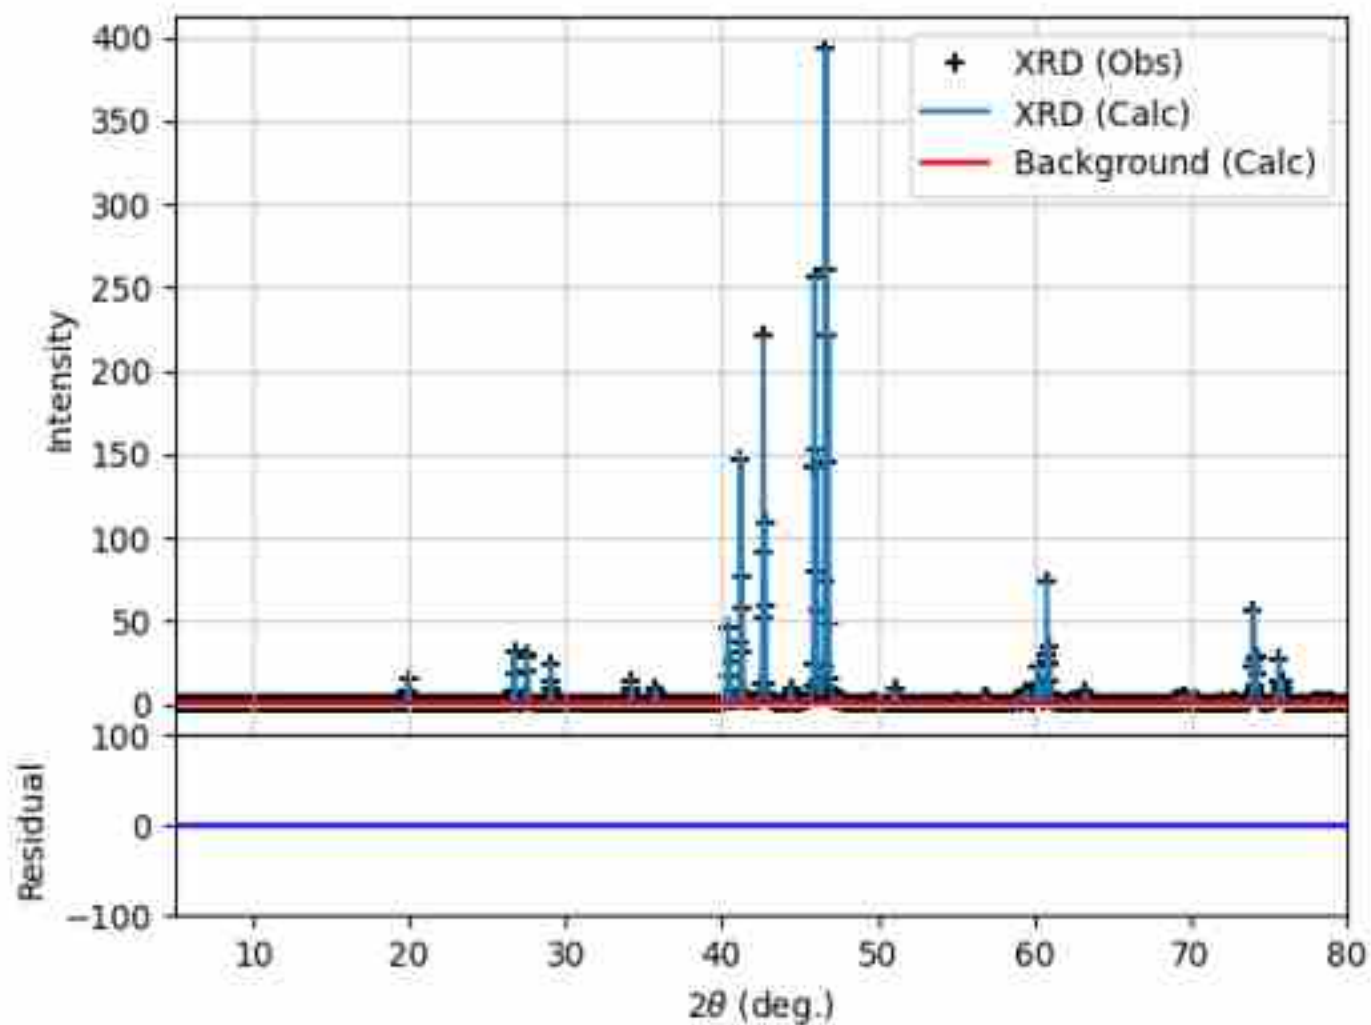

| RMSE before RR | Rwp     | RMSE after RR |
|----------------|---------|---------------|
| 0.015          | 0.00375 | 0.00055       |

# Np<sub>1</sub>Al<sub>2</sub>Pd<sub>5</sub>

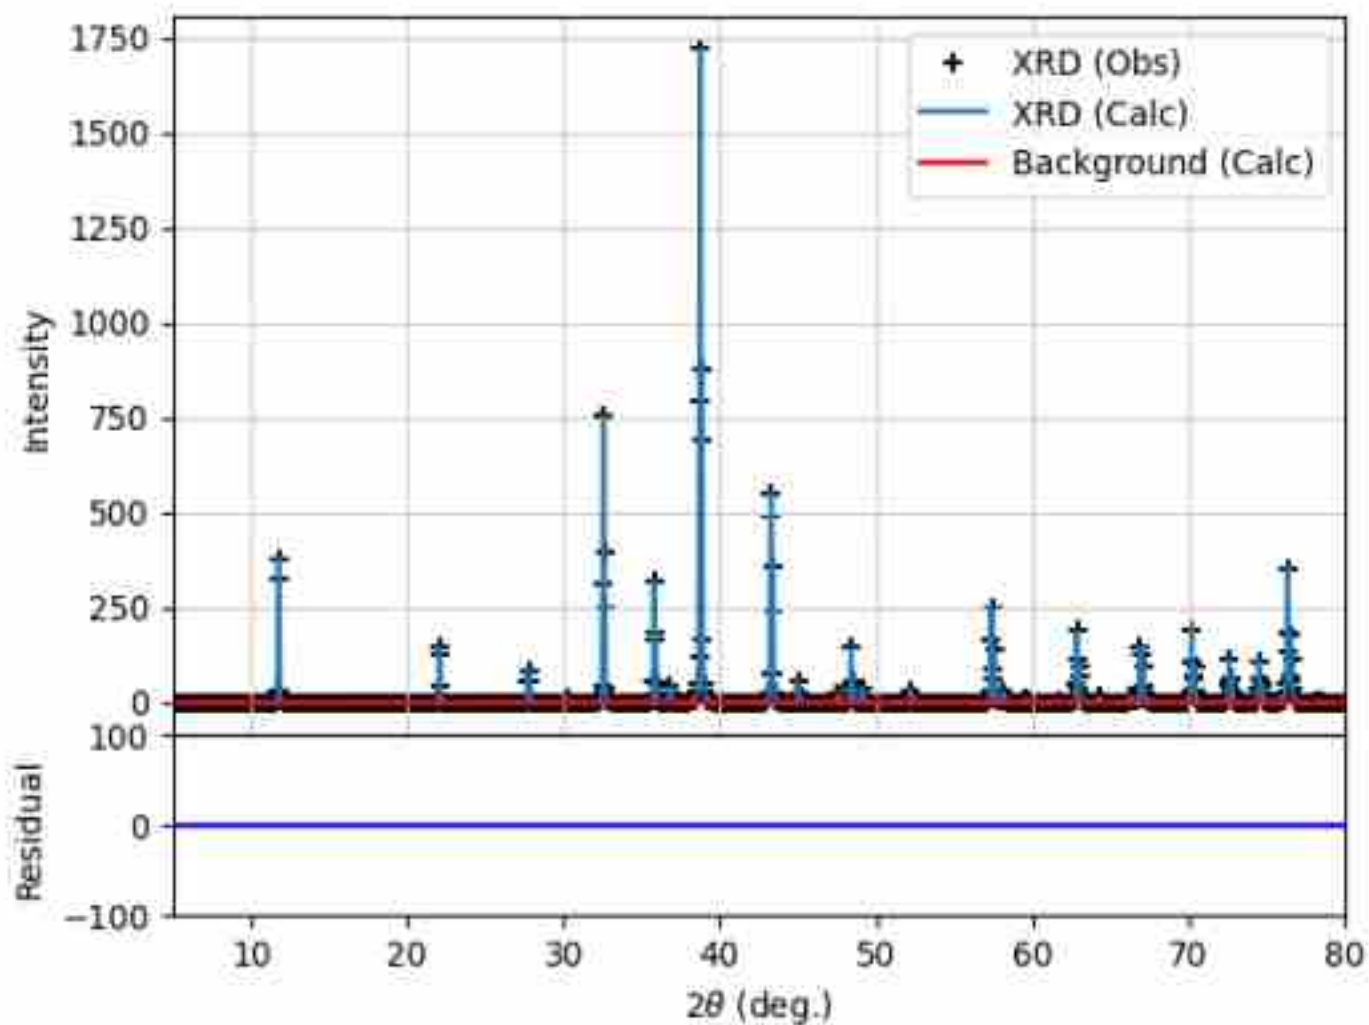

| RMSE before RR | Rwp     | RMSE after RR |
|----------------|---------|---------------|
| 0.015          | 0.01134 | 0.00165       |

# Np<sub>2</sub>Br<sub>6</sub>

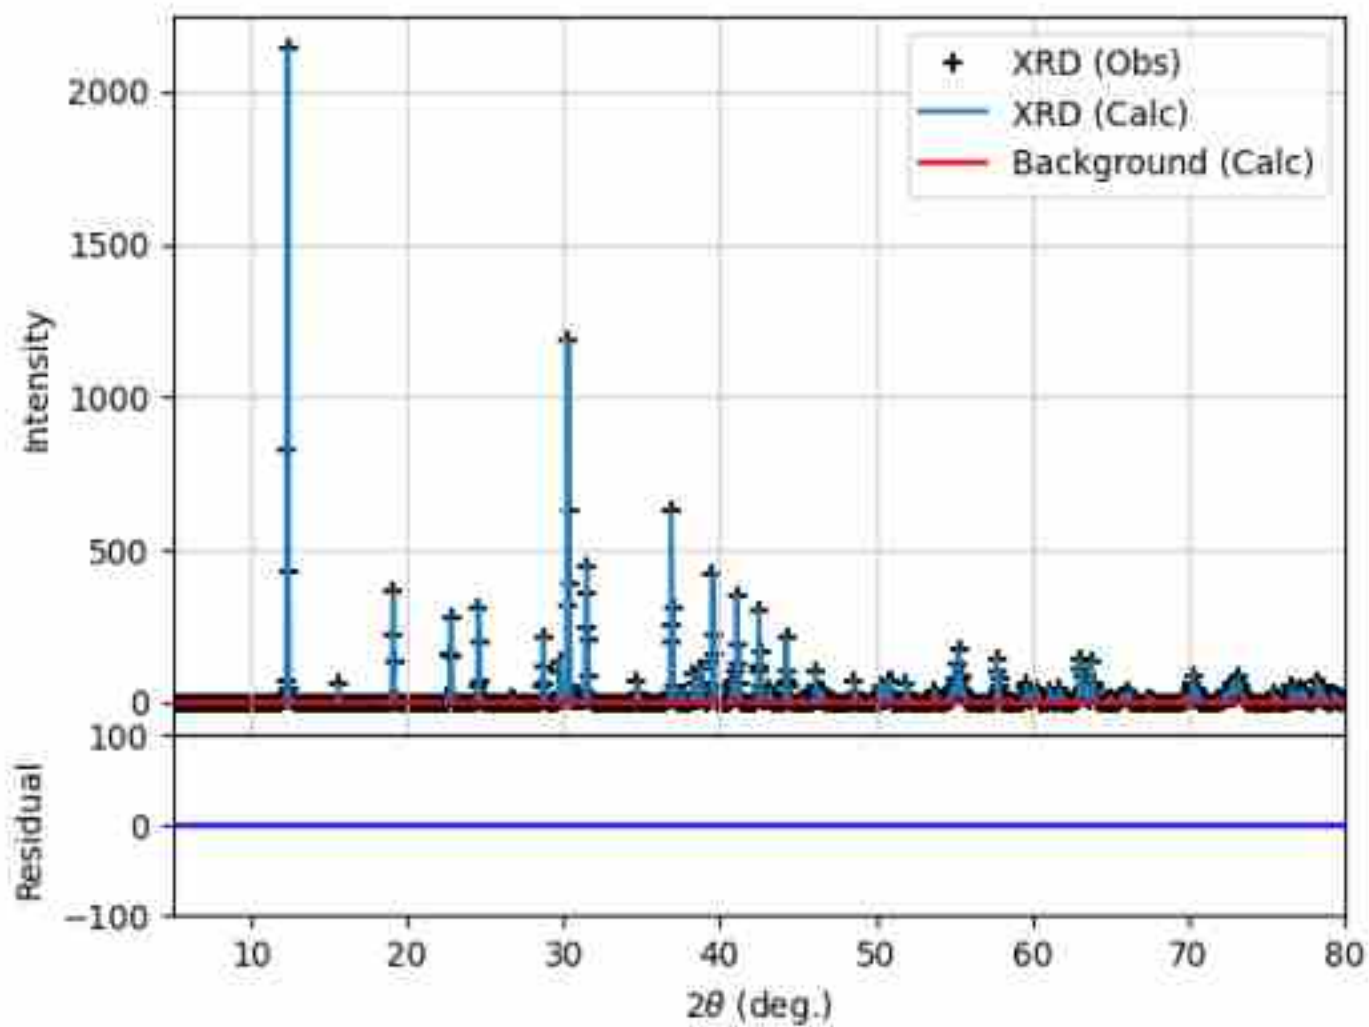

| RMSE before RR | Rwp     | RMSE after RR |
|----------------|---------|---------------|
| 0.015          | 0.00306 | 0.00038       |

# Np<sub>2</sub>F<sub>6</sub>

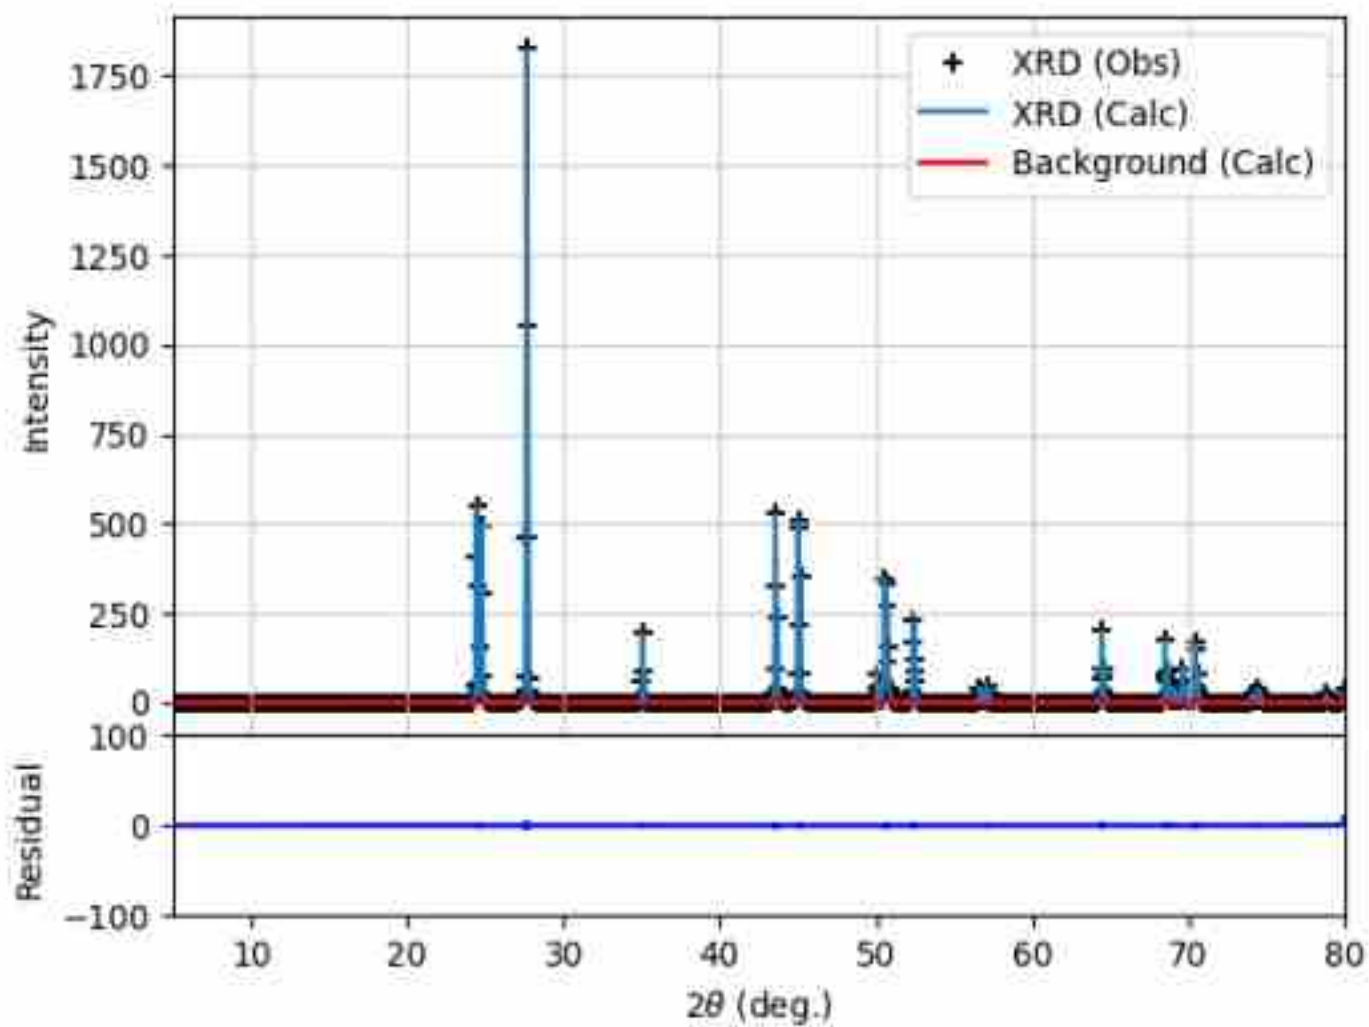

| RMSE before RR | Rwp     | RMSE after RR |
|----------------|---------|---------------|
| 0.015          | 1.98131 | 0.0398        |

# Os4Se8

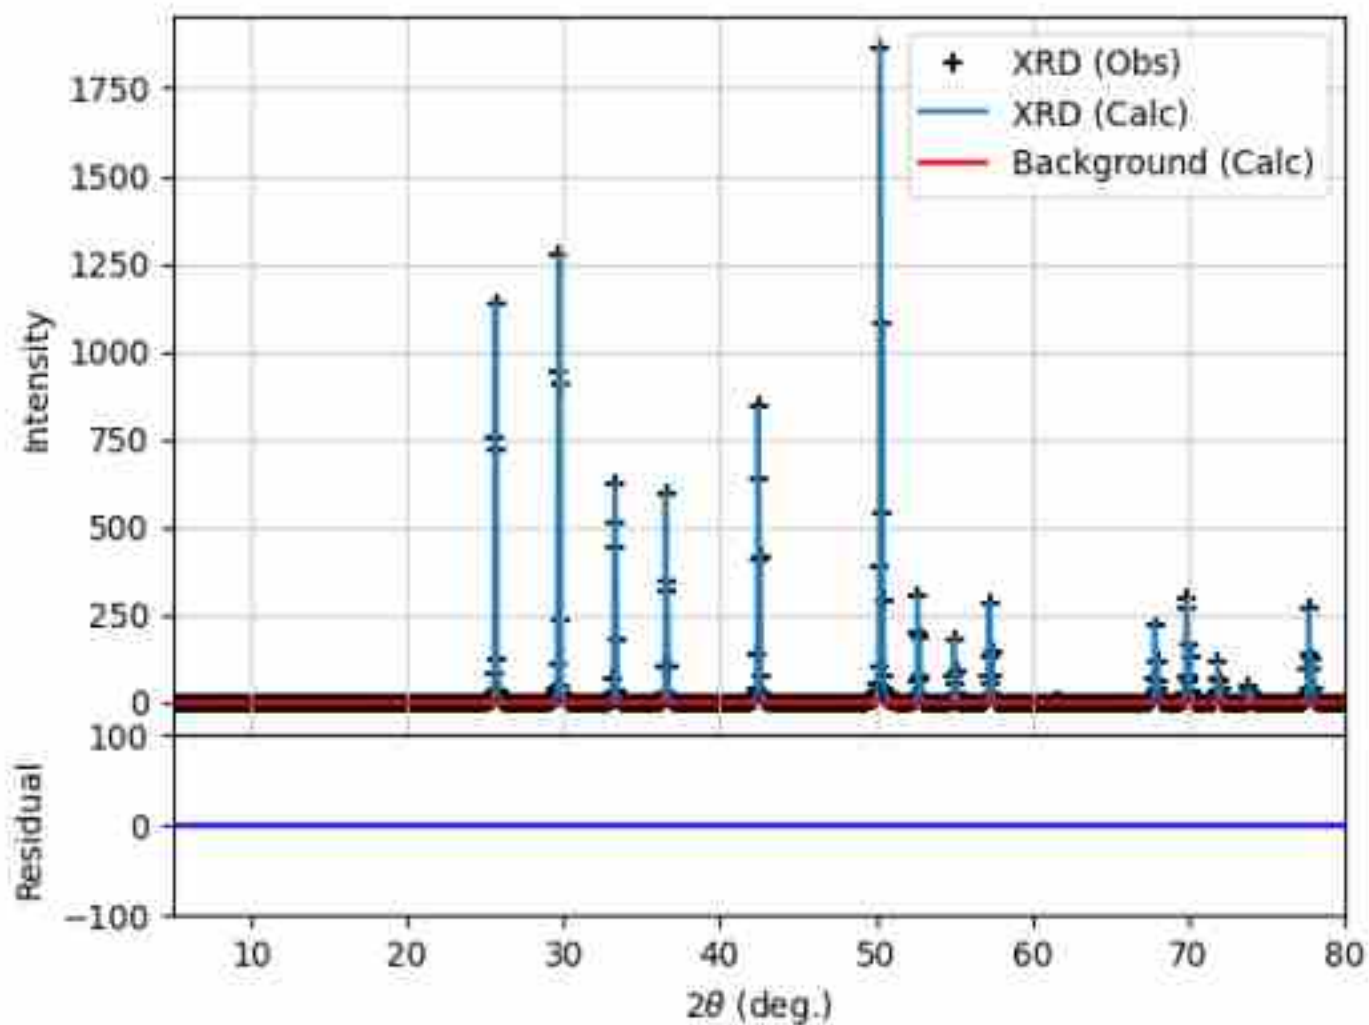

| RMSE before RR | Rwp     | RMSE after RR |
|----------------|---------|---------------|
| 0.015          | 0.00641 | 0.0006        |

# P4Ru2

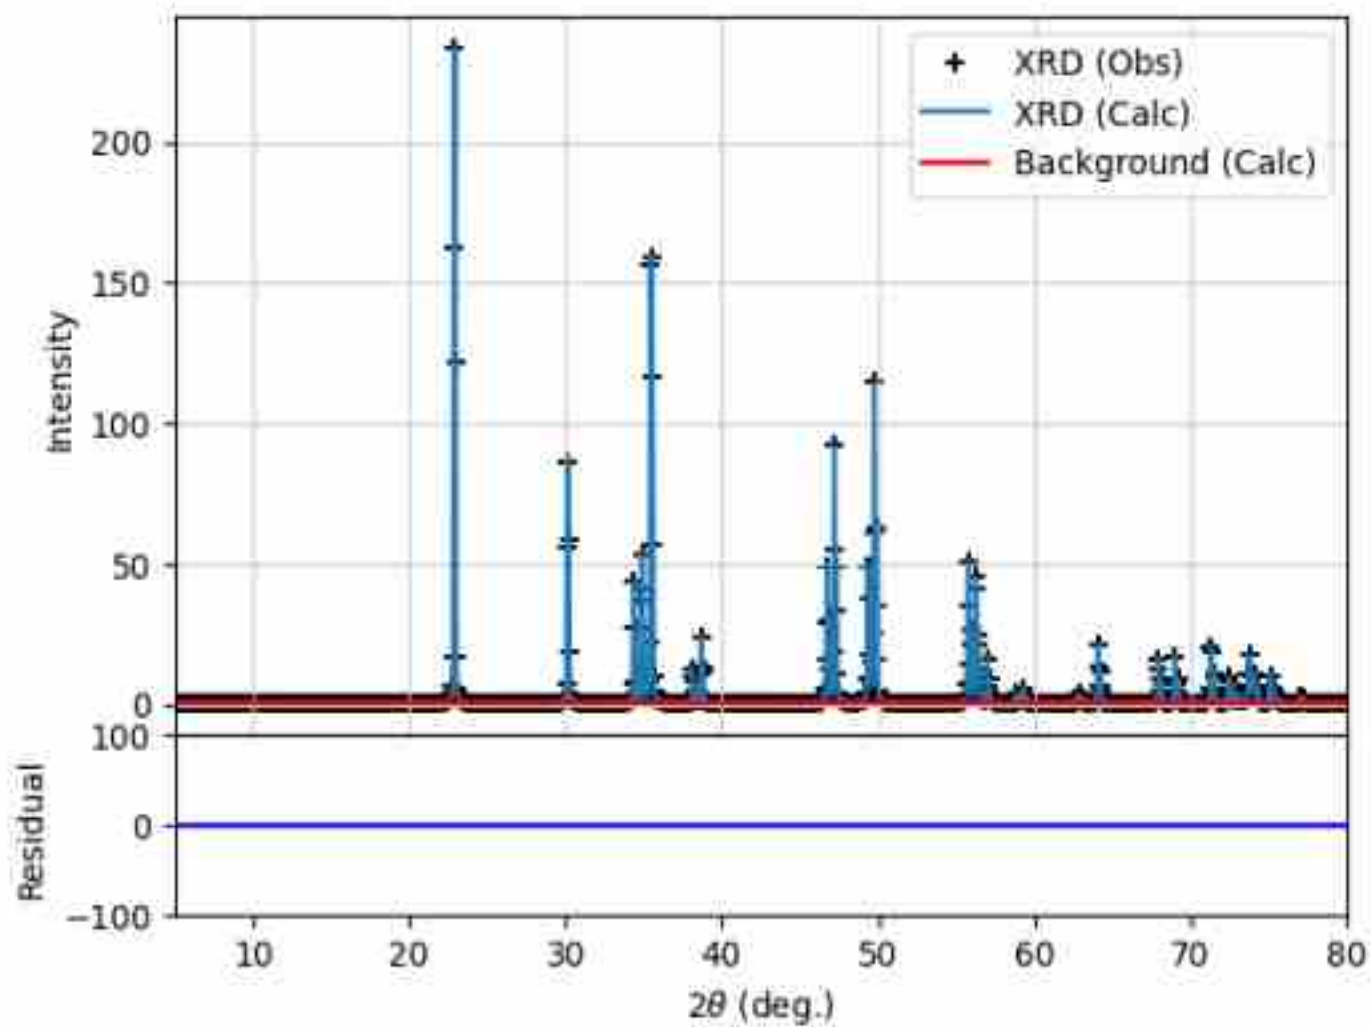

| RMSE before RR | Rwp     | RMSE after RR |
|----------------|---------|---------------|
| 0.015          | 0.00378 | 0.00048       |

# Pr1Ag2Ge2

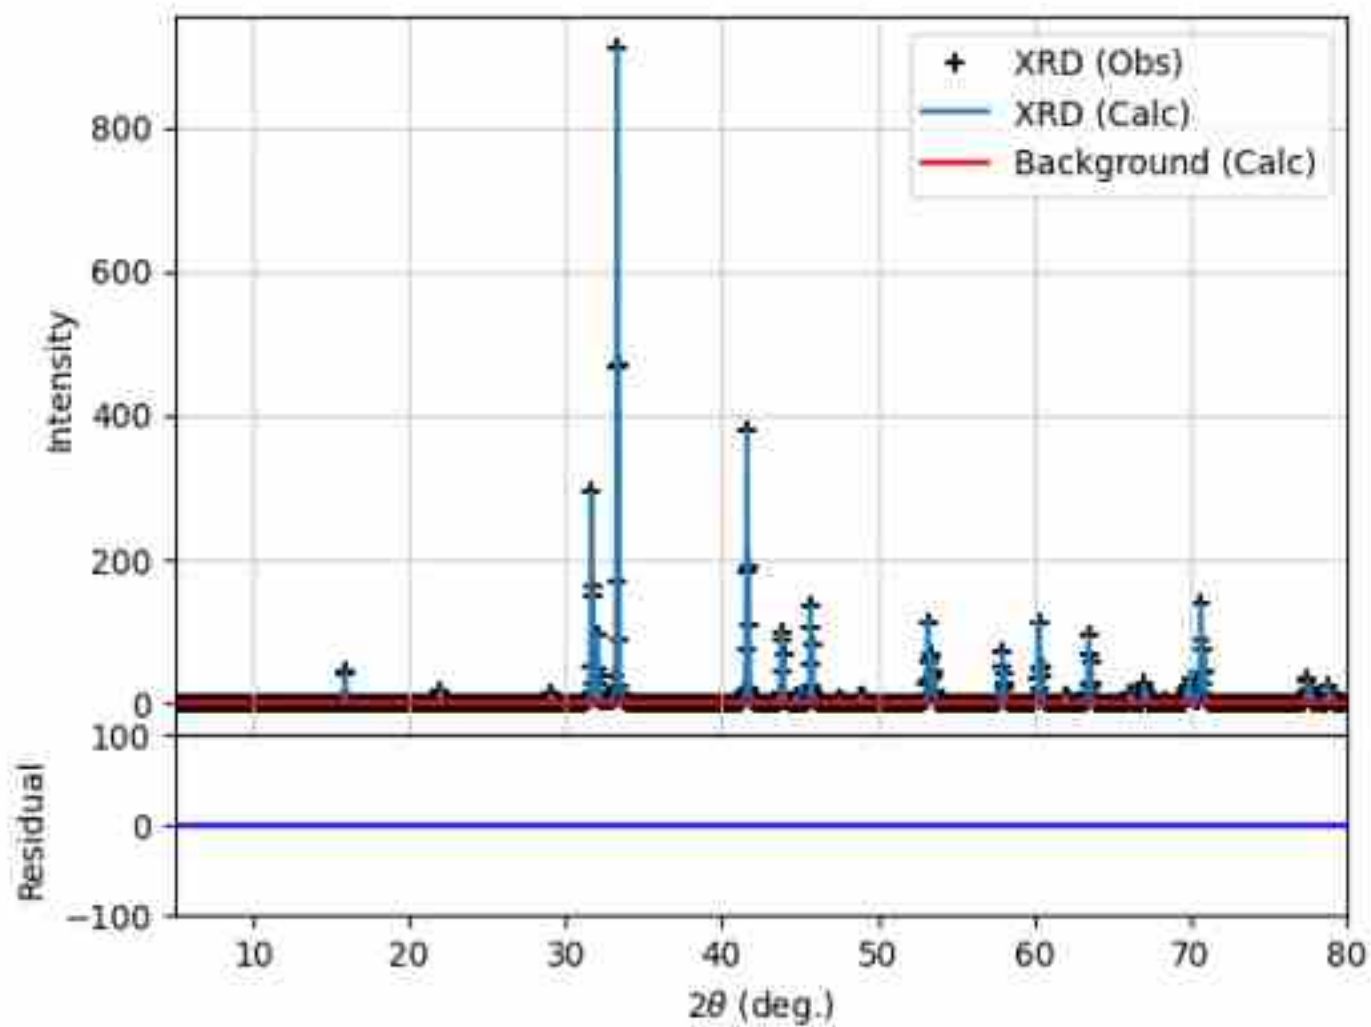

| RMSE before RR | Rwp     | RMSE after RR |
|----------------|---------|---------------|
| 0.015          | 0.00301 | 0.00054       |

# Pr1Er1Co17

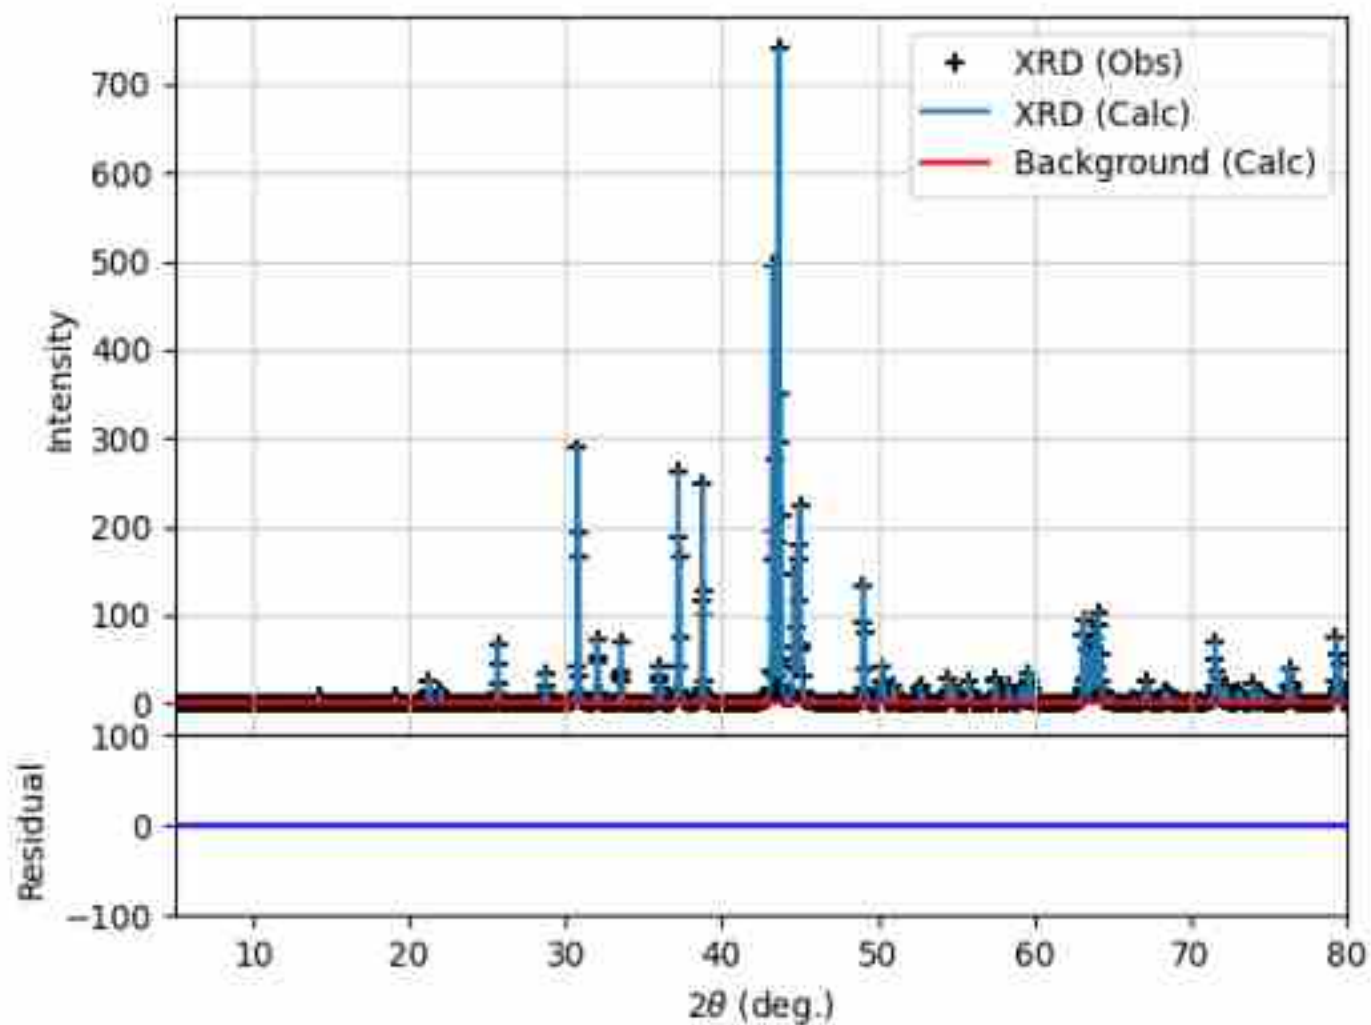

| RMSE before RR | Rwp     | RMSE after RR |
|----------------|---------|---------------|
| 0.015          | 0.00254 | 0.00055       |



# Pr1Mo6S8

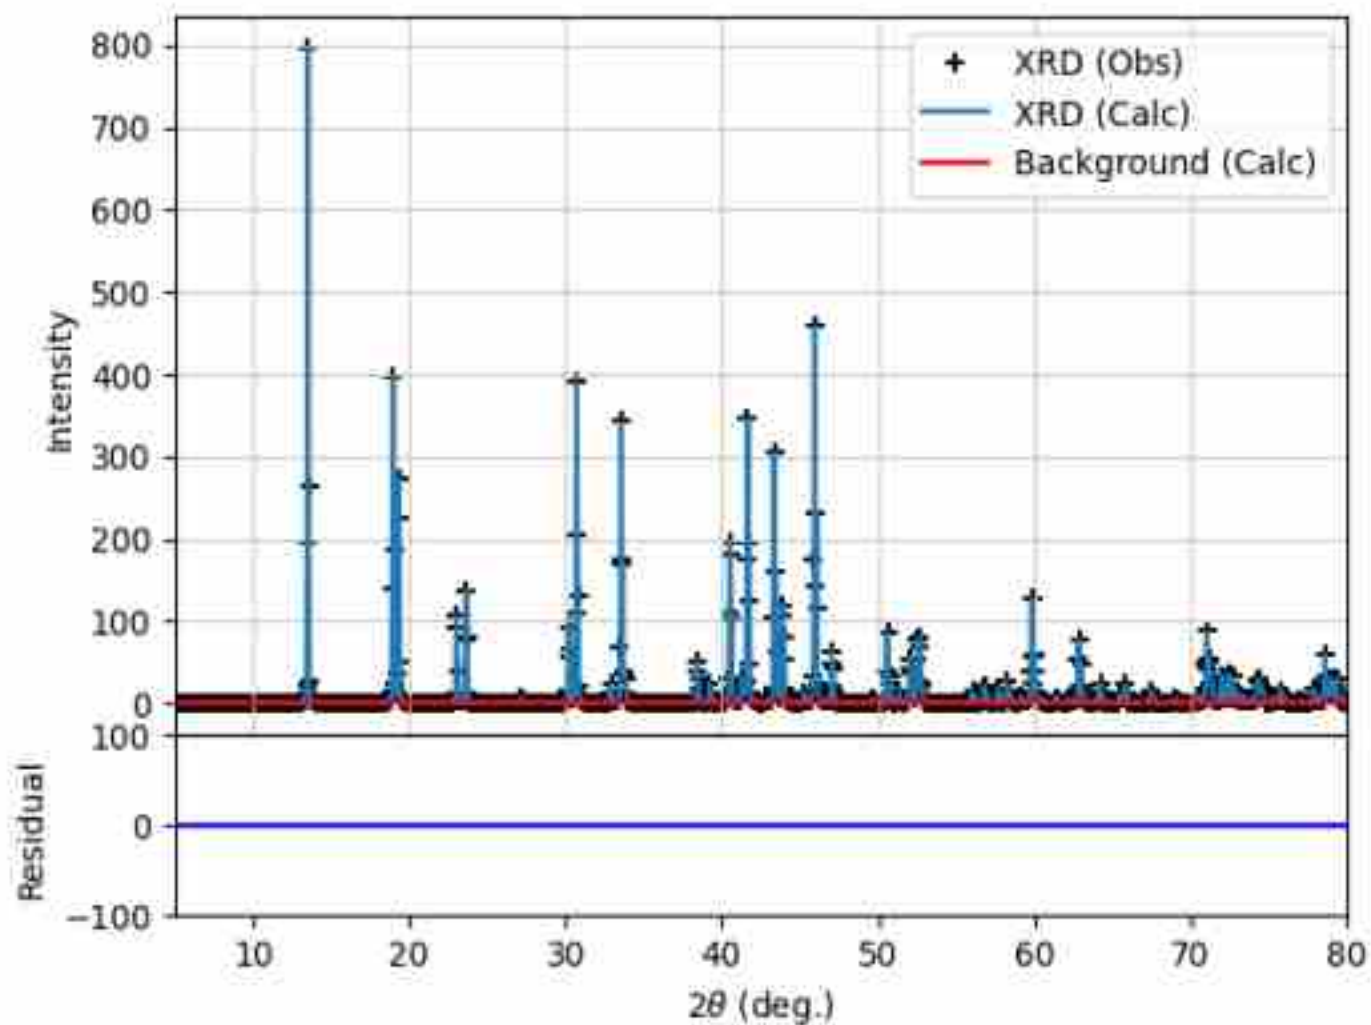

| RMSE before RR | Rwp     | RMSE after RR |
|----------------|---------|---------------|
| 0.015          | 0.00372 | 0.00067       |

# Pr<sub>2</sub>Al<sub>11</sub>Zn<sub>1</sub>

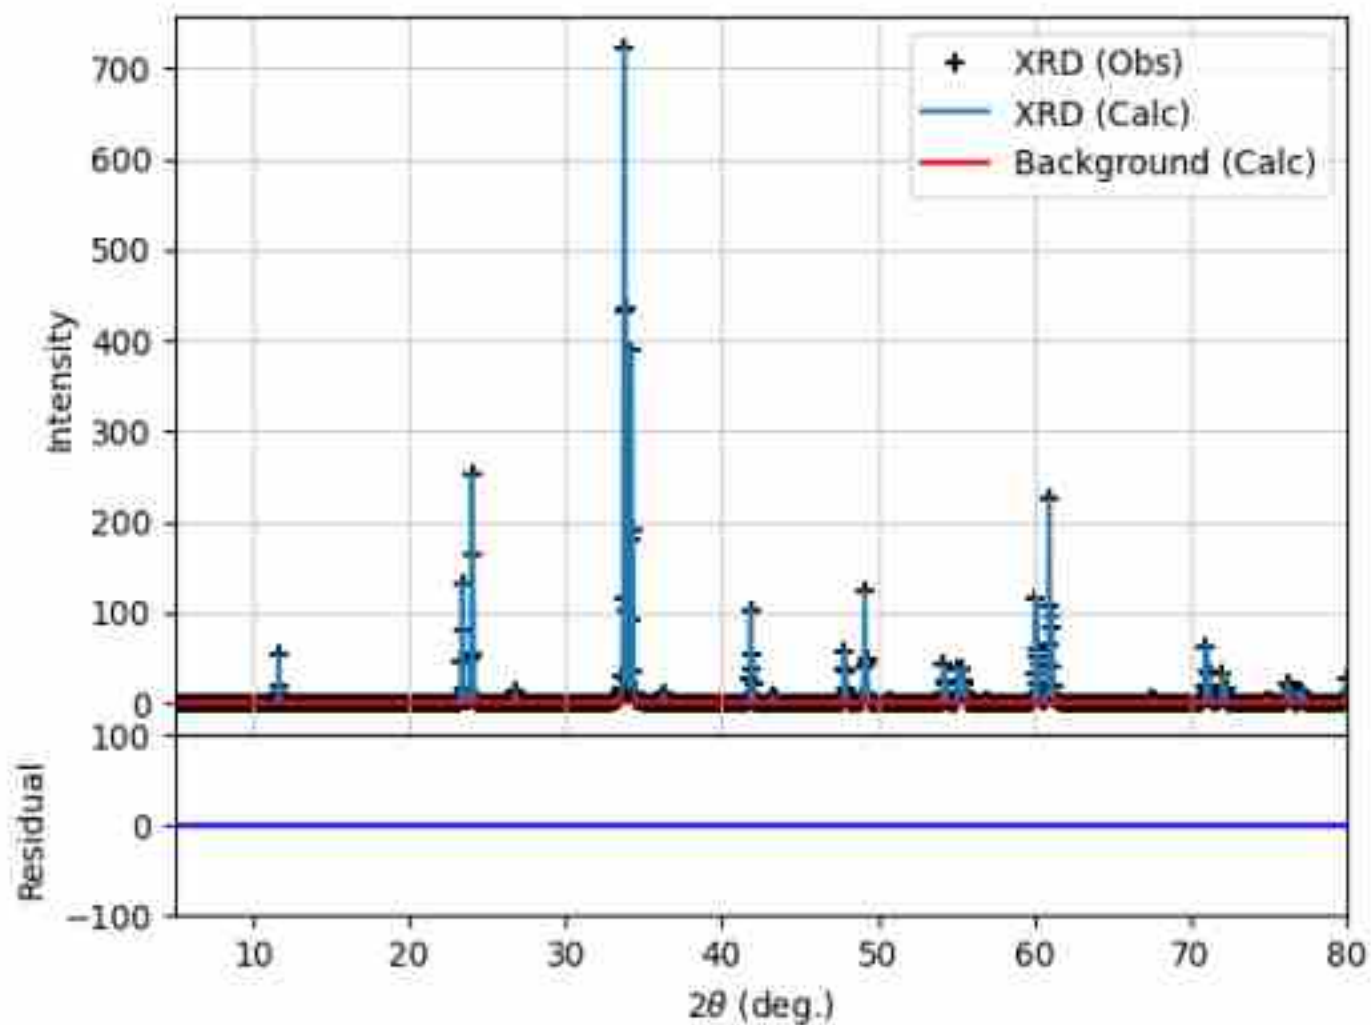

| RMSE before RR | Rwp     | RMSE after RR |
|----------------|---------|---------------|
| 0.015          | 0.01124 | 0.00064       |

# Pr<sub>2</sub>Al<sub>2</sub>O<sub>6</sub>

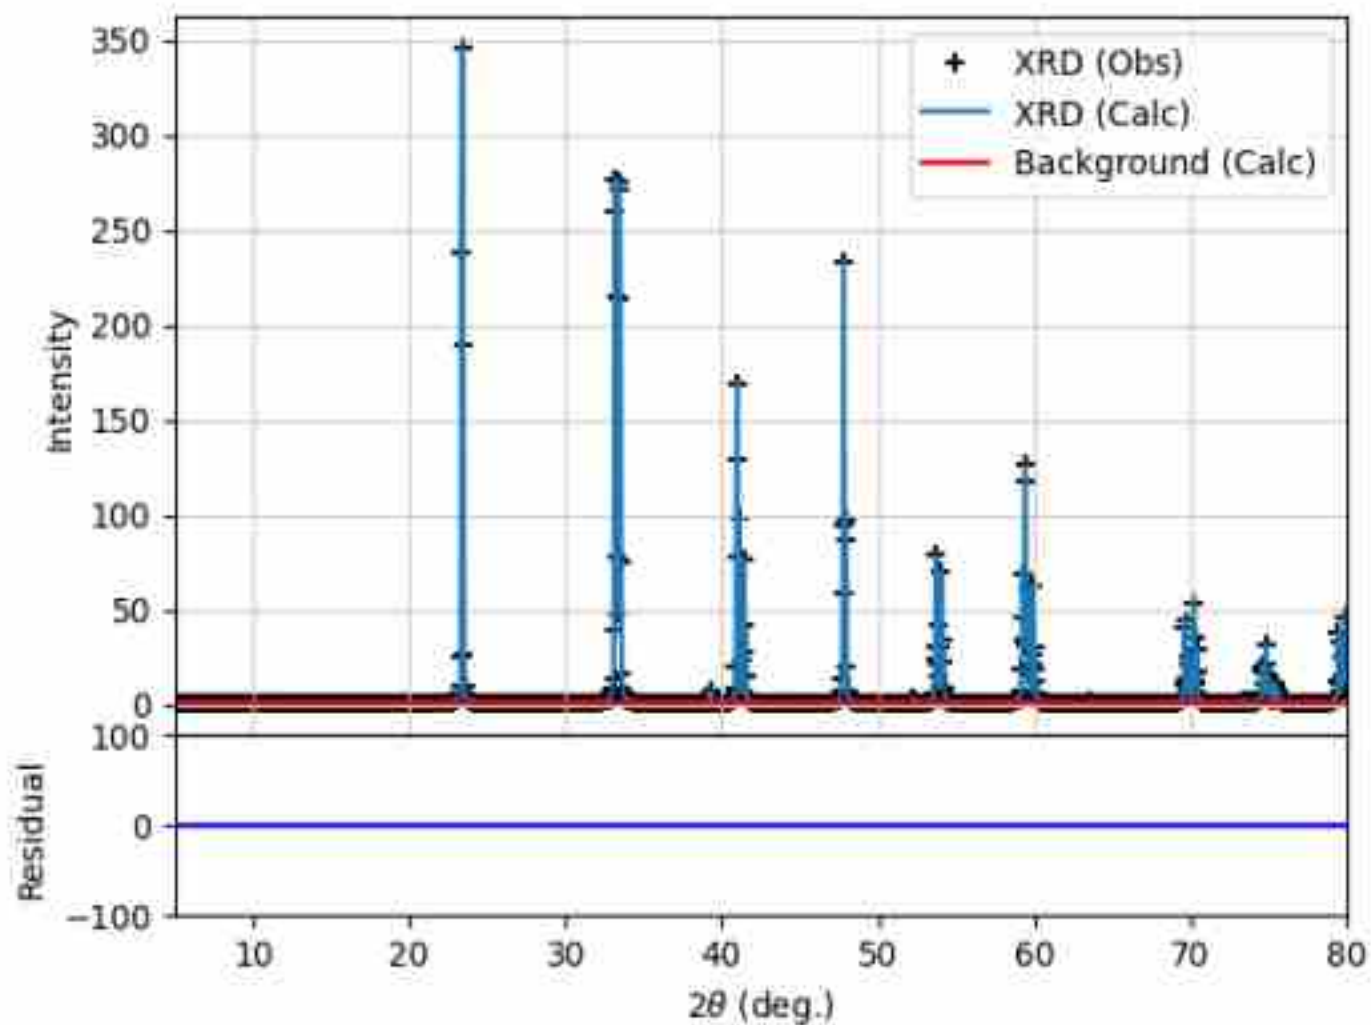

| RMSE before RR | Rwp     | RMSE after RR |
|----------------|---------|---------------|
| 0.015          | 0.00371 | 0.00137       |

# Pr<sub>2</sub>In<sub>4</sub>Rh<sub>2</sub>

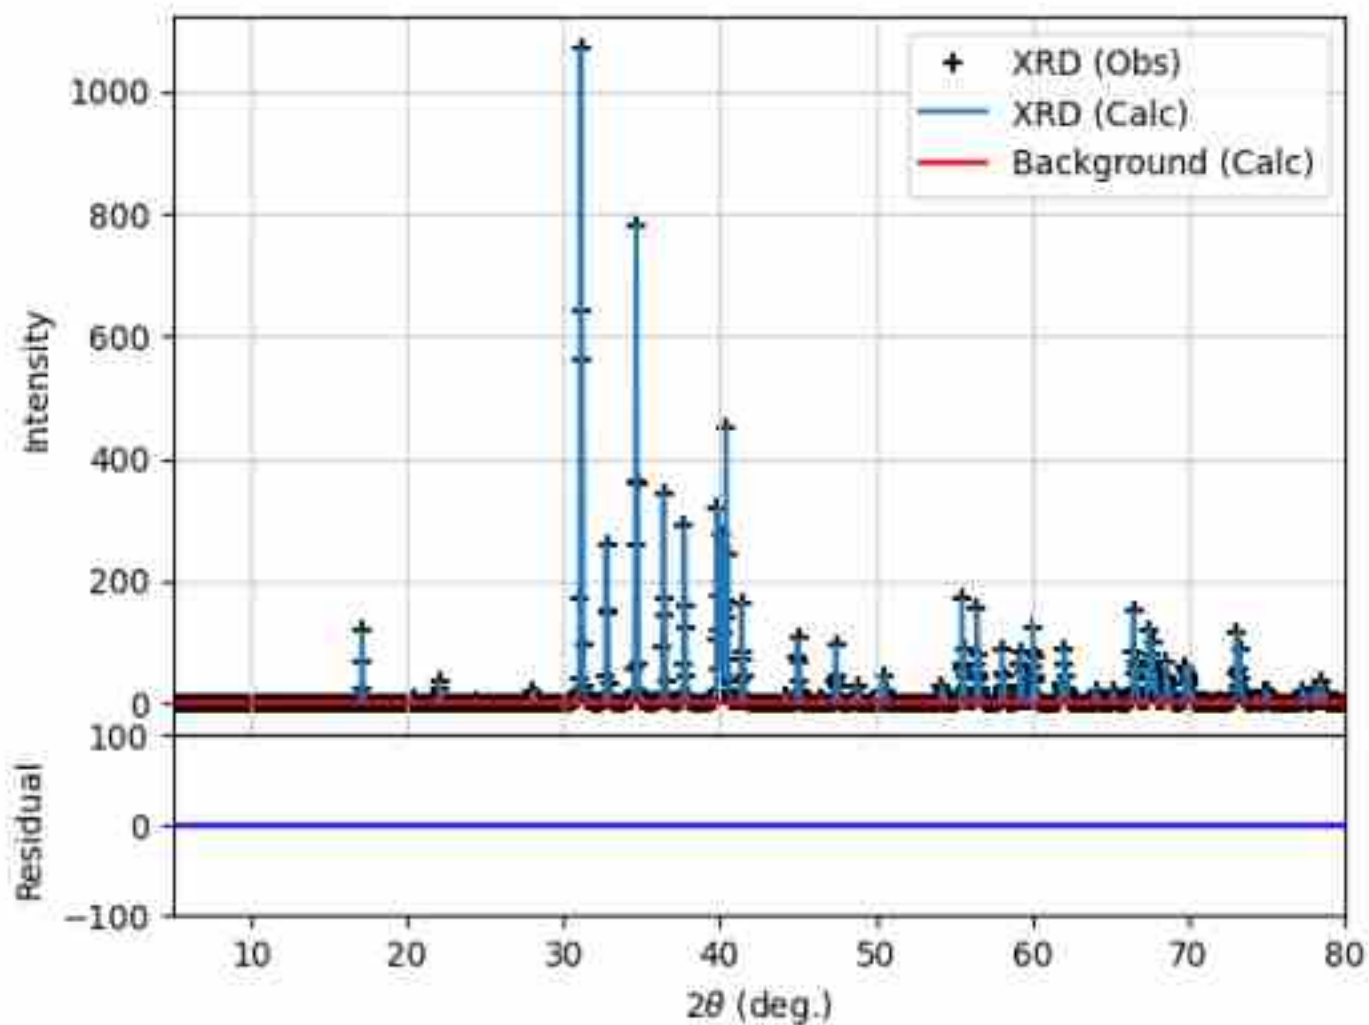

| RMSE before RR | Rwp     | RMSE after RR |
|----------------|---------|---------------|
| 0.015          | 0.00431 | 0.00026       |

# Pr<sub>2</sub>Tl<sub>3</sub>In<sub>3</sub>

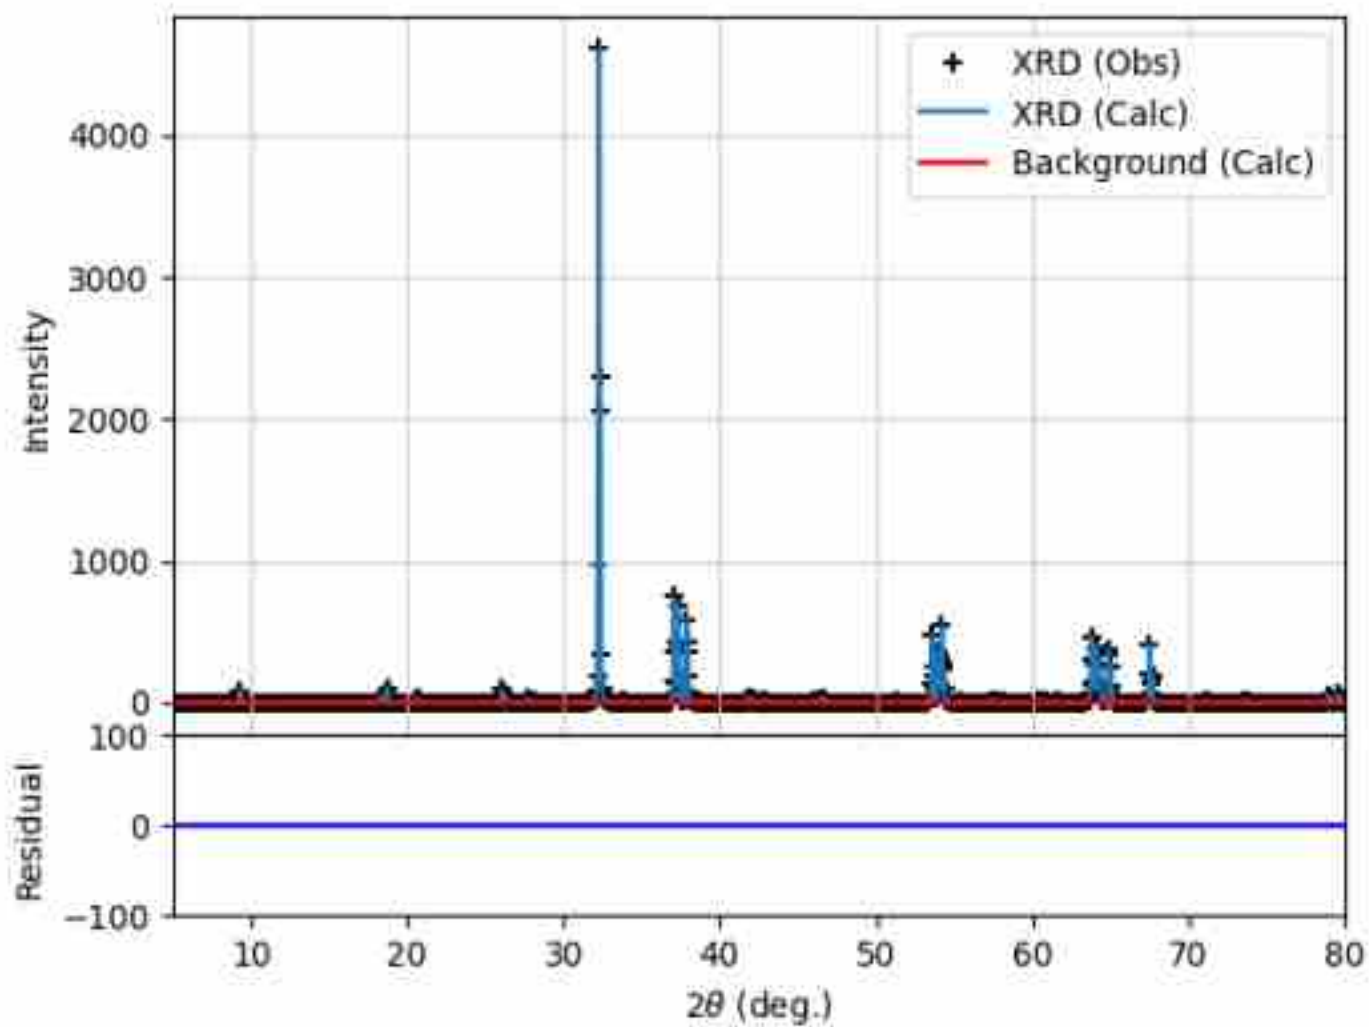

| RMSE before RR | Rwp     | RMSE after RR |
|----------------|---------|---------------|
| 0.015          | 0.00486 | 0.00019       |

# Pr<sub>4</sub>Mg<sub>2</sub>Pd<sub>4</sub>

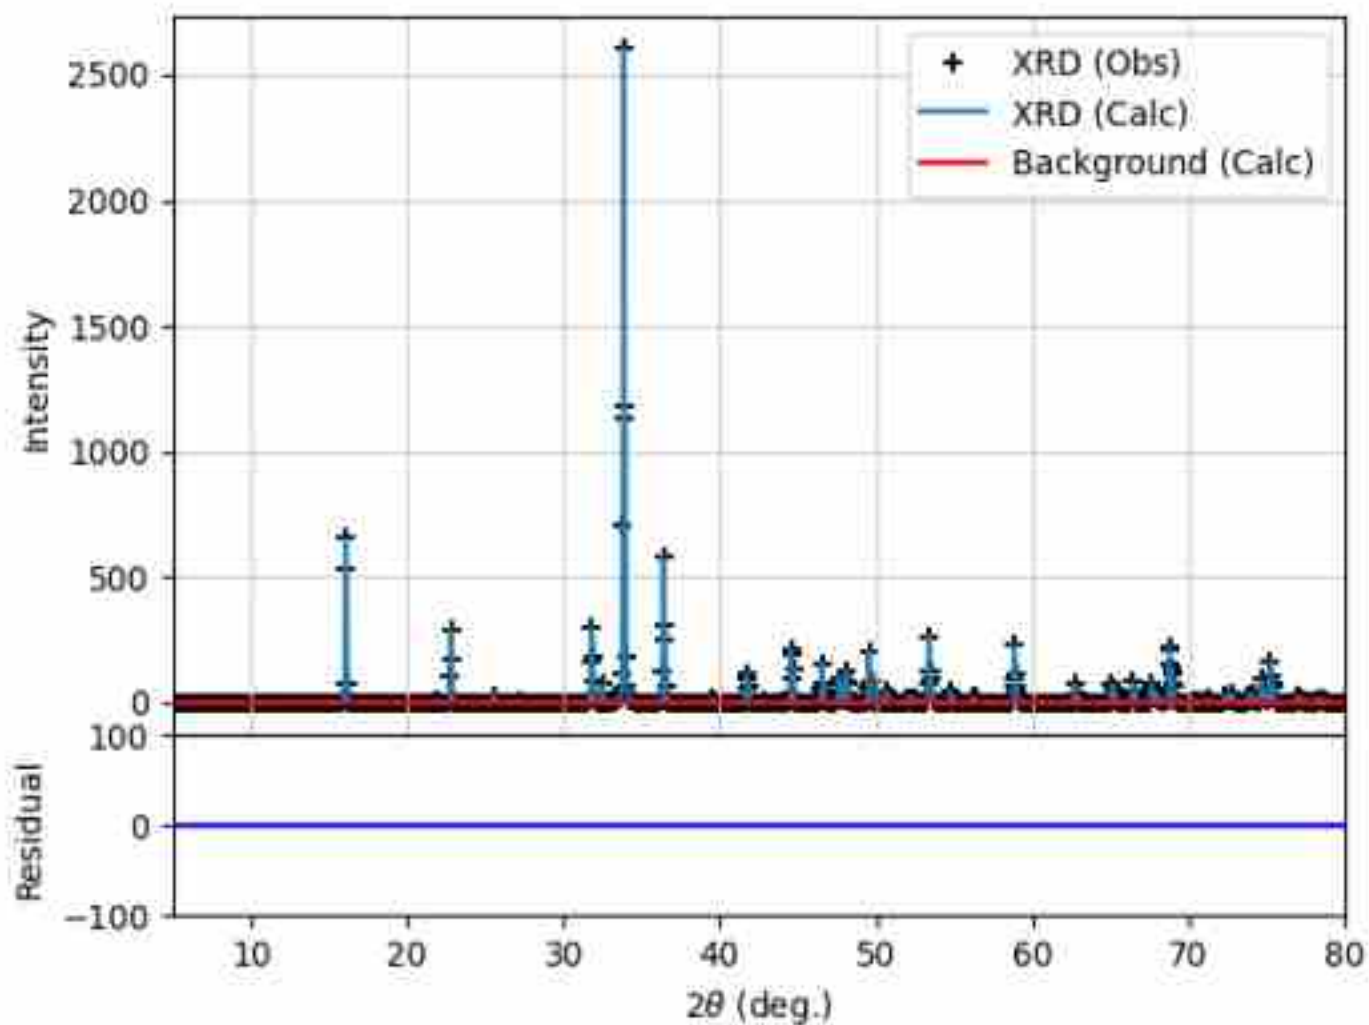

| RMSE before RR | Rwp     | RMSE after RR |
|----------------|---------|---------------|
| 0.015          | 0.00396 | 0.00268       |

# Pr<sub>4</sub>Mn<sub>2</sub>Rh<sub>2</sub>O<sub>12</sub>

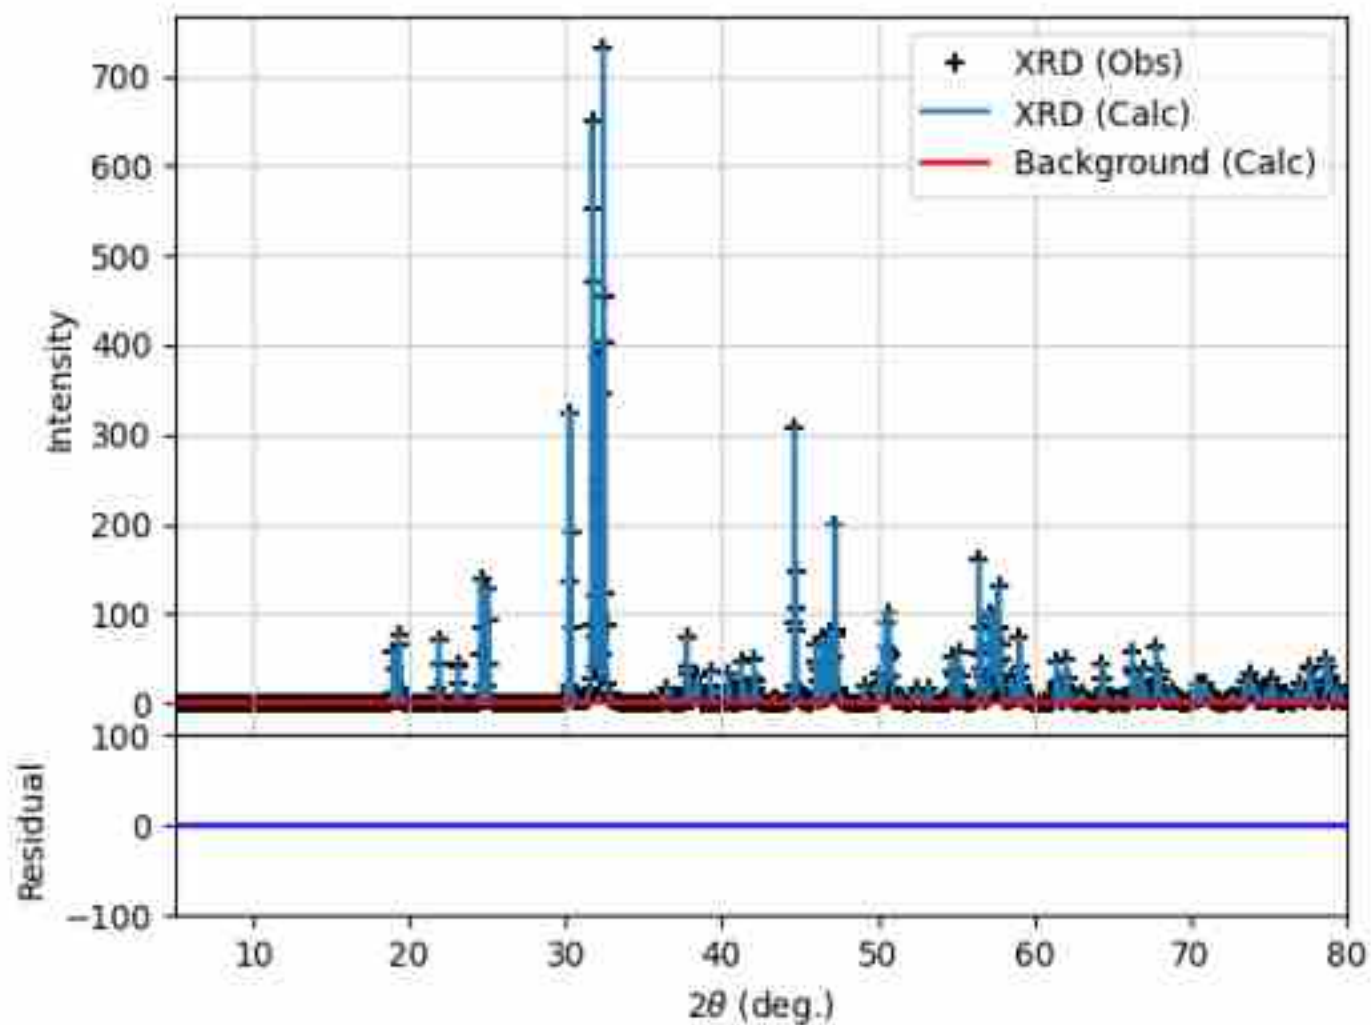

| RMSE before RR | Rwp     | RMSE after RR |
|----------------|---------|---------------|
| 0.015          | 0.00376 | 0.00104       |

# Pu<sub>2</sub>Zn<sub>17</sub>

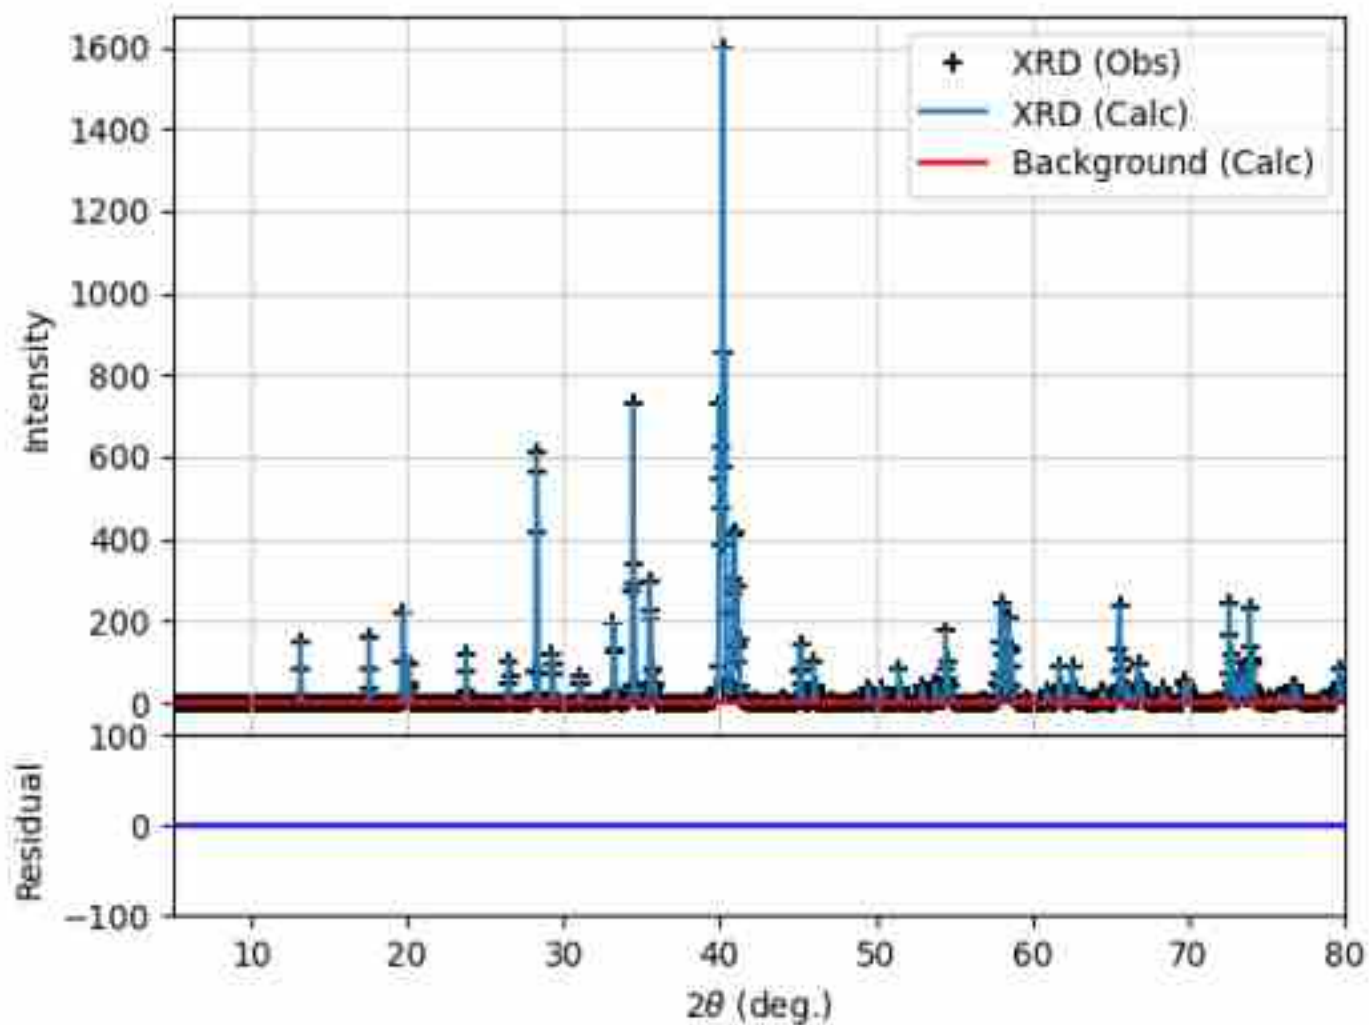

| RMSE before RR | Rwp     | RMSE after RR |
|----------------|---------|---------------|
| 0.015          | 0.00309 | 0.00051       |



# Rb1Lu1W2O8

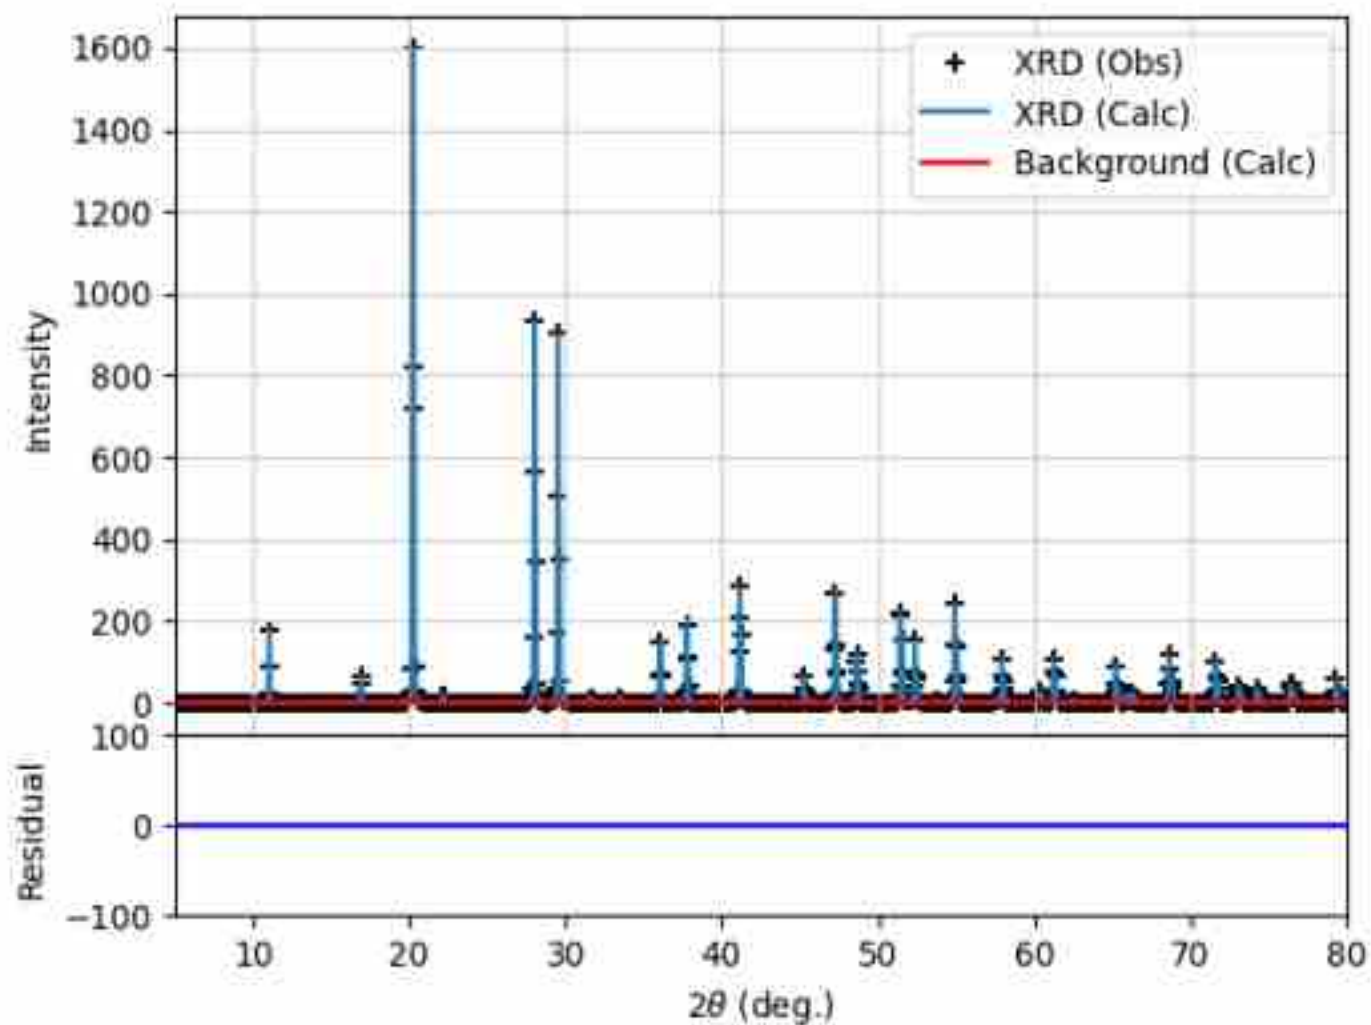

| RMSE before RR | Rwp     | RMSE after RR |
|----------------|---------|---------------|
| 0.015          | 0.00332 | 0.00153       |

# Rb<sub>2</sub>Ag<sub>1</sub>Au<sub>1</sub>F<sub>6</sub>

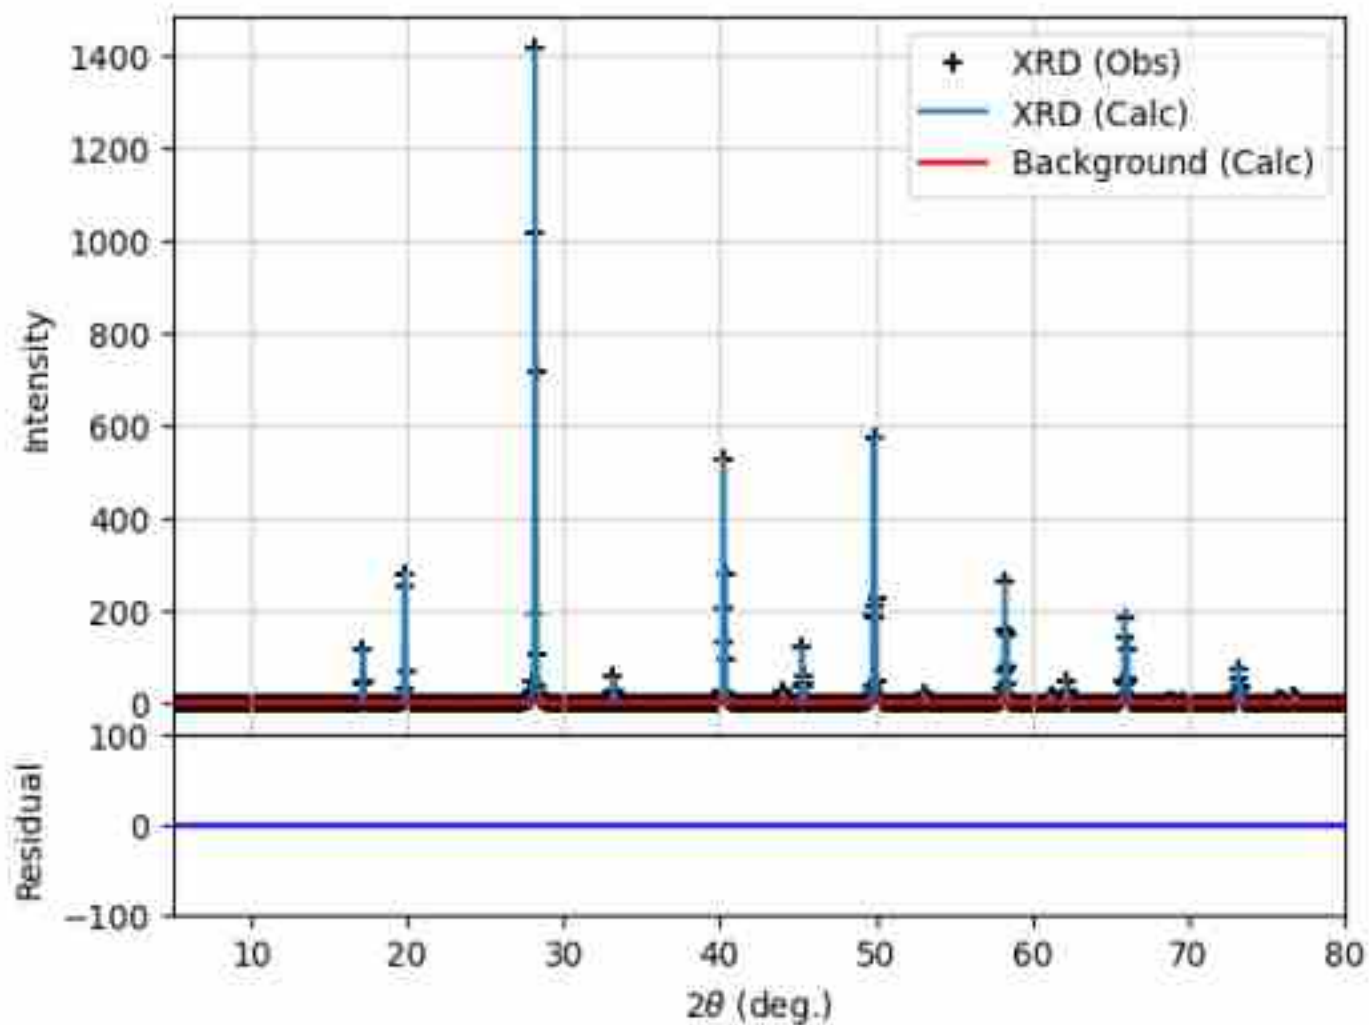

| RMSE before RR | Rwp     | RMSE after RR |
|----------------|---------|---------------|
| 0.015          | 0.01158 | 0.00345       |

# Rb<sub>2</sub>Ge<sub>1</sub>F<sub>6</sub>

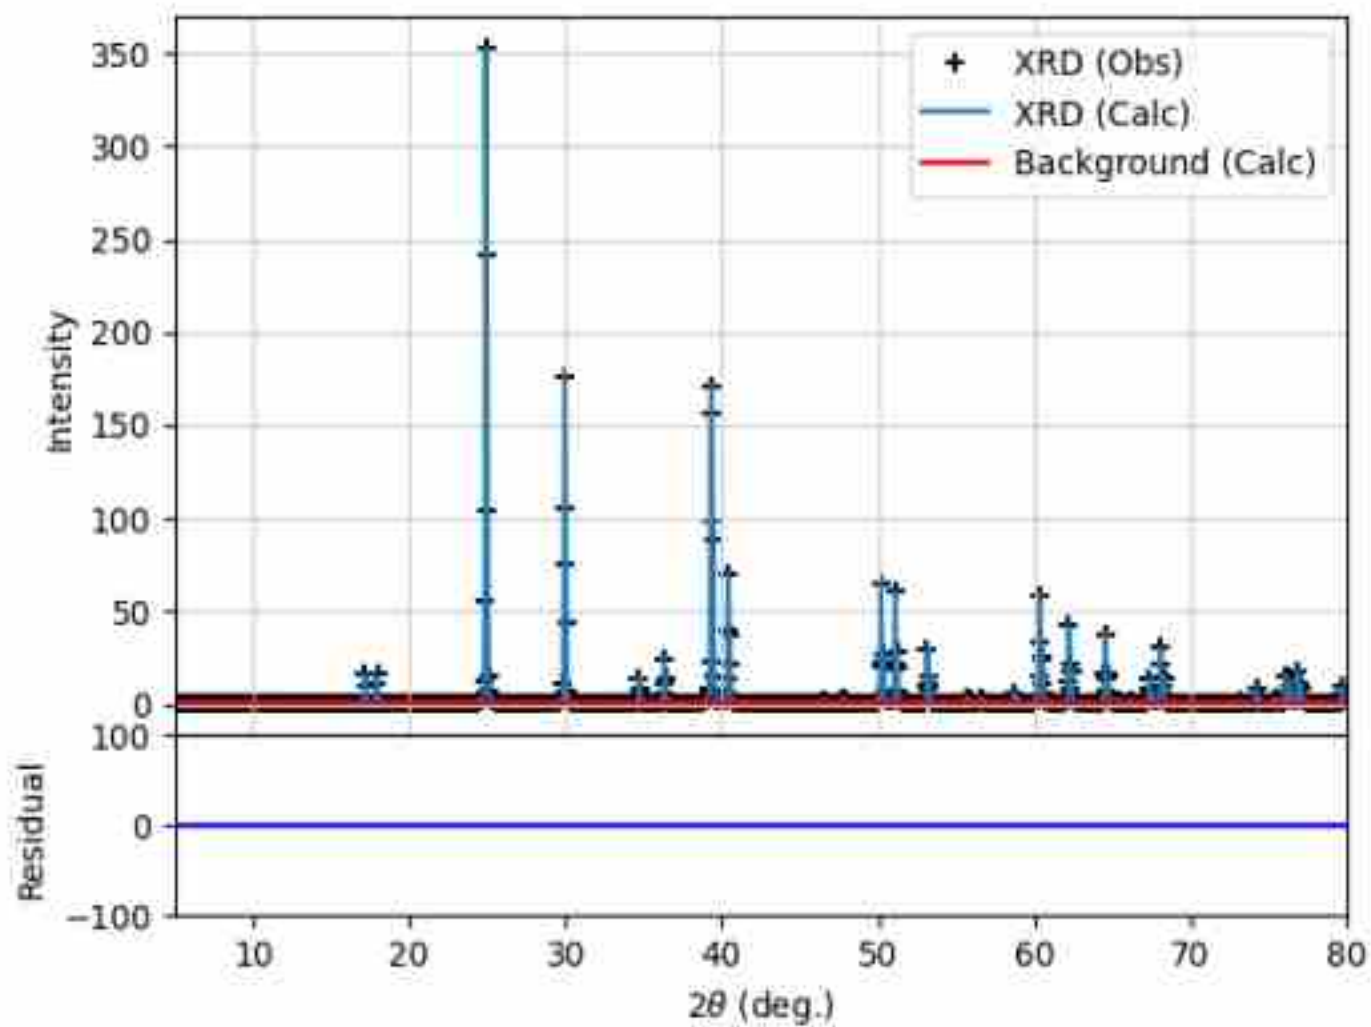

| RMSE before RR | Rwp     | RMSE after RR |
|----------------|---------|---------------|
| 0.015          | 0.00314 | 0.0017        |

# Rb<sub>2</sub>In<sub>1</sub>Cu<sub>1</sub>F<sub>6</sub>

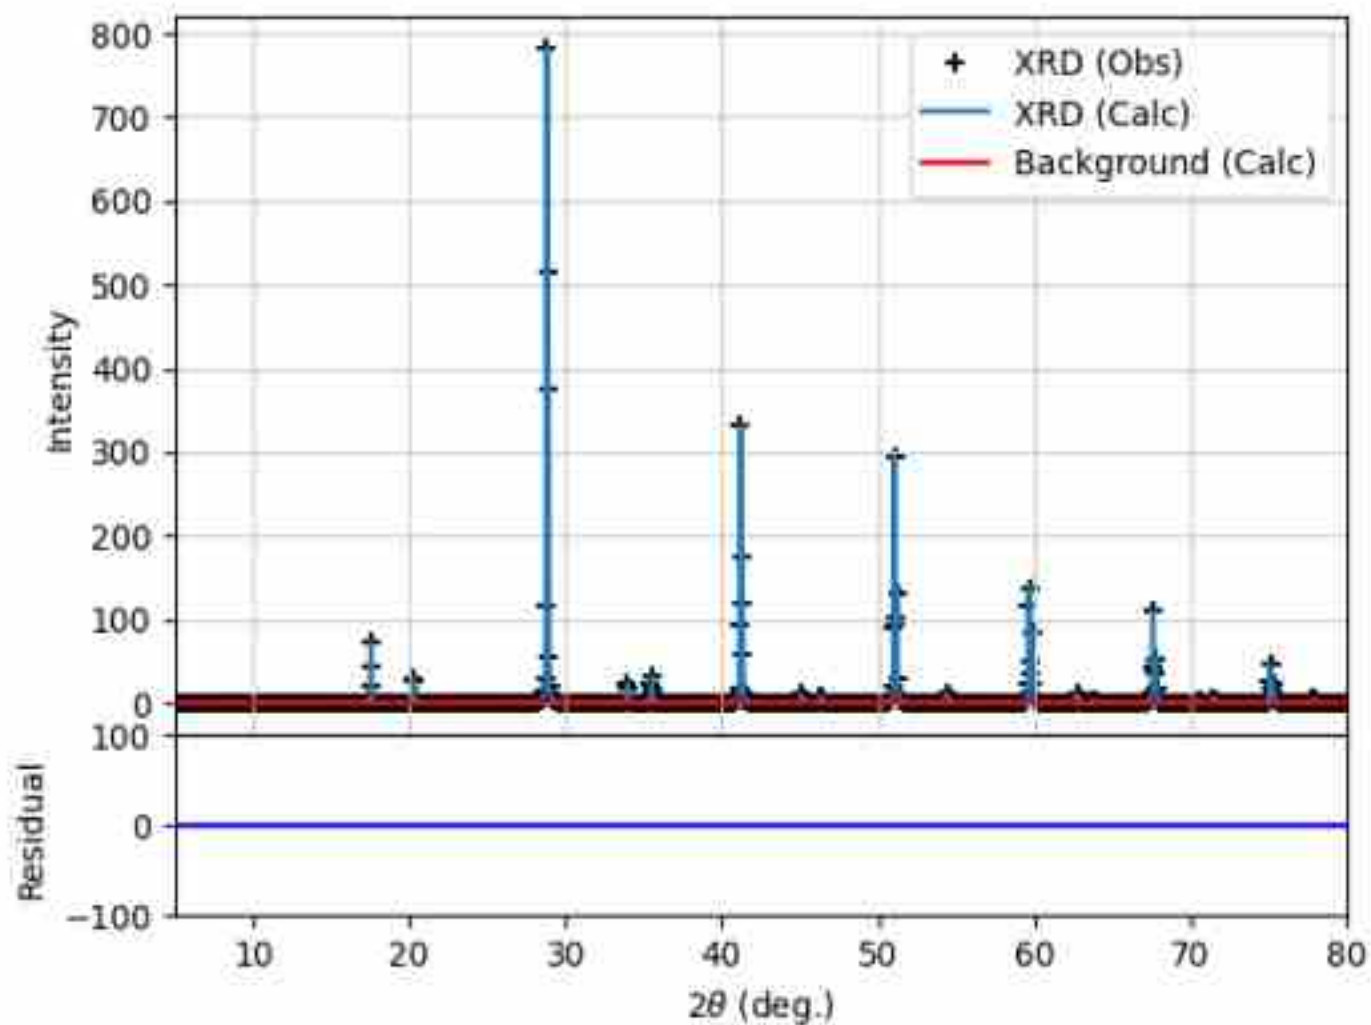

| RMSE before RR | Rwp     | RMSE after RR |
|----------------|---------|---------------|
| 0.015          | 0.00581 | 0.0022        |

# Rb<sub>2</sub>Mn<sub>1</sub>Cu<sub>1</sub>F<sub>6</sub>

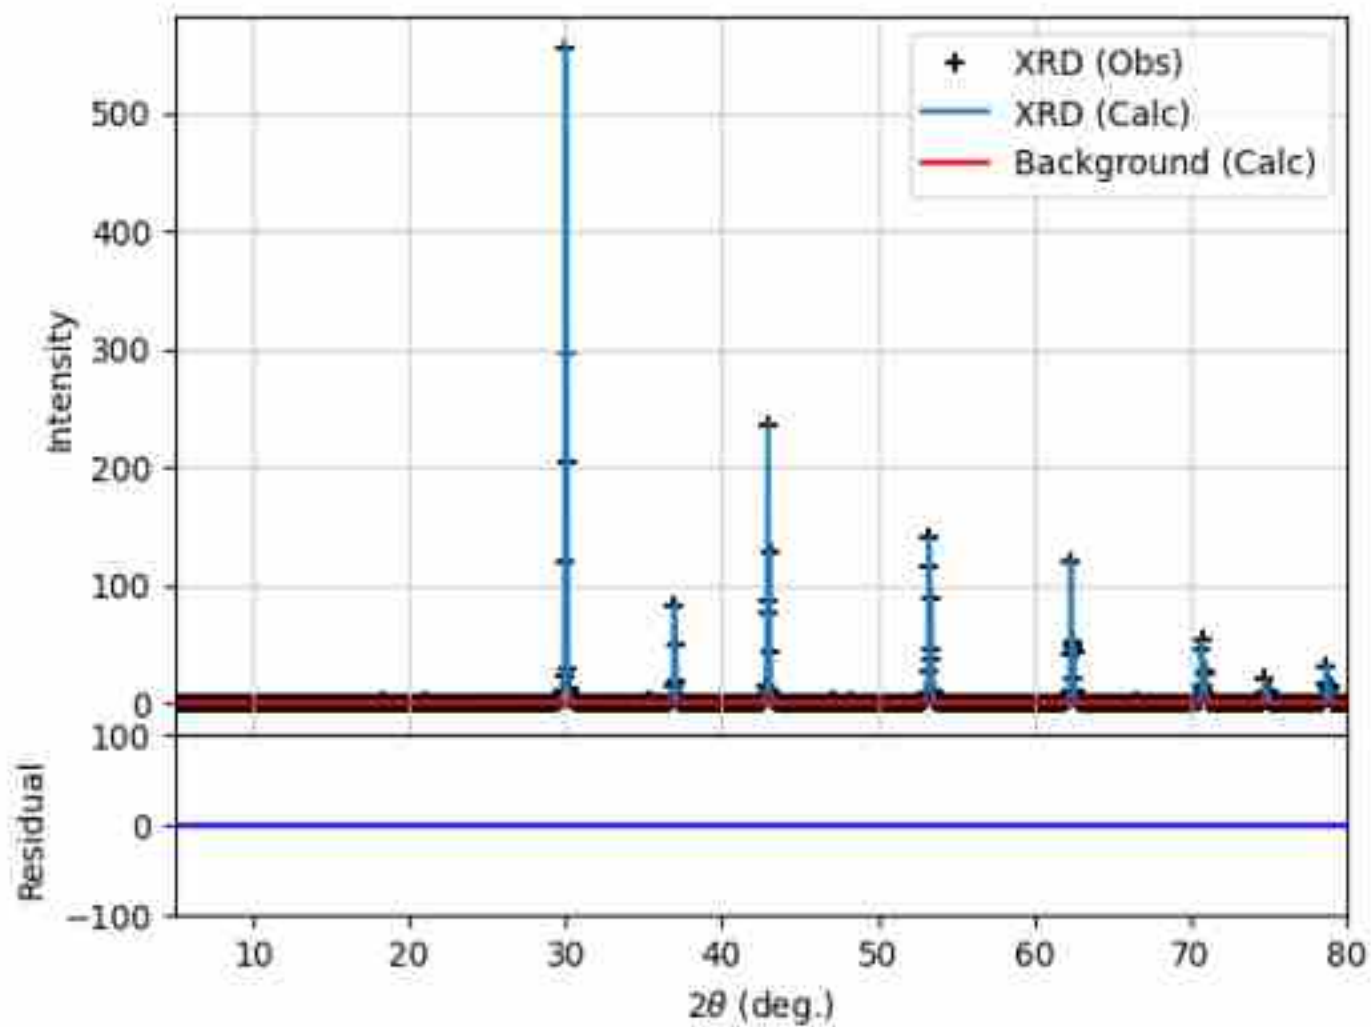

| RMSE before RR | Rwp    | RMSE after RR |
|----------------|--------|---------------|
| 0.015          | 0.0328 | 0.00219       |

# Rb<sub>2</sub>Mn<sub>2</sub>P<sub>2</sub>

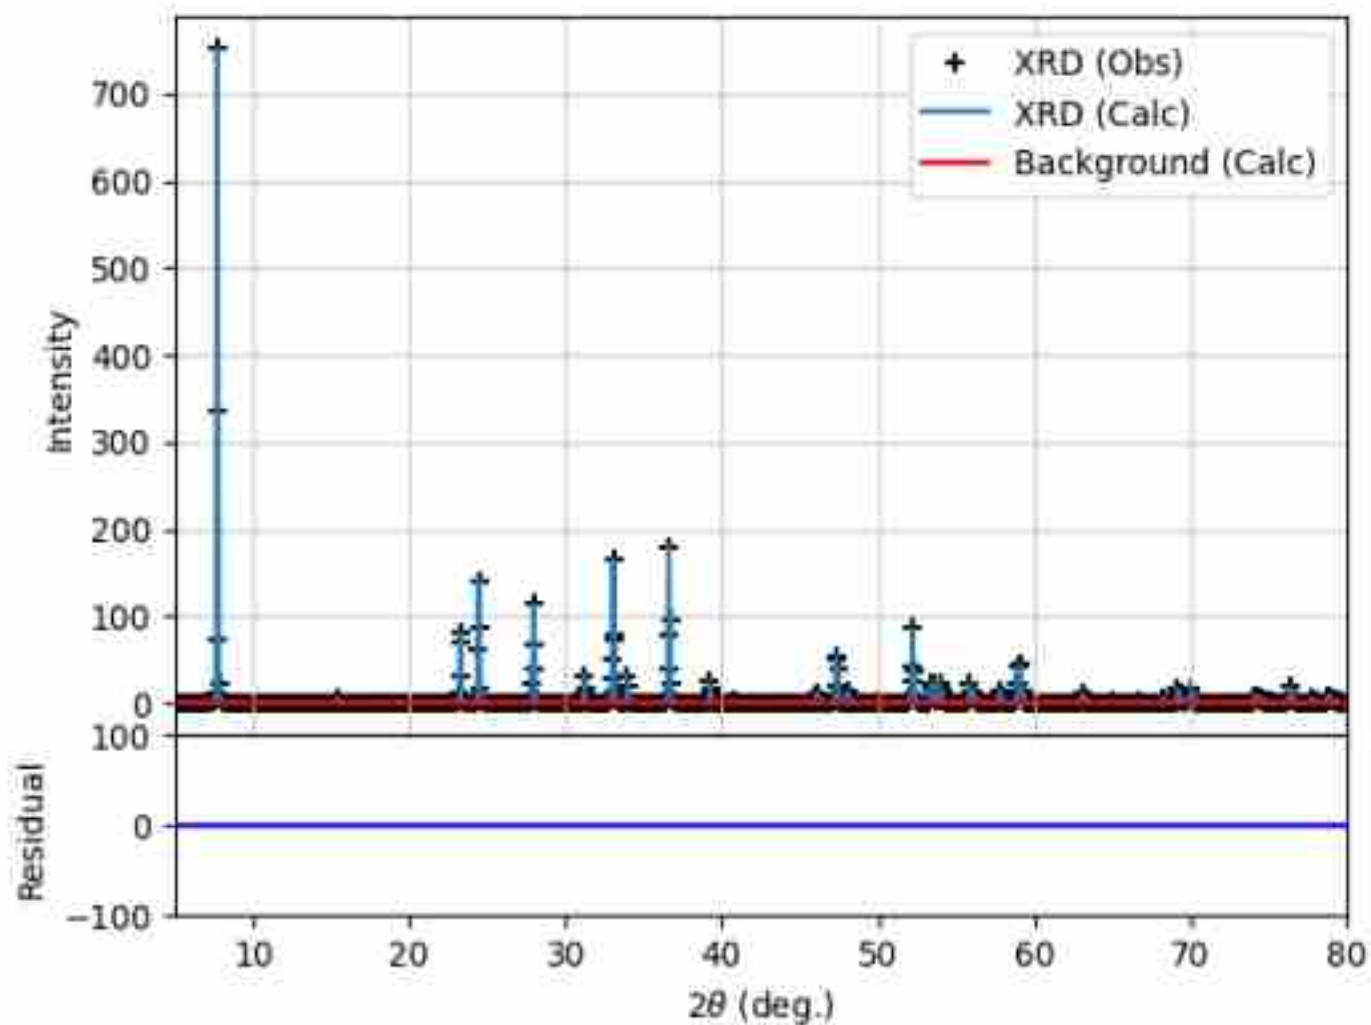

| RMSE before RR | Rwp     | RMSE after RR |
|----------------|---------|---------------|
| 0.015          | 0.00298 | 0.00036       |

# Rb<sub>2</sub>PtCl<sub>6</sub>

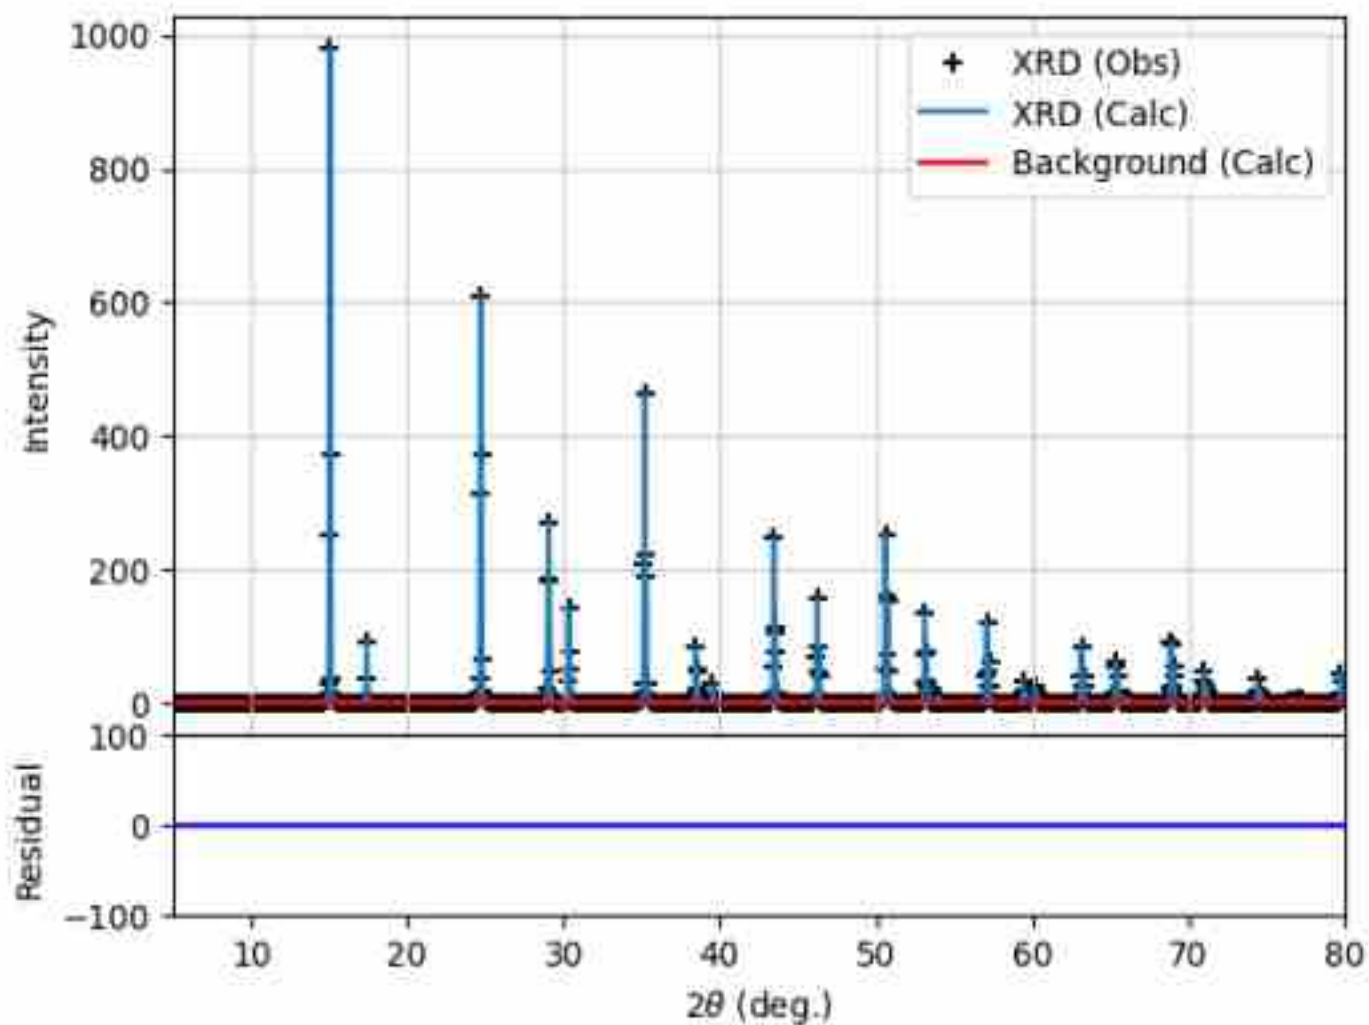

| RMSE before RR | Rwp     | RMSE after RR |
|----------------|---------|---------------|
| 0.015          | 0.07487 | 0.00649       |

# Rb<sub>2</sub>Y<sub>1</sub>Tl<sub>11</sub>I<sub>6</sub>

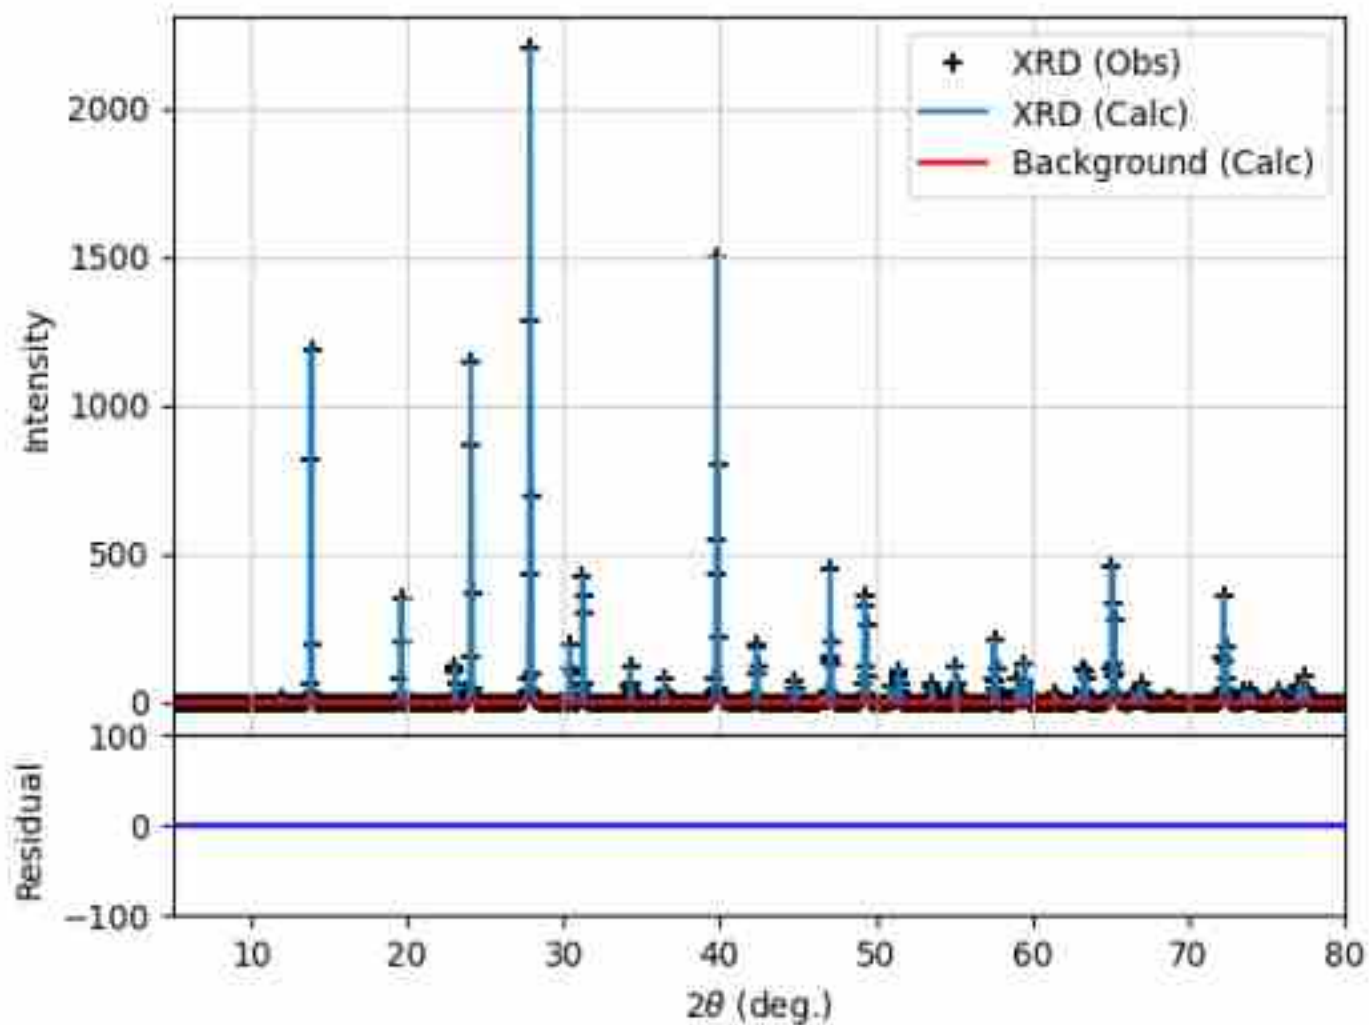

| RMSE before RR | Rwp     | RMSE after RR |
|----------------|---------|---------------|
| 0.015          | 0.02974 | 0.00203       |



# Rb<sub>2</sub>Y<sub>2</sub>Te<sub>4</sub>

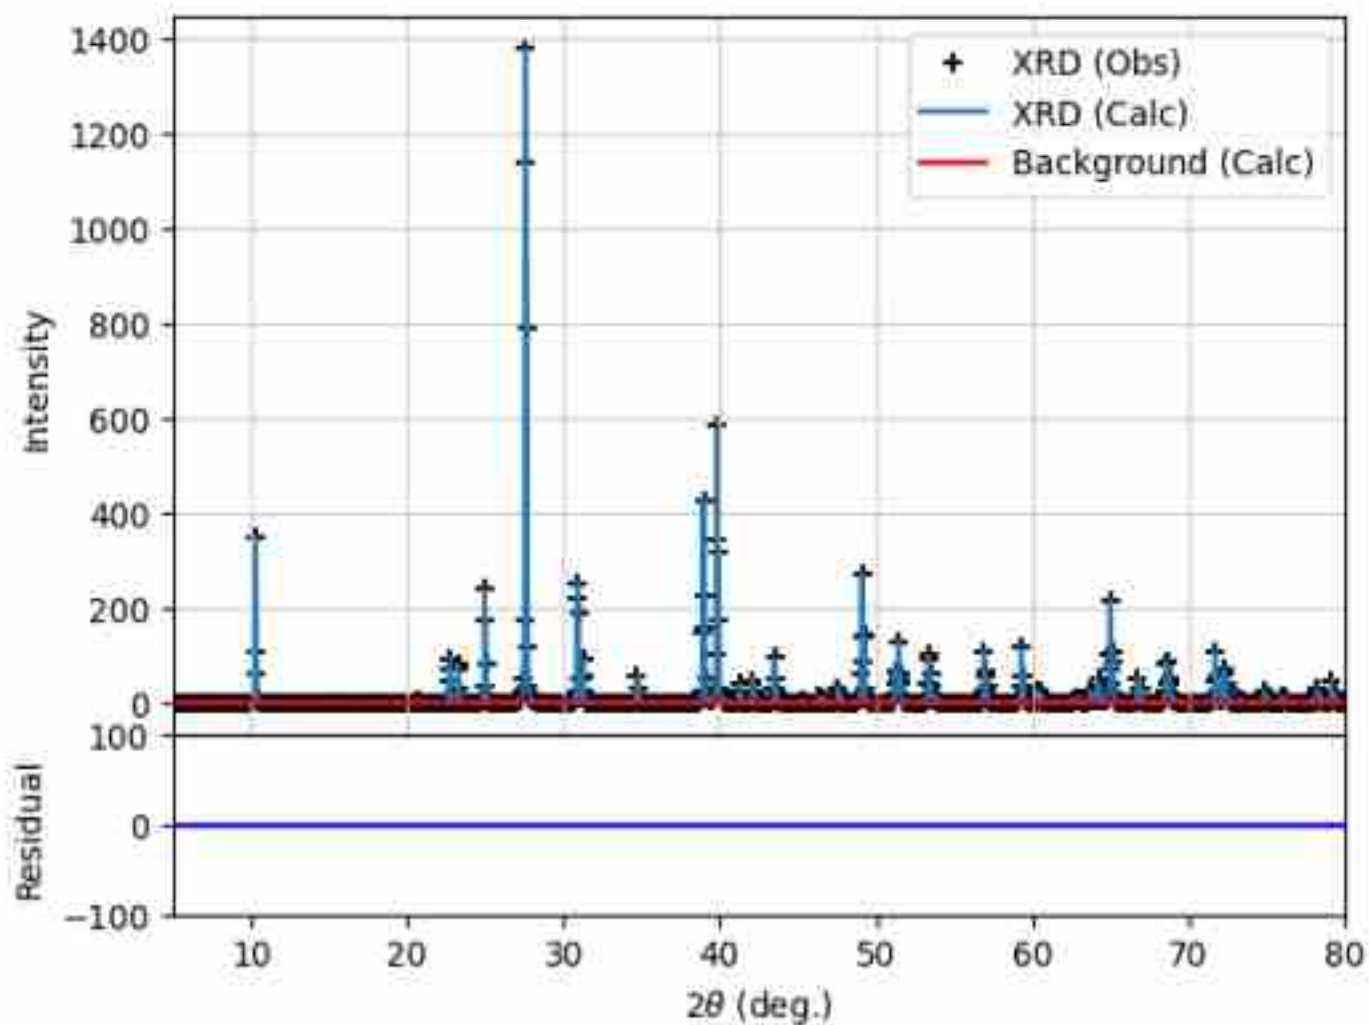

| RMSE before RR | Rwp     | RMSE after RR |
|----------------|---------|---------------|
| 0.015          | 0.00344 | 0.0006        |

# Re1Mo3

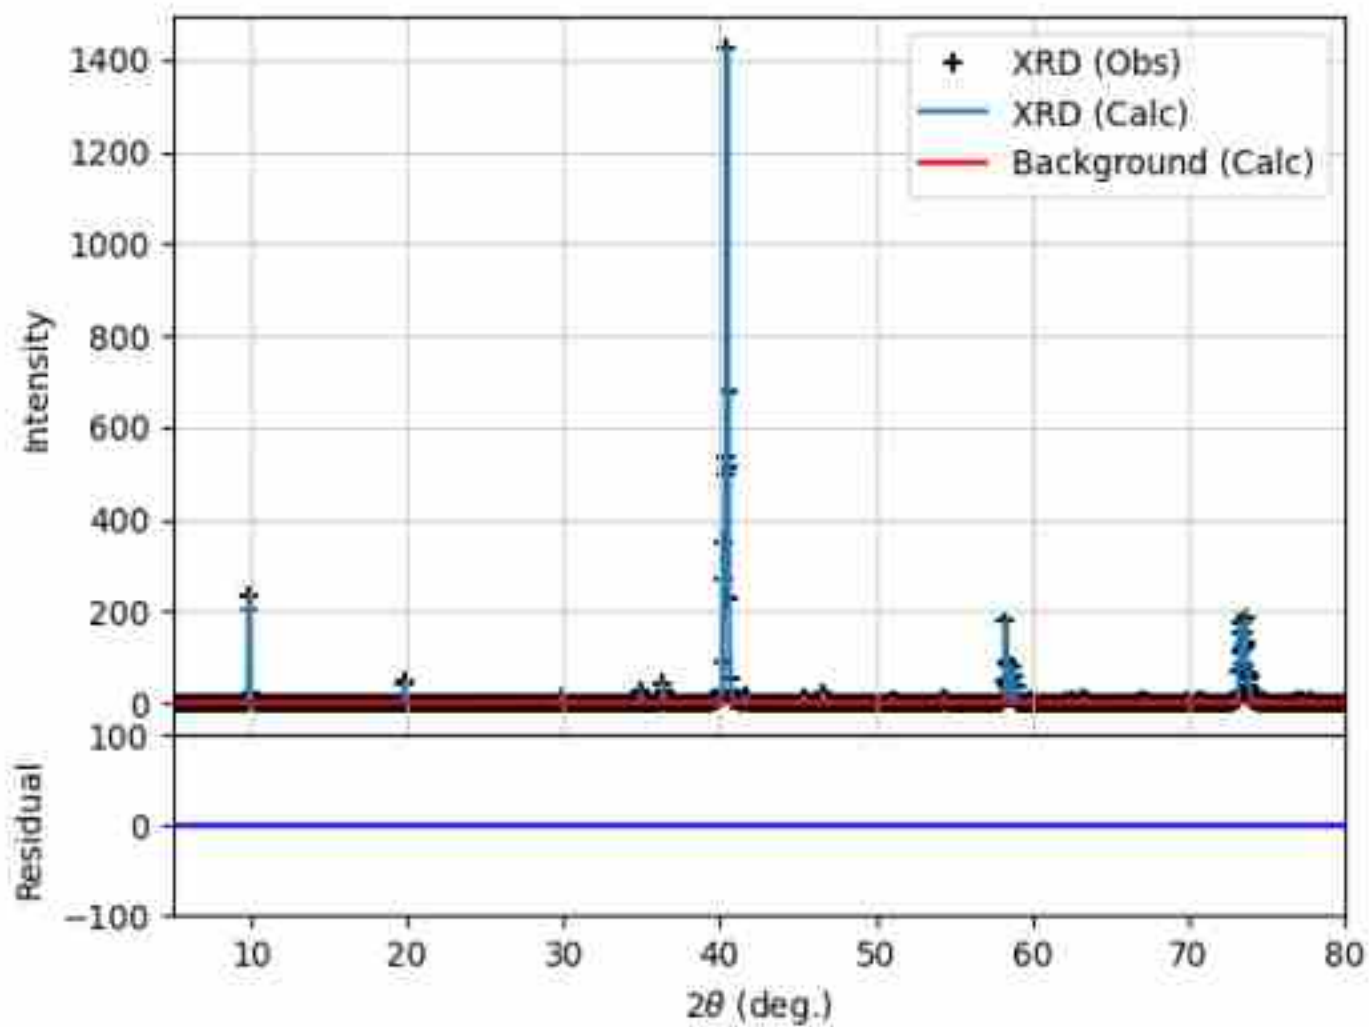

| RMSE before RR | Rwp     | RMSE after RR |
|----------------|---------|---------------|
| 0.015          | 0.00376 | 0.00023       |

# Sc1In1Cu4

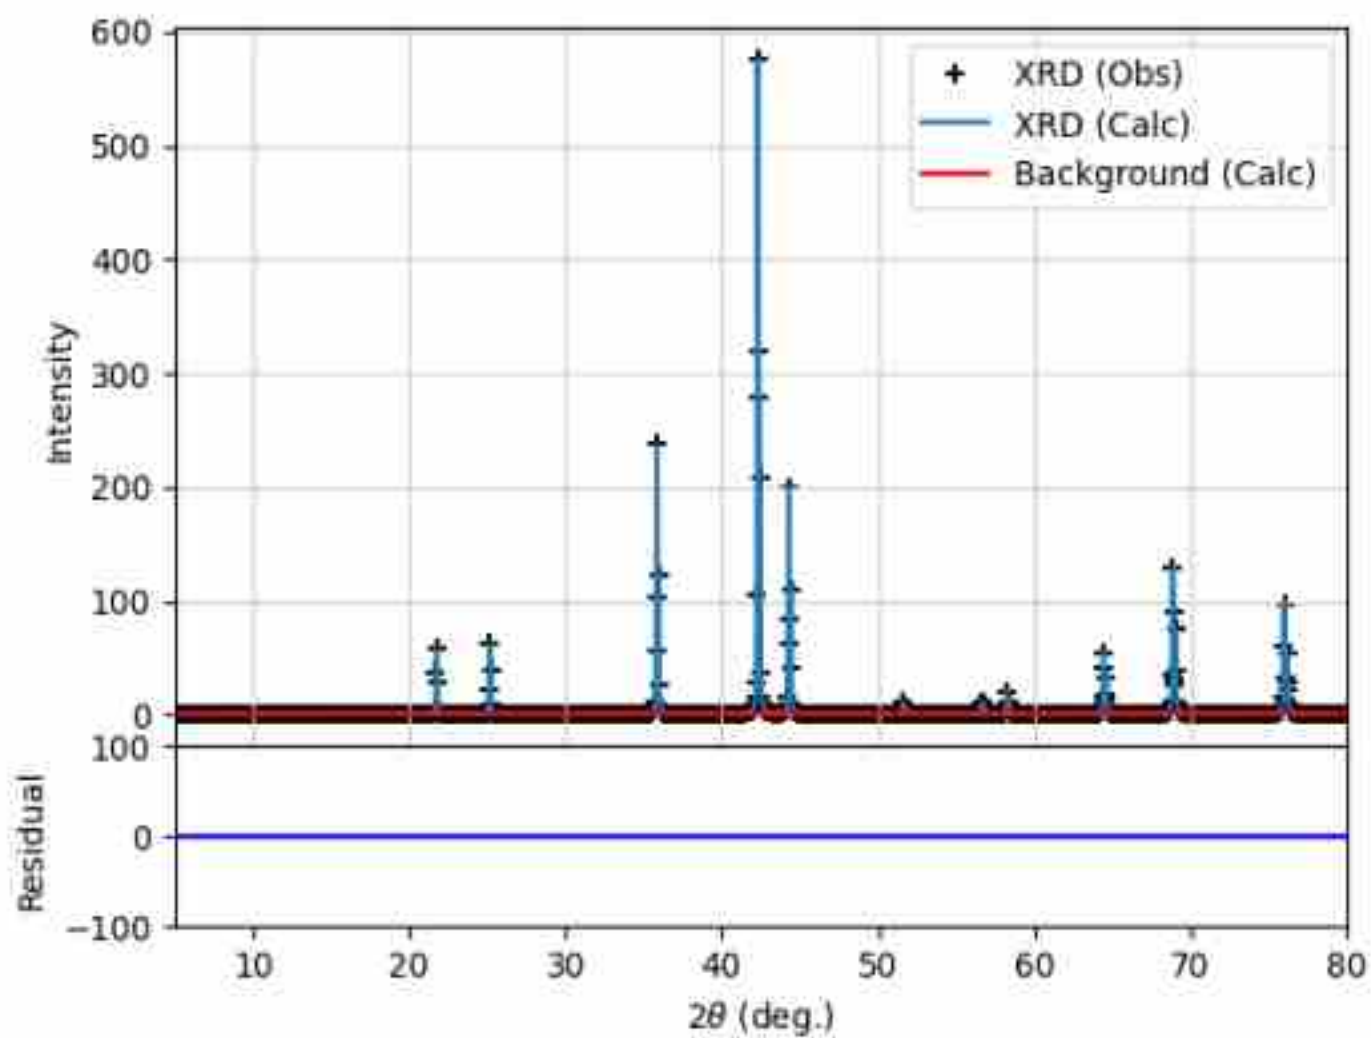

| RMSE before RR | Rwp     | RMSE after RR |
|----------------|---------|---------------|
| 0.015          | 0.02984 | 0.00304       |

# Sc<sub>3</sub>Cu<sub>4</sub>Ge<sub>4</sub>

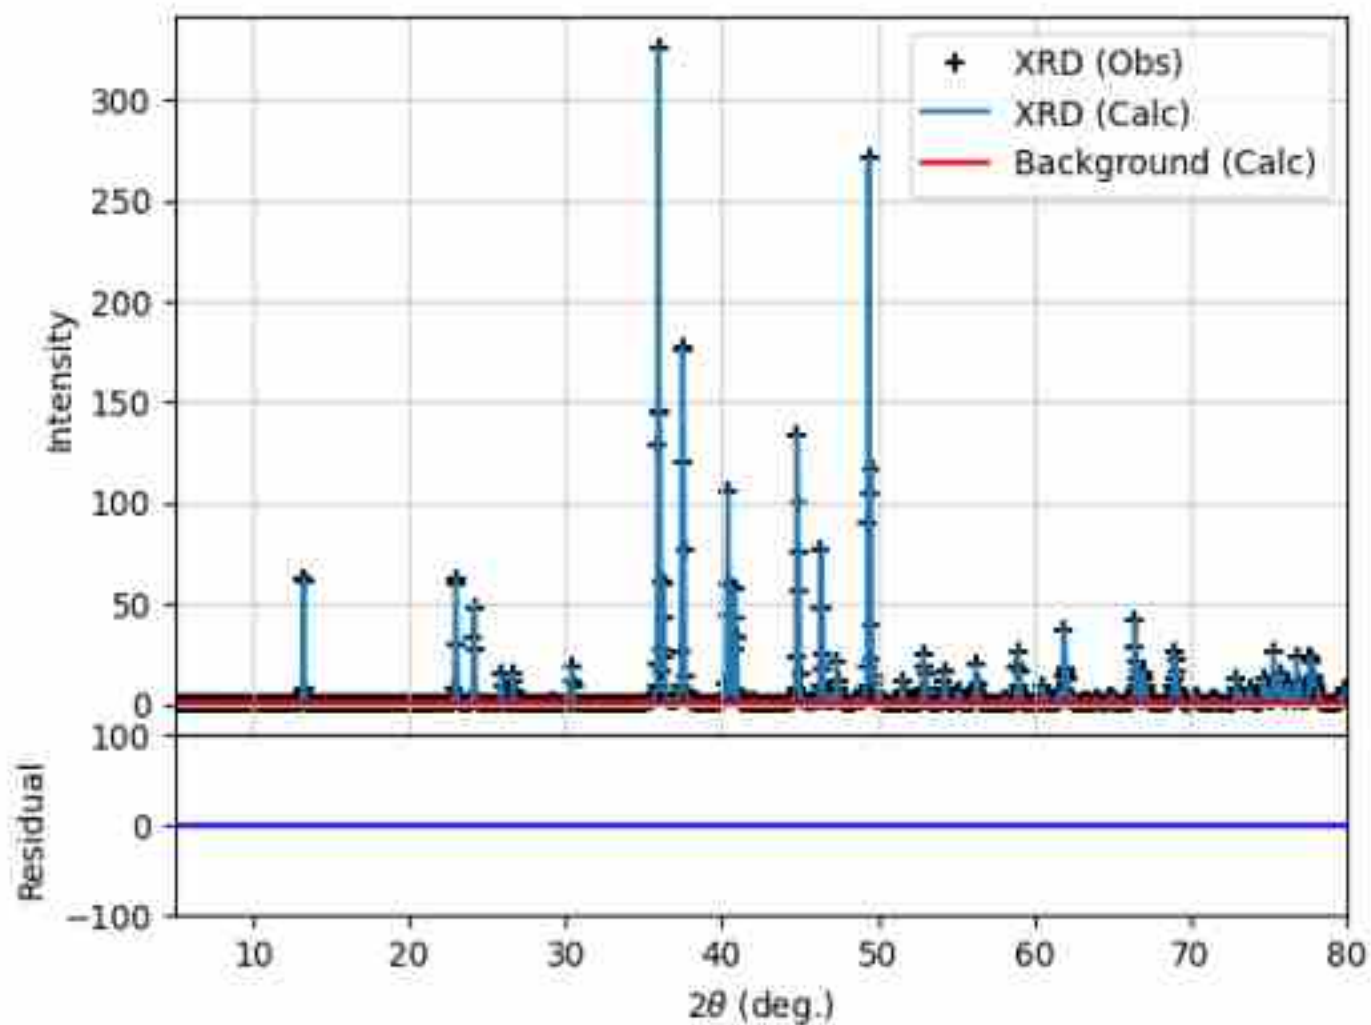

| RMSE before RR | Rwp     | RMSE after RR |
|----------------|---------|---------------|
| 0.015          | 0.00308 | 0.00048       |

# Sc3Fe1C4

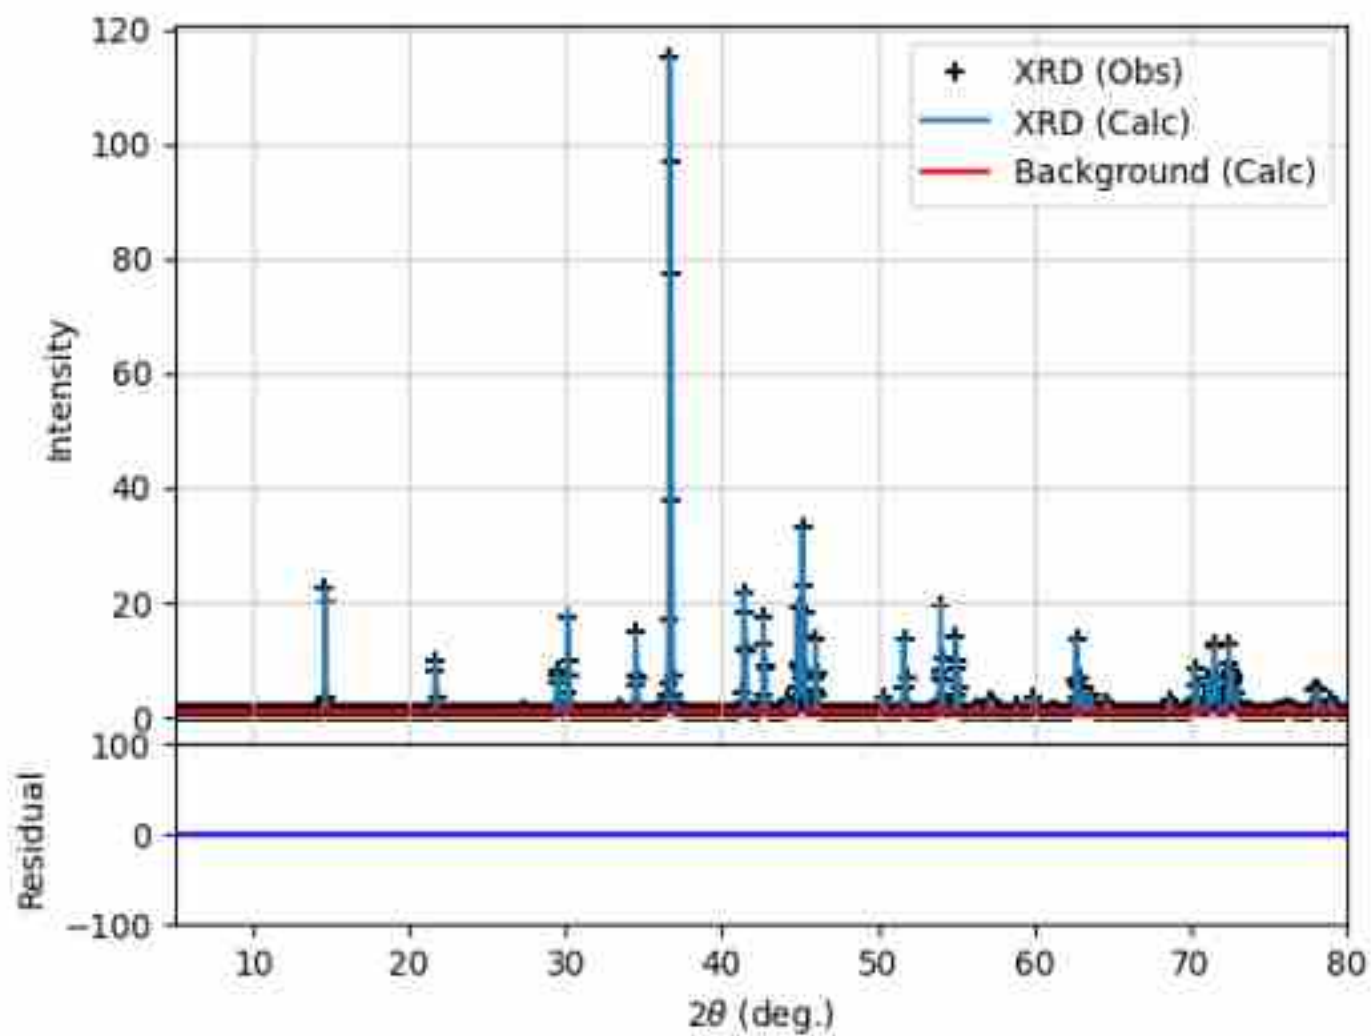

| RMSE before RR | Rwp     | RMSE after RR |
|----------------|---------|---------------|
| 0.015          | 0.00363 | 0.00166       |

# Sm<sub>2</sub>Al<sub>4</sub>Ni<sub>2</sub>

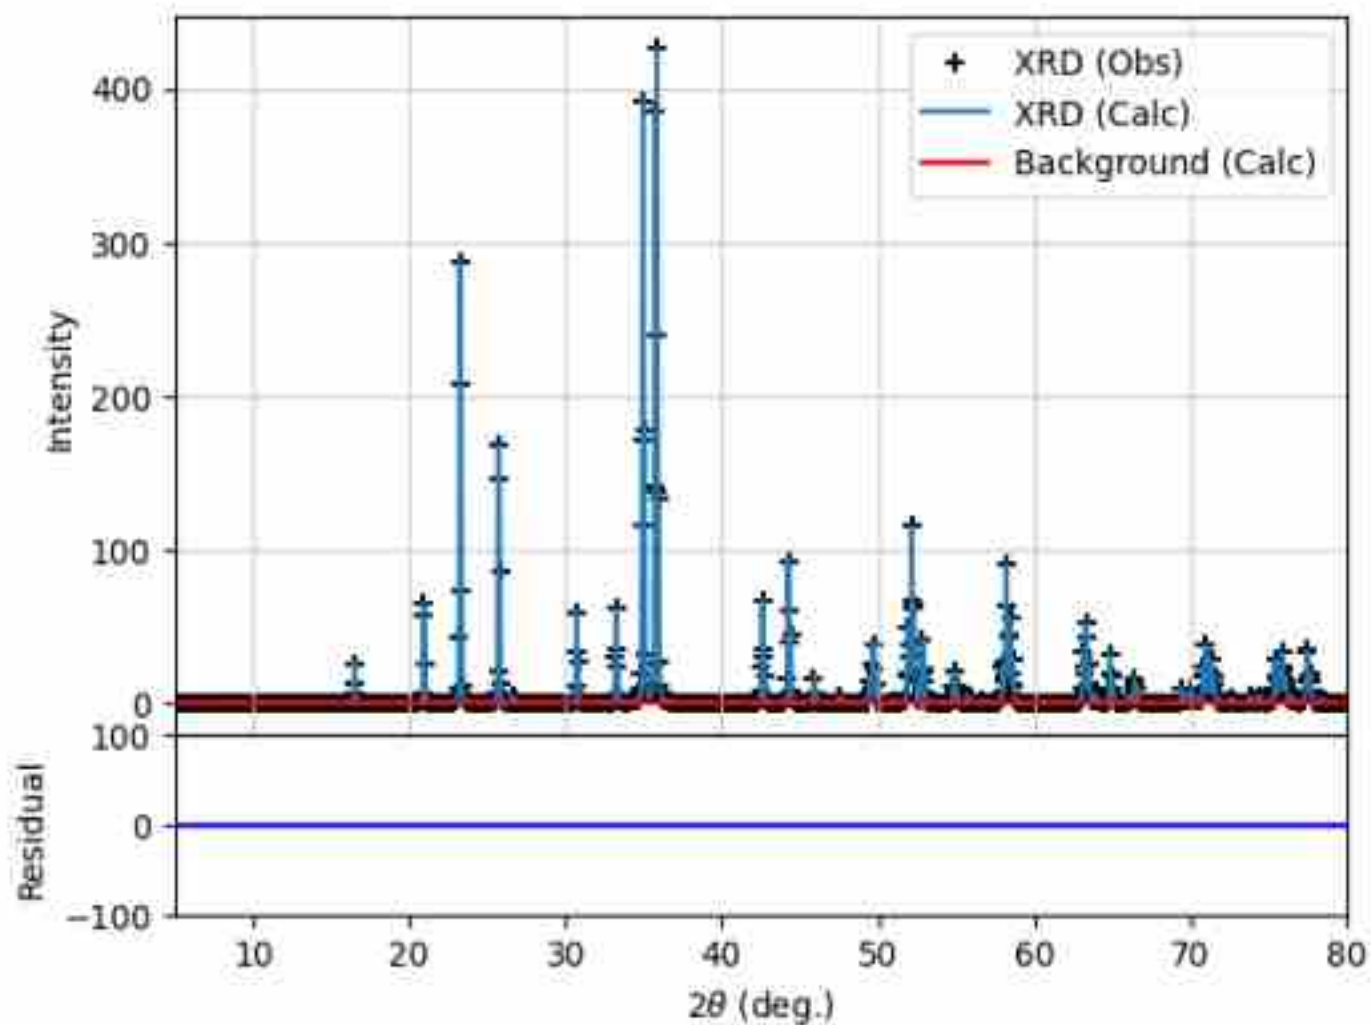

| RMSE before RR | Rwp     | RMSE after RR |
|----------------|---------|---------------|
| 0.015          | 0.00341 | 0.00096       |

# Sm2Al6

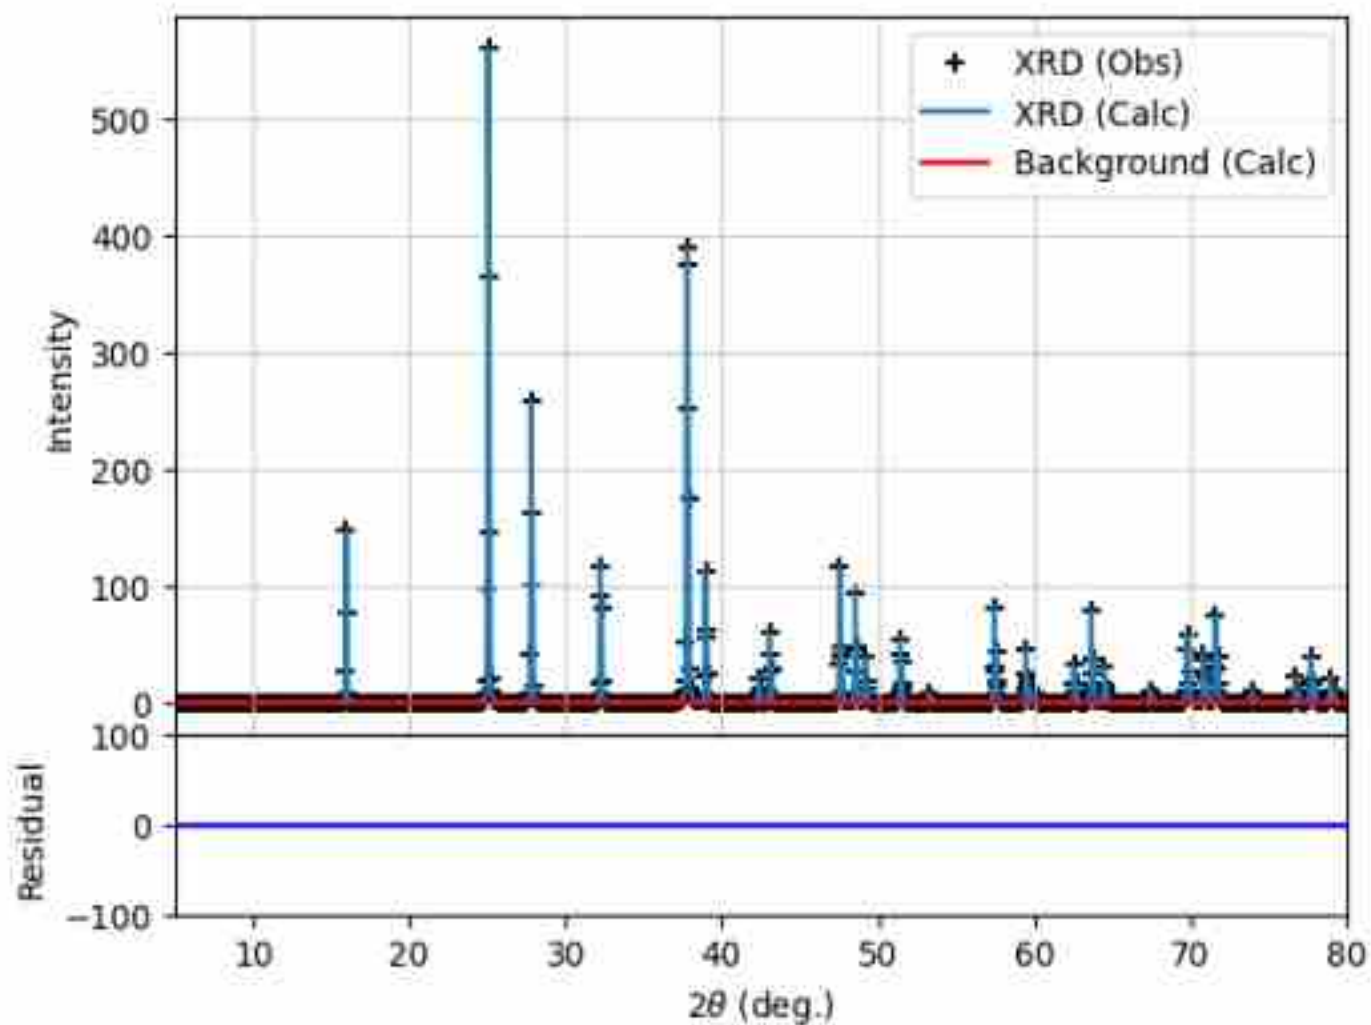

| RMSE before RR | Rwp     | RMSE after RR |
|----------------|---------|---------------|
| 0.015          | 0.01656 | 0.00491       |

Sm2Bi6

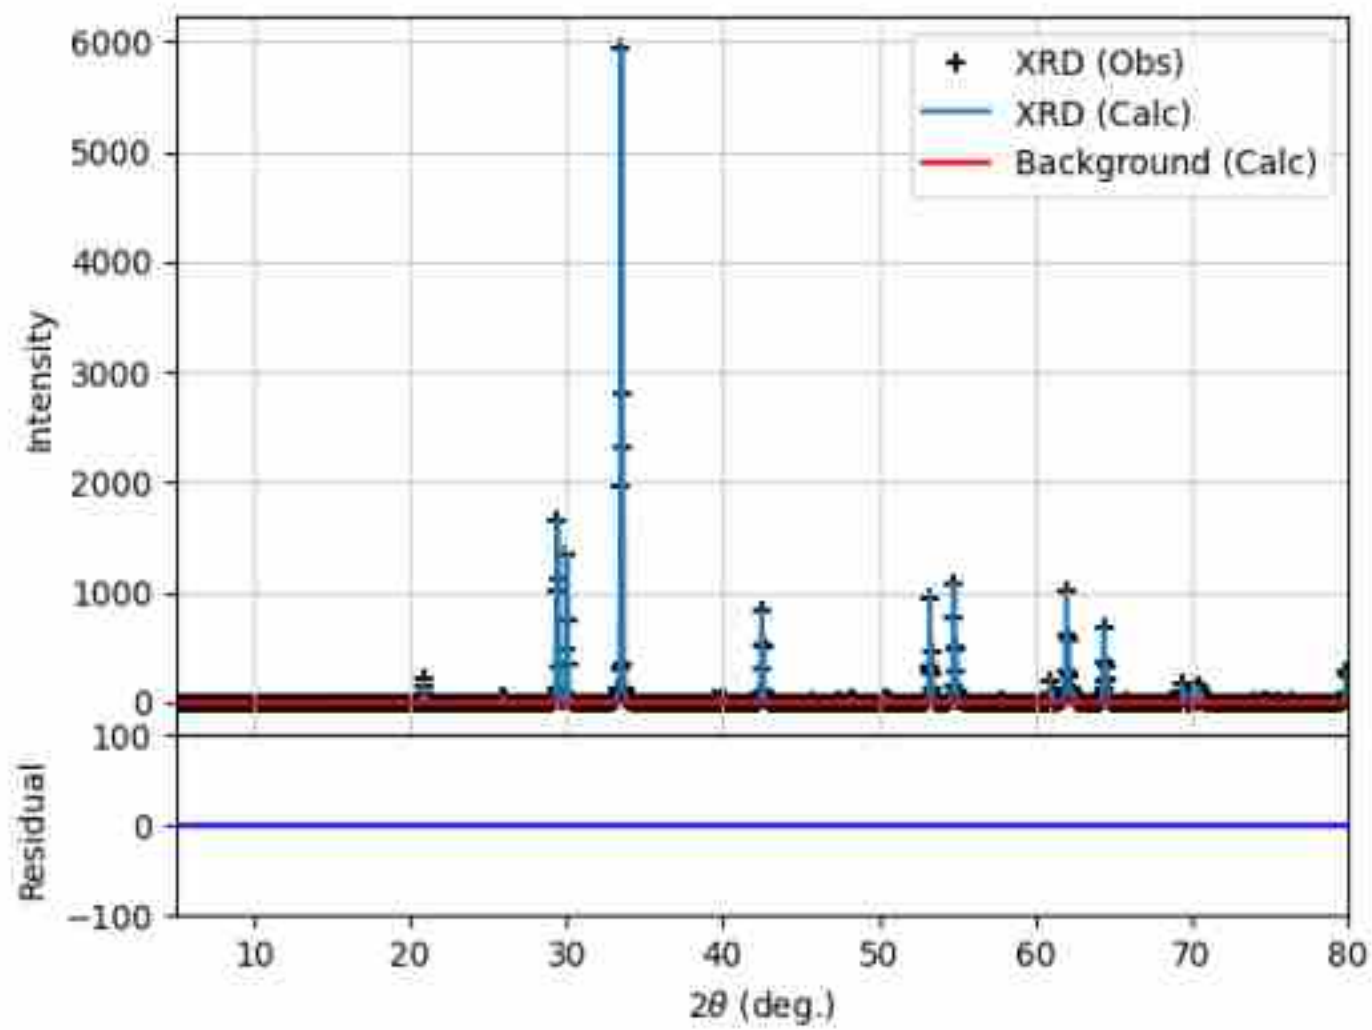

| RMSE before RR | Rwp     | RMSE after RR |
|----------------|---------|---------------|
| 0.015          | 0.00423 | 0.00049       |



# Sm<sub>2</sub>Cu<sub>1</sub>Ge<sub>6</sub>

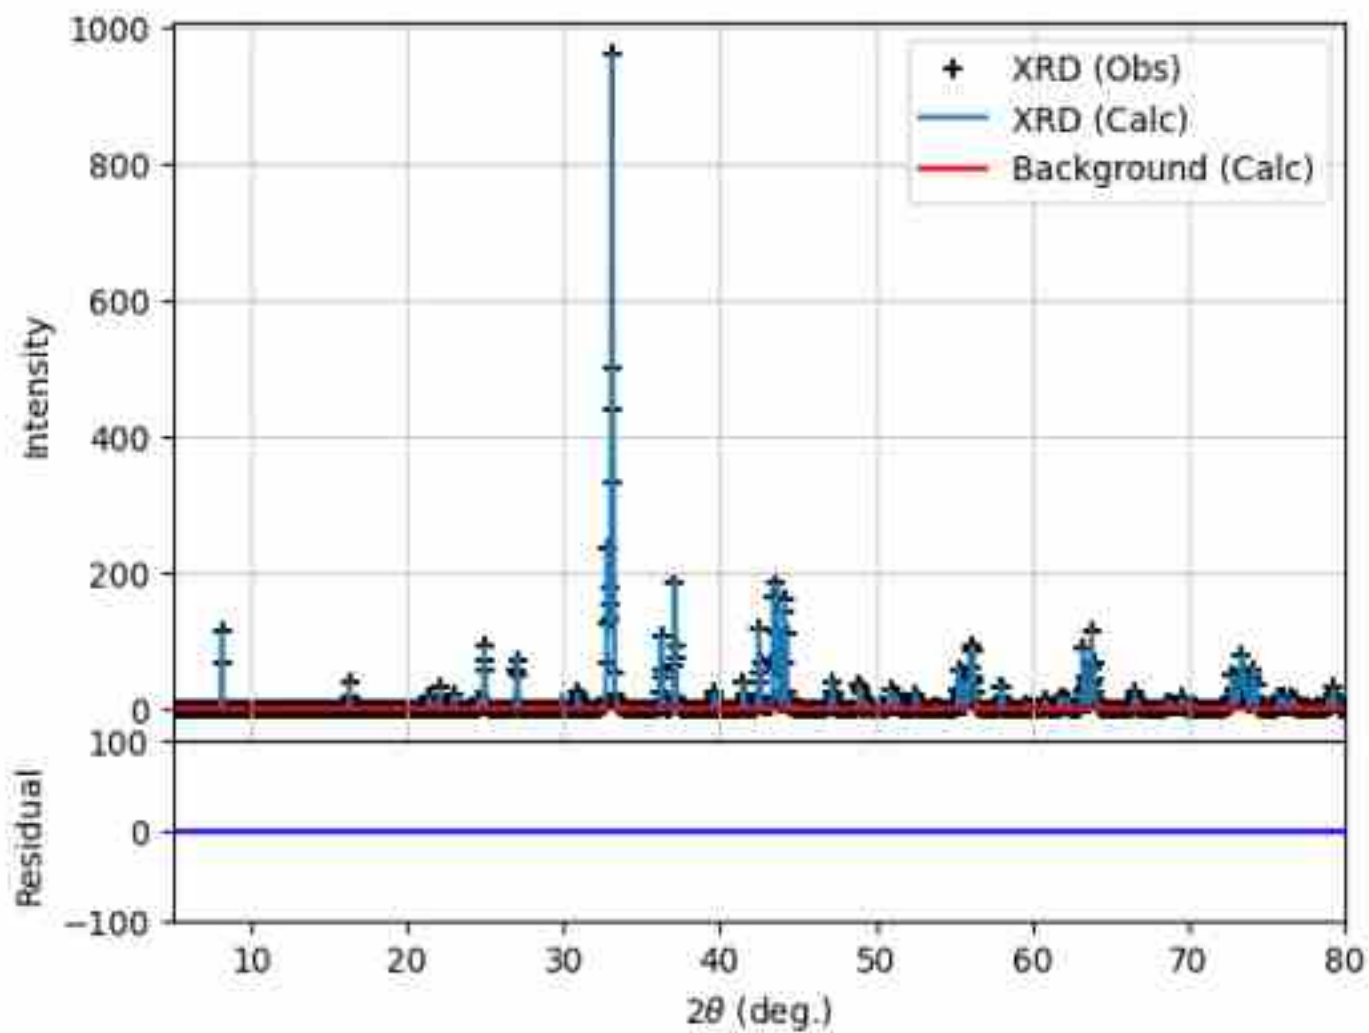

| RMSE before RR | Rwp     | RMSE after RR |
|----------------|---------|---------------|
| 0.015          | 0.00358 | 0.00042       |

# Sm<sub>2</sub>Fe<sub>2</sub>Ge<sub>4</sub>

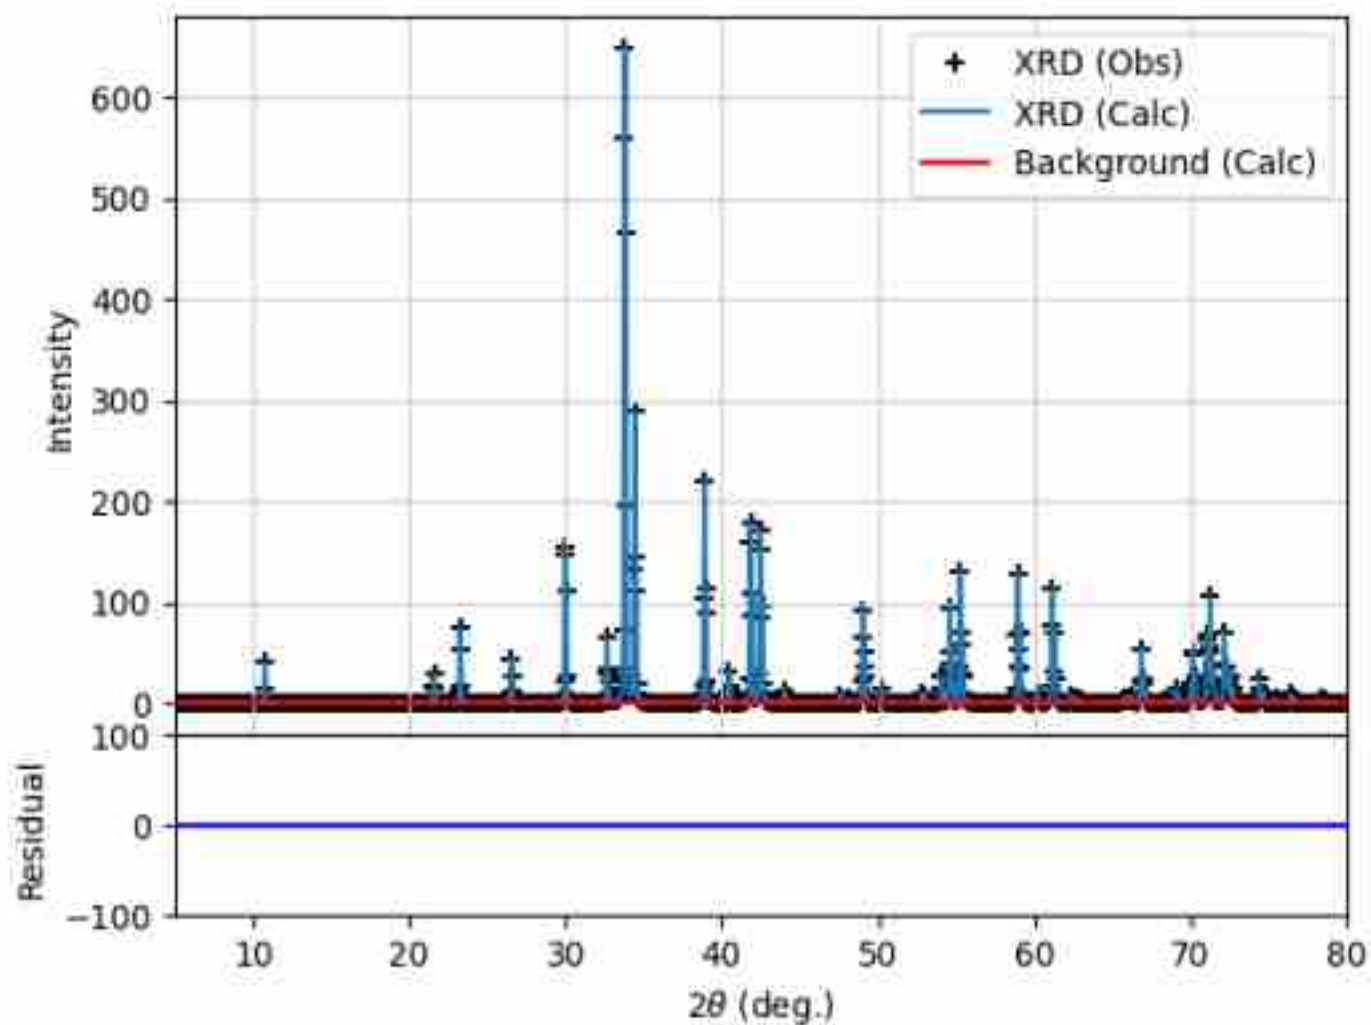

| RMSE before RR | Rwp     | RMSE after RR |
|----------------|---------|---------------|
| 0.015          | 0.00348 | 0.00037       |

# Sm<sub>2</sub>Mn<sub>4</sub>Si<sub>2</sub>C<sub>2</sub>

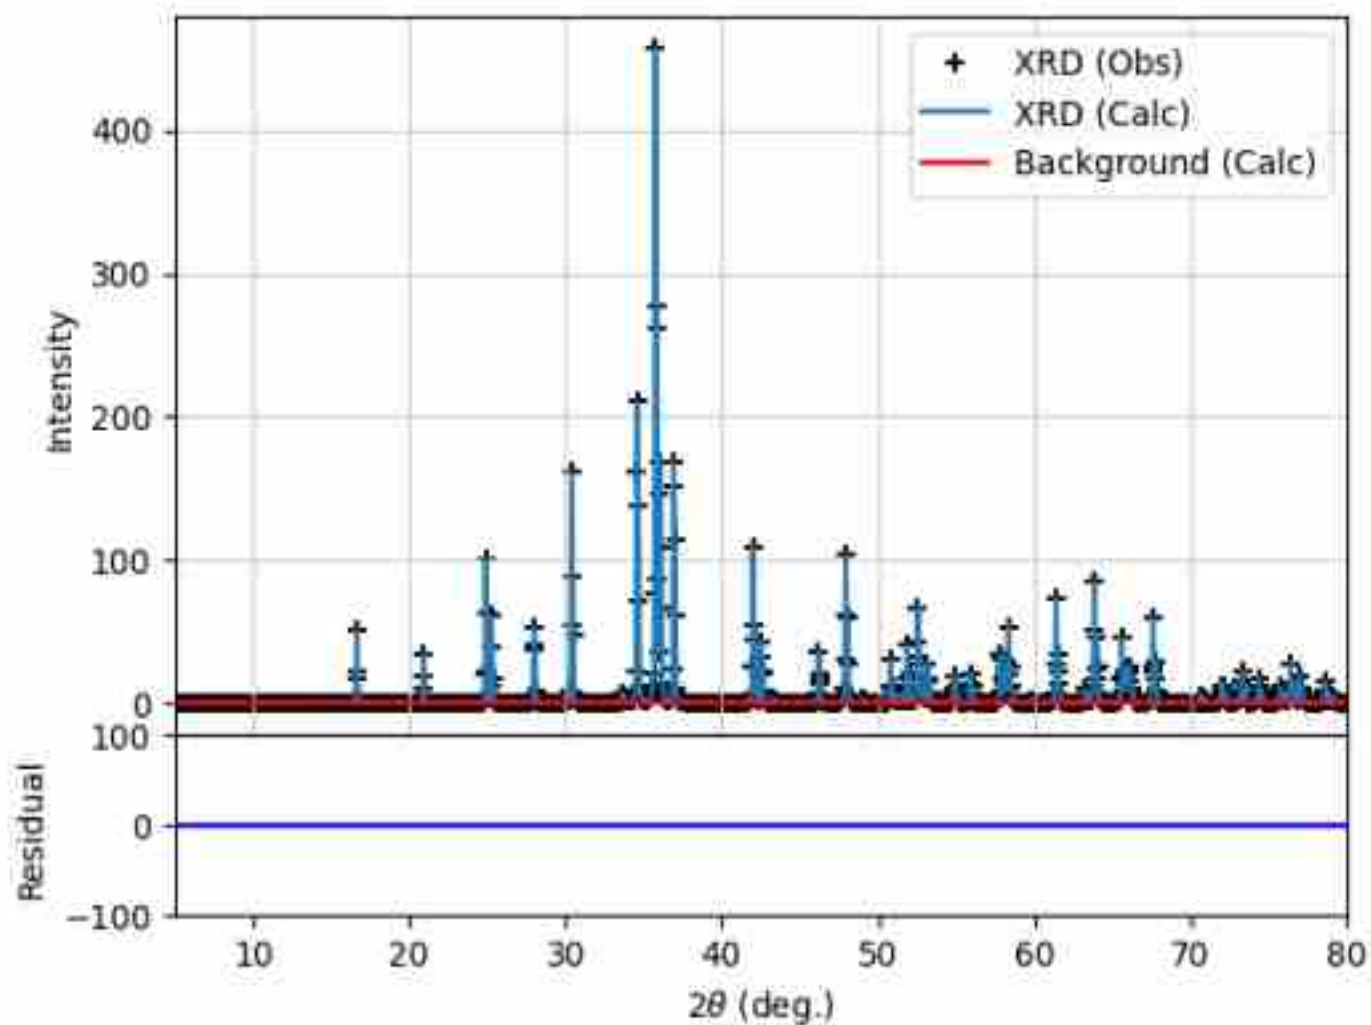

| RMSE before RR | Rwp     | RMSE after RR |
|----------------|---------|---------------|
| 0.015          | 0.00351 | 0.00064       |

# Sm4Al4Fe4

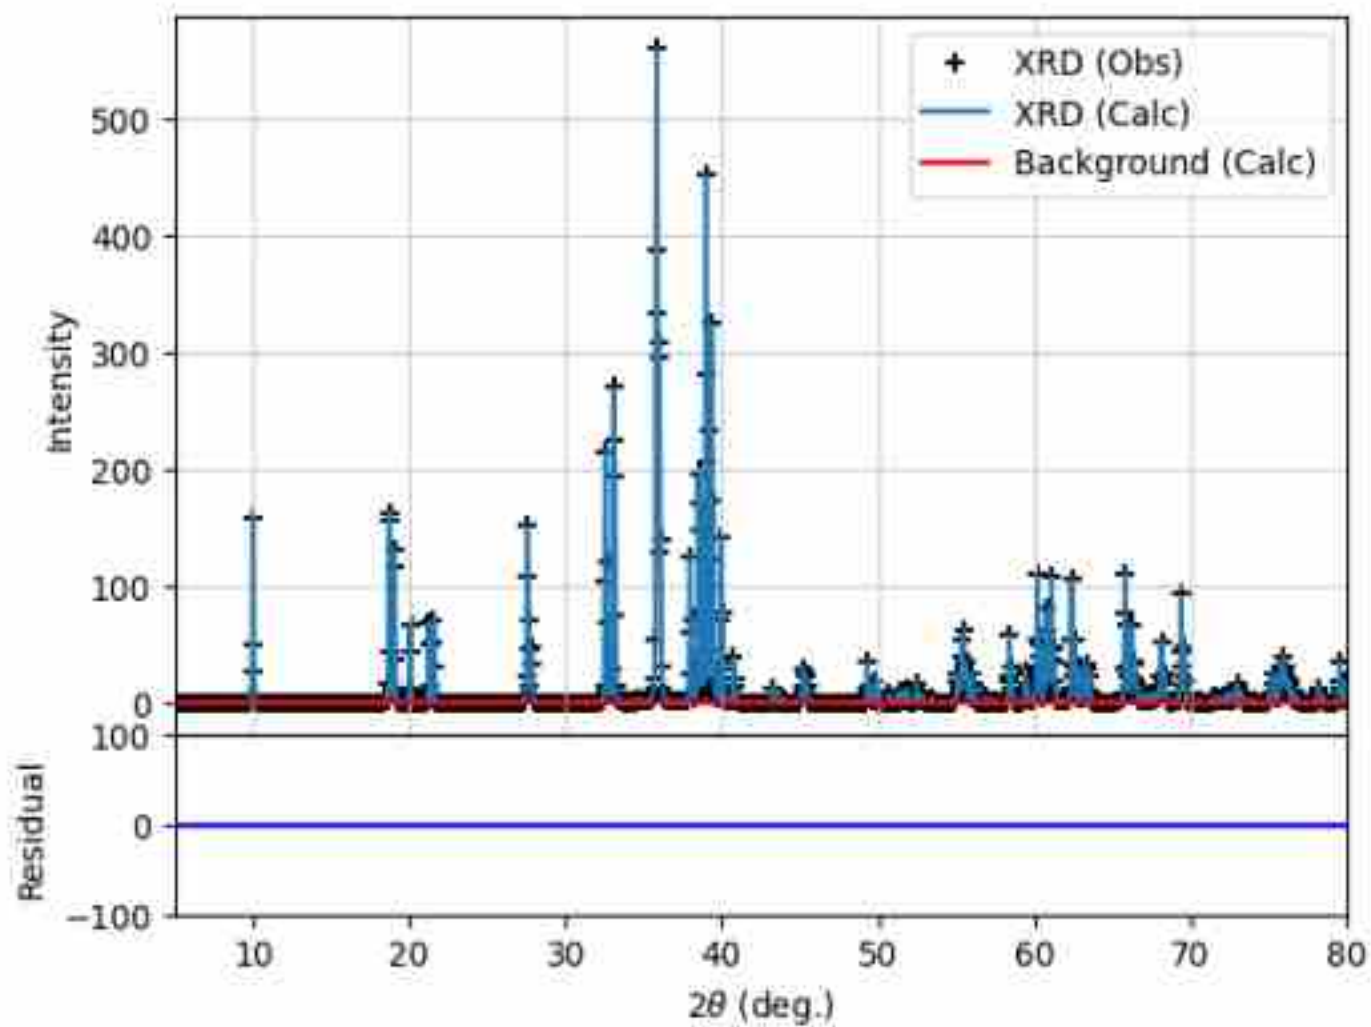

| RMSE before RR | Rwp     | RMSE after RR |
|----------------|---------|---------------|
| 0.015          | 0.00479 | 0.00059       |

# Sm4Al4O12

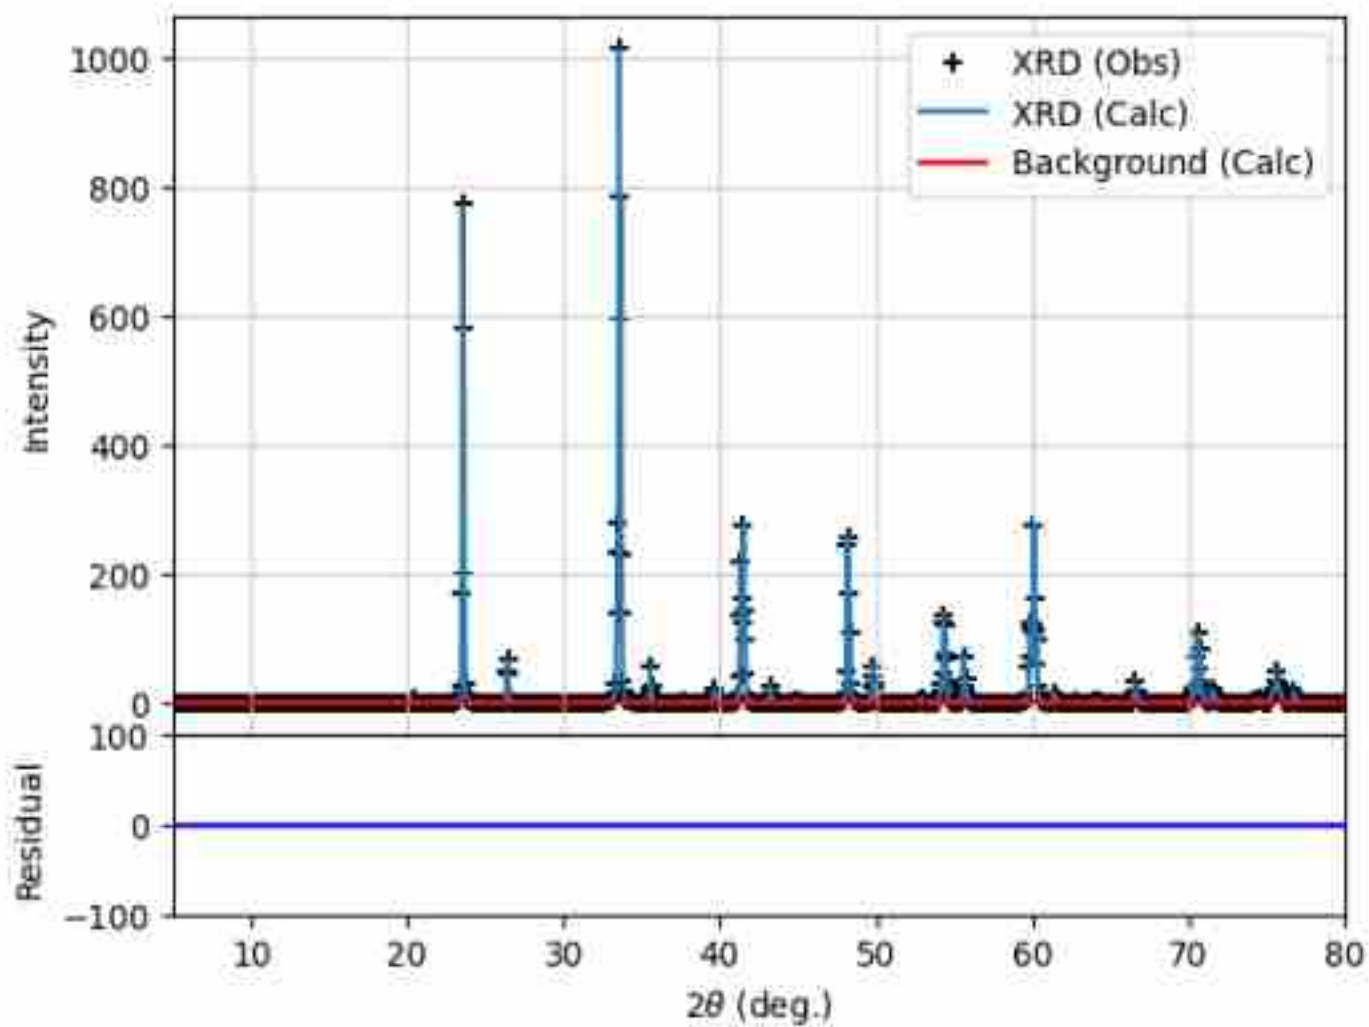

| RMSE before RR | Rwp     | RMSE after RR |
|----------------|---------|---------------|
| 0.015          | 0.00376 | 0.00148       |

# Sm4Ga4Pt4

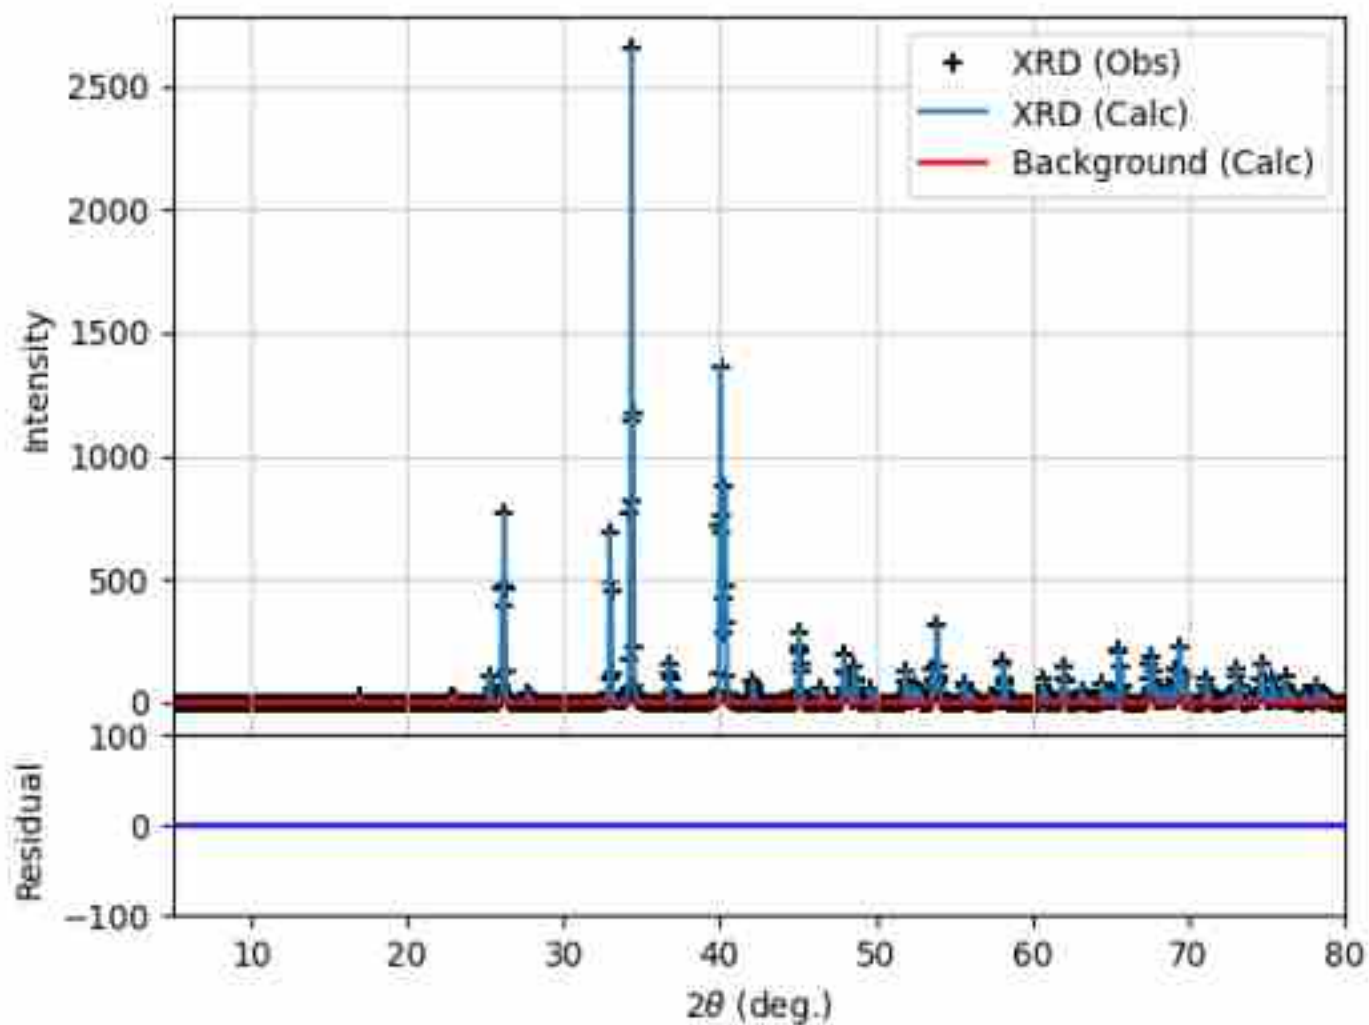

| RMSE before RR | Rwp     | RMSE after RR |
|----------------|---------|---------------|
| 0.015          | 0.00534 | 0.00094       |

# Sm4S4Br4

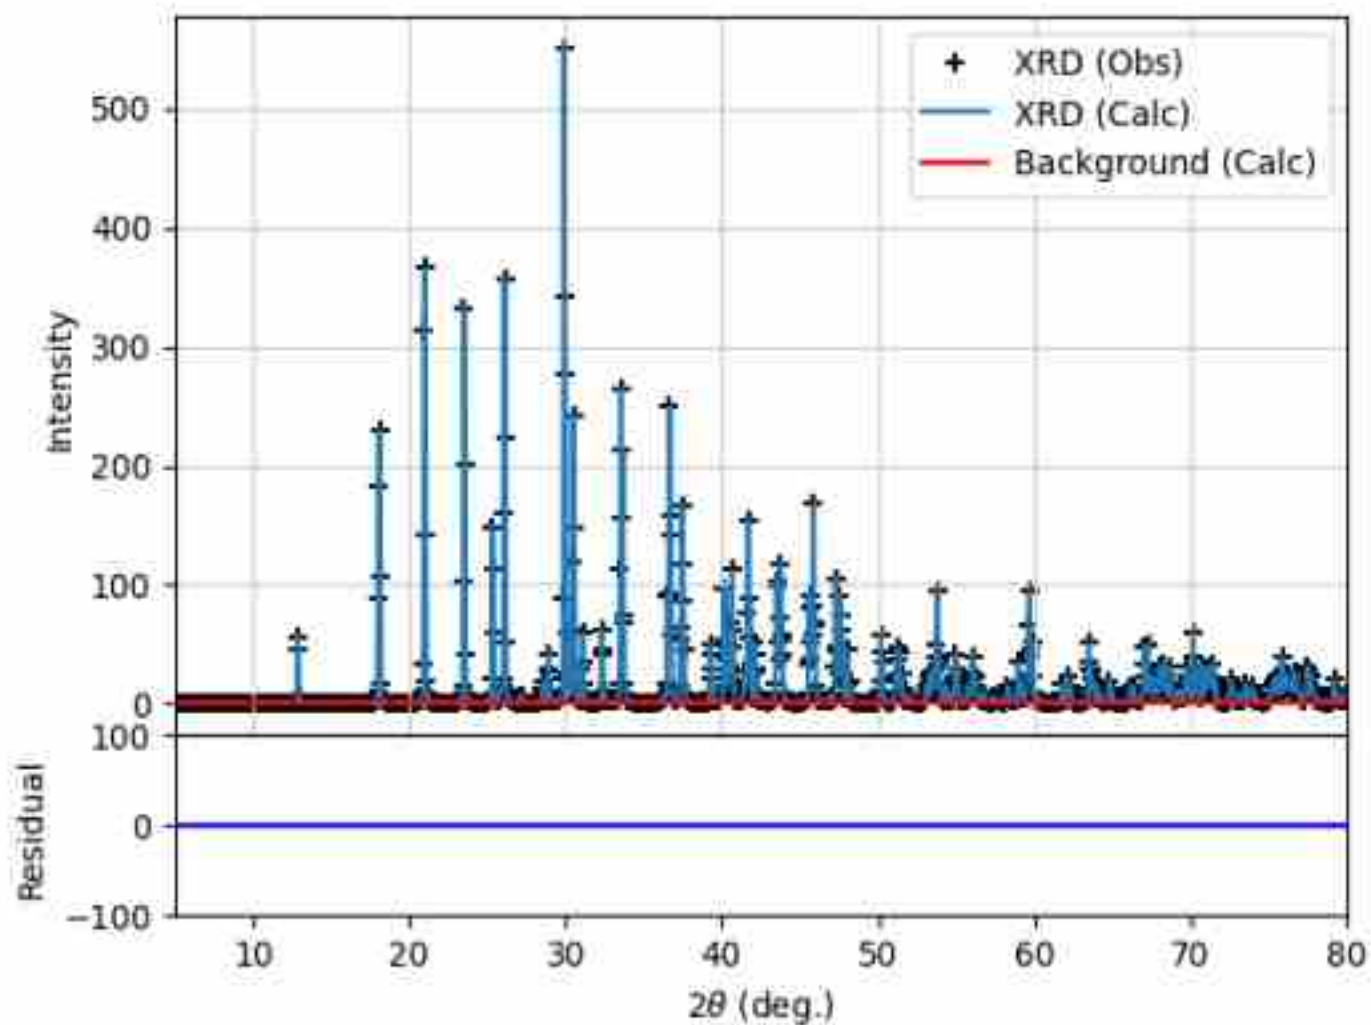

| RMSE before RR | Rwp     | RMSE after RR |
|----------------|---------|---------------|
| 0.015          | 0.00393 | 0.0006        |

# Sm4Sc4O12

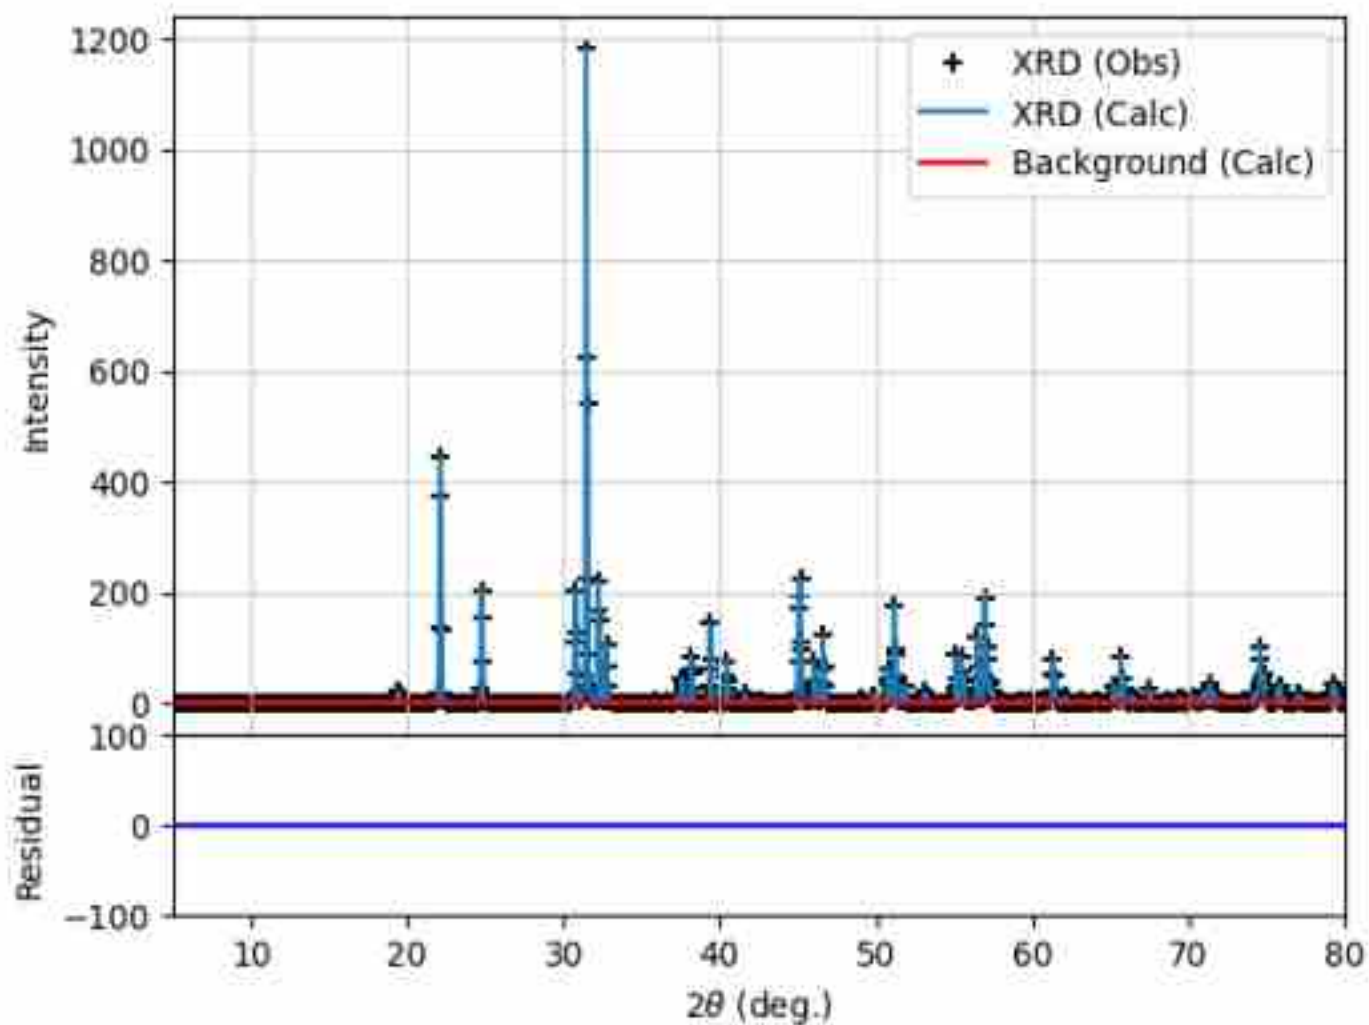

| RMSE before RR | Rwp     | RMSE after RR |
|----------------|---------|---------------|
| 0.015          | 0.00377 | 0.00107       |



# Sr1Ca1I4

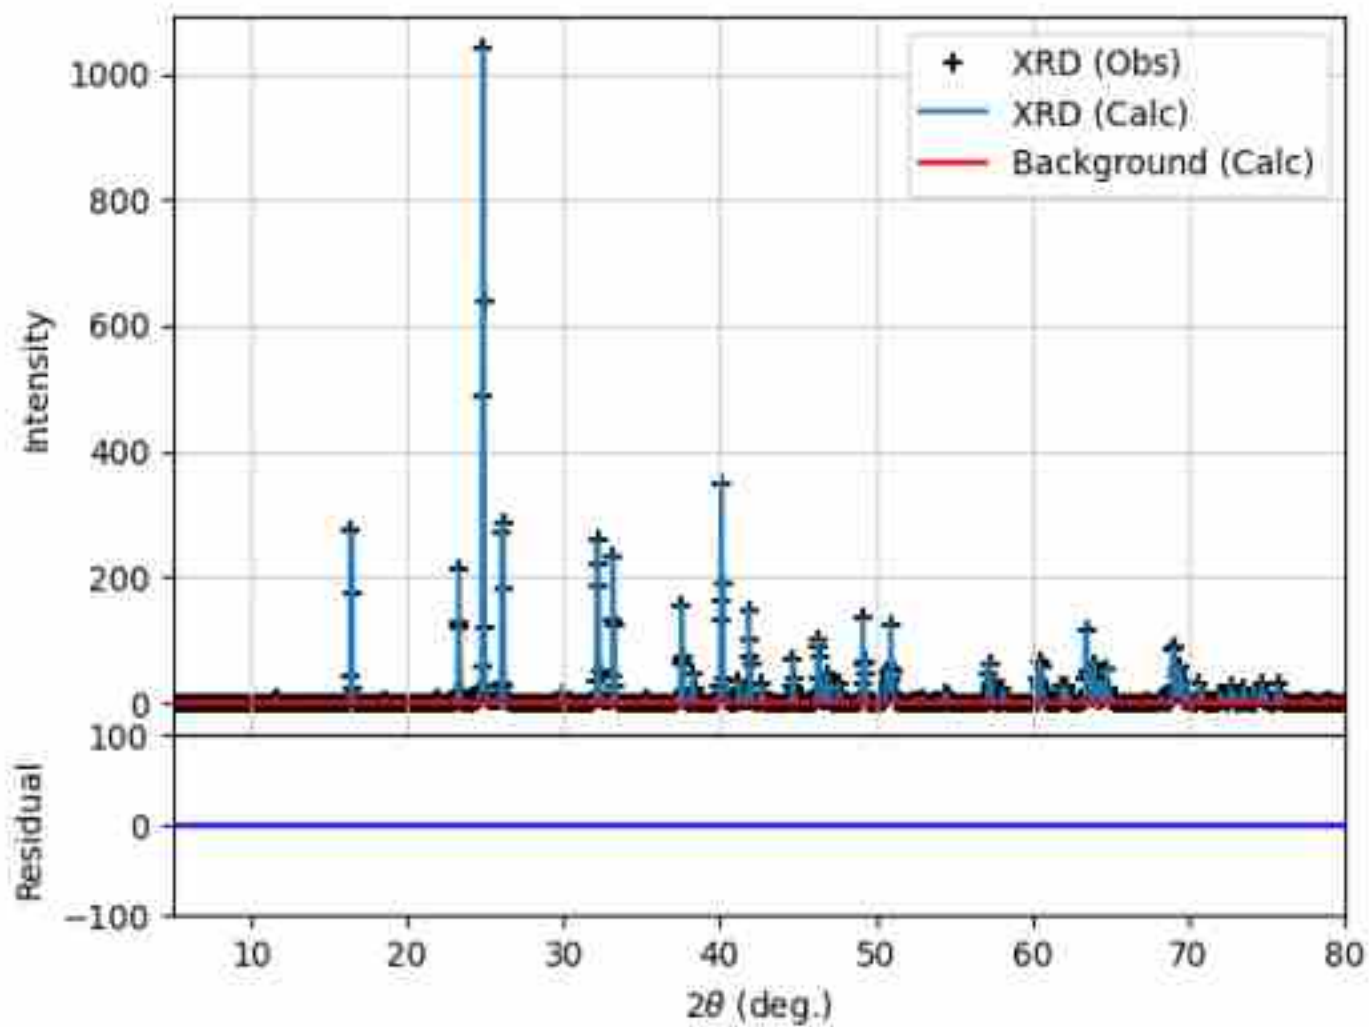

| RMSE before RR | Rwp     | RMSE after RR |
|----------------|---------|---------------|
| 0.015          | 0.00401 | 0.00034       |

# Sr1Fe1O3

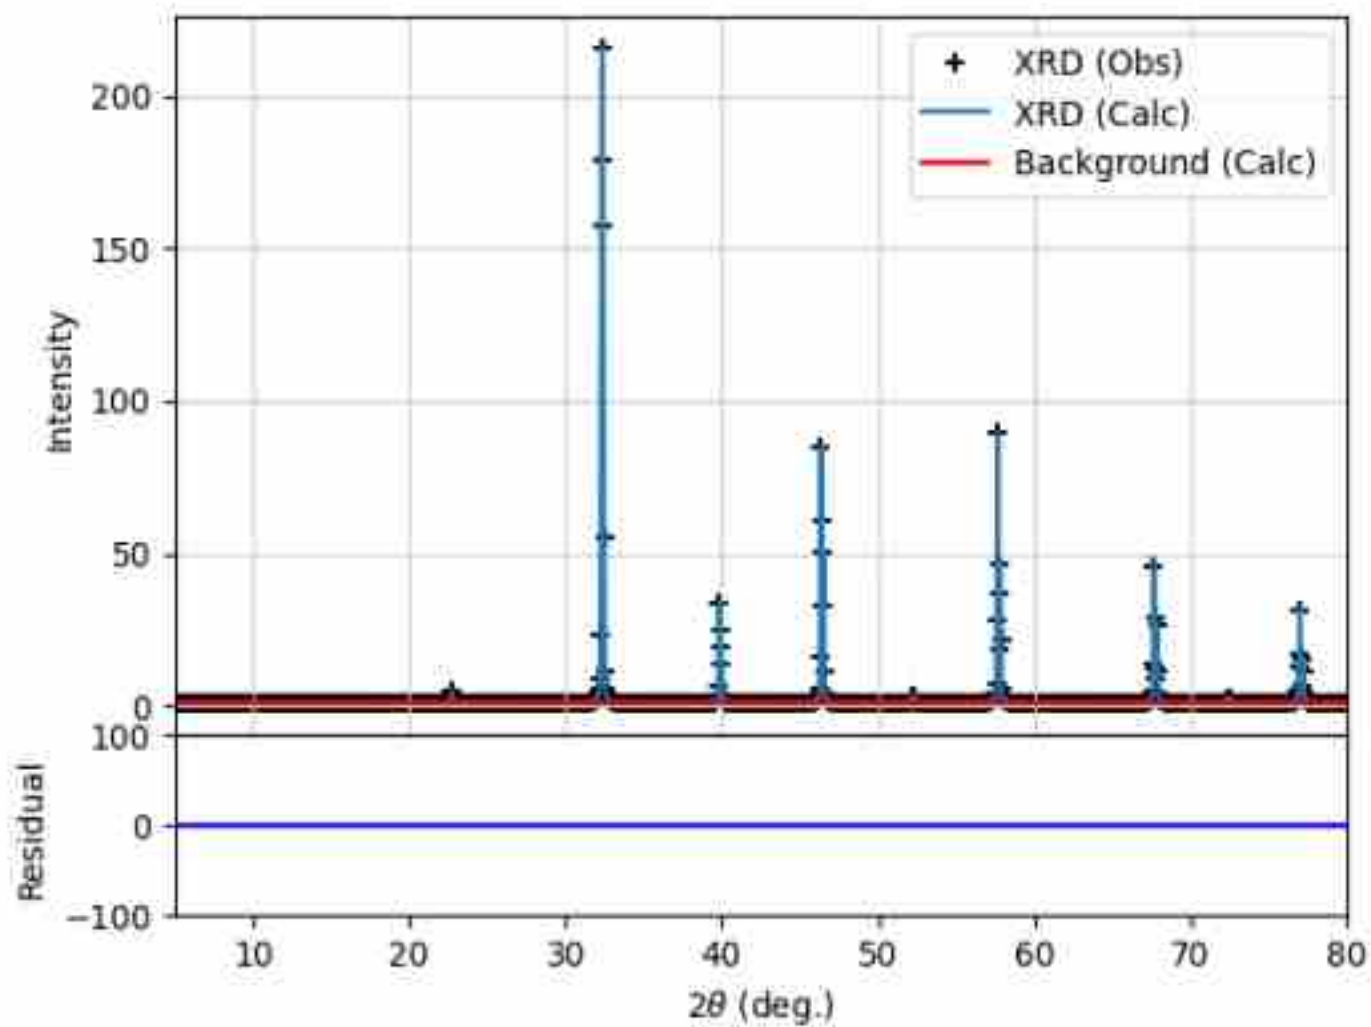

| RMSE before RR | Rwp     | RMSE after RR |
|----------------|---------|---------------|
| 0.015          | 0.16618 | 0.01054       |

# Sr1Nd1Mn2O6

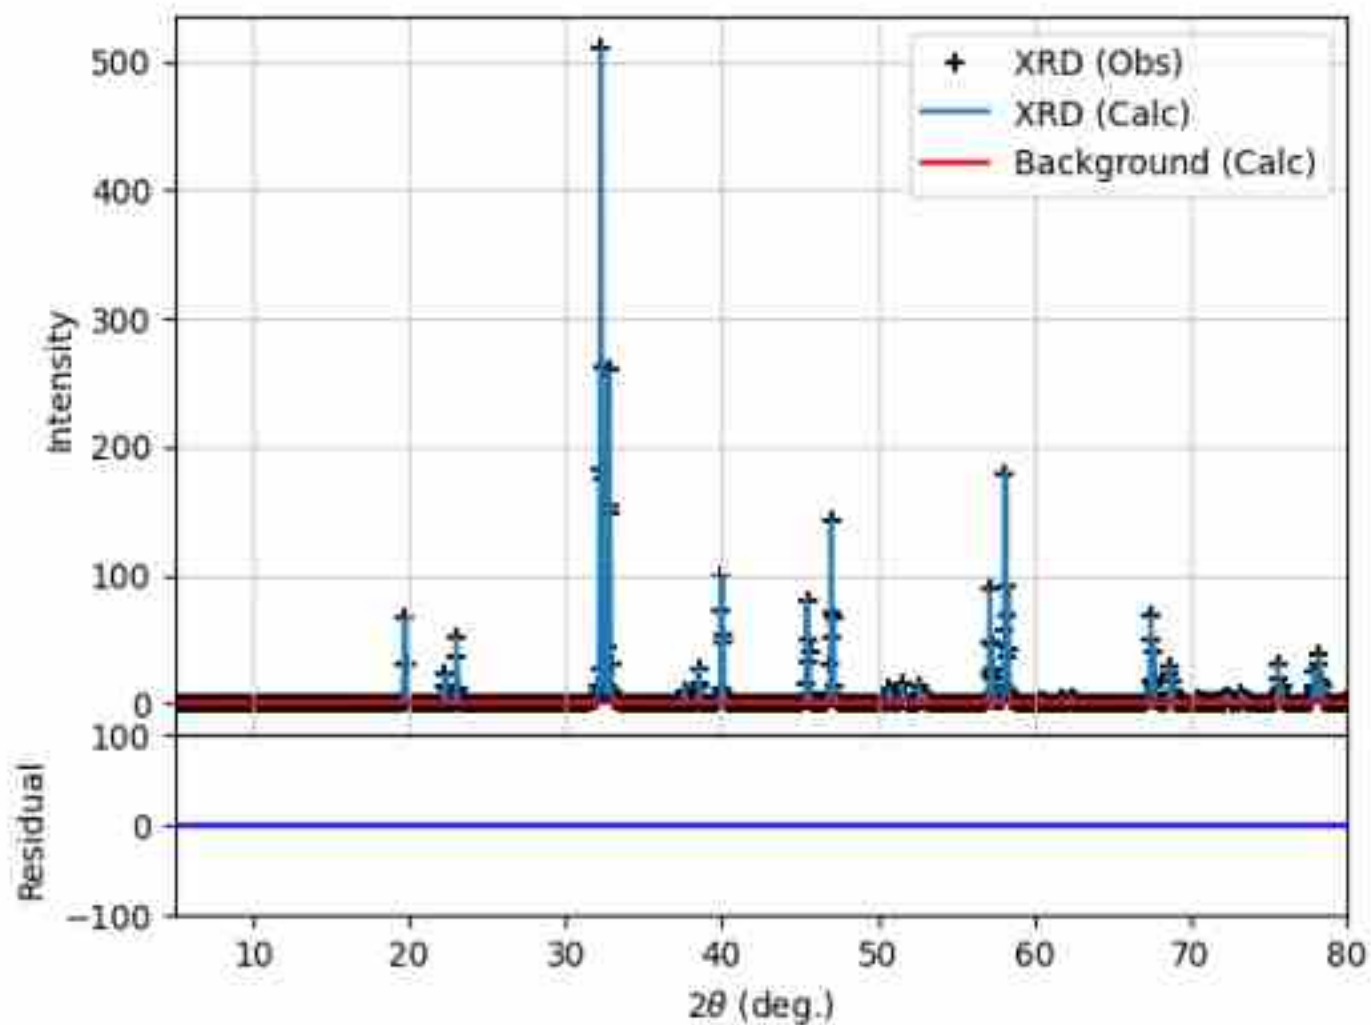

| RMSE before RR | Rwp     | RMSE after RR |
|----------------|---------|---------------|
| 0.015          | 0.00355 | 0.00124       |

# Sr<sub>2</sub>Al<sub>3</sub>In<sub>1</sub>

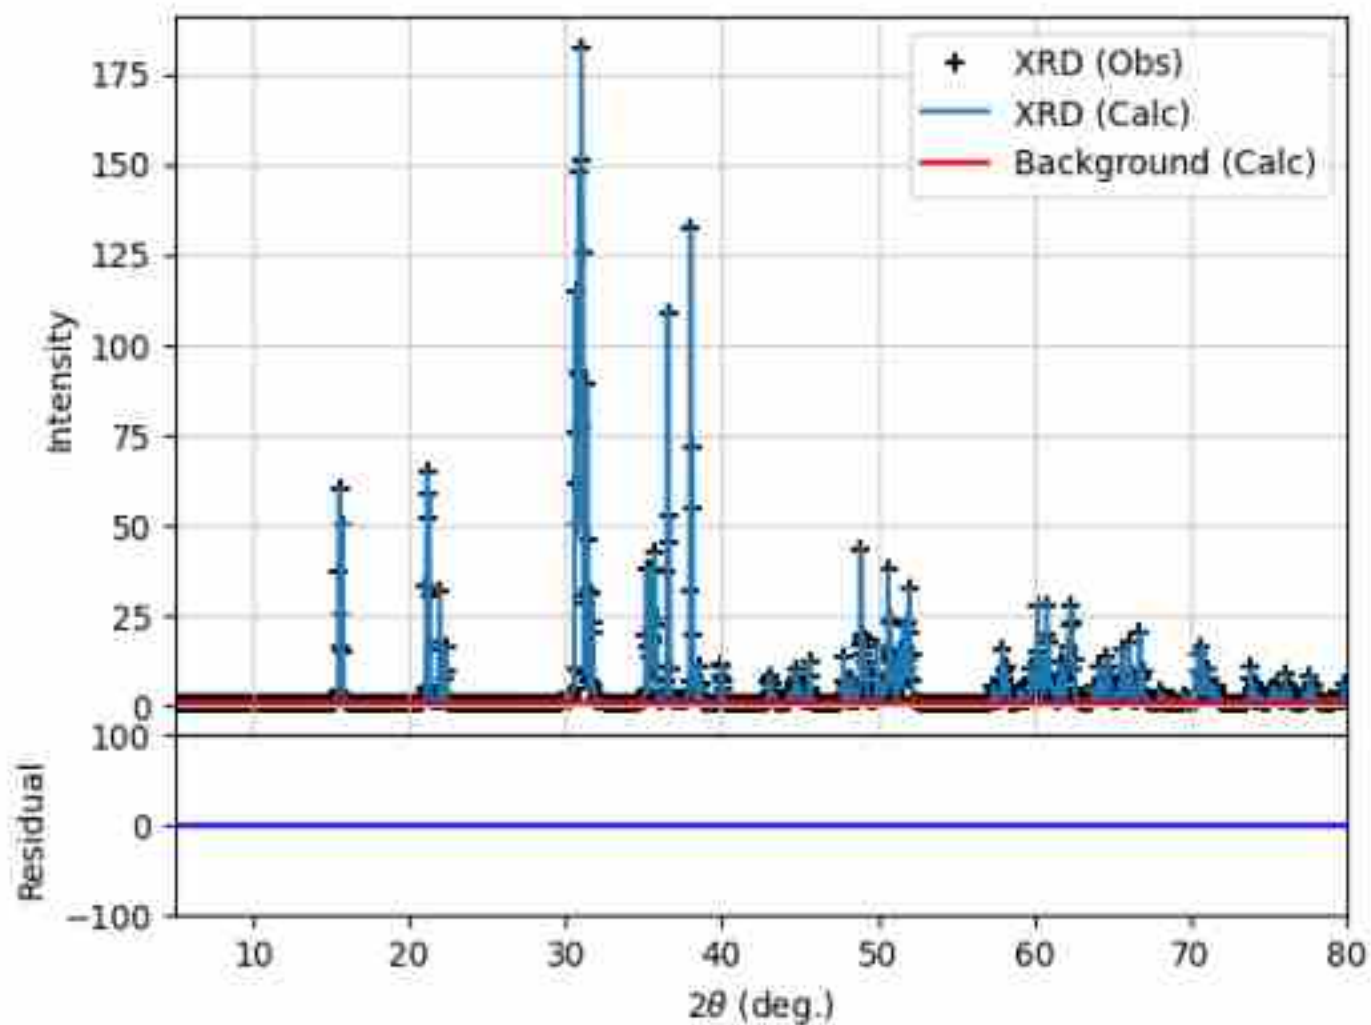

| RMSE before RR | Rwp     | RMSE after RR |
|----------------|---------|---------------|
| 0.015          | 0.00284 | 0.00028       |

# Sr<sub>4</sub>In<sub>2</sub>Sb<sub>2</sub>O<sub>12</sub>

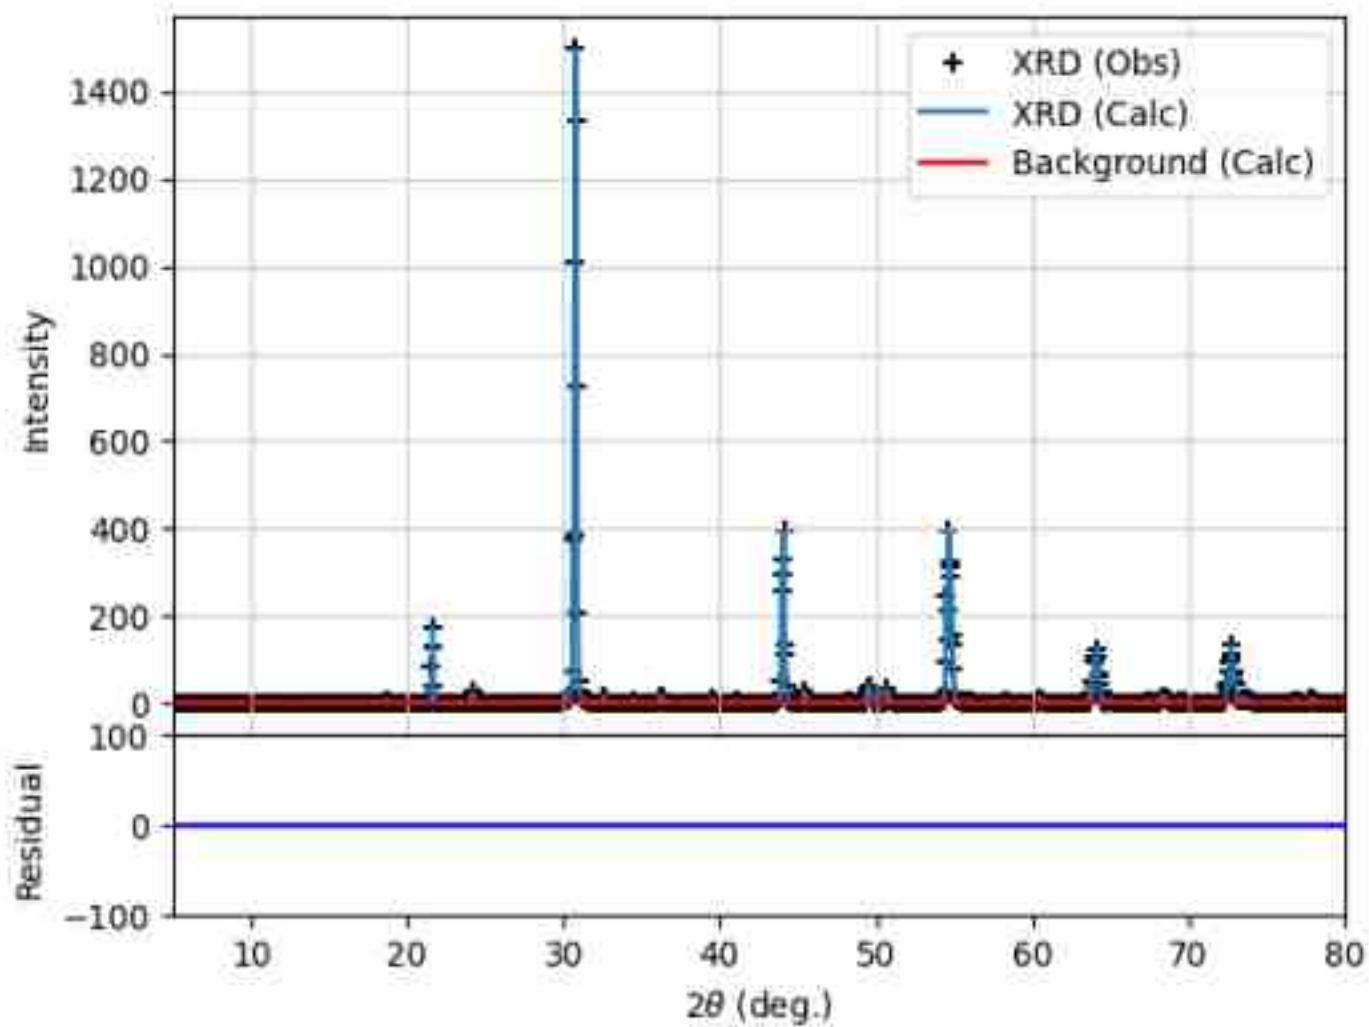

| RMSE before RR | Rwp     | RMSE after RR |
|----------------|---------|---------------|
| 0.015          | 0.00205 | 0.00077       |

# Ta1Cu3Te1Se2S1

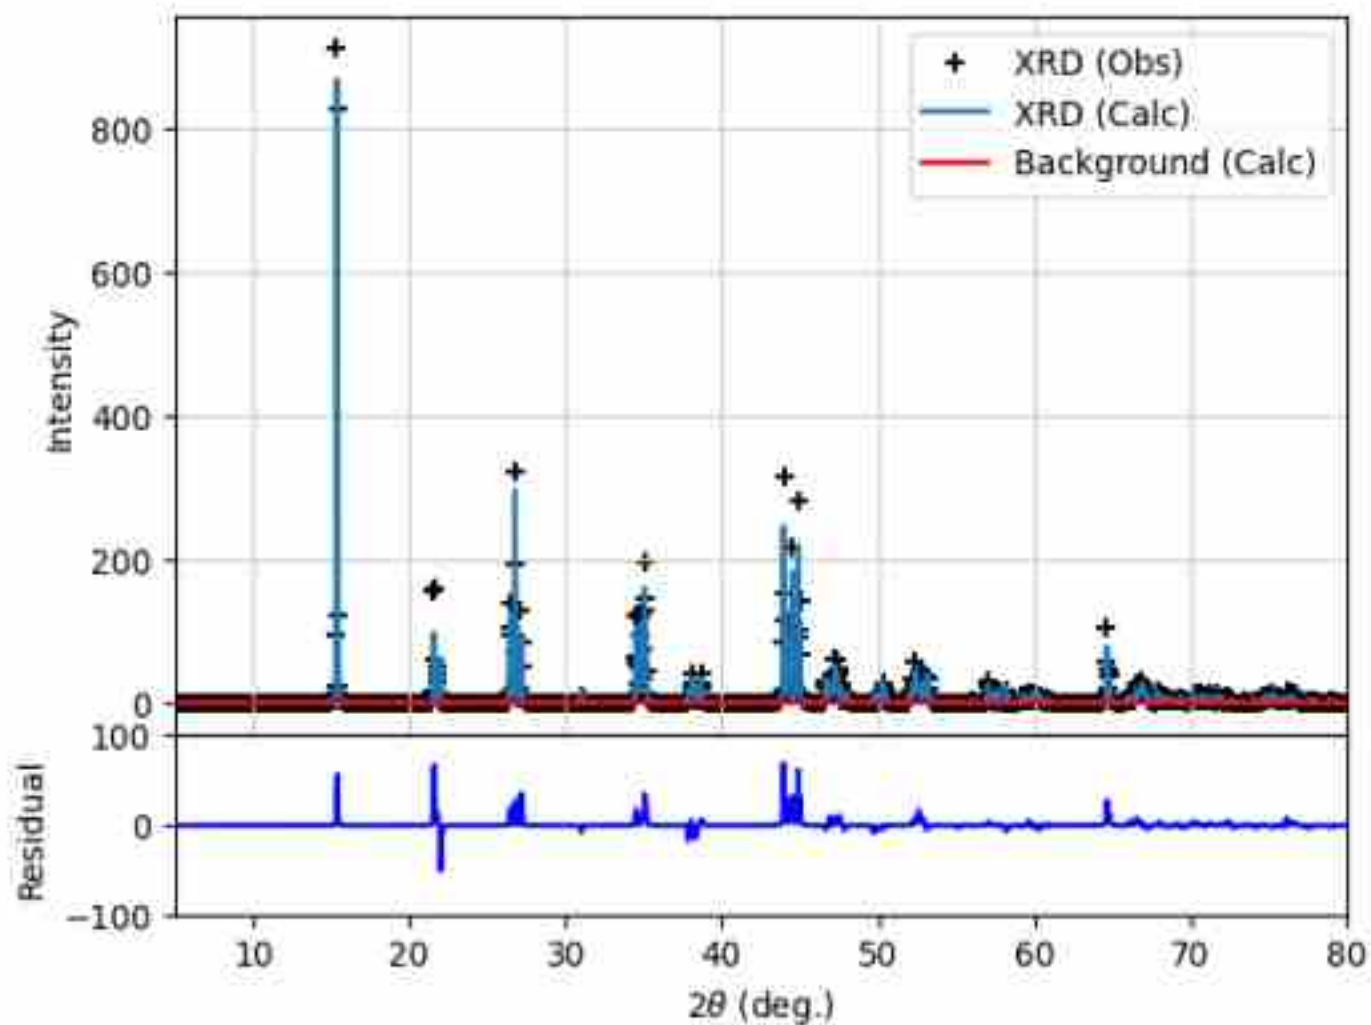

| RMSE before RR | Rwp      | RMSE after RR |
|----------------|----------|---------------|
| 0.015          | 31.35699 | 0.07348       |

# Ta<sub>3</sub>Al<sub>11</sub>Fe<sub>8</sub>

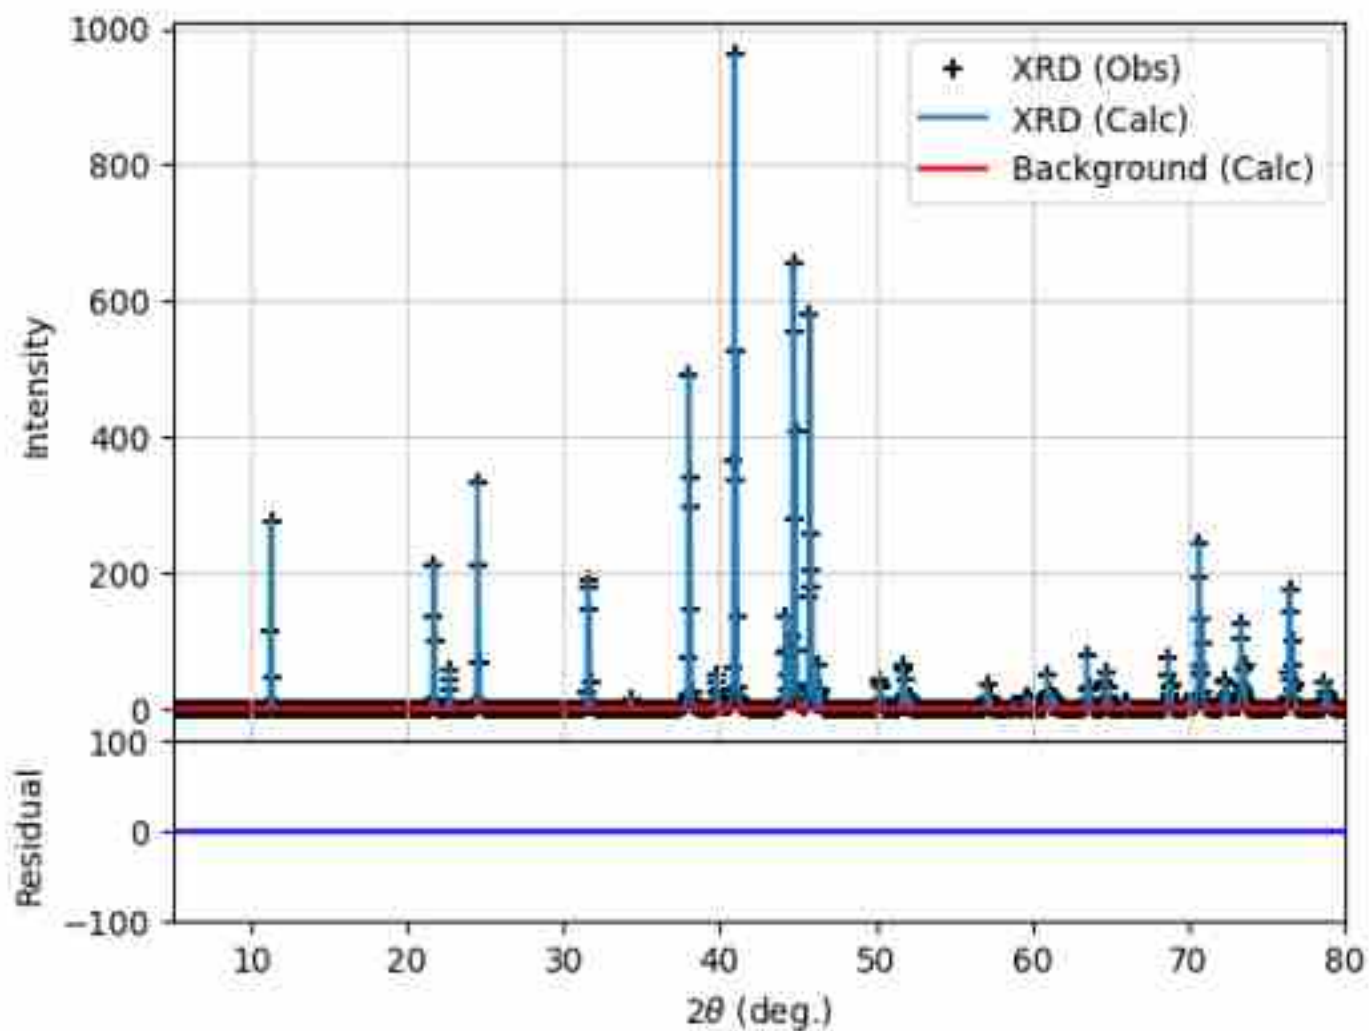

| RMSE before RR | Rwp     | RMSE after RR |
|----------------|---------|---------------|
| 0.015          | 0.00443 | 0.00057       |

# Ta4Cr4P4

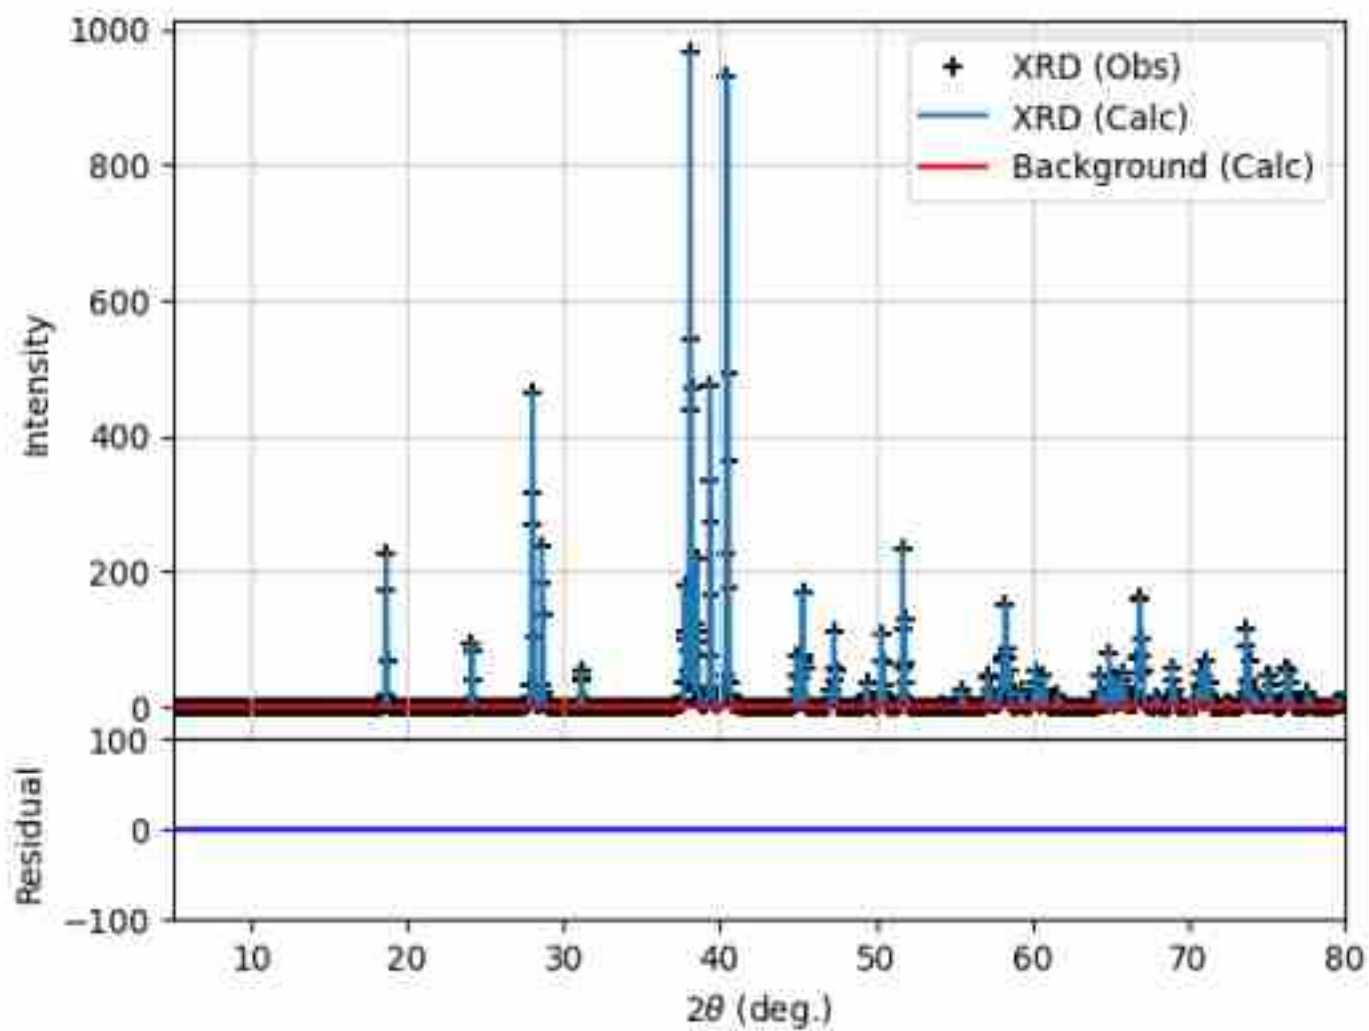

| RMSE before RR | Rwp    | RMSE after RR |
|----------------|--------|---------------|
| 0.015          | 0.0047 | 0.00089       |



# Tb1Al3B4O12

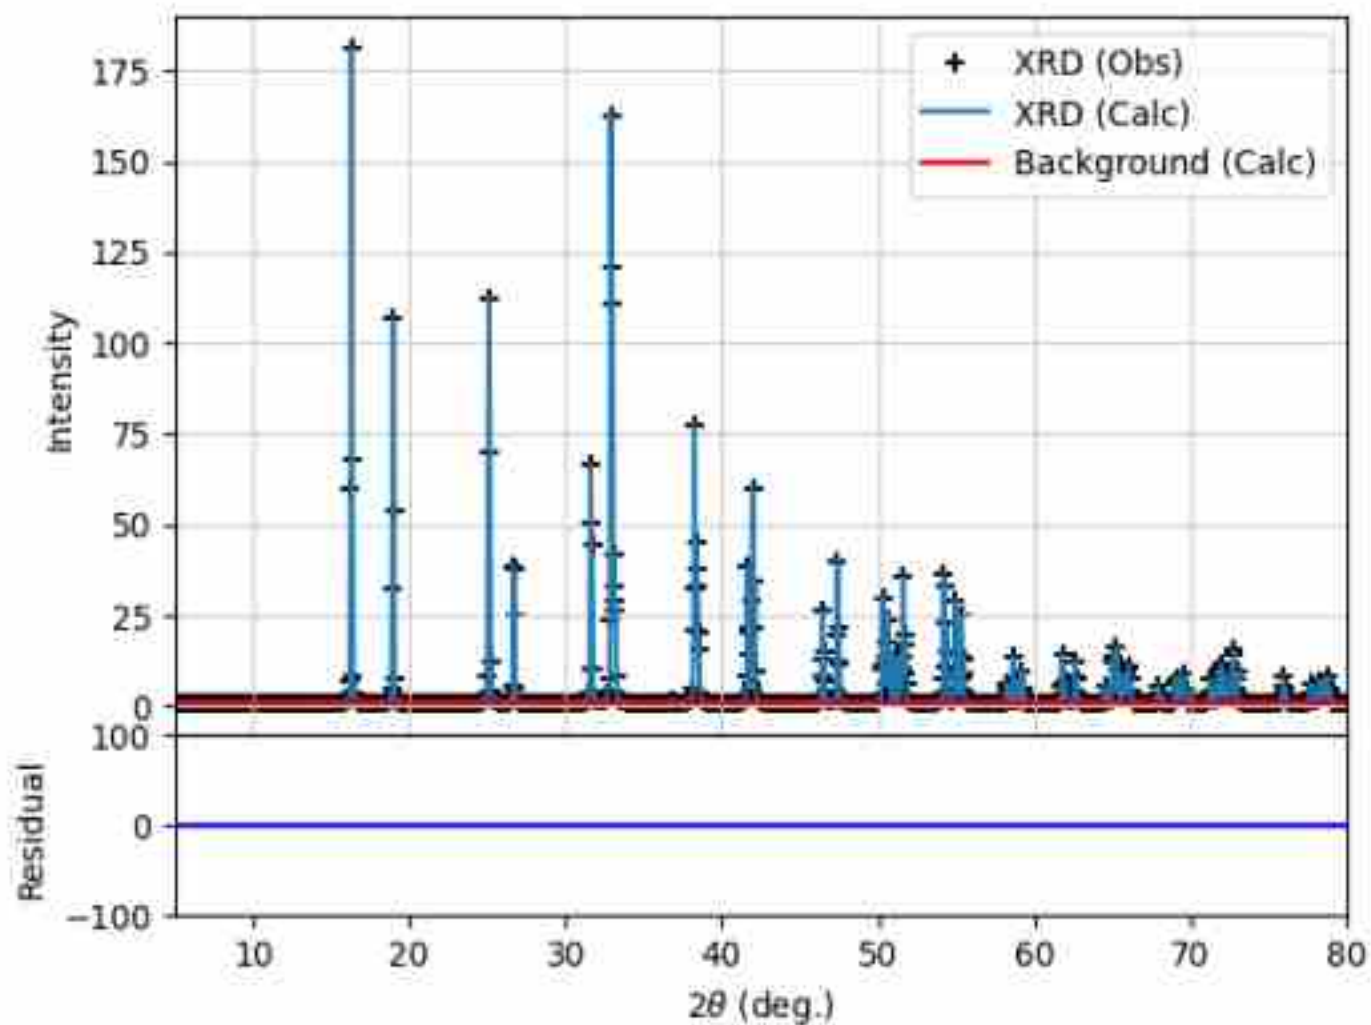

| RMSE before RR | Rwp    | RMSE after RR |
|----------------|--------|---------------|
| 0.015          | 0.0024 | 0.00164       |

# Tb1Al6Fe6

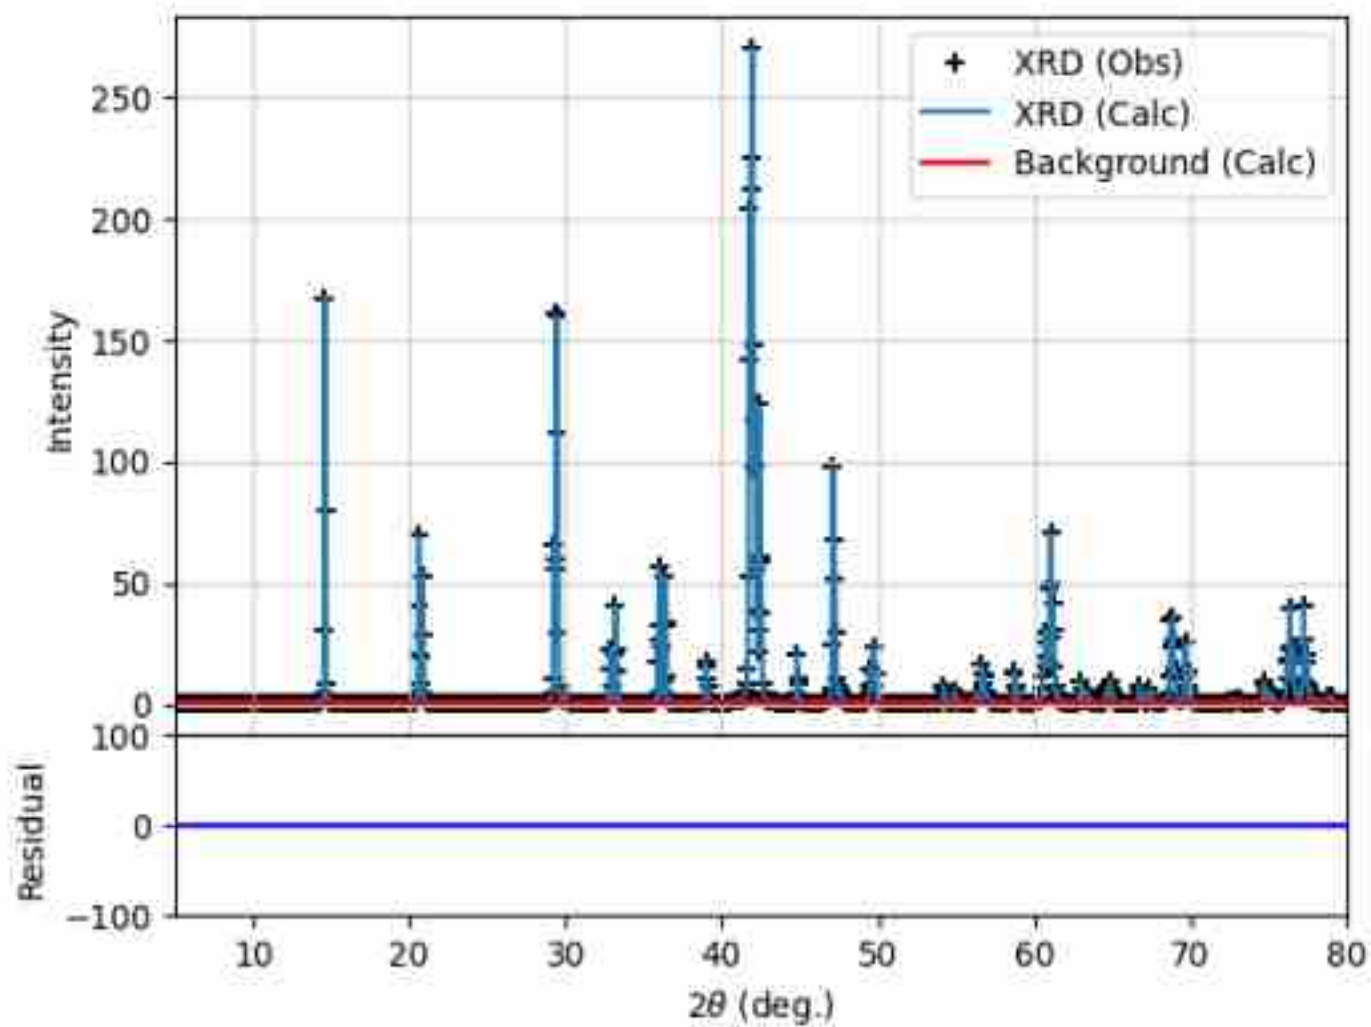

| RMSE before RR | Rwp    | RMSE after RR |
|----------------|--------|---------------|
| 0.015          | 0.0028 | 0.00047       |

# Tb1Nd1Fe17

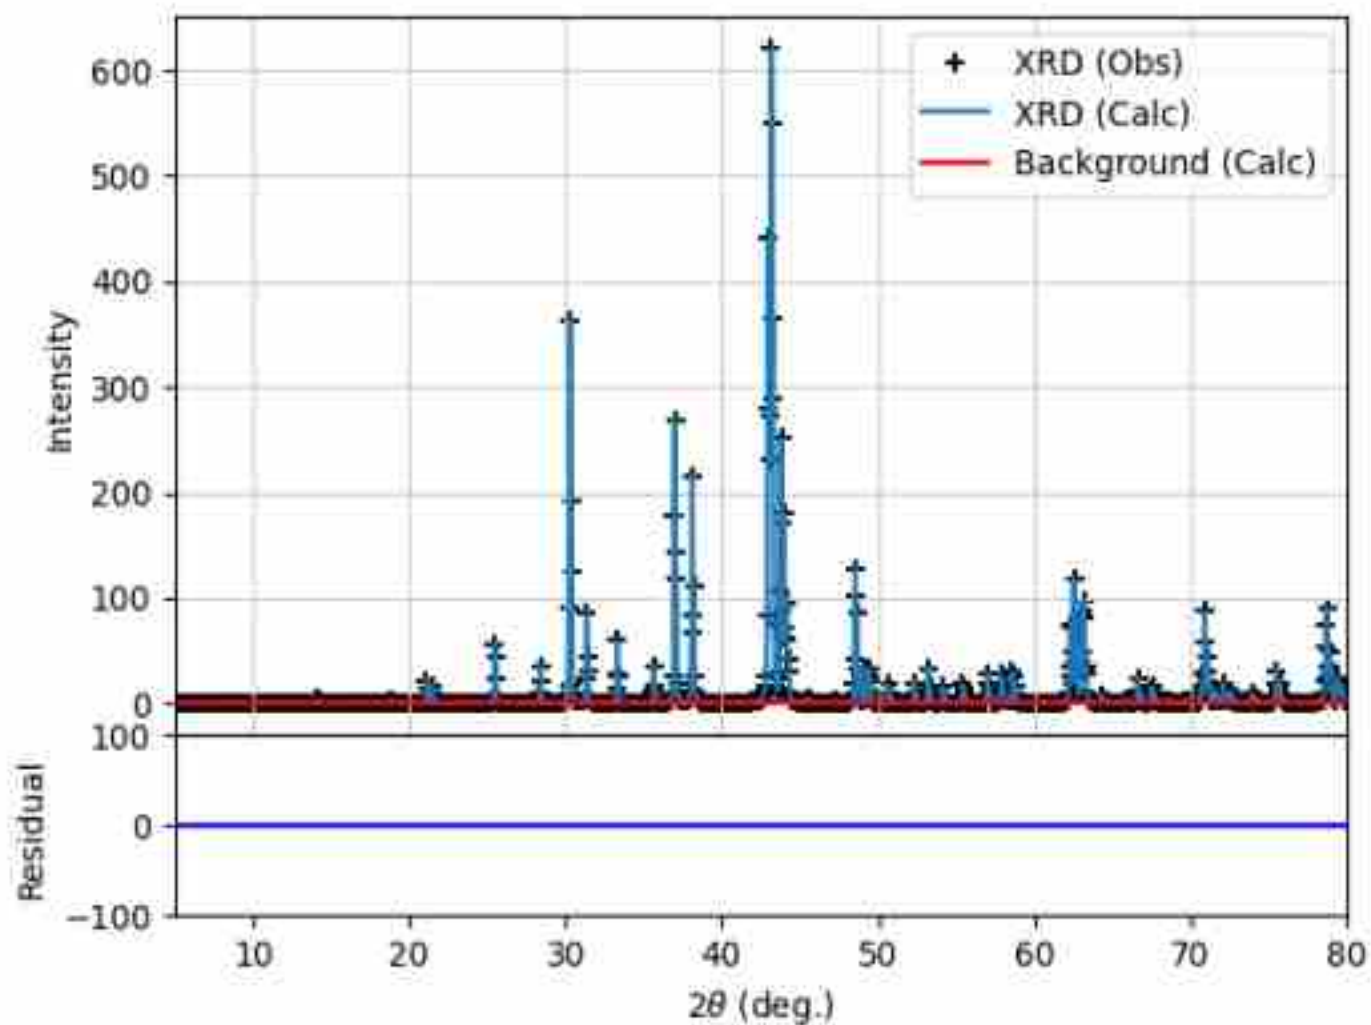

| RMSE before RR | Rwp     | RMSE after RR |
|----------------|---------|---------------|
| 0.015          | 0.00475 | 0.00085       |

# Tb<sub>2</sub>Ir<sub>4</sub>

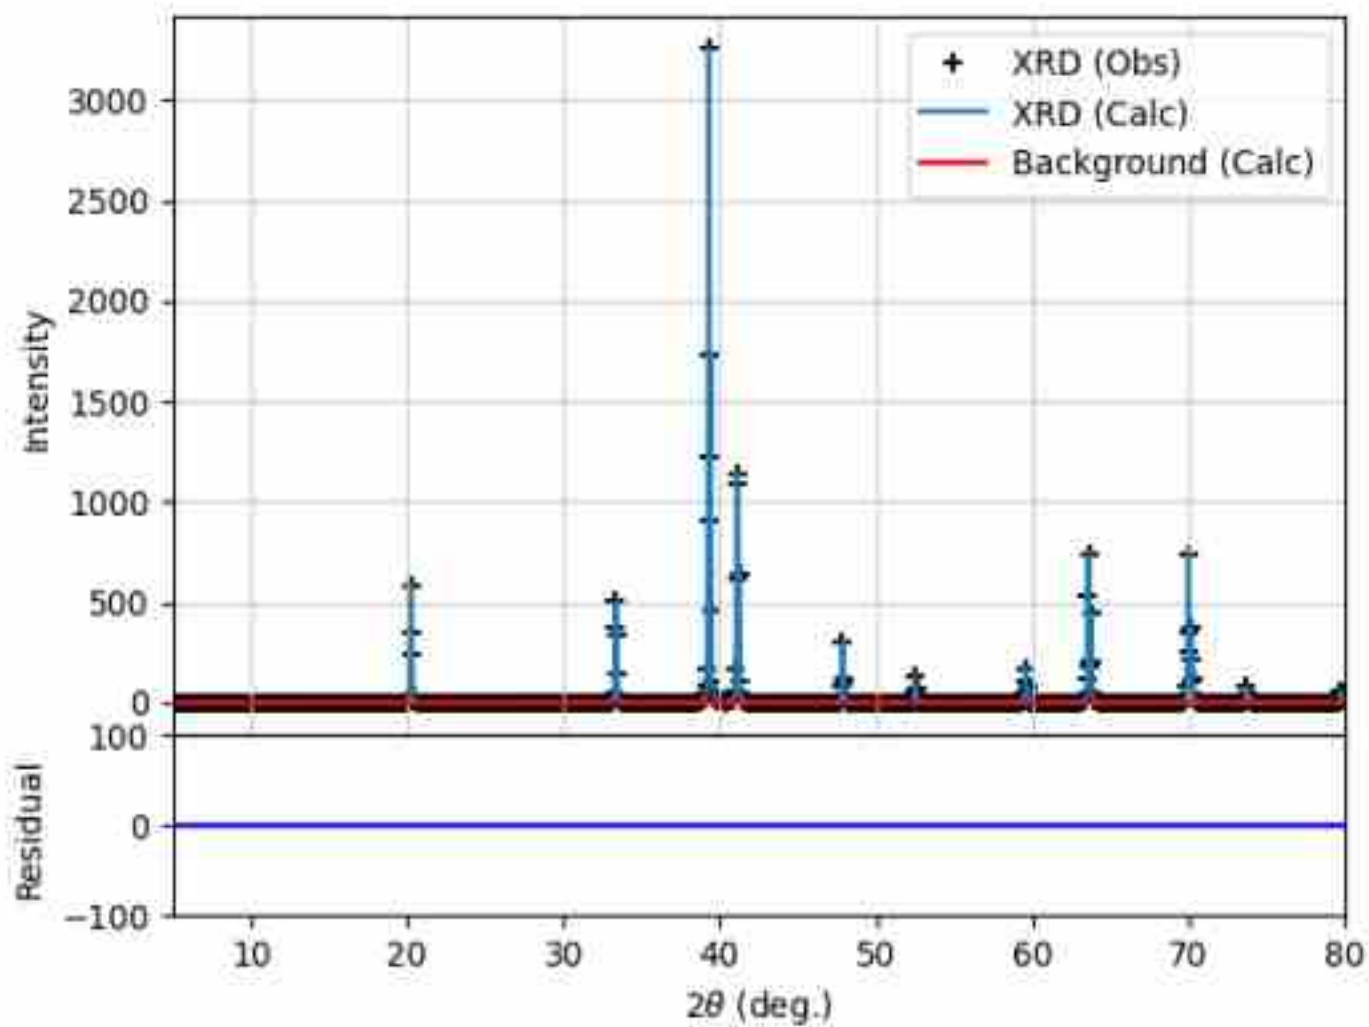

| RMSE before RR | Rwp     | RMSE after RR |
|----------------|---------|---------------|
| 0.015          | 0.13524 | 0.00215       |

# Tb<sub>3</sub>Al<sub>3</sub>Ni<sub>1</sub>Pd<sub>2</sub>

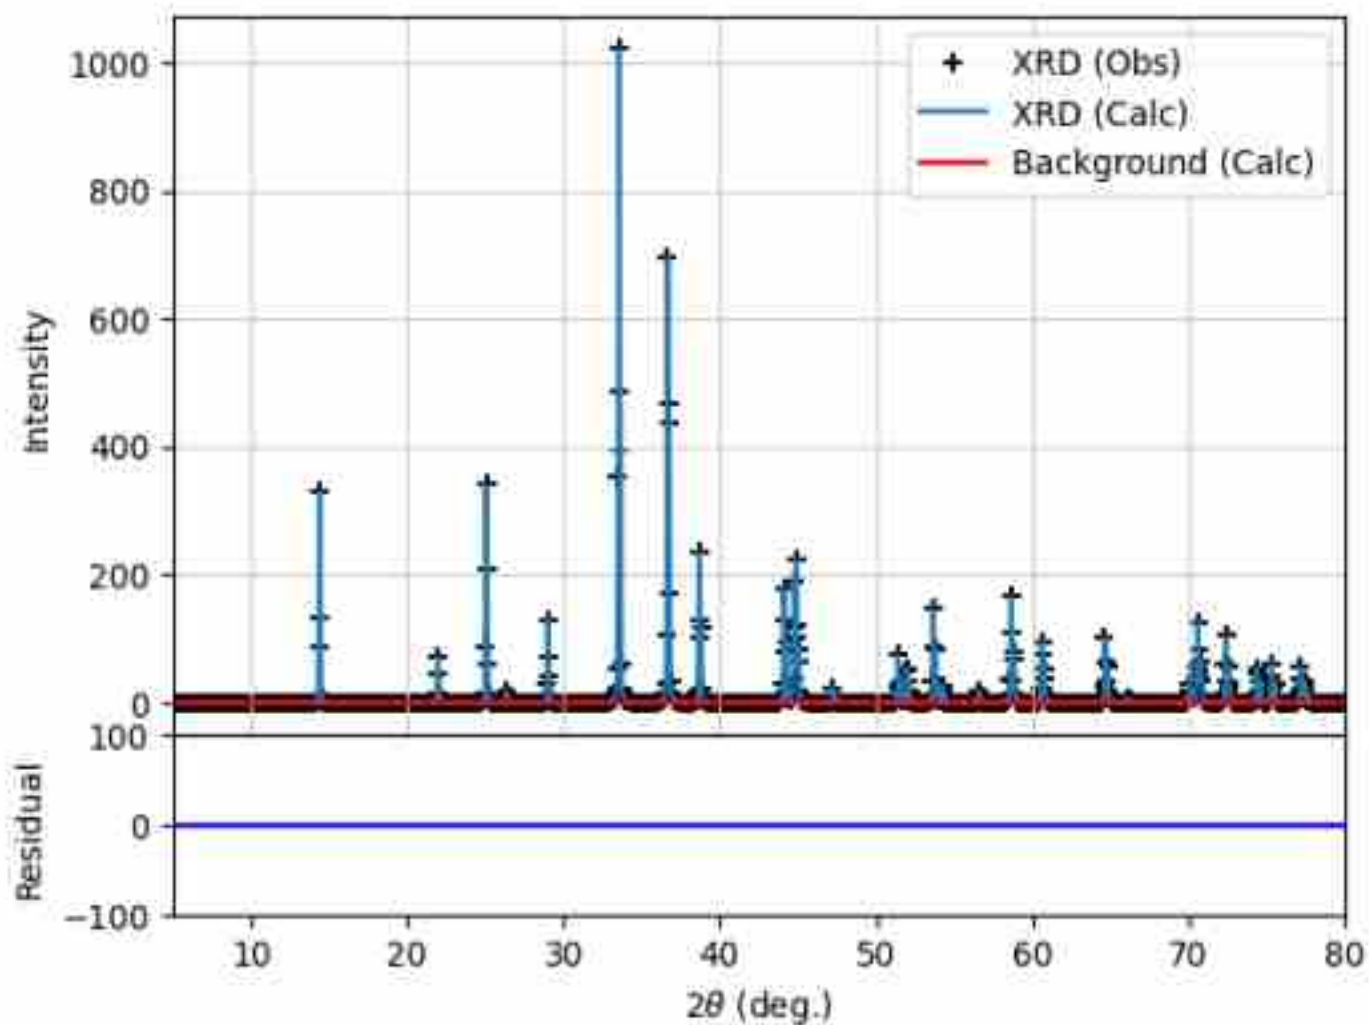

| RMSE before RR | Rwp     | RMSE after RR |
|----------------|---------|---------------|
| 0.015          | 0.00761 | 0.00071       |

# Tb<sub>4</sub>Mg<sub>2</sub>Se<sub>8</sub>

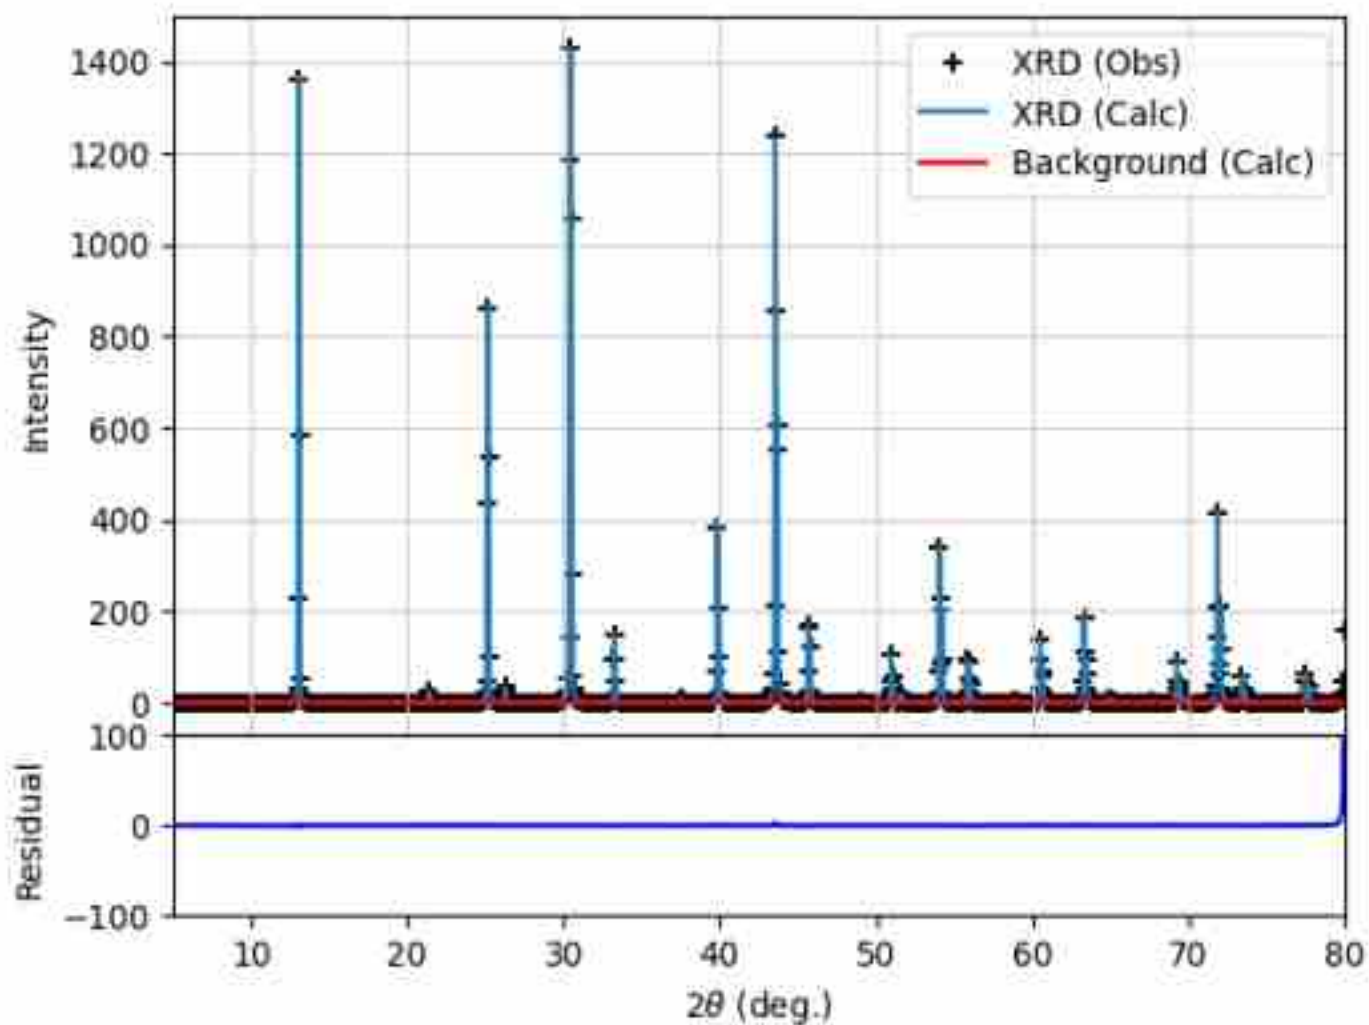

| RMSE before RR | Rwp      | RMSE after RR |
|----------------|----------|---------------|
| 0.015          | 13.28891 | 0.03694       |

# Th<sub>2</sub>B<sub>4</sub>O<sub>s</sub><sub>4</sub>

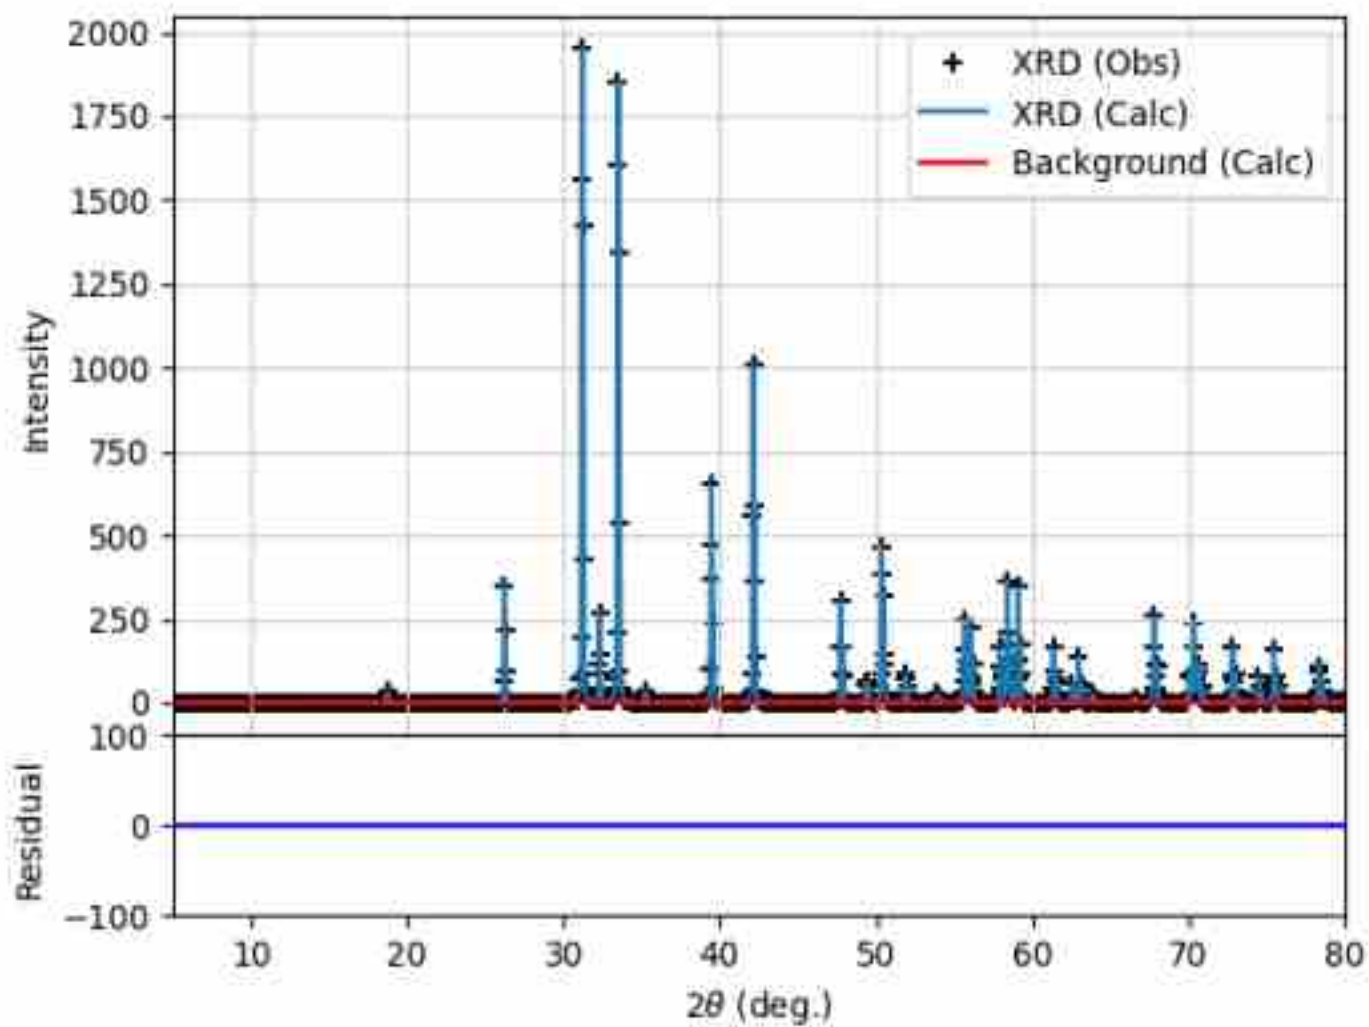

| RMSE before RR | Rwp     | RMSE after RR |
|----------------|---------|---------------|
| 0.015          | 0.00448 | 0.0037        |

# Th<sub>2</sub>Si<sub>2</sub>Se<sub>2</sub>

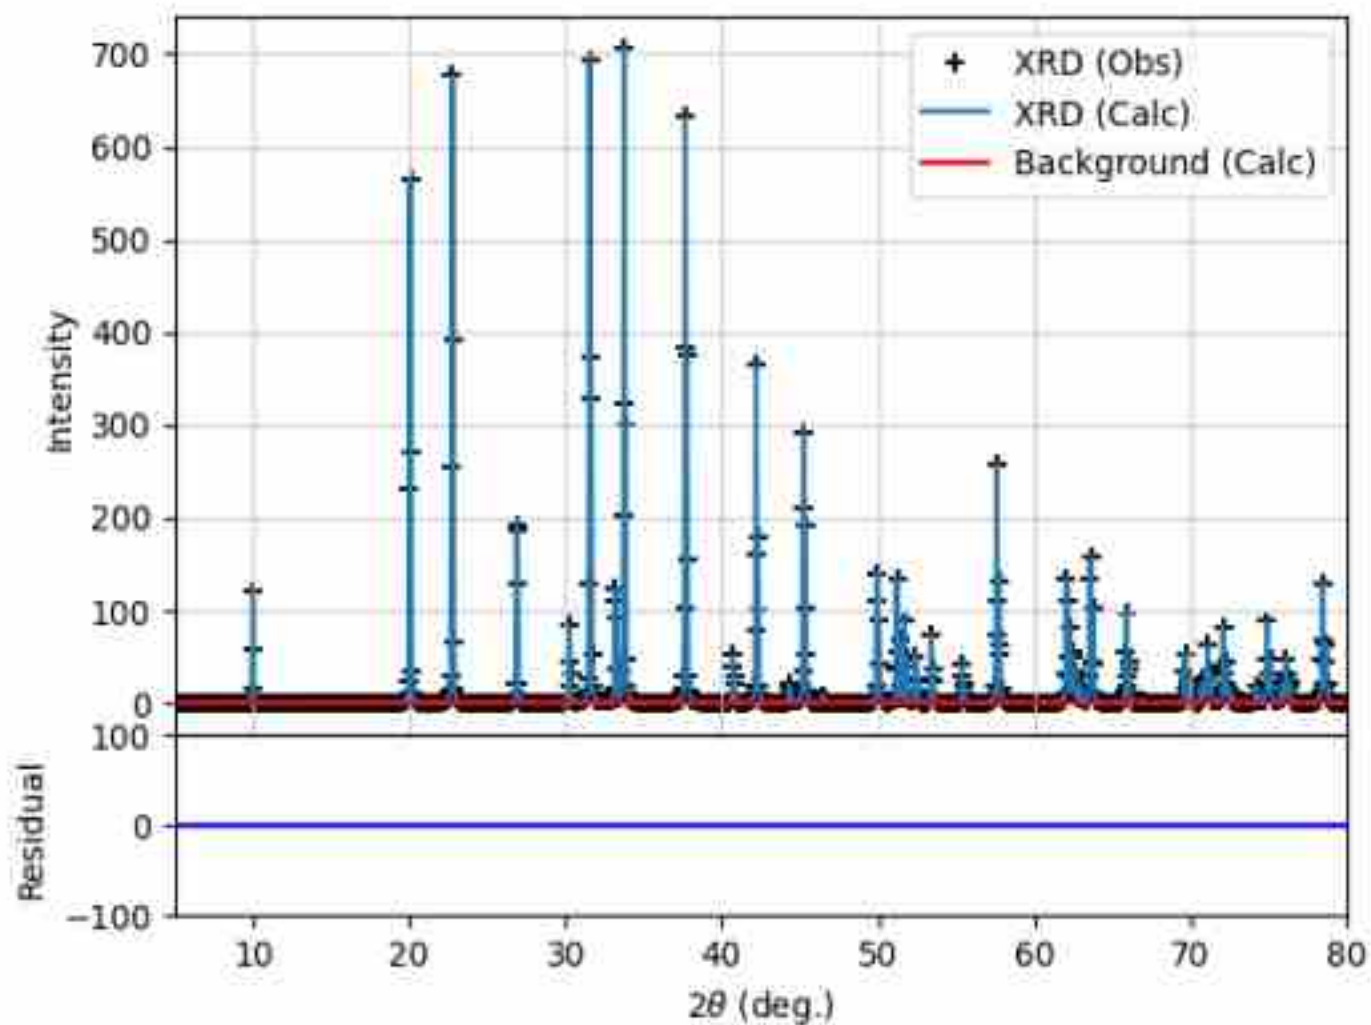

| RMSE before RR | Rwp     | RMSE after RR |
|----------------|---------|---------------|
| 0.015          | 0.00517 | 0.00269       |



# Ti1P4W3

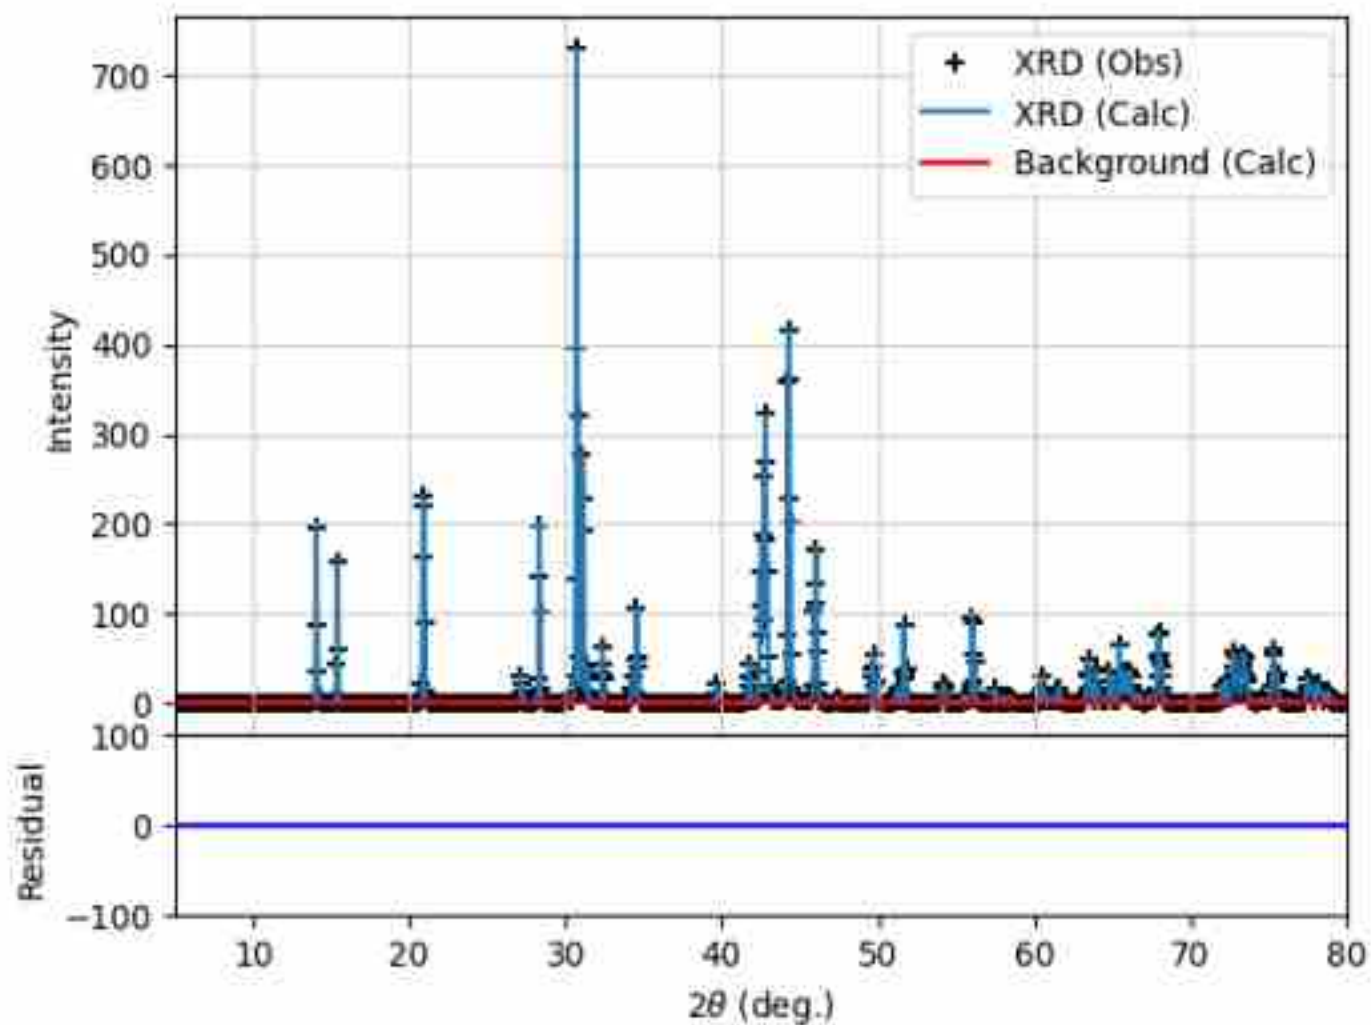

| RMSE before RR | Rwp     | RMSE after RR |
|----------------|---------|---------------|
| 0.015          | 0.00267 | 0.00059       |

# Ti2Cu3

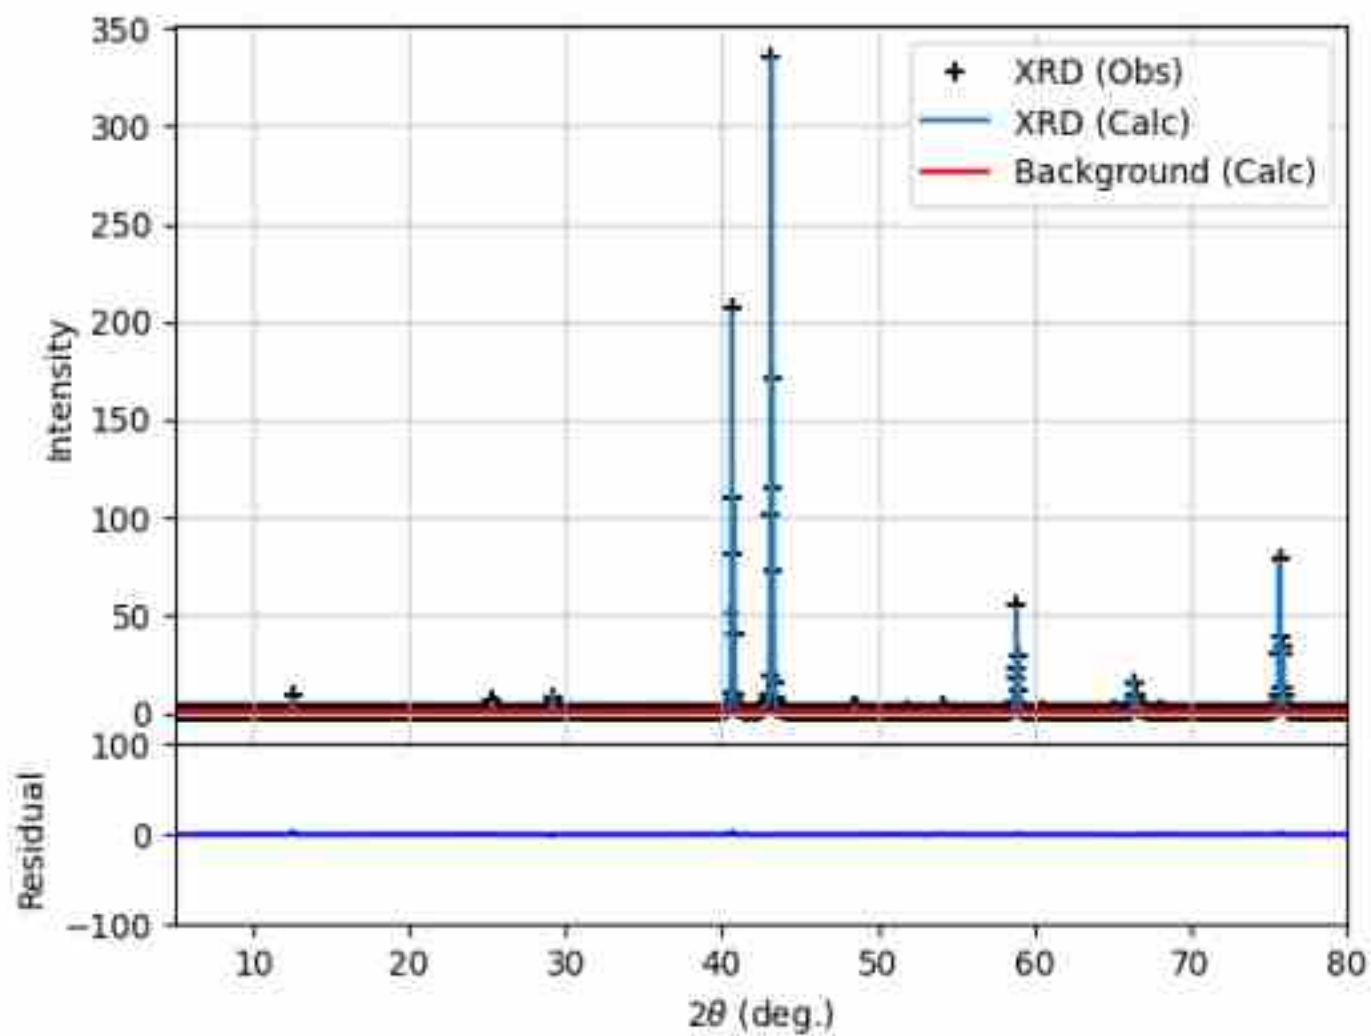

| RMSE before RR | Rwp     | RMSE after RR |
|----------------|---------|---------------|
| 0.015          | 4.73202 | 0.01507       |

# Ti2O4

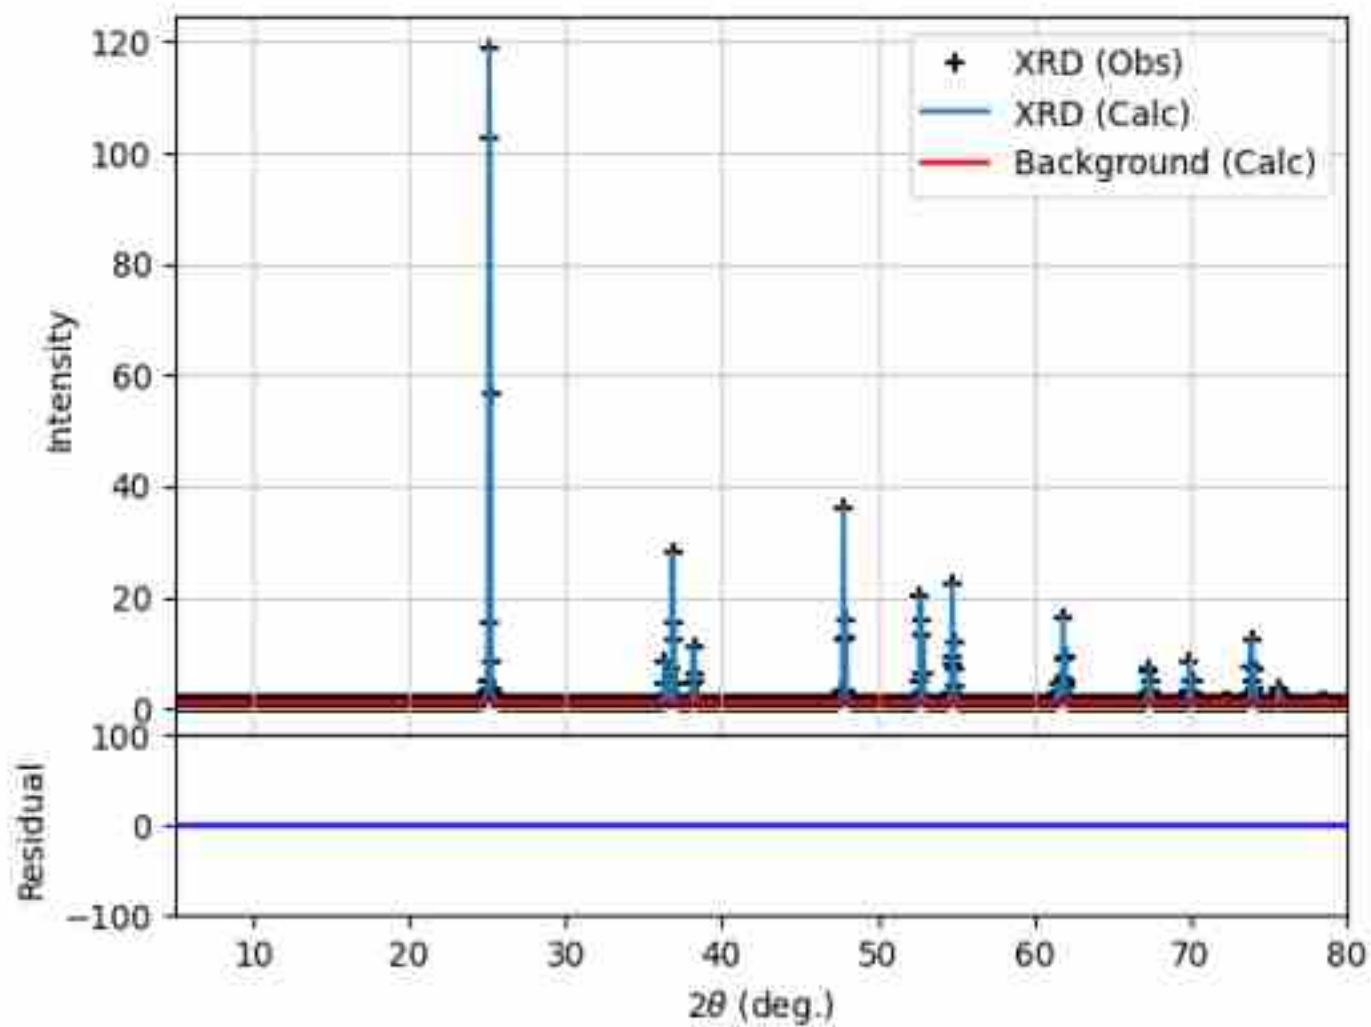

| RMSE before RR | Rwp    | RMSE after RR |
|----------------|--------|---------------|
| 0.015          | 0.0042 | 0.00082       |

# Tl2Cr1F6

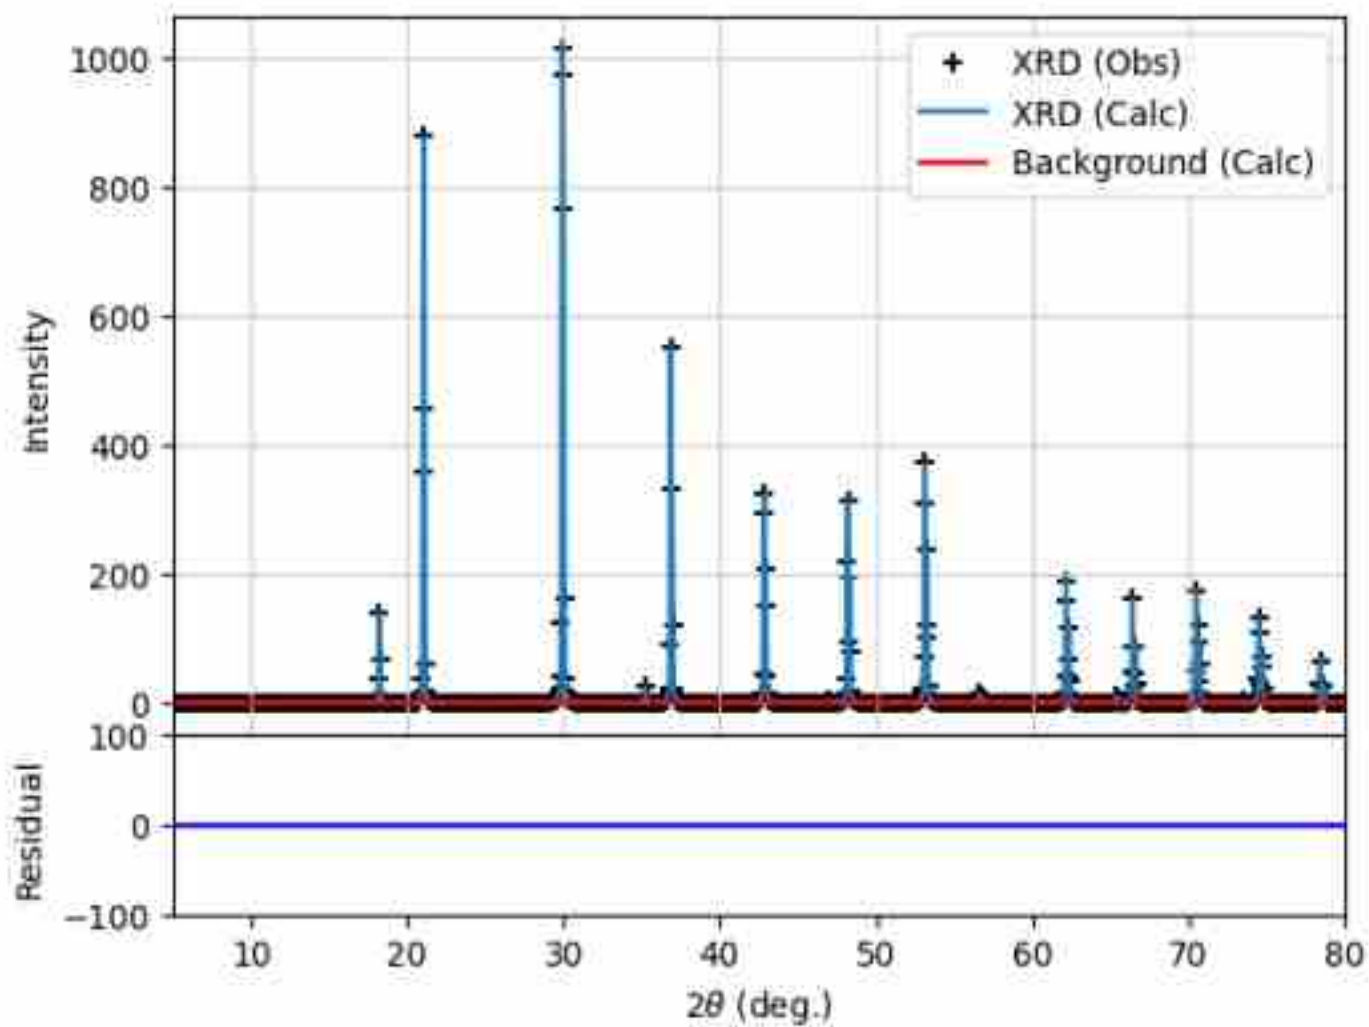

| RMSE before RR | Rwp     | RMSE after RR |
|----------------|---------|---------------|
| 0.015          | 0.02913 | 0.0065        |

# Tl<sub>2</sub>Sn<sub>1</sub>Hg<sub>1</sub>Te<sub>4</sub>

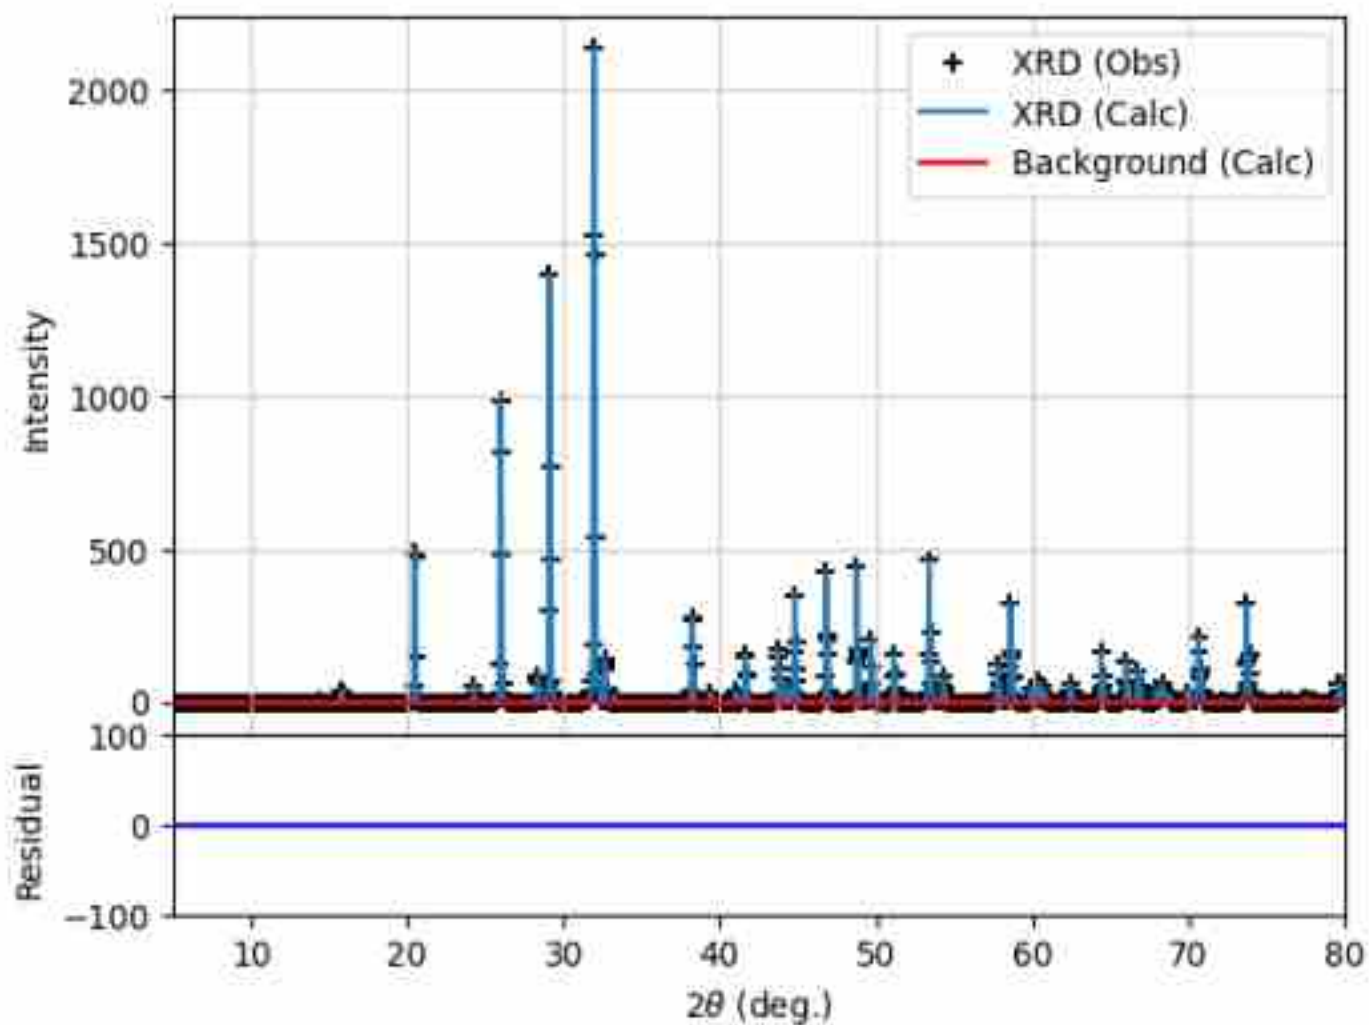

| RMSE before RR | Rwp     | RMSE after RR |
|----------------|---------|---------------|
| 0.015          | 0.00359 | 0.00029       |

# Tm1Be1Cu4

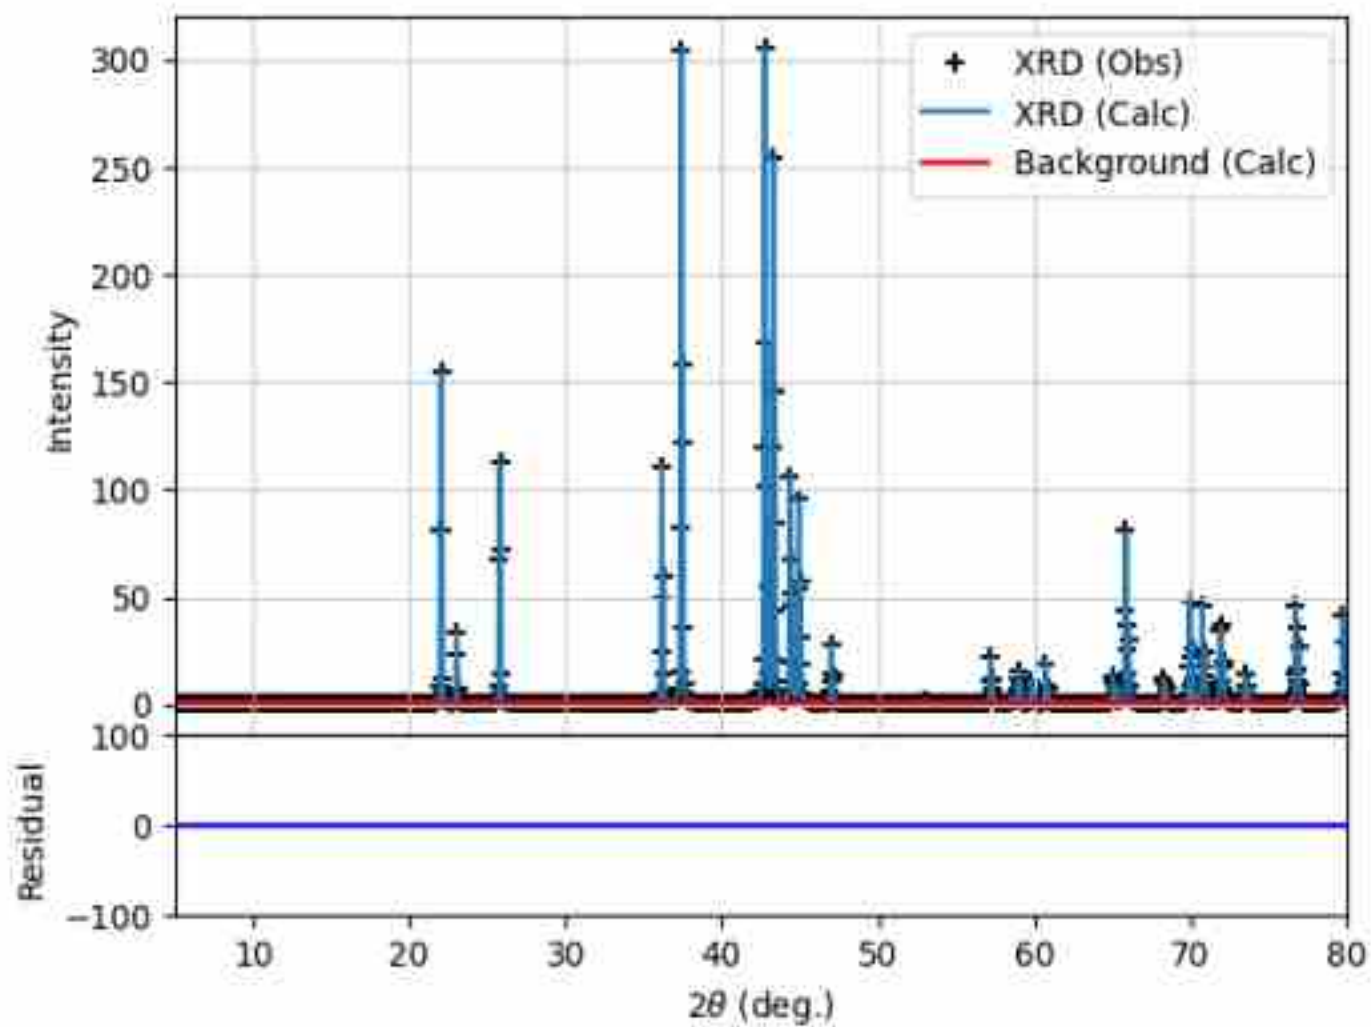

| RMSE before RR | Rwp     | RMSE after RR |
|----------------|---------|---------------|
| 0.015          | 0.00344 | 0.00025       |

# Tm1Co2Si2

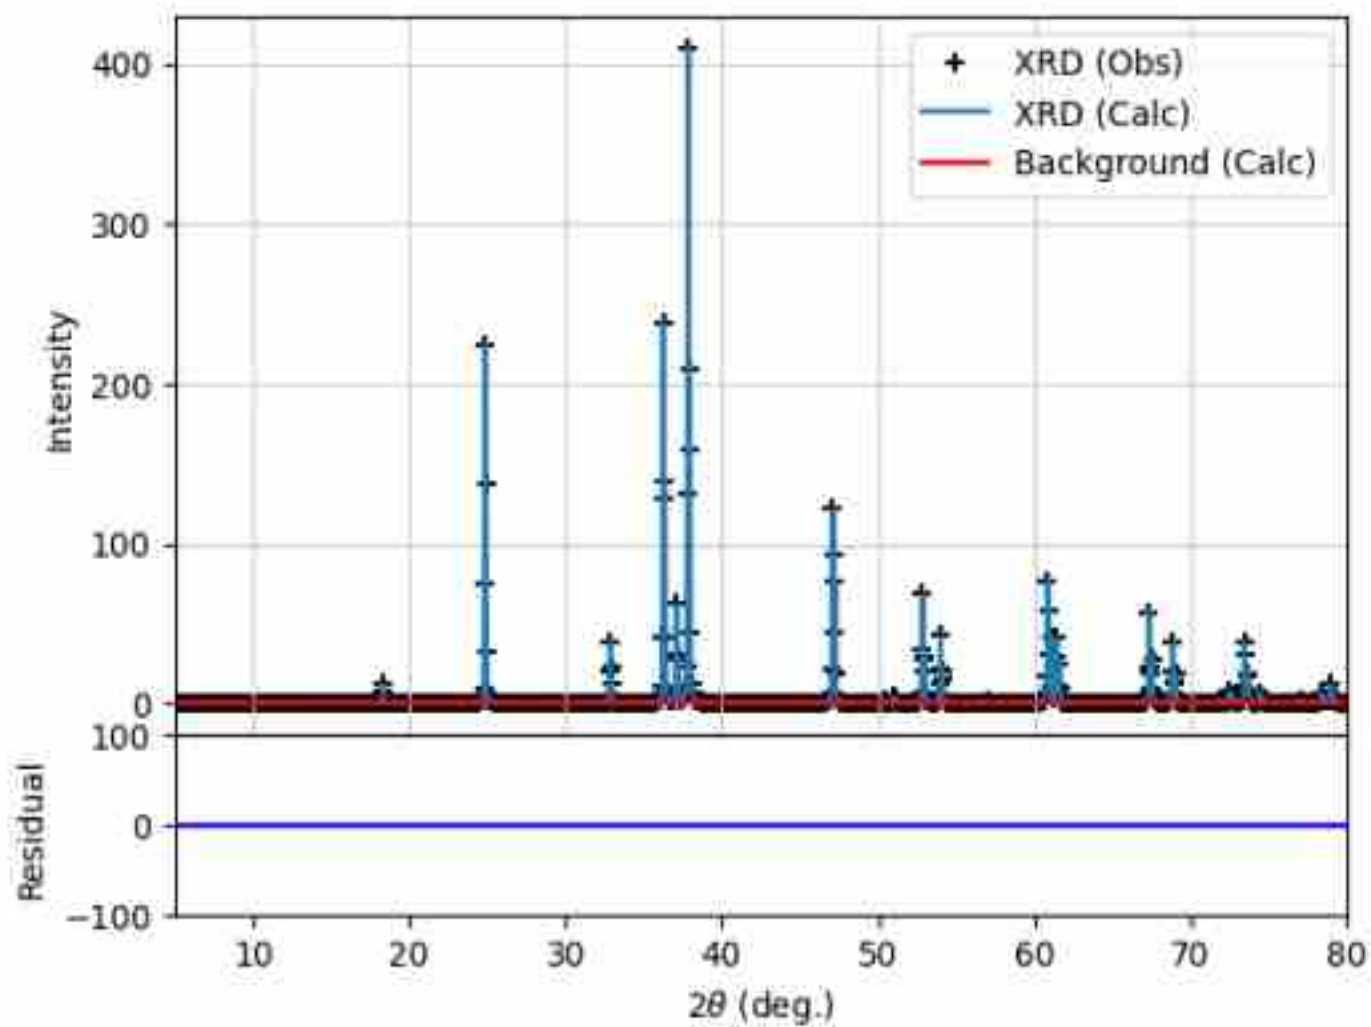

| RMSE before RR | Rwp     | RMSE after RR |
|----------------|---------|---------------|
| 0.015          | 0.00364 | 0.00078       |

# U<sub>2</sub>Fe<sub>2</sub>As<sub>4</sub>

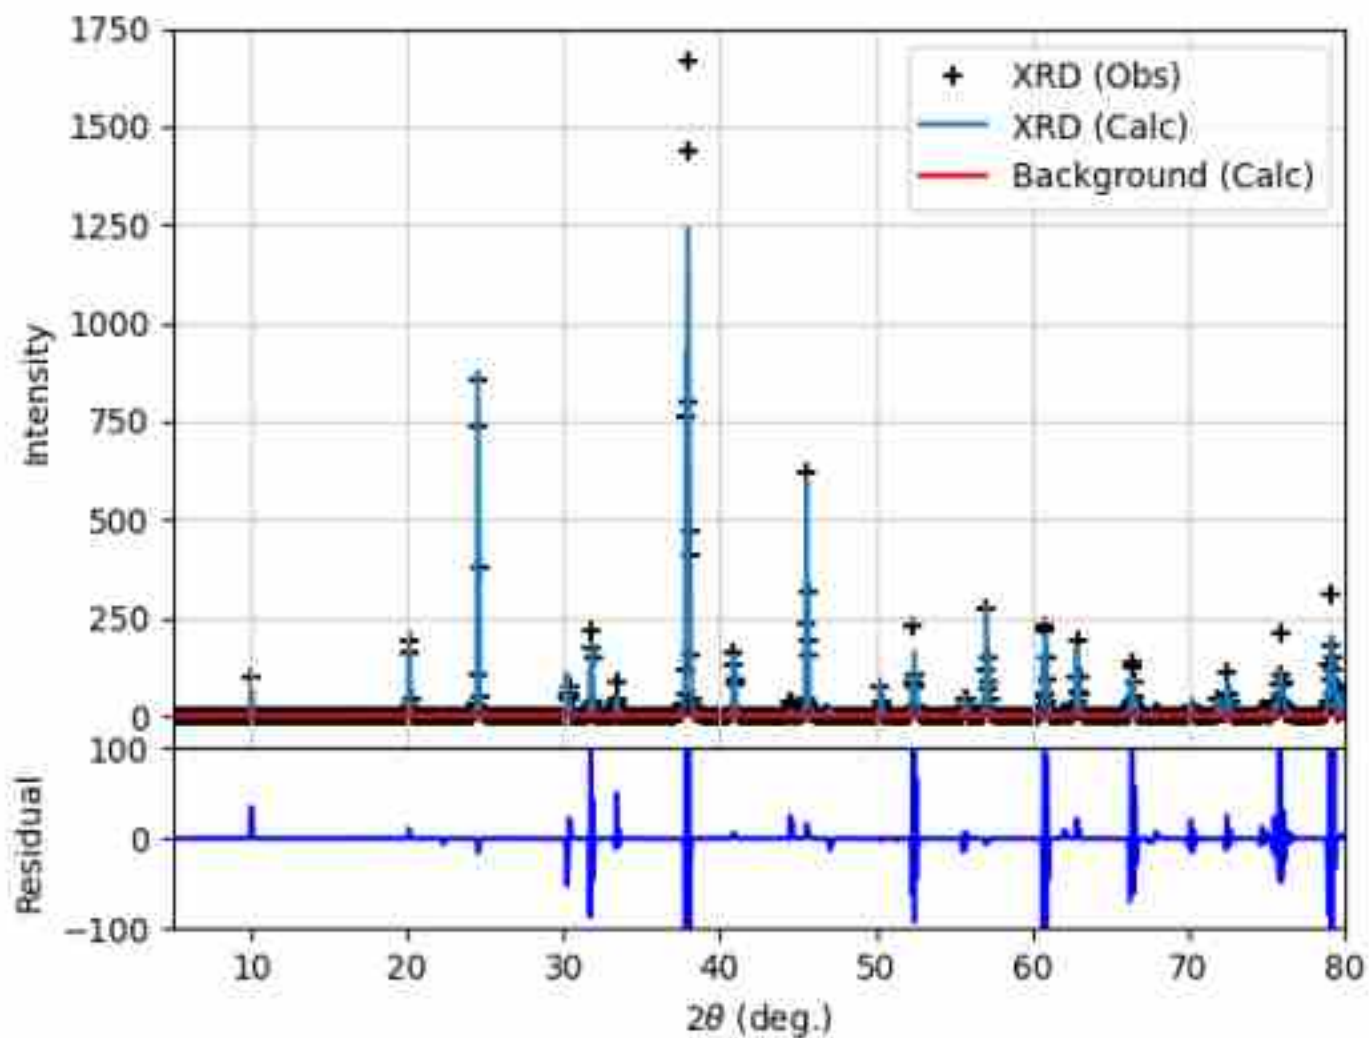

| RMSE before RR | Rwp      | RMSE after RR |
|----------------|----------|---------------|
| 0.015          | 53.96777 | 0.03359       |



# U<sub>2</sub>NiSb<sub>4</sub>

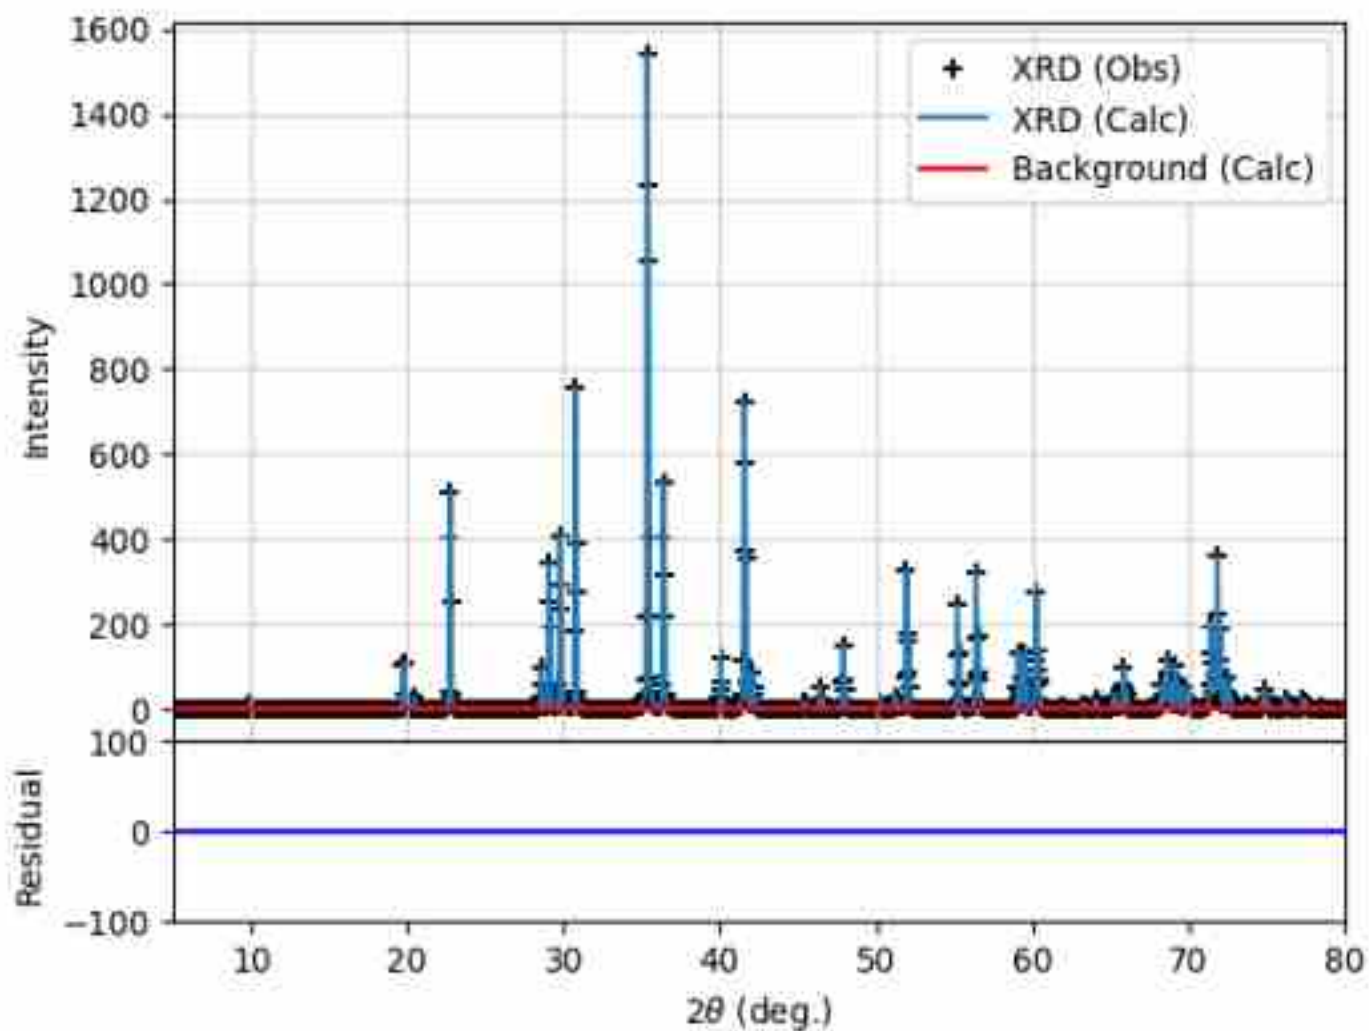

| RMSE before RR | Rwp    | RMSE after RR |
|----------------|--------|---------------|
| 0.015          | 0.0062 | 0.00043       |

# U2P1N2

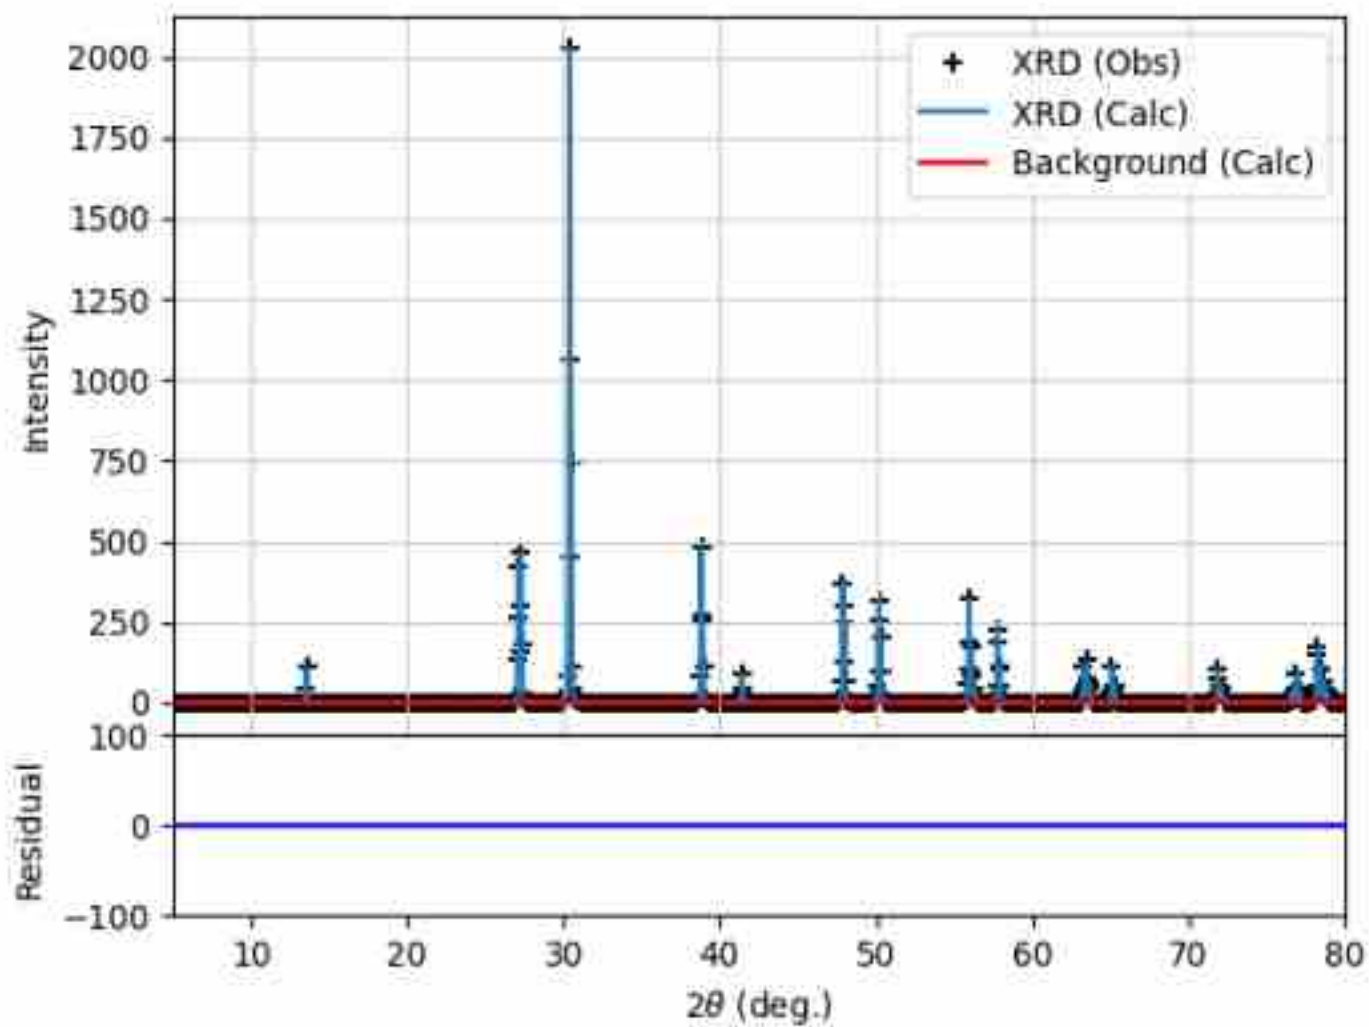

| RMSE before RR | Rwp     | RMSE after RR |
|----------------|---------|---------------|
| 0.015          | 0.00473 | 0.00244       |

# U<sub>3</sub>Al<sub>3</sub>Ru<sub>3</sub>

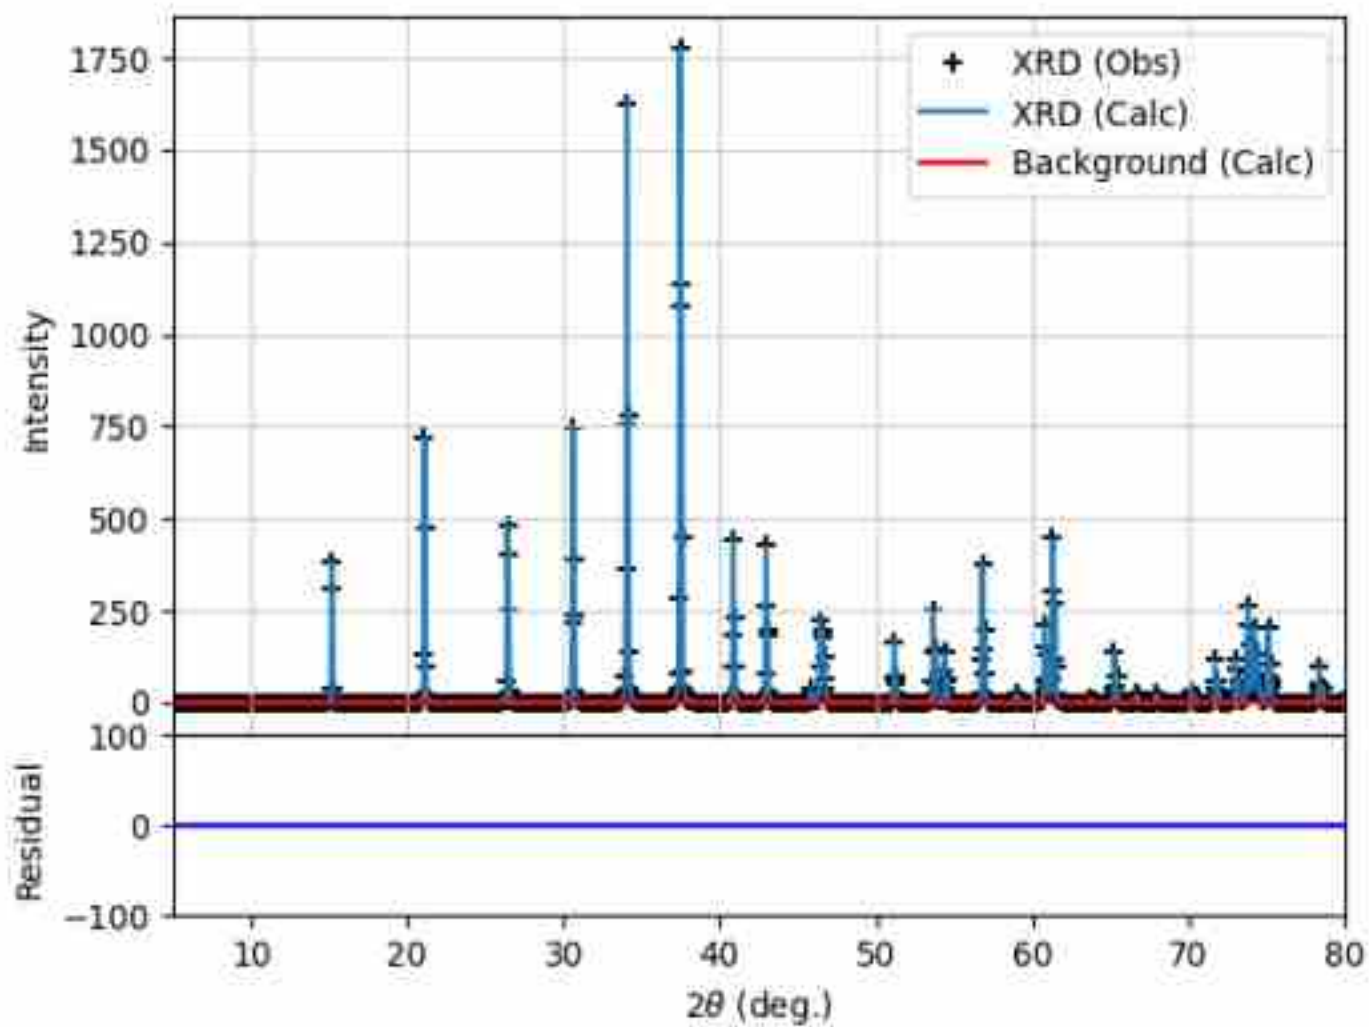

| RMSE before RR | Rwp     | RMSE after RR |
|----------------|---------|---------------|
| 0.015          | 0.00661 | 0.00238       |

# V<sub>2</sub>Cr<sub>1</sub>Se<sub>4</sub>

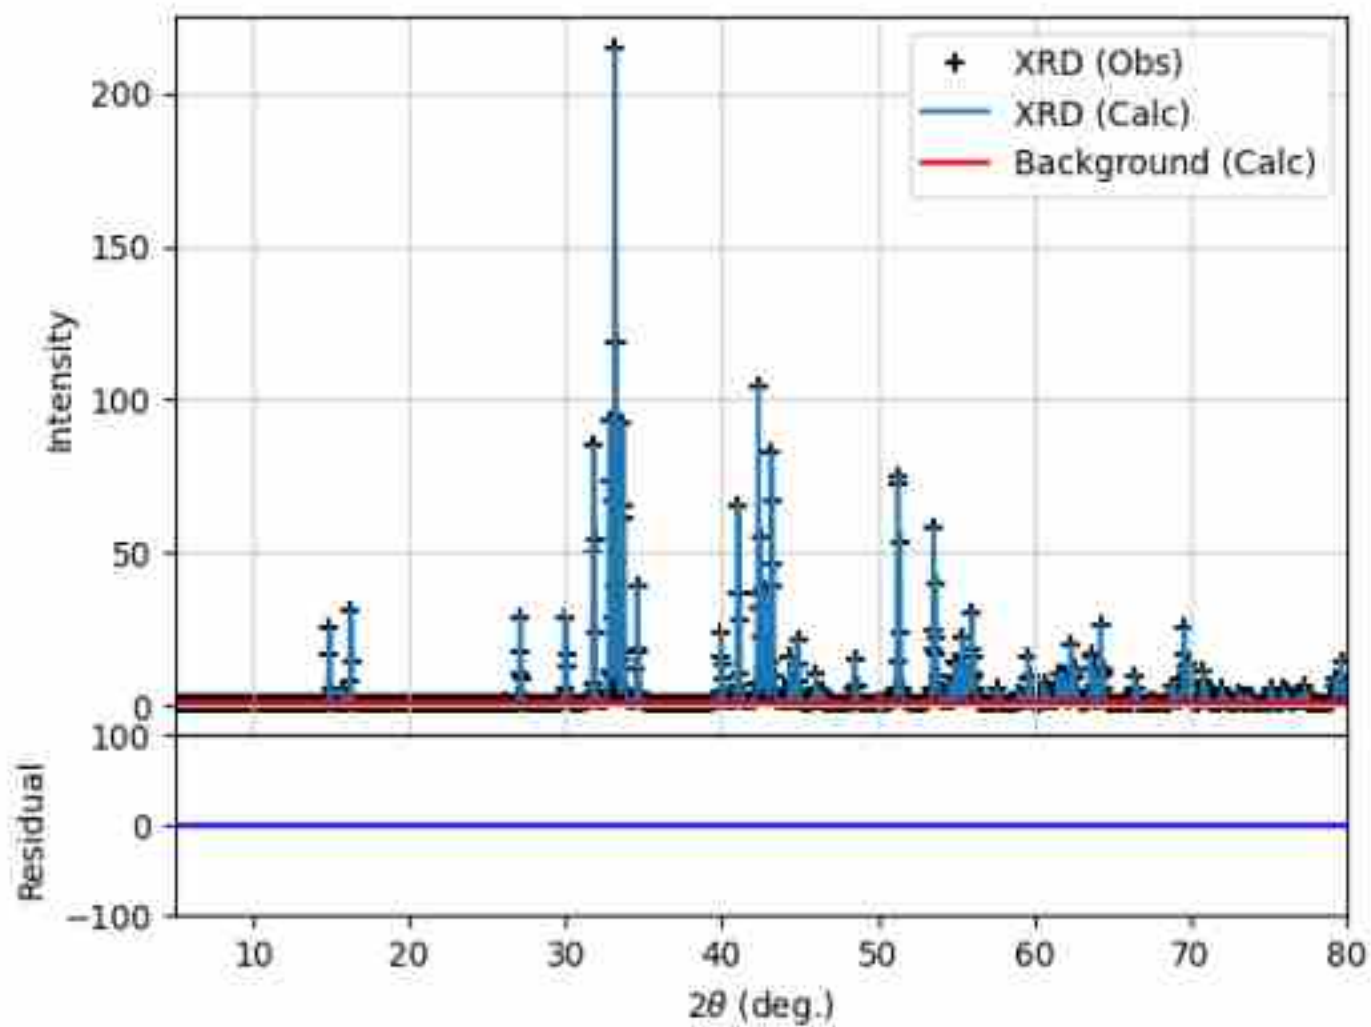

| RMSE before RR | Rwp     | RMSE after RR |
|----------------|---------|---------------|
| 0.015          | 0.00322 | 0.00042       |

# V2O2F2

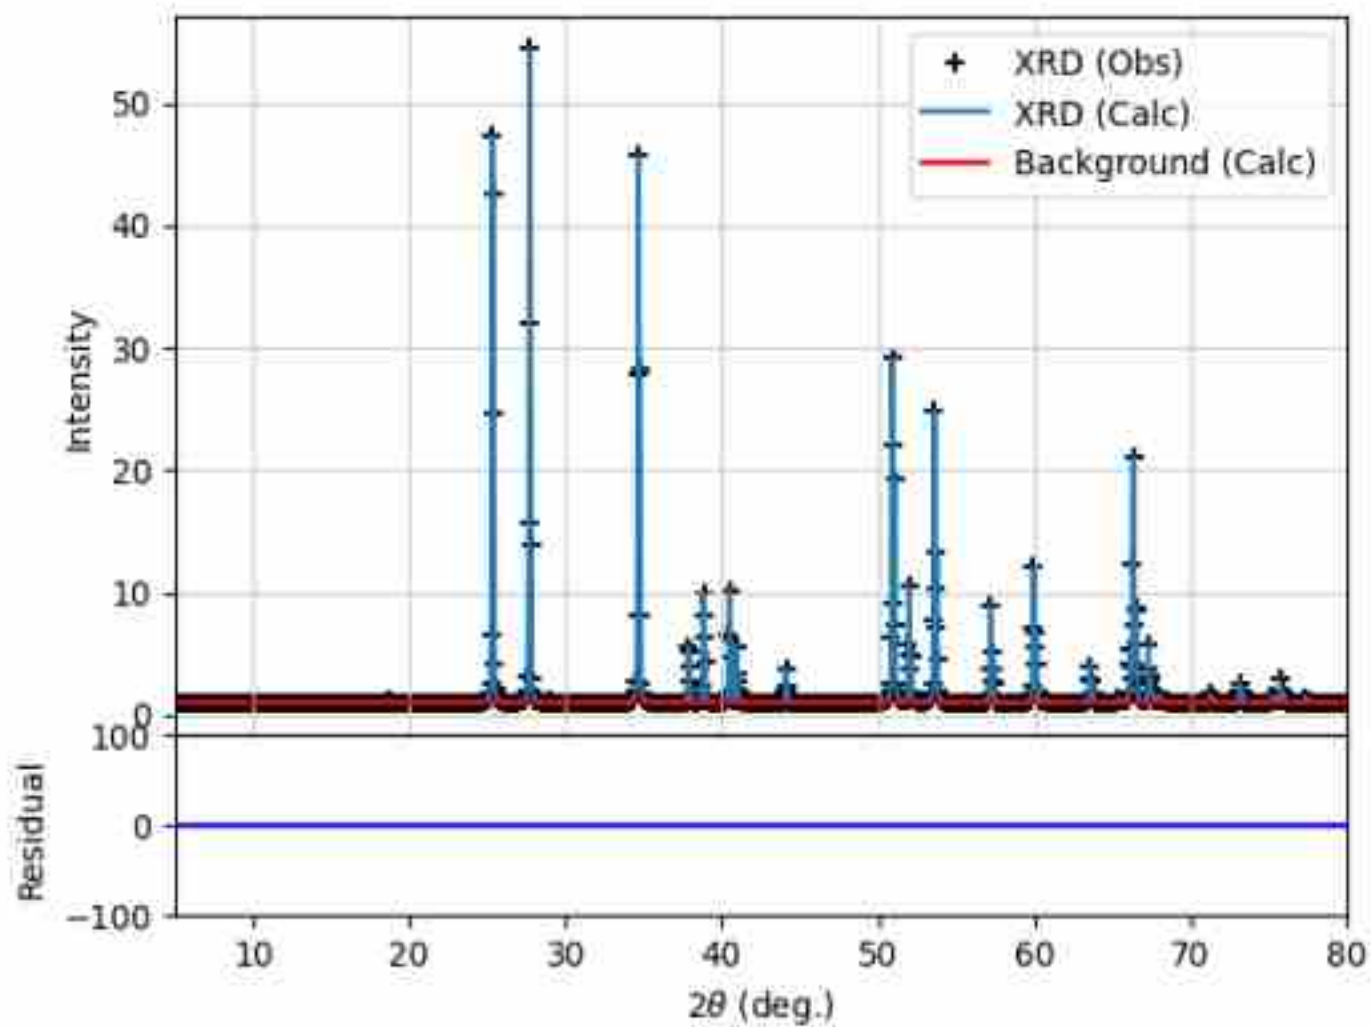

| RMSE before RR | Rwp     | RMSE after RR |
|----------------|---------|---------------|
| 0.015          | 0.00152 | 0.00038       |

# V2O3F1

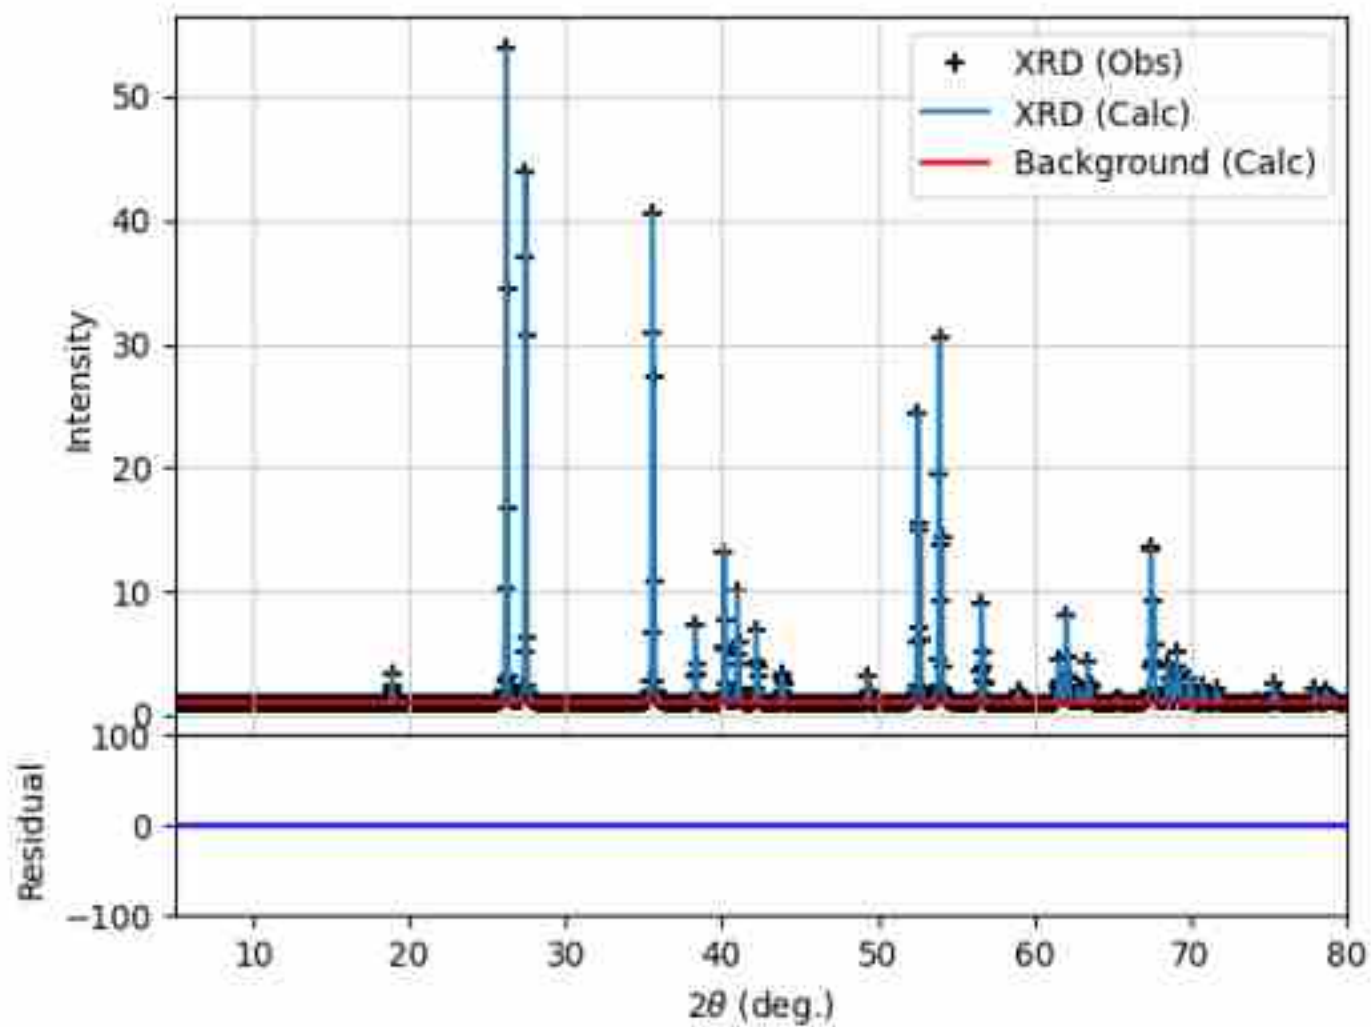

| RMSE before RR | Rwp     | RMSE after RR |
|----------------|---------|---------------|
| 0.015          | 0.00225 | 0.00071       |

# Y1Si2Ir2

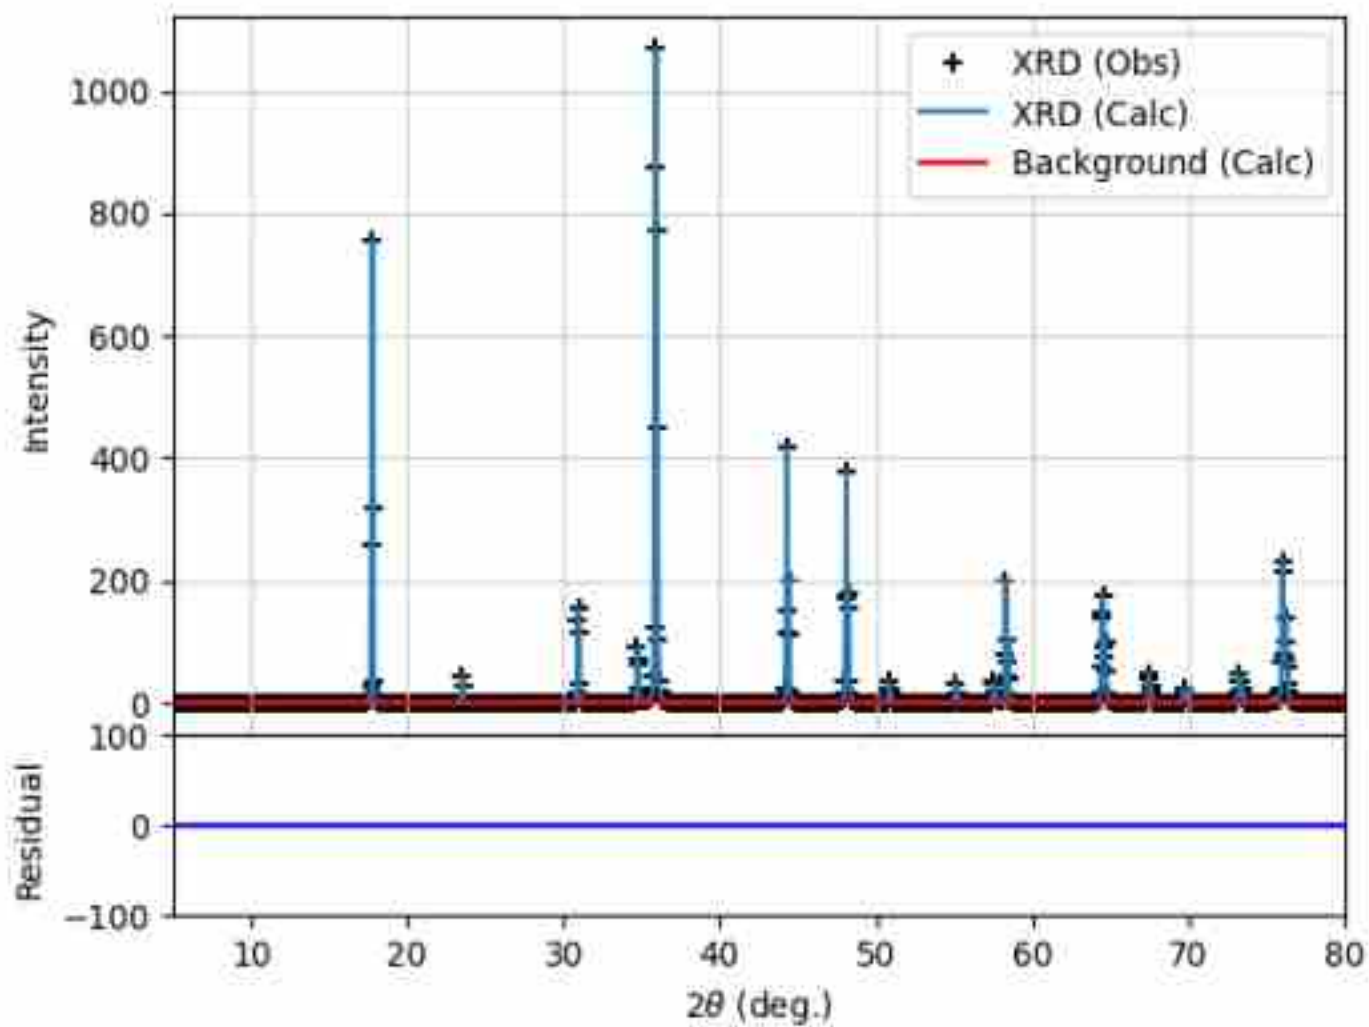

| RMSE before RR | Rwp     | RMSE after RR |
|----------------|---------|---------------|
| 0.015          | 0.00295 | 0.00063       |

# Y<sub>2</sub>Ag<sub>2</sub>Se<sub>4</sub>

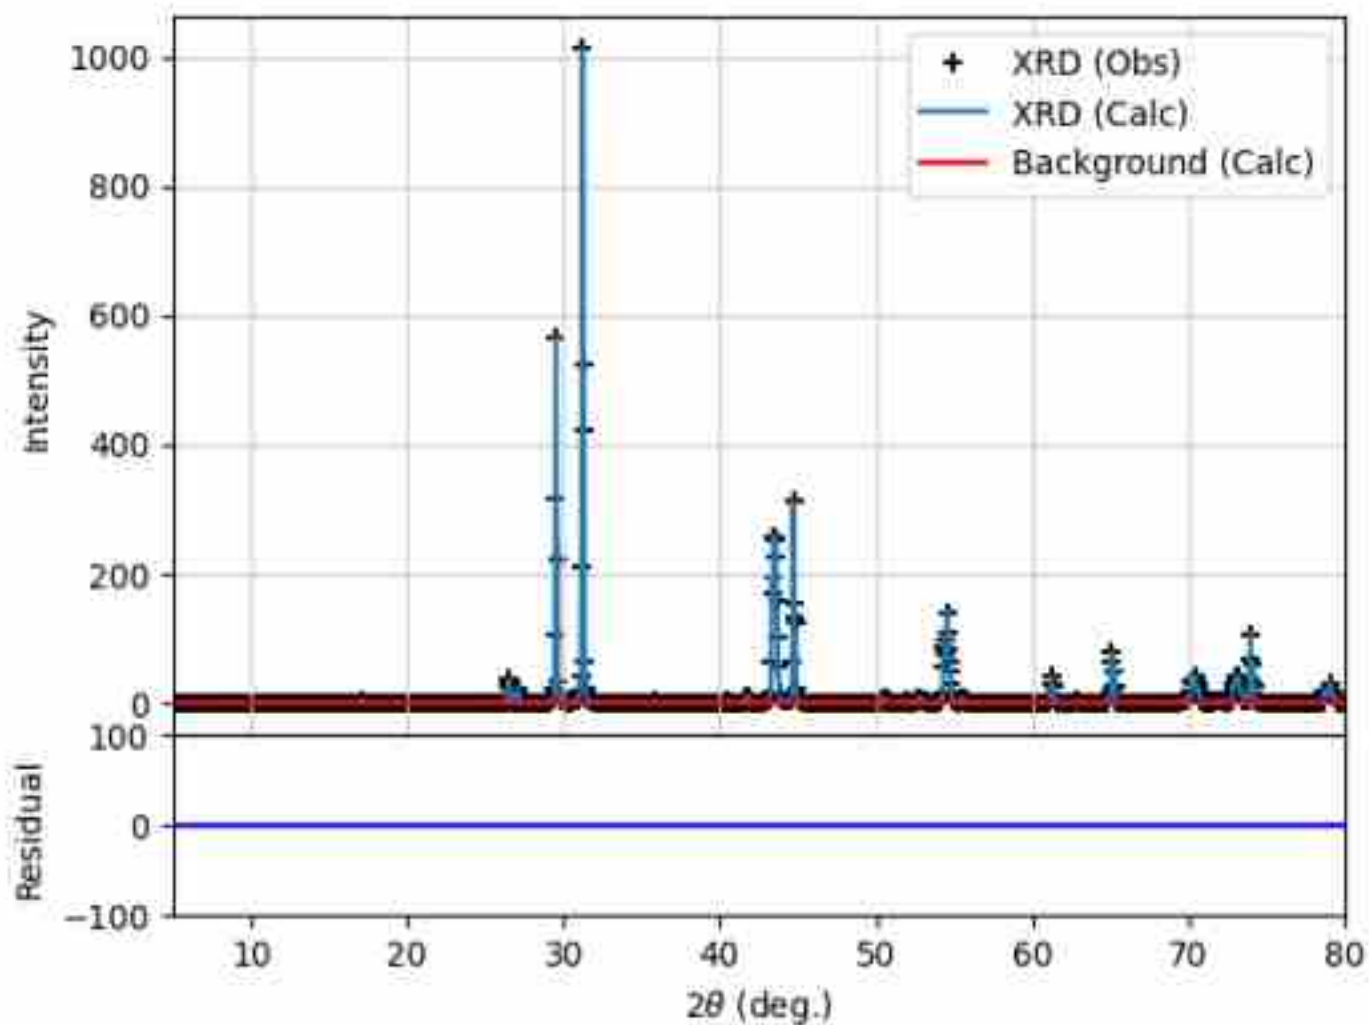

| RMSE before RR | Rwp     | RMSE after RR |
|----------------|---------|---------------|
| 0.015          | 0.33361 | 0.01086       |



# Y<sub>2</sub>Ga<sub>4</sub>Ni<sub>2</sub>

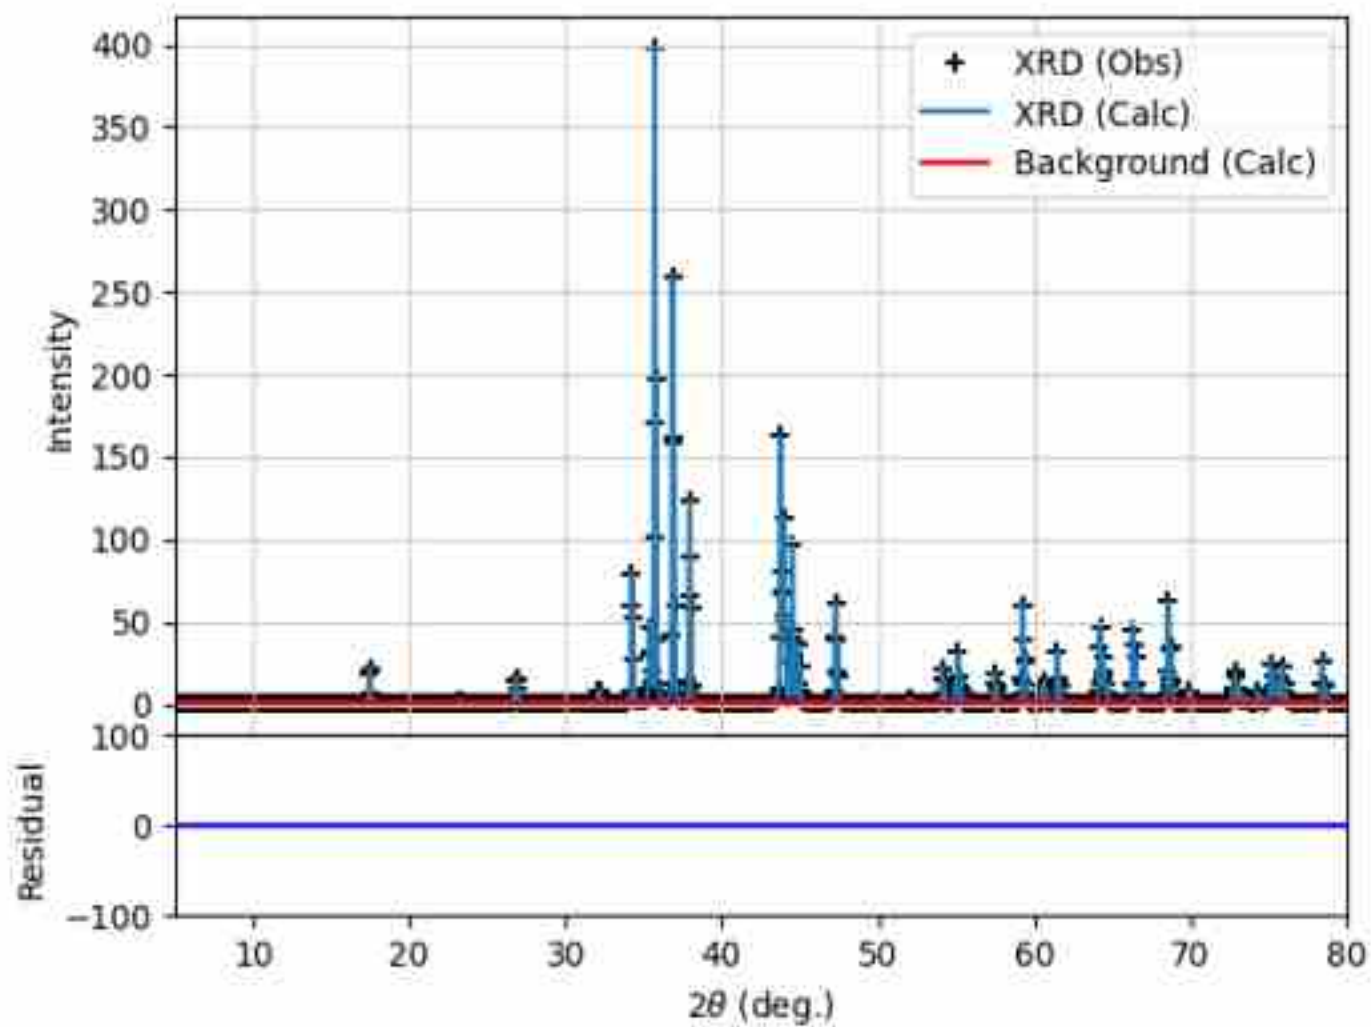

| RMSE before RR | Rwp     | RMSE after RR |
|----------------|---------|---------------|
| 0.015          | 0.00327 | 0.00039       |

# Y<sub>2</sub>Ga<sub>8</sub>Co<sub>1</sub>

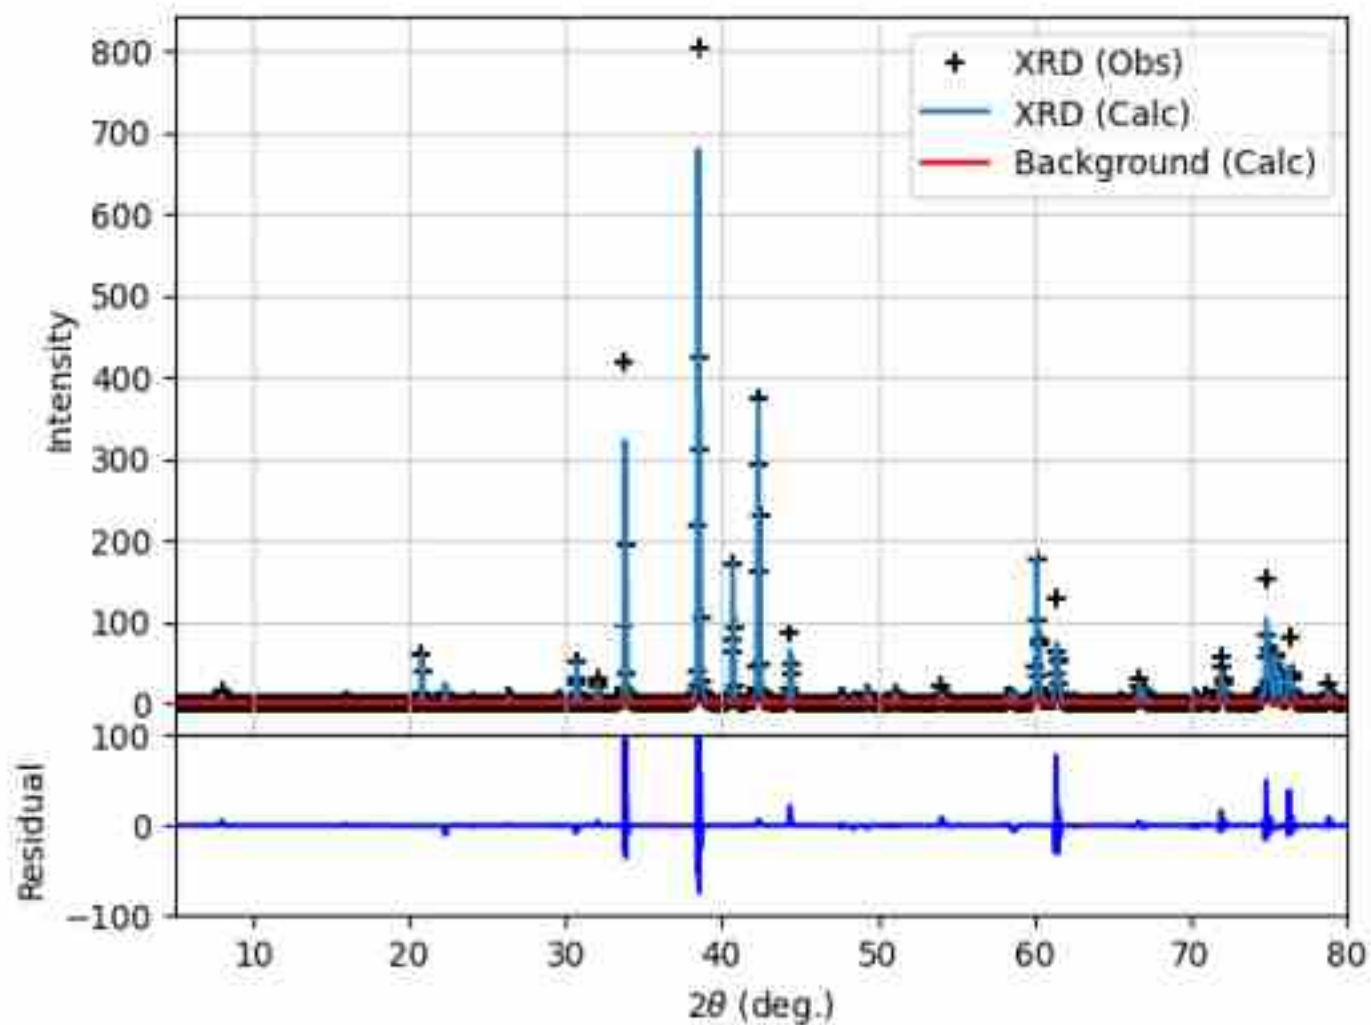

| RMSE before RR | Rwp      | RMSE after RR |
|----------------|----------|---------------|
| 0.015          | 21.04229 | 0.07306       |

# Y2Ir4

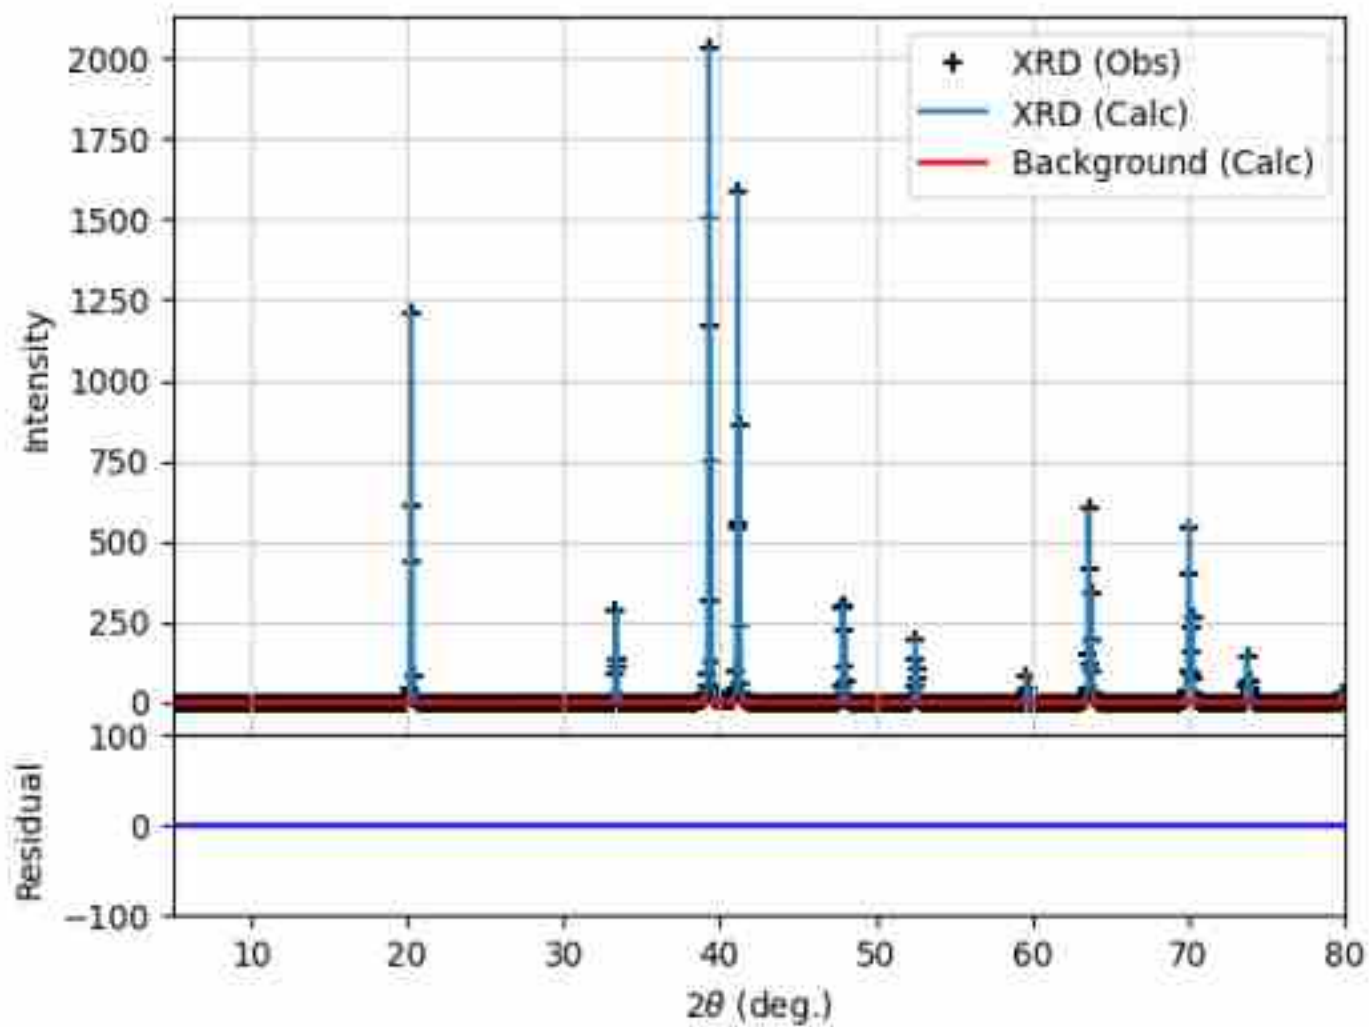

| RMSE before RR | Rwp     | RMSE after RR |
|----------------|---------|---------------|
| 0.015          | 0.04114 | 0.00172       |

# Y<sub>4</sub>Fe<sub>2</sub>C<sub>8</sub>

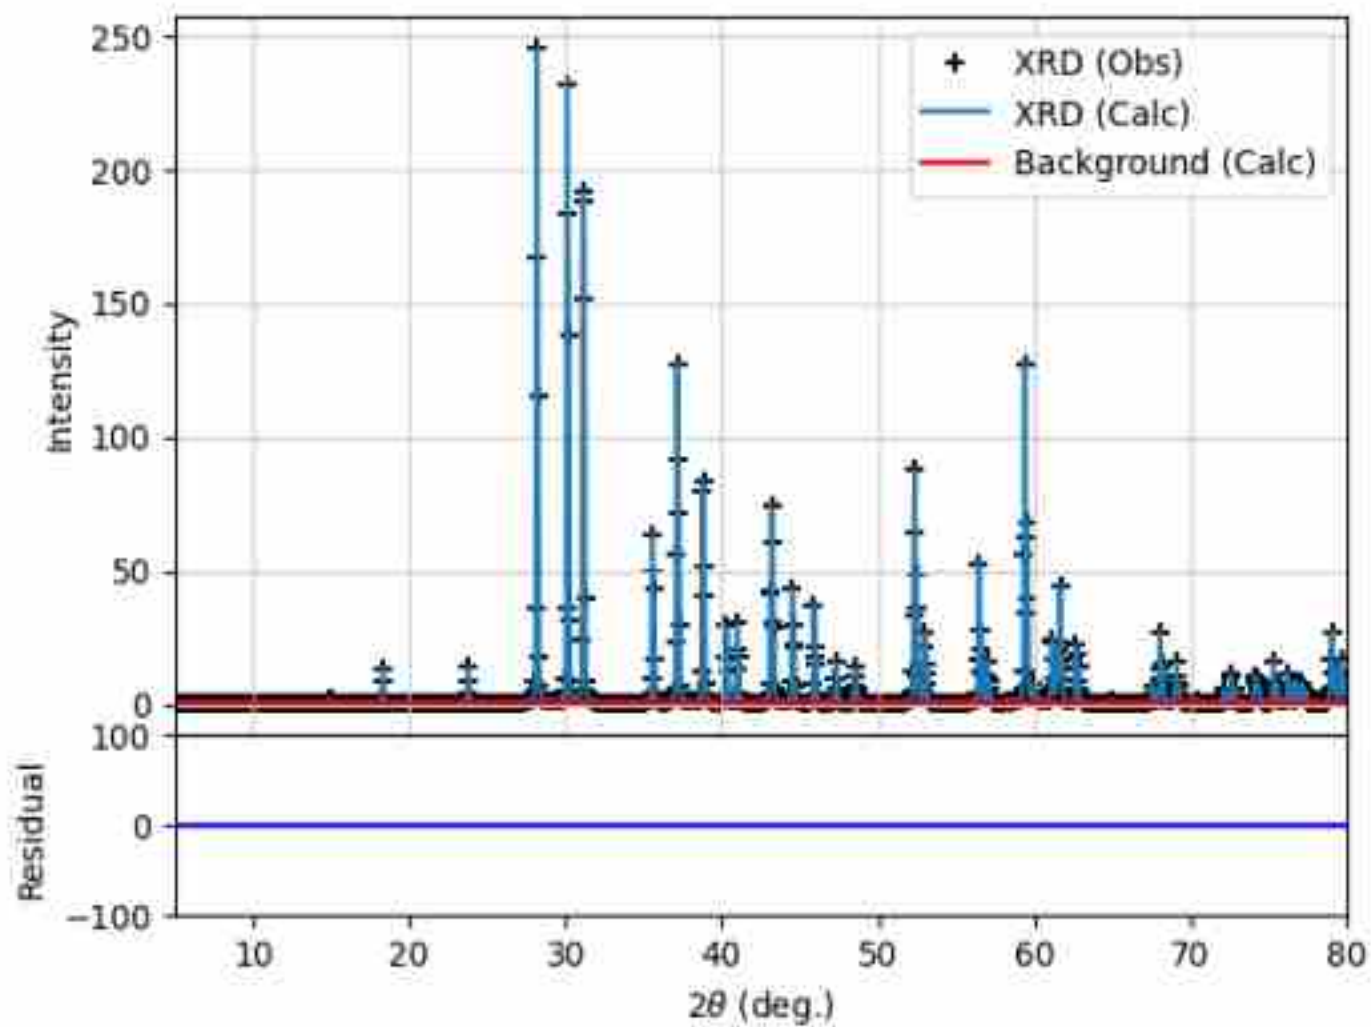

| RMSE before RR | Rwp     | RMSE after RR |
|----------------|---------|---------------|
| 0.015          | 0.00402 | 0.00194       |

# Y6Pd1Br10

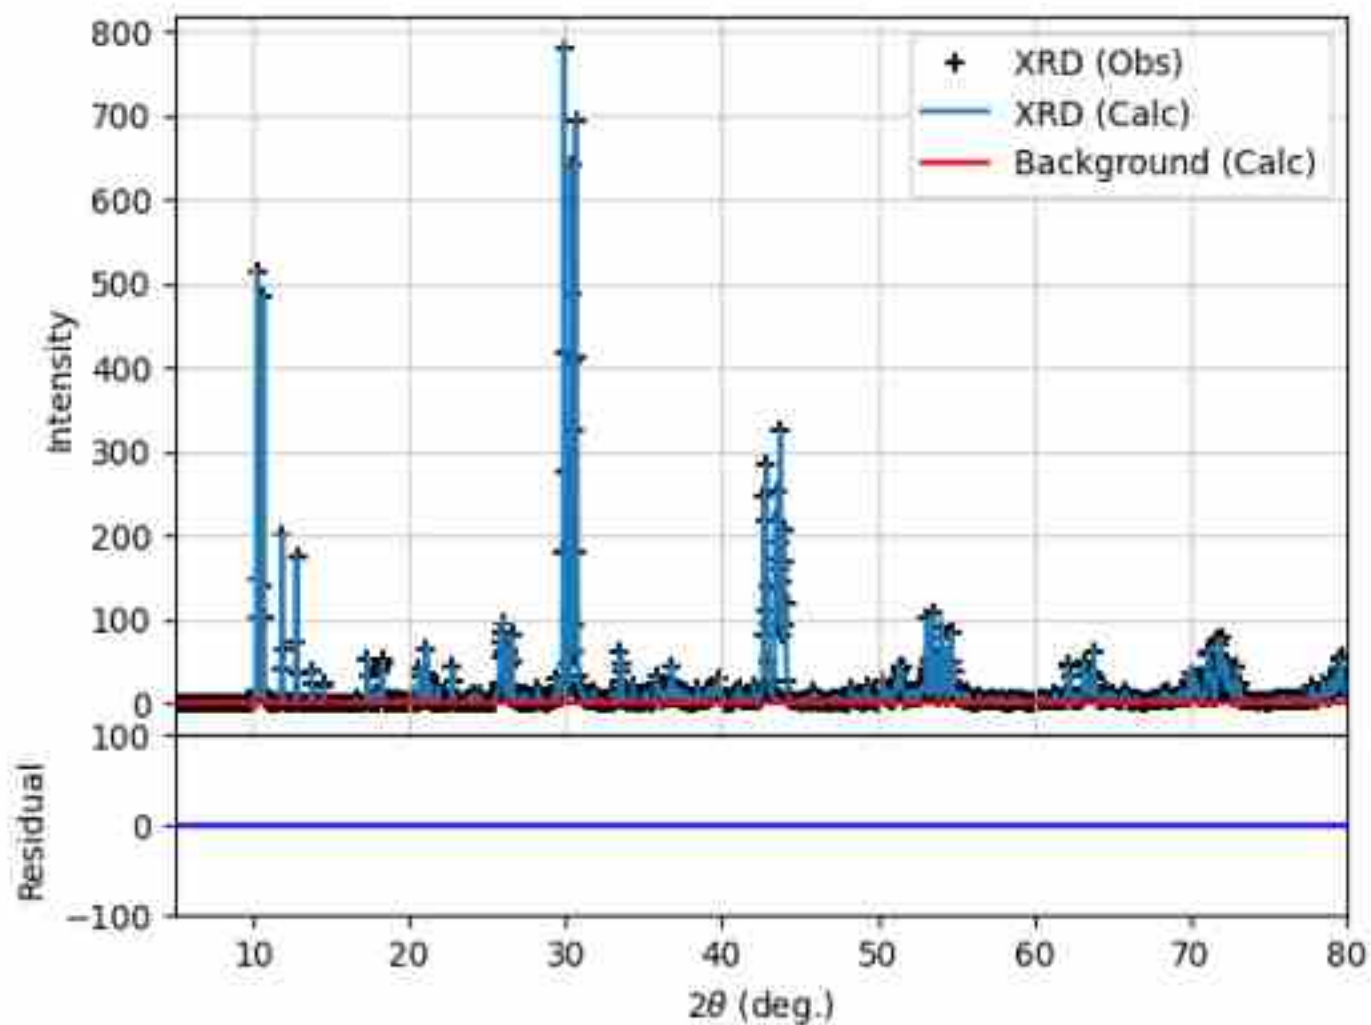

| RMSE before RR | Rwp     | RMSE after RR |
|----------------|---------|---------------|
| 0.015          | 0.00187 | 0.00031       |

# Y12Os4

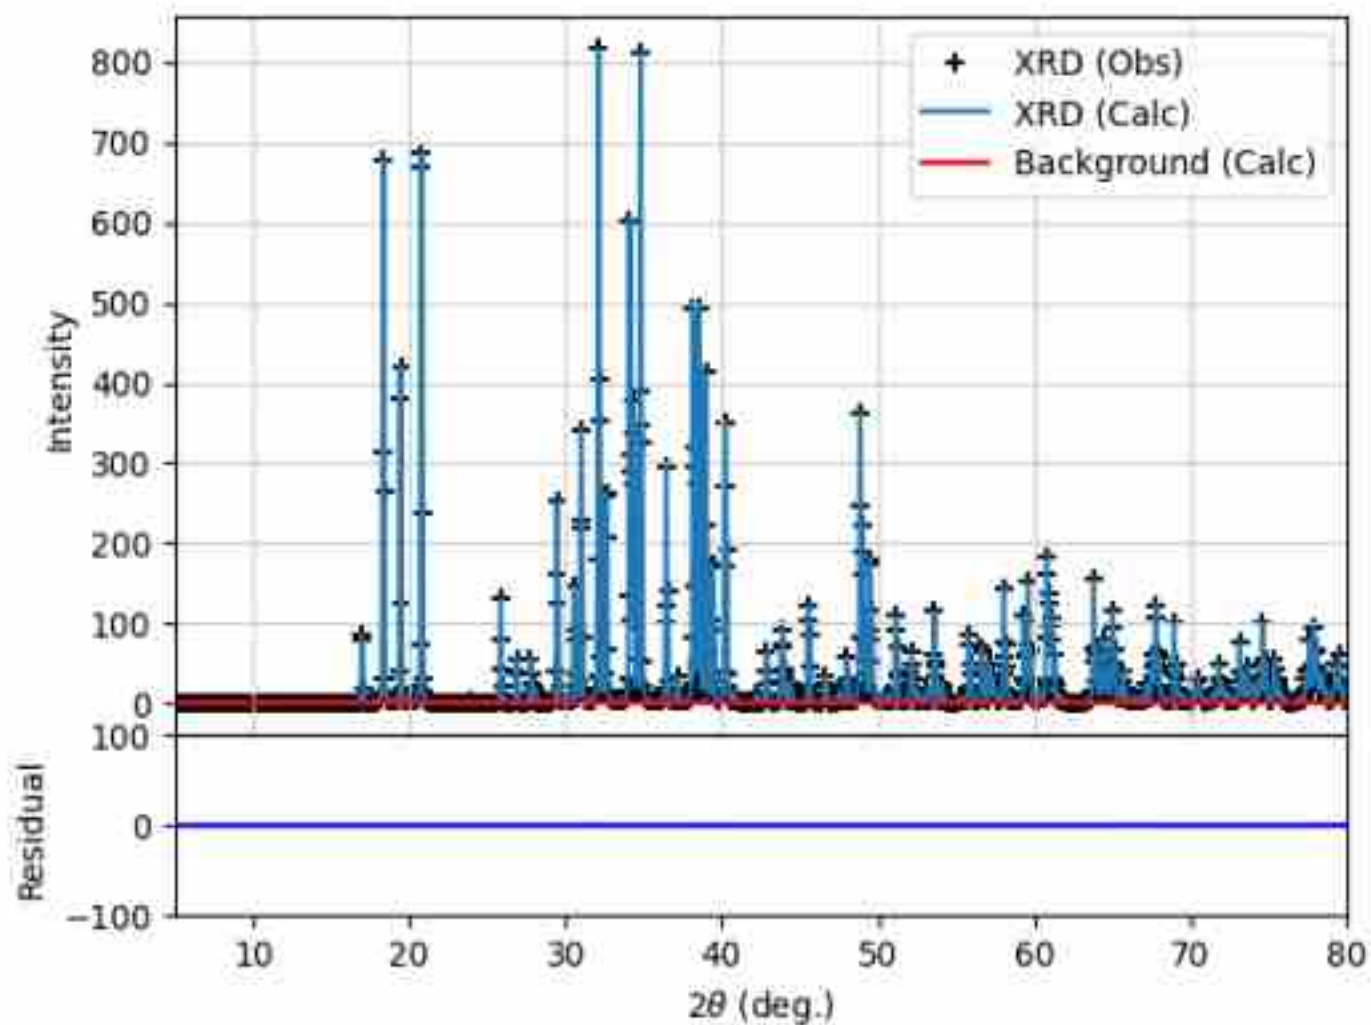

| RMSE before RR | Rwp     | RMSE after RR |
|----------------|---------|---------------|
| 0.015          | 0.31608 | 0.00532       |

# Yb<sub>4</sub>In<sub>2</sub>Pd<sub>4</sub>

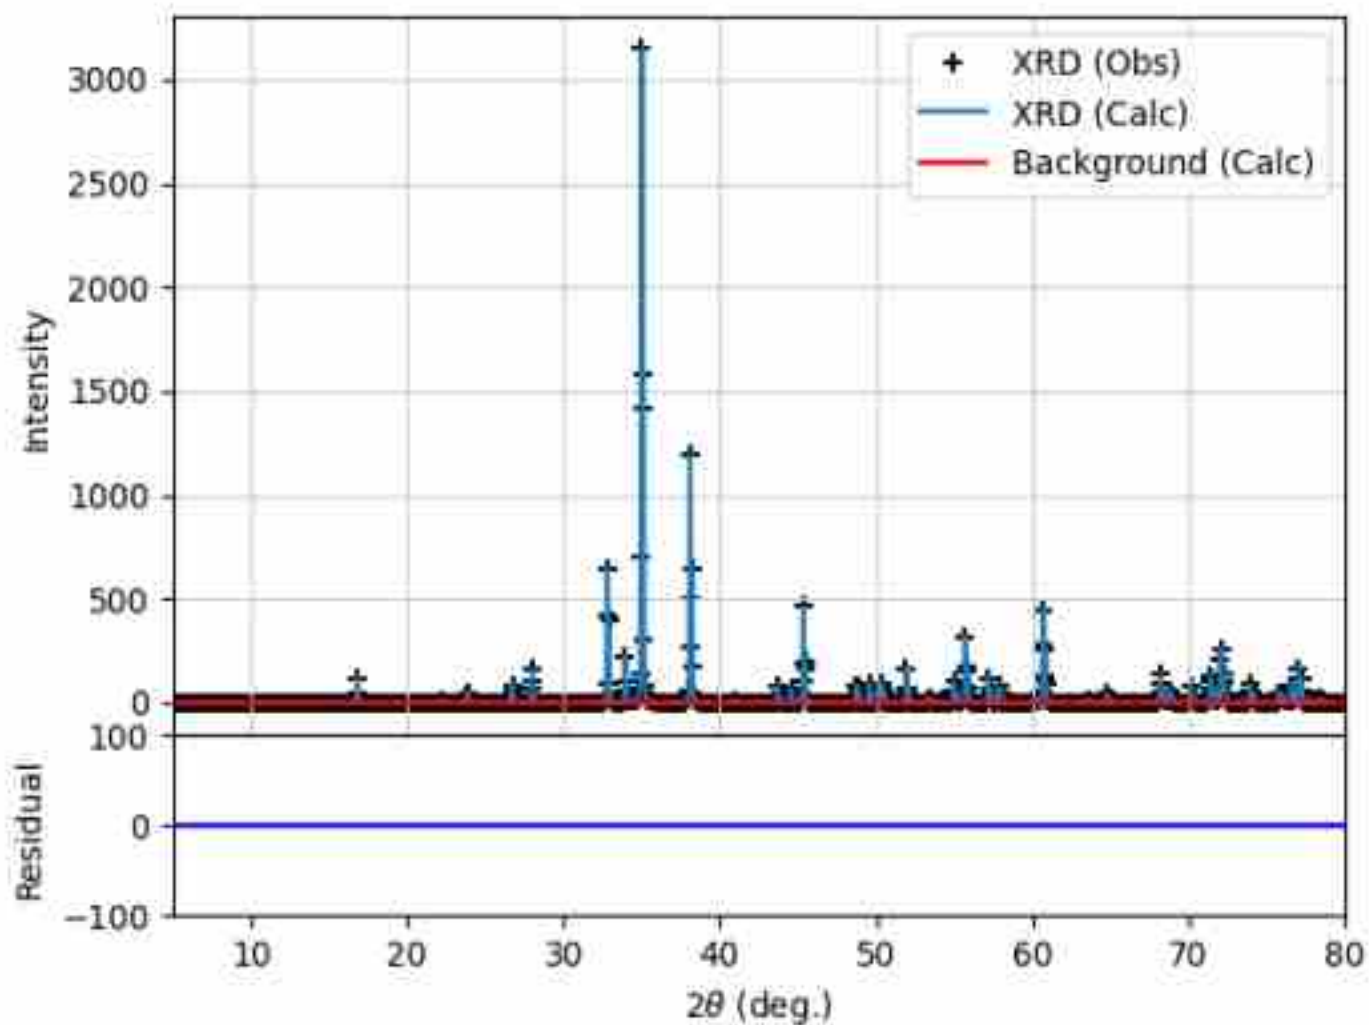

| RMSE before RR | Rwp     | RMSE after RR |
|----------------|---------|---------------|
| 0.015          | 0.00592 | 0.00024       |

# Zn<sub>1</sub>Cu<sub>2</sub>Ge<sub>1</sub>S<sub>4</sub>

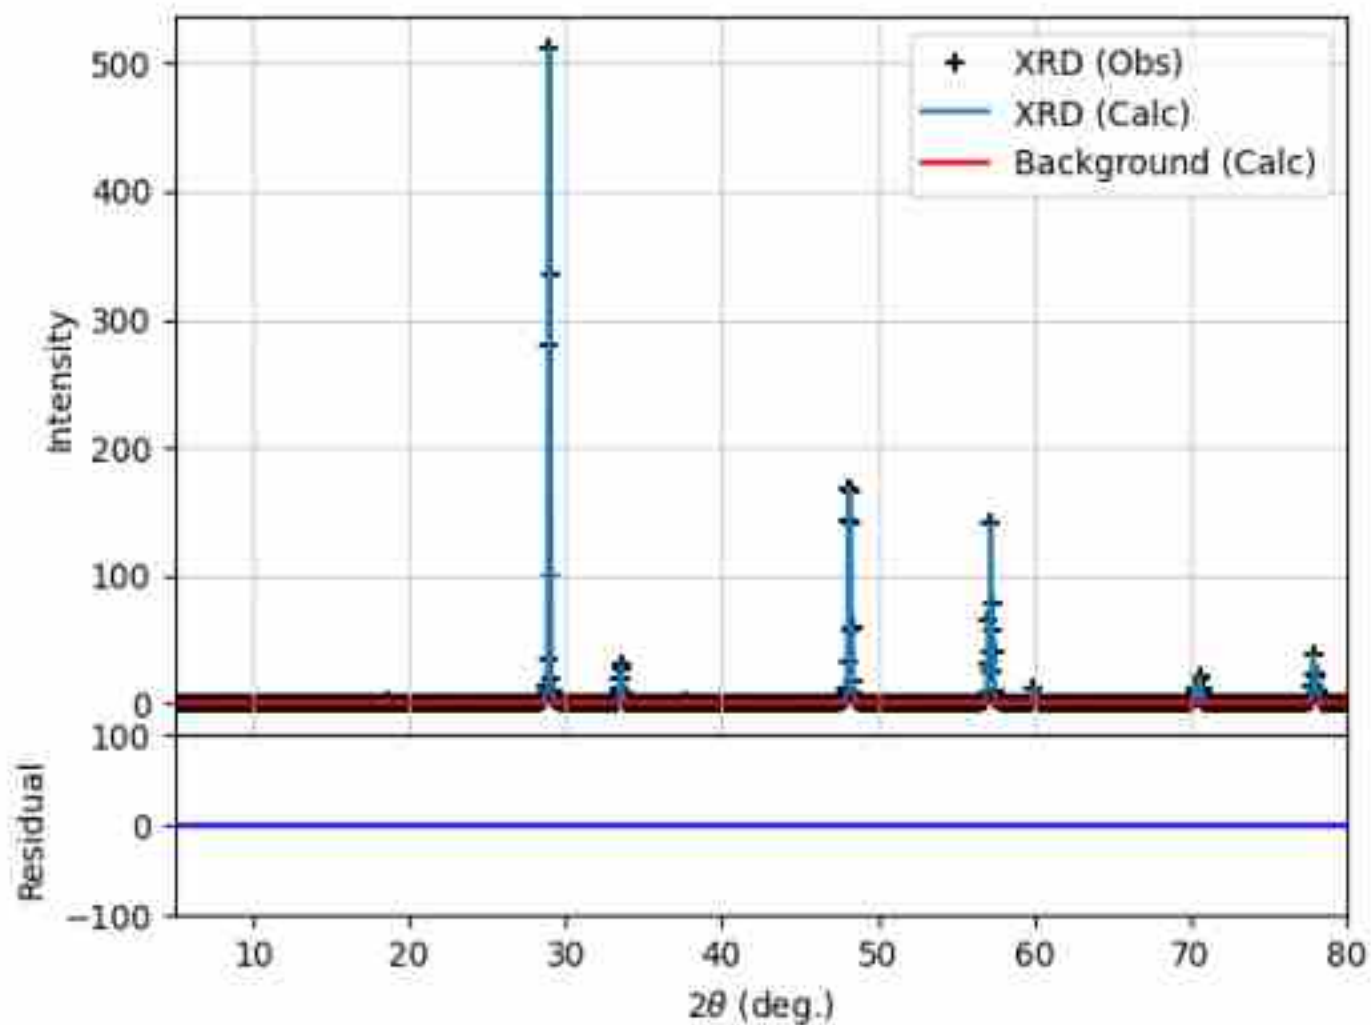

| RMSE before RR | Rwp     | RMSE after RR |
|----------------|---------|---------------|
| 0.015          | 0.00956 | 0.00064       |



# Zn1Ga1Cu1Se3

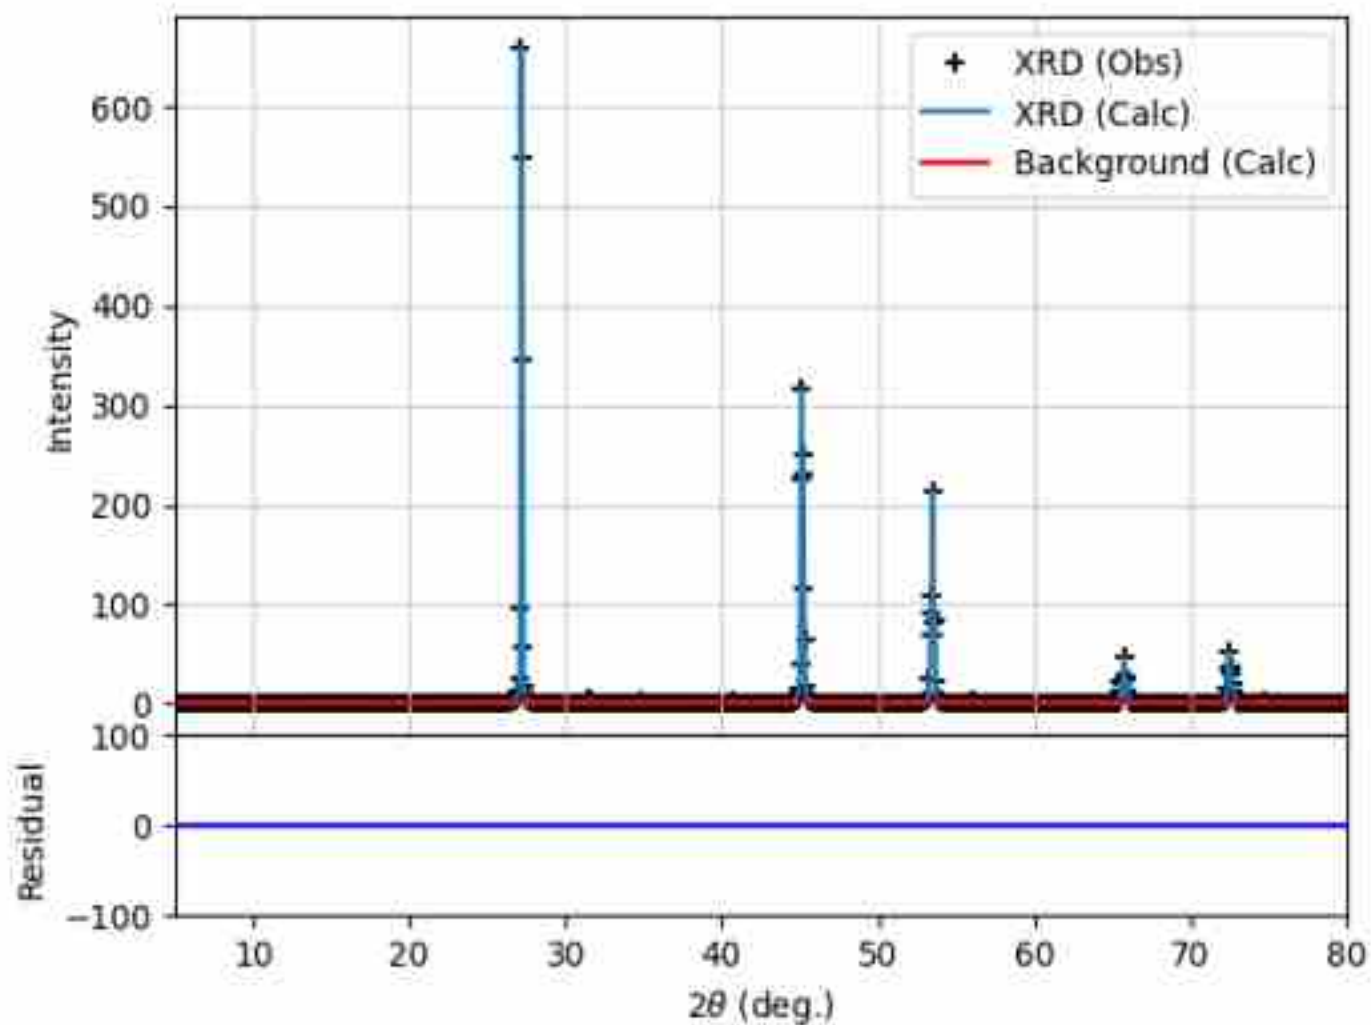

| RMSE before RR | Rwp     | RMSE after RR |
|----------------|---------|---------------|
| 0.015          | 0.00161 | 9e-05         |

# Zn<sub>2</sub>Si<sub>2</sub>As<sub>2</sub>P<sub>2</sub>

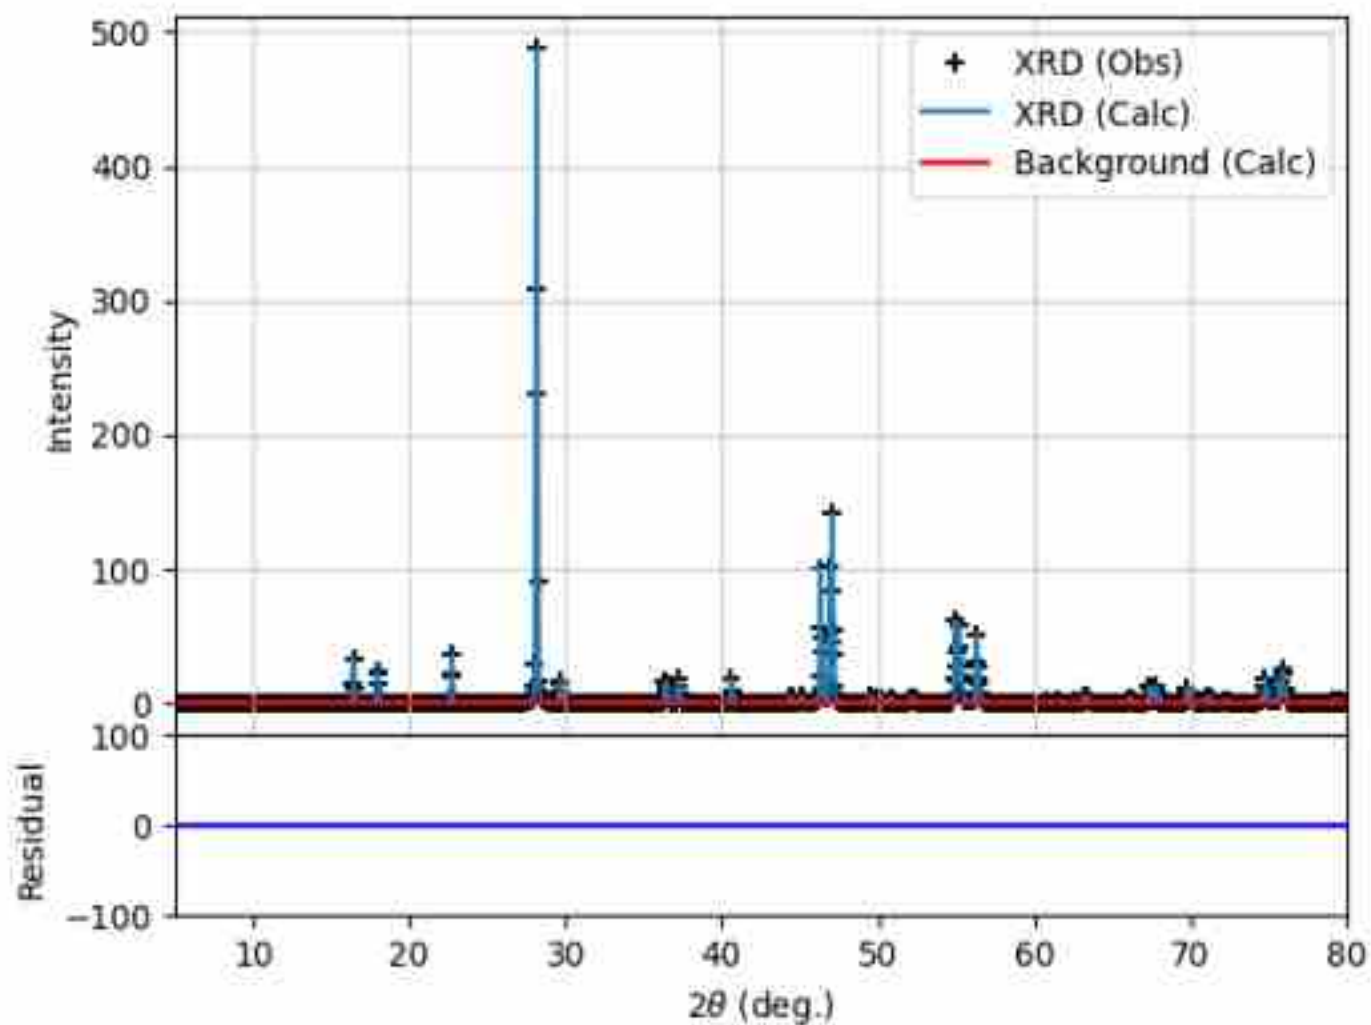

| RMSE before RR | Rwp     | RMSE after RR |
|----------------|---------|---------------|
| 0.015          | 0.00305 | 0.00039       |

# Zr<sub>4</sub>Cr<sub>6</sub>Fe<sub>2</sub>

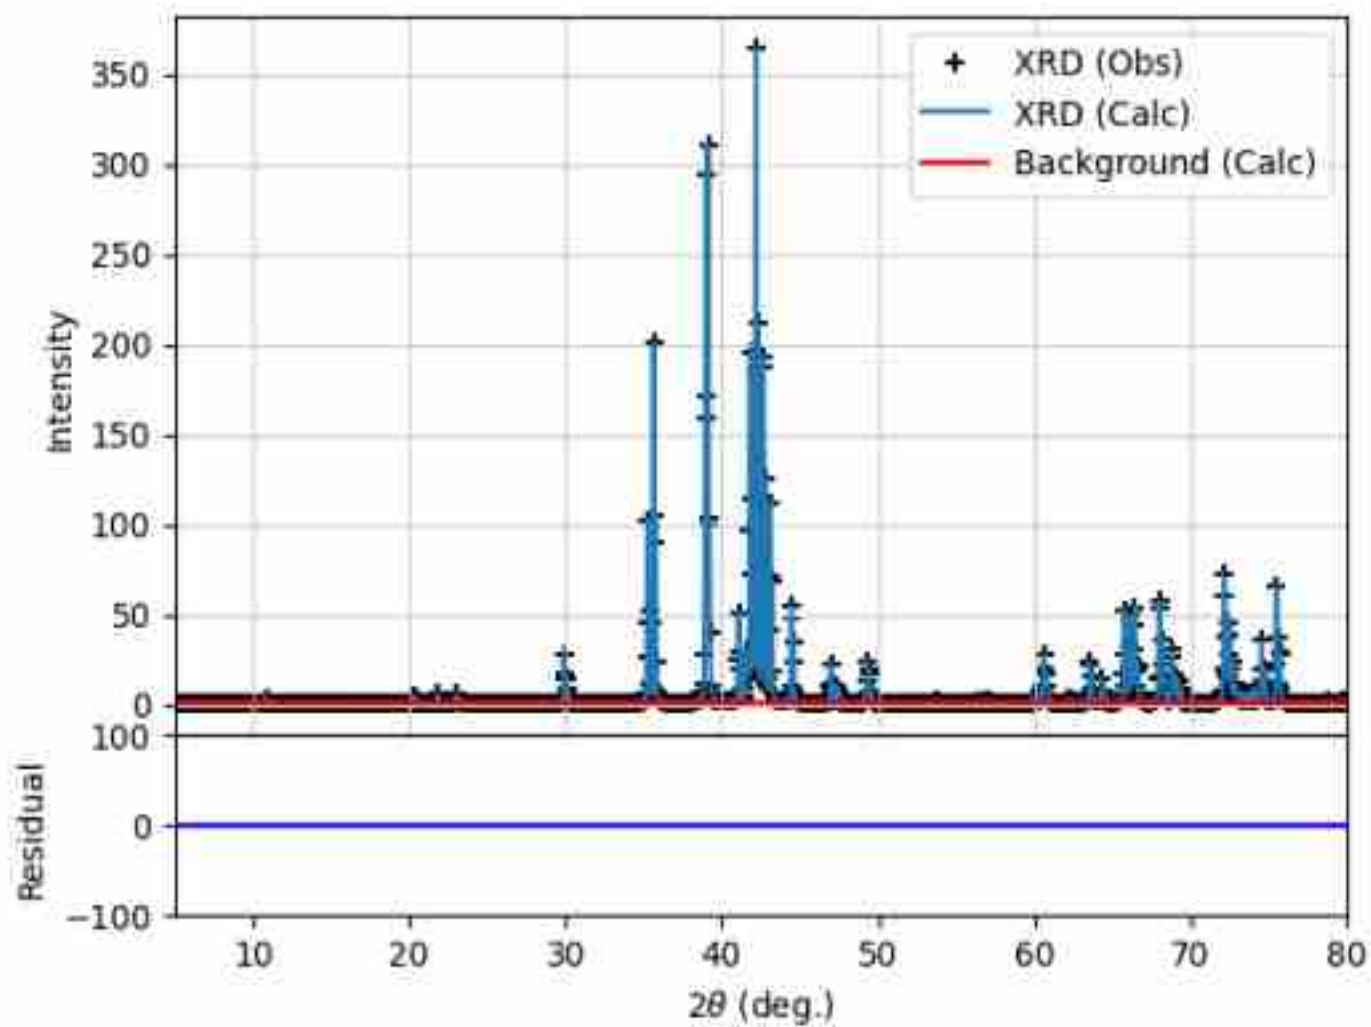

| RMSE before RR | Rwp     | RMSE after RR |
|----------------|---------|---------------|
| 0.015          | 0.00431 | 0.00031       |

# Zr<sub>4</sub>Fe<sub>4</sub>As<sub>4</sub>

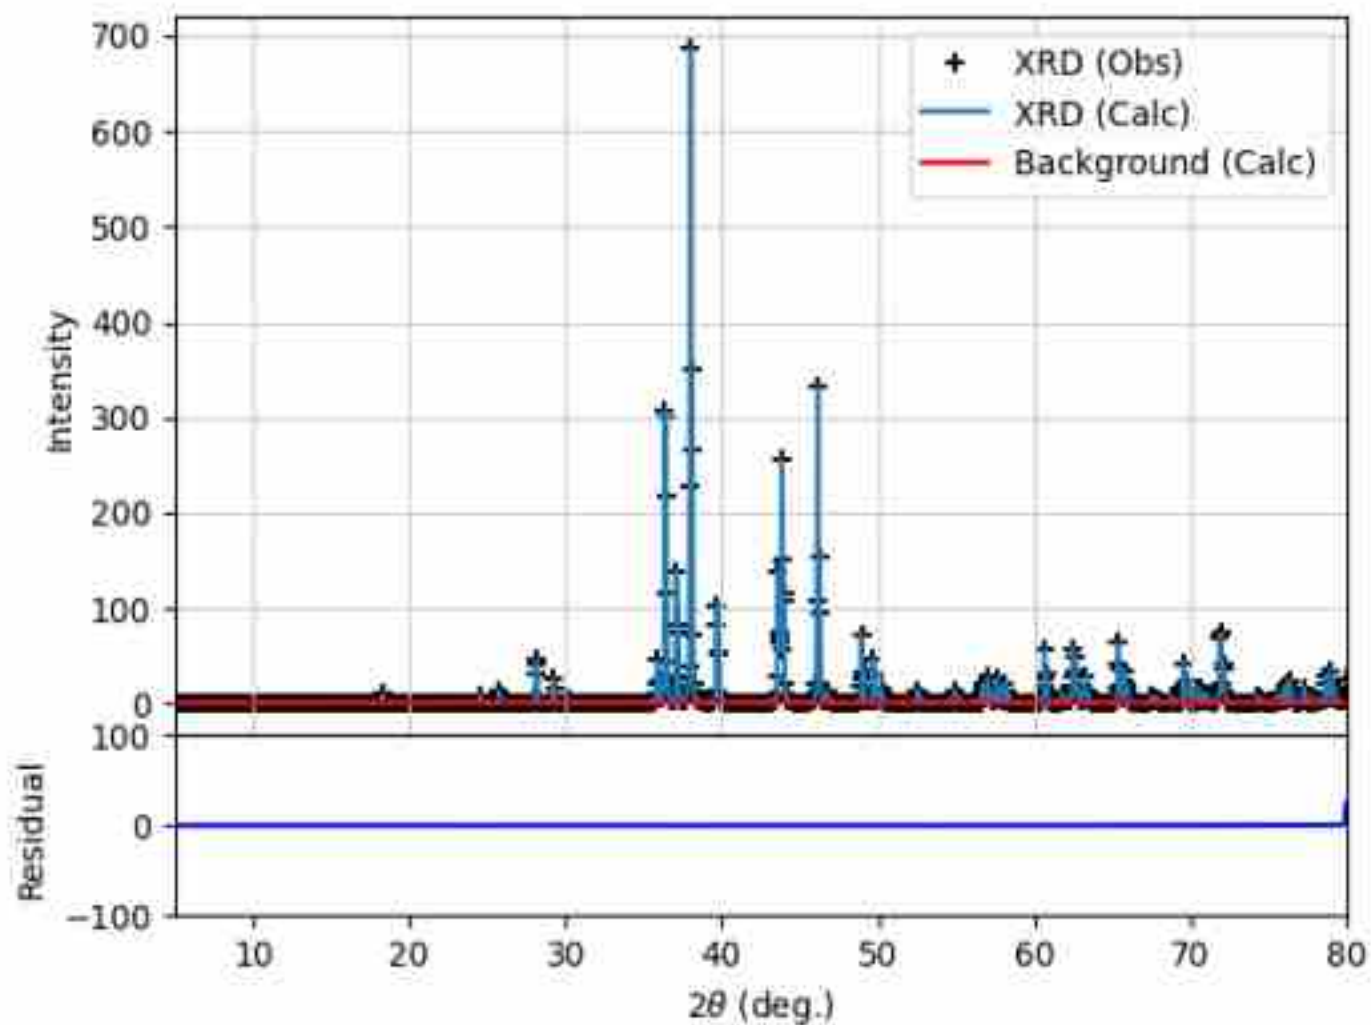

| RMSE before RR | Rwp    | RMSE after RR |
|----------------|--------|---------------|
| 0.015          | 7.2101 | 0.00795       |

# Ag<sub>2</sub>C<sub>2</sub>O<sub>6</sub>

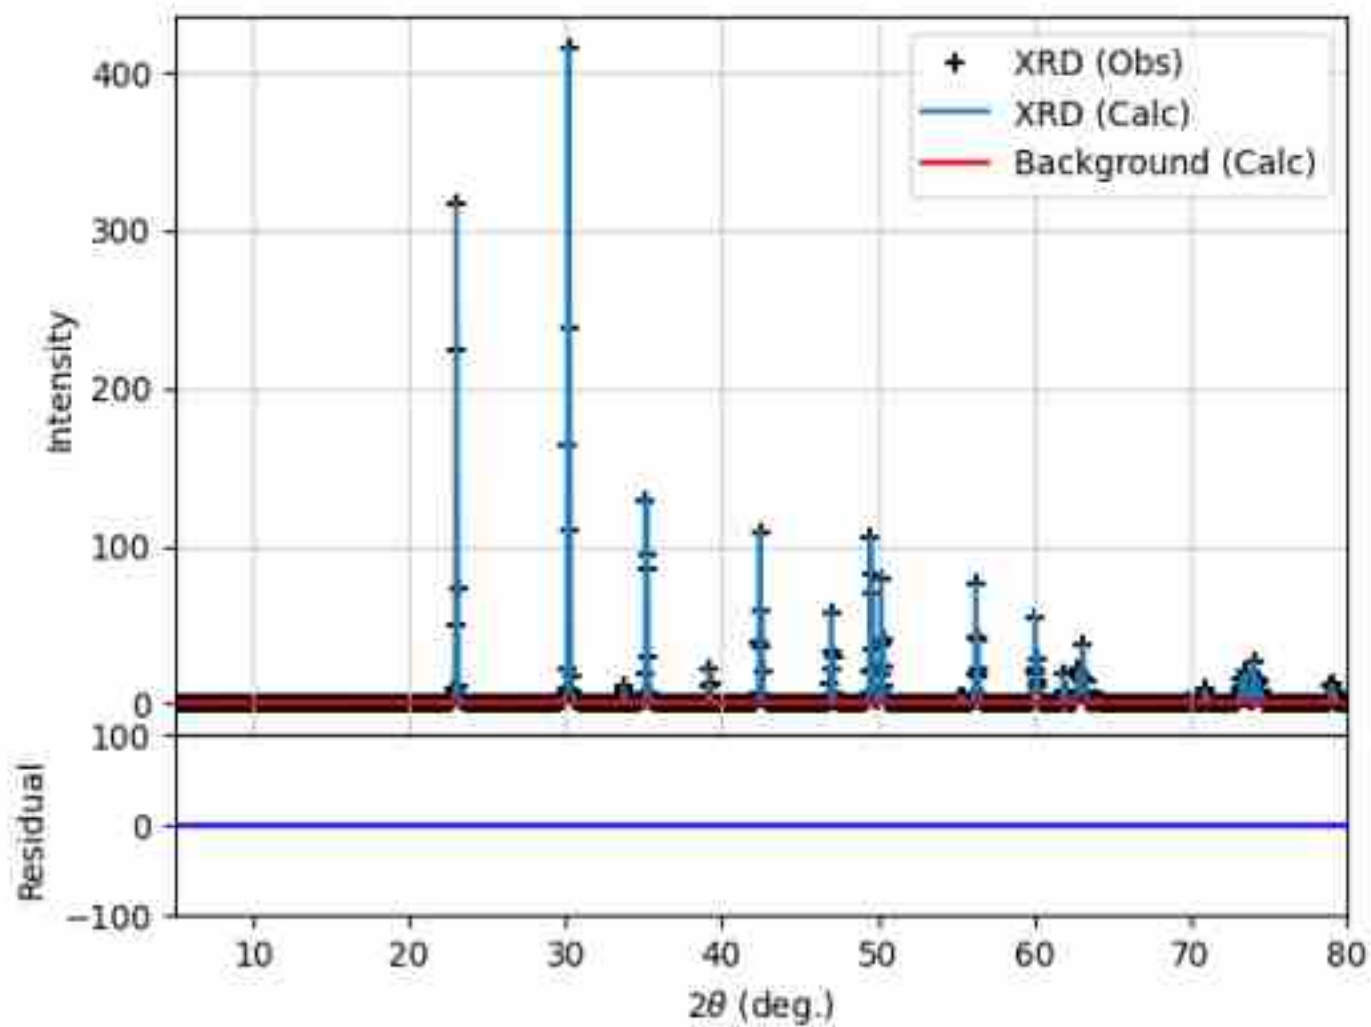

| RMSE before RR | Rwp     | RMSE after RR |
|----------------|---------|---------------|
| 0.016          | 0.00259 | 0.00116       |

# Ag<sub>3</sub>Sb<sub>1</sub>

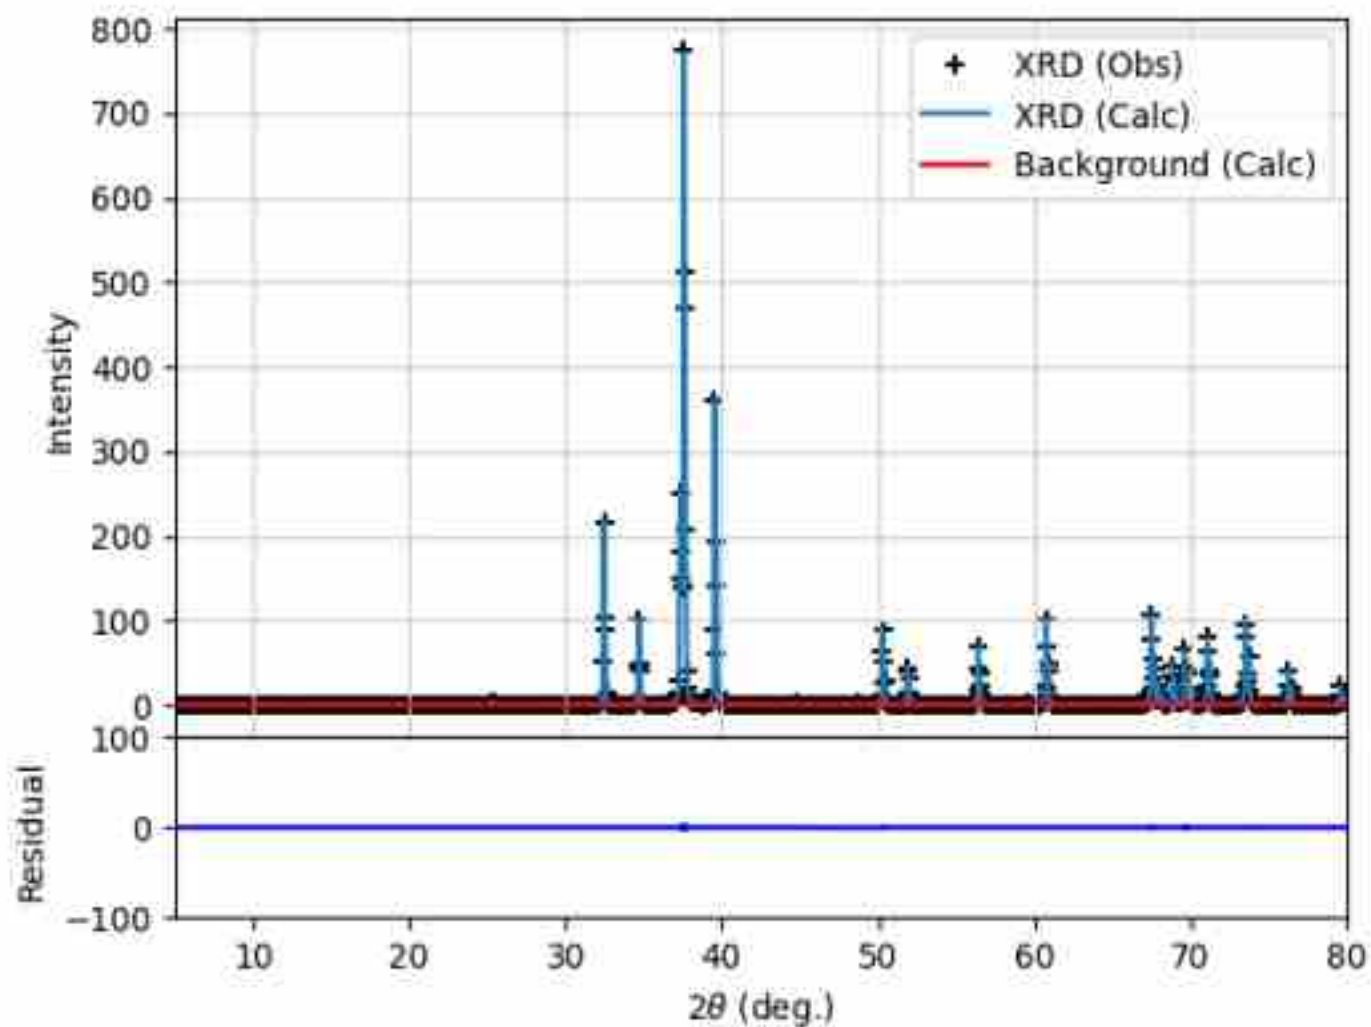

| RMSE before RR | Rwp     | RMSE after RR |
|----------------|---------|---------------|
| 0.016          | 0.62498 | 0.00019       |

# AlAg4

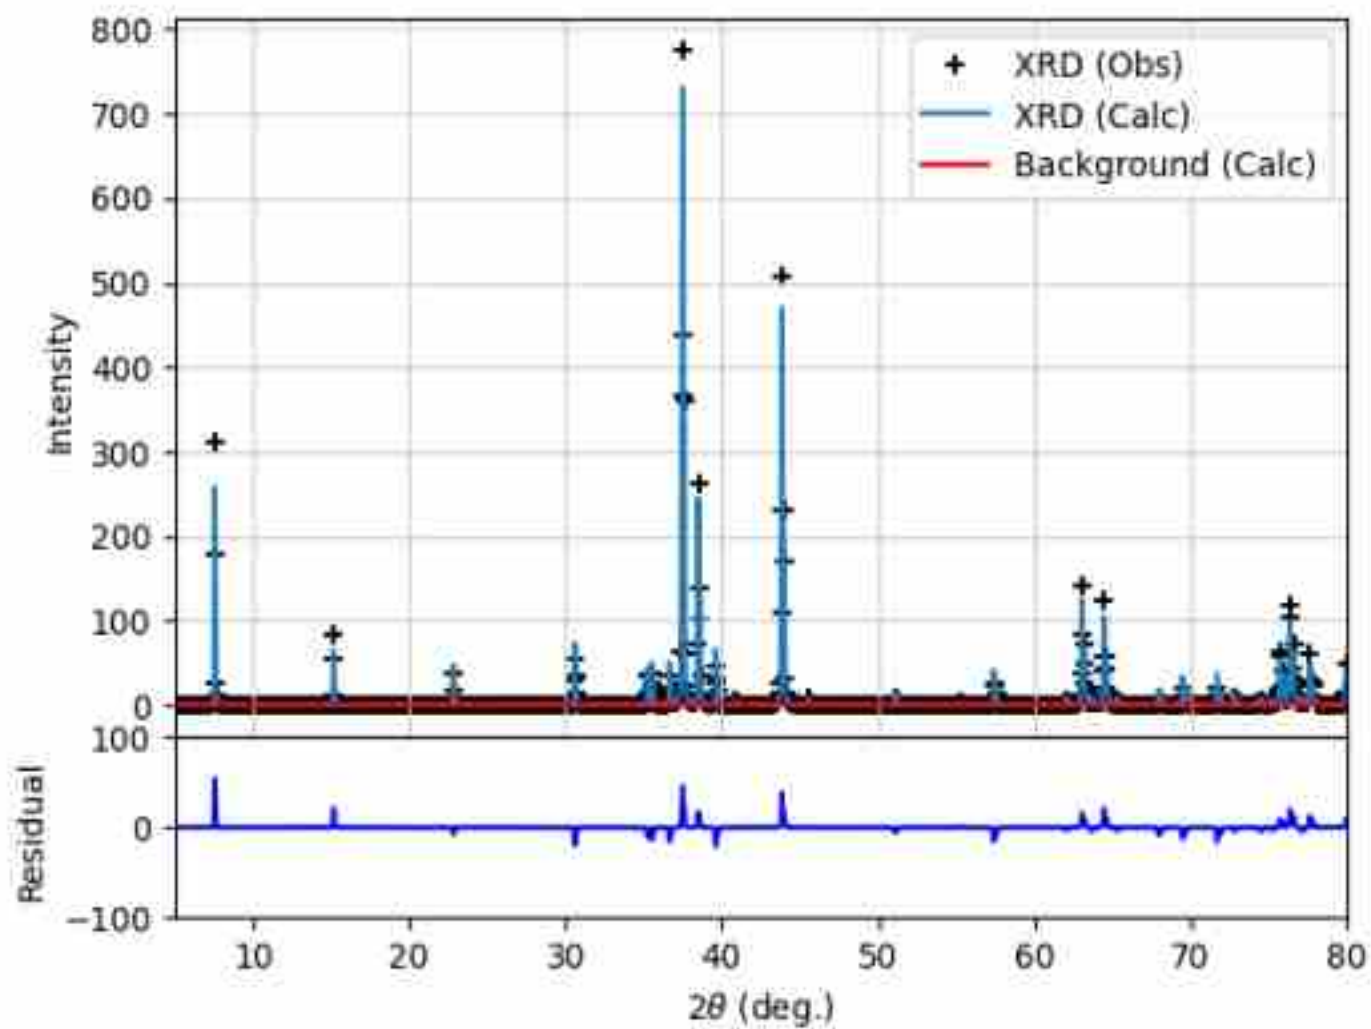

| RMSE before RR | Rwp     | RMSE after RR |
|----------------|---------|---------------|
| 0.016          | 18.9458 | 0.02639       |

# Ba<sub>2</sub>Ca<sub>2</sub>Tb<sub>2</sub>Bi<sub>2</sub>O<sub>12</sub>

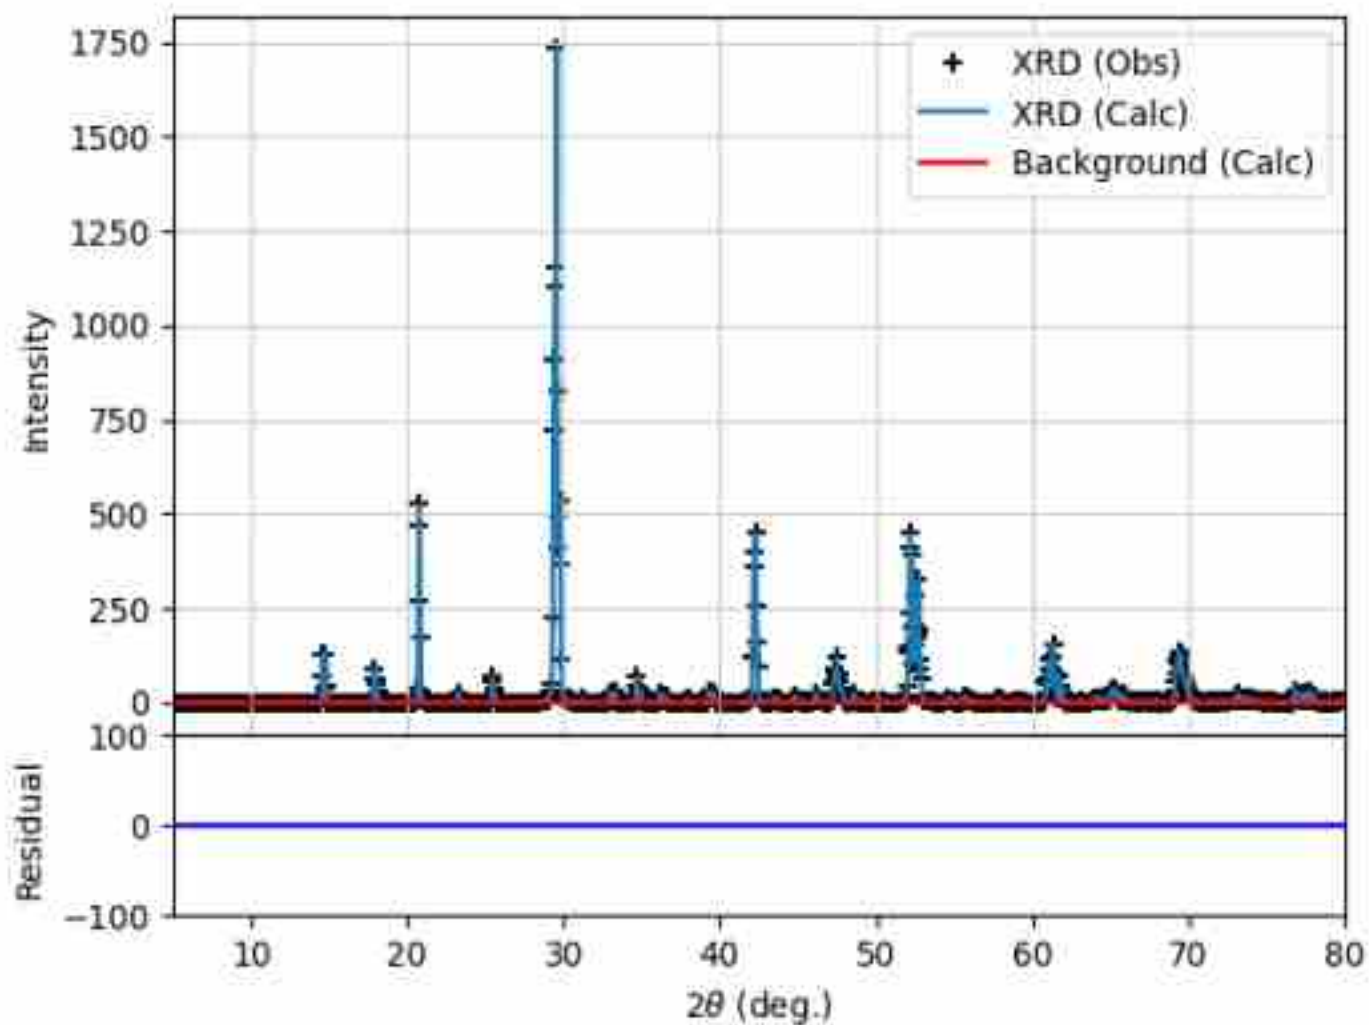

| RMSE before RR | Rwp     | RMSE after RR |
|----------------|---------|---------------|
| 0.016          | 0.02904 | 0.00328       |



# Ba2La2Ag2Se6

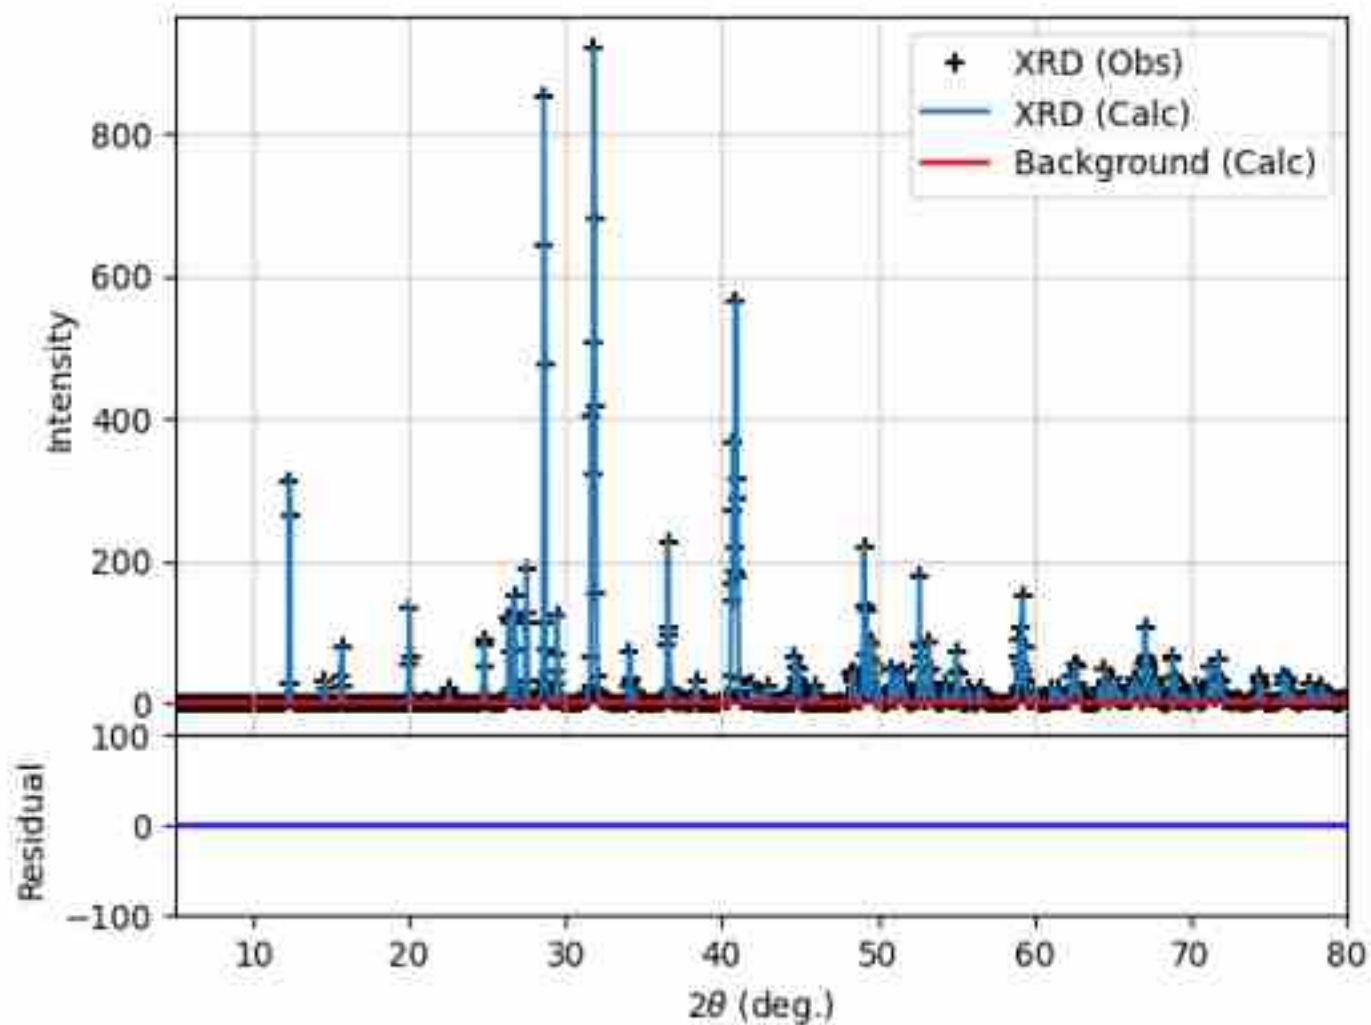

| RMSE before RR | Rwp     | RMSE after RR |
|----------------|---------|---------------|
| 0.016          | 0.00307 | 0.00021       |

# Ba<sub>2</sub>Na<sub>1</sub>I<sub>1</sub>O<sub>6</sub>

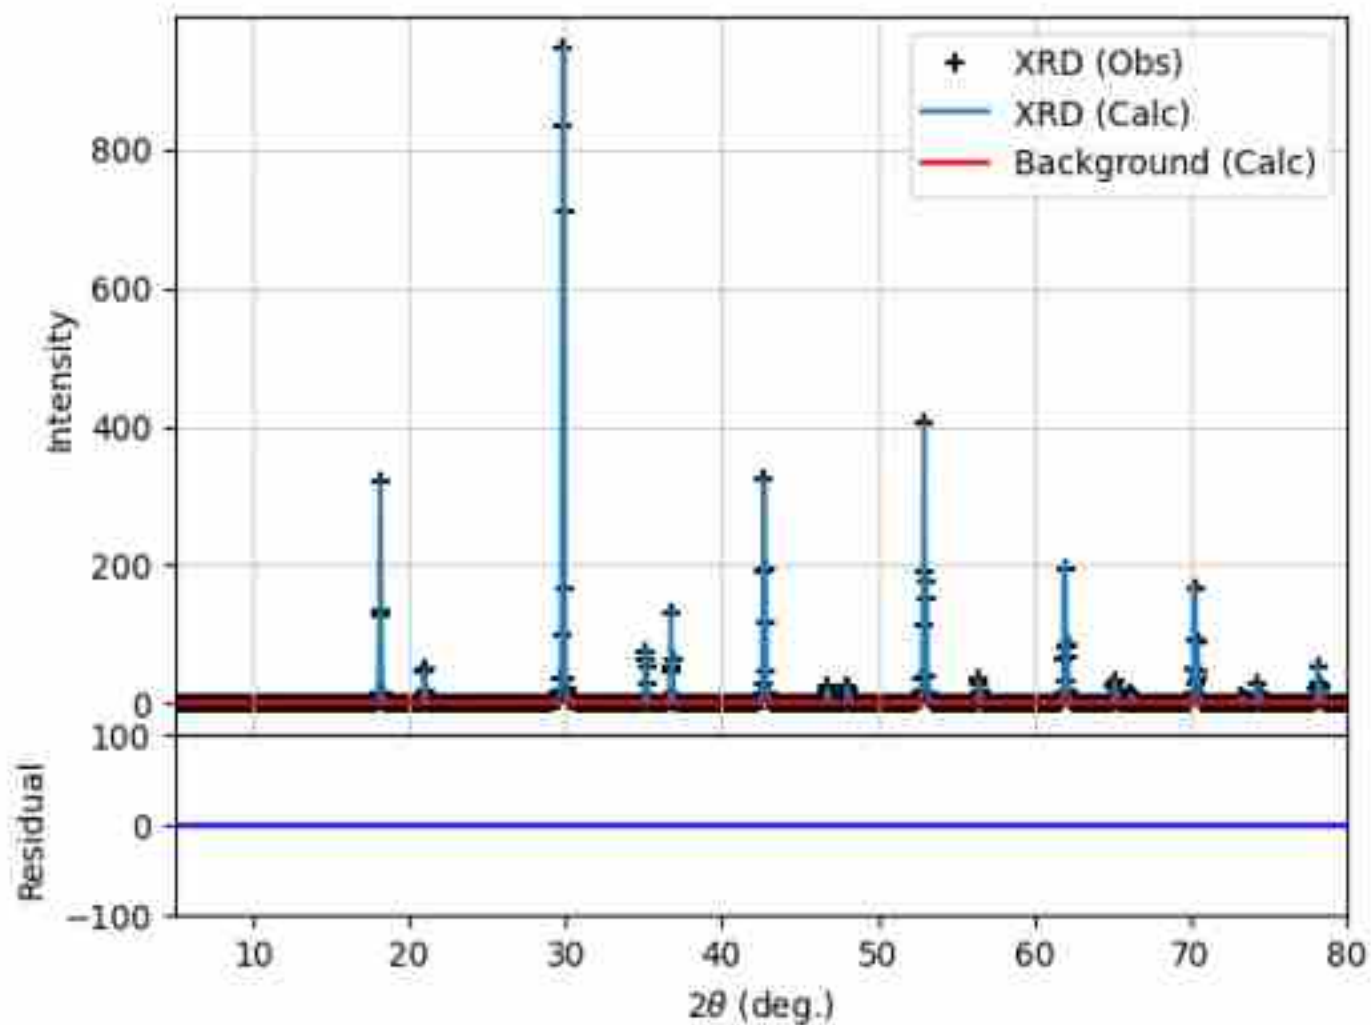

| RMSE before RR | Rwp     | RMSE after RR |
|----------------|---------|---------------|
| 0.016          | 0.03996 | 0.00797       |

# Ba<sub>2</sub>Pb<sub>2</sub>O<sub>6</sub>

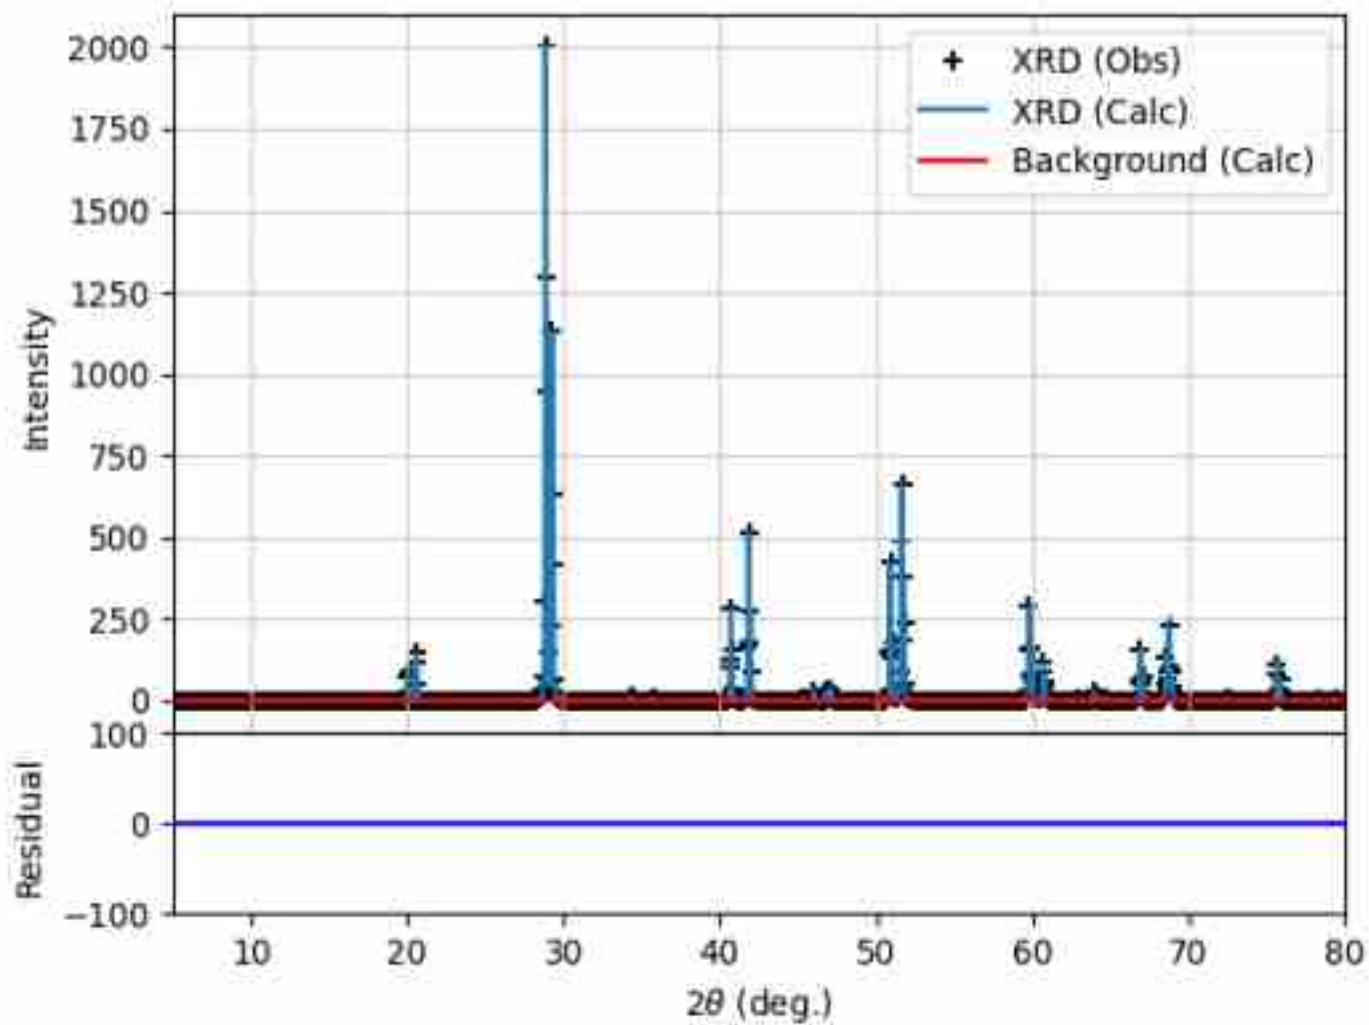

| RMSE before RR | Rwp     | RMSE after RR |
|----------------|---------|---------------|
| 0.016          | 0.00388 | 0.00147       |

# Ba<sub>2</sub>Pu<sub>1</sub>Pa<sub>1</sub>O<sub>6</sub>

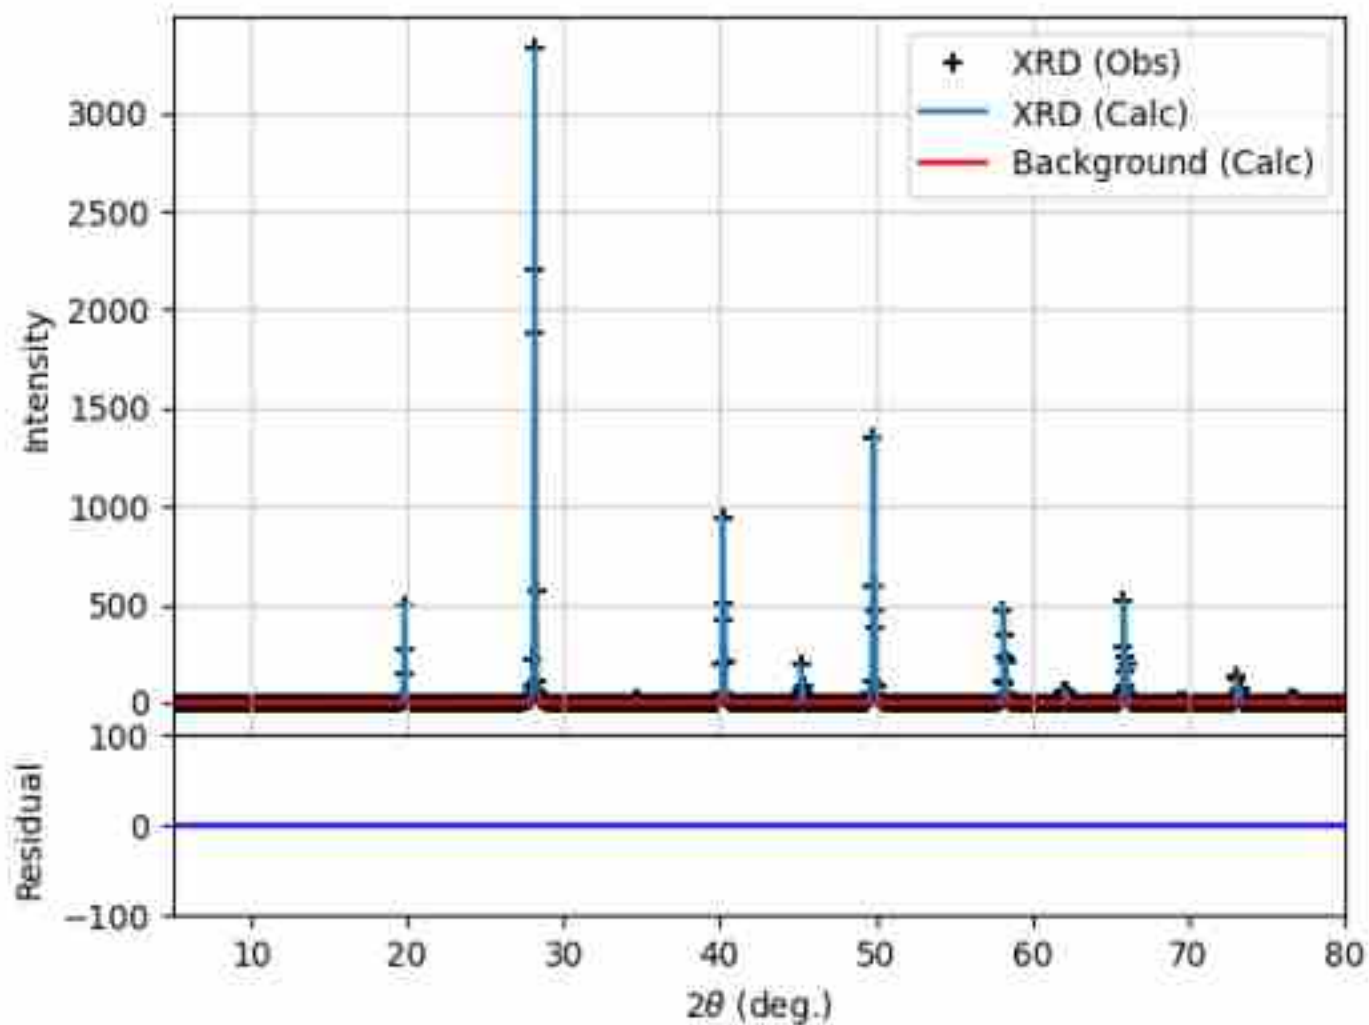

| RMSE before RR | Rwp     | RMSE after RR |
|----------------|---------|---------------|
| 0.016          | 0.04072 | 0.00429       |

# Ba<sub>2</sub>TlSbO<sub>6</sub>

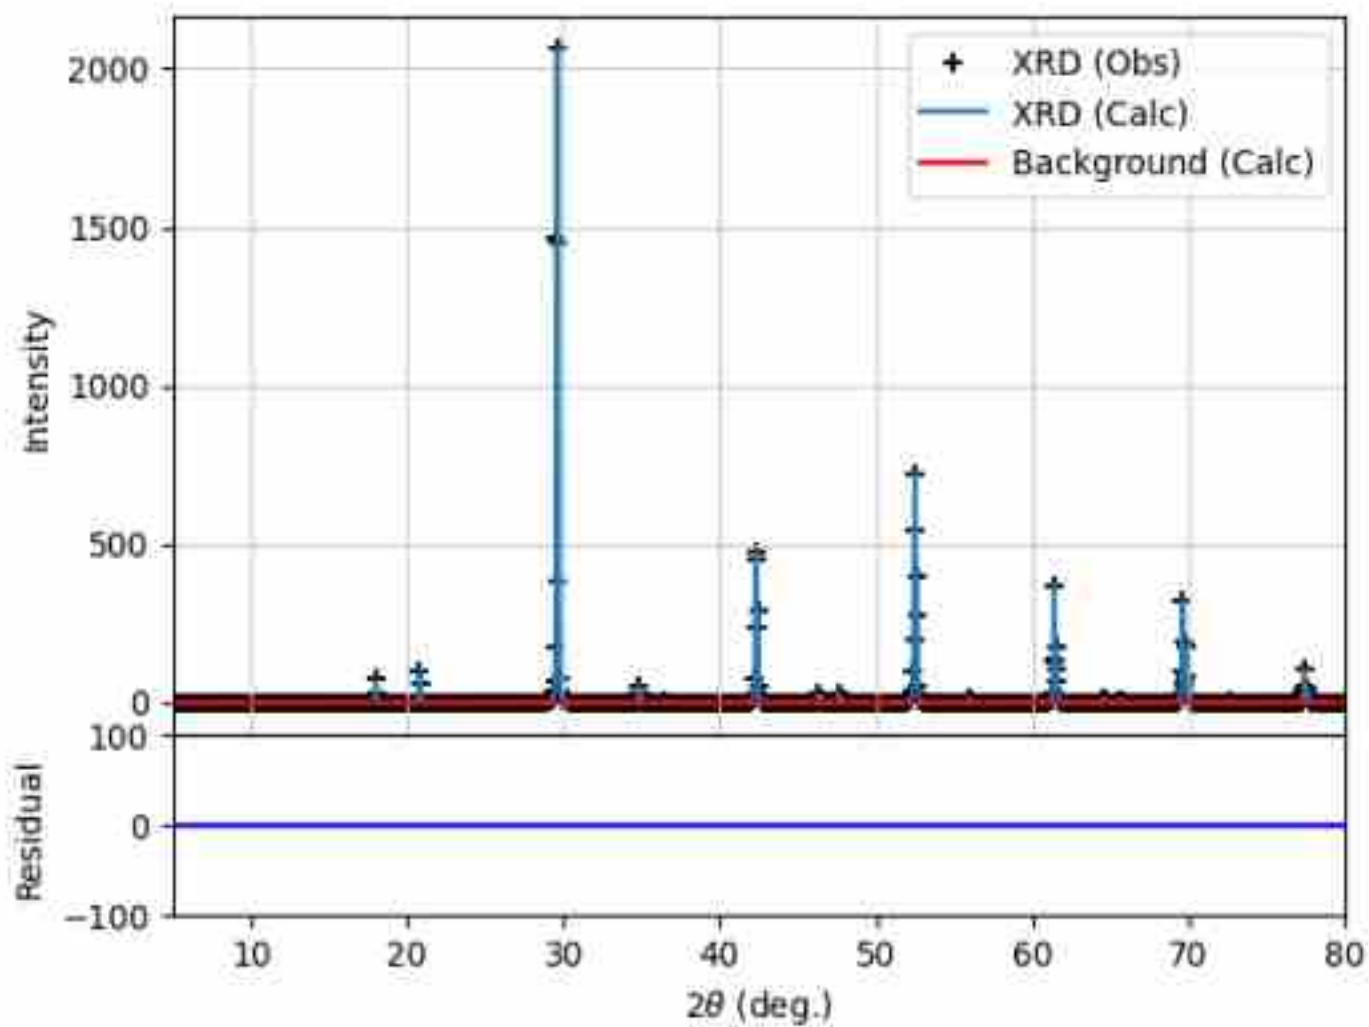

| RMSE before RR | Rwp     | RMSE after RR |
|----------------|---------|---------------|
| 0.016          | 0.00849 | 0.00452       |

# Ba<sub>3</sub>As<sub>2</sub>O<sub>8</sub>

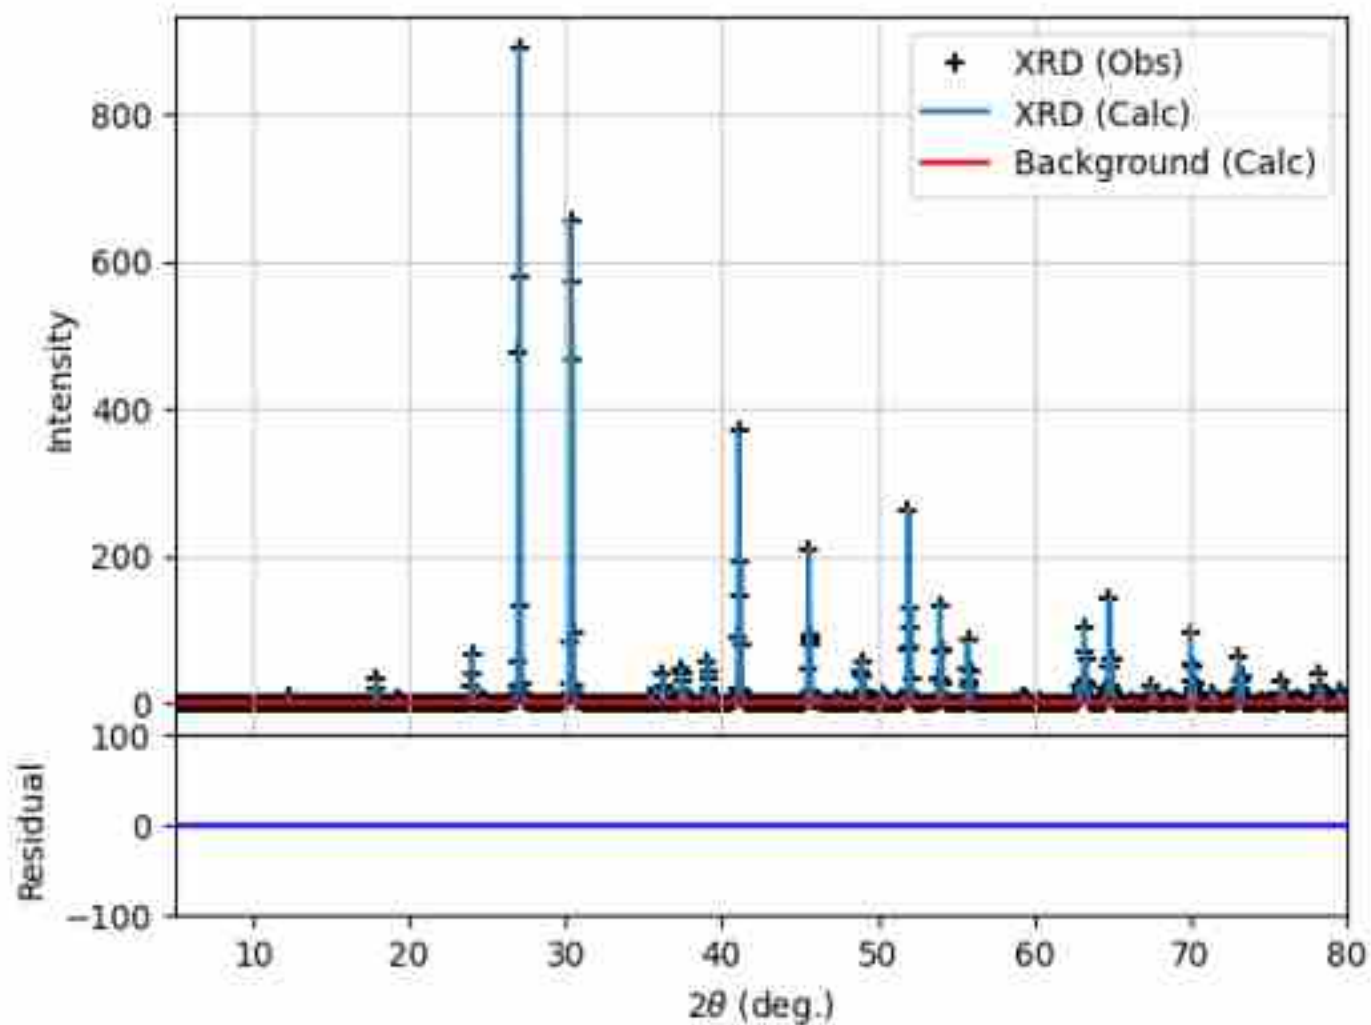

| RMSE before RR | Rwp     | RMSE after RR |
|----------------|---------|---------------|
| 0.016          | 0.00349 | 0.00071       |

# Ba<sub>4</sub>Ca<sub>4</sub>Ge<sub>4</sub>

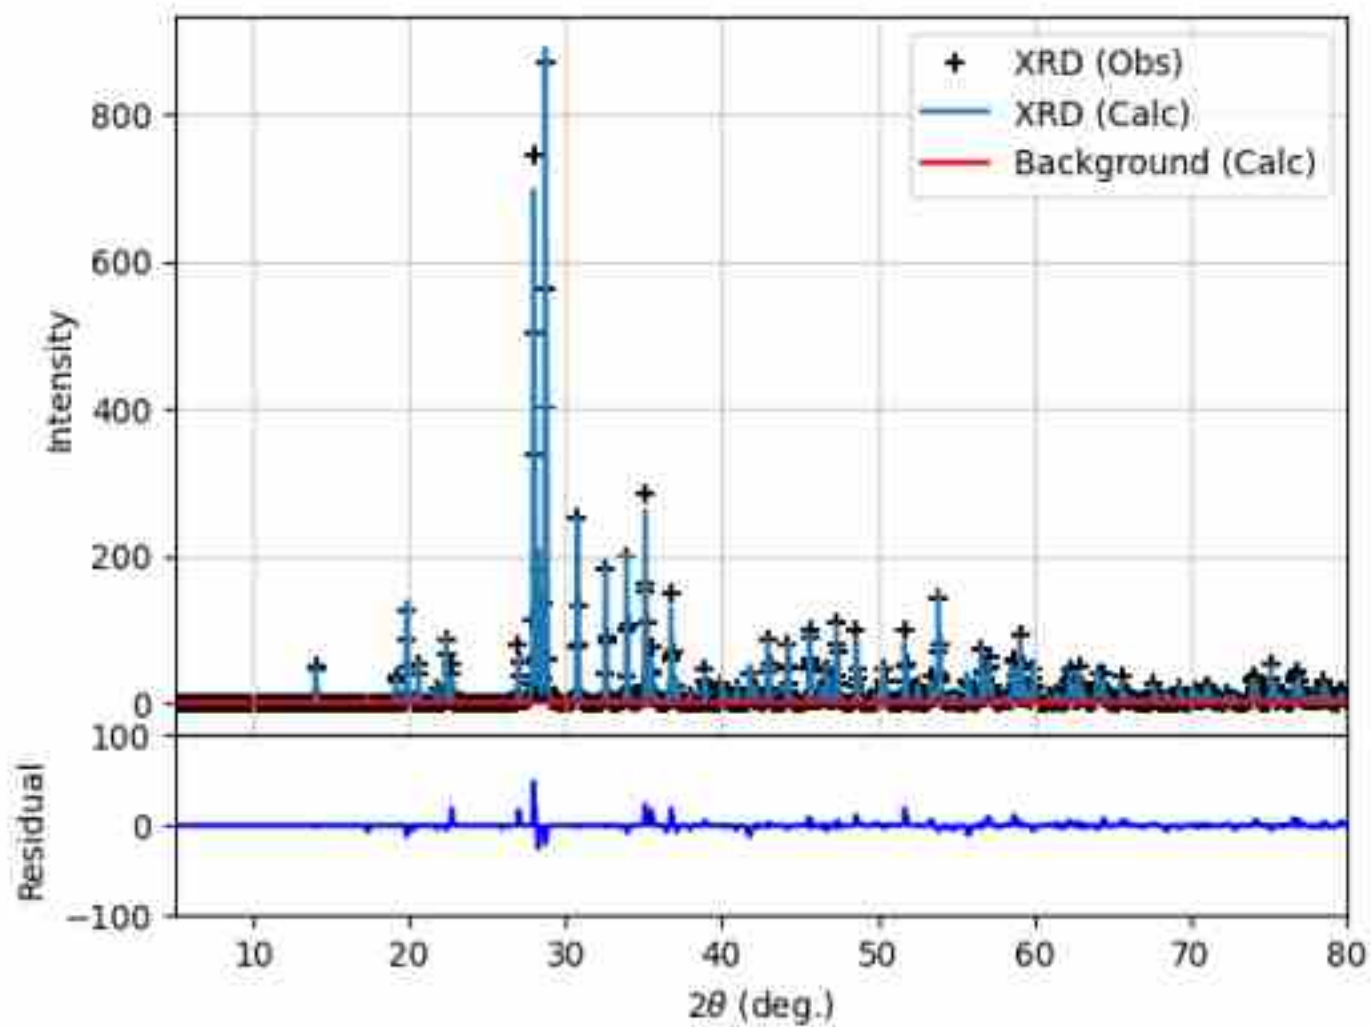

| RMSE before RR | Rwp      | RMSE after RR |
|----------------|----------|---------------|
| 0.016          | 15.45418 | 0.01723       |

# Ba<sub>4</sub>Gd<sub>2</sub>Ga<sub>2</sub>Se<sub>10</sub>

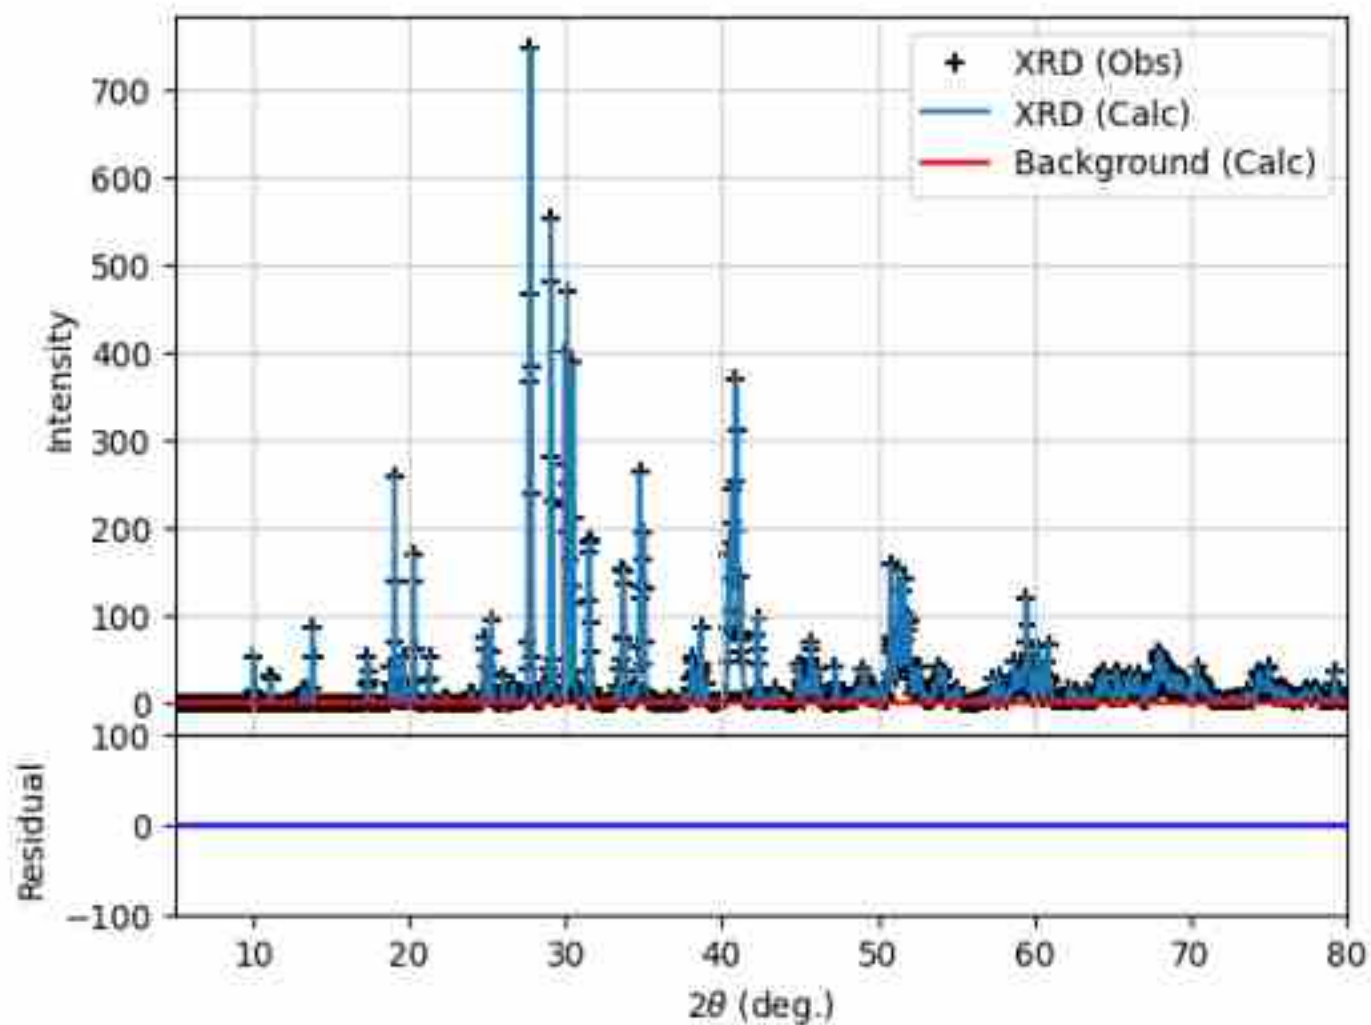

| RMSE before RR | Rwp     | RMSE after RR |
|----------------|---------|---------------|
| 0.016          | 0.00133 | 0.00014       |



# Ba<sub>4</sub>Lu<sub>2</sub>Ir<sub>2</sub>O<sub>12</sub>

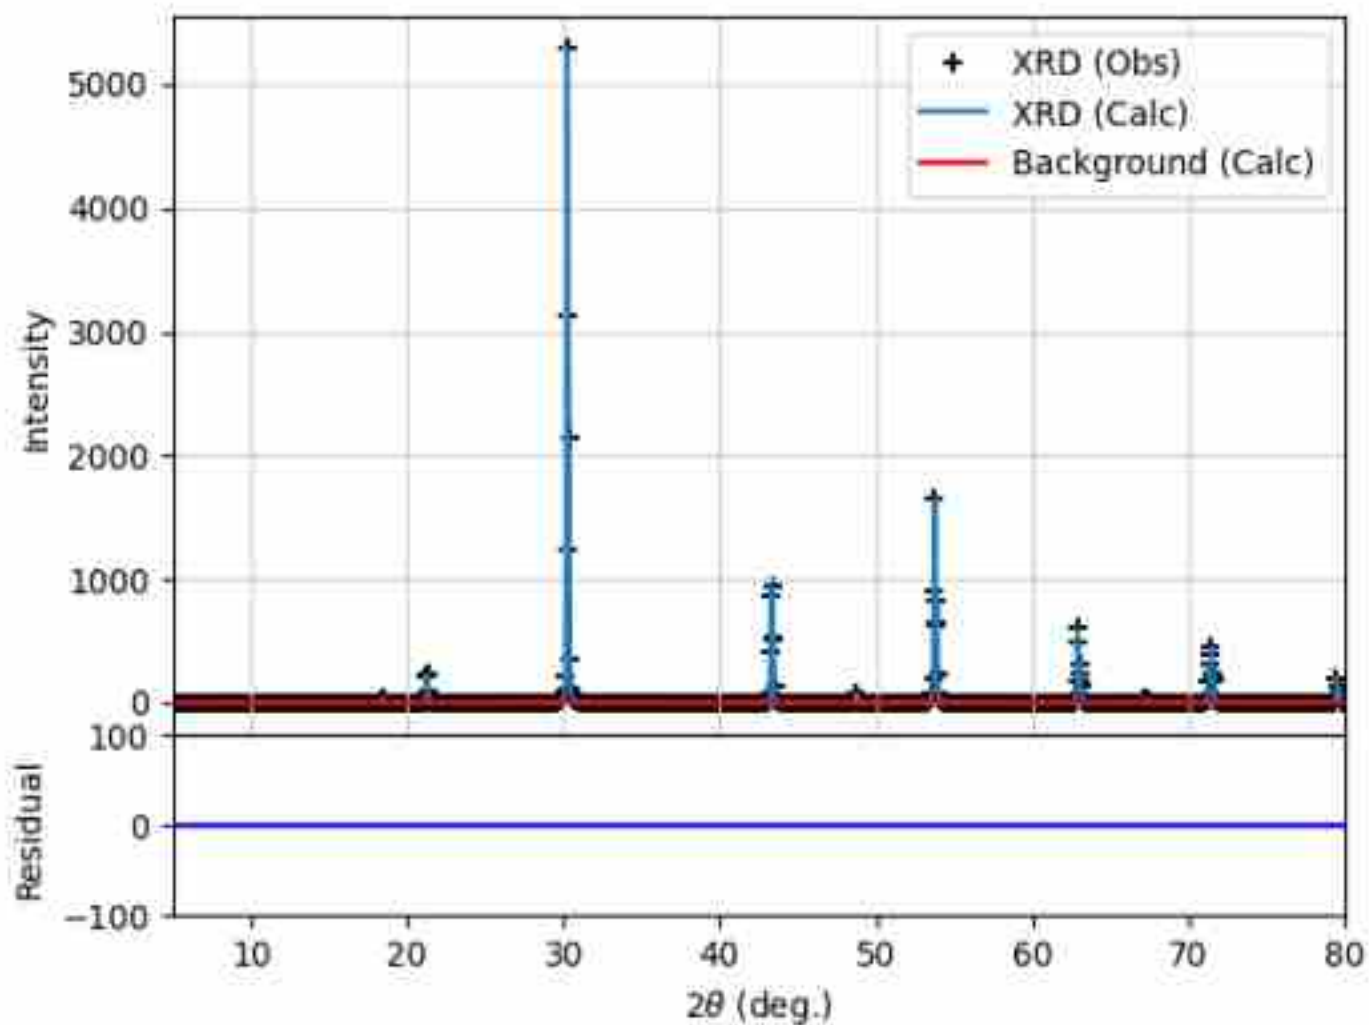

| RMSE before RR | Rwp     | RMSE after RR |
|----------------|---------|---------------|
| 0.016          | 0.00665 | 0.00162       |

# Be<sub>2</sub>I<sub>4</sub>

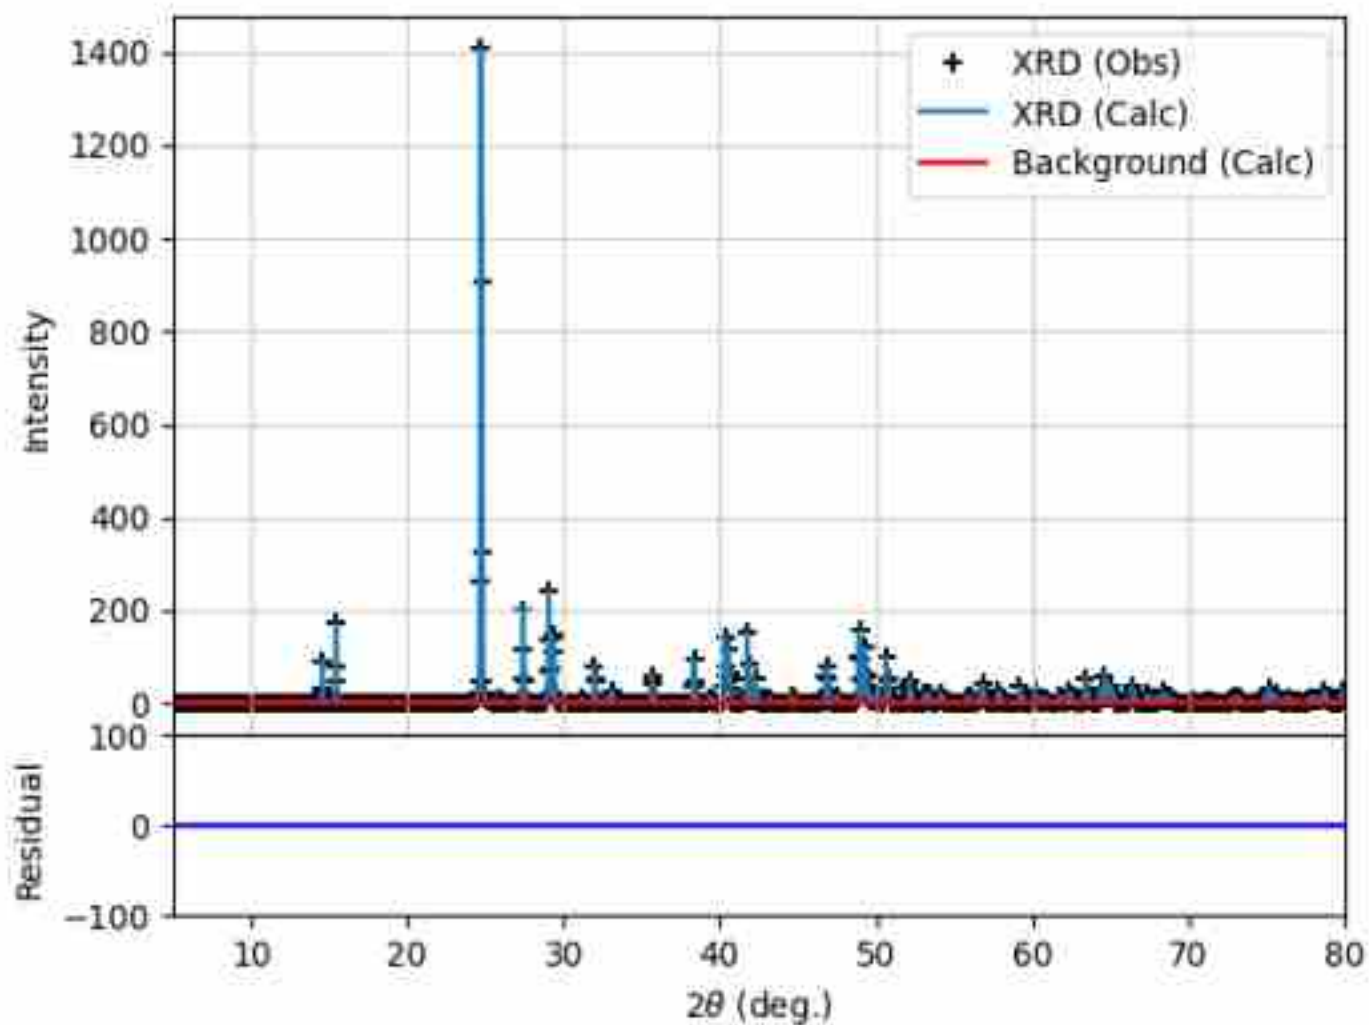

| RMSE before RR | Rwp    | RMSE after RR |
|----------------|--------|---------------|
| 0.016          | 0.0029 | 0.00114       |

# Be<sub>4</sub>Nb<sub>2</sub>

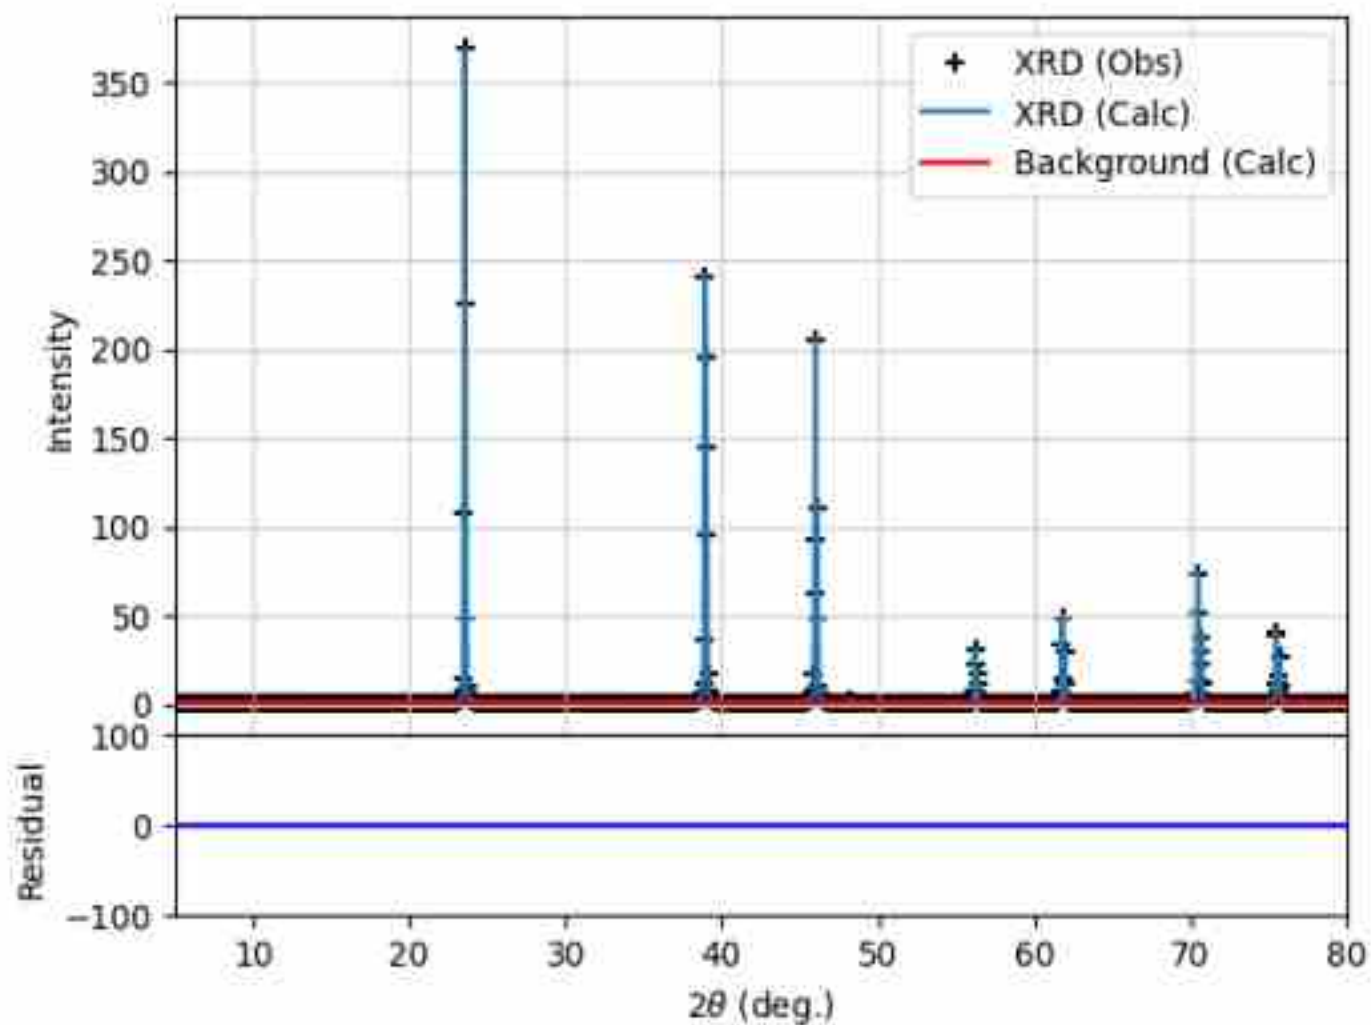

| RMSE before RR | Rwp     | RMSE after RR |
|----------------|---------|---------------|
| 0.016          | 0.00624 | 0.00487       |

# Be<sub>8</sub>Fe<sub>4</sub>

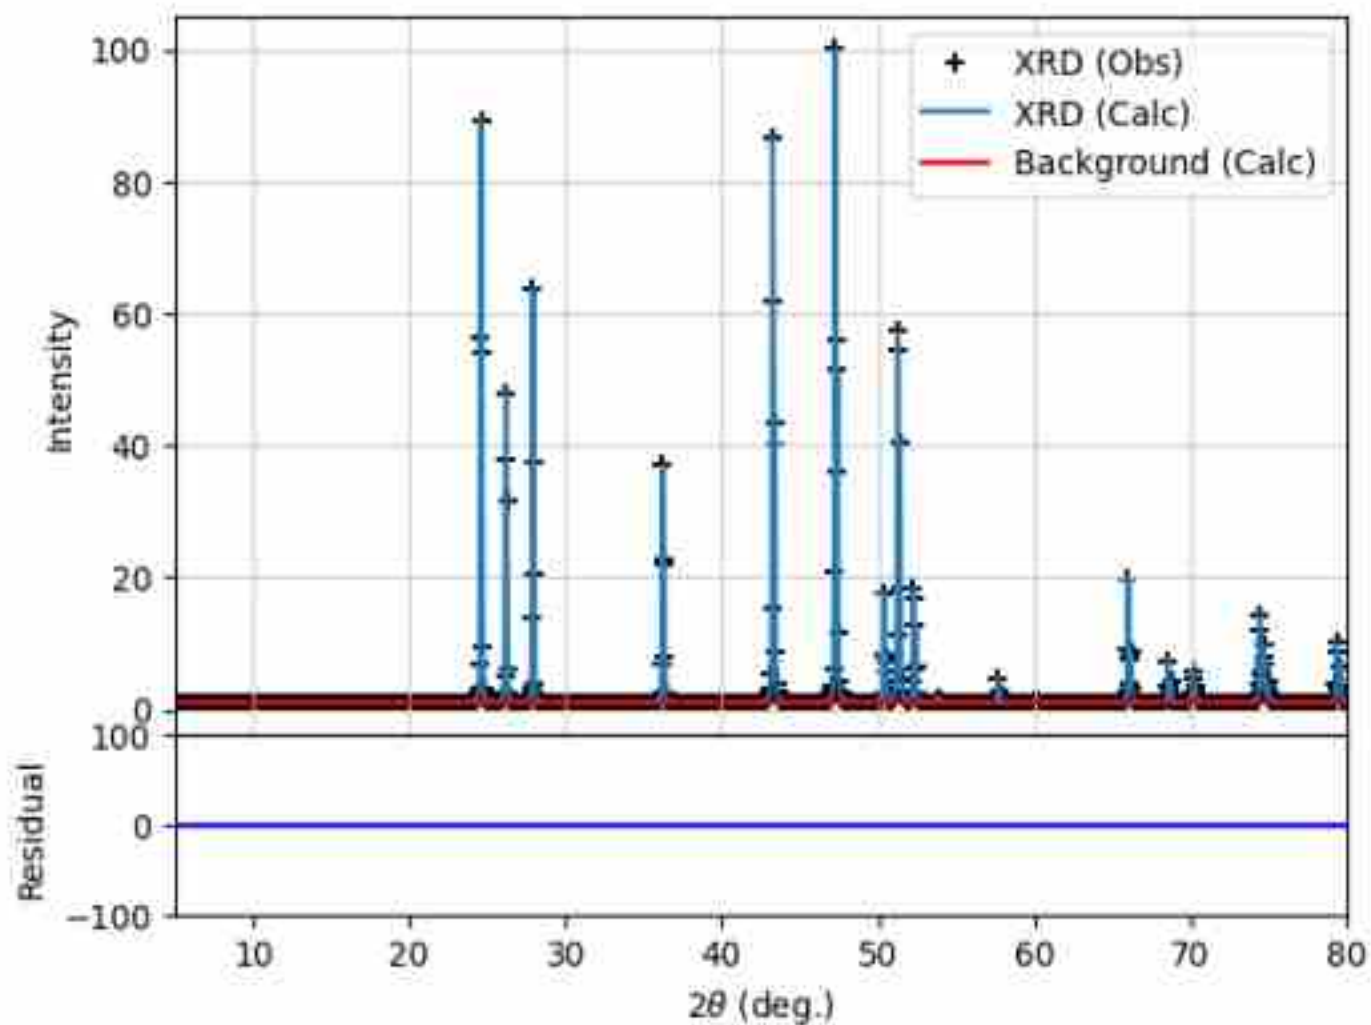

| RMSE before RR | Rwp     | RMSE after RR |
|----------------|---------|---------------|
| 0.016          | 0.00459 | 0.00341       |

# Bi1Pb1Br1O2

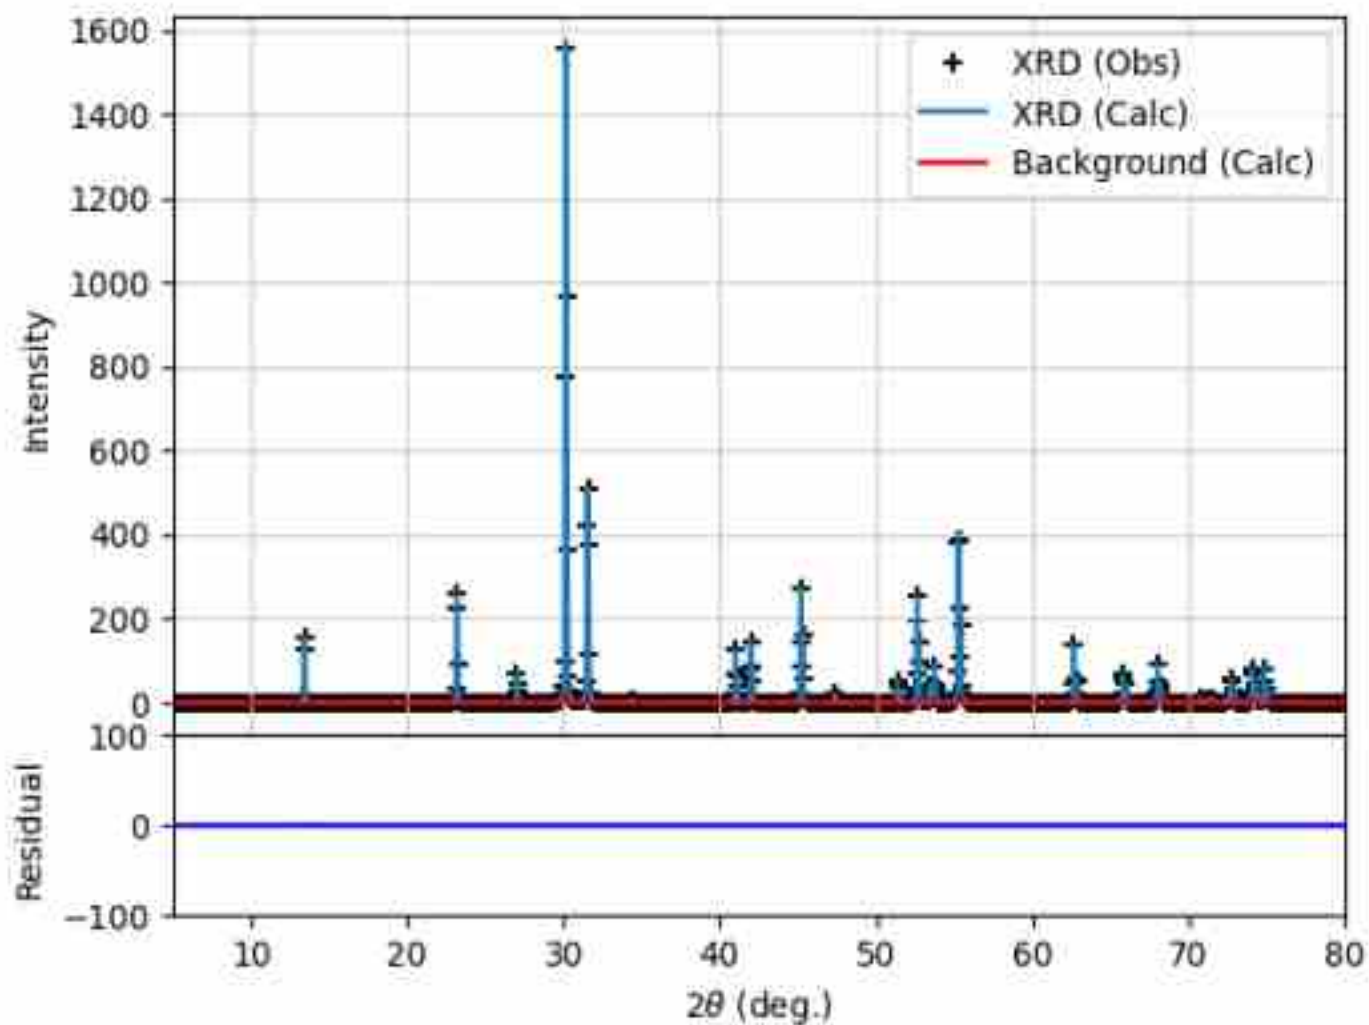

| RMSE before RR | Rwp     | RMSE after RR |
|----------------|---------|---------------|
| 0.016          | 0.13287 | 0.05407       |

# C2O4

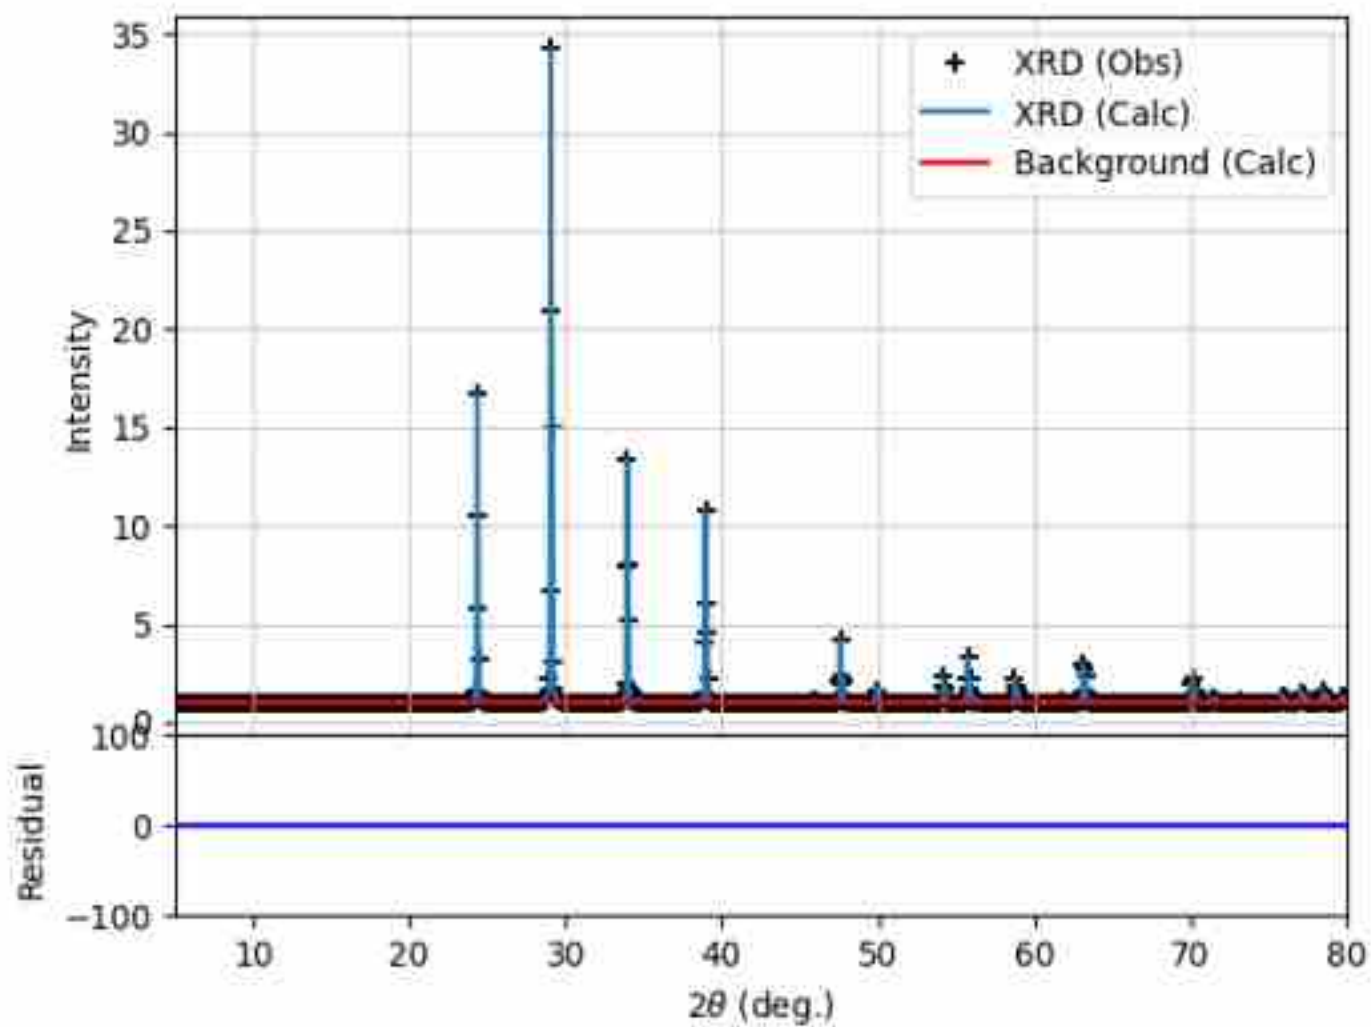

| RMSE before RR | Rwp   | RMSE after RR |
|----------------|-------|---------------|
| 0.016          | 0.002 | 0.00141       |

# Ca1Ag1O2

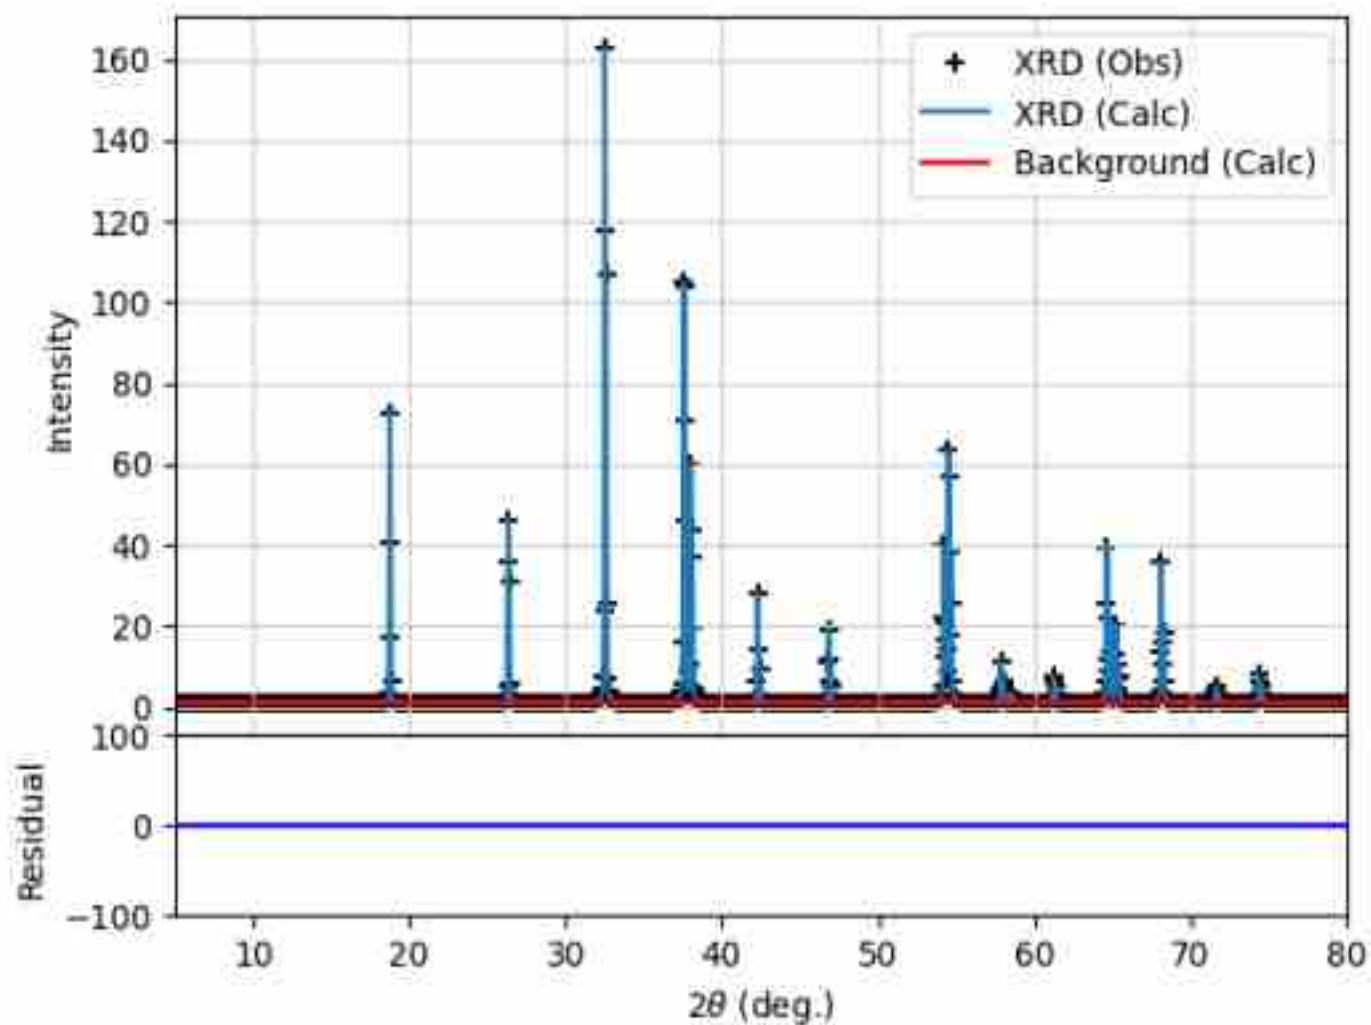

| RMSE before RR | Rwp     | RMSE after RR |
|----------------|---------|---------------|
| 0.016          | 0.00377 | 0.00108       |

# CaIn<sub>2</sub>N<sub>2</sub>

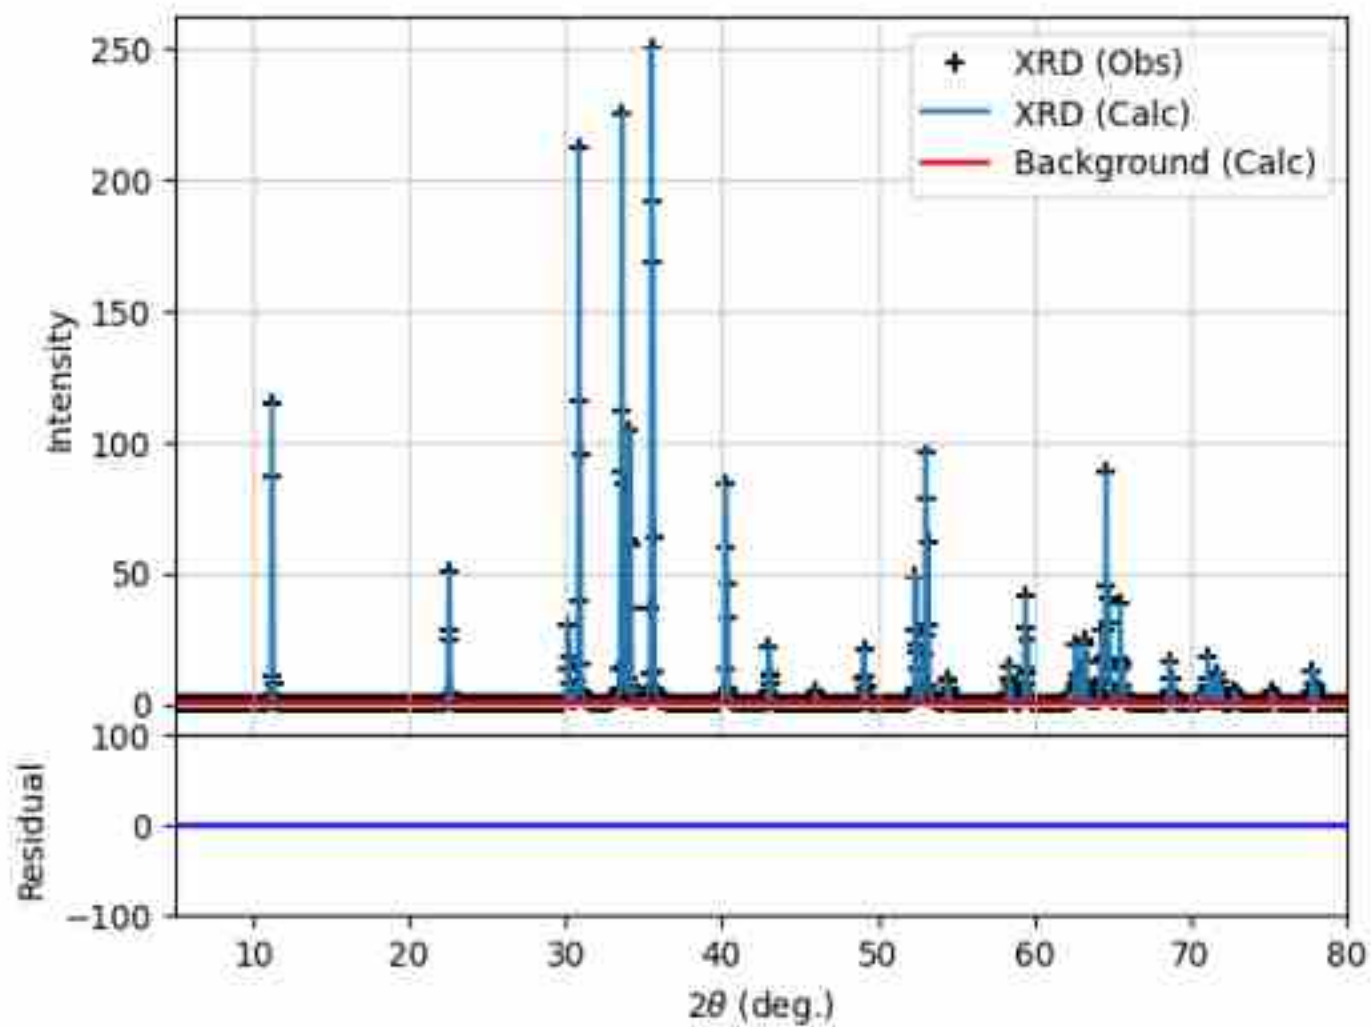

| RMSE before RR | Rwp     | RMSE after RR |
|----------------|---------|---------------|
| 0.016          | 0.06008 | 0.00333       |



# Ca<sub>1</sub>Mn<sub>7</sub>O<sub>8</sub>

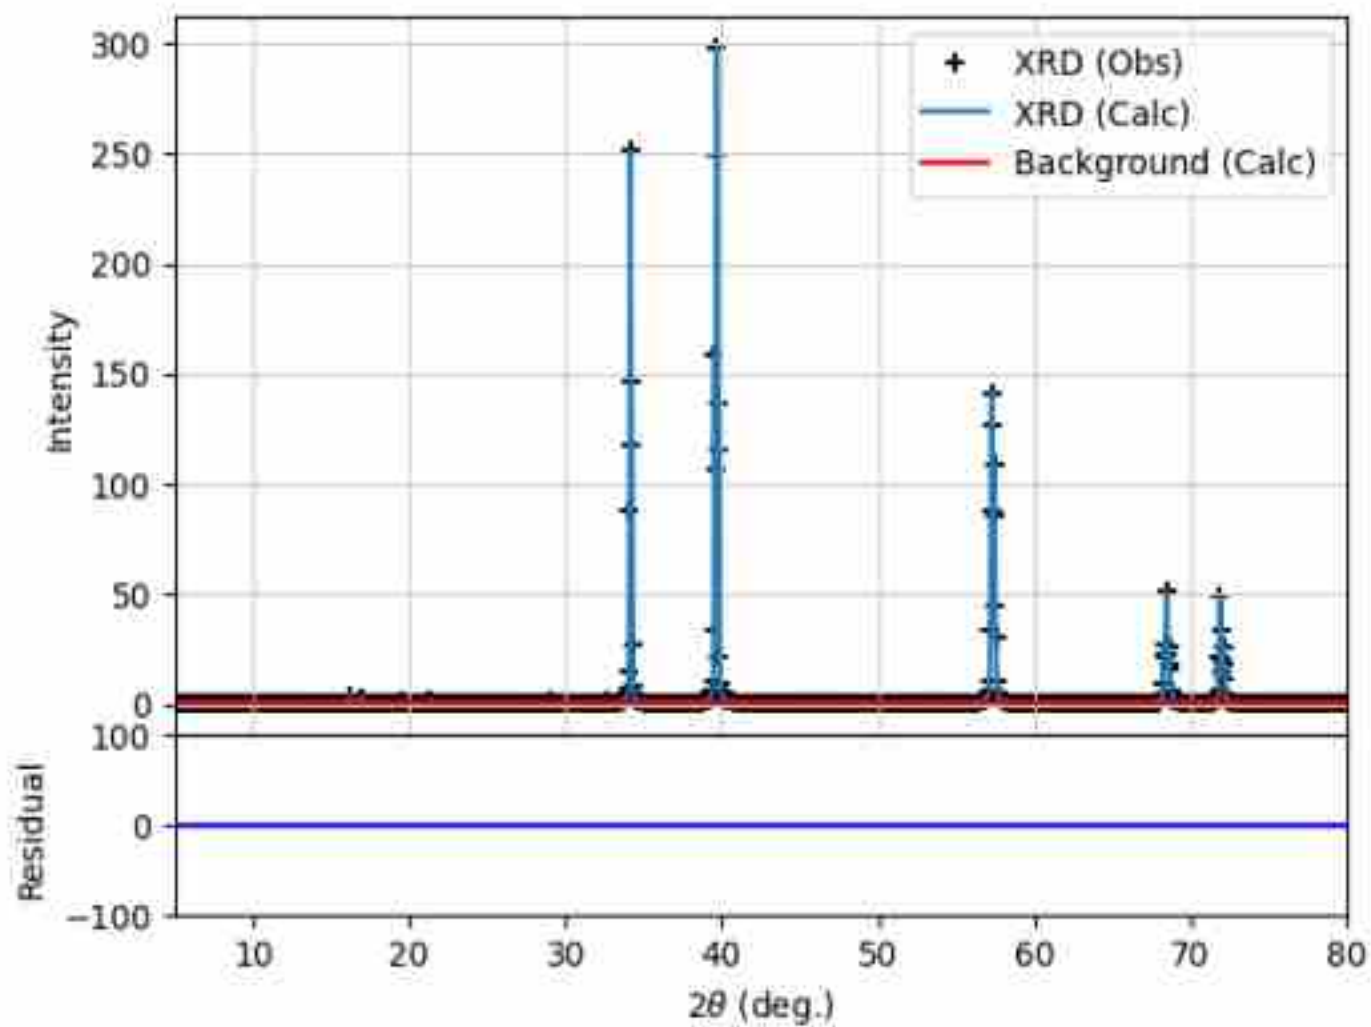

| RMSE before RR | Rwp     | RMSE after RR |
|----------------|---------|---------------|
| 0.016          | 0.00274 | 0.00072       |

# Ca<sub>2</sub>Fe<sub>2</sub>F<sub>10</sub>

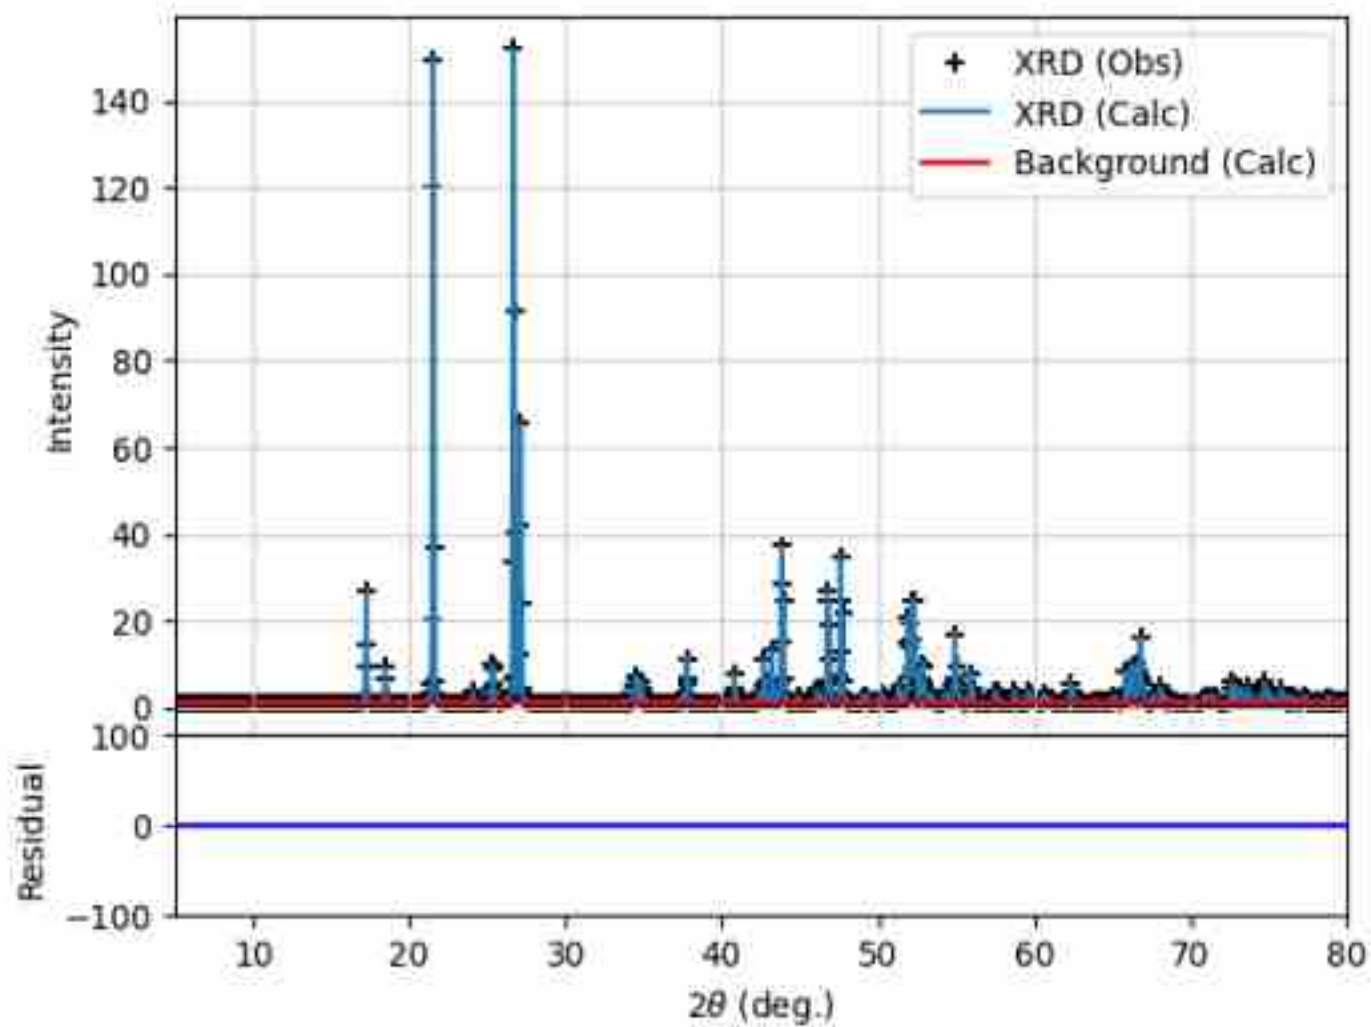

| RMSE before RR | Rwp     | RMSE after RR |
|----------------|---------|---------------|
| 0.016          | 0.00203 | 0.00049       |

# Ca<sub>2</sub>La<sub>2</sub>Fe<sub>2</sub>Sn<sub>2</sub>O<sub>12</sub>

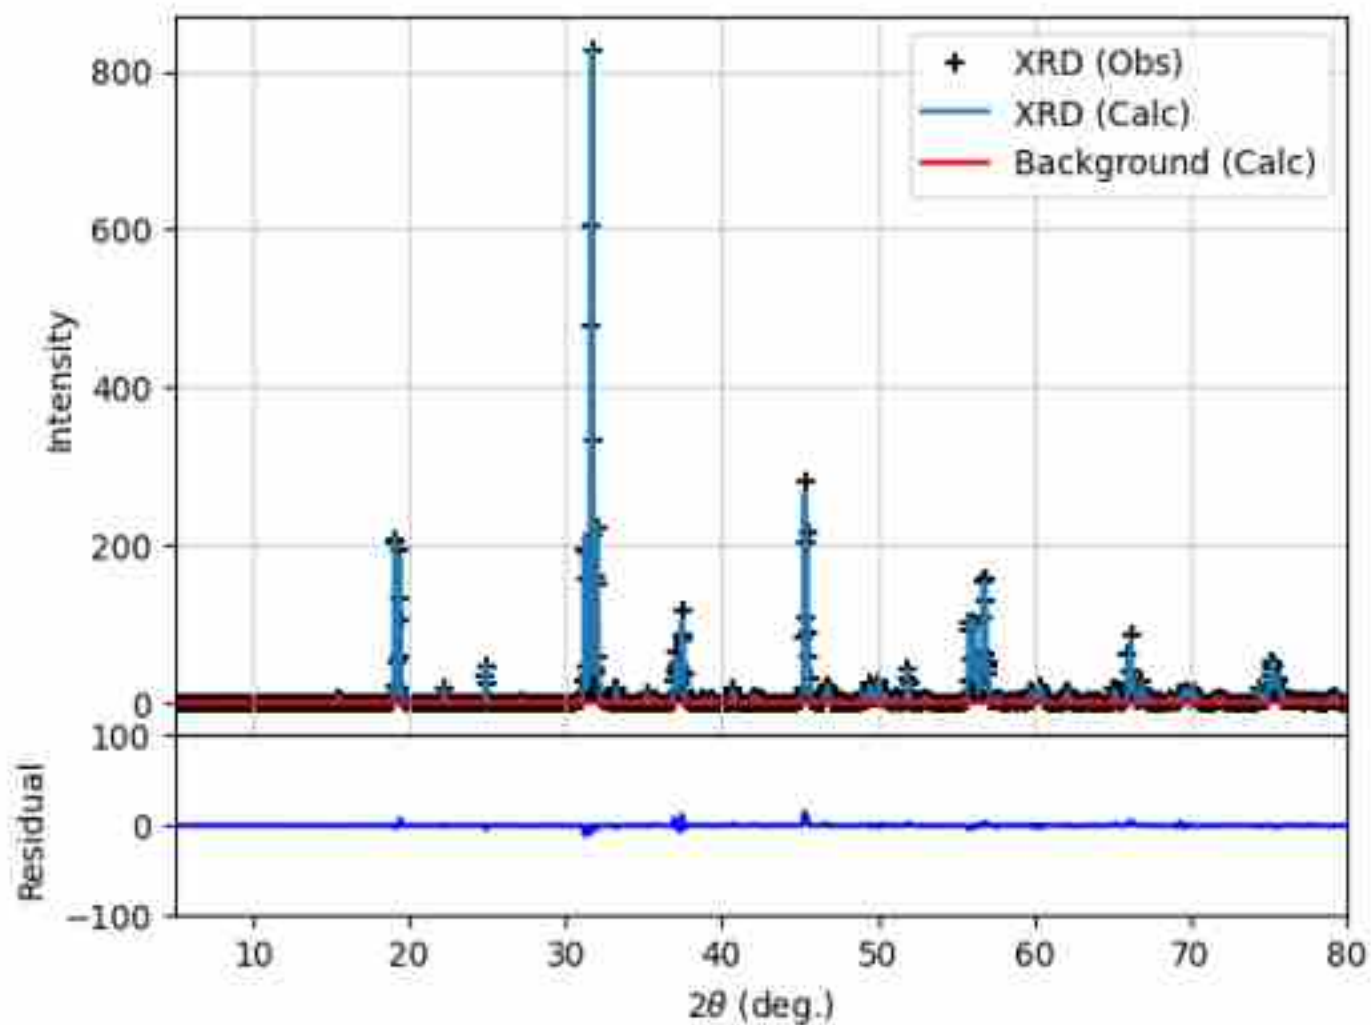

| RMSE before RR | Rwp     | RMSE after RR |
|----------------|---------|---------------|
| 0.016          | 5.77642 | 0.19907       |

# Ca<sub>2</sub>Tm<sub>2</sub>Mn<sub>4</sub>O<sub>12</sub>

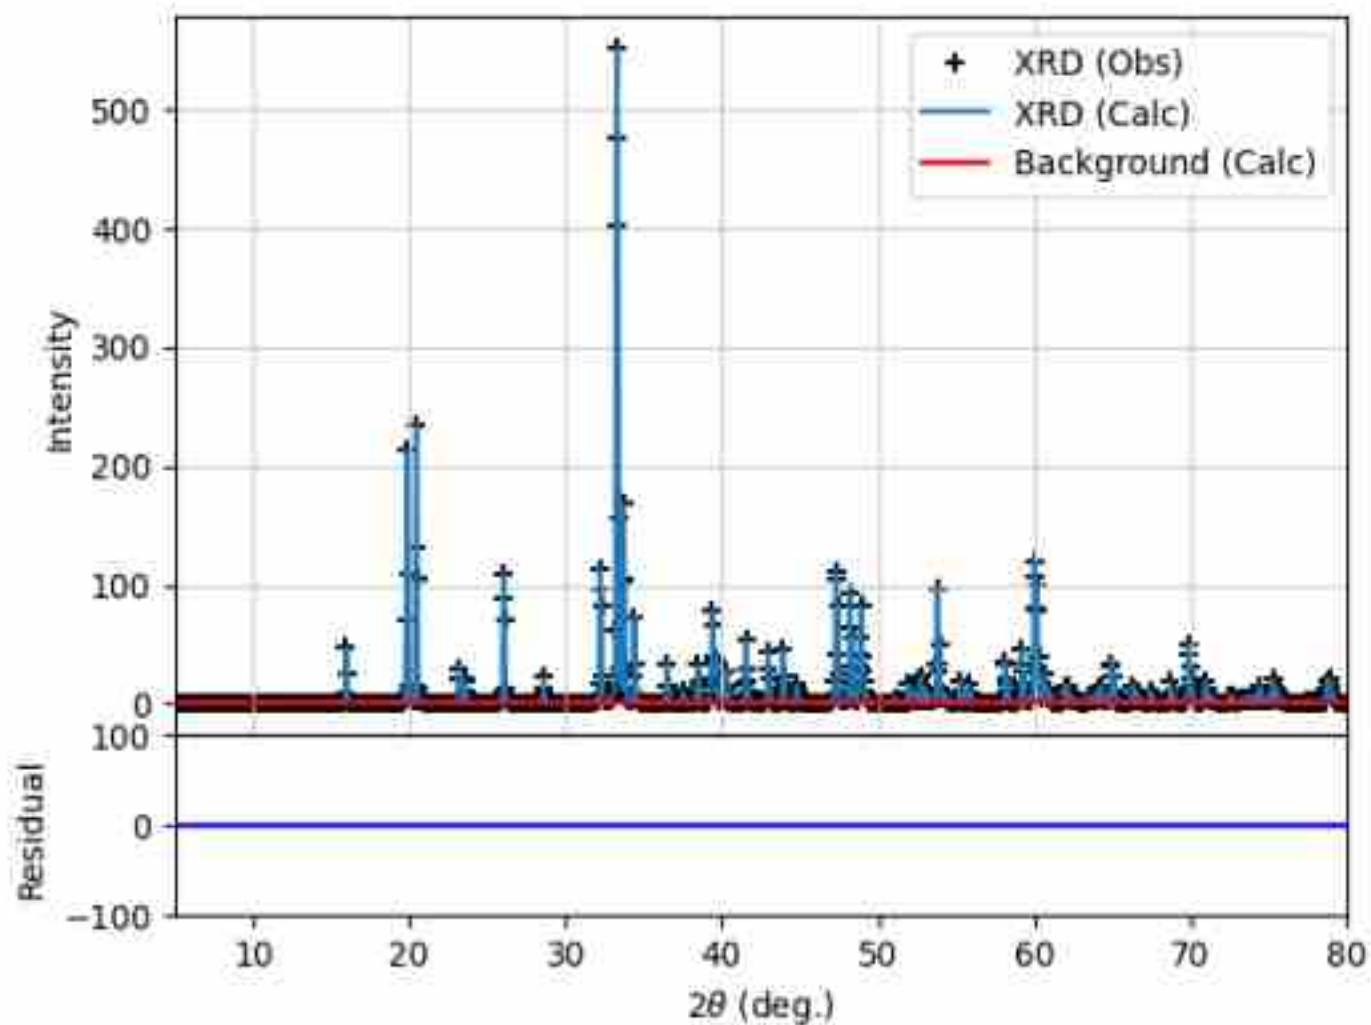

| RMSE before RR | Rwp     | RMSE after RR |
|----------------|---------|---------------|
| 0.016          | 0.00403 | 0.00116       |

# Ca<sub>3</sub>Cd<sub>3</sub>Sn<sub>3</sub>

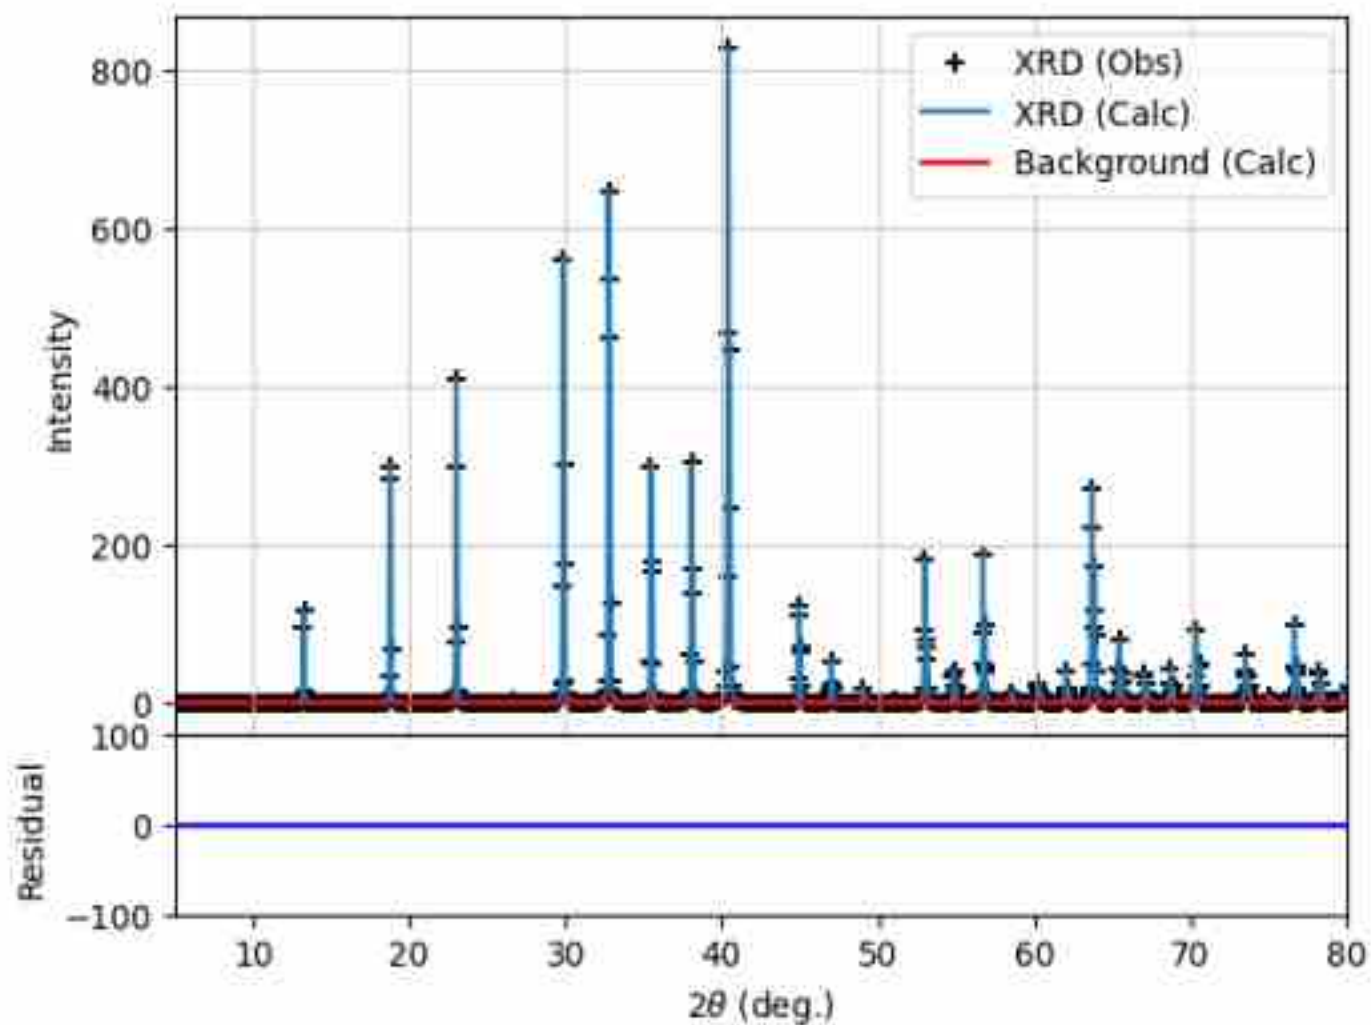

| RMSE before RR | Rwp     | RMSE after RR |
|----------------|---------|---------------|
| 0.016          | 0.00398 | 0.00119       |

# Ca<sub>4</sub>Zr<sub>4</sub>O<sub>12</sub>

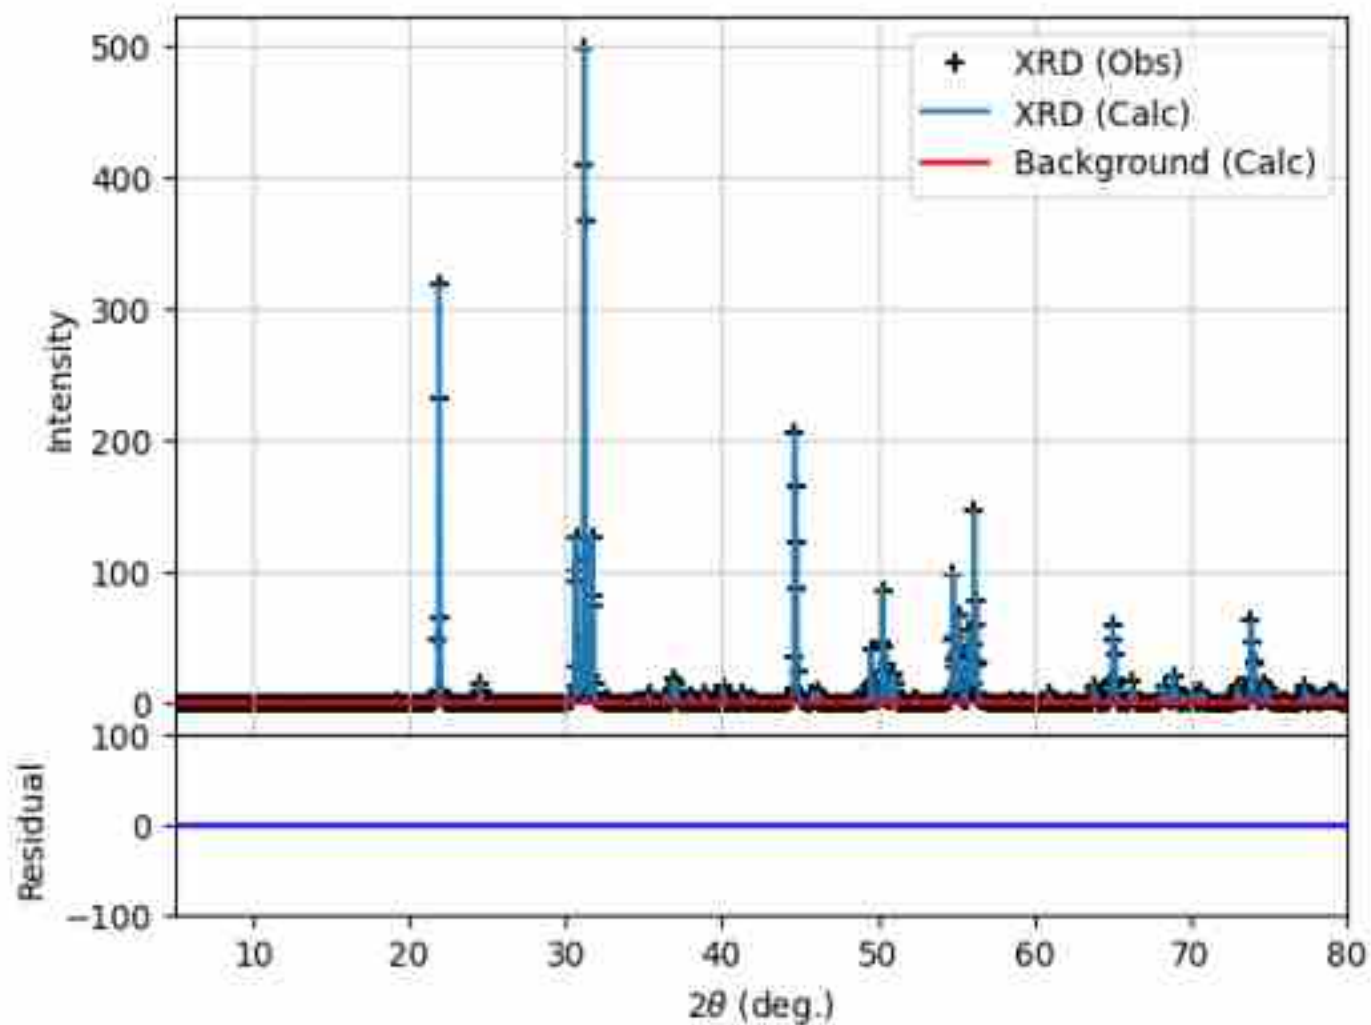

| RMSE before RR | Rwp     | RMSE after RR |
|----------------|---------|---------------|
| 0.016          | 0.00358 | 0.00067       |

# Cd<sub>2</sub>Mo<sub>2</sub>O<sub>8</sub>

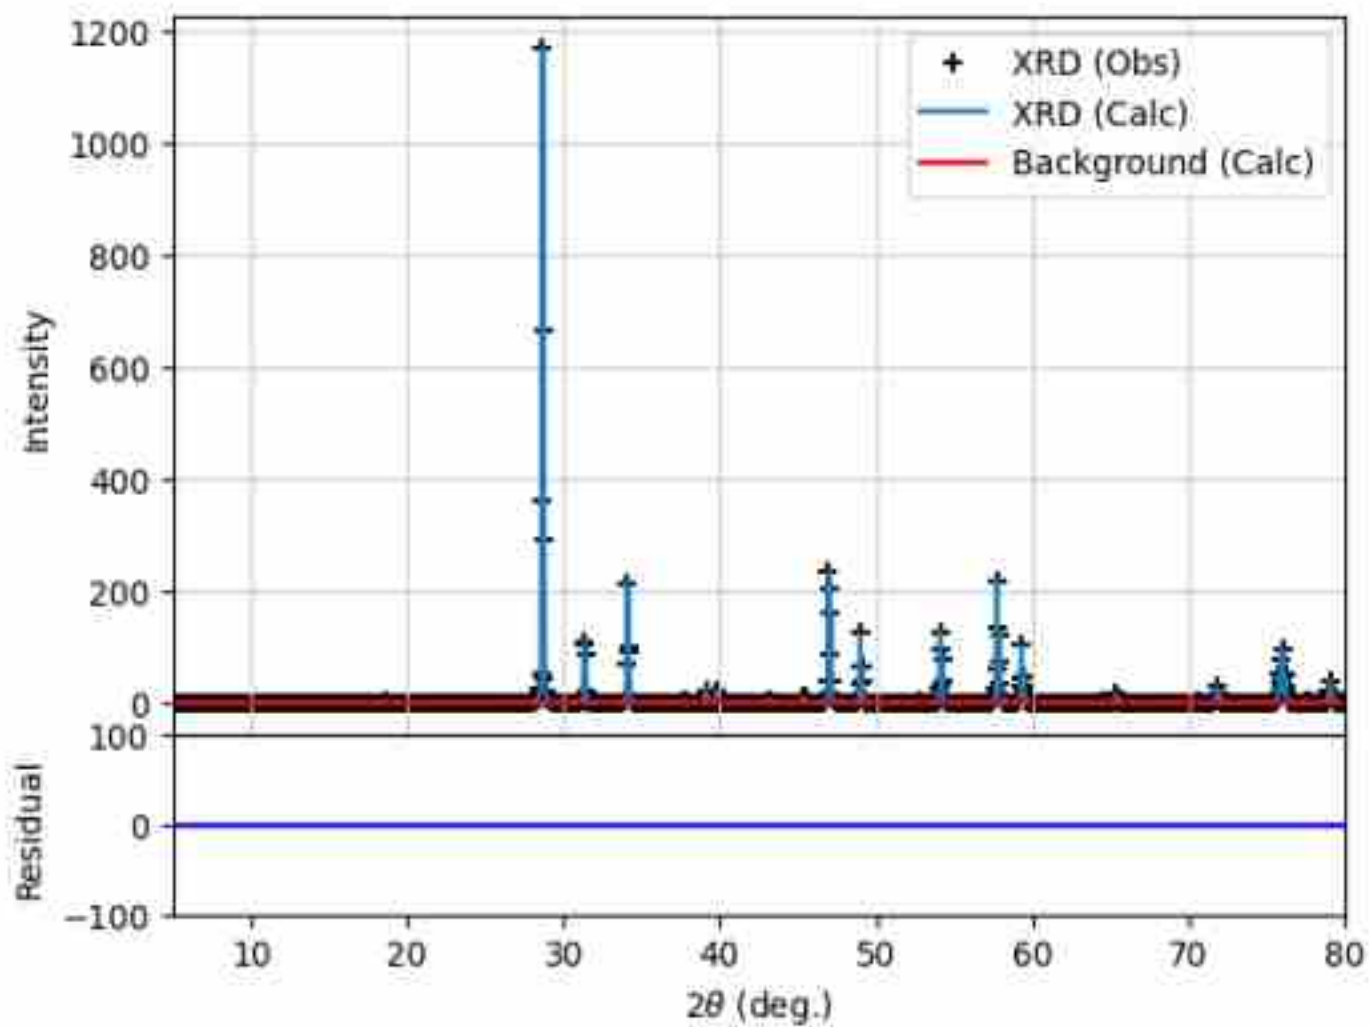

| RMSE before RR | Rwp     | RMSE after RR |
|----------------|---------|---------------|
| 0.016          | 0.00385 | 0.00137       |

# Cd6Pb2

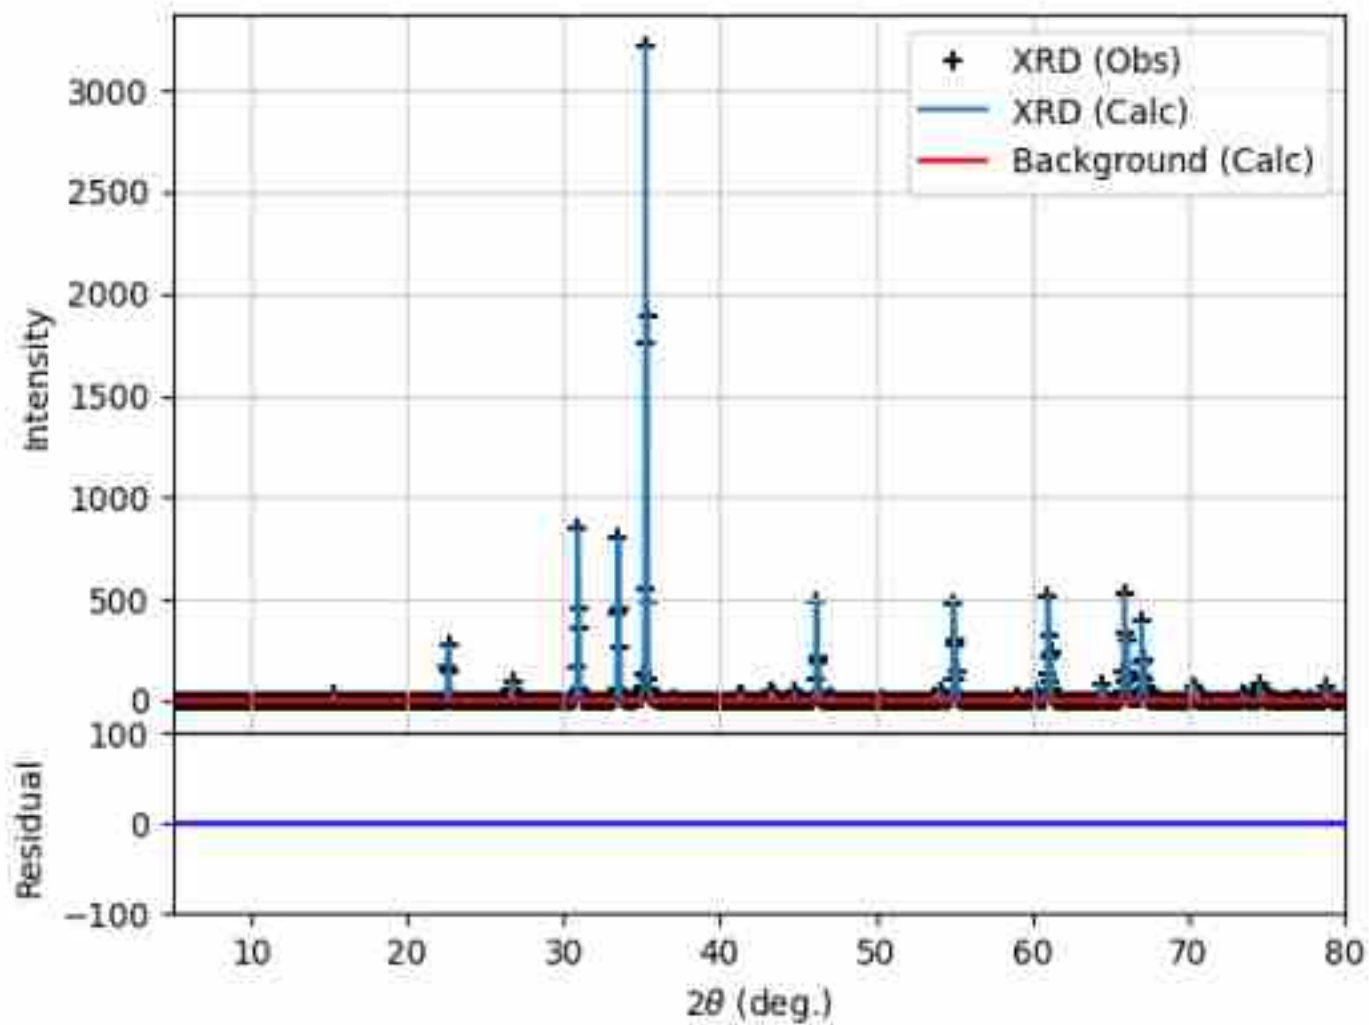

| RMSE before RR | Rwp     | RMSE after RR |
|----------------|---------|---------------|
| 0.016          | 0.01316 | 0.00093       |



# Ce<sub>2</sub>Al<sub>3</sub>Fe<sub>1</sub>

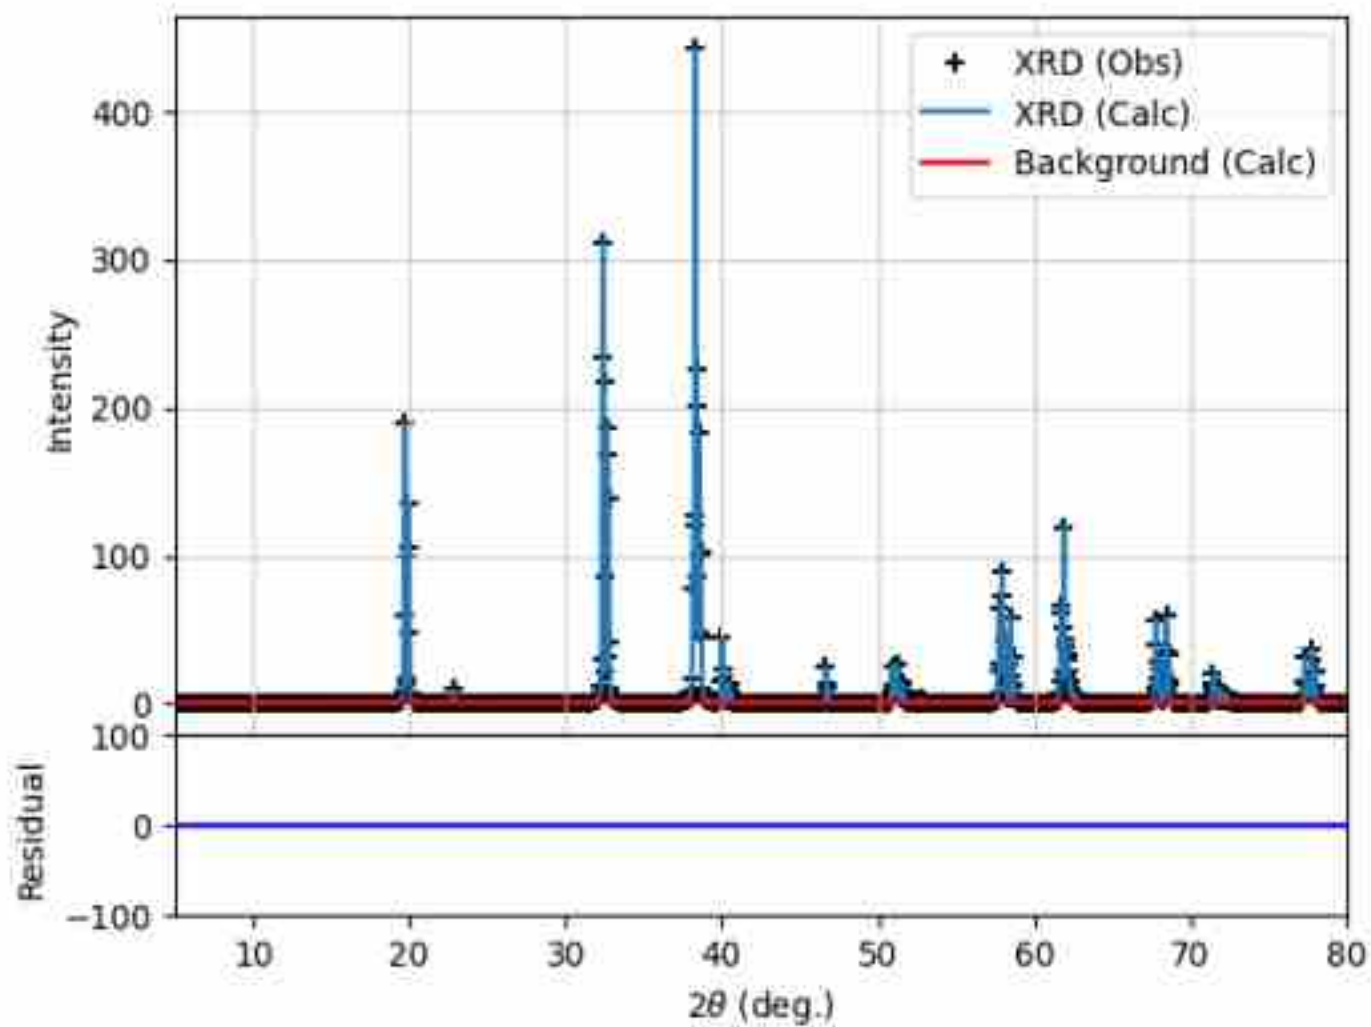

| RMSE before RR | Rwp     | RMSE after RR |
|----------------|---------|---------------|
| 0.016          | 0.00269 | 0.00026       |

Ce<sub>2</sub>Bi<sub>4</sub>Au<sub>2</sub>

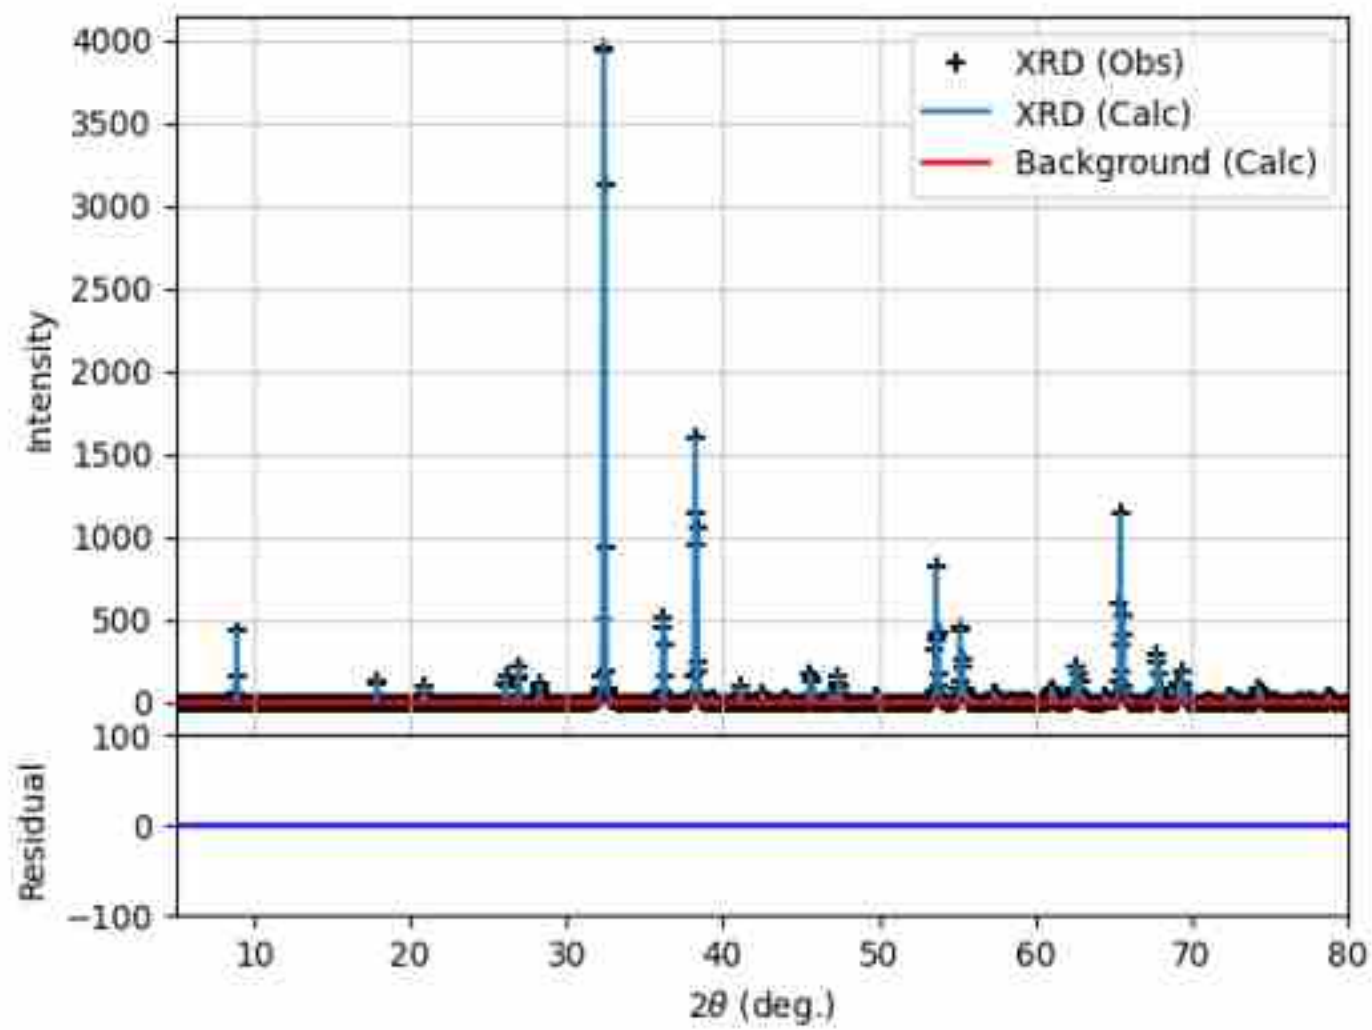

| RMSE before RR | Rwp     | RMSE after RR |
|----------------|---------|---------------|
| 0.016          | 0.00566 | 0.00037       |

# Ce<sub>2</sub>Fe<sub>2</sub>Si<sub>2</sub>

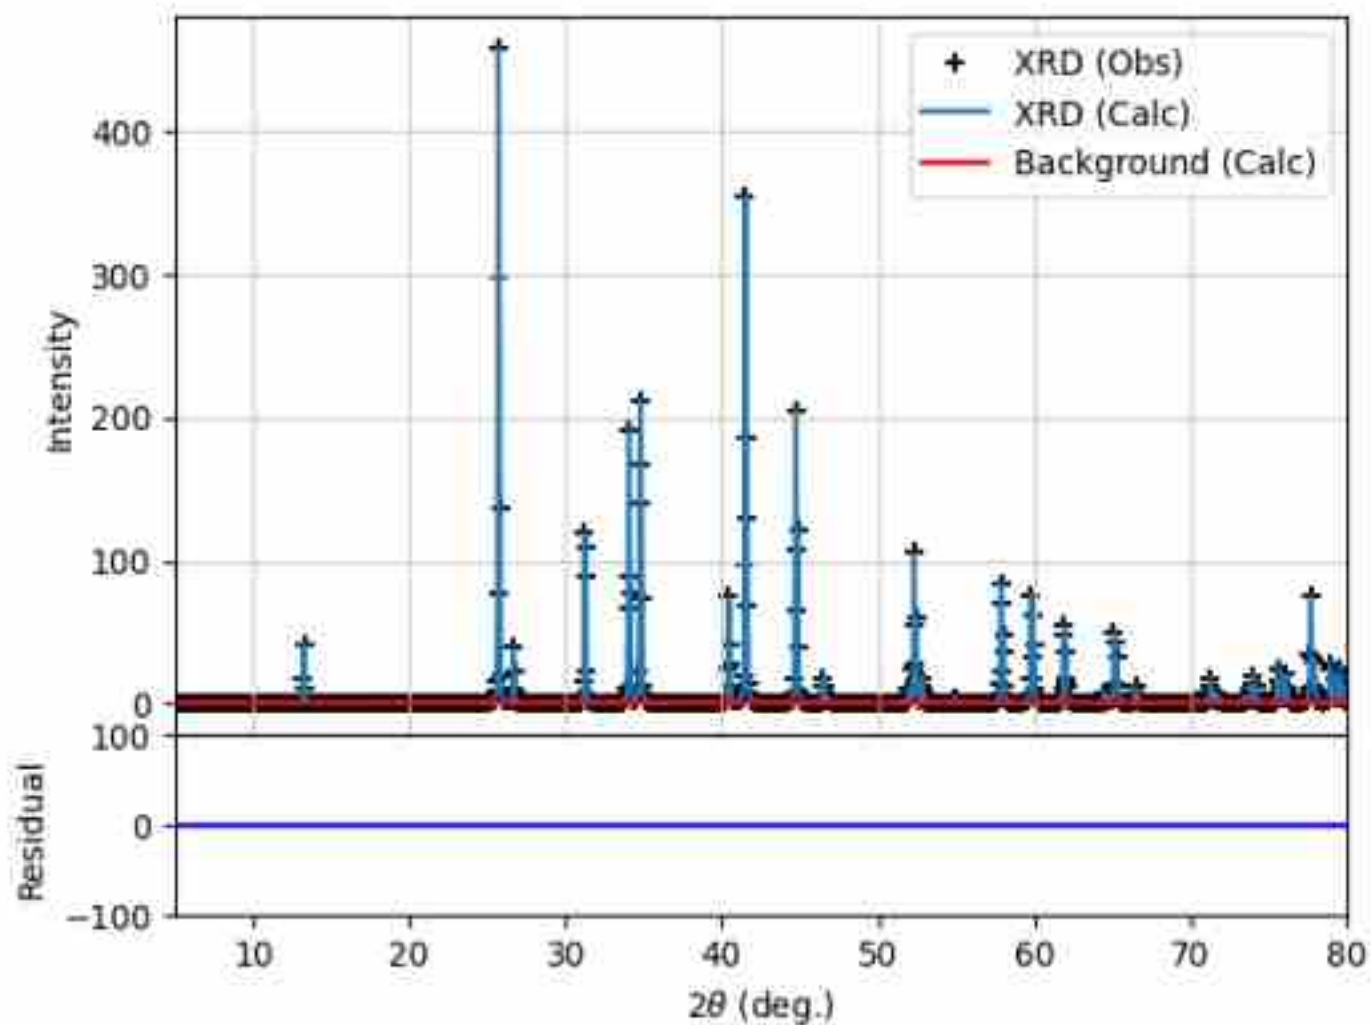

| RMSE before RR | Rwp     | RMSE after RR |
|----------------|---------|---------------|
| 0.016          | 0.00401 | 0.0008        |

# Ce<sub>2</sub>Ge<sub>6</sub>Pt<sub>1</sub>

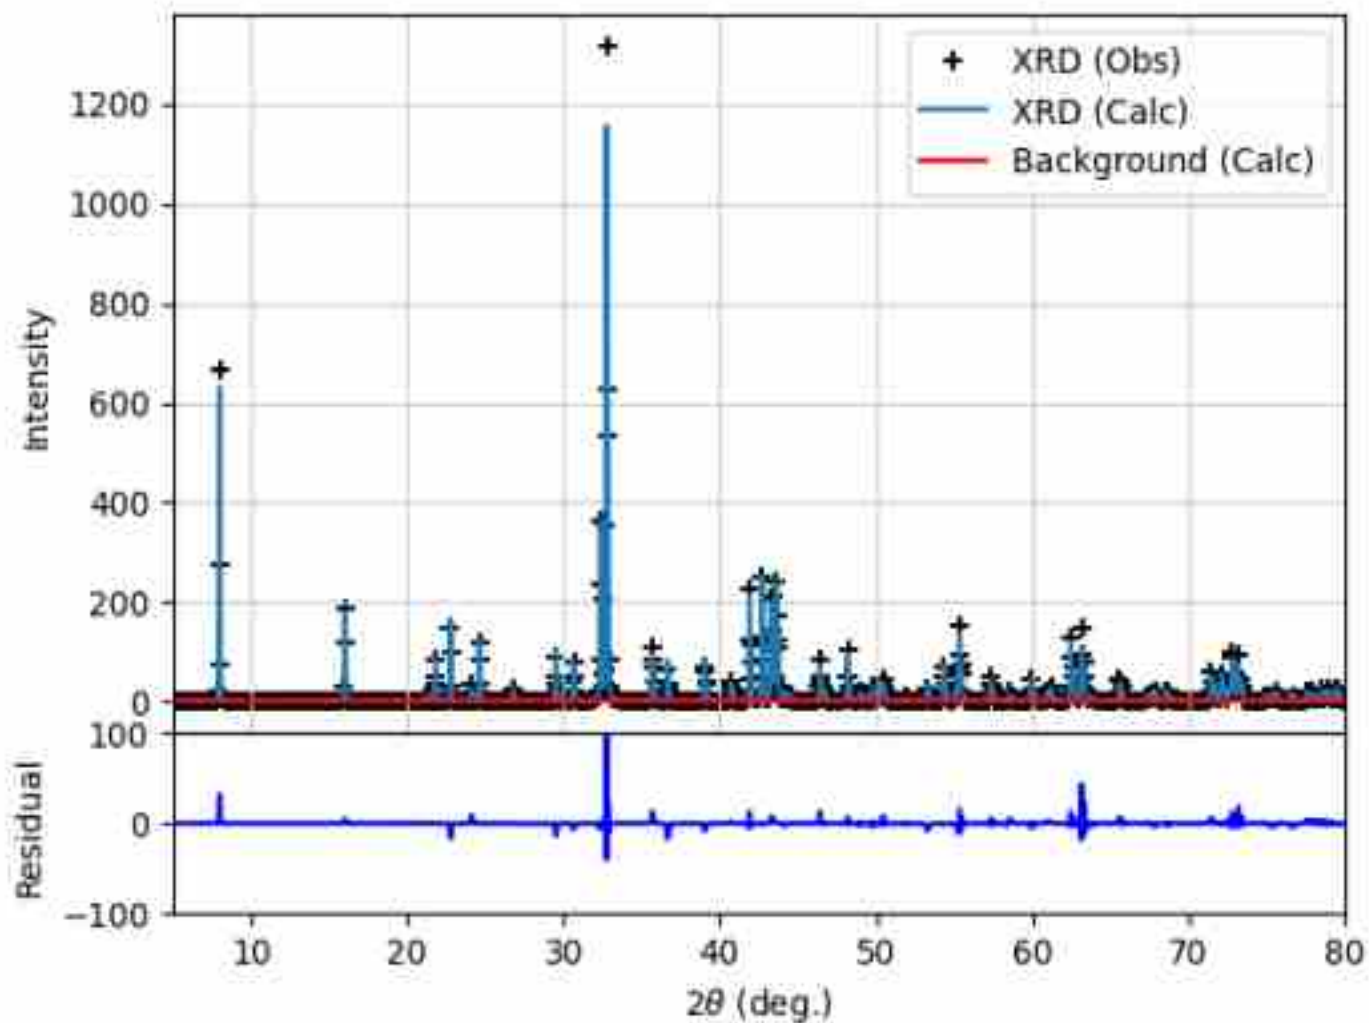

| RMSE before RR | Rwp      | RMSE after RR |
|----------------|----------|---------------|
| 0.016          | 10.87799 | 0.01618       |

# Ce4Al6Ru2

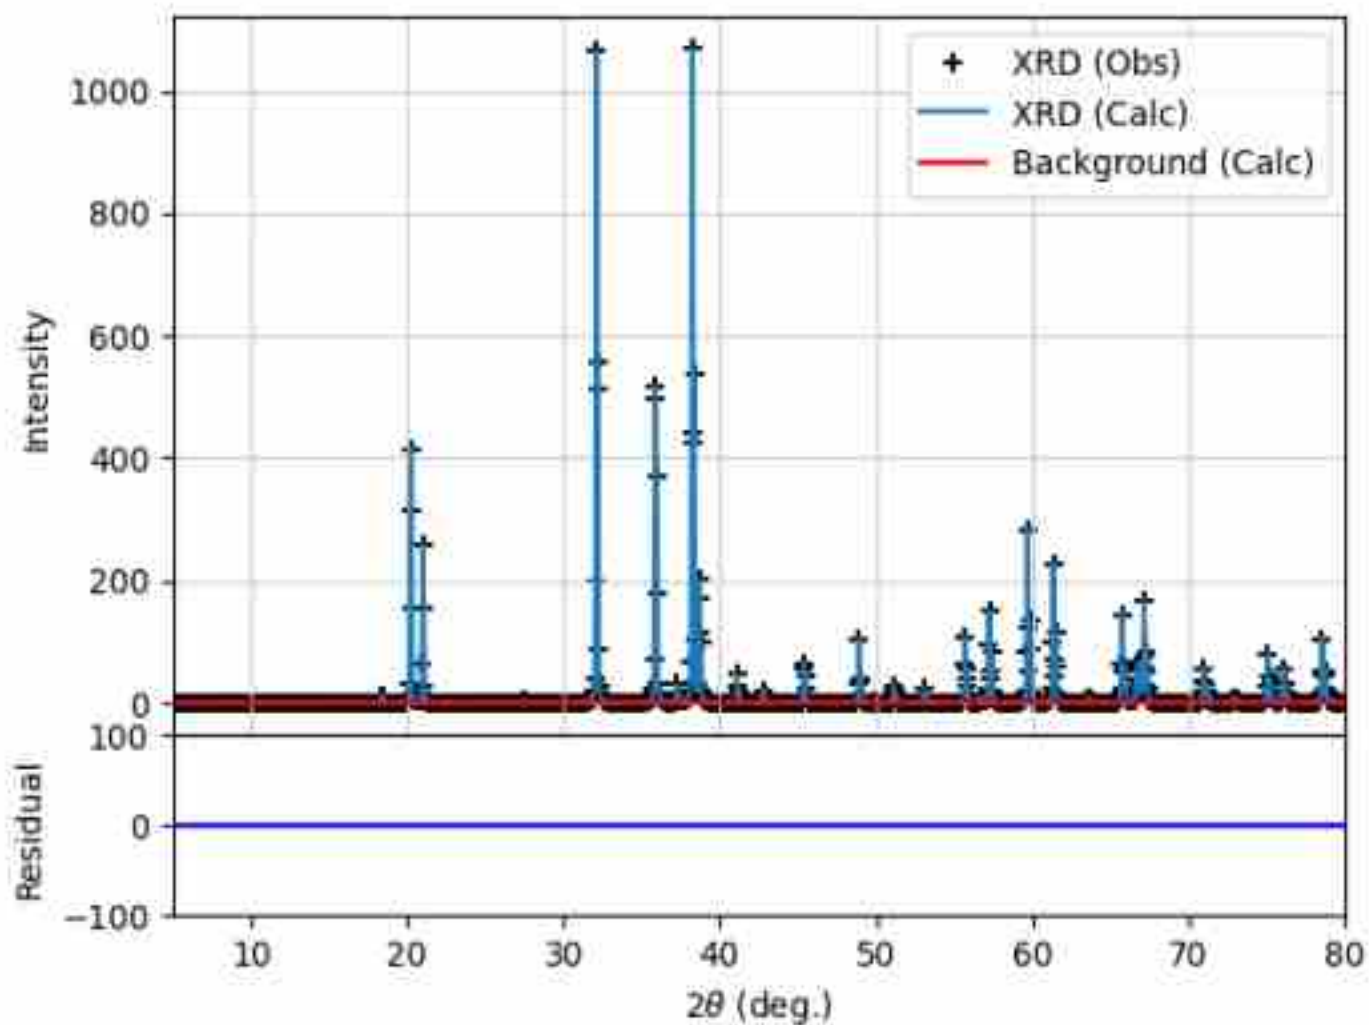

| RMSE before RR | Rwp    | RMSE after RR |
|----------------|--------|---------------|
| 0.016          | 0.0029 | 0.00075       |

# Ce6Pt8

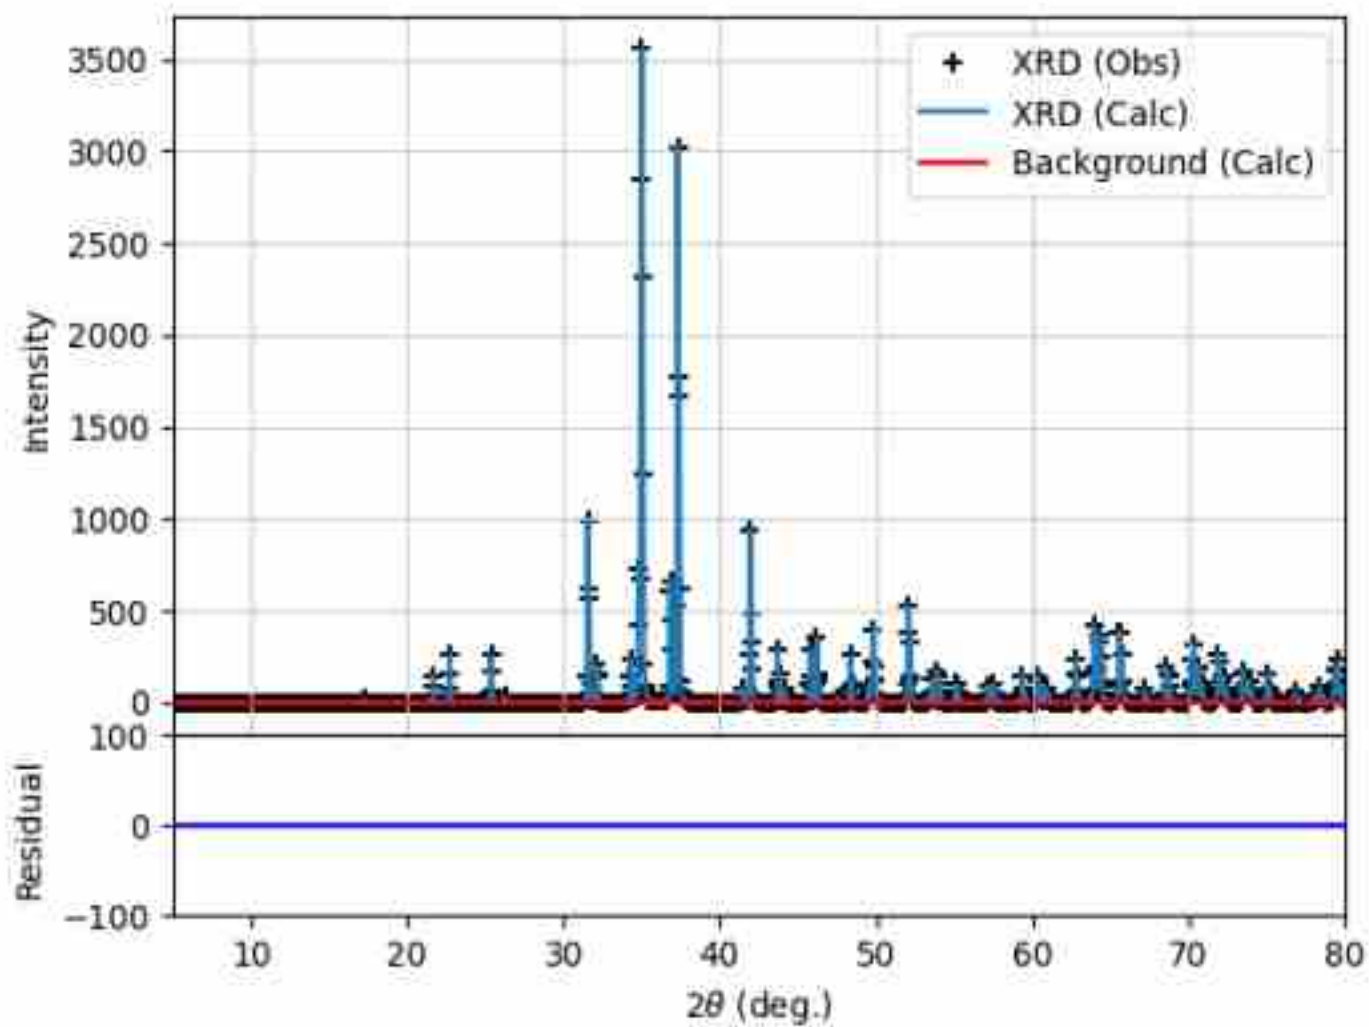

| RMSE before RR | Rwp     | RMSE after RR |
|----------------|---------|---------------|
| 0.016          | 0.00294 | 0.00032       |

# Co<sub>2</sub>Se<sub>2</sub>

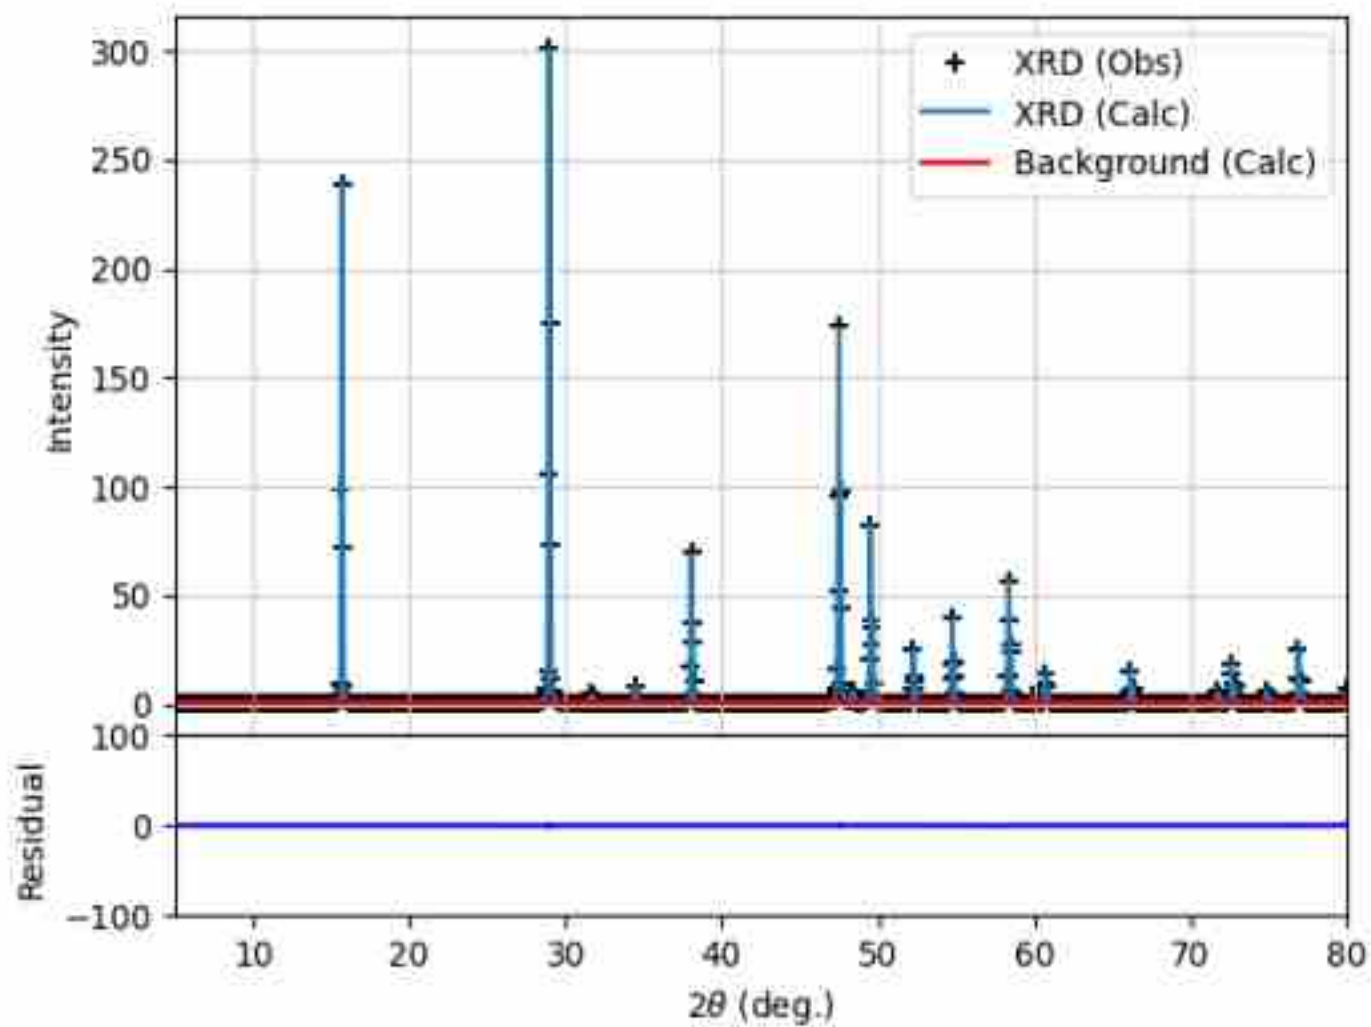

| RMSE before RR | Rwp    | RMSE after RR |
|----------------|--------|---------------|
| 0.016          | 2.1093 | 0.00978       |

# Cr<sub>2</sub>Co<sub>1</sub>Se<sub>3</sub>S<sub>1</sub>

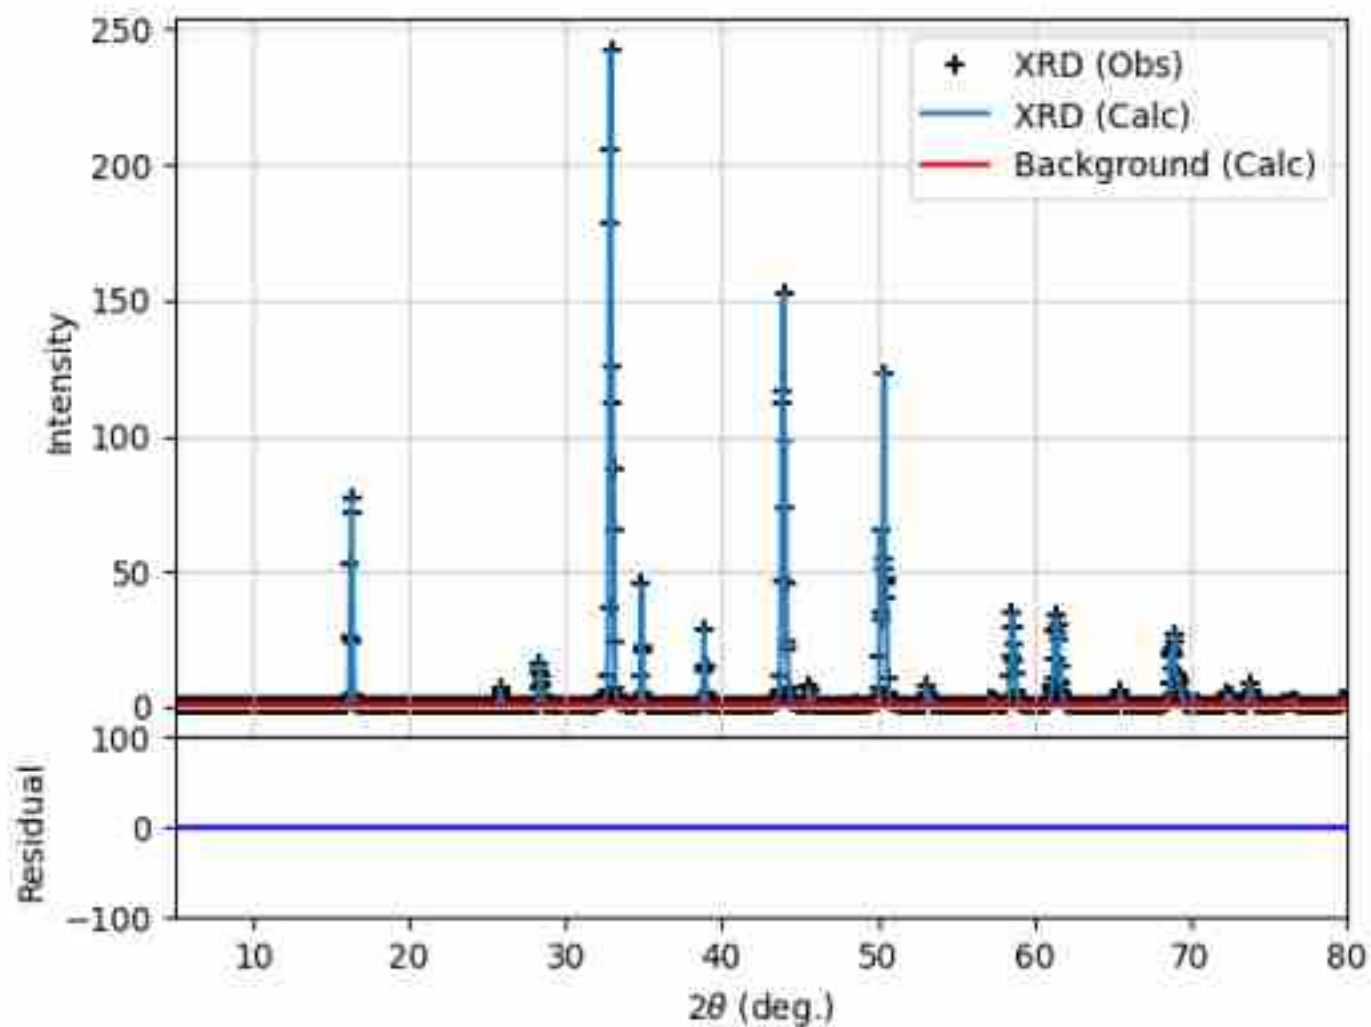

| RMSE before RR | Rwp     | RMSE after RR |
|----------------|---------|---------------|
| 0.016          | 0.00228 | 0.00029       |



# Cr<sub>4</sub>Co<sub>1</sub>Cu<sub>1</sub>S<sub>8</sub>

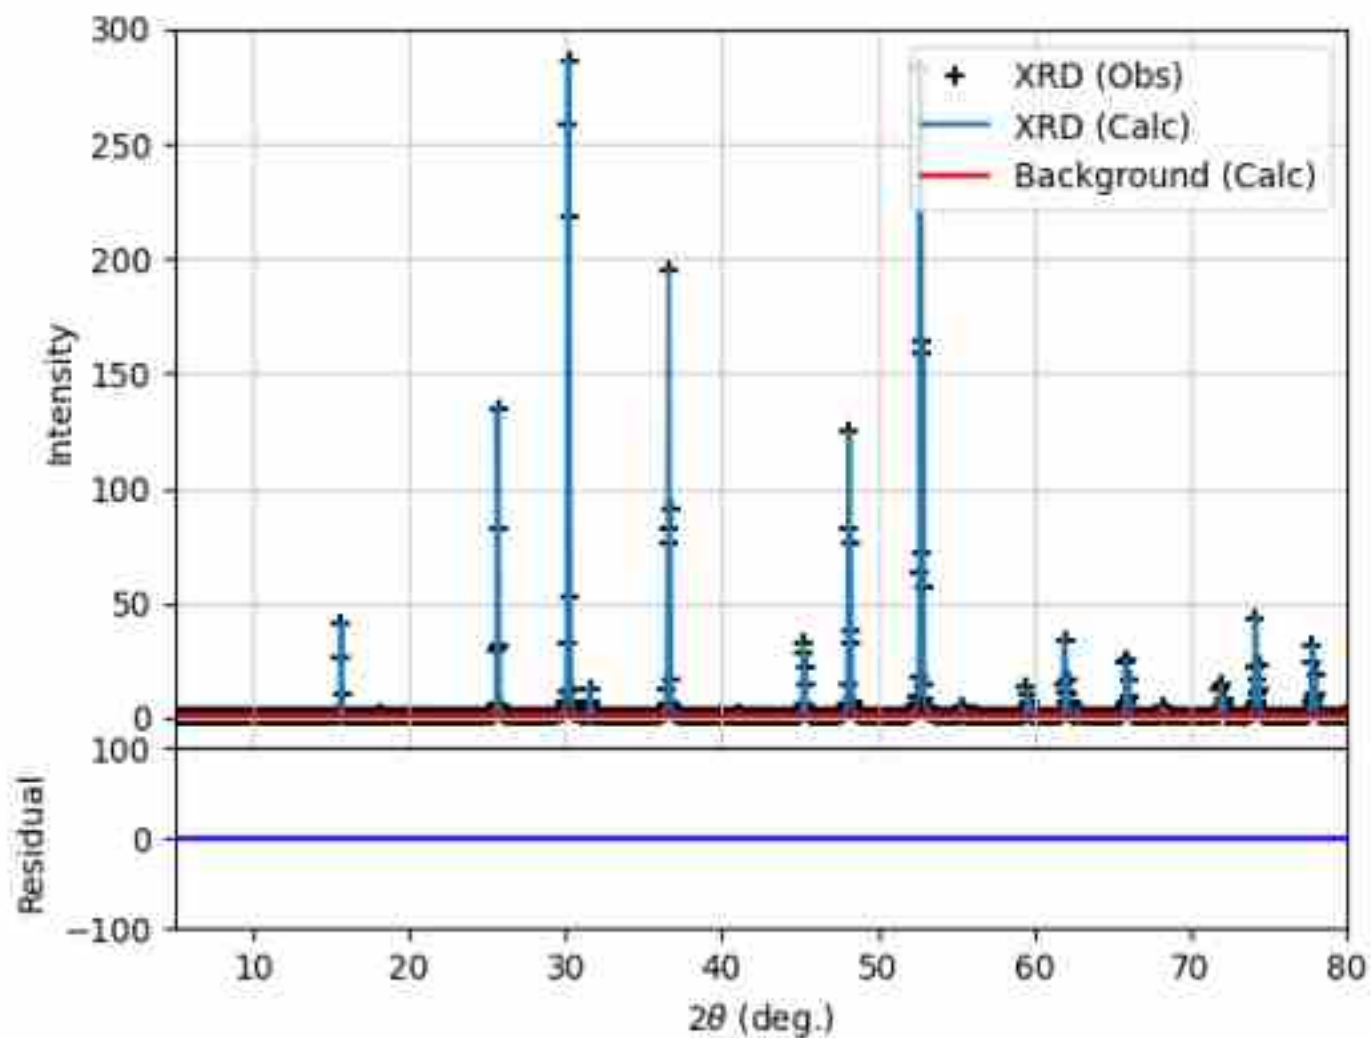

| RMSE before RR | Rwp    | RMSE after RR |
|----------------|--------|---------------|
| 0.016          | 0.0647 | 0.00462       |

# Cr<sub>4</sub>Hg<sub>2</sub>S<sub>8</sub>

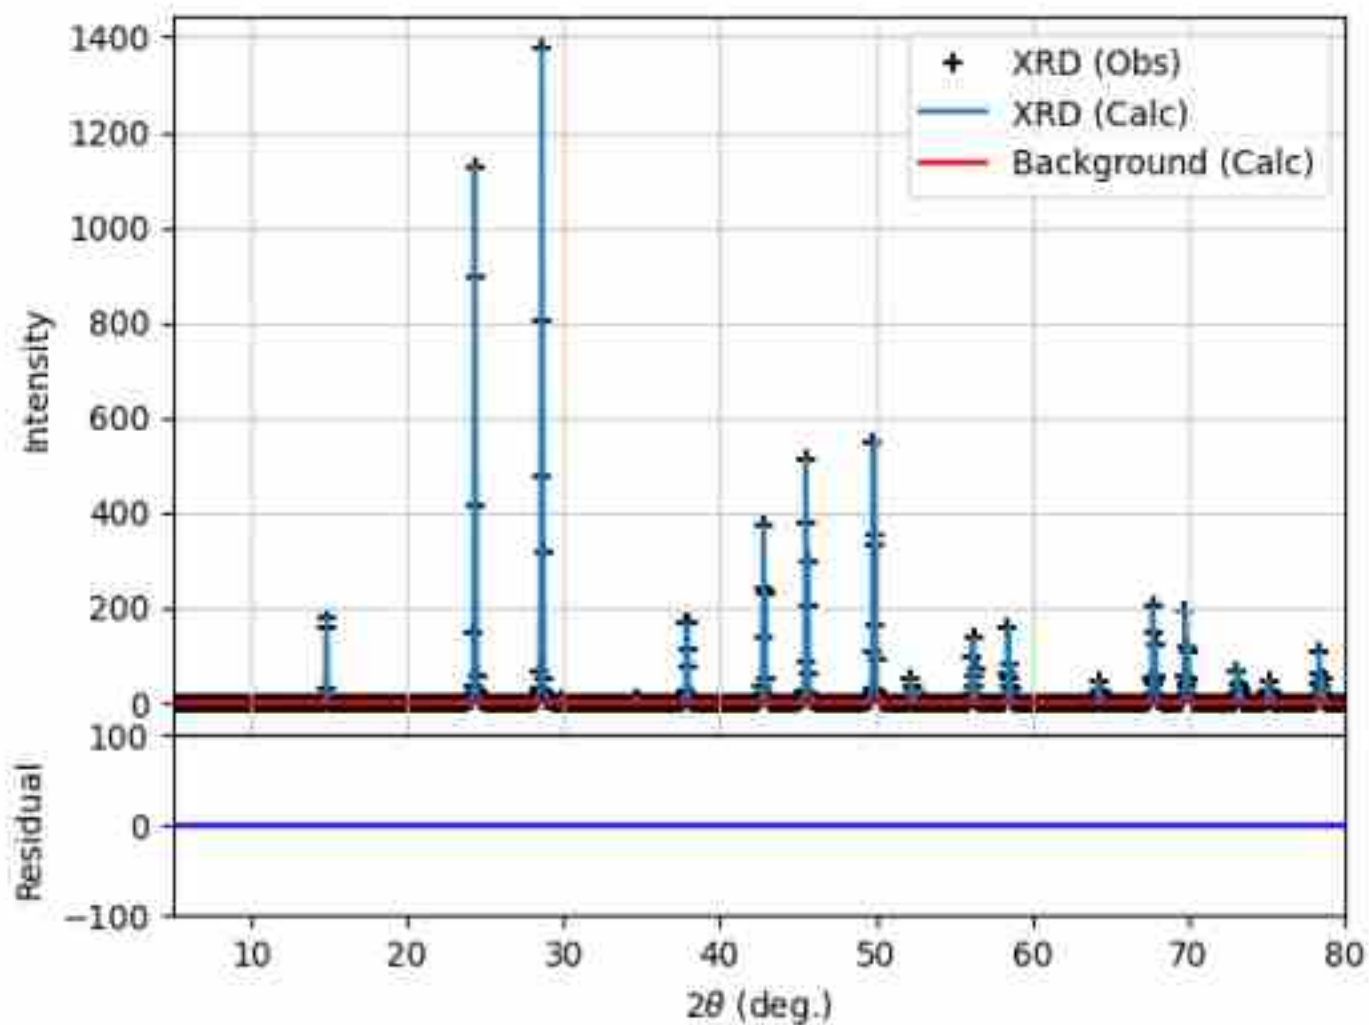

| RMSE before RR | Rwp     | RMSE after RR |
|----------------|---------|---------------|
| 0.016          | 0.00751 | 0.00231       |

# Cs<sub>1</sub>Zn<sub>4</sub>P<sub>3</sub>

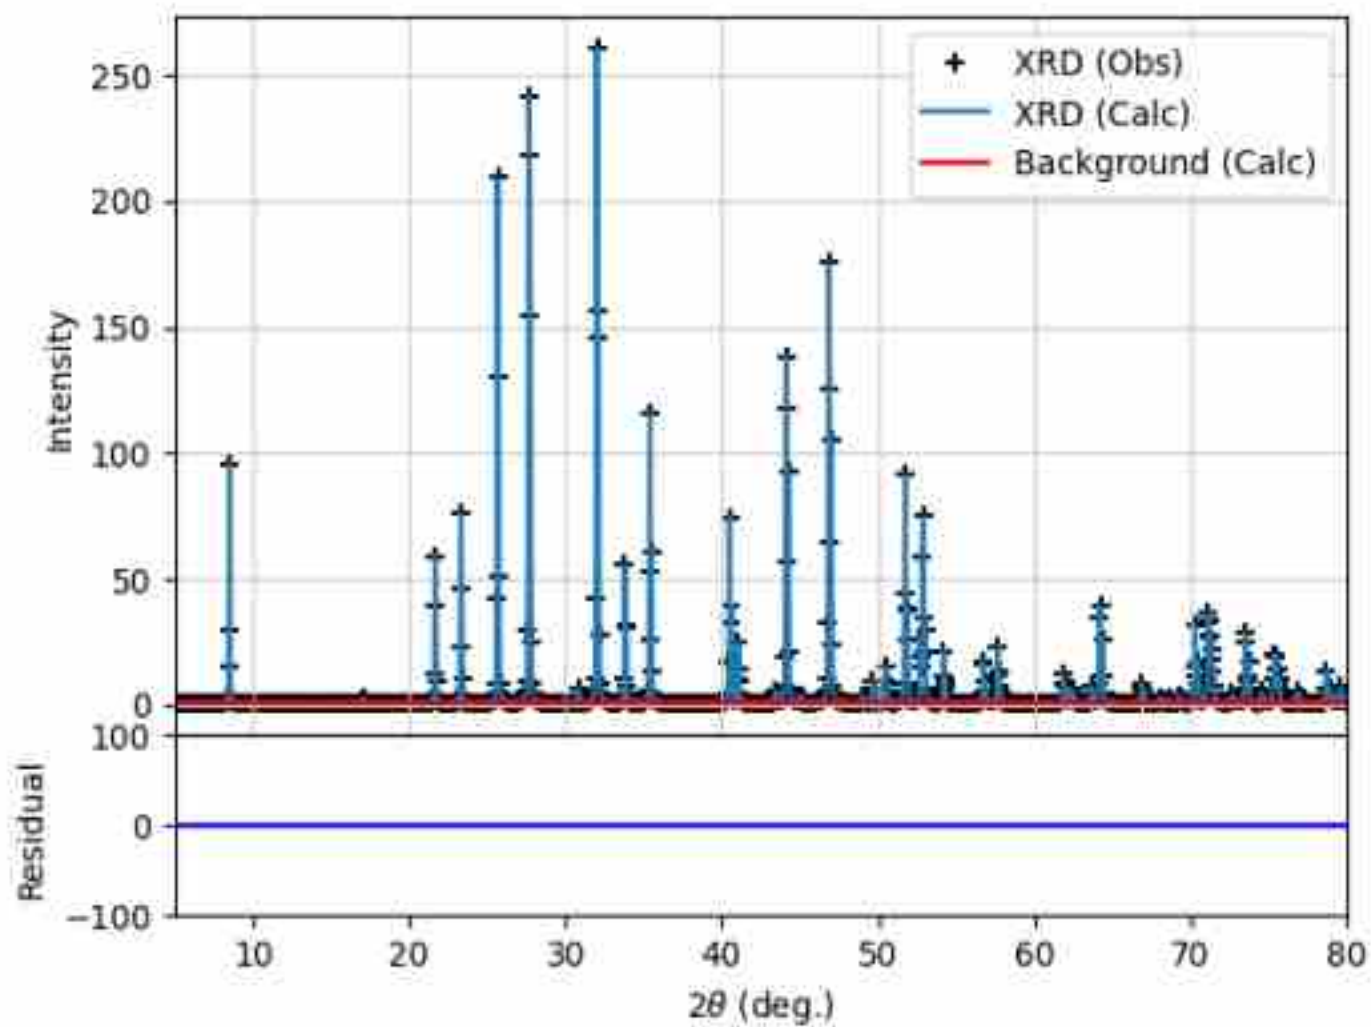

| RMSE before RR | Rwp    | RMSE after RR |
|----------------|--------|---------------|
| 0.016          | 0.0074 | 0.0004        |

# Cs<sub>2</sub>In<sub>1</sub>As<sub>1</sub>Br<sub>6</sub>

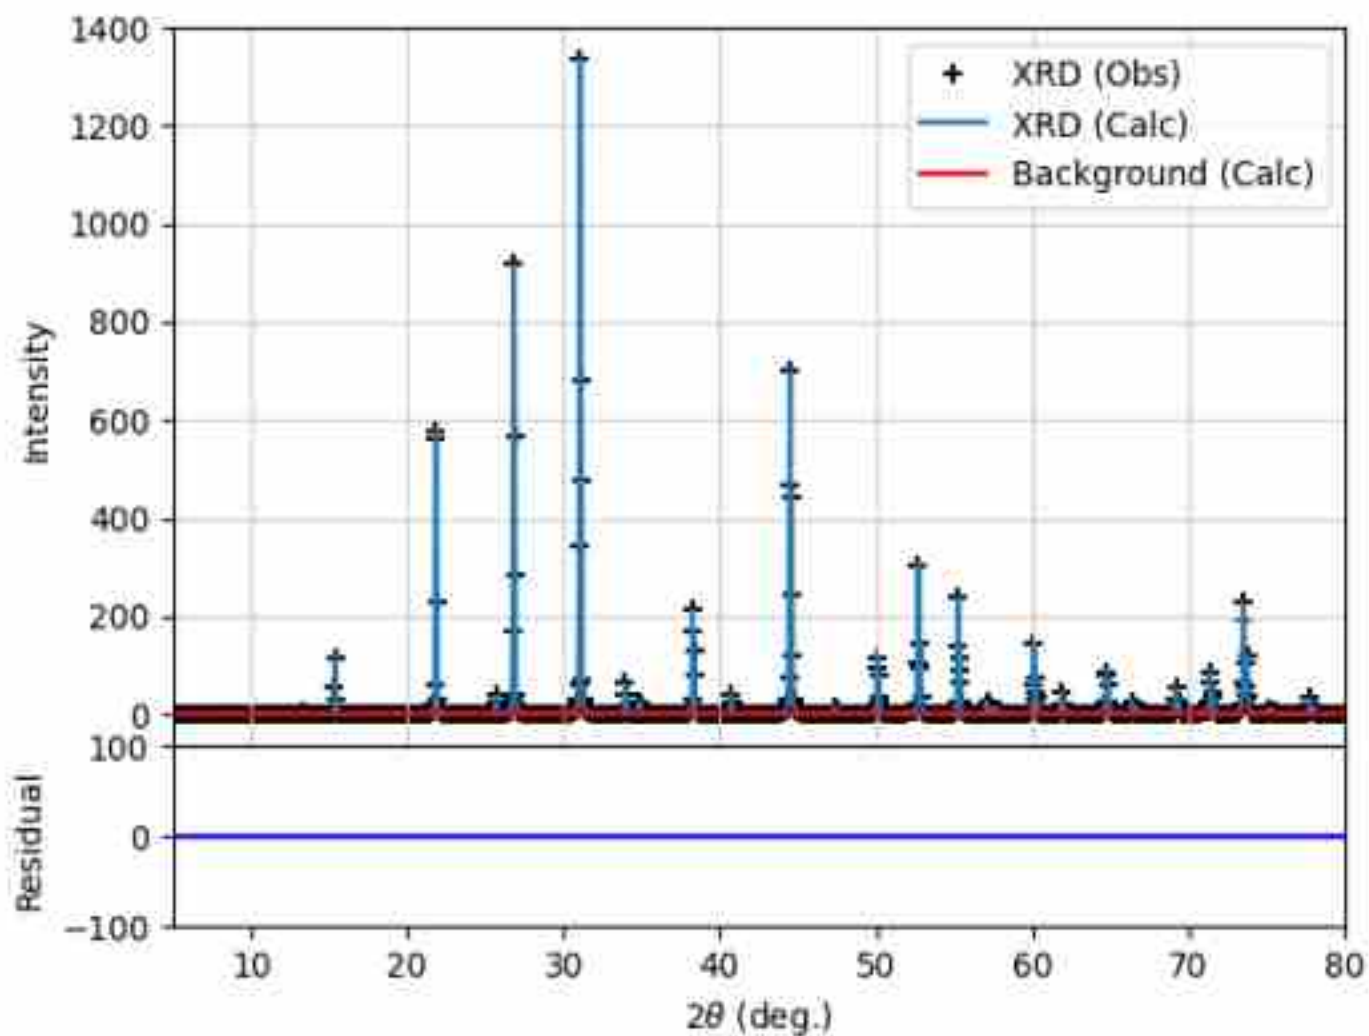

| RMSE before RR | Rwp     | RMSE after RR |
|----------------|---------|---------------|
| 0.016          | 0.04464 | 0.0019        |

# Cs<sub>2</sub>Pd<sub>1</sub>Cl<sub>4</sub>

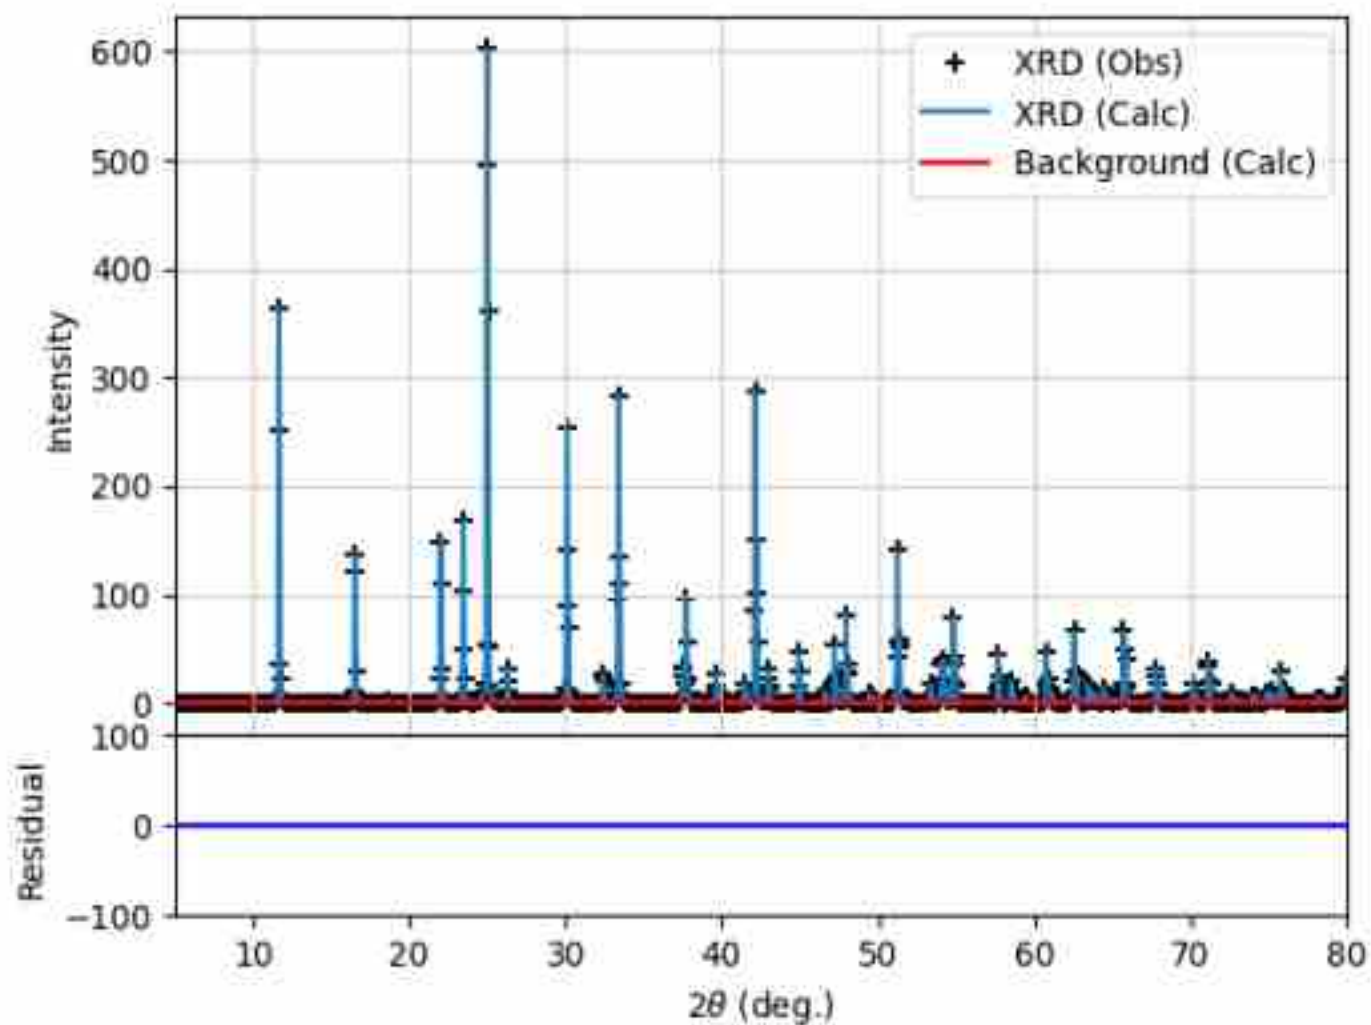

| RMSE before RR | Rwp     | RMSE after RR |
|----------------|---------|---------------|
| 0.016          | 0.00488 | 0.00037       |

# Cs<sub>2</sub>RbCuF<sub>6</sub>

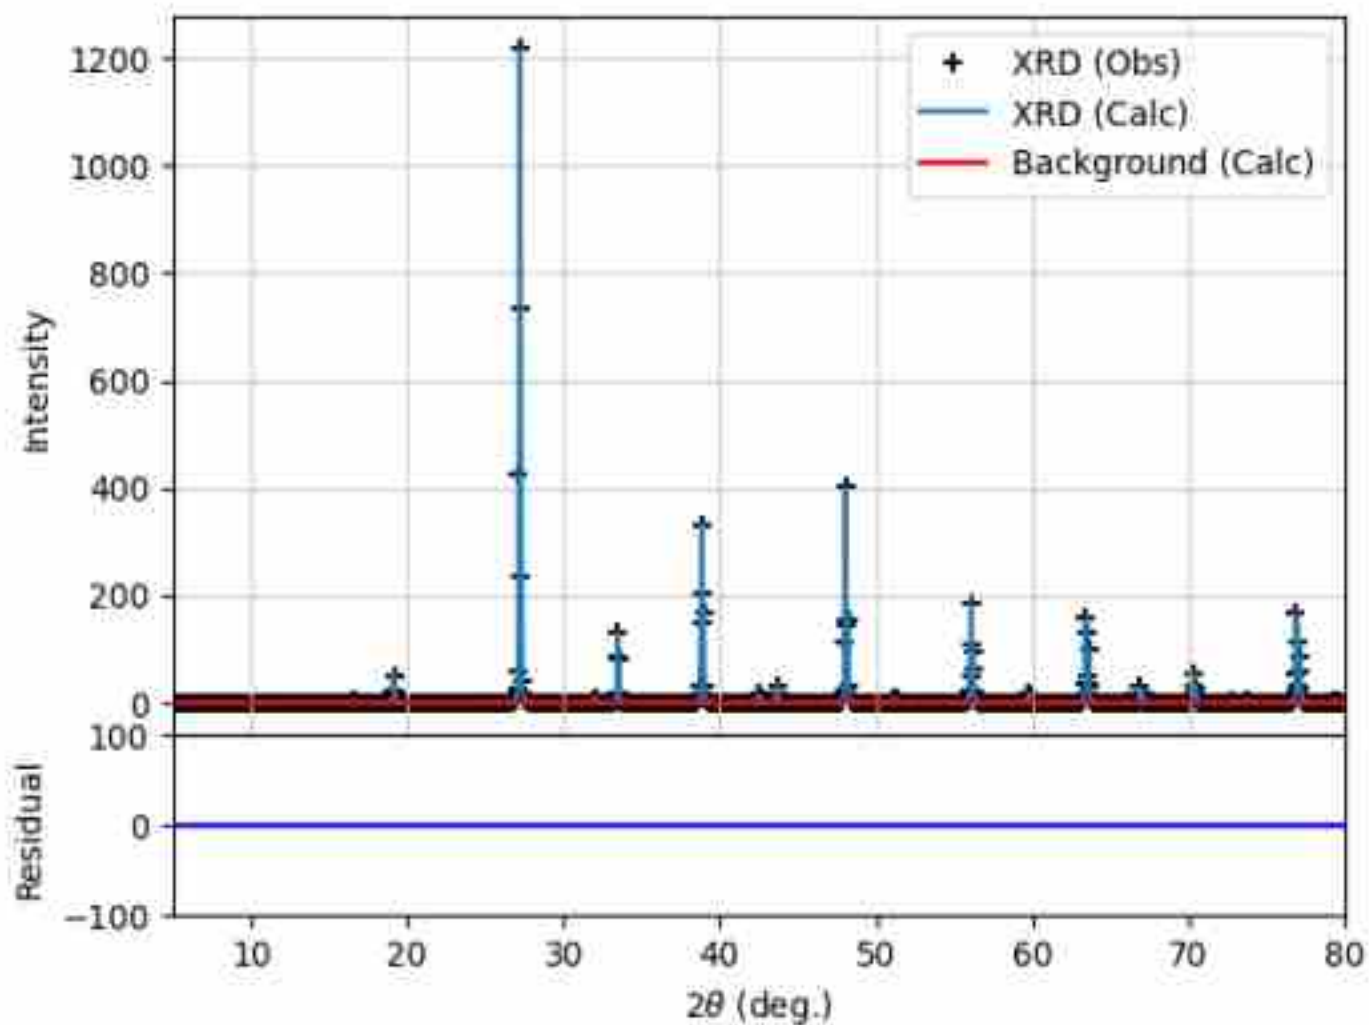

| RMSE before RR | Rwp     | RMSE after RR |
|----------------|---------|---------------|
| 0.016          | 0.01775 | 0.00344       |

# Cs<sub>2</sub>Tl<sub>1</sub>Mo<sub>1</sub>F<sub>6</sub>

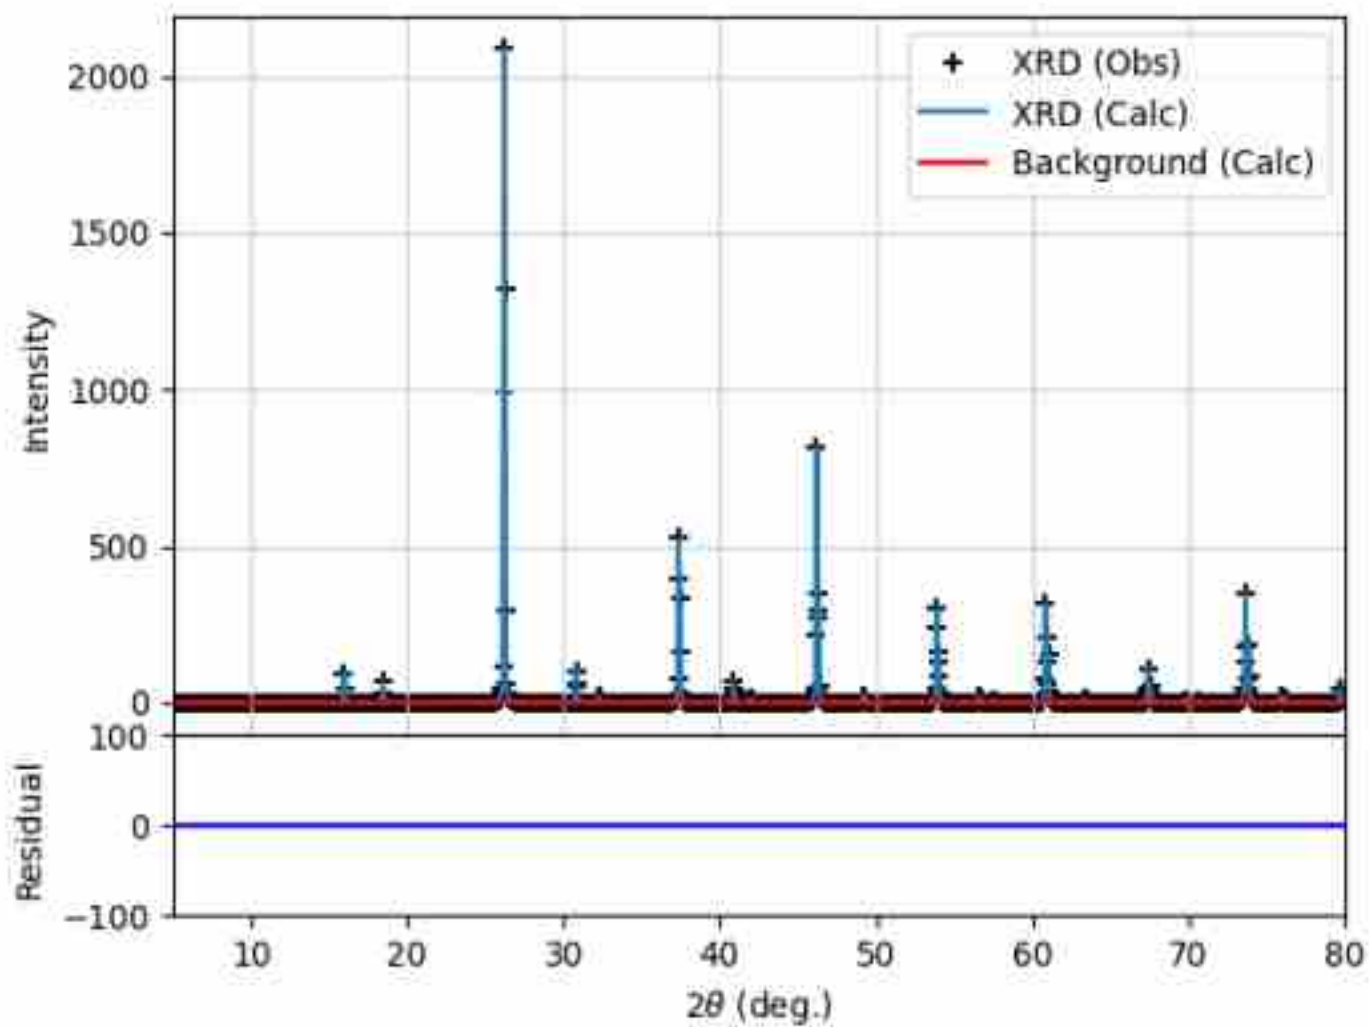

| RMSE before RR | Rwp     | RMSE after RR |
|----------------|---------|---------------|
| 0.016          | 0.00388 | 0.0018        |

# Cs<sub>4</sub>Mn<sub>2</sub>S<sub>4</sub>

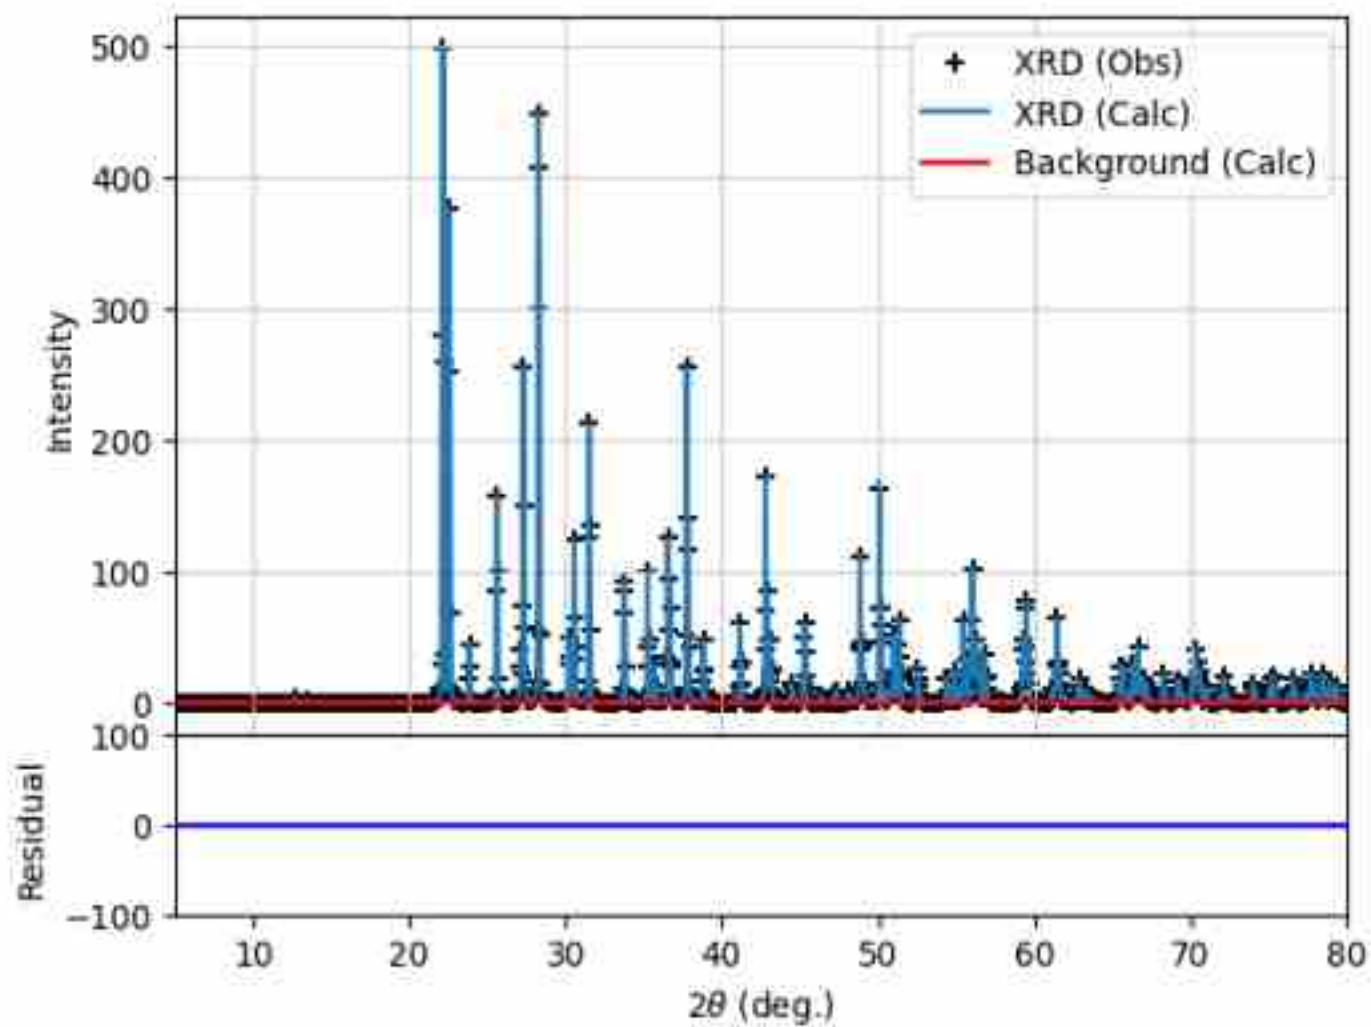

| RMSE before RR | Rwp     | RMSE after RR |
|----------------|---------|---------------|
| 0.016          | 0.00339 | 0.00035       |



# Cu<sub>2</sub>B<sub>2</sub>Se<sub>4</sub>

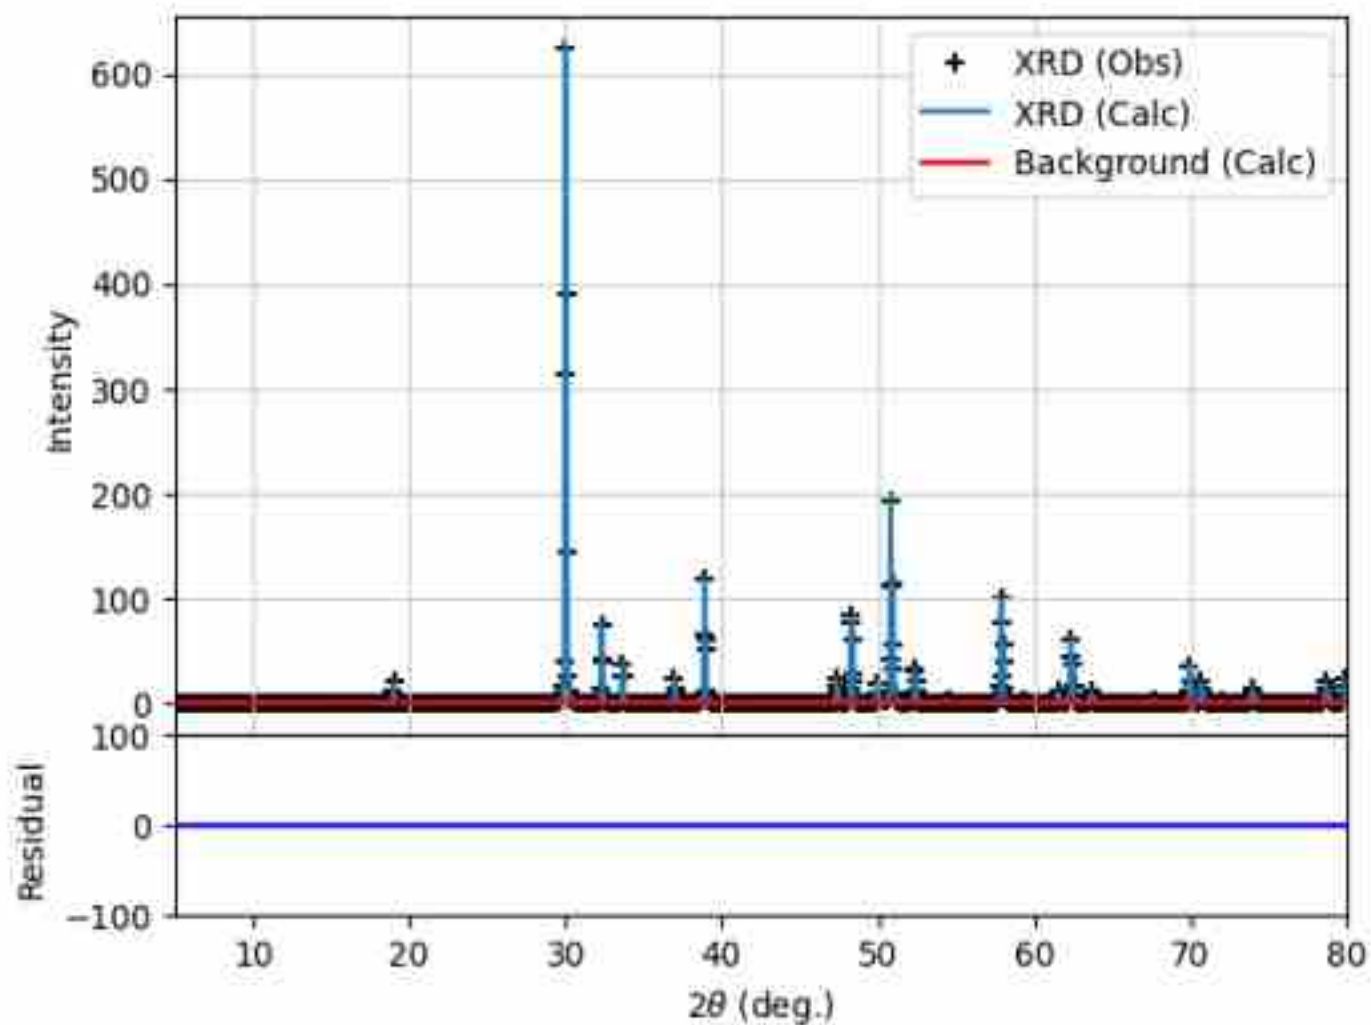

| RMSE before RR | Rwp     | RMSE after RR |
|----------------|---------|---------------|
| 0.016          | 0.00342 | 0.00112       |

# Cu<sub>6</sub>As<sub>2</sub>

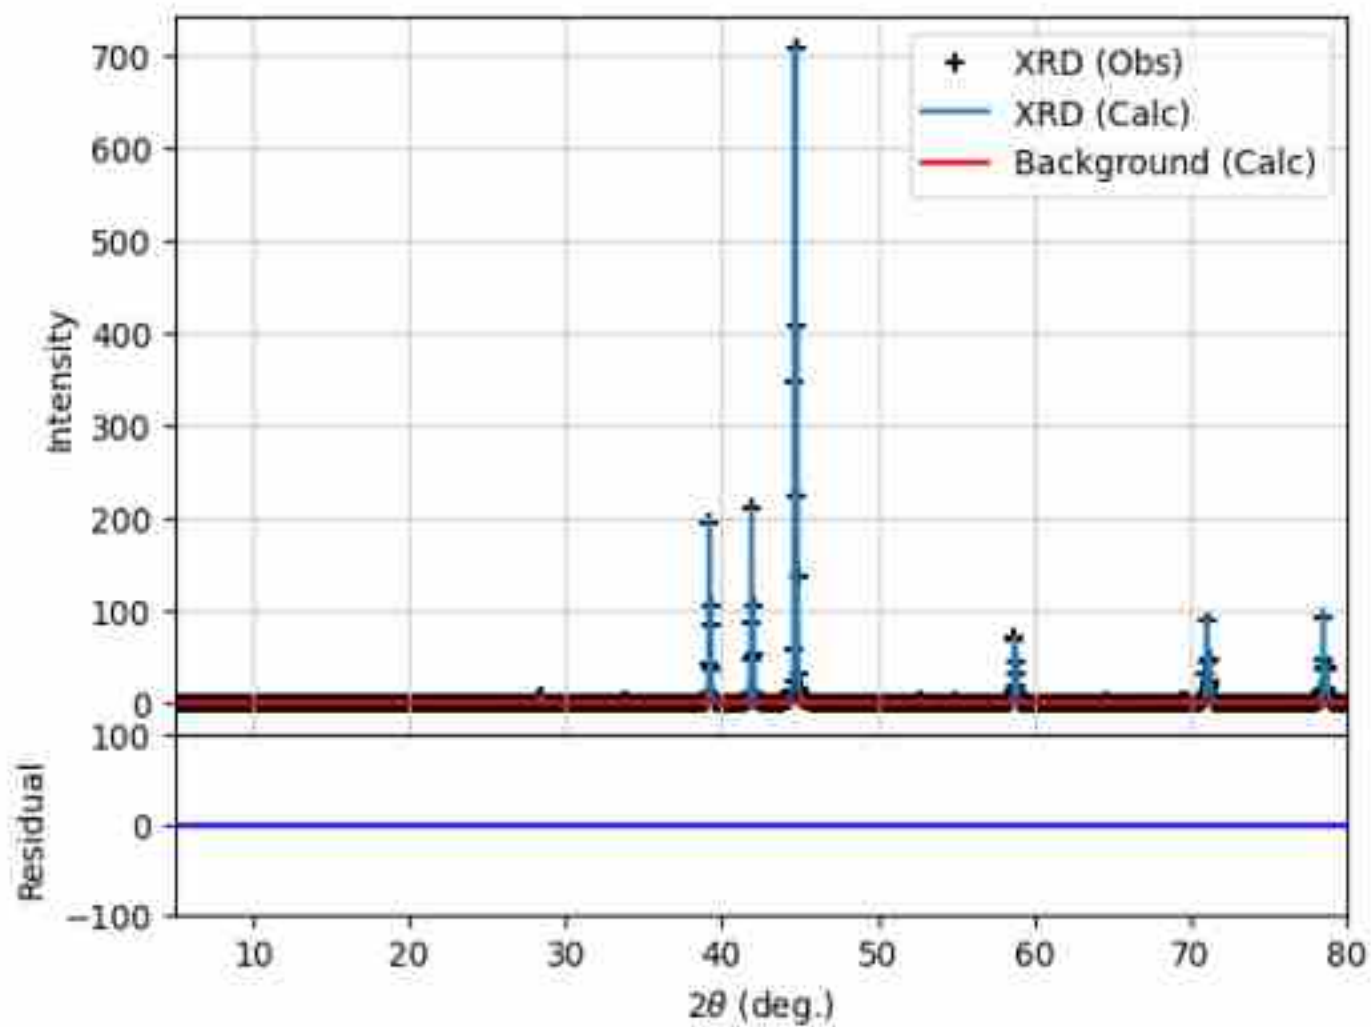

| RMSE before RR | Rwp     | RMSE after RR |
|----------------|---------|---------------|
| 0.016          | 0.00843 | 0.00059       |

# Dy<sub>2</sub>Cu<sub>2</sub>Te<sub>4</sub>

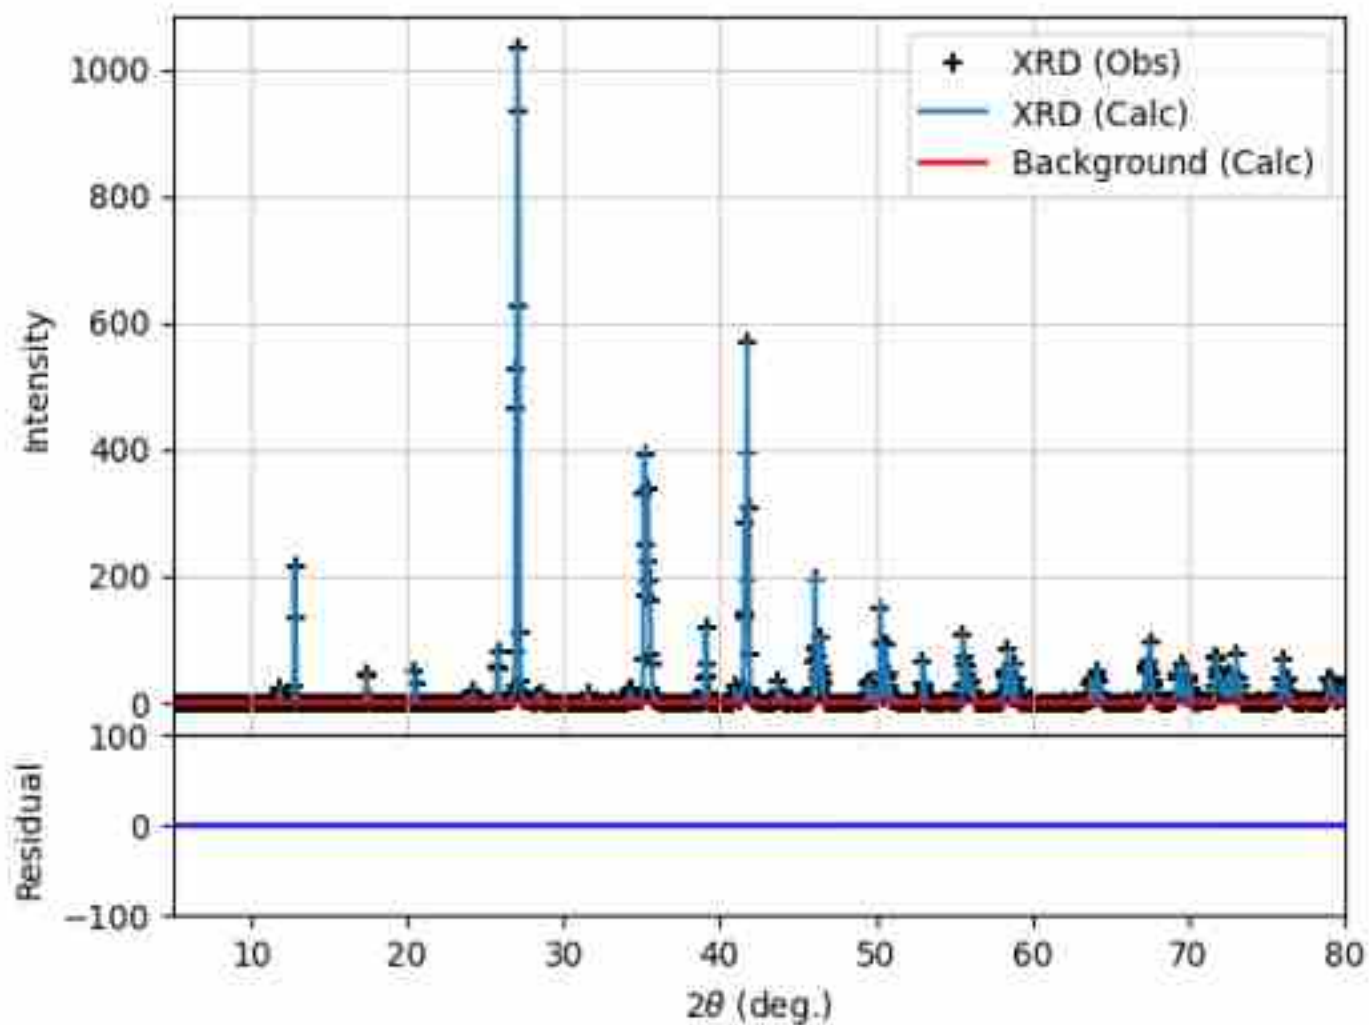

| RMSE before RR | Rwp     | RMSE after RR |
|----------------|---------|---------------|
| 0.016          | 0.18026 | 0.00203       |

# Dy<sub>2</sub>Ge<sub>6</sub>Pt<sub>1</sub>

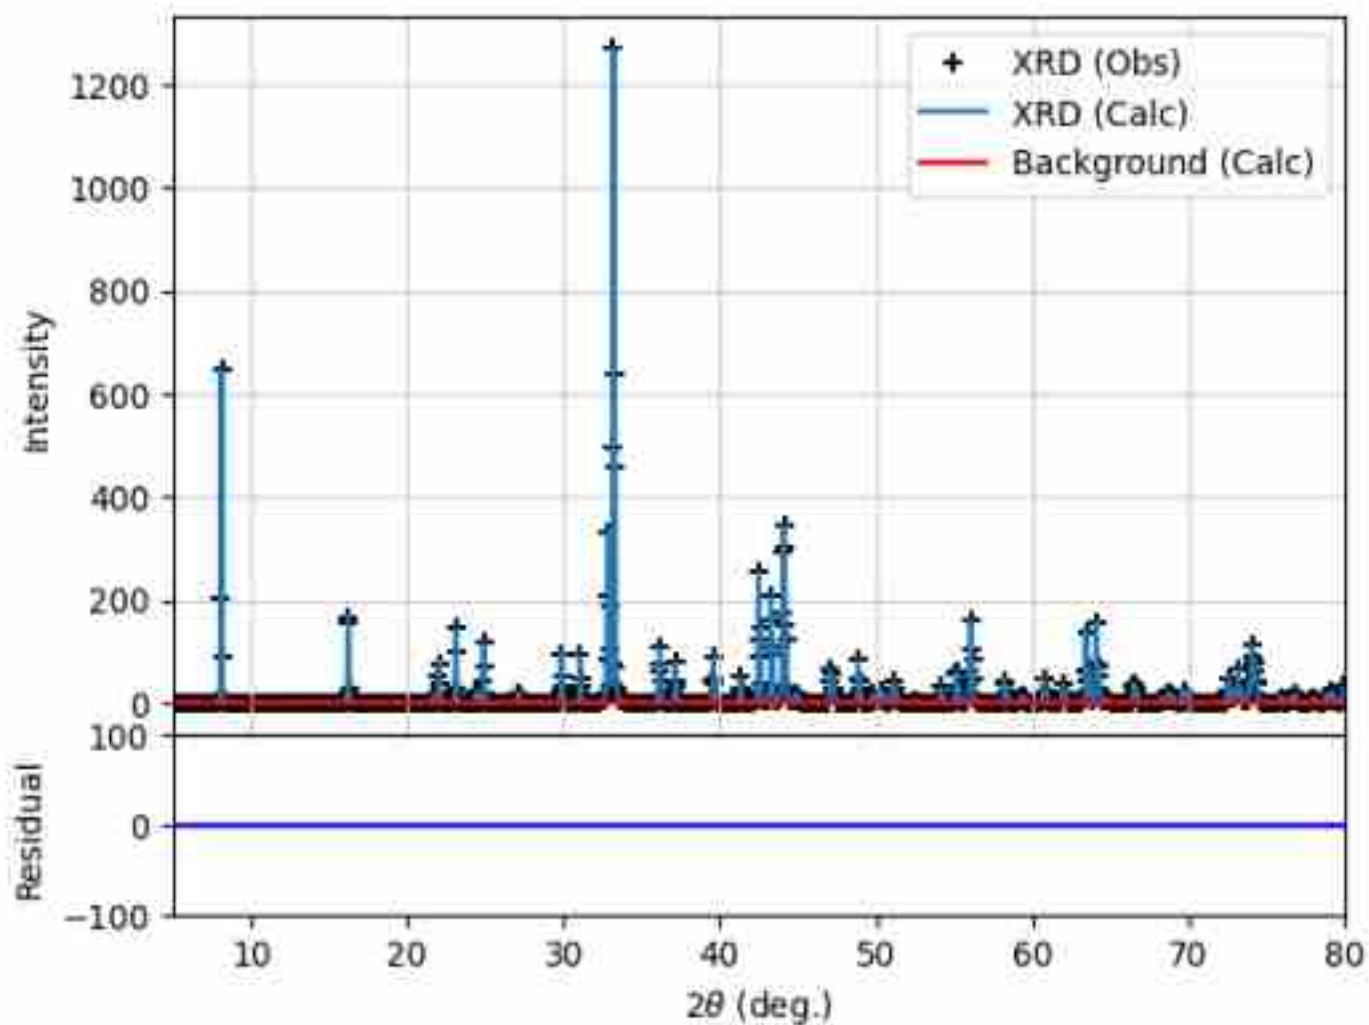

| RMSE before RR | Rwp     | RMSE after RR |
|----------------|---------|---------------|
| 0.016          | 0.00331 | 0.00032       |

# Dy<sub>2</sub>W<sub>2</sub>C<sub>12</sub>O<sub>8</sub>

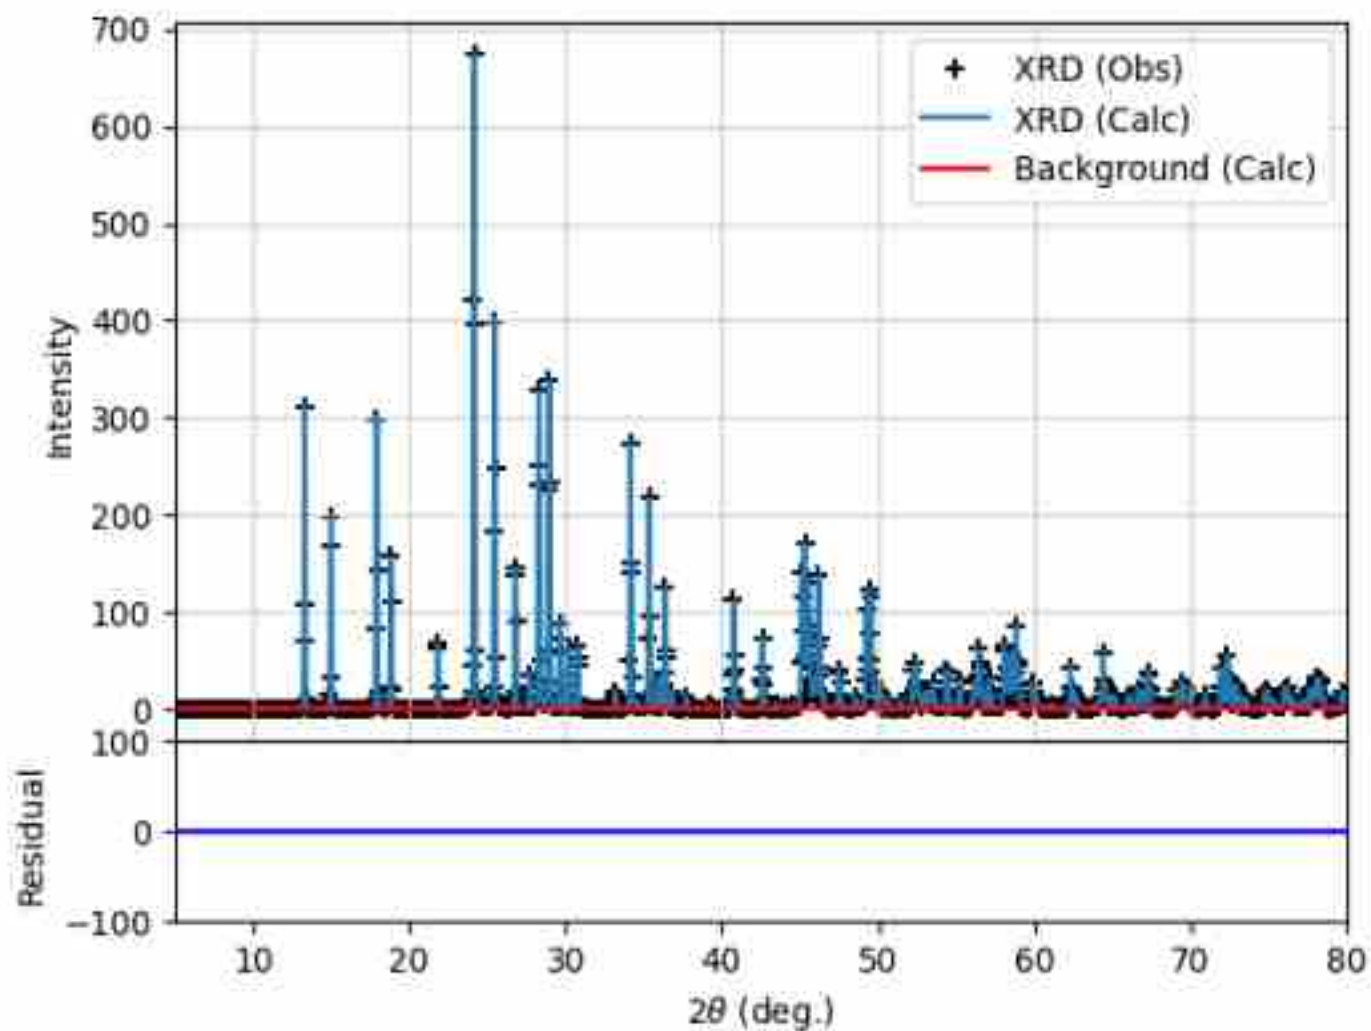

| RMSE before RR | Rwp     | RMSE after RR |
|----------------|---------|---------------|
| 0.016          | 0.00351 | 0.00059       |

# Dy3Al9

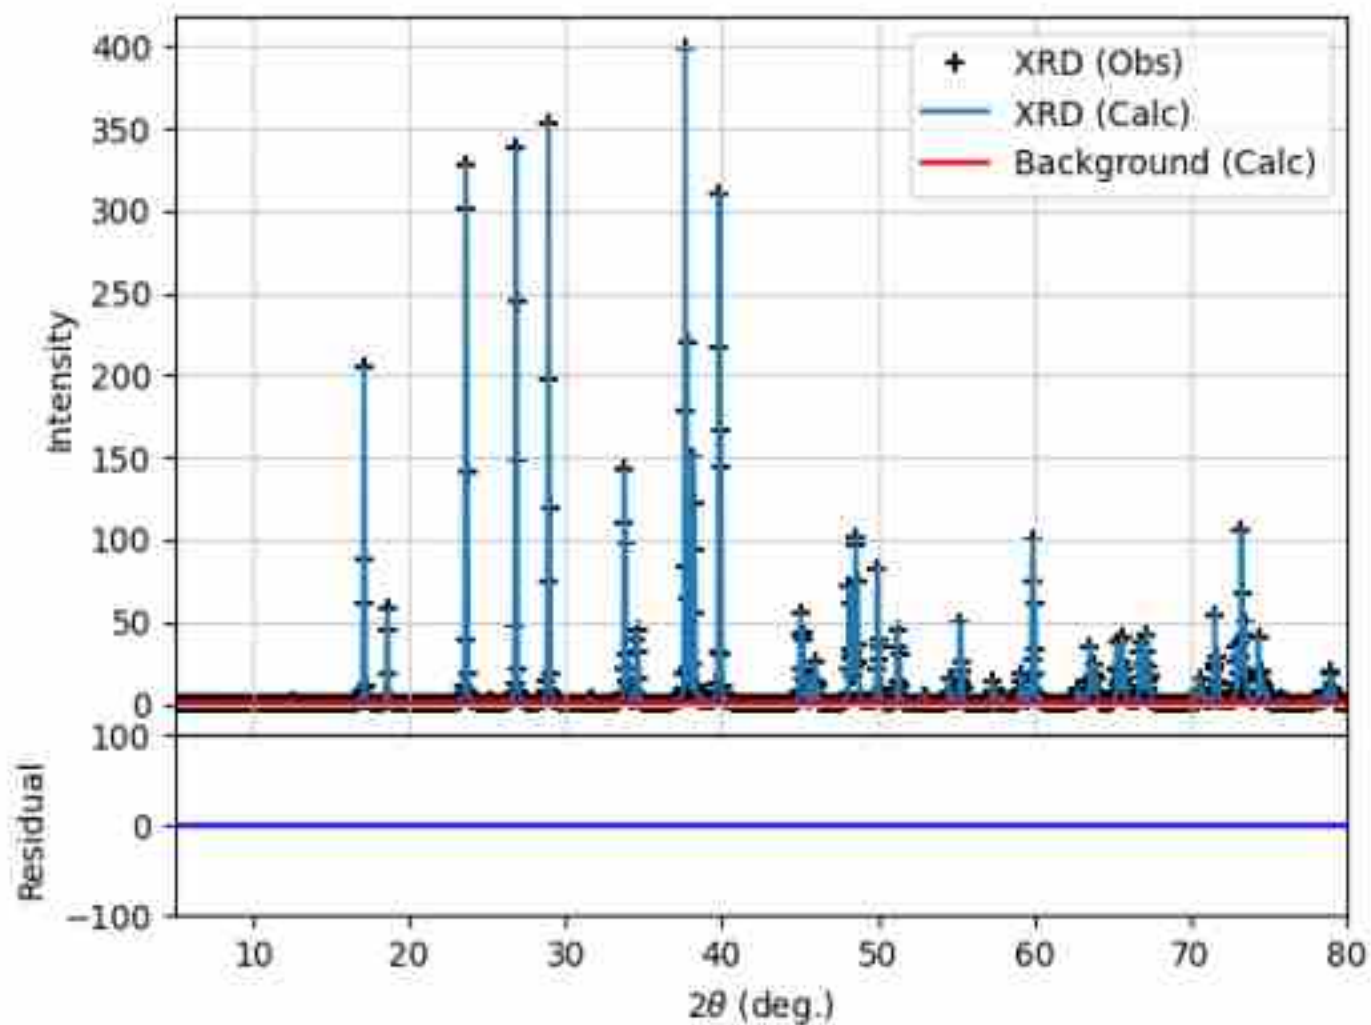

| RMSE before RR | Rwp     | RMSE after RR |
|----------------|---------|---------------|
| 0.016          | 0.00373 | 0.00097       |

# Dy<sub>3</sub>Cd<sub>3</sub>Ga<sub>3</sub>

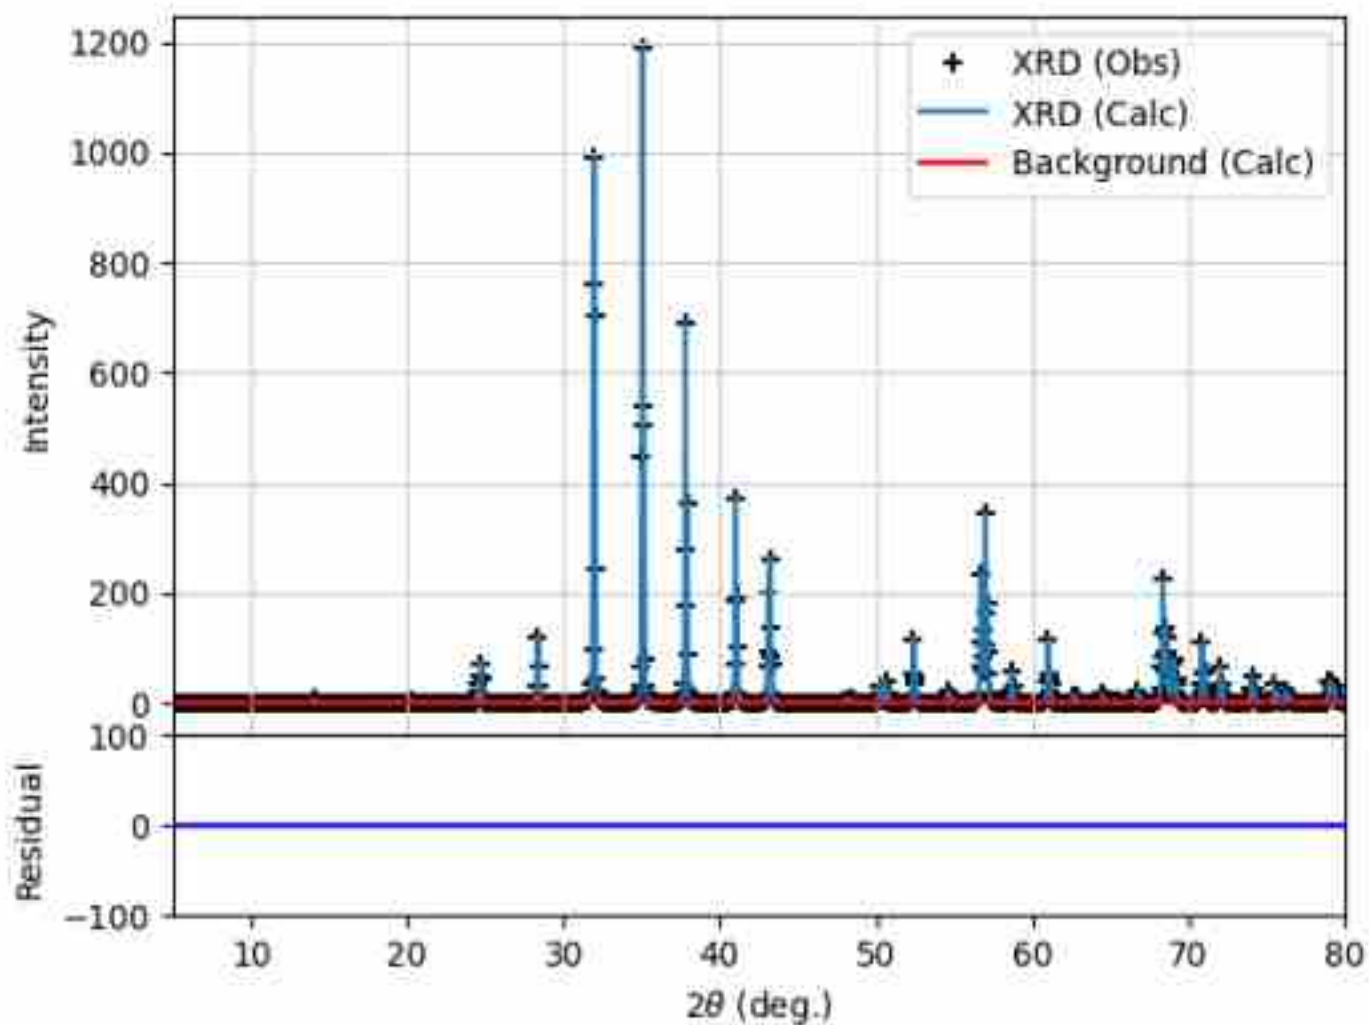

| RMSE before RR | Rwp     | RMSE after RR |
|----------------|---------|---------------|
| 0.016          | 0.00336 | 0.00044       |

# Dy<sub>3</sub>Fe<sub>9</sub>

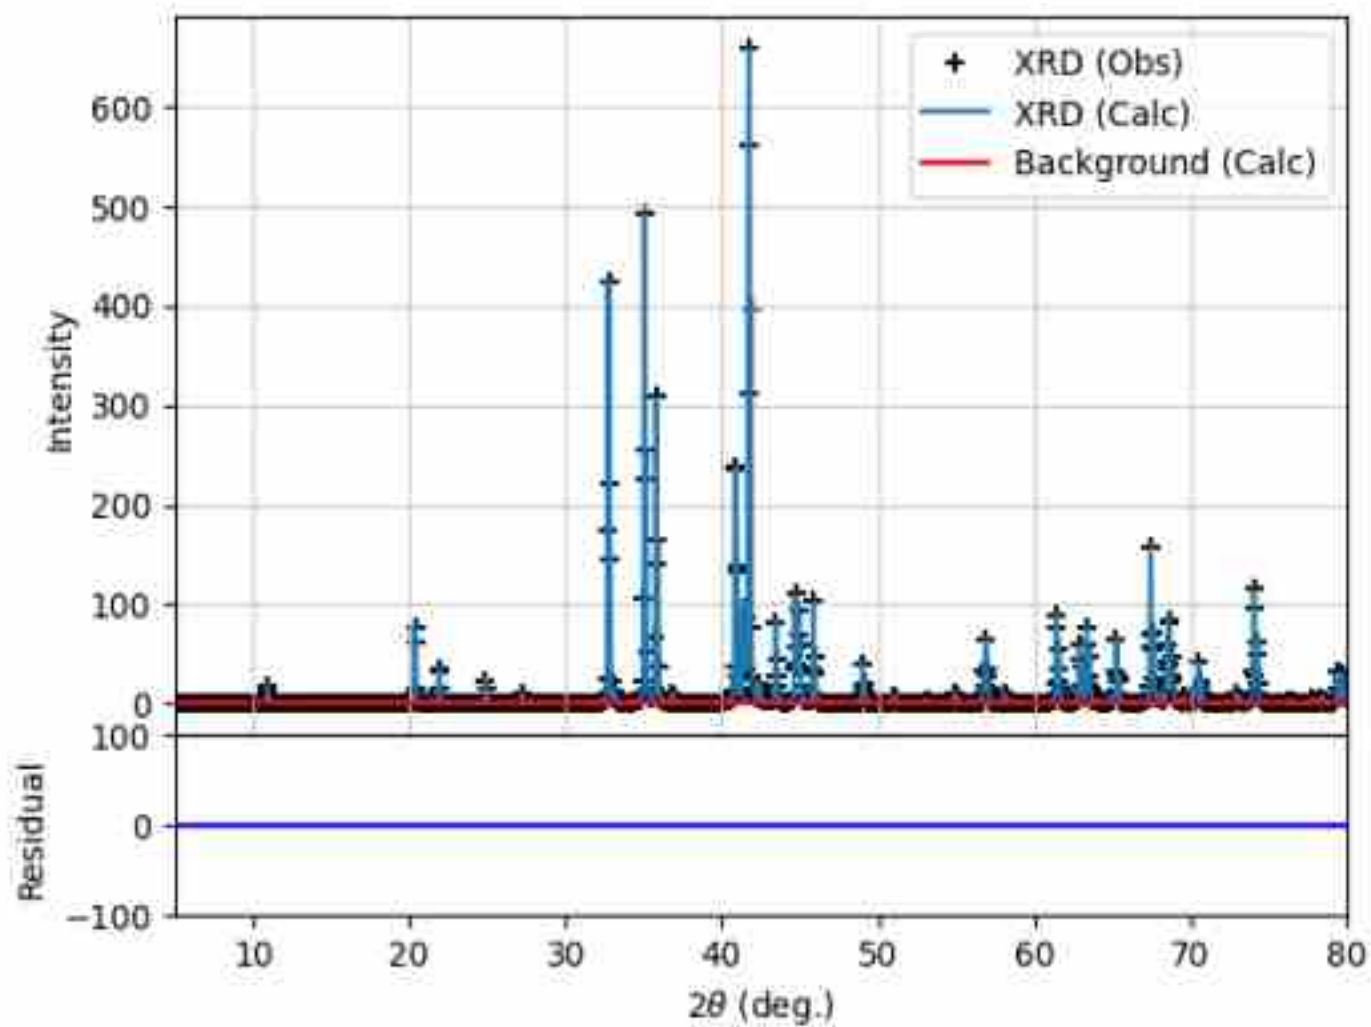

| RMSE before RR | Rwp     | RMSE after RR |
|----------------|---------|---------------|
| 0.016          | 0.00278 | 0.00047       |



# Dy<sub>4</sub>Ge<sub>10</sub>Rh<sub>6</sub>

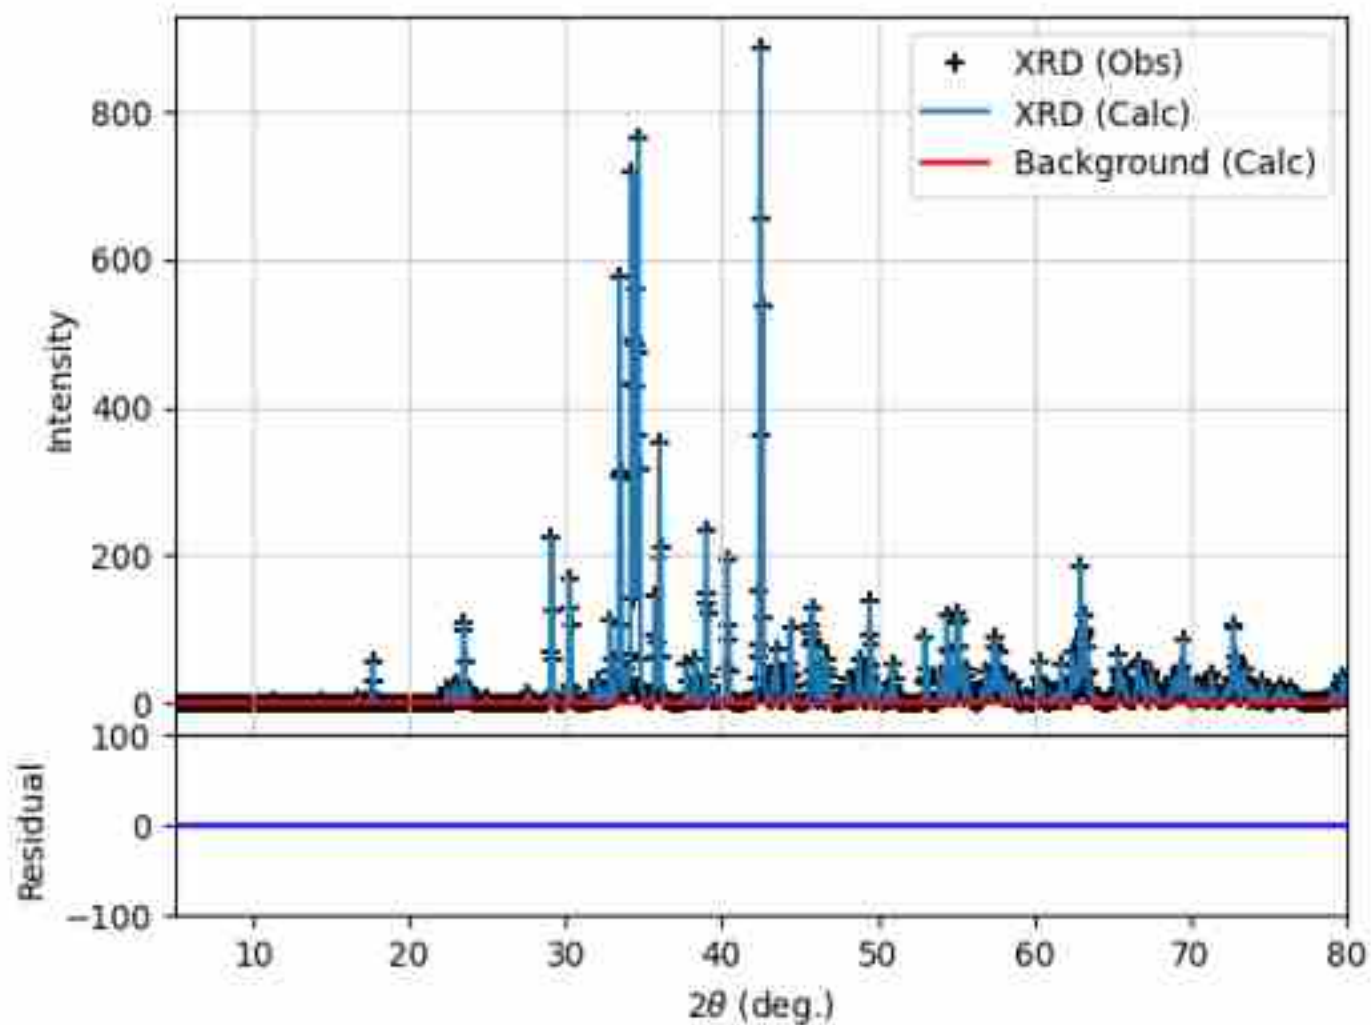

| RMSE before RR | Rwp     | RMSE after RR |
|----------------|---------|---------------|
| 0.016          | 0.00332 | 0.00029       |

# Er<sub>4</sub>Co<sub>6</sub>Si<sub>10</sub>

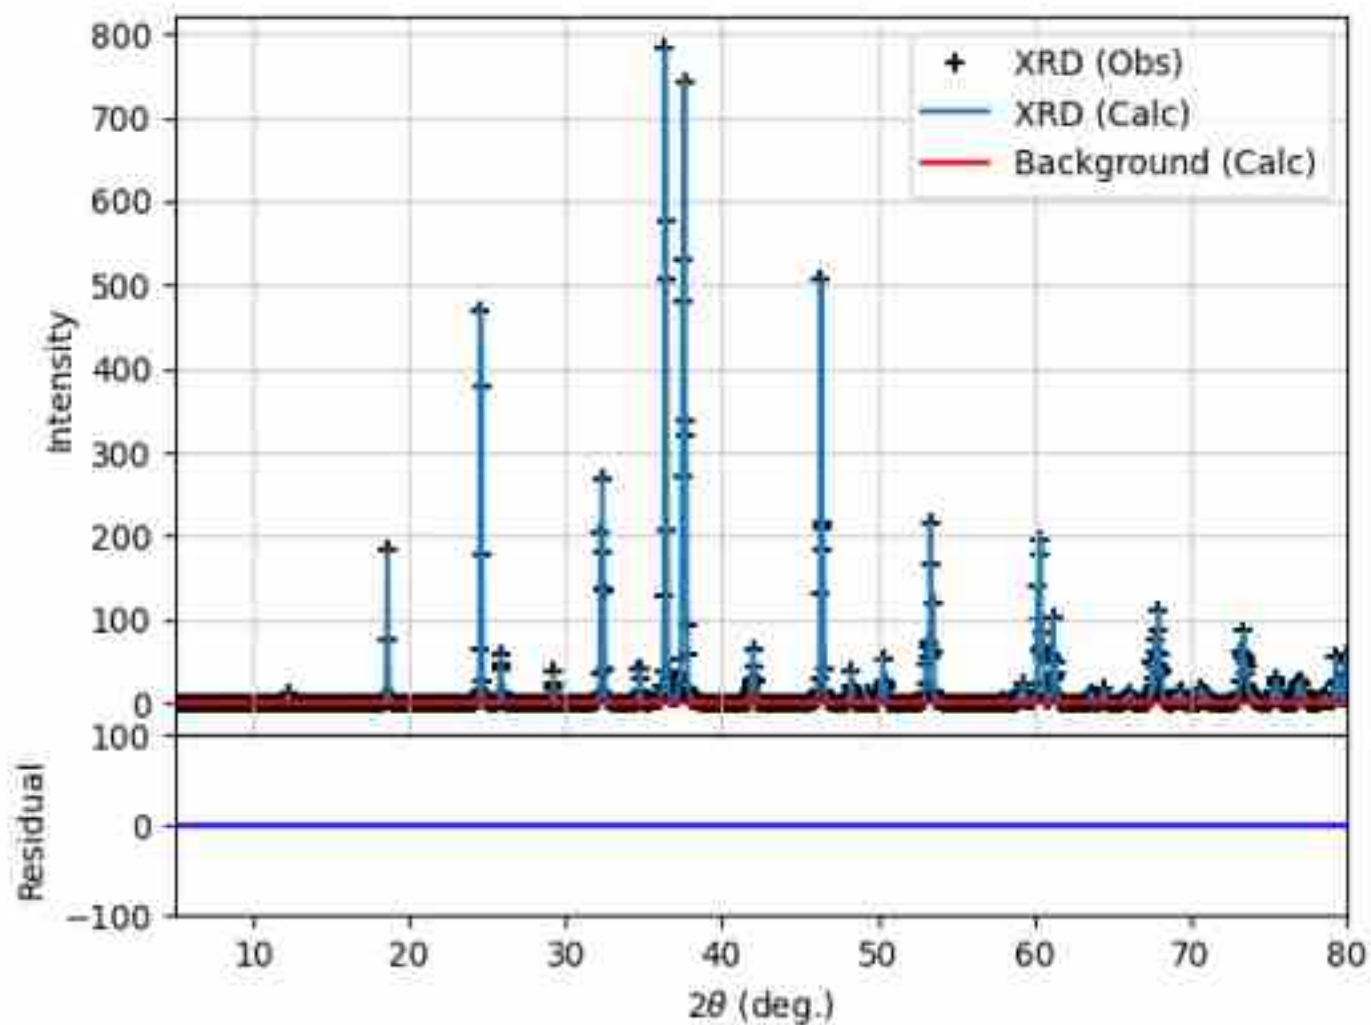

| RMSE before RR | Rwp     | RMSE after RR |
|----------------|---------|---------------|
| 0.016          | 0.00373 | 0.00056       |

# Er<sub>4</sub>Si<sub>4</sub>Pt<sub>4</sub>

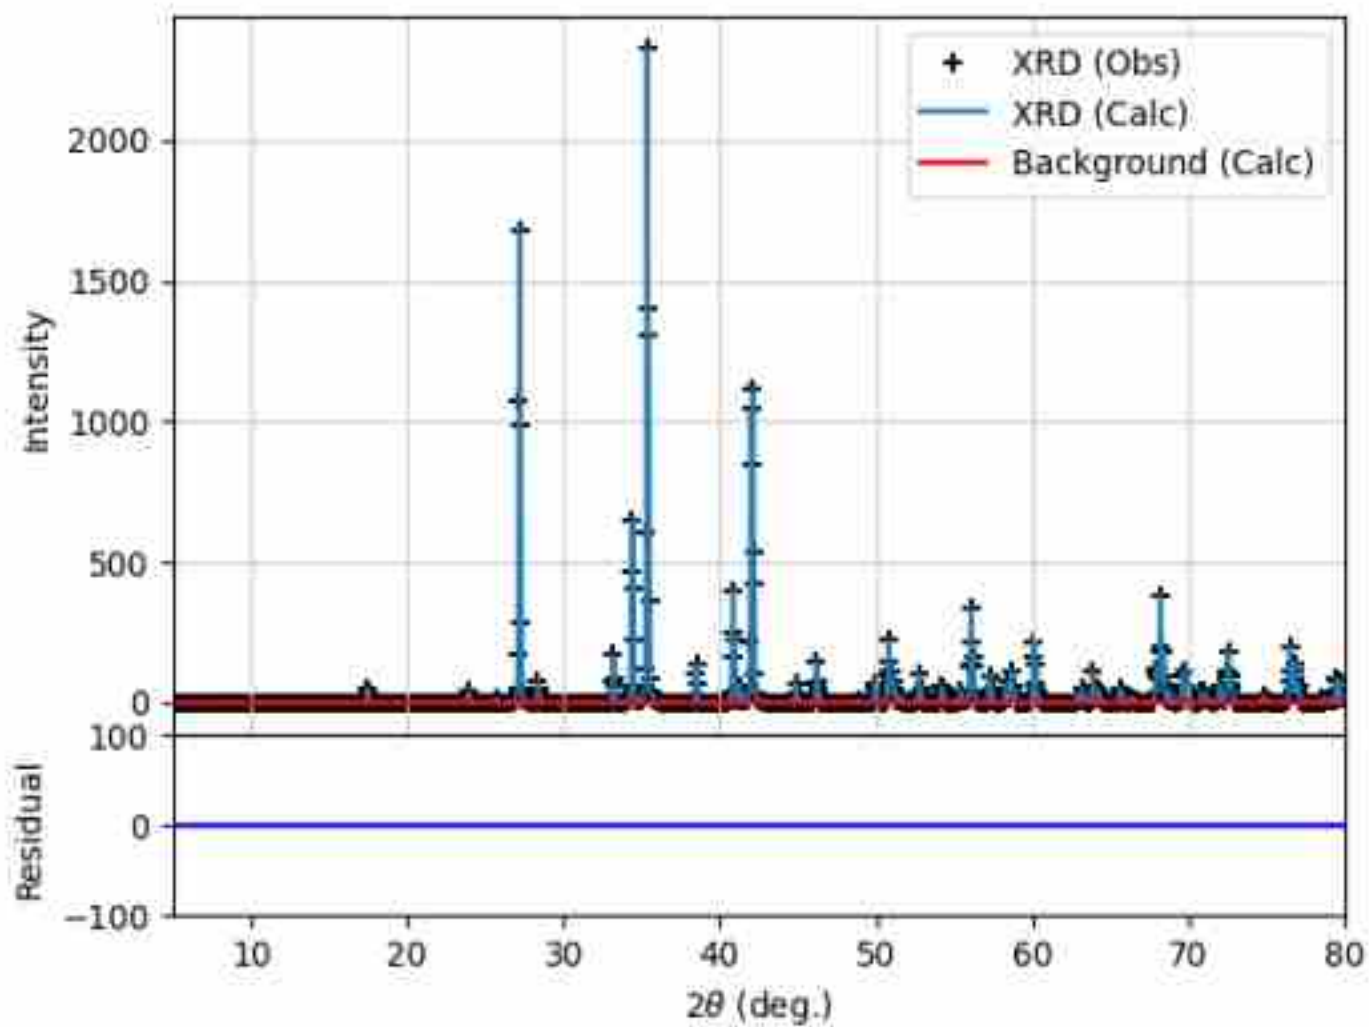

| RMSE before RR | Rwp     | RMSE after RR |
|----------------|---------|---------------|
| 0.016          | 0.00442 | 0.00078       |

# Eu1Cd1Au5

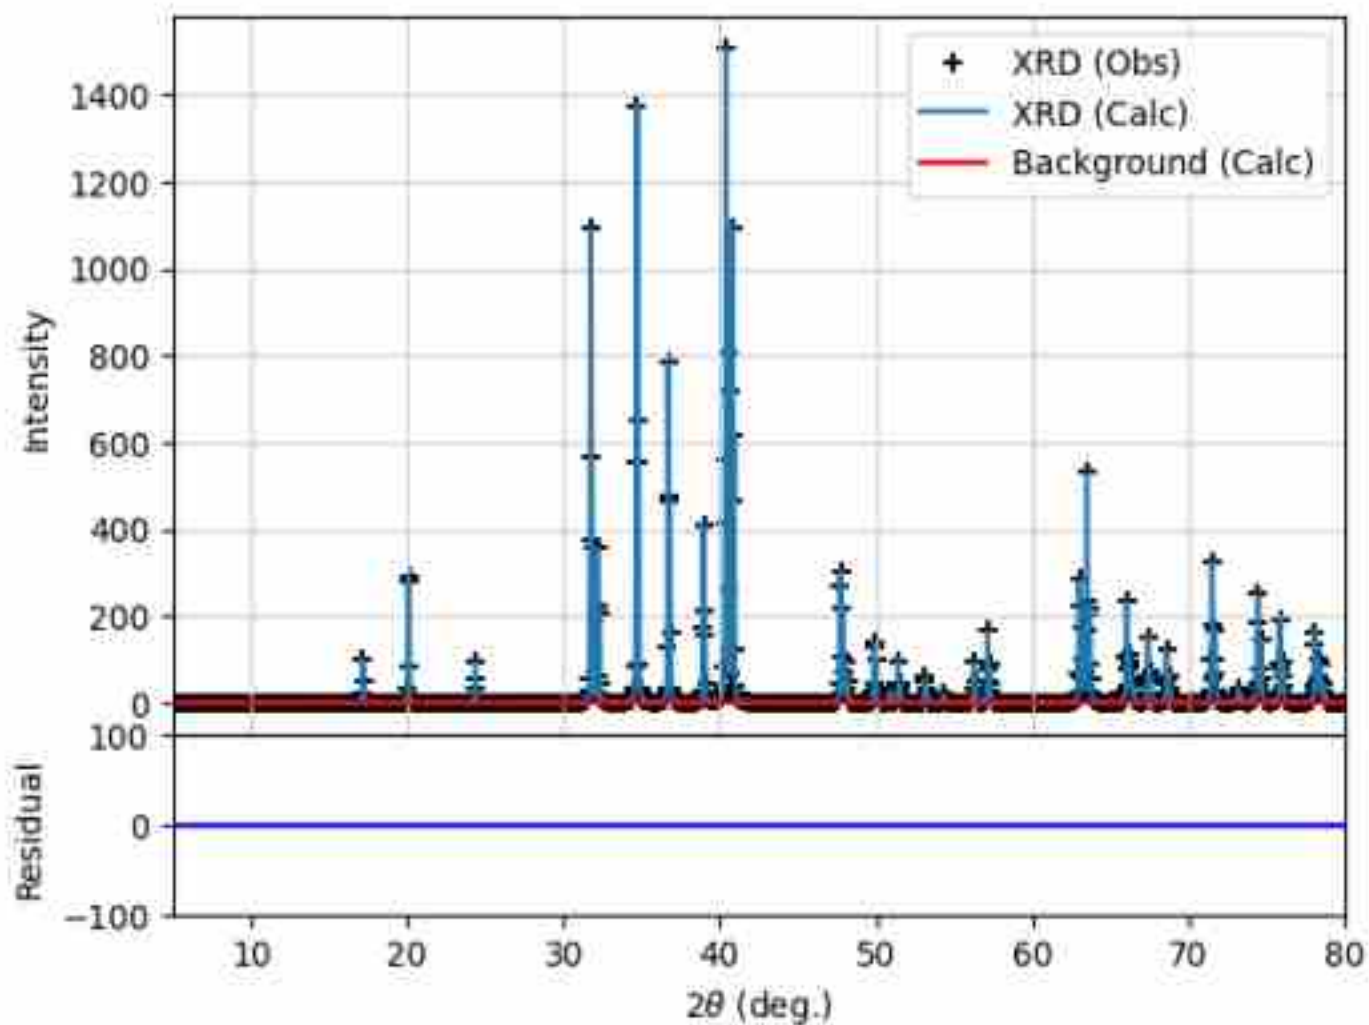

| RMSE before RR | Rwp     | RMSE after RR |
|----------------|---------|---------------|
| 0.016          | 0.00654 | 0.00067       |

# Eu1Cr2As2

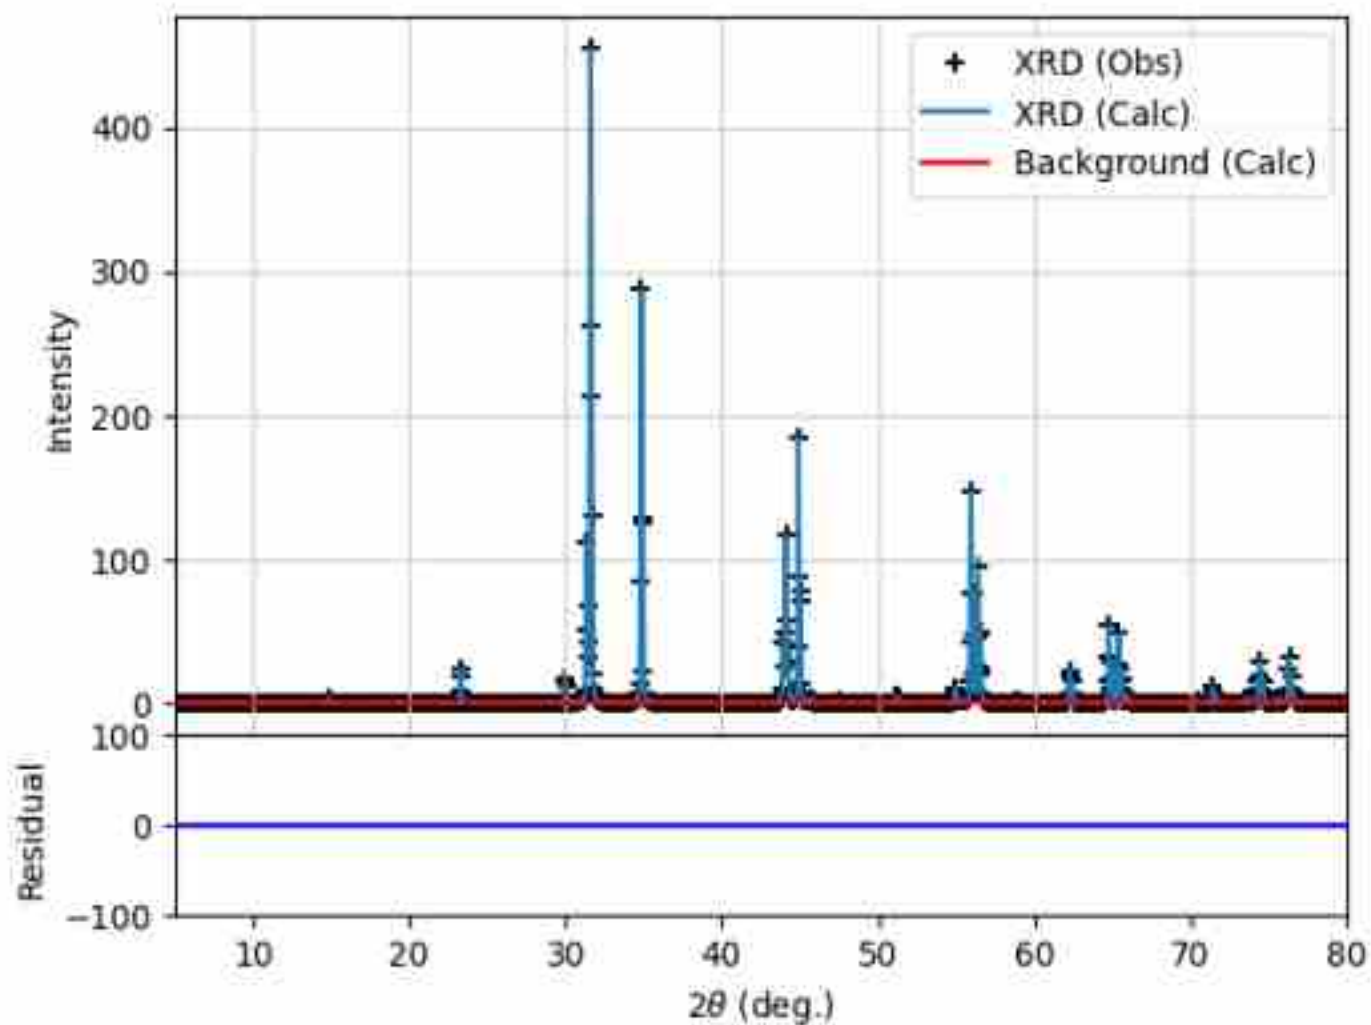

| RMSE before RR | Rwp     | RMSE after RR |
|----------------|---------|---------------|
| 0.016          | 0.00326 | 0.00063       |

# Eu1Ni5

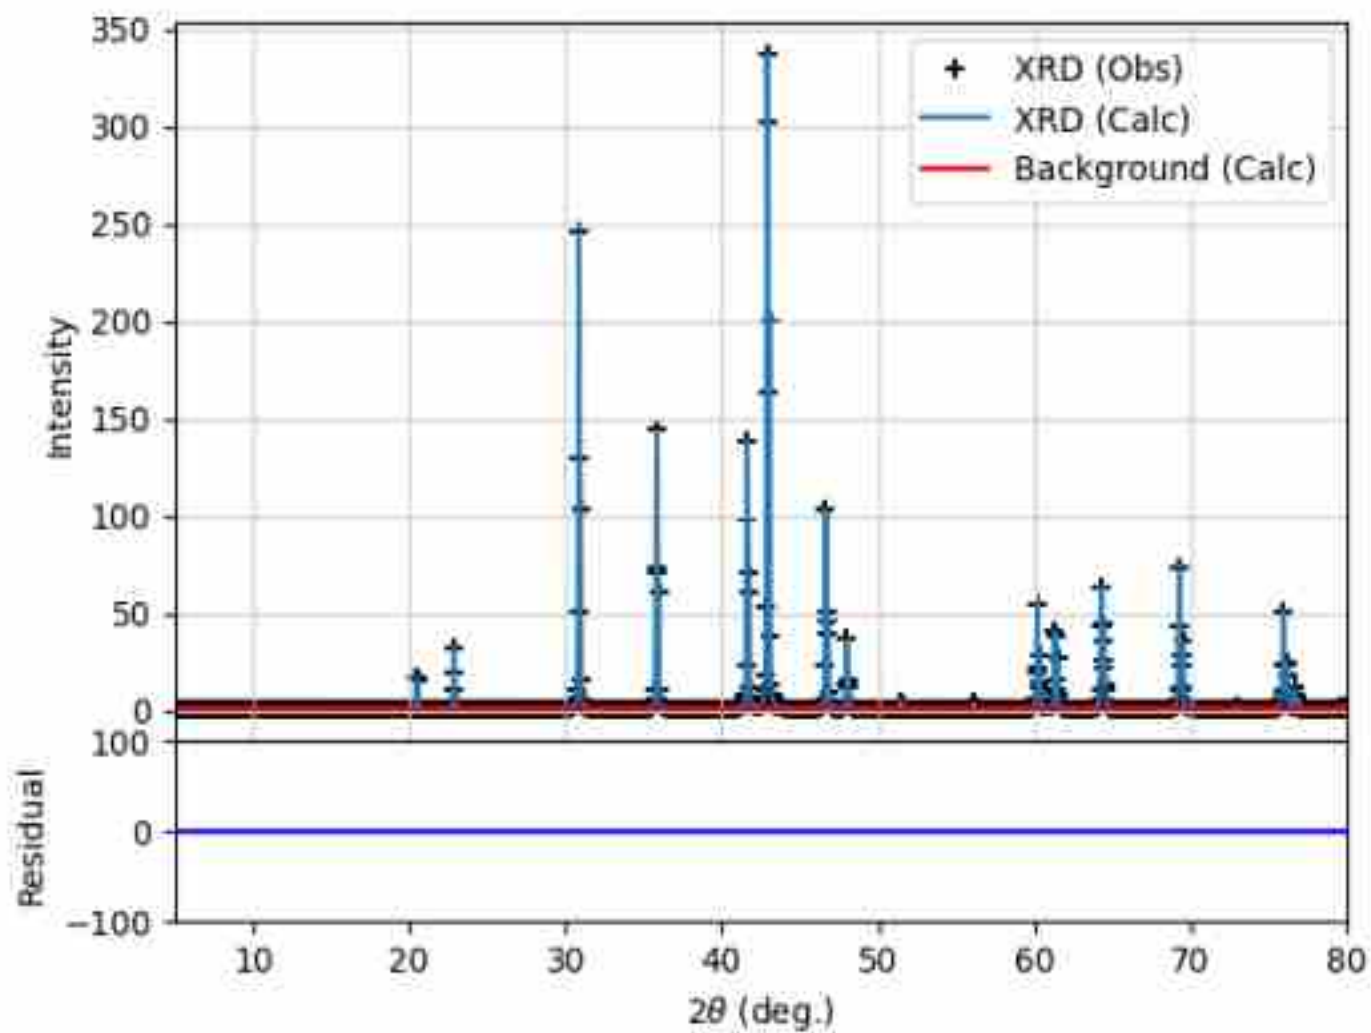

| RMSE before RR | Rwp     | RMSE after RR |
|----------------|---------|---------------|
| 0.016          | 0.00359 | 0.00079       |

# Eu<sub>4</sub>Ho<sub>2</sub>Ta<sub>2</sub>O<sub>12</sub>

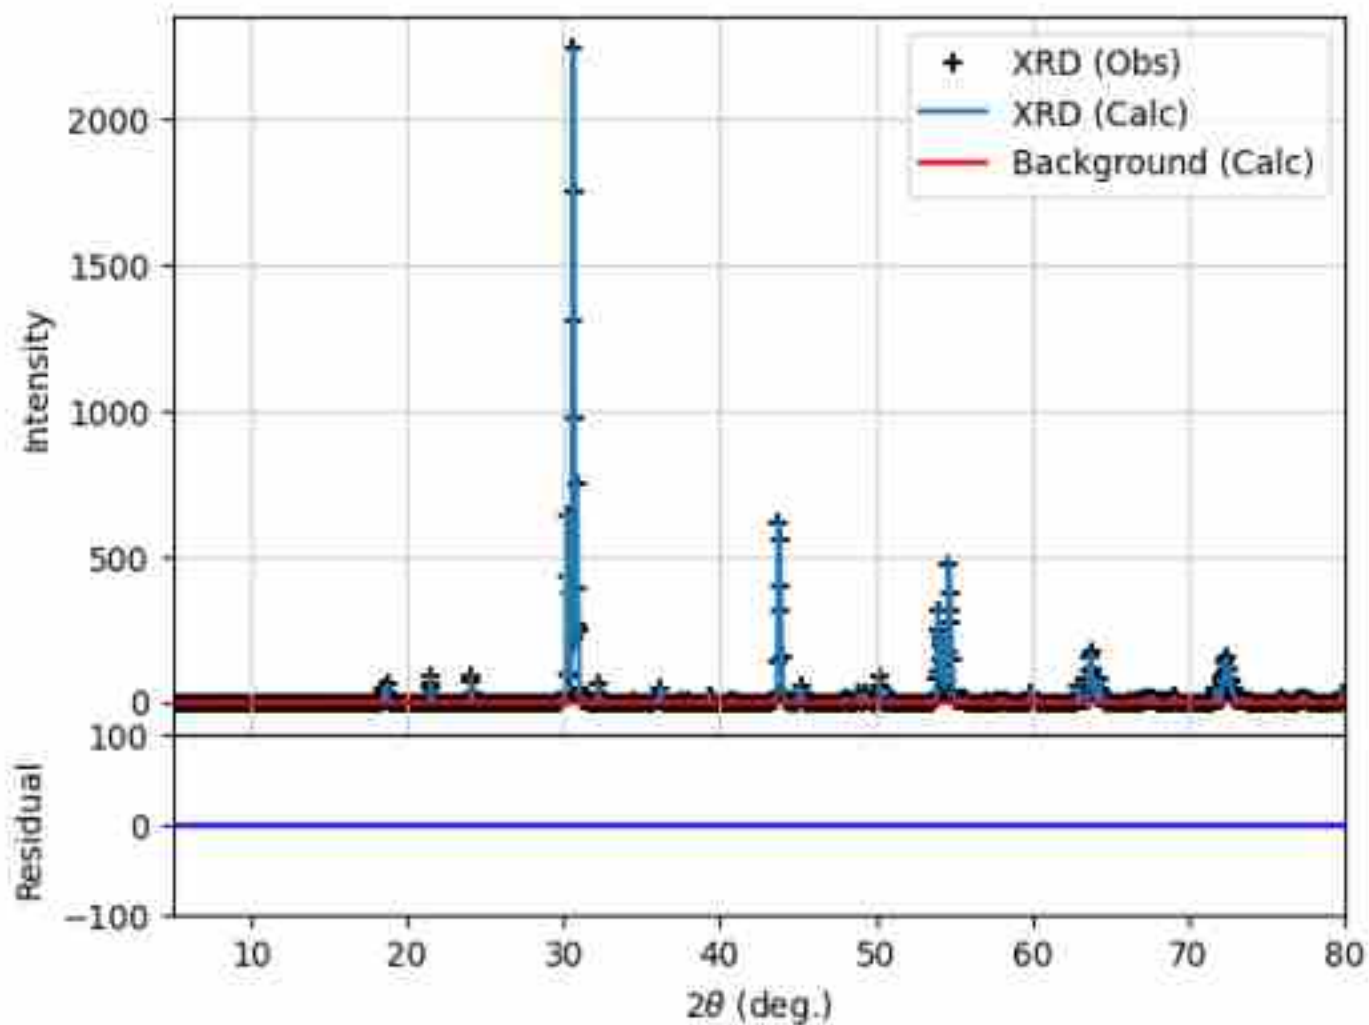

| RMSE before RR | Rwp     | RMSE after RR |
|----------------|---------|---------------|
| 0.016          | 0.00315 | 0.00117       |

# Eu6Ge10

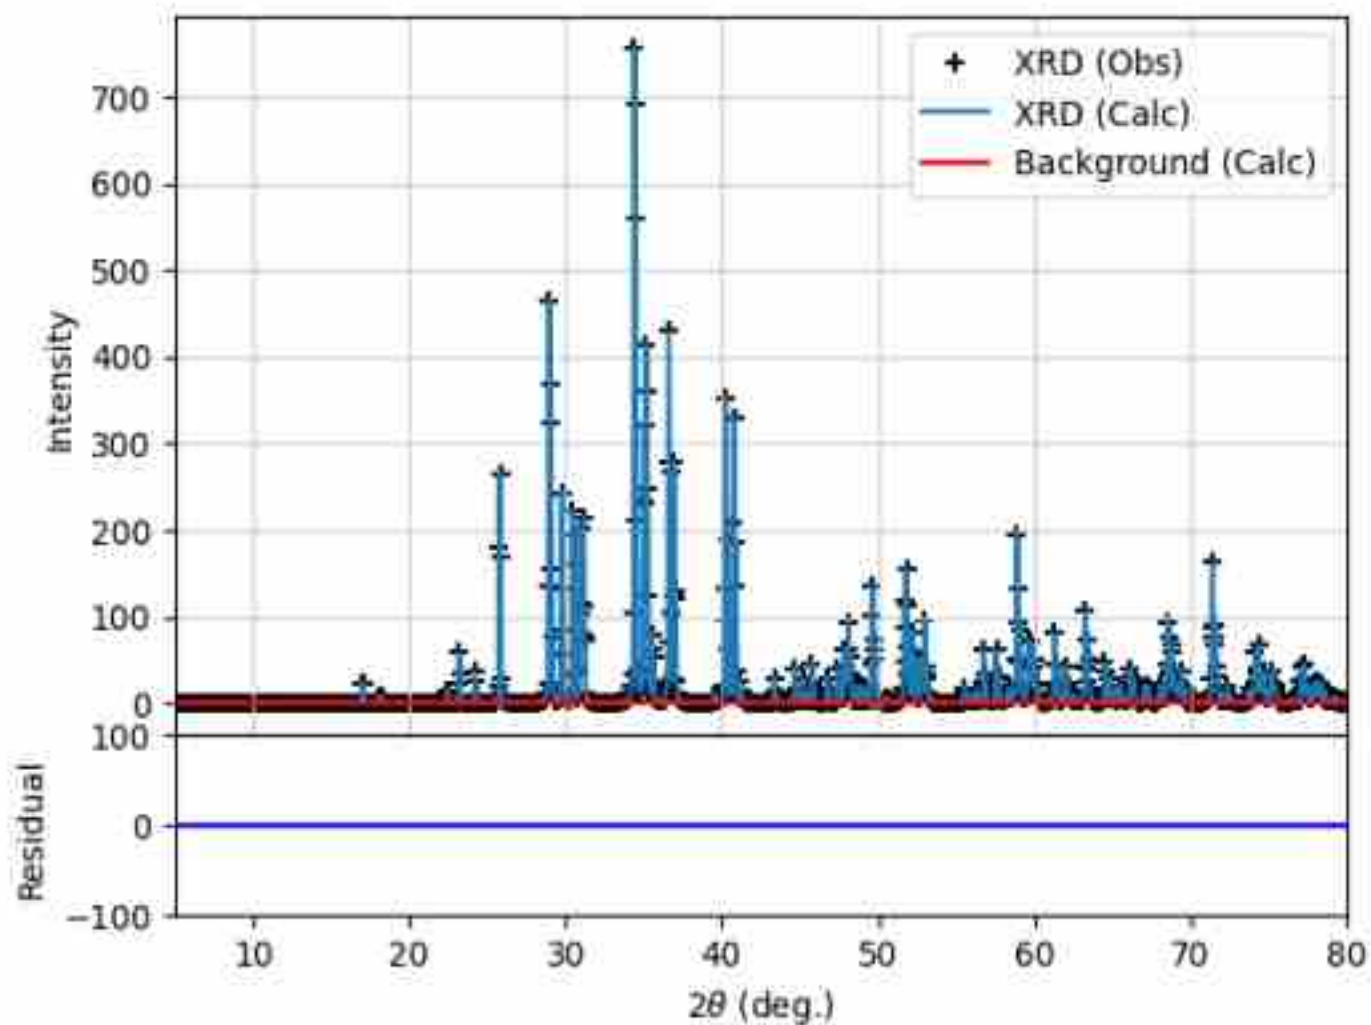

| RMSE before RR | Rwp     | RMSE after RR |
|----------------|---------|---------------|
| 0.016          | 0.00392 | 0.00034       |



# Fe1Ni2Se4

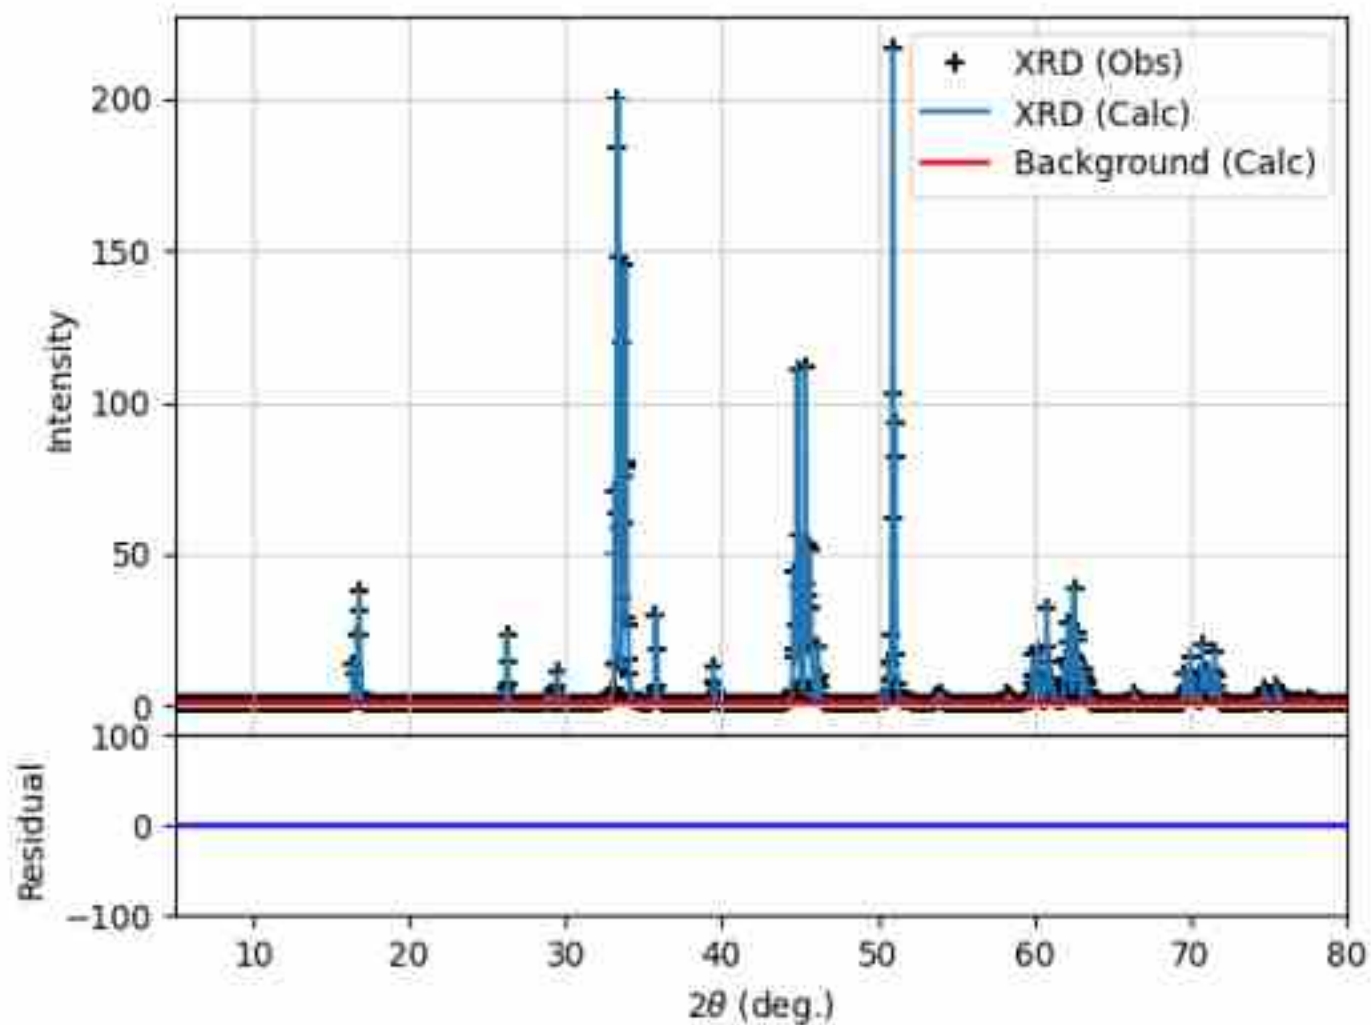

| RMSE before RR | Rwp     | RMSE after RR |
|----------------|---------|---------------|
| 0.016          | 0.00291 | 0.0002        |

# Fe6Ge2

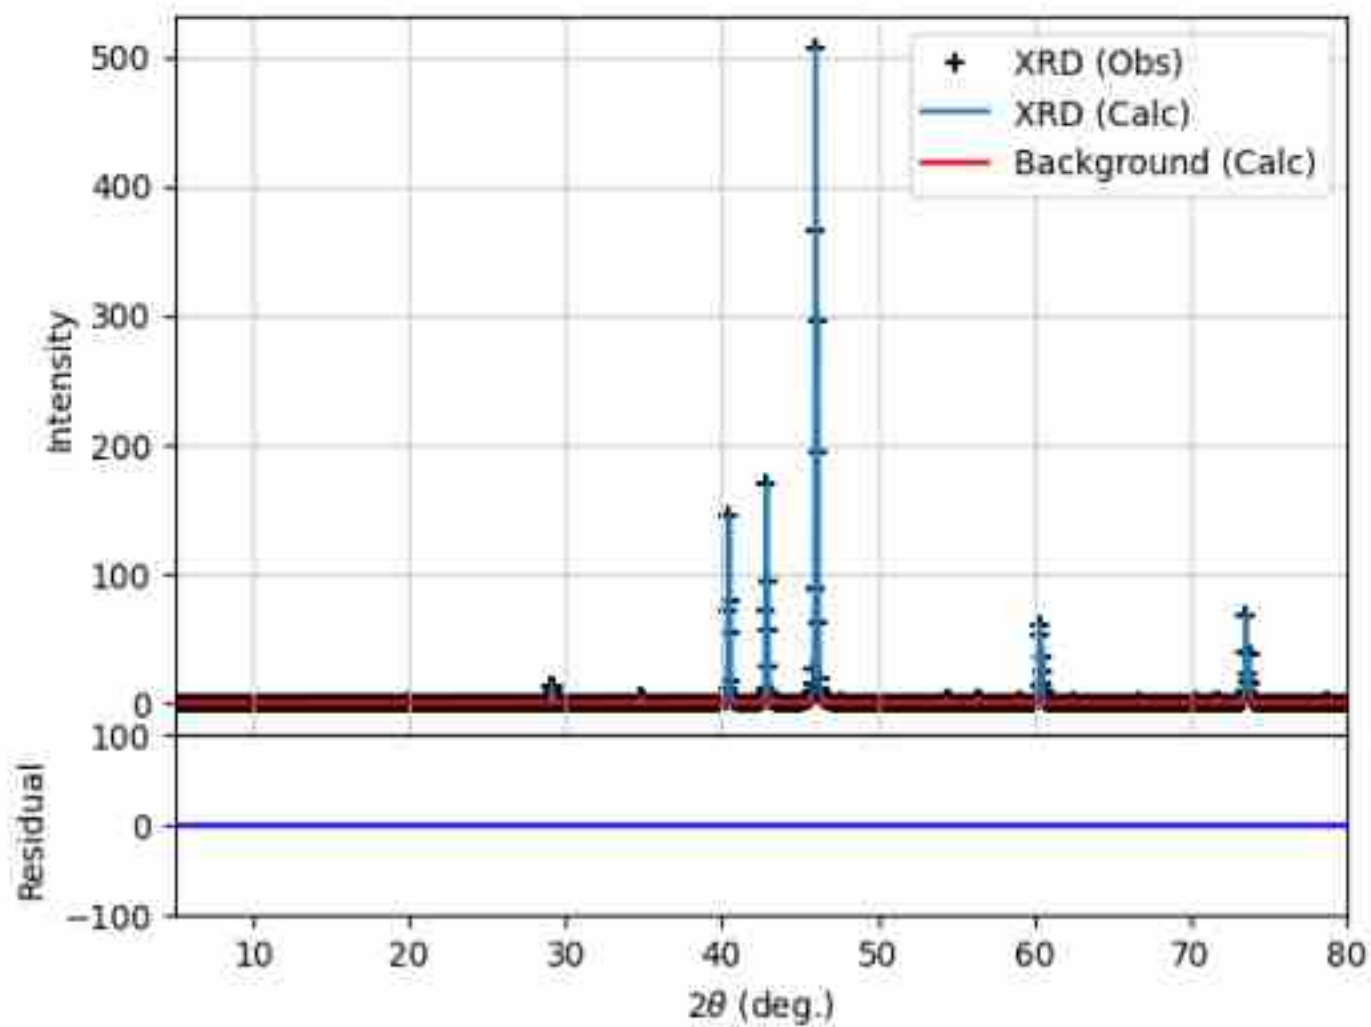

| RMSE before RR | Rwp     | RMSE after RR |
|----------------|---------|---------------|
| 0.016          | 0.15332 | 0.00412       |

# Gd1Al8Fe4

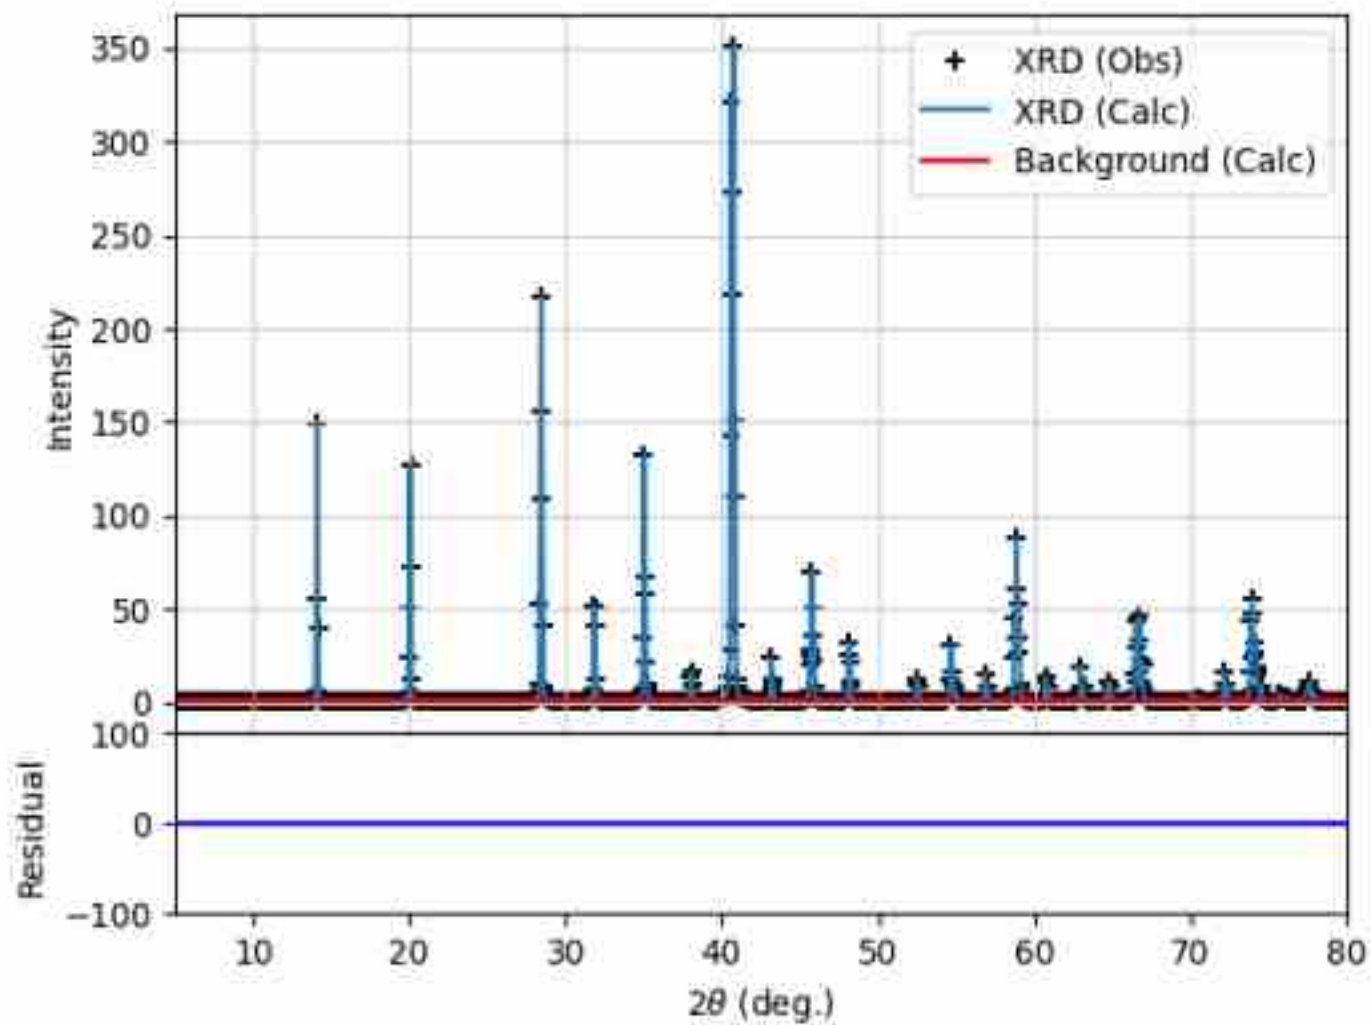

| RMSE before RR | Rwp     | RMSE after RR |
|----------------|---------|---------------|
| 0.016          | 0.00272 | 0.00076       |

# Gd<sub>2</sub>Cr<sub>2</sub>C<sub>3</sub>

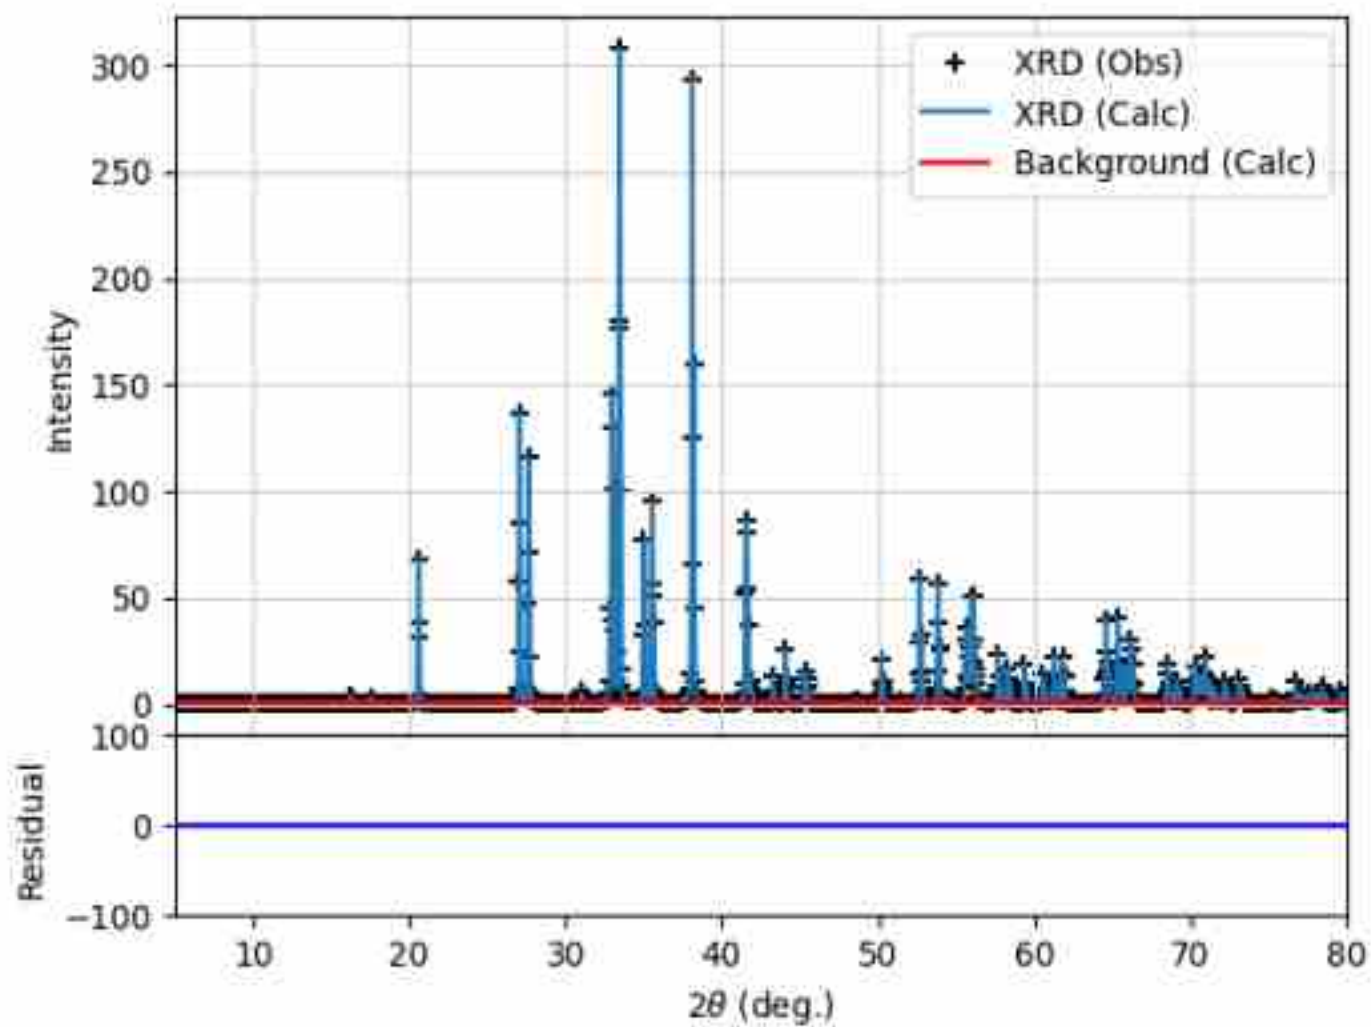

| RMSE before RR | Rwp     | RMSE after RR |
|----------------|---------|---------------|
| 0.016          | 0.00308 | 0.00133       |

# Gd4Ge4Rh4

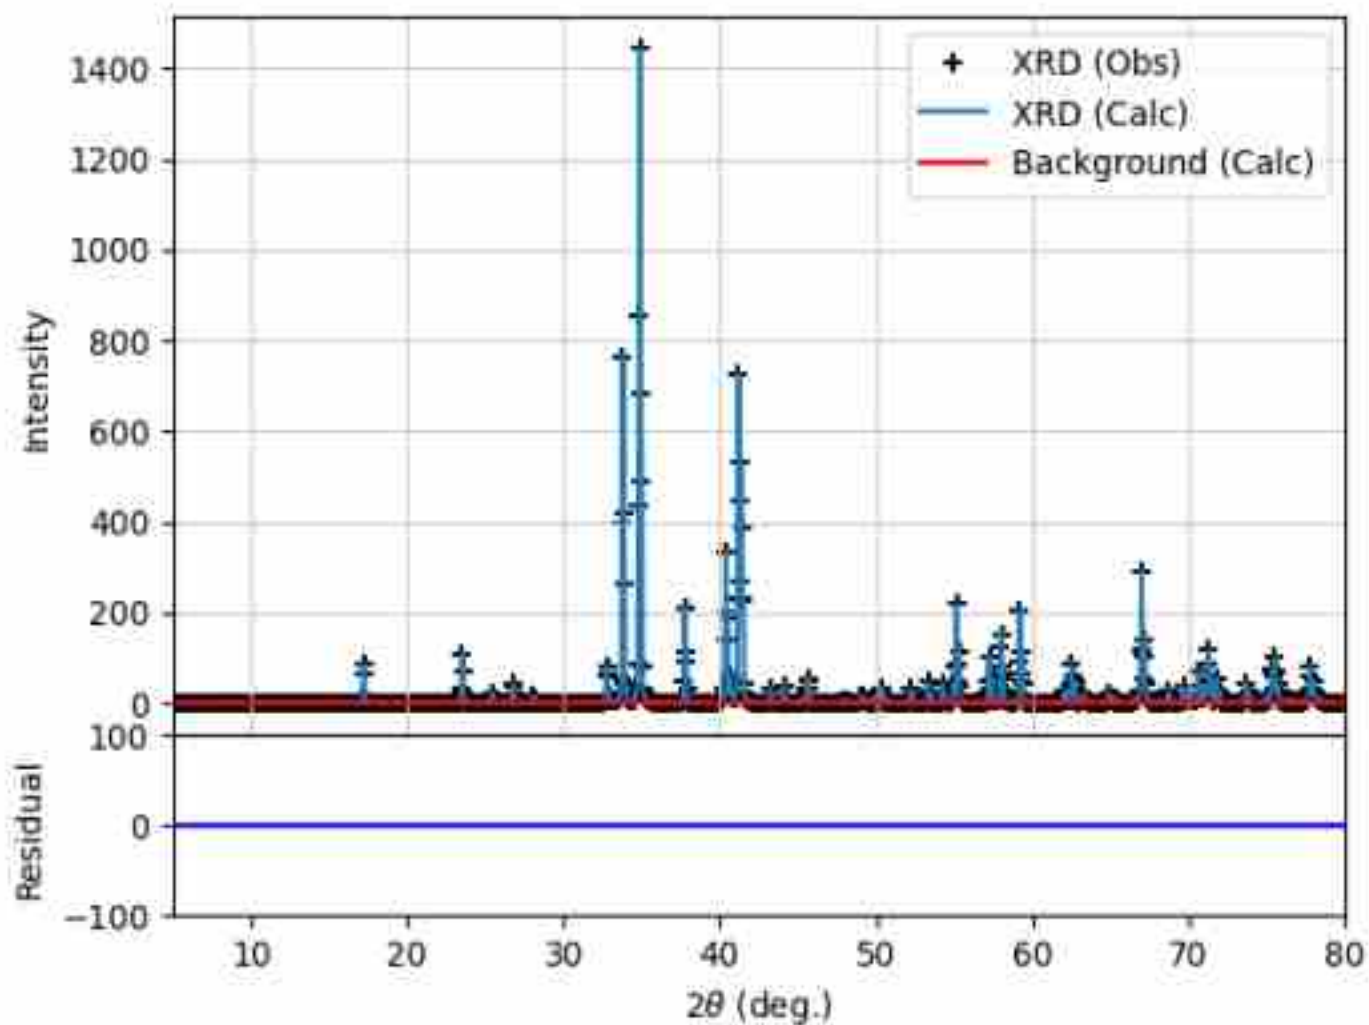

| RMSE before RR | Rwp     | RMSE after RR |
|----------------|---------|---------------|
| 0.016          | 0.00421 | 0.00049       |

# Gd4Sc4O12

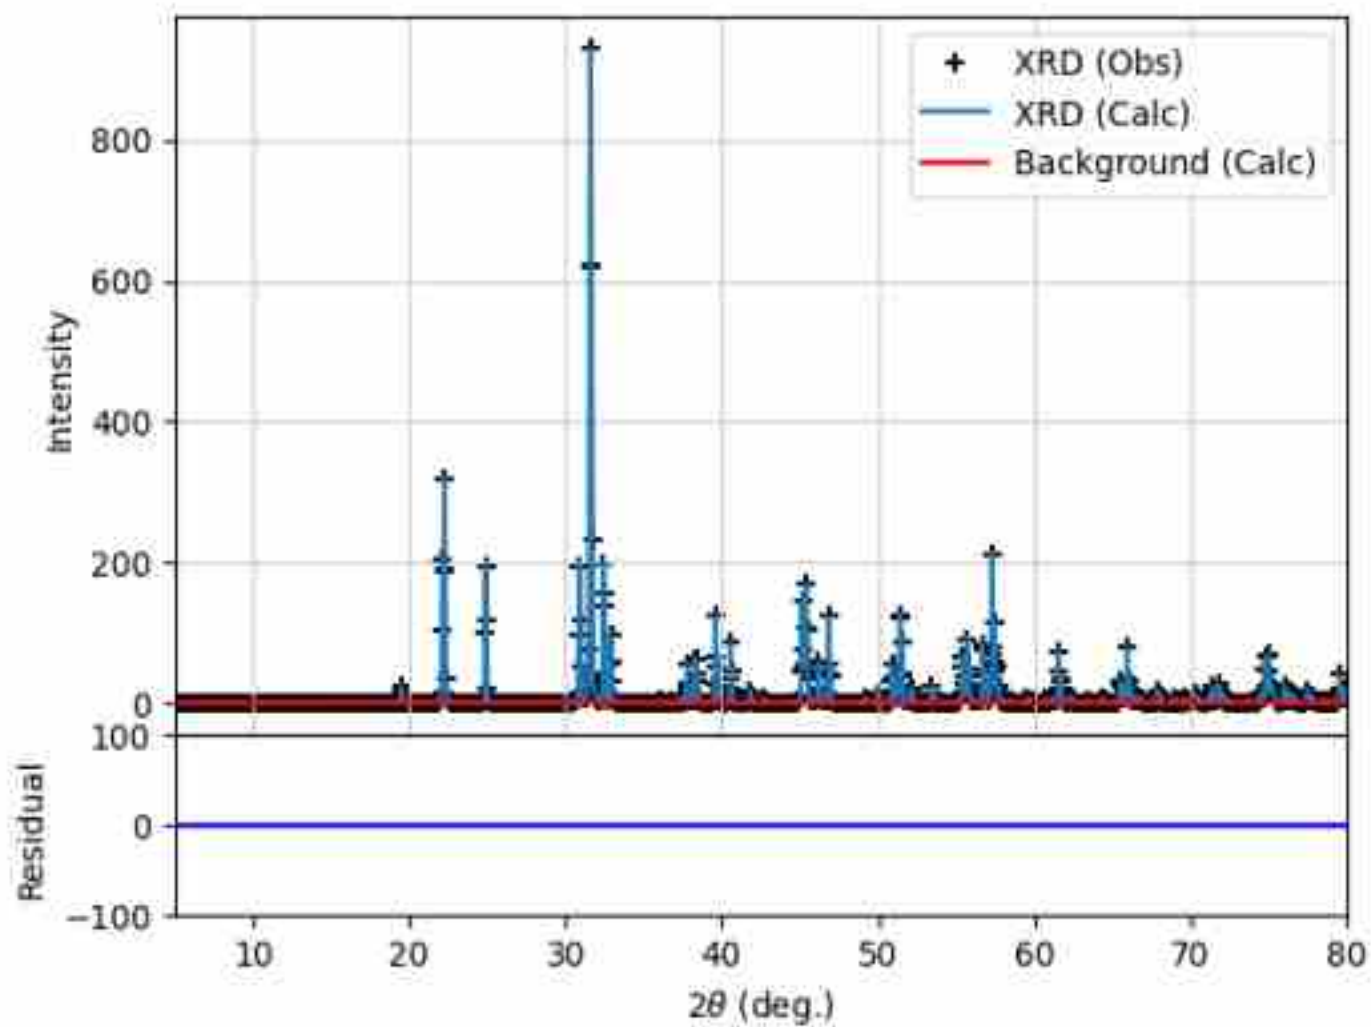

| RMSE before RR | Rwp     | RMSE after RR |
|----------------|---------|---------------|
| 0.016          | 0.00383 | 0.00082       |

# Hf1Ti1N2

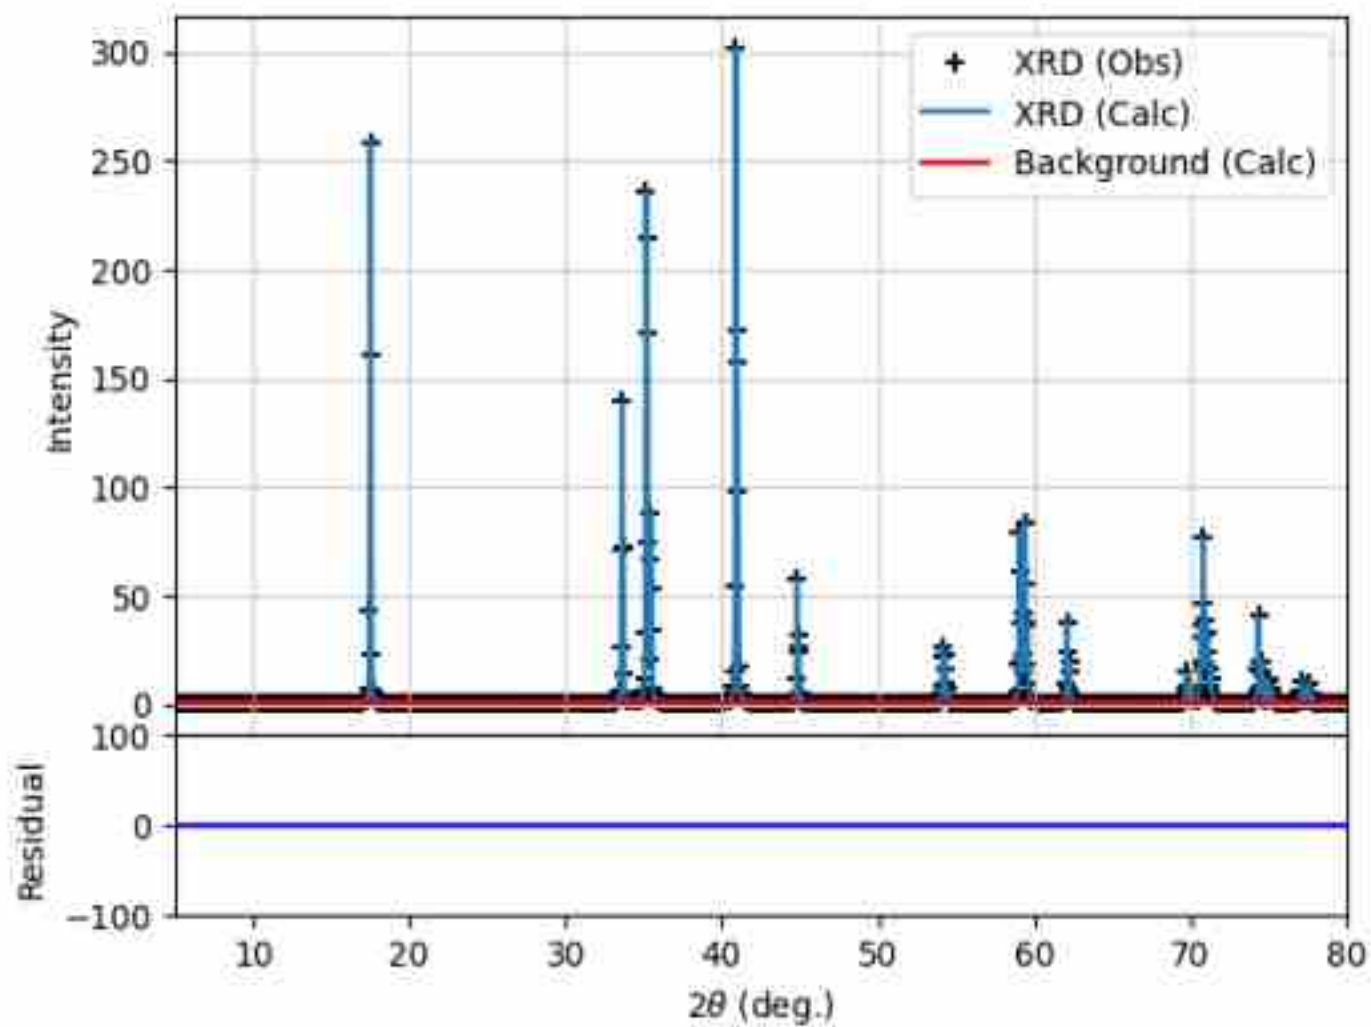

| RMSE before RR | Rwp     | RMSE after RR |
|----------------|---------|---------------|
| 0.016          | 0.02424 | 0.00379       |

# Hf6Ni1Sb2

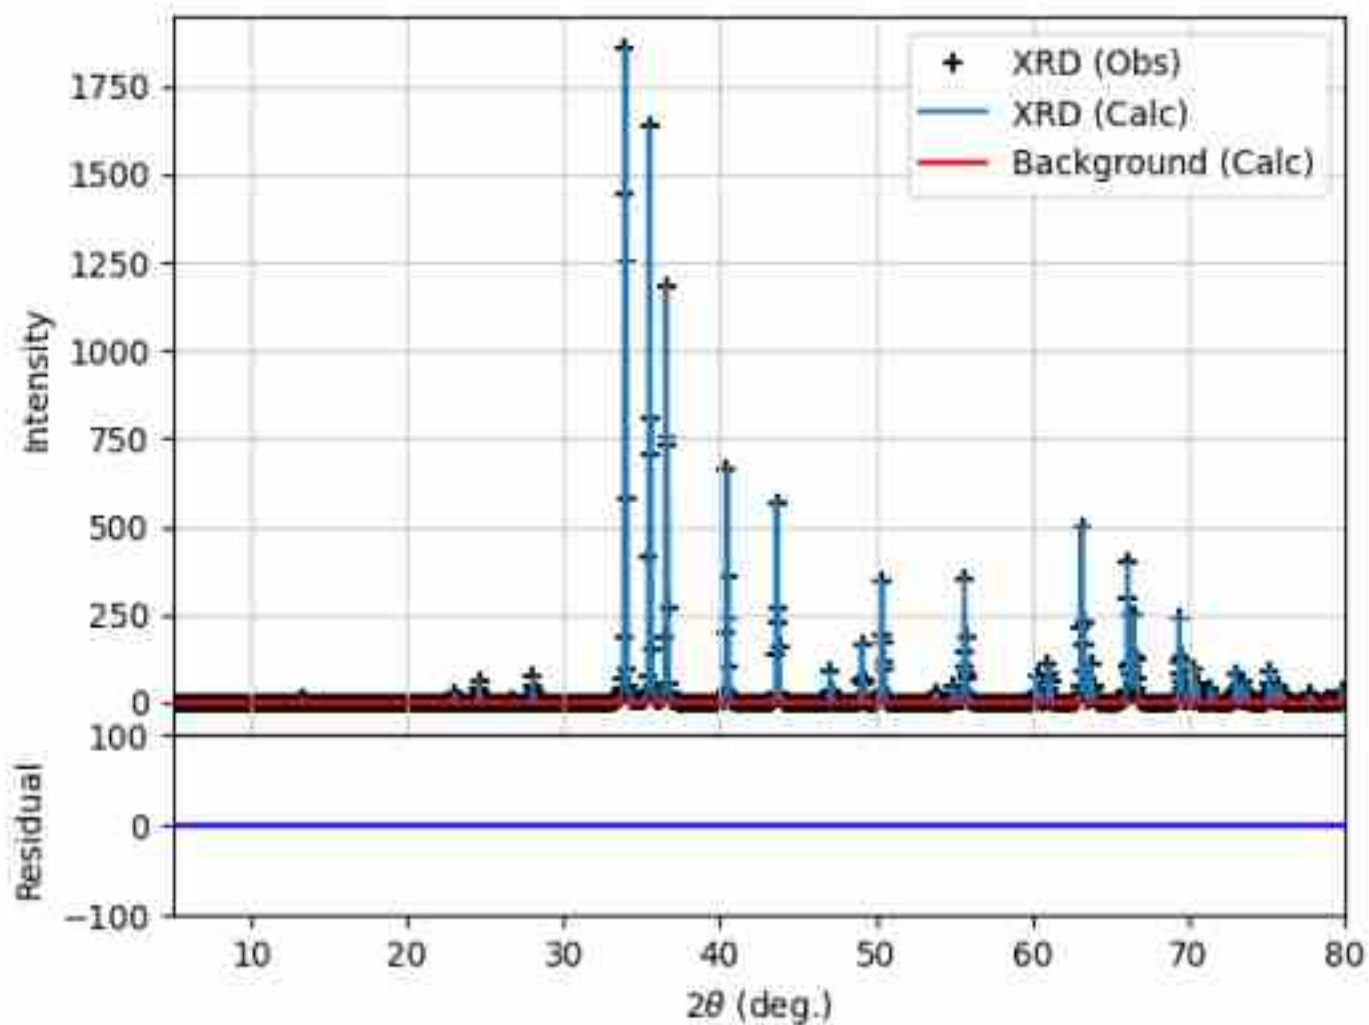

| RMSE before RR | Rwp     | RMSE after RR |
|----------------|---------|---------------|
| 0.016          | 0.01184 | 0.00163       |



# Ho<sub>1</sub>Al<sub>3</sub>B<sub>4</sub>O<sub>12</sub>

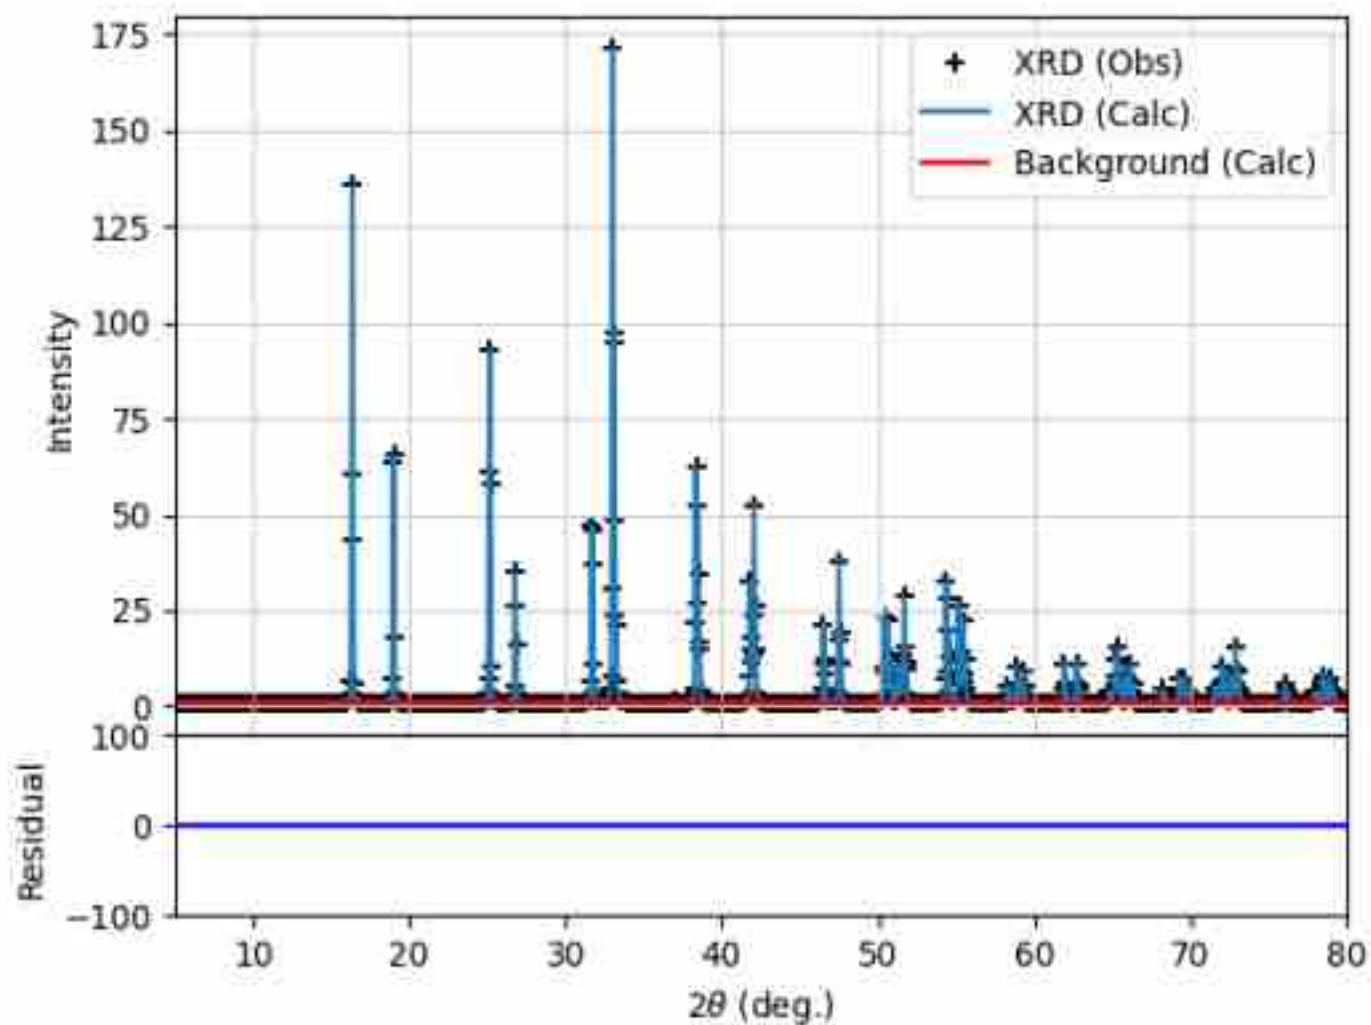

| RMSE before RR | Rwp    | RMSE after RR |
|----------------|--------|---------------|
| 0.016          | 0.0028 | 0.00154       |

# Ho1Cr6Ge6

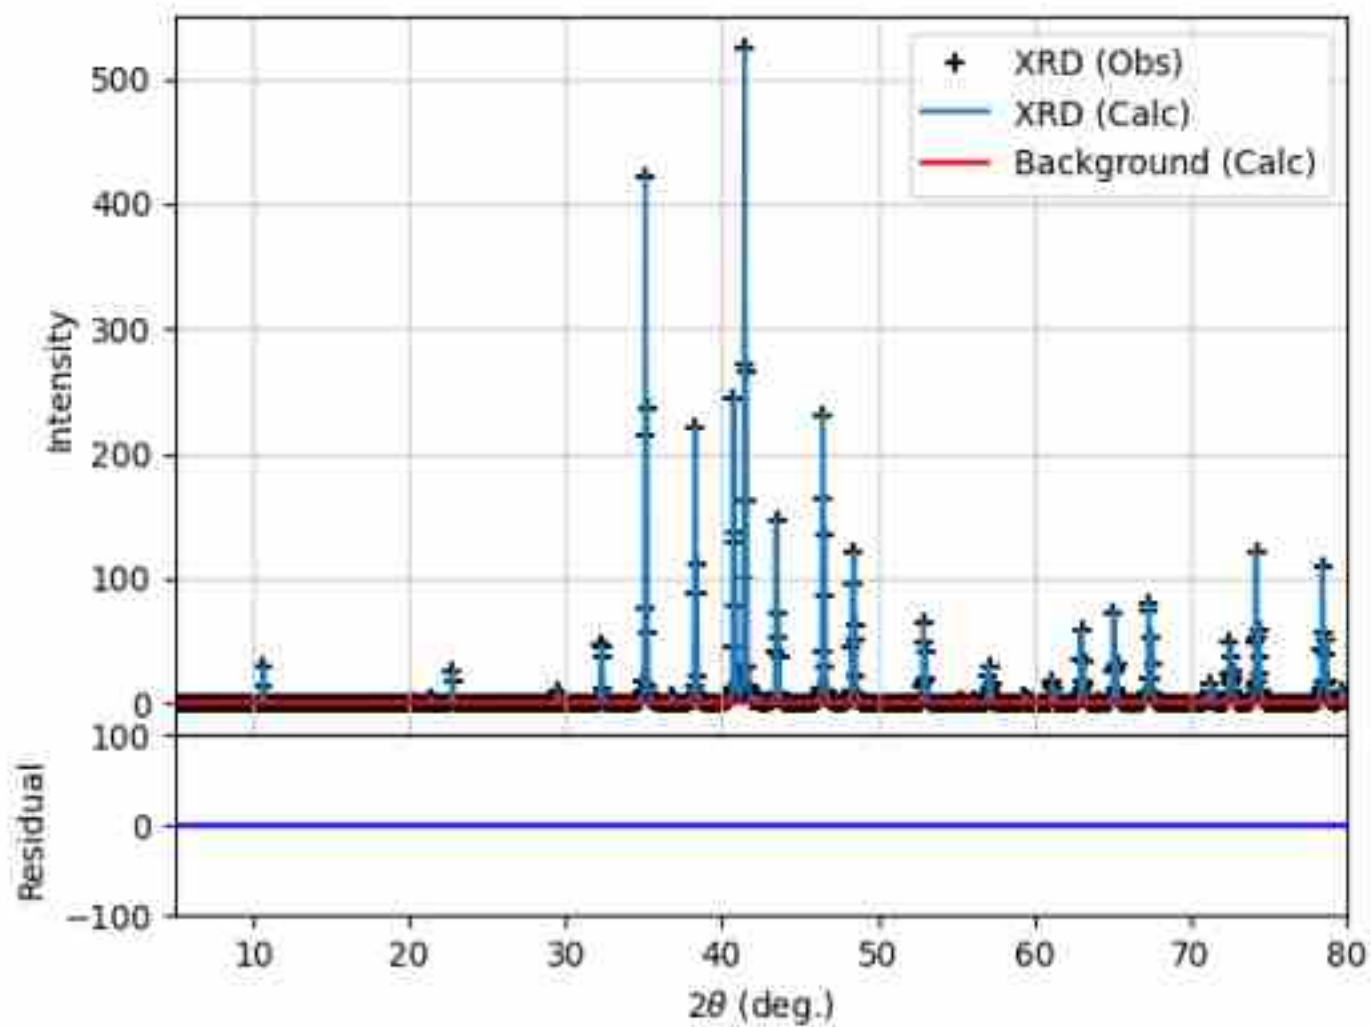

| RMSE before RR | Rwp    | RMSE after RR |
|----------------|--------|---------------|
| 0.016          | 0.0029 | 0.00055       |

# Ho1Ga6Co6

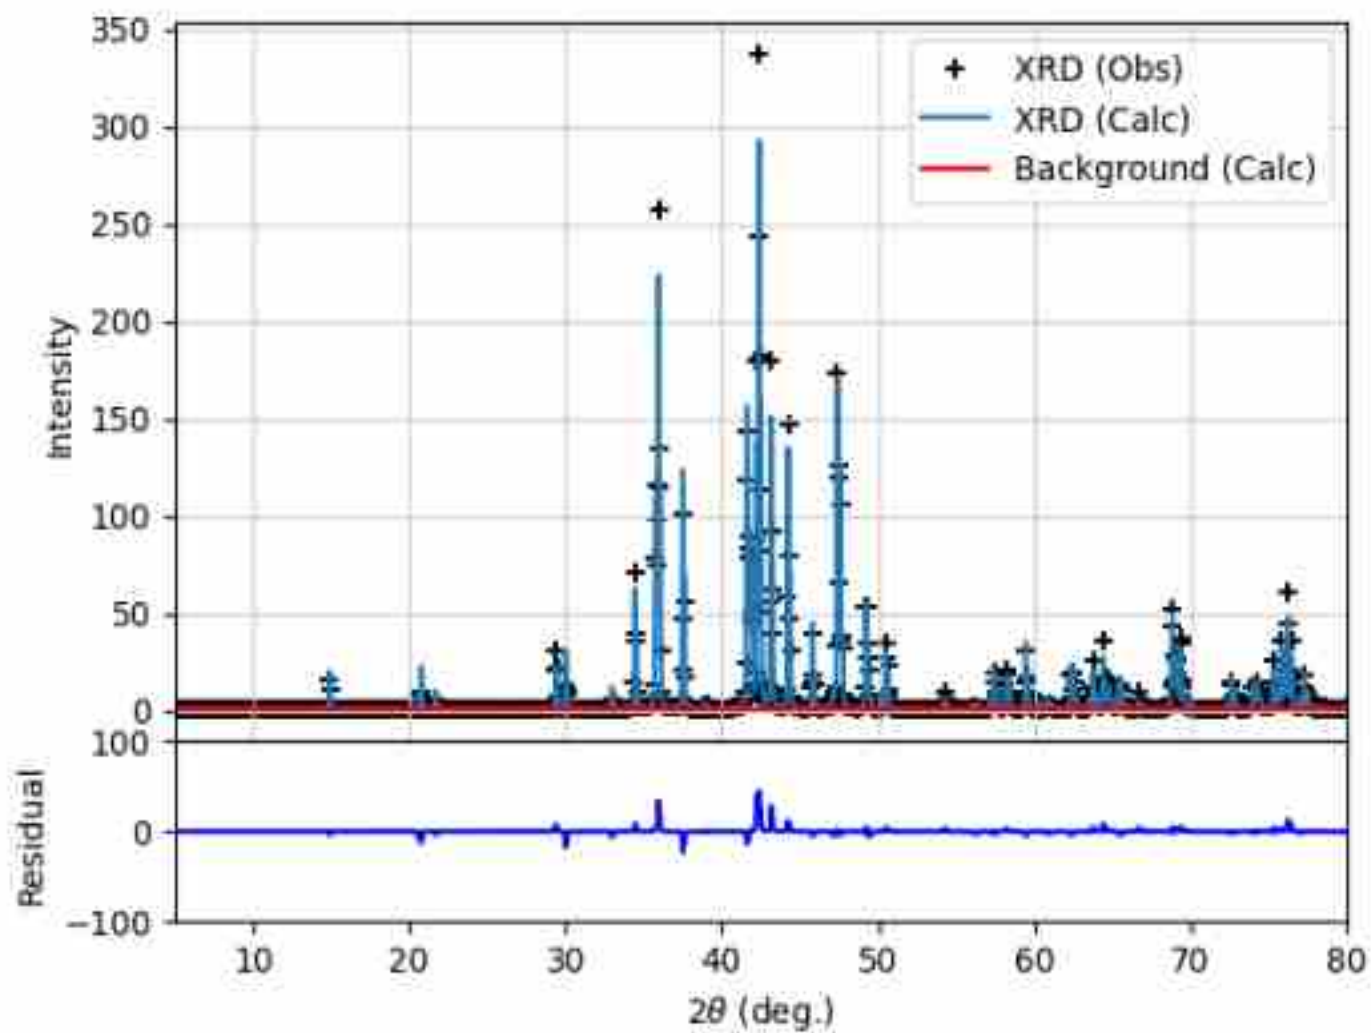

| RMSE before RR | Rwp      | RMSE after RR |
|----------------|----------|---------------|
| 0.016          | 19.08399 | 0.1154        |

# Ho1Ga6Fe6

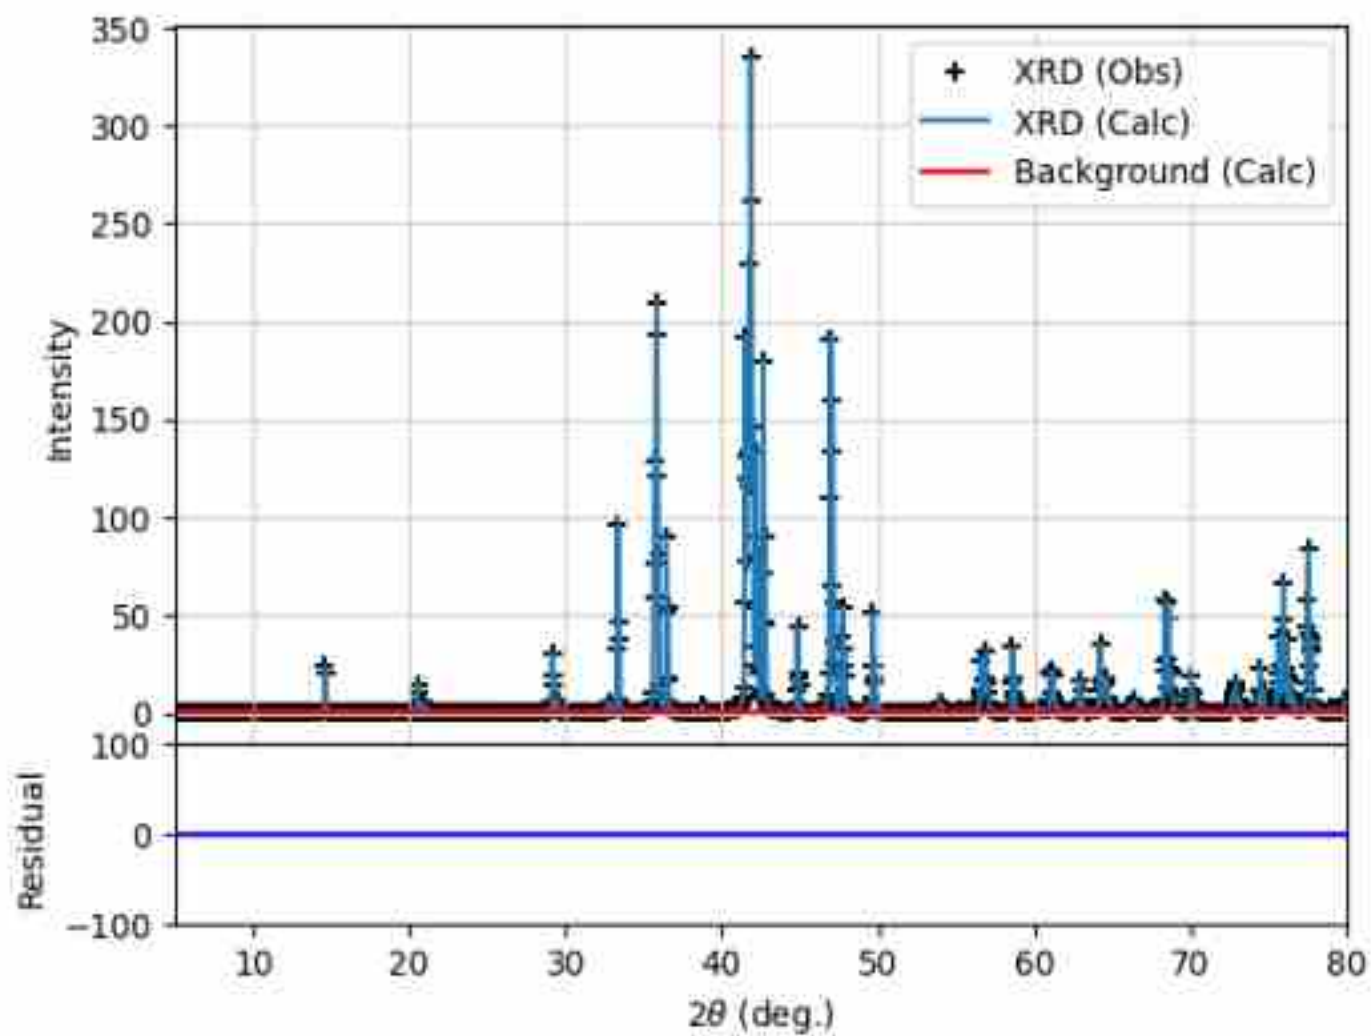

| RMSE before RR | Rwp     | RMSE after RR |
|----------------|---------|---------------|
| 0.016          | 0.00357 | 0.00029       |

# Ho<sub>2</sub>Mg<sub>2</sub>Fe<sub>4</sub>O<sub>12</sub>

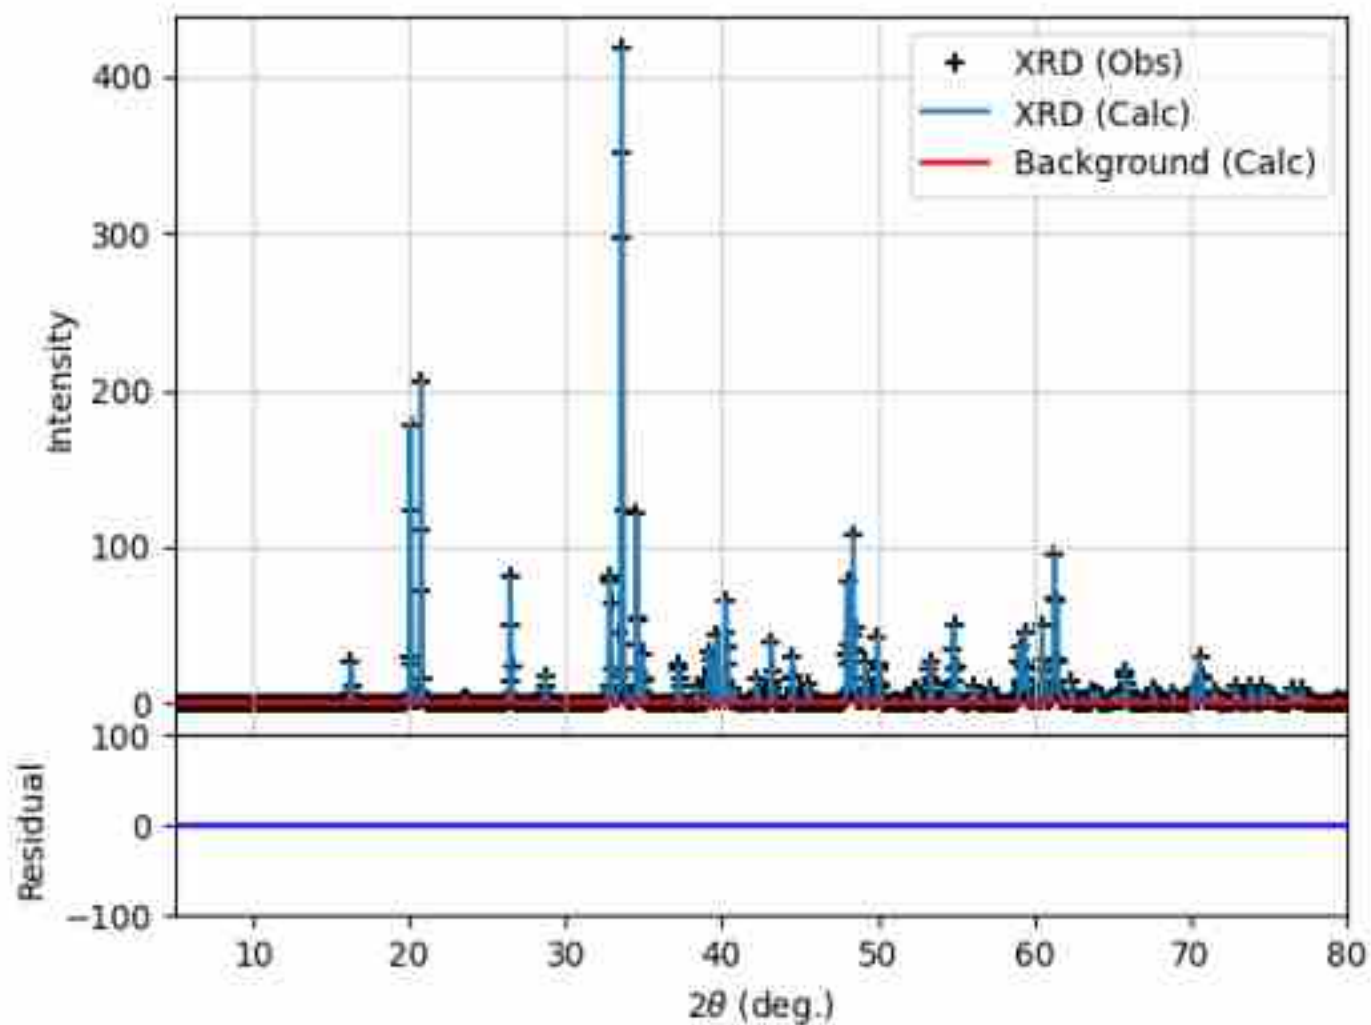

| RMSE before RR | Rwp     | RMSE after RR |
|----------------|---------|---------------|
| 0.016          | 0.00406 | 0.00131       |

# Ho<sub>2</sub>O<sub>2</sub>F<sub>2</sub>

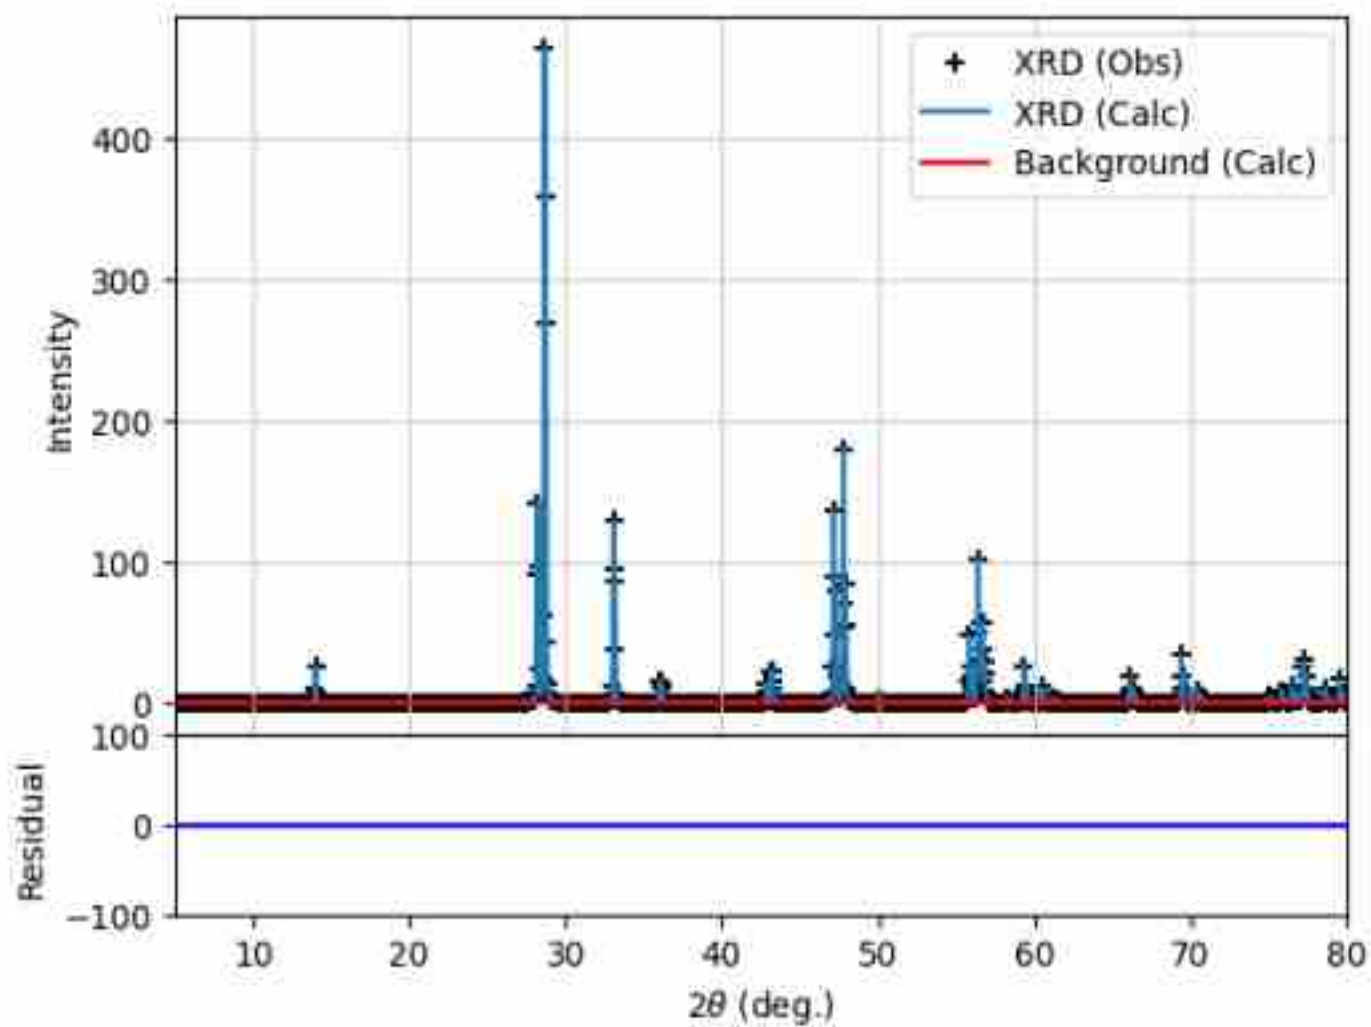

| RMSE before RR | Rwp     | RMSE after RR |
|----------------|---------|---------------|
| 0.016          | 0.00626 | 0.00254       |

# Ho<sub>4</sub>Sb<sub>4</sub>Ir<sub>4</sub>

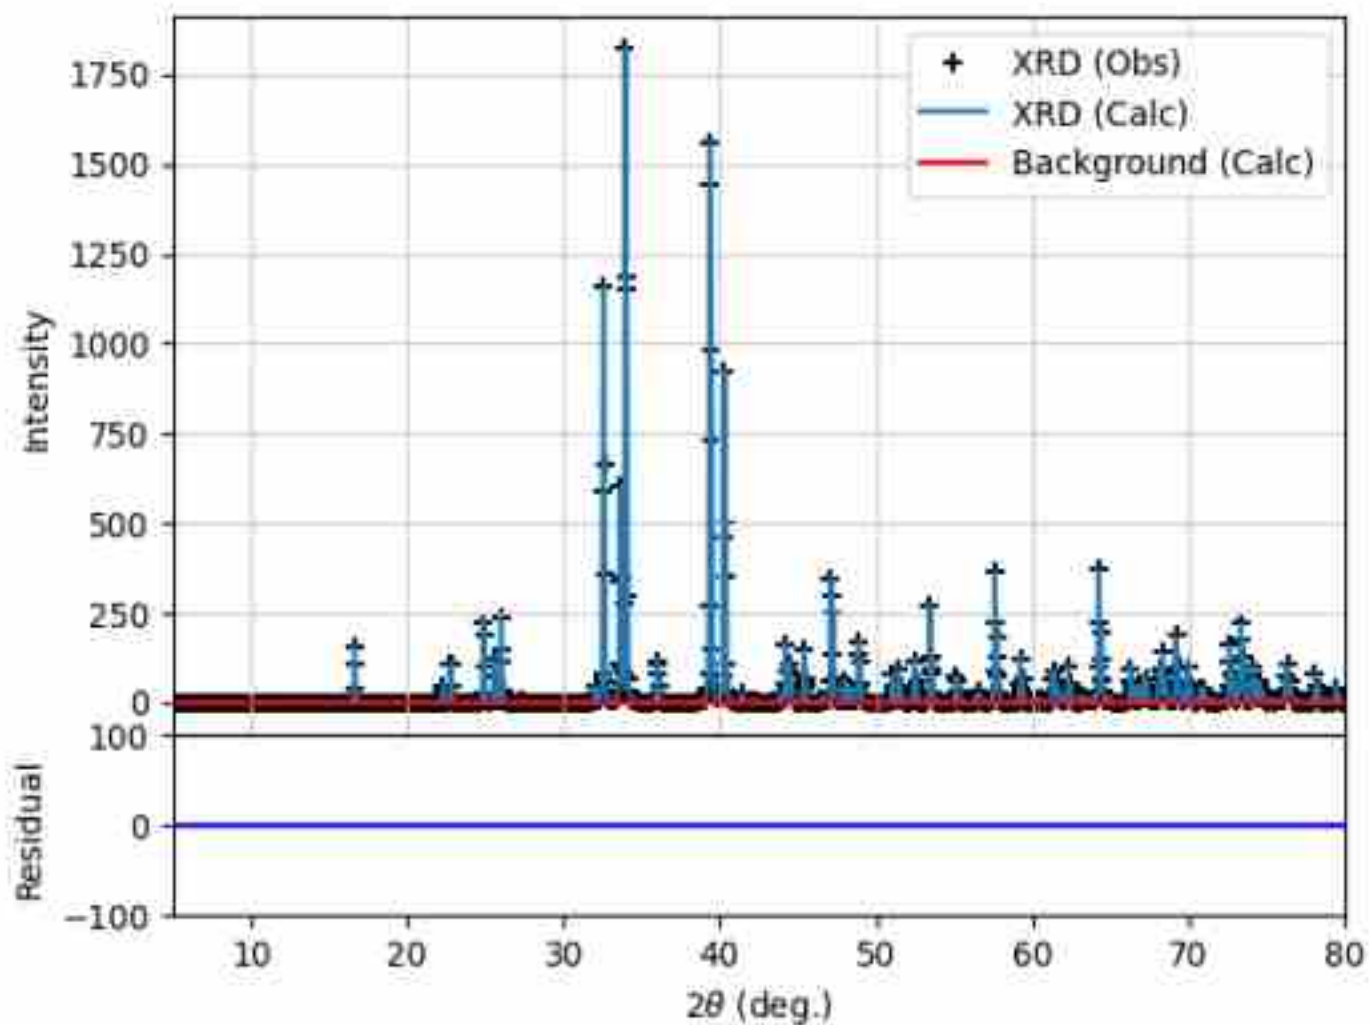

| RMSE before RR | Rwp    | RMSE after RR |
|----------------|--------|---------------|
| 0.016          | 0.0045 | 0.00039       |

# Ho<sub>4</sub>Te<sub>2</sub>O<sub>4</sub>

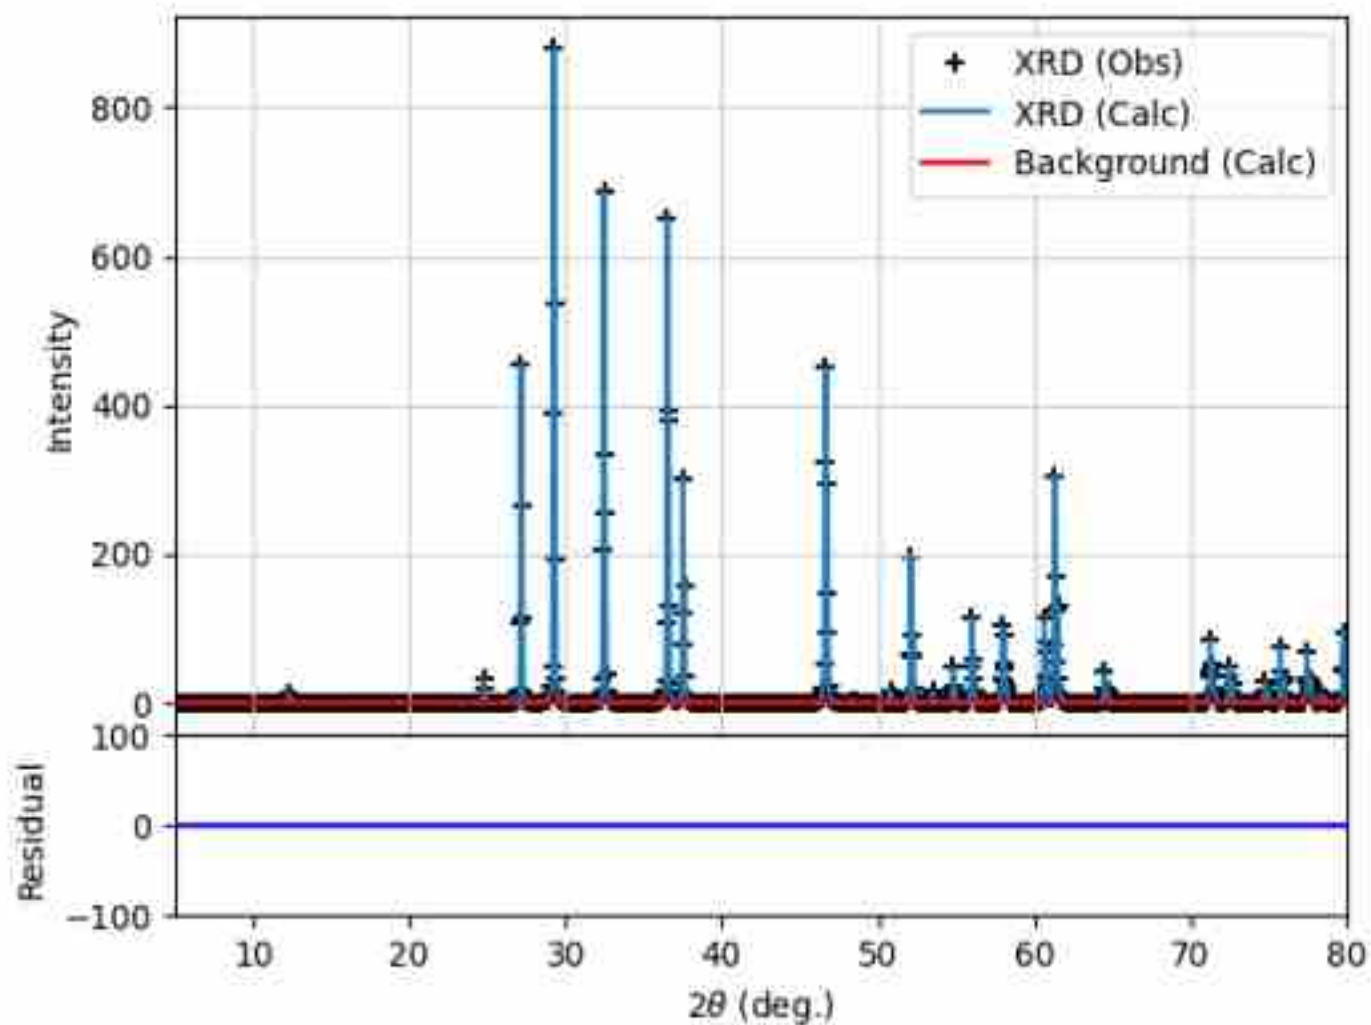

| RMSE before RR | Rwp     | RMSE after RR |
|----------------|---------|---------------|
| 0.016          | 0.00343 | 0.00325       |



# Ho10Ru4

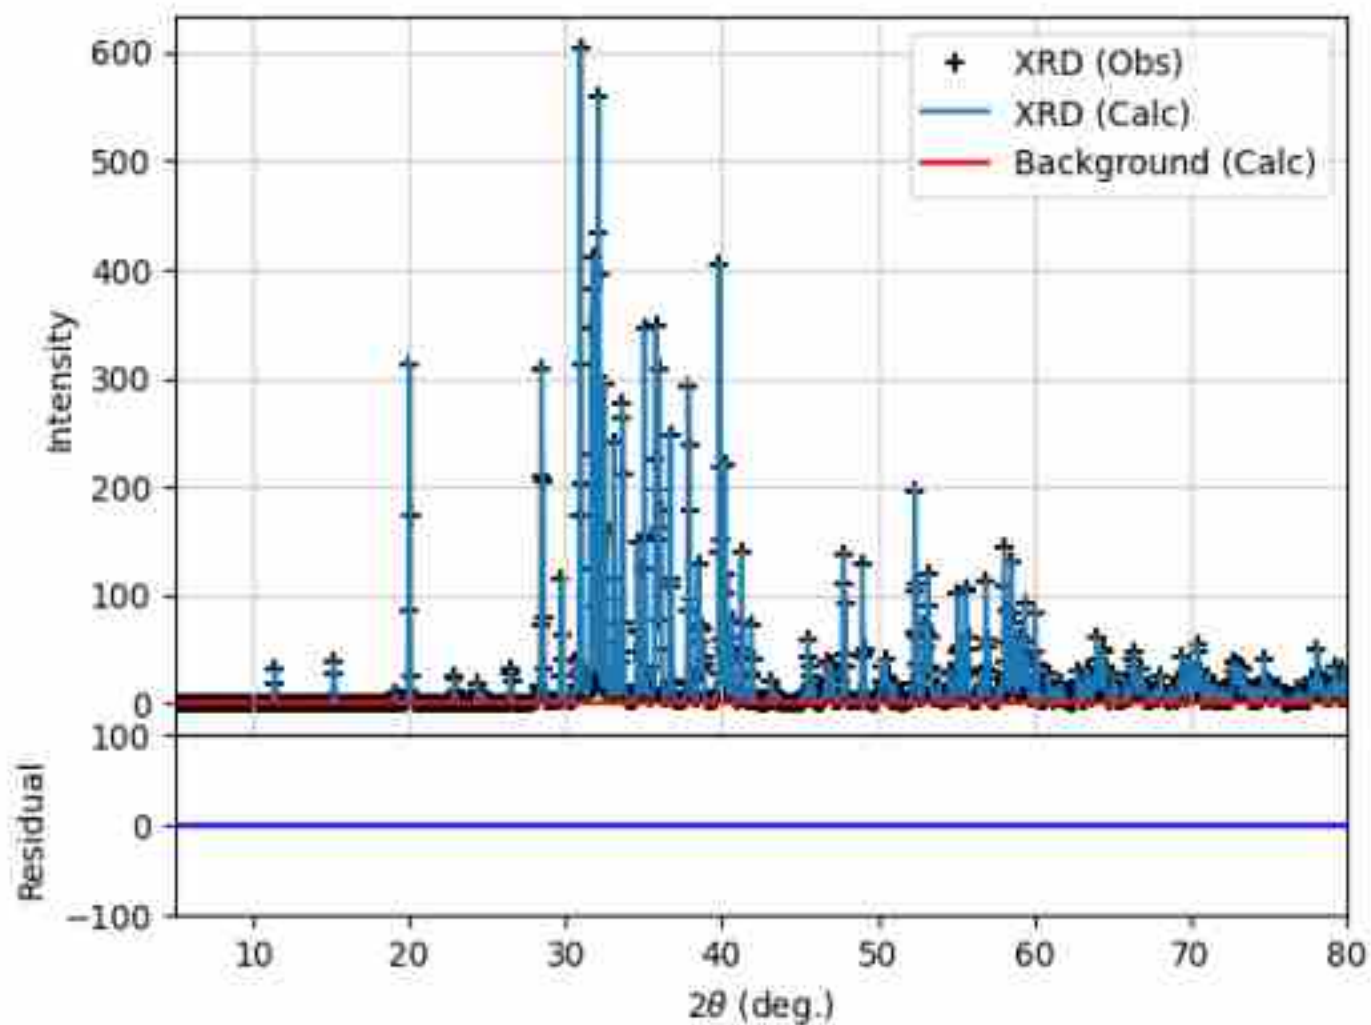

| RMSE before RR | Rwp    | RMSE after RR |
|----------------|--------|---------------|
| 0.016          | 0.0045 | 0.00046       |

# In<sub>1</sub>Bi<sub>2</sub>S<sub>4</sub>Cl<sub>1</sub>

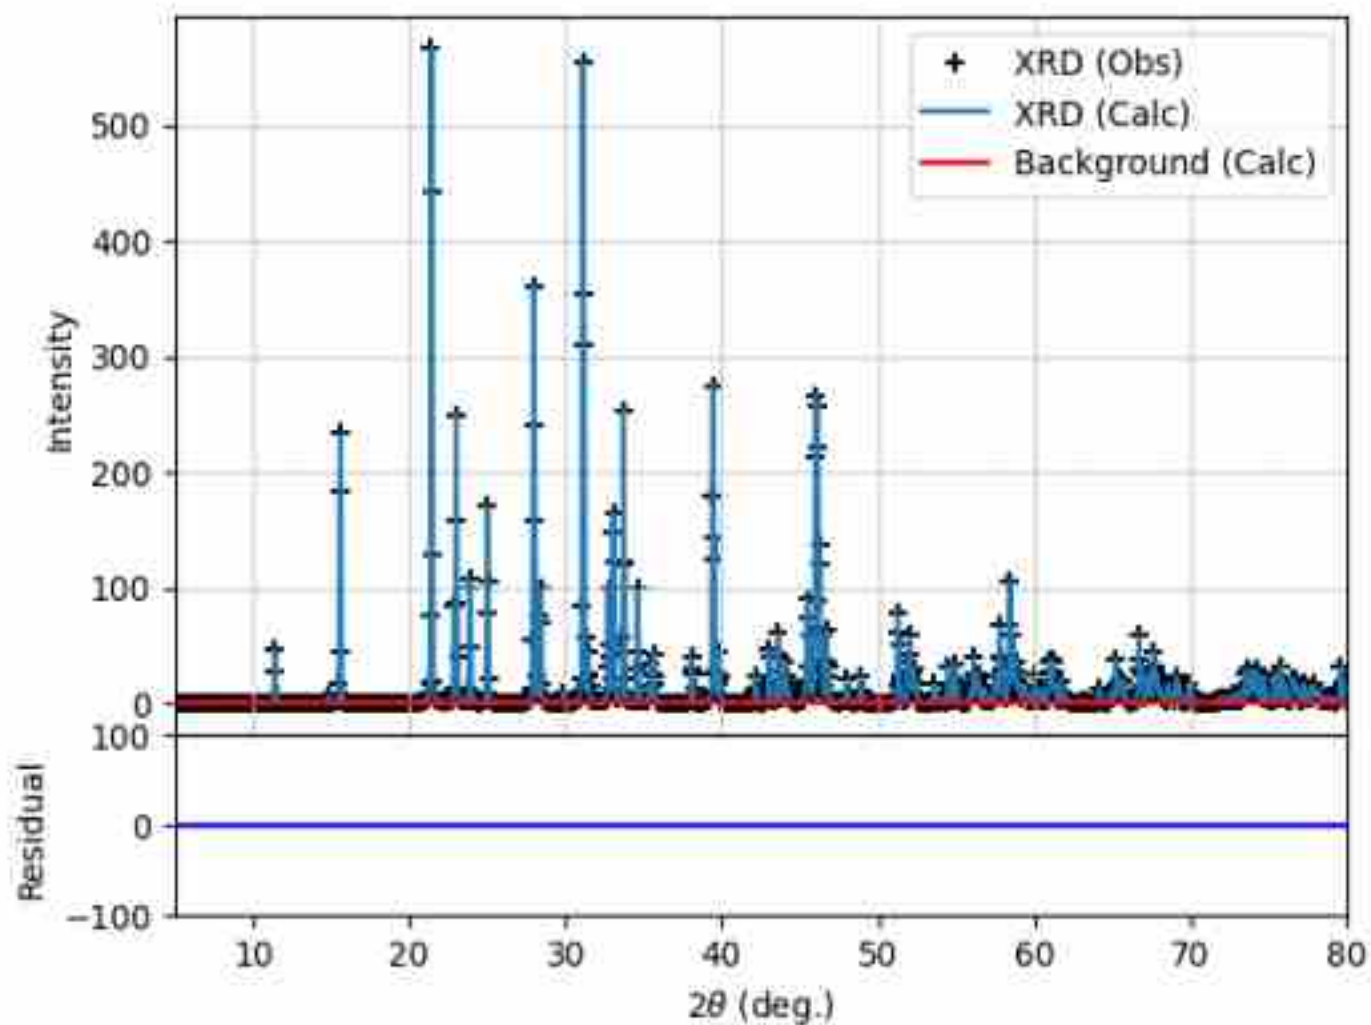

| RMSE before RR | Rwp     | RMSE after RR |
|----------------|---------|---------------|
| 0.016          | 0.00333 | 0.00045       |

# K<sub>2</sub>In<sub>2</sub>F<sub>6</sub>

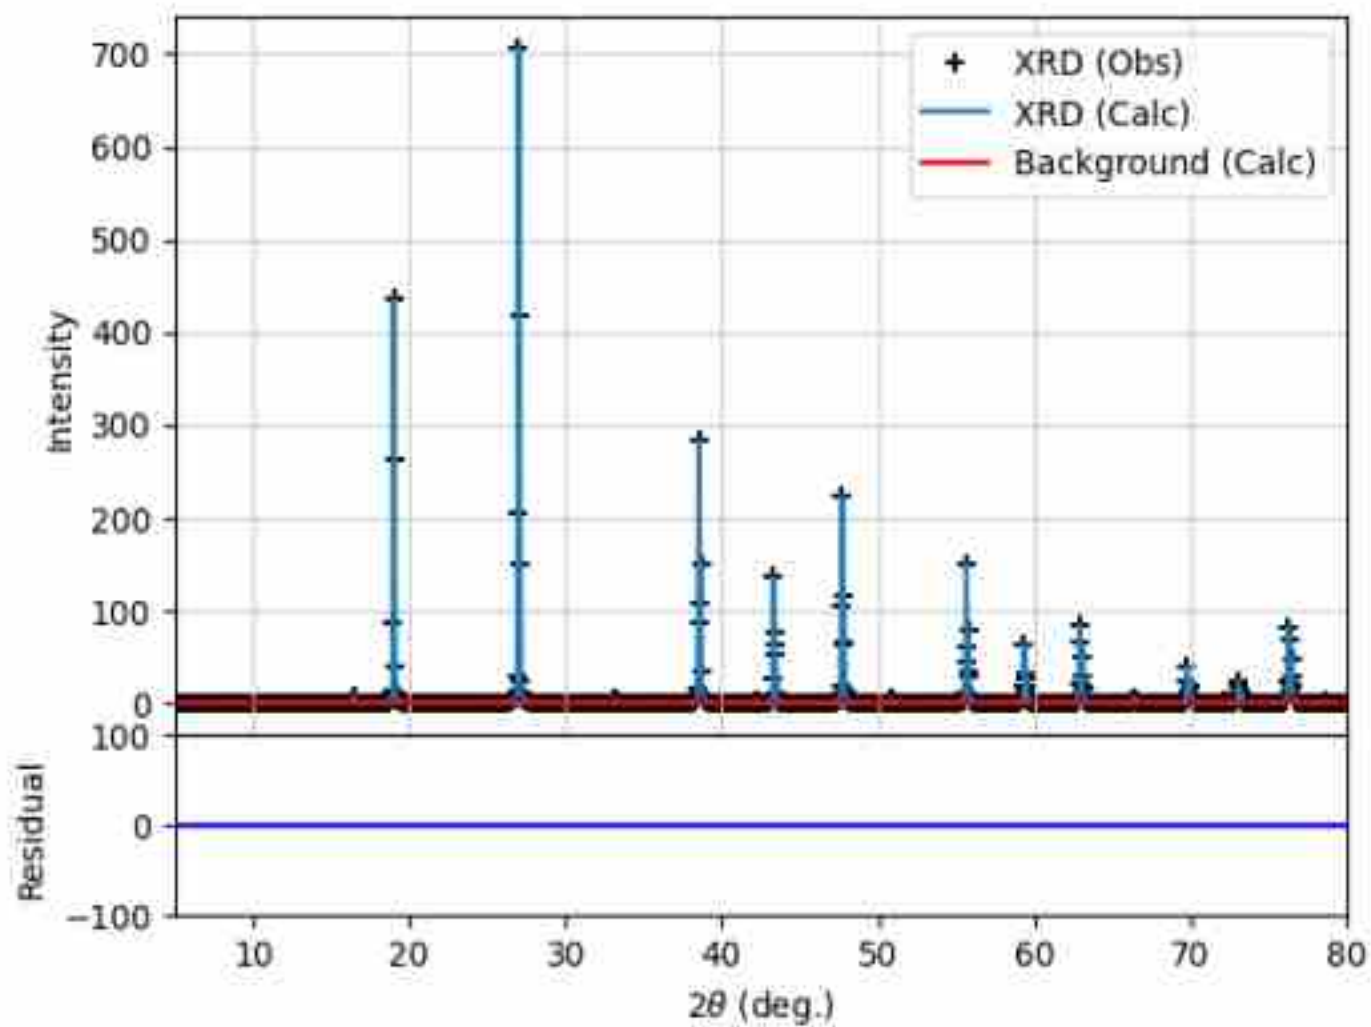

| RMSE before RR | Rwp     | RMSE after RR |
|----------------|---------|---------------|
| 0.016          | 0.02513 | 0.0033        |

# K<sub>2</sub>Li<sub>2</sub>Te<sub>2</sub>

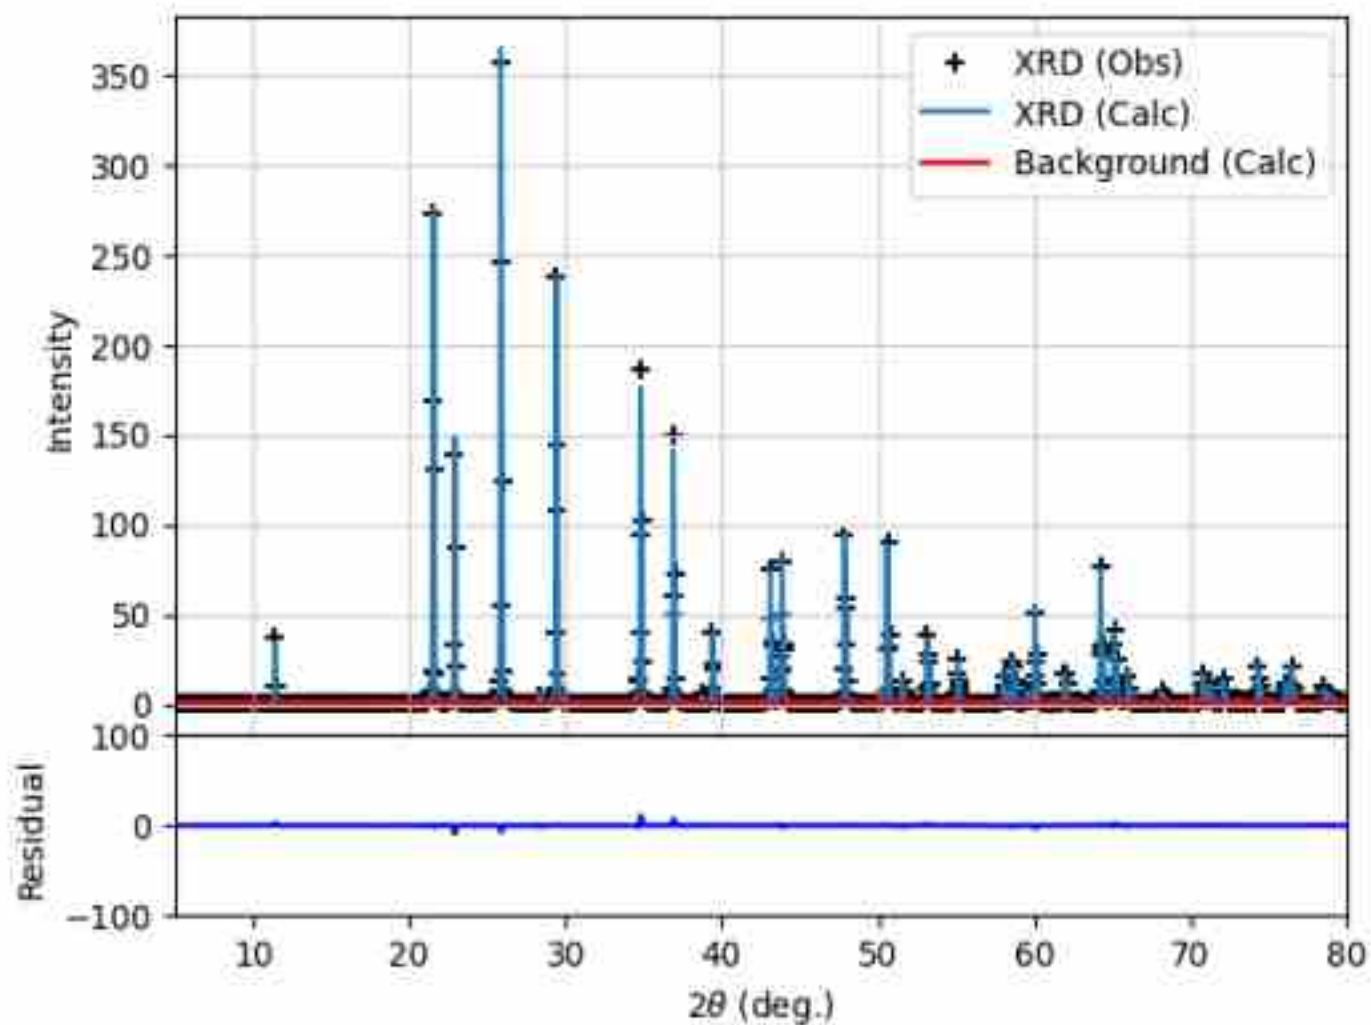

| RMSE before RR | Rwp     | RMSE after RR |
|----------------|---------|---------------|
| 0.016          | 3.77423 | 0.33173       |

# K<sub>2</sub>PdCl<sub>4</sub>

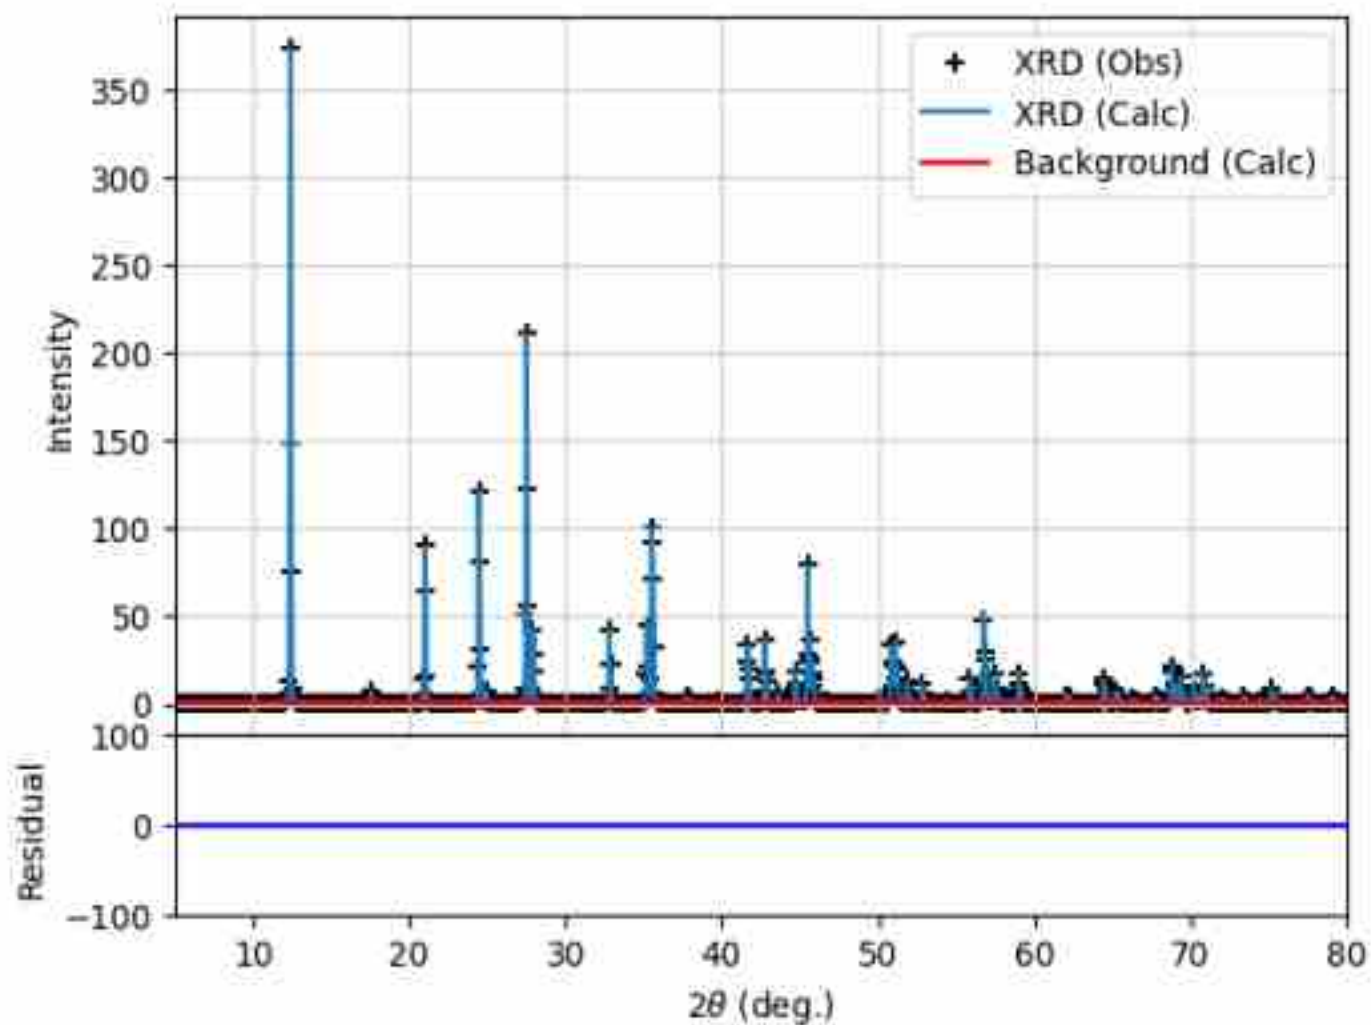

| RMSE before RR | Rwp     | RMSE after RR |
|----------------|---------|---------------|
| 0.016          | 0.00412 | 0.00075       |

# K2Rb1A11F6

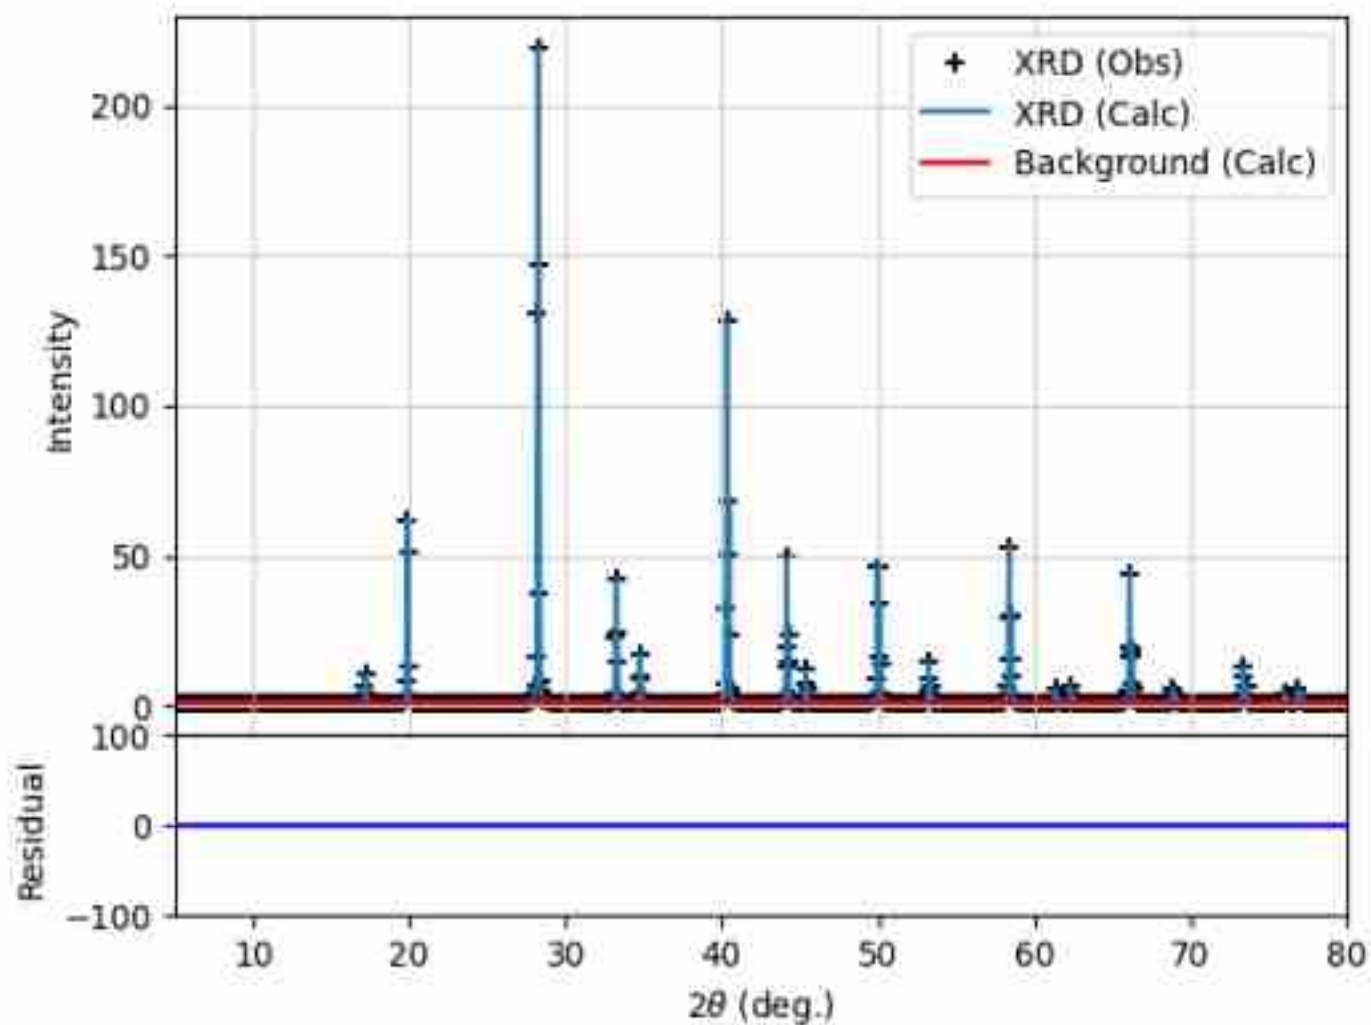

| RMSE before RR | Rwp     | RMSE after RR |
|----------------|---------|---------------|
| 0.016          | 0.02885 | 0.00521       |

# K2V2C16

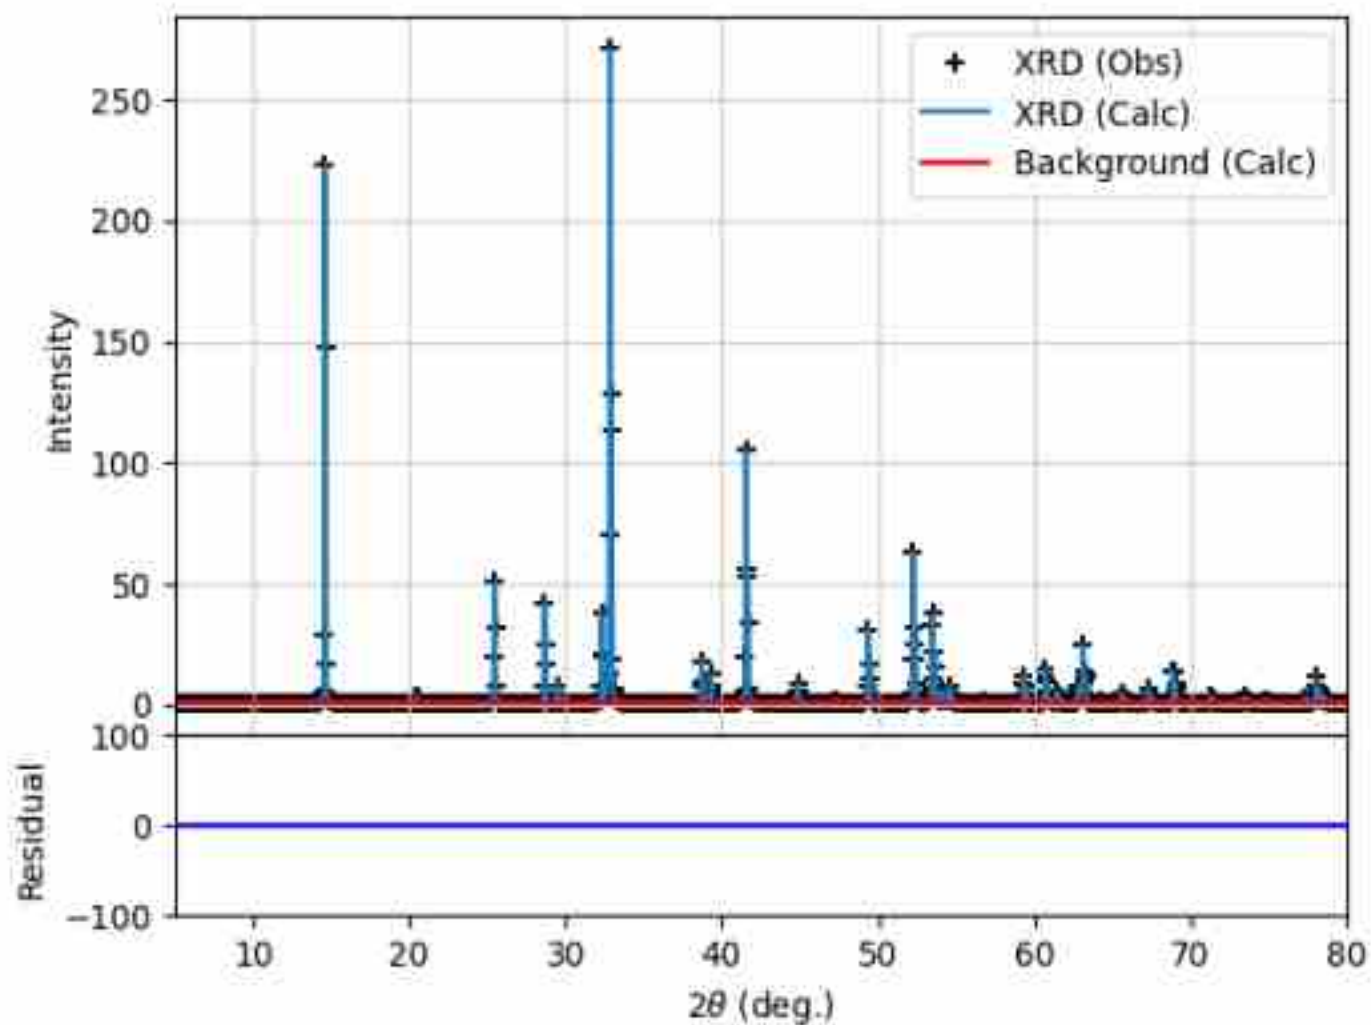

| RMSE before RR | Rwp     | RMSE after RR |
|----------------|---------|---------------|
| 0.016          | 0.03803 | 0.00279       |

# K3Co2F7

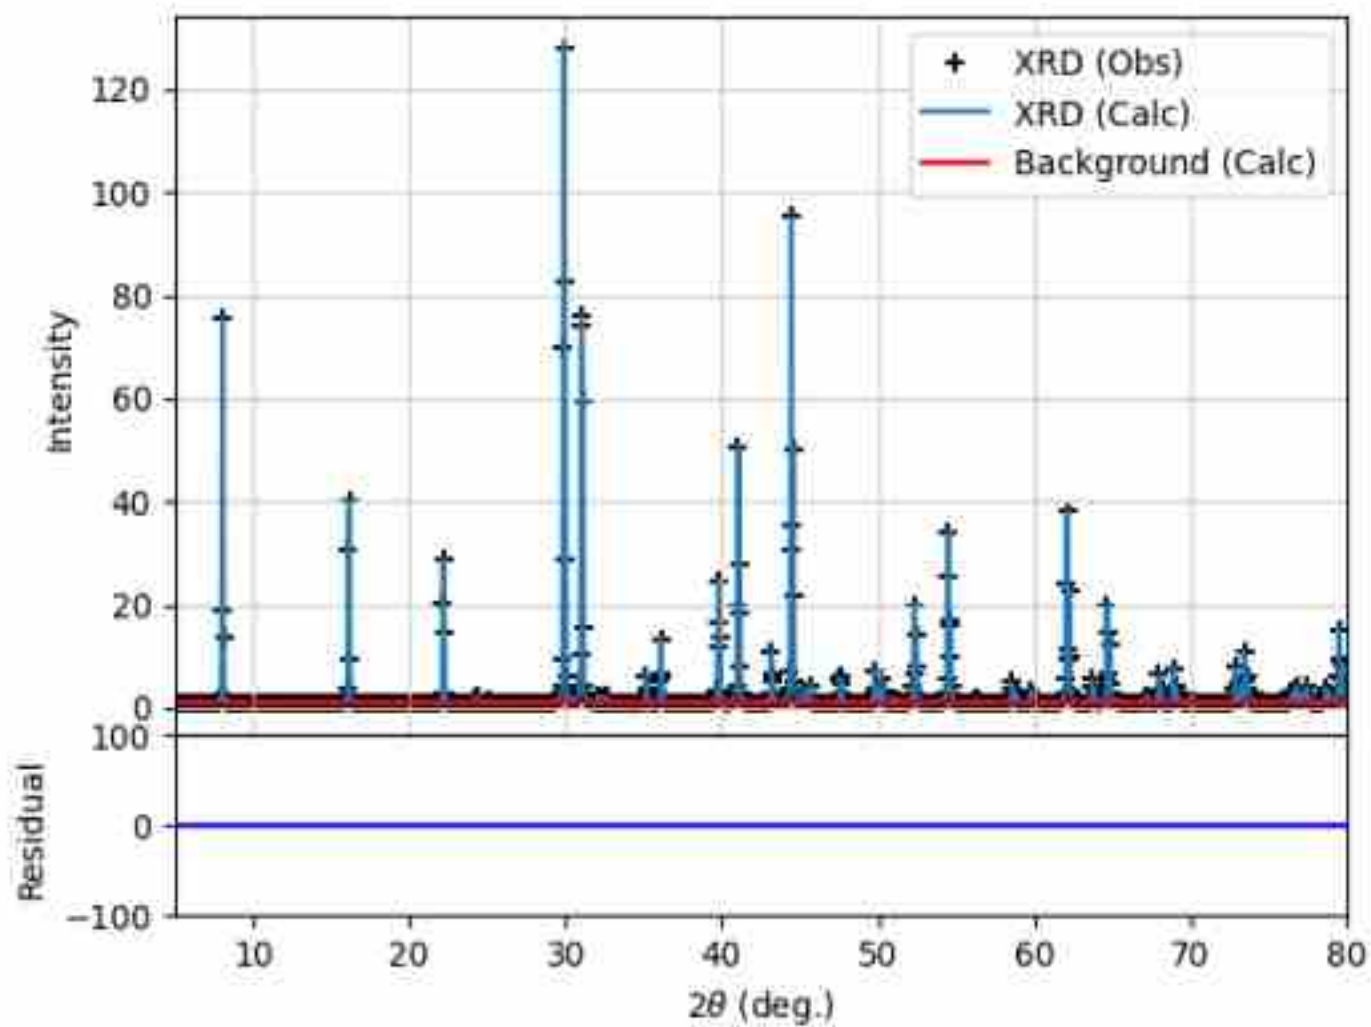

| RMSE before RR | Rwp     | RMSE after RR |
|----------------|---------|---------------|
| 0.016          | 0.00275 | 0.00068       |



# K<sub>3</sub>Cu<sub>3</sub>P<sub>2</sub>

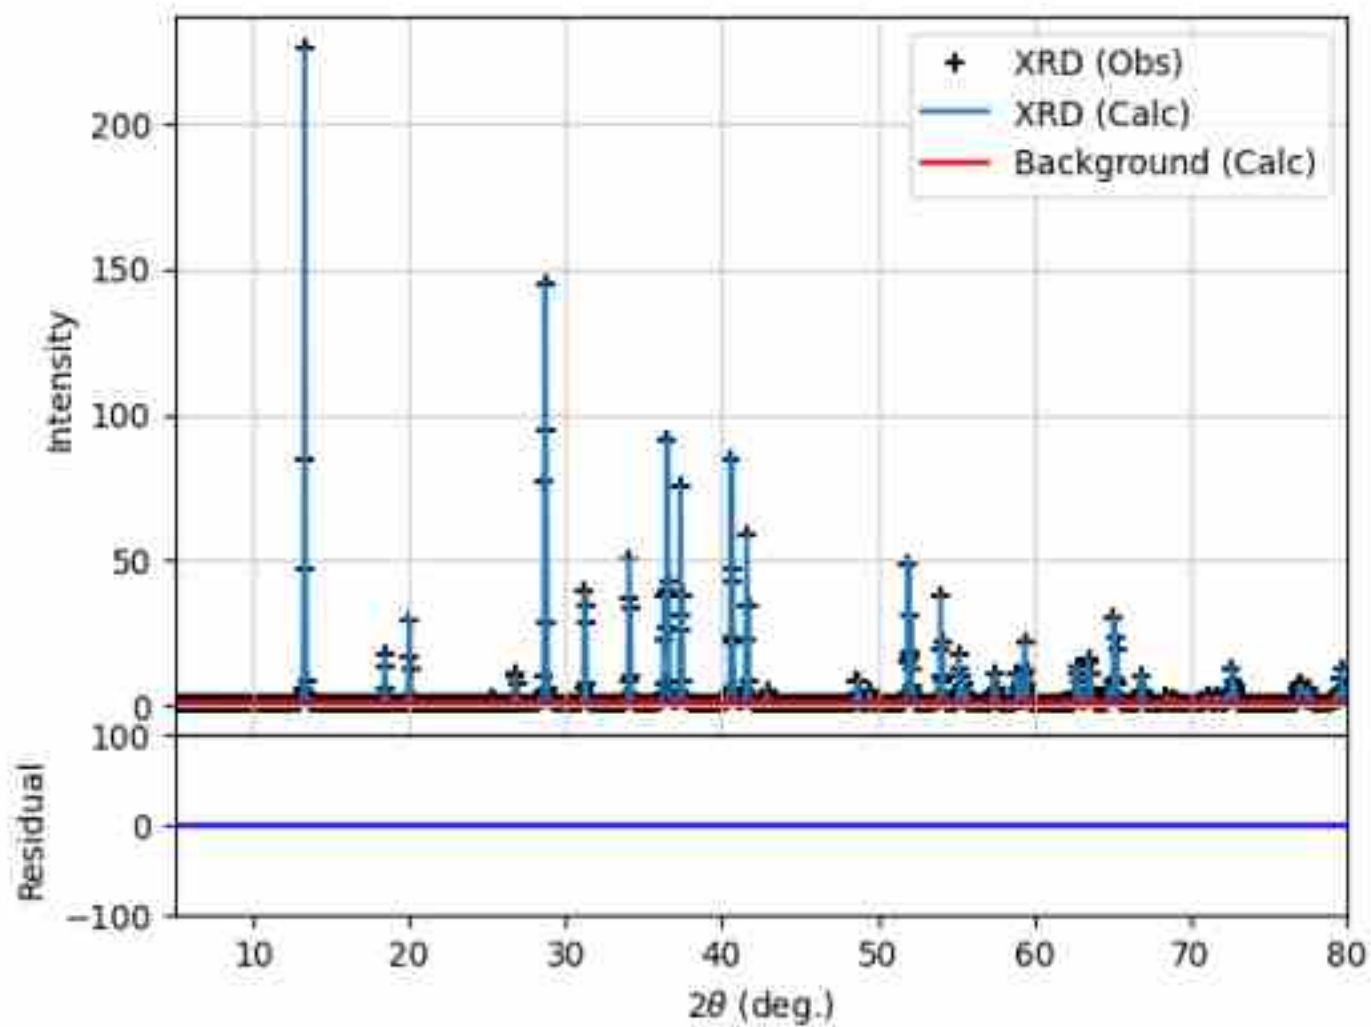

| RMSE before RR | Rwp     | RMSE after RR |
|----------------|---------|---------------|
| 0.016          | 0.00217 | 0.00028       |

# K4Au8

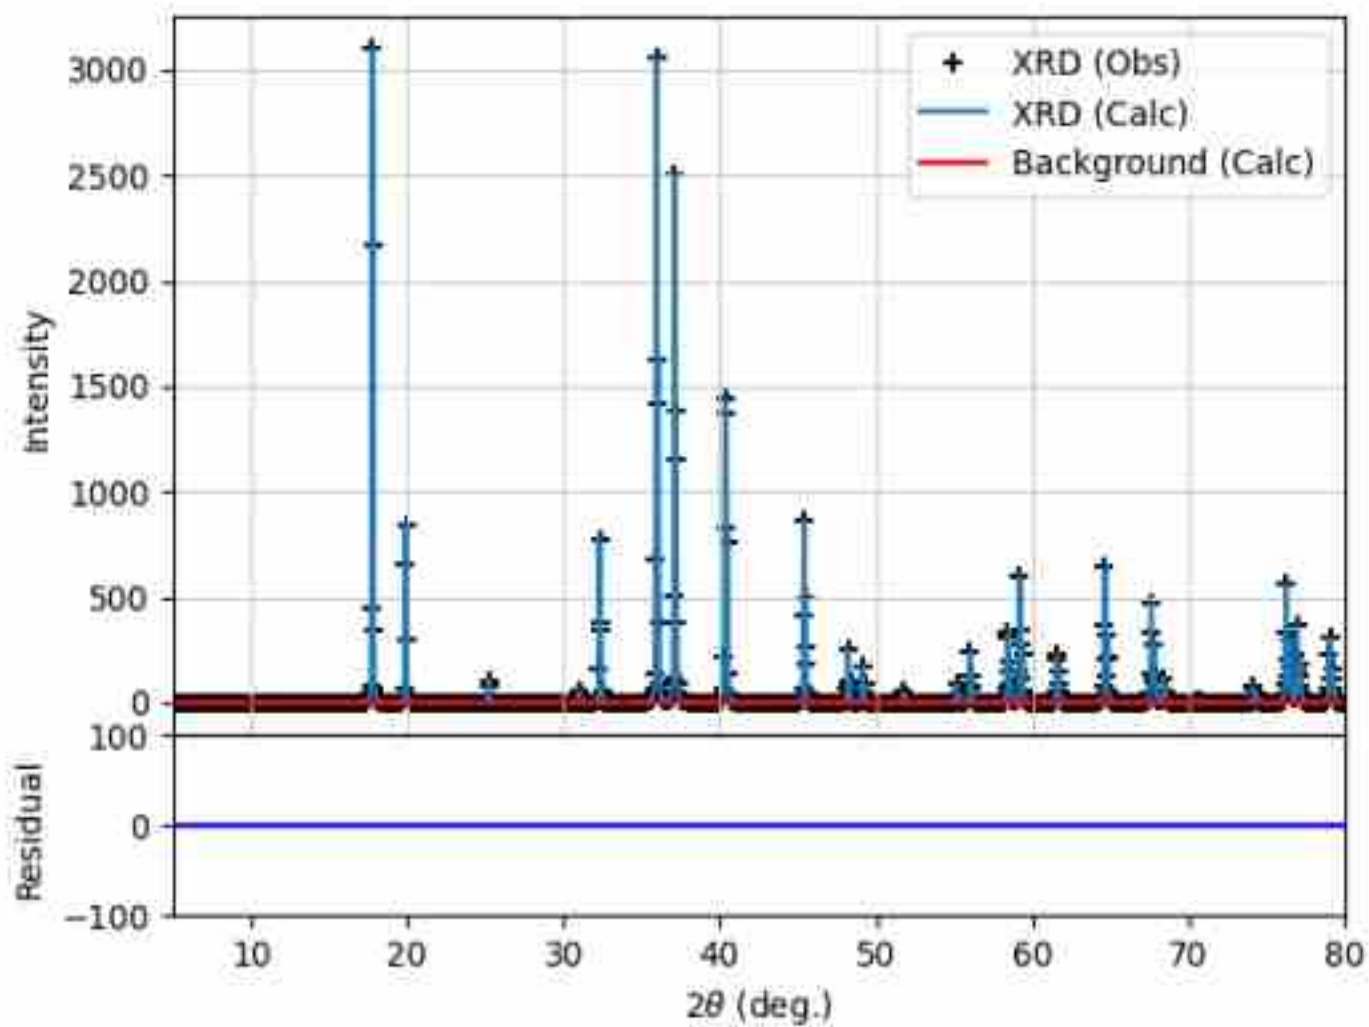

| RMSE before RR | Rwp     | RMSE after RR |
|----------------|---------|---------------|
| 0.016          | 0.02432 | 0.00225       |

# K4Zn1As2

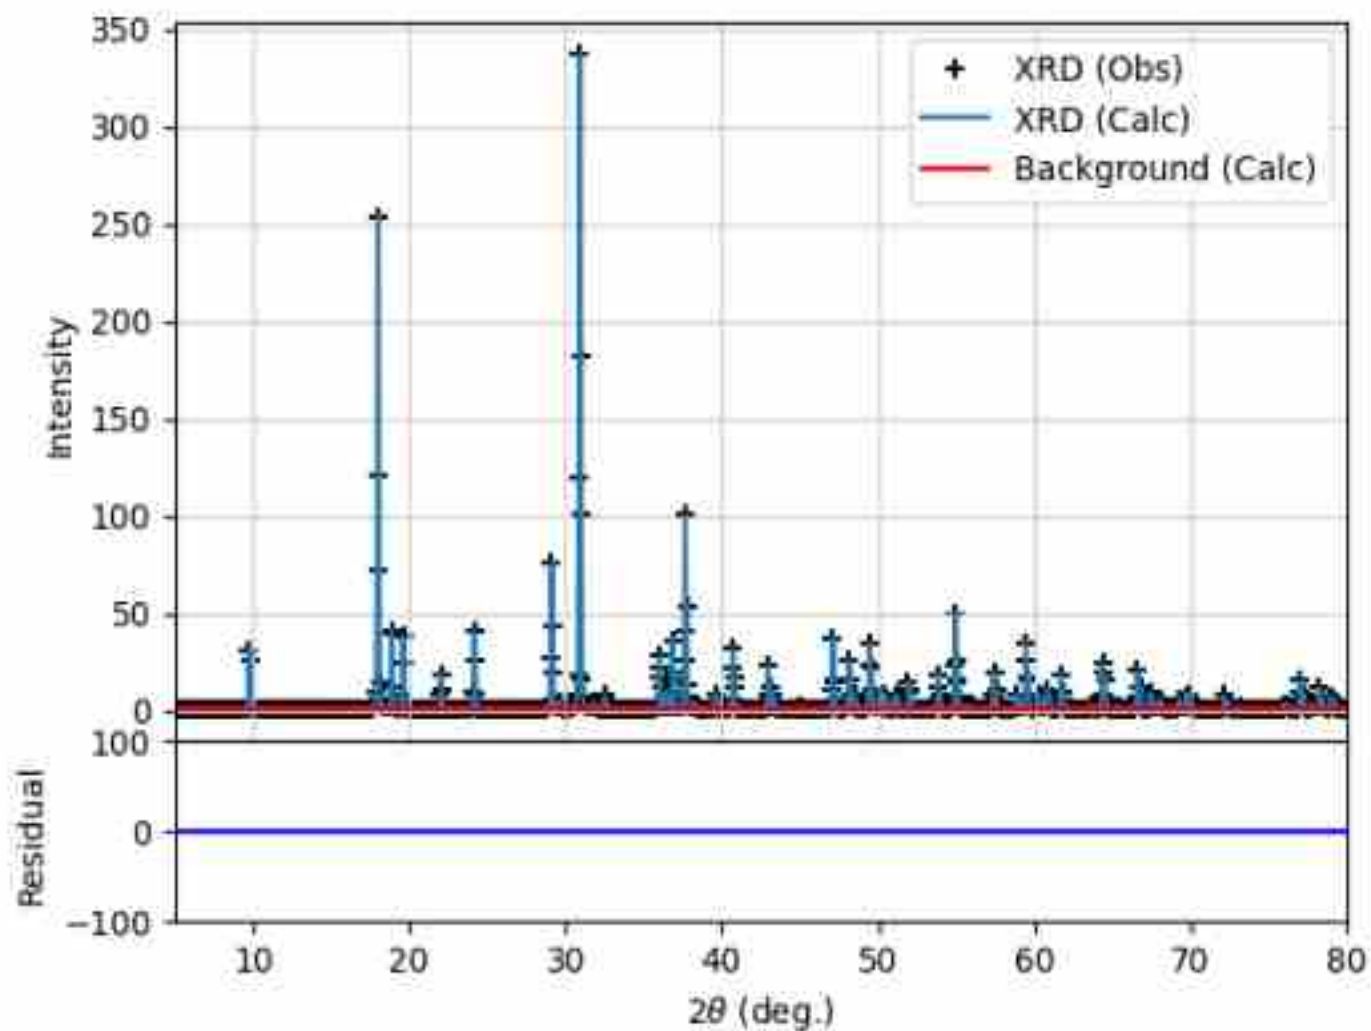

| RMSE before RR | Rwp     | RMSE after RR |
|----------------|---------|---------------|
| 0.016          | 0.00324 | 0.00022       |

# La1Ge4Rh6

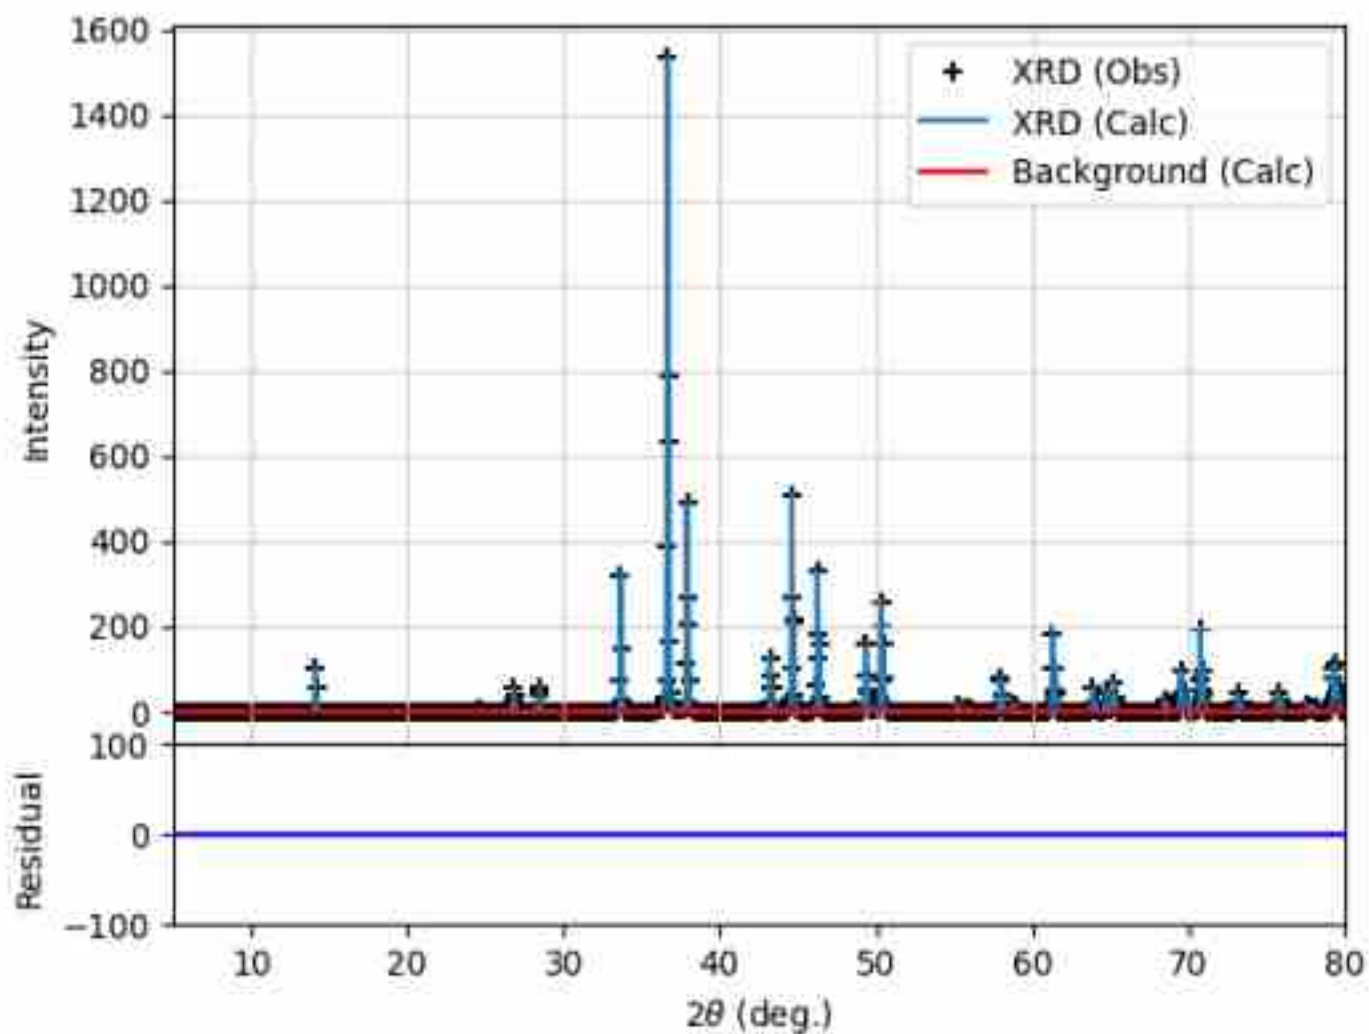

| RMSE before RR | Rwp     | RMSE after RR |
|----------------|---------|---------------|
| 0.016          | 0.00456 | 0.00102       |

# La1Ni4Rh1

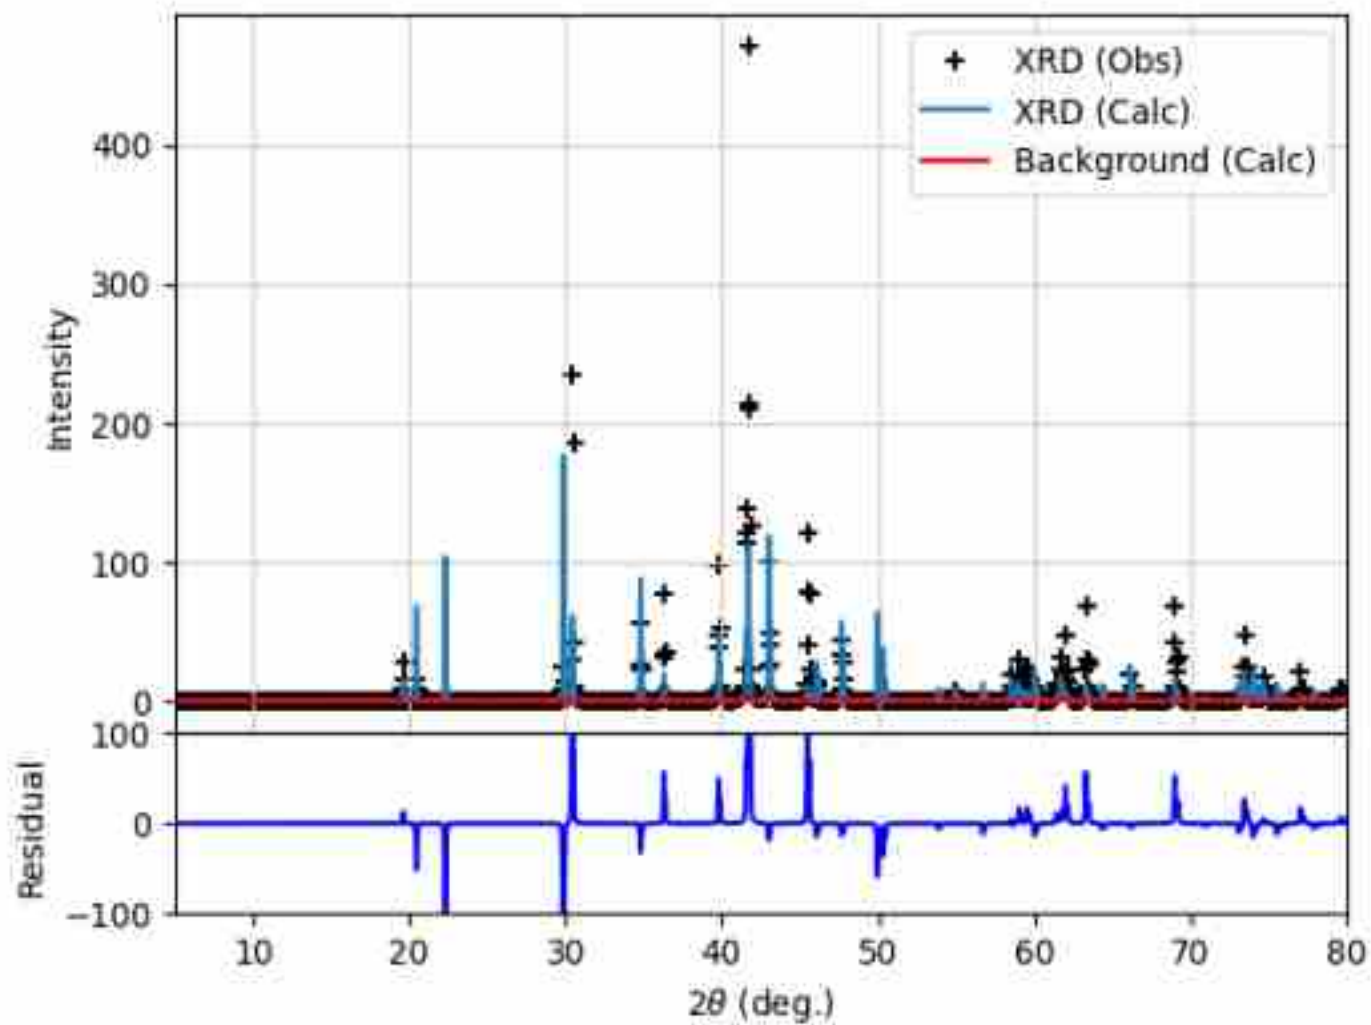

| RMSE before RR | Rwp   | RMSE after RR |
|----------------|-------|---------------|
| 0.016          | 100.0 | 0.01796       |

# La<sub>2</sub>Br<sub>2</sub>O<sub>2</sub>

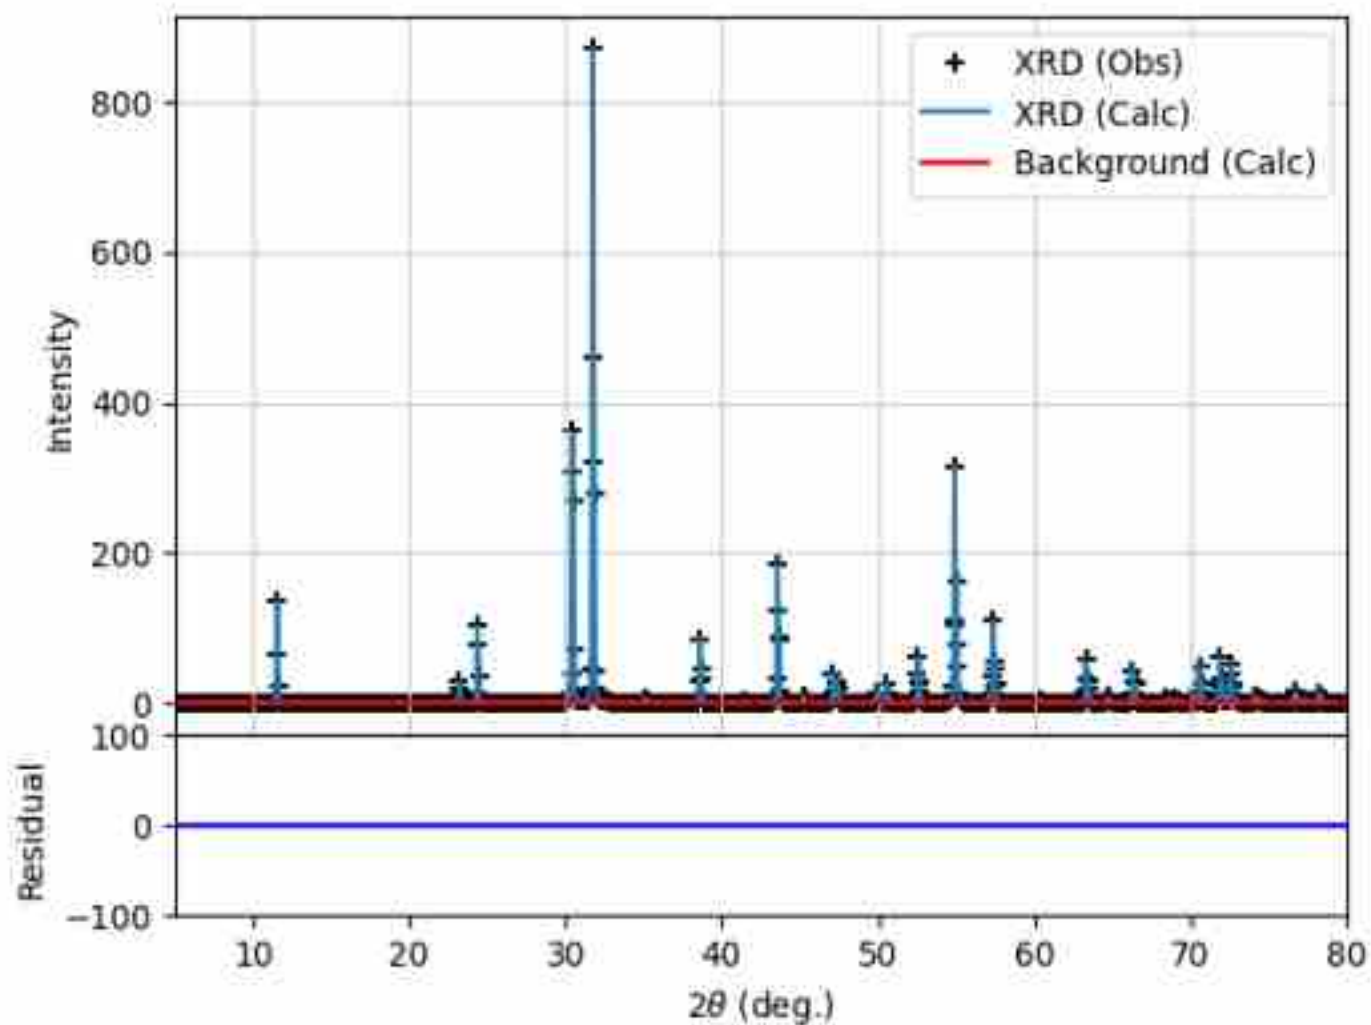

| RMSE before RR | Rwp     | RMSE after RR |
|----------------|---------|---------------|
| 0.016          | 0.00424 | 0.00073       |

# La<sub>2</sub>Cr<sub>2</sub>Ge<sub>6</sub>

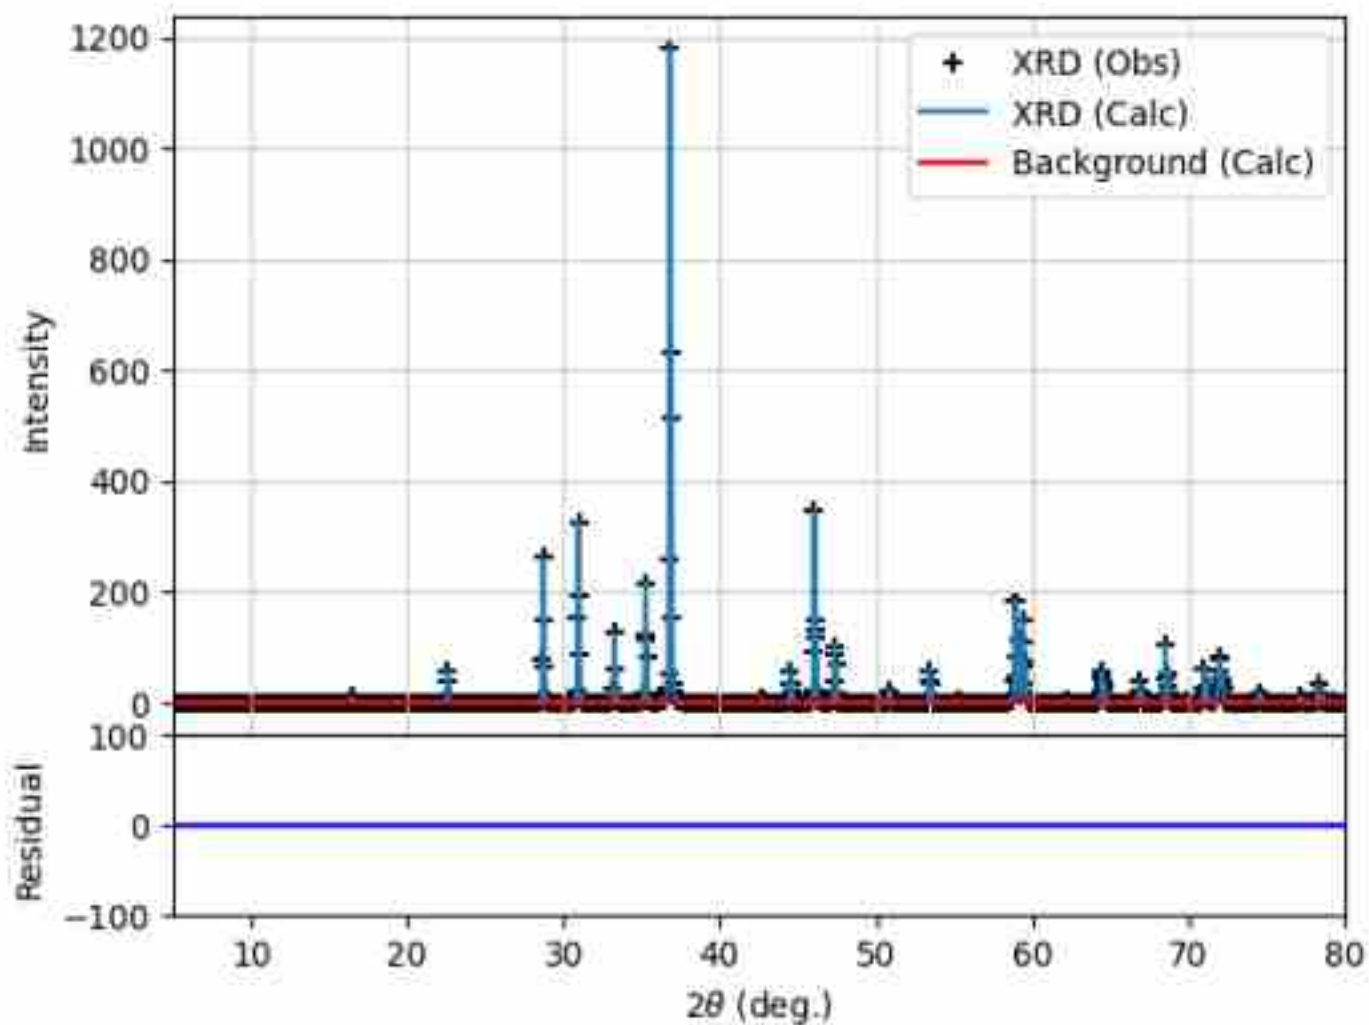

| RMSE before RR | Rwp     | RMSE after RR |
|----------------|---------|---------------|
| 0.016          | 0.00439 | 0.00086       |

# La<sub>3</sub>Mg<sub>3</sub>Au<sub>3</sub>

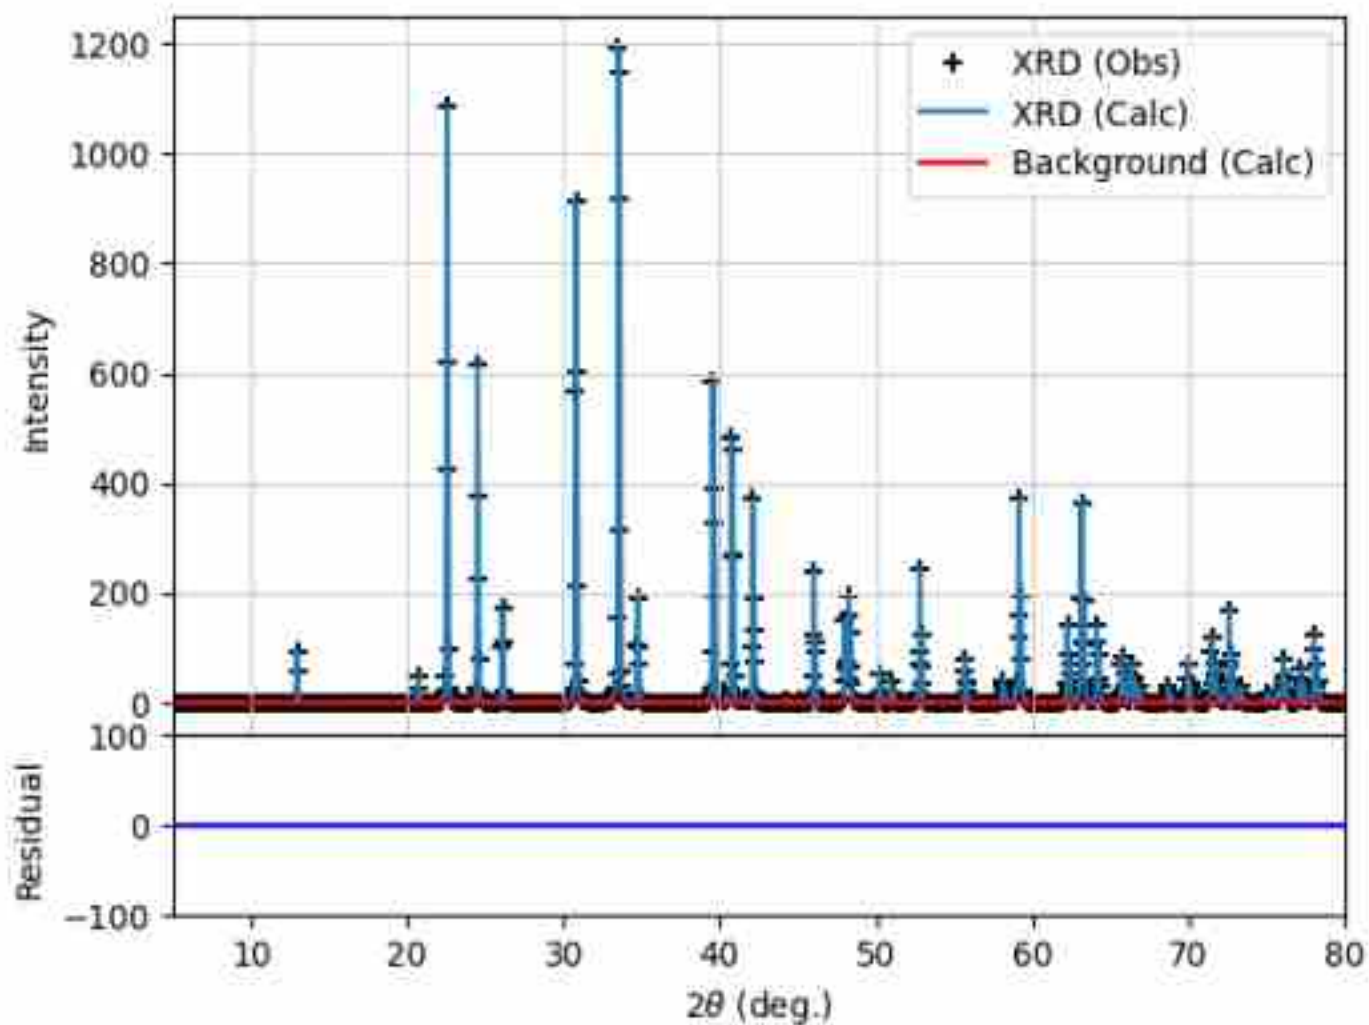

| RMSE before RR | Rwp     | RMSE after RR |
|----------------|---------|---------------|
| 0.016          | 0.00328 | 0.00132       |



# La<sub>3</sub>SmCr<sub>4</sub>O<sub>12</sub>

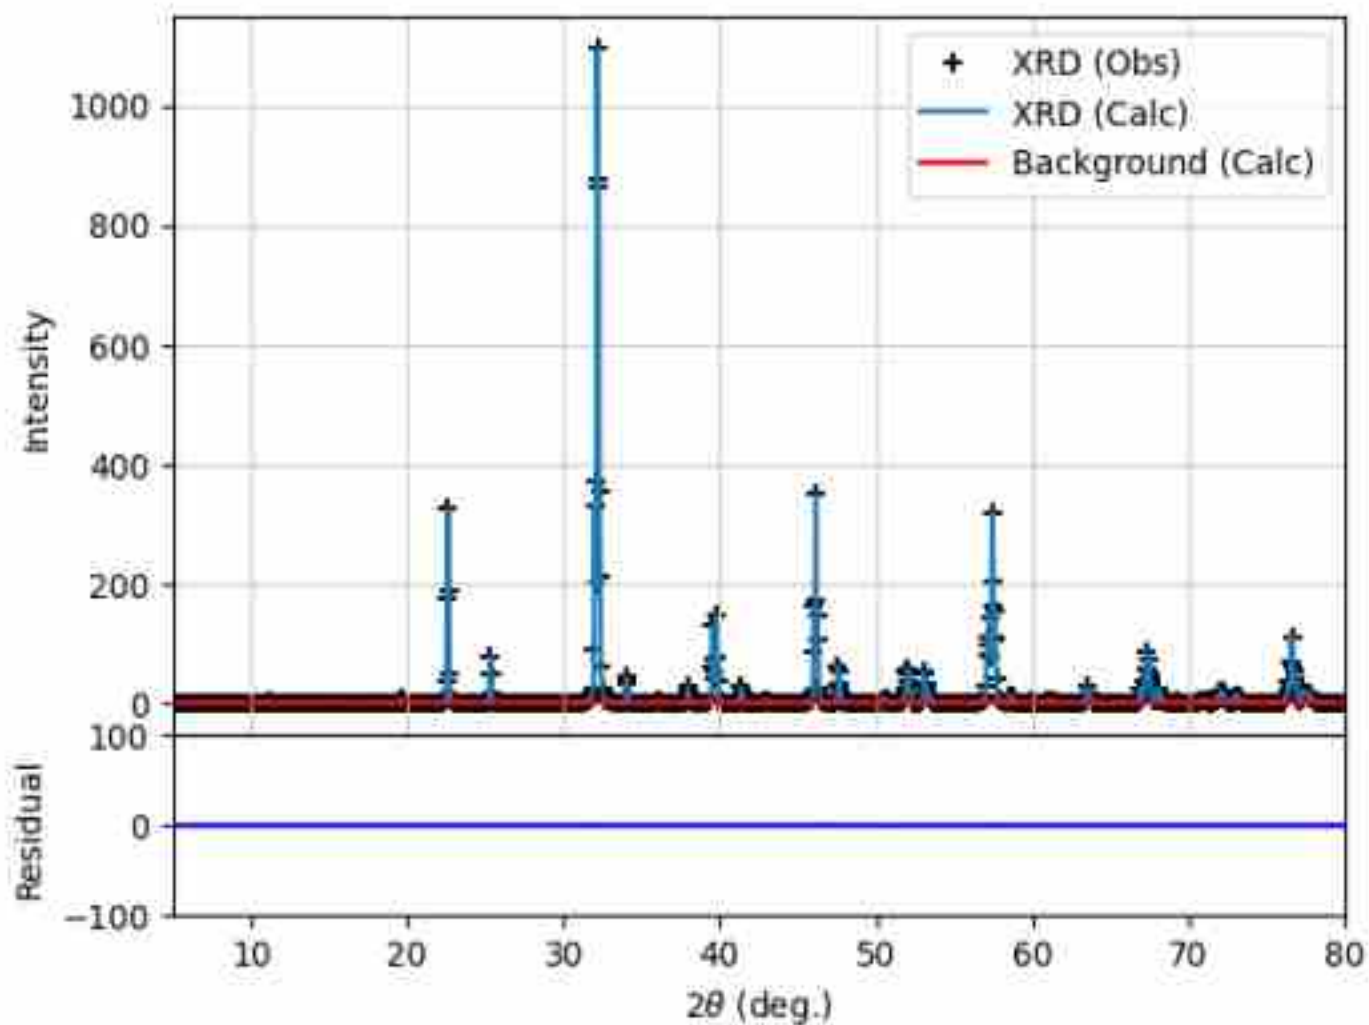

| RMSE before RR | Rwp     | RMSE after RR |
|----------------|---------|---------------|
| 0.016          | 0.38289 | 0.02192       |

# La<sub>4</sub>Si<sub>4</sub>

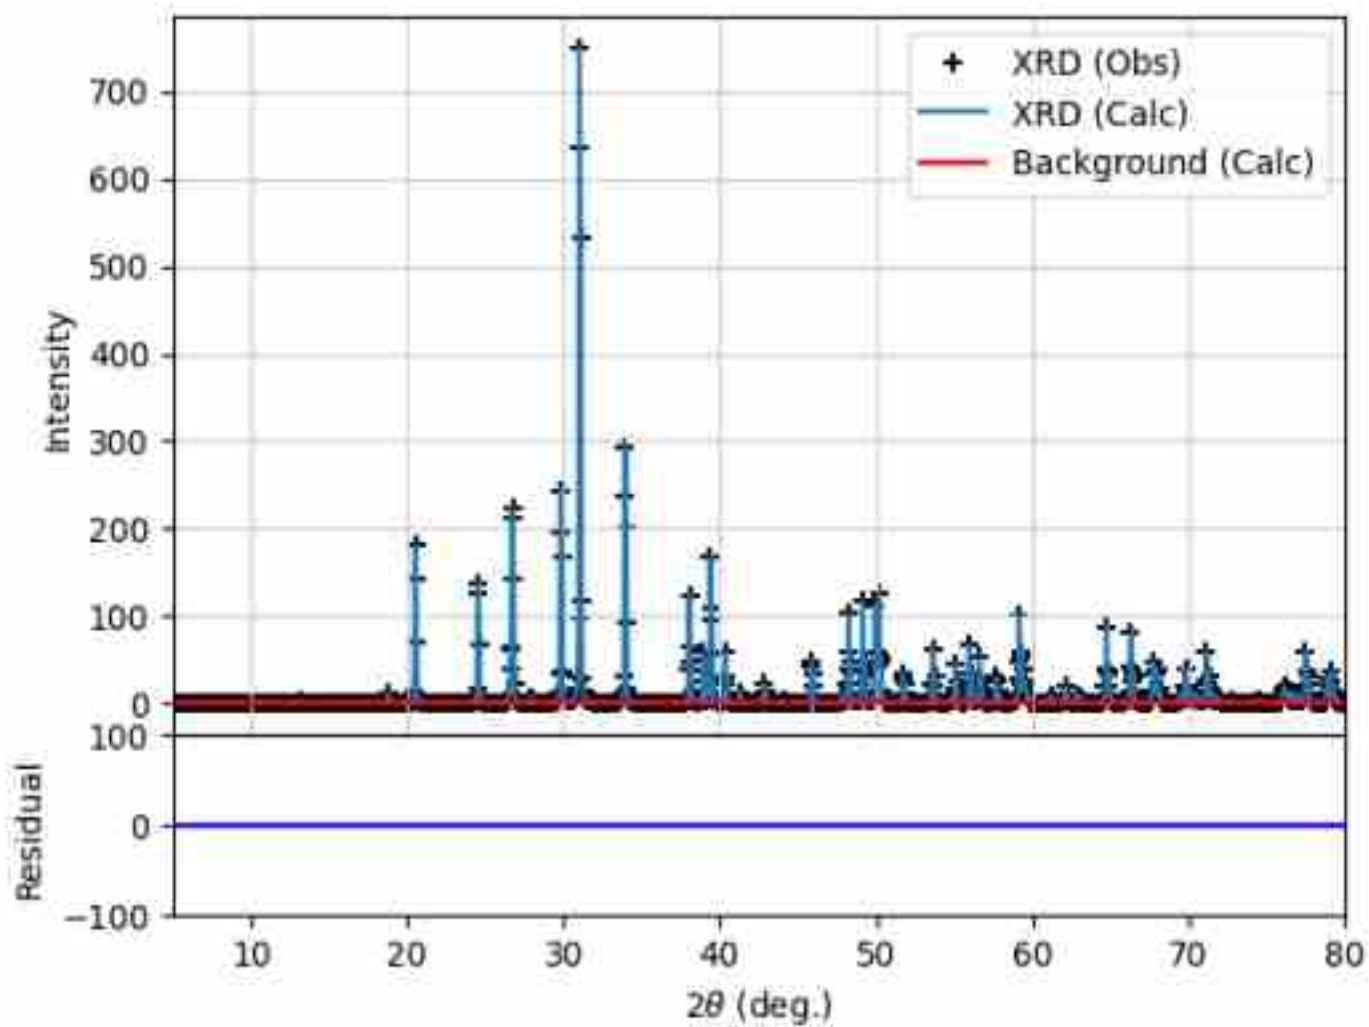

| RMSE before RR | Rwp    | RMSE after RR |
|----------------|--------|---------------|
| 0.016          | 0.0043 | 0.00084       |

# La6Pd8

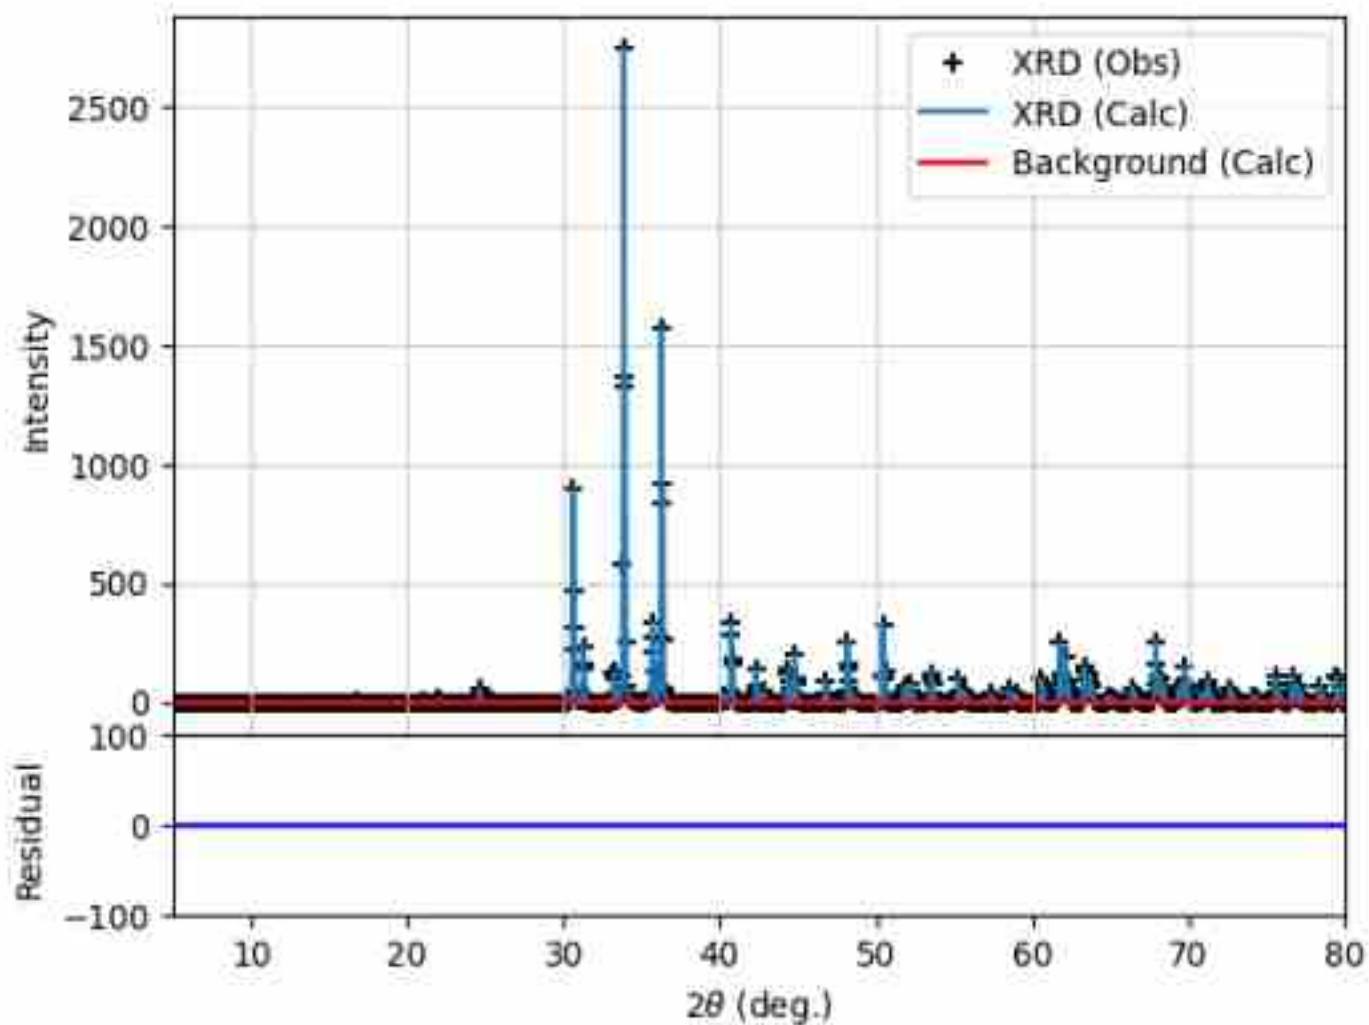

| RMSE before RR | Rwp     | RMSE after RR |
|----------------|---------|---------------|
| 0.016          | 0.00314 | 0.00035       |

# Li1V1F4

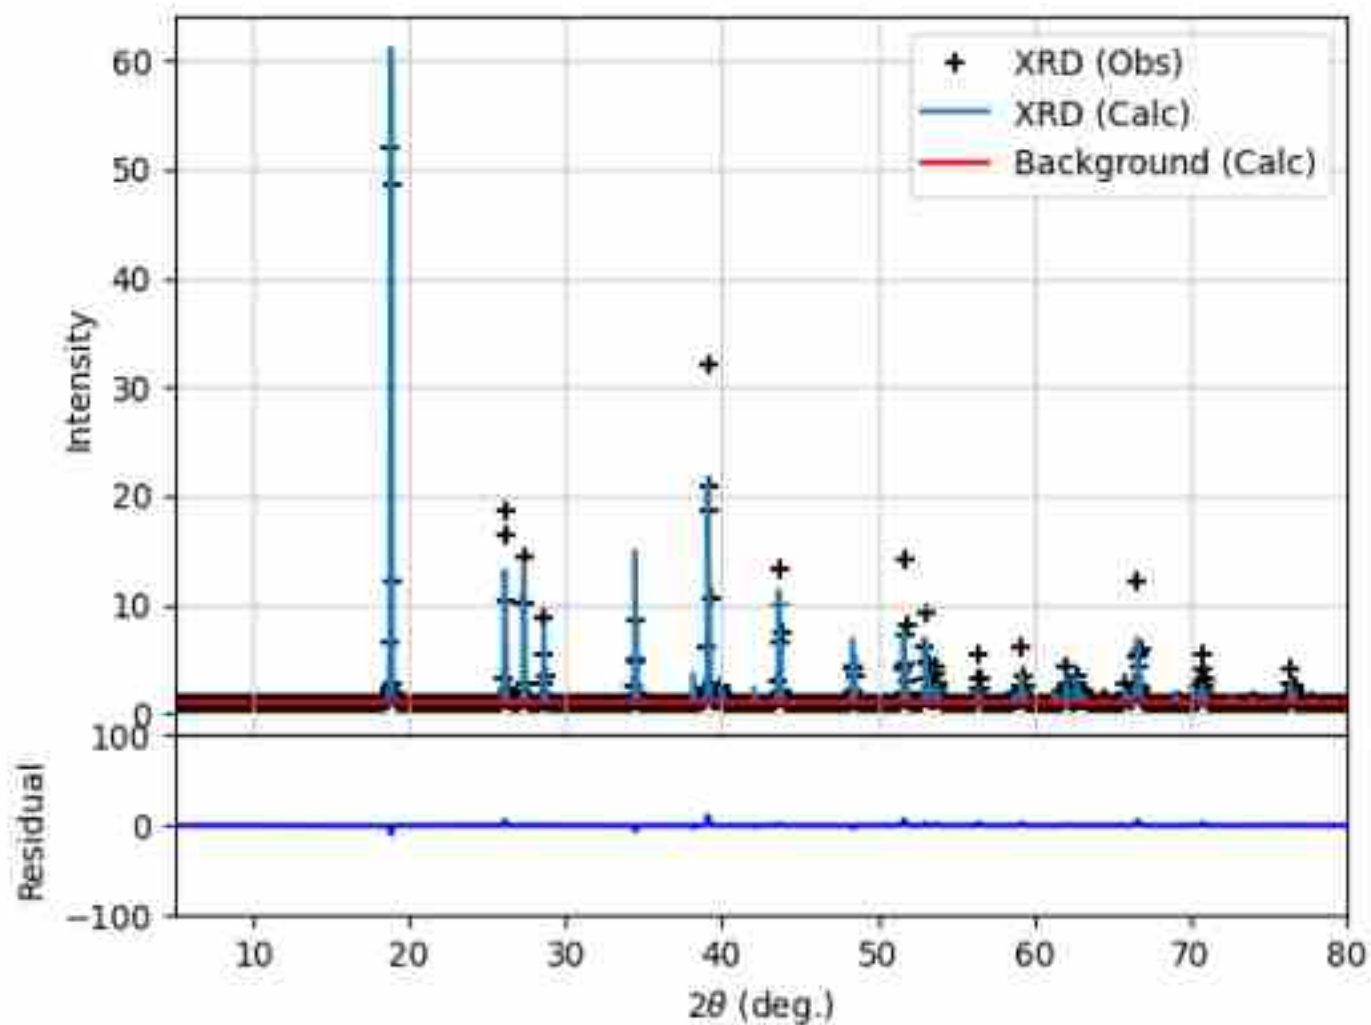

| RMSE before RR | Rwp     | RMSE after RR |
|----------------|---------|---------------|
| 0.016          | 19.2281 | None          |

# Li<sub>2</sub>Ag<sub>2</sub>O<sub>4</sub>

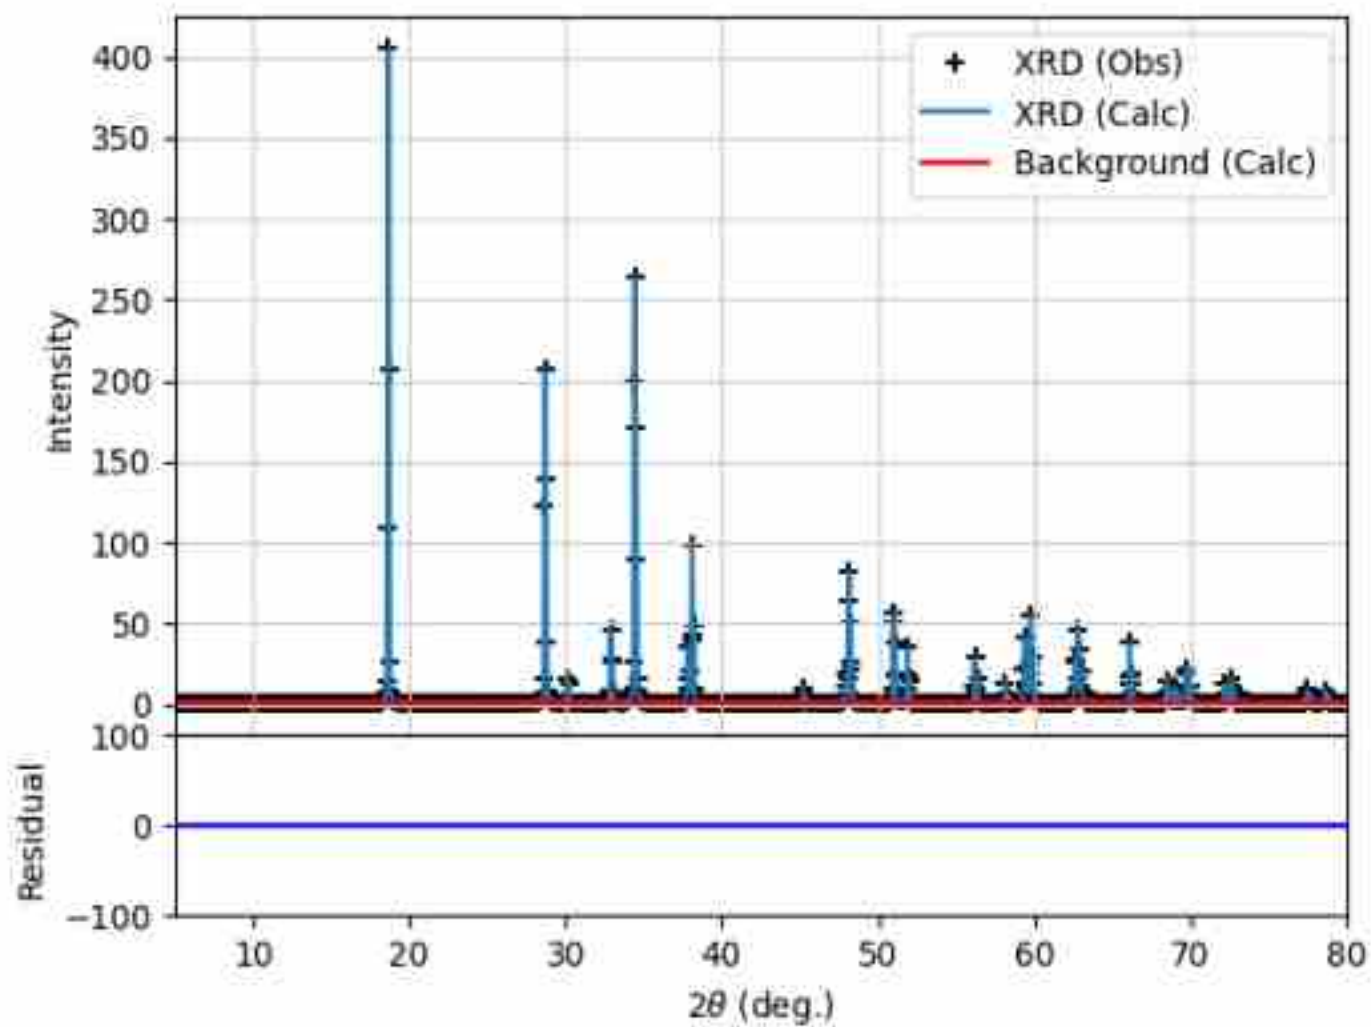

| RMSE before RR | Rwp     | RMSE after RR |
|----------------|---------|---------------|
| 0.016          | 0.00365 | 0.0014        |

# Li<sub>2</sub>Co<sub>2</sub>Sn<sub>2</sub>O<sub>8</sub>

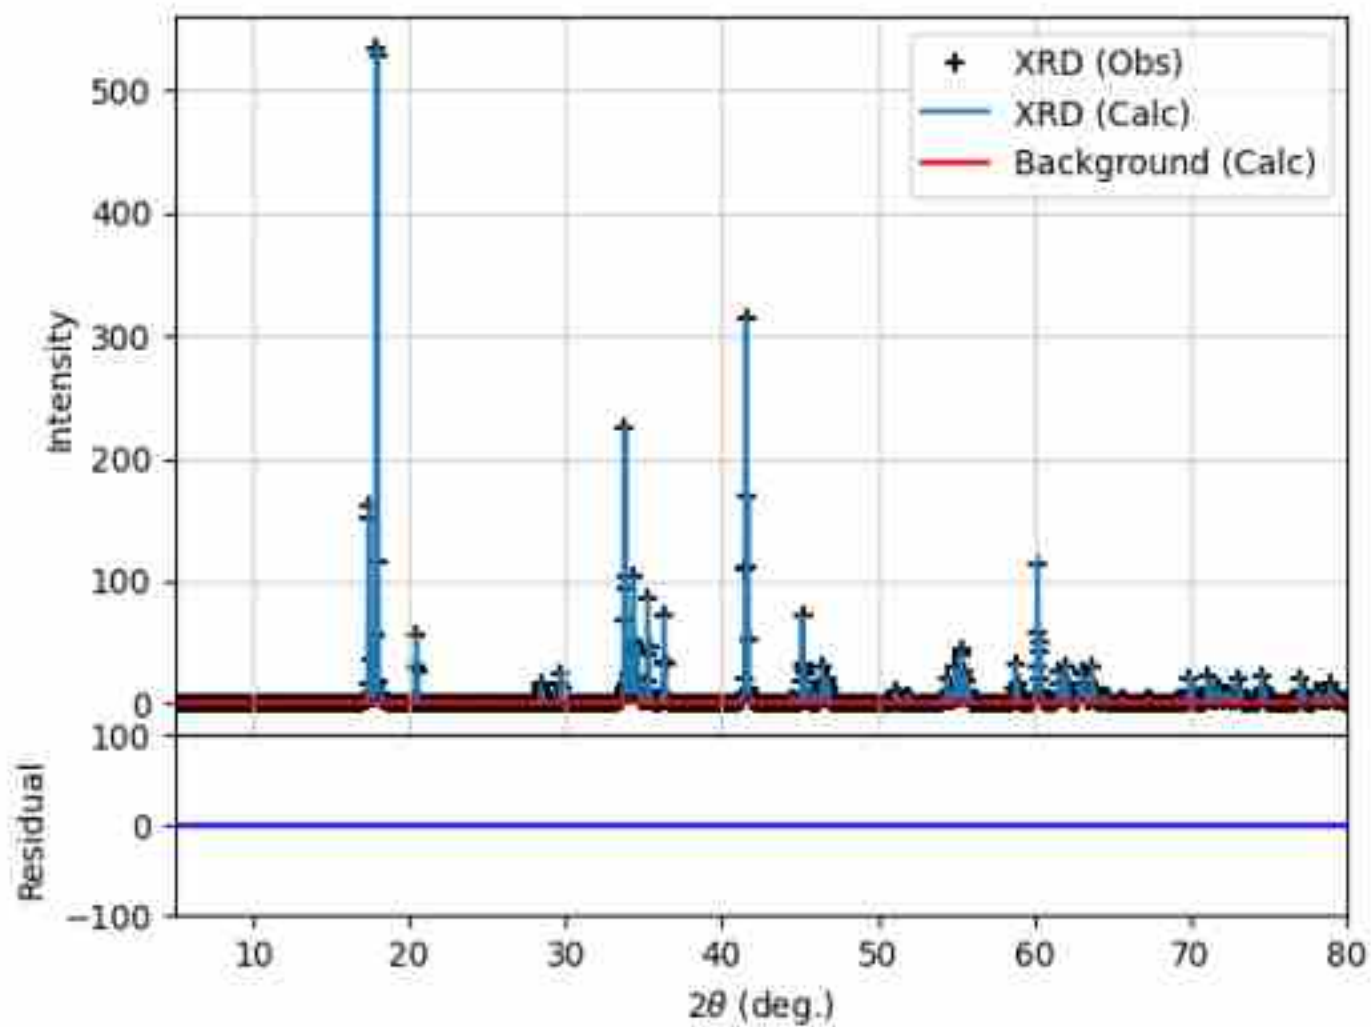

| RMSE before RR | Rwp     | RMSE after RR |
|----------------|---------|---------------|
| 0.016          | 0.00336 | 0.00126       |

# Li<sub>2</sub>Ni<sub>2</sub>O<sub>4</sub>

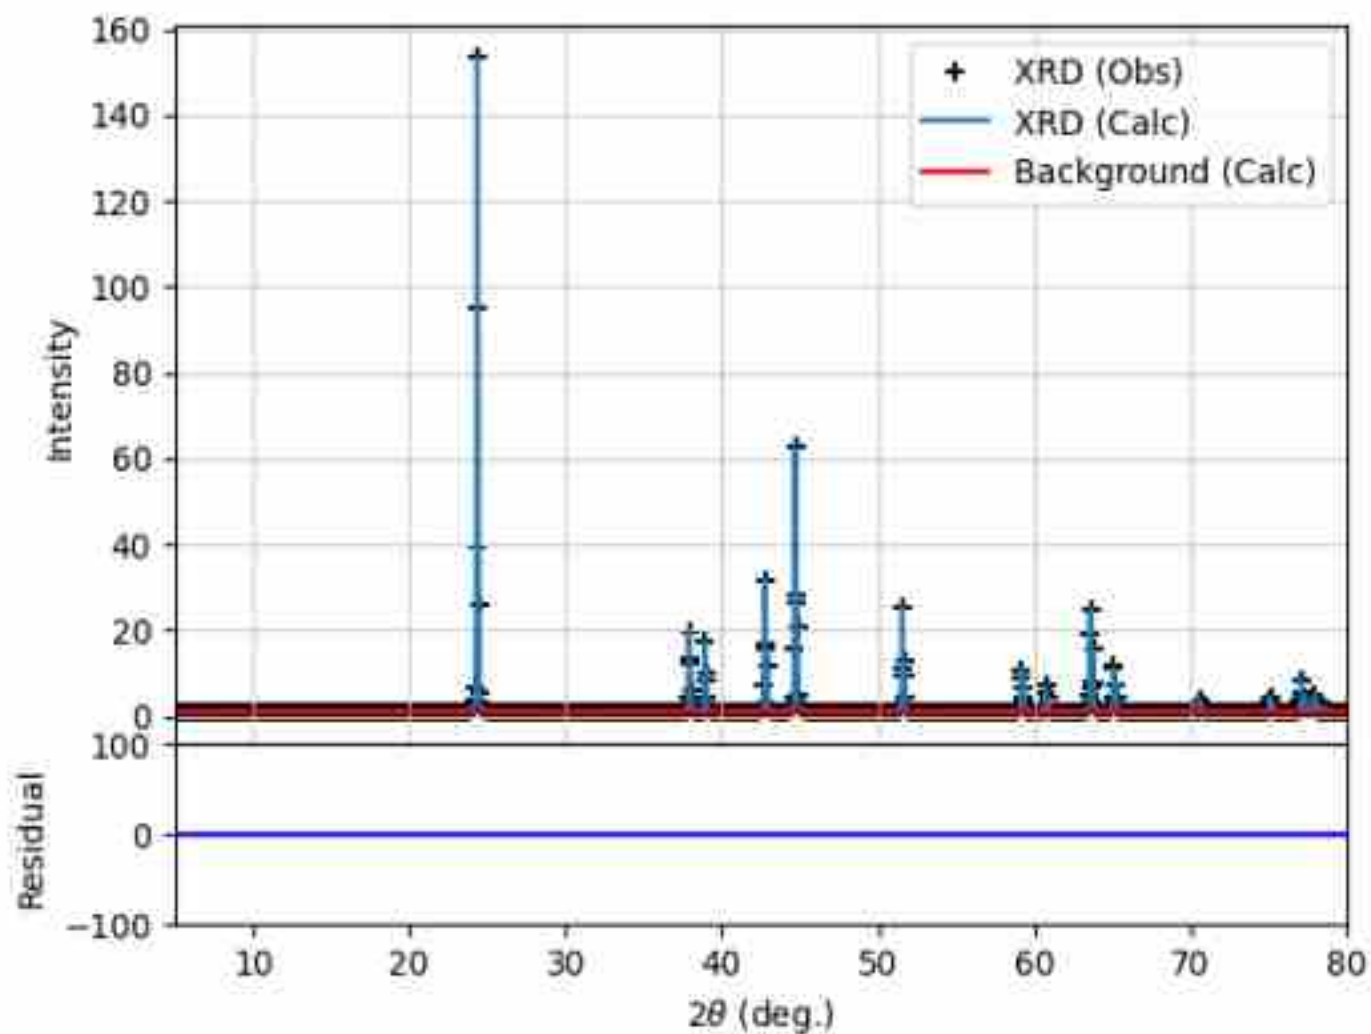

| RMSE before RR | Rwp     | RMSE after RR |
|----------------|---------|---------------|
| 0.016          | 0.00156 | 0.00101       |

# Li<sub>2</sub>Pr<sub>2</sub>S<sub>4</sub>

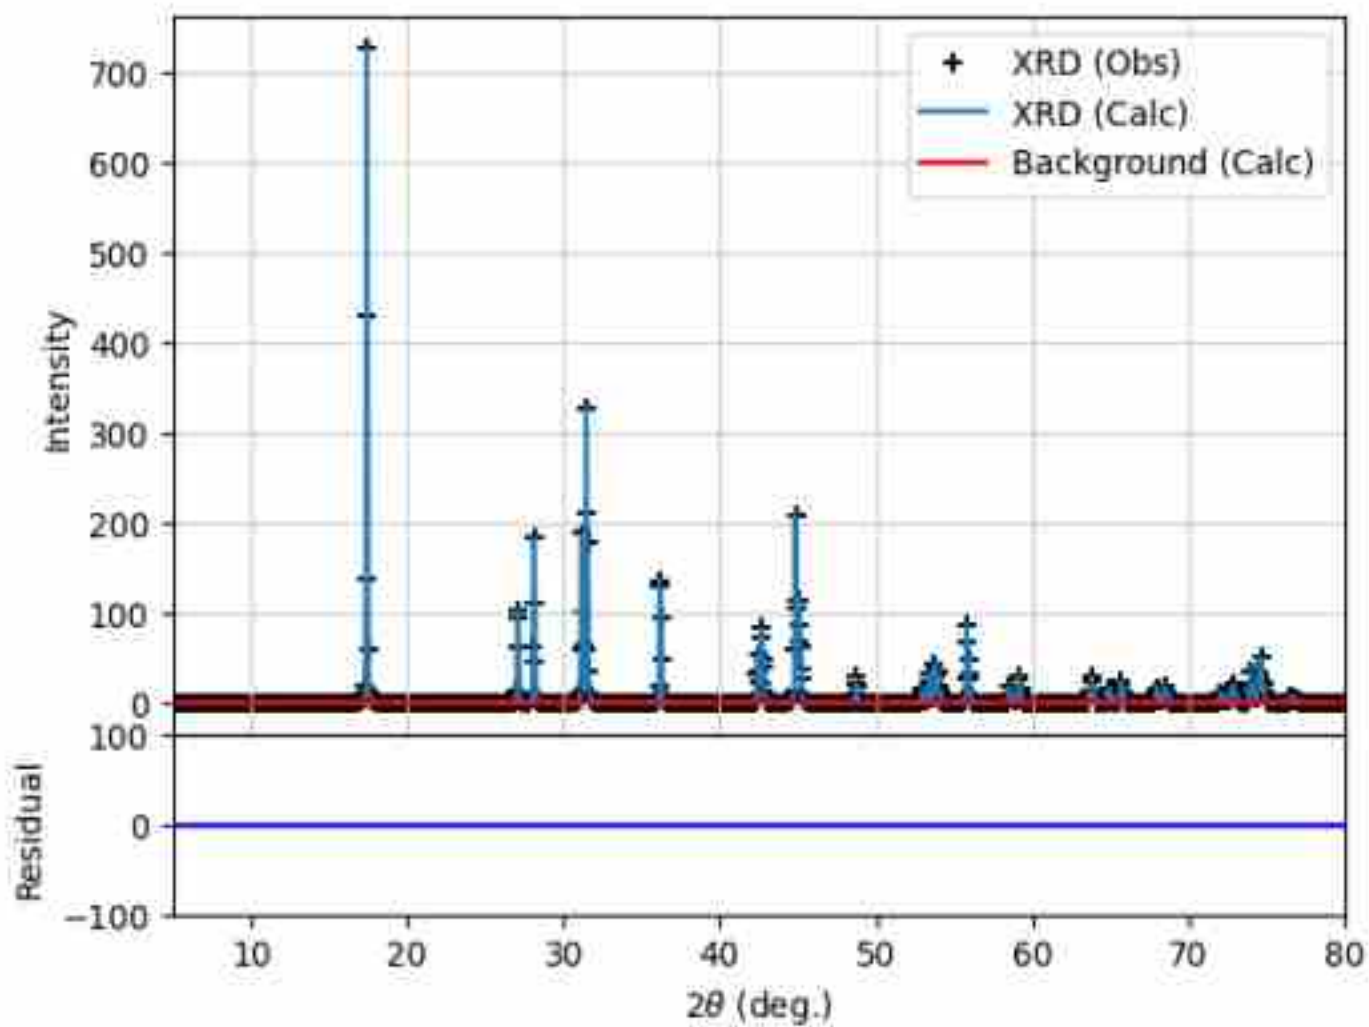

| RMSE before RR | Rwp     | RMSE after RR |
|----------------|---------|---------------|
| 0.016          | 0.00172 | 0.00558       |



# Li<sub>2</sub>Sb<sub>2</sub>Se<sub>4</sub>

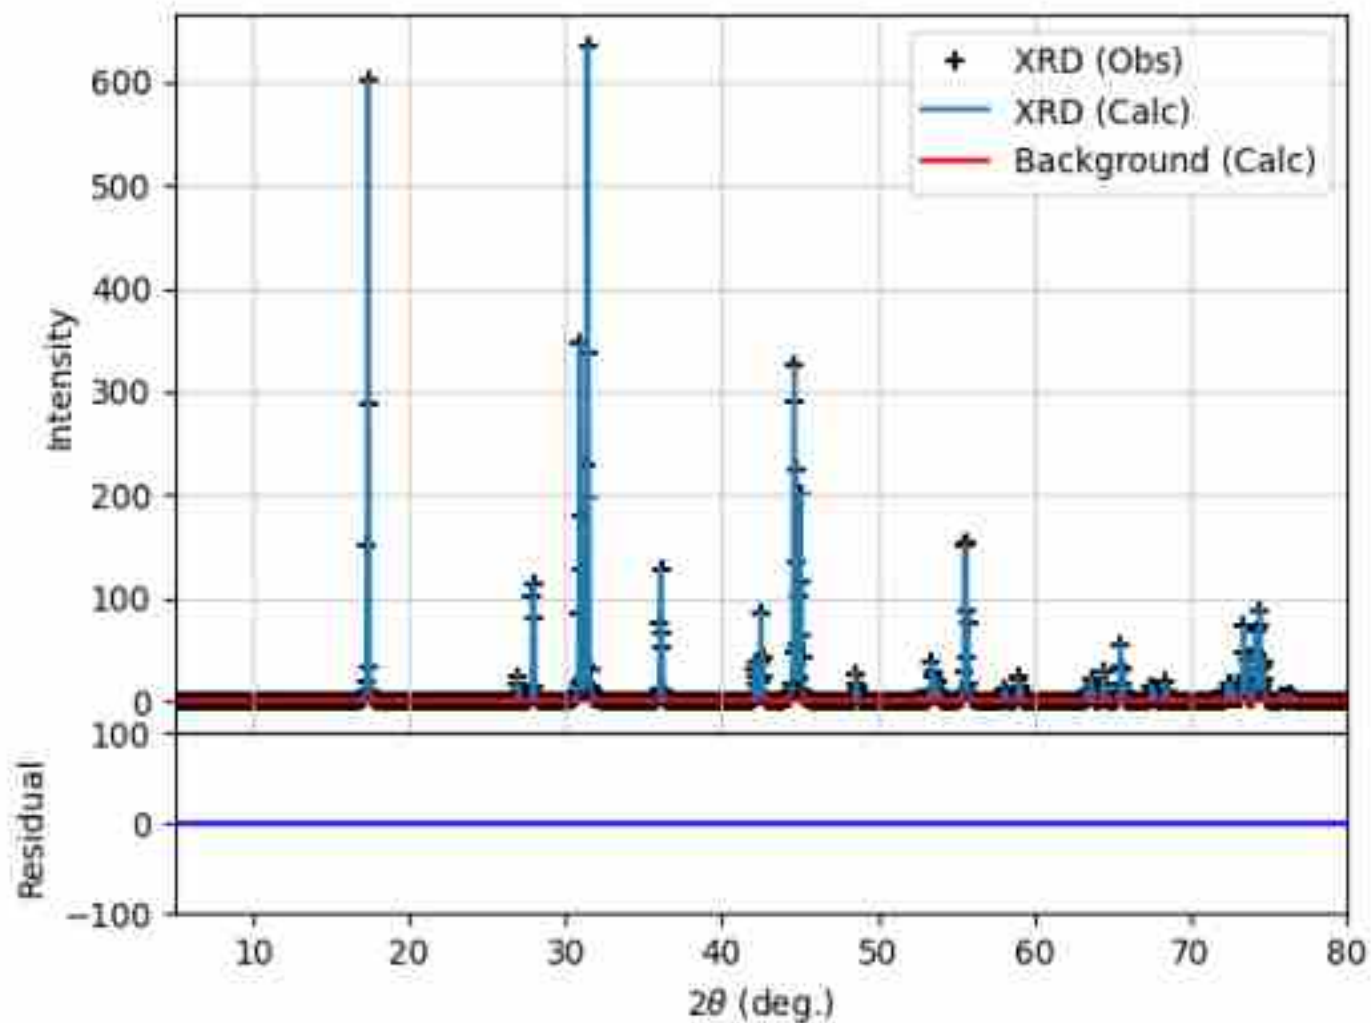

| RMSE before RR | Rwp     | RMSE after RR |
|----------------|---------|---------------|
| 0.016          | 0.01742 | 0.00512       |

# Li<sub>2</sub>V<sub>3</sub>Cr<sub>10</sub>O<sub>8</sub>

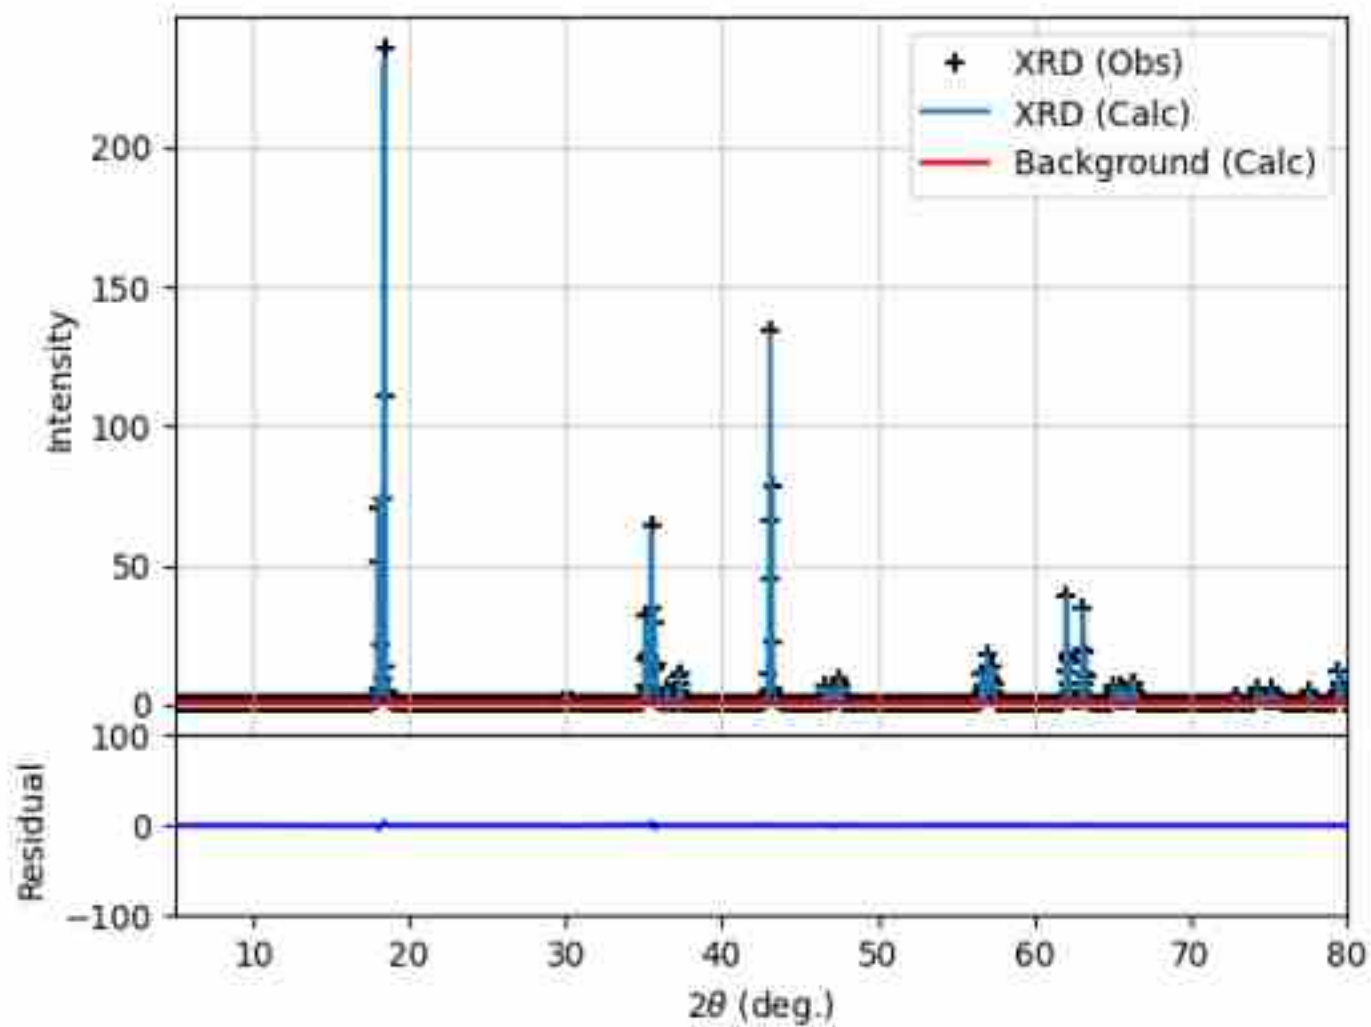

| RMSE before RR | Rwp   | RMSE after RR |
|----------------|-------|---------------|
| 0.016          | 3.051 | 0.02052       |

# Li<sub>2</sub>V<sub>6</sub>O<sub>8</sub>

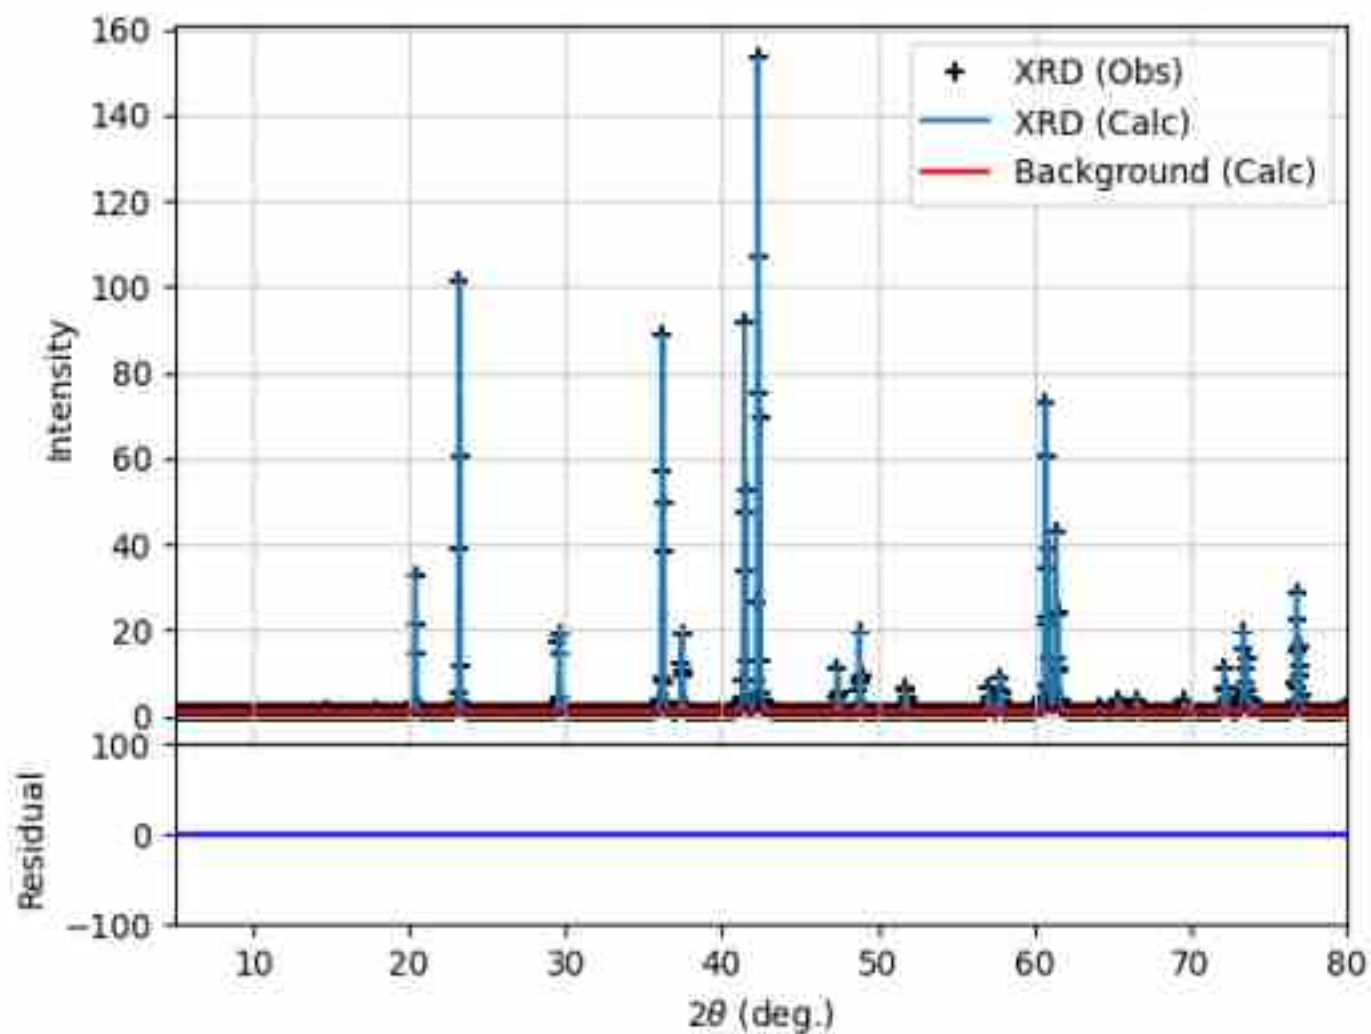

| RMSE before RR | Rwp     | RMSE after RR |
|----------------|---------|---------------|
| 0.016          | 0.12342 | 0.01401       |

# Li<sub>4</sub>Al<sub>2</sub>Co<sub>2</sub>O<sub>8</sub>

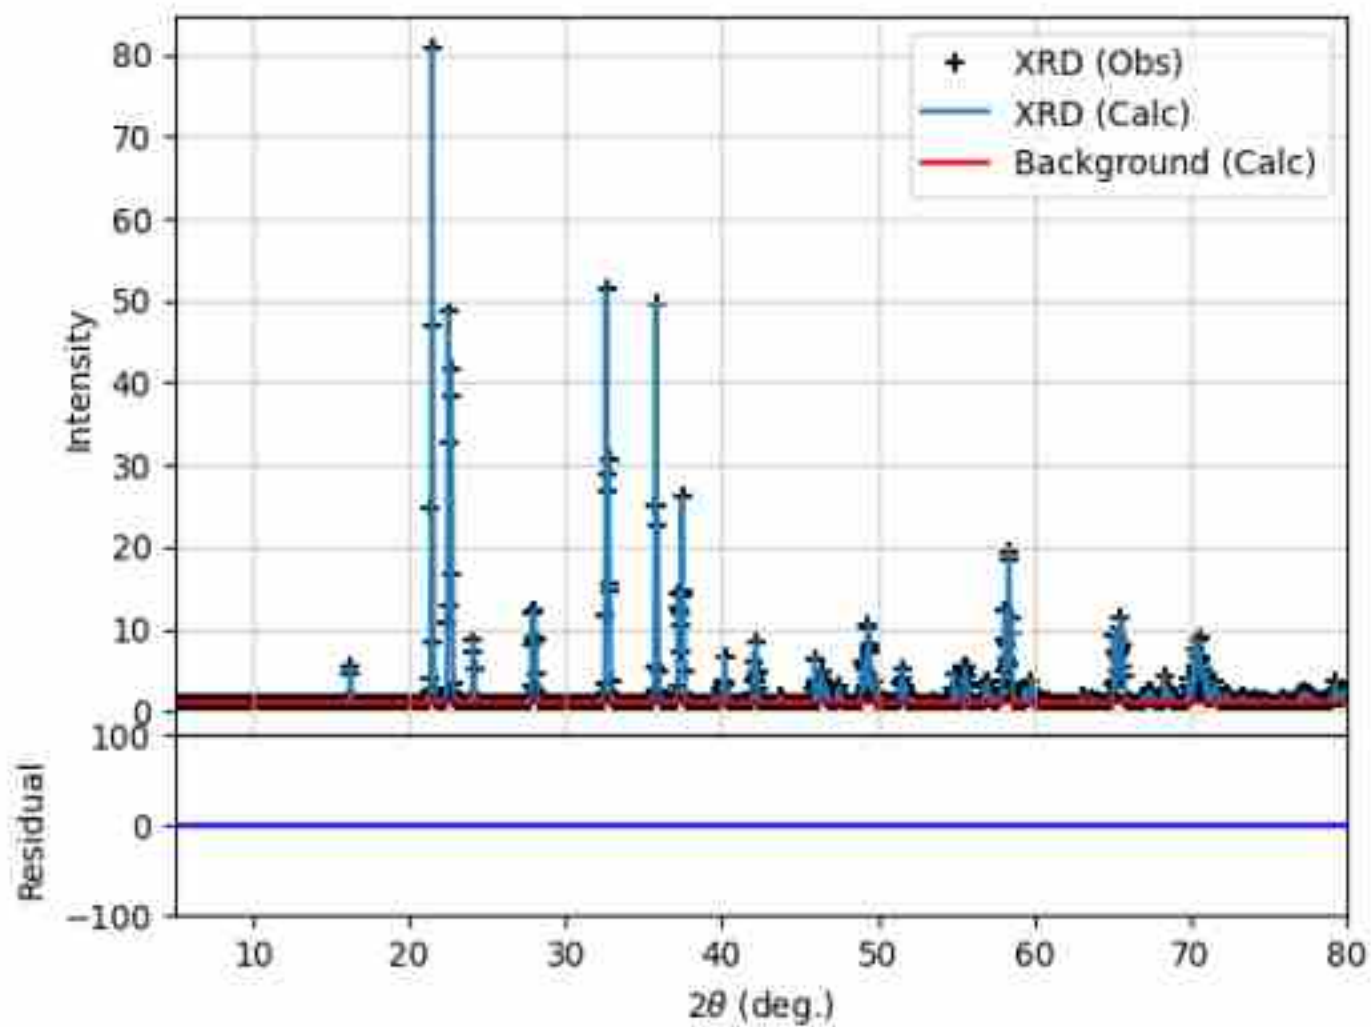

| RMSE before RR | Rwp     | RMSE after RR |
|----------------|---------|---------------|
| 0.016          | 0.04474 | 0.00574       |

# Li<sub>4</sub>Fe<sub>3</sub>Ni<sub>1</sub>O<sub>8</sub>

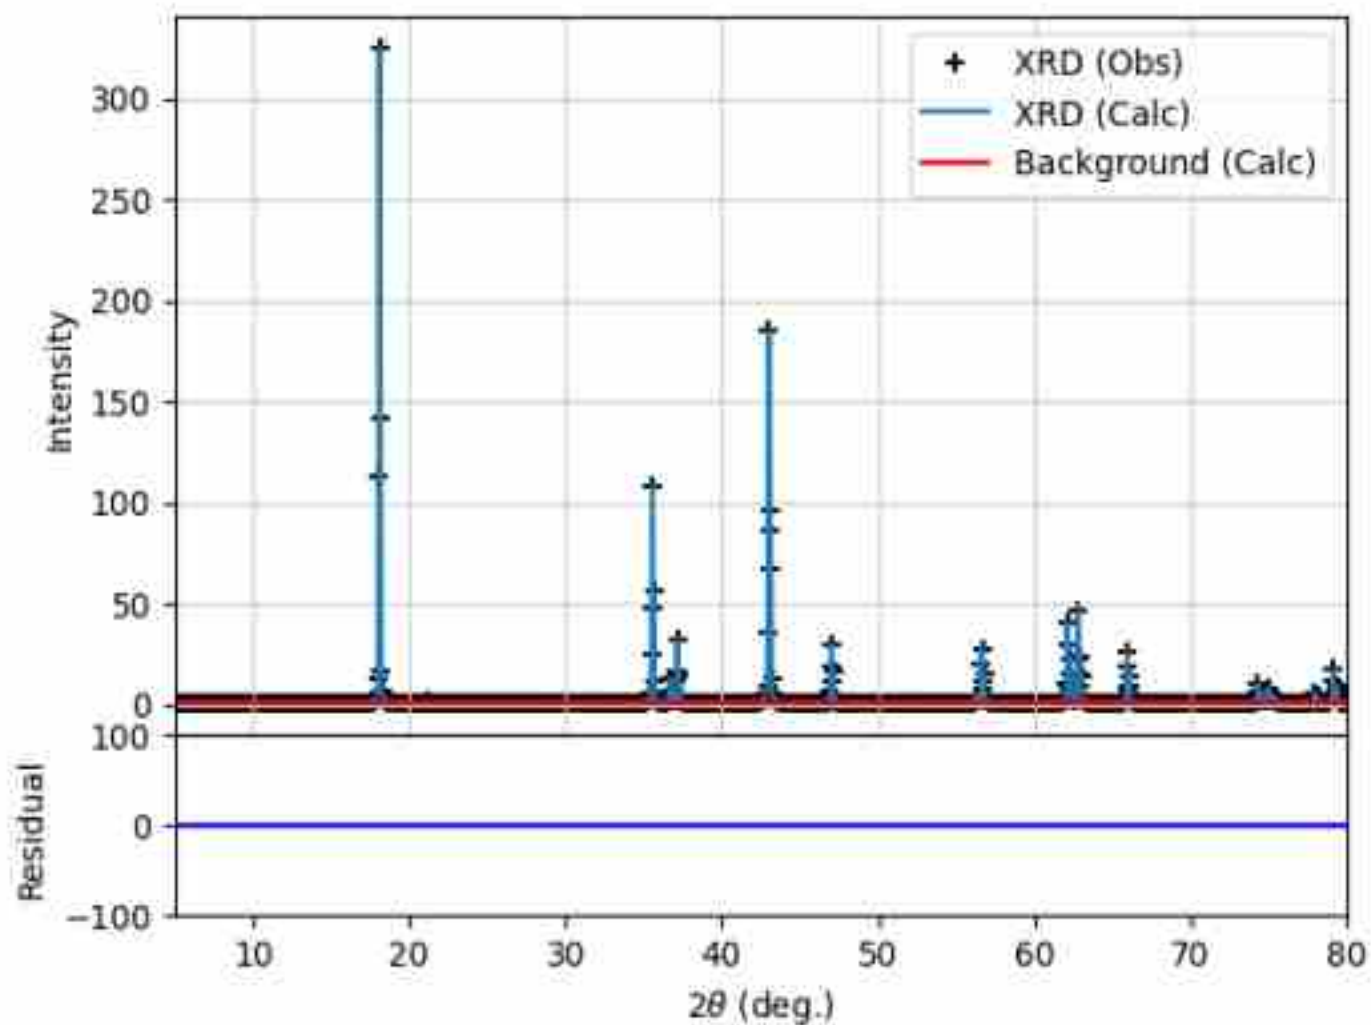

| RMSE before RR | Rwp     | RMSE after RR |
|----------------|---------|---------------|
| 0.016          | 0.00511 | 0.00351       |

# Li<sub>4</sub>Pr<sub>4</sub>Ge<sub>6</sub>

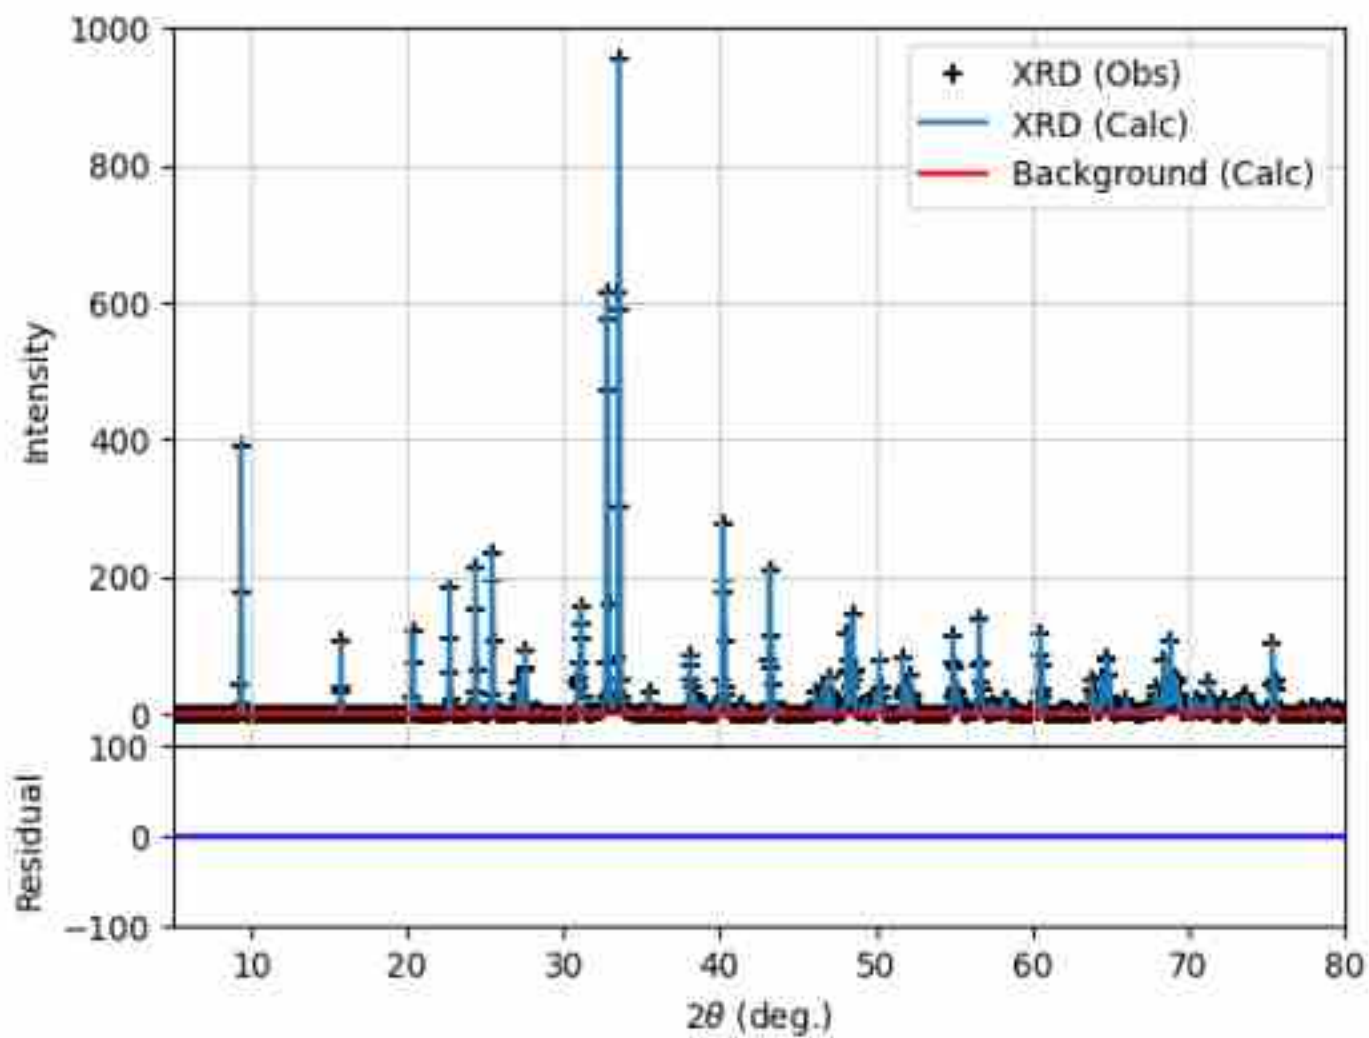

| RMSE before RR | Rwp     | RMSE after RR |
|----------------|---------|---------------|
| 0.016          | 0.00387 | 0.00229       |

# Li<sub>4</sub>V<sub>3</sub>Fe<sub>1</sub>O<sub>8</sub>

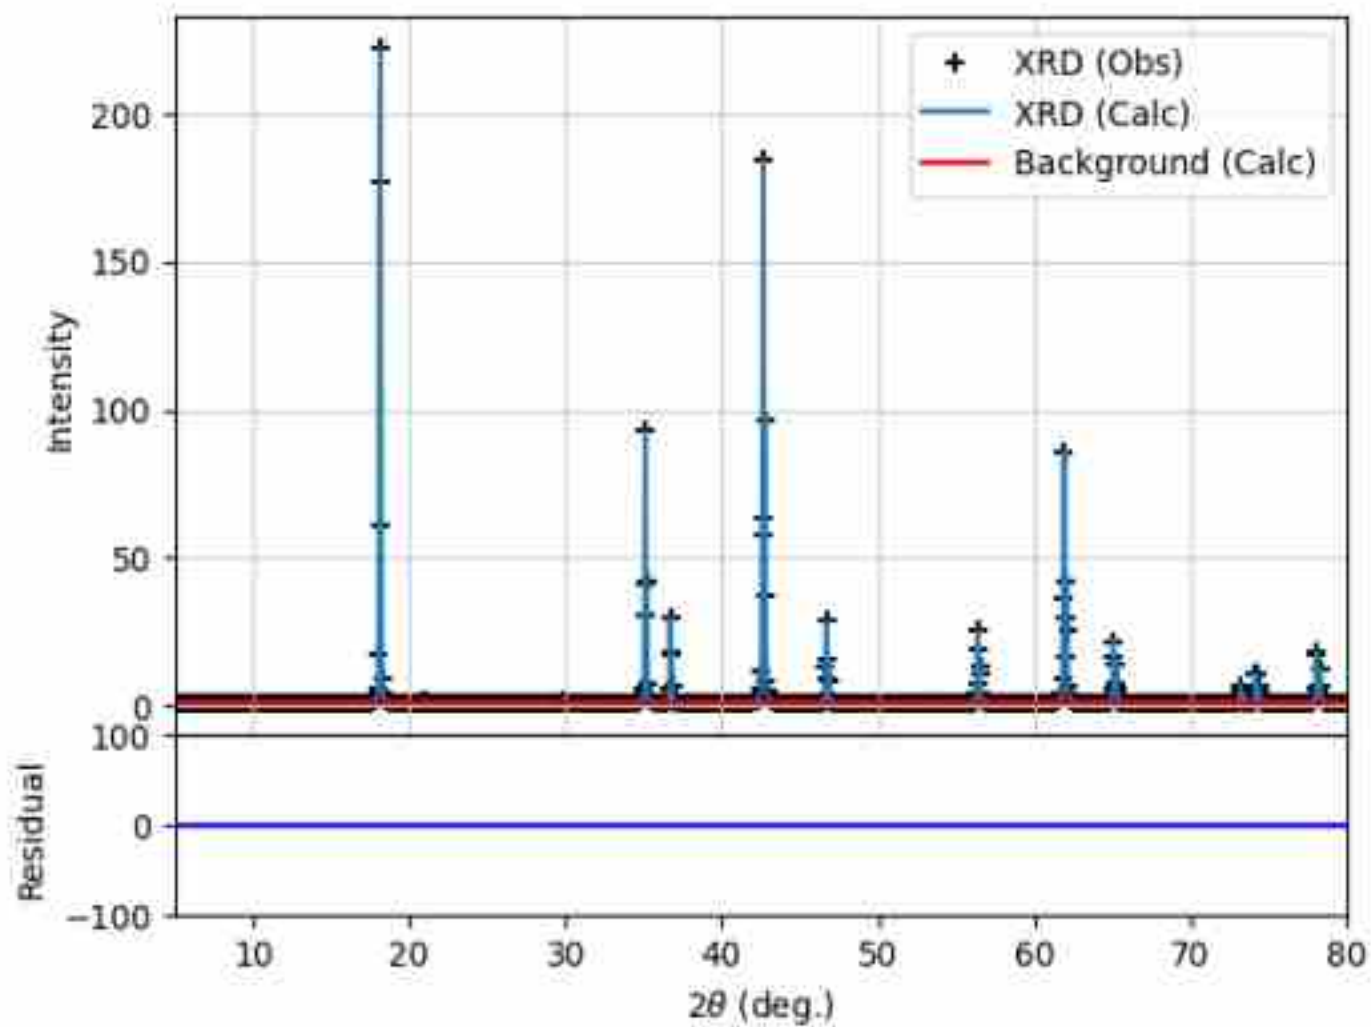

| RMSE before RR | Rwp     | RMSE after RR |
|----------------|---------|---------------|
| 0.016          | 0.10293 | 0.01808       |

# Li<sub>4</sub>Zr<sub>2</sub>O<sub>6</sub>

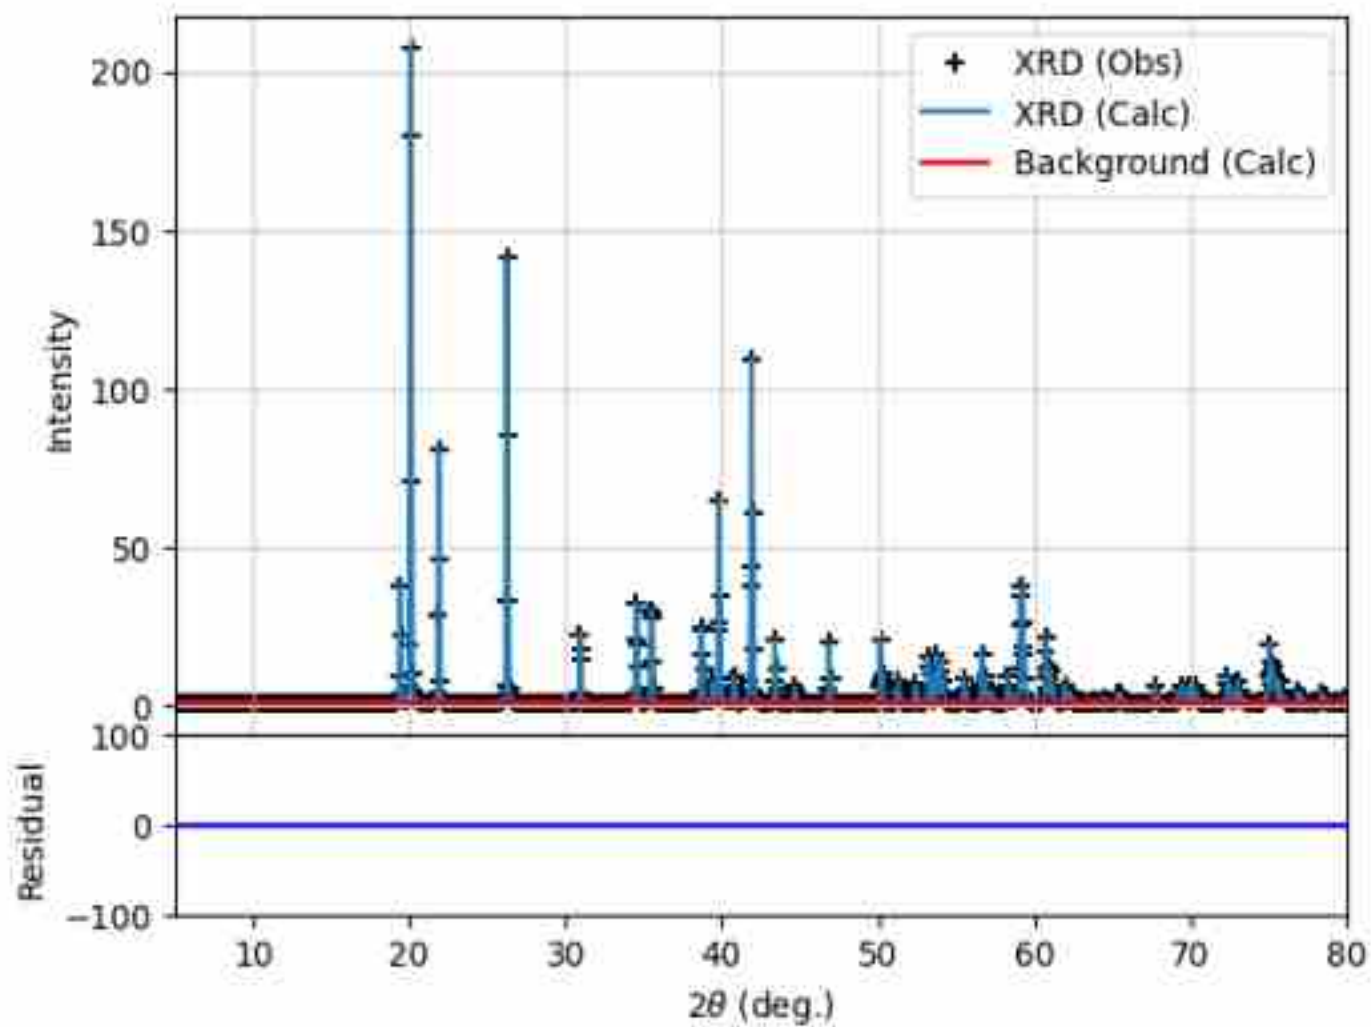

| RMSE before RR | Rwp     | RMSE after RR |
|----------------|---------|---------------|
| 0.016          | 0.00343 | 0.00159       |



# Lu<sub>2</sub>Cr<sub>2</sub>C<sub>3</sub>

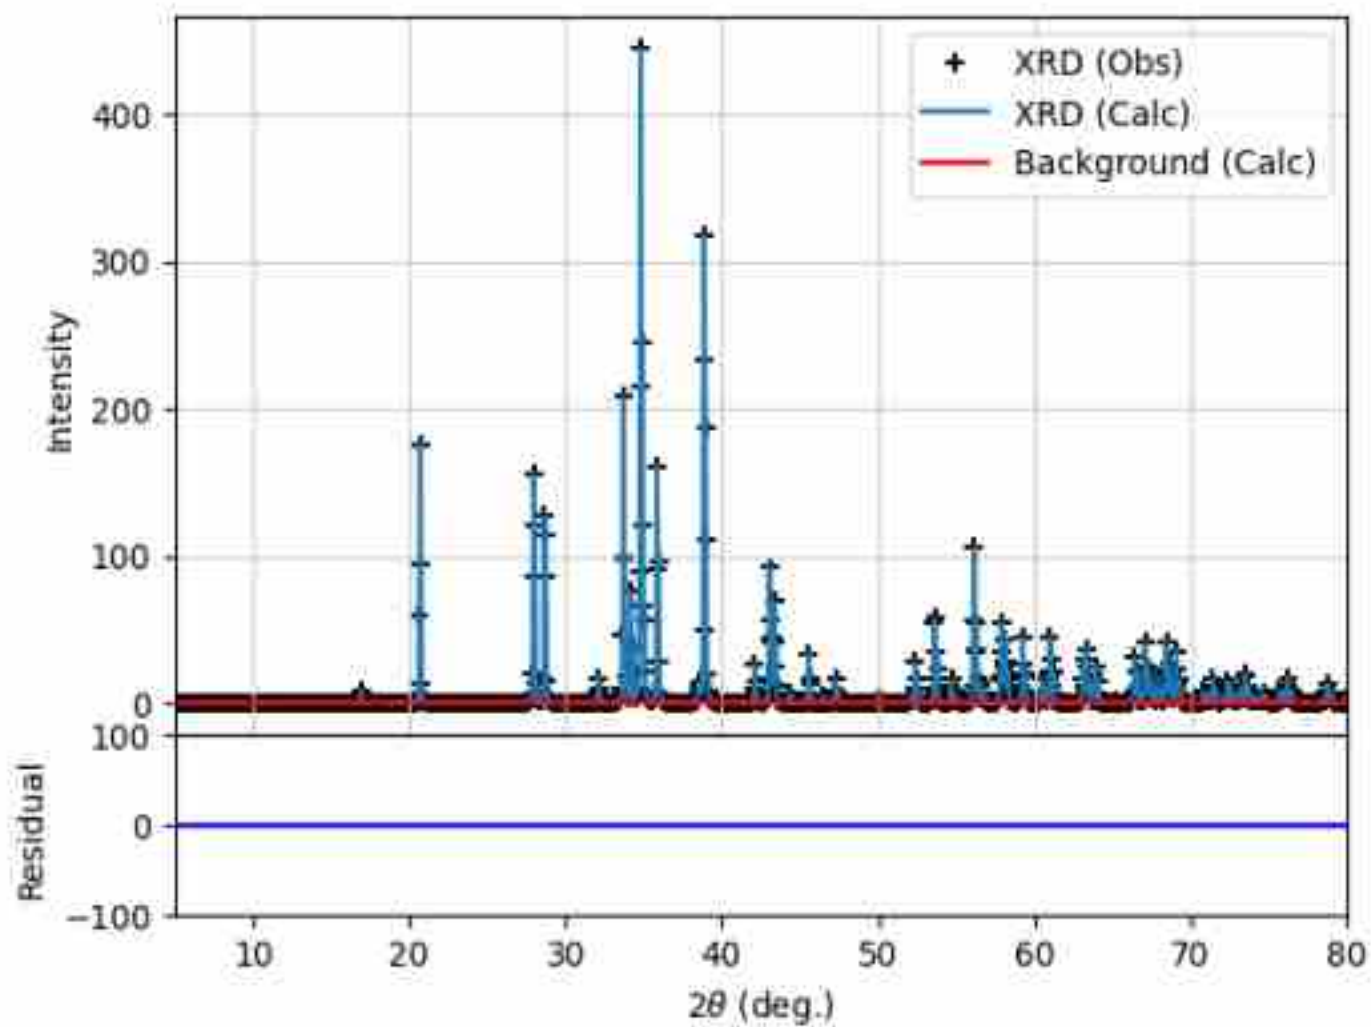

| RMSE before RR | Rwp     | RMSE after RR |
|----------------|---------|---------------|
| 0.016          | 0.00282 | 0.00055       |

# Lu<sub>2</sub>Ga<sub>8</sub>Fe<sub>1</sub>

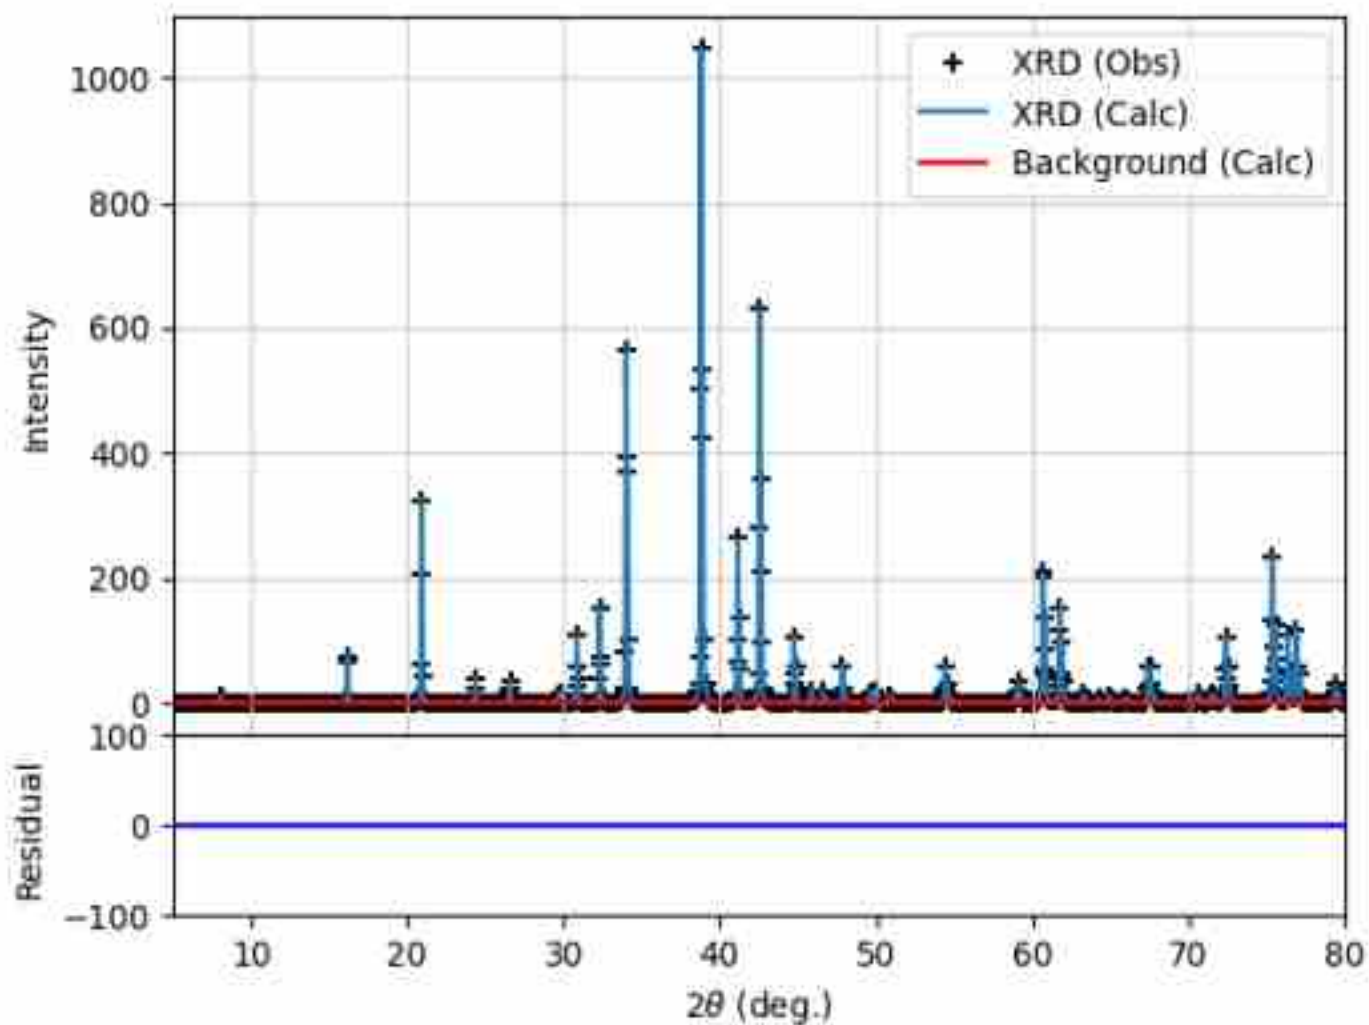

| RMSE before RR | Rwp     | RMSE after RR |
|----------------|---------|---------------|
| 0.016          | 0.00478 | 0.00081       |

# Lu<sub>2</sub>H<sub>4</sub>Cl<sub>2</sub>O<sub>4</sub>

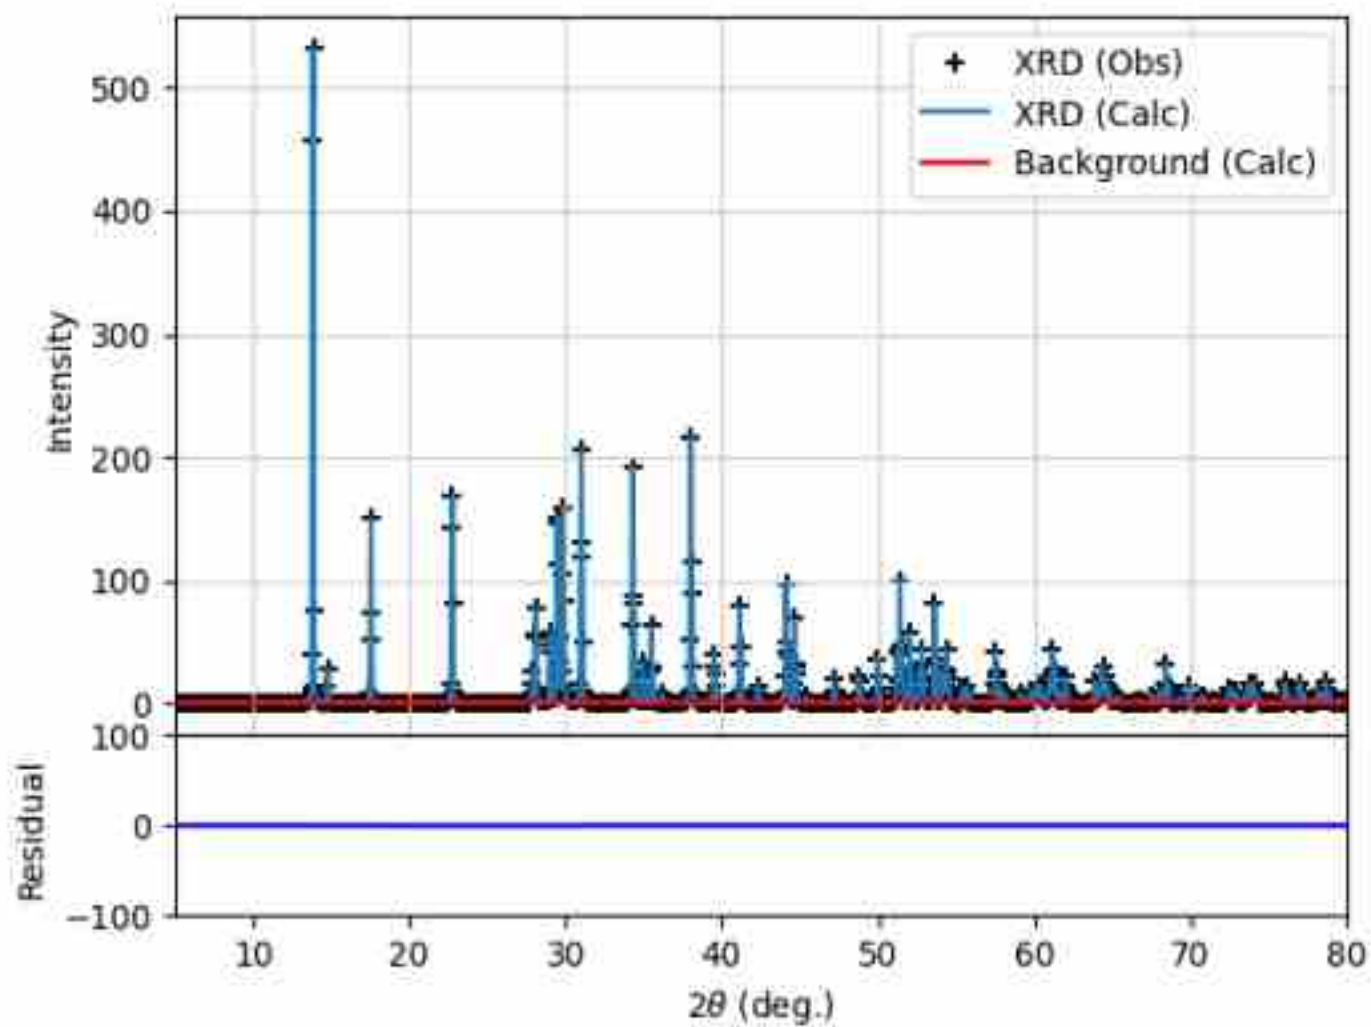

| RMSE before RR | Rwp     | RMSE after RR |
|----------------|---------|---------------|
| 0.016          | 0.30344 | 0.37067       |

# Lu<sub>4</sub>Ge<sub>4</sub>Ir<sub>4</sub>

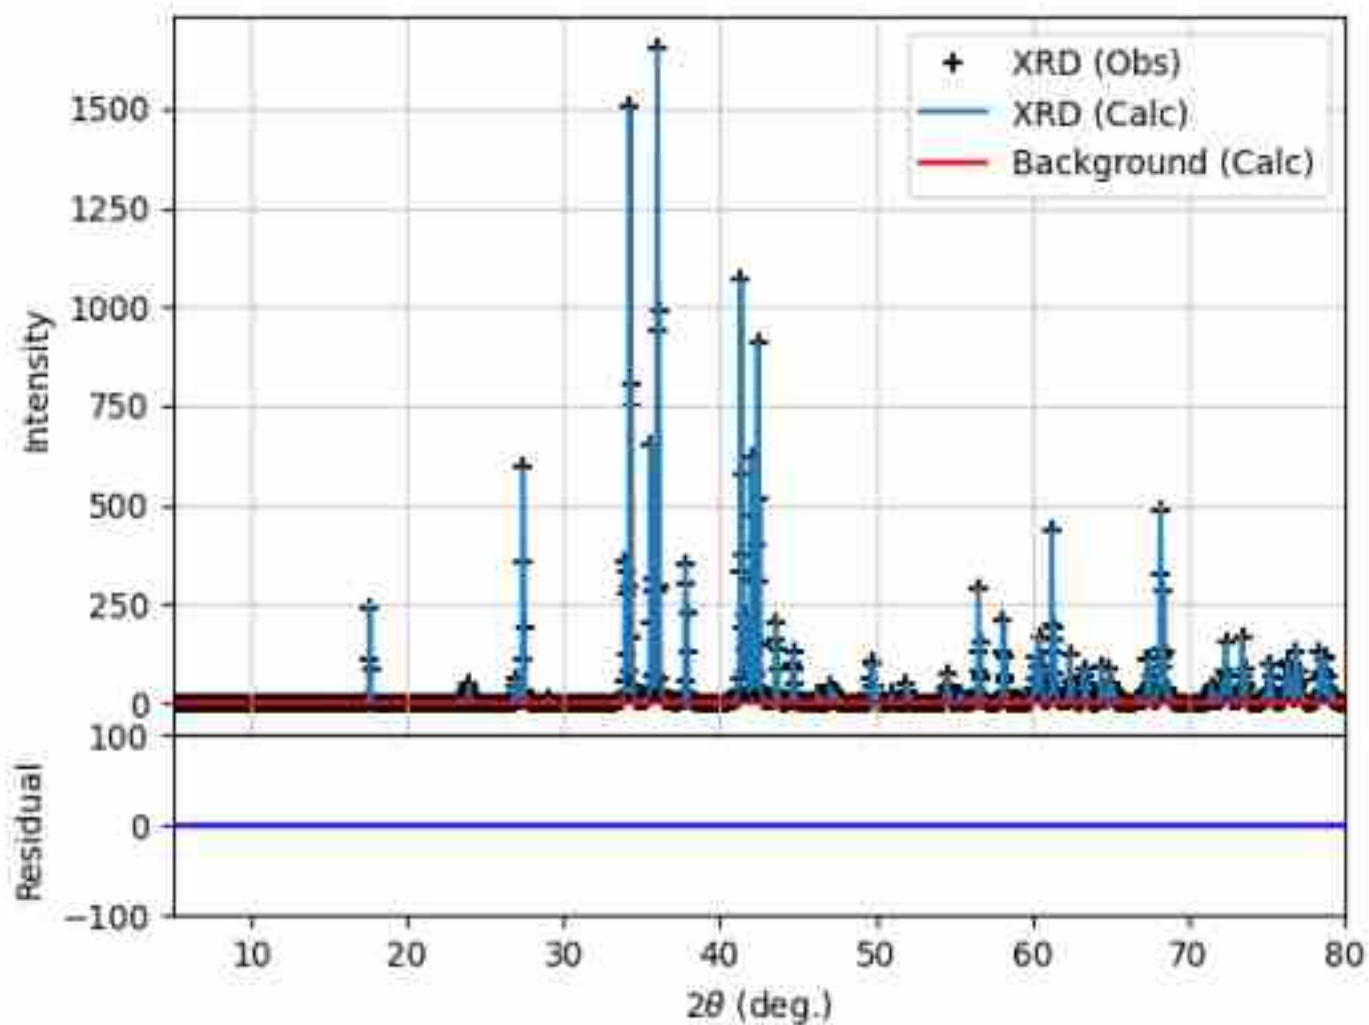

| RMSE before RR | Rwp     | RMSE after RR |
|----------------|---------|---------------|
| 0.016          | 0.00453 | 0.00037       |

# Lu4Tc8

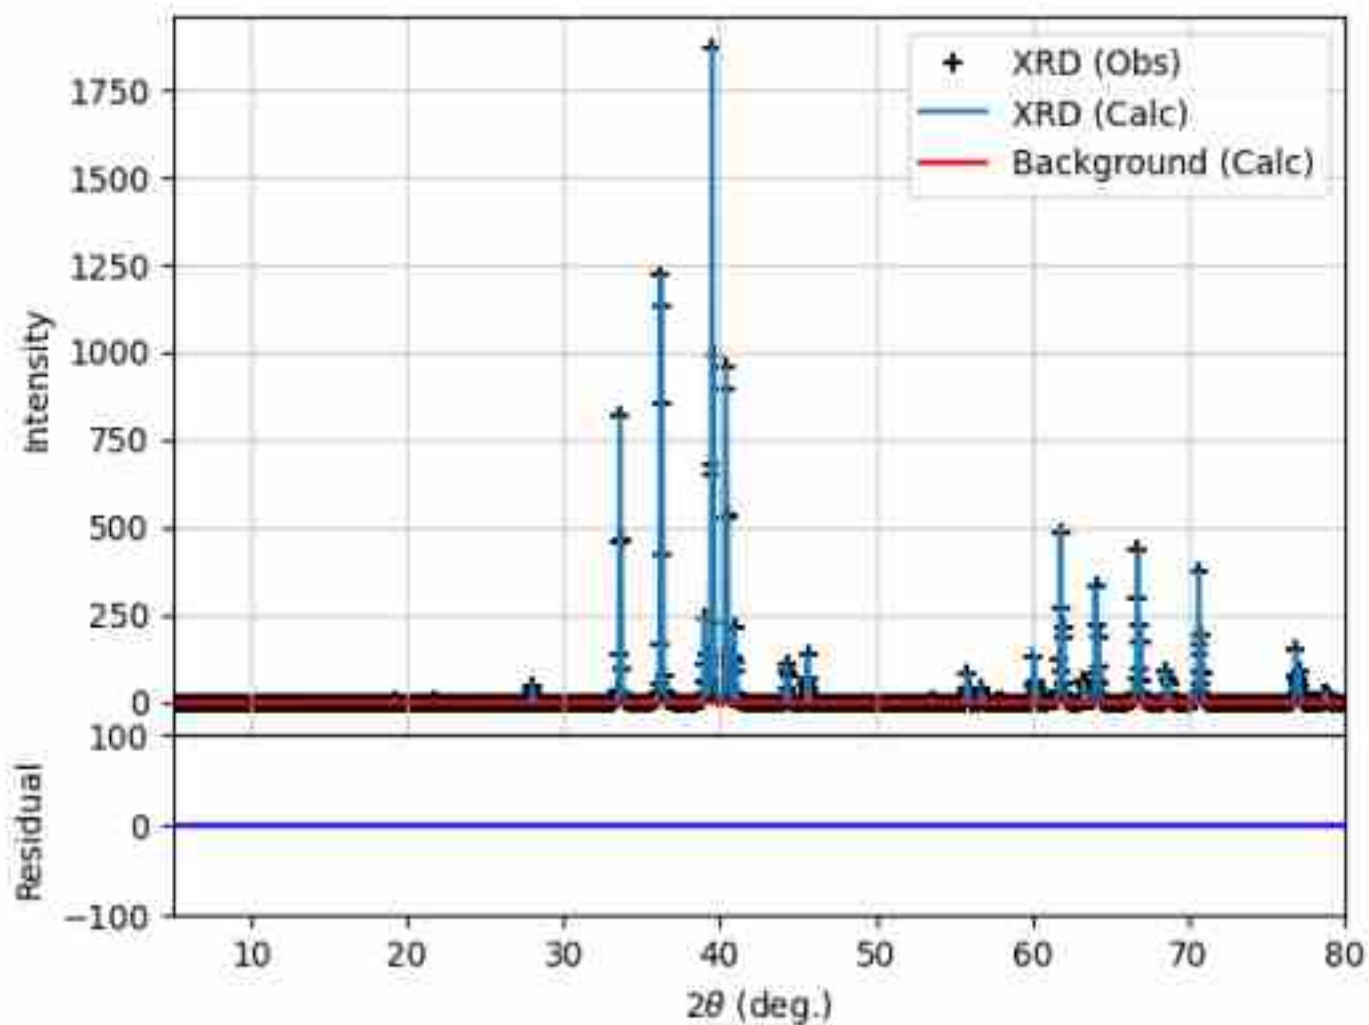

| RMSE before RR | Rwp     | RMSE after RR |
|----------------|---------|---------------|
| 0.016          | 0.00494 | 0.0005        |

# Mg<sub>1</sub>Cu<sub>4</sub>Sn<sub>1</sub>

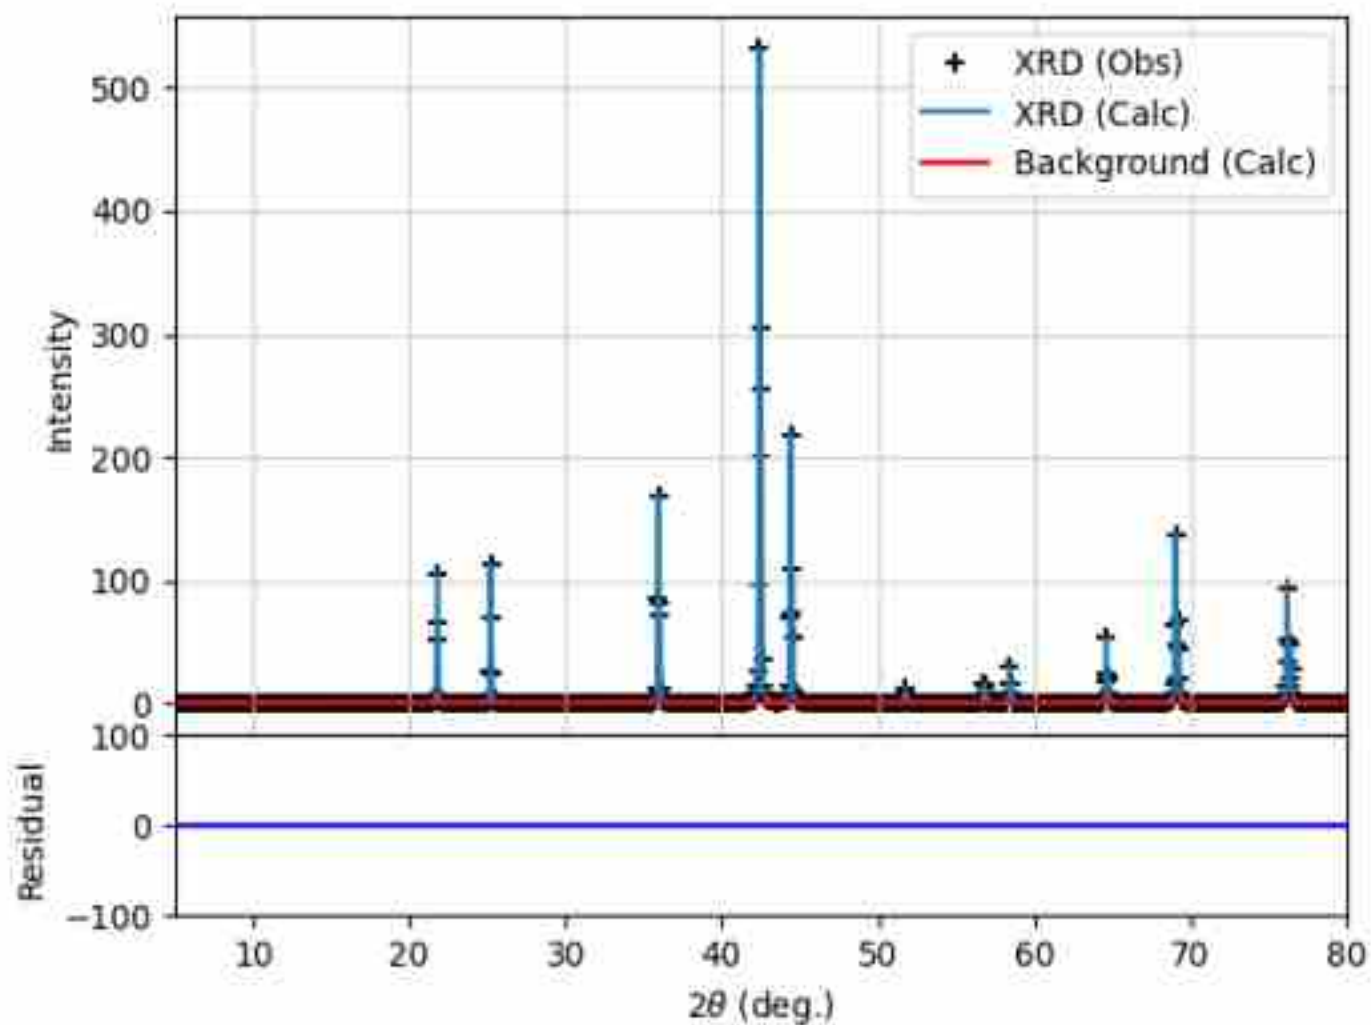

| RMSE before RR | Rwp     | RMSE after RR |
|----------------|---------|---------------|
| 0.016          | 0.02288 | 0.00458       |

# Mg<sub>1</sub>V<sub>2</sub>O<sub>6</sub>

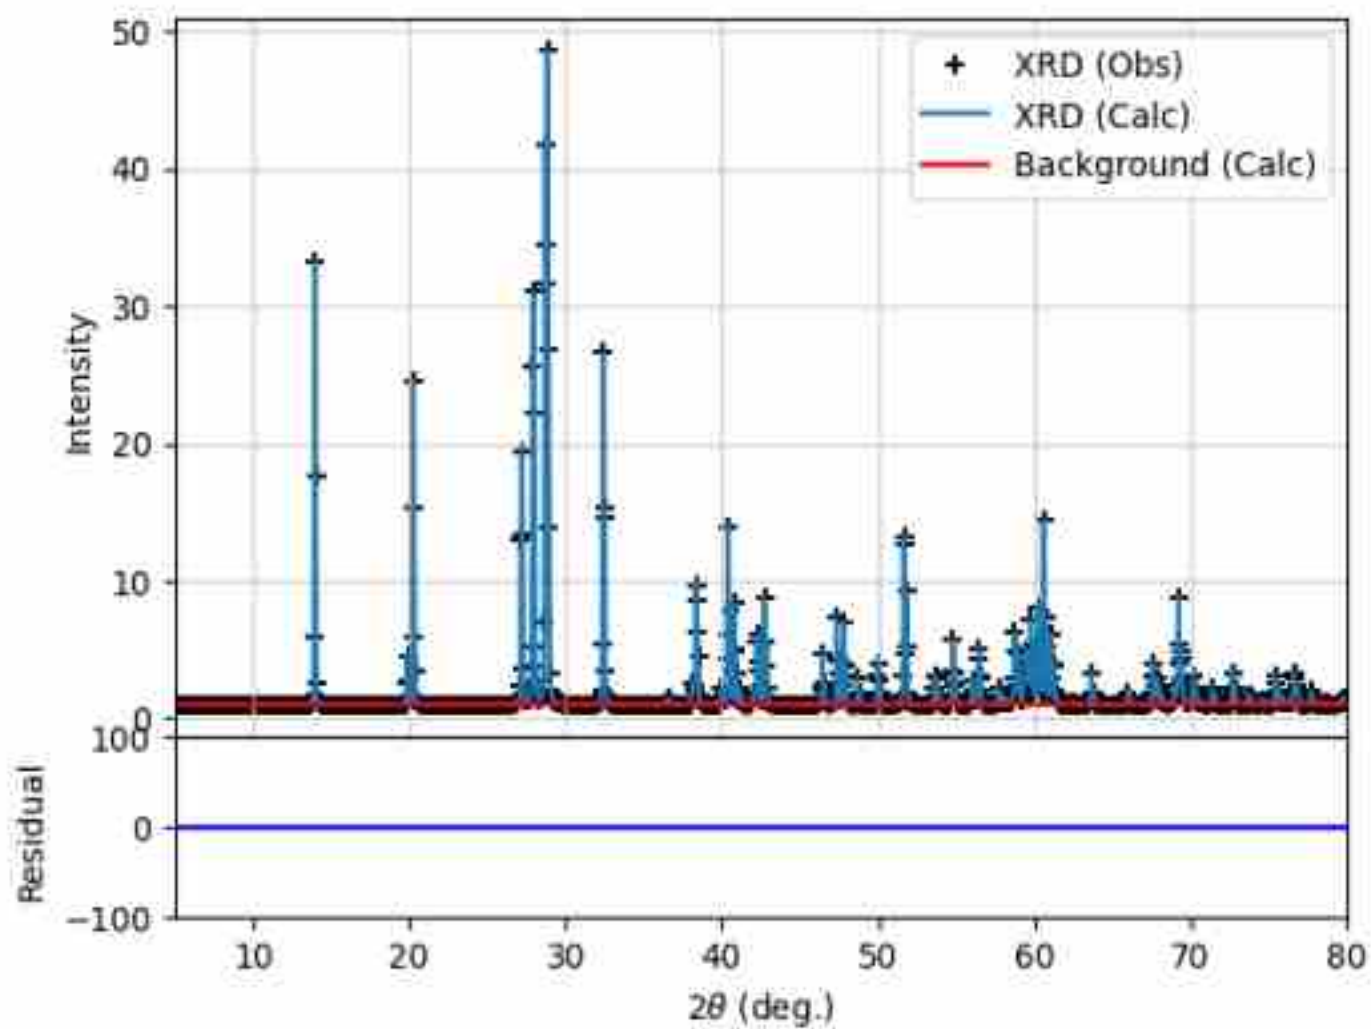

| RMSE before RR | Rwp     | RMSE after RR |
|----------------|---------|---------------|
| 0.016          | 0.00181 | 0.00066       |

# Mg<sub>2</sub>Hg<sub>6</sub>

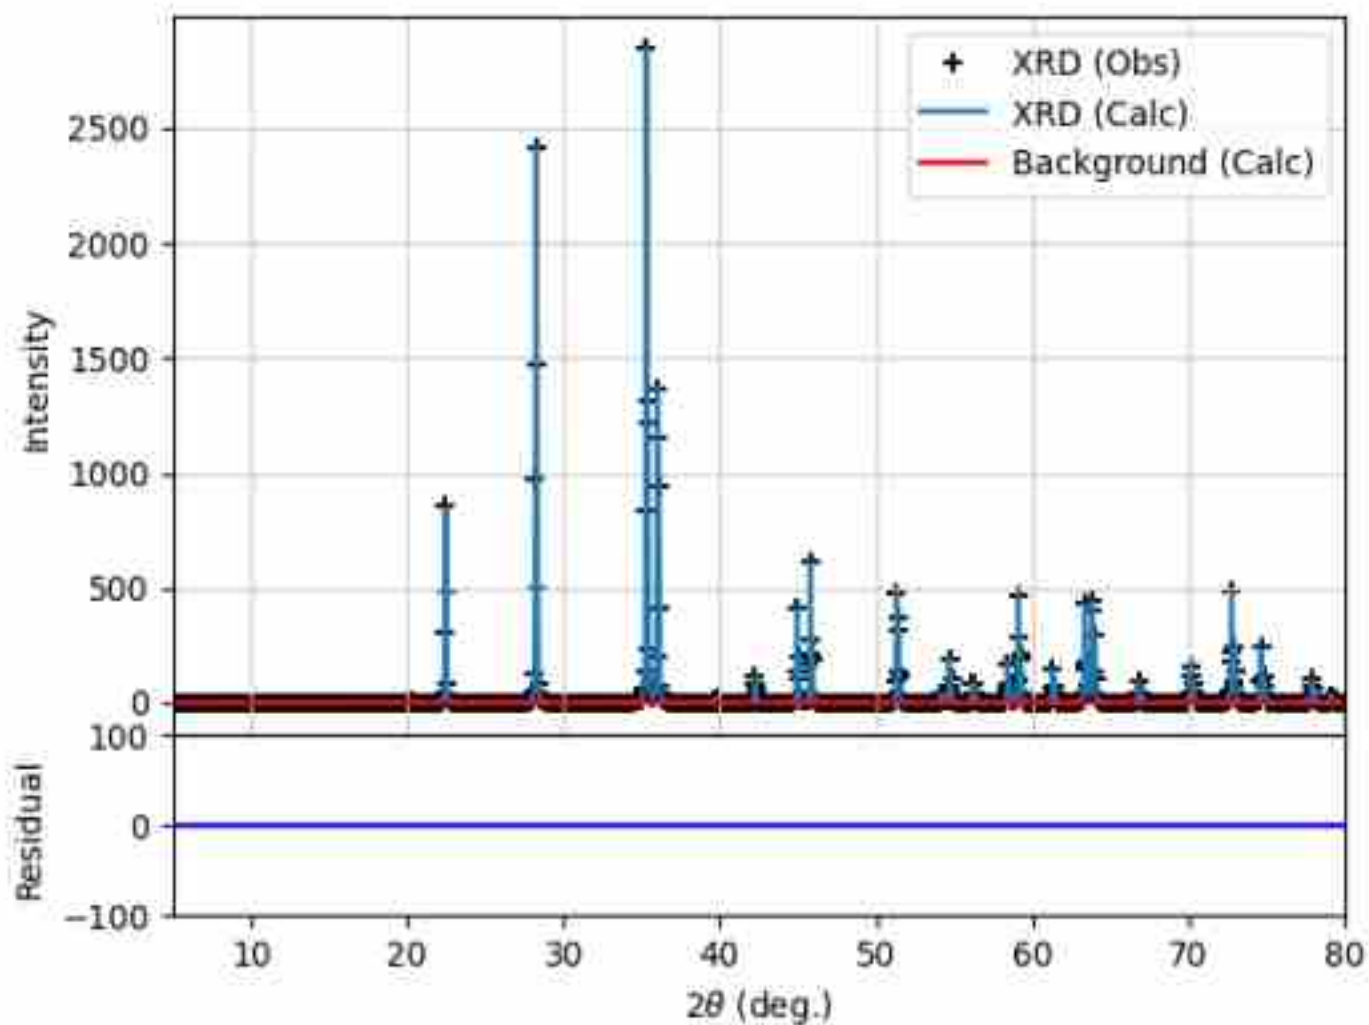

| RMSE before RR | Rwp     | RMSE after RR |
|----------------|---------|---------------|
| 0.016          | 0.00435 | 0.00043       |



# Mg<sub>2</sub>Sc<sub>3</sub>TiS<sub>8</sub>

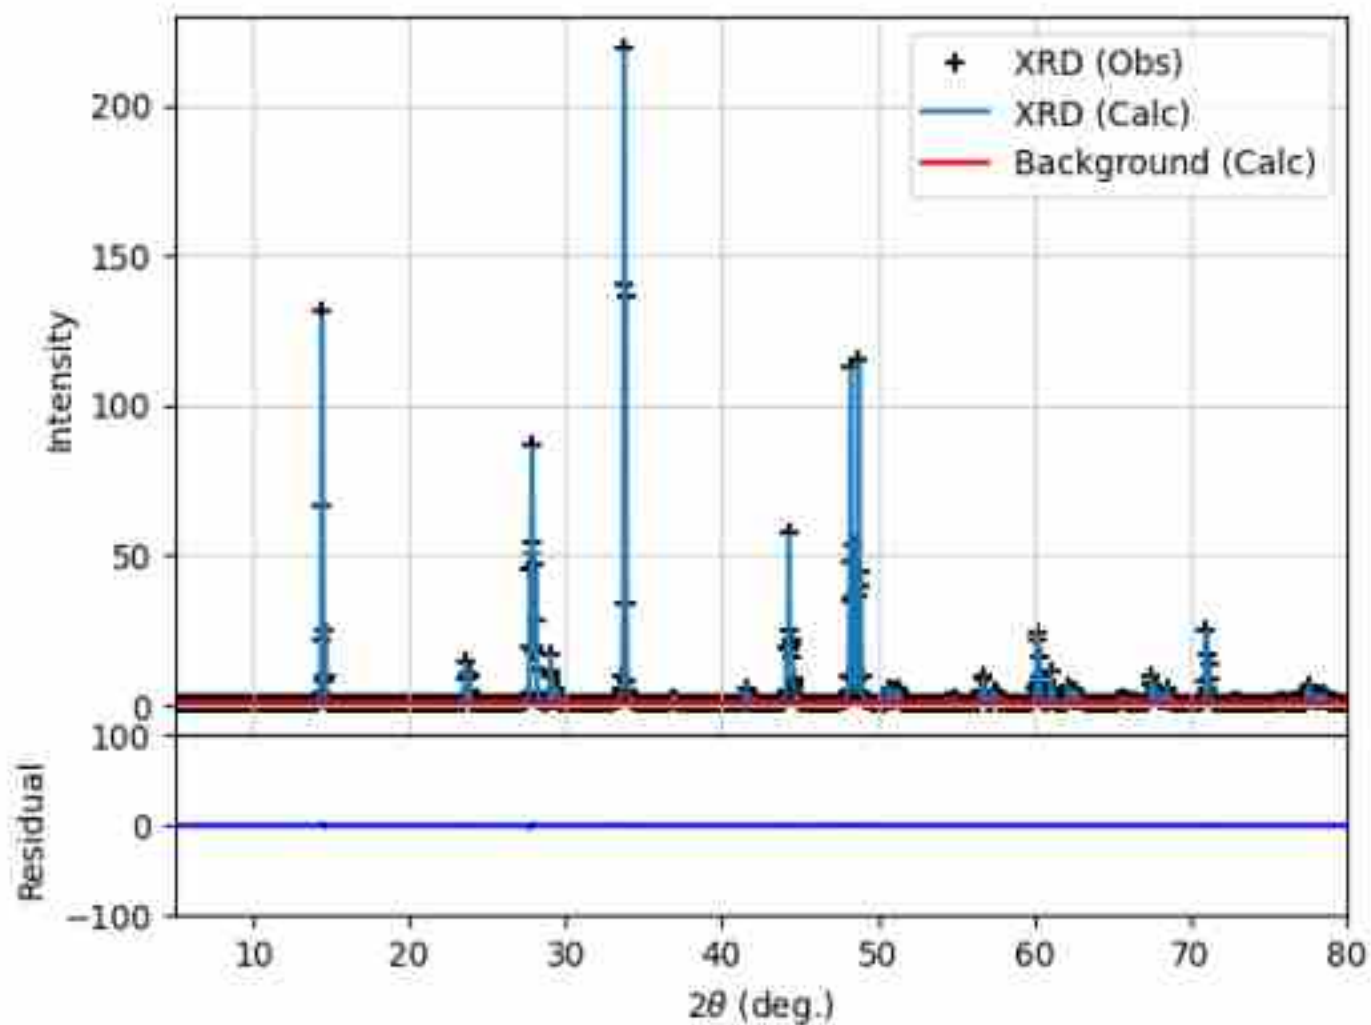

| RMSE before RR | Rwp     | RMSE after RR |
|----------------|---------|---------------|
| 0.016          | 2.31779 | 0.02647       |

# Mg<sub>2</sub>Zn<sub>2</sub>Co<sub>2</sub>

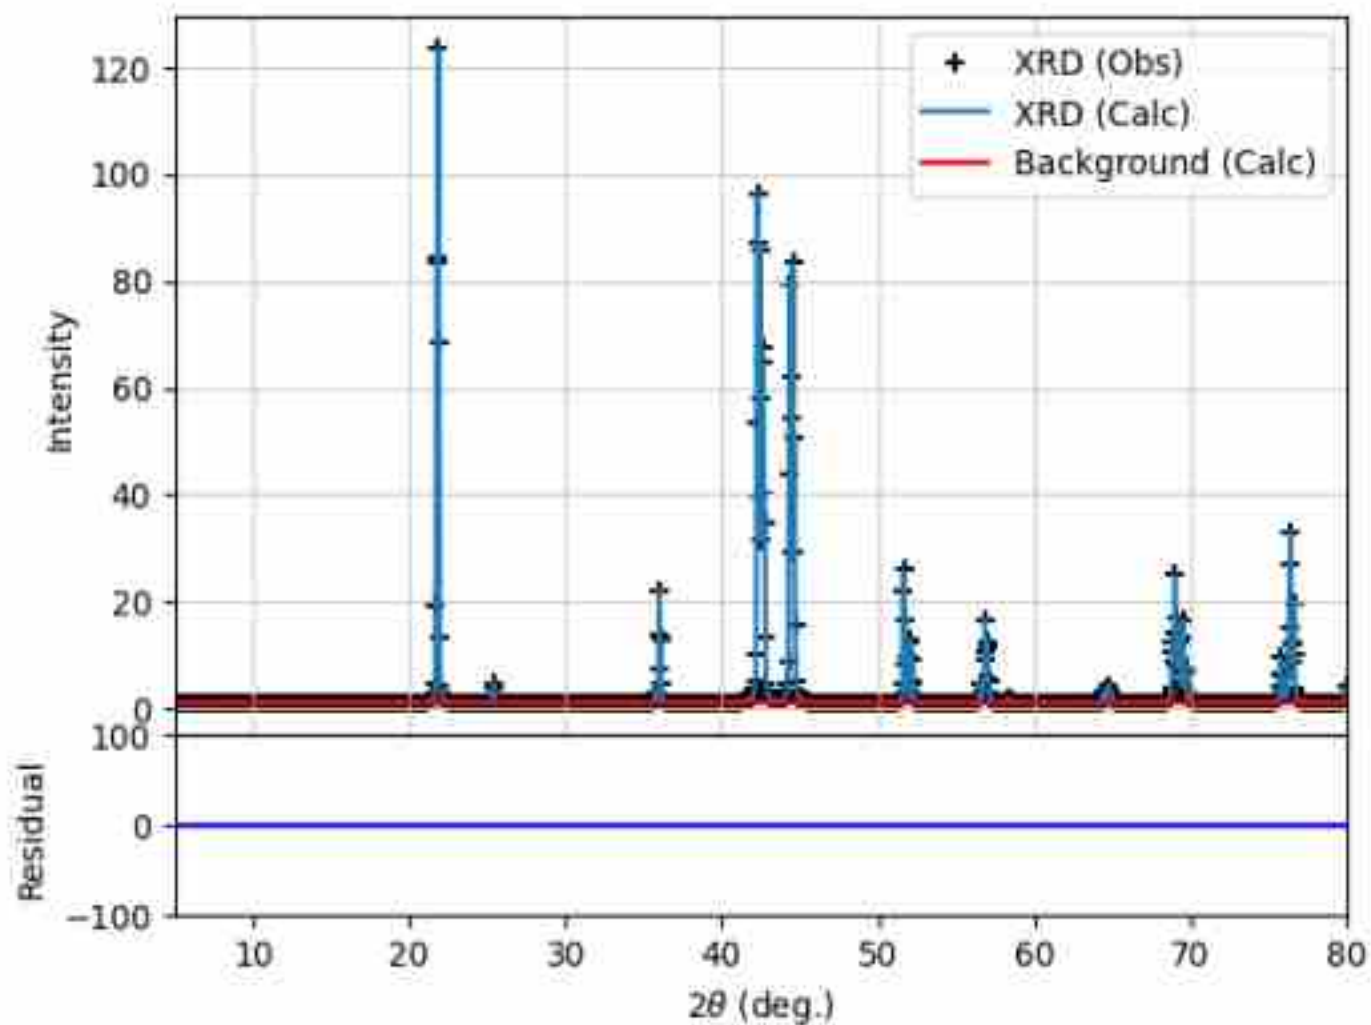

| RMSE before RR | Rwp     | RMSE after RR |
|----------------|---------|---------------|
| 0.016          | 0.00262 | 0.00043       |

# Mg<sub>3</sub>Sn<sub>3</sub>

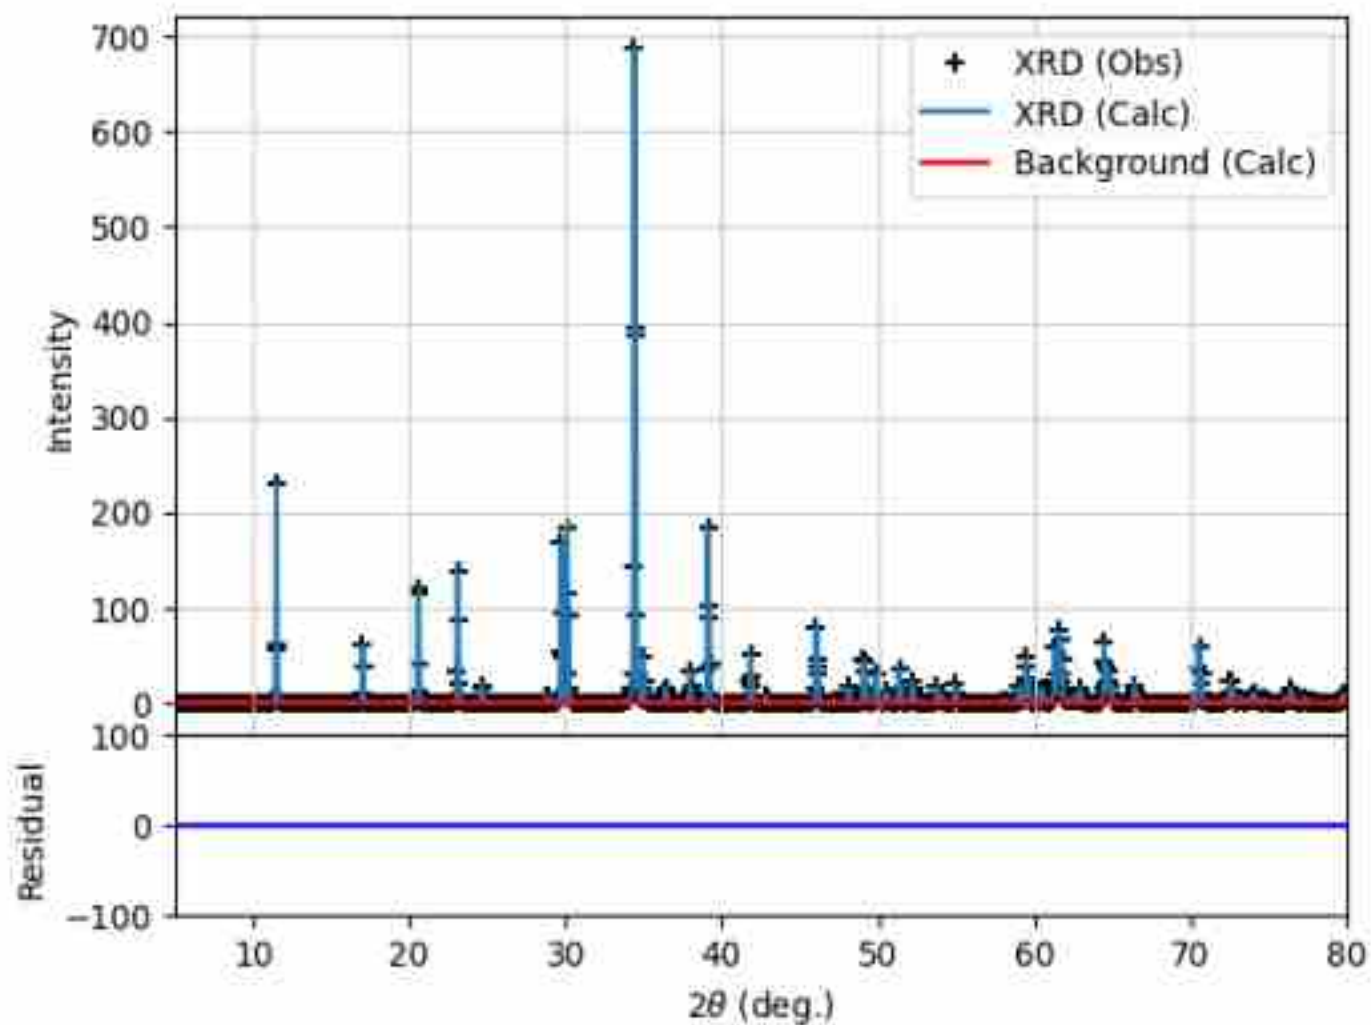

| RMSE before RR | Rwp     | RMSE after RR |
|----------------|---------|---------------|
| 0.016          | 0.00335 | 0.00038       |

# Mg<sub>4</sub>Mn<sub>2</sub>B<sub>4</sub>Ir<sub>10</sub>

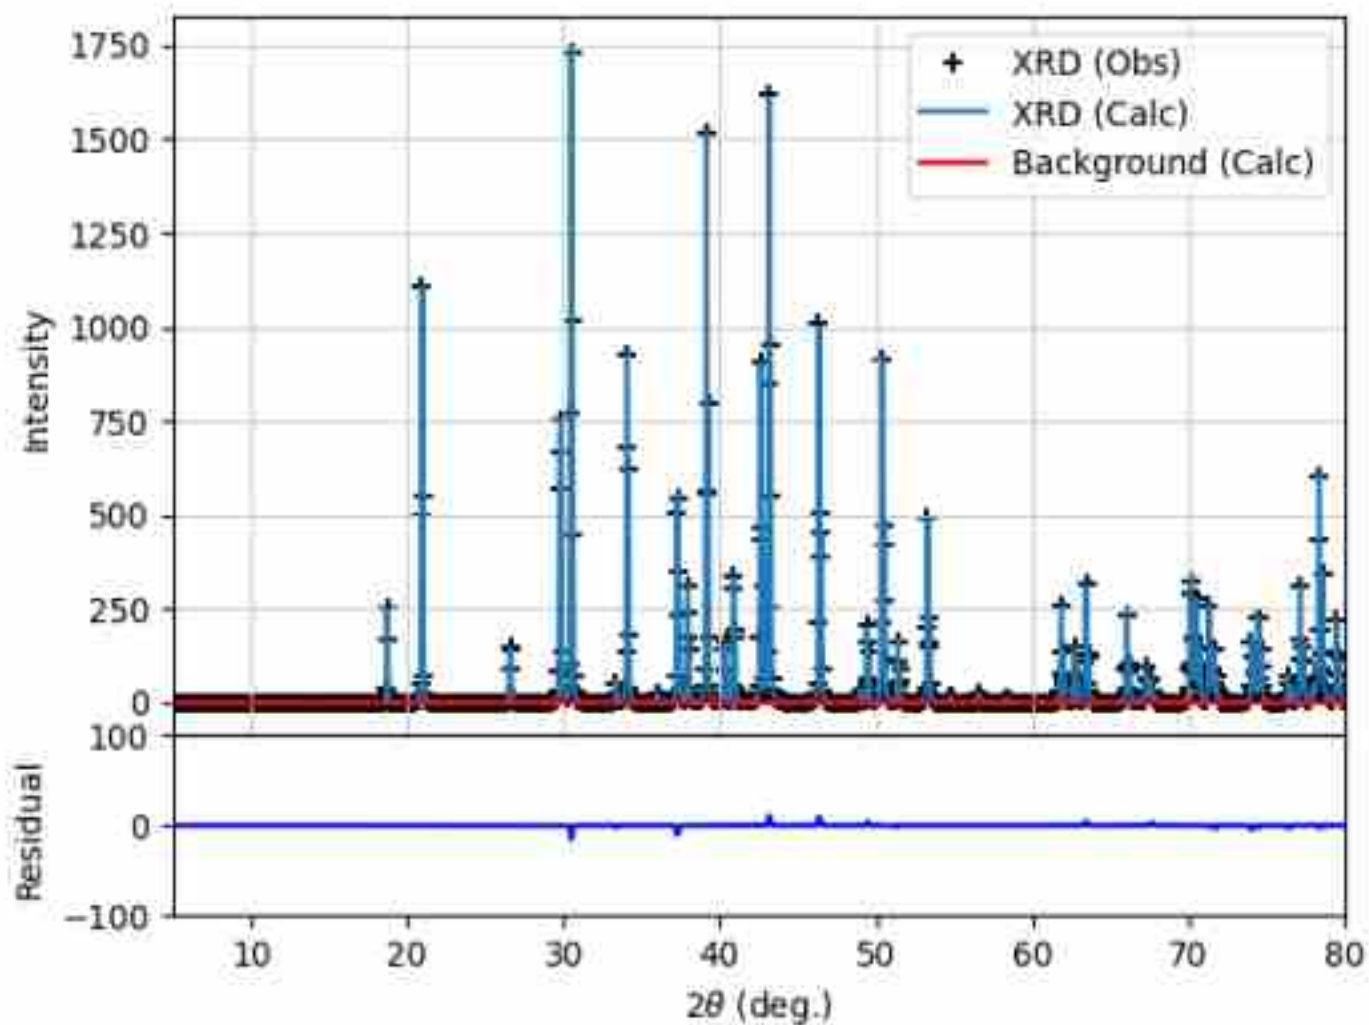

| RMSE before RR | Rwp     | RMSE after RR |
|----------------|---------|---------------|
| 0.016          | 0.91855 | 0.0343        |

# Mn1Br2

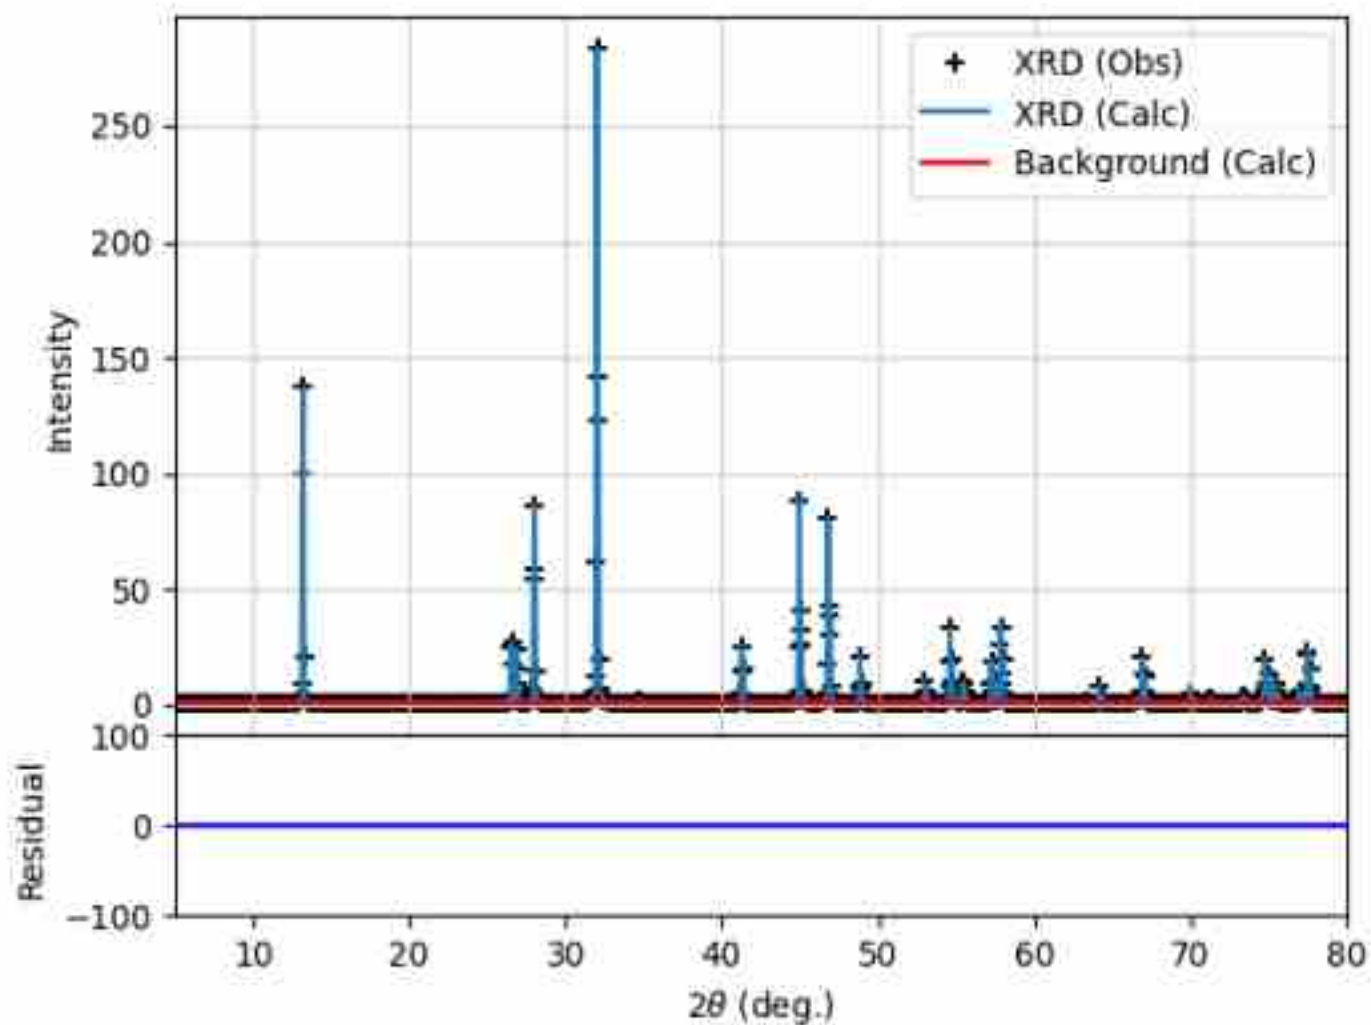

| RMSE before RR | Rwp    | RMSE after RR |
|----------------|--------|---------------|
| 0.016          | 0.0282 | 0.00207       |

# Mn1In1Rh2

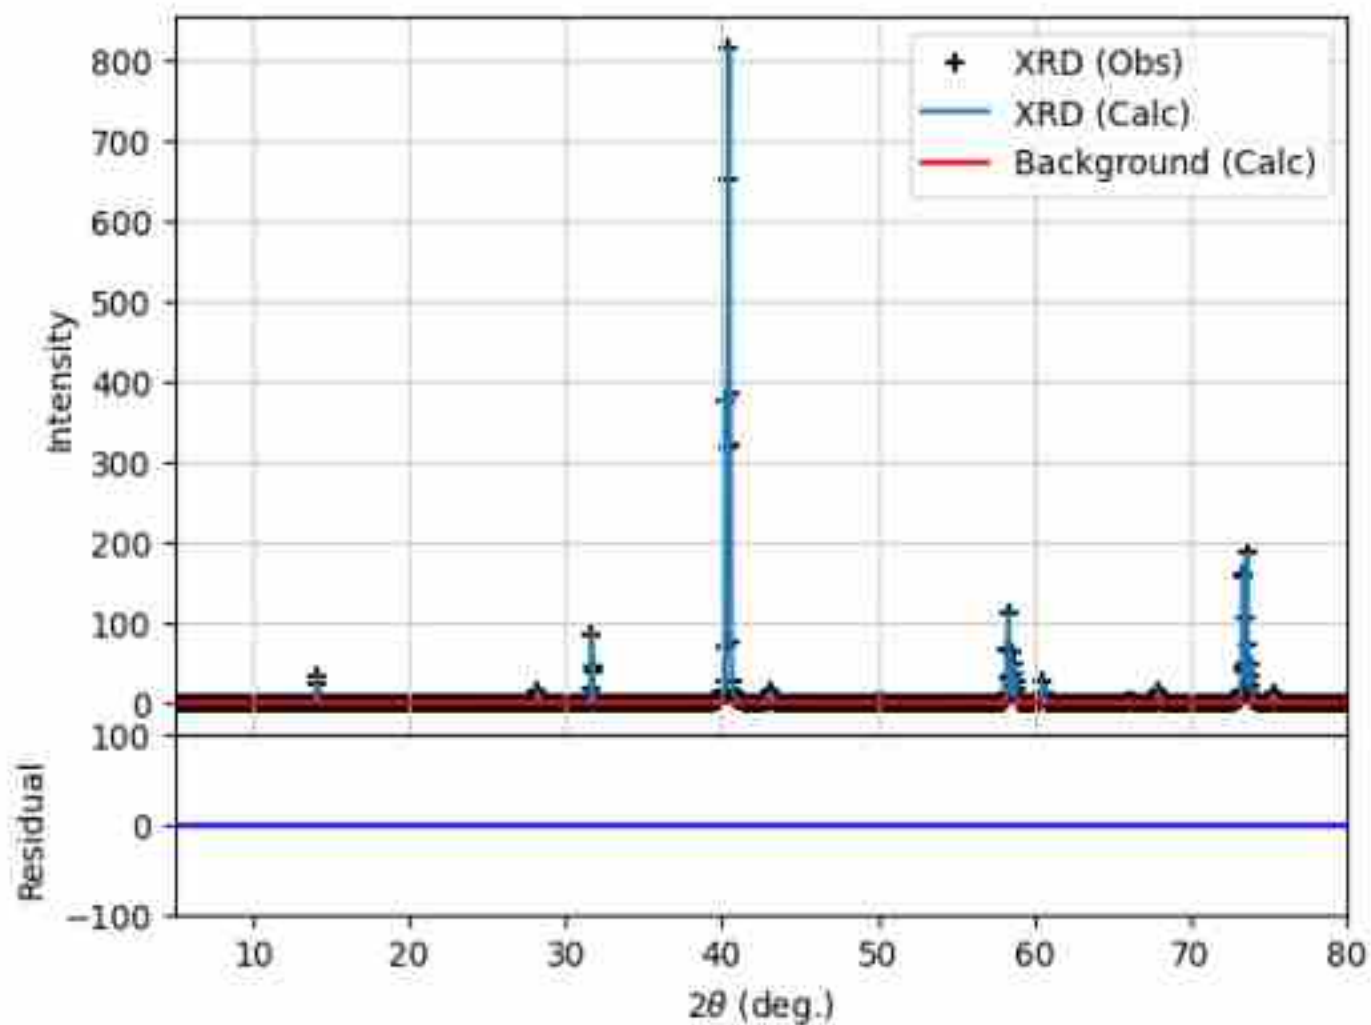

| RMSE before RR | Rwp     | RMSE after RR |
|----------------|---------|---------------|
| 0.016          | 0.00315 | 0.00029       |

# Mn<sub>4</sub>Ga<sub>3</sub>Co<sub>8</sub>Ge<sub>1</sub>

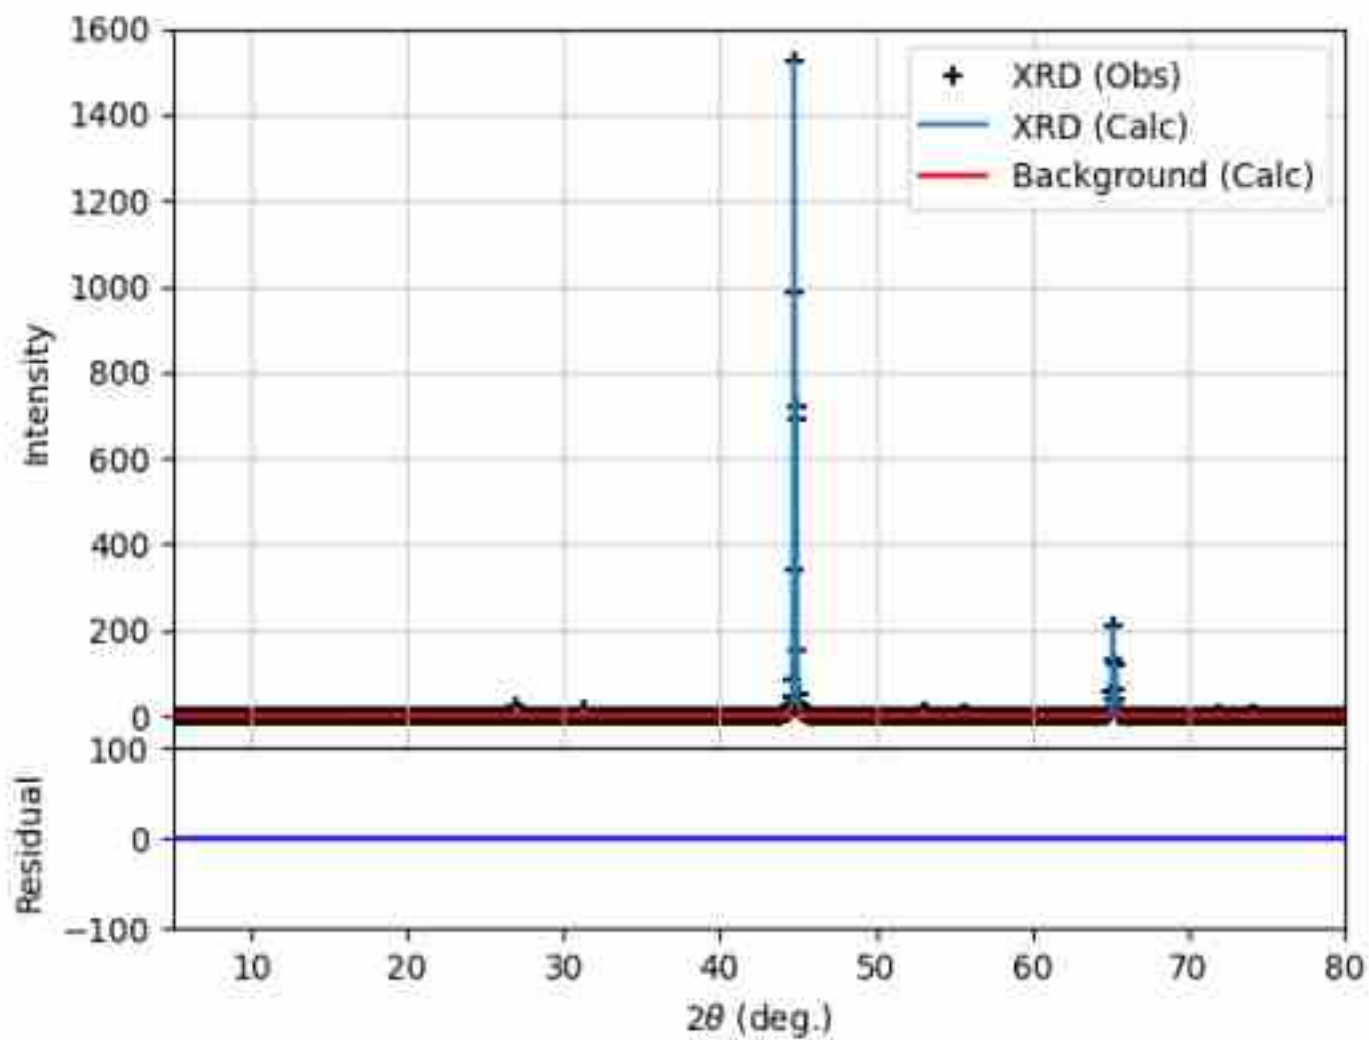

| RMSE before RR | Rwp     | RMSE after RR |
|----------------|---------|---------------|
| 0.016          | 0.00171 | 0.00049       |

# Na1N1O2

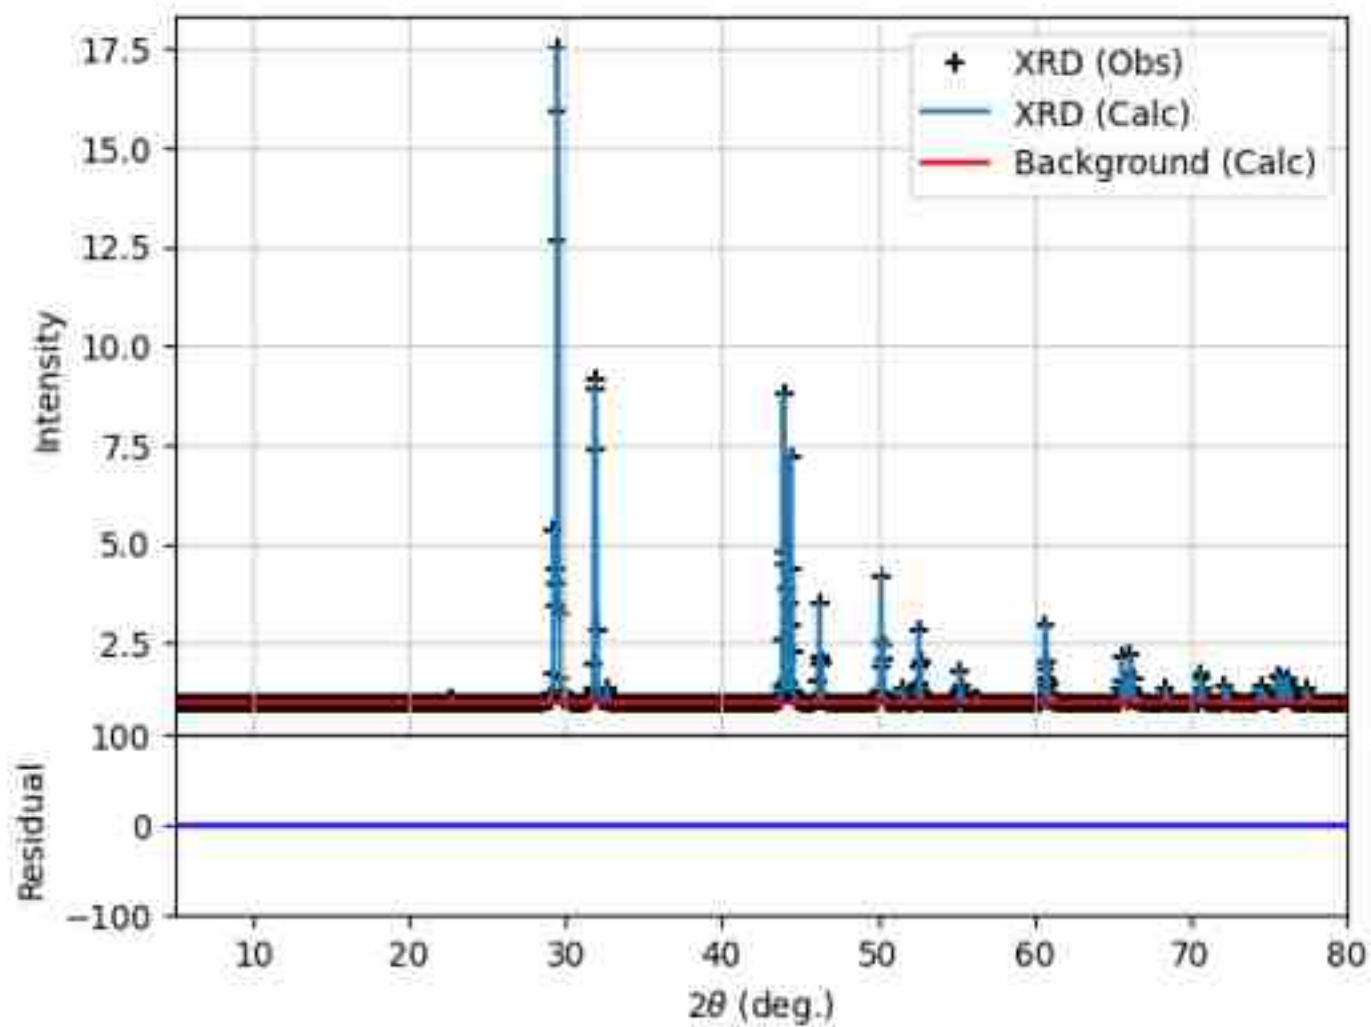

| RMSE before RR | Rwp     | RMSE after RR |
|----------------|---------|---------------|
| 0.016          | 0.00065 | 0.00033       |



# Na1Tc1O3

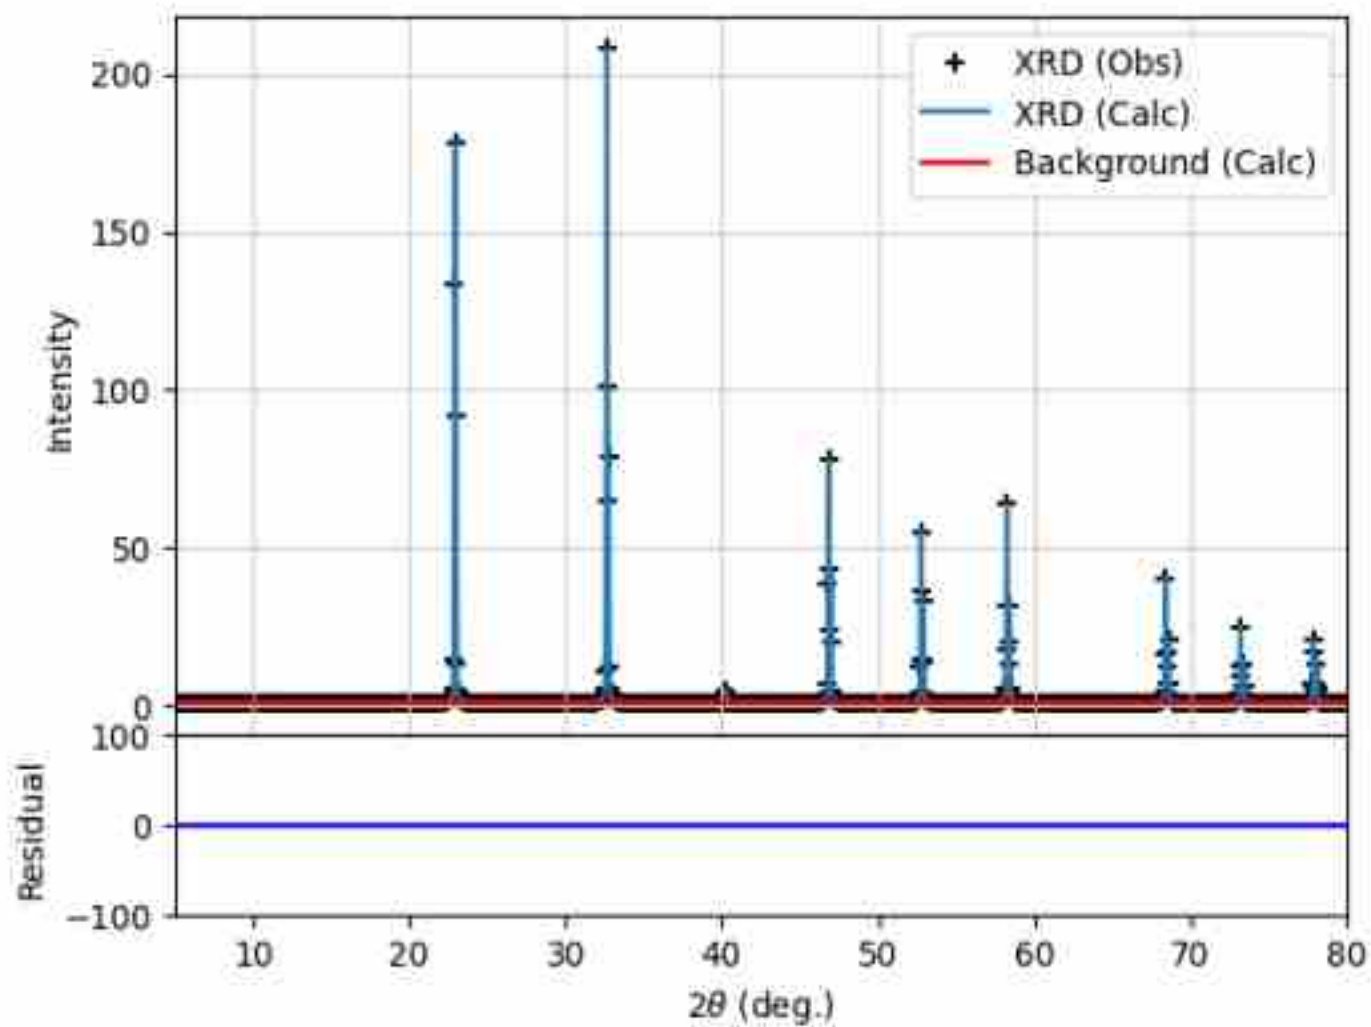

| RMSE before RR | Rwp    | RMSE after RR |
|----------------|--------|---------------|
| 0.016          | 0.0034 | 0.00136       |

# Na<sub>2</sub>Lu<sub>2</sub>Ti<sub>4</sub>O<sub>12</sub>

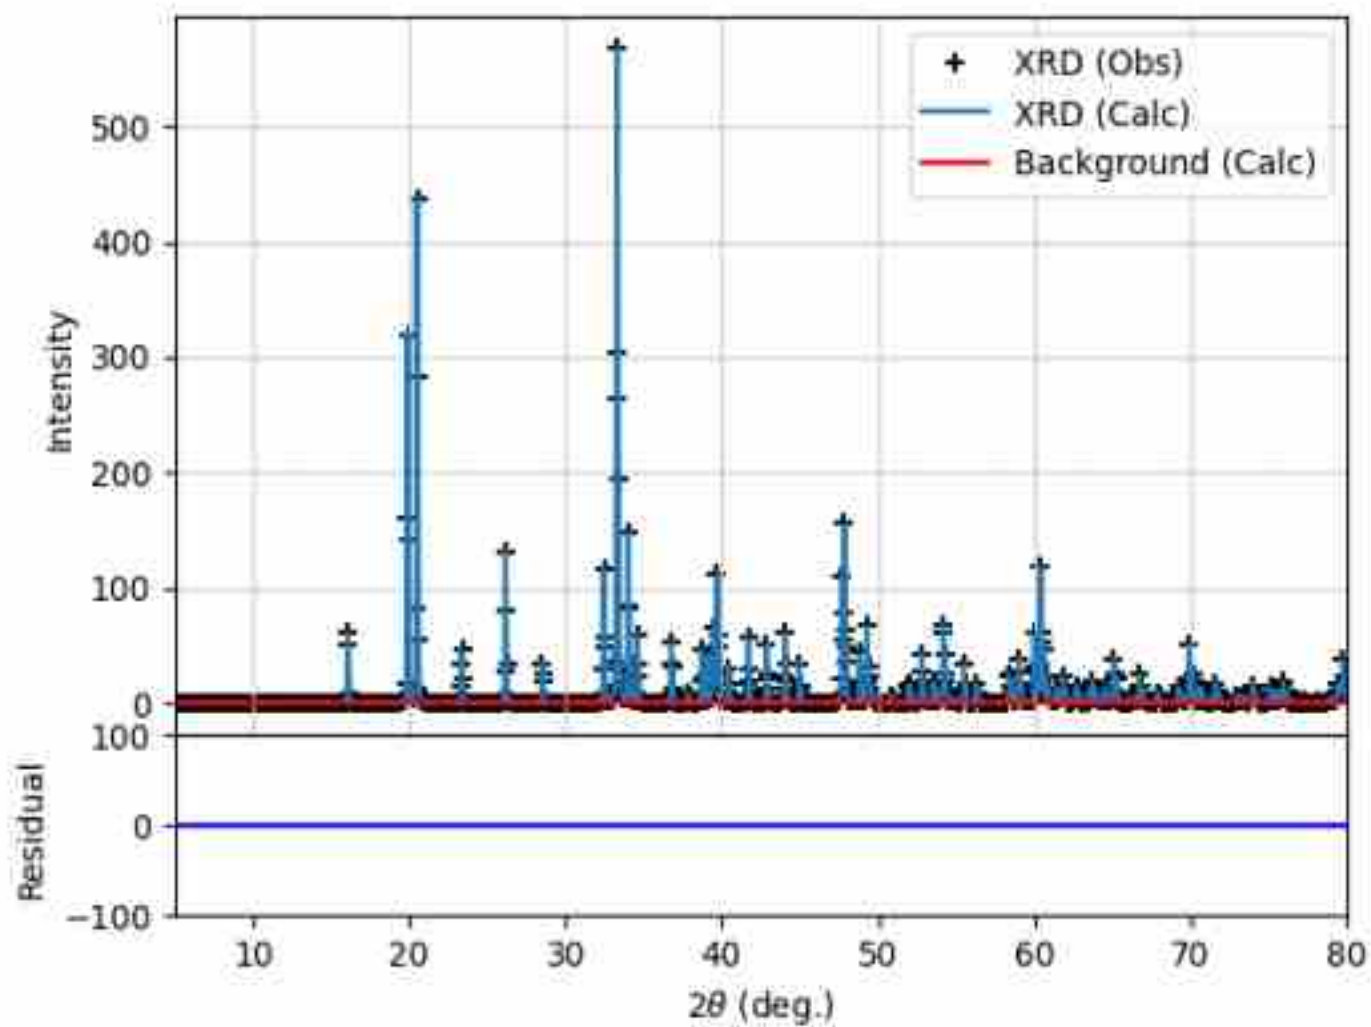

| RMSE before RR | Rwp     | RMSE after RR |
|----------------|---------|---------------|
| 0.016          | 0.00485 | 0.00115       |

# Na<sub>2</sub>Zn<sub>2</sub>P<sub>2</sub>

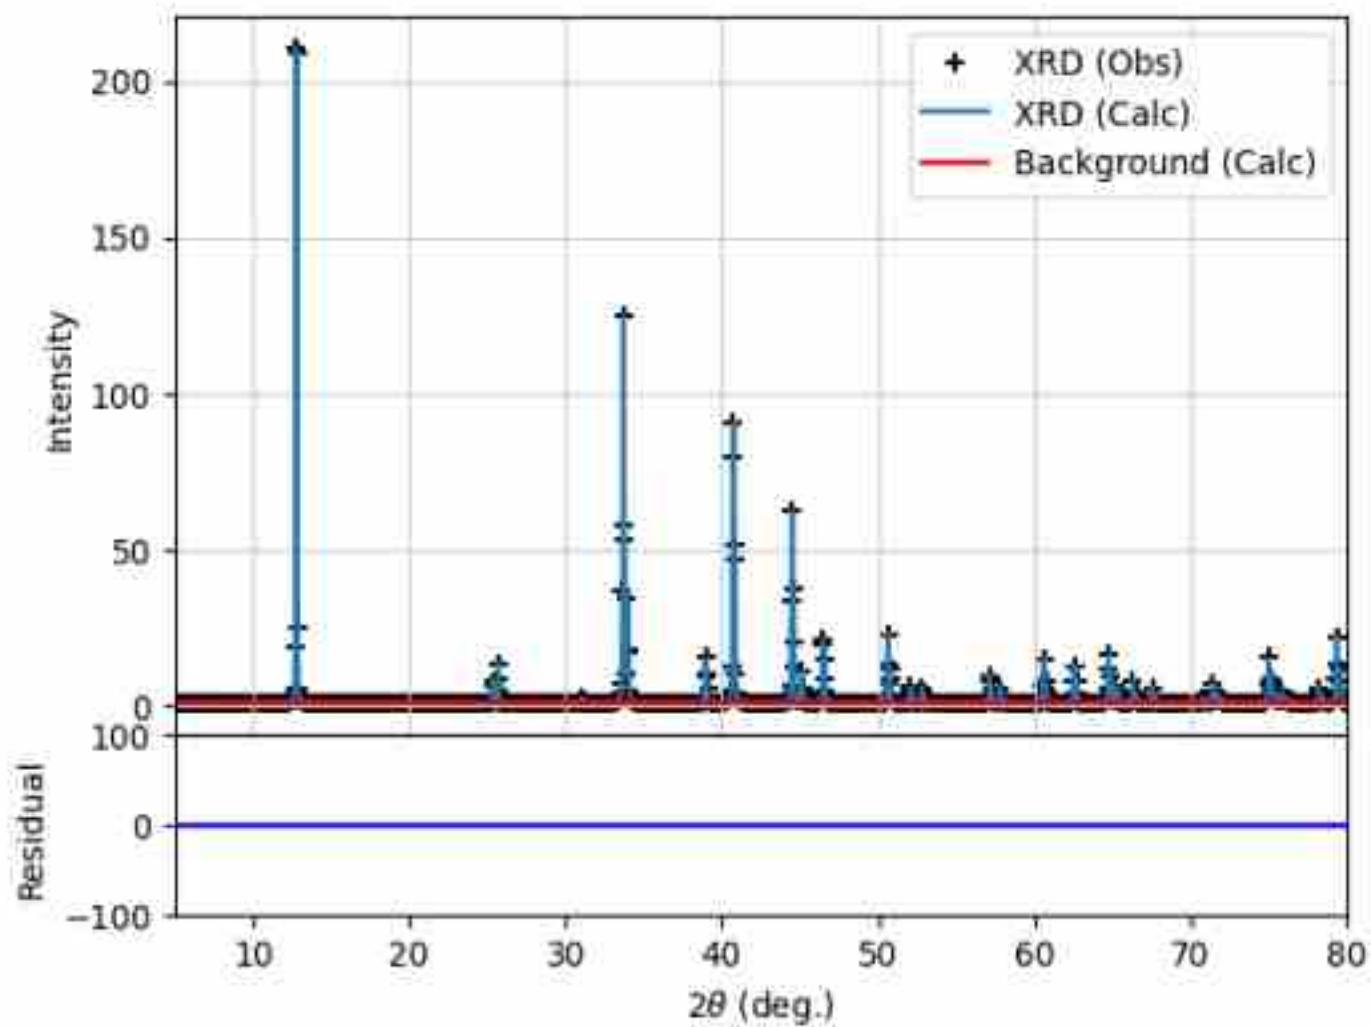

| RMSE before RR | Rwp     | RMSE after RR |
|----------------|---------|---------------|
| 0.016          | 0.00354 | 0.00145       |

# Na<sub>4</sub>Ag<sub>2</sub>As<sub>2</sub>

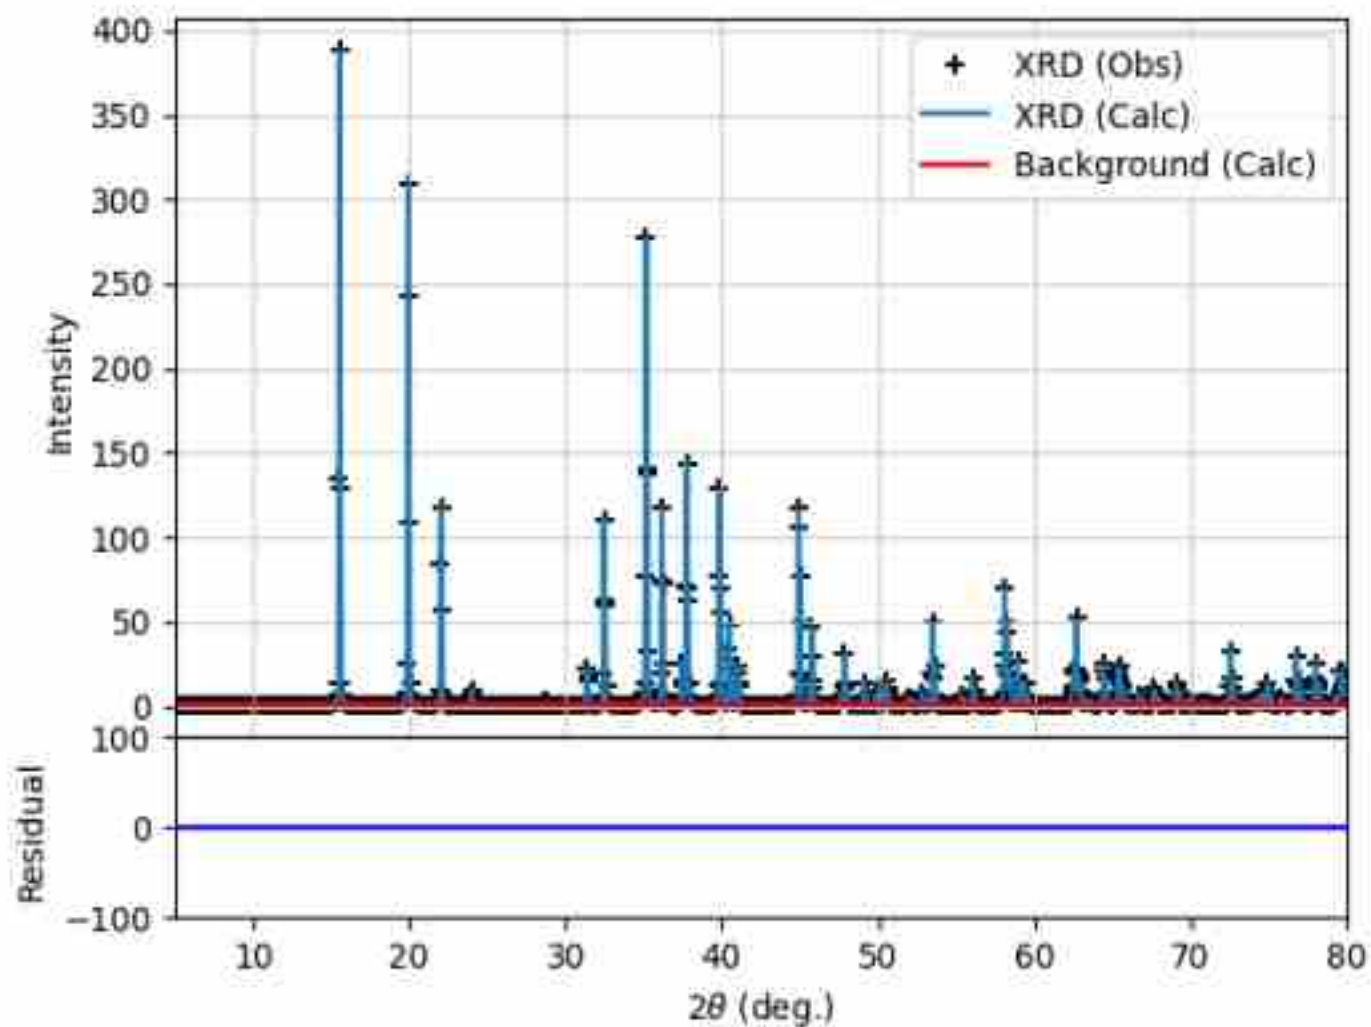

| RMSE before RR | Rwp     | RMSE after RR |
|----------------|---------|---------------|
| 0.016          | 0.00498 | 0.00044       |

# Na5Sb1O5

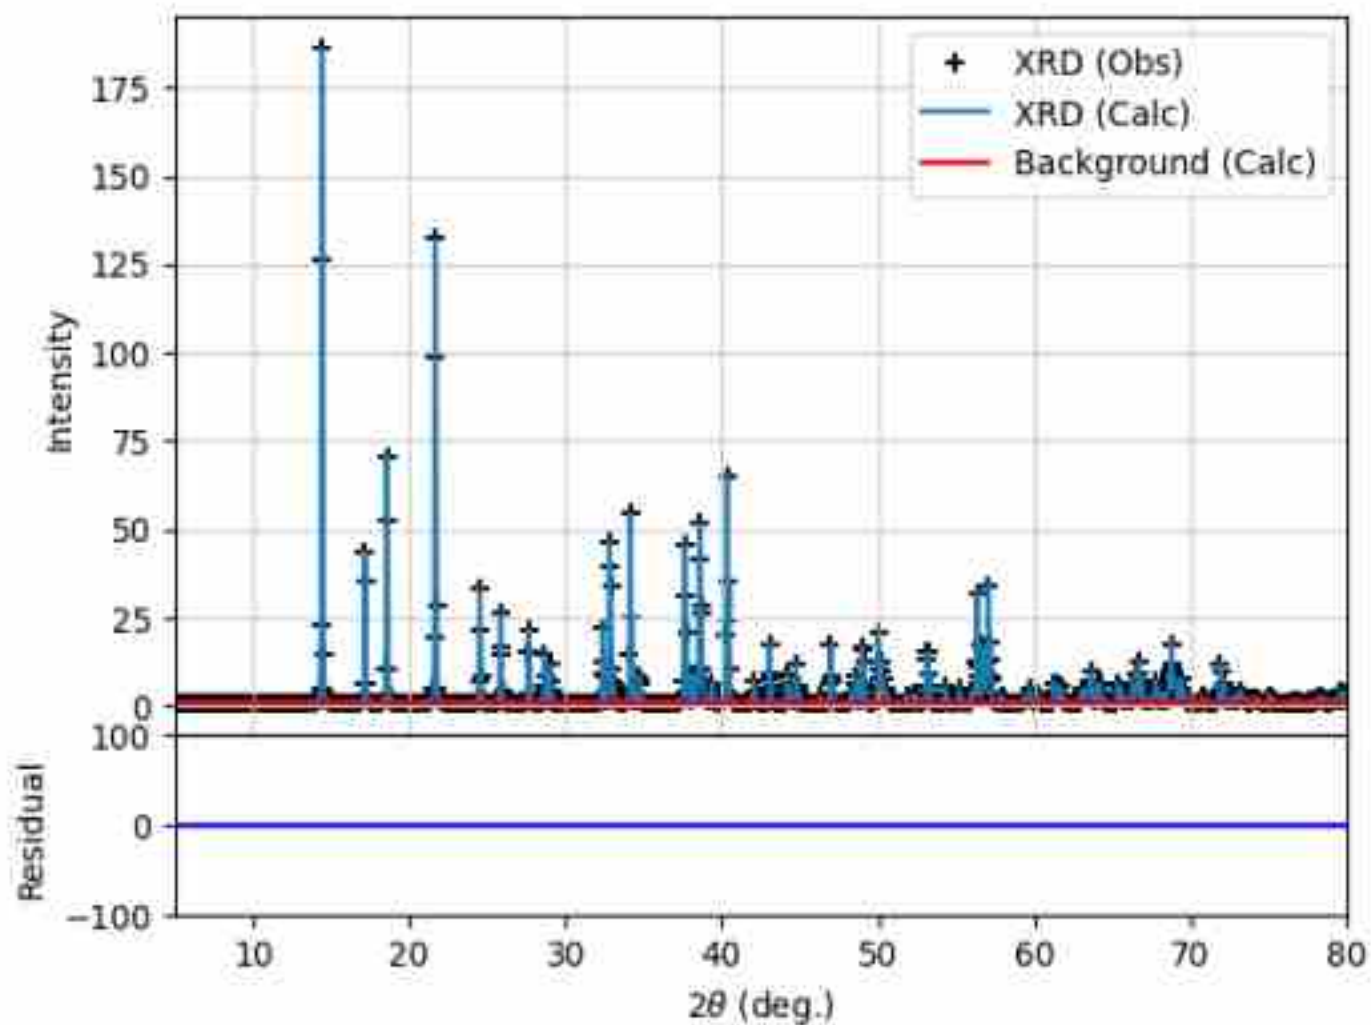

| RMSE before RR | Rwp     | RMSE after RR |
|----------------|---------|---------------|
| 0.016          | 0.00243 | 0.00055       |

# Nb1F4

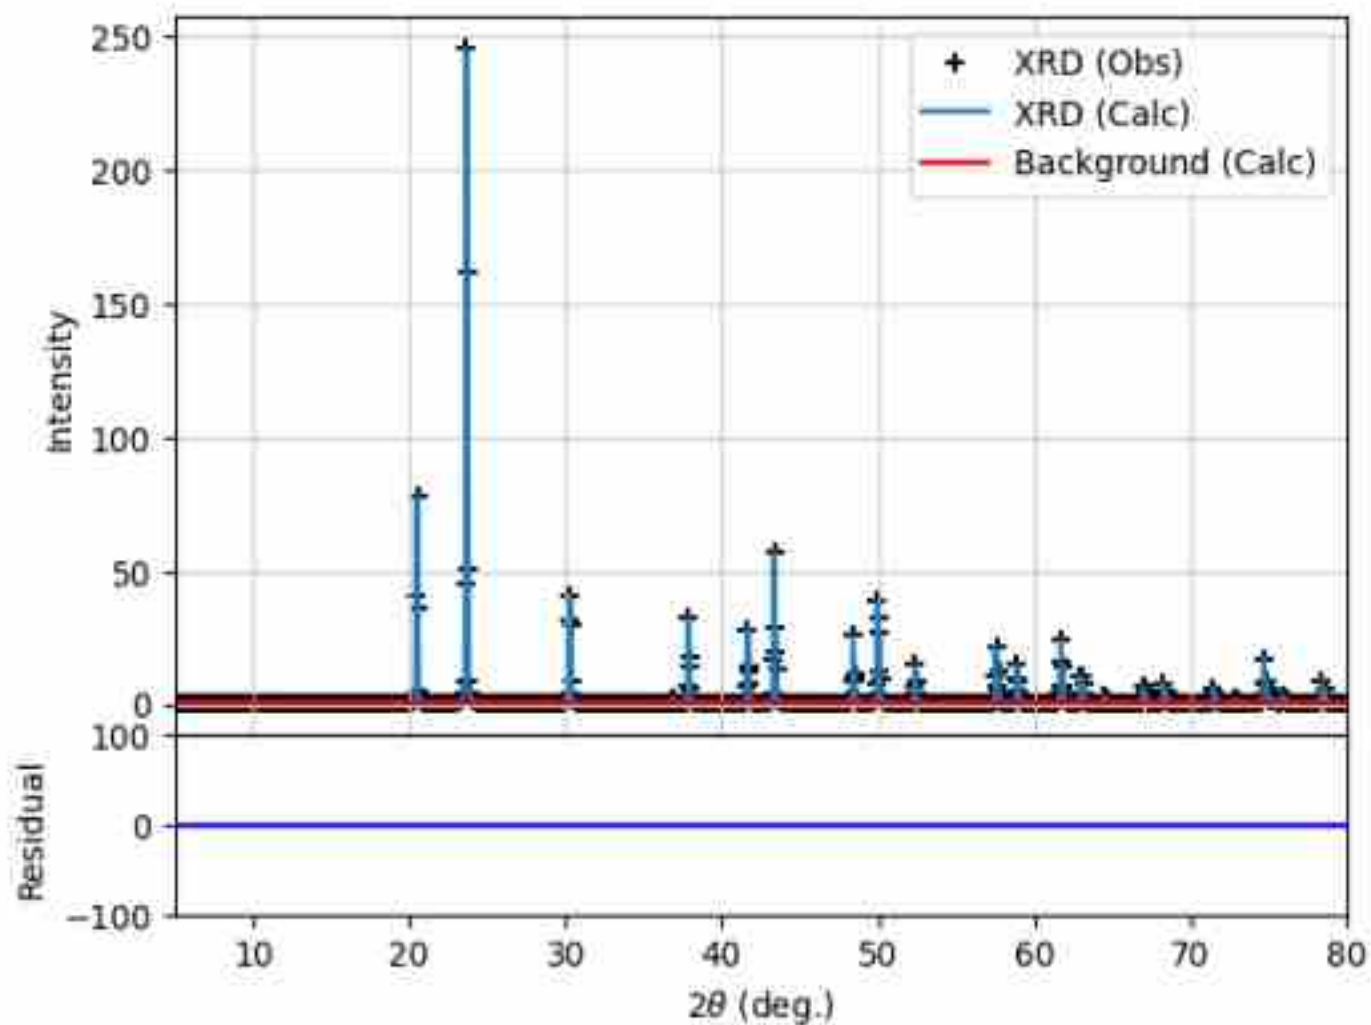

| RMSE before RR | Rwp     | RMSE after RR |
|----------------|---------|---------------|
| 0.016          | 0.00336 | 0.00064       |

# Nb<sub>2</sub>I<sub>6</sub>

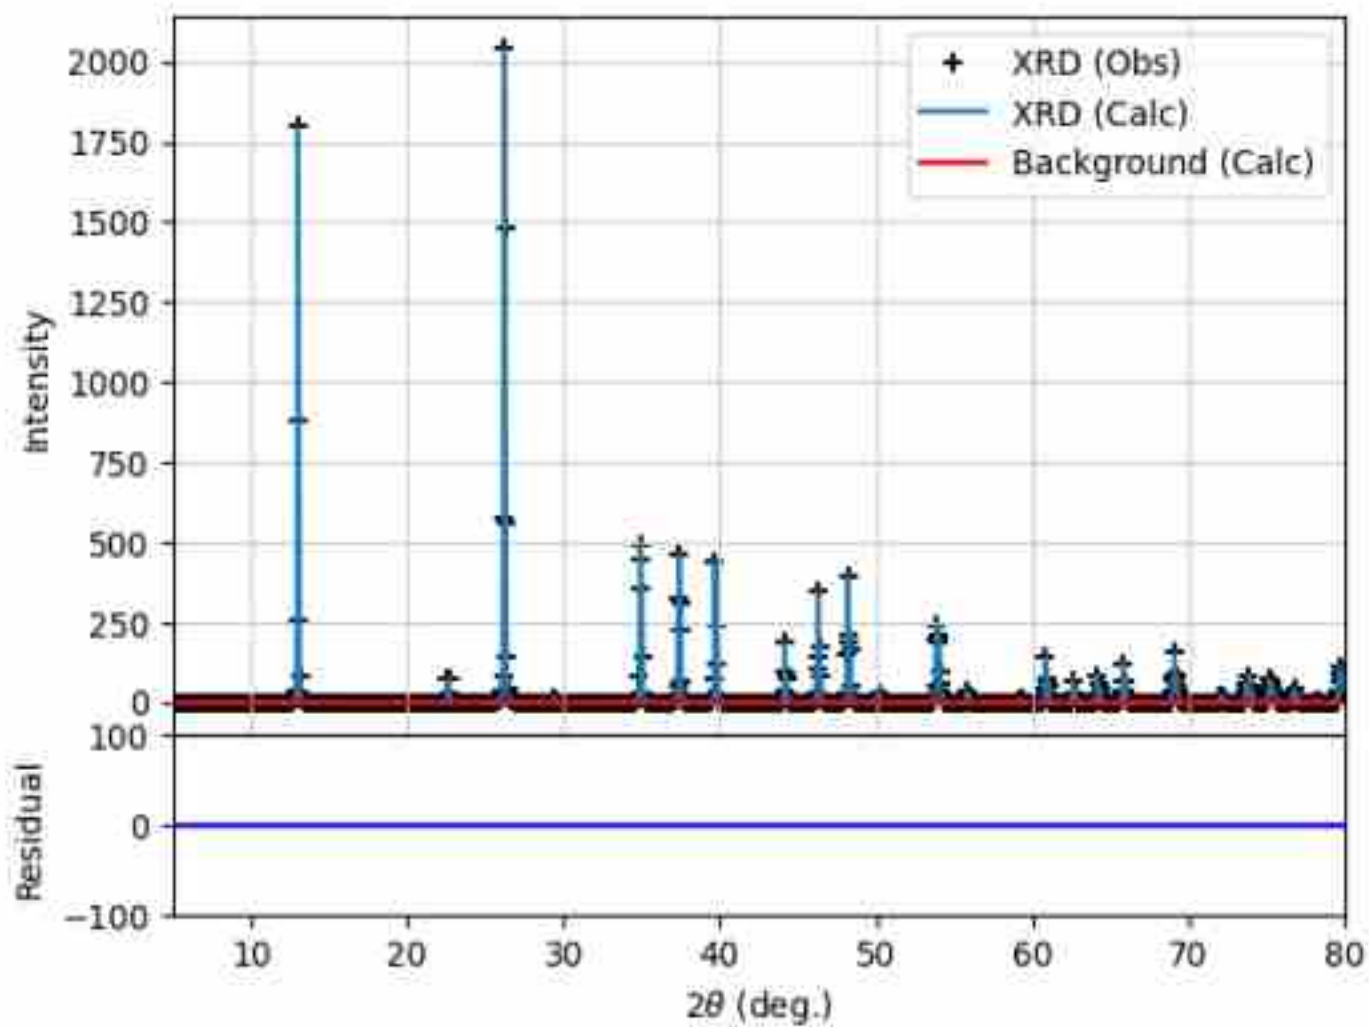

| RMSE before RR | Rwp     | RMSE after RR |
|----------------|---------|---------------|
| 0.016          | 0.00325 | 0.0003        |

# Nb4P2C2

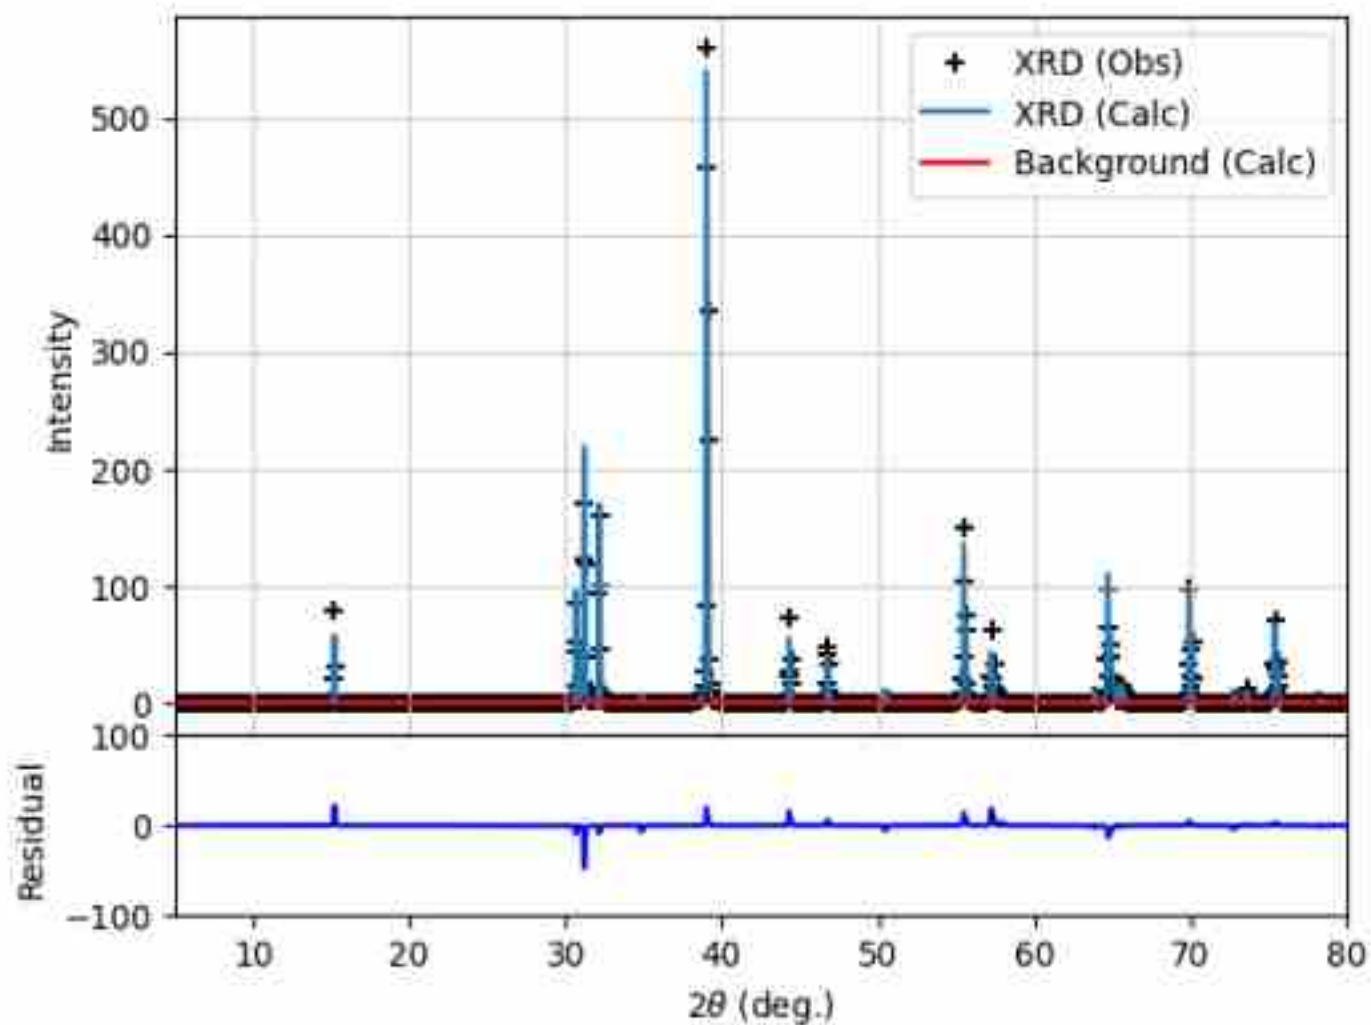

| RMSE before RR | Rwp      | RMSE after RR |
|----------------|----------|---------------|
| 0.016          | 16.79452 | 0.04524       |



# Nd1Ni2P2

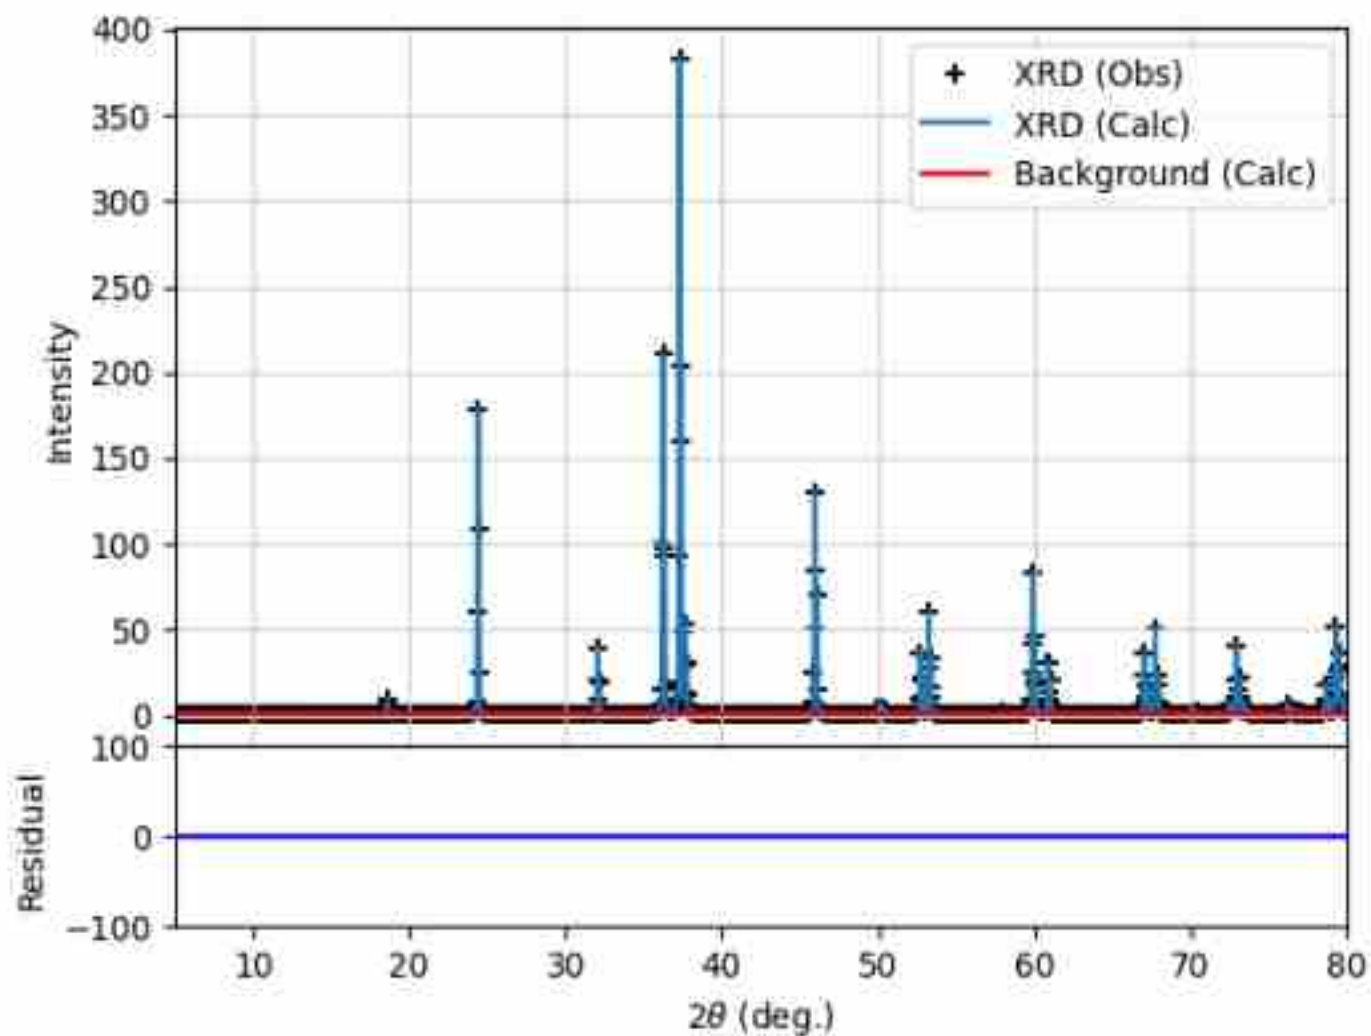

| RMSE before RR | Rwp     | RMSE after RR |
|----------------|---------|---------------|
| 0.016          | 0.00402 | 0.00051       |

# Nd<sub>2</sub>B<sub>4</sub>Ru<sub>4</sub>

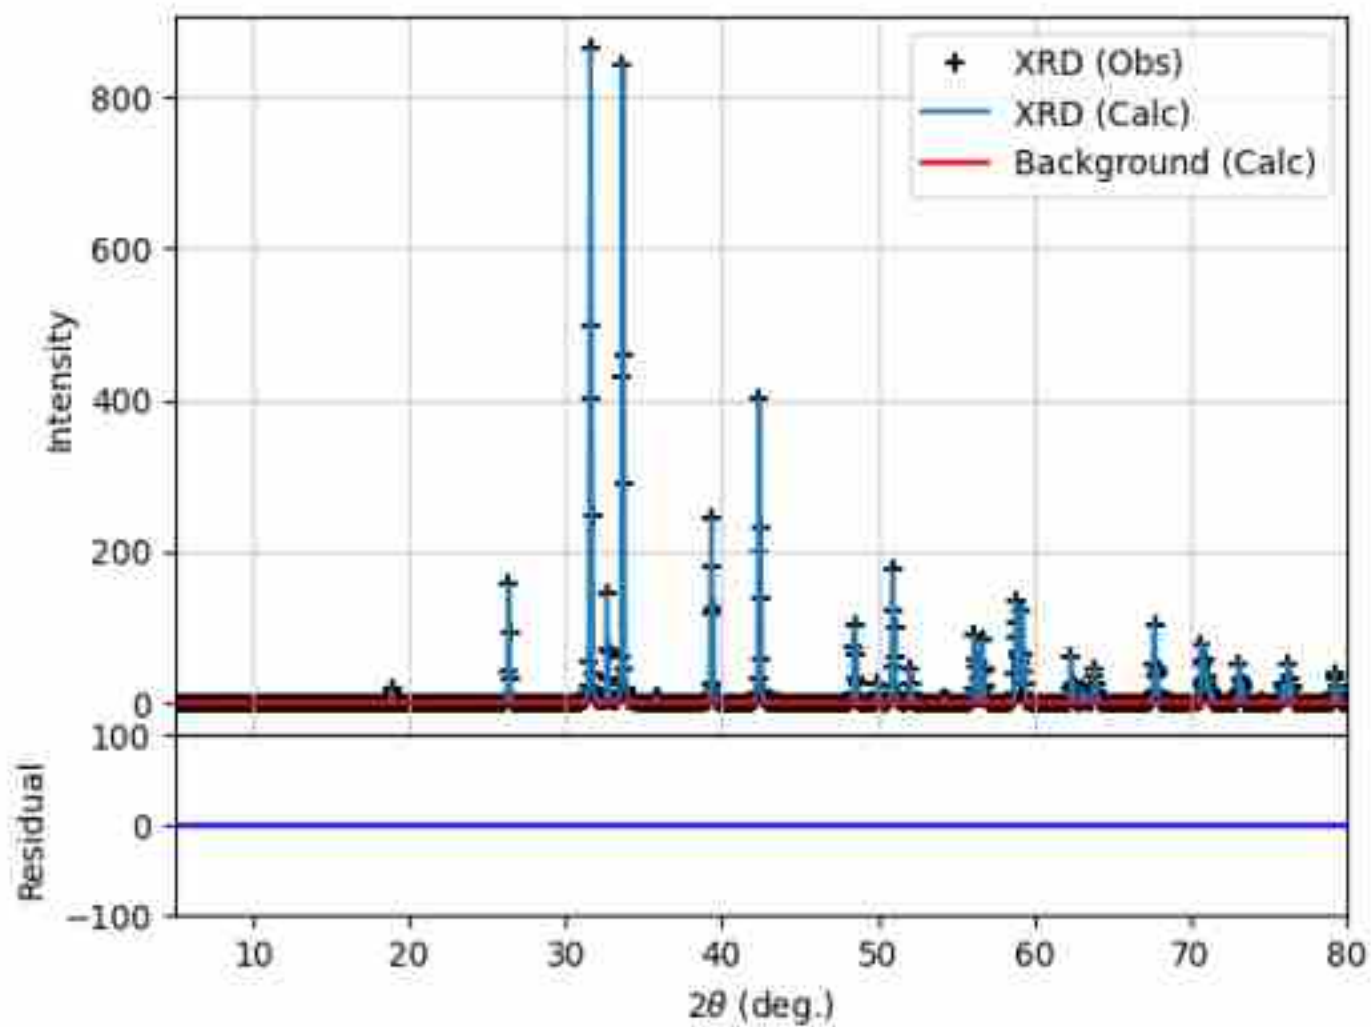

| RMSE before RR | Rwp     | RMSE after RR |
|----------------|---------|---------------|
| 0.016          | 0.00363 | 0.00128       |

# Nd<sub>2</sub>Cd<sub>4</sub>Pd<sub>2</sub>

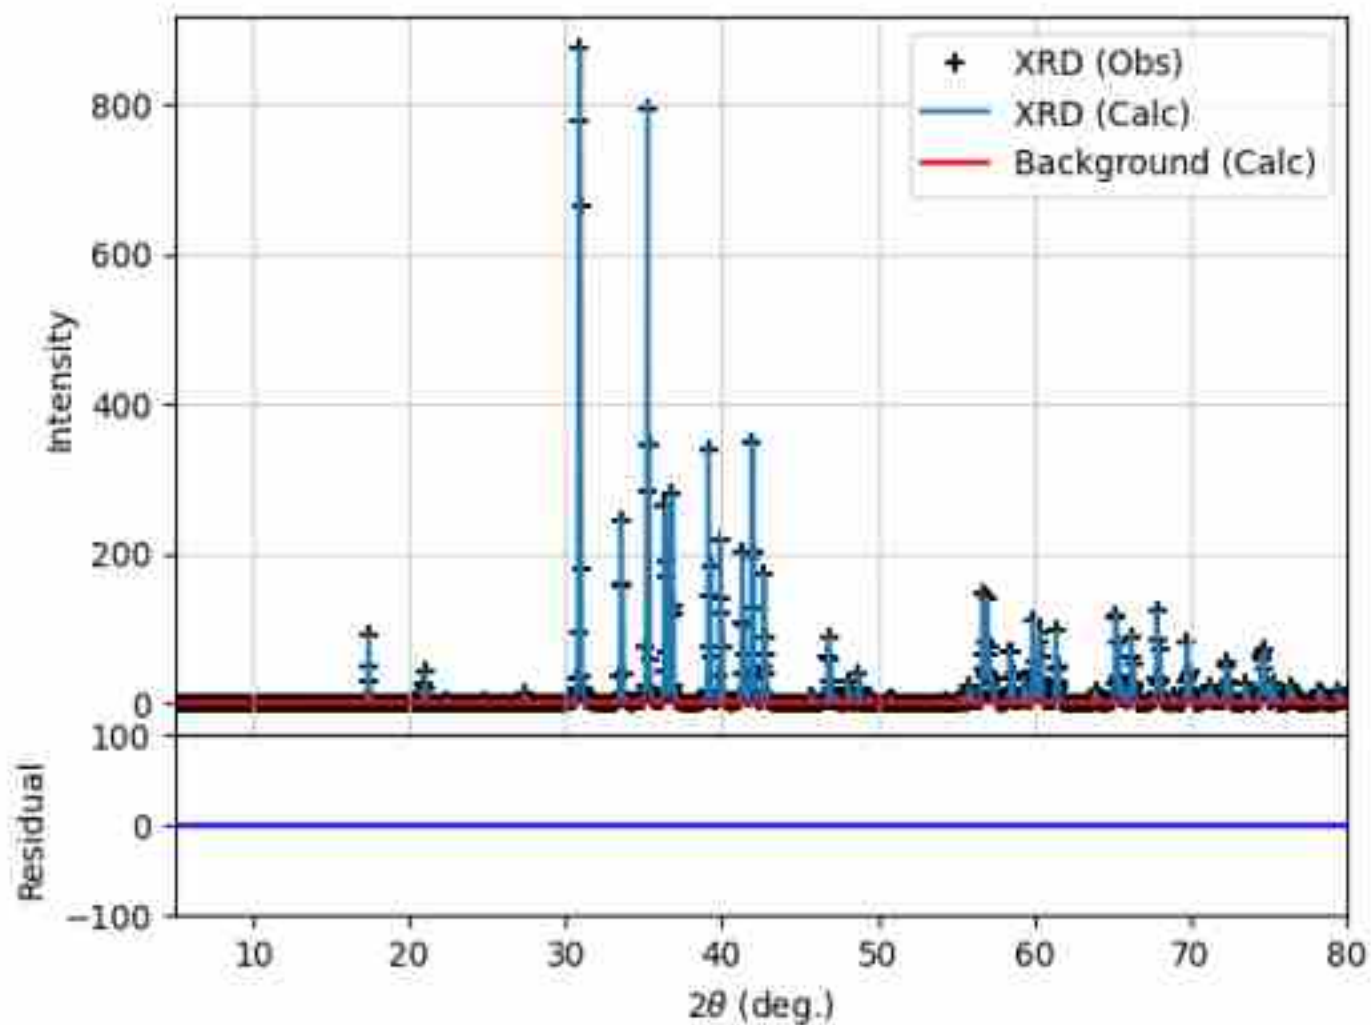

| RMSE before RR | Rwp     | RMSE after RR |
|----------------|---------|---------------|
| 0.016          | 0.00384 | 0.00023       |

# Nd<sub>2</sub>Cu<sub>10</sub>O<sub>4</sub>

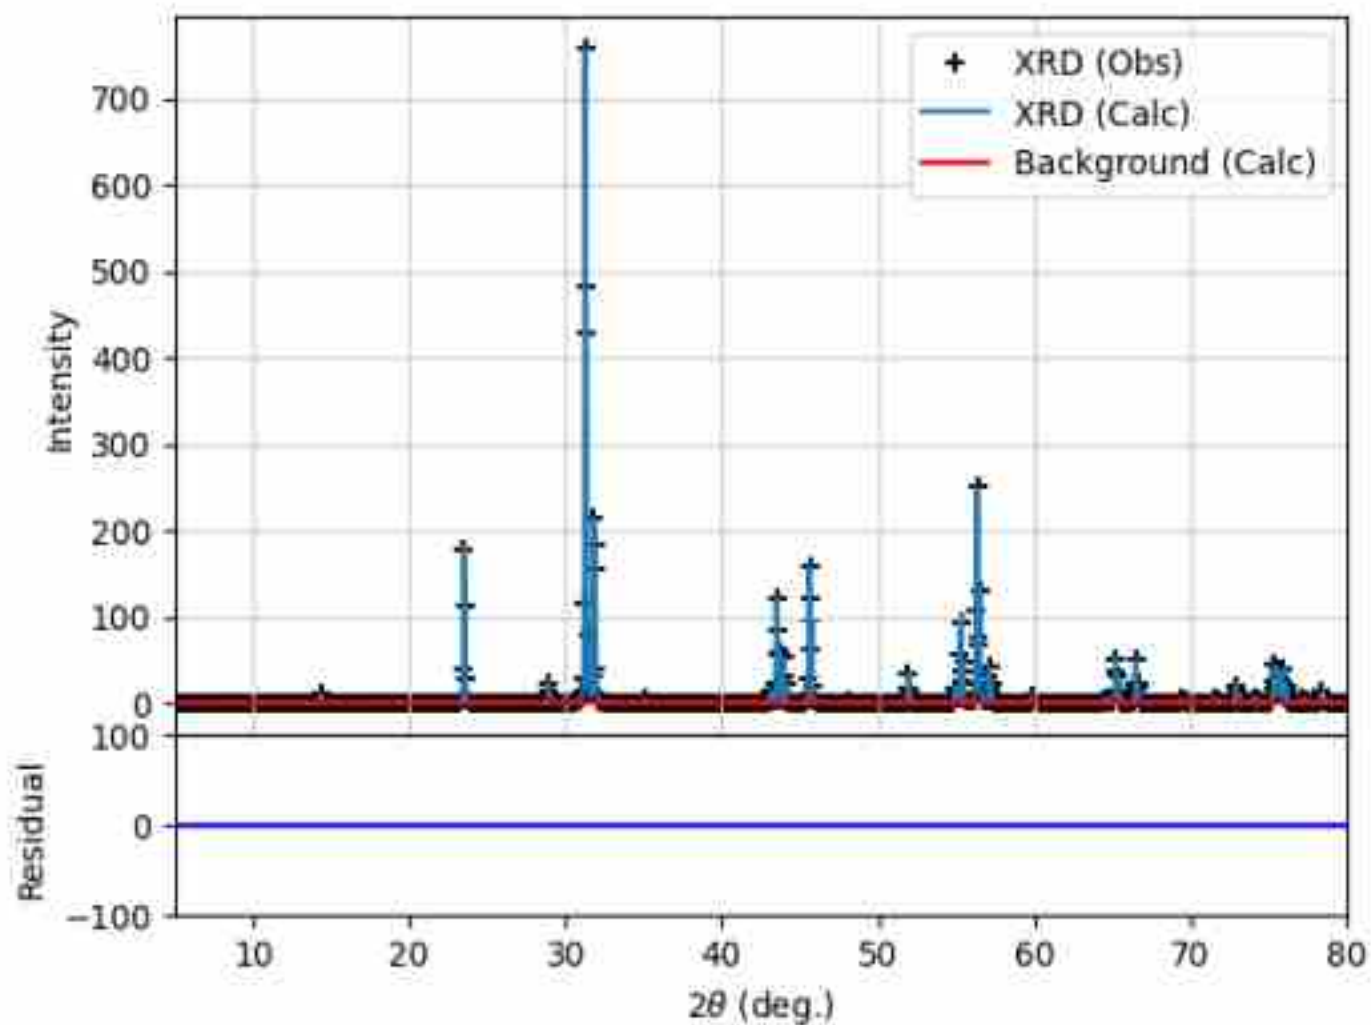

| RMSE before RR | Rwp     | RMSE after RR |
|----------------|---------|---------------|
| 0.016          | 0.00412 | 0.00137       |

# Nd<sub>2</sub>Cu<sub>2</sub>S<sub>2</sub>O<sub>2</sub>

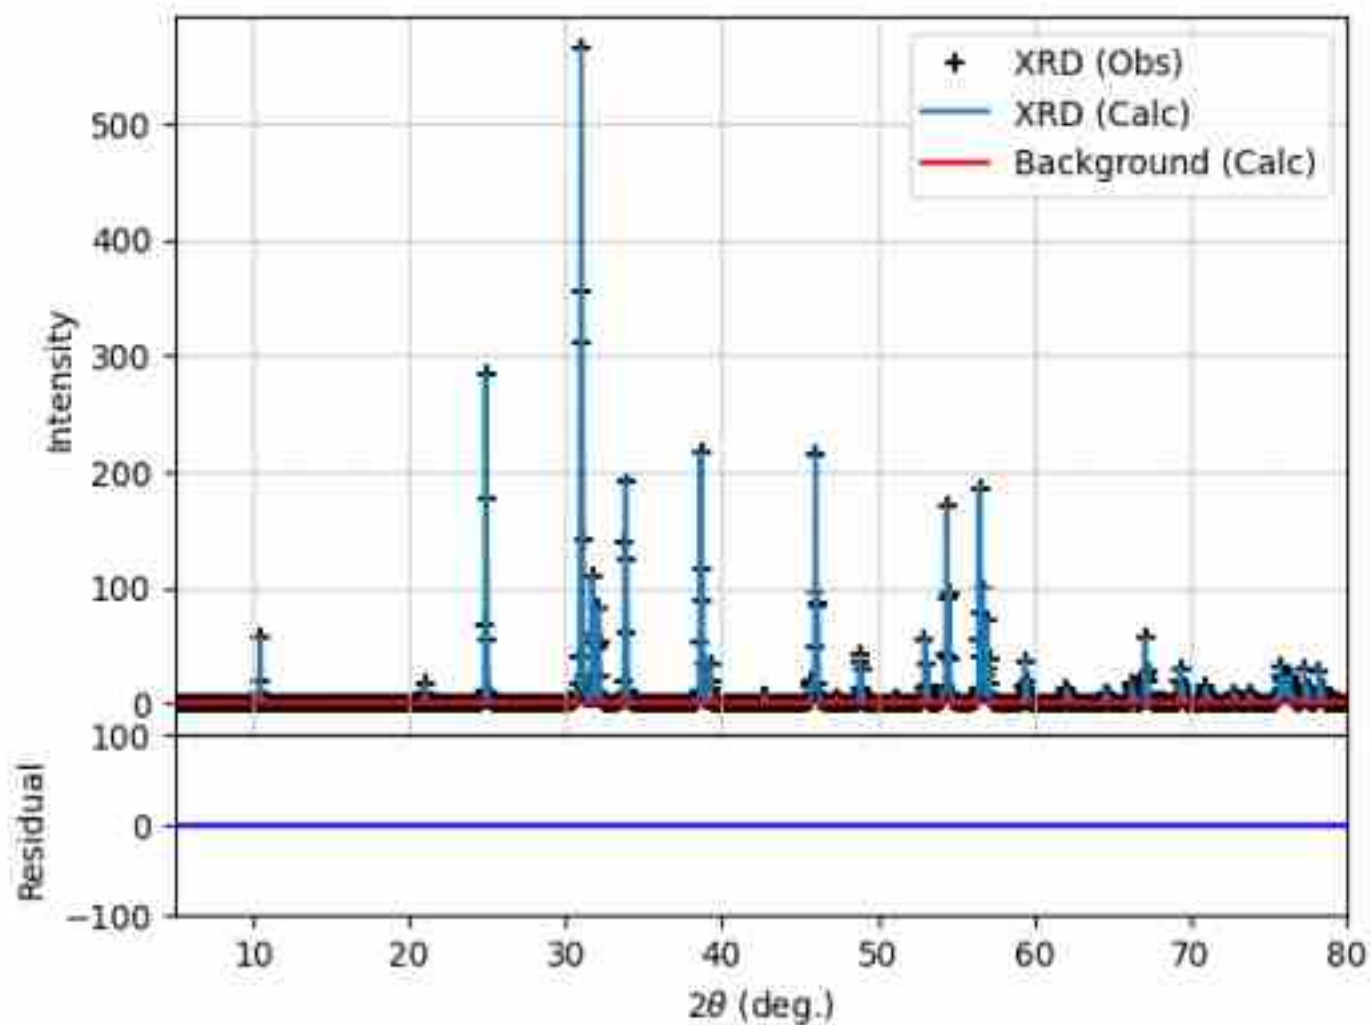

| RMSE before RR | Rwp     | RMSE after RR |
|----------------|---------|---------------|
| 0.016          | 0.00579 | 0.00175       |

# Nd<sub>2</sub>Fe<sub>2</sub>Ge<sub>4</sub>

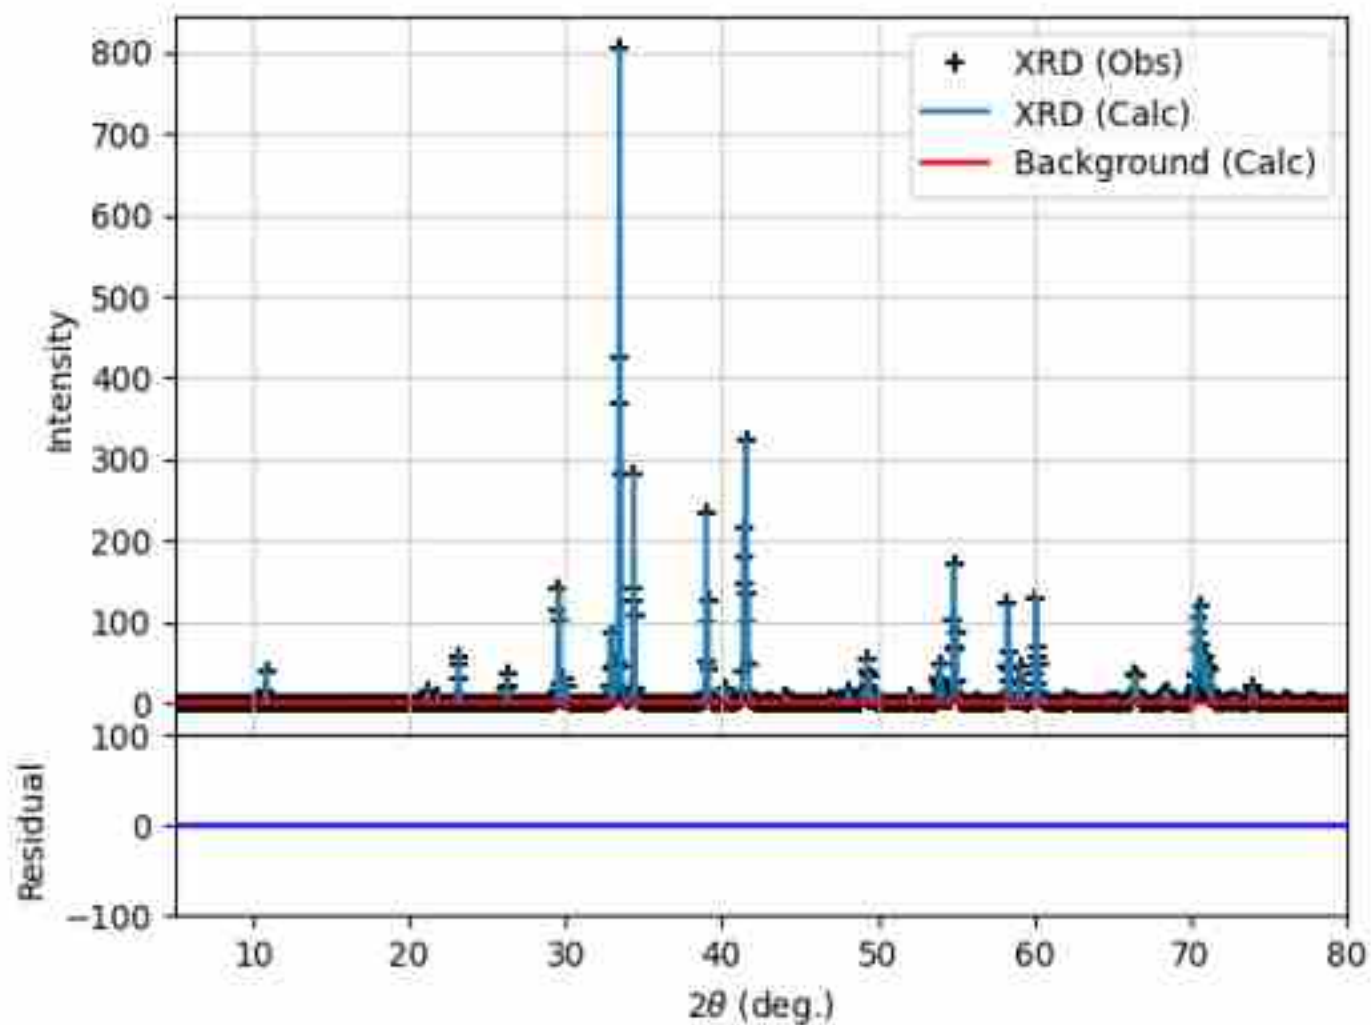

| RMSE before RR | Rwp     | RMSE after RR |
|----------------|---------|---------------|
| 0.016          | 0.00485 | 0.00047       |

# Nd<sub>2</sub>NiGe<sub>6</sub>

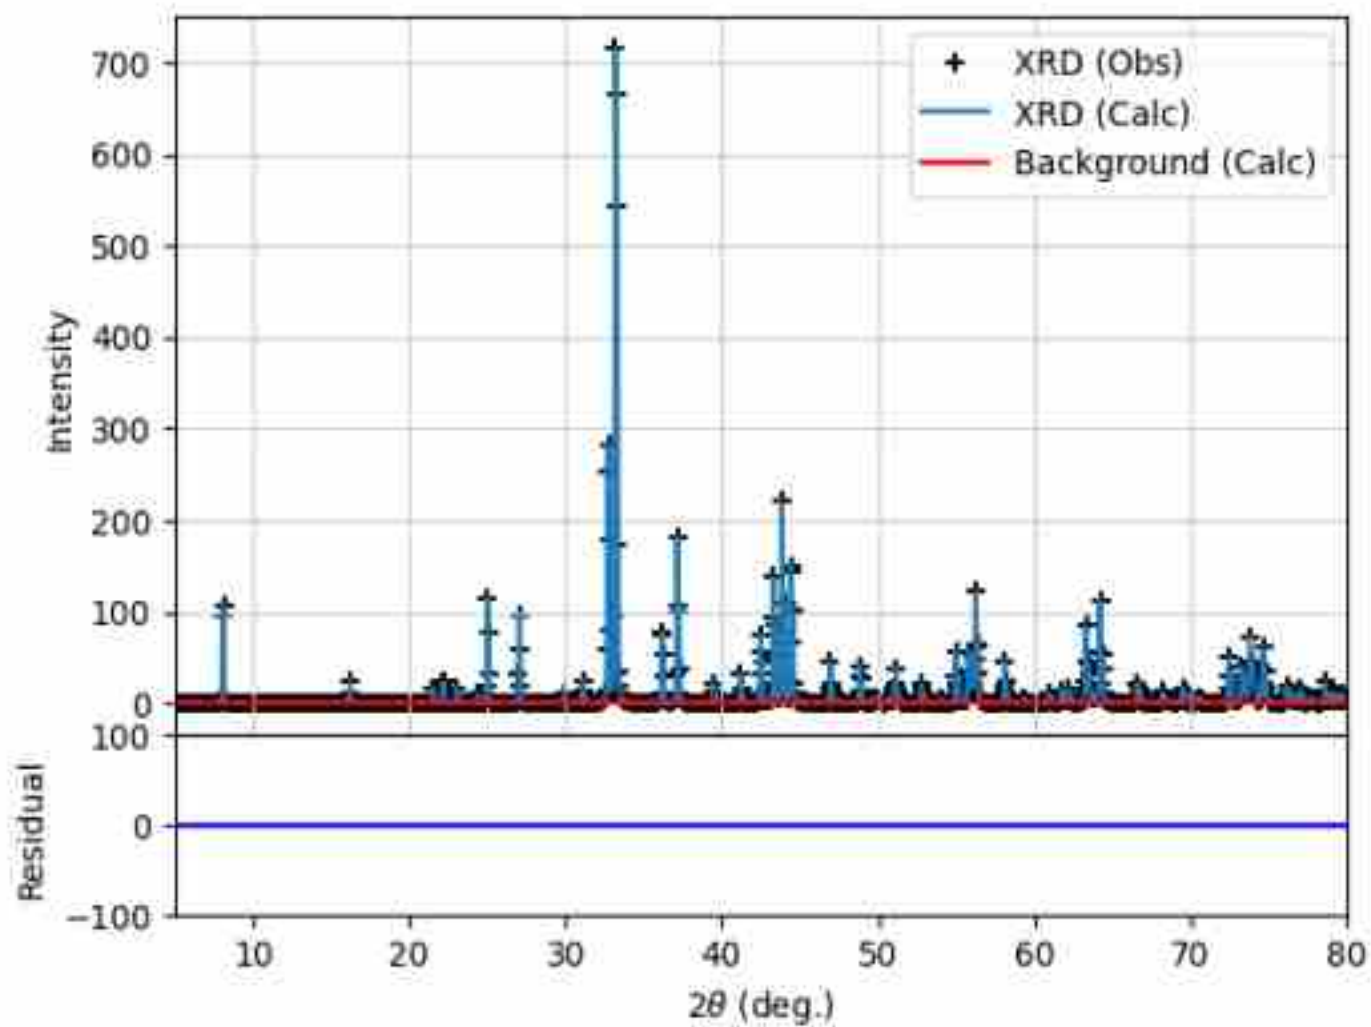

| RMSE before RR | Rwp     | RMSE after RR |
|----------------|---------|---------------|
| 0.016          | 0.00329 | 0.00031       |

# Nd<sub>2</sub>Si<sub>4</sub>Ru<sub>2</sub>

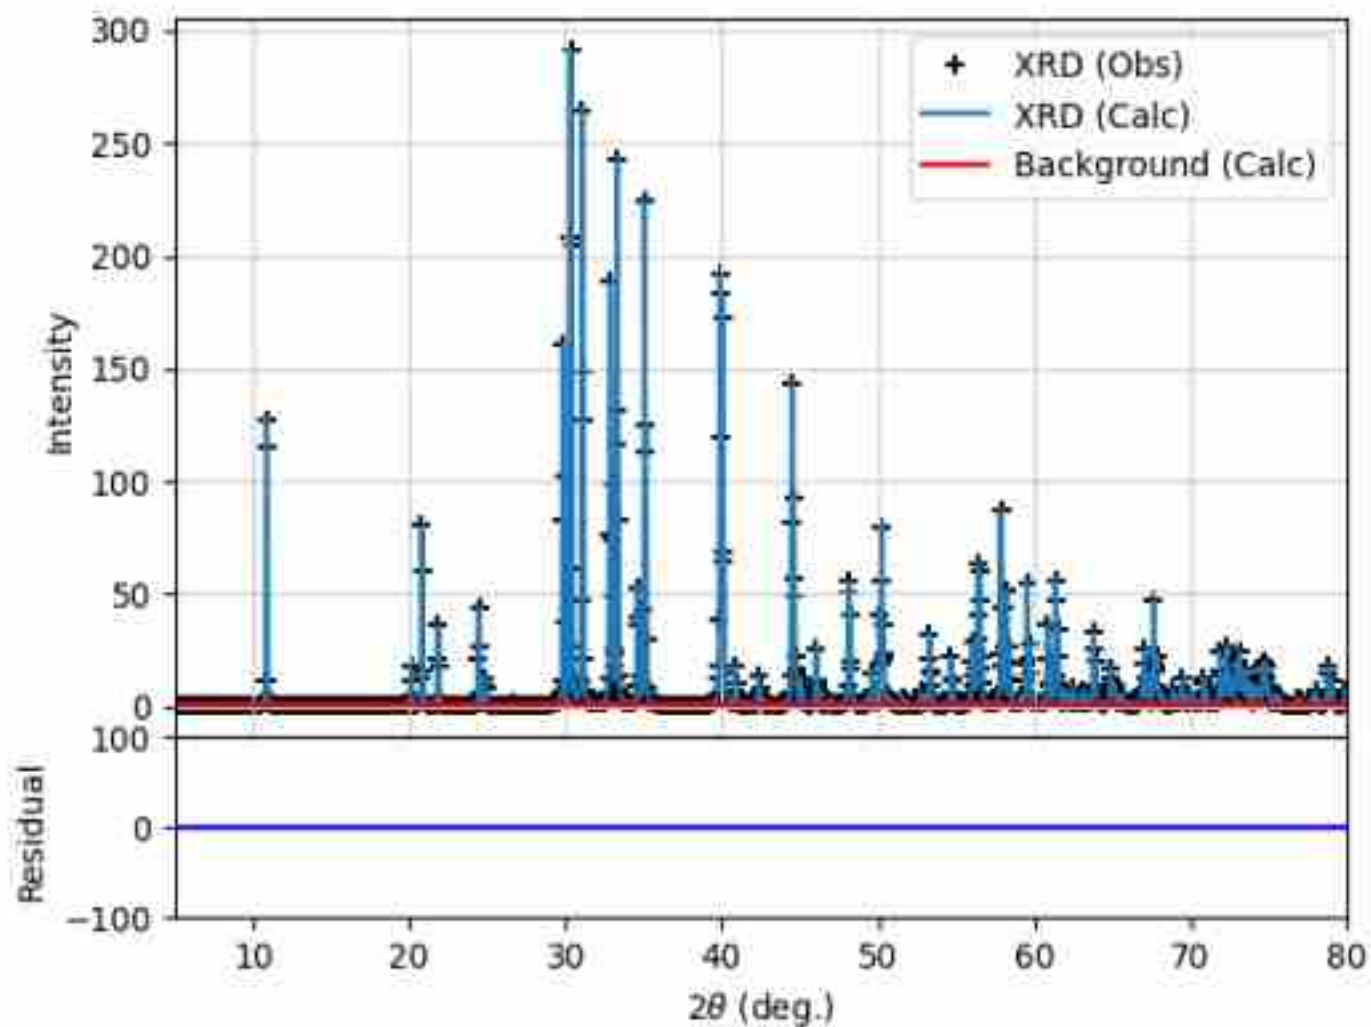

| RMSE before RR | Rwp     | RMSE after RR |
|----------------|---------|---------------|
| 0.016          | 0.01827 | 0.00189       |



# Nd<sub>4</sub>Pb<sub>2</sub>Se<sub>8</sub>

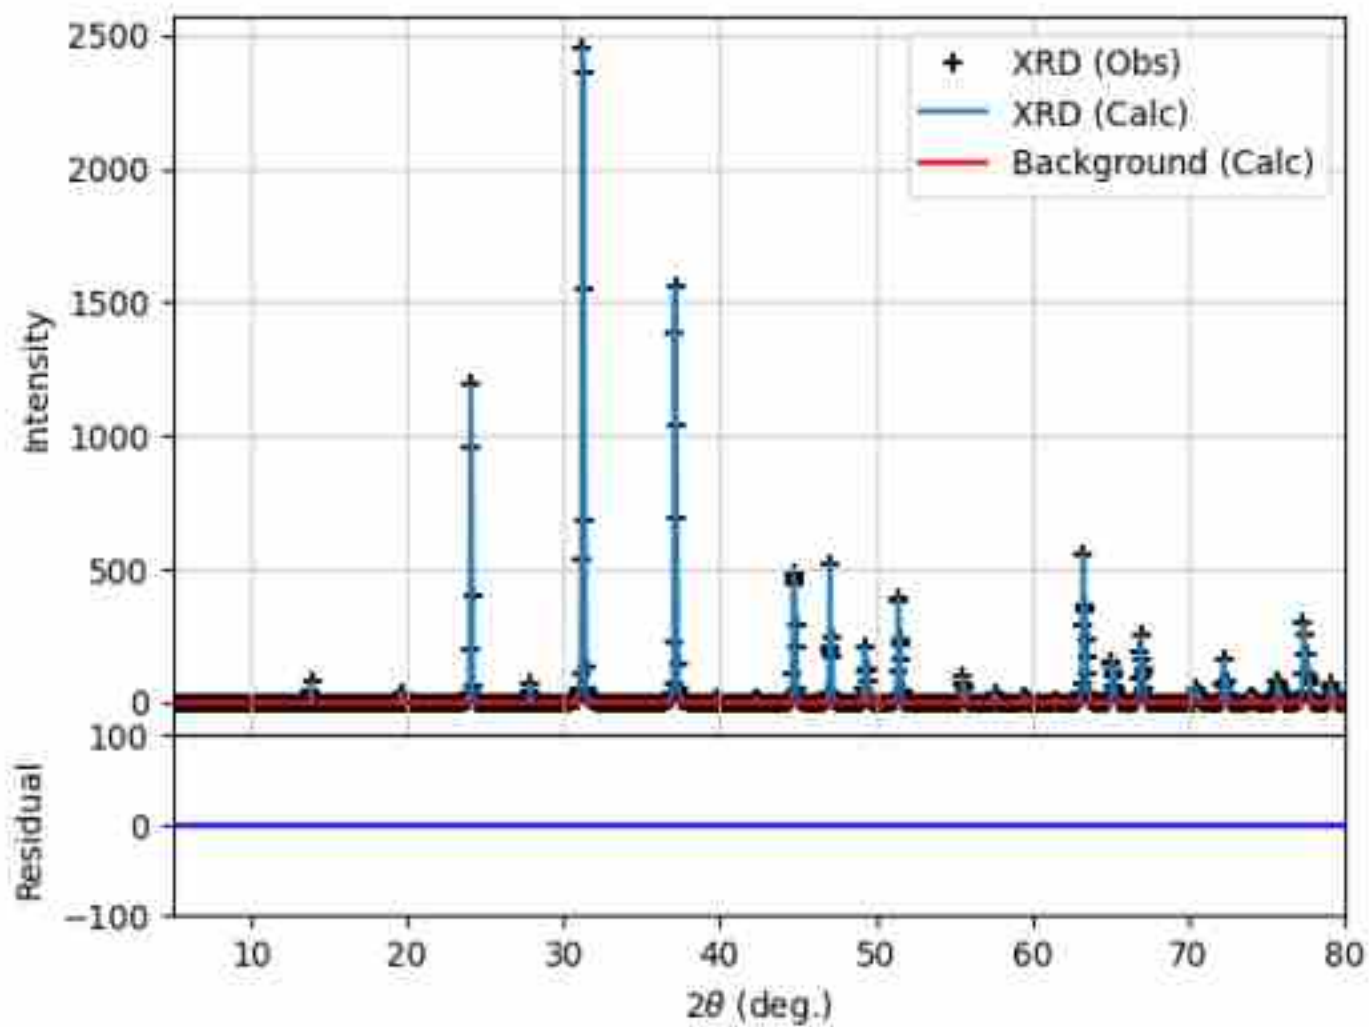

| RMSE before RR | Rwp     | RMSE after RR |
|----------------|---------|---------------|
| 0.016          | 0.00397 | 0.00071       |

# Nd4Pt4

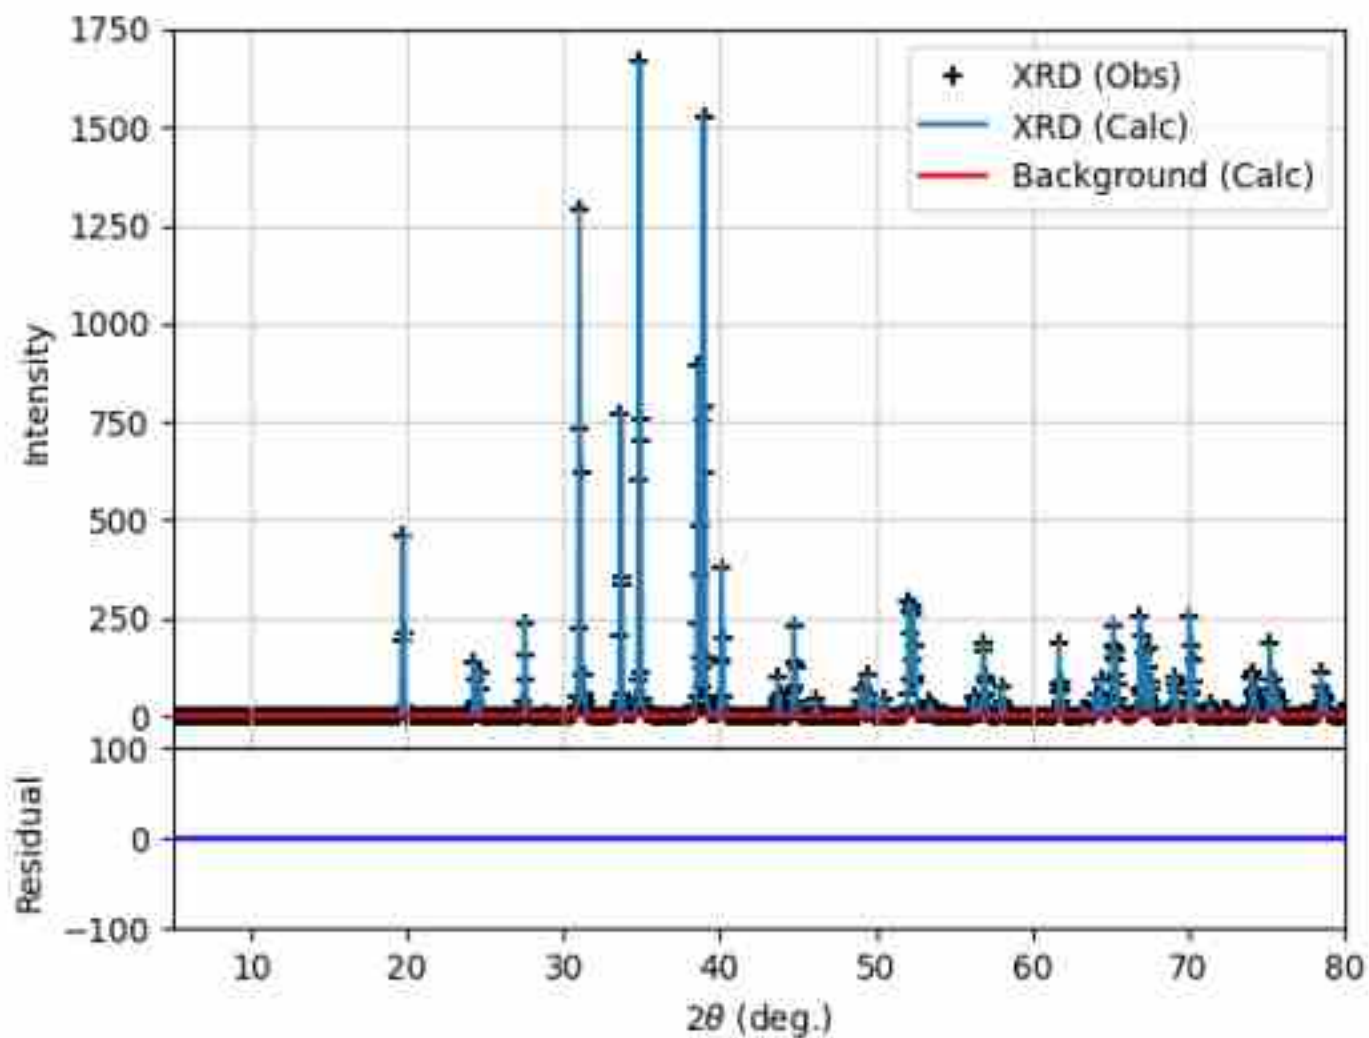

| RMSE before RR | Rwp     | RMSE after RR |
|----------------|---------|---------------|
| 0.016          | 0.00546 | 0.00032       |

# Nd6In2

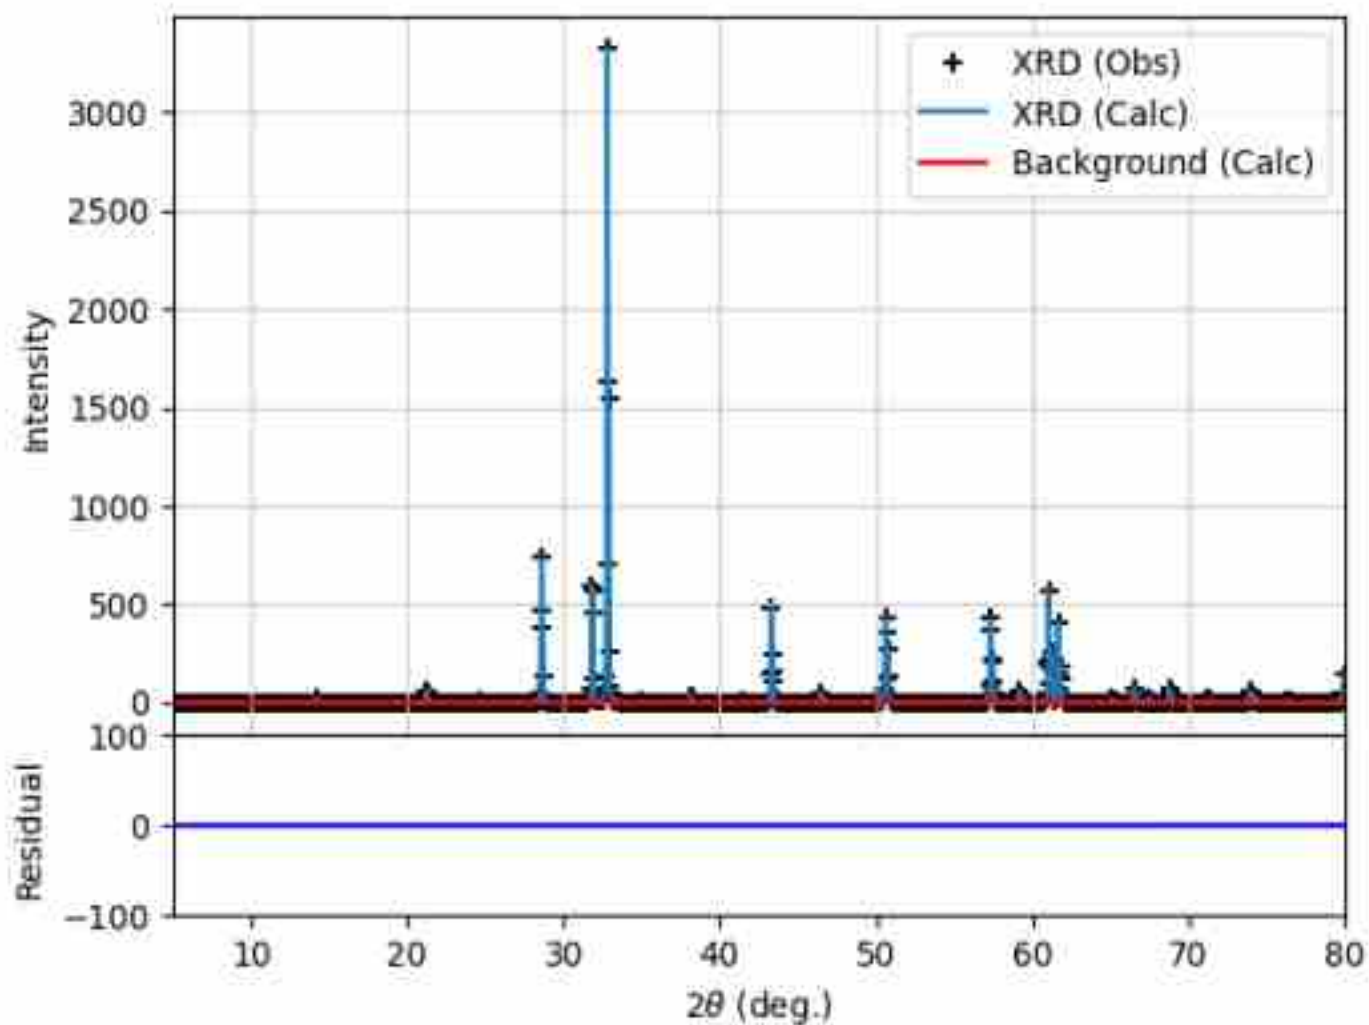

| RMSE before RR | Rwp     | RMSE after RR |
|----------------|---------|---------------|
| 0.016          | 0.15363 | 0.00241       |

# Nd10Ir4

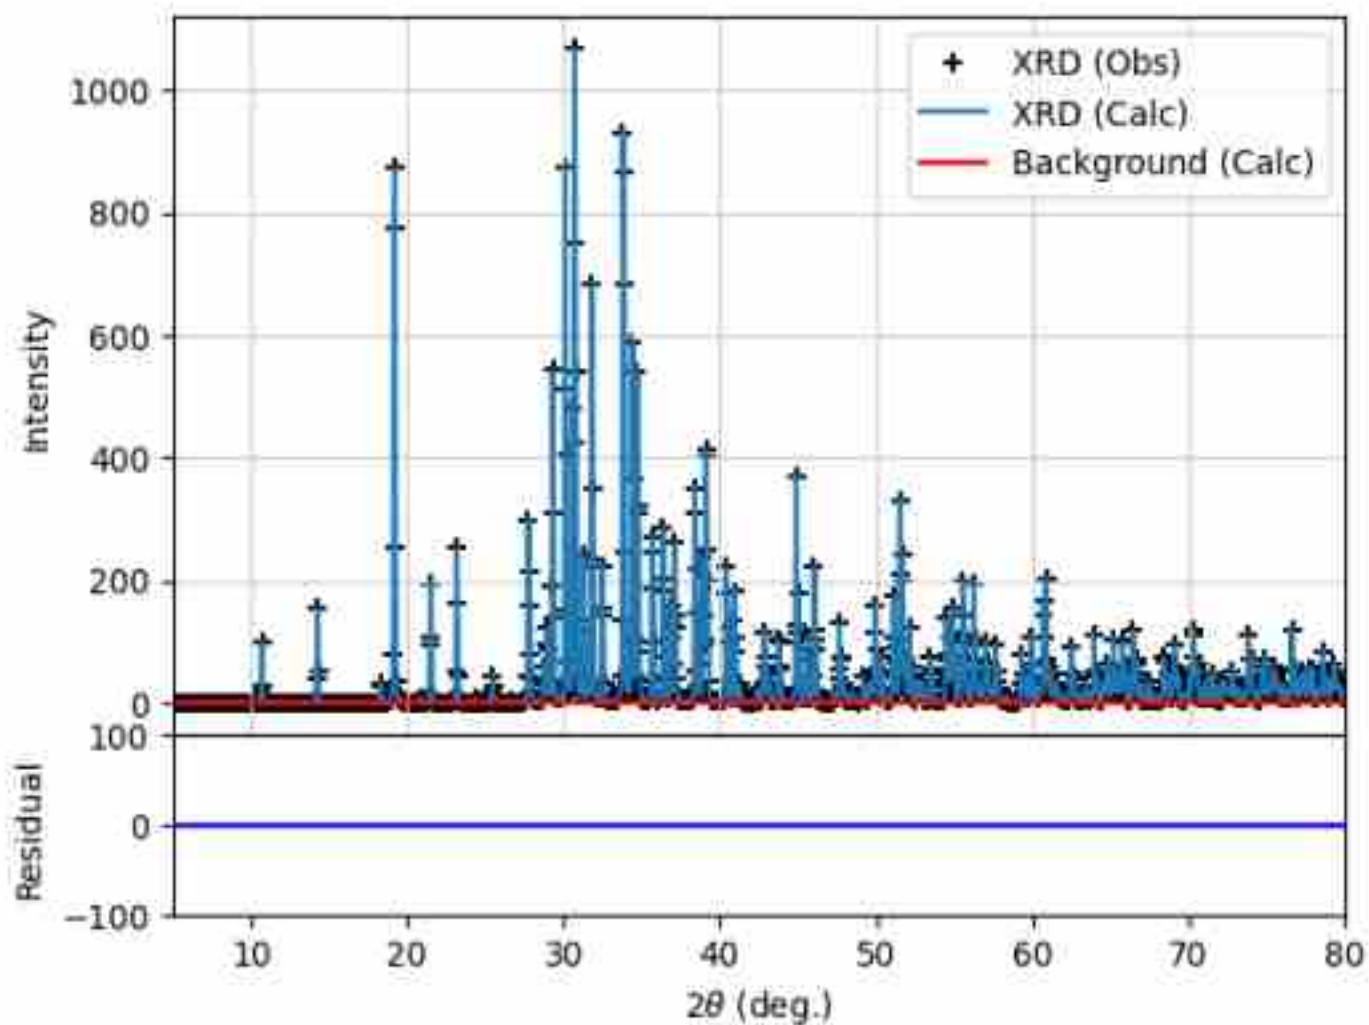

| RMSE before RR | Rwp     | RMSE after RR |
|----------------|---------|---------------|
| 0.016          | 0.00364 | 0.00023       |

# Ni6Mo4P2

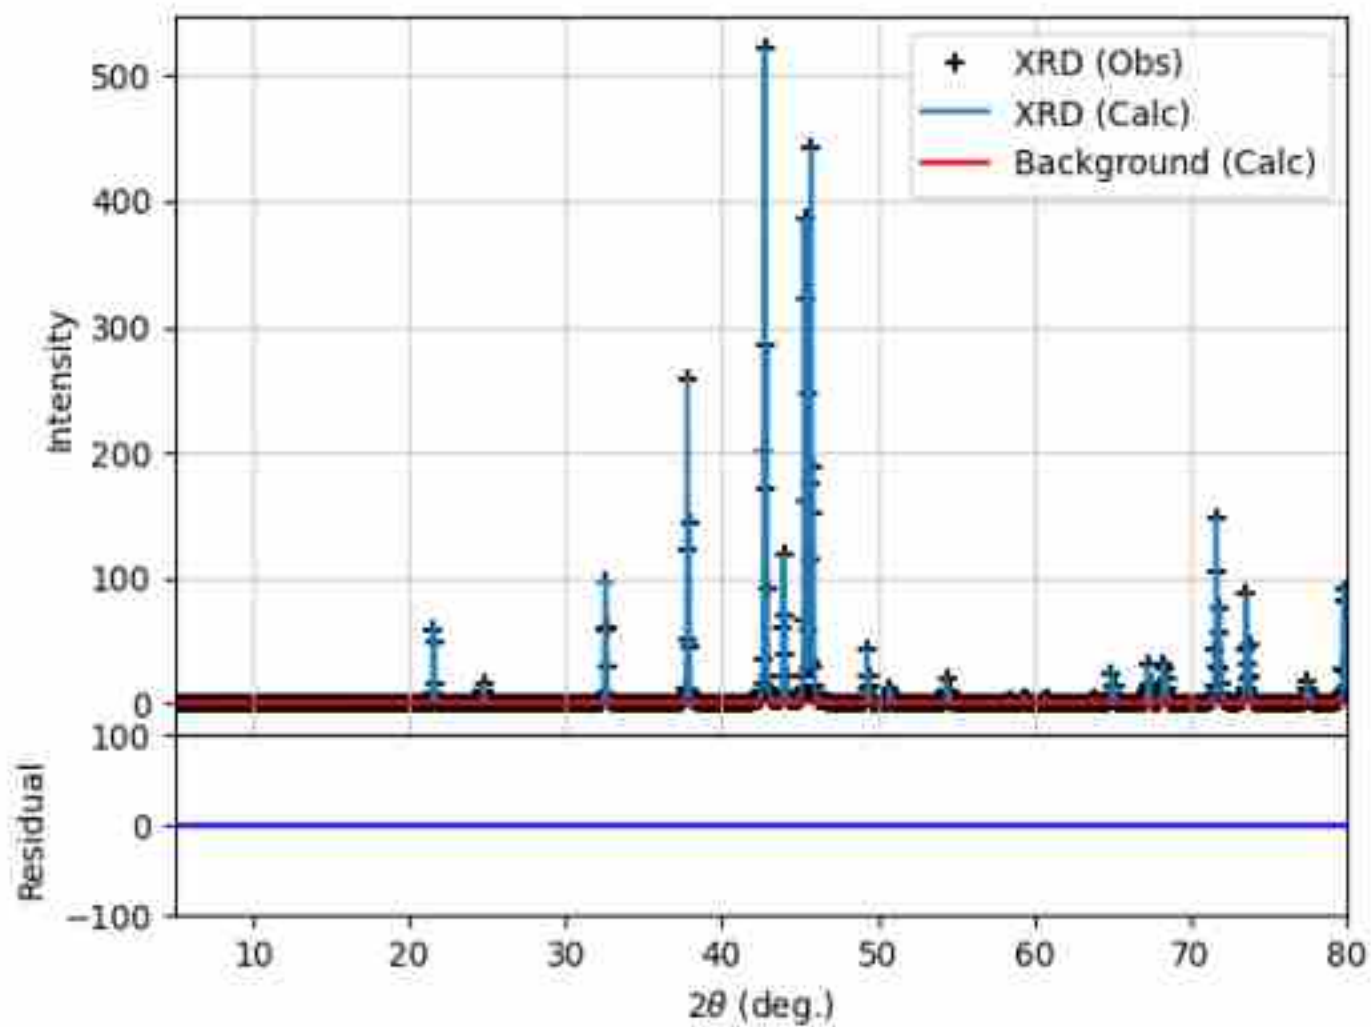

| RMSE before RR | Rwp     | RMSE after RR |
|----------------|---------|---------------|
| 0.016          | 0.04335 | 0.00266       |

# Ni6O1F11

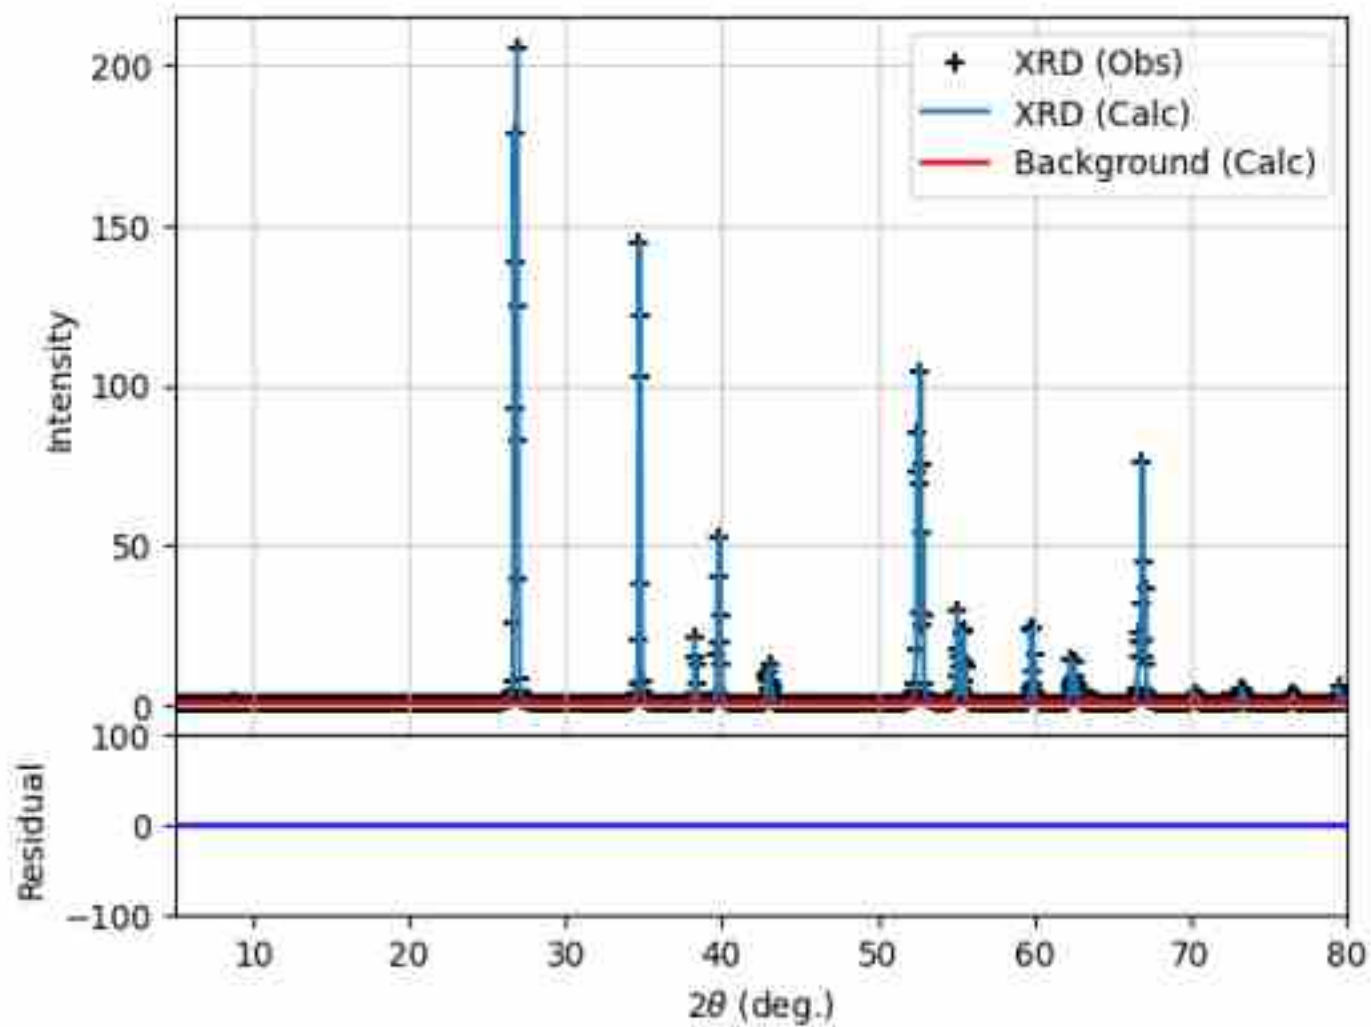

| RMSE before RR | Rwp     | RMSE after RR |
|----------------|---------|---------------|
| 0.016          | 0.00415 | 0.00106       |

# Pa2Pd6

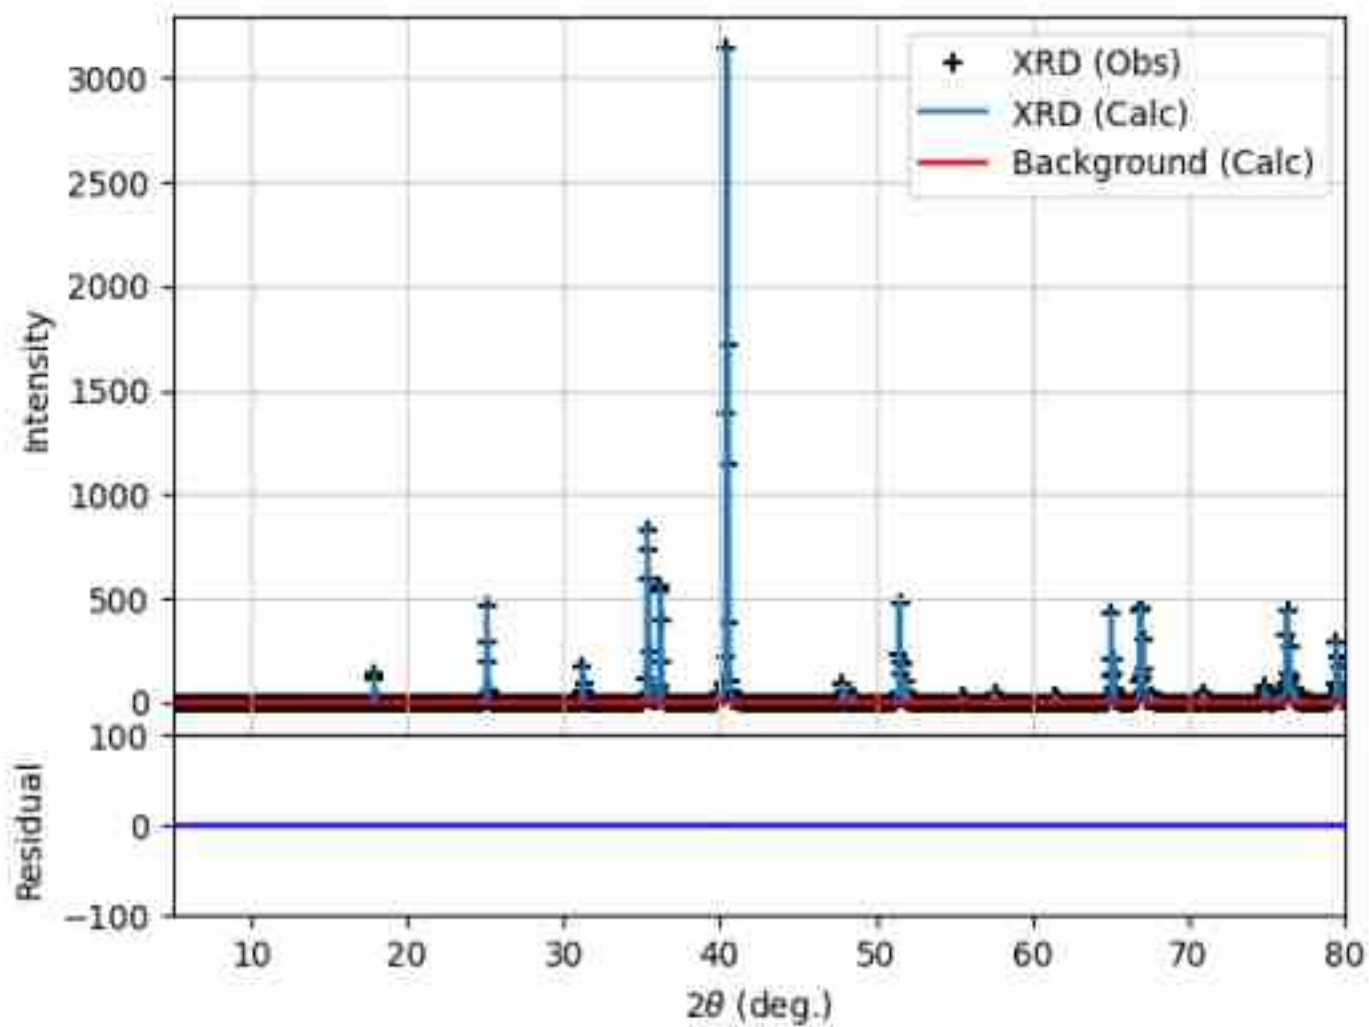

| RMSE before RR | Rwp     | RMSE after RR |
|----------------|---------|---------------|
| 0.016          | 0.02543 | 0.00199       |

# Pm2Br4

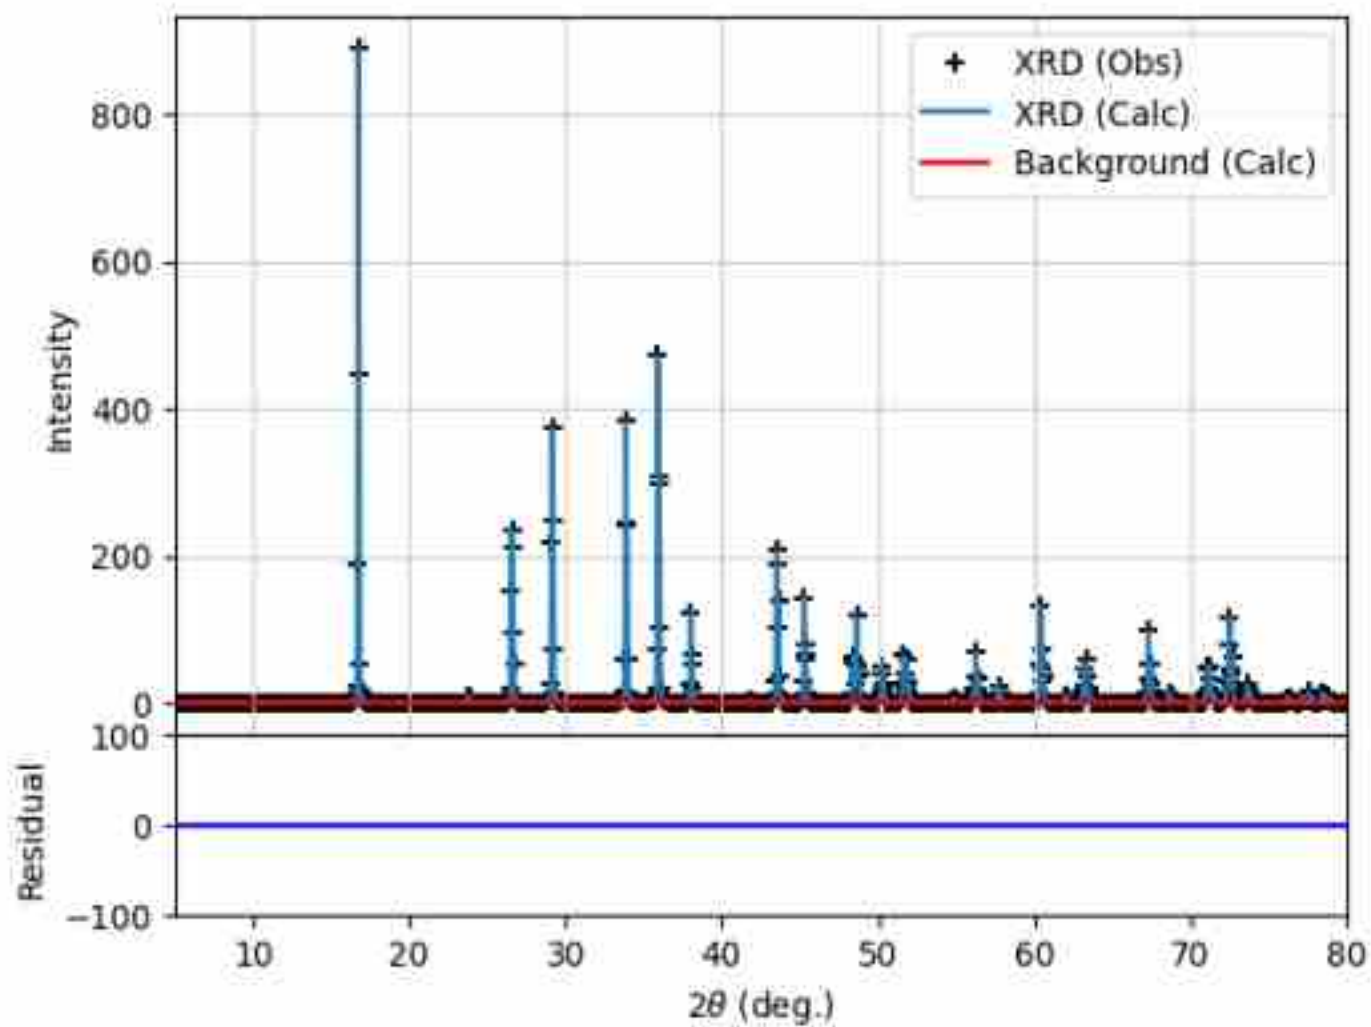

| RMSE before RR | Rwp     | RMSE after RR |
|----------------|---------|---------------|
| 0.016          | 0.00477 | 0.00063       |



# Pr1Ho1Al4

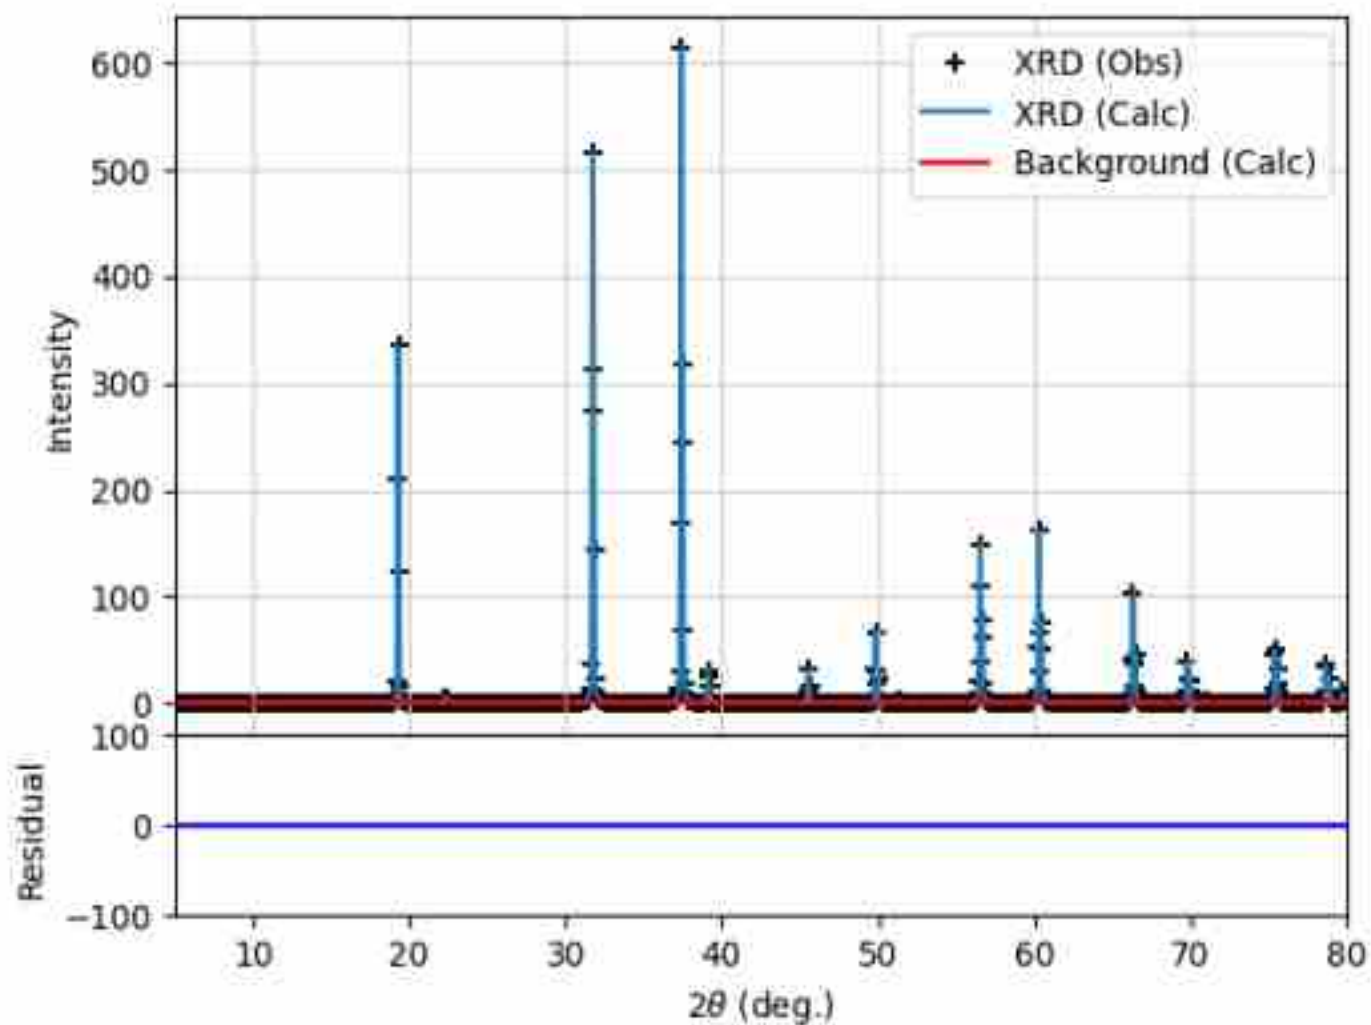

| RMSE before RR | Rwp     | RMSE after RR |
|----------------|---------|---------------|
| 0.016          | 0.03041 | 0.00407       |

# Pr1Sb12Os4

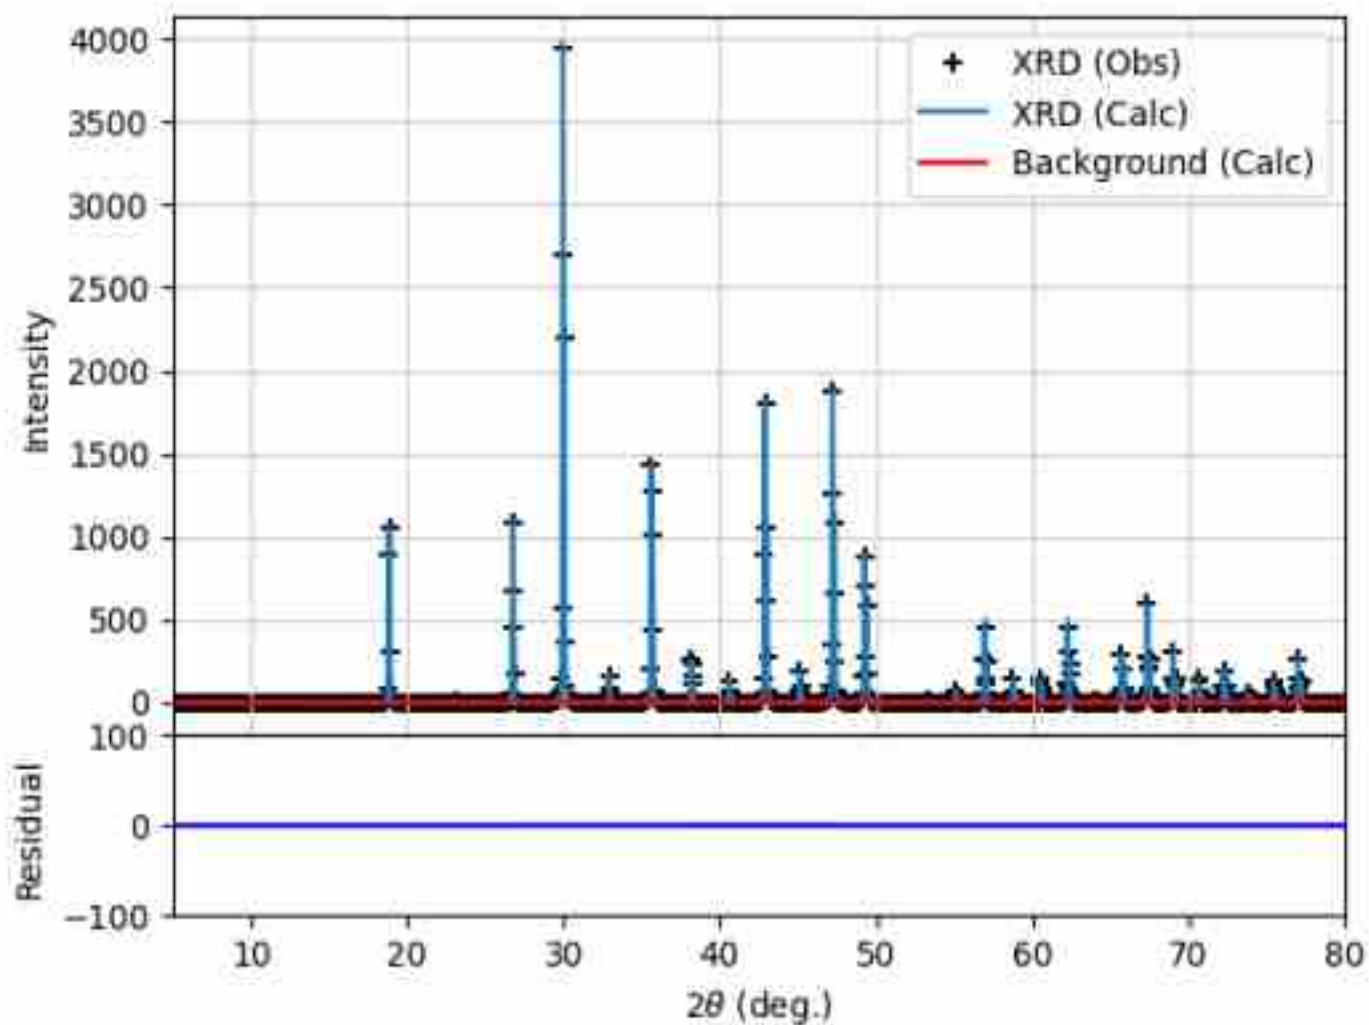

| RMSE before RR | Rwp     | RMSE after RR |
|----------------|---------|---------------|
| 0.016          | 0.10491 | 0.00295       |

# Pr<sub>2</sub>H<sub>6</sub>O<sub>6</sub>

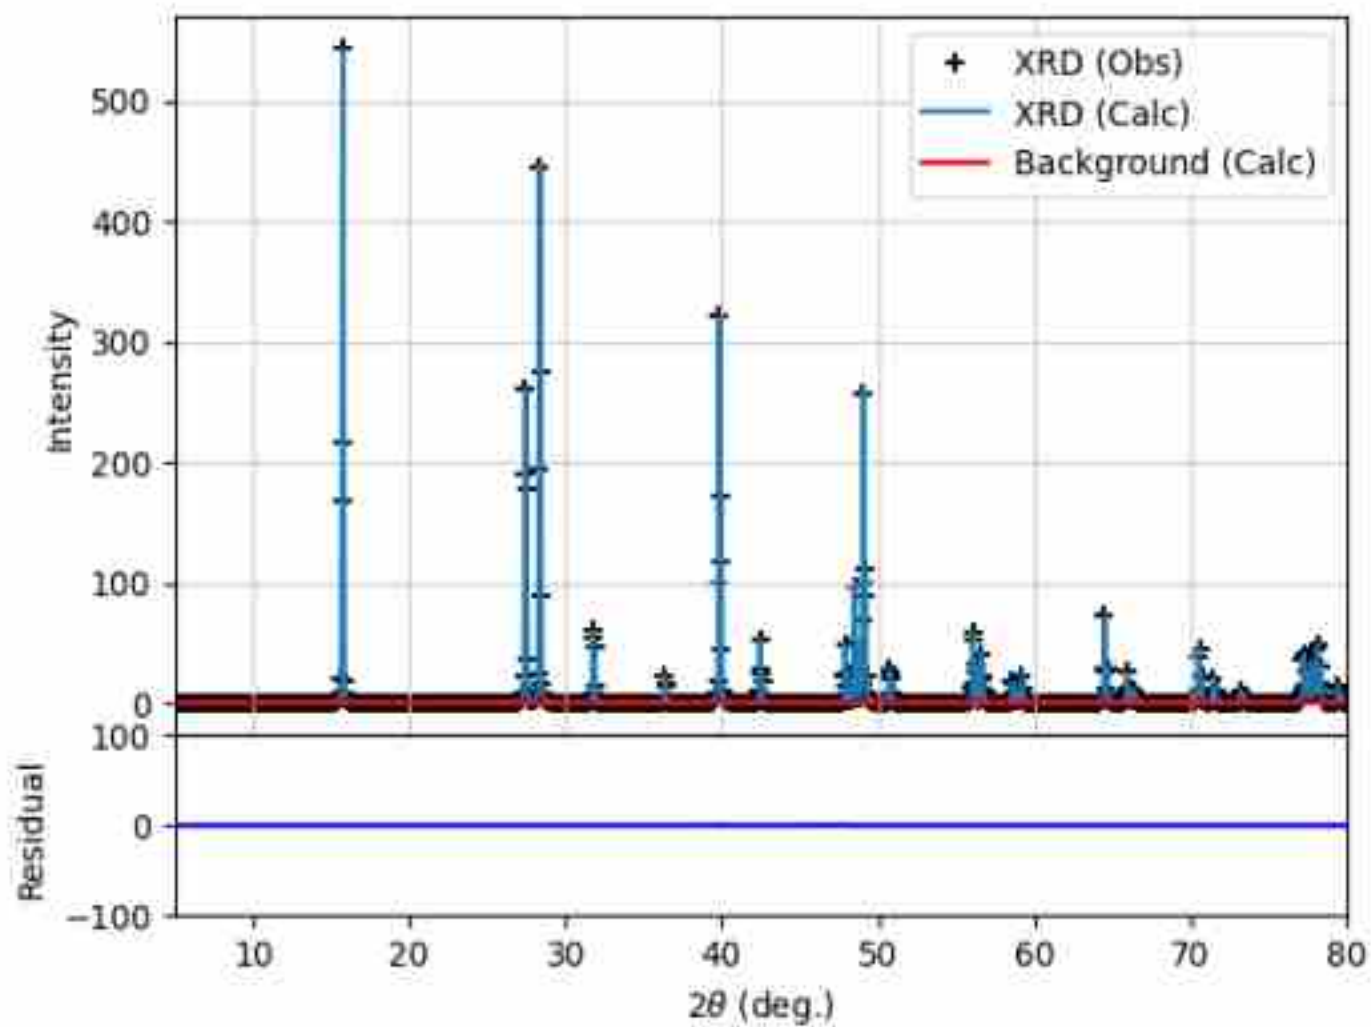

| RMSE before RR | Rwp     | RMSE after RR |
|----------------|---------|---------------|
| 0.016          | 0.26348 | 0.05506       |

# Pr<sub>3</sub>In<sub>3</sub>Au<sub>3</sub>

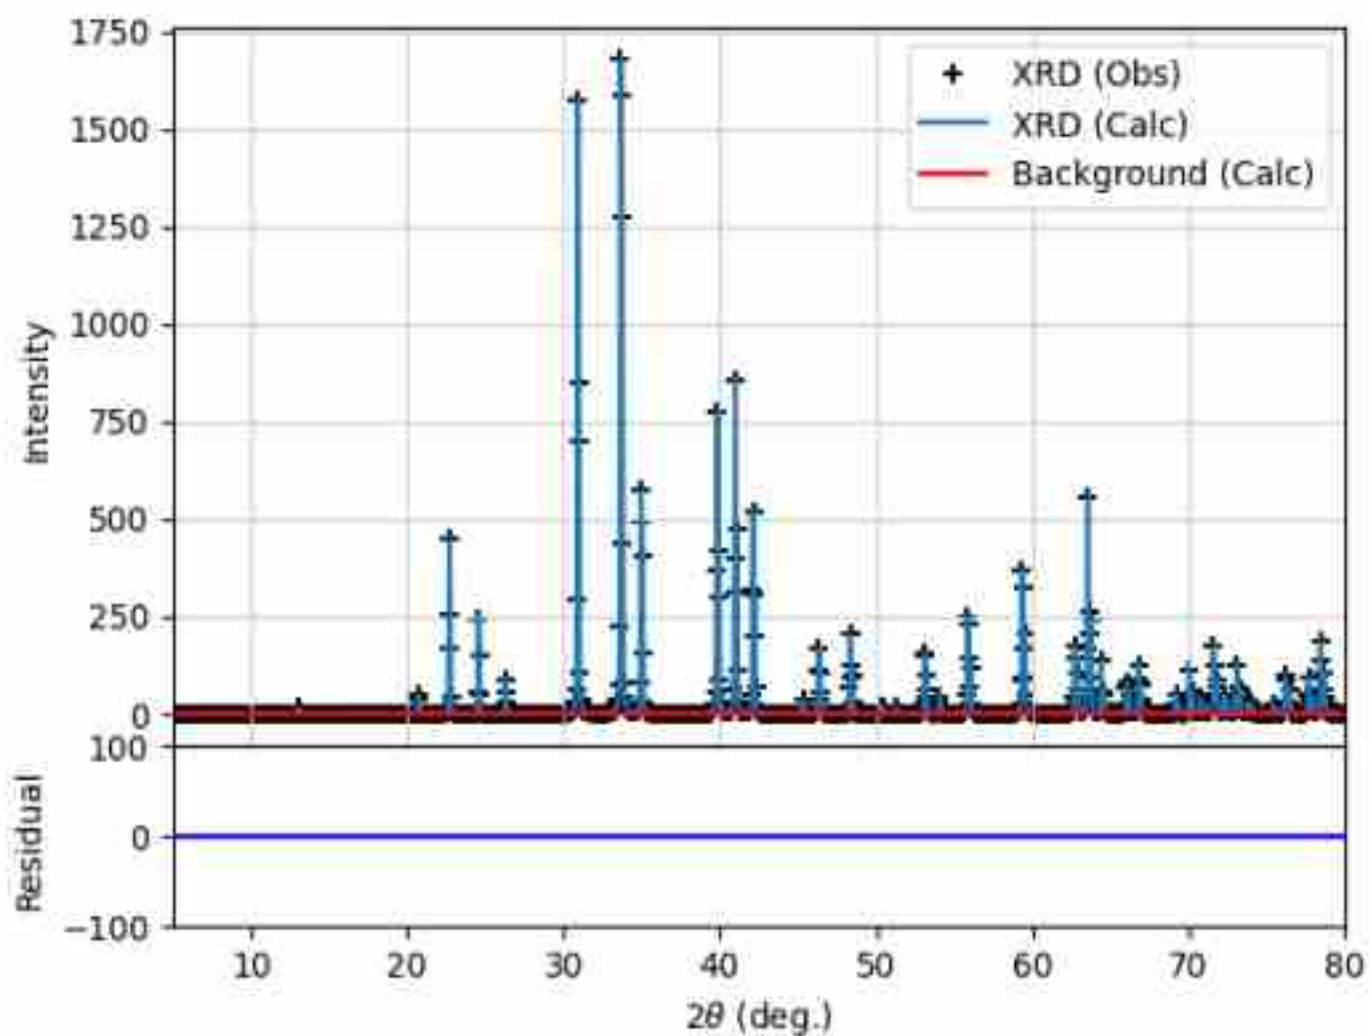

| RMSE before RR | Rwp     | RMSE after RR |
|----------------|---------|---------------|
| 0.016          | 0.00596 | 0.00108       |

# Pr<sub>4</sub>Fe<sub>3</sub>Si<sub>4</sub>Ru<sub>1</sub>

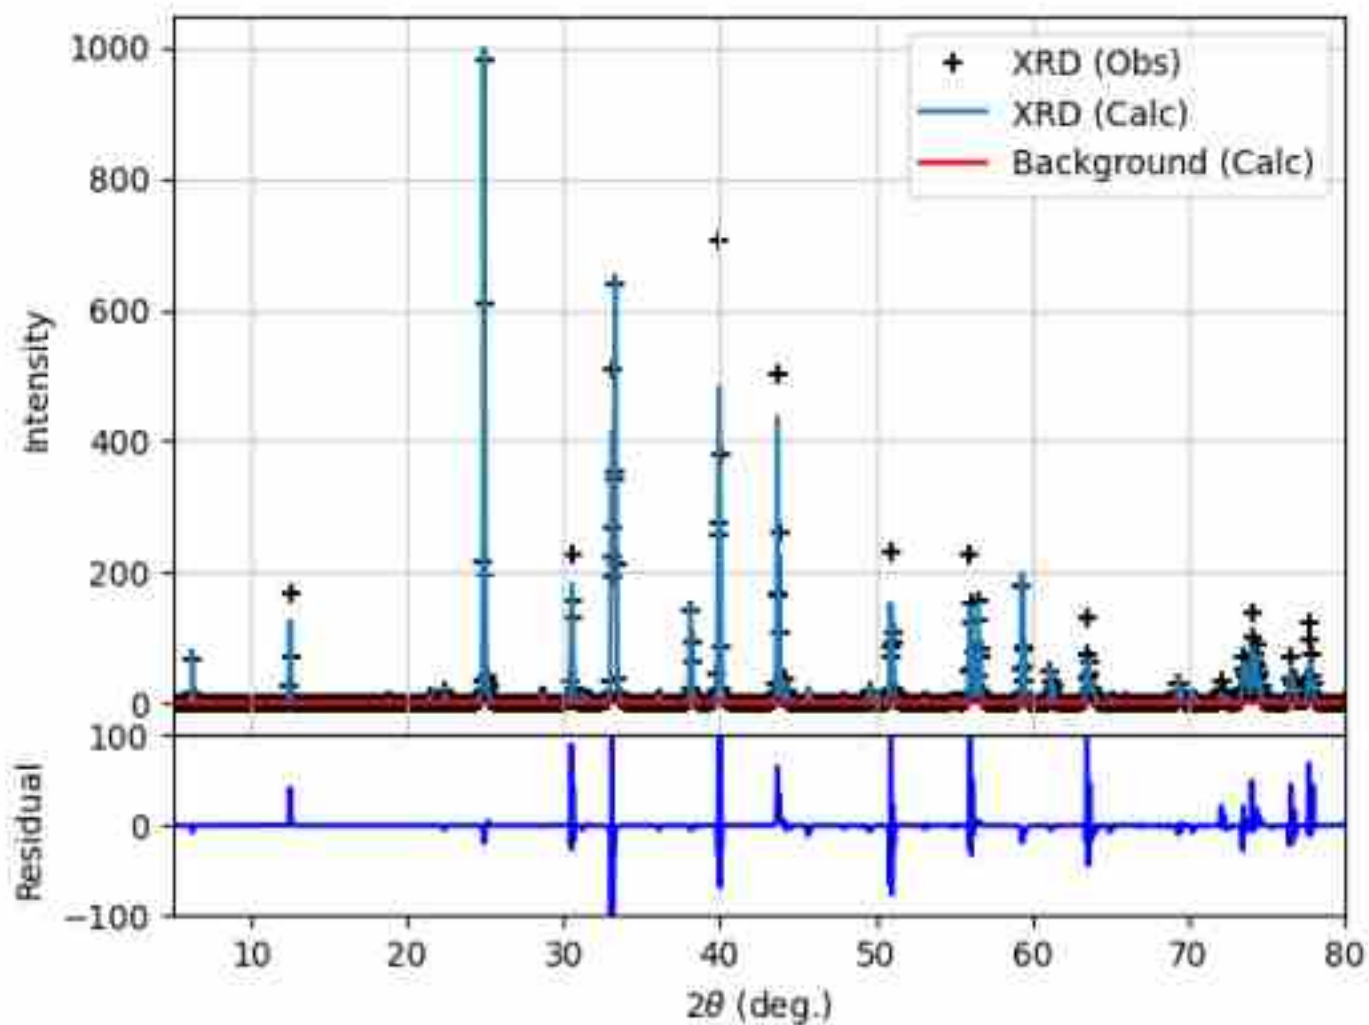

| RMSE before RR | Rwp      | RMSE after RR |
|----------------|----------|---------------|
| 0.016          | 30.91651 | 0.1682        |

# Pr12Ir4

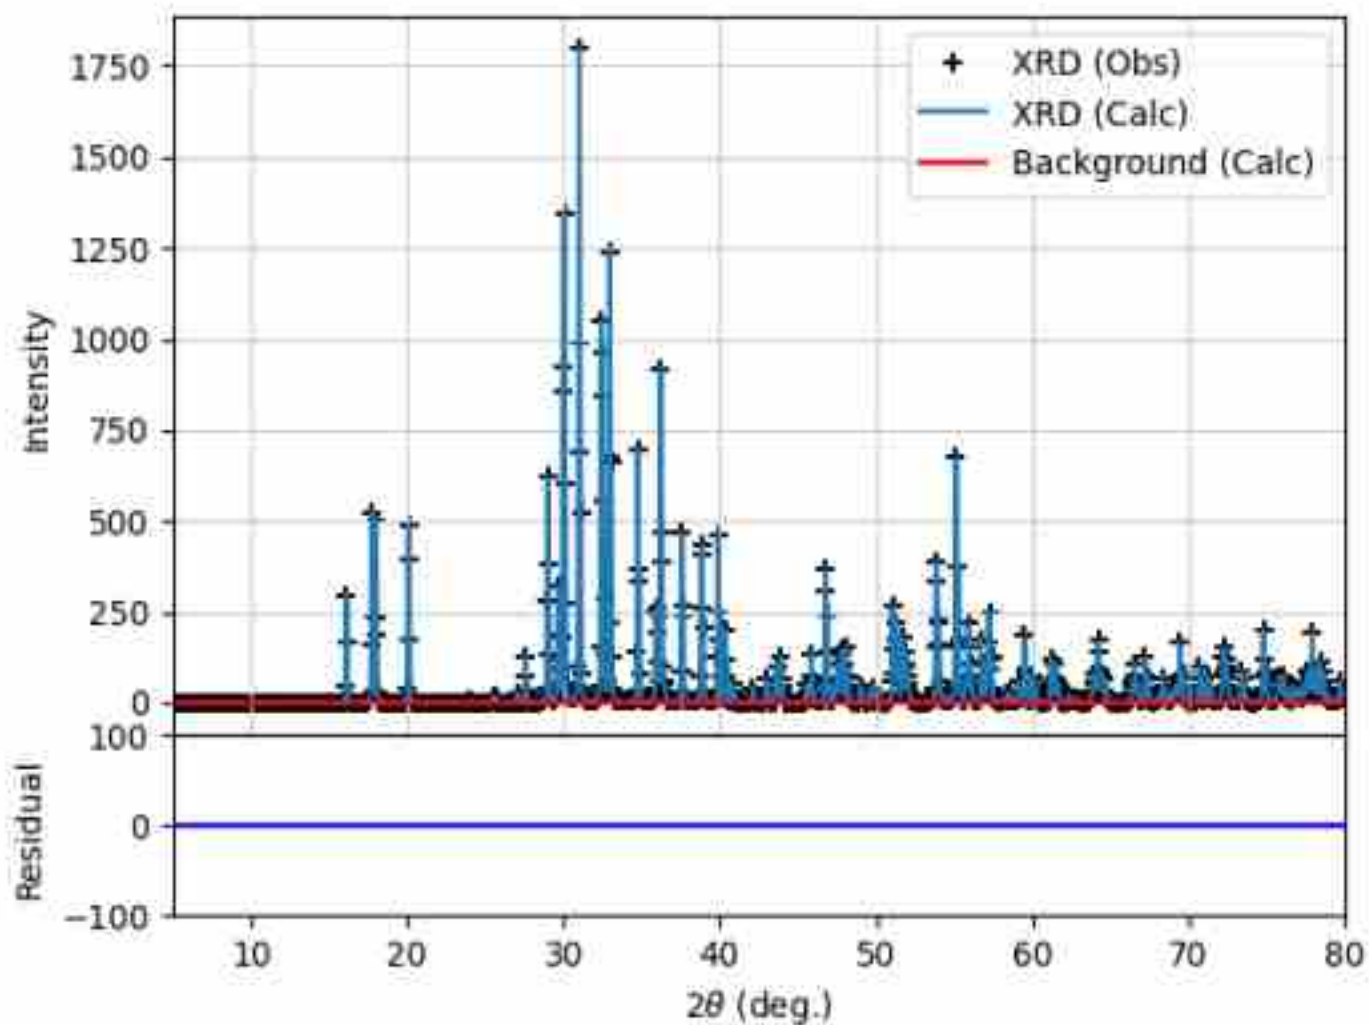

| RMSE before RR | Rwp     | RMSE after RR |
|----------------|---------|---------------|
| 0.016          | 0.00423 | 0.00038       |

# Pt2Pb4

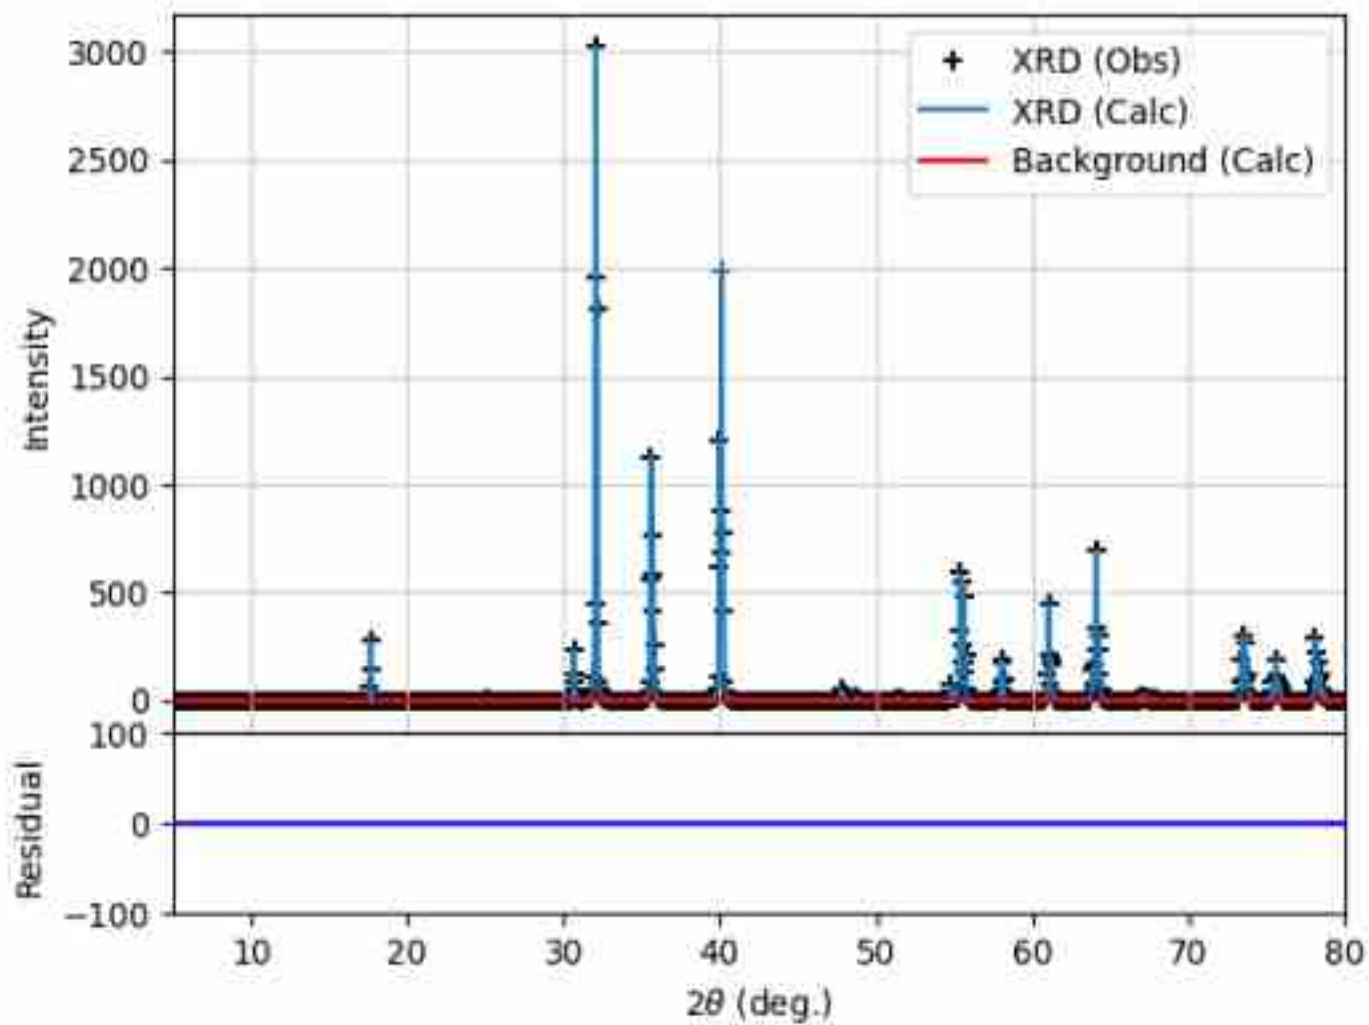

| RMSE before RR | Rwp     | RMSE after RR |
|----------------|---------|---------------|
| 0.016          | 0.00453 | 0.00014       |

# Rb<sub>2</sub>FeF<sub>4</sub>

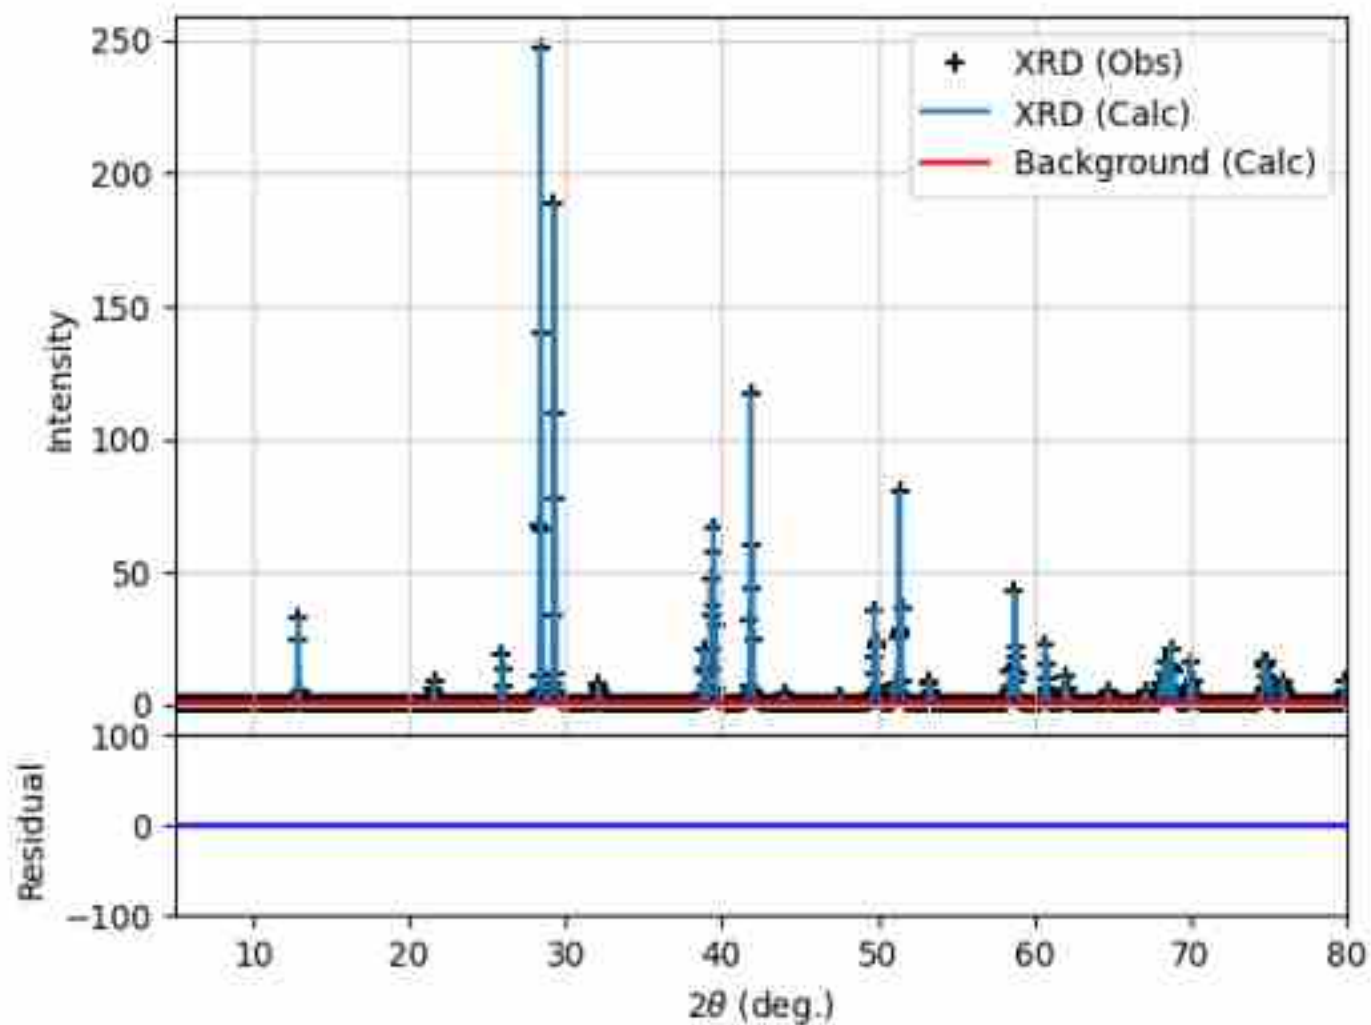

| RMSE before RR | Rwp     | RMSE after RR |
|----------------|---------|---------------|
| 0.016          | 0.00266 | 0.00087       |



# Rb<sub>2</sub>MnF<sub>6</sub>

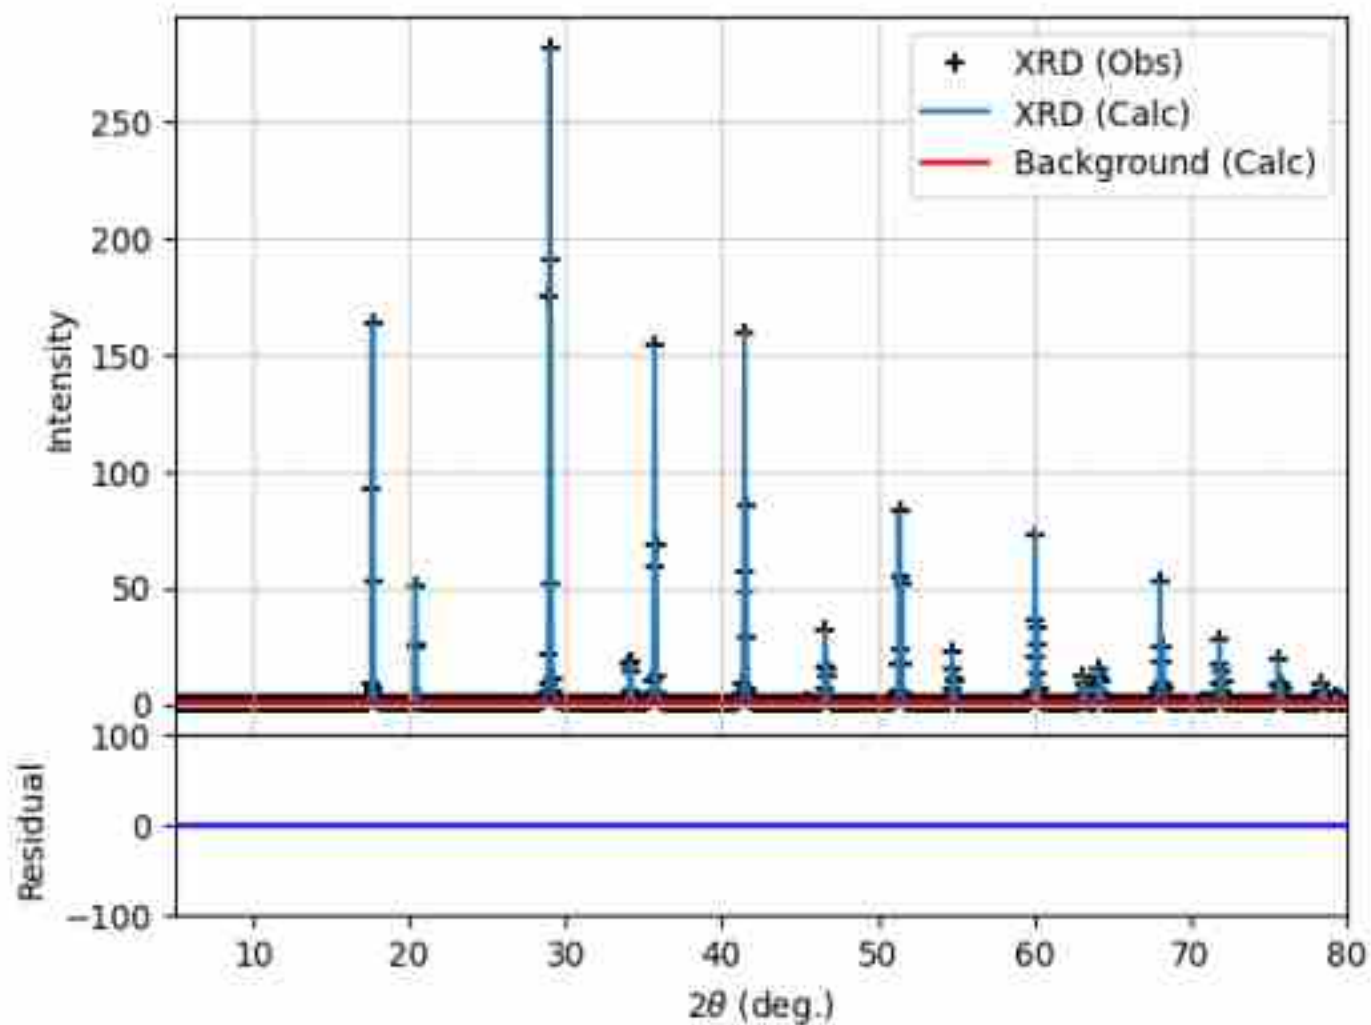

| RMSE before RR | Rwp     | RMSE after RR |
|----------------|---------|---------------|
| 0.016          | 0.10469 | 0.00943       |

# Rb<sub>2</sub>NaAlF<sub>6</sub>

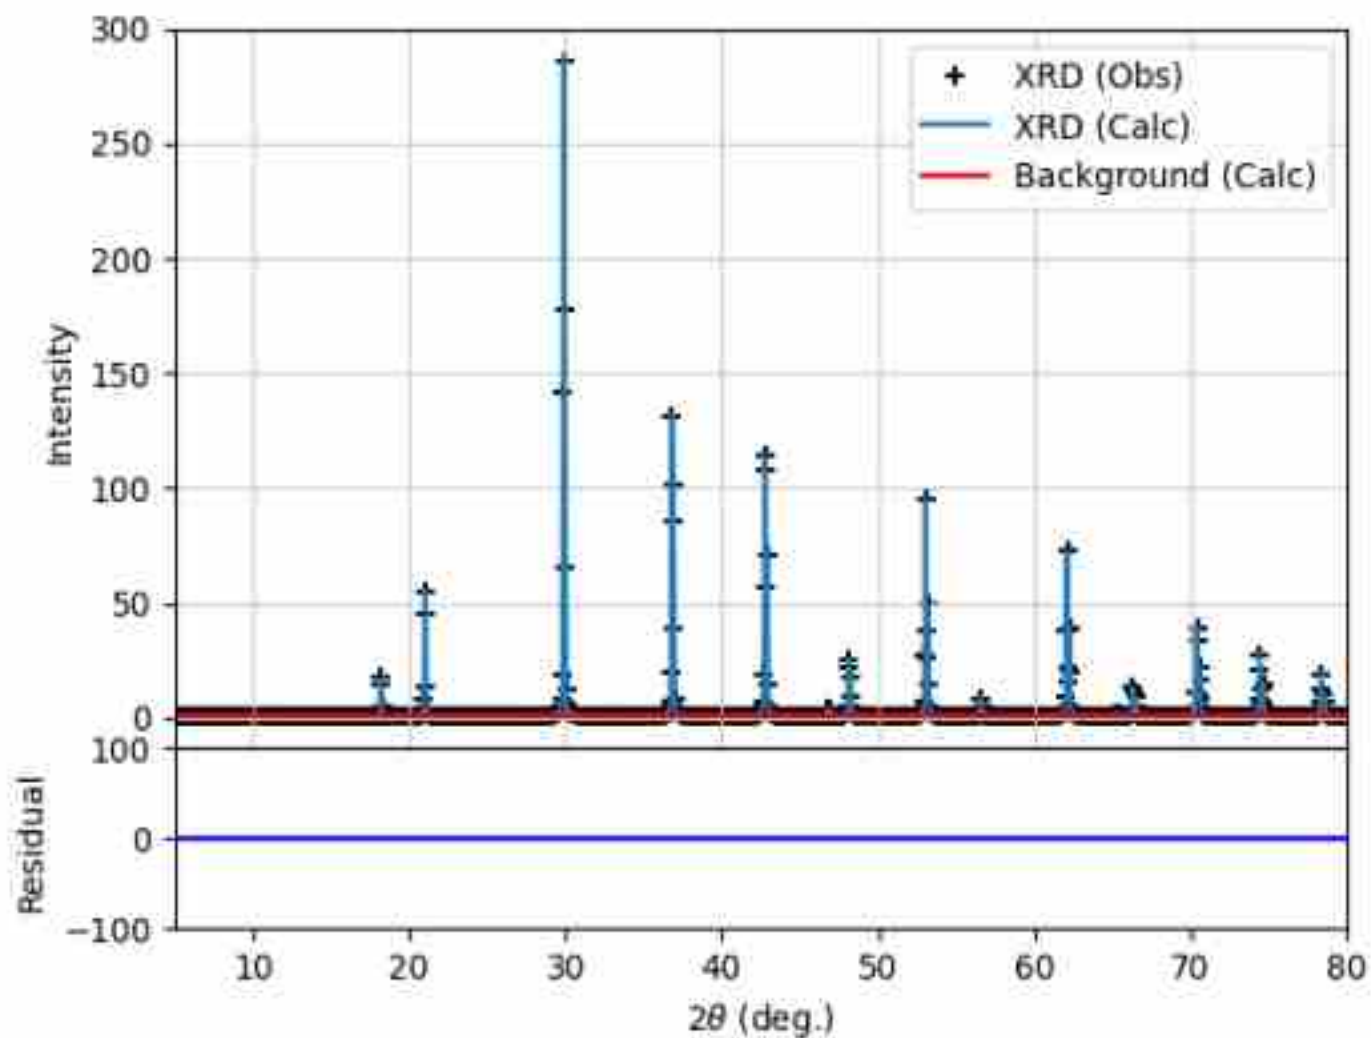

| RMSE before RR | Rwp     | RMSE after RR |
|----------------|---------|---------------|
| 0.016          | 0.02765 | 0.00471       |

# Rb<sub>4</sub>Cu<sub>4</sub>O<sub>4</sub>

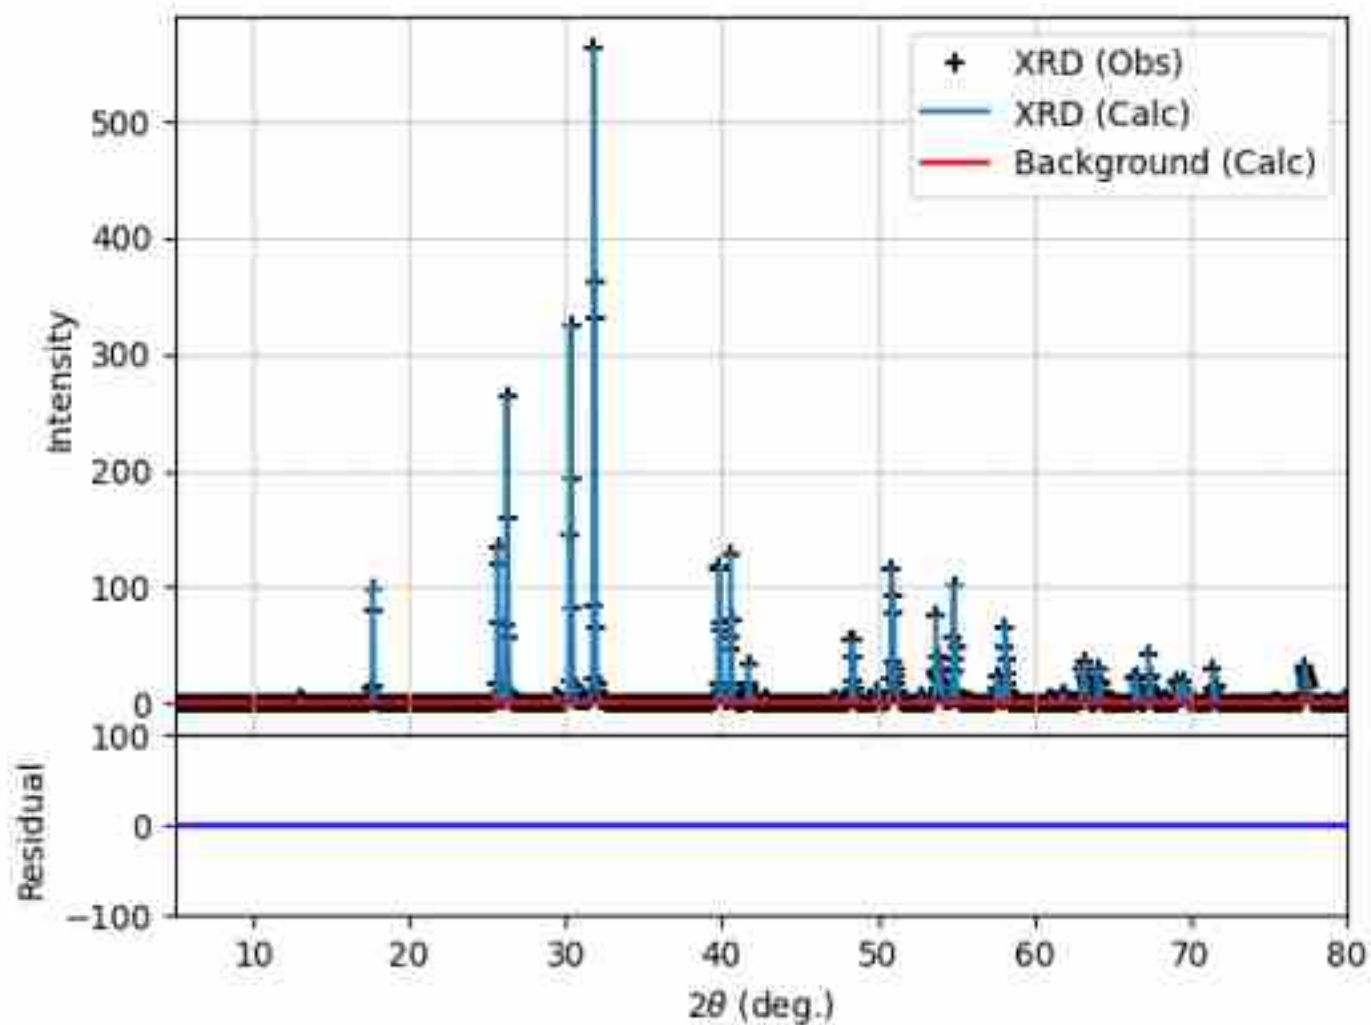

| RMSE before RR | Rwp    | RMSE after RR |
|----------------|--------|---------------|
| 0.016          | 0.0033 | 0.00063       |

# Re6Tc2

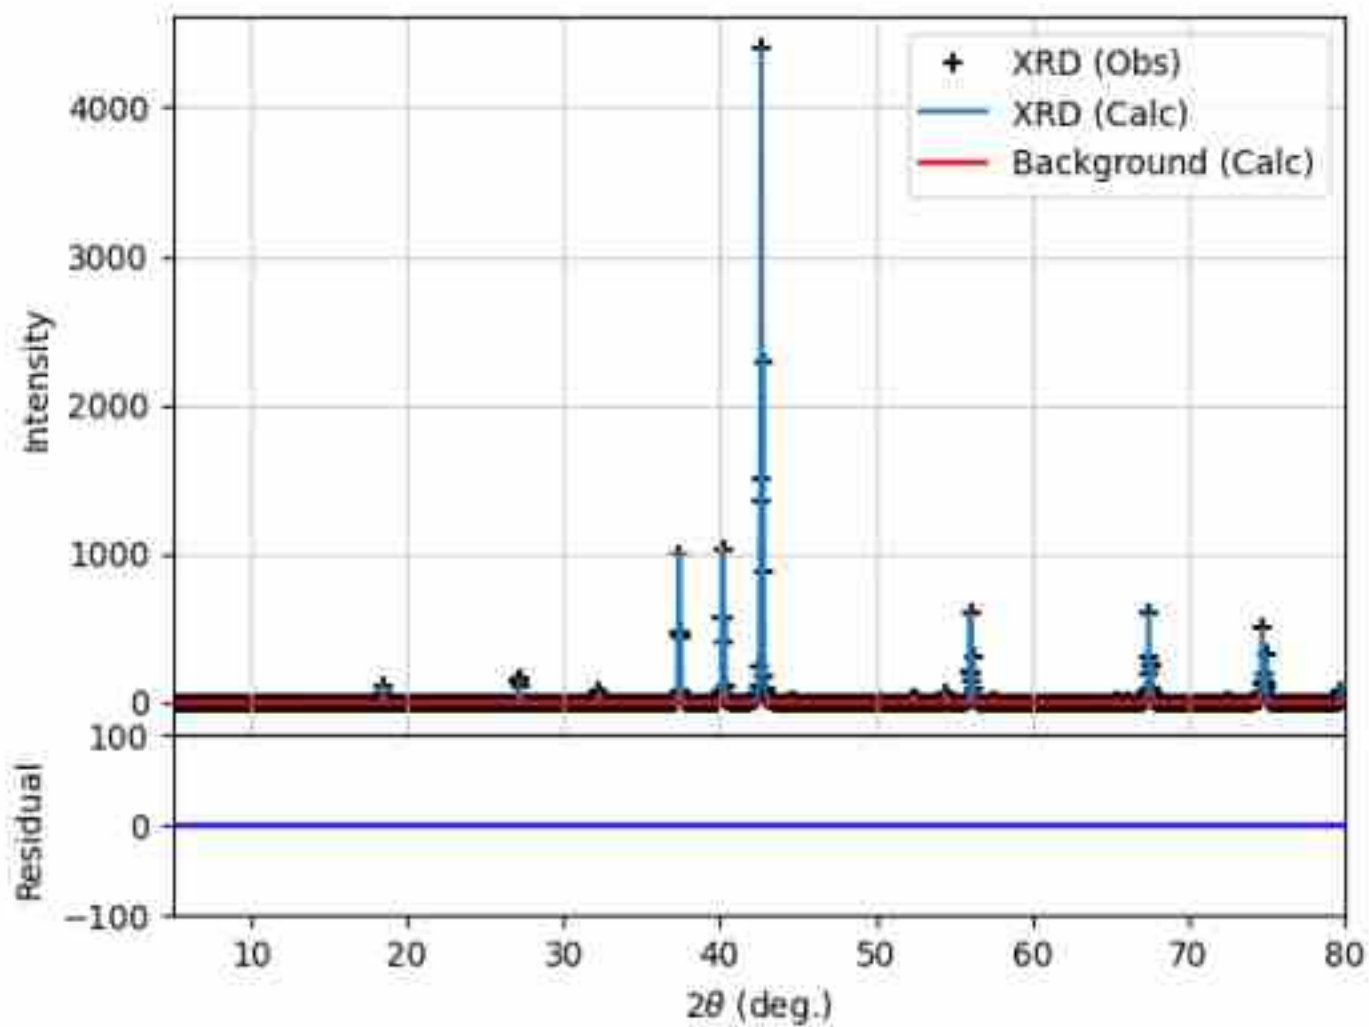

| RMSE before RR | Rwp     | RMSE after RR |
|----------------|---------|---------------|
| 0.016          | 0.03151 | 0.00145       |

# Sc2Au6

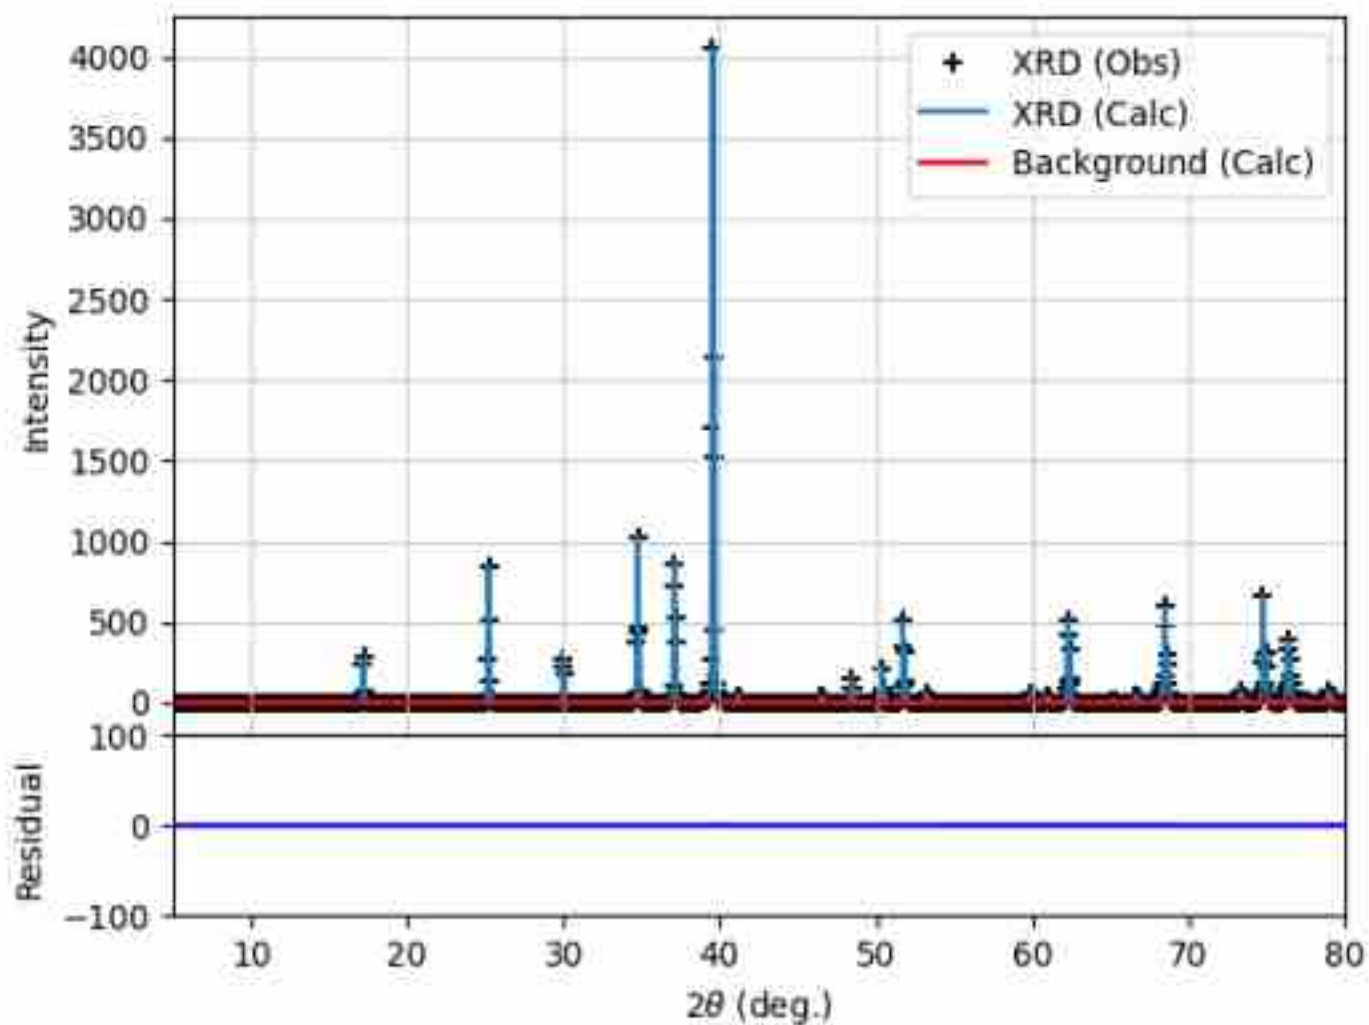

| RMSE before RR | Rwp     | RMSE after RR |
|----------------|---------|---------------|
| 0.016          | 0.19256 | 0.0043        |

# Sc<sub>4</sub>Ga<sub>2</sub>B<sub>4</sub>Ir<sub>10</sub>

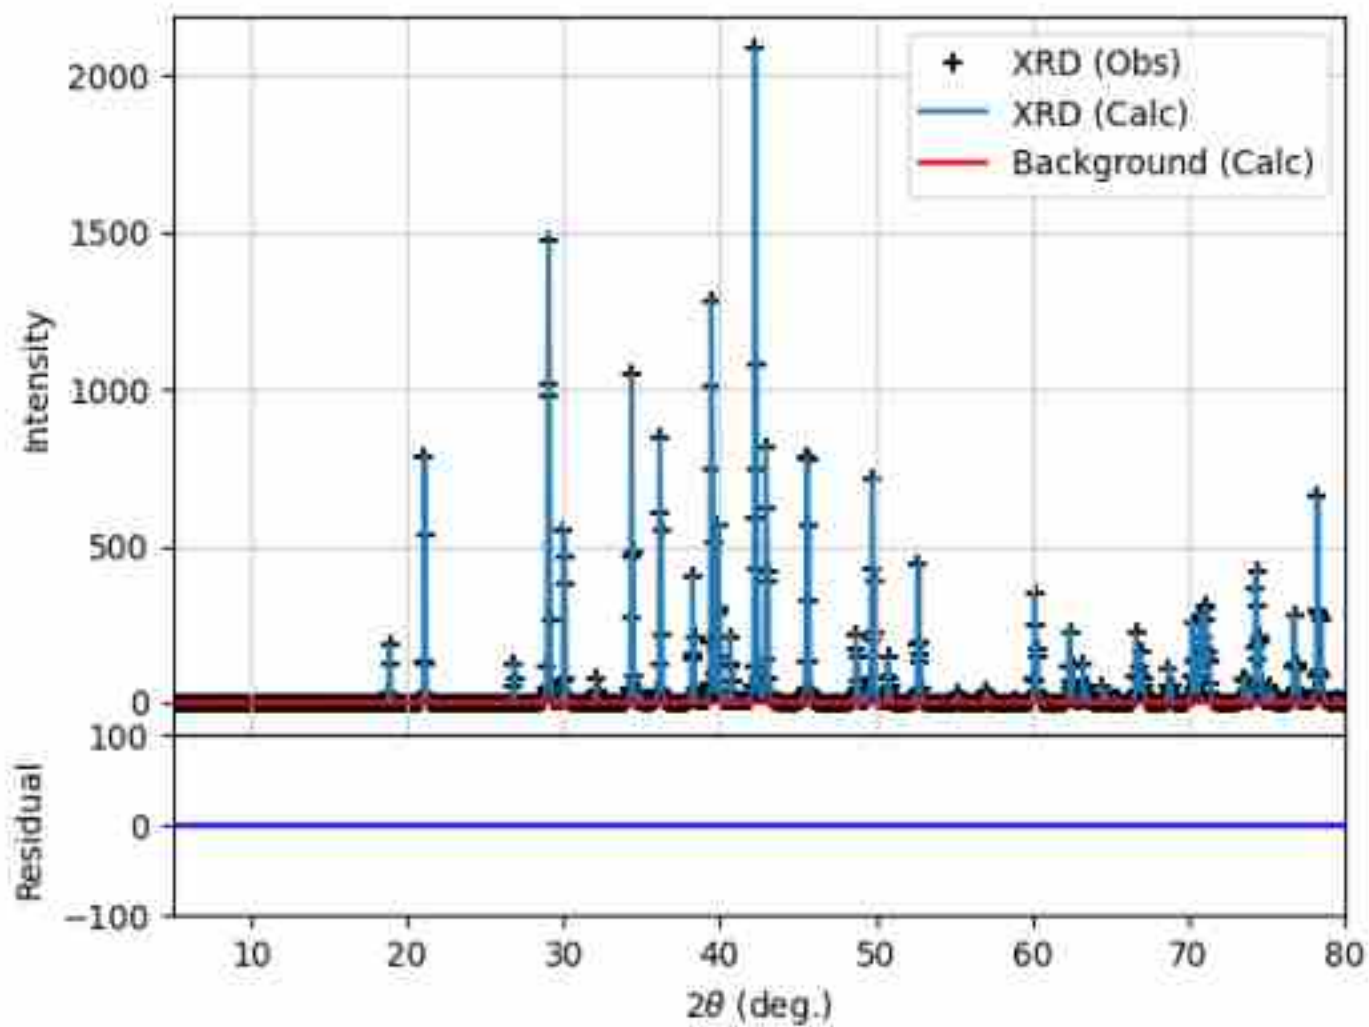

| RMSE before RR | Rwp     | RMSE after RR |
|----------------|---------|---------------|
| 0.016          | 0.00503 | 0.00177       |

# Sc6B4Ir10

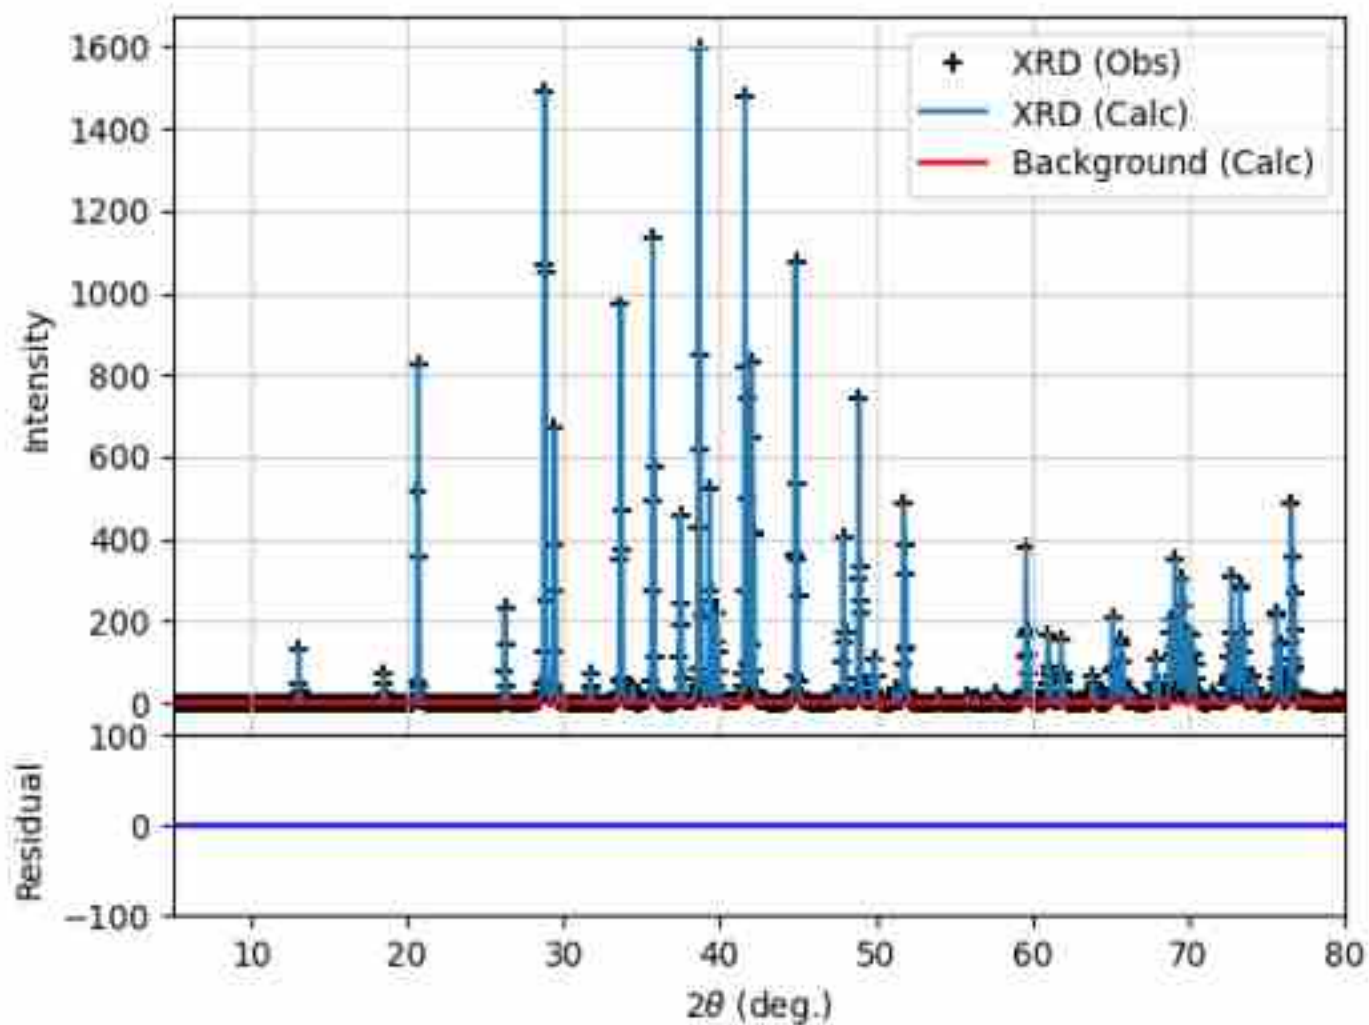

| RMSE before RR | Rwp     | RMSE after RR |
|----------------|---------|---------------|
| 0.016          | 0.00459 | 0.00136       |

# Sc6Fe1Te2

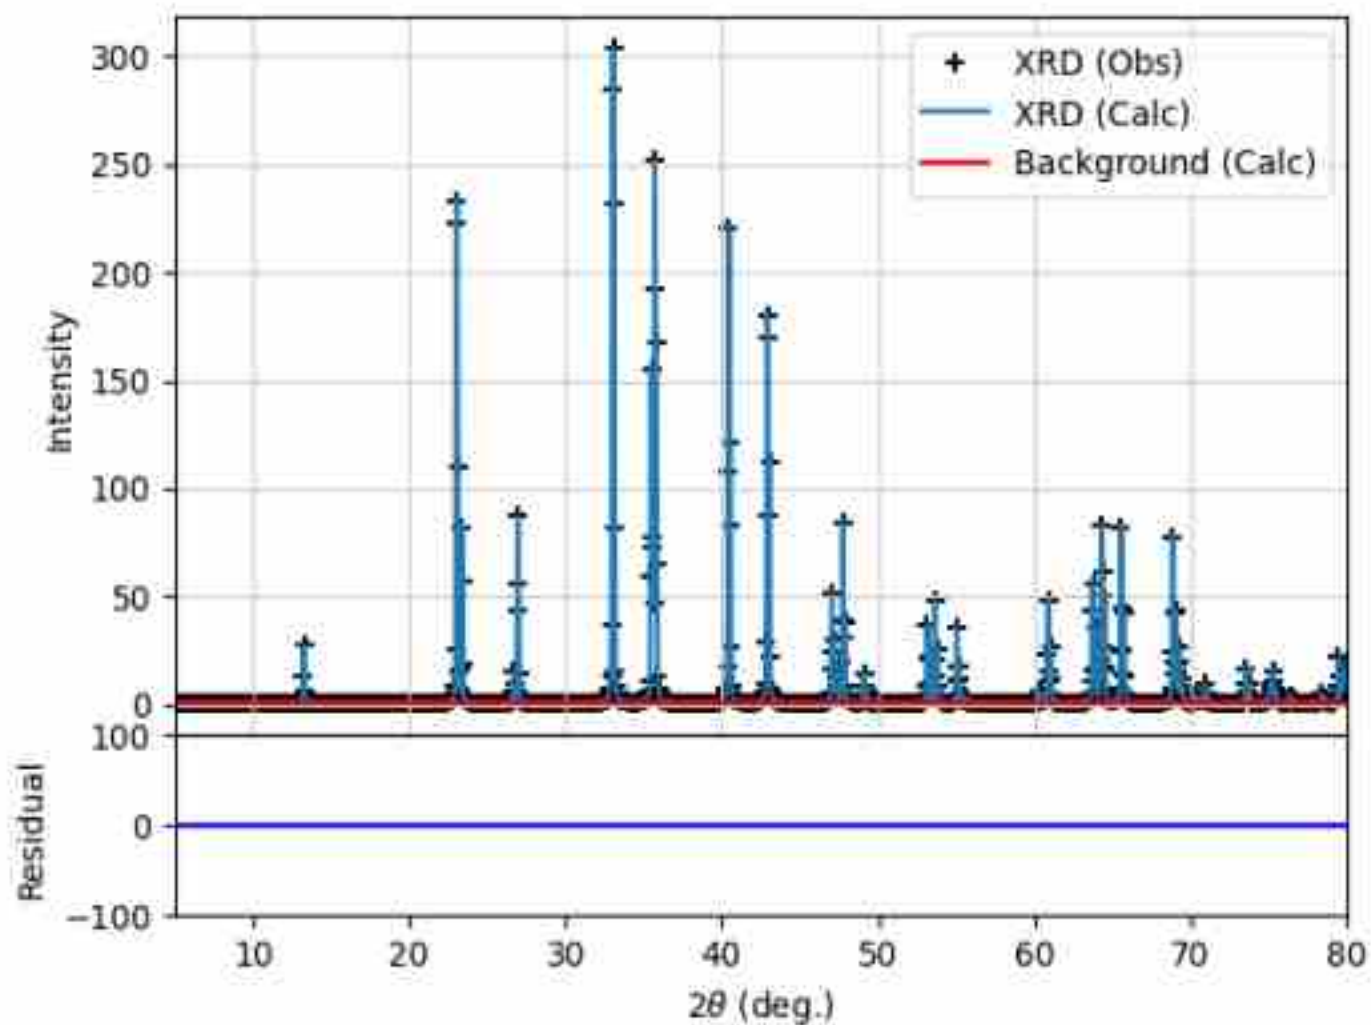

| RMSE before RR | Rwp     | RMSE after RR |
|----------------|---------|---------------|
| 0.016          | 0.00311 | 0.00056       |



# Sc6Re1O12

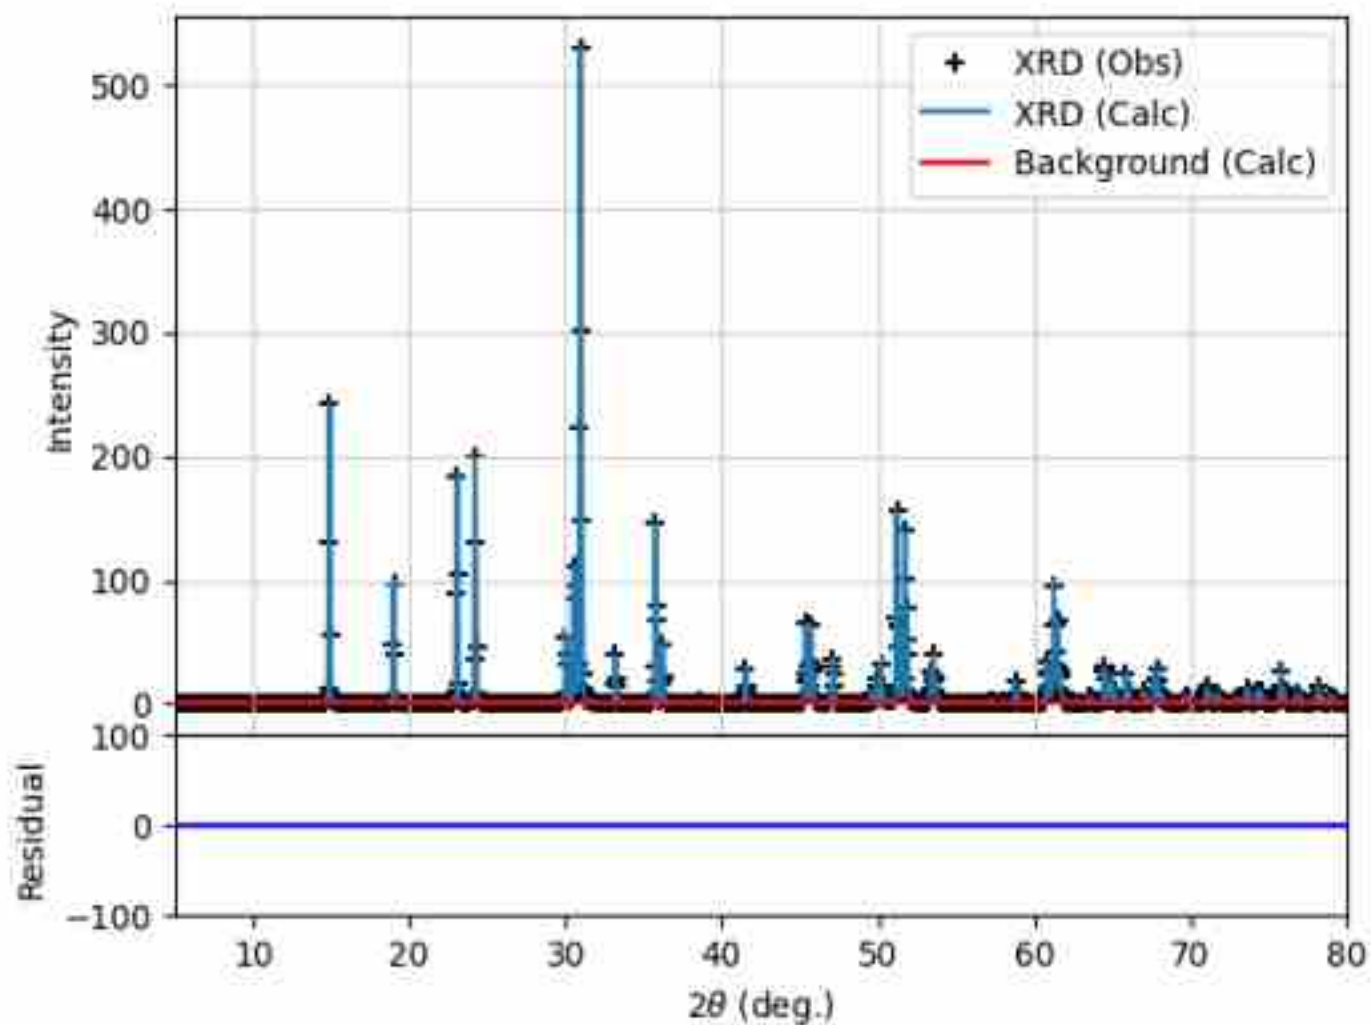

| RMSE before RR | Rwp     | RMSE after RR |
|----------------|---------|---------------|
| 0.016          | 0.00315 | 0.00126       |

# Sm1Fe10Mo2

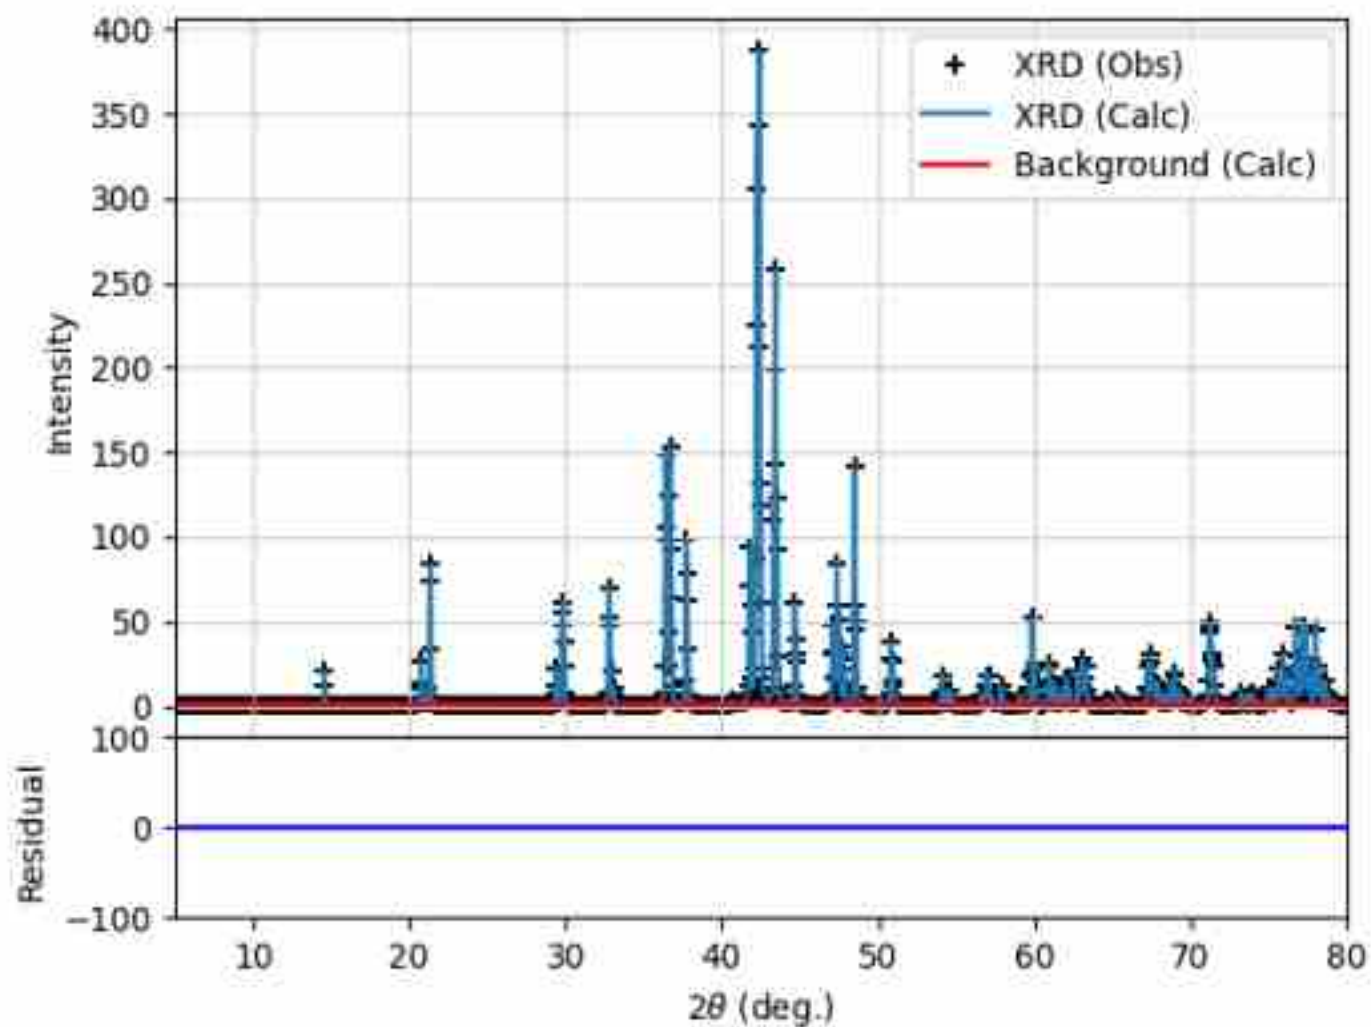

| RMSE before RR | Rwp     | RMSE after RR |
|----------------|---------|---------------|
| 0.016          | 0.00344 | 0.00043       |

# Sm1In1Cu4

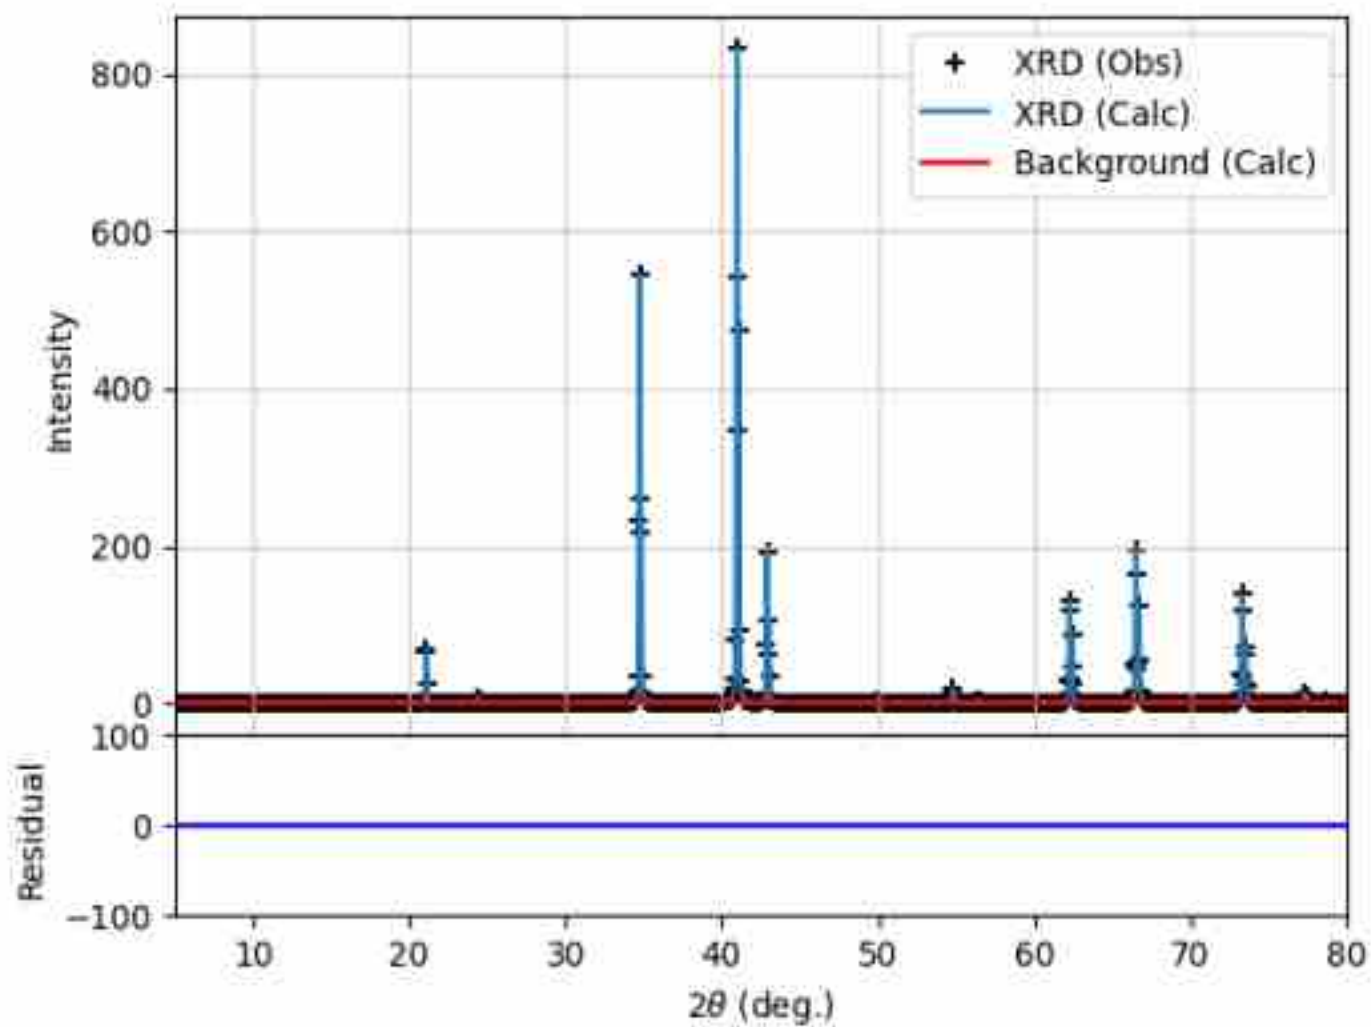

| RMSE before RR | Rwp     | RMSE after RR |
|----------------|---------|---------------|
| 0.016          | 0.06651 | 0.00357       |

# Sm1Zn1Ag1P2

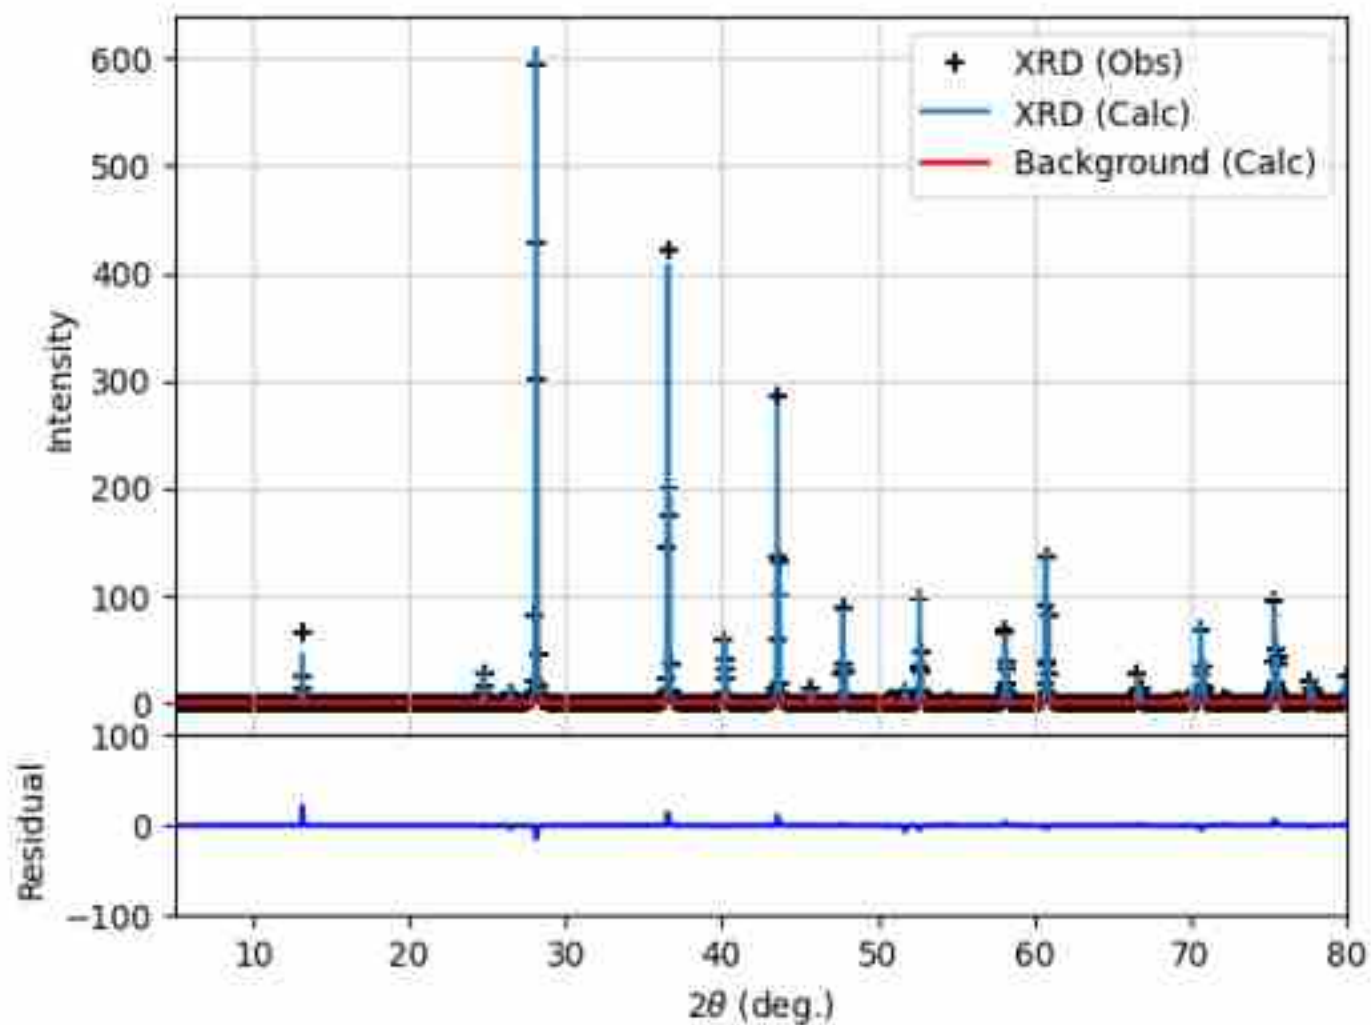

| RMSE before RR | Rwp     | RMSE after RR |
|----------------|---------|---------------|
| 0.016          | 6.97047 | 0.04646       |

# Sm<sub>2</sub>B<sub>4</sub>Ru<sub>4</sub>

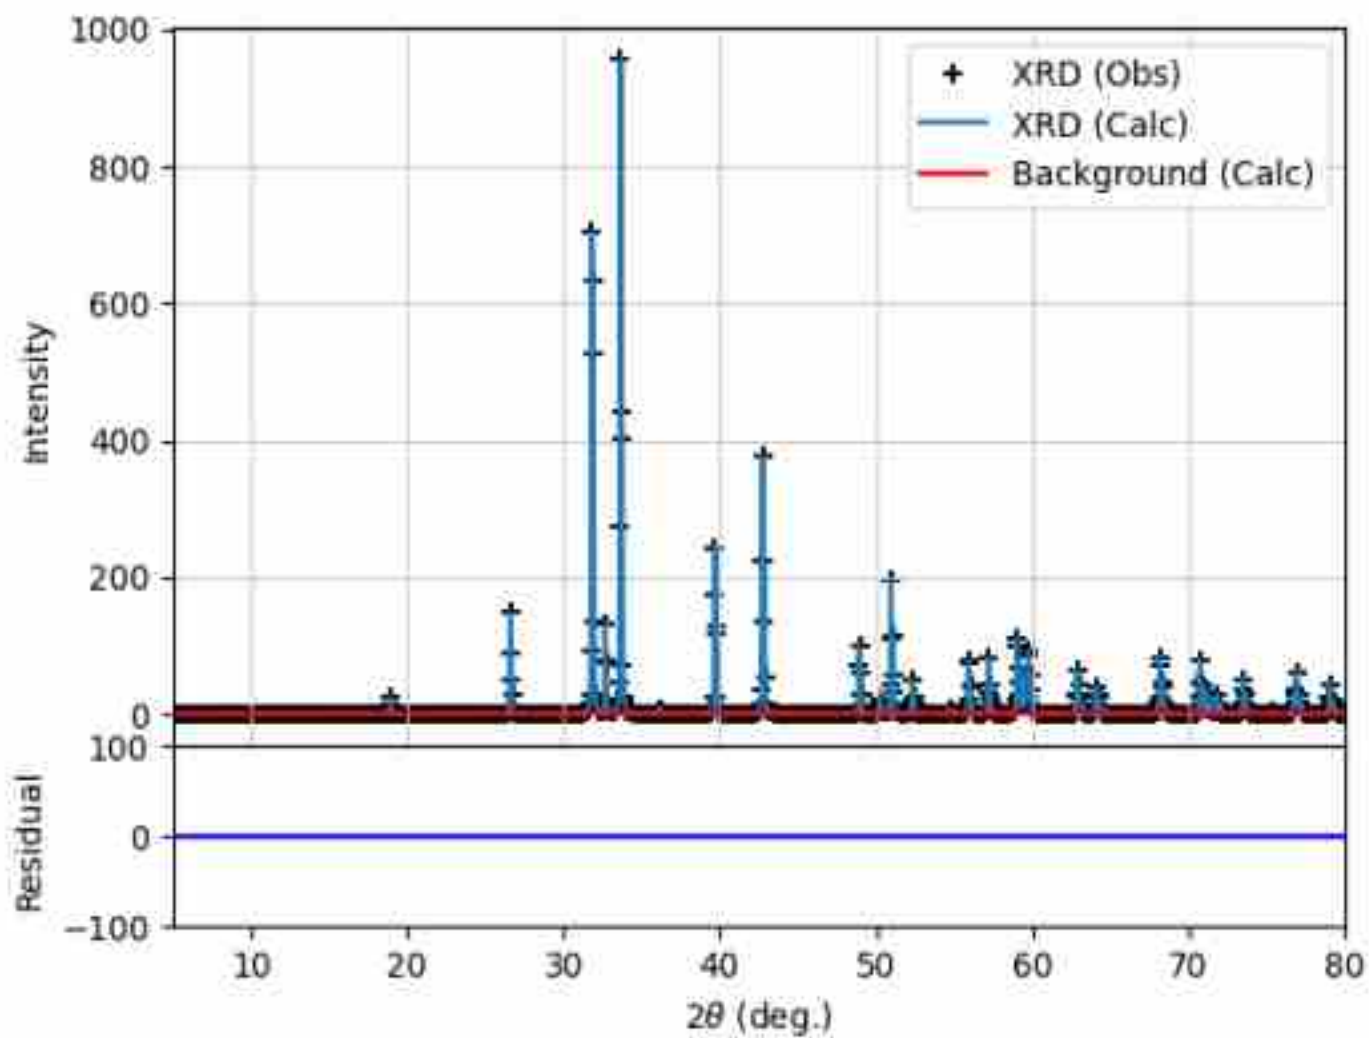

| RMSE before RR | Rwp     | RMSE after RR |
|----------------|---------|---------------|
| 0.016          | 0.00296 | 0.00114       |

# Sm<sub>3</sub>Y<sub>1</sub>S<sub>4</sub>

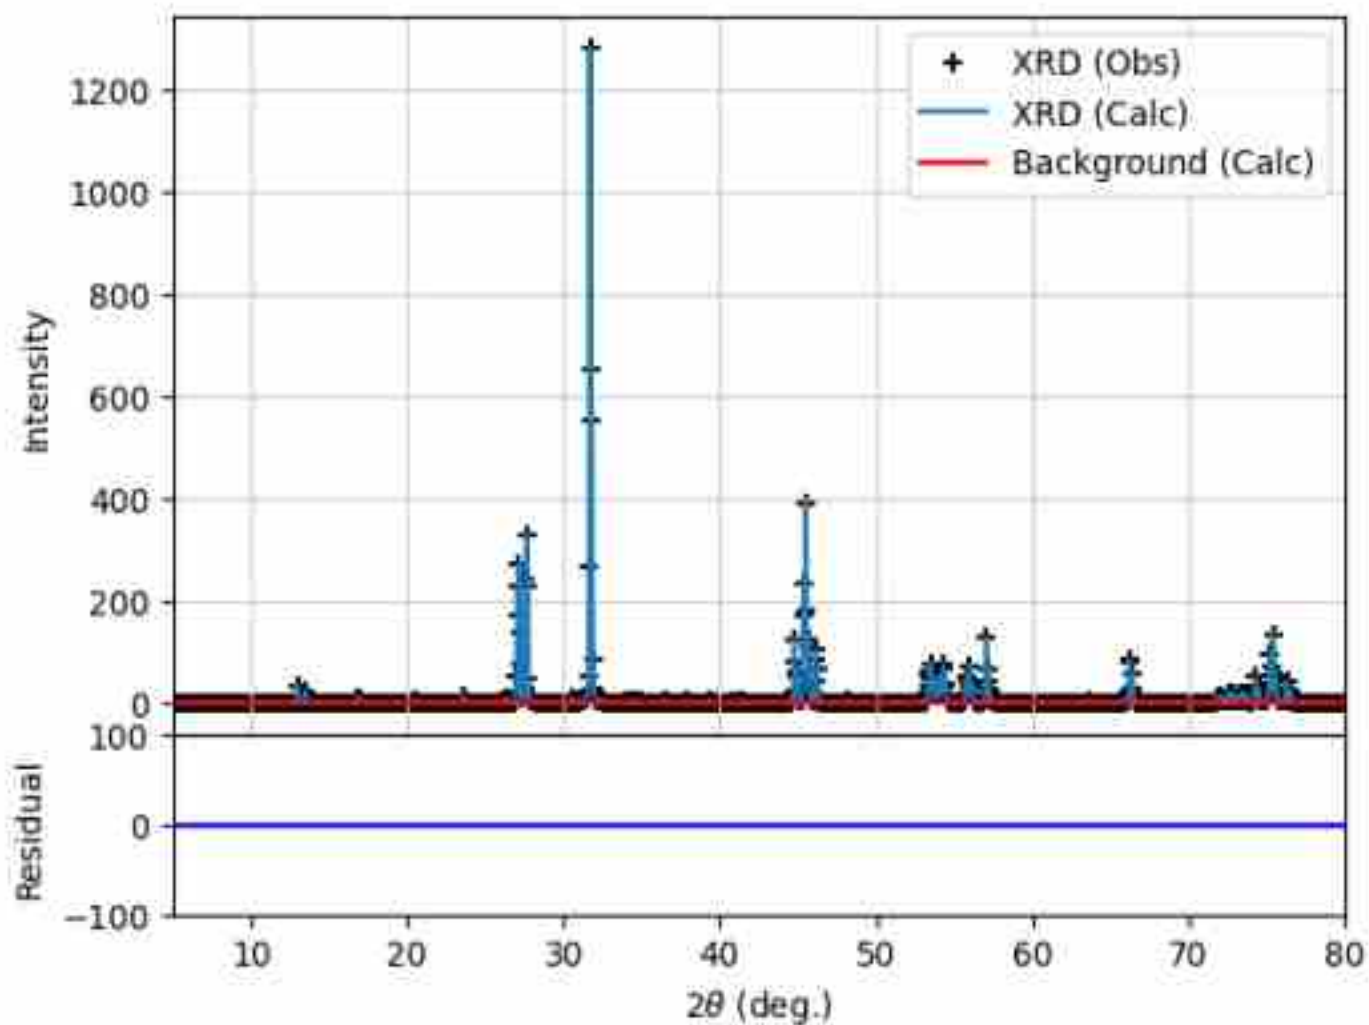

| RMSE before RR | Rwp     | RMSE after RR |
|----------------|---------|---------------|
| 0.016          | 0.00352 | 0.00061       |

# Sm4Au4

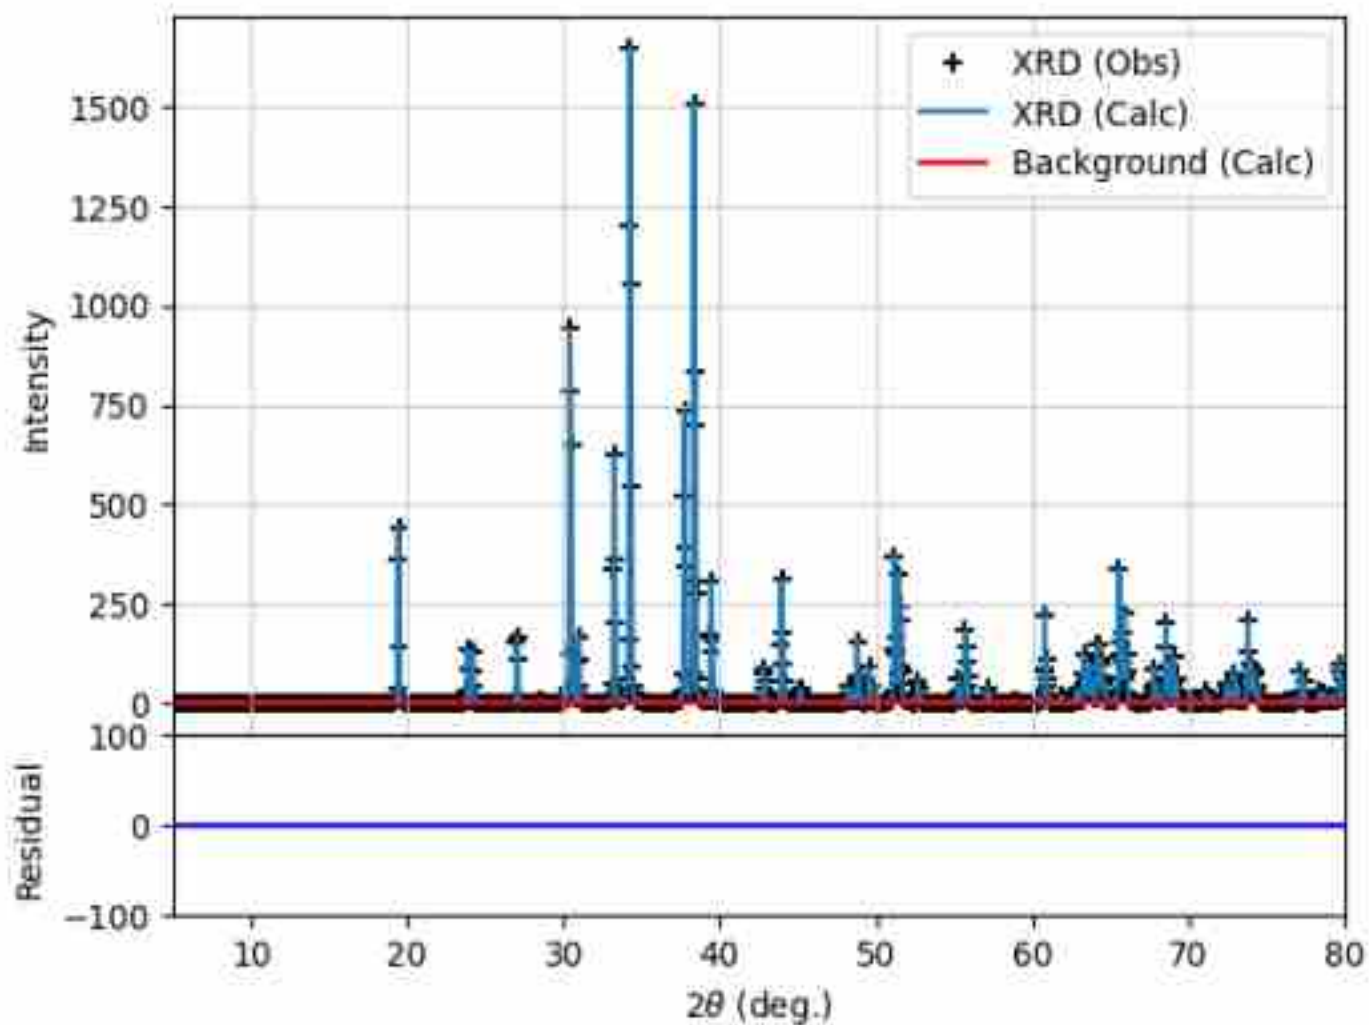

| RMSE before RR | Rwp     | RMSE after RR |
|----------------|---------|---------------|
| 0.016          | 0.00459 | 0.00024       |

# Sm<sub>4</sub>Mg<sub>2</sub>Pt<sub>2</sub>O<sub>12</sub>

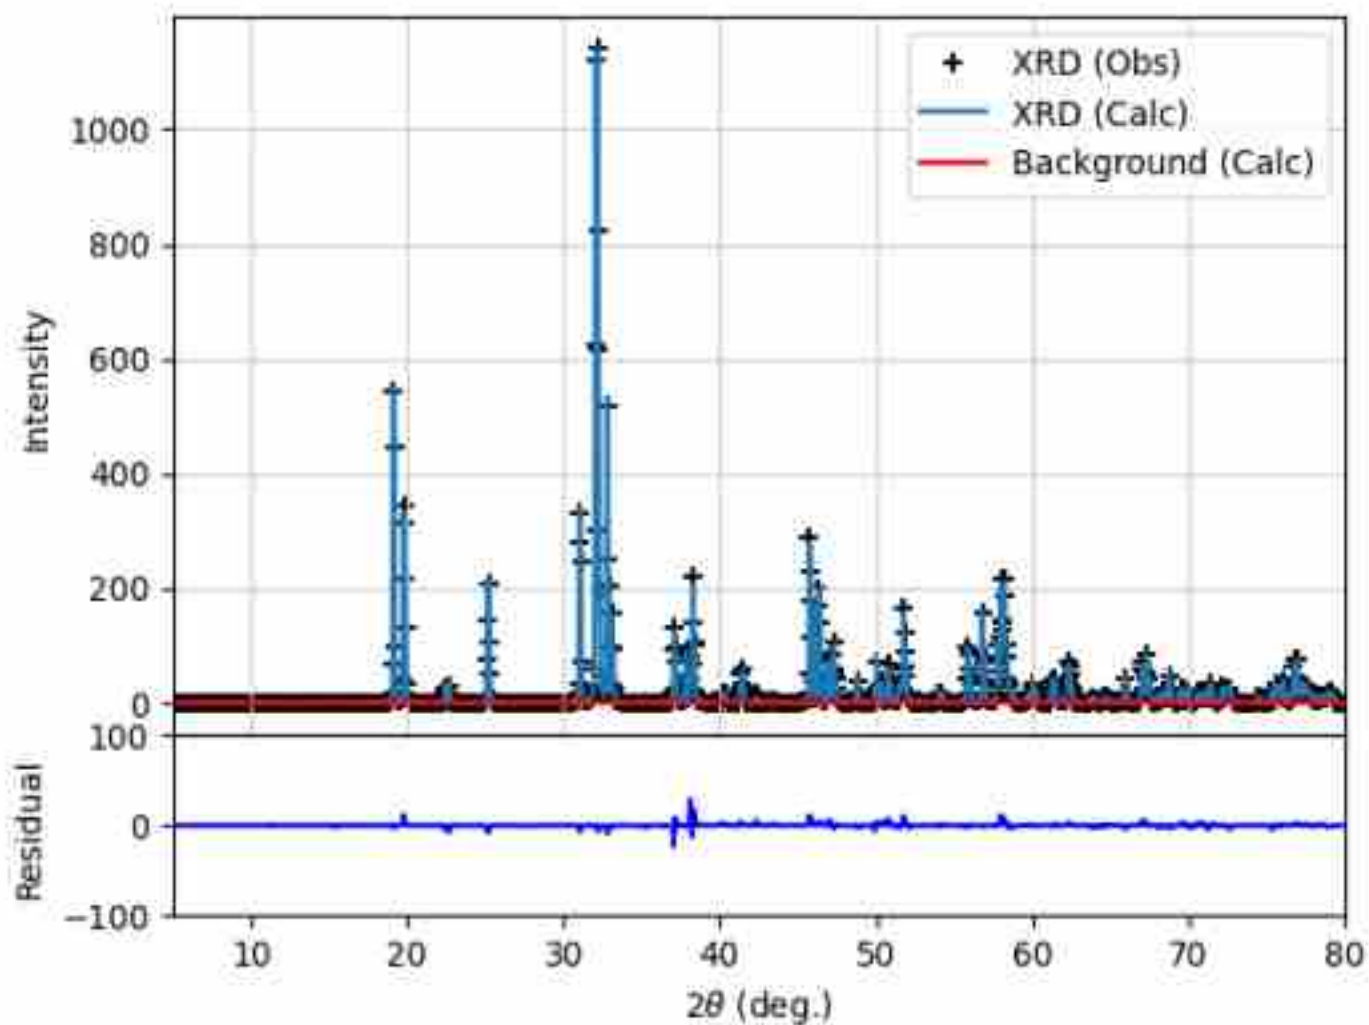

| RMSE before RR | Rwp     | RMSE after RR |
|----------------|---------|---------------|
| 0.016          | 6.72876 | 0.32005       |



# Sm10Ga6

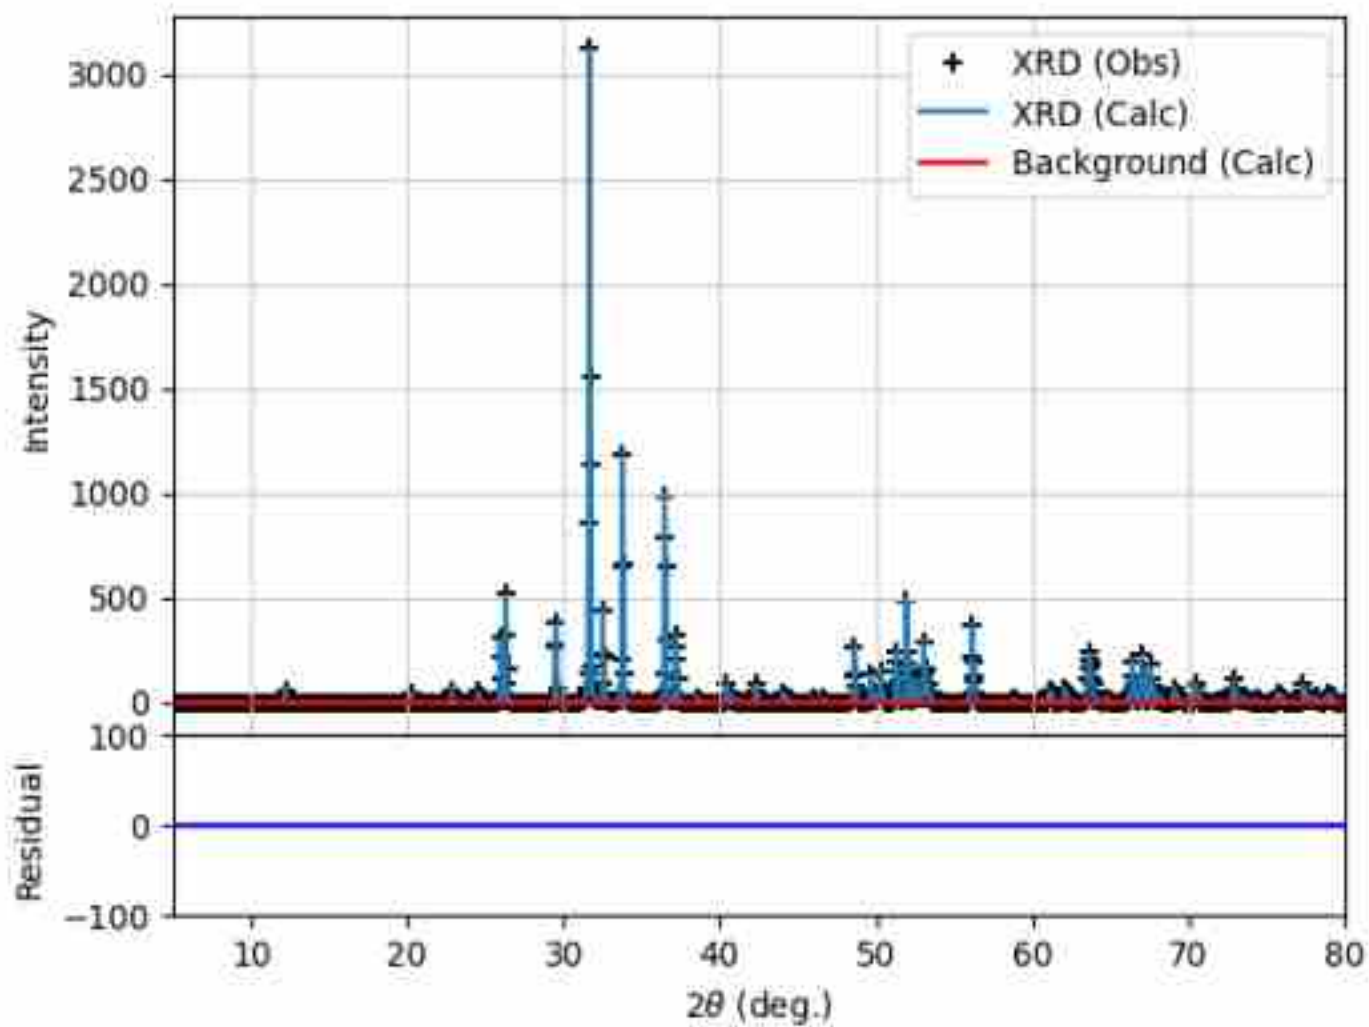

| RMSE before RR | Rwp   | RMSE after RR |
|----------------|-------|---------------|
| 0.016          | 0.003 | 0.00022       |

# Sm12Ir4

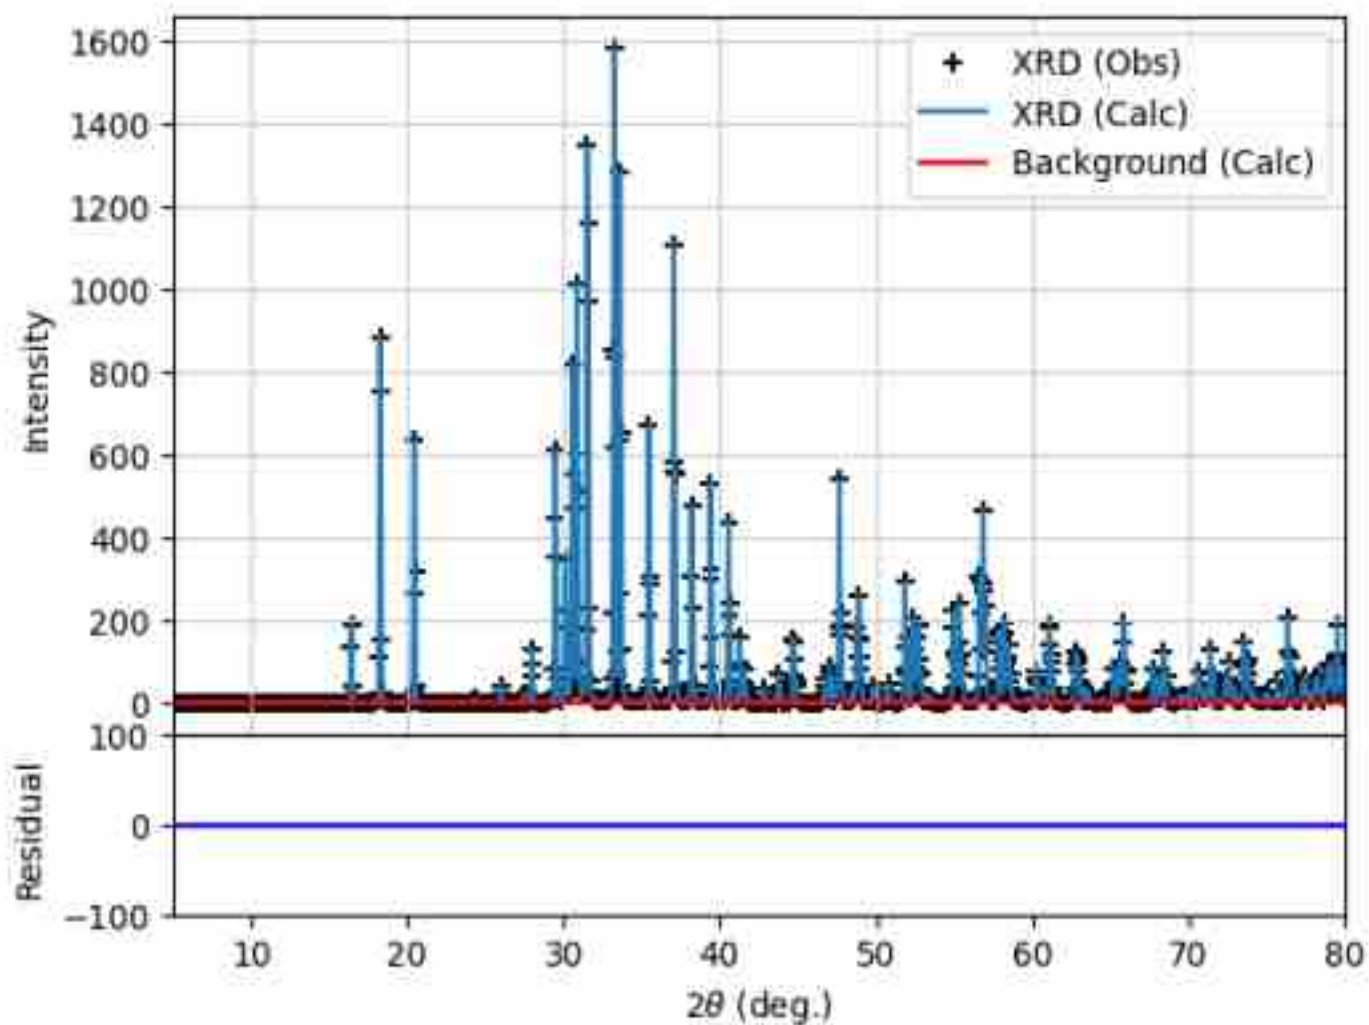

| RMSE before RR | Rwp   | RMSE after RR |
|----------------|-------|---------------|
| 0.016          | 0.004 | 0.00022       |

# Sr2Hg6

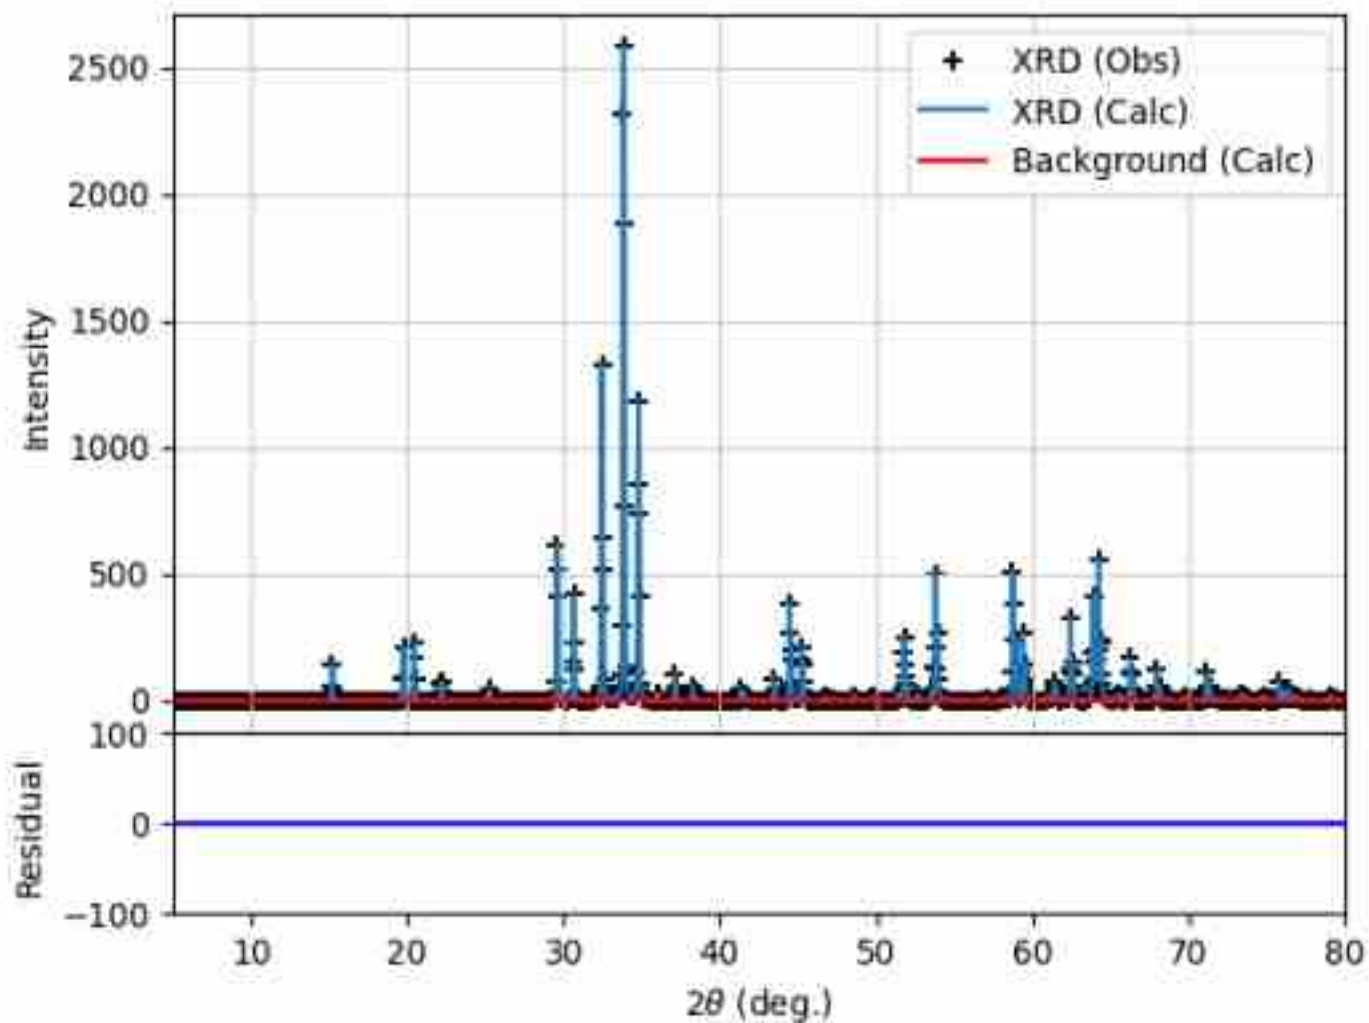

| RMSE before RR | Rwp     | RMSE after RR |
|----------------|---------|---------------|
| 0.016          | 0.00359 | 0.00018       |

# Sr<sub>2</sub>La<sub>2</sub>V<sub>2</sub>O<sub>8</sub>

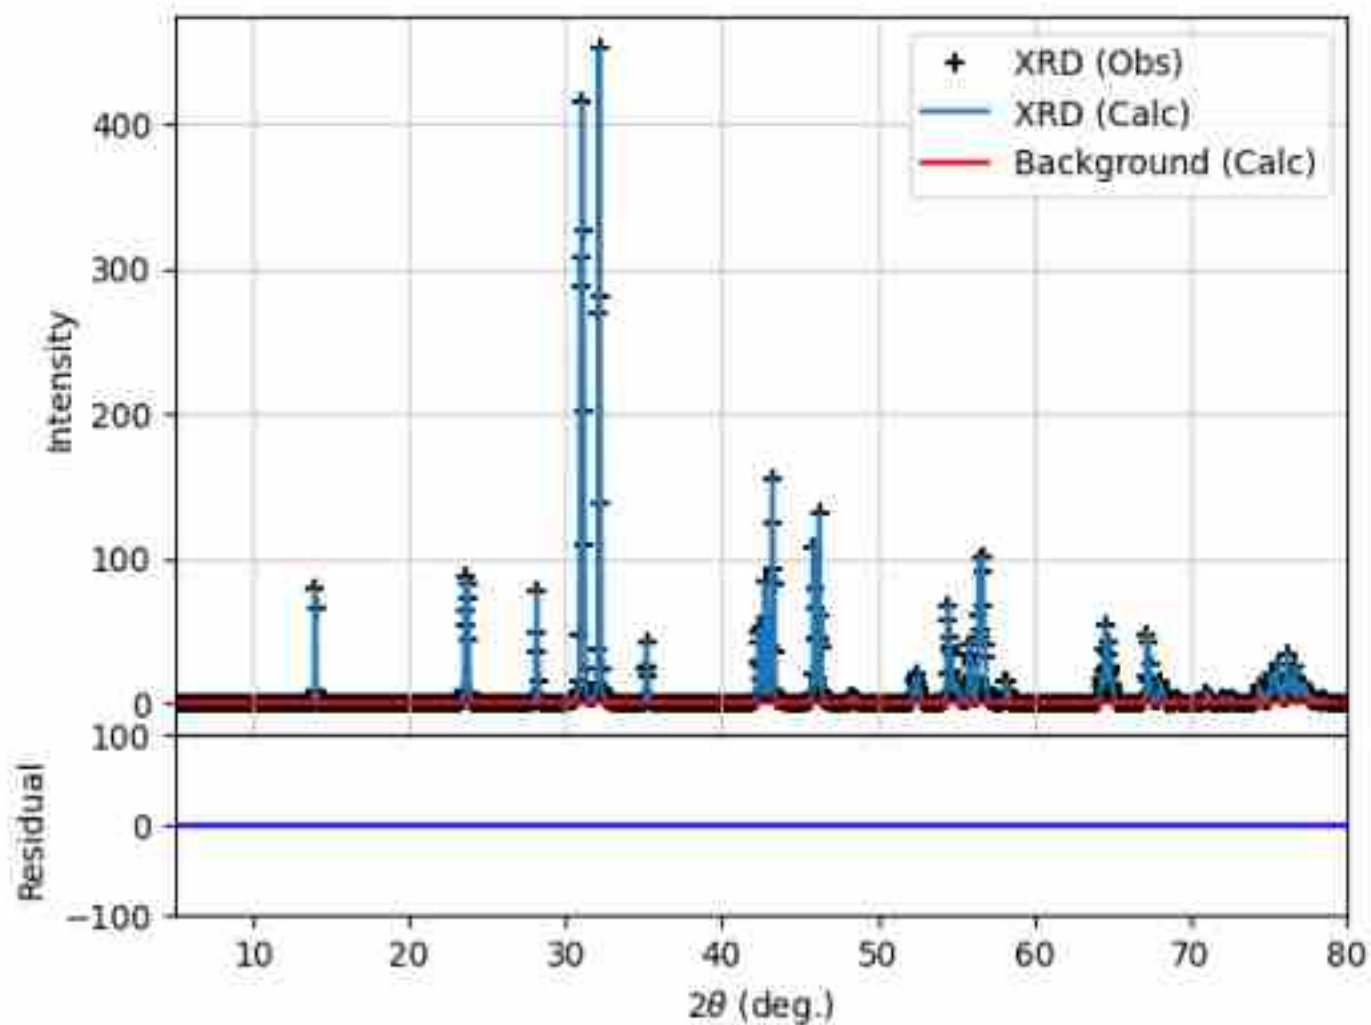

| RMSE before RR | Rwp     | RMSE after RR |
|----------------|---------|---------------|
| 0.016          | 0.00322 | 3e-05         |

# Sr<sub>2</sub>Nb<sub>1</sub>Ga<sub>1</sub>O<sub>6</sub>

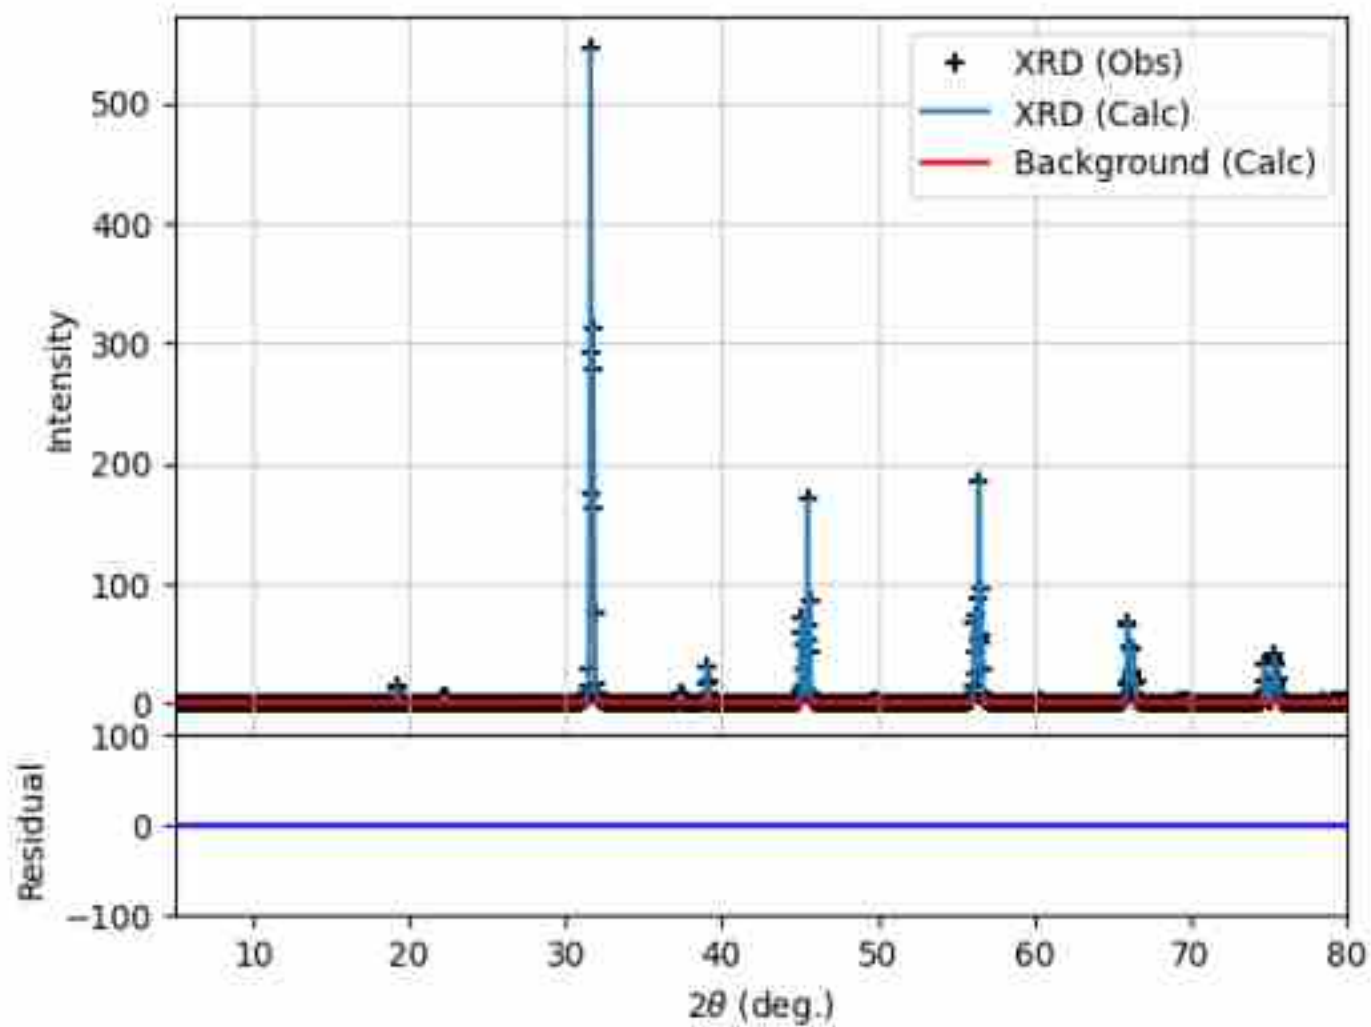

| RMSE before RR | Rwp     | RMSE after RR |
|----------------|---------|---------------|
| 0.016          | 0.00419 | 0.00157       |

# Sr<sub>2</sub>Nd<sub>1</sub>Mn<sub>2</sub>O<sub>7</sub>

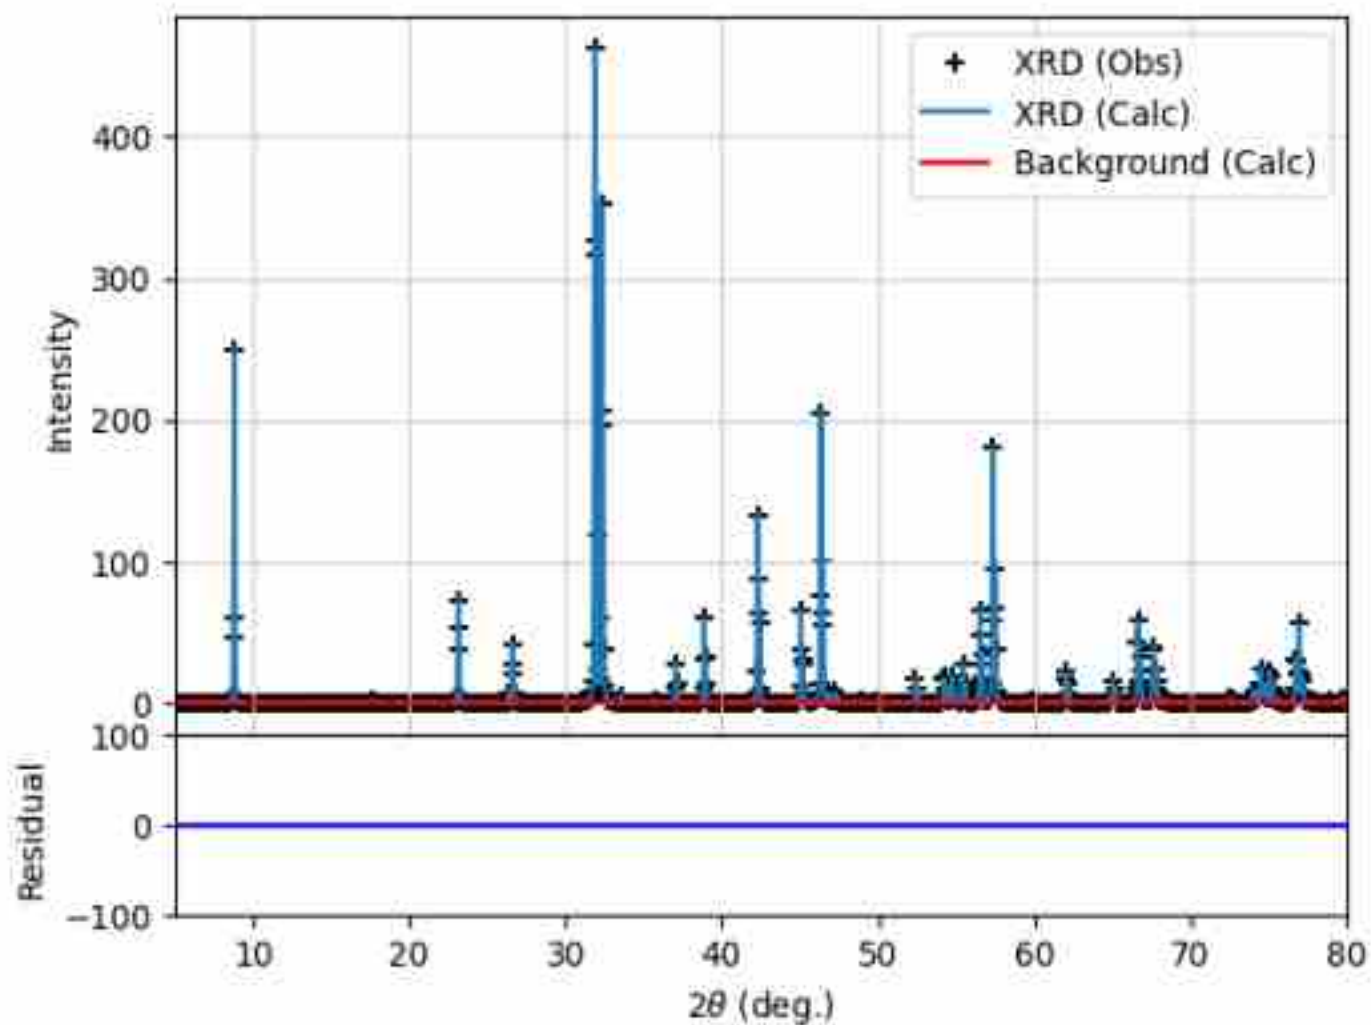

| RMSE before RR | Rwp     | RMSE after RR |
|----------------|---------|---------------|
| 0.016          | 0.00335 | 0.00133       |

# Sr<sub>2</sub>U<sub>1</sub>Cr<sub>1</sub>O<sub>6</sub>

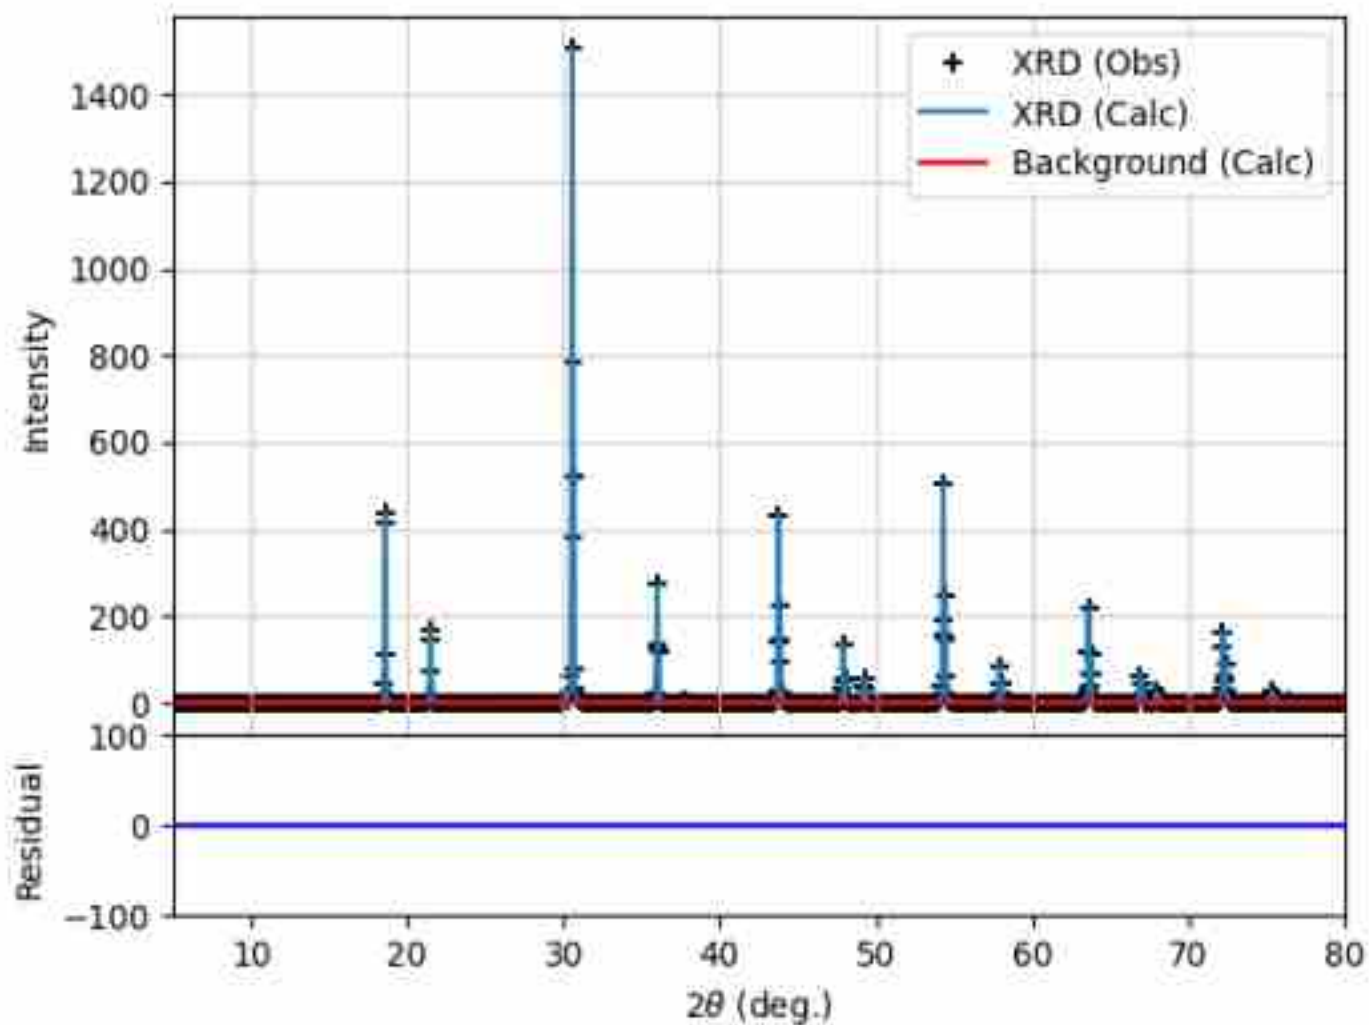

| RMSE before RR | Rwp     | RMSE after RR |
|----------------|---------|---------------|
| 0.016          | 0.01459 | 0.00713       |

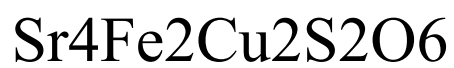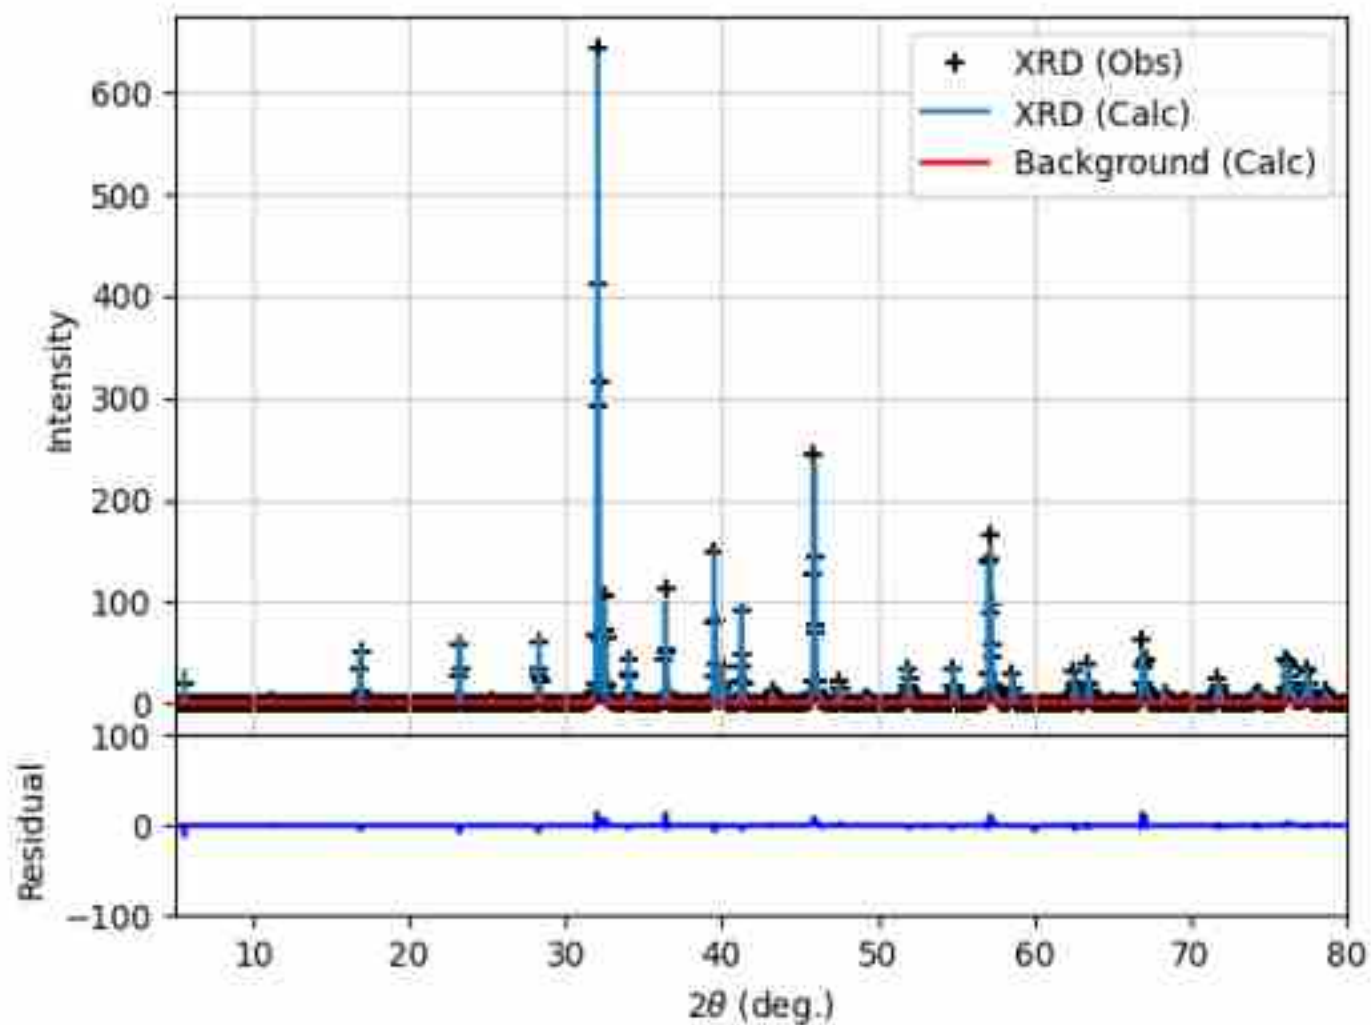

| RMSE before RR | Rwp      | RMSE after RR |
|----------------|----------|---------------|
| 0.016          | 10.81308 | 0.03538       |



# Sr<sub>4</sub>Sn<sub>4</sub>O<sub>12</sub>

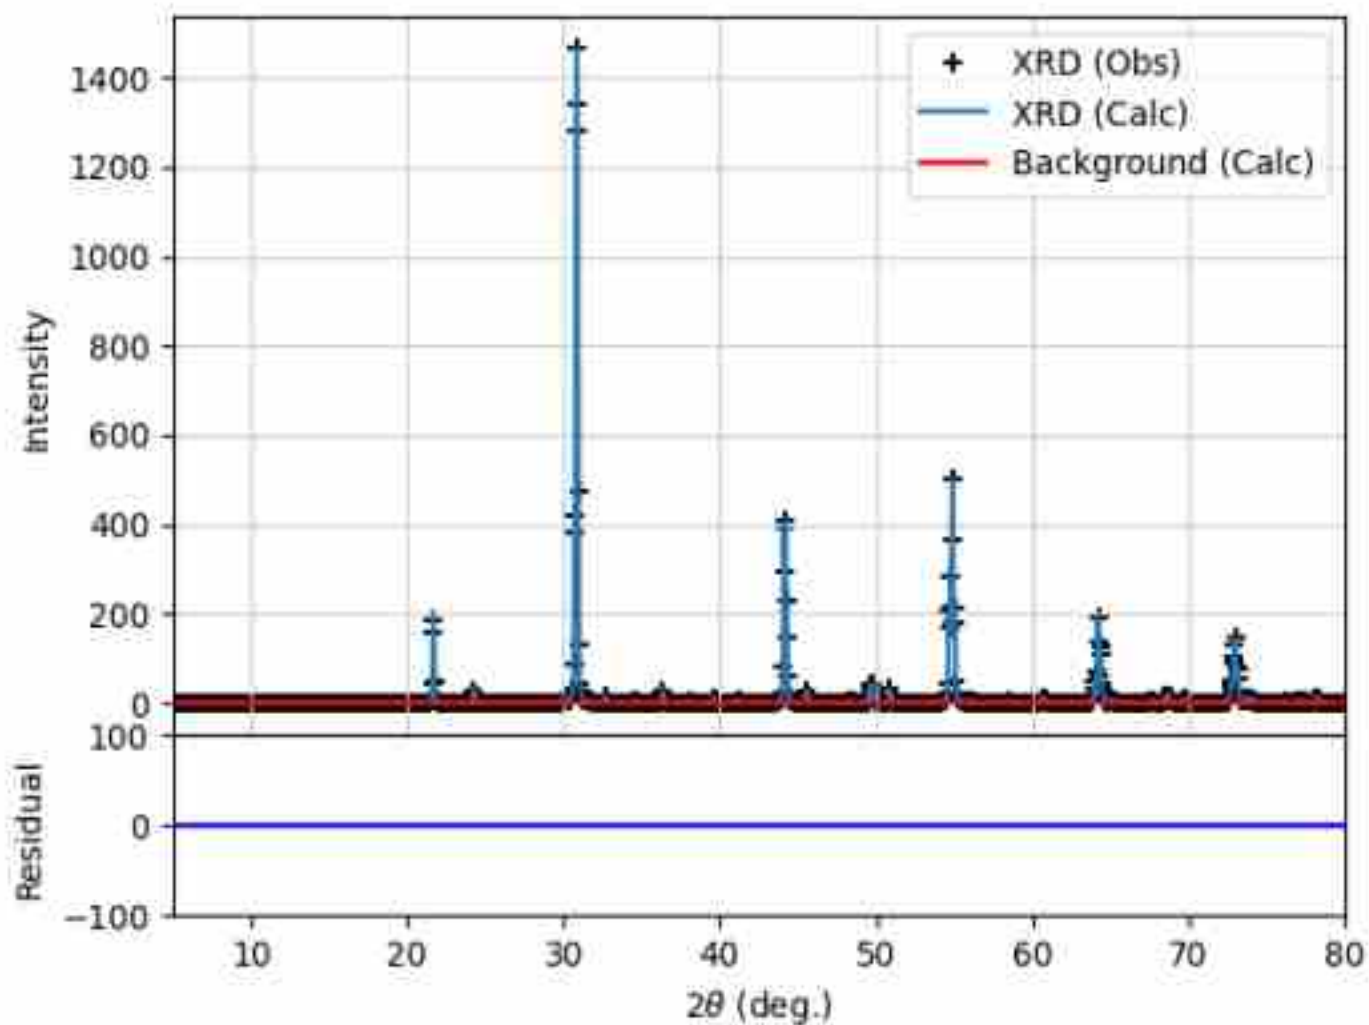

| RMSE before RR | Rwp     | RMSE after RR |
|----------------|---------|---------------|
| 0.016          | 0.00294 | 0.0013        |

# Sr<sub>4</sub>Y<sub>2</sub>Ta<sub>2</sub>O<sub>12</sub>

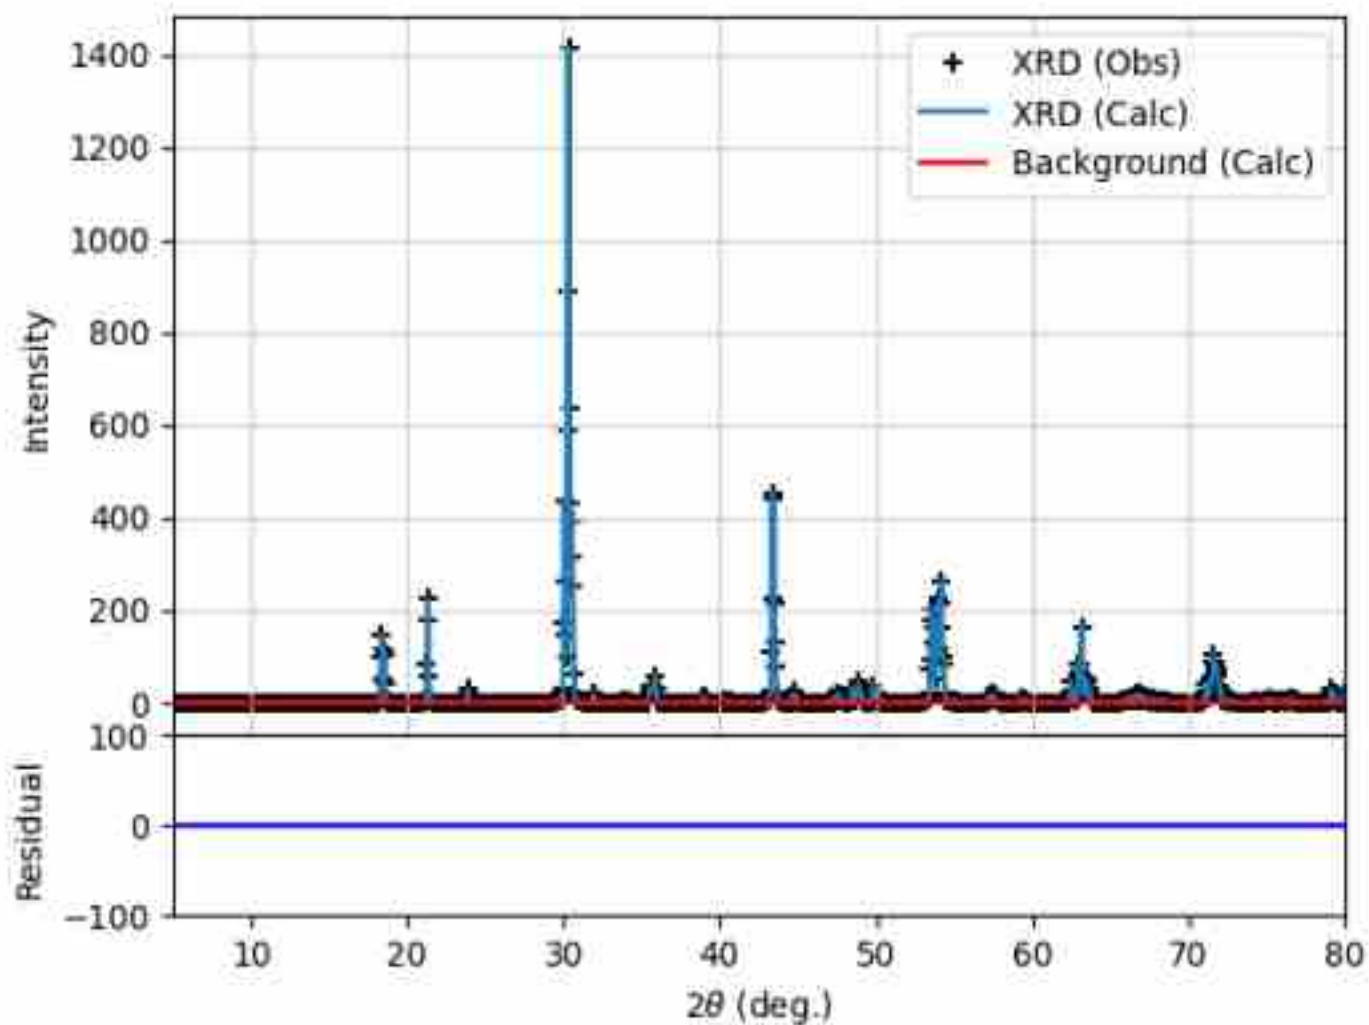

| RMSE before RR | Rwp     | RMSE after RR |
|----------------|---------|---------------|
| 0.016          | 0.00323 | 0.00096       |

# Ta<sub>1</sub>Ti<sub>1</sub>Ni<sub>6</sub>

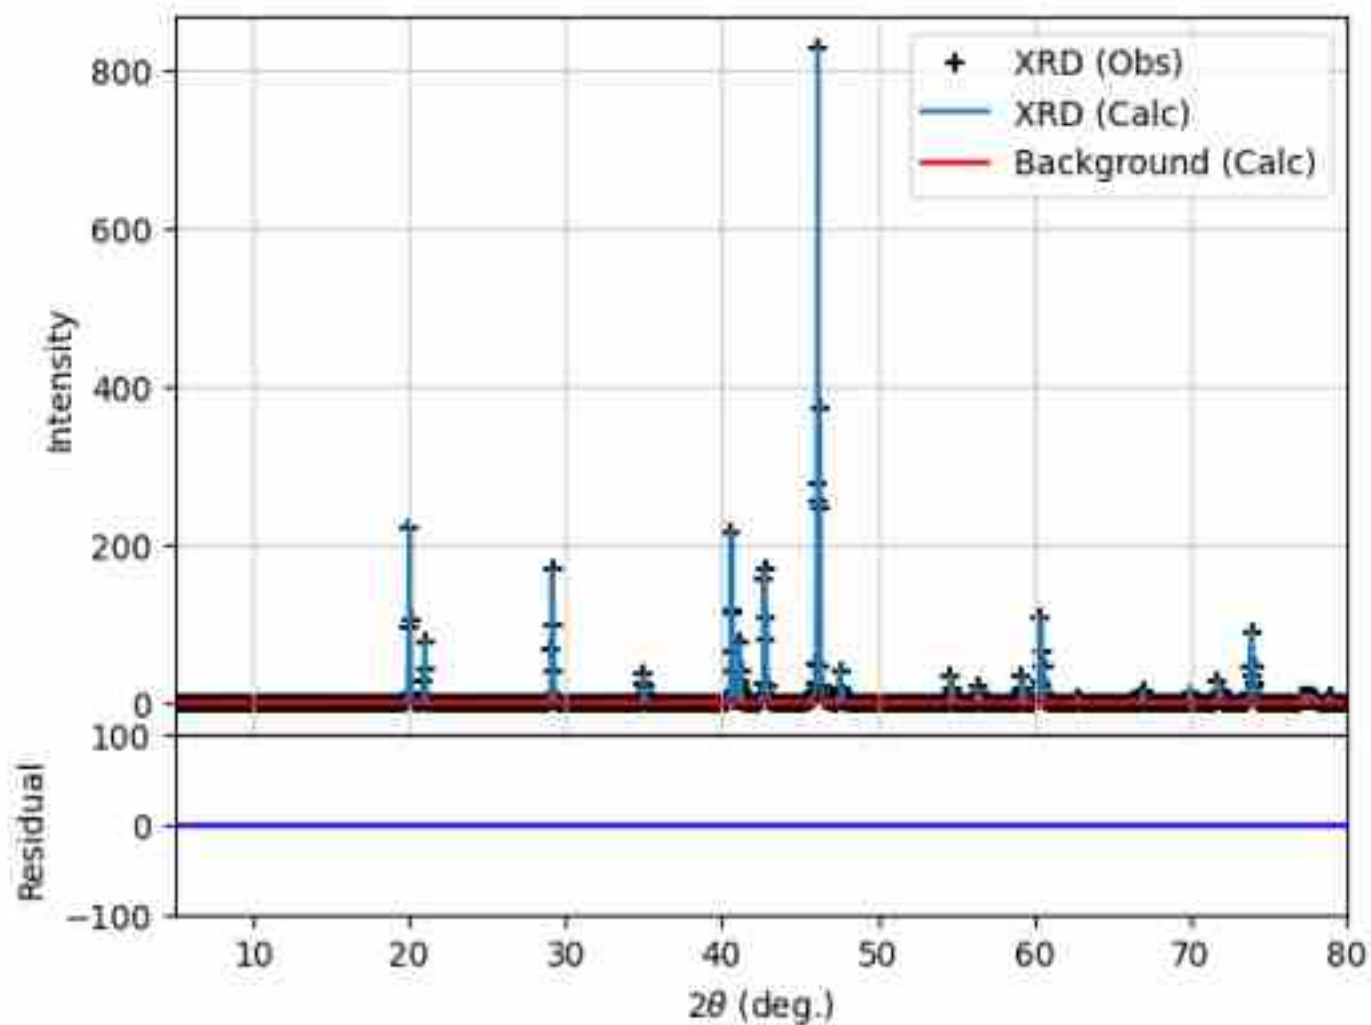

| RMSE before RR | Rwp    | RMSE after RR |
|----------------|--------|---------------|
| 0.016          | 0.0081 | 0.00188       |

# Ta1Ti1Se4

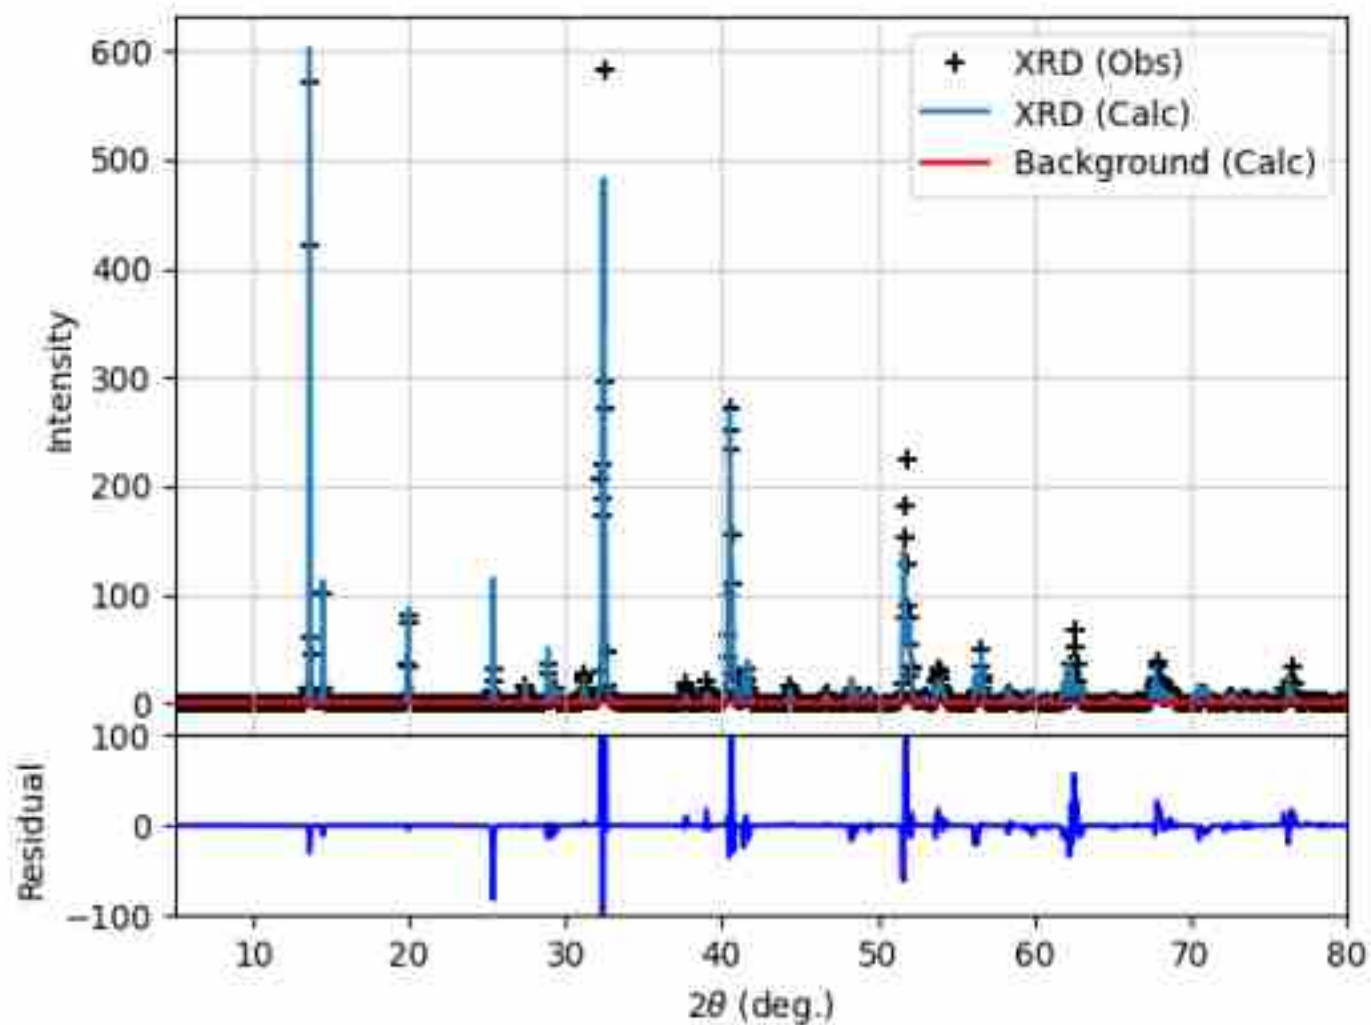

| RMSE before RR | Rwp     | RMSE after RR |
|----------------|---------|---------------|
| 0.016          | 71.8664 | 0.02587       |

# Tb2Te1S2

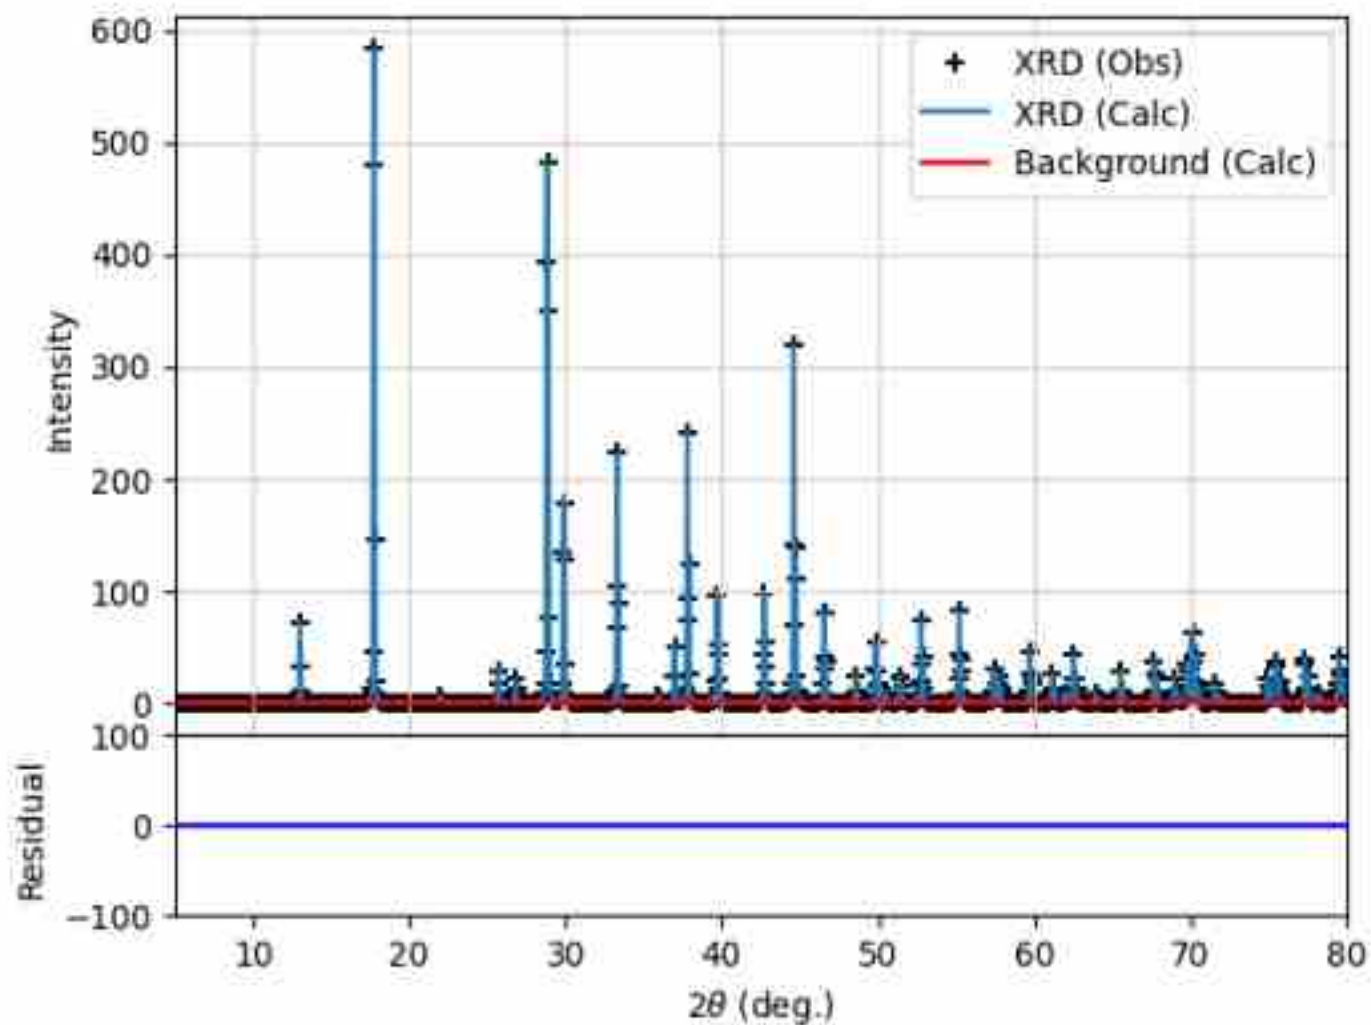

| RMSE before RR | Rwp     | RMSE after RR |
|----------------|---------|---------------|
| 0.016          | 0.00339 | 0.00052       |

# Tb6Ir1I10

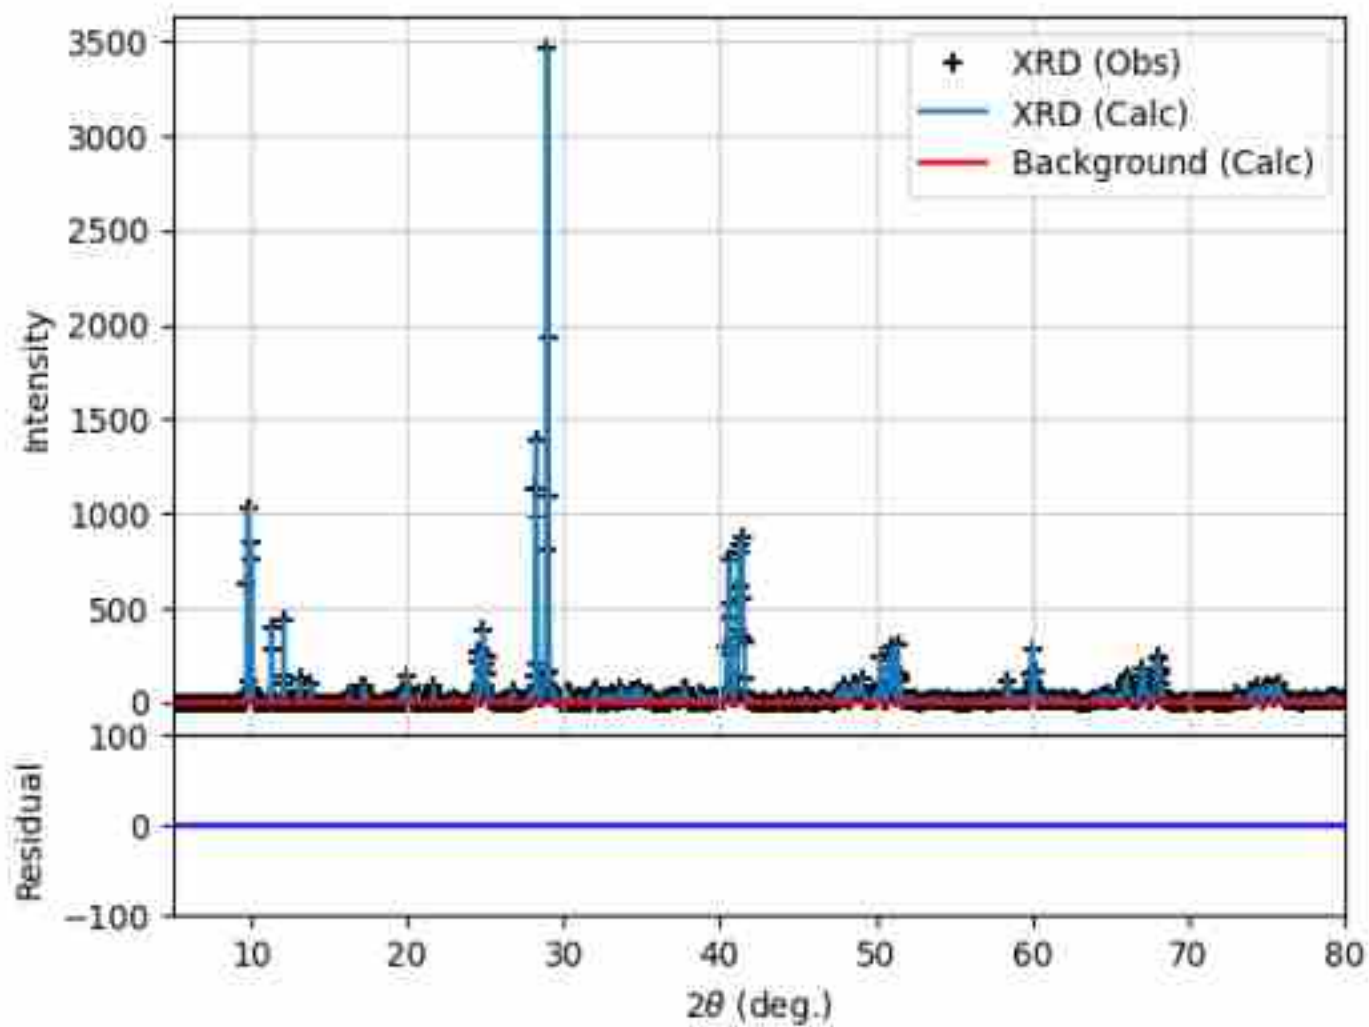

| RMSE before RR | Rwp     | RMSE after RR |
|----------------|---------|---------------|
| 0.016          | 0.00015 | 7e-05         |

# Tb6Tl10

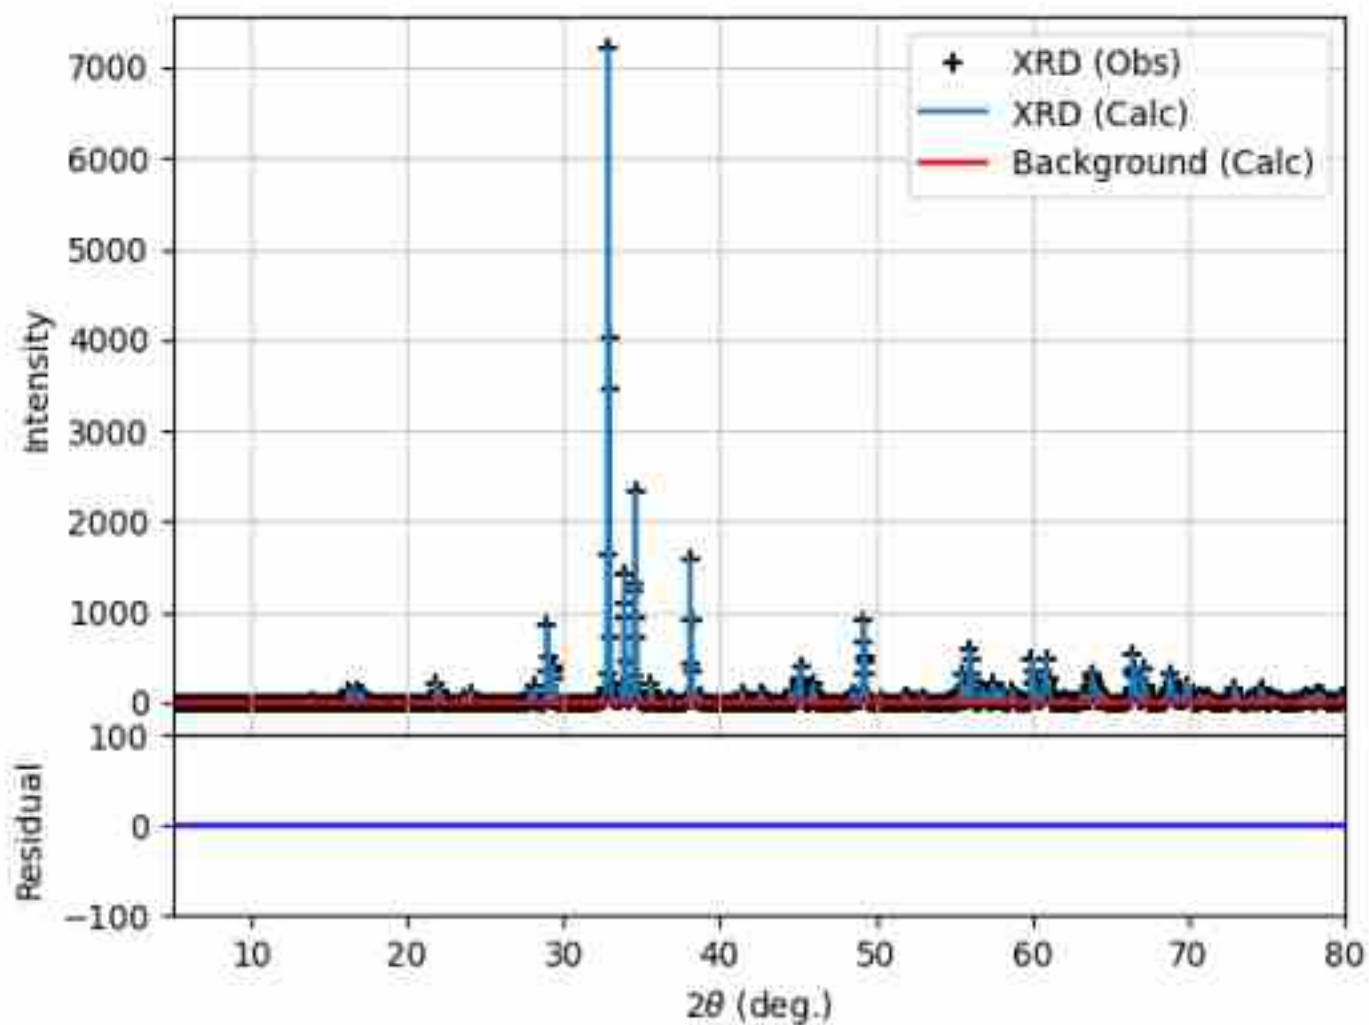

| RMSE before RR | Rwp     | RMSE after RR |
|----------------|---------|---------------|
| 0.016          | 0.00336 | 0.00033       |

# Tb10Ru4

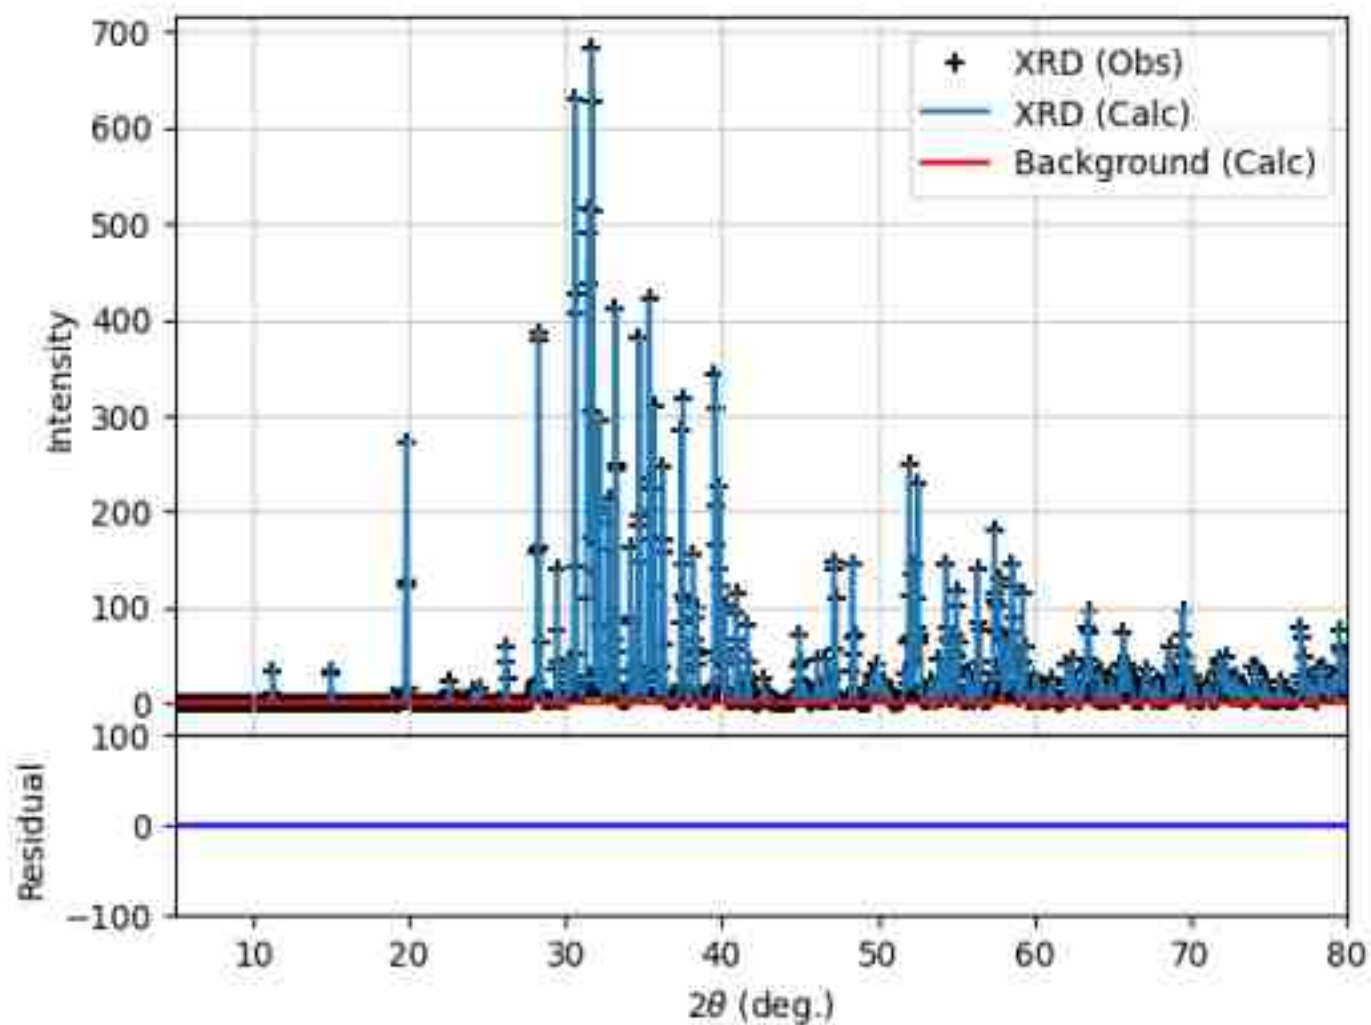

| RMSE before RR | Rwp     | RMSE after RR |
|----------------|---------|---------------|
| 0.016          | 0.00358 | 0.00023       |



# Th<sub>2</sub>Si<sub>2</sub>Ru<sub>4</sub>C<sub>2</sub>

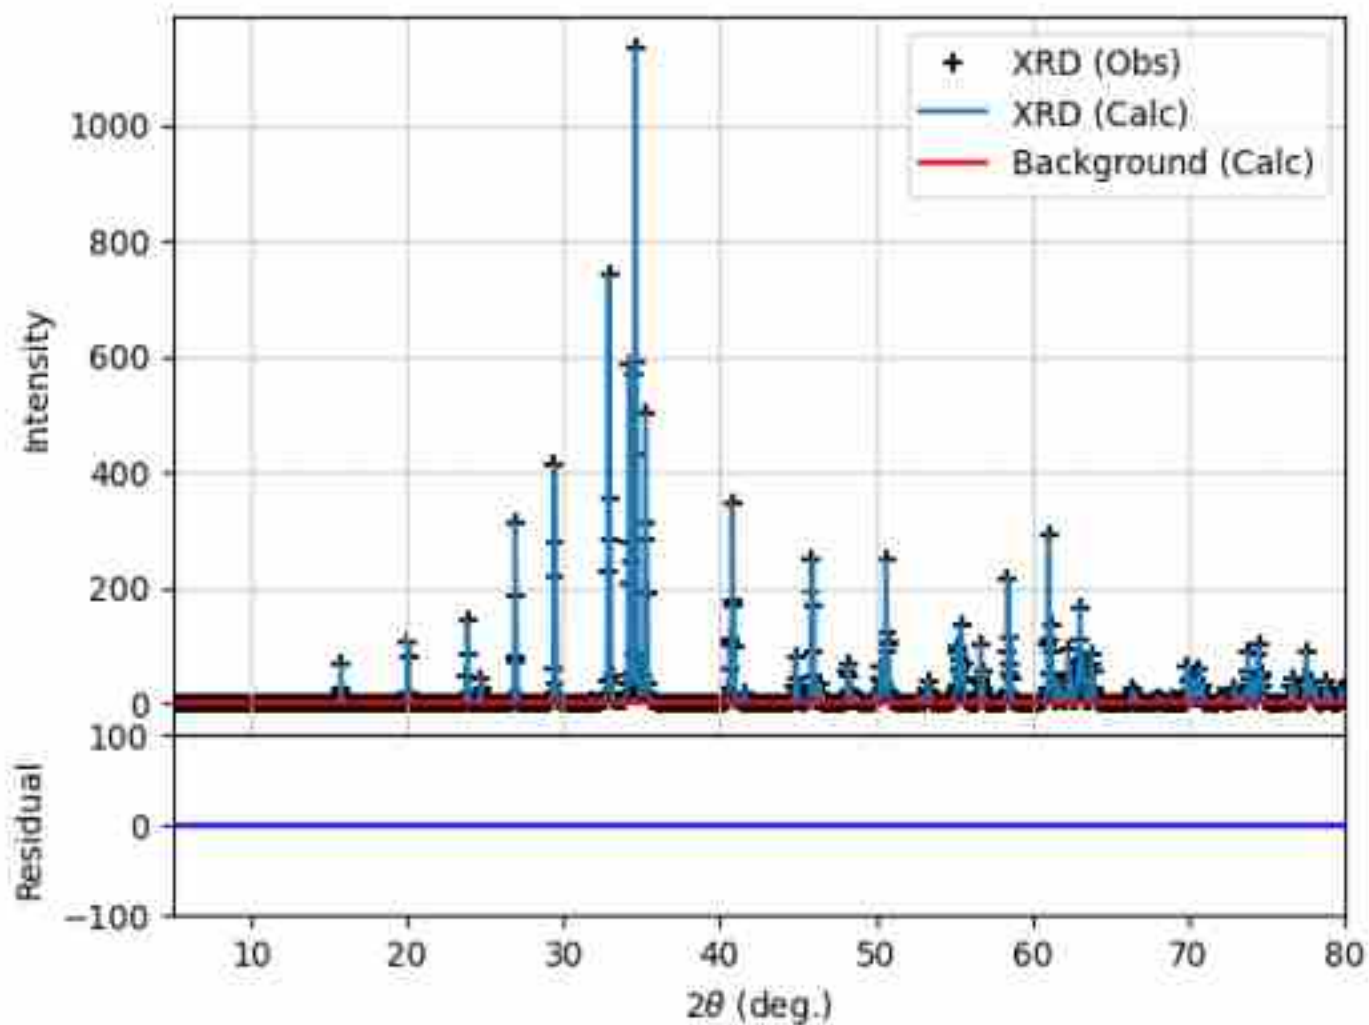

| RMSE before RR | Rwp     | RMSE after RR |
|----------------|---------|---------------|
| 0.016          | 0.00343 | 0.00096       |

# Ti1H2

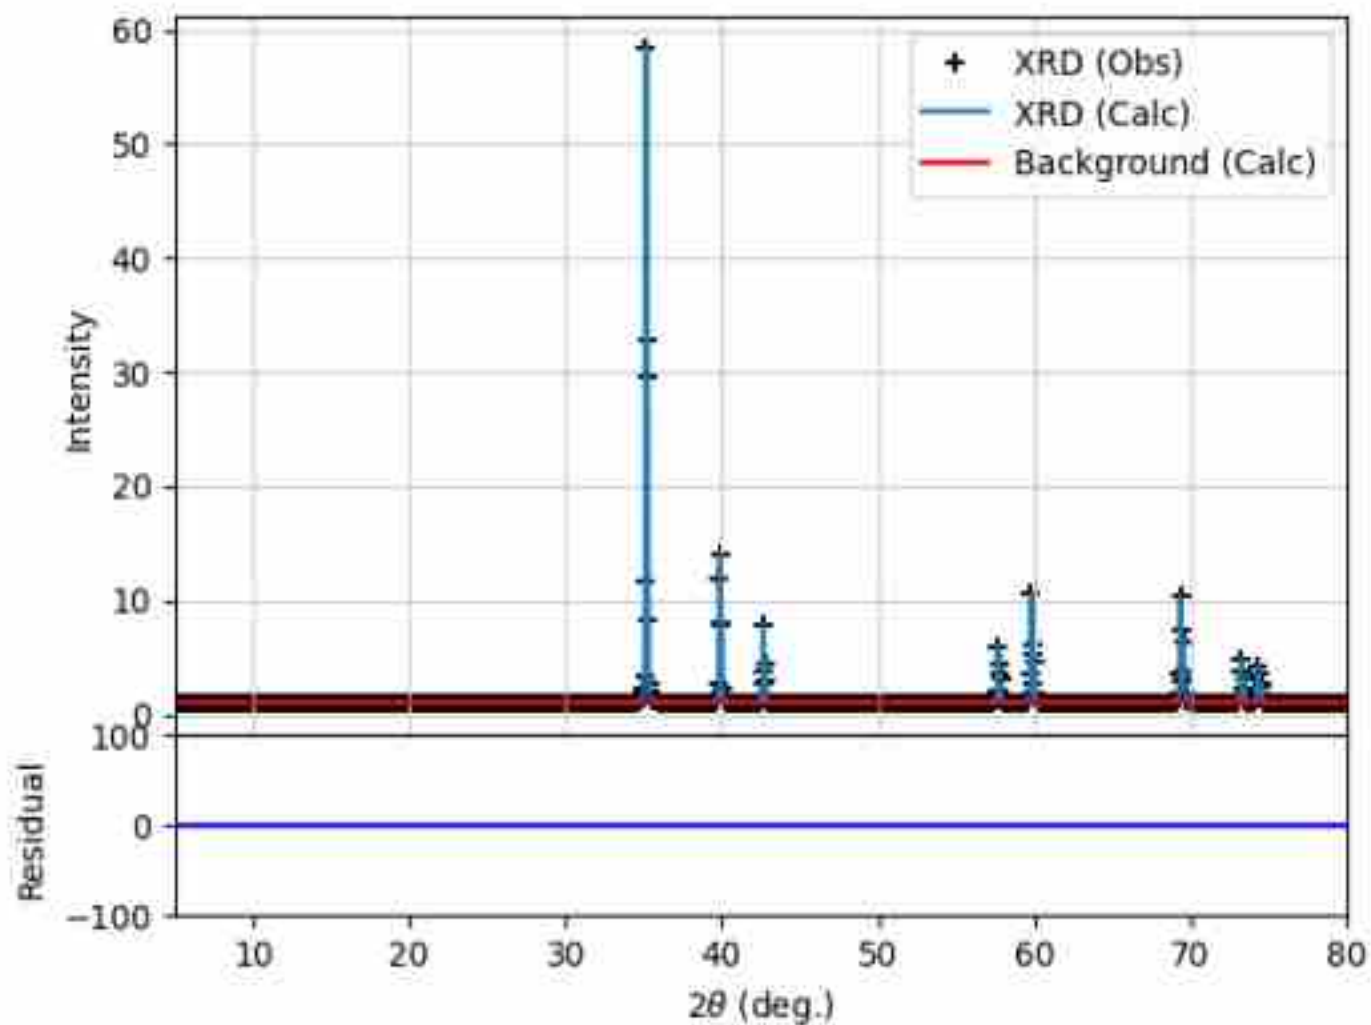

| RMSE before RR | Rwp     | RMSE after RR |
|----------------|---------|---------------|
| 0.016          | 0.00243 | 0.00567       |

# Ti1Mn2V1As4

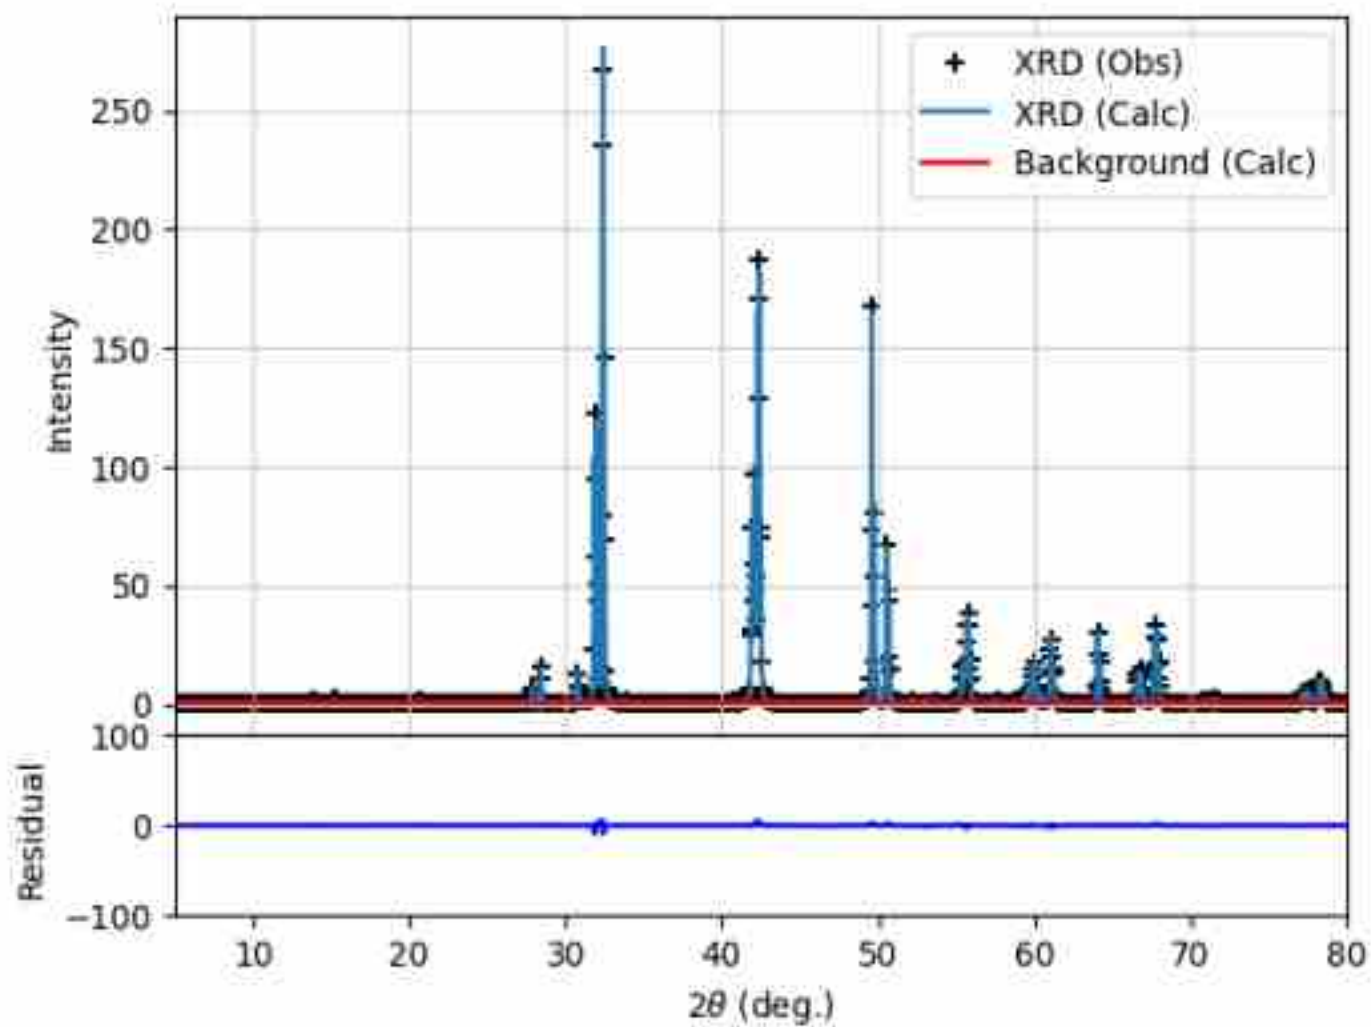

| RMSE before RR | Rwp     | RMSE after RR |
|----------------|---------|---------------|
| 0.016          | 5.07213 | None          |

# Ti2Al4

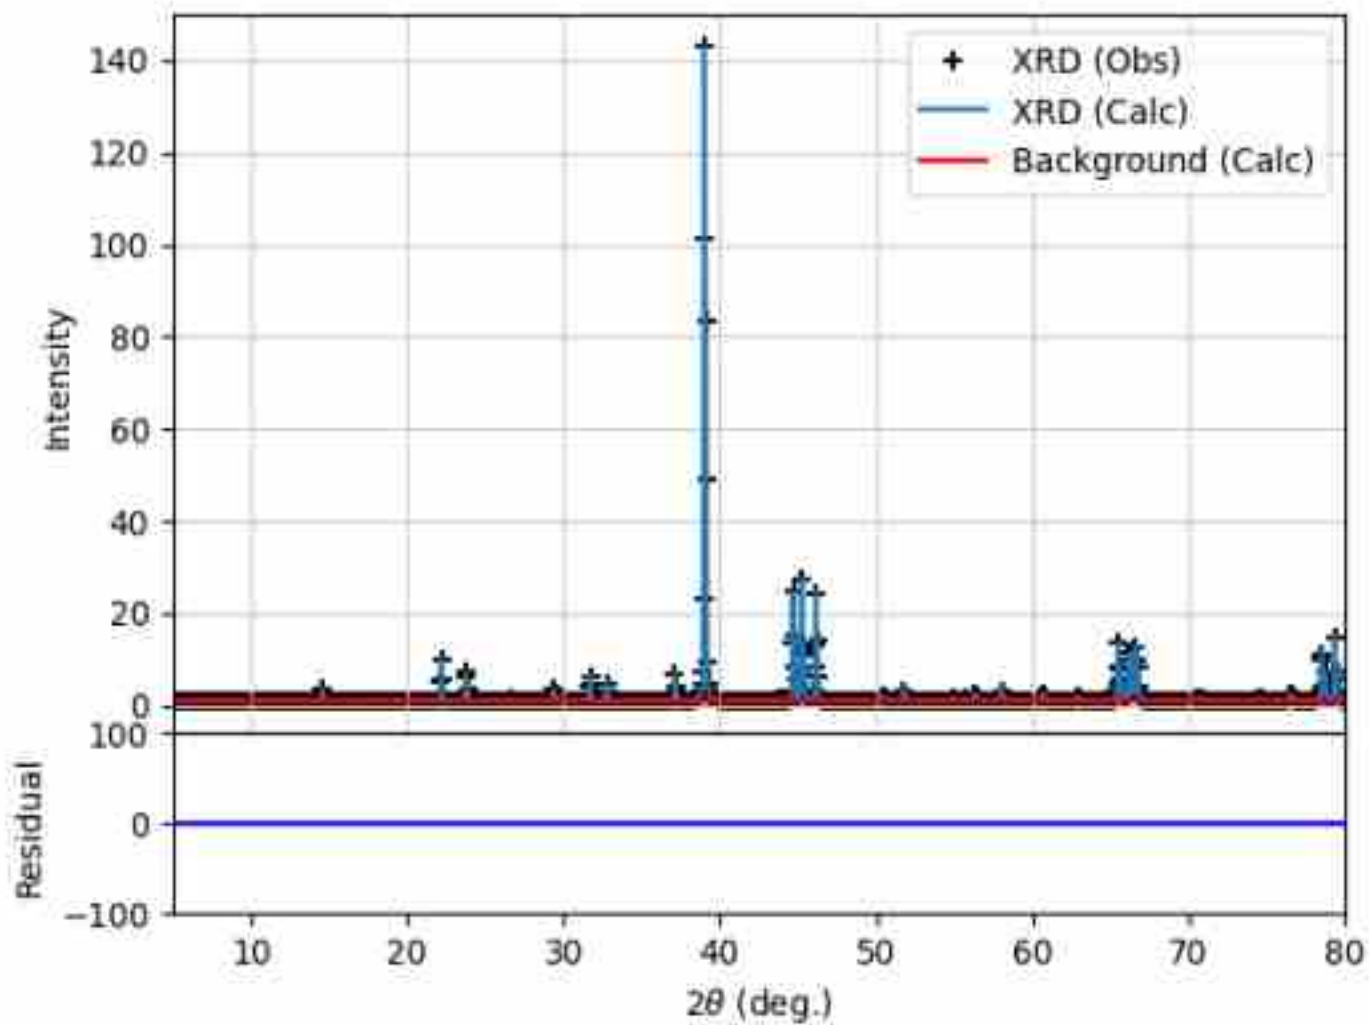

| RMSE before RR | Rwp     | RMSE after RR |
|----------------|---------|---------------|
| 0.016          | 0.07919 | 0.0011        |

# Ti<sub>2</sub>Br<sub>2</sub>N<sub>2</sub>

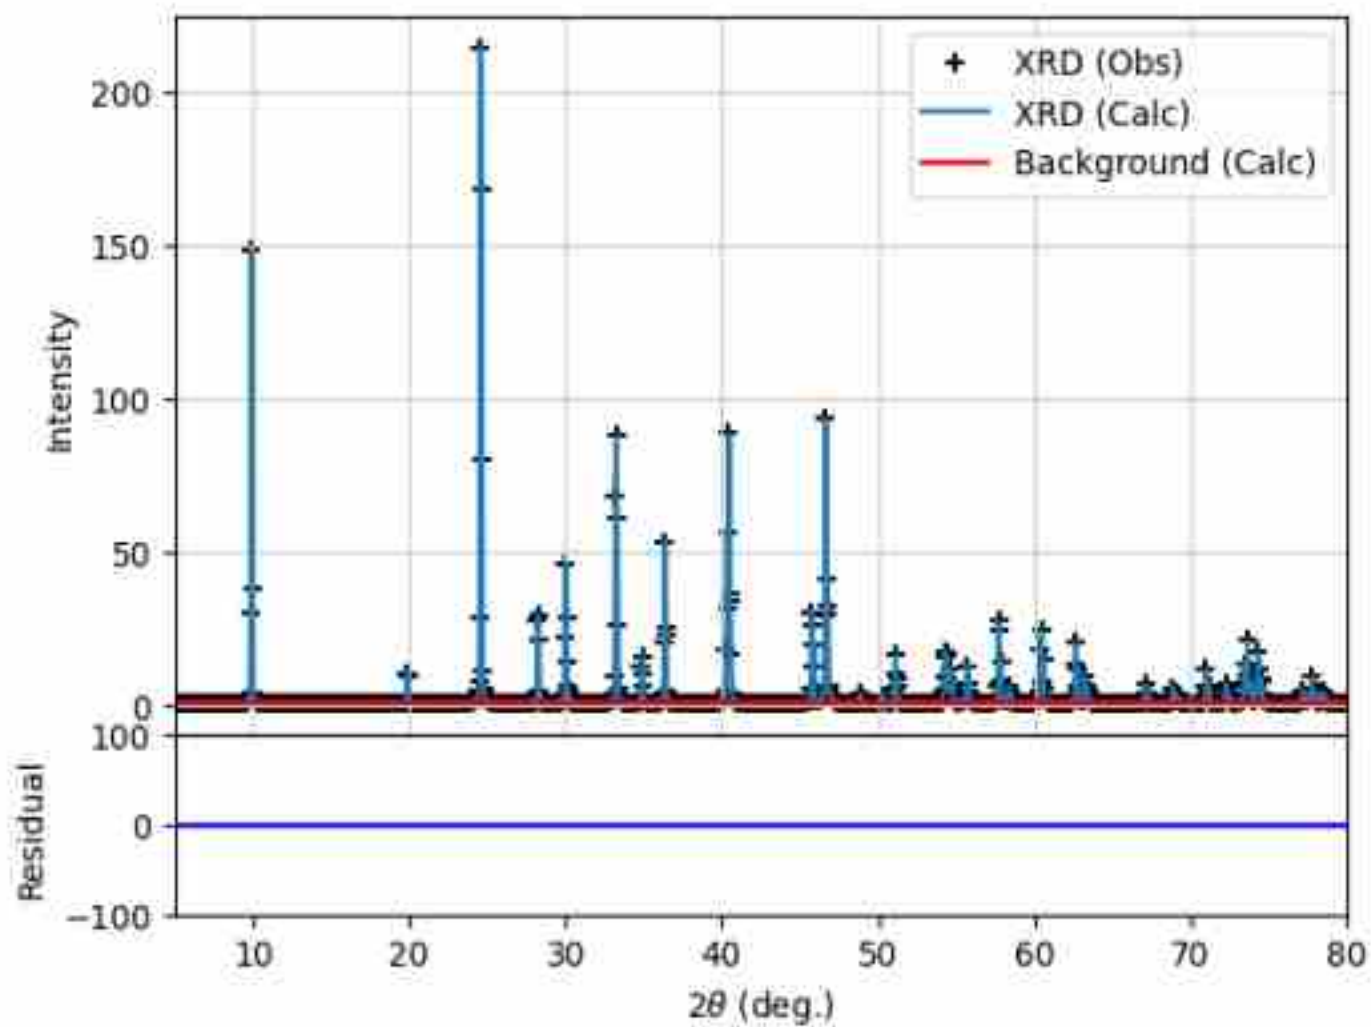

| RMSE before RR | Rwp     | RMSE after RR |
|----------------|---------|---------------|
| 0.016          | 0.00347 | 0.00103       |

# Ti2C1N1

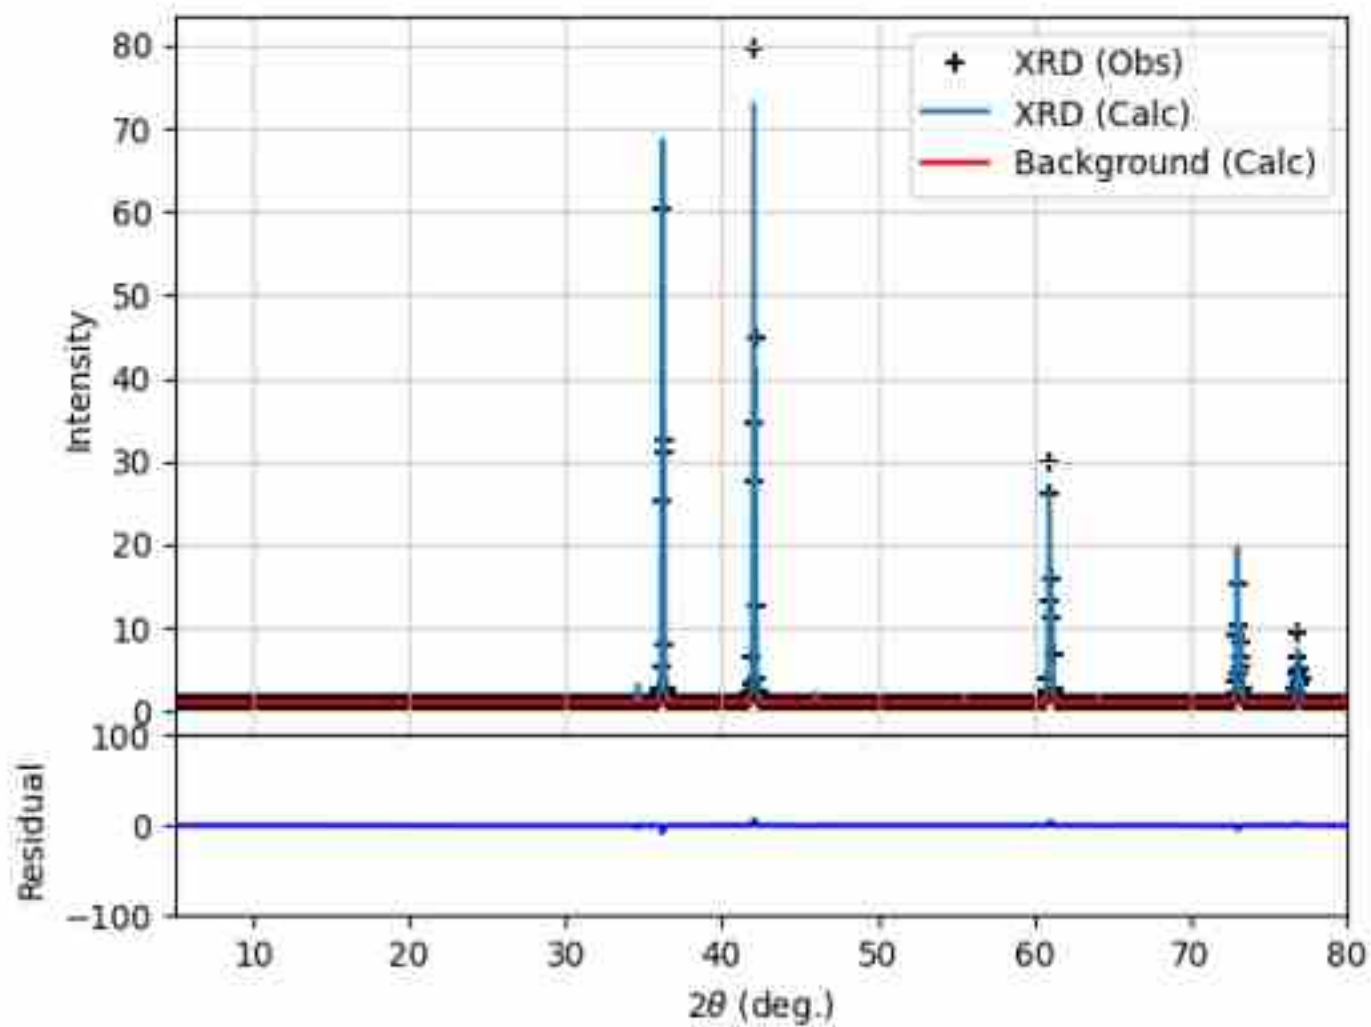

| RMSE before RR | Rwp      | RMSE after RR |
|----------------|----------|---------------|
| 0.016          | 10.78225 | 0.0238        |

# Ti<sub>2</sub>Sn<sub>2</sub>O<sub>6</sub>

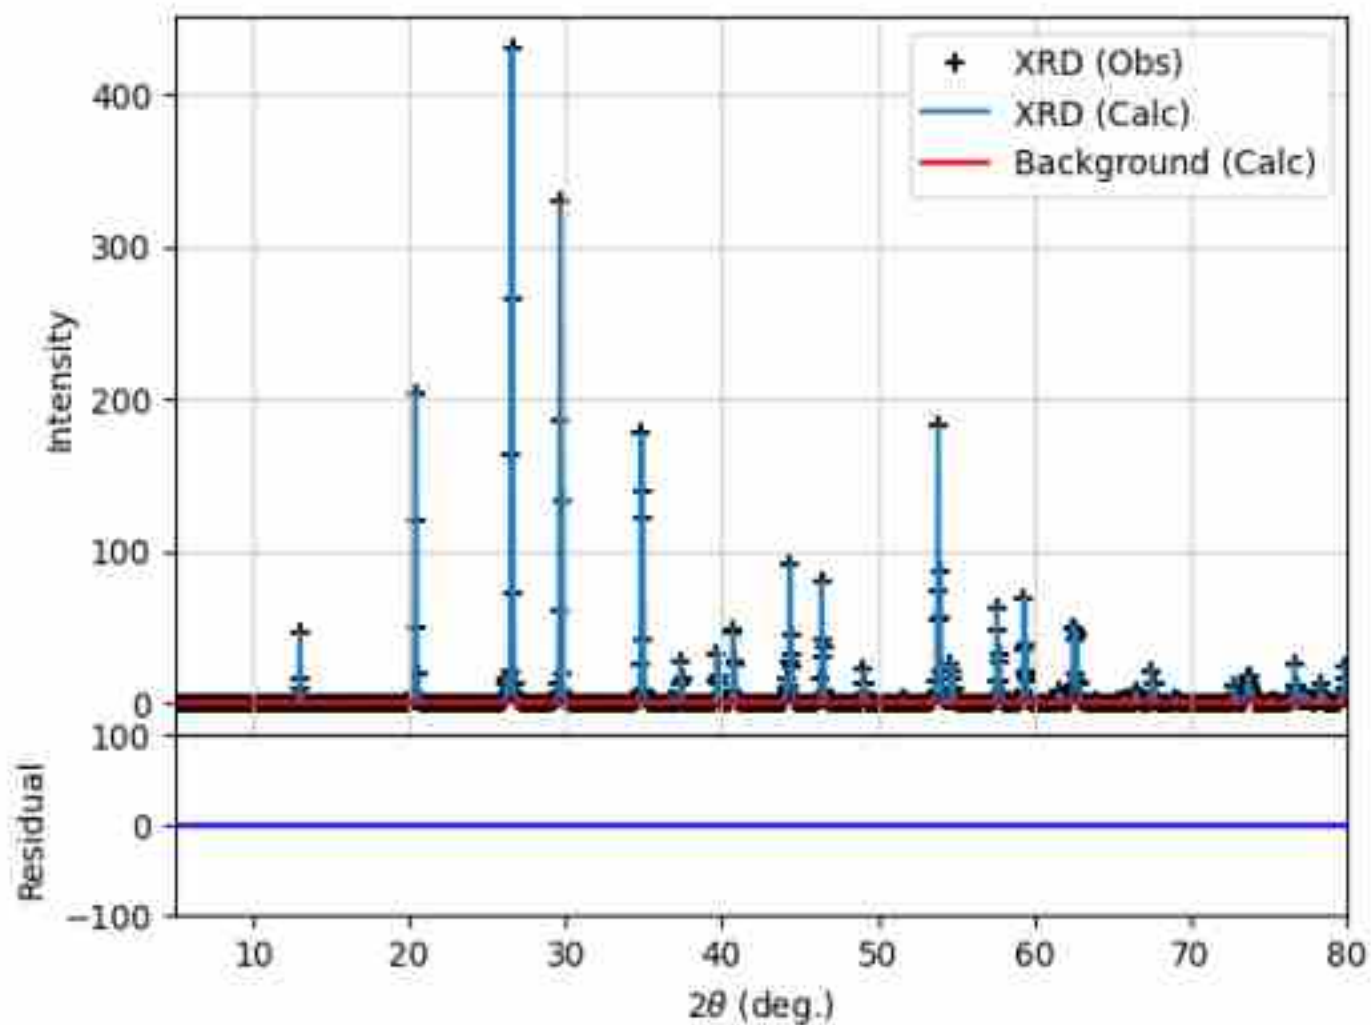

| RMSE before RR | Rwp     | RMSE after RR |
|----------------|---------|---------------|
| 0.016          | 0.00283 | 0.00087       |

# Tl<sub>2</sub>Sn<sub>1</sub>Hg<sub>1</sub>Se<sub>4</sub>

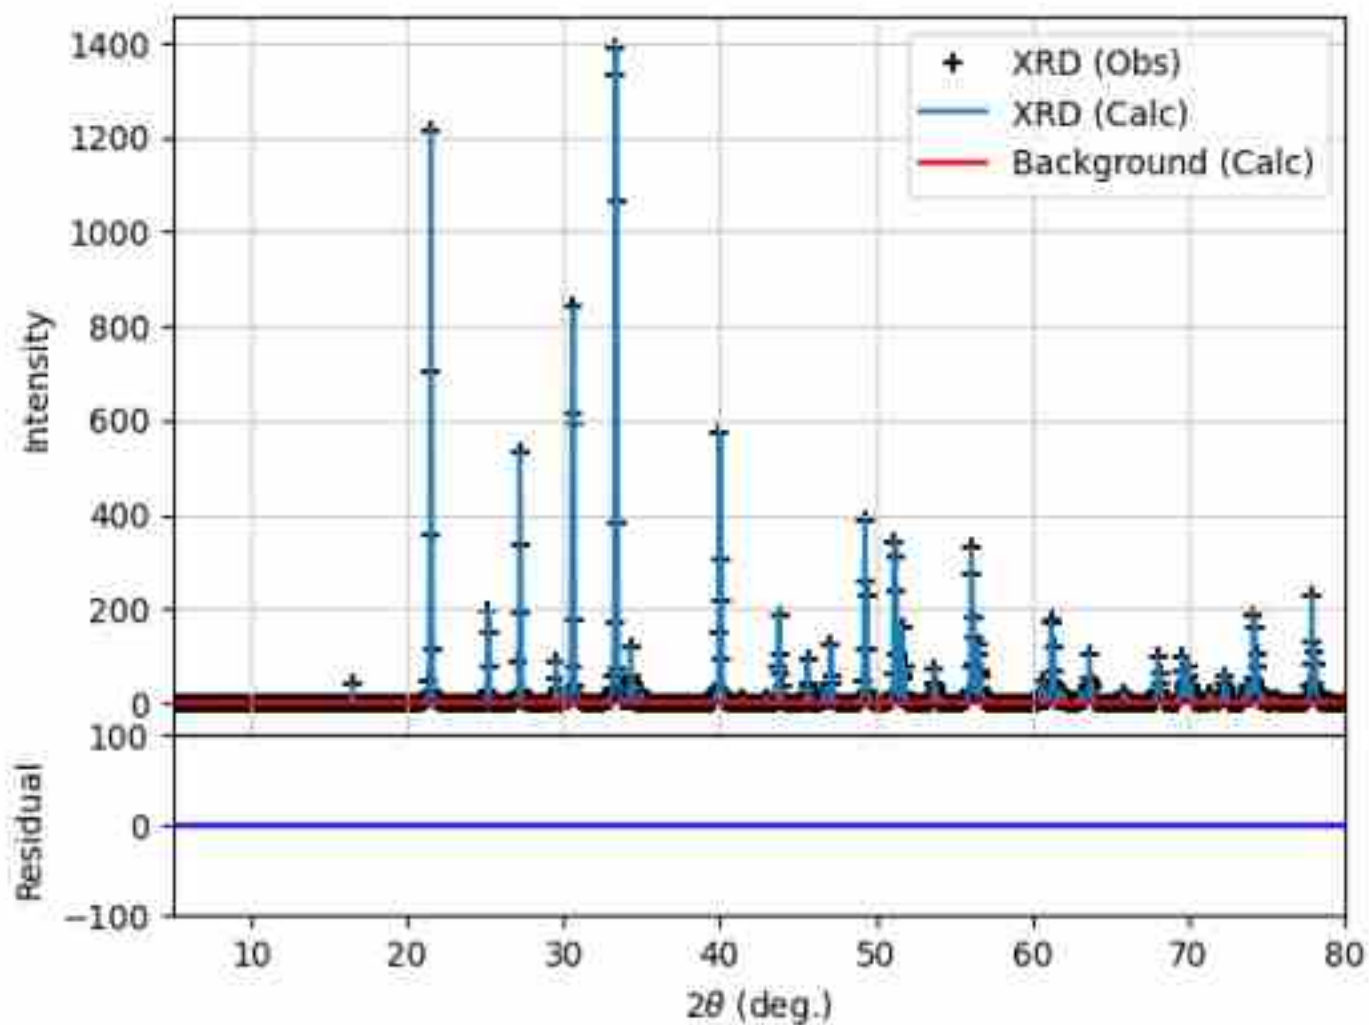

| RMSE before RR | Rwp     | RMSE after RR |
|----------------|---------|---------------|
| 0.016          | 0.00404 | 0.00032       |



# Tl3V1F6

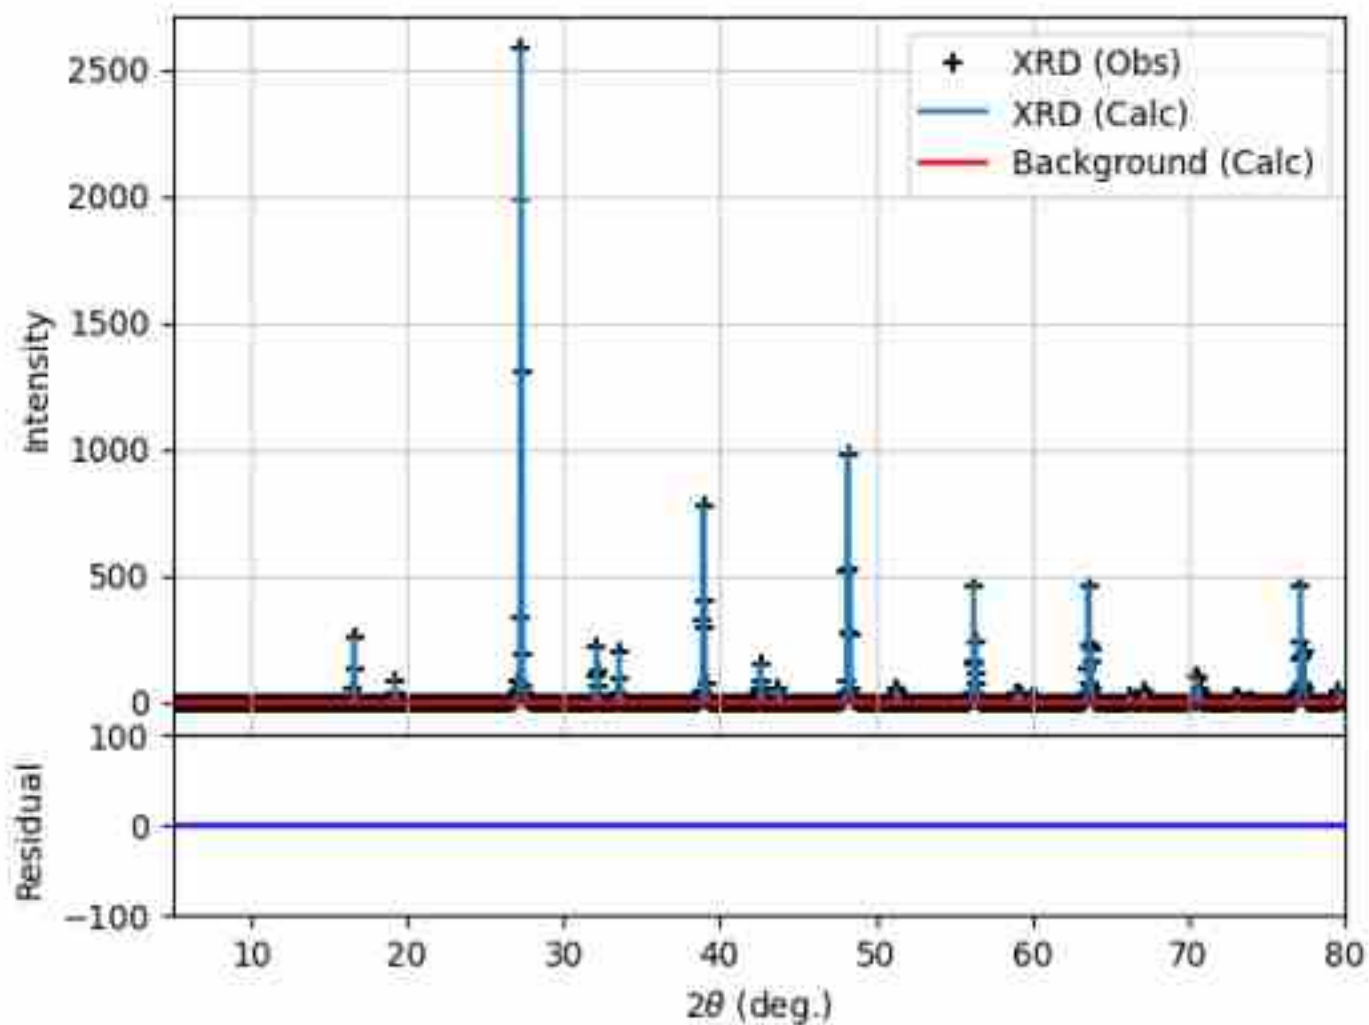

| RMSE before RR | Rwp     | RMSE after RR |
|----------------|---------|---------------|
| 0.016          | 0.01249 | 0.00408       |

# Tm1Cu5

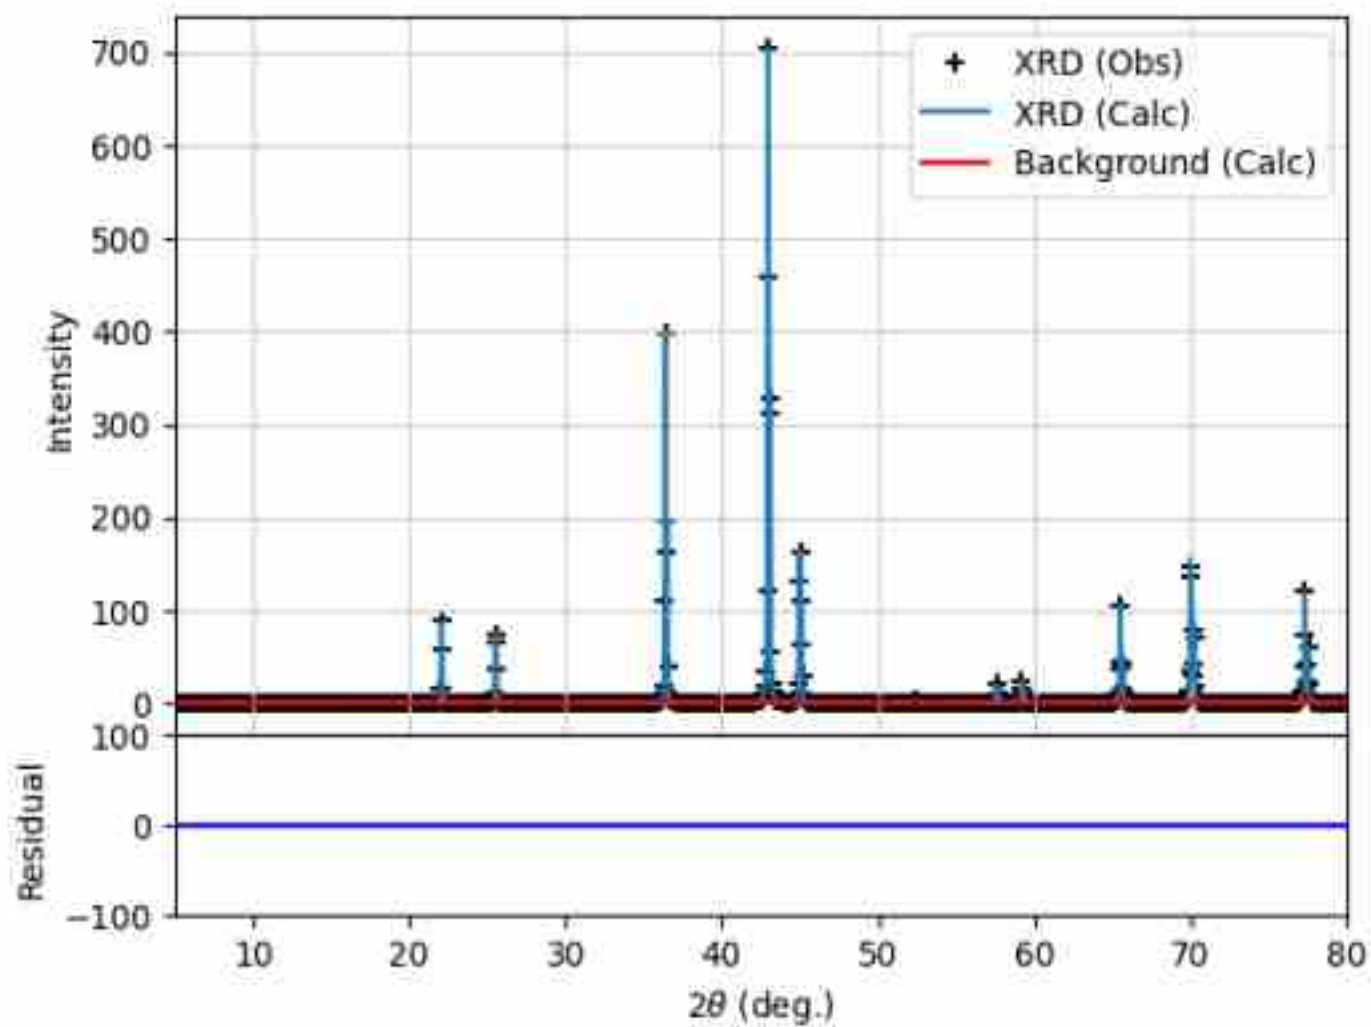

| RMSE before RR | Rwp     | RMSE after RR |
|----------------|---------|---------------|
| 0.016          | 0.03642 | 0.00372       |

# Tm1Ga6Fe6

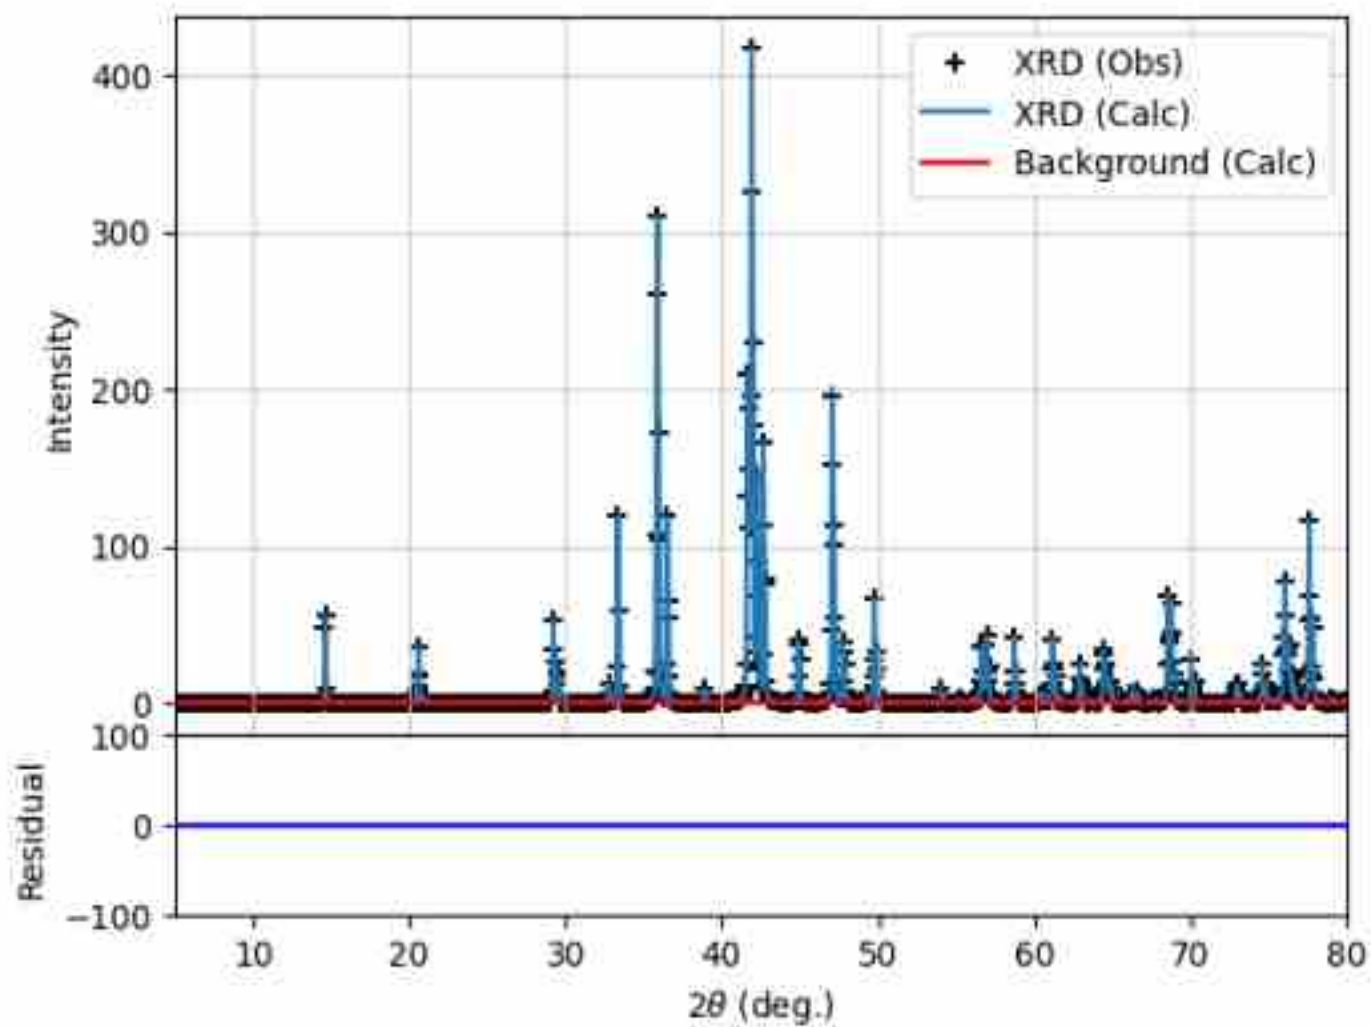

| RMSE before RR | Rwp     | RMSE after RR |
|----------------|---------|---------------|
| 0.016          | 0.00375 | 0.0004        |

# Tm<sub>2</sub>Si<sub>2</sub>O<sub>8</sub>C<sub>2</sub>

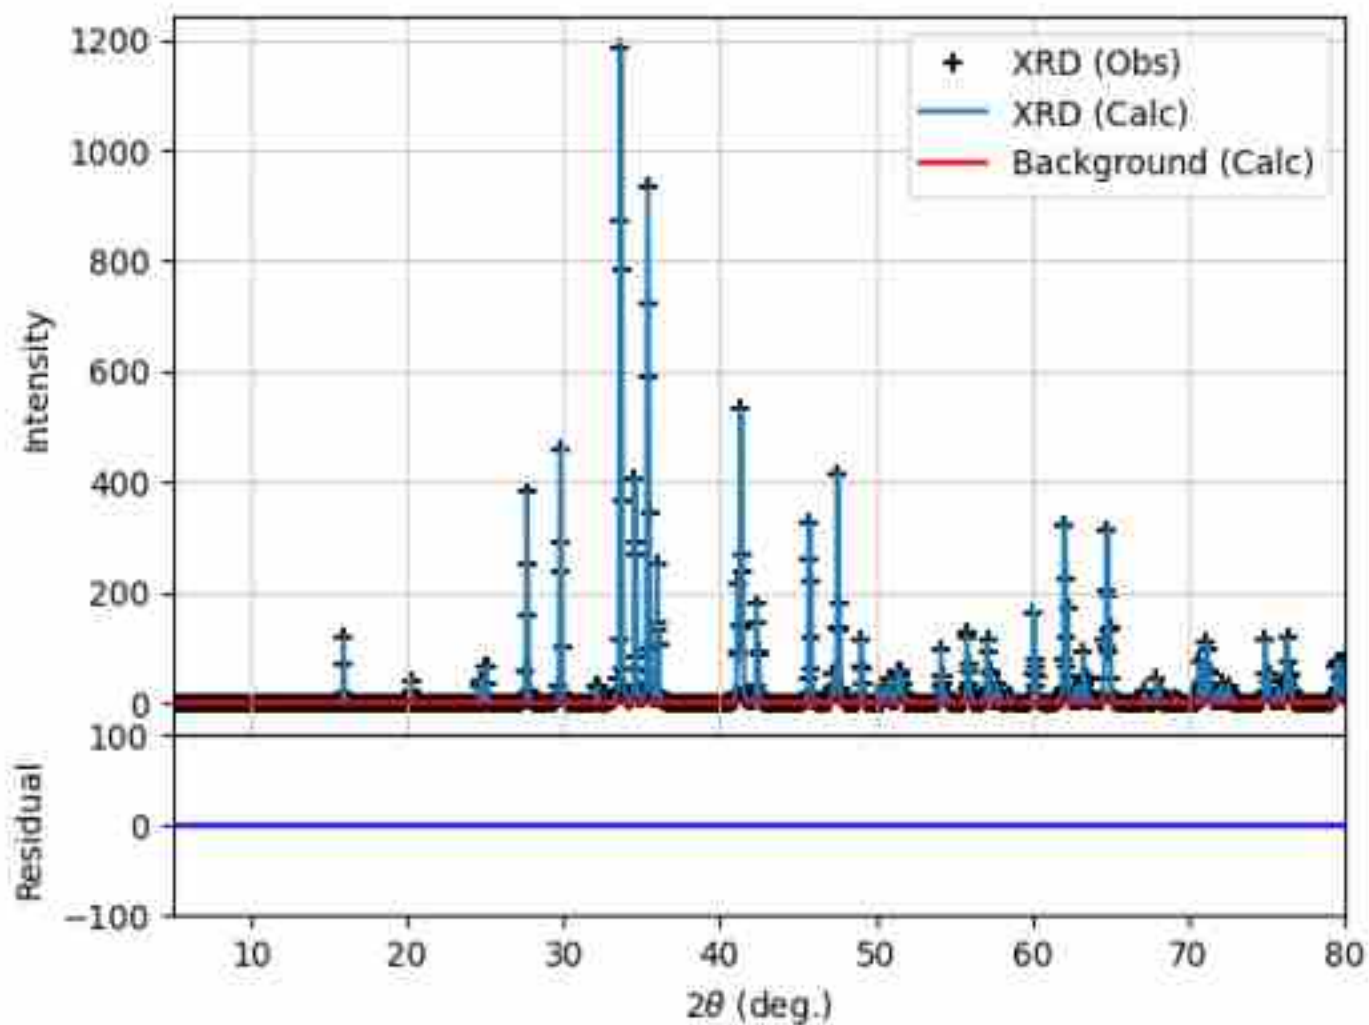

| RMSE before RR | Rwp     | RMSE after RR |
|----------------|---------|---------------|
| 0.016          | 0.00425 | 0.002         |

# Tm<sub>3</sub>Cu<sub>4</sub>Ge<sub>4</sub>

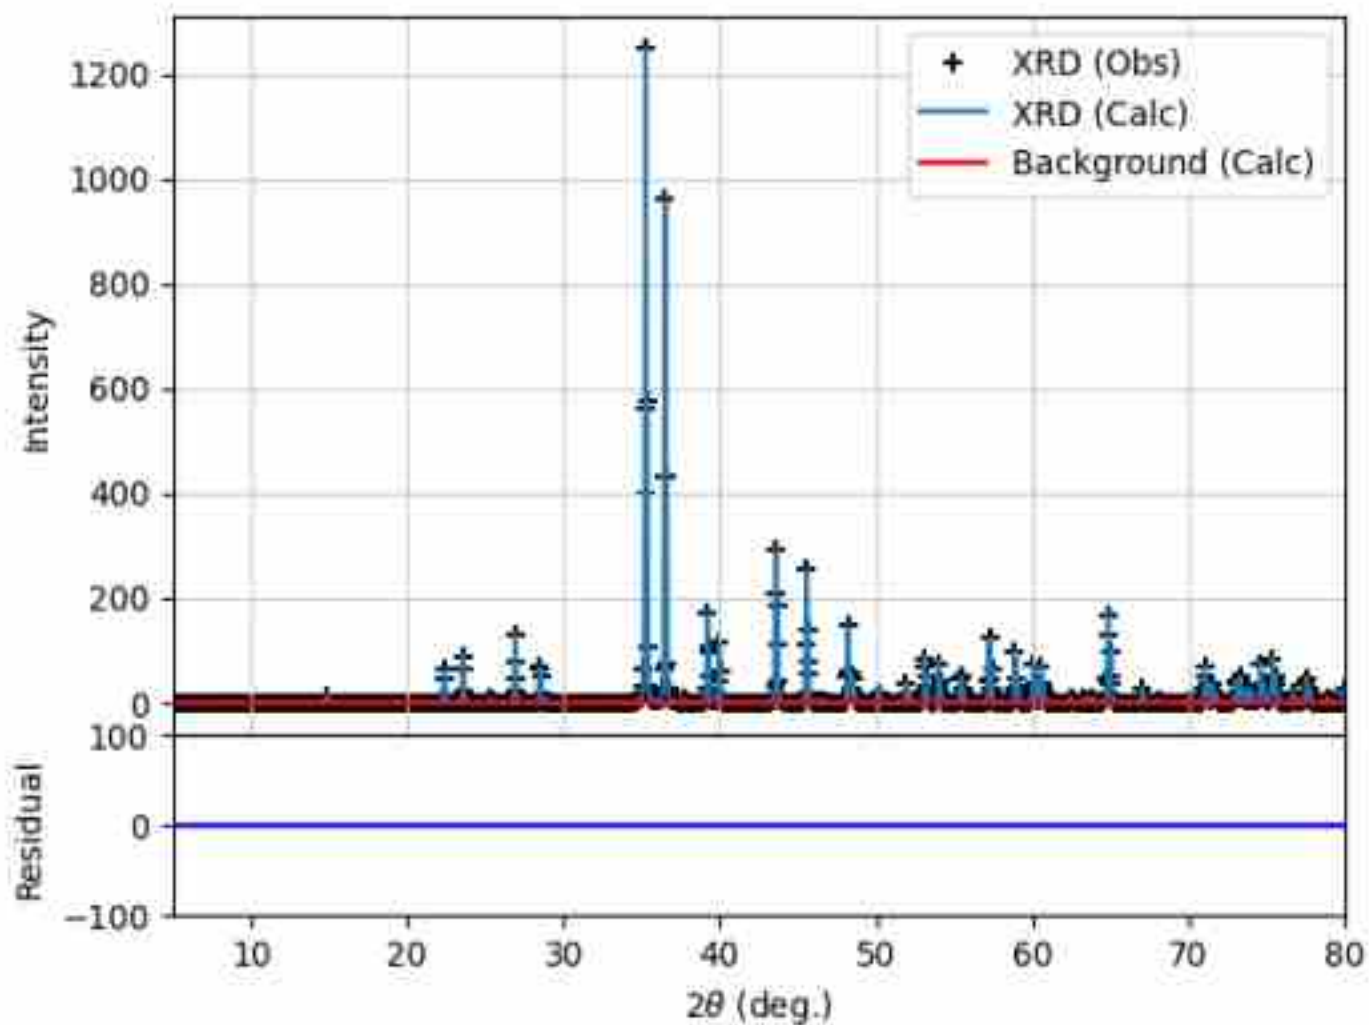

| RMSE before RR | Rwp     | RMSE after RR |
|----------------|---------|---------------|
| 0.016          | 0.00302 | 0.00028       |

# Tm<sub>3</sub>Ga<sub>8</sub>Ag<sub>3</sub>

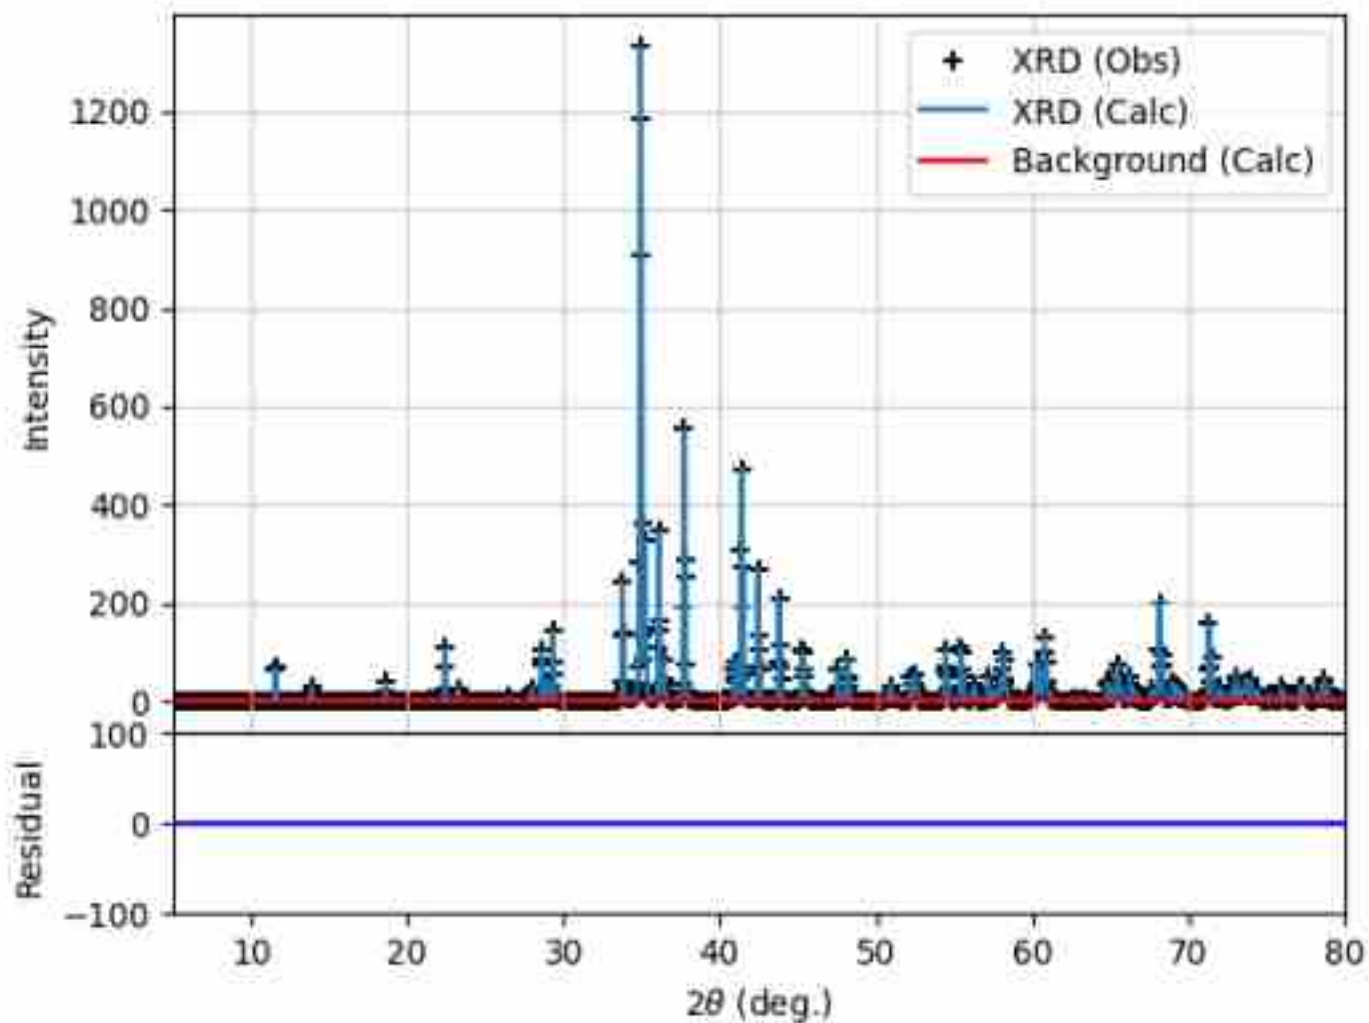

| RMSE before RR | Rwp     | RMSE after RR |
|----------------|---------|---------------|
| 0.016          | 0.00451 | 0.0005        |

# Tm12Os4

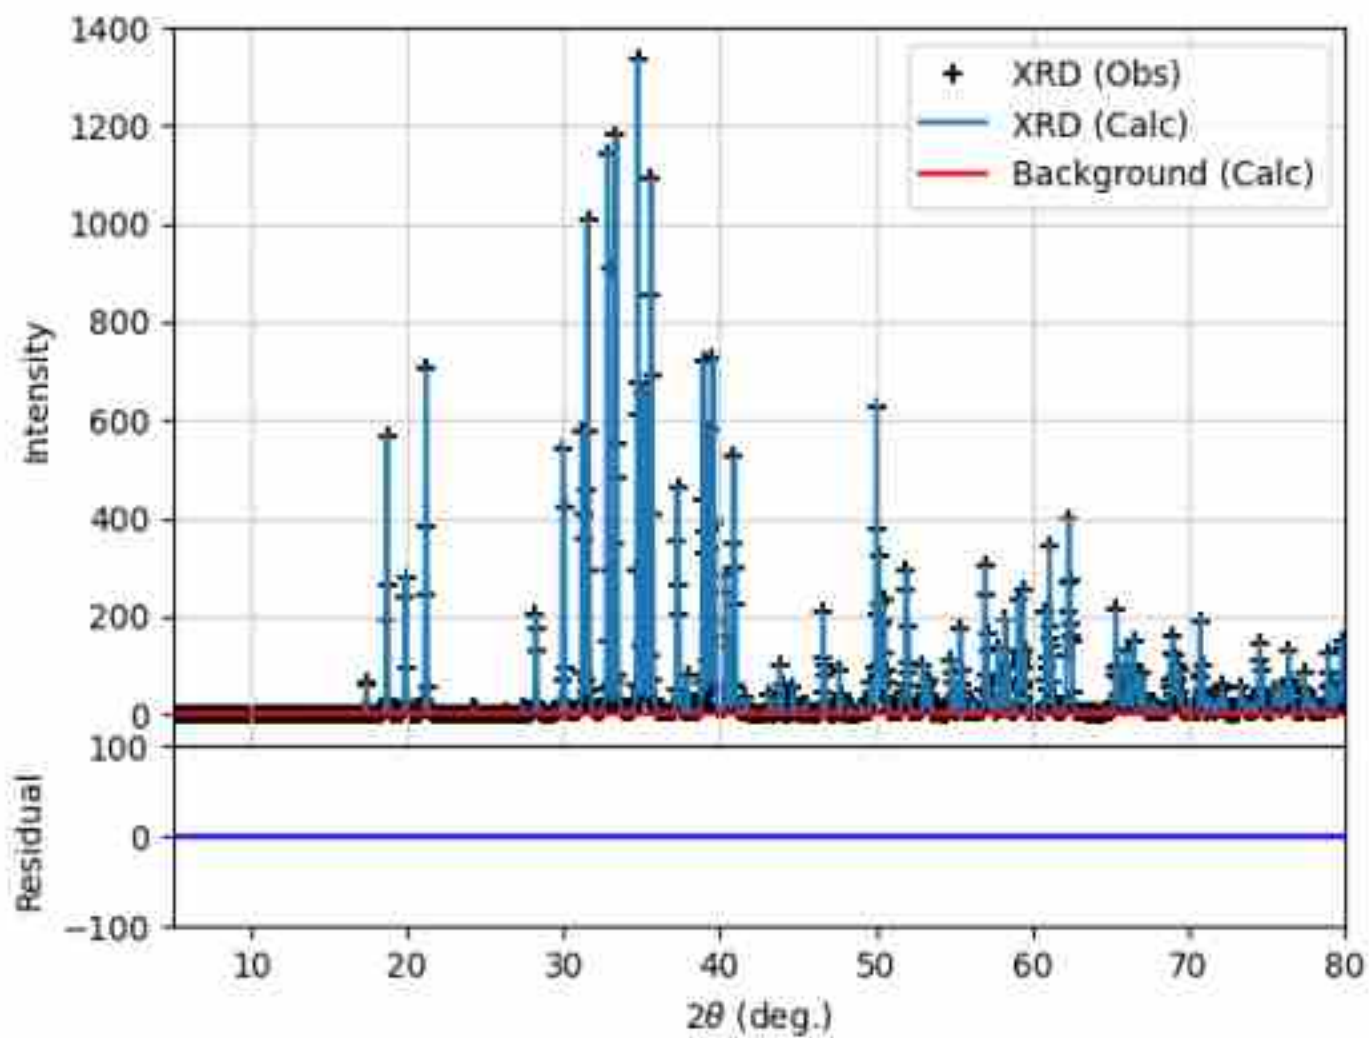

| RMSE before RR | Rwp   | RMSE after RR |
|----------------|-------|---------------|
| 0.016          | 0.005 | 0.00034       |

# U<sub>2</sub>Si<sub>3</sub>Ni<sub>1</sub>

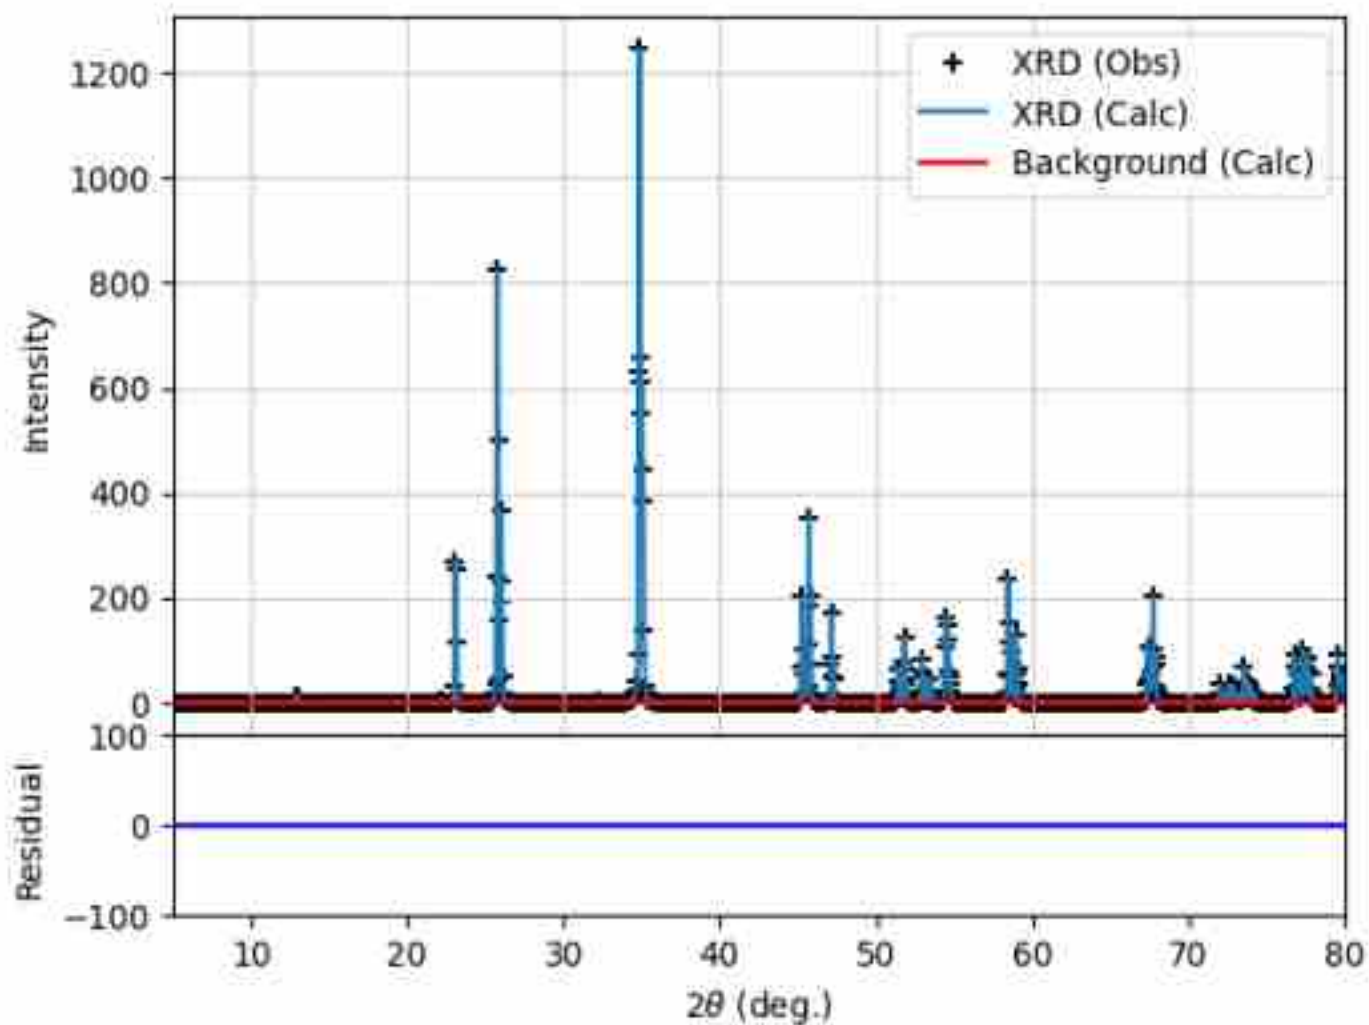

| RMSE before RR | Rwp     | RMSE after RR |
|----------------|---------|---------------|
| 0.016          | 0.00426 | 0.00093       |



# U<sub>4</sub>In<sub>2</sub>Ir<sub>4</sub>

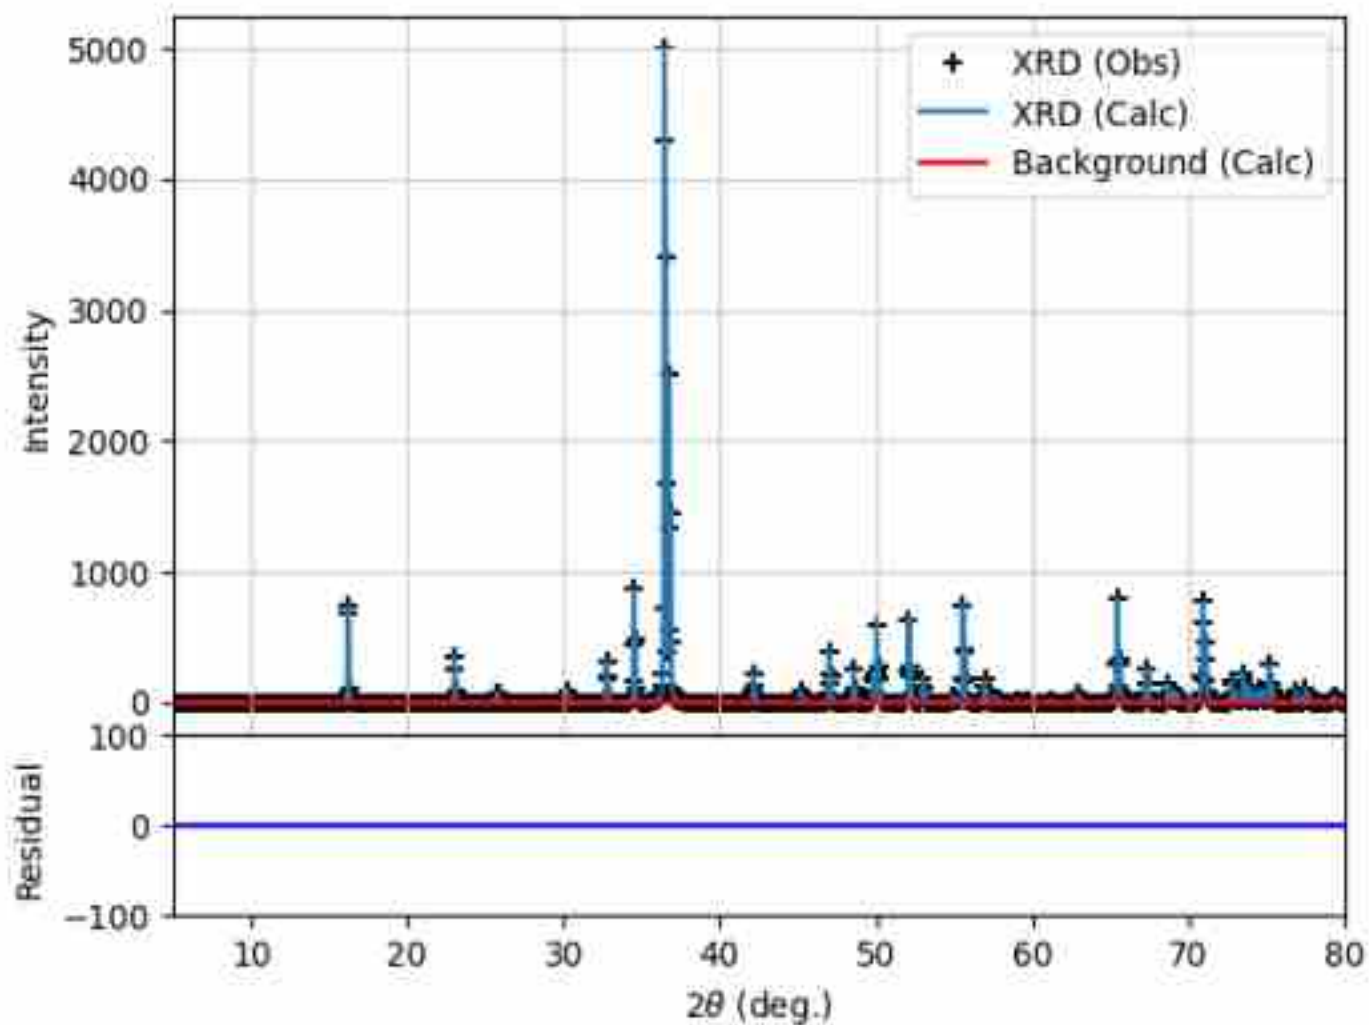

| RMSE before RR | Rwp     | RMSE after RR |
|----------------|---------|---------------|
| 0.016          | 0.00457 | 0.00036       |

# U<sub>4</sub>Te<sub>1</sub>Se<sub>7</sub>

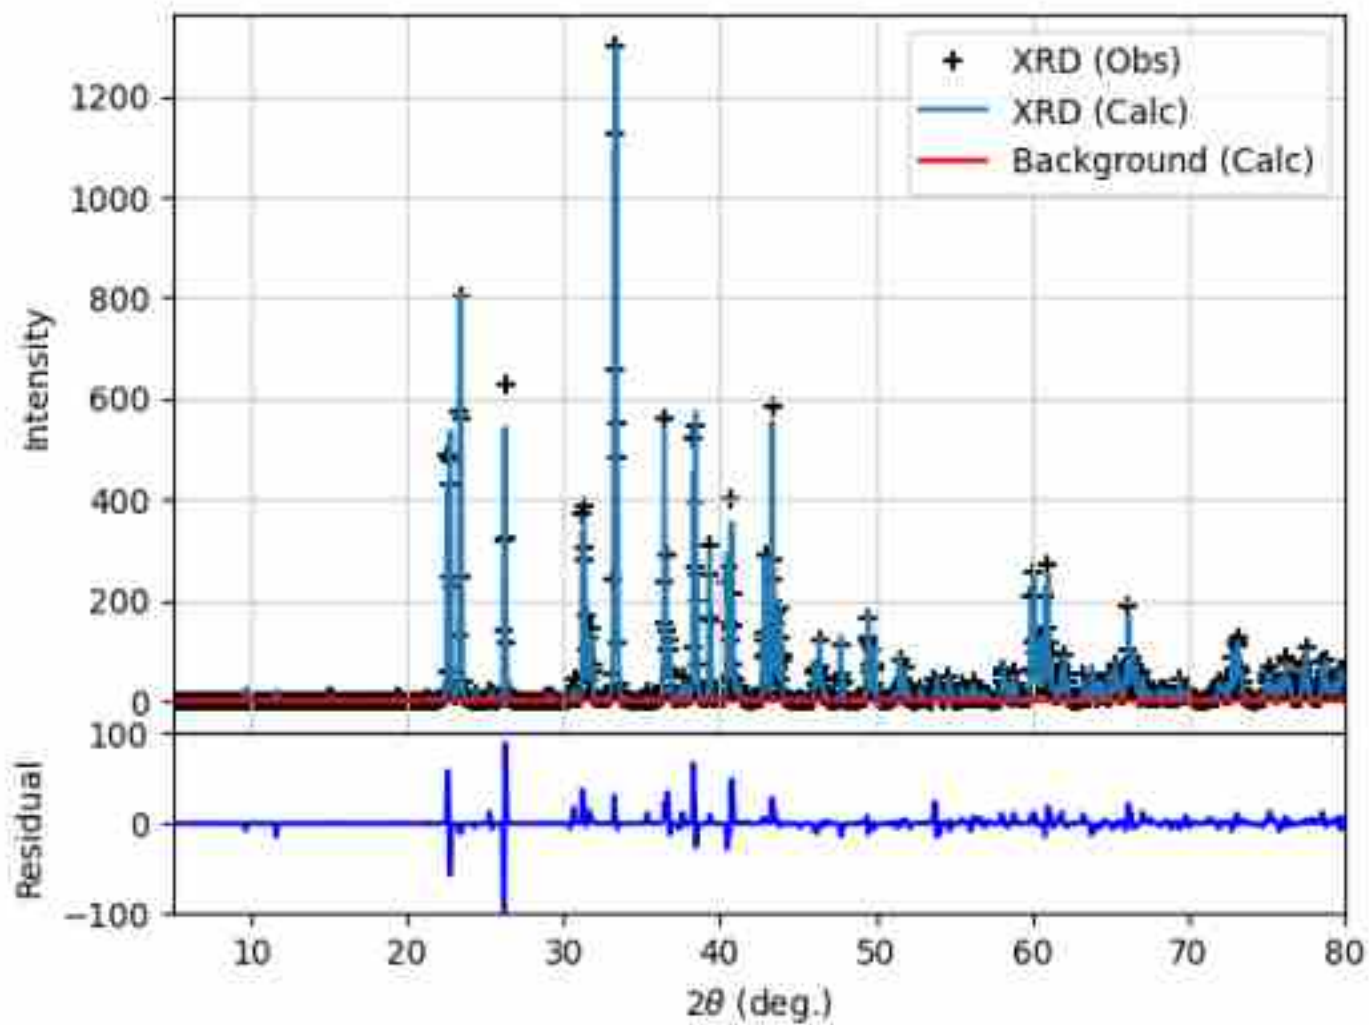

| RMSE before RR | Rwp      | RMSE after RR |
|----------------|----------|---------------|
| 0.016          | 13.25253 | 0.05162       |

# Y1Al2Pd5

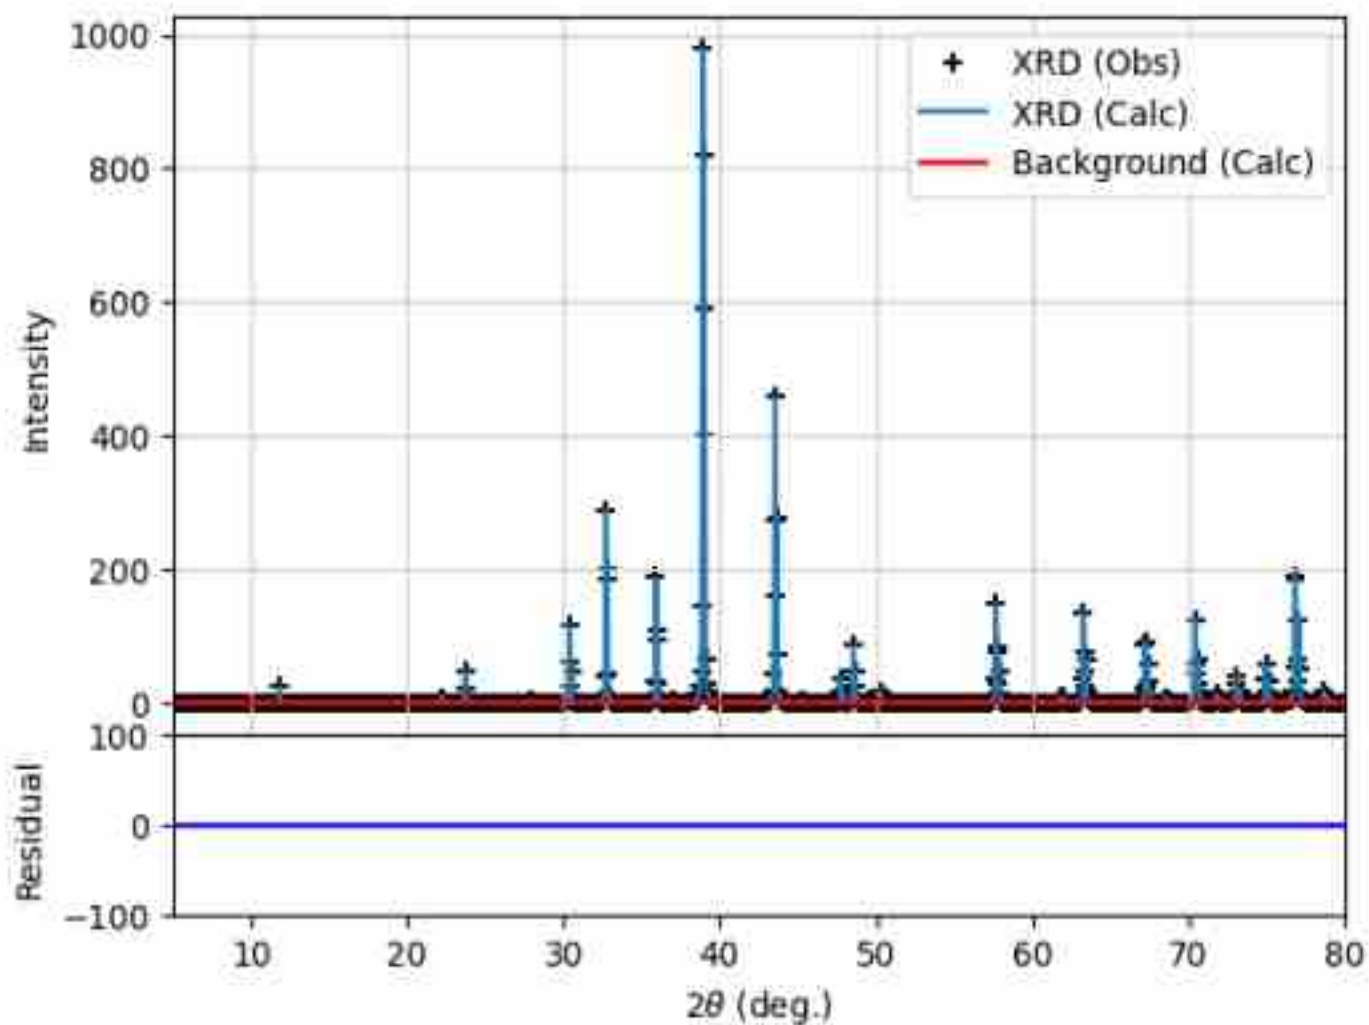

| RMSE before RR | Rwp     | RMSE after RR |
|----------------|---------|---------------|
| 0.016          | 0.00491 | 0.00095       |

# Y1Cu1W2O8

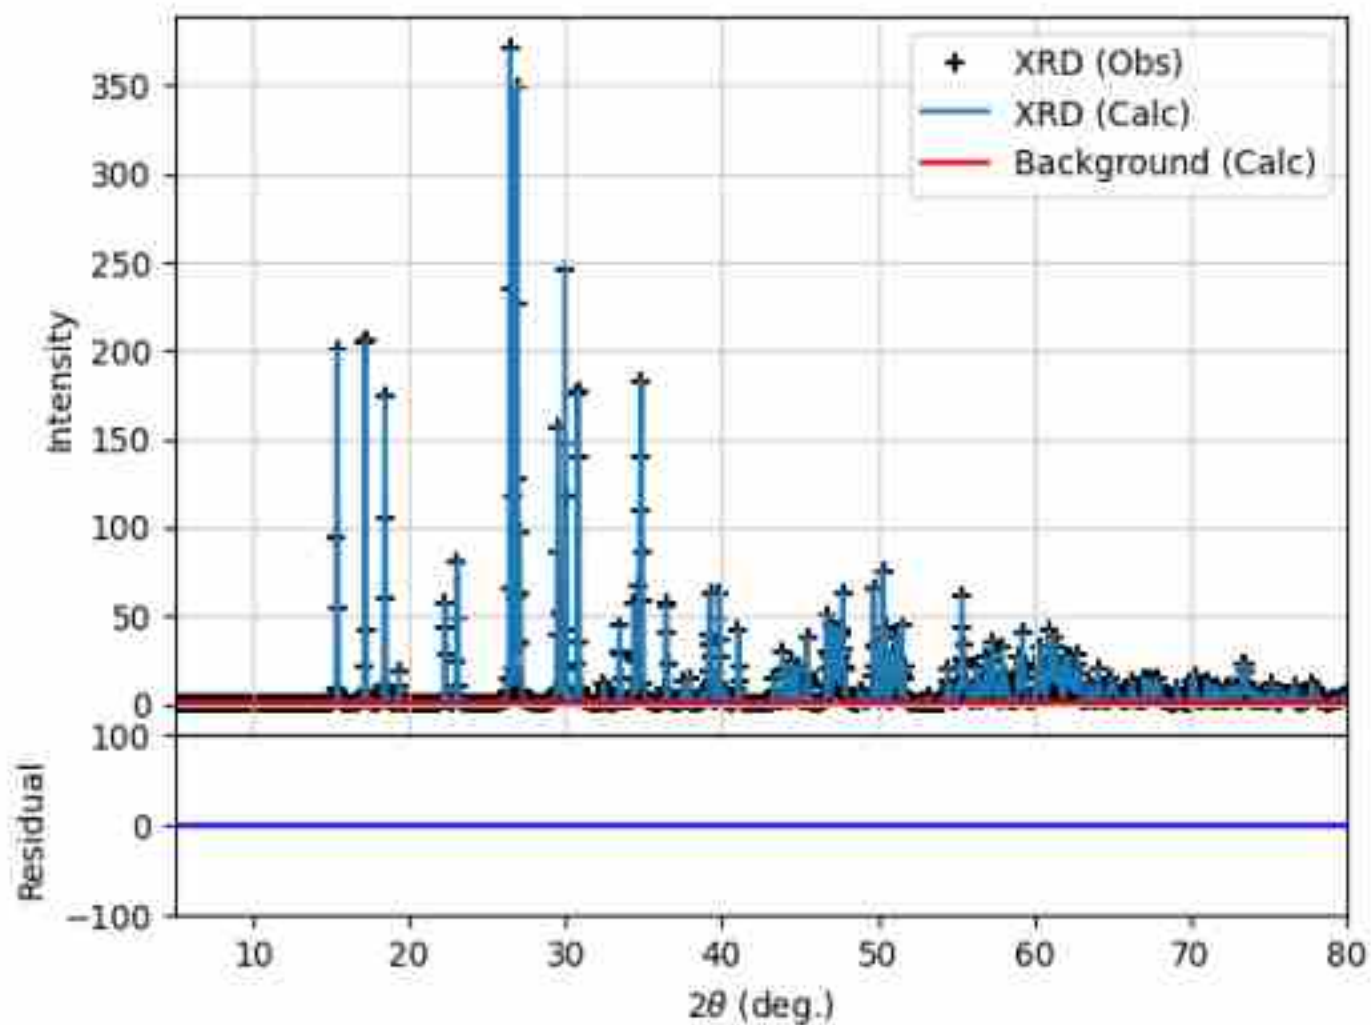

| RMSE before RR | Rwp     | RMSE after RR |
|----------------|---------|---------------|
| 0.016          | 0.00168 | 0.00017       |

# Y1In7Cu5

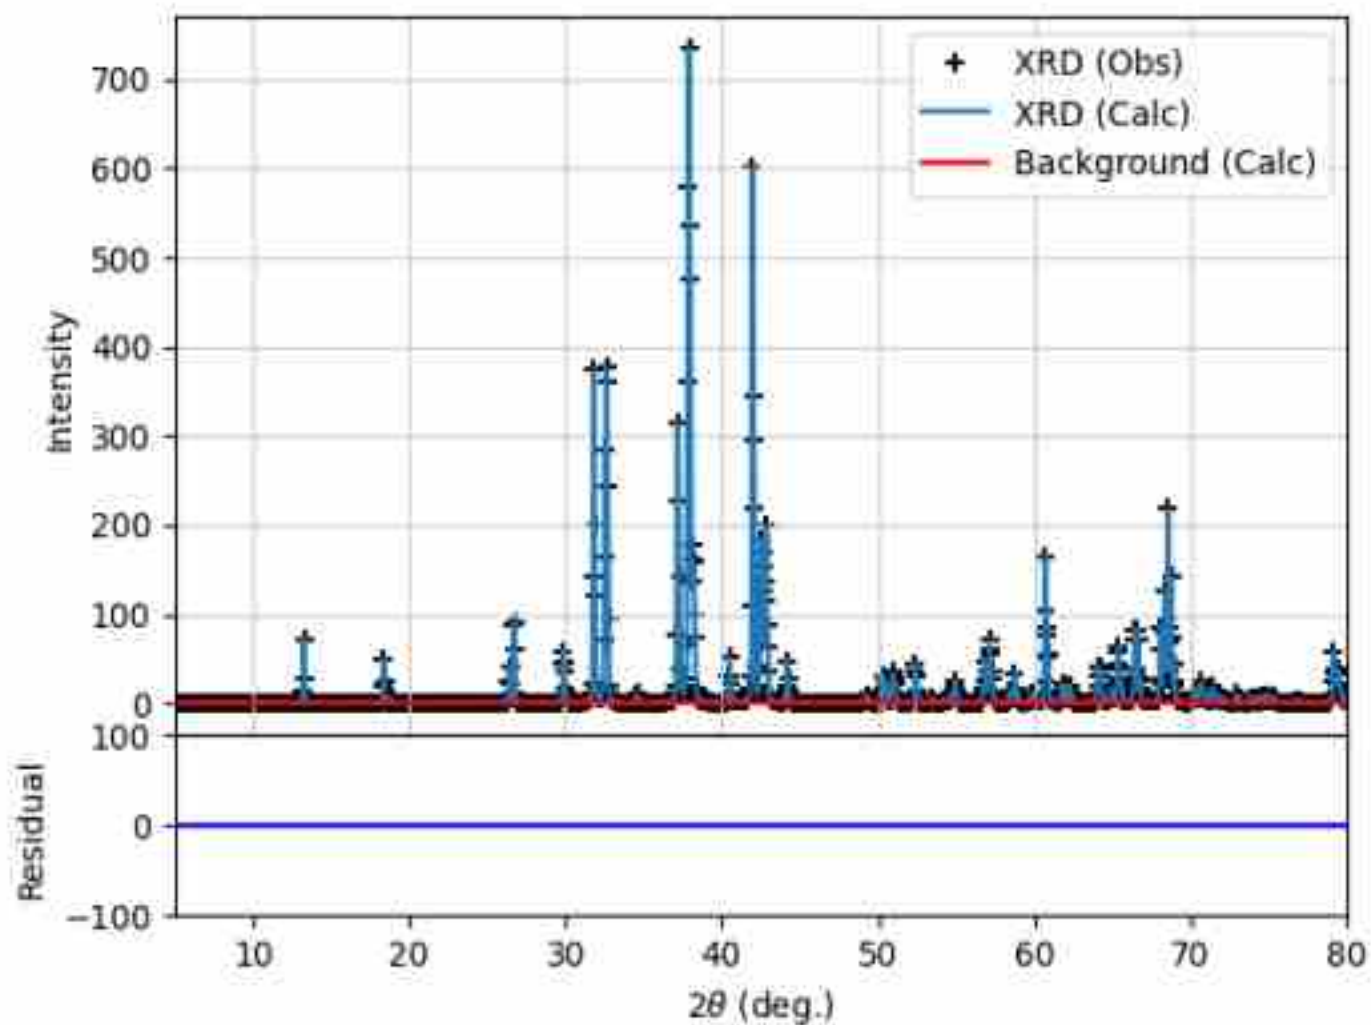

| RMSE before RR | Rwp     | RMSE after RR |
|----------------|---------|---------------|
| 0.016          | 0.00323 | 0.00035       |

# Y1Mg15

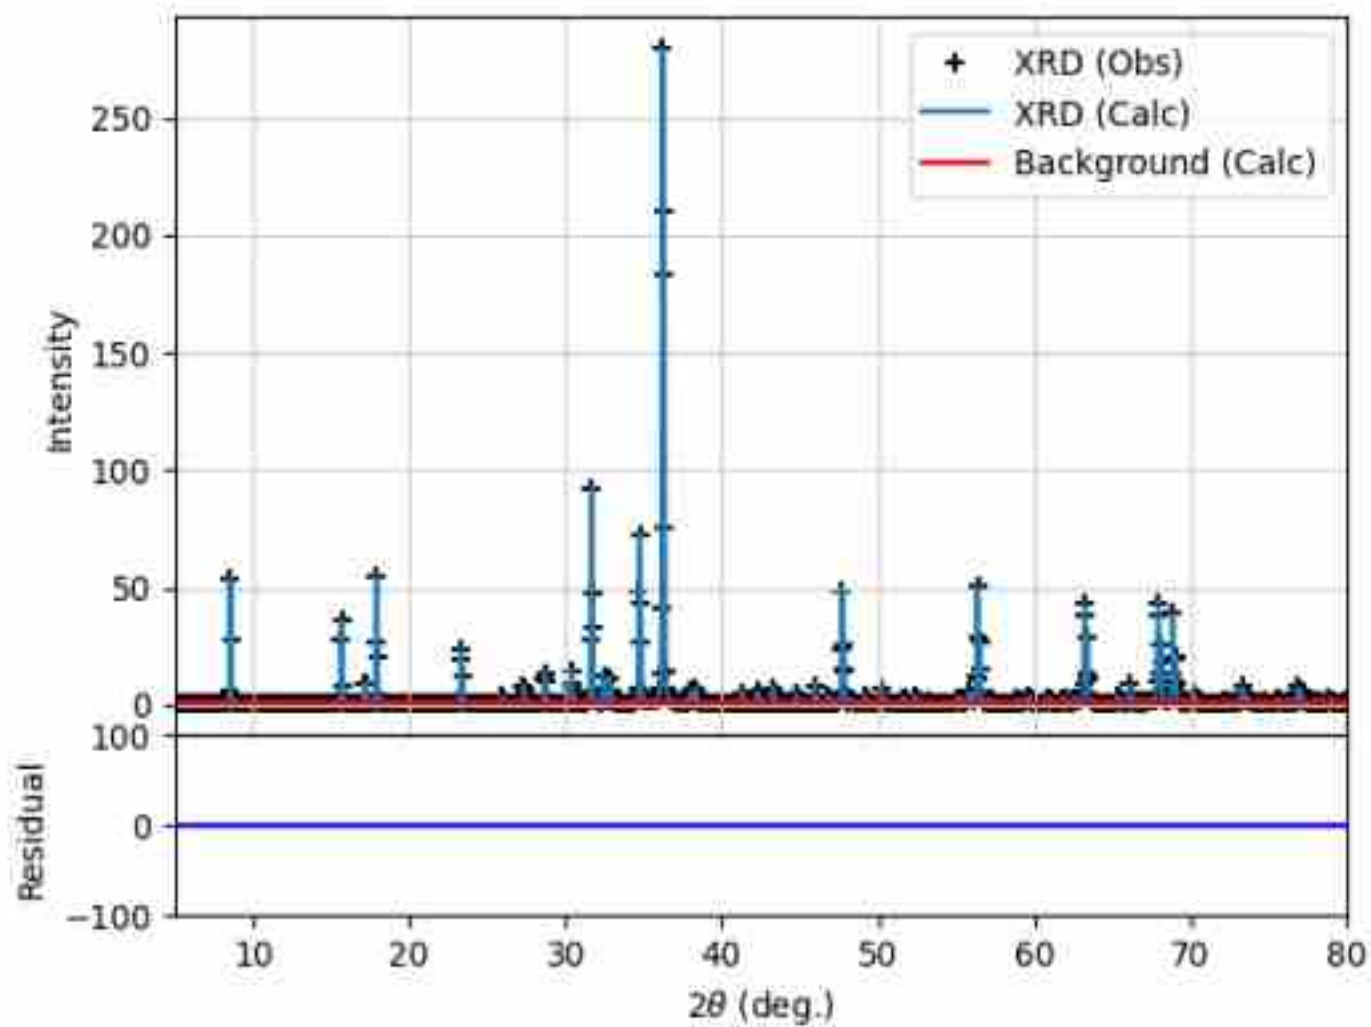

| RMSE before RR | Rwp     | RMSE after RR |
|----------------|---------|---------------|
| 0.016          | 0.01221 | 0.00225       |

# Y1Mn6Sn4Ge2

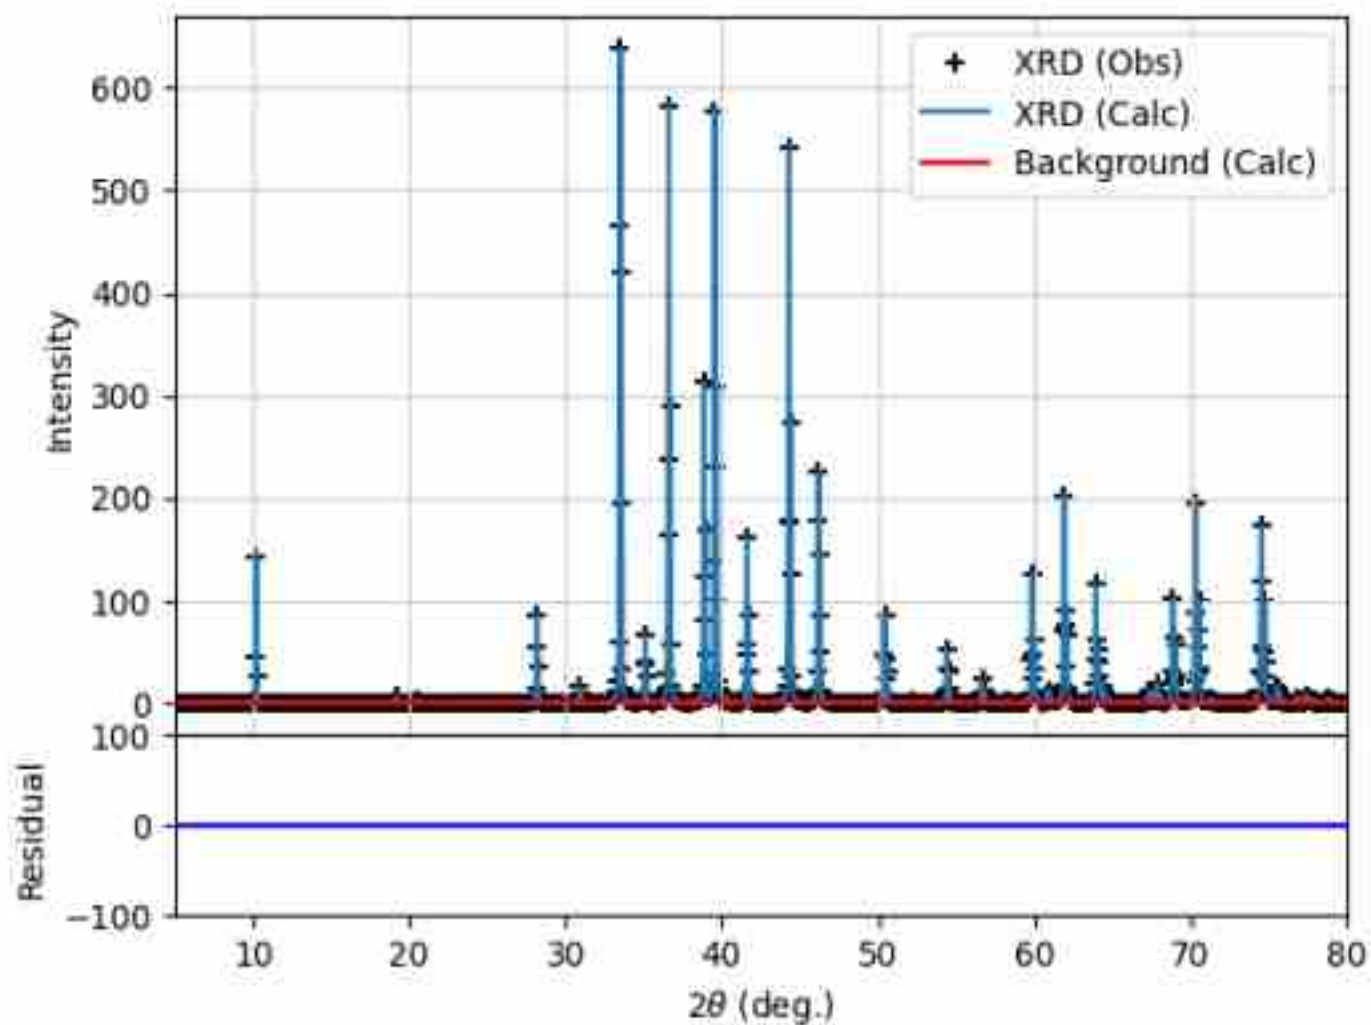

| RMSE before RR | Rwp     | RMSE after RR |
|----------------|---------|---------------|
| 0.016          | 0.00314 | 0.00042       |

# Y1Th1Co10

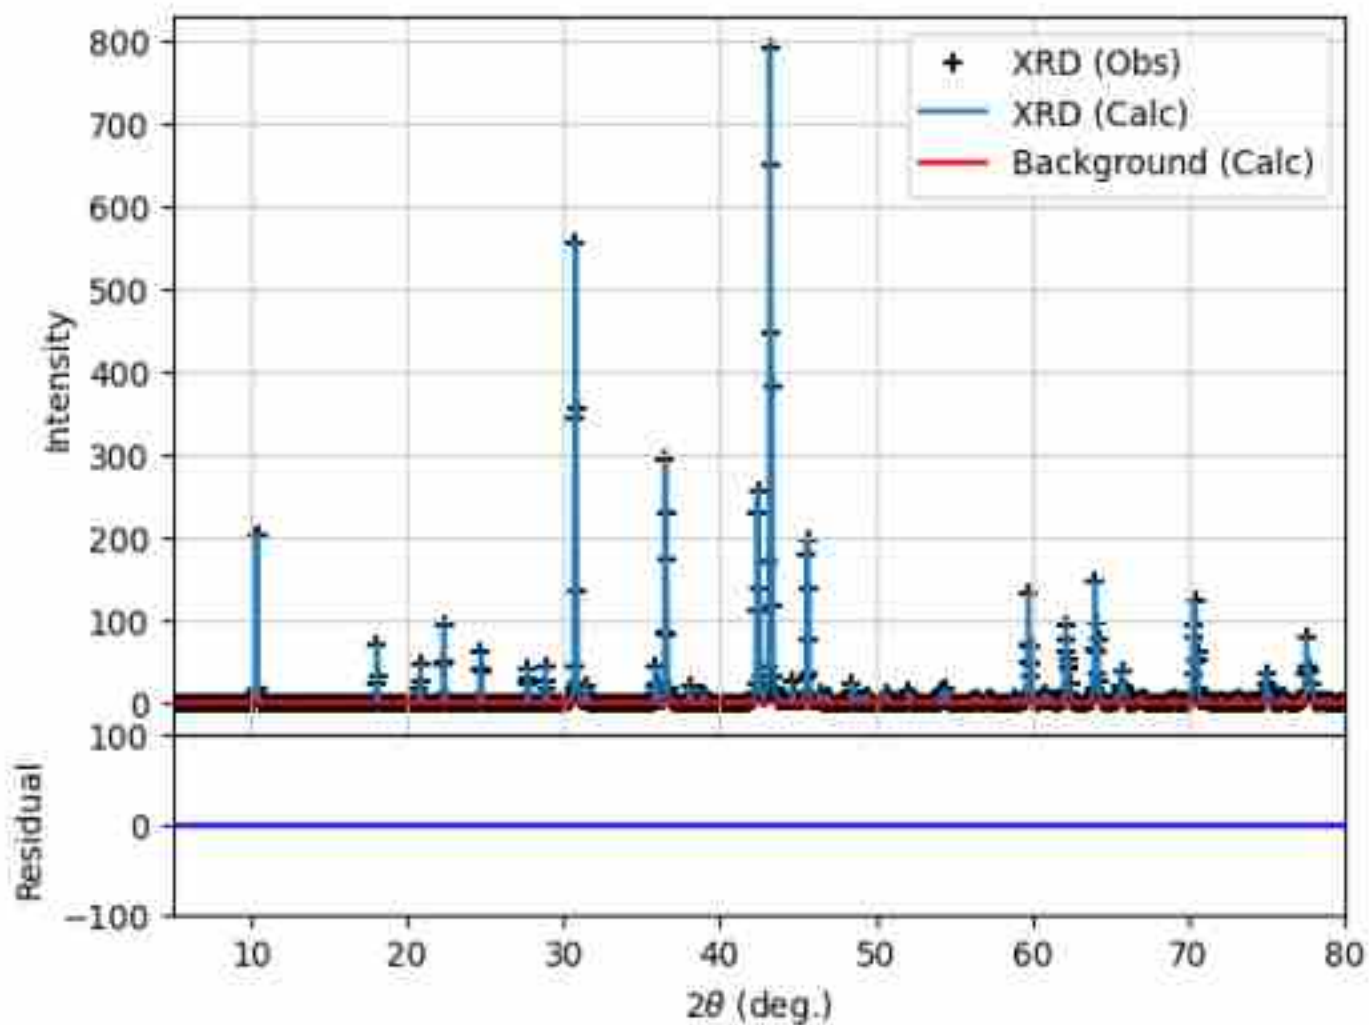

| RMSE before RR | Rwp   | RMSE after RR |
|----------------|-------|---------------|
| 0.016          | 0.003 | 0.00045       |



# Y1V2Fe5Co5

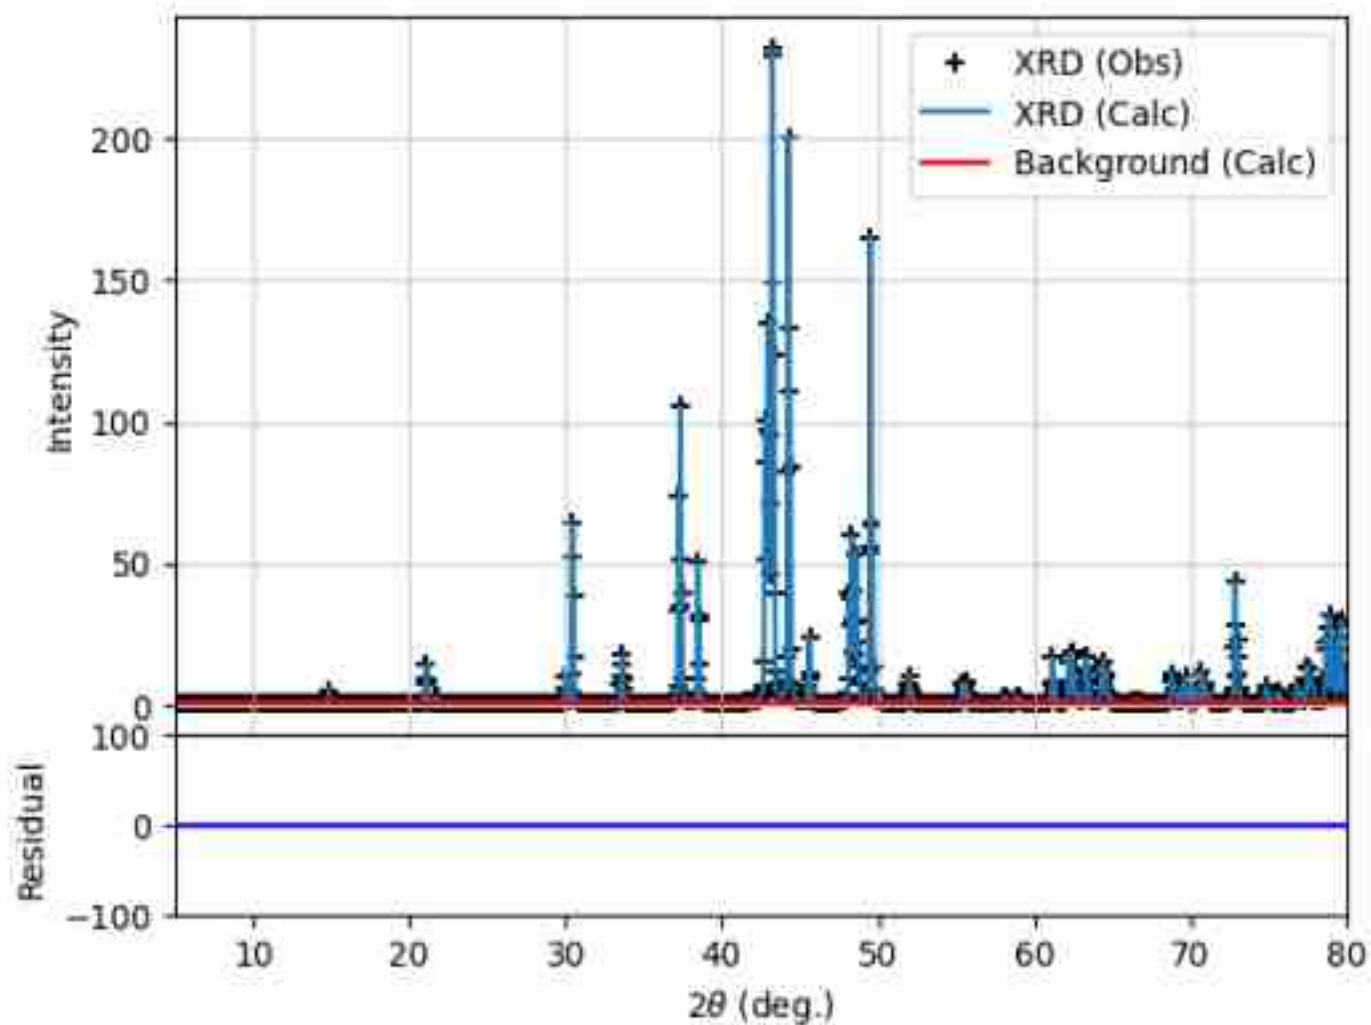

| RMSE before RR | Rwp     | RMSE after RR |
|----------------|---------|---------------|
| 0.016          | 0.00225 | 0.00039       |

# Y2Br6

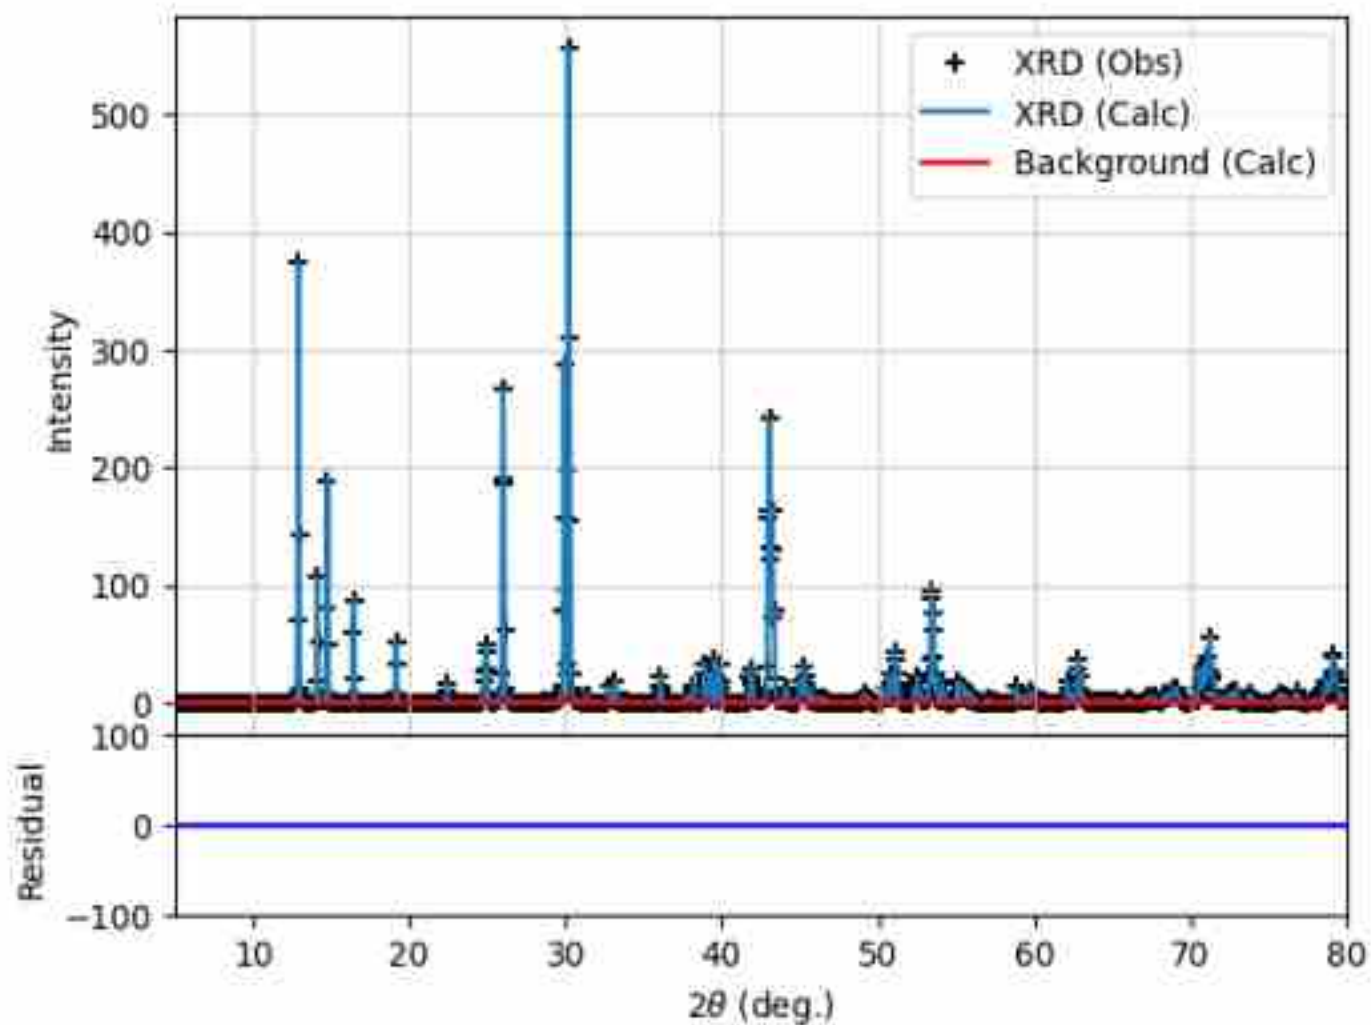

| RMSE before RR | Rwp     | RMSE after RR |
|----------------|---------|---------------|
| 0.016          | 0.00317 | 0.00018       |

# Y<sub>2</sub>Ge<sub>6</sub>Pd<sub>1</sub>

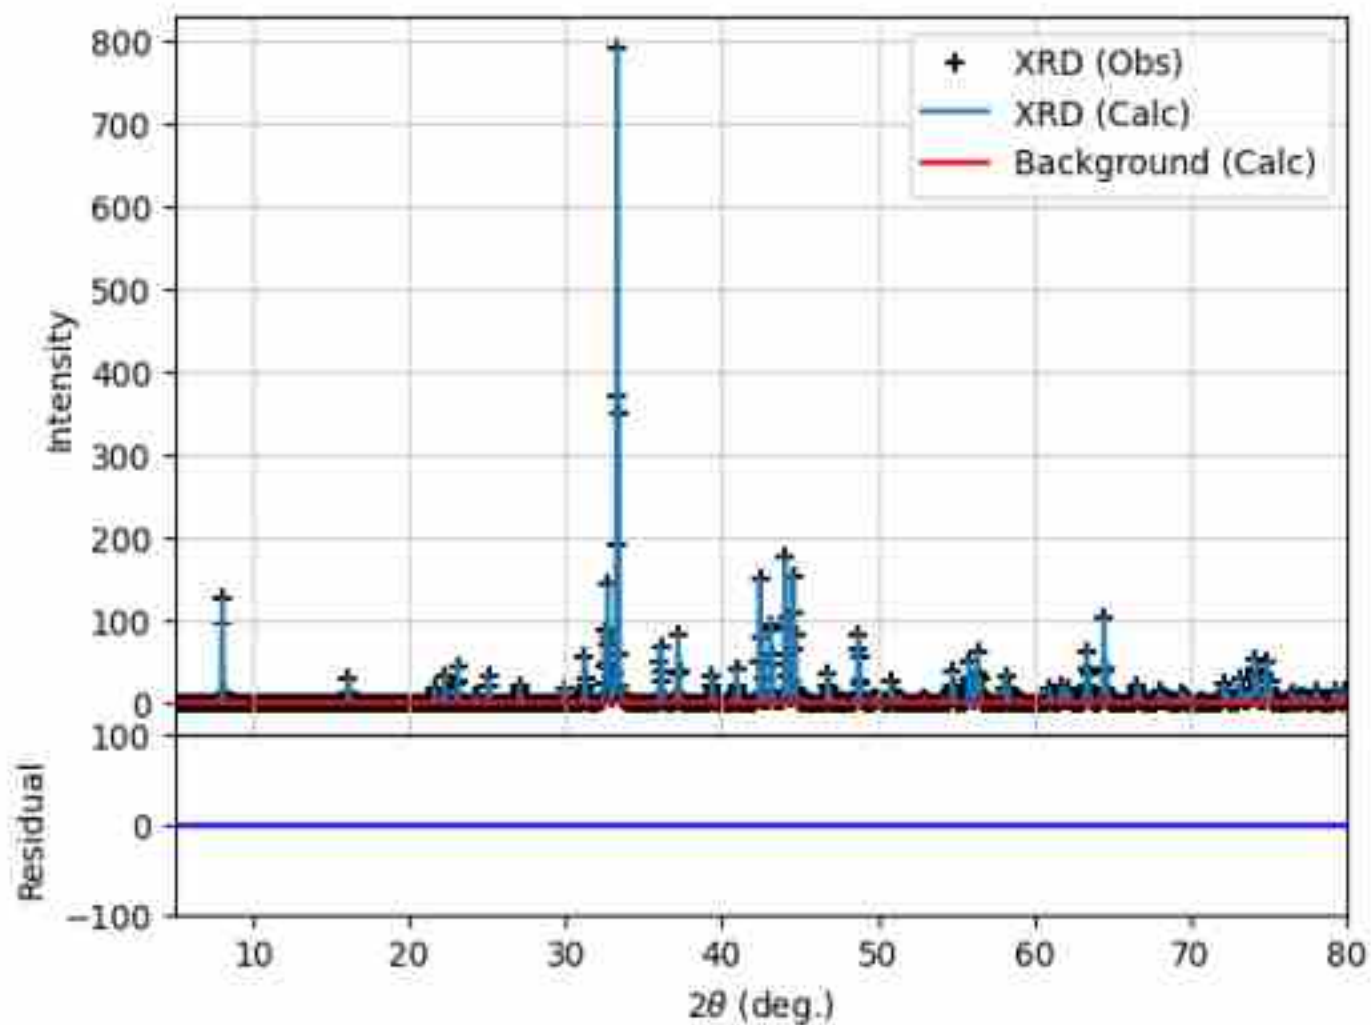

| RMSE before RR | Rwp     | RMSE after RR |
|----------------|---------|---------------|
| 0.016          | 0.00356 | 0.00031       |

# Y2Zr2F14

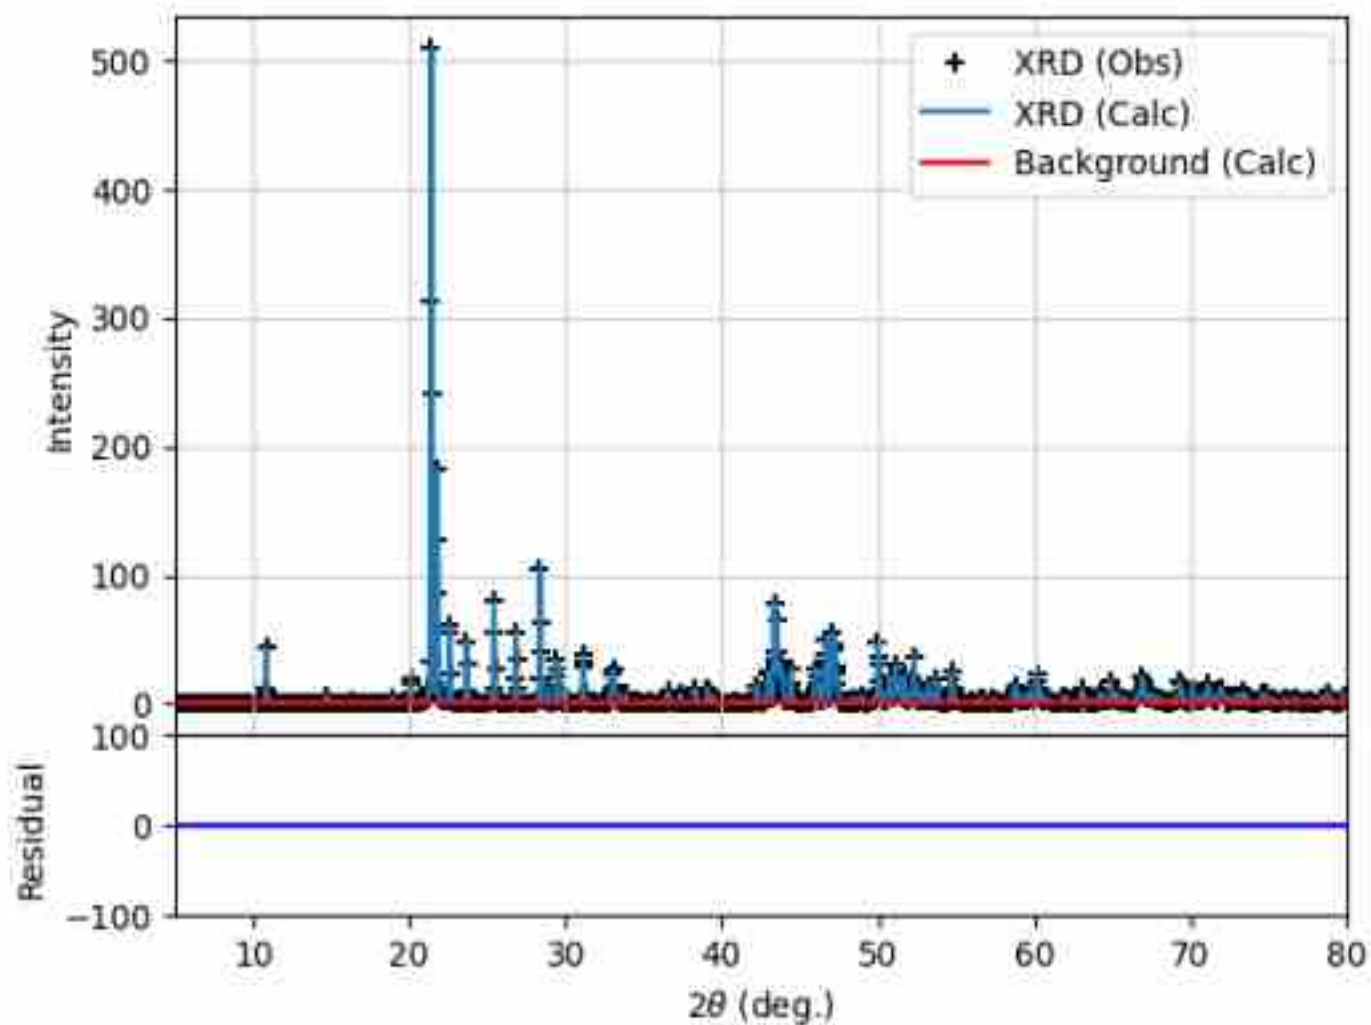

| RMSE before RR | Rwp     | RMSE after RR |
|----------------|---------|---------------|
| 0.016          | 0.00333 | 0.00058       |

# Y3In3Ni3

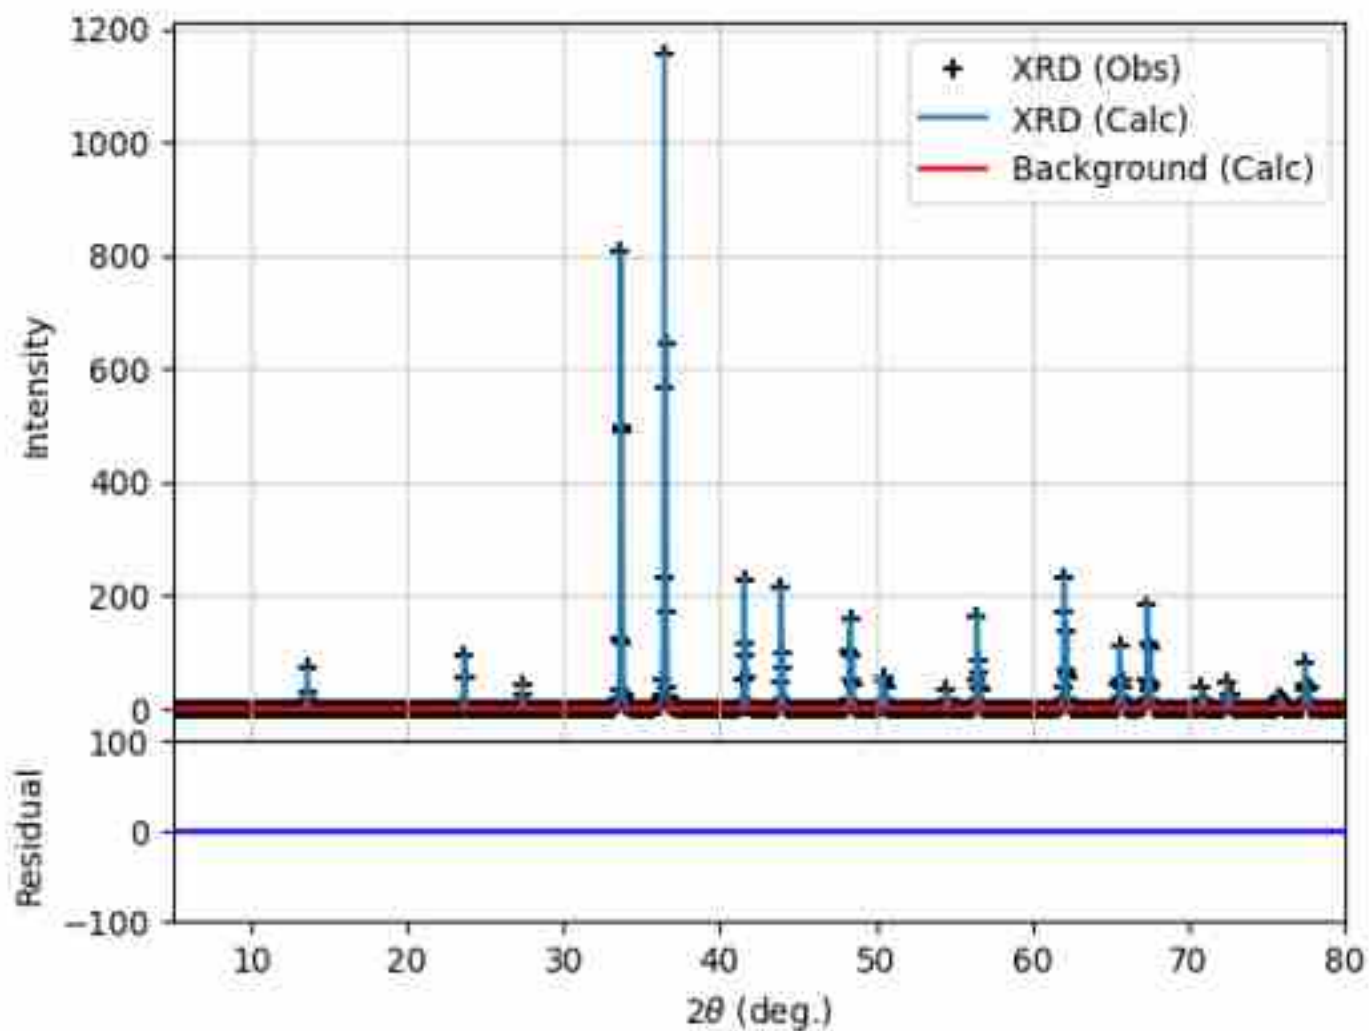

| RMSE before RR | Rwp     | RMSE after RR |
|----------------|---------|---------------|
| 0.016          | 0.00356 | 0.00102       |

# Y4Ge4Rh4

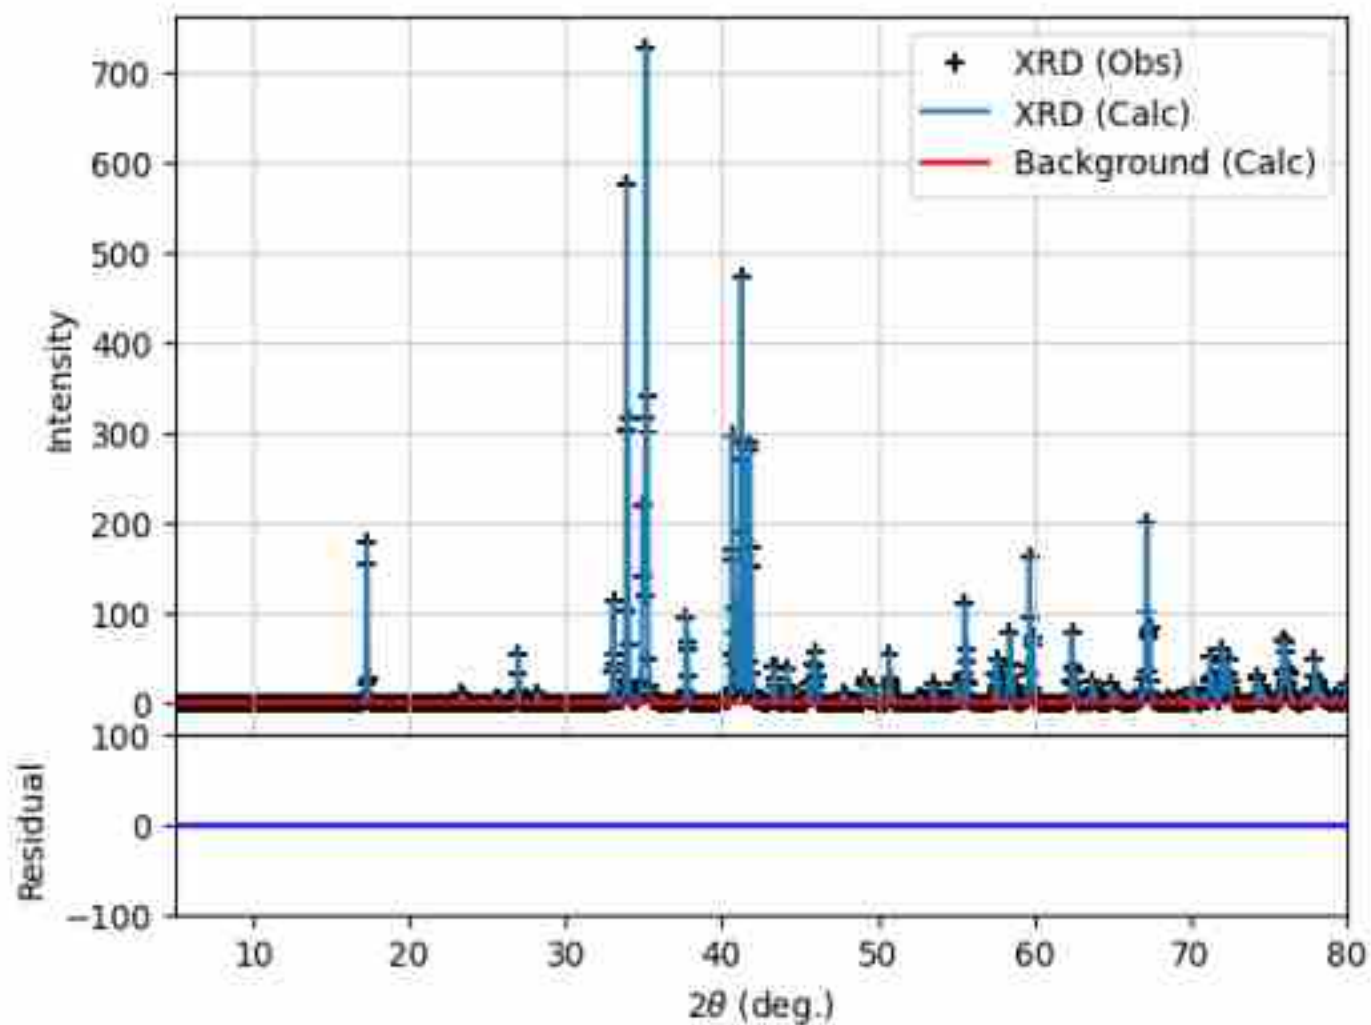

| RMSE before RR | Rwp     | RMSE after RR |
|----------------|---------|---------------|
| 0.016          | 0.00489 | 0.00035       |

# Y4Tc8

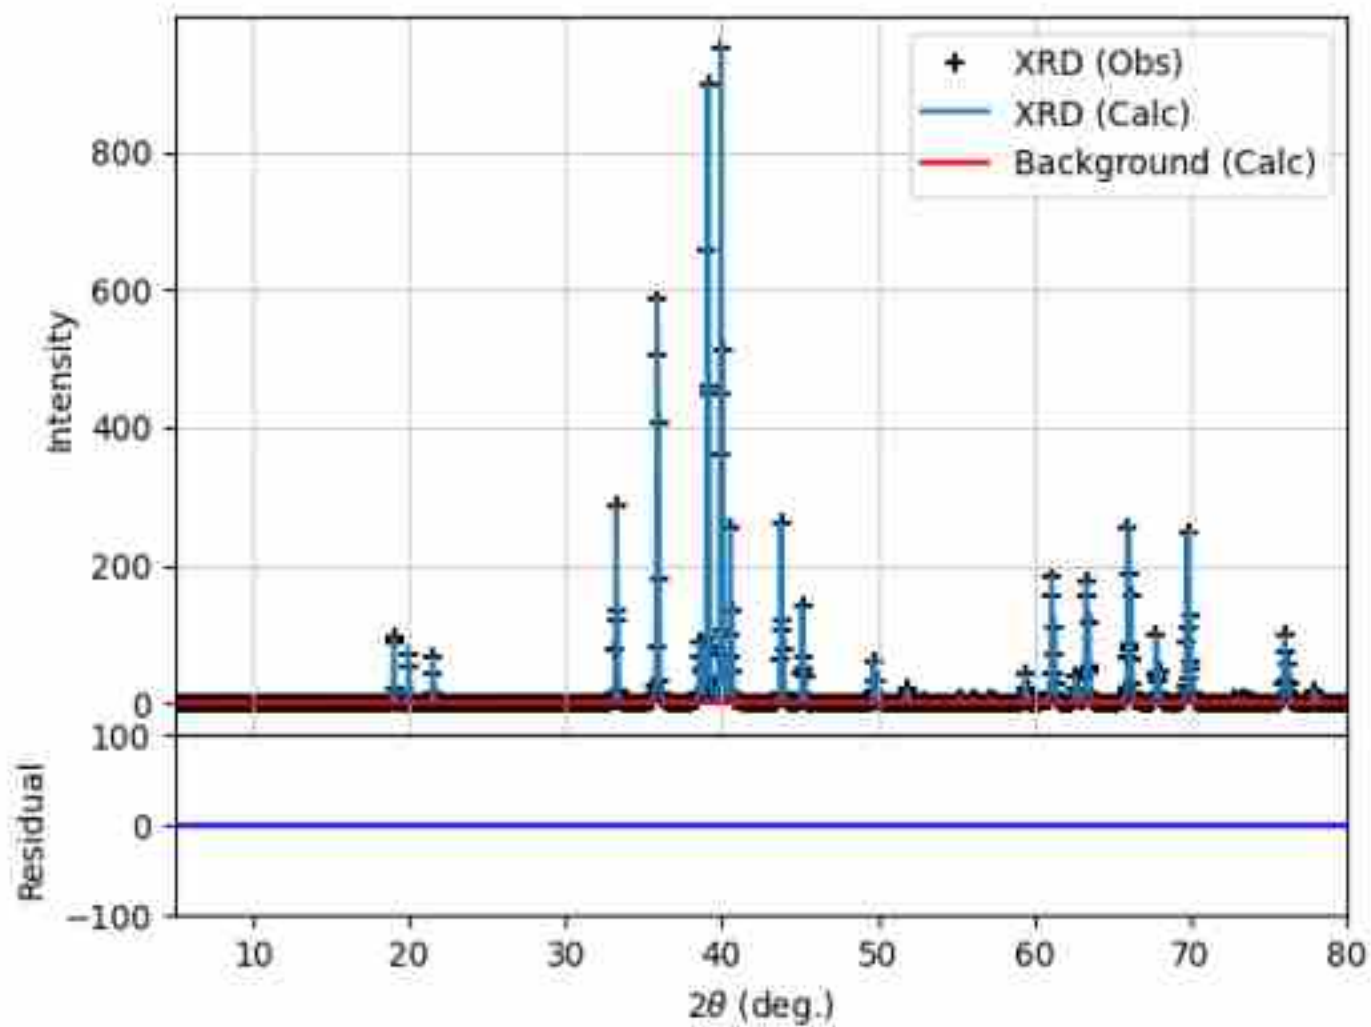

| RMSE before RR | Rwp     | RMSE after RR |
|----------------|---------|---------------|
| 0.016          | 0.00669 | 0.00063       |

# Y6Au4

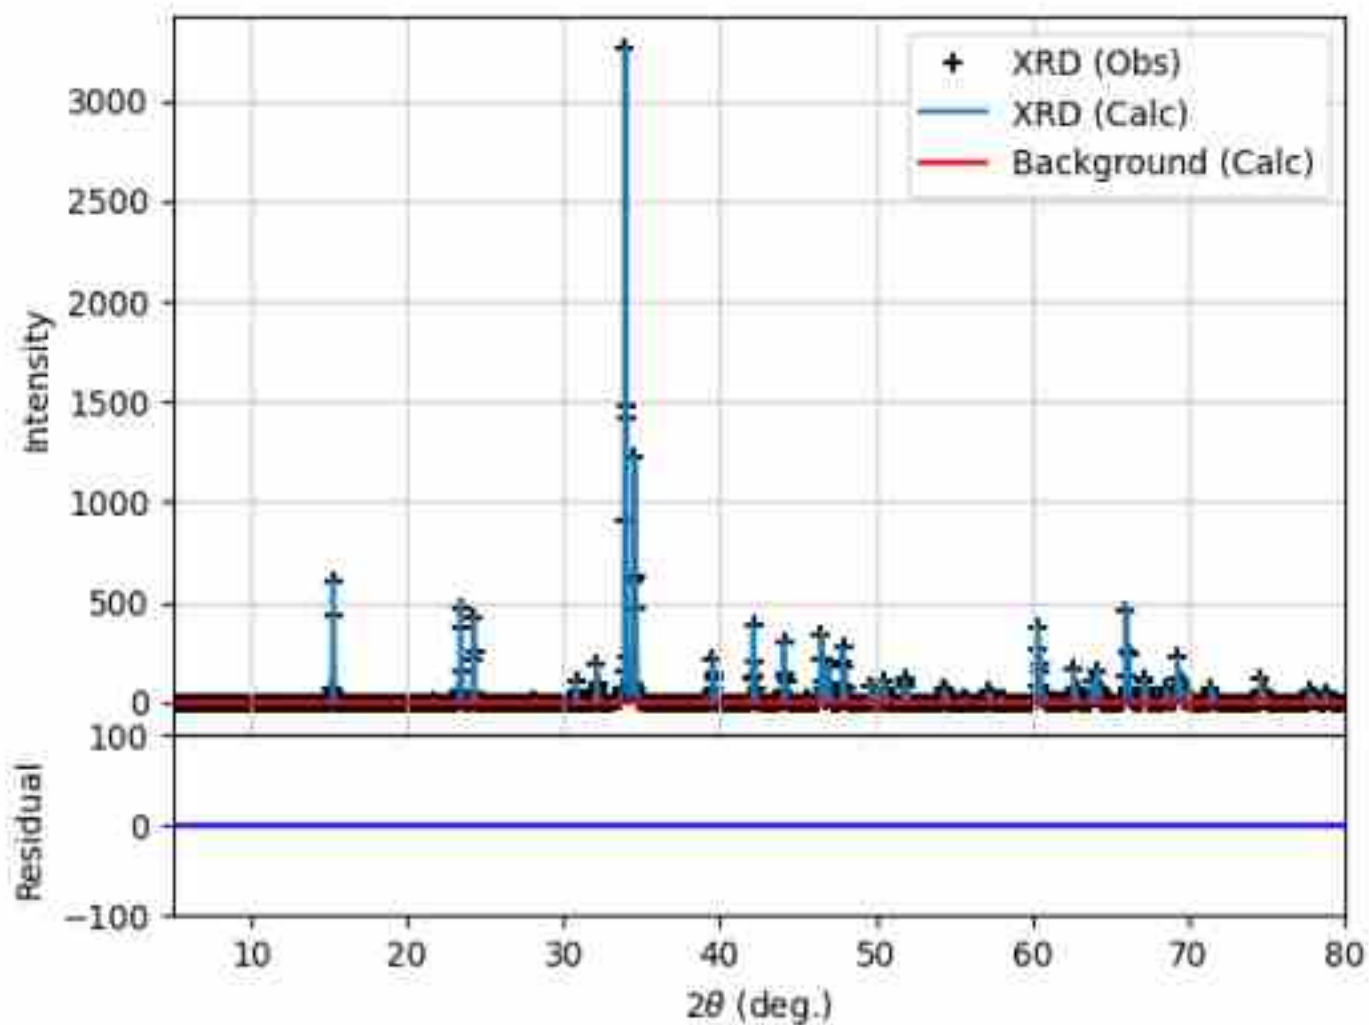

| RMSE before RR | Rwp     | RMSE after RR |
|----------------|---------|---------------|
| 0.016          | 0.00425 | 0.00028       |



# Y12Rh4

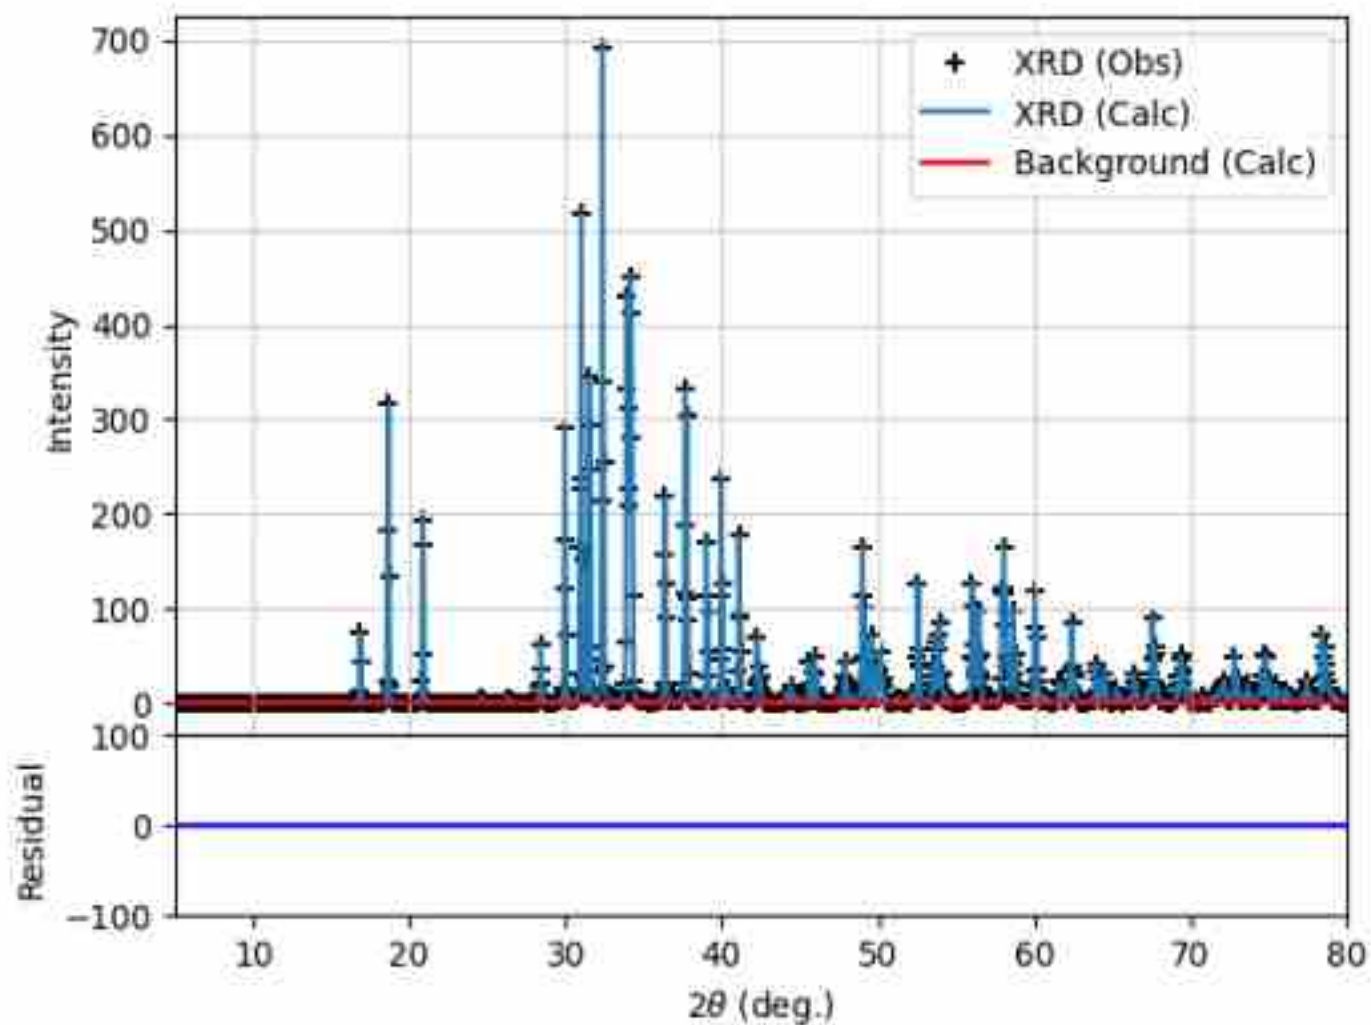

| RMSE before RR | Rwp    | RMSE after RR |
|----------------|--------|---------------|
| 0.016          | 0.0038 | 0.00031       |

# Yb1Er2Se4

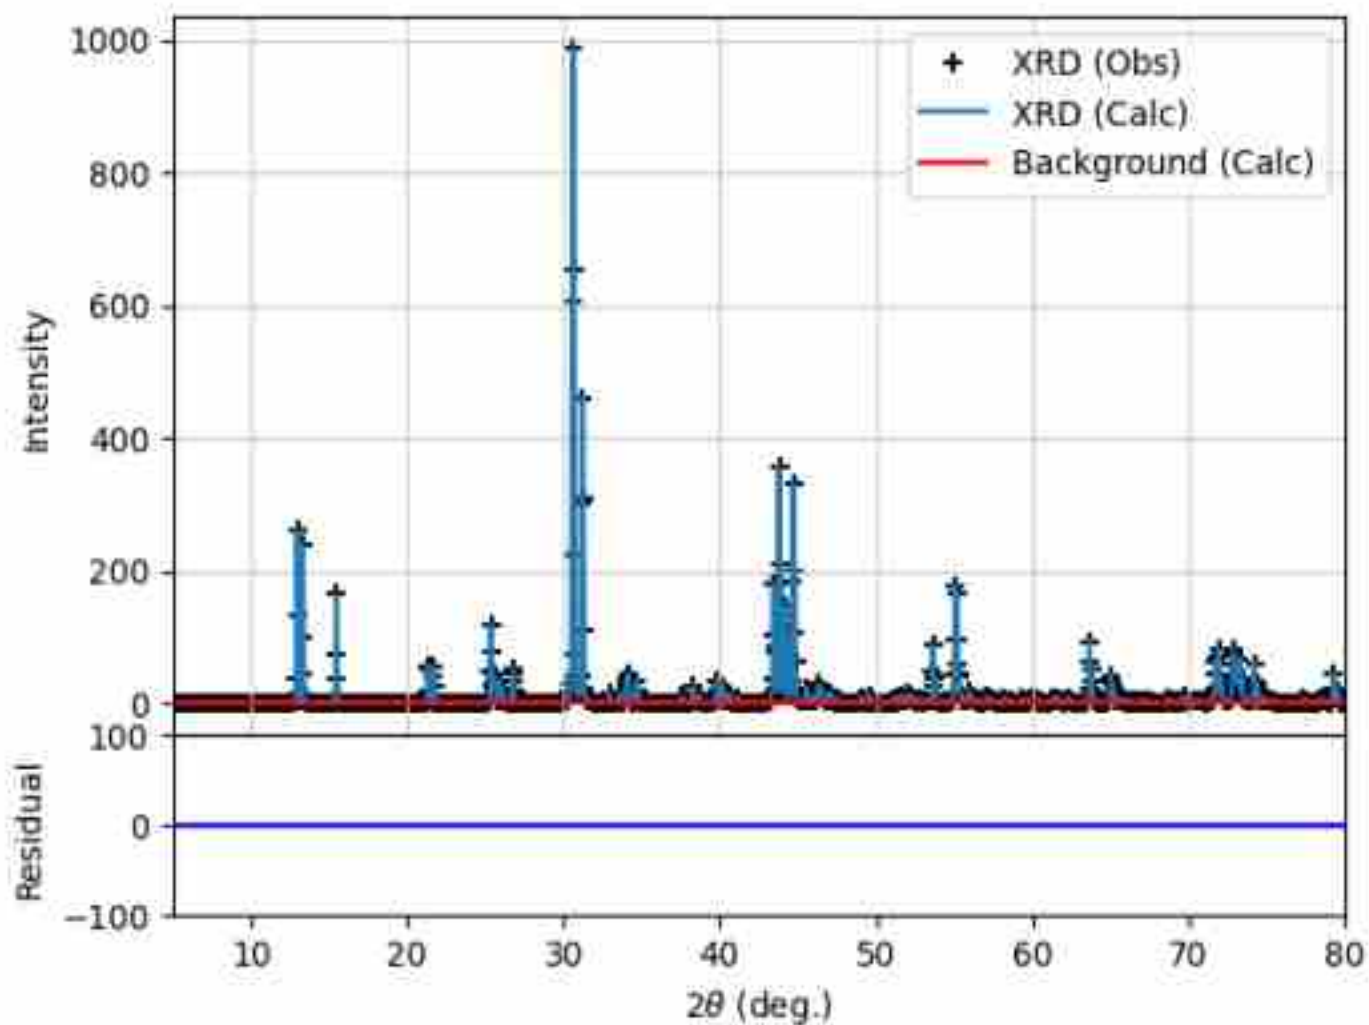

| RMSE before RR | Rwp     | RMSE after RR |
|----------------|---------|---------------|
| 0.016          | 0.00275 | 0.00031       |

# Yb1Tm1S2

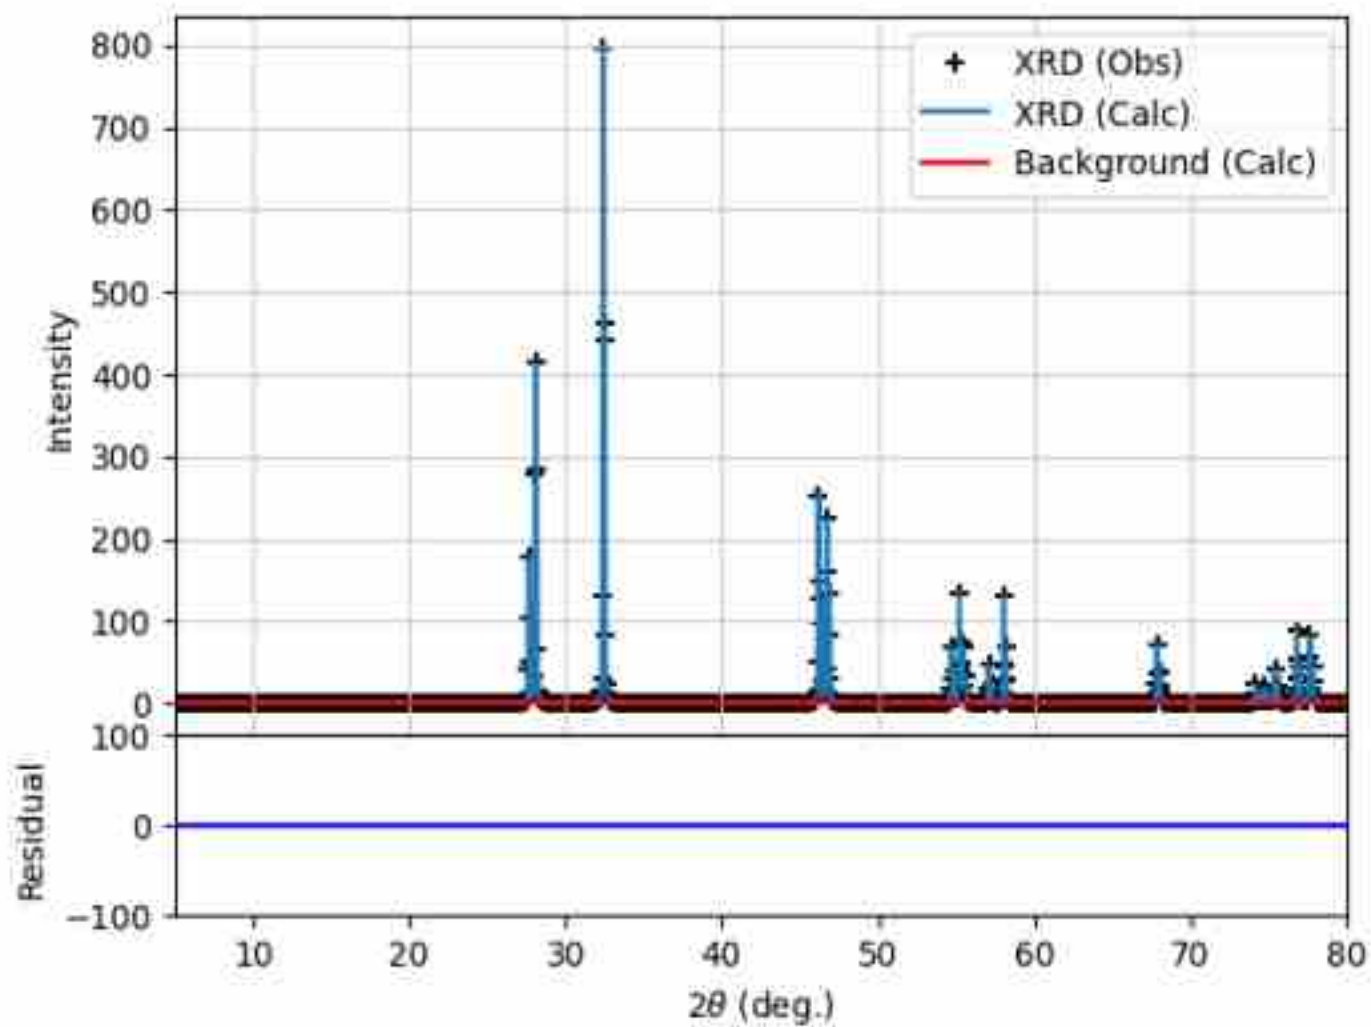

| RMSE before RR | Rwp     | RMSE after RR |
|----------------|---------|---------------|
| 0.016          | 0.00423 | 0.00058       |

# Yb<sub>2</sub>Ge<sub>6</sub>

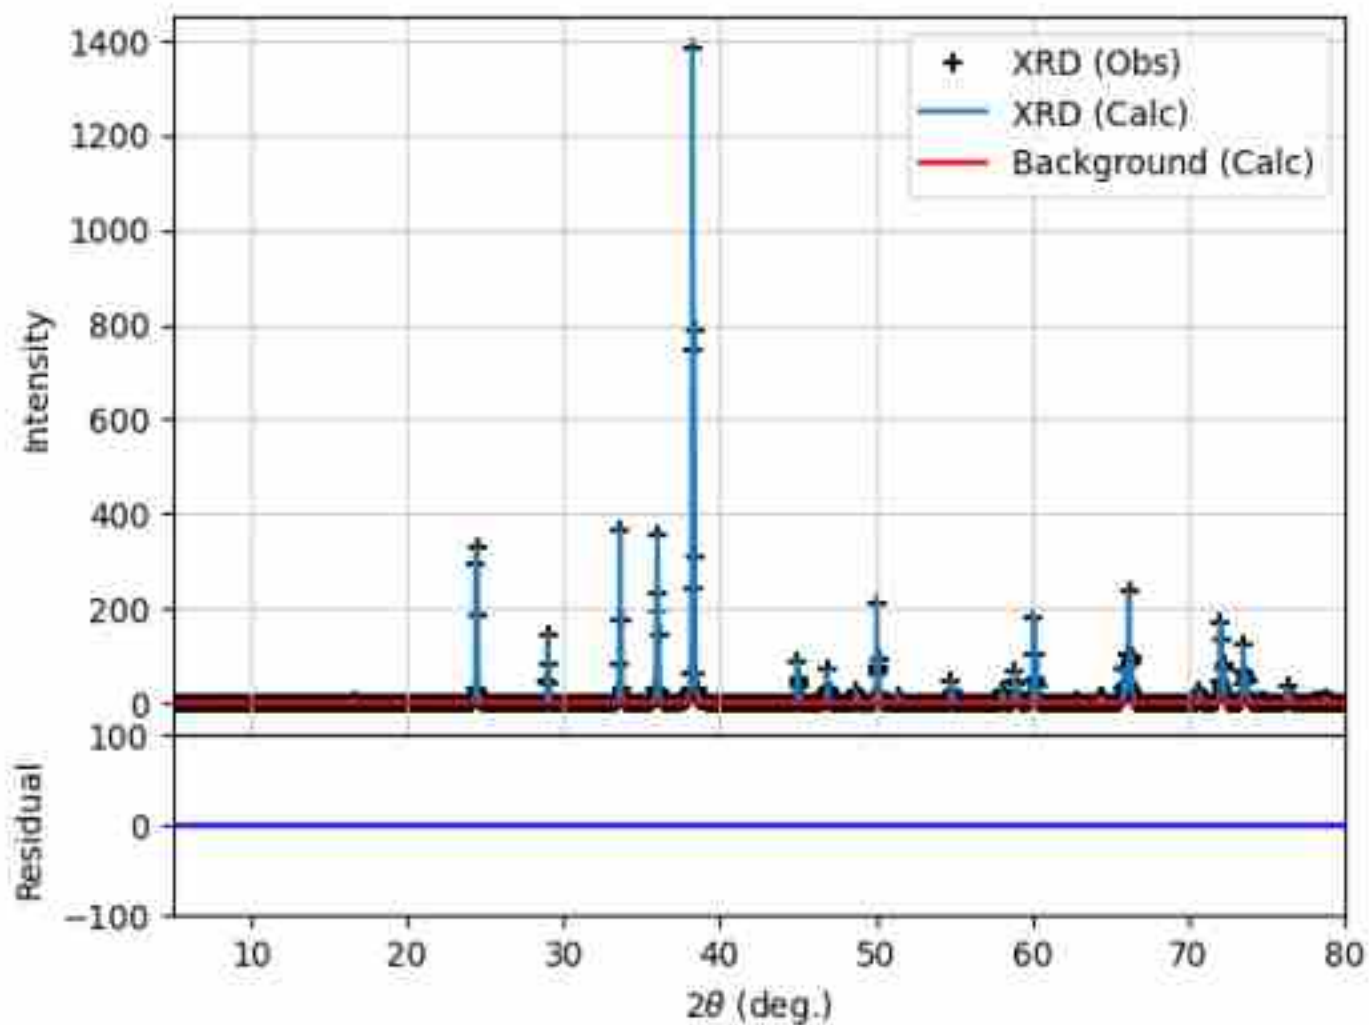

| RMSE before RR | Rwp     | RMSE after RR |
|----------------|---------|---------------|
| 0.016          | 0.05037 | 0.00263       |

# Yb<sub>3</sub>Ag<sub>3</sub>Ge<sub>3</sub>

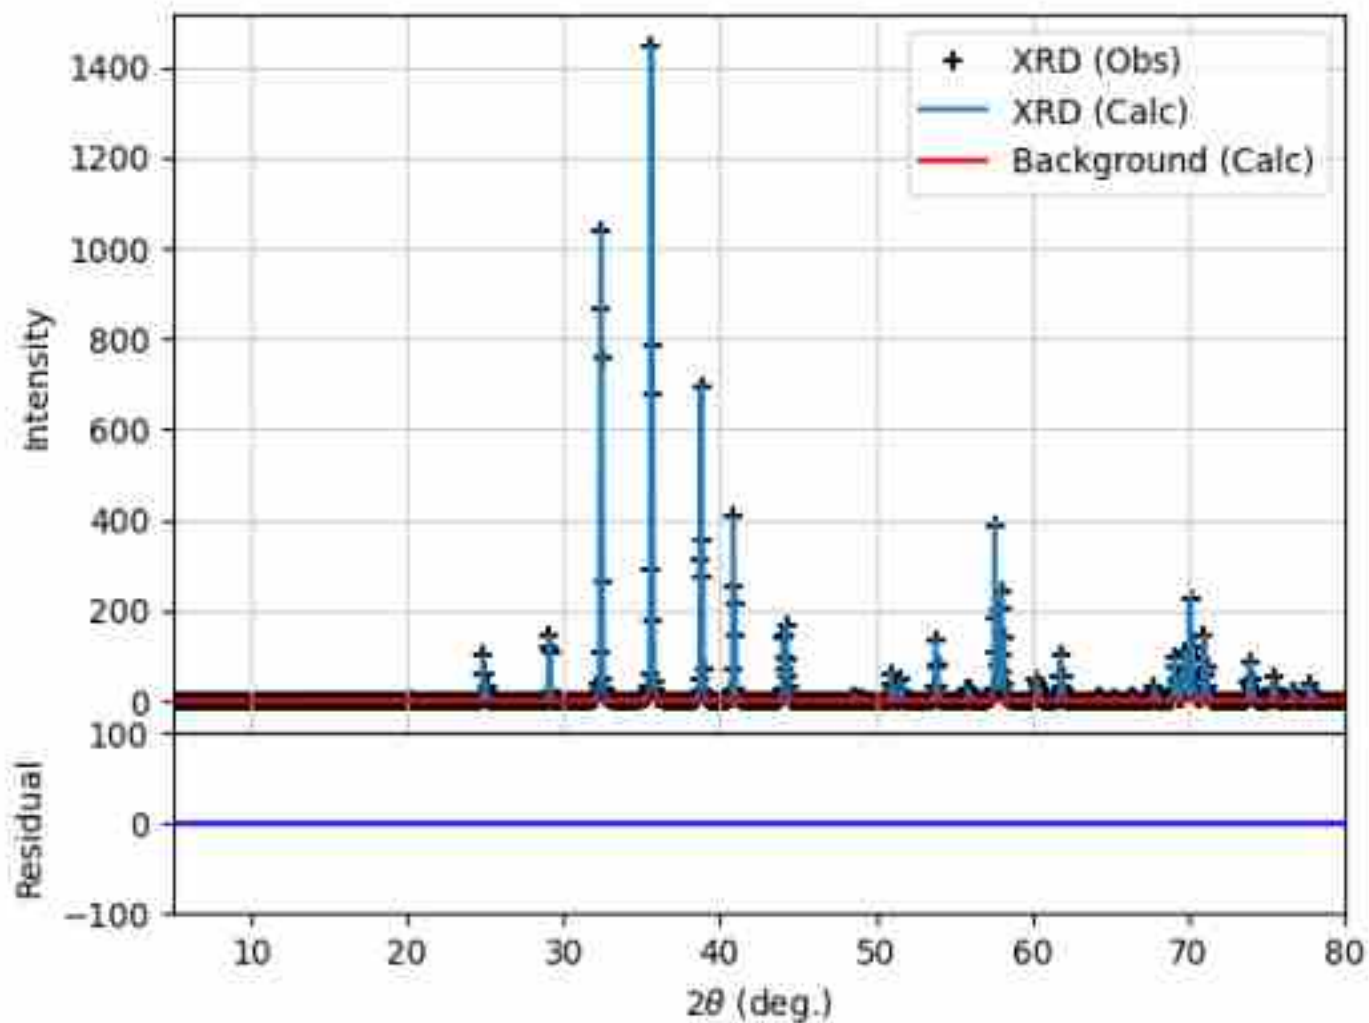

| RMSE before RR | Rwp     | RMSE after RR |
|----------------|---------|---------------|
| 0.016          | 0.00518 | 0.00073       |

# Zr<sub>2</sub>Br<sub>2</sub>

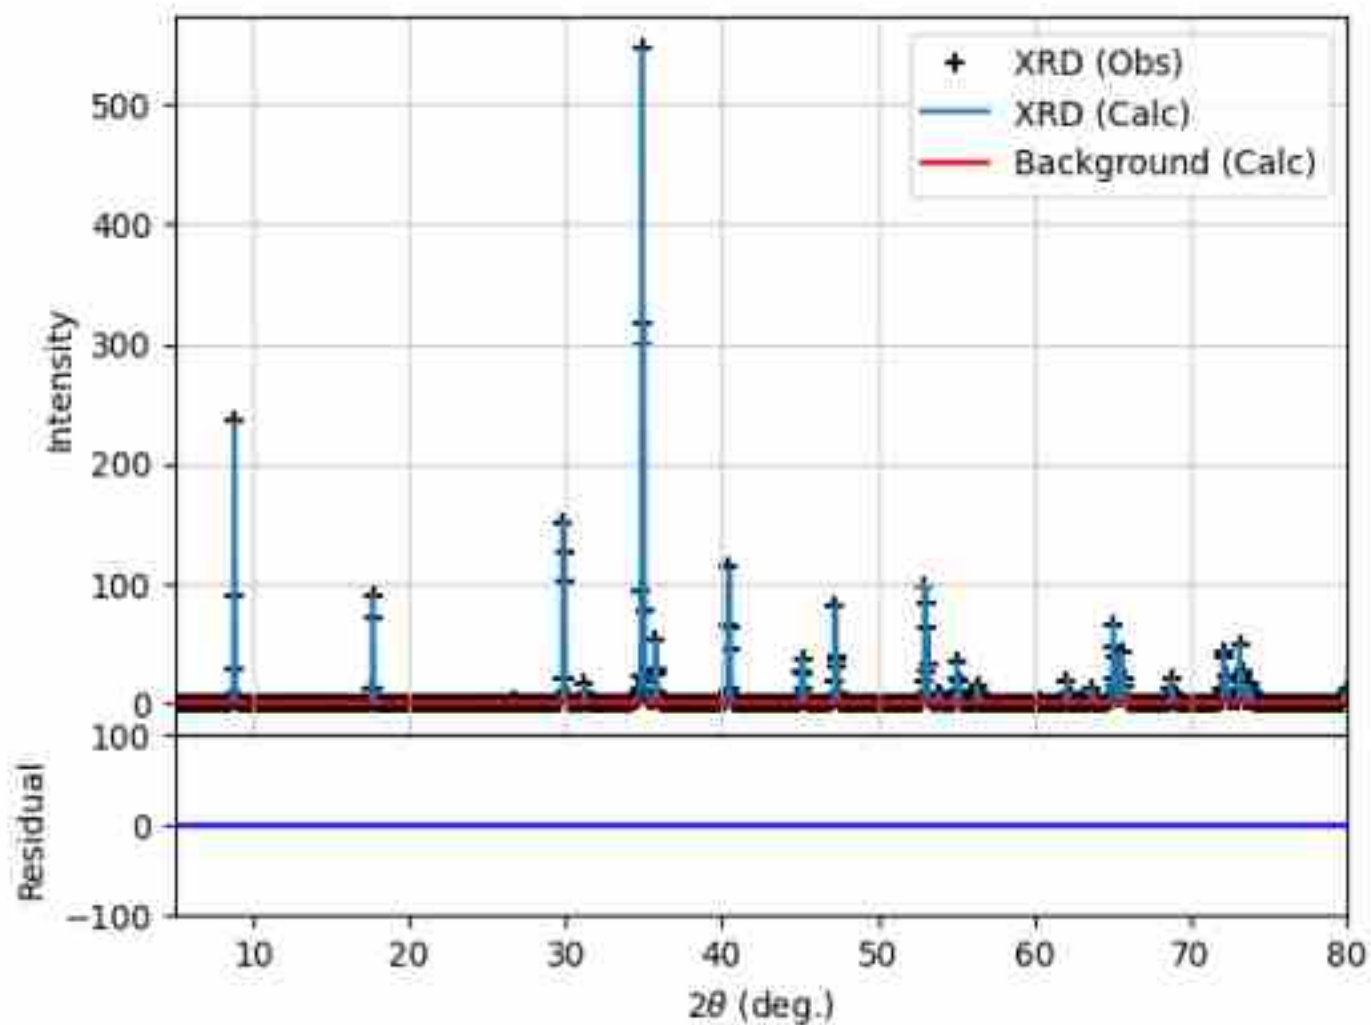

| RMSE before RR | Rwp     | RMSE after RR |
|----------------|---------|---------------|
| 0.016          | 0.00273 | 0.00033       |

# Zr<sub>2</sub>Ga<sub>3</sub>Ni<sub>1</sub>

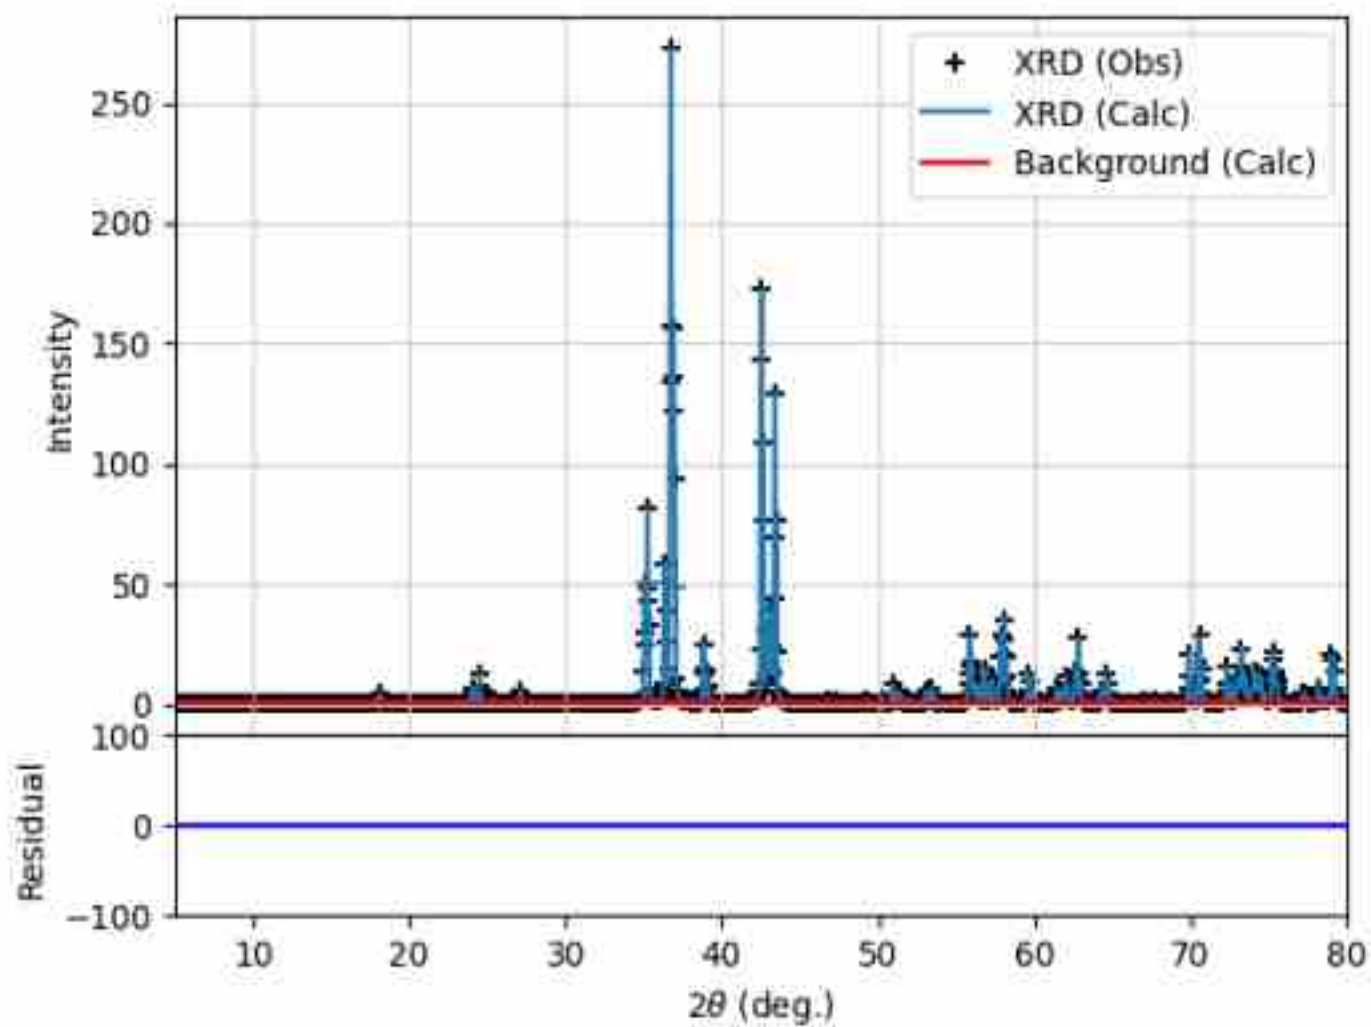

| RMSE before RR | Rwp     | RMSE after RR |
|----------------|---------|---------------|
| 0.016          | 0.00351 | 0.00019       |

# Zr<sub>2</sub>Ni<sub>8</sub>As<sub>4</sub>

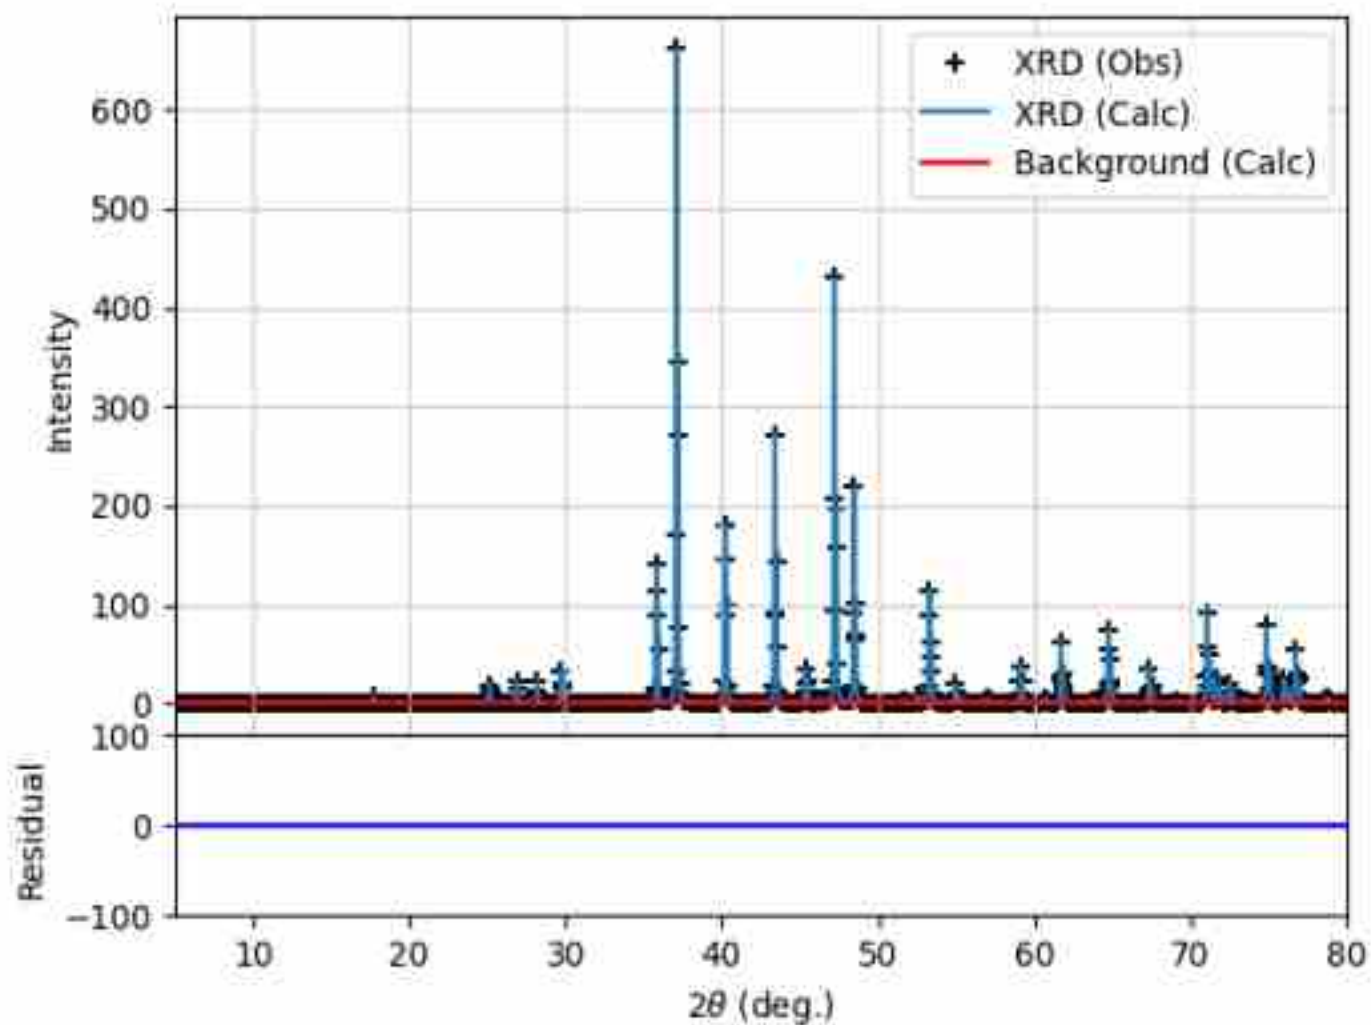

| RMSE before RR | Rwp     | RMSE after RR |
|----------------|---------|---------------|
| 0.016          | 0.00403 | 0.00059       |



# Zr2O4

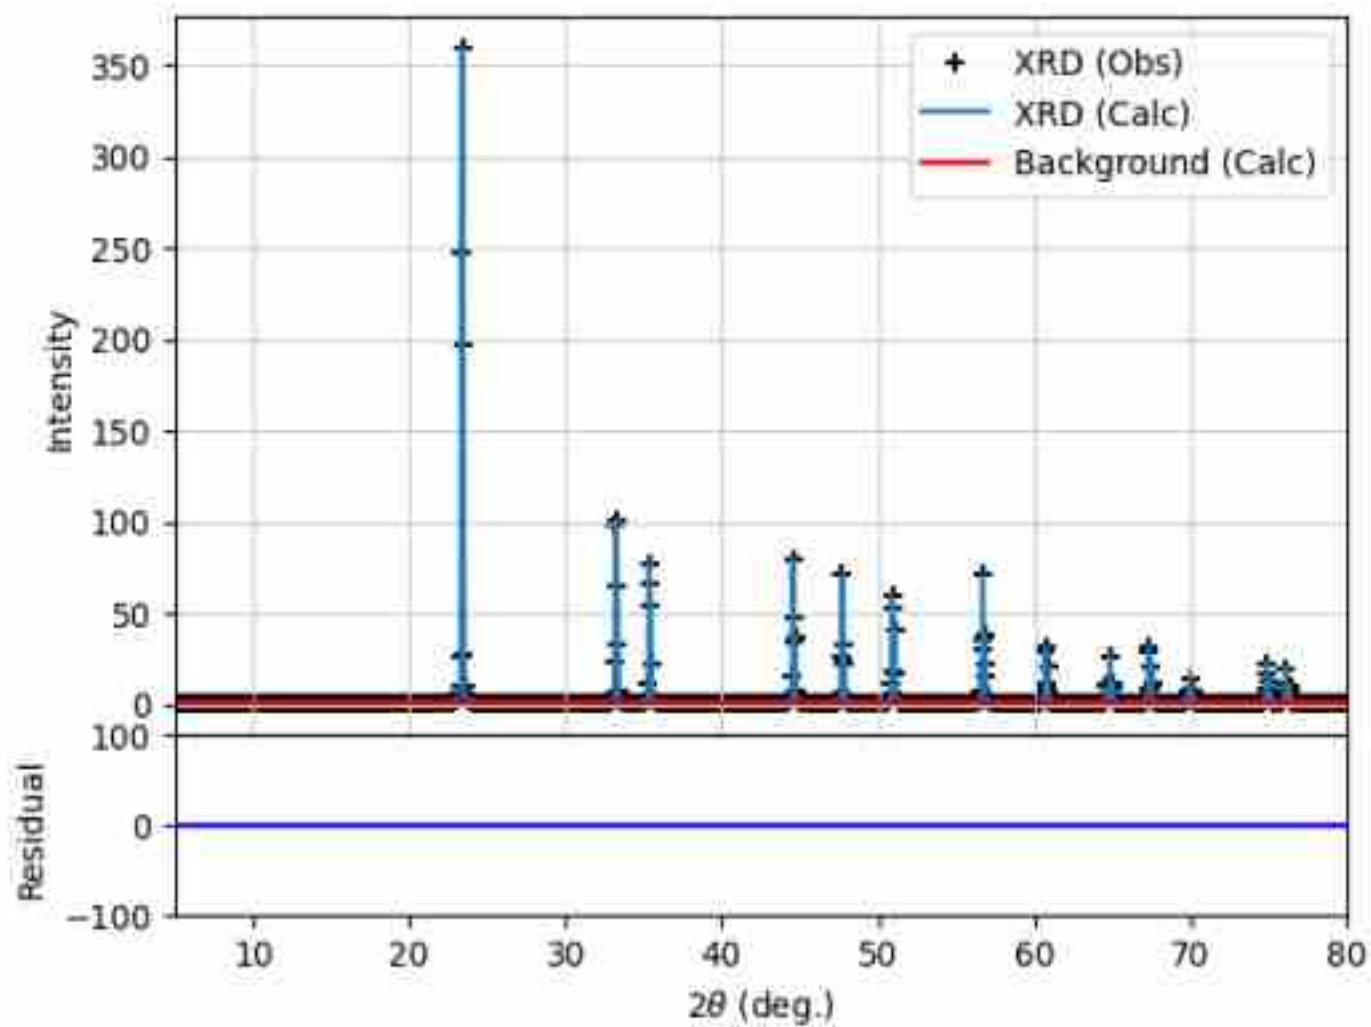

| RMSE before RR | Rwp     | RMSE after RR |
|----------------|---------|---------------|
| 0.016          | 0.00274 | 0.0007        |

# Zr<sub>2</sub>Ti<sub>2</sub>Cu<sub>2</sub>S<sub>8</sub>

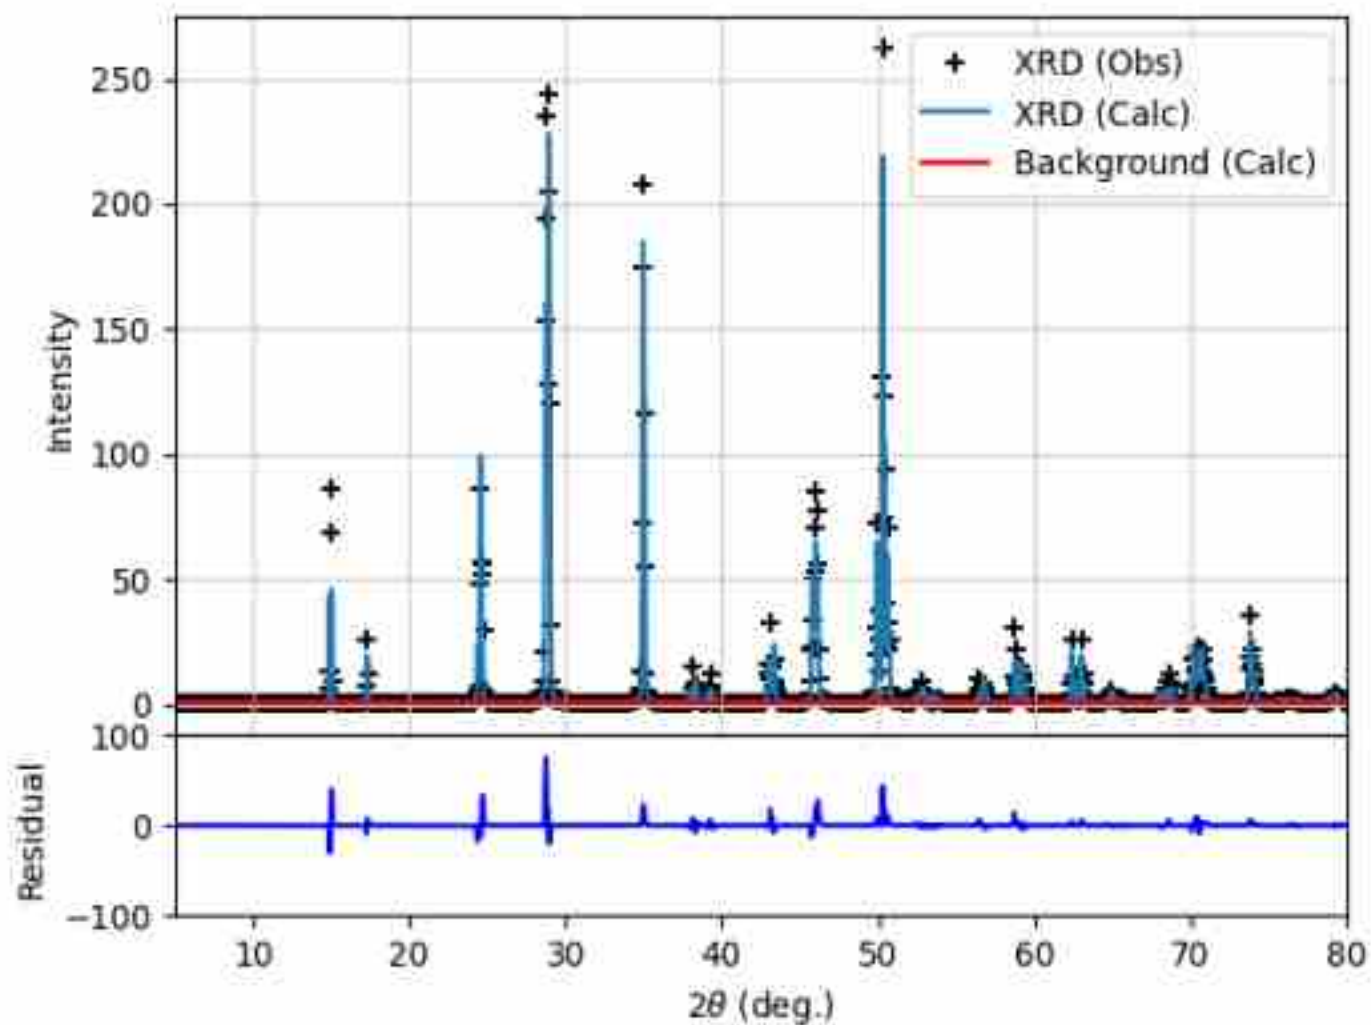

| RMSE before RR | Rwp     | RMSE after RR |
|----------------|---------|---------------|
| 0.016          | 29.6419 | 0.03241       |

# Zr<sub>3</sub>Fe<sub>8</sub>Mo<sub>1</sub>

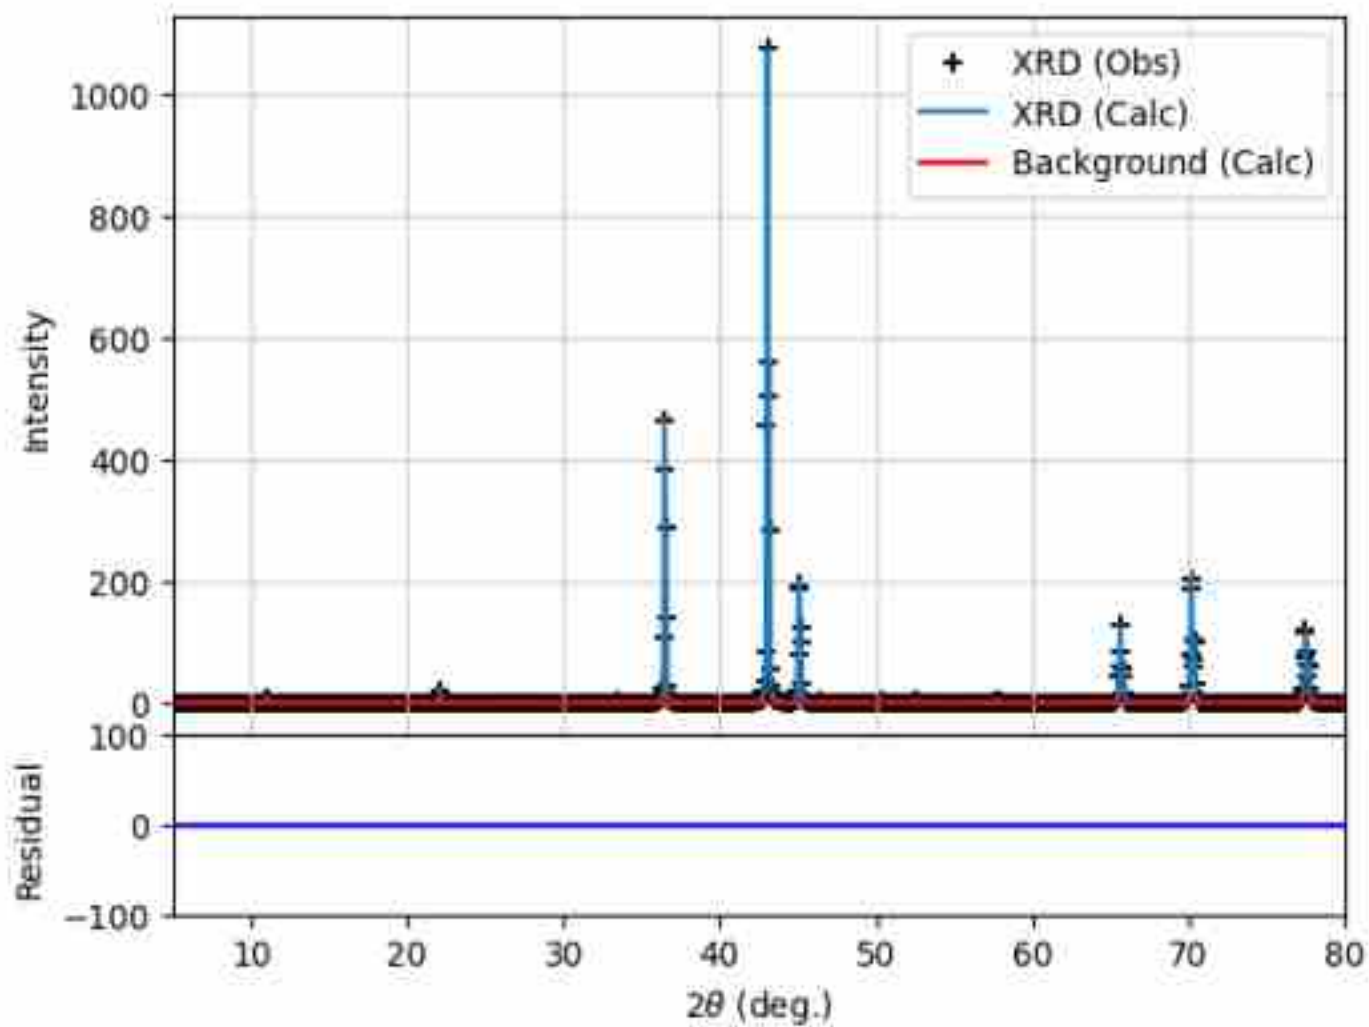

| RMSE before RR | Rwp     | RMSE after RR |
|----------------|---------|---------------|
| 0.016          | 0.00296 | 0.00038       |

# Zr<sub>3</sub>Ge<sub>3</sub>O<sub>s</sub>3

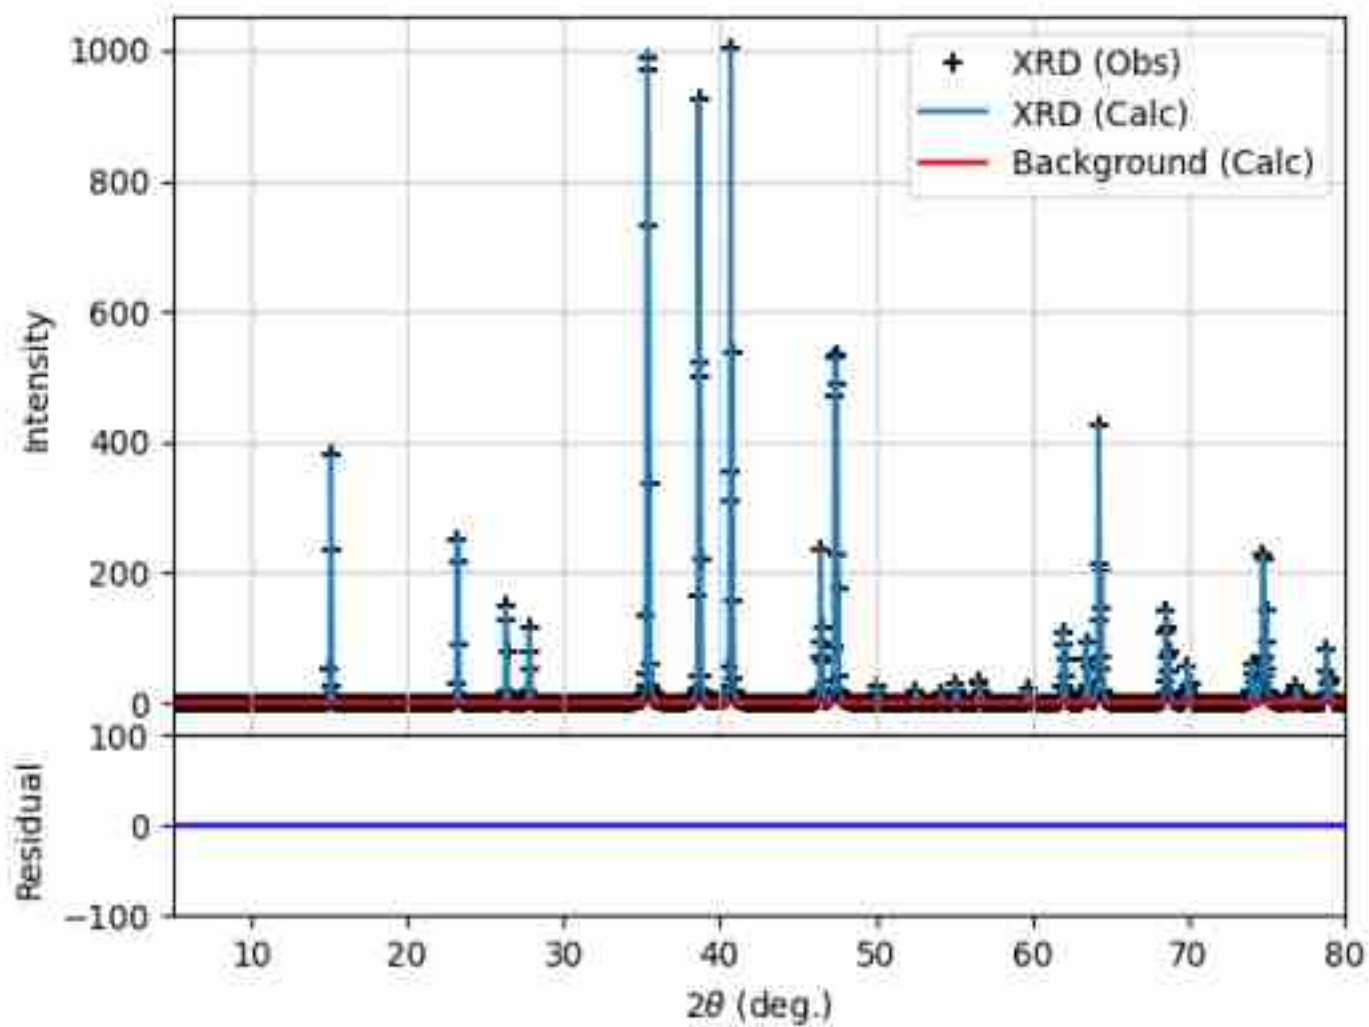

| RMSE before RR | Rwp     | RMSE after RR |
|----------------|---------|---------------|
| 0.016          | 0.00365 | 0.0007        |

# Zr<sub>3</sub>Re<sub>3</sub>Si<sub>3</sub>

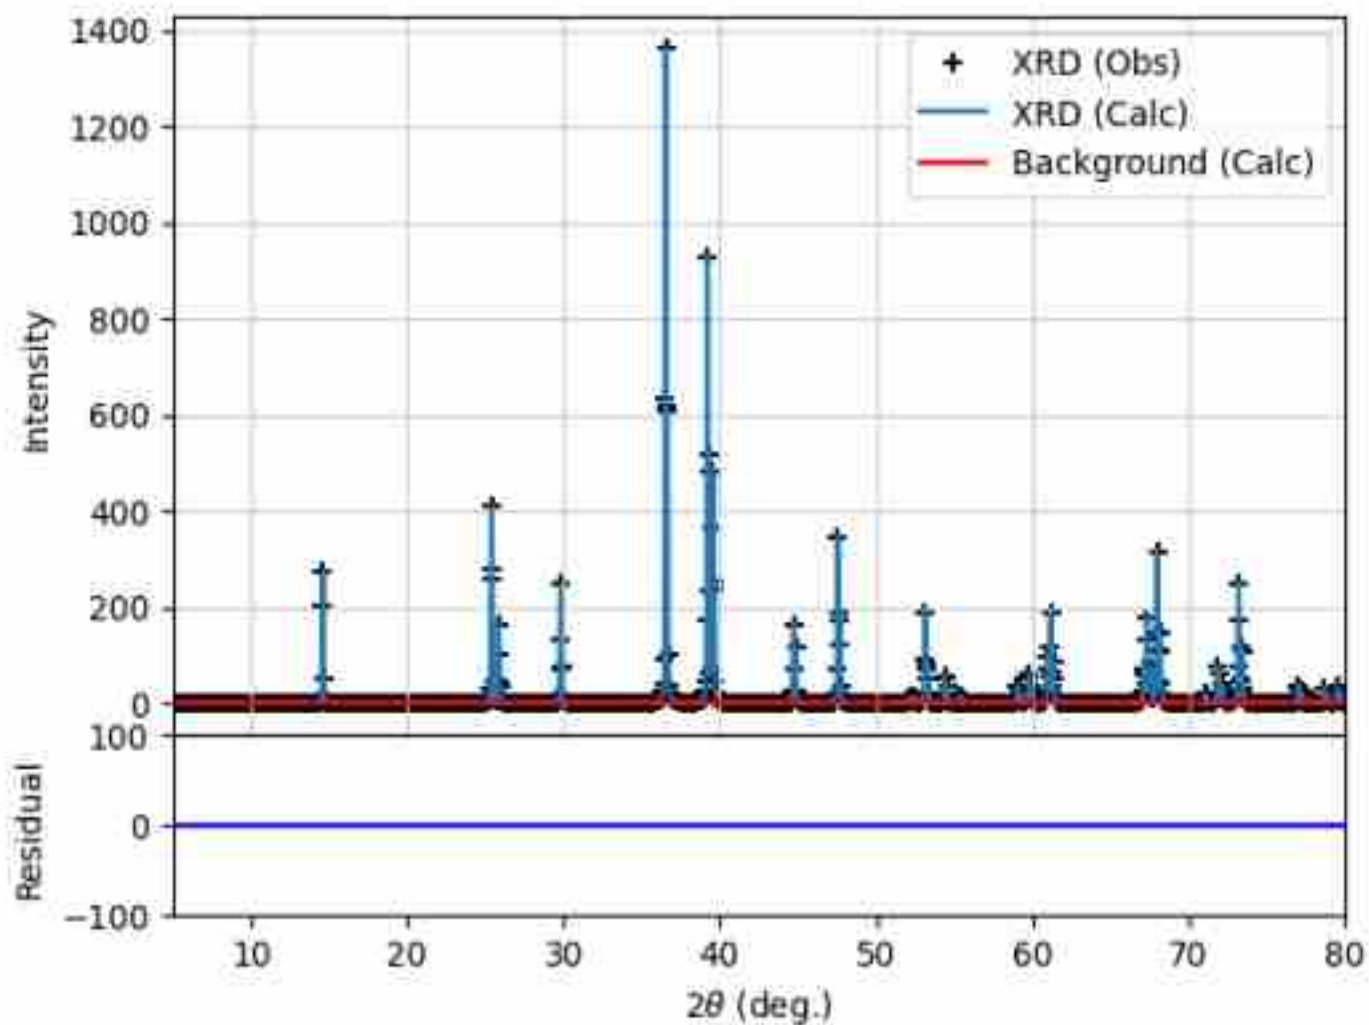

| RMSE before RR | Rwp     | RMSE after RR |
|----------------|---------|---------------|
| 0.016          | 0.00318 | 0.00117       |

# Zr<sub>4</sub>Cr<sub>6</sub>Si<sub>2</sub>

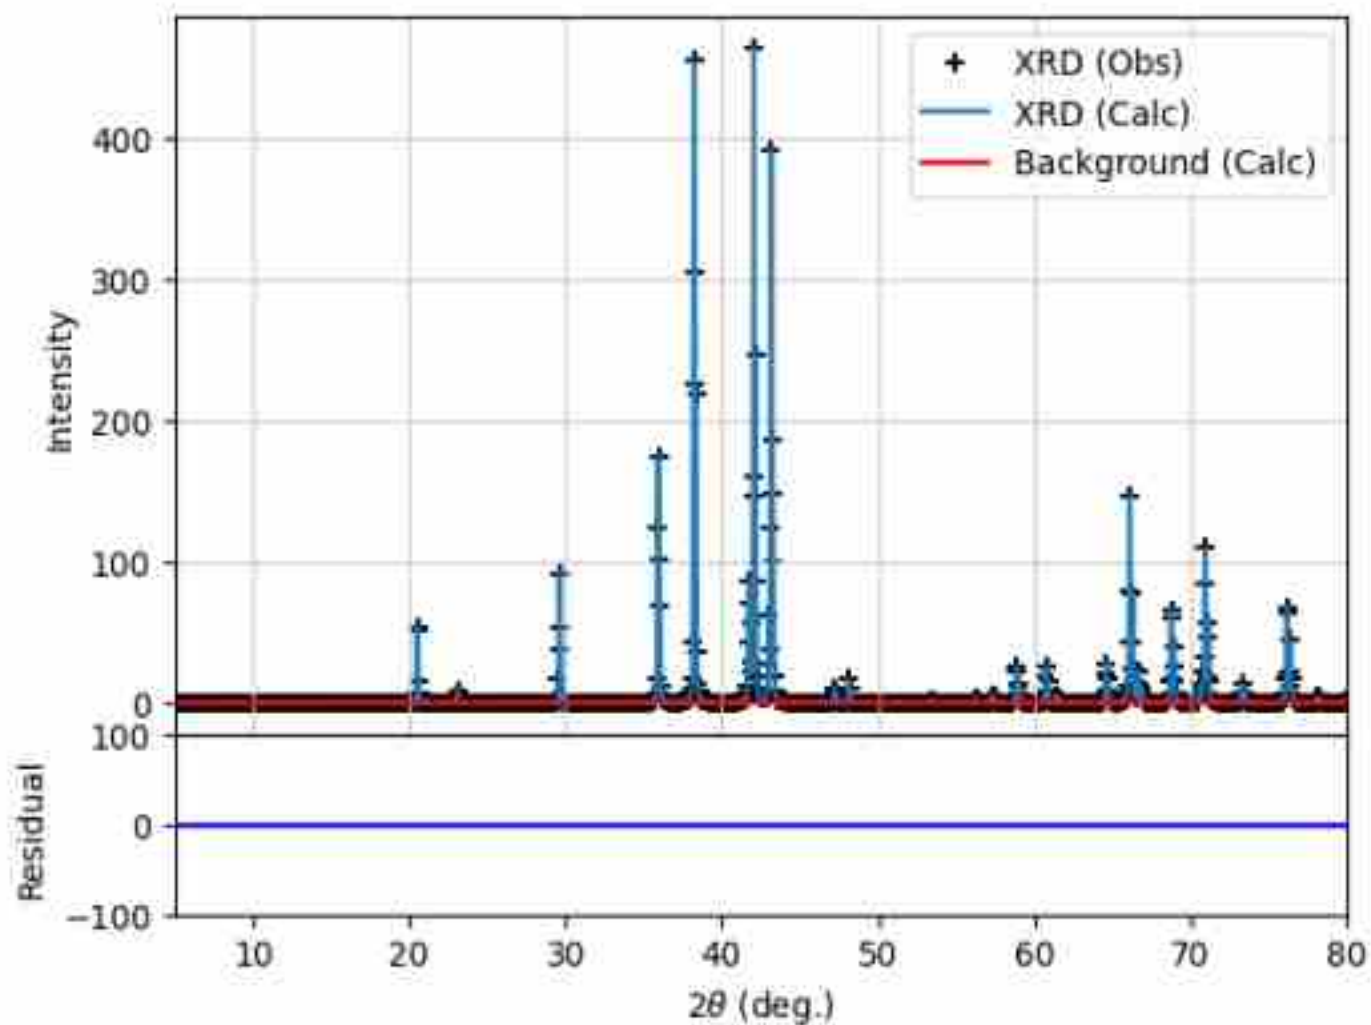

| RMSE before RR | Rwp     | RMSE after RR |
|----------------|---------|---------------|
| 0.016          | 0.00398 | 0.00087       |

# Zr4V8

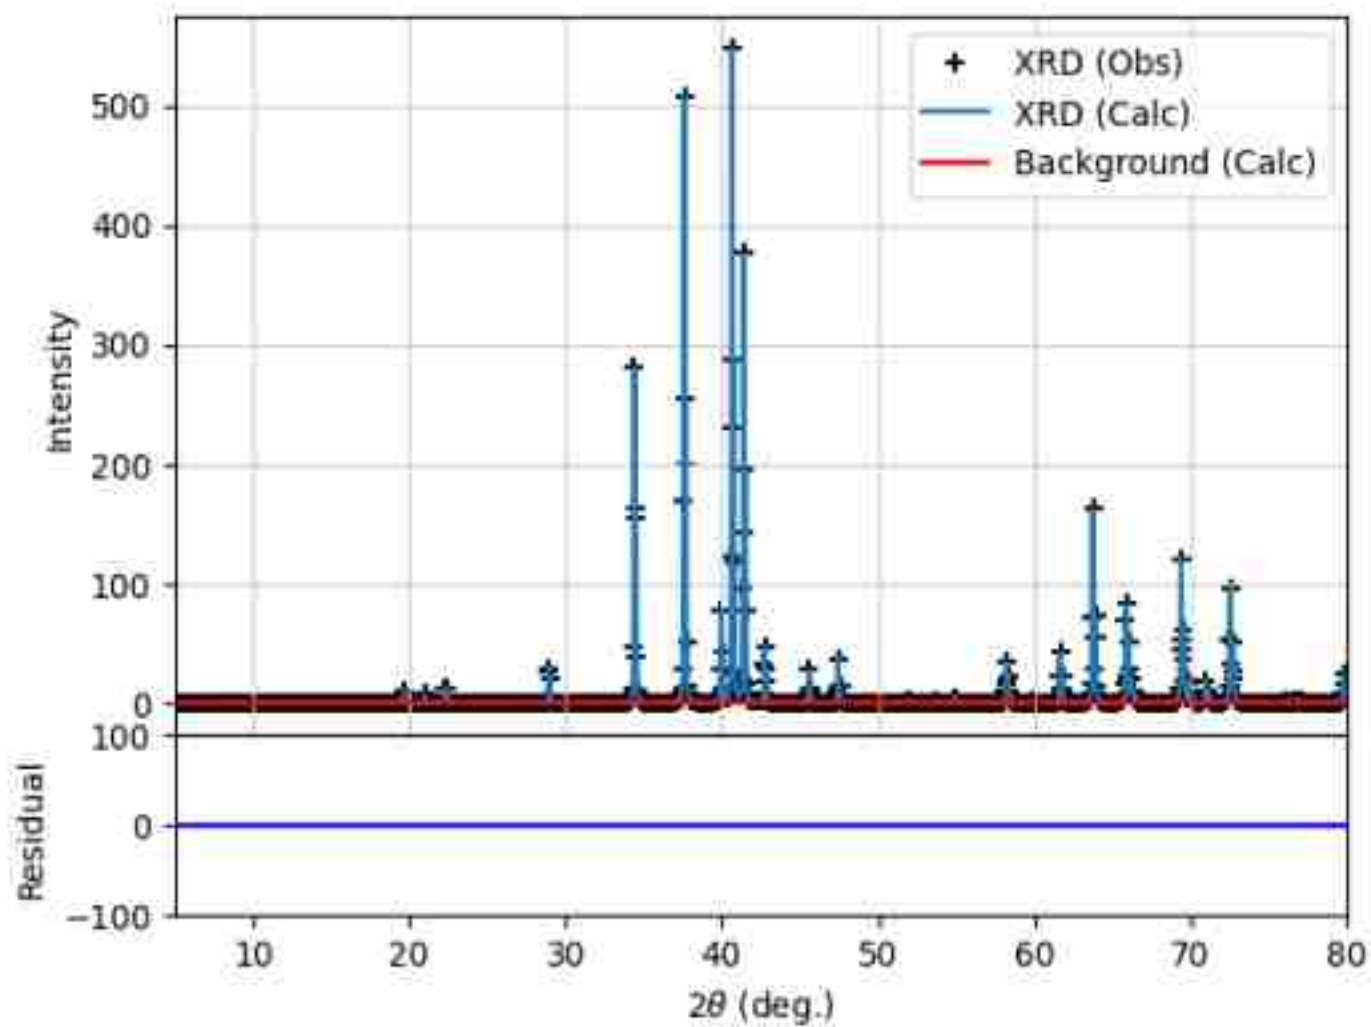

| RMSE before RR | Rwp     | RMSE after RR |
|----------------|---------|---------------|
| 0.016          | 0.00625 | 0.00107       |

# Zr6Bi2

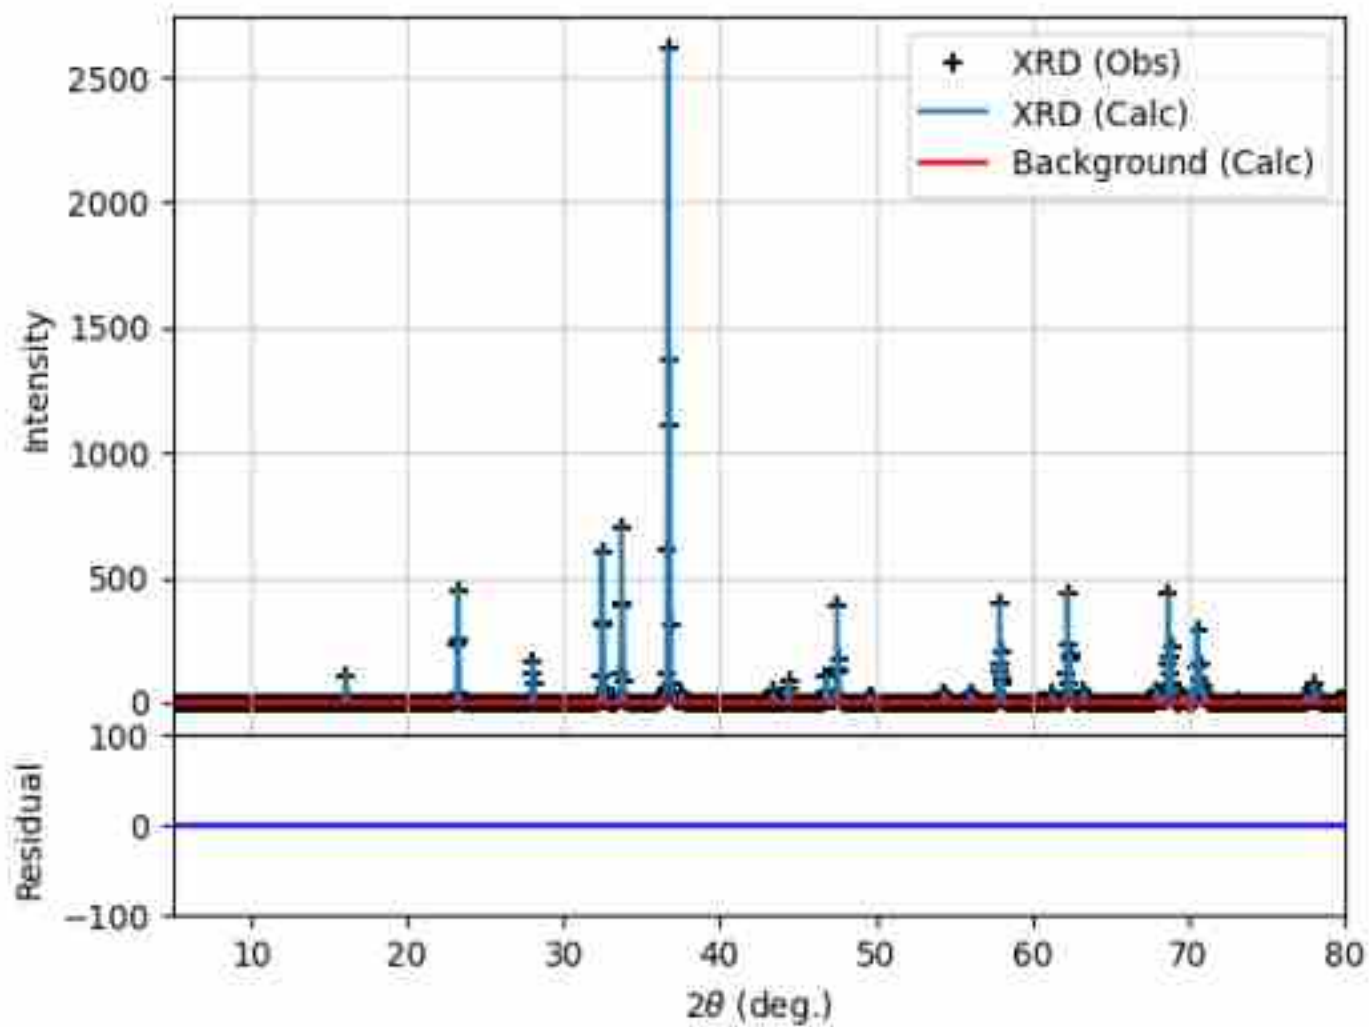

| RMSE before RR | Rwp     | RMSE after RR |
|----------------|---------|---------------|
| 0.016          | 0.03718 | 0.00217       |



# Al<sub>2</sub>Cu<sub>2</sub>Sn<sub>2</sub>S<sub>8</sub>

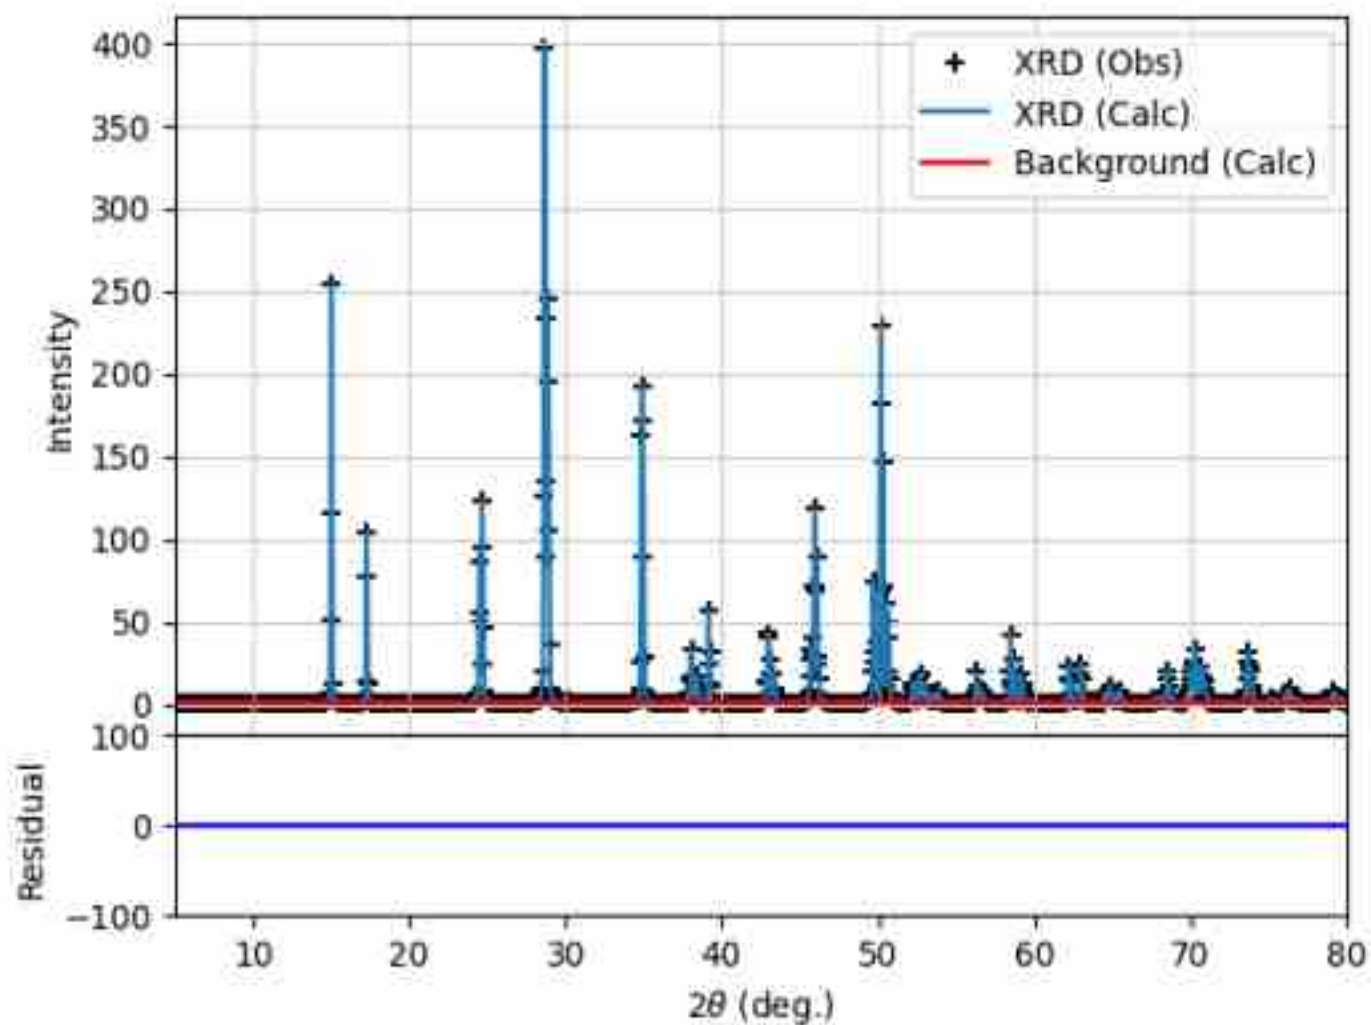

| RMSE before RR | Rwp     | RMSE after RR |
|----------------|---------|---------------|
| 0.017          | 0.00304 | 0.00079       |

# Al<sub>4</sub>In<sub>4</sub>N<sub>8</sub>

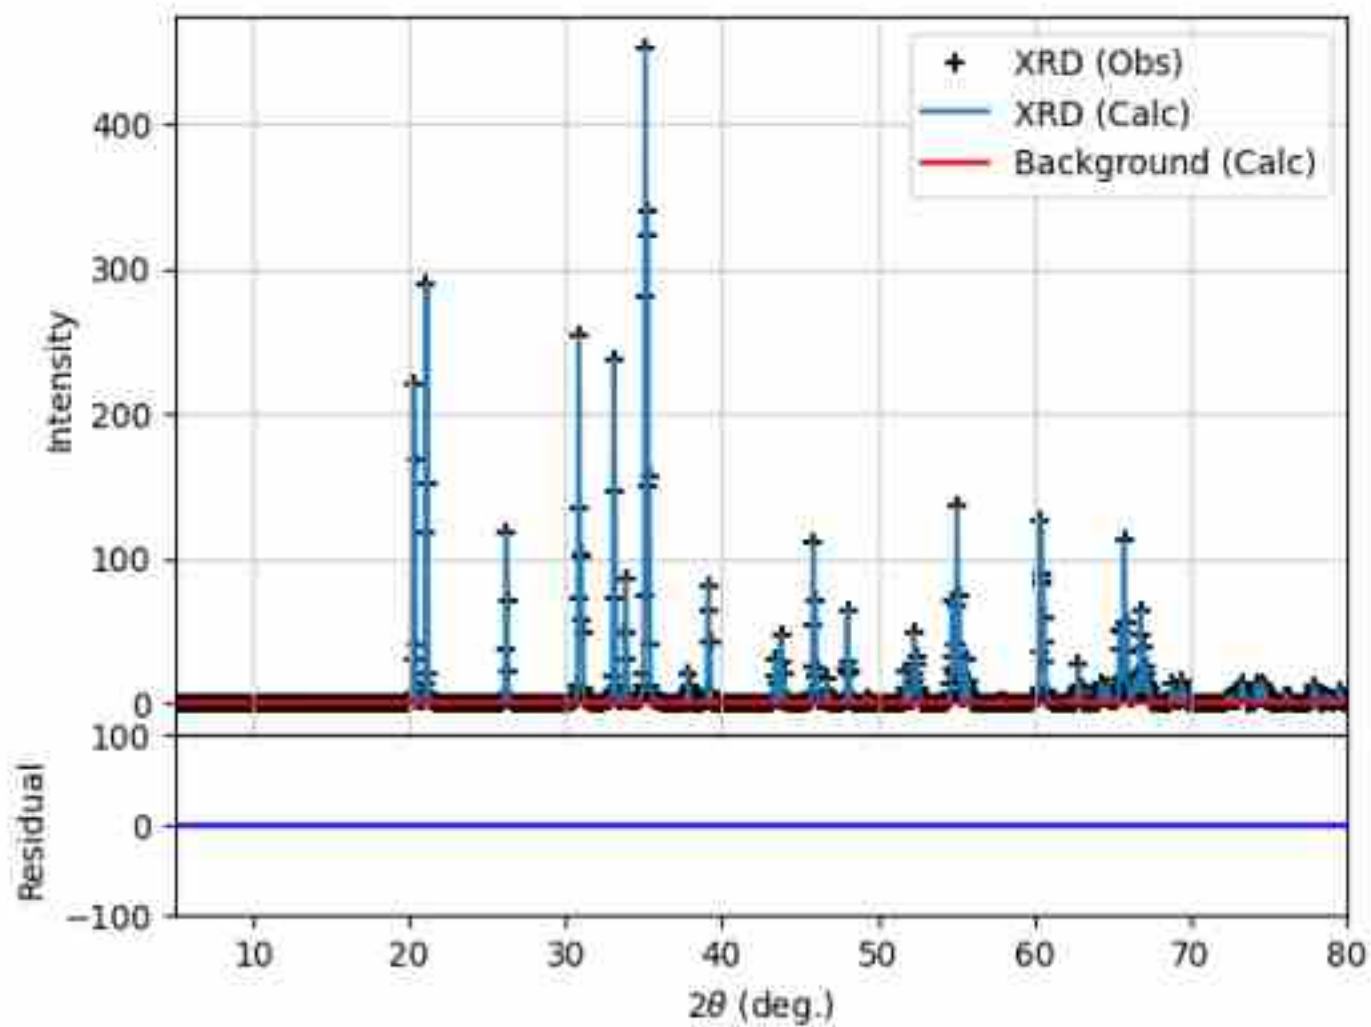

| RMSE before RR | Rwp     | RMSE after RR |
|----------------|---------|---------------|
| 0.017          | 0.00542 | 0.00168       |

# Ba1Ni2P2

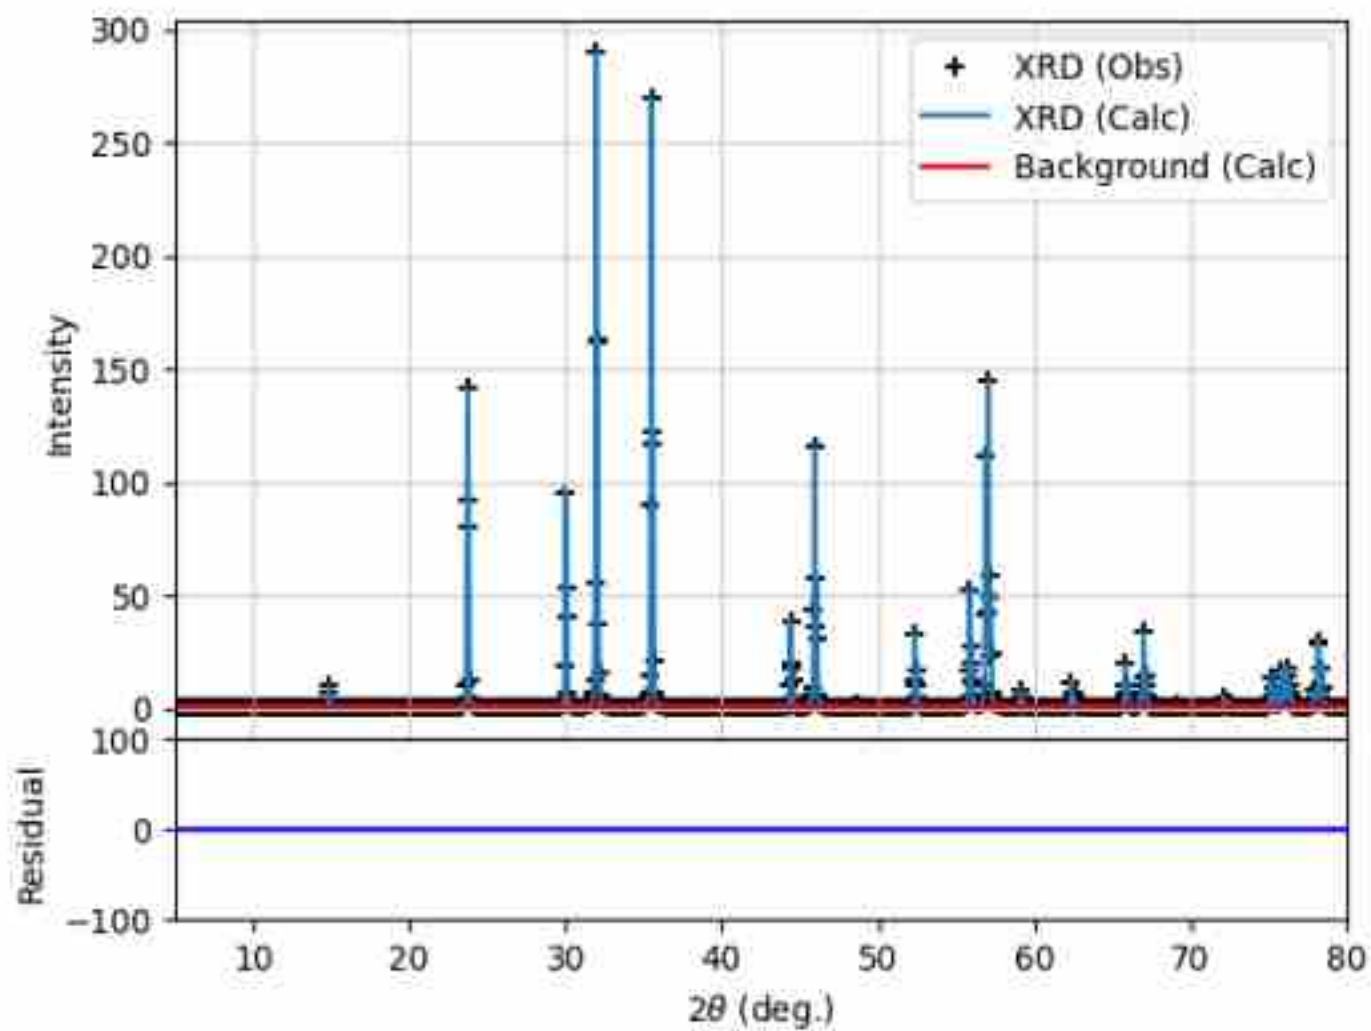

| RMSE before RR | Rwp     | RMSE after RR |
|----------------|---------|---------------|
| 0.017          | 0.00382 | 0.00078       |

# Ba1Sm2Co1O5

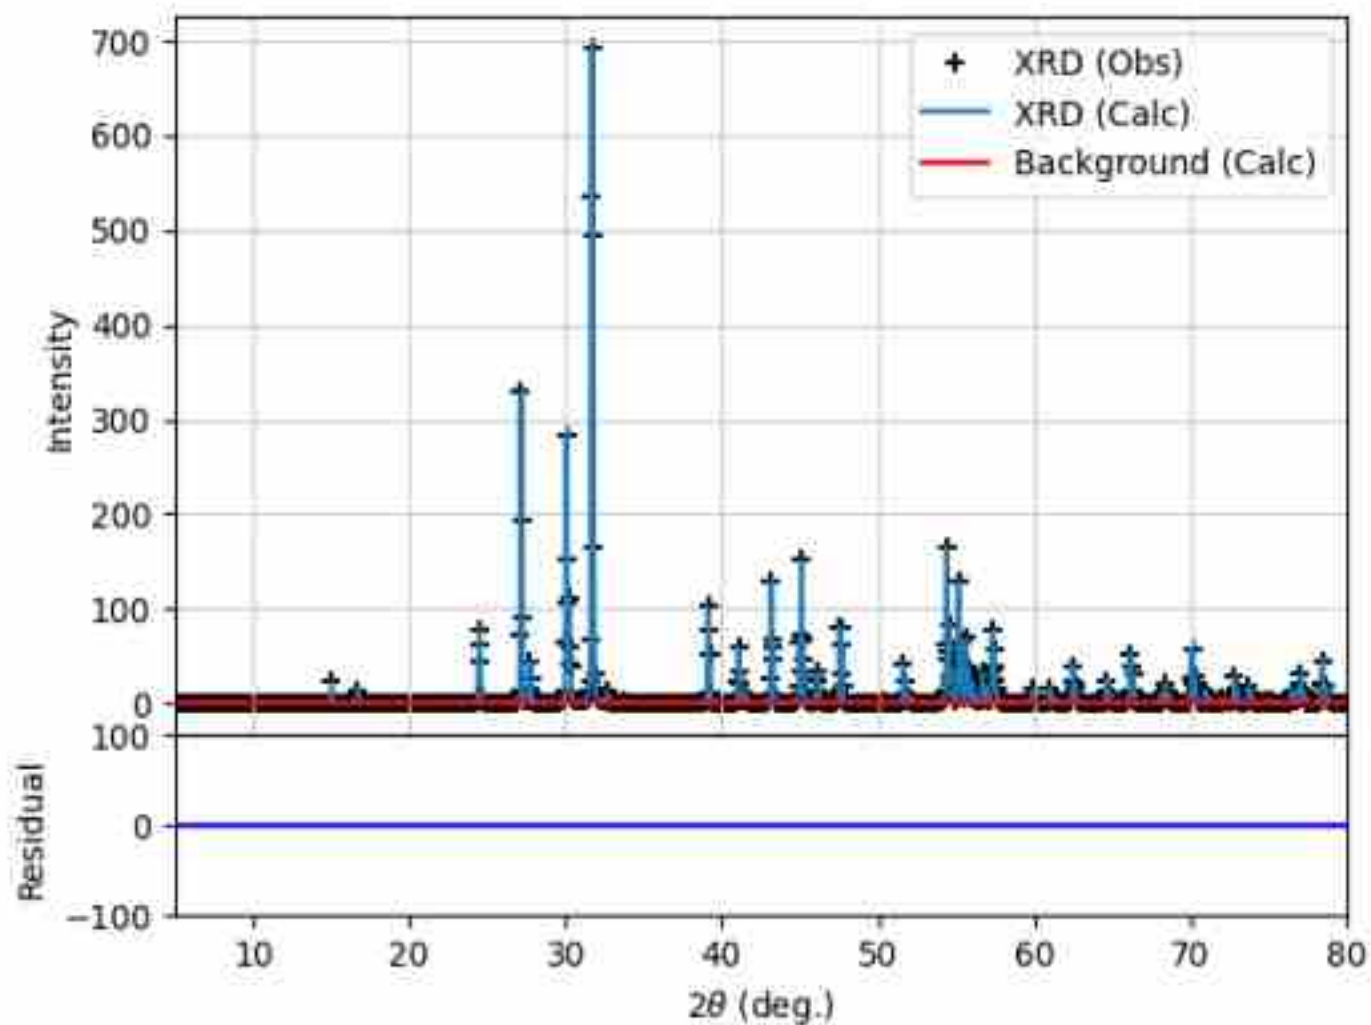

| RMSE before RR | Rwp     | RMSE after RR |
|----------------|---------|---------------|
| 0.017          | 0.00329 | 0.00122       |

# Ba1Sr1Nd1Cu3O7

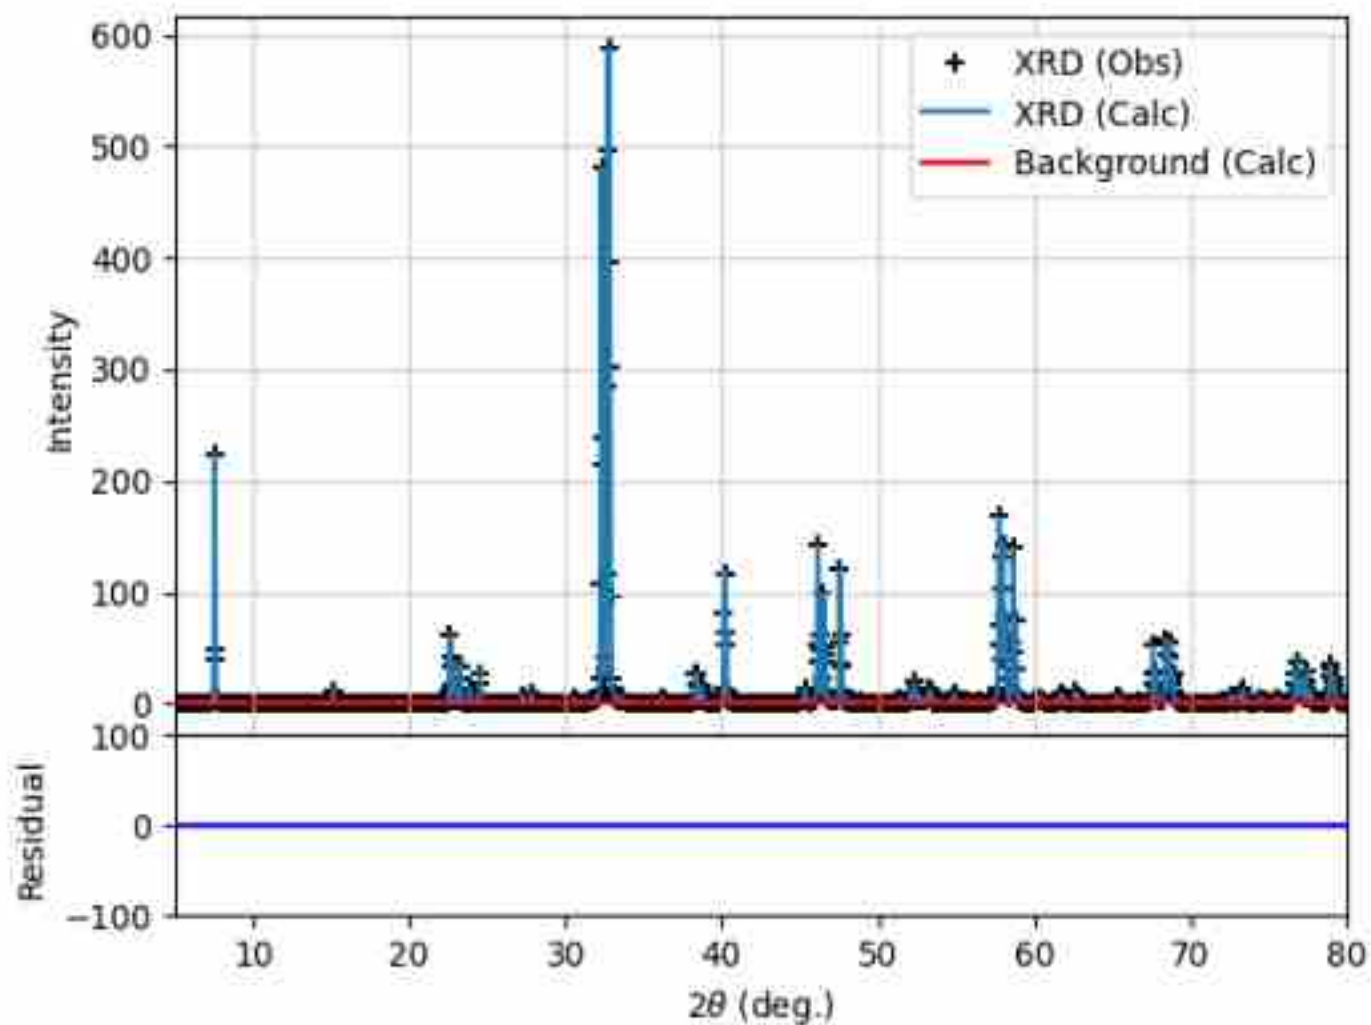

| RMSE before RR | Rwp    | RMSE after RR |
|----------------|--------|---------------|
| 0.017          | 0.0047 | 0.00085       |

# Ba<sub>2</sub>Bi<sub>3</sub>

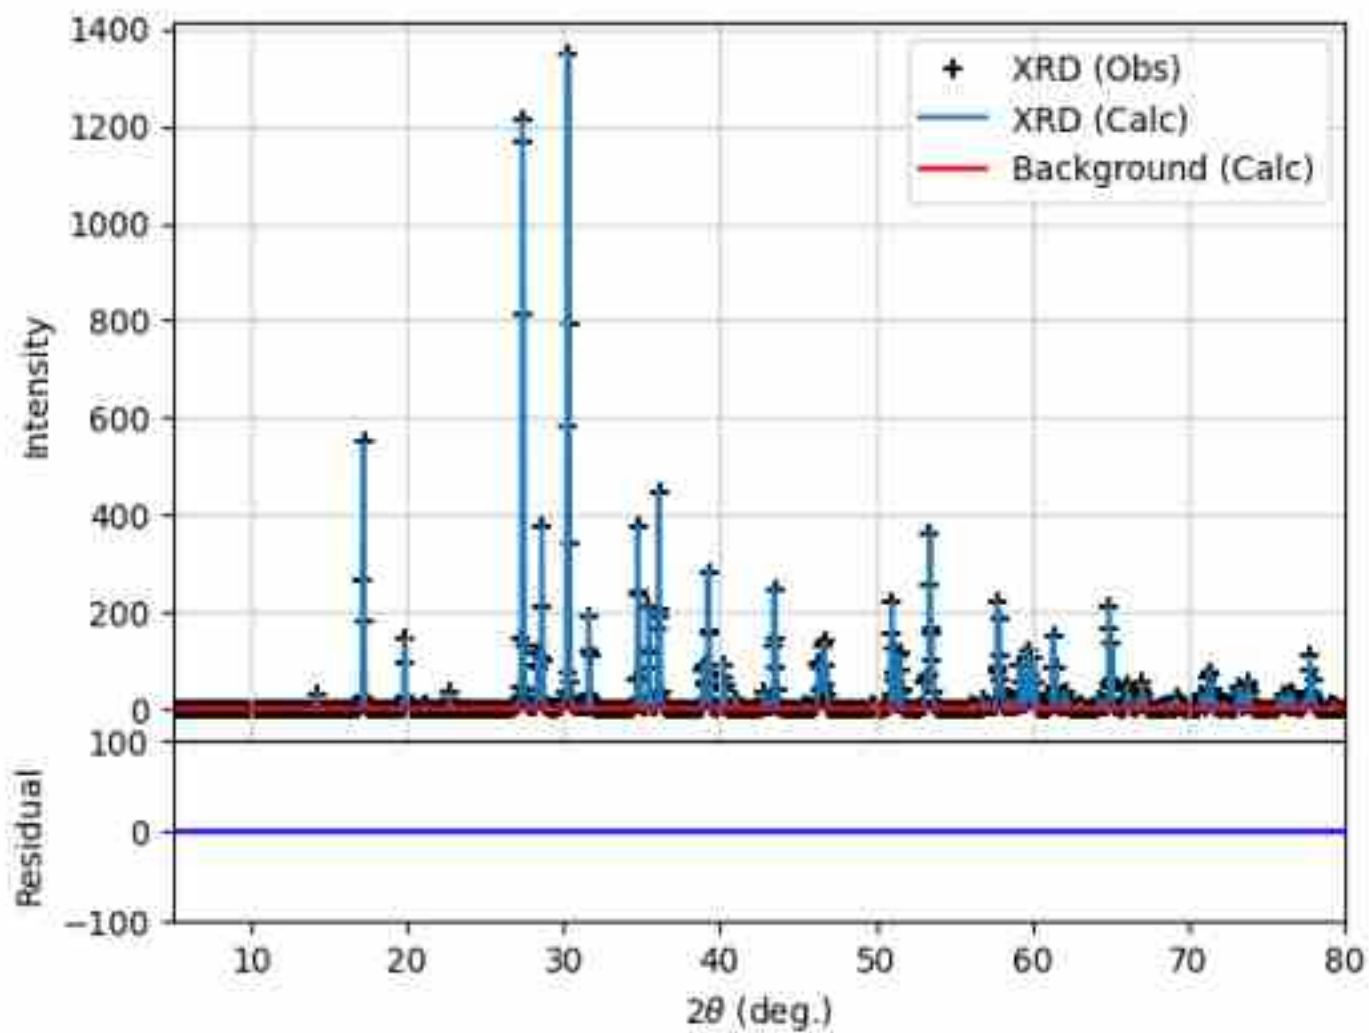

| RMSE before RR | Rwp    | RMSE after RR |
|----------------|--------|---------------|
| 0.017          | 0.0032 | 8e-05         |

# Ba<sub>2</sub>Cu<sub>3</sub>Br<sub>1</sub>Cl<sub>1</sub>O<sub>4</sub>

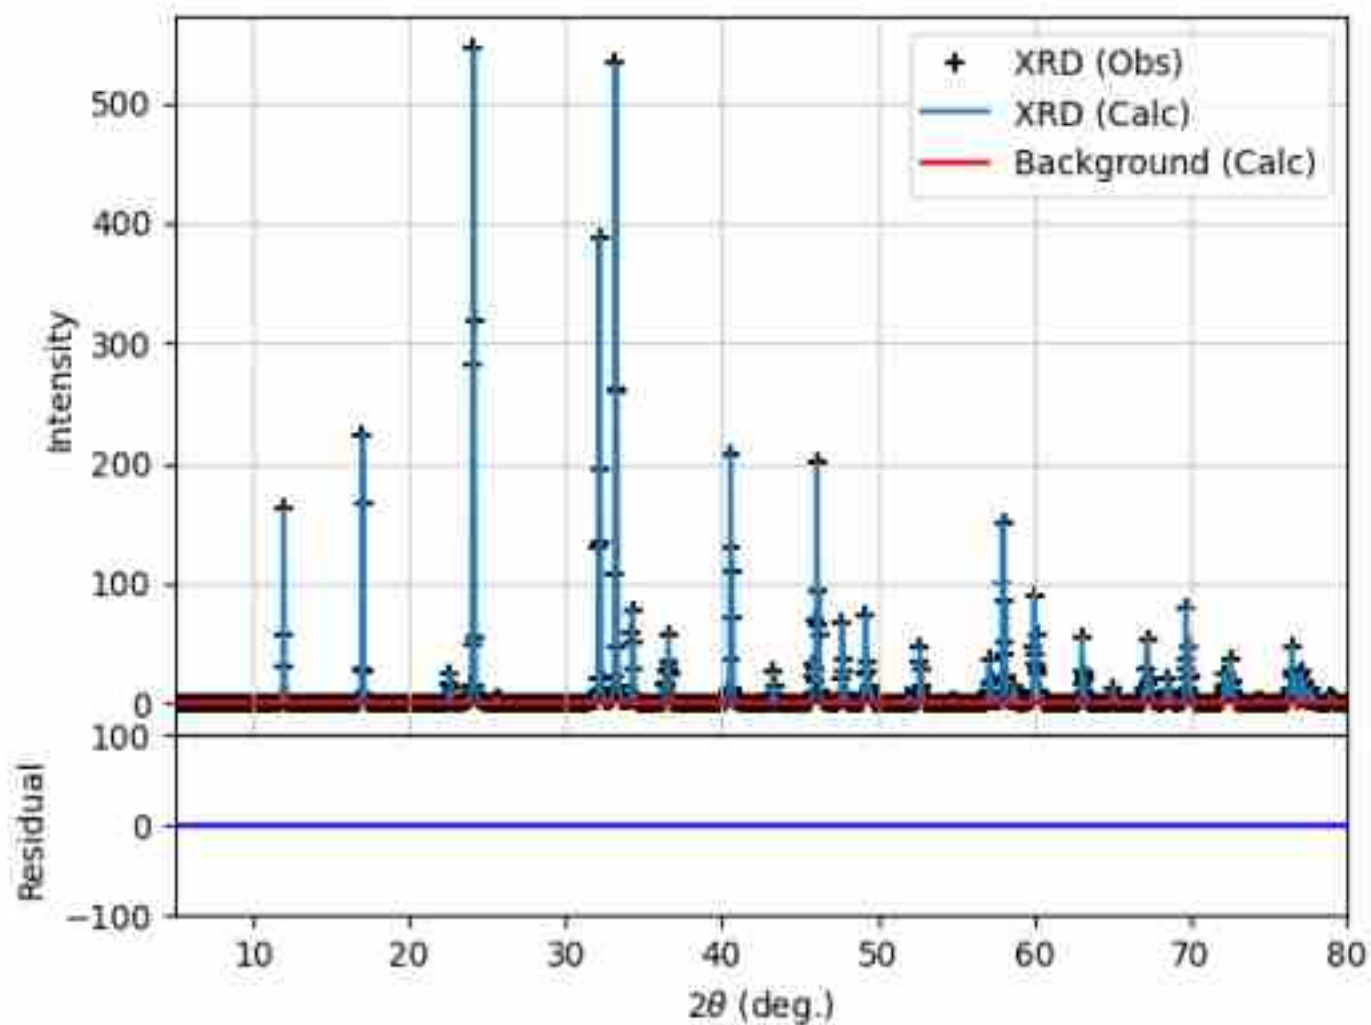

| RMSE before RR | Rwp     | RMSE after RR |
|----------------|---------|---------------|
| 0.017          | 0.00329 | 0.00131       |

# Ba<sub>2</sub>Gd<sub>2</sub>Au<sub>2</sub>Se<sub>6</sub>

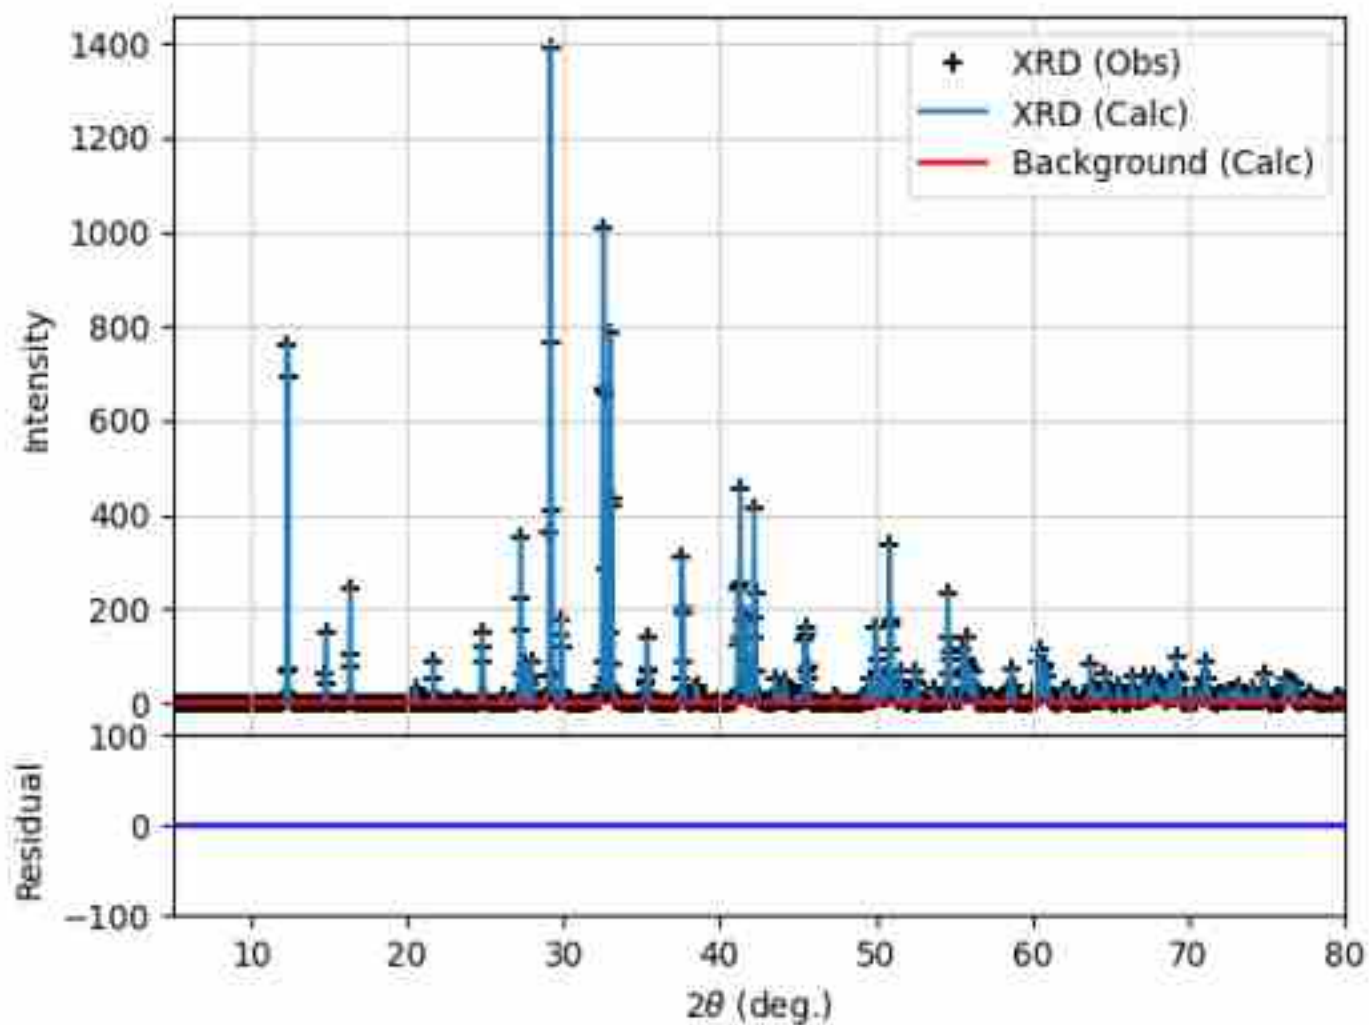

| RMSE before RR | Rwp     | RMSE after RR |
|----------------|---------|---------------|
| 0.017          | 0.00393 | 0.00032       |



# Ba<sub>2</sub>Ti<sub>2</sub>S<sub>6</sub>

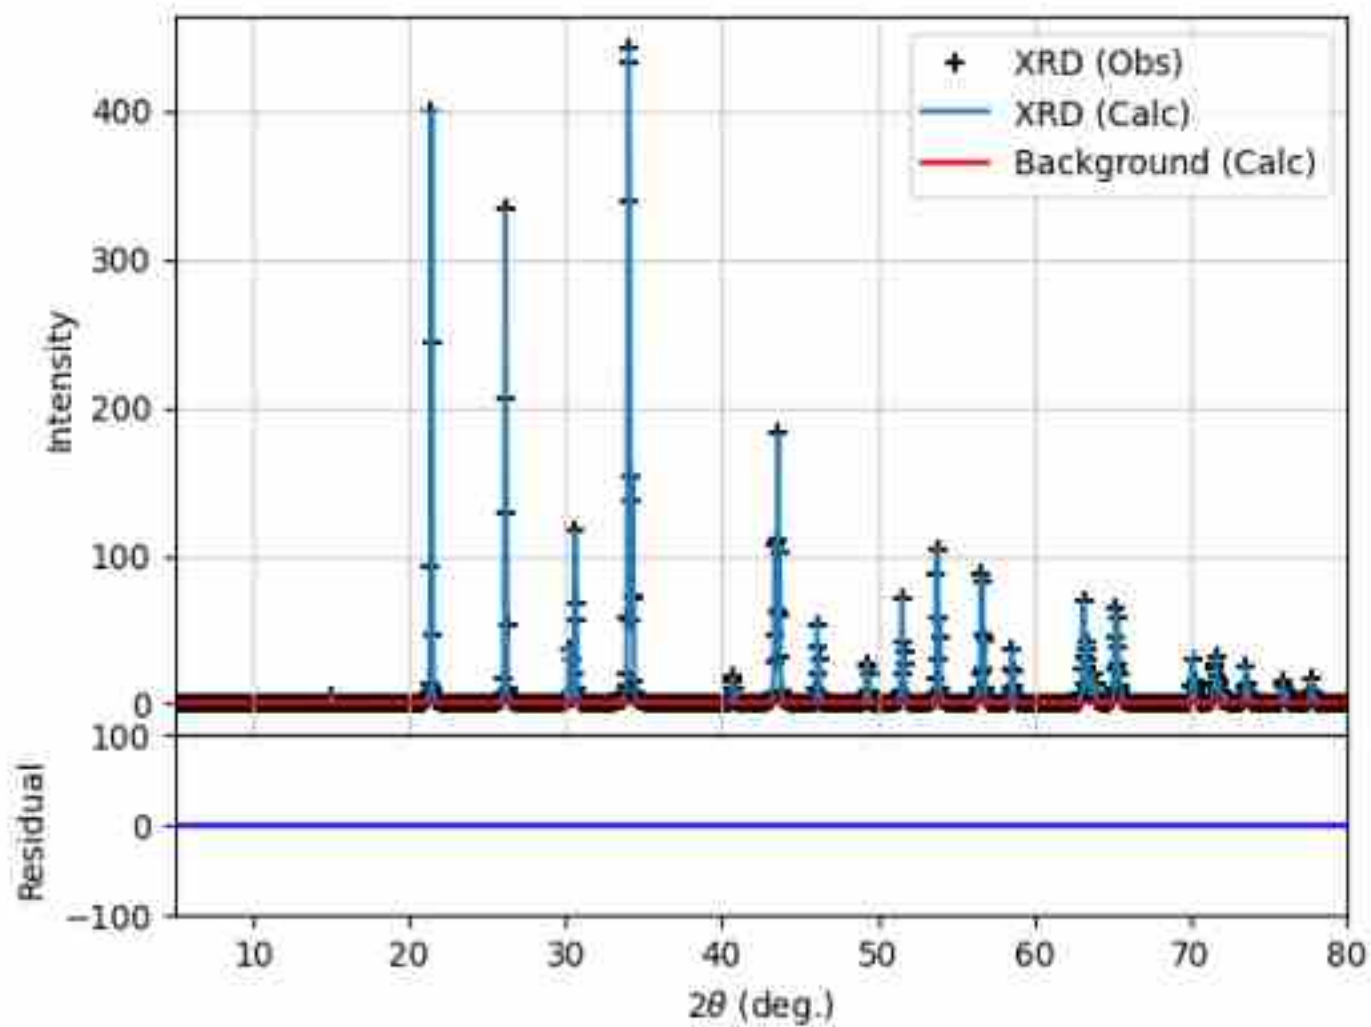

| RMSE before RR | Rwp     | RMSE after RR |
|----------------|---------|---------------|
| 0.017          | 0.00432 | 0.00096       |

# Ba<sub>2</sub>Y<sub>2</sub>Br<sub>10</sub>

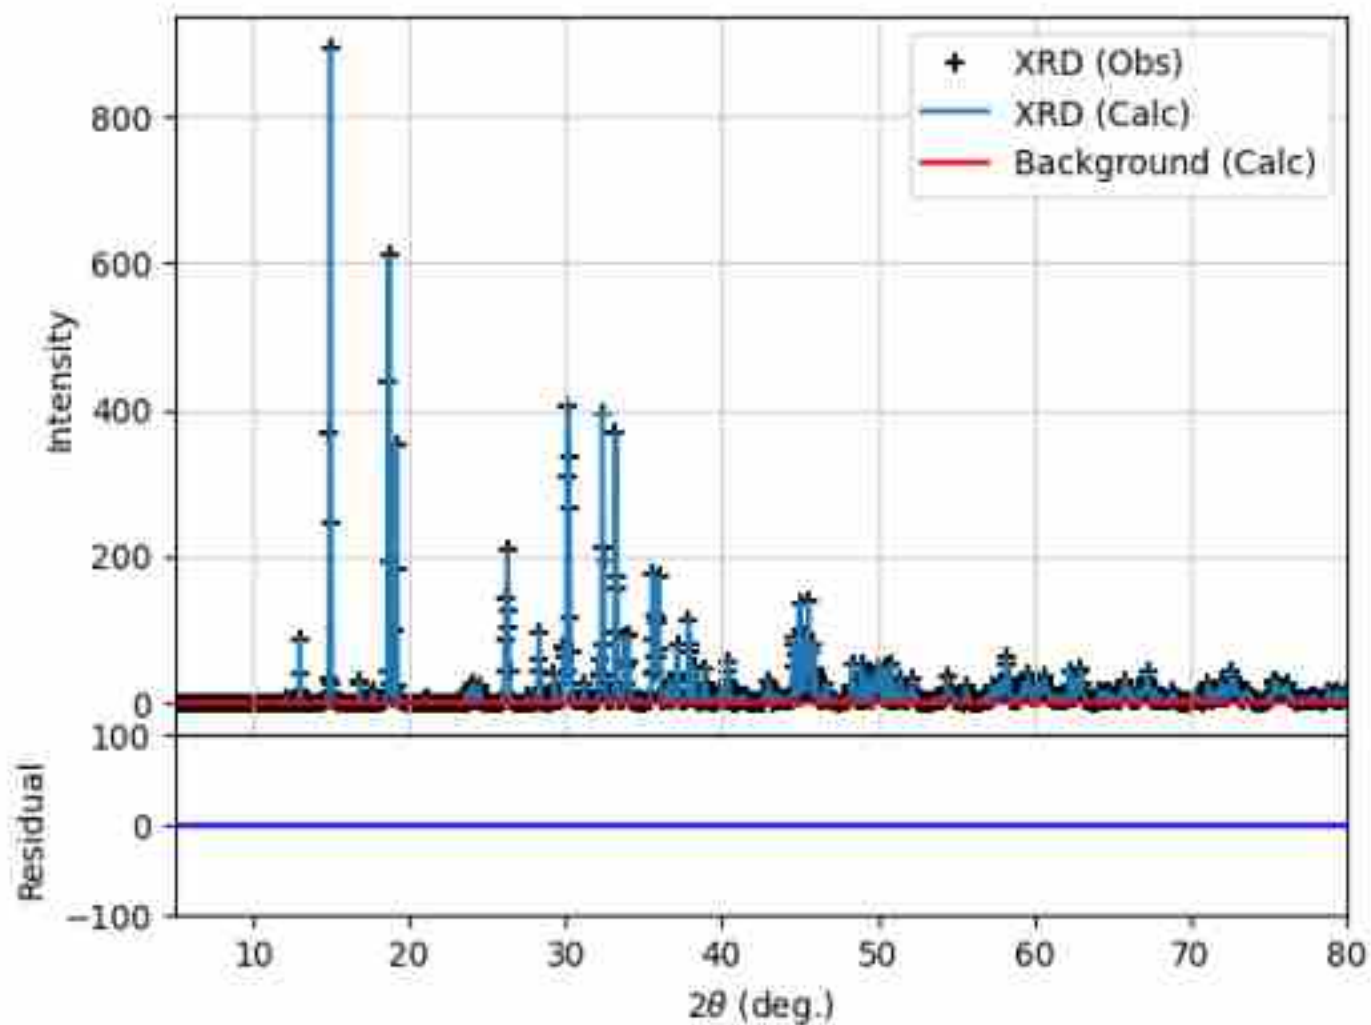

| RMSE before RR | Rwp     | RMSE after RR |
|----------------|---------|---------------|
| 0.017          | 0.00271 | 0.00025       |

# Ba3Lu2Mo1O9

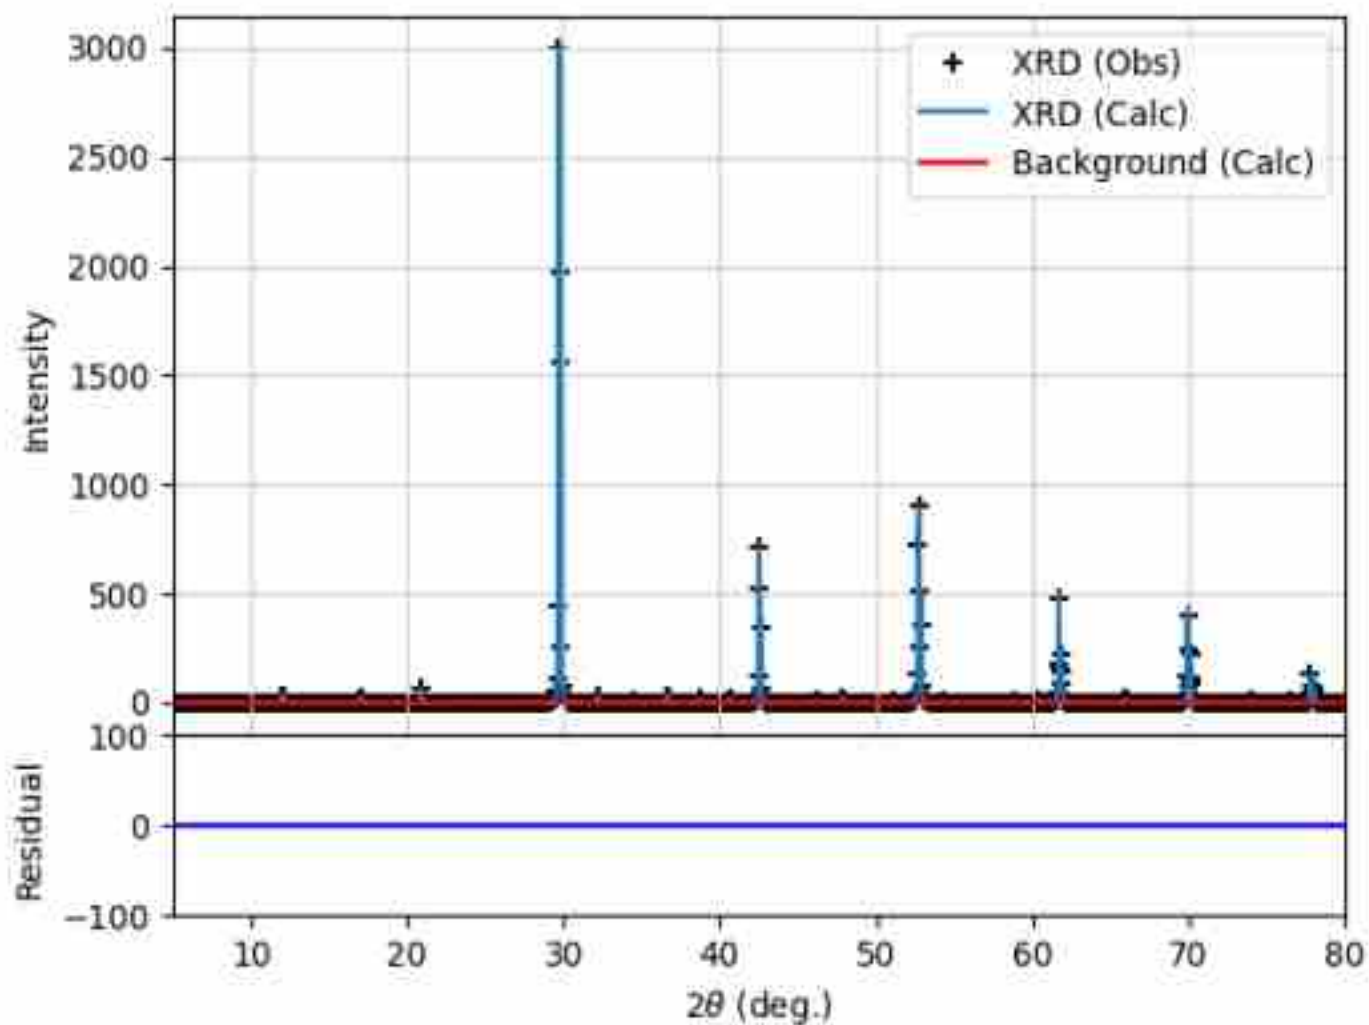

| RMSE before RR | Rwp     | RMSE after RR |
|----------------|---------|---------------|
| 0.017          | 0.00576 | 0.00316       |

# Ba<sub>3</sub>Ta<sub>2</sub>Cd<sub>1</sub>O<sub>9</sub>

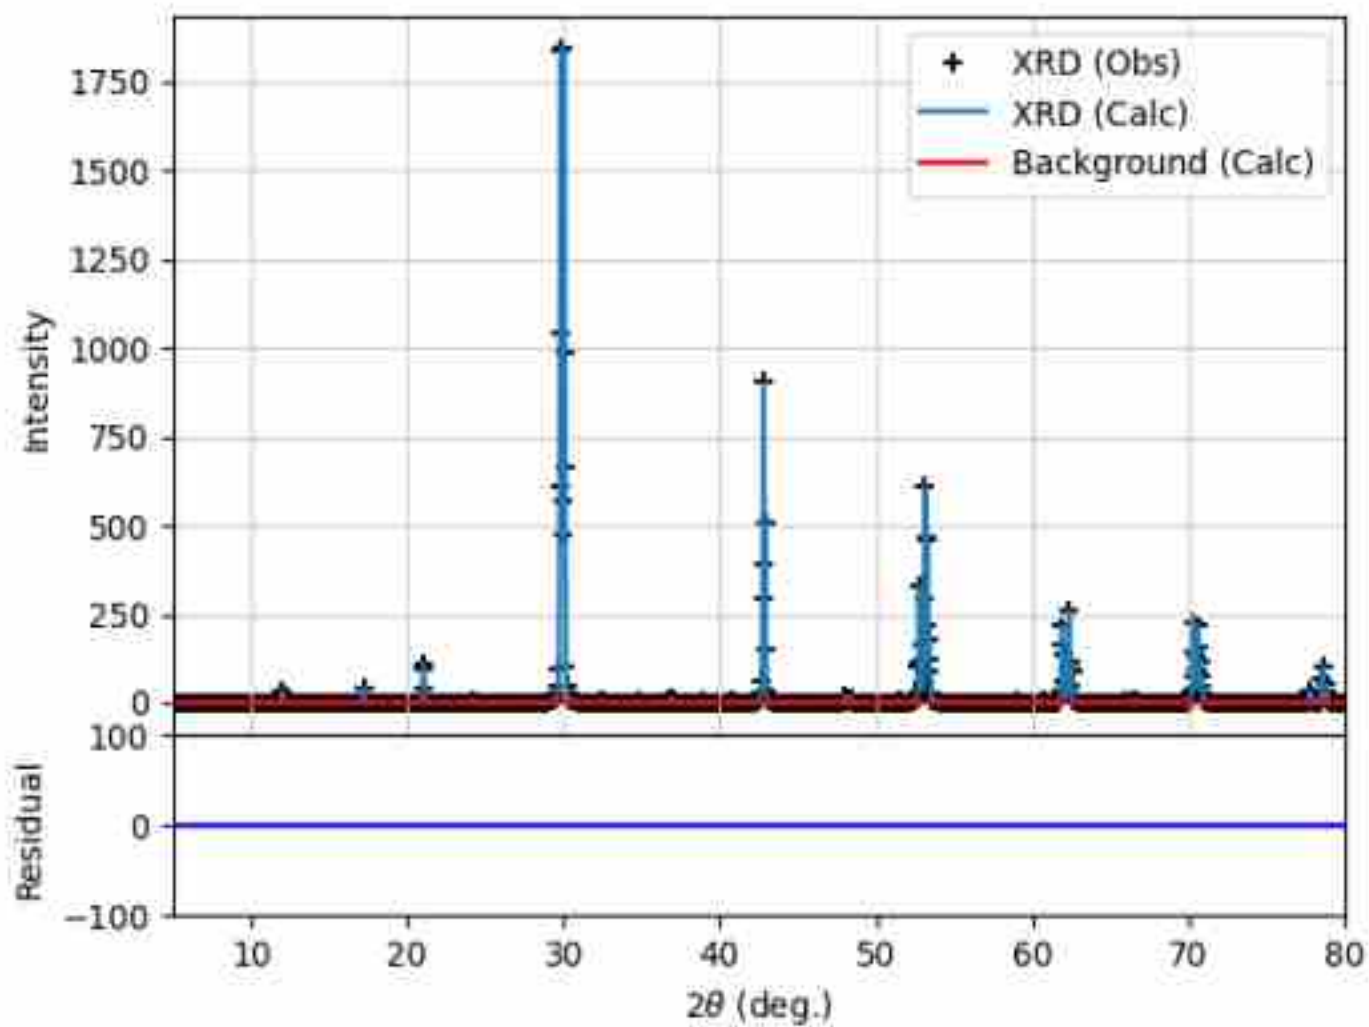

| RMSE before RR | Rwp     | RMSE after RR |
|----------------|---------|---------------|
| 0.017          | 0.00327 | 0.00164       |

# Ba<sub>4</sub>Ce<sub>2</sub>Bi<sub>2</sub>O<sub>12</sub>

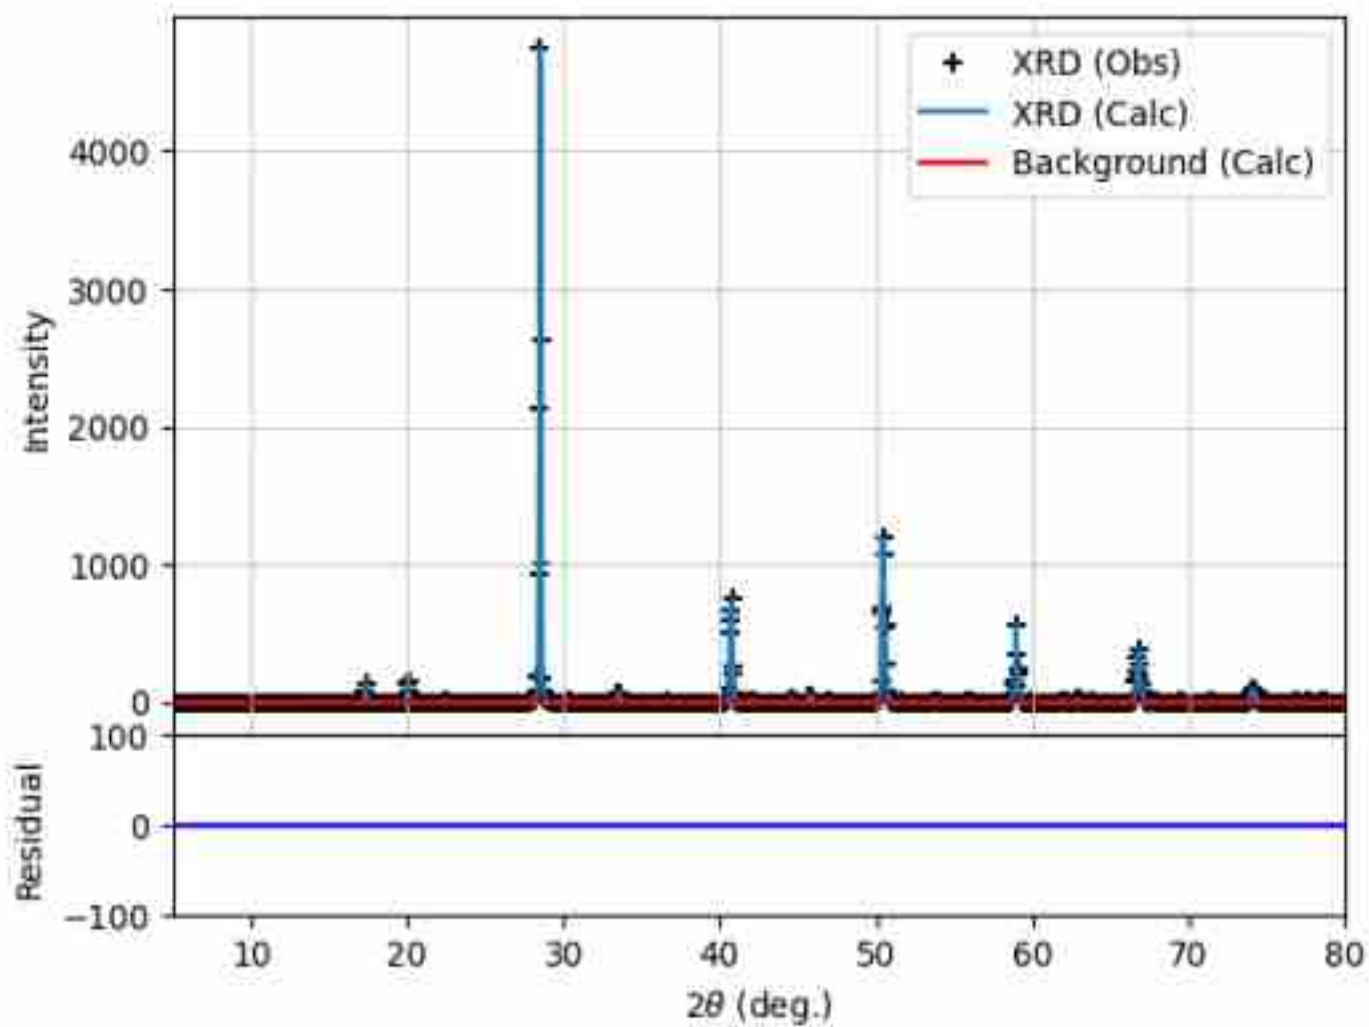

| RMSE before RR | Rwp     | RMSE after RR |
|----------------|---------|---------------|
| 0.017          | 0.00231 | 0.00146       |

# Ba<sub>4</sub>Sm<sub>2</sub>Ga<sub>2</sub>Se<sub>10</sub>

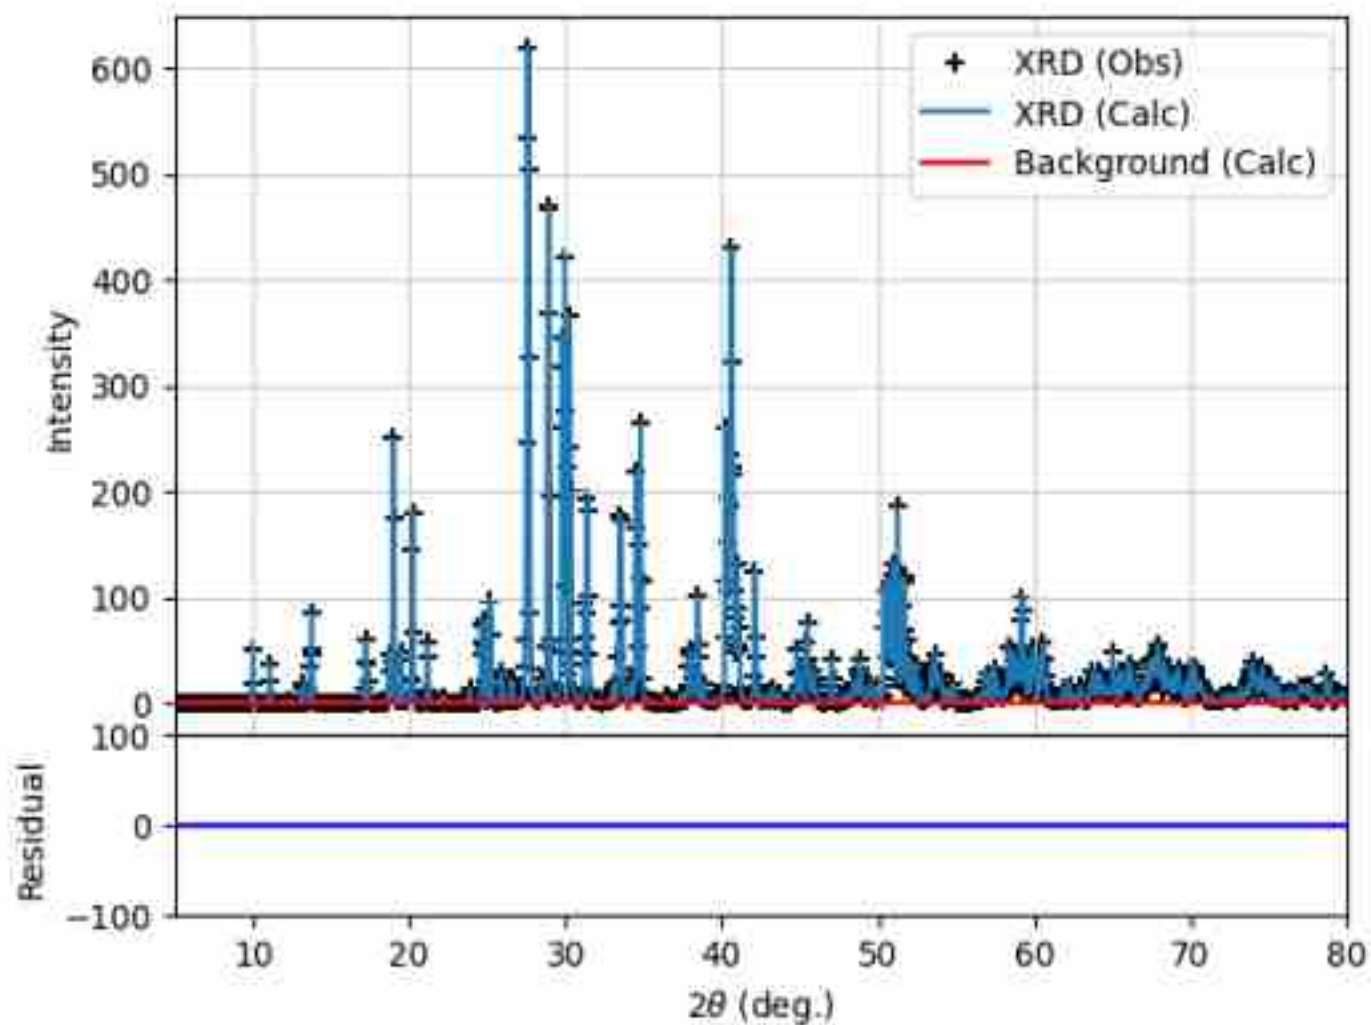

| RMSE before RR | Rwp     | RMSE after RR |
|----------------|---------|---------------|
| 0.017          | 0.00048 | 0.0001        |

# Be5Co1

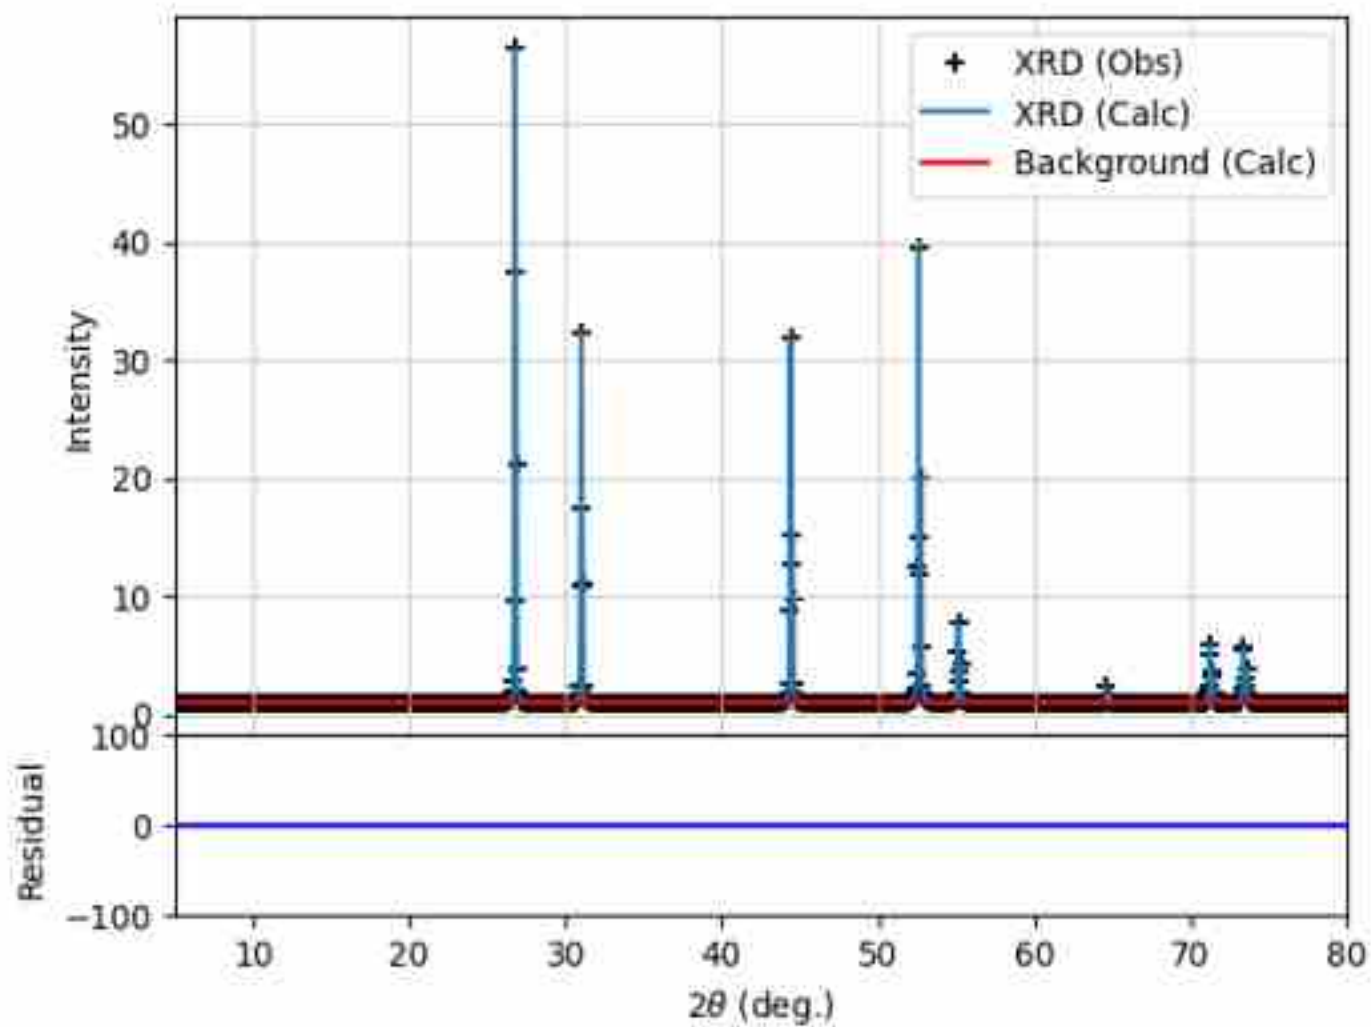

| RMSE before RR | Rwp     | RMSE after RR |
|----------------|---------|---------------|
| 0.017          | 0.00171 | 0.00209       |

# Bi2Pd1

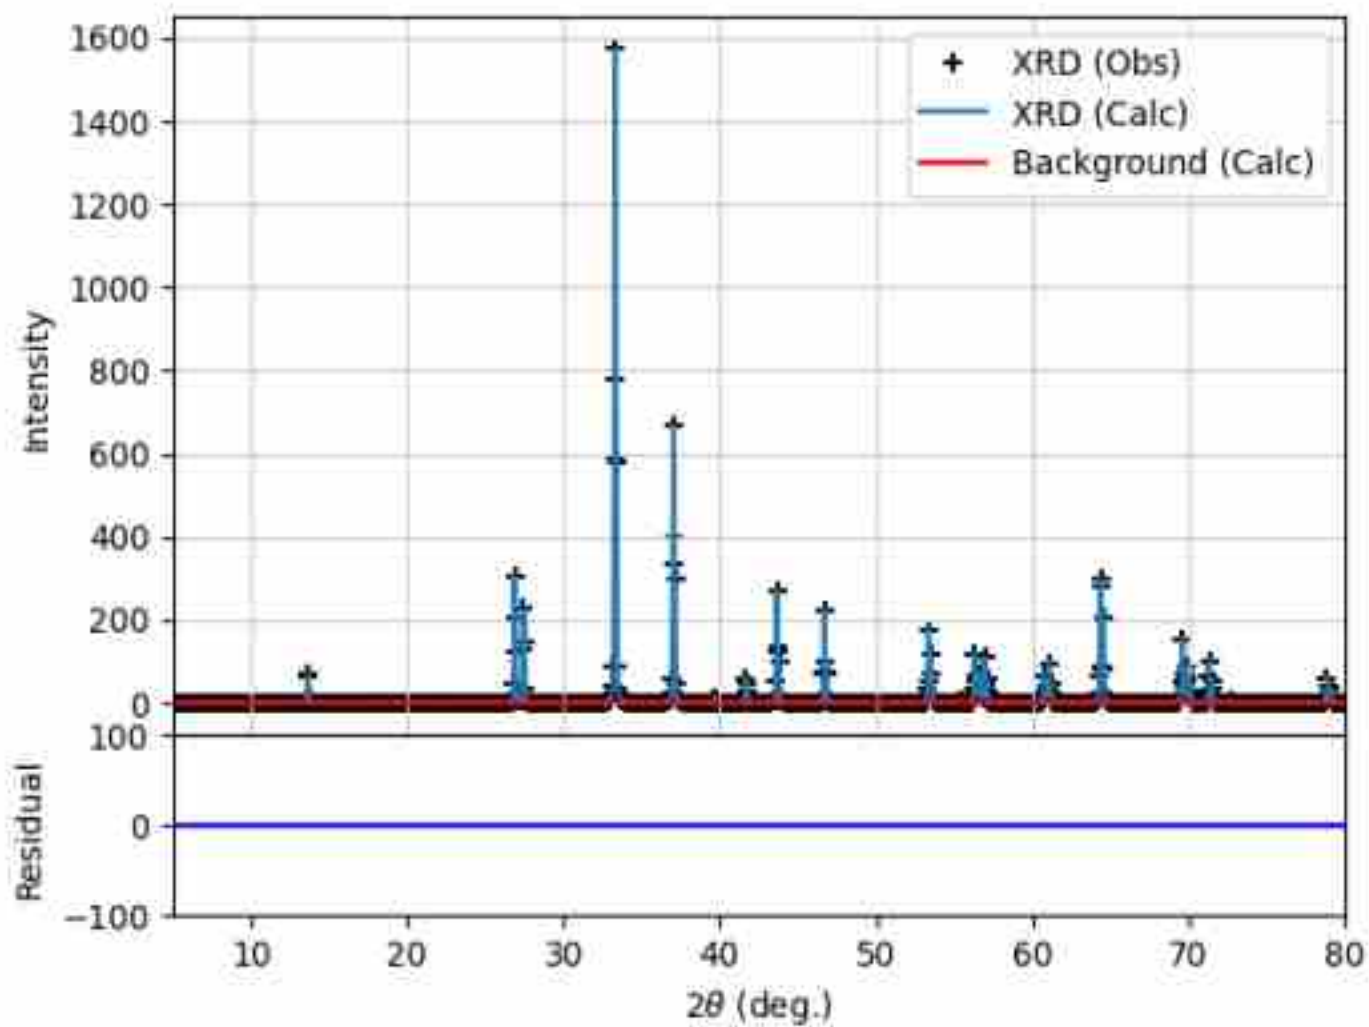

| RMSE before RR | Rwp     | RMSE after RR |
|----------------|---------|---------------|
| 0.017          | 0.01483 | 0.00106       |



# Bi<sub>4</sub>Te<sub>4</sub>Pt<sub>4</sub>

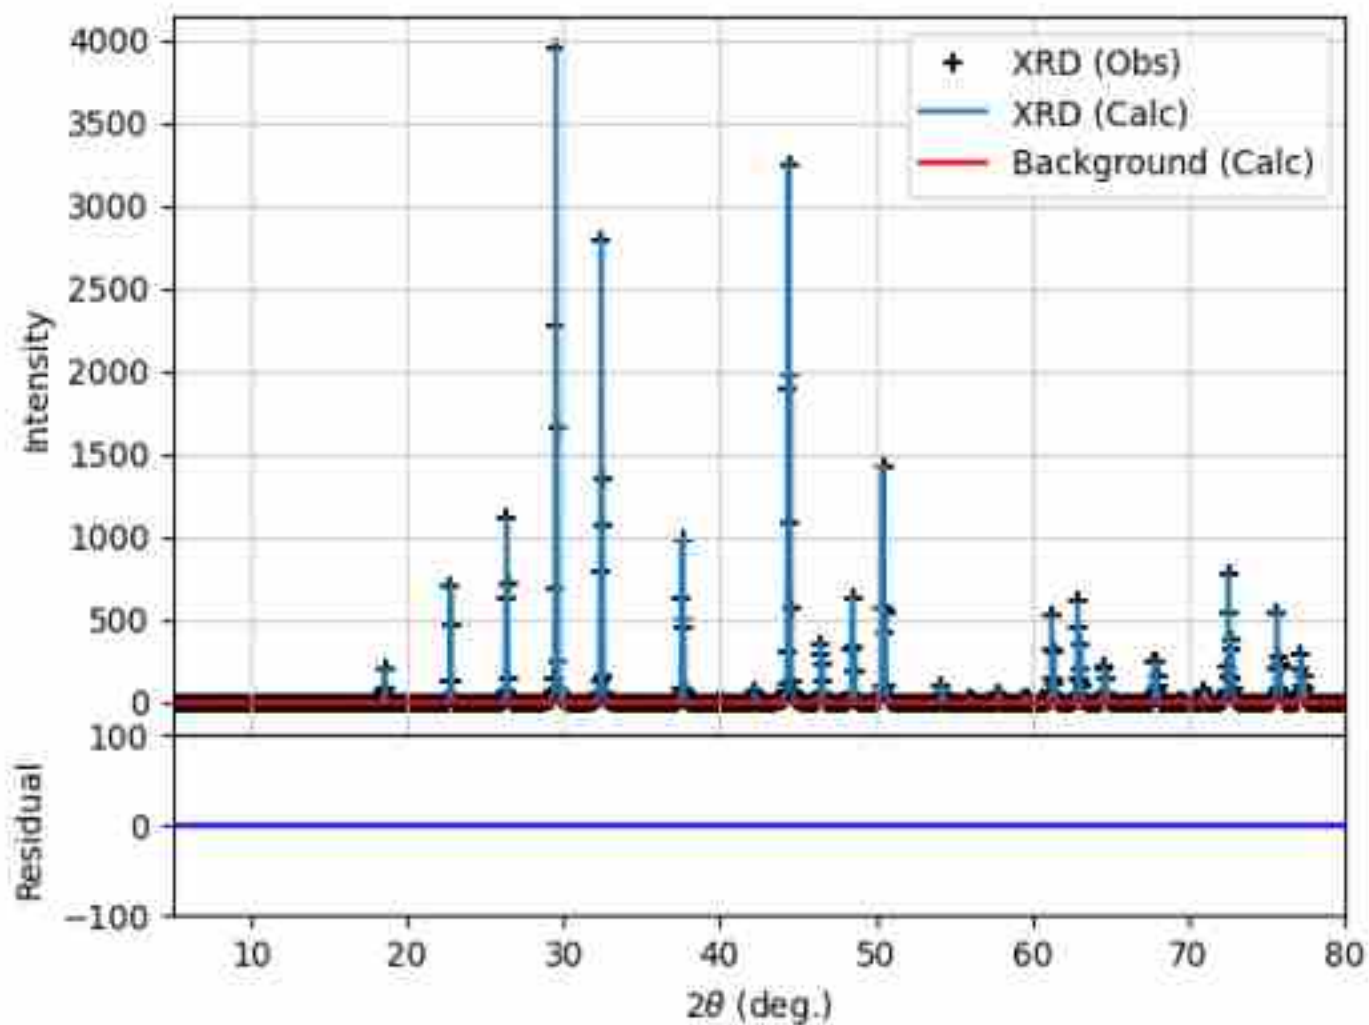

| RMSE before RR | Rwp     | RMSE after RR |
|----------------|---------|---------------|
| 0.017          | 0.01013 | 0.00073       |

# Ca<sub>1</sub>As<sub>2</sub>O<sub>6</sub>

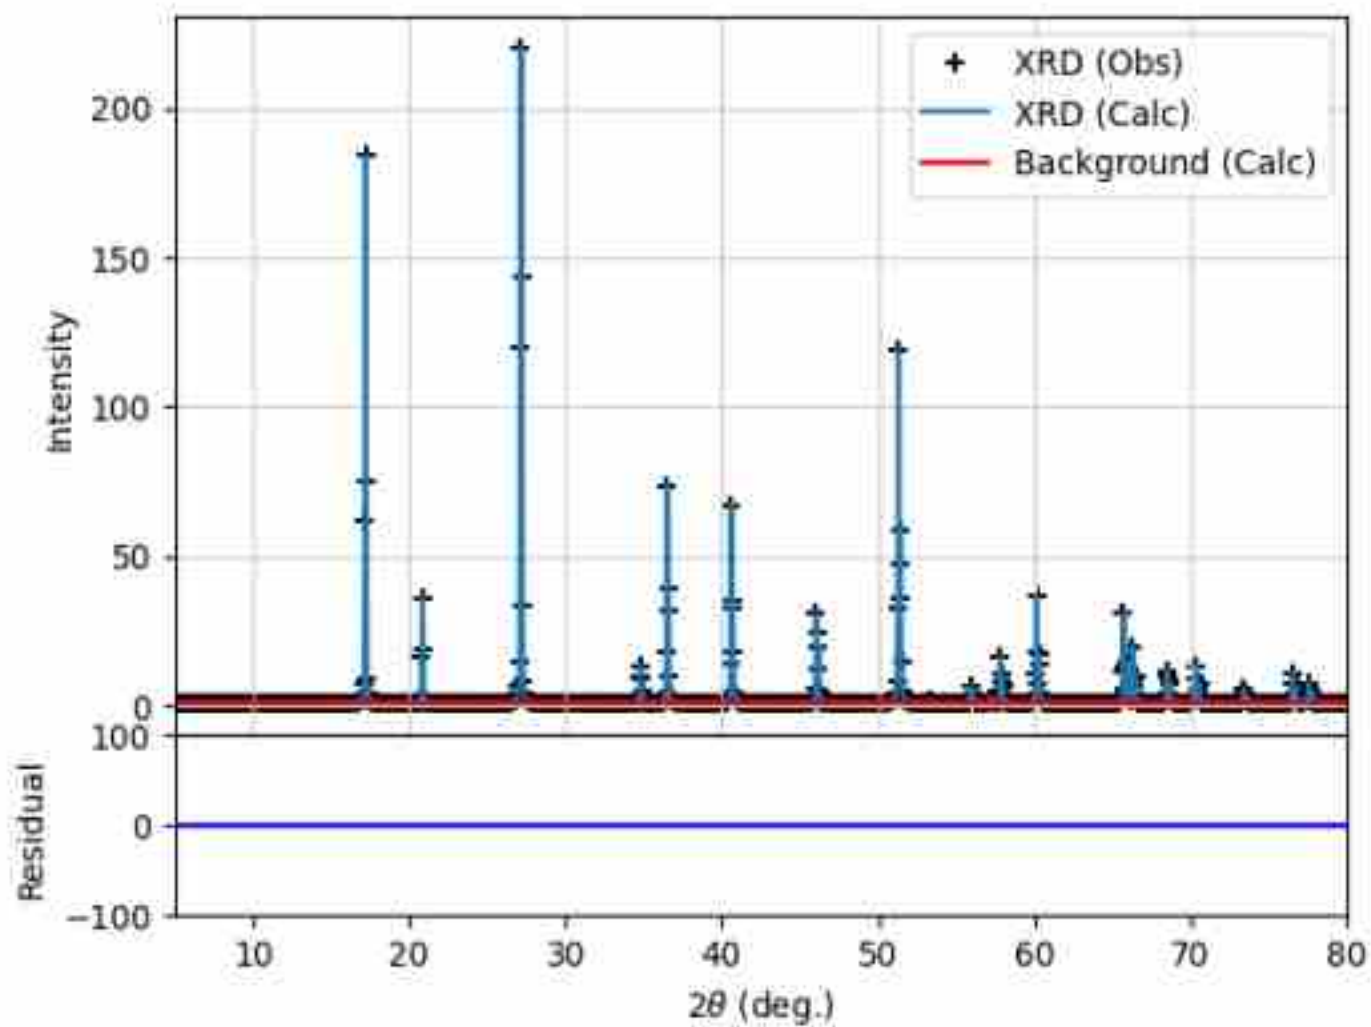

| RMSE before RR | Rwp     | RMSE after RR |
|----------------|---------|---------------|
| 0.017          | 0.00235 | 0.00136       |

# Ca1Cr1F6

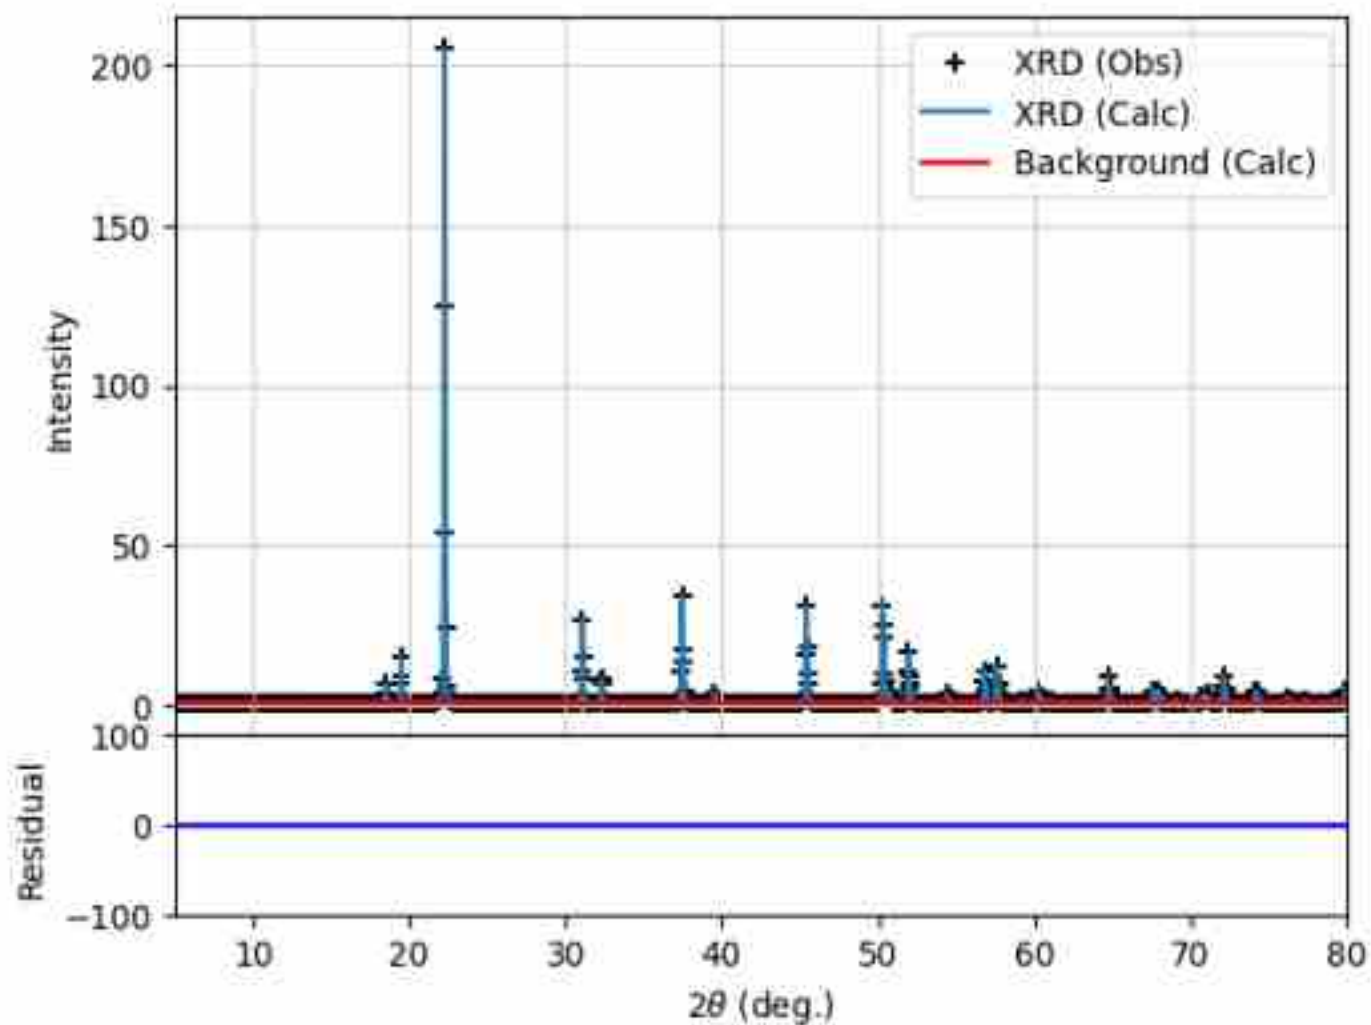

| RMSE before RR | Rwp     | RMSE after RR |
|----------------|---------|---------------|
| 0.017          | 0.00164 | 0.0005        |

# Ca1W1F6

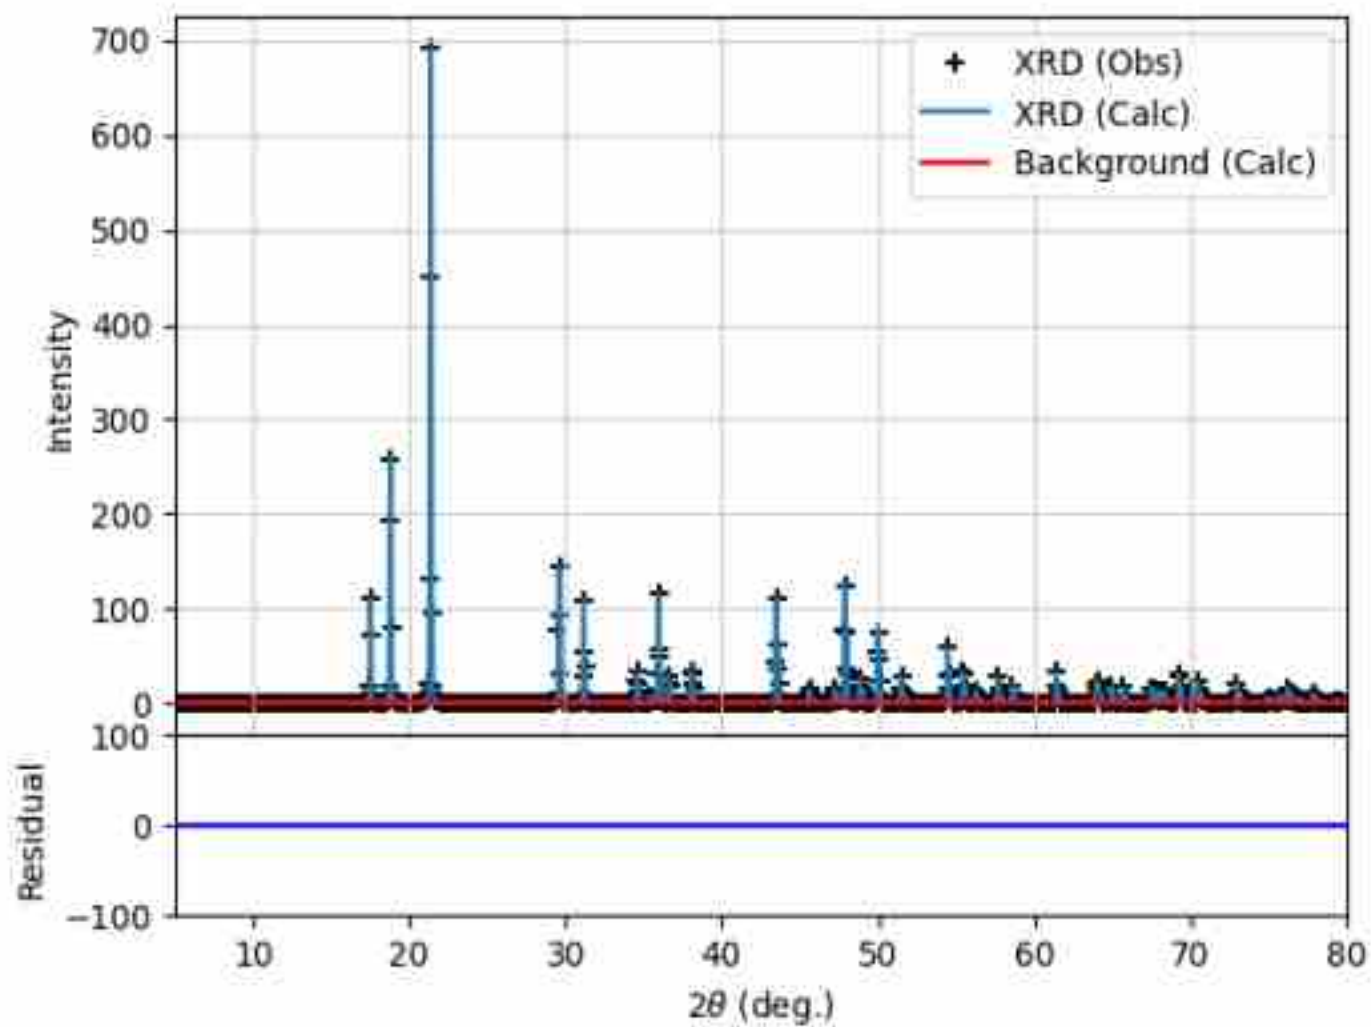

| RMSE before RR | Rwp     | RMSE after RR |
|----------------|---------|---------------|
| 0.017          | 0.00305 | 0.00131       |

# Ca<sub>2</sub>Fe<sub>2</sub>Si<sub>2</sub>O<sub>10</sub>

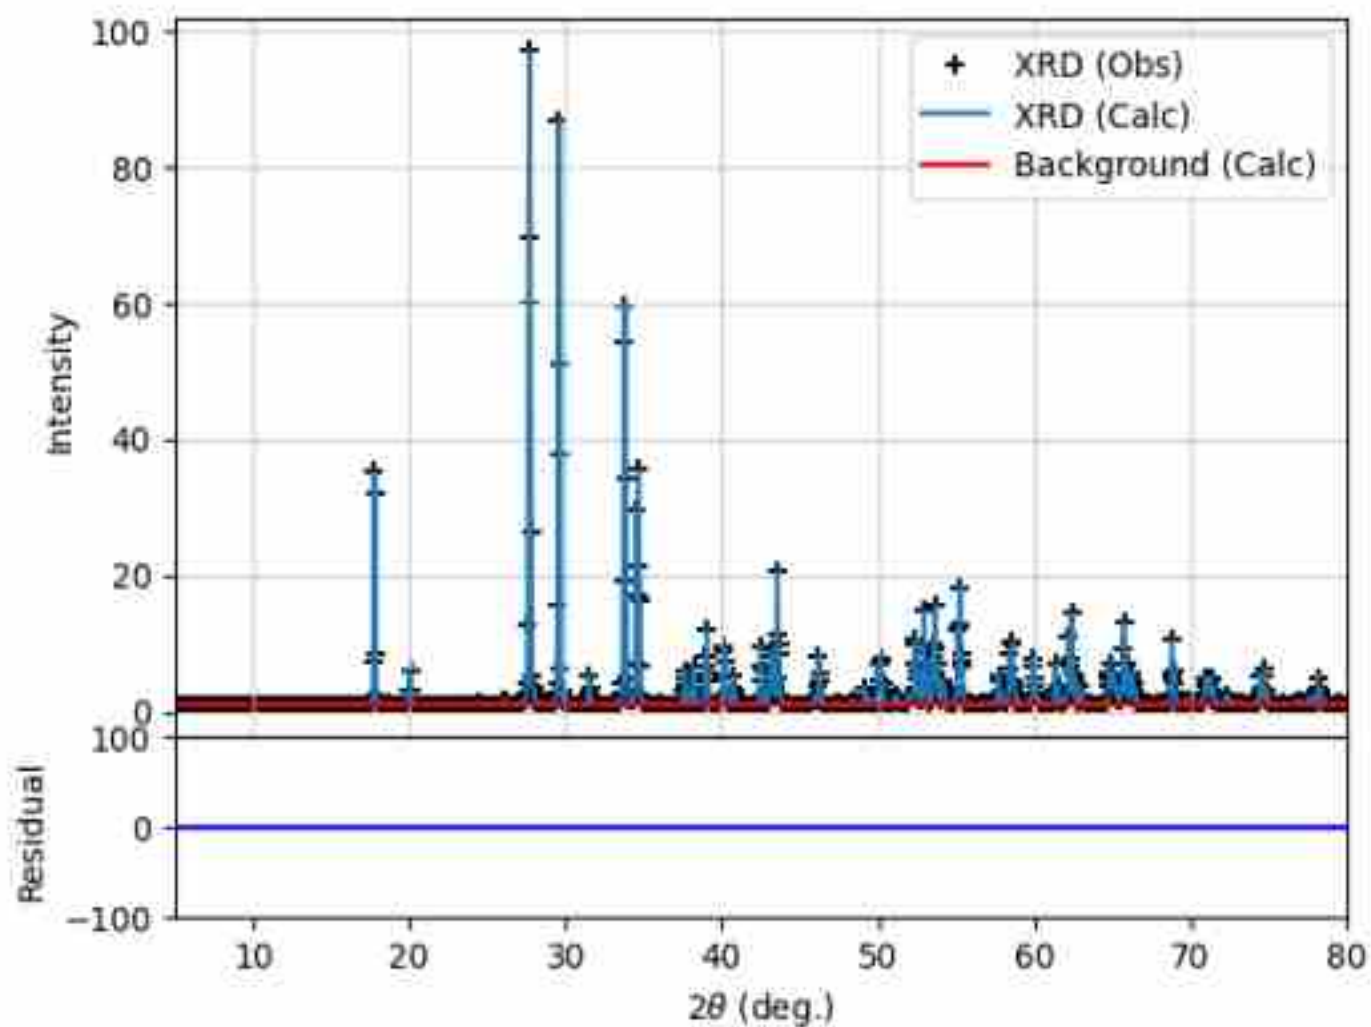

| RMSE before RR | Rwp     | RMSE after RR |
|----------------|---------|---------------|
| 0.017          | 0.00137 | 0.00035       |

# Ca<sub>3</sub>Cd<sub>3</sub>Ge<sub>3</sub>

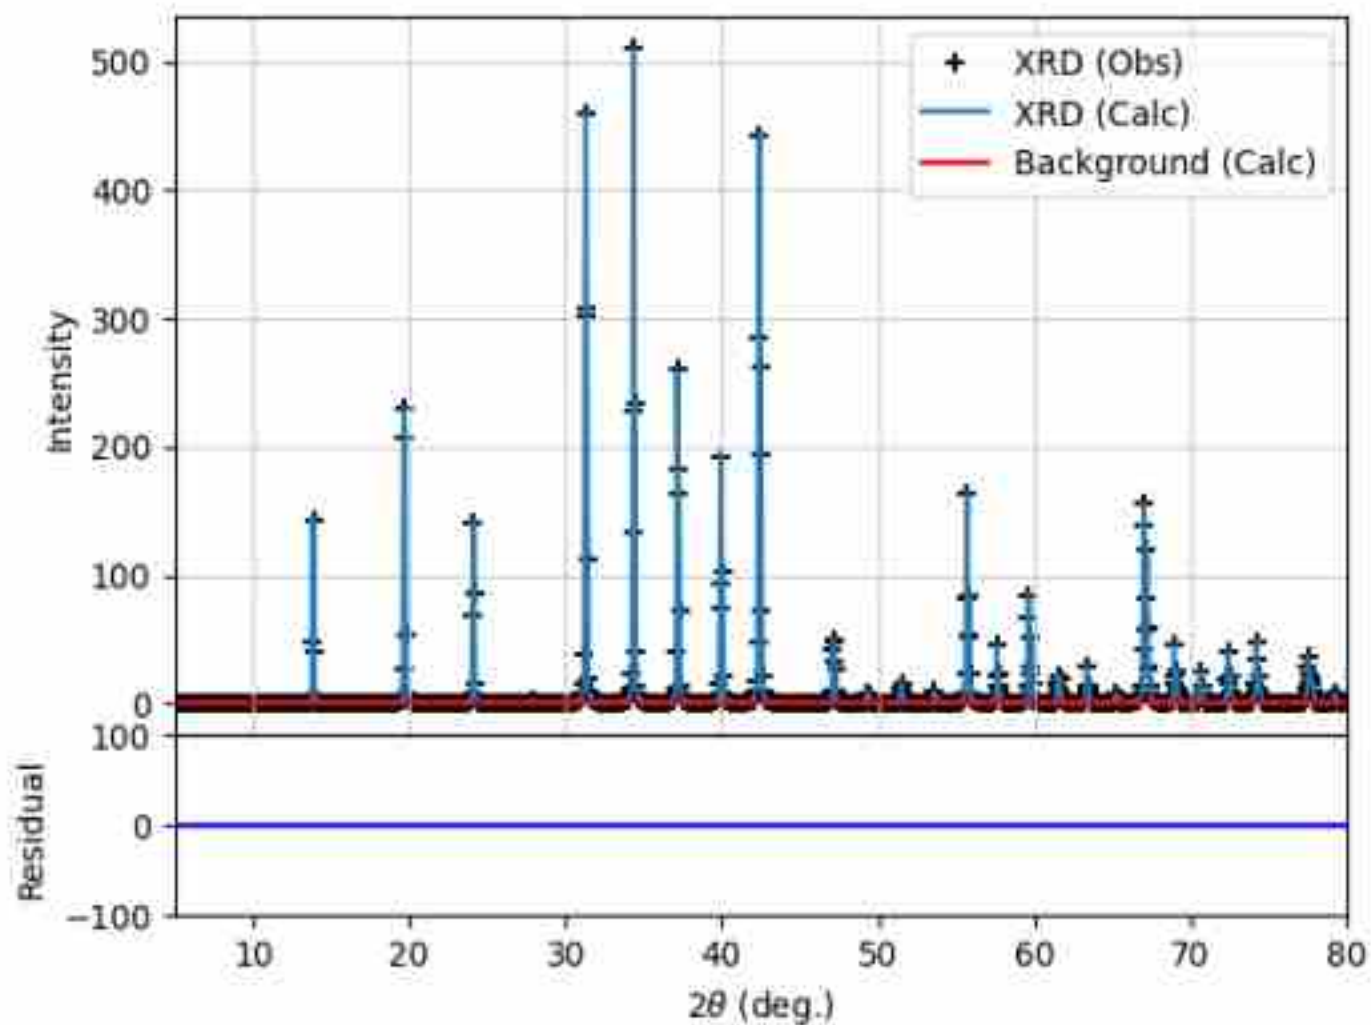

| RMSE before RR | Rwp     | RMSE after RR |
|----------------|---------|---------------|
| 0.017          | 0.00471 | 0.00083       |

# Ca<sub>4</sub>Al<sub>2</sub>Fe<sub>2</sub>O<sub>10</sub>

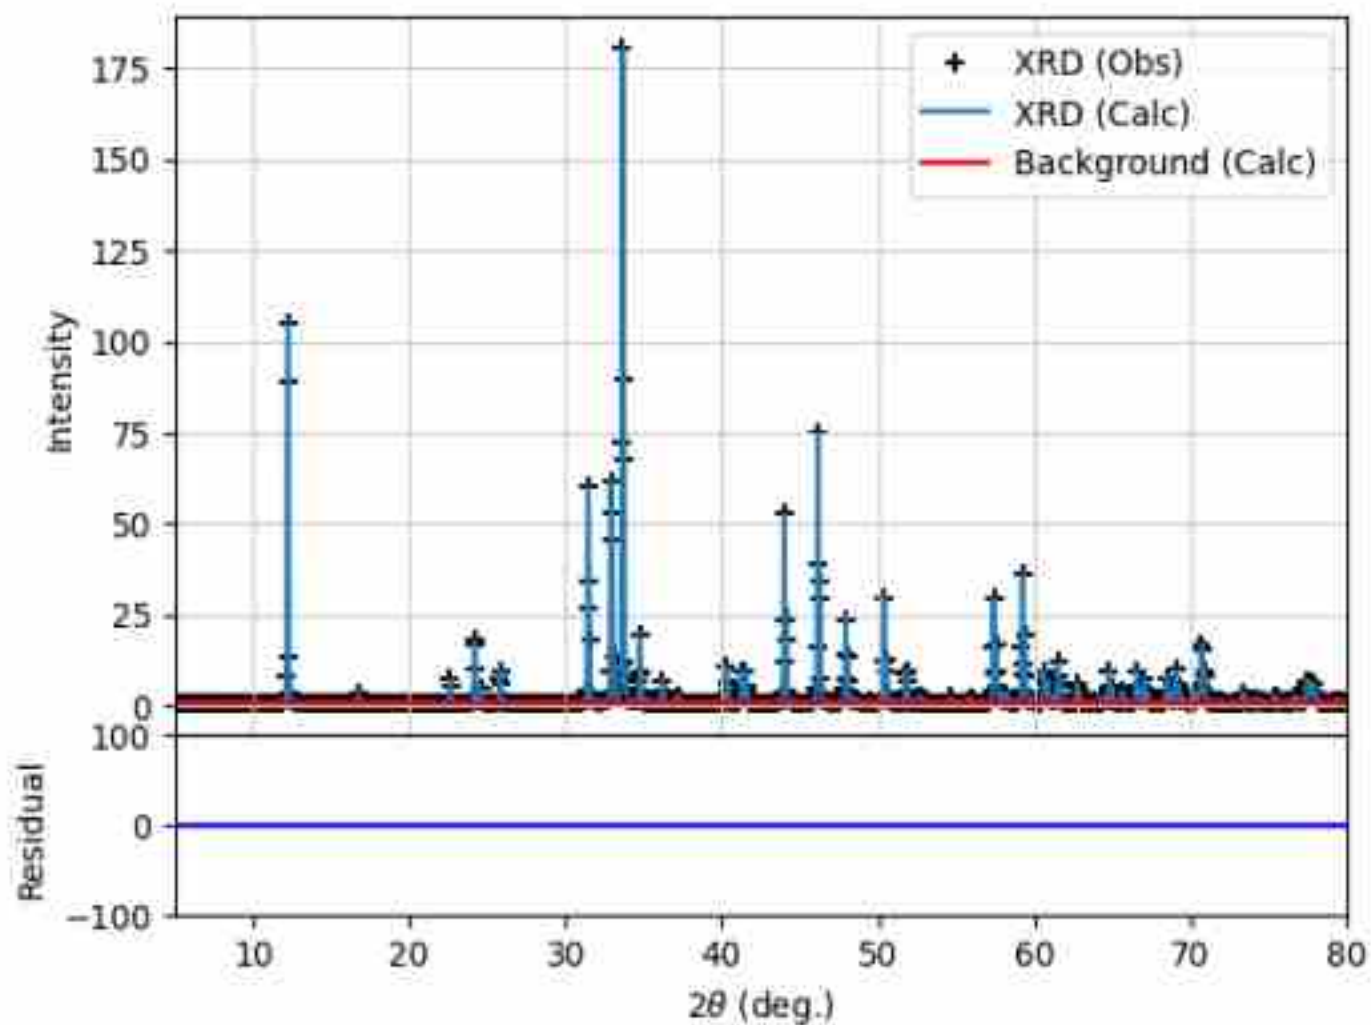

| RMSE before RR | Rwp    | RMSE after RR |
|----------------|--------|---------------|
| 0.017          | 0.0026 | 0.00048       |

# Ca<sub>4</sub>Cr<sub>2</sub>W<sub>2</sub>O<sub>12</sub>

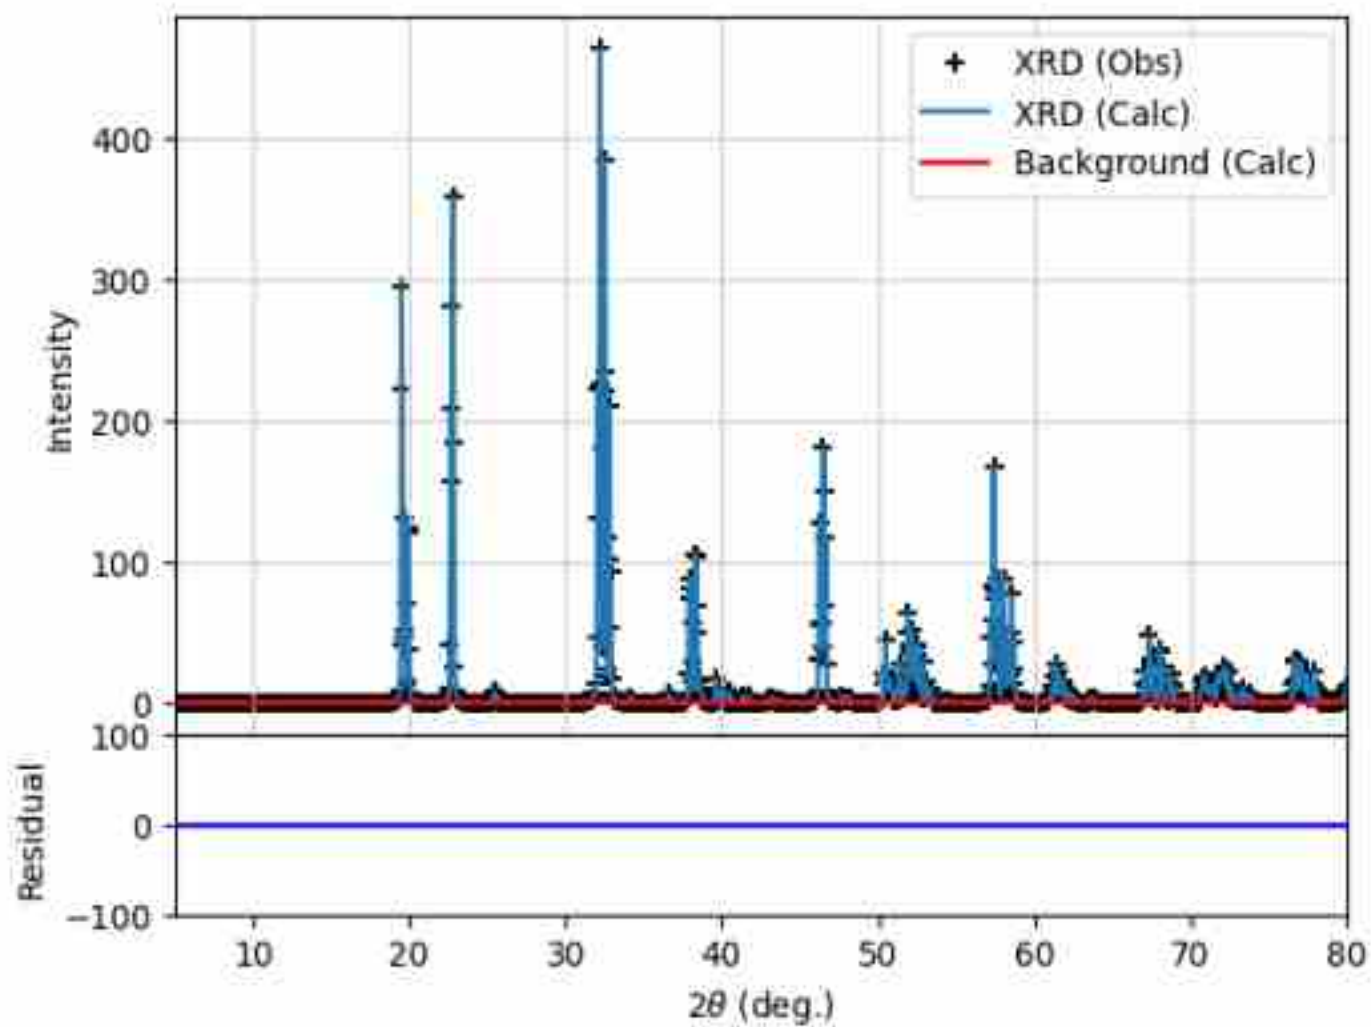

| RMSE before RR | Rwp     | RMSE after RR |
|----------------|---------|---------------|
| 0.017          | 0.00276 | 0.00104       |



# Ca<sub>4</sub>Mn<sub>2</sub>W<sub>2</sub>O<sub>12</sub>

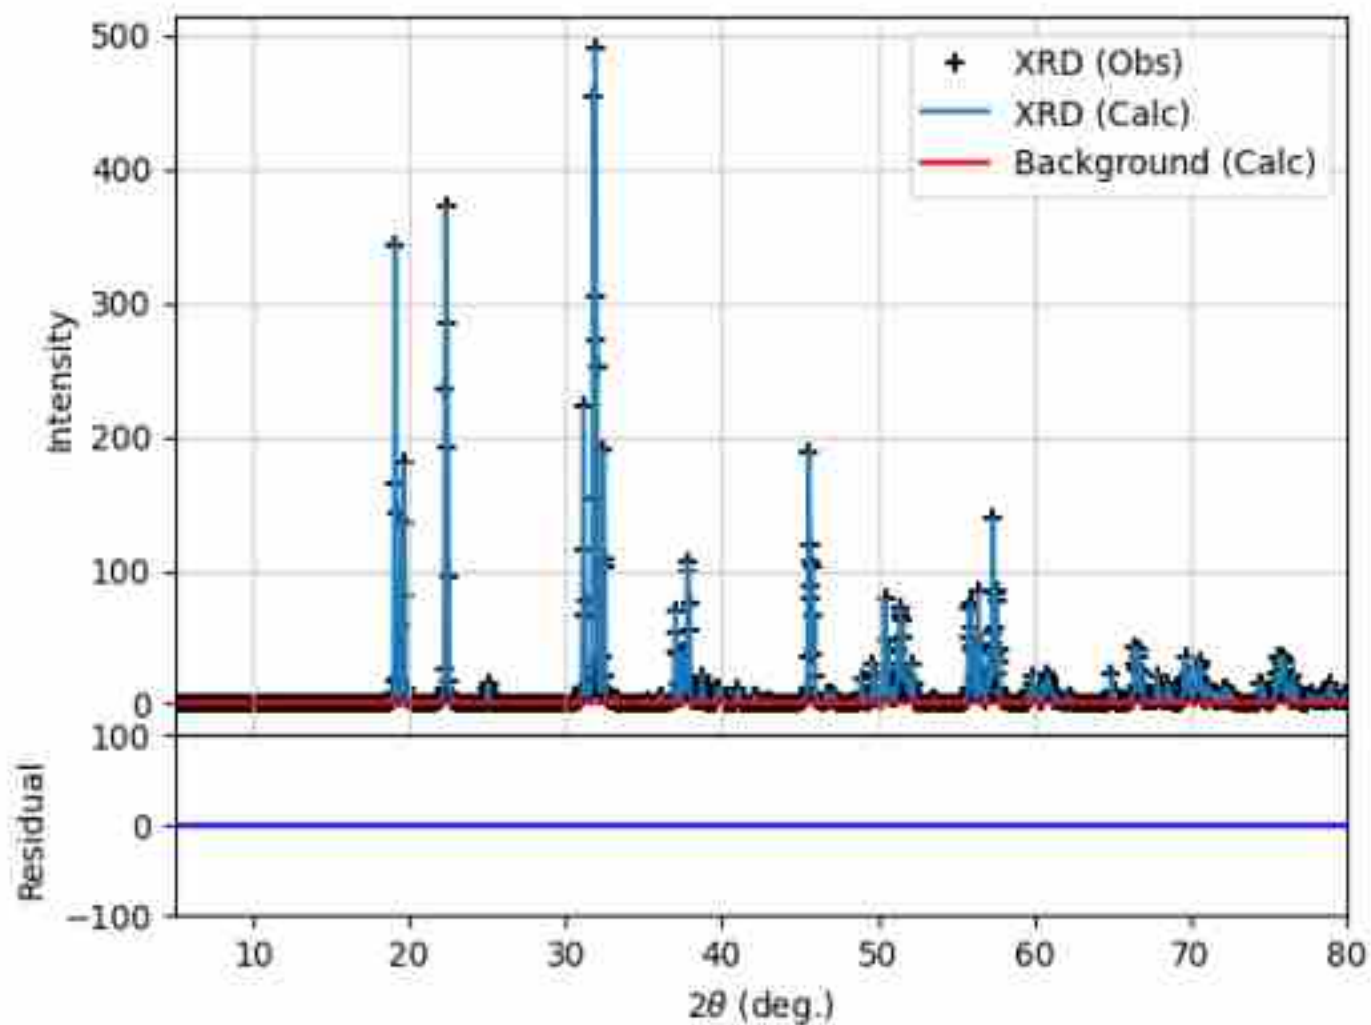

| RMSE before RR | Rwp    | RMSE after RR |
|----------------|--------|---------------|
| 0.017          | 0.0028 | 0.00102       |

# Ca<sub>4</sub>Sn<sub>2</sub>Ir<sub>2</sub>O<sub>12</sub>

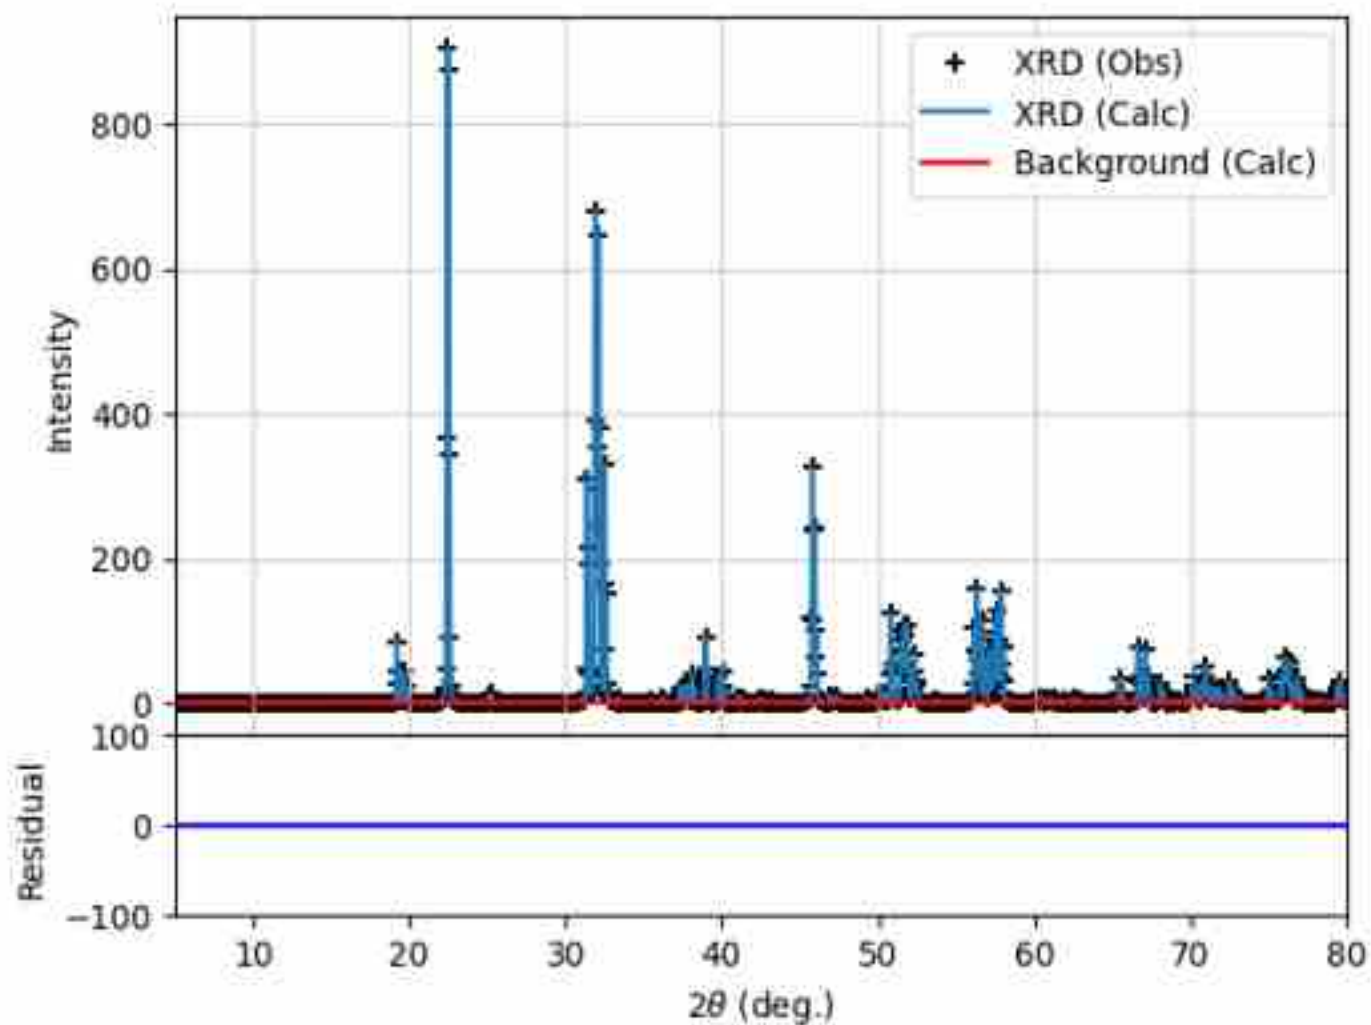

| RMSE before RR | Rwp     | RMSE after RR |
|----------------|---------|---------------|
| 0.017          | 0.00408 | 0.001         |

# Ca<sub>4</sub>Ti<sub>2</sub>Cr<sub>2</sub>O<sub>12</sub>

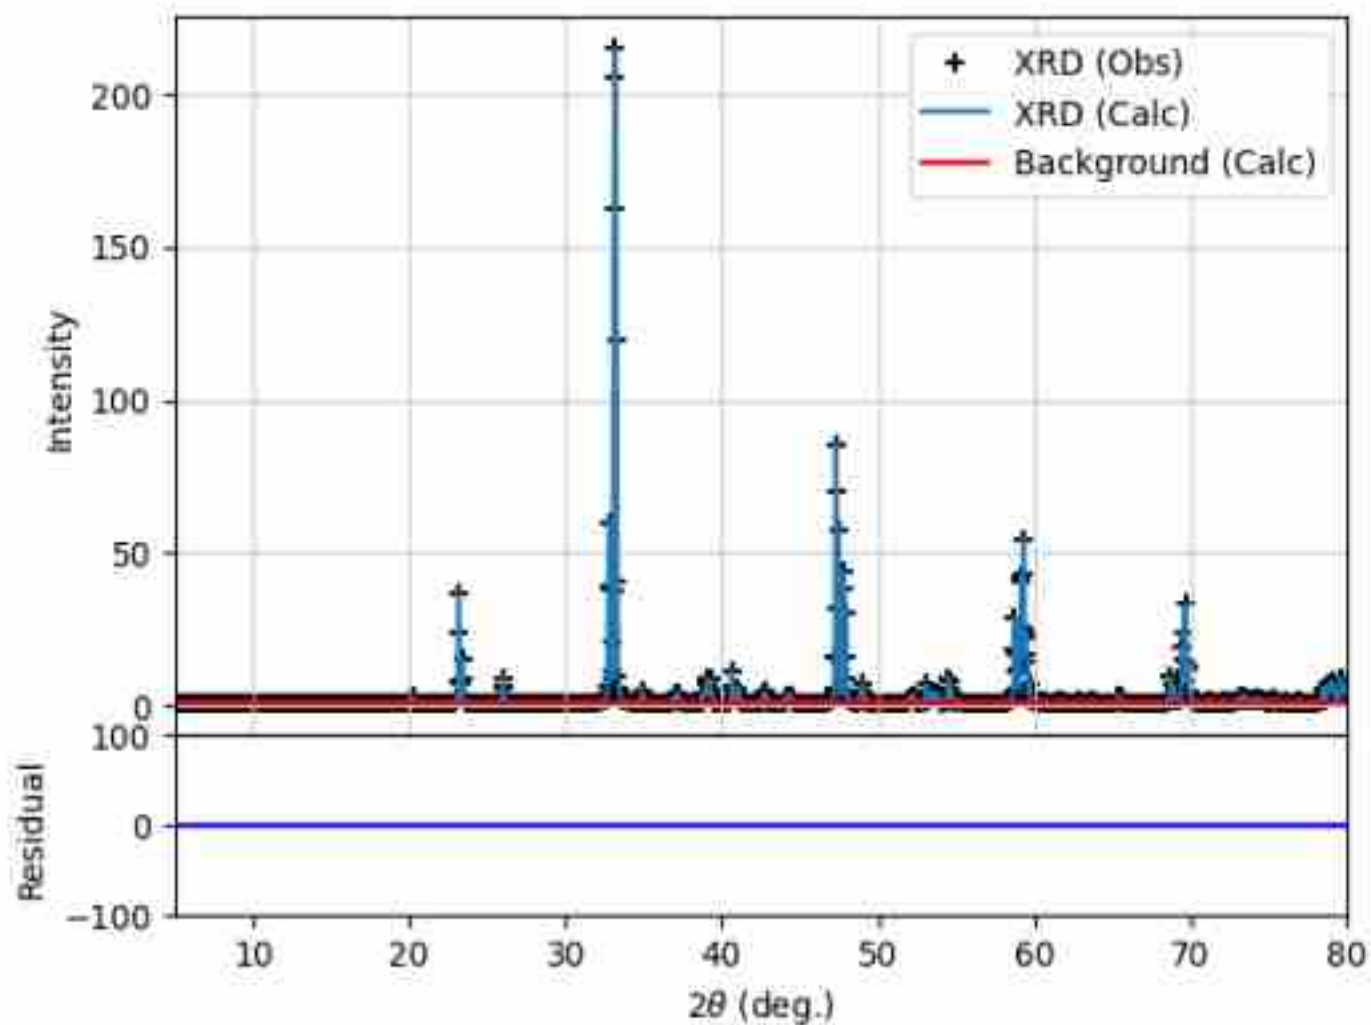

| RMSE before RR | Rwp     | RMSE after RR |
|----------------|---------|---------------|
| 0.017          | 0.00261 | 0.0011        |

# Cd<sub>2</sub>Si<sub>2</sub>P<sub>4</sub>

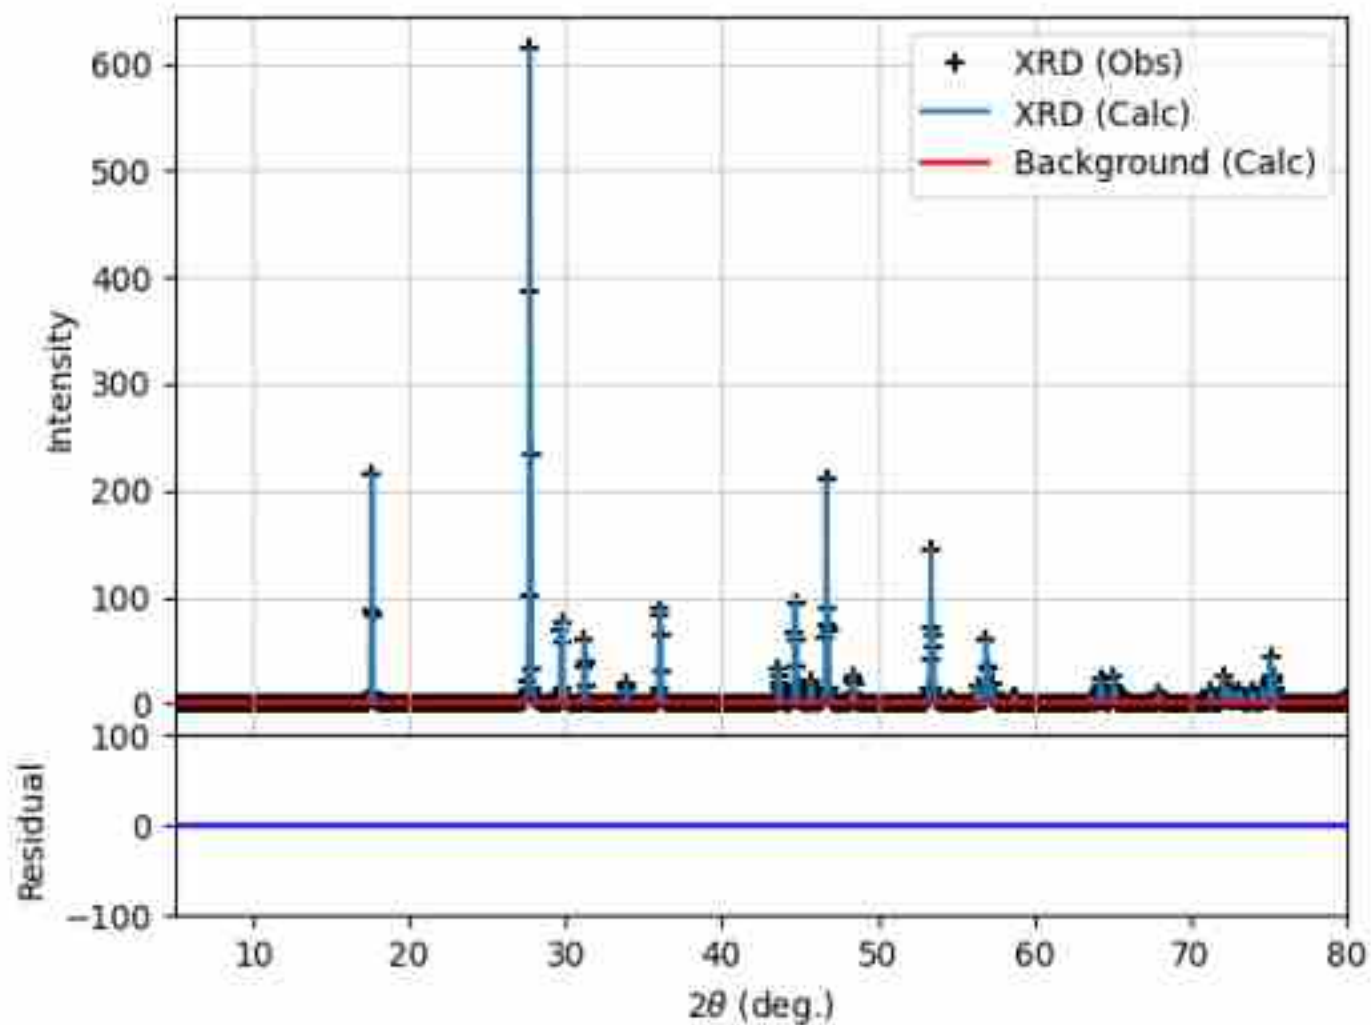

| RMSE before RR | Rwp     | RMSE after RR |
|----------------|---------|---------------|
| 0.017          | 0.00405 | 0.00062       |

# Ce1Th2O6

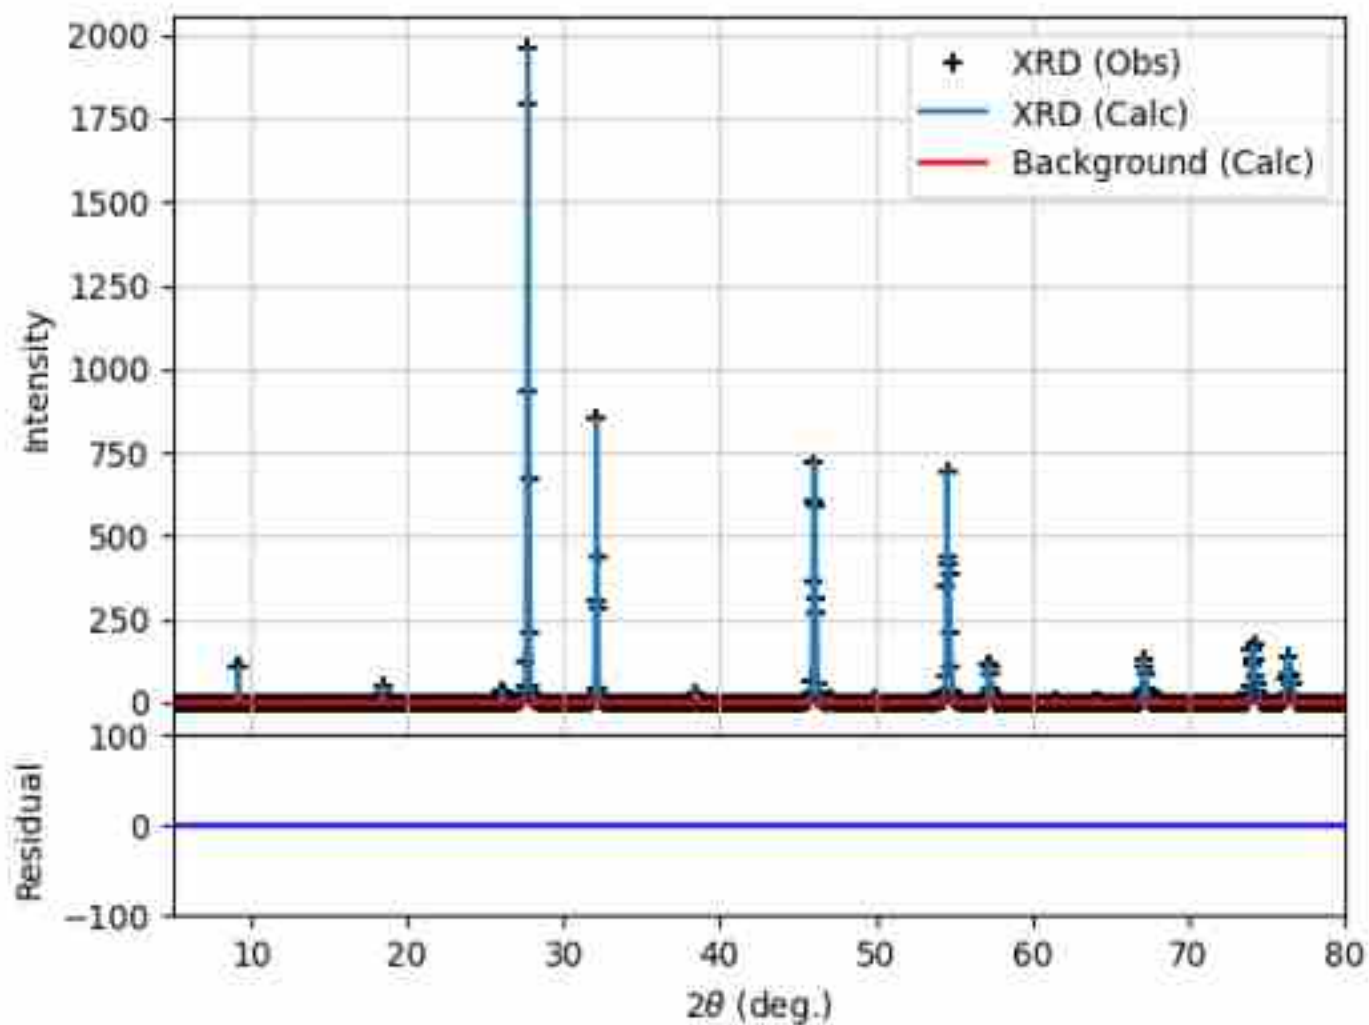

| RMSE before RR | Rwp     | RMSE after RR |
|----------------|---------|---------------|
| 0.017          | 0.00255 | 0.00157       |

# Ce<sub>2</sub>Co<sub>5</sub>Cu<sub>5</sub>

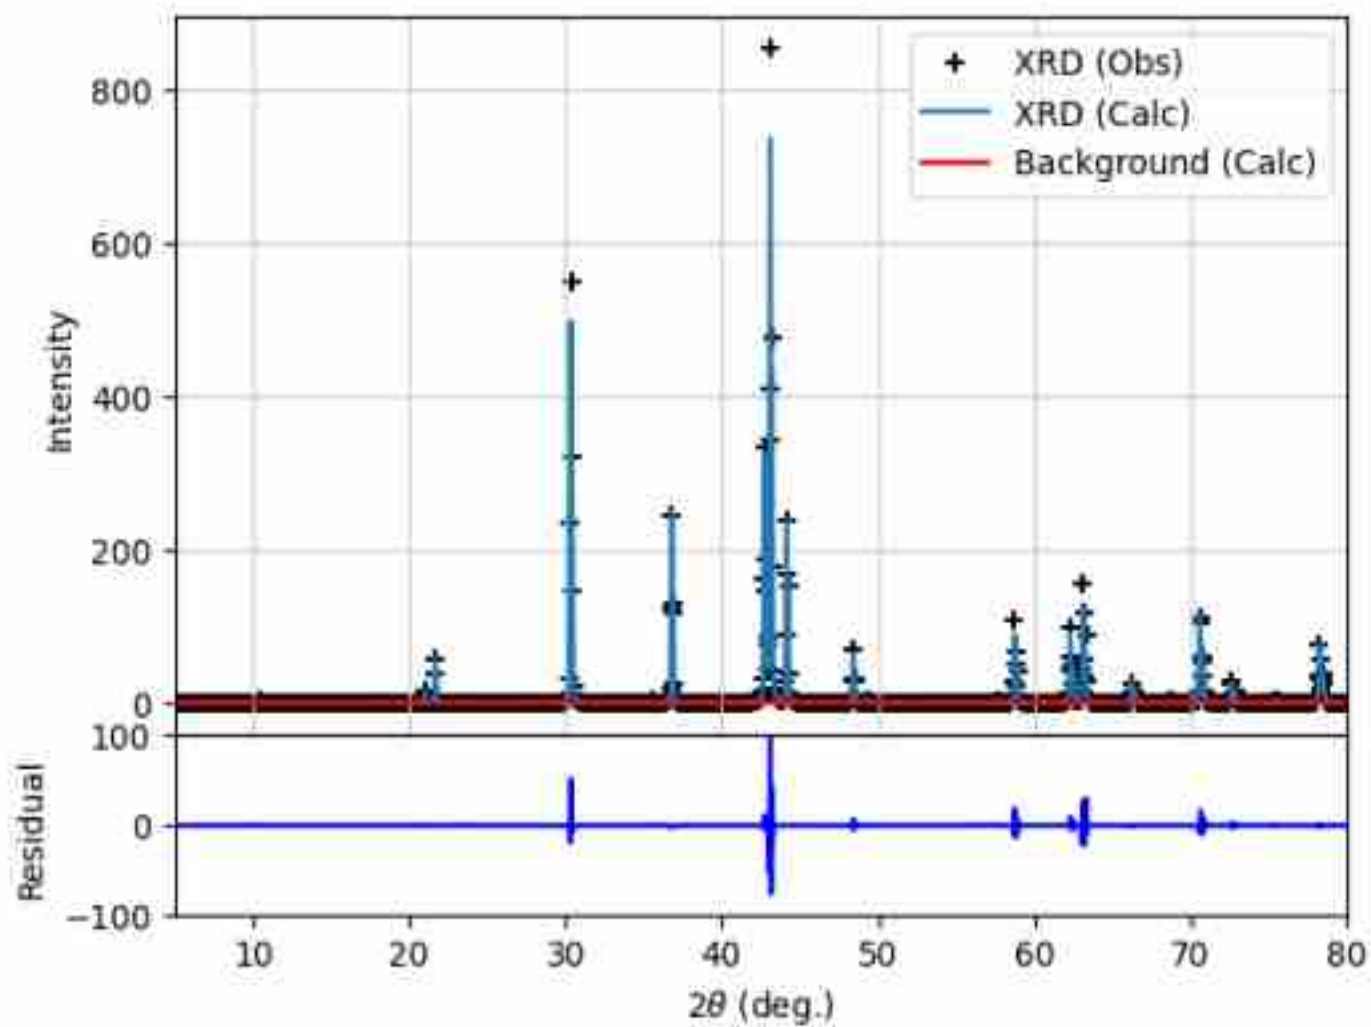

| RMSE before RR | Rwp      | RMSE after RR |
|----------------|----------|---------------|
| 0.017          | 11.36053 | 0.02228       |

# Ce<sub>2</sub>Cu<sub>1</sub>N<sub>2</sub>O<sub>2</sub>

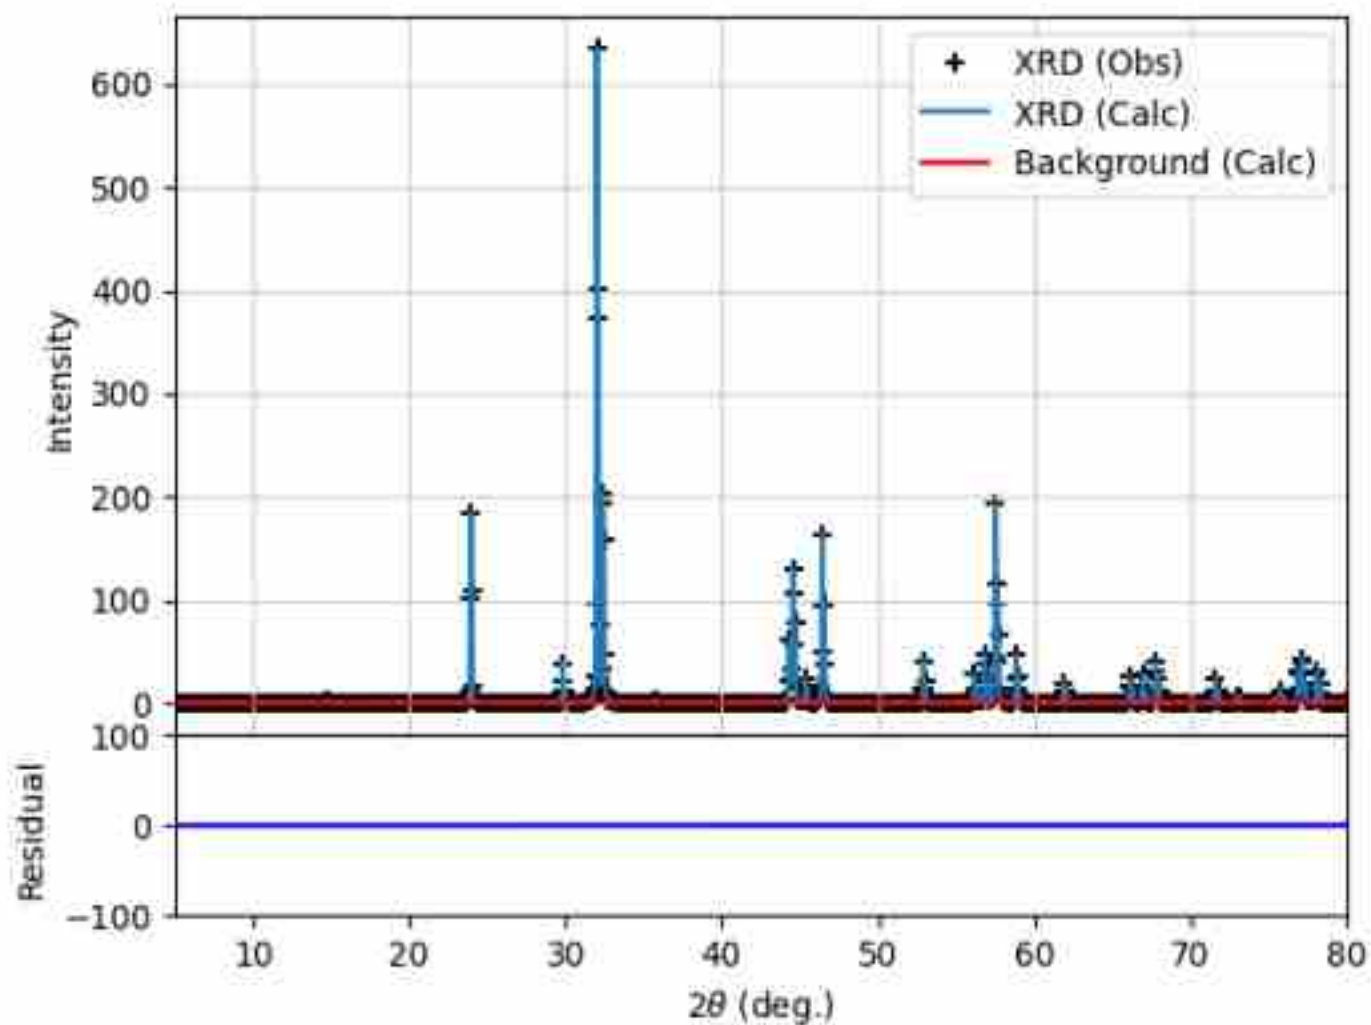

| RMSE before RR | Rwp     | RMSE after RR |
|----------------|---------|---------------|
| 0.017          | 1.57811 | 0.02959       |

# Ce<sub>2</sub>Mg<sub>1</sub>Co<sub>9</sub>

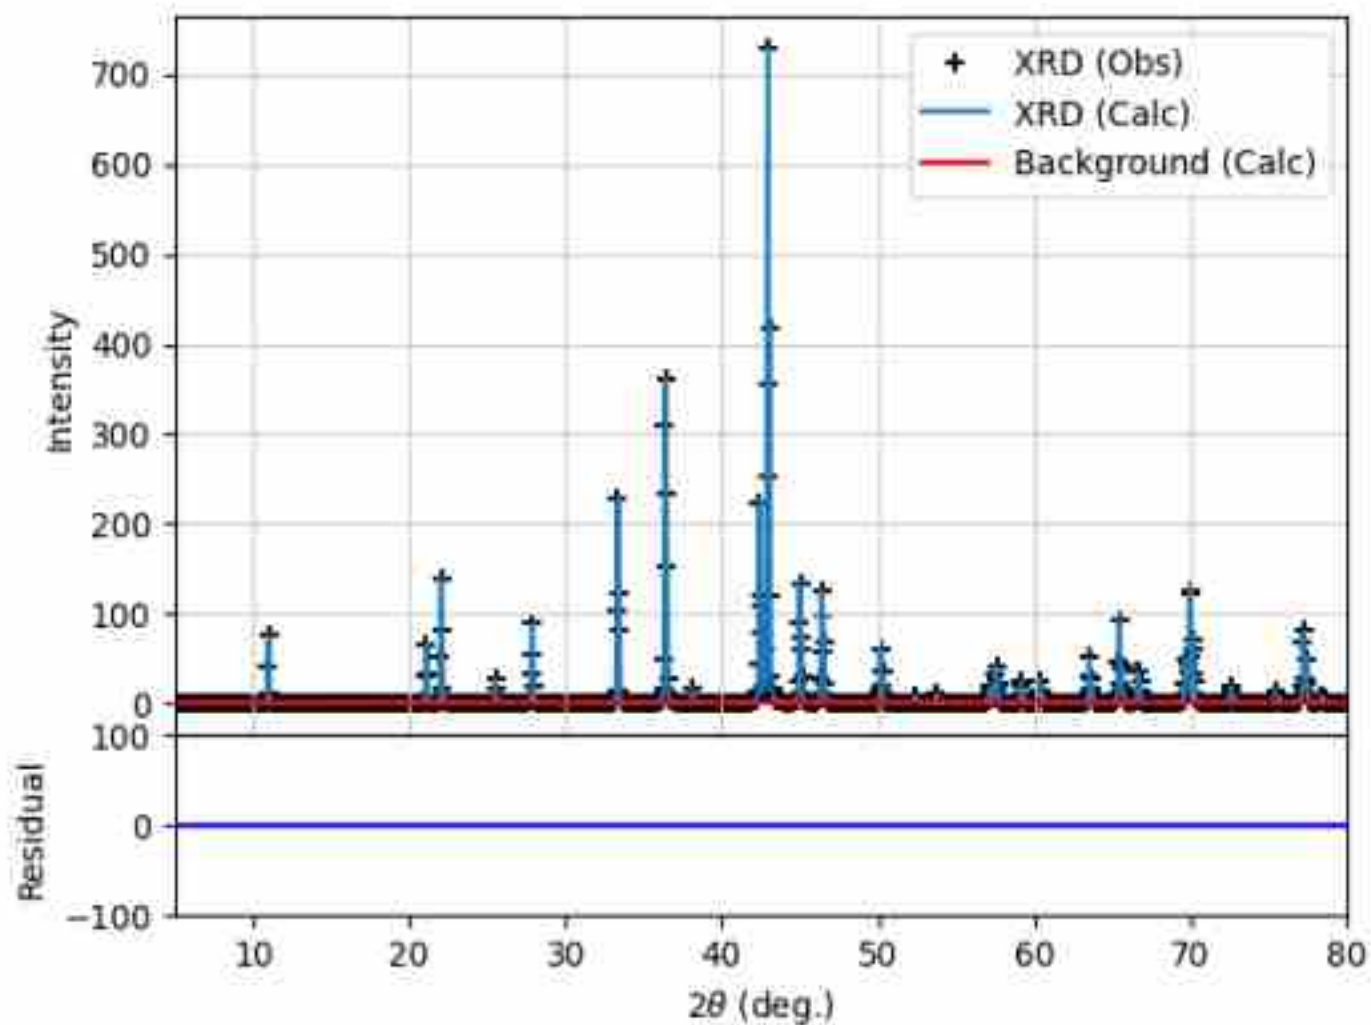

| RMSE before RR | Rwp    | RMSE after RR |
|----------------|--------|---------------|
| 0.017          | 0.0027 | 0.00055       |



# Ce<sub>2</sub>P<sub>2</sub>Ir<sub>2</sub>

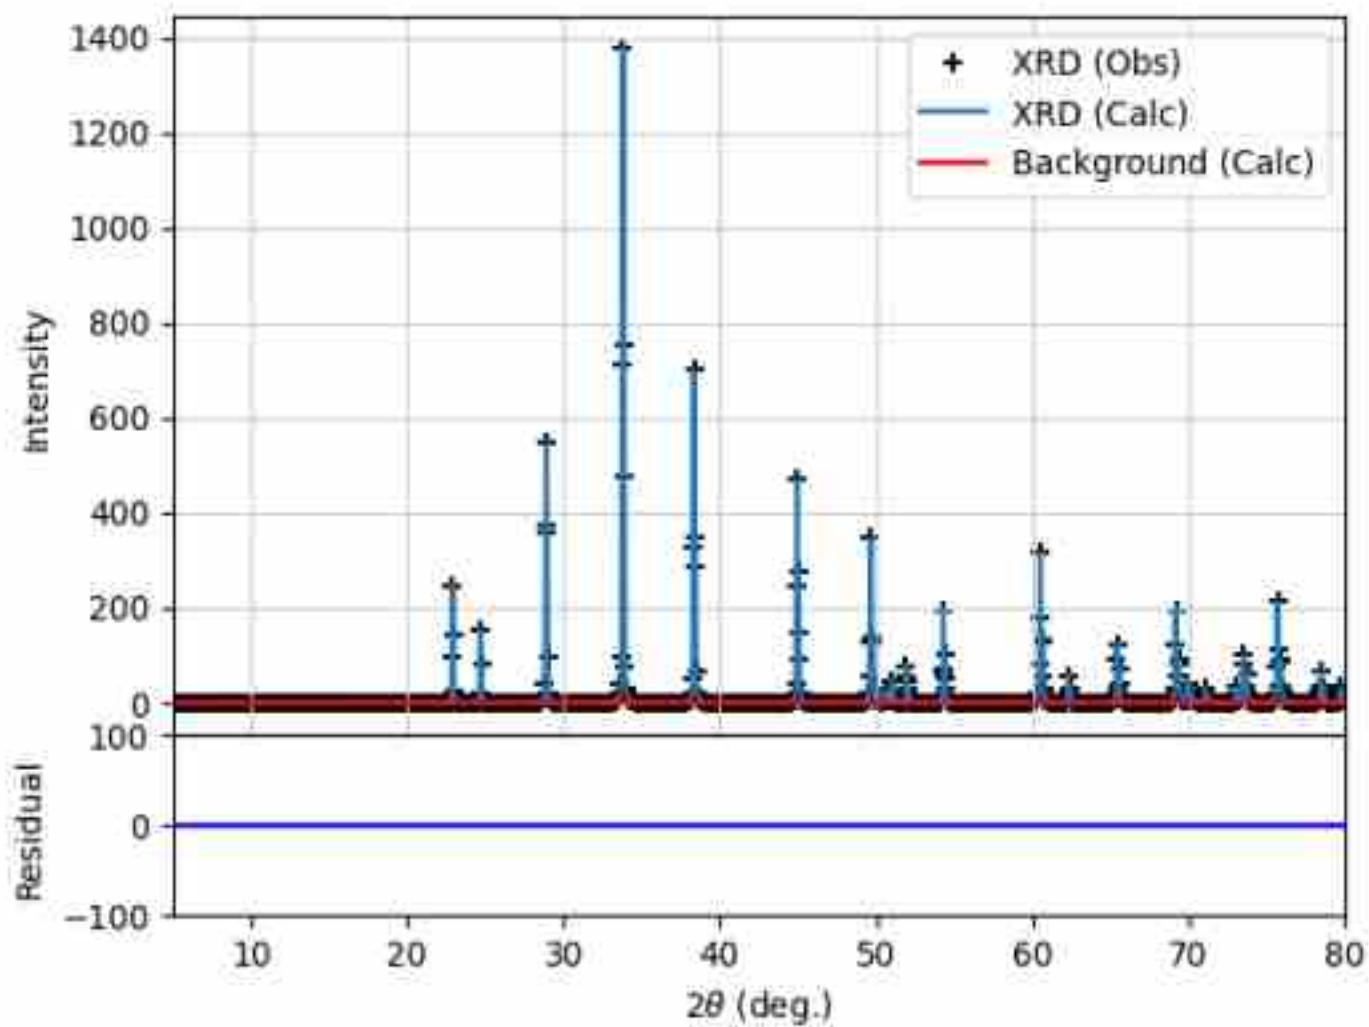

| RMSE before RR | Rwp     | RMSE after RR |
|----------------|---------|---------------|
| 0.017          | 0.00456 | 0.00069       |

# Ce<sub>2</sub>P<sub>2</sub>Ru<sub>2</sub>O<sub>2</sub>

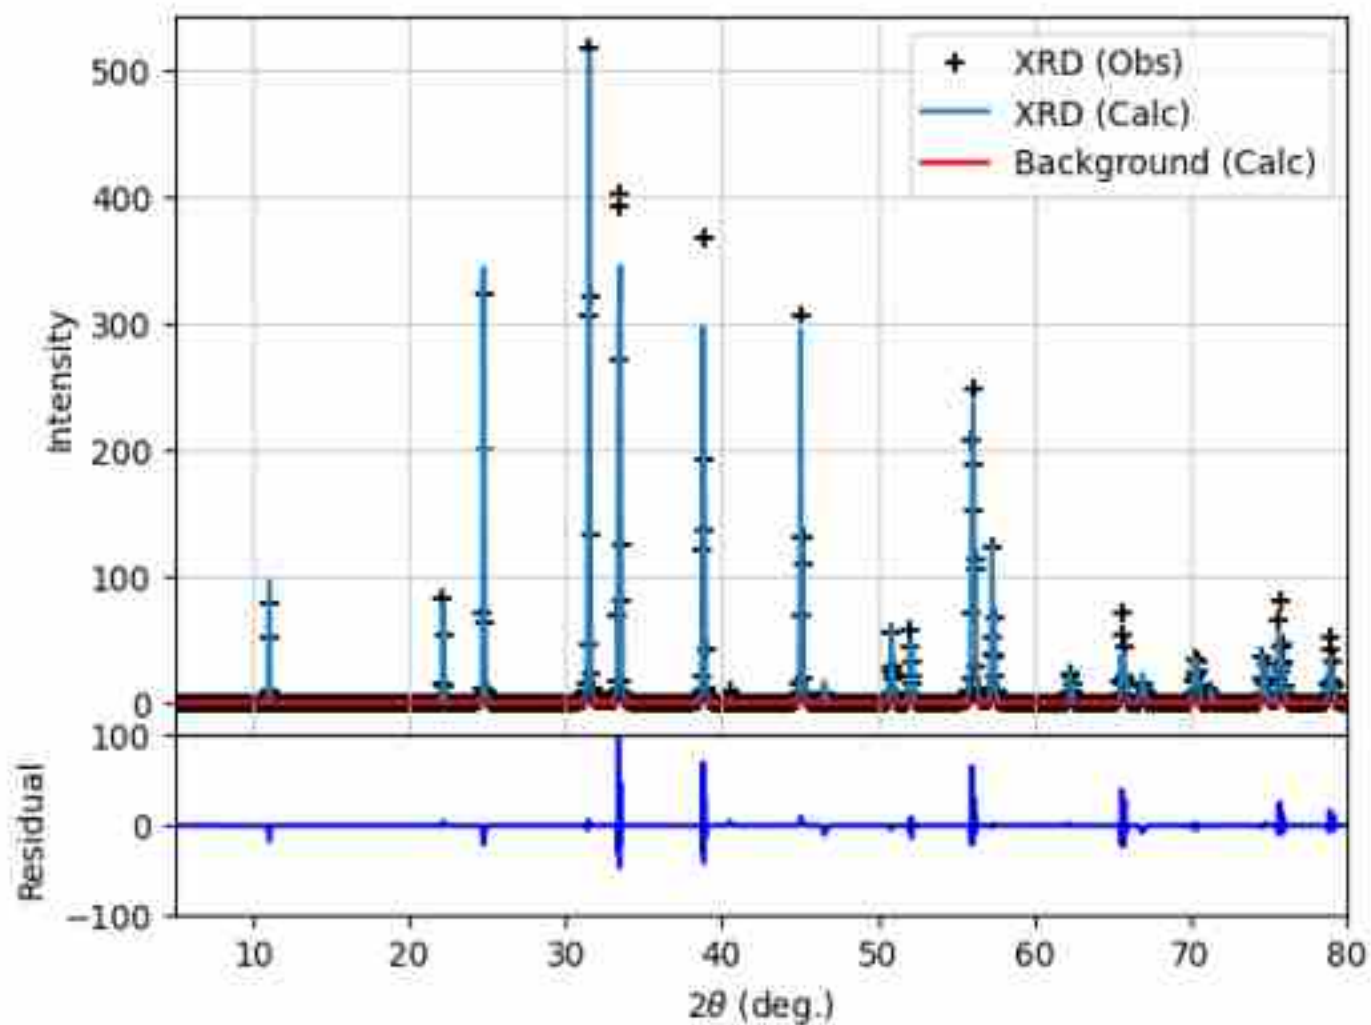

| RMSE before RR | Rwp      | RMSE after RR |
|----------------|----------|---------------|
| 0.017          | 18.70568 | 0.20715       |

# Ce<sub>2</sub>Y<sub>2</sub>Ga<sub>4</sub>Pd<sub>8</sub>

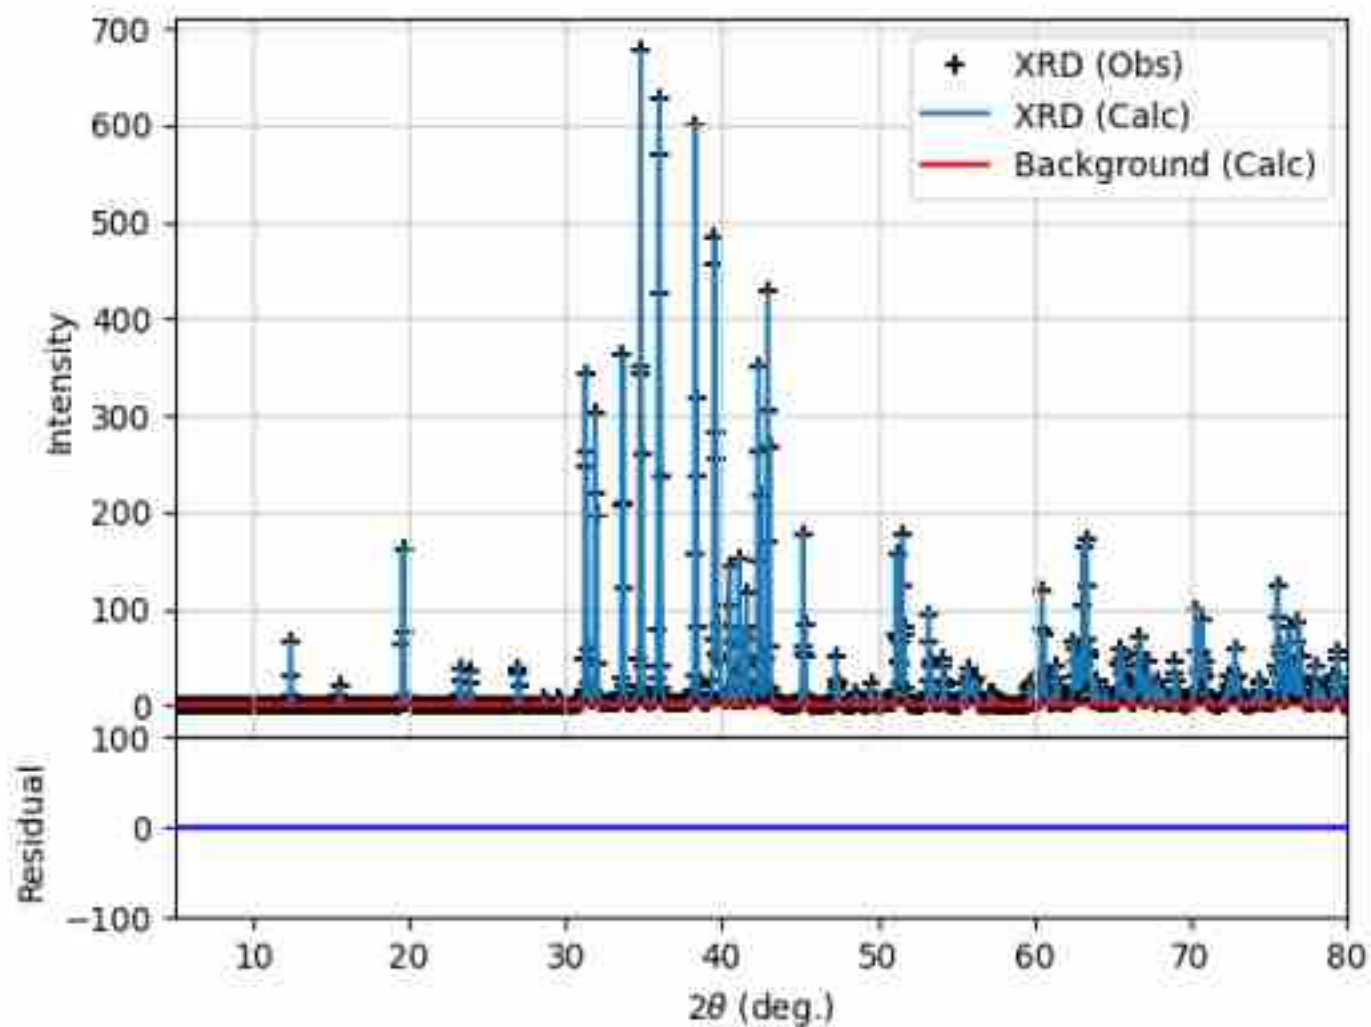

| RMSE before RR | Rwp     | RMSE after RR |
|----------------|---------|---------------|
| 0.017          | 0.00484 | 0.00046       |

# Ce<sub>3</sub>Co<sub>9</sub>

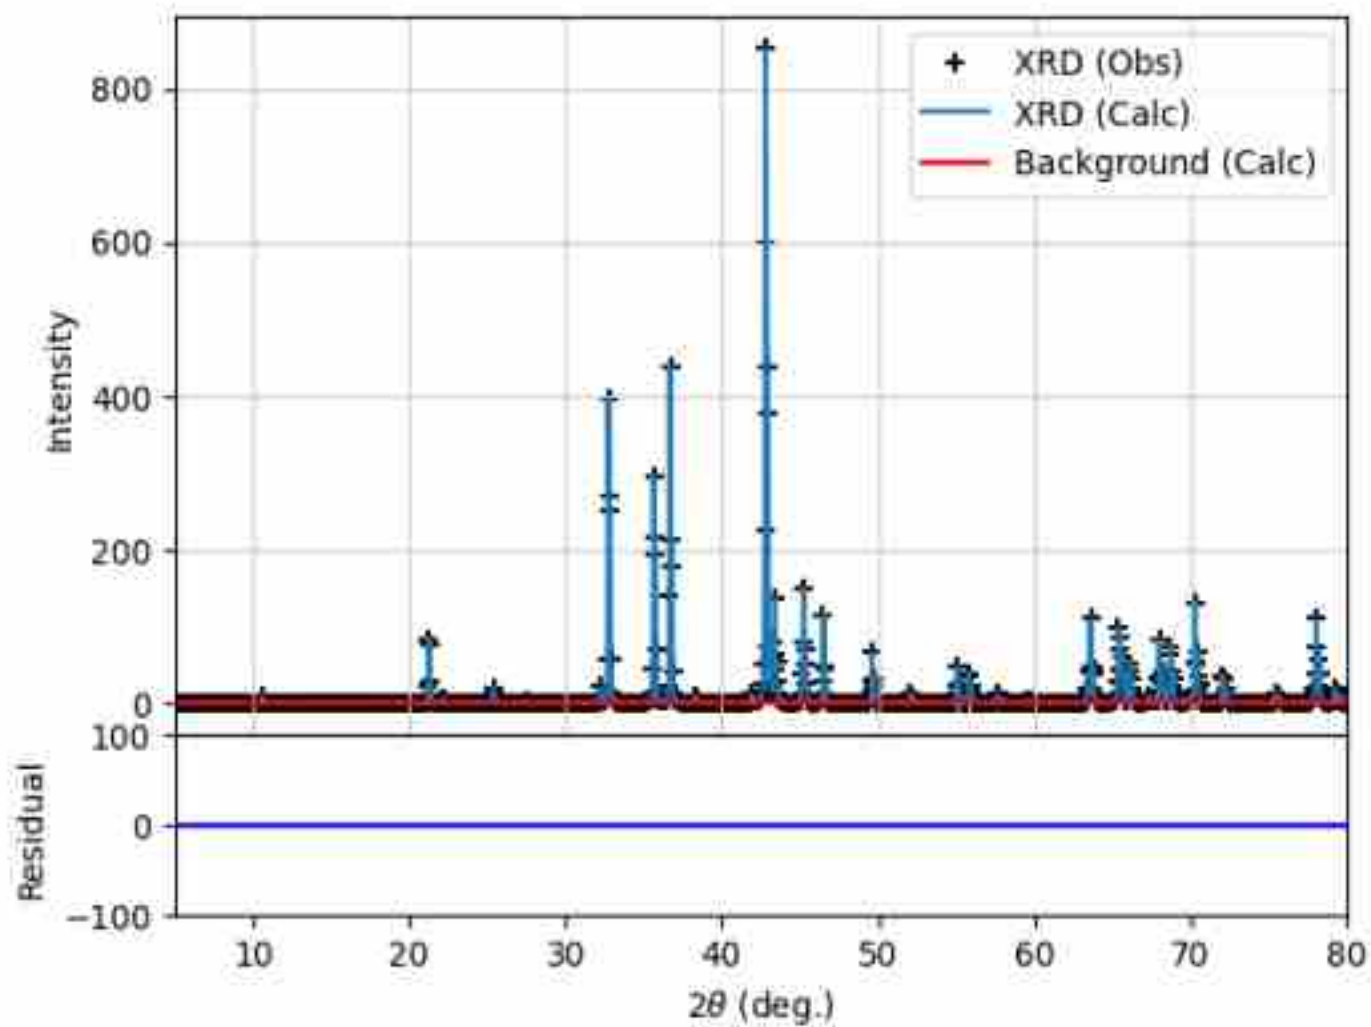

| RMSE before RR | Rwp     | RMSE after RR |
|----------------|---------|---------------|
| 0.017          | 0.00414 | 0.00068       |

# Co<sub>2</sub>Ni<sub>2</sub>Te<sub>8</sub>

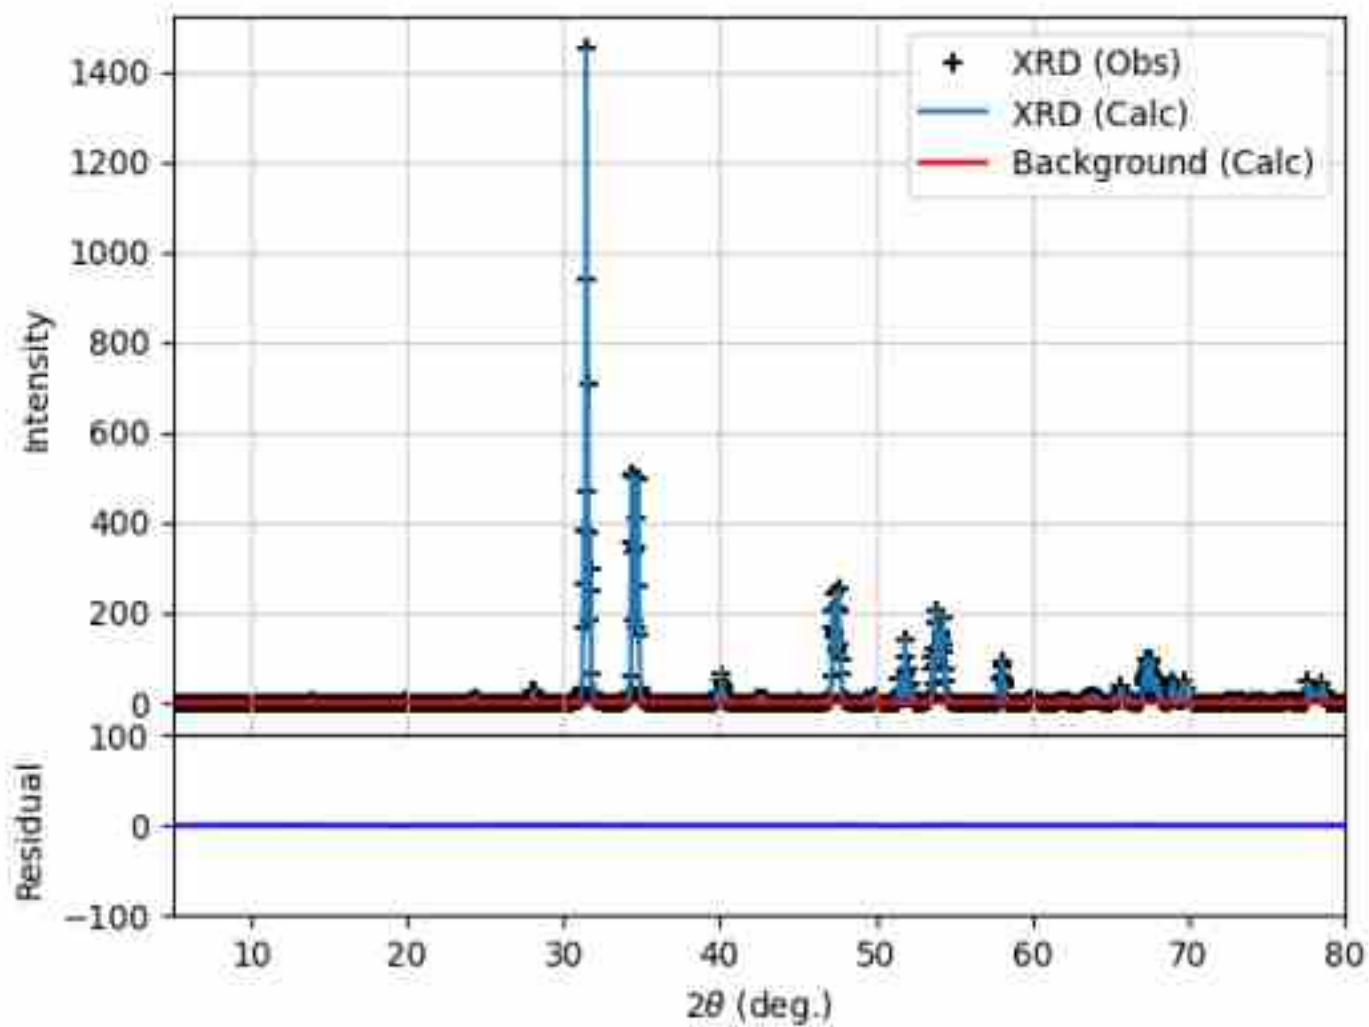

| RMSE before RR | Rwp     | RMSE after RR |
|----------------|---------|---------------|
| 0.017          | 0.95172 | 0.01681       |

# Co4O8

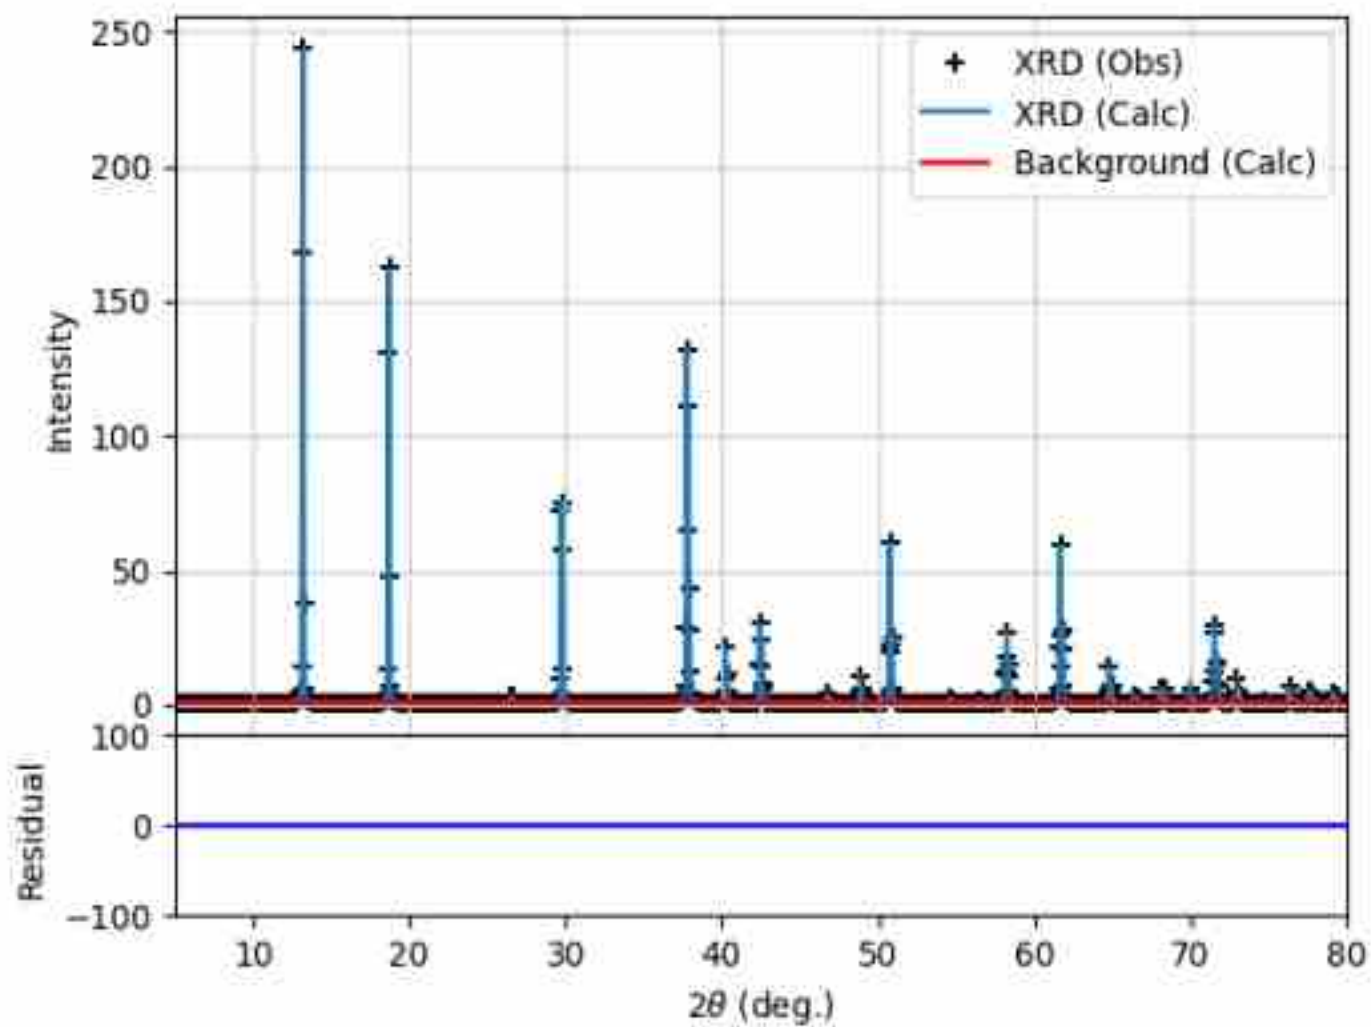

| RMSE before RR | Rwp     | RMSE after RR |
|----------------|---------|---------------|
| 0.017          | 0.00431 | 0.00227       |

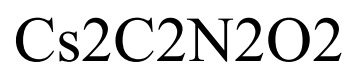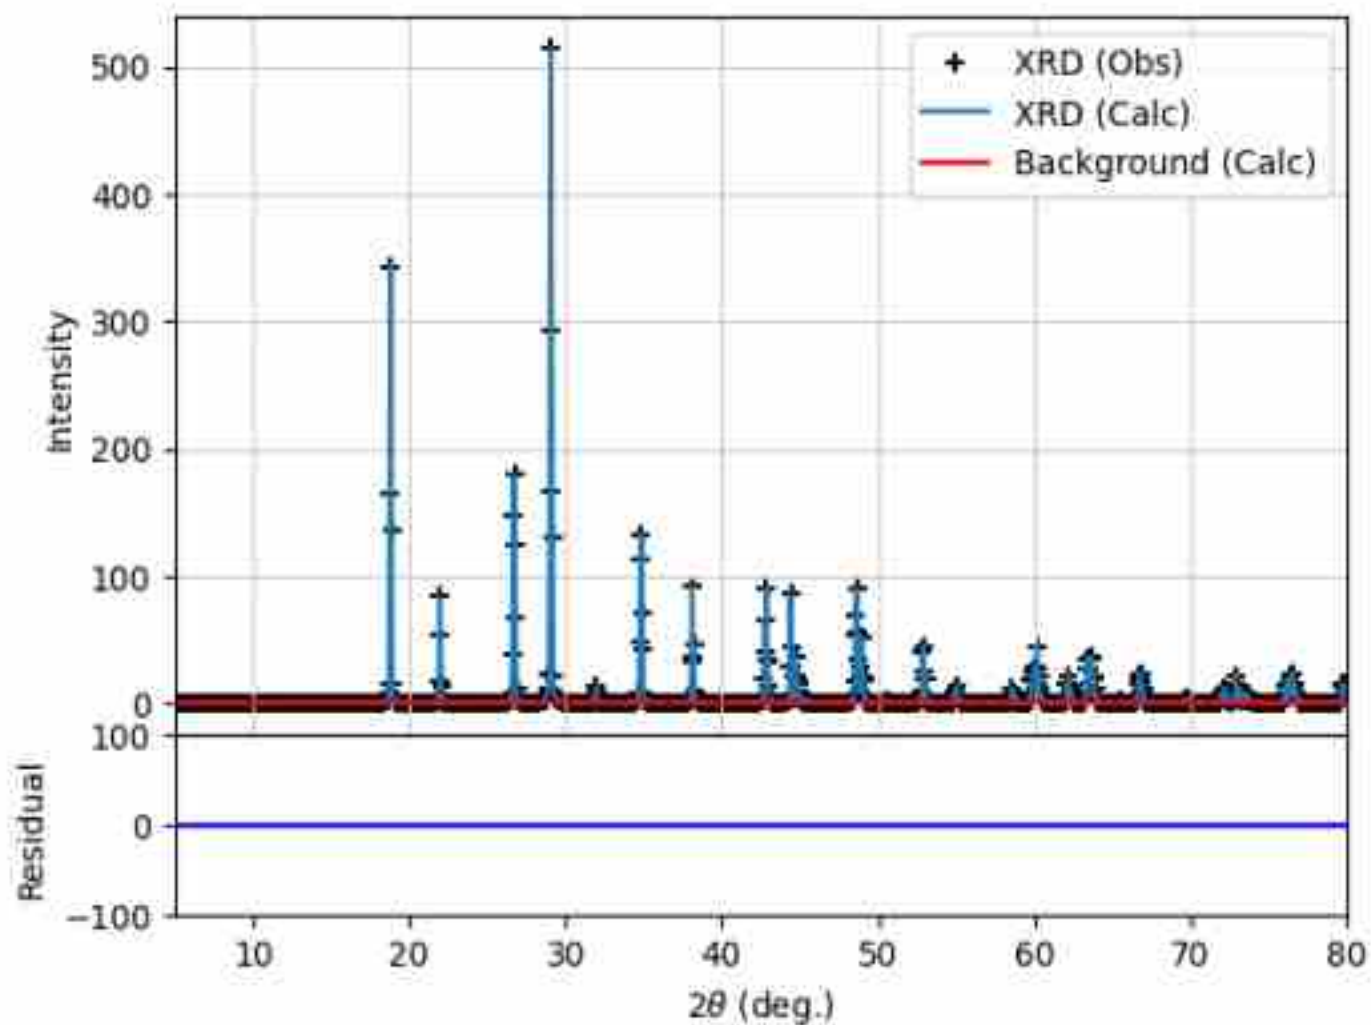

| RMSE before RR | Rwp     | RMSE after RR |
|----------------|---------|---------------|
| 0.017          | 0.09064 | 0.01176       |

# Cs<sub>2</sub>Cu<sub>2</sub>O<sub>4</sub>

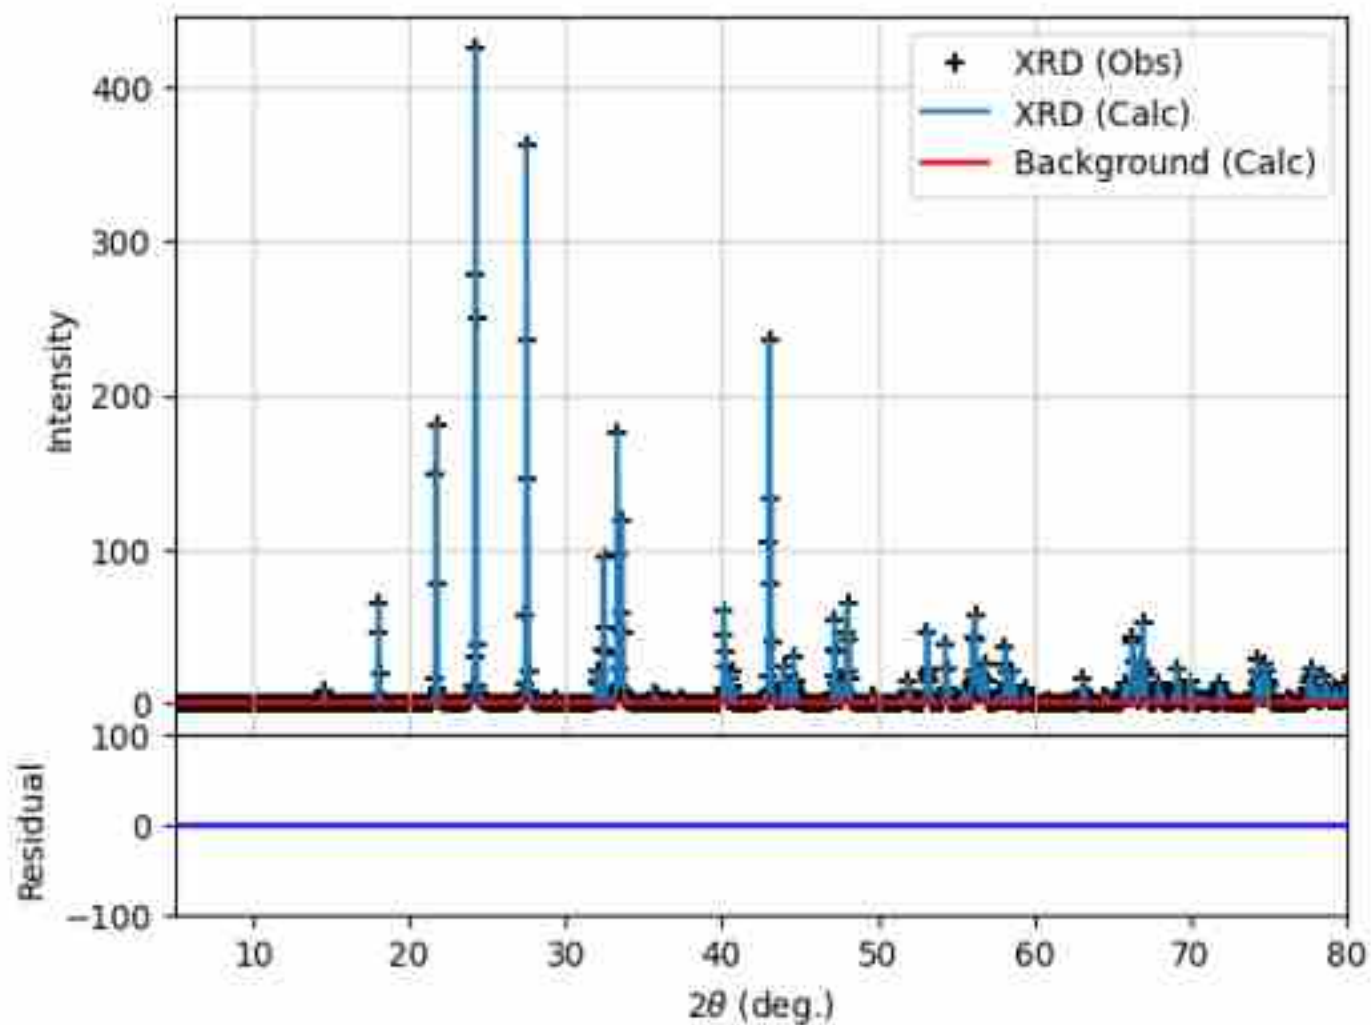

| RMSE before RR | Rwp     | RMSE after RR |
|----------------|---------|---------------|
| 0.017          | 0.00371 | 0.0009        |



# $\text{Cs}_2\text{Dy}_2\text{Zn}_2\text{Se}_6$

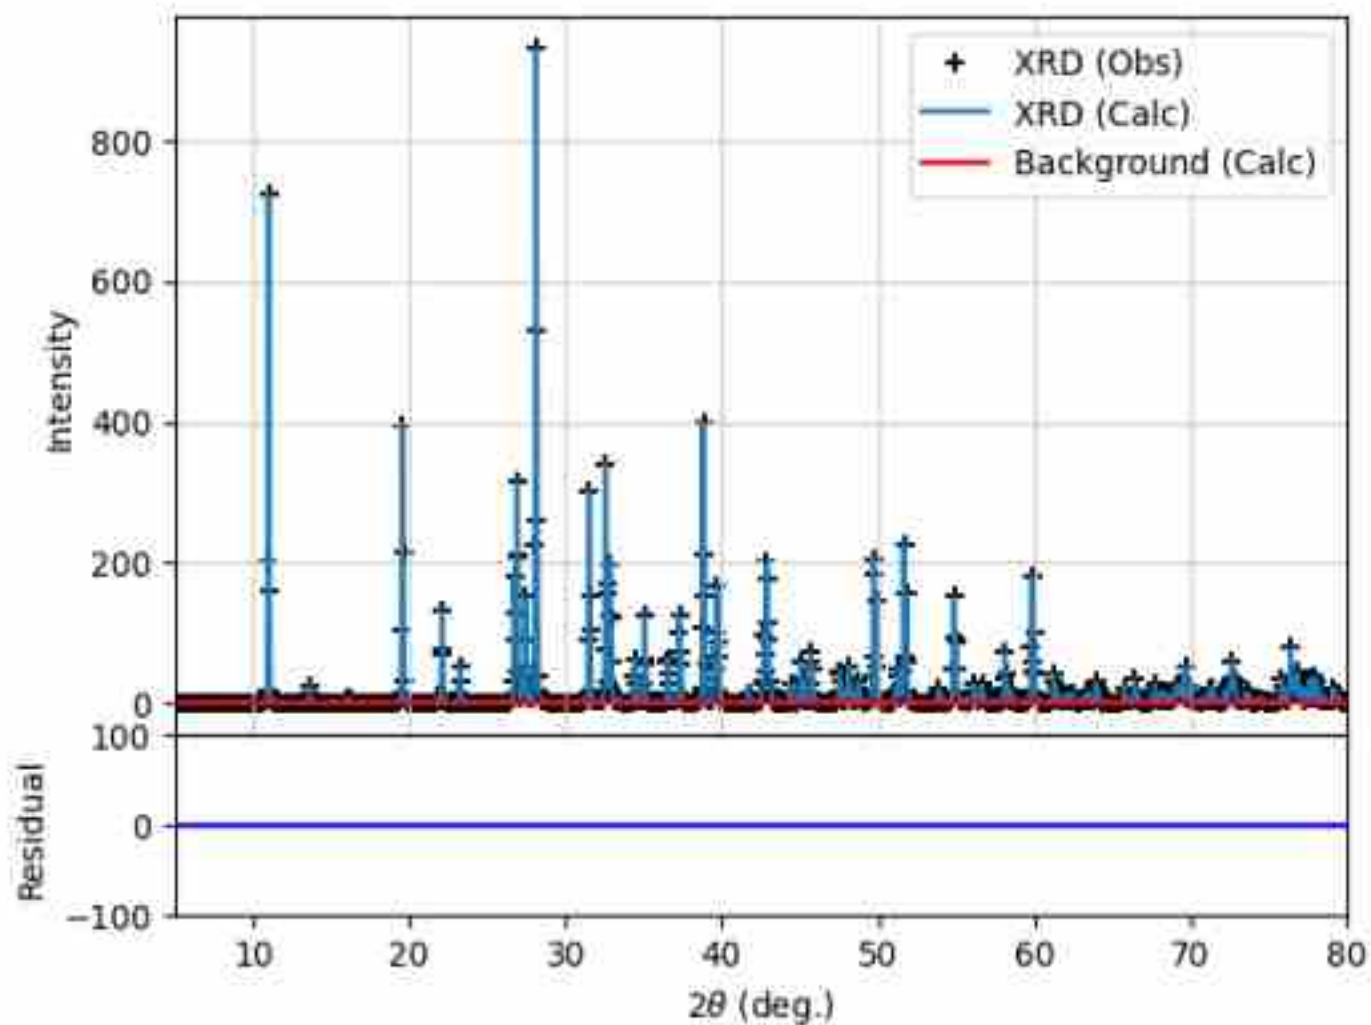

| RMSE before RR | Rwp     | RMSE after RR |
|----------------|---------|---------------|
| 0.017          | 0.00349 | 0.00034       |

# Cs<sub>2</sub>Er<sub>2</sub>O<sub>4</sub>

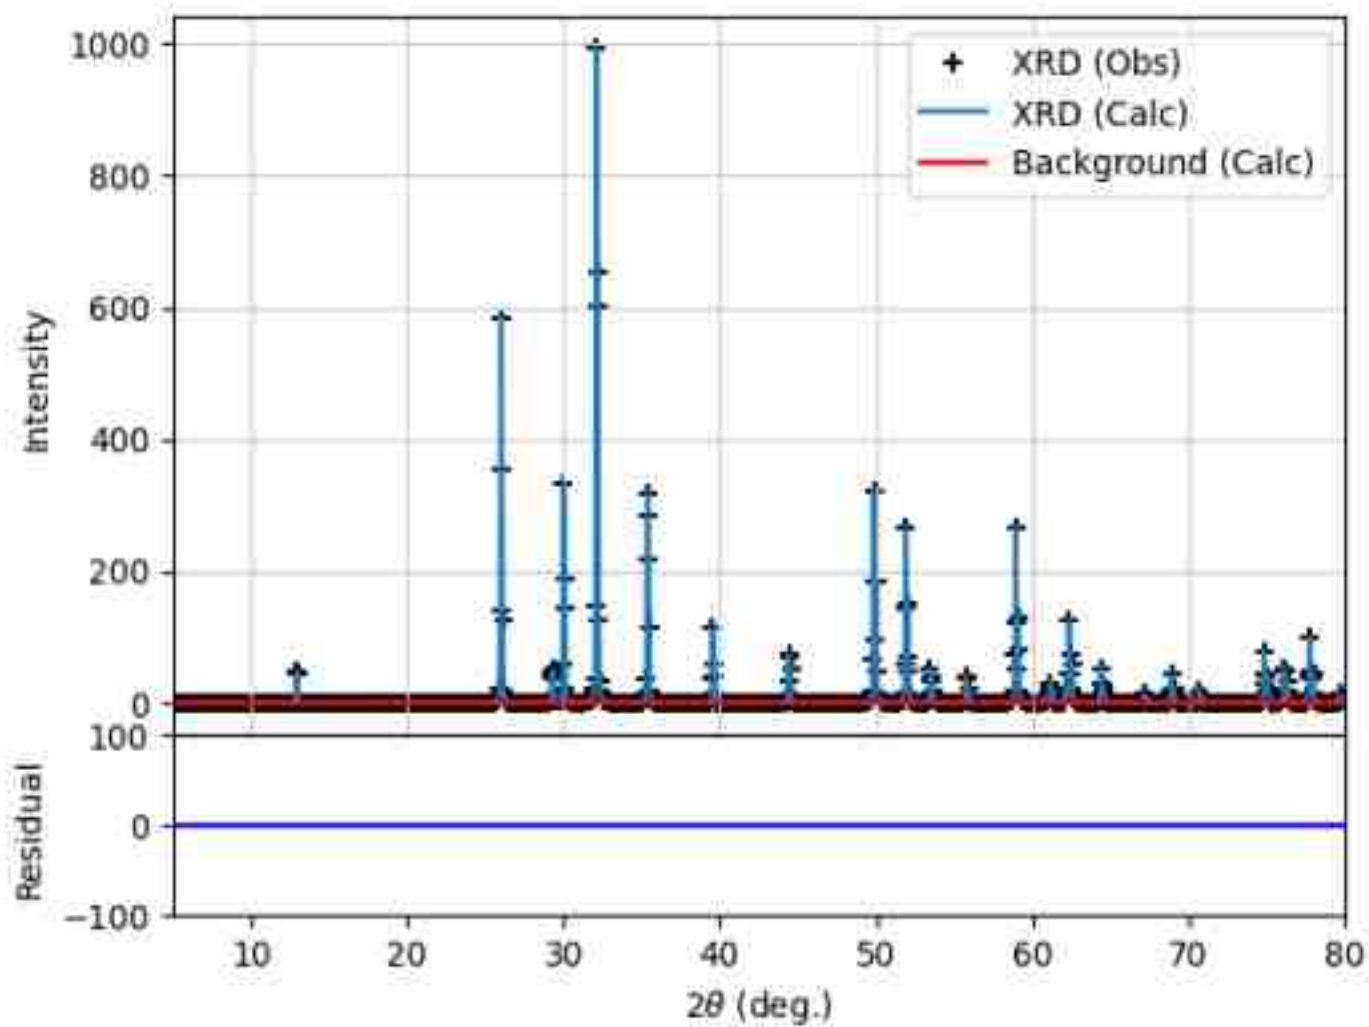

| RMSE before RR | Rwp     | RMSE after RR |
|----------------|---------|---------------|
| 0.017          | 0.00341 | 0.0021        |

# $\text{Cs}_2\text{Gd}_2\text{Cd}_2\text{Te}_6$

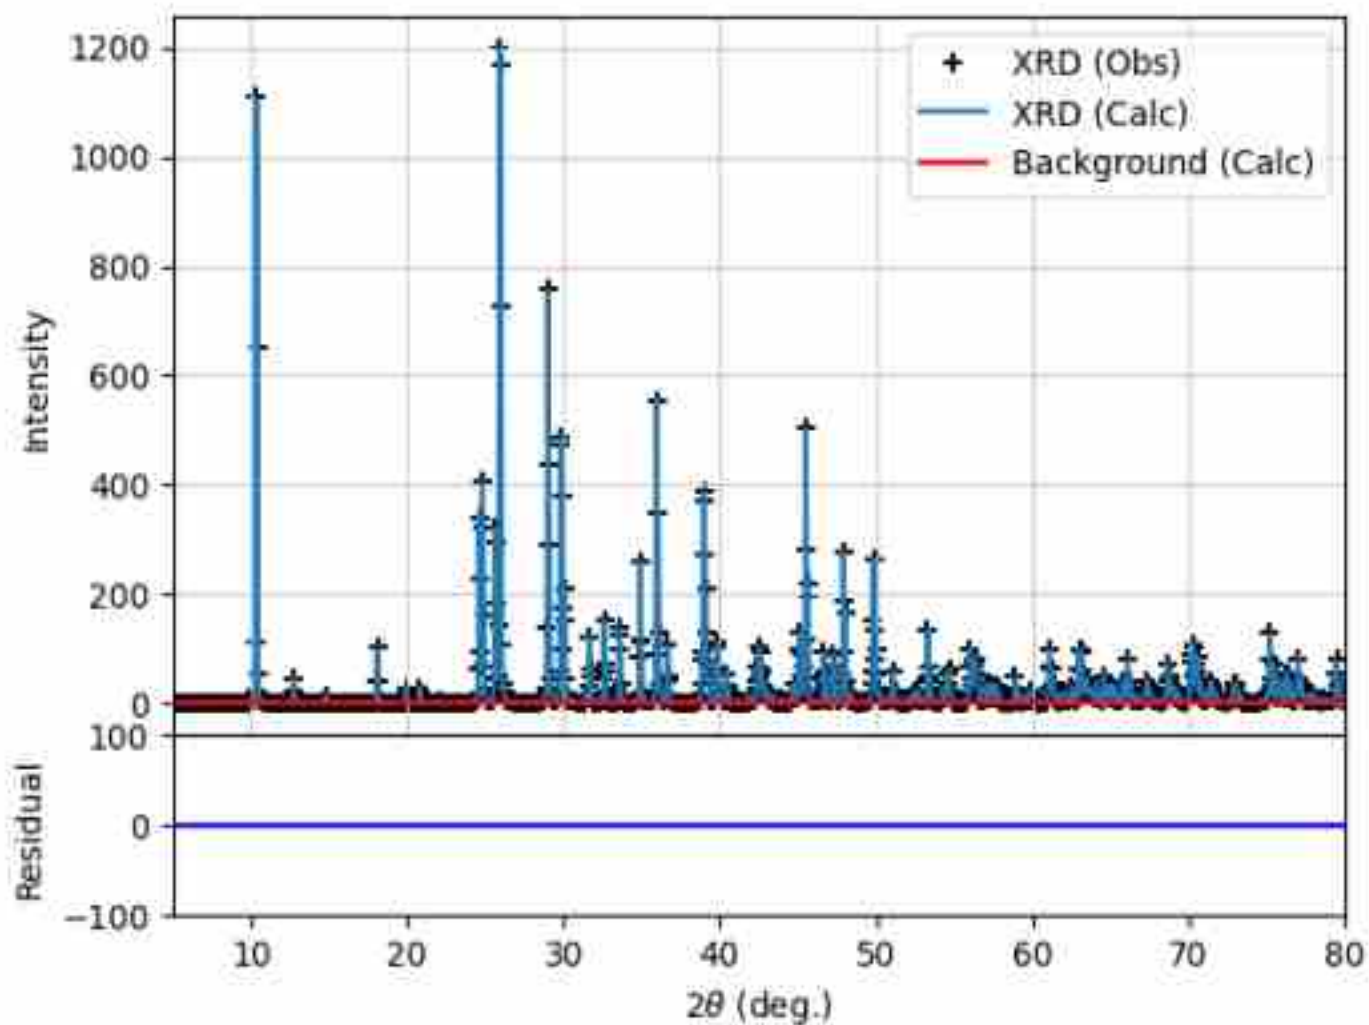

| RMSE before RR | Rwp     | RMSE after RR |
|----------------|---------|---------------|
| 0.017          | 0.00392 | 0.00024       |

# Cs<sub>2</sub>Ge<sub>1</sub>Cl<sub>6</sub>

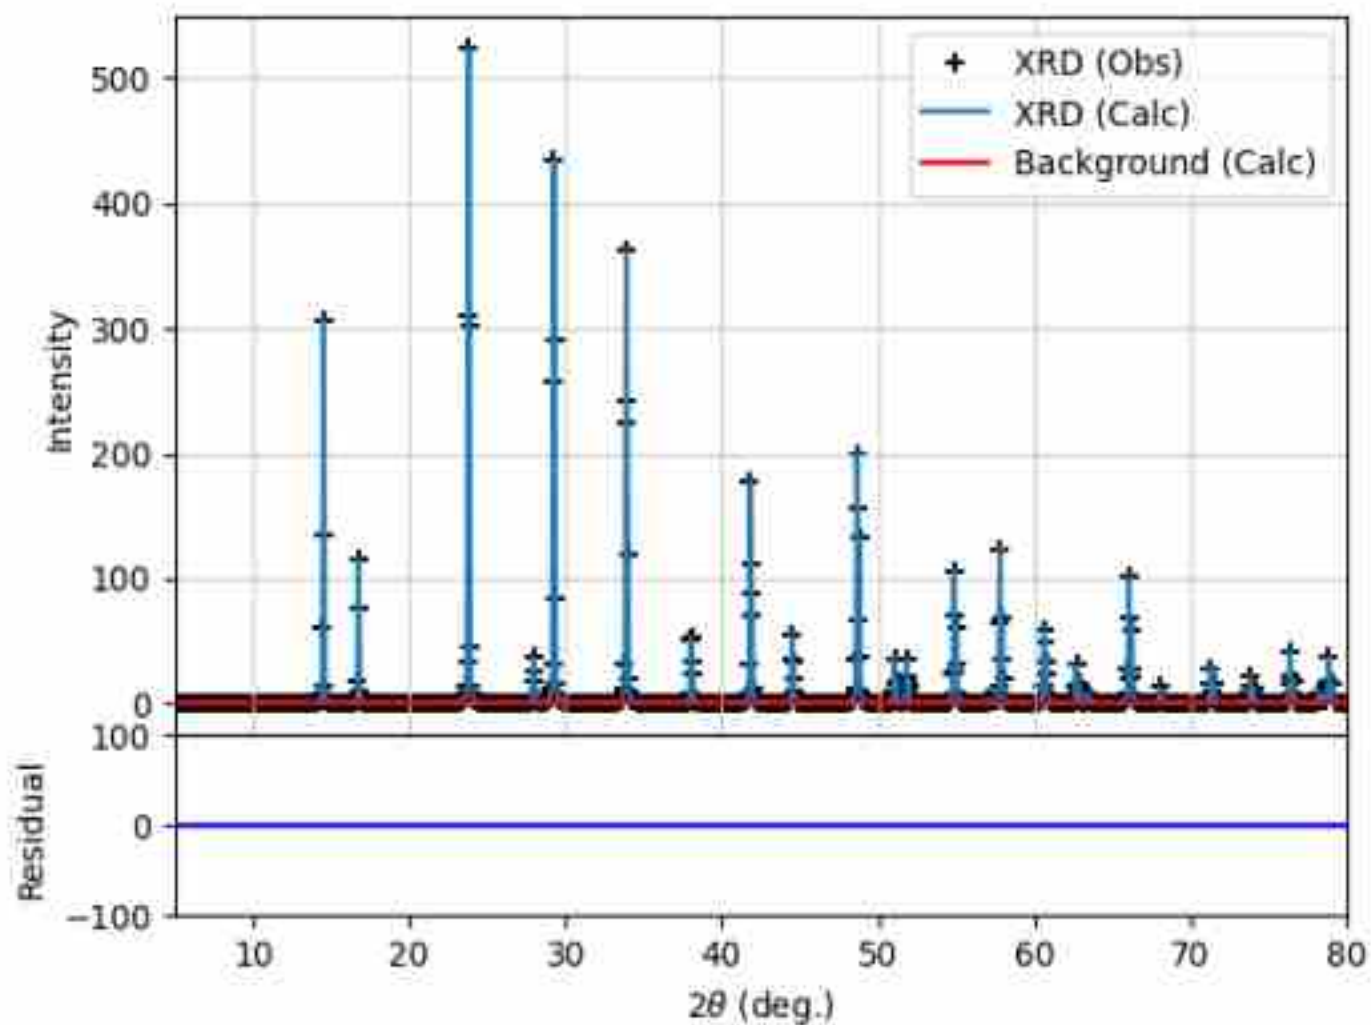

| RMSE before RR | Rwp     | RMSE after RR |
|----------------|---------|---------------|
| 0.017          | 0.05161 | 0.00413       |

# Cs<sub>2</sub>In<sub>1</sub>Bi<sub>1</sub>F<sub>6</sub>

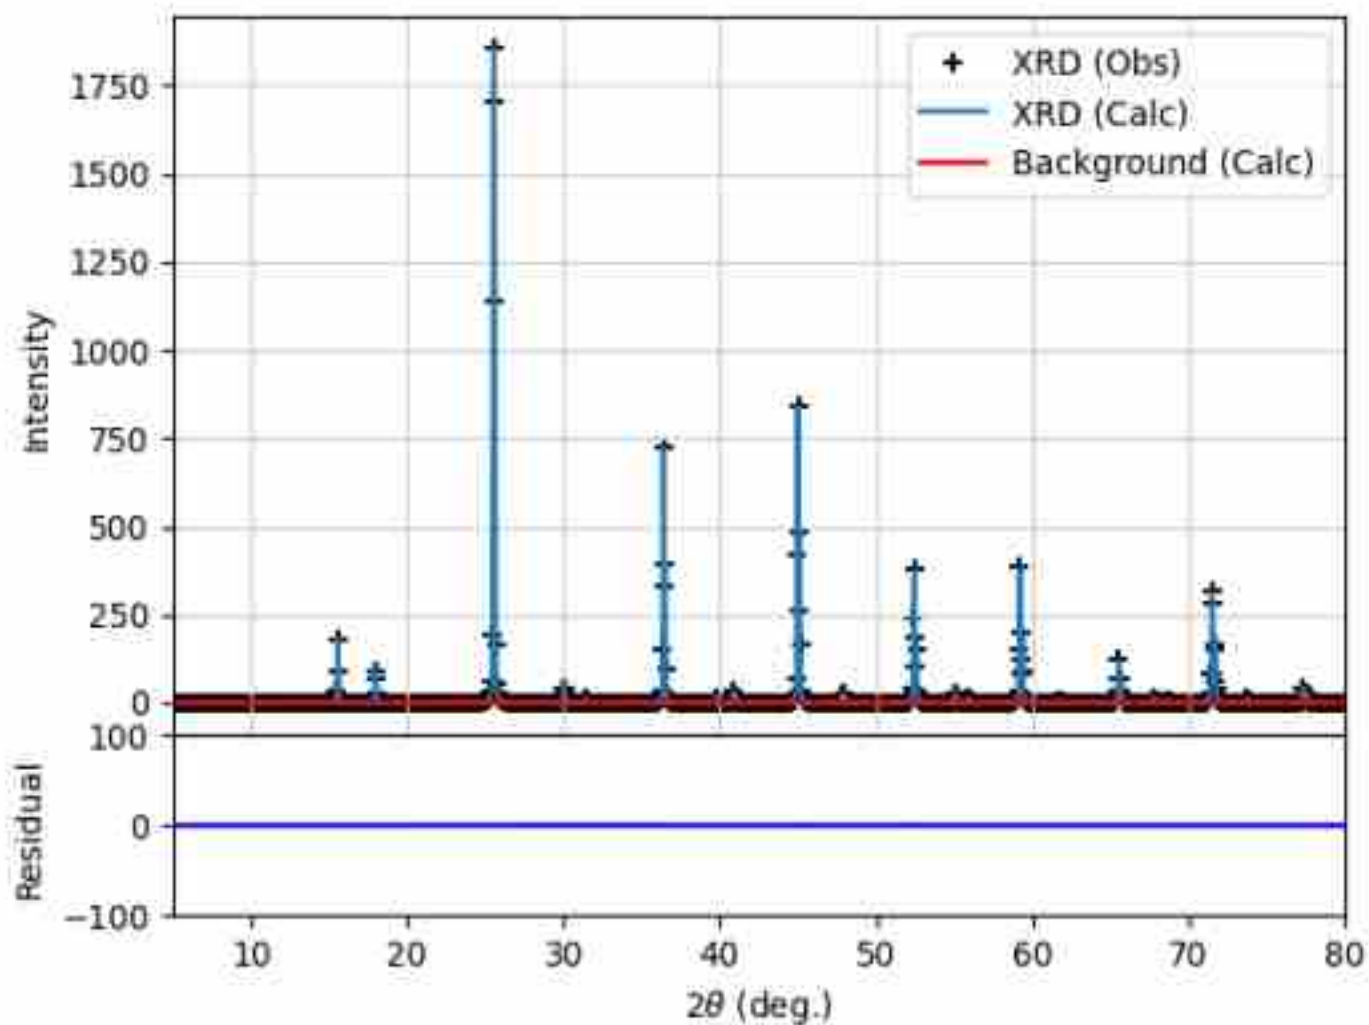

| RMSE before RR | Rwp     | RMSE after RR |
|----------------|---------|---------------|
| 0.017          | 0.12219 | 0.01089       |

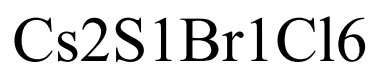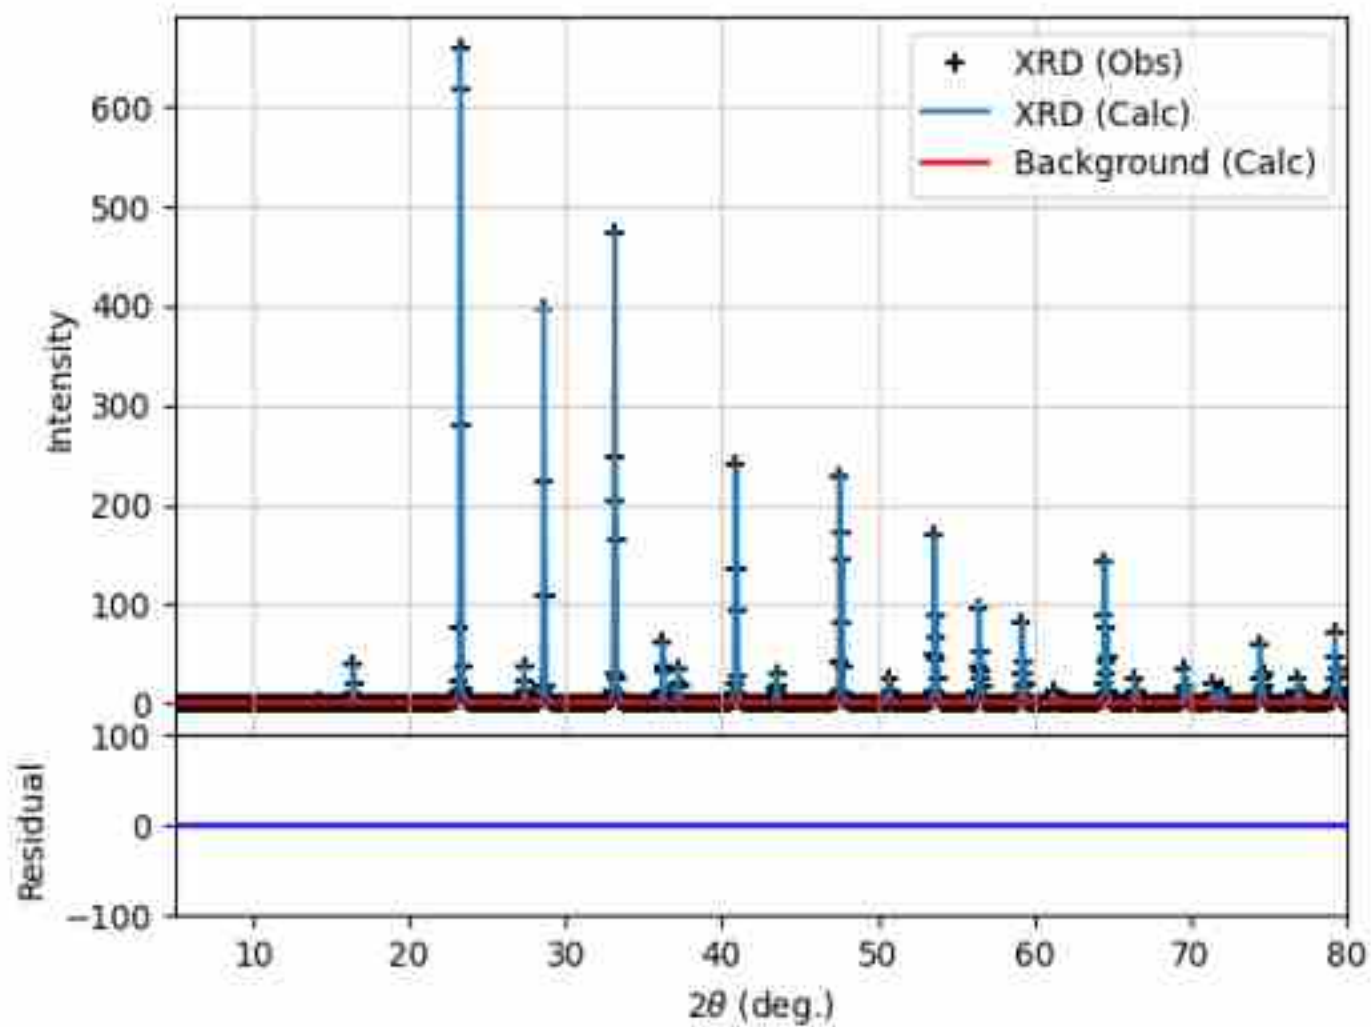

| RMSE before RR | Rwp     | RMSE after RR |
|----------------|---------|---------------|
| 0.017          | 0.04554 | 0.00429       |

# Cs<sub>2</sub>Y<sub>1</sub>In<sub>1</sub>Cl<sub>6</sub>

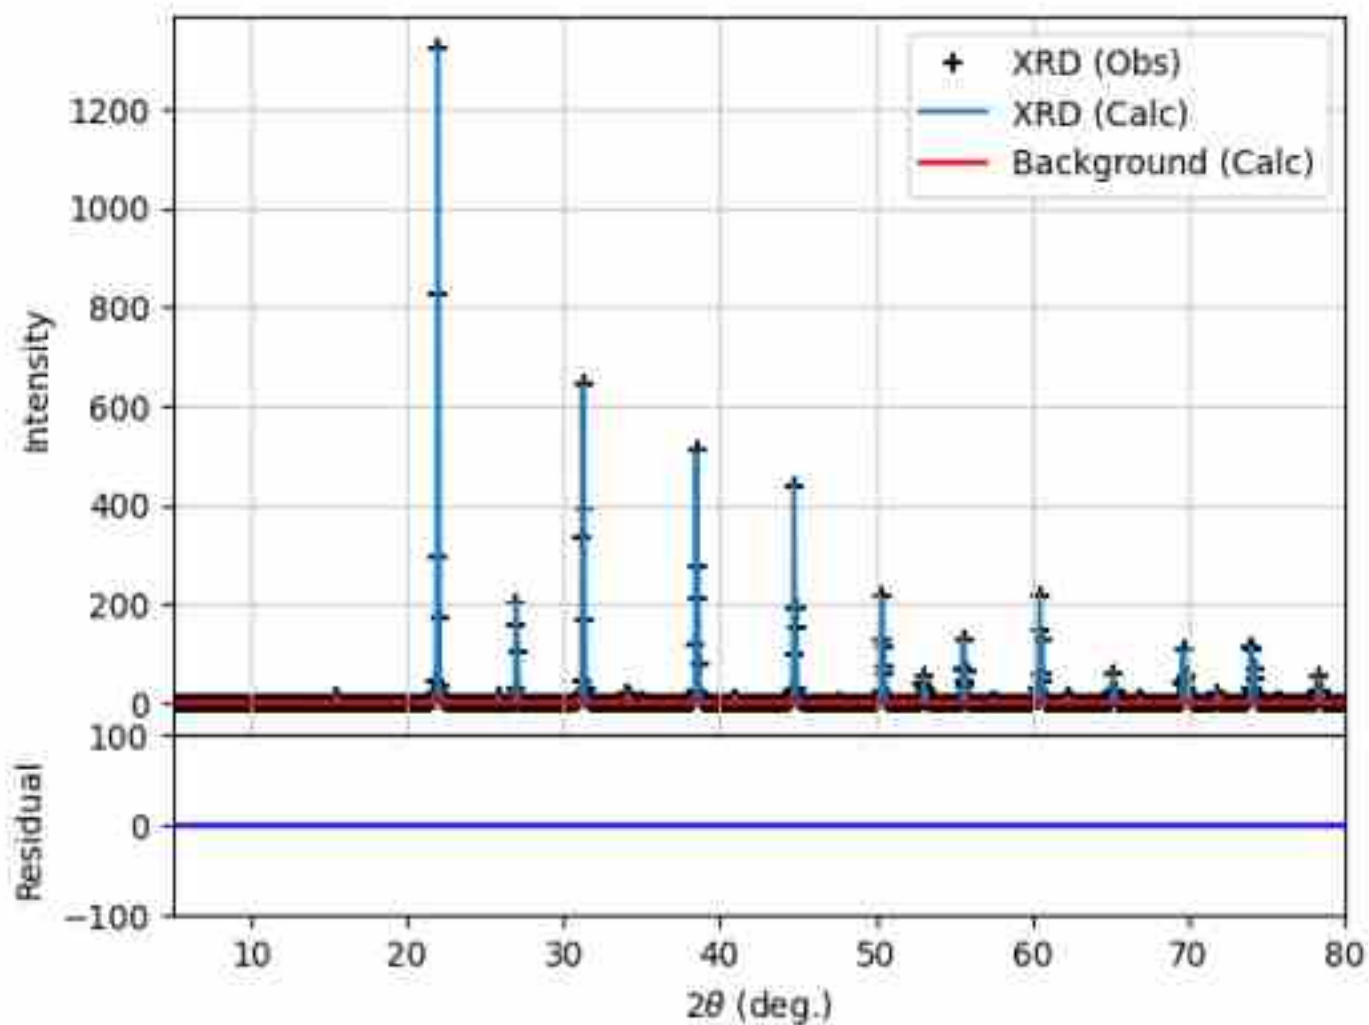

| RMSE before RR | Rwp     | RMSE after RR |
|----------------|---------|---------------|
| 0.017          | 0.04268 | 0.00372       |

# Cu<sub>2</sub>F<sub>4</sub>

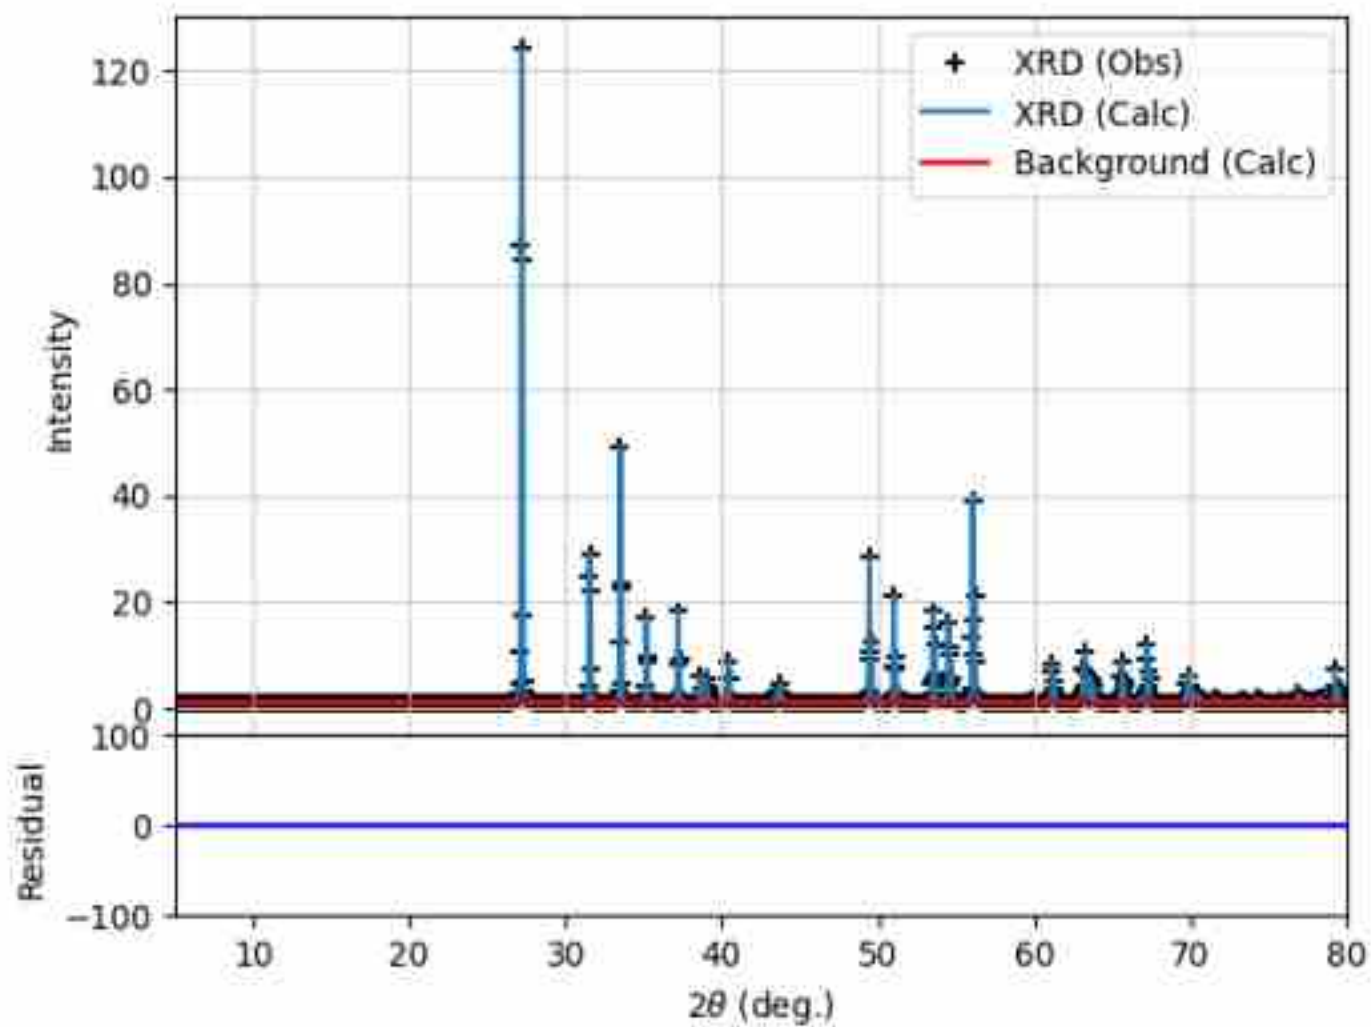

| RMSE before RR | Rwp     | RMSE after RR |
|----------------|---------|---------------|
| 0.017          | 0.00287 | 0.00075       |



# Cu<sub>3</sub>Sb<sub>1</sub>S<sub>4</sub>

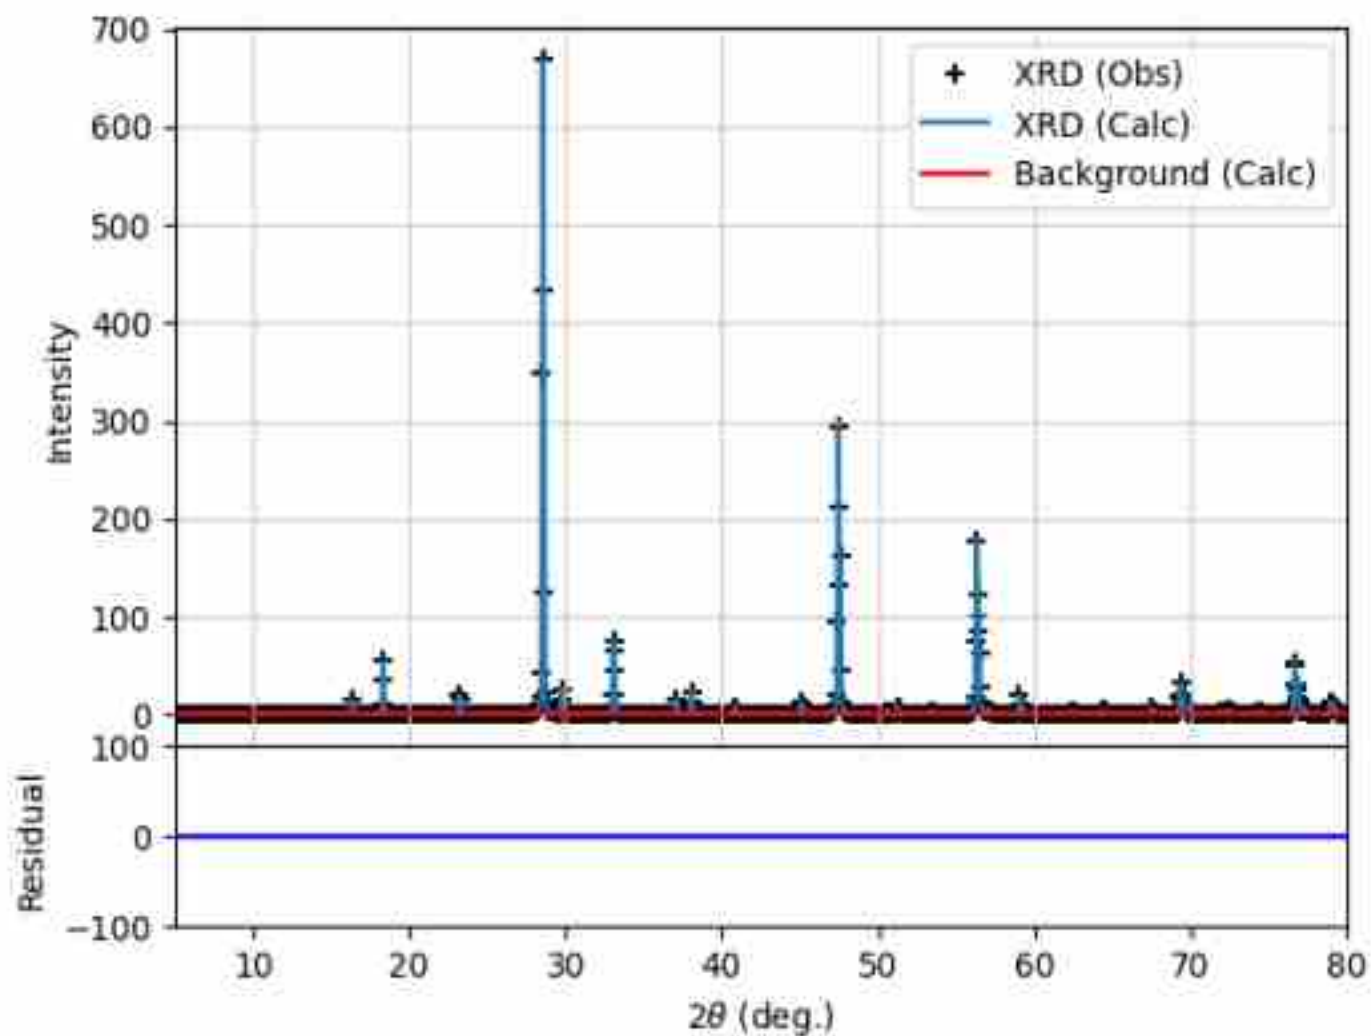

| RMSE before RR | Rwp     | RMSE after RR |
|----------------|---------|---------------|
| 0.017          | 0.00255 | 0.00049       |

# Cu4I4

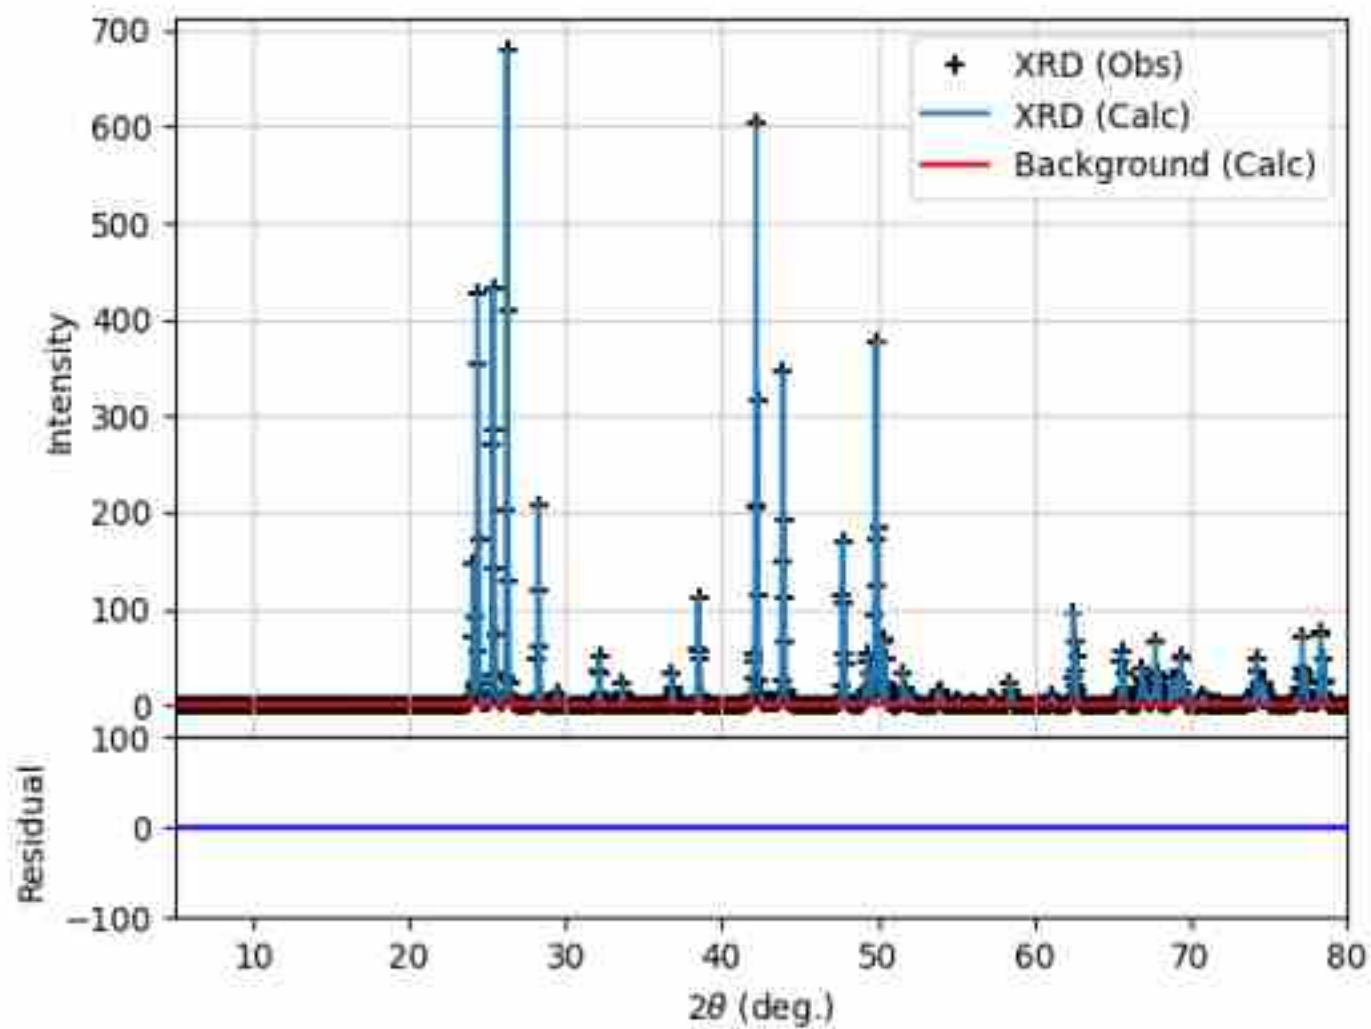

| RMSE before RR | Rwp     | RMSE after RR |
|----------------|---------|---------------|
| 0.017          | 0.00334 | 0.00033       |

# Dy6Ru4

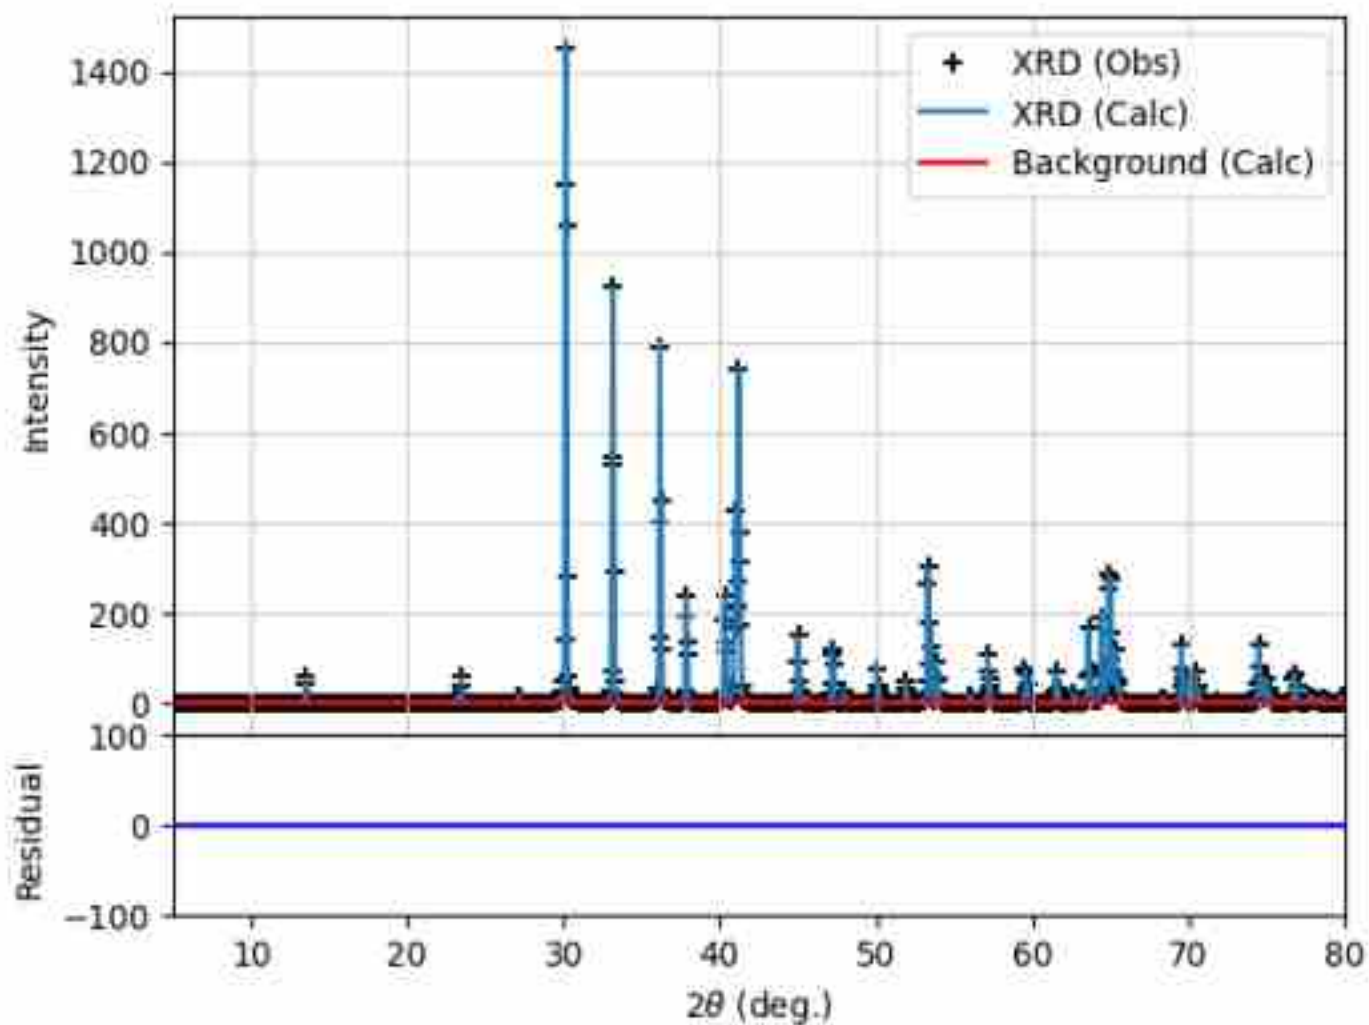

| RMSE before RR | Rwp     | RMSE after RR |
|----------------|---------|---------------|
| 0.017          | 0.00513 | 0.00056       |

# Dy8Al8

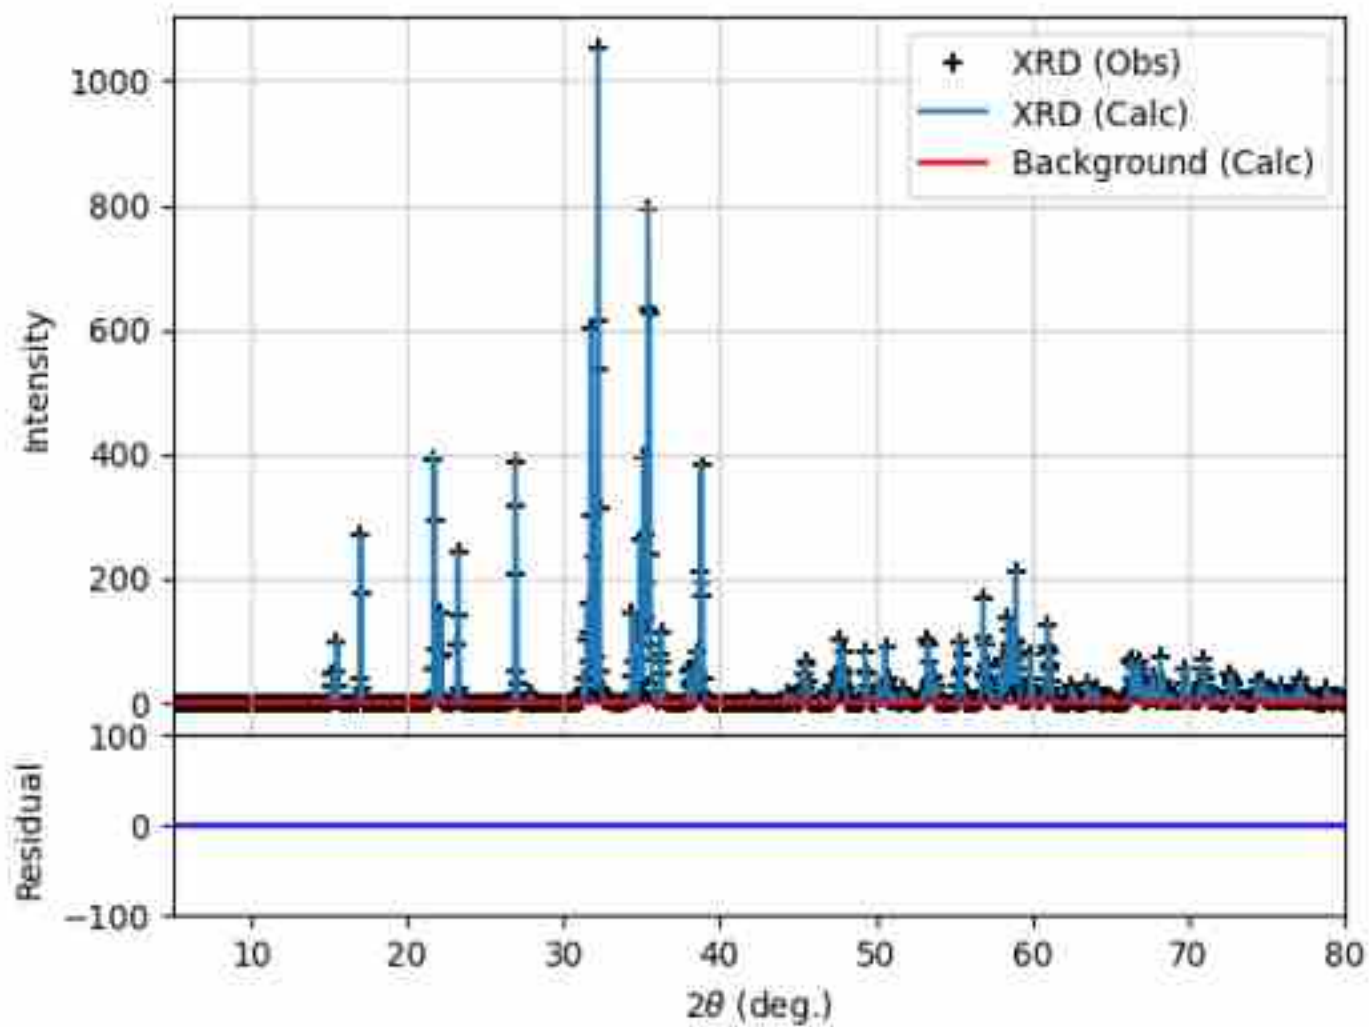

| RMSE before RR | Rwp     | RMSE after RR |
|----------------|---------|---------------|
| 0.017          | 0.00436 | 0.0009        |

# Er1Al3B4O12

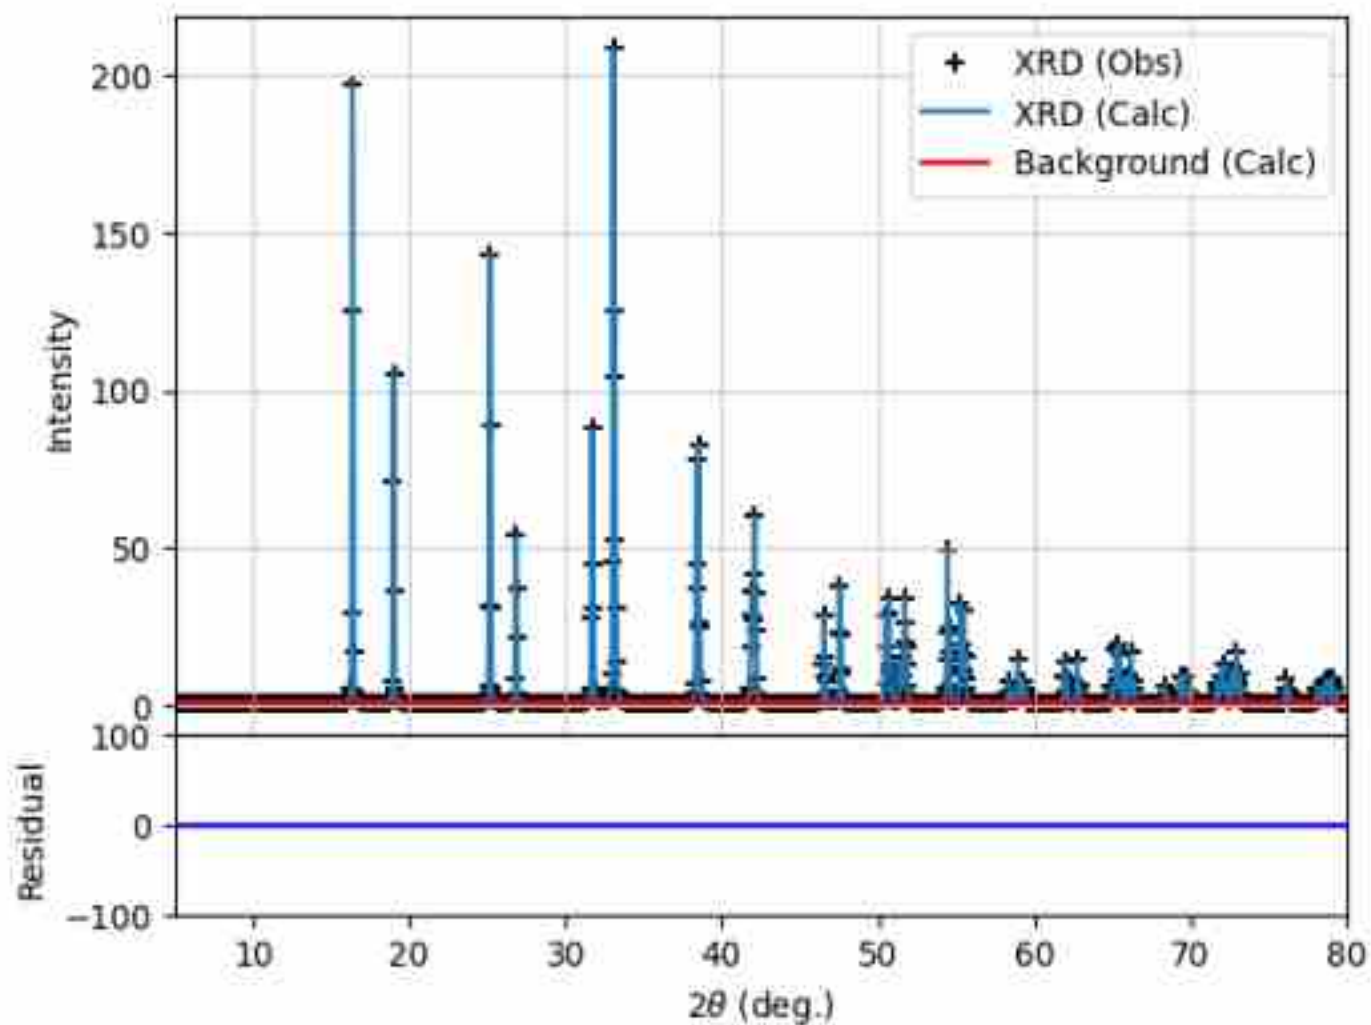

| RMSE before RR | Rwp    | RMSE after RR |
|----------------|--------|---------------|
| 0.017          | 0.0028 | 0.00239       |

# Er1Al4Ge2Au1

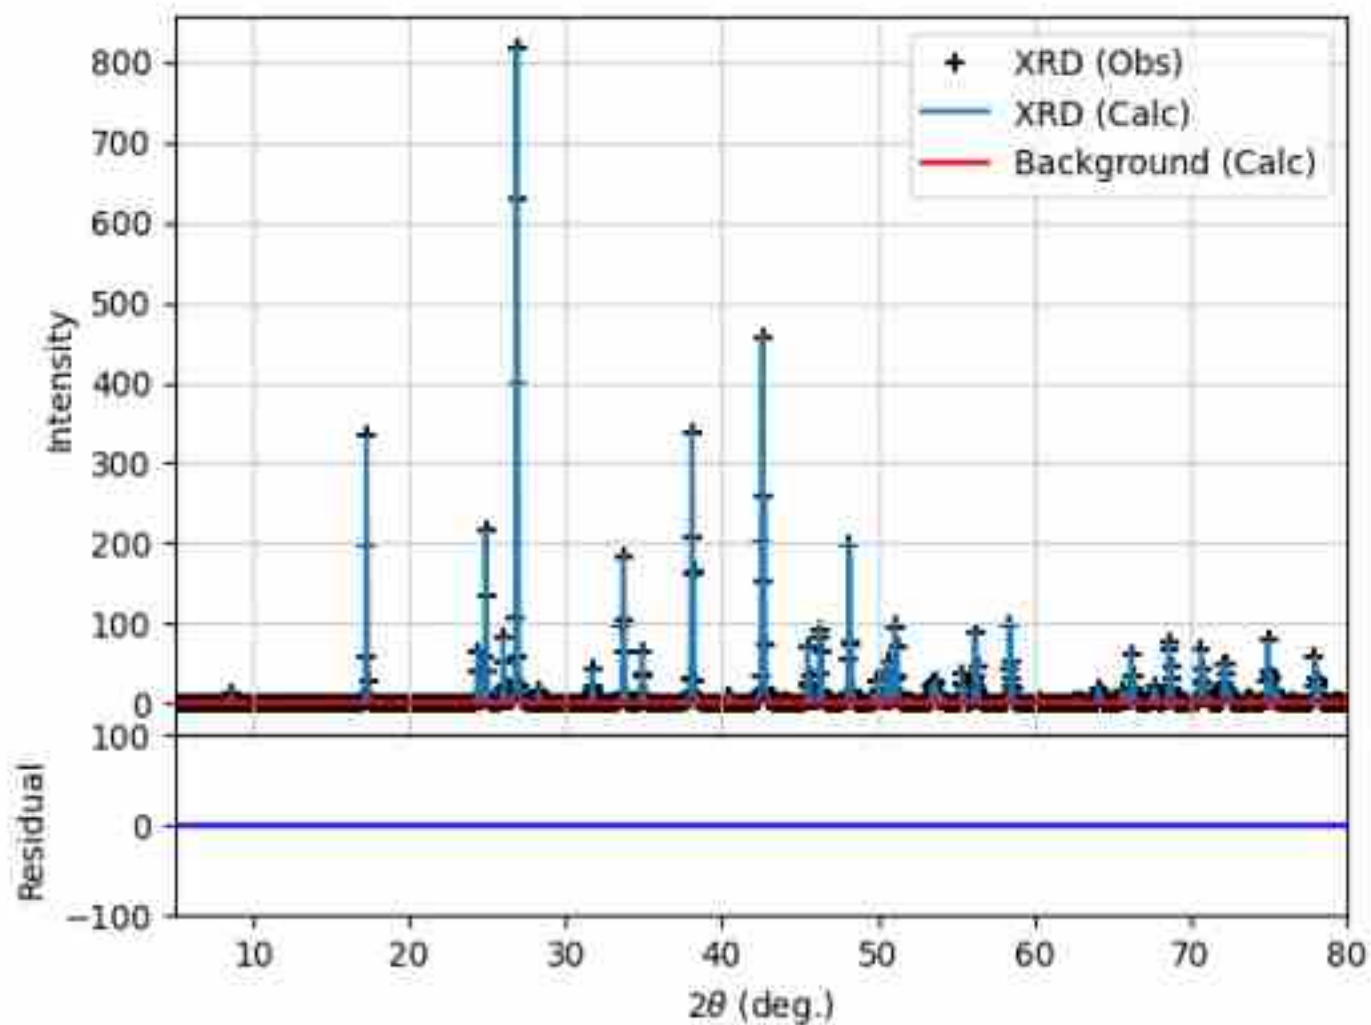

| RMSE before RR | Rwp     | RMSE after RR |
|----------------|---------|---------------|
| 0.017          | 0.00328 | 0.00094       |

# Er<sub>1</sub>Al<sub>8</sub>Cu<sub>4</sub>

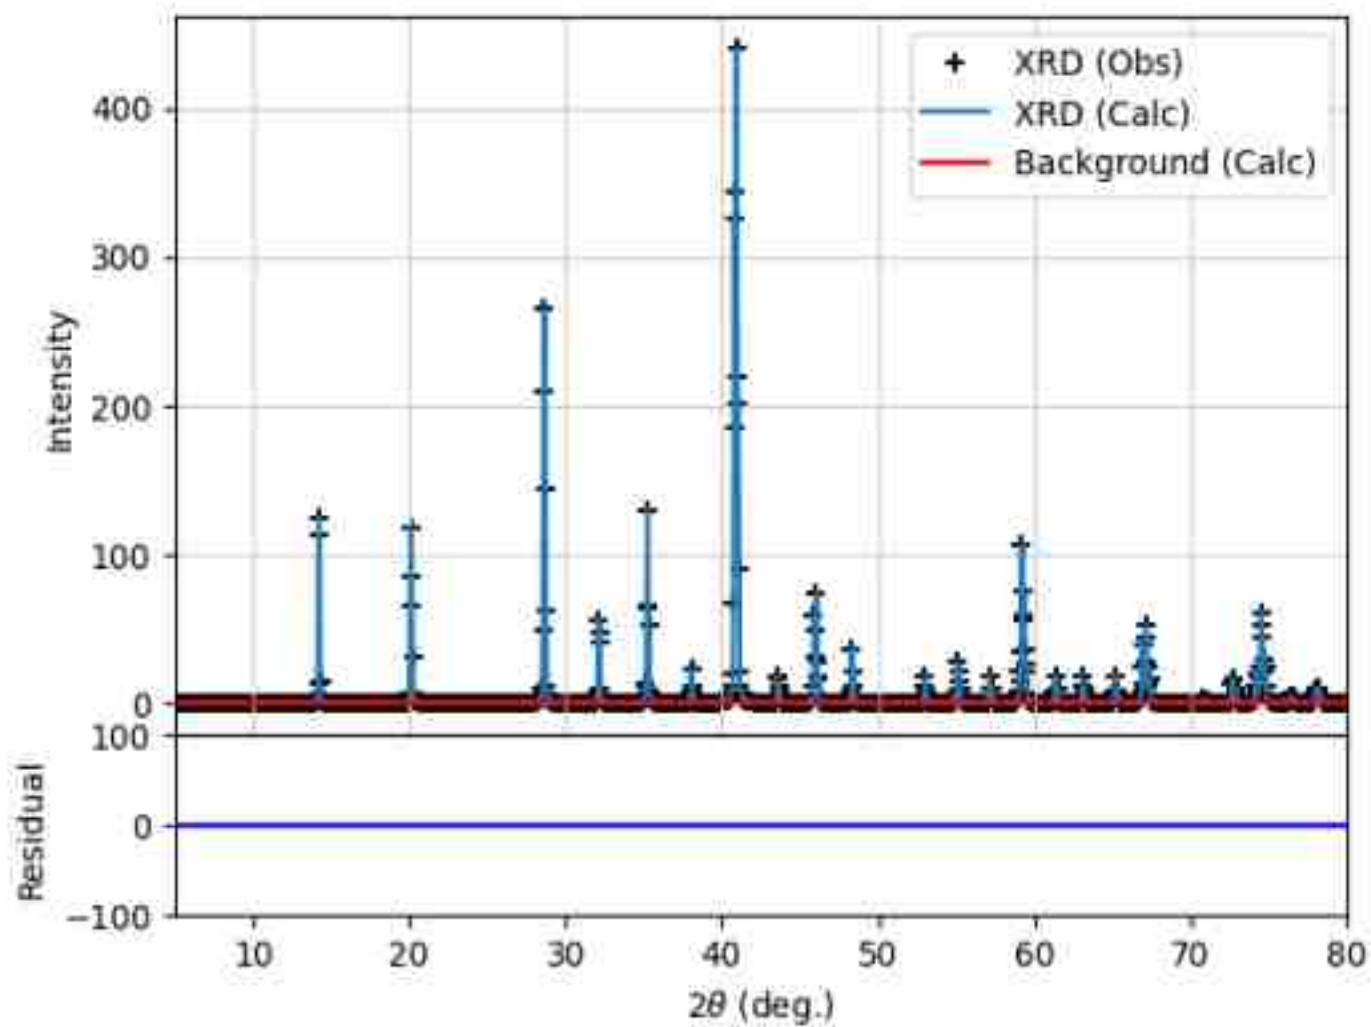

| RMSE before RR | Rwp     | RMSE after RR |
|----------------|---------|---------------|
| 0.017          | 0.00288 | 0.0011        |

# Er<sub>2</sub>Al<sub>8</sub>Ni<sub>2</sub>

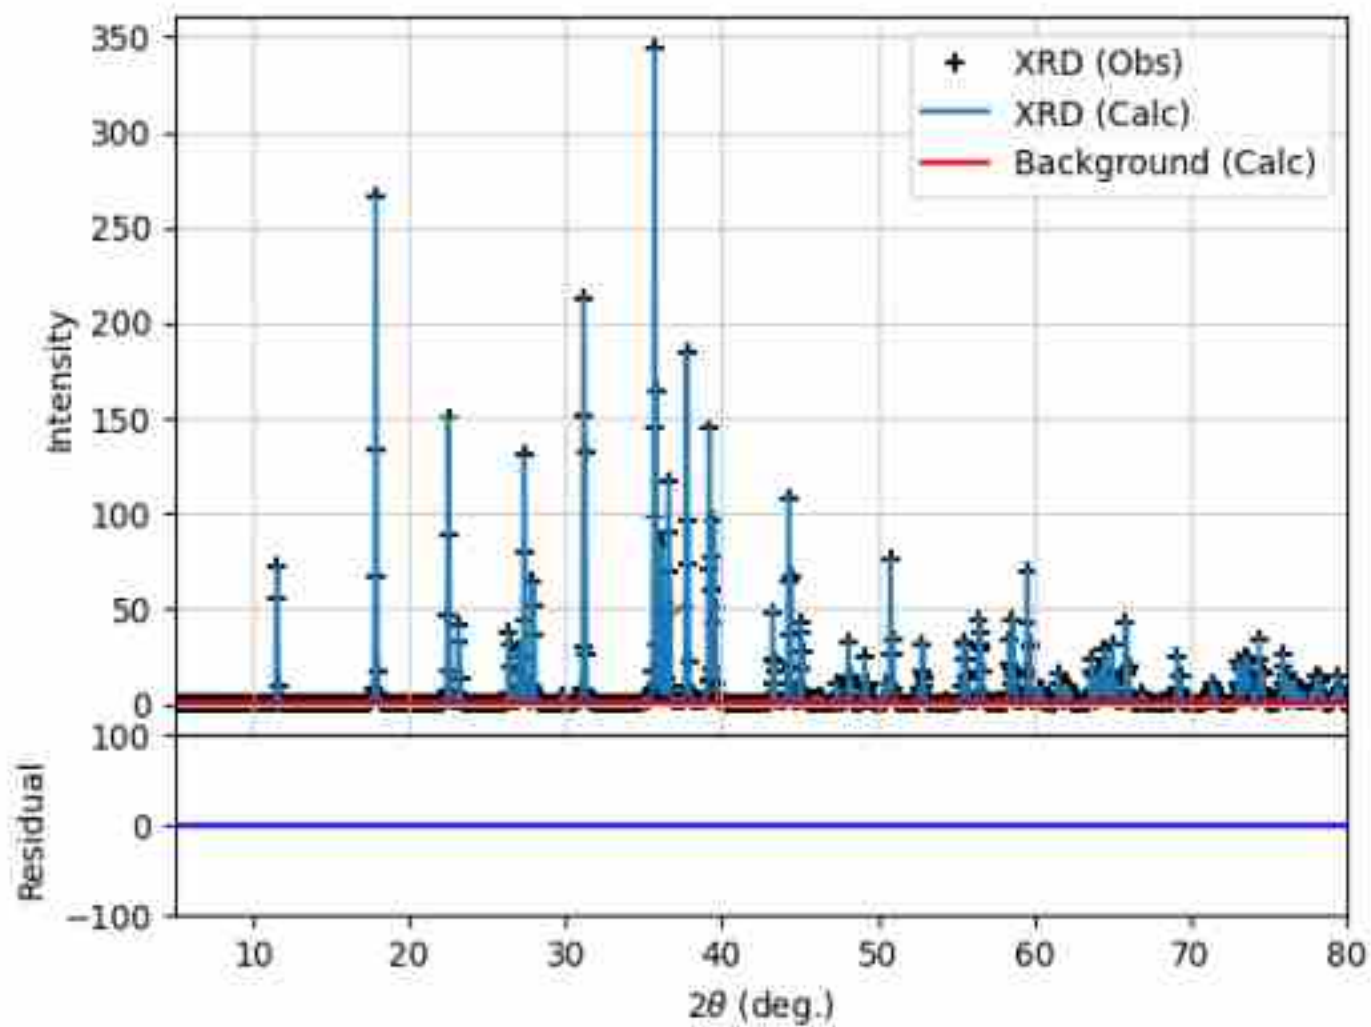

| RMSE before RR | Rwp     | RMSE after RR |
|----------------|---------|---------------|
| 0.017          | 0.00349 | 0.00061       |



# Er<sub>2</sub>Cu<sub>6</sub>S<sub>6</sub>

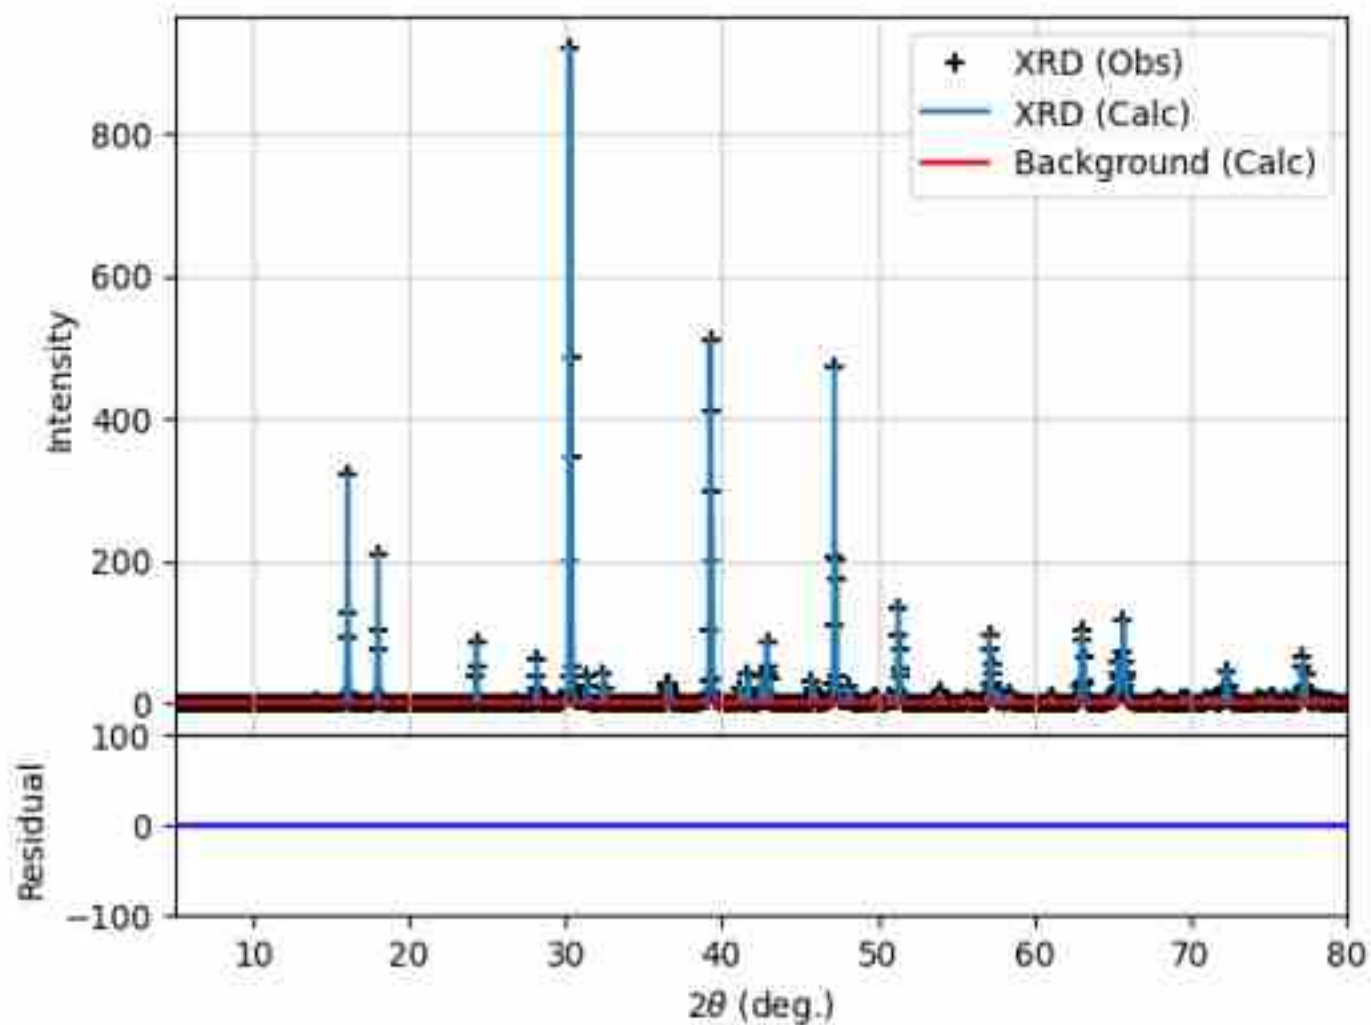

| RMSE before RR | Rwp     | RMSE after RR |
|----------------|---------|---------------|
| 0.017          | 0.00311 | 0.00043       |

# Er<sub>4</sub>Co<sub>6</sub>Ge<sub>10</sub>

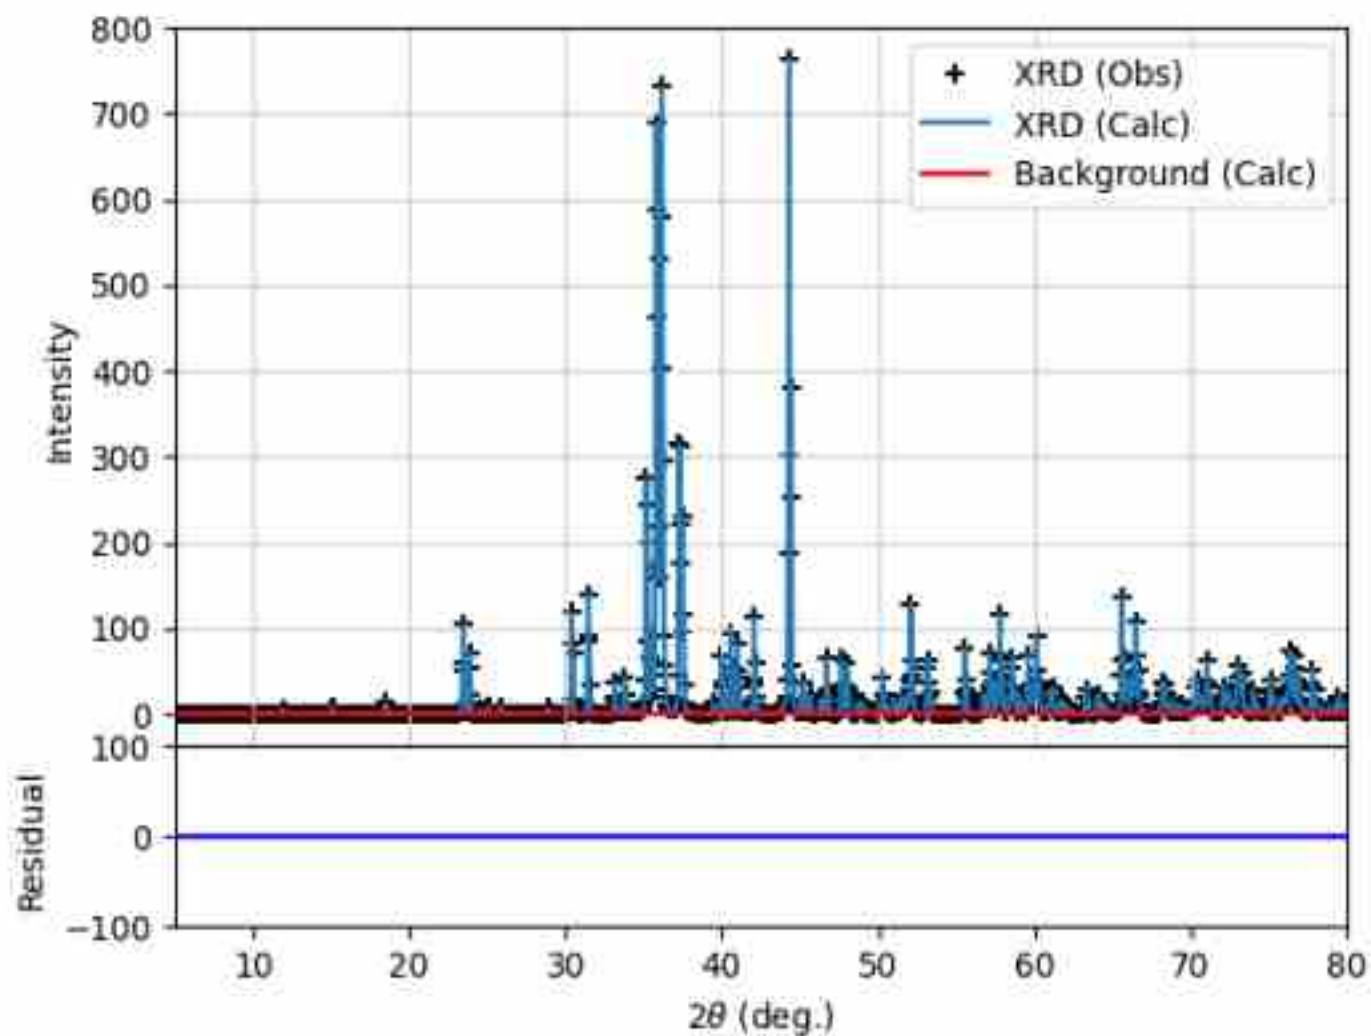

| RMSE before RR | Rwp     | RMSE after RR |
|----------------|---------|---------------|
| 0.017          | 0.00337 | 0.00032       |

# Er<sub>6</sub>Fe<sub>4</sub>Ge<sub>6</sub>

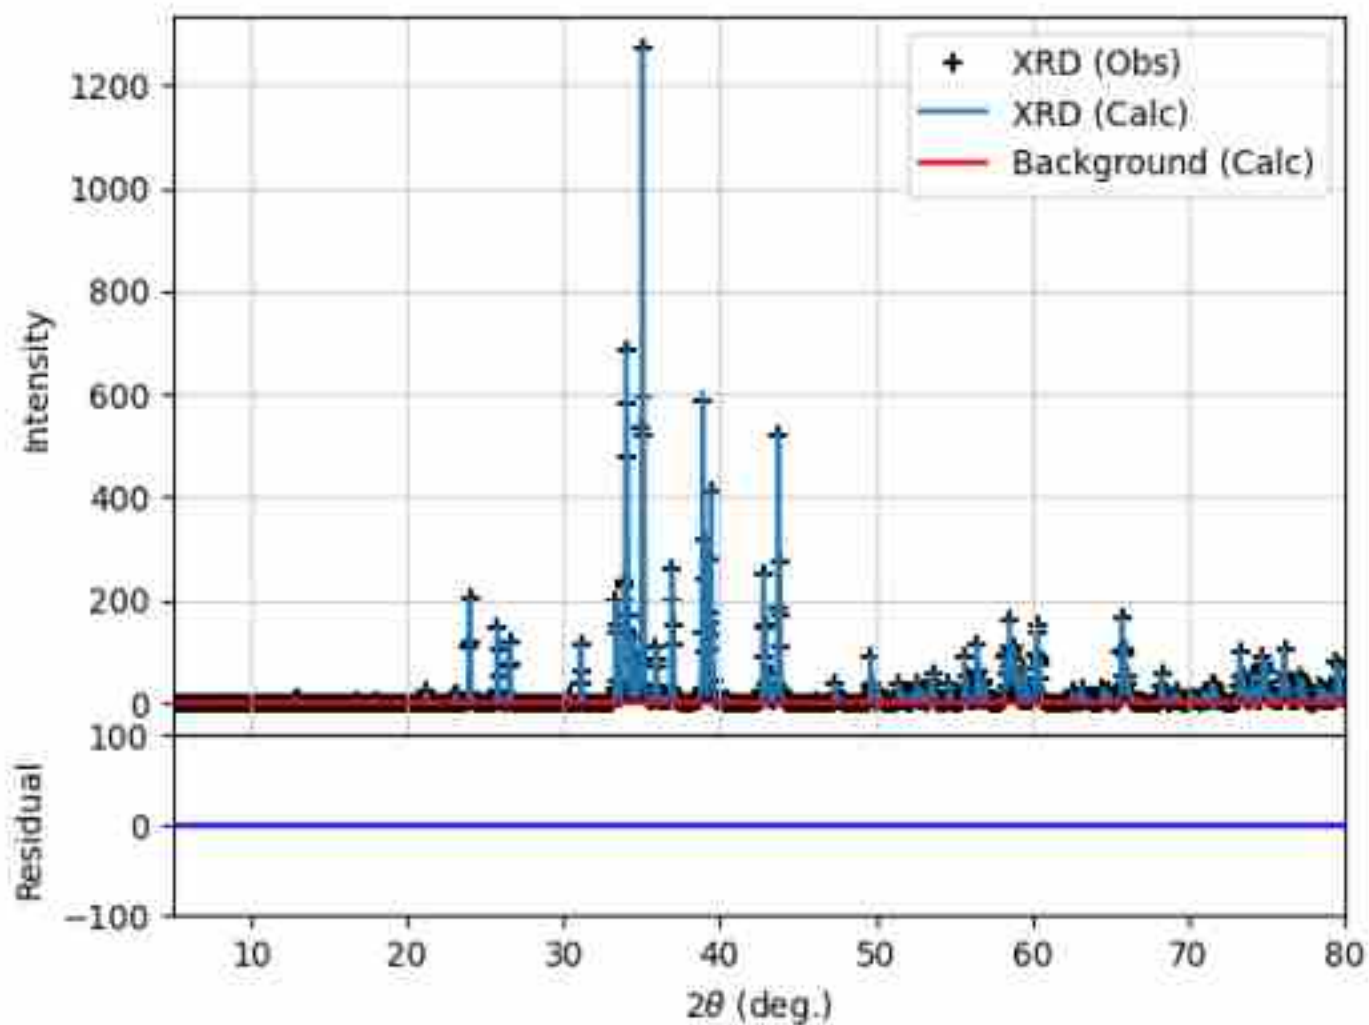

| RMSE before RR | Rwp     | RMSE after RR |
|----------------|---------|---------------|
| 0.017          | 0.00406 | 0.00027       |

# Er12Ru4

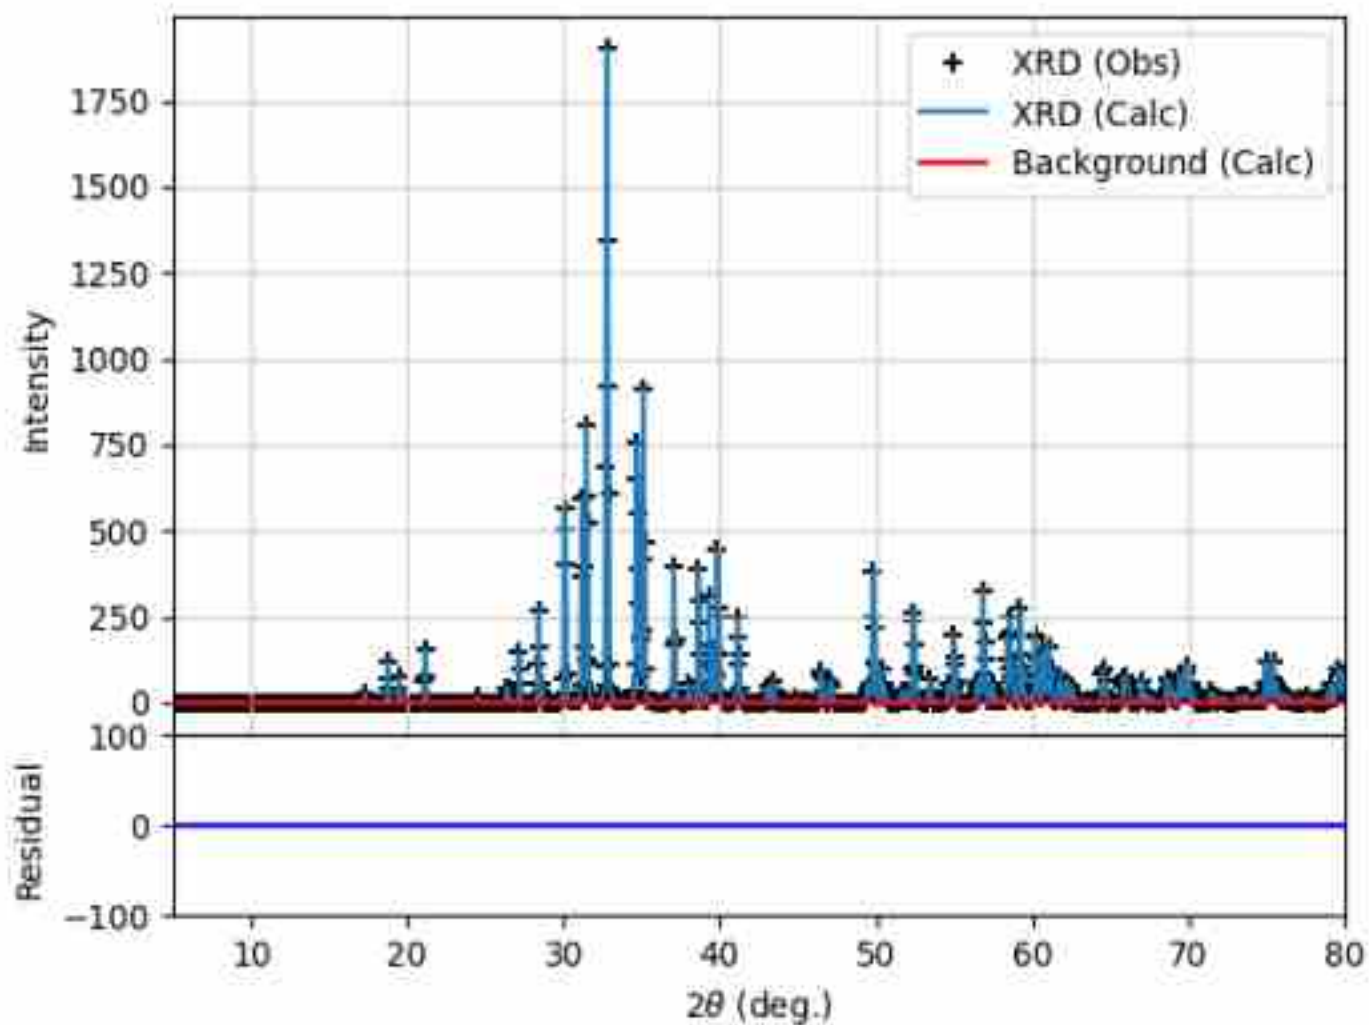

| RMSE before RR | Rwp     | RMSE after RR |
|----------------|---------|---------------|
| 0.017          | 0.00399 | 0.00029       |

# Eu<sub>1</sub>Zn<sub>2</sub>Sb<sub>2</sub>

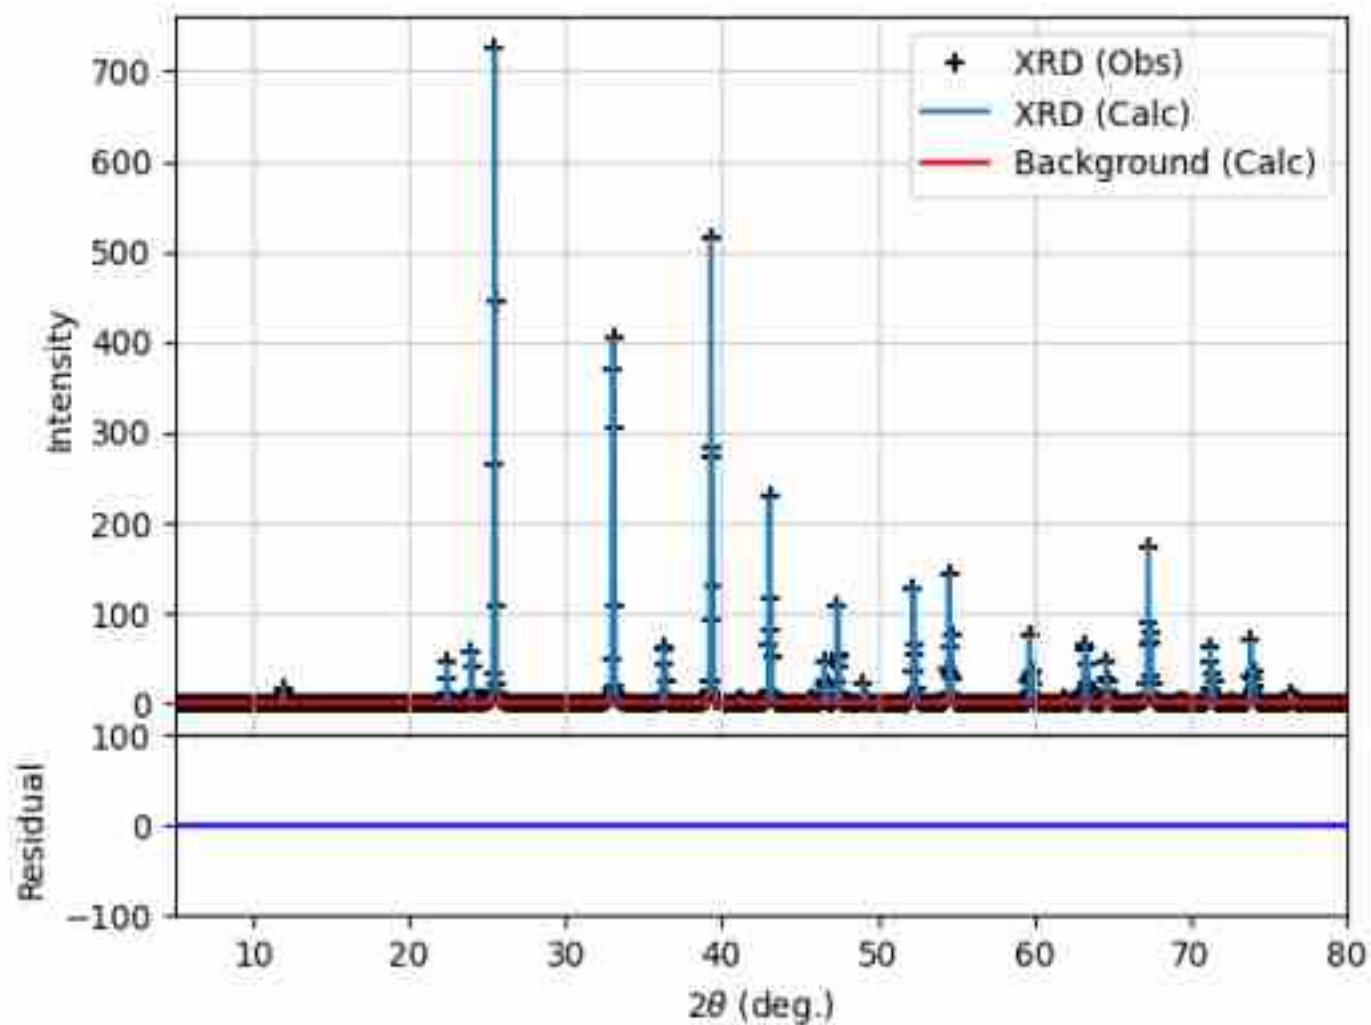

| RMSE before RR | Rwp    | RMSE after RR |
|----------------|--------|---------------|
| 0.017          | 0.0037 | 0.00035       |

# Eu<sub>2</sub>Nb<sub>2</sub>O<sub>8</sub>

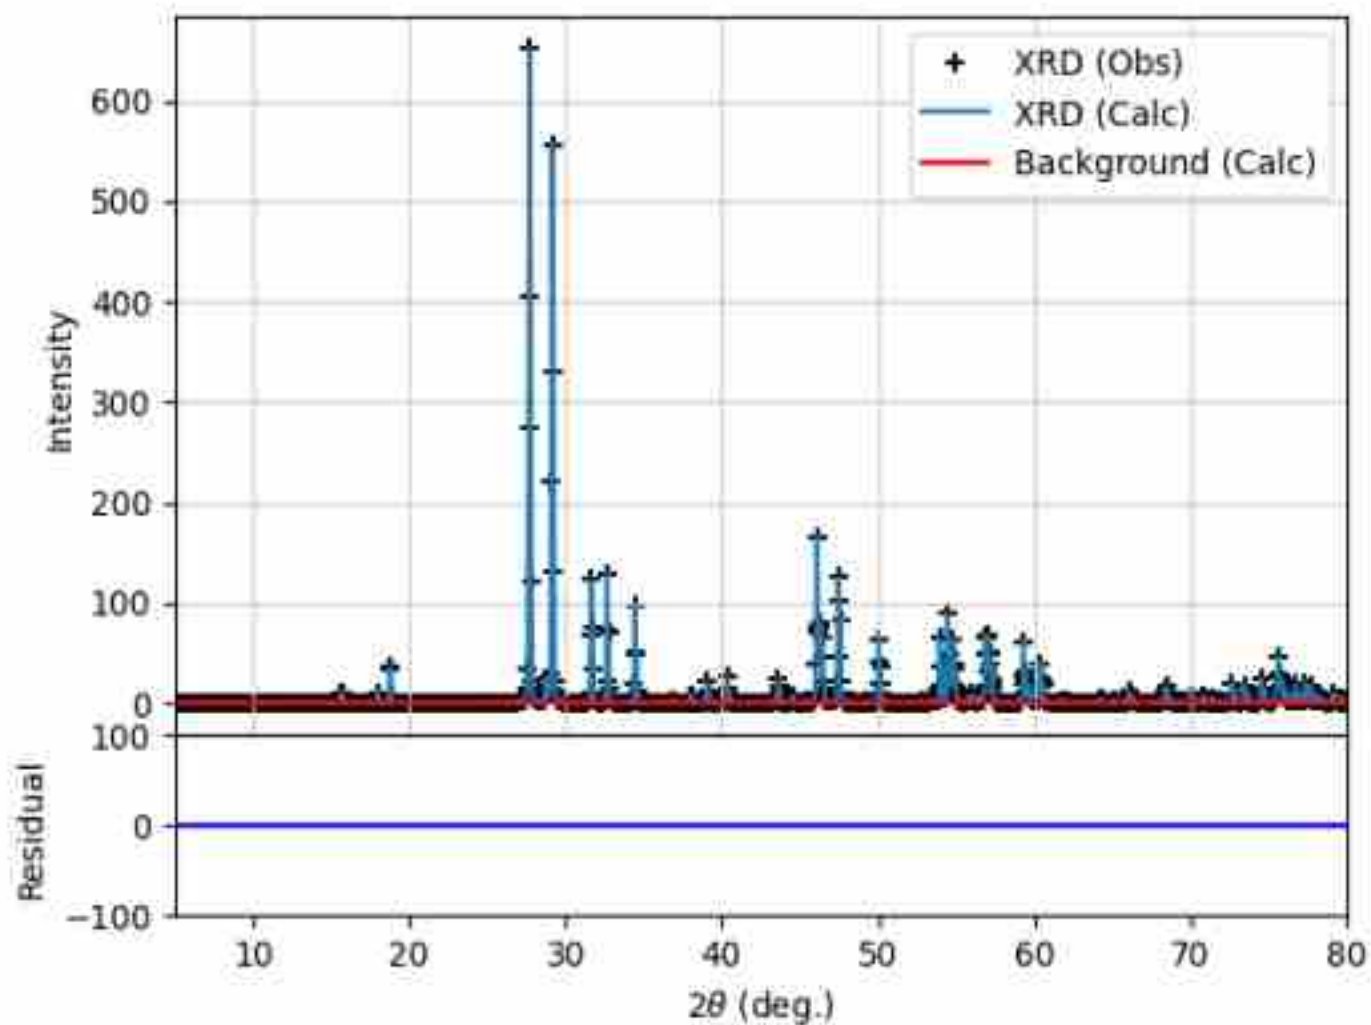

| RMSE before RR | Rwp   | RMSE after RR |
|----------------|-------|---------------|
| 0.017          | 0.003 | 0.00106       |

# Eu<sub>2</sub>Sn<sub>4</sub>Pd<sub>4</sub>

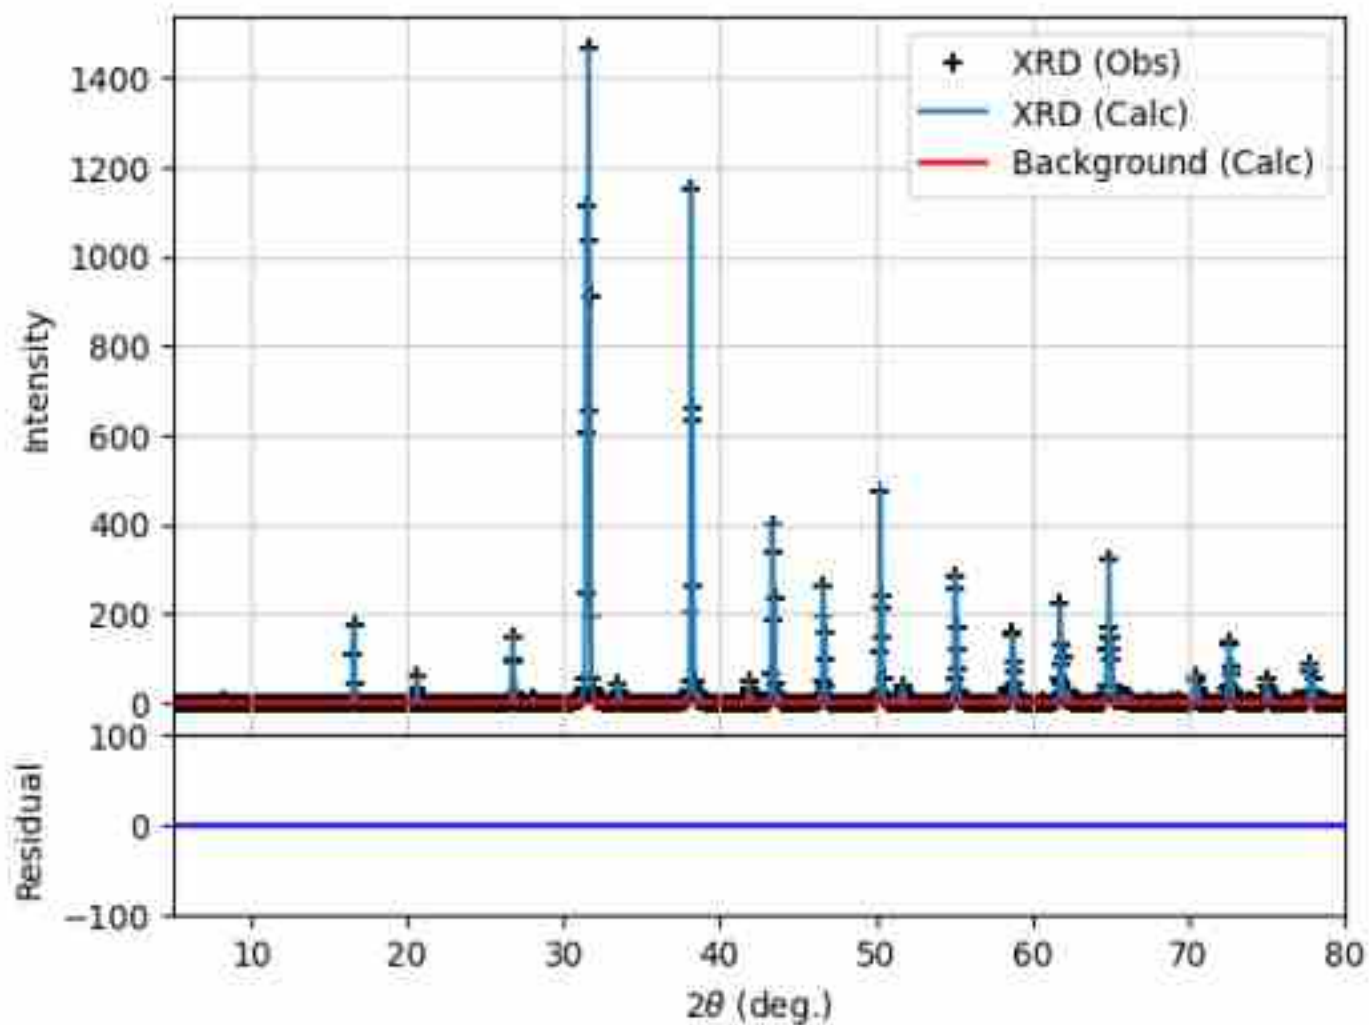

| RMSE before RR | Rwp     | RMSE after RR |
|----------------|---------|---------------|
| 0.017          | 0.00714 | 0.00043       |

# Fe<sub>2</sub>O<sub>2</sub>F<sub>2</sub>

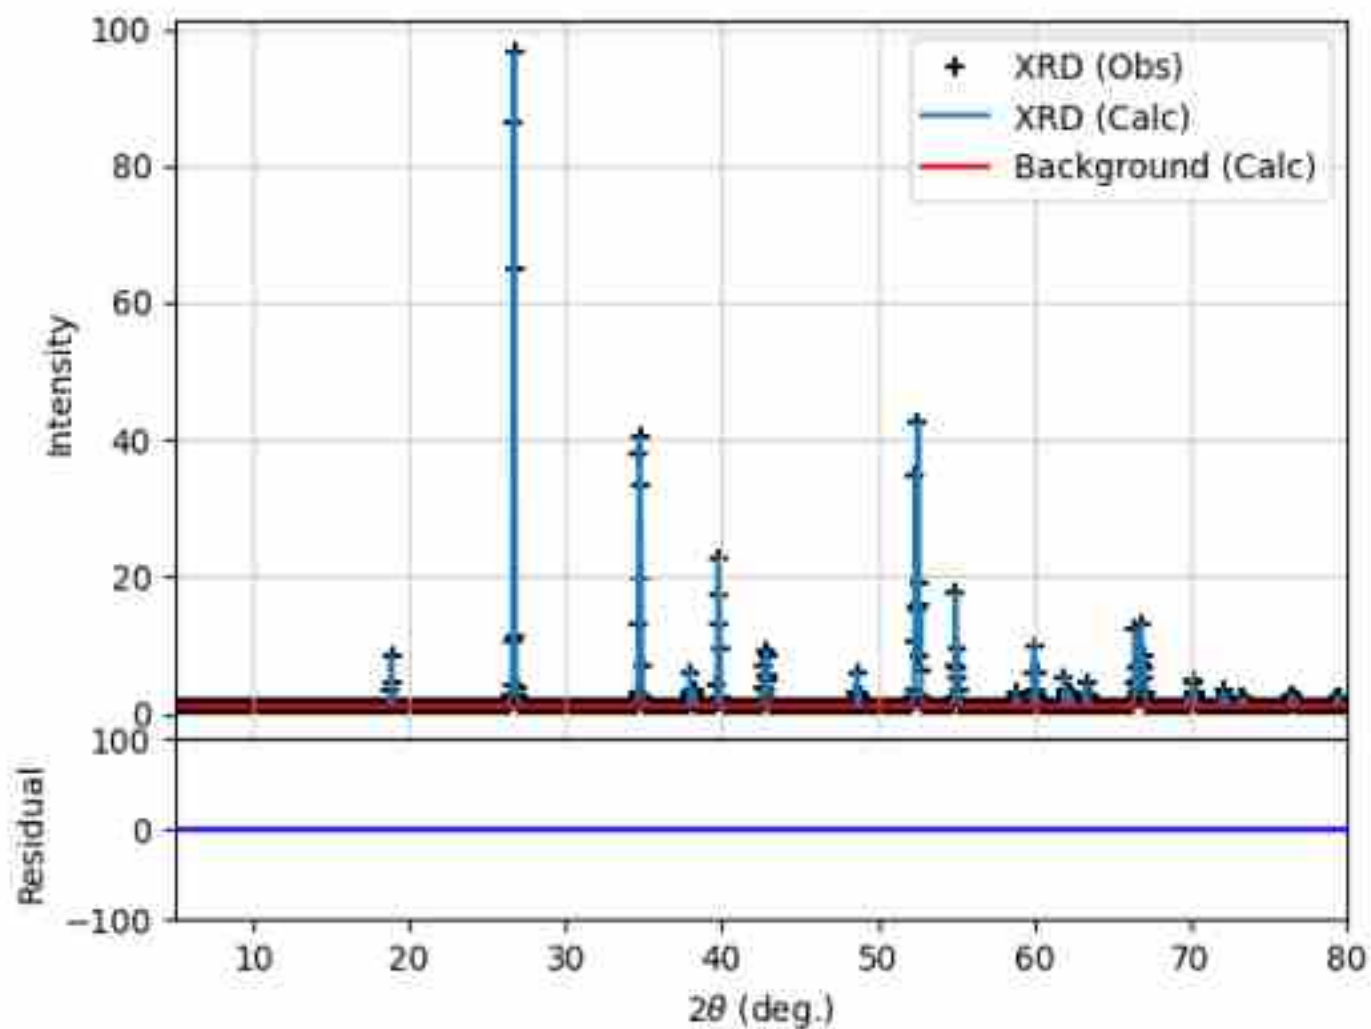

| RMSE before RR | Rwp     | RMSE after RR |
|----------------|---------|---------------|
| 0.017          | 0.00178 | 0.00068       |



# Fe<sub>2</sub>Pt<sub>1</sub>Rh<sub>1</sub>

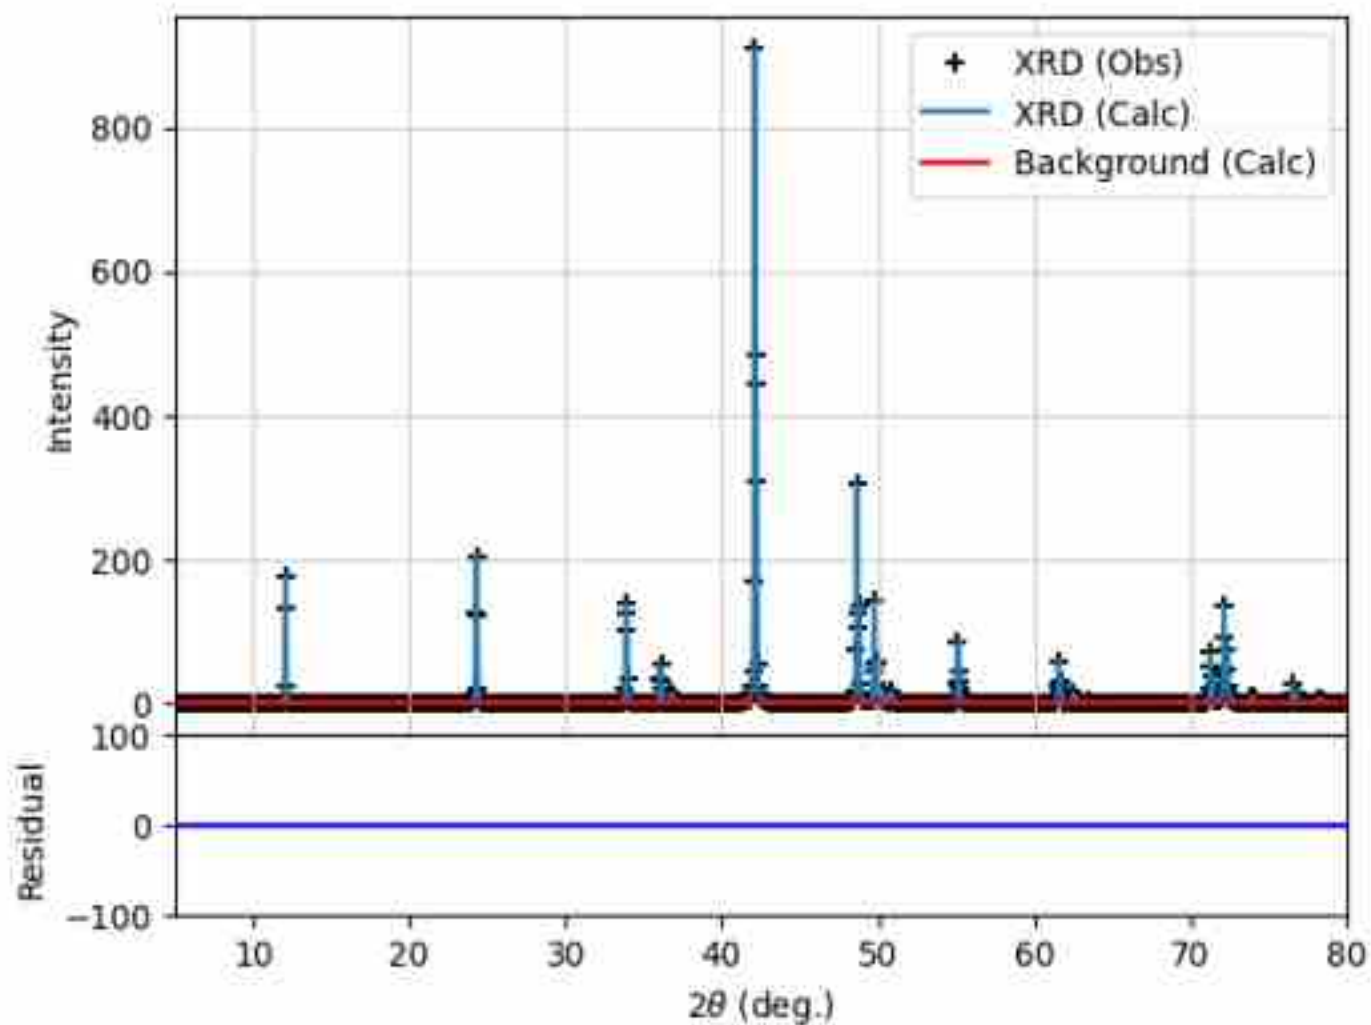

| RMSE before RR | Rwp     | RMSE after RR |
|----------------|---------|---------------|
| 0.017          | 0.00402 | 0.00073       |

# Gd1Al1Zn1Ge2

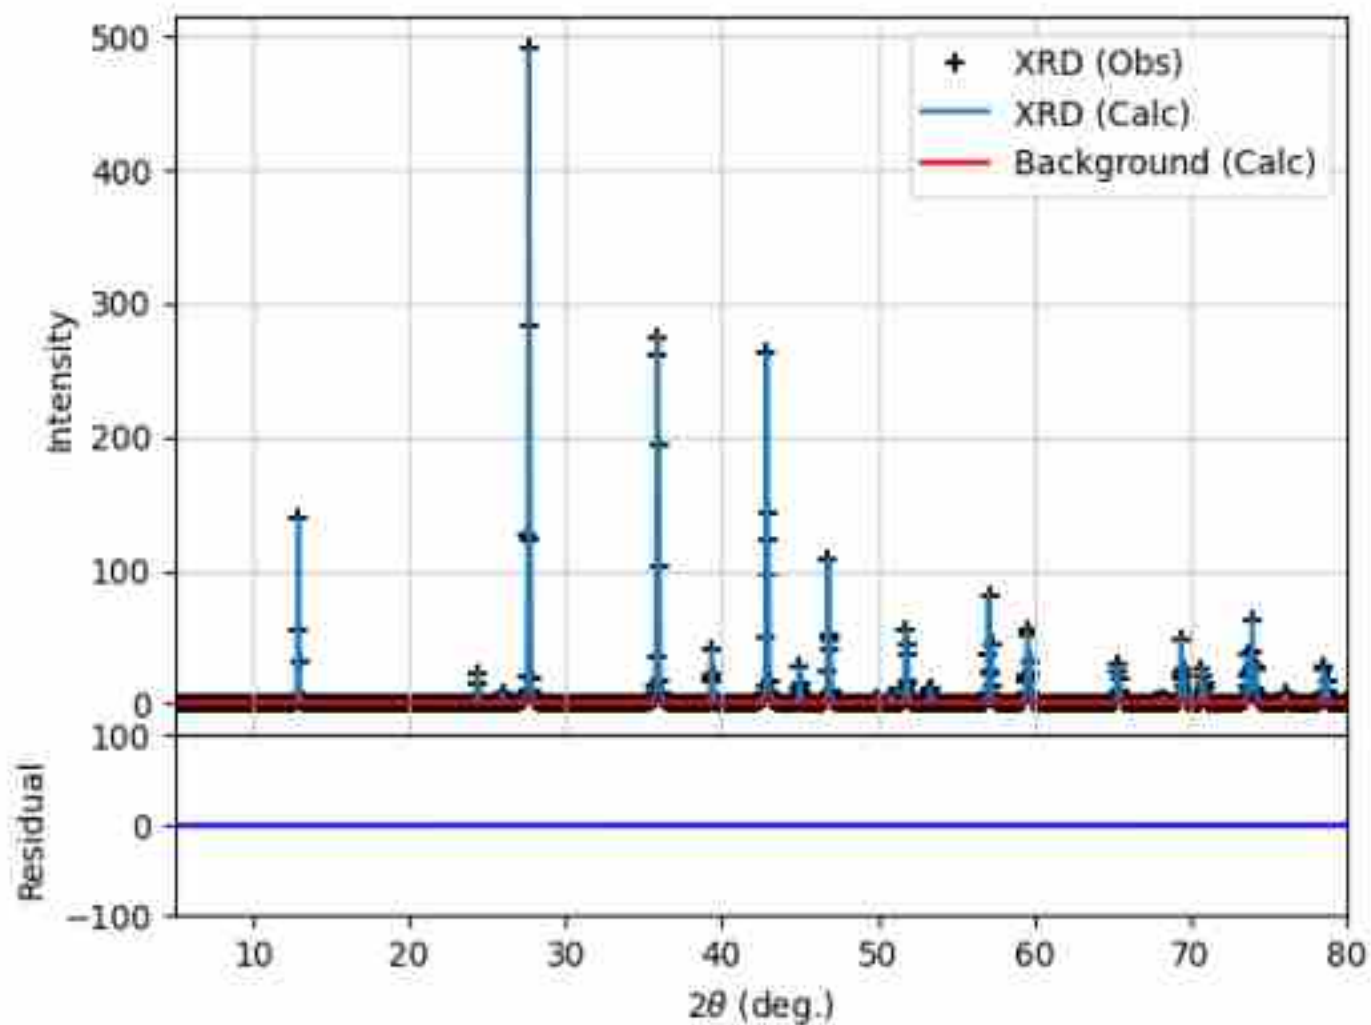

| RMSE before RR | Rwp     | RMSE after RR |
|----------------|---------|---------------|
| 0.017          | 2.03196 | 0.00408       |

# Gd<sub>2</sub>Y<sub>2</sub>Fe<sub>4</sub>O<sub>12</sub>

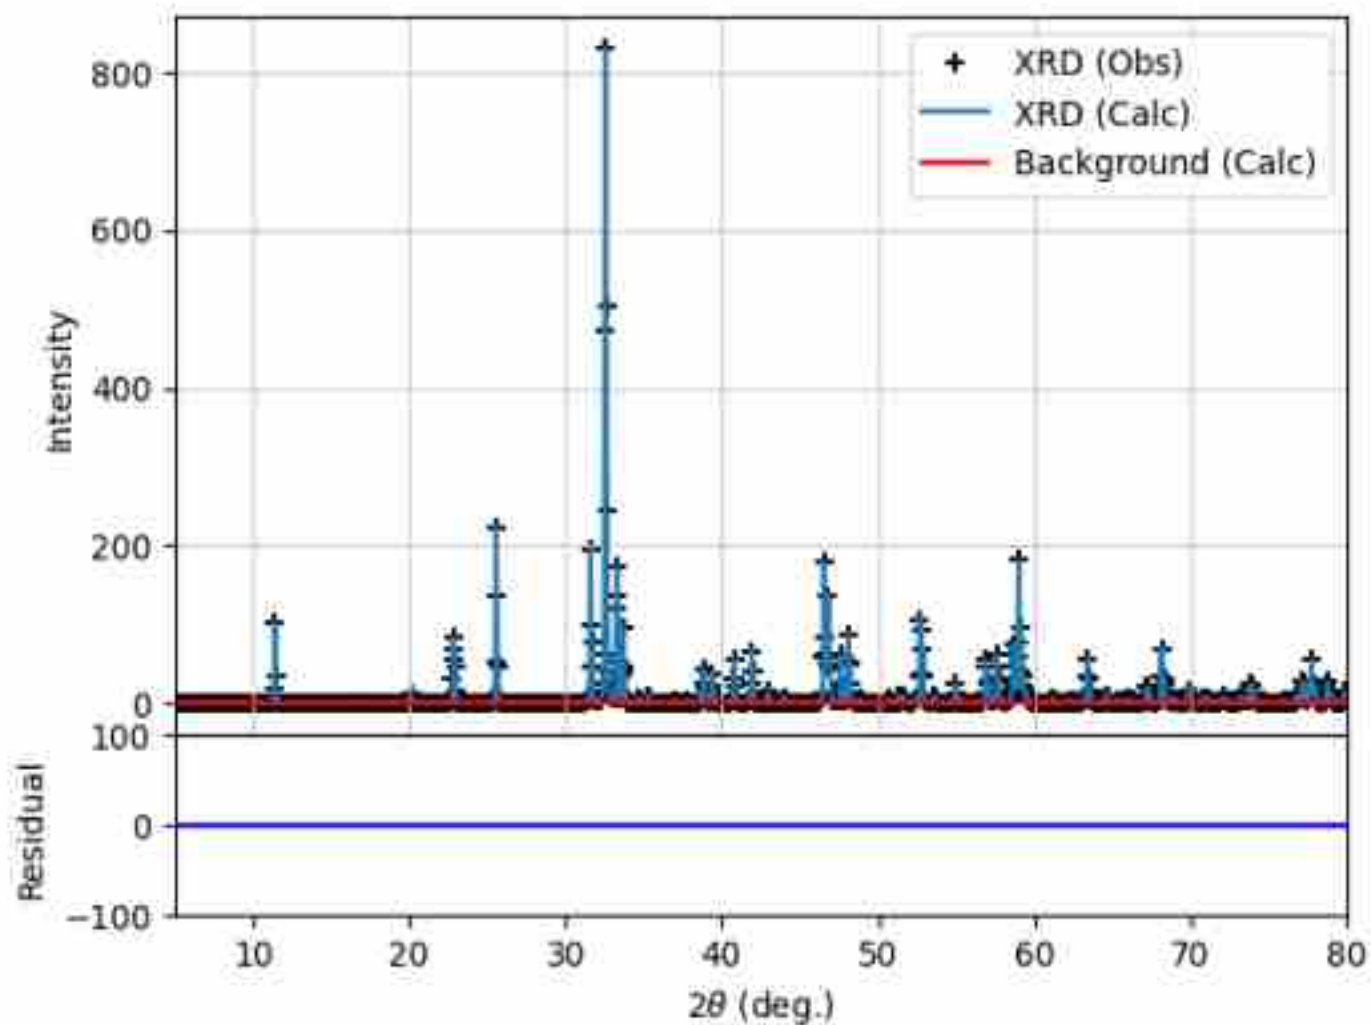

| RMSE before RR | Rwp     | RMSE after RR |
|----------------|---------|---------------|
| 0.017          | 0.00384 | 0.00137       |

# Gd<sub>3</sub>Al<sub>3</sub>Cu<sub>3</sub>

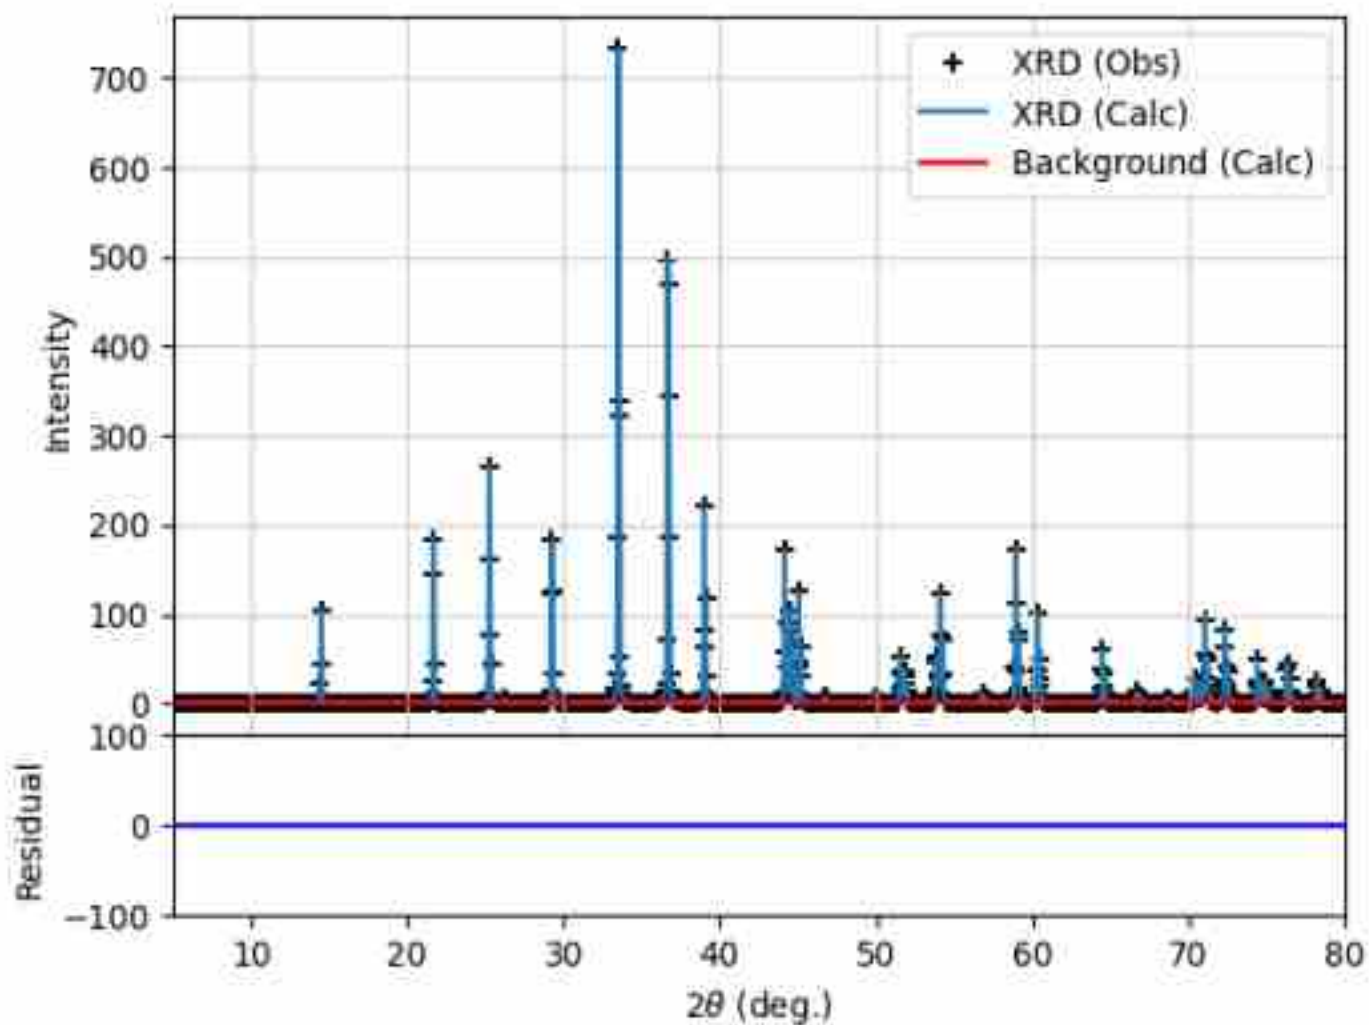

| RMSE before RR | Rwp     | RMSE after RR |
|----------------|---------|---------------|
| 0.017          | 0.00298 | 0.00075       |

# Gd4Al4

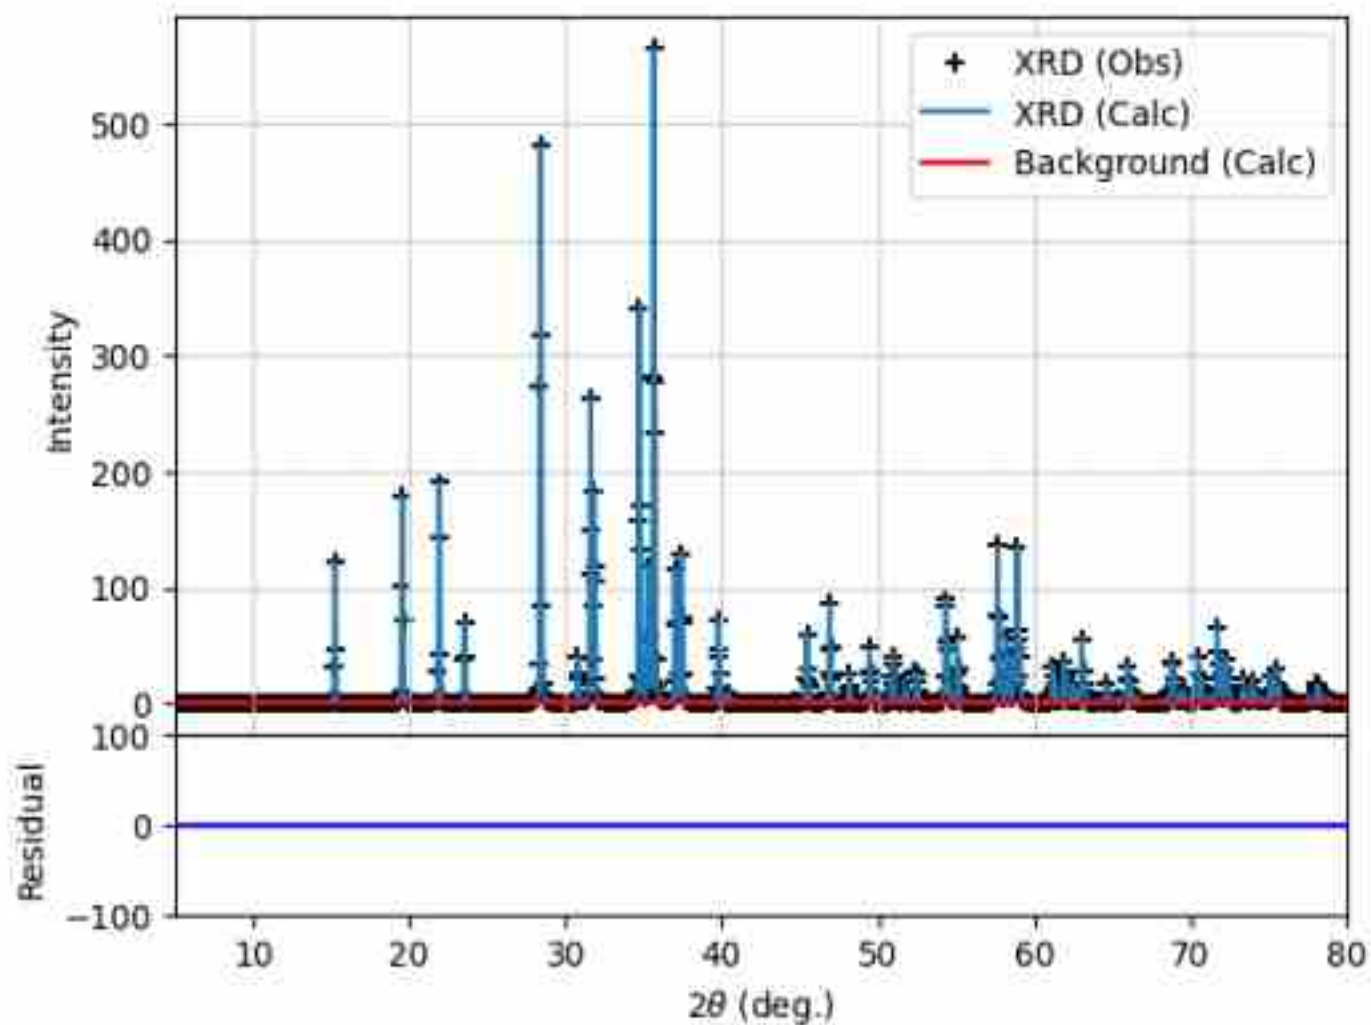

| RMSE before RR | Rwp     | RMSE after RR |
|----------------|---------|---------------|
| 0.017          | 0.00454 | 0.00042       |

# Gd<sub>4</sub>Lu<sub>4</sub>O<sub>12</sub>

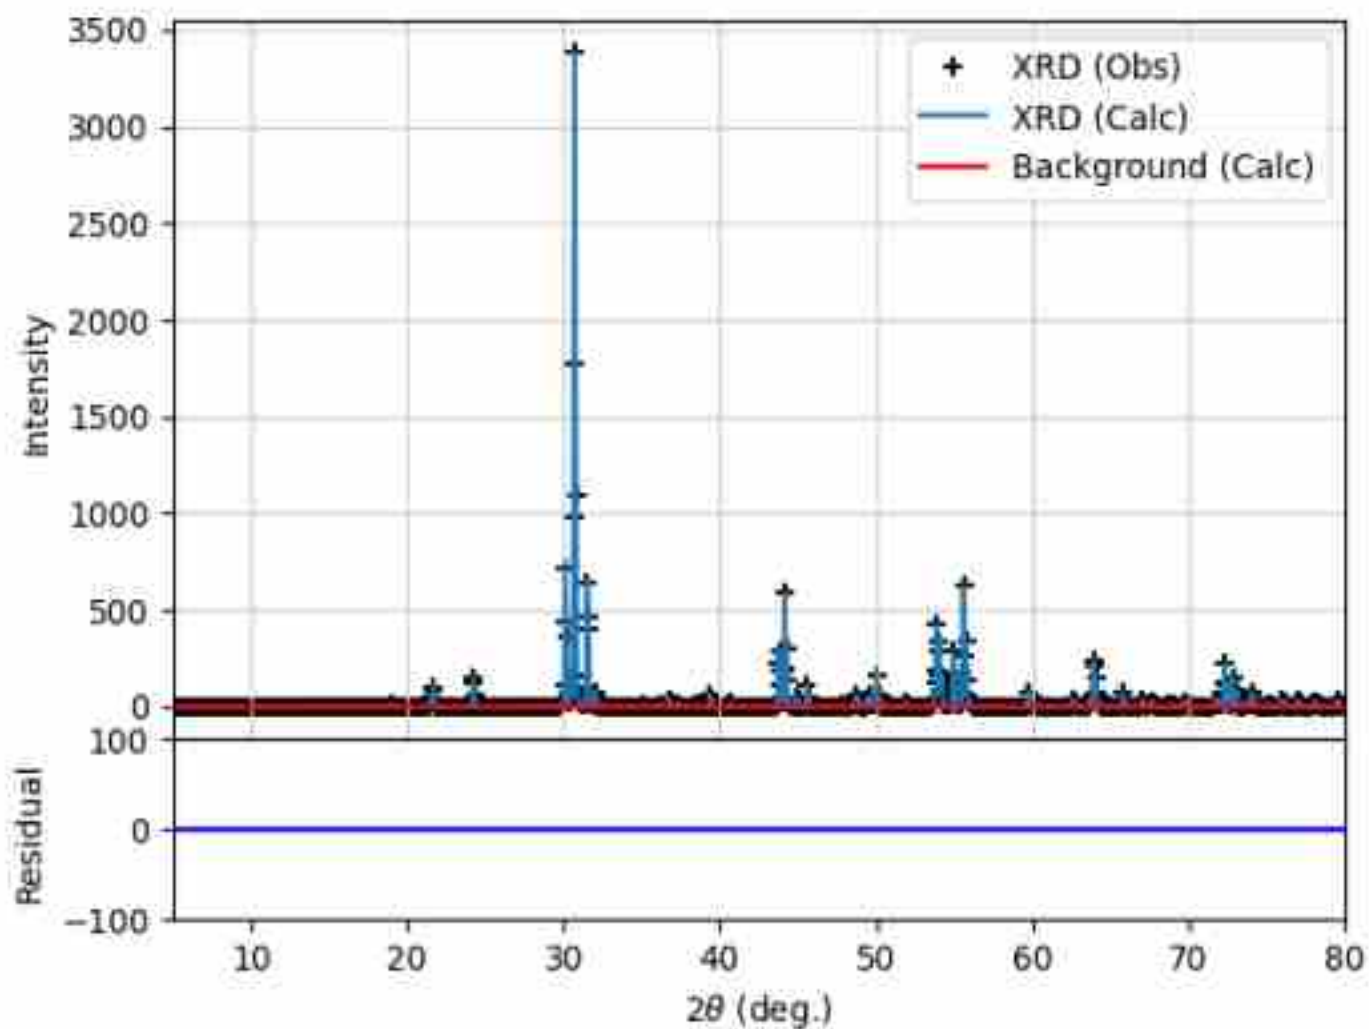

| RMSE before RR | Rwp     | RMSE after RR |
|----------------|---------|---------------|
| 0.017          | 0.00496 | 0.0012        |

# Ge2Mo1

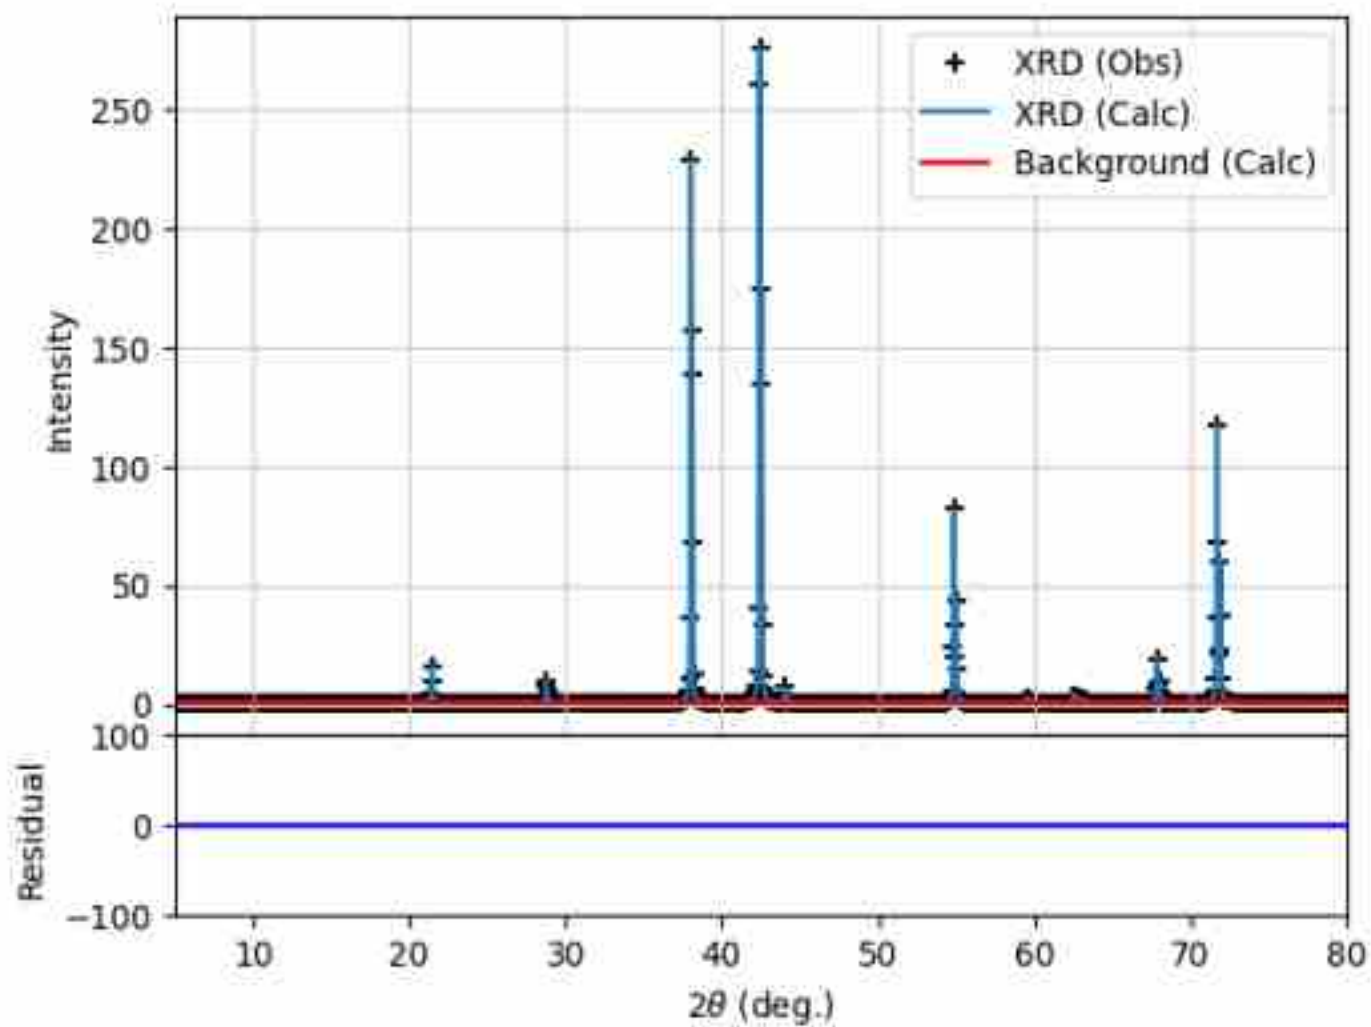

| RMSE before RR | Rwp     | RMSE after RR |
|----------------|---------|---------------|
| 0.017          | 0.40924 | 0.00214       |

# Ge<sub>2</sub>S<sub>4</sub>

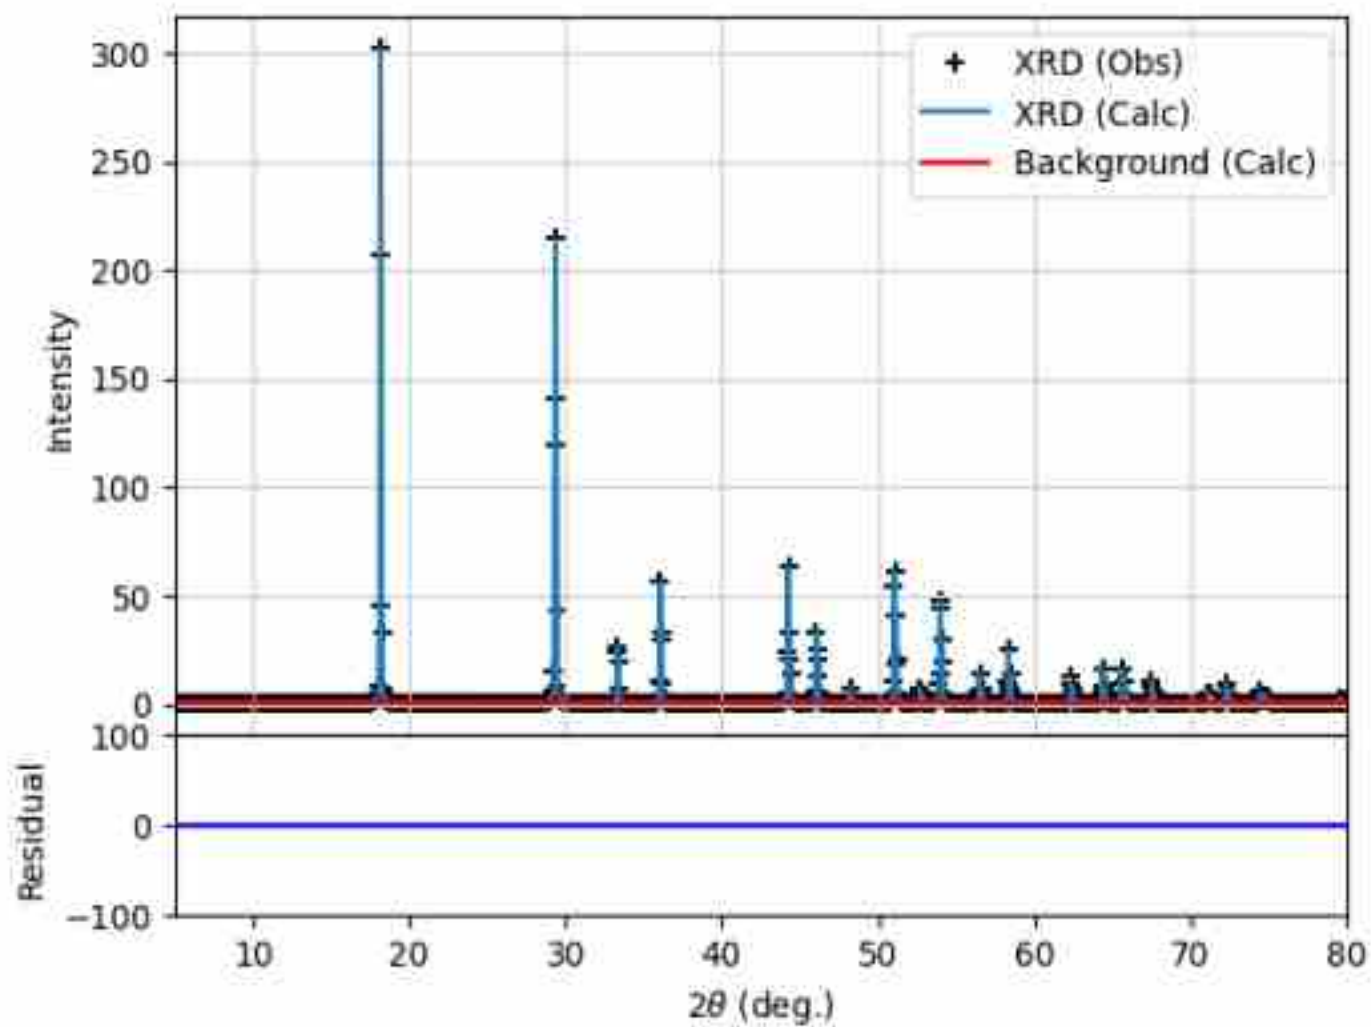

| RMSE before RR | Rwp     | RMSE after RR |
|----------------|---------|---------------|
| 0.017          | 0.00411 | 0.00052       |



# Hf1Mn1F6

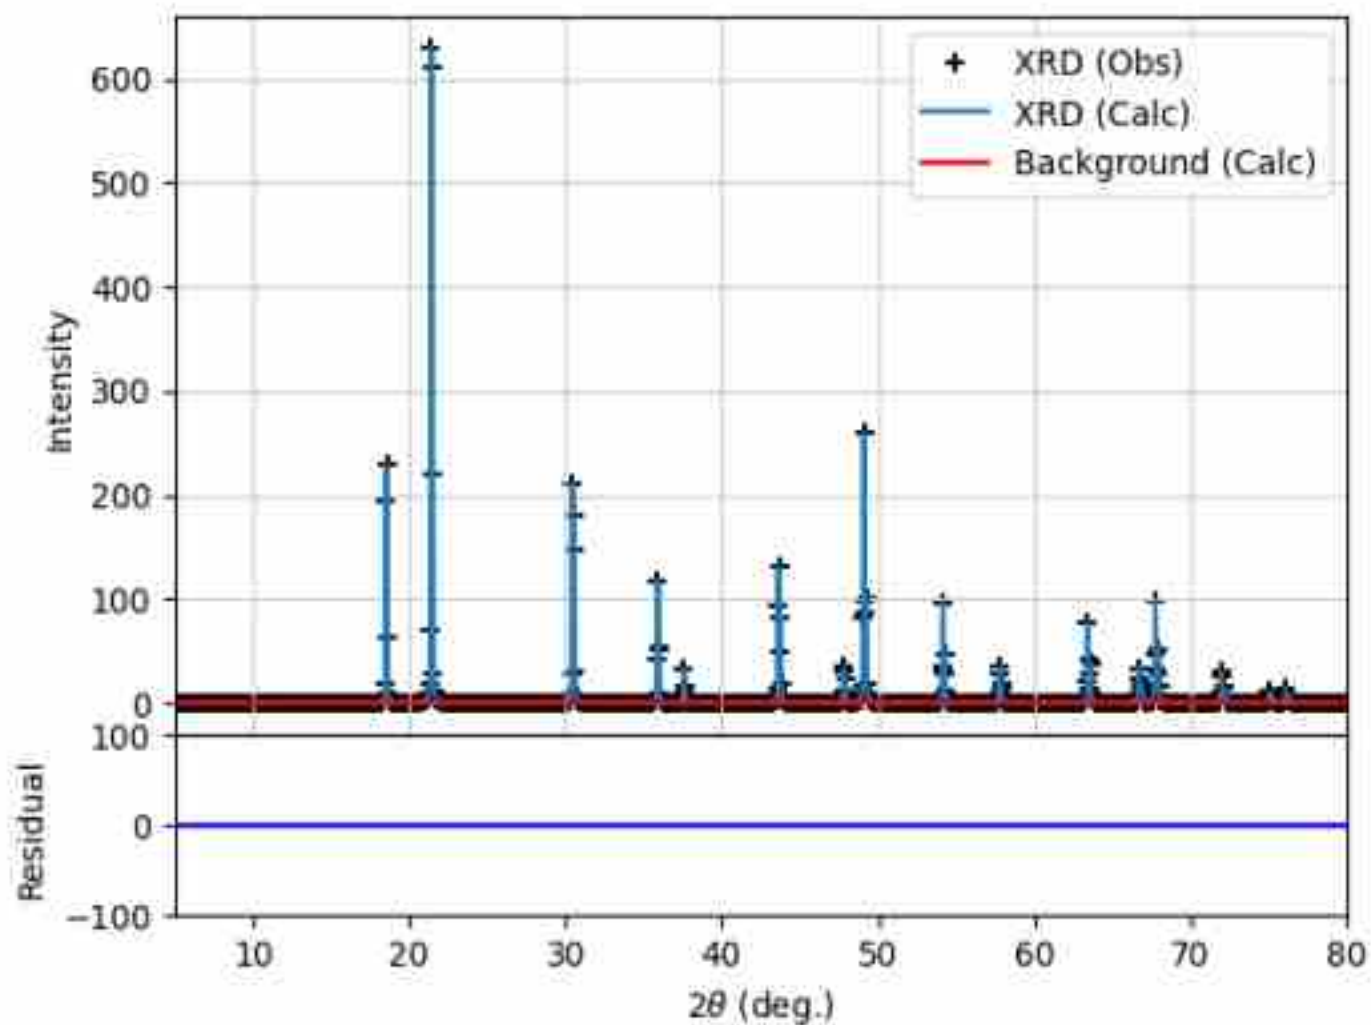

| RMSE before RR | Rwp     | RMSE after RR |
|----------------|---------|---------------|
| 0.017          | 0.02404 | 0.00468       |

# Hf1Ti1C2

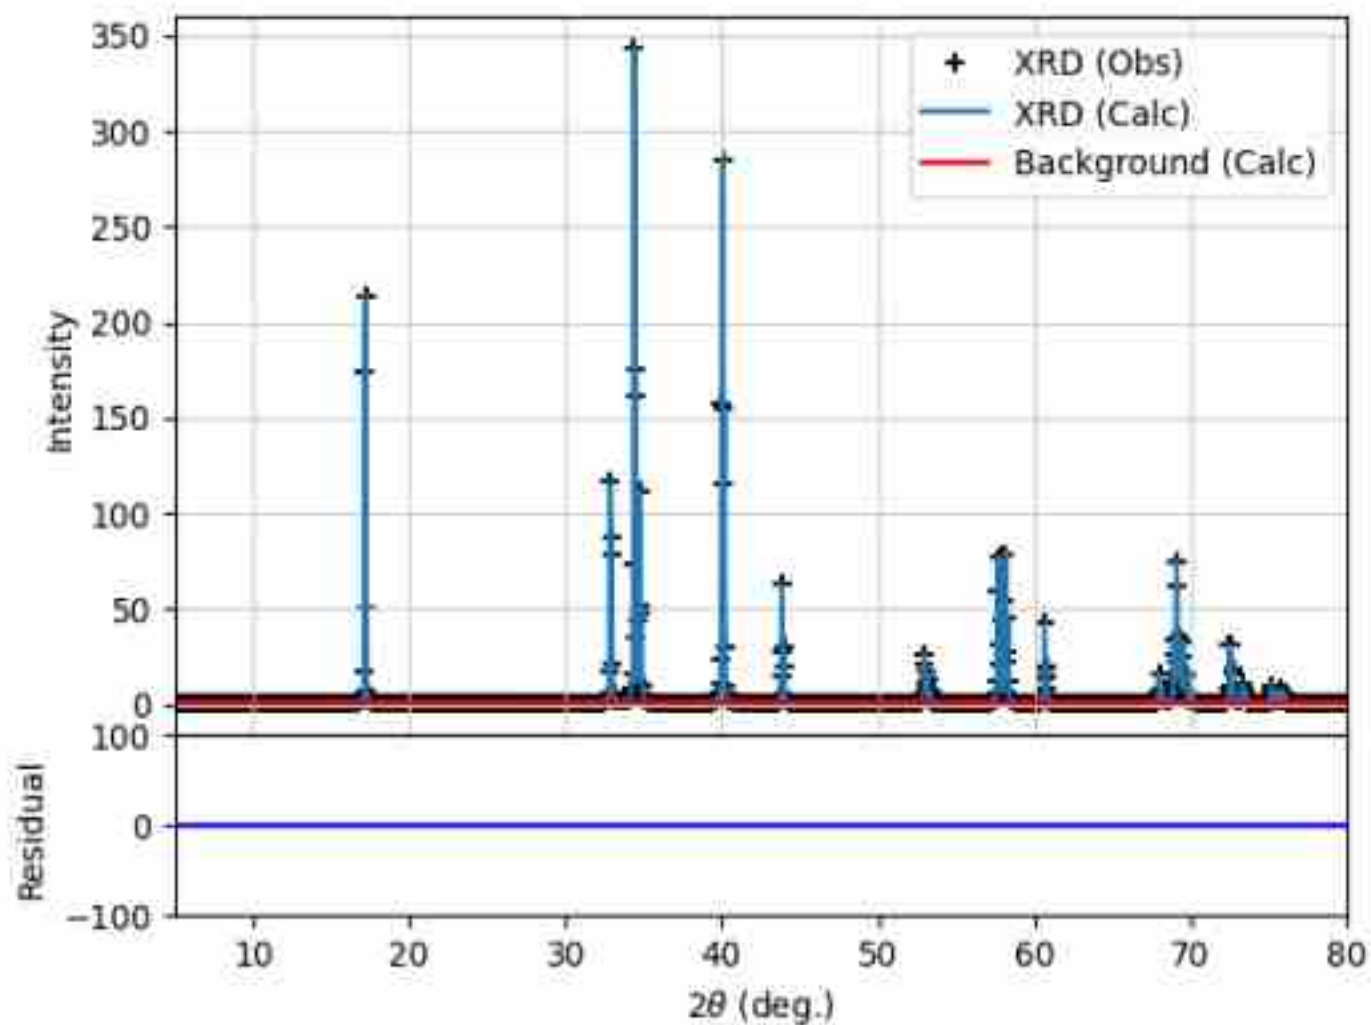

| RMSE before RR | Rwp     | RMSE after RR |
|----------------|---------|---------------|
| 0.017          | 0.00392 | 0.00149       |

# Hf<sub>2</sub>Si<sub>2</sub>S<sub>2</sub>

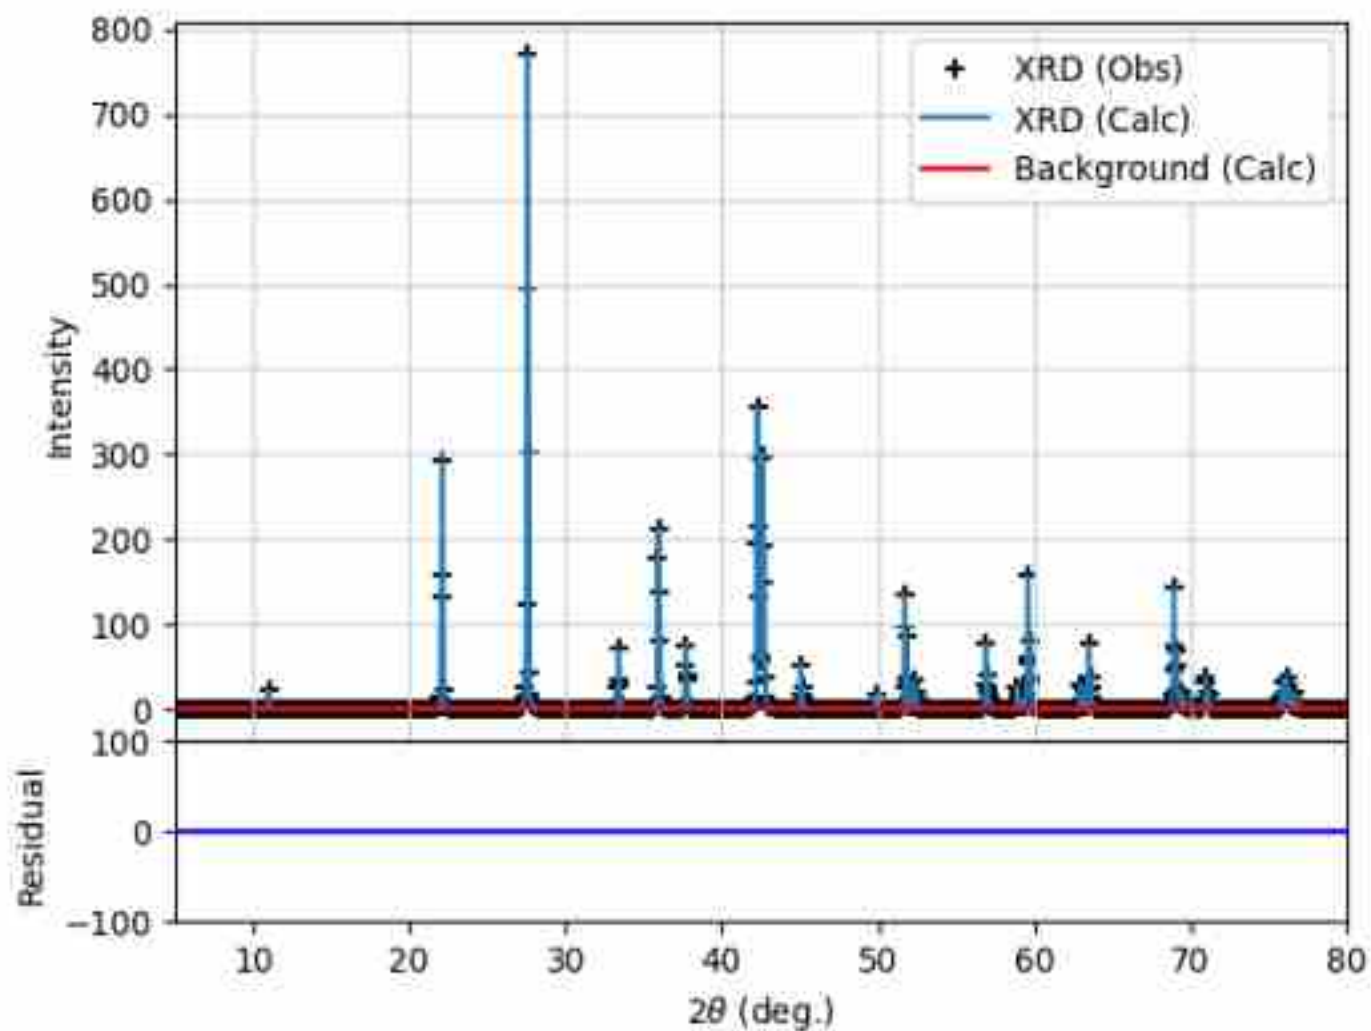

| RMSE before RR | Rwp    | RMSE after RR |
|----------------|--------|---------------|
| 0.017          | 0.0047 | 0.00052       |

# Hf4Nb4P4

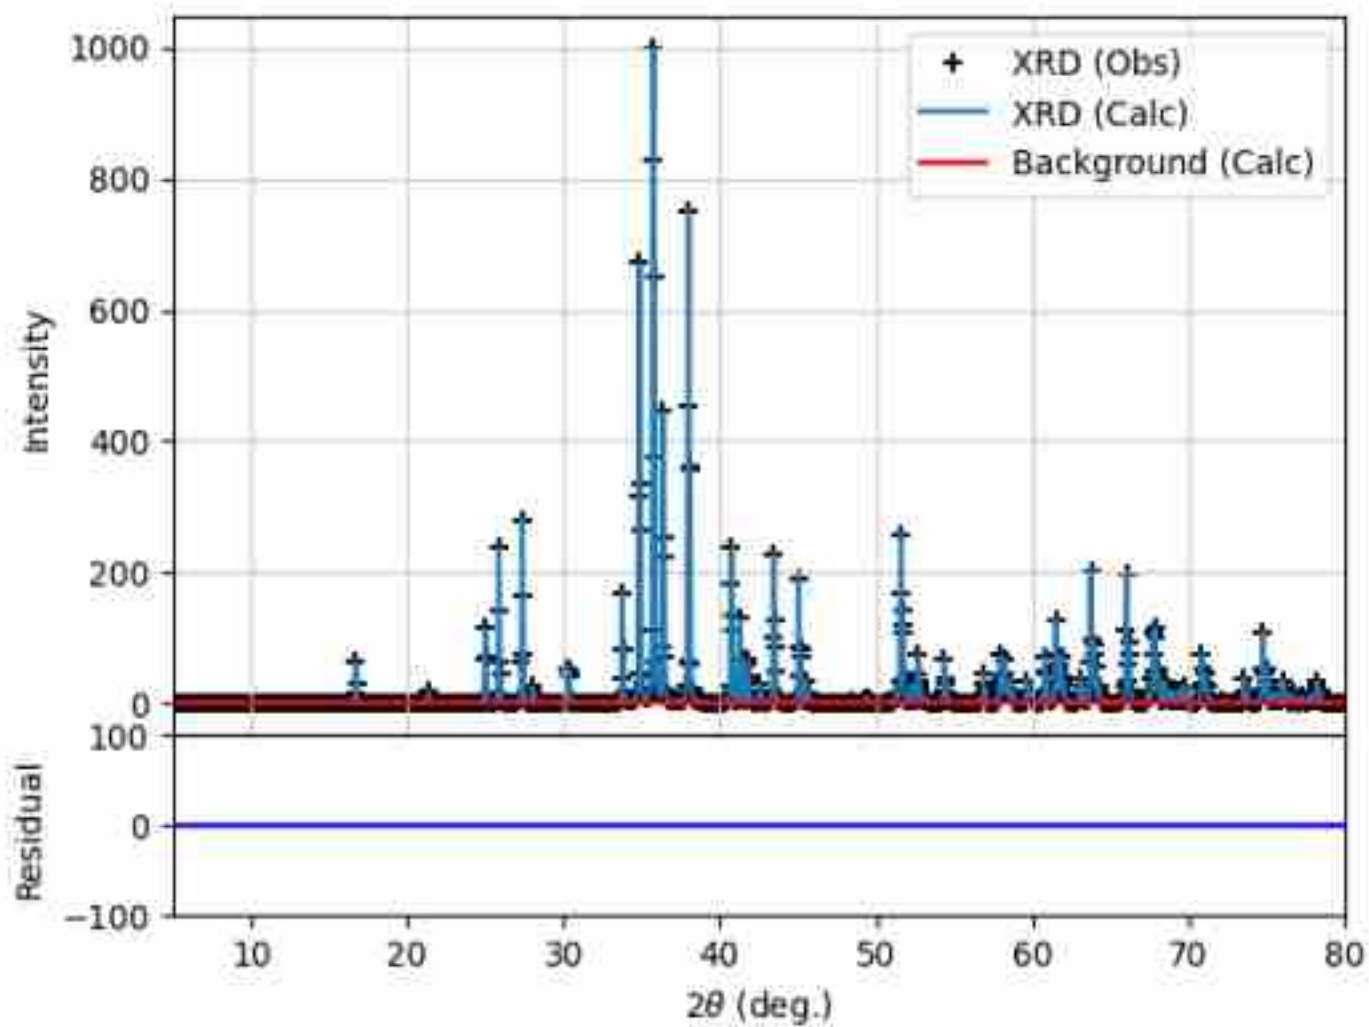

| RMSE before RR | Rwp     | RMSE after RR |
|----------------|---------|---------------|
| 0.017          | 0.00488 | 0.00046       |

# Hf4Sn2C2

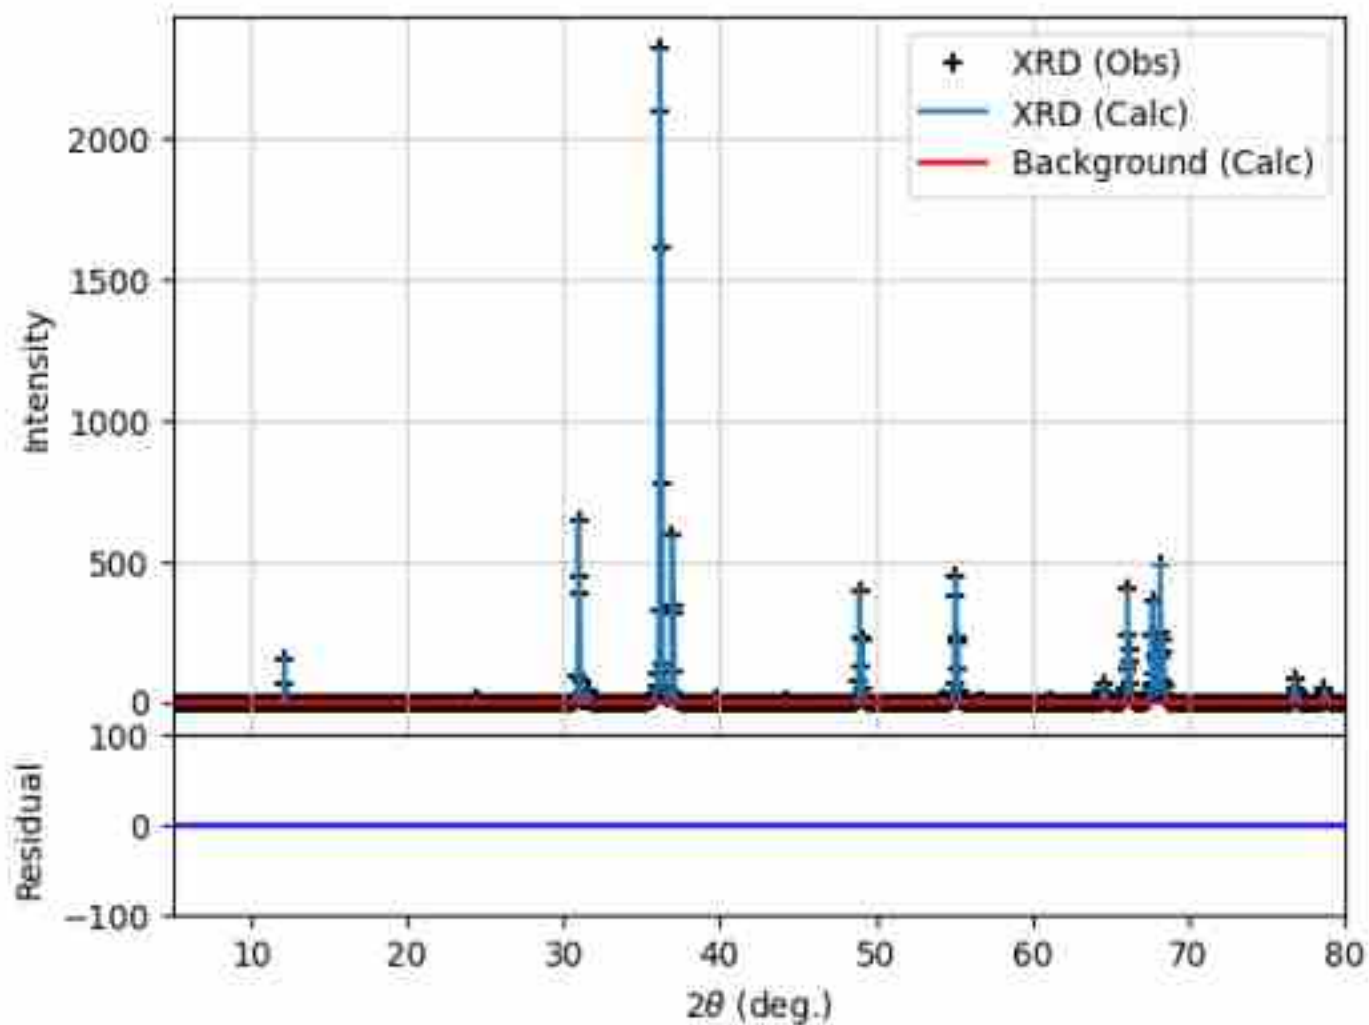

| RMSE before RR | Rwp    | RMSE after RR |
|----------------|--------|---------------|
| 0.017          | 0.0053 | 0.0007        |

# Hf10Ni2Sb6

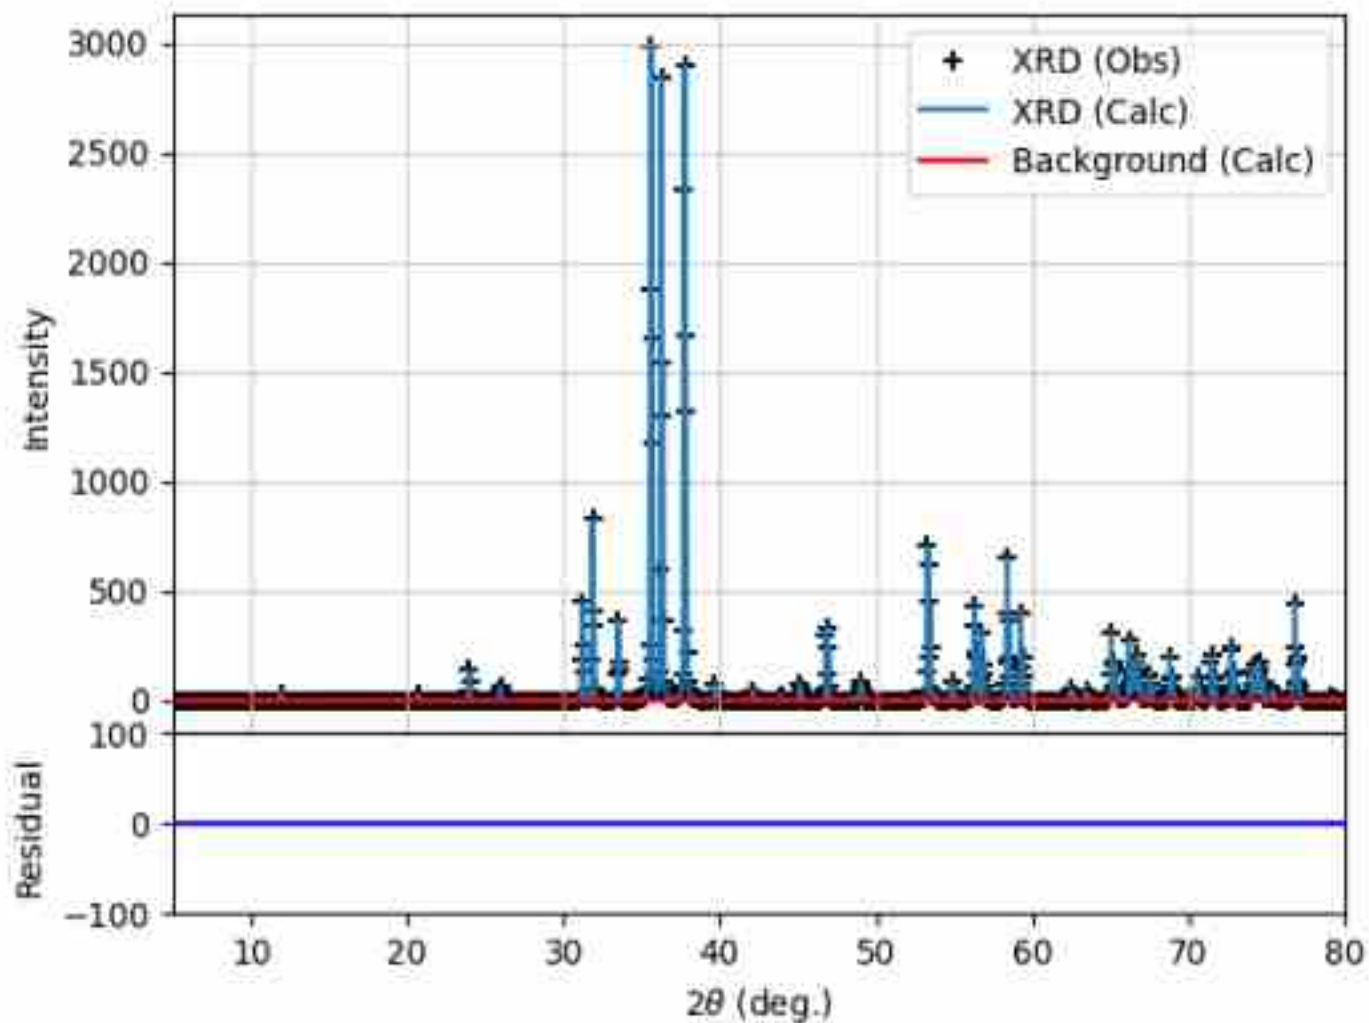

| RMSE before RR | Rwp     | RMSE after RR |
|----------------|---------|---------------|
| 0.017          | 0.00504 | 0.00049       |

# Ho1Cu5

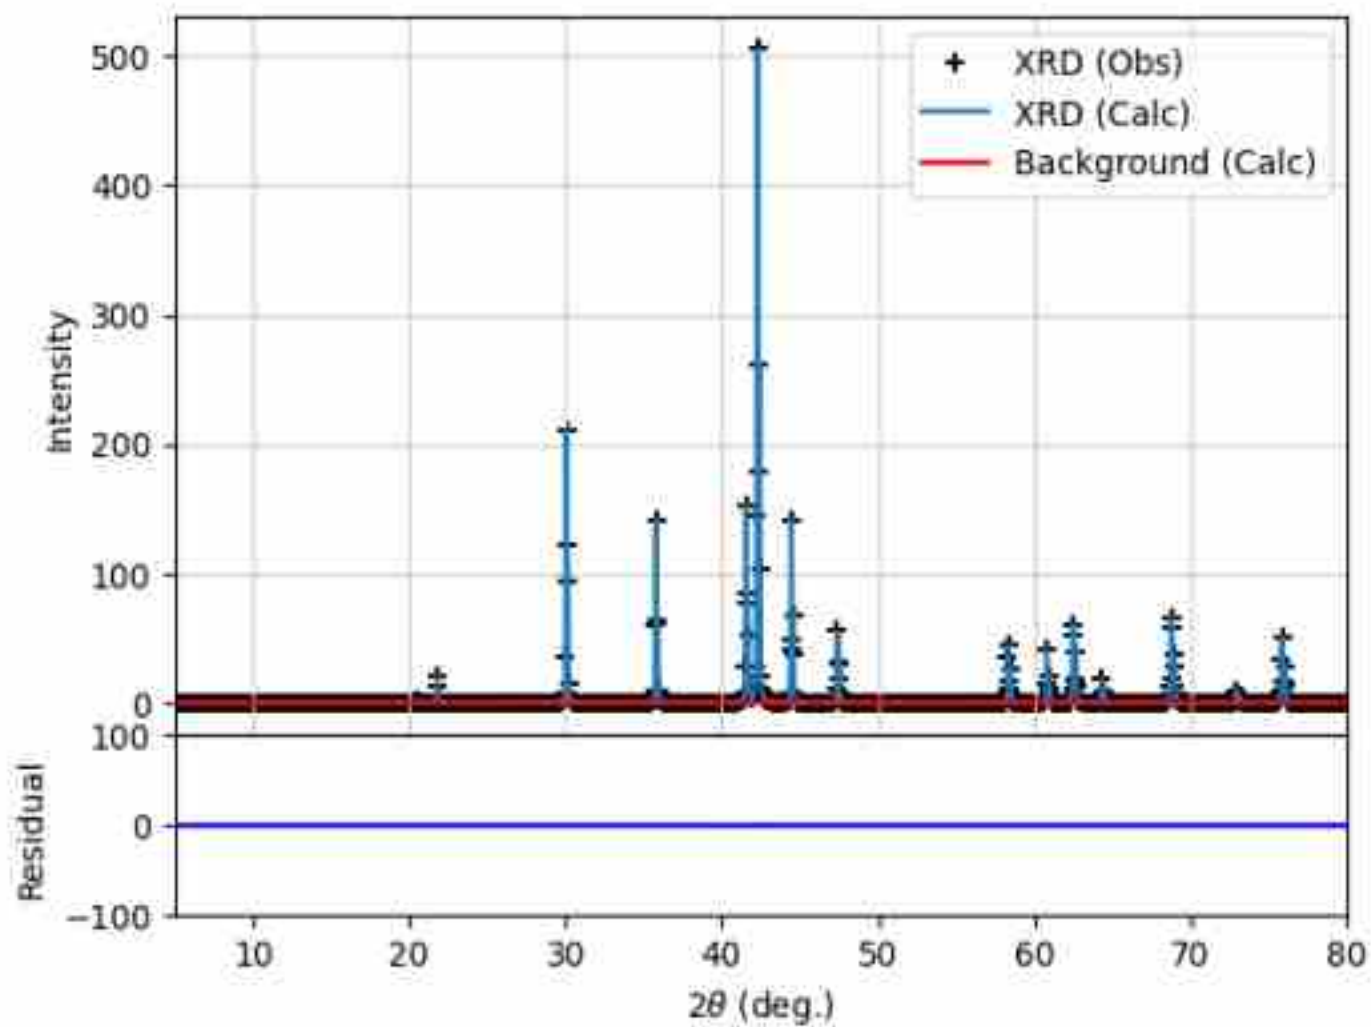

| RMSE before RR | Rwp     | RMSE after RR |
|----------------|---------|---------------|
| 0.017          | 0.04638 | 0.00149       |

# Ho<sub>2</sub>Co<sub>2</sub>Ni<sub>2</sub>

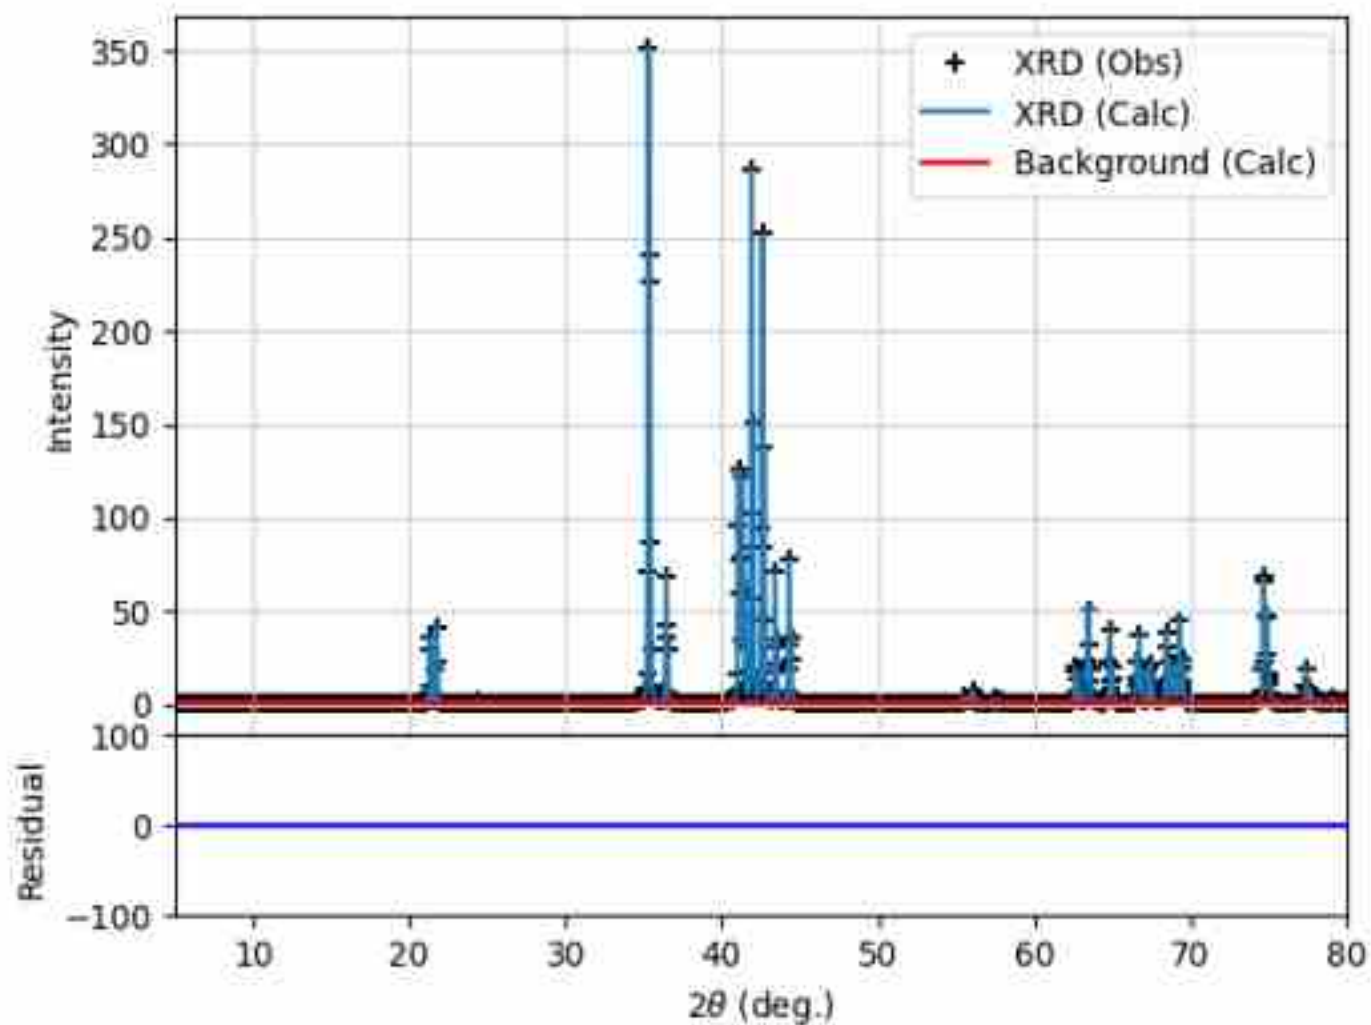

| RMSE before RR | Rwp     | RMSE after RR |
|----------------|---------|---------------|
| 0.017          | 0.00309 | 0.00016       |



# Ho<sub>2</sub>Ga<sub>8</sub>Fe<sub>1</sub>

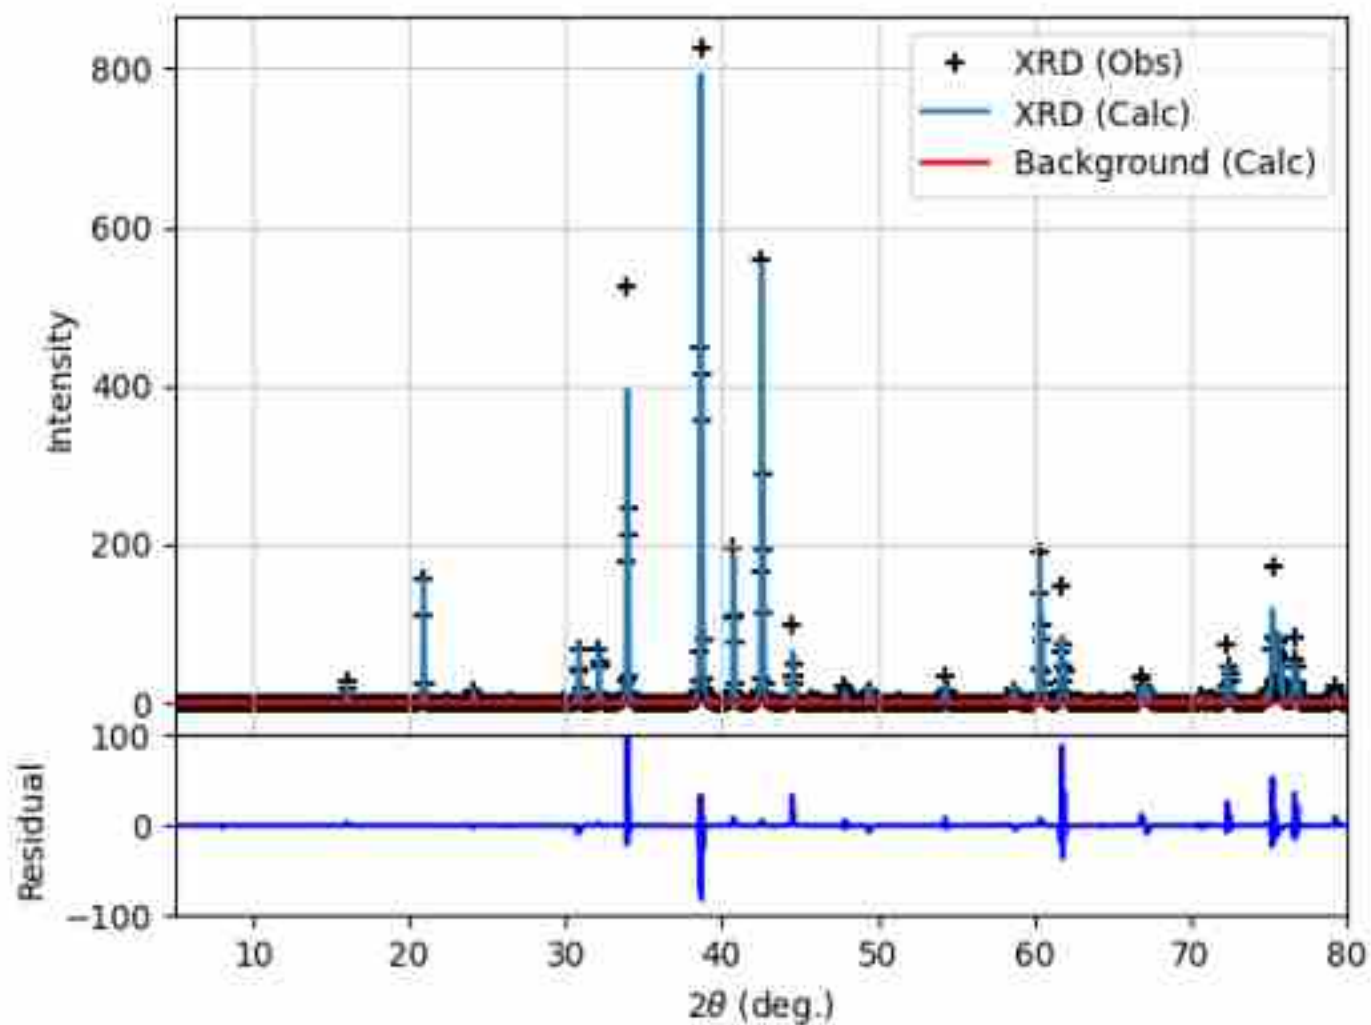

| RMSE before RR | Rwp      | RMSE after RR |
|----------------|----------|---------------|
| 0.017          | 20.63971 | 0.01766       |

# Ho<sub>2</sub>Zn<sub>2</sub>Sn<sub>4</sub>

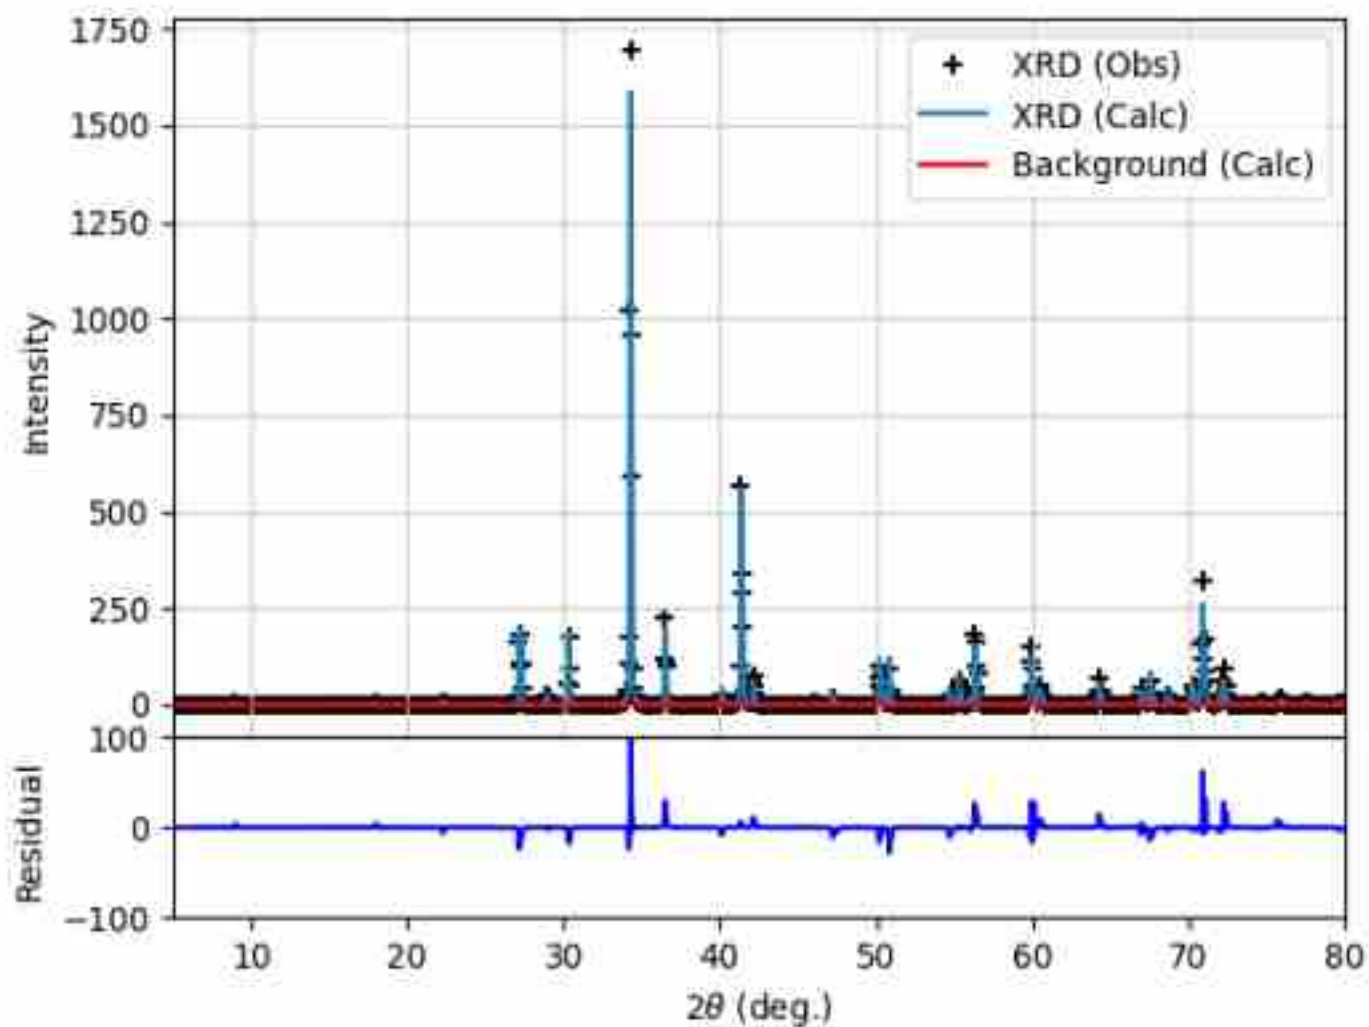

| RMSE before RR | Rwp      | RMSE after RR |
|----------------|----------|---------------|
| 0.017          | 15.19747 | 0.02901       |

# Ho<sub>3</sub>In<sub>3</sub>Pd<sub>3</sub>

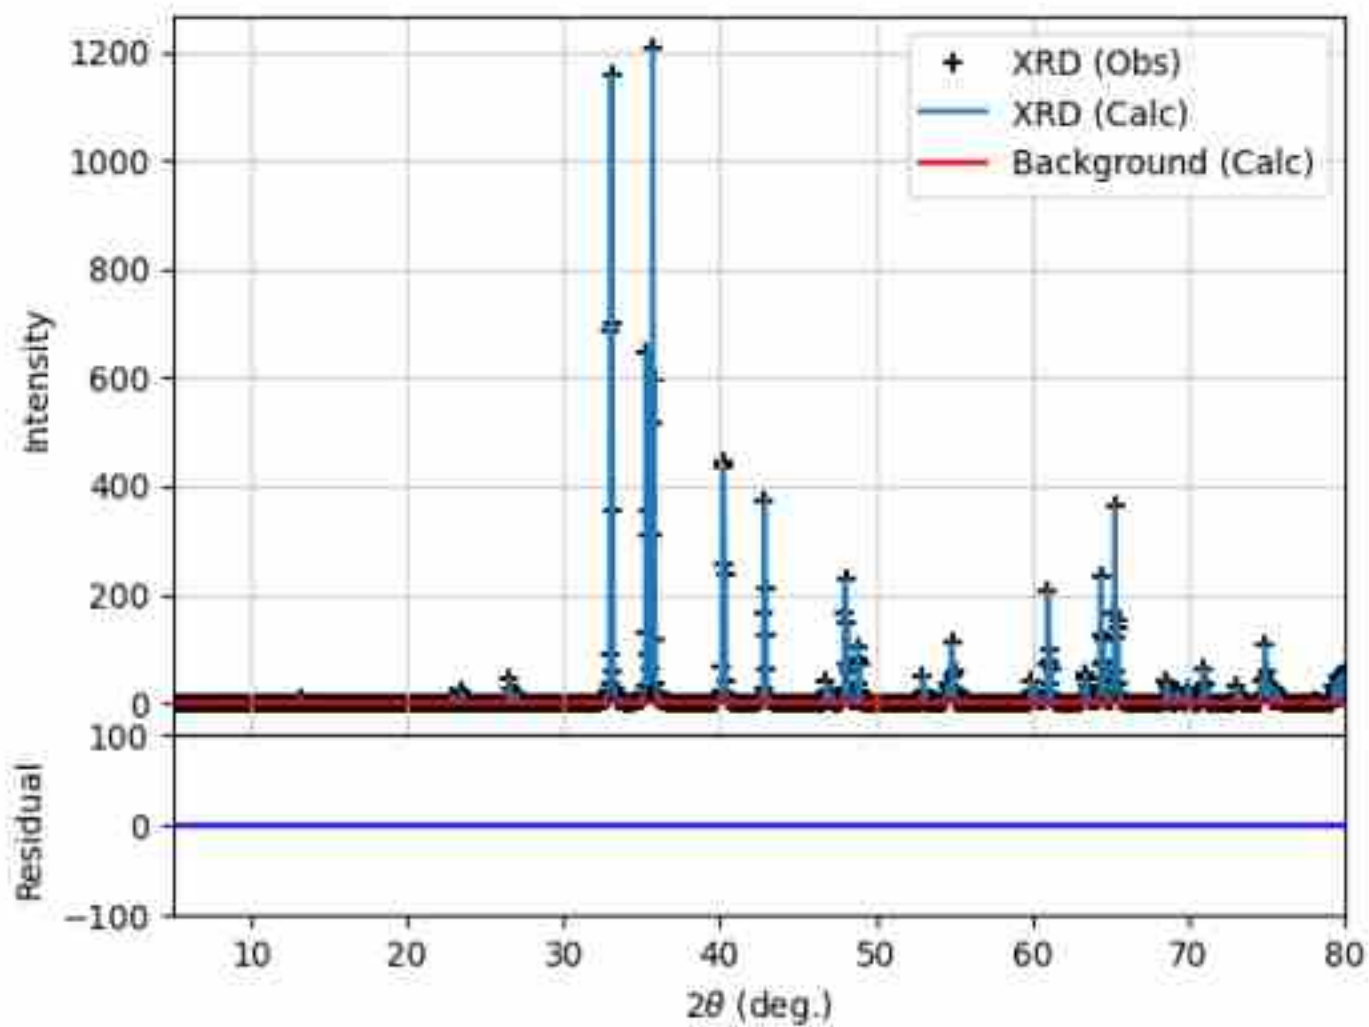

| RMSE before RR | Rwp     | RMSE after RR |
|----------------|---------|---------------|
| 0.017          | 0.00308 | 0.00048       |

# Ho<sub>4</sub>Co<sub>4</sub>Si<sub>4</sub>

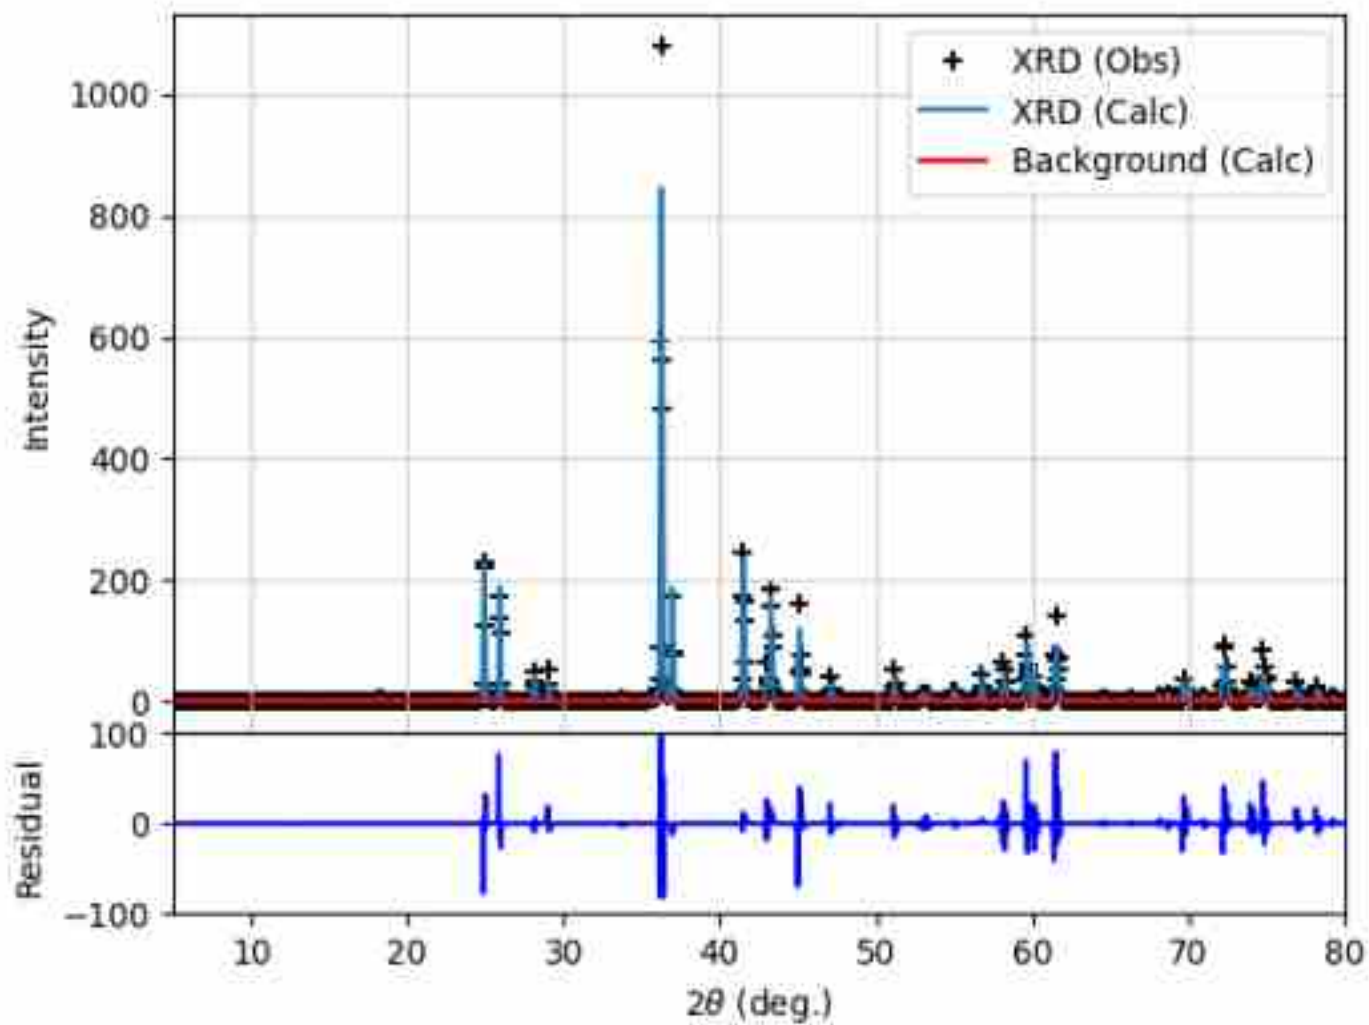

| RMSE before RR | Rwp      | RMSE after RR |
|----------------|----------|---------------|
| 0.017          | 47.82742 | 0.03672       |

# Ho<sub>6</sub>Ni<sub>4</sub>Ru<sub>8</sub>

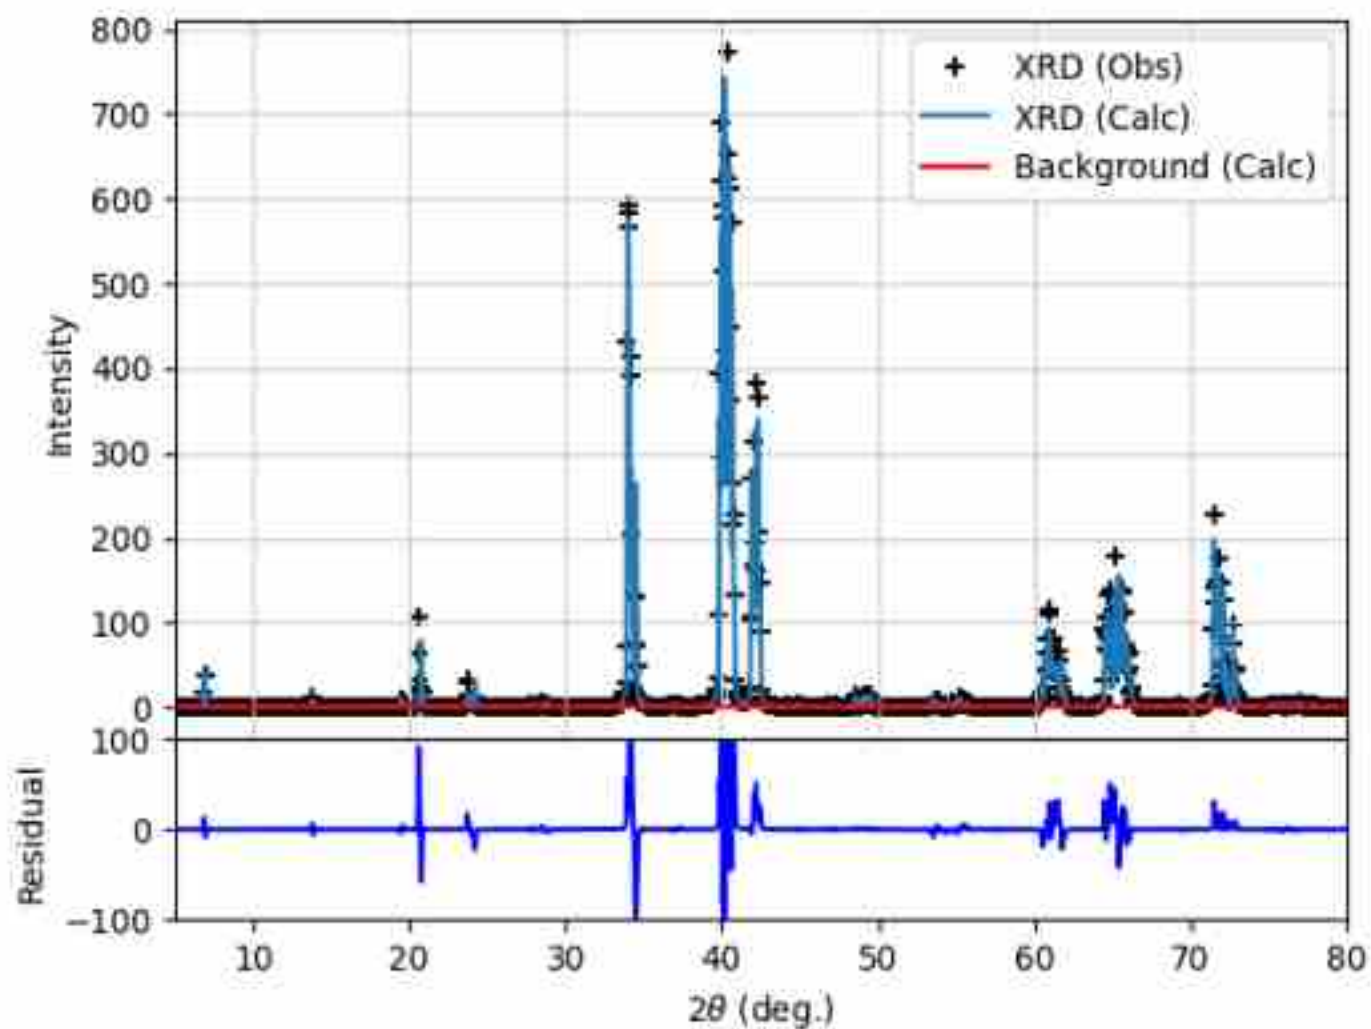

| RMSE before RR | Rwp      | RMSE after RR |
|----------------|----------|---------------|
| 0.017          | 27.97709 | 0.01747       |

# Ho8Pt4

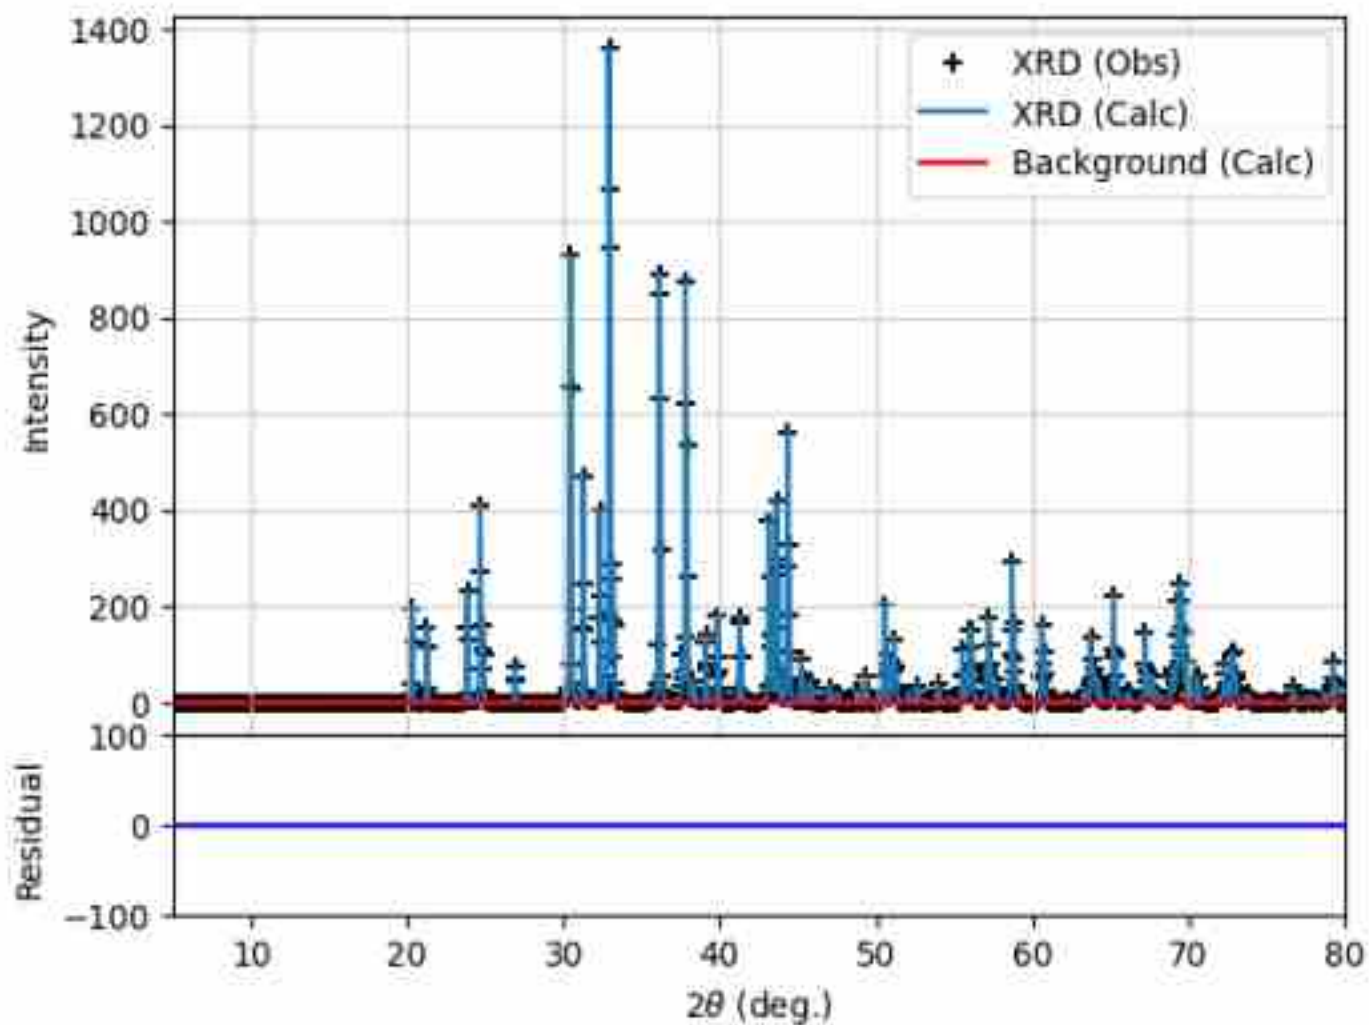

| RMSE before RR | Rwp     | RMSE after RR |
|----------------|---------|---------------|
| 0.017          | 0.00511 | 0.00034       |

# In<sub>4</sub>H<sub>4</sub>O<sub>8</sub>

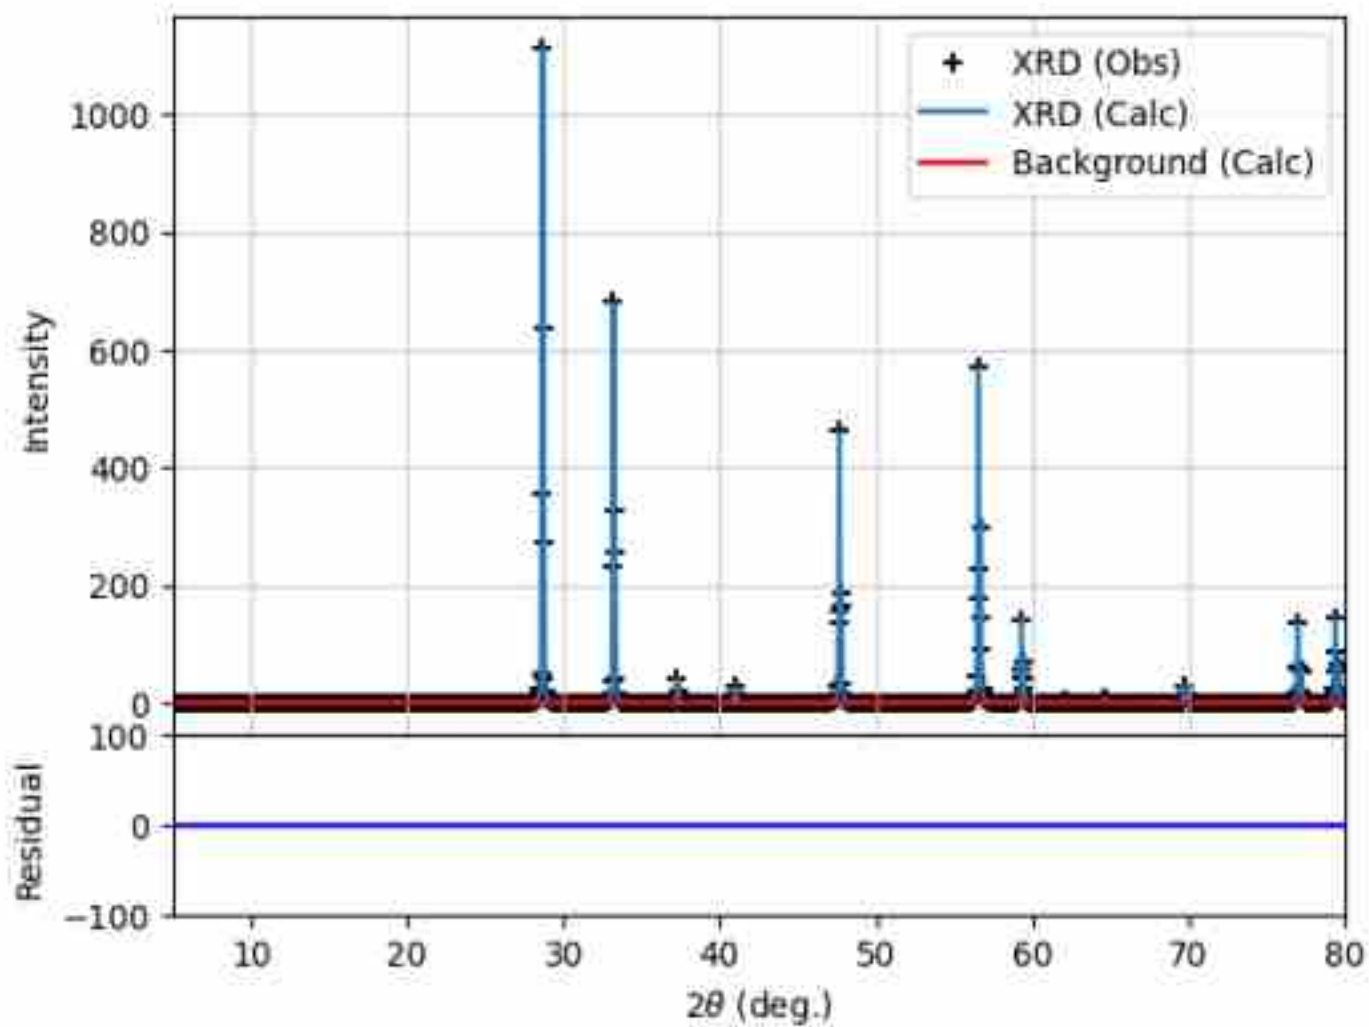

| RMSE before RR | Rwp    | RMSE after RR |
|----------------|--------|---------------|
| 0.017          | 0.0112 | 0.01109       |

# Ir<sub>2</sub>W<sub>2</sub>O<sub>12</sub>

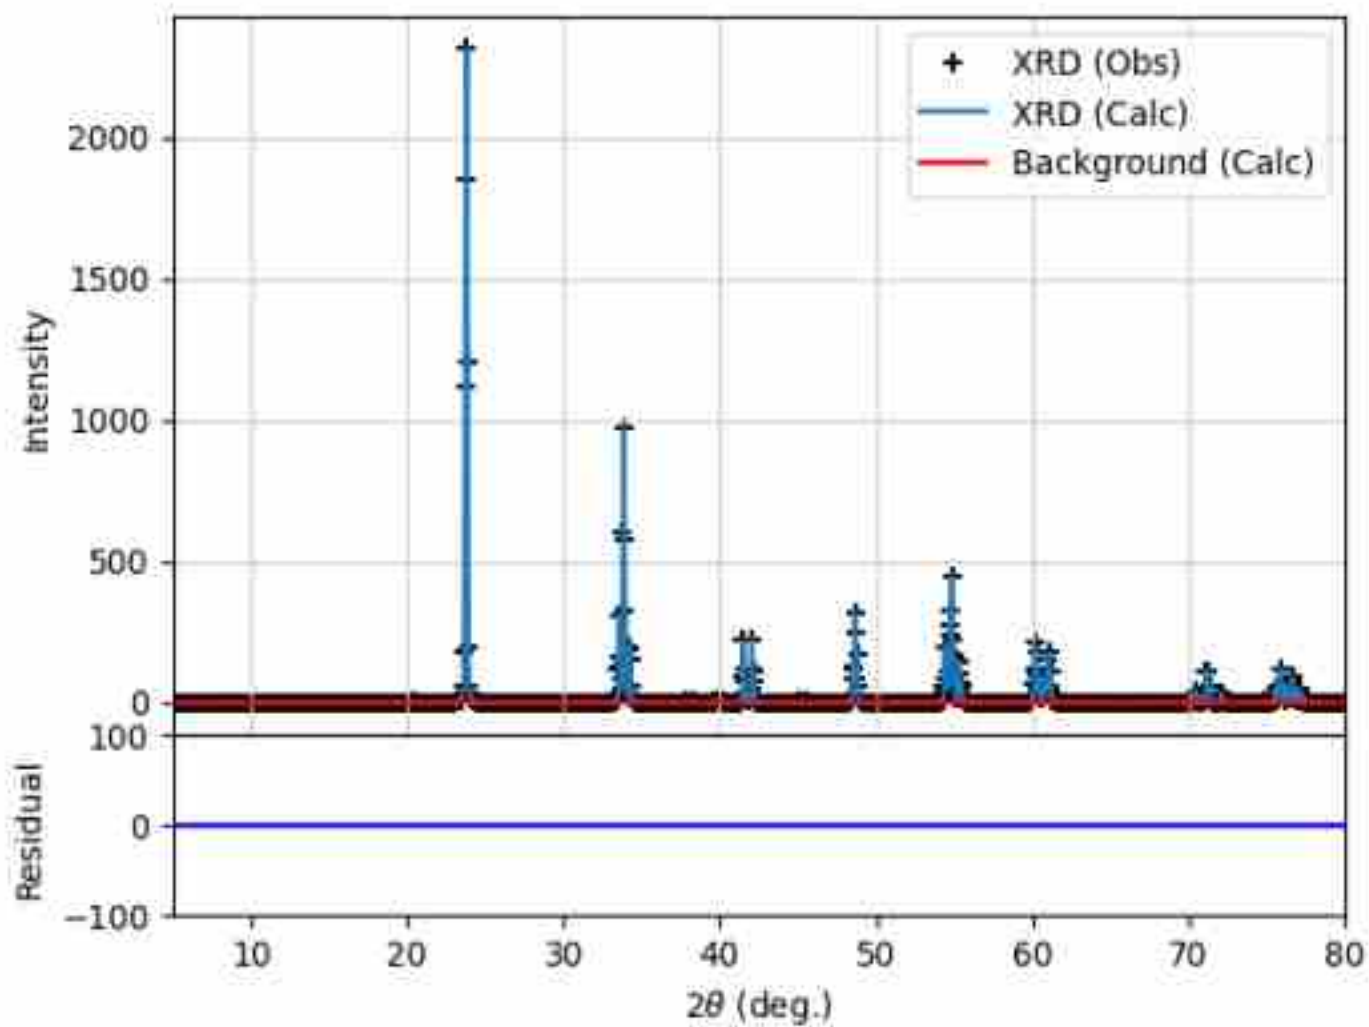

| RMSE before RR | Rwp     | RMSE after RR |
|----------------|---------|---------------|
| 0.017          | 0.00311 | 0.00102       |



# K1B1H4

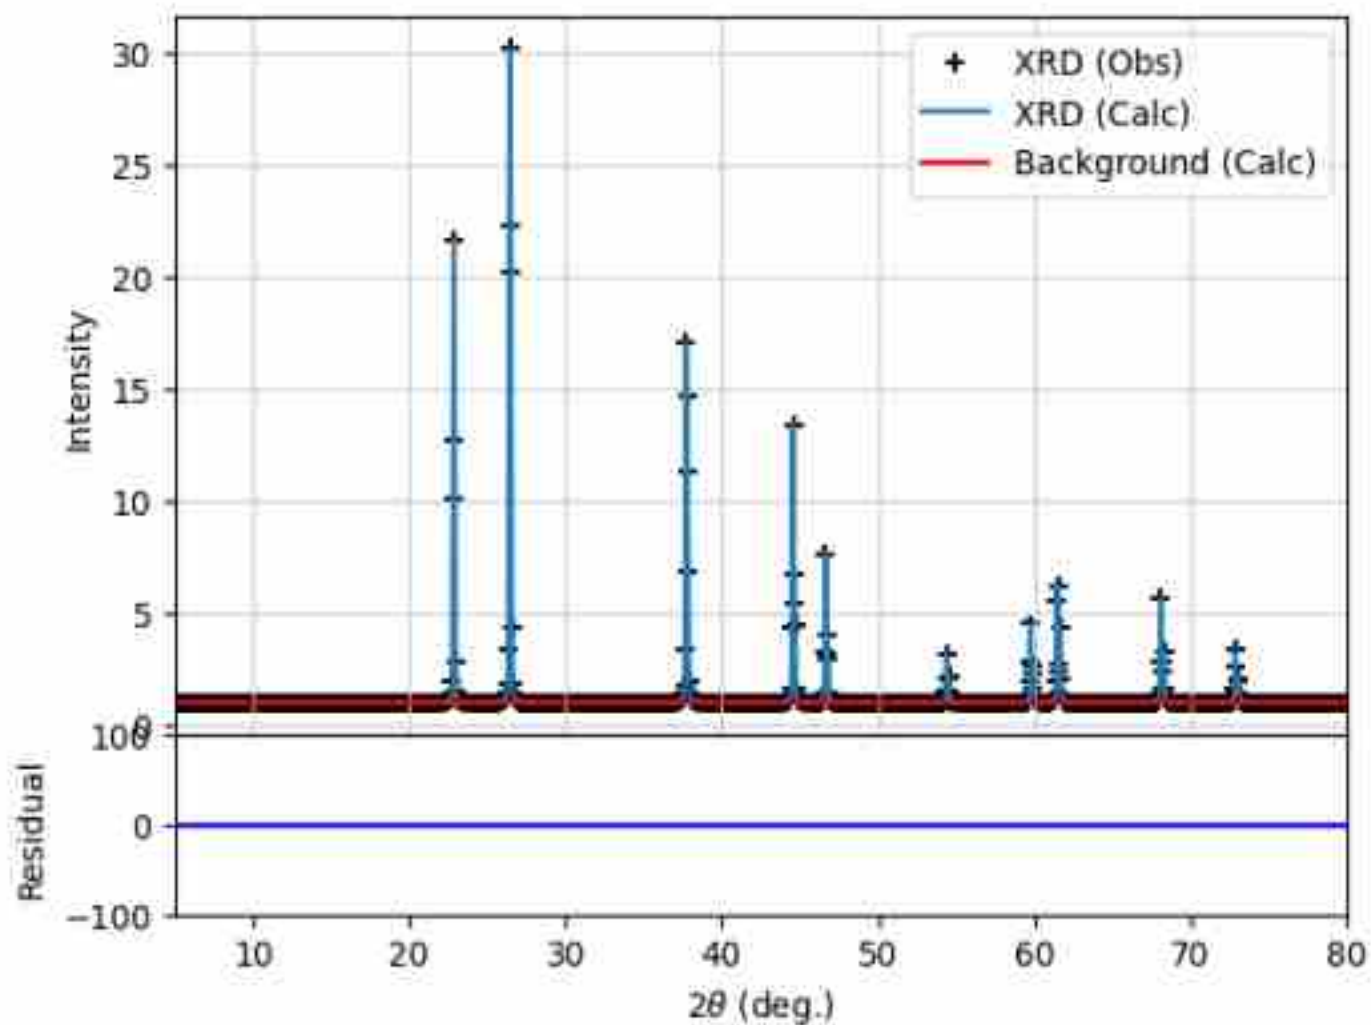

| RMSE before RR | Rwp     | RMSE after RR |
|----------------|---------|---------------|
| 0.017          | 0.00256 | 0.00774       |

# K1Cd4P3

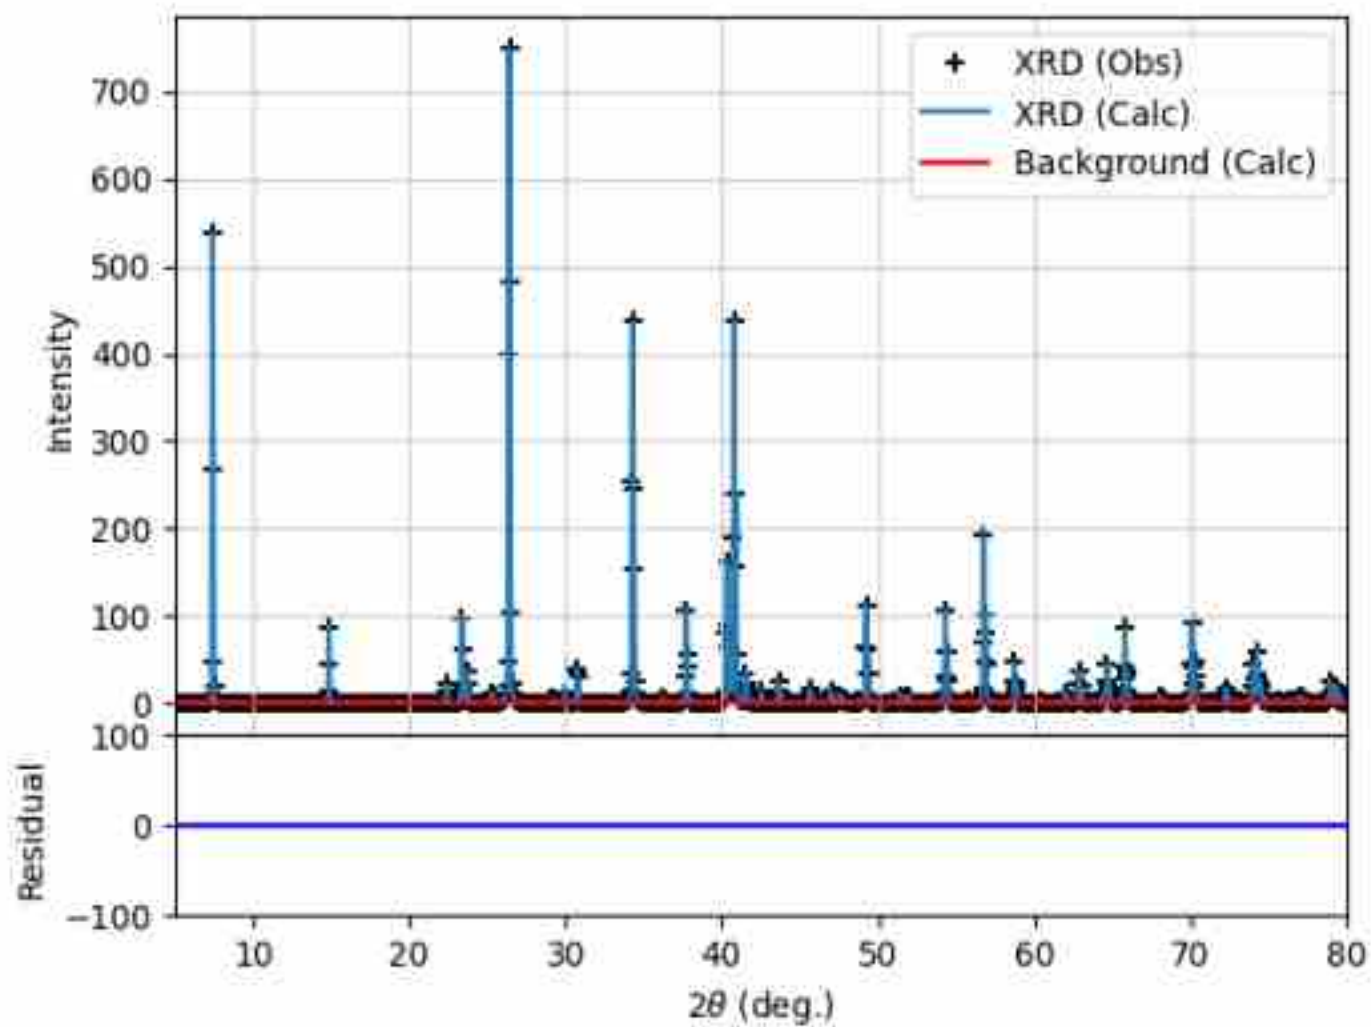

| RMSE before RR | Rwp     | RMSE after RR |
|----------------|---------|---------------|
| 0.017          | 0.00256 | 0.00064       |

# K1Tc1O3

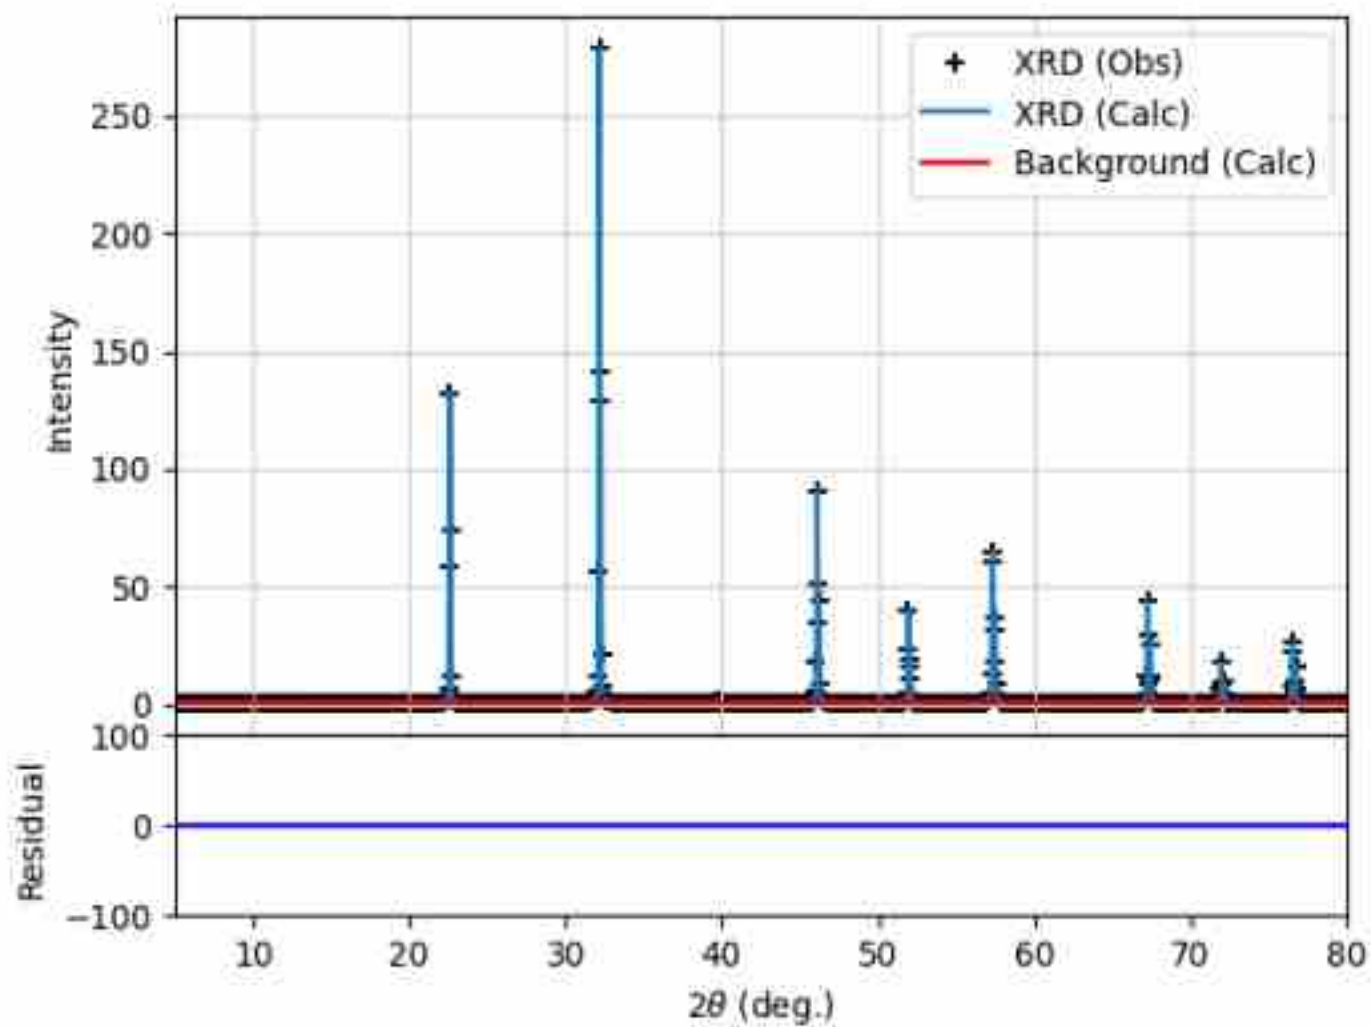

| RMSE before RR | Rwp     | RMSE after RR |
|----------------|---------|---------------|
| 0.017          | 0.01119 | 0.00361       |

# K<sub>2</sub>Ho<sub>2</sub>Be<sub>2</sub>F<sub>12</sub>

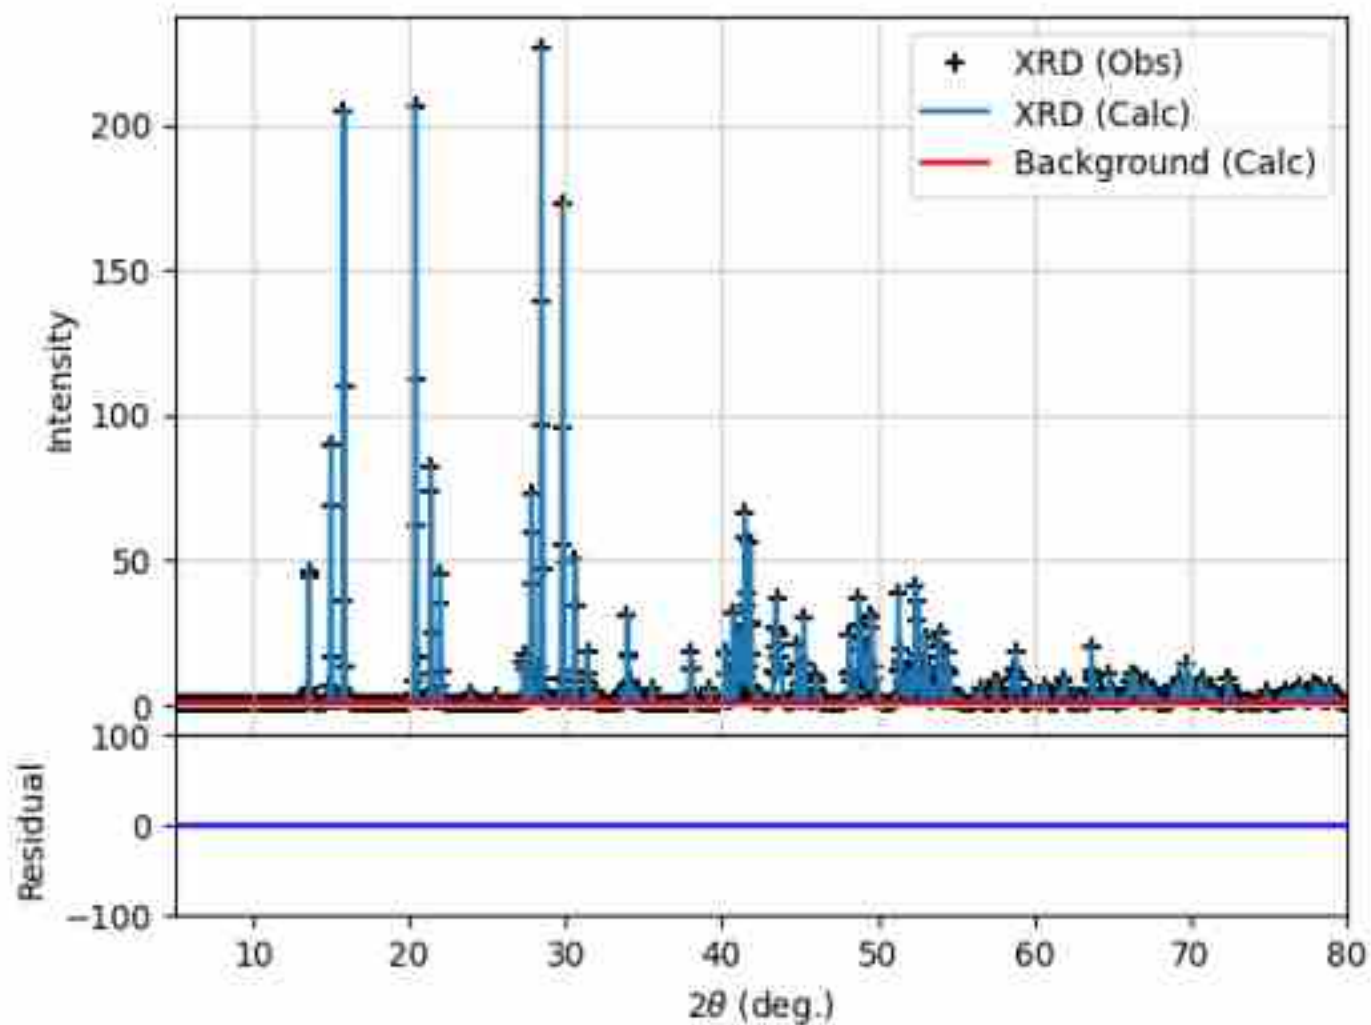

| RMSE before RR | Rwp     | RMSE after RR |
|----------------|---------|---------------|
| 0.017          | 0.00307 | 0.00076       |

# K<sub>2</sub>NiF<sub>6</sub>

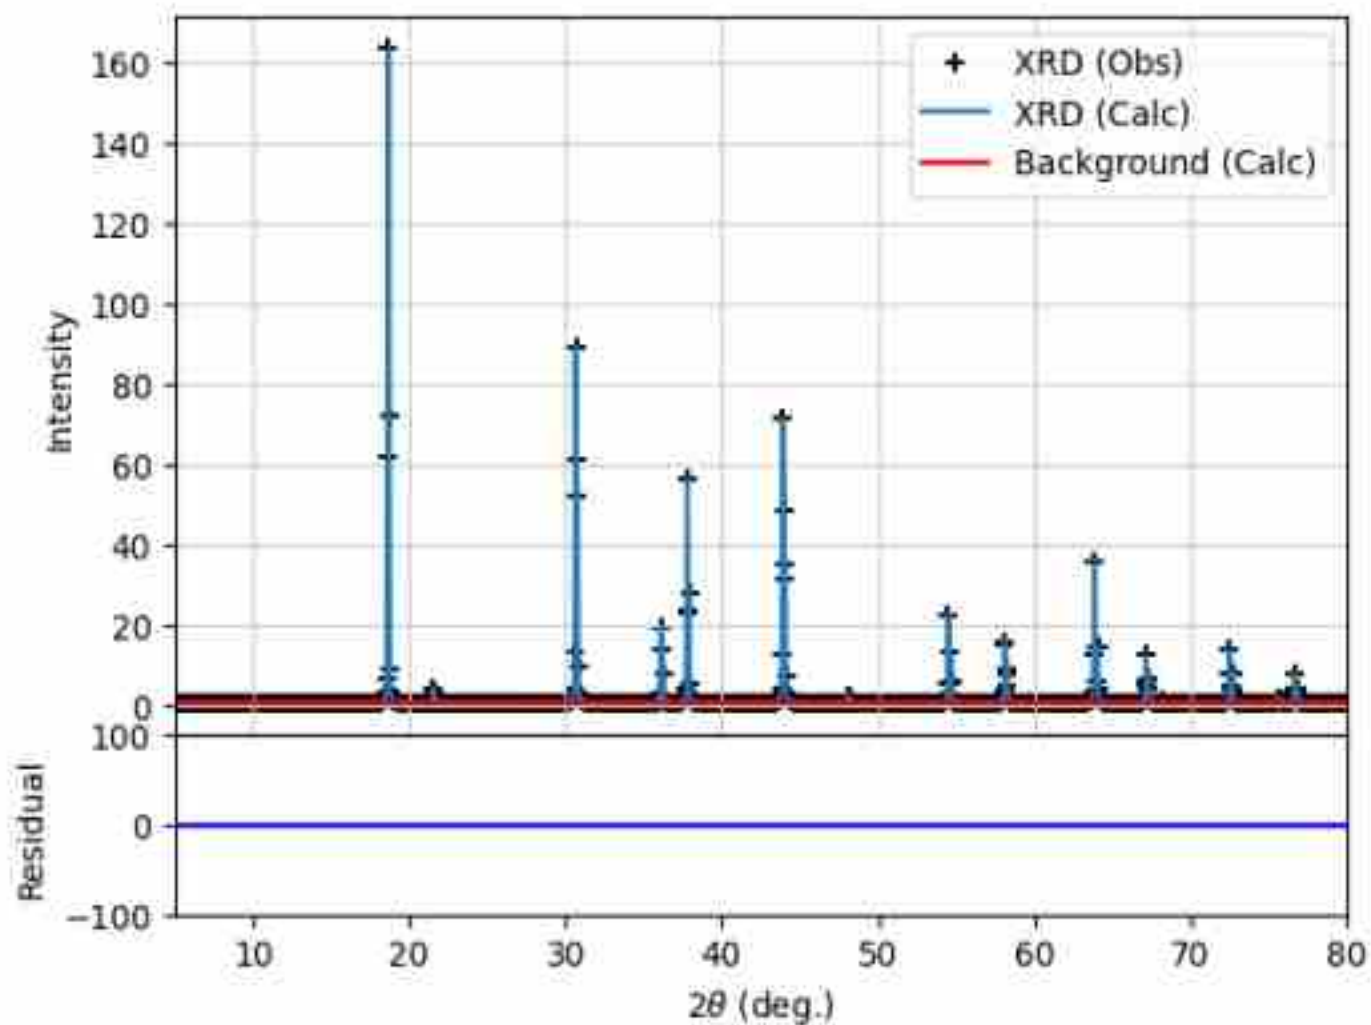

| RMSE before RR | Rwp     | RMSE after RR |
|----------------|---------|---------------|
| 0.017          | 0.06126 | 0.00453       |

# K2Rb1As1F6

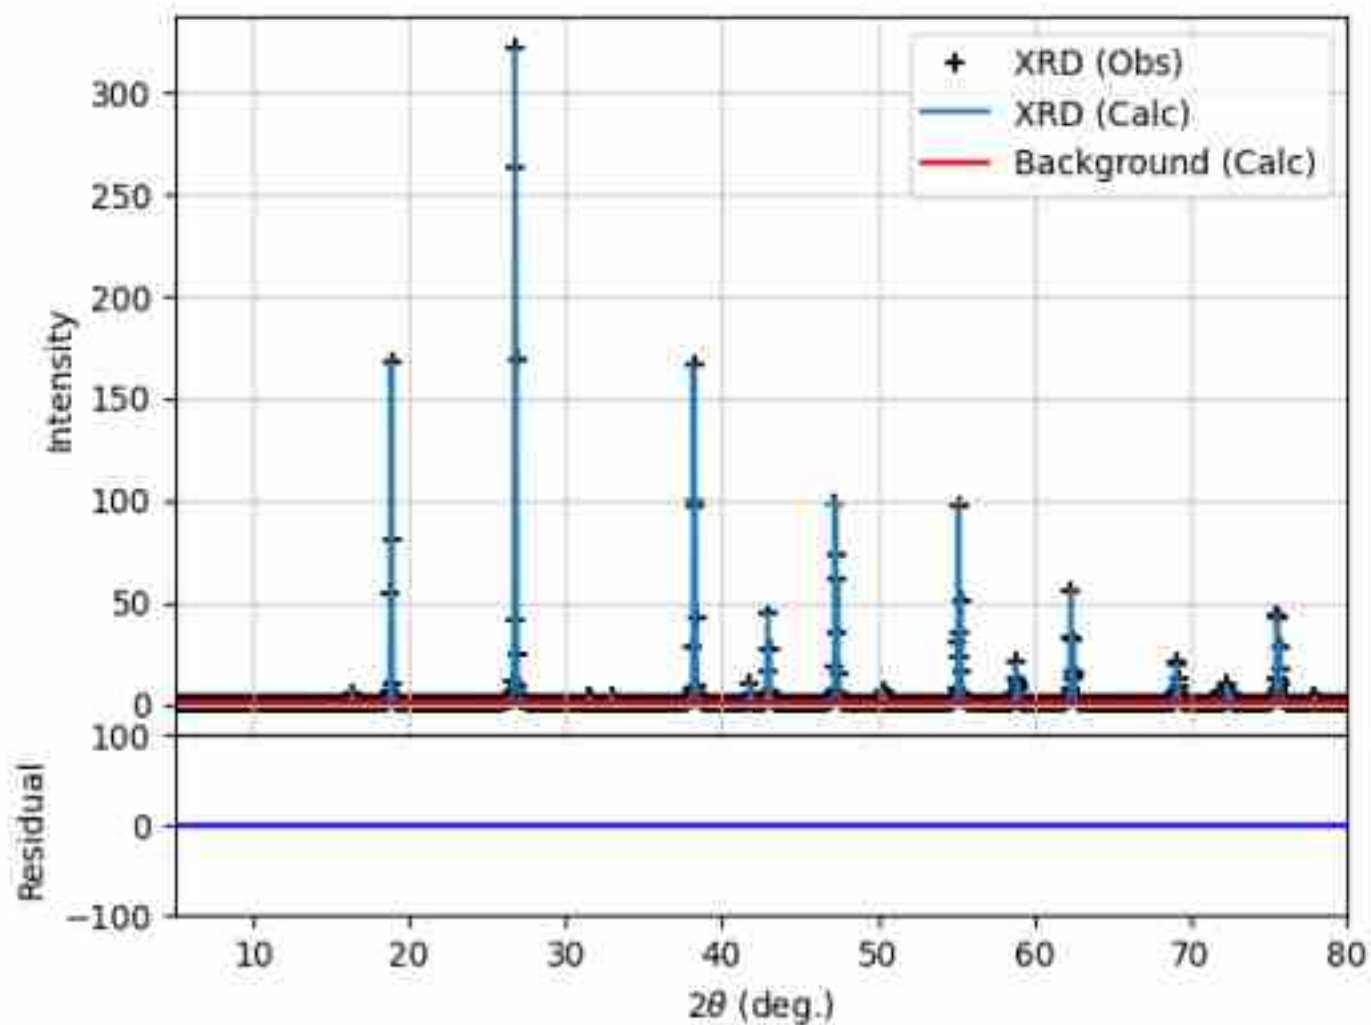

| RMSE before RR | Rwp     | RMSE after RR |
|----------------|---------|---------------|
| 0.017          | 0.00634 | 0.00183       |

# K<sub>2</sub>Rb<sub>1</sub>Co<sub>1</sub>F<sub>6</sub>

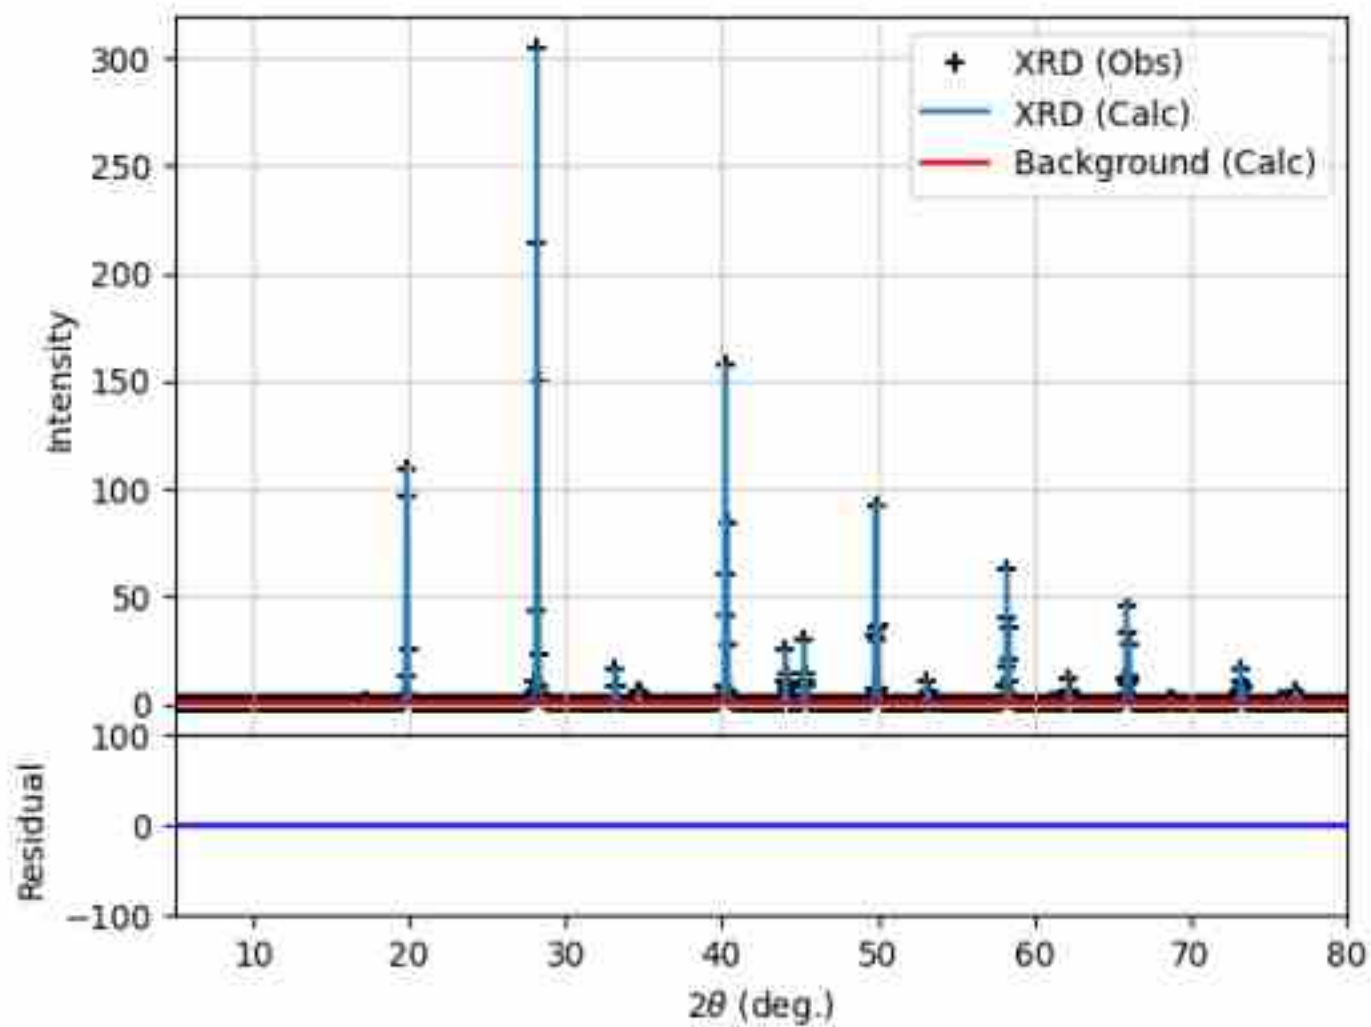

| RMSE before RR | Rwp     | RMSE after RR |
|----------------|---------|---------------|
| 0.017          | 0.04378 | 0.00574       |

# K3Ho1V2O8

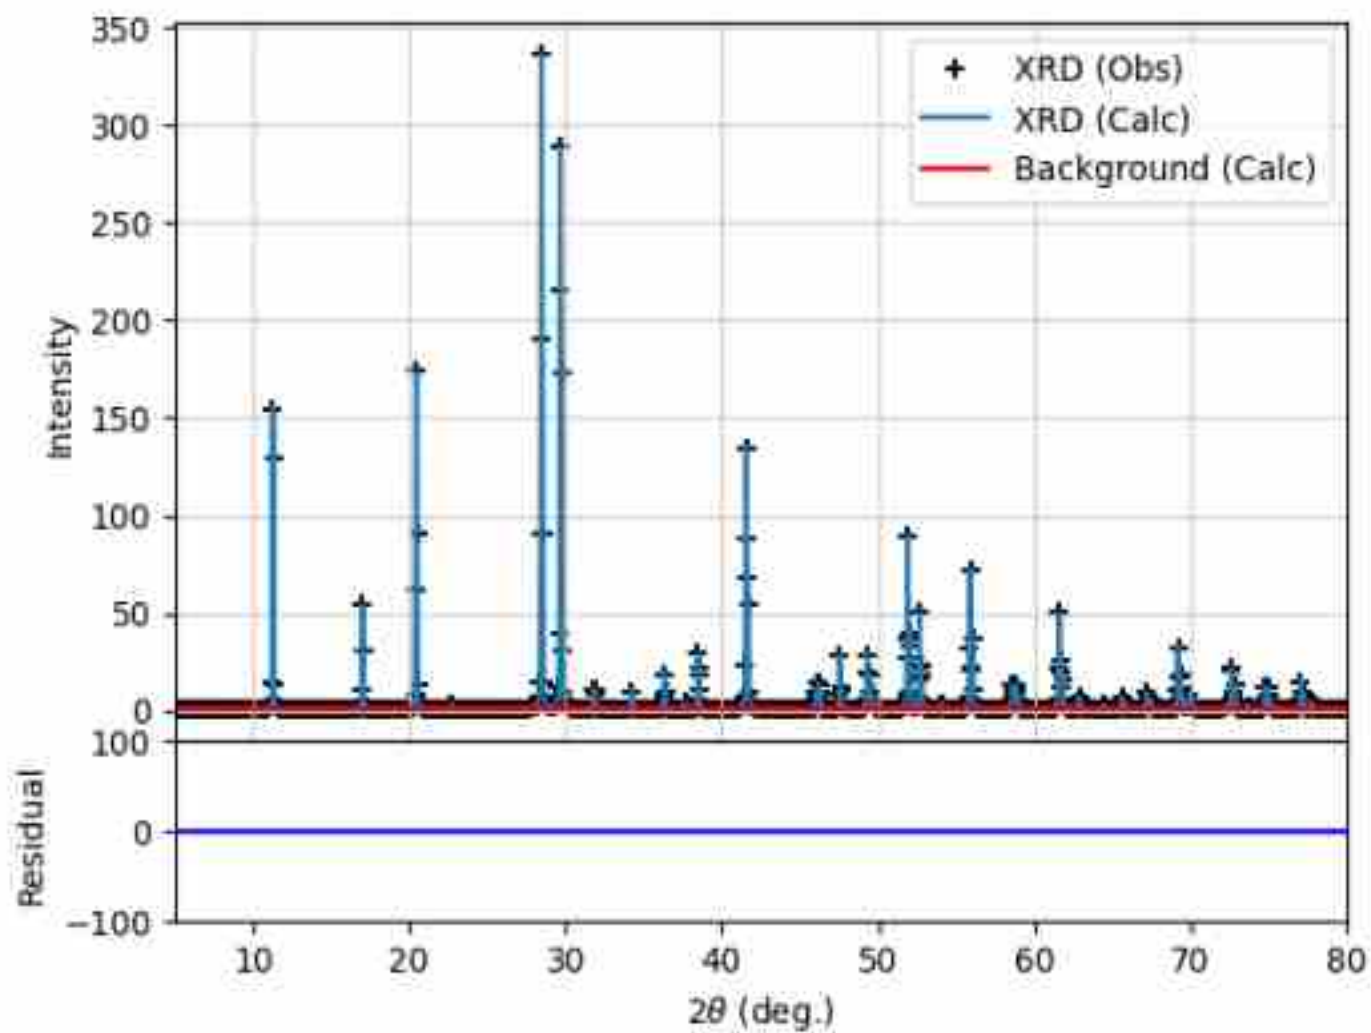

| RMSE before RR | Rwp     | RMSE after RR |
|----------------|---------|---------------|
| 0.017          | 0.00191 | 0.00054       |



# K4Na8

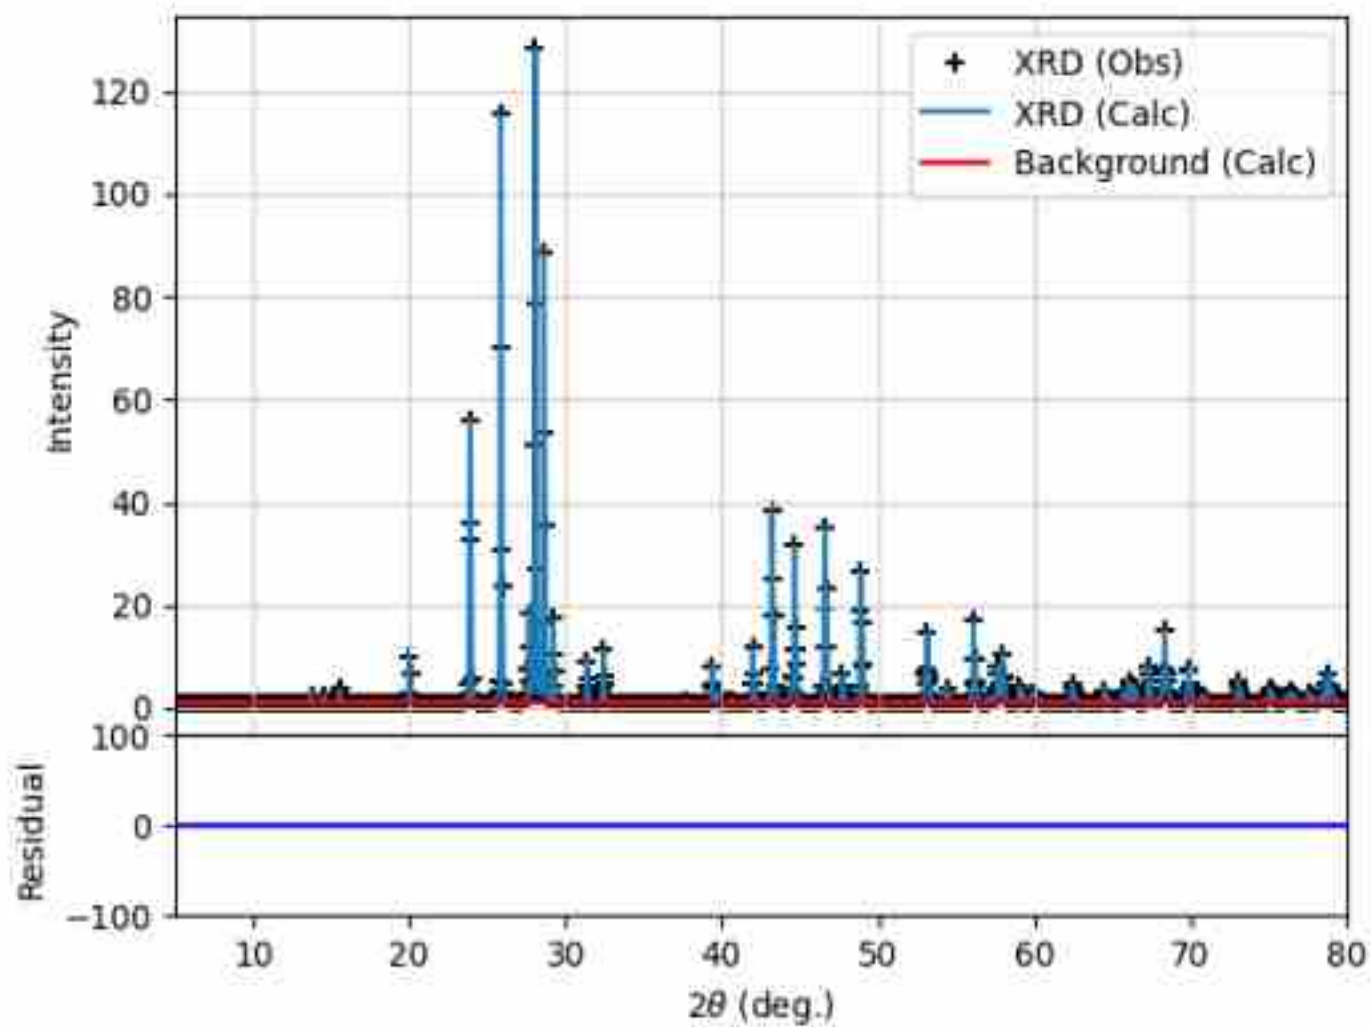

| RMSE before RR | Rwp     | RMSE after RR |
|----------------|---------|---------------|
| 0.017          | 0.00512 | 0.00097       |

# K8

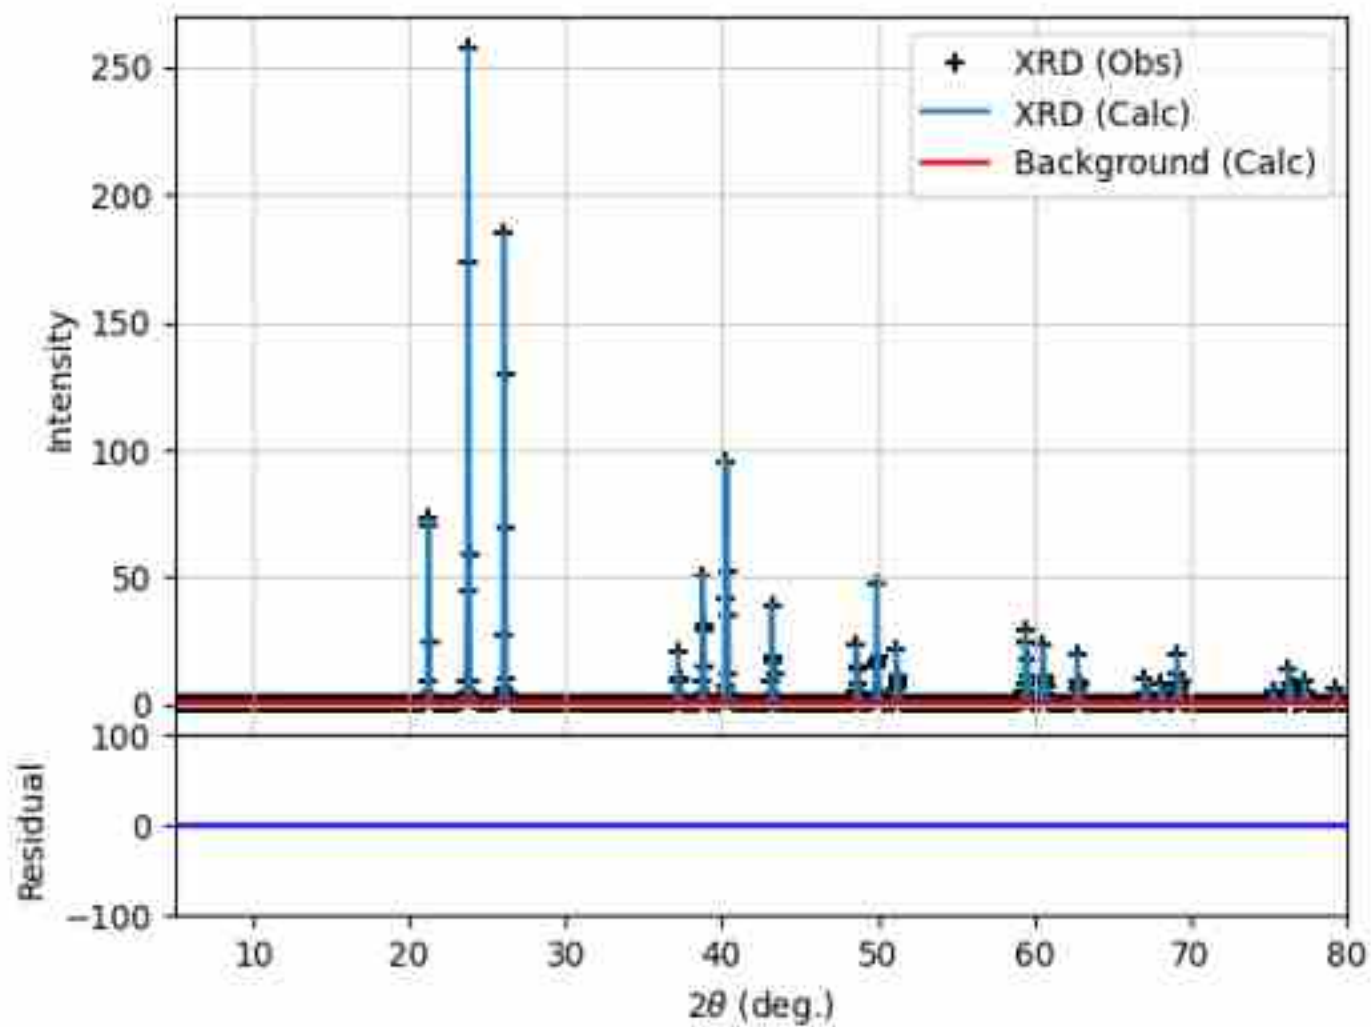

| RMSE before RR | Rwp     | RMSE after RR |
|----------------|---------|---------------|
| 0.017          | 0.00375 | 0.00049       |

# La<sub>1</sub>Nd<sub>3</sub>Ga<sub>4</sub>O<sub>12</sub>

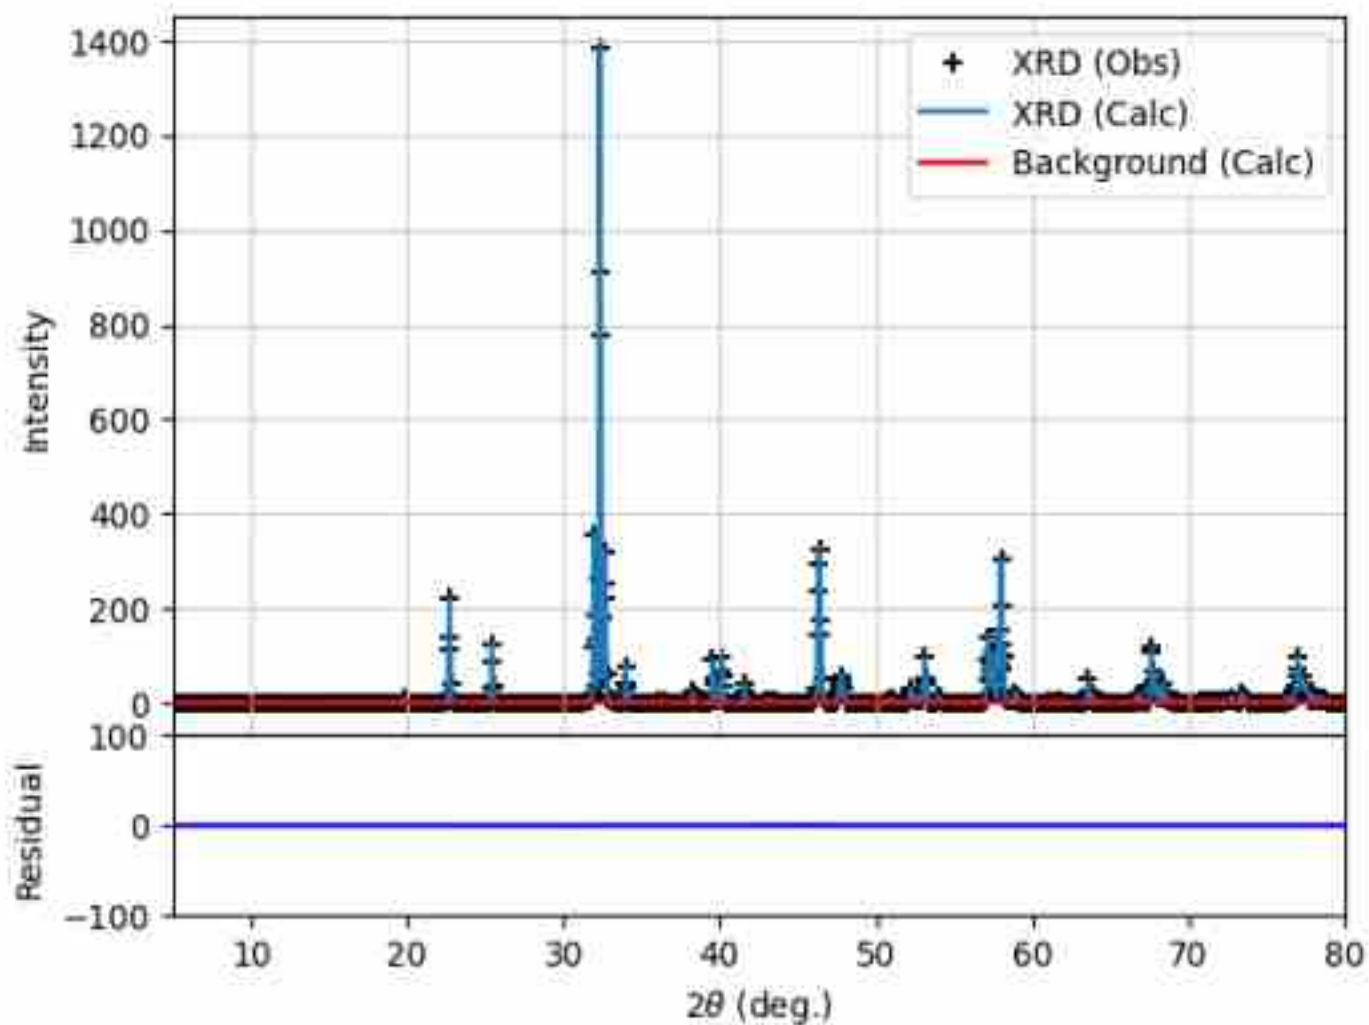

| RMSE before RR | Rwp     | RMSE after RR |
|----------------|---------|---------------|
| 0.017          | 0.24015 | 0.01803       |

# La2Al6

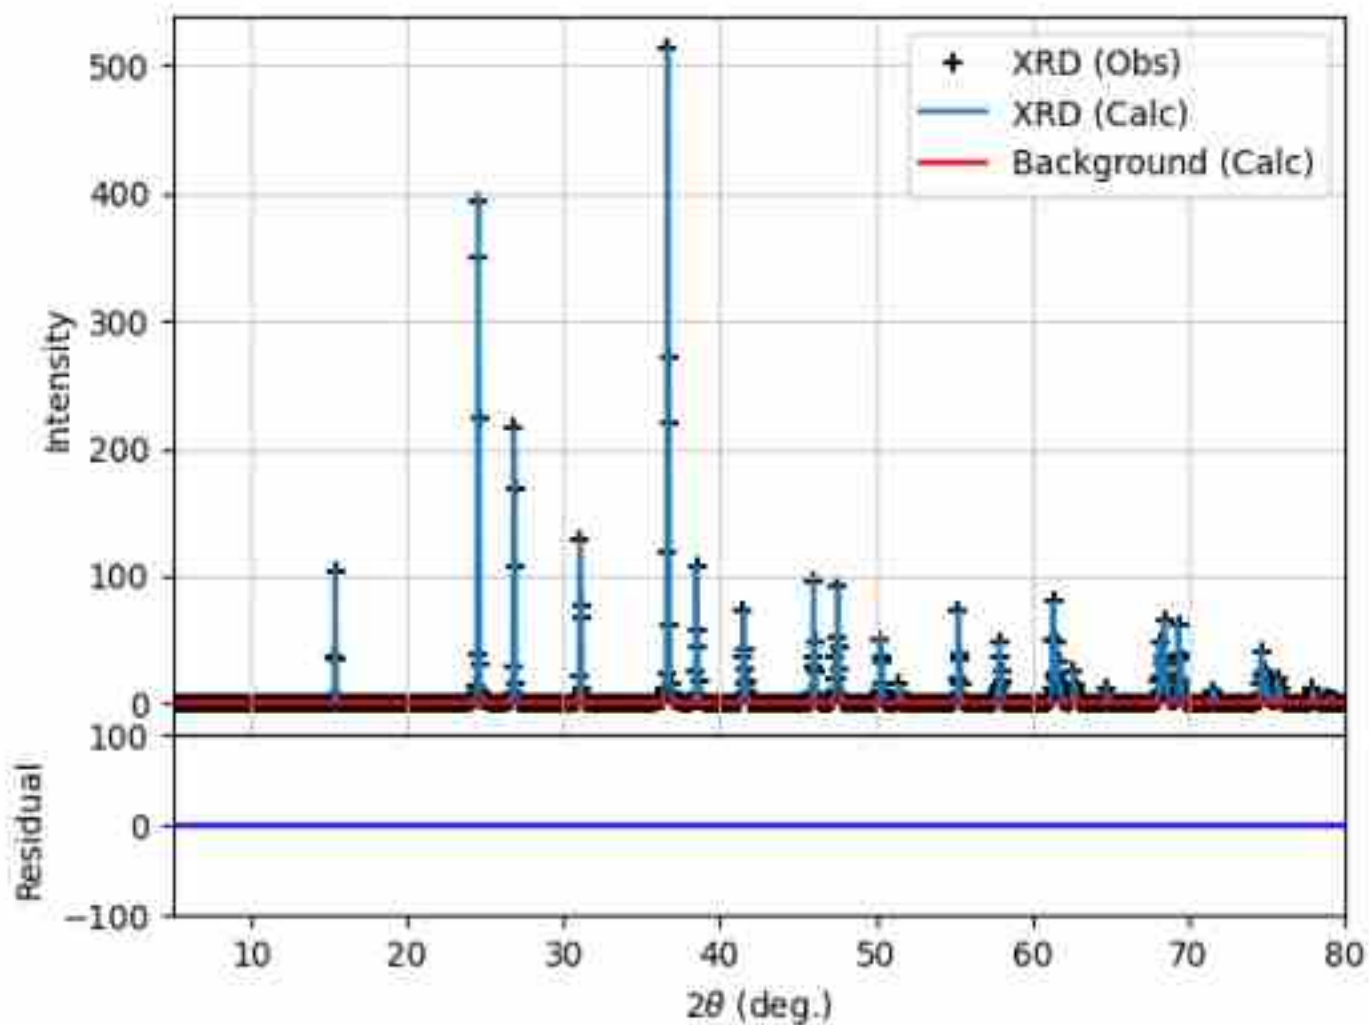

| RMSE before RR | Rwp     | RMSE after RR |
|----------------|---------|---------------|
| 0.017          | 0.00305 | 0.00133       |

# La<sub>2</sub>Sm<sub>2</sub>Cr<sub>4</sub>O<sub>12</sub>

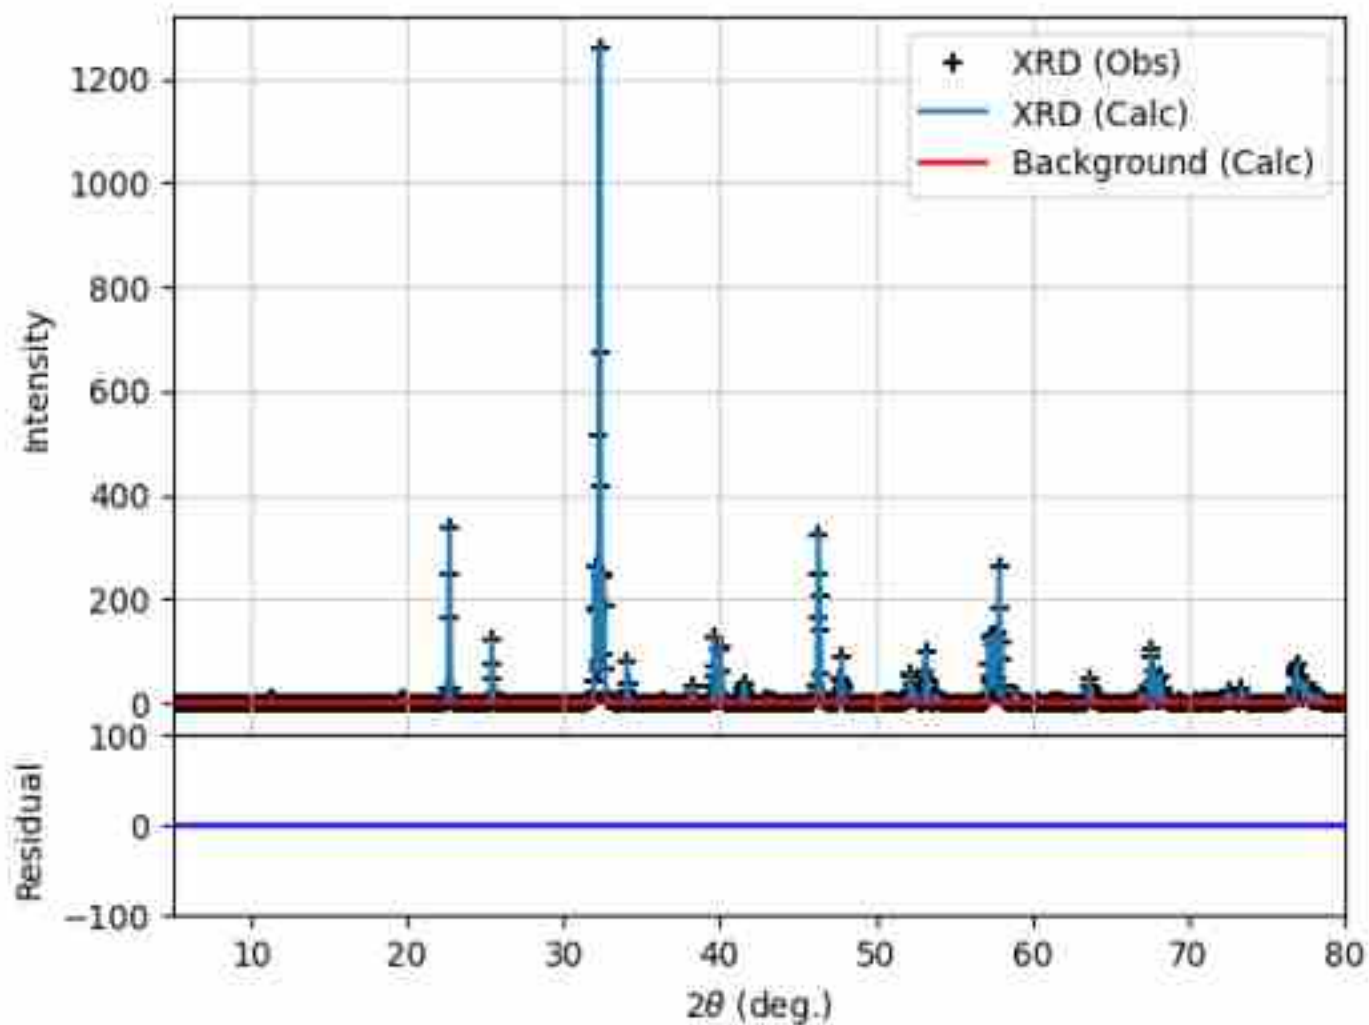

| RMSE before RR | Rwp     | RMSE after RR |
|----------------|---------|---------------|
| 0.017          | 0.00359 | 0.00114       |

# La<sub>3</sub>Ga<sub>6</sub>Co<sub>9</sub>

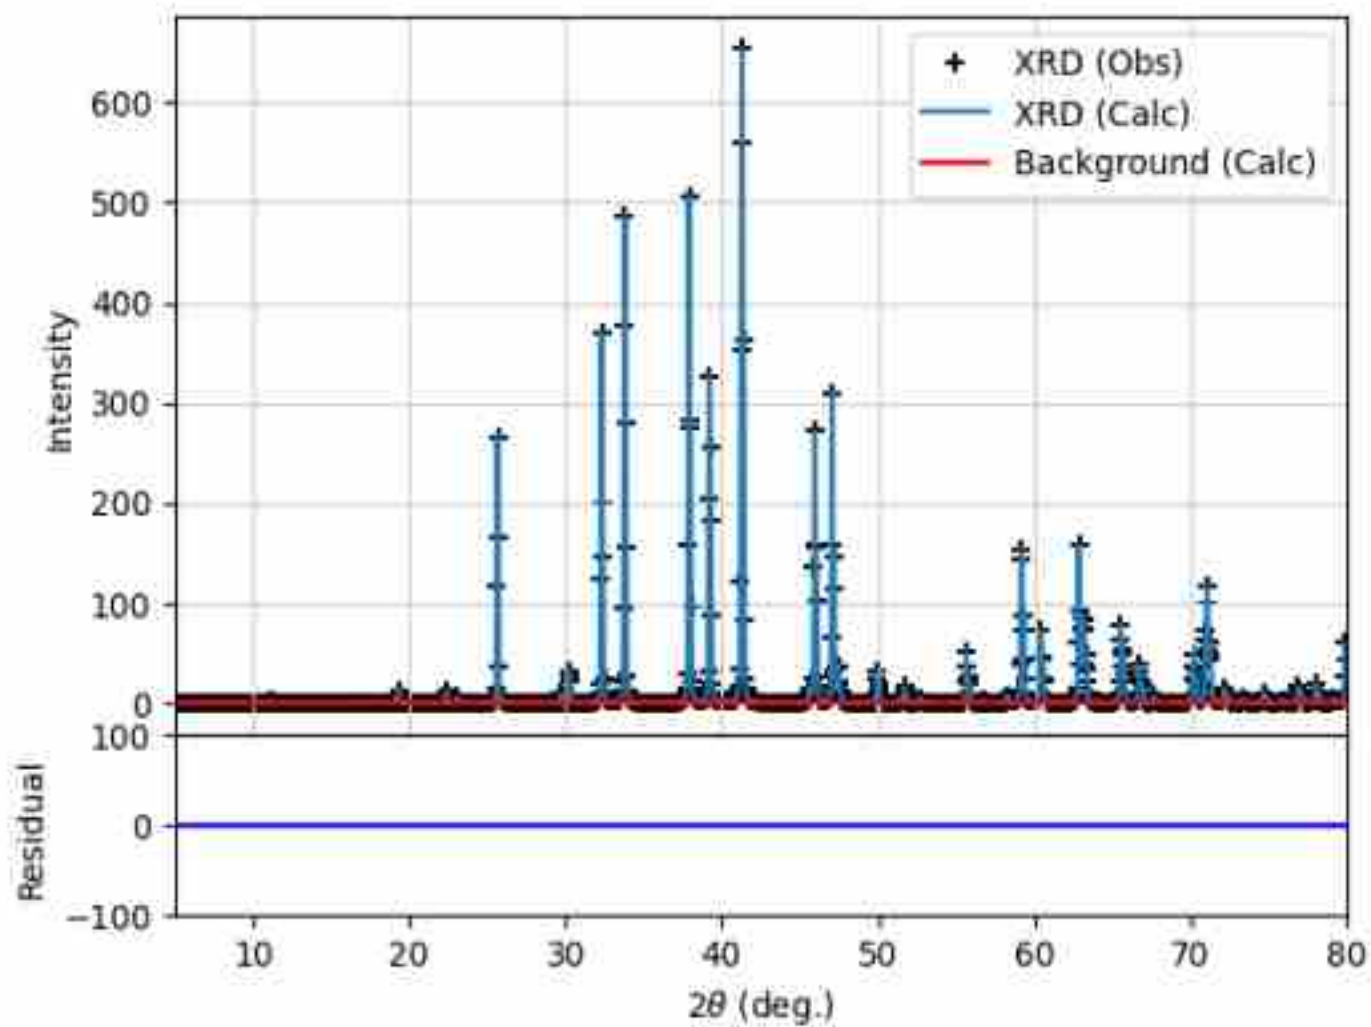

| RMSE before RR | Rwp     | RMSE after RR |
|----------------|---------|---------------|
| 0.017          | 0.00407 | 0.00064       |

# La<sub>4</sub>Zn<sub>2</sub>Rh<sub>2</sub>O<sub>12</sub>

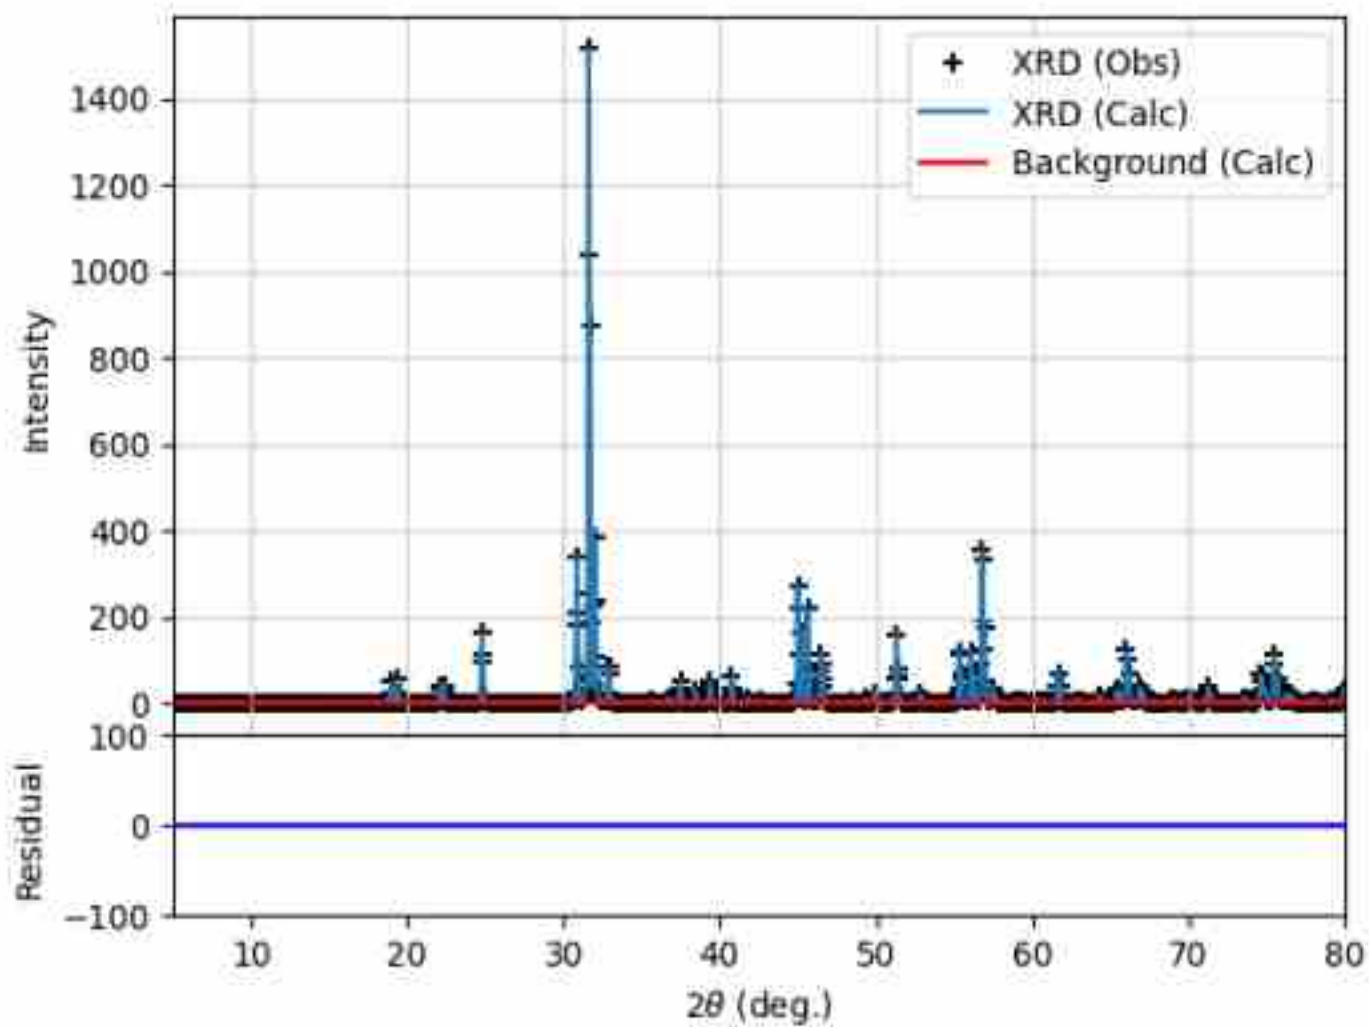

| RMSE before RR | Rwp     | RMSE after RR |
|----------------|---------|---------------|
| 0.017          | 0.00349 | 0.00121       |

# Li1Co3Ni1O8

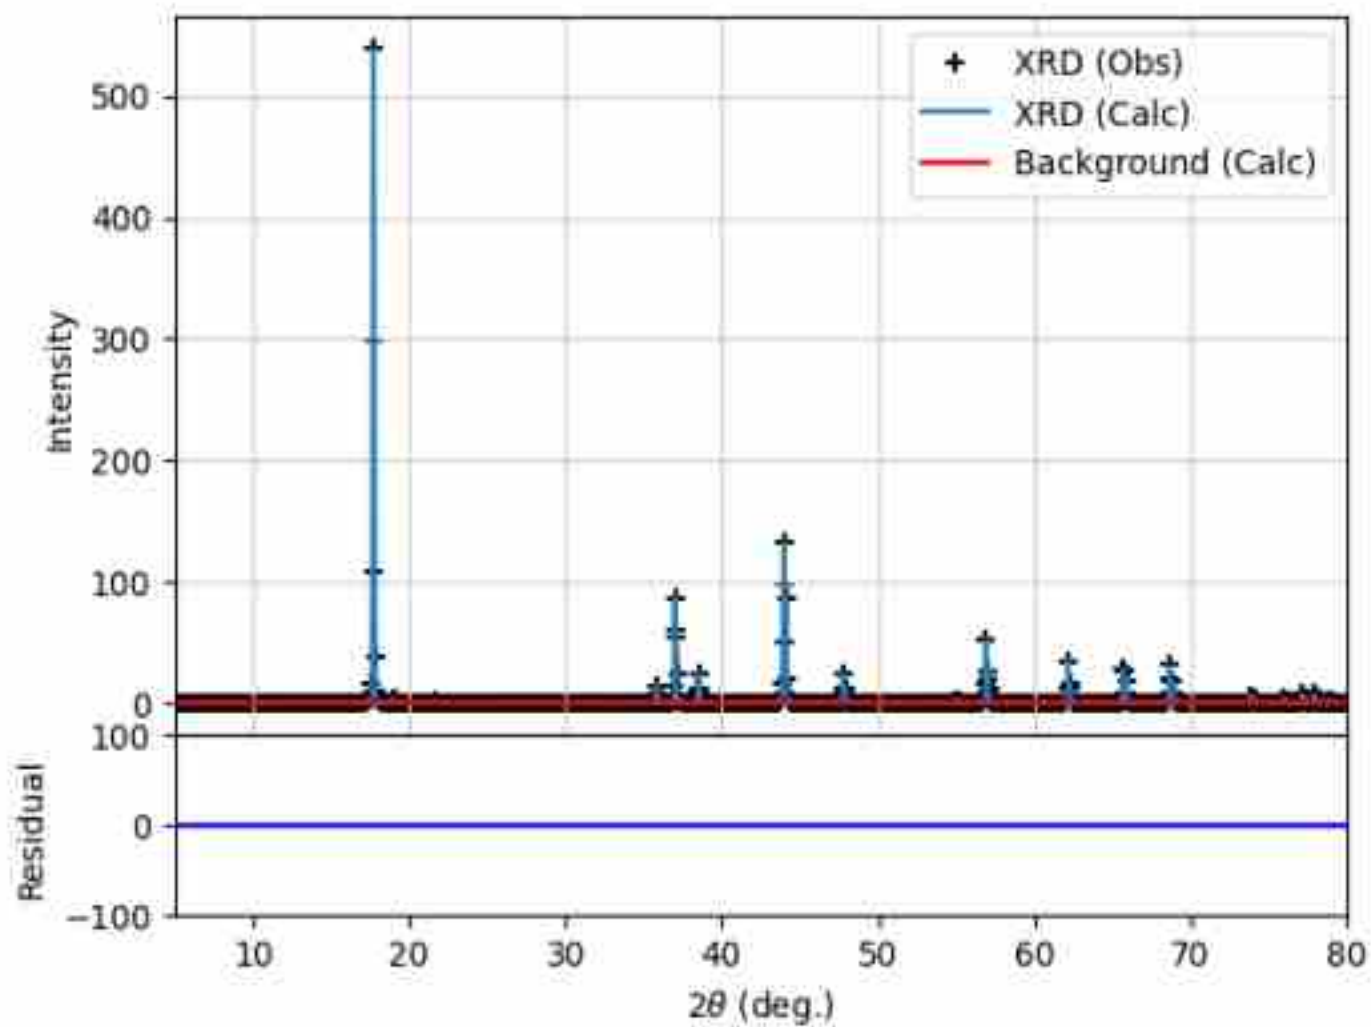

| RMSE before RR | Rwp    | RMSE after RR |
|----------------|--------|---------------|
| 0.017          | 0.0028 | 0.00118       |



# Li1Cu1O2

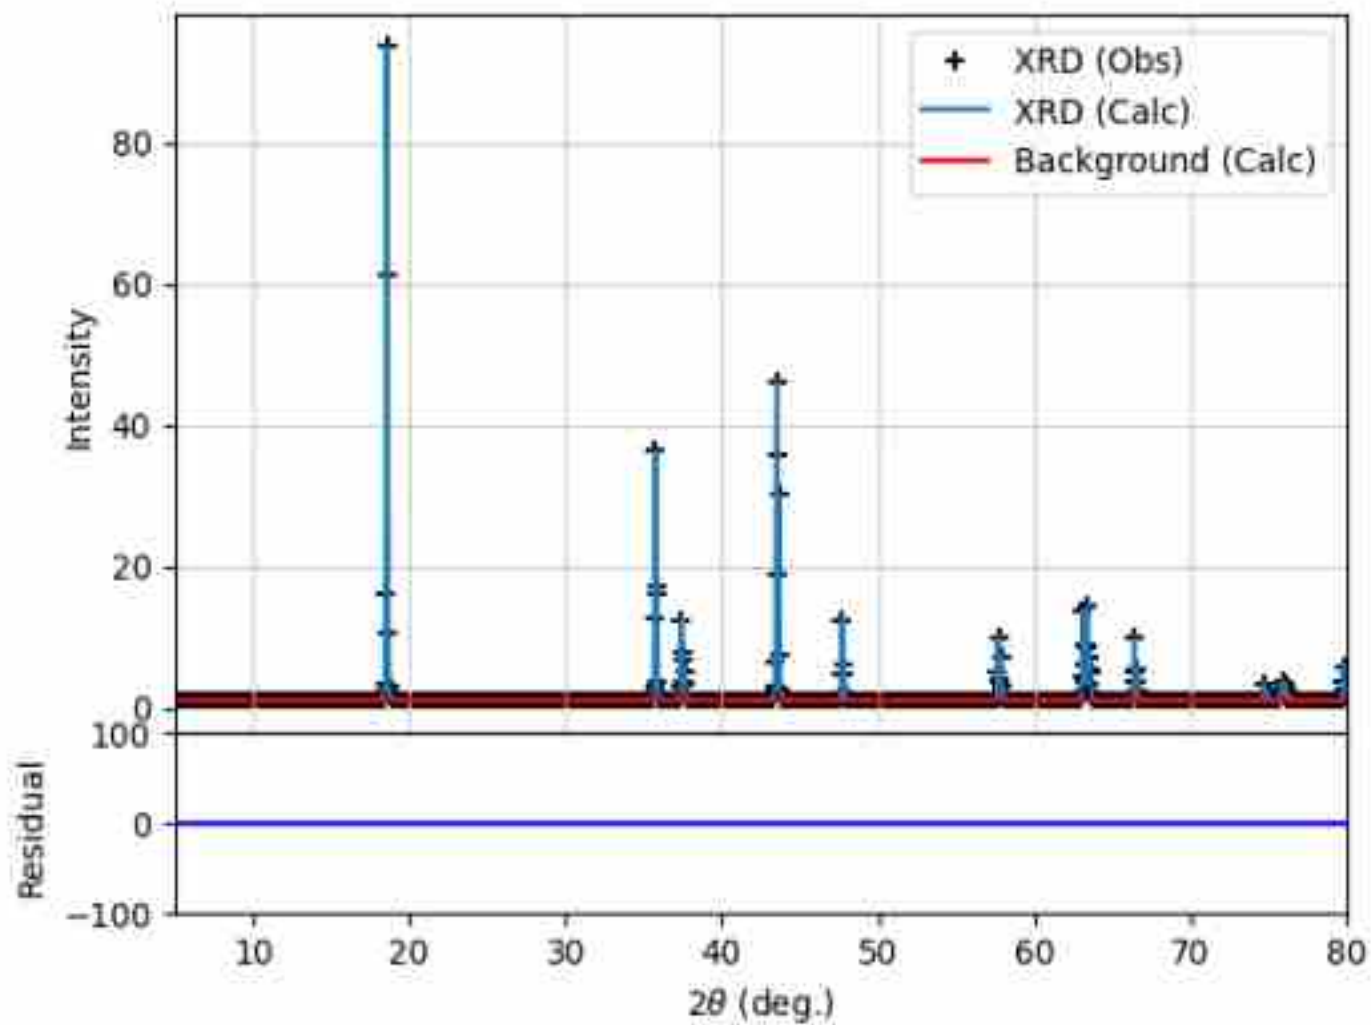

| RMSE before RR | Rwp     | RMSE after RR |
|----------------|---------|---------------|
| 0.017          | 0.00224 | 0.00189       |

# Li<sub>1</sub>La<sub>4</sub>Cu<sub>1</sub>O<sub>8</sub>

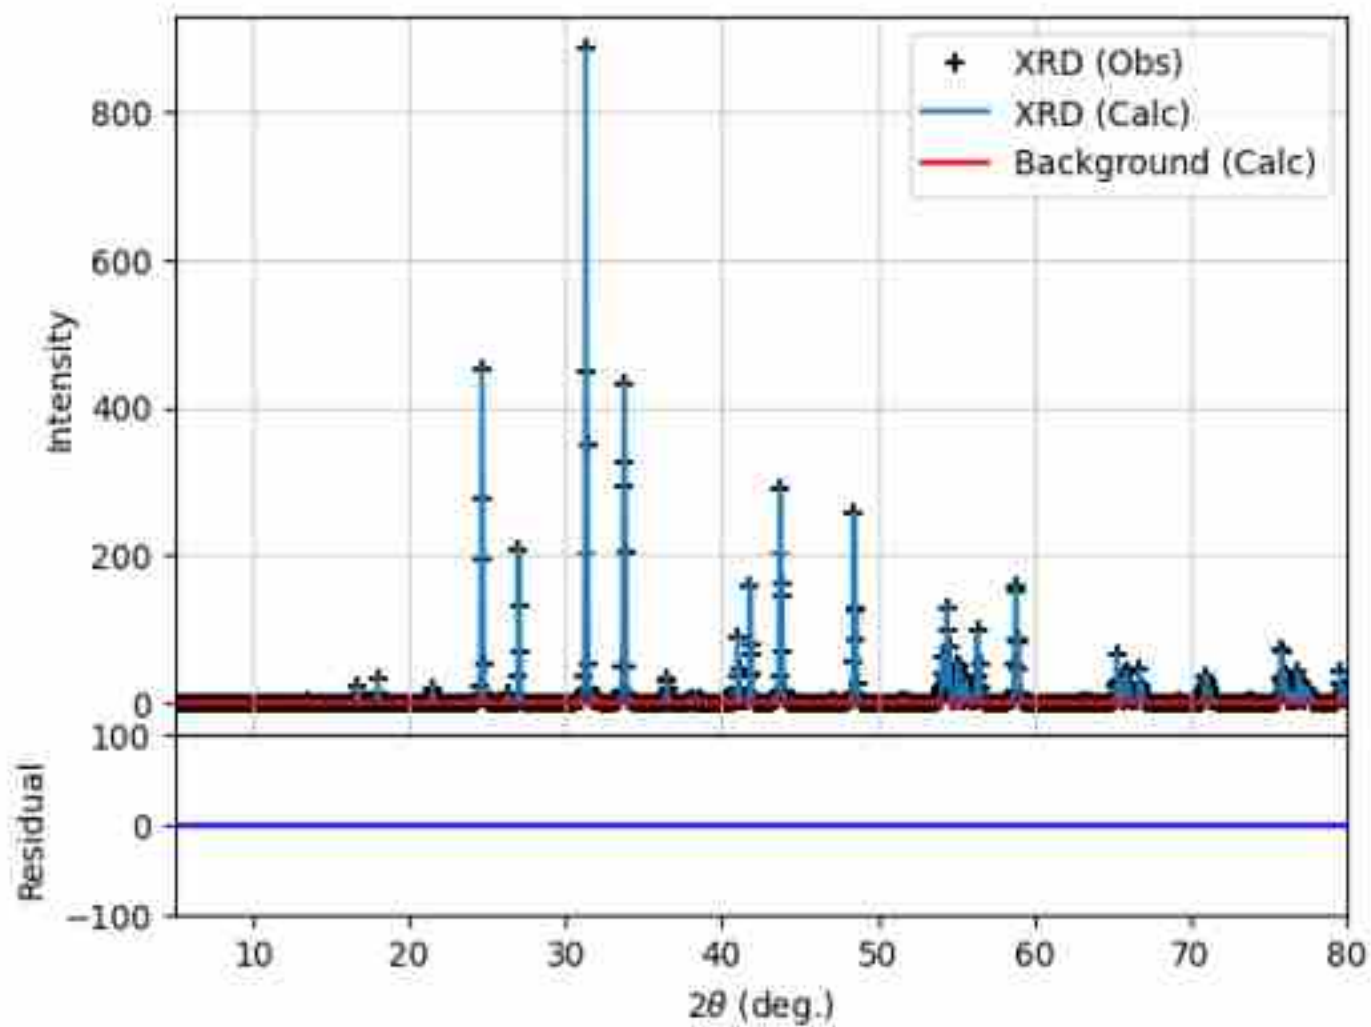

| RMSE before RR | Rwp     | RMSE after RR |
|----------------|---------|---------------|
| 0.017          | 0.00364 | 0.00141       |

# Li<sub>2</sub>Ca<sub>2</sub>Fe<sub>2</sub>F<sub>12</sub>

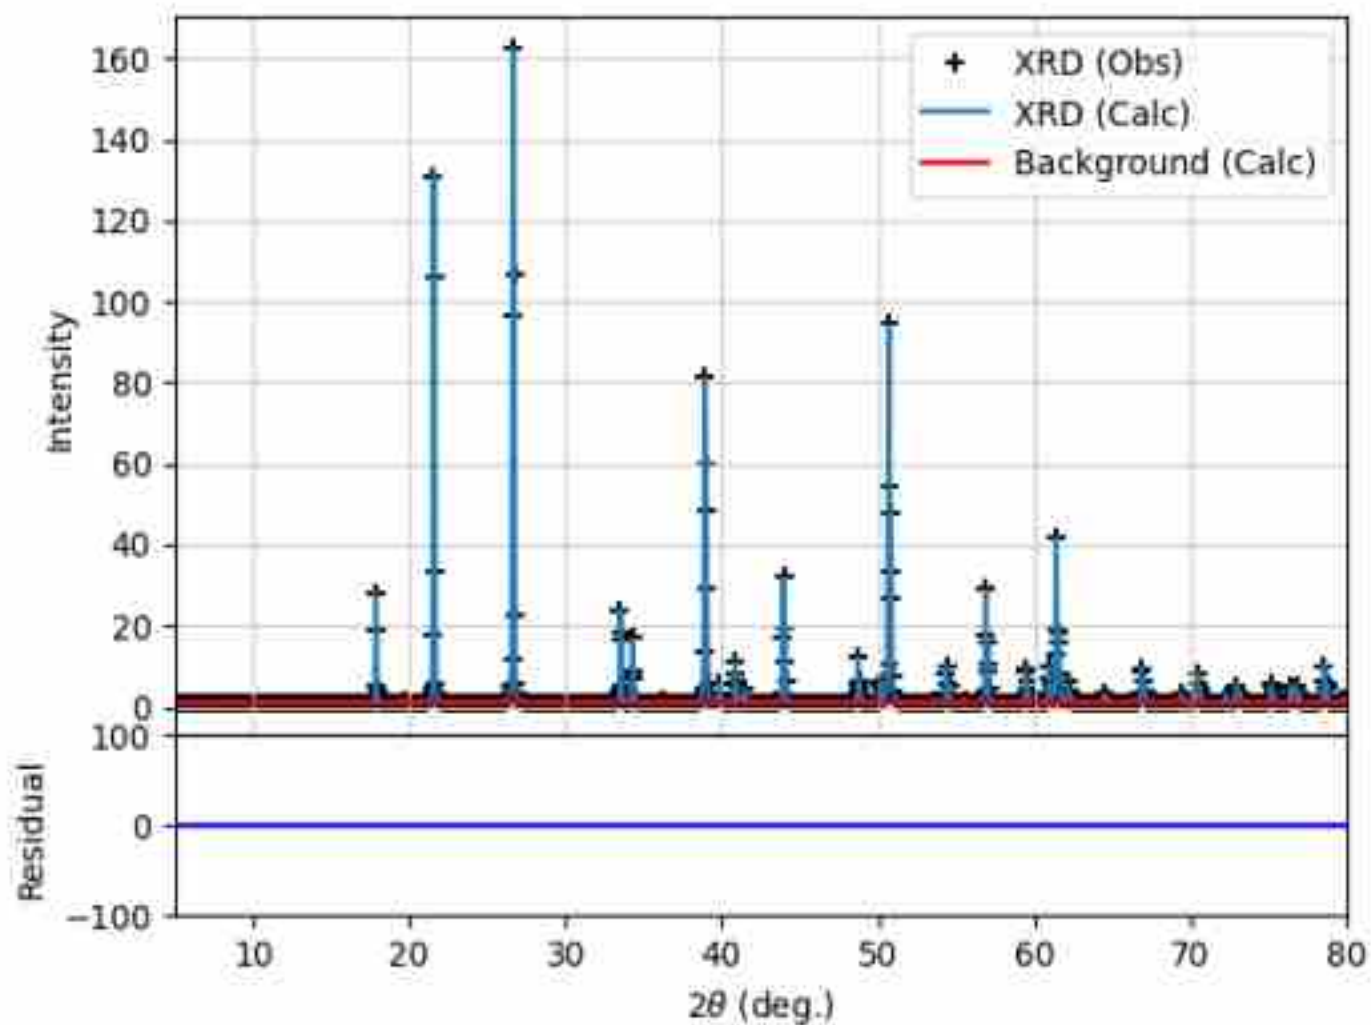

| RMSE before RR | Rwp     | RMSE after RR |
|----------------|---------|---------------|
| 0.017          | 0.00411 | 0.0016        |

# Li<sub>2</sub>Cu<sub>1</sub>Si<sub>1</sub>O<sub>4</sub>

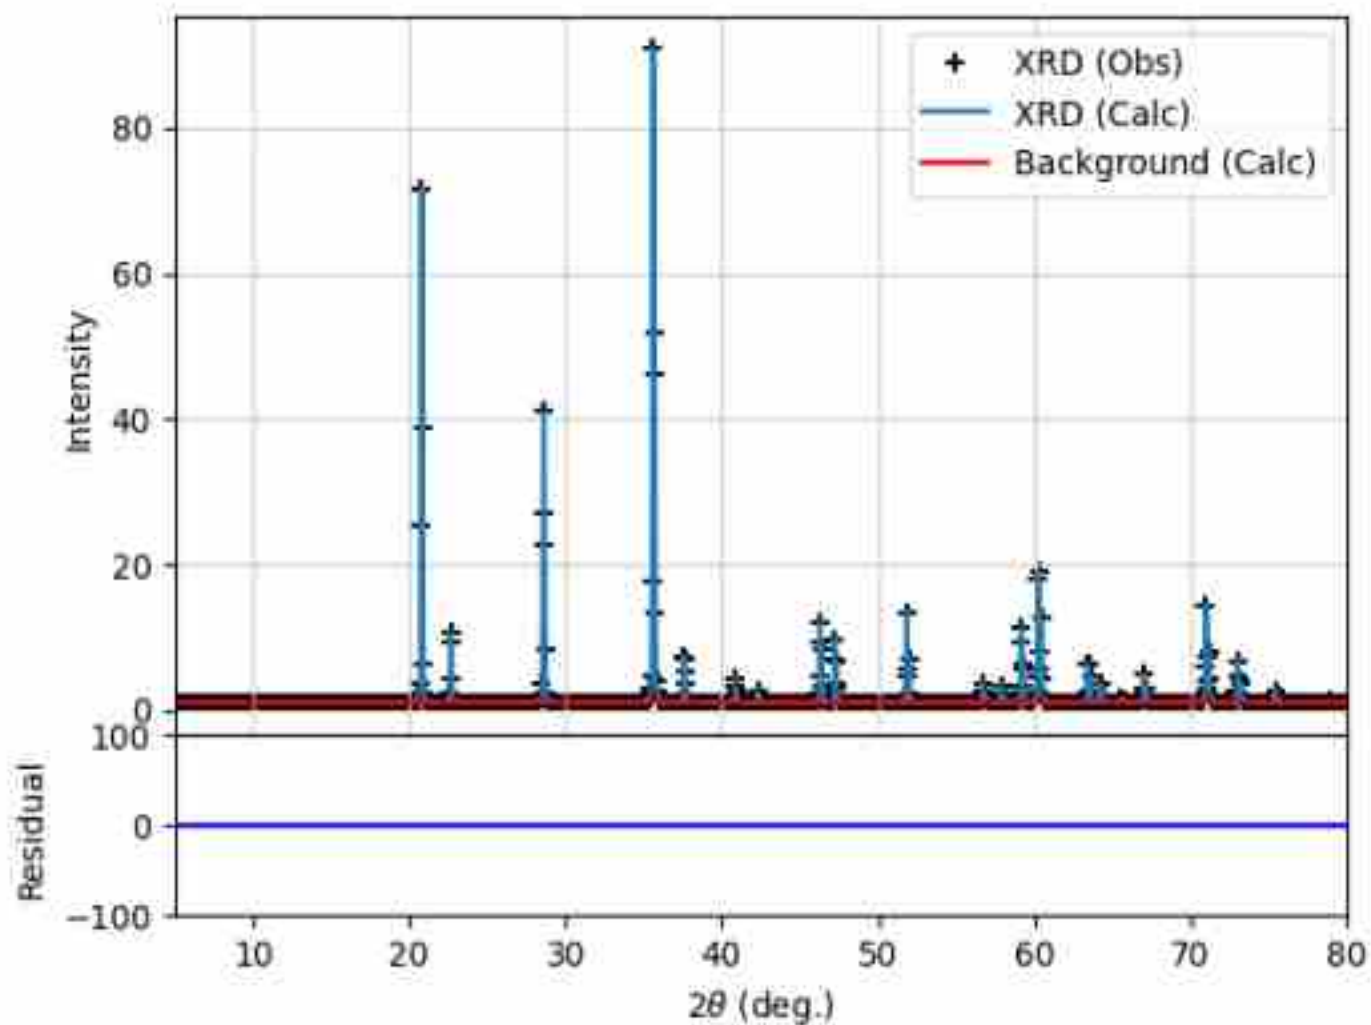

| RMSE before RR | Rwp     | RMSE after RR |
|----------------|---------|---------------|
| 0.017          | 0.01606 | 0.00483       |

# Li<sub>2</sub>Fe<sub>2</sub>P<sub>2</sub>H<sub>2</sub>O<sub>10</sub>

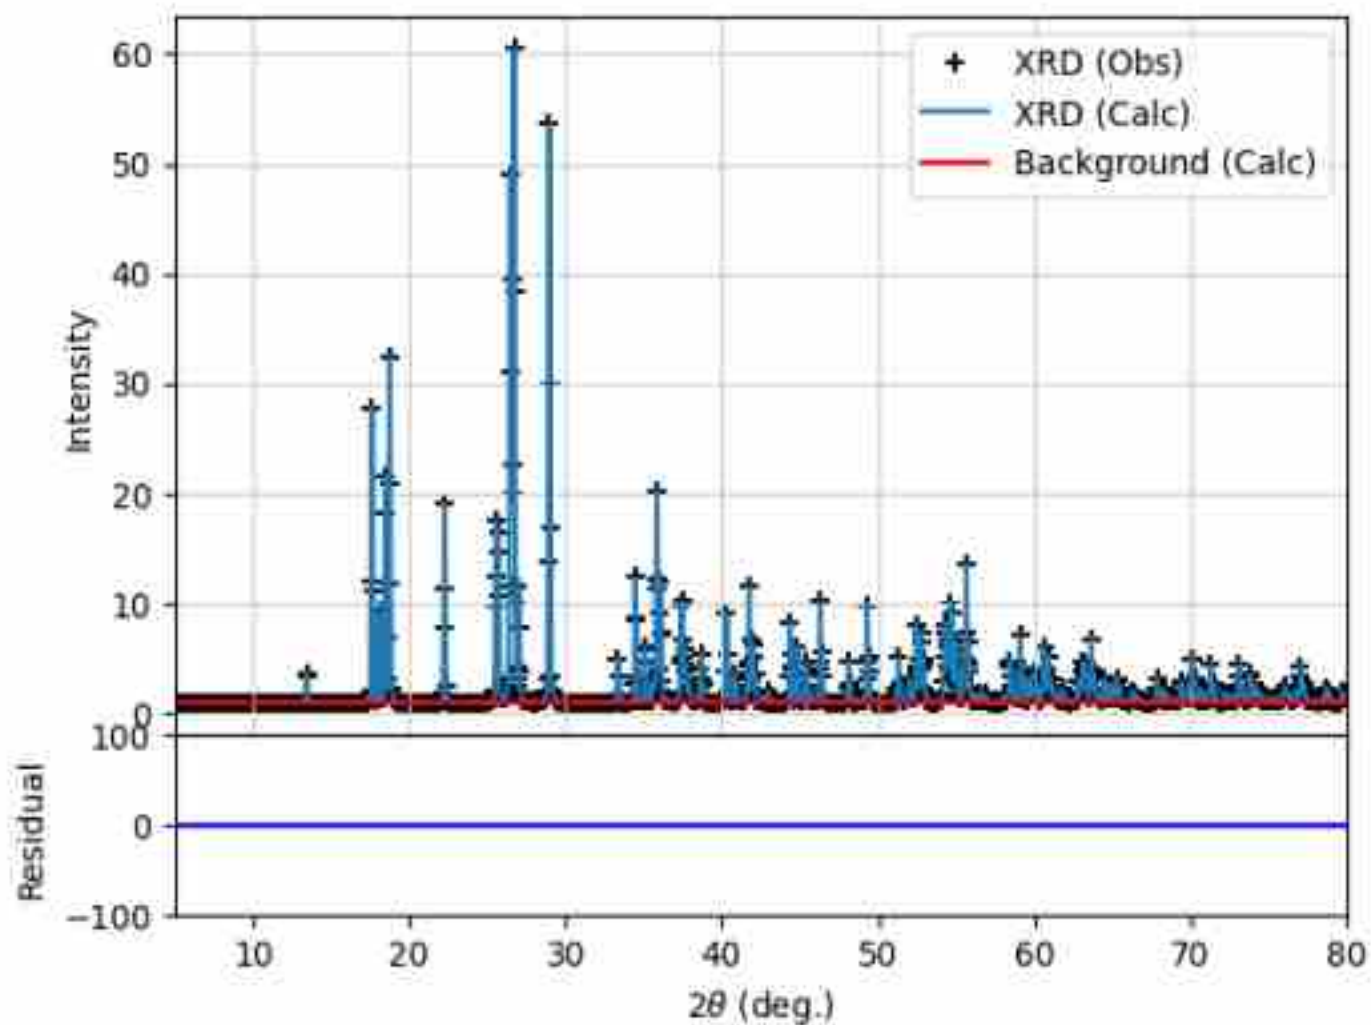

| RMSE before RR | Rwp     | RMSE after RR |
|----------------|---------|---------------|
| 0.017          | 0.00133 | 0.00043       |

# Li<sub>2</sub>V<sub>6</sub>O<sub>8</sub>

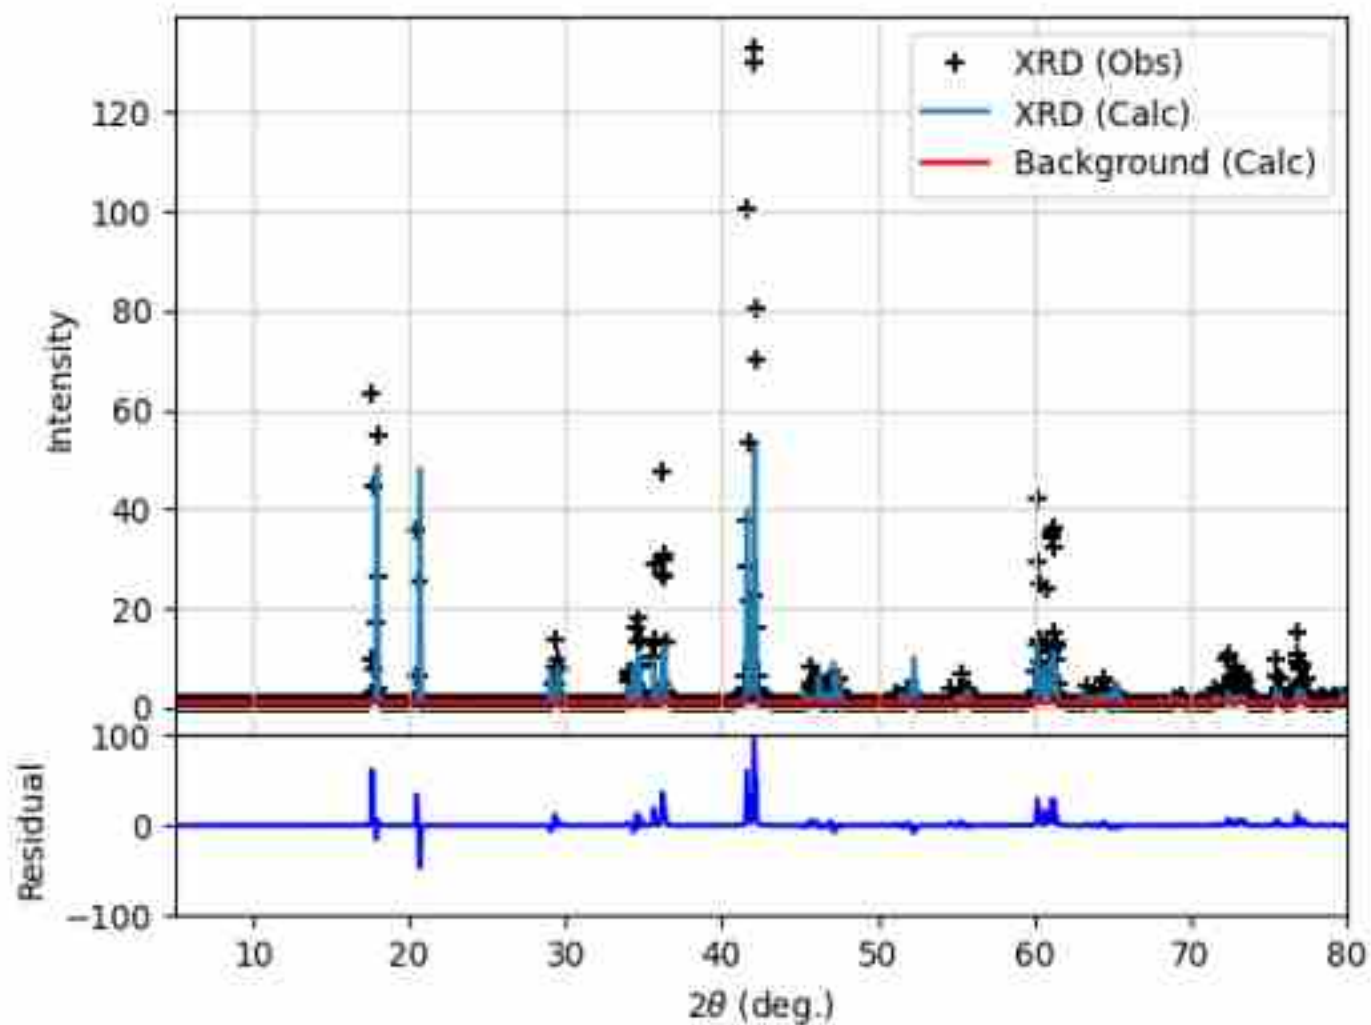

| RMSE before RR | Rwp   | RMSE after RR |
|----------------|-------|---------------|
| 0.017          | 100.0 | 0.07409       |

# Li<sub>4</sub>Fe<sub>3</sub>Co<sub>1</sub>O<sub>8</sub>

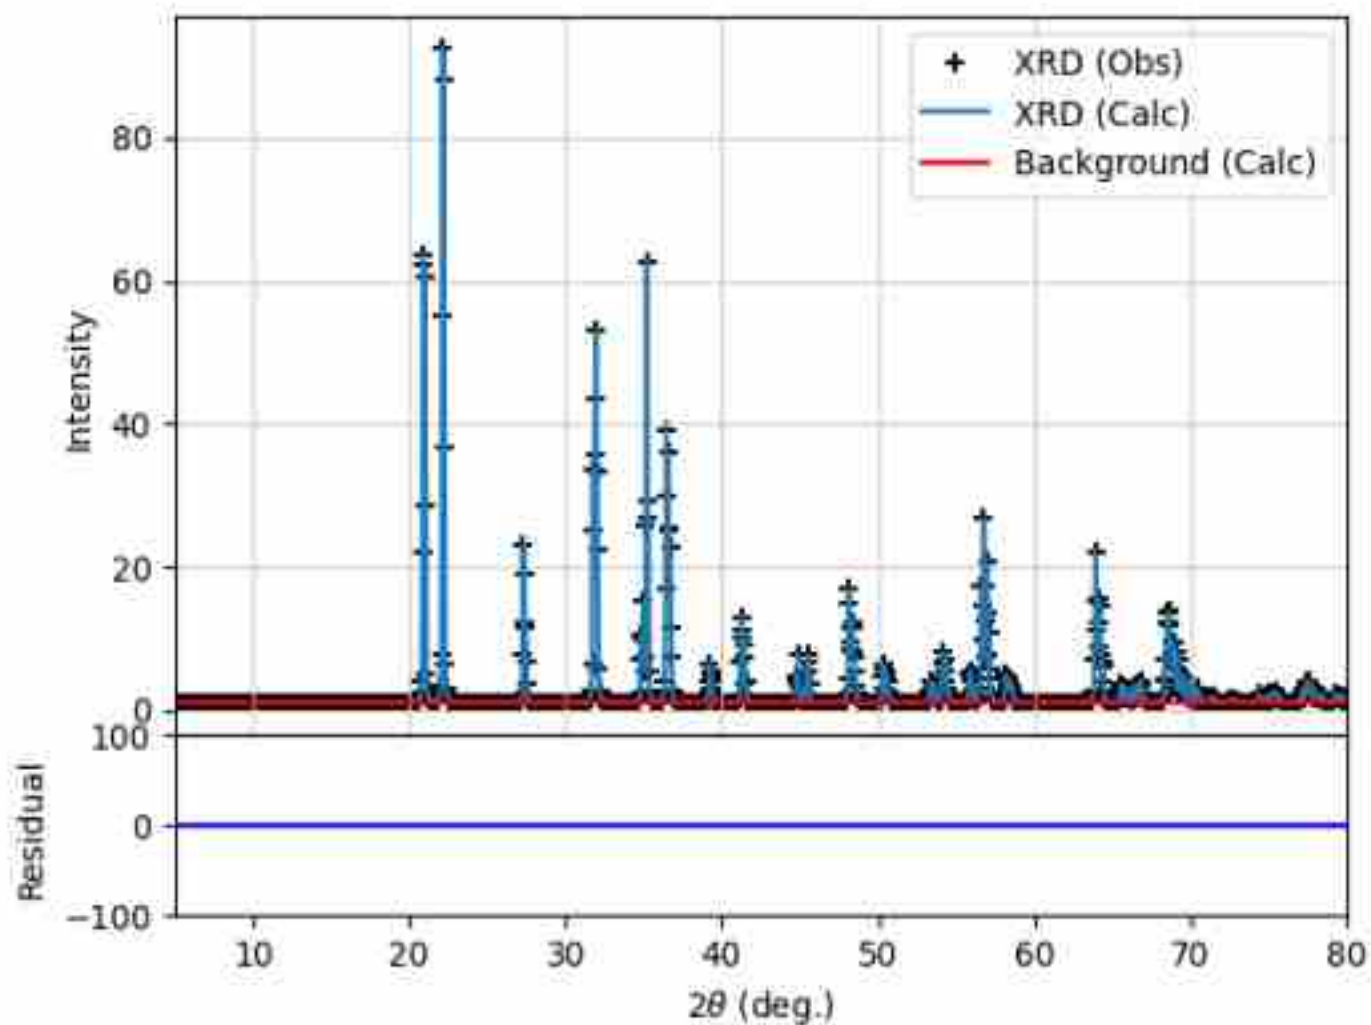

| RMSE before RR | Rwp    | RMSE after RR |
|----------------|--------|---------------|
| 0.017          | 0.1501 | 0.0183        |

# Li<sub>4</sub>Mo<sub>2</sub>O<sub>6</sub>

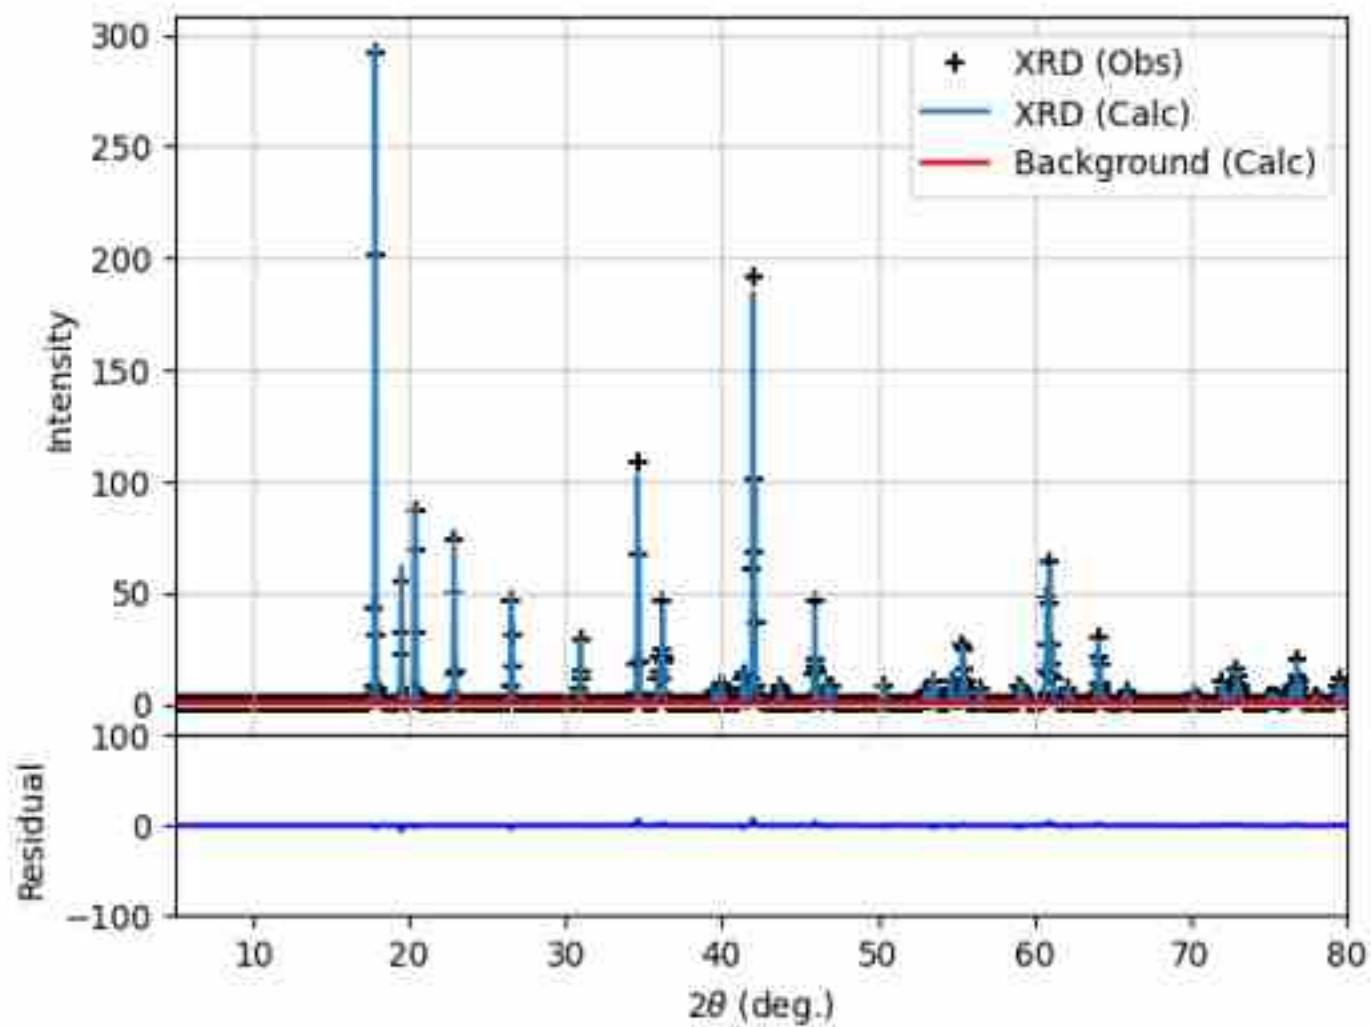

| RMSE before RR | Rwp     | RMSE after RR |
|----------------|---------|---------------|
| 0.017          | 5.09418 | 0.02674       |



# Li5Ga4

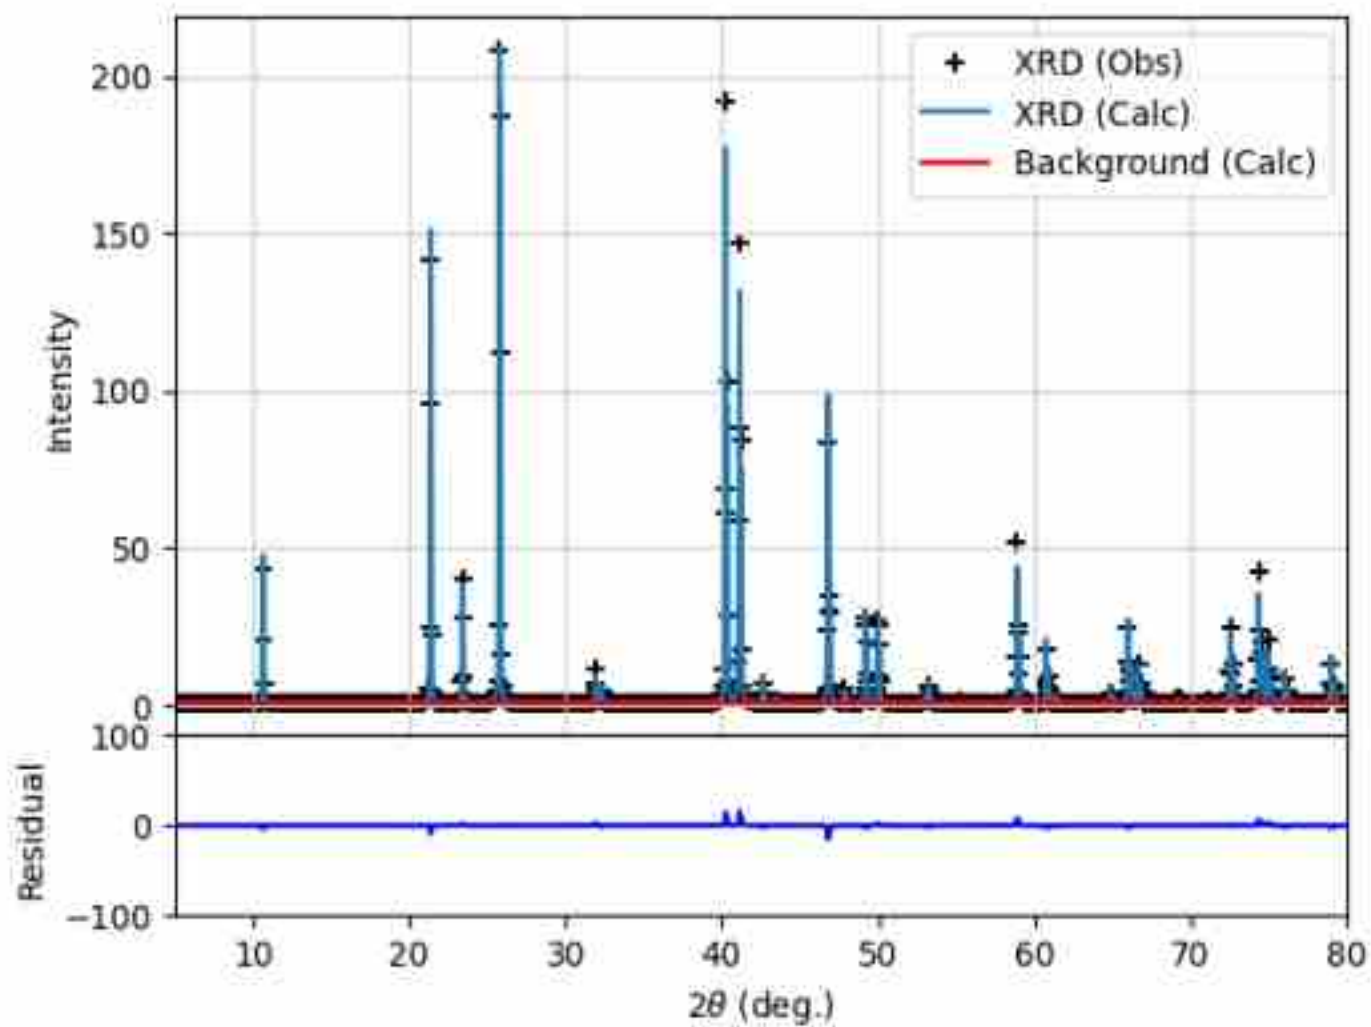

| RMSE before RR | Rwp     | RMSE after RR |
|----------------|---------|---------------|
| 0.017          | 9.42498 | 0.20313       |

# Lu1Al8Cu4

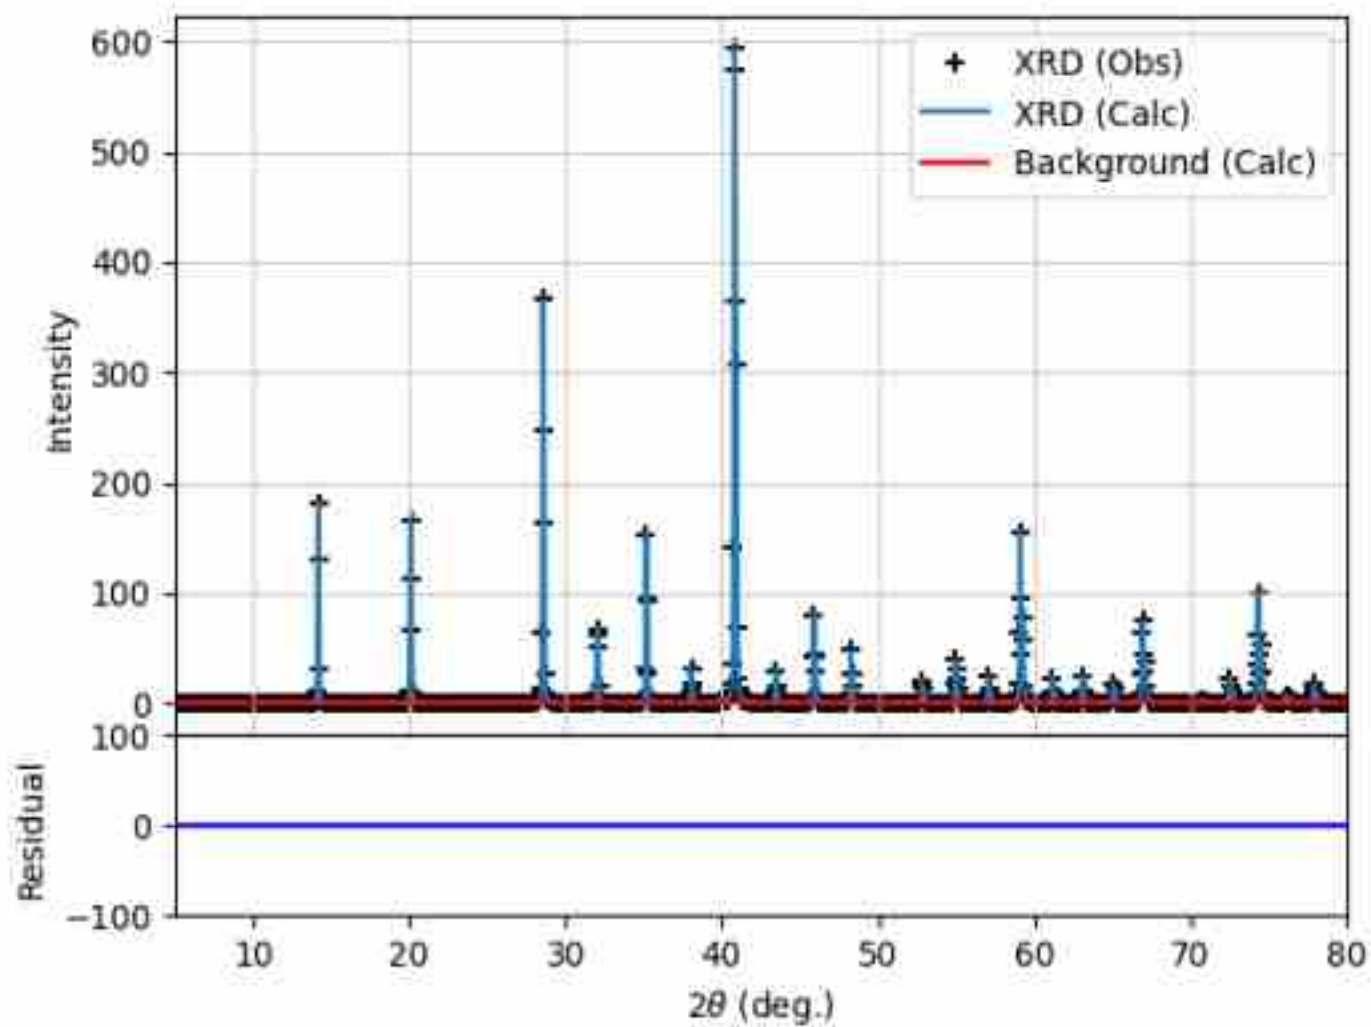

| RMSE before RR | Rwp     | RMSE after RR |
|----------------|---------|---------------|
| 0.017          | 0.00331 | 0.00121       |

# Lu<sub>2</sub>W<sub>2</sub>Cl<sub>2</sub>O<sub>8</sub>

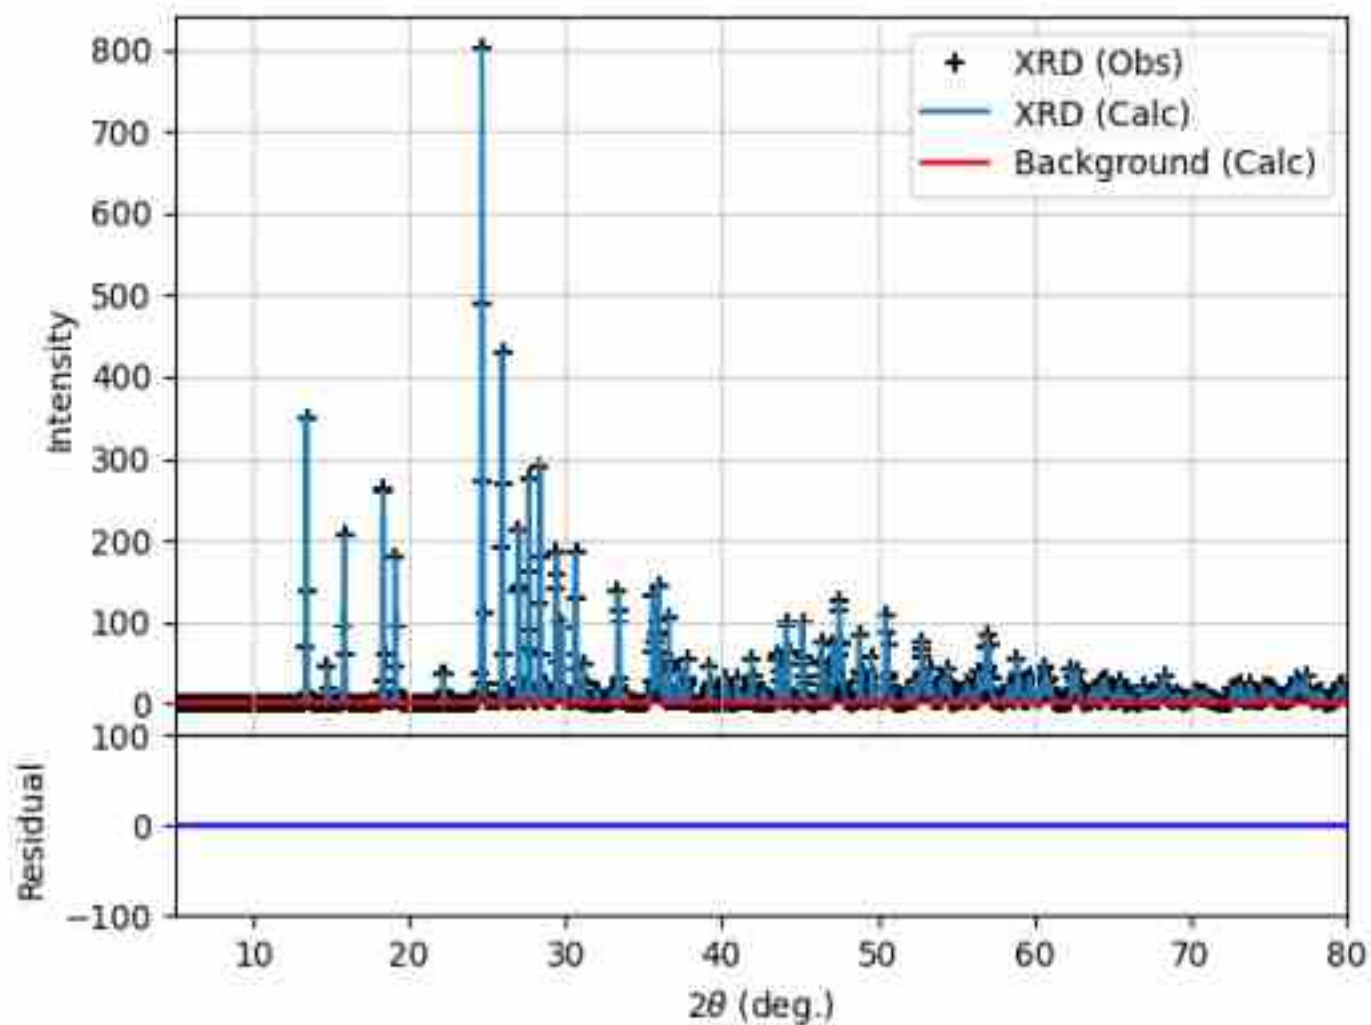

| RMSE before RR | Rwp    | RMSE after RR |
|----------------|--------|---------------|
| 0.017          | 0.0004 | 0.00039       |

# Lu<sub>4</sub>Ge<sub>4</sub>Ru<sub>4</sub>

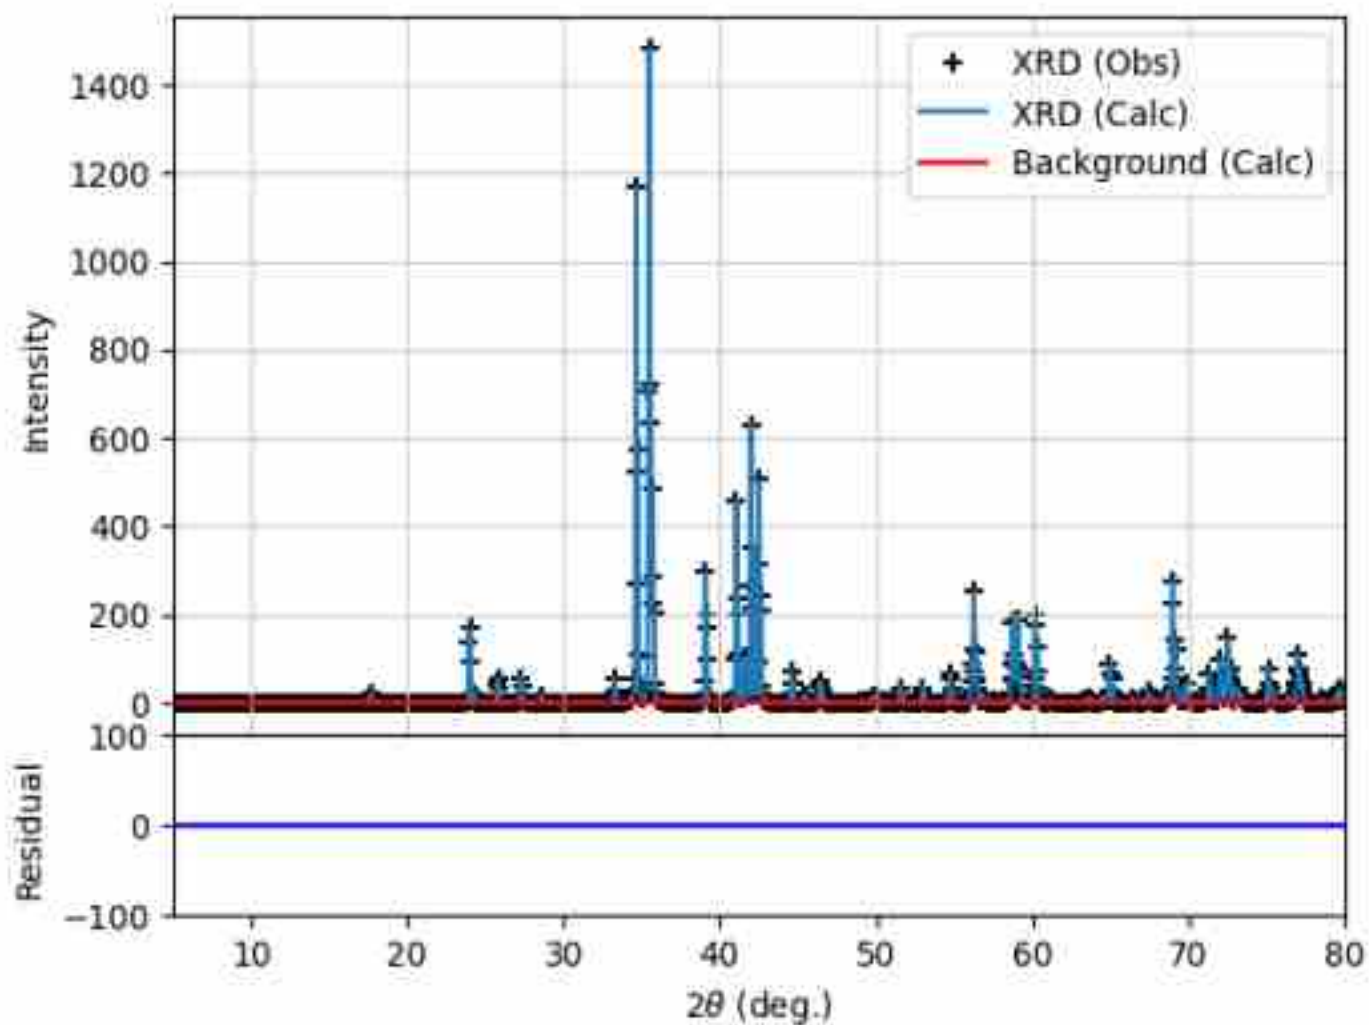

| RMSE before RR | Rwp     | RMSE after RR |
|----------------|---------|---------------|
| 0.017          | 0.00479 | 0.00037       |

# Lu4Rh4O12

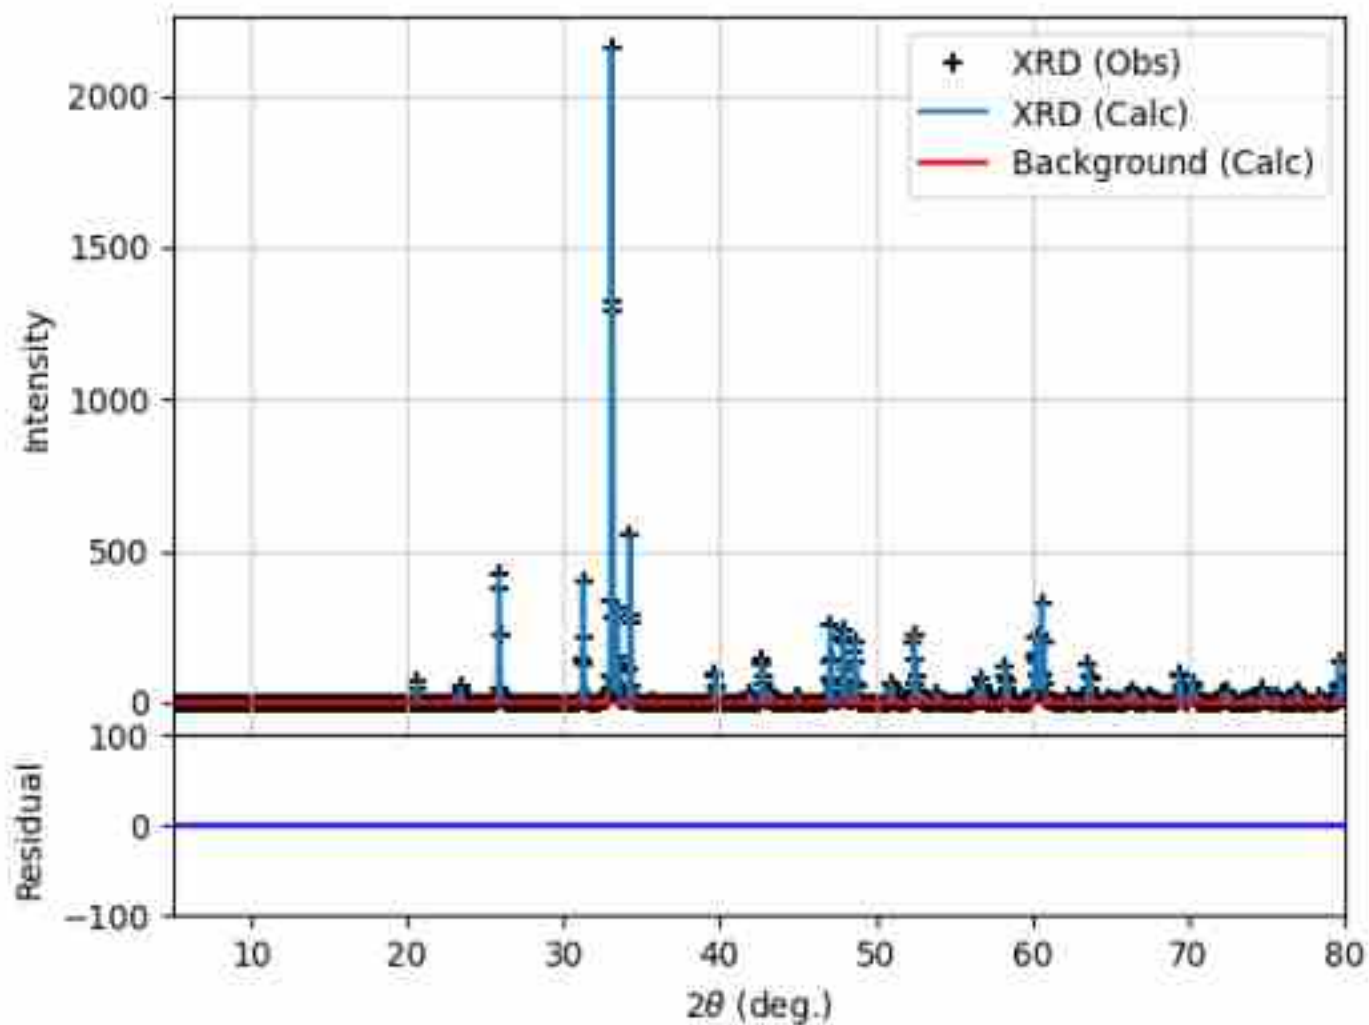

| RMSE before RR | Rwp    | RMSE after RR |
|----------------|--------|---------------|
| 0.017          | 0.0049 | 0.00156       |

# Mg1Hg5

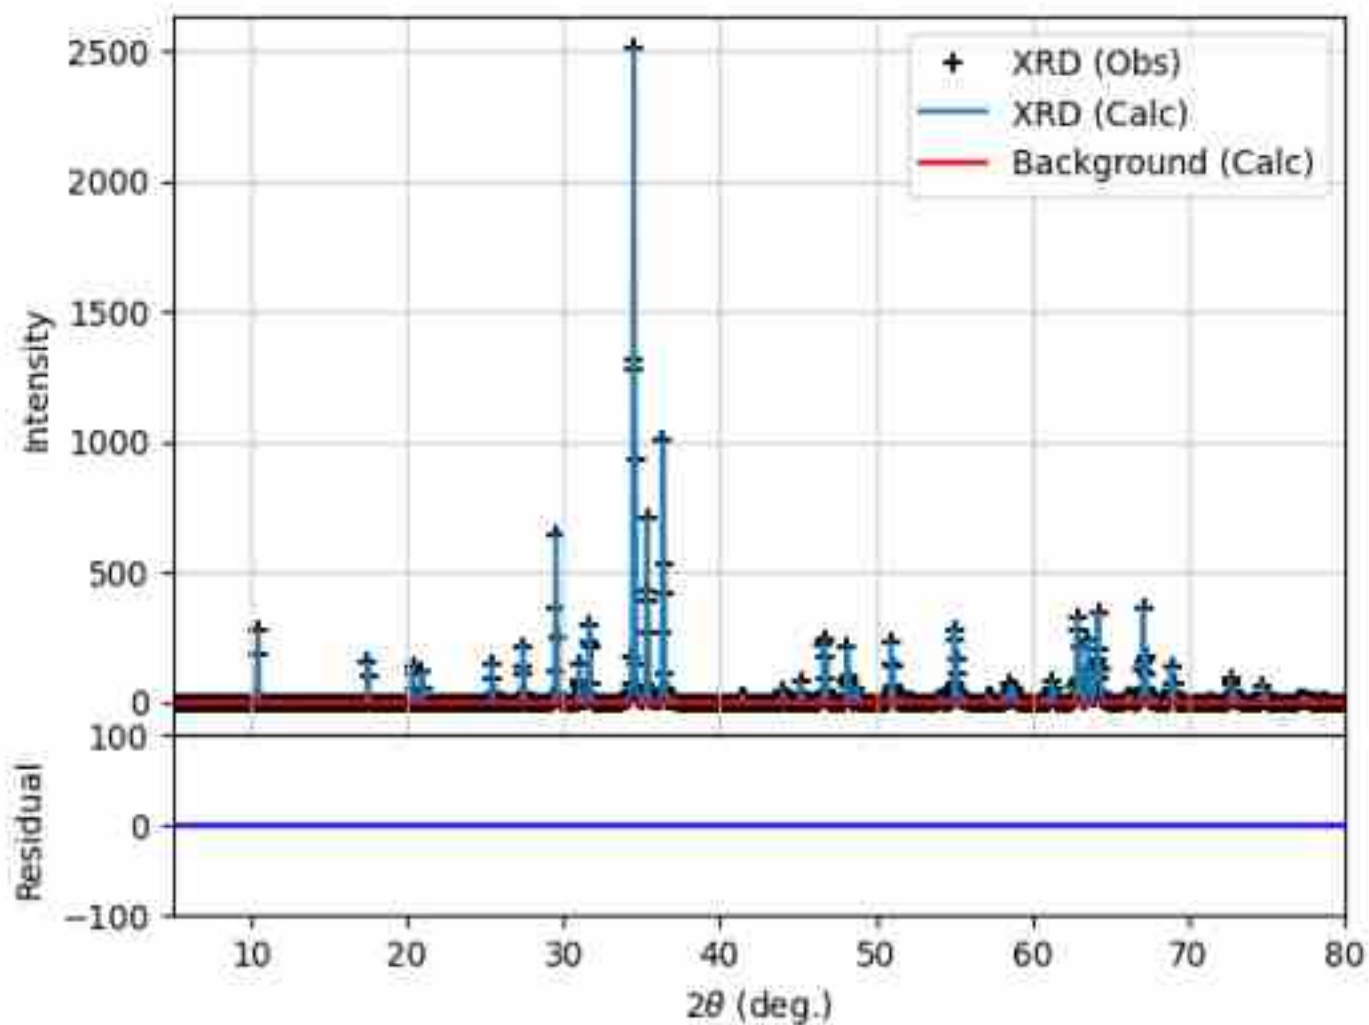

| RMSE before RR | Rwp     | RMSE after RR |
|----------------|---------|---------------|
| 0.017          | 0.00349 | 0.00057       |

# Mg<sub>2</sub>MnAl<sub>3</sub>S<sub>8</sub>

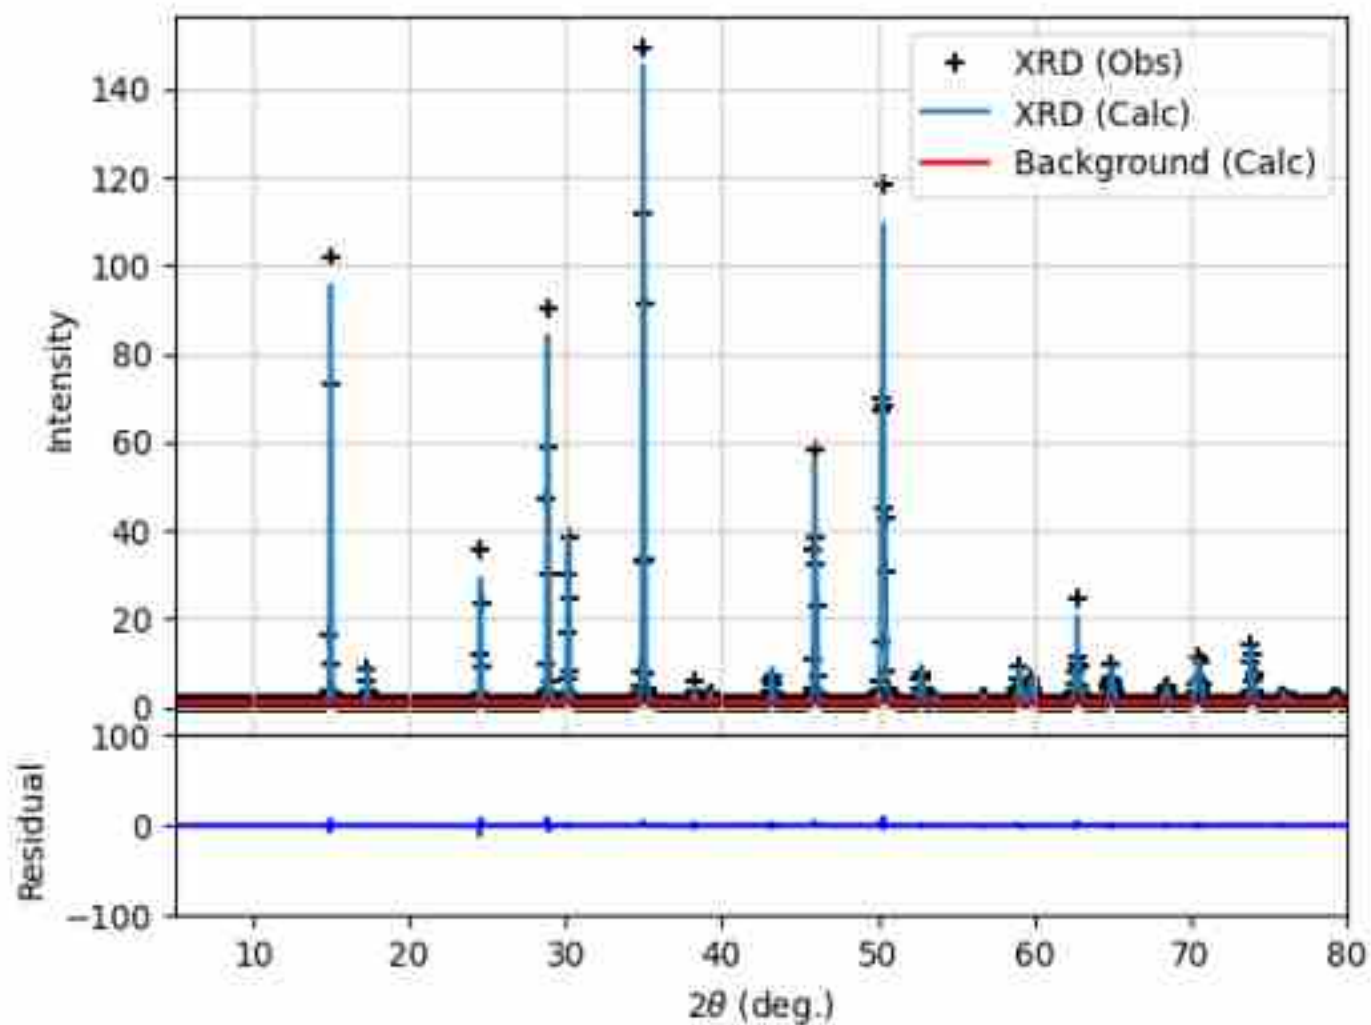

| RMSE before RR | Rwp      | RMSE after RR |
|----------------|----------|---------------|
| 0.017          | 10.36756 | 0.0309        |

# Mg2O2

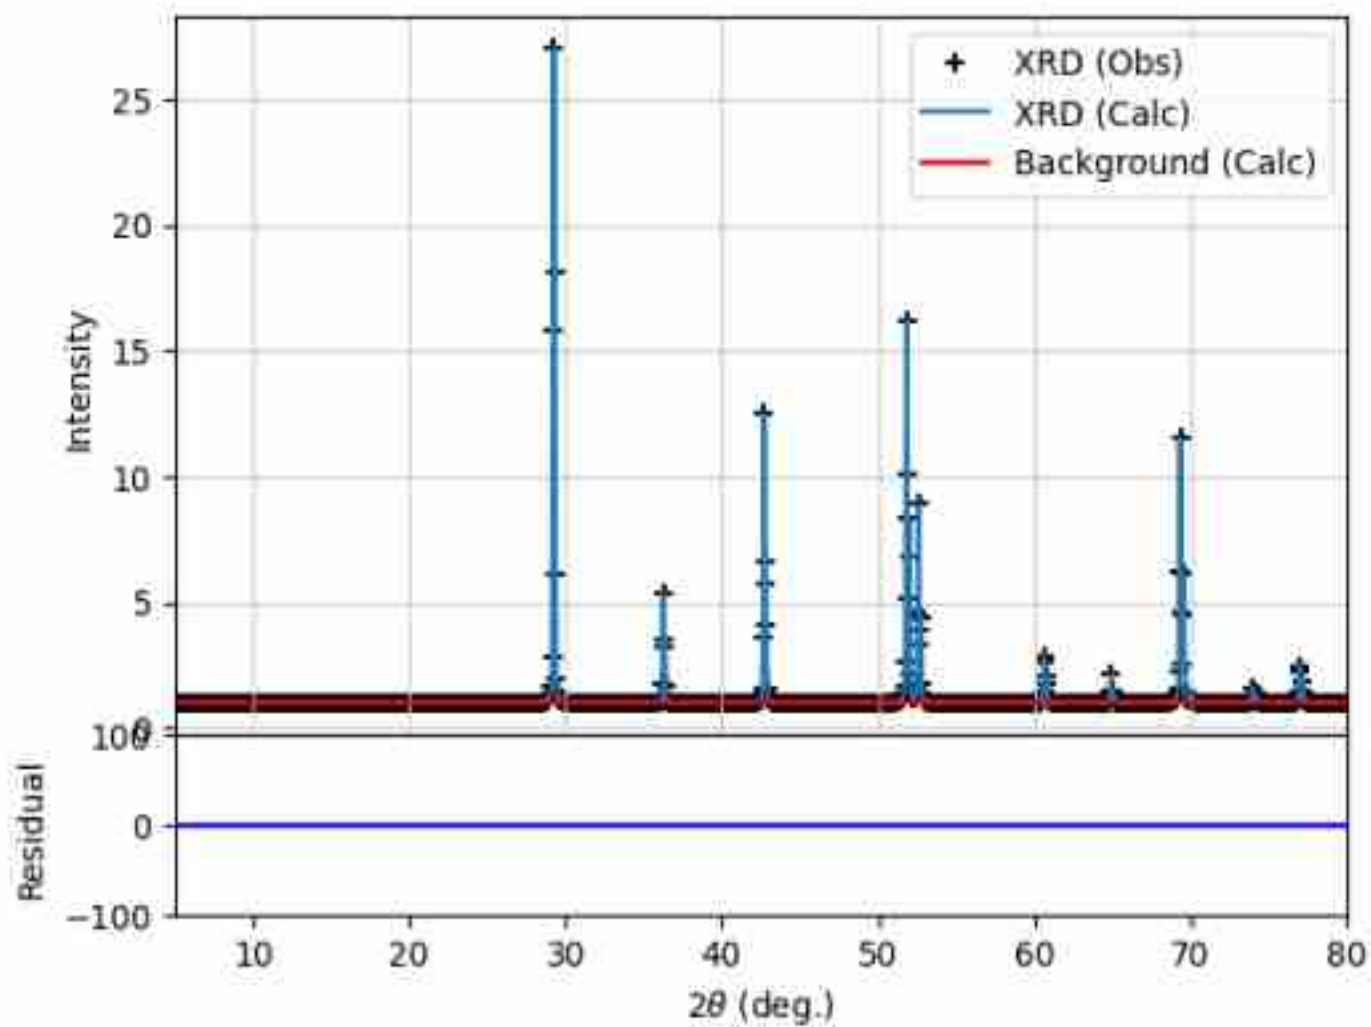

| RMSE before RR | Rwp     | RMSE after RR |
|----------------|---------|---------------|
| 0.017          | 0.00089 | 0.00057       |



# Mg<sub>2</sub>Sc<sub>4</sub>S<sub>8</sub>

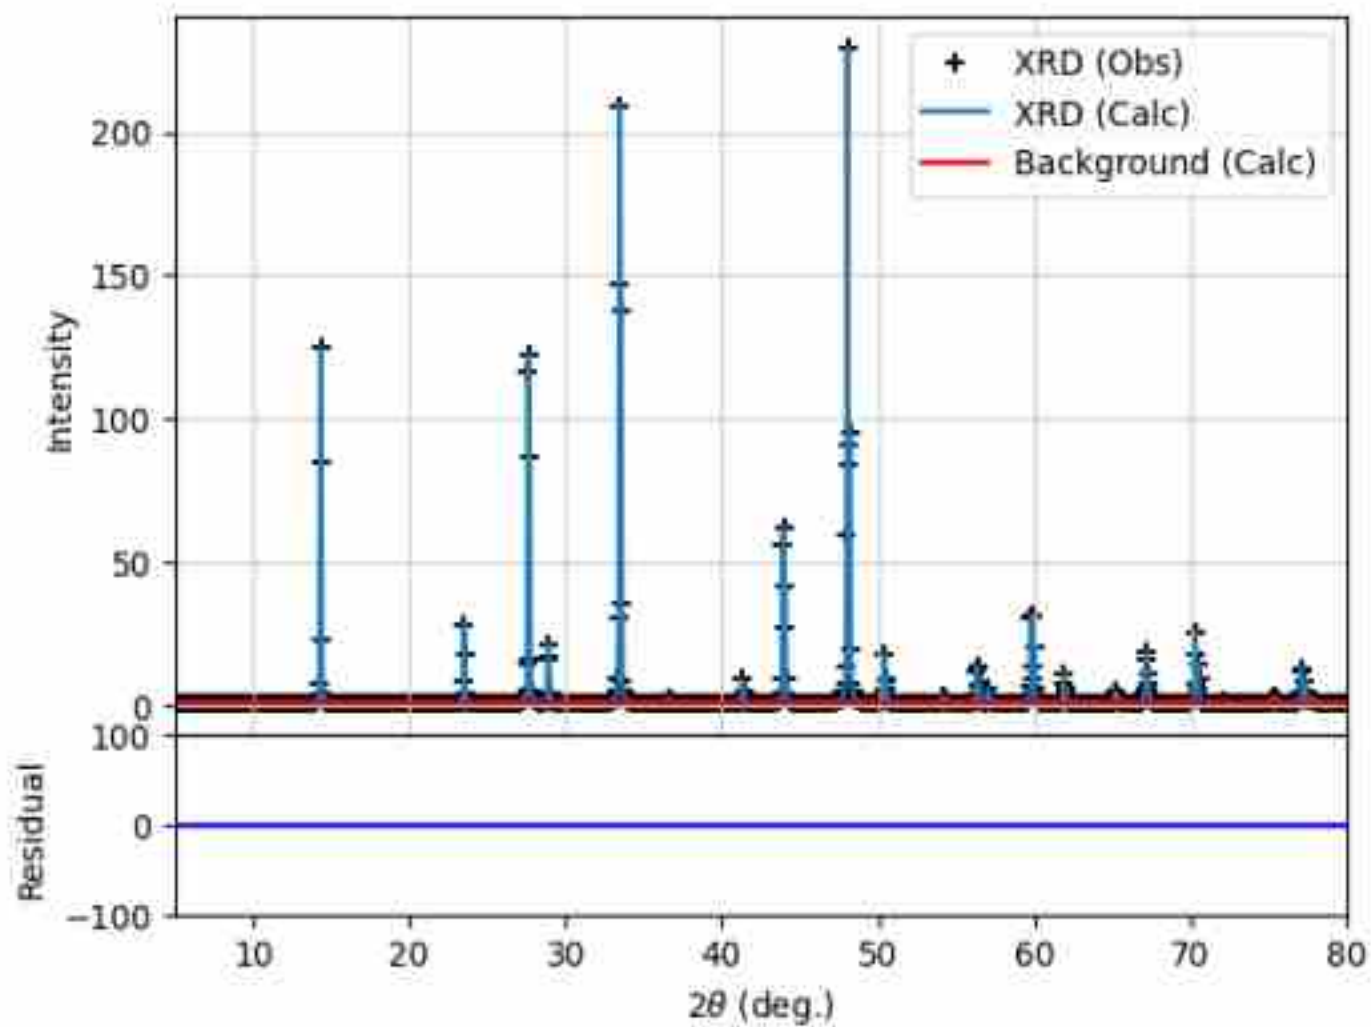

| RMSE before RR | Rwp     | RMSE after RR |
|----------------|---------|---------------|
| 0.017          | 0.02466 | 0.00266       |

# Mg<sub>2</sub>Sn<sub>2</sub>O<sub>6</sub>

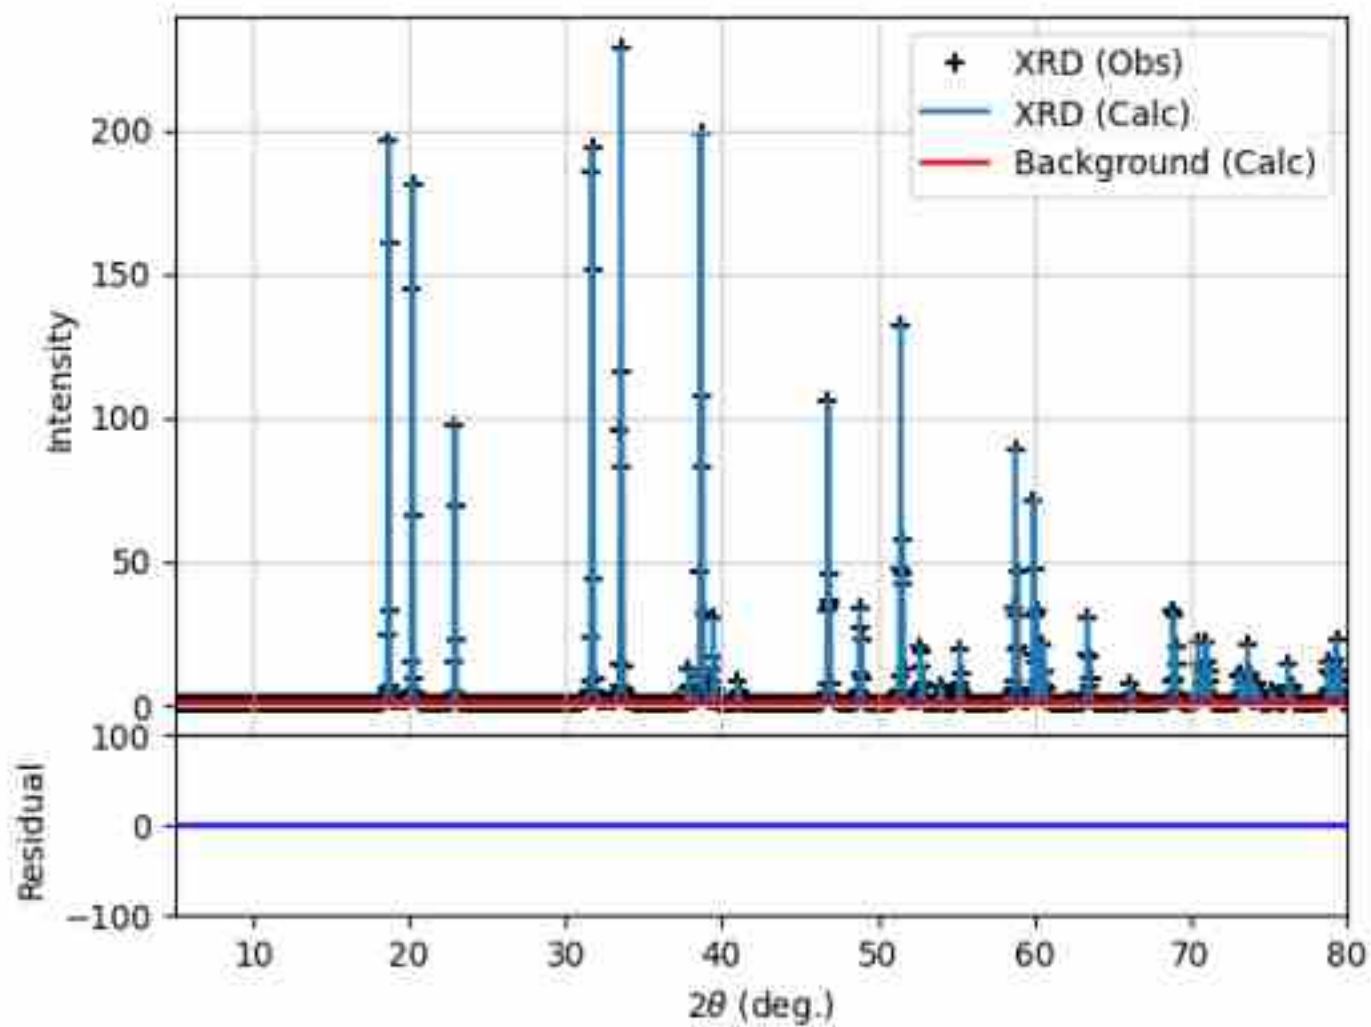

| RMSE before RR | Rwp     | RMSE after RR |
|----------------|---------|---------------|
| 0.017          | 0.00383 | 0.00214       |

# Mg<sub>2</sub>TiCr<sub>3</sub>S<sub>8</sub>

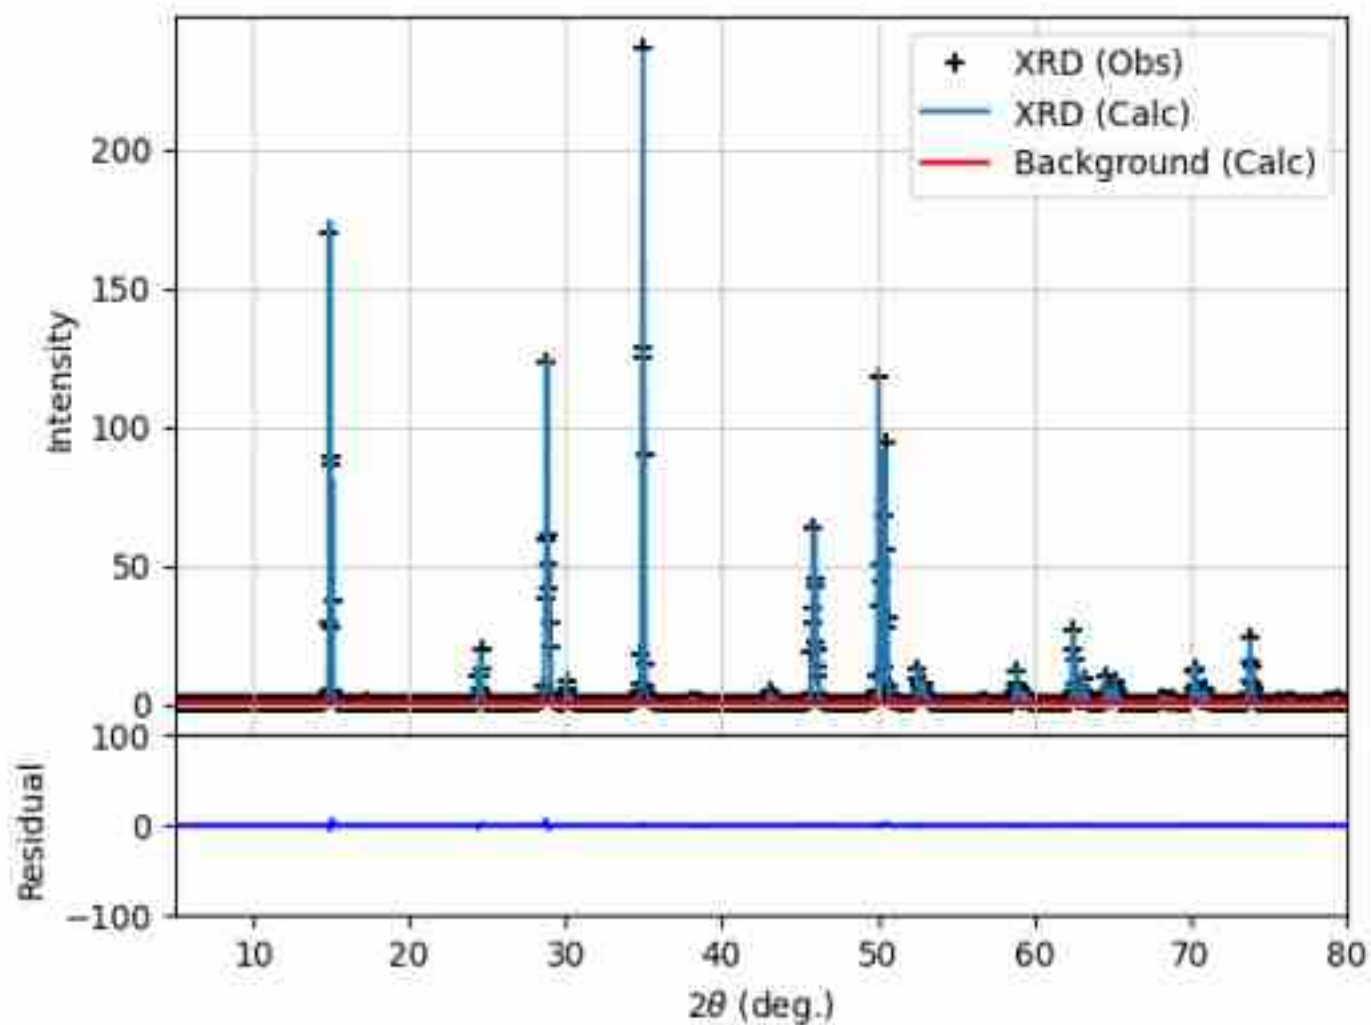

| RMSE before RR | Rwp     | RMSE after RR |
|----------------|---------|---------------|
| 0.017          | 3.89759 | 0.02565       |

# Mg<sub>3</sub>Ga<sub>3</sub>Au<sub>3</sub>

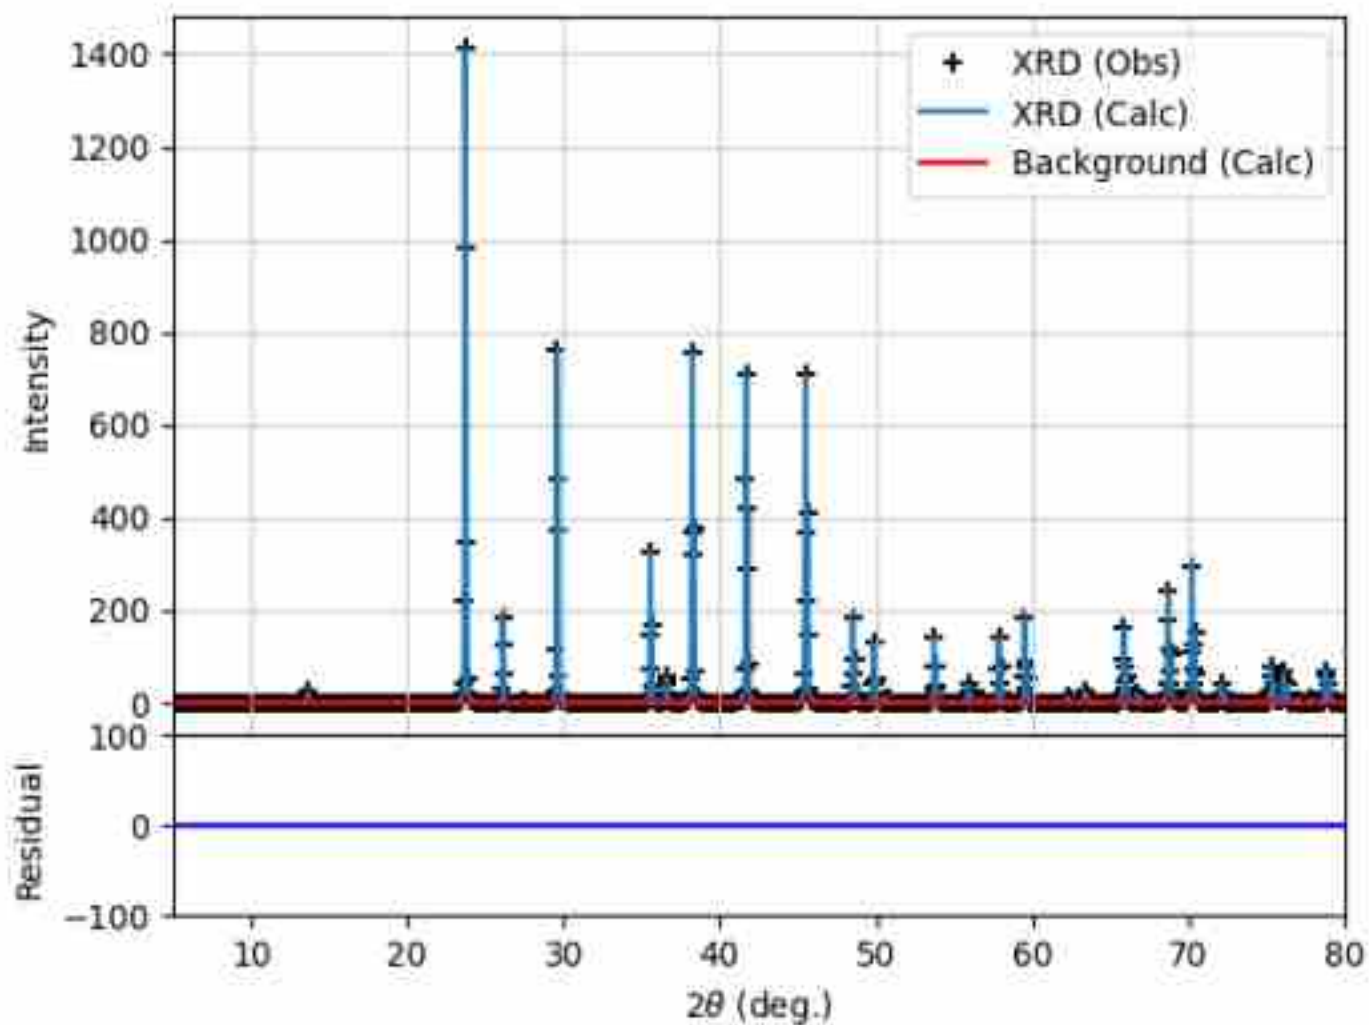

| RMSE before RR | Rwp     | RMSE after RR |
|----------------|---------|---------------|
| 0.017          | 0.00341 | 0.00091       |

# Mg<sub>4</sub>Ga<sub>4</sub>Cu<sub>4</sub>

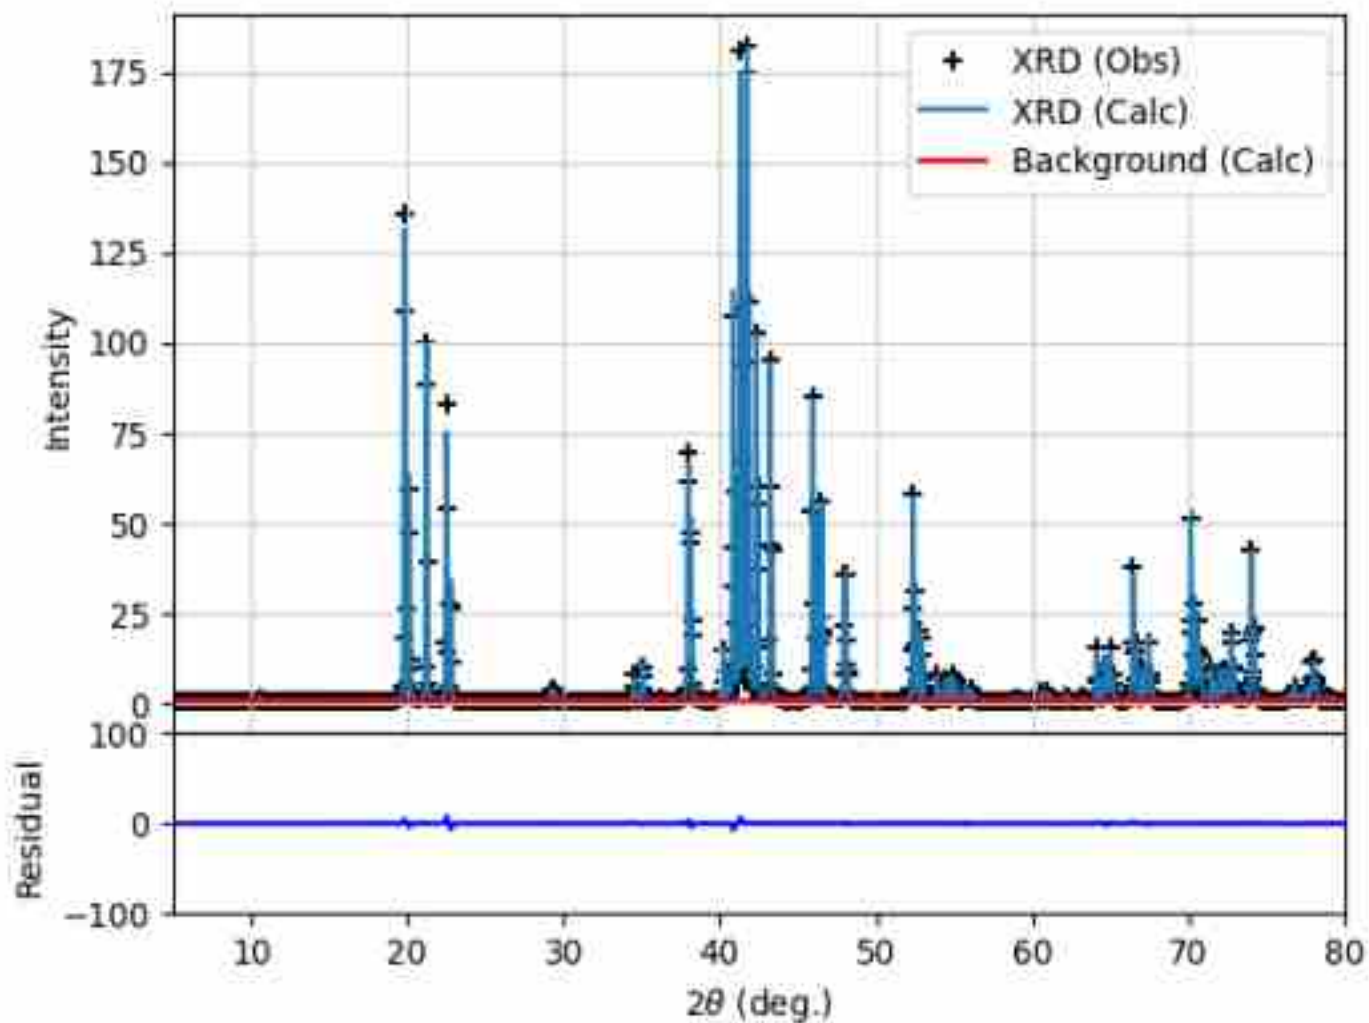

| RMSE before RR | Rwp     | RMSE after RR |
|----------------|---------|---------------|
| 0.017          | 4.82036 | 0.01761       |

# Mg5Bi1

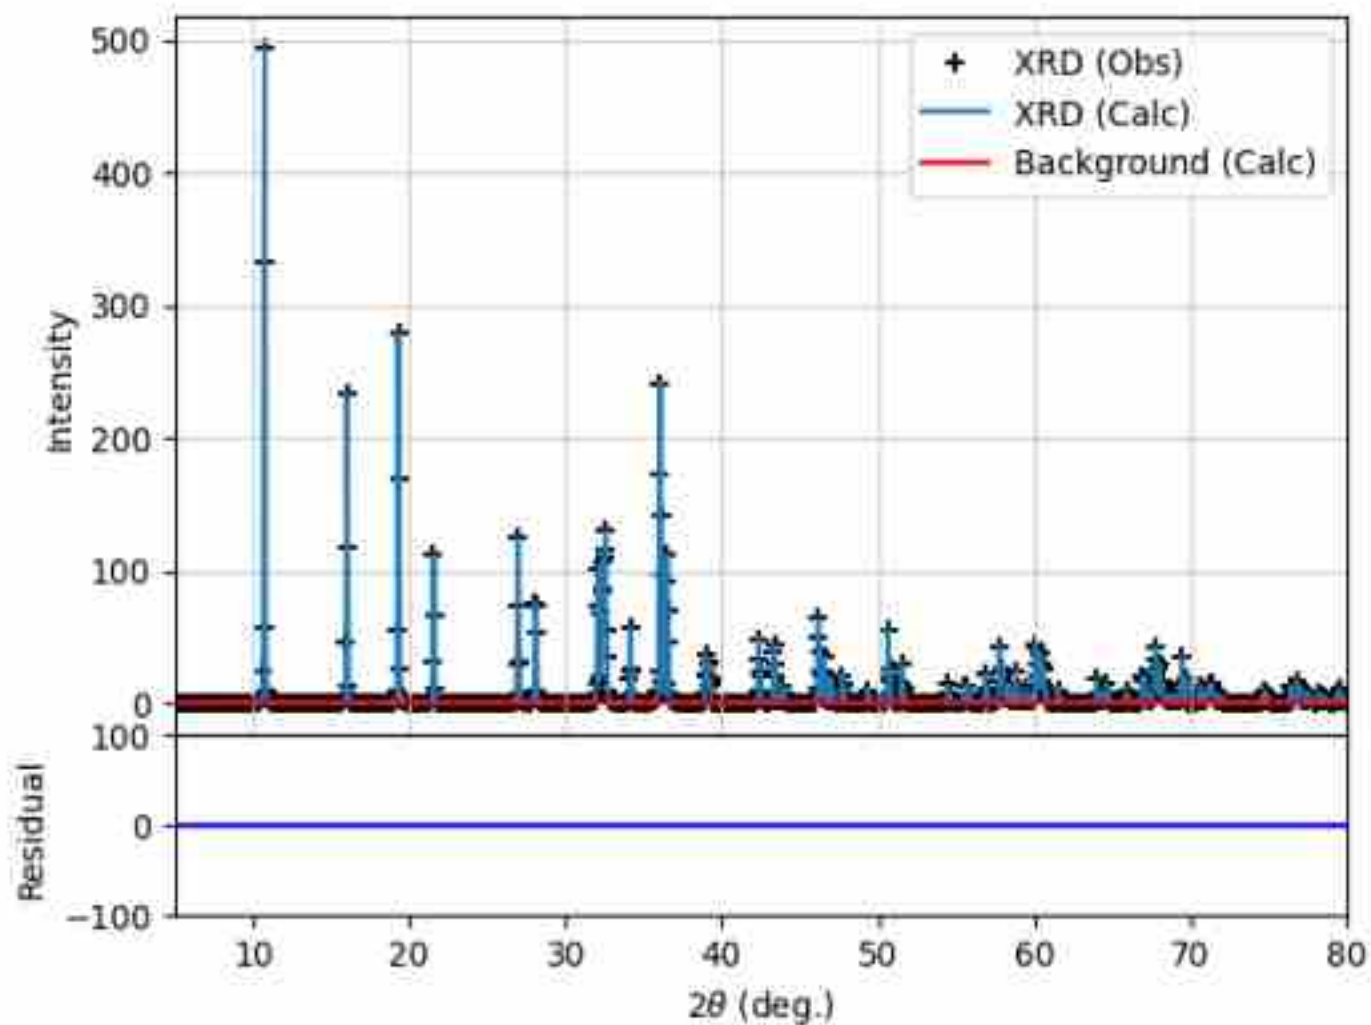

| RMSE before RR | Rwp     | RMSE after RR |
|----------------|---------|---------------|
| 0.017          | 0.00365 | 0.0007        |

# Mn<sub>3</sub>Cu<sub>10</sub>O<sub>8</sub>

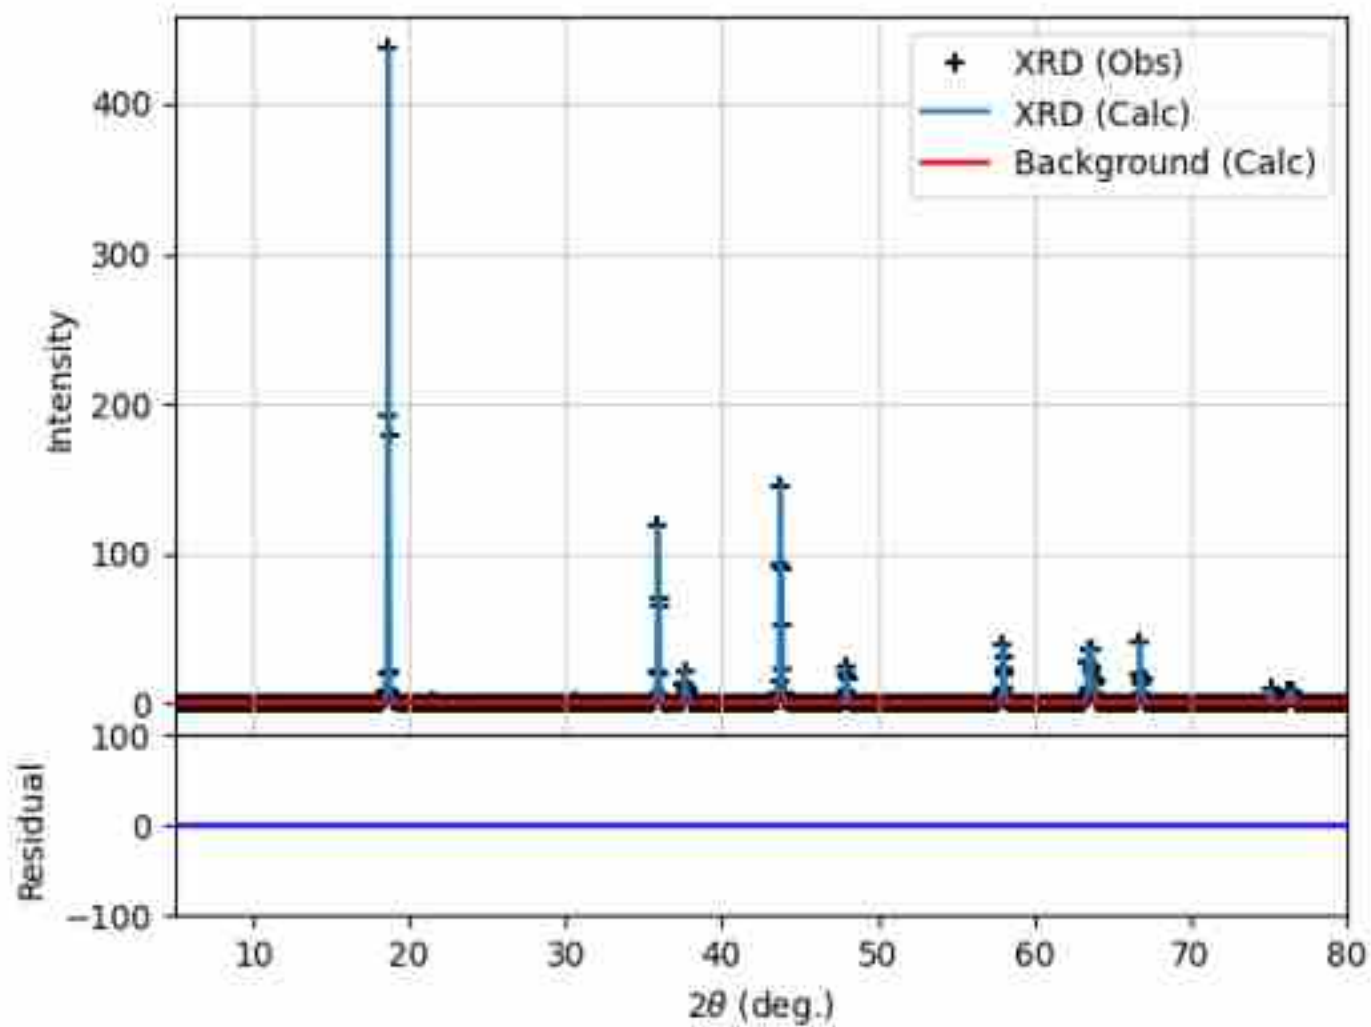

| RMSE before RR | Rwp     | RMSE after RR |
|----------------|---------|---------------|
| 0.017          | 0.00247 | 0.00136       |

# Mn<sub>3</sub>Ge<sub>3</sub>Pd<sub>3</sub>

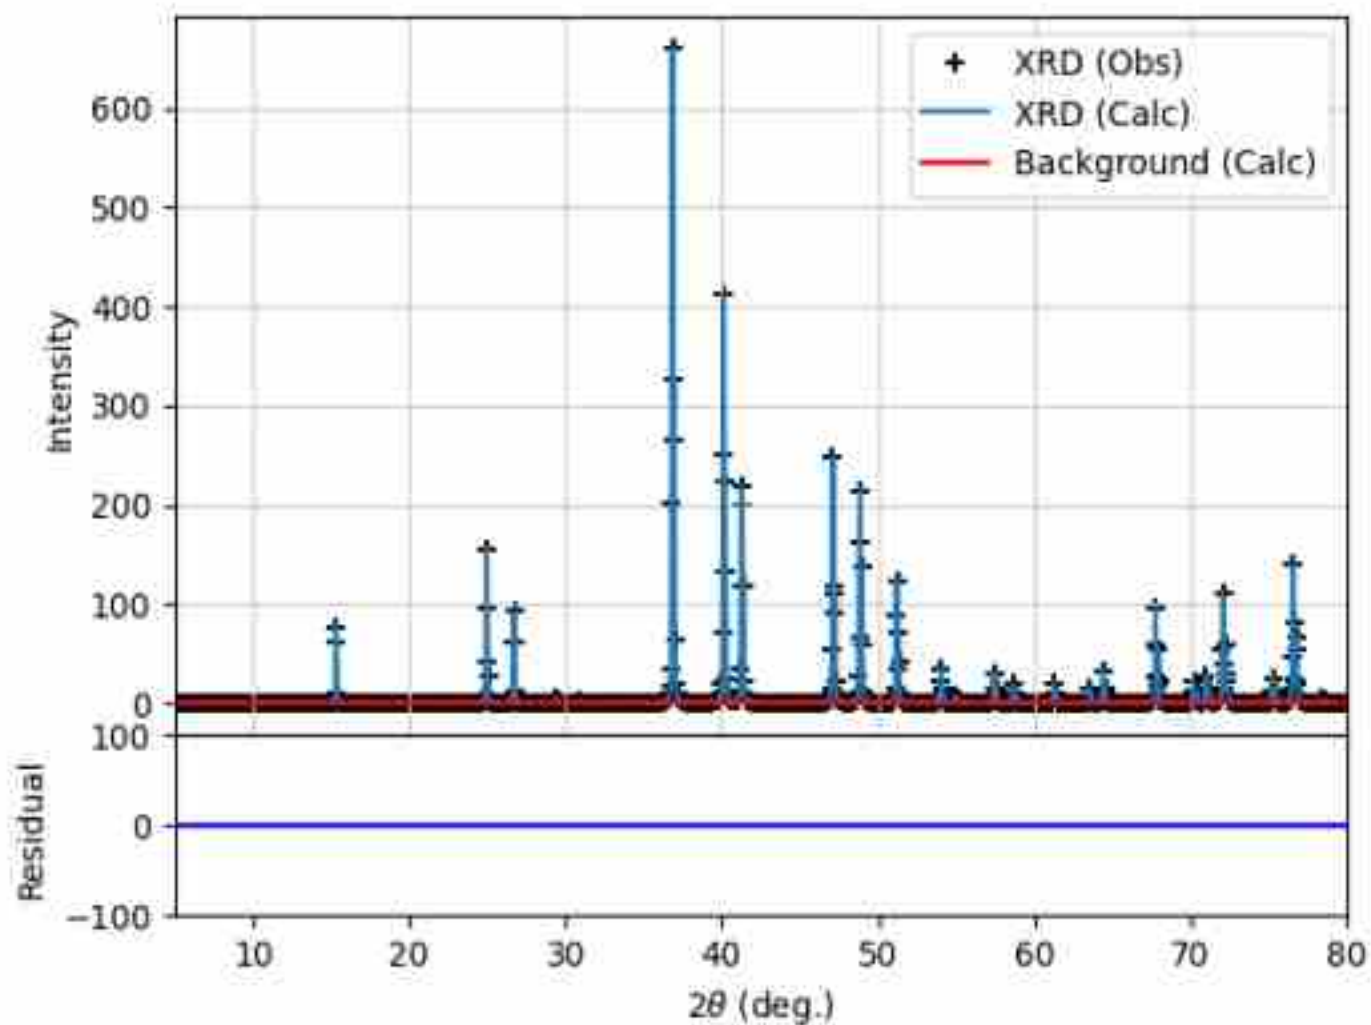

| RMSE before RR | Rwp     | RMSE after RR |
|----------------|---------|---------------|
| 0.017          | 0.00303 | 0.00056       |



# Na1Nd1W2O8

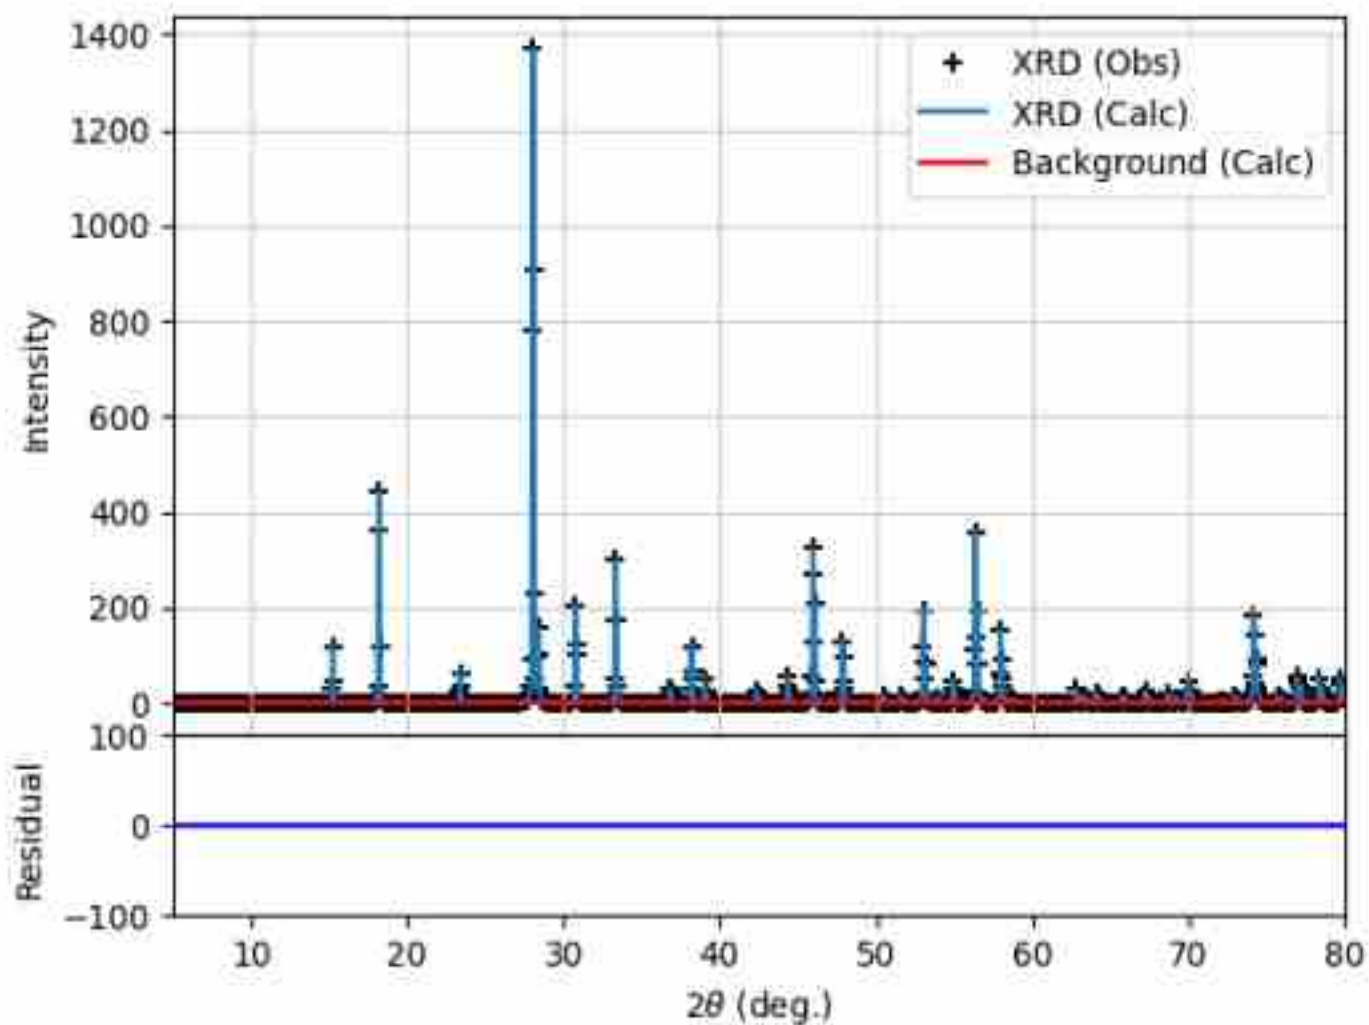

| RMSE before RR | Rwp     | RMSE after RR |
|----------------|---------|---------------|
| 0.017          | 0.00321 | 0.00139       |

# Na<sub>2</sub>Gd<sub>2</sub>Cl<sub>8</sub>

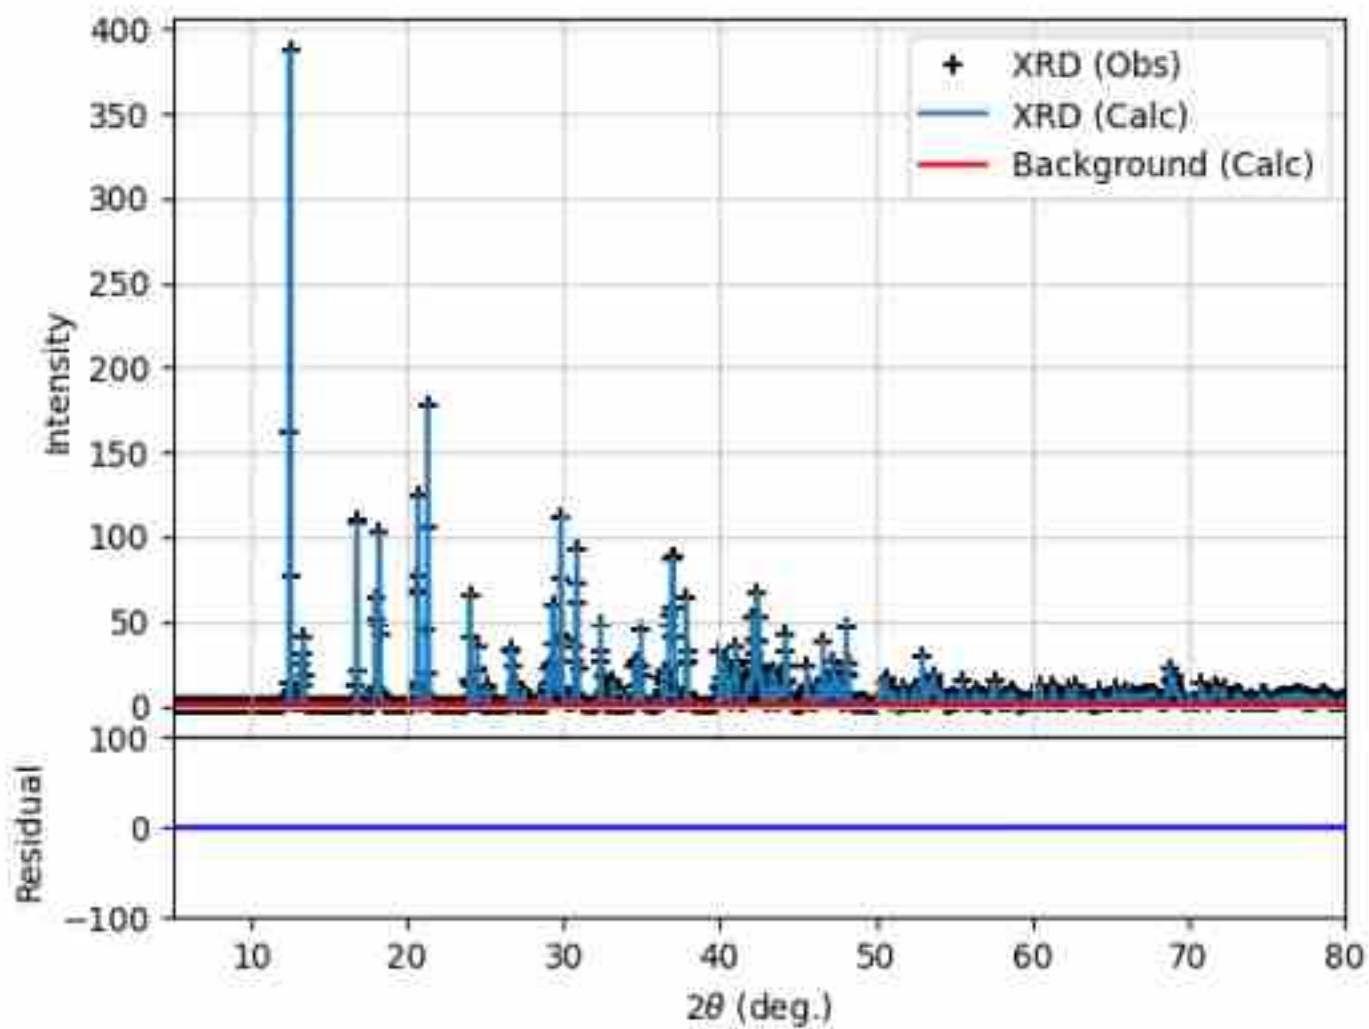

| RMSE before RR | Rwp     | RMSE after RR |
|----------------|---------|---------------|
| 0.017          | 0.07914 | 0.00216       |

# Na<sub>2</sub>PtCl<sub>2</sub>

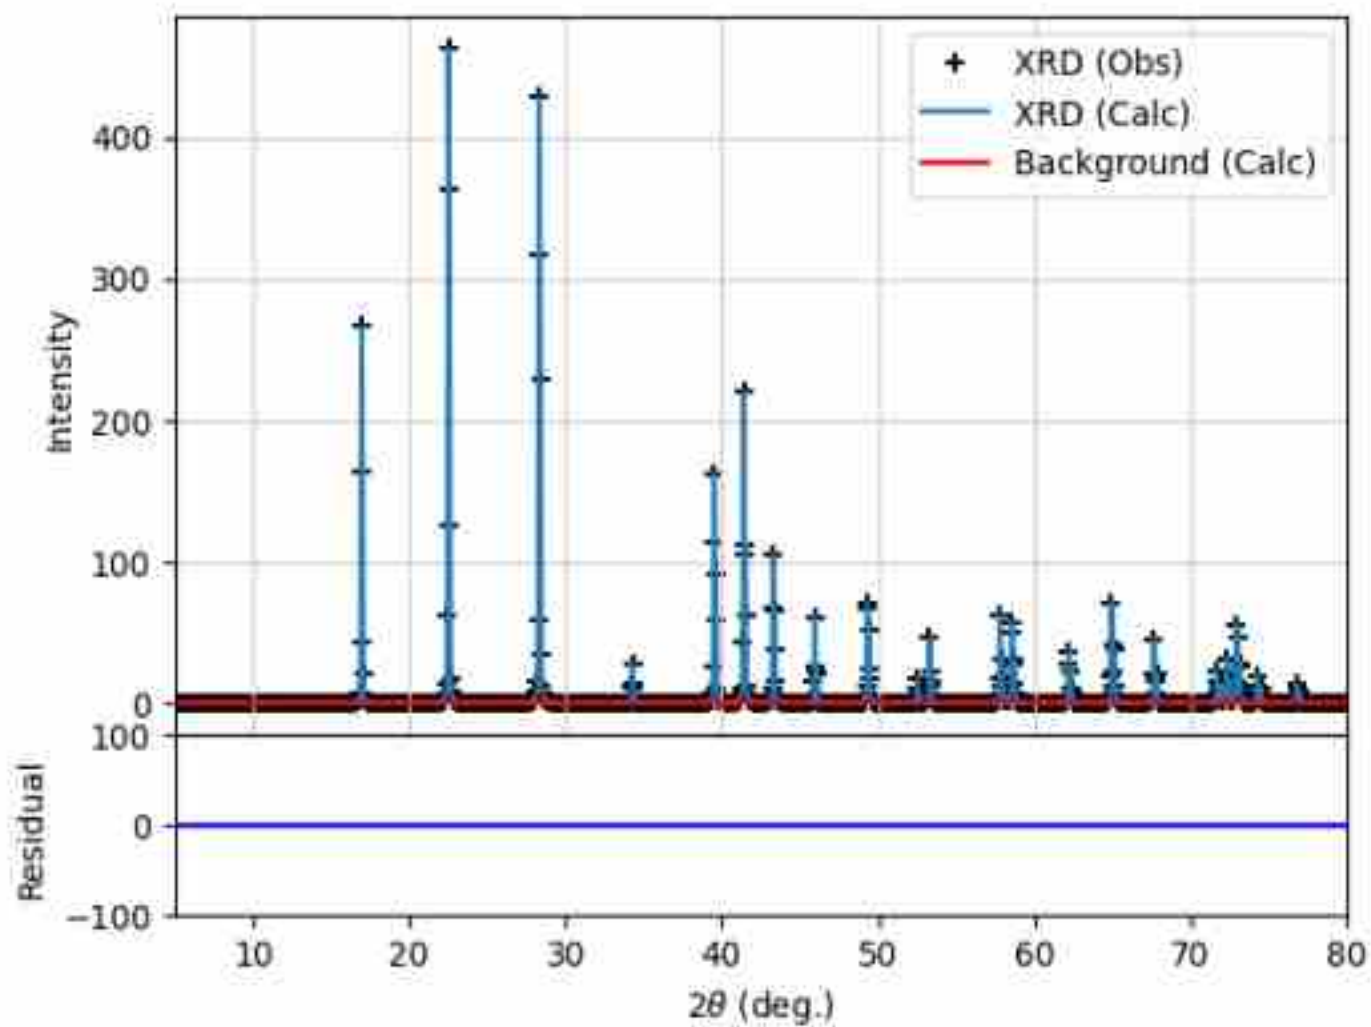

| RMSE before RR | Rwp     | RMSE after RR |
|----------------|---------|---------------|
| 0.017          | 0.00515 | 0.00353       |

# Na<sub>2</sub>U<sub>1</sub>F<sub>8</sub>

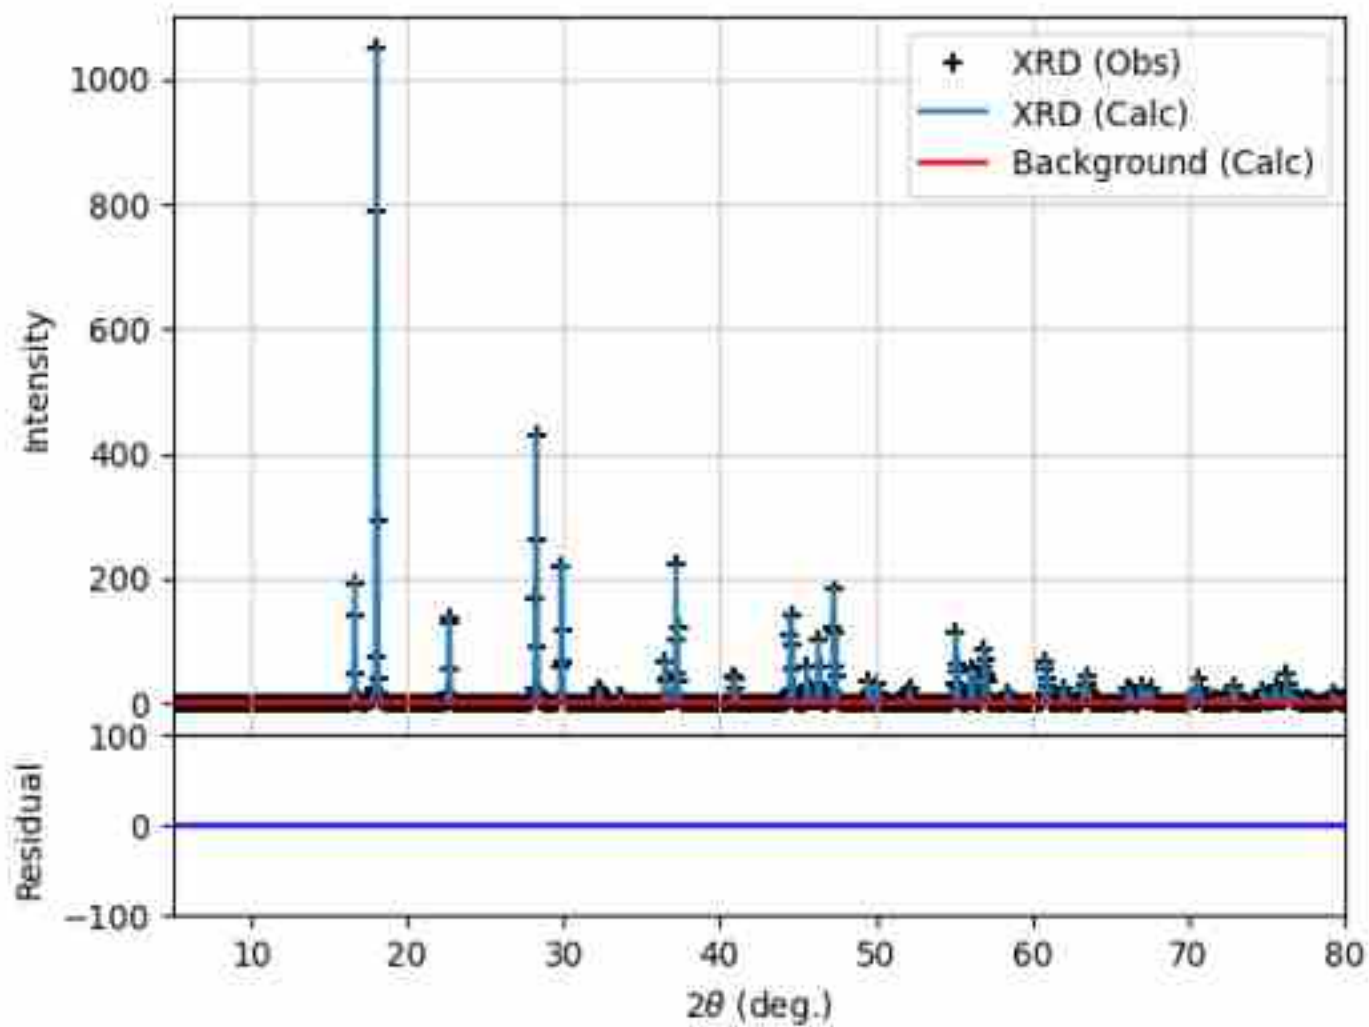

| RMSE before RR | Rwp     | RMSE after RR |
|----------------|---------|---------------|
| 0.017          | 0.00781 | 0.00358       |

# Na<sub>3</sub>GaF<sub>6</sub>

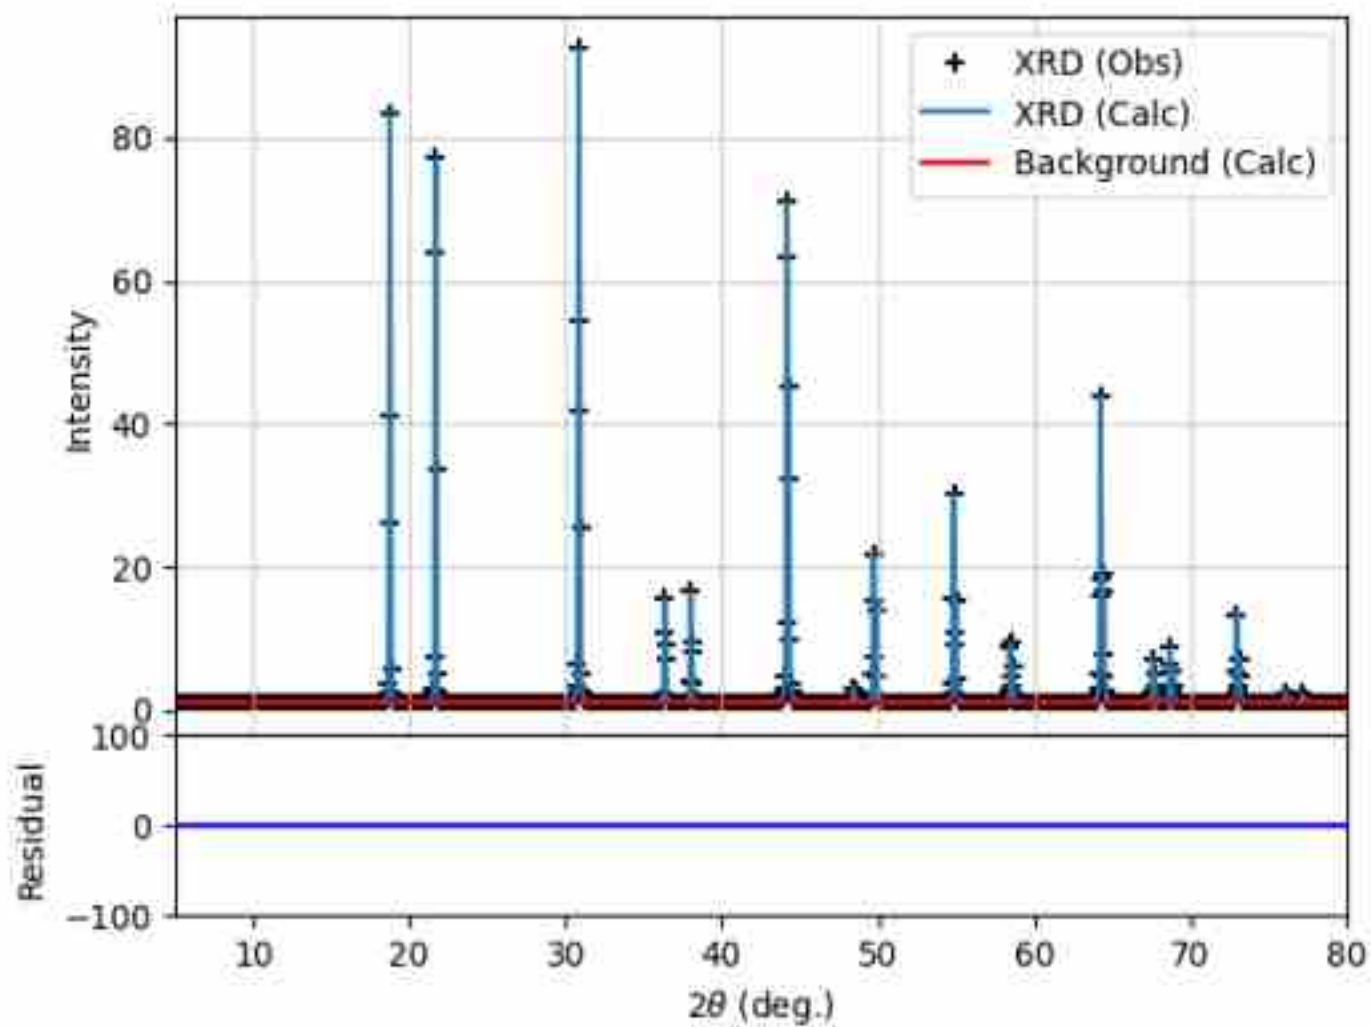

| RMSE before RR | Rwp     | RMSE after RR |
|----------------|---------|---------------|
| 0.017          | 0.02755 | 0.00462       |

# Na<sub>4</sub>U<sub>10</sub>O<sub>5</sub>

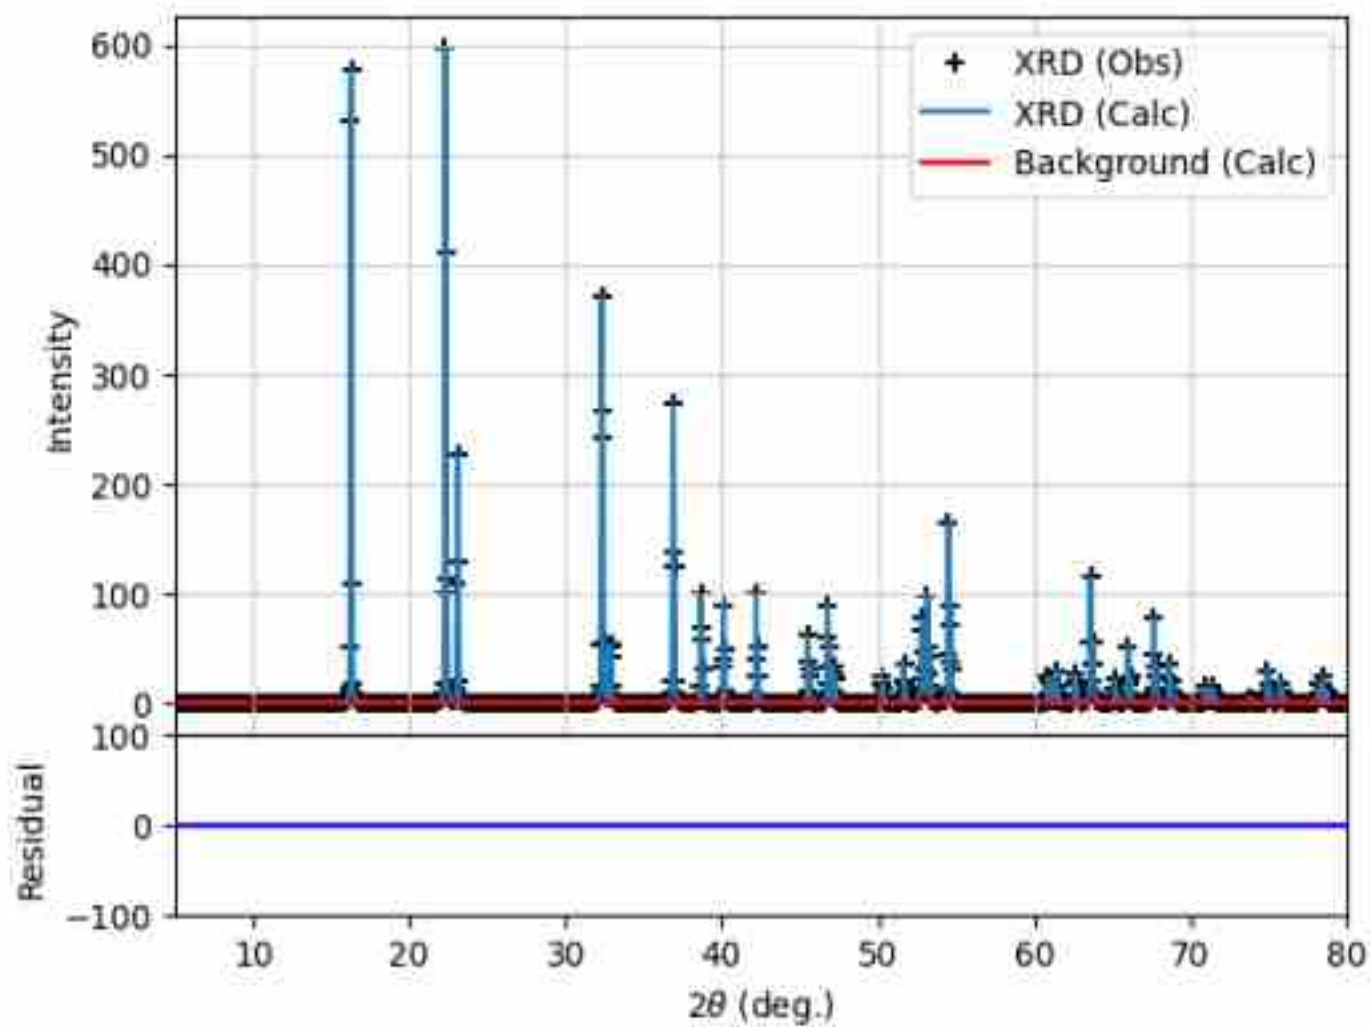

| RMSE before RR | Rwp     | RMSE after RR |
|----------------|---------|---------------|
| 0.017          | 0.00896 | 0.00373       |

# Na<sub>6</sub>Ag<sub>2</sub>

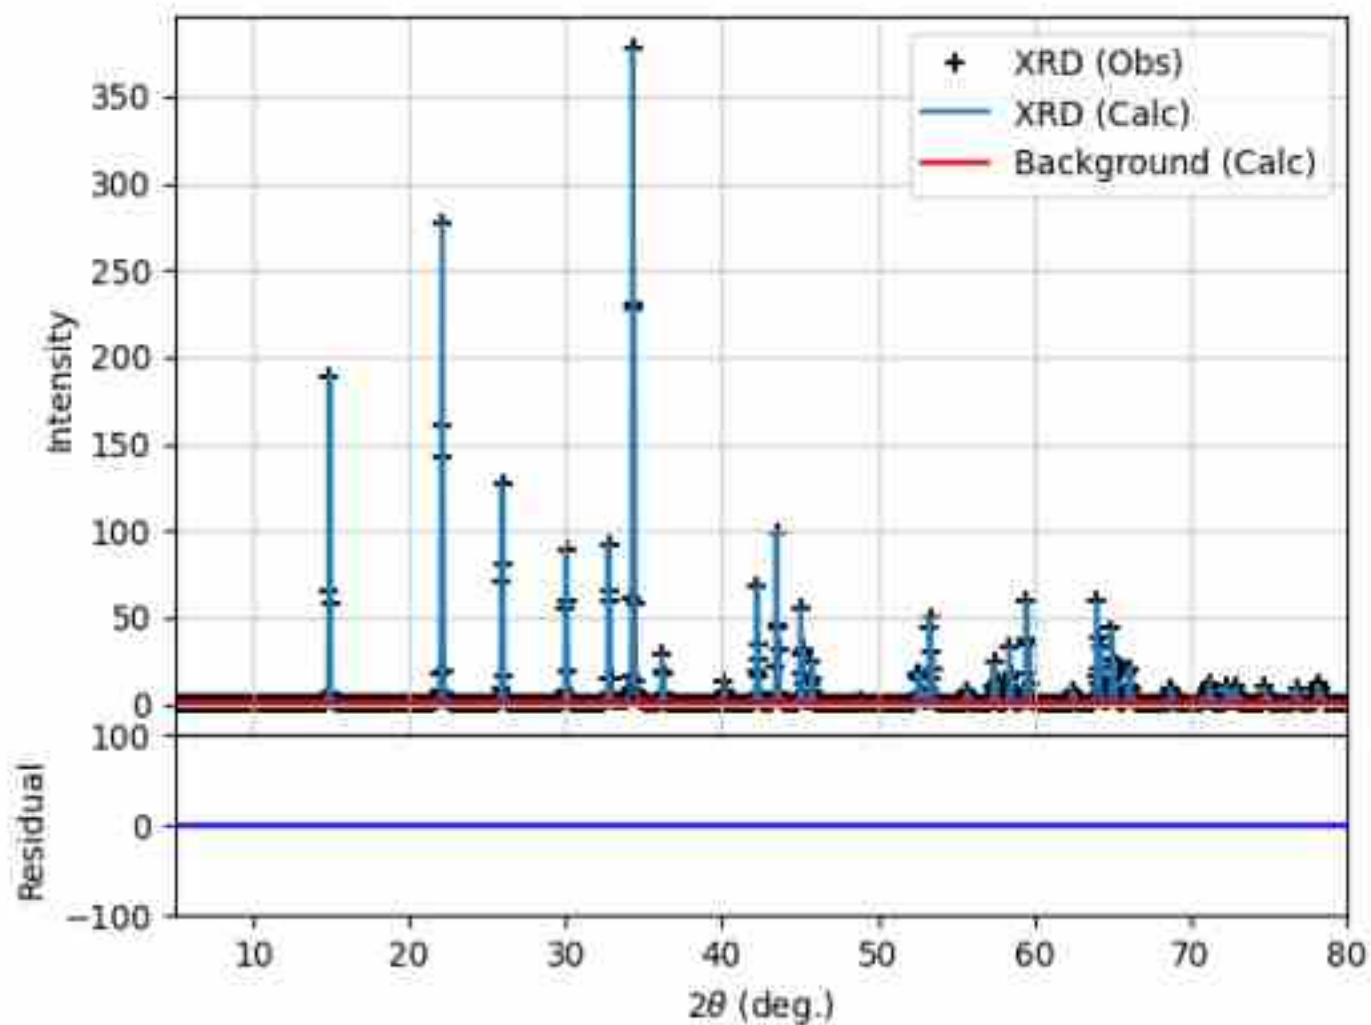

| RMSE before RR | Rwp     | RMSE after RR |
|----------------|---------|---------------|
| 0.017          | 0.00901 | 0.00234       |

# Nb<sub>4</sub>Al<sub>4</sub>Zn<sub>4</sub>

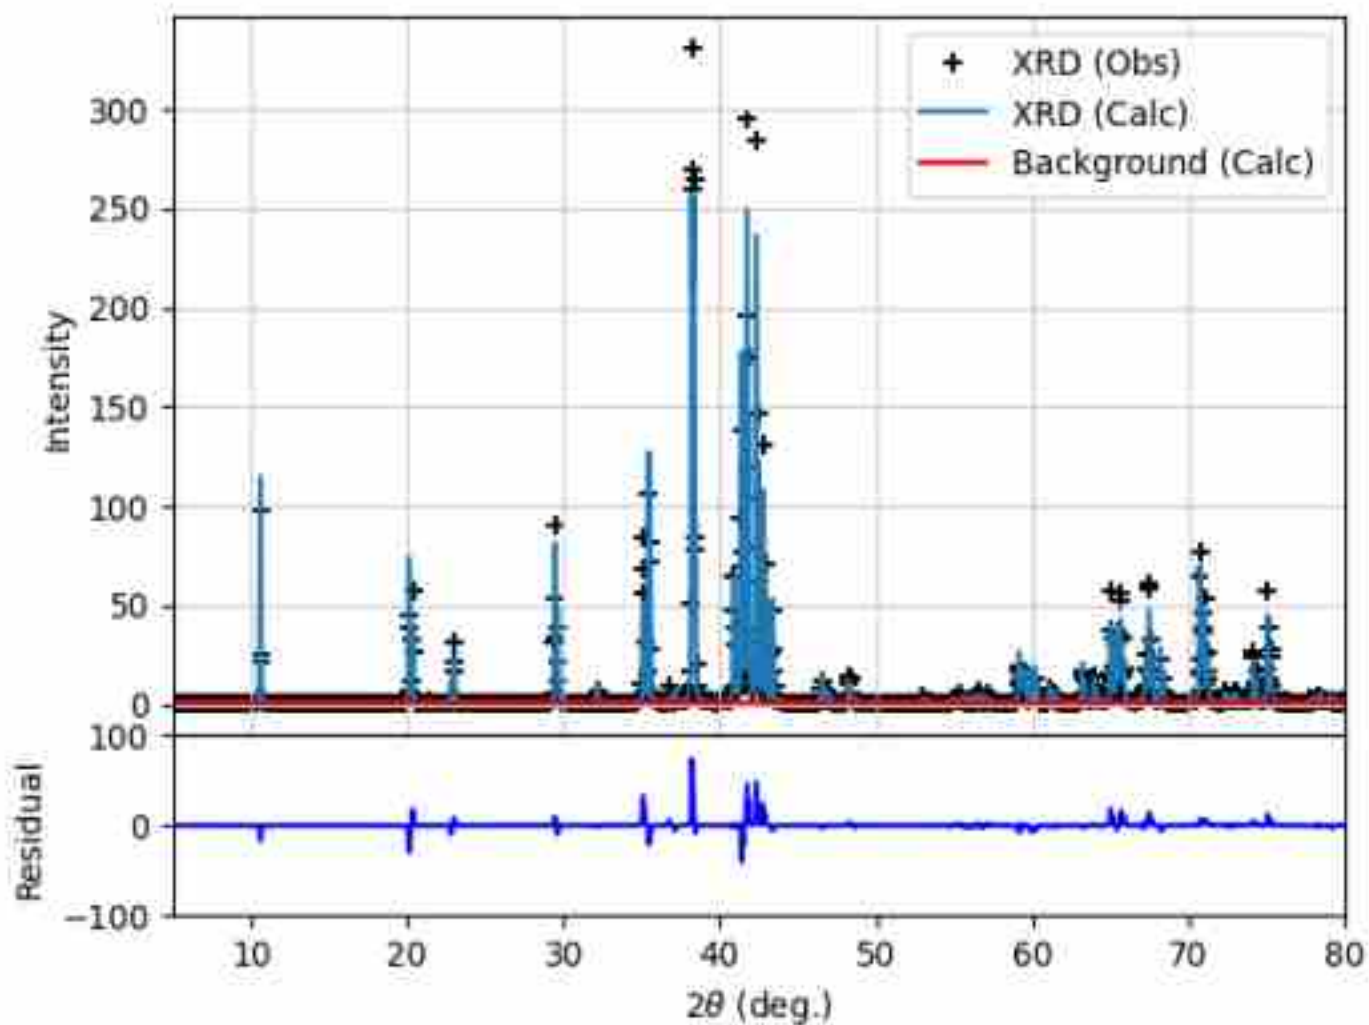

| RMSE before RR | Rwp      | RMSE after RR |
|----------------|----------|---------------|
| 0.017          | 23.63494 | 0.08772       |



# Nb<sub>4</sub>Co<sub>4</sub>Si<sub>4</sub>

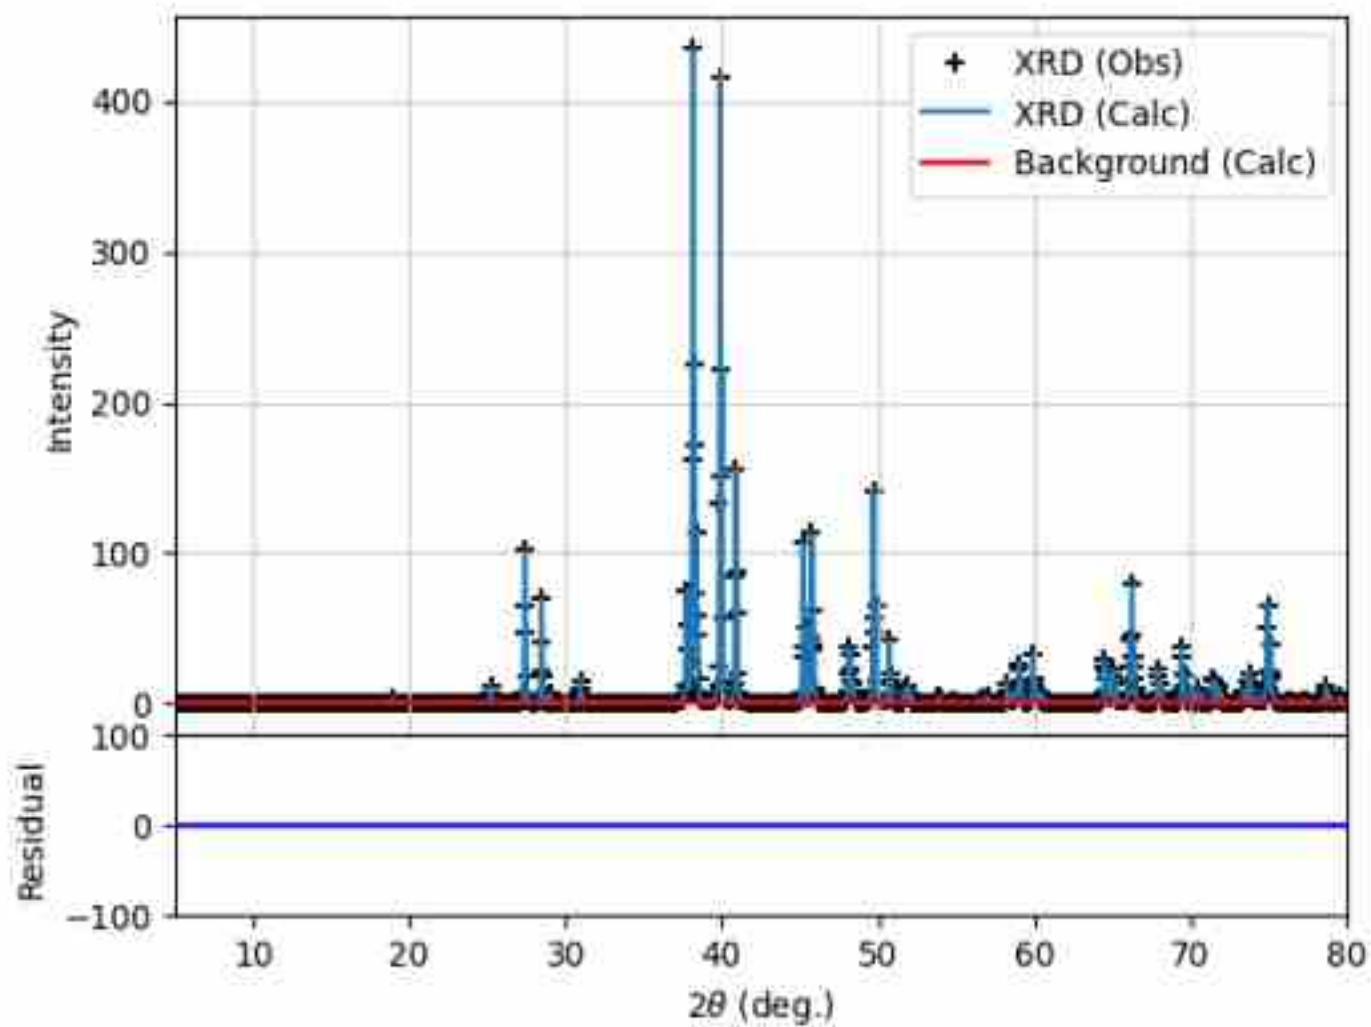

| RMSE before RR | Rwp     | RMSE after RR |
|----------------|---------|---------------|
| 0.017          | 0.00381 | 0.0005        |

# Nb<sub>4</sub>Ga<sub>2</sub>Ni<sub>6</sub>

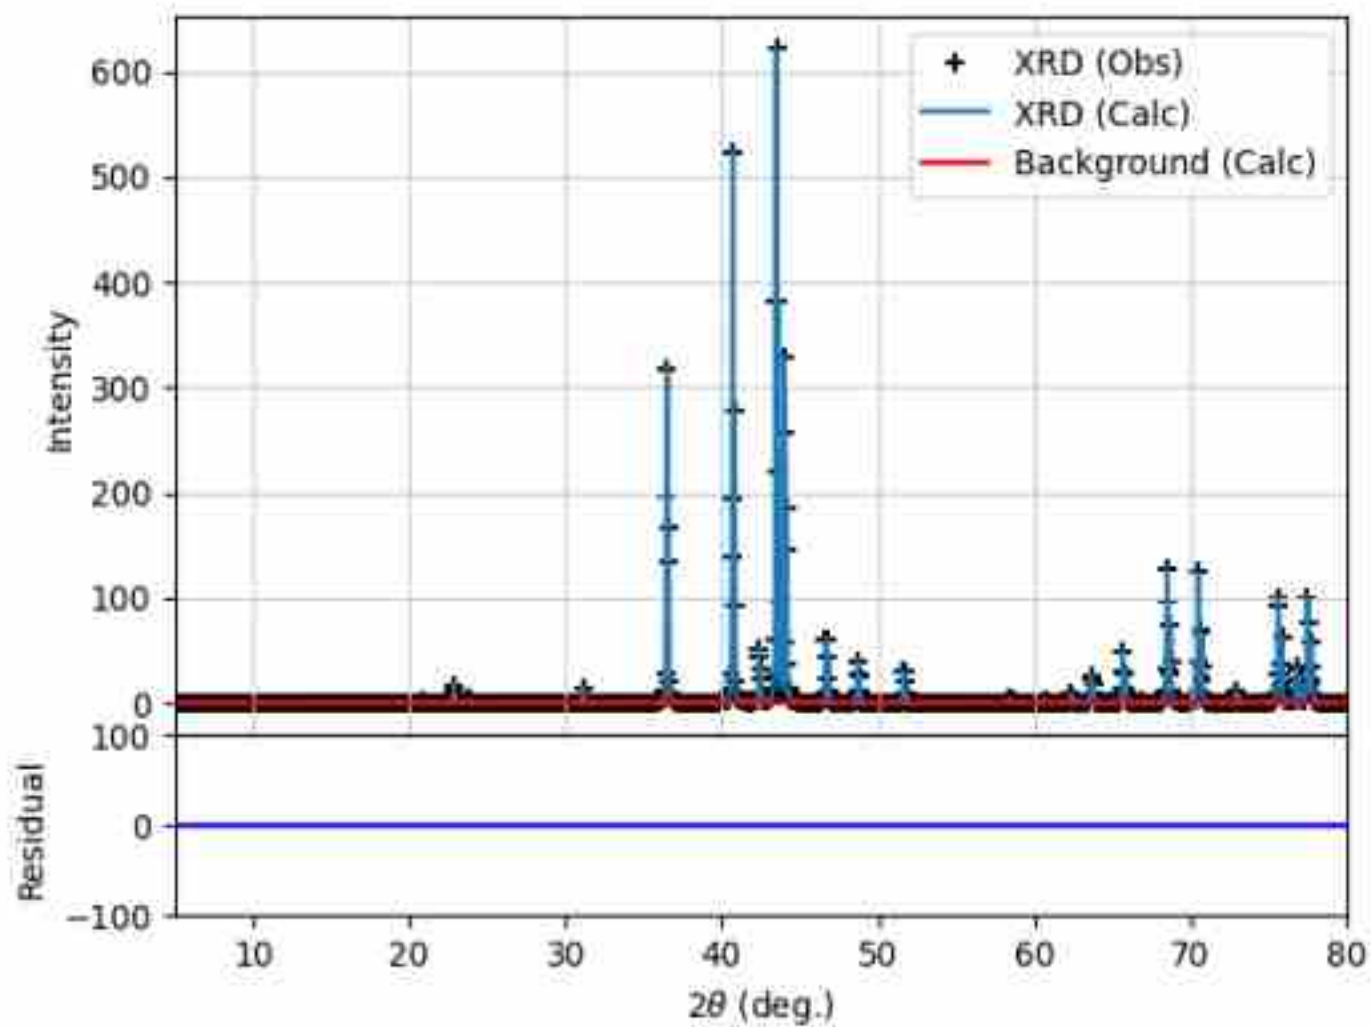

| RMSE before RR | Rwp     | RMSE after RR |
|----------------|---------|---------------|
| 0.017          | 0.01993 | 0.00155       |

# Nb<sub>4</sub>Ni<sub>1</sub>C<sub>2</sub>S<sub>4</sub>

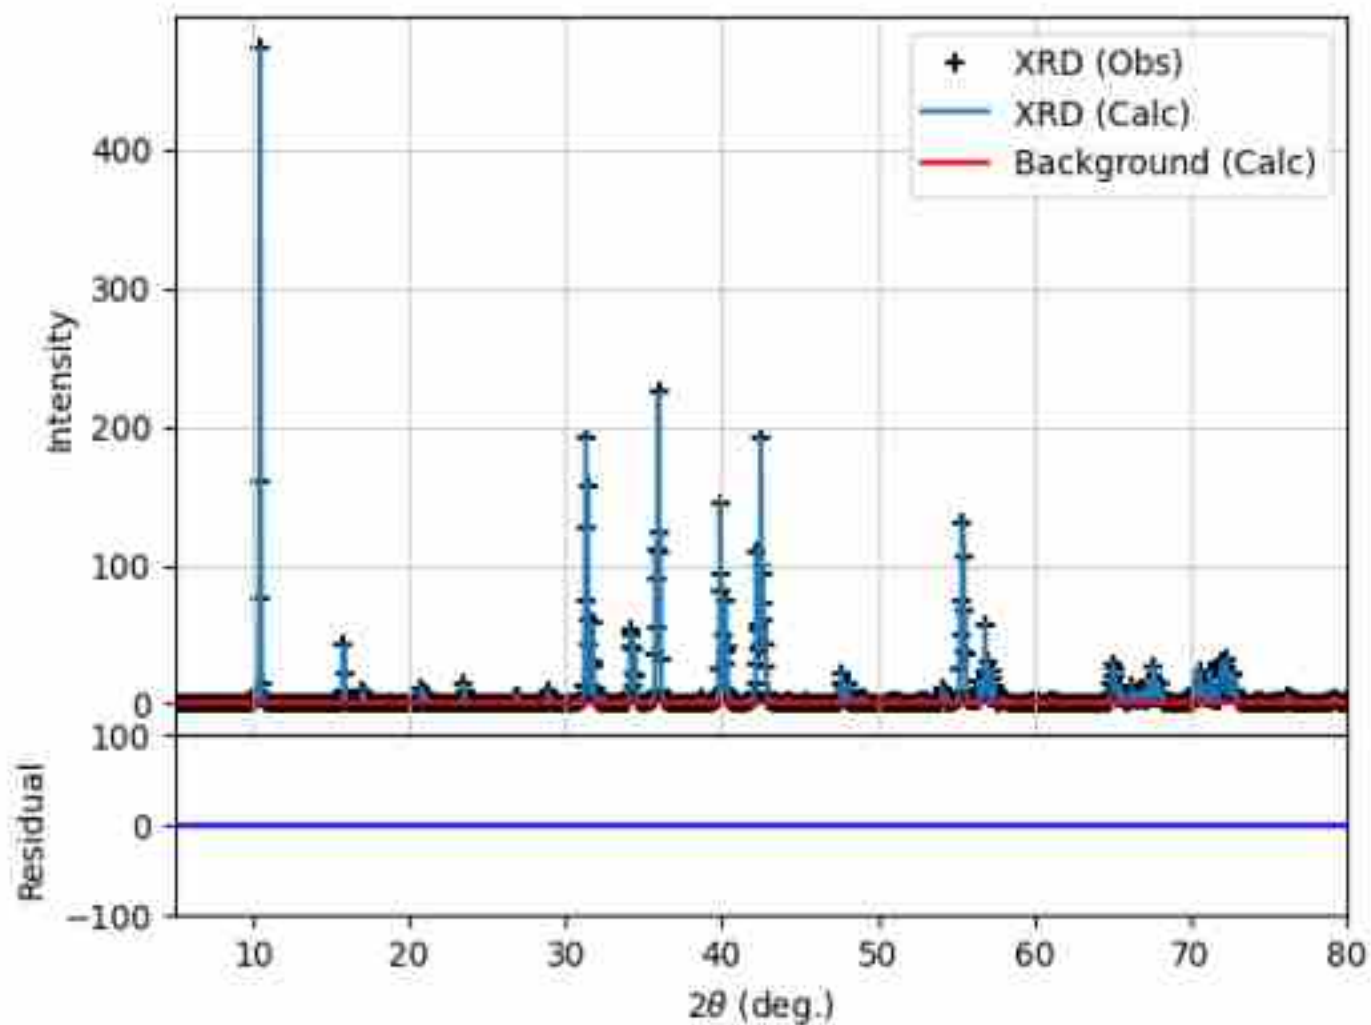

| RMSE before RR | Rwp     | RMSE after RR |
|----------------|---------|---------------|
| 0.017          | 0.00304 | 0.0006        |

# Nd2Sc6

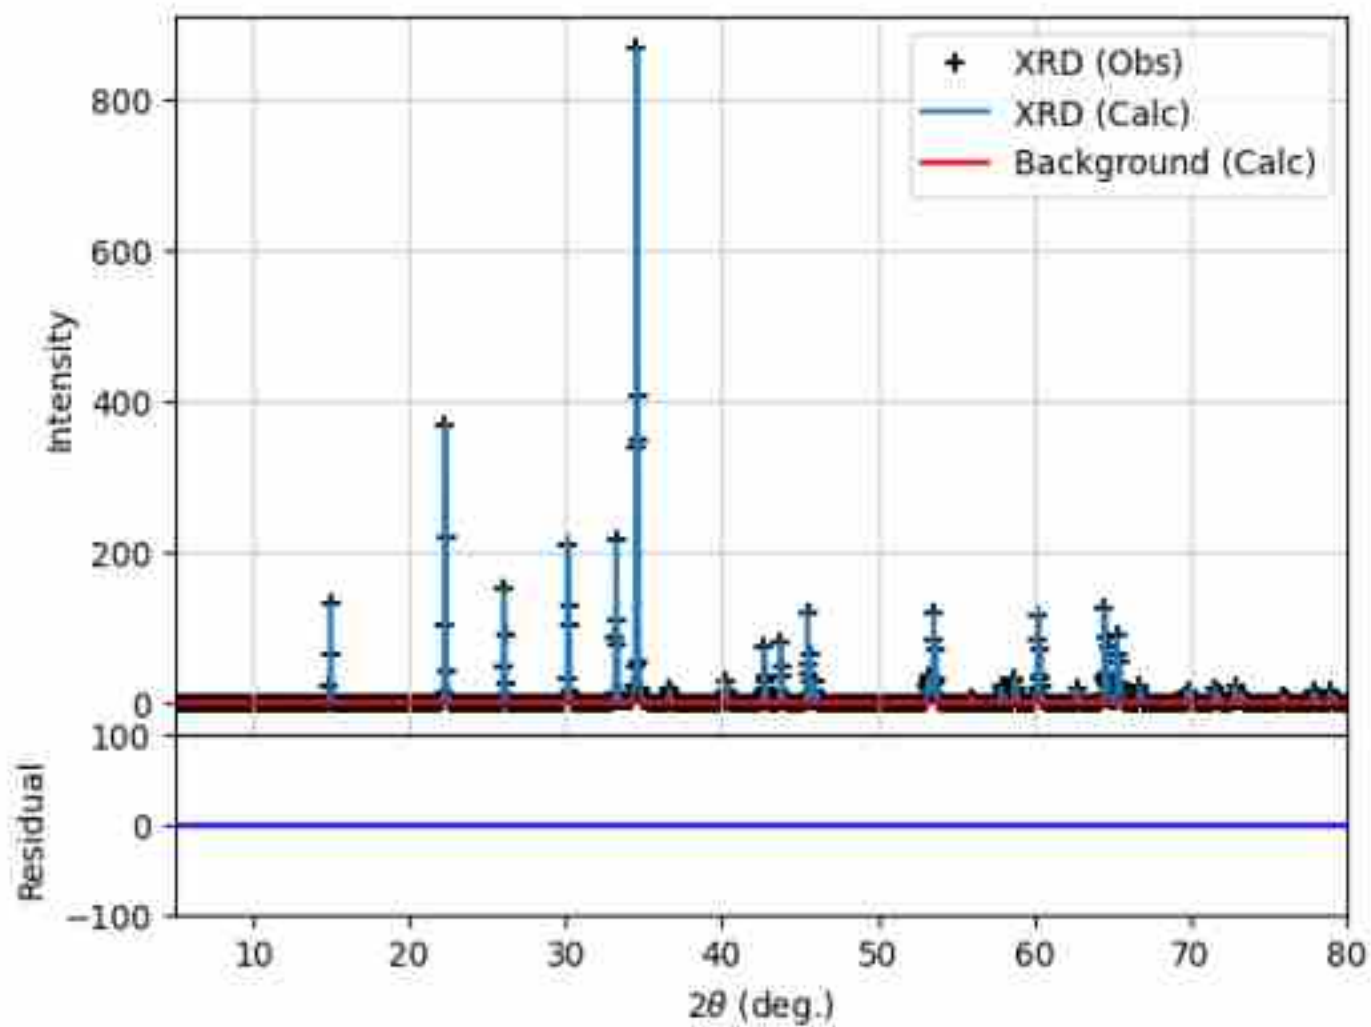

| RMSE before RR | Rwp     | RMSE after RR |
|----------------|---------|---------------|
| 0.017          | 0.01329 | 0.00133       |

# Nd<sub>3</sub>Co<sub>6</sub>Sn<sub>5</sub>

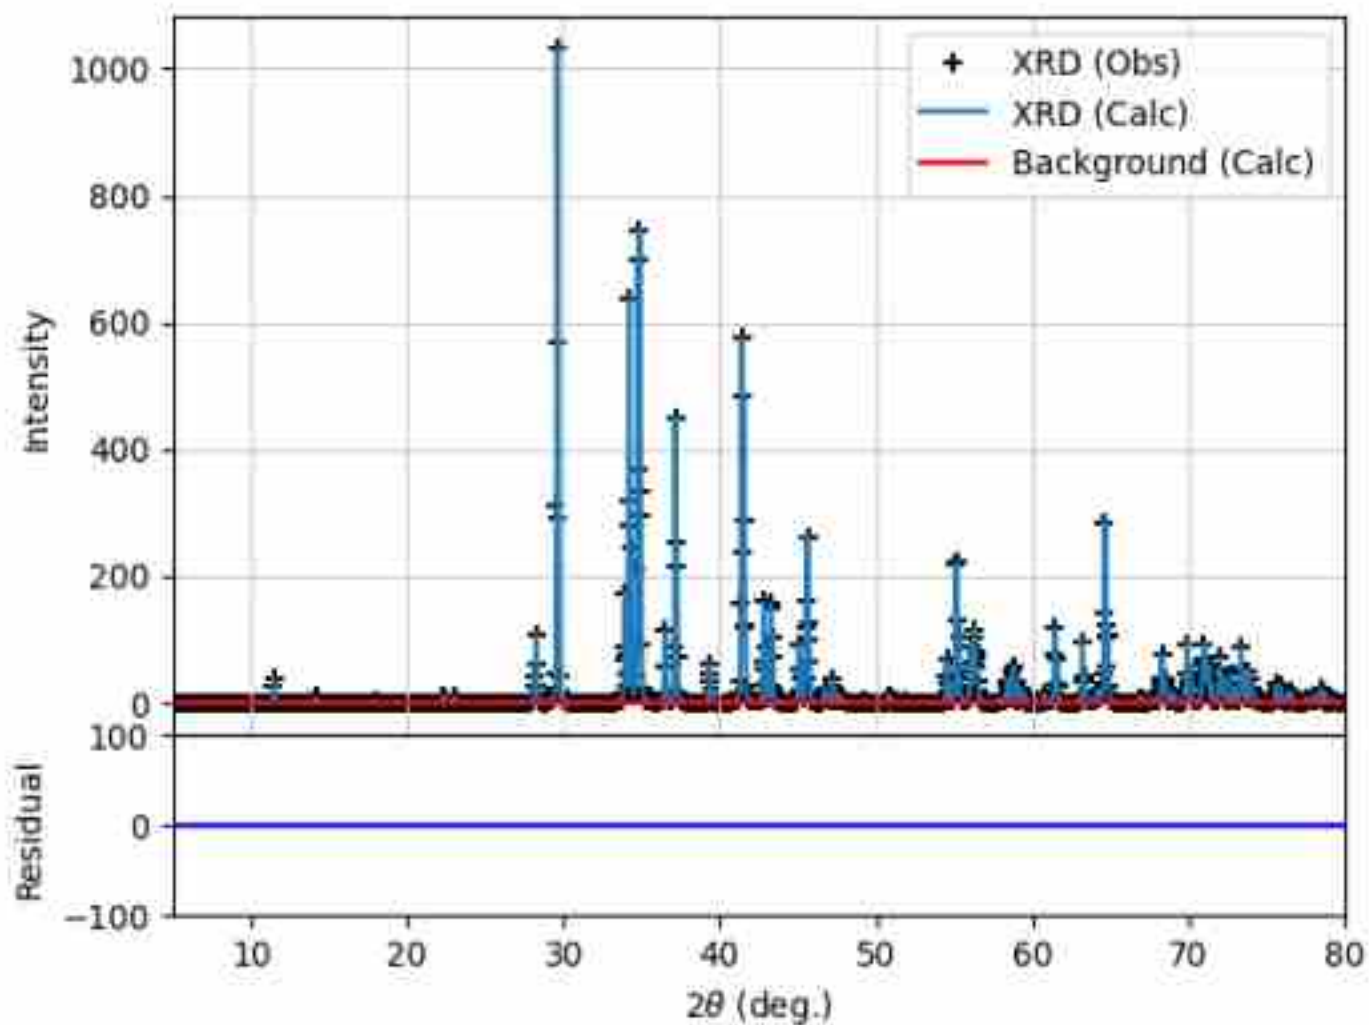

| RMSE before RR | Rwp     | RMSE after RR |
|----------------|---------|---------------|
| 0.017          | 0.00451 | 0.00036       |

# Nd4Br8

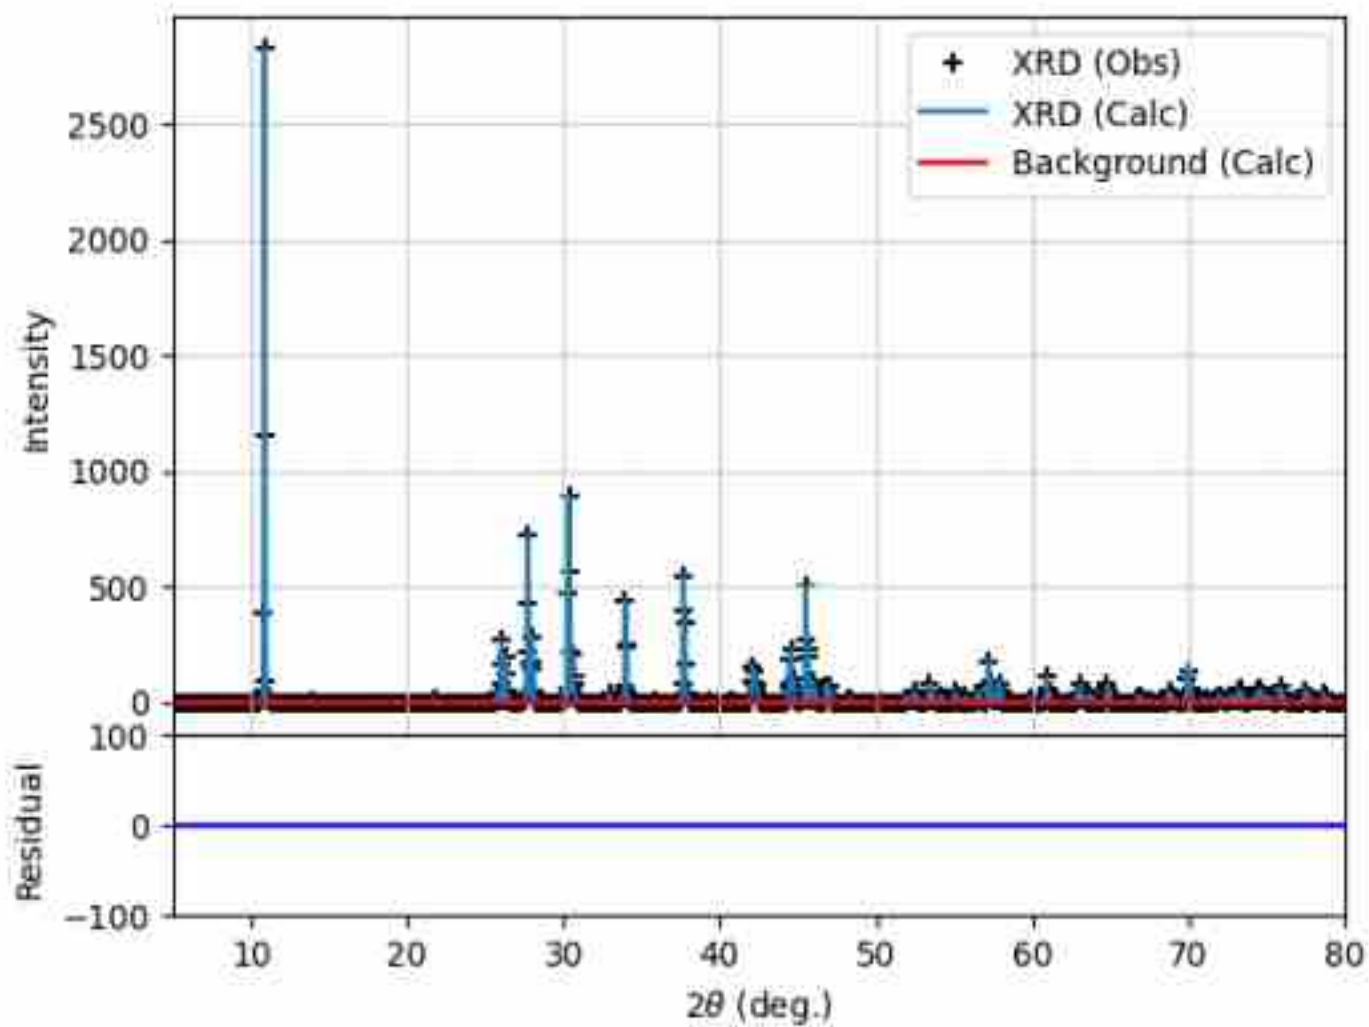

| RMSE before RR | Rwp     | RMSE after RR |
|----------------|---------|---------------|
| 0.017          | 0.00417 | 0.00023       |

# Nd<sub>4</sub>Ga<sub>4</sub>Pd<sub>4</sub>

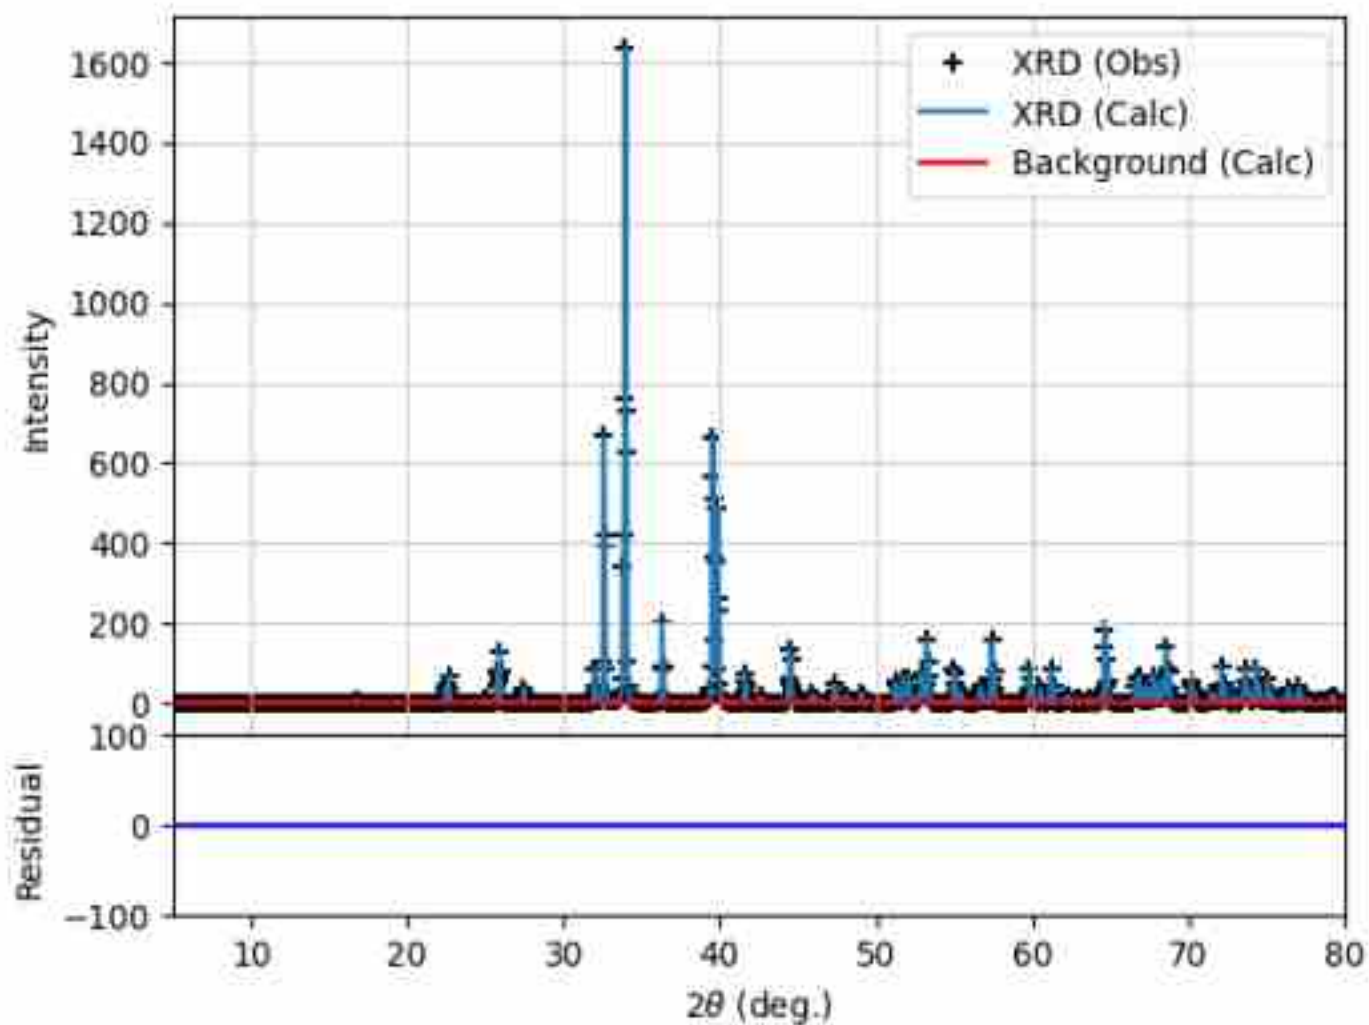

| RMSE before RR | Rwp   | RMSE after RR |
|----------------|-------|---------------|
| 0.017          | 0.004 | 0.00032       |

# Nd<sub>4</sub>Mg<sub>2</sub>S<sub>8</sub>

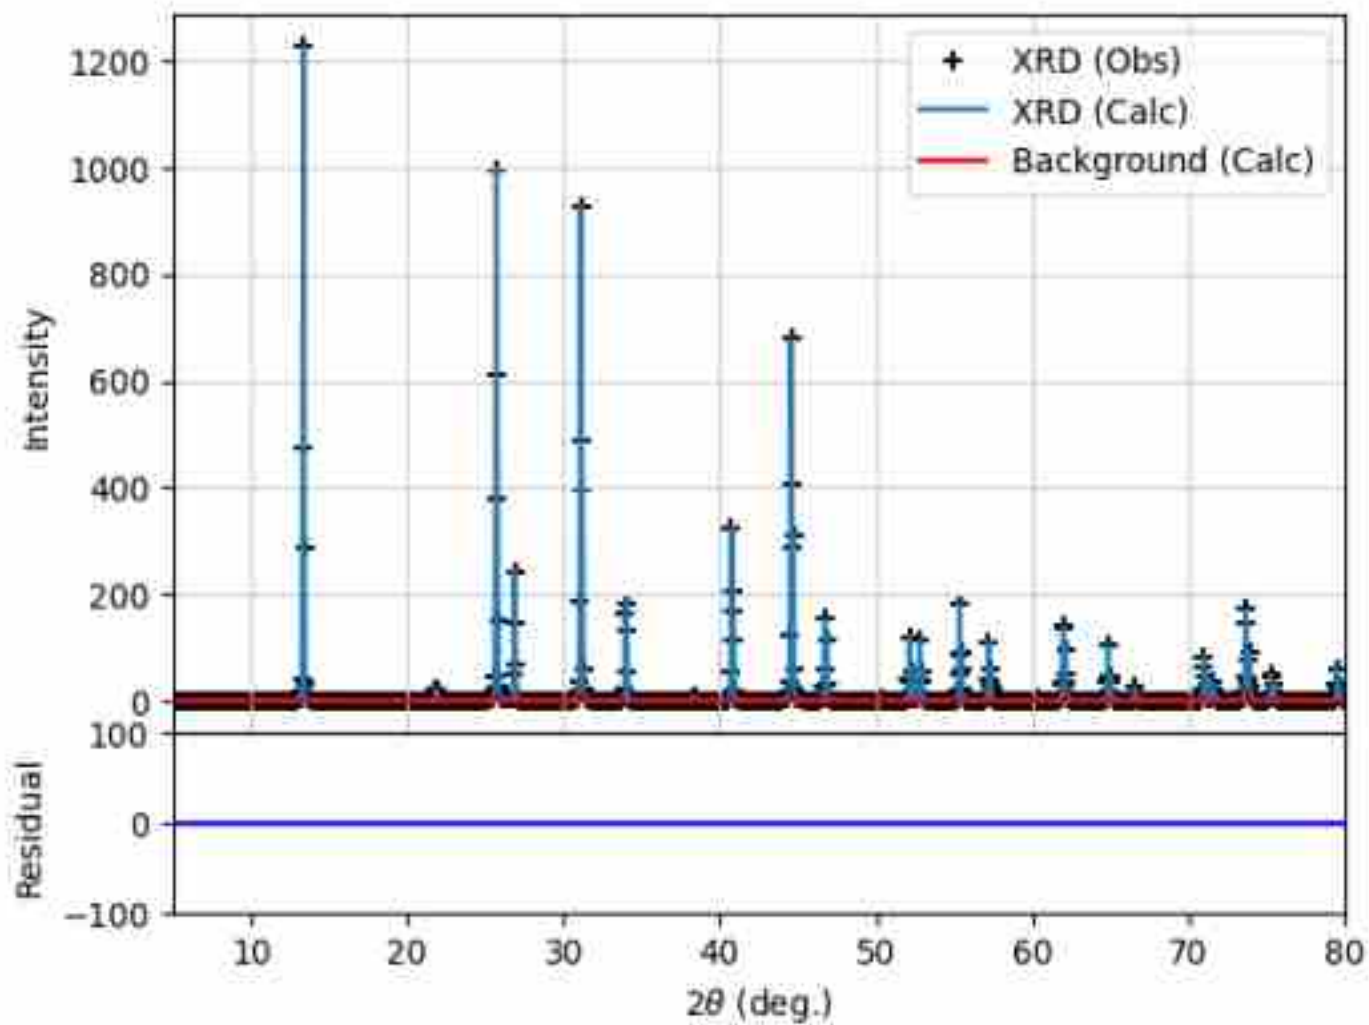

| RMSE before RR | Rwp     | RMSE after RR |
|----------------|---------|---------------|
| 0.017          | 0.02794 | 0.00405       |



# Nd6Al2

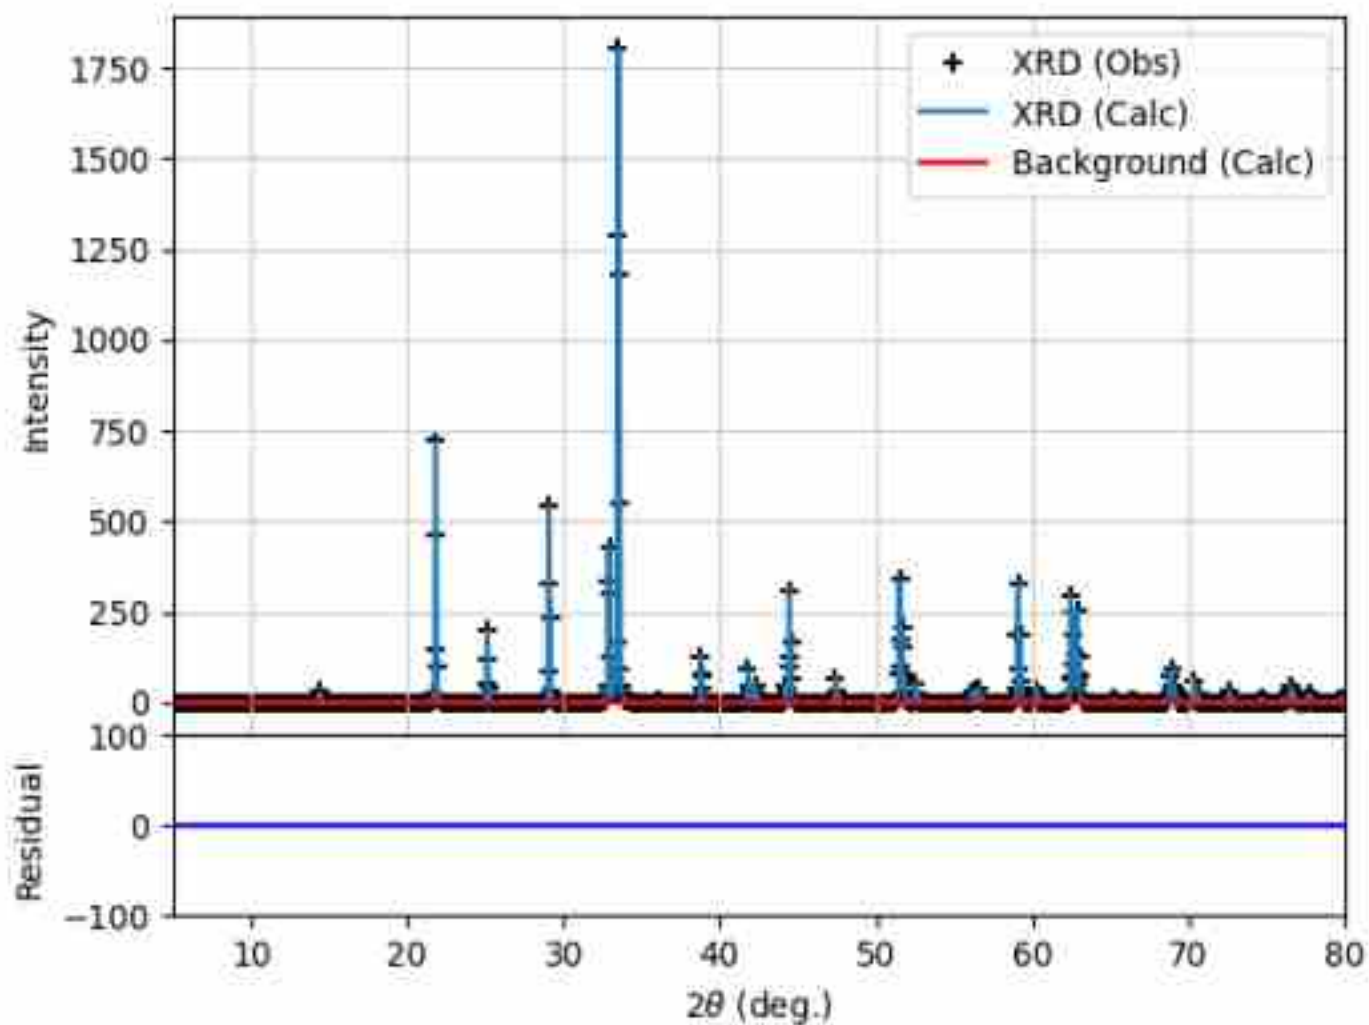

| RMSE before RR | Rwp     | RMSE after RR |
|----------------|---------|---------------|
| 0.017          | 0.00651 | 0.00068       |

Nd6Sc2

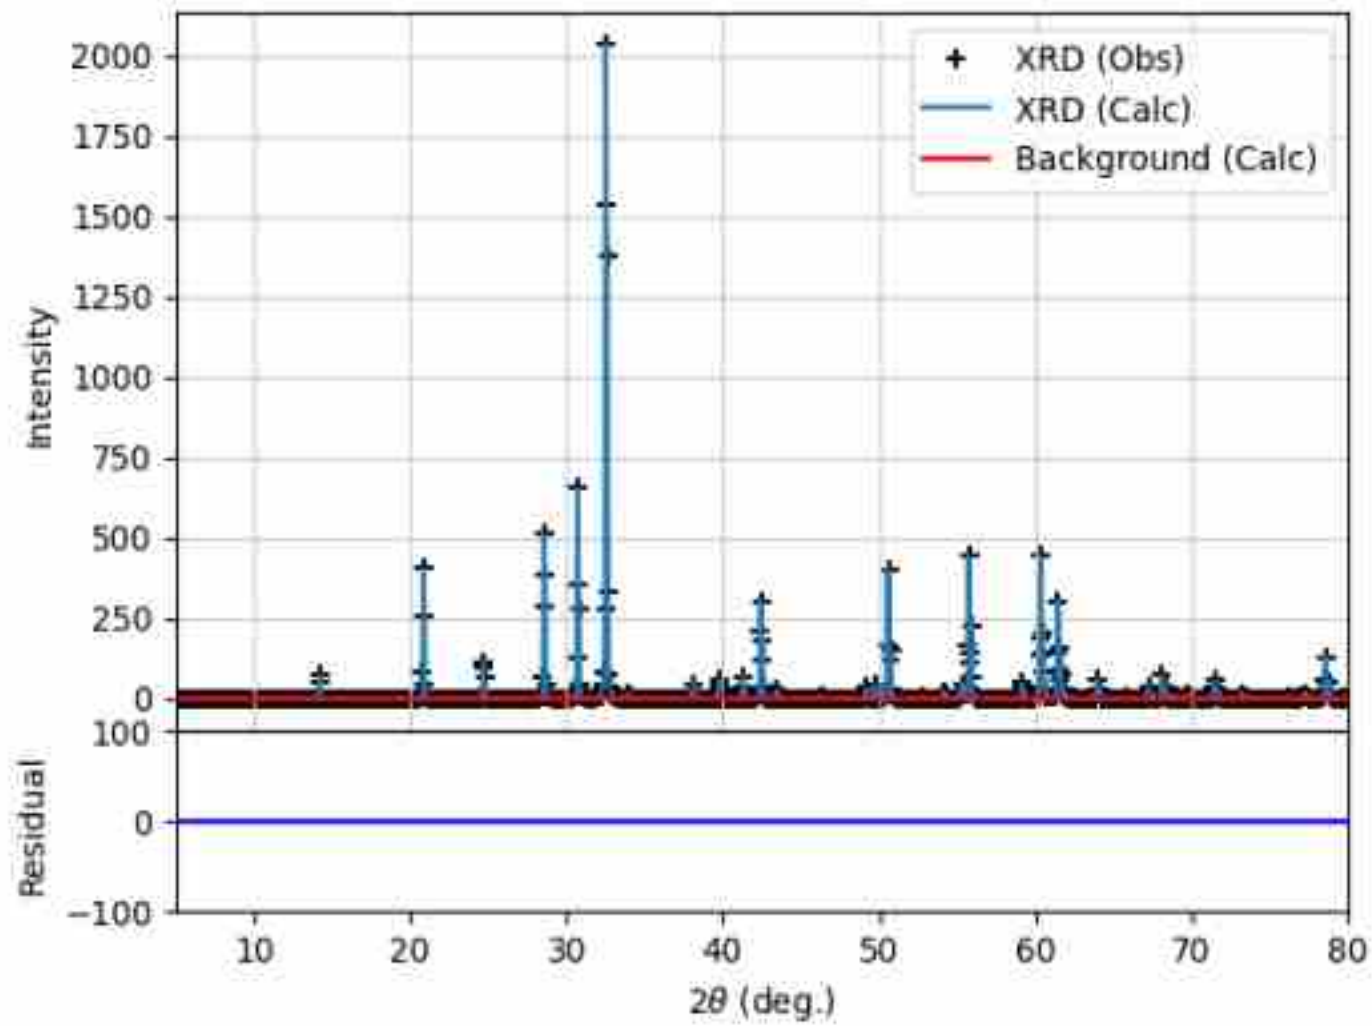

| RMSE before RR | Rwp     | RMSE after RR |
|----------------|---------|---------------|
| 0.017          | 0.03958 | 0.00152       |

# Nd10Ga6

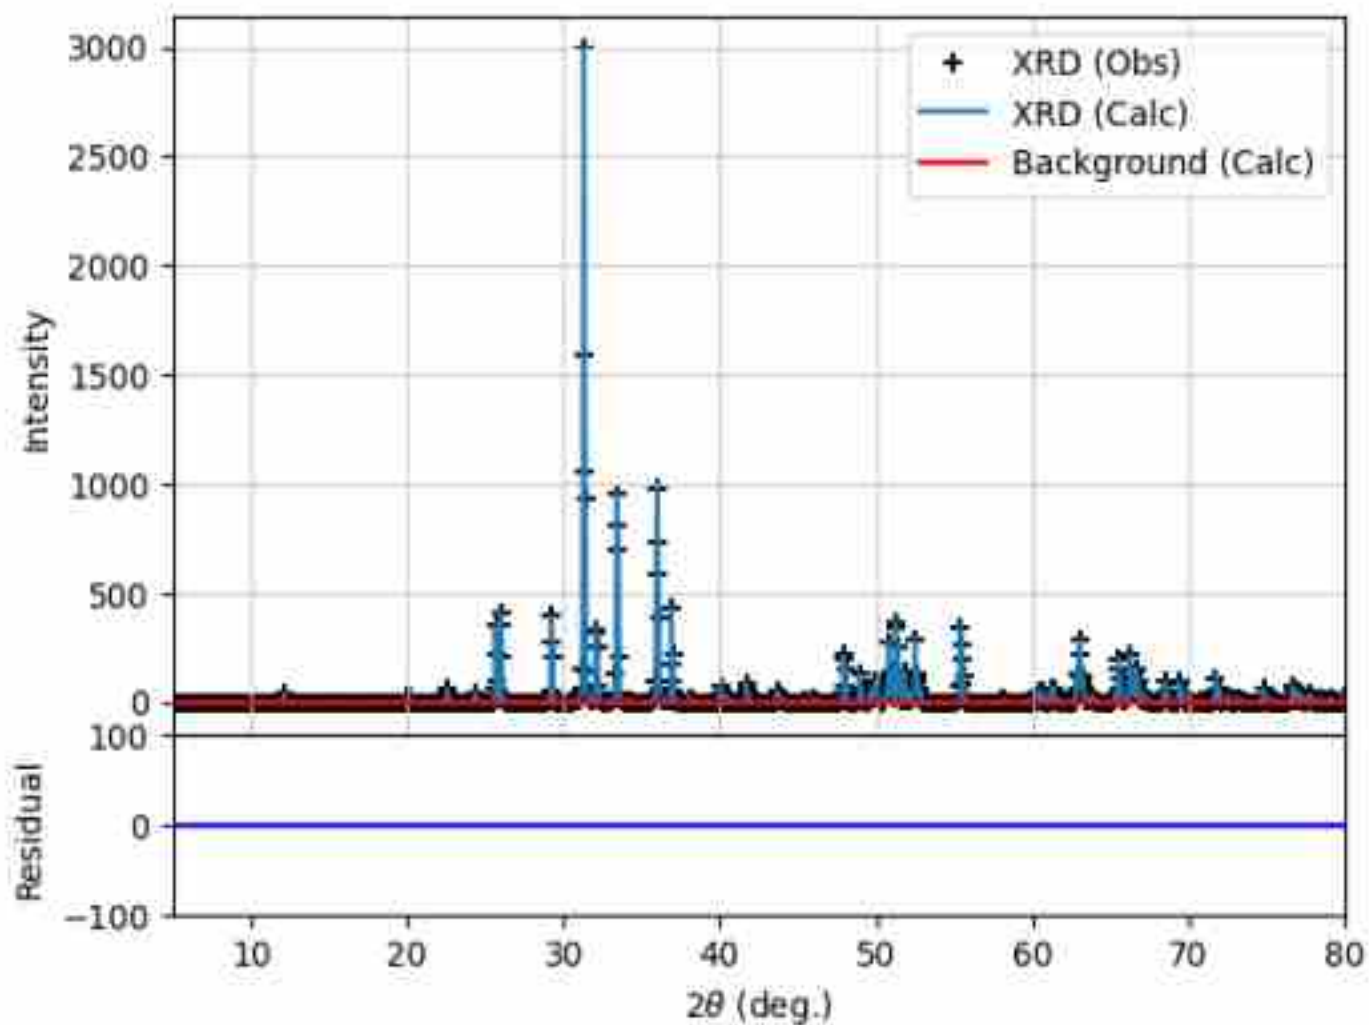

| RMSE before RR | Rwp     | RMSE after RR |
|----------------|---------|---------------|
| 0.017          | 0.00392 | 0.00028       |

# Ni1H2O2

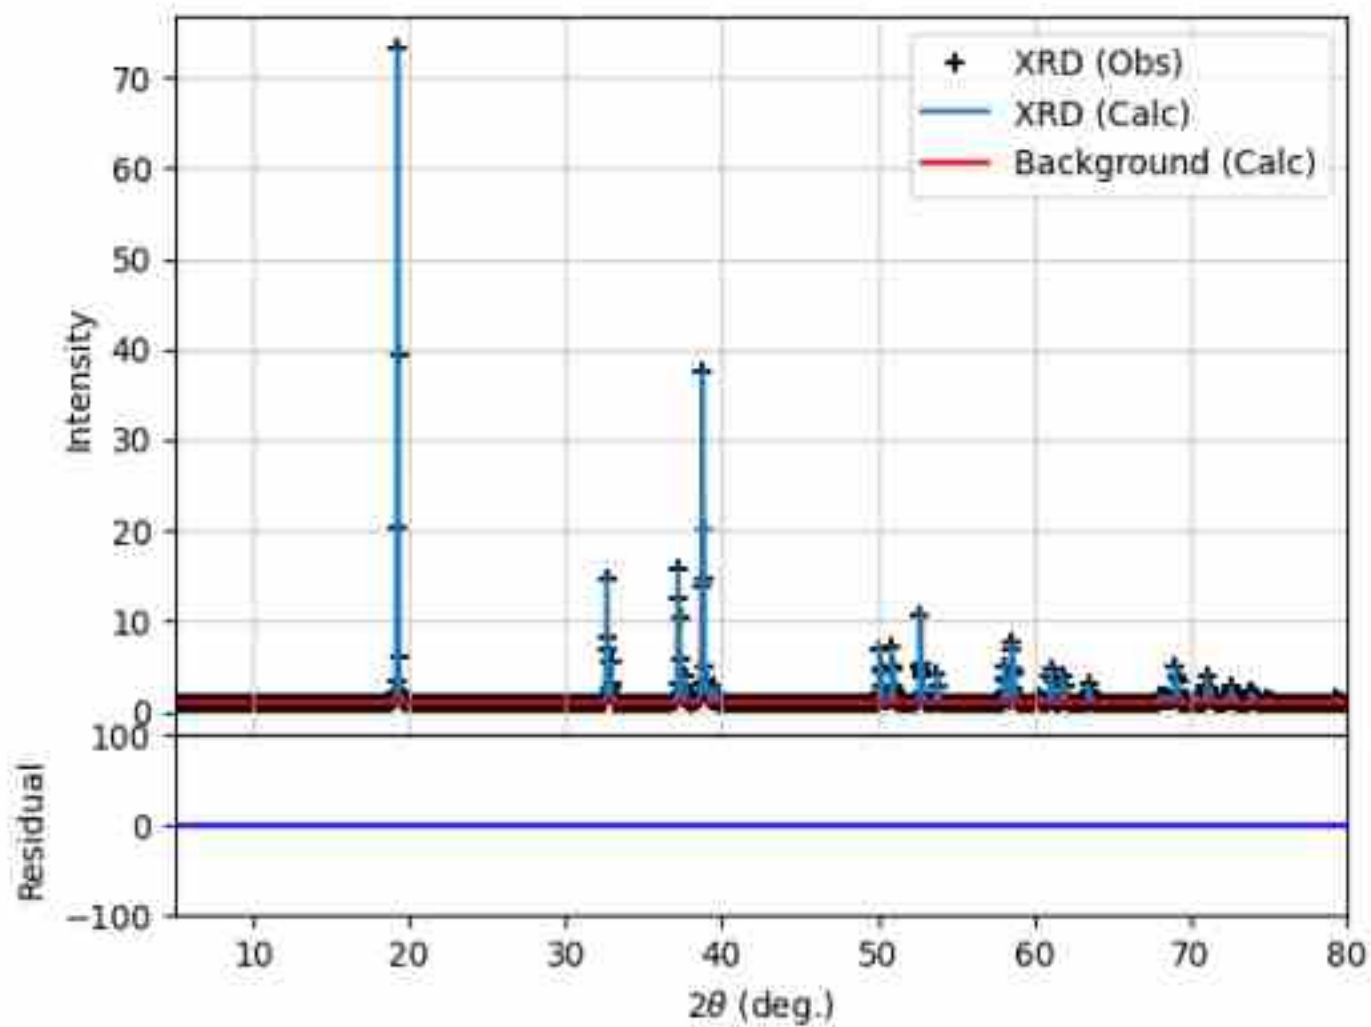

| RMSE before RR | Rwp     | RMSE after RR |
|----------------|---------|---------------|
| 0.017          | 0.00164 | 0.00079       |

# Ni<sub>2</sub>Ge<sub>4</sub>Pd<sub>2</sub>

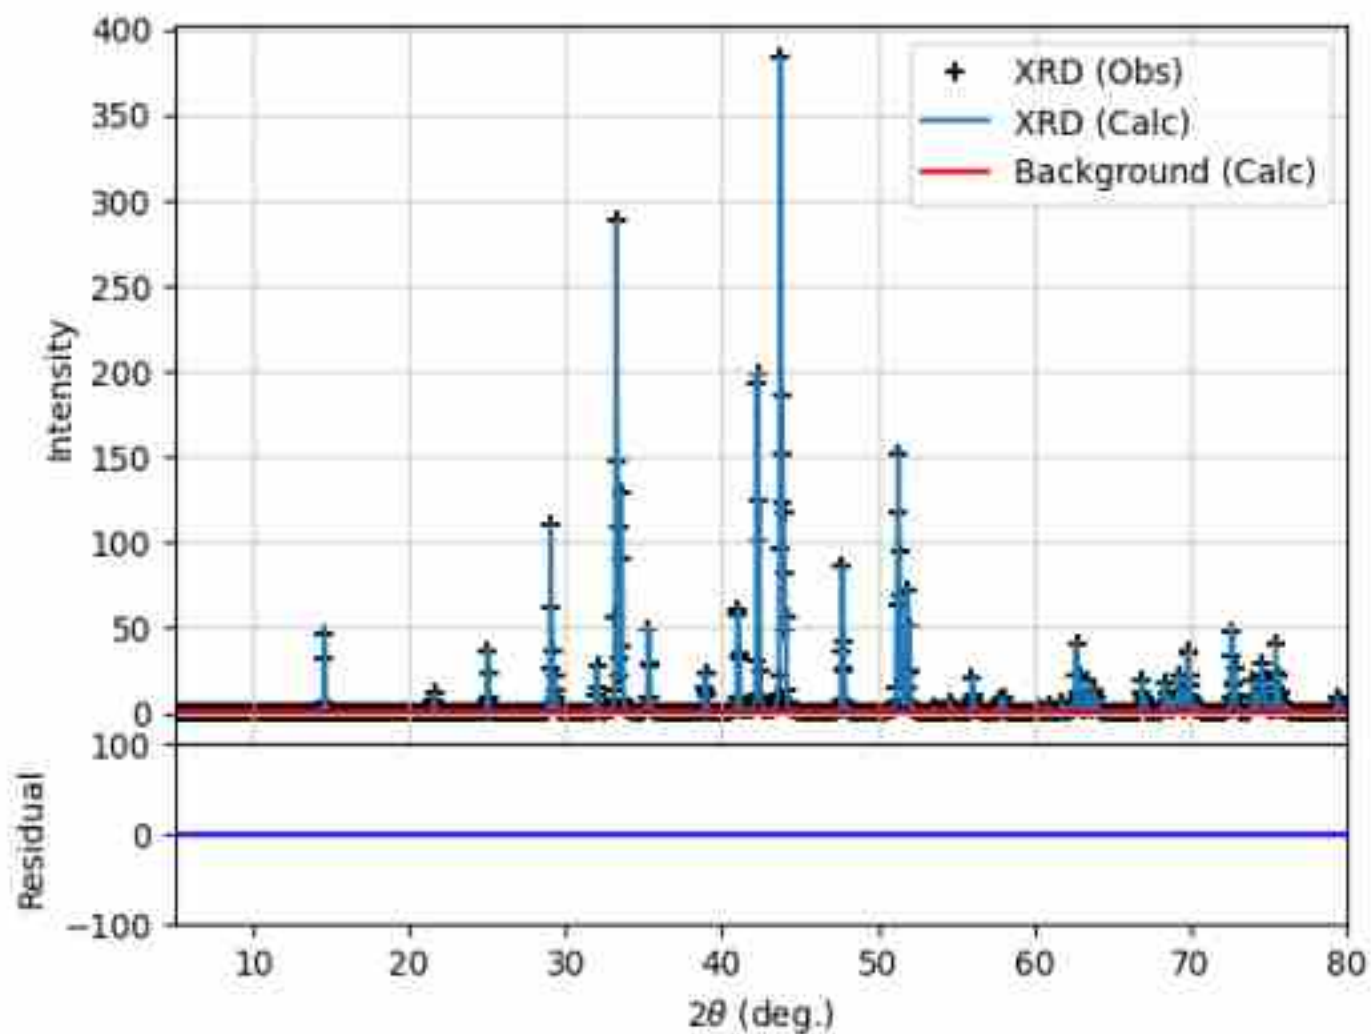

| RMSE before RR | Rwp     | RMSE after RR |
|----------------|---------|---------------|
| 0.017          | 0.00373 | 0.00022       |

# Ni6O1F11

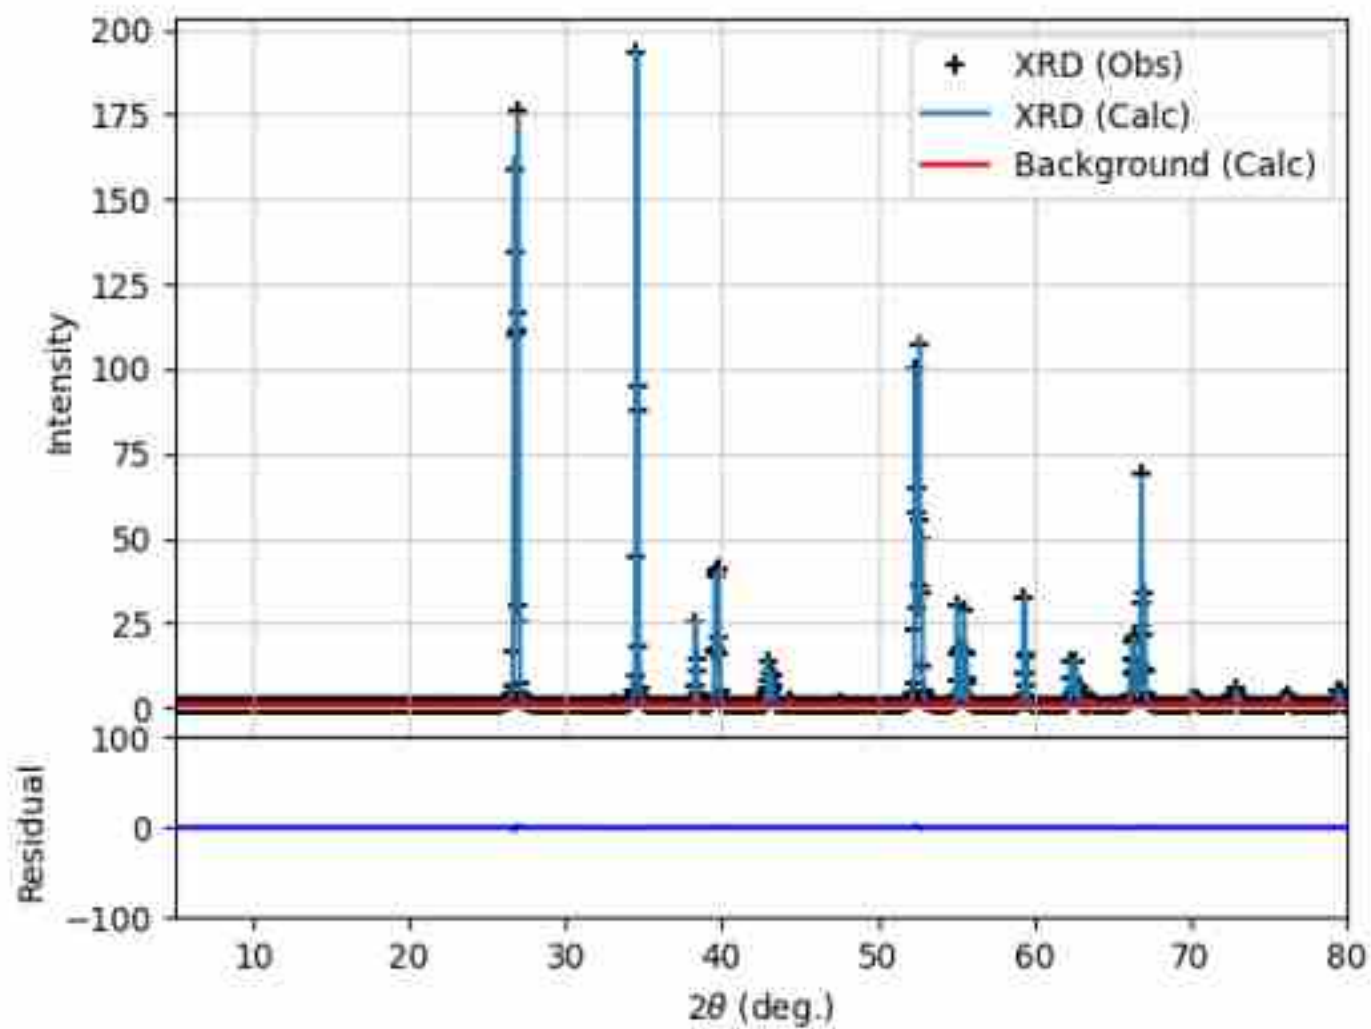

| RMSE before RR | Rwp     | RMSE after RR |
|----------------|---------|---------------|
| 0.017          | 1.27261 | 0.03352       |

# P4Os4S4

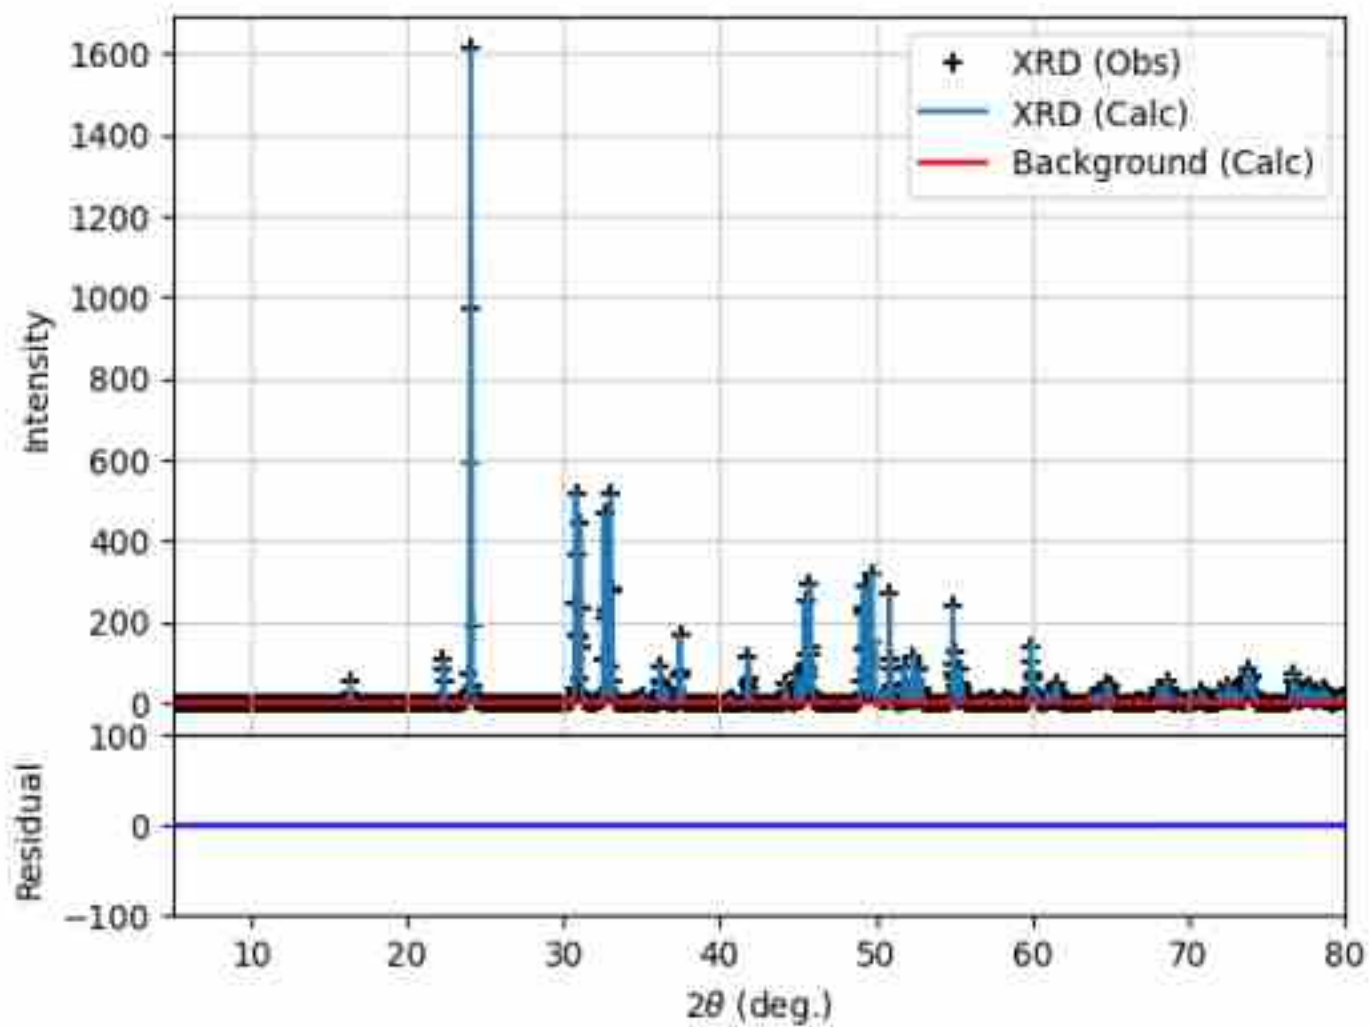

| RMSE before RR | Rwp    | RMSE after RR |
|----------------|--------|---------------|
| 0.017          | 0.1669 | 0.00471       |

# Pa1Pt5

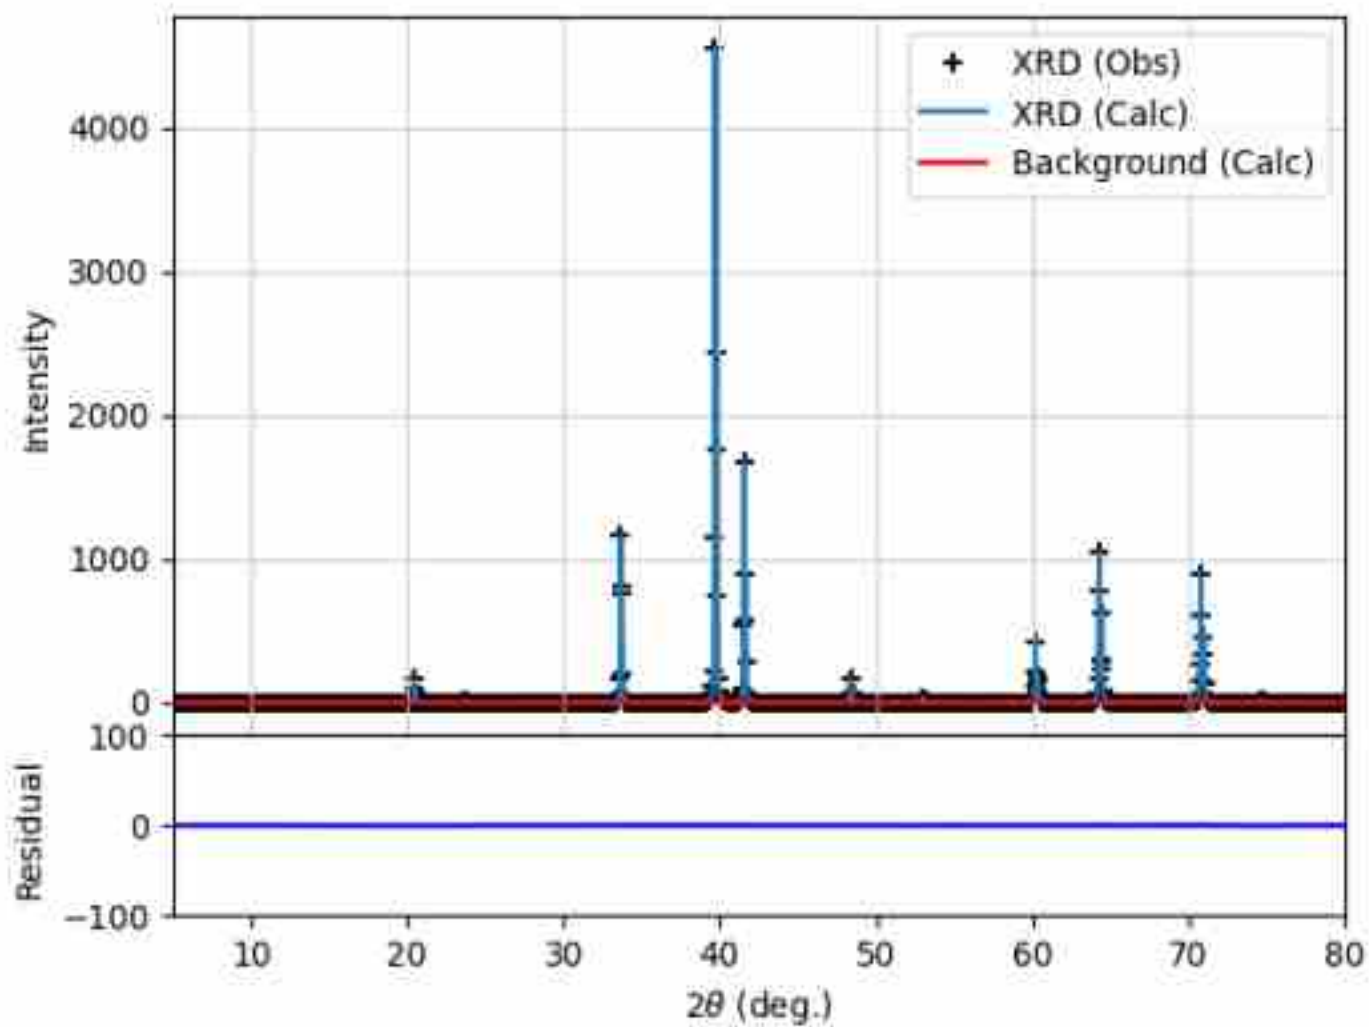

| RMSE before RR | Rwp   | RMSE after RR |
|----------------|-------|---------------|
| 0.017          | 0.457 | 0.00478       |



# Pr1Fe1Ge3

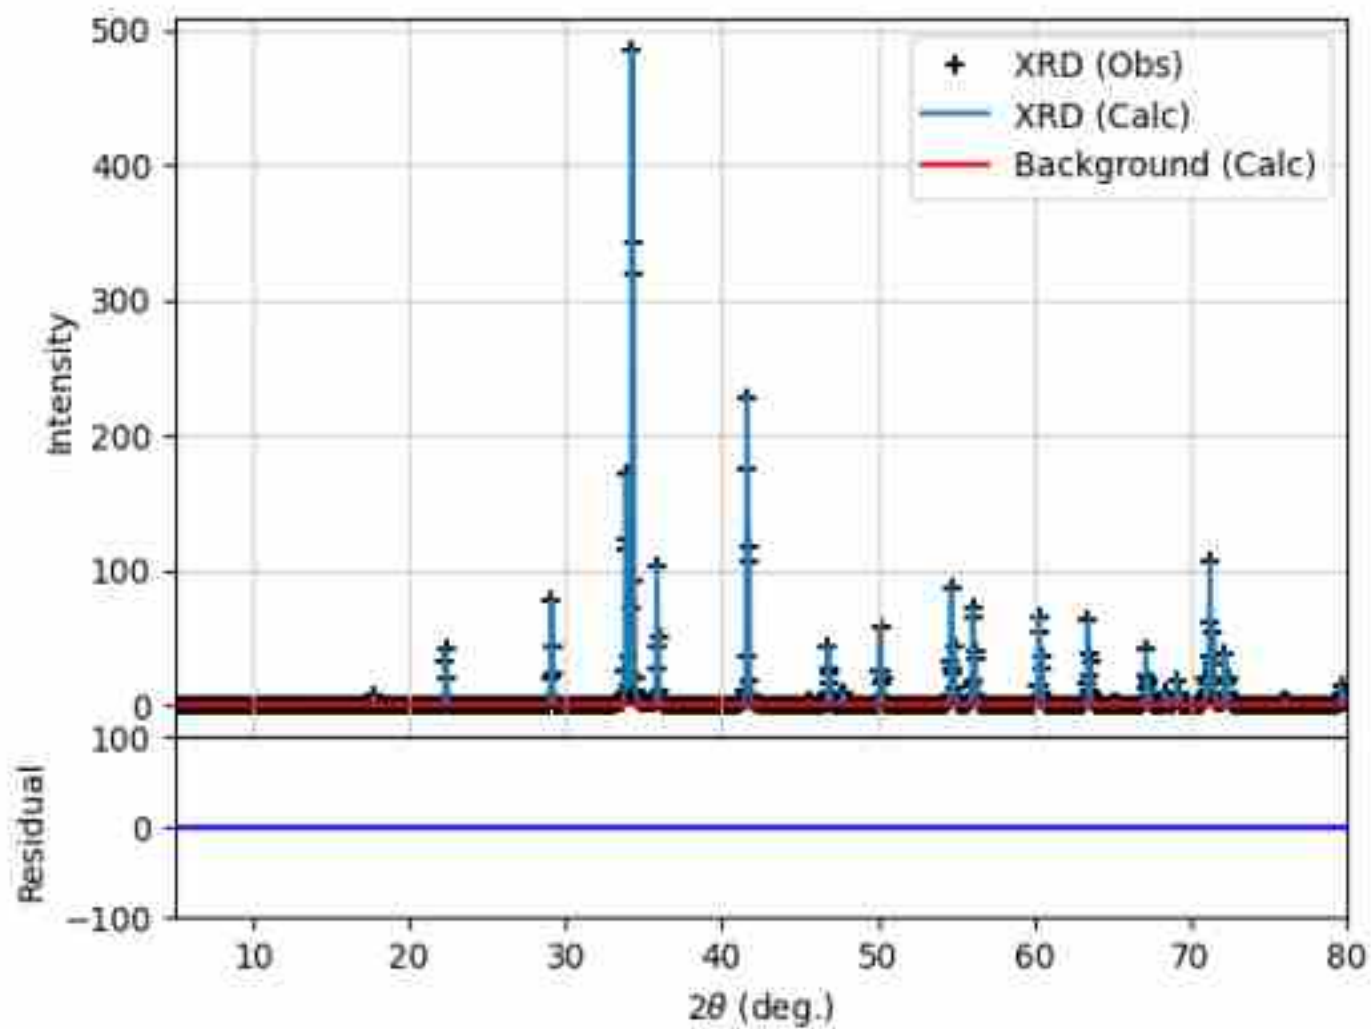

| RMSE before RR | Rwp     | RMSE after RR |
|----------------|---------|---------------|
| 0.017          | 0.00344 | 0.00037       |

# Pr1Ni5

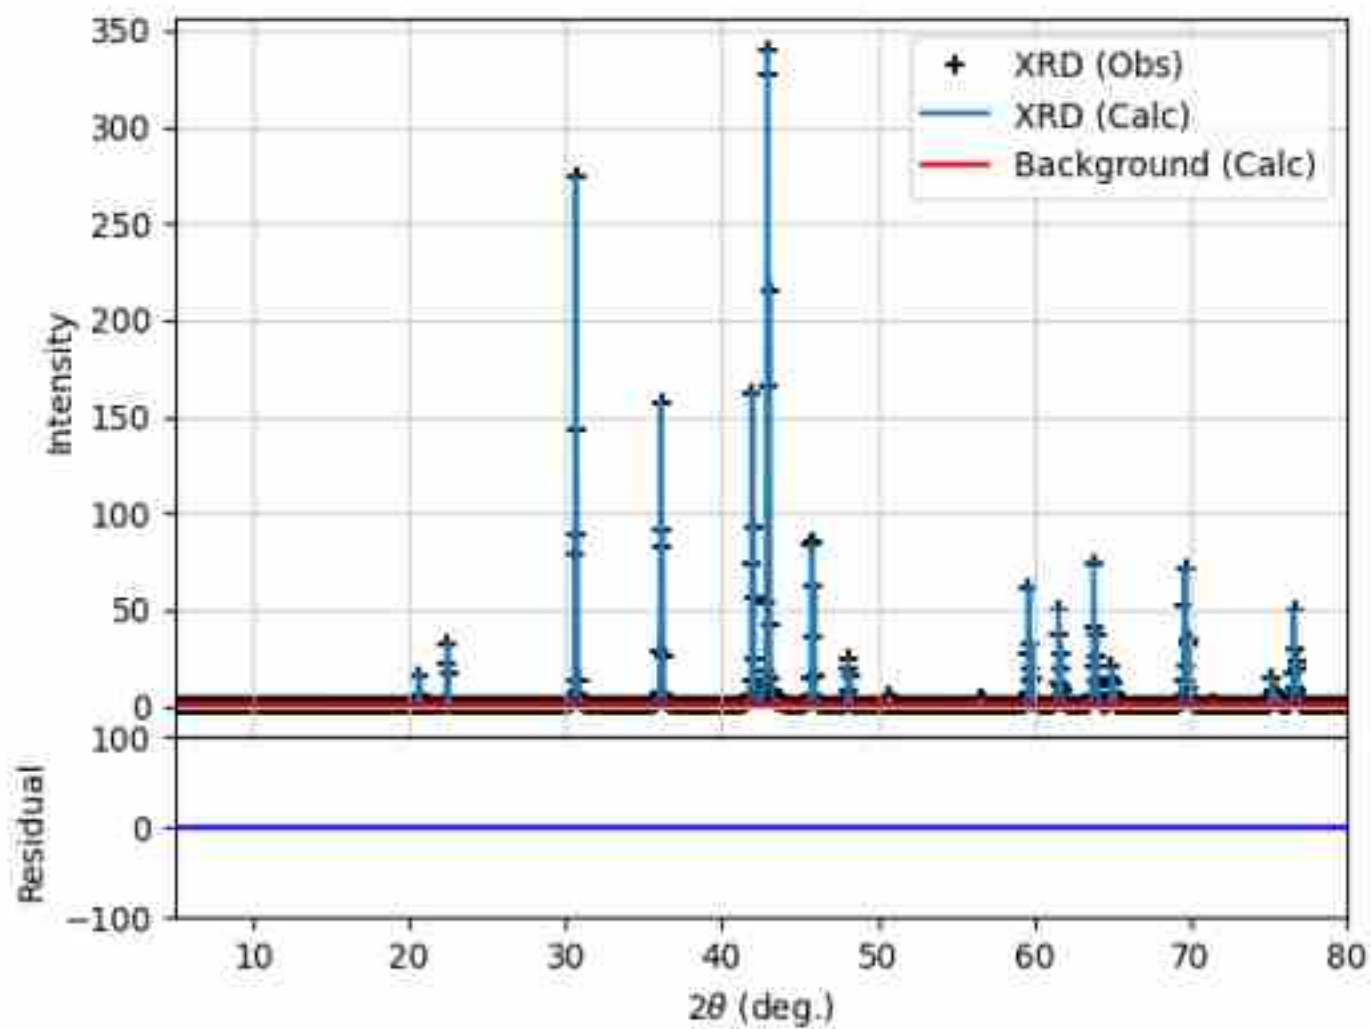

| RMSE before RR | Rwp     | RMSE after RR |
|----------------|---------|---------------|
| 0.017          | 0.00264 | 0.00077       |

# Pr<sub>2</sub>Al<sub>2</sub>Co<sub>15</sub>

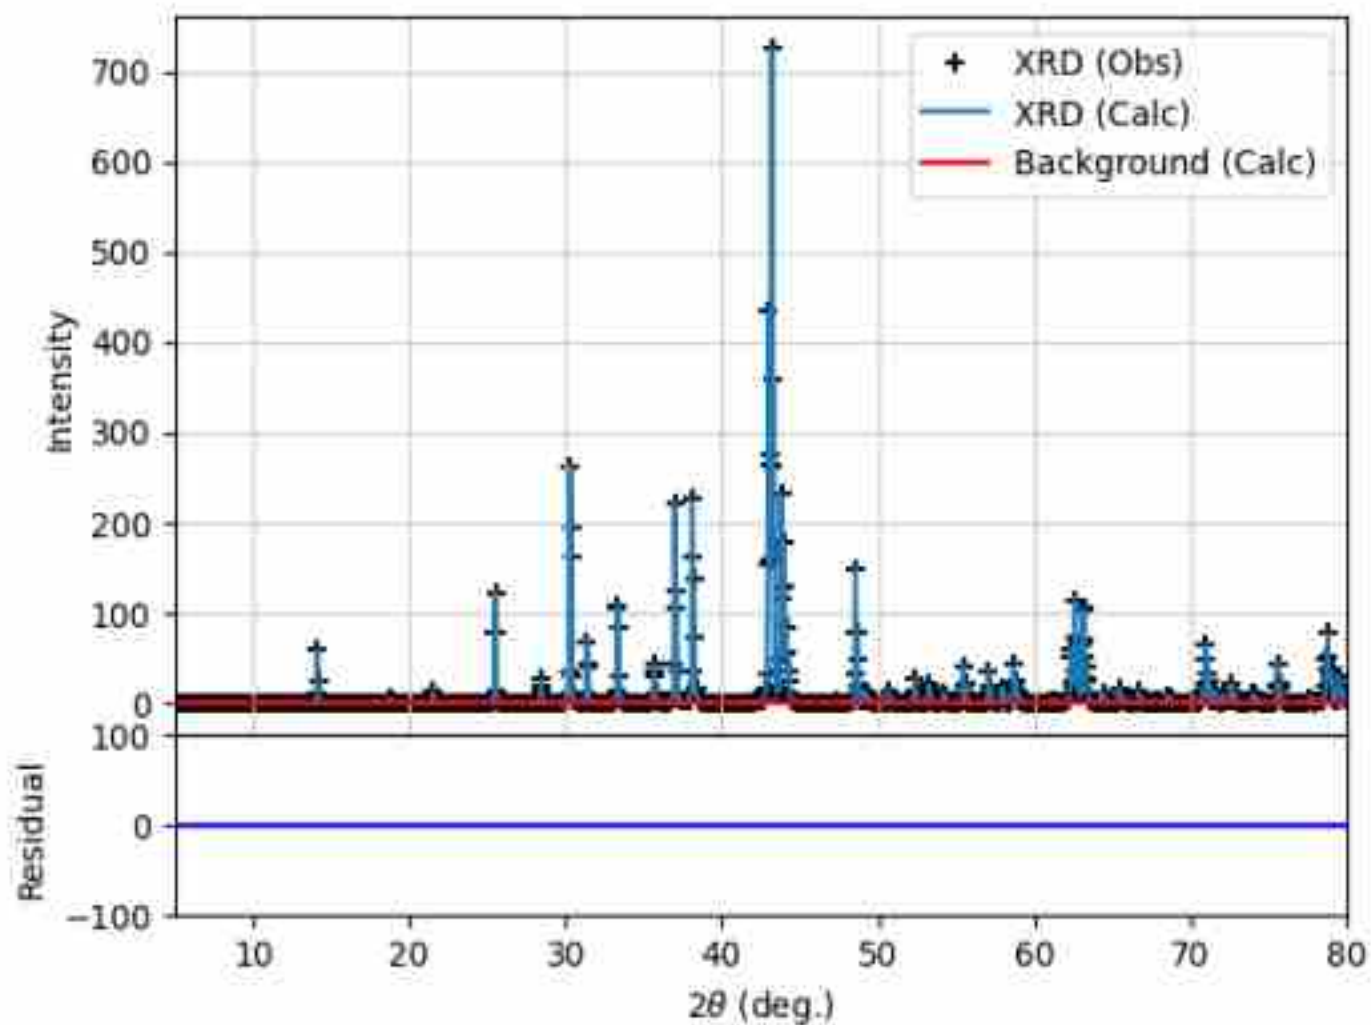

| RMSE before RR | Rwp     | RMSE after RR |
|----------------|---------|---------------|
| 0.017          | 0.00286 | 0.00043       |

# Pr<sub>2</sub>Al<sub>8</sub>Co<sub>2</sub>

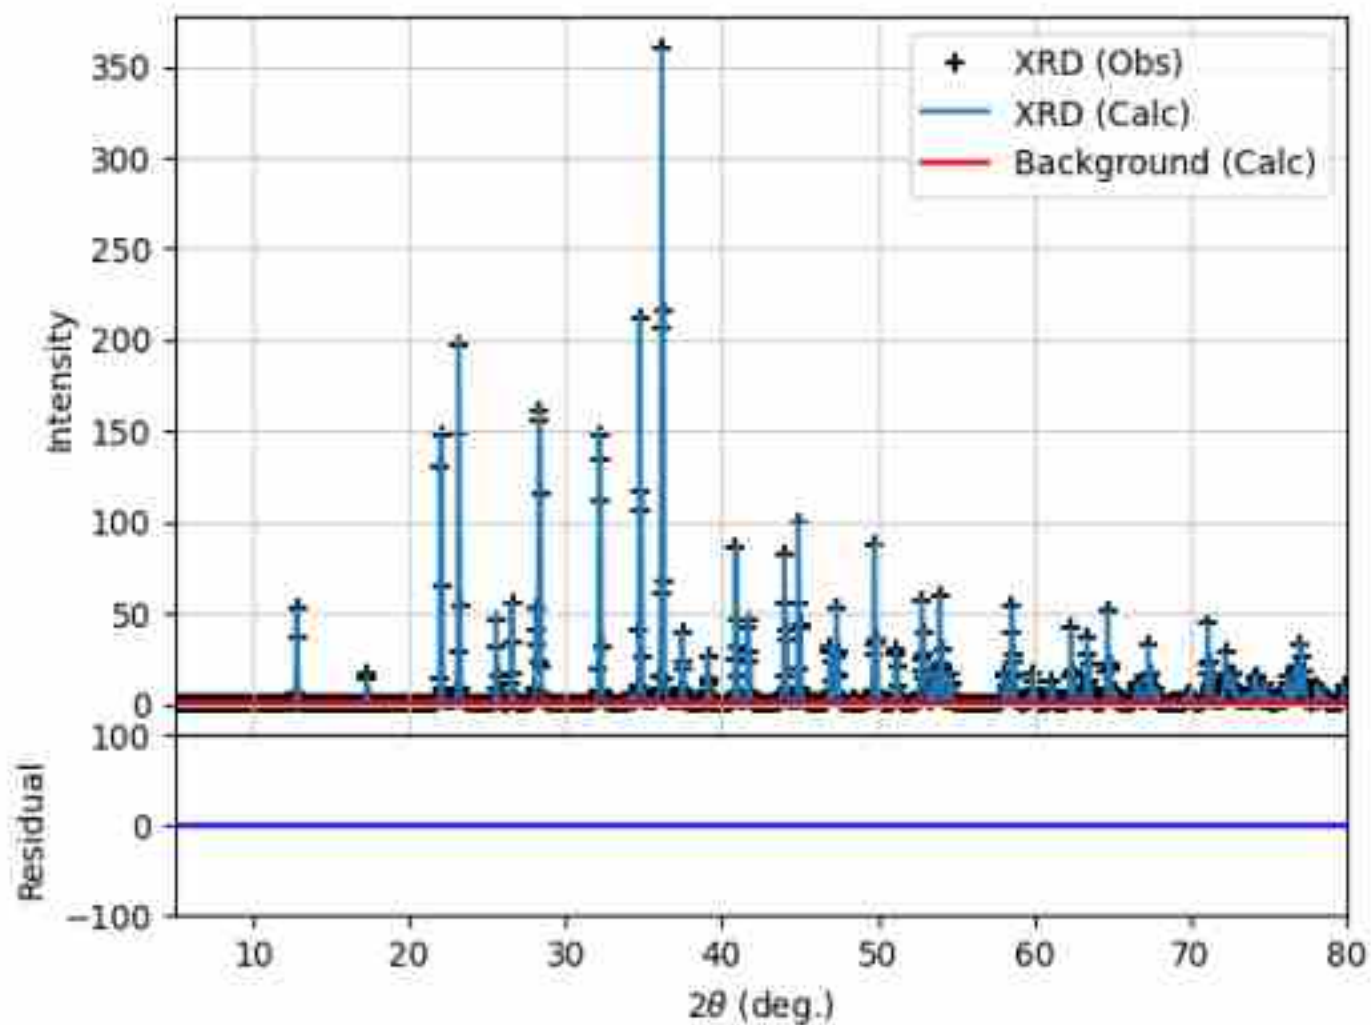

| RMSE before RR | Rwp     | RMSE after RR |
|----------------|---------|---------------|
| 0.017          | 0.00403 | 0.00055       |

# Pr<sub>2</sub>Br<sub>2</sub>O<sub>2</sub>

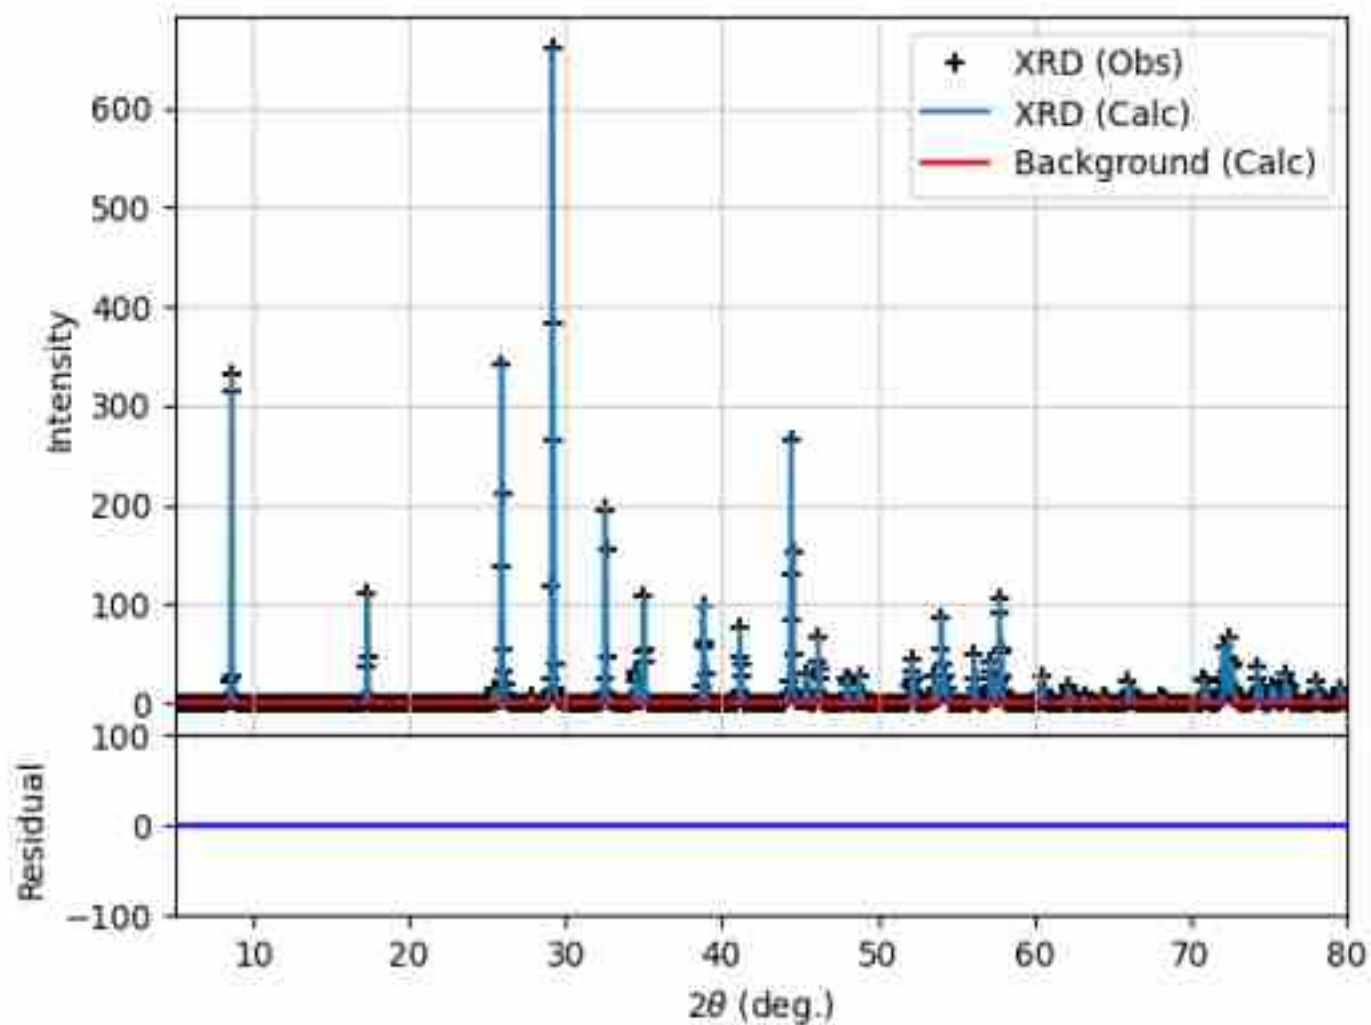

| RMSE before RR | Rwp     | RMSE after RR |
|----------------|---------|---------------|
| 0.017          | 0.00398 | 0.00279       |

# Pr<sub>2</sub>In<sub>3</sub>Cu<sub>1</sub>

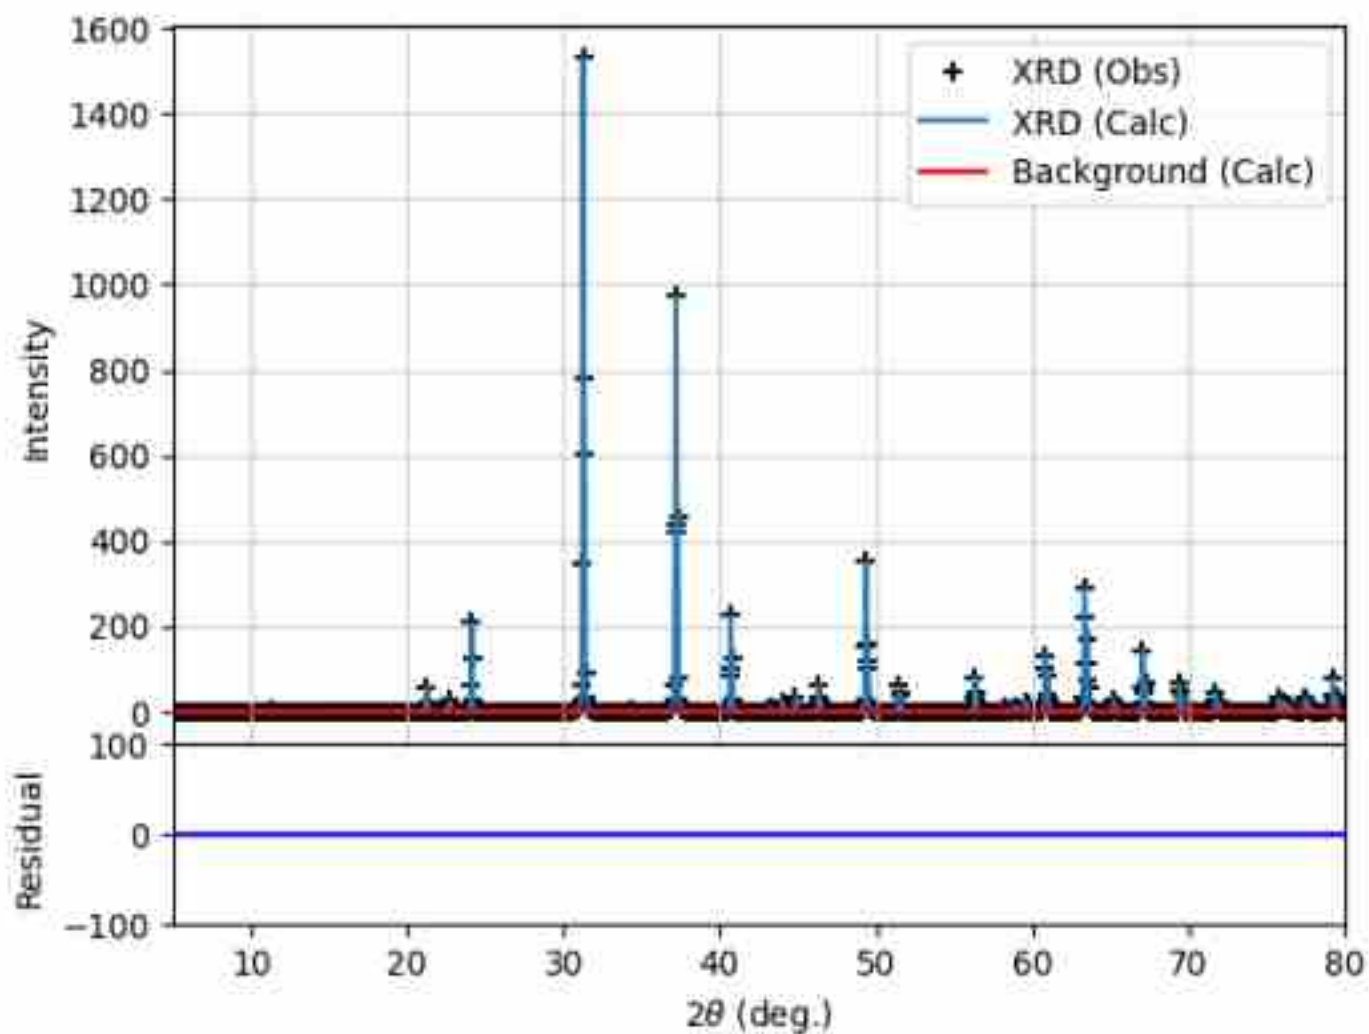

| RMSE before RR | Rwp     | RMSE after RR |
|----------------|---------|---------------|
| 0.017          | 0.00437 | 0.00023       |

# Pr<sub>4</sub>V<sub>4</sub>O<sub>12</sub>

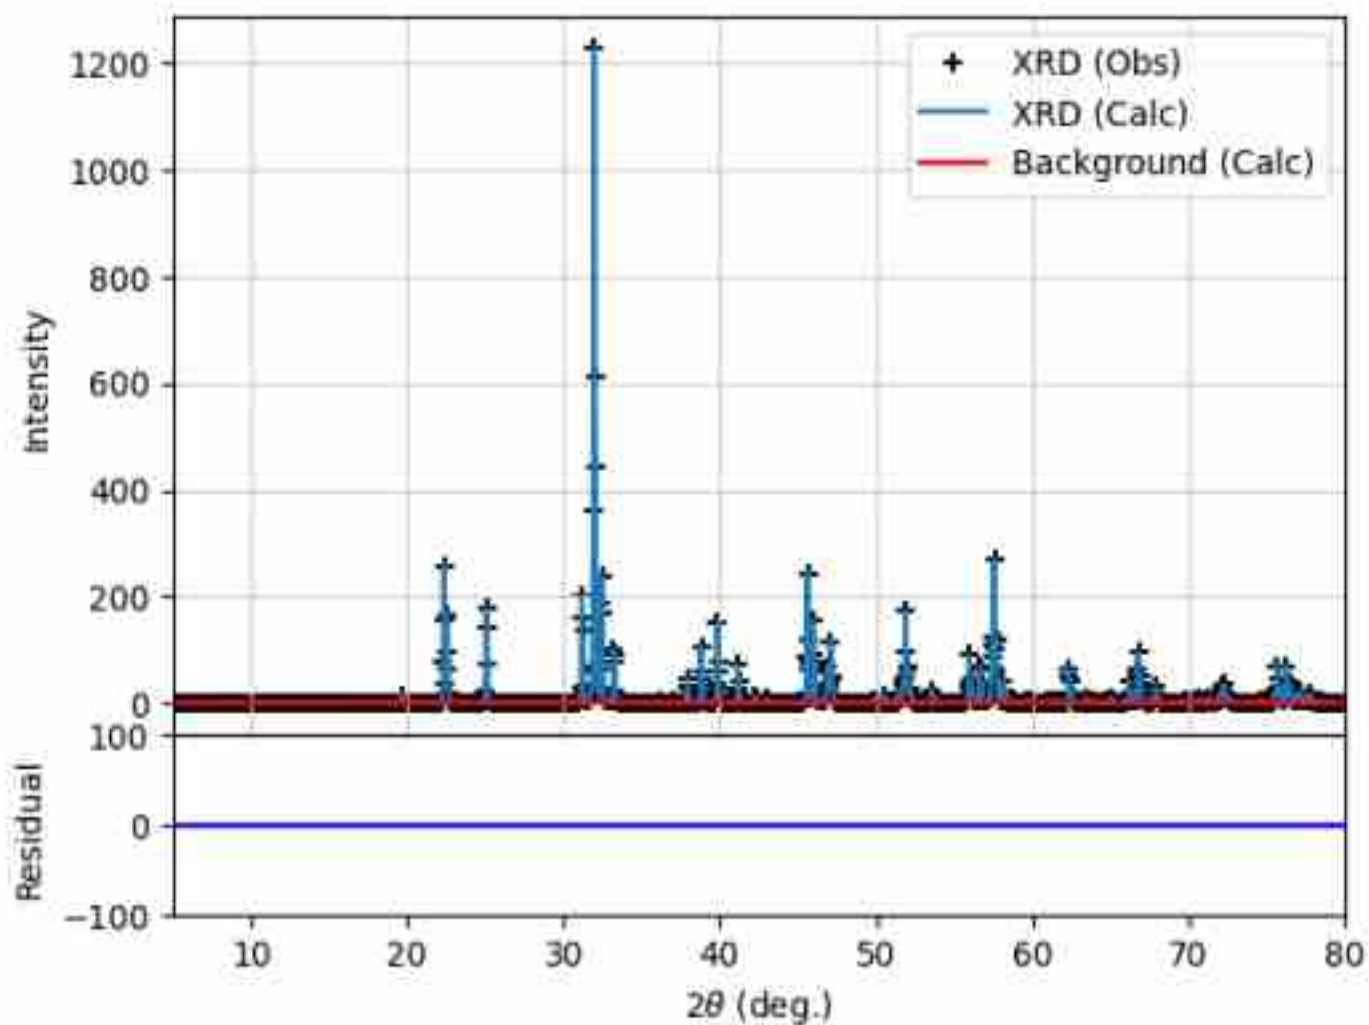

| RMSE before RR | Rwp    | RMSE after RR |
|----------------|--------|---------------|
| 0.017          | 0.0039 | 0.00147       |

# Pr<sub>4</sub>Zn<sub>10</sub>Sn<sub>2</sub>

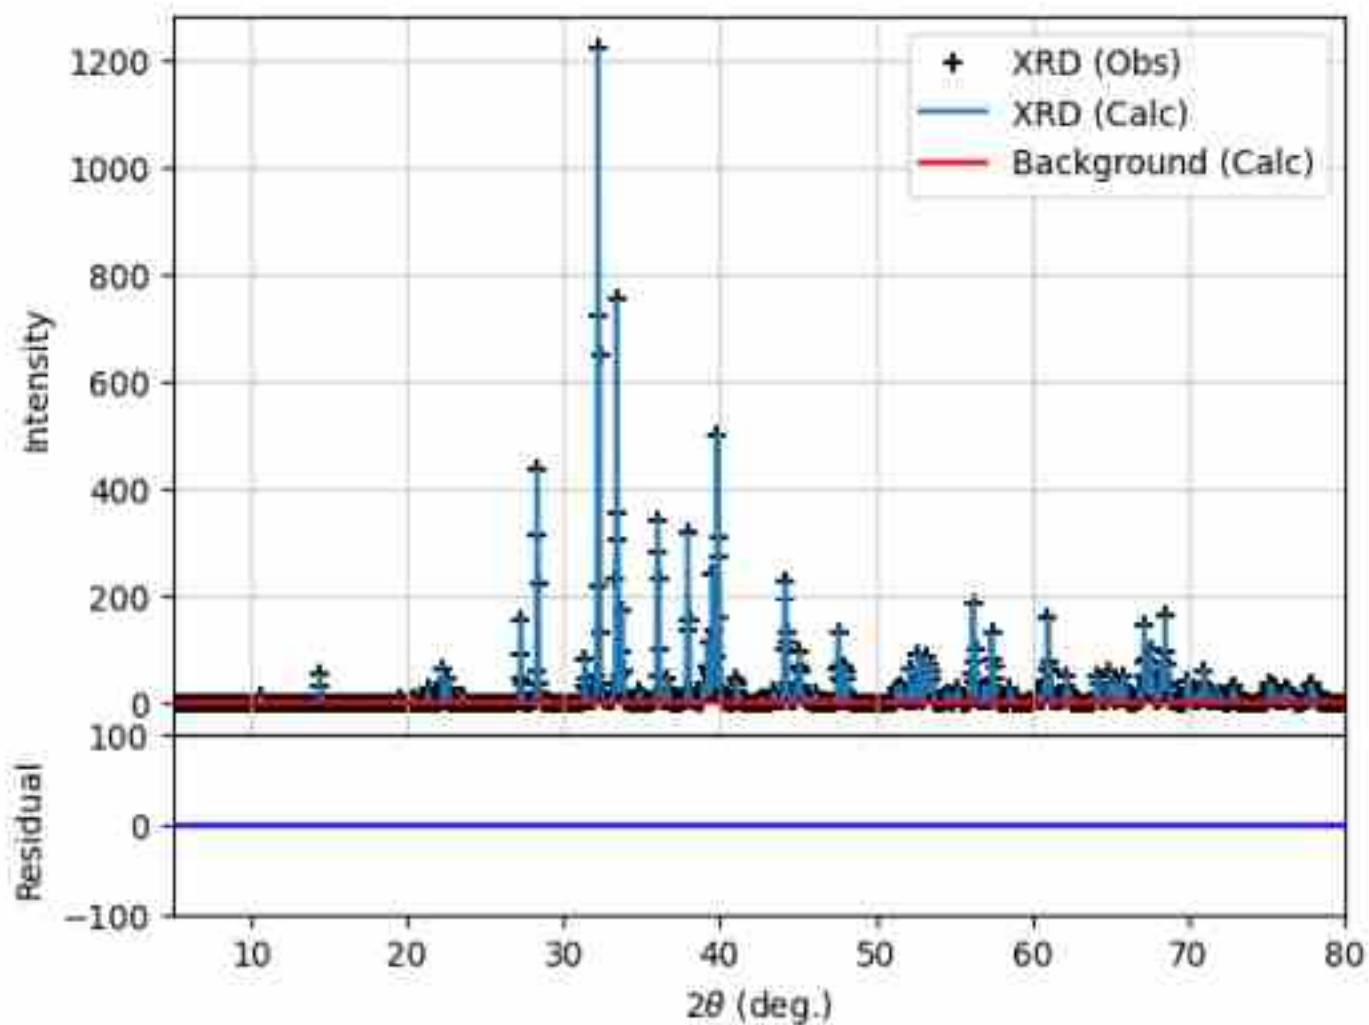

| RMSE before RR | Rwp     | RMSE after RR |
|----------------|---------|---------------|
| 0.017          | 0.00452 | 0.0005        |



# Pu<sub>2</sub>Sb<sub>2</sub>Te<sub>2</sub>

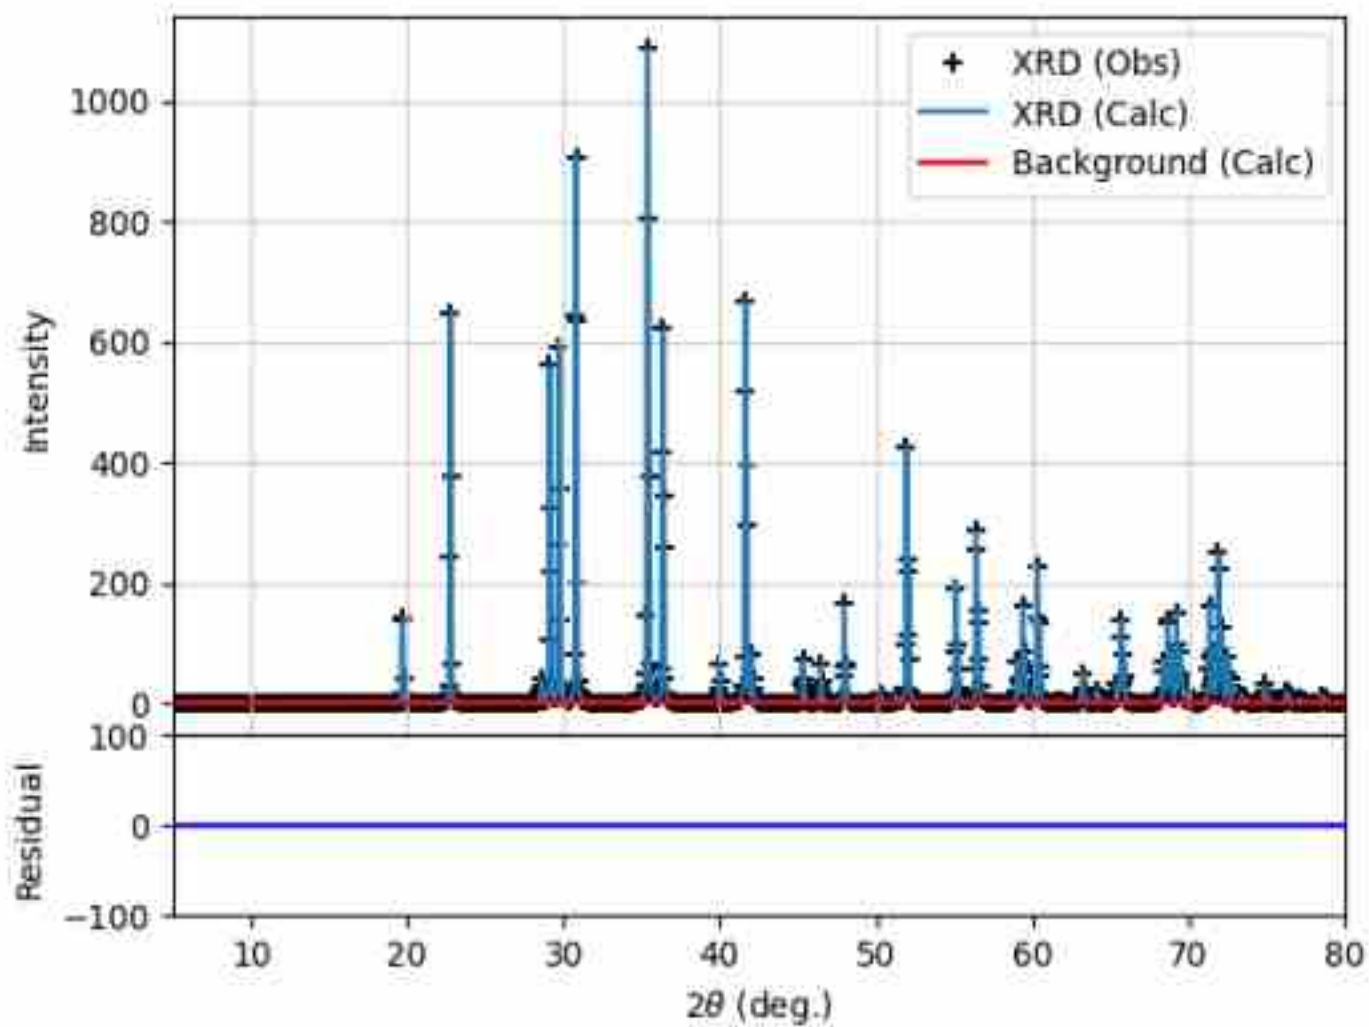

| RMSE before RR | Rwp    | RMSE after RR |
|----------------|--------|---------------|
| 0.017          | 0.0067 | 0.00039       |

# Pu<sub>3</sub>Ni<sub>9</sub>

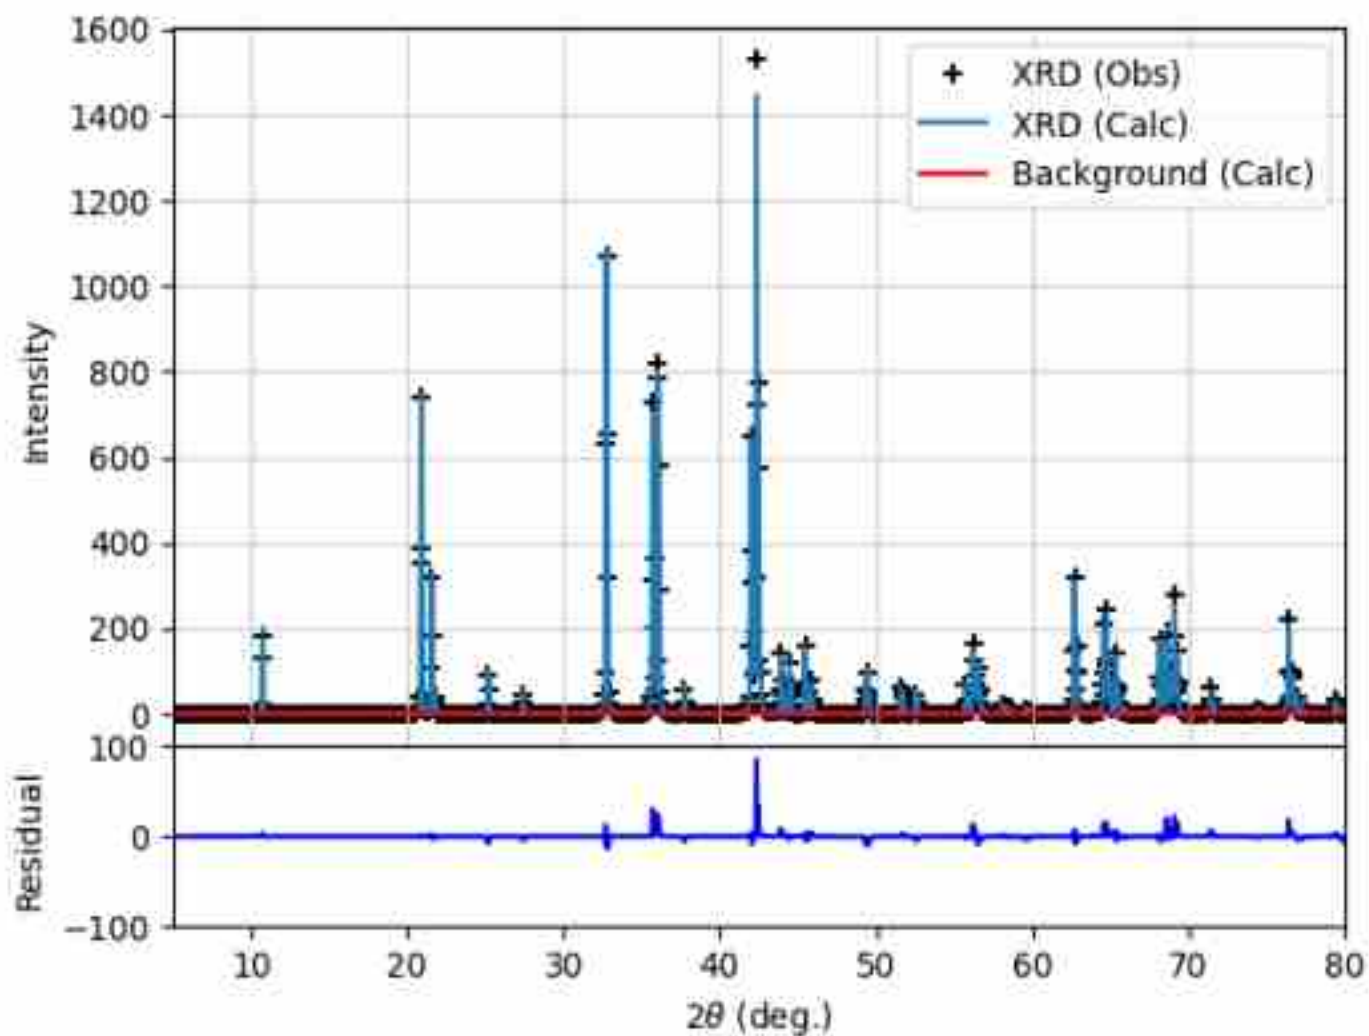

| RMSE before RR | Rwp     | RMSE after RR |
|----------------|---------|---------------|
| 0.017          | 8.26994 | 0.0438        |

# Rb1Sc1Mo2O8

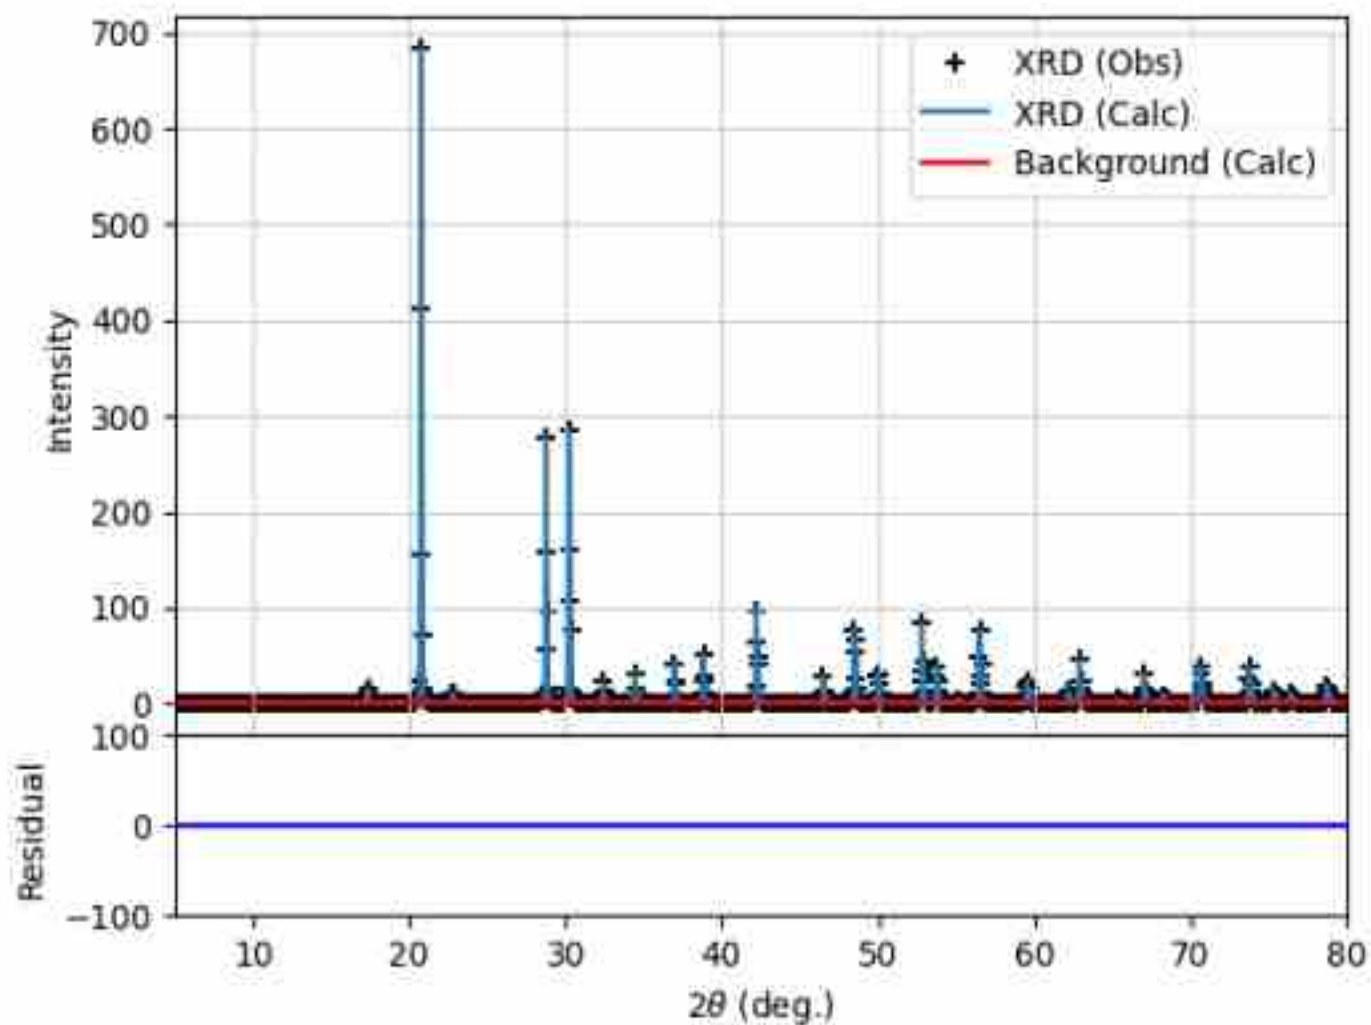

| RMSE before RR | Rwp    | RMSE after RR |
|----------------|--------|---------------|
| 0.017          | 0.0037 | 0.0018        |

# Rb<sub>2</sub>Hg<sub>1</sub>Sb<sub>1</sub>I<sub>6</sub>

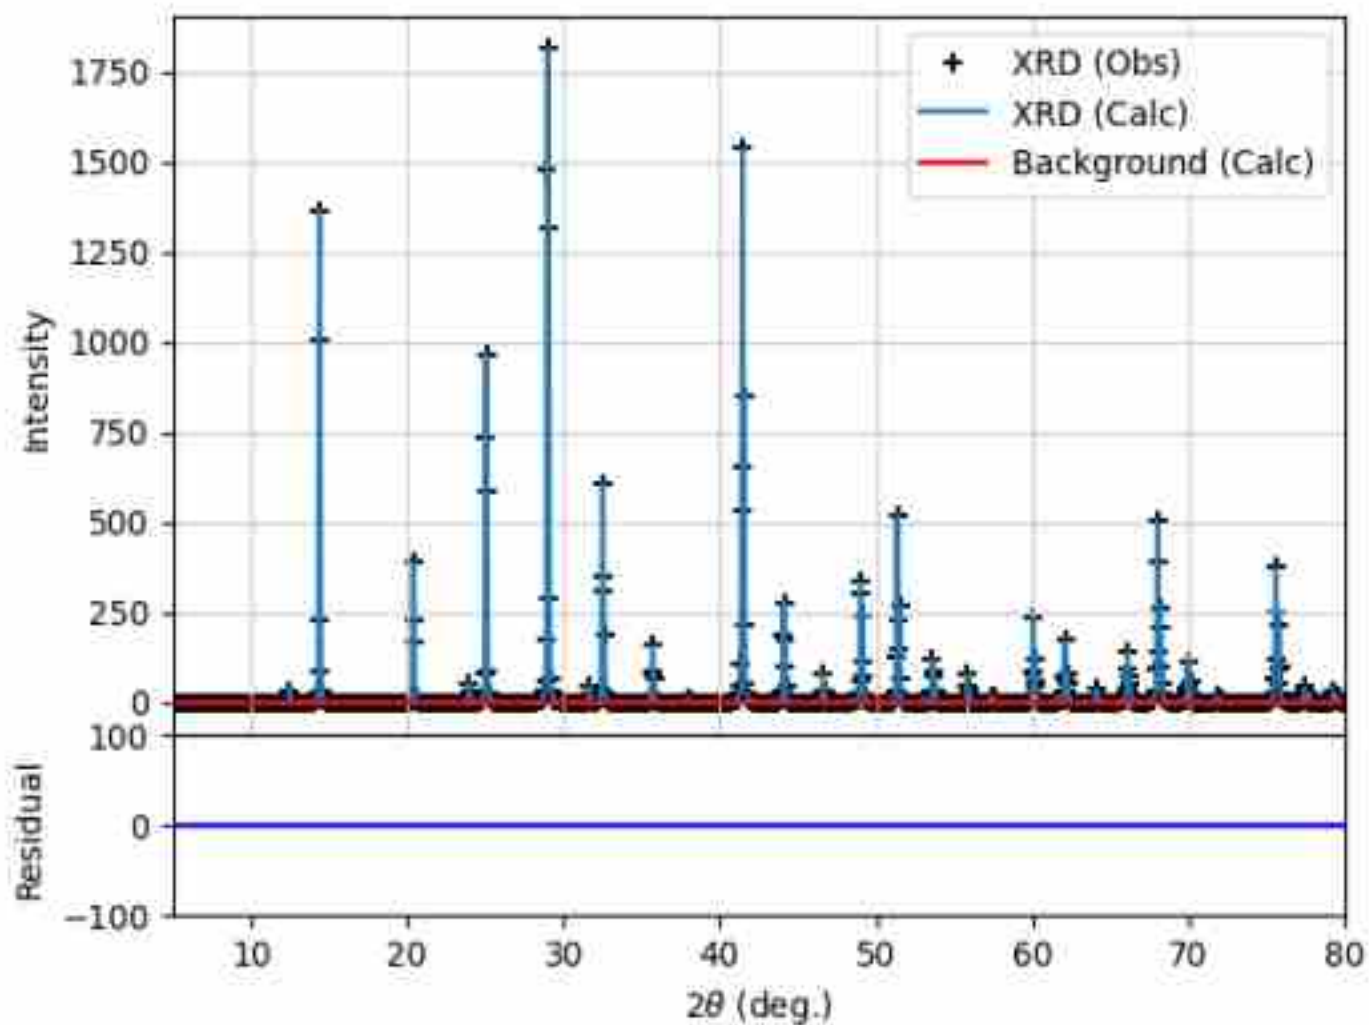

| RMSE before RR | Rwp     | RMSE after RR |
|----------------|---------|---------------|
| 0.017          | 0.09897 | 0.00222       |

# Rb<sub>2</sub>Li<sub>1</sub>Ni<sub>1</sub>F<sub>6</sub>

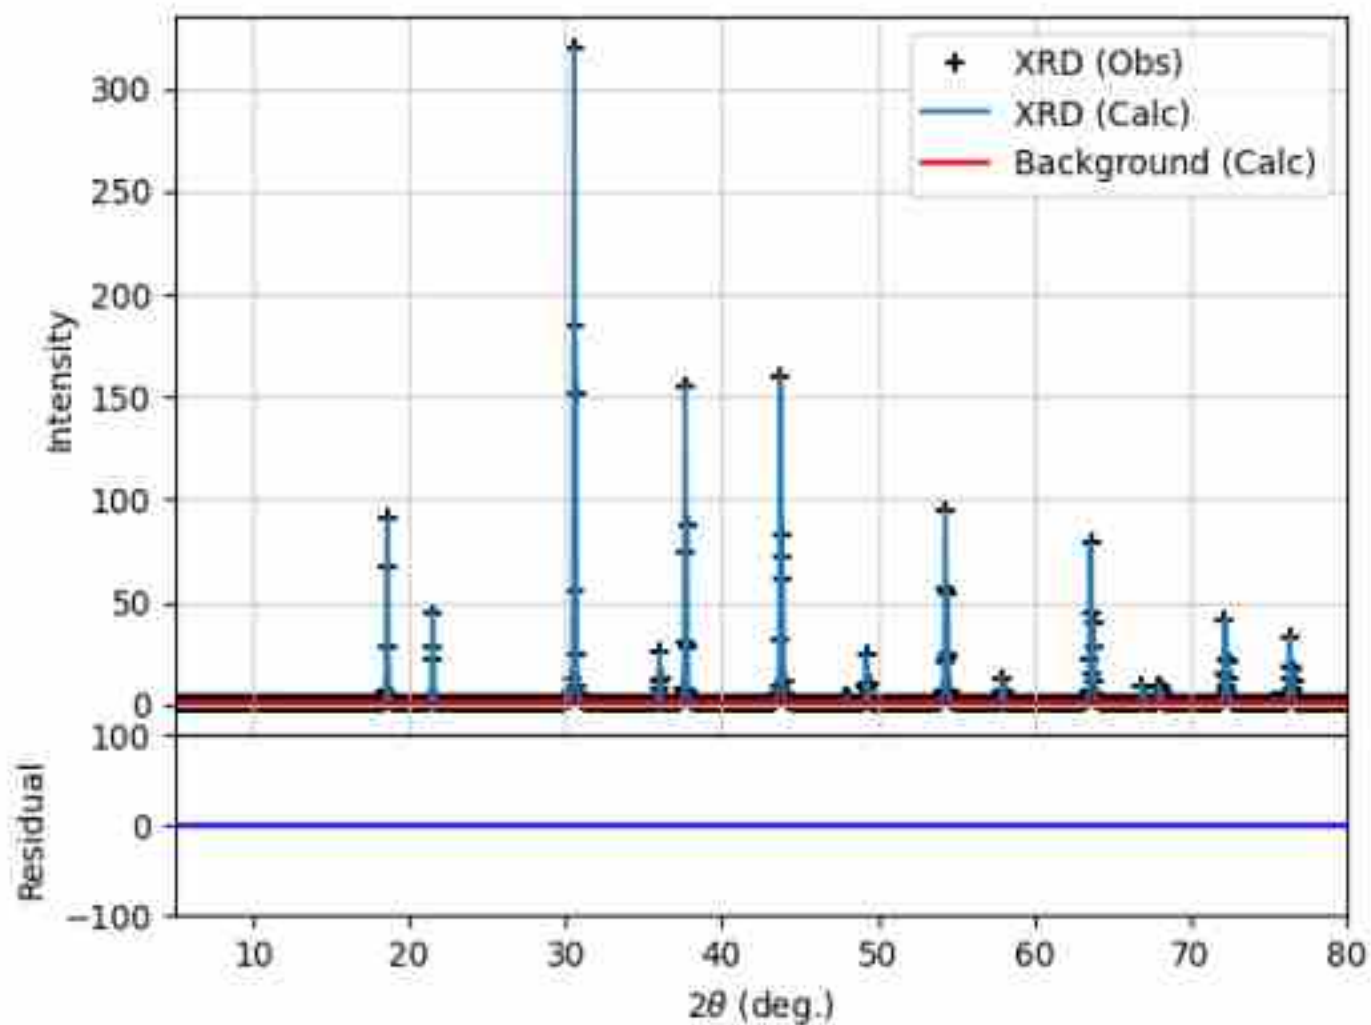

| RMSE before RR | Rwp     | RMSE after RR |
|----------------|---------|---------------|
| 0.017          | 0.03975 | 0.0059        |

# Rb3I2Br1

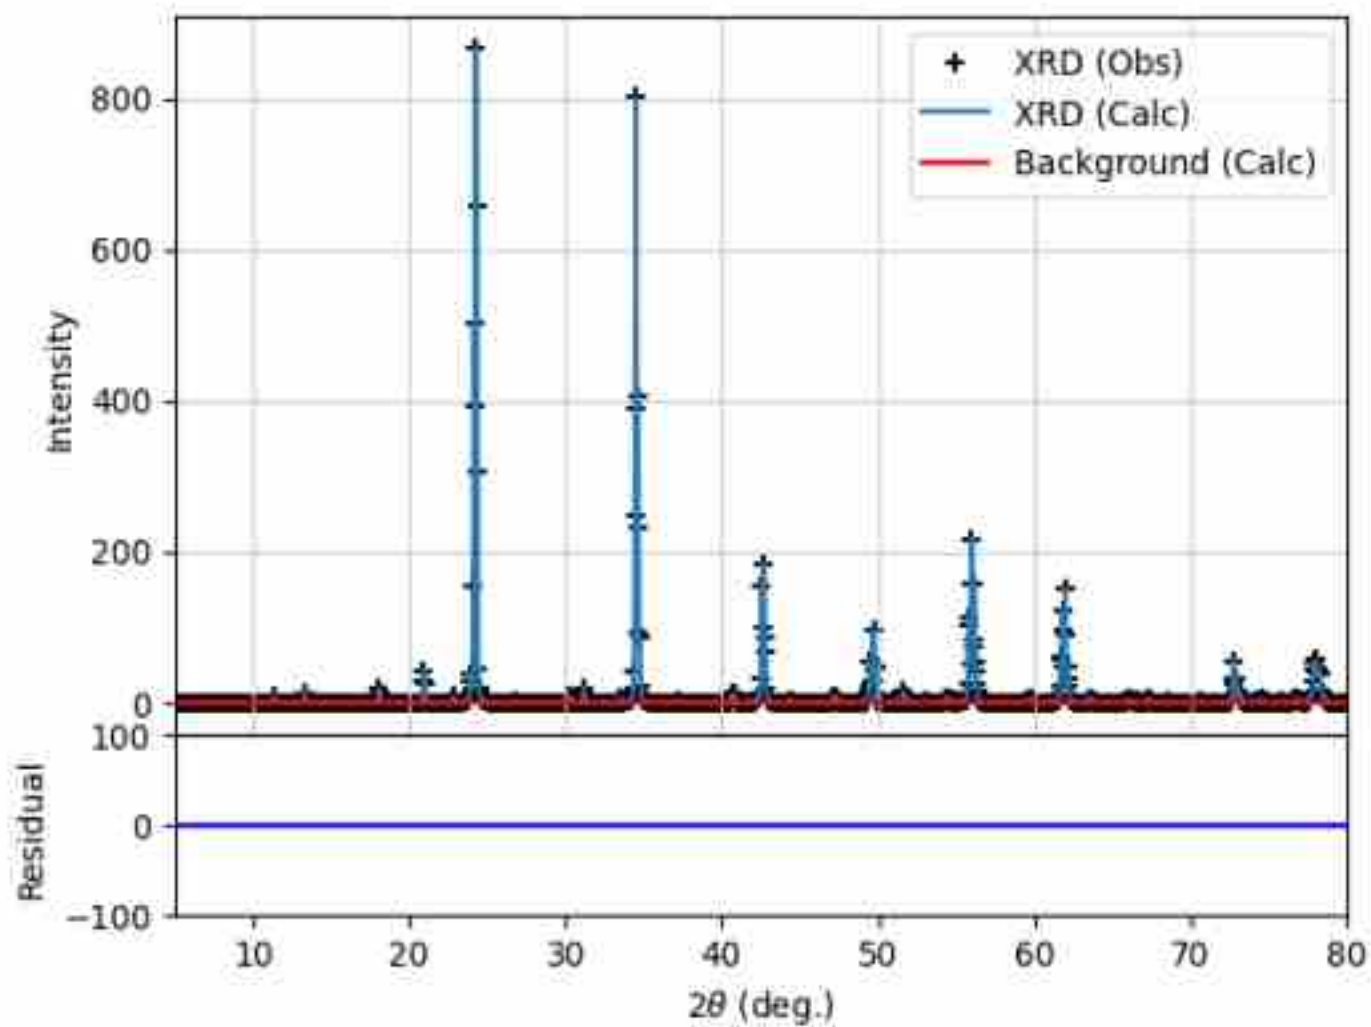

| RMSE before RR | Rwp     | RMSE after RR |
|----------------|---------|---------------|
| 0.017          | 0.00257 | 0.00017       |

# Re2Ru6

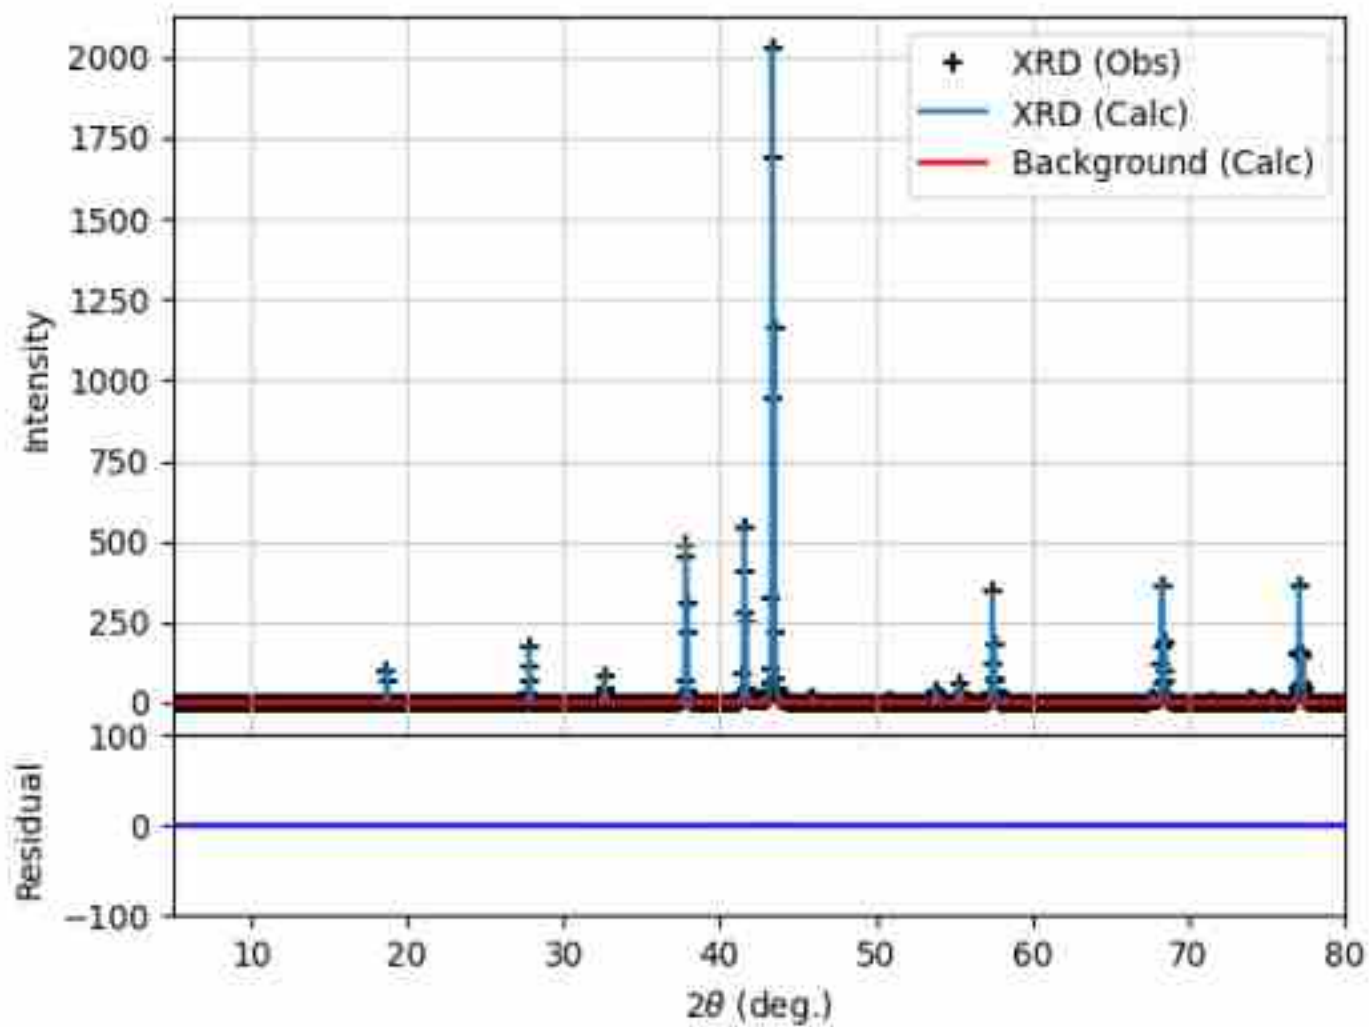

| RMSE before RR | Rwp     | RMSE after RR |
|----------------|---------|---------------|
| 0.017          | 0.32753 | 0.00422       |

# Sc2Al2Ge2

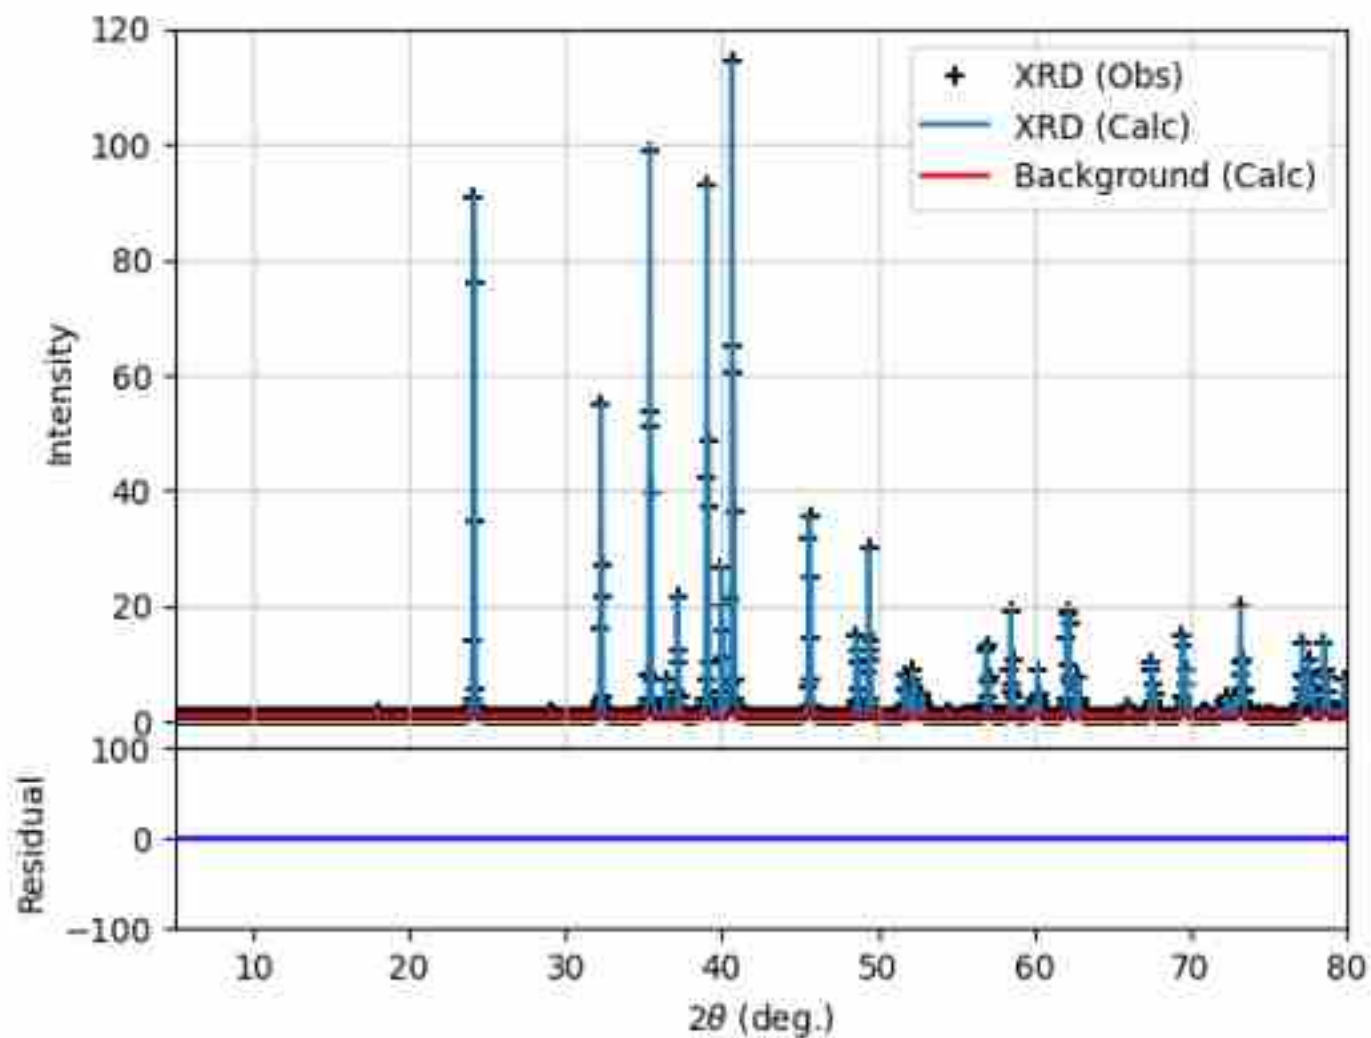

| RMSE before RR | Rwp     | RMSE after RR |
|----------------|---------|---------------|
| 0.017          | 0.00399 | 0.00034       |



# Sc2Zn6

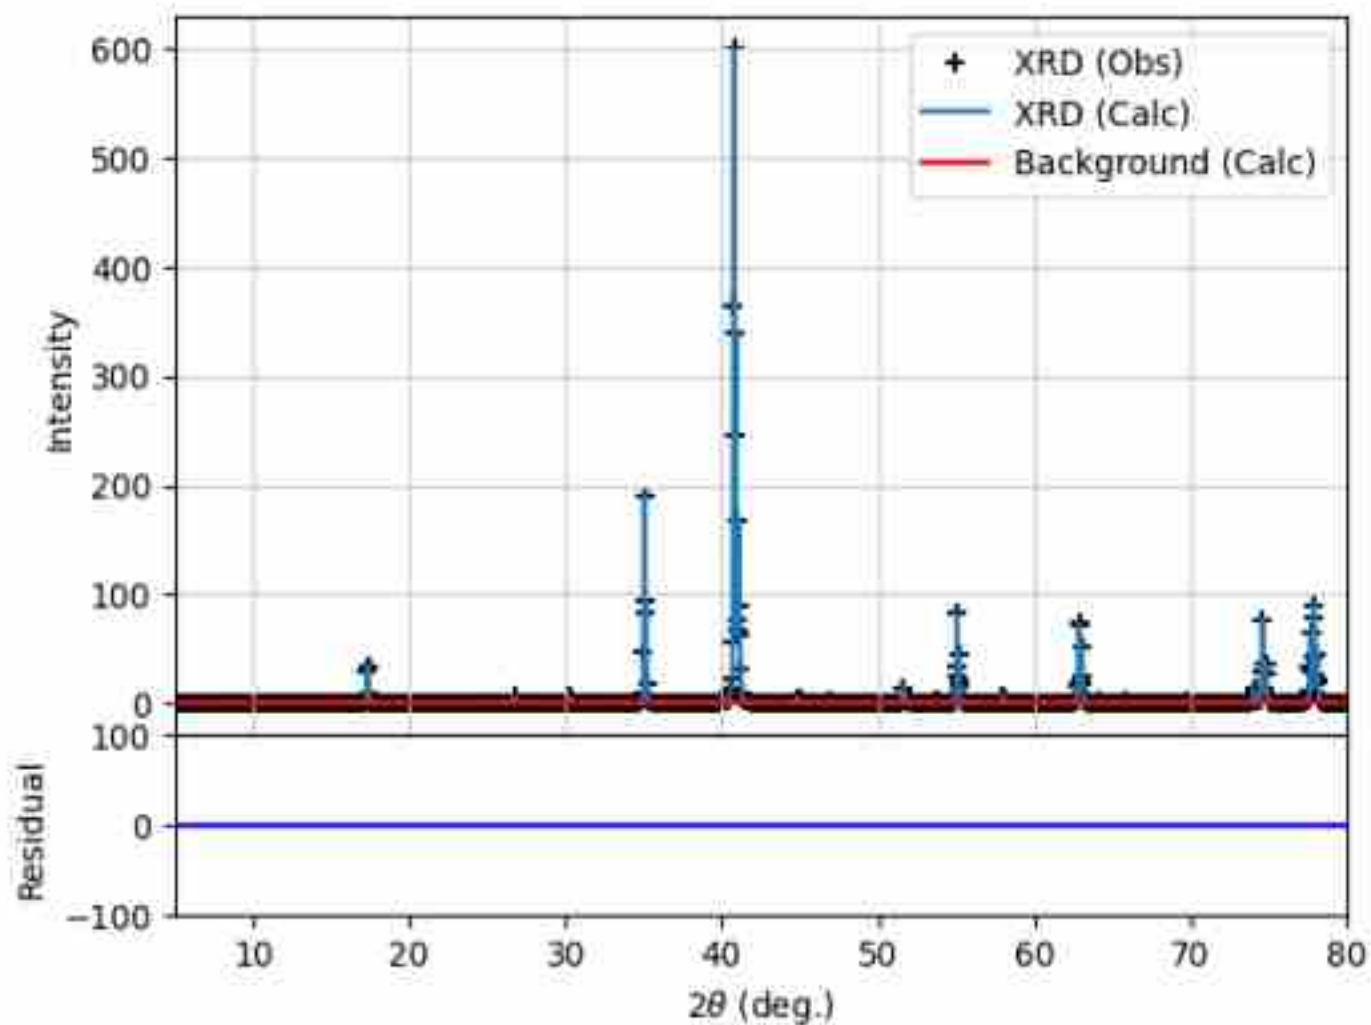

| RMSE before RR | Rwp     | RMSE after RR |
|----------------|---------|---------------|
| 0.017          | 0.08452 | 0.00314       |

# Sc<sub>4</sub>Zn<sub>2</sub>S<sub>8</sub>

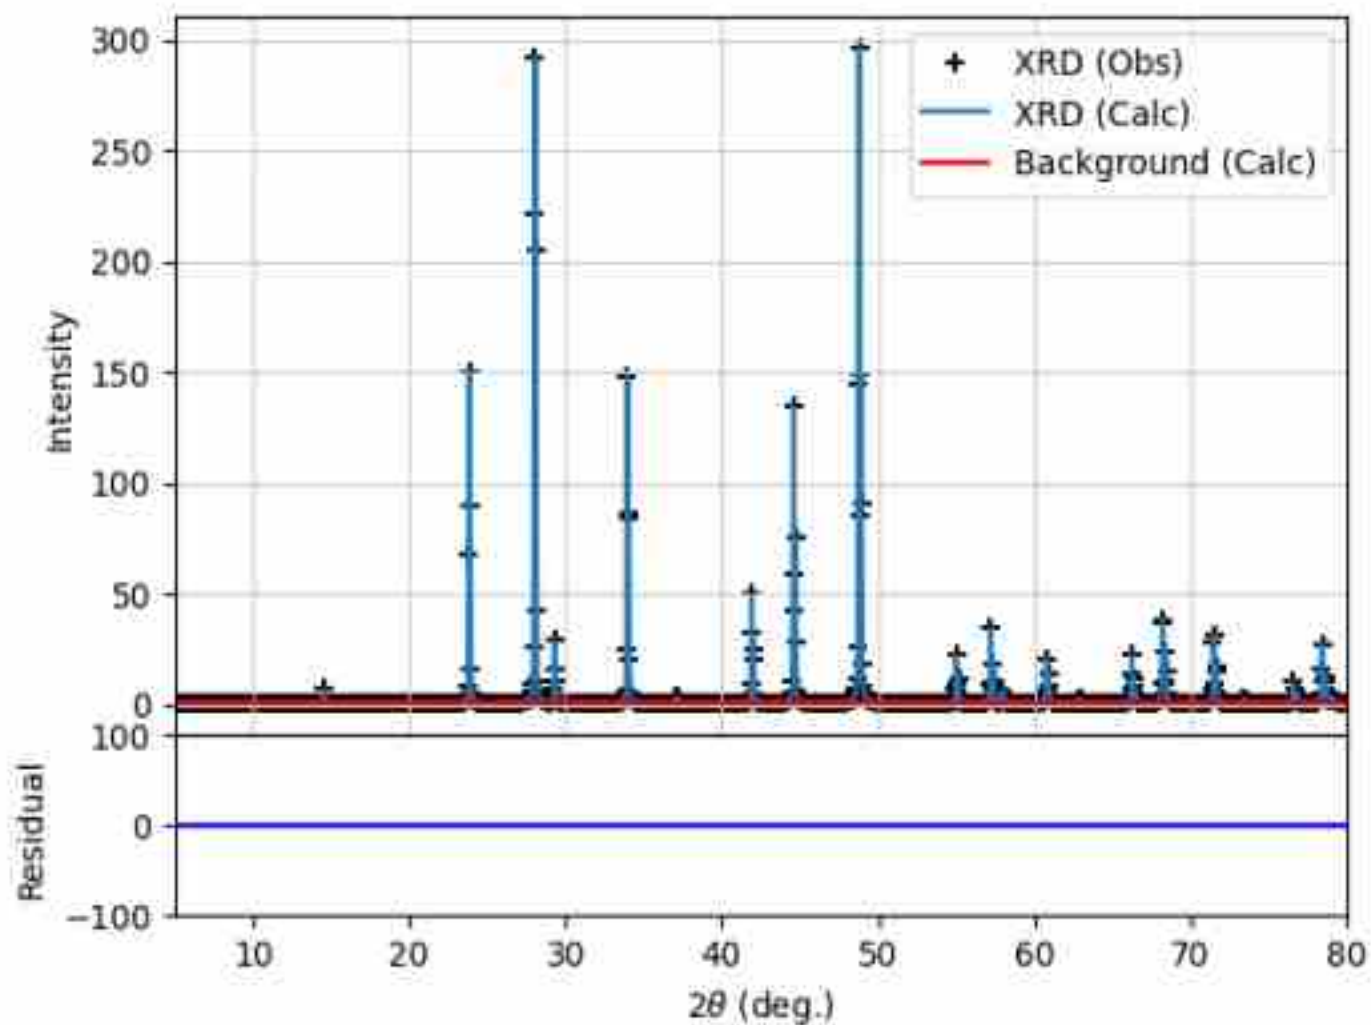

| RMSE before RR | Rwp     | RMSE after RR |
|----------------|---------|---------------|
| 0.017          | 0.03516 | 0.00246       |

# Sc<sub>6</sub>Te<sub>2</sub>O<sub>s</sub>1

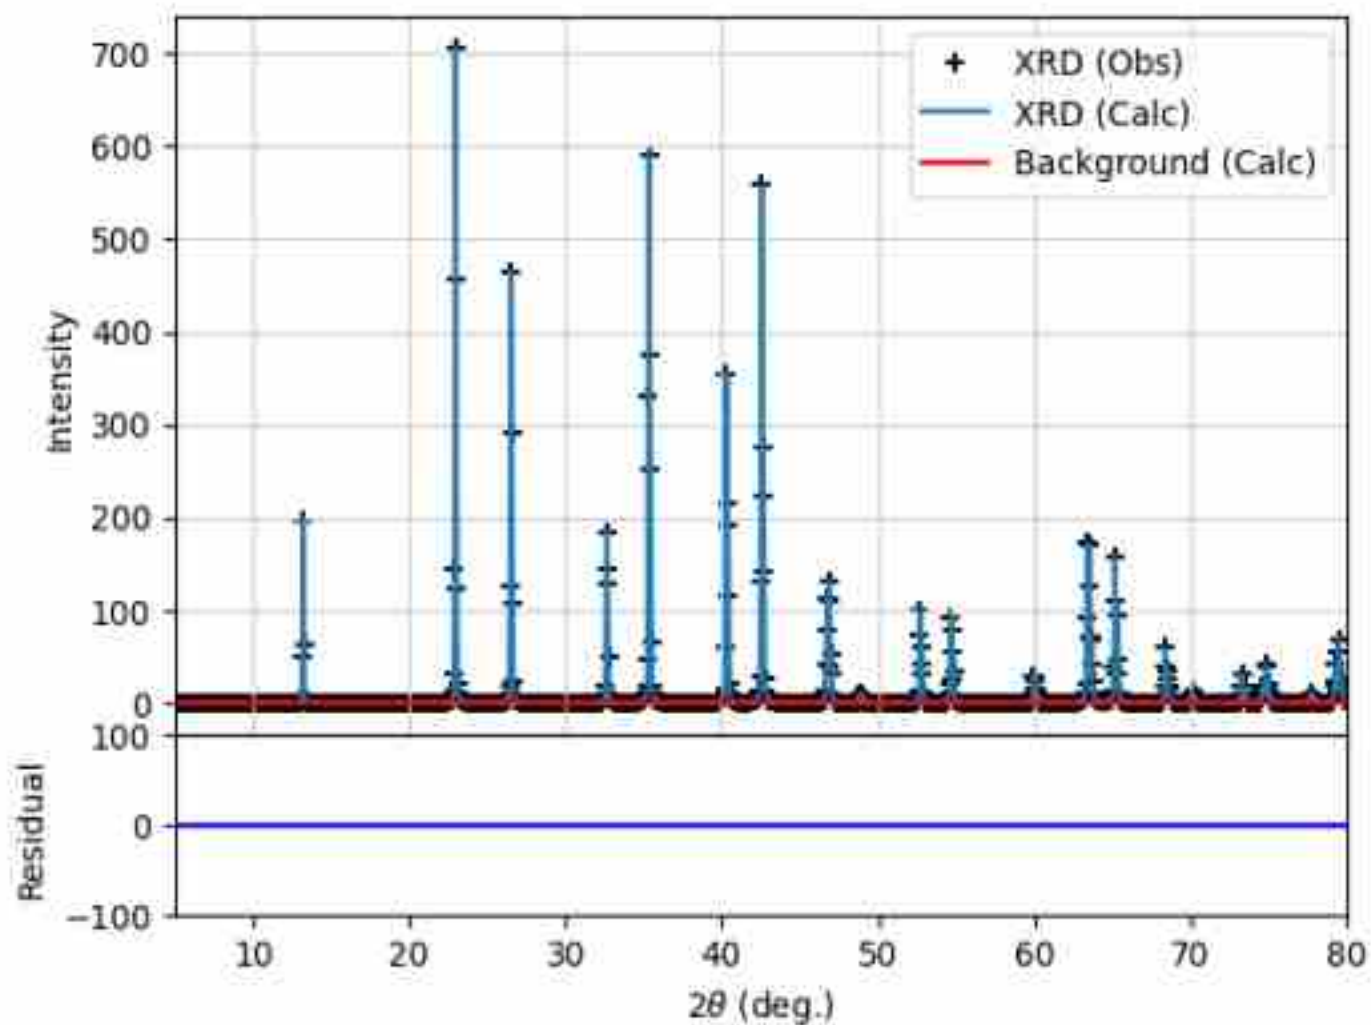

| RMSE before RR | Rwp     | RMSE after RR |
|----------------|---------|---------------|
| 0.017          | 0.00721 | 0.00136       |

# Sm1Dy1Fe4

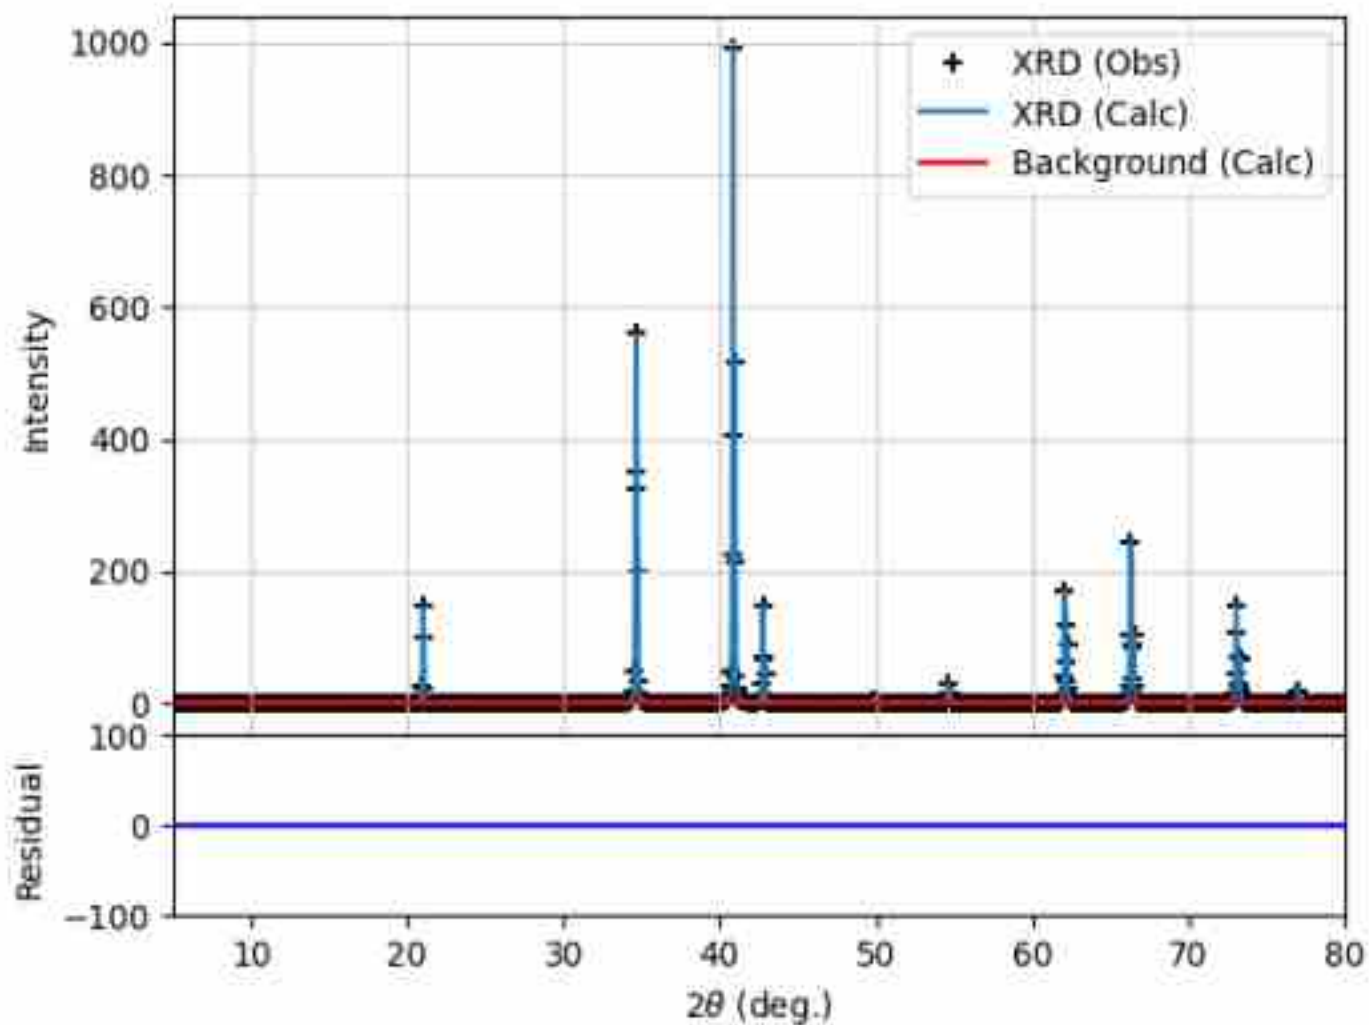

| RMSE before RR | Rwp     | RMSE after RR |
|----------------|---------|---------------|
| 0.017          | 0.00307 | 0.00027       |

# Sm2Cu2O6

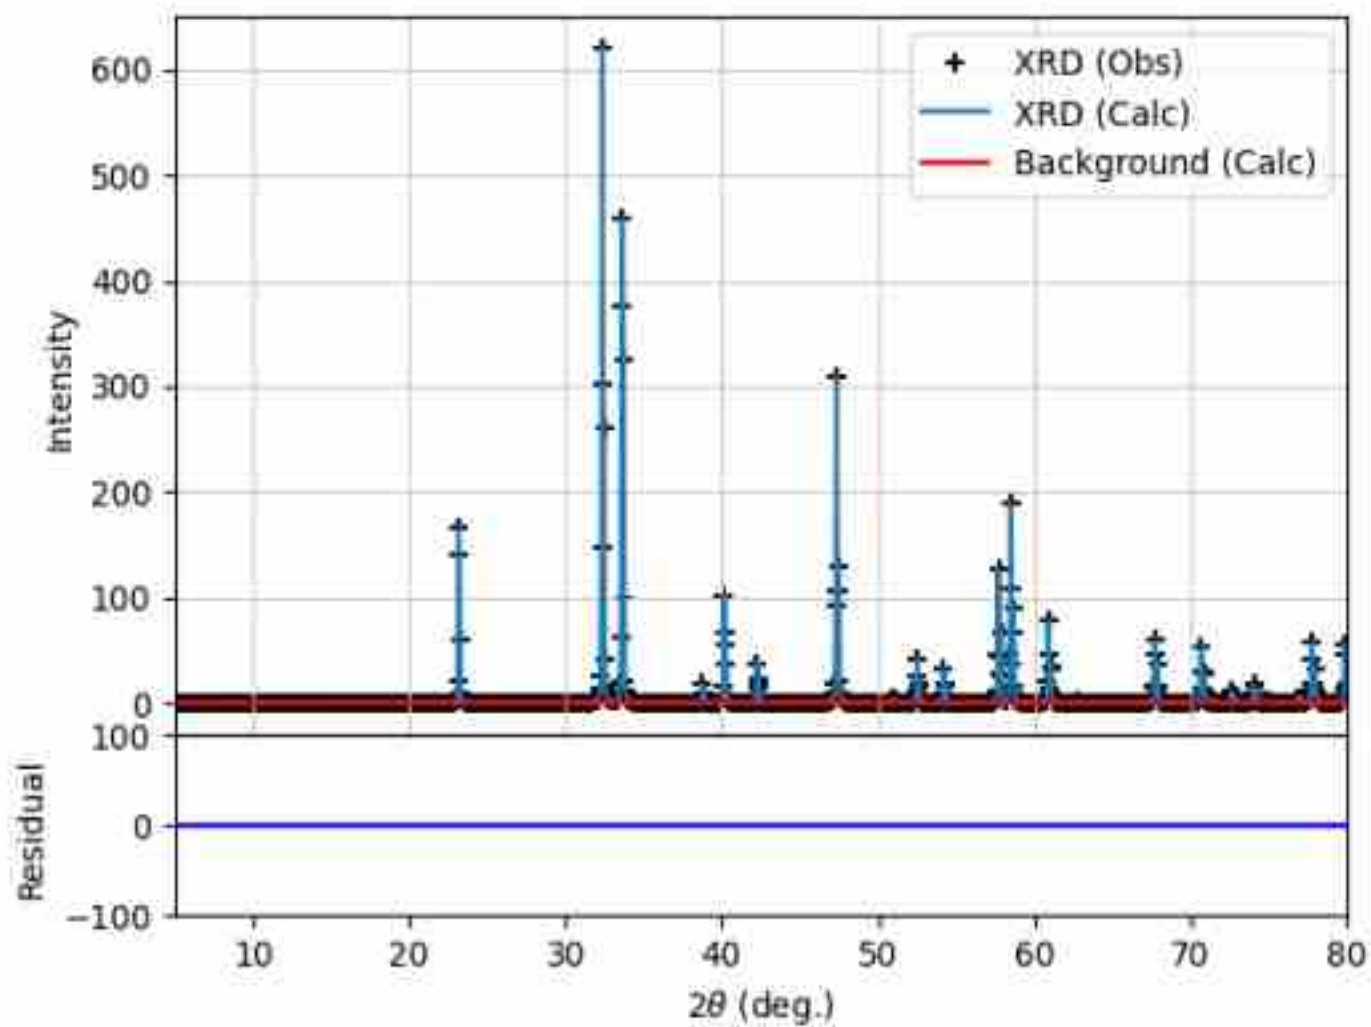

| RMSE before RR | Rwp     | RMSE after RR |
|----------------|---------|---------------|
| 0.017          | 0.00409 | 0.00167       |

# Sm<sub>2</sub>Ta<sub>2</sub>Cl<sub>12</sub>O<sub>7</sub>

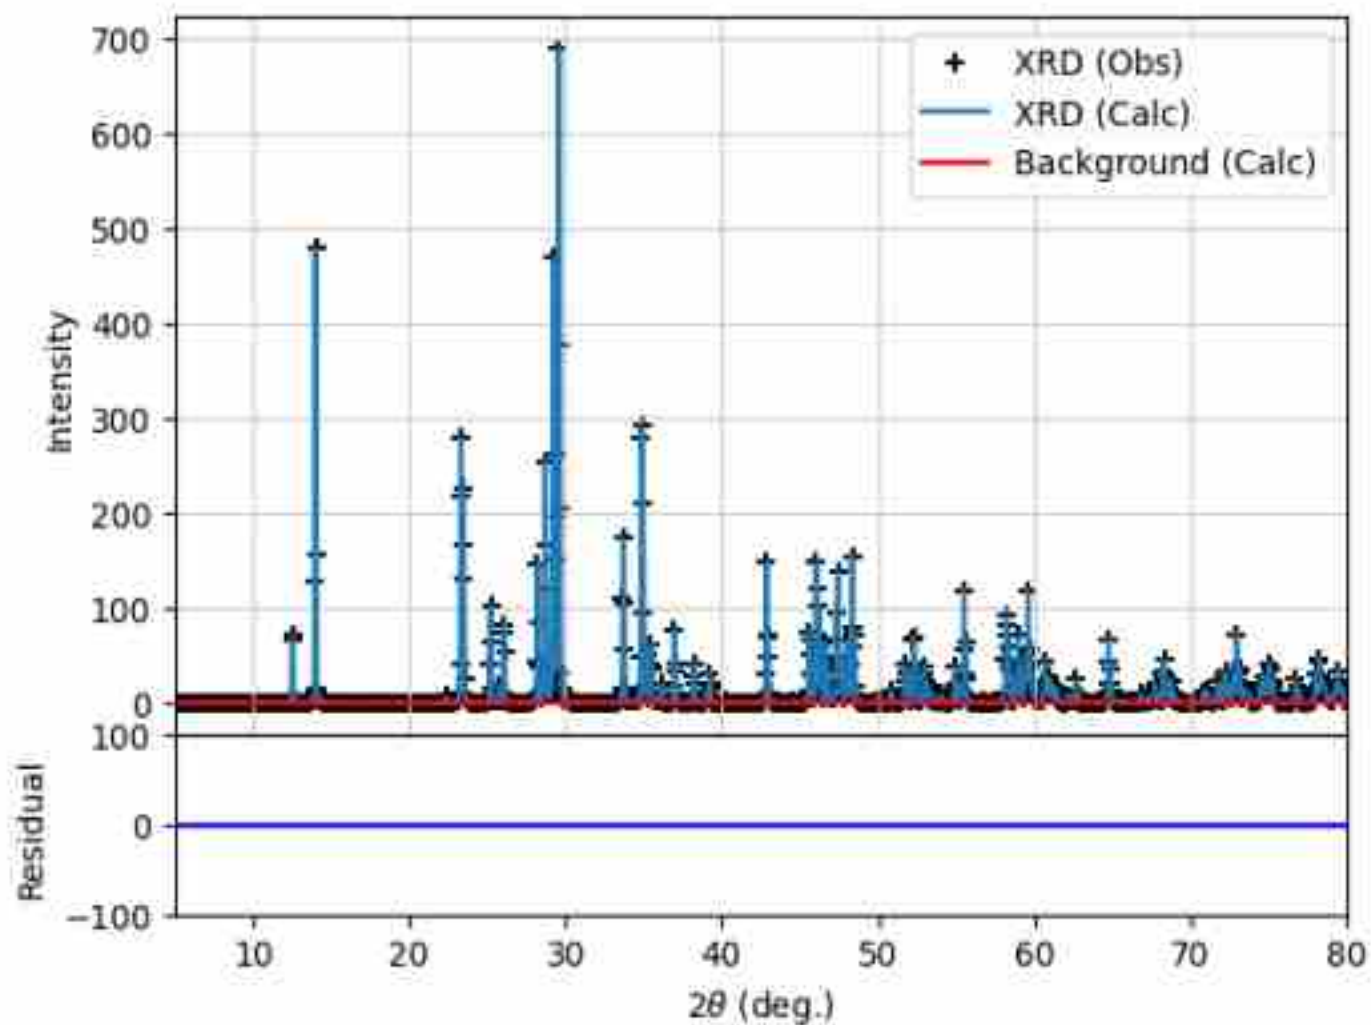

| RMSE before RR | Rwp     | RMSE after RR |
|----------------|---------|---------------|
| 0.017          | 0.00349 | 0.00101       |

# Sm<sub>3</sub>Cd<sub>3</sub>Au<sub>3</sub>

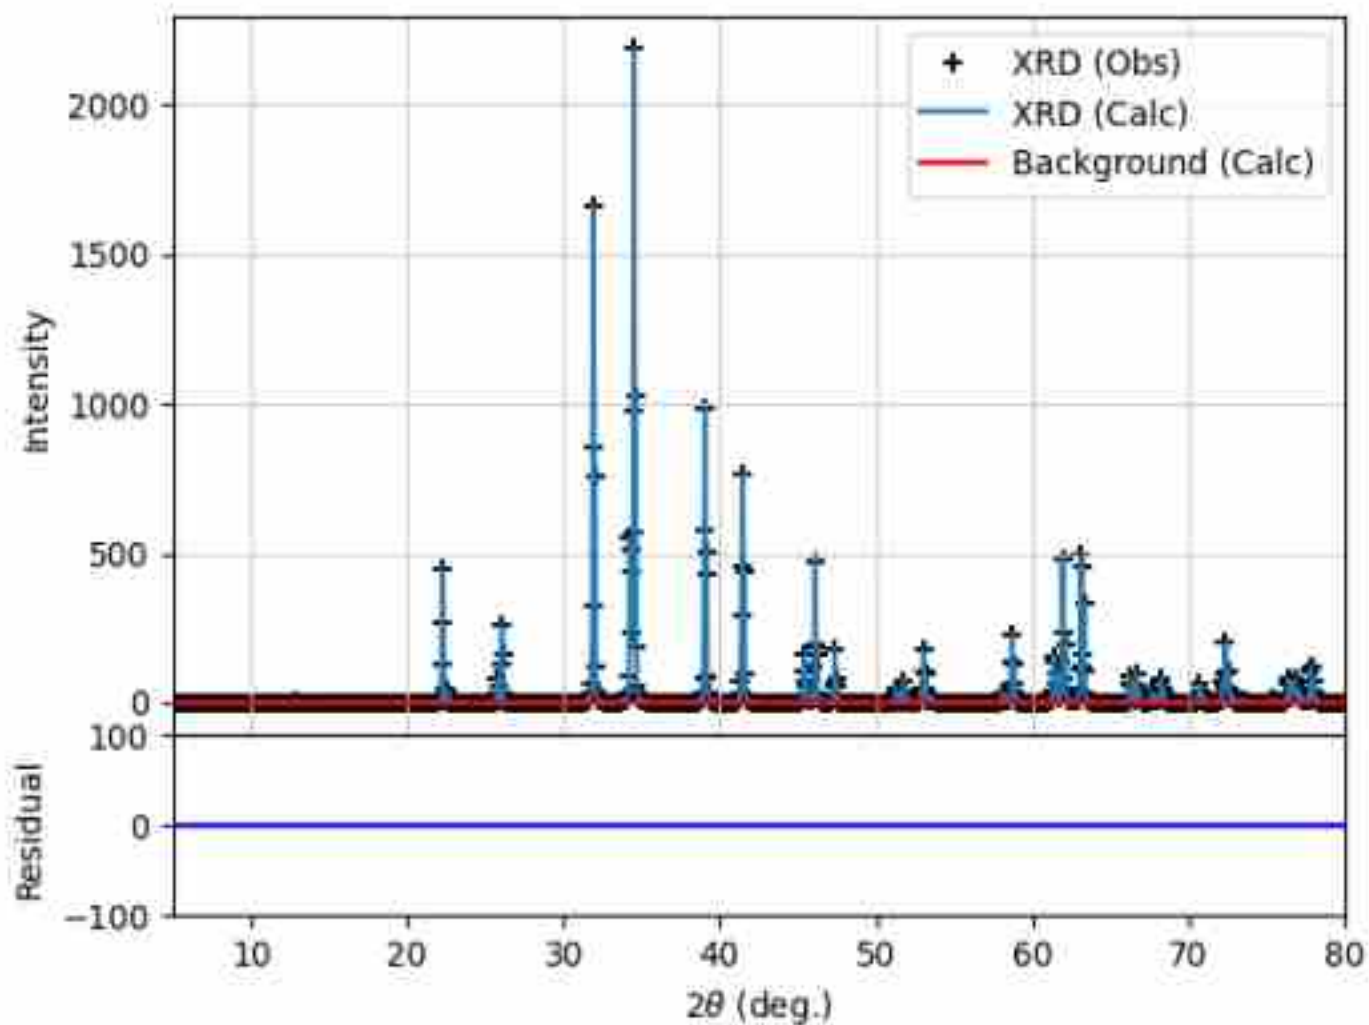

| RMSE before RR | Rwp     | RMSE after RR |
|----------------|---------|---------------|
| 0.017          | 0.00444 | 0.00071       |

# Sm3Fe9

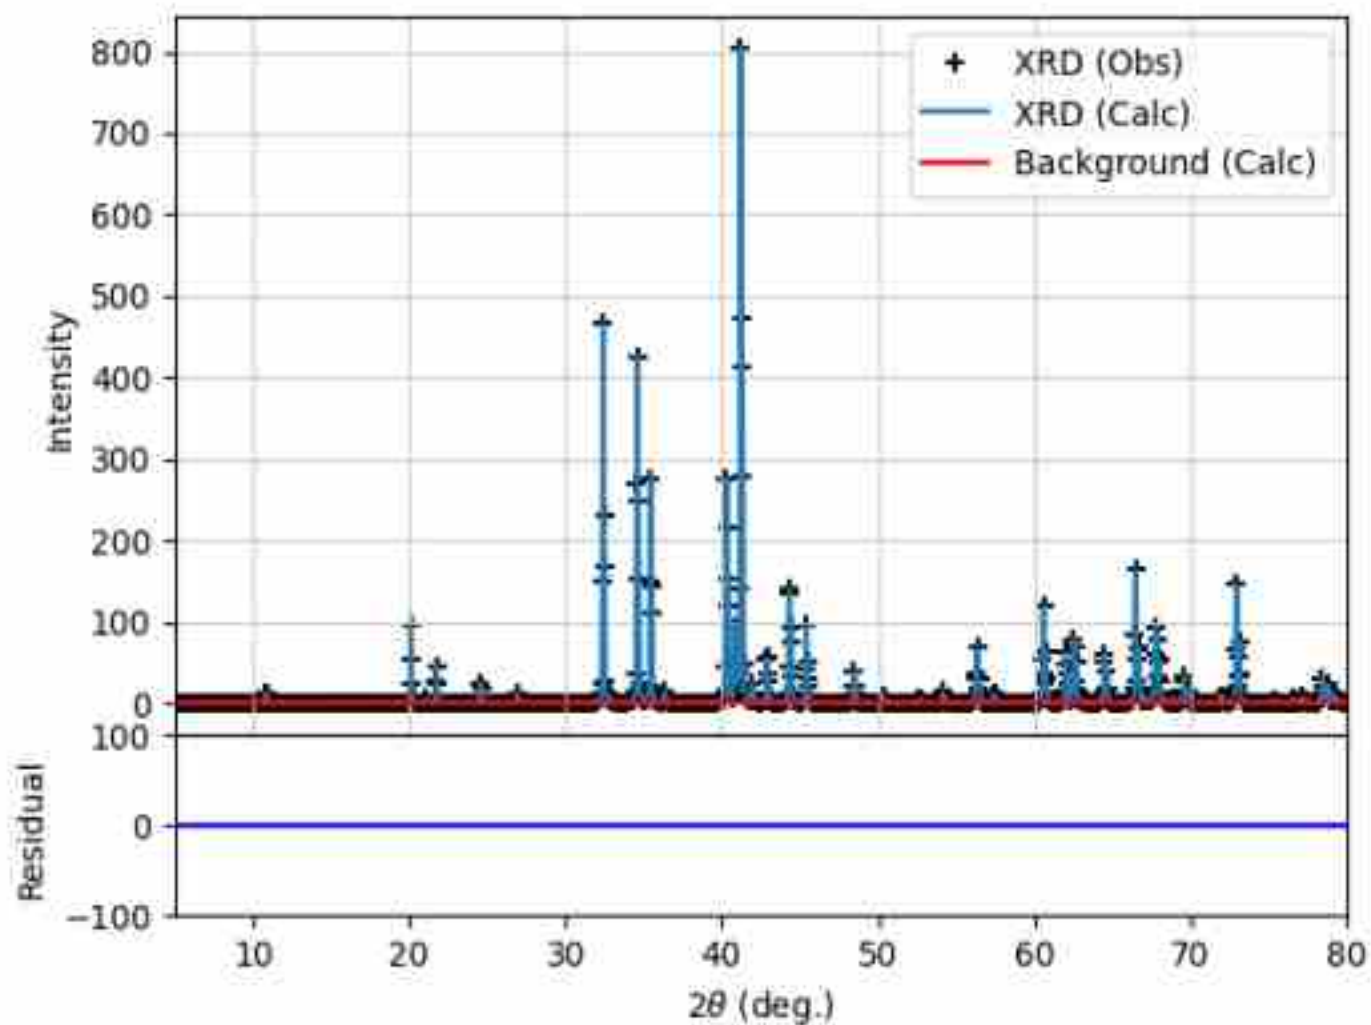

| RMSE before RR | Rwp     | RMSE after RR |
|----------------|---------|---------------|
| 0.017          | 0.00355 | 0.00062       |



# Sm<sub>3</sub>In<sub>3</sub>Cu<sub>3</sub>

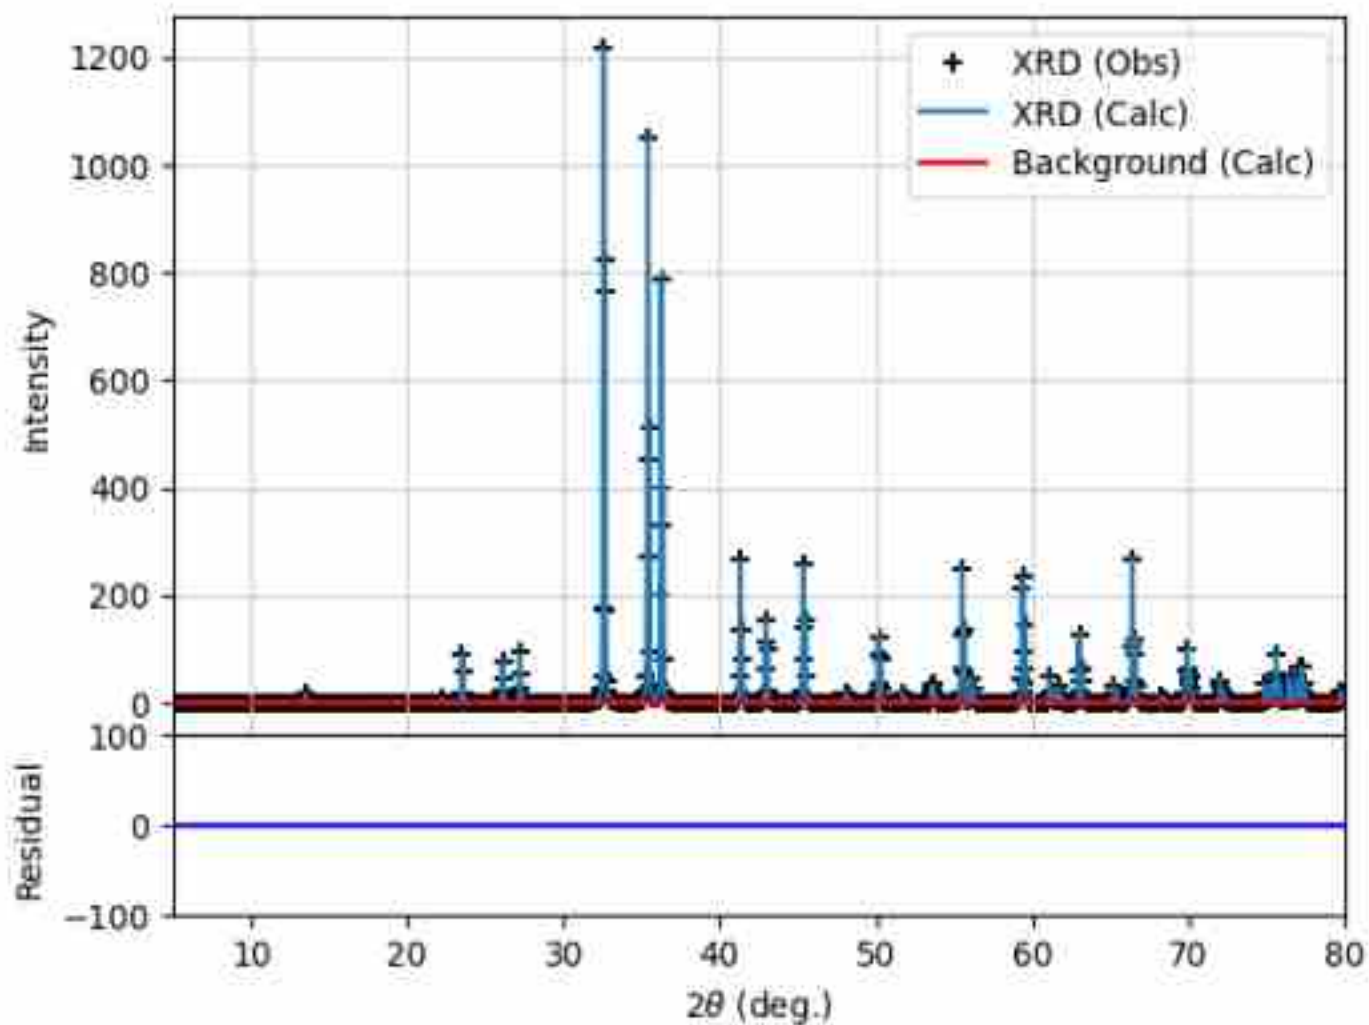

| RMSE before RR | Rwp     | RMSE after RR |
|----------------|---------|---------------|
| 0.017          | 0.00498 | 0.0008        |

# Sm4Co4O12

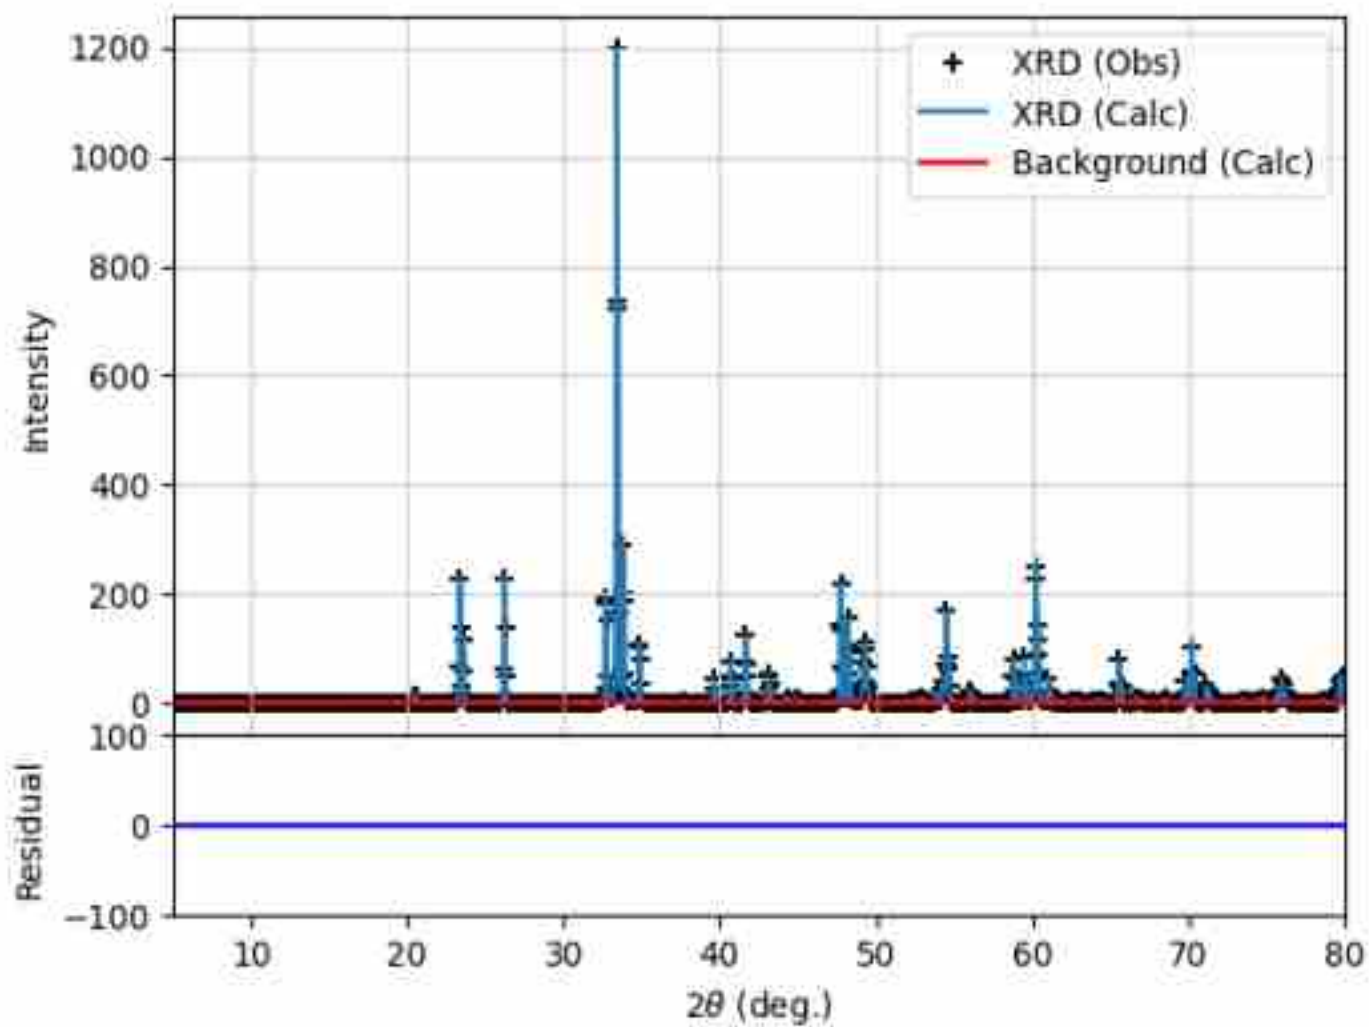

| RMSE before RR | Rwp    | RMSE after RR |
|----------------|--------|---------------|
| 0.017          | 0.0038 | 0.00121       |

# Sm4Cu1Sn8

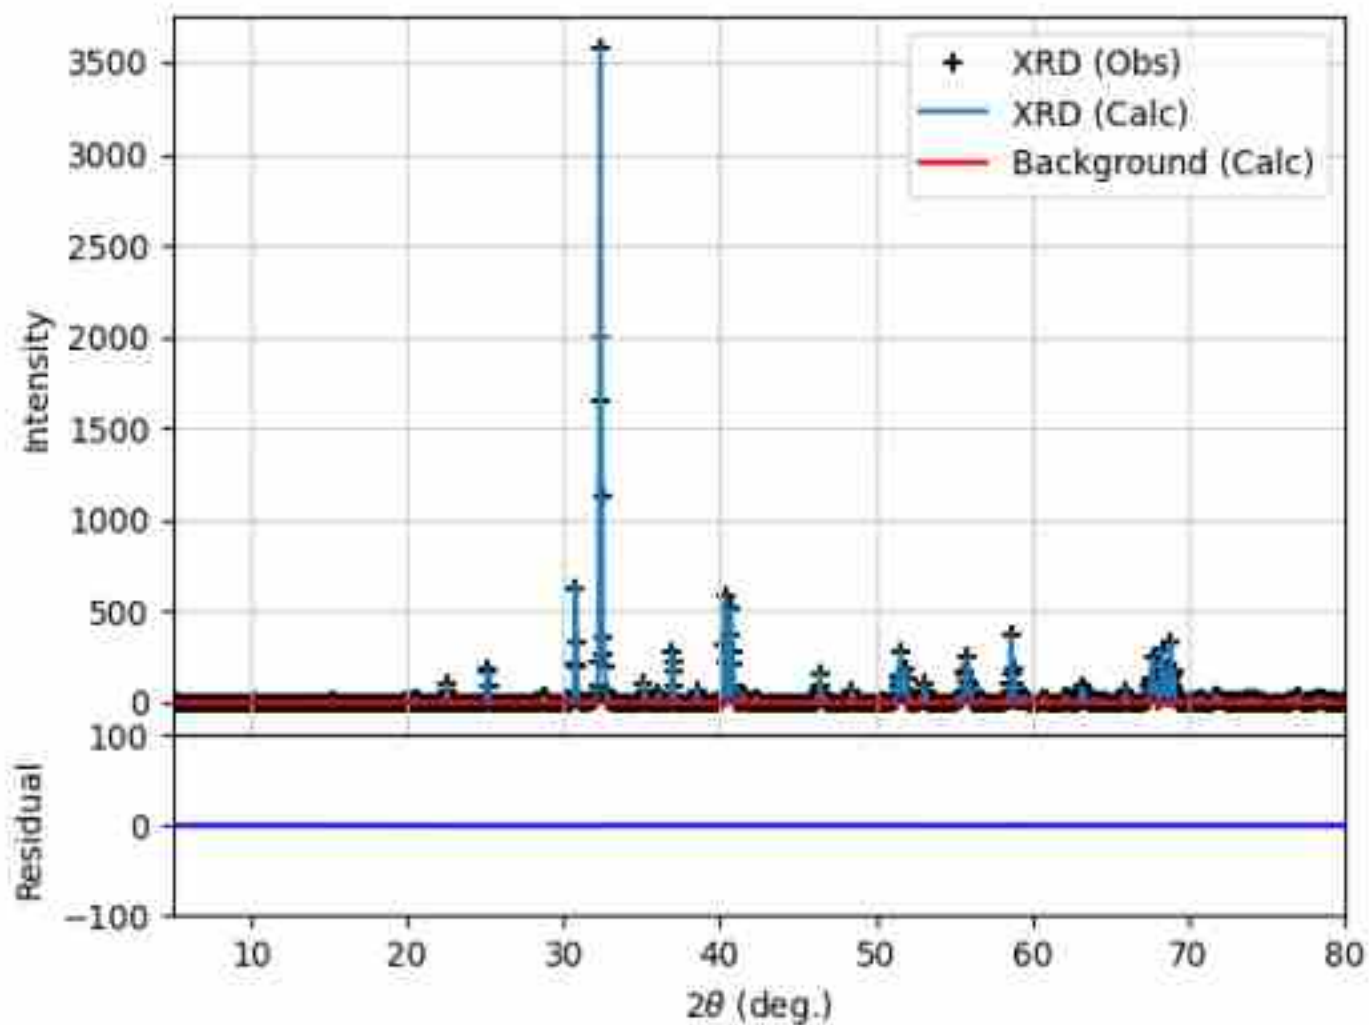

| RMSE before RR | Rwp     | RMSE after RR |
|----------------|---------|---------------|
| 0.017          | 0.02295 | 0.00031       |

# Sm4Ge10Rh6

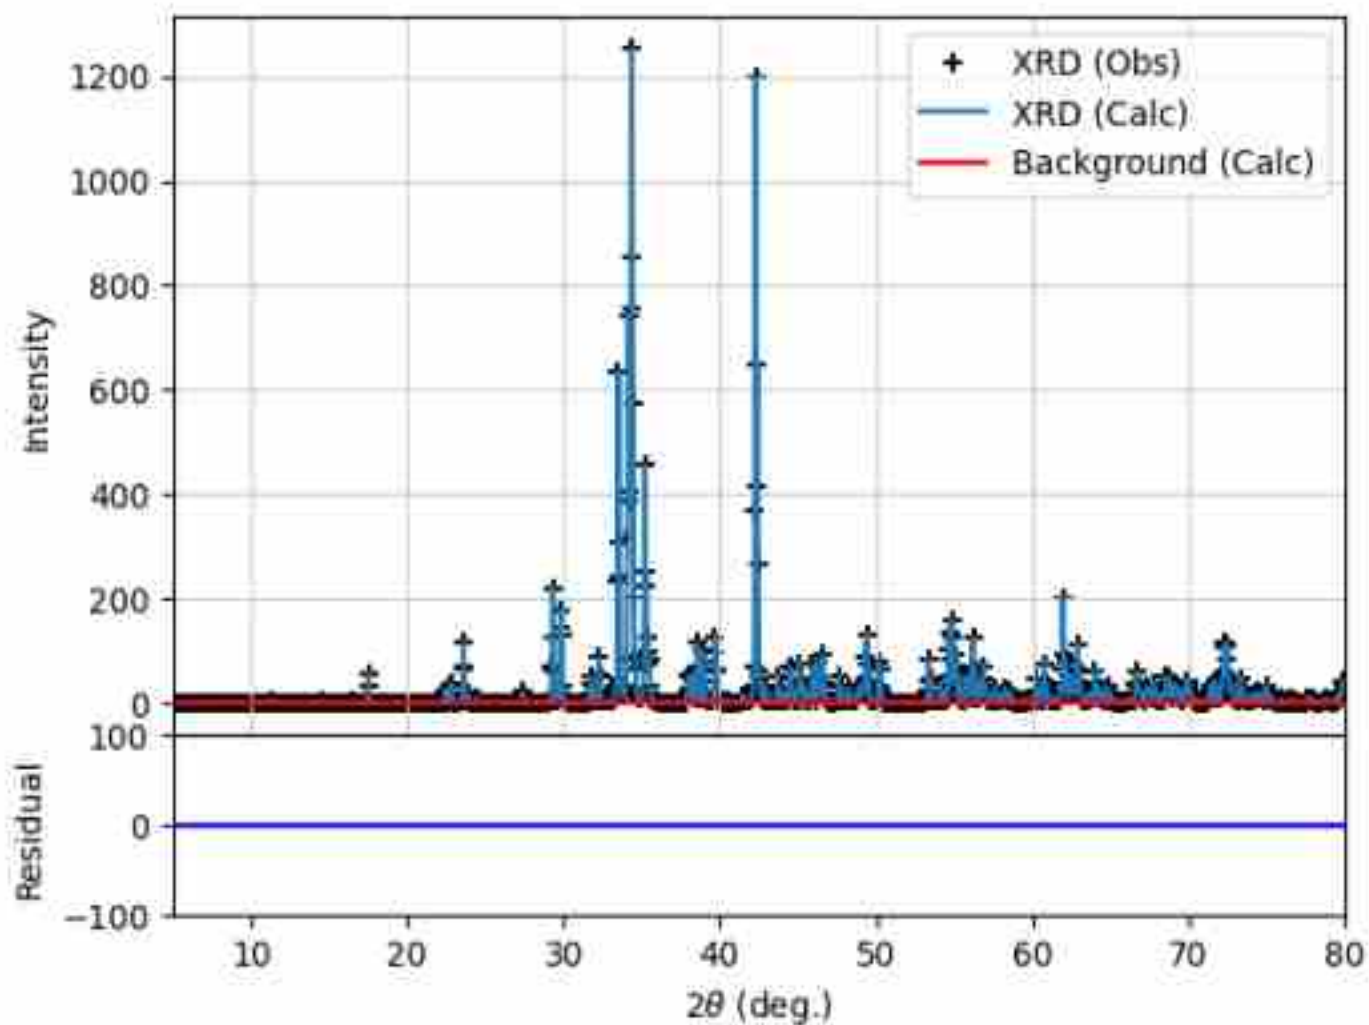

| RMSE before RR | Rwp     | RMSE after RR |
|----------------|---------|---------------|
| 0.017          | 0.00348 | 0.00033       |

# Sn4Pt4Se4

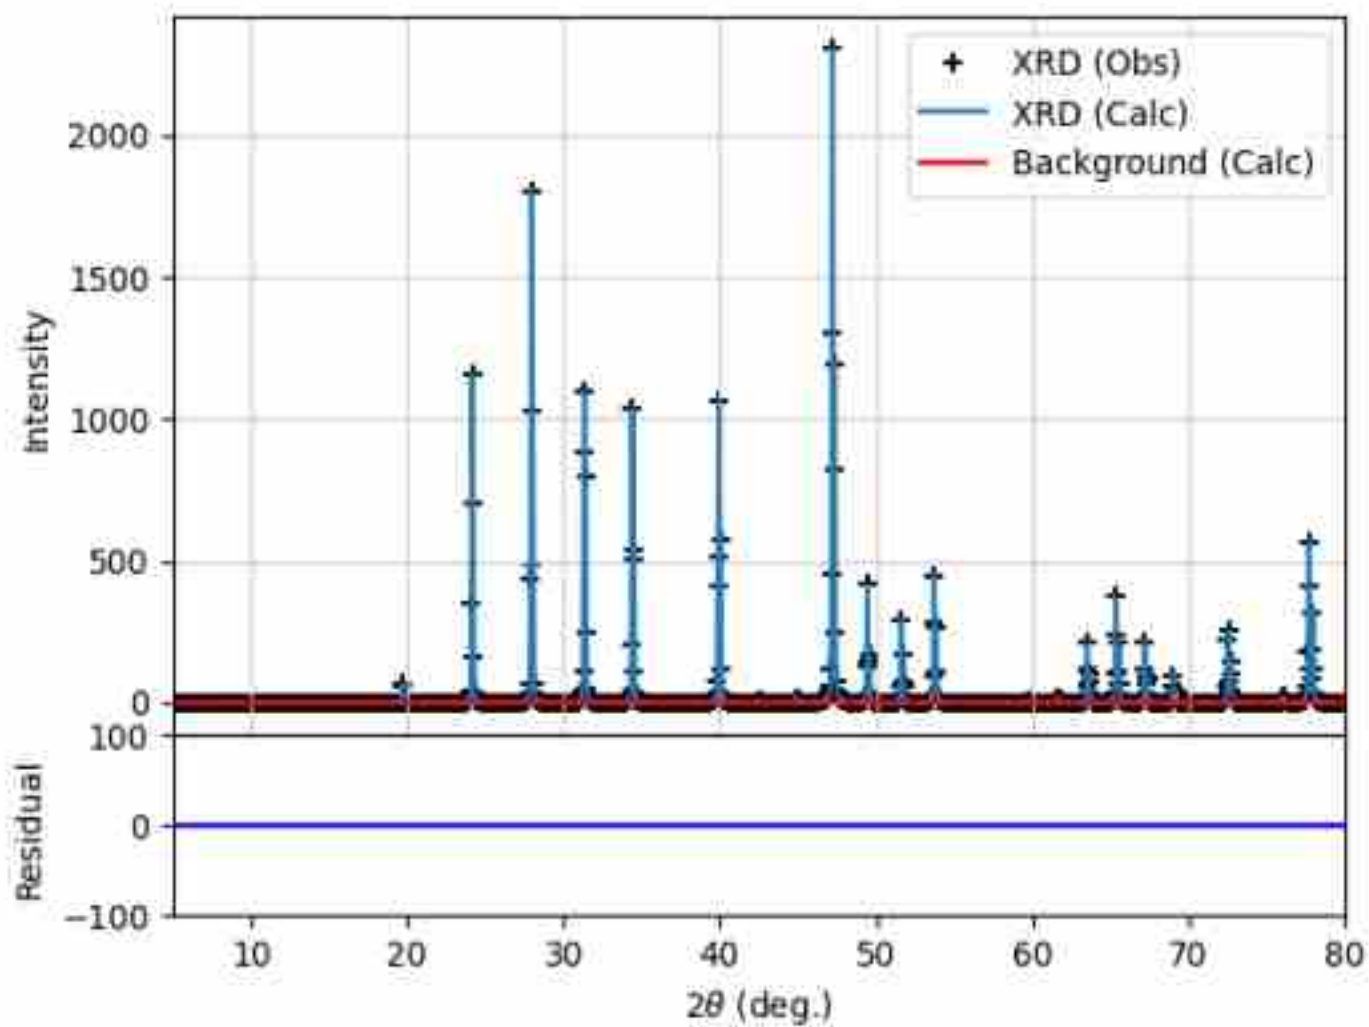

| RMSE before RR | Rwp    | RMSE after RR |
|----------------|--------|---------------|
| 0.017          | 0.0054 | 0.00039       |

# Sr1Ca1Cu2O4

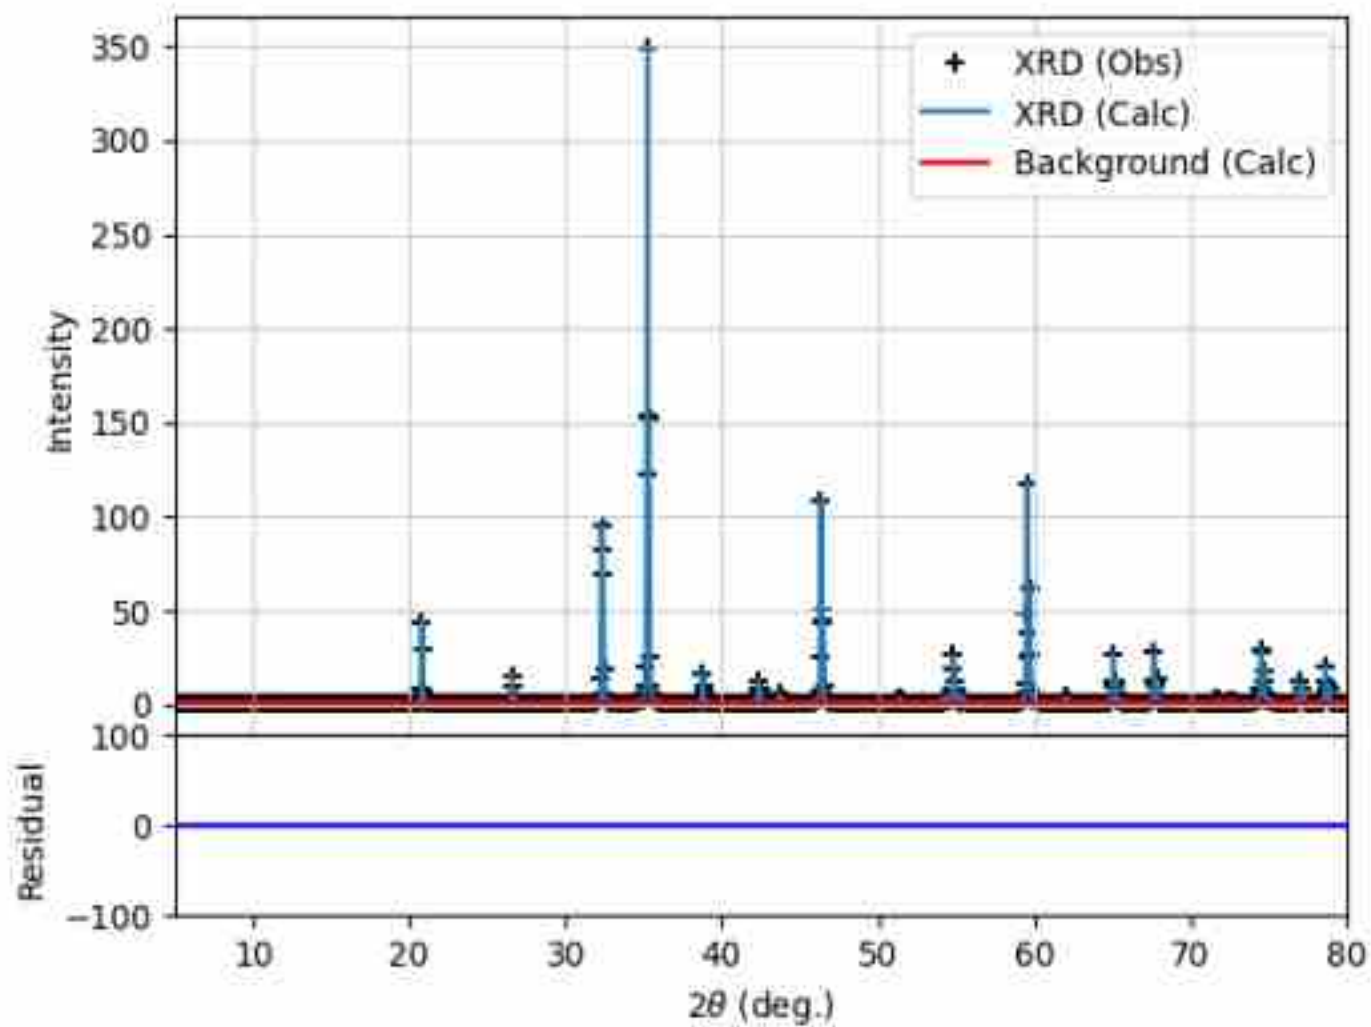

| RMSE before RR | Rwp     | RMSE after RR |
|----------------|---------|---------------|
| 0.017          | 0.00299 | 0.00051       |

# Sr1La2Sc2O7

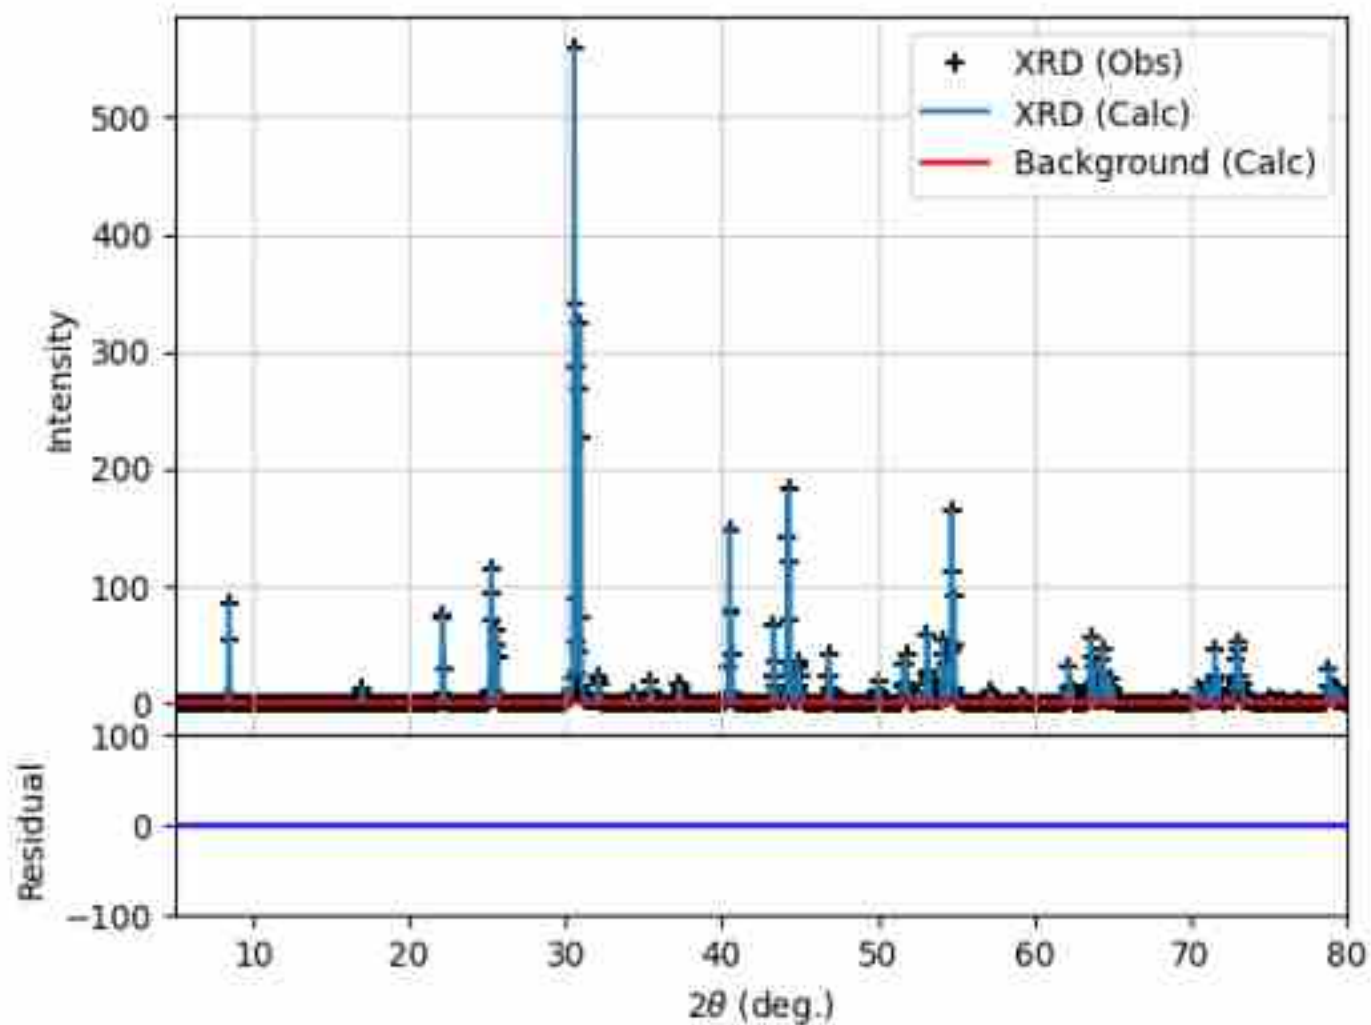

| RMSE before RR | Rwp     | RMSE after RR |
|----------------|---------|---------------|
| 0.017          | 0.00208 | 0.00051       |

# Sr1Pr3Cr1Ni1O8

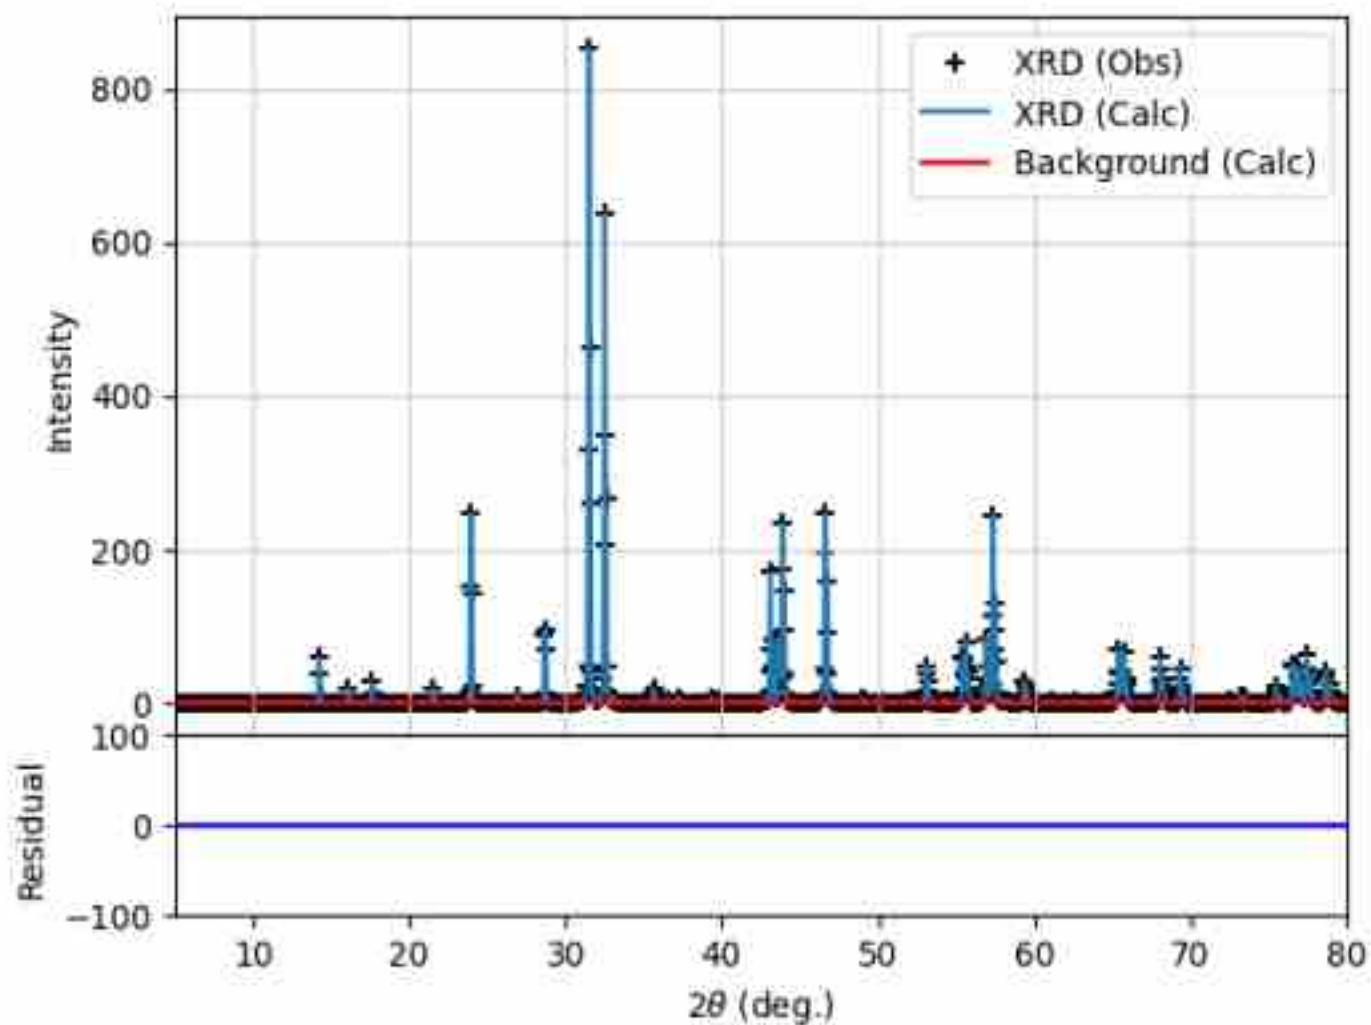

| RMSE before RR | Rwp     | RMSE after RR |
|----------------|---------|---------------|
| 0.017          | 0.00379 | 0.00153       |



# Sr<sub>2</sub>Cd<sub>2</sub>Bi<sub>4</sub>

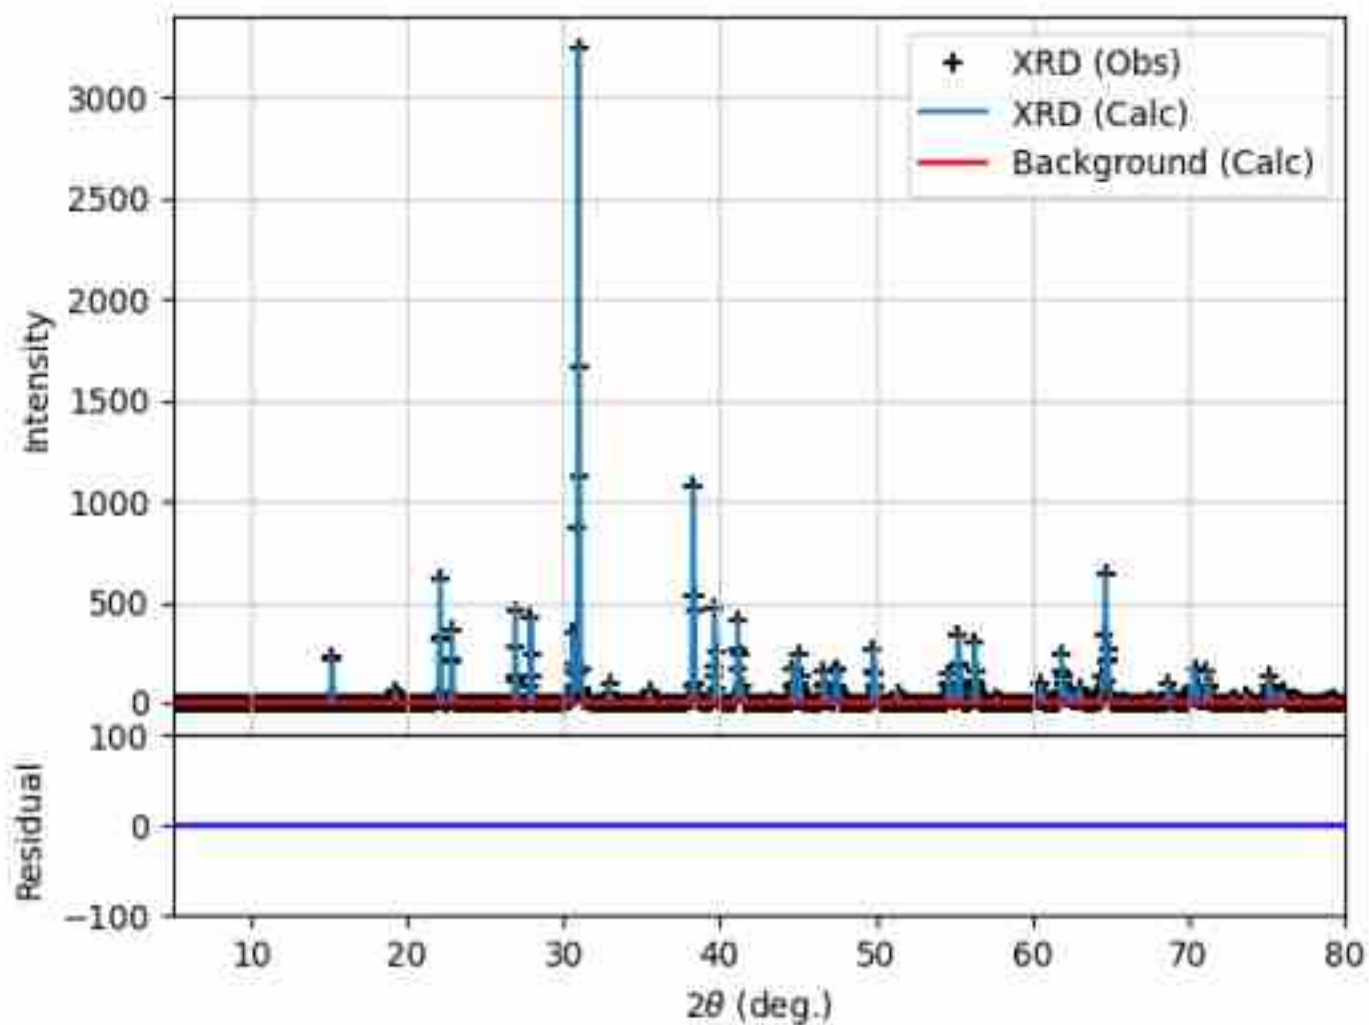

| RMSE before RR | Rwp     | RMSE after RR |
|----------------|---------|---------------|
| 0.017          | 0.00364 | 0.00027       |

Sr2Mg1Mo1O6

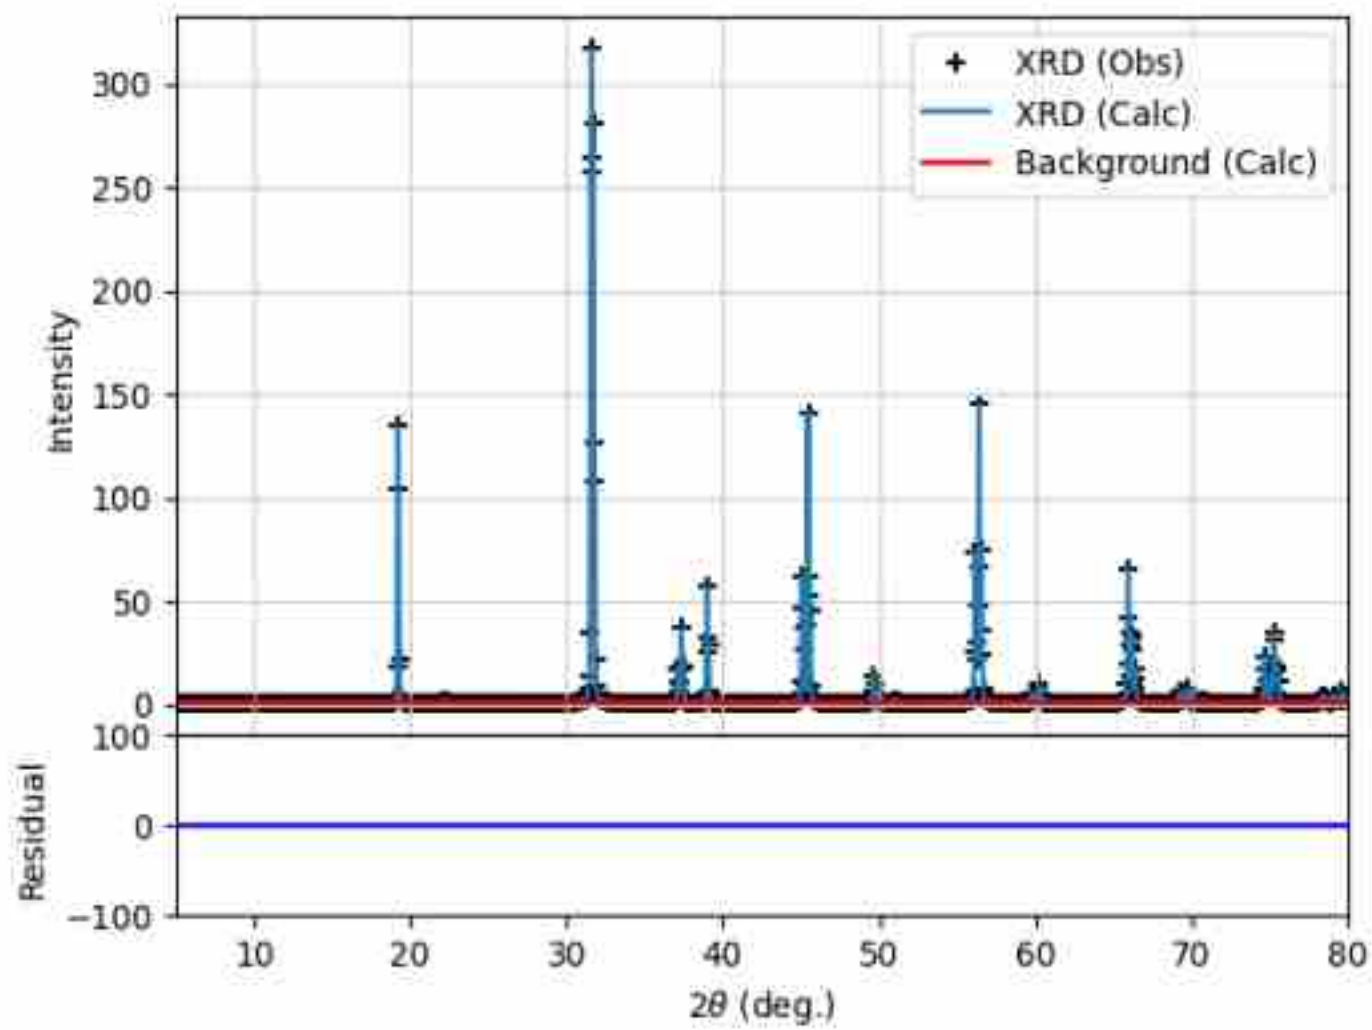

| RMSE before RR | Rwp     | RMSE after RR |
|----------------|---------|---------------|
| 0.017          | 0.00314 | 0.00172       |

# Sr<sub>2</sub>Ta<sub>1</sub>Ga<sub>1</sub>O<sub>6</sub>

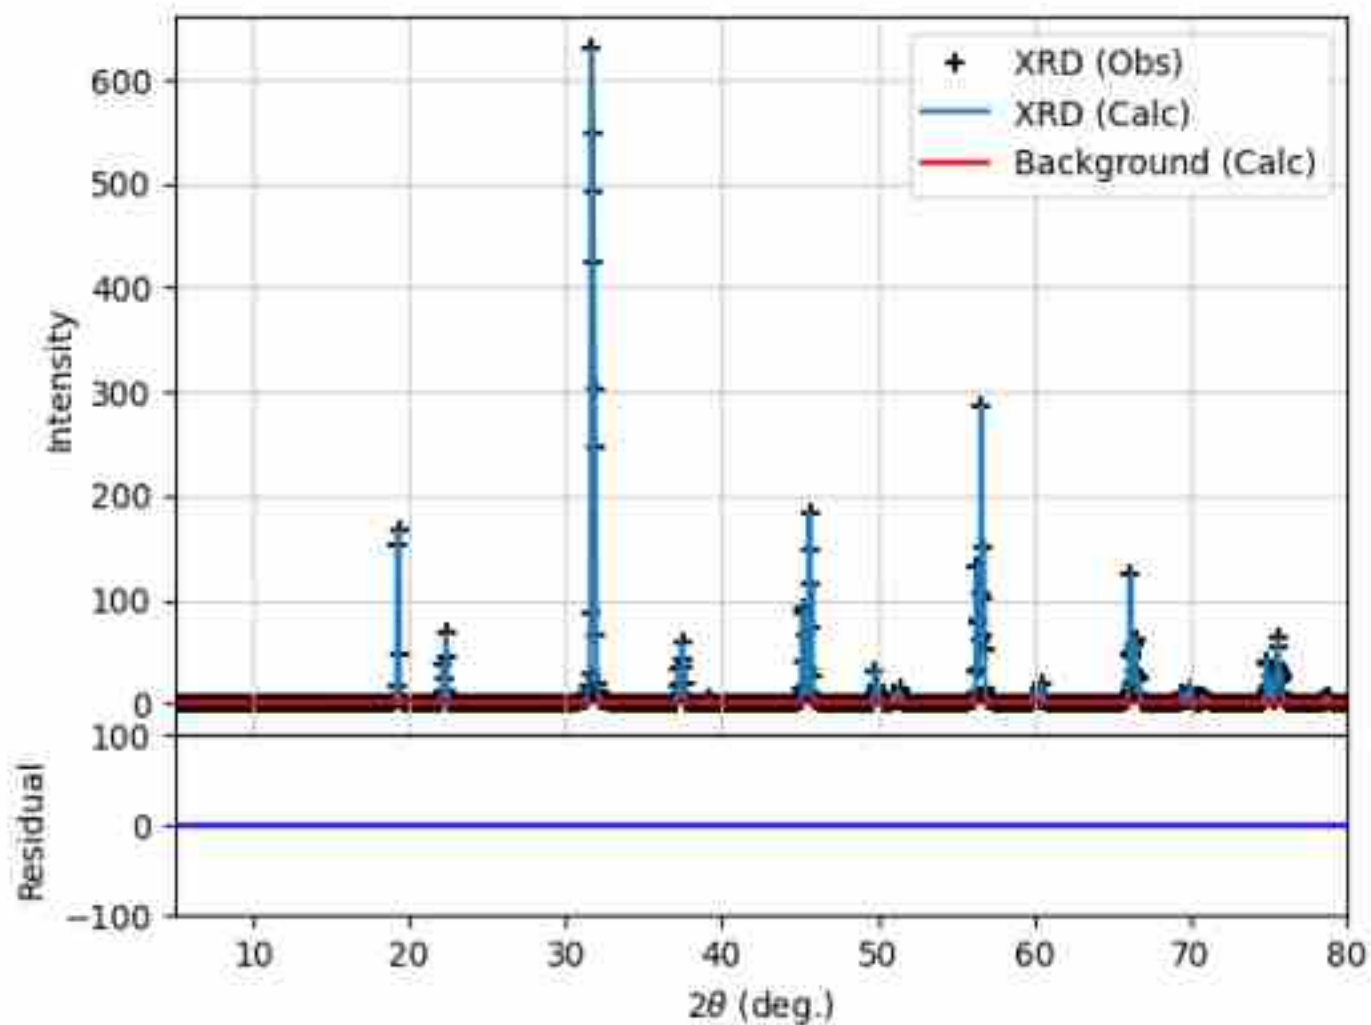

| RMSE before RR | Rwp     | RMSE after RR |
|----------------|---------|---------------|
| 0.017          | 0.00287 | 0.00166       |

# Sr<sub>3</sub>Mn<sub>2</sub>O<sub>7</sub>

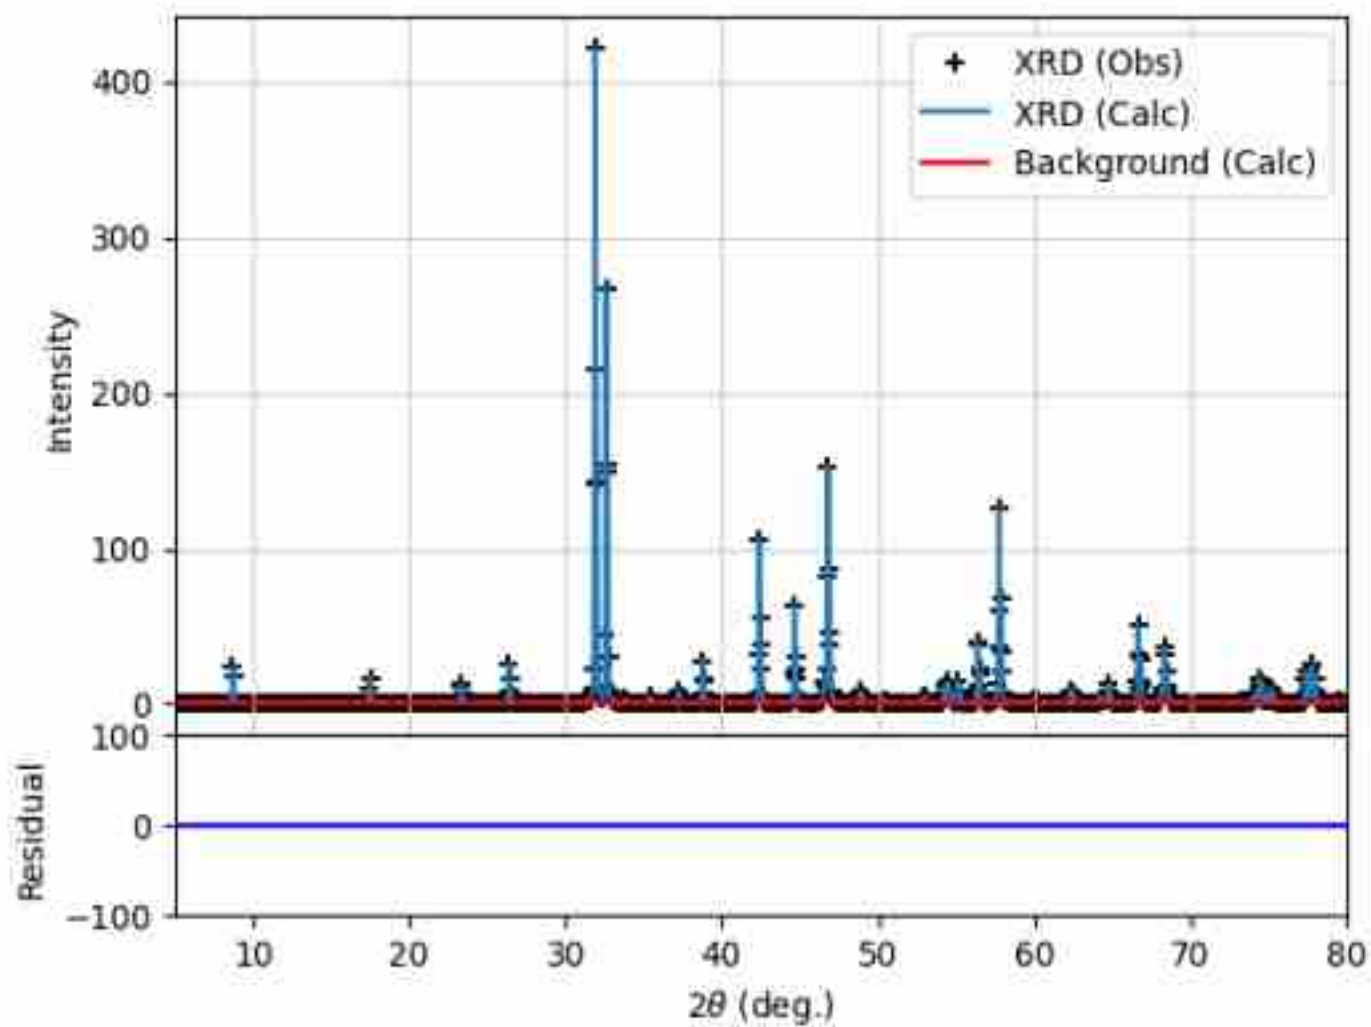

| RMSE before RR | Rwp     | RMSE after RR |
|----------------|---------|---------------|
| 0.017          | 0.00446 | 0.00103       |

# Sr<sub>4</sub>Co<sub>2</sub>W<sub>2</sub>O<sub>12</sub>

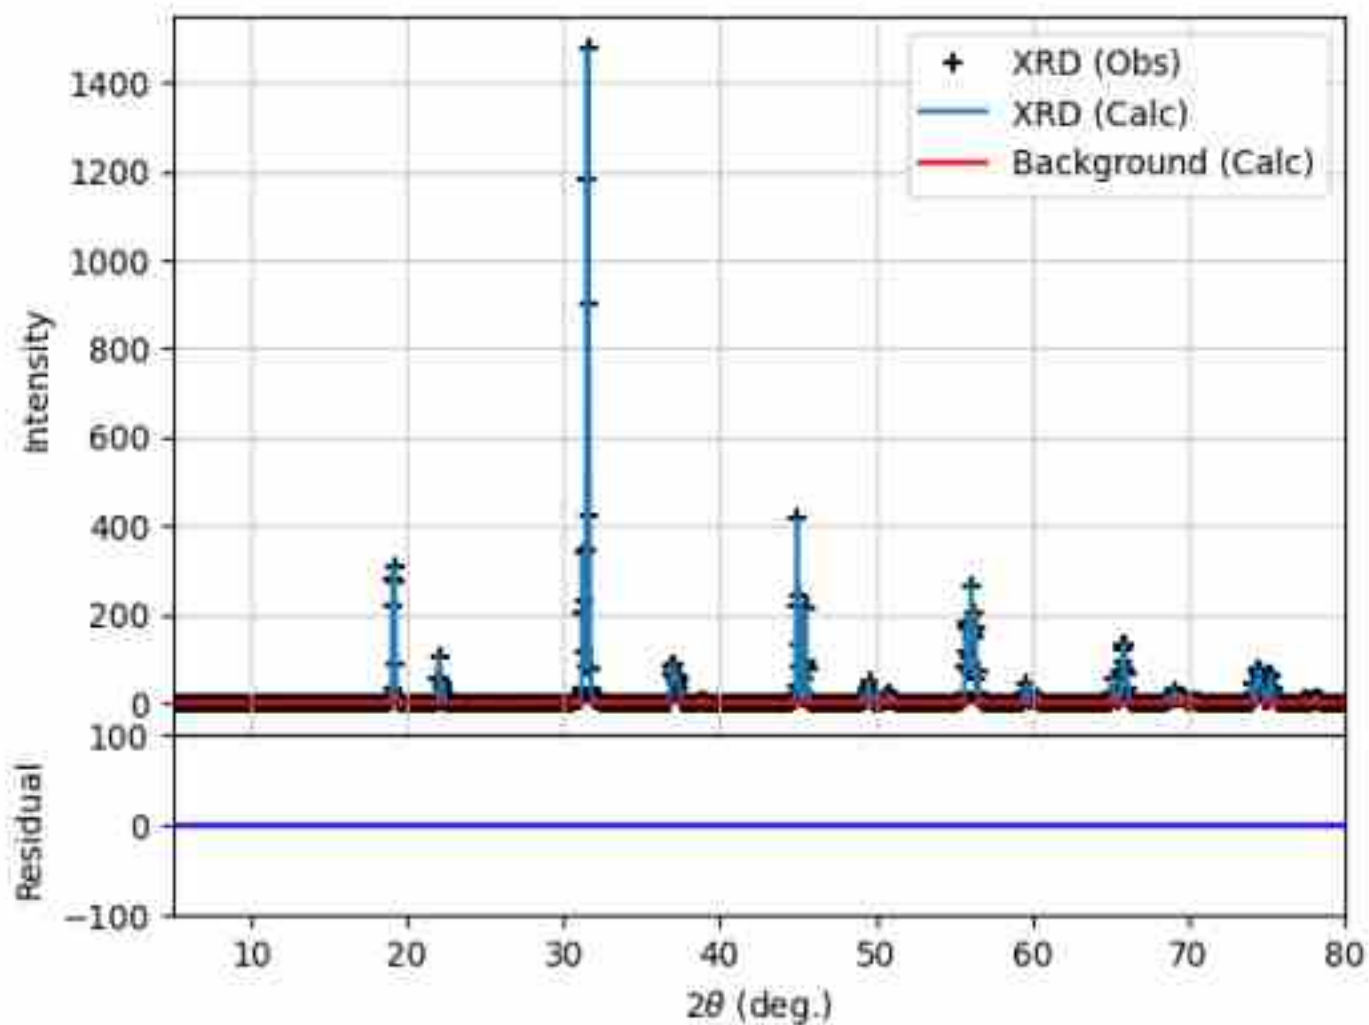

| RMSE before RR | Rwp     | RMSE after RR |
|----------------|---------|---------------|
| 0.017          | 0.00336 | 0.00073       |

# Sr<sub>4</sub>Si<sub>8</sub>

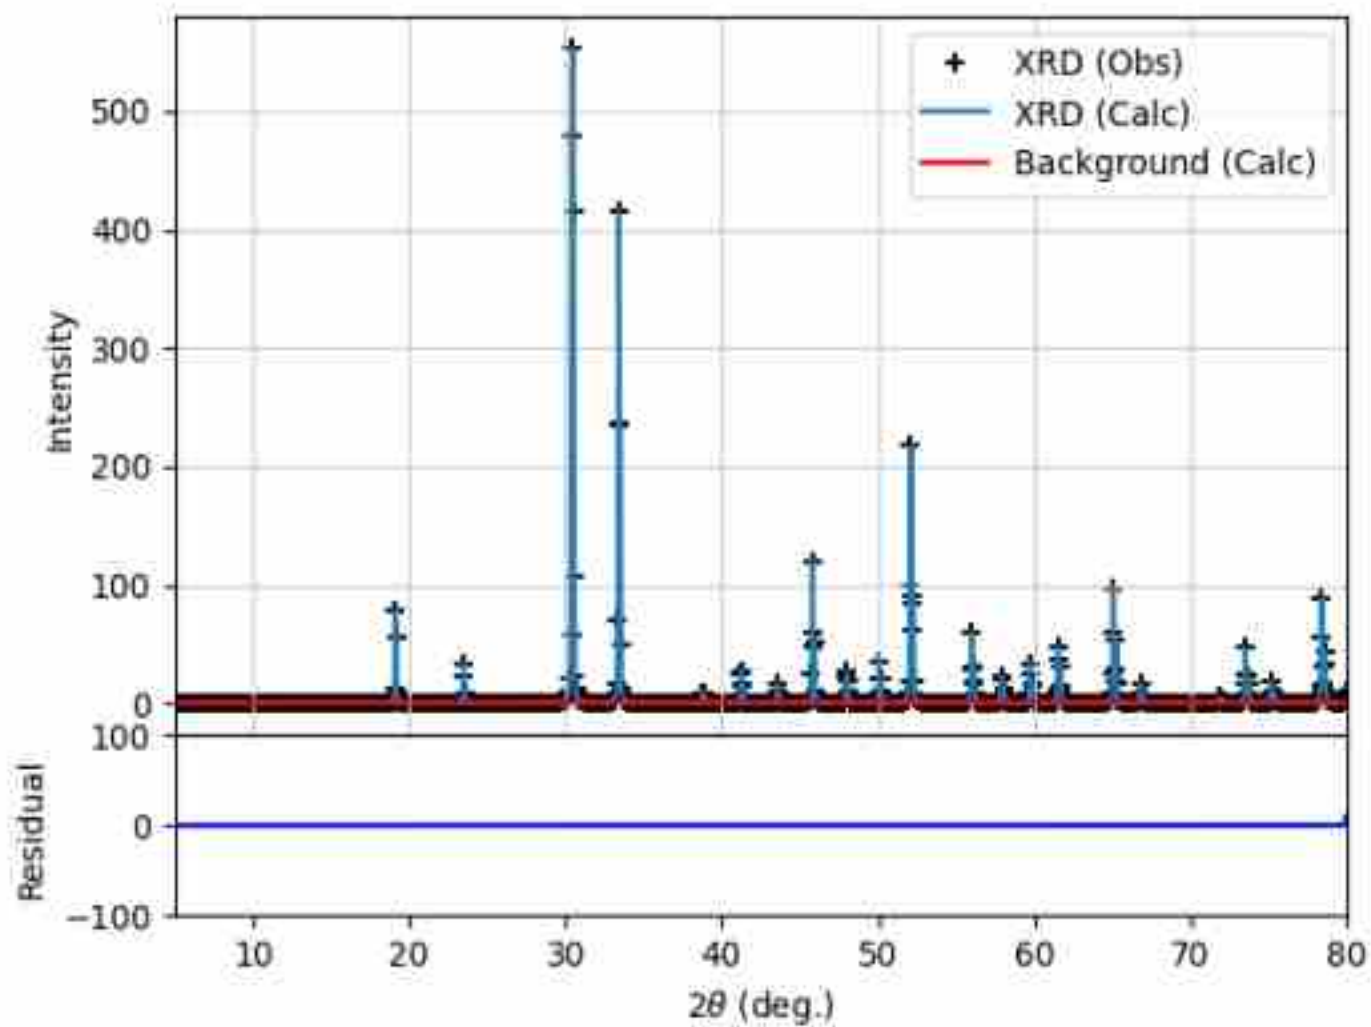

| RMSE before RR | Rwp     | RMSE after RR |
|----------------|---------|---------------|
| 0.017          | 5.19039 | 0.01134       |

# Ta<sub>2</sub>Fe<sub>2</sub>O<sub>8</sub>

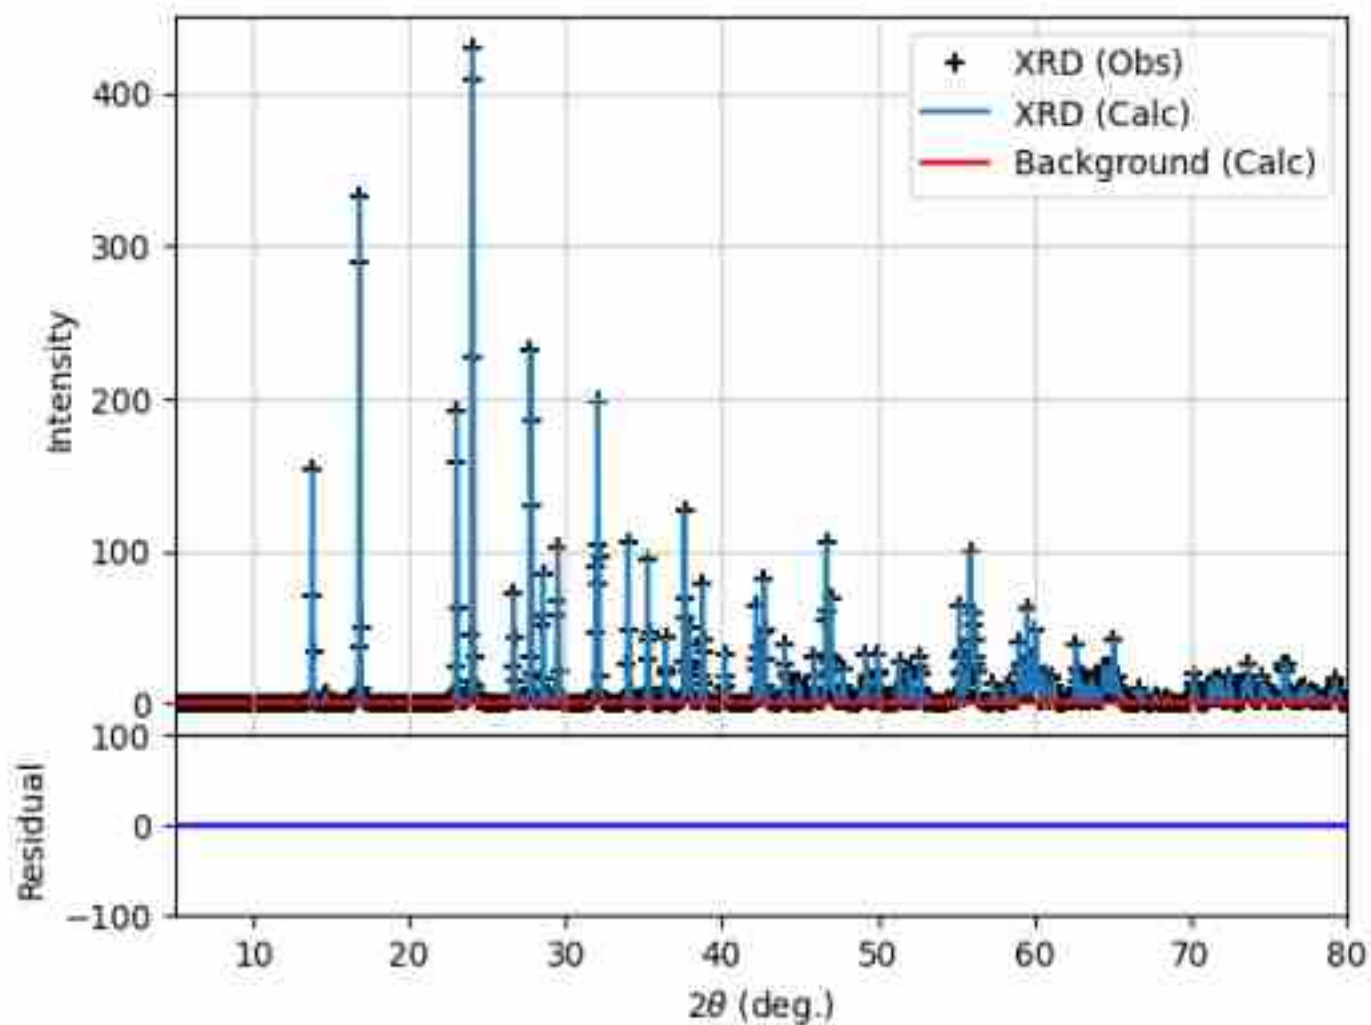

| RMSE before RR | Rwp    | RMSE after RR |
|----------------|--------|---------------|
| 0.017          | 0.0032 | 0.00106       |

# Ta<sub>3</sub>Mn<sub>8</sub>Al<sub>11</sub>

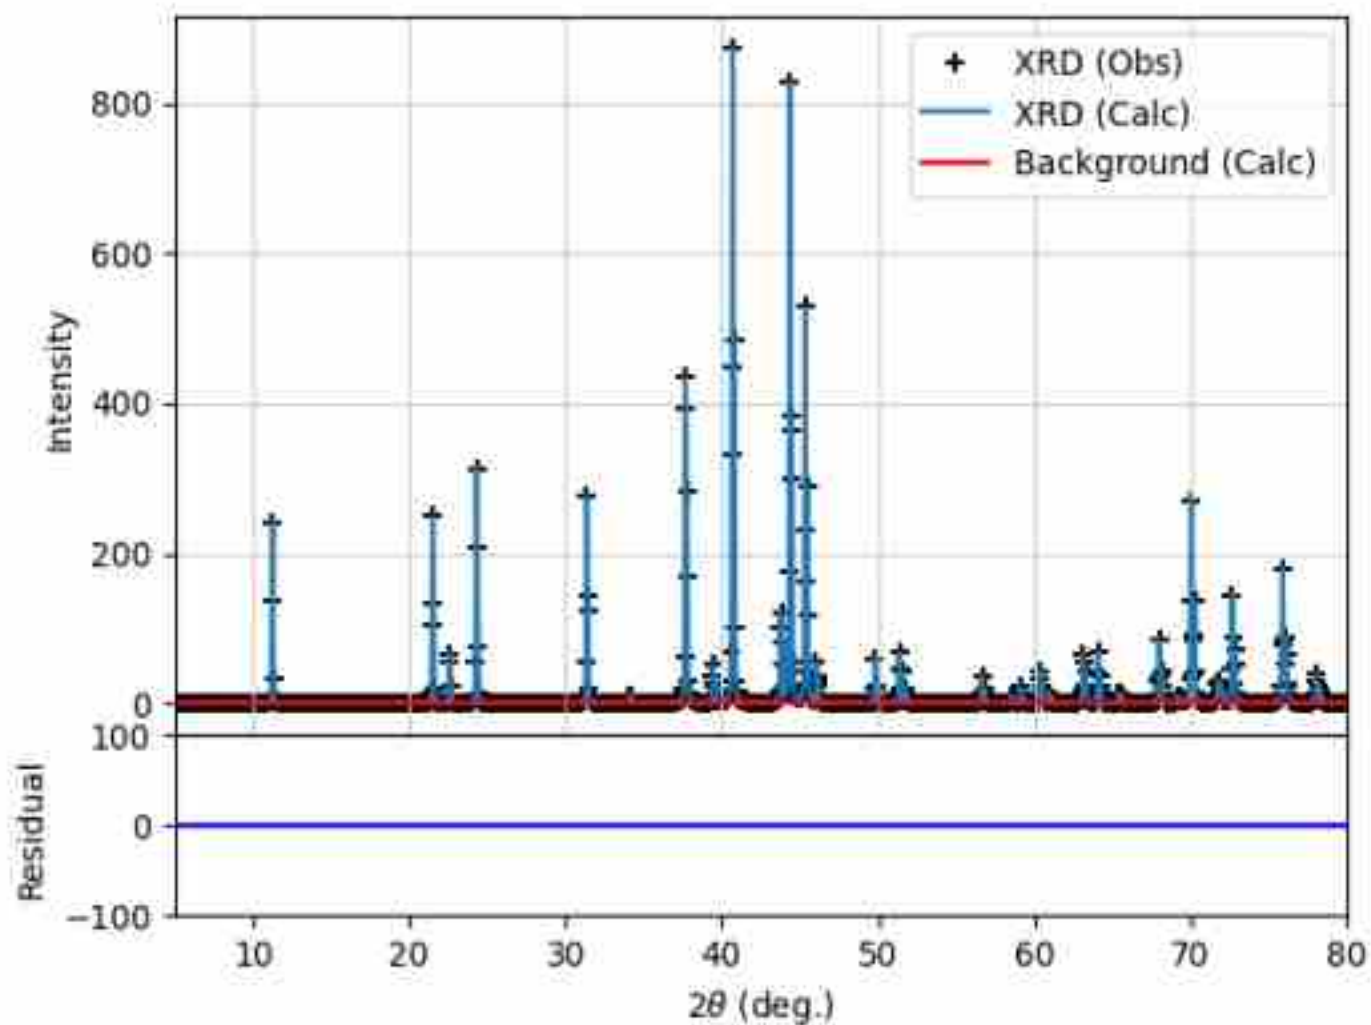

| RMSE before RR | Rwp     | RMSE after RR |
|----------------|---------|---------------|
| 0.017          | 0.00473 | 0.00109       |



# Ta<sub>4</sub>Al<sub>4</sub>Ni<sub>4</sub>

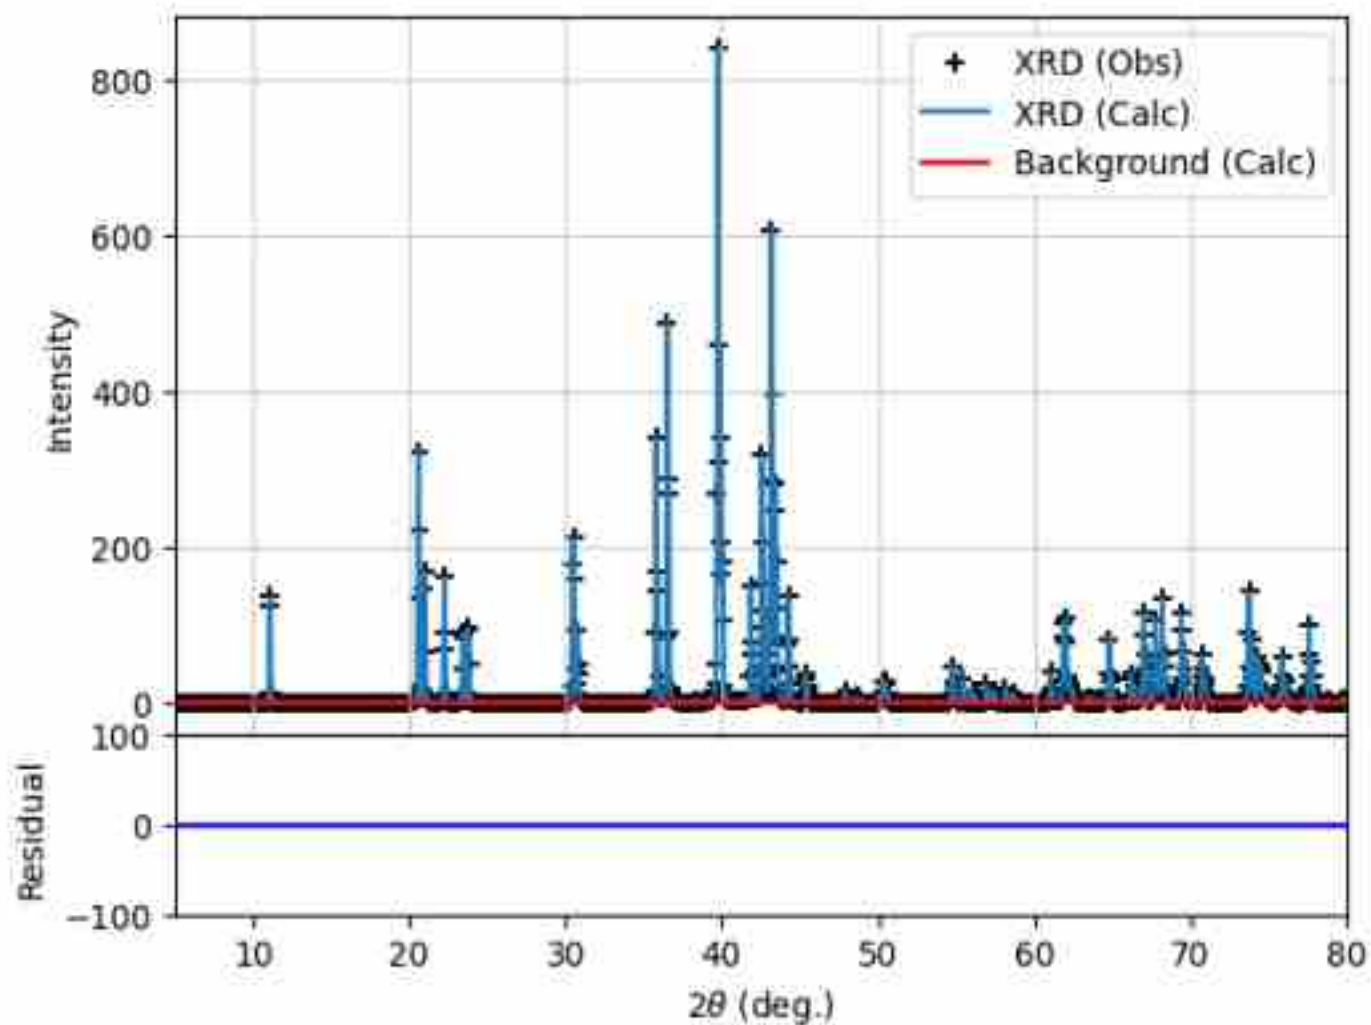

| RMSE before RR | Rwp     | RMSE after RR |
|----------------|---------|---------------|
| 0.017          | 0.00344 | 0.00055       |

# Ta<sub>4</sub>Cr<sub>6</sub>Si<sub>2</sub>

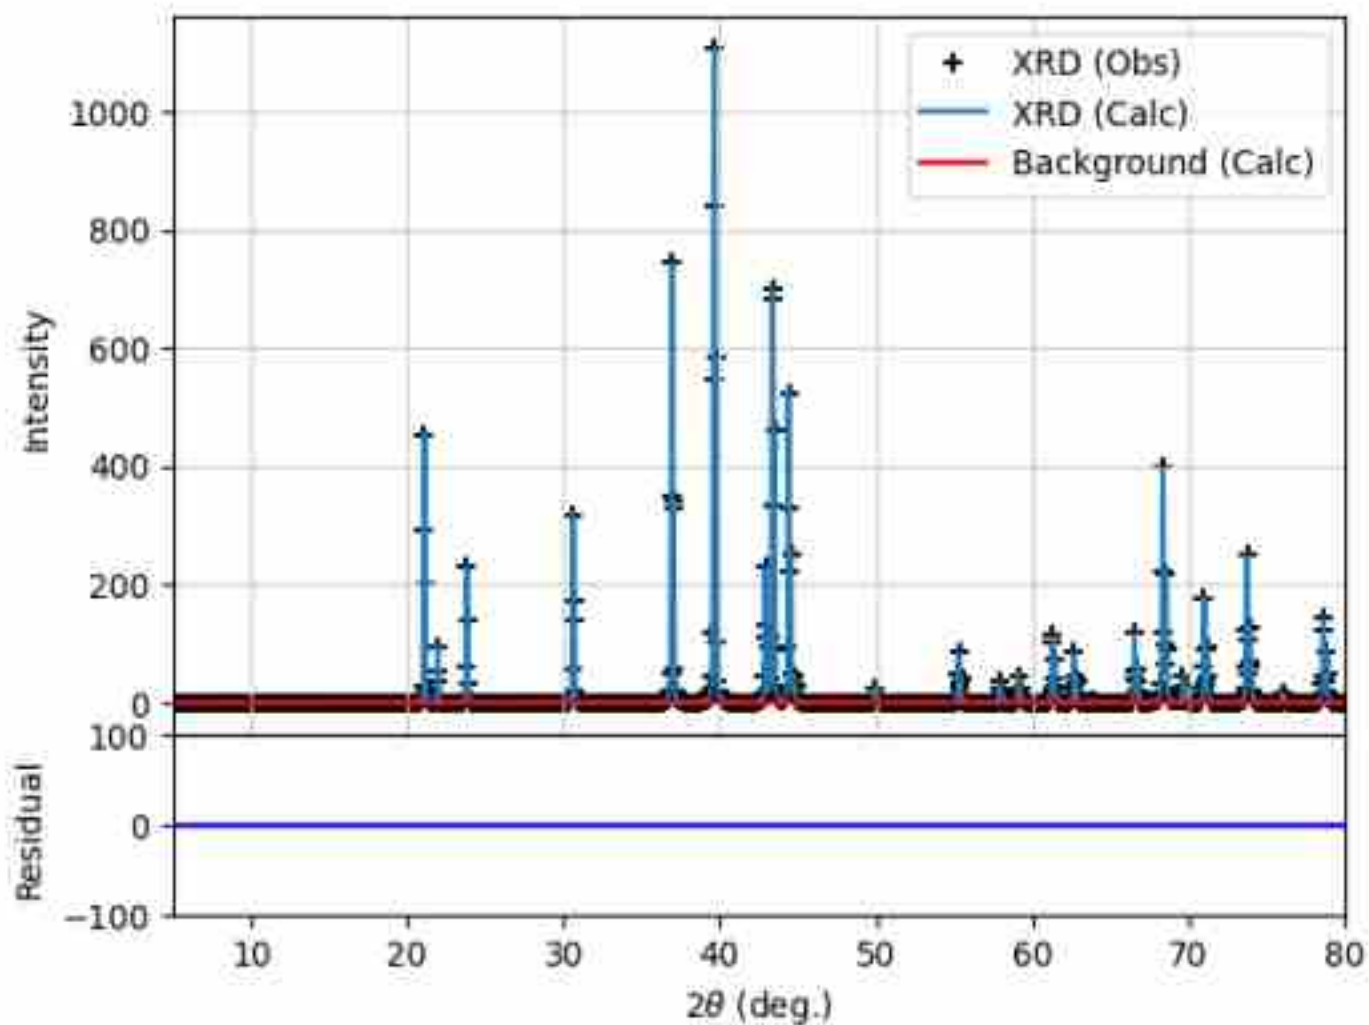

| RMSE before RR | Rwp    | RMSE after RR |
|----------------|--------|---------------|
| 0.017          | 0.0308 | 0.00333       |

# Ta4Fe8

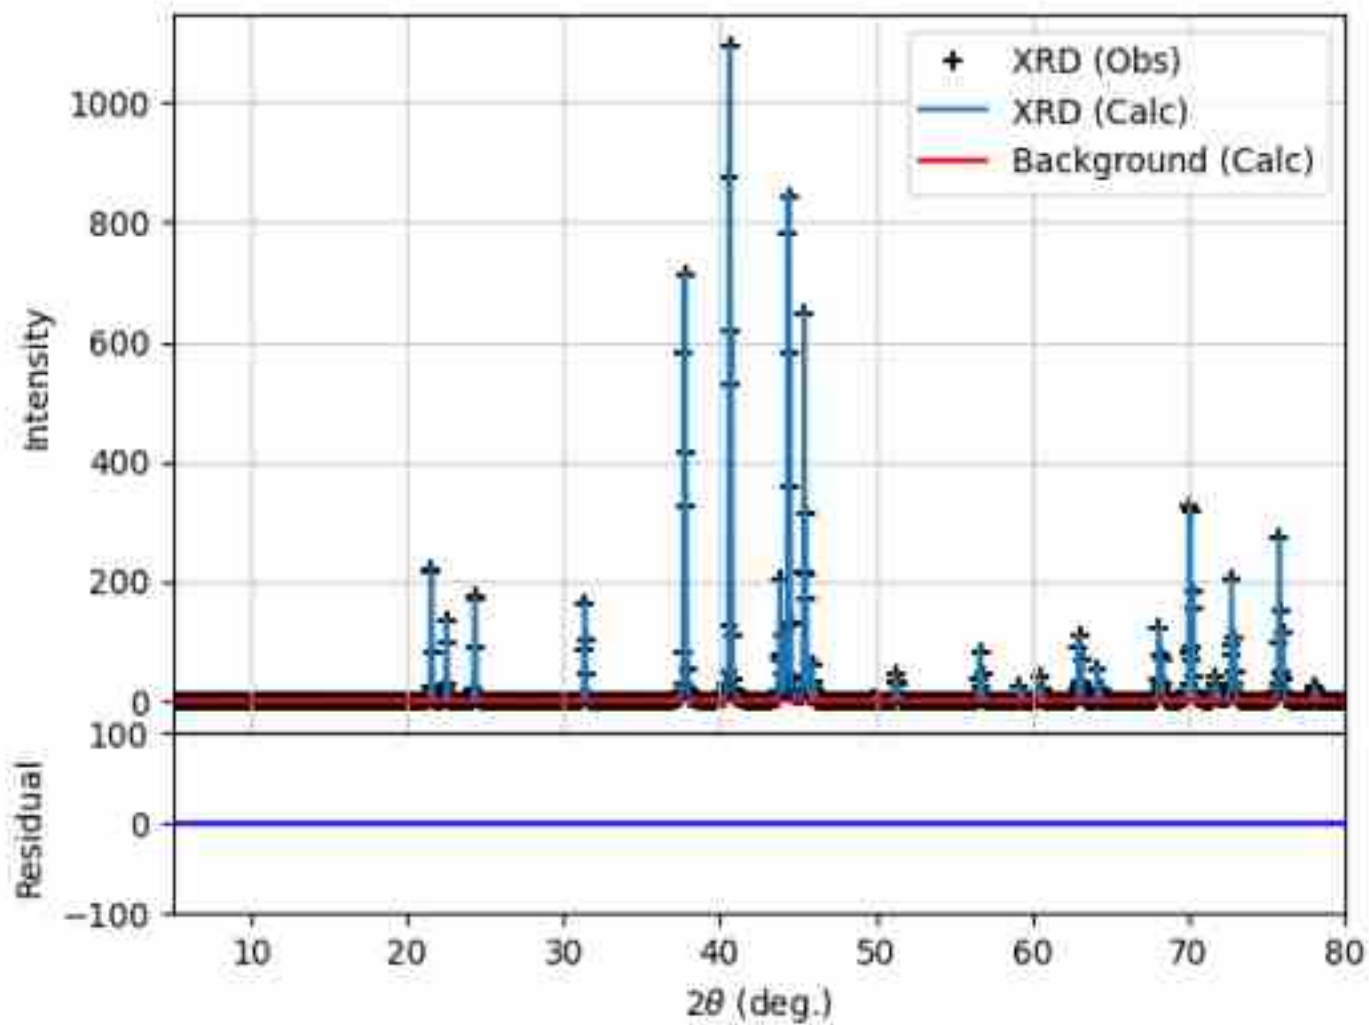

| RMSE before RR | Rwp     | RMSE after RR |
|----------------|---------|---------------|
| 0.017          | 0.00825 | 0.001         |

# Ta<sub>4</sub>Ge<sub>4</sub>Rh<sub>4</sub>

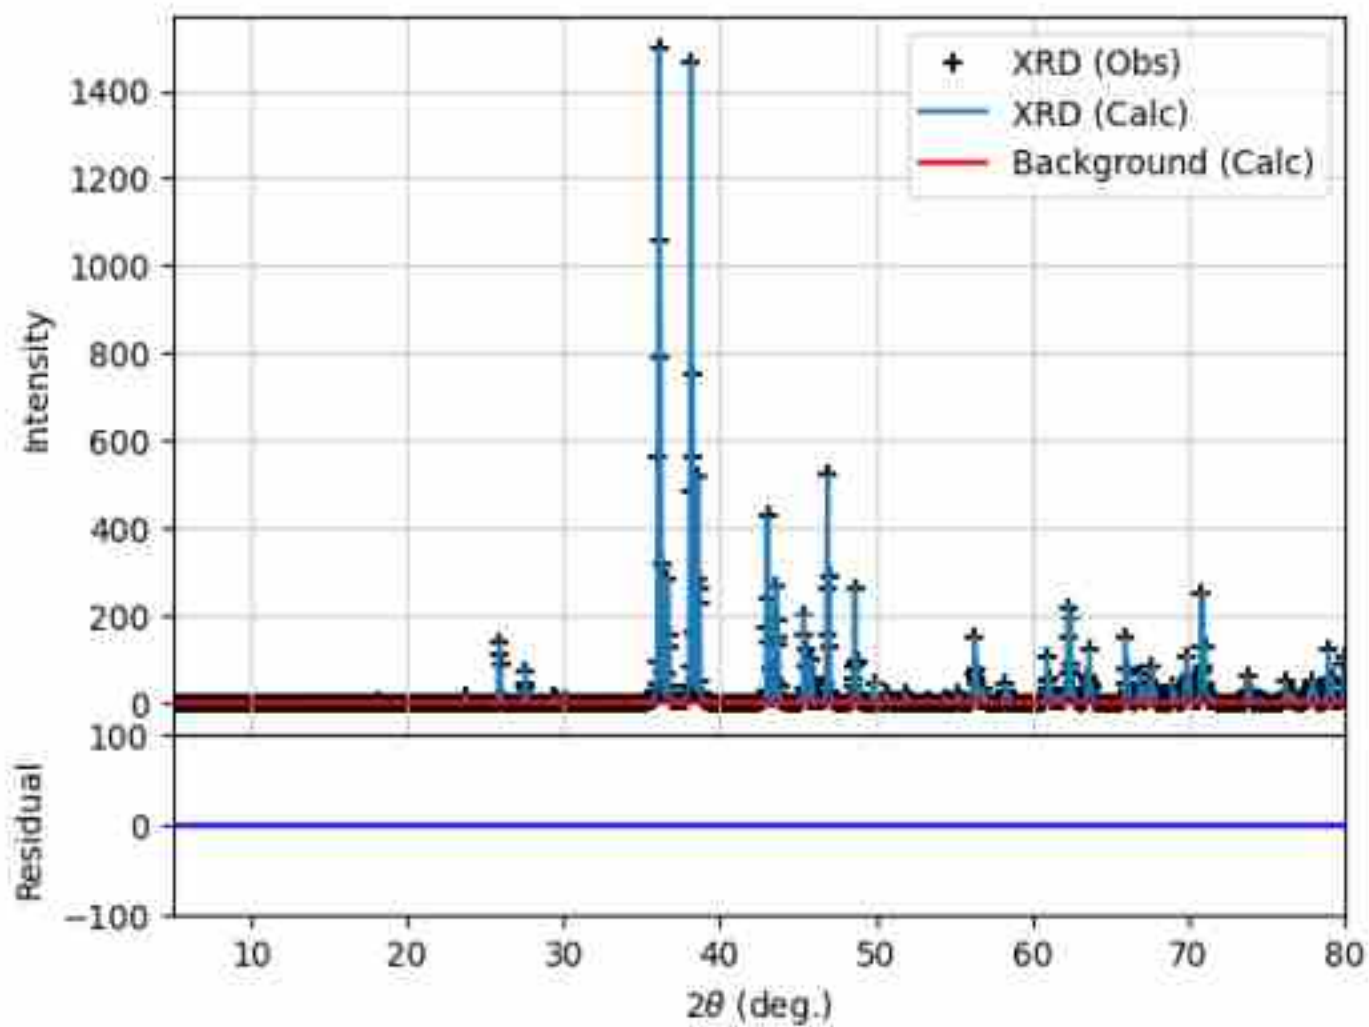

| RMSE before RR | Rwp     | RMSE after RR |
|----------------|---------|---------------|
| 0.017          | 0.00472 | 0.0004        |

# Ta6Rh2S12

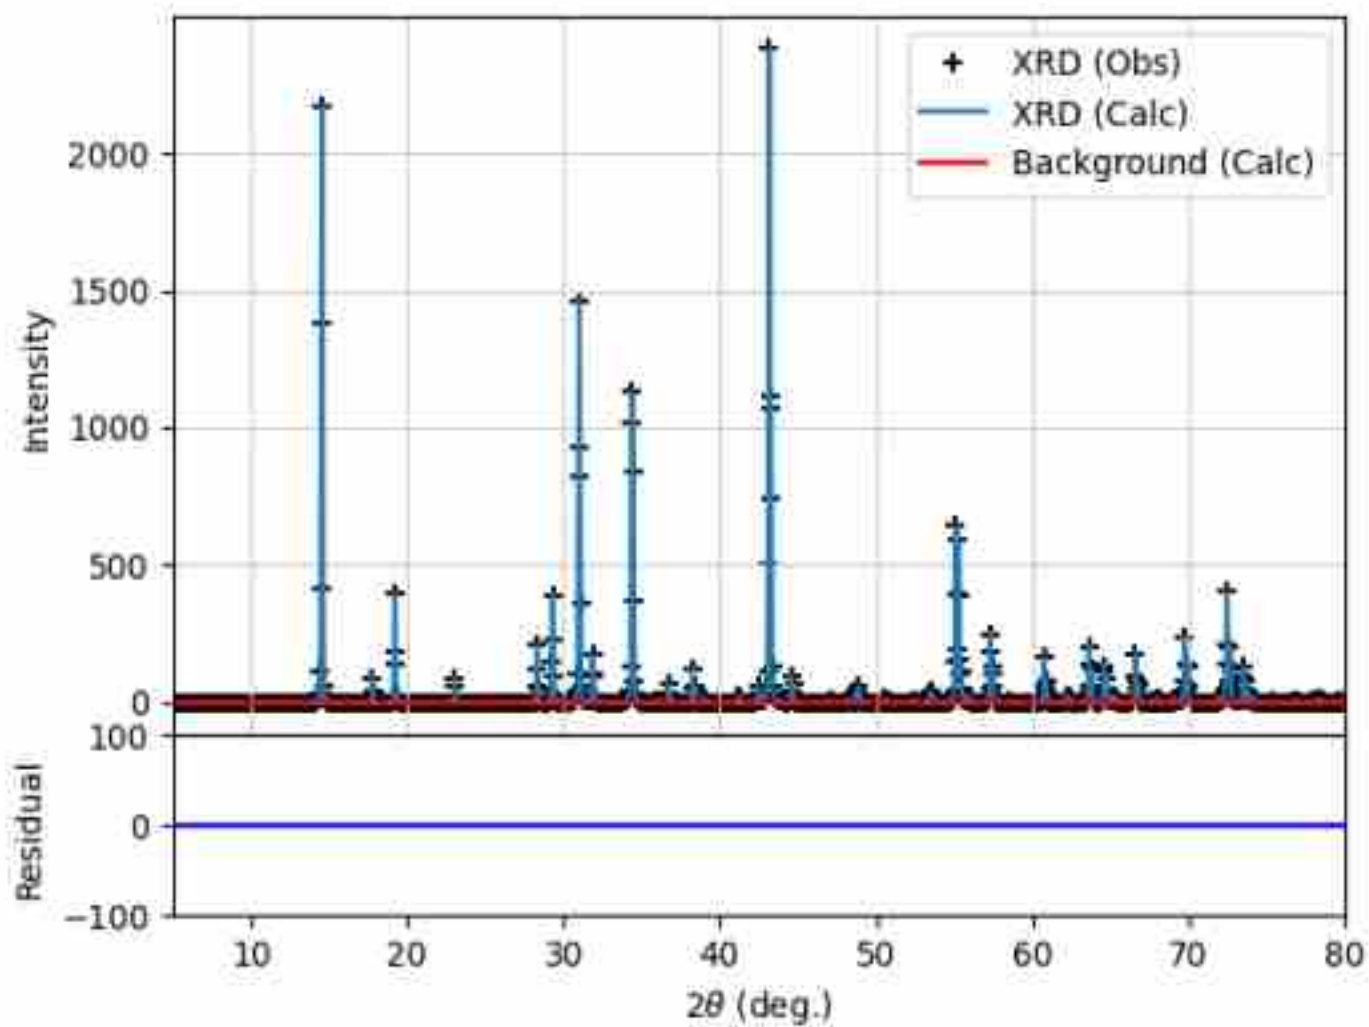

| RMSE before RR | Rwp     | RMSE after RR |
|----------------|---------|---------------|
| 0.017          | 0.00251 | 0.00084       |

# Tb1Fe10Mo2

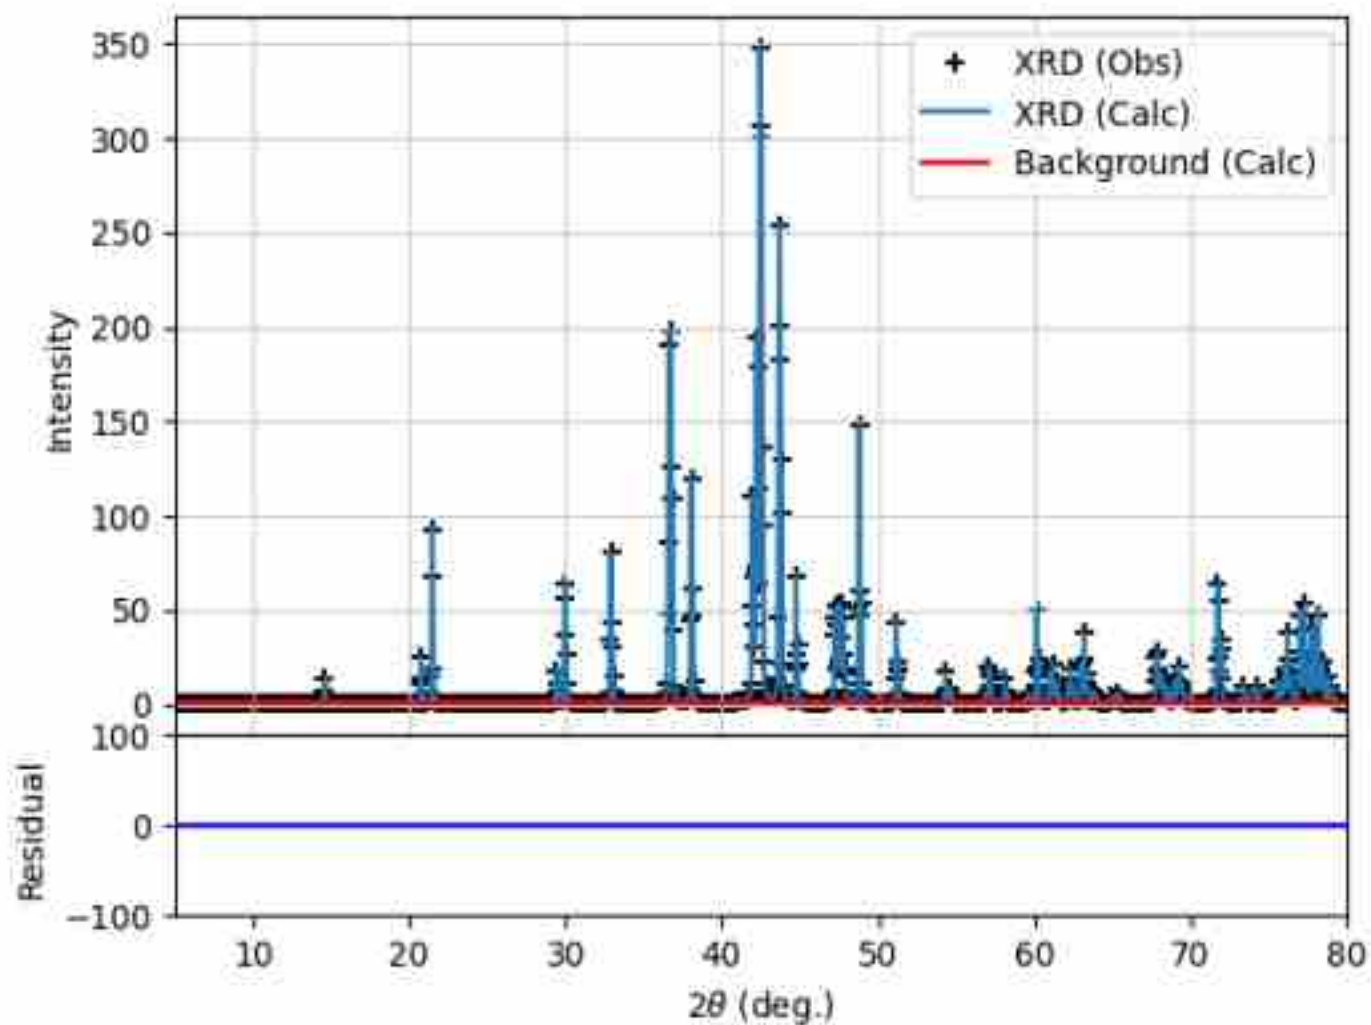

| RMSE before RR | Rwp     | RMSE after RR |
|----------------|---------|---------------|
| 0.017          | 0.00287 | 0.00045       |

# Tb<sub>2</sub>H<sub>6</sub>O<sub>6</sub>

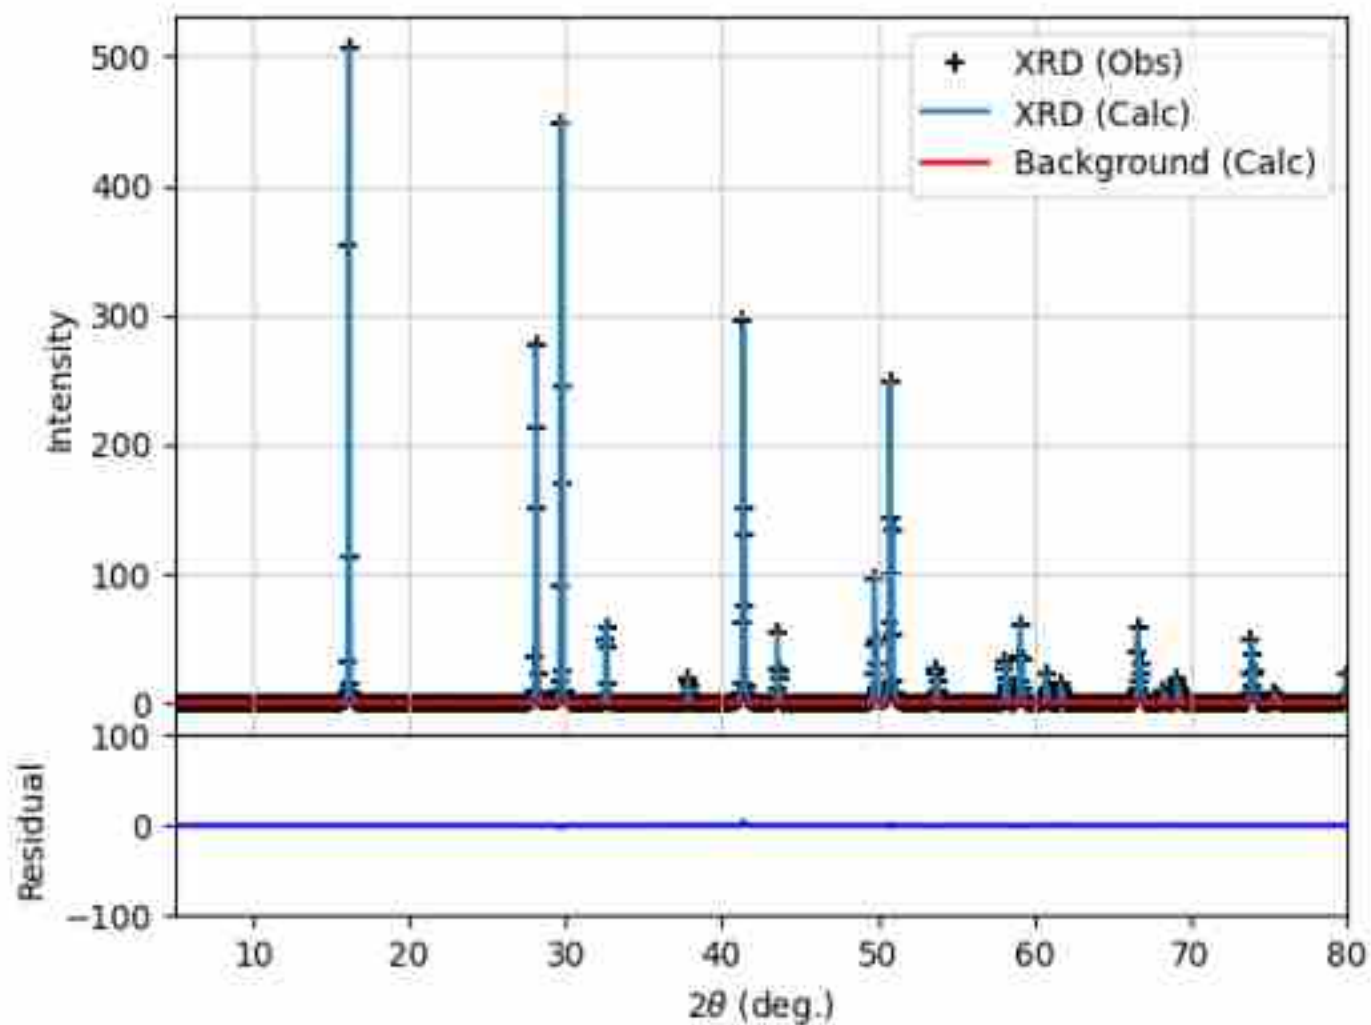

| RMSE before RR | Rwp     | RMSE after RR |
|----------------|---------|---------------|
| 0.017          | 0.75887 | 0.12704       |

# Tb<sub>2</sub>V<sub>2</sub>O<sub>8</sub>

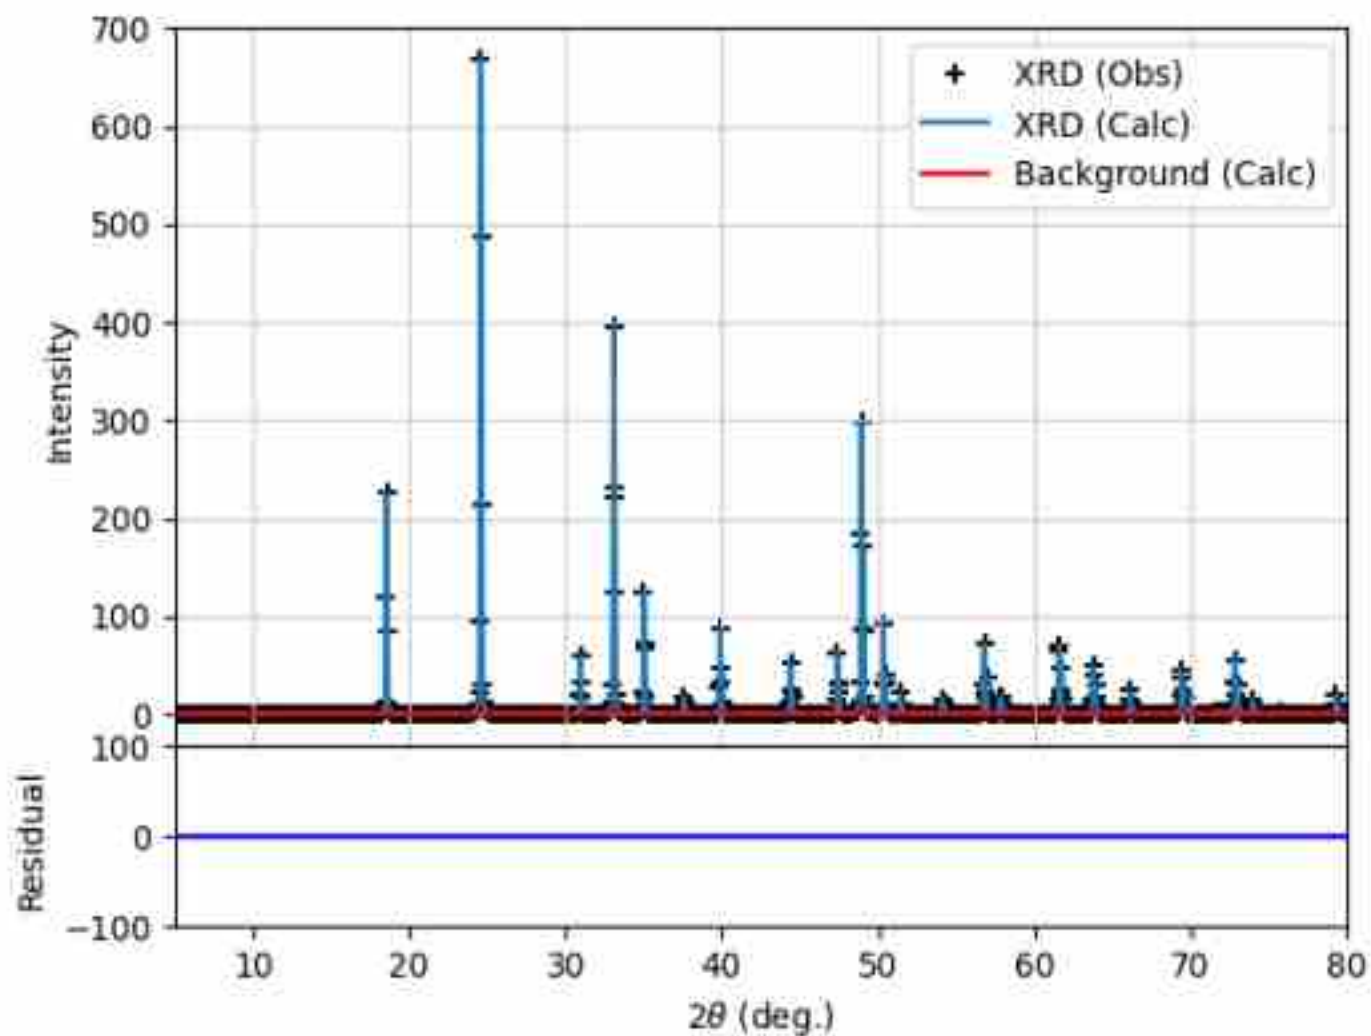

| RMSE before RR | Rwp     | RMSE after RR |
|----------------|---------|---------------|
| 0.017          | 0.00331 | 0.00125       |



# Tb<sub>4</sub>Mg<sub>2</sub>Cu<sub>4</sub>

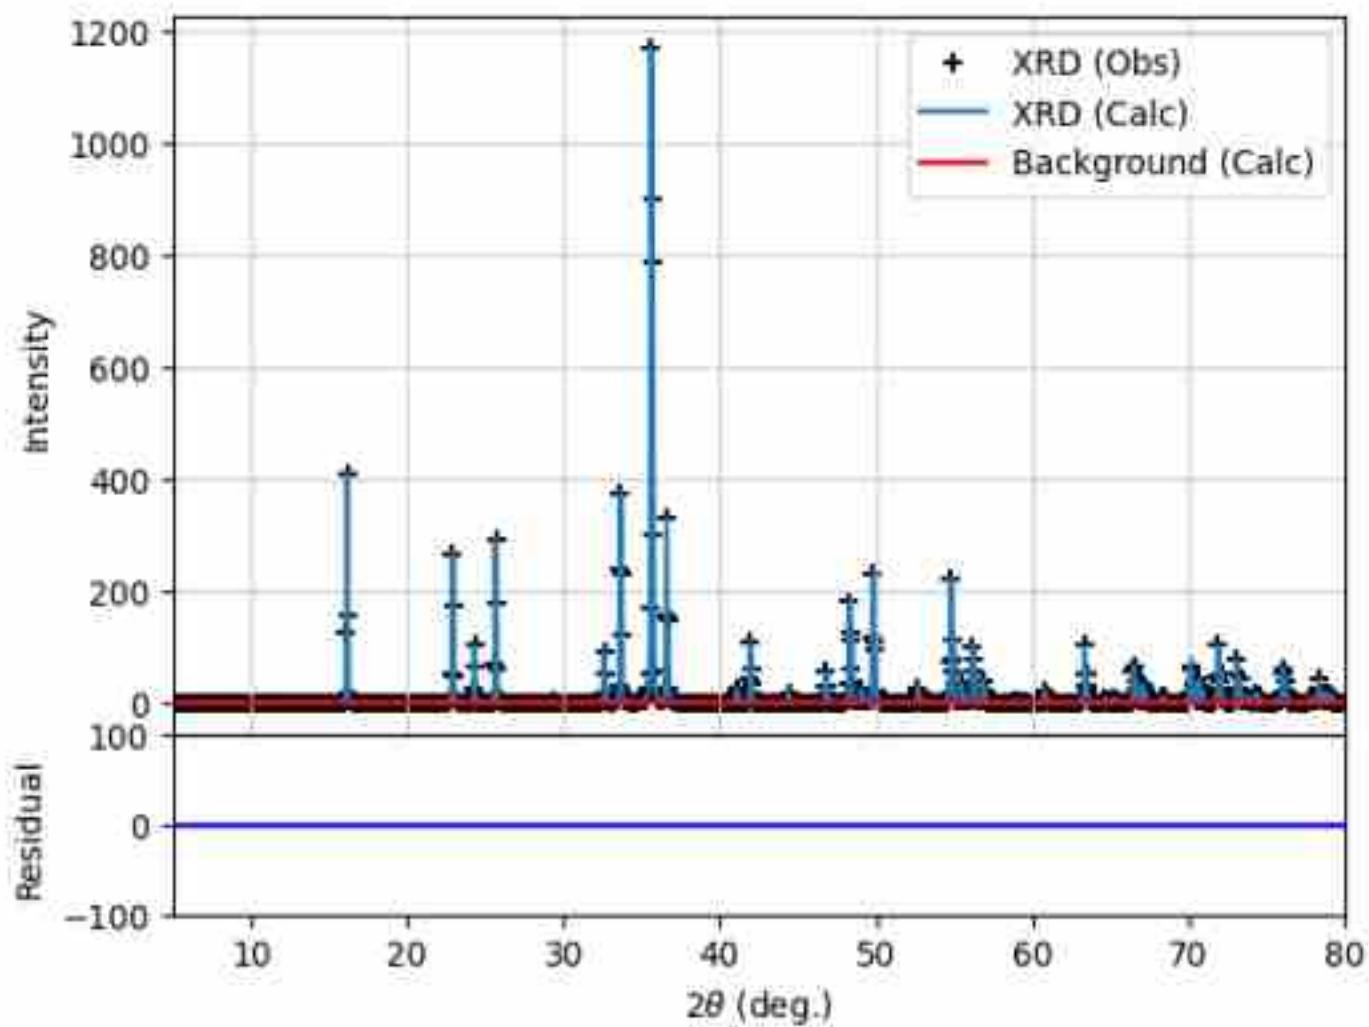

| RMSE before RR | Rwp     | RMSE after RR |
|----------------|---------|---------------|
| 0.017          | 0.00434 | 0.00064       |

# Tb4Sb4Ir4

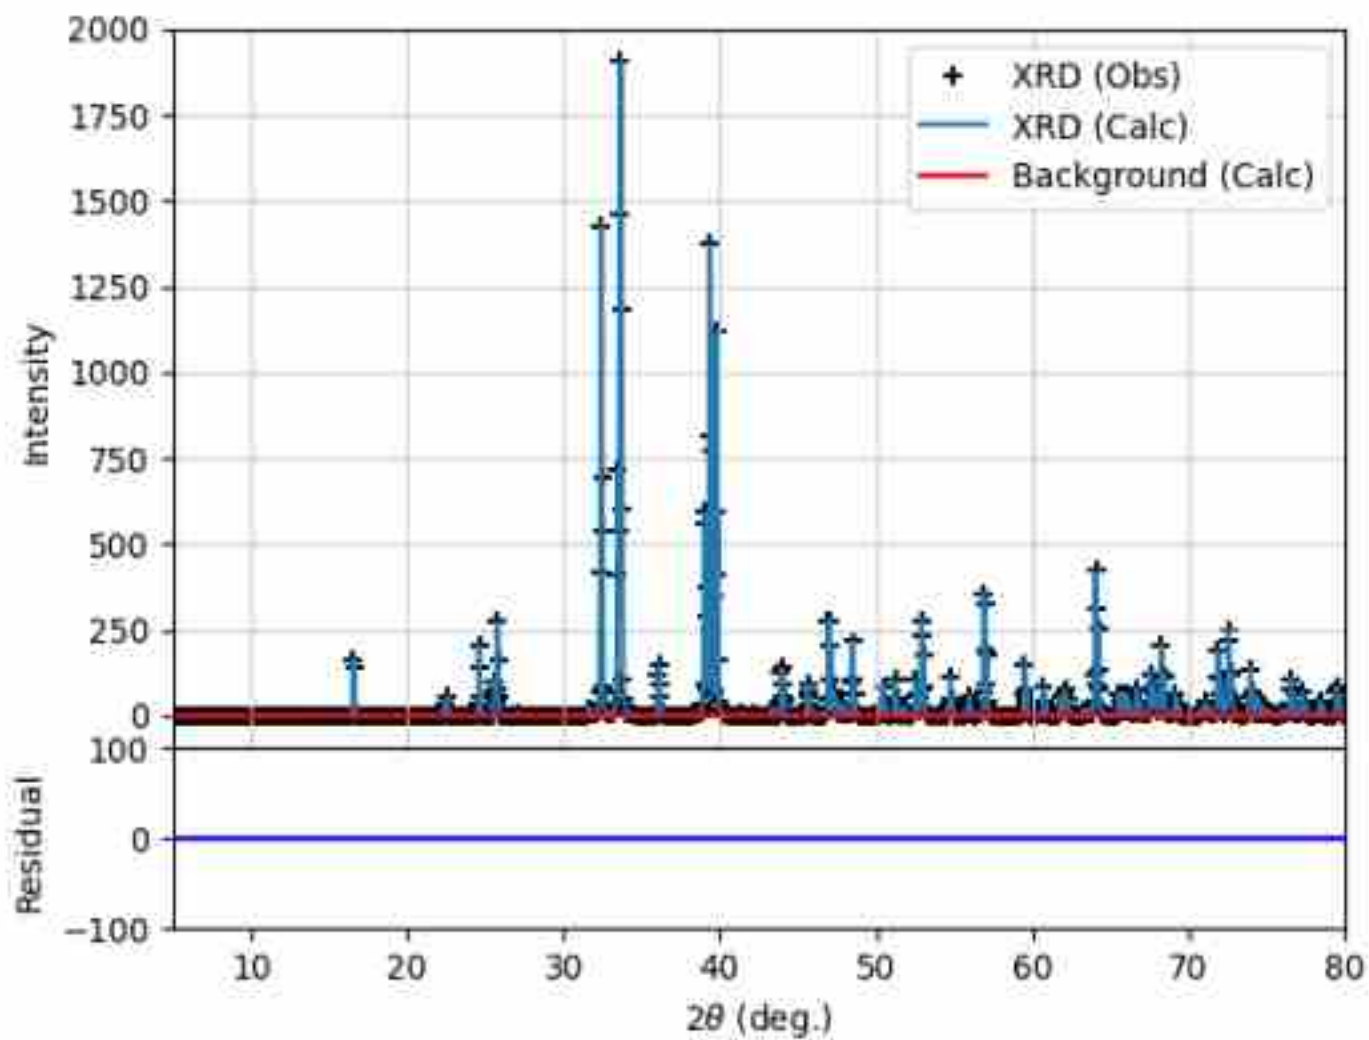

| RMSE before RR | Rwp     | RMSE after RR |
|----------------|---------|---------------|
| 0.017          | 0.00499 | 0.00021       |

# Tb4W4C8

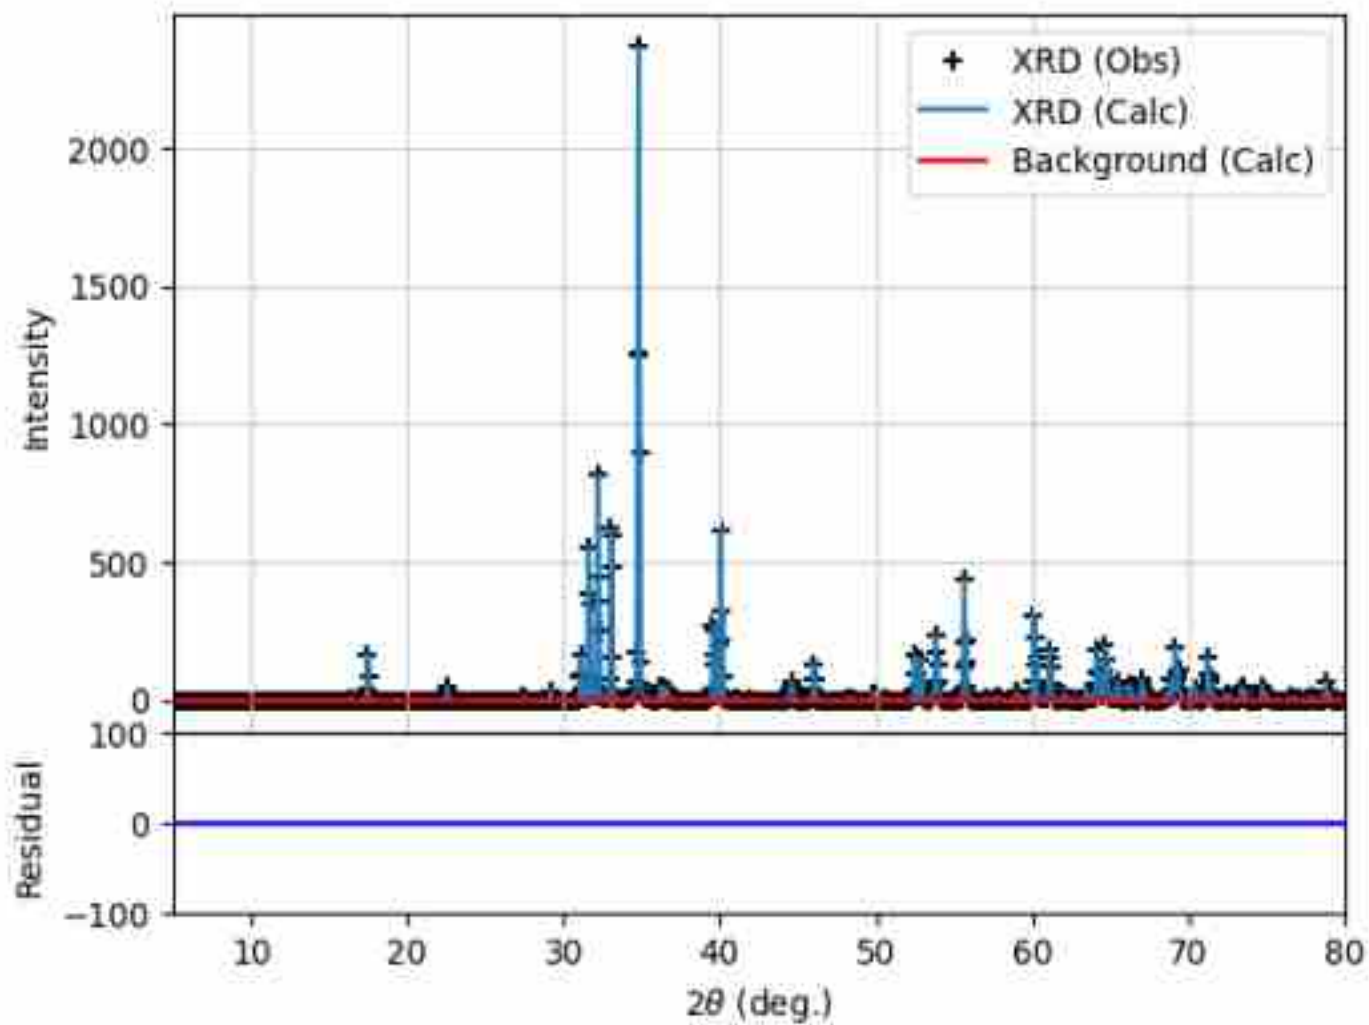

| RMSE before RR | Rwp     | RMSE after RR |
|----------------|---------|---------------|
| 0.017          | 0.00577 | 0.0028        |

# Tb12Rh4

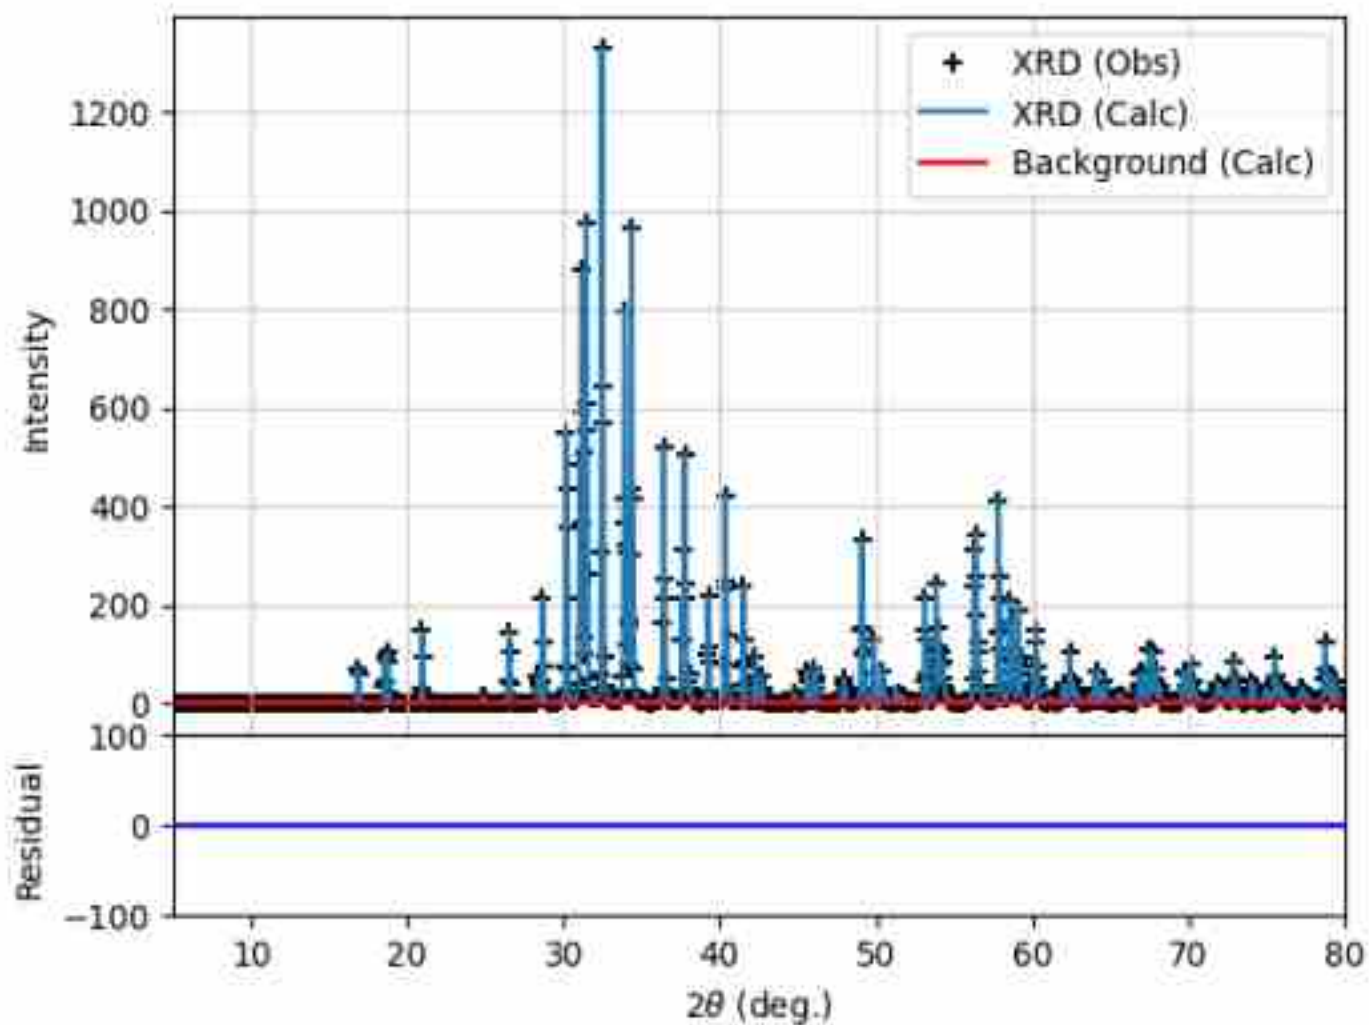

| RMSE before RR | Rwp     | RMSE after RR |
|----------------|---------|---------------|
| 0.017          | 0.00447 | 0.00036       |

# Th2C18

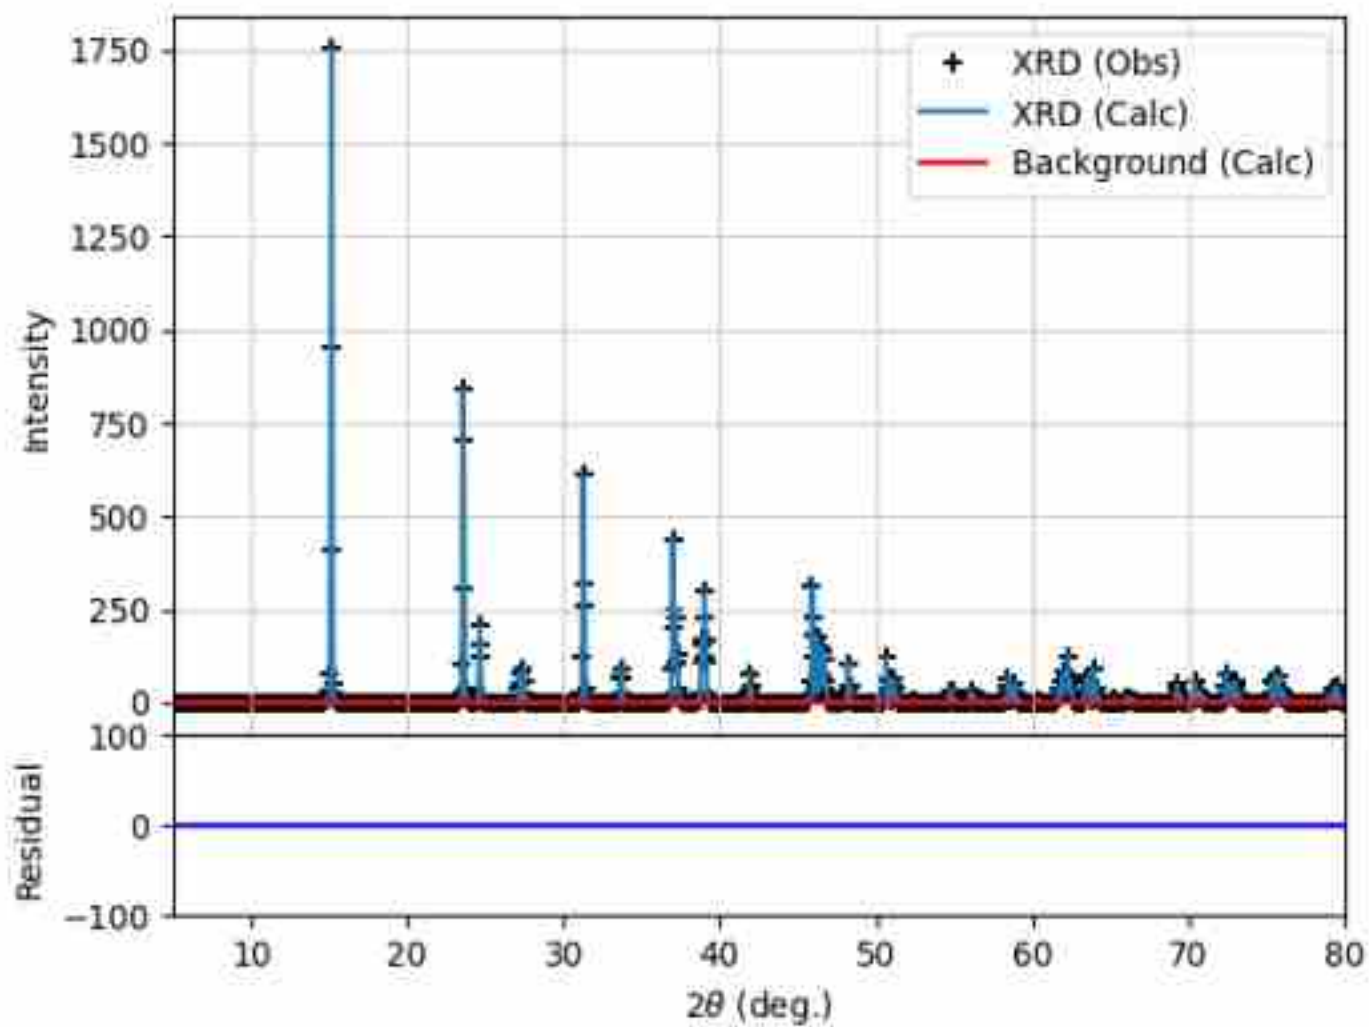

| RMSE before RR | Rwp     | RMSE after RR |
|----------------|---------|---------------|
| 0.017          | 0.00383 | 0.00064       |

Ti2Cd2O6

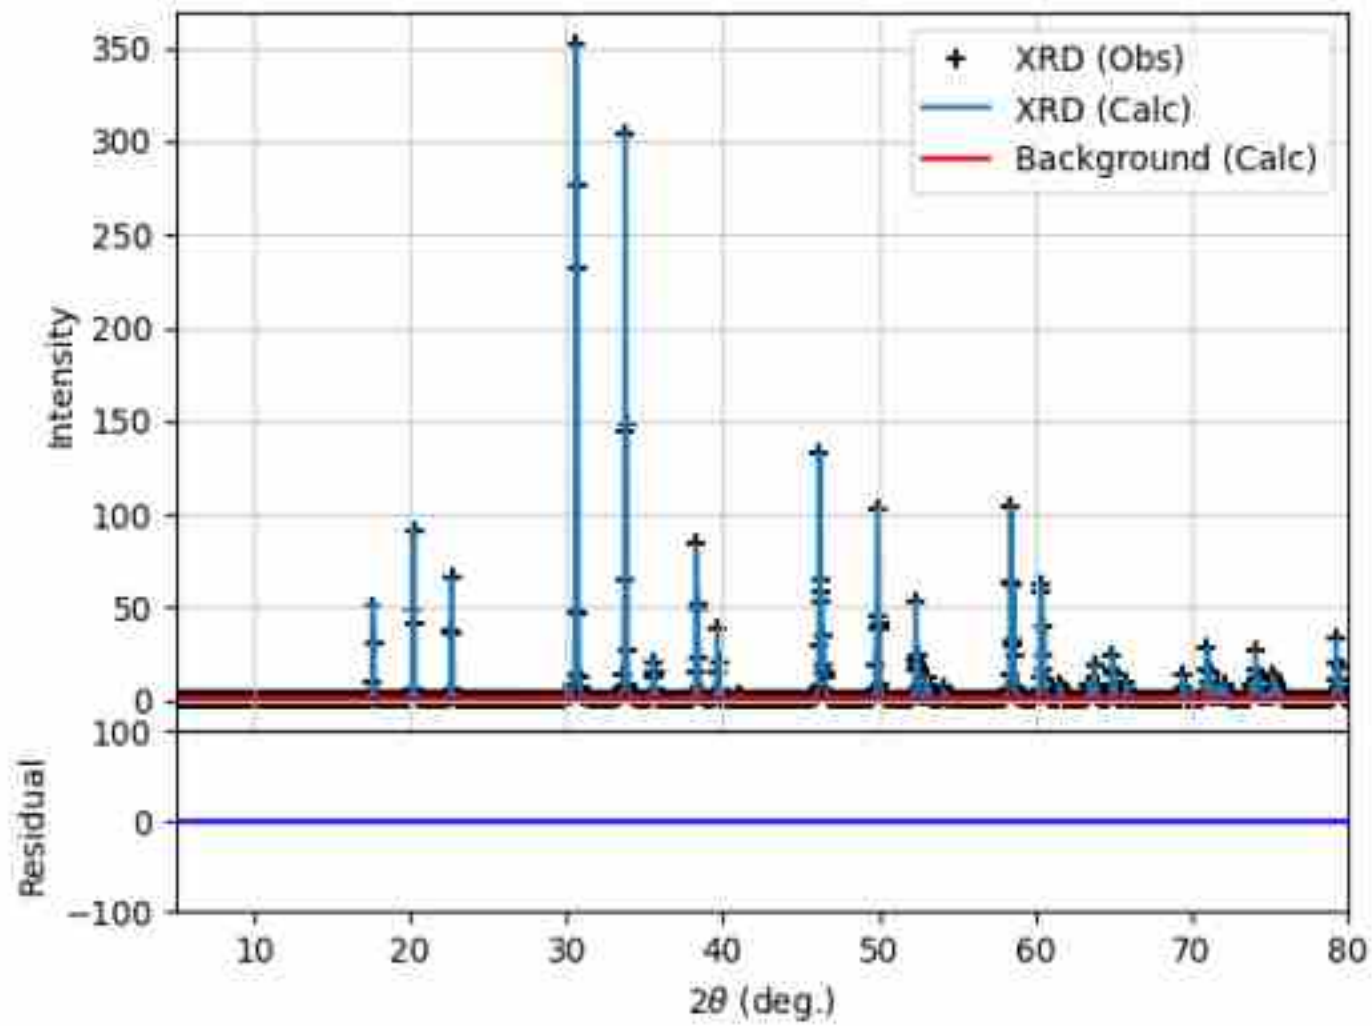

| RMSE before RR | Rwp     | RMSE after RR |
|----------------|---------|---------------|
| 0.017          | 0.00334 | 0.00158       |

# Ti<sub>4</sub>Cr<sub>6</sub>Si<sub>2</sub>

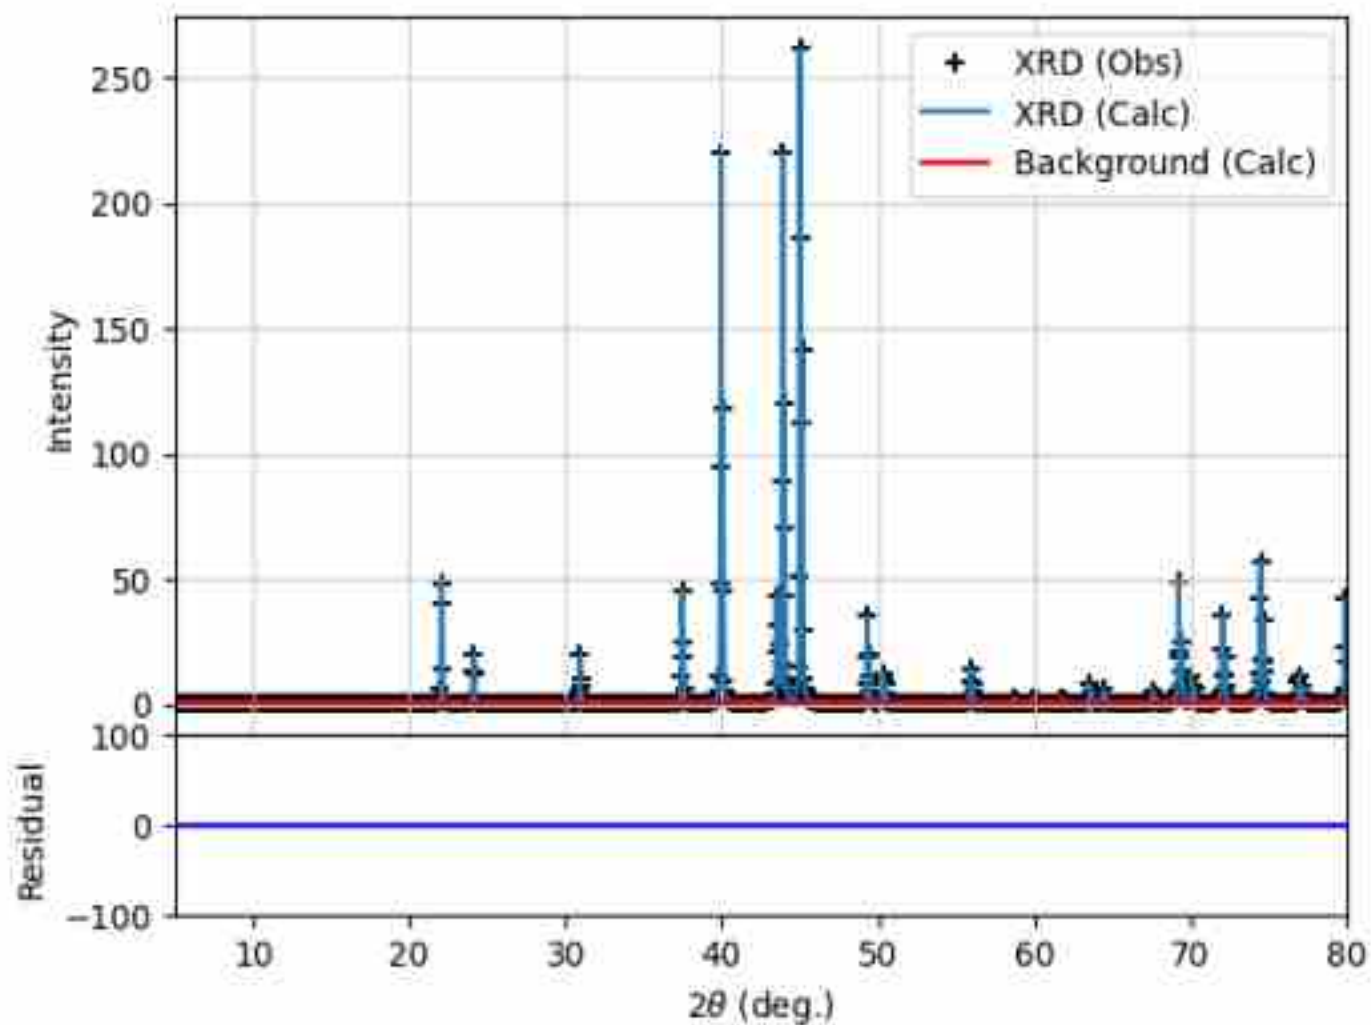

| RMSE before RR | Rwp     | RMSE after RR |
|----------------|---------|---------------|
| 0.017          | 0.00694 | 0.00076       |

# Ti4Pt12

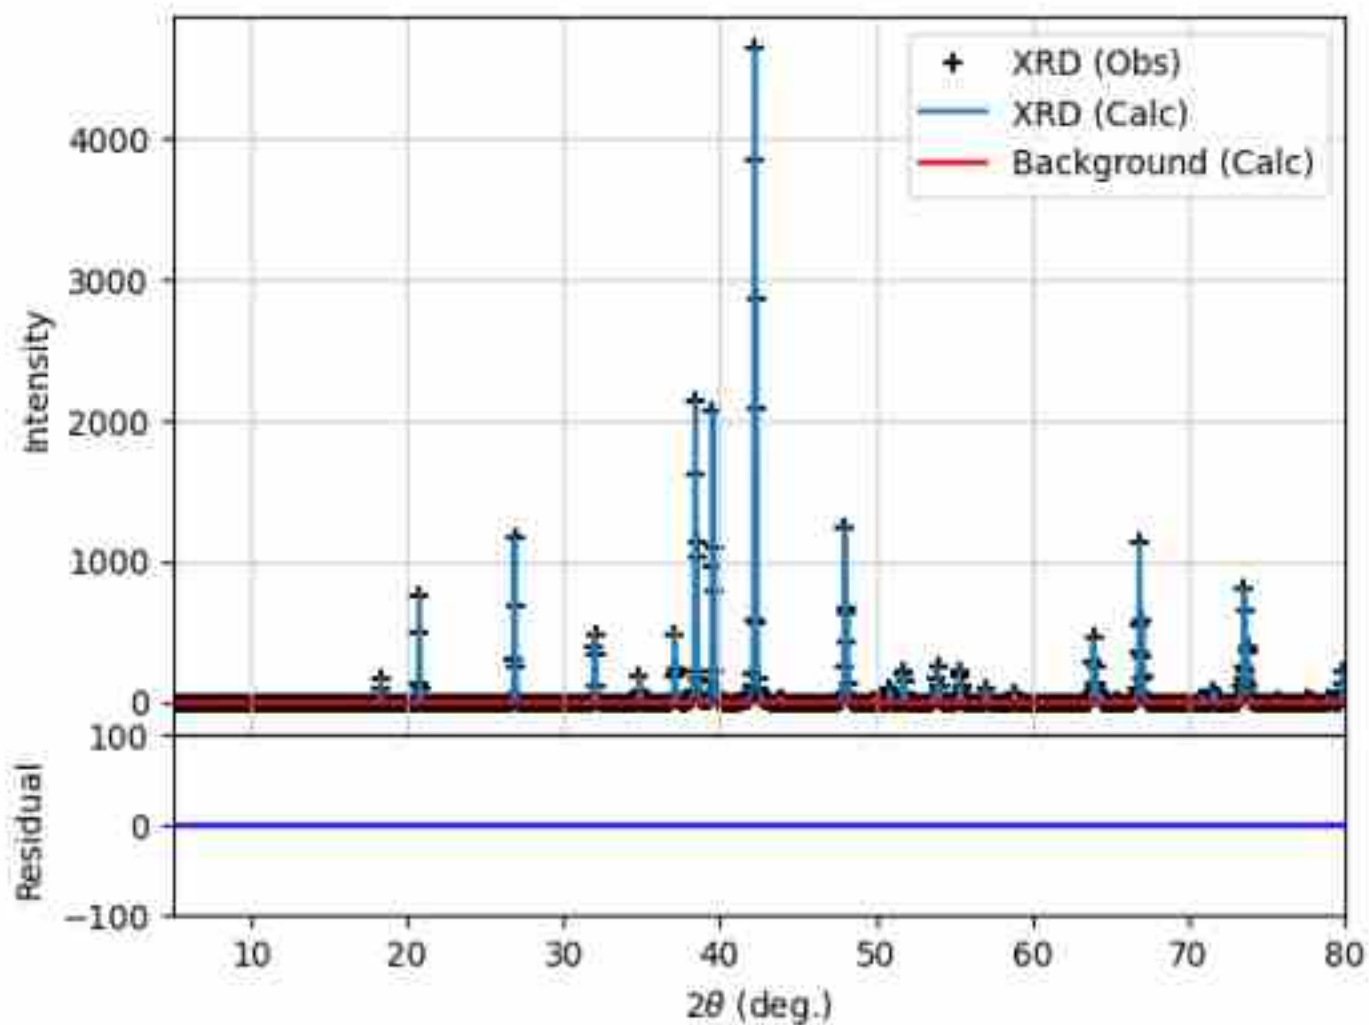

| RMSE before RR | Rwp    | RMSE after RR |
|----------------|--------|---------------|
| 0.017          | 0.0374 | 0.00345       |



# Tl<sub>2</sub>Fe<sub>1</sub>Cu<sub>3</sub>Te<sub>4</sub>

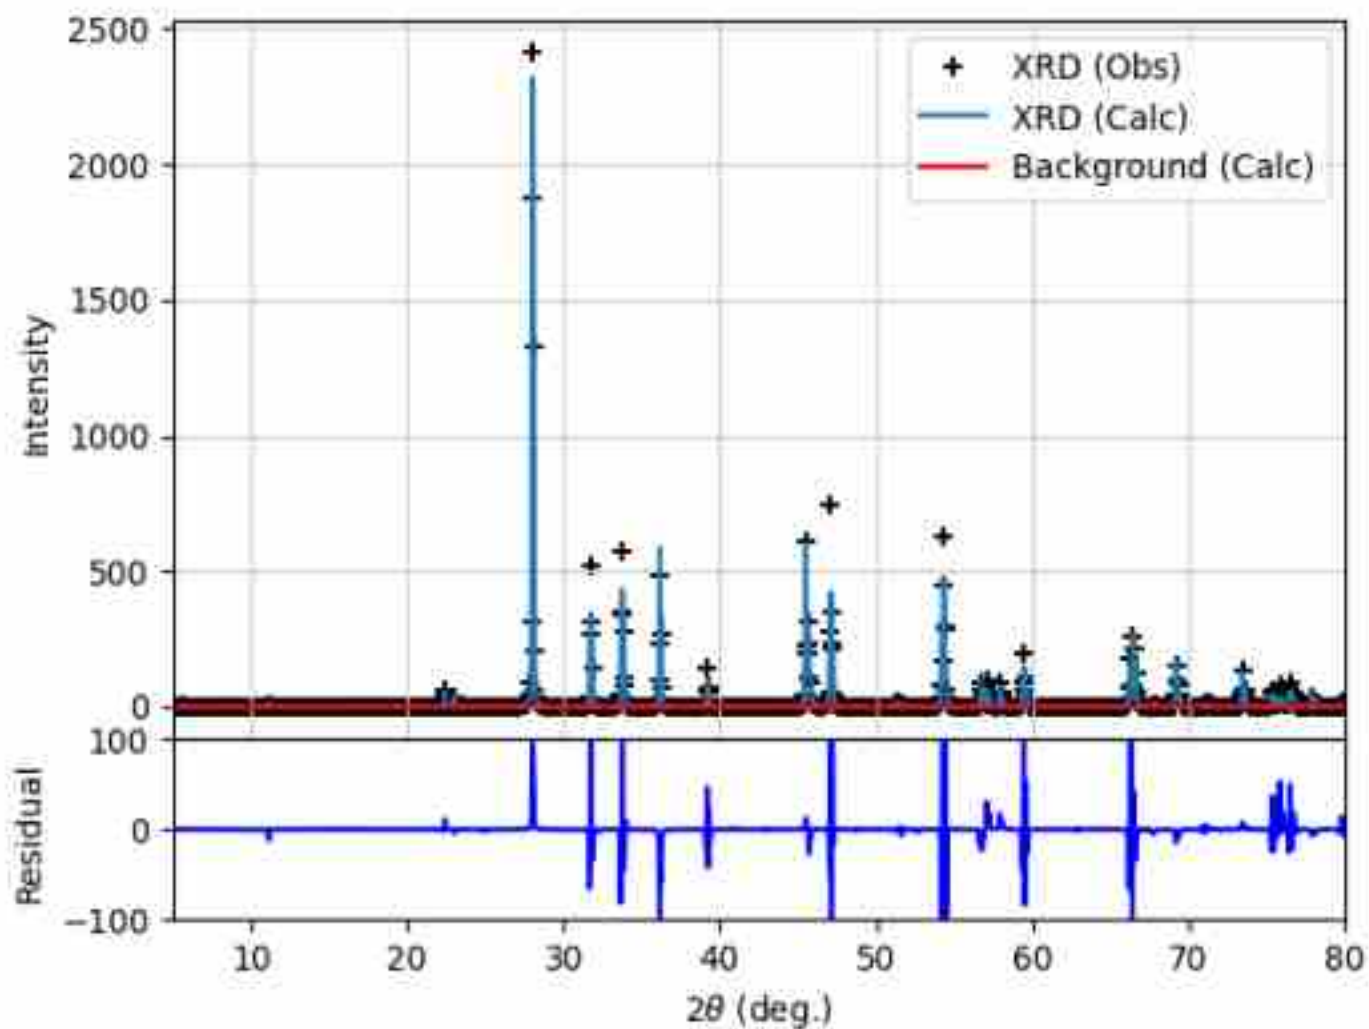

| RMSE before RR | Rwp      | RMSE after RR |
|----------------|----------|---------------|
| 0.017          | 39.96487 | 0.44812       |

# Tl<sub>2</sub>In<sub>1</sub>Ga<sub>1</sub>F<sub>6</sub>

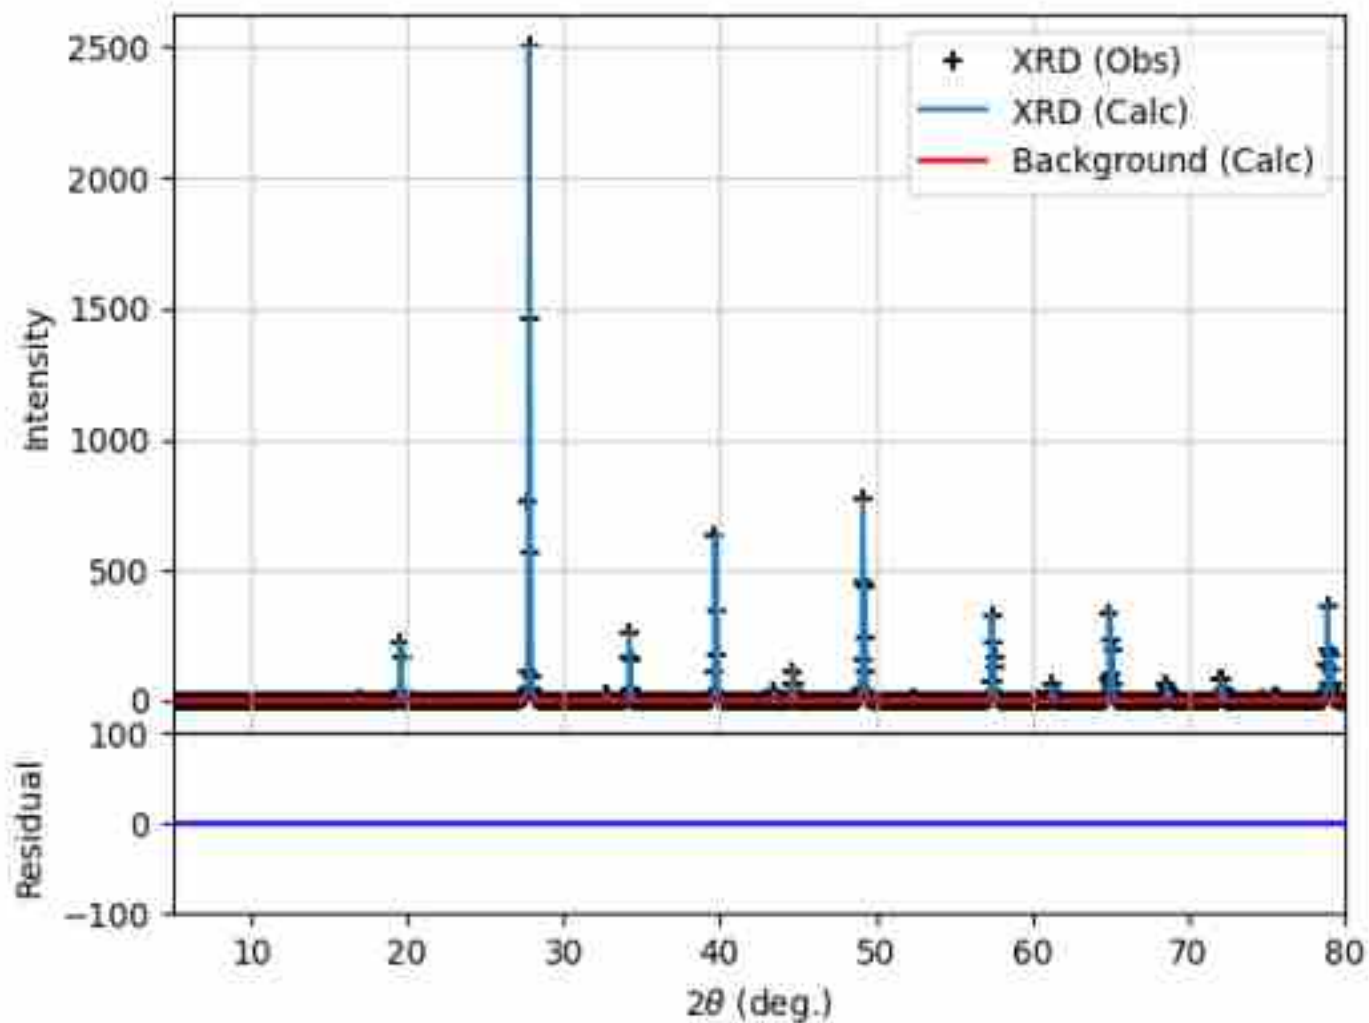

| RMSE before RR | Rwp     | RMSE after RR |
|----------------|---------|---------------|
| 0.017          | 0.01037 | 0.0038        |

# Tm<sub>2</sub>Ni<sub>1</sub>Ge<sub>6</sub>

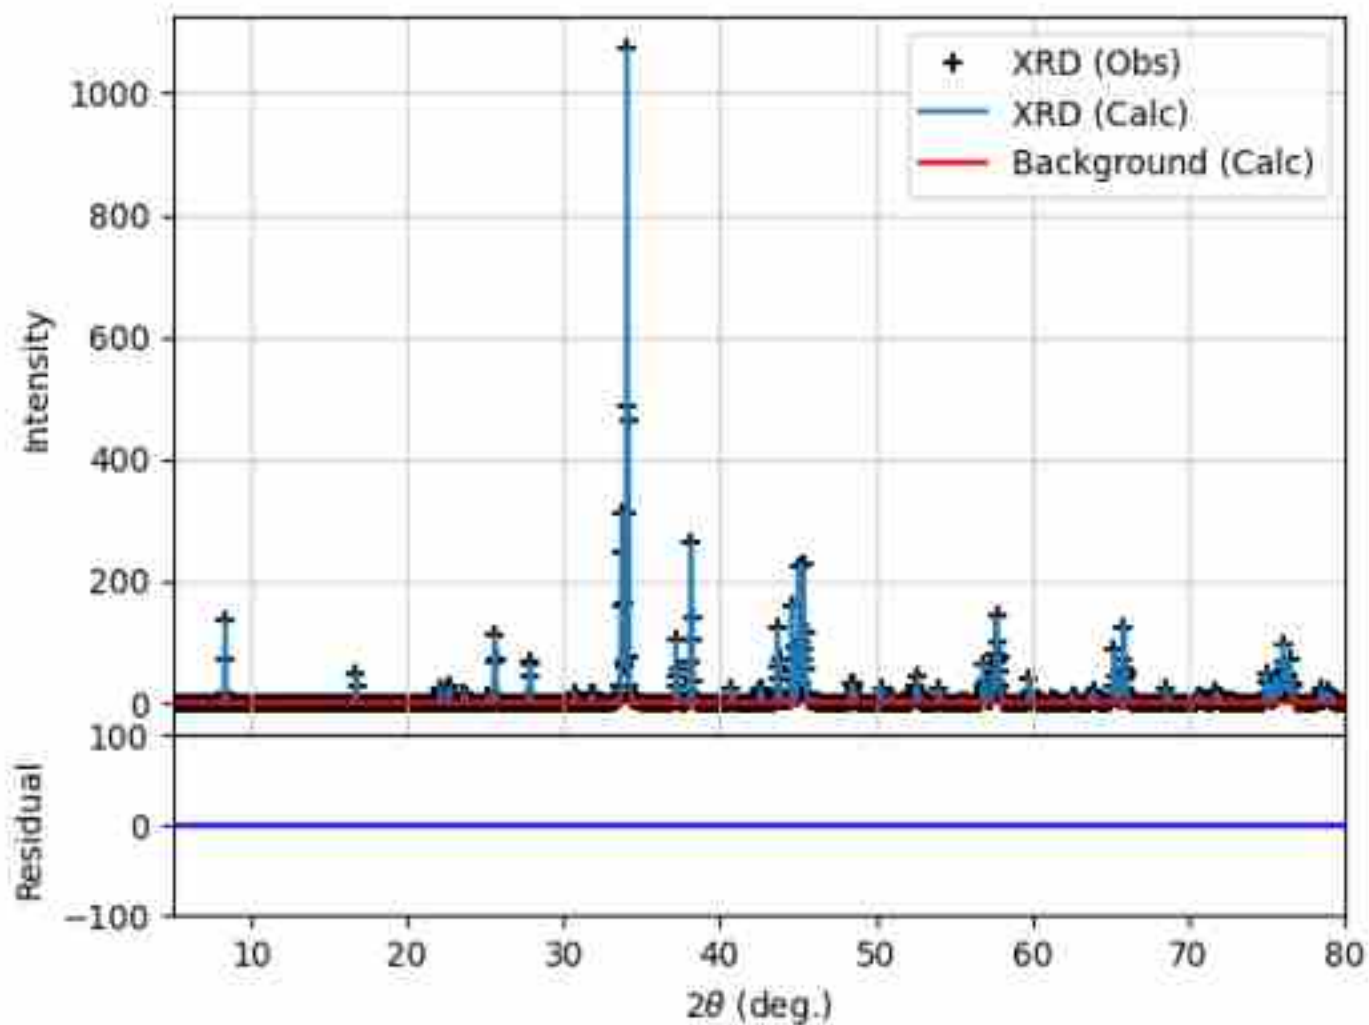

| RMSE before RR | Rwp     | RMSE after RR |
|----------------|---------|---------------|
| 0.017          | 0.00365 | 0.0003        |

# Tm<sub>2</sub>Ni<sub>2</sub>Sn<sub>8</sub>

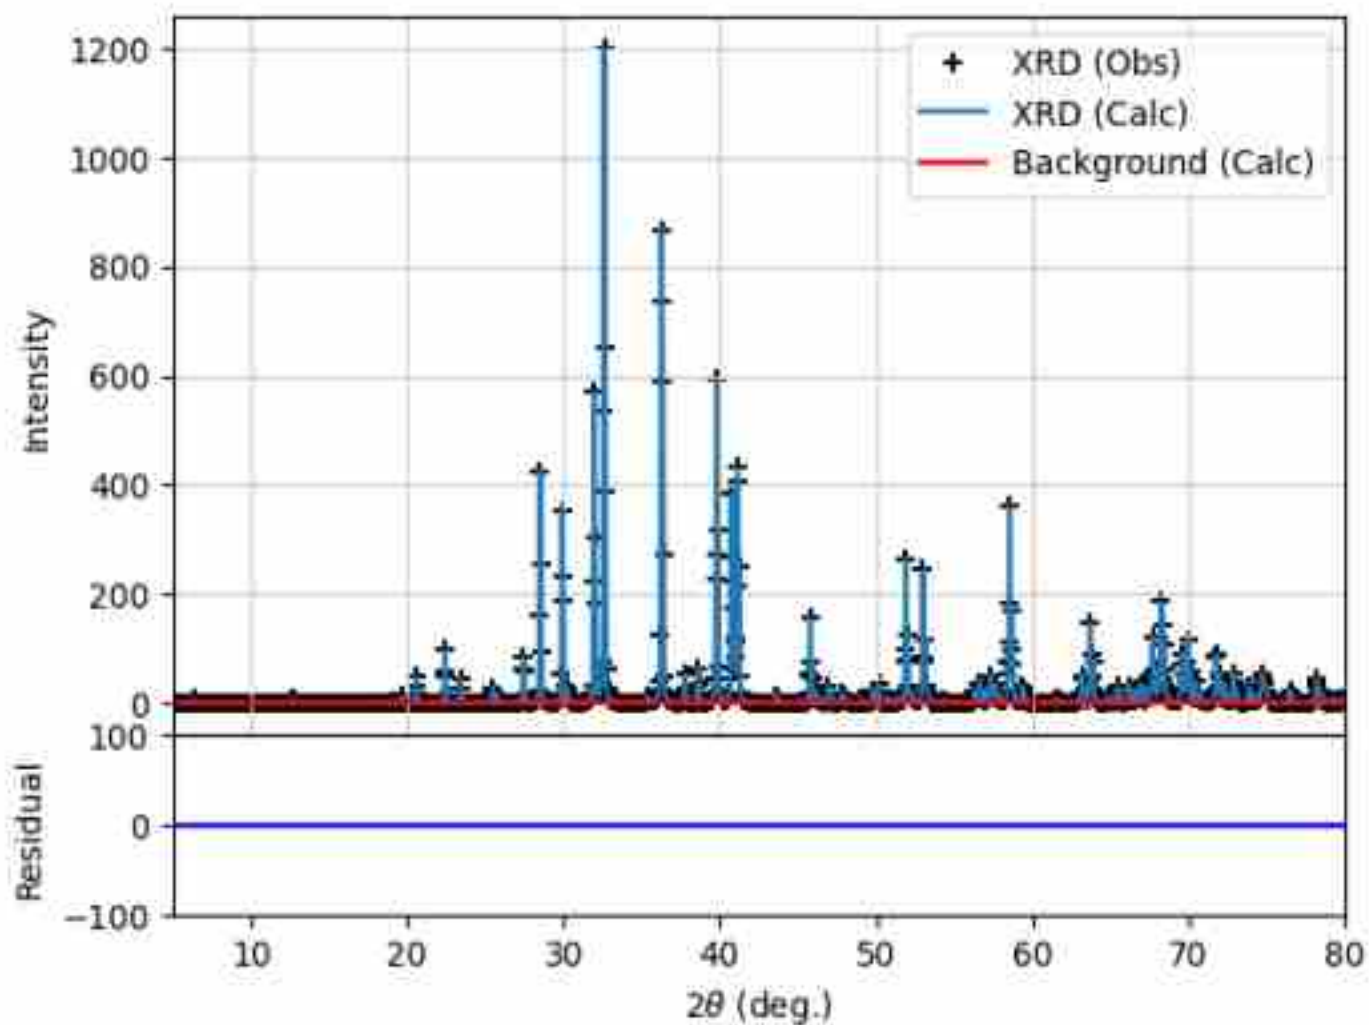

| RMSE before RR | Rwp     | RMSE after RR |
|----------------|---------|---------------|
| 0.017          | 0.00356 | 0.00032       |

# Tm<sub>4</sub>Tc<sub>8</sub>

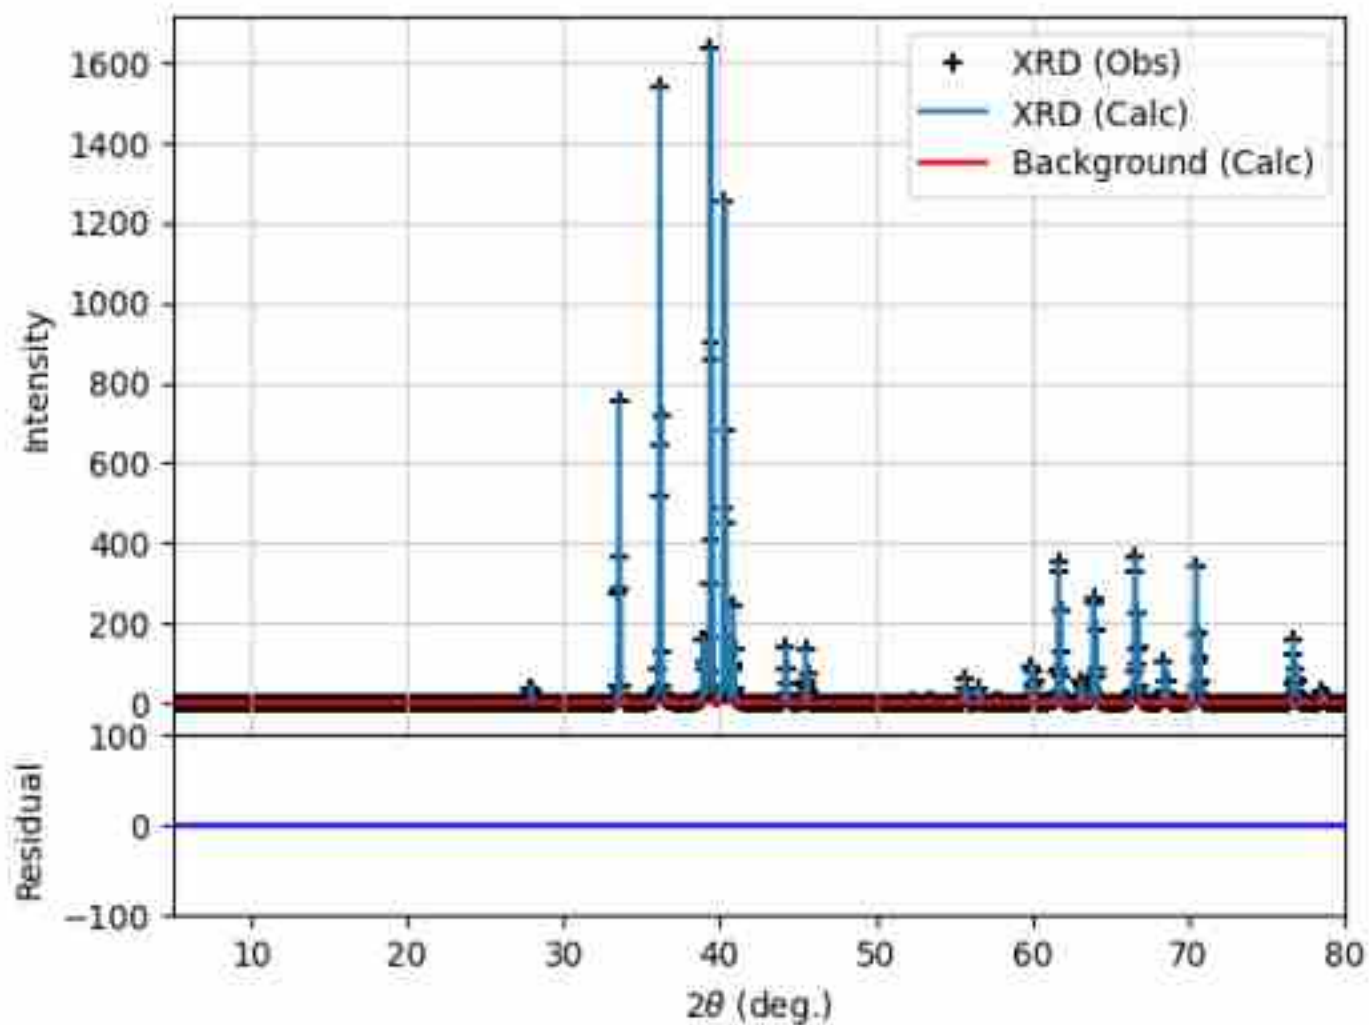

| RMSE before RR | Rwp    | RMSE after RR |
|----------------|--------|---------------|
| 0.017          | 0.0057 | 0.00038       |

# U1Cu2P2

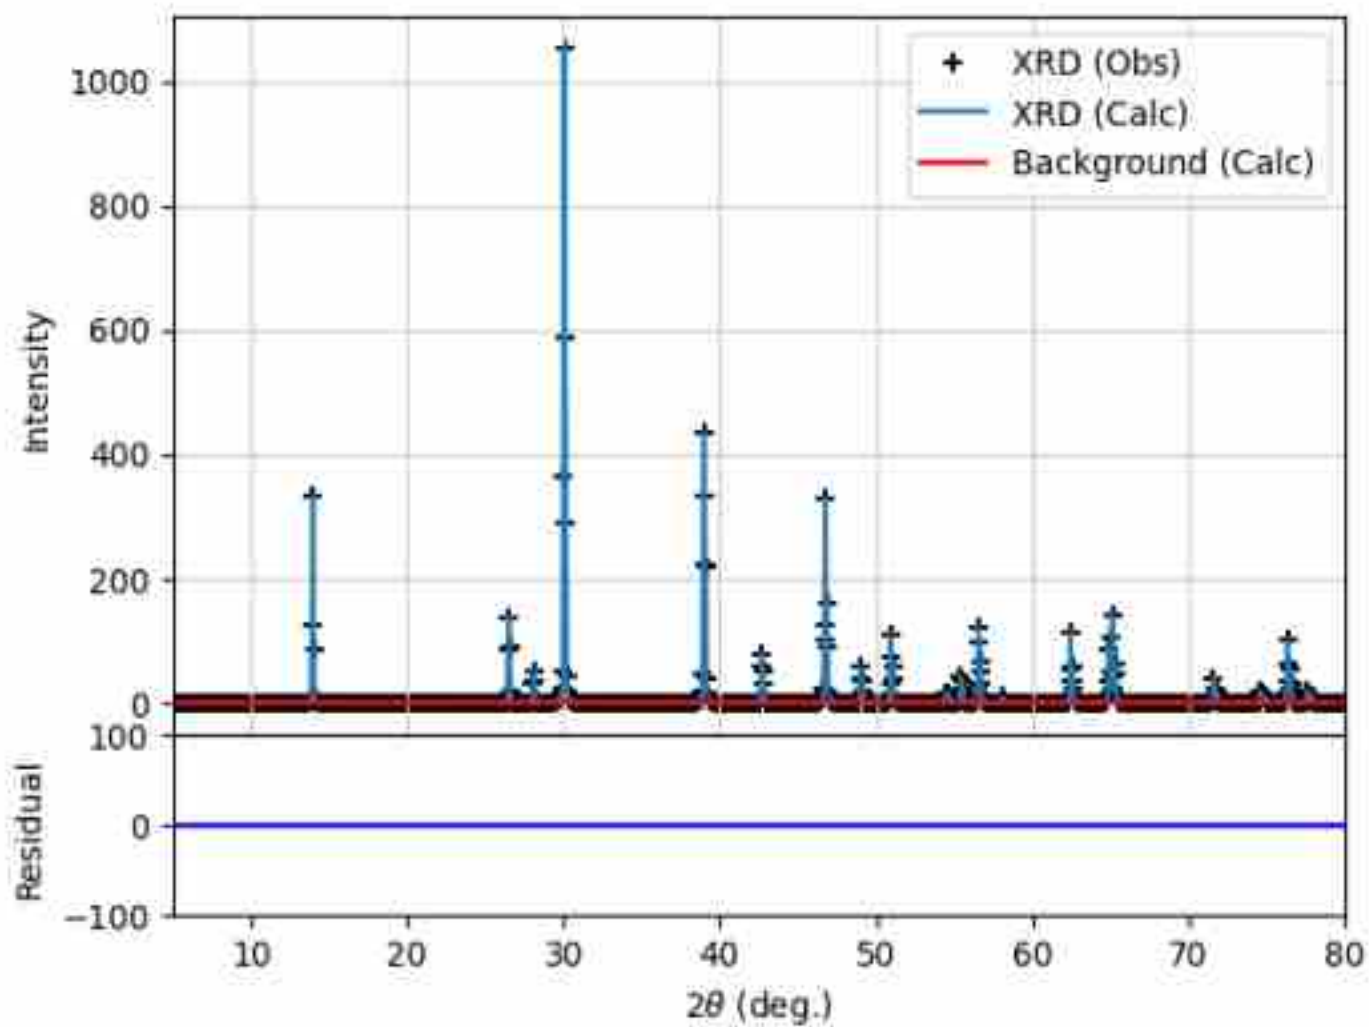

| RMSE before RR | Rwp     | RMSE after RR |
|----------------|---------|---------------|
| 0.017          | 0.00293 | 0.00096       |

# U<sub>2</sub>Ge<sub>2</sub>S<sub>2</sub>

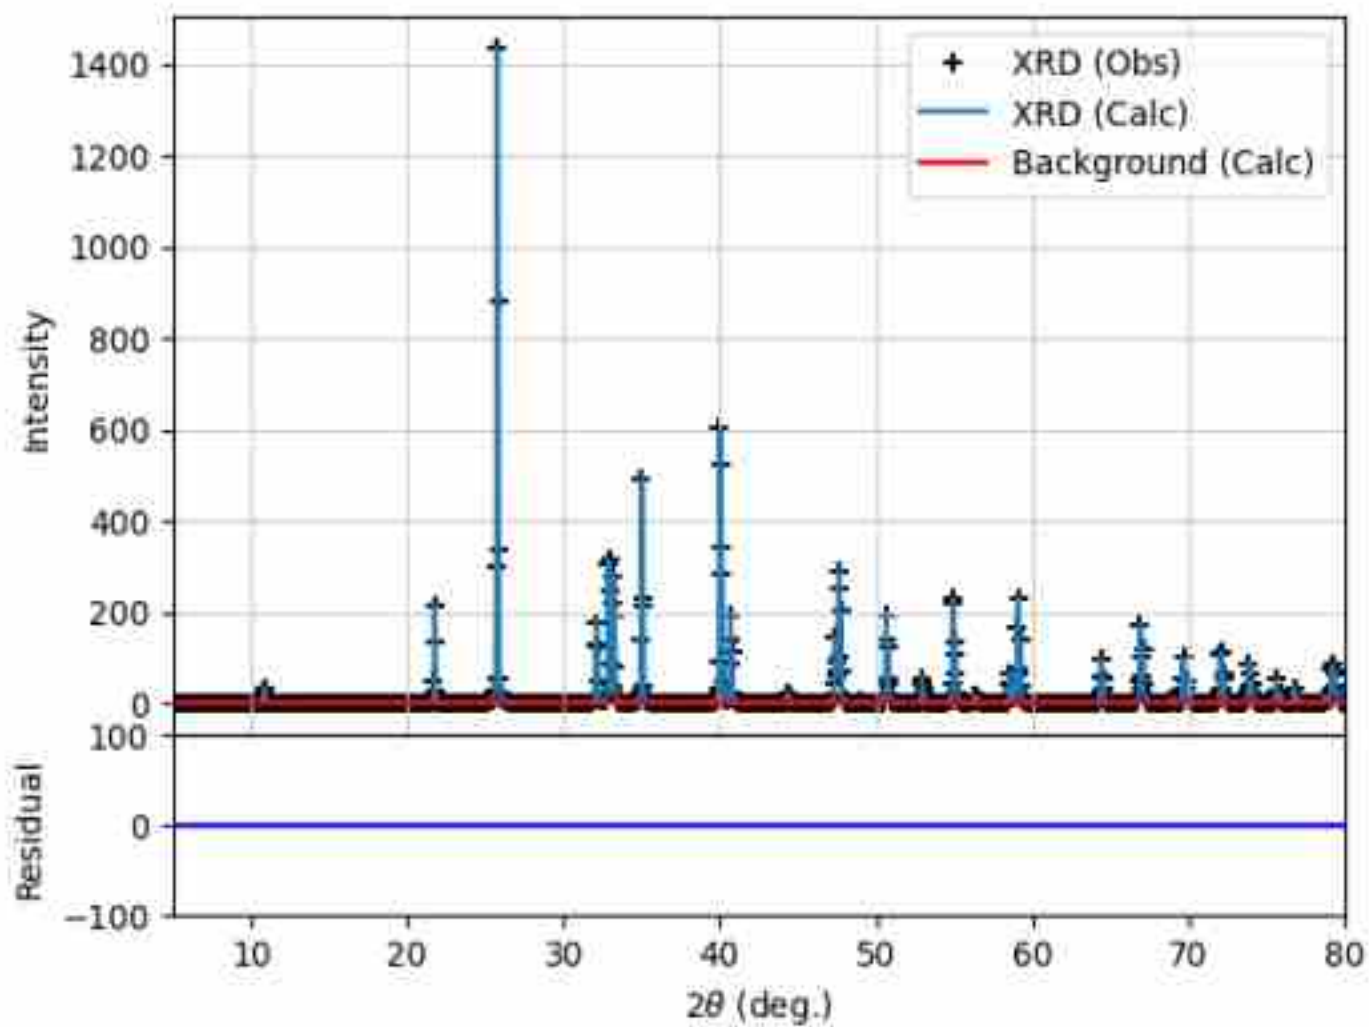

| RMSE before RR | Rwp     | RMSE after RR |
|----------------|---------|---------------|
| 0.017          | 0.00529 | 0.00097       |

# V2B2O6

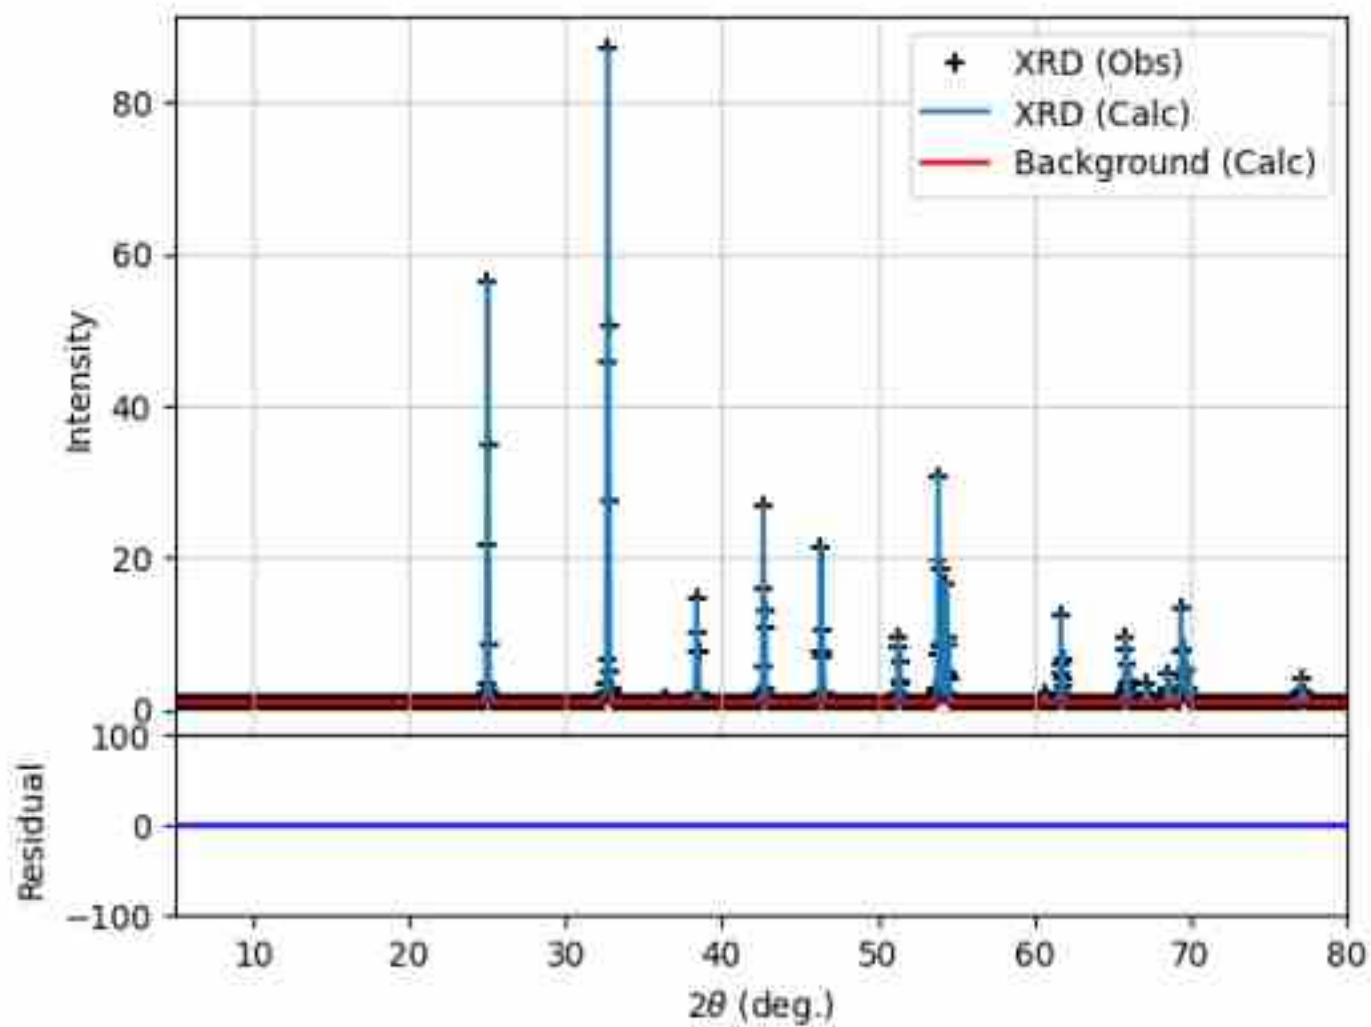

| RMSE before RR | Rwp     | RMSE after RR |
|----------------|---------|---------------|
| 0.017          | 0.00165 | 0.00072       |



# V2Zn1O6

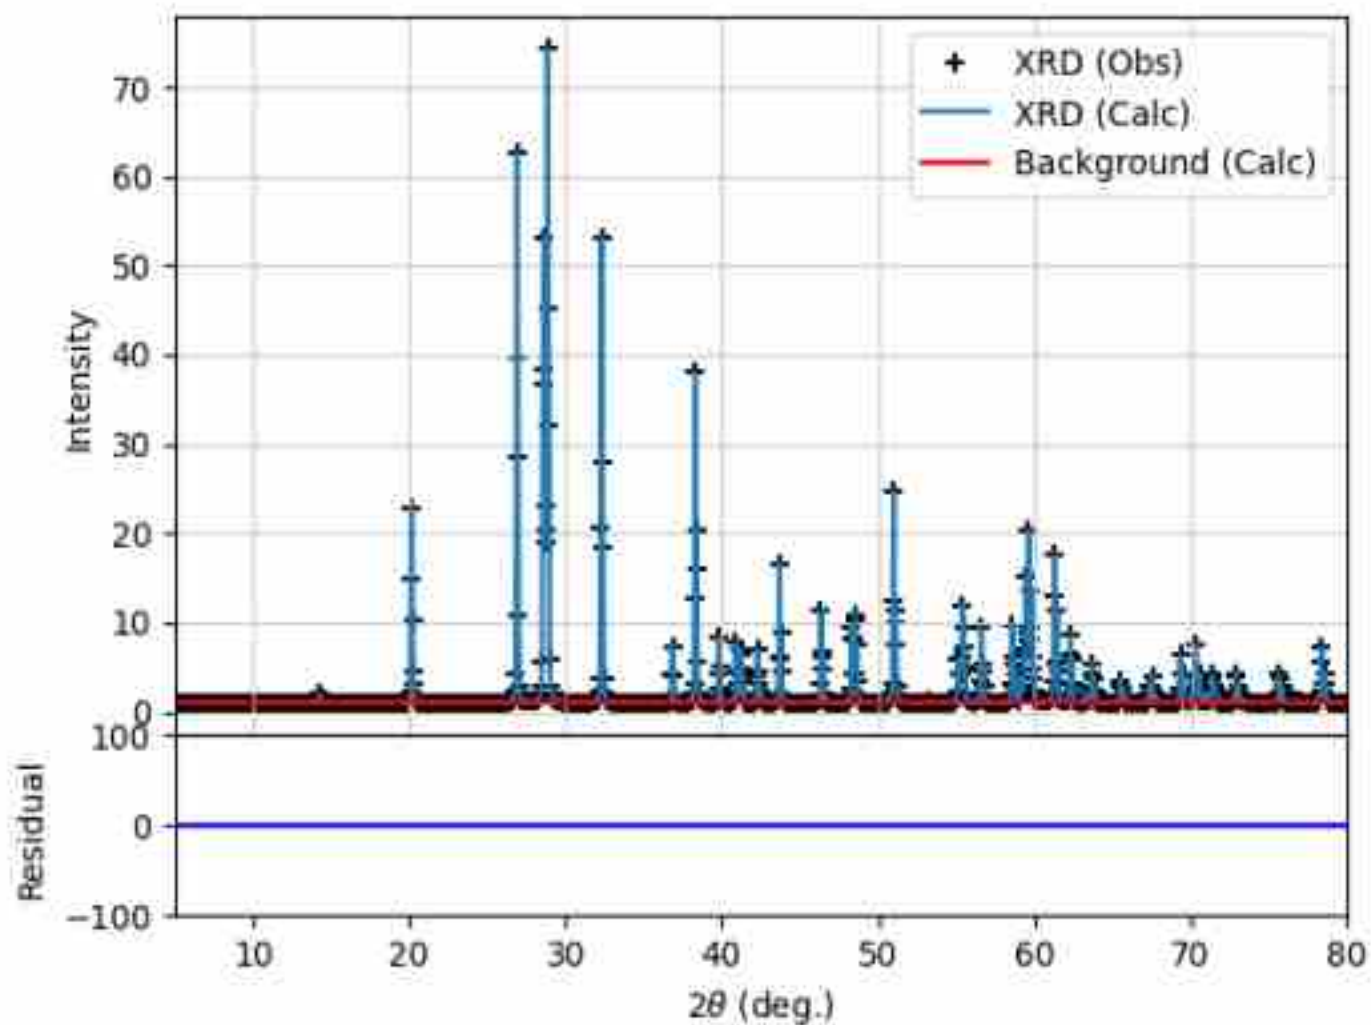

| RMSE before RR | Rwp    | RMSE after RR |
|----------------|--------|---------------|
| 0.017          | 0.0025 | 0.00054       |

# W1O3

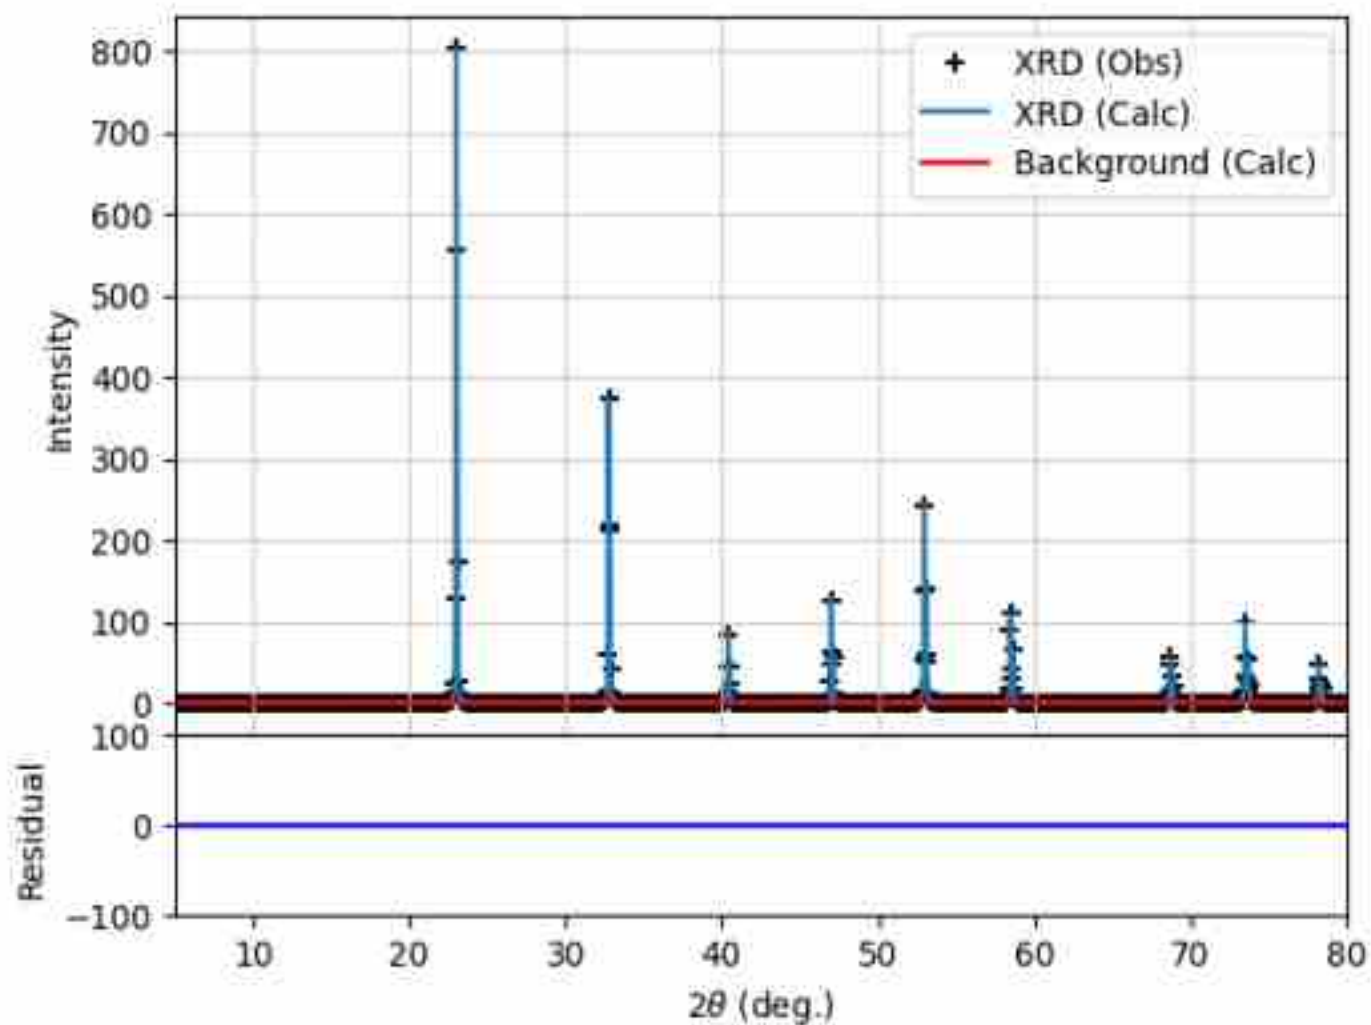

| RMSE before RR | Rwp     | RMSE after RR |
|----------------|---------|---------------|
| 0.017          | 0.00505 | 0.00156       |

# Y1Co10Mo2

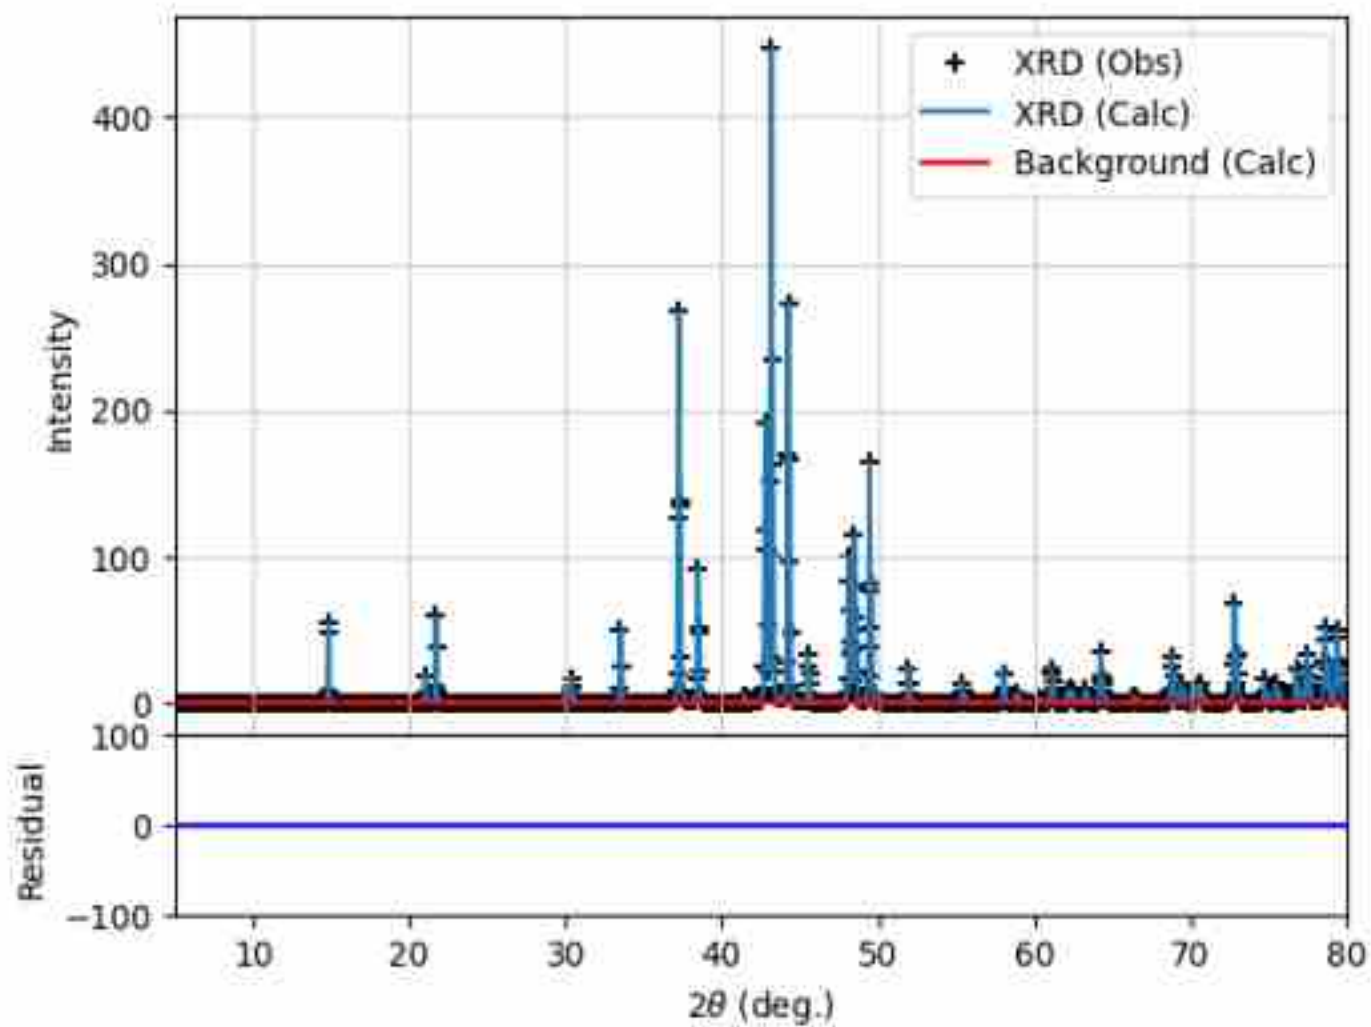

| RMSE before RR | Rwp     | RMSE after RR |
|----------------|---------|---------------|
| 0.017          | 0.00273 | 0.0005        |

# Y2B3C2

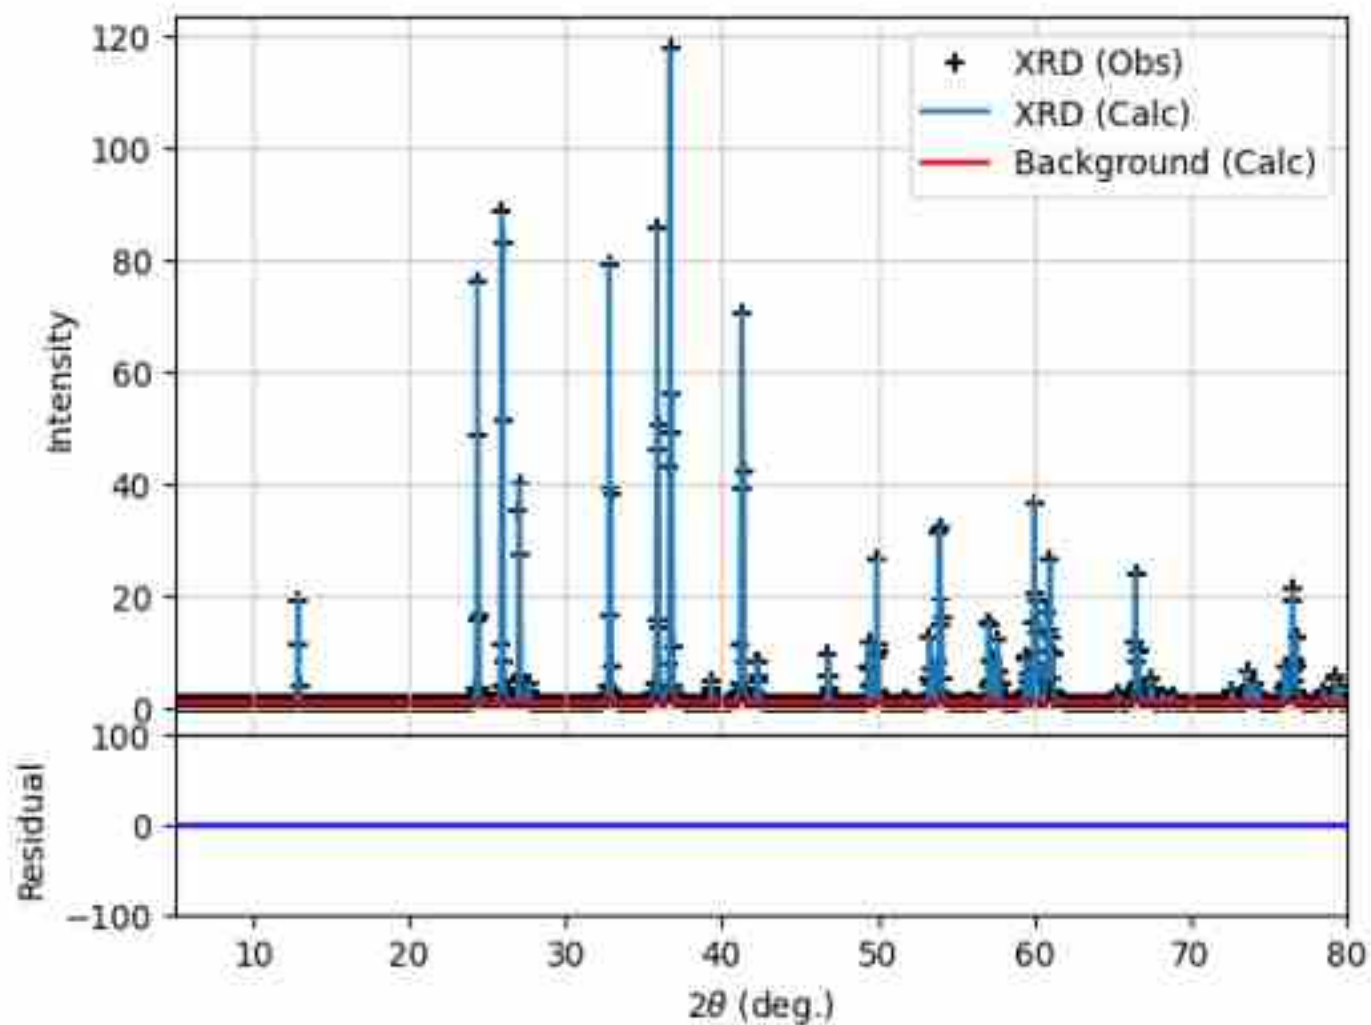

| RMSE before RR | Rwp     | RMSE after RR |
|----------------|---------|---------------|
| 0.017          | 0.00225 | 0.00134       |

# Y<sub>2</sub>Si<sub>4</sub>Rh<sub>6</sub>

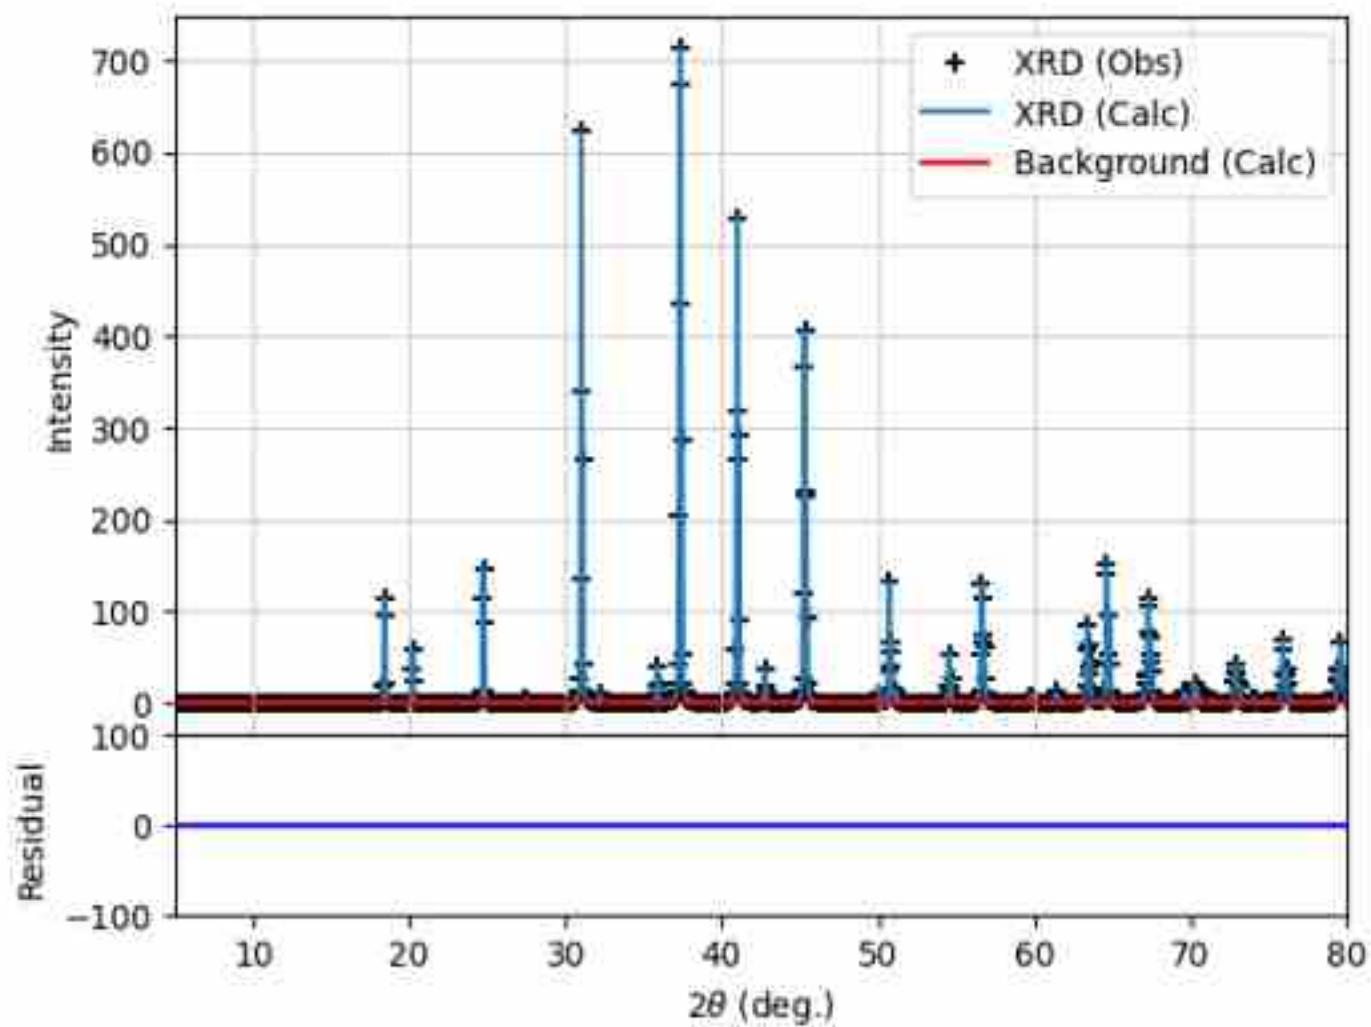

| RMSE before RR | Rwp    | RMSE after RR |
|----------------|--------|---------------|
| 0.017          | 0.0027 | 0.00071       |

# Y<sub>2</sub>Zn<sub>2</sub>As<sub>2</sub>O<sub>2</sub>

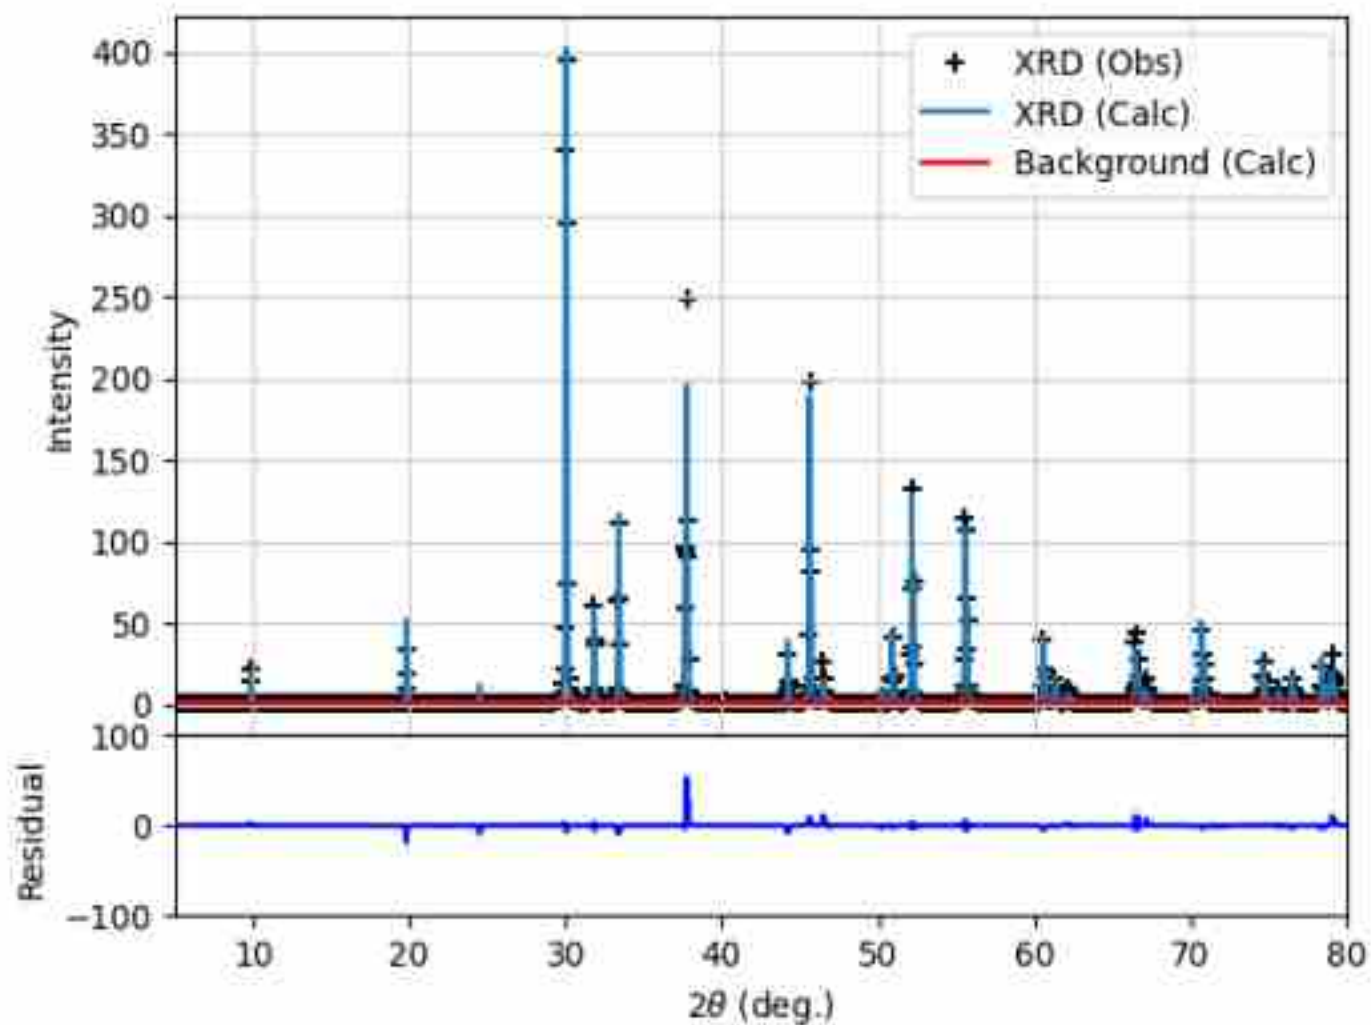

| RMSE before RR | Rwp      | RMSE after RR |
|----------------|----------|---------------|
| 0.017          | 17.45376 | 0.01792       |

# Y<sub>3</sub>In<sub>3</sub>Rh<sub>3</sub>

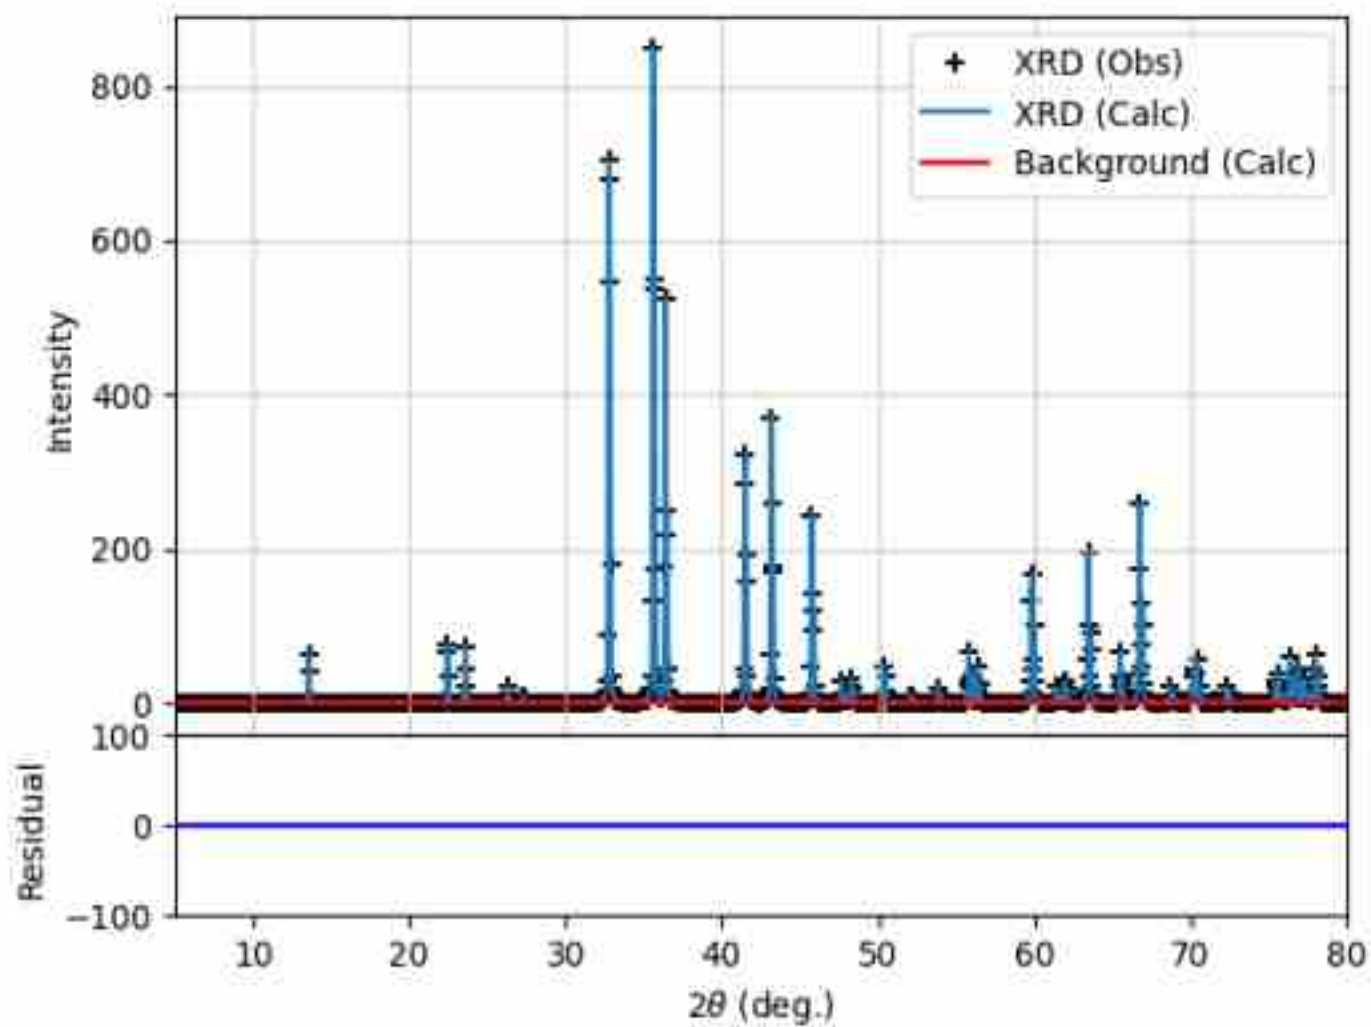

| RMSE before RR | Rwp     | RMSE after RR |
|----------------|---------|---------------|
| 0.017          | 0.00377 | 0.00091       |

# Y3Mg2V1S8

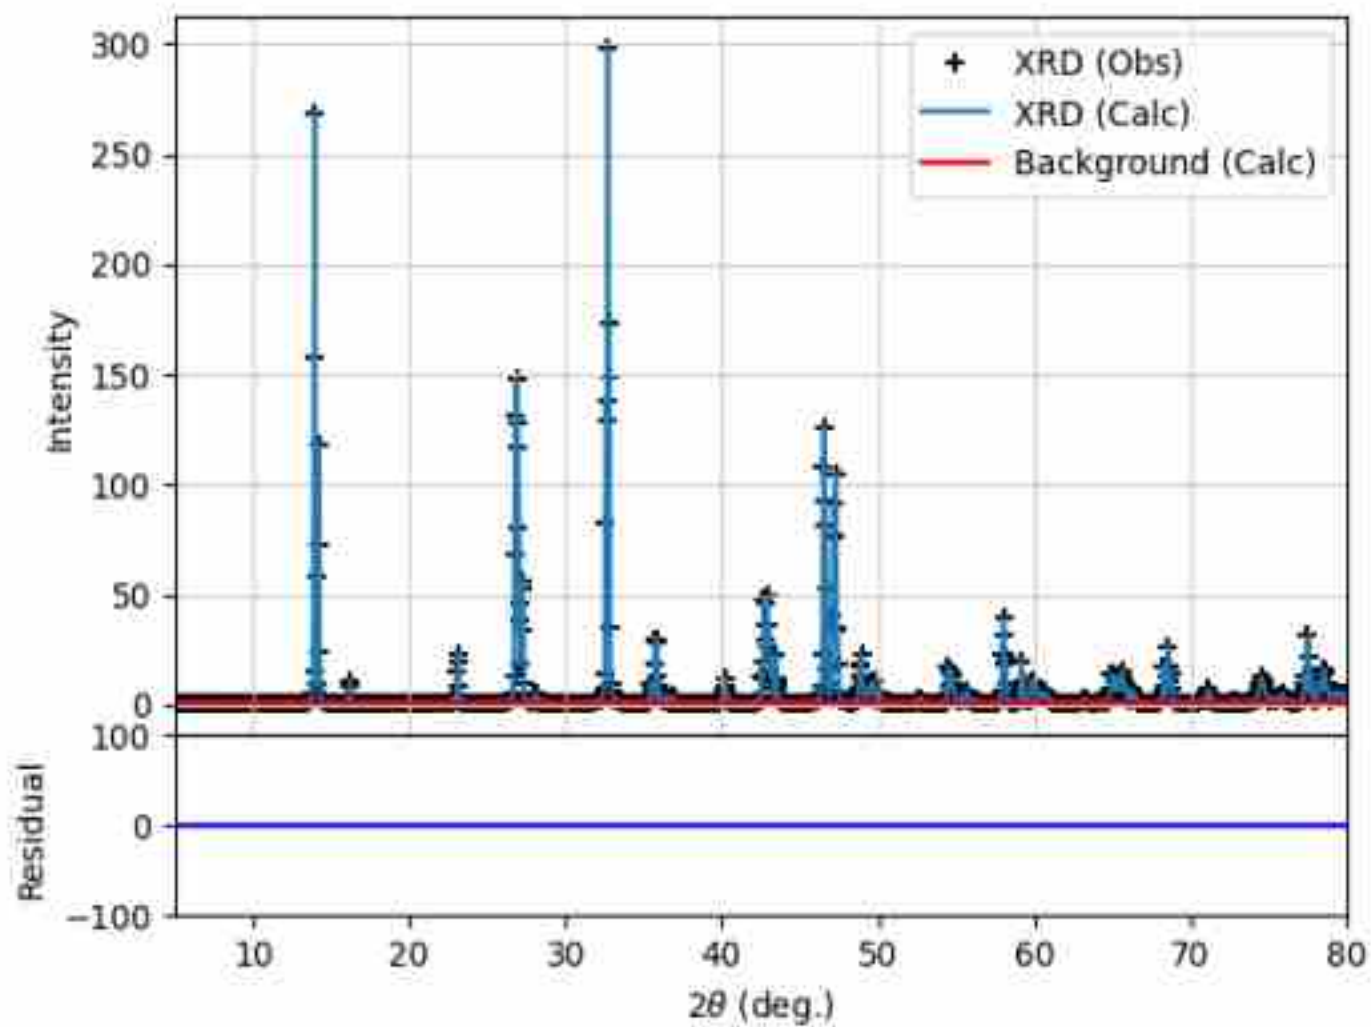

| RMSE before RR | Rwp     | RMSE after RR |
|----------------|---------|---------------|
| 0.017          | 0.00067 | 0.00021       |



# Y<sub>3</sub>Mg<sub>3</sub>Au<sub>3</sub>

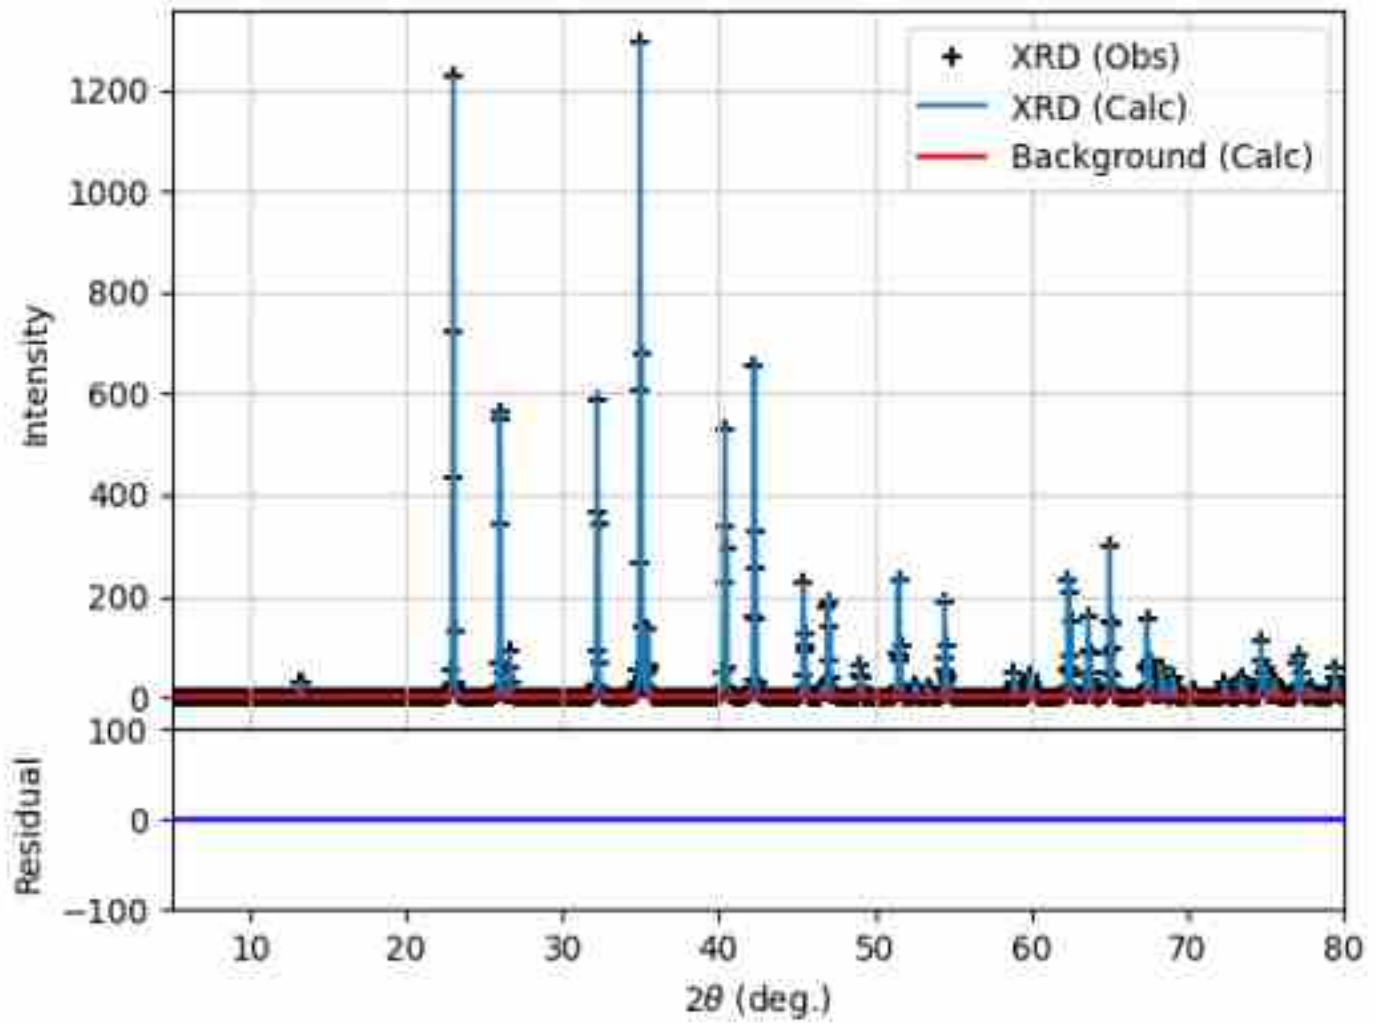

| RMSE before RR | Rwp     | RMSE after RR |
|----------------|---------|---------------|
| 0.017          | 0.00399 | 0.00087       |

# Y4C1I5

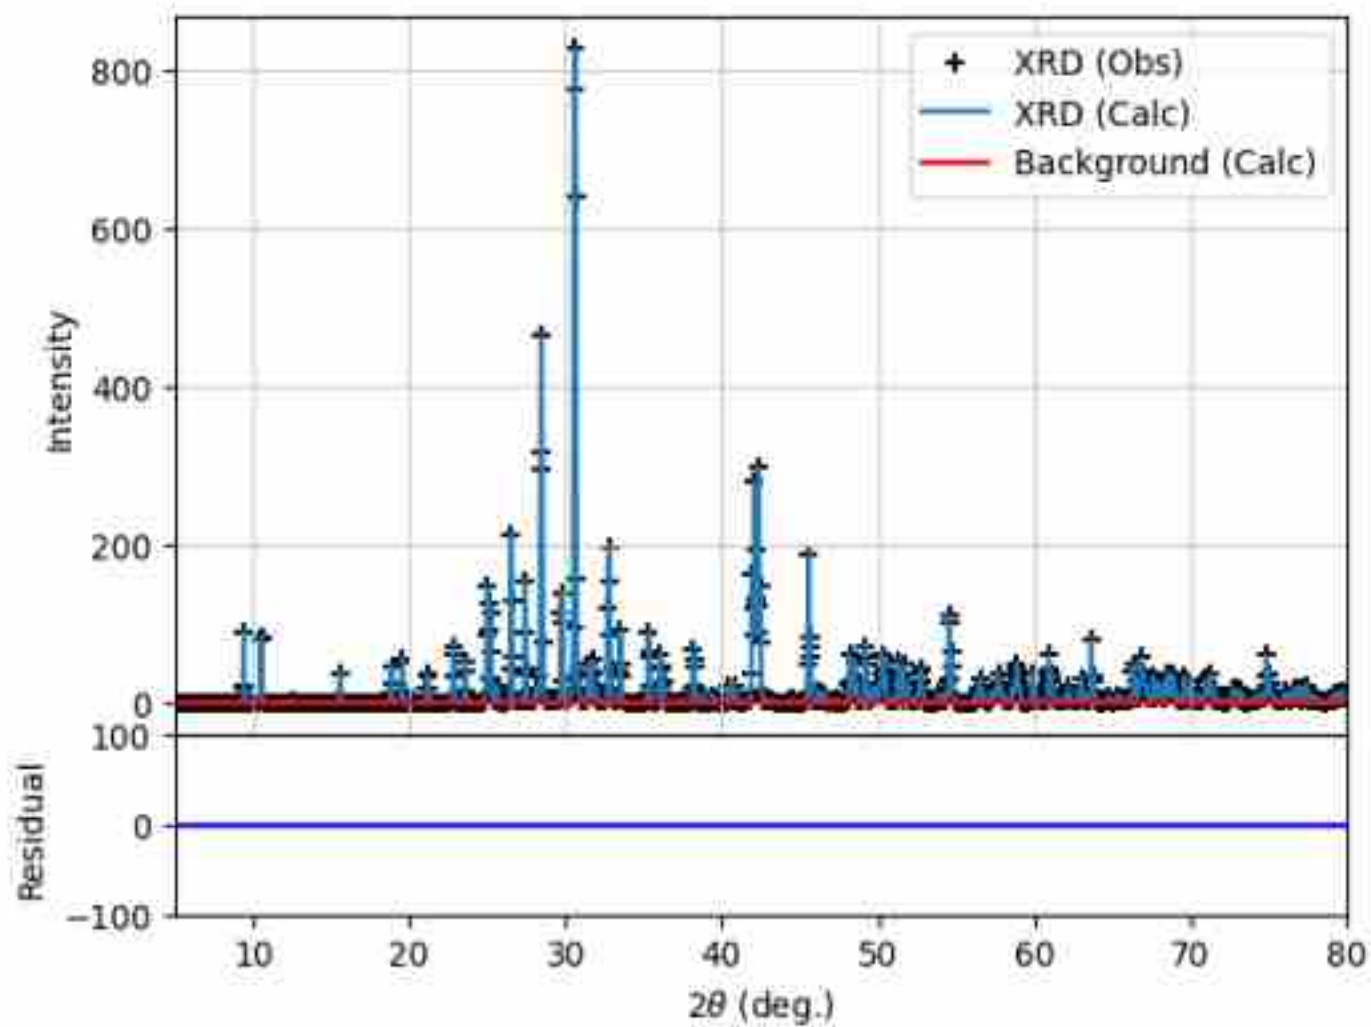

| RMSE before RR | Rwp     | RMSE after RR |
|----------------|---------|---------------|
| 0.017          | 0.00264 | 0.00025       |

# Y<sub>4</sub>Fe<sub>4</sub>O<sub>12</sub>

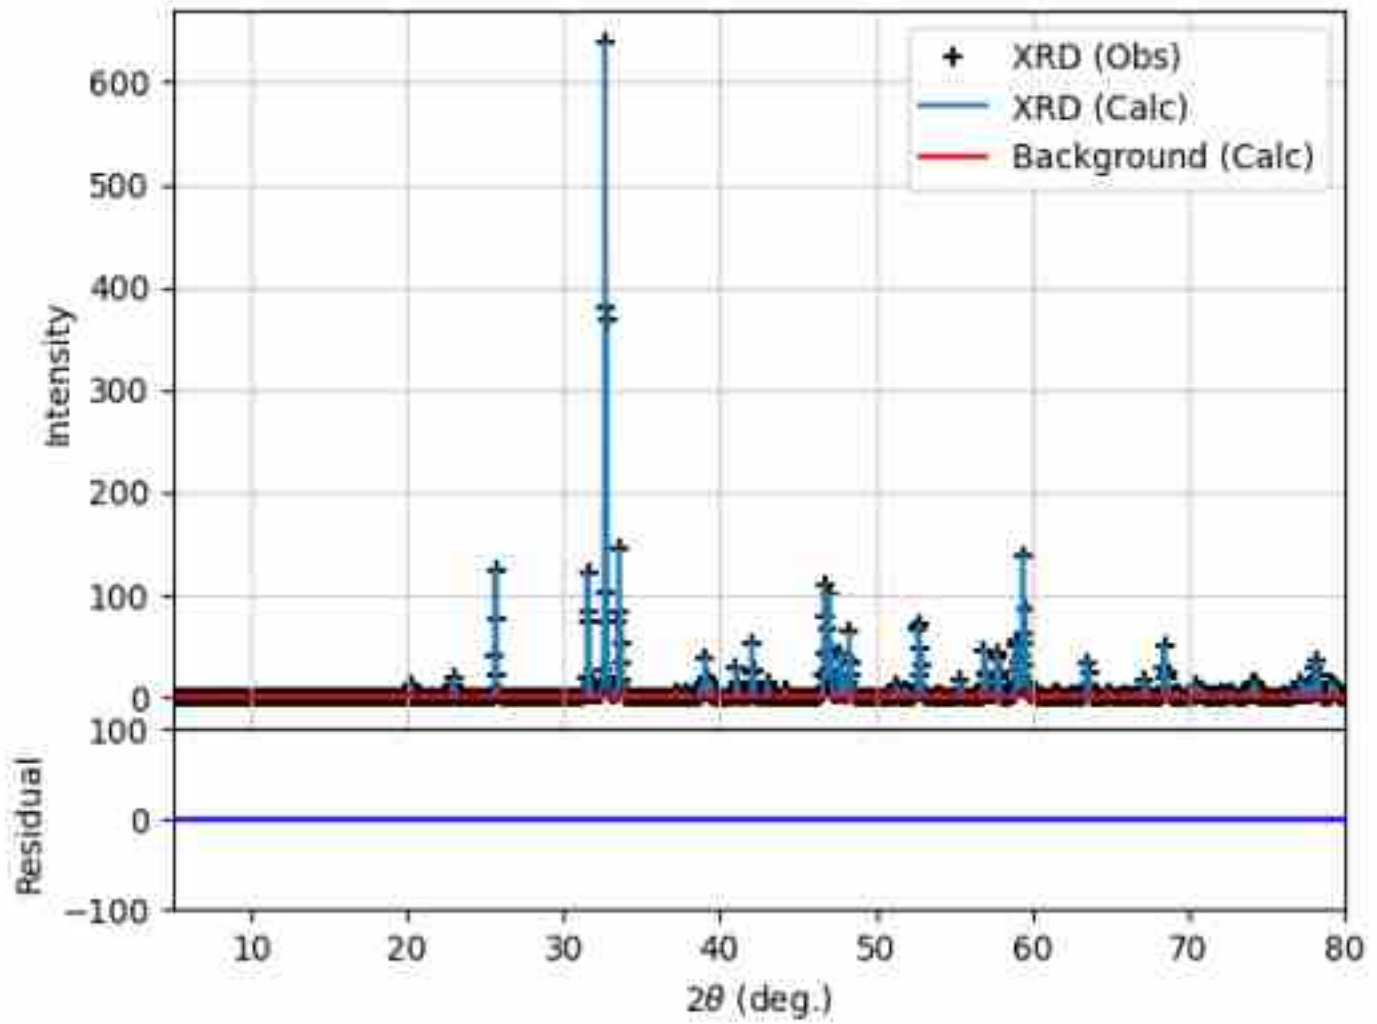

| RMSE before RR | Rwp     | RMSE after RR |
|----------------|---------|---------------|
| 0.017          | 0.00414 | 0.0015        |

# Y<sub>4</sub>Mn<sub>2</sub>Fe<sub>2</sub>O<sub>12</sub>

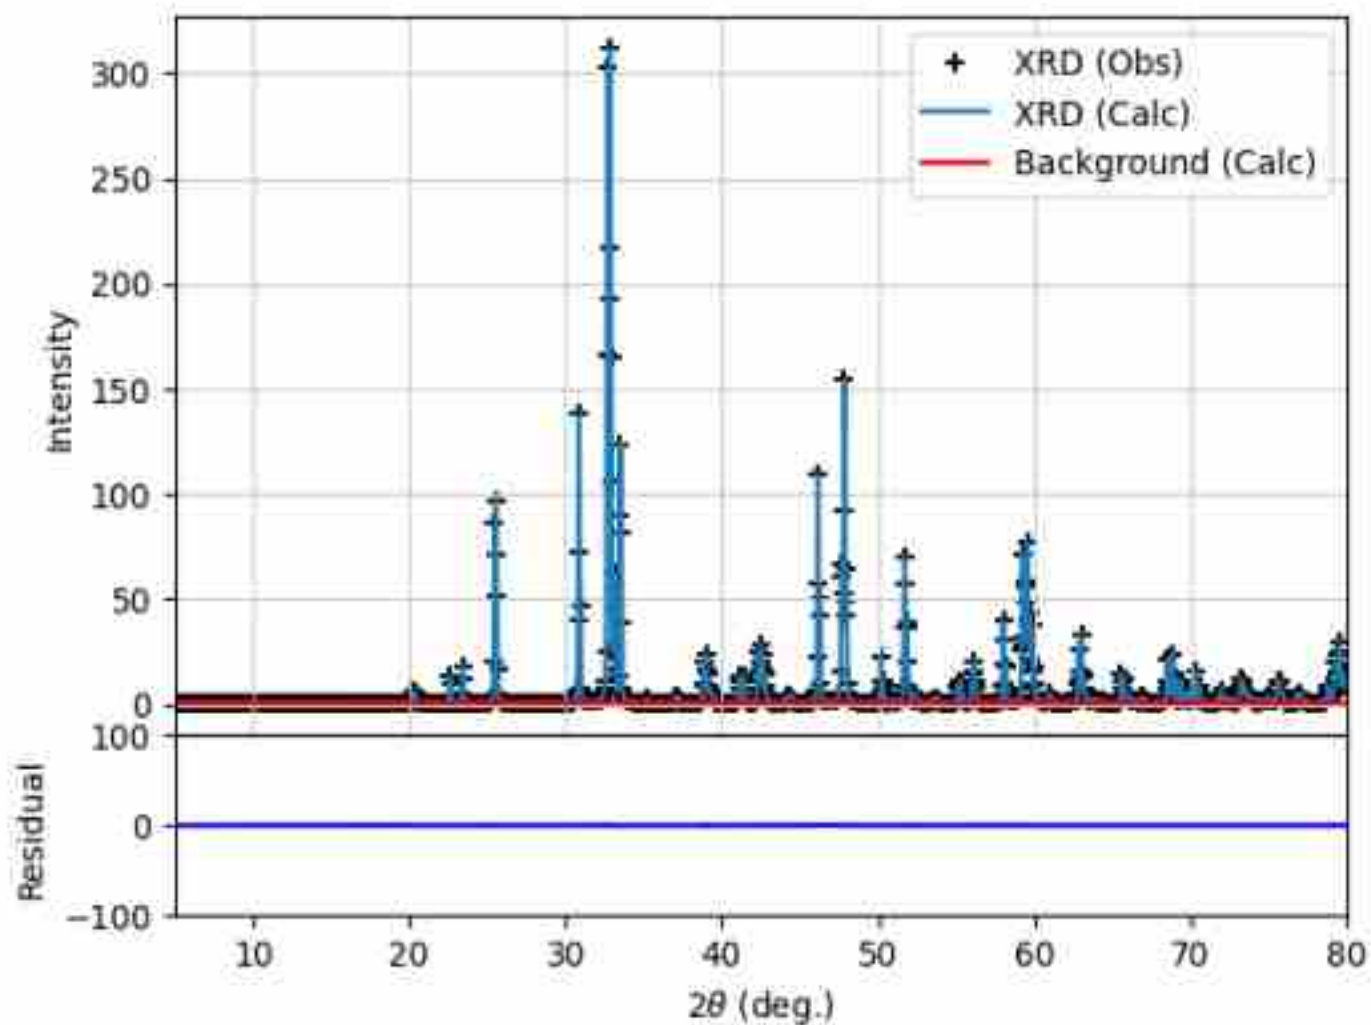

| RMSE before RR | Rwp     | RMSE after RR |
|----------------|---------|---------------|
| 0.017          | 0.89864 | 0.03232       |

# Y<sub>4</sub>Si<sub>1</sub>S<sub>3</sub>

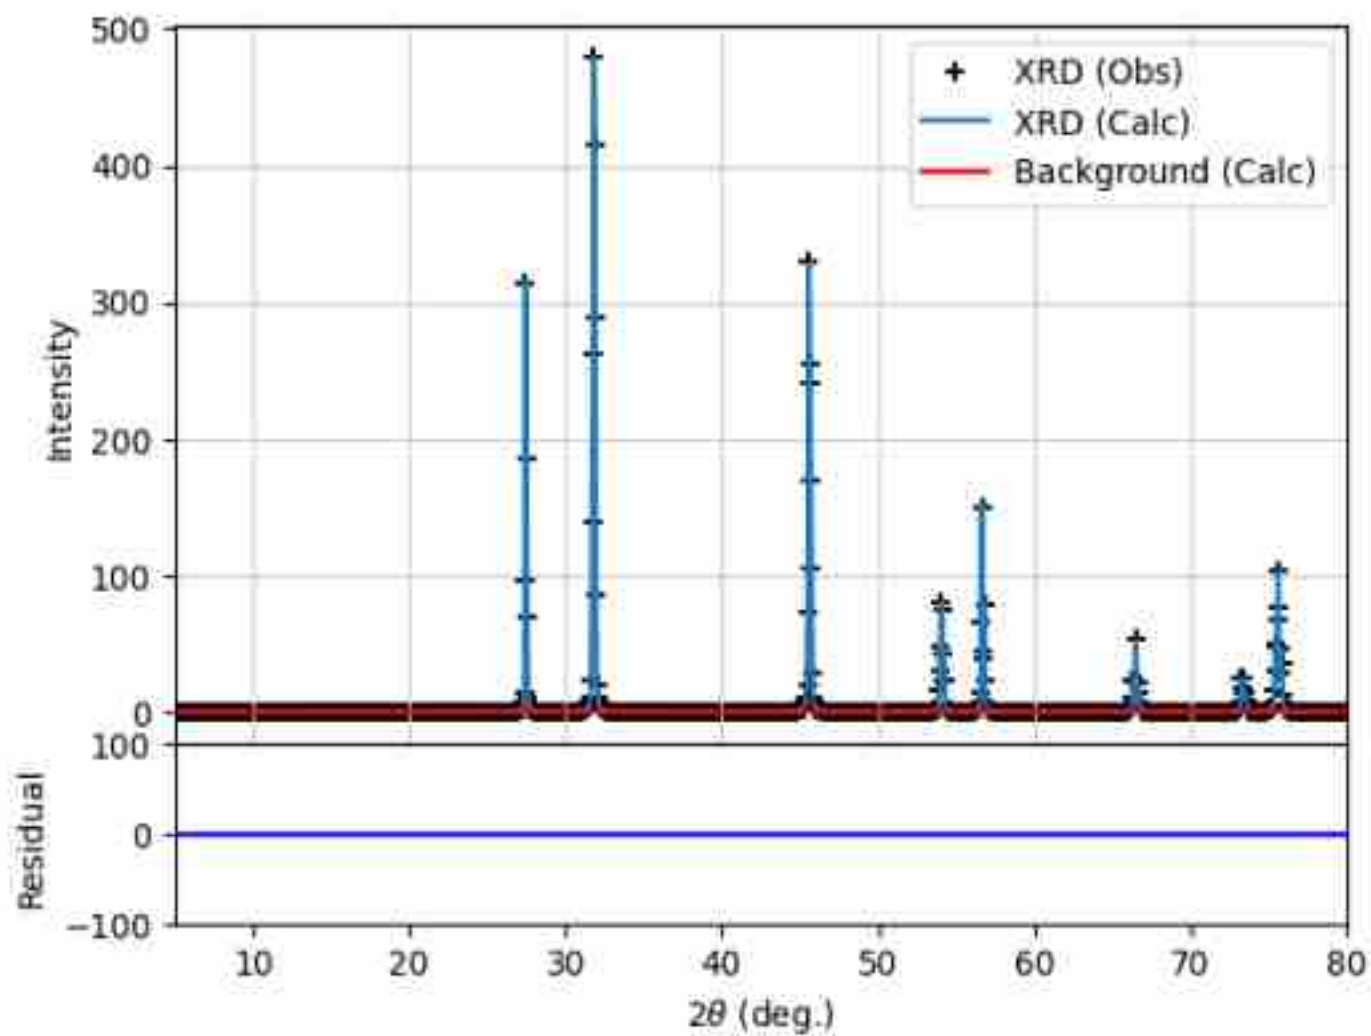

| RMSE before RR | Rwp     | RMSE after RR |
|----------------|---------|---------------|
| 0.017          | 0.00293 | 0.0003        |

# Y4U1Pd15

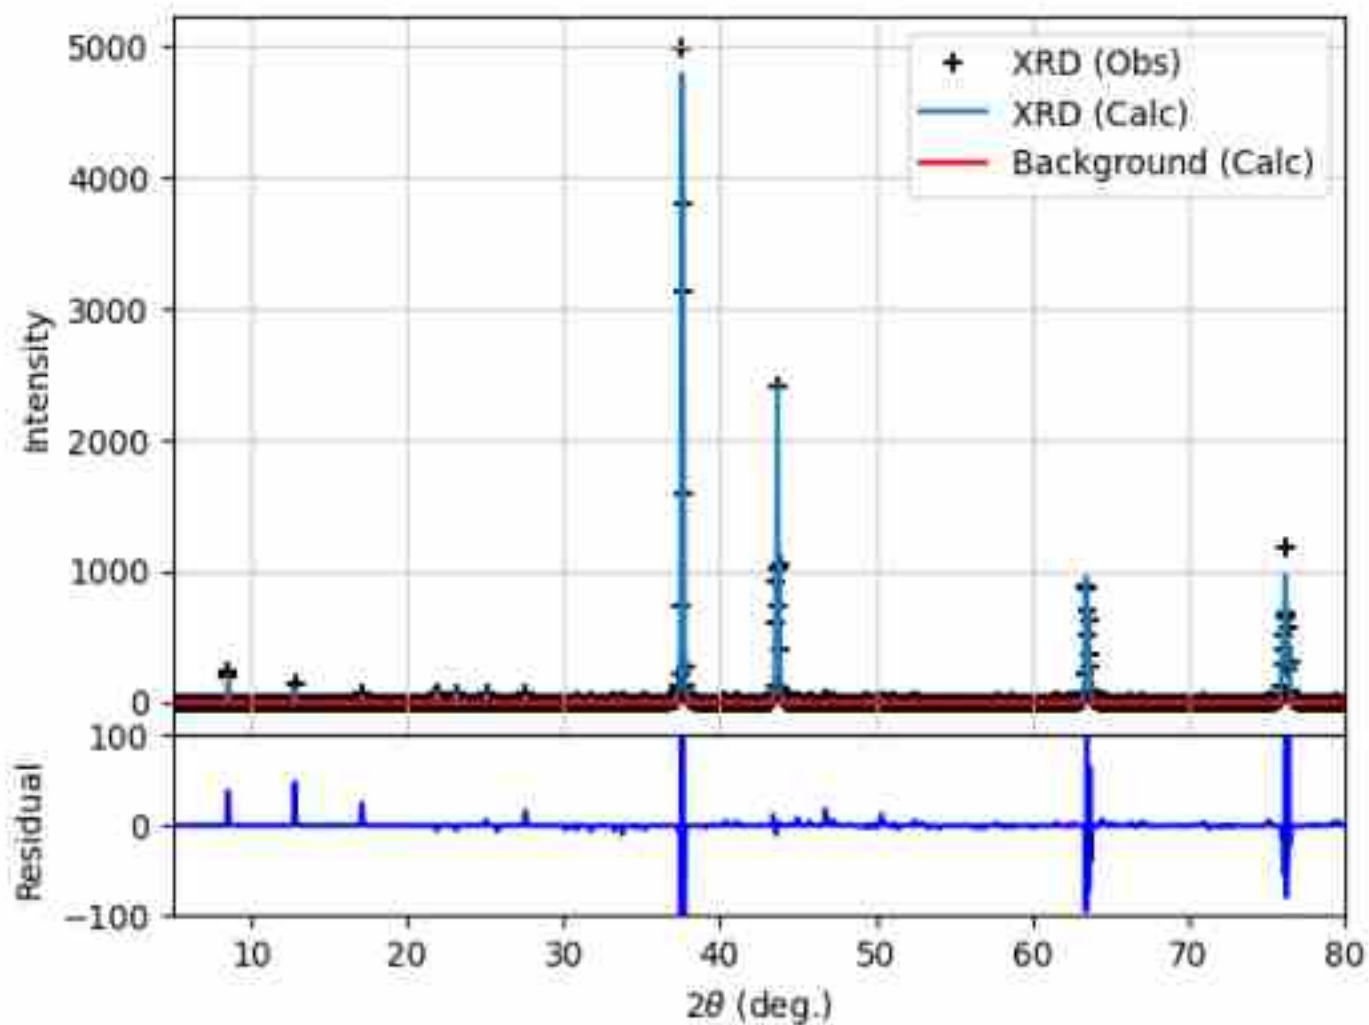

| RMSE before RR | Rwp      | RMSE after RR |
|----------------|----------|---------------|
| 0.017          | 13.14617 | 0.03194       |

# Y<sub>4</sub>Zn<sub>1</sub>Ga<sub>3</sub>

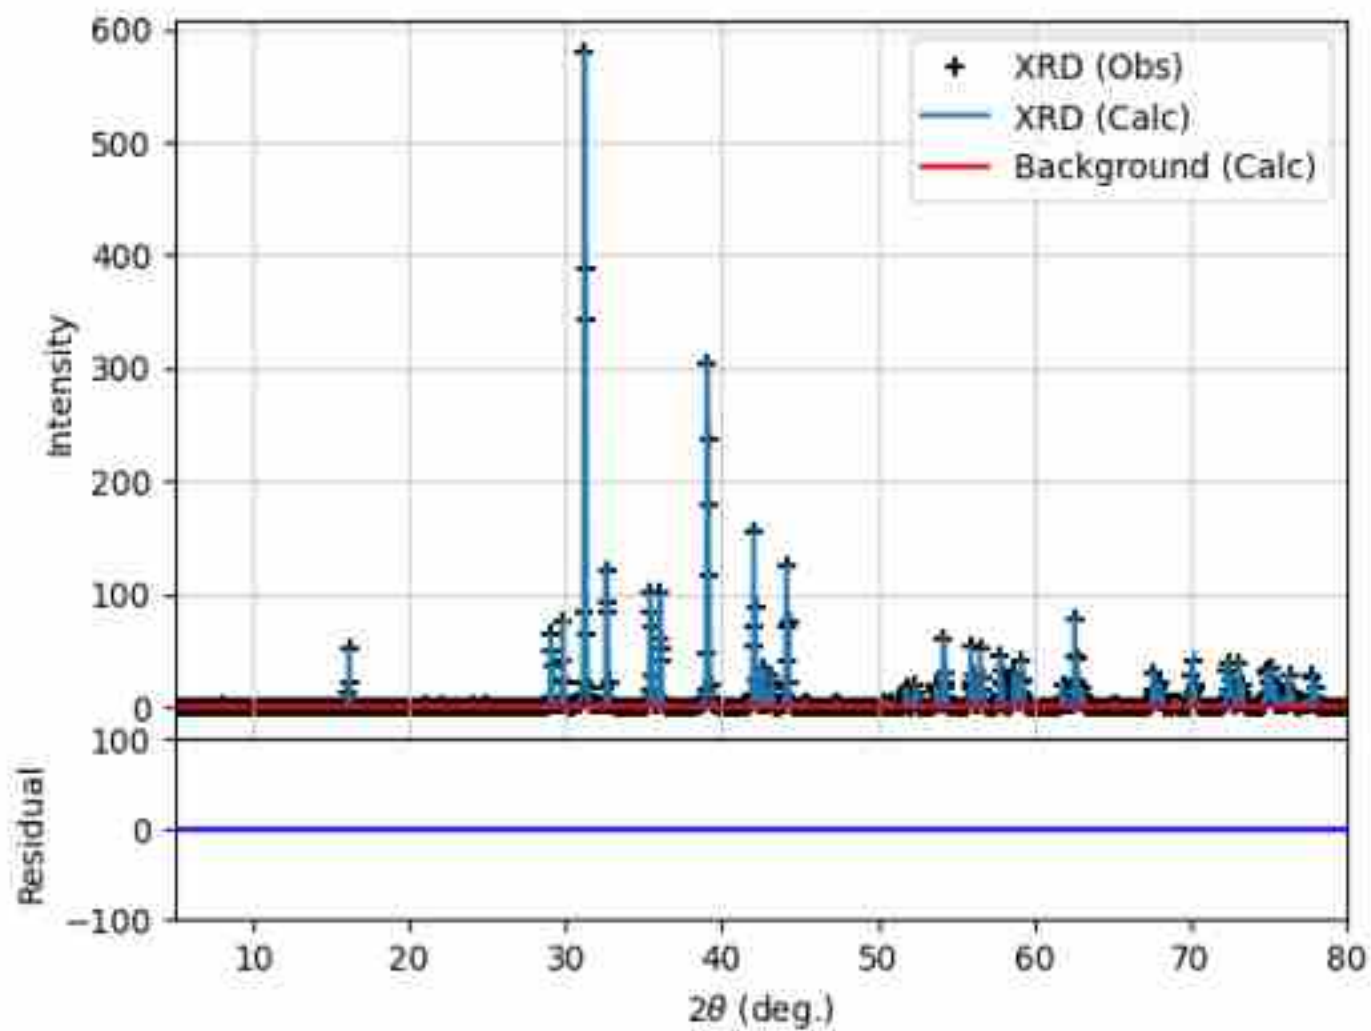

| RMSE before RR | Rwp     | RMSE after RR |
|----------------|---------|---------------|
| 0.017          | 0.27302 | 0.00671       |

# Yb1Gd1P2O8

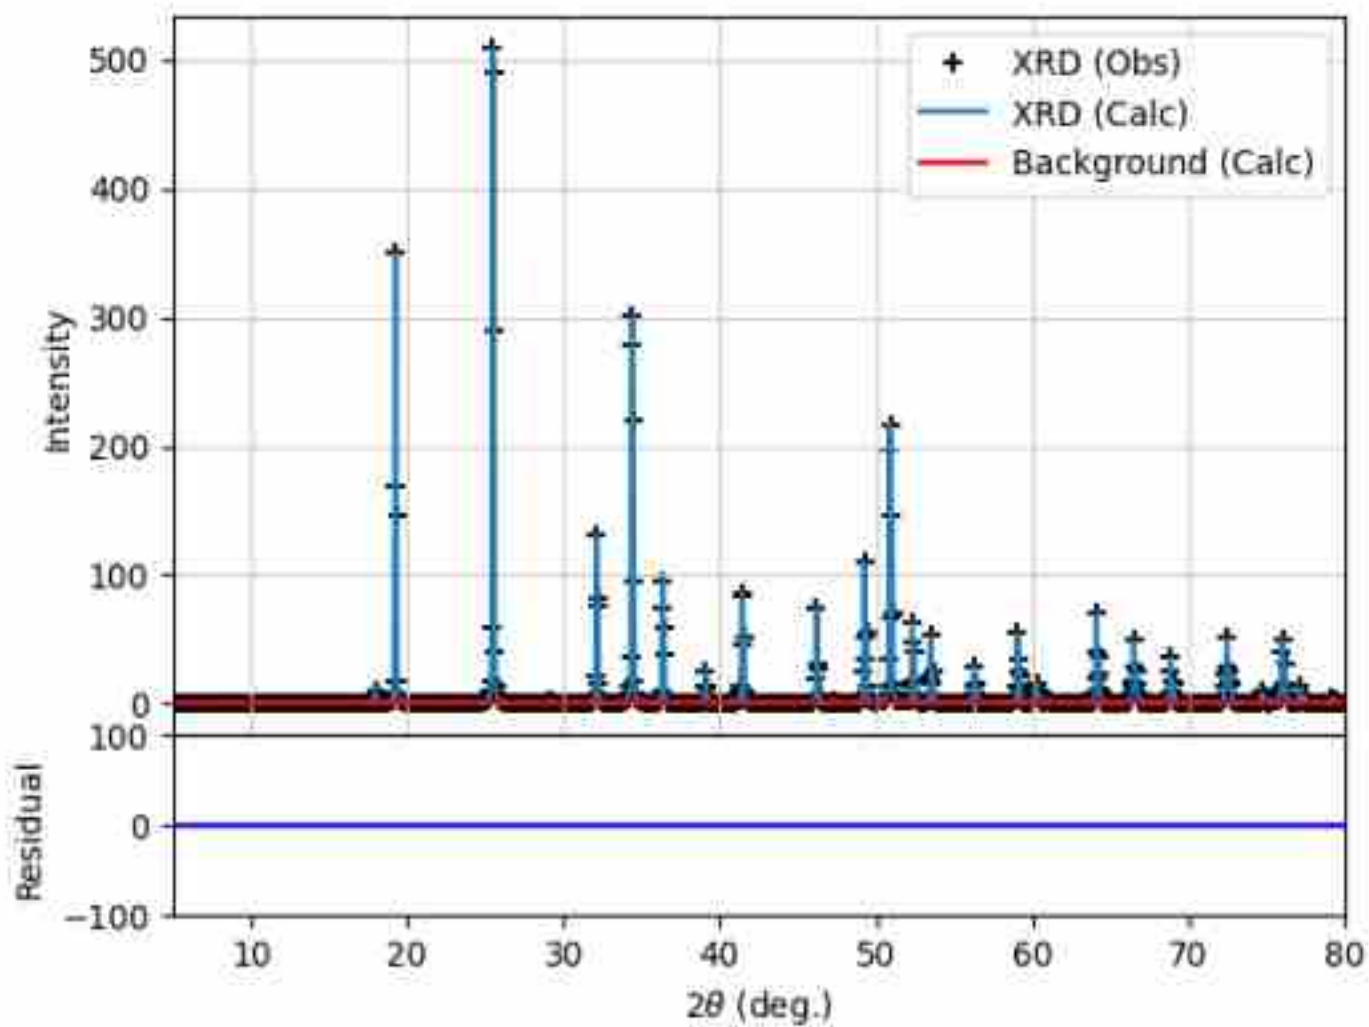

| RMSE before RR | Rwp     | RMSE after RR |
|----------------|---------|---------------|
| 0.017          | 0.00296 | 0.00134       |



# Yb4Cr4O12

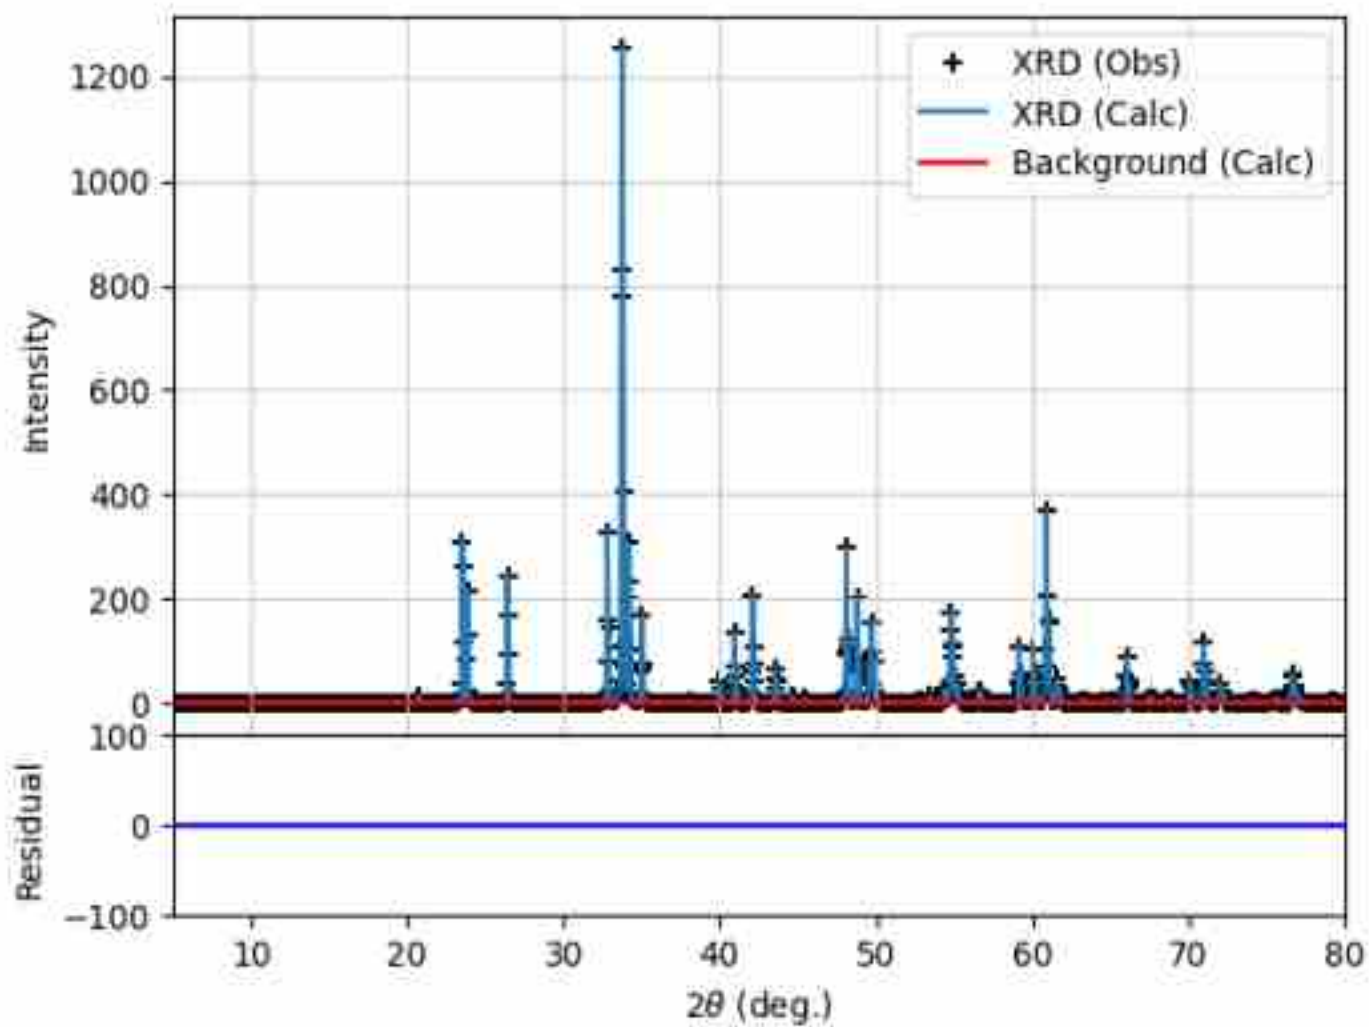

| RMSE before RR | Rwp     | RMSE after RR |
|----------------|---------|---------------|
| 0.017          | 0.00408 | 0.00147       |

# Yb<sub>4</sub>Ge<sub>4</sub>Ir<sub>4</sub>

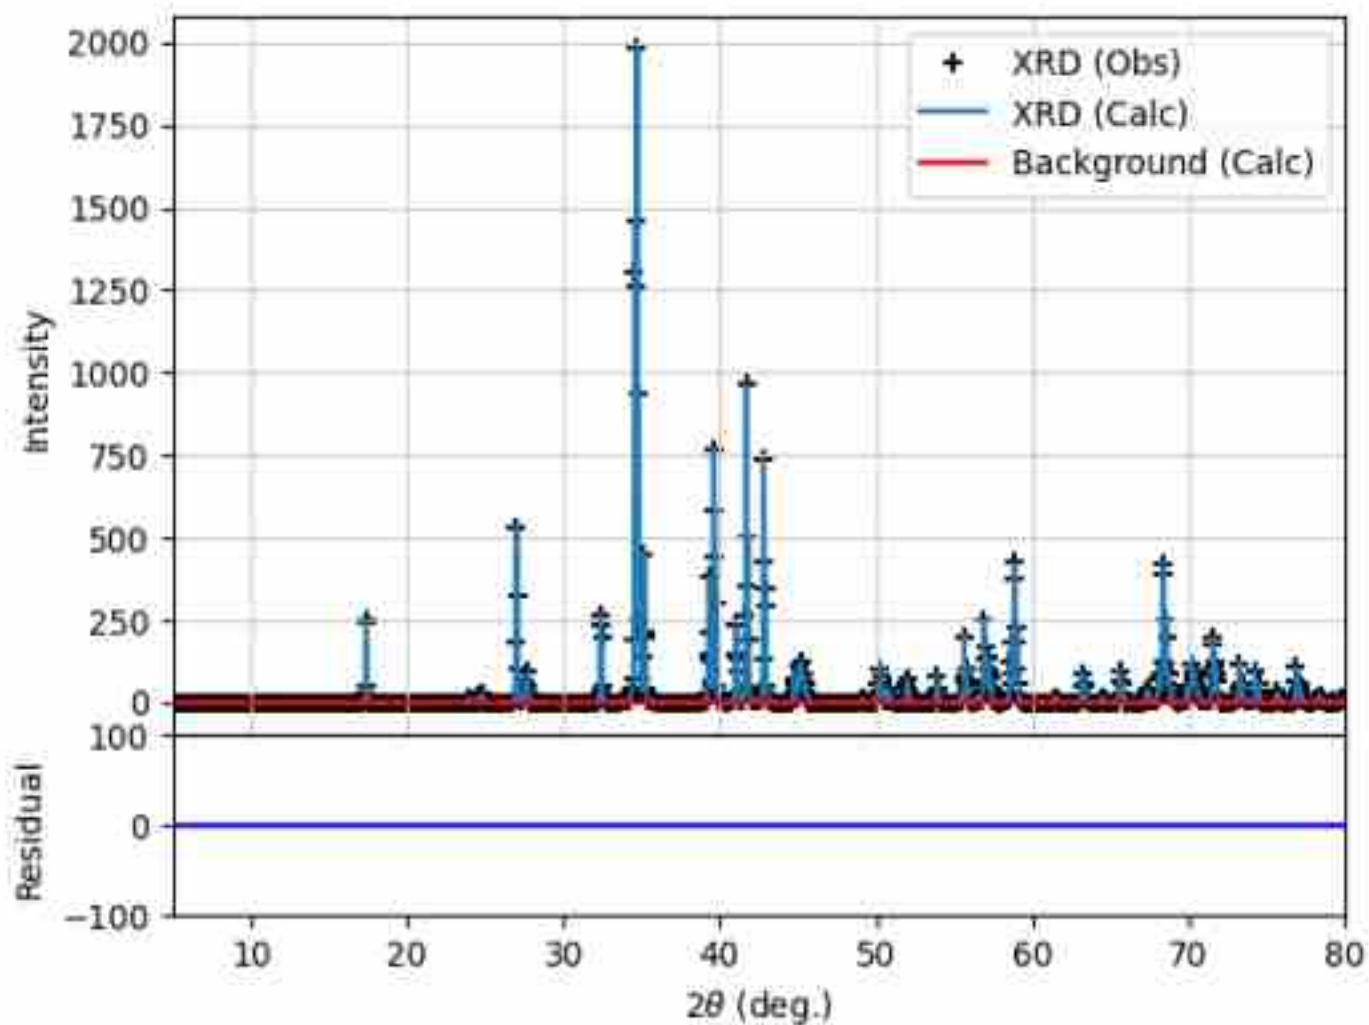

| RMSE before RR | Rwp     | RMSE after RR |
|----------------|---------|---------------|
| 0.017          | 0.00504 | 0.00042       |

# Yb<sub>4</sub>Sb<sub>4</sub>Pd<sub>4</sub>

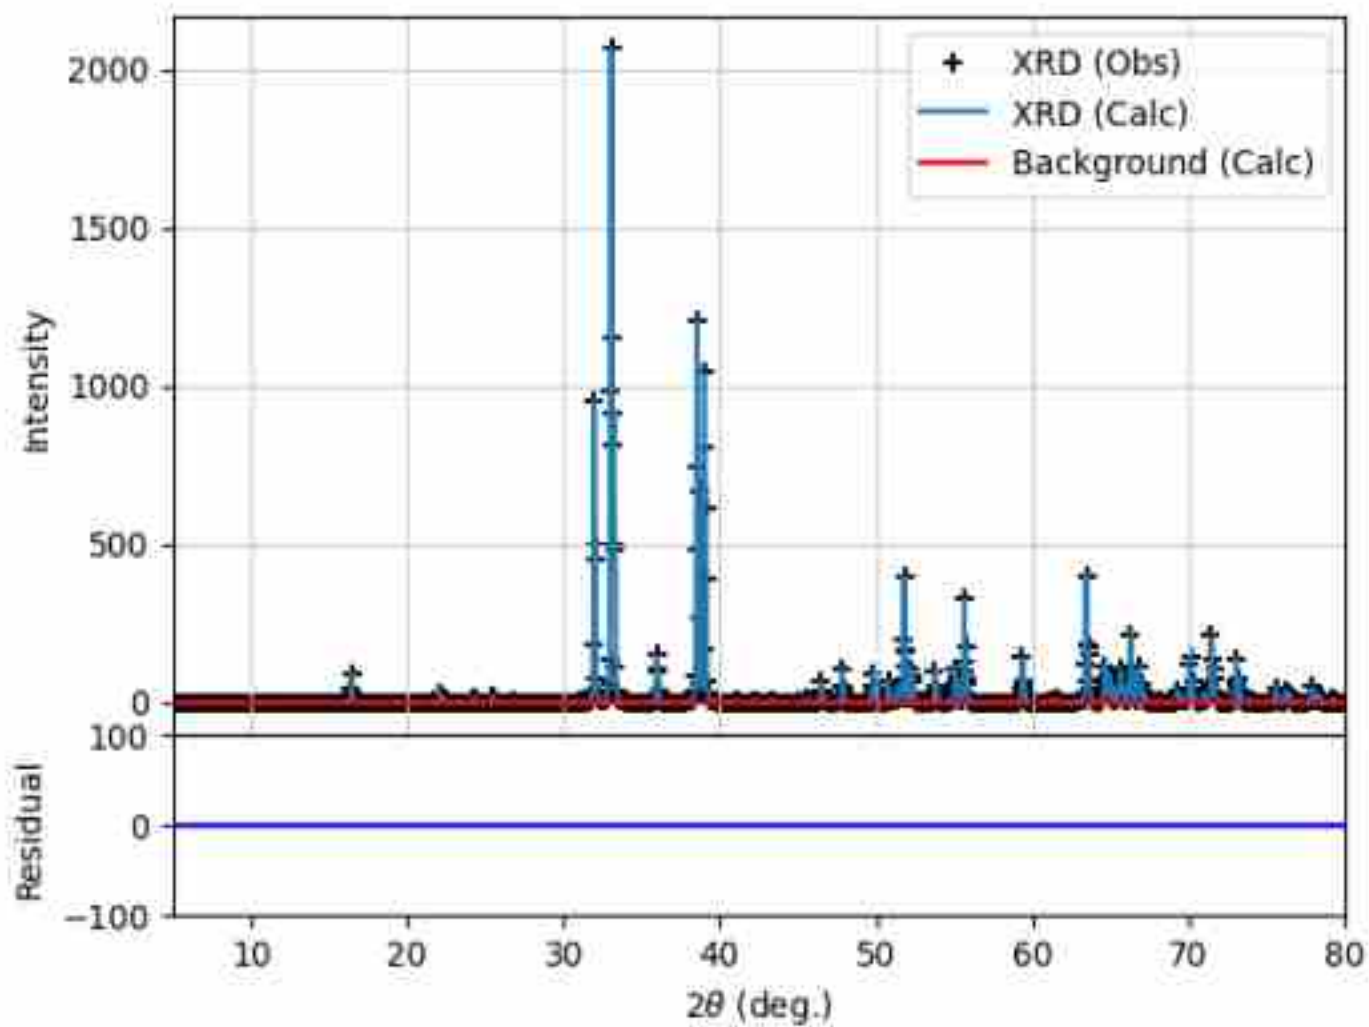

| RMSE before RR | Rwp     | RMSE after RR |
|----------------|---------|---------------|
| 0.017          | 0.00499 | 0.00033       |

# Zn1Cr4Cu1Se8

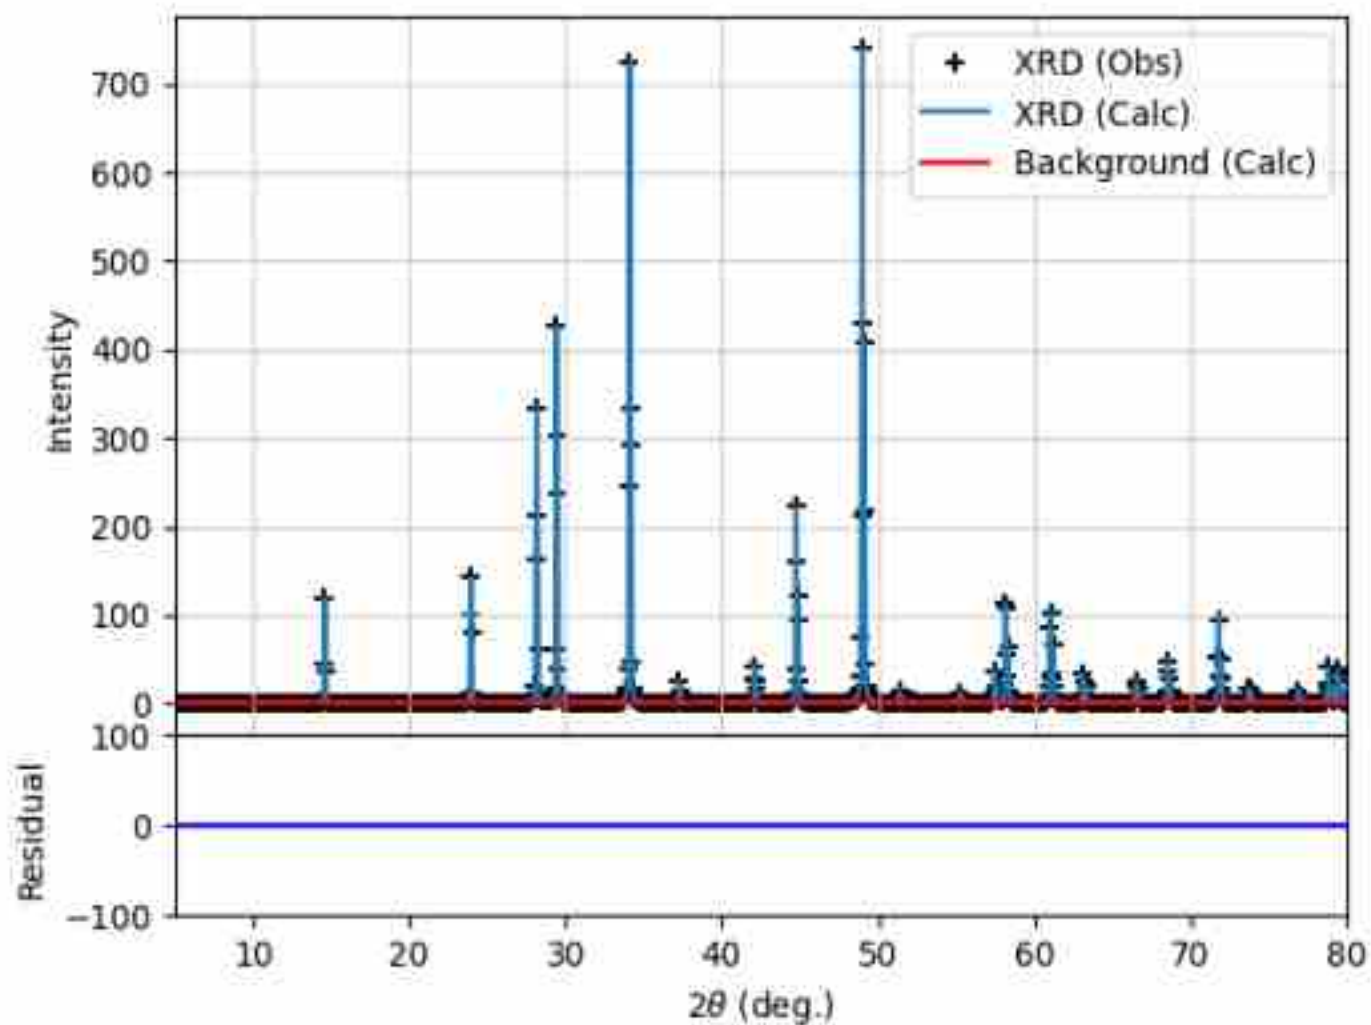

| RMSE before RR | Rwp     | RMSE after RR |
|----------------|---------|---------------|
| 0.017          | 0.06413 | 0.00283       |

# Zn<sub>2</sub>Ge<sub>2</sub>As<sub>4</sub>

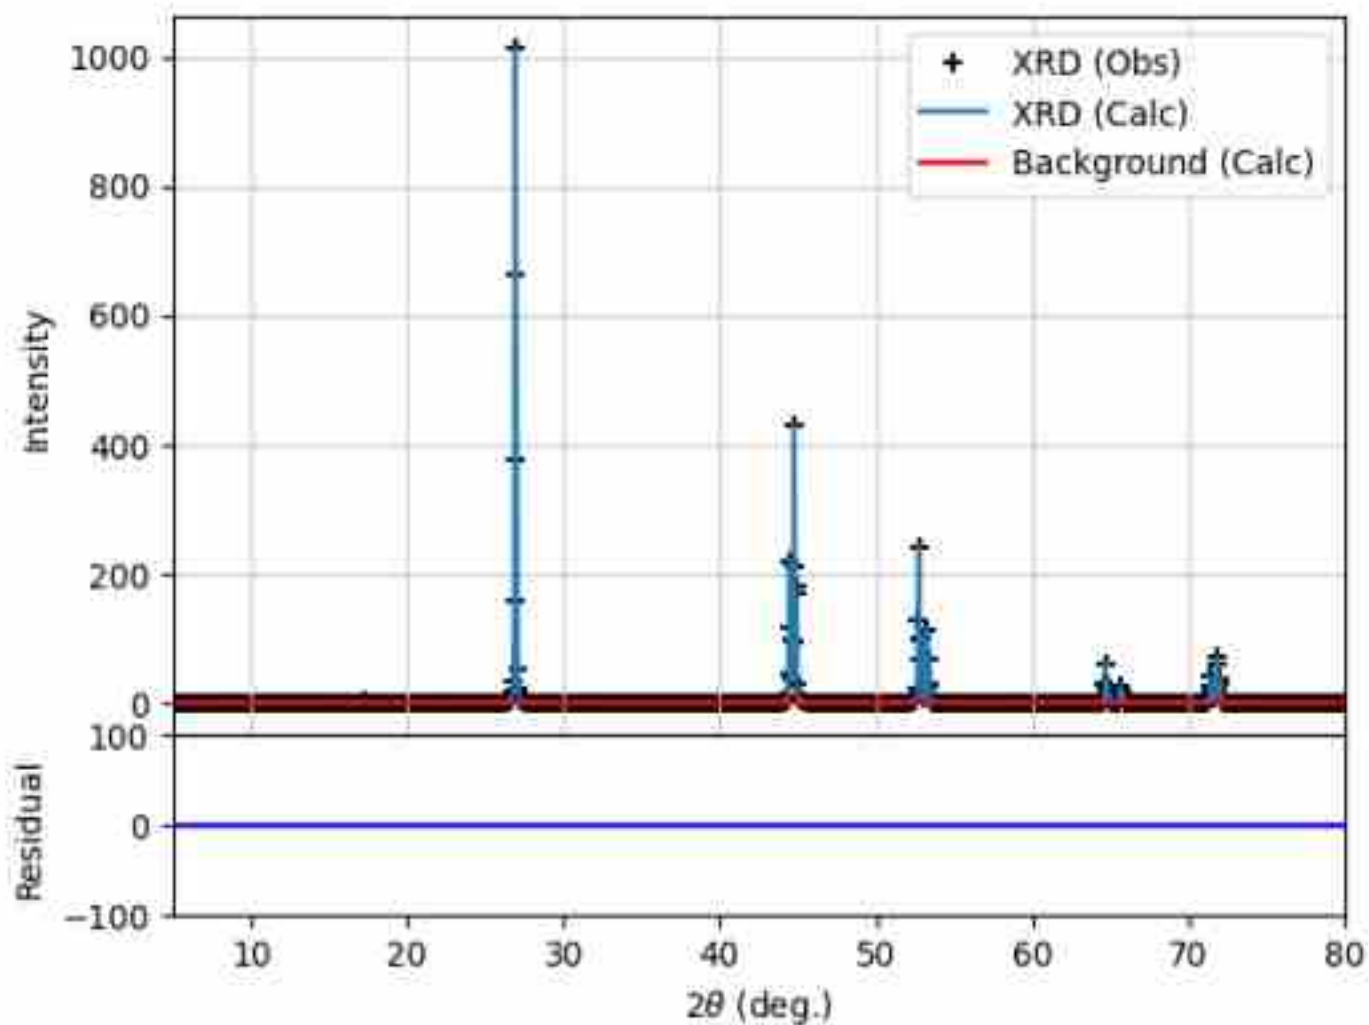

| RMSE before RR | Rwp     | RMSE after RR |
|----------------|---------|---------------|
| 0.017          | 0.01169 | 0.00087       |

# Zn<sub>2</sub>Si<sub>2</sub>P<sub>4</sub>

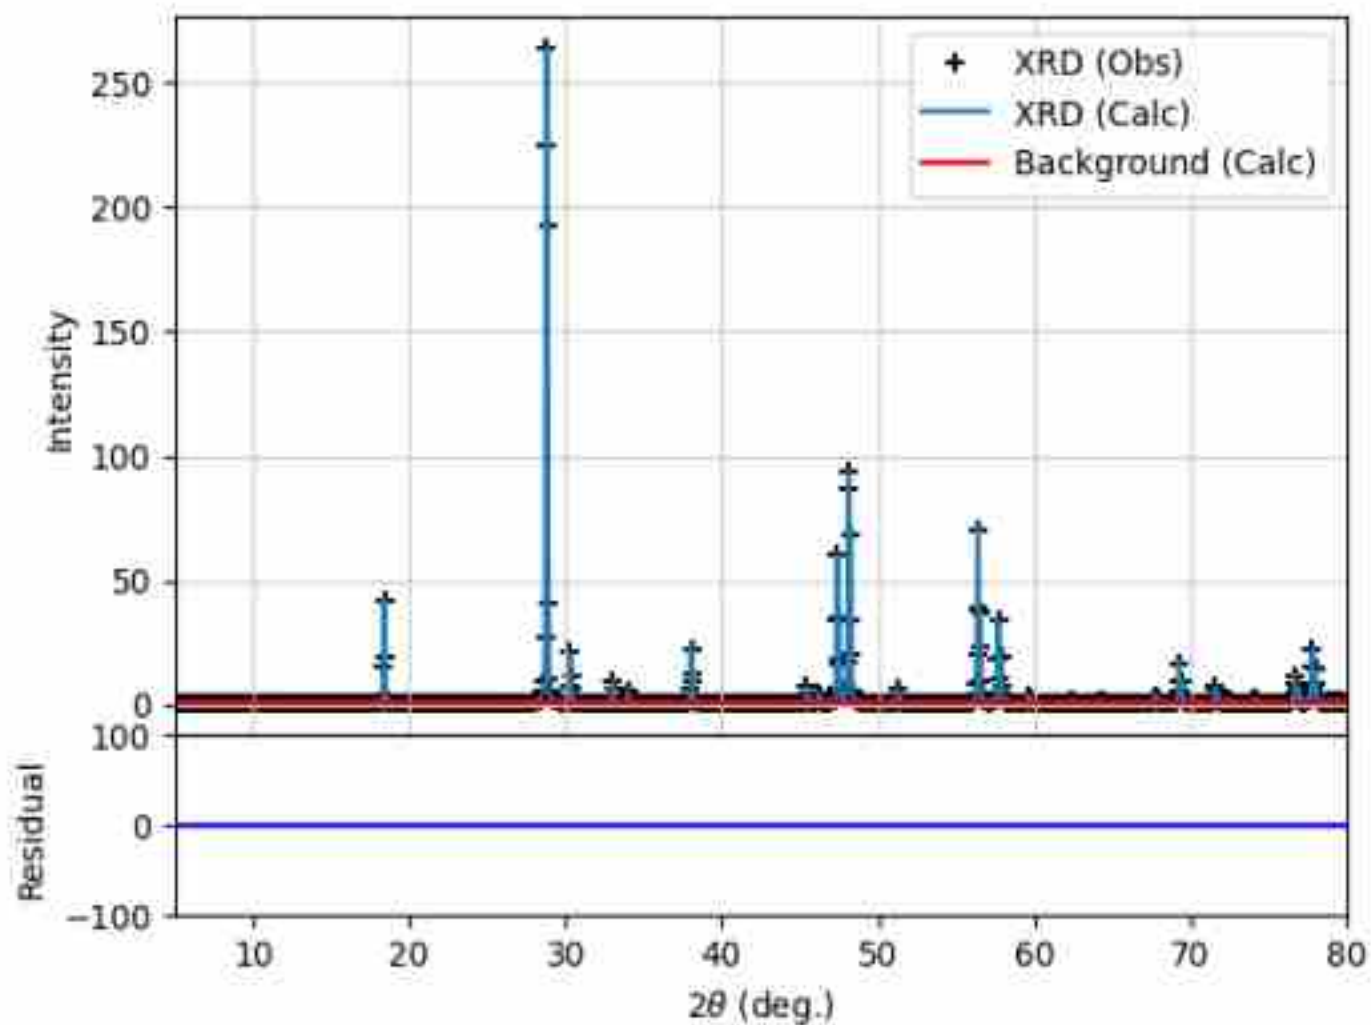

| RMSE before RR | Rwp     | RMSE after RR |
|----------------|---------|---------------|
| 0.017          | 0.00348 | 0.00054       |

# Zr1Ni4Sn1

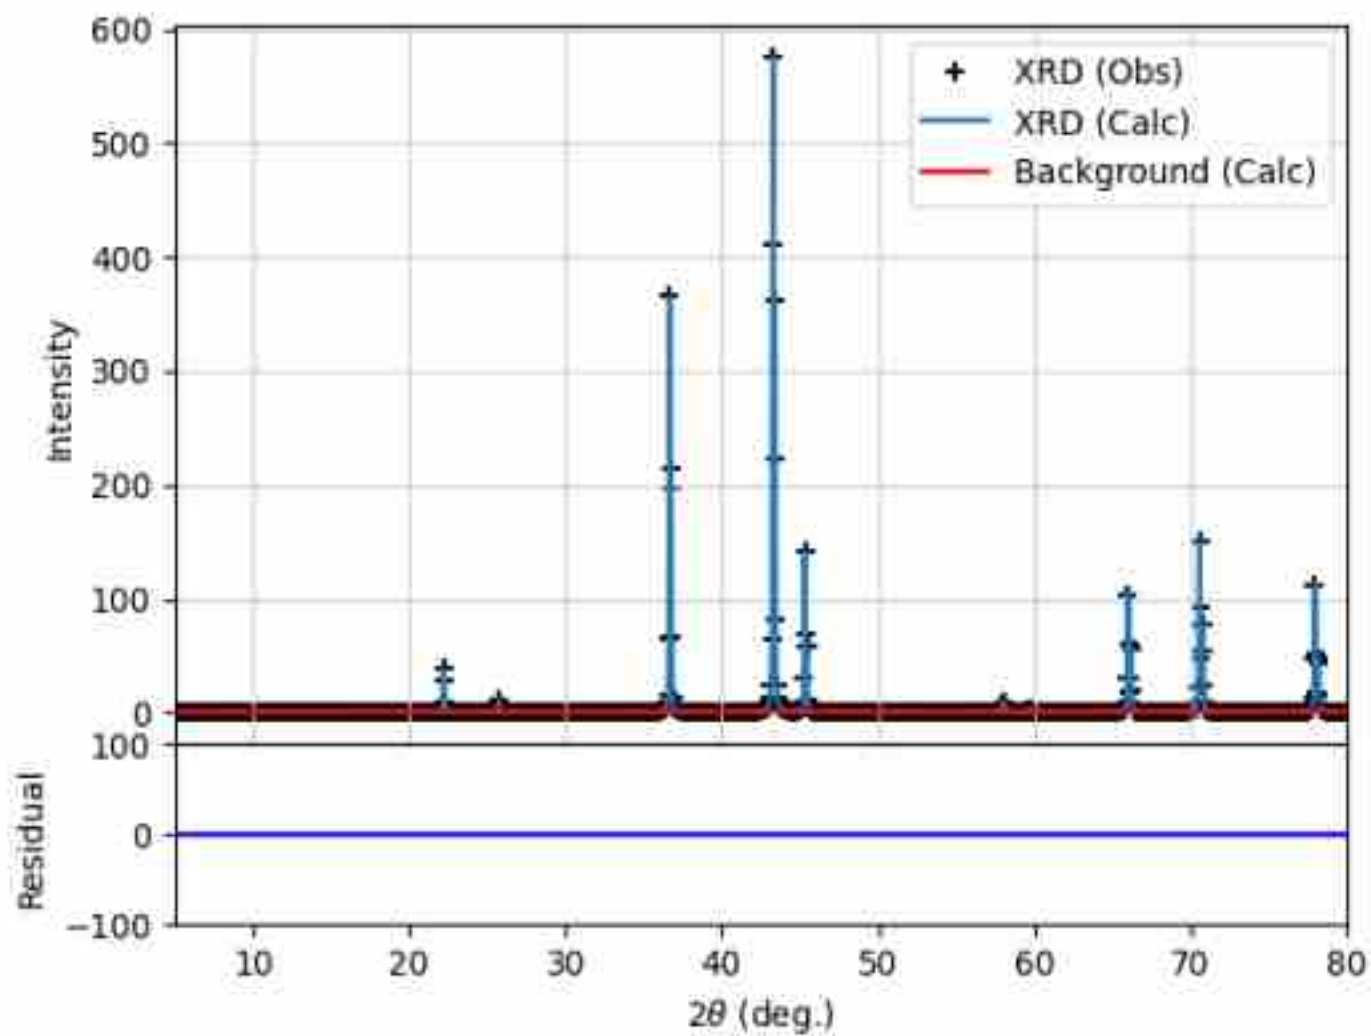

| RMSE before RR | Rwp     | RMSE after RR |
|----------------|---------|---------------|
| 0.017          | 0.00748 | 0.00125       |

# Zr1U1Al6

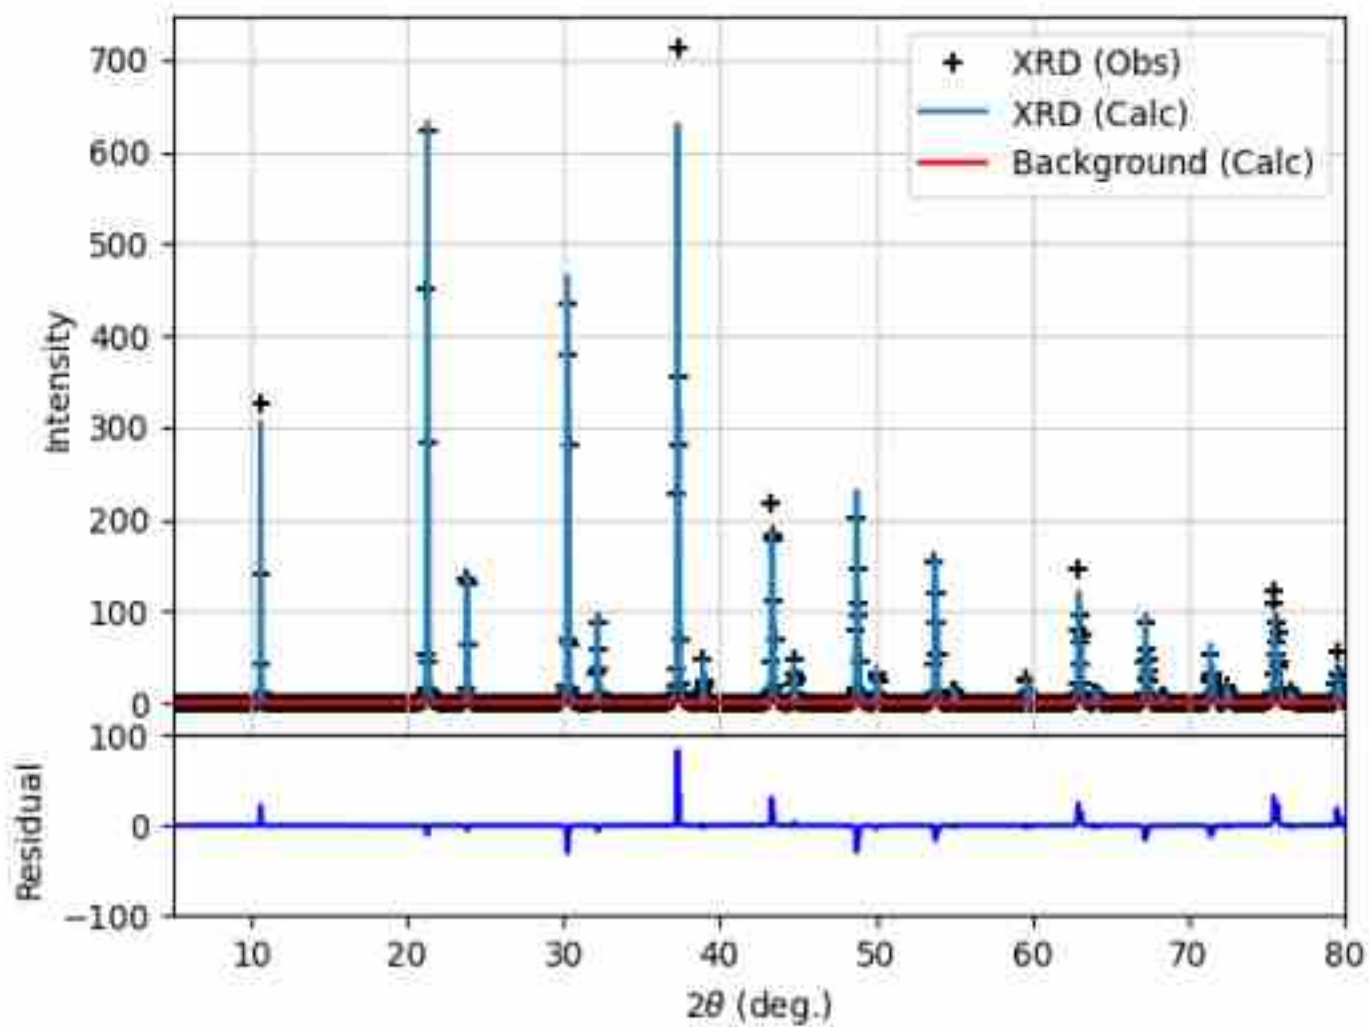

| RMSE before RR | Rwp     | RMSE after RR |
|----------------|---------|---------------|
| 0.017          | 11.0492 | 0.3787        |



# Zr<sub>2</sub>Cu<sub>2</sub>Ge<sub>4</sub>

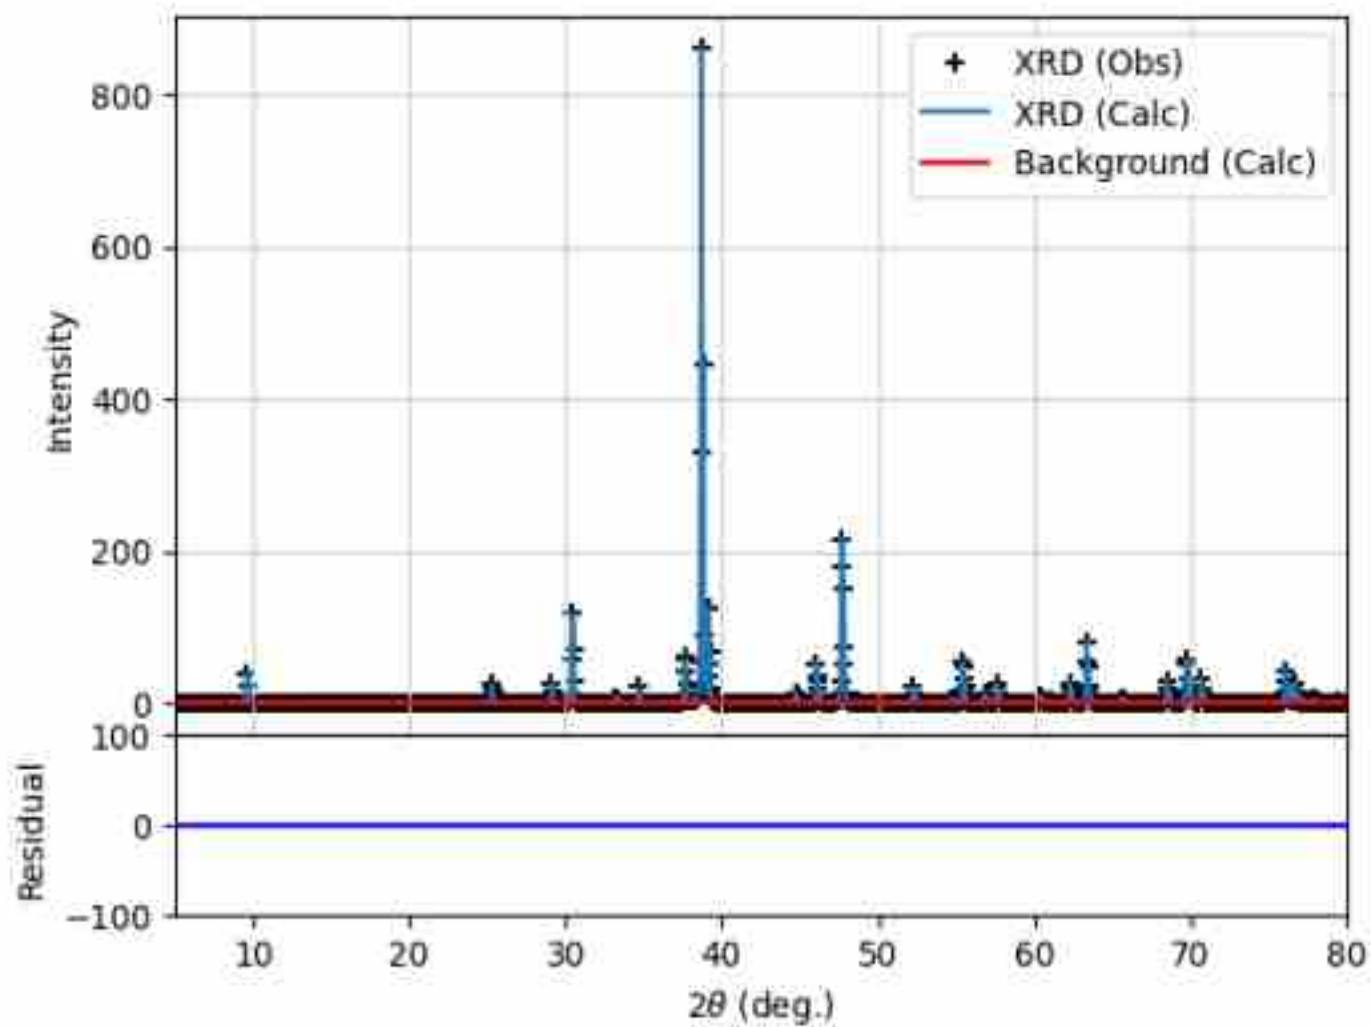

| RMSE before RR | Rwp     | RMSE after RR |
|----------------|---------|---------------|
| 0.017          | 0.00423 | 0.0003        |

# Zr<sub>2</sub>Mn<sub>2</sub>Ni<sub>2</sub>

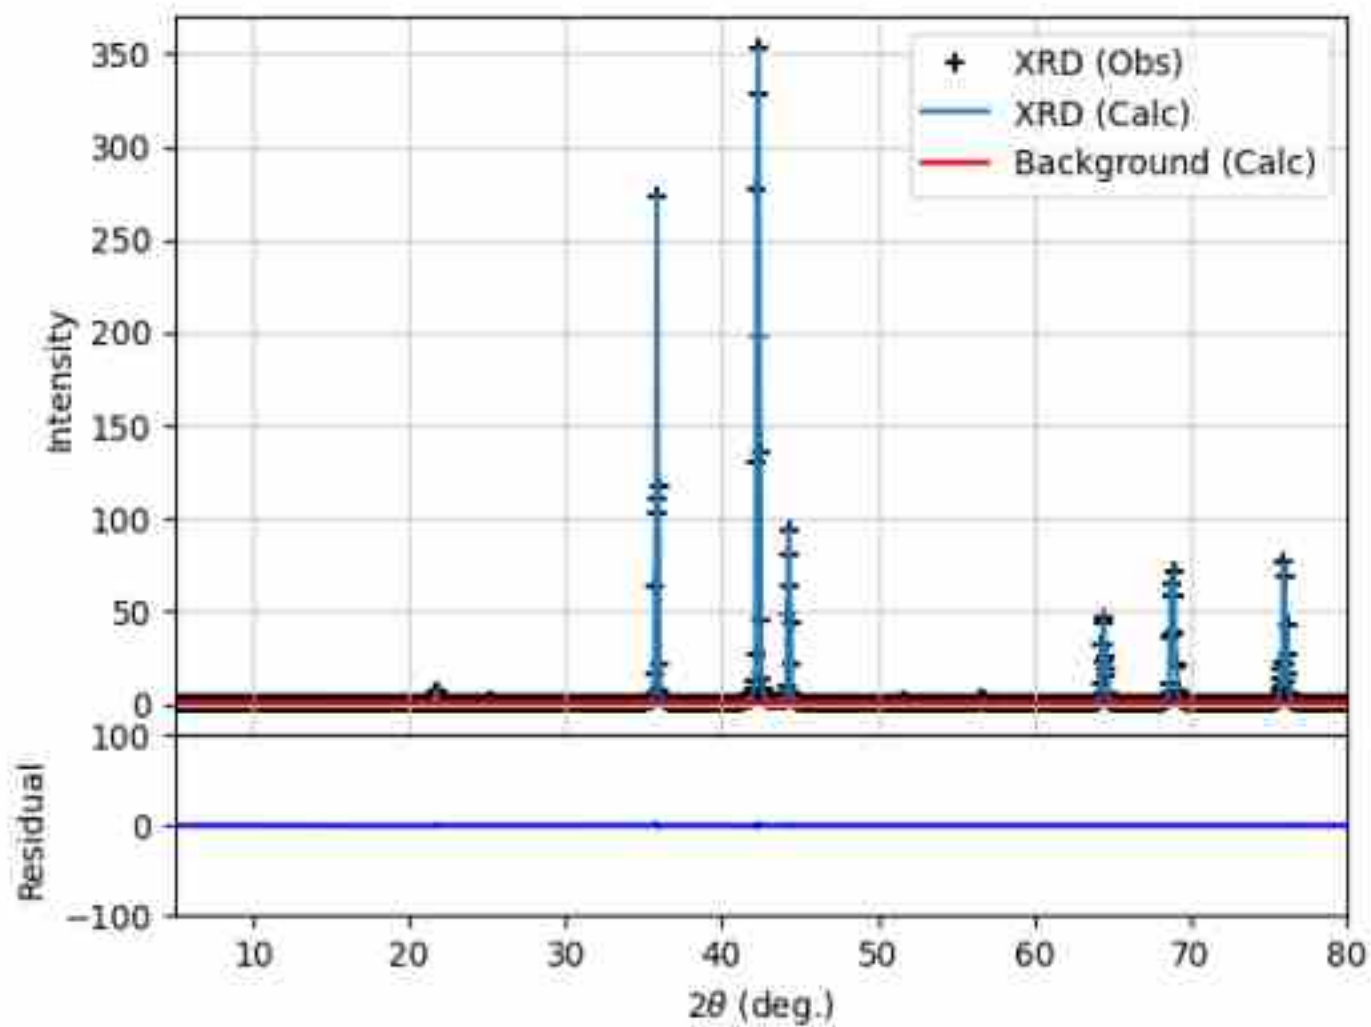

| RMSE before RR | Rwp     | RMSE after RR |
|----------------|---------|---------------|
| 0.017          | 1.01071 | 0.0079        |

# Zr<sub>2</sub>Nb<sub>2</sub>Fe<sub>8</sub>

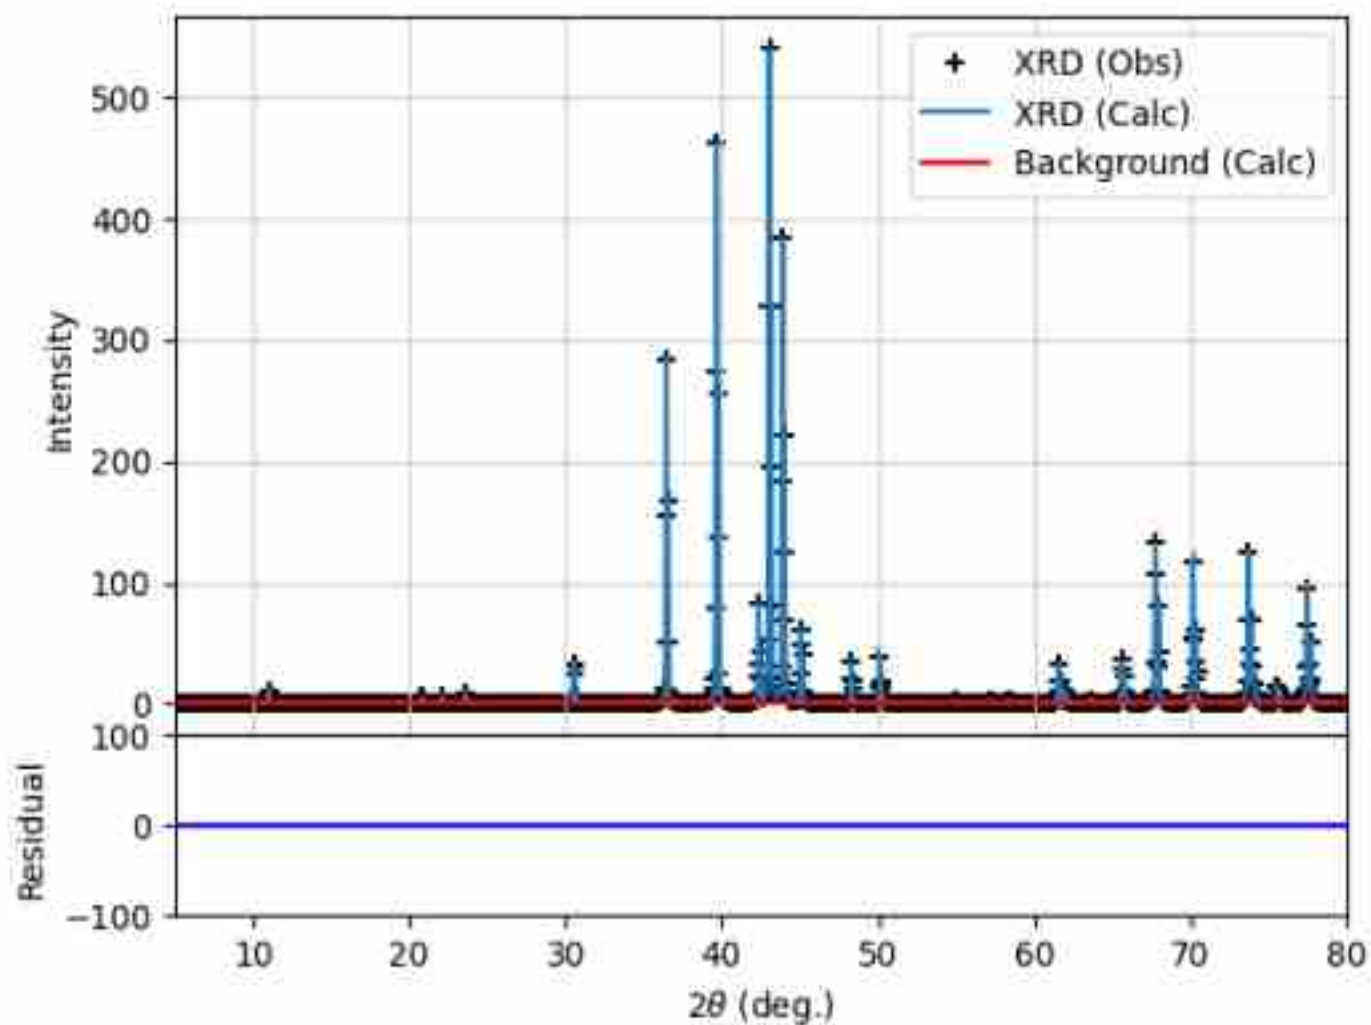

| RMSE before RR | Rwp     | RMSE after RR |
|----------------|---------|---------------|
| 0.017          | 0.00911 | 0.00079       |

# Zr<sub>2</sub>Se<sub>2</sub>O<sub>2</sub>

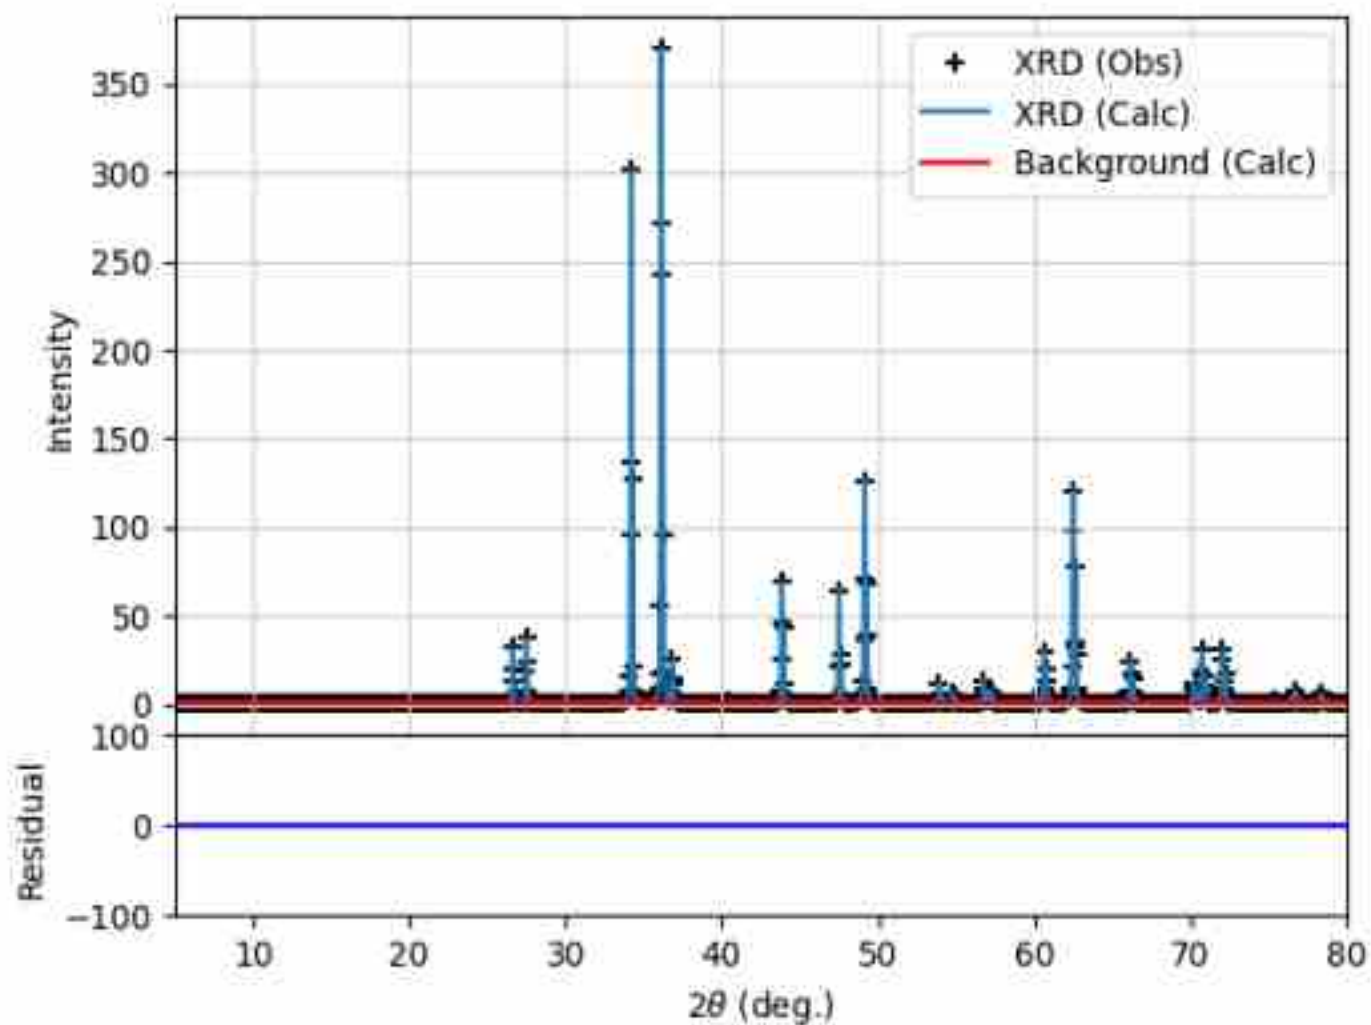

| RMSE before RR | Rwp     | RMSE after RR |
|----------------|---------|---------------|
| 0.017          | 0.00672 | 0.0008        |

# Zr<sub>4</sub>Al<sub>4</sub>Co<sub>4</sub>

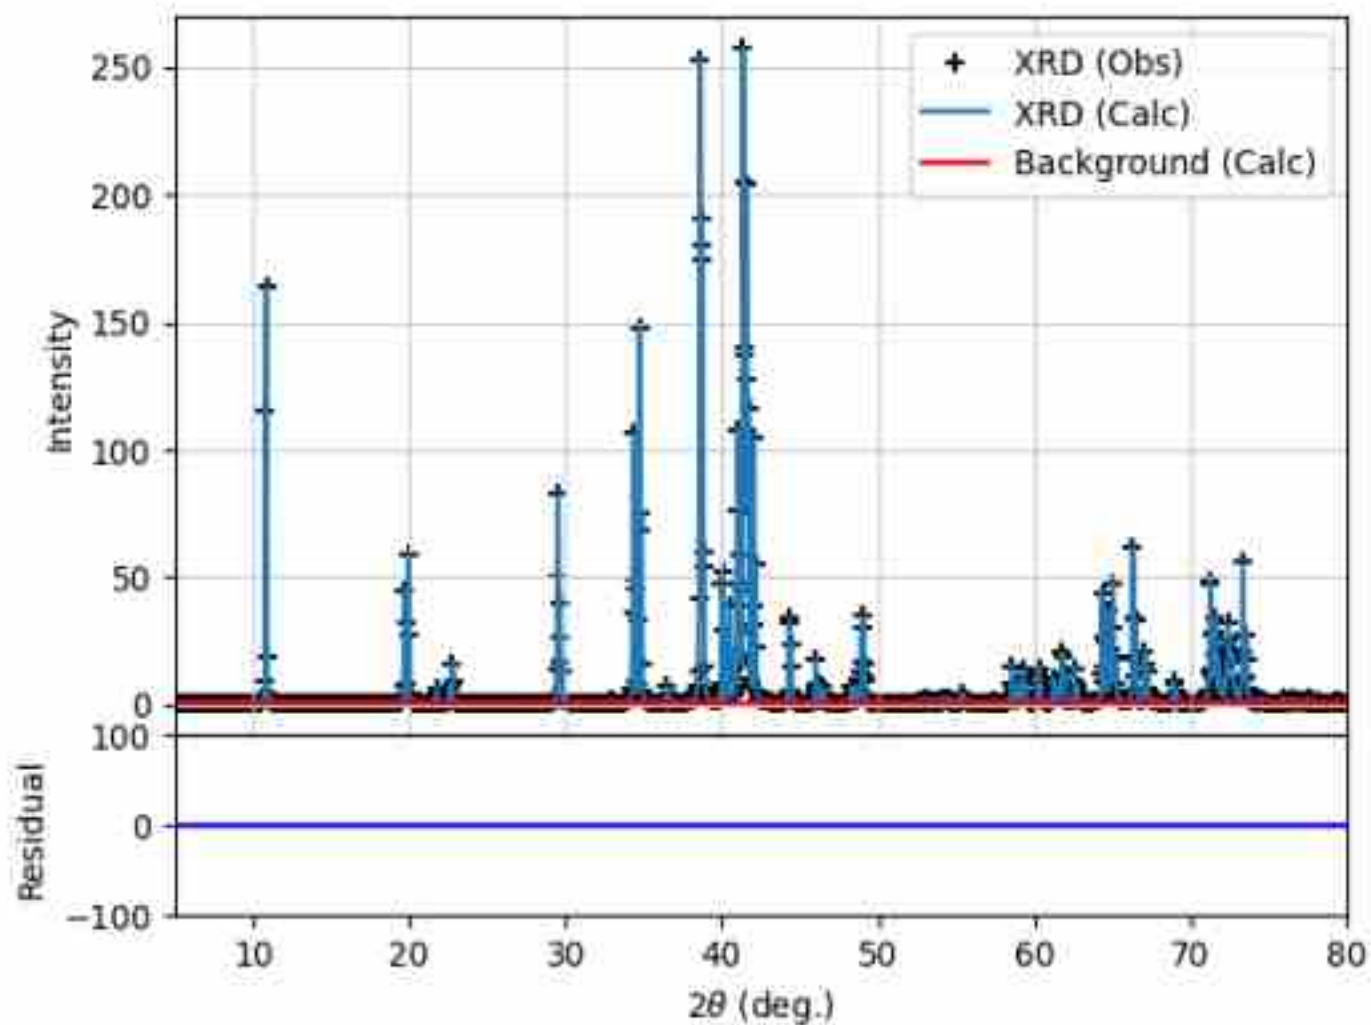

| RMSE before RR | Rwp     | RMSE after RR |
|----------------|---------|---------------|
| 0.017          | 0.00355 | 0.00036       |

# Zr<sub>4</sub>Cr<sub>2</sub>Fe<sub>6</sub>

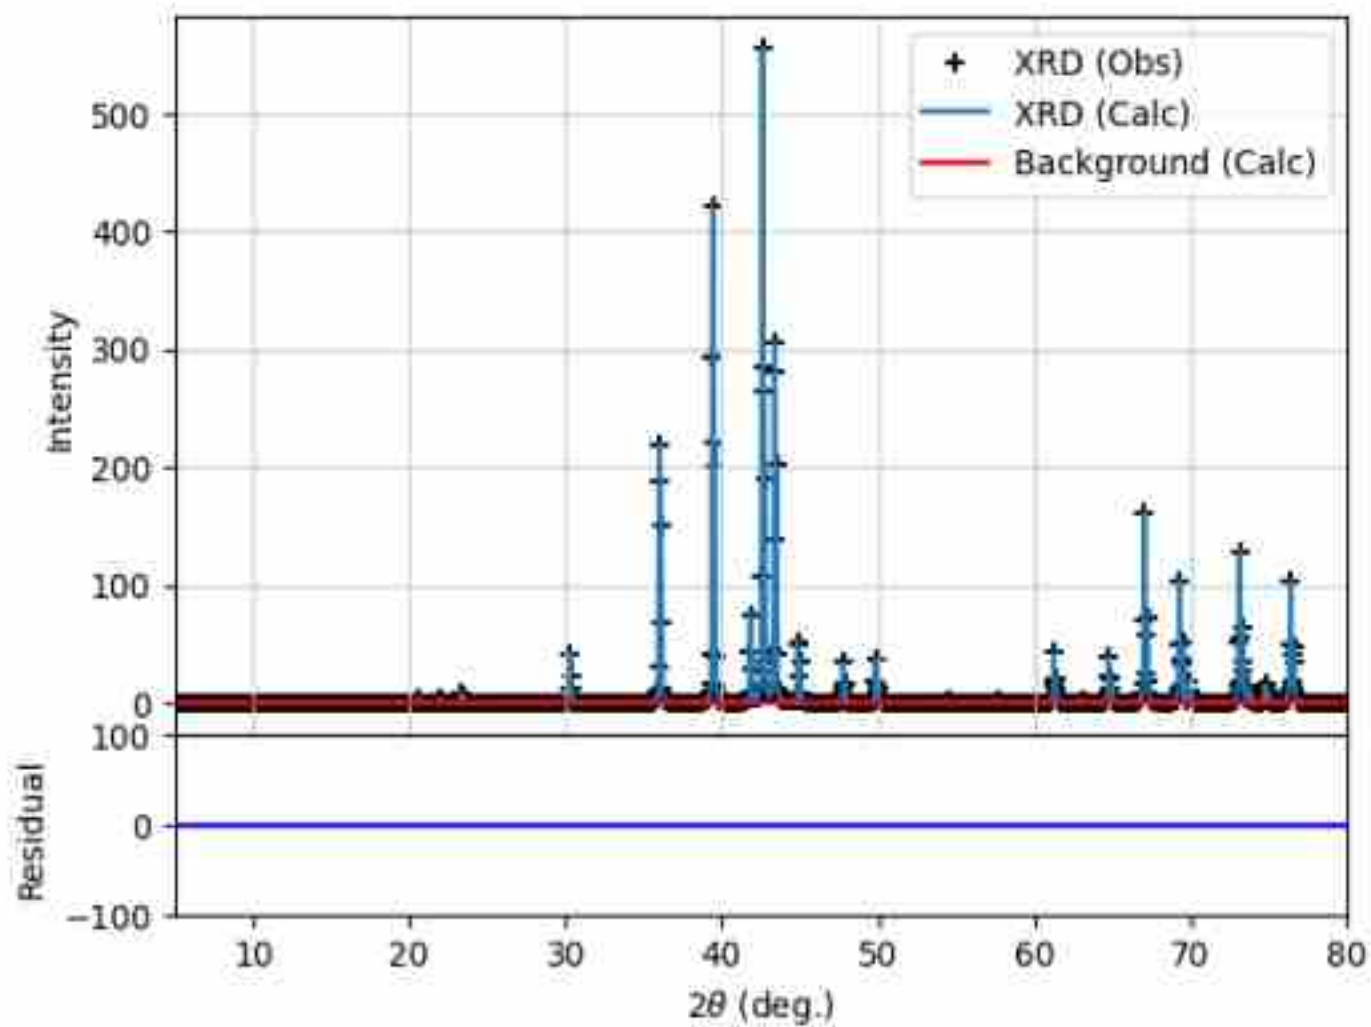

| RMSE before RR | Rwp     | RMSE after RR |
|----------------|---------|---------------|
| 0.017          | 0.02891 | 0.00233       |

# Zr<sub>4</sub>Fe<sub>4</sub>Re<sub>4</sub>

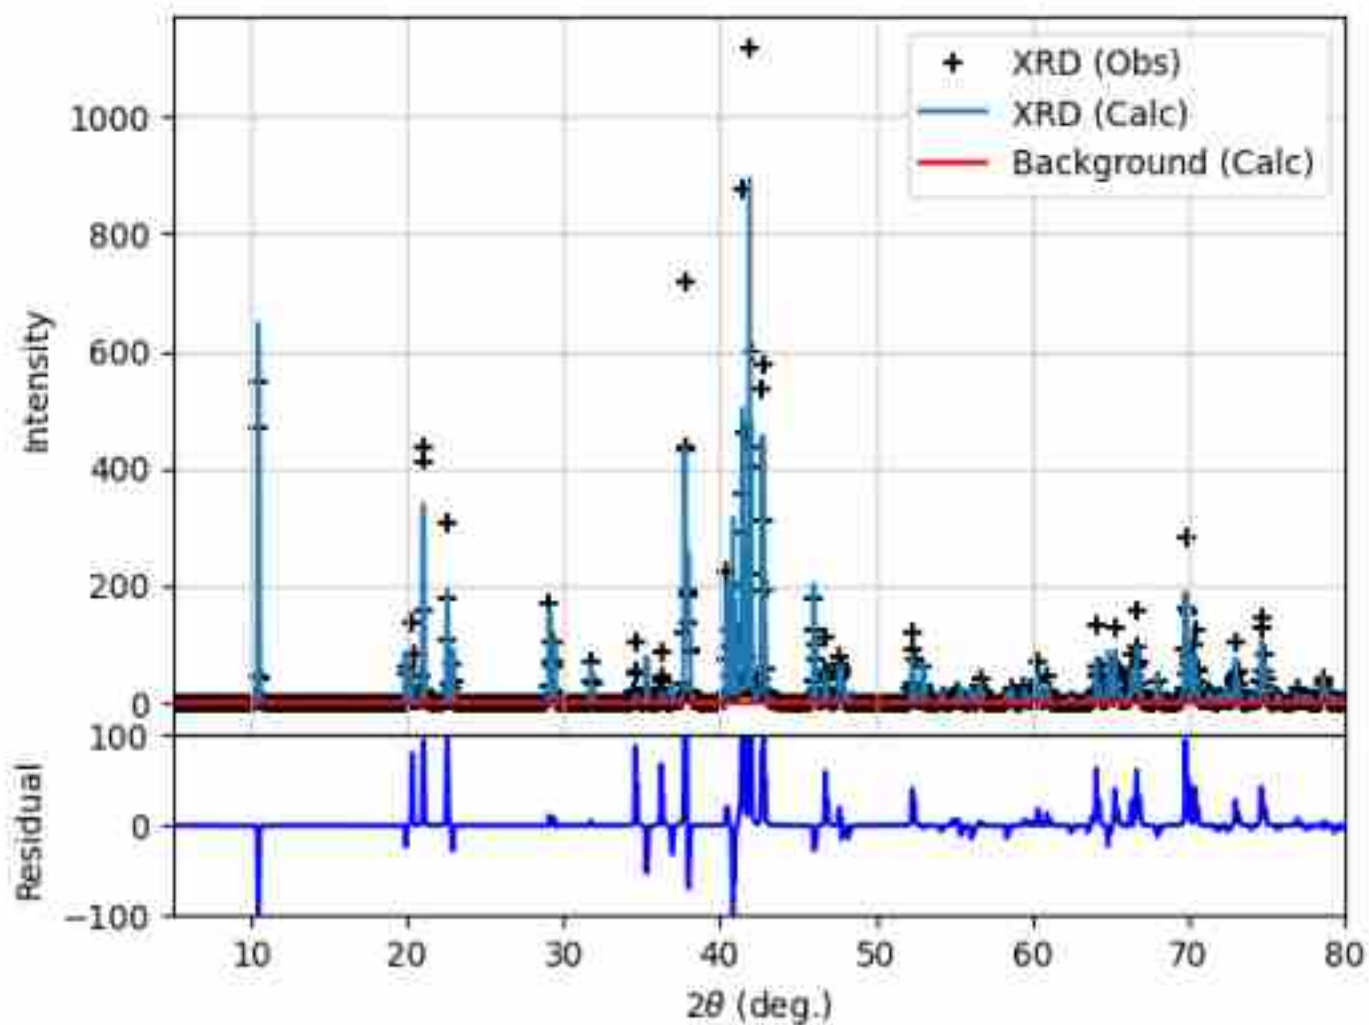

| RMSE before RR | Rwp      | RMSE after RR |
|----------------|----------|---------------|
| 0.017          | 40.59972 | 0.07681       |

Al1Ga1Cu2Se2S2

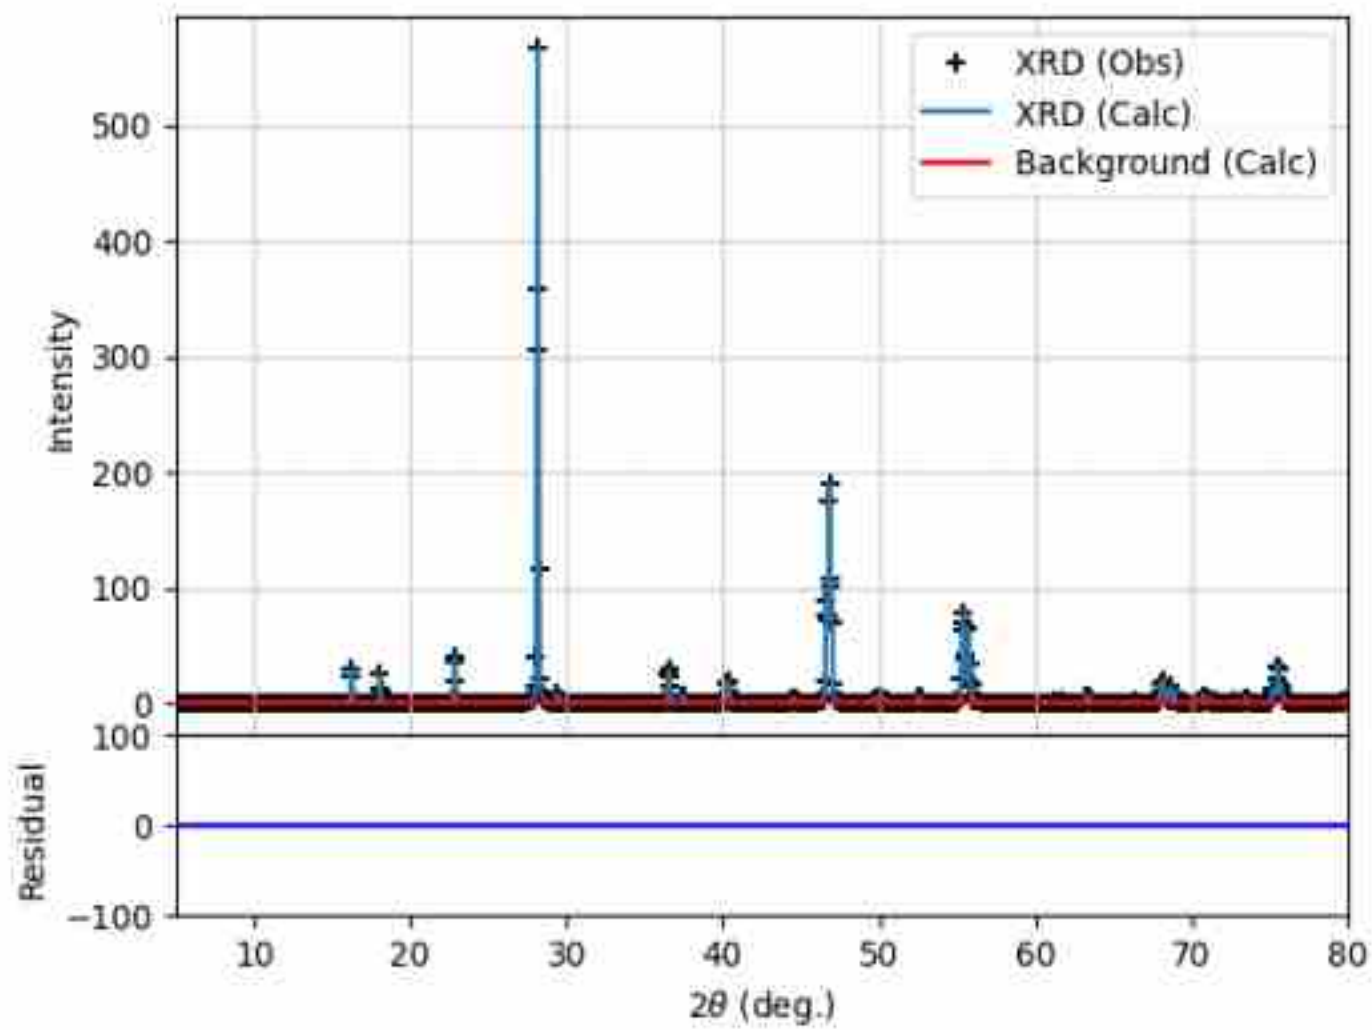

| RMSE before RR | Rwp     | RMSE after RR |
|----------------|---------|---------------|
| 0.018          | 0.00171 | 0.00043       |



# Al1In1Ga1Sb3

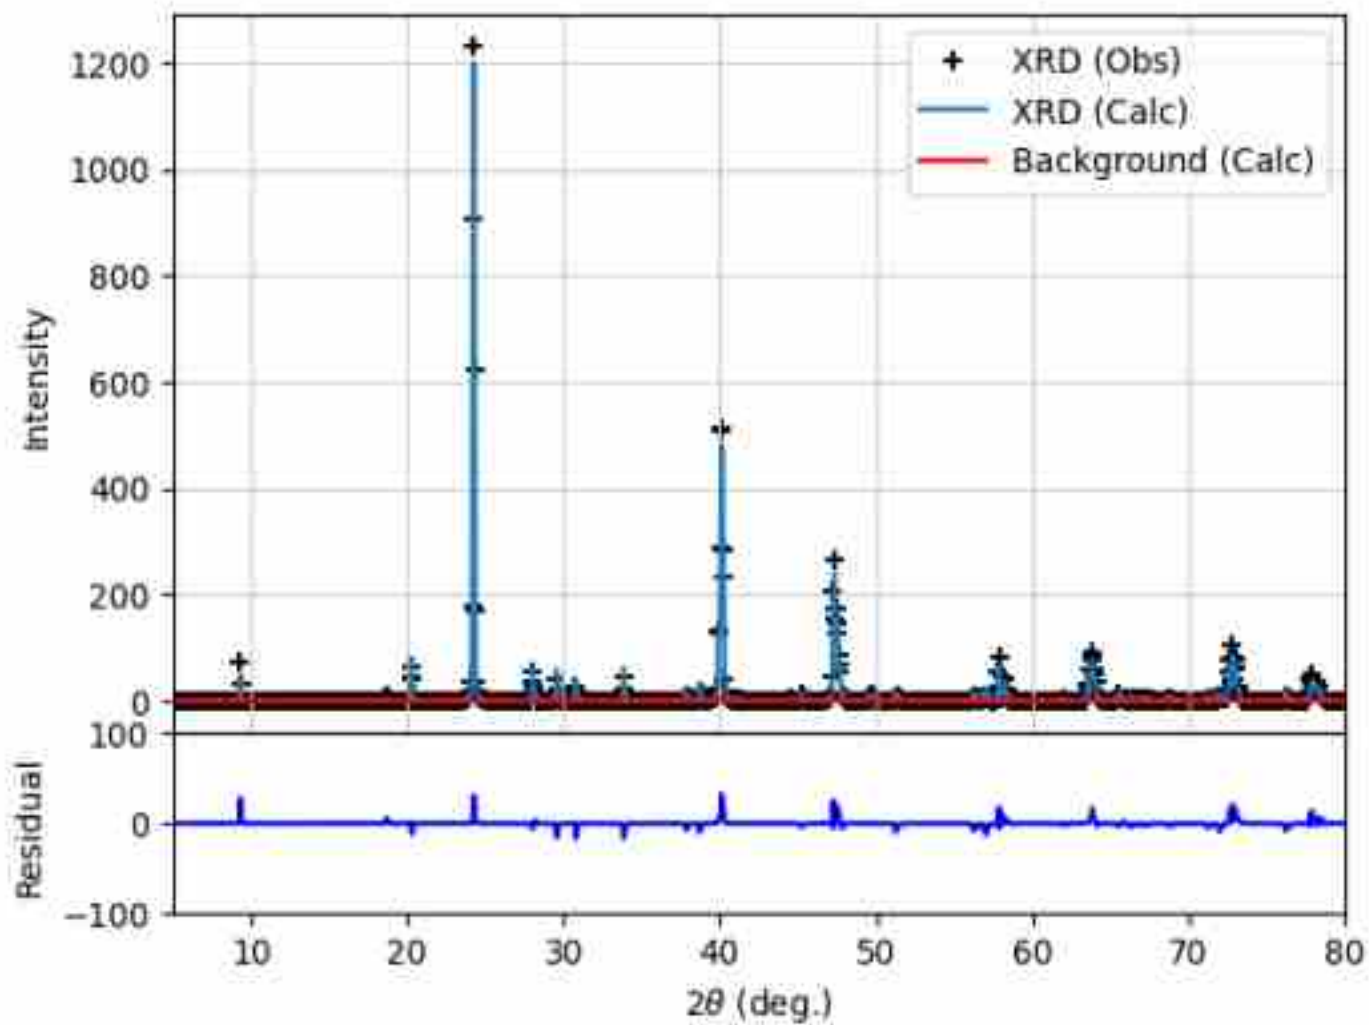

| RMSE before RR | Rwp      | RMSE after RR |
|----------------|----------|---------------|
| 0.018          | 18.56119 | 0.01835       |

# Al1Re2

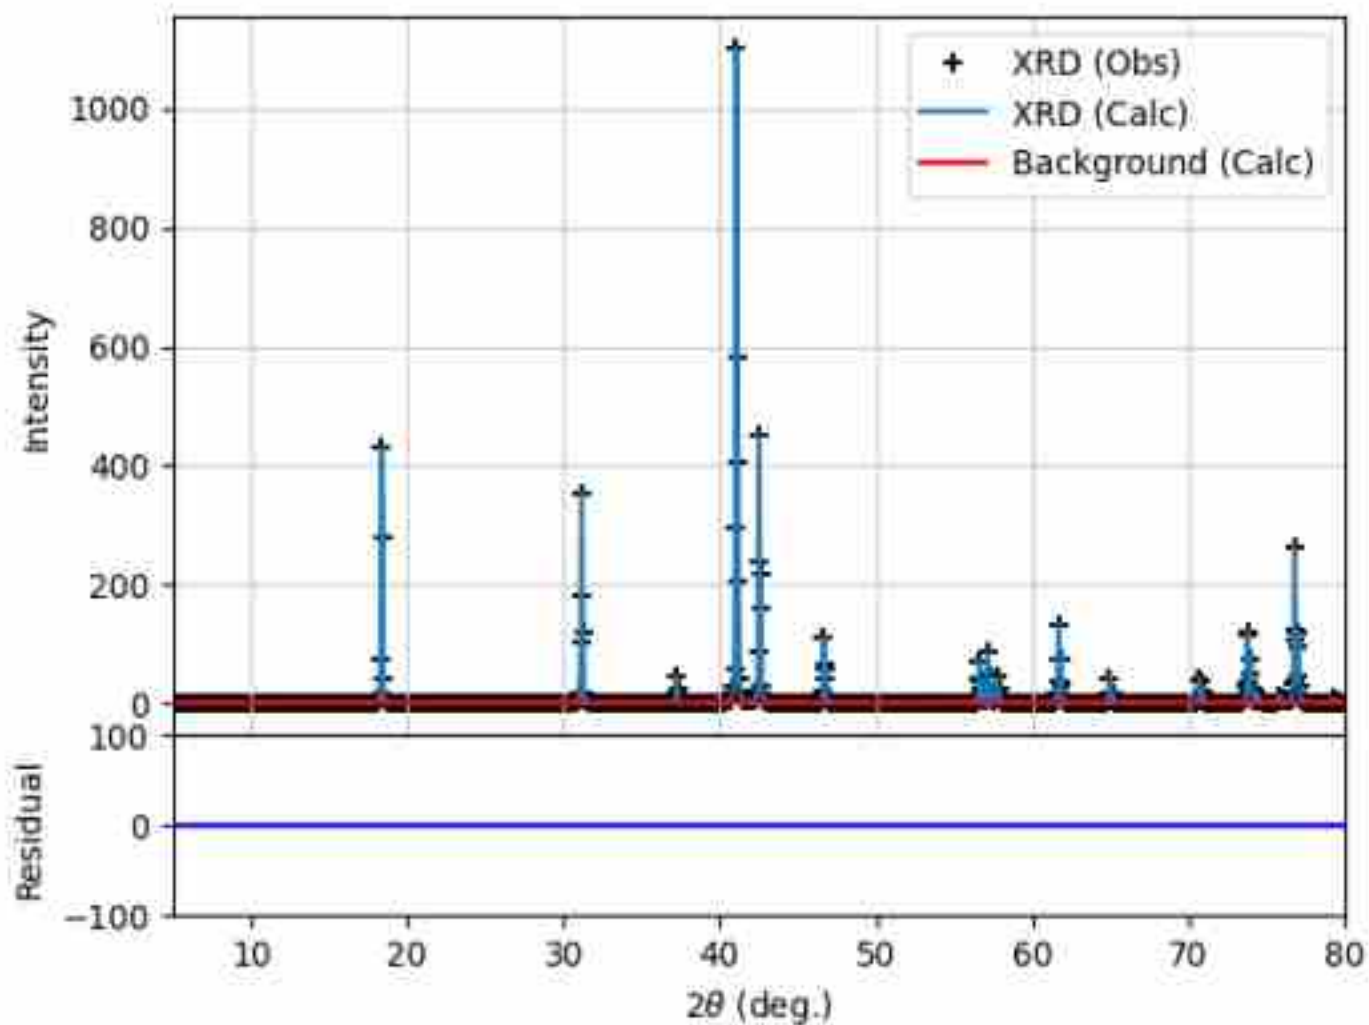

| RMSE before RR | Rwp     | RMSE after RR |
|----------------|---------|---------------|
| 0.018          | 0.00887 | 0.00212       |

# Al<sub>2</sub>Ru<sub>1</sub>

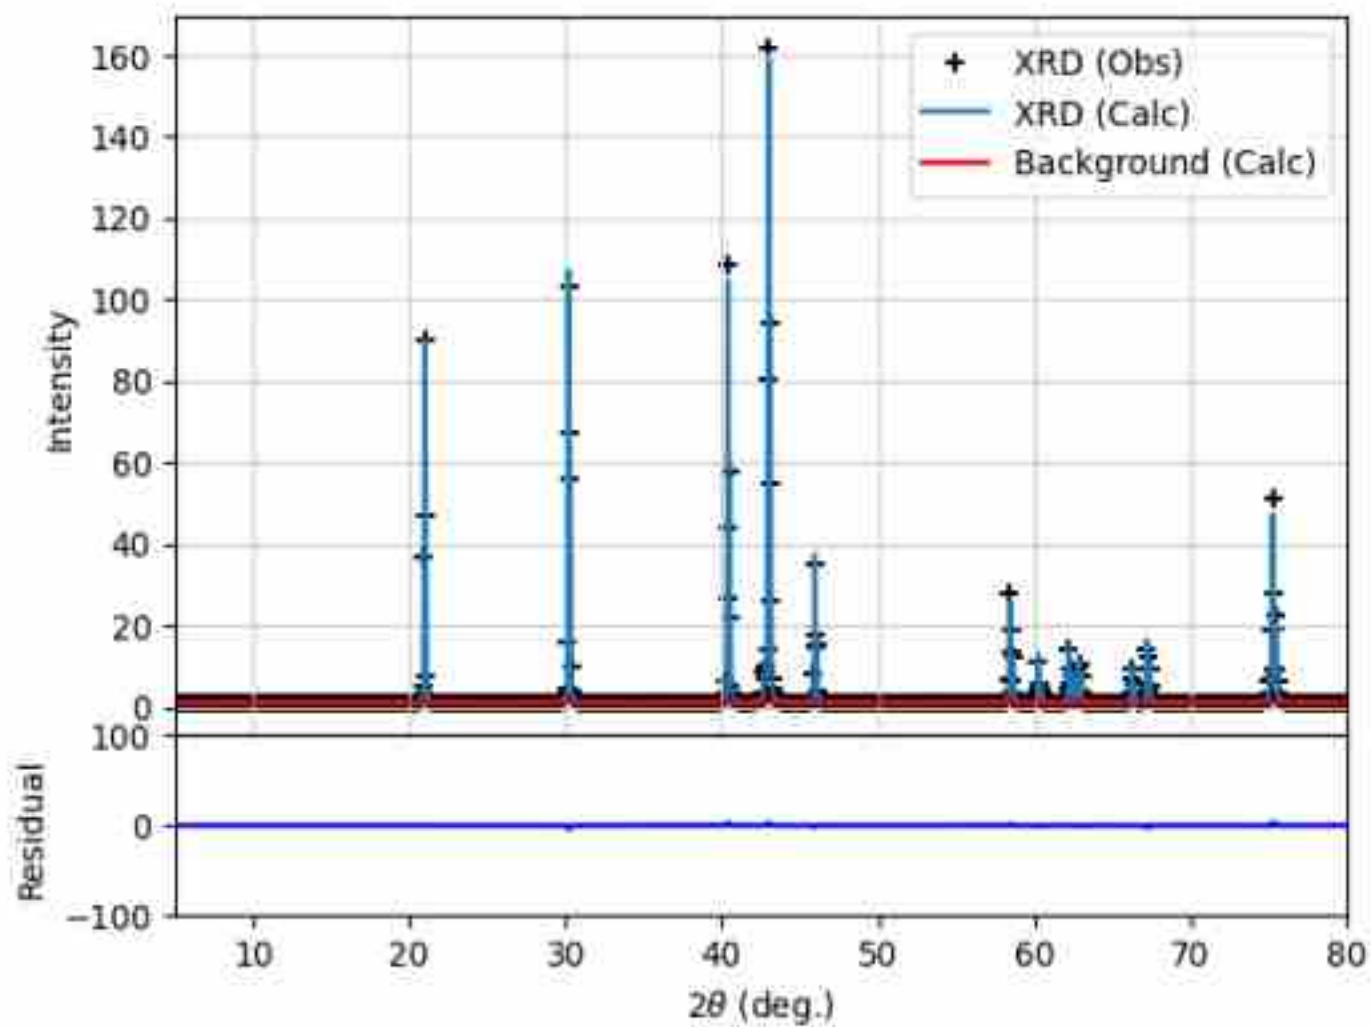

| RMSE before RR | Rwp     | RMSE after RR |
|----------------|---------|---------------|
| 0.018          | 3.87002 | 0.03294       |

# Al4Pd4

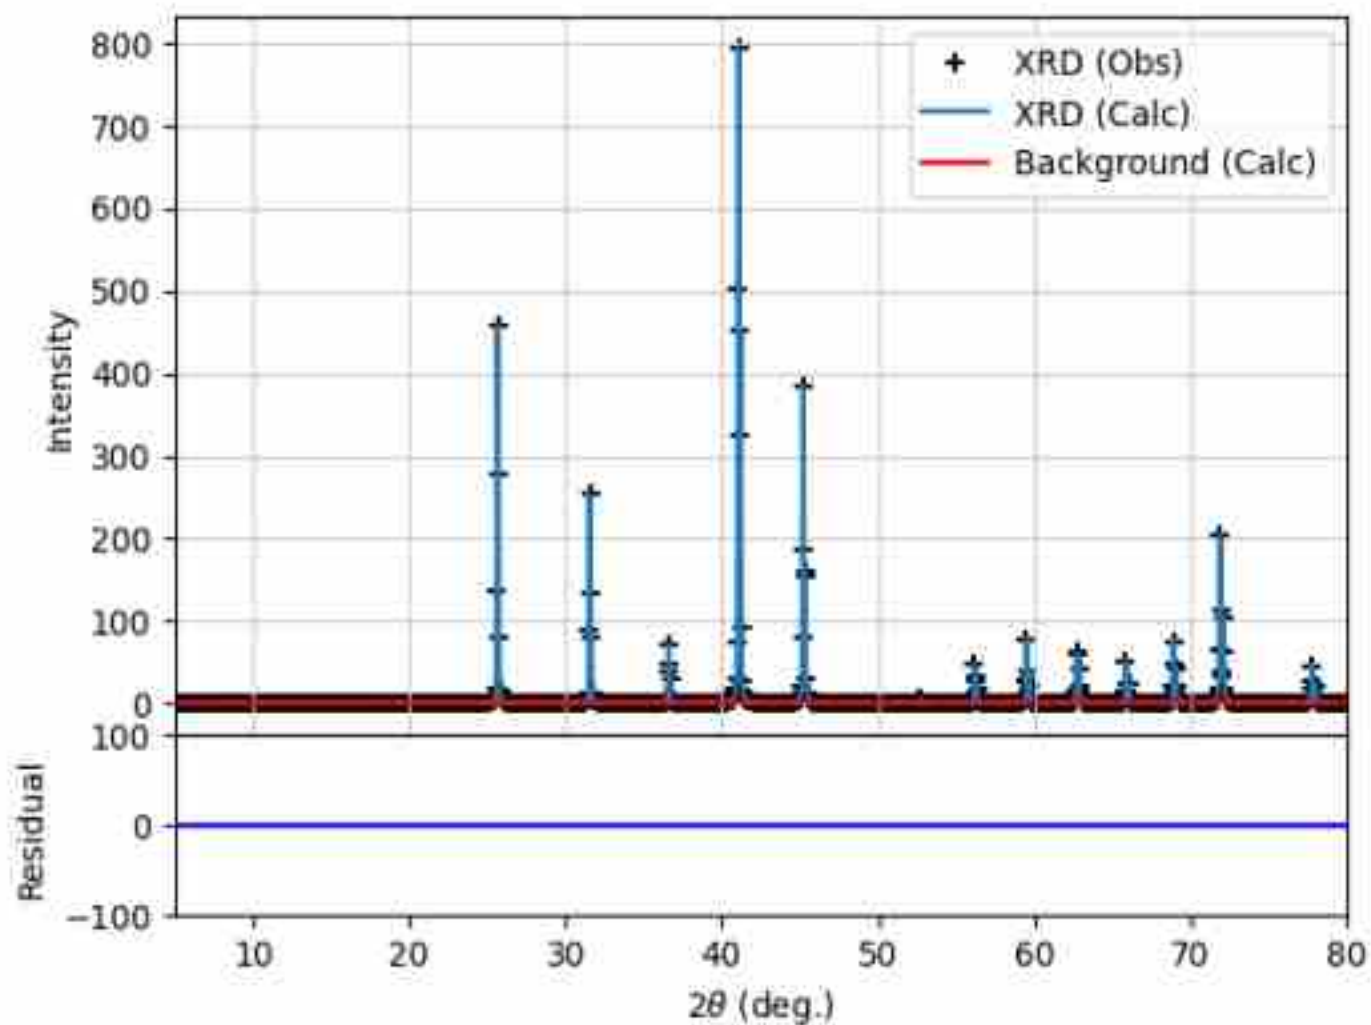

| RMSE before RR | Rwp    | RMSE after RR |
|----------------|--------|---------------|
| 0.018          | 0.0053 | 0.00094       |

# Ba1Ca1I4

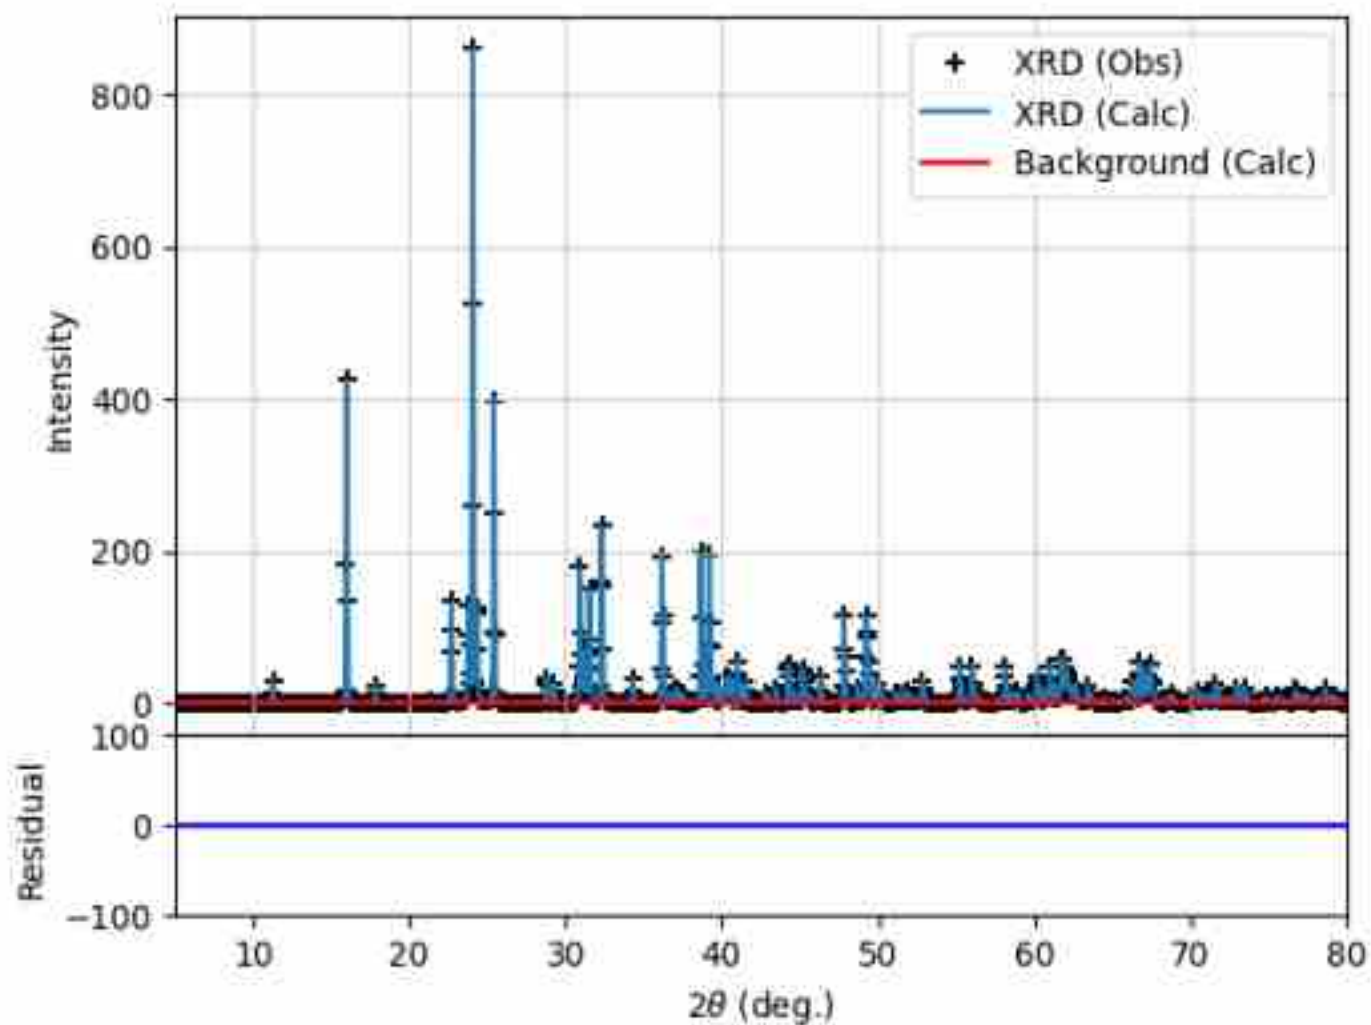

| RMSE before RR | Rwp     | RMSE after RR |
|----------------|---------|---------------|
| 0.018          | 0.00361 | 0.00013       |

# Ba<sub>1</sub>Dy<sub>1</sub>Fe<sub>2</sub>O<sub>5</sub>

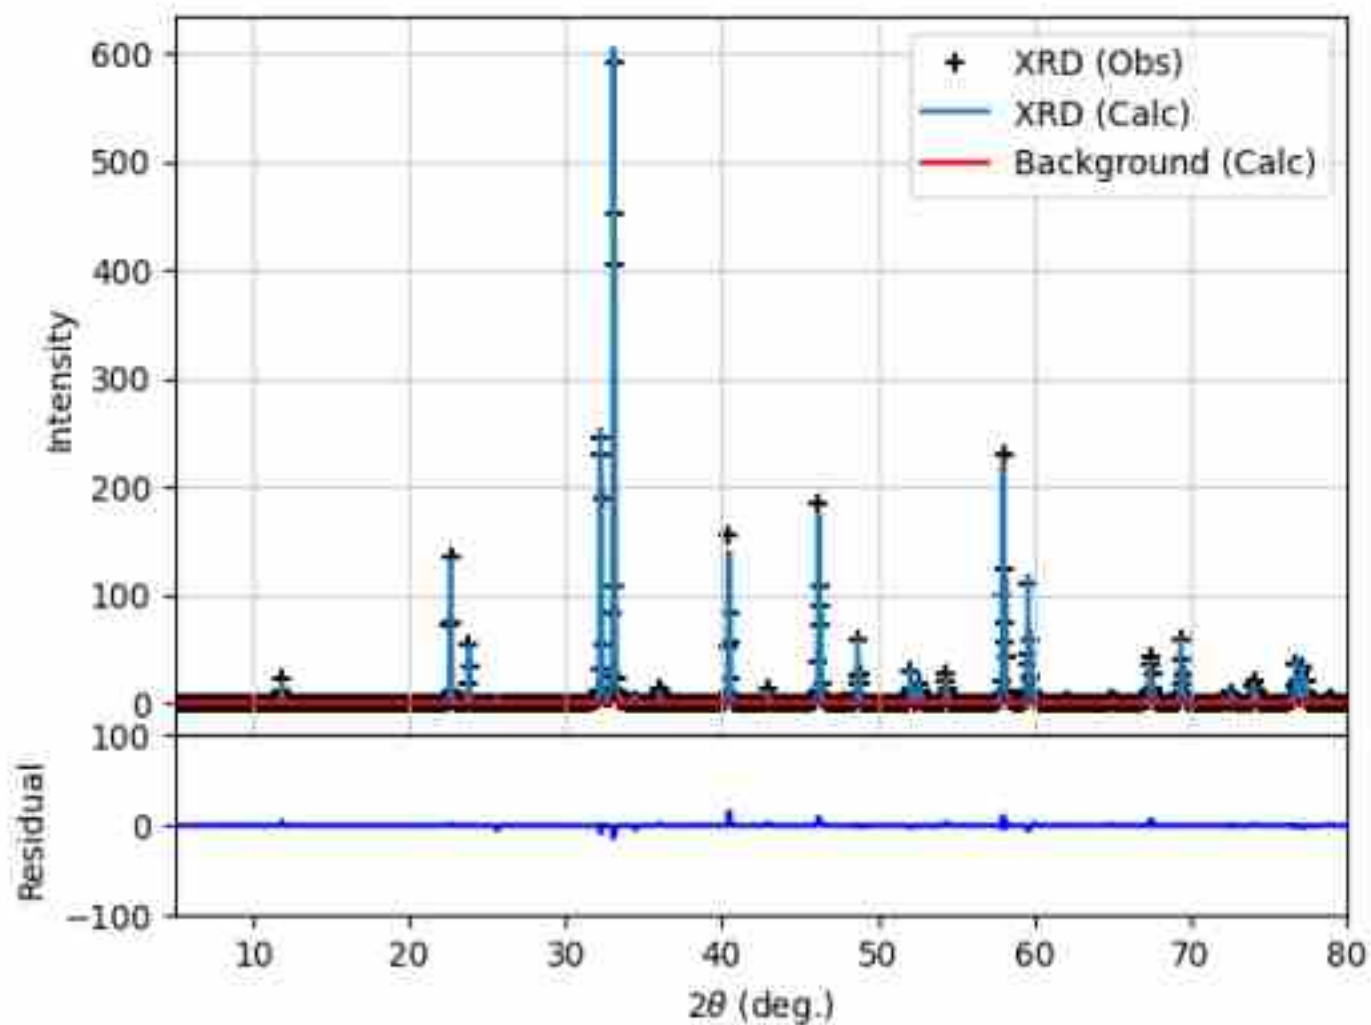

| RMSE before RR | Rwp     | RMSE after RR |
|----------------|---------|---------------|
| 0.018          | 10.6066 | 0.02925       |

Ba1Sr1Ca1Se1O6

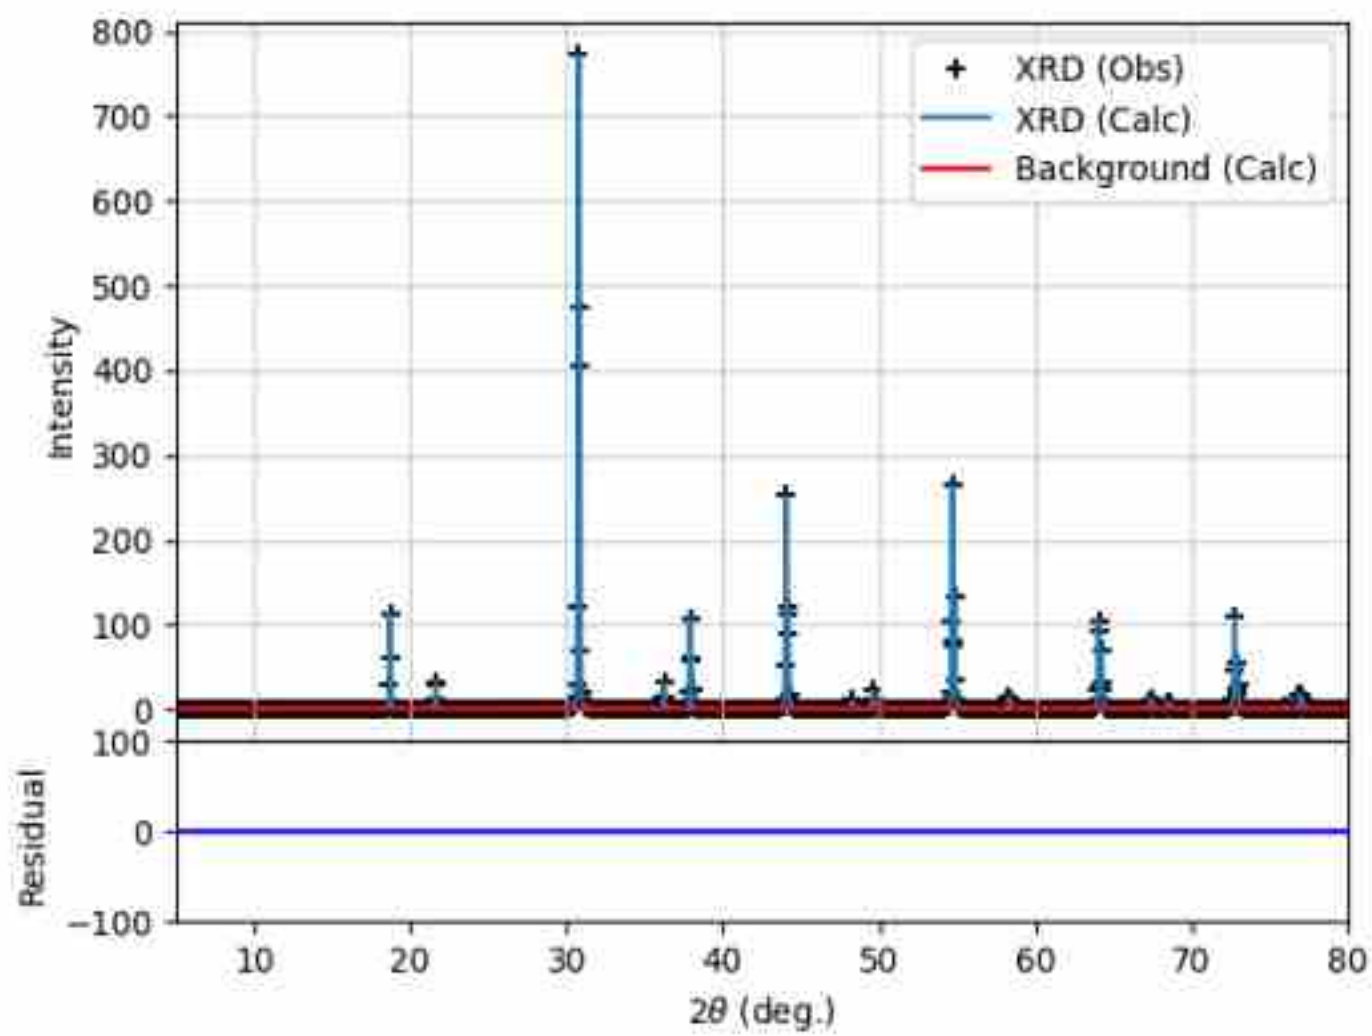

| RMSE before RR | Rwp    | RMSE after RR |
|----------------|--------|---------------|
| 0.018          | 0.0158 | 0.00483       |

# Ba1Tb2Ni1O5

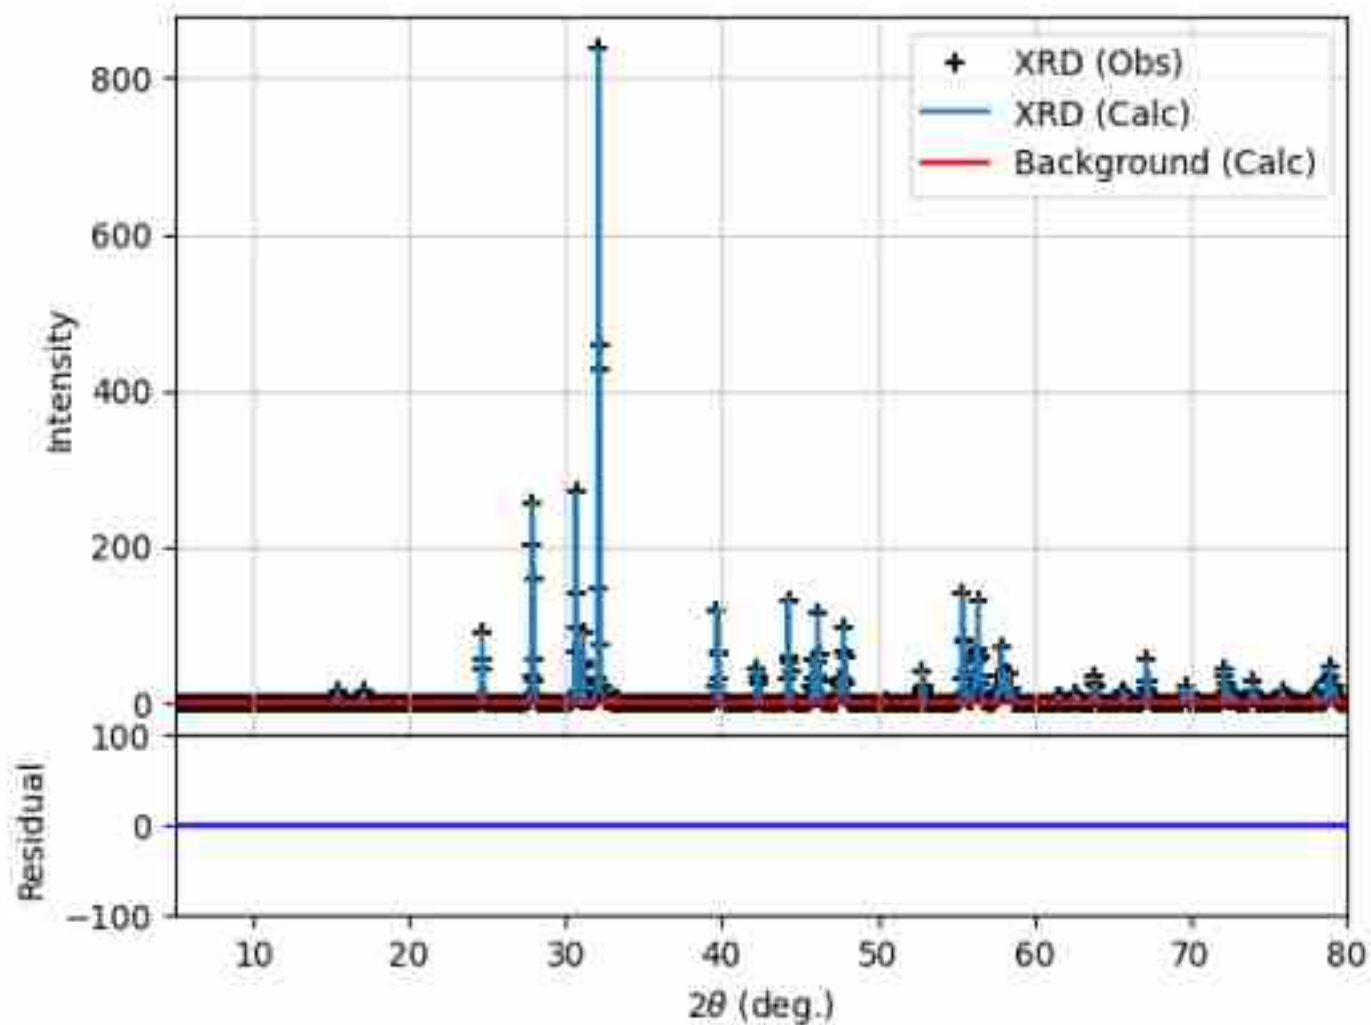

| RMSE before RR | Rwp     | RMSE after RR |
|----------------|---------|---------------|
| 0.018          | 0.00428 | 0.00098       |



# Ba<sub>2</sub>Hg<sub>6</sub>

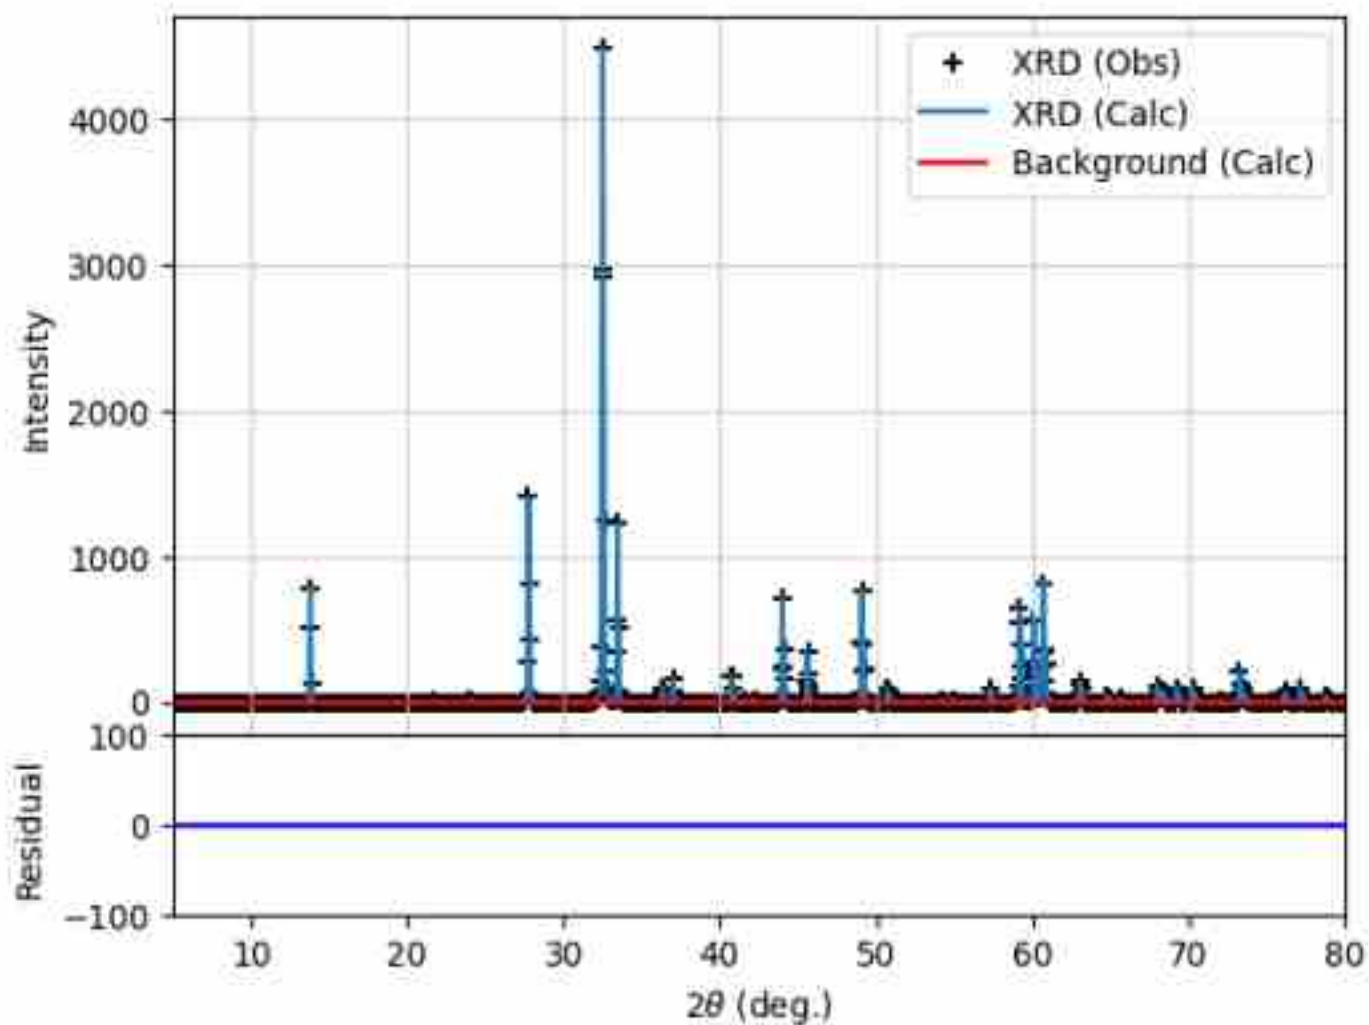

| RMSE before RR | Rwp     | RMSE after RR |
|----------------|---------|---------------|
| 0.018          | 0.04757 | 0.00128       |

# Ba<sub>2</sub>Nd<sub>1</sub>Cu<sub>3</sub>O<sub>6</sub>

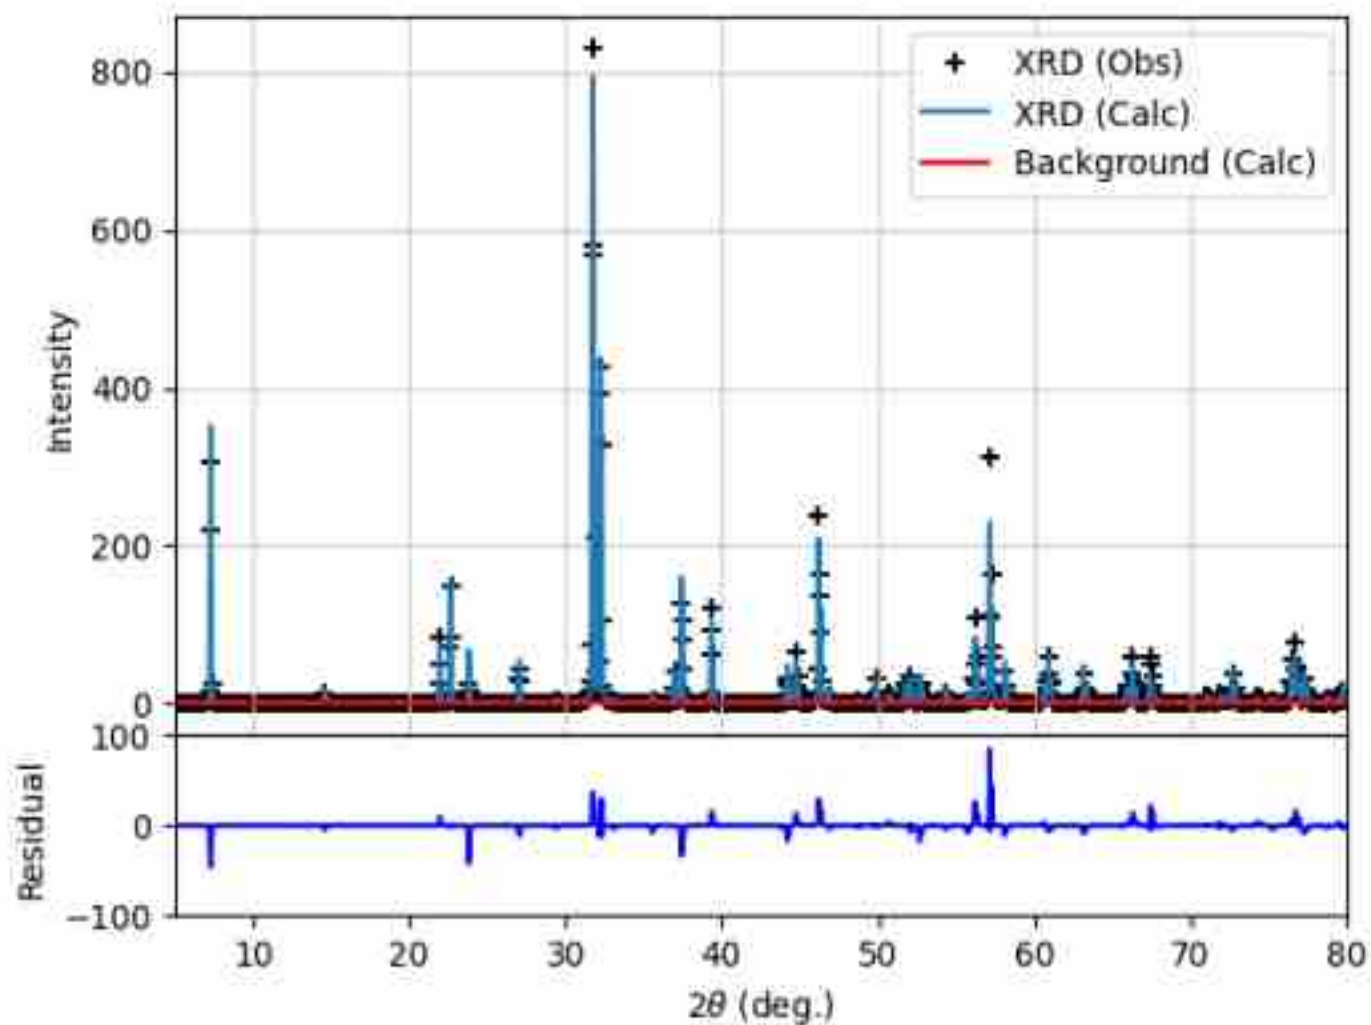

| RMSE before RR | Rwp      | RMSE after RR |
|----------------|----------|---------------|
| 0.018          | 23.61064 | 0.18365       |

# Ba<sub>2</sub>Sr<sub>2</sub>Ce<sub>4</sub>O<sub>12</sub>

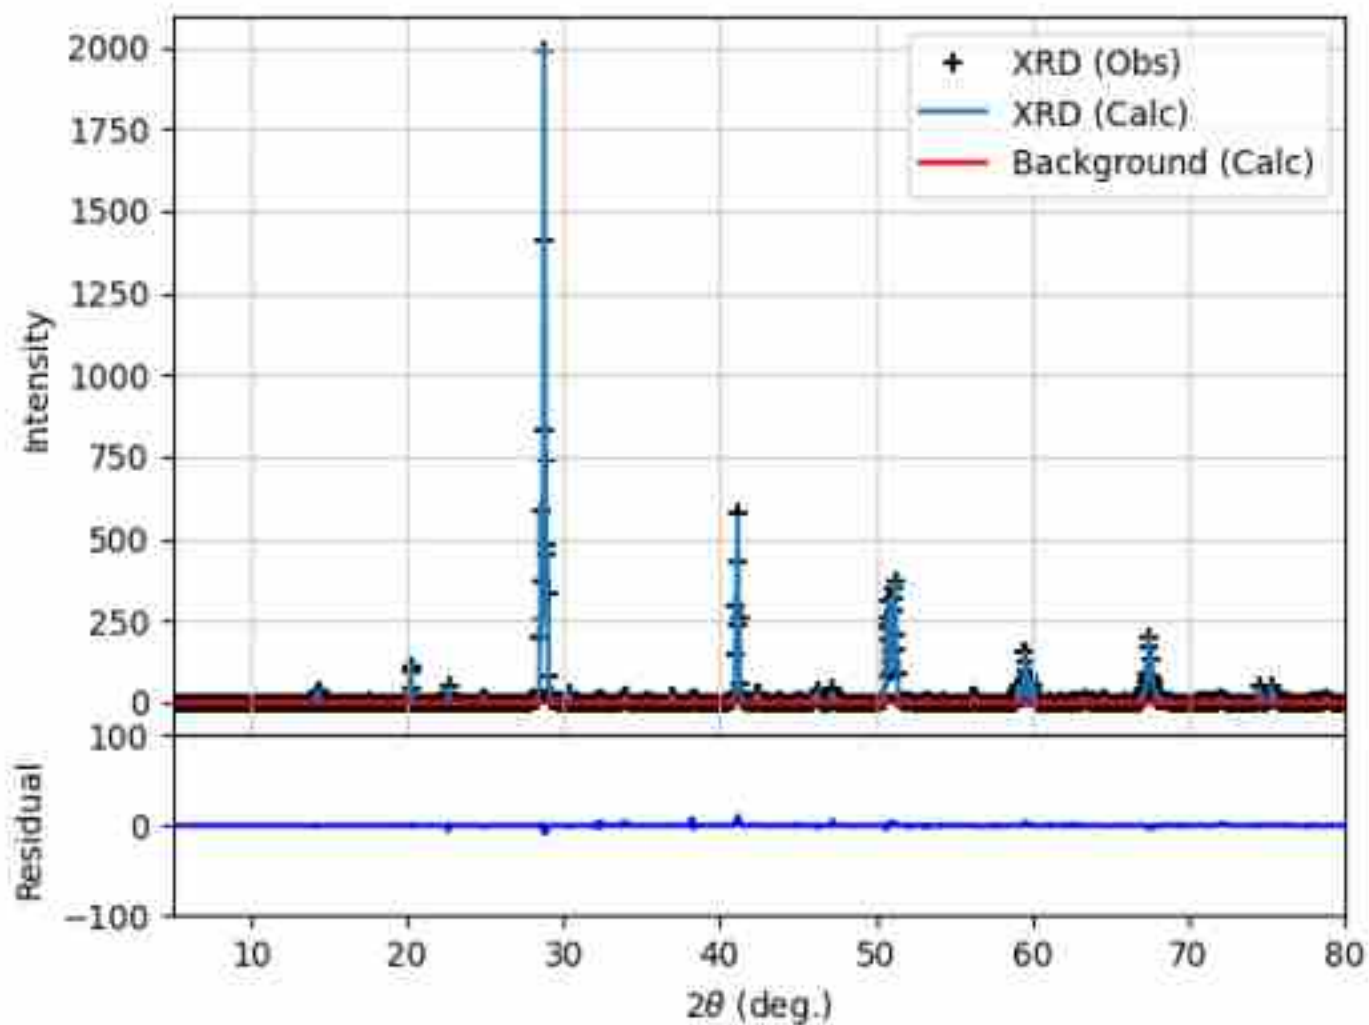

| RMSE before RR | Rwp     | RMSE after RR |
|----------------|---------|---------------|
| 0.018          | 4.88402 | 0.17905       |

# Ba<sub>3</sub>Al<sub>2</sub>Sn<sub>2</sub>

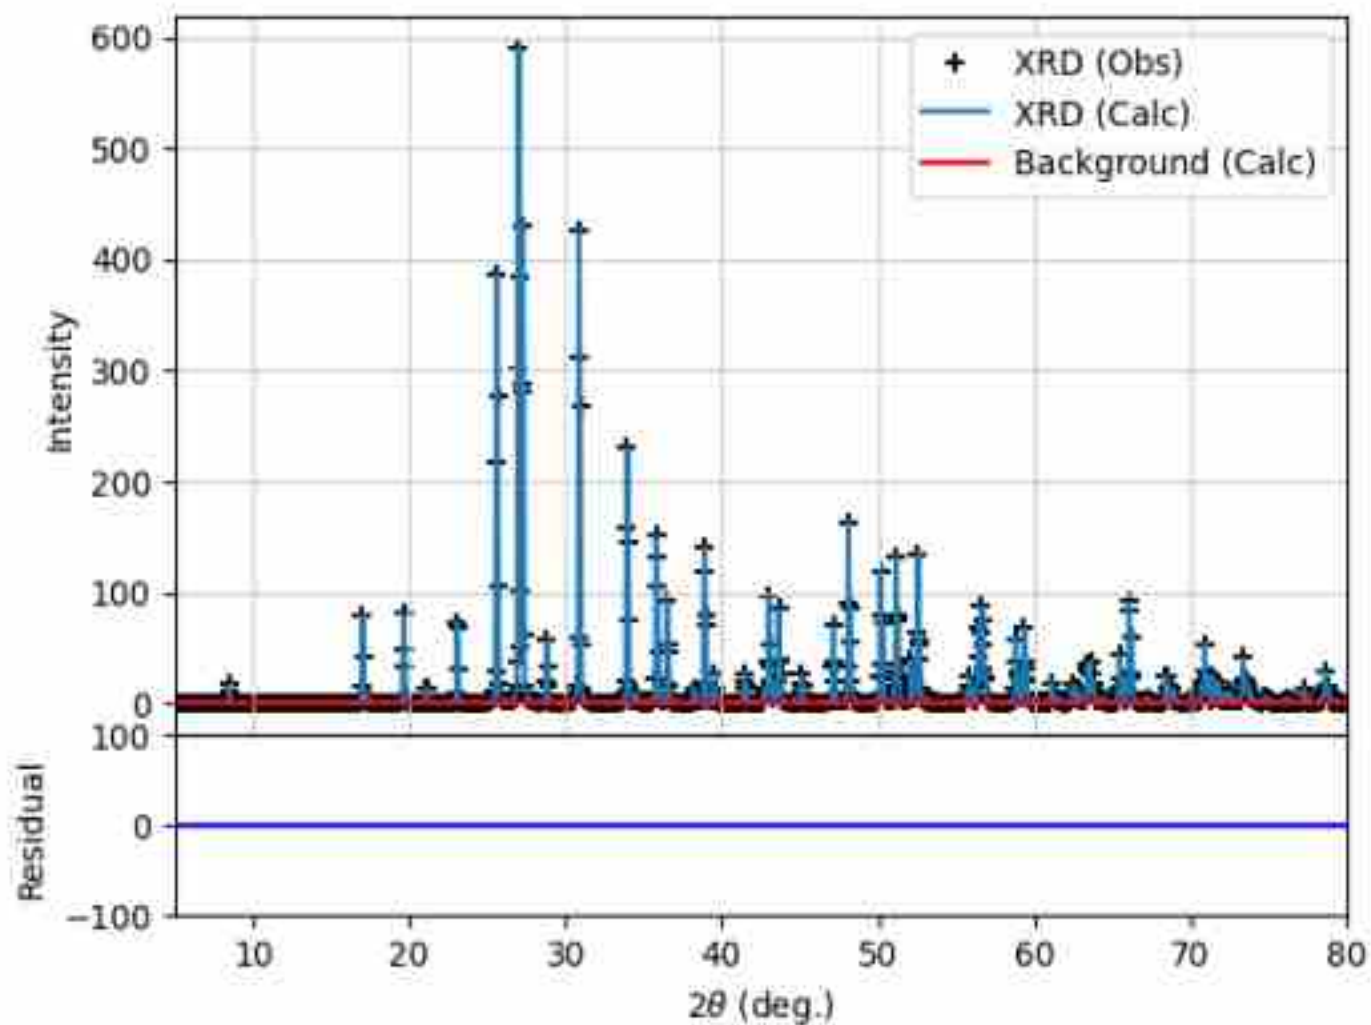

| RMSE before RR | Rwp     | RMSE after RR |
|----------------|---------|---------------|
| 0.018          | 0.00361 | 0.00082       |

# Ba<sub>3</sub>Cd<sub>2</sub>Sb<sub>4</sub>

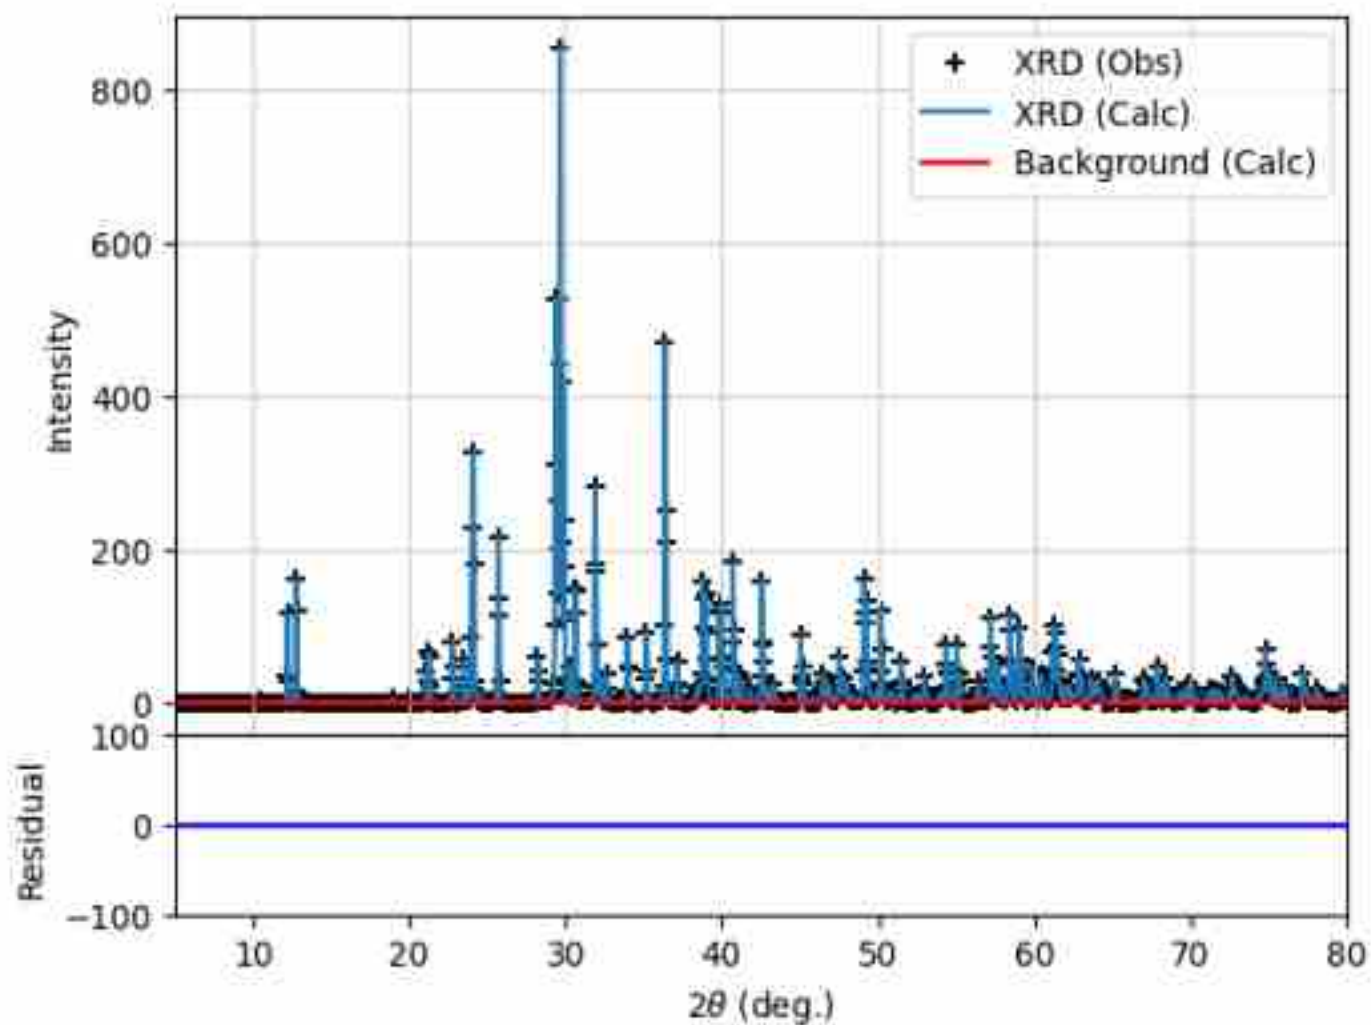

| RMSE before RR | Rwp    | RMSE after RR |
|----------------|--------|---------------|
| 0.018          | 0.0029 | 0.0002        |

# Ba<sub>4</sub>Ru<sub>4</sub>O<sub>12</sub>

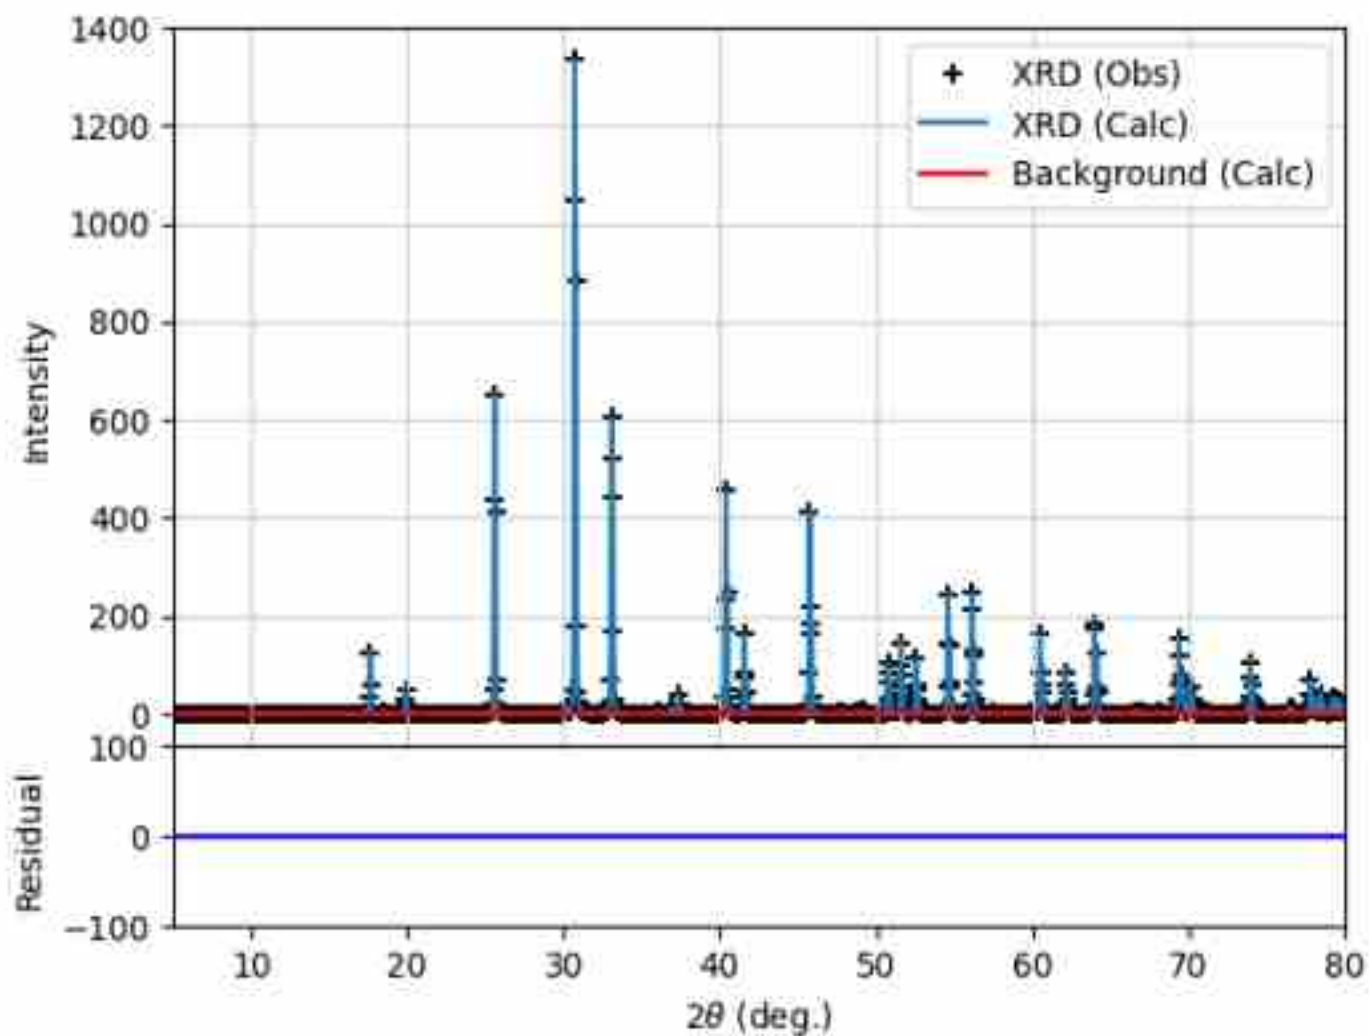

| RMSE before RR | Rwp     | RMSE after RR |
|----------------|---------|---------------|
| 0.018          | 0.00441 | 0.00164       |

Ba4Si4Pt4

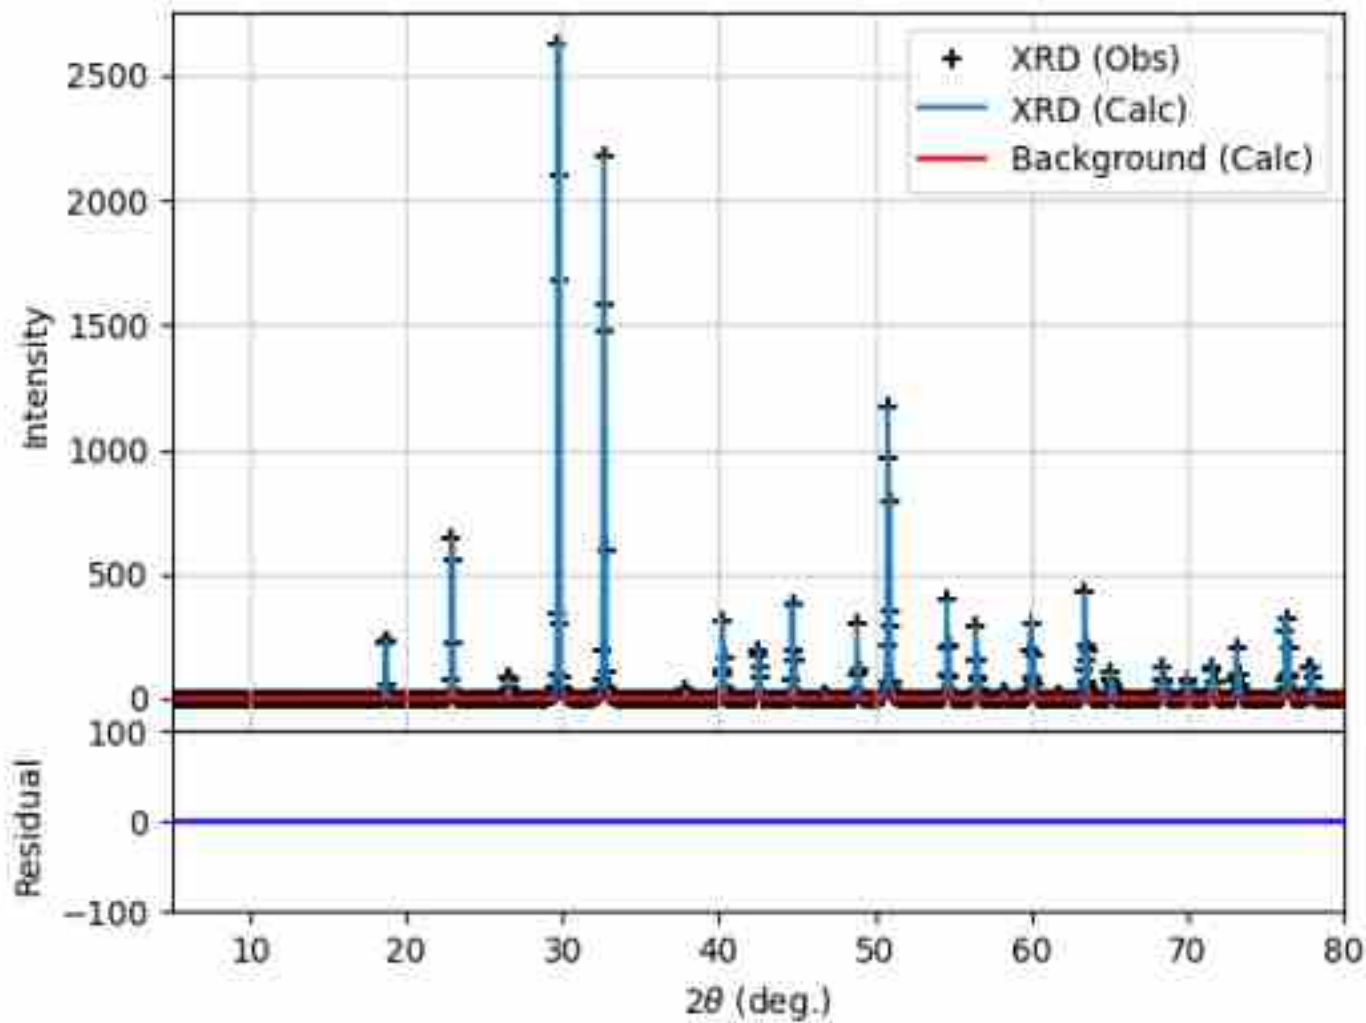

| RMSE before RR | Rwp     | RMSE after RR |
|----------------|---------|---------------|
| 0.018          | 0.00692 | 0.00111       |

# Ba<sub>4</sub>Sm<sub>2</sub>Ga<sub>2</sub>Te<sub>10</sub>

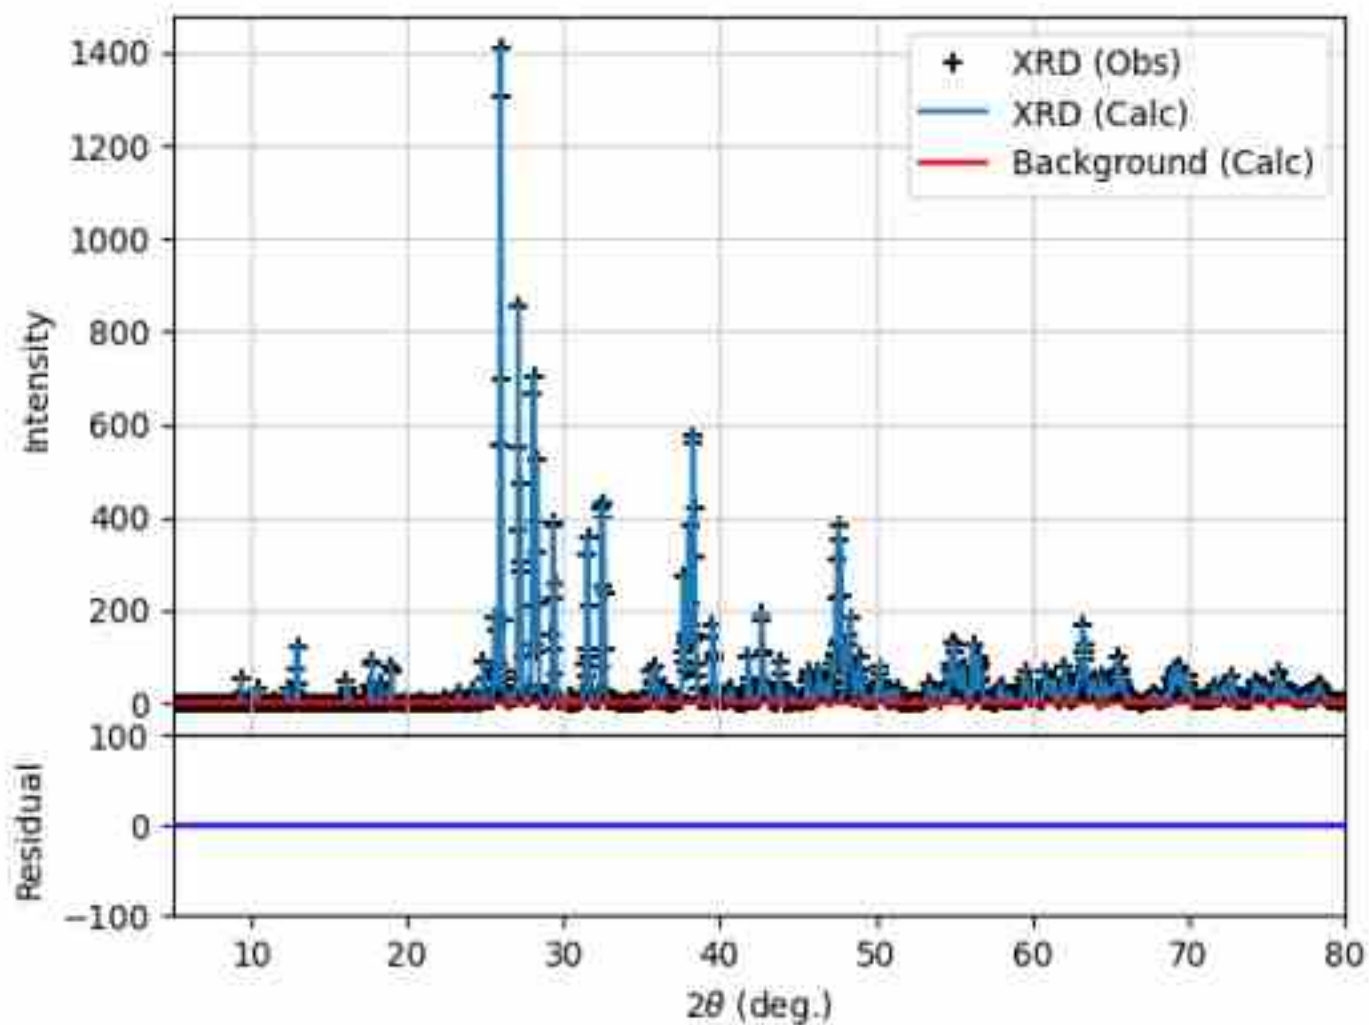

| RMSE before RR | Rwp     | RMSE after RR |
|----------------|---------|---------------|
| 0.018          | 0.00068 | 0.00013       |



# Be6Co2

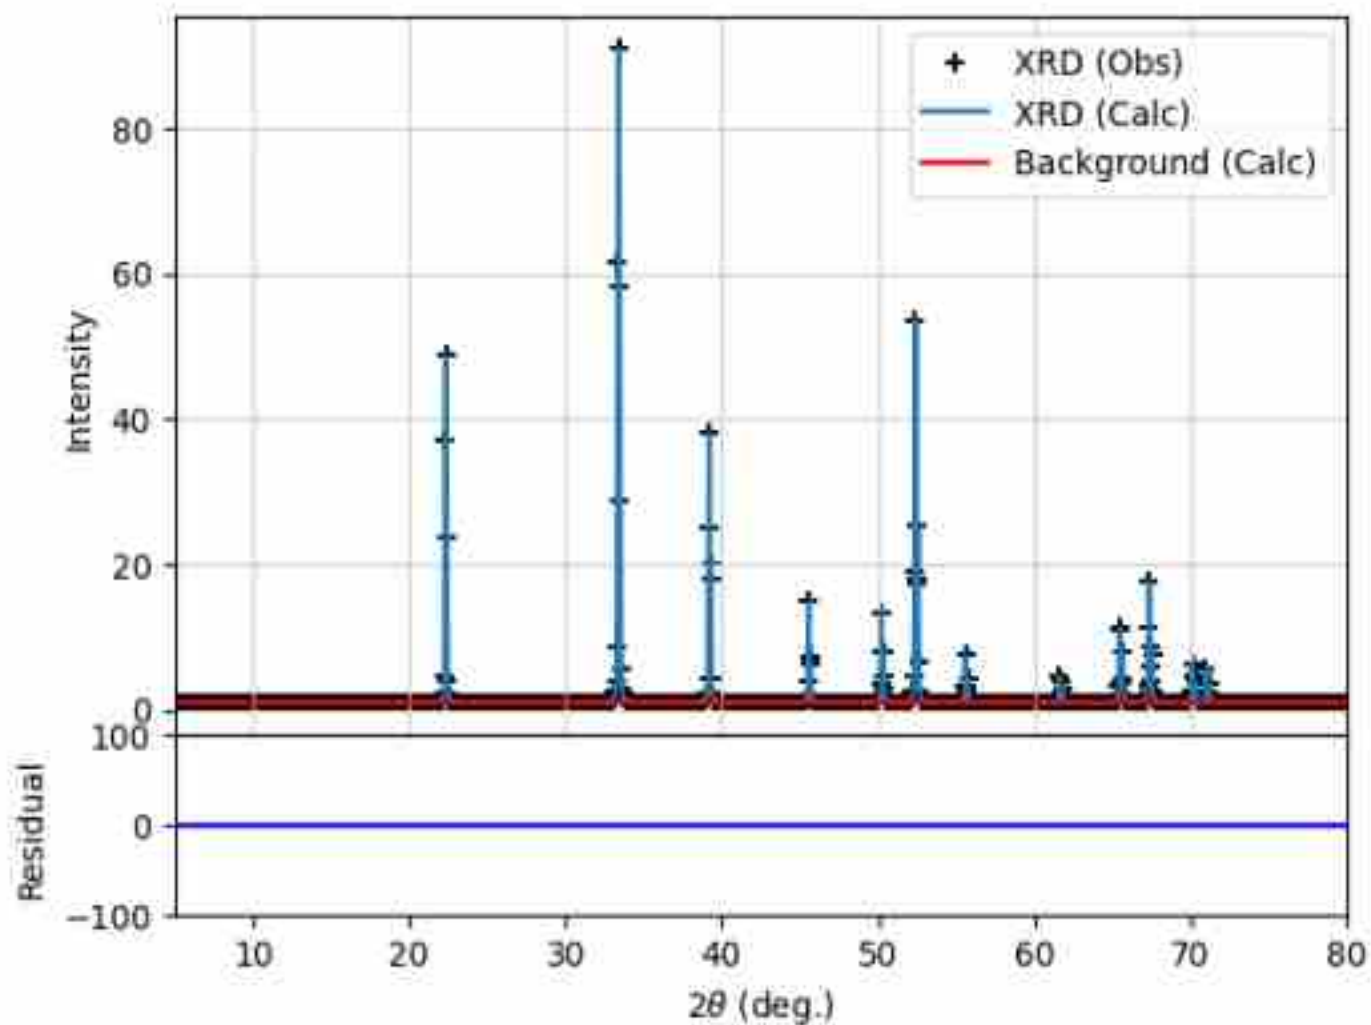

| RMSE before RR | Rwp     | RMSE after RR |
|----------------|---------|---------------|
| 0.018          | 0.00886 | 0.00574       |

# Ca1Mn3Al9

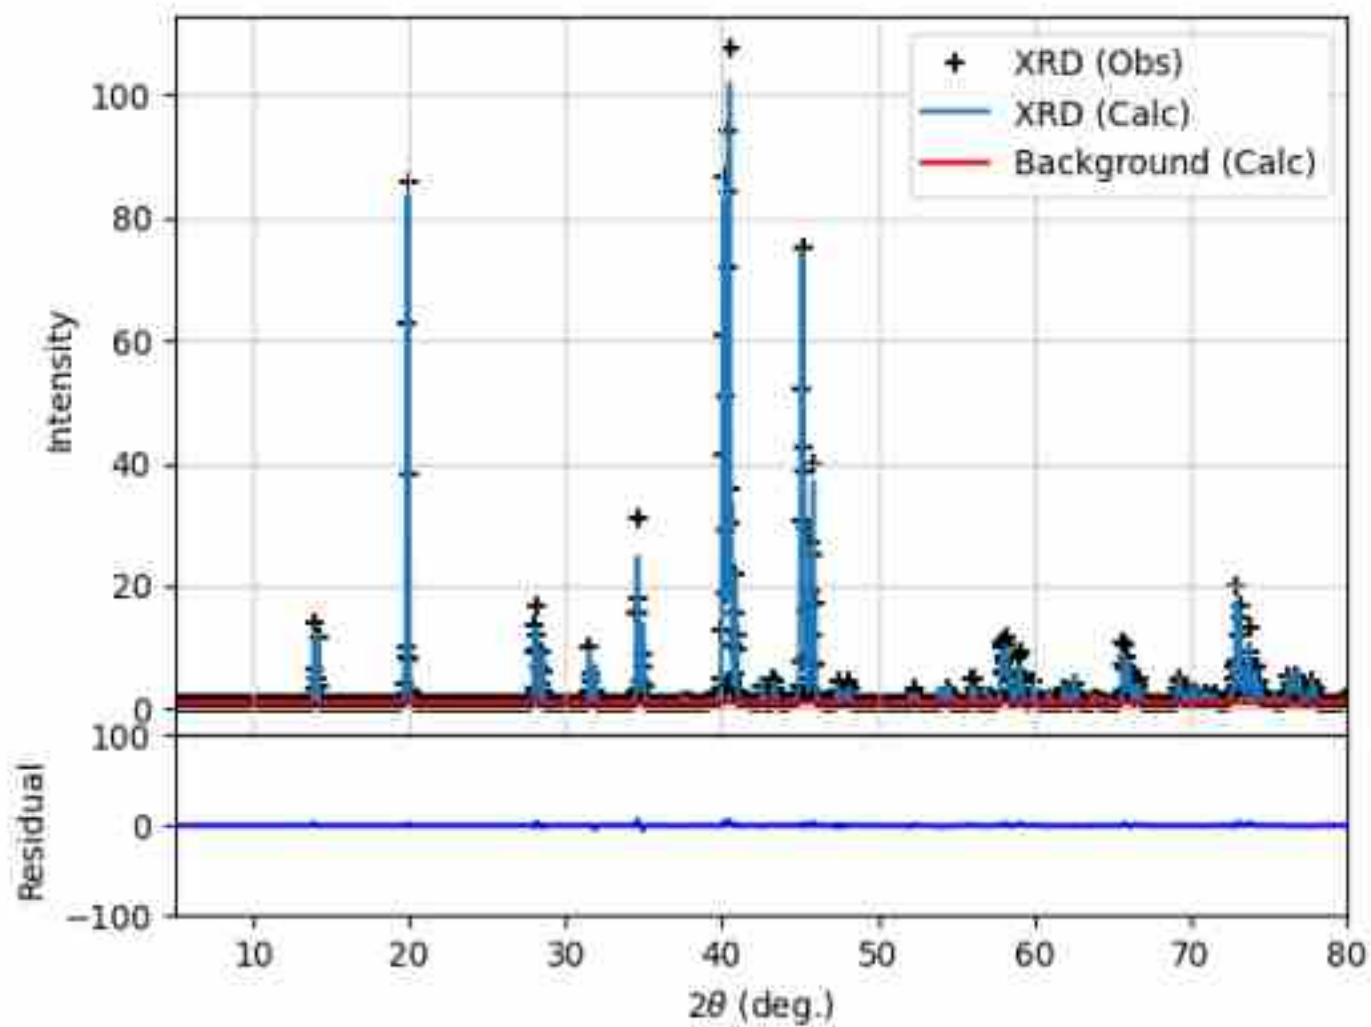

| RMSE before RR | Rwp      | RMSE after RR |
|----------------|----------|---------------|
| 0.018          | 13.64912 | 0.06356       |

# Ca<sub>1</sub>Mn<sub>4</sub>Cu<sub>3</sub>O<sub>12</sub>

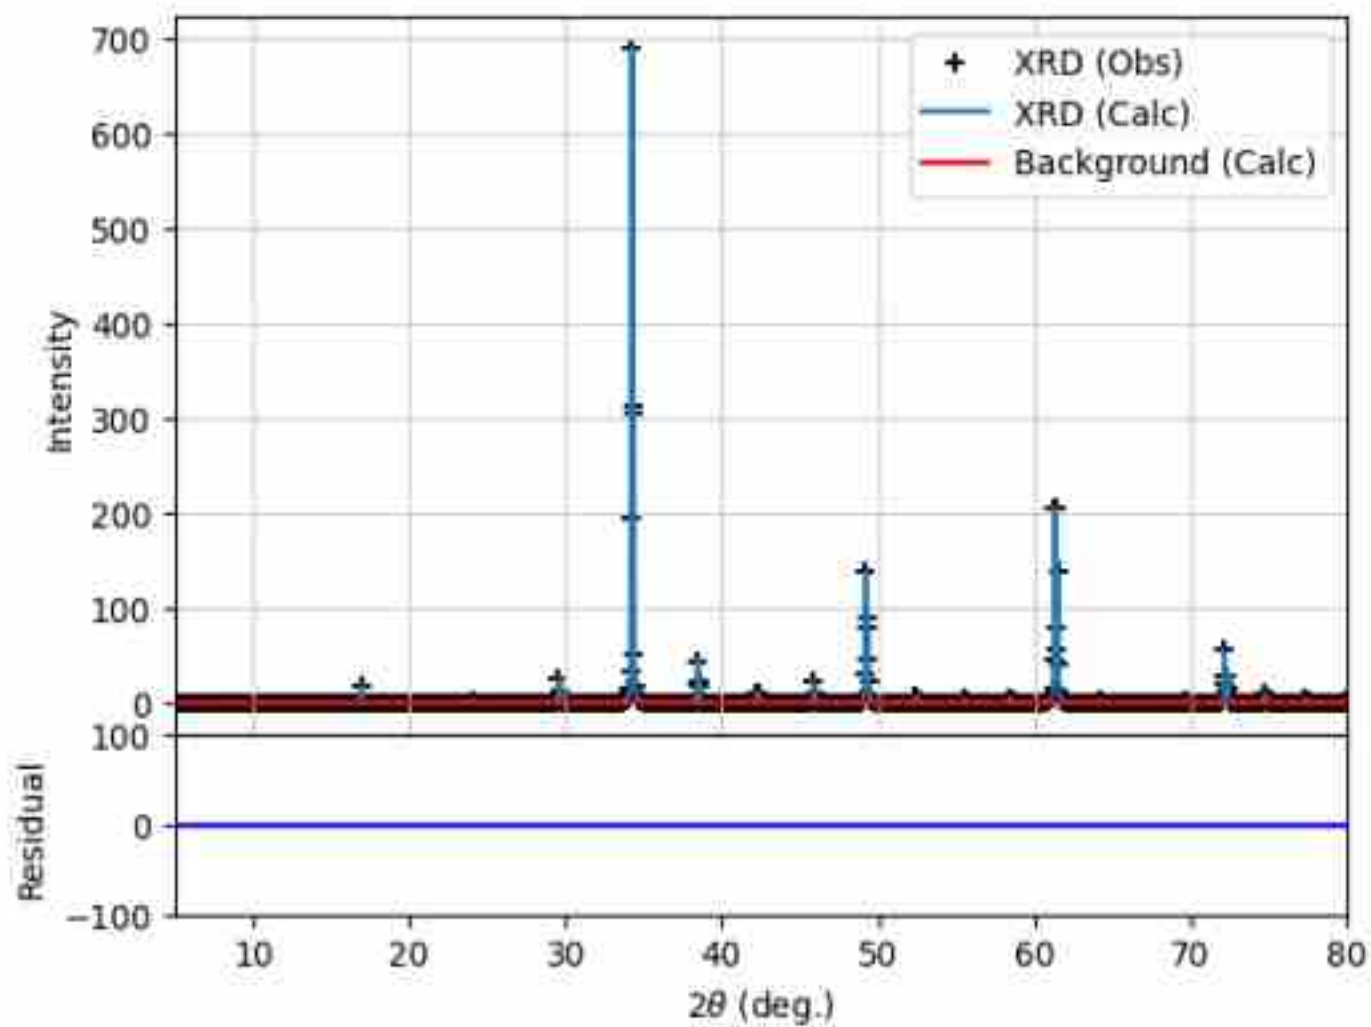

| RMSE before RR | Rwp   | RMSE after RR |
|----------------|-------|---------------|
| 0.018          | 0.012 | 0.00397       |

# Ca1Mo1F6

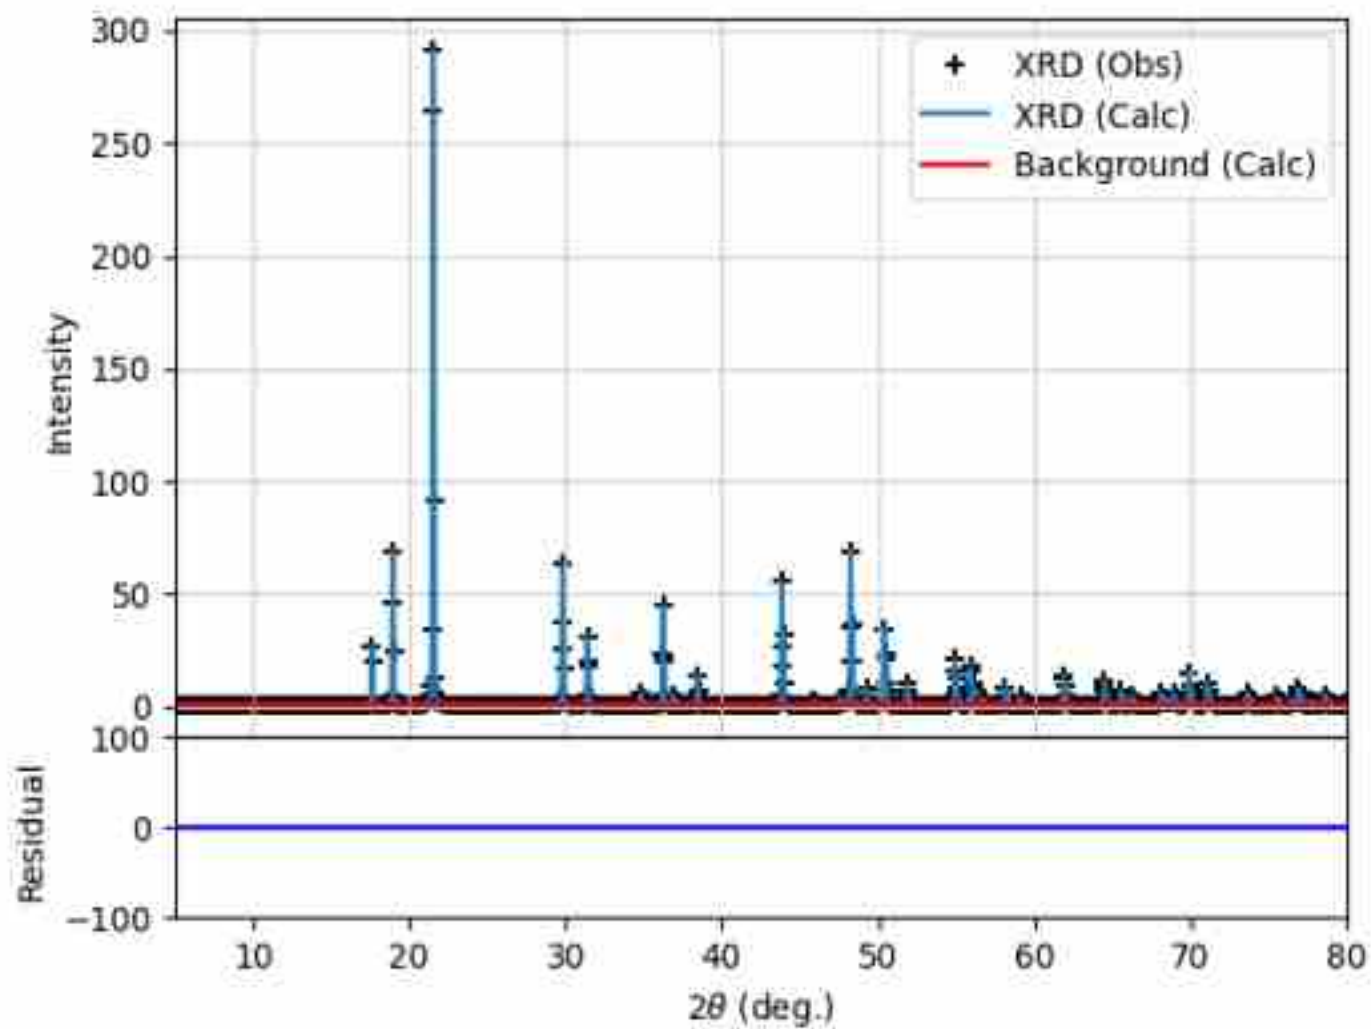

| RMSE before RR | Rwp     | RMSE after RR |
|----------------|---------|---------------|
| 0.018          | 0.00278 | 0.00098       |

# Ca<sub>1</sub>Yb<sub>3</sub>Mn<sub>4</sub>O<sub>12</sub>

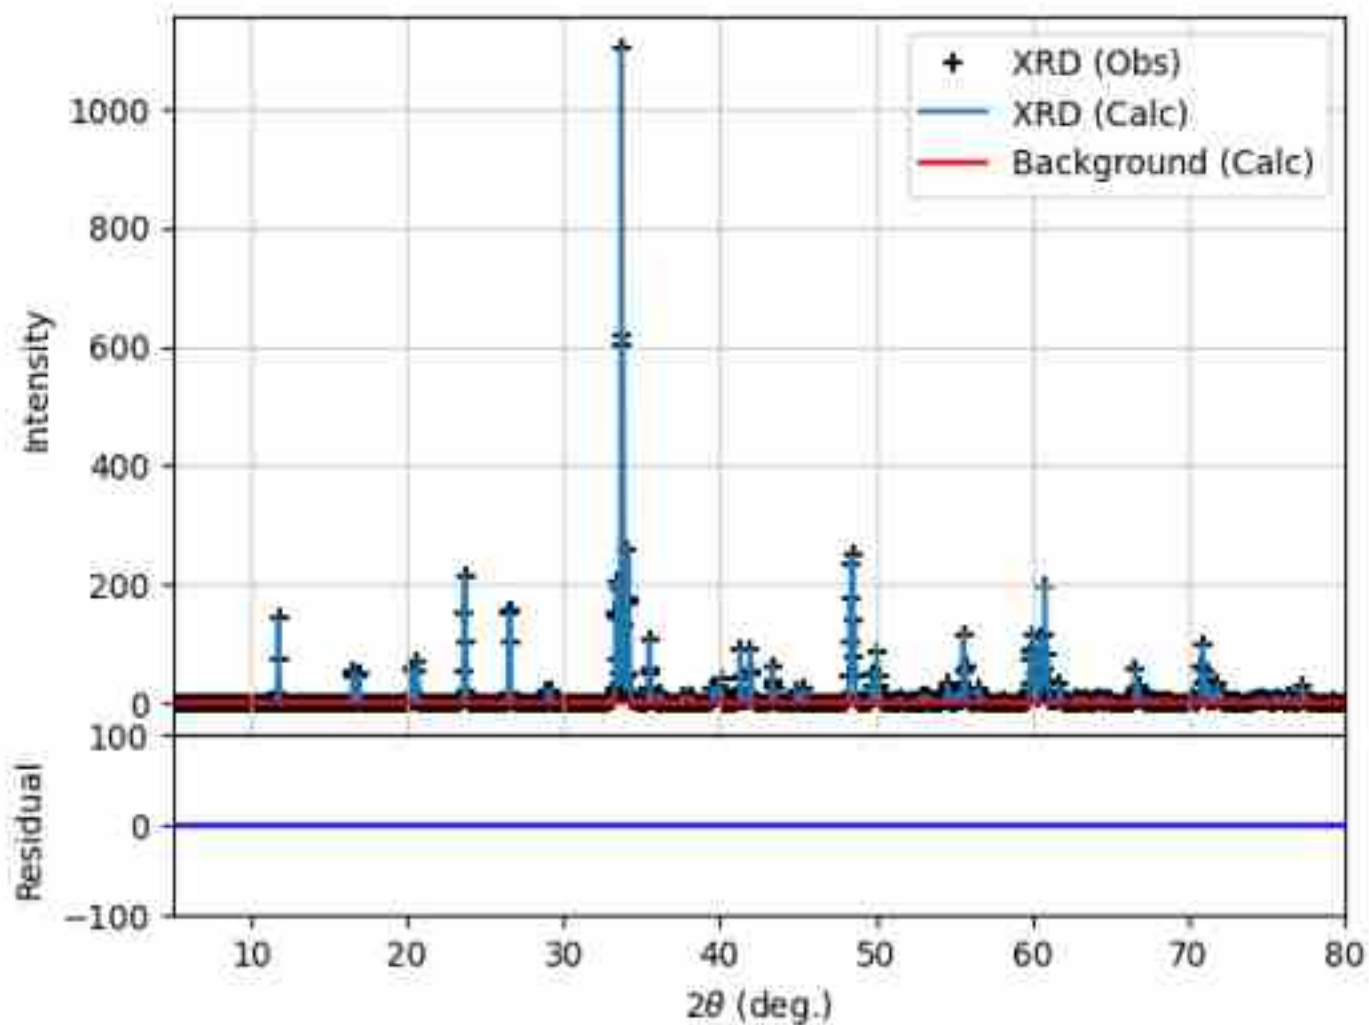

| RMSE before RR | Rwp     | RMSE after RR |
|----------------|---------|---------------|
| 0.018          | 0.00348 | 0.00126       |

# Ca<sub>2</sub>Au<sub>4</sub>

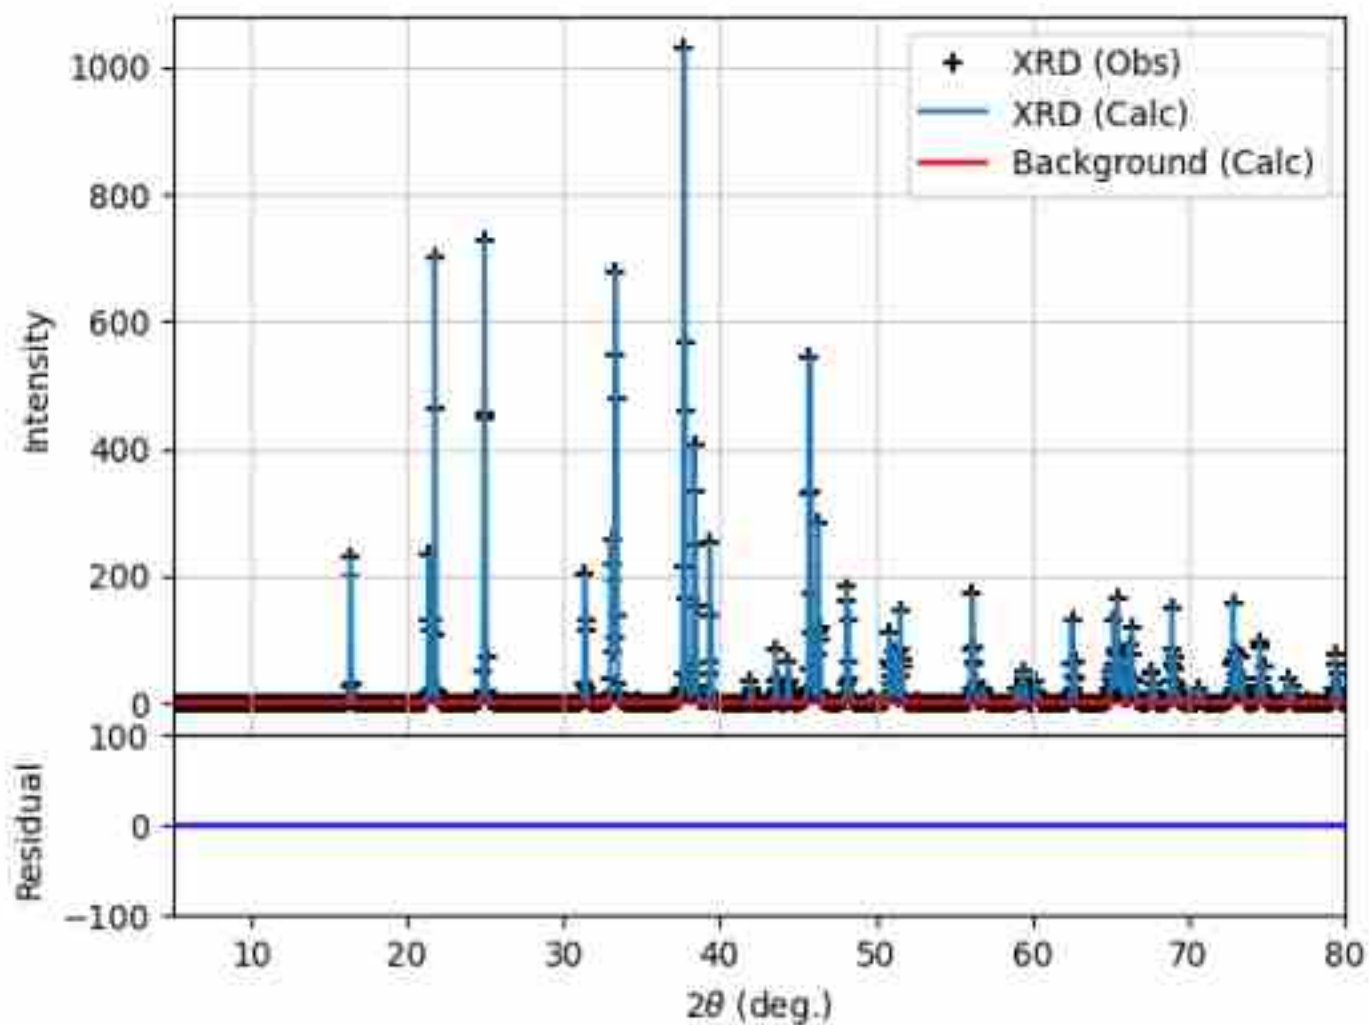

| RMSE before RR | Rwp     | RMSE after RR |
|----------------|---------|---------------|
| 0.018          | 0.00394 | 0.00048       |

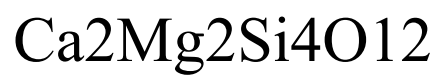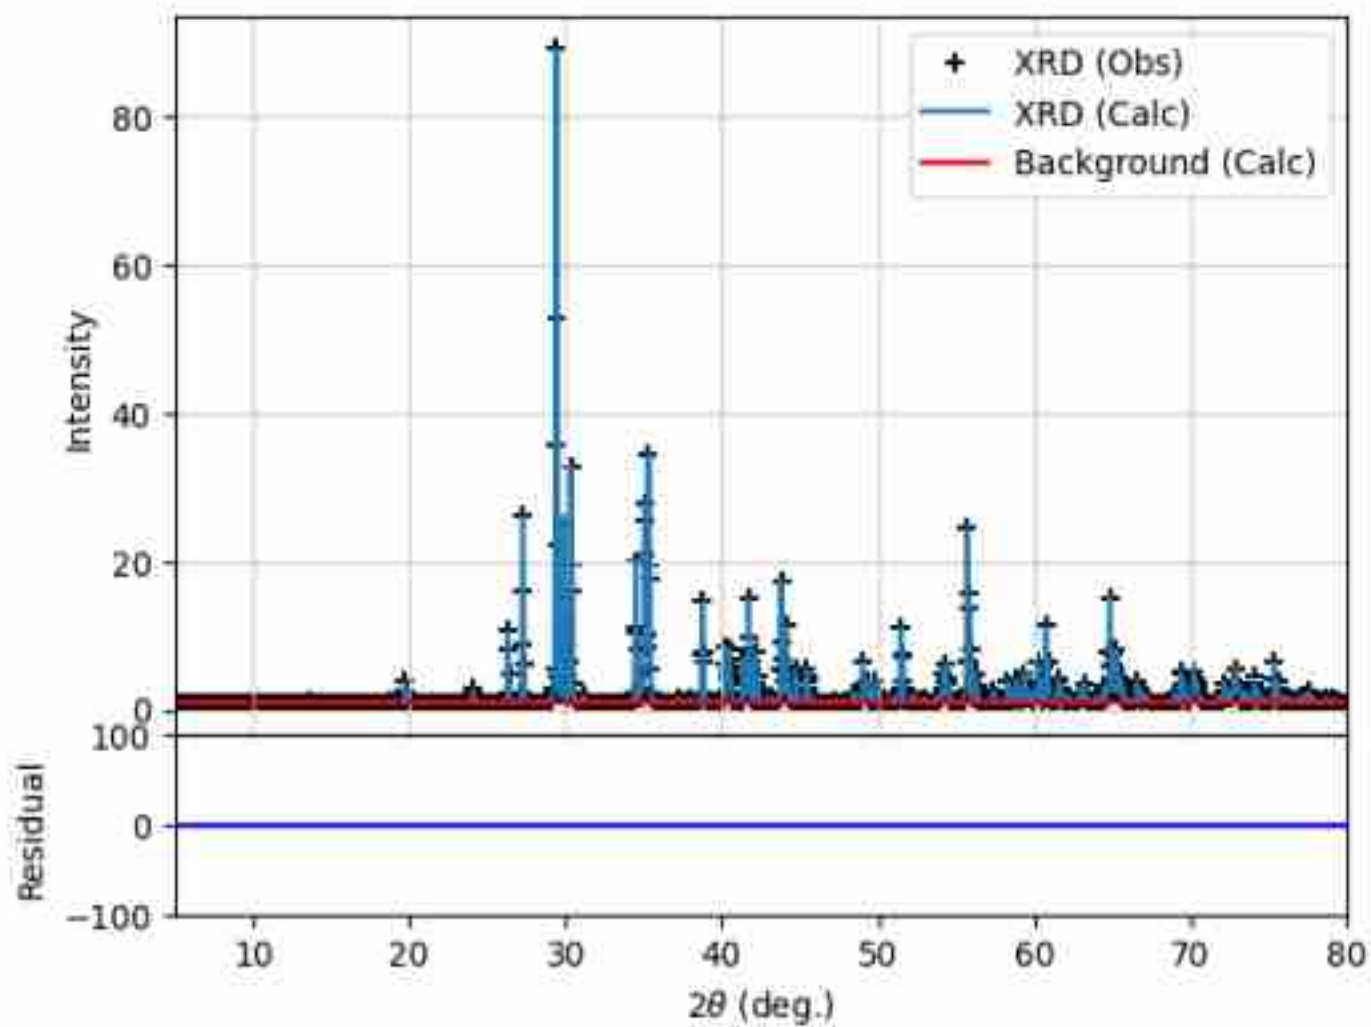

| RMSE before RR | Rwp     | RMSE after RR |
|----------------|---------|---------------|
| 0.018          | 0.00251 | 0.00049       |

# Ca<sub>2</sub>Pr<sub>2</sub>Fe<sub>4</sub>O<sub>12</sub>

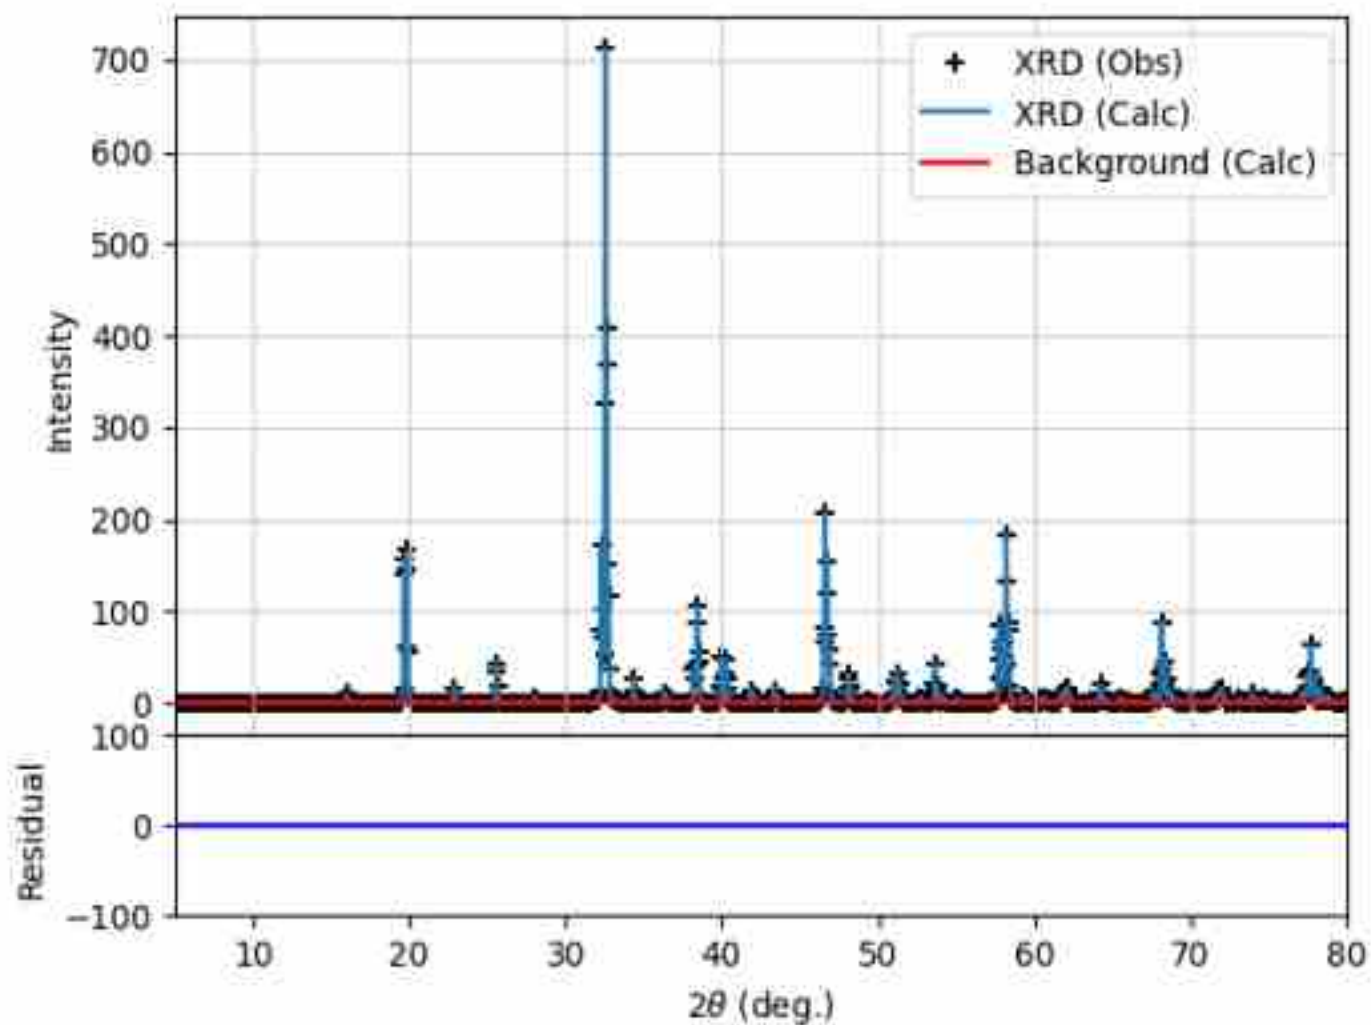

| RMSE before RR | Rwp     | RMSE after RR |
|----------------|---------|---------------|
| 0.018          | 0.00365 | 0.00117       |



# Ca<sub>3</sub>V<sub>2</sub>O<sub>8</sub>

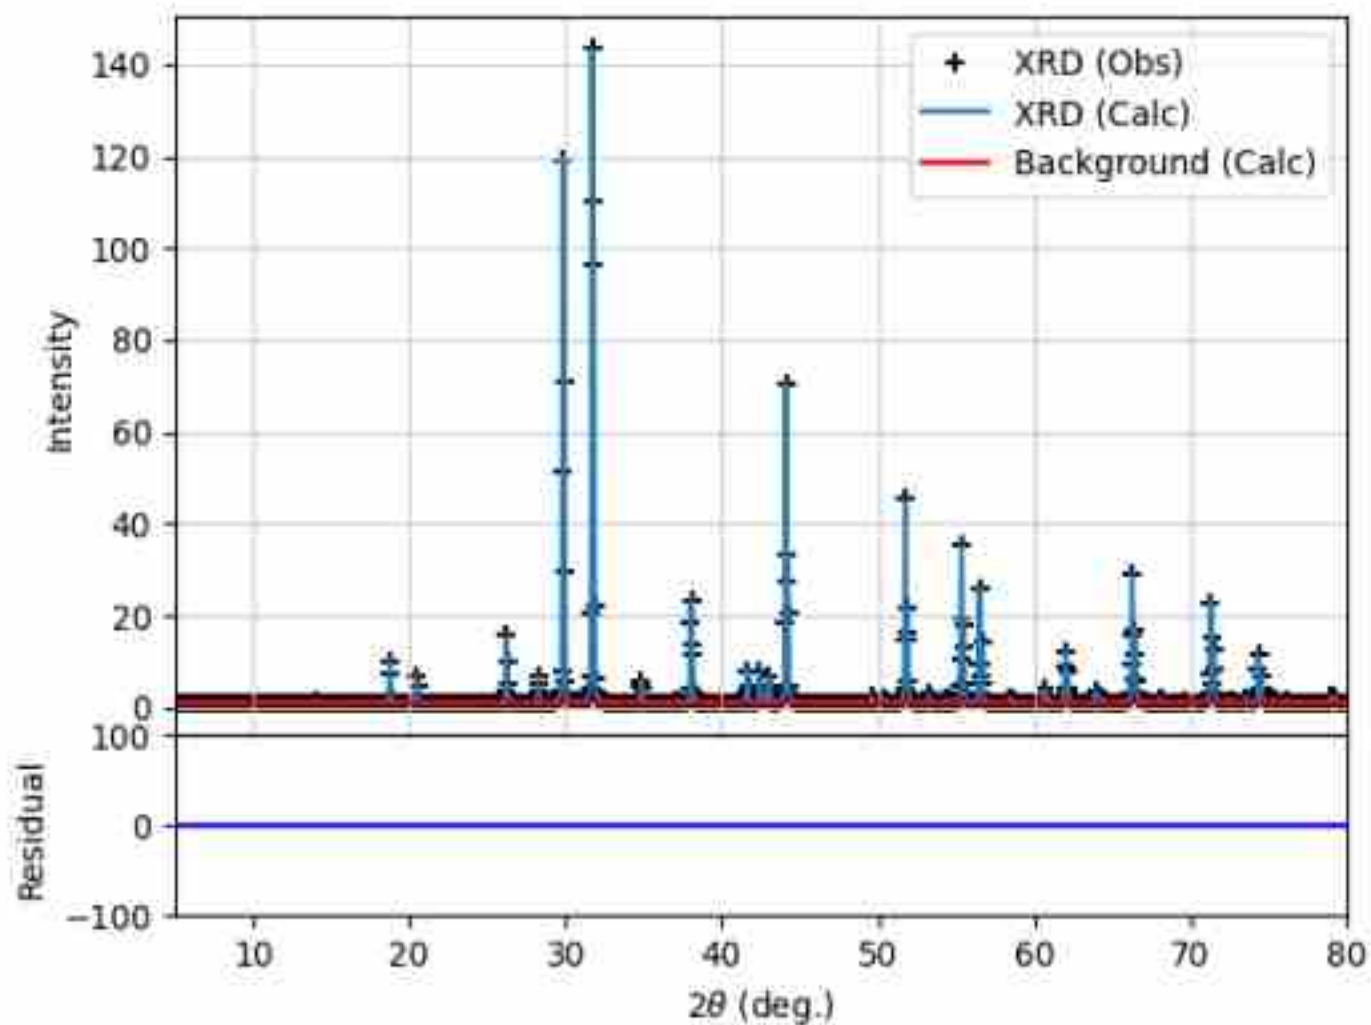

| RMSE before RR | Rwp    | RMSE after RR |
|----------------|--------|---------------|
| 0.018          | 0.0024 | 0.00117       |

# Ca<sub>4</sub>Cd<sub>4</sub>Au<sub>4</sub>

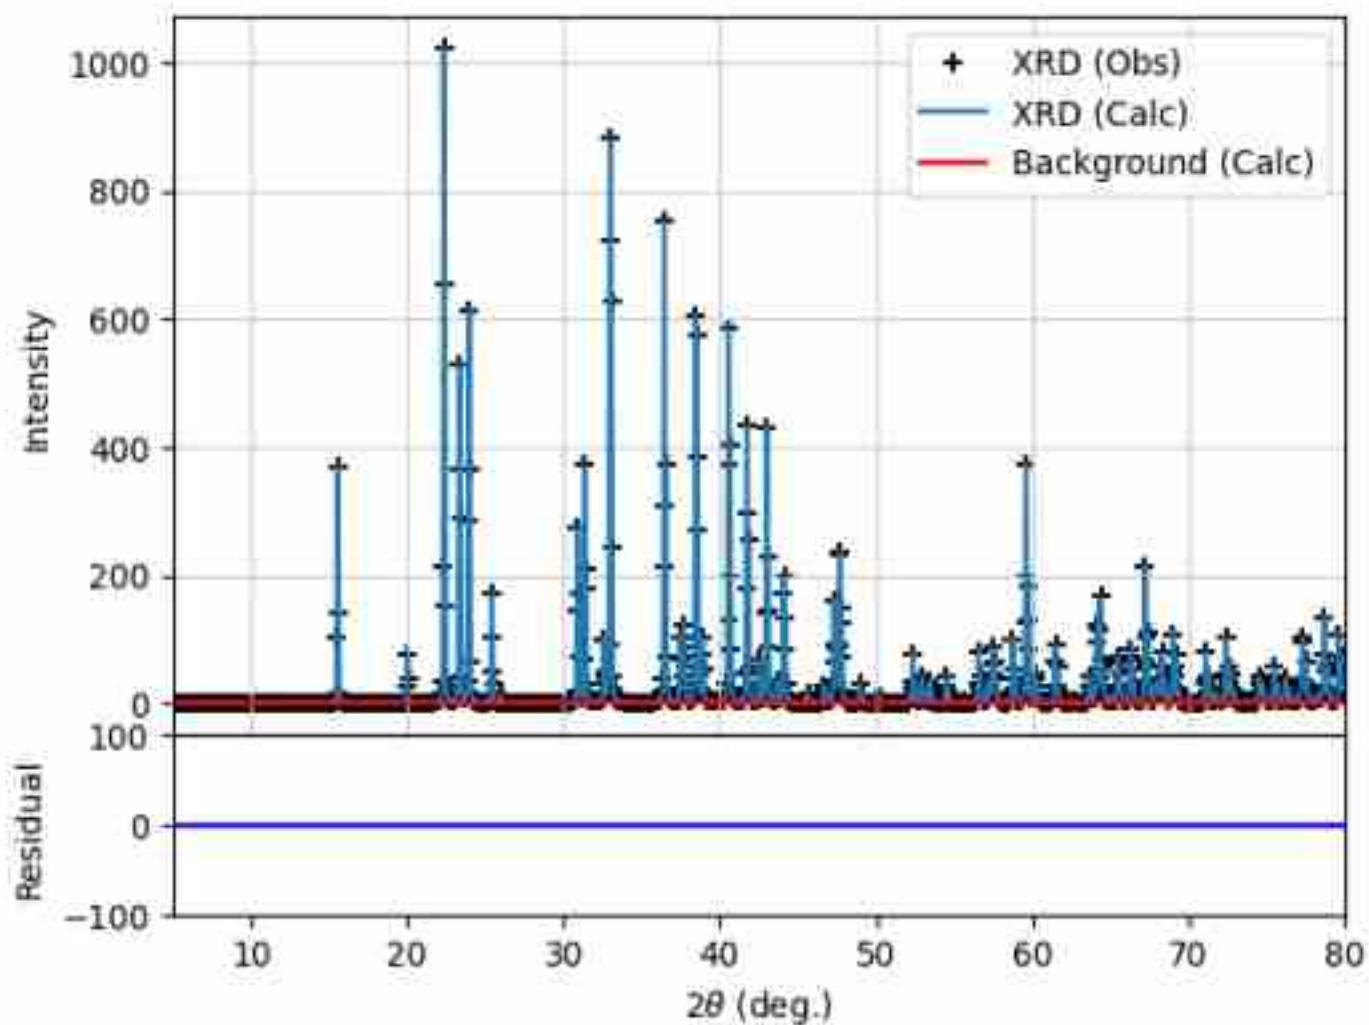

| RMSE before RR | Rwp     | RMSE after RR |
|----------------|---------|---------------|
| 0.018          | 0.00437 | 0.00038       |

# Ca<sub>4</sub>Ga<sub>4</sub>Sn<sub>4</sub>

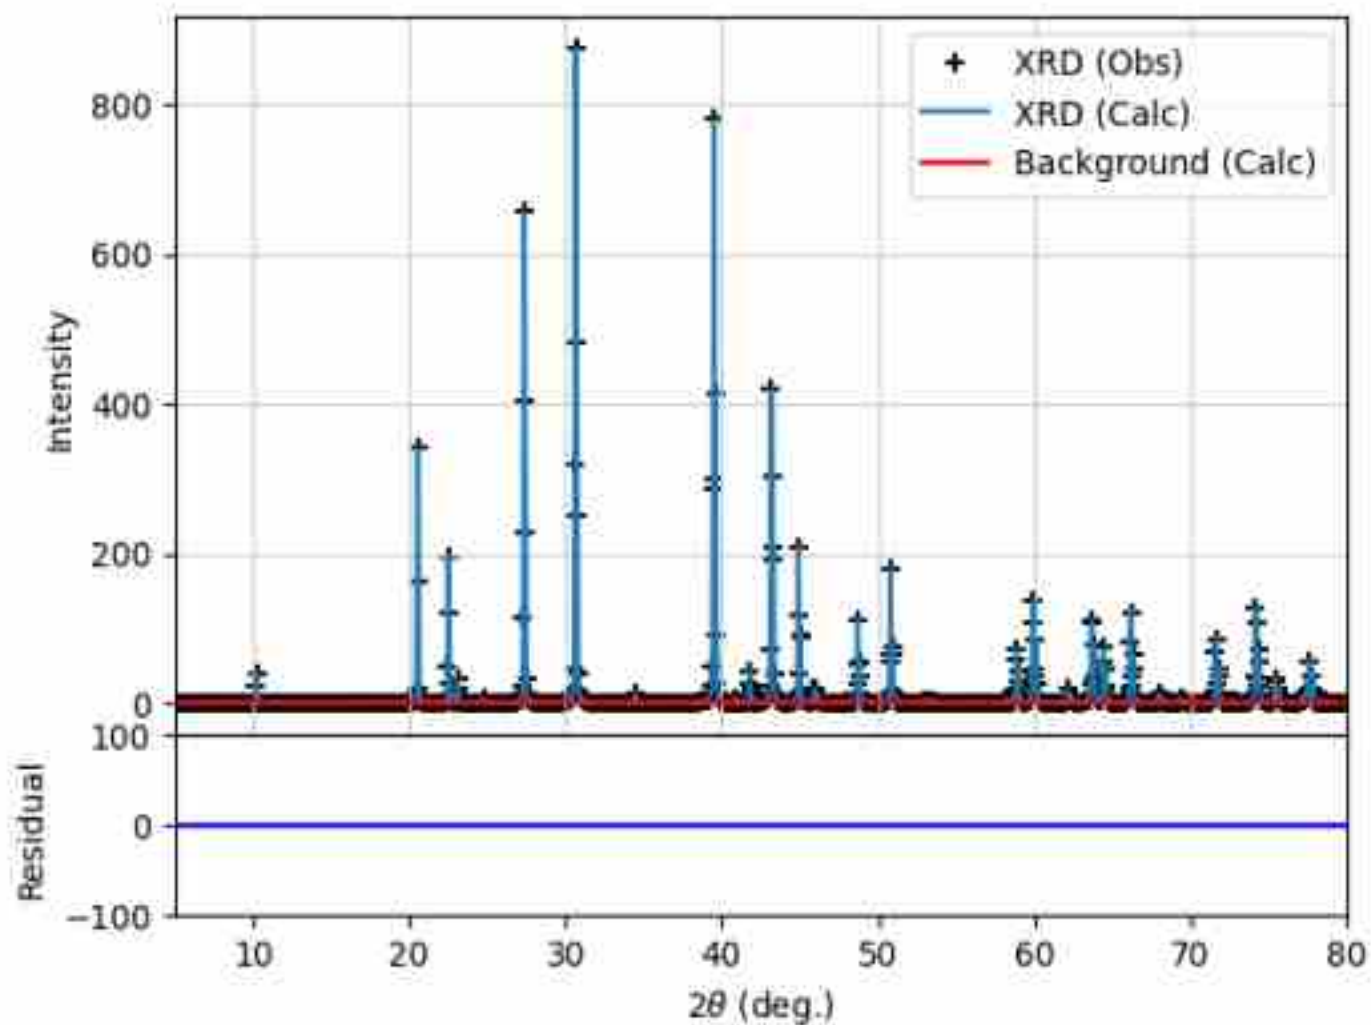

| RMSE before RR | Rwp     | RMSE after RR |
|----------------|---------|---------------|
| 0.018          | 0.00411 | 0.00076       |

# Ca<sub>4</sub>Ru<sub>4</sub>O<sub>12</sub>

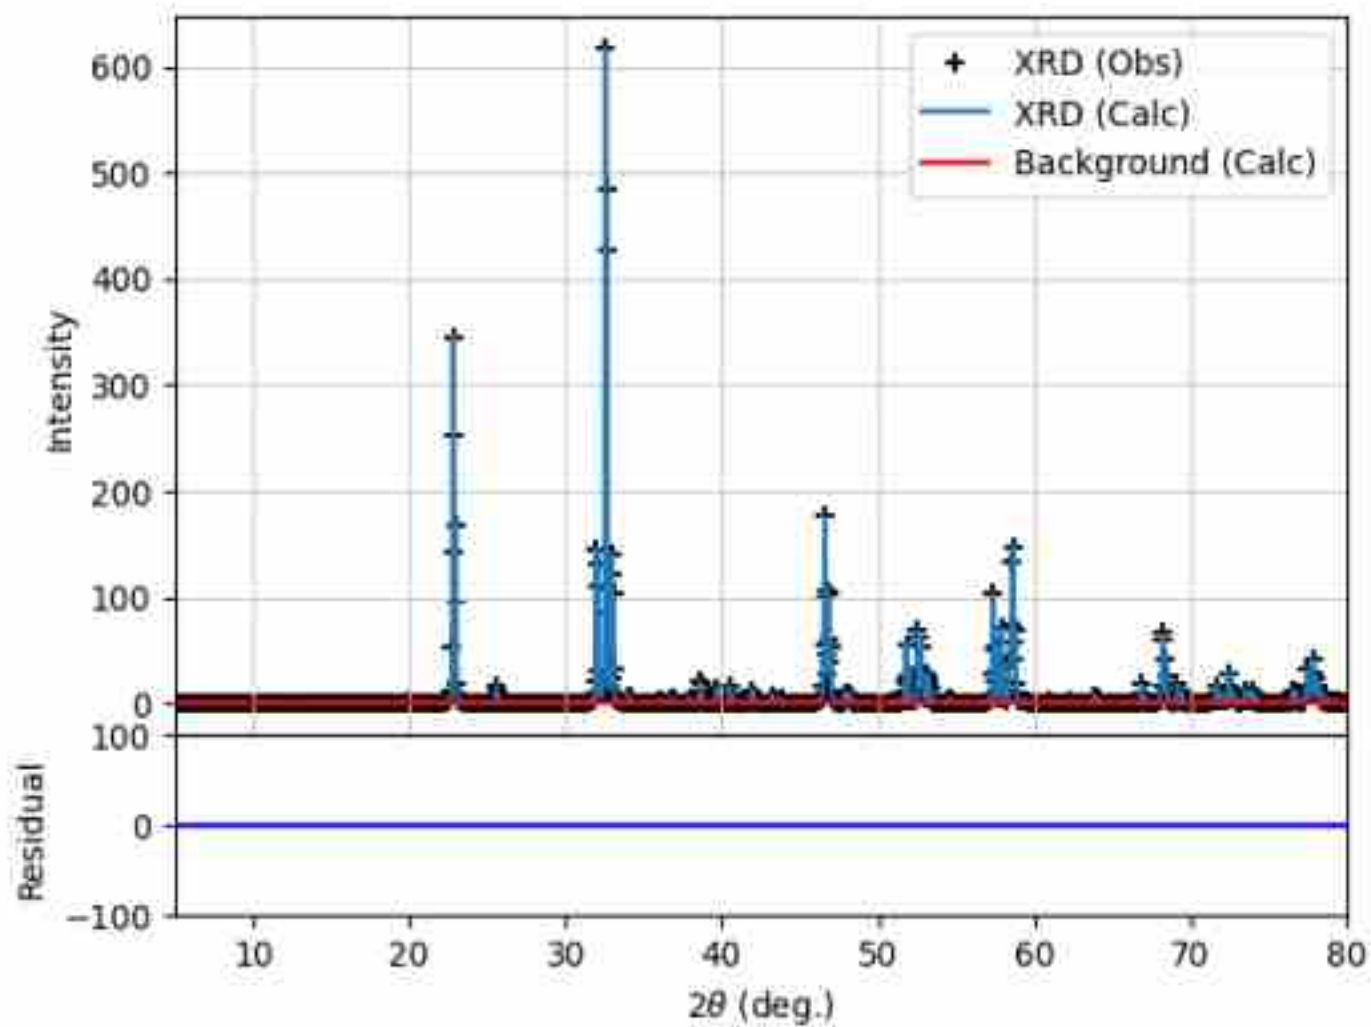

| RMSE before RR | Rwp     | RMSE after RR |
|----------------|---------|---------------|
| 0.018          | 0.00532 | 0.00153       |

# Ca<sub>4</sub>Ta<sub>2</sub>In<sub>2</sub>O<sub>12</sub>

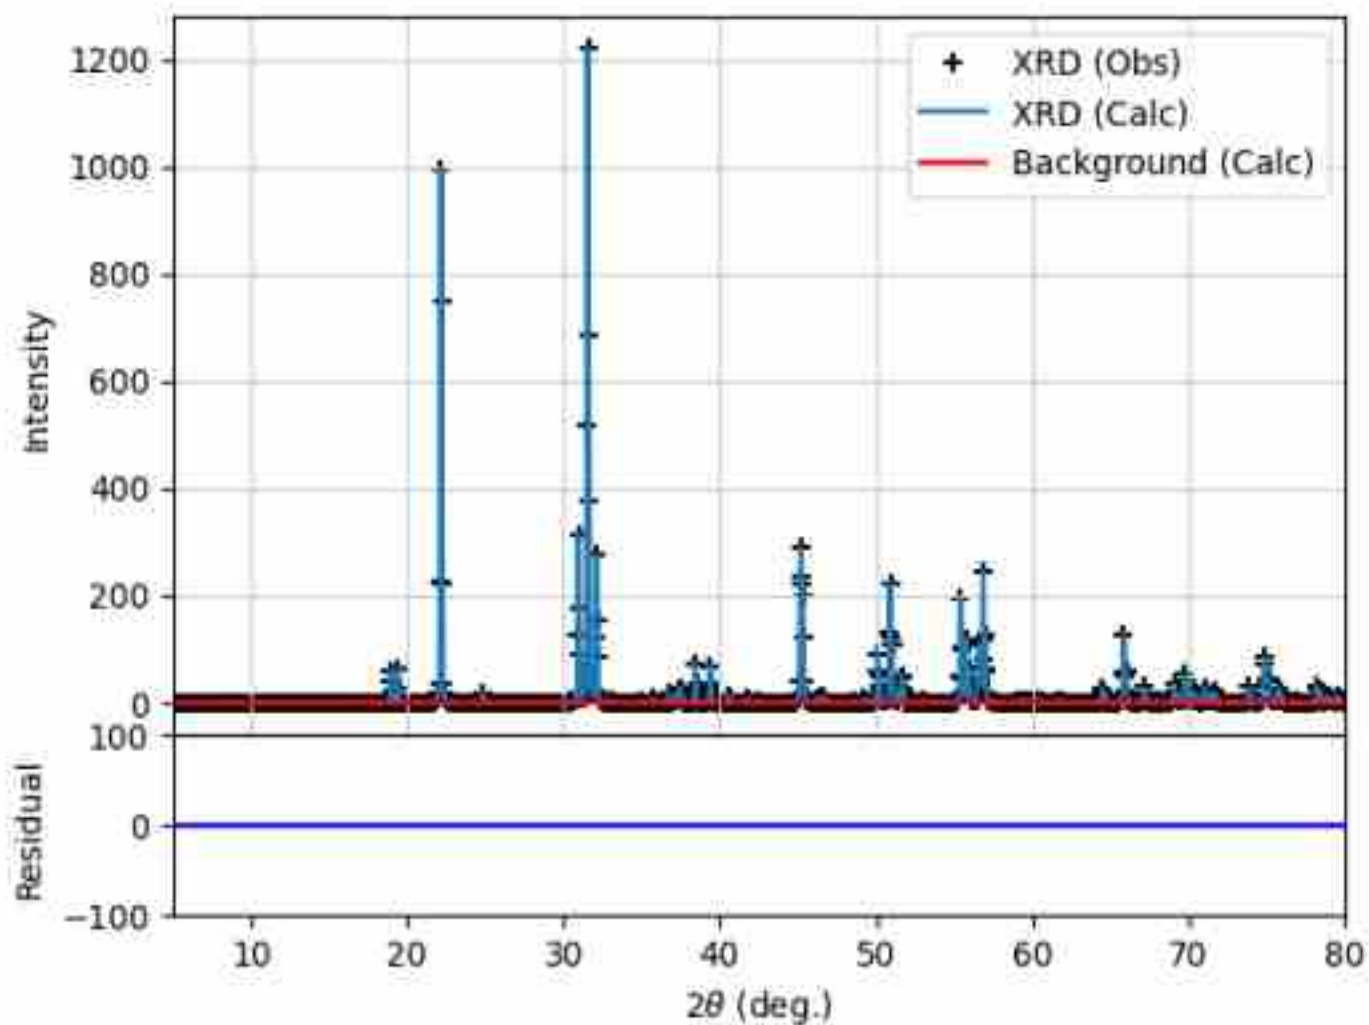

| RMSE before RR | Rwp     | RMSE after RR |
|----------------|---------|---------------|
| 0.018          | 0.00367 | 0.00106       |

# Ca<sub>8</sub>Ti<sub>2</sub>N<sub>8</sub>

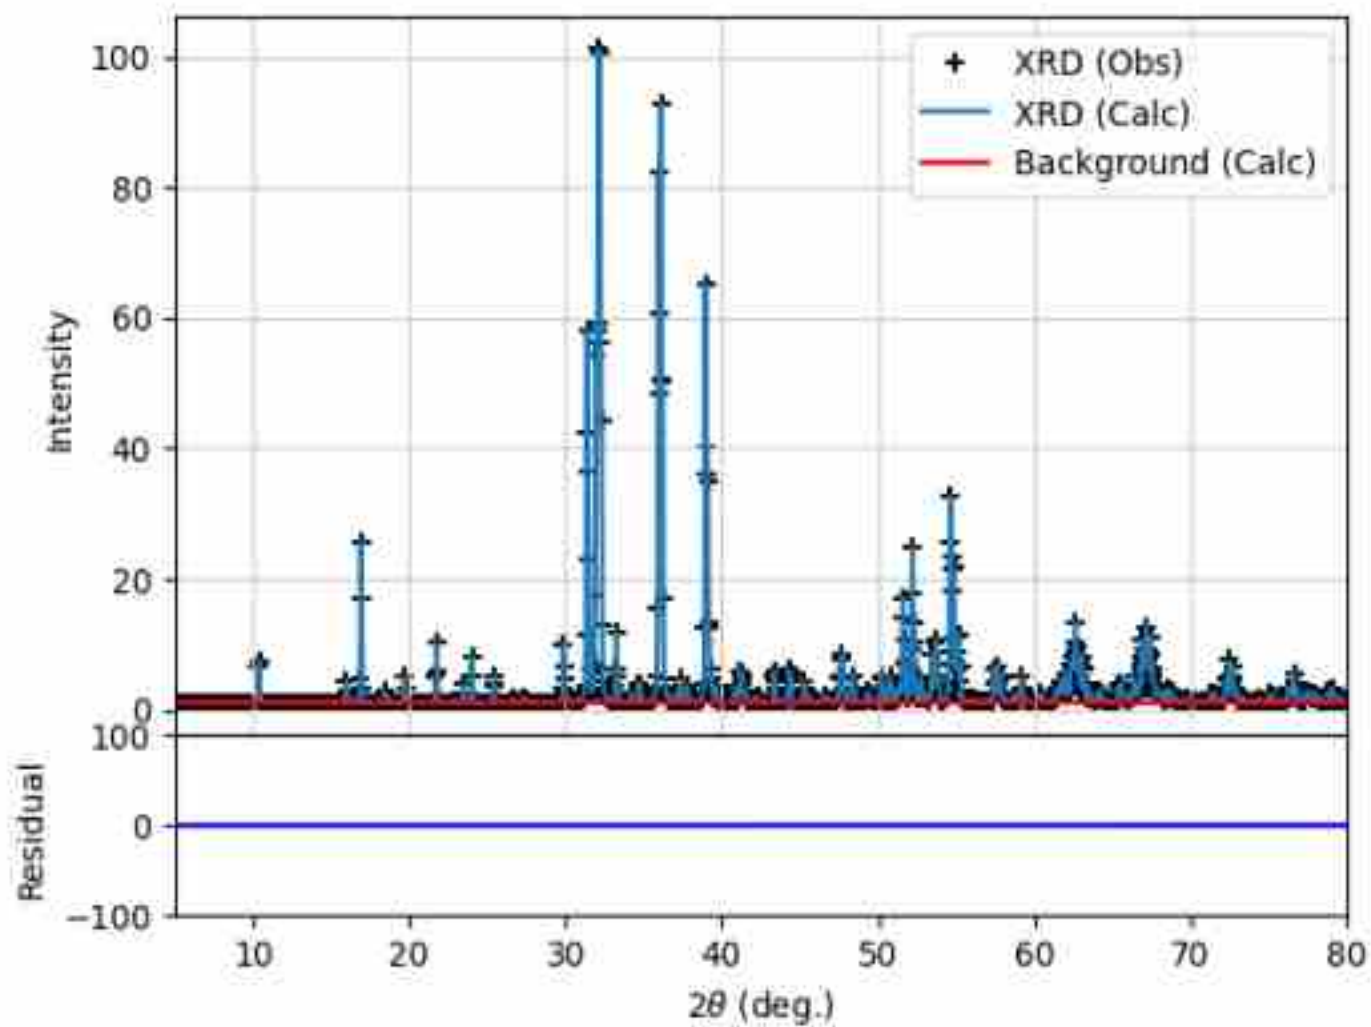

| RMSE before RR | Rwp     | RMSE after RR |
|----------------|---------|---------------|
| 0.018          | 0.80367 | 0.00651       |

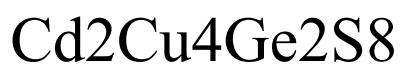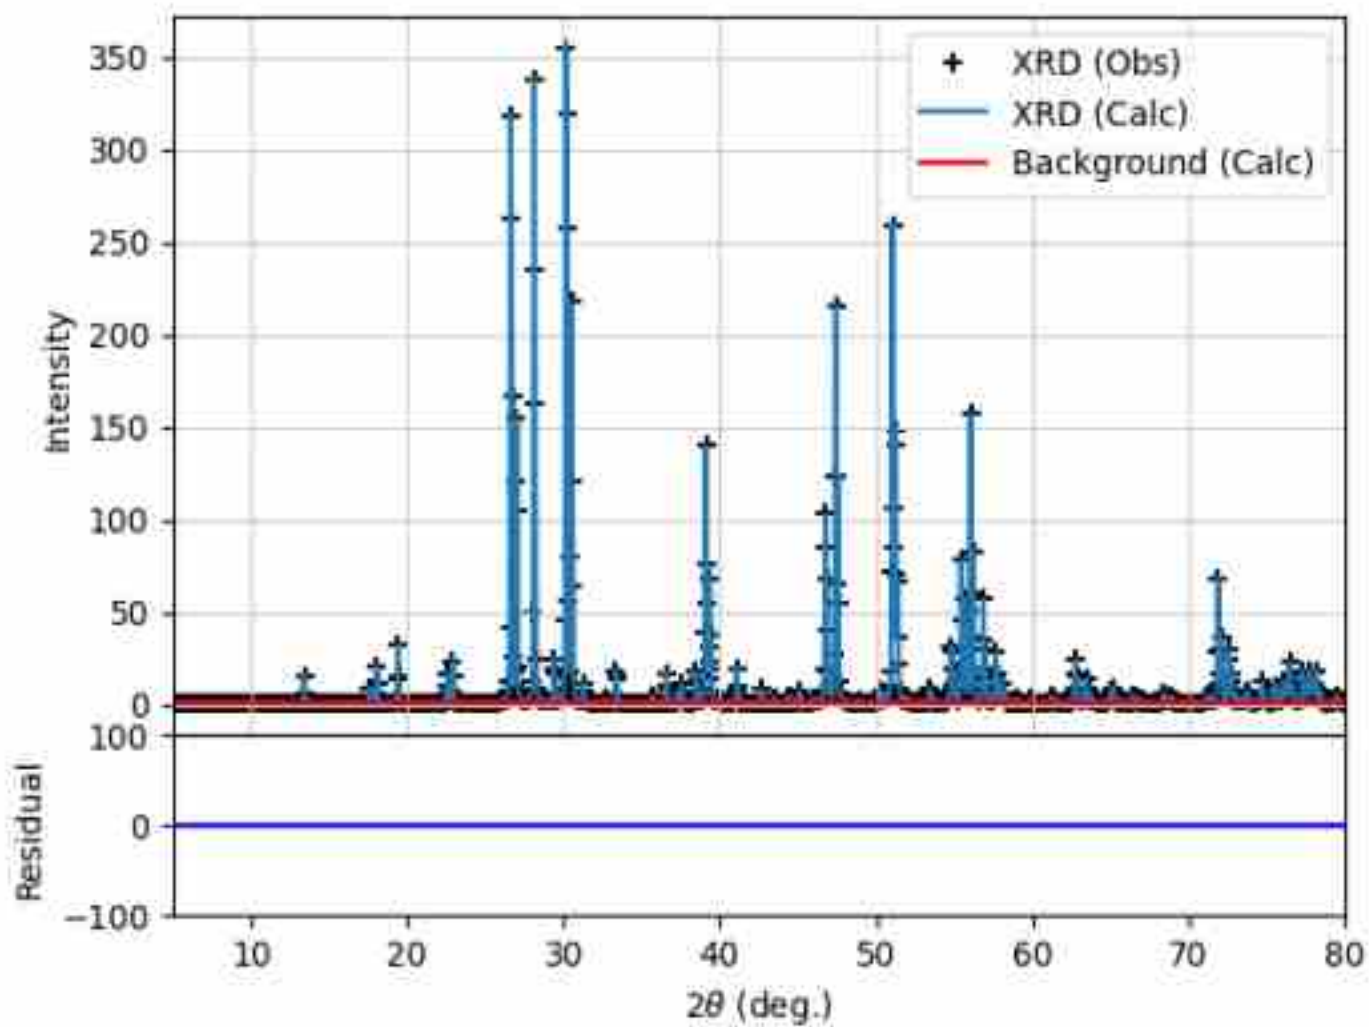

| RMSE before RR | Rwp     | RMSE after RR |
|----------------|---------|---------------|
| 0.018          | 0.00398 | 0.00052       |

# Cd<sub>2</sub>Si<sub>2</sub>As<sub>4</sub>

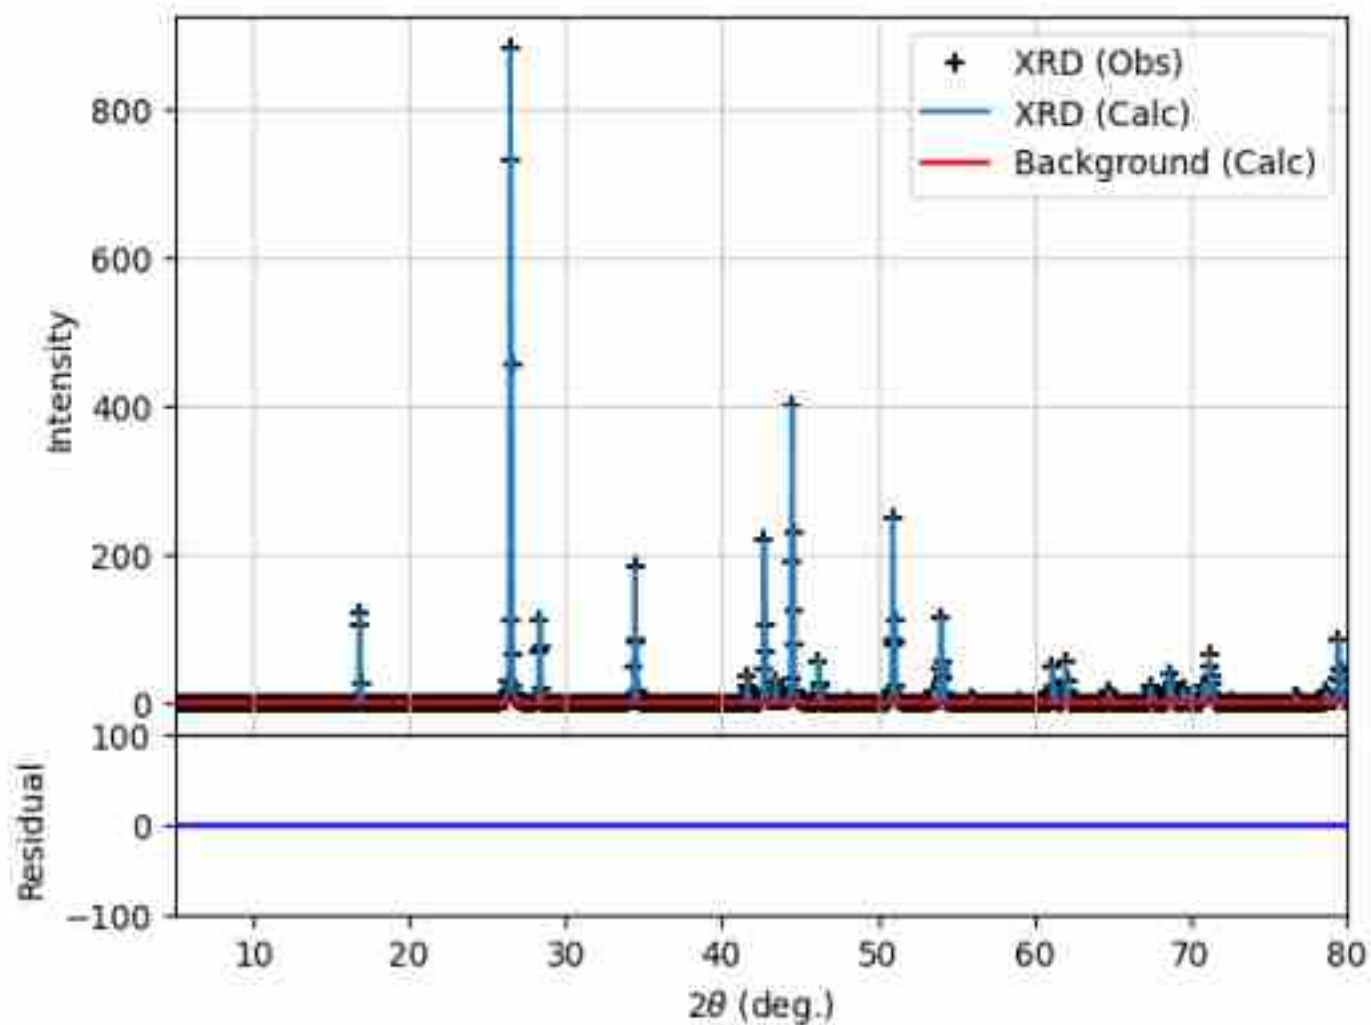

| RMSE before RR | Rwp     | RMSE after RR |
|----------------|---------|---------------|
| 0.018          | 0.00368 | 0.00044       |



Cd<sub>2</sub>Sn<sub>2</sub>Sb<sub>4</sub>

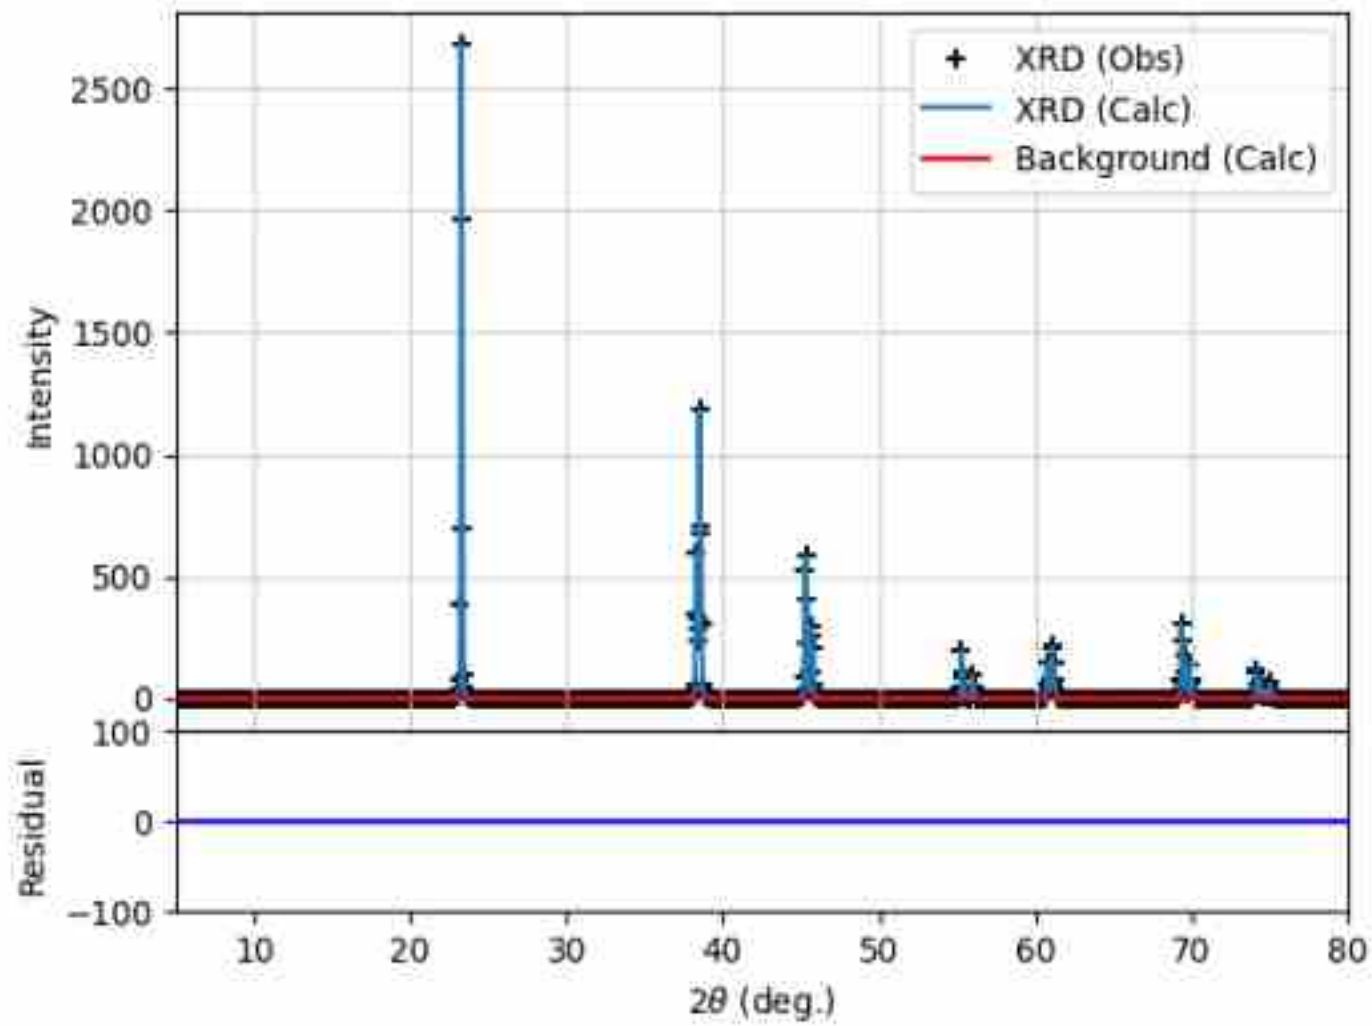

| RMSE before RR | Rwp     | RMSE after RR |
|----------------|---------|---------------|
| 0.018          | 0.01009 | 0.00057       |

# Ce3Sb1As2

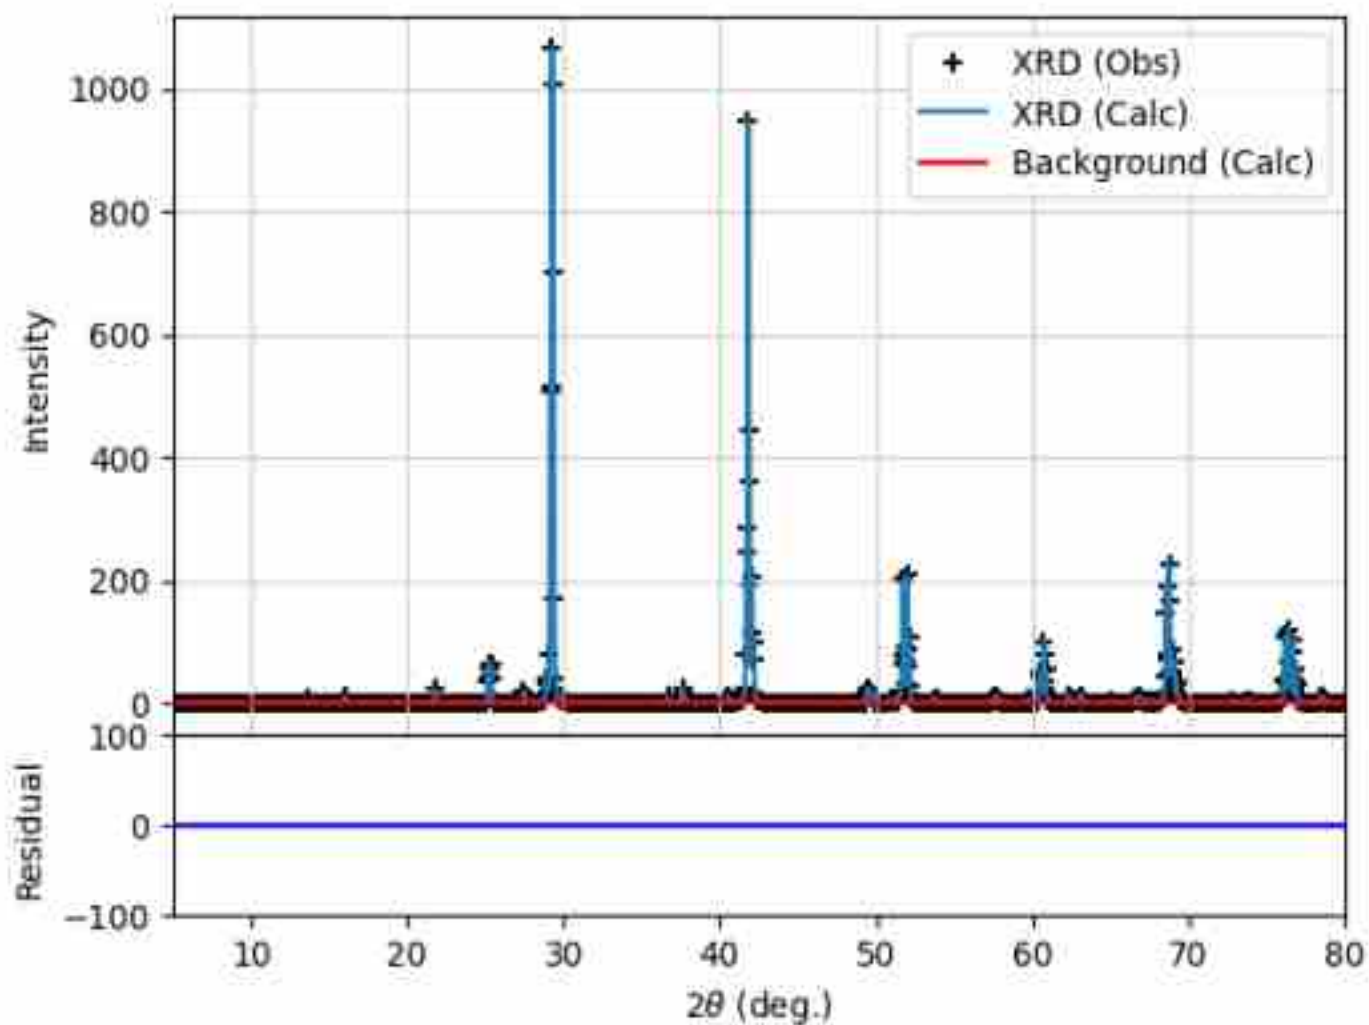

| RMSE before RR | Rwp     | RMSE after RR |
|----------------|---------|---------------|
| 0.018          | 0.00348 | 0.0004        |

# Ce<sub>4</sub>Al<sub>4</sub>Au<sub>4</sub>

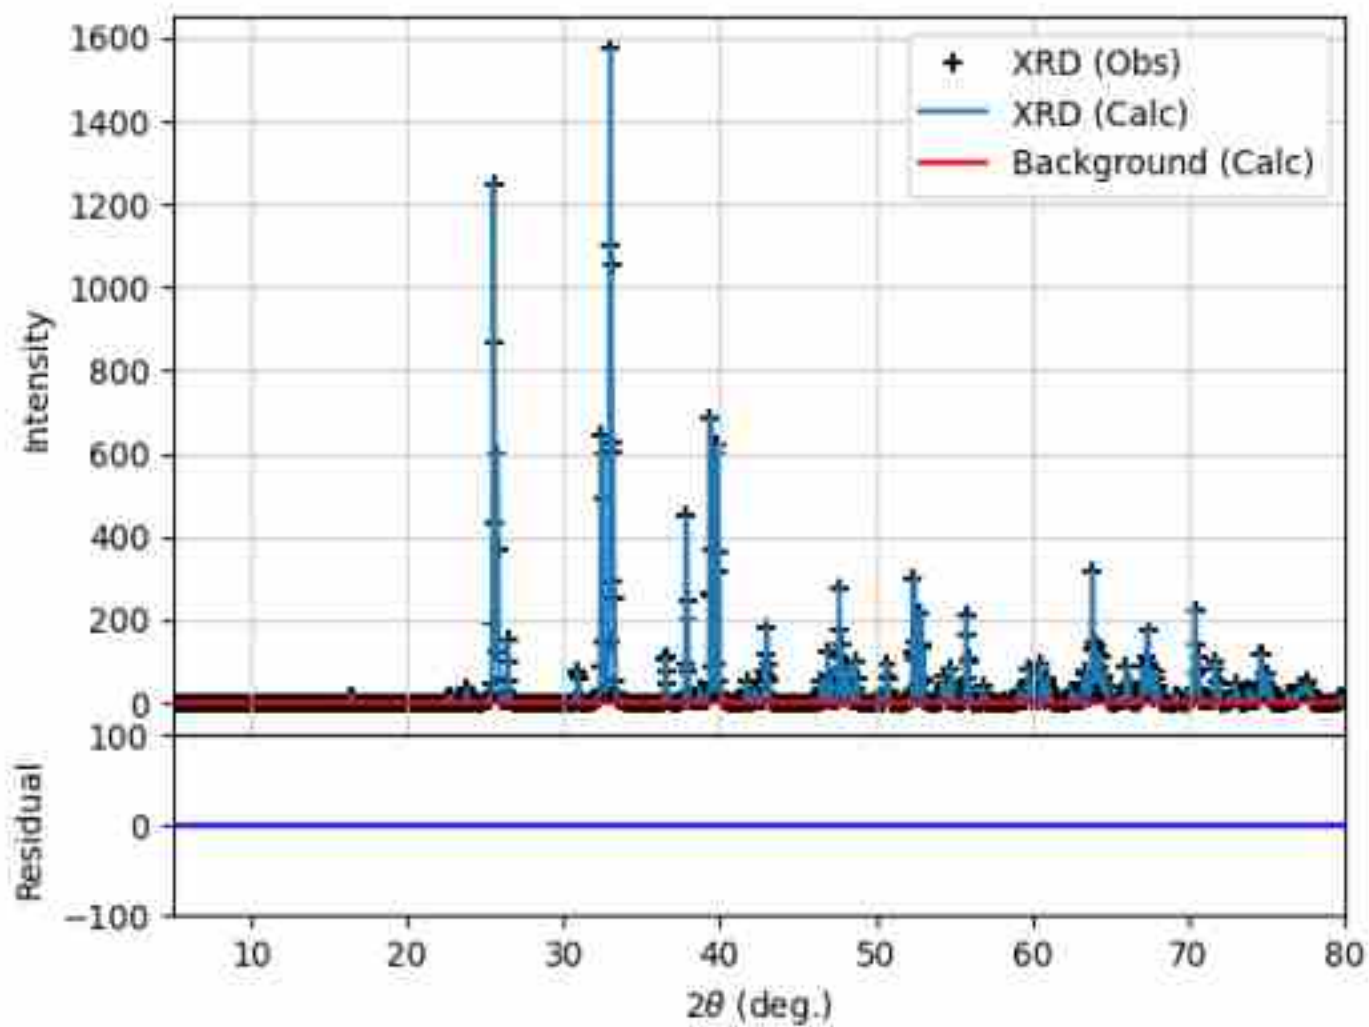

| RMSE before RR | Rwp     | RMSE after RR |
|----------------|---------|---------------|
| 0.018          | 0.00945 | 0.00168       |

# Cr1Au1S2

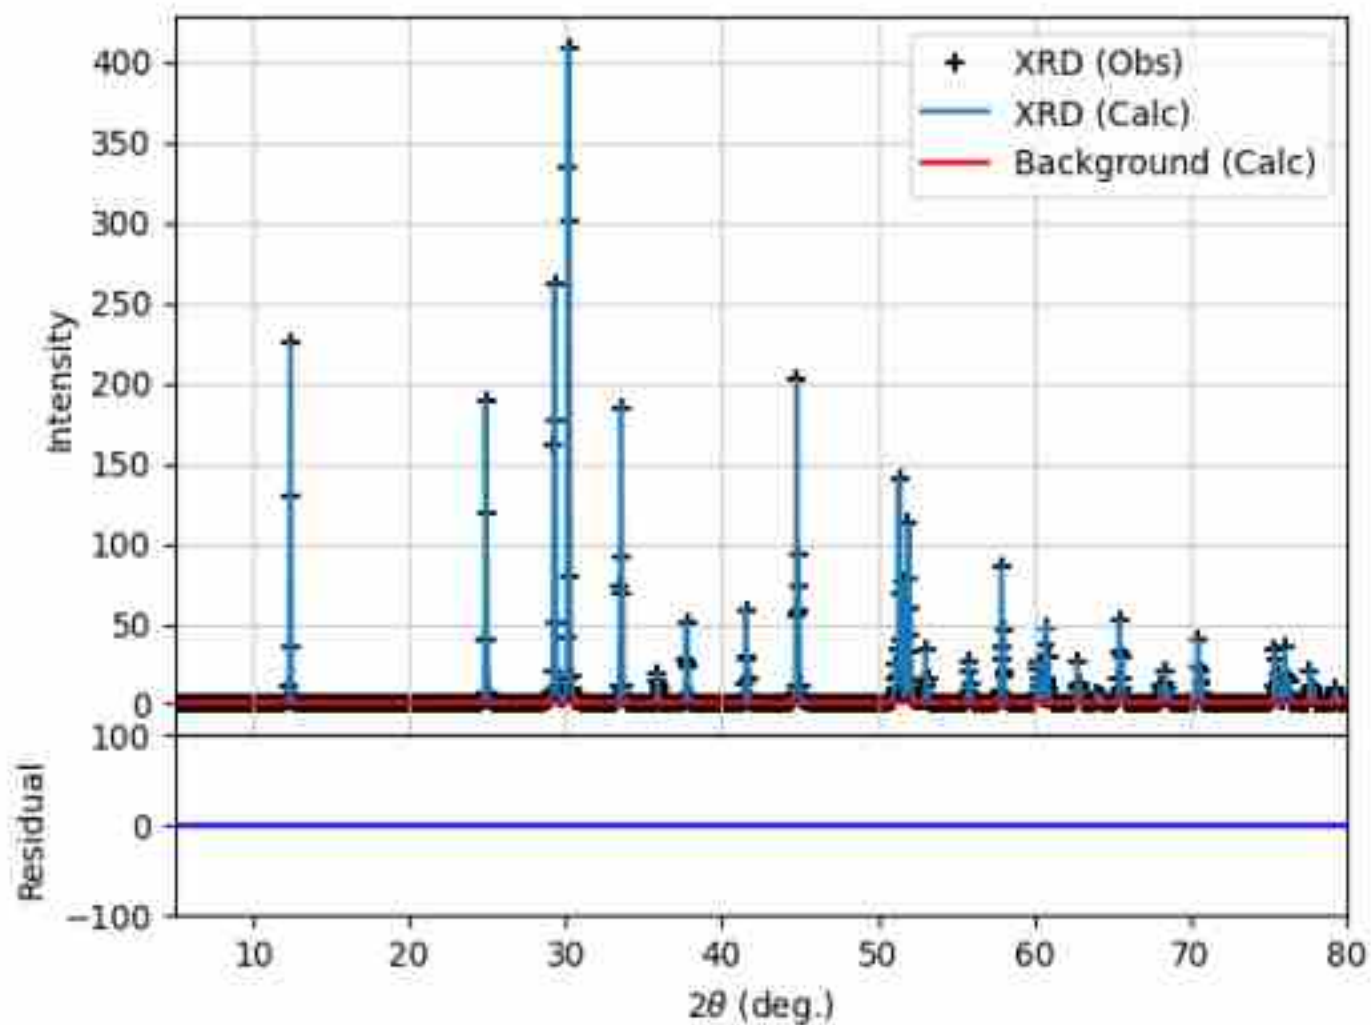

| RMSE before RR | Rwp     | RMSE after RR |
|----------------|---------|---------------|
| 0.018          | 0.00522 | 0.00198       |

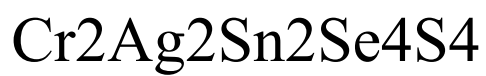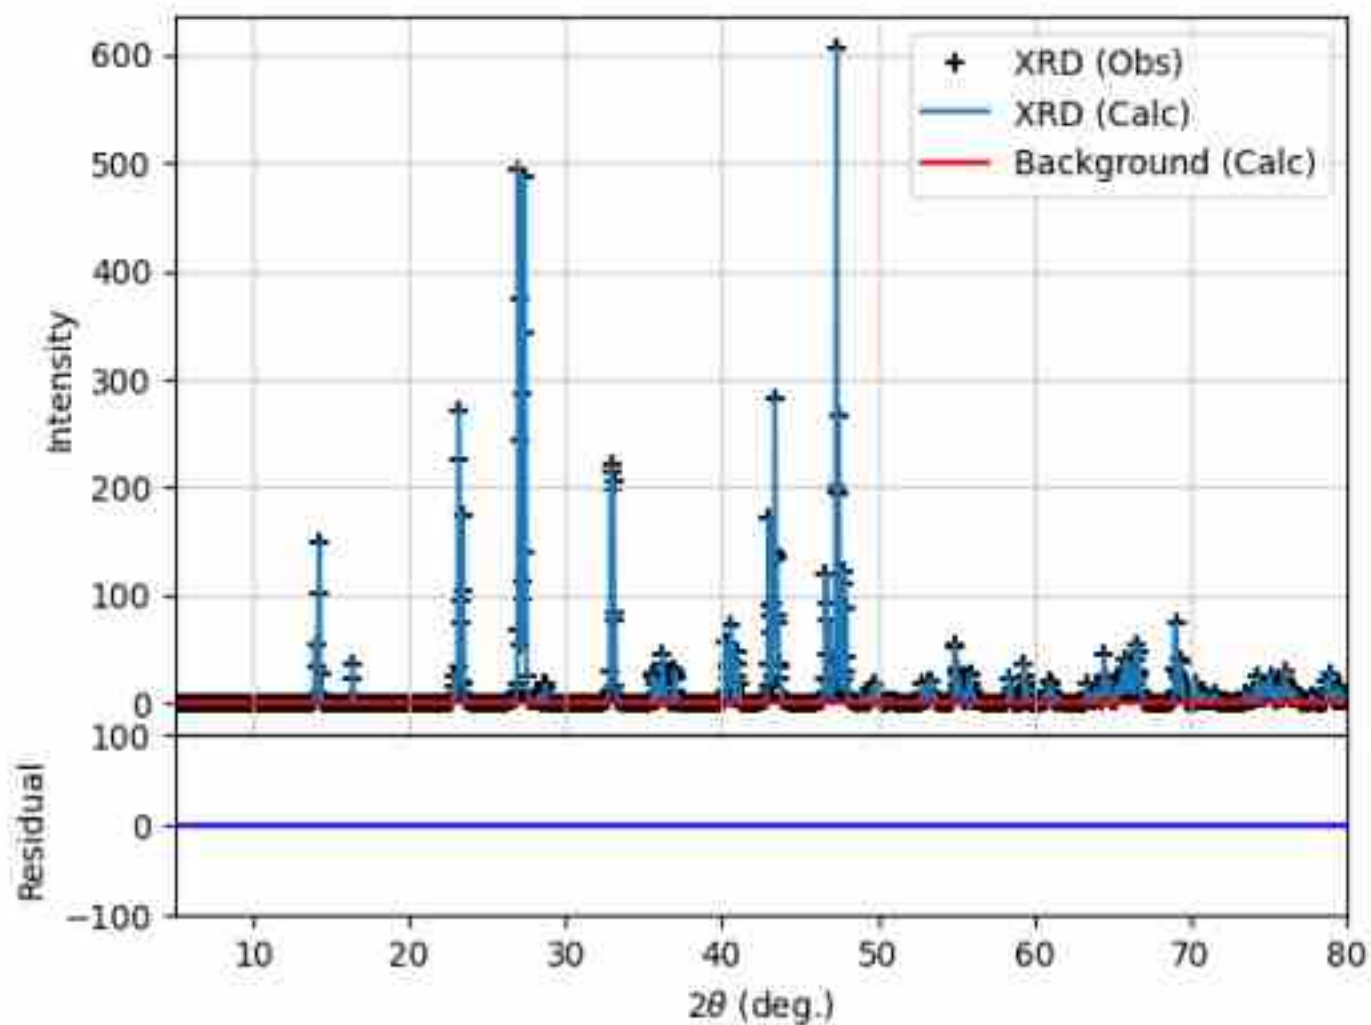

| RMSE before RR | Rwp     | RMSE after RR |
|----------------|---------|---------------|
| 0.018          | 0.00325 | 0.00043       |

# Cr<sub>2</sub>Fe<sub>1</sub>Se<sub>4</sub>

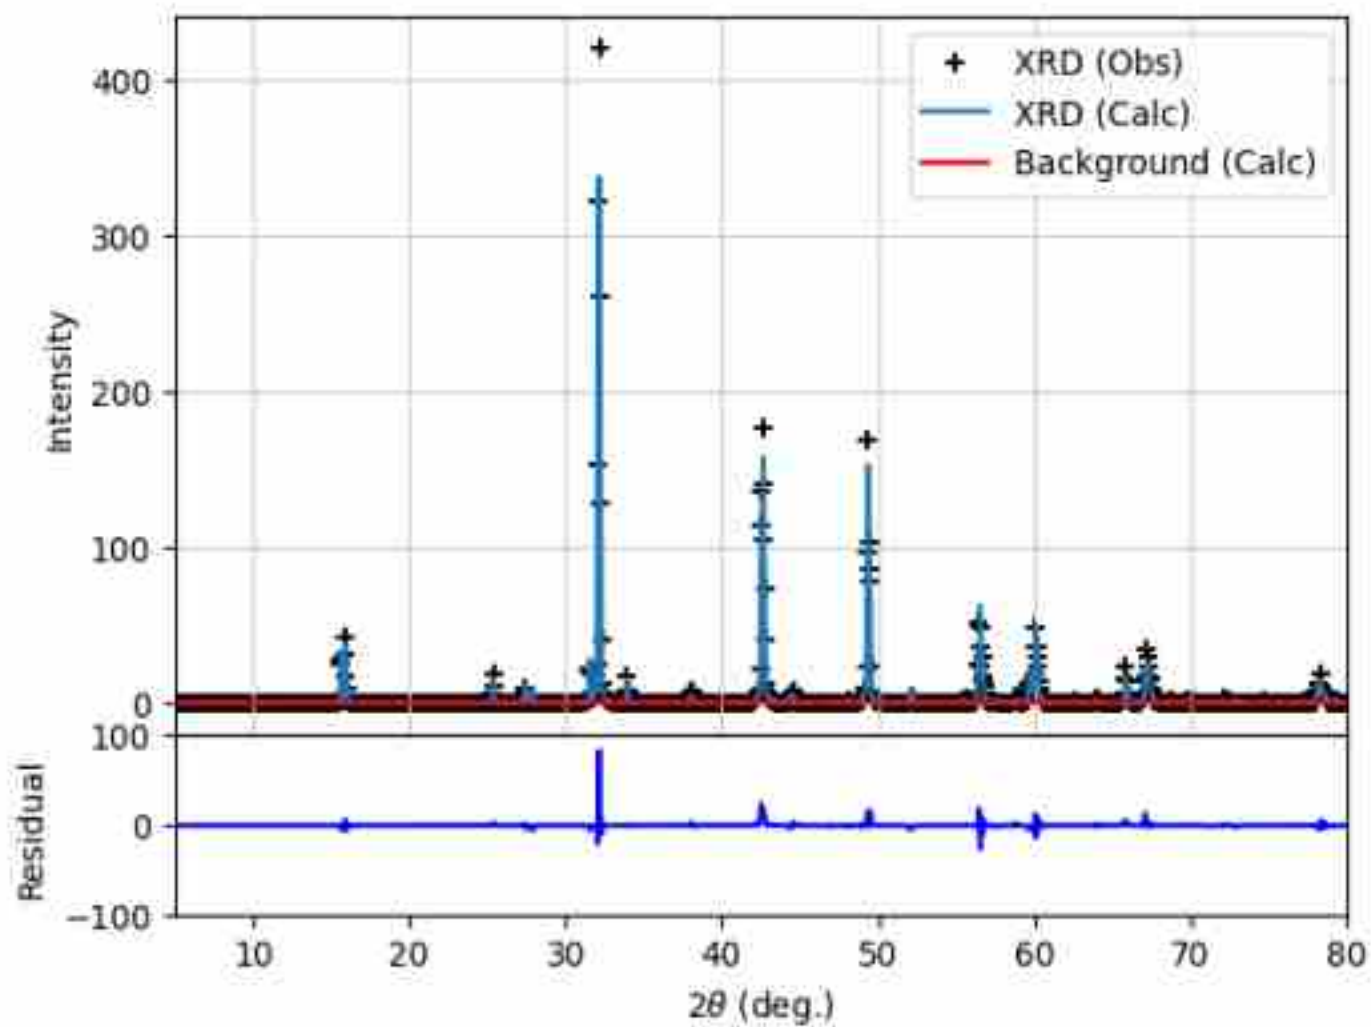

| RMSE before RR | Rwp      | RMSE after RR |
|----------------|----------|---------------|
| 0.018          | 19.85241 | 0.05669       |

# Cr<sub>4</sub>Co<sub>1</sub>Ni<sub>1</sub>S<sub>8</sub>

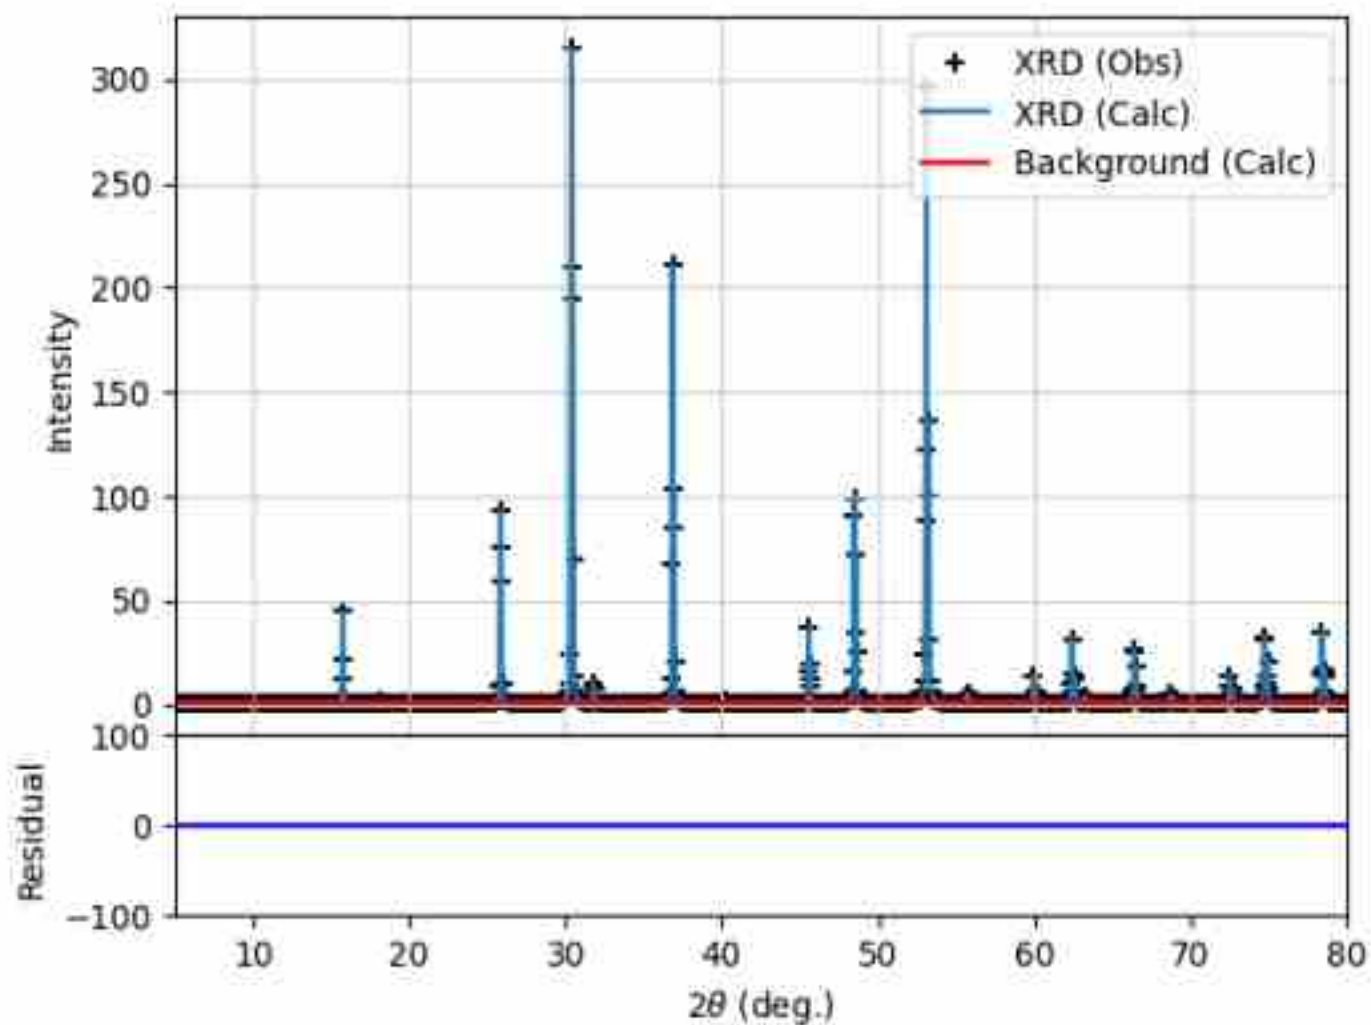

| RMSE before RR | Rwp     | RMSE after RR |
|----------------|---------|---------------|
| 0.018          | 0.00817 | 0.00165       |

# Cr<sub>4</sub>Cu<sub>2</sub>Se<sub>8</sub>

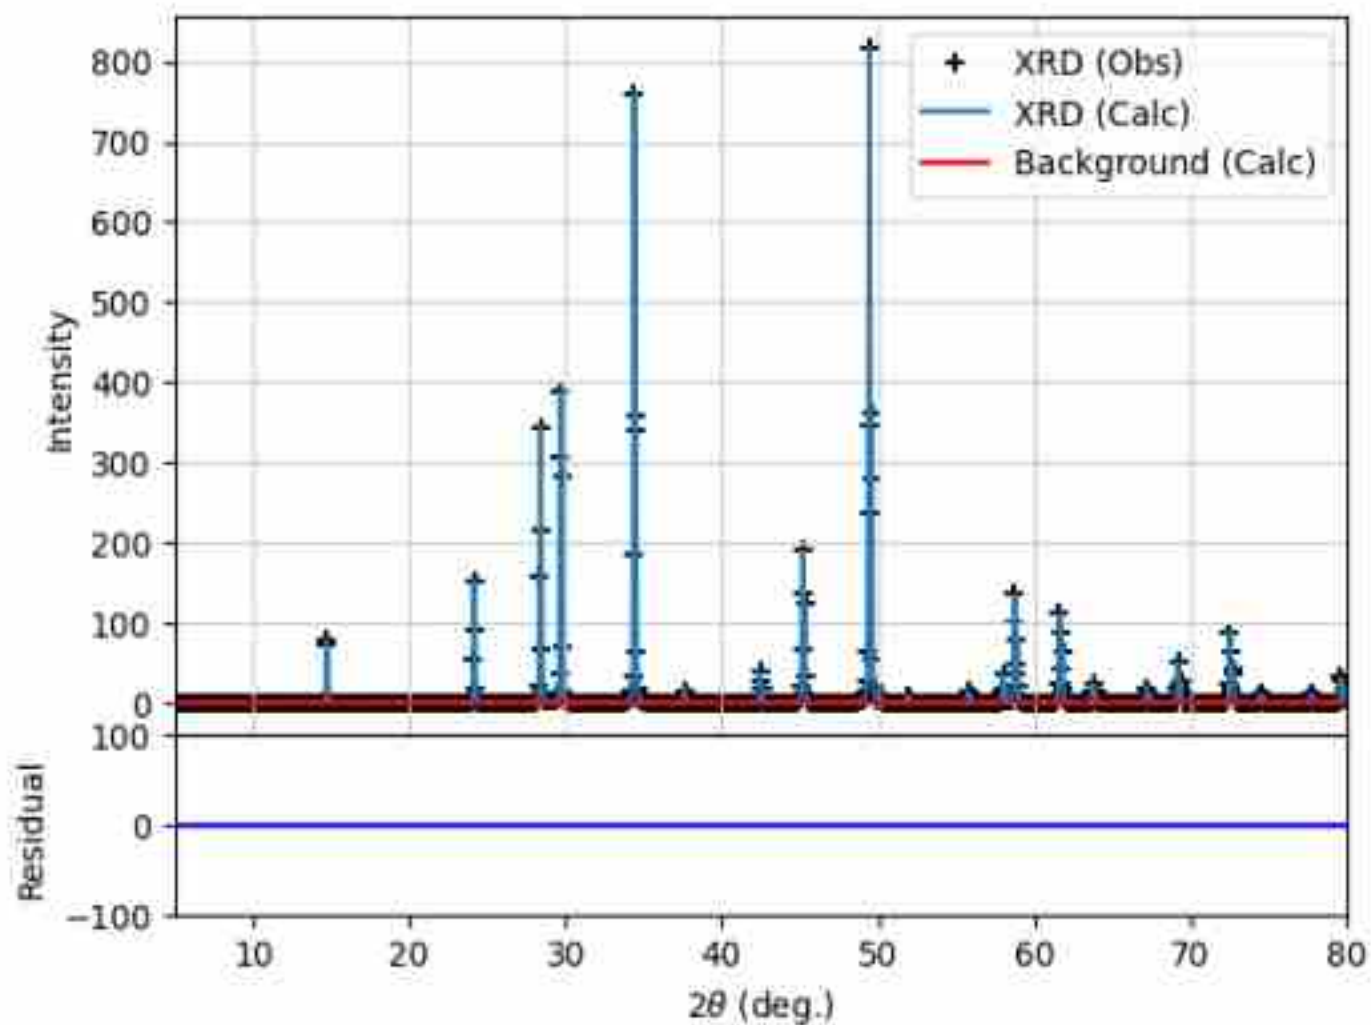

| RMSE before RR | Rwp     | RMSE after RR |
|----------------|---------|---------------|
| 0.018          | 0.07778 | 0.00296       |



# Cr6P2N2

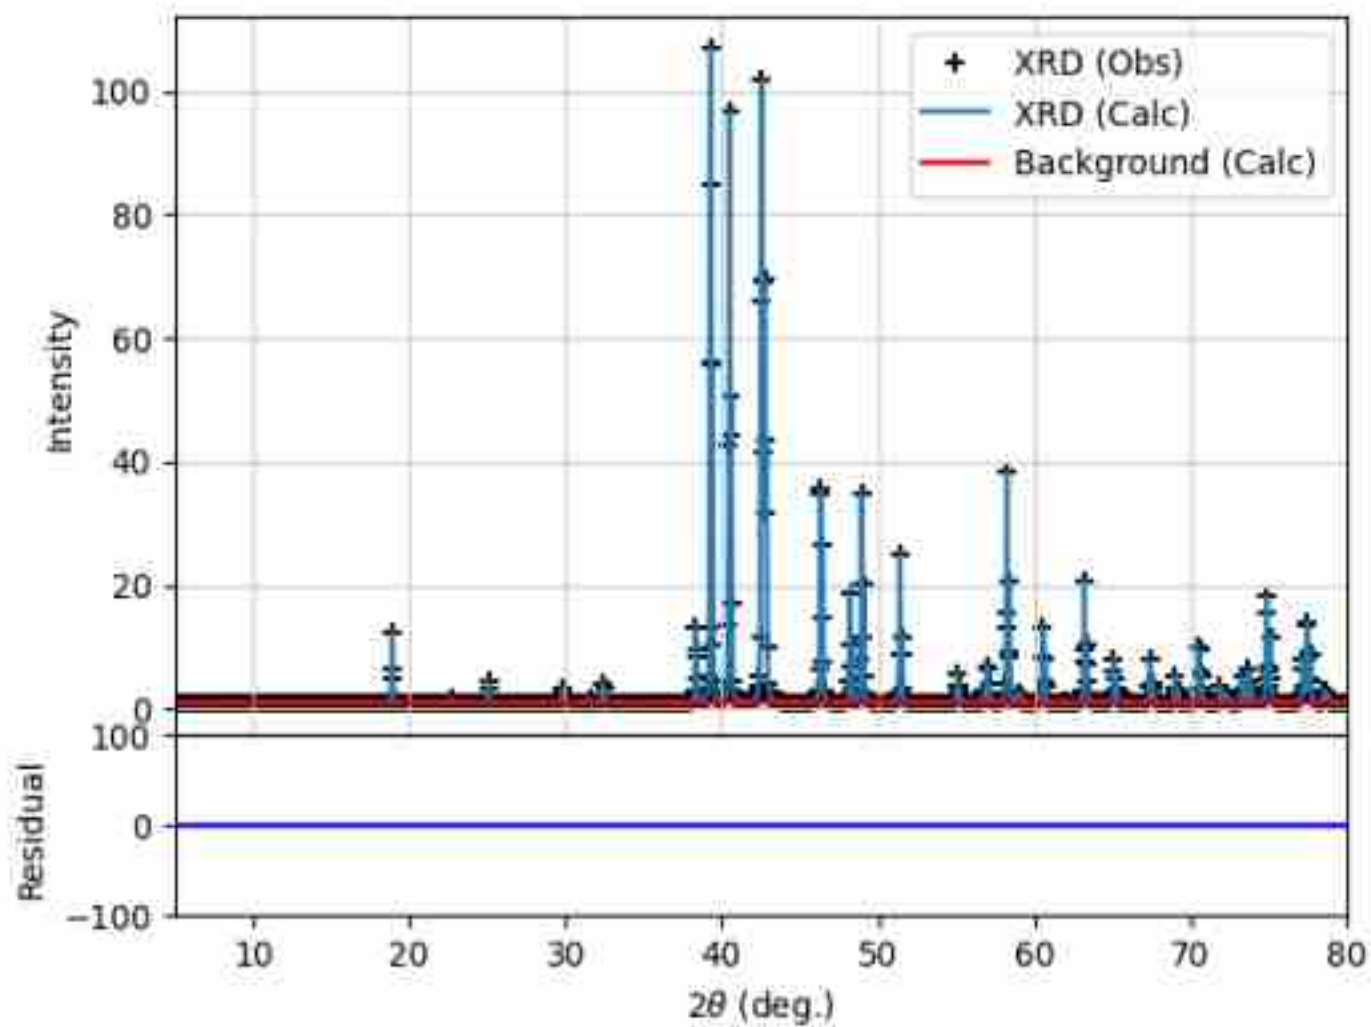

| RMSE before RR | Rwp     | RMSE after RR |
|----------------|---------|---------------|
| 0.018          | 0.00291 | 0.0005        |

# Cs<sub>2</sub>Cu<sub>1</sub>Sb<sub>1</sub>Br<sub>6</sub>

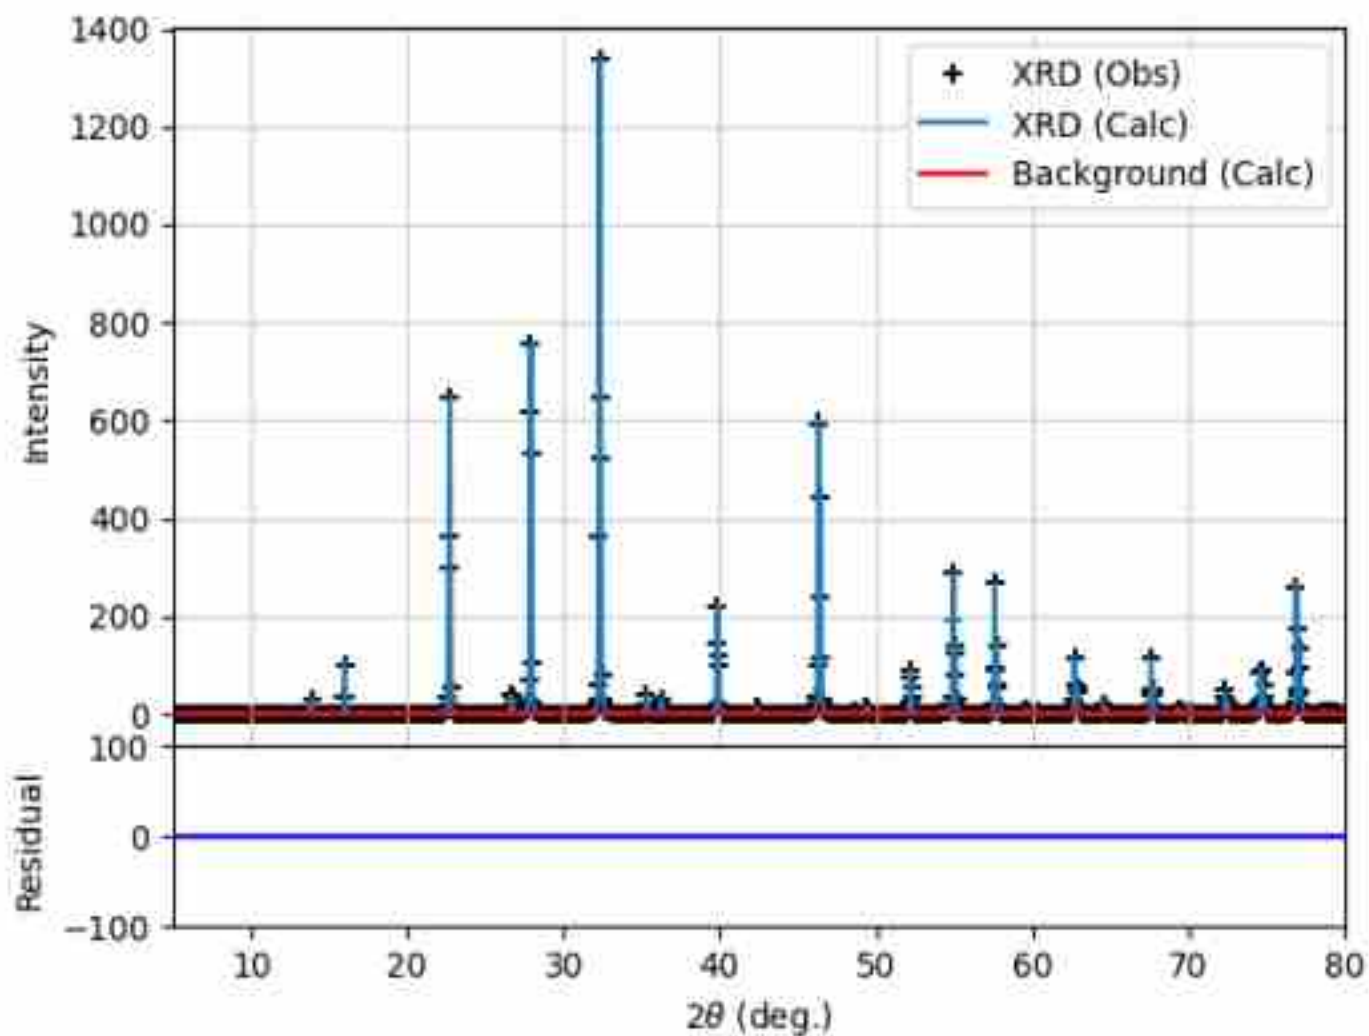

| RMSE before RR | Rwp     | RMSE after RR |
|----------------|---------|---------------|
| 0.018          | 0.10327 | 0.00332       |

# Cs2Sc2I6

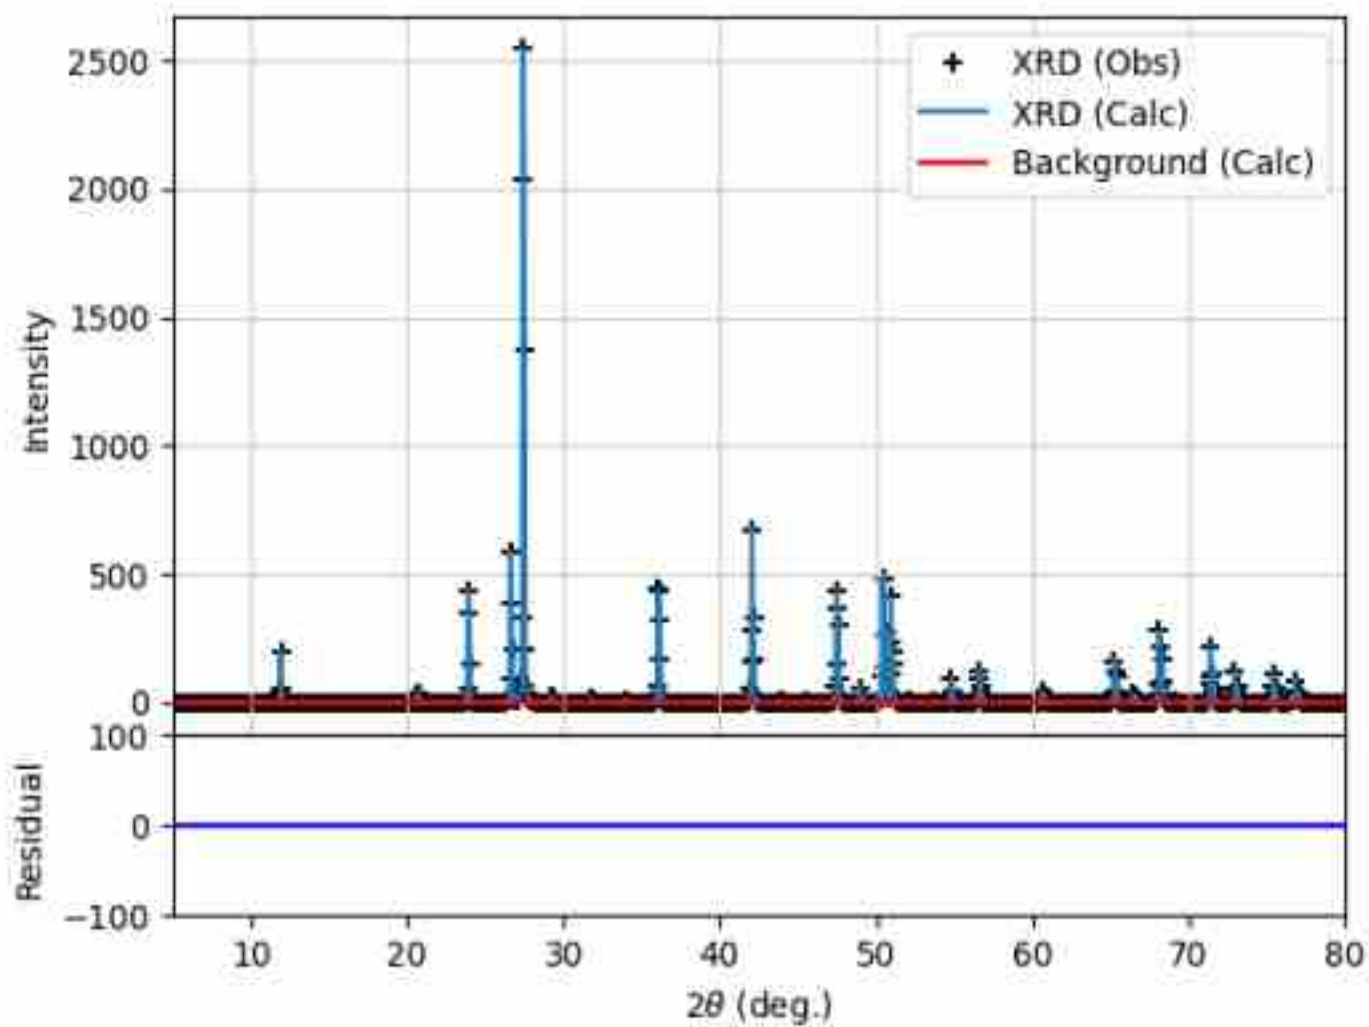

| RMSE before RR | Rwp     | RMSE after RR |
|----------------|---------|---------------|
| 0.018          | 0.01439 | 0.00107       |

# Cs<sub>2</sub>Ti<sub>2</sub>Br<sub>6</sub>

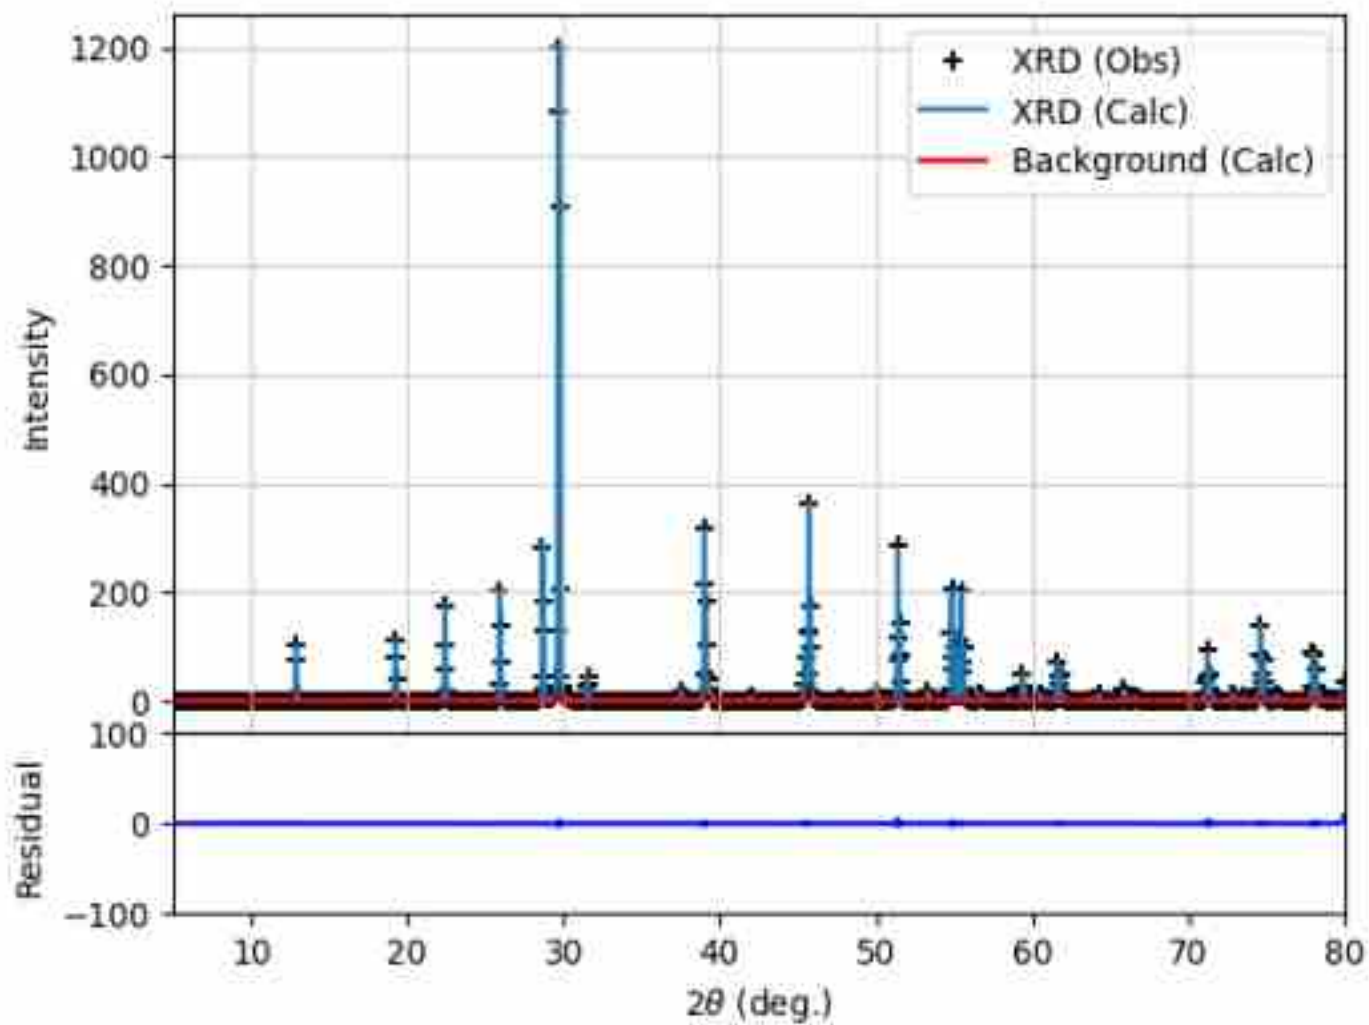

| RMSE before RR | Rwp     | RMSE after RR |
|----------------|---------|---------------|
| 0.018          | 2.37636 | 0.00959       |

# Cs<sub>2</sub>V<sub>2</sub>Cl<sub>6</sub>

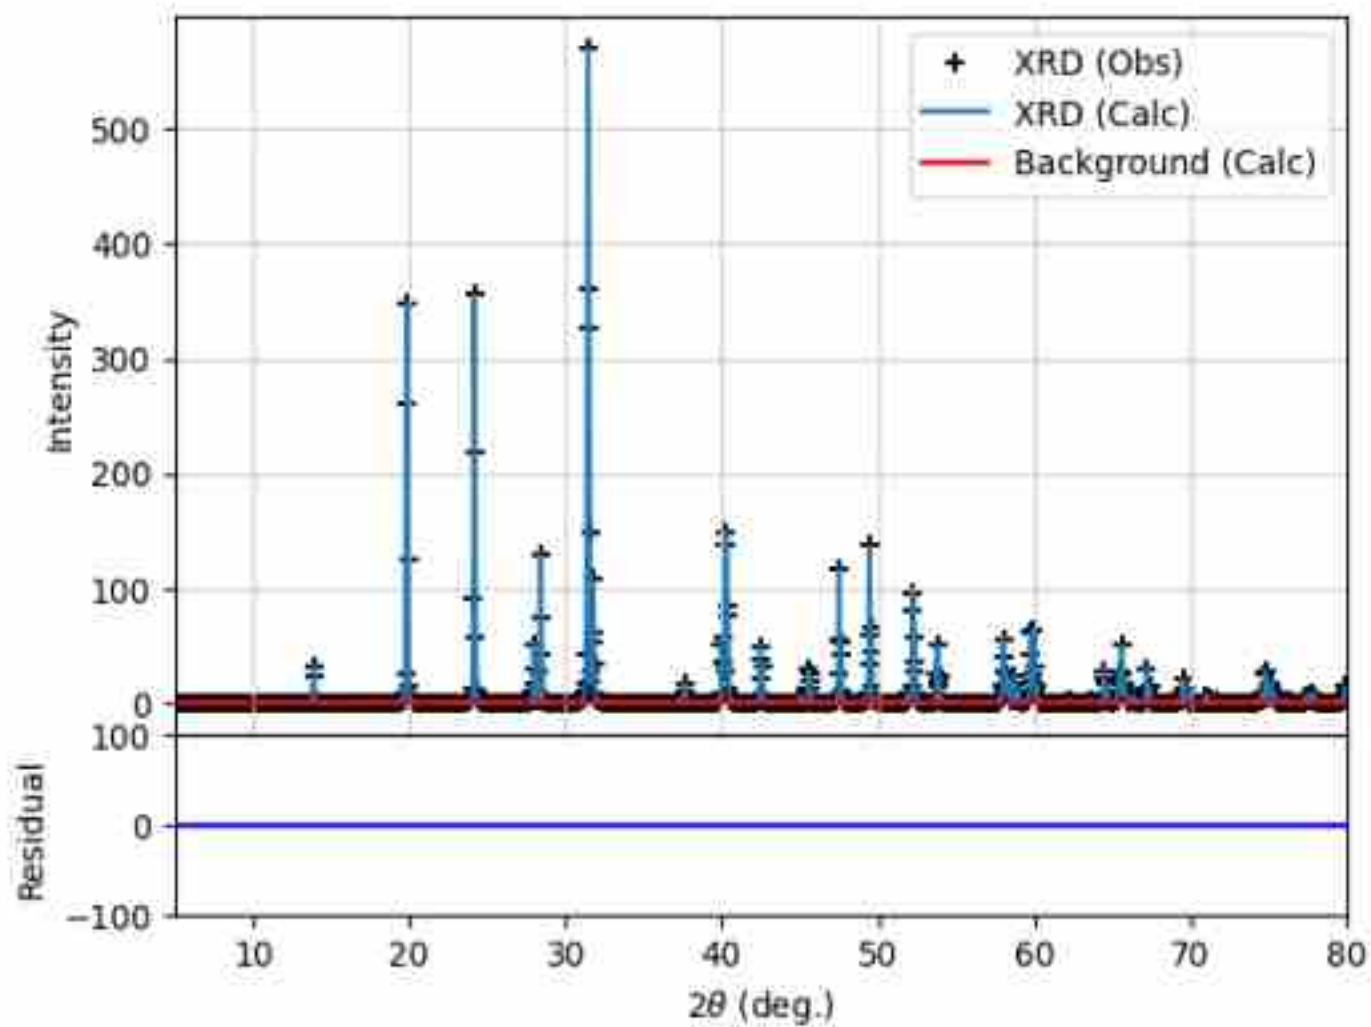

| RMSE before RR | Rwp     | RMSE after RR |
|----------------|---------|---------------|
| 0.018          | 0.01633 | 0.00255       |

# Cs8Te4

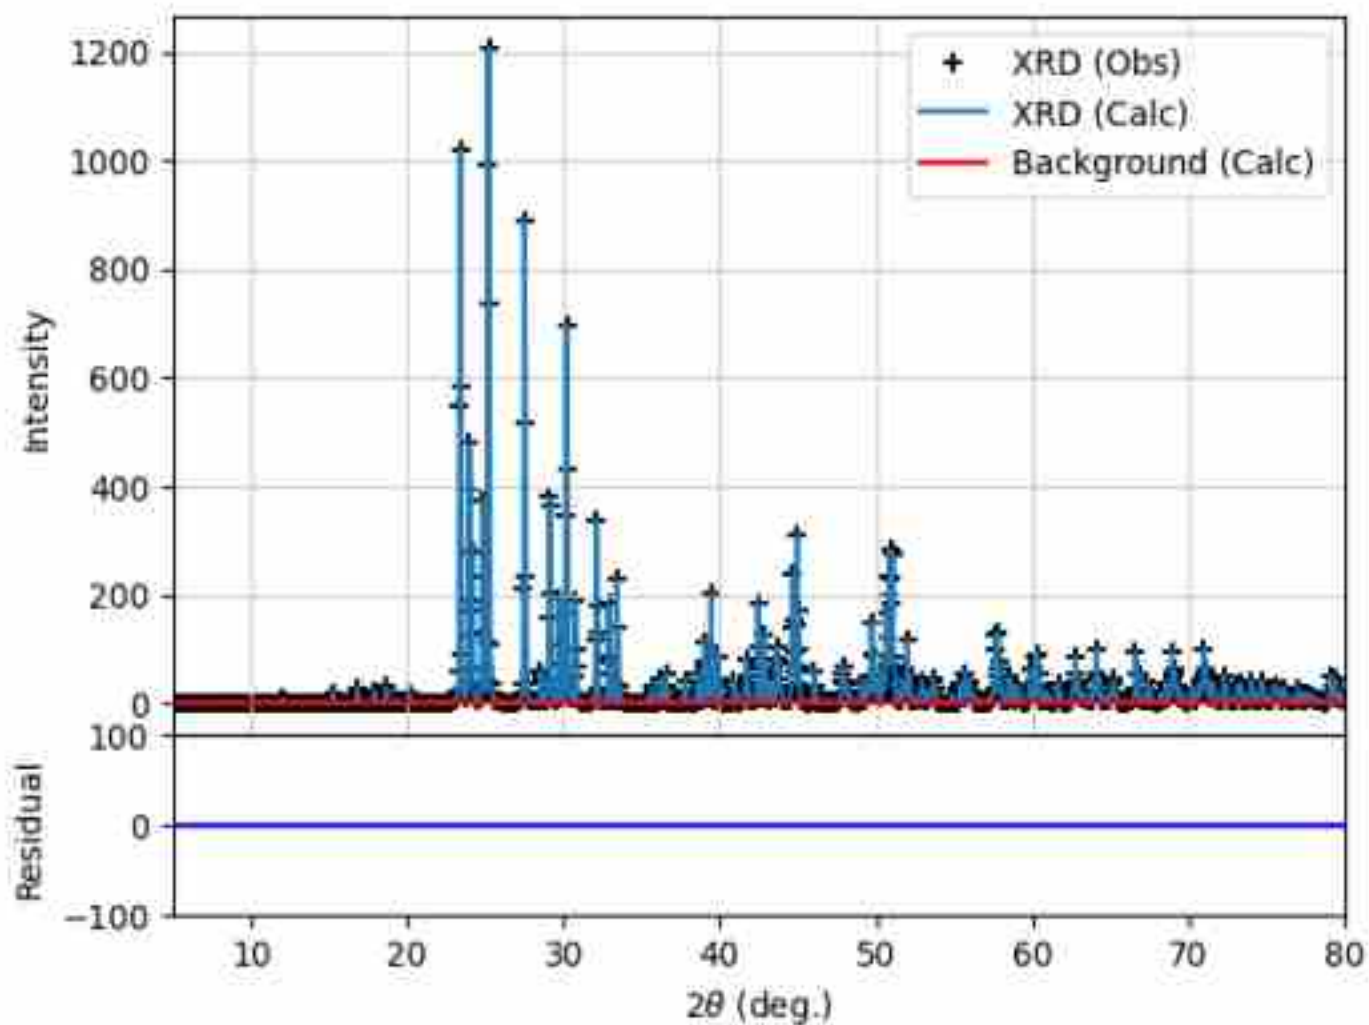

| RMSE before RR | Rwp     | RMSE after RR |
|----------------|---------|---------------|
| 0.018          | 0.00373 | 0.00025       |

# Cu4O2

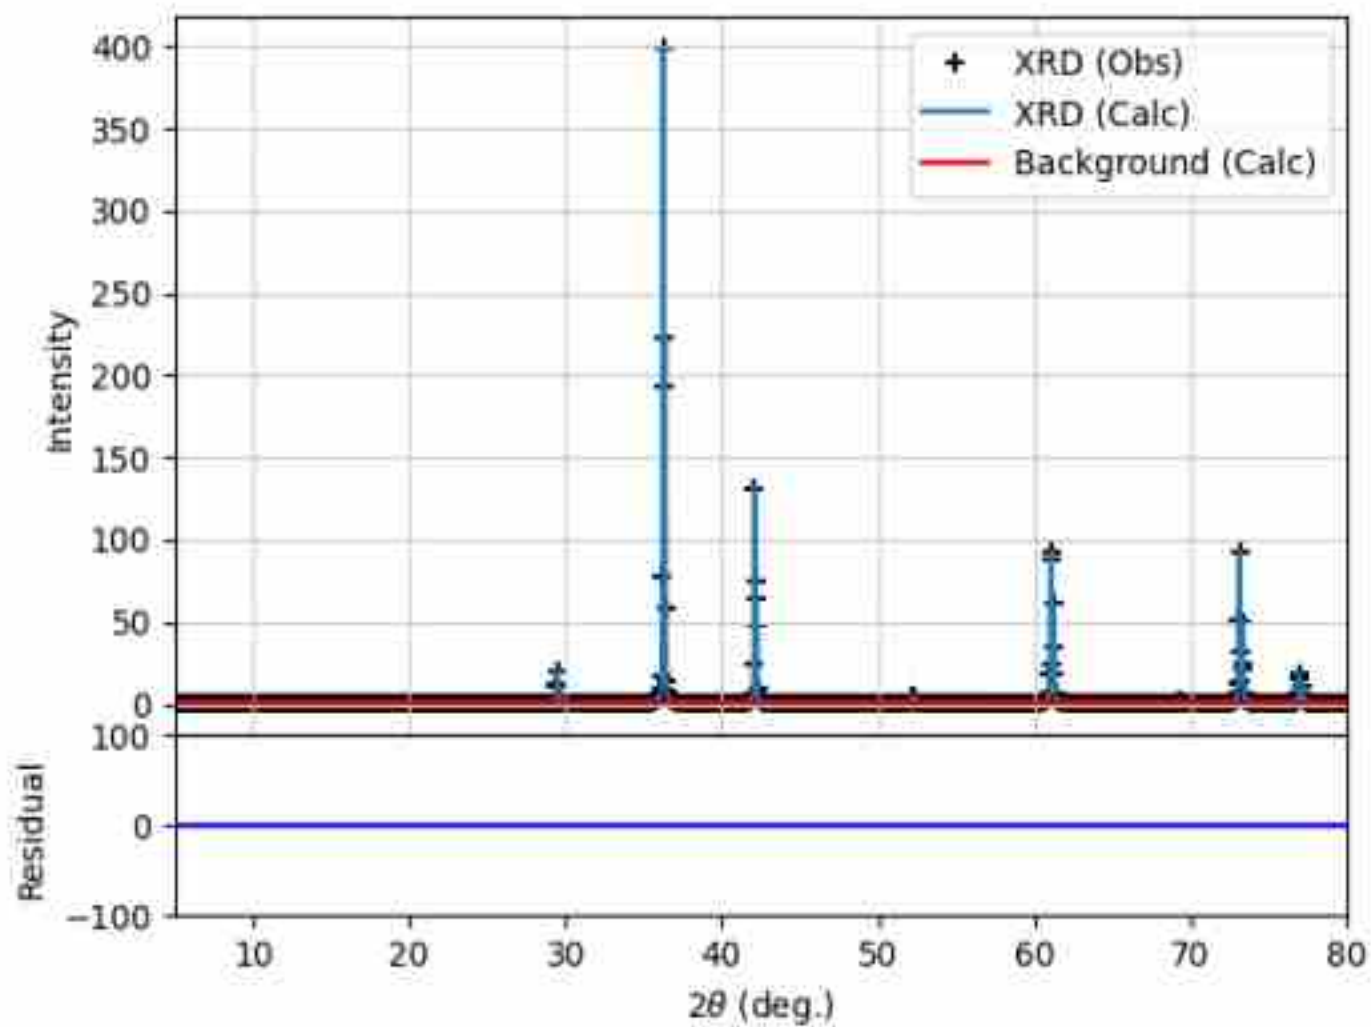

| RMSE before RR | Rwp    | RMSE after RR |
|----------------|--------|---------------|
| 0.018          | 0.0518 | 0.00203       |

# Dy<sub>1</sub>Si<sub>2</sub>Ni<sub>2</sub>

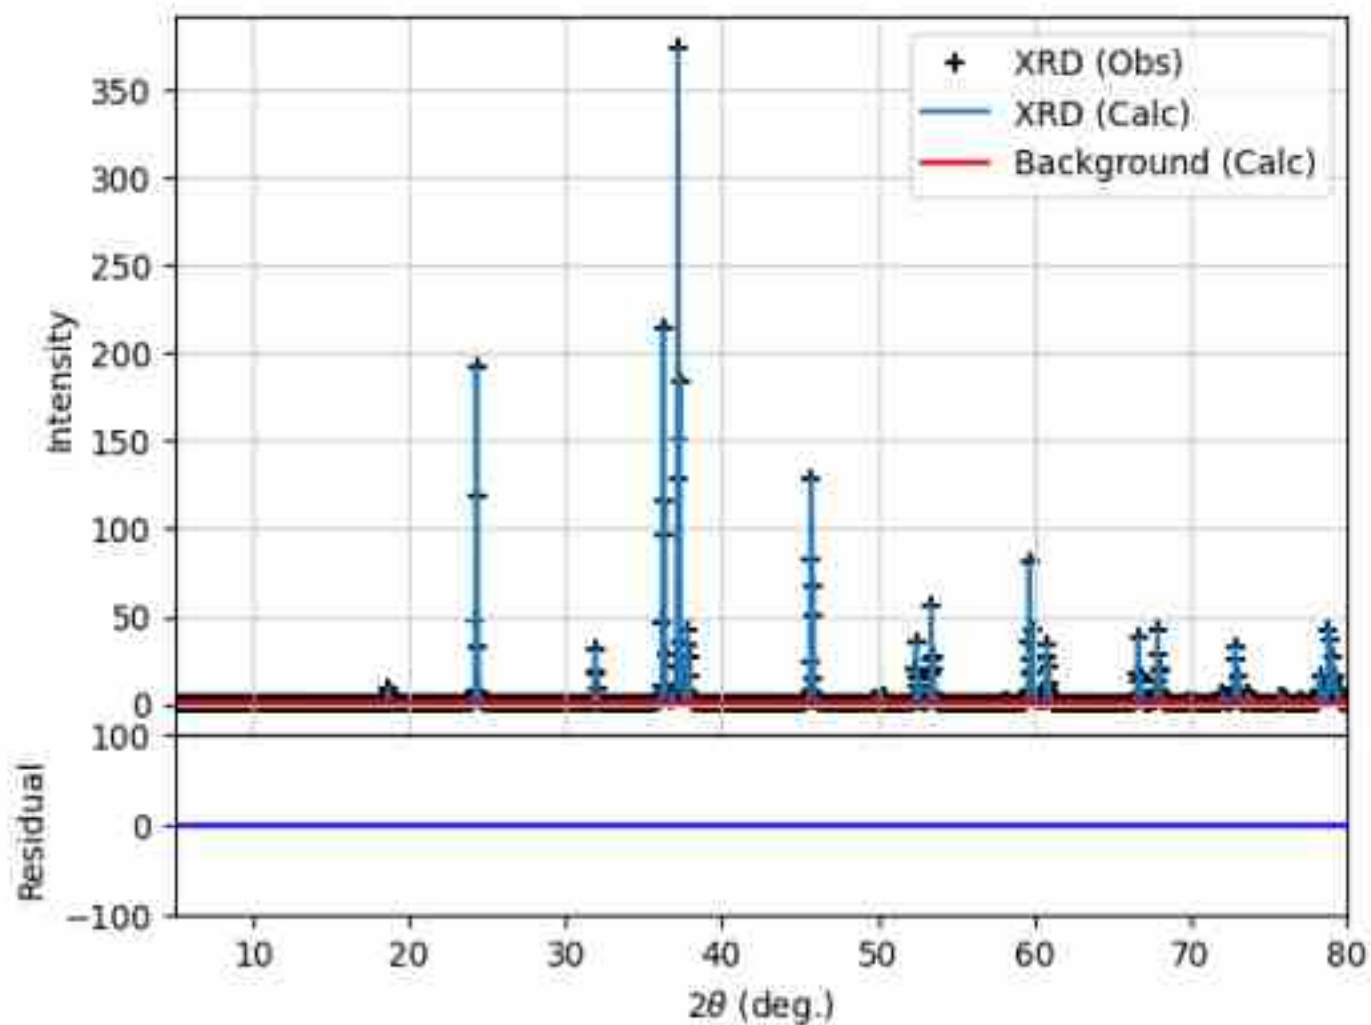

| RMSE before RR | Rwp     | RMSE after RR |
|----------------|---------|---------------|
| 0.018          | 0.00348 | 0.00074       |



# Dy1Ti1Co11

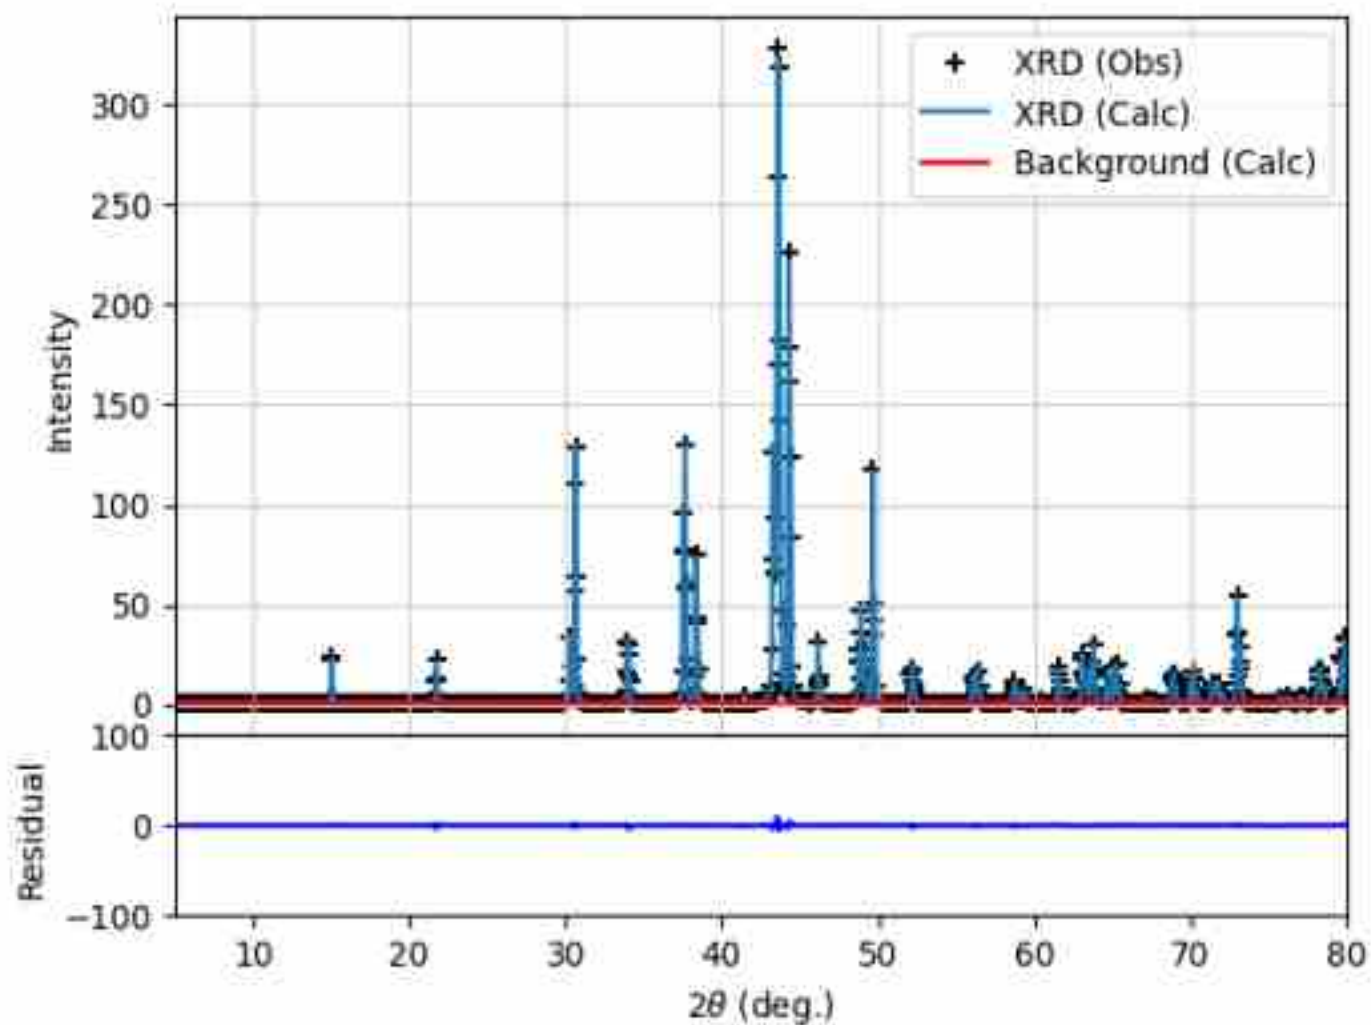

| RMSE before RR | Rwp     | RMSE after RR |
|----------------|---------|---------------|
| 0.018          | 3.19974 | 0.03424       |

# Dy<sub>2</sub>Fe<sub>8</sub>Ge<sub>4</sub>

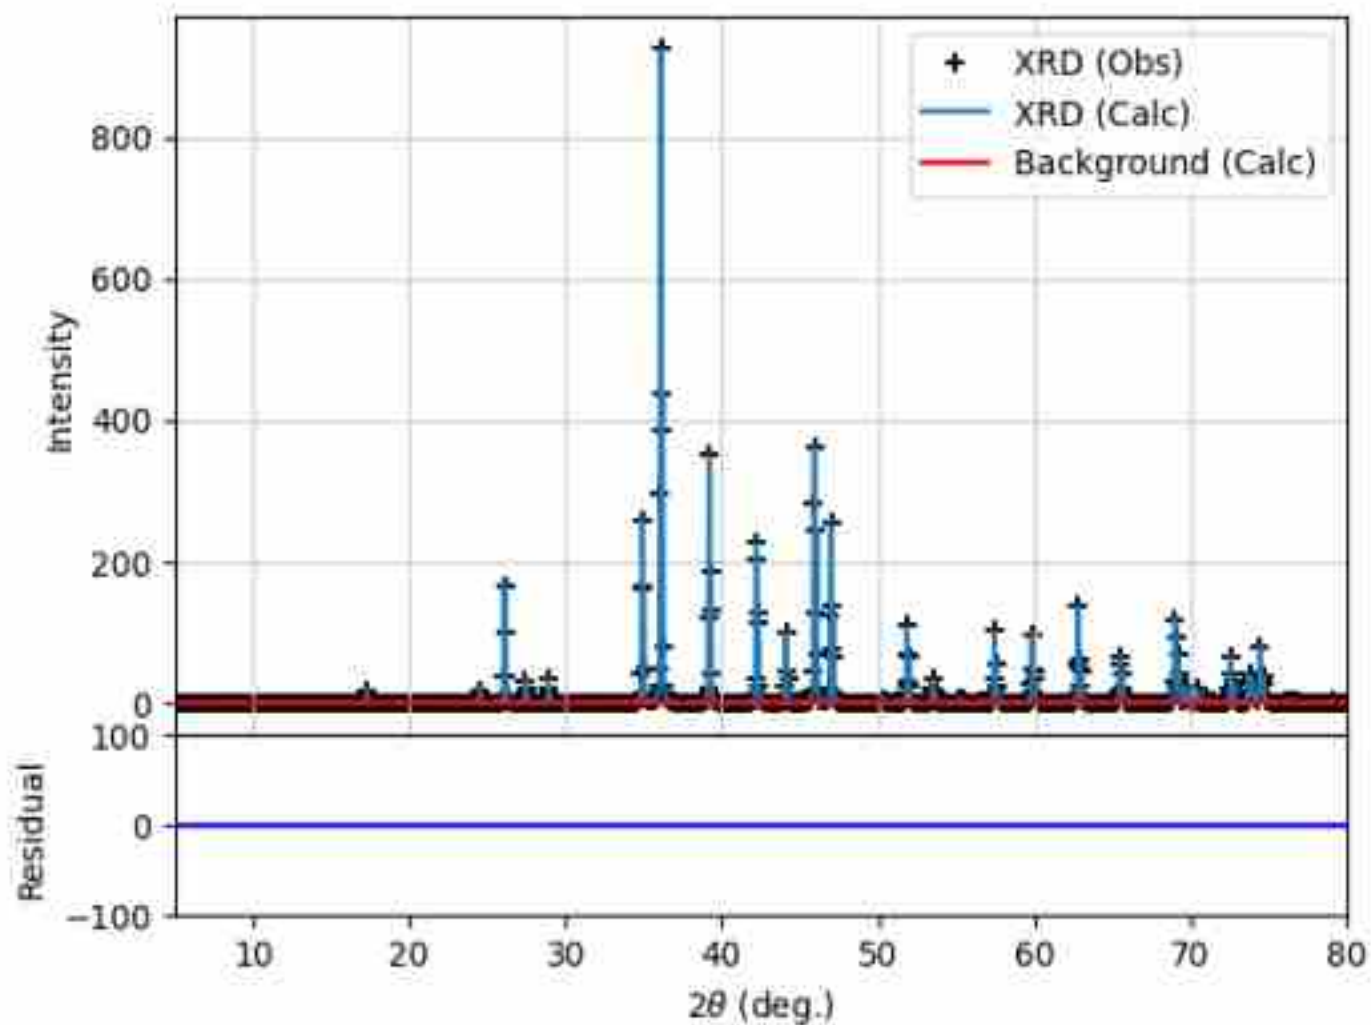

| RMSE before RR | Rwp     | RMSE after RR |
|----------------|---------|---------------|
| 0.018          | 0.00431 | 0.00042       |

# Dy<sub>2</sub>Si<sub>2</sub>O<sub>8</sub>C<sub>2</sub>

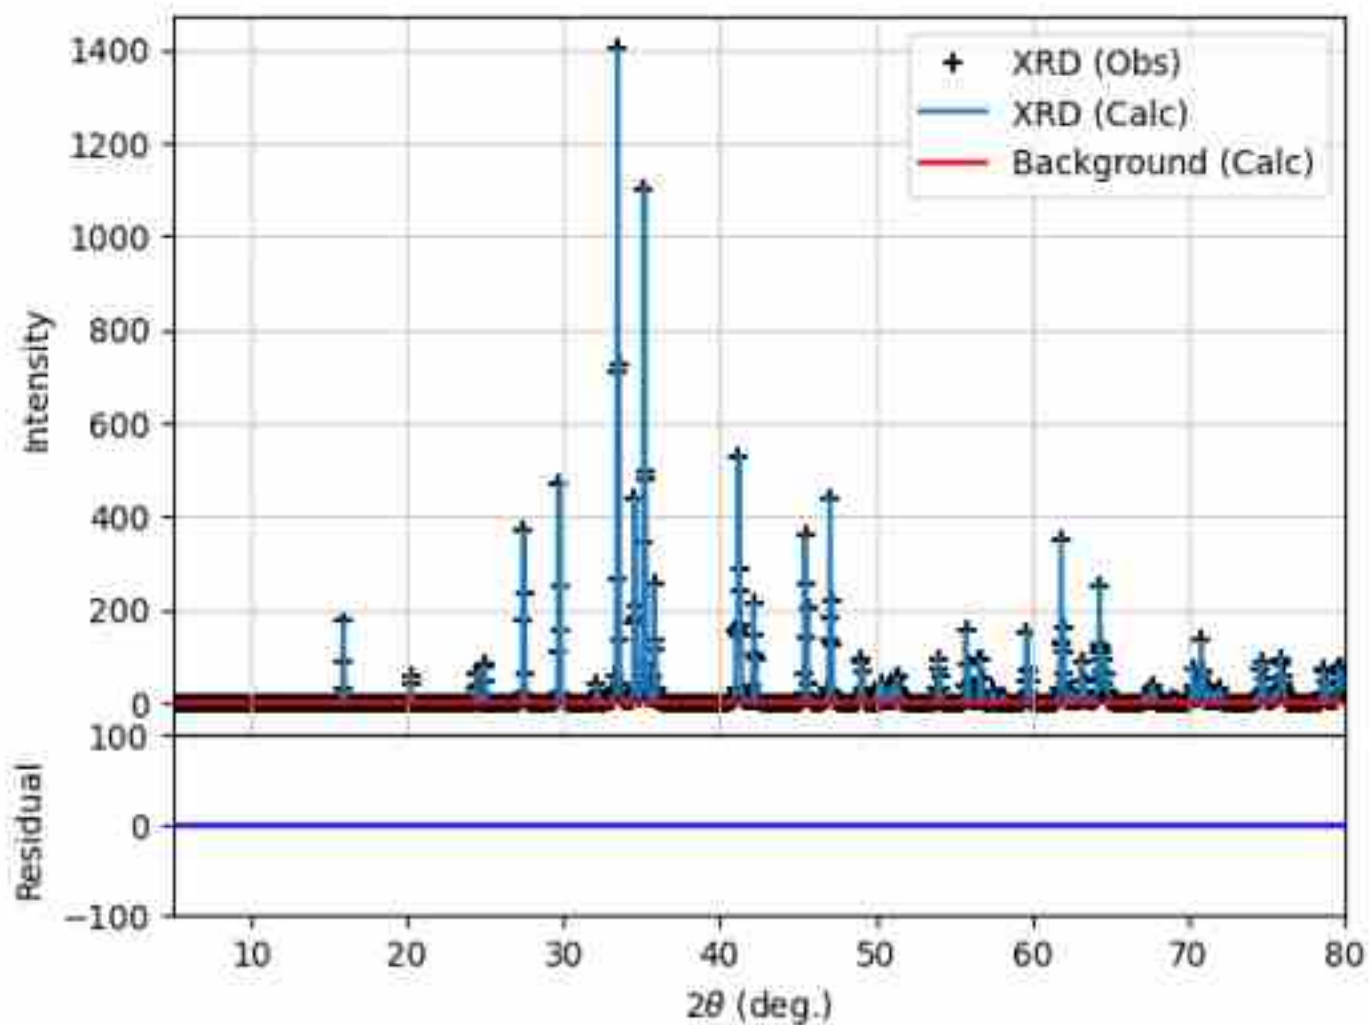

| RMSE before RR | Rwp    | RMSE after RR |
|----------------|--------|---------------|
| 0.018          | 0.0043 | 0.00133       |

# Dy<sub>2</sub>Si<sub>2</sub>Ru<sub>4</sub>C<sub>2</sub>

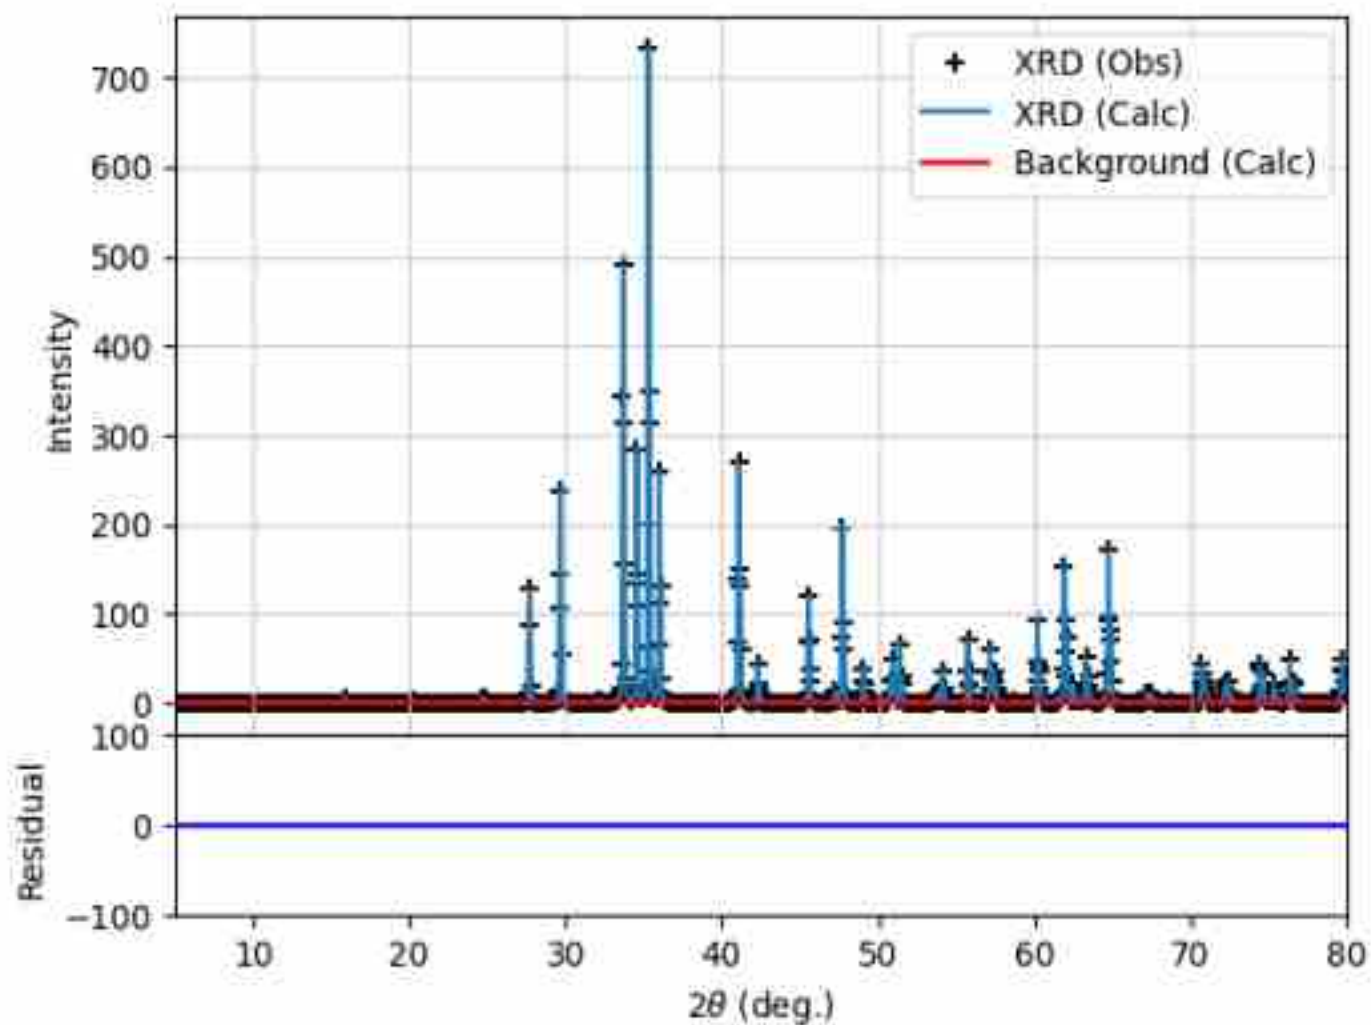

| RMSE before RR | Rwp     | RMSE after RR |
|----------------|---------|---------------|
| 0.018          | 0.00393 | 0.00101       |

# Dy<sub>4</sub>Ge<sub>10</sub>Ru<sub>6</sub>

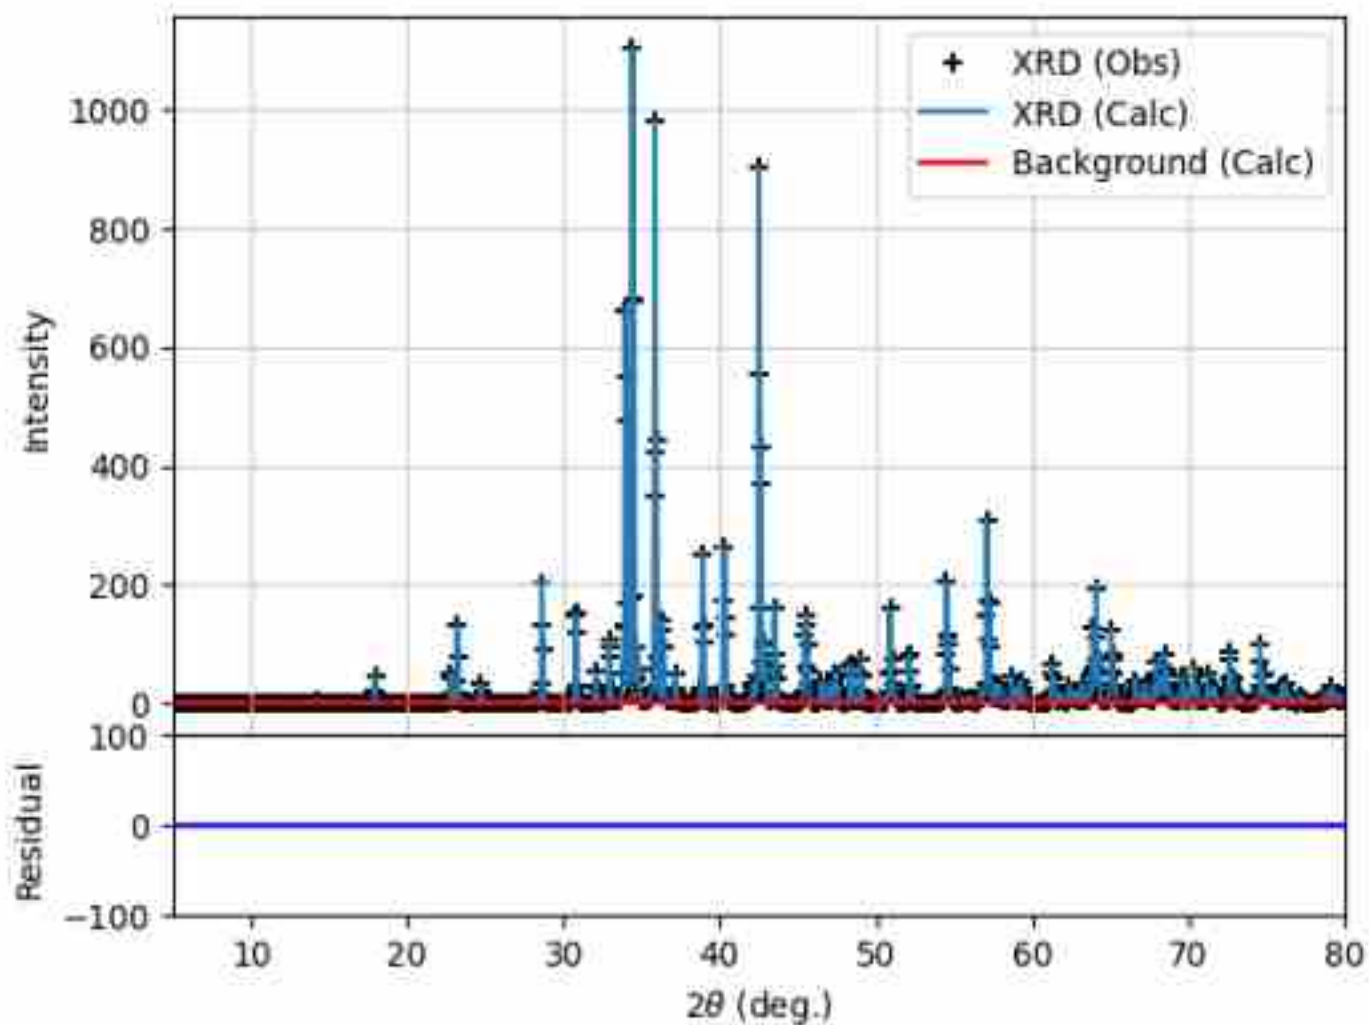

| RMSE before RR | Rwp     | RMSE after RR |
|----------------|---------|---------------|
| 0.018          | 0.00317 | 0.00034       |

# Dy<sub>4</sub>Sb<sub>4</sub>Rh<sub>4</sub>

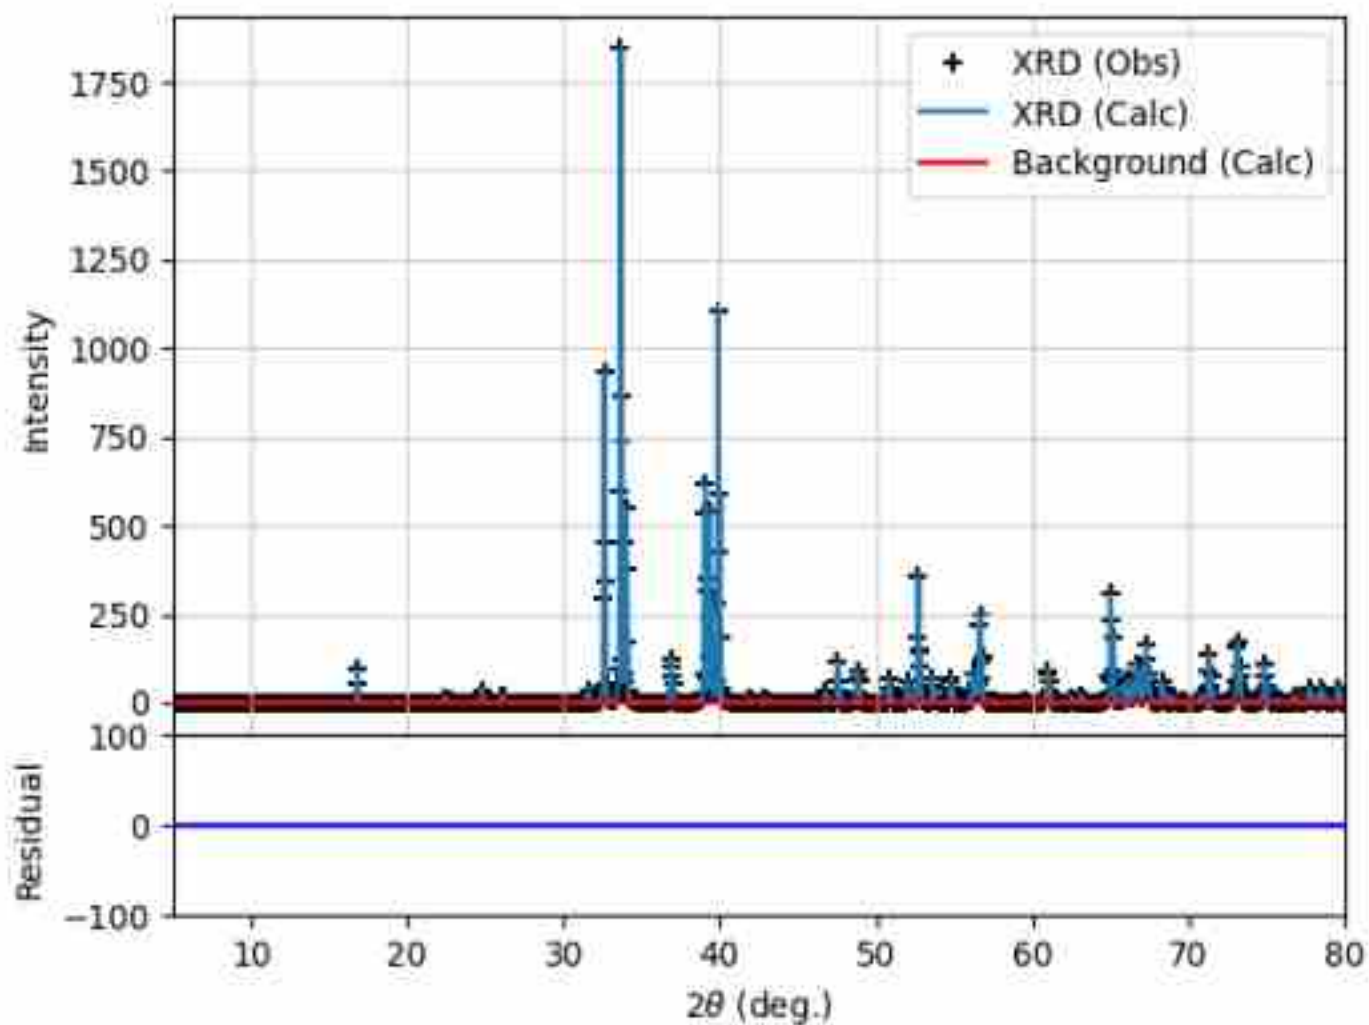

| RMSE before RR | Rwp     | RMSE after RR |
|----------------|---------|---------------|
| 0.018          | 0.00479 | 0.0004        |

# Dy<sub>4</sub>Ti<sub>4</sub>O<sub>12</sub>

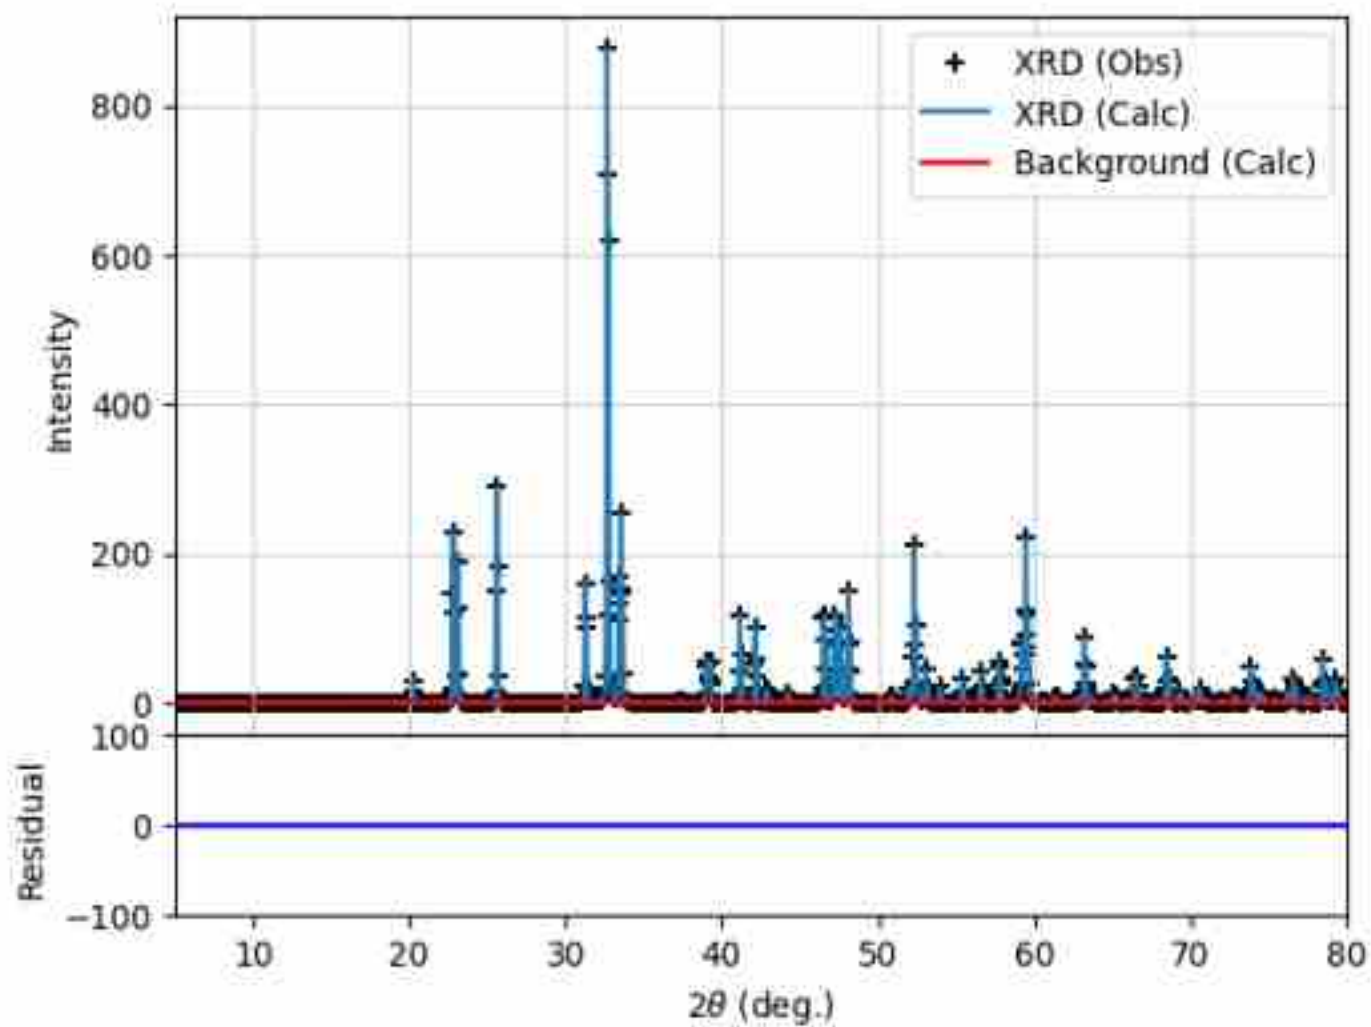

| RMSE before RR | Rwp     | RMSE after RR |
|----------------|---------|---------------|
| 0.018          | 0.00426 | 0.00139       |

# Dy10Pt6

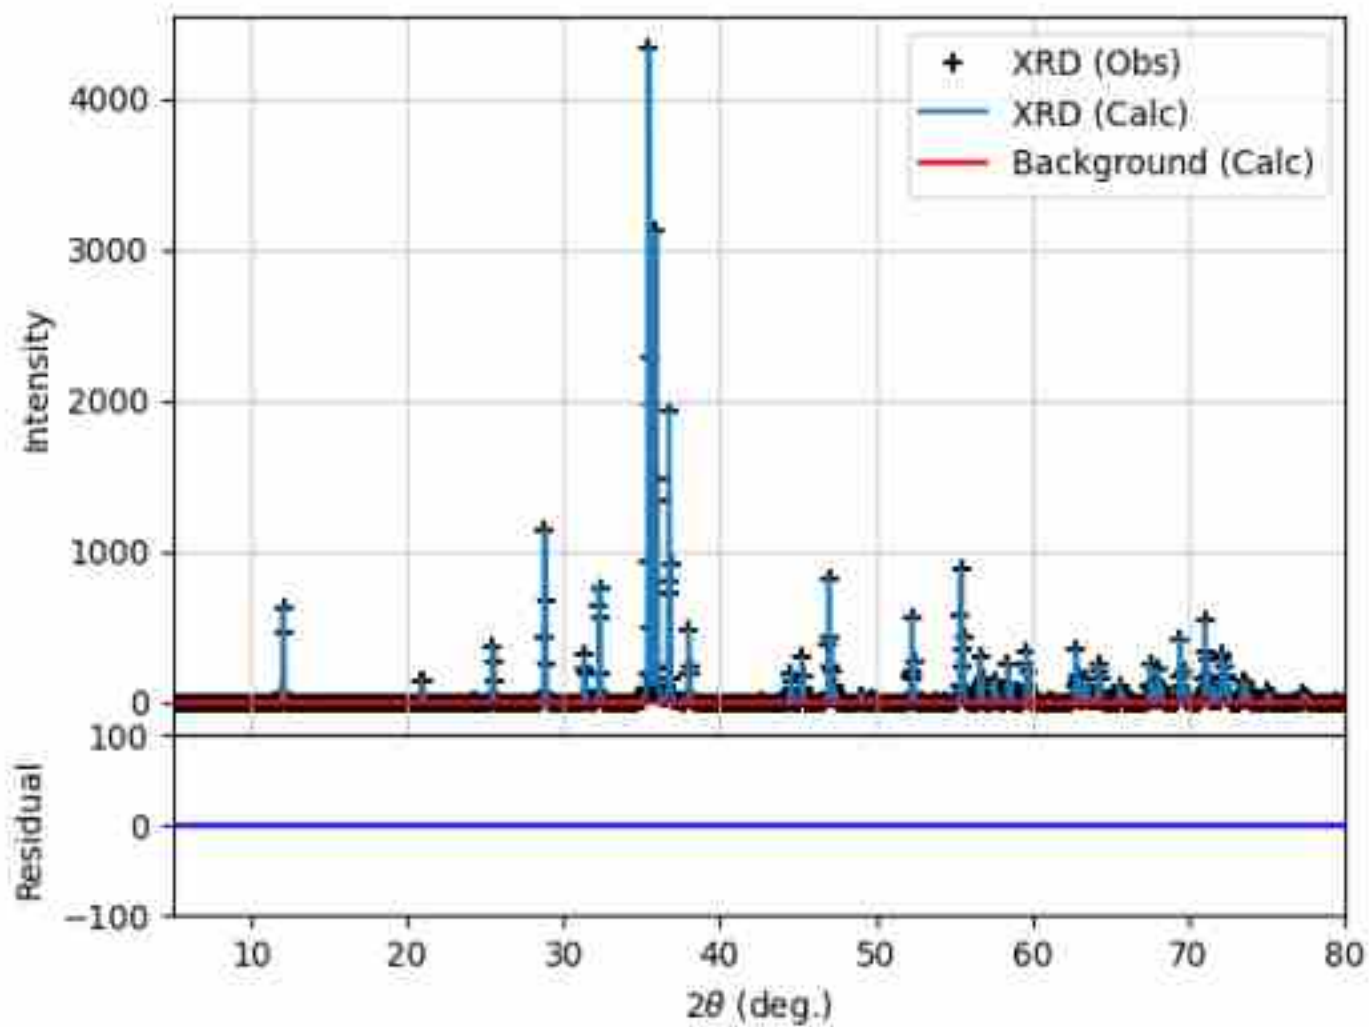

| RMSE before RR | Rwp     | RMSE after RR |
|----------------|---------|---------------|
| 0.018          | 0.00917 | 0.00054       |



# Er<sub>2</sub>Ag<sub>2</sub>Te<sub>4</sub>

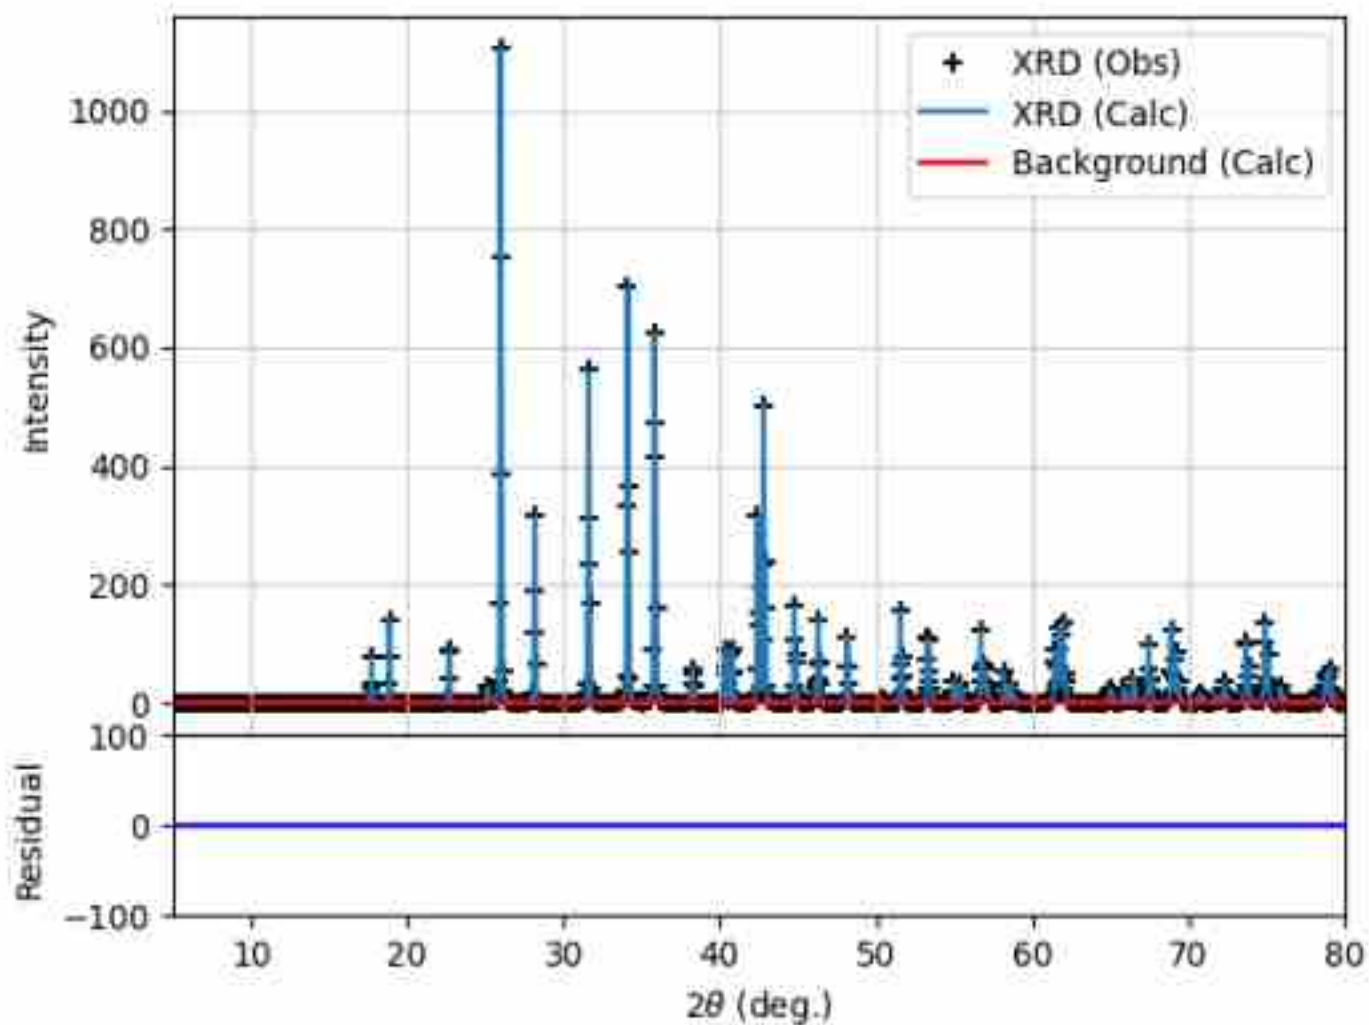

| RMSE before RR | Rwp     | RMSE after RR |
|----------------|---------|---------------|
| 0.018          | 0.00408 | 0.00036       |

# Er<sub>3</sub>Cu<sub>4</sub>Sn<sub>4</sub>

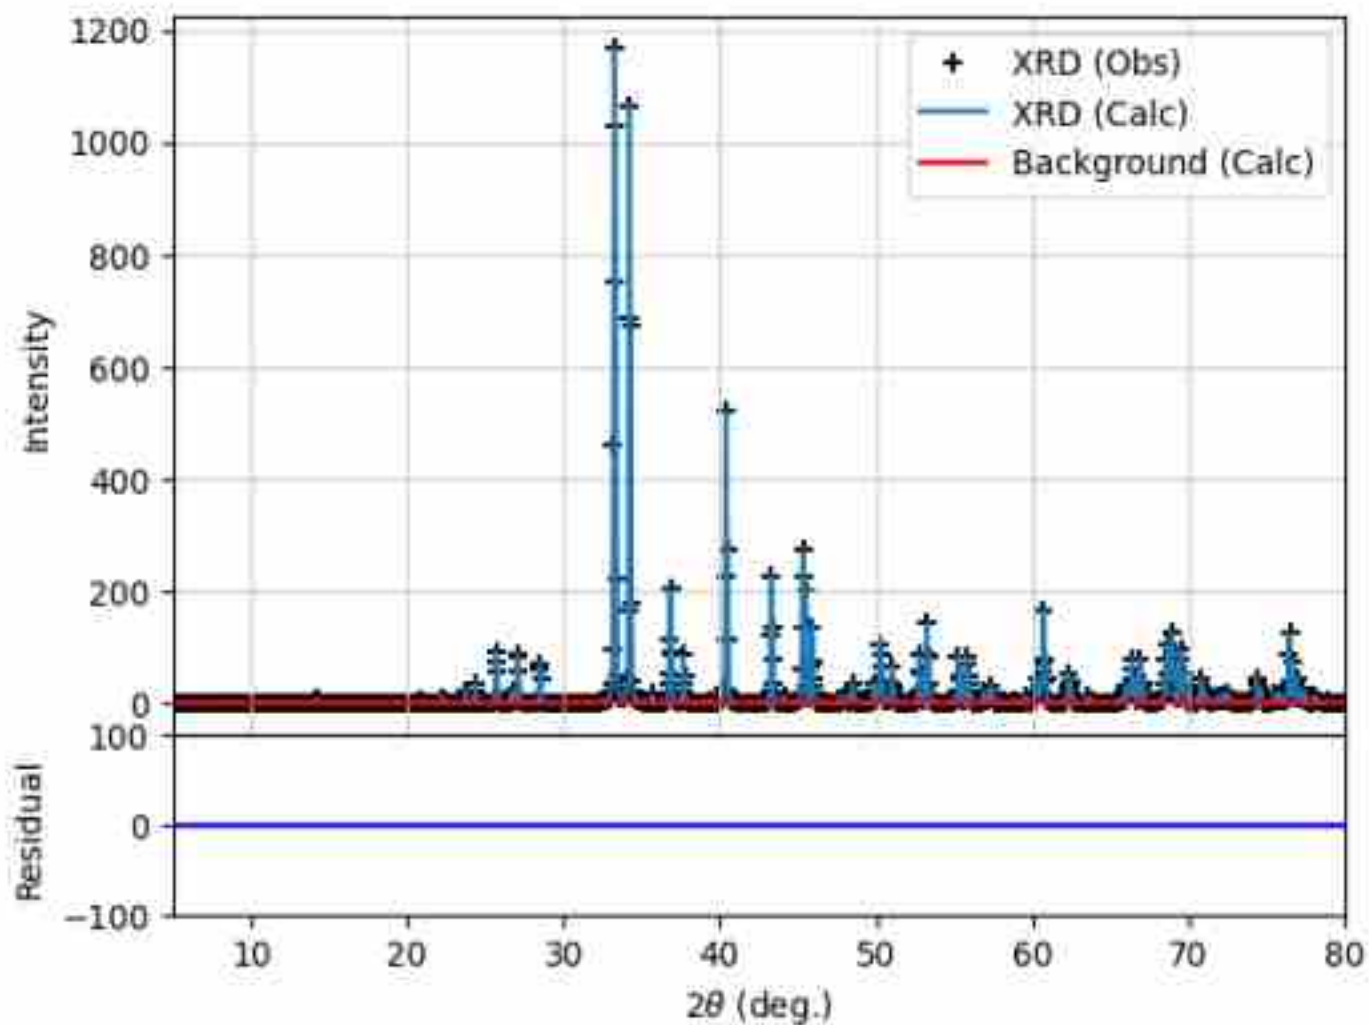

| RMSE before RR | Rwp     | RMSE after RR |
|----------------|---------|---------------|
| 0.018          | 0.00322 | 0.00043       |

# Er<sub>4</sub>Fe<sub>2</sub>C<sub>8</sub>

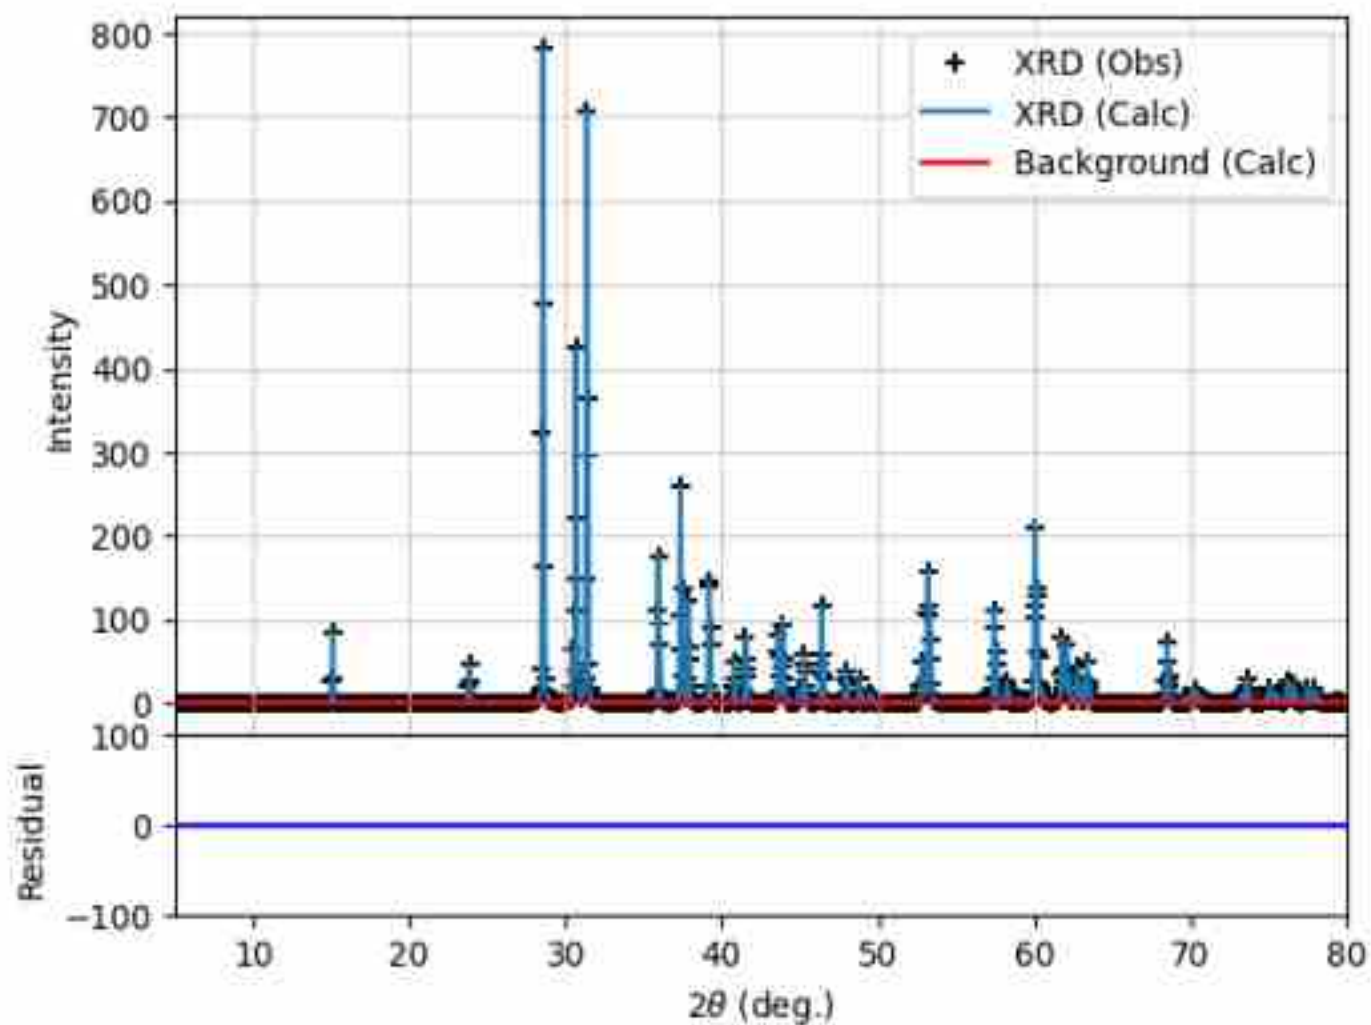

| RMSE before RR | Rwp     | RMSE after RR |
|----------------|---------|---------------|
| 0.018          | 0.00661 | 0.00387       |

# Er8Al4

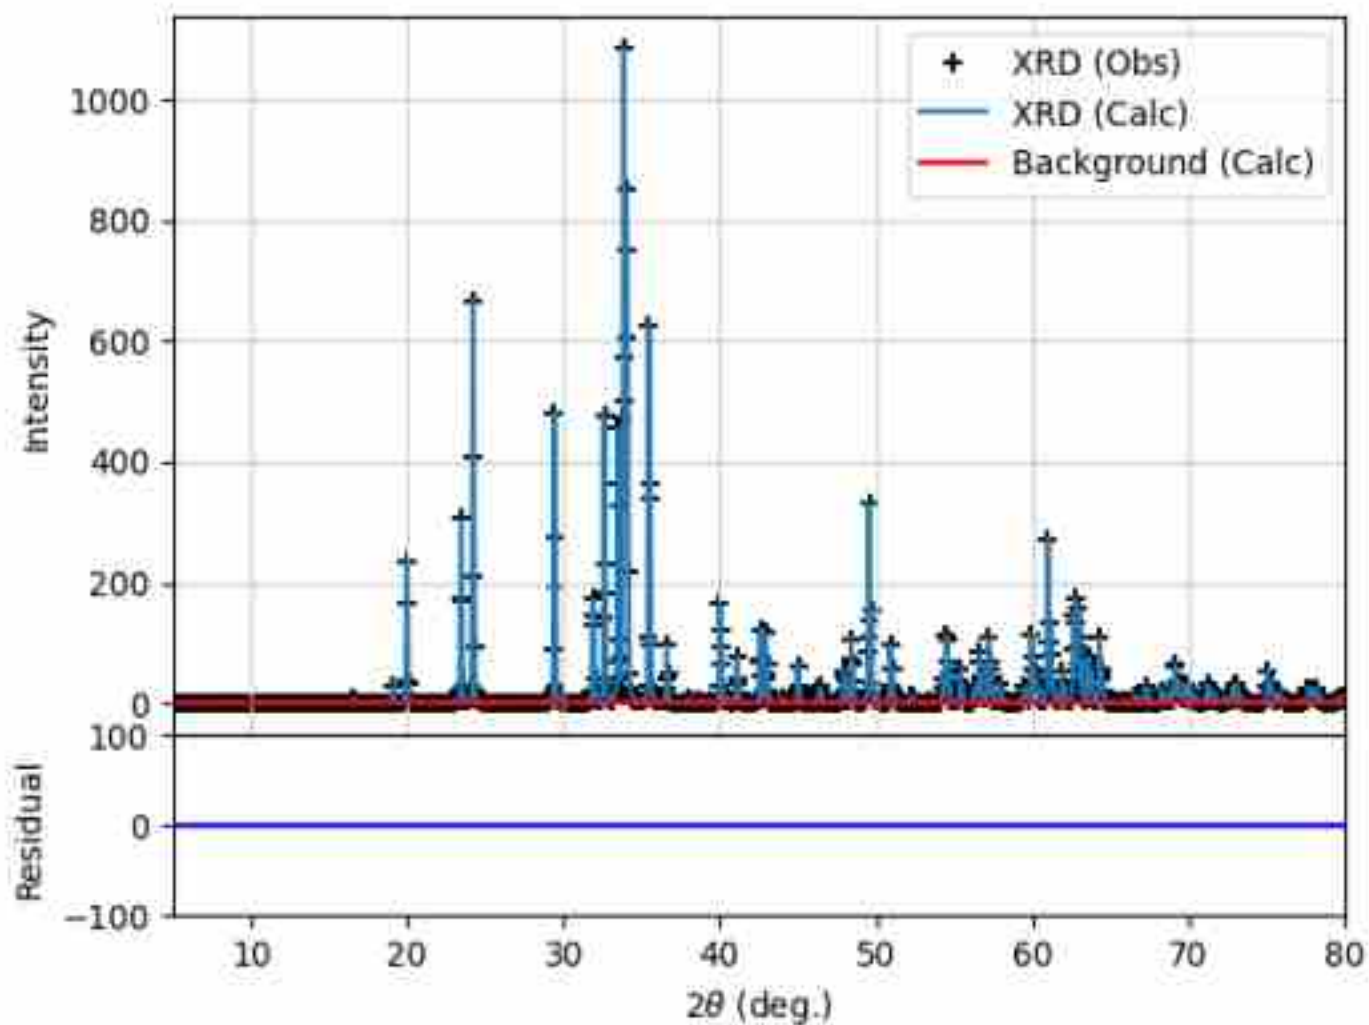

| RMSE before RR | Rwp     | RMSE after RR |
|----------------|---------|---------------|
| 0.018          | 0.00477 | 0.00049       |

# Er10Ge6C2

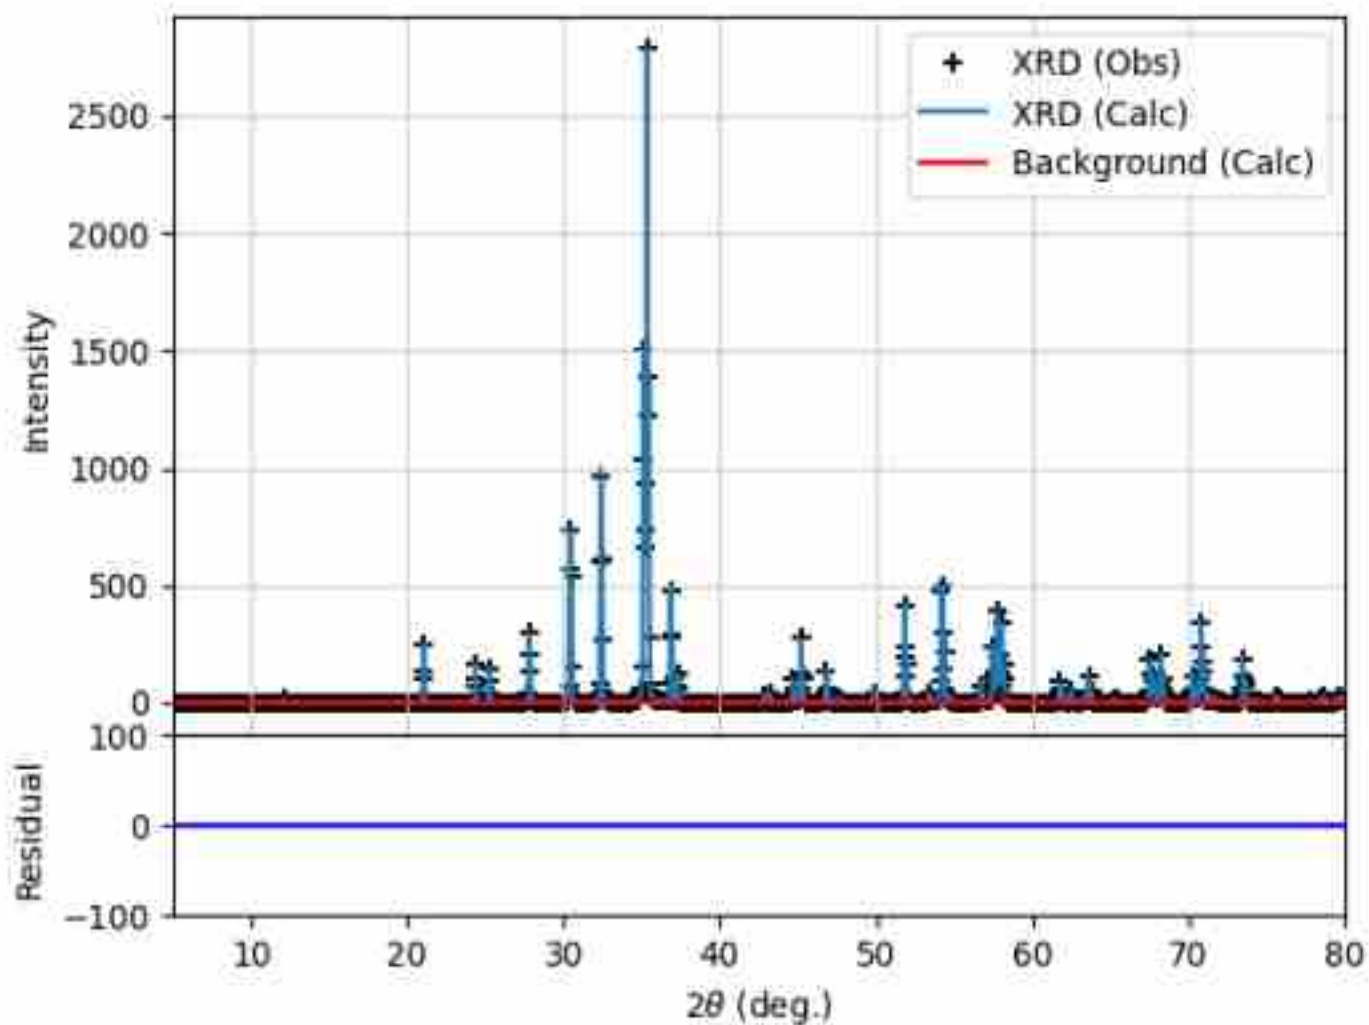

| RMSE before RR | Rwp    | RMSE after RR |
|----------------|--------|---------------|
| 0.018          | 0.0058 | 0.00126       |

# Eu1Mn1O3

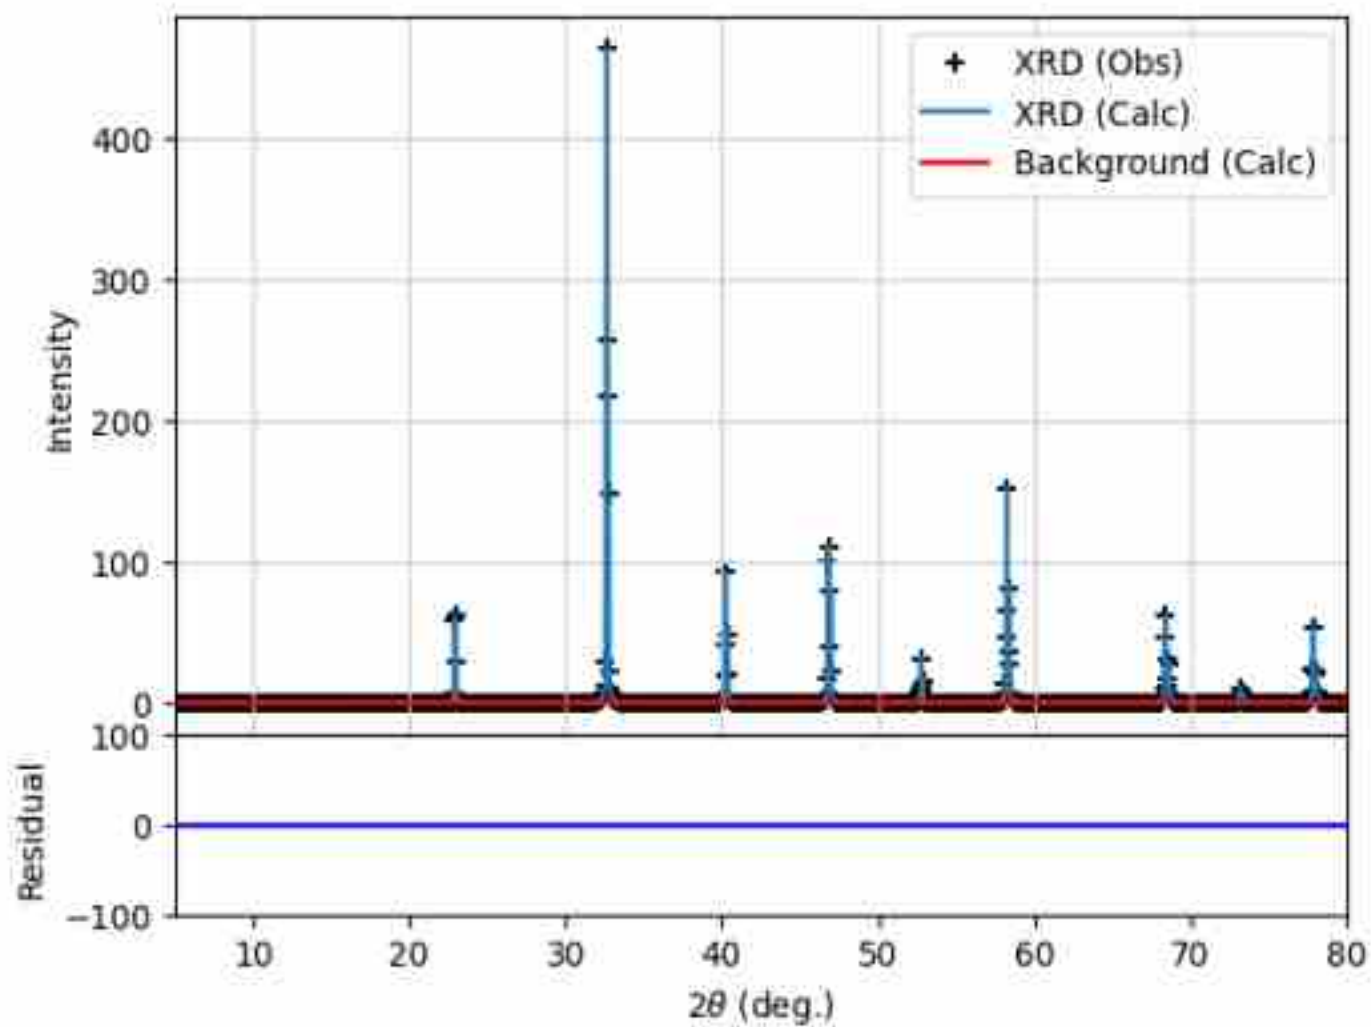

| RMSE before RR | Rwp     | RMSE after RR |
|----------------|---------|---------------|
| 0.018          | 0.00421 | 0.00333       |

# Eu1Sb12Os4

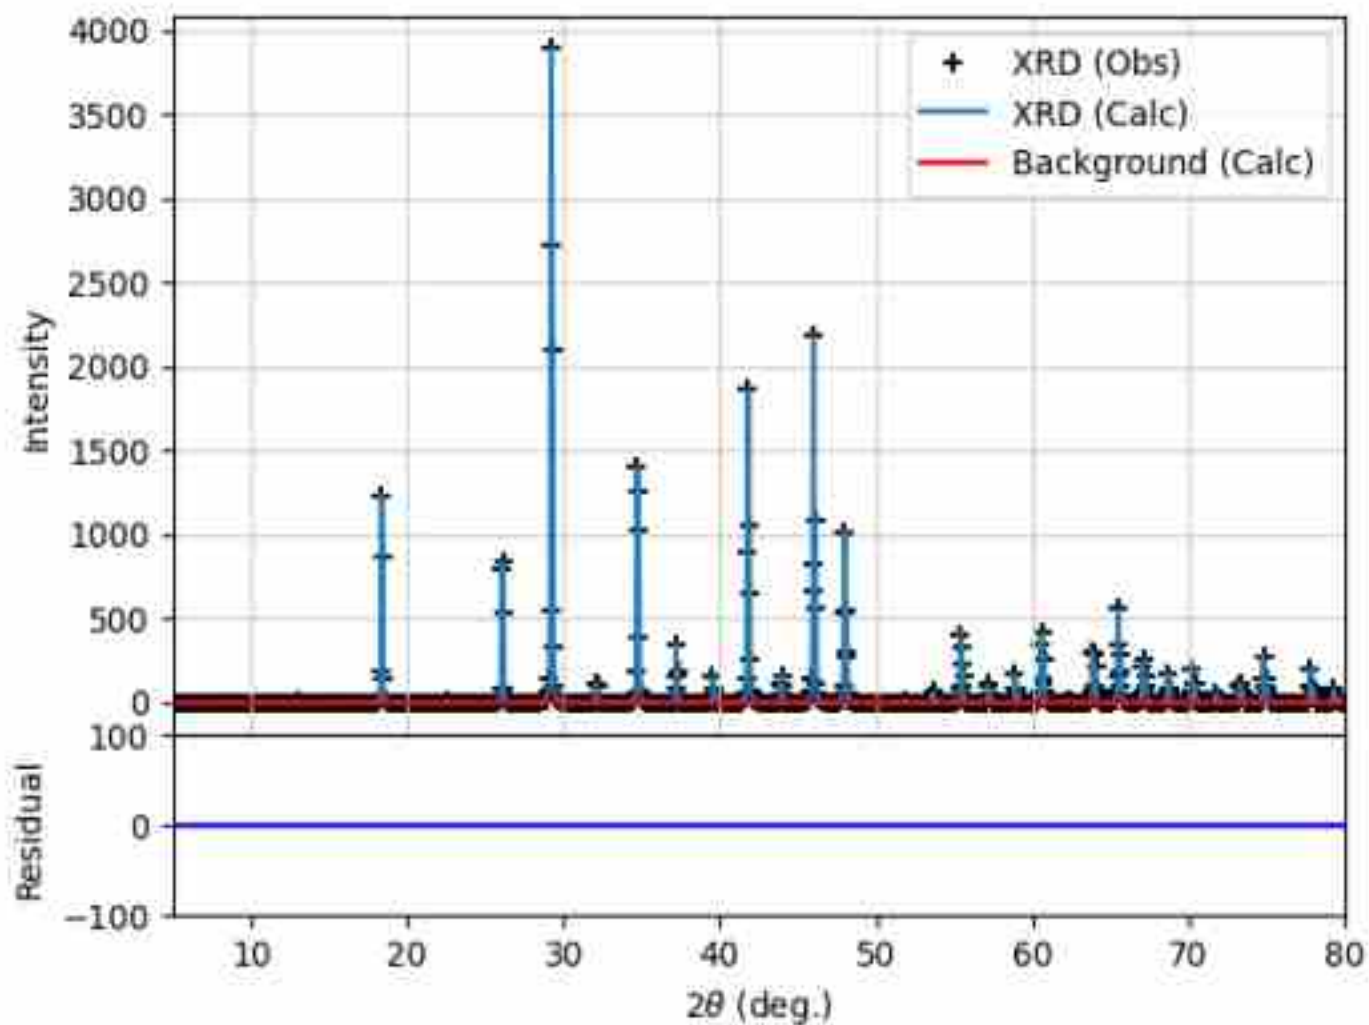

| RMSE before RR | Rwp     | RMSE after RR |
|----------------|---------|---------------|
| 0.018          | 0.00602 | 0.00083       |

# Eu4As2O1

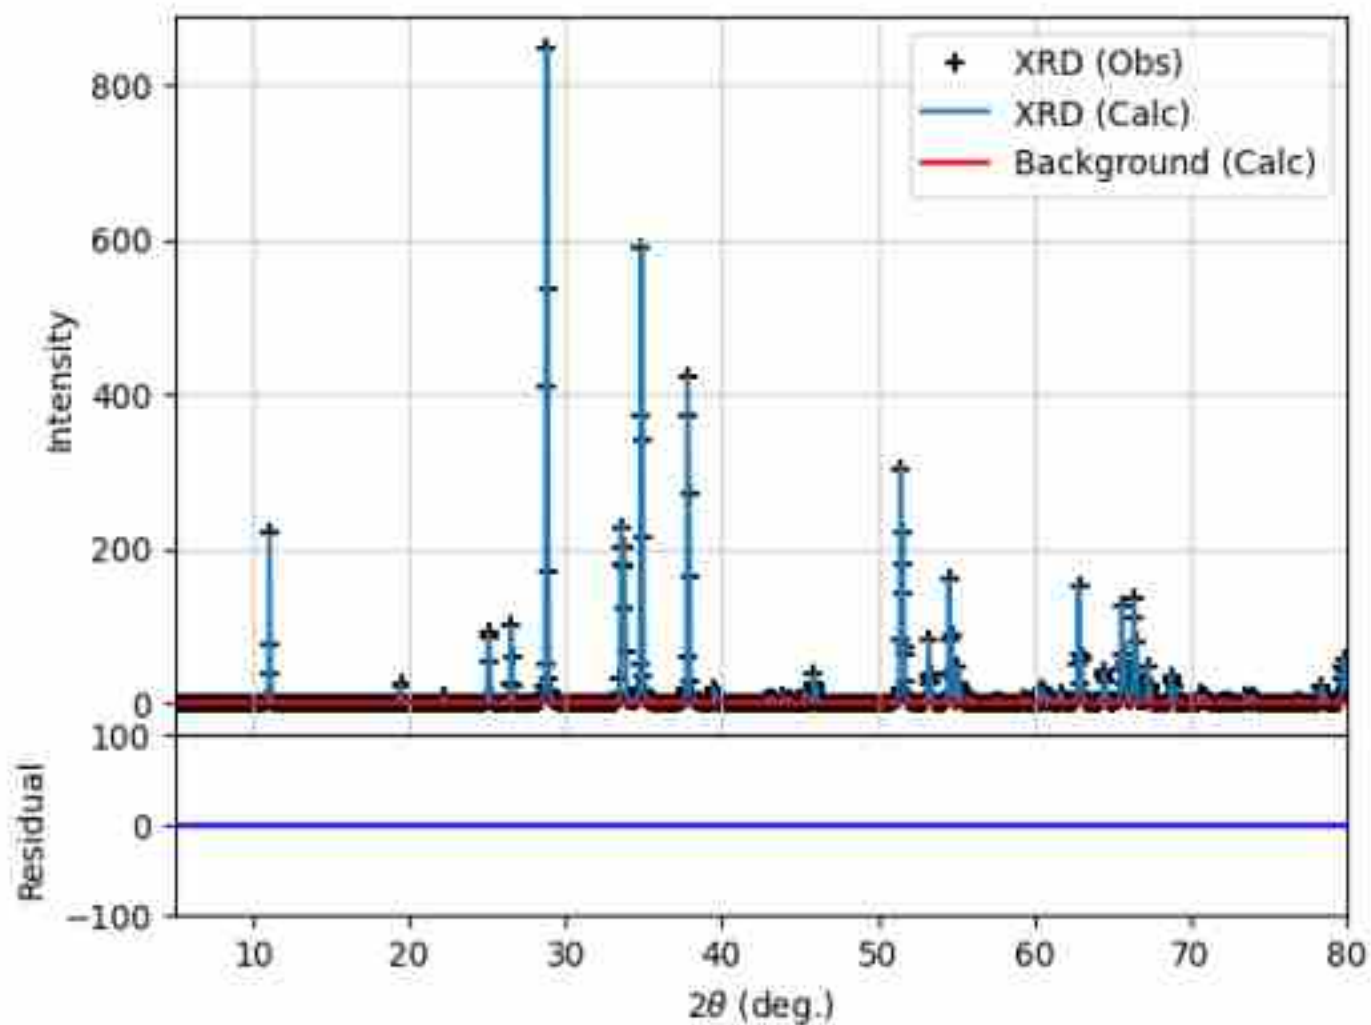

| RMSE before RR | Rwp     | RMSE after RR |
|----------------|---------|---------------|
| 0.018          | 0.00359 | 0.00026       |



# Eu4Mg4Pb4

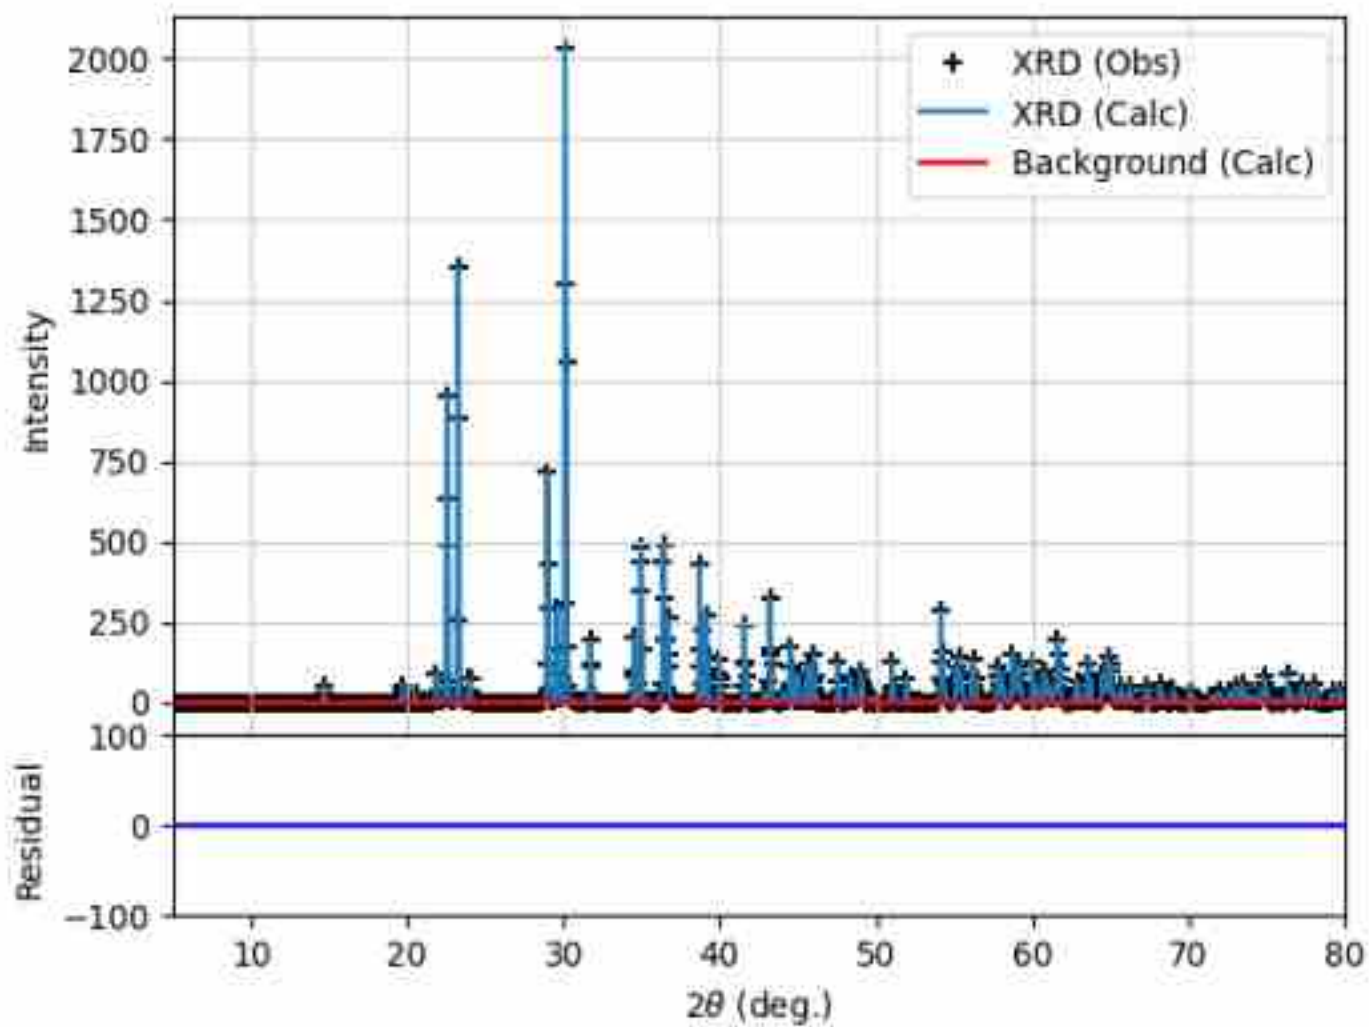

| RMSE before RR | Rwp     | RMSE after RR |
|----------------|---------|---------------|
| 0.018          | 0.00405 | 0.0006        |

# Eu<sub>4</sub>Si<sub>2</sub>S<sub>8</sub>

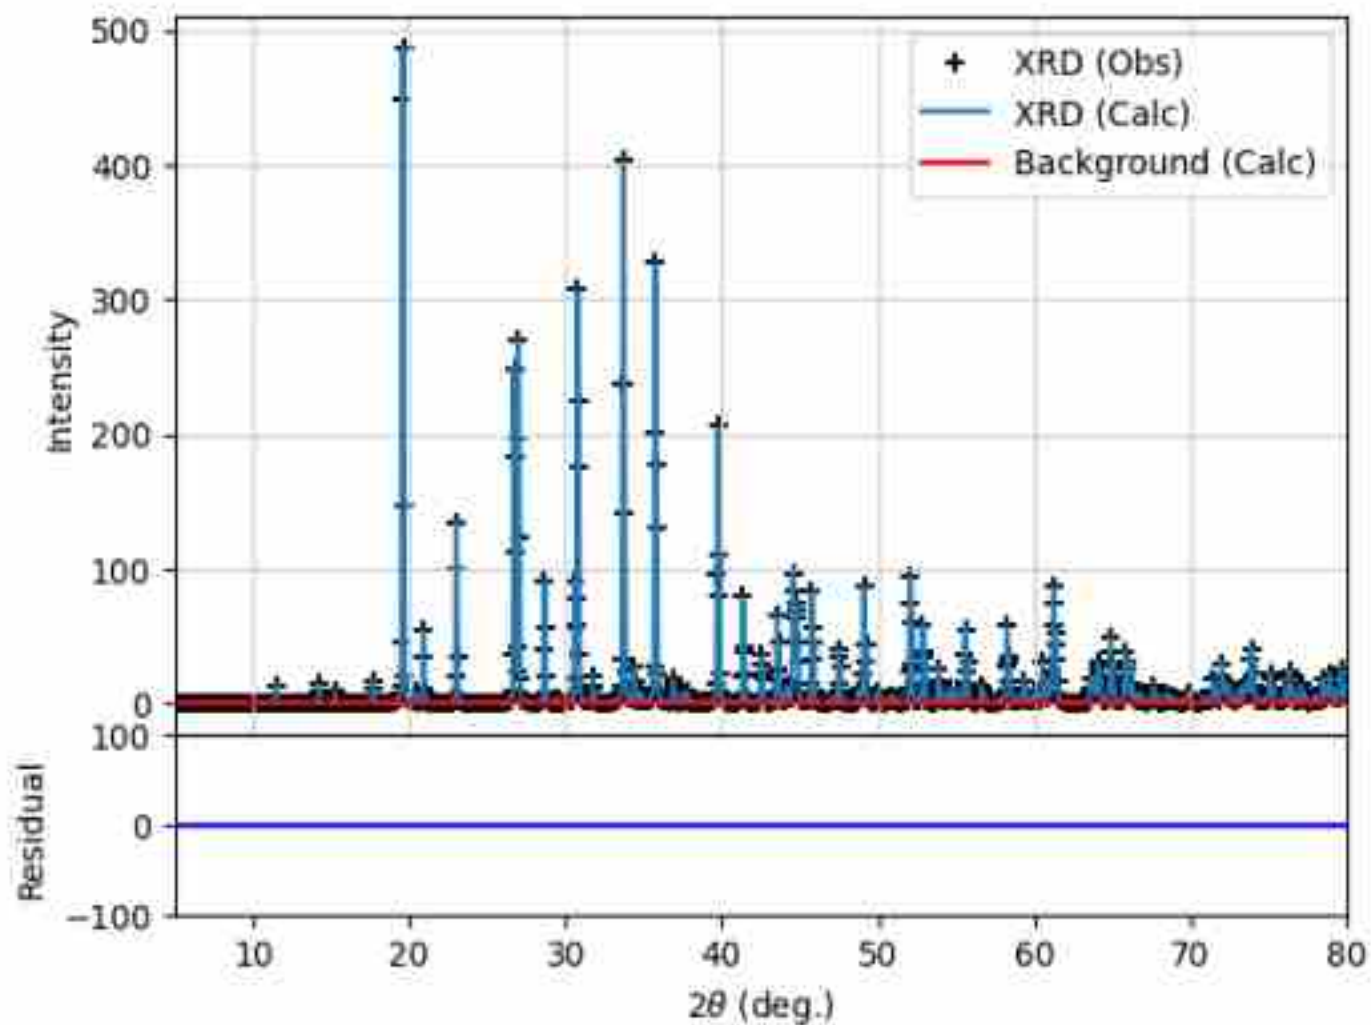

| RMSE before RR | Rwp     | RMSE after RR |
|----------------|---------|---------------|
| 0.018          | 0.00274 | 0.00068       |

# Eu<sub>4</sub>Zn<sub>2</sub>Pt<sub>2</sub>O<sub>12</sub>

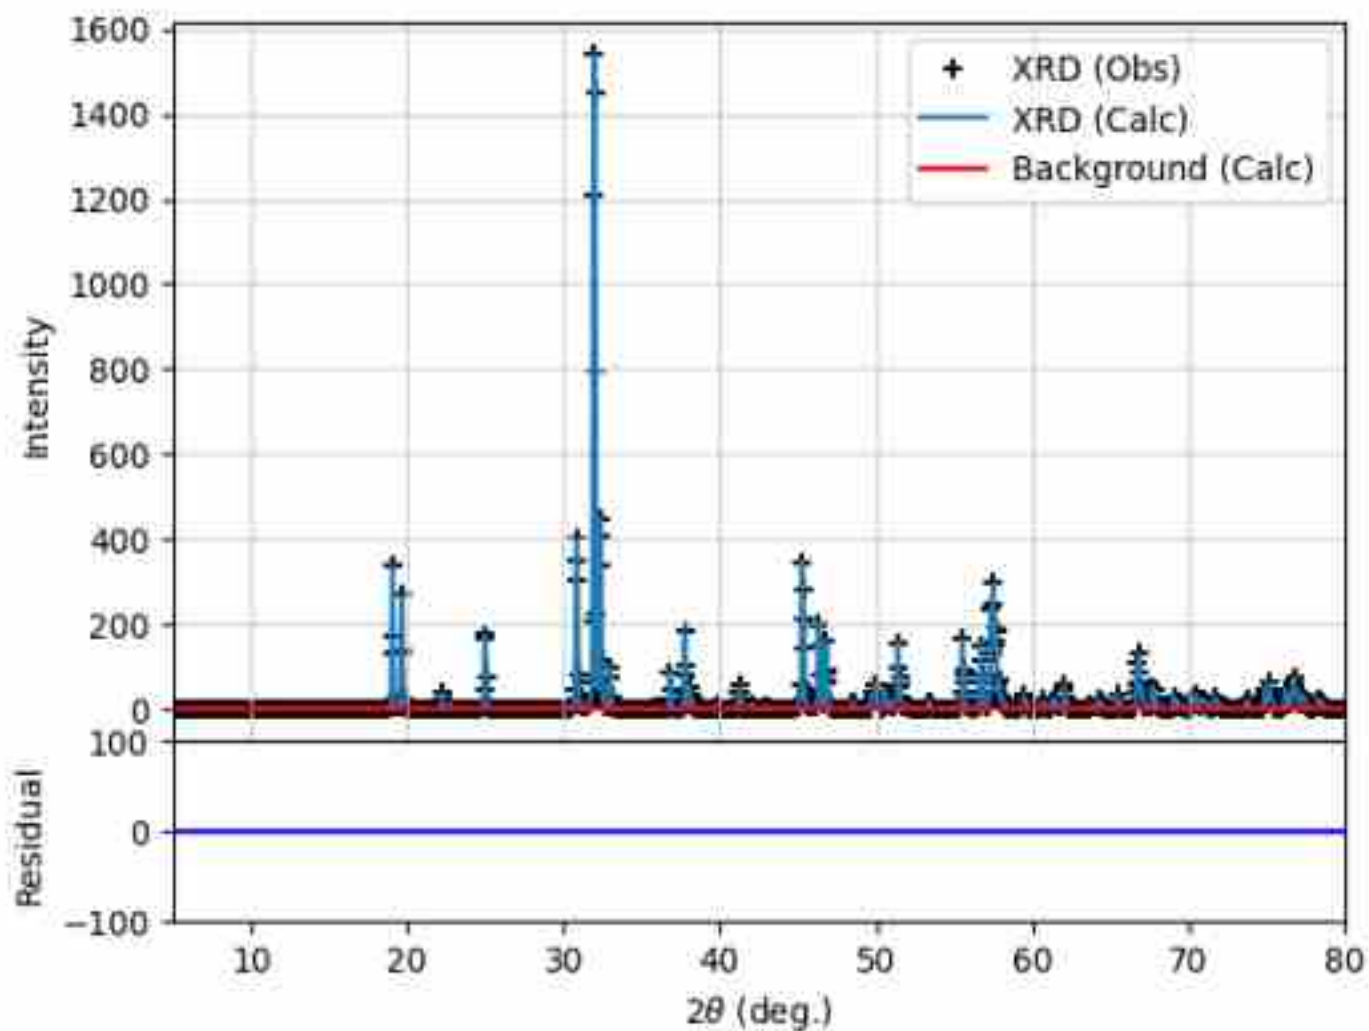

| RMSE before RR | Rwp     | RMSE after RR |
|----------------|---------|---------------|
| 0.018          | 0.00351 | 0.00112       |

# Ga<sub>2</sub>Ni<sub>6</sub>

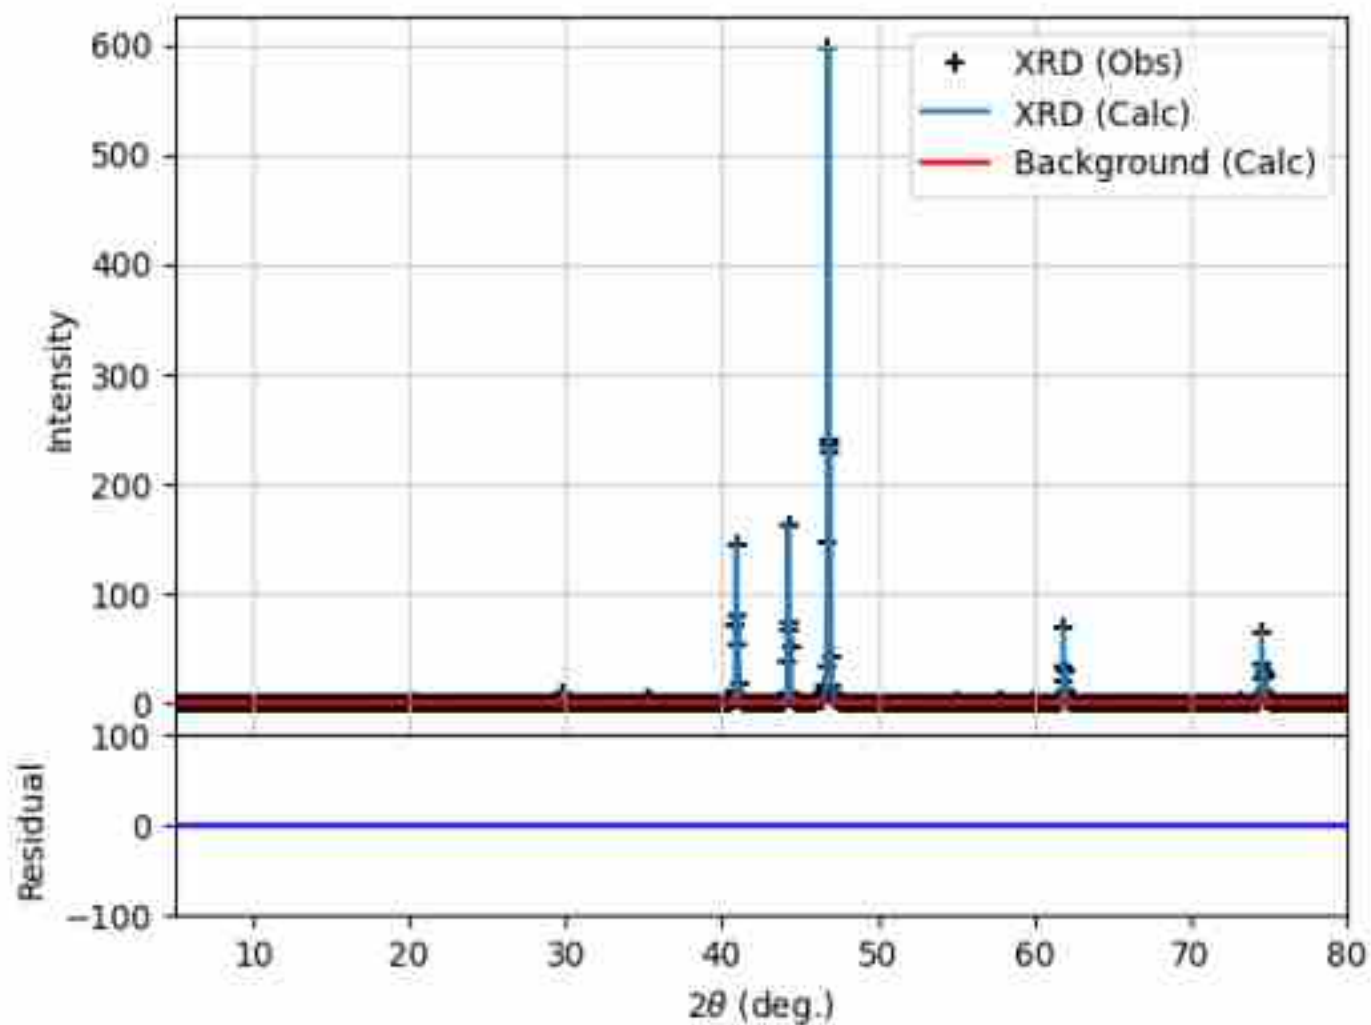

| RMSE before RR | Rwp    | RMSE after RR |
|----------------|--------|---------------|
| 0.018          | 0.0539 | 0.00243       |

# Gd<sub>4</sub>Pb<sub>2</sub>S<sub>8</sub>

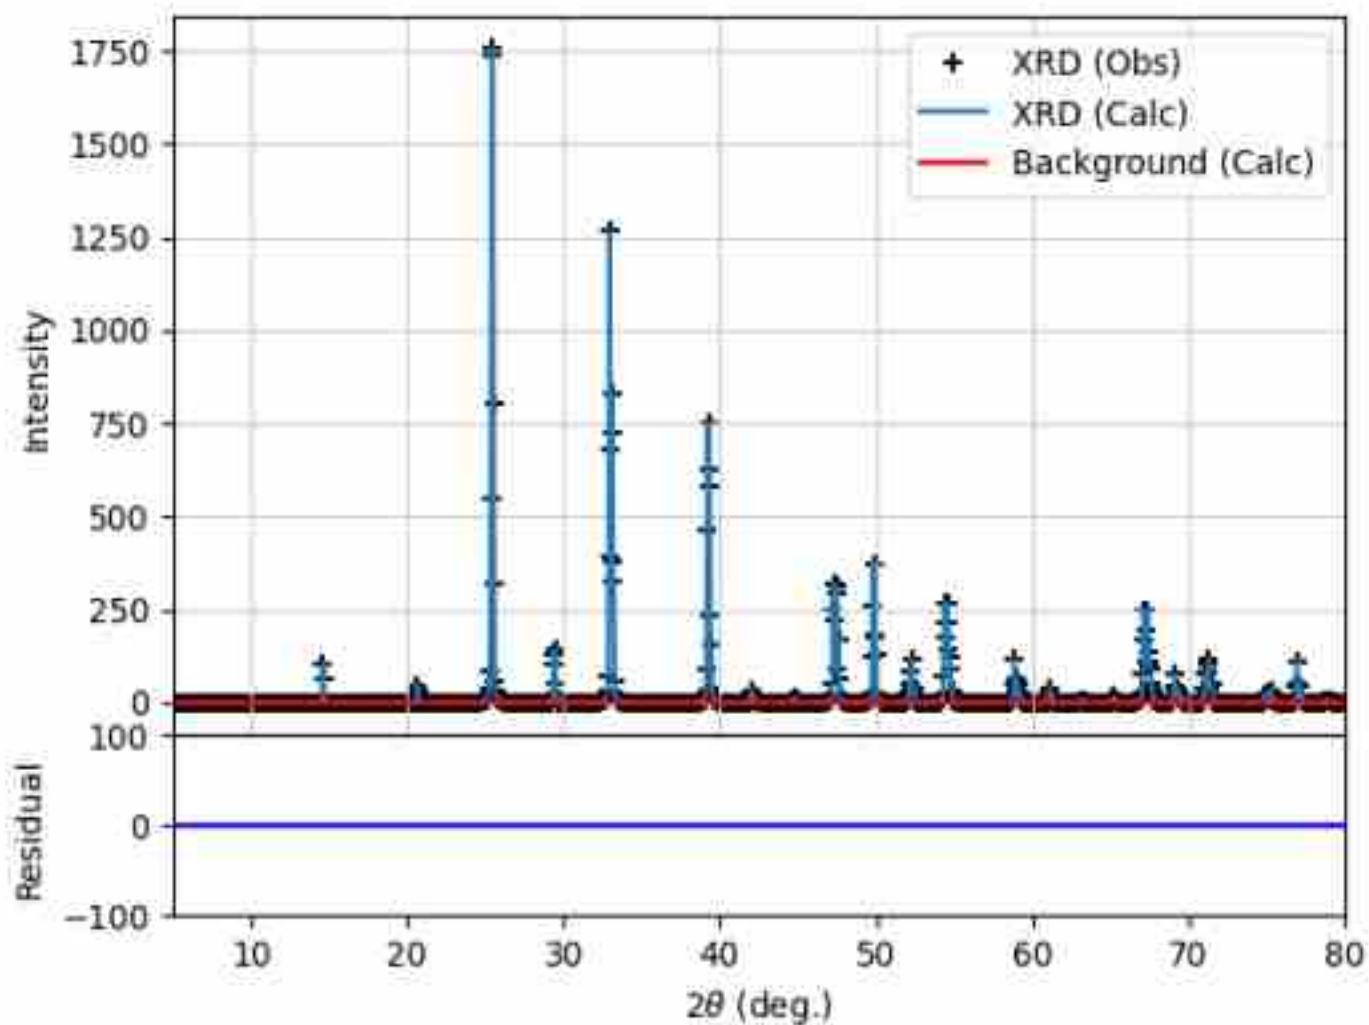

| RMSE before RR | Rwp     | RMSE after RR |
|----------------|---------|---------------|
| 0.018          | 0.00359 | 0.00077       |

# Gd<sub>4</sub>Si<sub>4</sub>Pt<sub>8</sub>

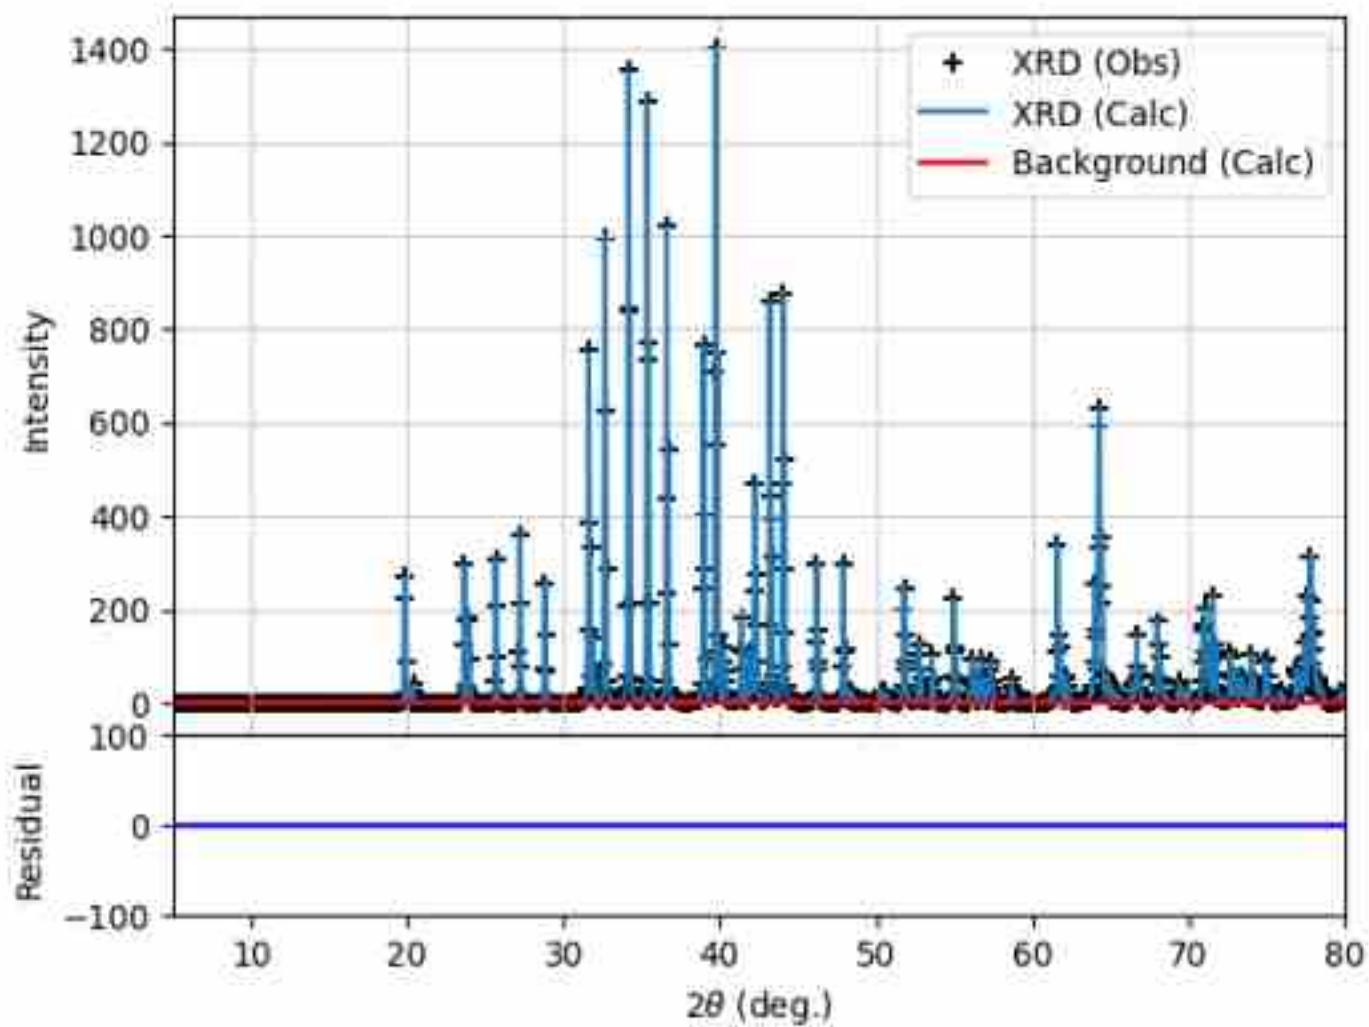

| RMSE before RR | Rwp     | RMSE after RR |
|----------------|---------|---------------|
| 0.018          | 0.00476 | 0.00066       |

# Hf2Al3Au1

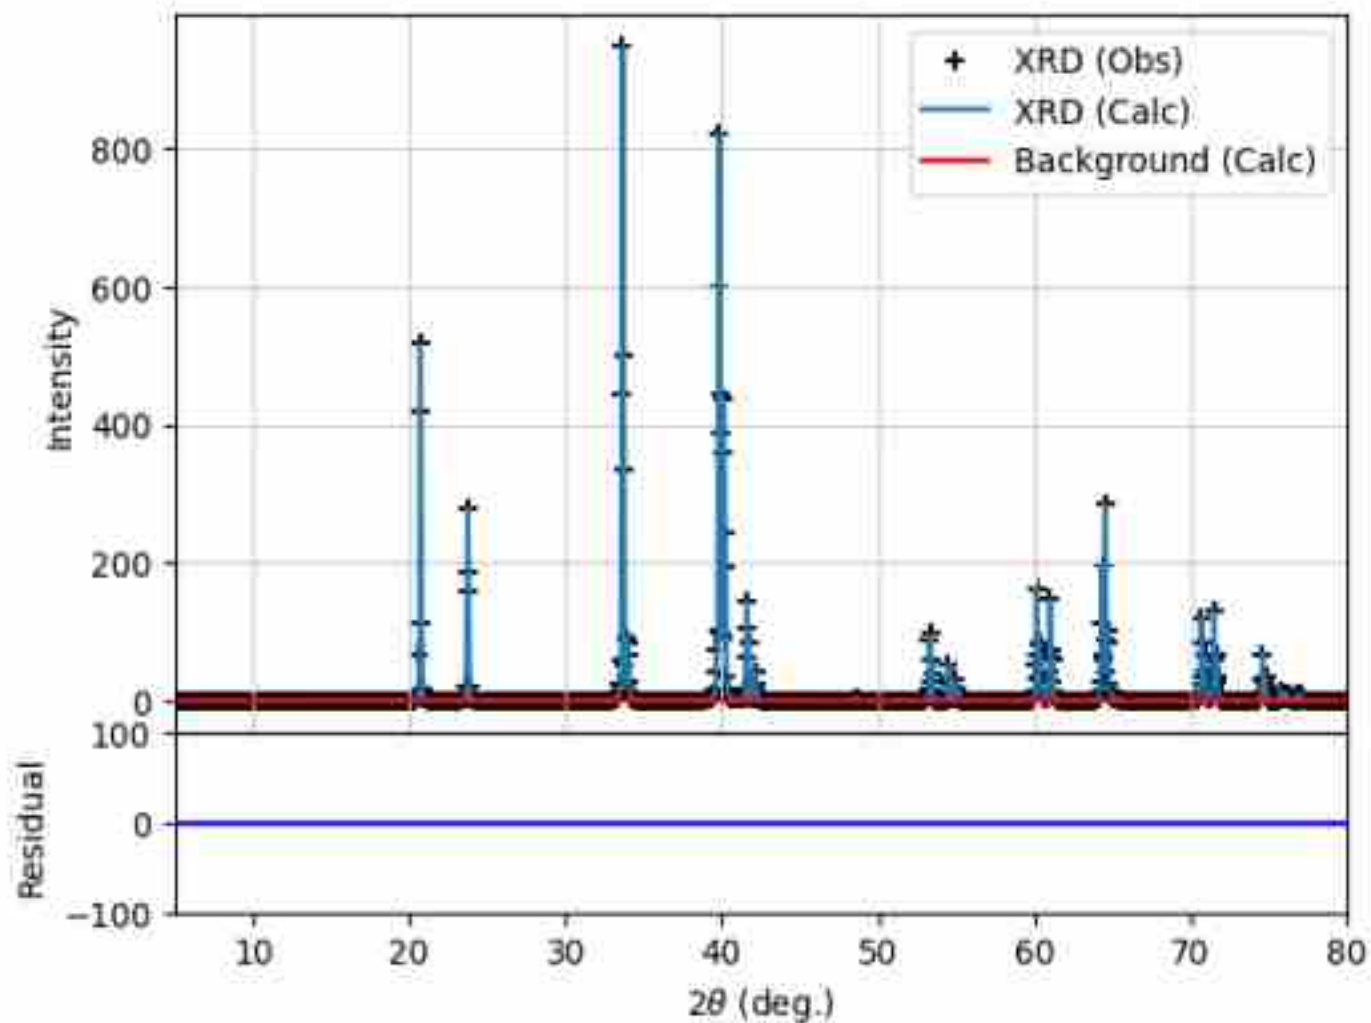

| RMSE before RR | Rwp     | RMSE after RR |
|----------------|---------|---------------|
| 0.018          | 0.00855 | 0.00072       |

# Hf<sub>2</sub>Cr<sub>2</sub>Cu<sub>2</sub>S<sub>8</sub>

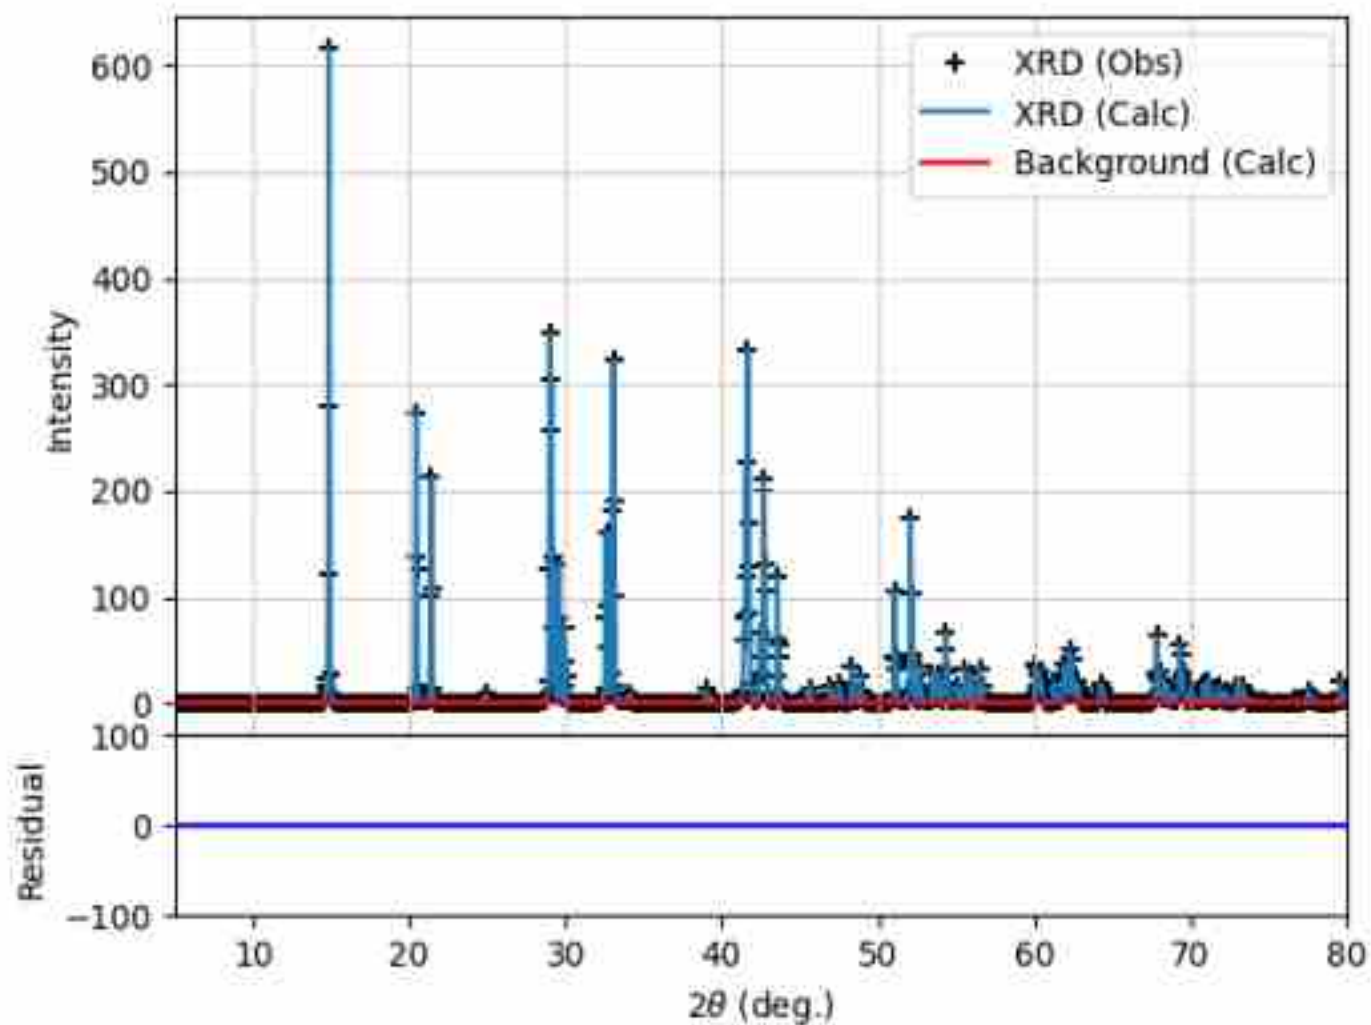

| RMSE before RR | Rwp     | RMSE after RR |
|----------------|---------|---------------|
| 0.018          | 0.00251 | 0.00018       |



# Hf<sub>2</sub>Ge<sub>2</sub>O<sub>8</sub>

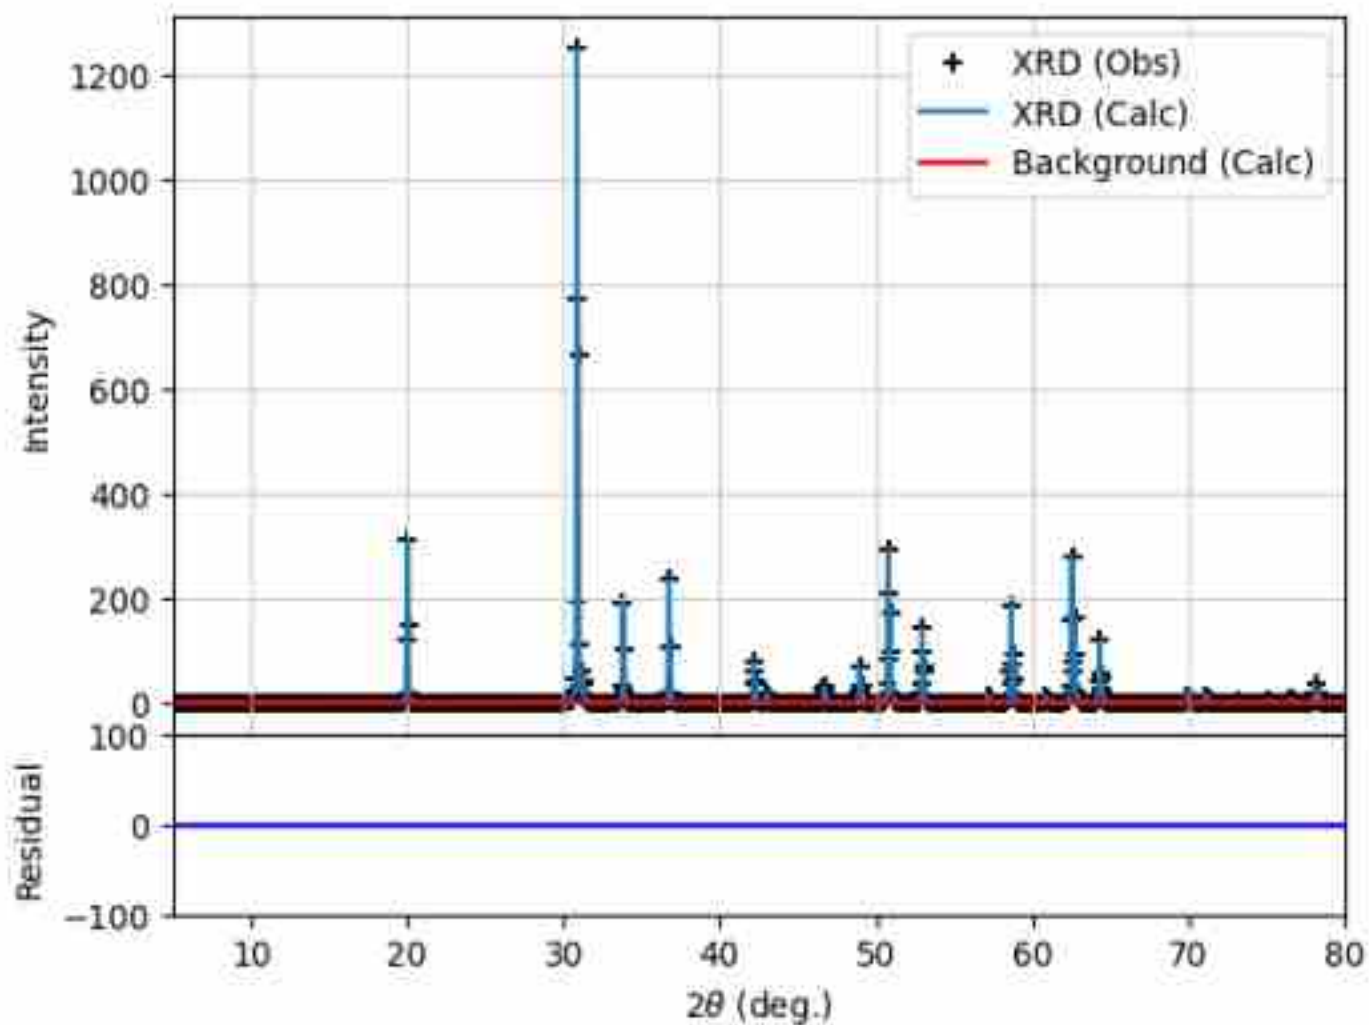

| RMSE before RR | Rwp     | RMSE after RR |
|----------------|---------|---------------|
| 0.018          | 0.00384 | 0.00159       |

# Hf3Ni9

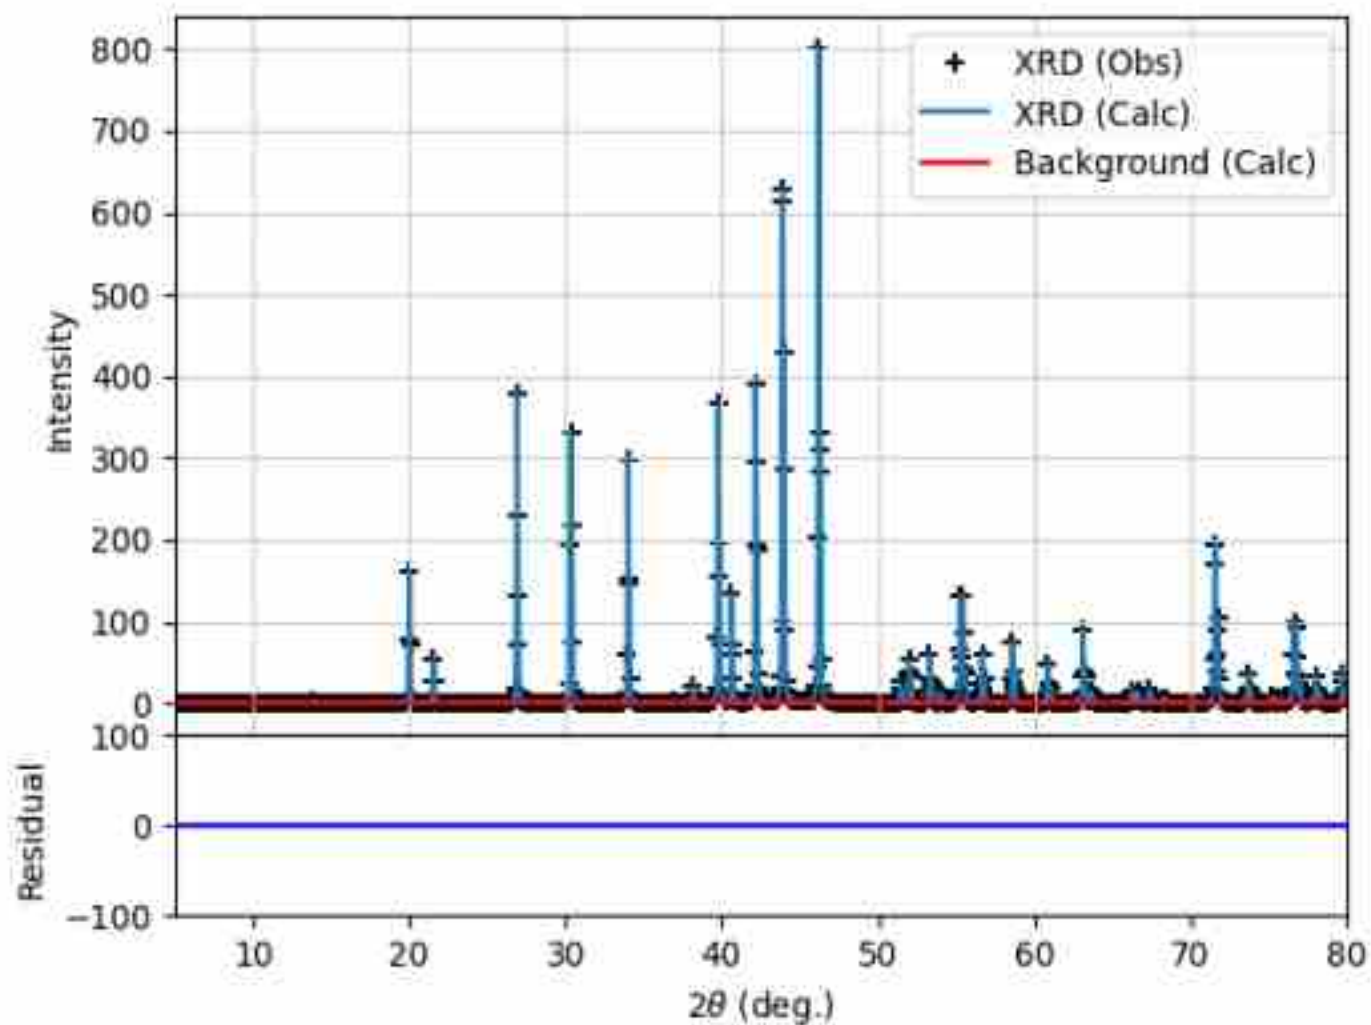

| RMSE before RR | Rwp     | RMSE after RR |
|----------------|---------|---------------|
| 0.018          | 0.00446 | 0.00094       |

# Ho2Ga6

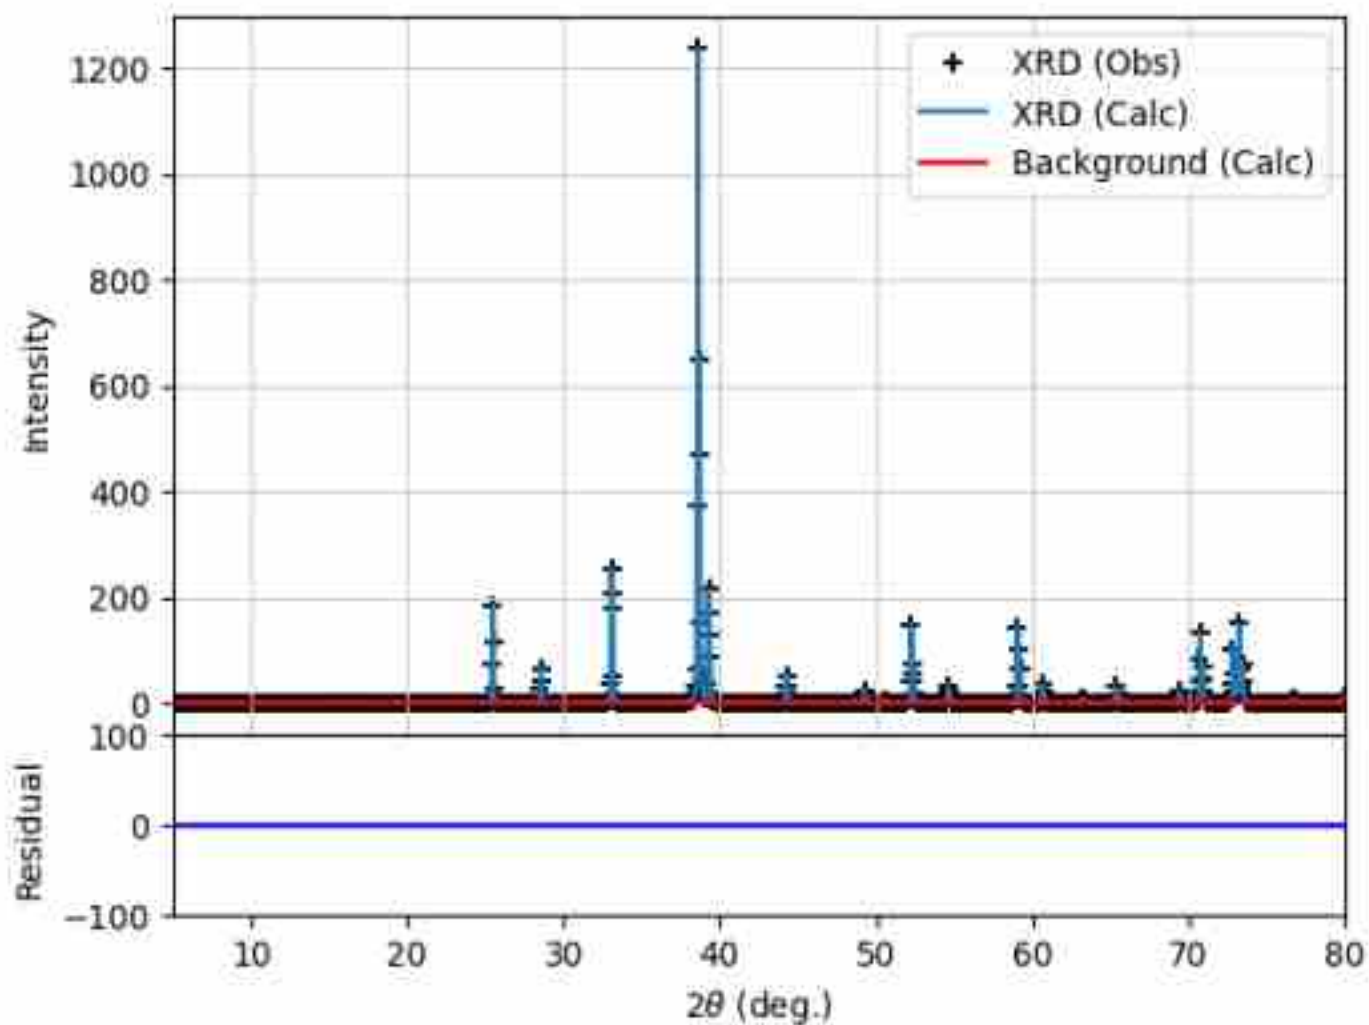

| RMSE before RR | Rwp     | RMSE after RR |
|----------------|---------|---------------|
| 0.018          | 0.01404 | 0.00135       |

# Ho<sub>4</sub>Al<sub>4</sub>Rh<sub>4</sub>

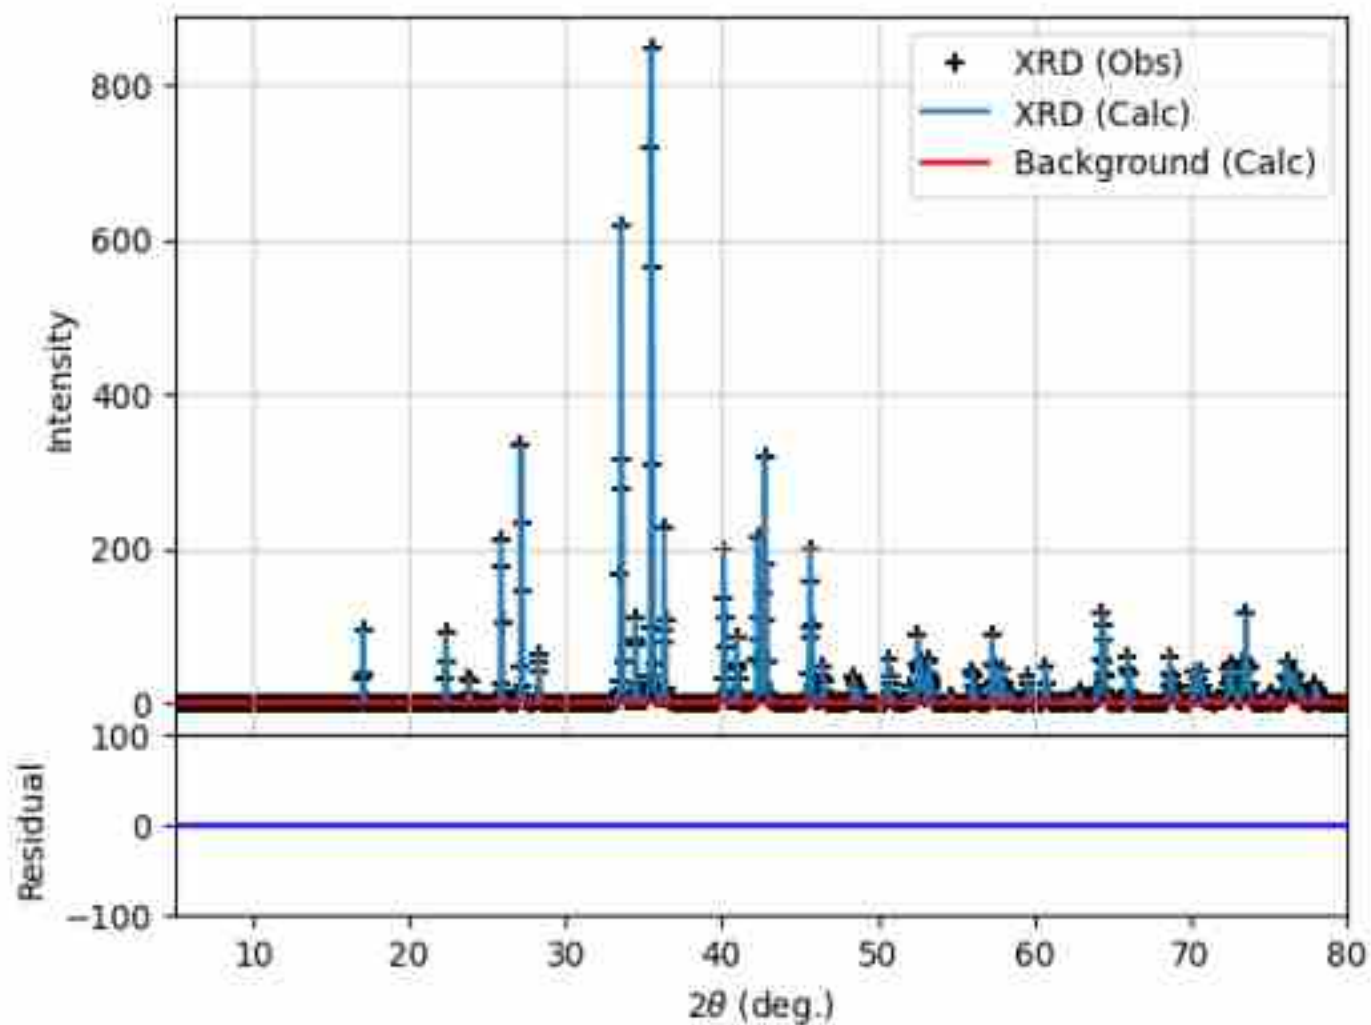

| RMSE before RR | Rwp     | RMSE after RR |
|----------------|---------|---------------|
| 0.018          | 0.00449 | 0.00064       |

# Ho<sub>4</sub>Fe<sub>2</sub>C<sub>8</sub>

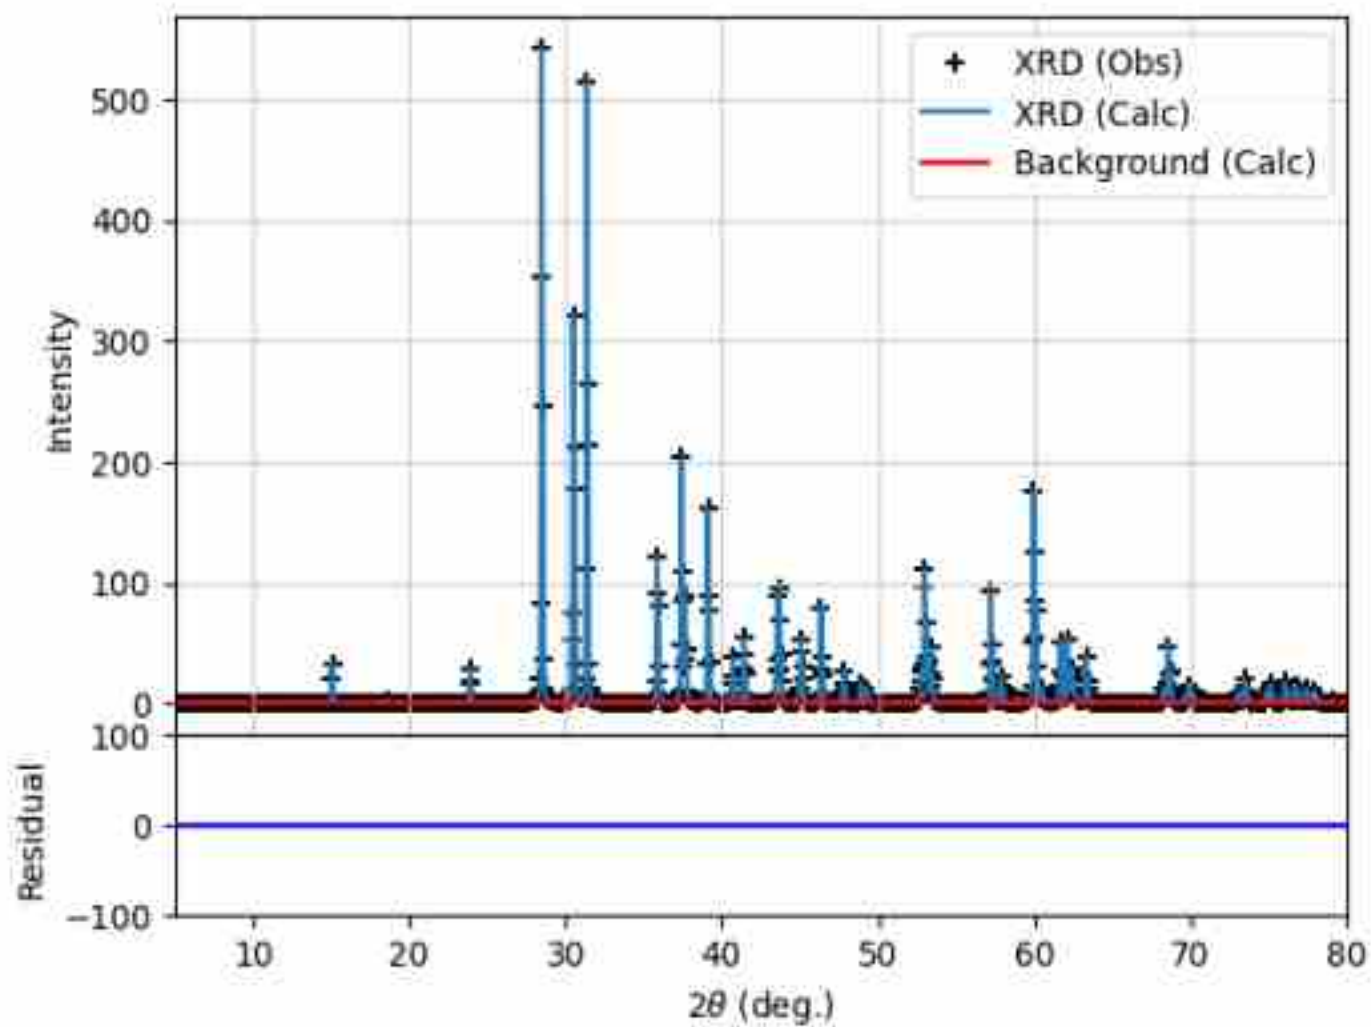

| RMSE before RR | Rwp     | RMSE after RR |
|----------------|---------|---------------|
| 0.018          | 0.00396 | 0.00121       |

# Ho<sub>4</sub>Ge<sub>8</sub>Pd<sub>1</sub>

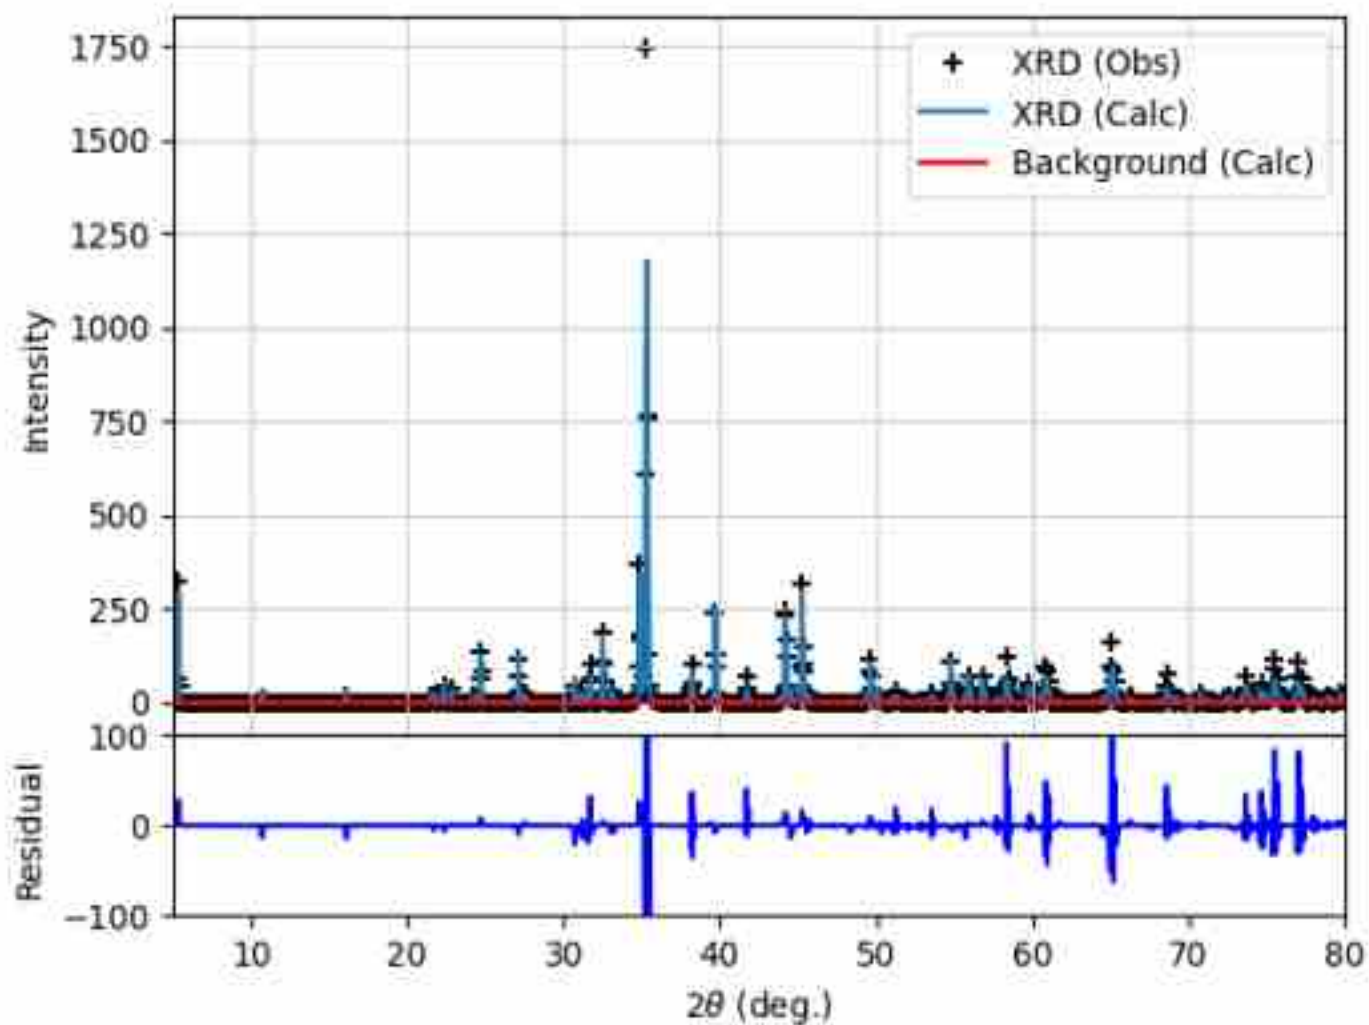

| RMSE before RR | Rwp      | RMSE after RR |
|----------------|----------|---------------|
| 0.018          | 47.22893 | 0.01768       |

# Ho<sub>4</sub>Mg<sub>2</sub>

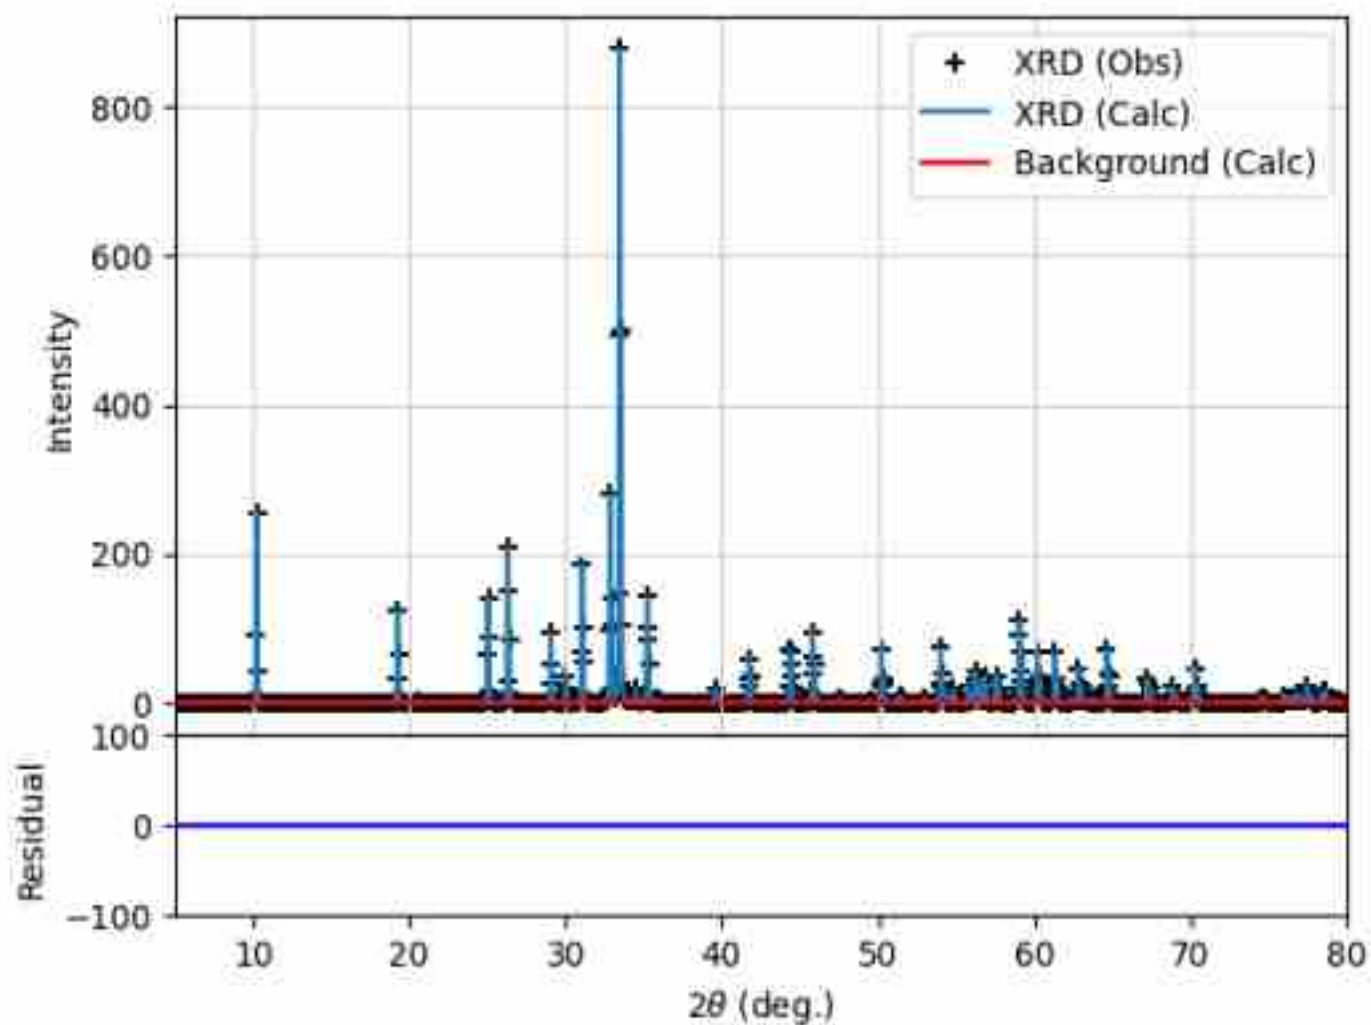

| RMSE before RR | Rwp     | RMSE after RR |
|----------------|---------|---------------|
| 0.018          | 0.00388 | 0.00044       |

# In1Cu4

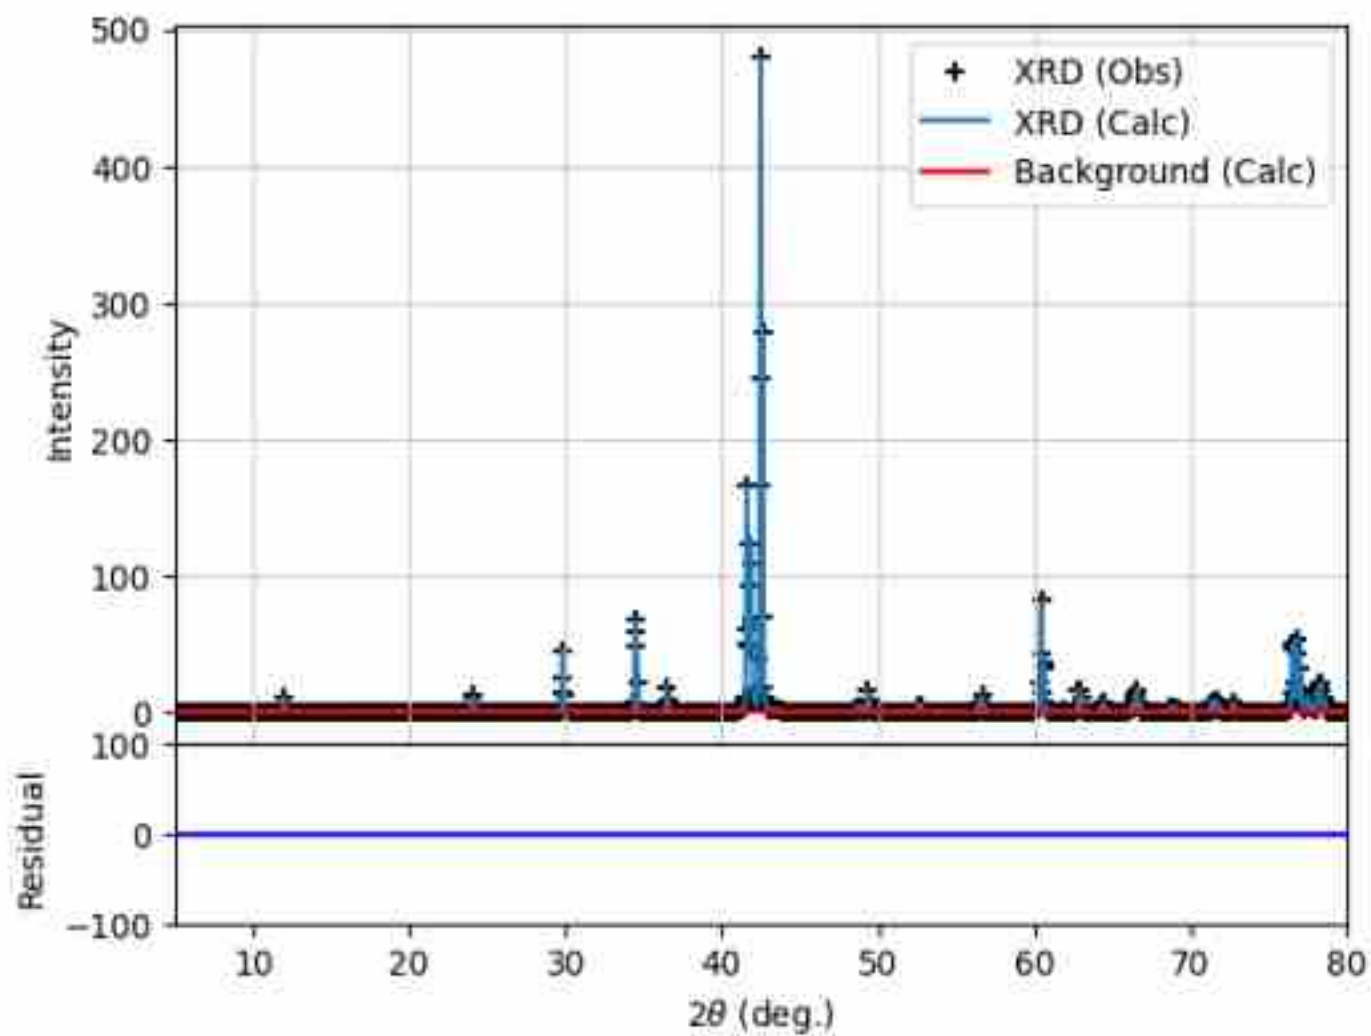

| RMSE before RR | Rwp     | RMSE after RR |
|----------------|---------|---------------|
| 0.018          | 0.00342 | 0.00027       |



# In<sub>3</sub>Pt<sub>2</sub>

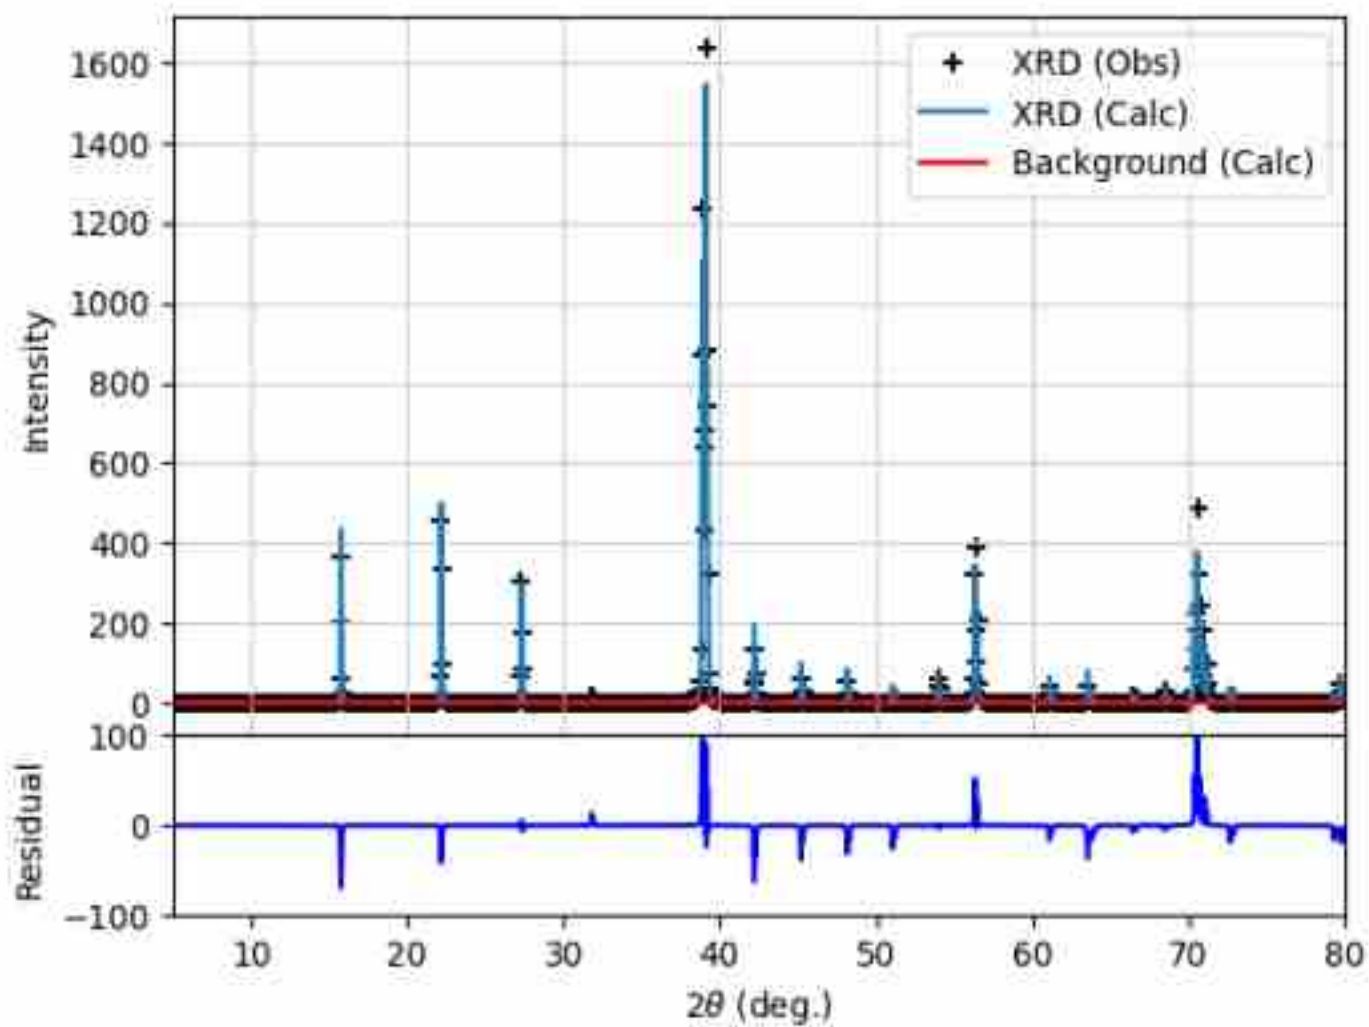

| RMSE before RR | Rwp      | RMSE after RR |
|----------------|----------|---------------|
| 0.018          | 24.21444 | 0.05787       |

# K1Ce1F4

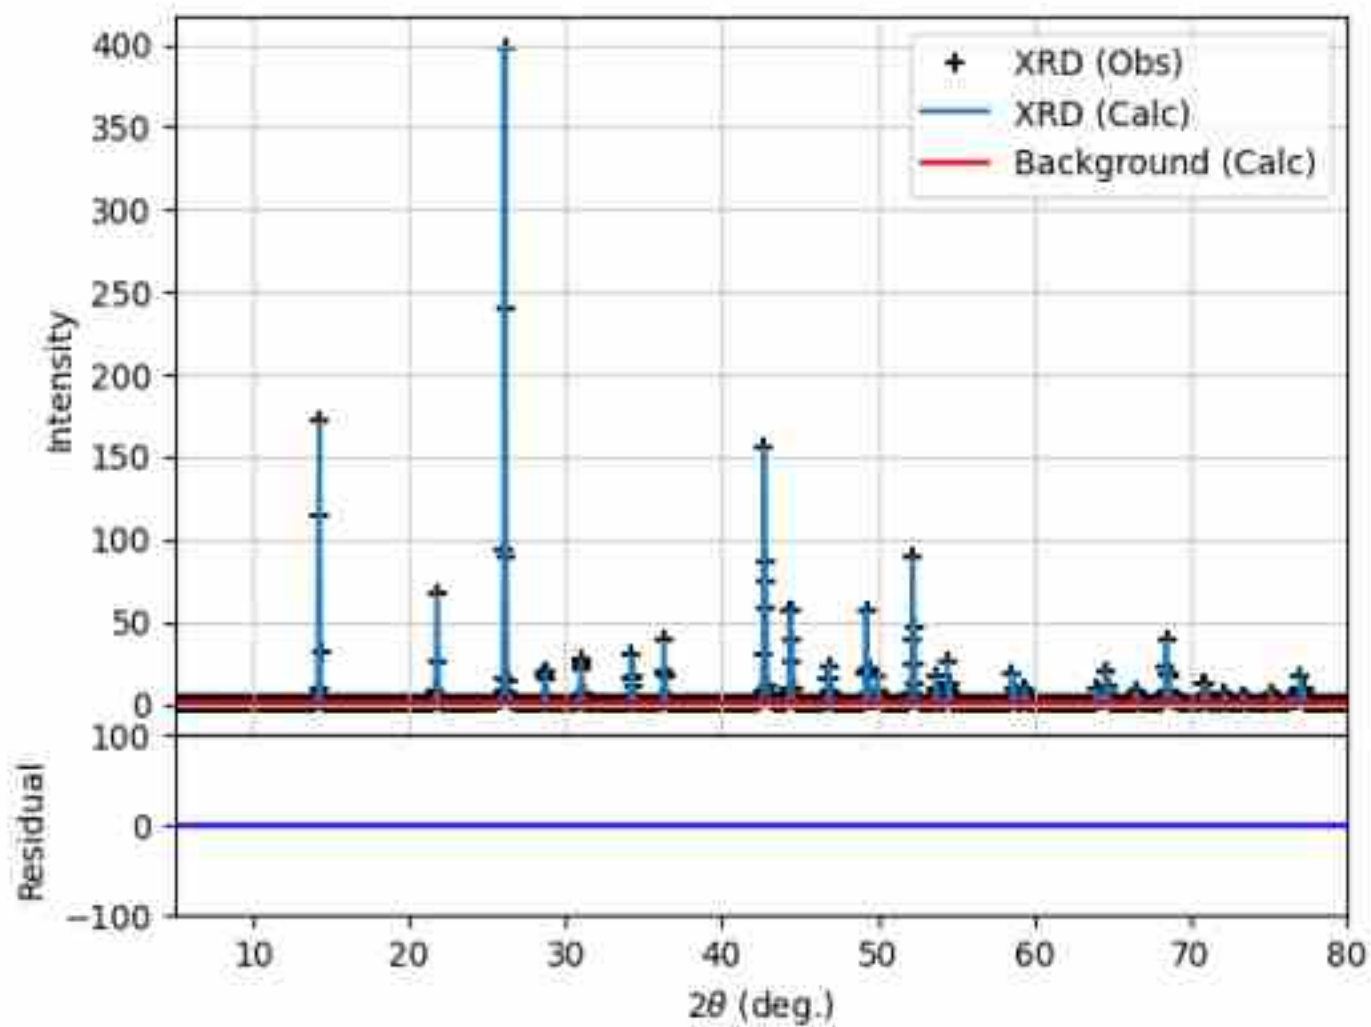

| RMSE before RR | Rwp     | RMSE after RR |
|----------------|---------|---------------|
| 0.018          | 0.00429 | 0.00114       |

# K<sub>2</sub>Er<sub>2</sub>Be<sub>2</sub>F<sub>12</sub>

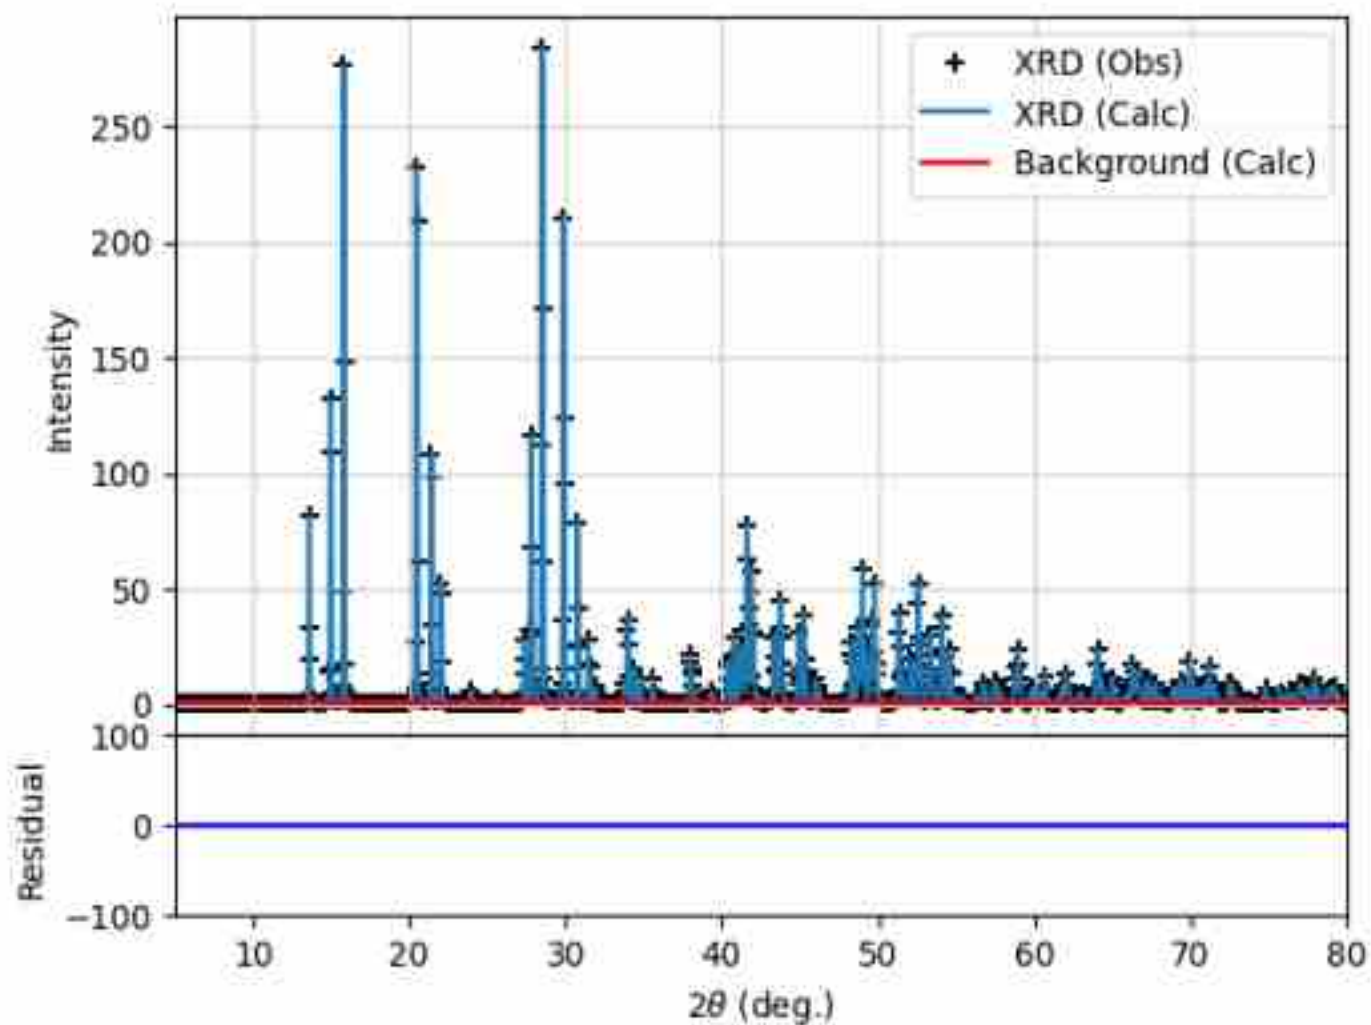

| RMSE before RR | Rwp     | RMSE after RR |
|----------------|---------|---------------|
| 0.018          | 0.00338 | 0.00121       |

# K<sub>2</sub>Fe<sub>4</sub>S<sub>6</sub>

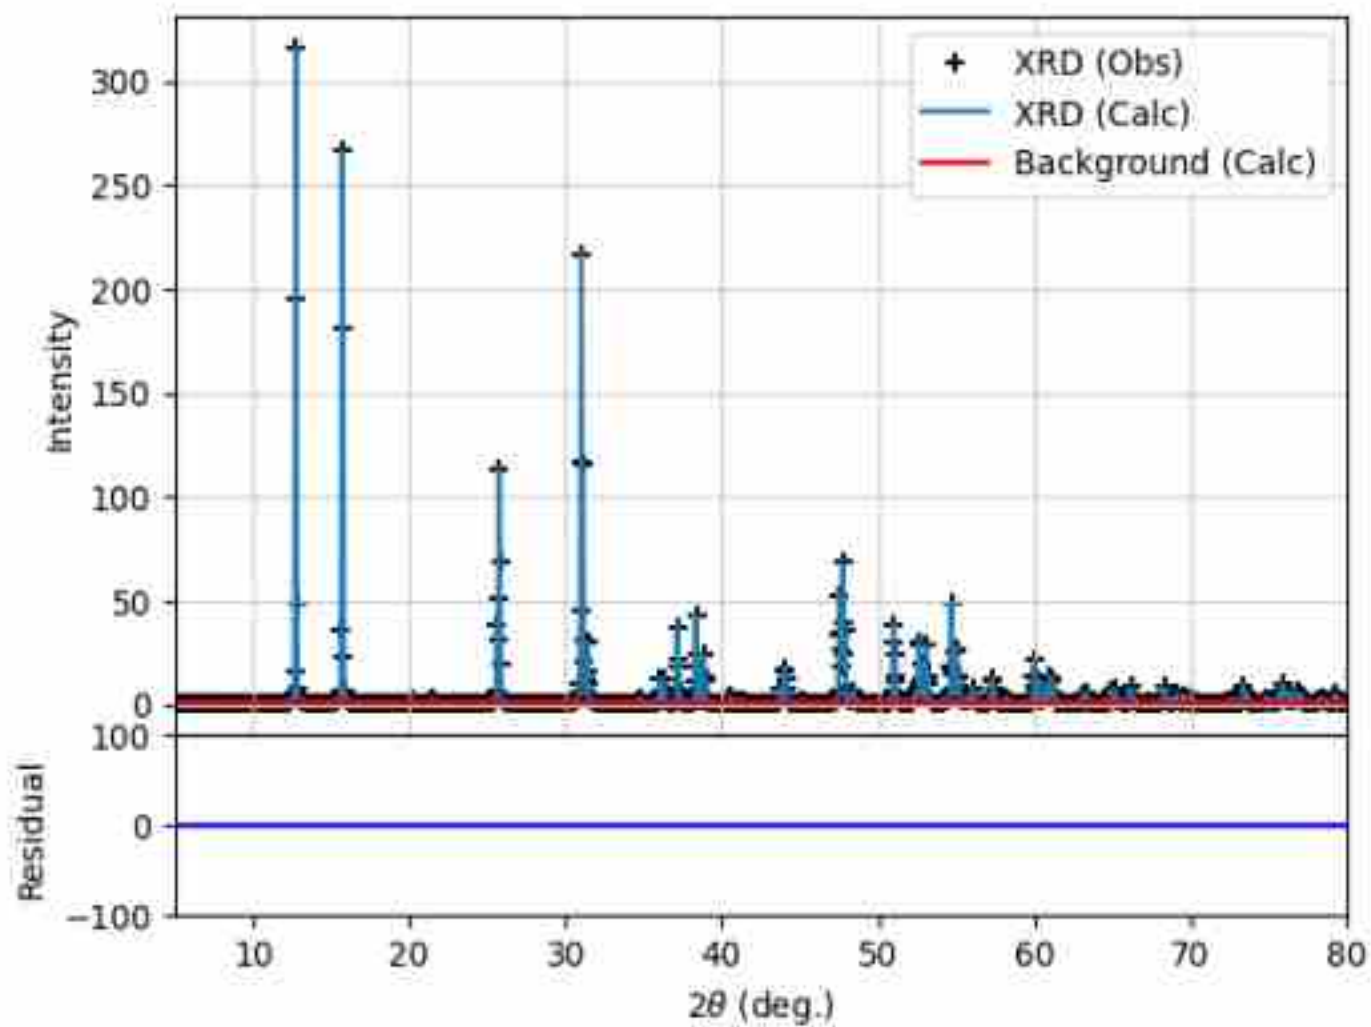

| RMSE before RR | Rwp     | RMSE after RR |
|----------------|---------|---------------|
| 0.018          | 0.00371 | 0.00055       |

# K<sub>2</sub>Hg<sub>2</sub>As<sub>2</sub>

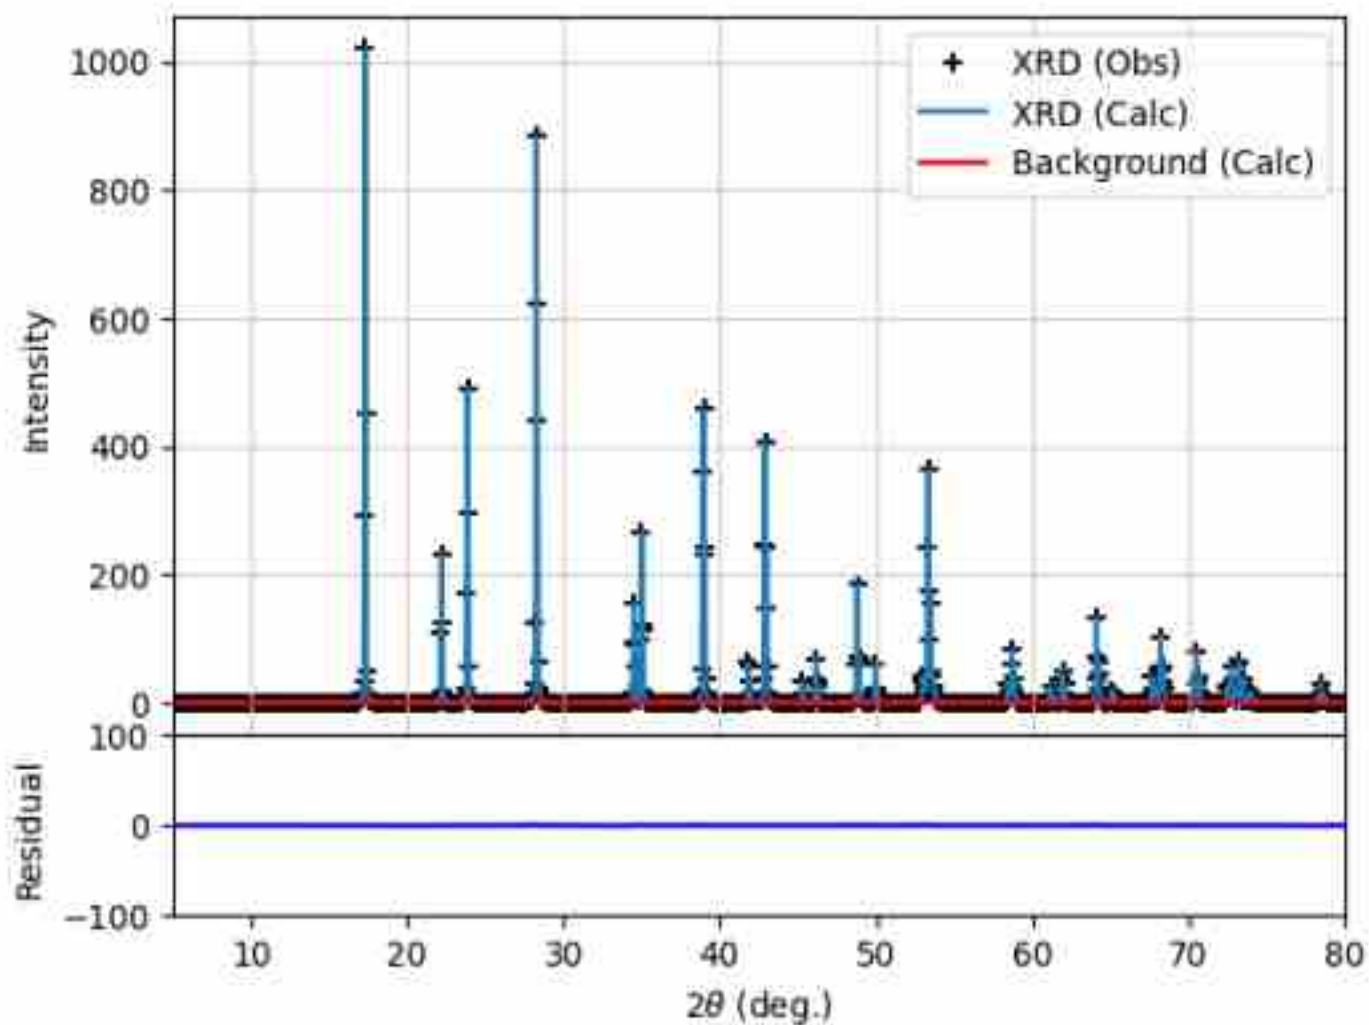

| RMSE before RR | Rwp     | RMSE after RR |
|----------------|---------|---------------|
| 0.018          | 0.54934 | 0.01004       |

# K4V2Ag2S8

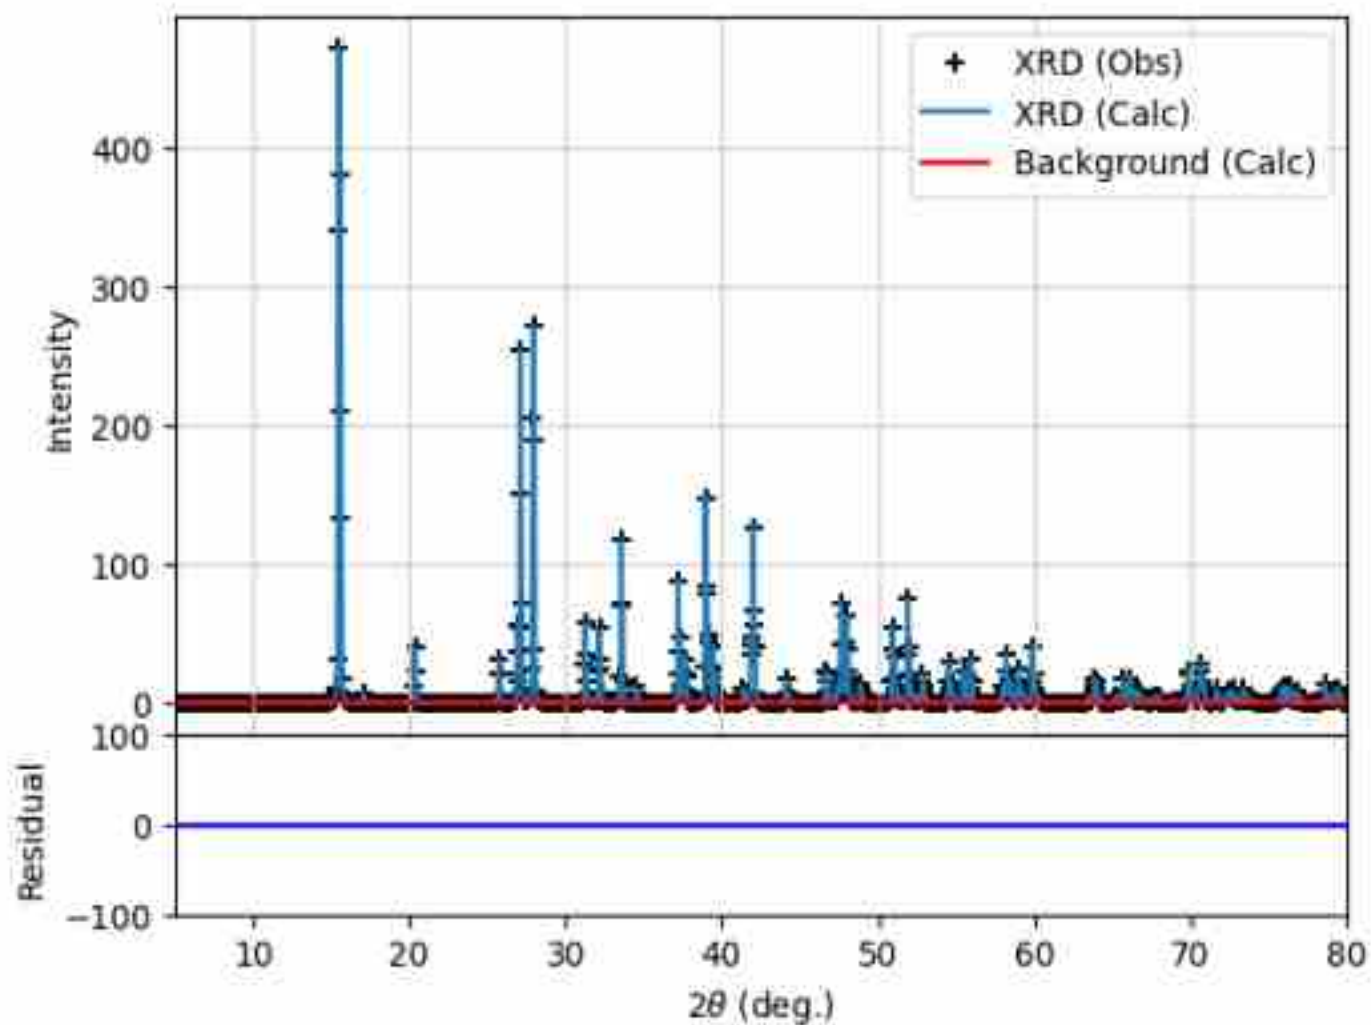

| RMSE before RR | Rwp     | RMSE after RR |
|----------------|---------|---------------|
| 0.018          | 0.00294 | 0.00057       |

# K5Sb4

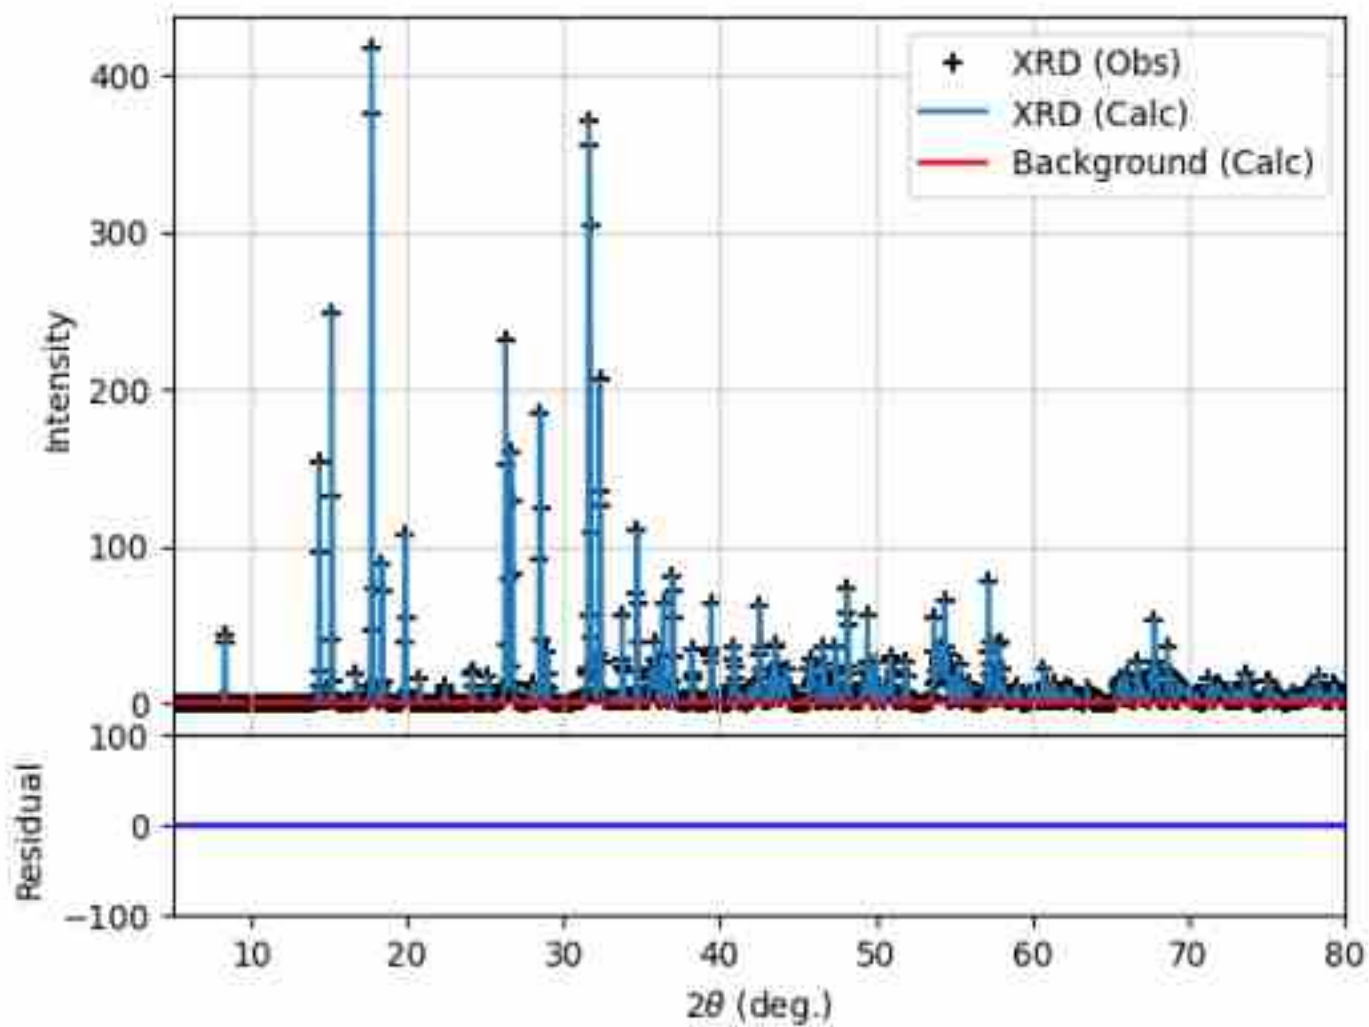

| RMSE before RR | Rwp     | RMSE after RR |
|----------------|---------|---------------|
| 0.018          | 0.00274 | 0.00034       |

# La1Ce1Co10

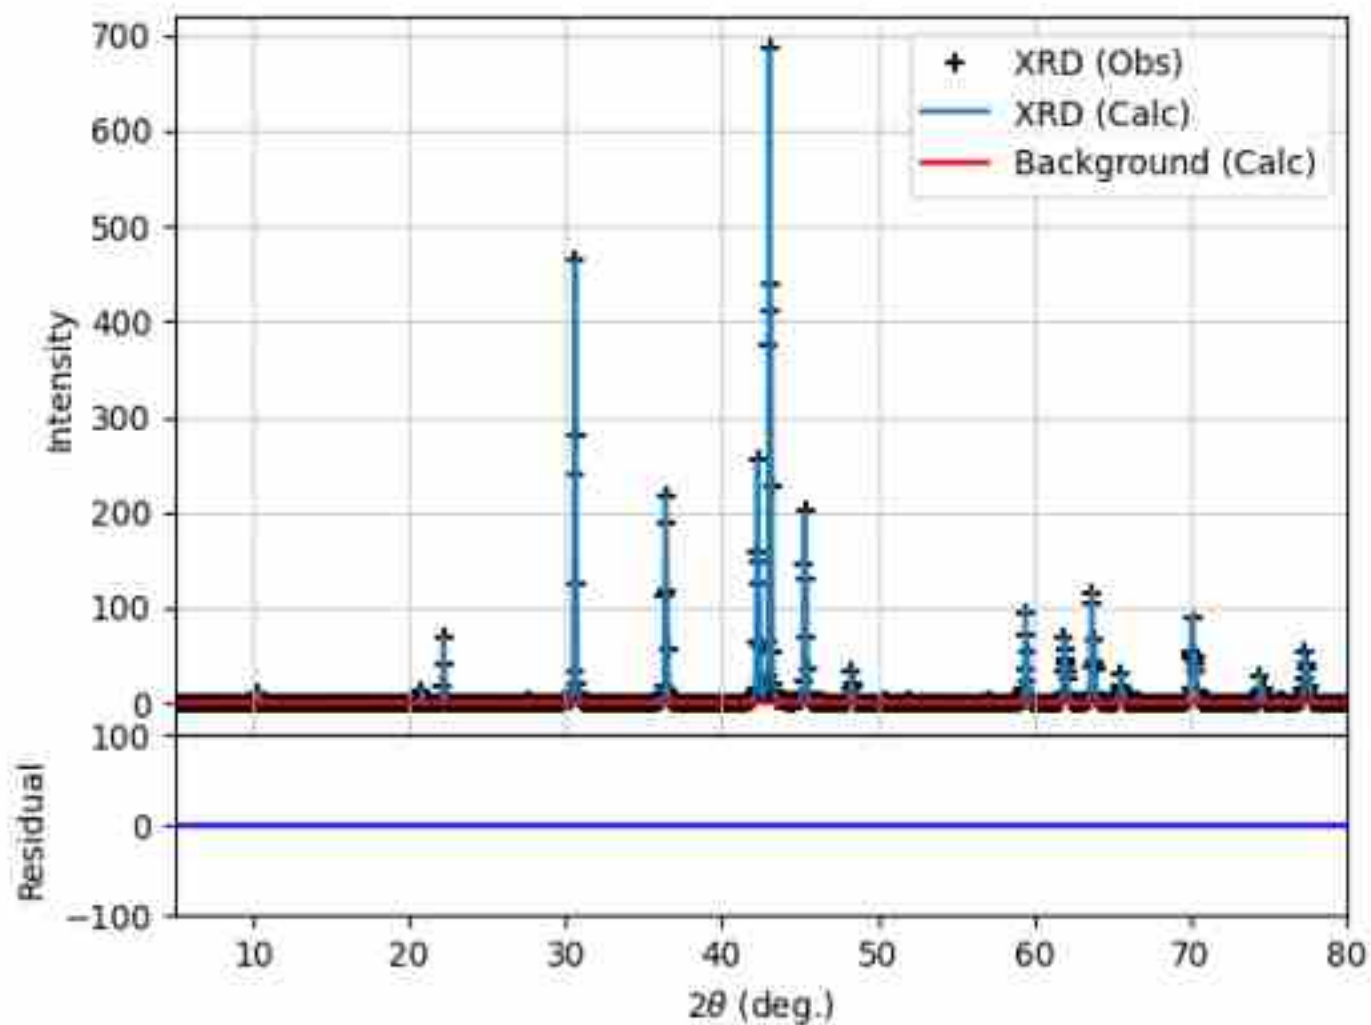

| RMSE before RR | Rwp     | RMSE after RR |
|----------------|---------|---------------|
| 0.018          | 0.00363 | 0.00068       |



# La1Gd3Br4O4

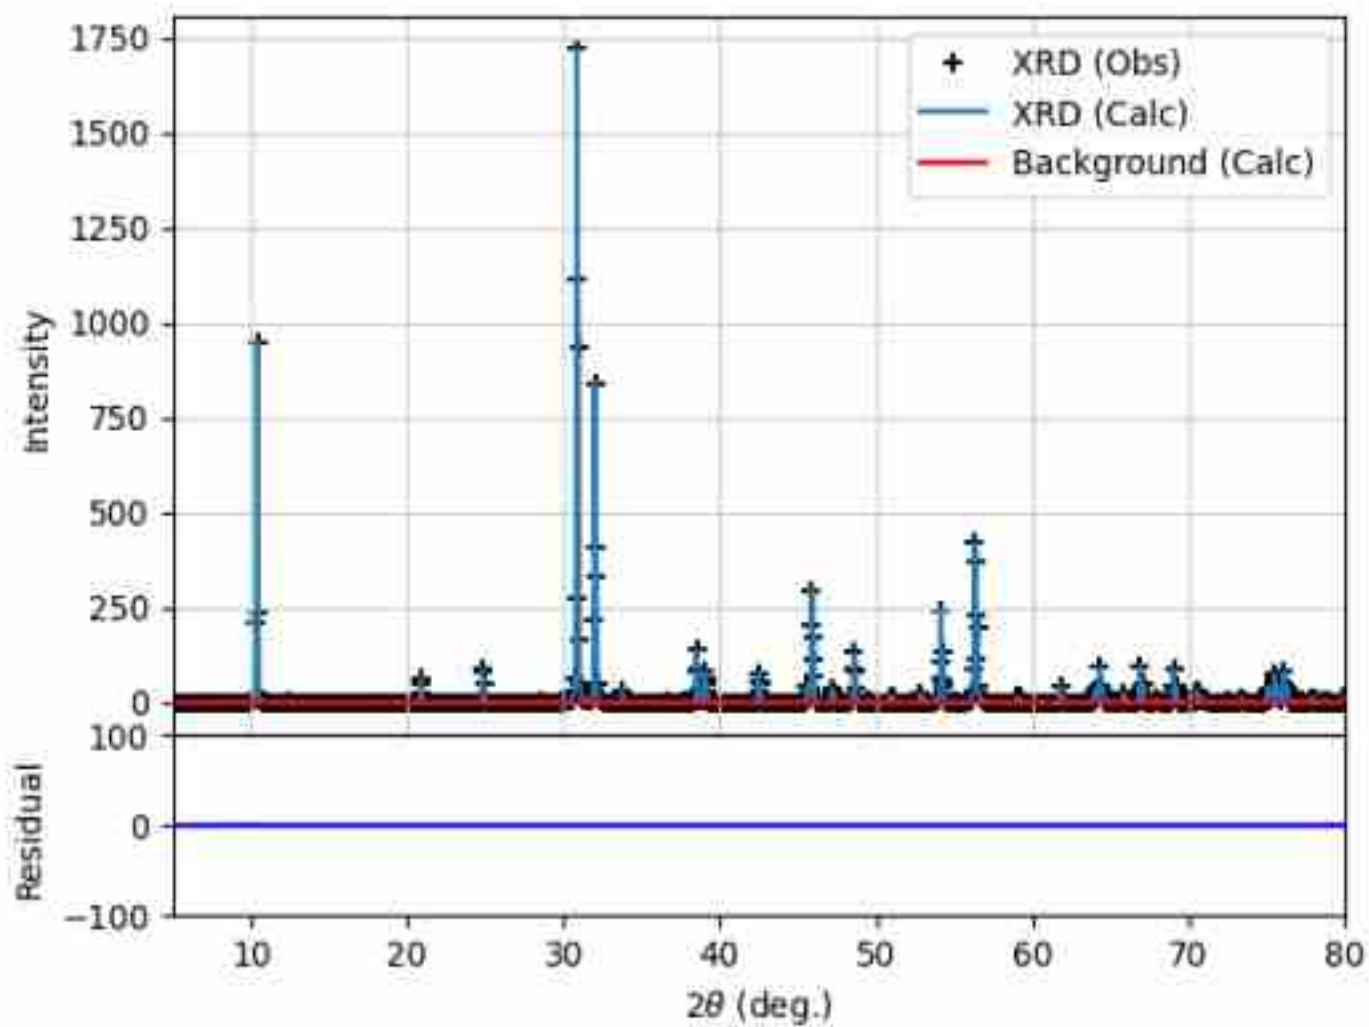

| RMSE before RR | Rwp     | RMSE after RR |
|----------------|---------|---------------|
| 0.018          | 0.19581 | 0.02875       |

# La<sub>1</sub>Ni<sub>4</sub>Pt<sub>1</sub>

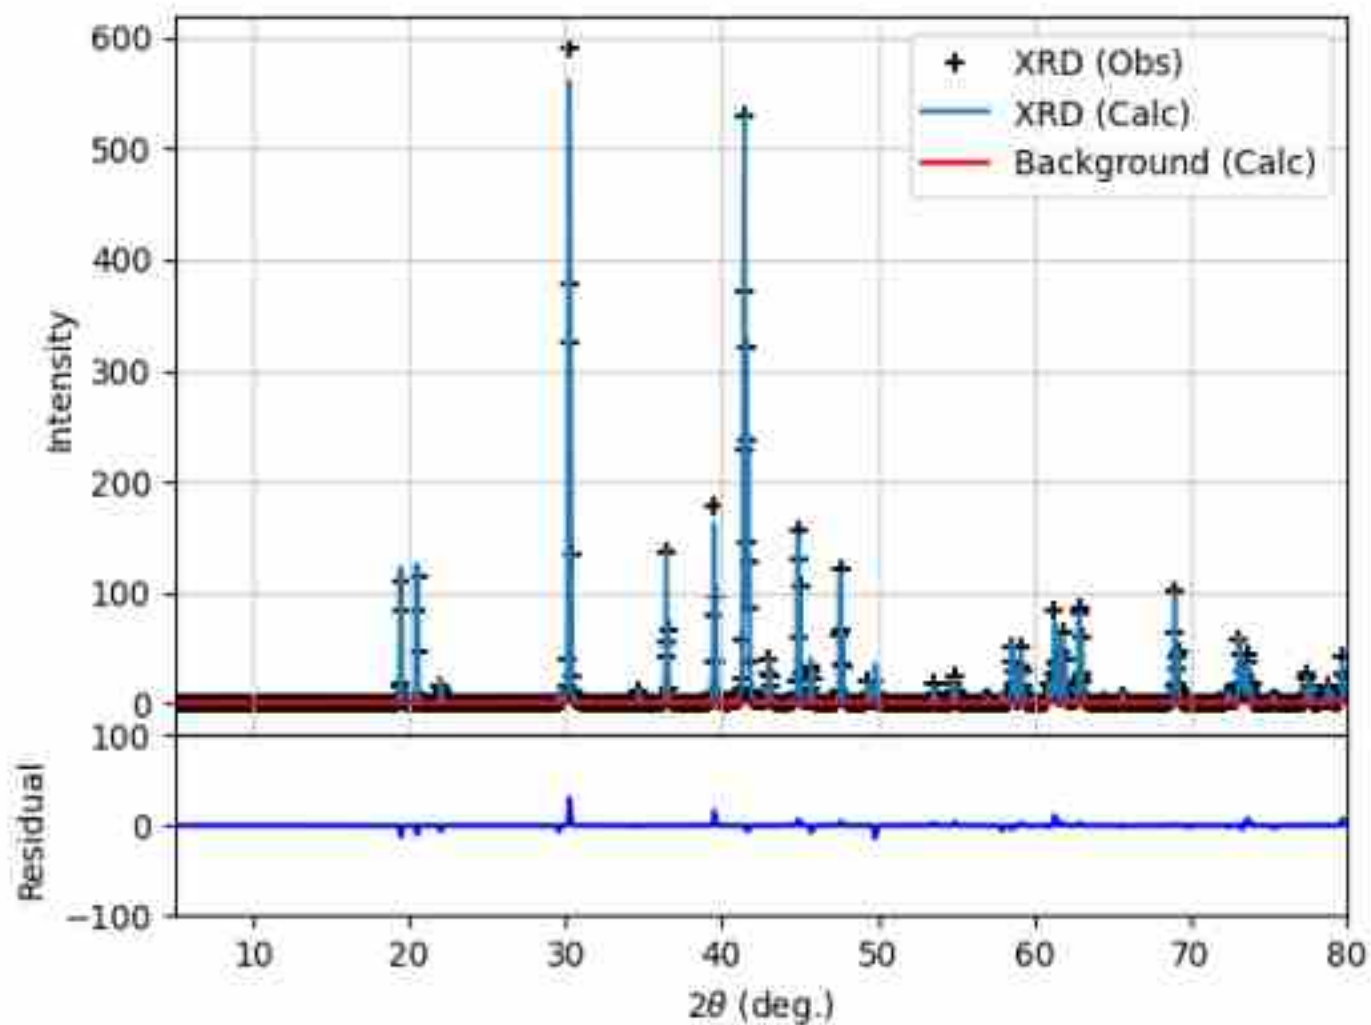

| RMSE before RR | Rwp      | RMSE after RR |
|----------------|----------|---------------|
| 0.018          | 10.89911 | 0.01799       |

# La1Sn6Ru4

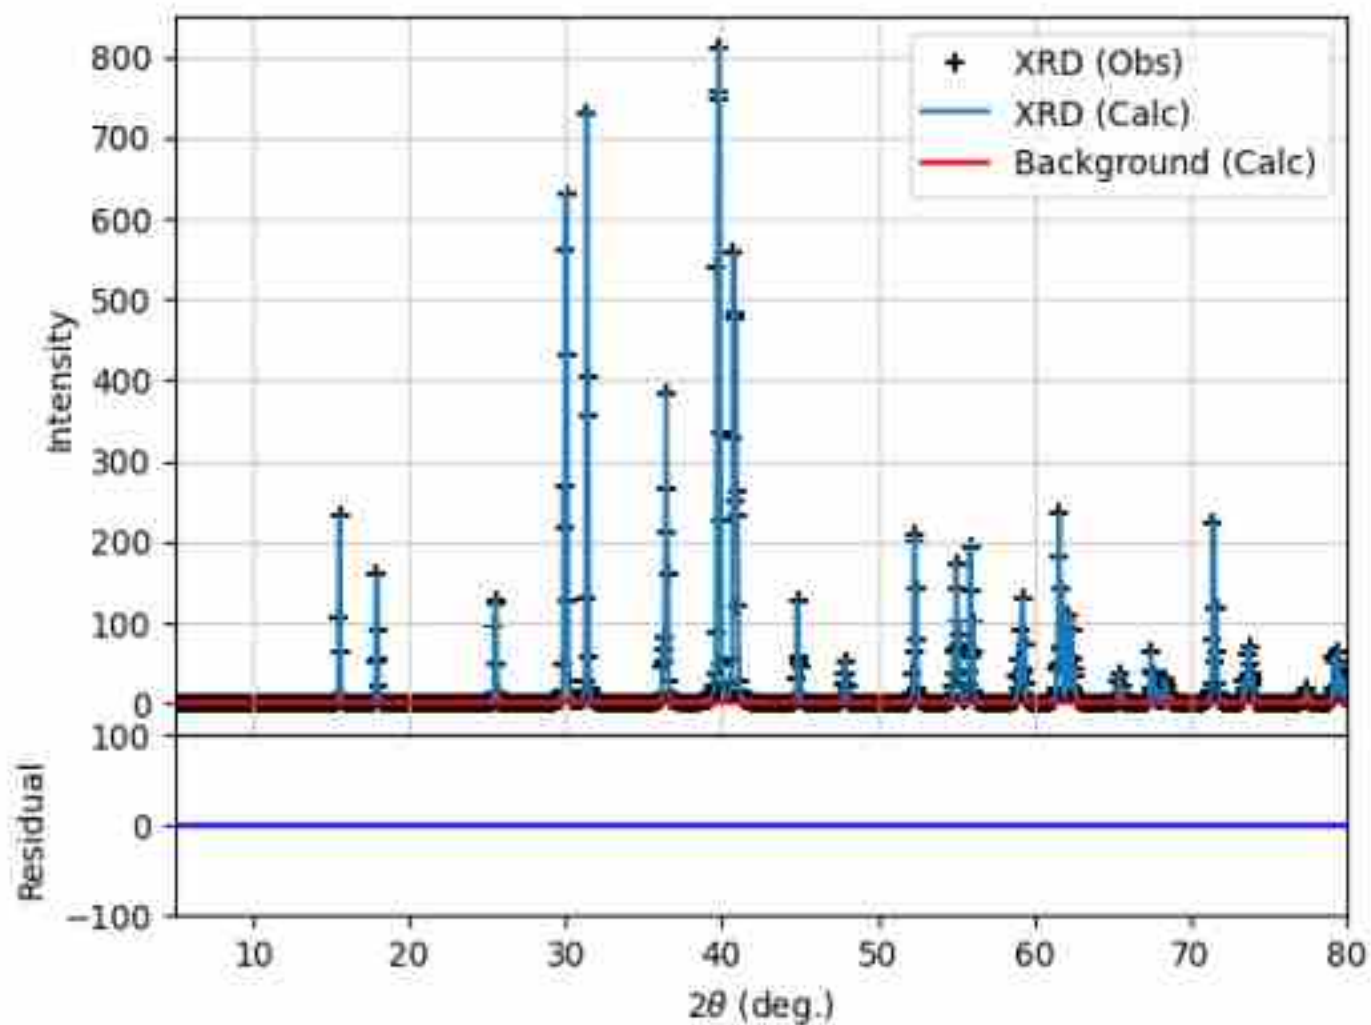

| RMSE before RR | Rwp     | RMSE after RR |
|----------------|---------|---------------|
| 0.018          | 0.00312 | 0.00055       |

# La<sub>2</sub>B<sub>4</sub>O<sub>s</sub><sub>4</sub>

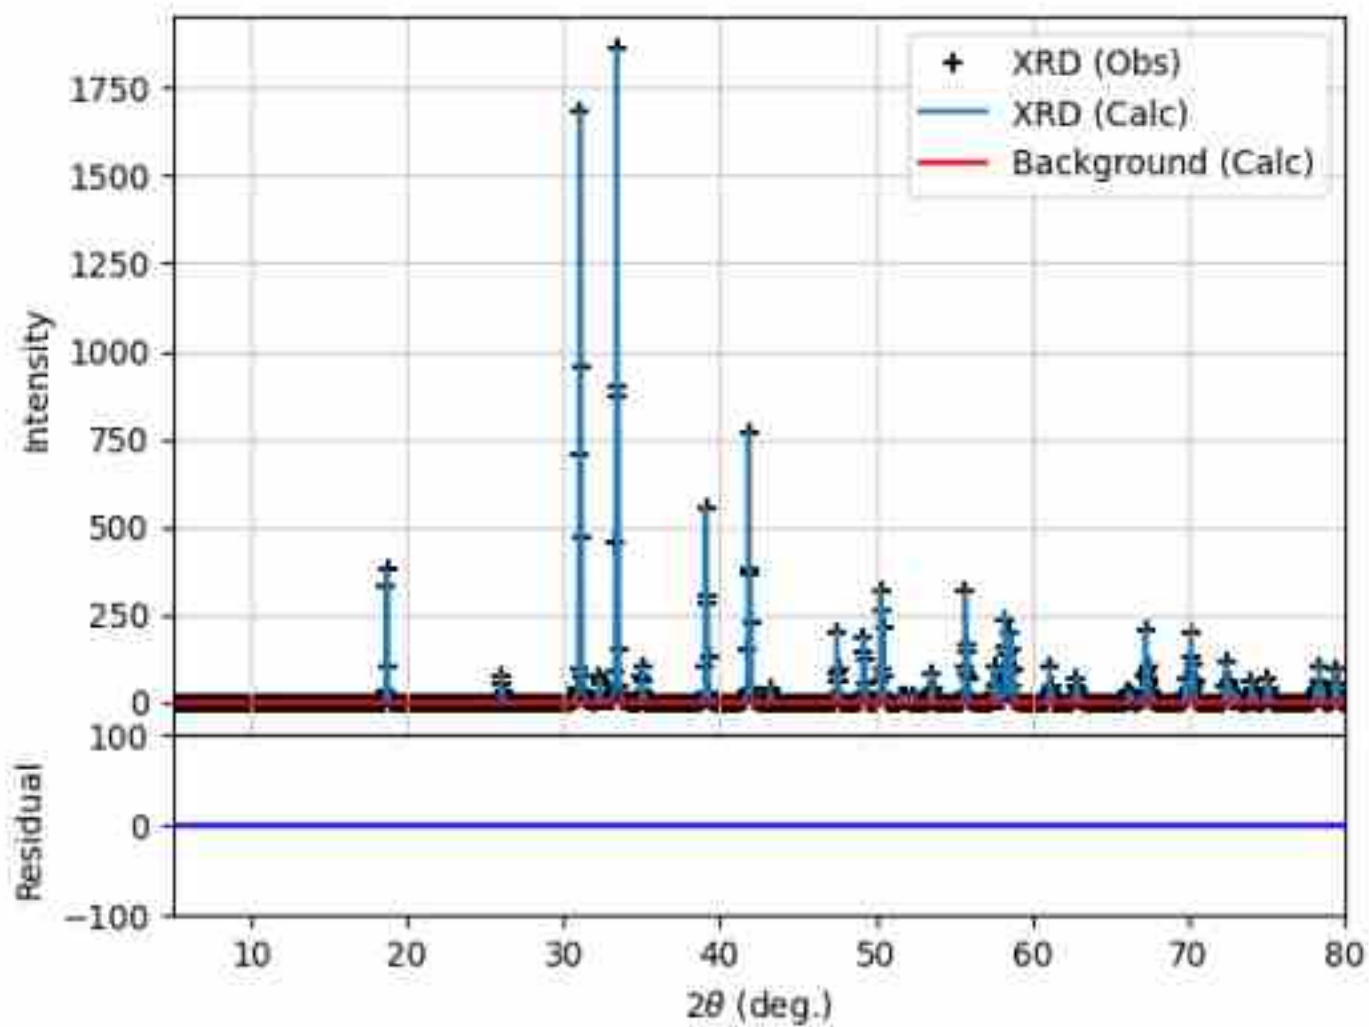

| RMSE before RR | Rwp     | RMSE after RR |
|----------------|---------|---------------|
| 0.018          | 0.00367 | 0.00164       |

# La<sub>2</sub>Mg<sub>4</sub>Ni<sub>2</sub>

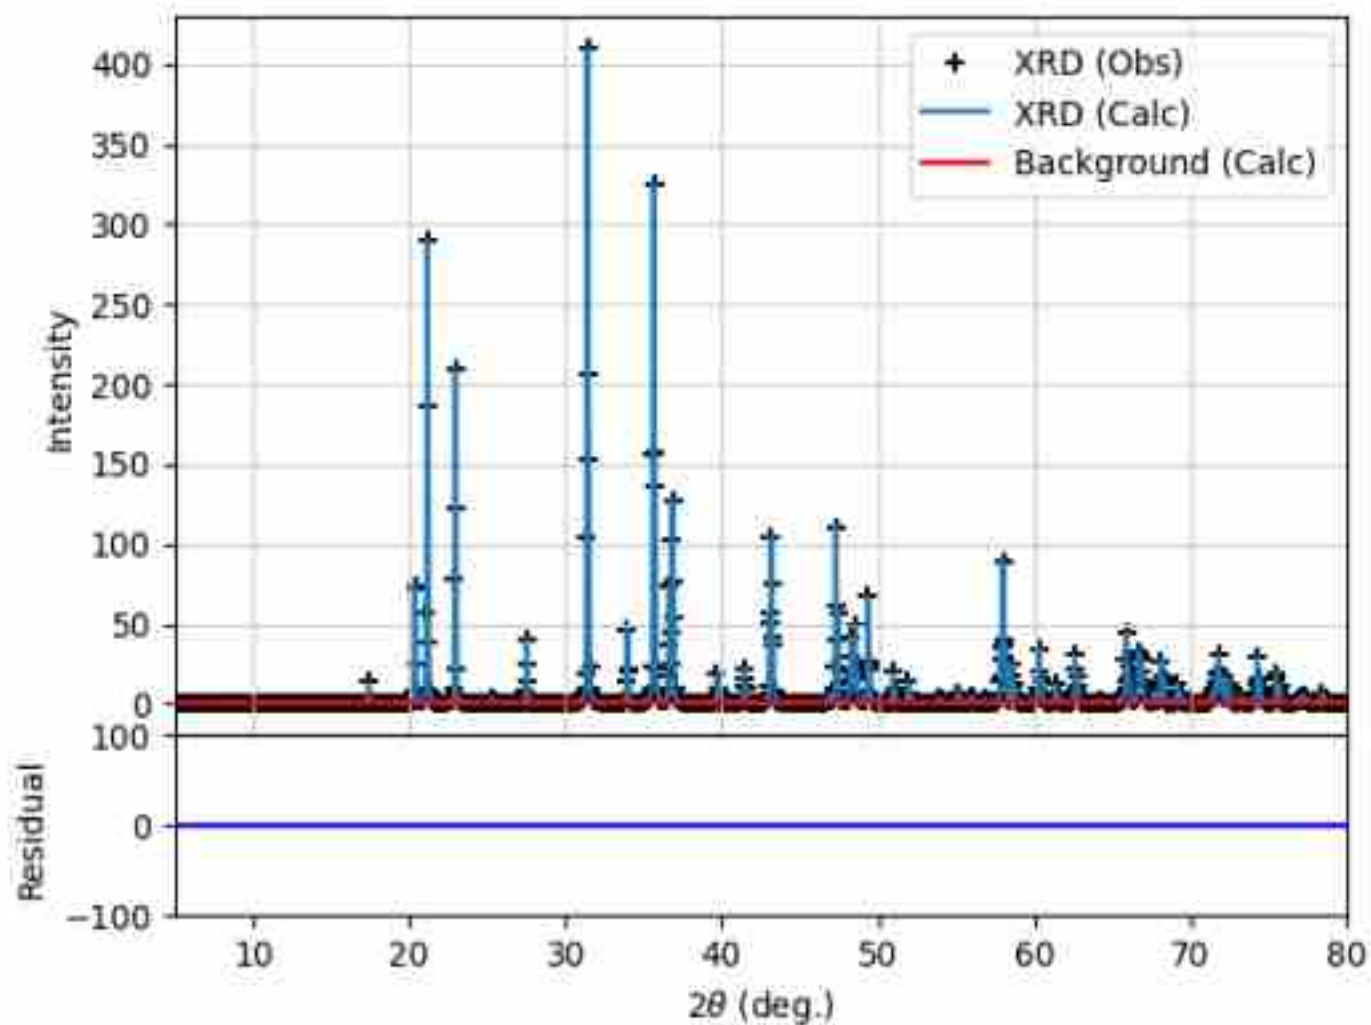

| RMSE before RR | Rwp     | RMSE after RR |
|----------------|---------|---------------|
| 0.018          | 0.00379 | 0.00054       |

# La<sub>3</sub>Y<sub>1</sub>Mn<sub>4</sub>Si<sub>4</sub>

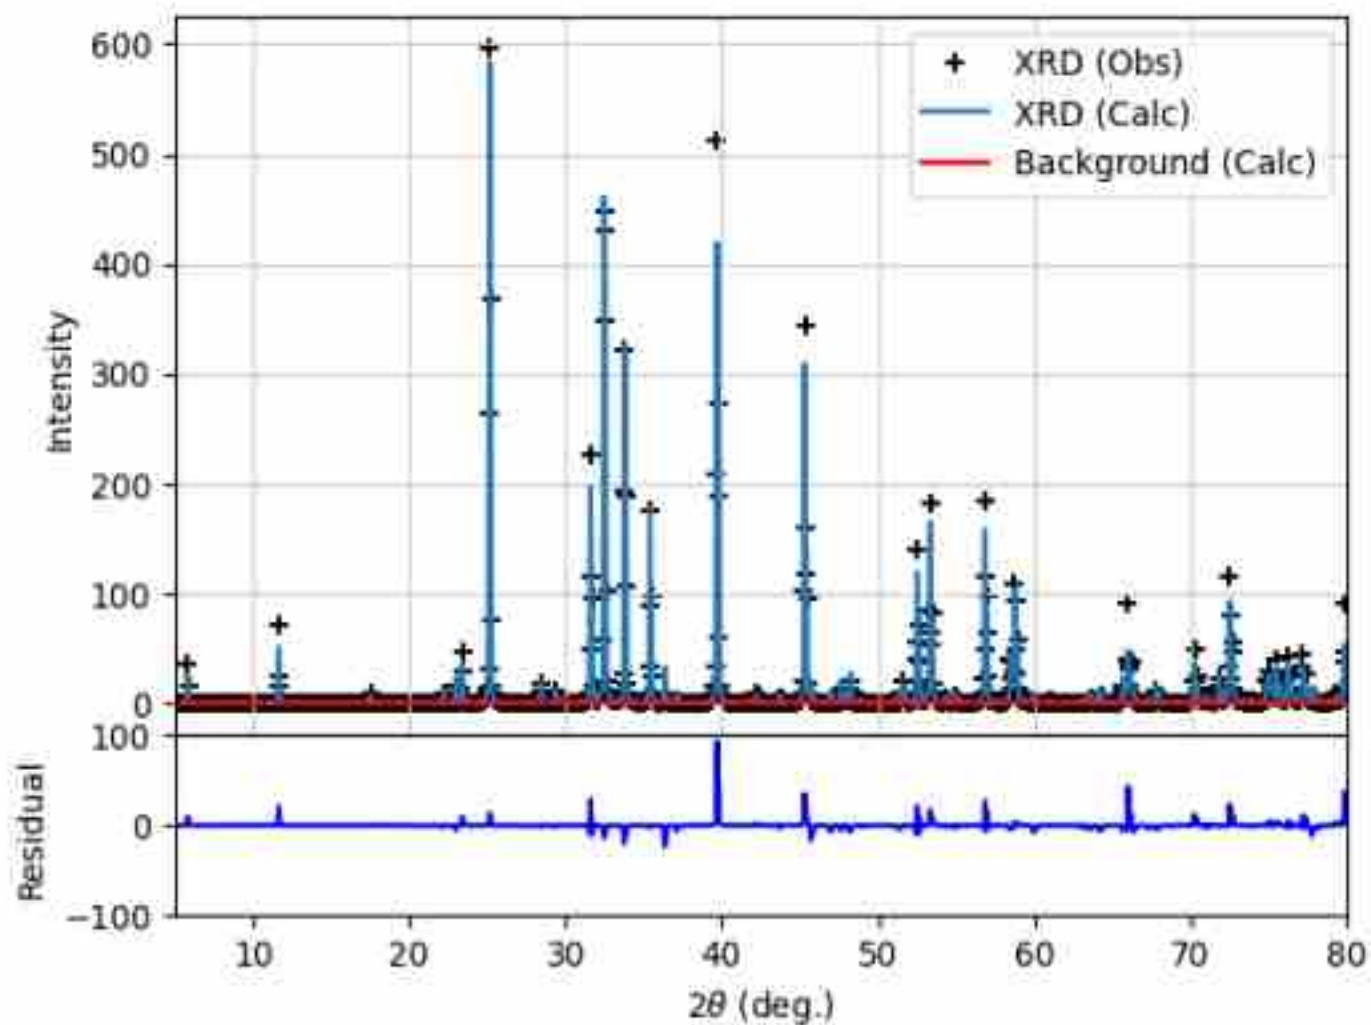

| RMSE before RR | Rwp      | RMSE after RR |
|----------------|----------|---------------|
| 0.018          | 24.22347 | 0.03276       |

# La<sub>4</sub>In<sub>4</sub>O<sub>12</sub>

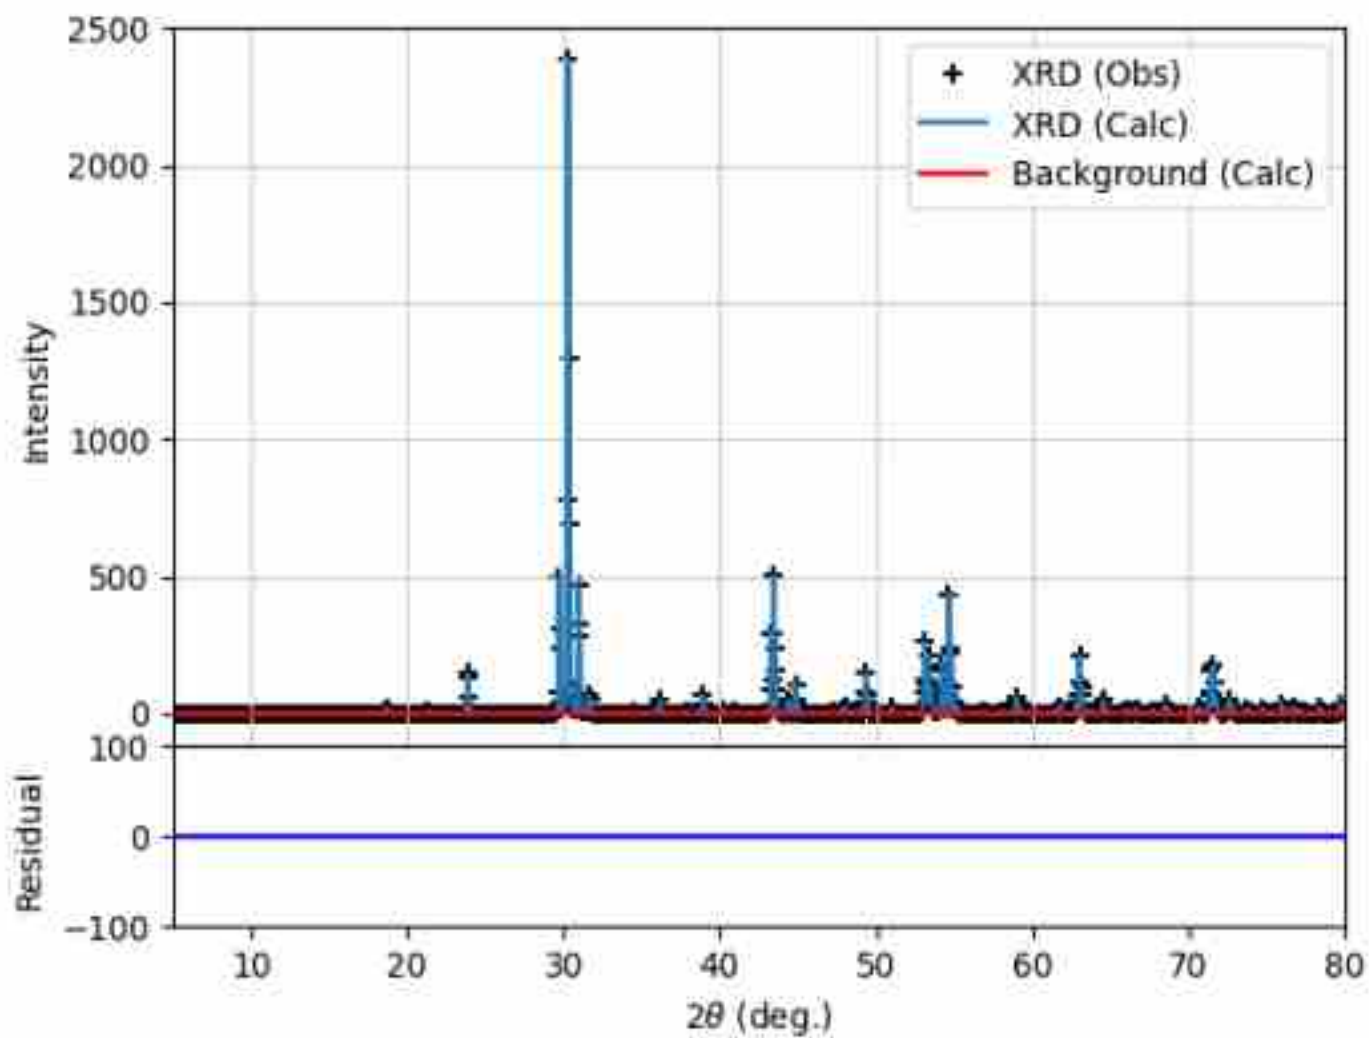

| RMSE before RR | Rwp     | RMSE after RR |
|----------------|---------|---------------|
| 0.018          | 0.00376 | 0.00107       |

# La<sub>4</sub>Ni<sub>2</sub>Ru<sub>2</sub>O<sub>12</sub>

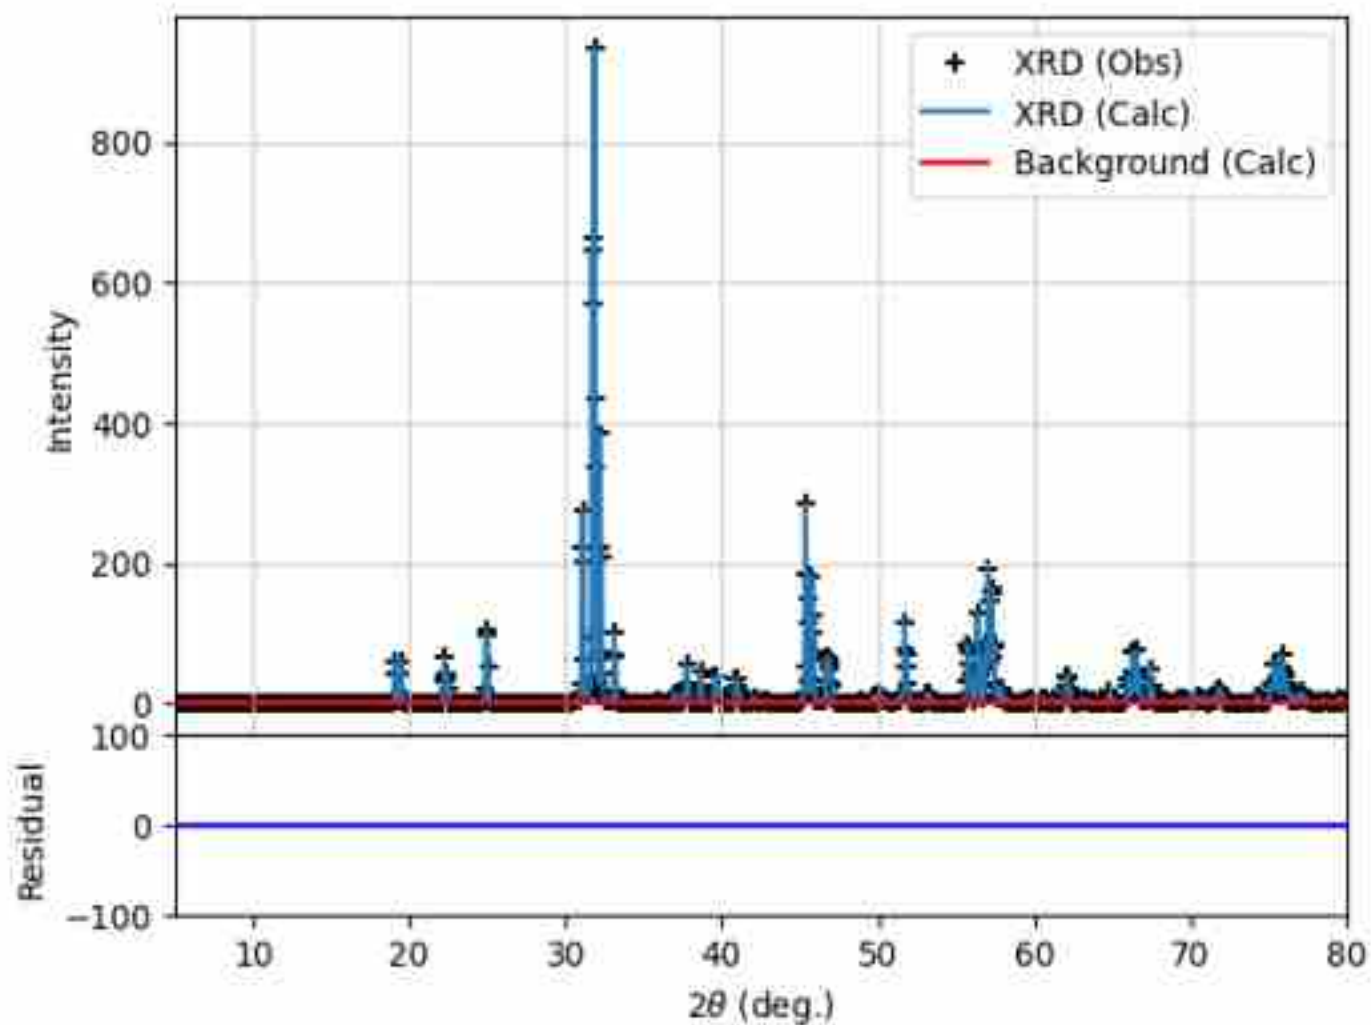

| RMSE before RR | Rwp     | RMSE after RR |
|----------------|---------|---------------|
| 0.018          | 0.00351 | 0.00094       |



# Li1Co6Ge6

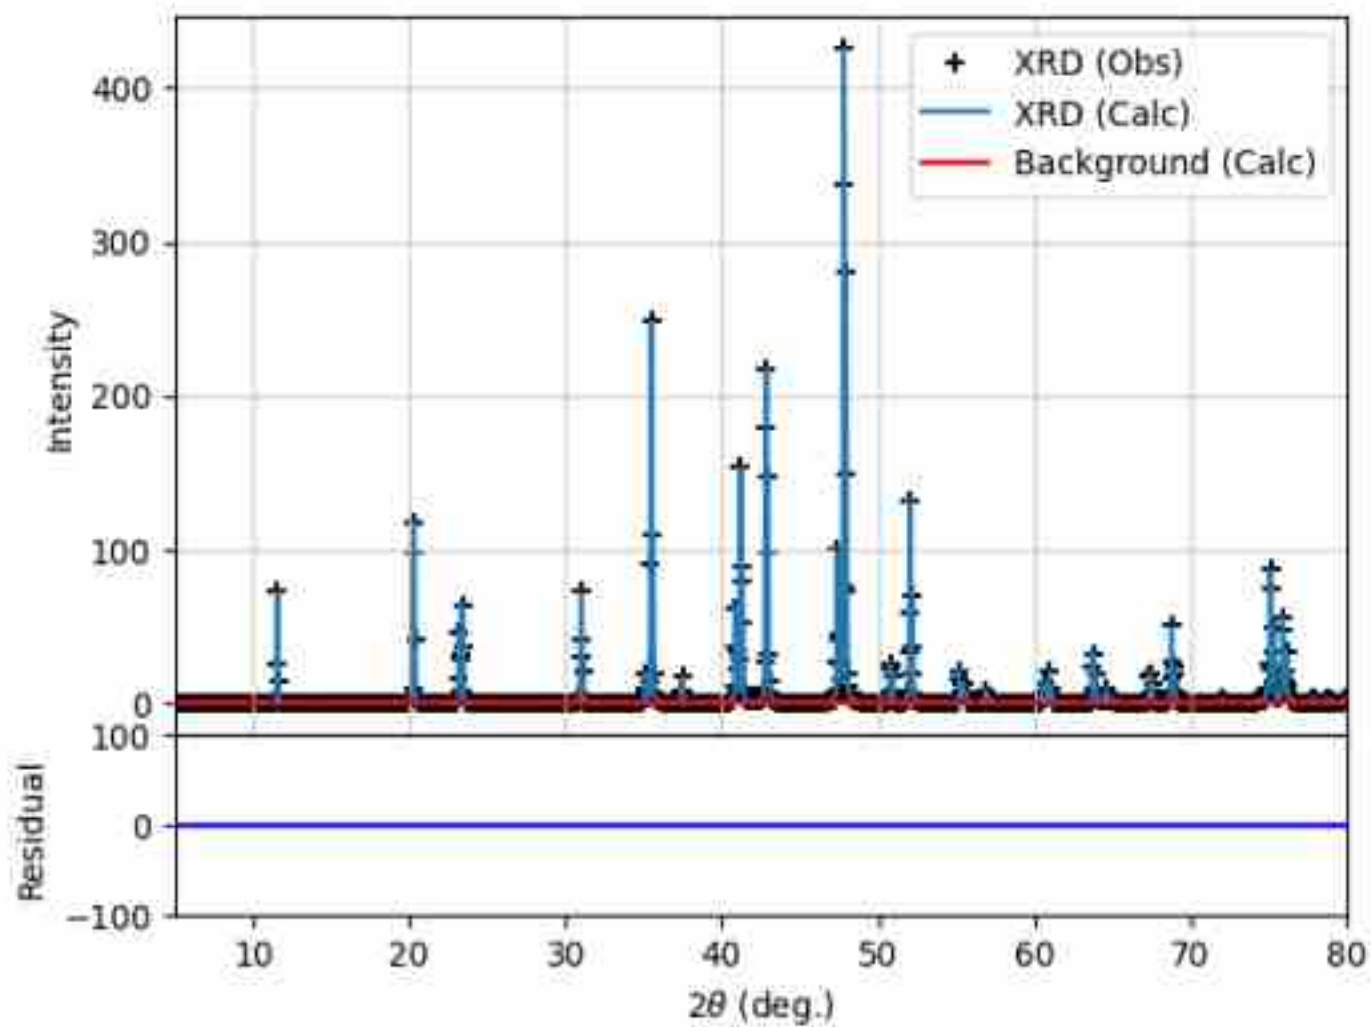

| RMSE before RR | Rwp     | RMSE after RR |
|----------------|---------|---------------|
| 0.018          | 0.00603 | 0.00269       |

# Li<sub>2</sub>H<sub>4</sub>I<sub>2</sub>O<sub>2</sub>

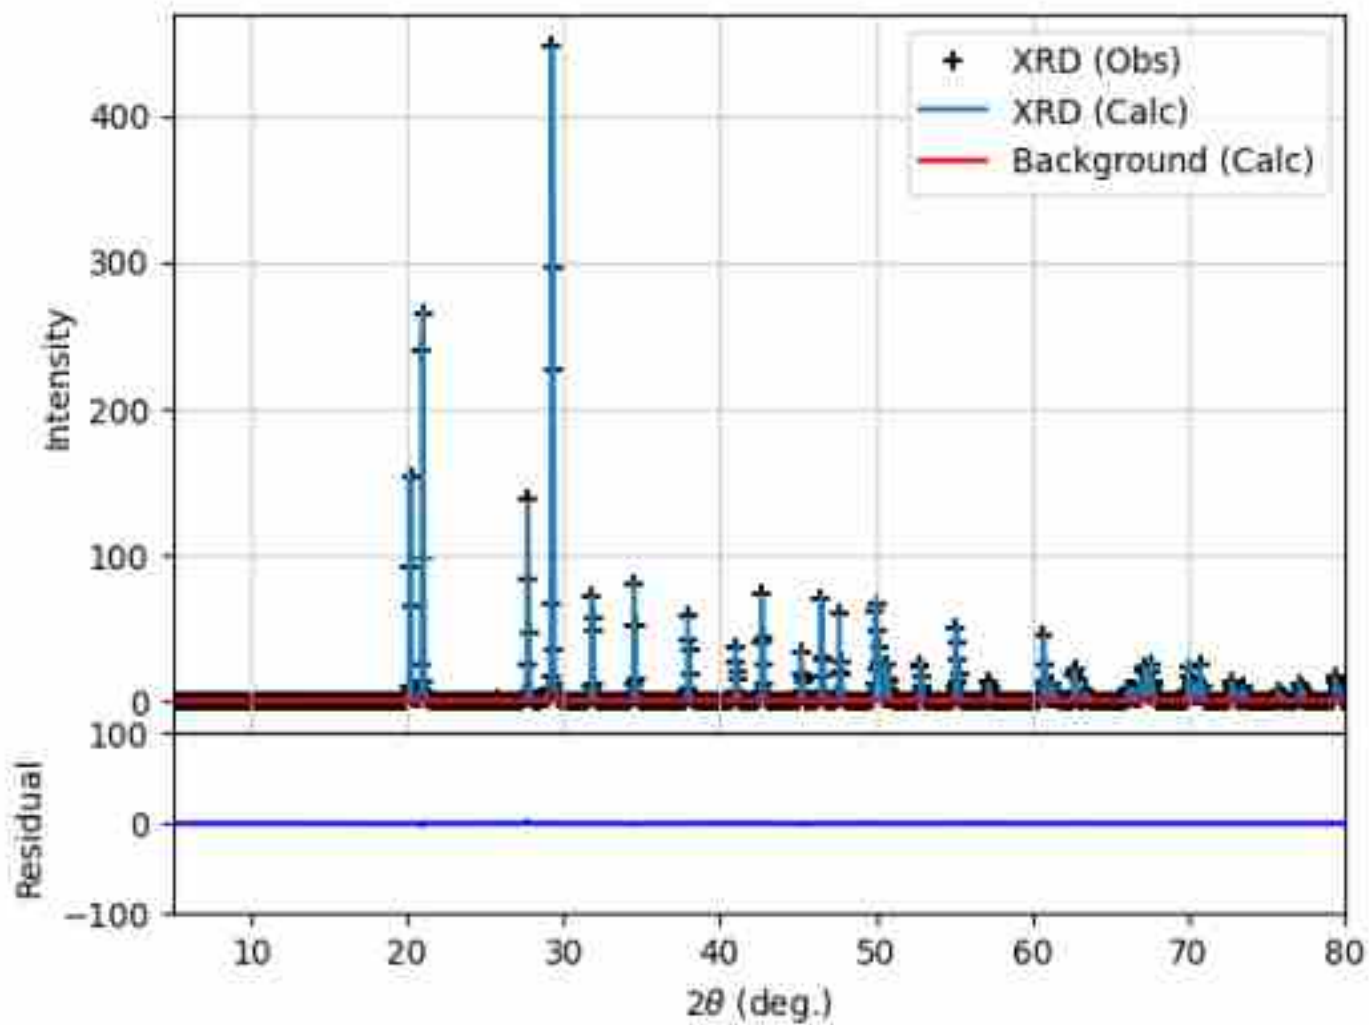

| RMSE before RR | Rwp     | RMSE after RR |
|----------------|---------|---------------|
| 0.018          | 0.83629 | 0.11442       |

# Li<sub>2</sub>TiCr<sub>3</sub>O<sub>8</sub>

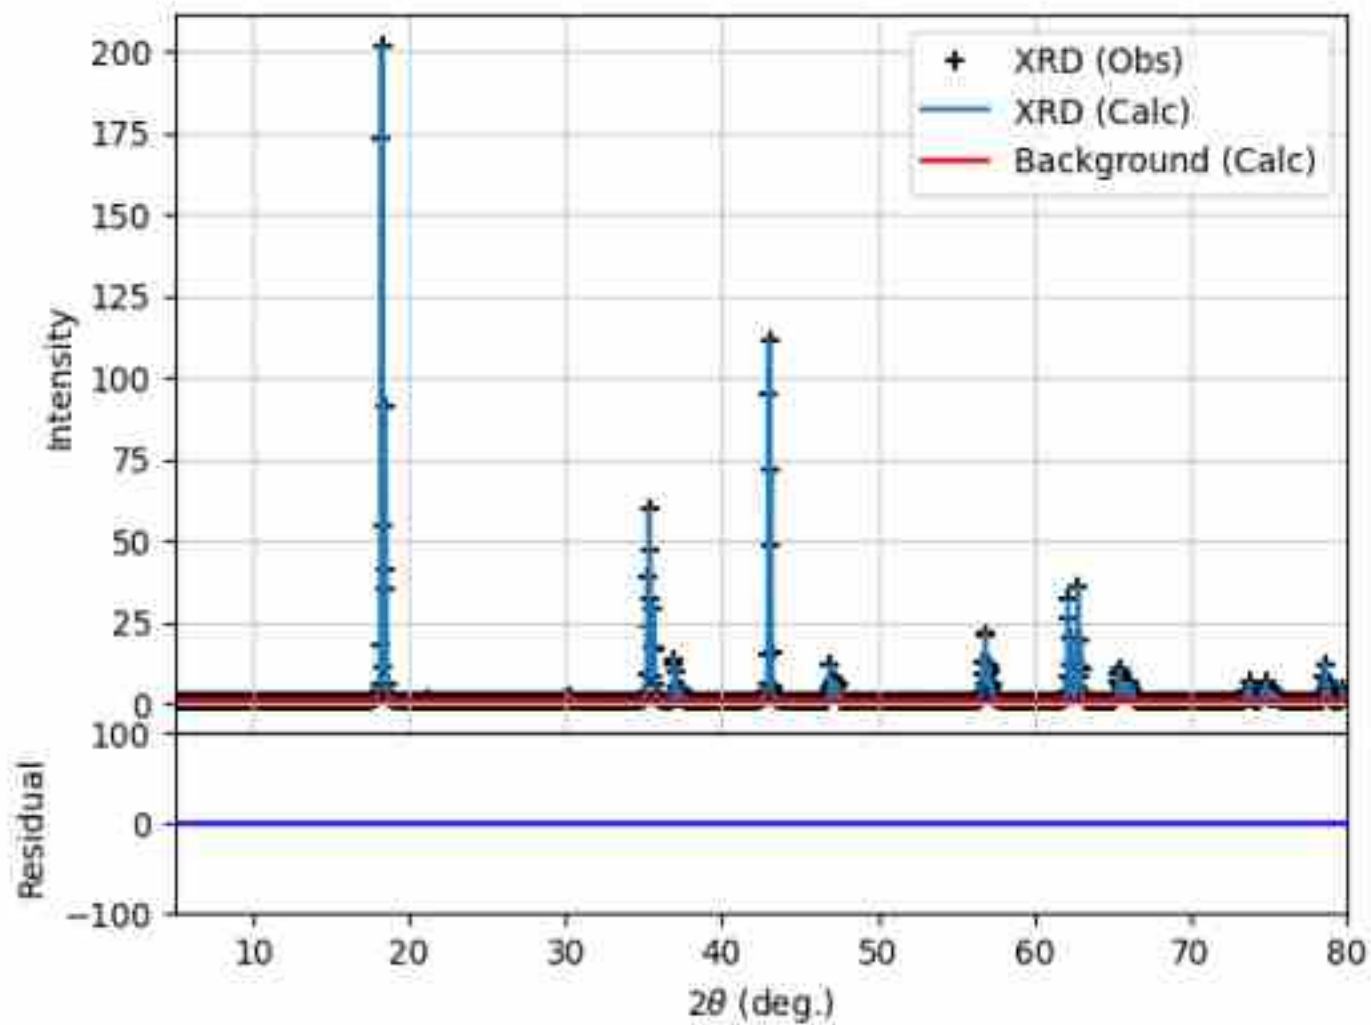

| RMSE before RR | Rwp     | RMSE after RR |
|----------------|---------|---------------|
| 0.018          | 0.00186 | 0.00068       |

# Li<sub>3</sub>Fe<sub>2</sub>Cu<sub>1</sub>O<sub>6</sub>

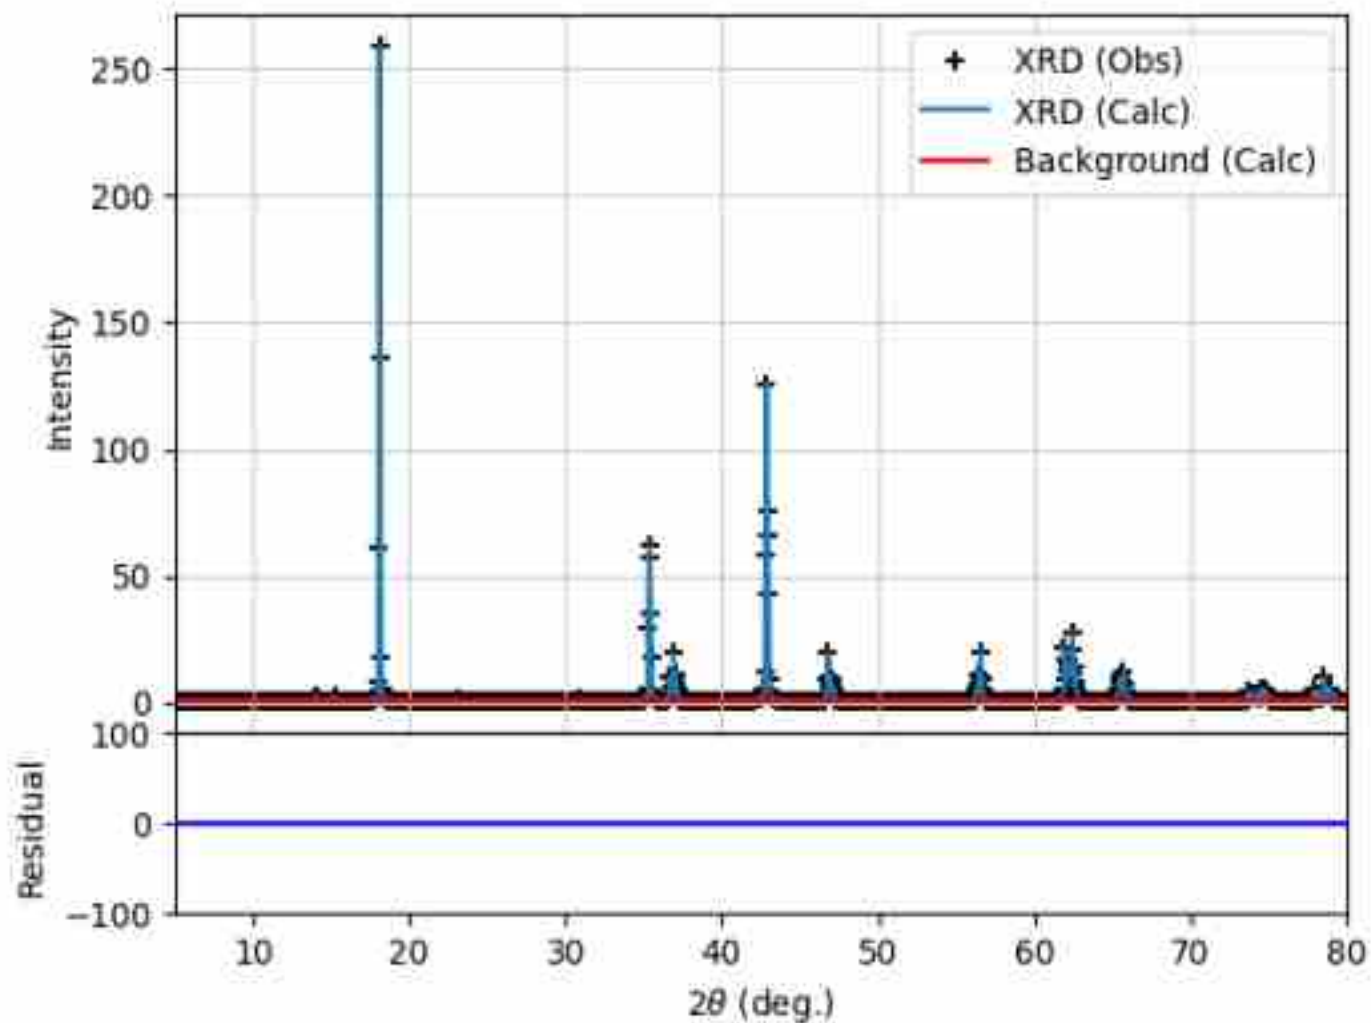

| RMSE before RR | Rwp     | RMSE after RR |
|----------------|---------|---------------|
| 0.018          | 0.00214 | 0.00062       |

# Li<sub>3</sub>Mn<sub>1</sub>Co<sub>4</sub>O<sub>8</sub>

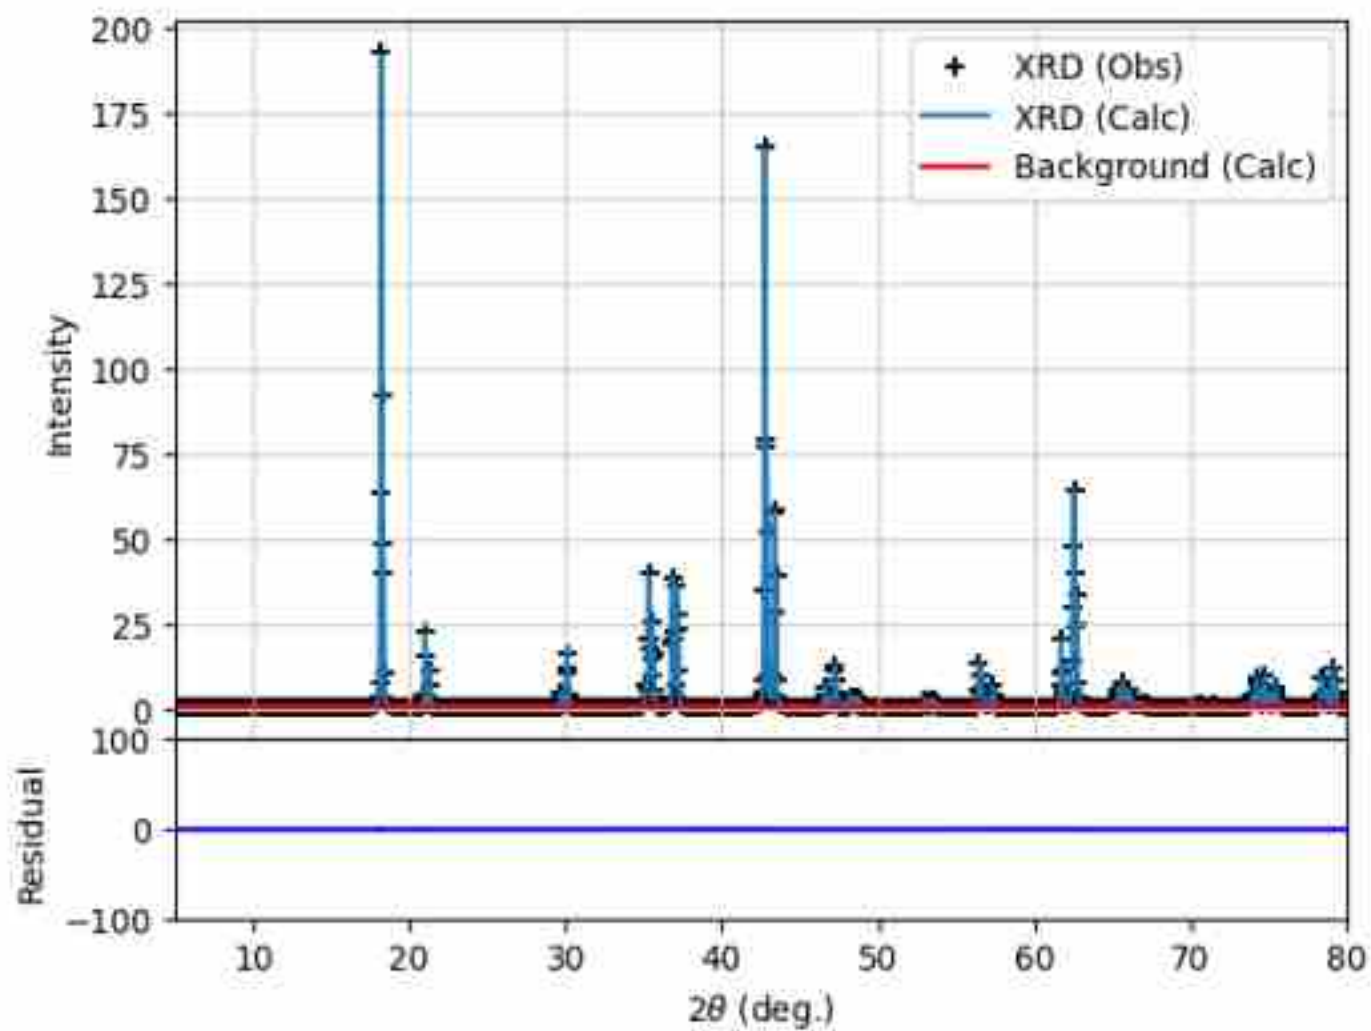

| RMSE before RR | Rwp     | RMSE after RR |
|----------------|---------|---------------|
| 0.018          | 1.00325 | 0.03894       |

# Li<sub>3</sub>Ta<sub>1</sub>O<sub>4</sub>

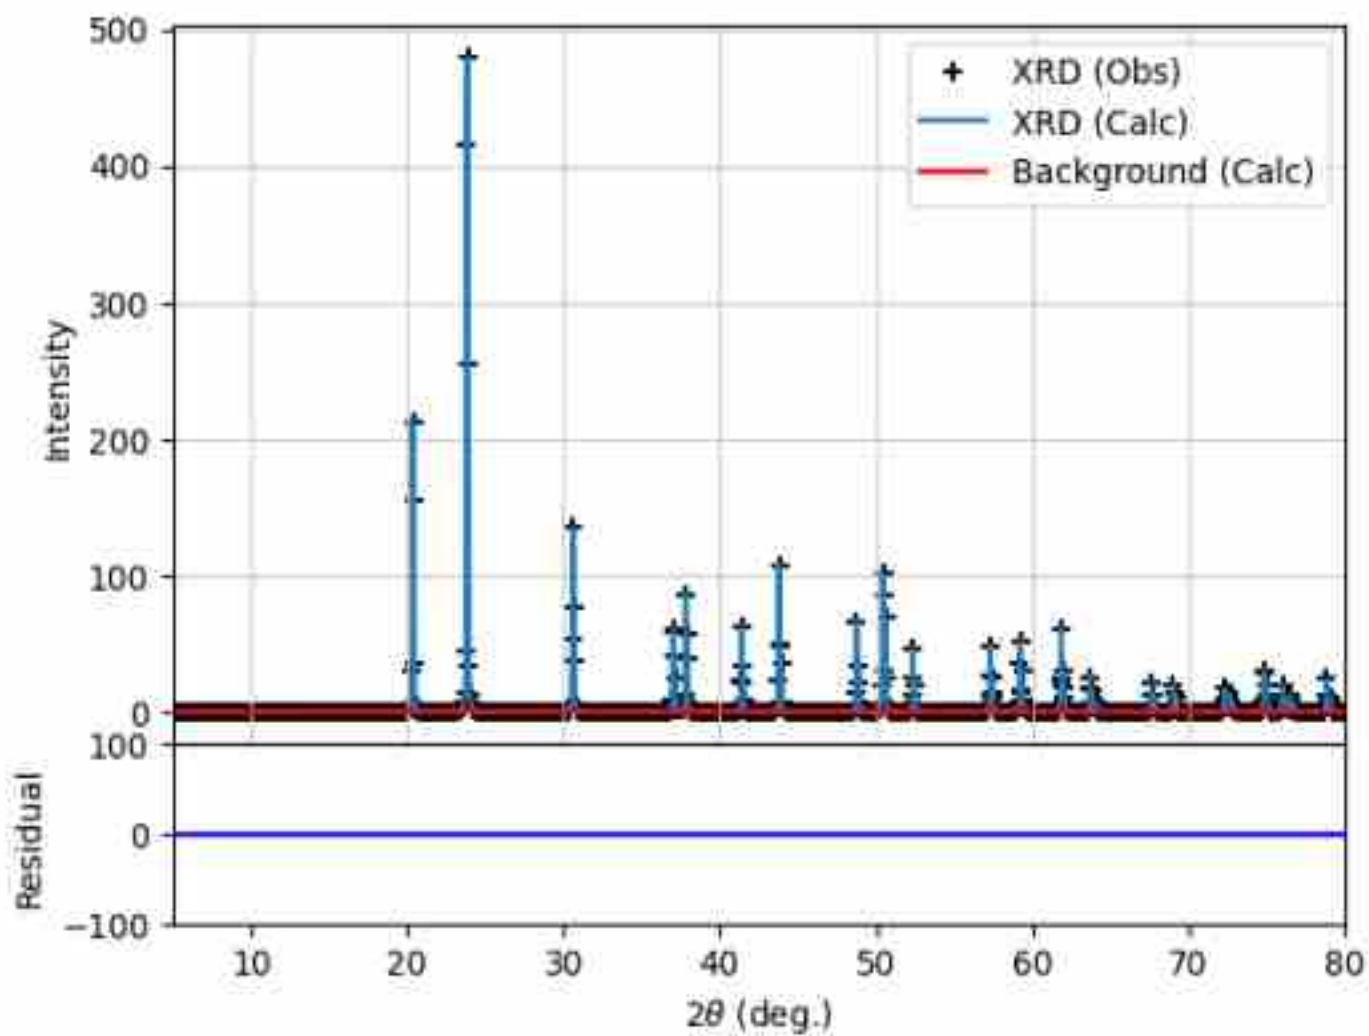

| RMSE before RR | Rwp     | RMSE after RR |
|----------------|---------|---------------|
| 0.018          | 0.05755 | 0.01527       |

# Li<sub>4</sub>Al<sub>2</sub>Ni<sub>2</sub>O<sub>8</sub>

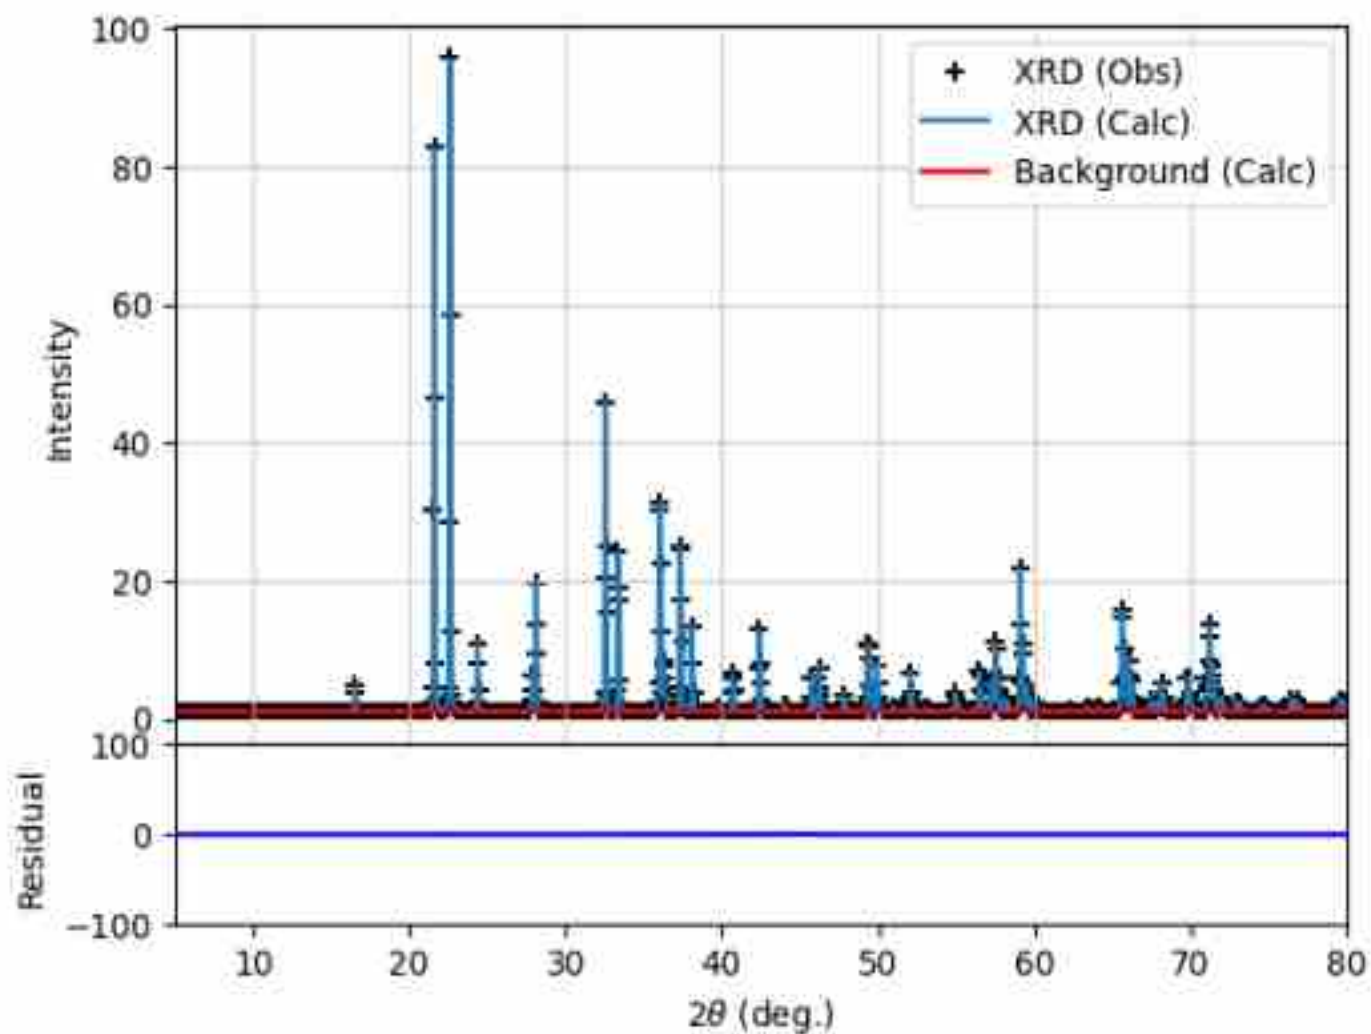

| RMSE before RR | Rwp    | RMSE after RR |
|----------------|--------|---------------|
| 0.018          | 0.9591 | 0.05064       |

# Li<sub>4</sub>In<sub>4</sub>Se<sub>8</sub>

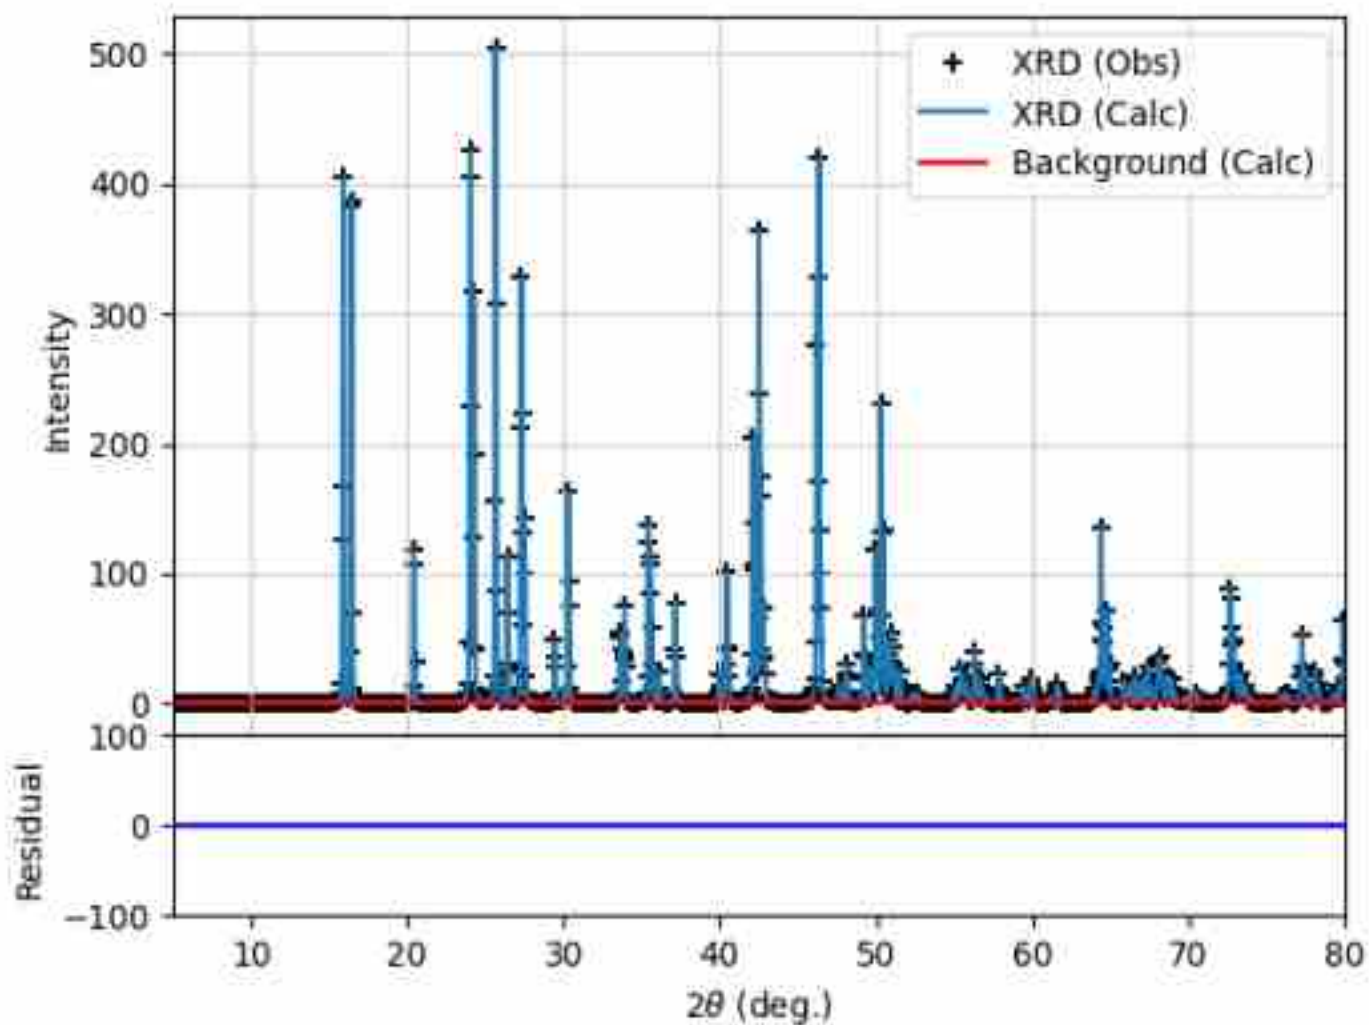

| RMSE before RR | Rwp     | RMSE after RR |
|----------------|---------|---------------|
| 0.018          | 0.00404 | 0.00032       |



# Li<sub>4</sub>MnCrO<sub>6</sub>

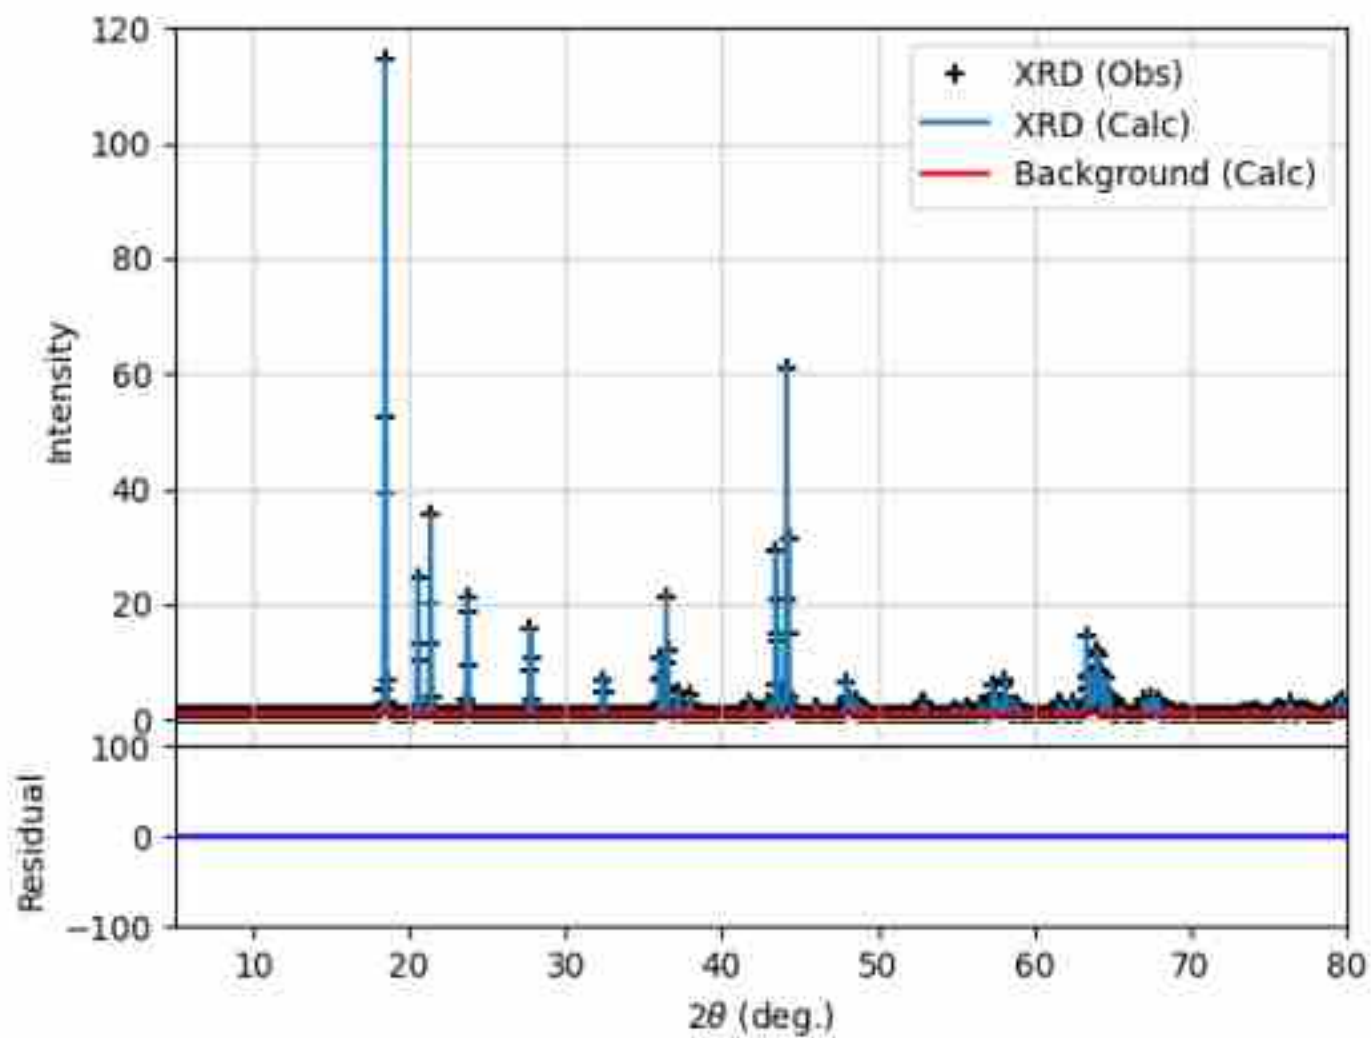

| RMSE before RR | Rwp     | RMSE after RR |
|----------------|---------|---------------|
| 0.018          | 0.00183 | 0.00072       |

# Li5Cr1C18

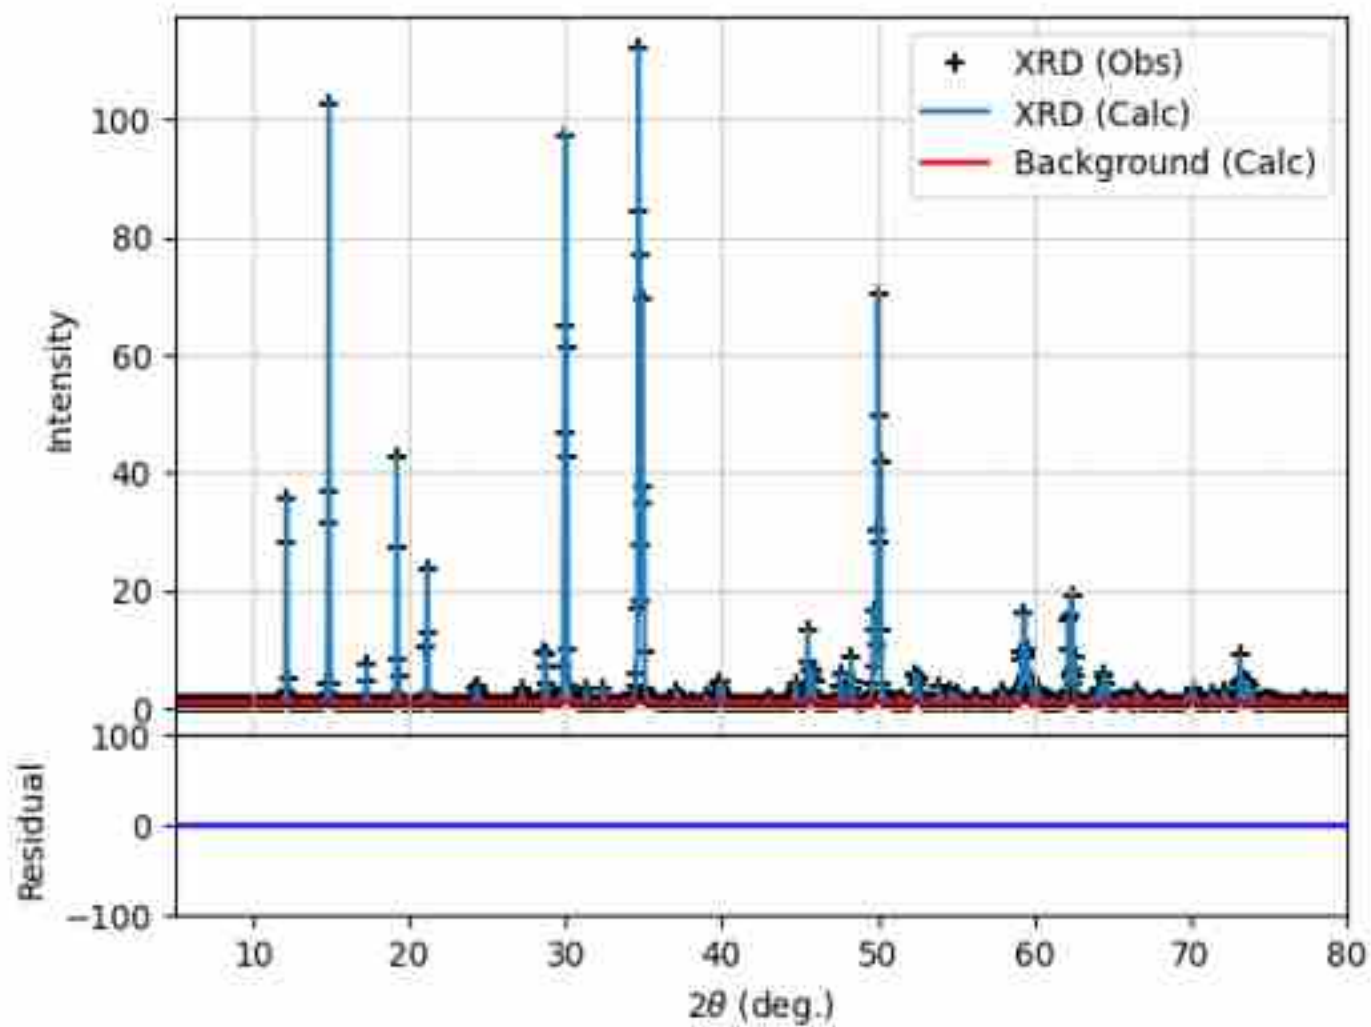

| RMSE before RR | Rwp     | RMSE after RR |
|----------------|---------|---------------|
| 0.018          | 0.00289 | 0.00121       |

# Lu1Cu5

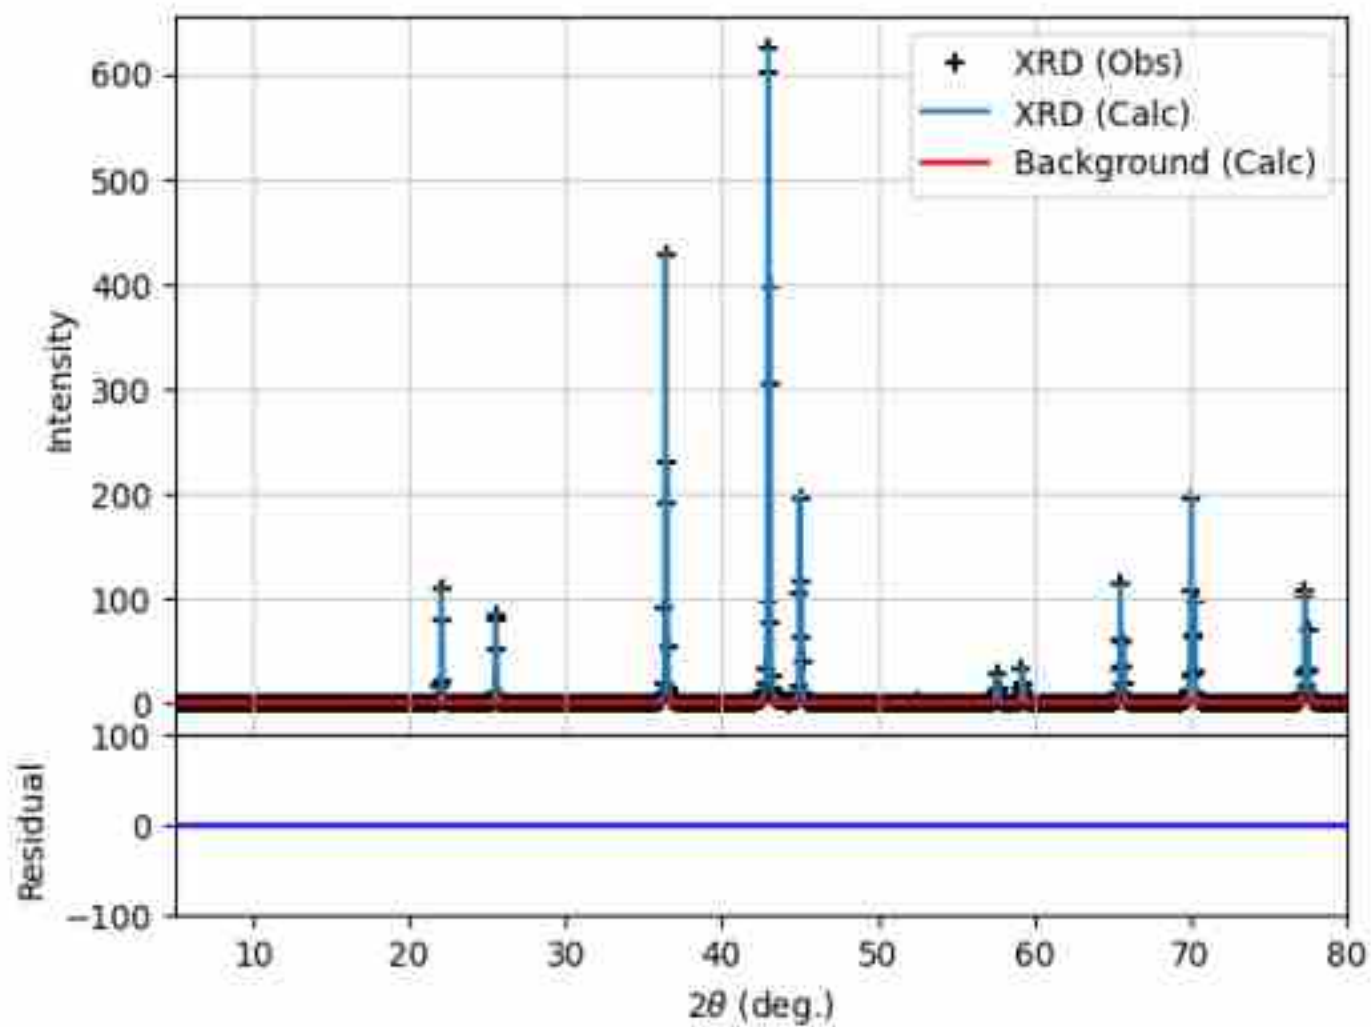

| RMSE before RR | Rwp     | RMSE after RR |
|----------------|---------|---------------|
| 0.018          | 0.01908 | 0.00296       |

# Lu1In1Co4

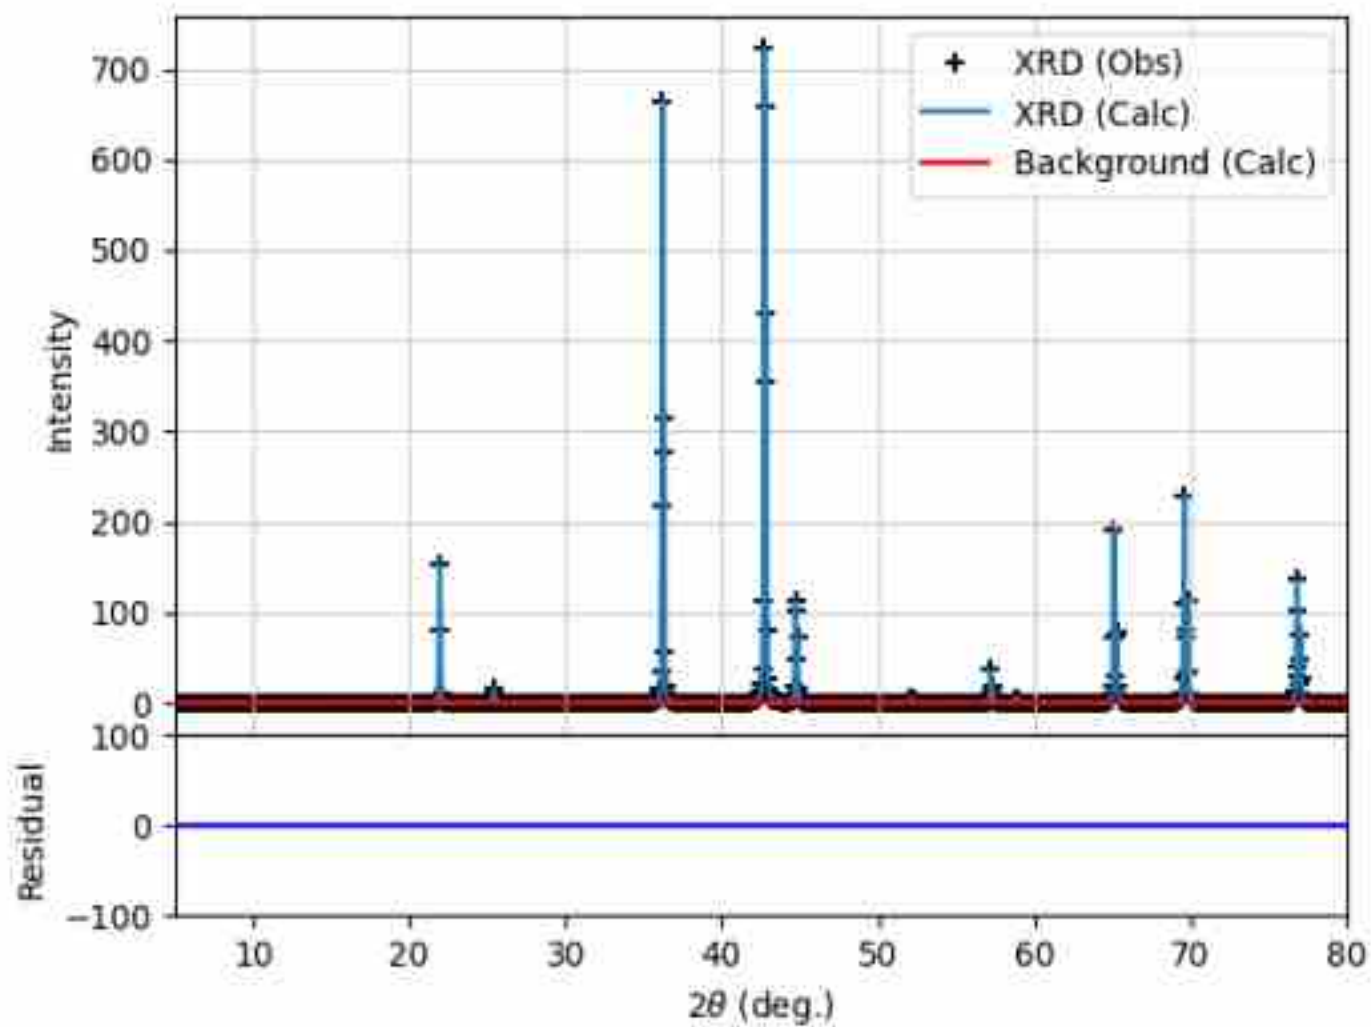

| RMSE before RR | Rwp     | RMSE after RR |
|----------------|---------|---------------|
| 0.018          | 0.00512 | 0.00103       |

# Lu2Al6

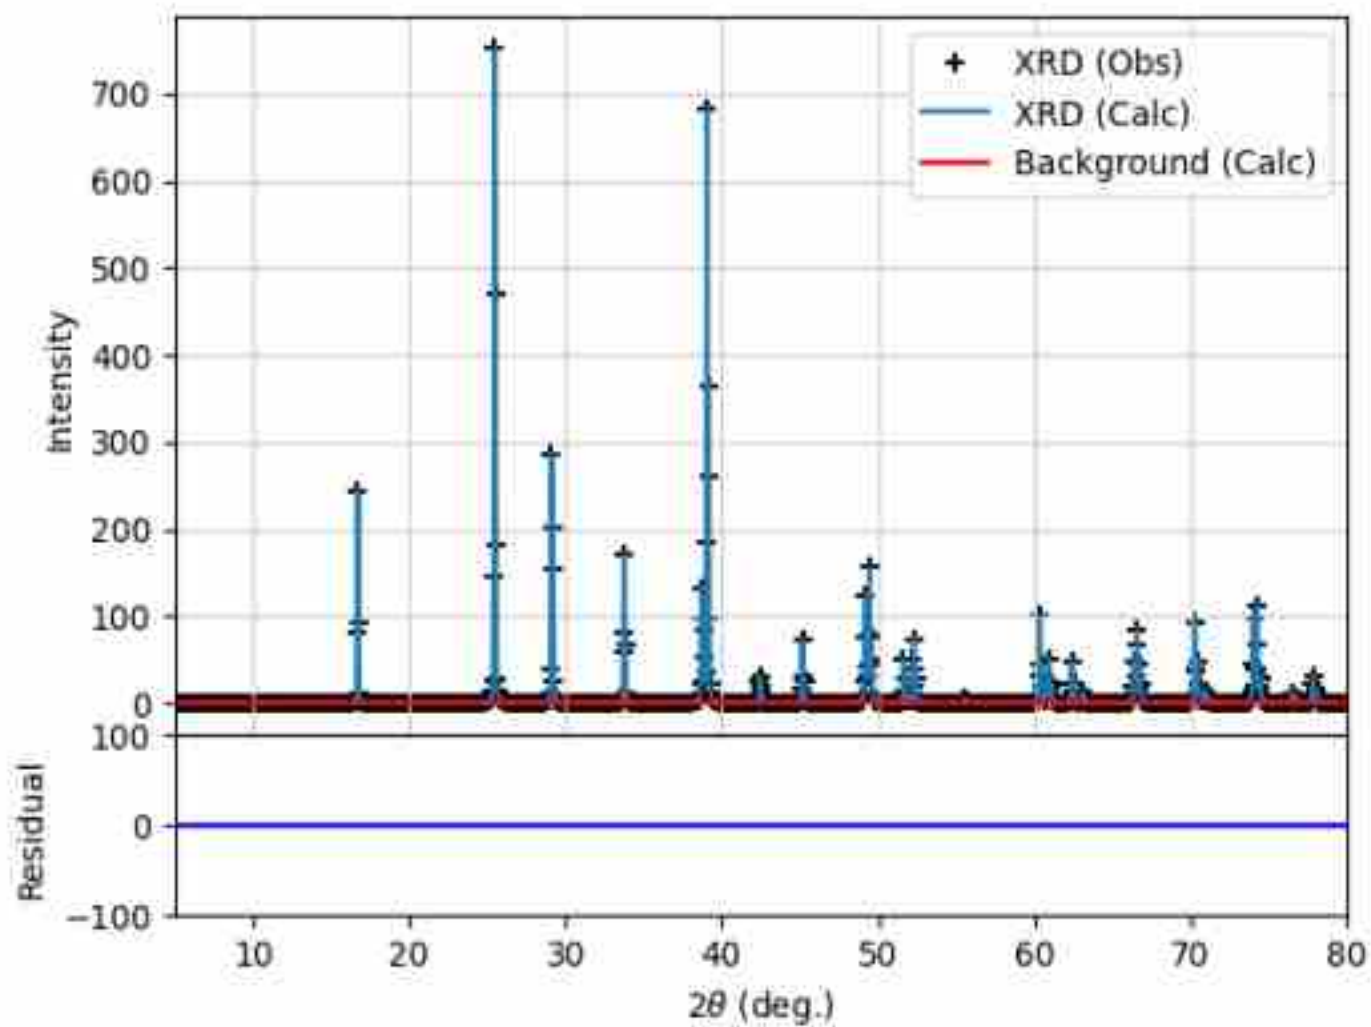

| RMSE before RR | Rwp     | RMSE after RR |
|----------------|---------|---------------|
| 0.018          | 0.01756 | 0.00321       |

# Lu<sub>2</sub>Ge<sub>2</sub>Au<sub>2</sub>

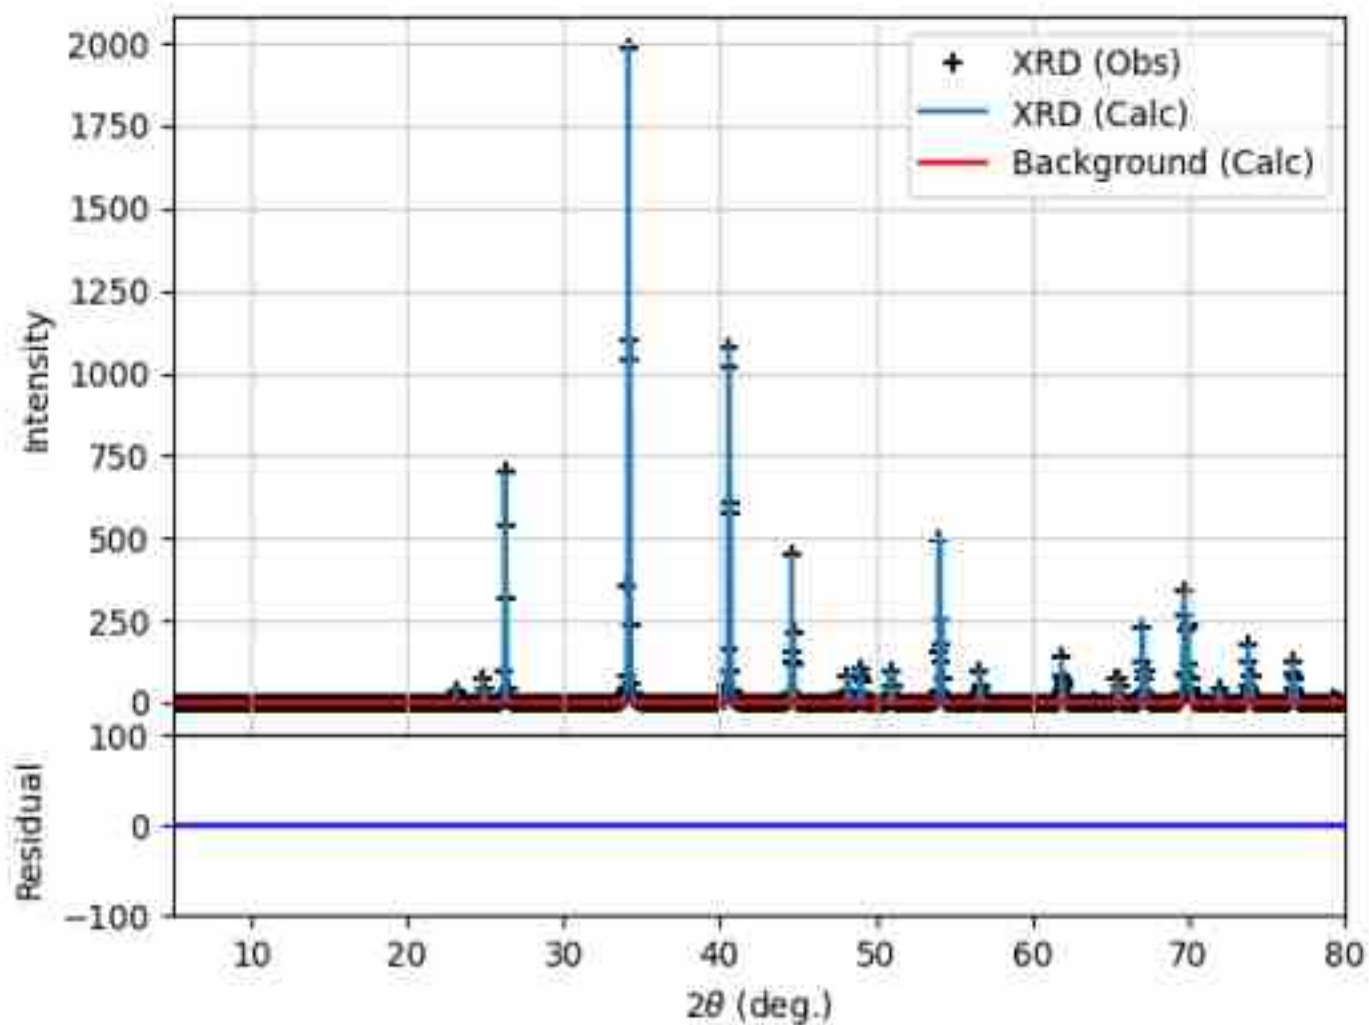

| RMSE before RR | Rwp     | RMSE after RR |
|----------------|---------|---------------|
| 0.018          | 0.00375 | 0.00035       |

# Lu<sub>3</sub>Ga<sub>6</sub>Ni<sub>9</sub>

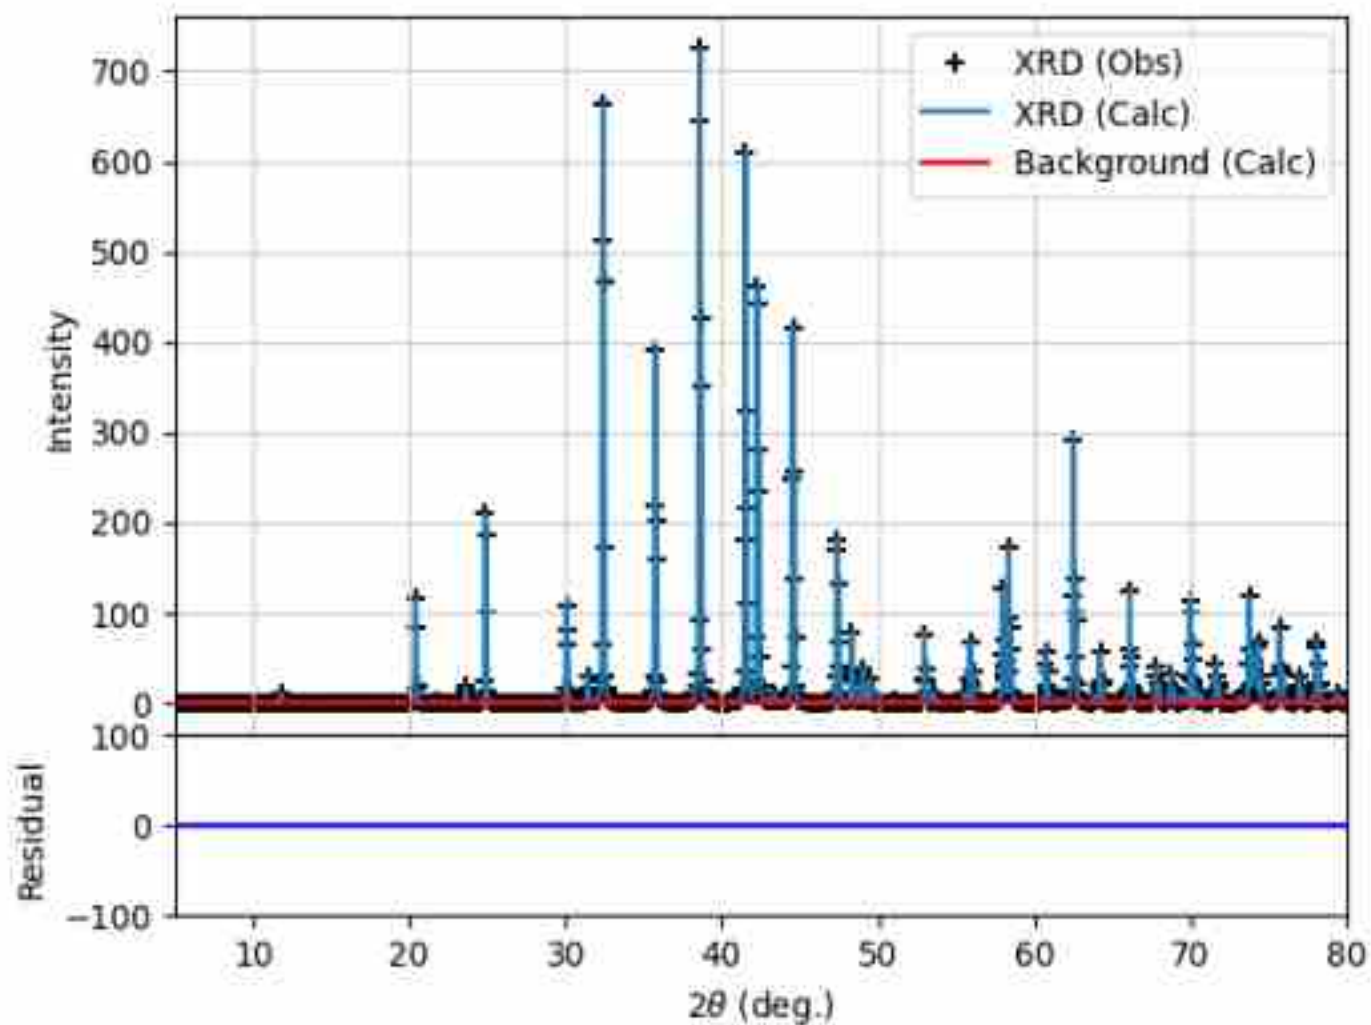

| RMSE before RR | Rwp     | RMSE after RR |
|----------------|---------|---------------|
| 0.018          | 0.00493 | 0.00082       |

# Lu10Pt6

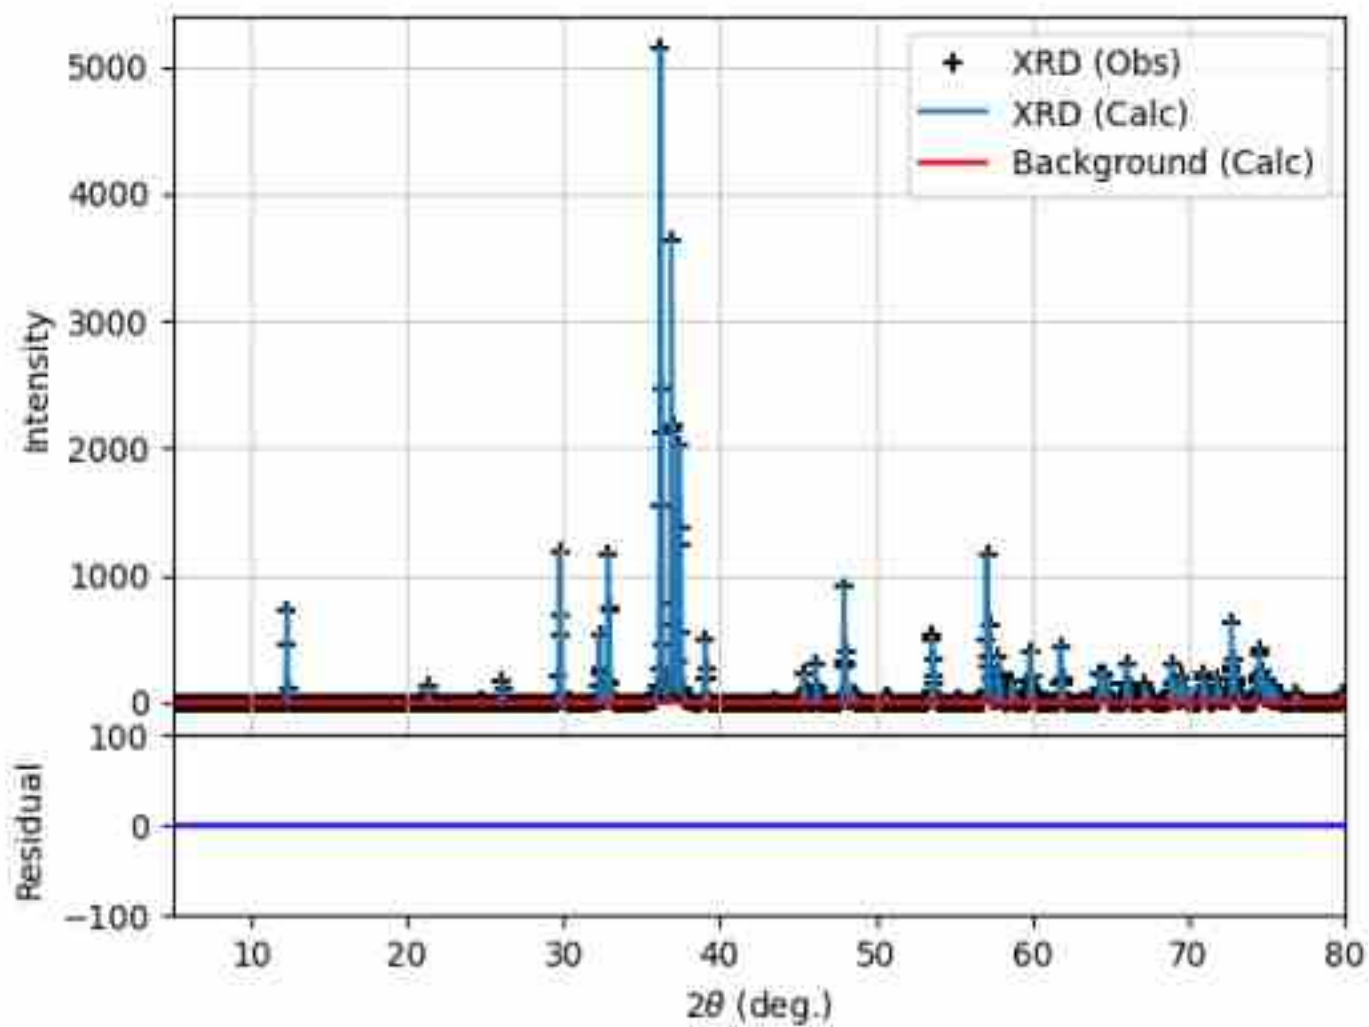

| RMSE before RR | Rwp     | RMSE after RR |
|----------------|---------|---------------|
| 0.018          | 0.00347 | 0.00026       |



# Mg1U2O6

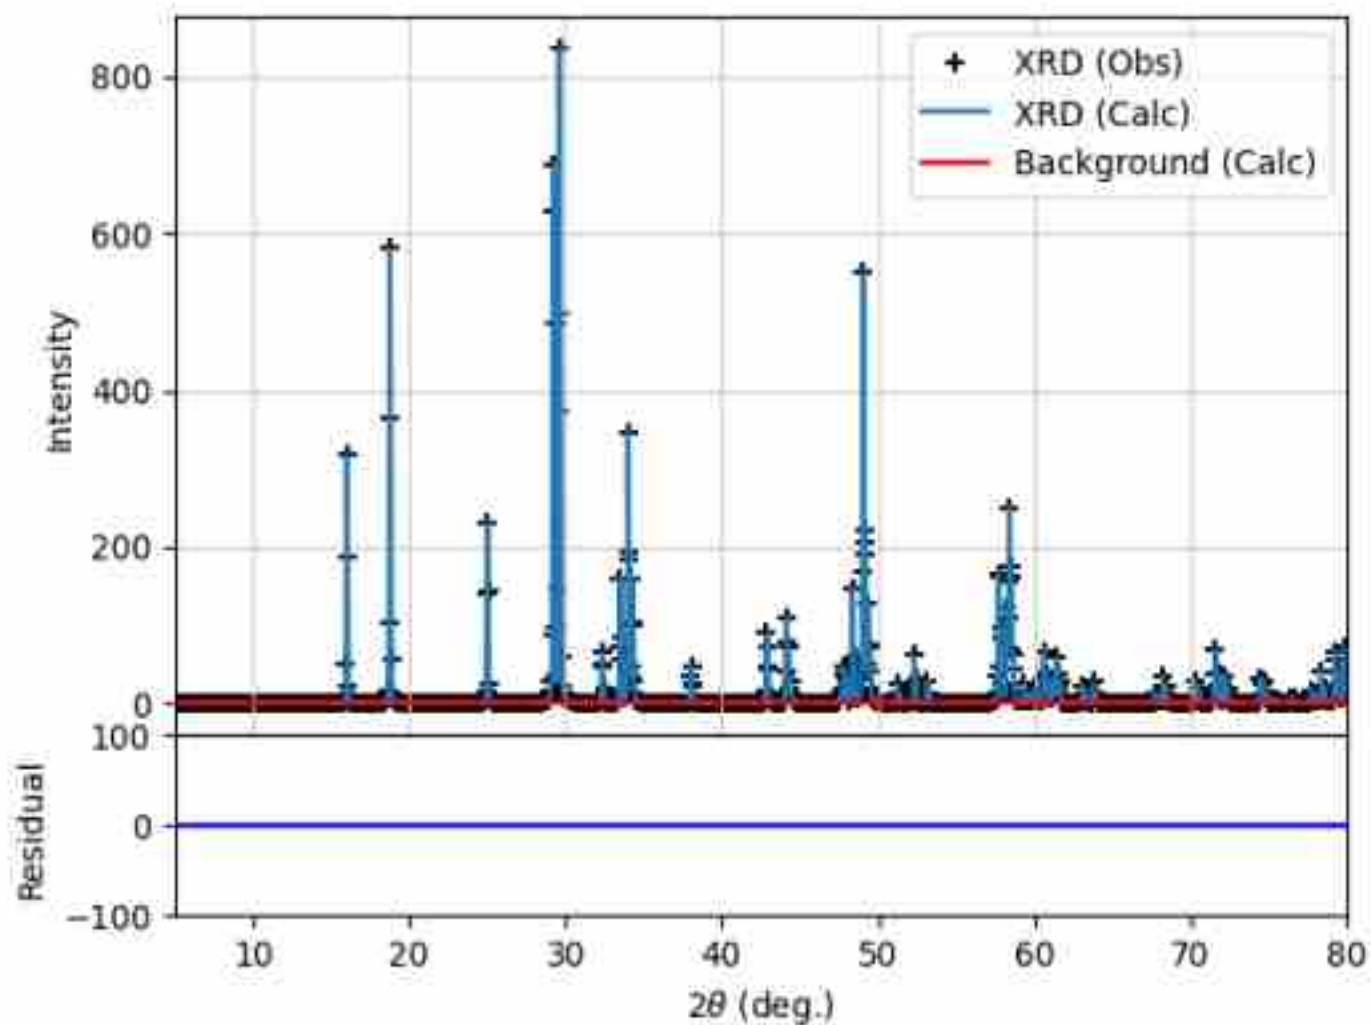

| RMSE before RR | Rwp     | RMSE after RR |
|----------------|---------|---------------|
| 0.018          | 0.00451 | 0.00204       |

# Mg<sub>2</sub>Si<sub>2</sub>N<sub>4</sub>

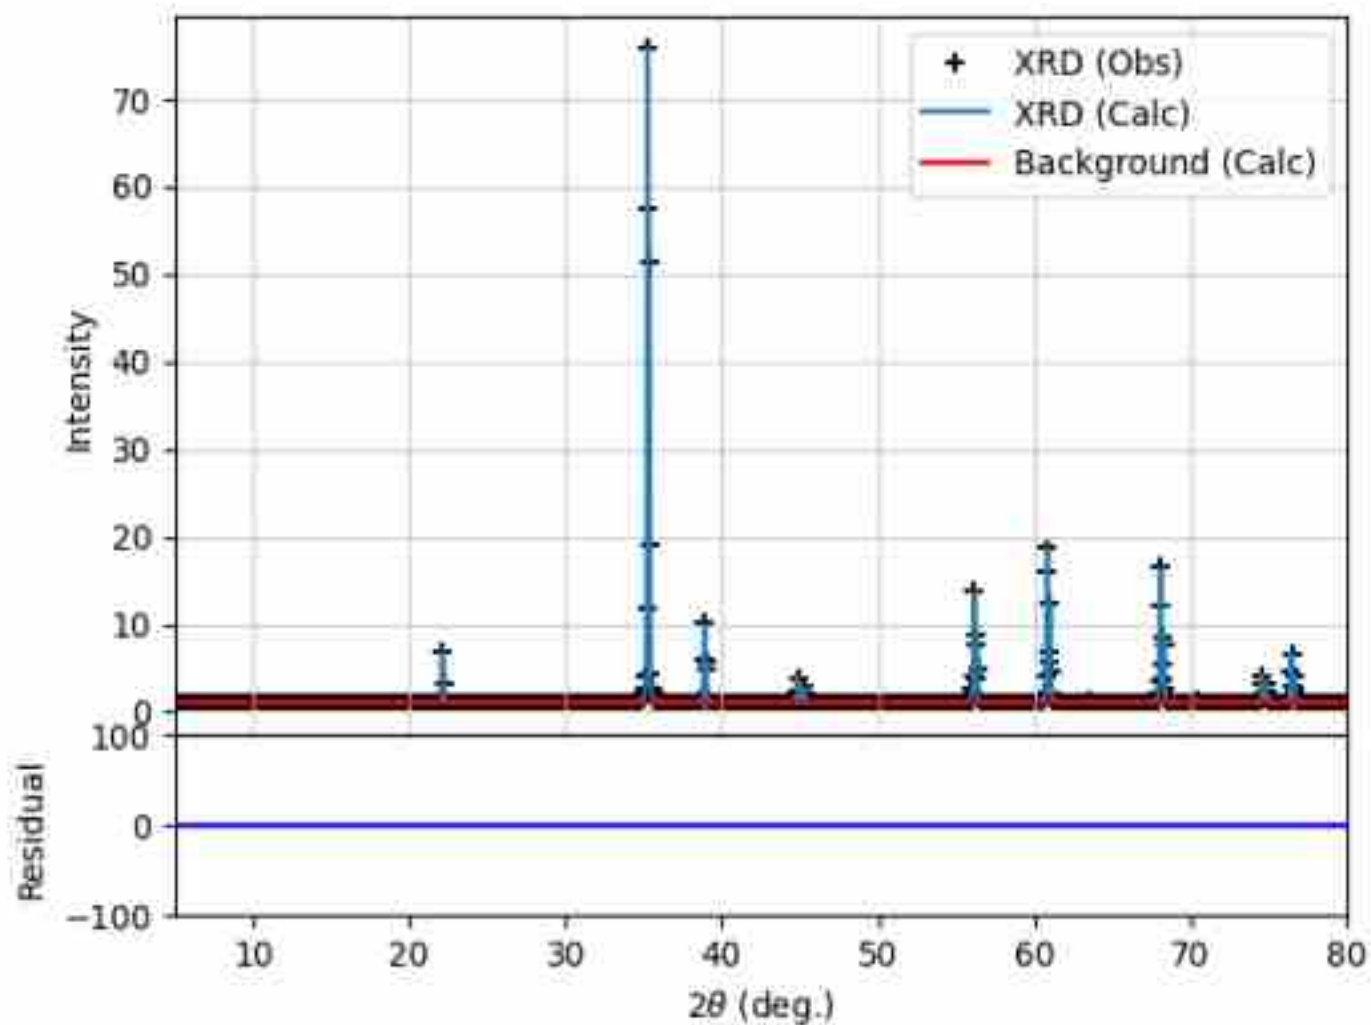

| RMSE before RR | Rwp    | RMSE after RR |
|----------------|--------|---------------|
| 0.018          | 0.0019 | 0.00137       |

# Mg4Al8

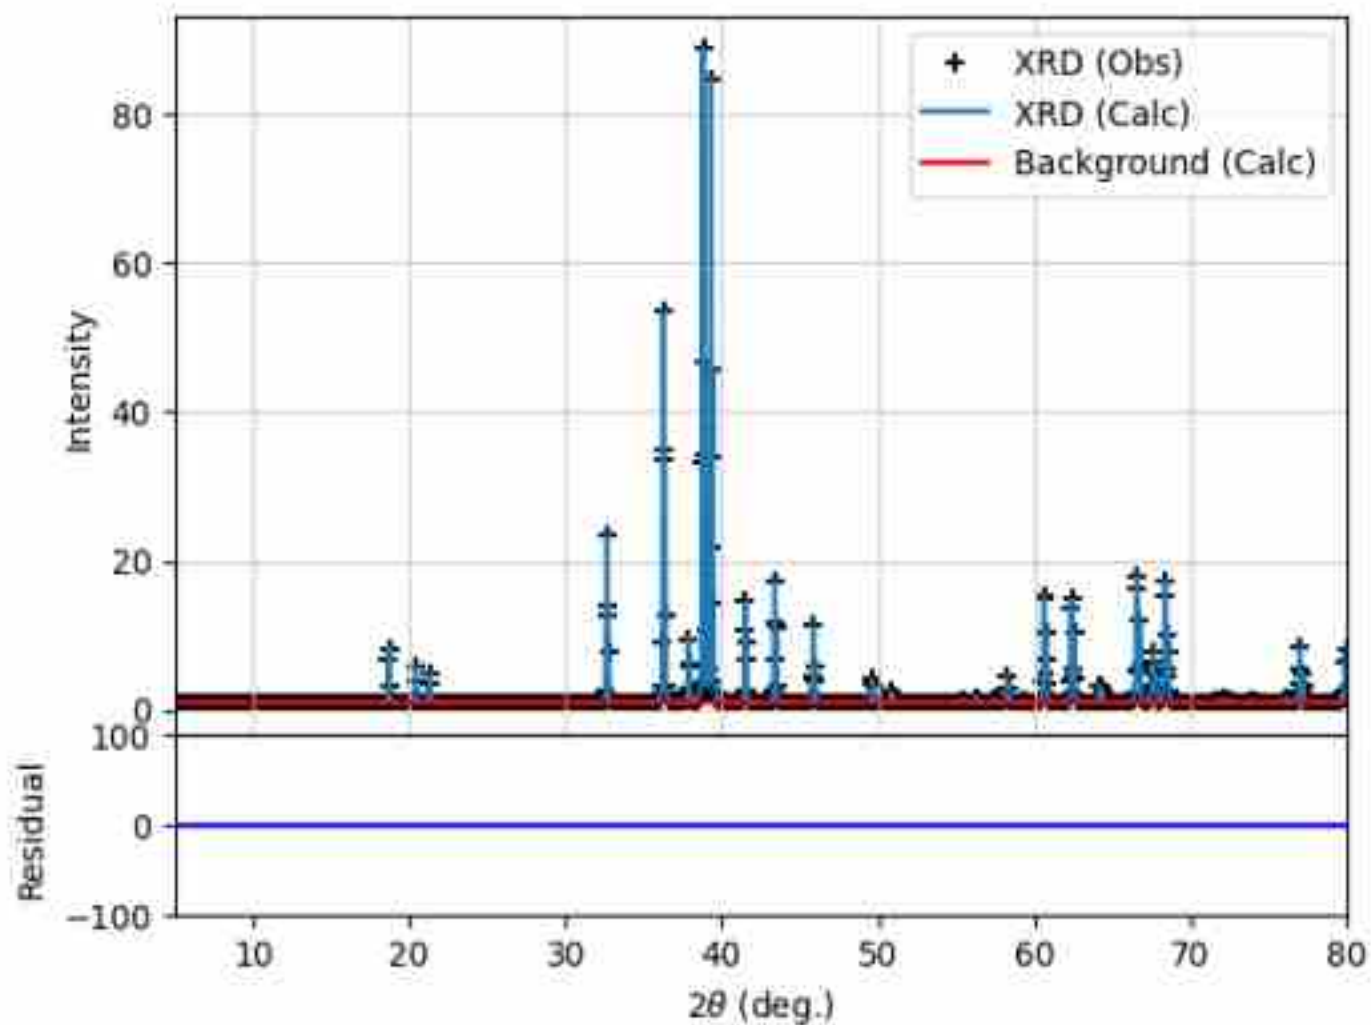

| RMSE before RR | Rwp     | RMSE after RR |
|----------------|---------|---------------|
| 0.018          | 0.00446 | 0.001         |

# Mg<sub>4</sub>Ga<sub>2</sub>

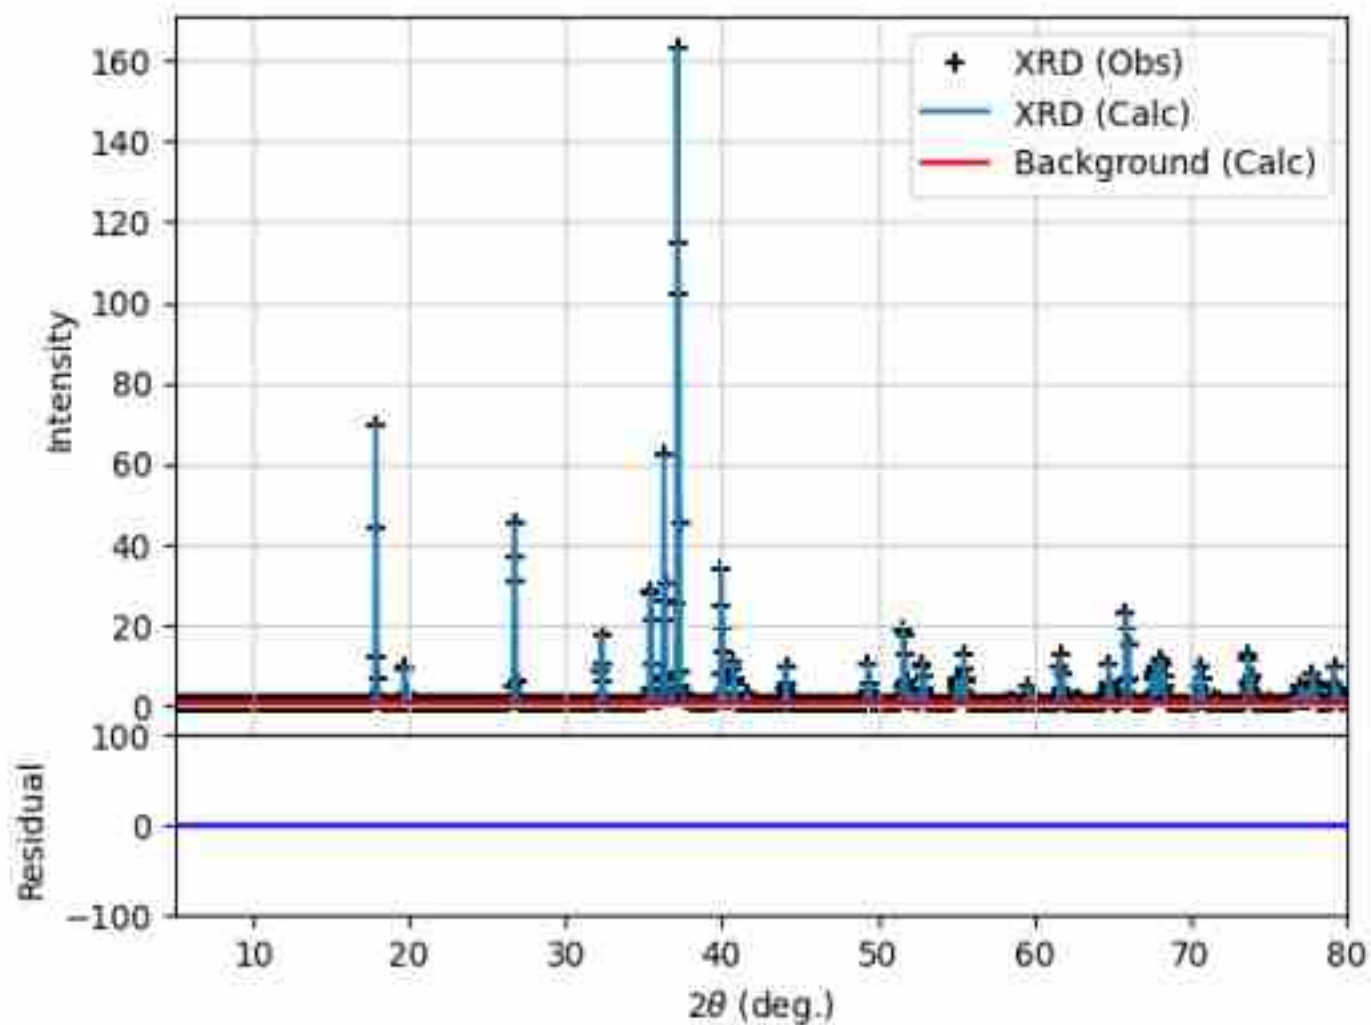

| RMSE before RR | Rwp     | RMSE after RR |
|----------------|---------|---------------|
| 0.018          | 0.00411 | 0.00102       |

# Mn<sub>2</sub>Fe<sub>2</sub>P<sub>4</sub>

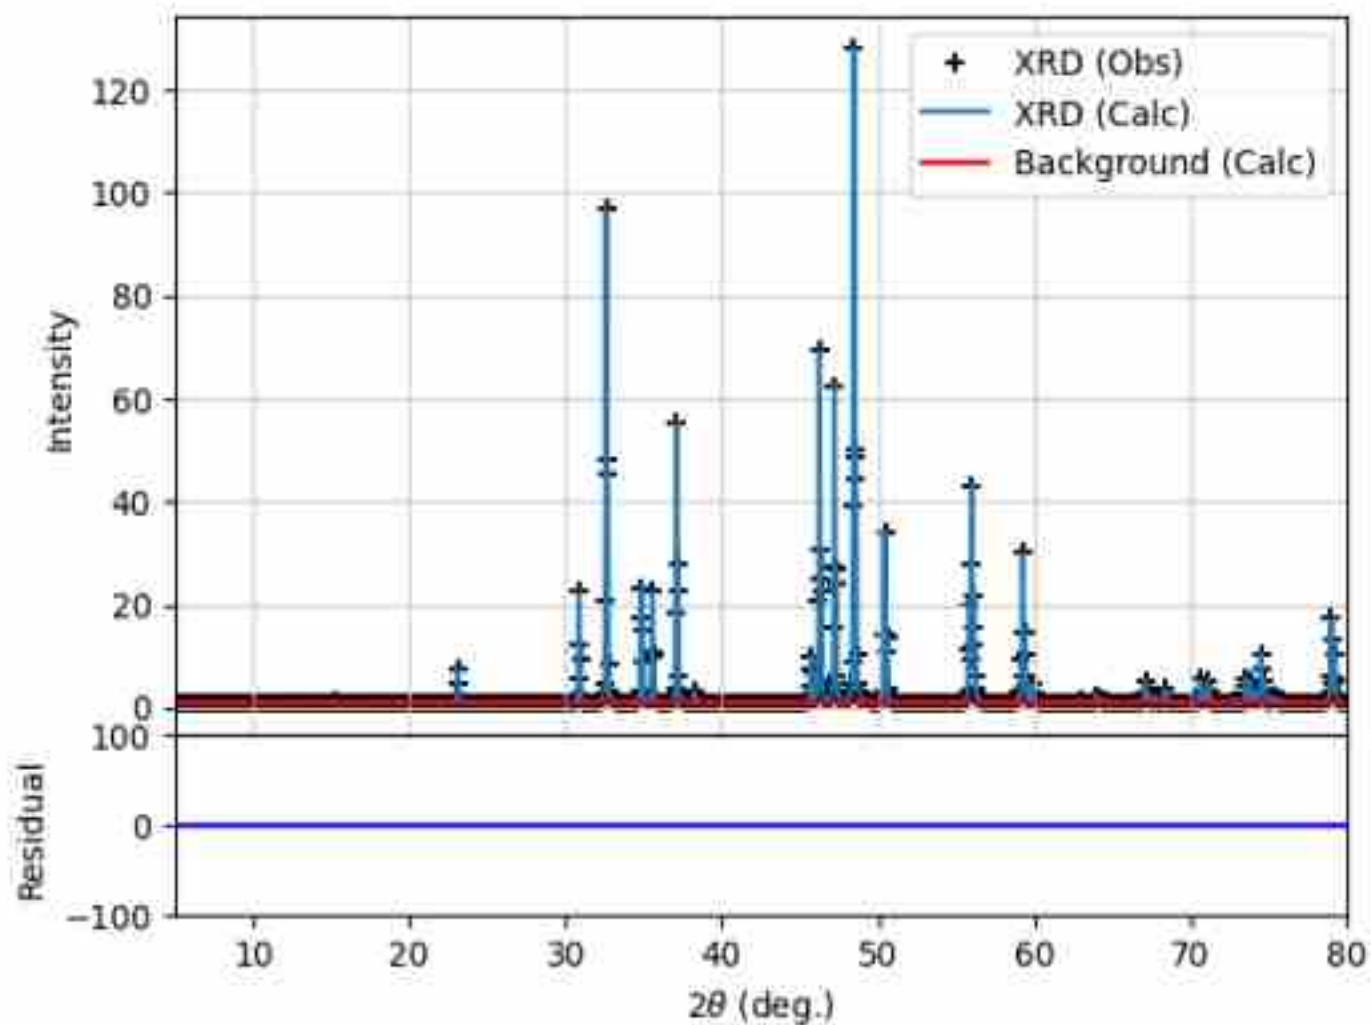

| RMSE before RR | Rwp     | RMSE after RR |
|----------------|---------|---------------|
| 0.018          | 0.00339 | 0.00046       |

Mn<sub>2</sub>In<sub>1</sub>Sb<sub>1</sub>Pd<sub>4</sub>

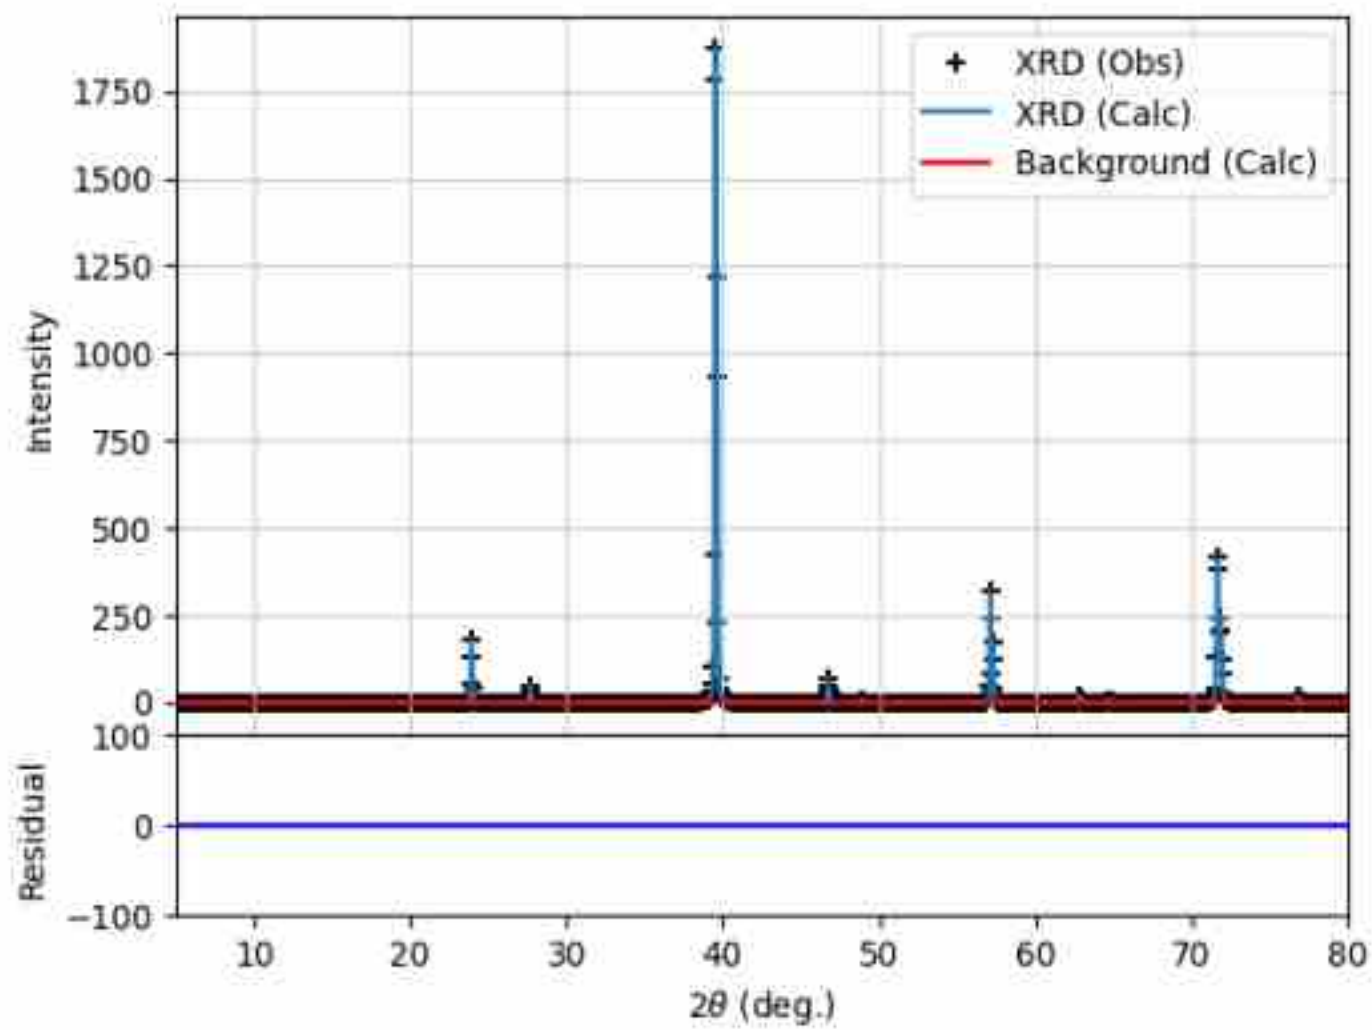

| RMSE before RR | Rwp     | RMSE after RR |
|----------------|---------|---------------|
| 0.018          | 0.00302 | 0.00028       |

# Mn<sub>3</sub>Co<sub>2</sub>As<sub>3</sub>Rh<sub>1</sub>

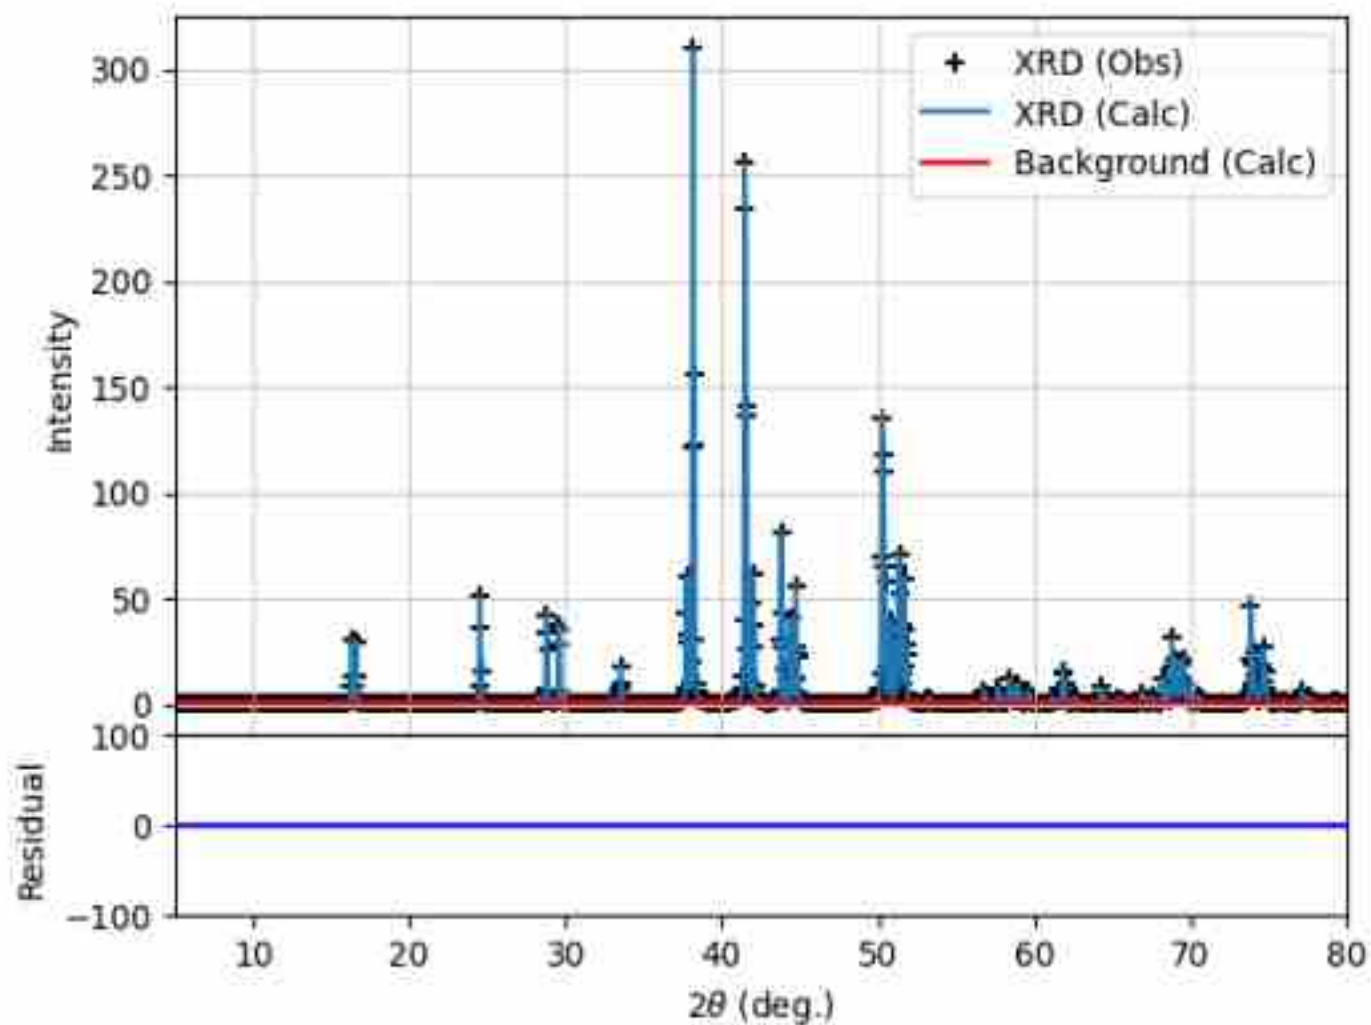

| RMSE before RR | Rwp     | RMSE after RR |
|----------------|---------|---------------|
| 0.018          | 0.00285 | 0.0003        |

# Mn<sub>3</sub>Ni<sub>4</sub>Sb<sub>1</sub>

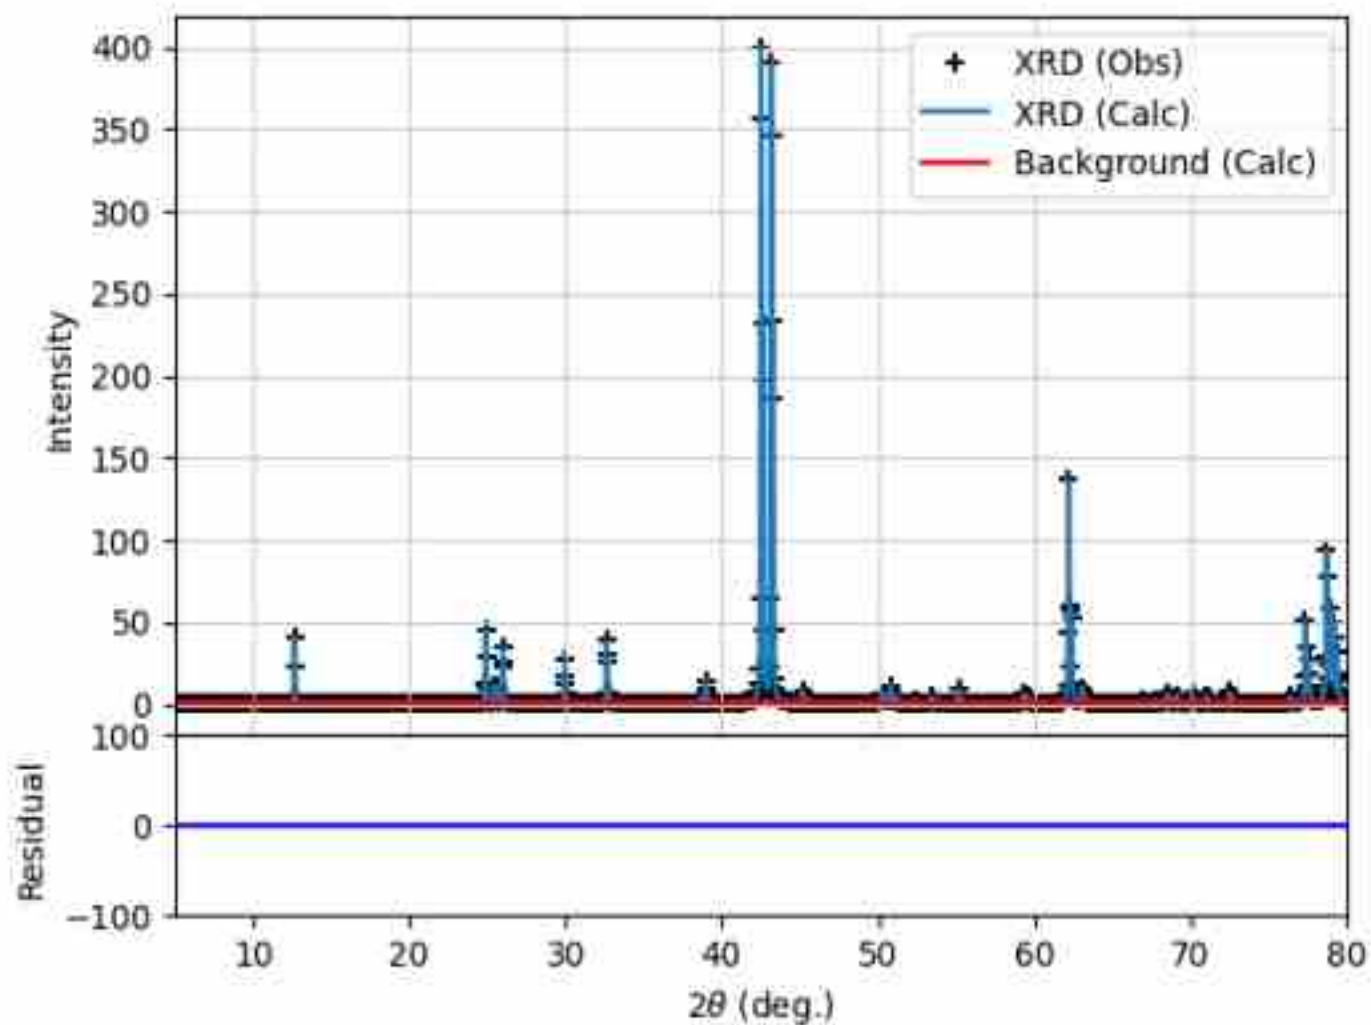

| RMSE before RR | Rwp     | RMSE after RR |
|----------------|---------|---------------|
| 0.018          | 0.00301 | 0.00021       |



# Mn<sub>4</sub>Co<sub>4</sub>P<sub>4</sub>

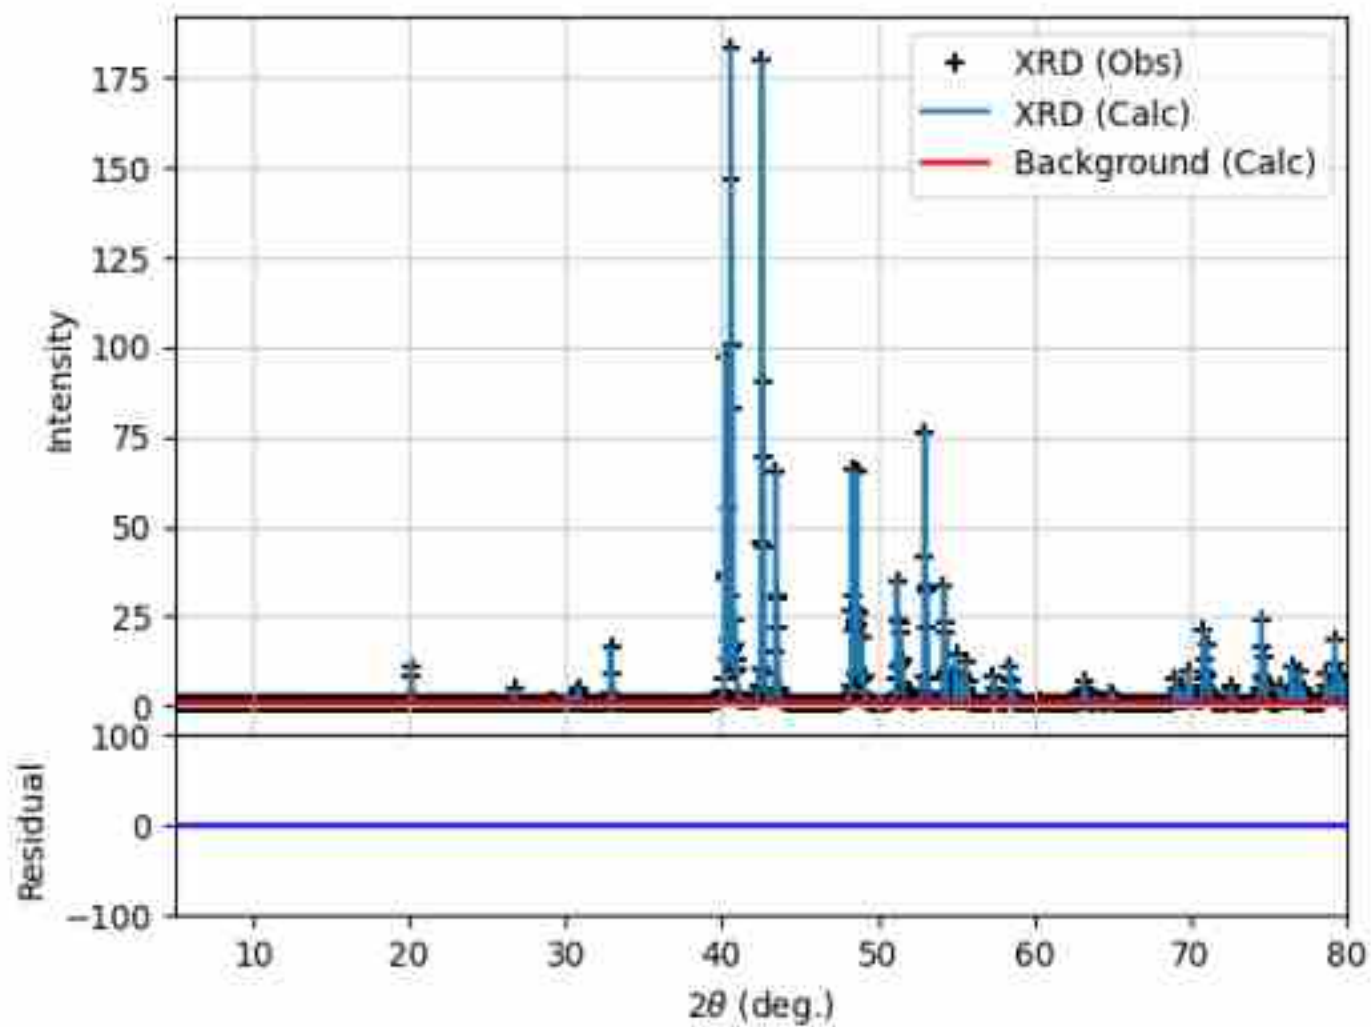

| RMSE before RR | Rwp     | RMSE after RR |
|----------------|---------|---------------|
| 0.018          | 0.00385 | 0.00057       |

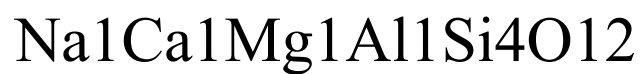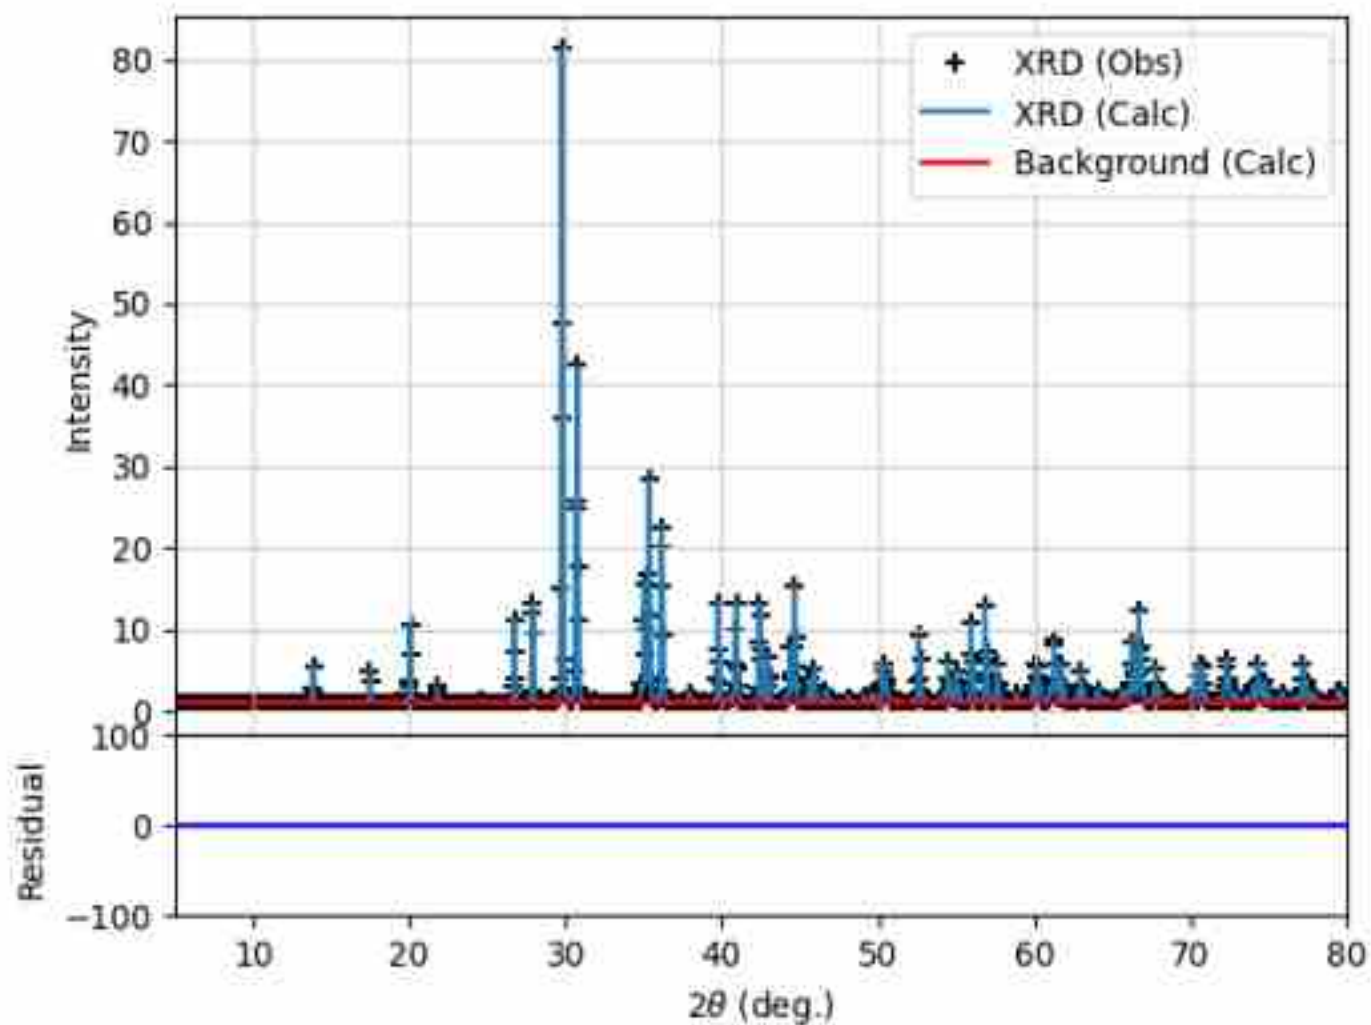

| RMSE before RR | Rwp     | RMSE after RR |
|----------------|---------|---------------|
| 0.018          | 0.02753 | 0.0009        |

# Na<sub>1</sub>Li<sub>1</sub>Ga<sub>2</sub>Si<sub>4</sub>O<sub>12</sub>

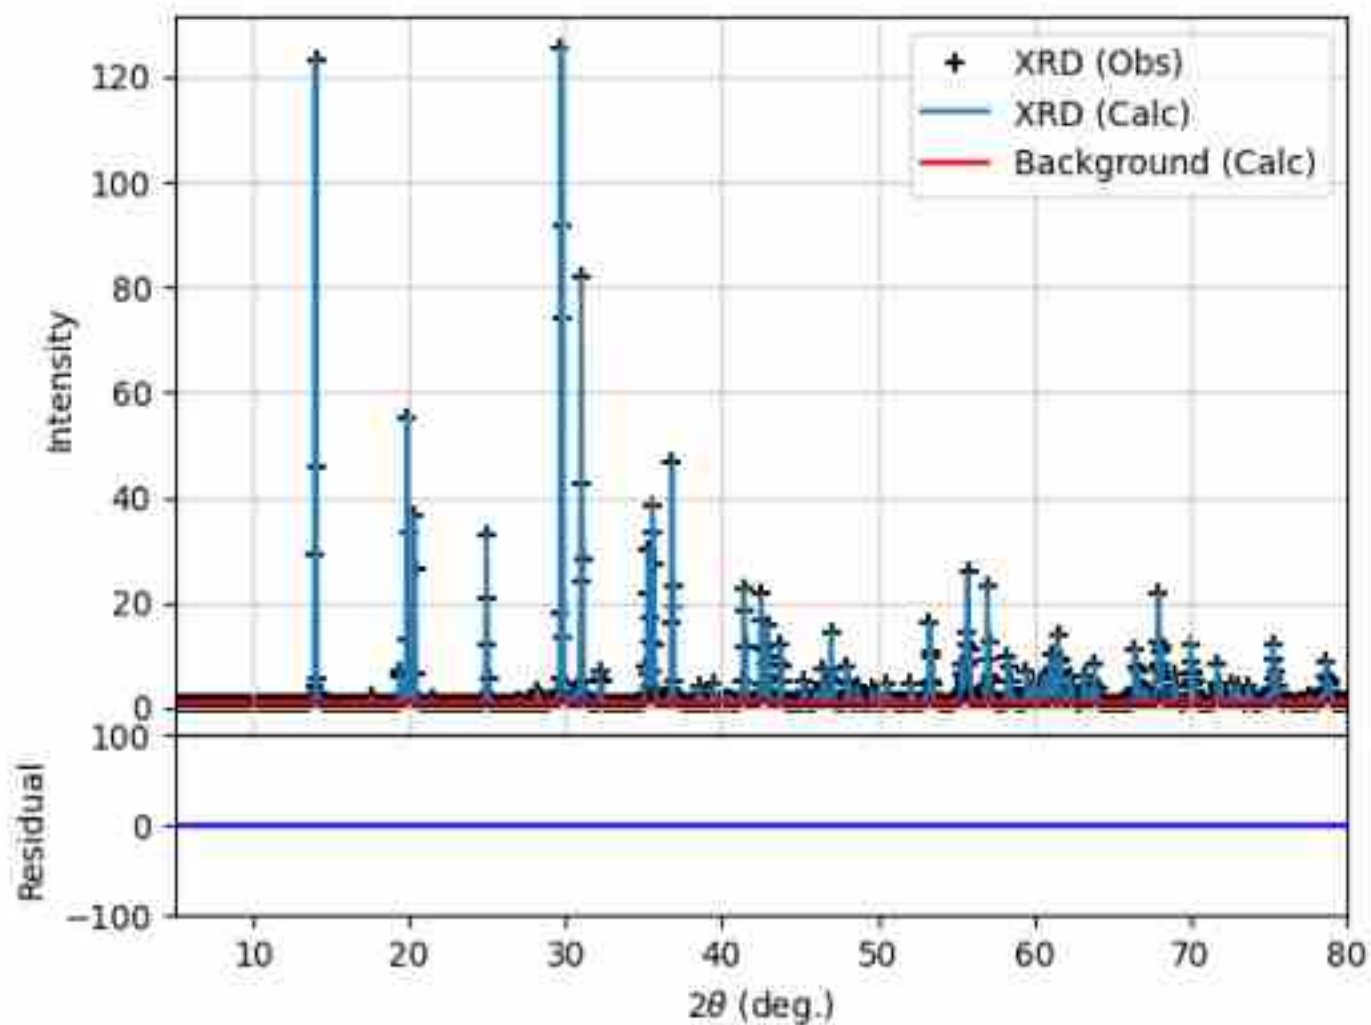

| RMSE before RR | Rwp     | RMSE after RR |
|----------------|---------|---------------|
| 0.018          | 0.00366 | 0.00093       |

# Na1Sr2I1O6

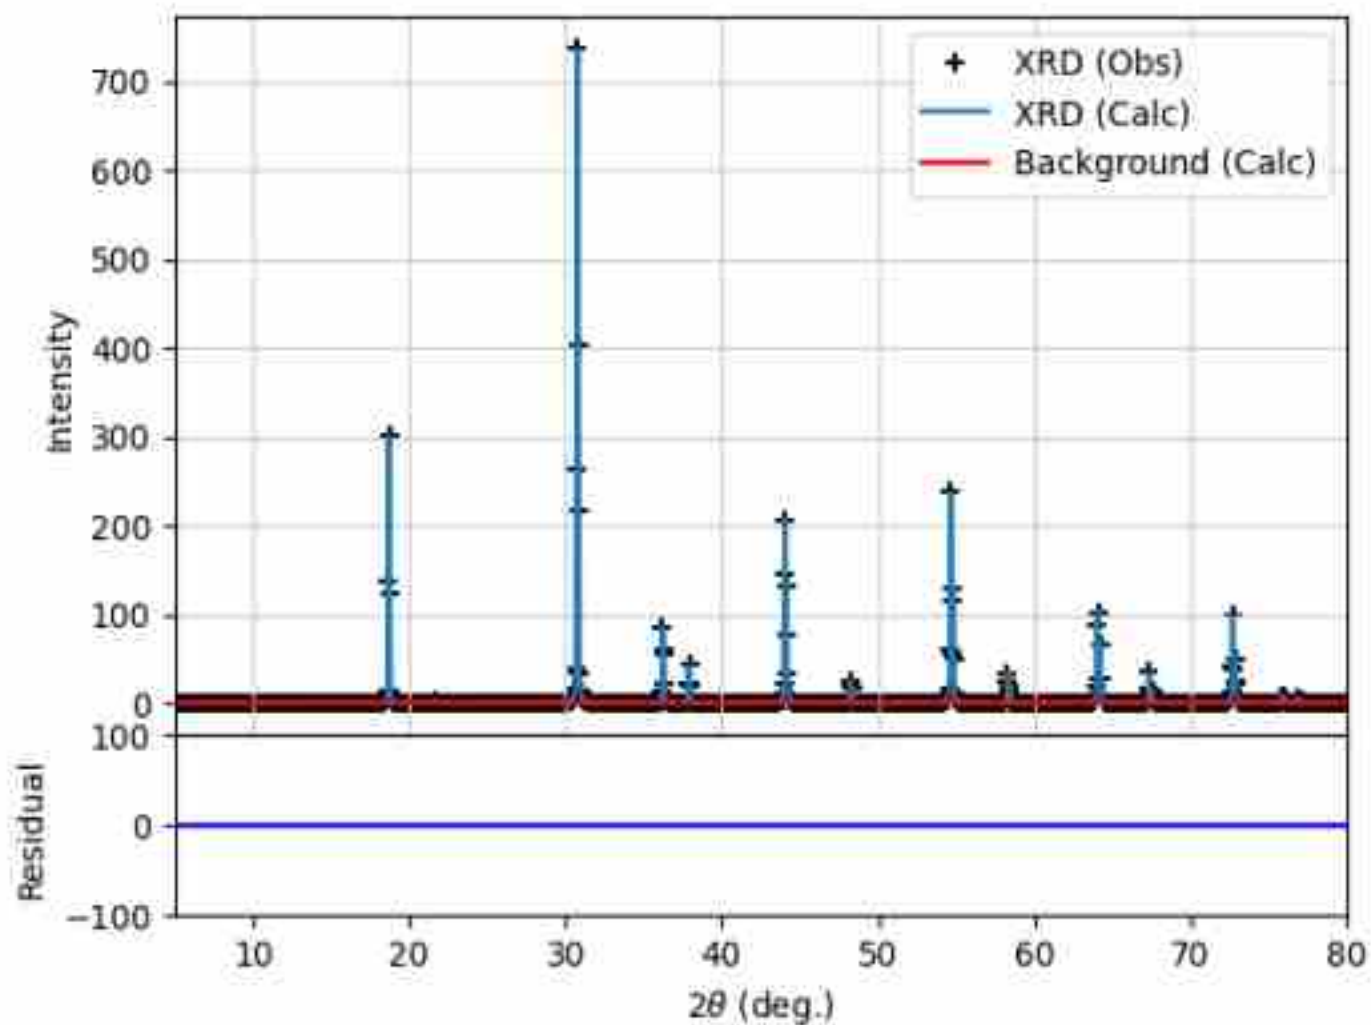

| RMSE before RR | Rwp     | RMSE after RR |
|----------------|---------|---------------|
| 0.018          | 0.00925 | 0.00354       |

# Na<sub>2</sub>Dy<sub>2</sub>Ti<sub>4</sub>O<sub>12</sub>

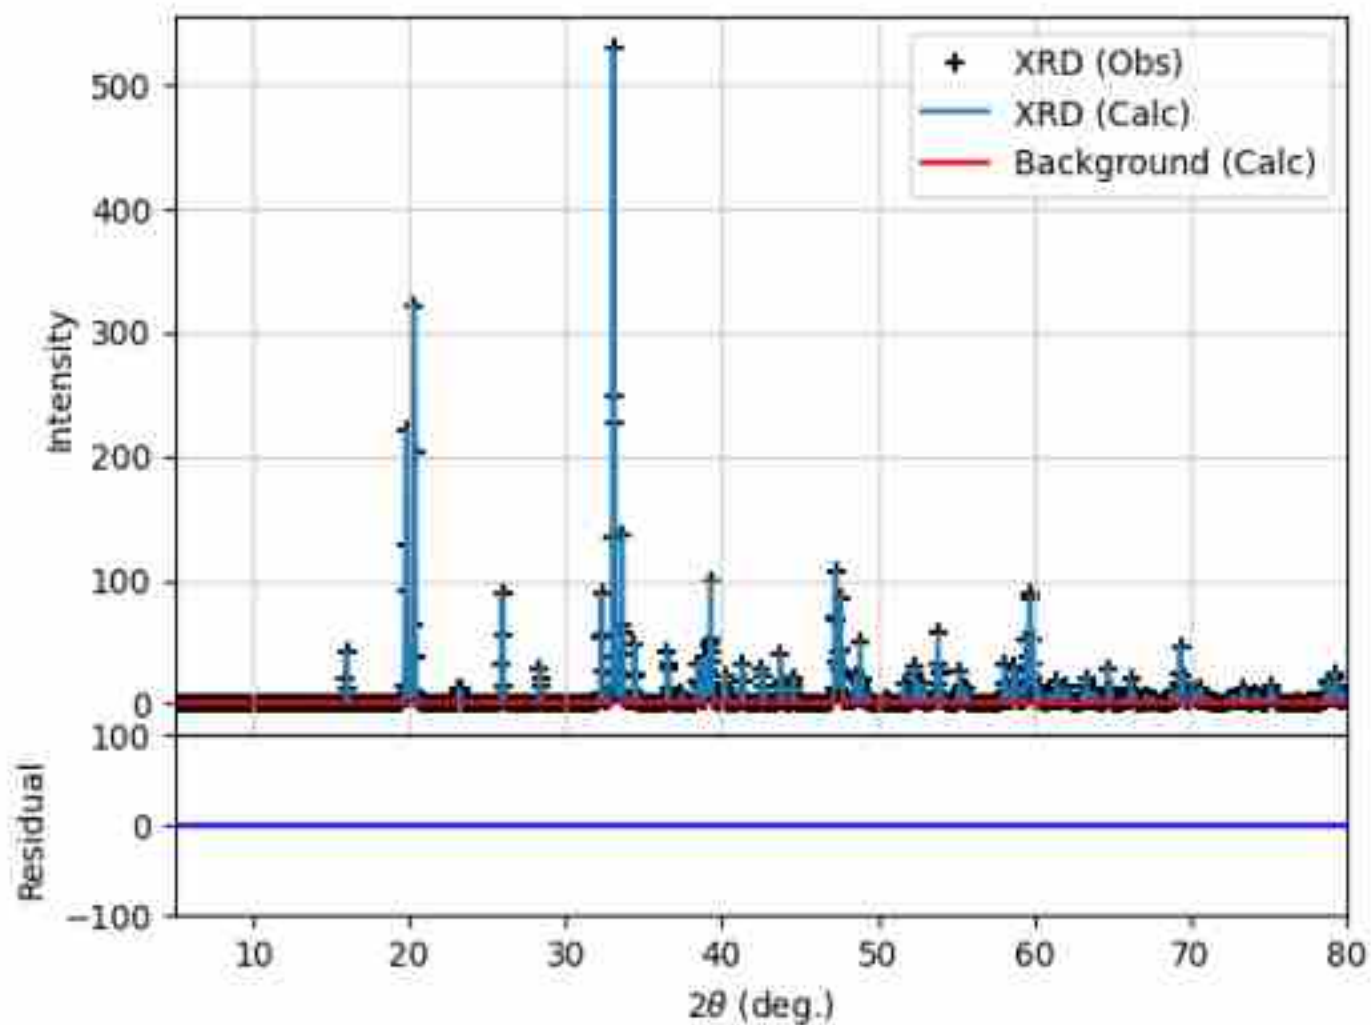

| RMSE before RR | Rwp     | RMSE after RR |
|----------------|---------|---------------|
| 0.018          | 0.00416 | 0.00136       |

# Na<sub>2</sub>Sr<sub>6</sub>

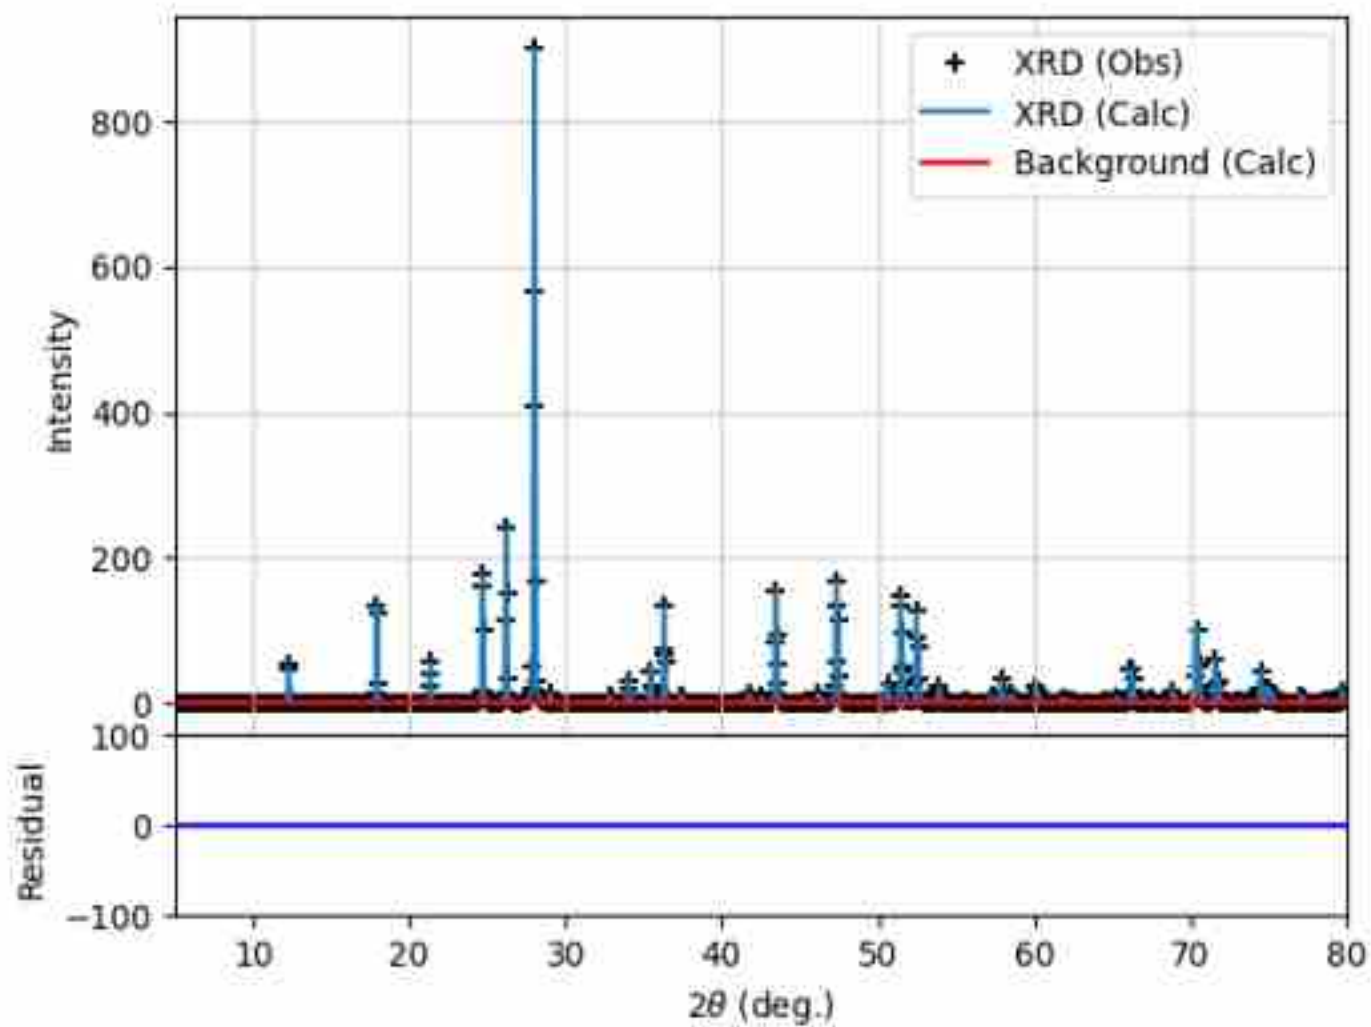

| RMSE before RR | Rwp     | RMSE after RR |
|----------------|---------|---------------|
| 0.018          | 0.01344 | 0.00088       |

# Na<sub>3</sub>Cu<sub>2</sub>Sb<sub>1</sub>O<sub>6</sub>

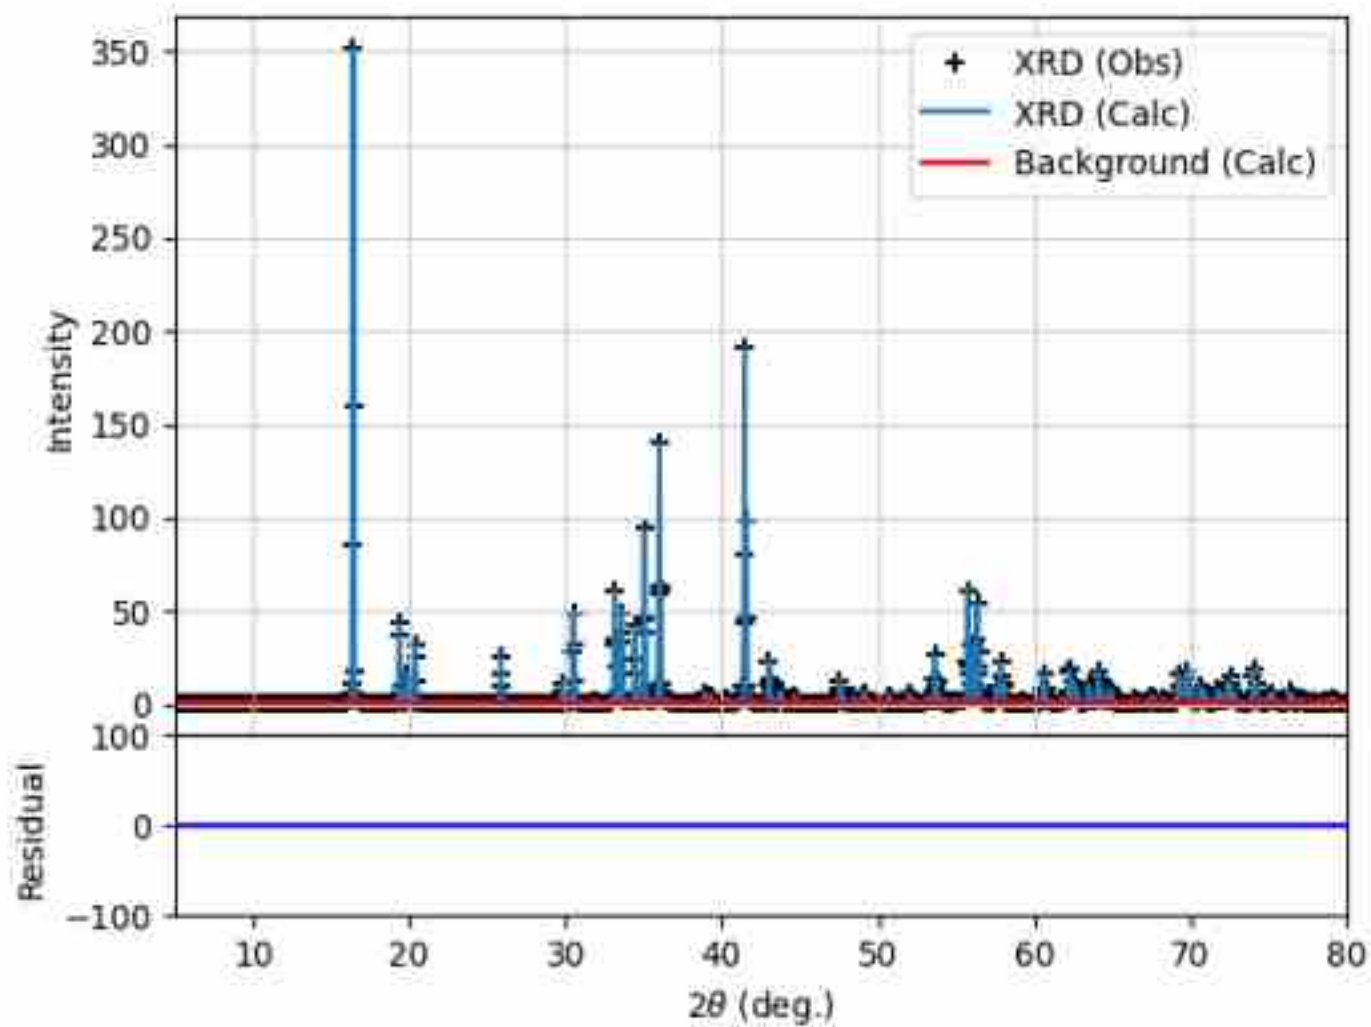

| RMSE before RR | Rwp     | RMSE after RR |
|----------------|---------|---------------|
| 0.018          | 0.00288 | 0.0009        |

# Na<sub>6</sub>Dy<sub>2</sub>Br<sub>12</sub>

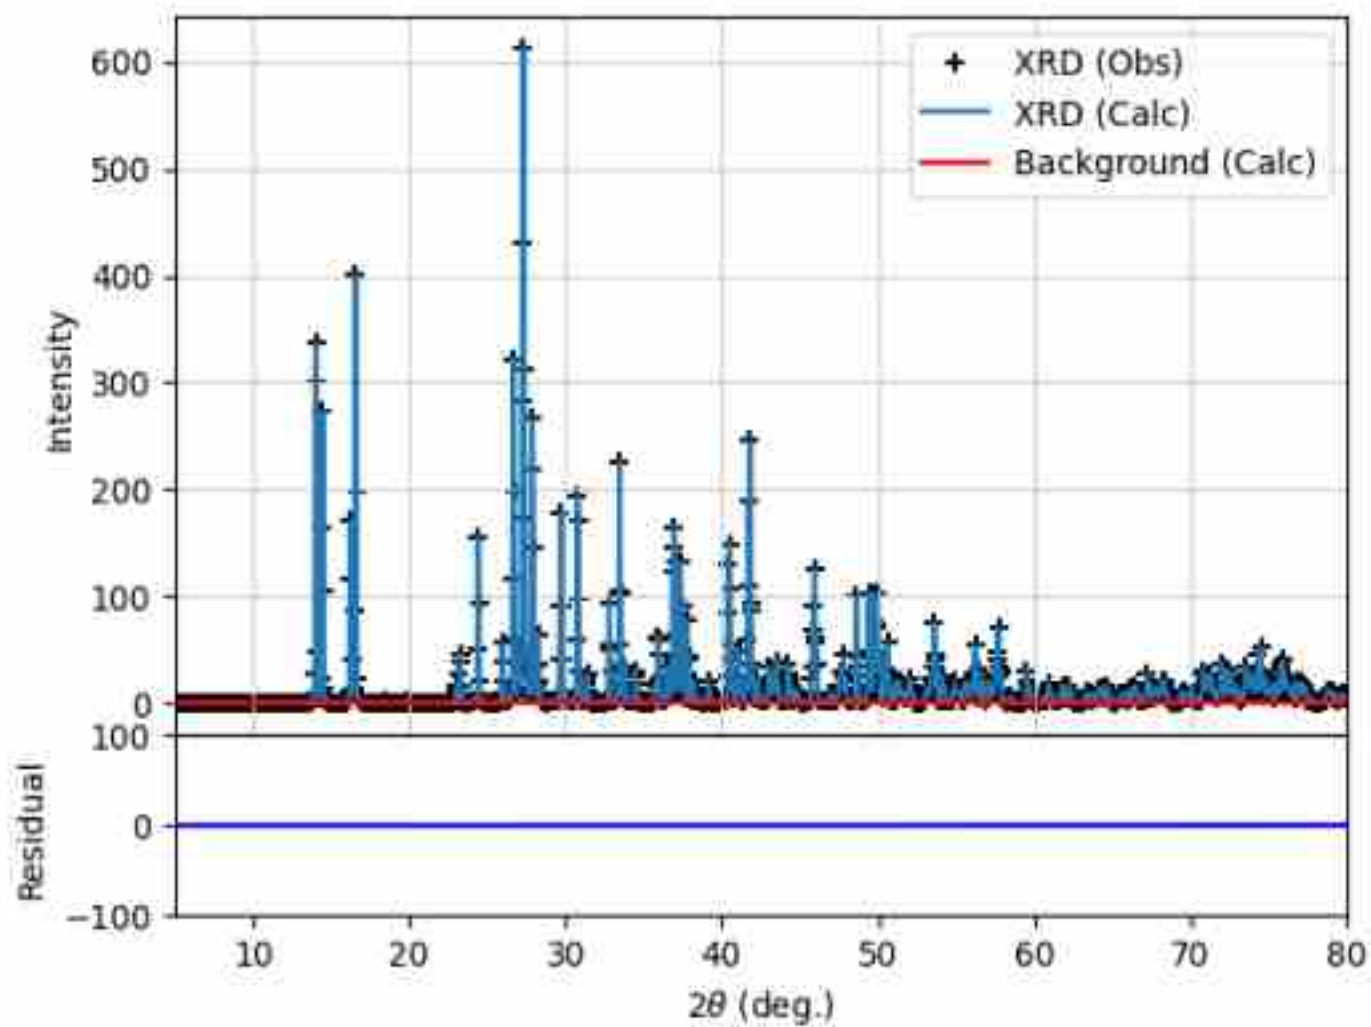

| RMSE before RR | Rwp     | RMSE after RR |
|----------------|---------|---------------|
| 0.018          | 0.56345 | 0.00902       |



# Nb1Cr3Ag2S8

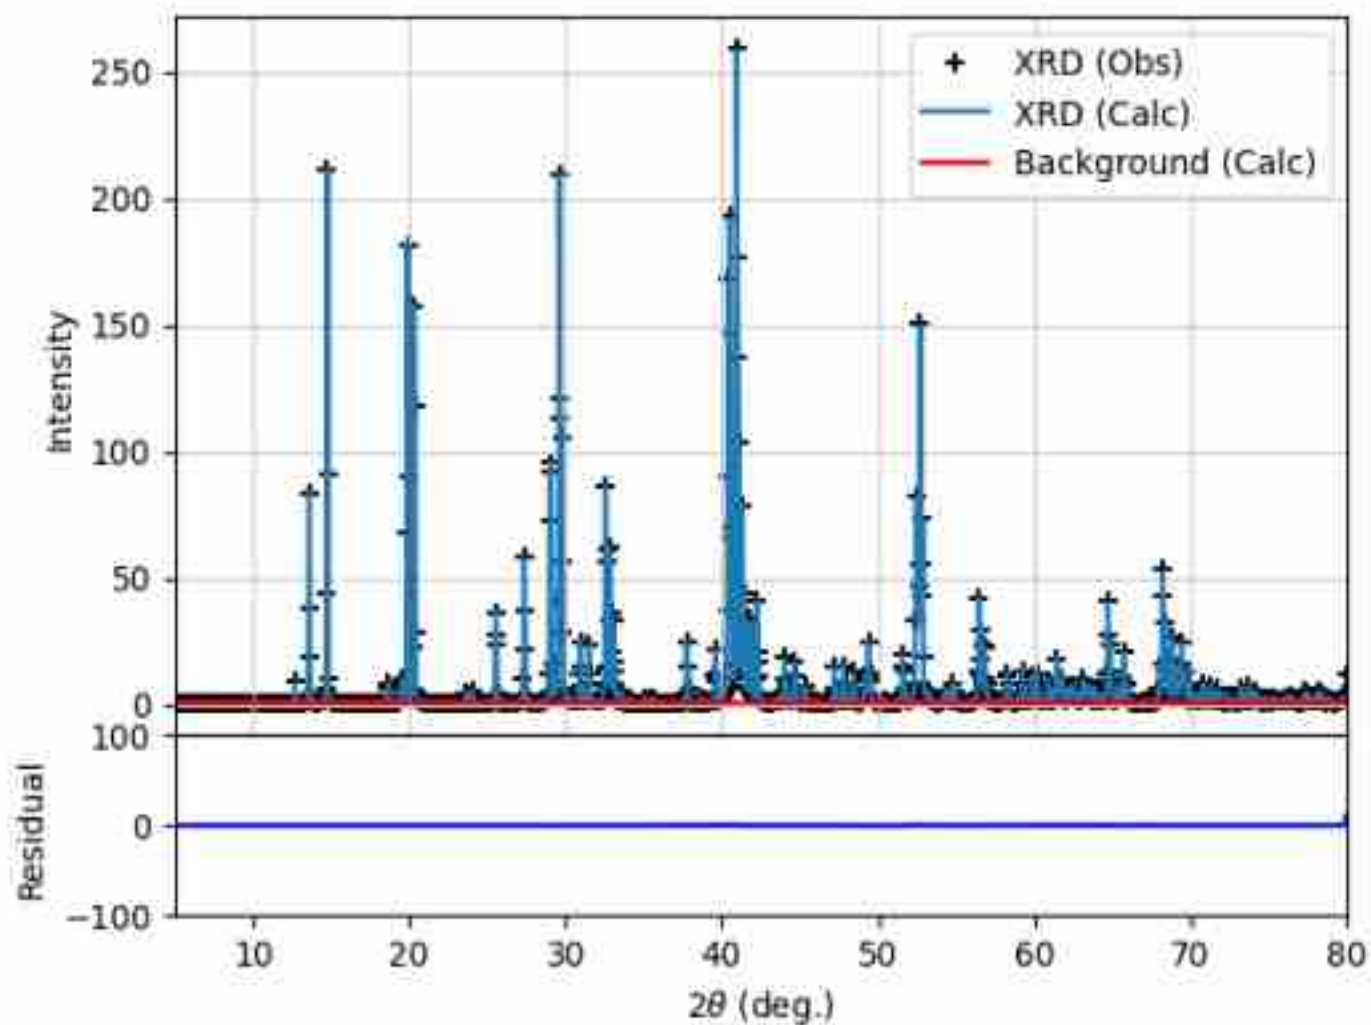

| RMSE before RR | Rwp     | RMSE after RR |
|----------------|---------|---------------|
| 0.018          | 4.55603 | 0.01502       |

# Nb<sub>3</sub>Au<sub>2</sub>

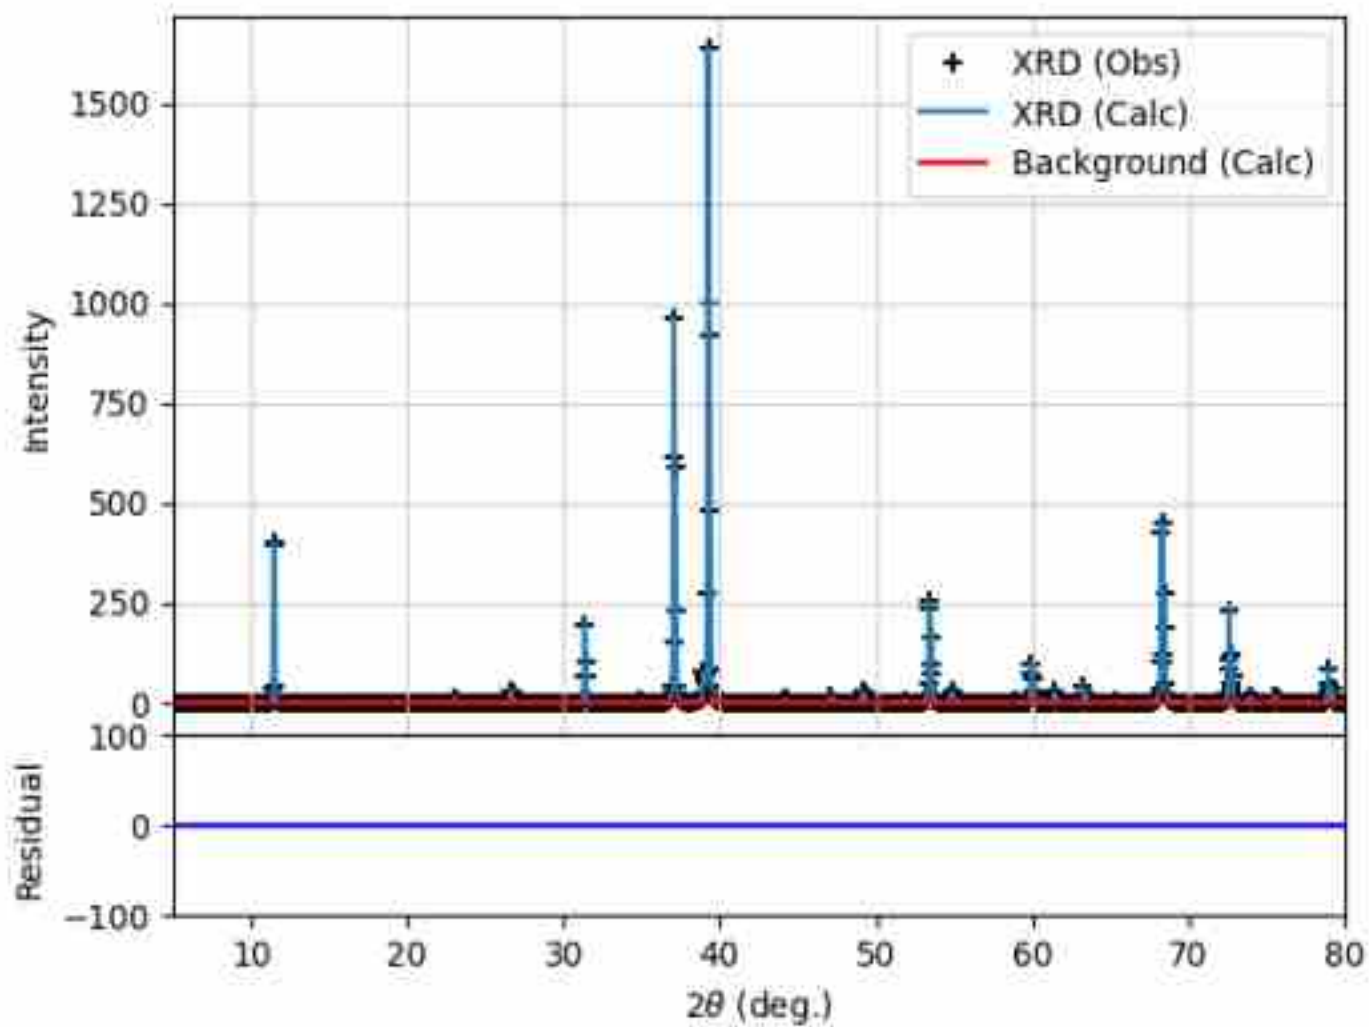

| RMSE before RR | Rwp     | RMSE after RR |
|----------------|---------|---------------|
| 0.018          | 0.00628 | 0.00056       |

# Nb<sub>4</sub>Co<sub>6</sub>Si<sub>2</sub>

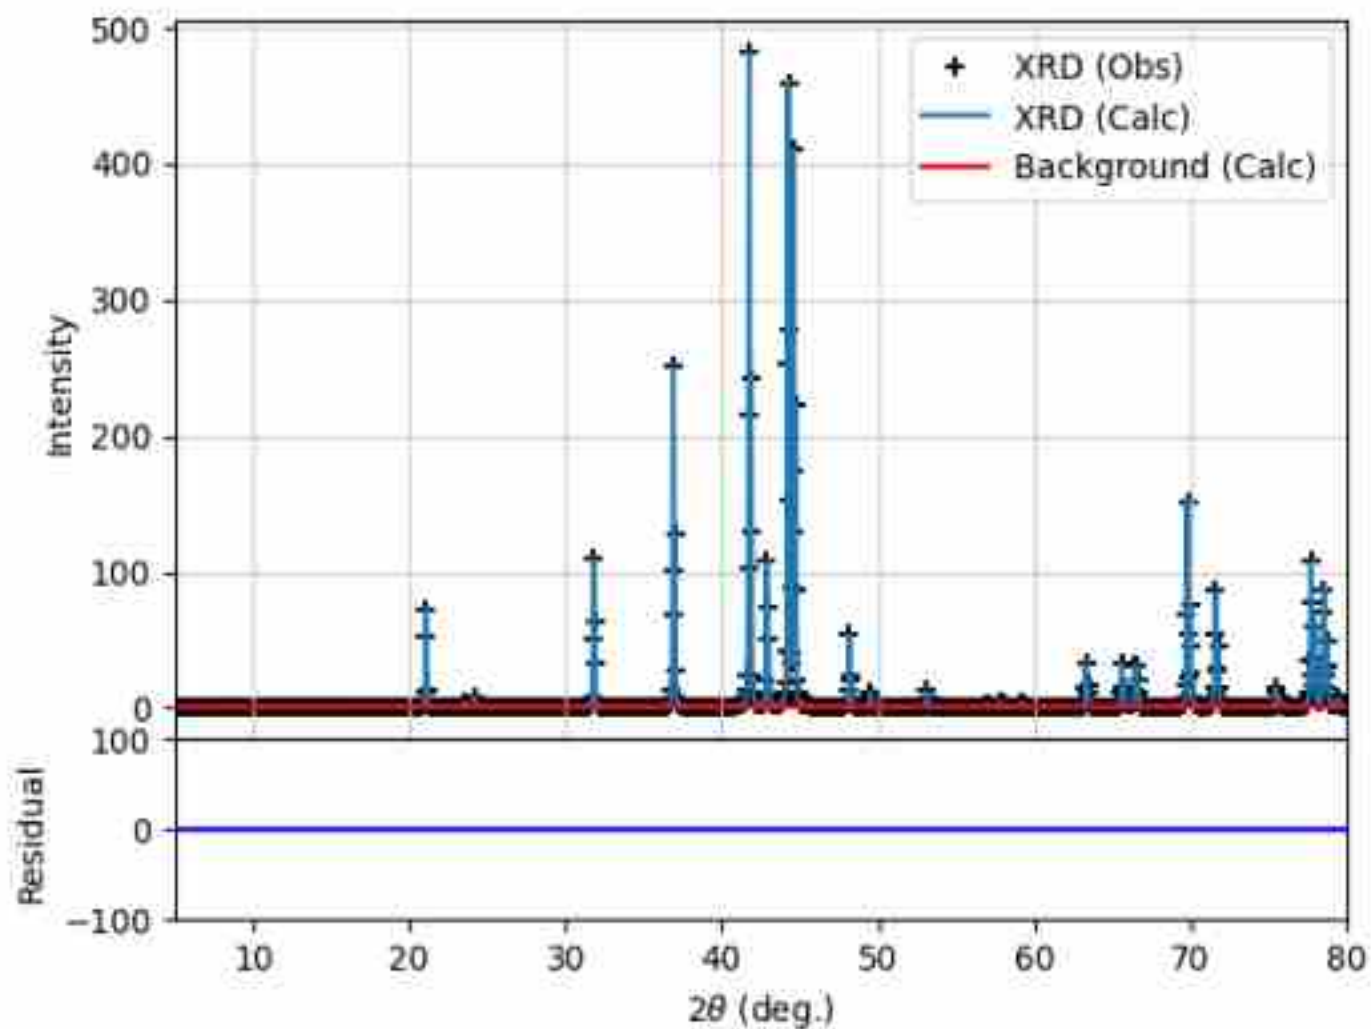

| RMSE before RR | Rwp     | RMSE after RR |
|----------------|---------|---------------|
| 0.018          | 0.00693 | 0.00123       |

# Nb<sub>4</sub>Sn<sub>2</sub>C<sub>2</sub>

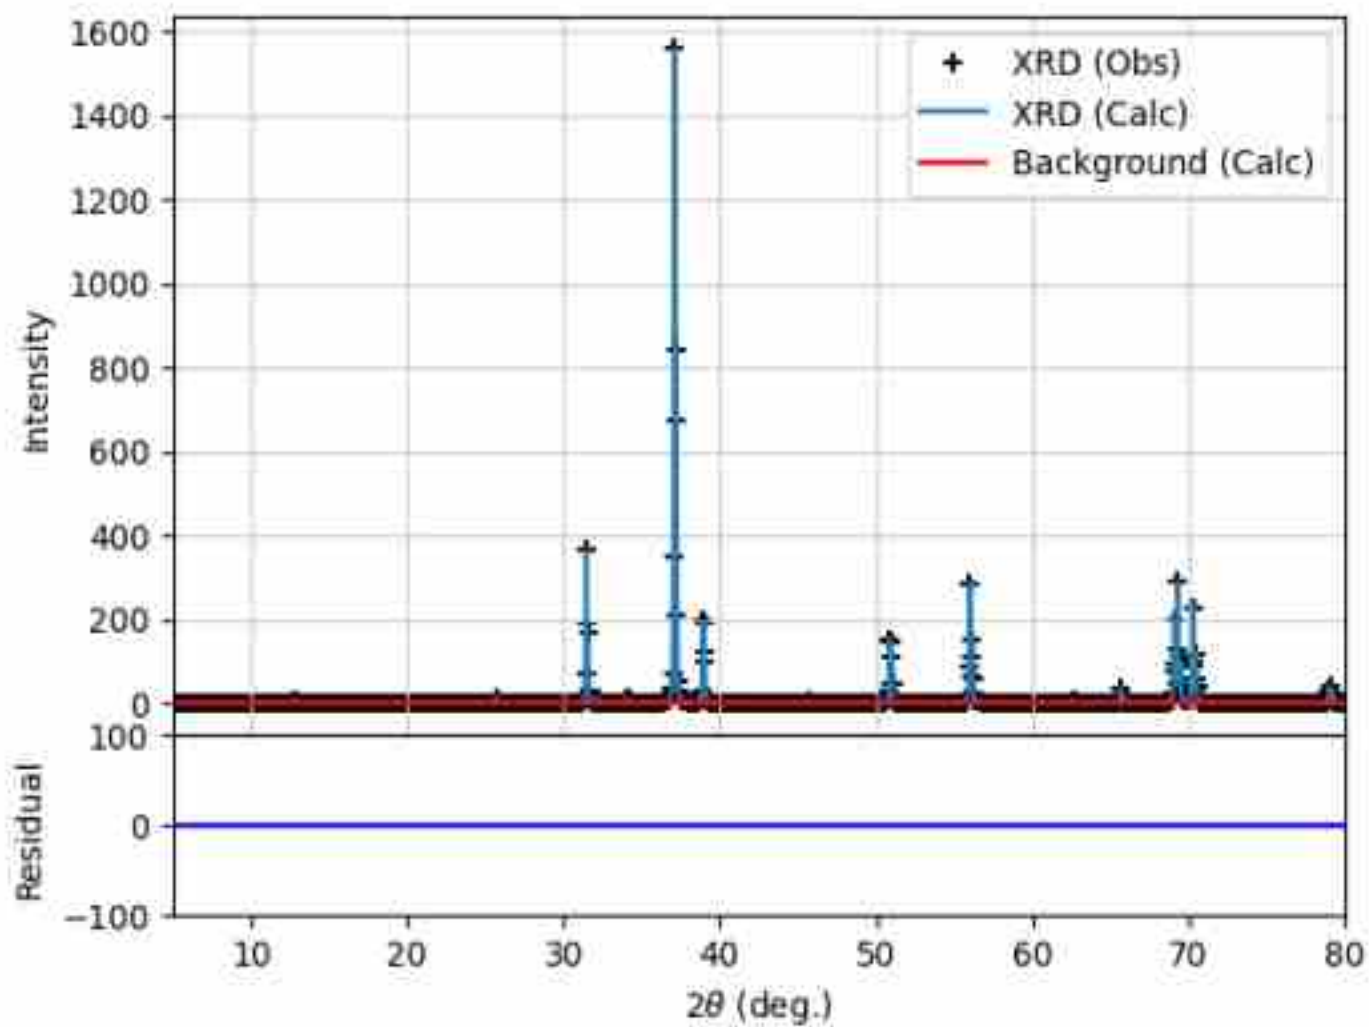

| RMSE before RR | Rwp     | RMSE after RR |
|----------------|---------|---------------|
| 0.018          | 0.00463 | 0.00107       |

# Nd<sub>2</sub>As<sub>2</sub>O<sub>8</sub>

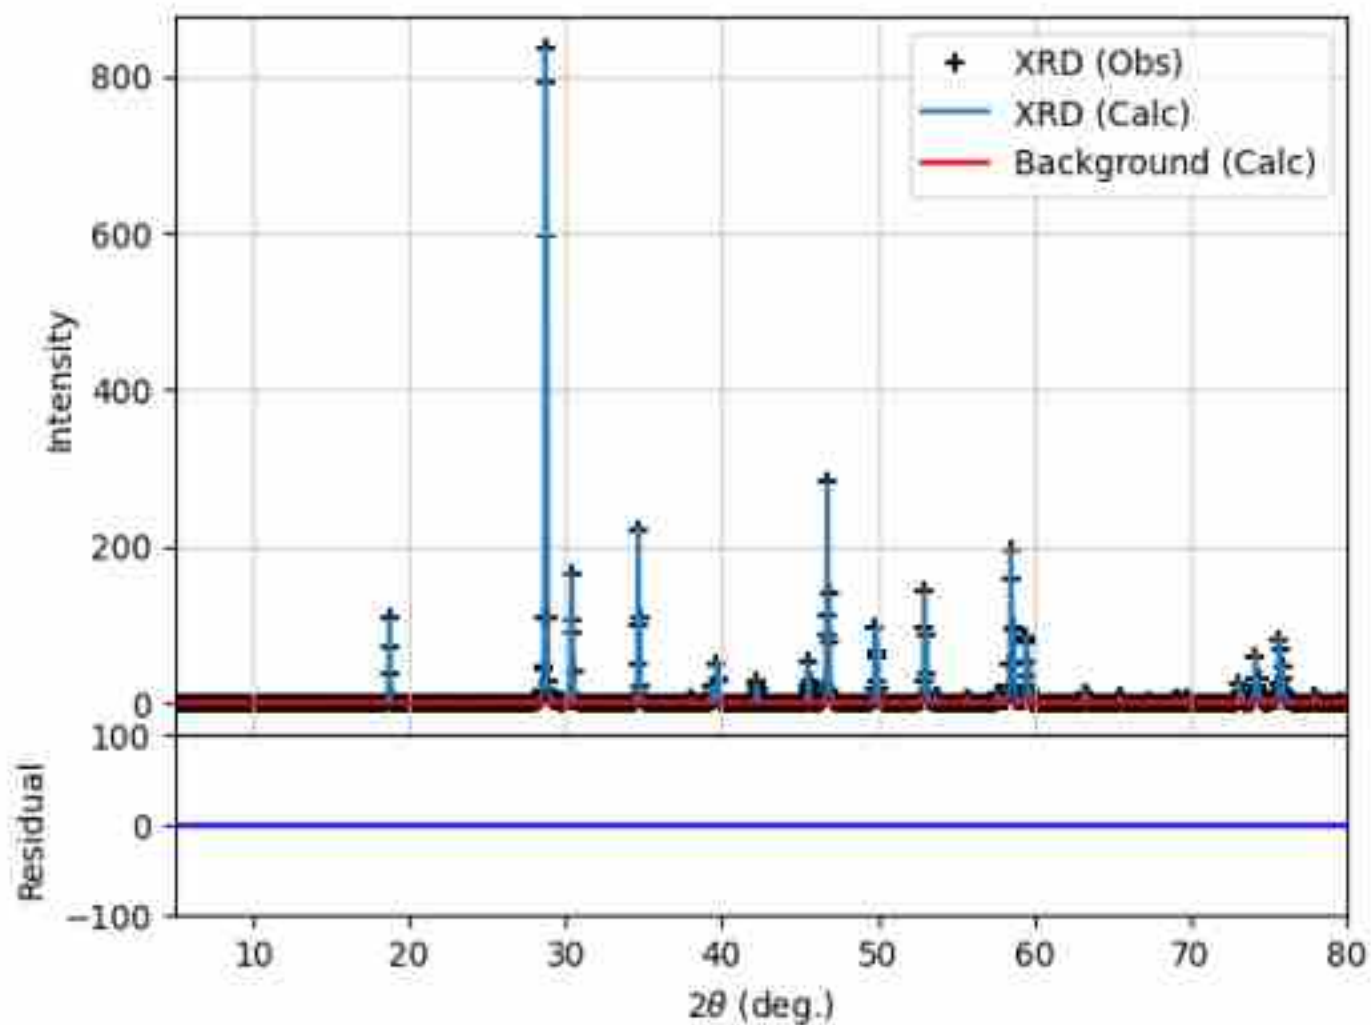

| RMSE before RR | Rwp     | RMSE after RR |
|----------------|---------|---------------|
| 0.018          | 0.00291 | 0.00119       |

# Nd2Cd6

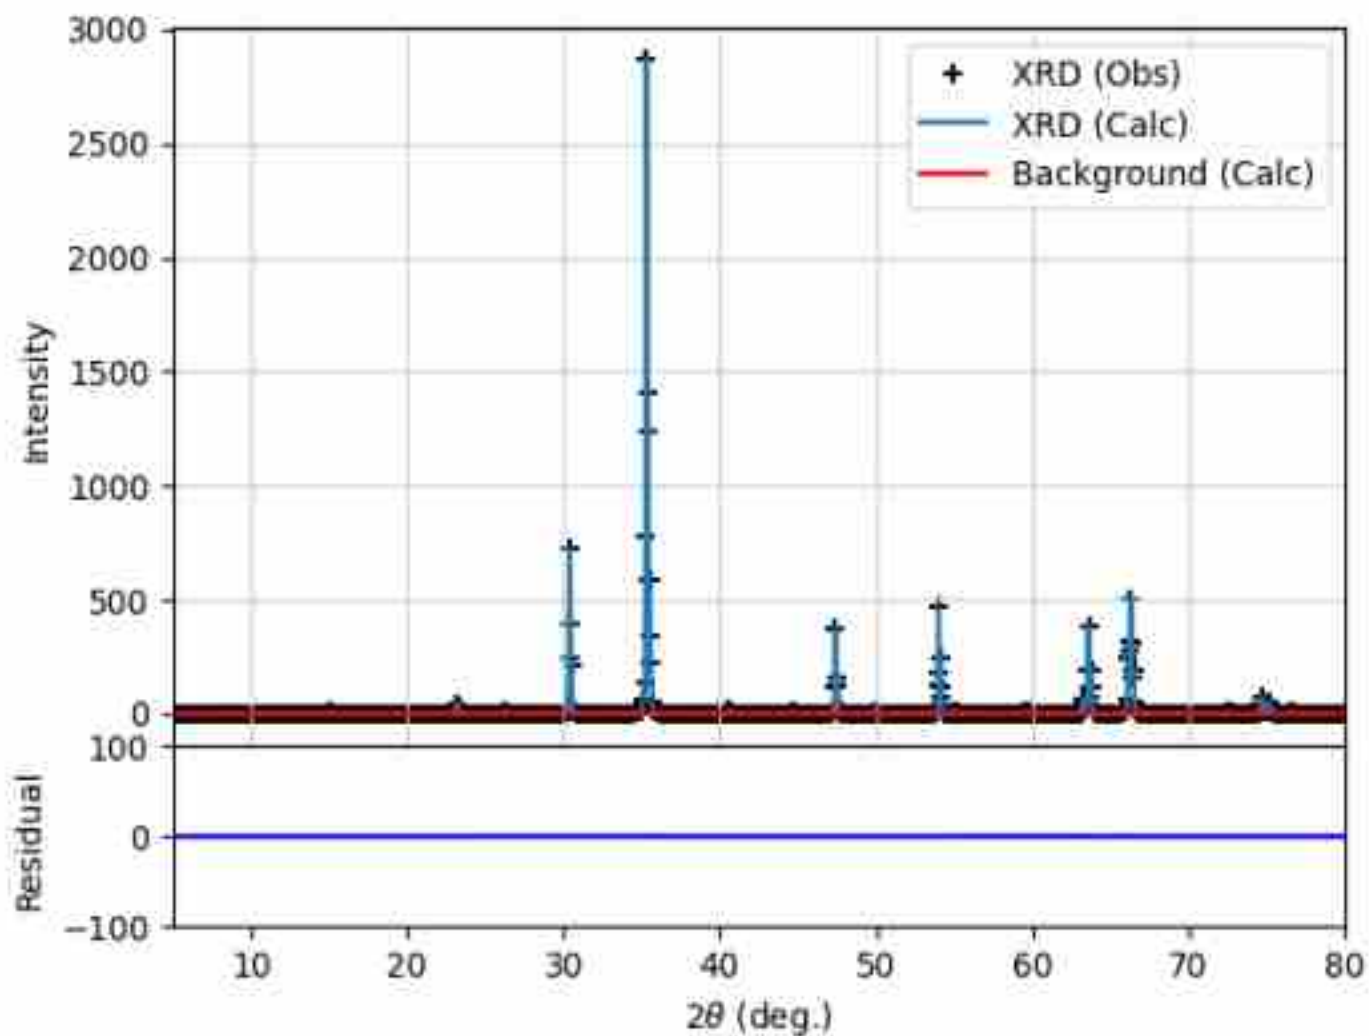

| RMSE before RR | Rwp     | RMSE after RR |
|----------------|---------|---------------|
| 0.018          | 0.23321 | 0.00209       |

# Nd<sub>2</sub>Cu<sub>2</sub>Ag<sub>2</sub>

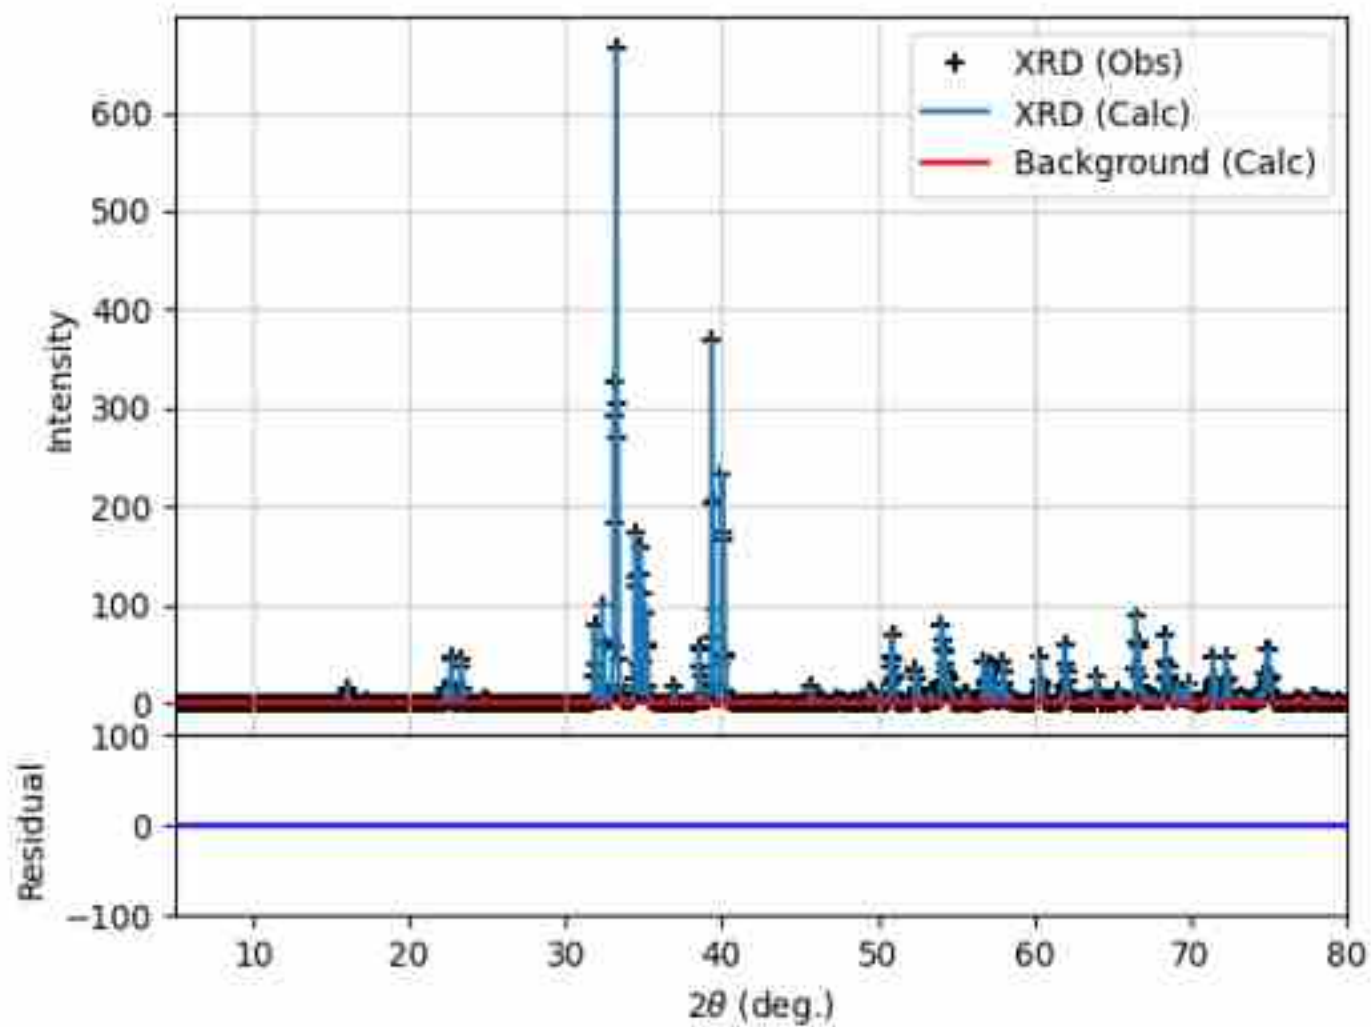

| RMSE before RR | Rwp     | RMSE after RR |
|----------------|---------|---------------|
| 0.018          | 0.00309 | 0.00023       |

# Nd3Mg3Ti3

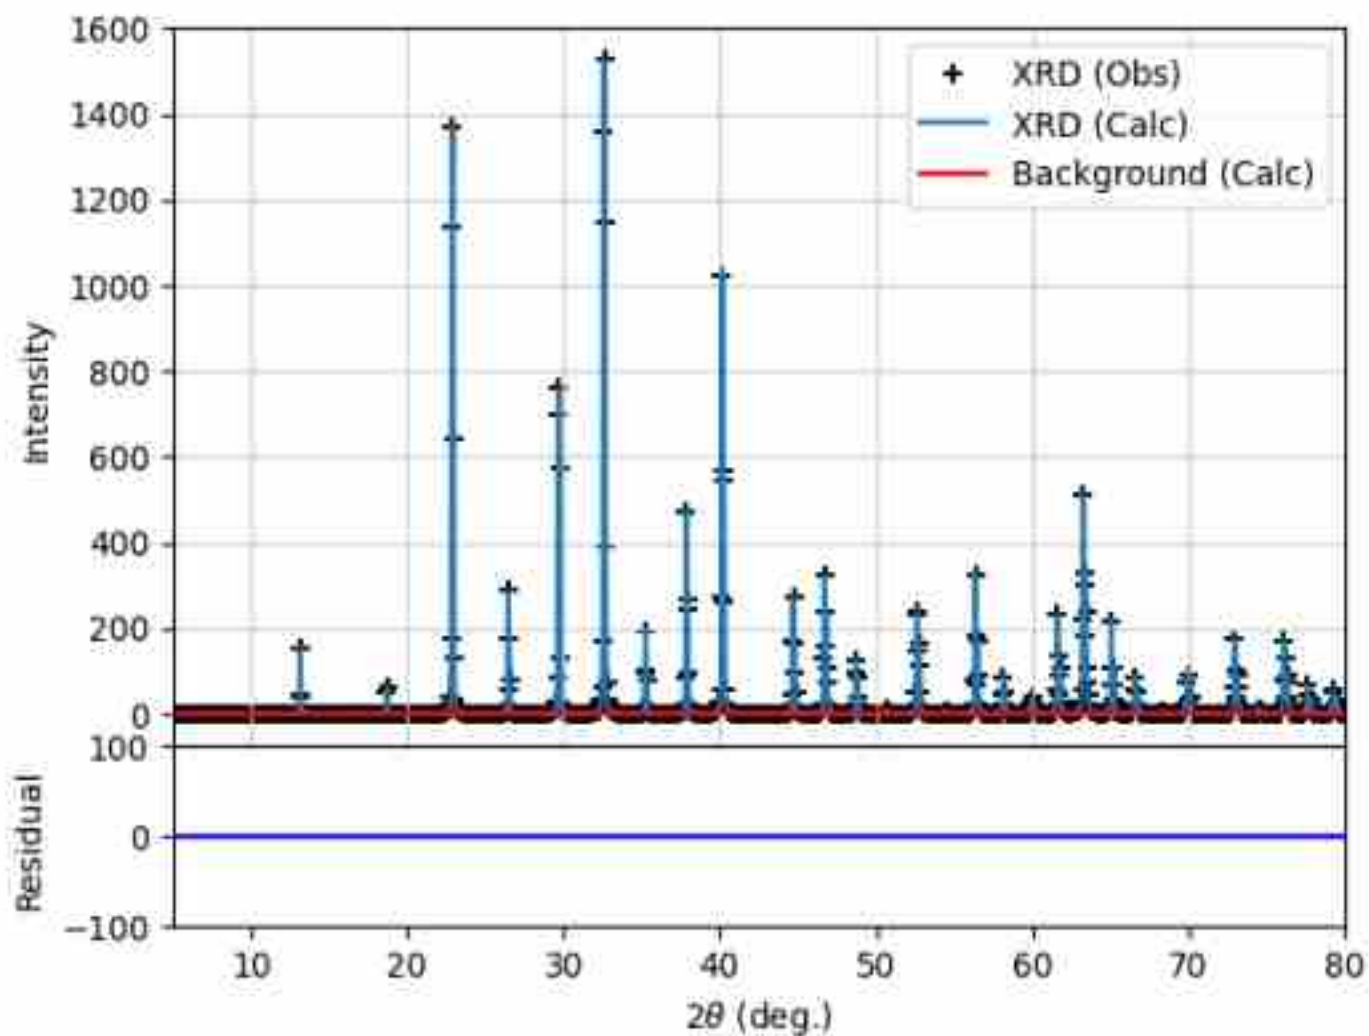

| RMSE before RR | Rwp     | RMSE after RR |
|----------------|---------|---------------|
| 0.018          | 0.00458 | 0.0014        |



# Nd<sub>4</sub>Ge<sub>10</sub>Ir<sub>6</sub>

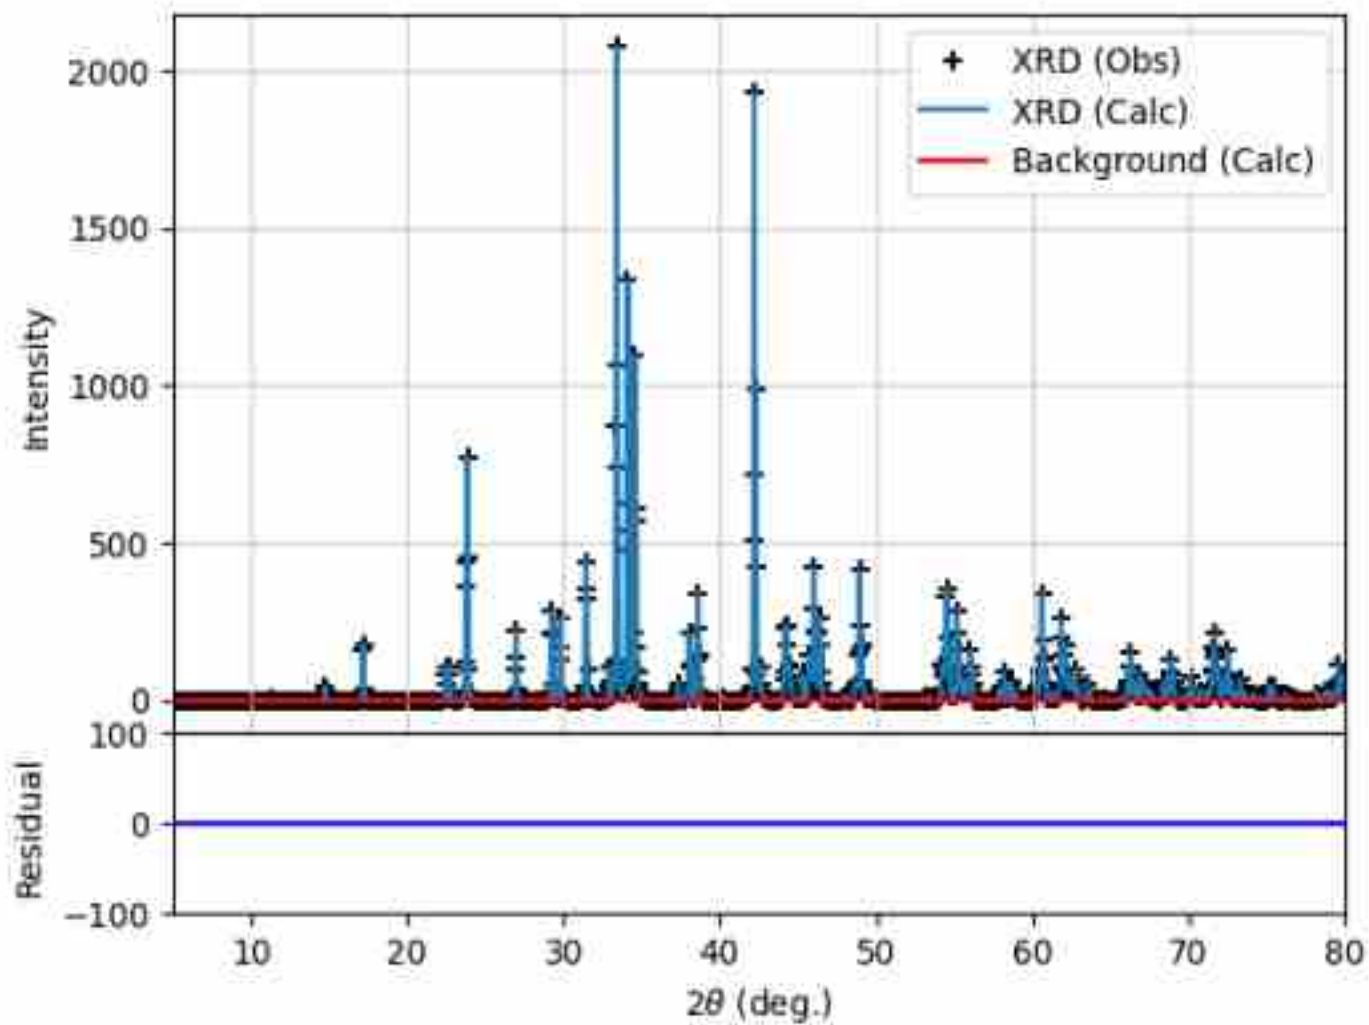

| RMSE before RR | Rwp    | RMSE after RR |
|----------------|--------|---------------|
| 0.018          | 0.0038 | 0.00036       |

# Nd<sub>4</sub>Zn<sub>10</sub>Sn<sub>2</sub>

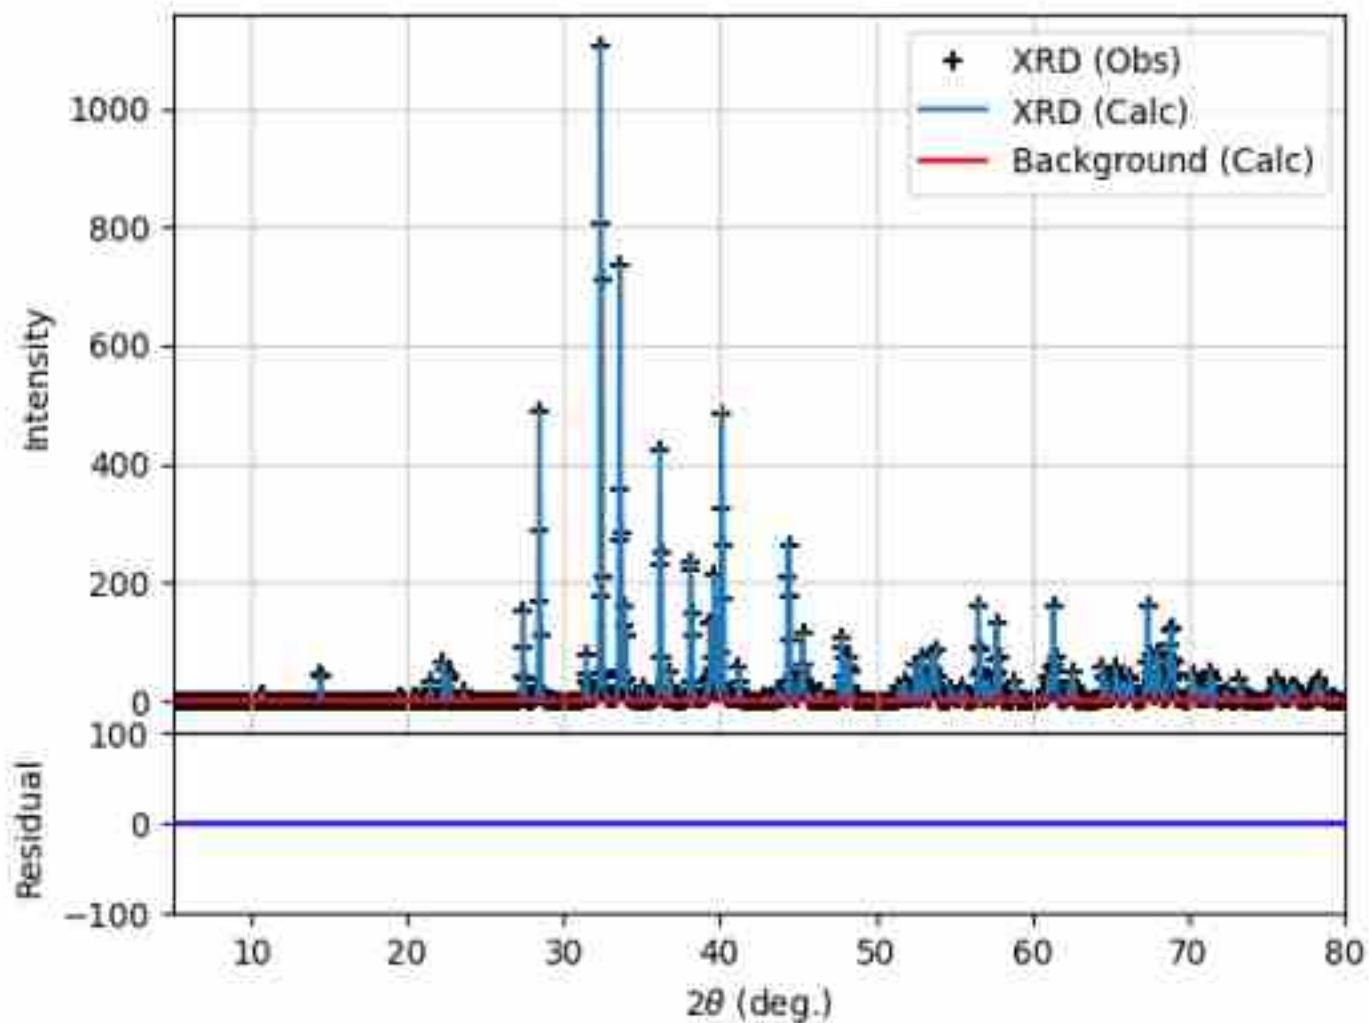

| RMSE before RR | Rwp     | RMSE after RR |
|----------------|---------|---------------|
| 0.018          | 0.00375 | 0.00037       |

# Pa2C18

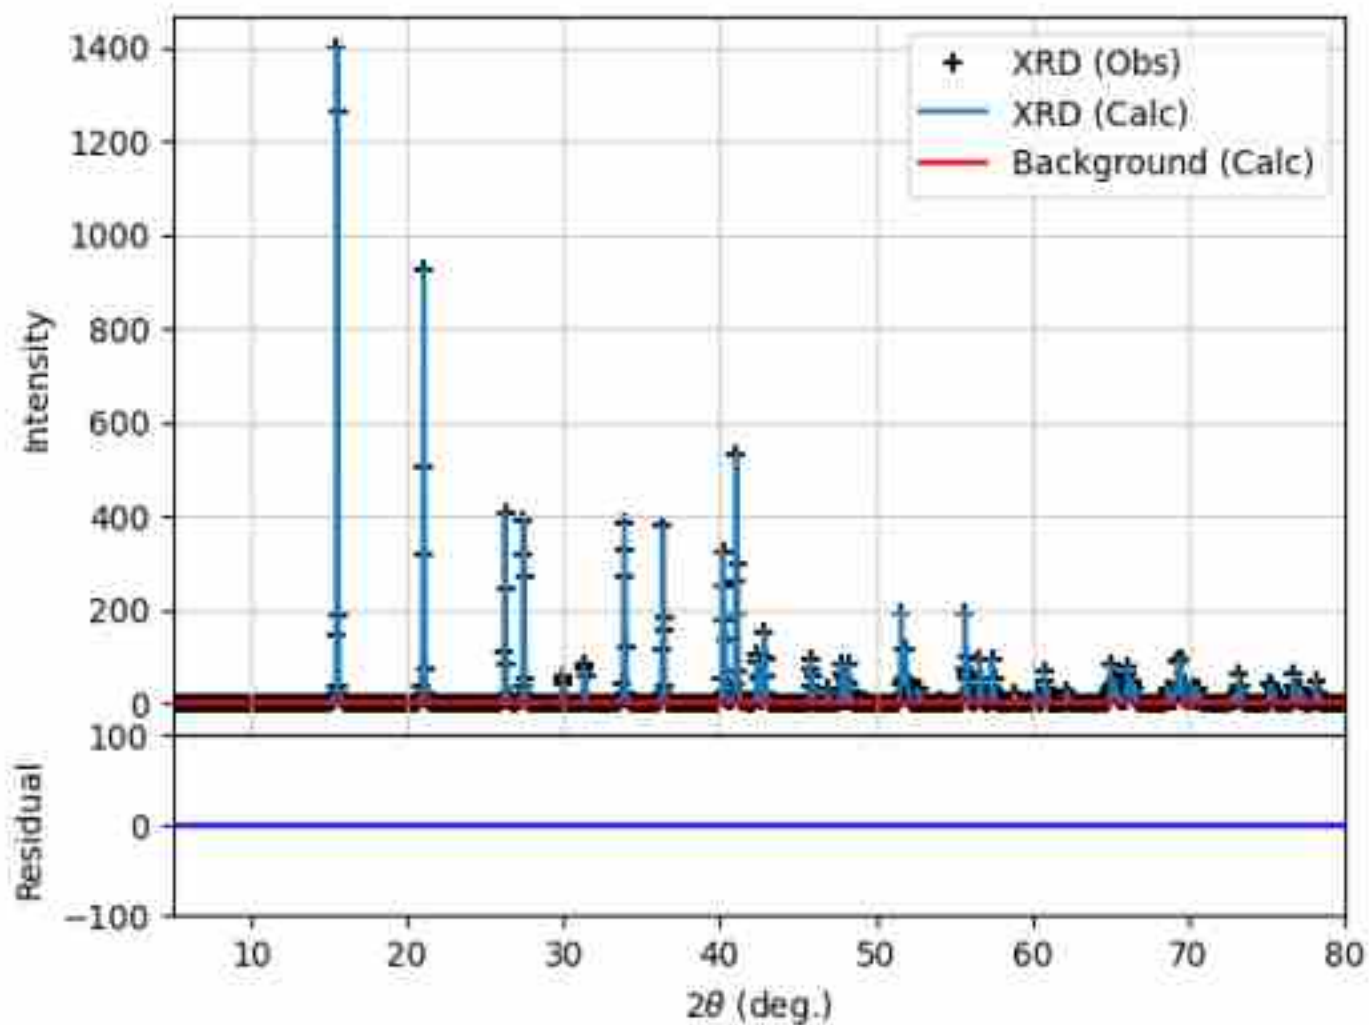

| RMSE before RR | Rwp    | RMSE after RR |
|----------------|--------|---------------|
| 0.018          | 0.0032 | 0.00084       |

# Pr<sub>1</sub>Cu<sub>4</sub>Pd<sub>1</sub>

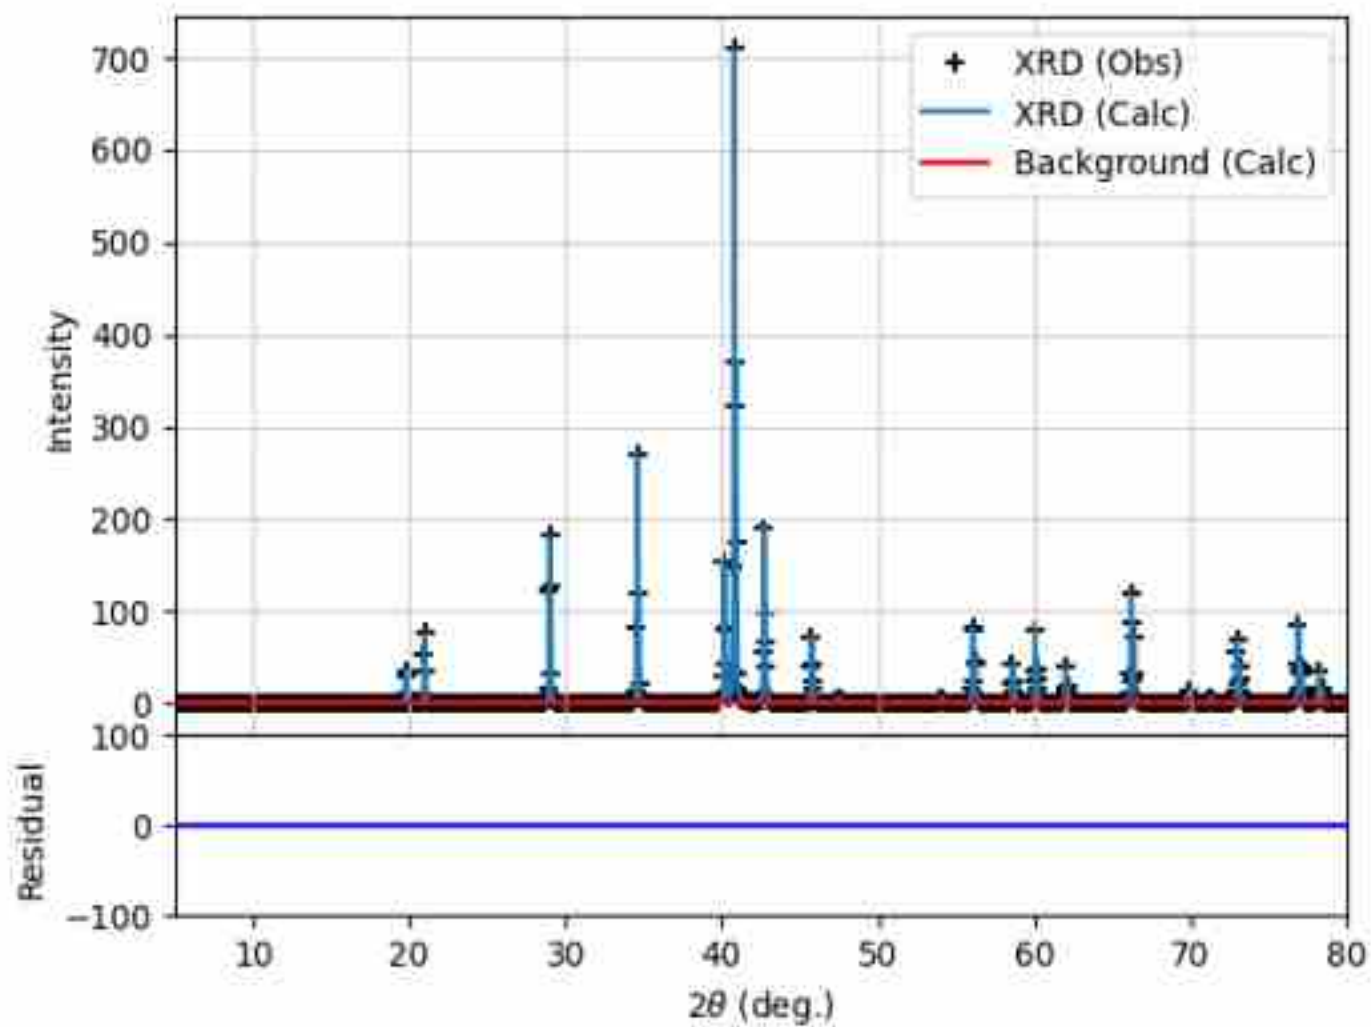

| RMSE before RR | Rwp     | RMSE after RR |
|----------------|---------|---------------|
| 0.018          | 0.00714 | 0.00119       |

# Pr<sub>2</sub>Co<sub>2</sub>C<sub>4</sub>

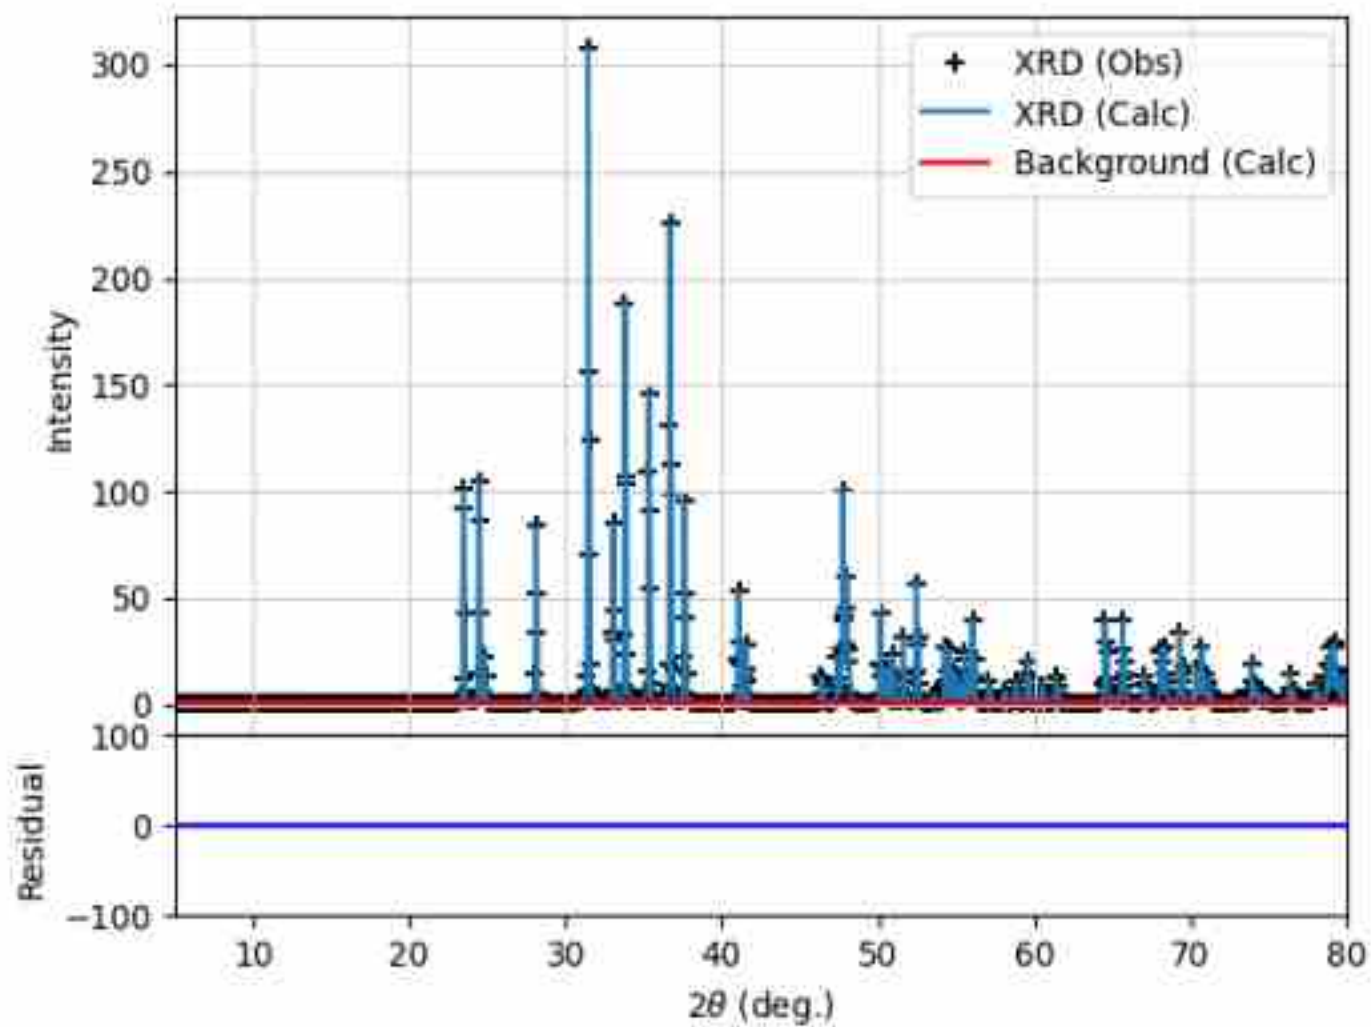

| RMSE before RR | Rwp     | RMSE after RR |
|----------------|---------|---------------|
| 0.018          | 0.00342 | 0.00061       |

# Pr<sub>4</sub>Ge<sub>8</sub>Pt<sub>4</sub>

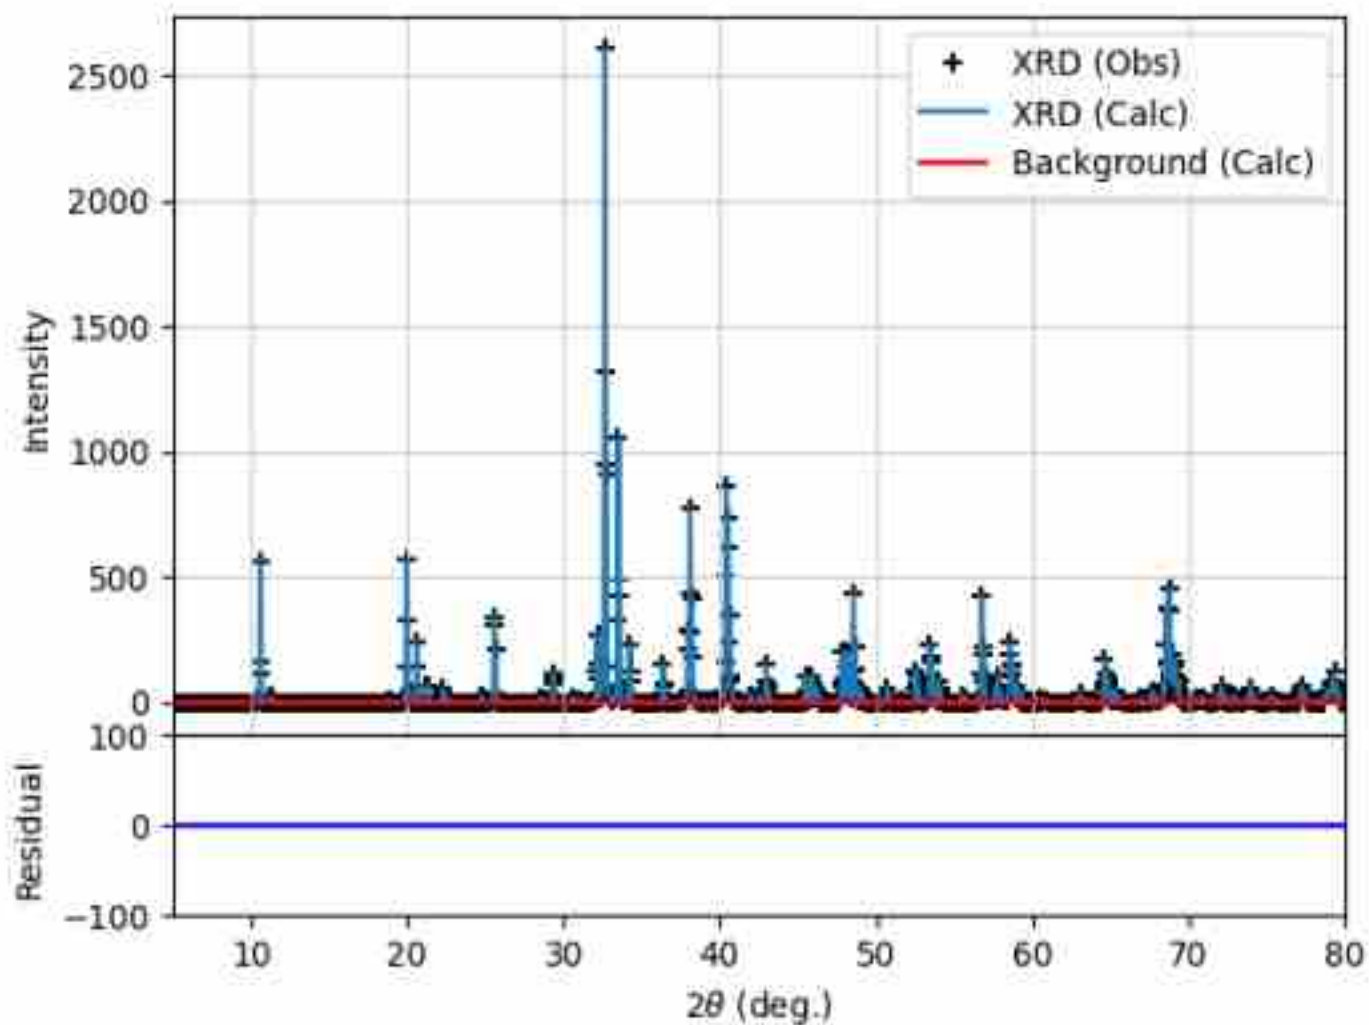

| RMSE before RR | Rwp     | RMSE after RR |
|----------------|---------|---------------|
| 0.018          | 0.00377 | 0.00041       |

# Pu<sub>4</sub>Ni<sub>4</sub>Sn<sub>2</sub>

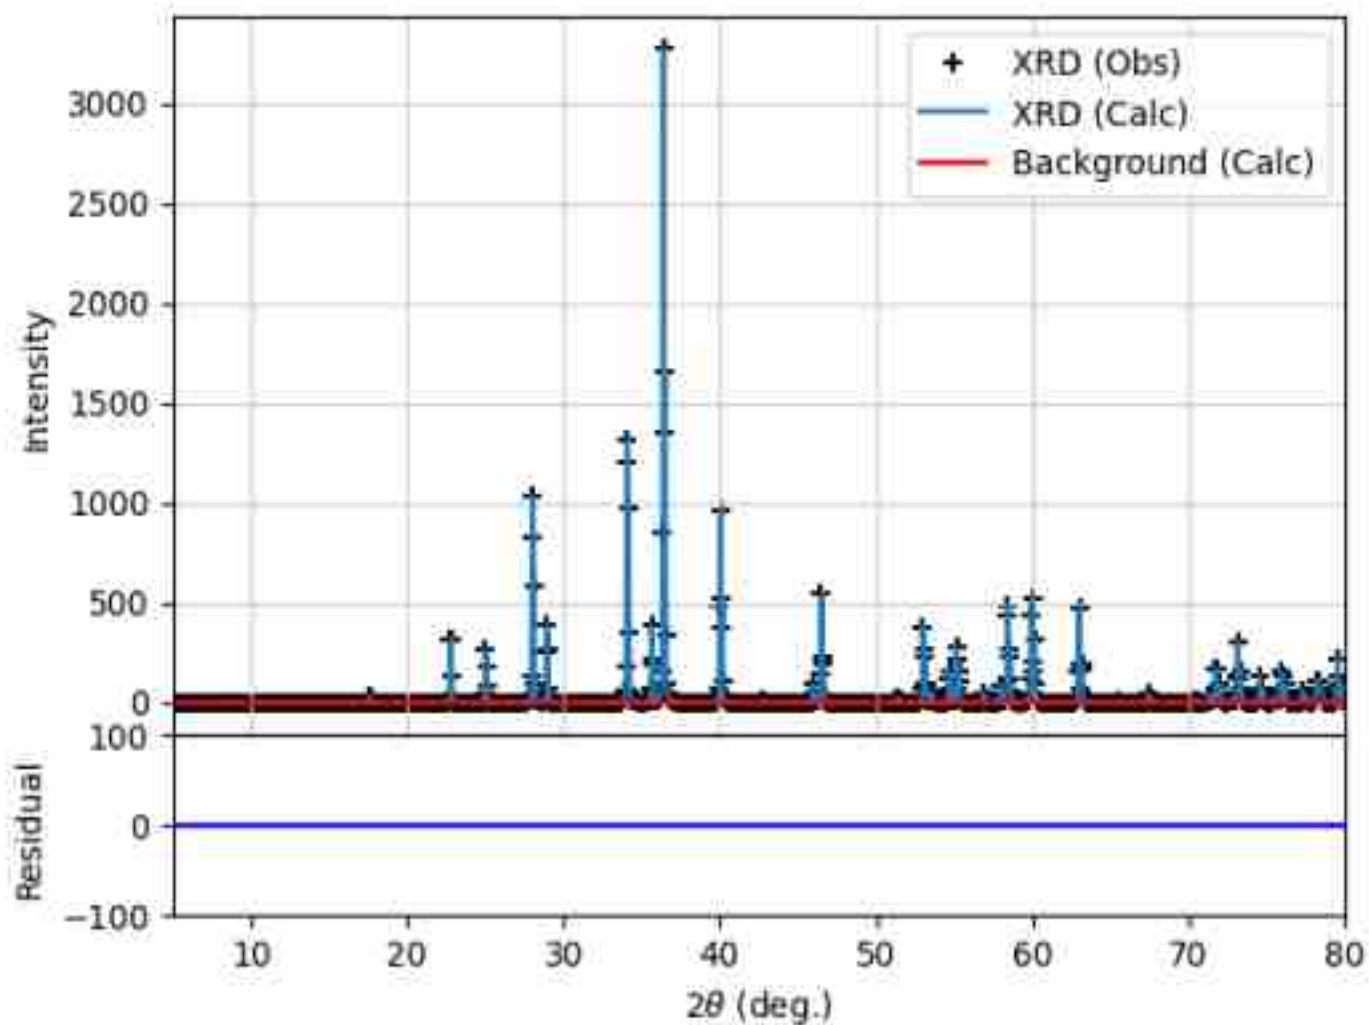

| RMSE before RR | Rwp     | RMSE after RR |
|----------------|---------|---------------|
| 0.018          | 0.00457 | 0.00053       |

# Rb1Mn1Cu1S2

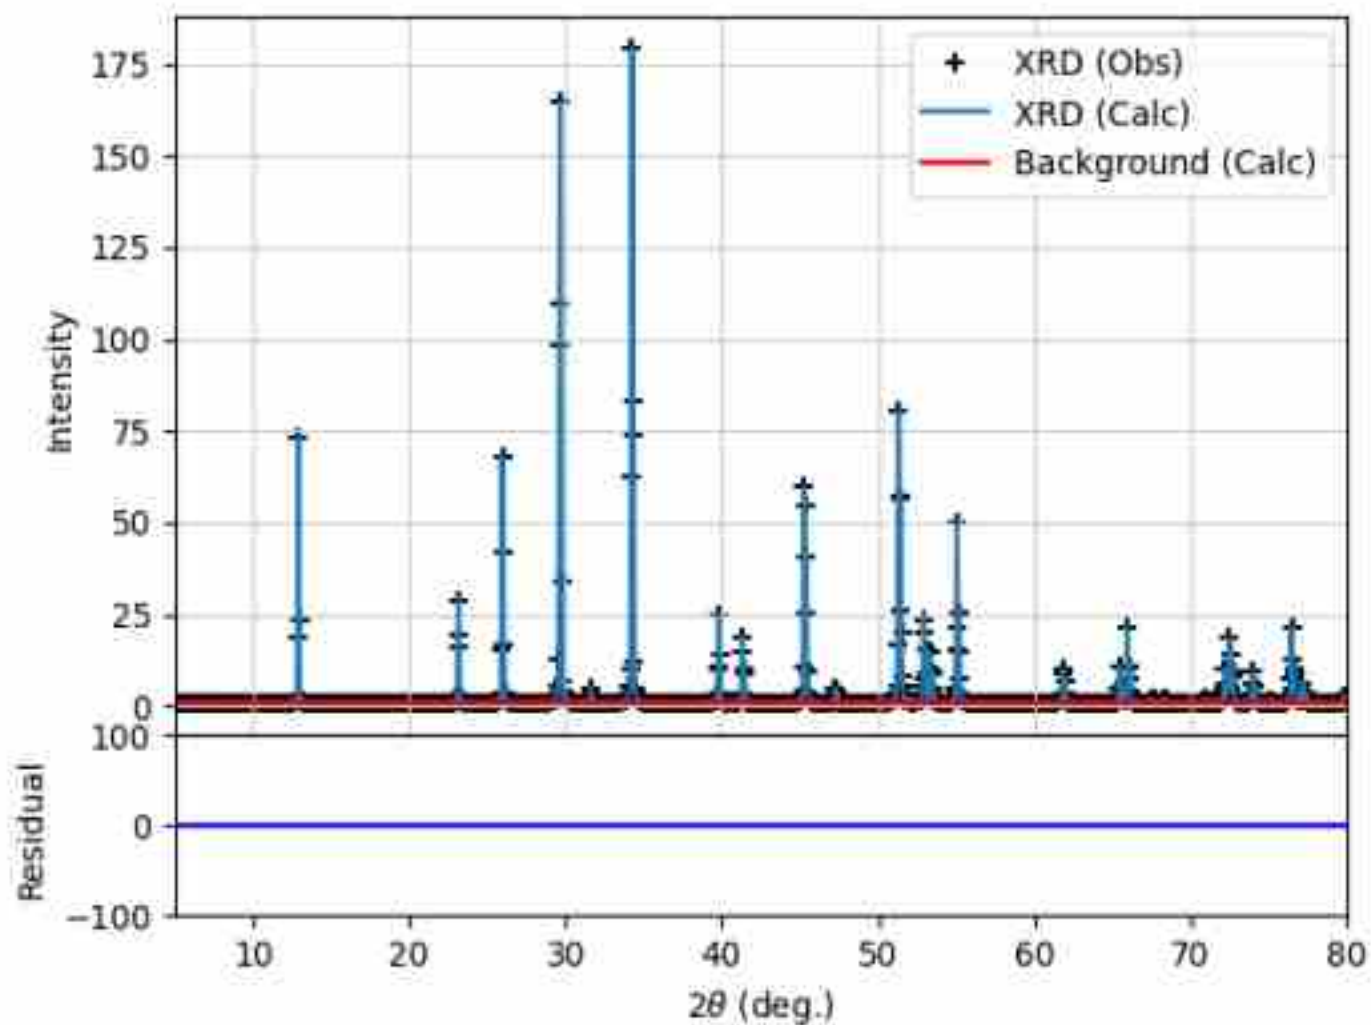

| RMSE before RR | Rwp     | RMSE after RR |
|----------------|---------|---------------|
| 0.018          | 0.00296 | 0.00036       |



# Rb1Tl1O2

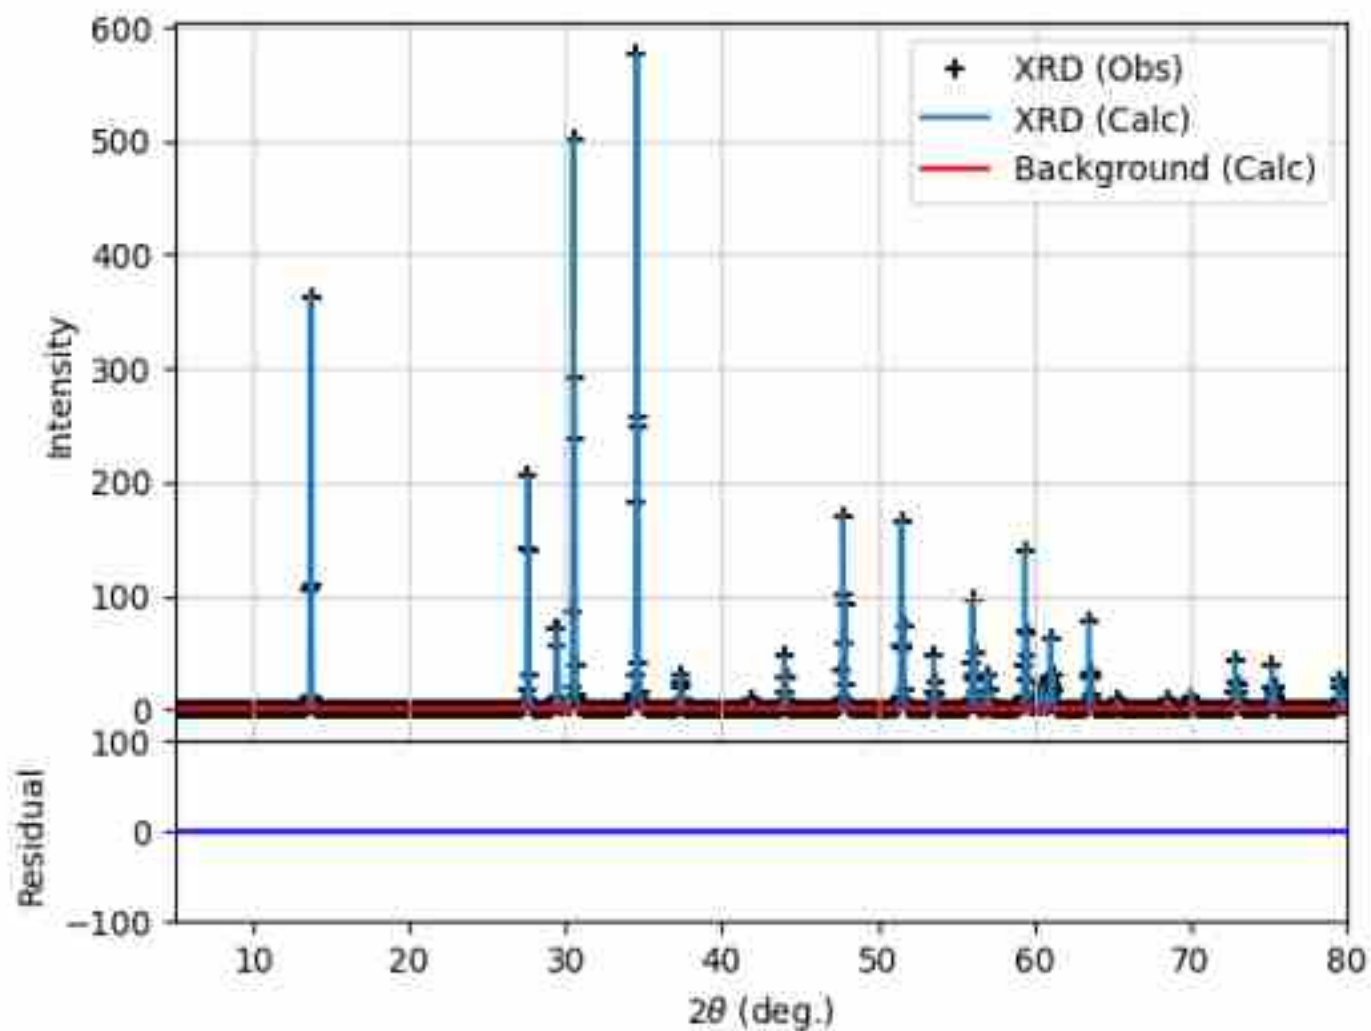

| RMSE before RR | Rwp     | RMSE after RR |
|----------------|---------|---------------|
| 0.018          | 0.00458 | 0.00156       |

# Rb<sub>2</sub>Ag<sub>2</sub>O<sub>4</sub>

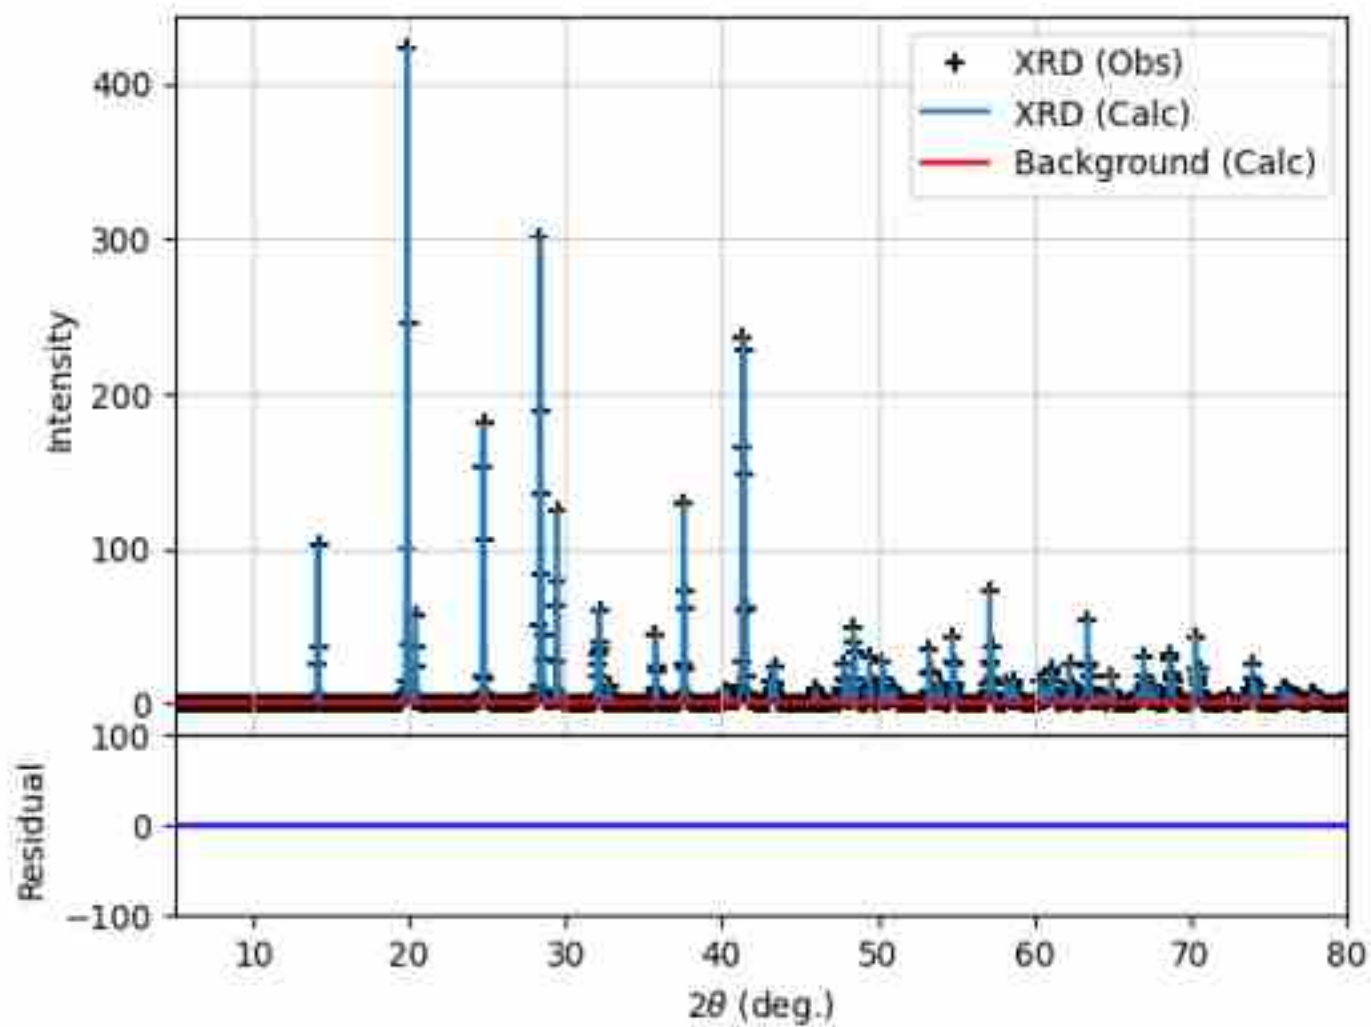

| RMSE before RR | Rwp     | RMSE after RR |
|----------------|---------|---------------|
| 0.018          | 0.00341 | 0.00082       |

# Rb<sub>2</sub>Tm<sub>2</sub>Be<sub>2</sub>F<sub>12</sub>

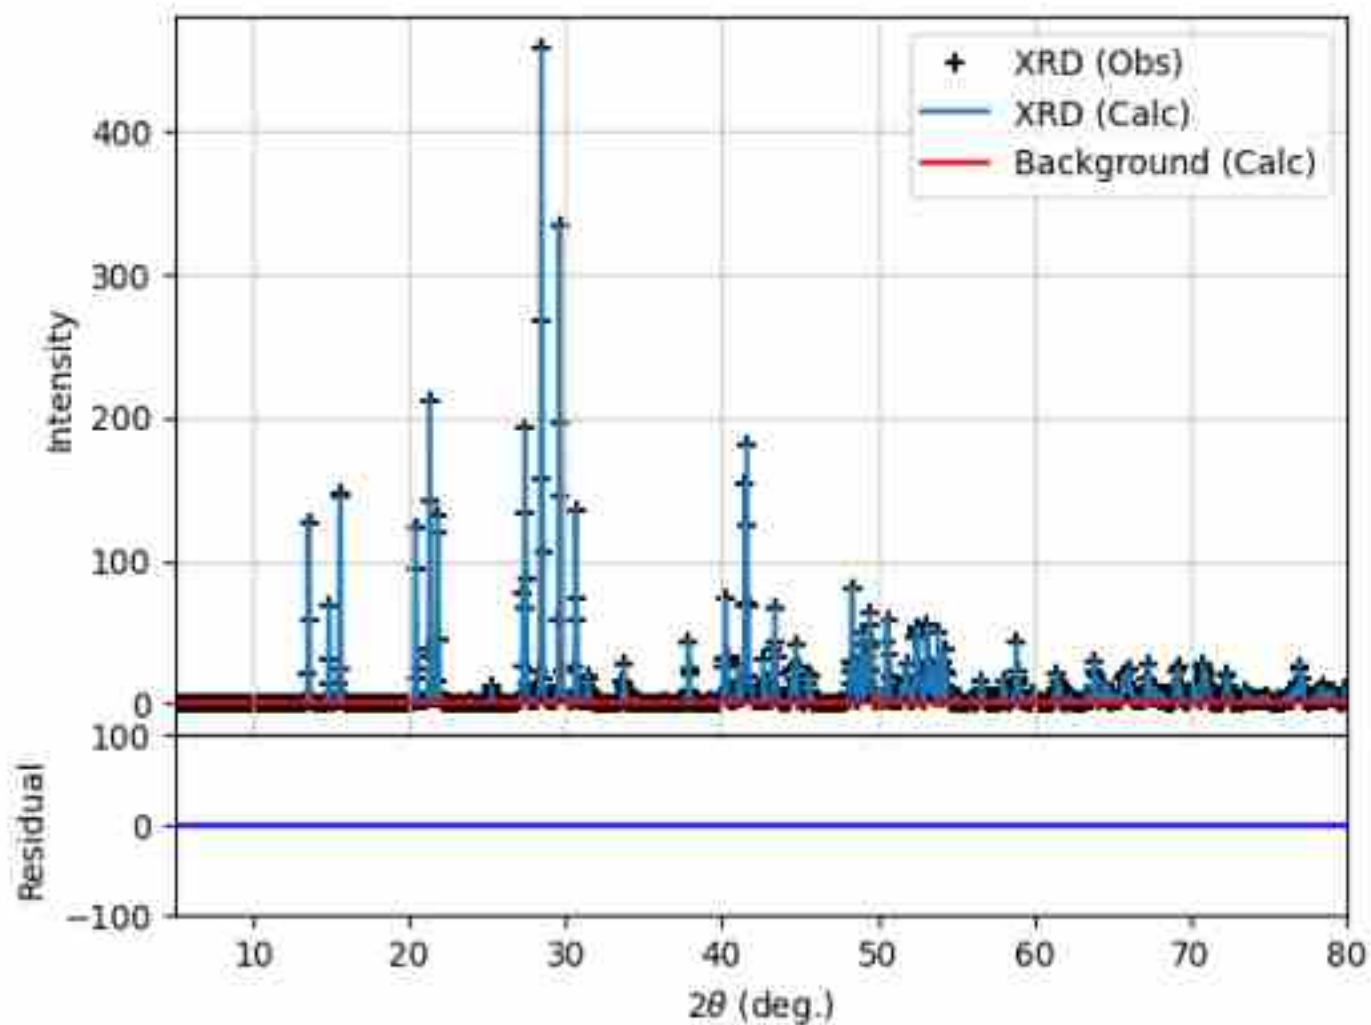

| RMSE before RR | Rwp     | RMSE after RR |
|----------------|---------|---------------|
| 0.018          | 0.00357 | 0.00145       |

# Rb<sub>2</sub>Y<sub>2</sub>Be<sub>2</sub>F<sub>12</sub>

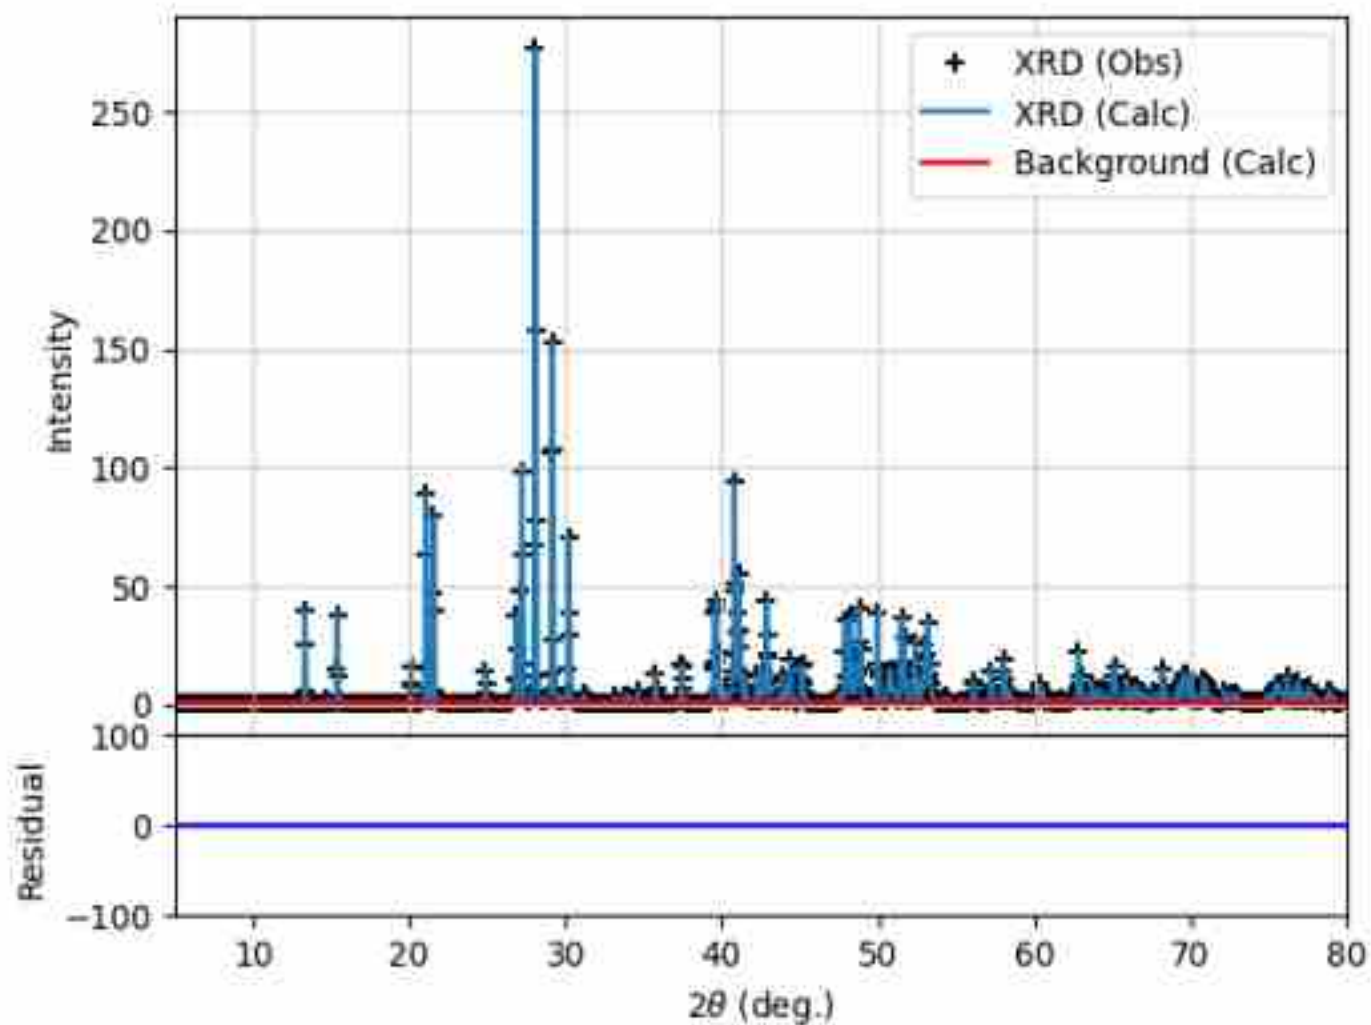

| RMSE before RR | Rwp     | RMSE after RR |
|----------------|---------|---------------|
| 0.018          | 0.00369 | 0.00134       |

# Rb<sub>3</sub>Ca<sub>2</sub>Cl<sub>7</sub>

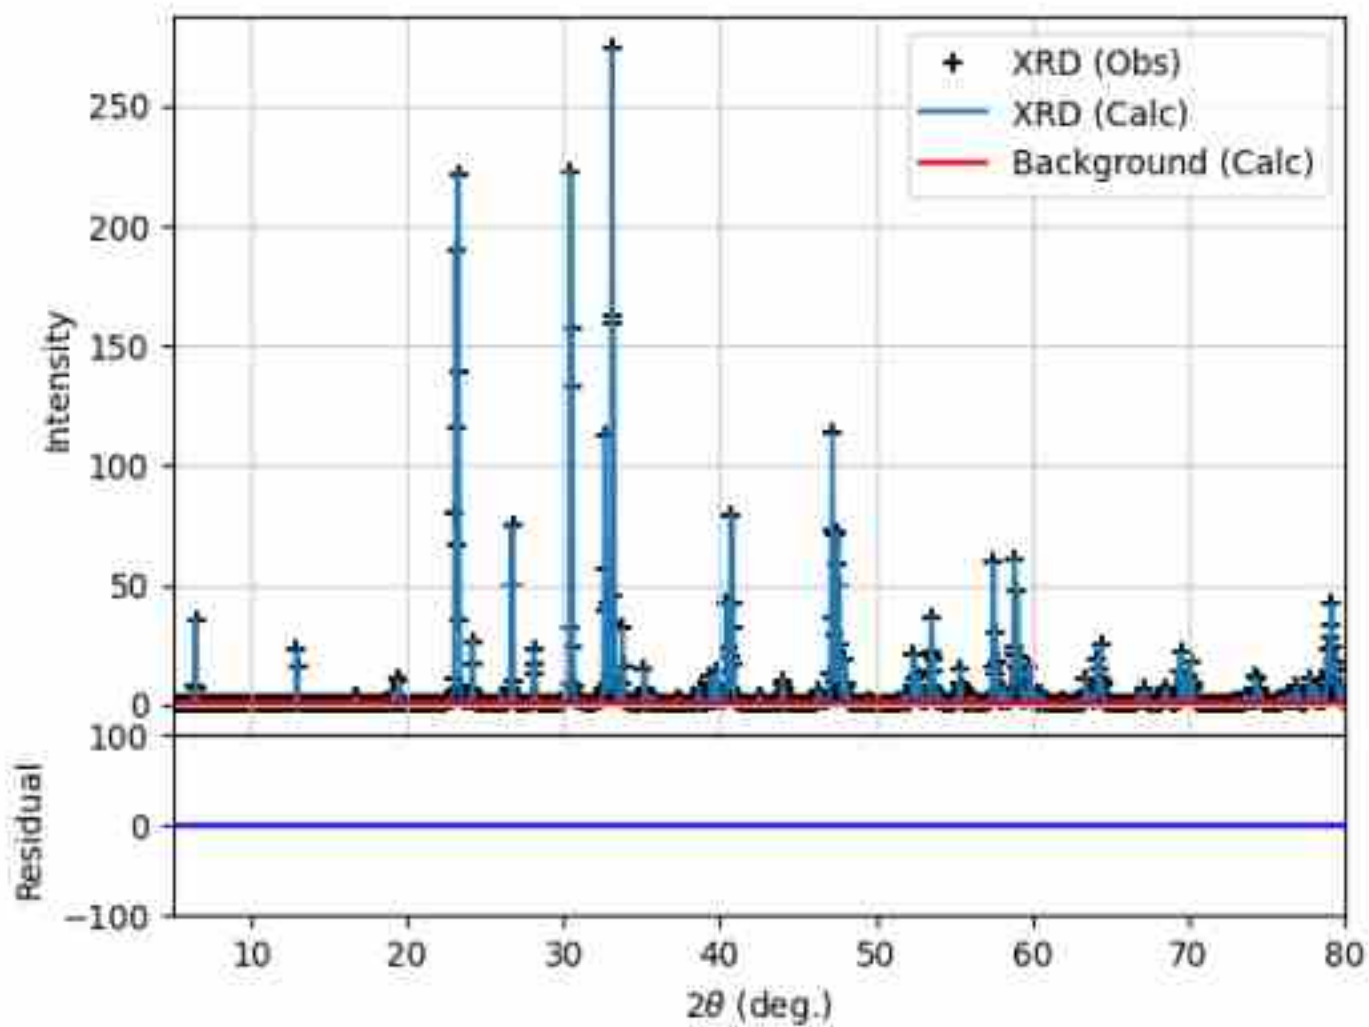

| RMSE before RR | Rwp     | RMSE after RR |
|----------------|---------|---------------|
| 0.018          | 0.00383 | 0.00057       |

# Rb<sub>3</sub>Y<sub>1</sub>P<sub>2</sub>O<sub>8</sub>

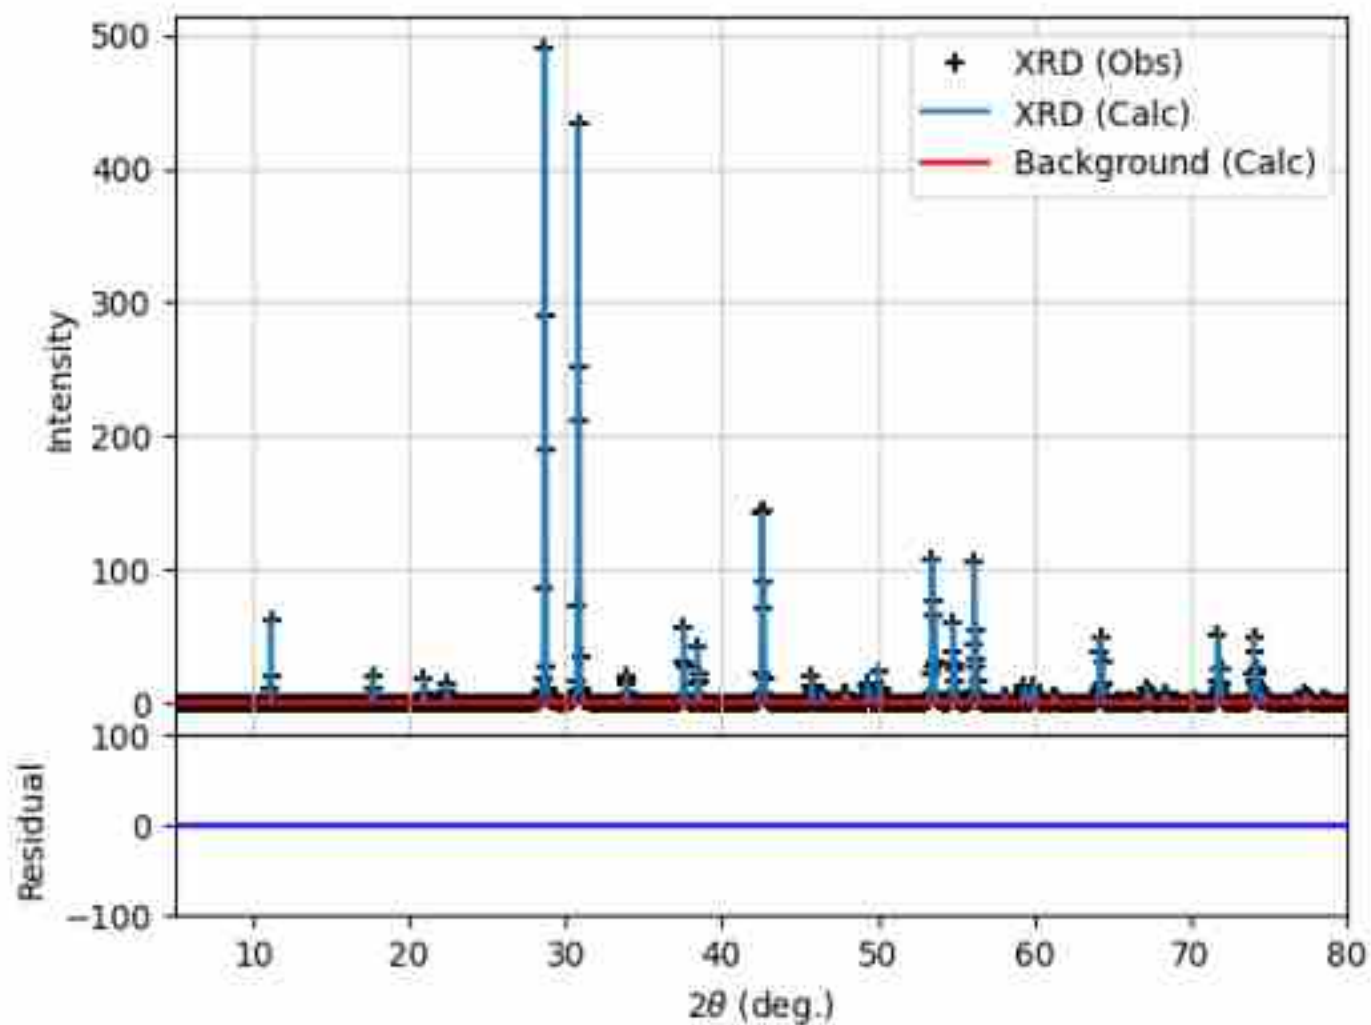

| RMSE before RR | Rwp     | RMSE after RR |
|----------------|---------|---------------|
| 0.018          | 0.00287 | 0.00076       |

# Sc4Al4O12

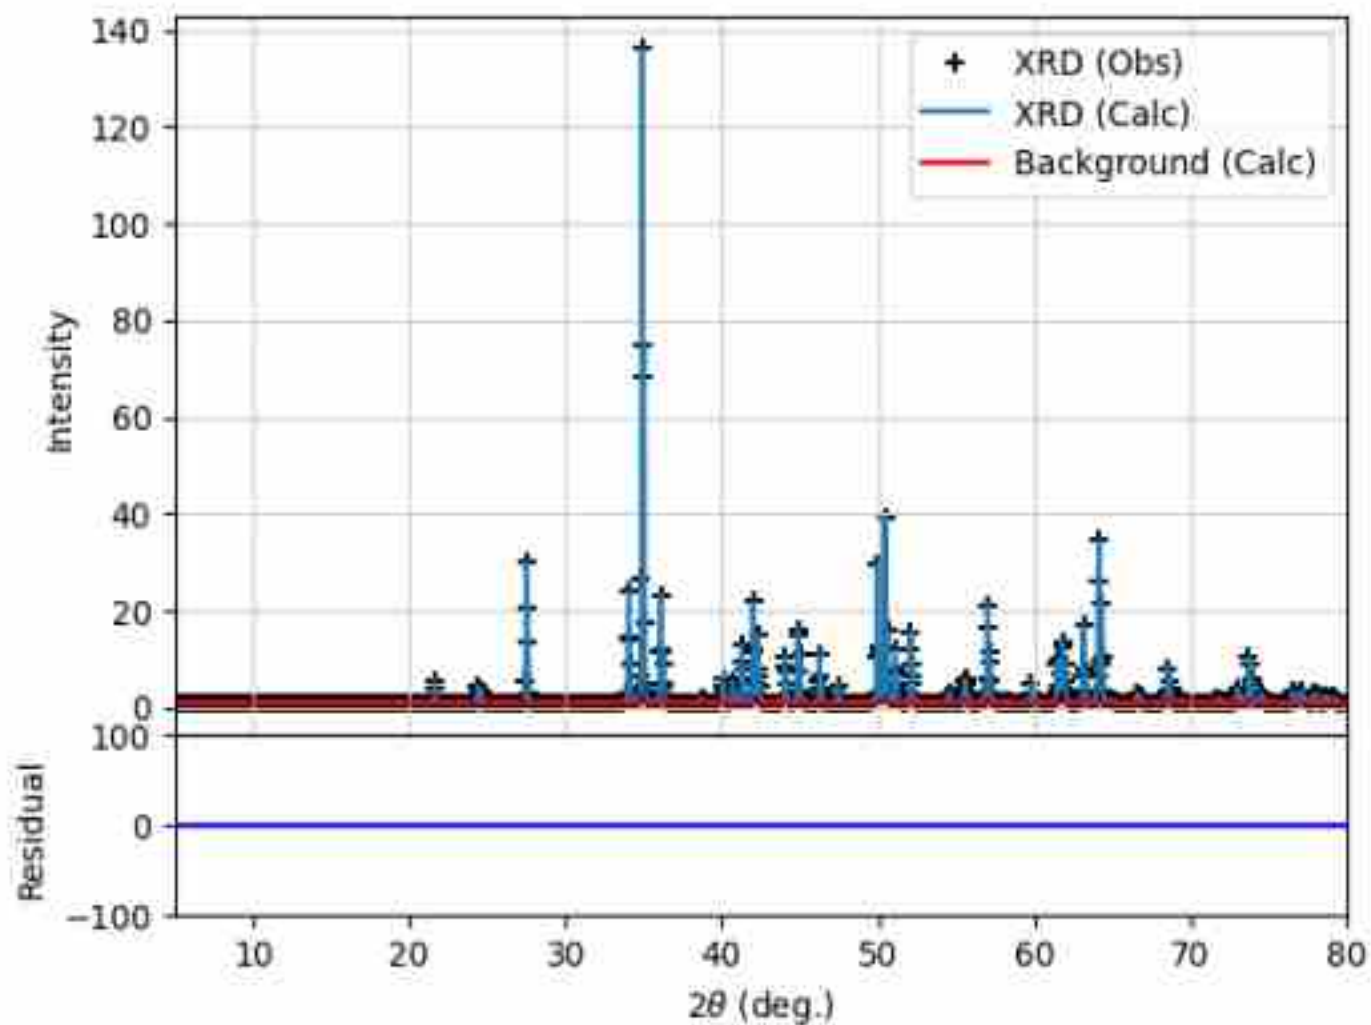

| RMSE before RR | Rwp     | RMSE after RR |
|----------------|---------|---------------|
| 0.018          | 0.00293 | 0.00124       |

# Sm1Fe2Ge2

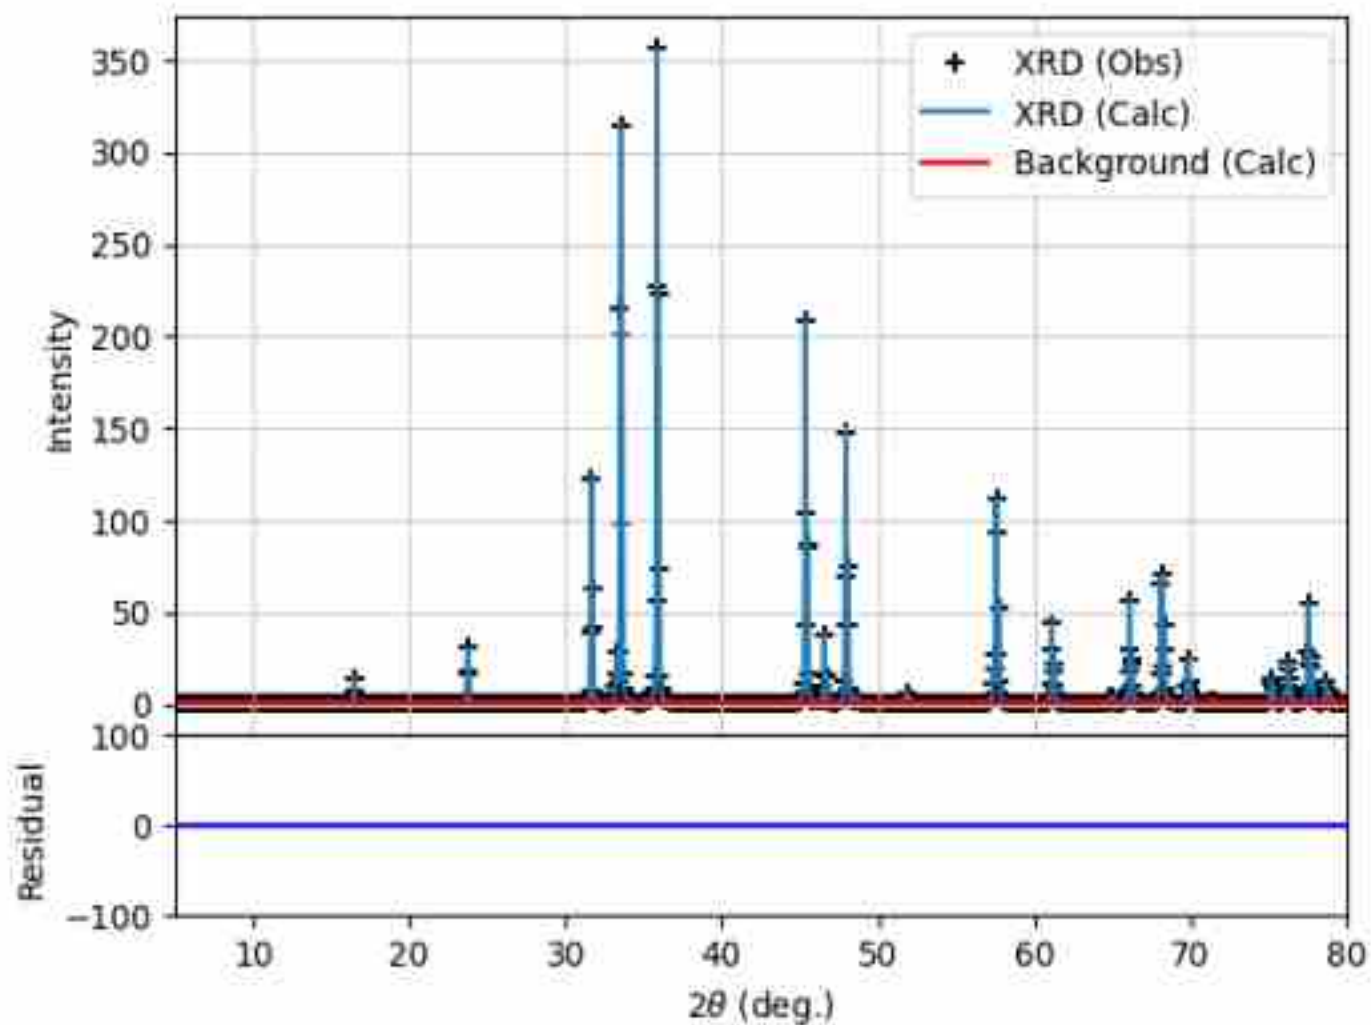

| RMSE before RR | Rwp     | RMSE after RR |
|----------------|---------|---------------|
| 0.018          | 0.05748 | 0.00064       |



# Sm2Cr2O8

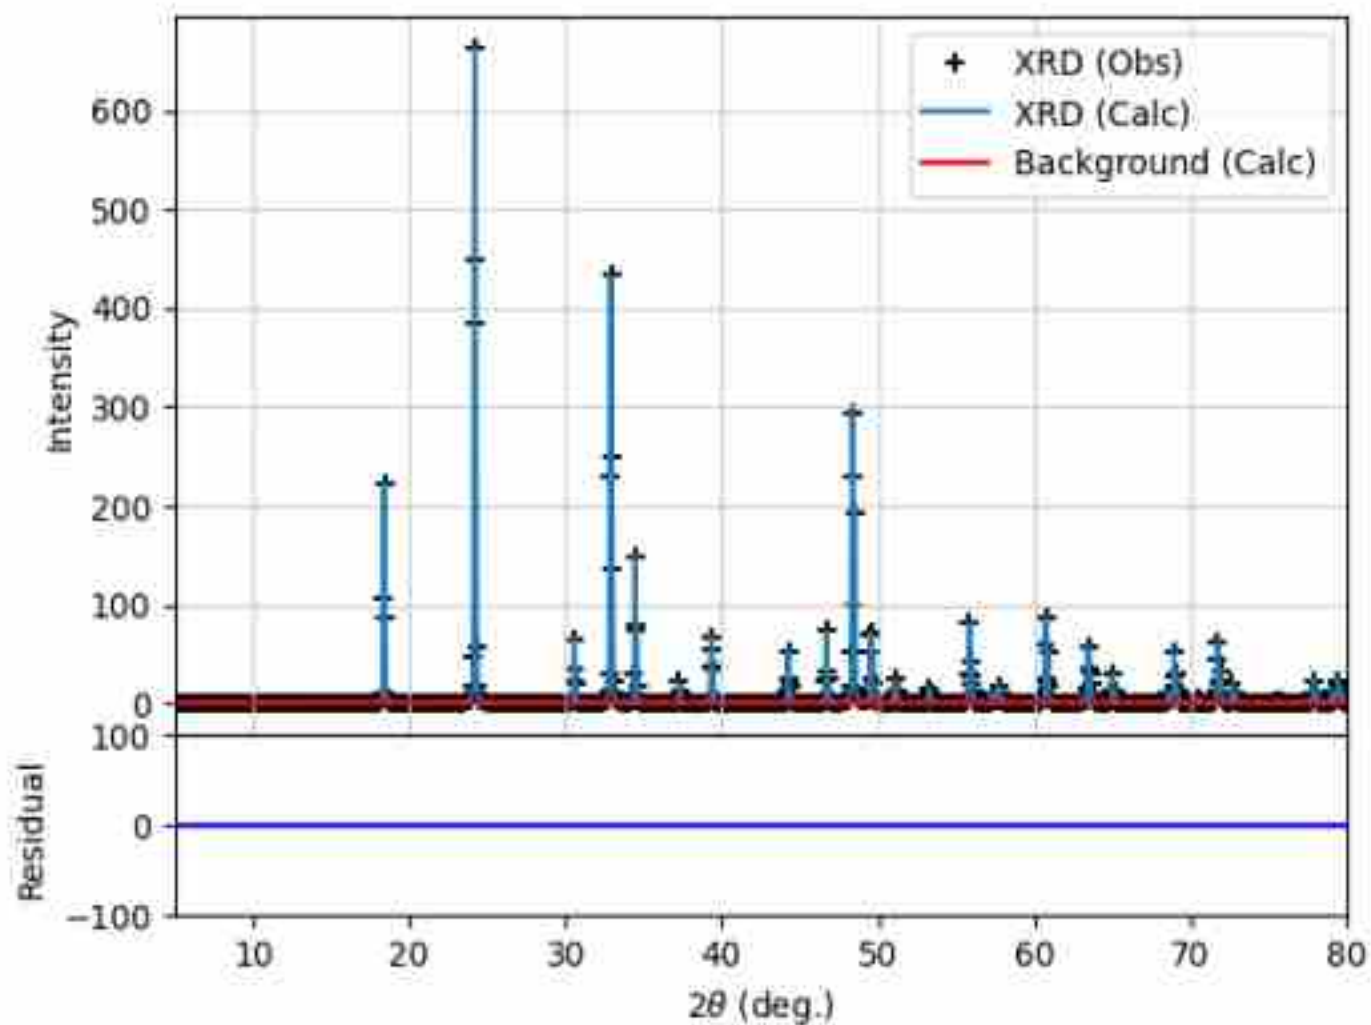

| RMSE before RR | Rwp     | RMSE after RR |
|----------------|---------|---------------|
| 0.018          | 0.00384 | 0.00125       |

# Sm<sub>2</sub>Er<sub>6</sub>Se<sub>12</sub>

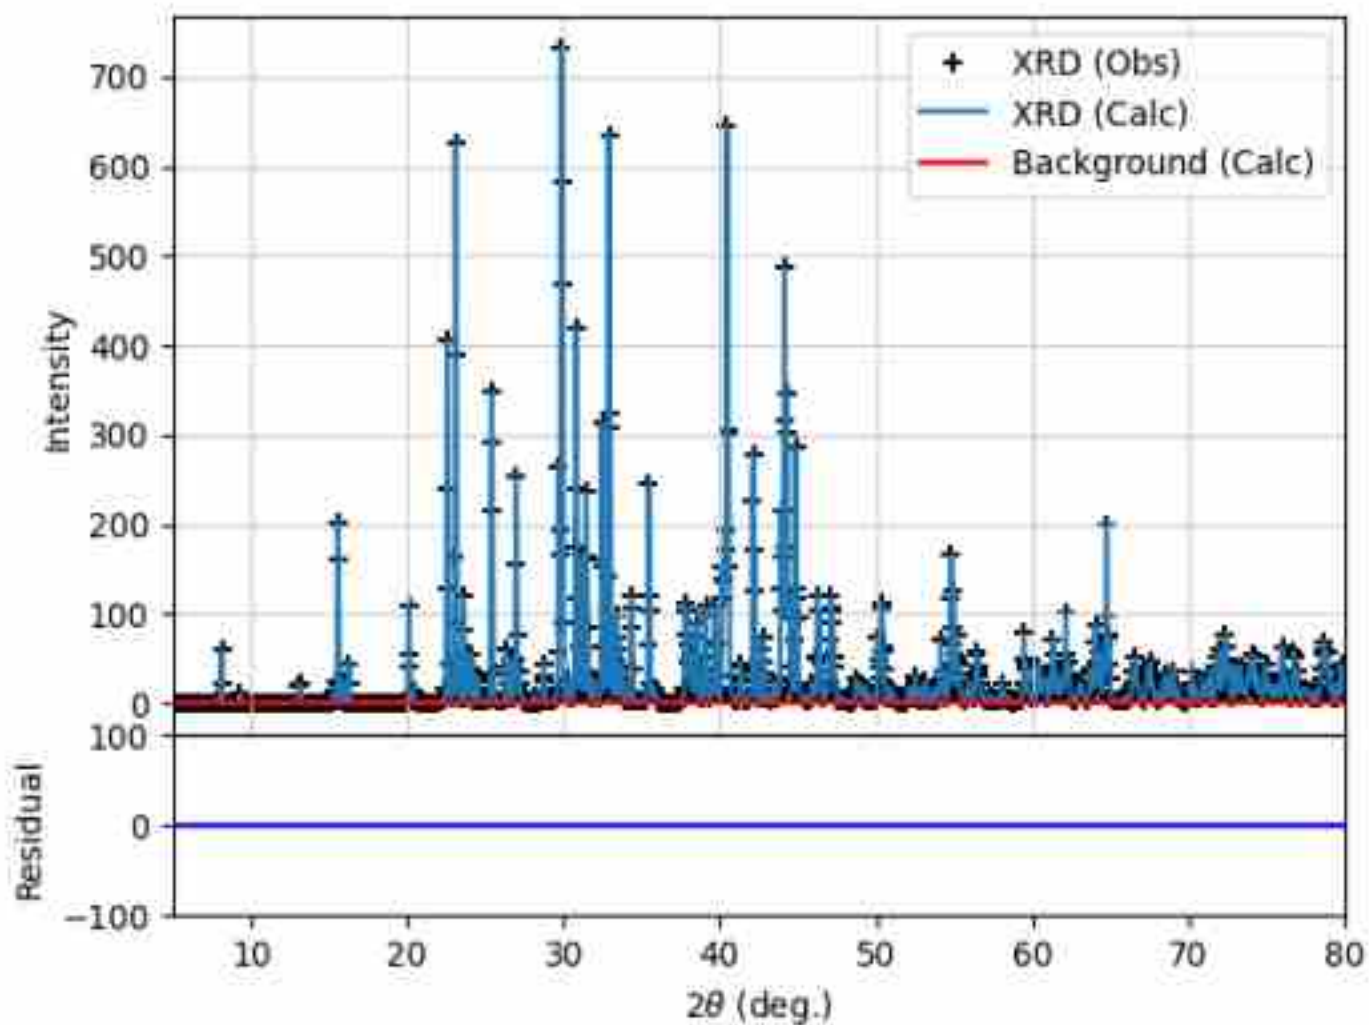

| RMSE before RR | Rwp    | RMSE after RR |
|----------------|--------|---------------|
| 0.018          | 0.0034 | 0.00035       |

Sm4Ge4Pt4

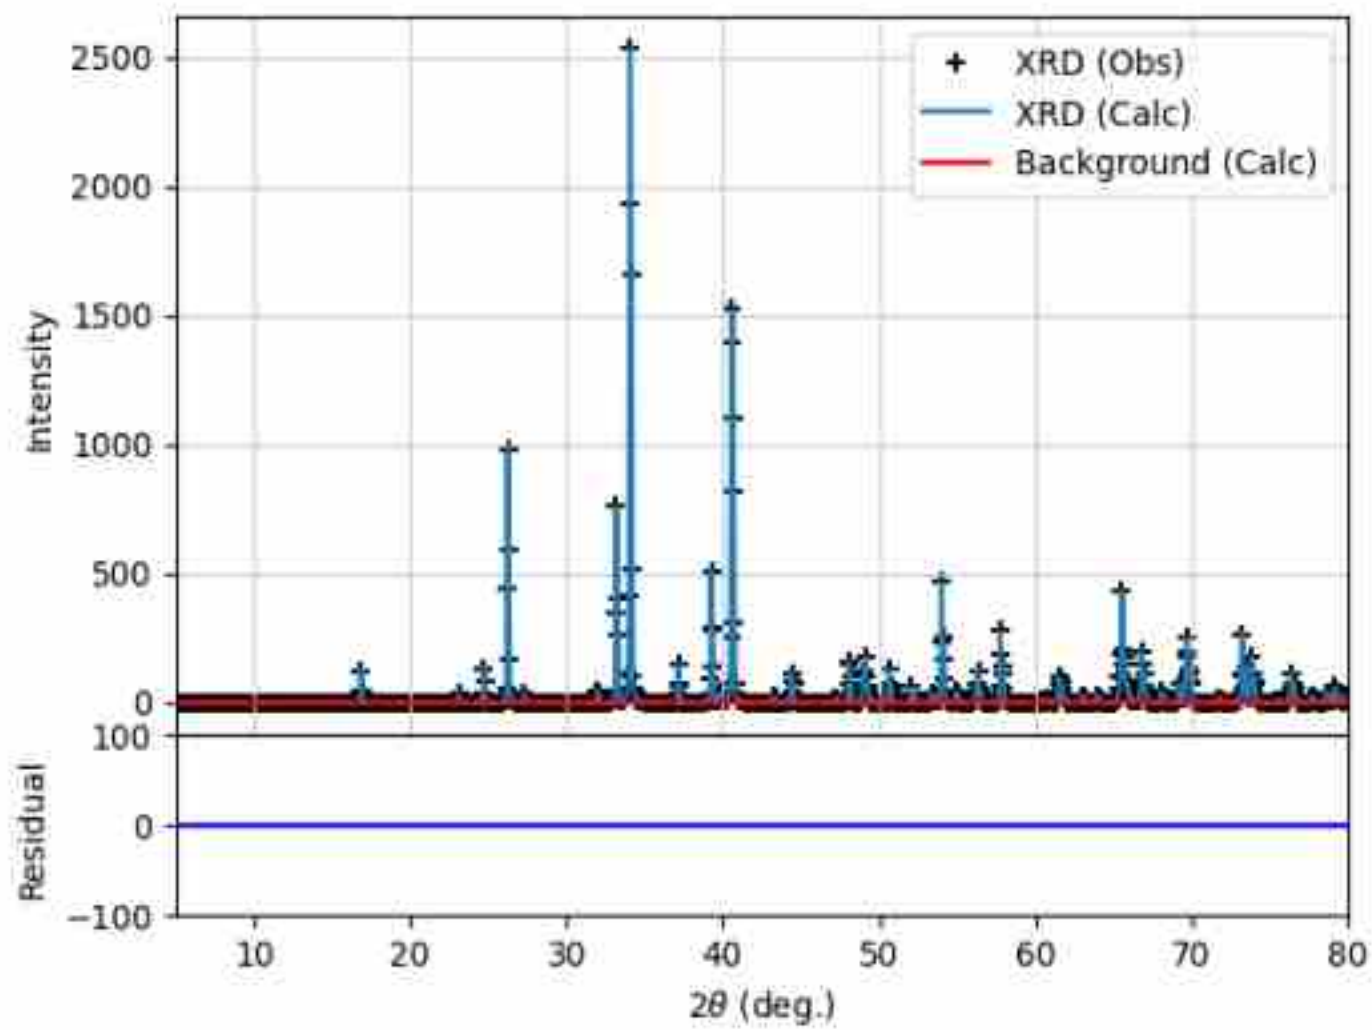

| RMSE before RR | Rwp     | RMSE after RR |
|----------------|---------|---------------|
| 0.018          | 0.00408 | 0.00037       |

# Sm4Ge10Pt6

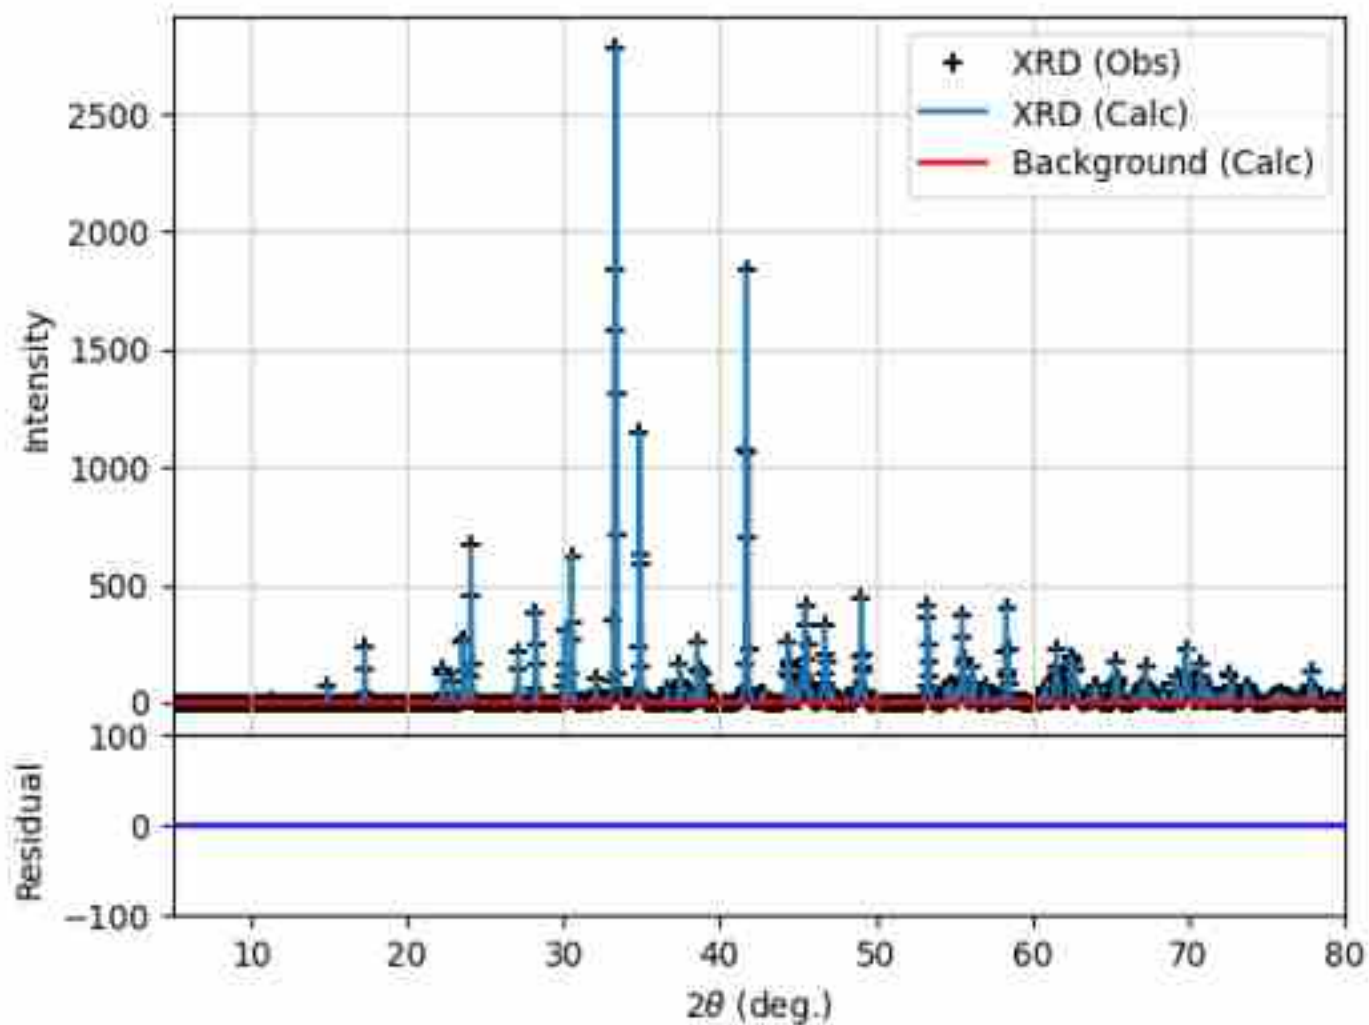

| RMSE before RR | Rwp     | RMSE after RR |
|----------------|---------|---------------|
| 0.018          | 0.00312 | 0.00046       |

# Sm<sub>4</sub>Mg<sub>2</sub>Cu<sub>4</sub>

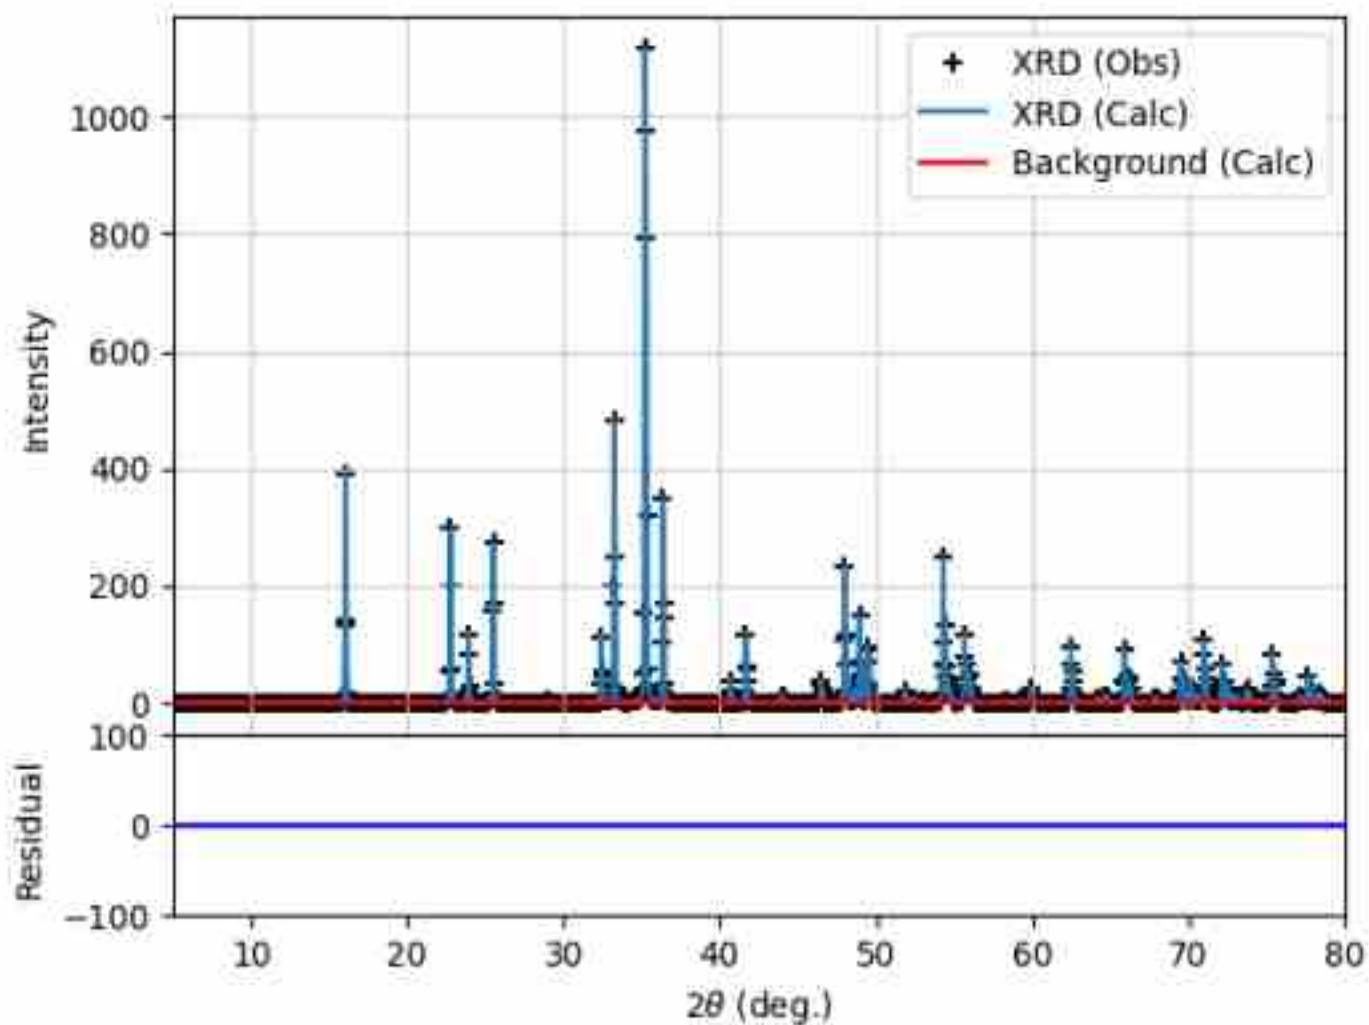

| RMSE before RR | Rwp     | RMSE after RR |
|----------------|---------|---------------|
| 0.018          | 0.00575 | 0.00059       |

# Sm<sub>4</sub>Ni<sub>2</sub>Pt<sub>2</sub>O<sub>12</sub>

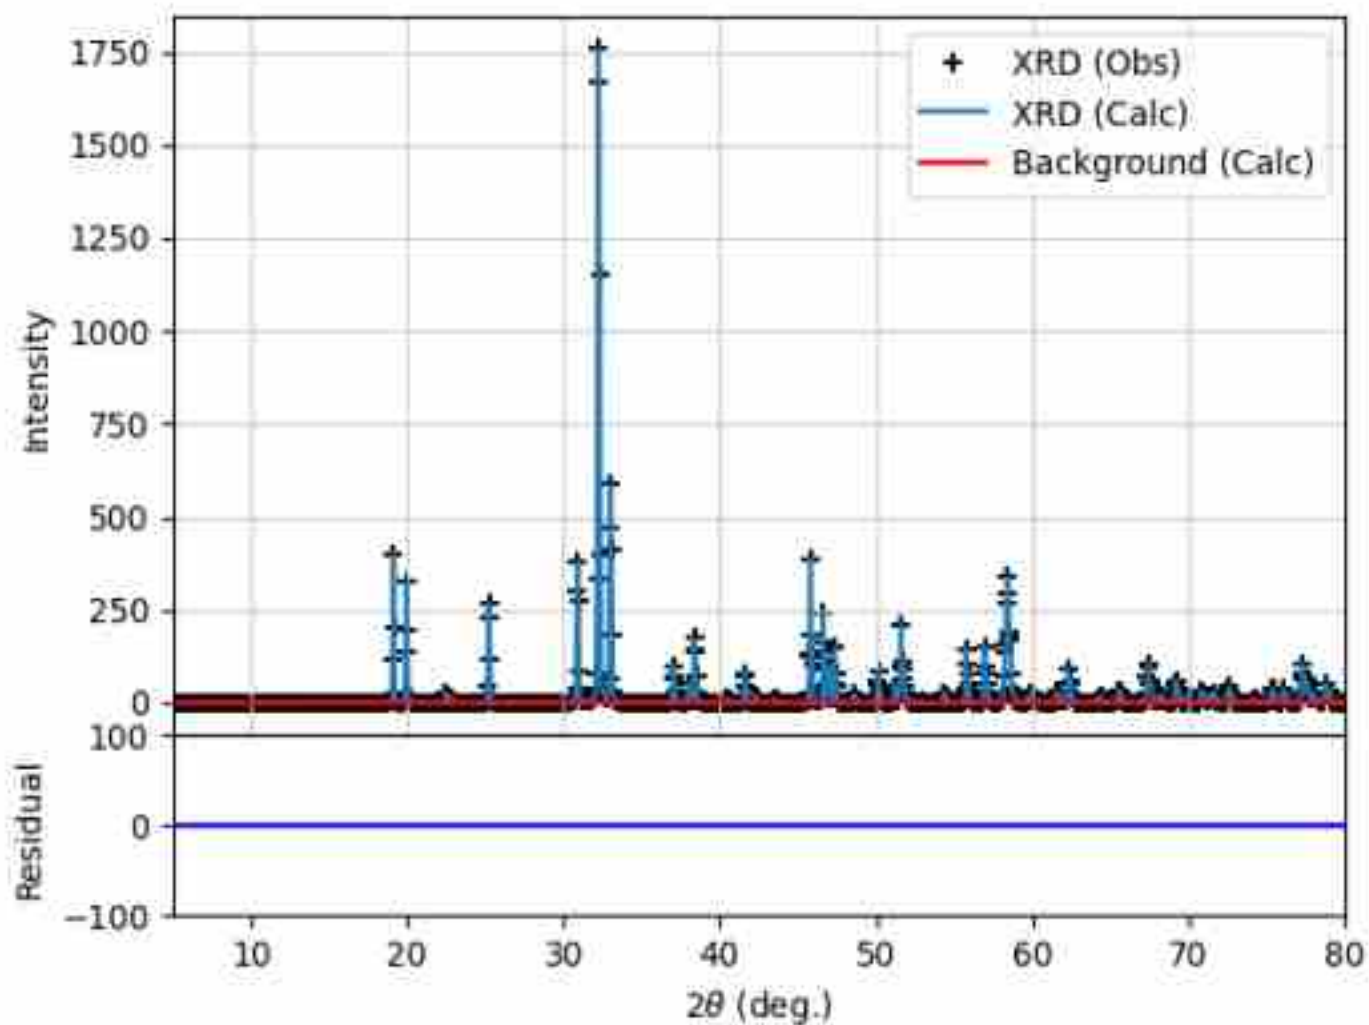

| RMSE before RR | Rwp     | RMSE after RR |
|----------------|---------|---------------|
| 0.018          | 0.00367 | 0.00199       |

# Sr1La6Os1I12

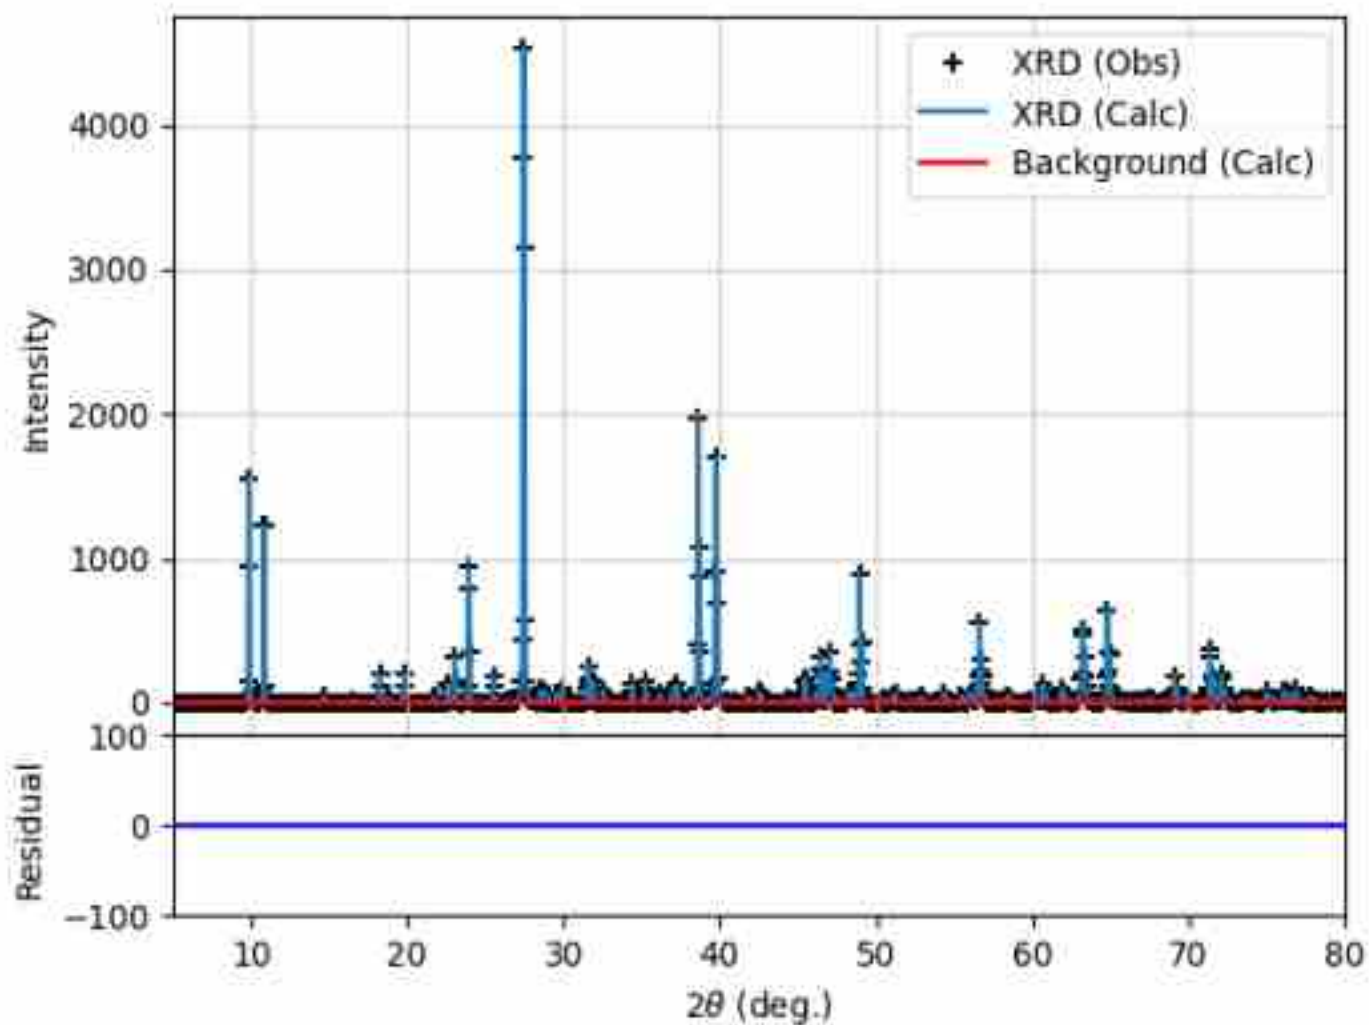

| RMSE before RR | Rwp     | RMSE after RR |
|----------------|---------|---------------|
| 0.018          | 0.00328 | 0.00021       |

# Sr1Pr1Sc1O4

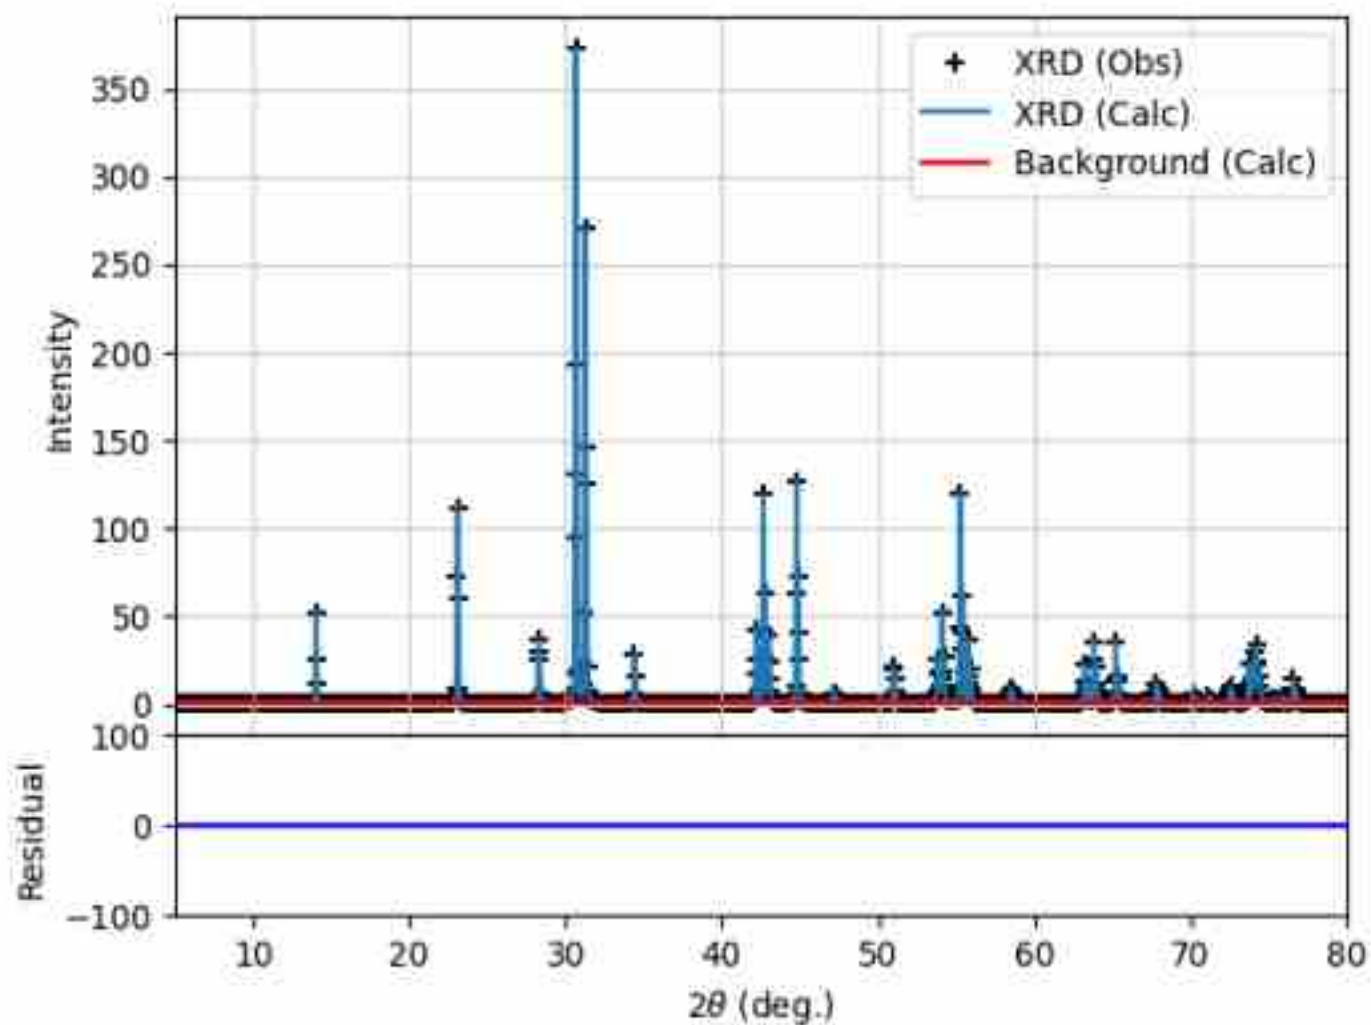

| RMSE before RR | Rwp    | RMSE after RR |
|----------------|--------|---------------|
| 0.018          | 0.0032 | 0.00085       |



# Sr<sub>2</sub>Cu<sub>1</sub>O<sub>2</sub>F<sub>2</sub>

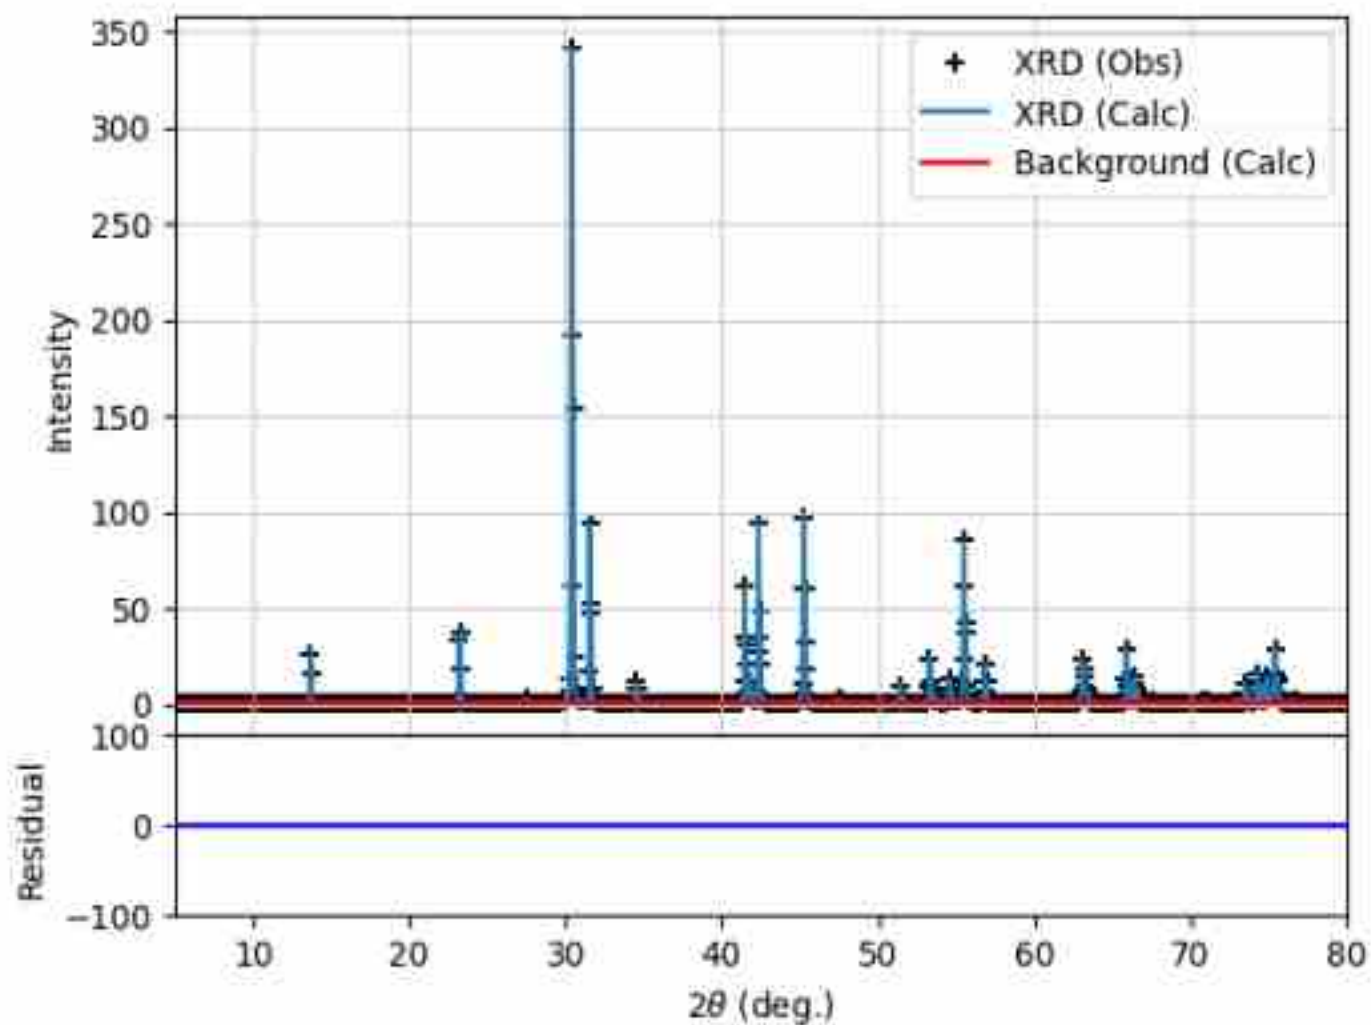

| RMSE before RR | Rwp   | RMSE after RR |
|----------------|-------|---------------|
| 0.018          | 0.003 | 0.0024        |

# Sr<sub>2</sub>Cu<sub>4</sub>Sb<sub>4</sub>

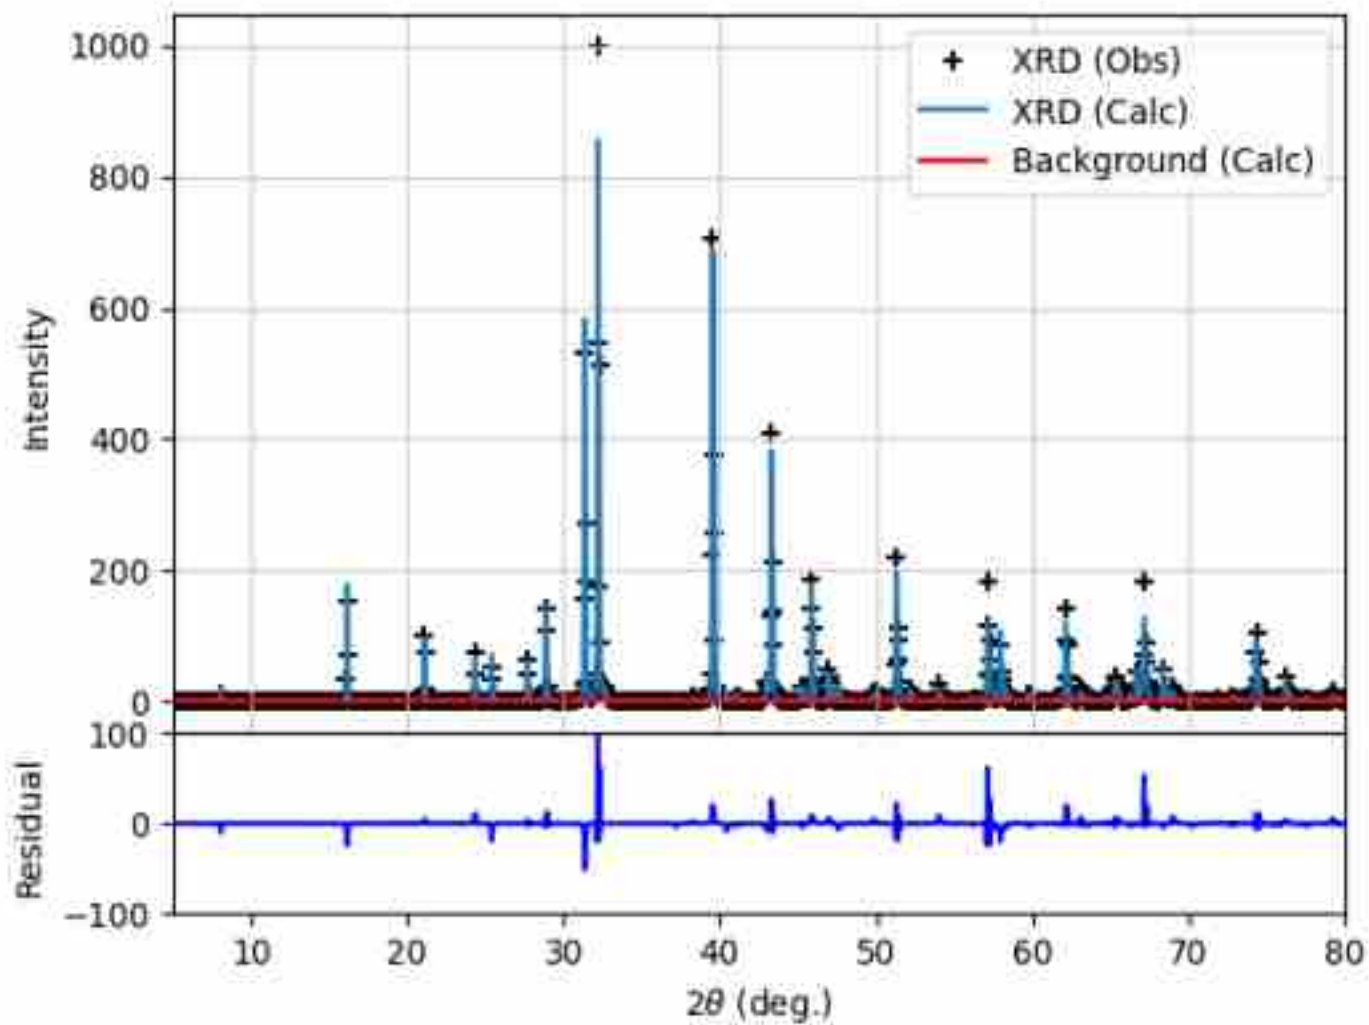

| RMSE before RR | Rwp     | RMSE after RR |
|----------------|---------|---------------|
| 0.018          | 18.0785 | 0.40193       |

# Sr<sub>2</sub>LiReO<sub>6</sub>

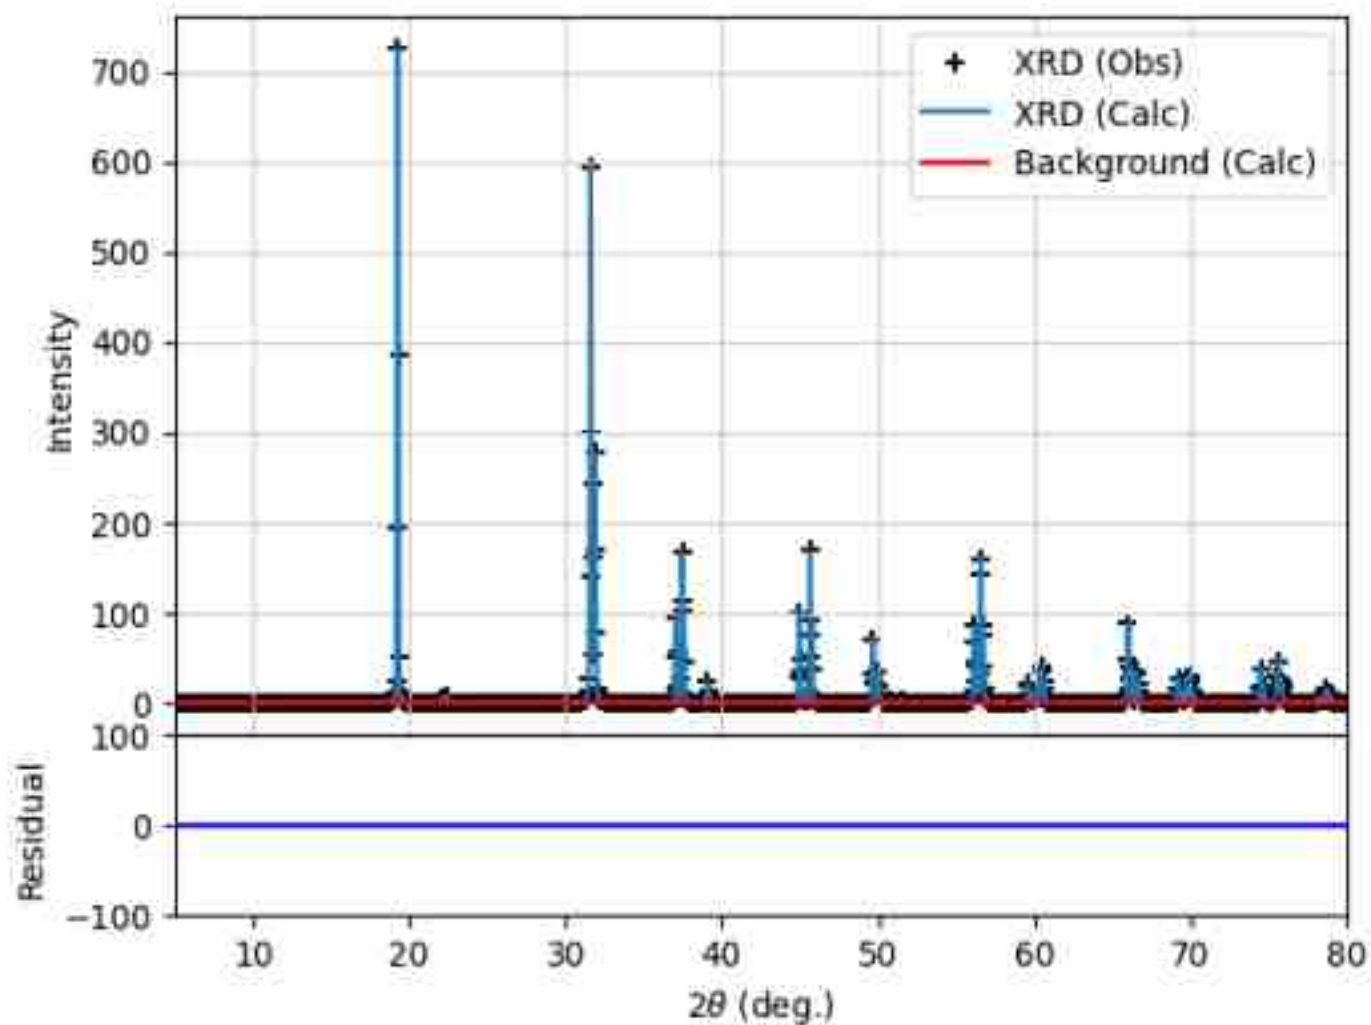

| RMSE before RR | Rwp     | RMSE after RR |
|----------------|---------|---------------|
| 0.018          | 0.00387 | 0.00243       |

# Sr<sub>2</sub>Nd<sub>2</sub>Ni<sub>2</sub>O<sub>8</sub>

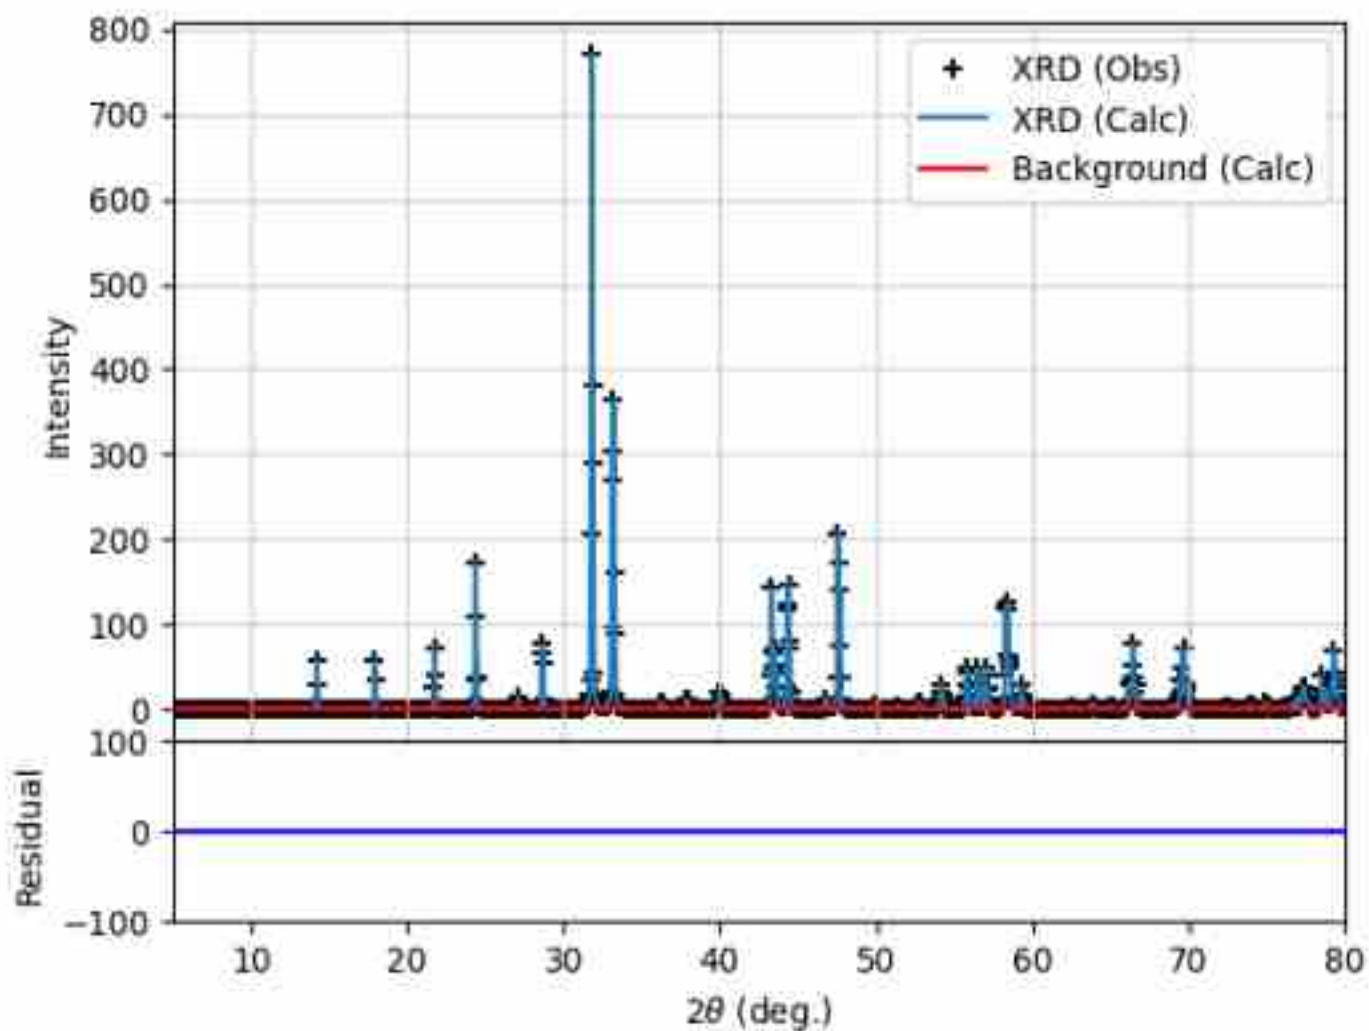

| RMSE before RR | Rwp     | RMSE after RR |
|----------------|---------|---------------|
| 0.018          | 0.00367 | 0.00125       |

# Sr<sub>2</sub>Tl<sub>6</sub>

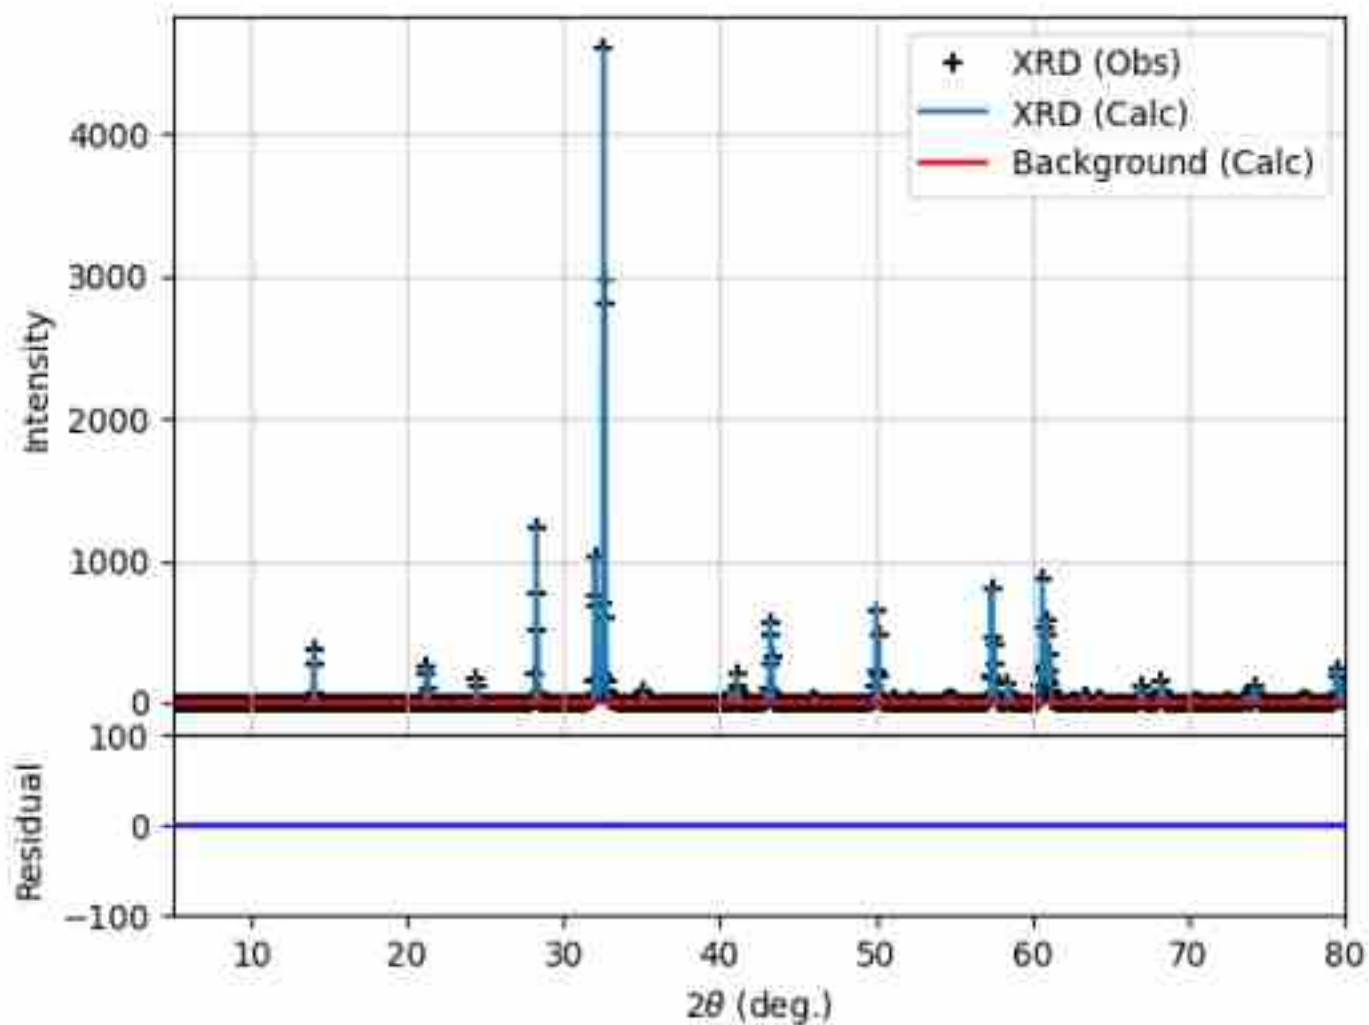

| RMSE before RR | Rwp     | RMSE after RR |
|----------------|---------|---------------|
| 0.018          | 0.03726 | 0.00134       |

# Sr<sub>2</sub>V<sub>1</sub>Mo<sub>1</sub>O<sub>6</sub>

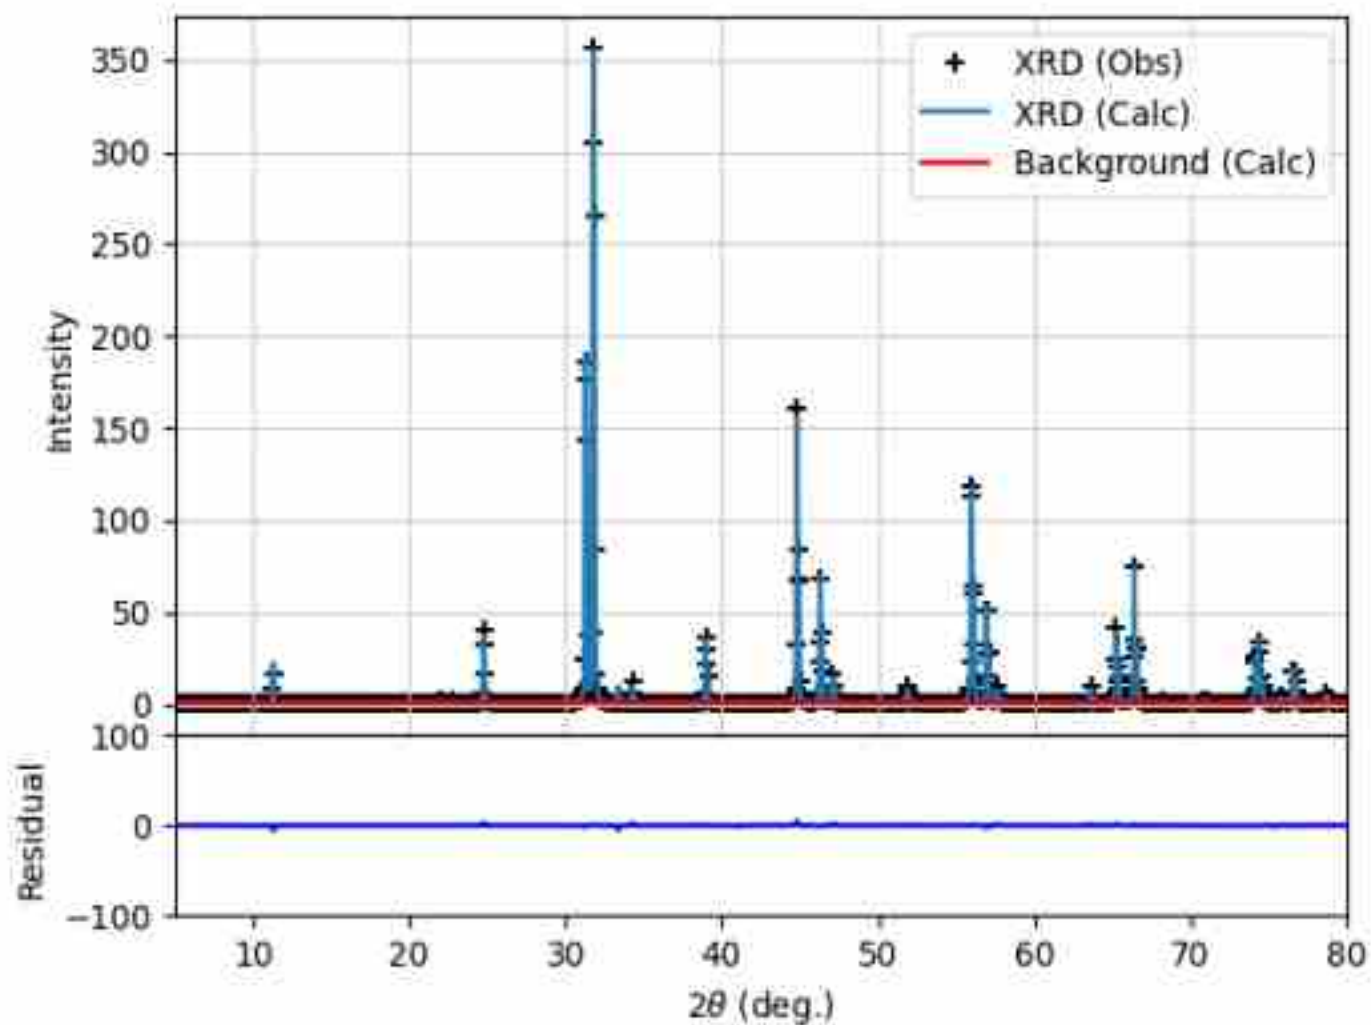

| RMSE before RR | Rwp     | RMSE after RR |
|----------------|---------|---------------|
| 0.018          | 6.30587 | 0.0245        |

# Sr<sub>3</sub>Co<sub>2</sub>Cl<sub>2</sub>O<sub>5</sub>

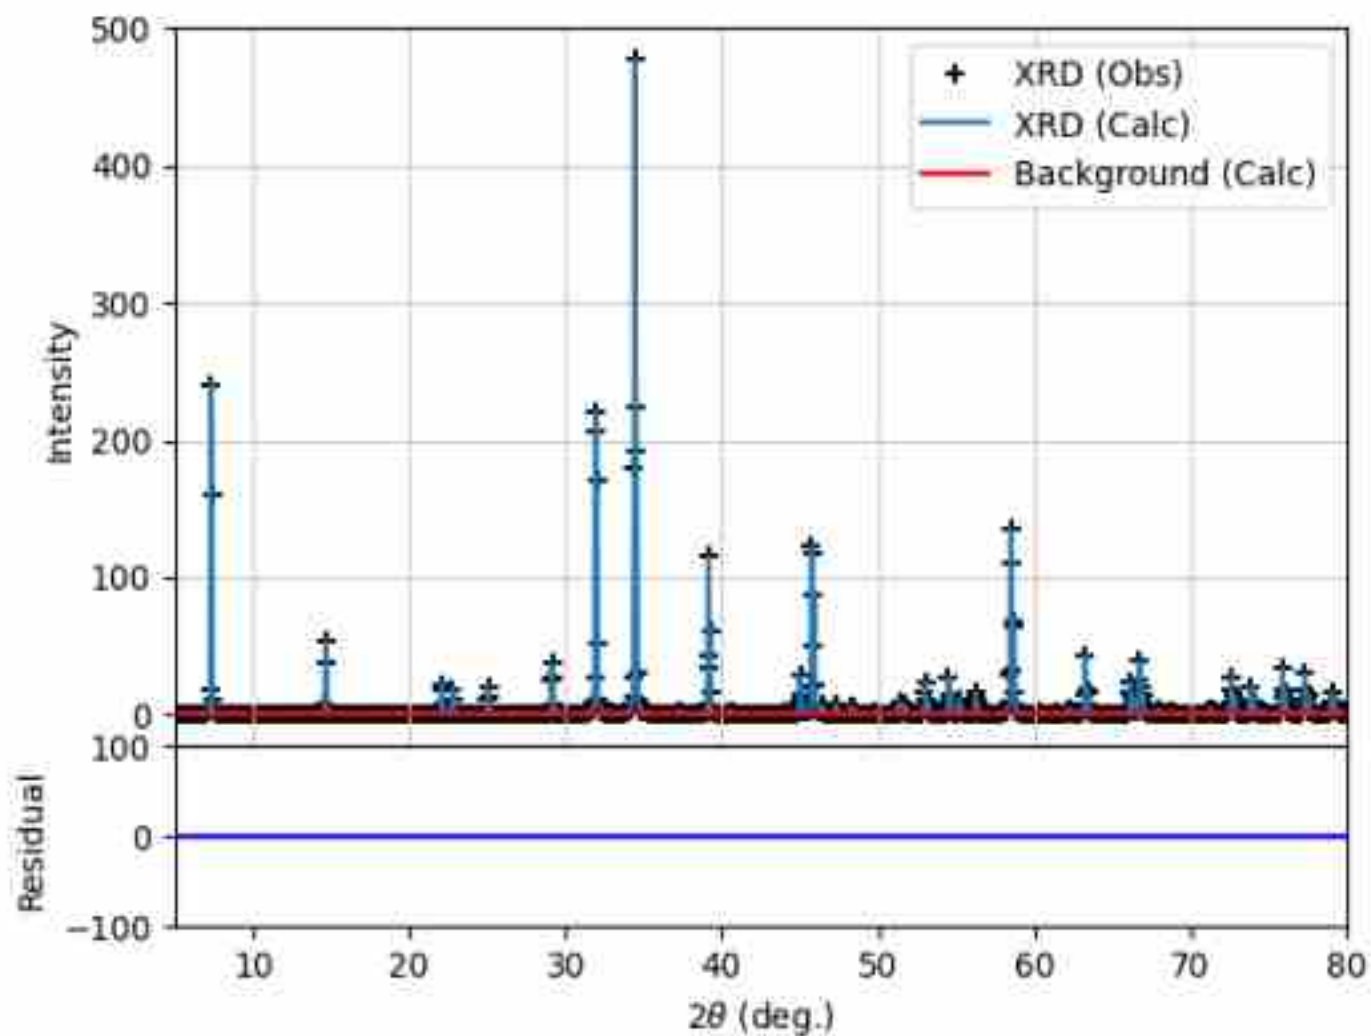

| RMSE before RR | Rwp     | RMSE after RR |
|----------------|---------|---------------|
| 0.018          | 0.00344 | 0.00106       |

# Sr<sub>3</sub>Ru<sub>2</sub>O<sub>7</sub>

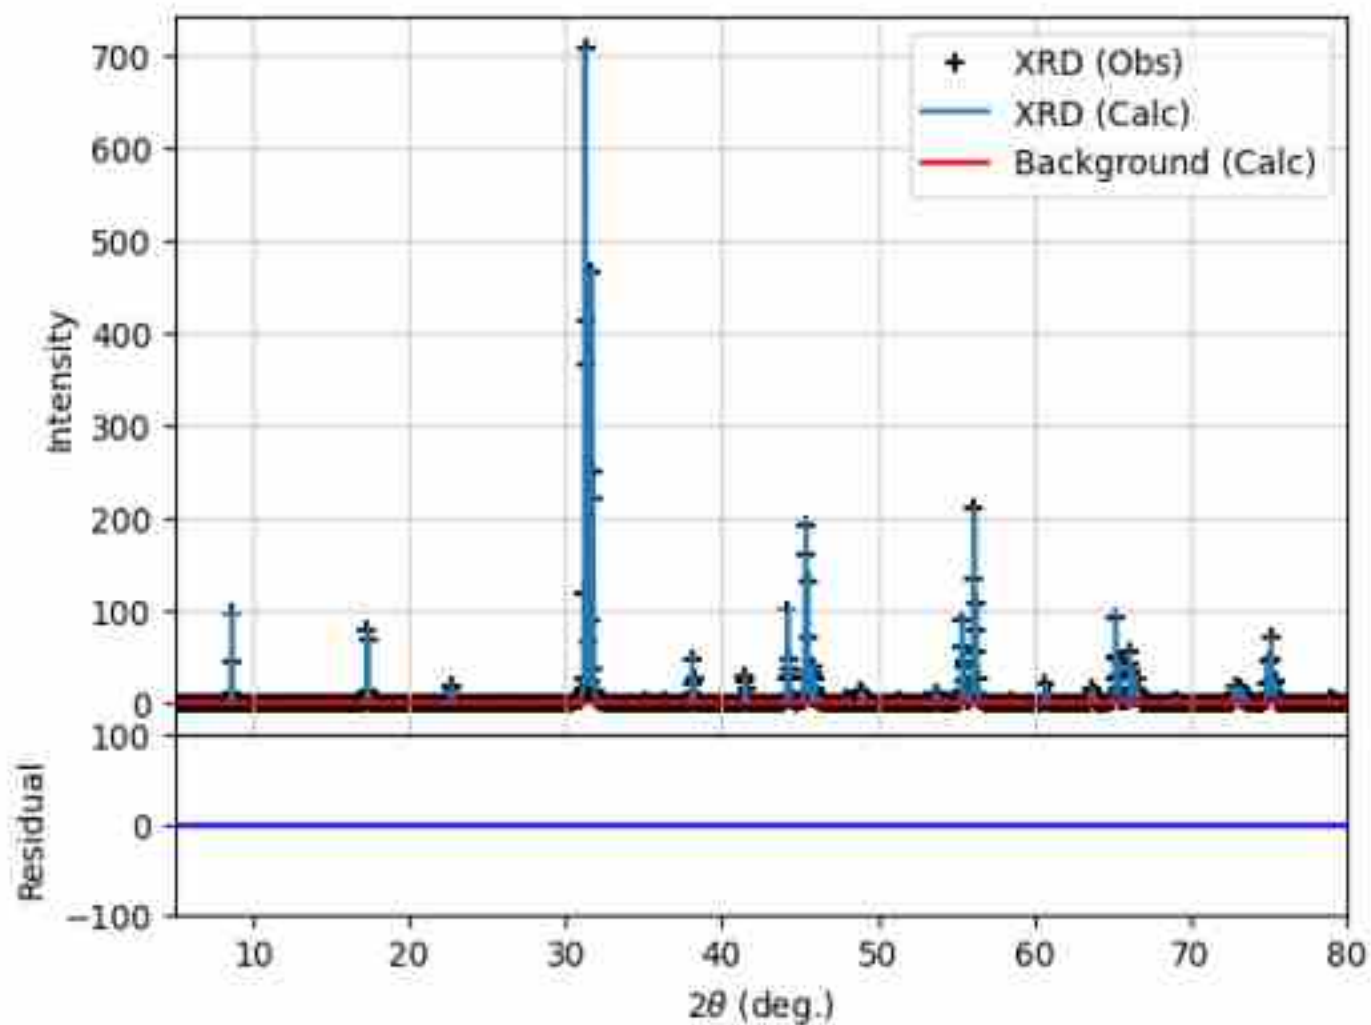

| RMSE before RR | Rwp    | RMSE after RR |
|----------------|--------|---------------|
| 0.018          | 0.0045 | 0.00086       |



# Sr<sub>4</sub>Y<sub>2</sub>Ir<sub>2</sub>O<sub>12</sub>

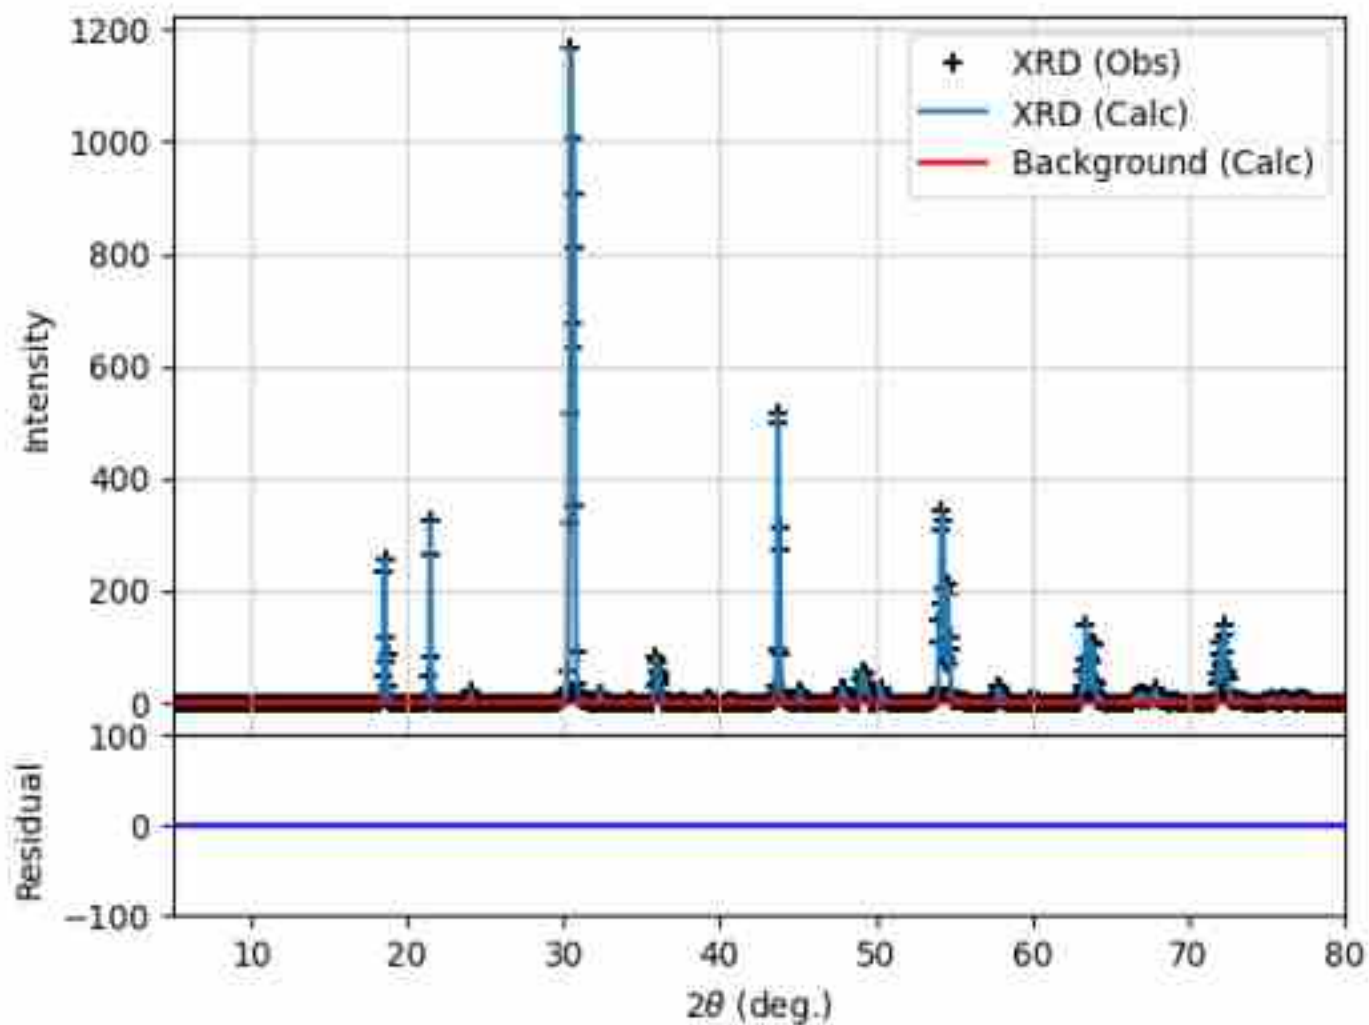

| RMSE before RR | Rwp     | RMSE after RR |
|----------------|---------|---------------|
| 0.018          | 0.00289 | 0.00147       |

# Sr<sub>4</sub>Y<sub>2</sub>Nb<sub>2</sub>O<sub>12</sub>

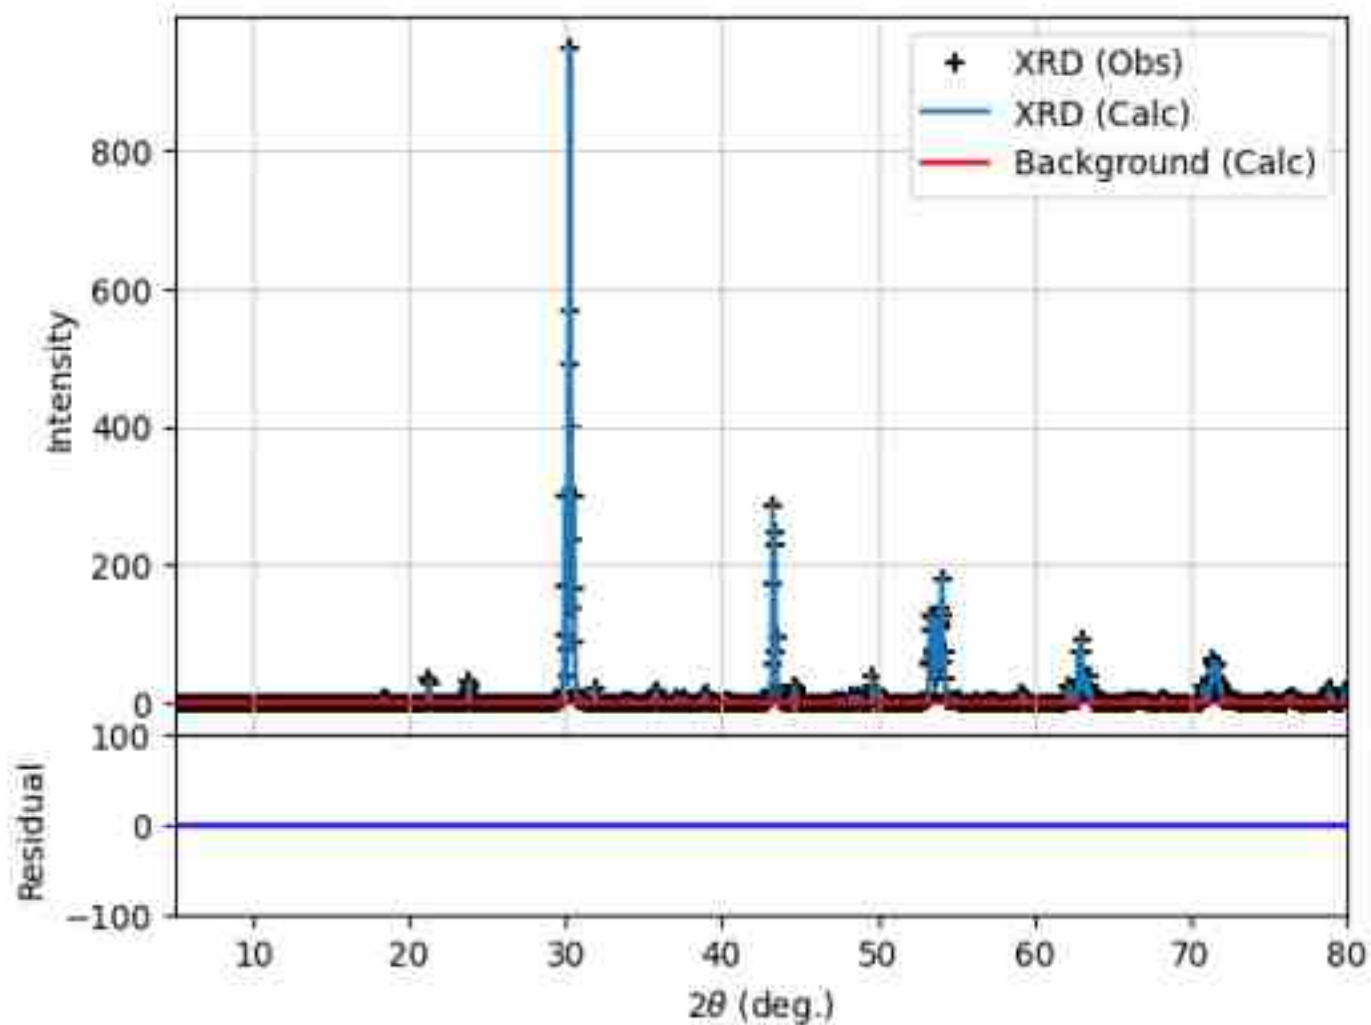

| RMSE before RR | Rwp     | RMSE after RR |
|----------------|---------|---------------|
| 0.018          | 0.00324 | 0.00093       |

# Sr<sub>4</sub>Yb<sub>2</sub>Mo<sub>2</sub>O<sub>12</sub>

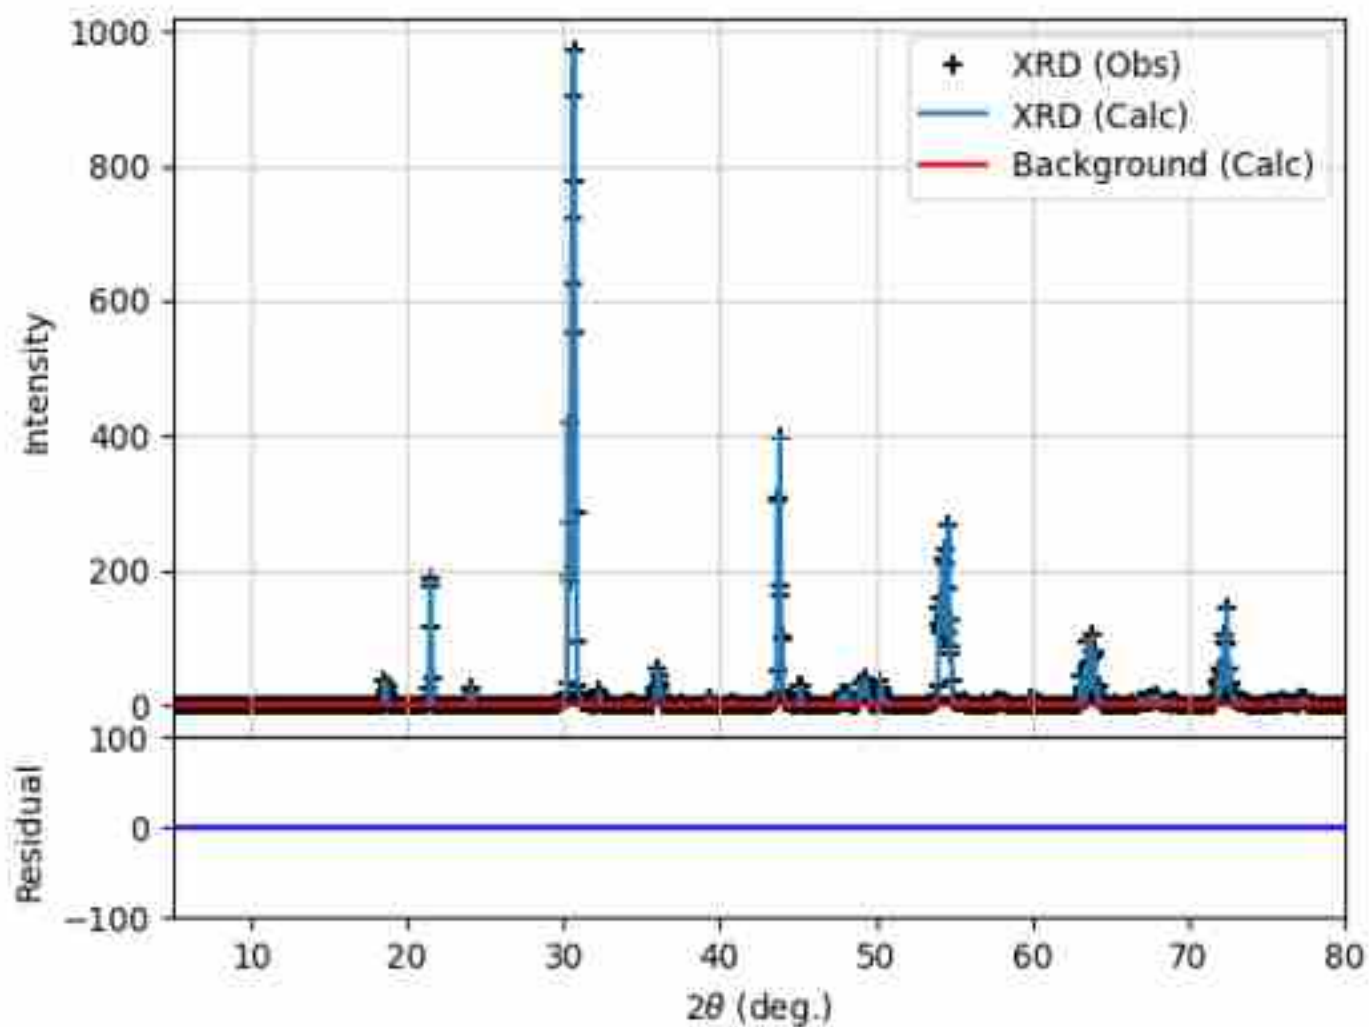

| RMSE before RR | Rwp     | RMSE after RR |
|----------------|---------|---------------|
| 0.018          | 0.00352 | 0.00147       |

# Sr<sub>4</sub>Yb<sub>2</sub>Ru<sub>2</sub>O<sub>12</sub>

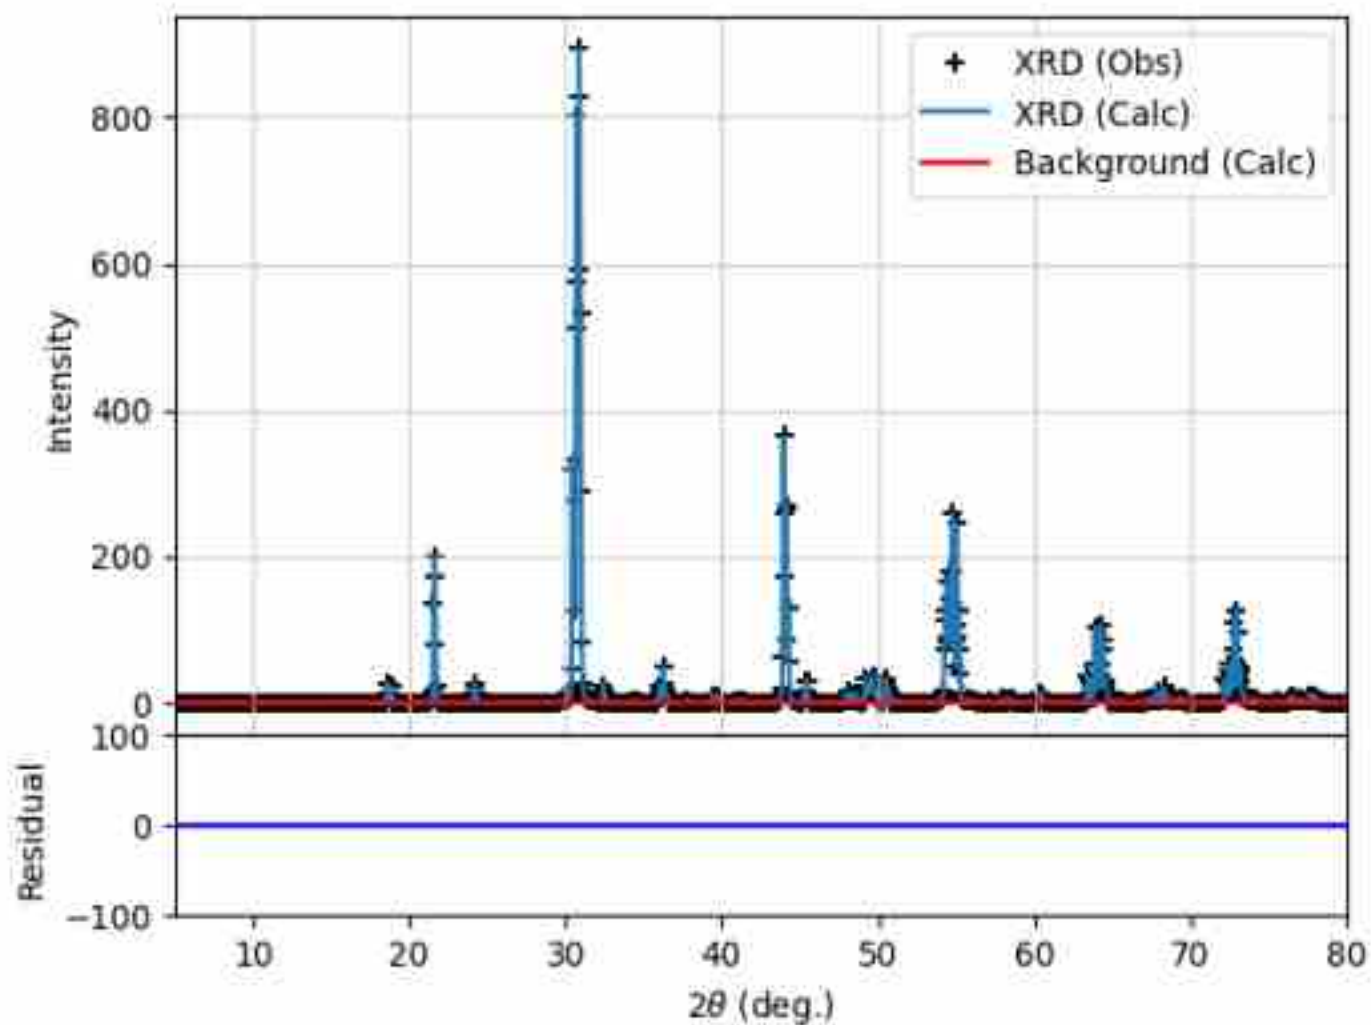

| RMSE before RR | Rwp     | RMSE after RR |
|----------------|---------|---------------|
| 0.018          | 0.00326 | 0.00104       |

# Tb1Ho1Co4

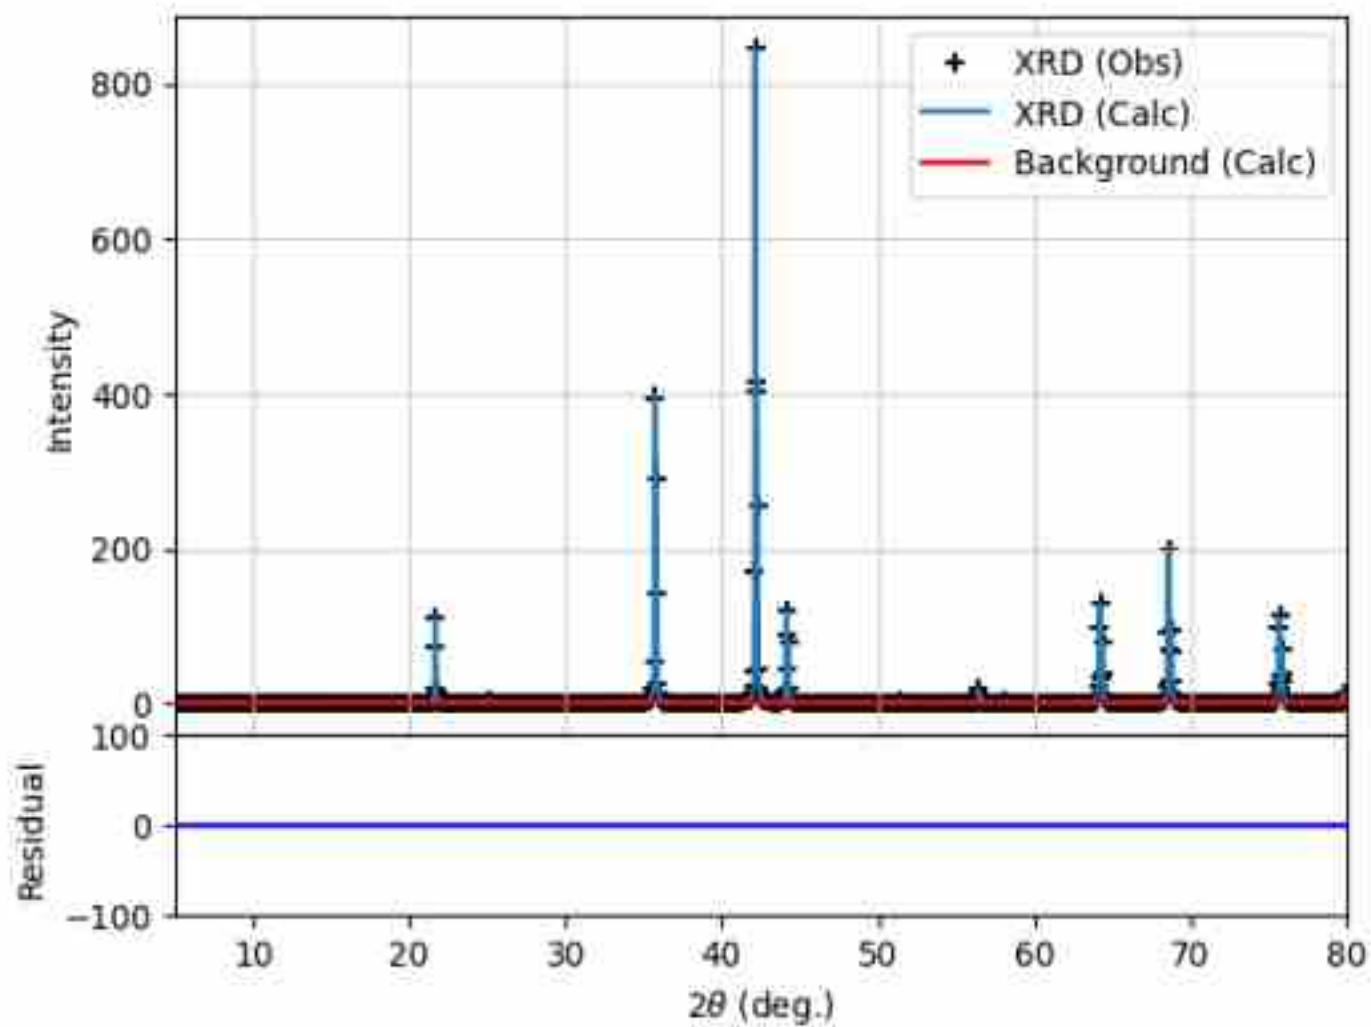

| RMSE before RR | Rwp     | RMSE after RR |
|----------------|---------|---------------|
| 0.018          | 0.00931 | 0.00145       |

# Tb<sub>2</sub>Al<sub>2</sub>Ge<sub>2</sub>

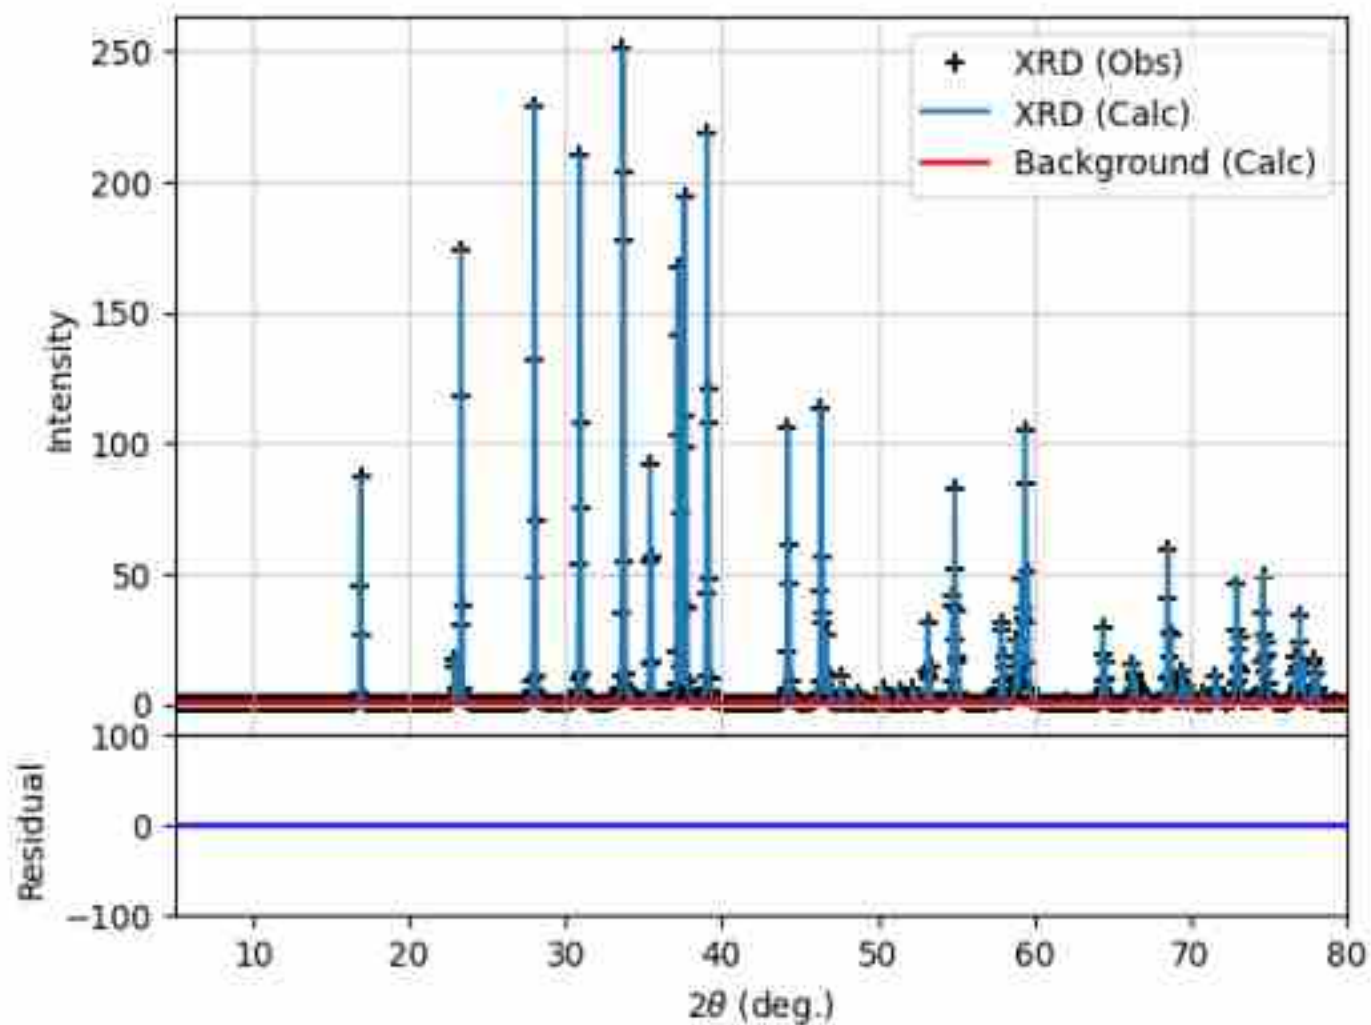

| RMSE before RR | Rwp     | RMSE after RR |
|----------------|---------|---------------|
| 0.018          | 0.00348 | 0.0004        |

# Tb<sub>4</sub>Mg<sub>2</sub>Ti<sub>2</sub>O<sub>12</sub>

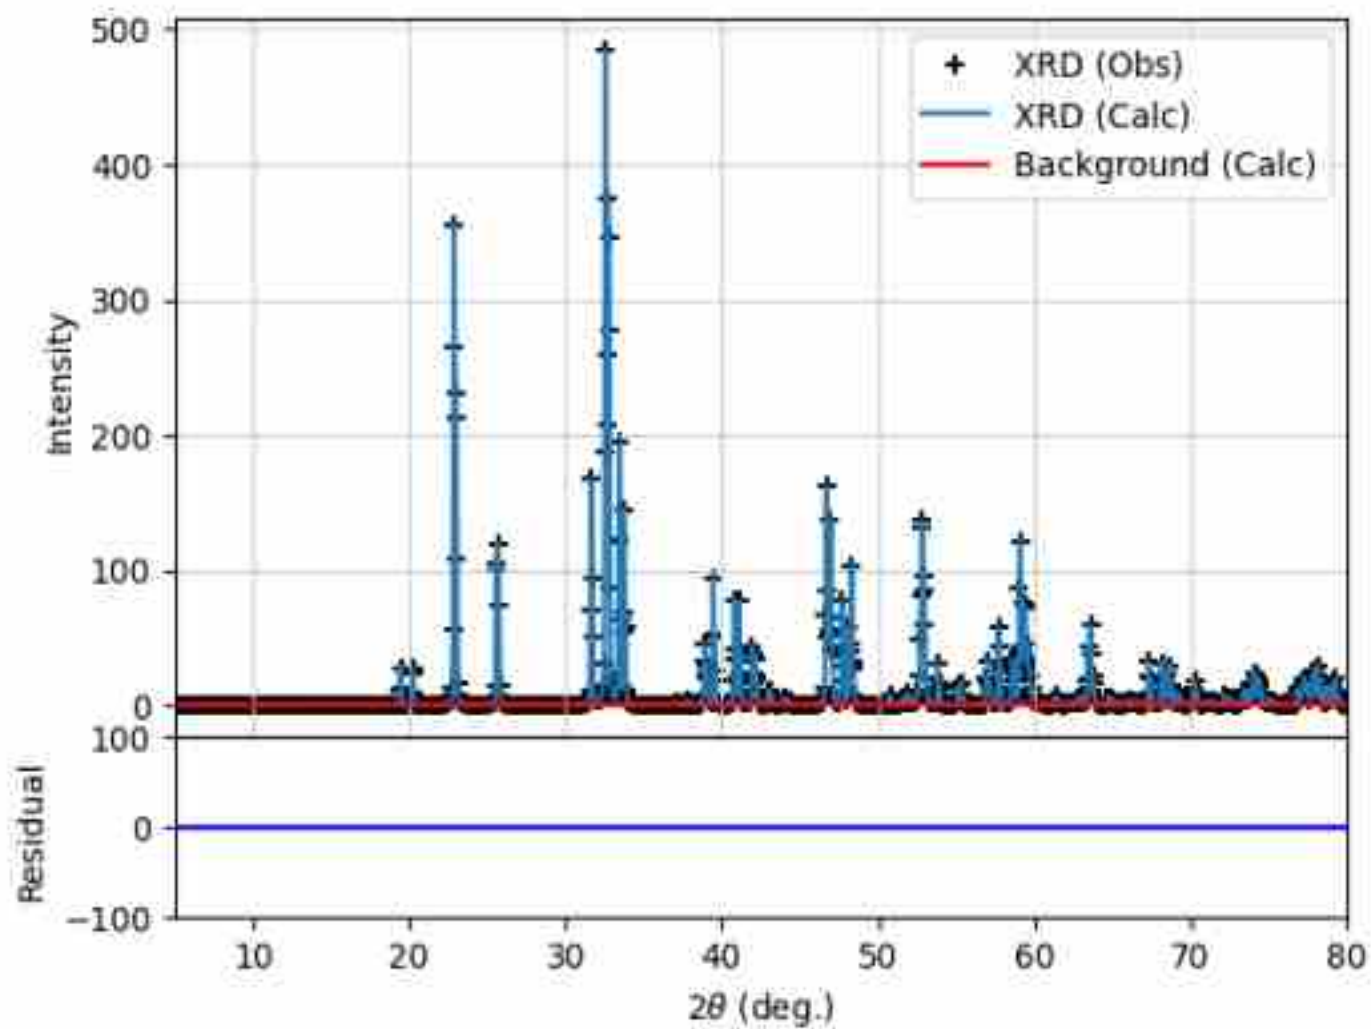

| RMSE before RR | Rwp     | RMSE after RR |
|----------------|---------|---------------|
| 0.018          | 0.00405 | 0.00105       |

# Tb8Pt4

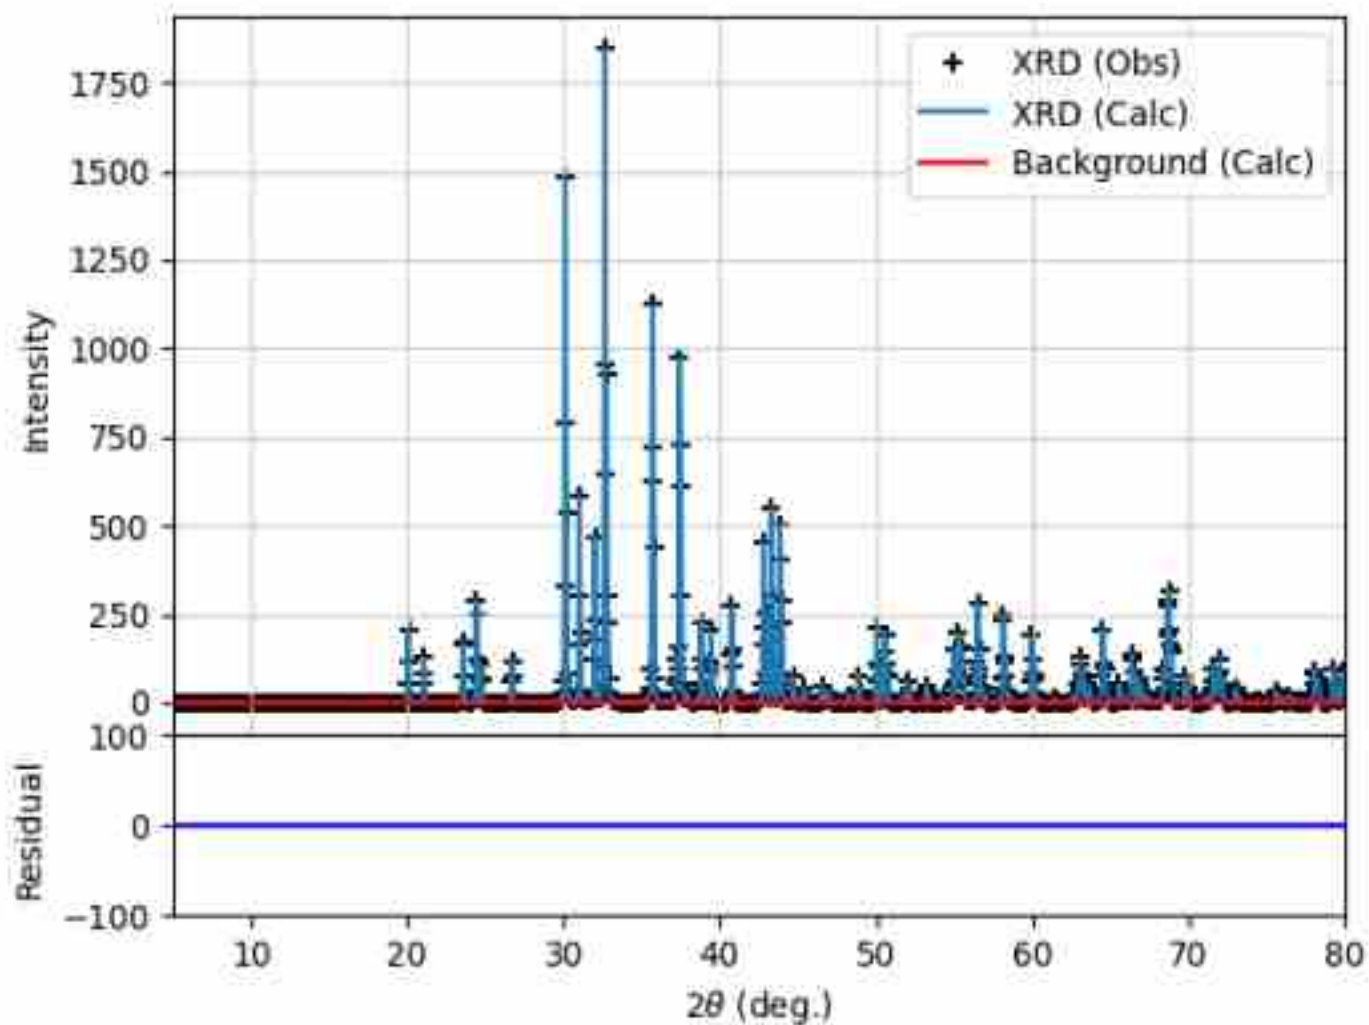

| RMSE before RR | Rwp     | RMSE after RR |
|----------------|---------|---------------|
| 0.018          | 0.00424 | 0.00035       |



# Tb8S12

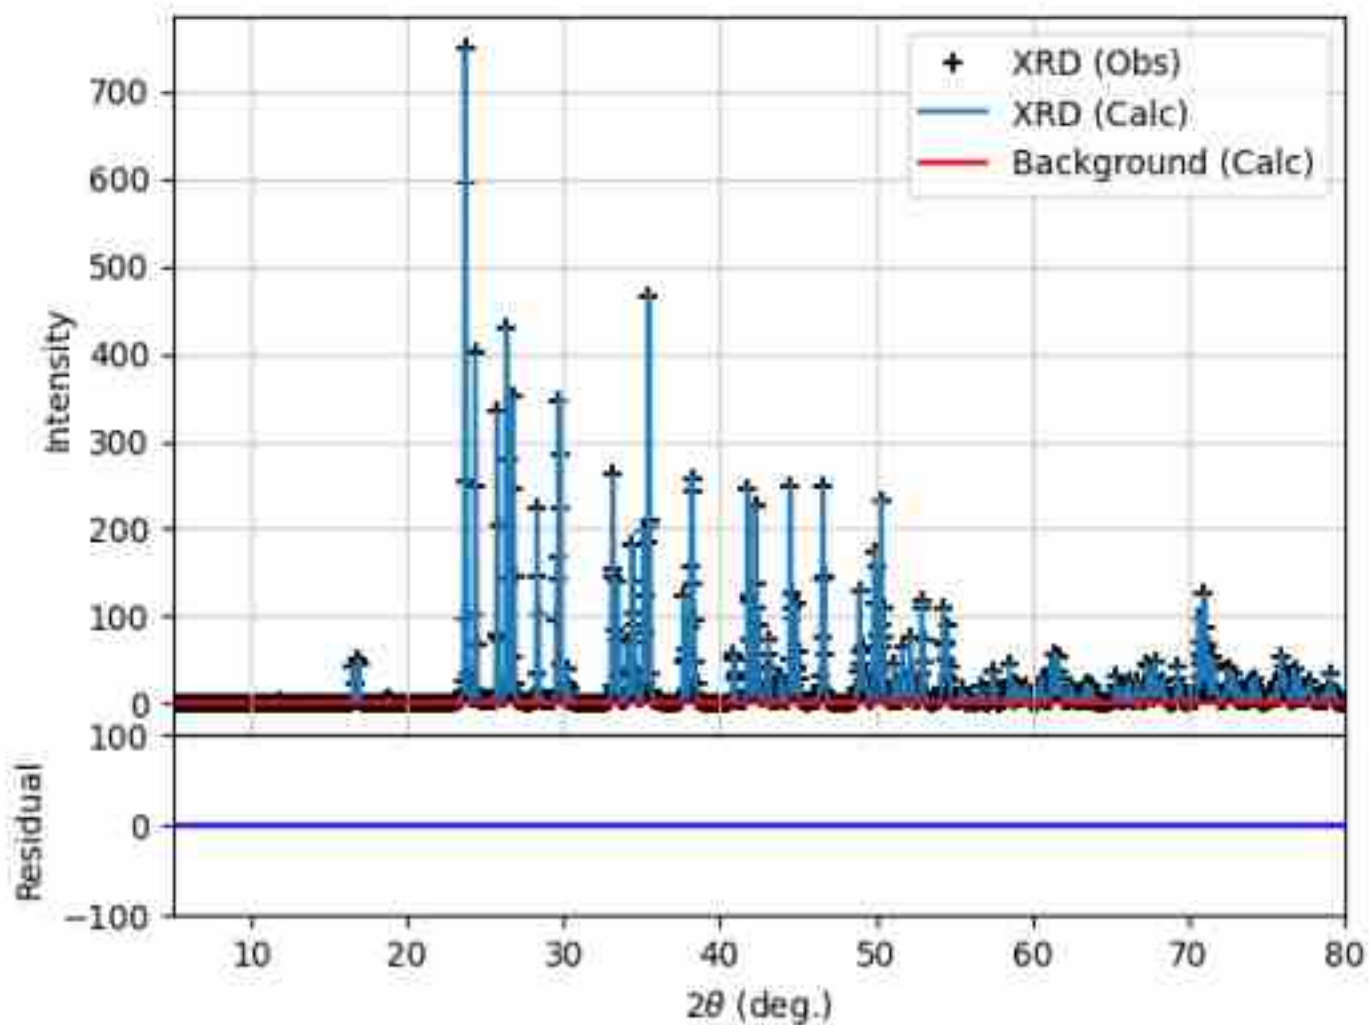

| RMSE before RR | Rwp     | RMSE after RR |
|----------------|---------|---------------|
| 0.018          | 0.00396 | 0.00055       |

# Th1U3Re8

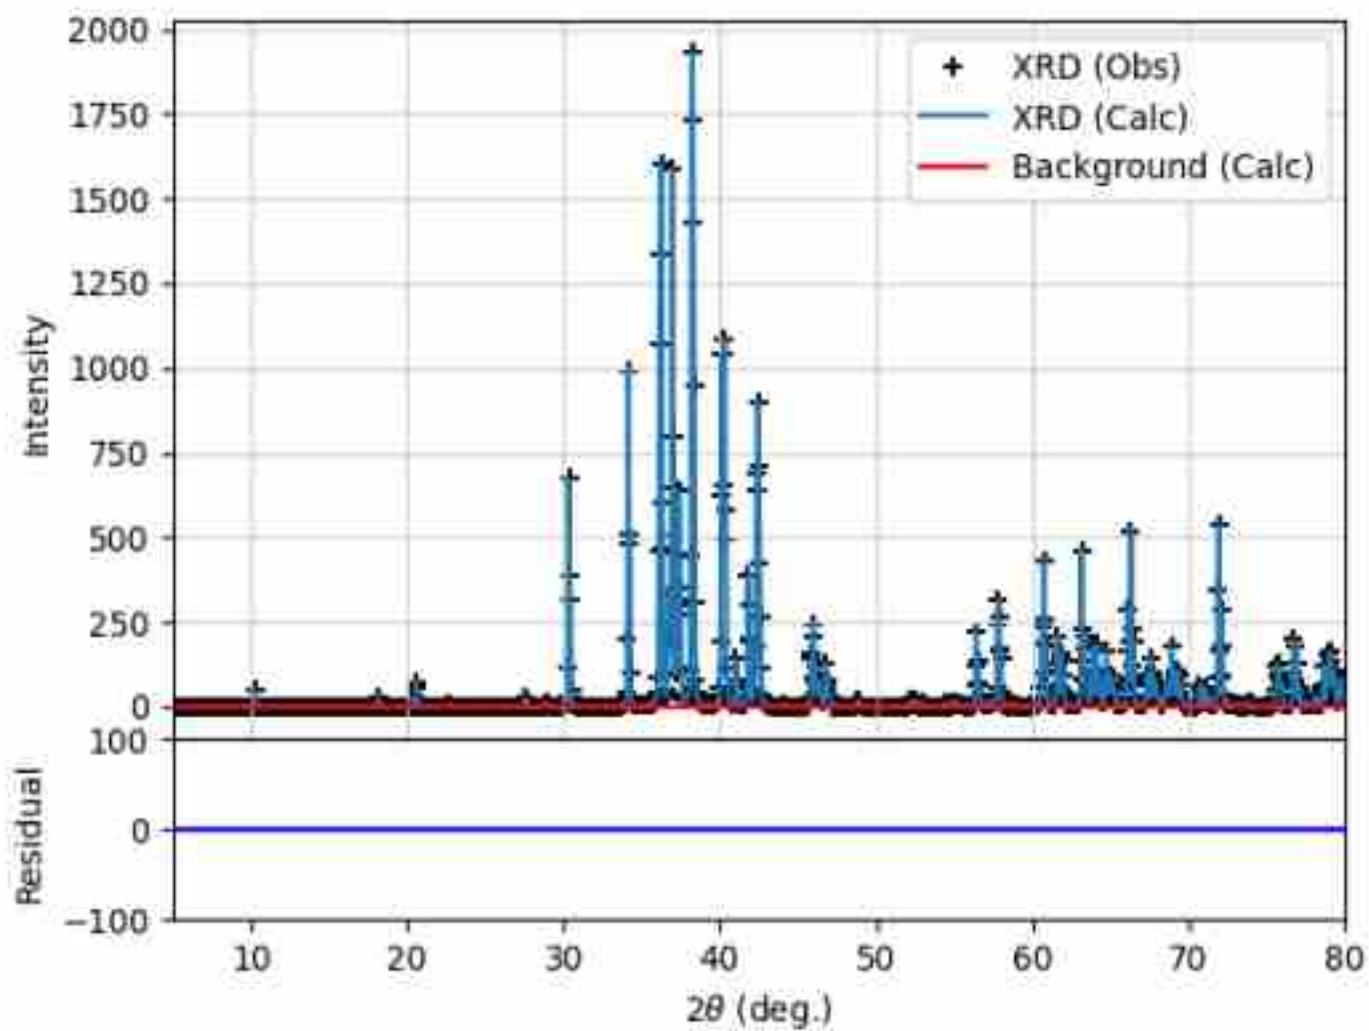

| RMSE before RR | Rwp     | RMSE after RR |
|----------------|---------|---------------|
| 0.018          | 0.00436 | 0.00023       |

# Th<sub>2</sub>Te<sub>2</sub>O<sub>2</sub>

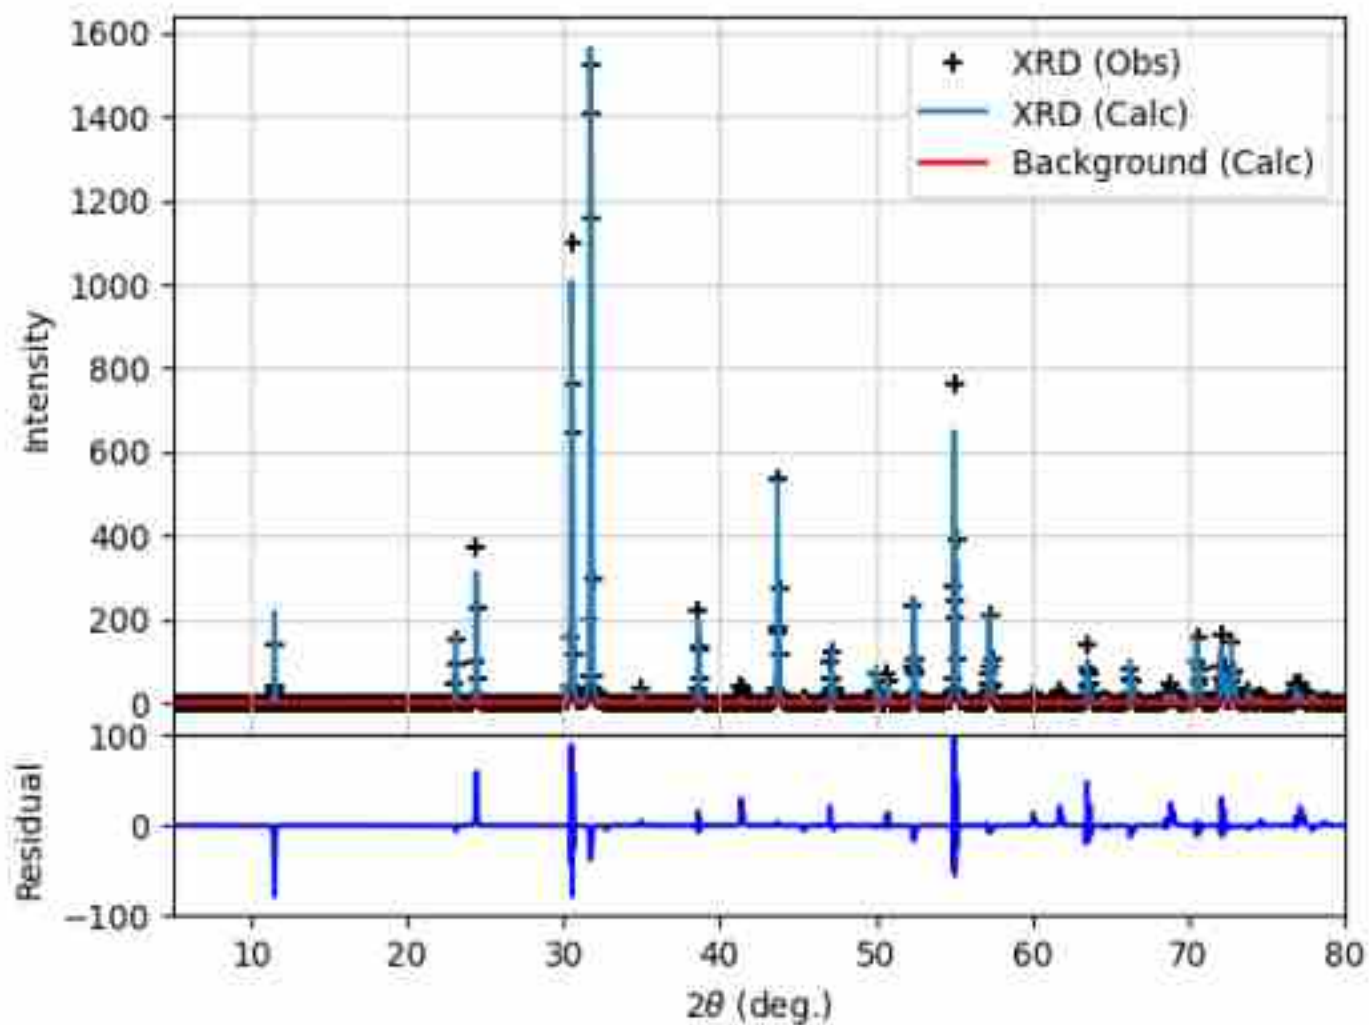

| RMSE before RR | Rwp      | RMSE after RR |
|----------------|----------|---------------|
| 0.018          | 15.88956 | 0.02257       |

# Th6Pd8

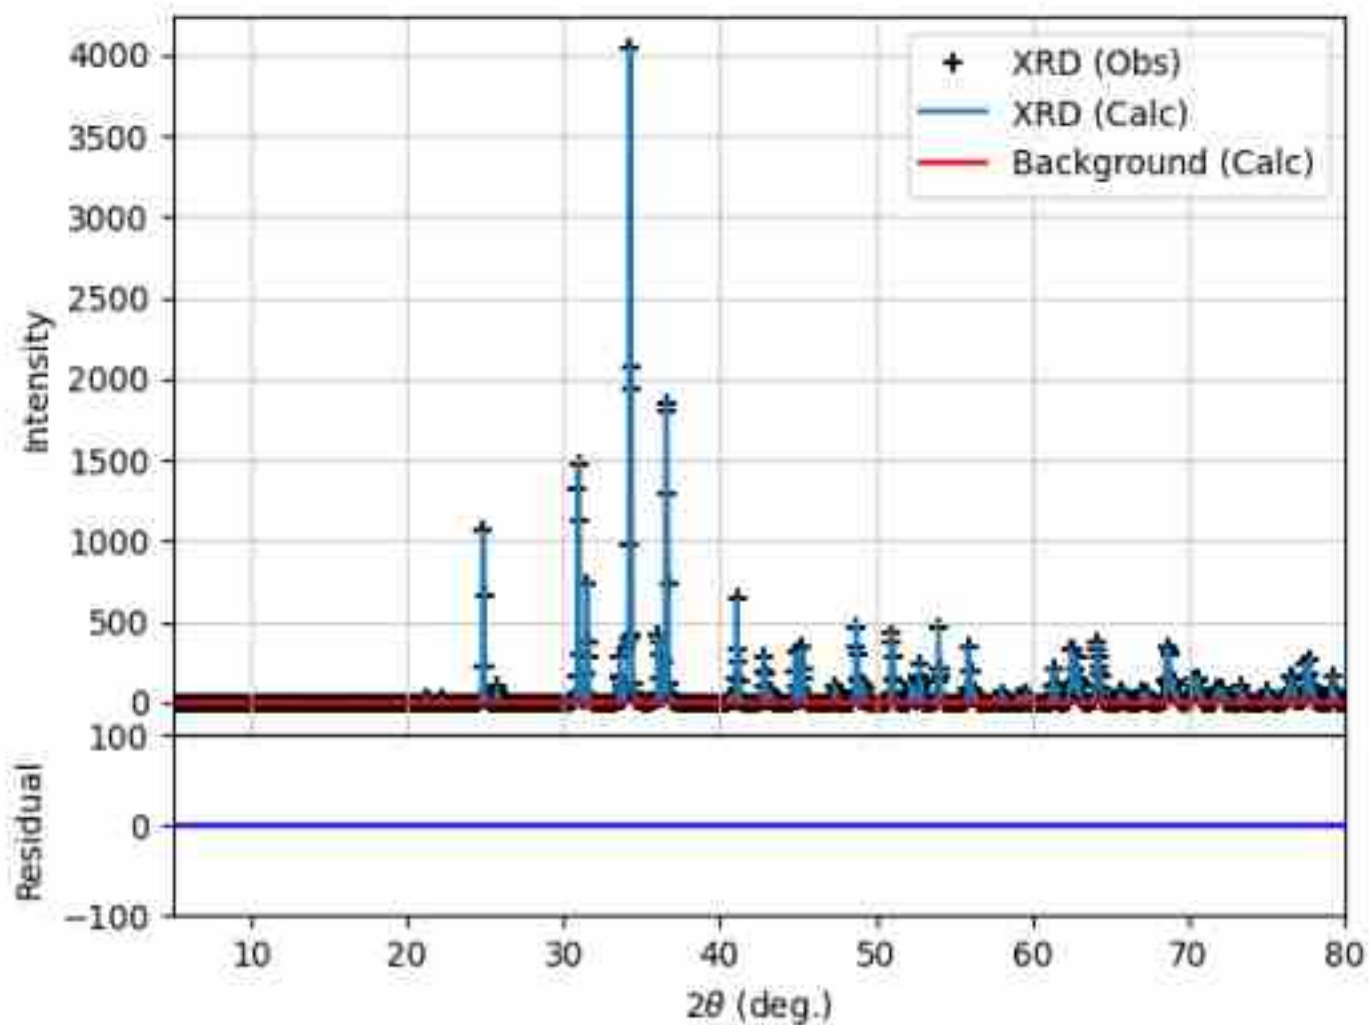

| RMSE before RR | Rwp     | RMSE after RR |
|----------------|---------|---------------|
| 0.018          | 0.00354 | 0.00046       |

# Ti1Nb1S4

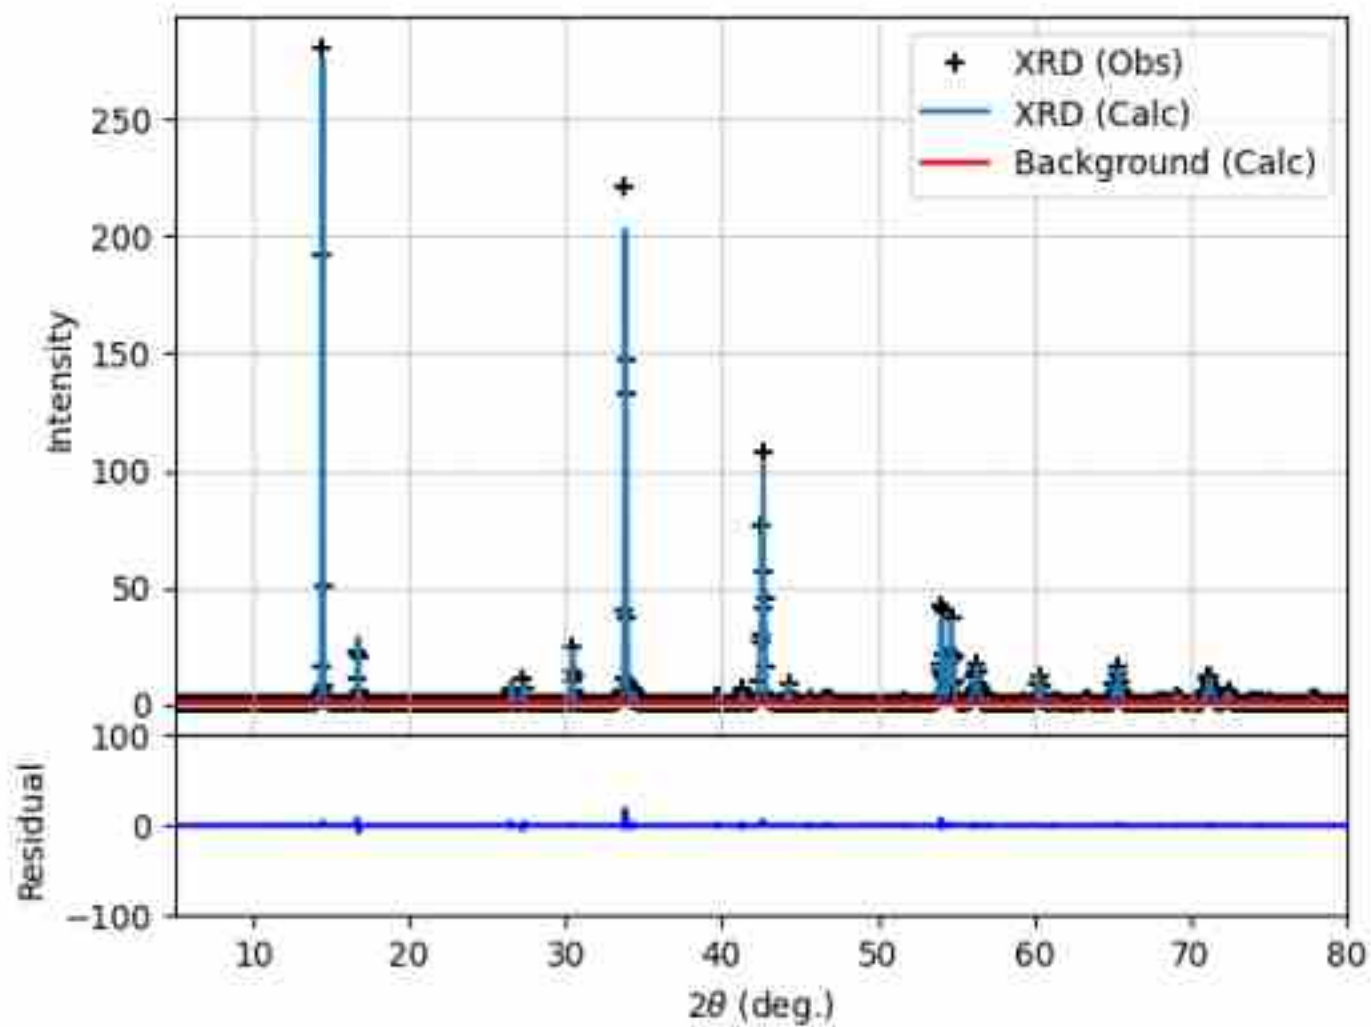

| RMSE before RR | Rwp      | RMSE after RR |
|----------------|----------|---------------|
| 0.018          | 12.17362 | 0.01889       |

# Ti2C16

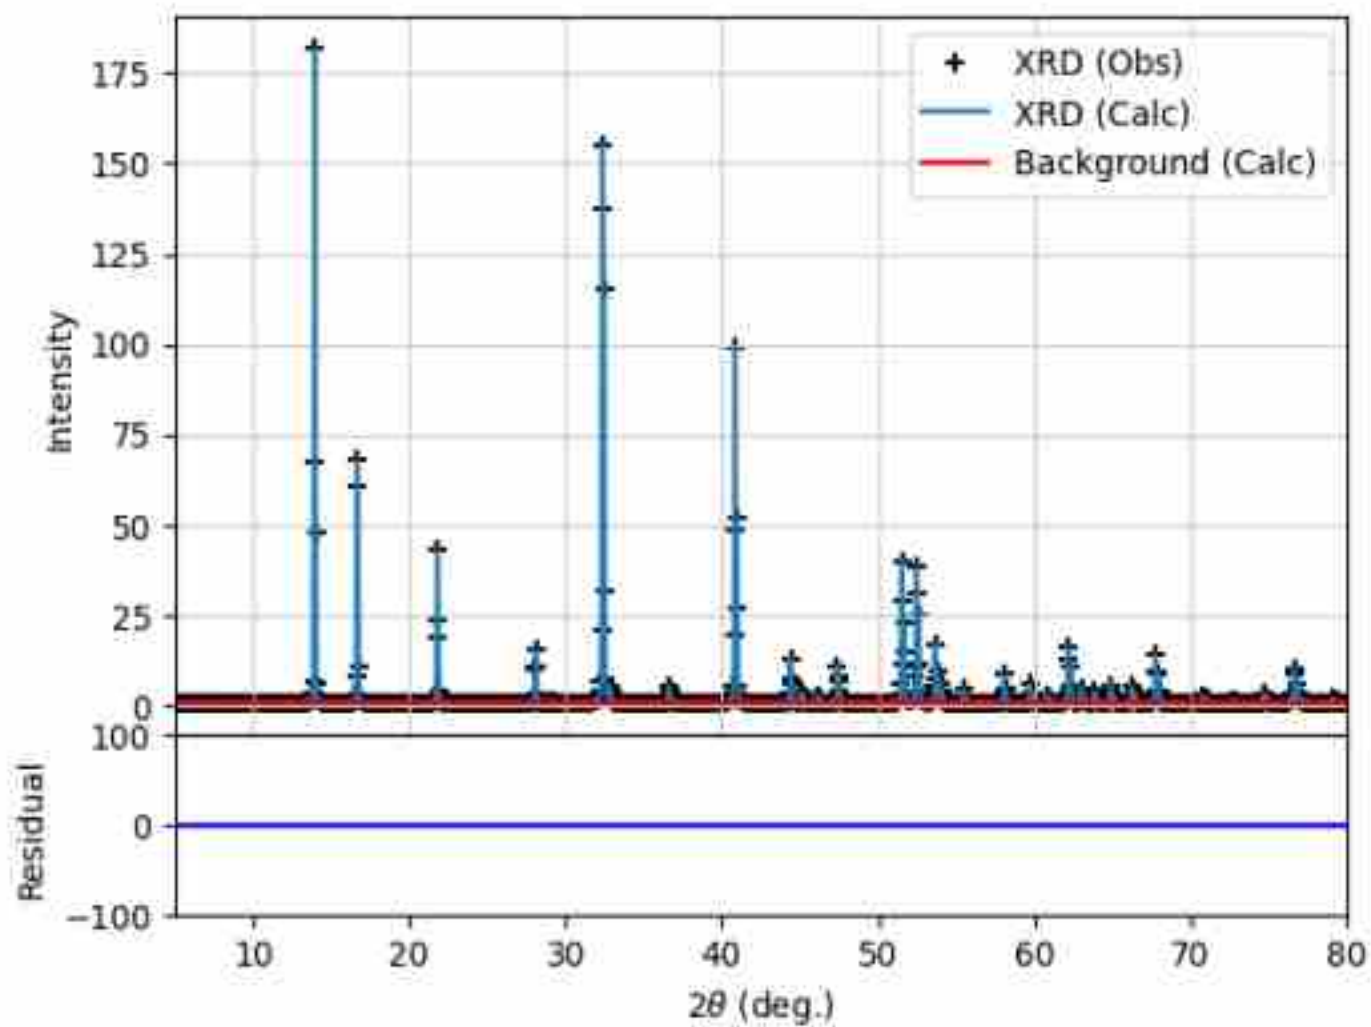

| RMSE before RR | Rwp    | RMSE after RR |
|----------------|--------|---------------|
| 0.018          | 0.0031 | 0.00053       |

# Ti<sub>2</sub>Co<sub>1</sub>S<sub>4</sub>

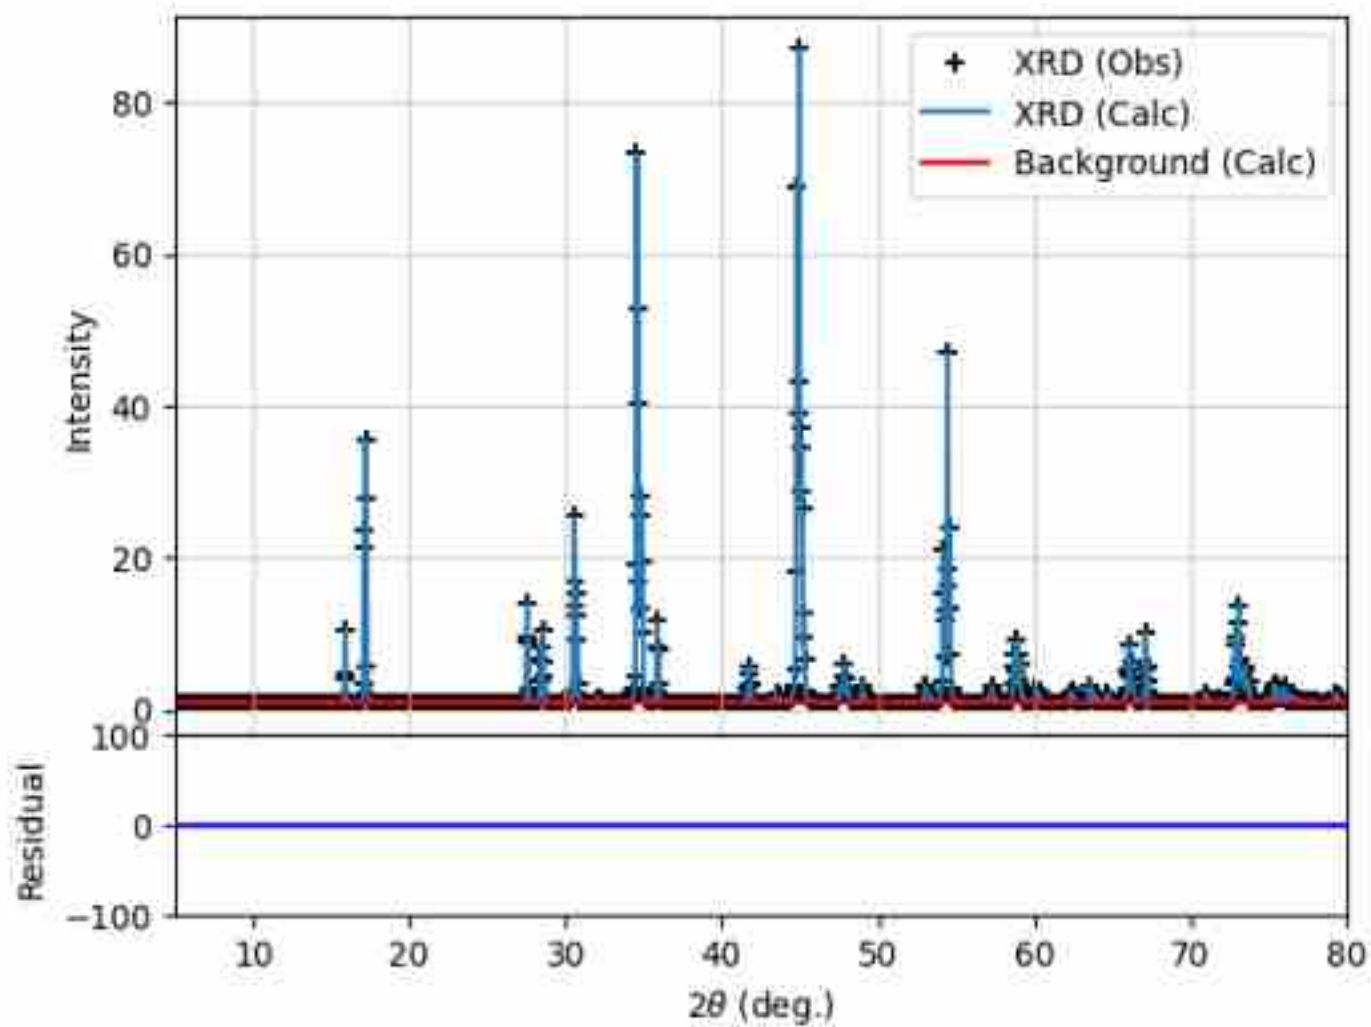

| RMSE before RR | Rwp     | RMSE after RR |
|----------------|---------|---------------|
| 0.018          | 0.00174 | 0.00038       |

# Ti<sub>2</sub>FeCu

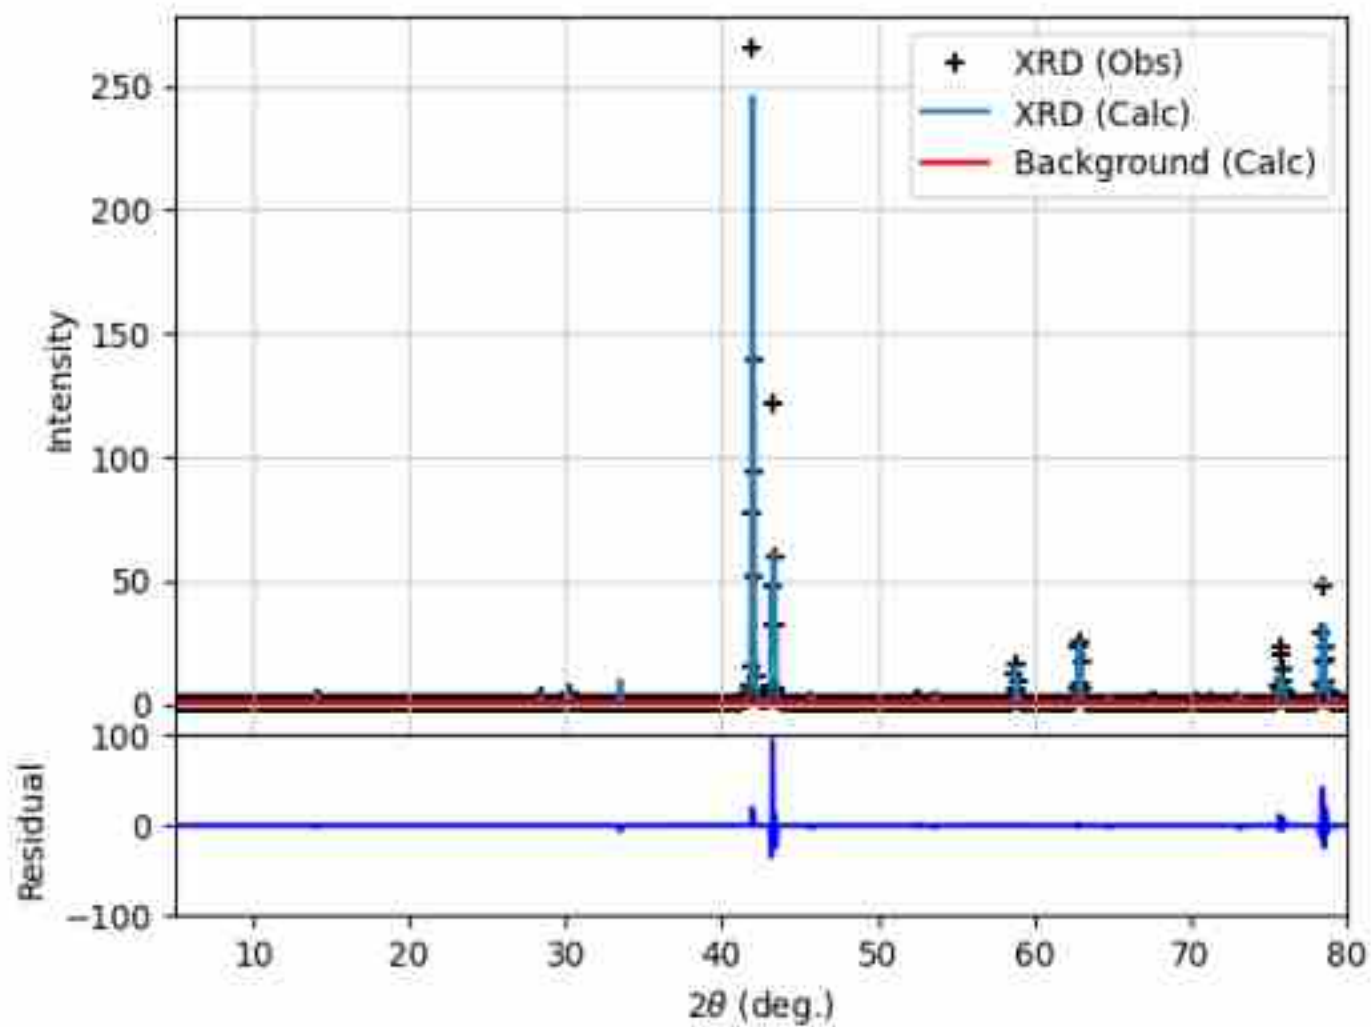

| RMSE before RR | Rwp      | RMSE after RR |
|----------------|----------|---------------|
| 0.018          | 48.09977 | 0.01788       |



# Ti<sub>4</sub>Cd<sub>1</sub>Cu<sub>3</sub>O<sub>12</sub>

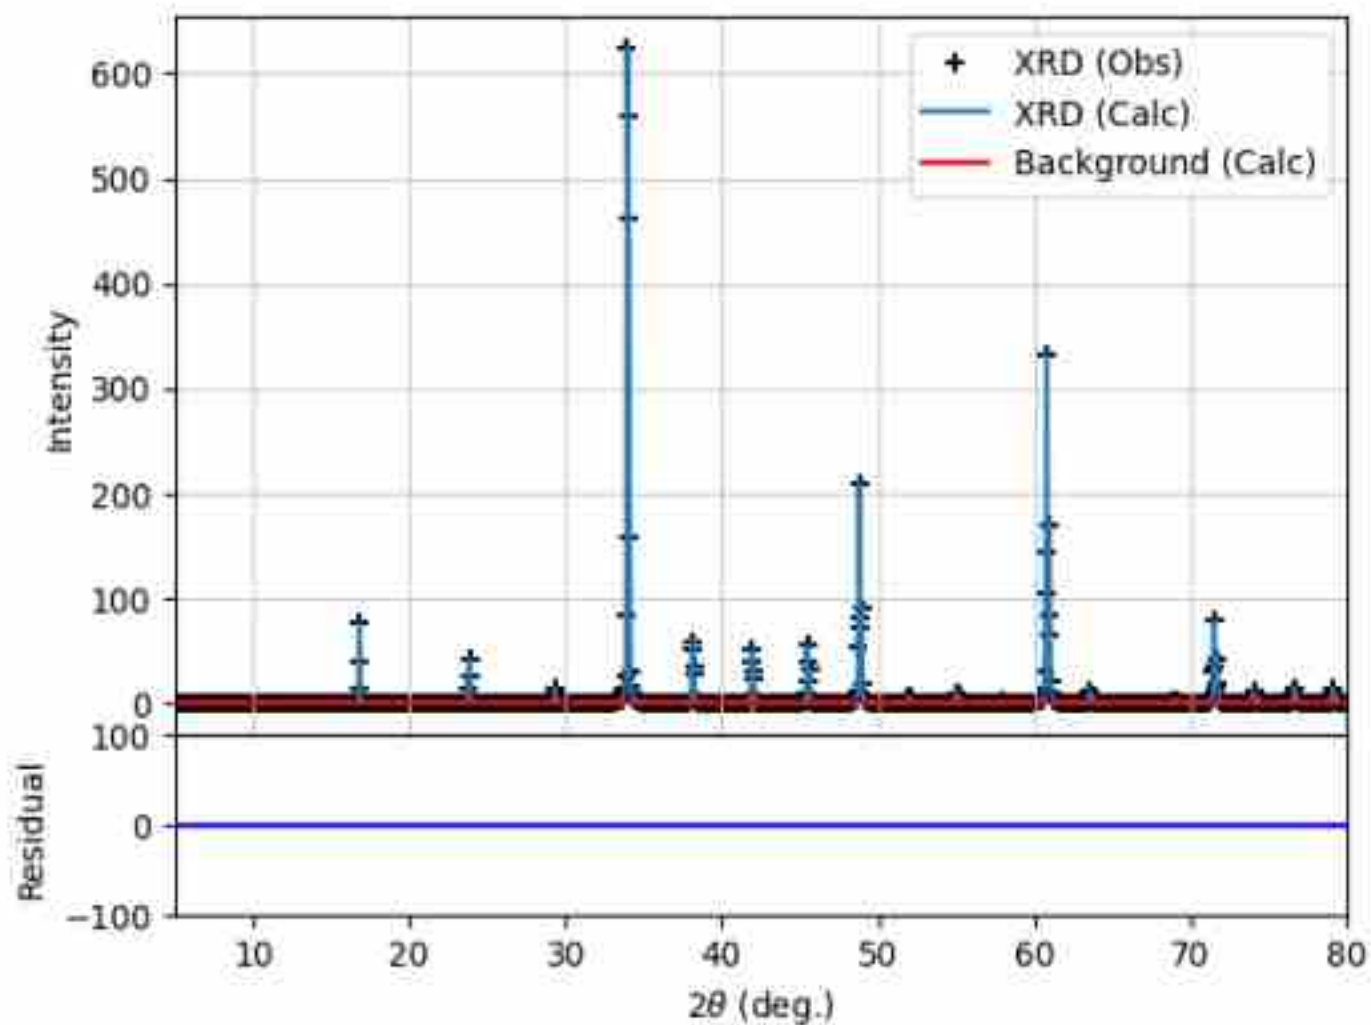

| RMSE before RR | Rwp     | RMSE after RR |
|----------------|---------|---------------|
| 0.018          | 0.02718 | 0.007         |

# Ti<sub>8</sub>Fe<sub>2</sub>Bi<sub>4</sub>

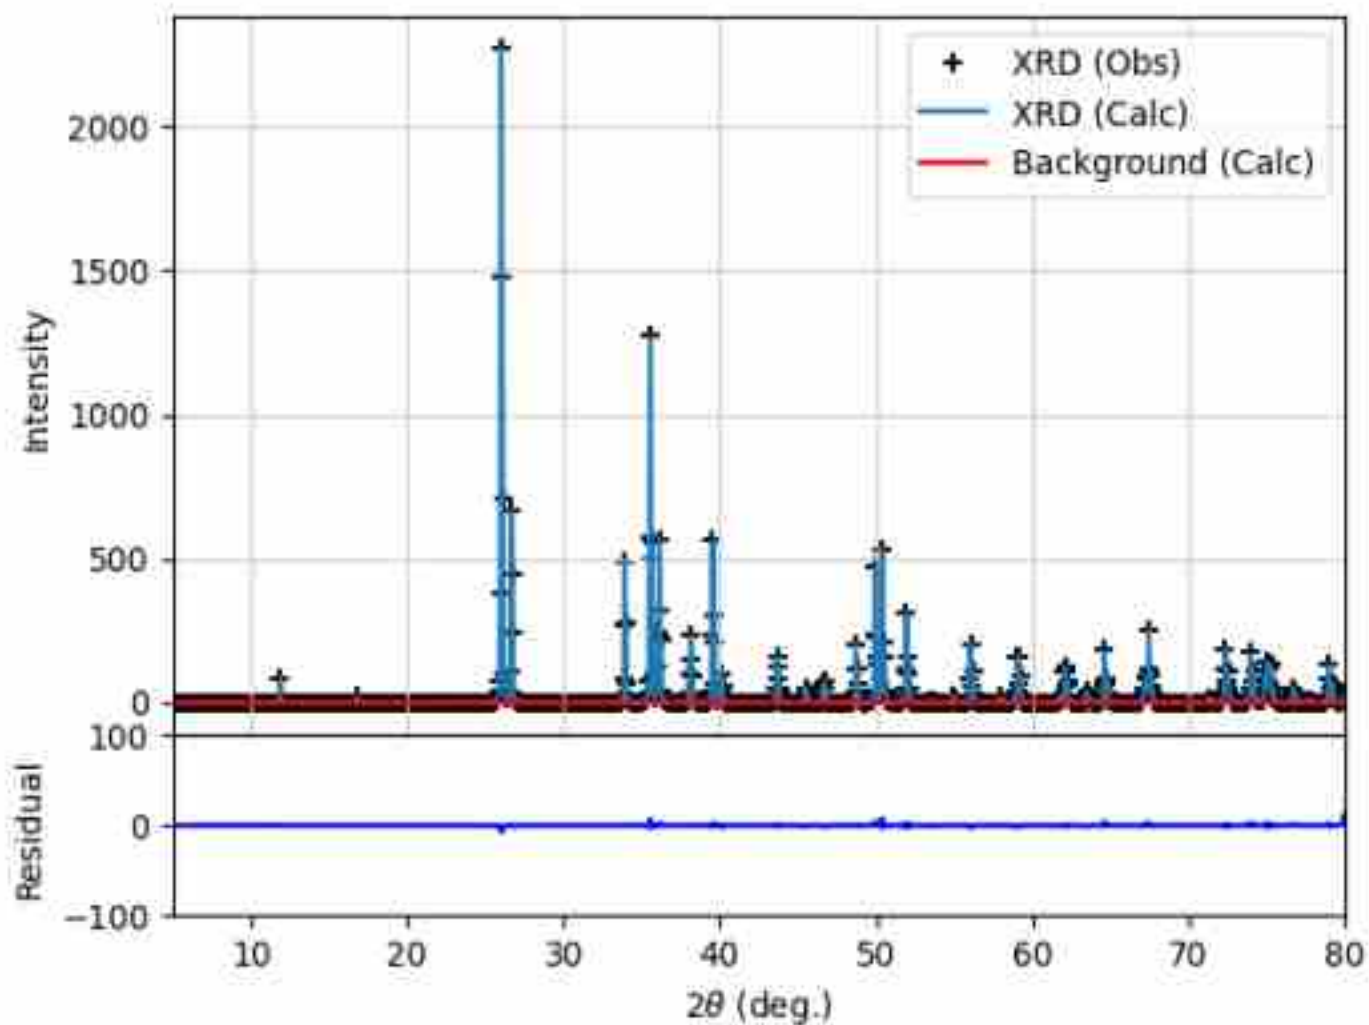

| RMSE before RR | Rwp     | RMSE after RR |
|----------------|---------|---------------|
| 0.018          | 2.14364 | 0.01894       |

# Ti8Se12

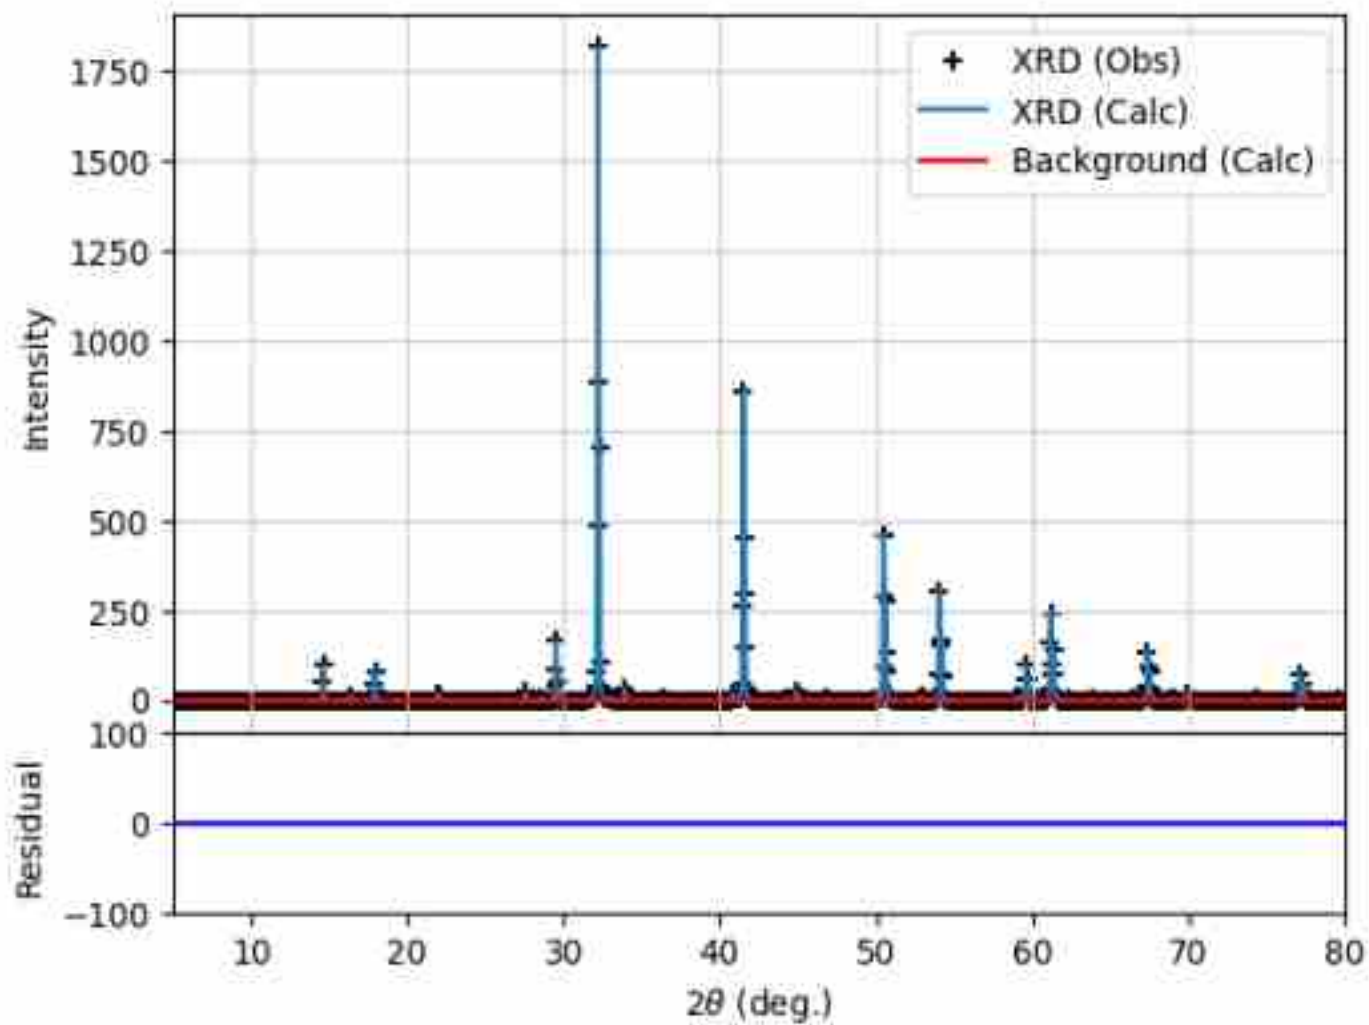

| RMSE before RR | Rwp     | RMSE after RR |
|----------------|---------|---------------|
| 0.018          | 0.00558 | 0.00072       |

# Tl1In1S2

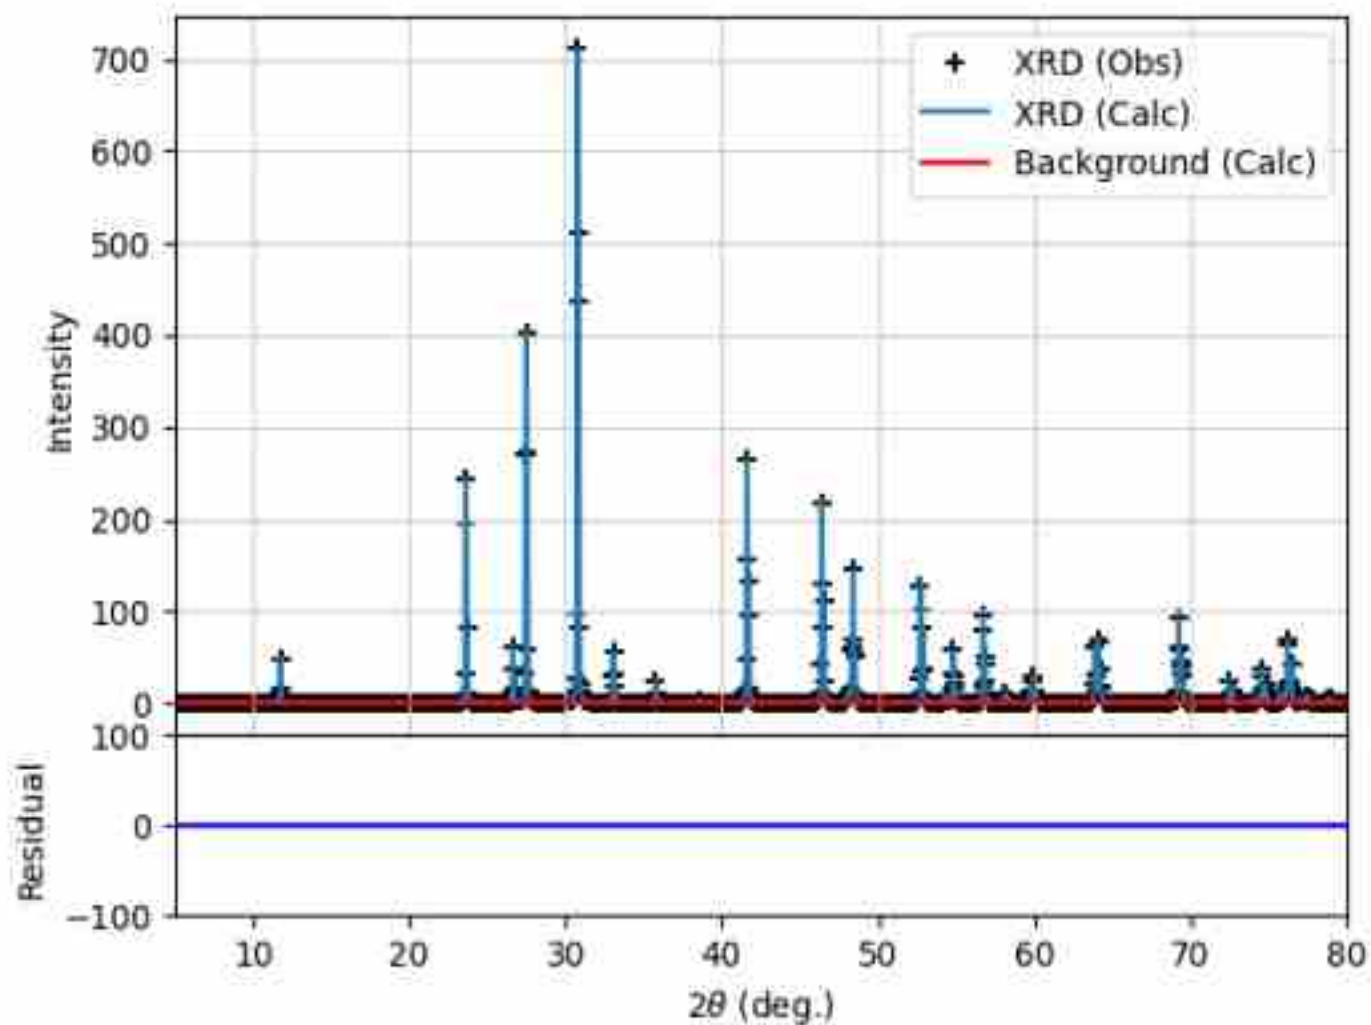

| RMSE before RR | Rwp     | RMSE after RR |
|----------------|---------|---------------|
| 0.018          | 0.00416 | 0.00063       |

# Tm<sub>2</sub>Al<sub>2</sub>Cu<sub>2</sub>

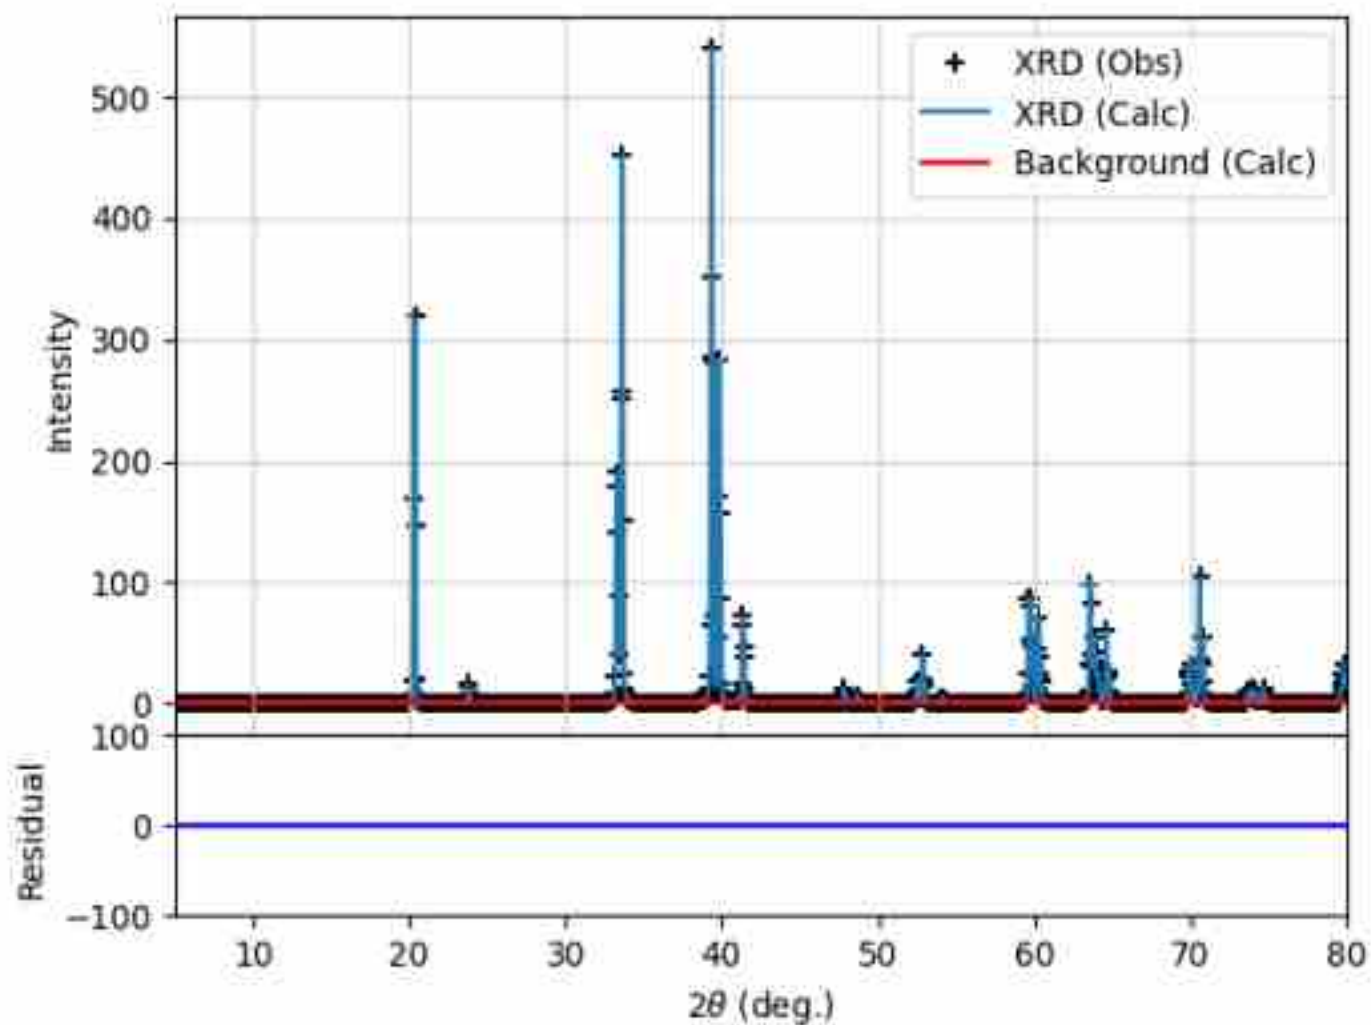

| RMSE before RR | Rwp    | RMSE after RR |
|----------------|--------|---------------|
| 0.018          | 0.0039 | 0.00039       |

# Tm<sub>2</sub>Co<sub>2</sub>Ge<sub>4</sub>

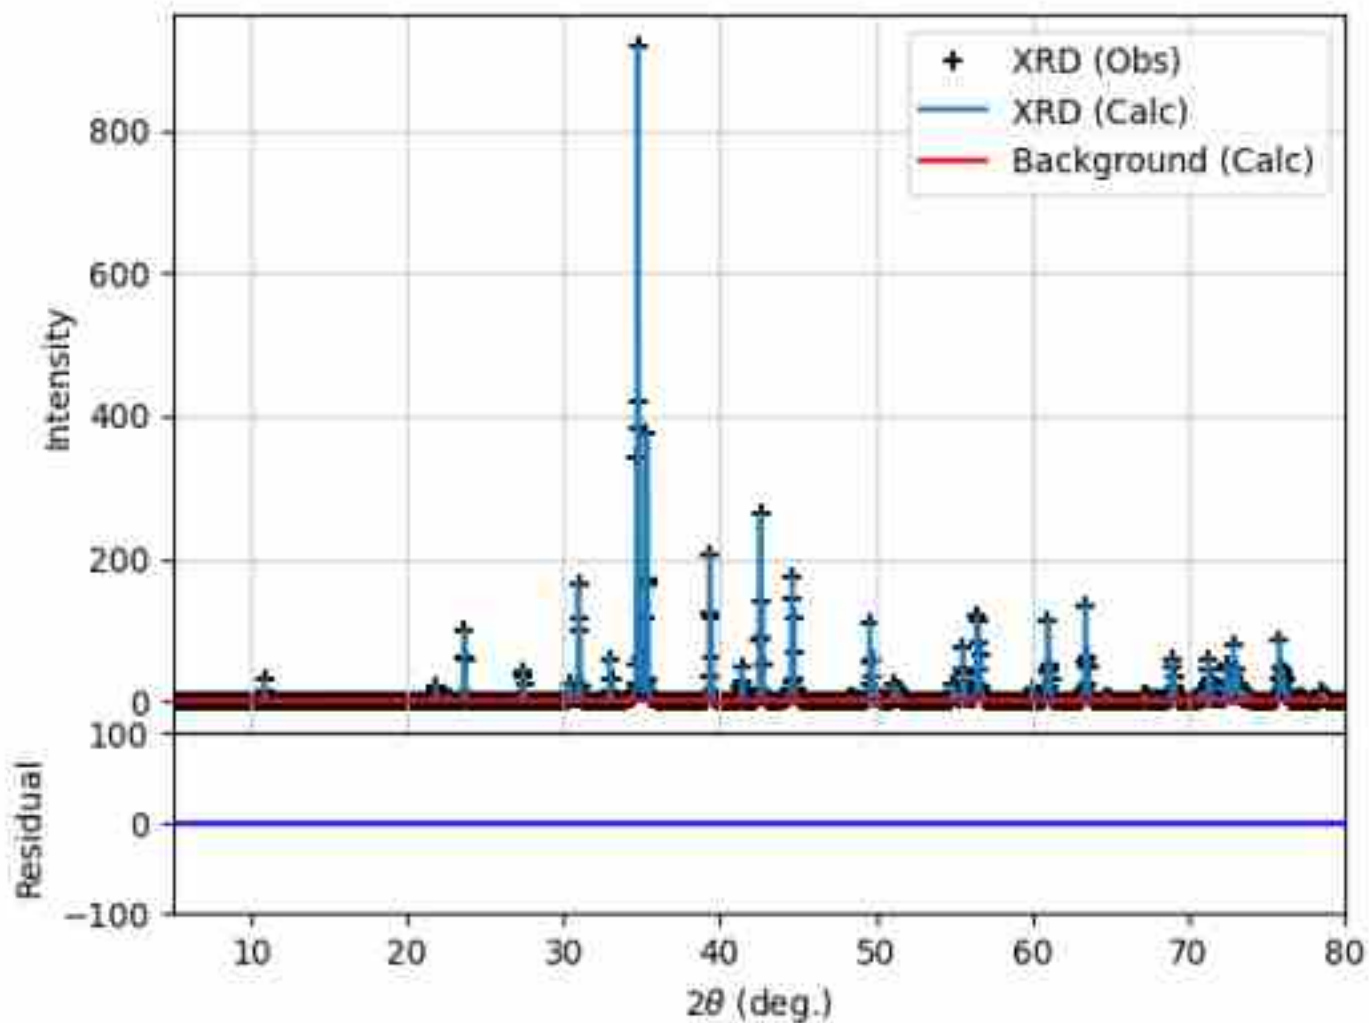

| RMSE before RR | Rwp     | RMSE after RR |
|----------------|---------|---------------|
| 0.018          | 0.00485 | 0.00054       |

# Tm<sub>4</sub>Cd<sub>1</sub>Se<sub>7</sub>

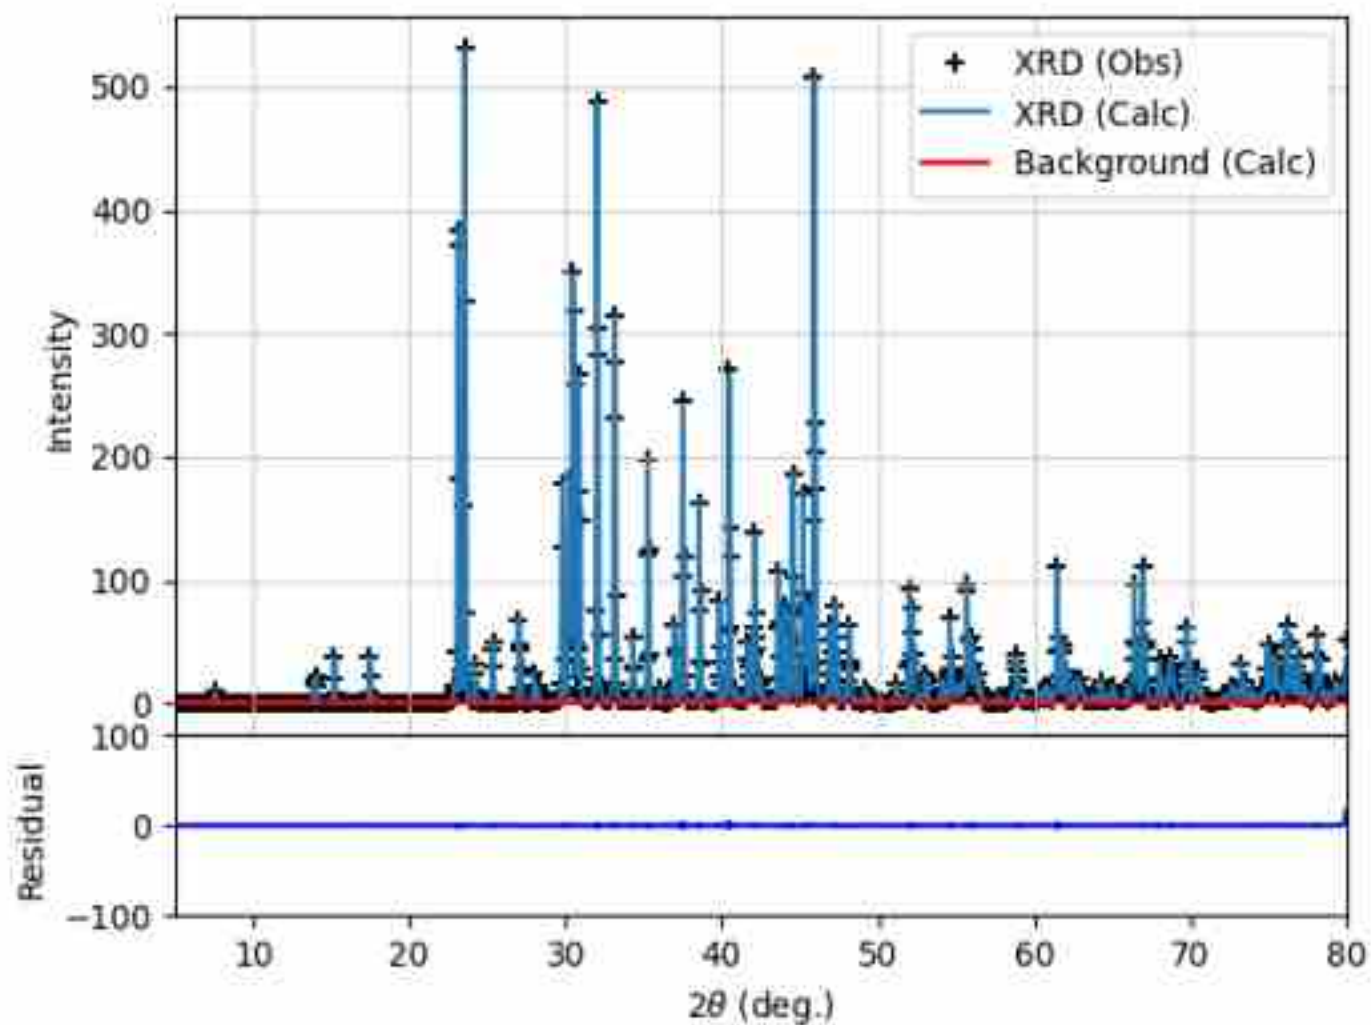

| RMSE before RR | Rwp     | RMSE after RR |
|----------------|---------|---------------|
| 0.018          | 2.65514 | 0.00982       |

# Tm<sub>4</sub>Mg<sub>2</sub>S<sub>8</sub>

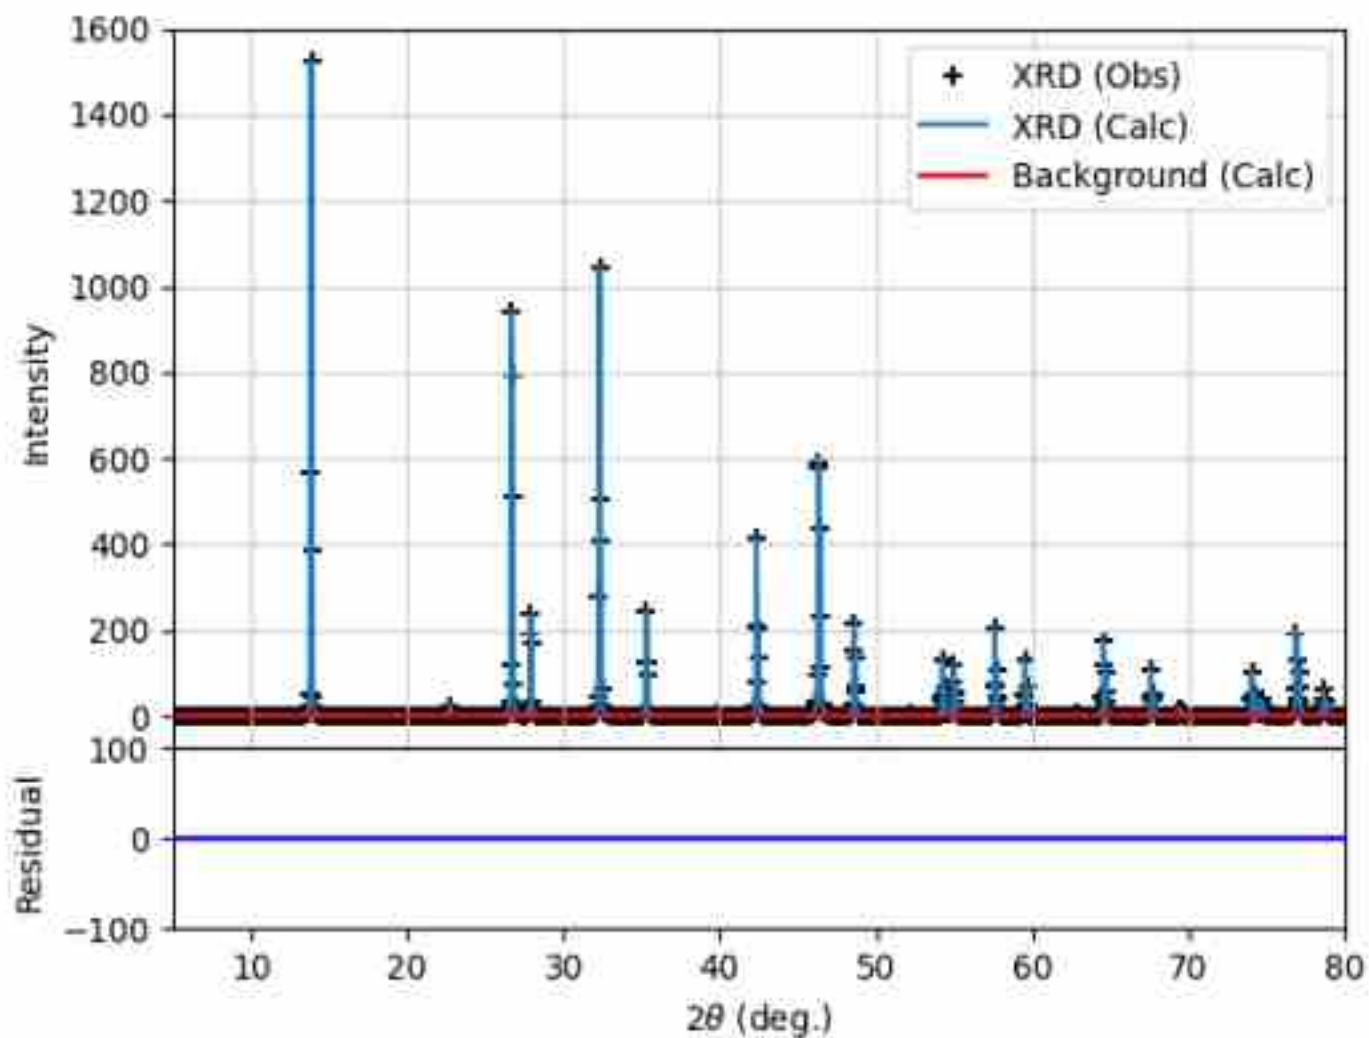

| RMSE before RR | Rwp     | RMSE after RR |
|----------------|---------|---------------|
| 0.018          | 0.03013 | 0.00417       |



# Tm<sub>4</sub>Mg<sub>2</sub>

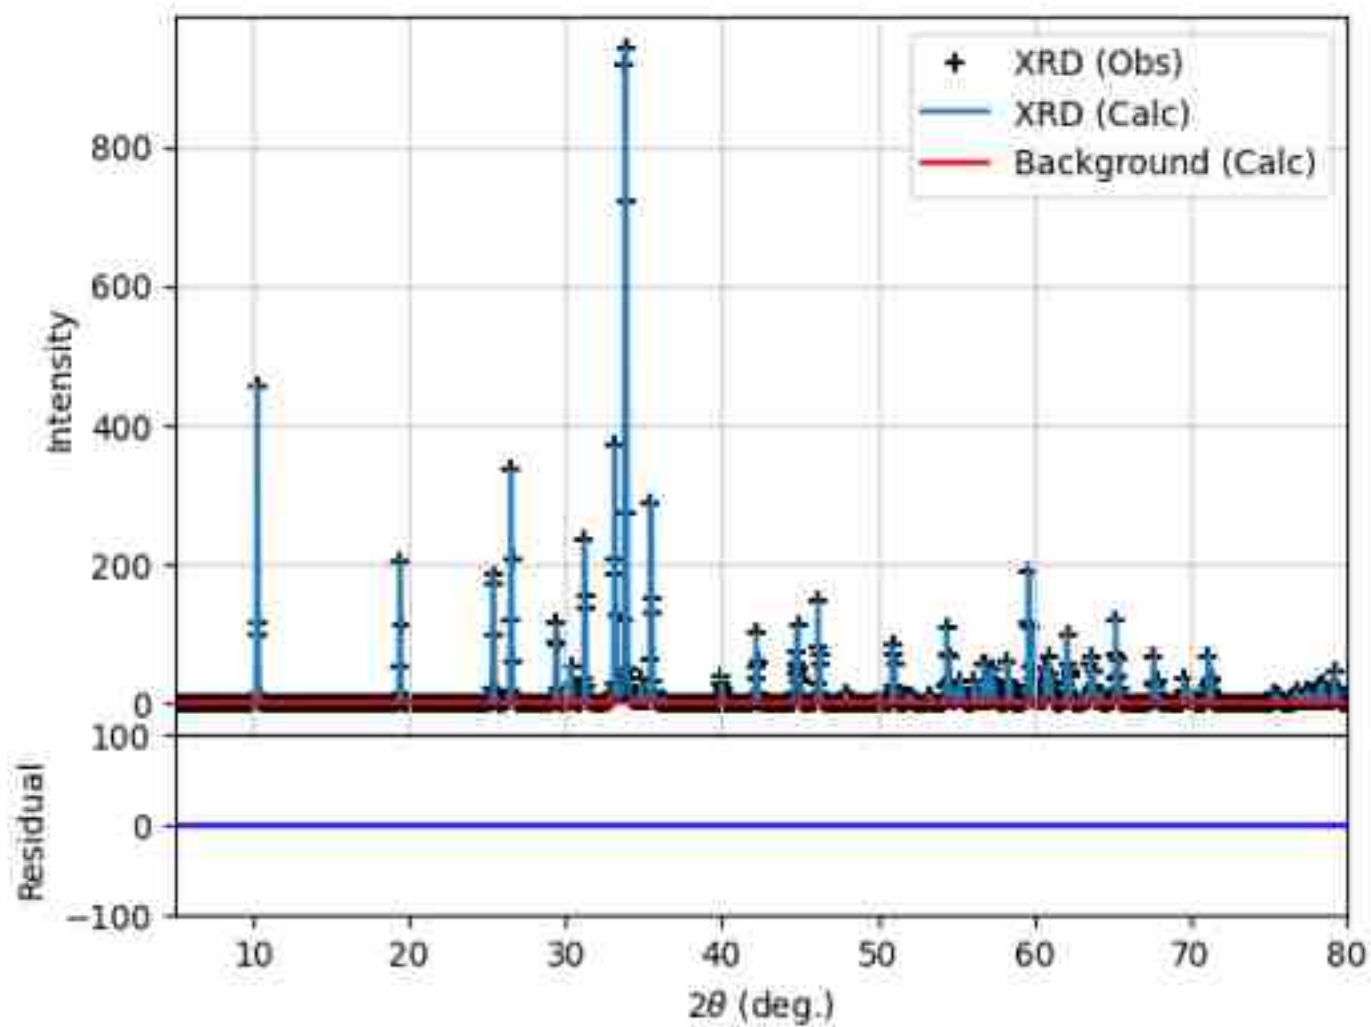

| RMSE before RR | Rwp    | RMSE after RR |
|----------------|--------|---------------|
| 0.018          | 0.0035 | 0.00044       |

# Tm<sub>4</sub>Ni<sub>2</sub>Ru<sub>2</sub>O<sub>12</sub>

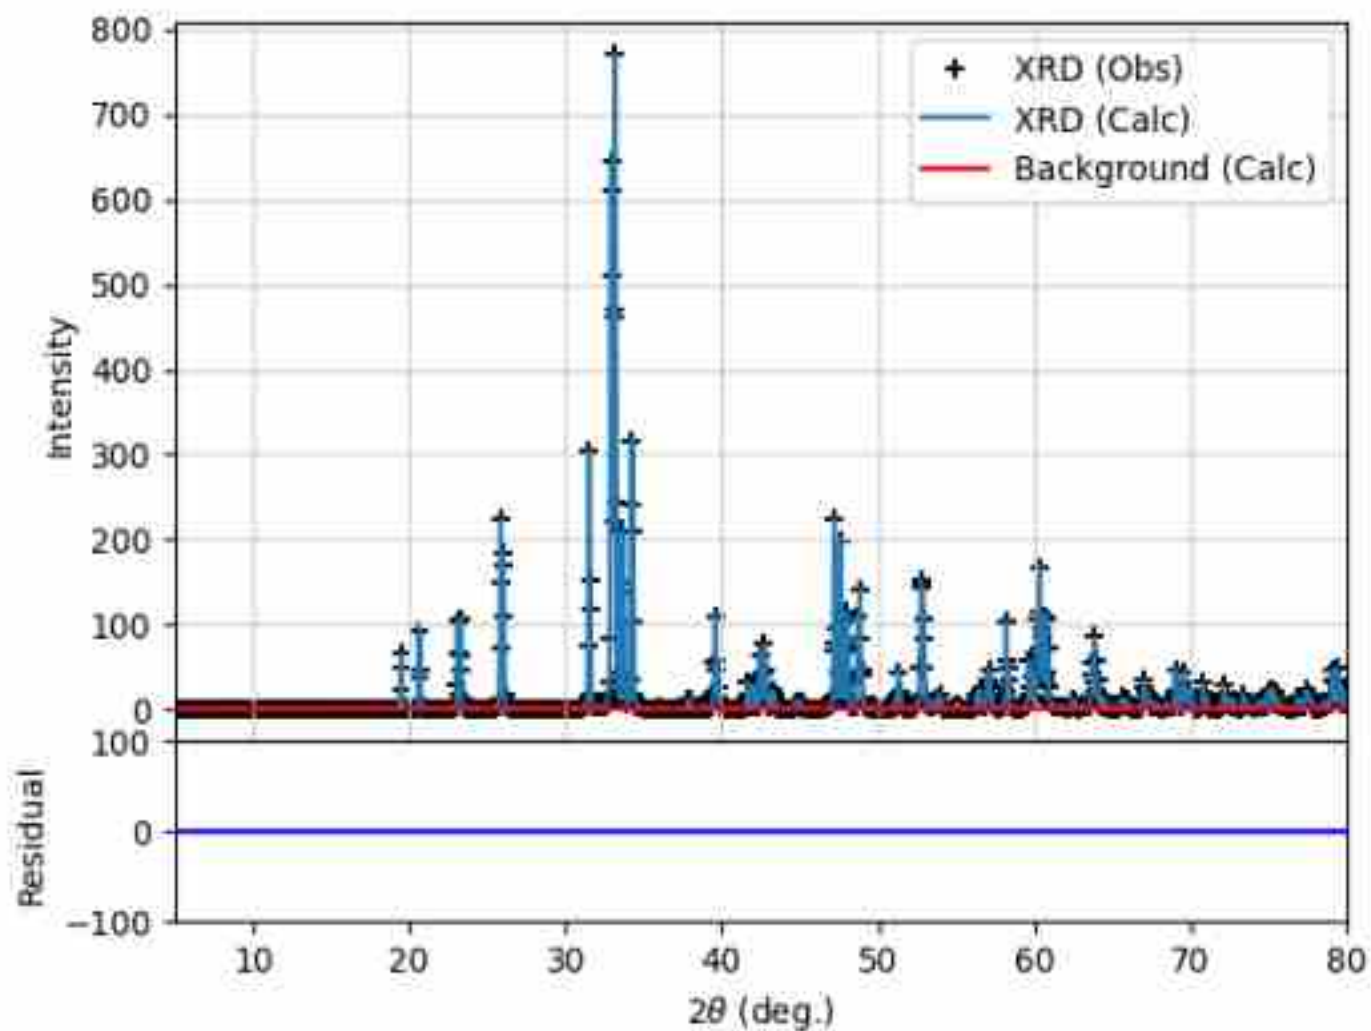

| RMSE before RR | Rwp     | RMSE after RR |
|----------------|---------|---------------|
| 0.018          | 0.00398 | 0.0011        |

# Tm8Al18

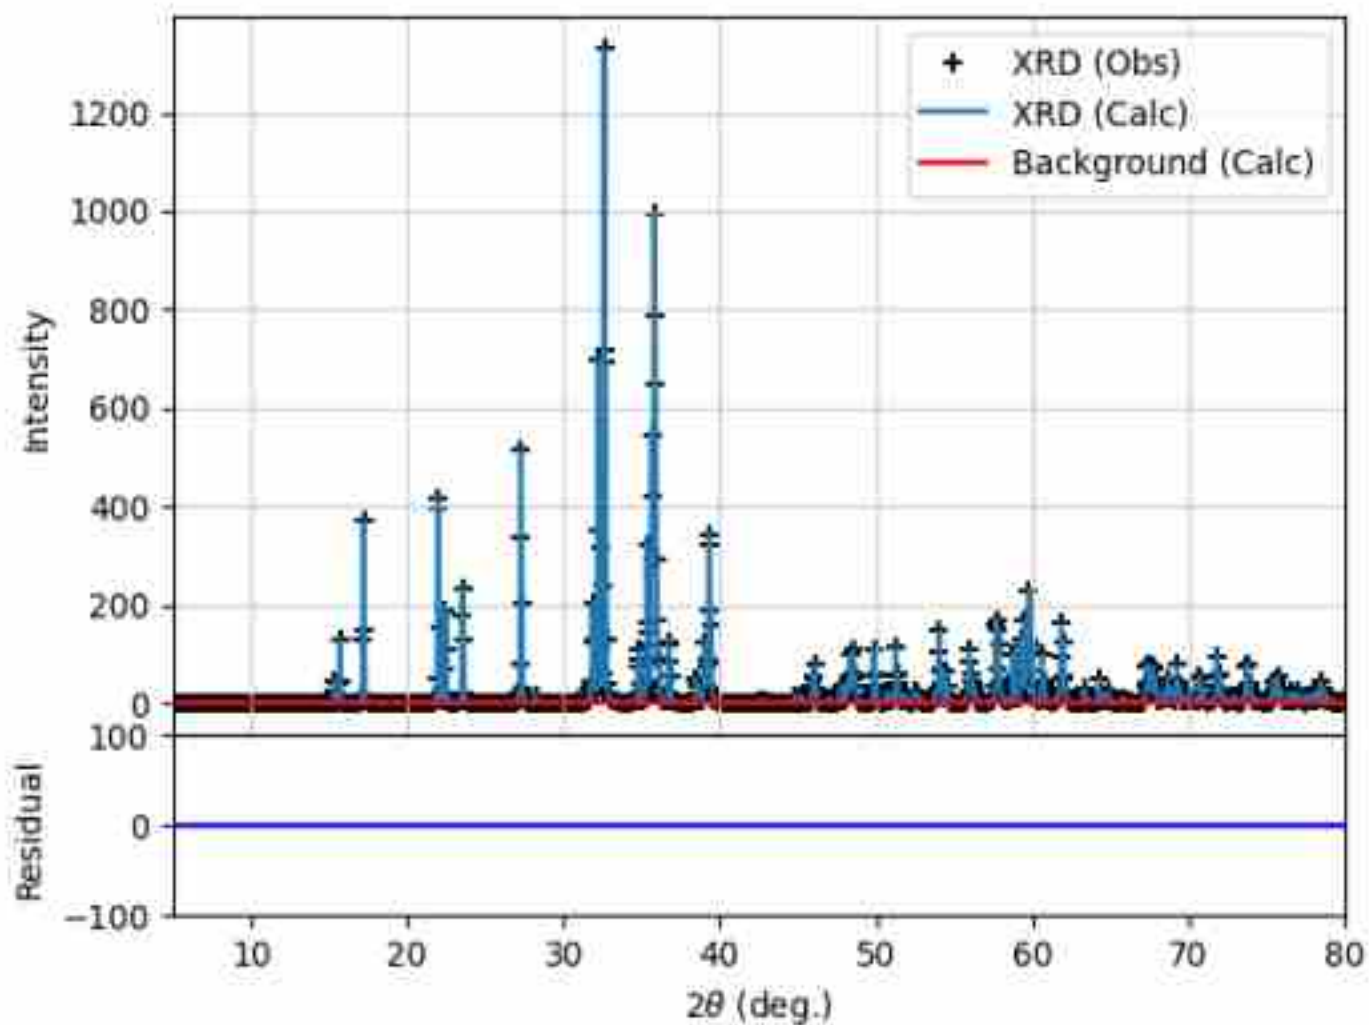

| RMSE before RR | Rwp     | RMSE after RR |
|----------------|---------|---------------|
| 0.018          | 0.00448 | 0.00104       |

# U<sub>2</sub>Sb<sub>4</sub>Ru<sub>2</sub>

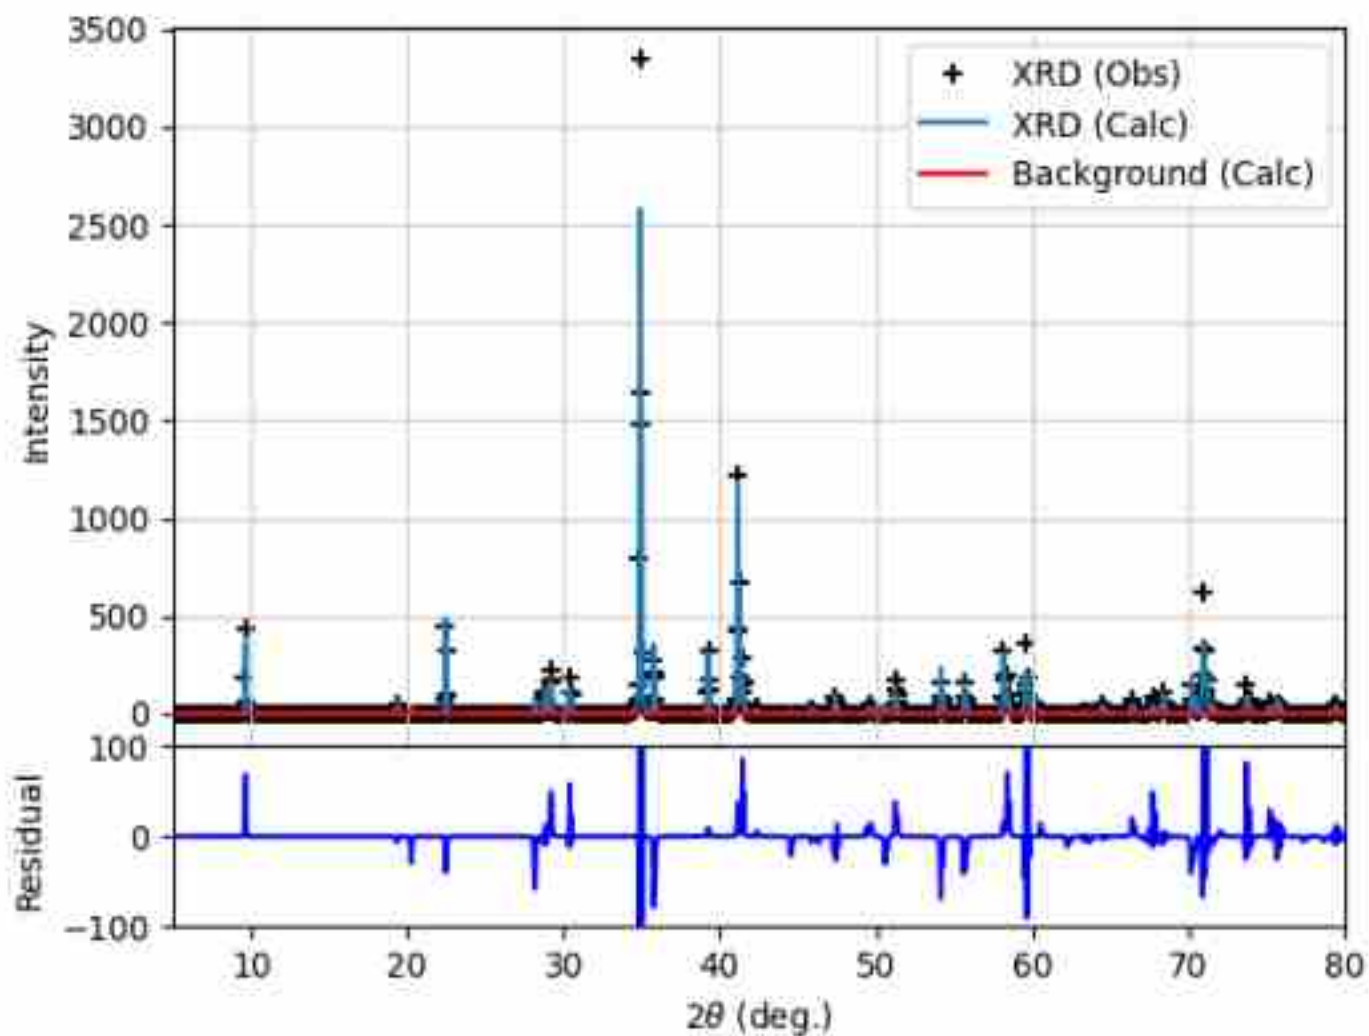

| RMSE before RR | Rwp      | RMSE after RR |
|----------------|----------|---------------|
| 0.018          | 41.19736 | 0.02338       |

# U<sub>2</sub>Si<sub>2</sub>Se<sub>2</sub>

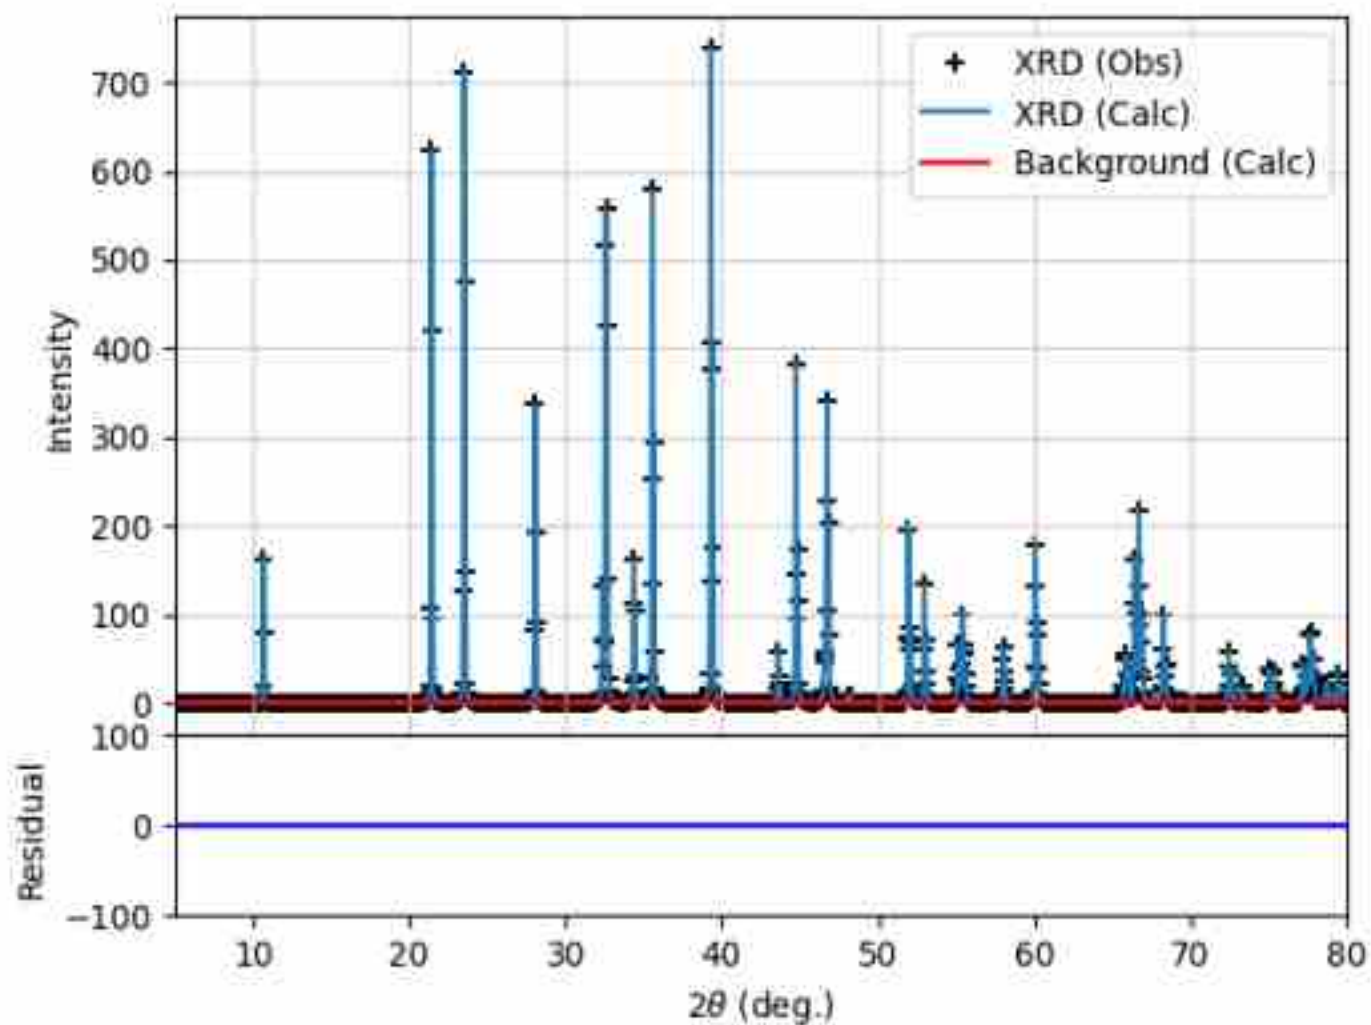

| RMSE before RR | Rwp    | RMSE after RR |
|----------------|--------|---------------|
| 0.018          | 0.0051 | 0.00105       |

# U<sub>4</sub>Ga<sub>2</sub>Co<sub>4</sub>

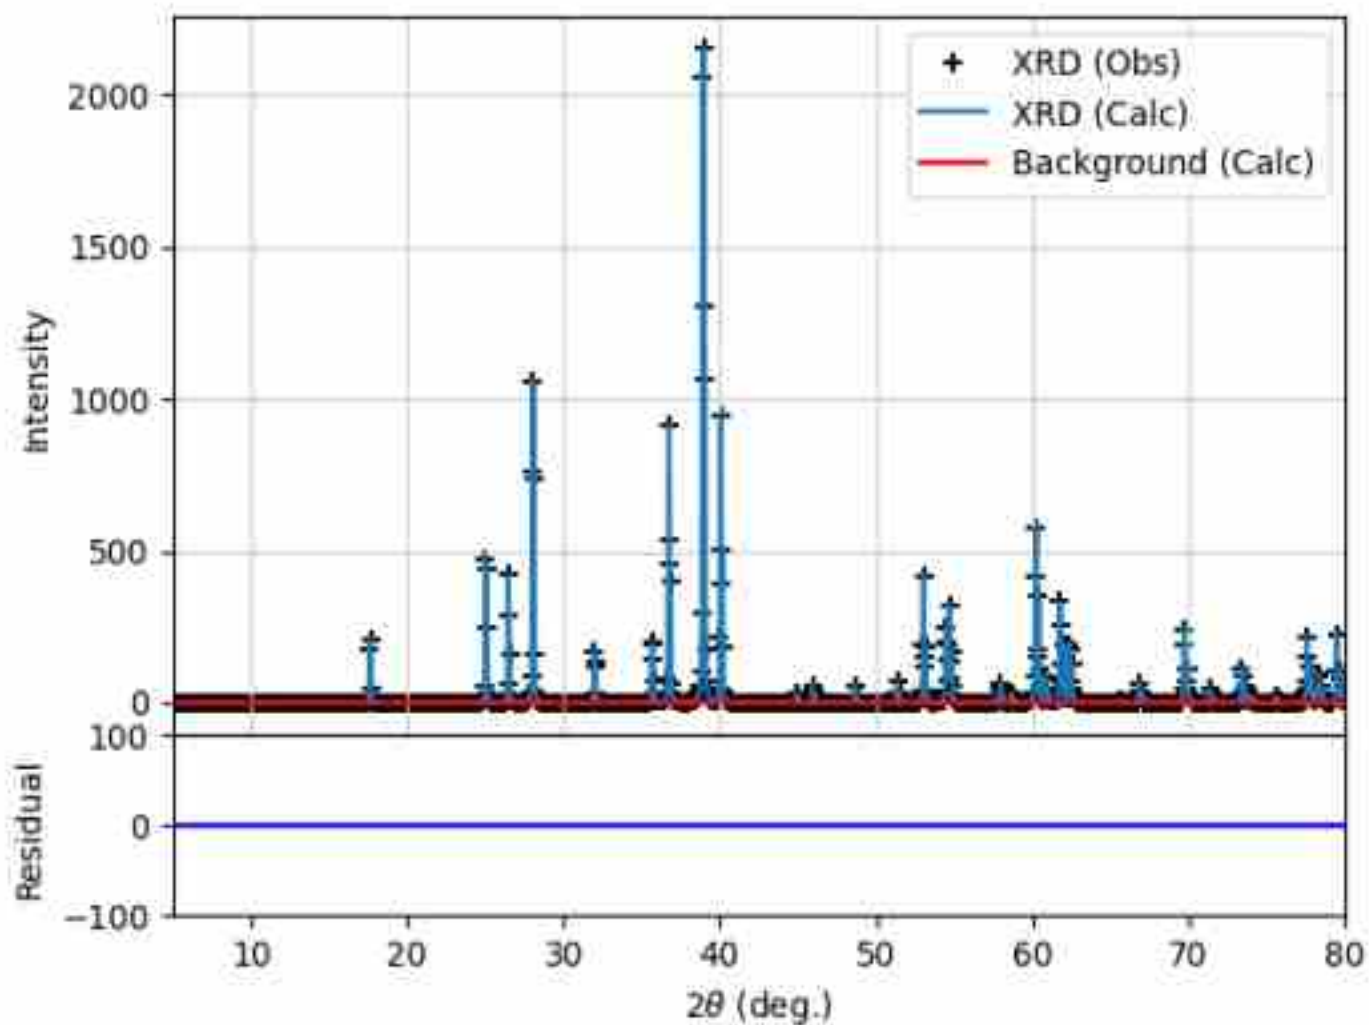

| RMSE before RR | Rwp     | RMSE after RR |
|----------------|---------|---------------|
| 0.018          | 0.00551 | 0.00078       |

# V1Ga1Mo3S8

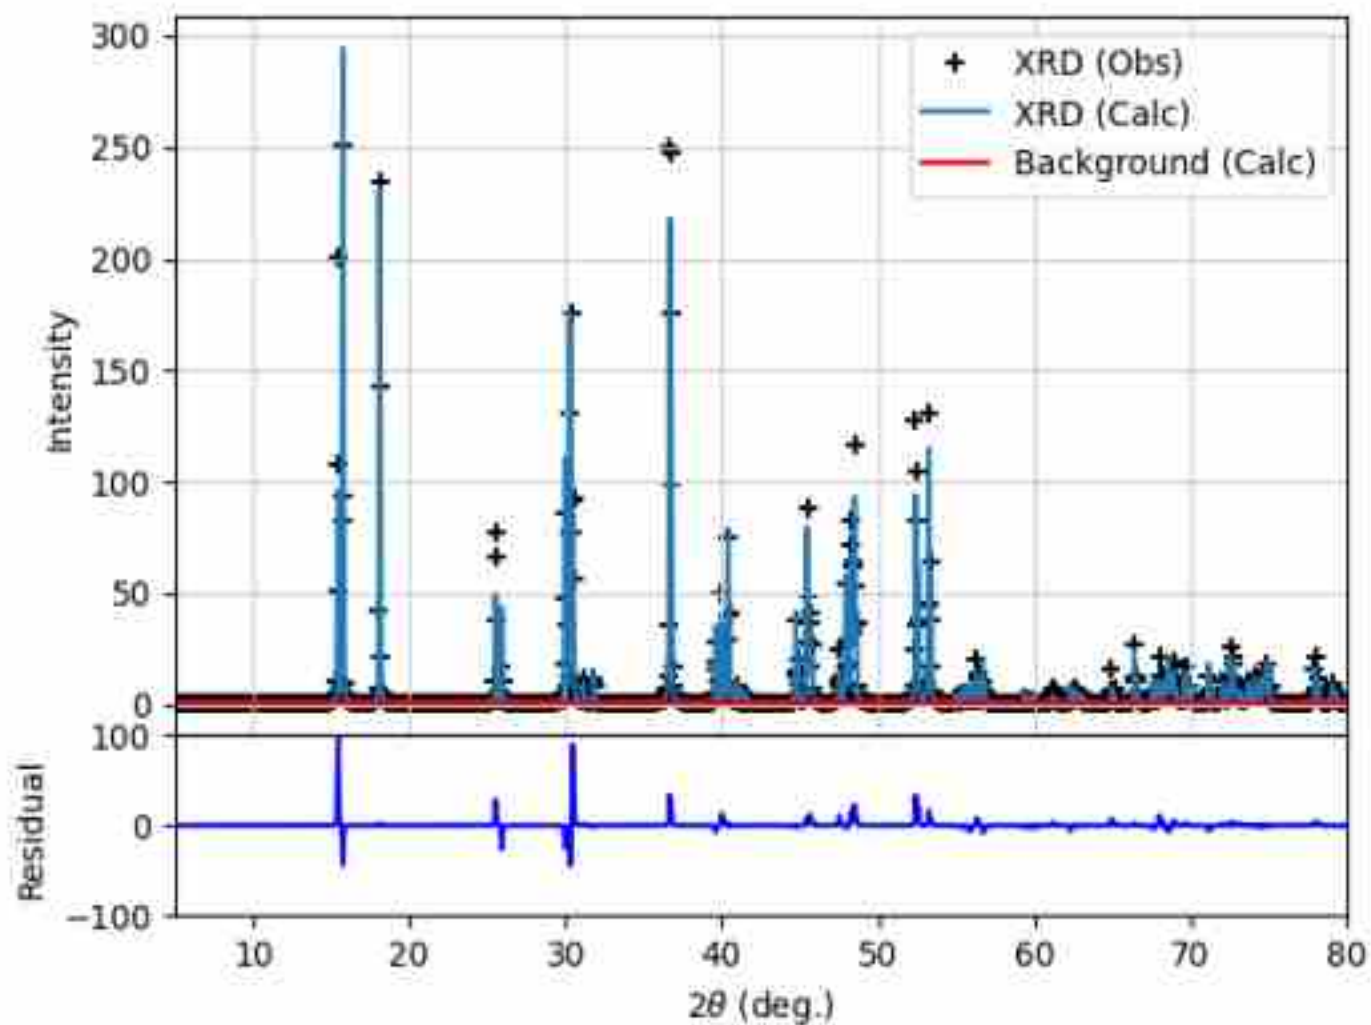

| RMSE before RR | Rwp      | RMSE after RR |
|----------------|----------|---------------|
| 0.018          | 26.97833 | 0.07593       |

# V1S2

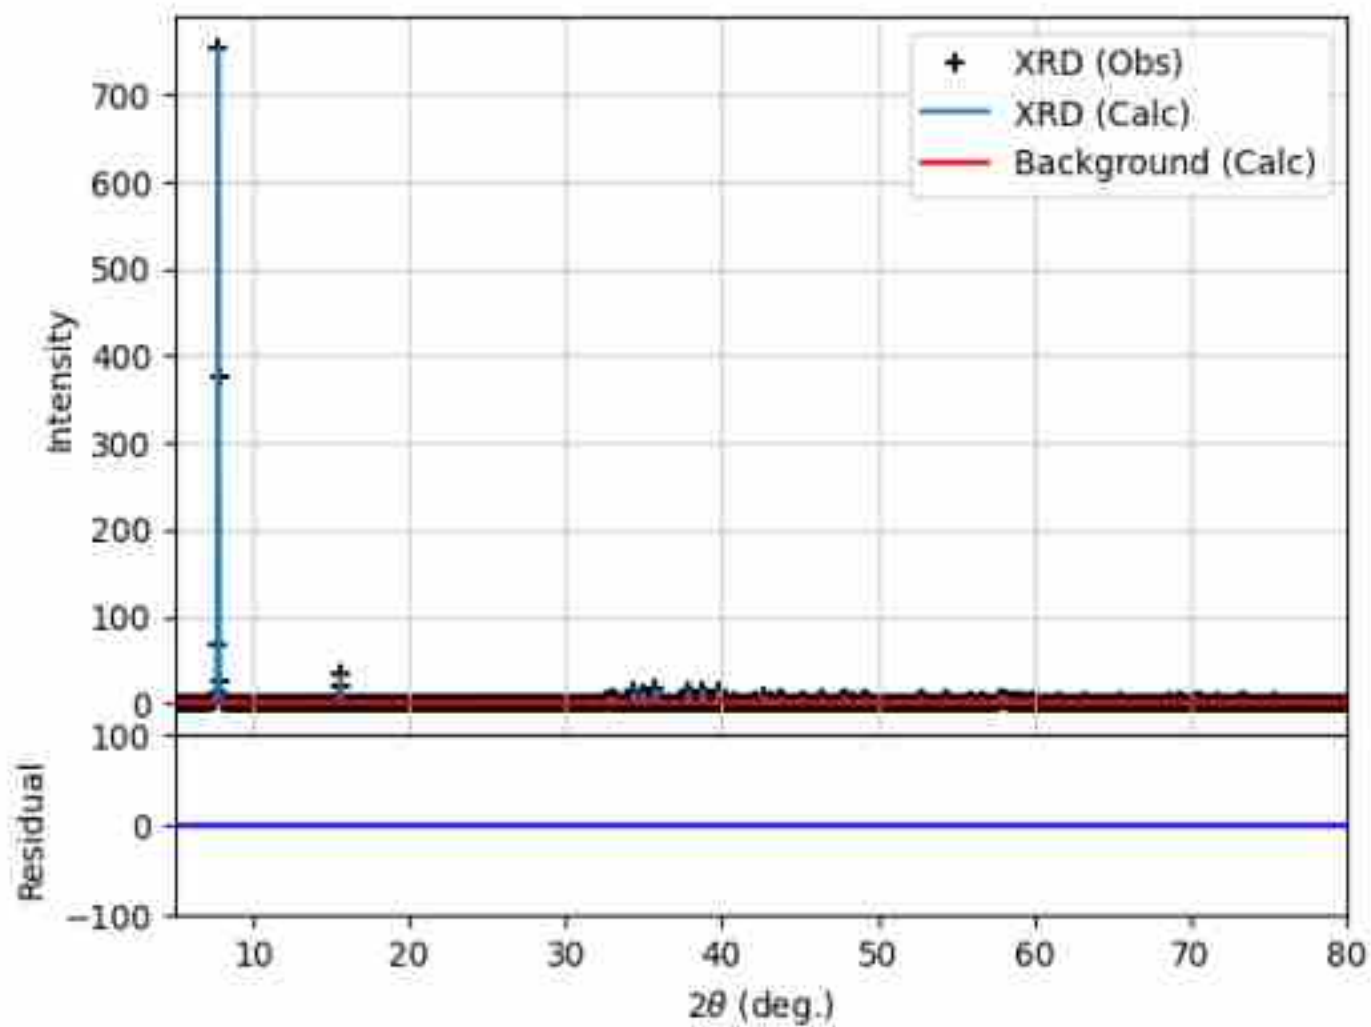

| RMSE before RR | Rwp     | RMSE after RR |
|----------------|---------|---------------|
| 0.018          | 0.00098 | 6e-05         |



# V4Fe4P4

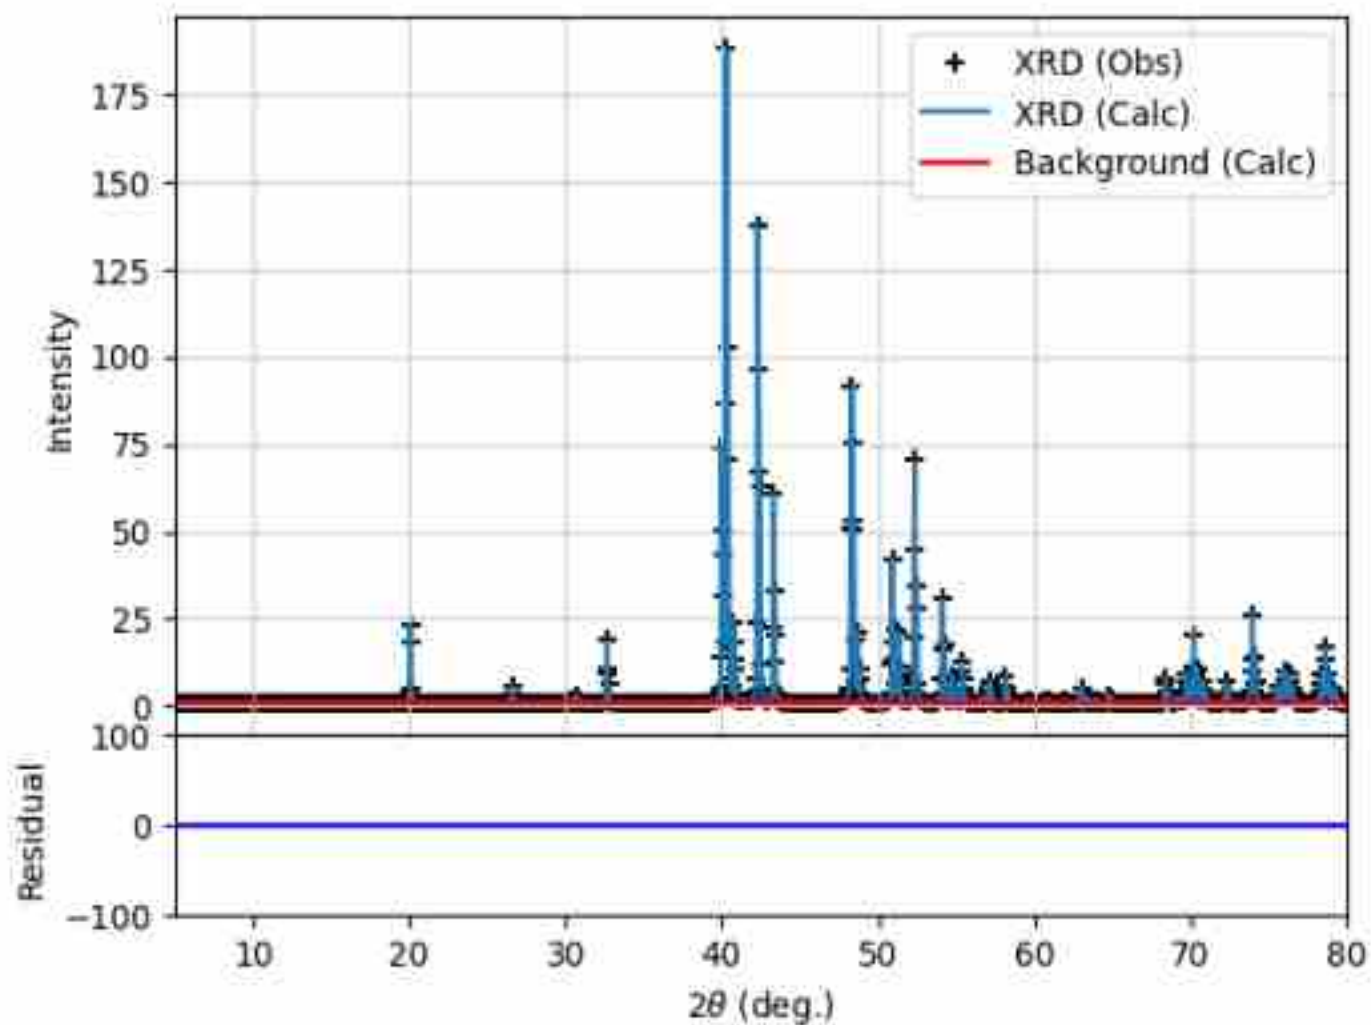

| RMSE before RR | Rwp    | RMSE after RR |
|----------------|--------|---------------|
| 0.018          | 0.0039 | 0.00053       |

# Y1Th4O10

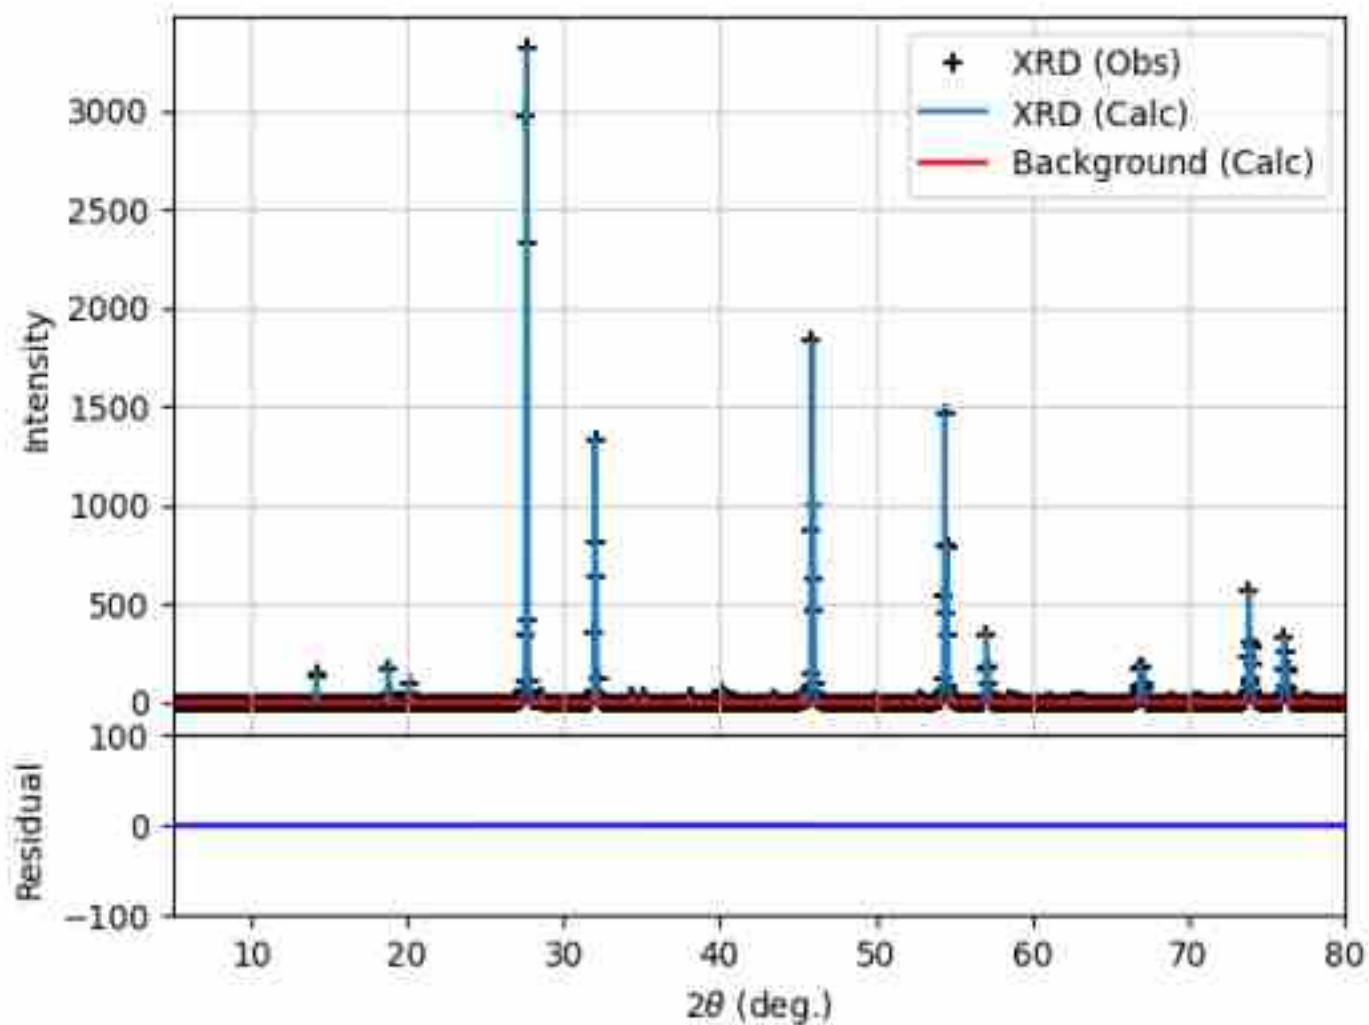

| RMSE before RR | Rwp     | RMSE after RR |
|----------------|---------|---------------|
| 0.018          | 0.01425 | 0.00559       |

# Y2Au6

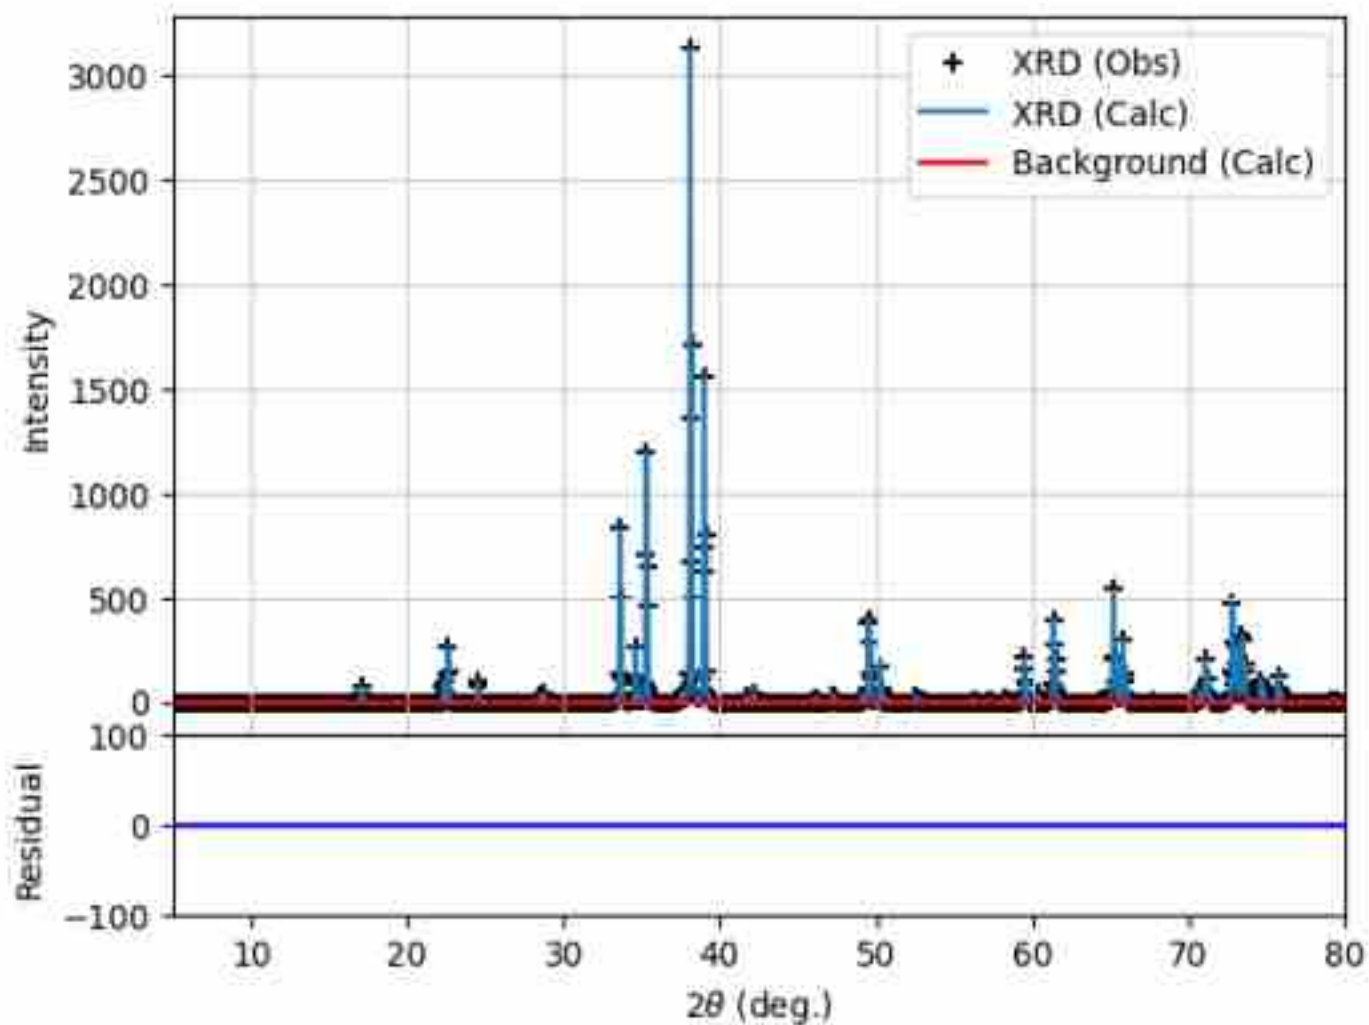

| RMSE before RR | Rwp     | RMSE after RR |
|----------------|---------|---------------|
| 0.018          | 0.00482 | 0.00023       |

# Y<sub>2</sub>Hg<sub>6</sub>

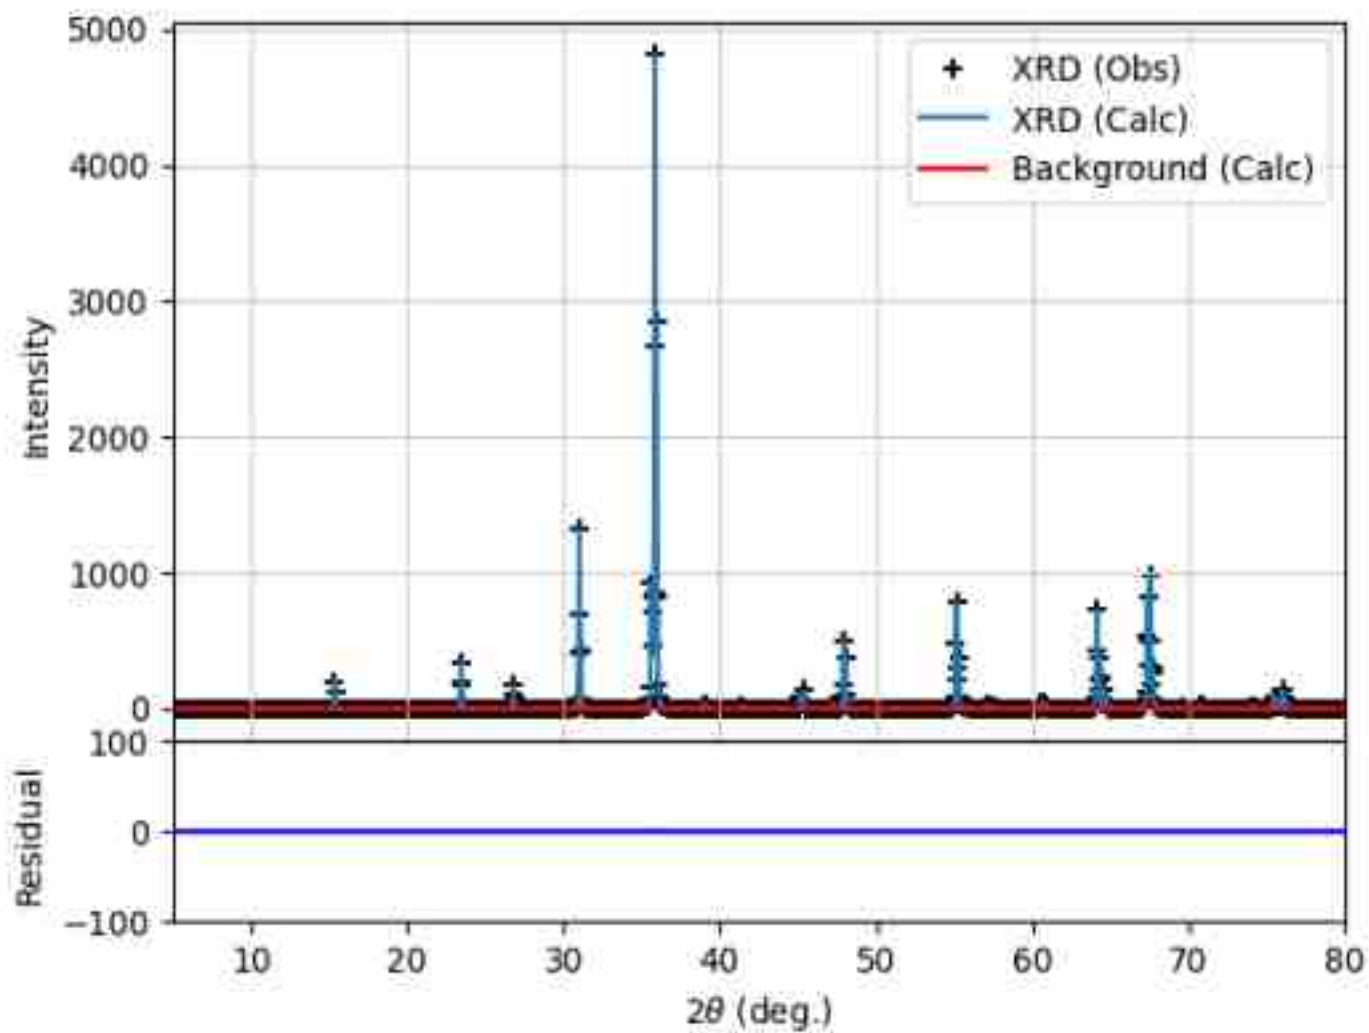

| RMSE before RR | Rwp     | RMSE after RR |
|----------------|---------|---------------|
| 0.018          | 0.07566 | 0.00236       |

# Y4Al4Au4

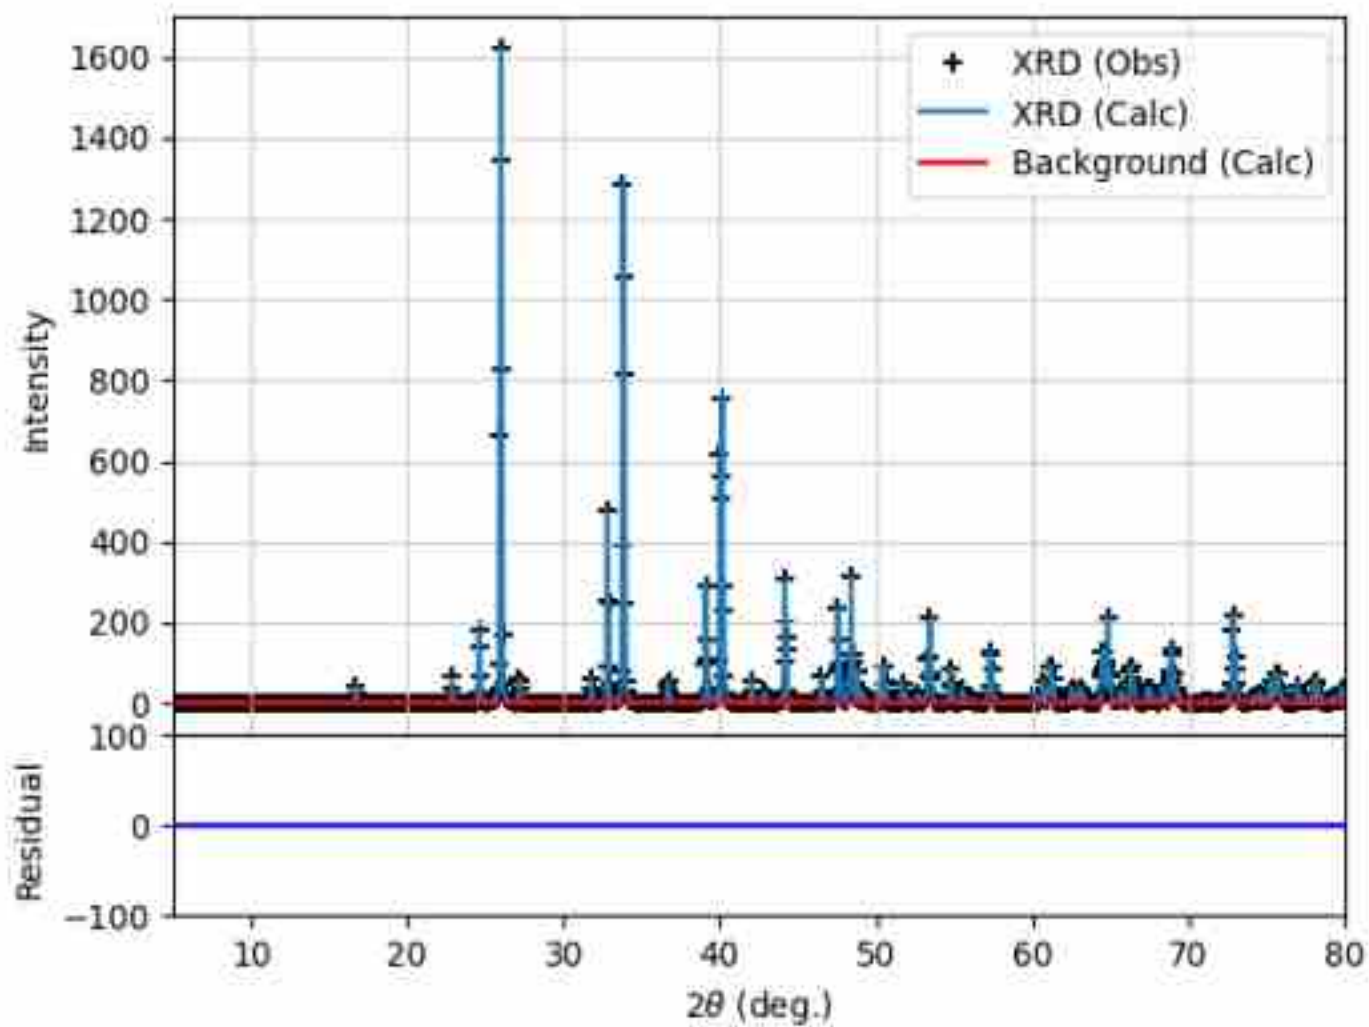

| RMSE before RR | Rwp     | RMSE after RR |
|----------------|---------|---------------|
| 0.018          | 0.00399 | 0.0005        |

# Y4U1S7

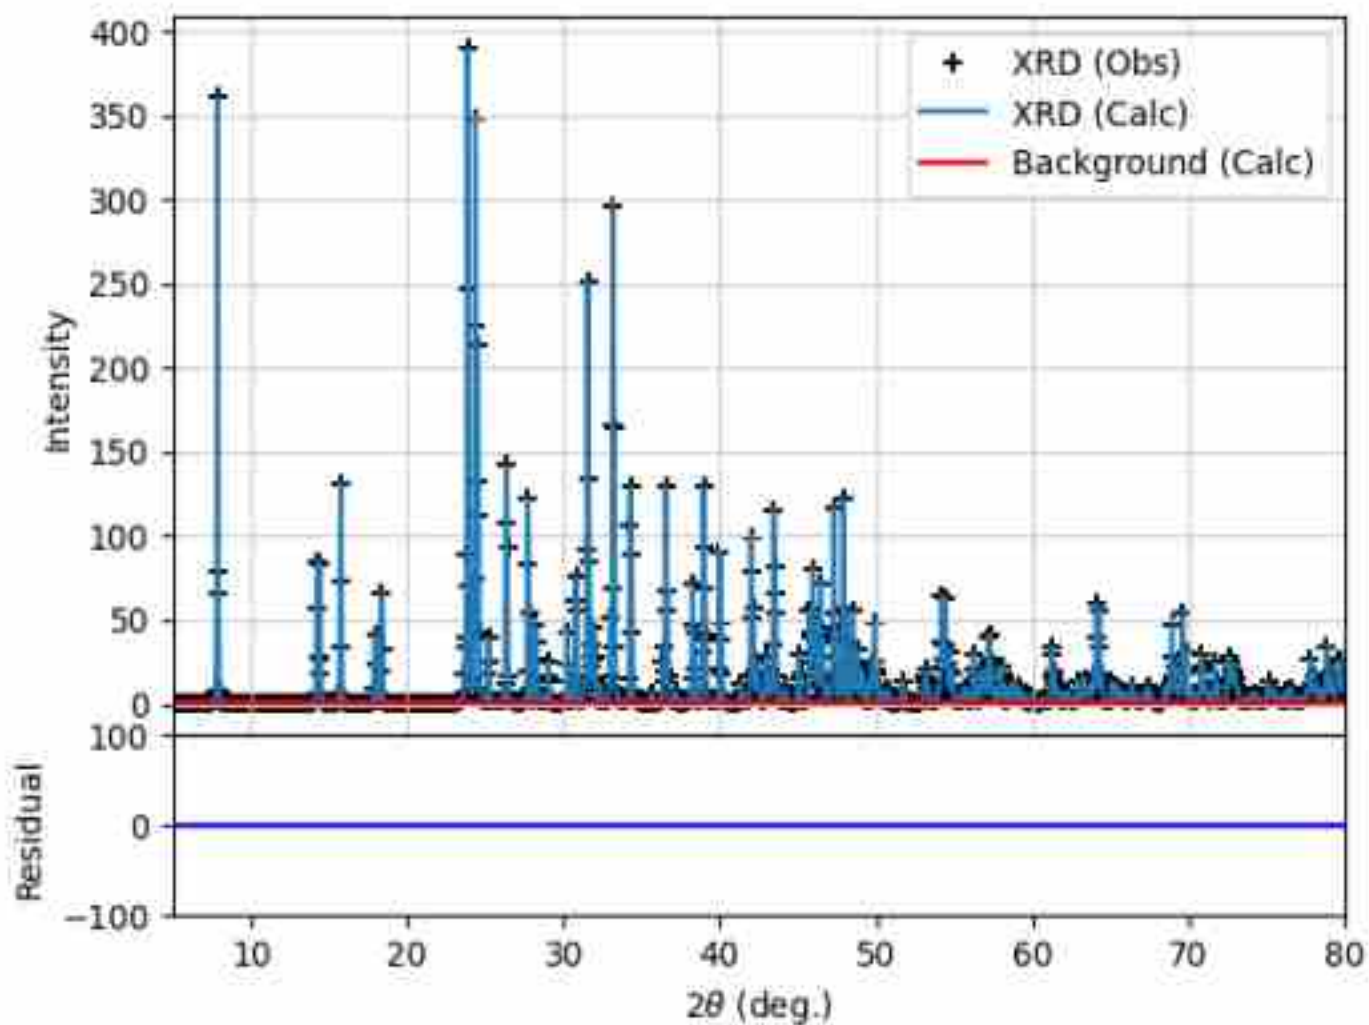

| RMSE before RR | Rwp     | RMSE after RR |
|----------------|---------|---------------|
| 0.018          | 0.00364 | 0.00043       |

# Y4W4N12

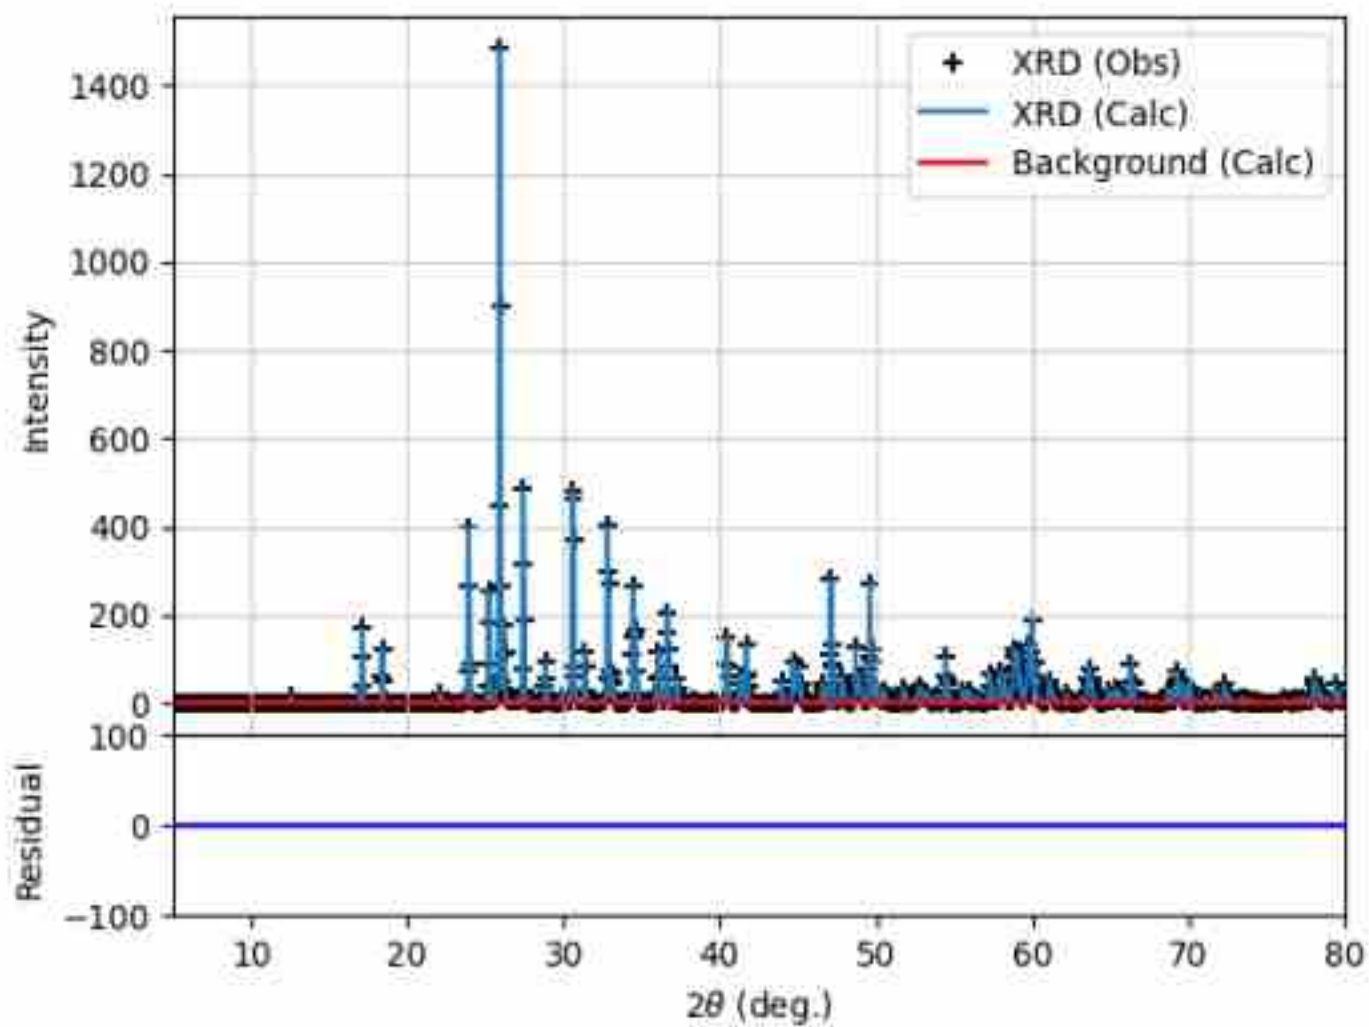

| RMSE before RR | Rwp     | RMSE after RR |
|----------------|---------|---------------|
| 0.018          | 0.00368 | 0.00103       |

# Y8Se12

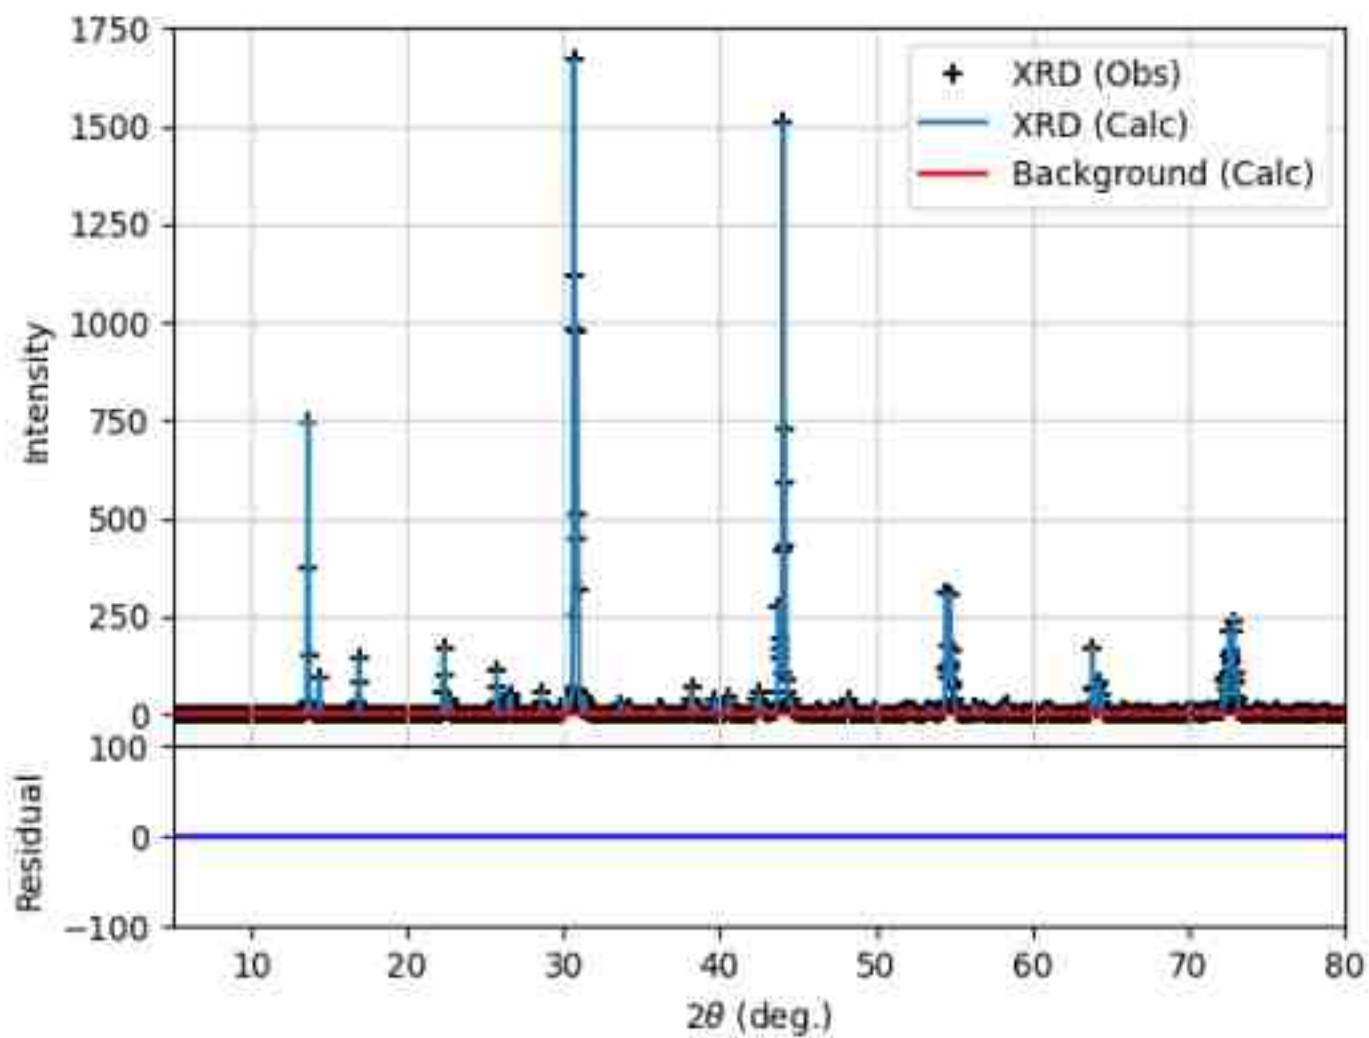

| RMSE before RR | Rwp     | RMSE after RR |
|----------------|---------|---------------|
| 0.018          | 0.00301 | 0.00033       |



# Yb<sub>2</sub>Al<sub>11</sub>Ni<sub>2</sub>

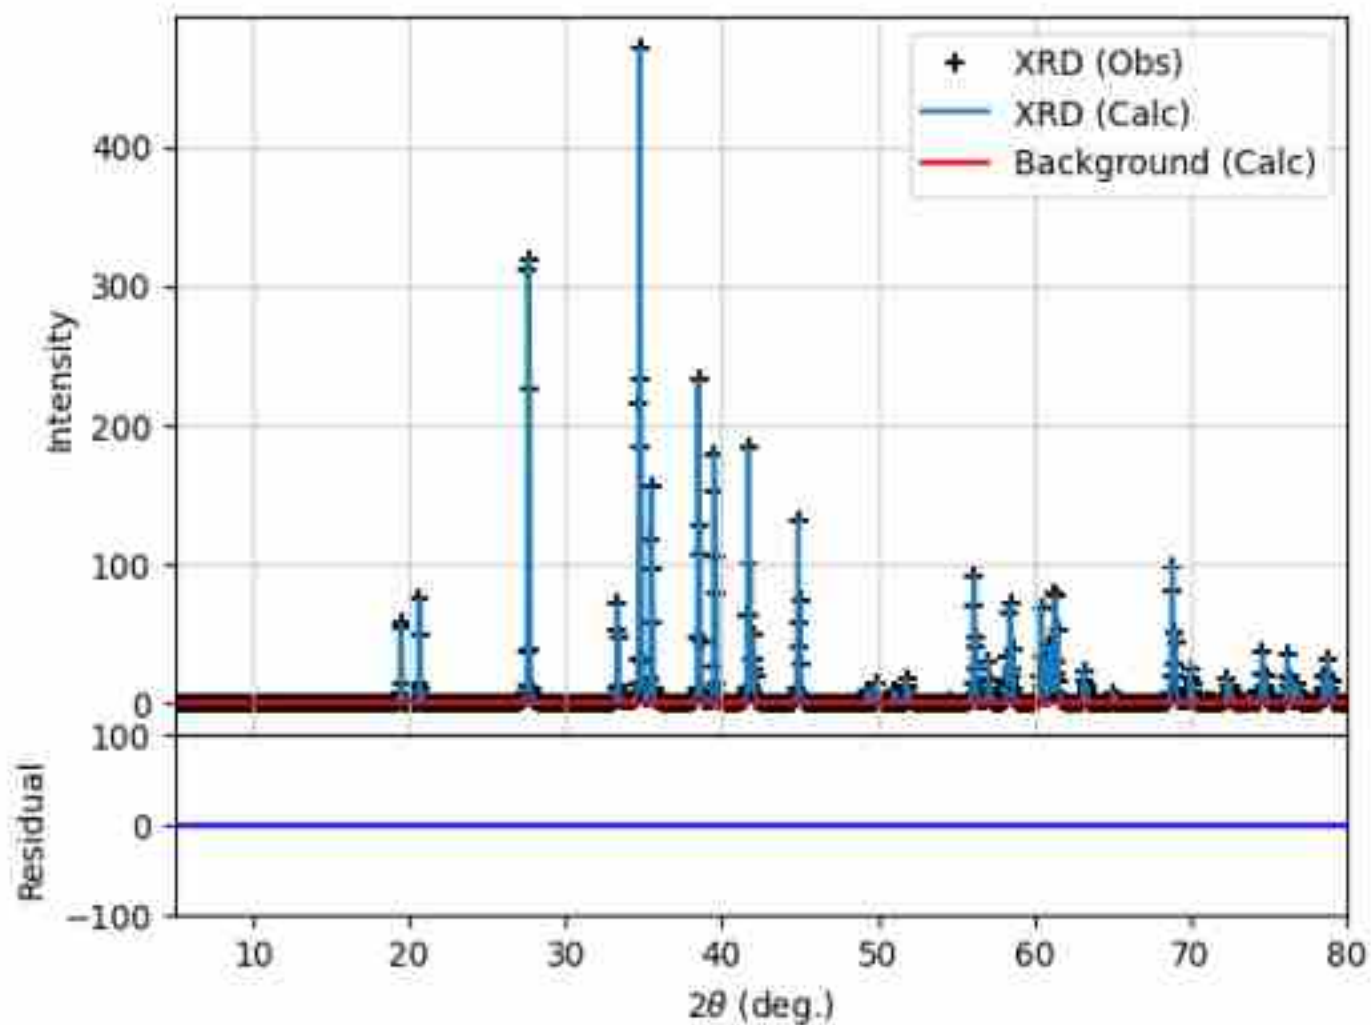

| RMSE before RR | Rwp     | RMSE after RR |
|----------------|---------|---------------|
| 0.018          | 0.00438 | 0.00032       |

# Zn<sub>2</sub>Ge<sub>1</sub>S<sub>4</sub>

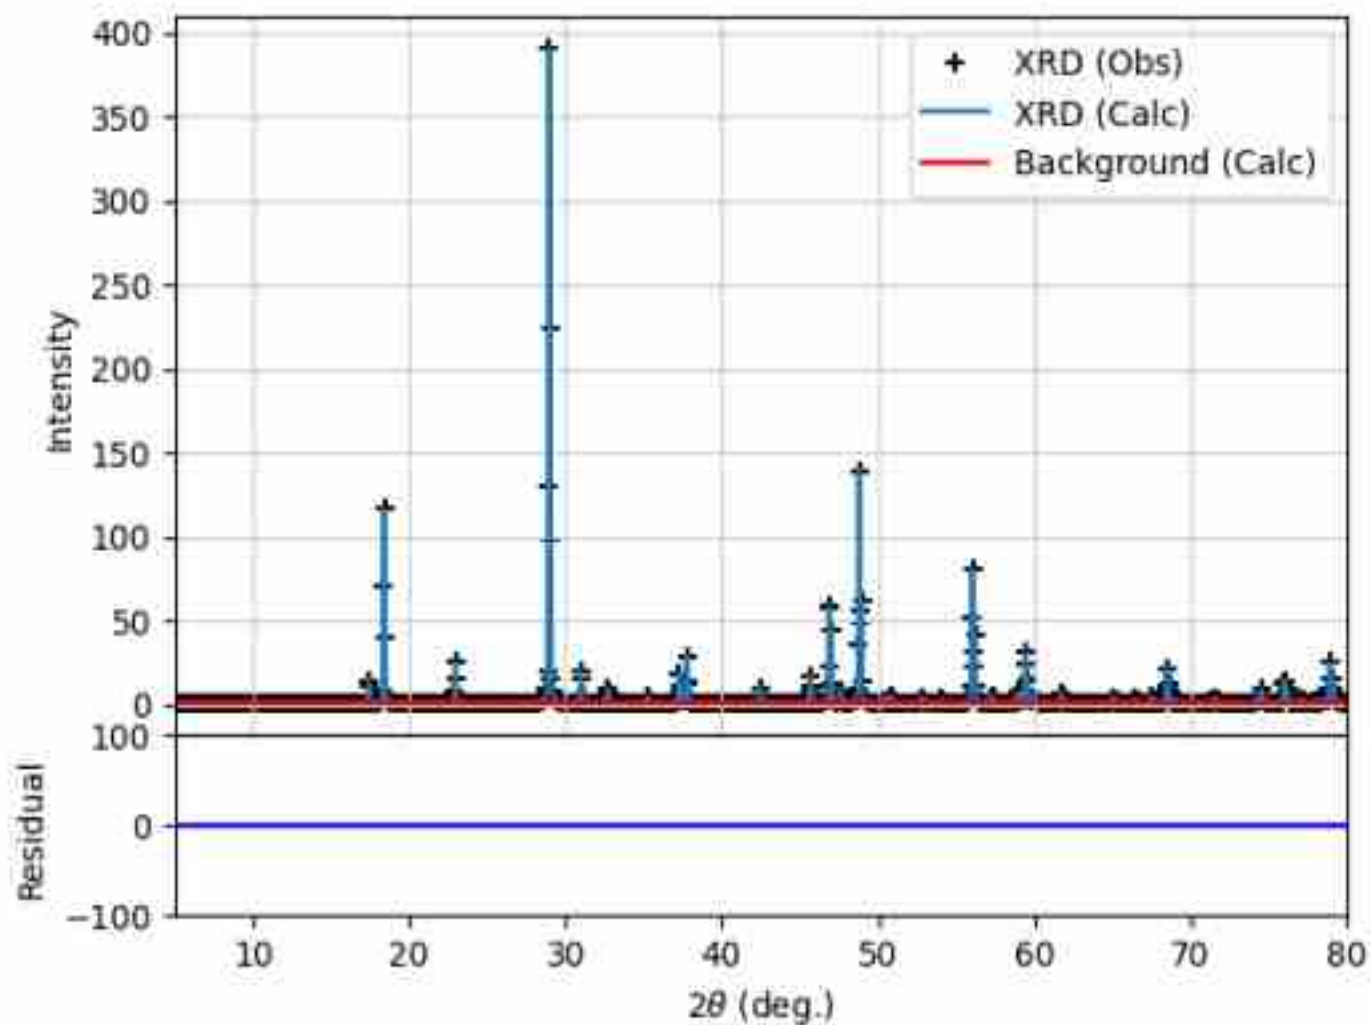

| RMSE before RR | Rwp     | RMSE after RR |
|----------------|---------|---------------|
| 0.018          | 0.00318 | 0.00048       |

# Zn<sub>2</sub>Se<sub>2</sub>O<sub>8</sub>

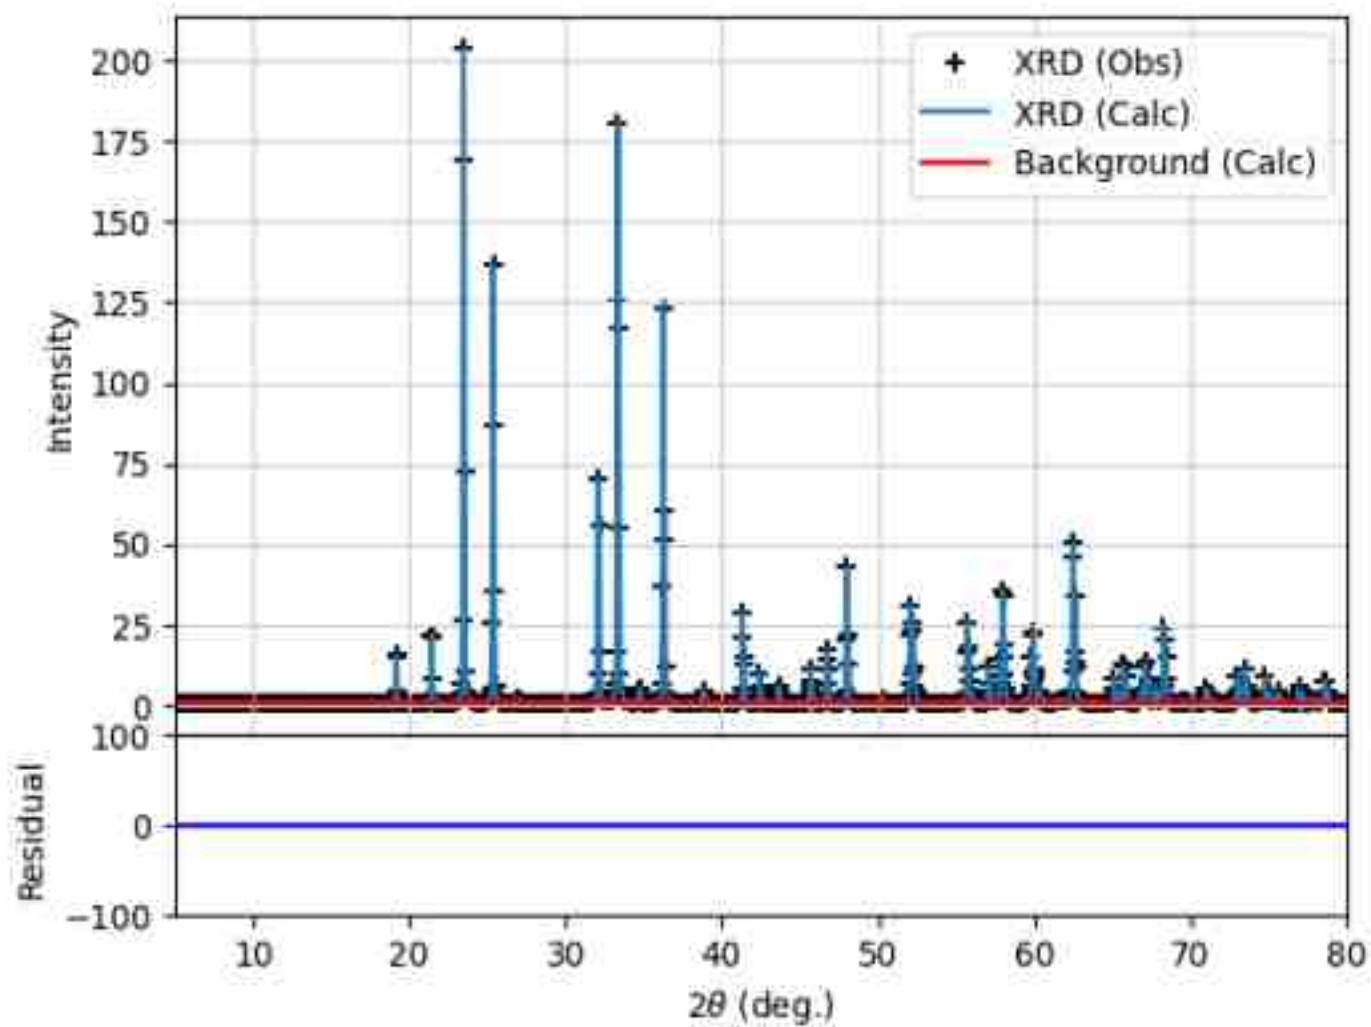

| RMSE before RR | Rwp     | RMSE after RR |
|----------------|---------|---------------|
| 0.018          | 0.00329 | 0.0006        |

# Zn<sub>5</sub>Se<sub>4</sub>S<sub>1</sub>

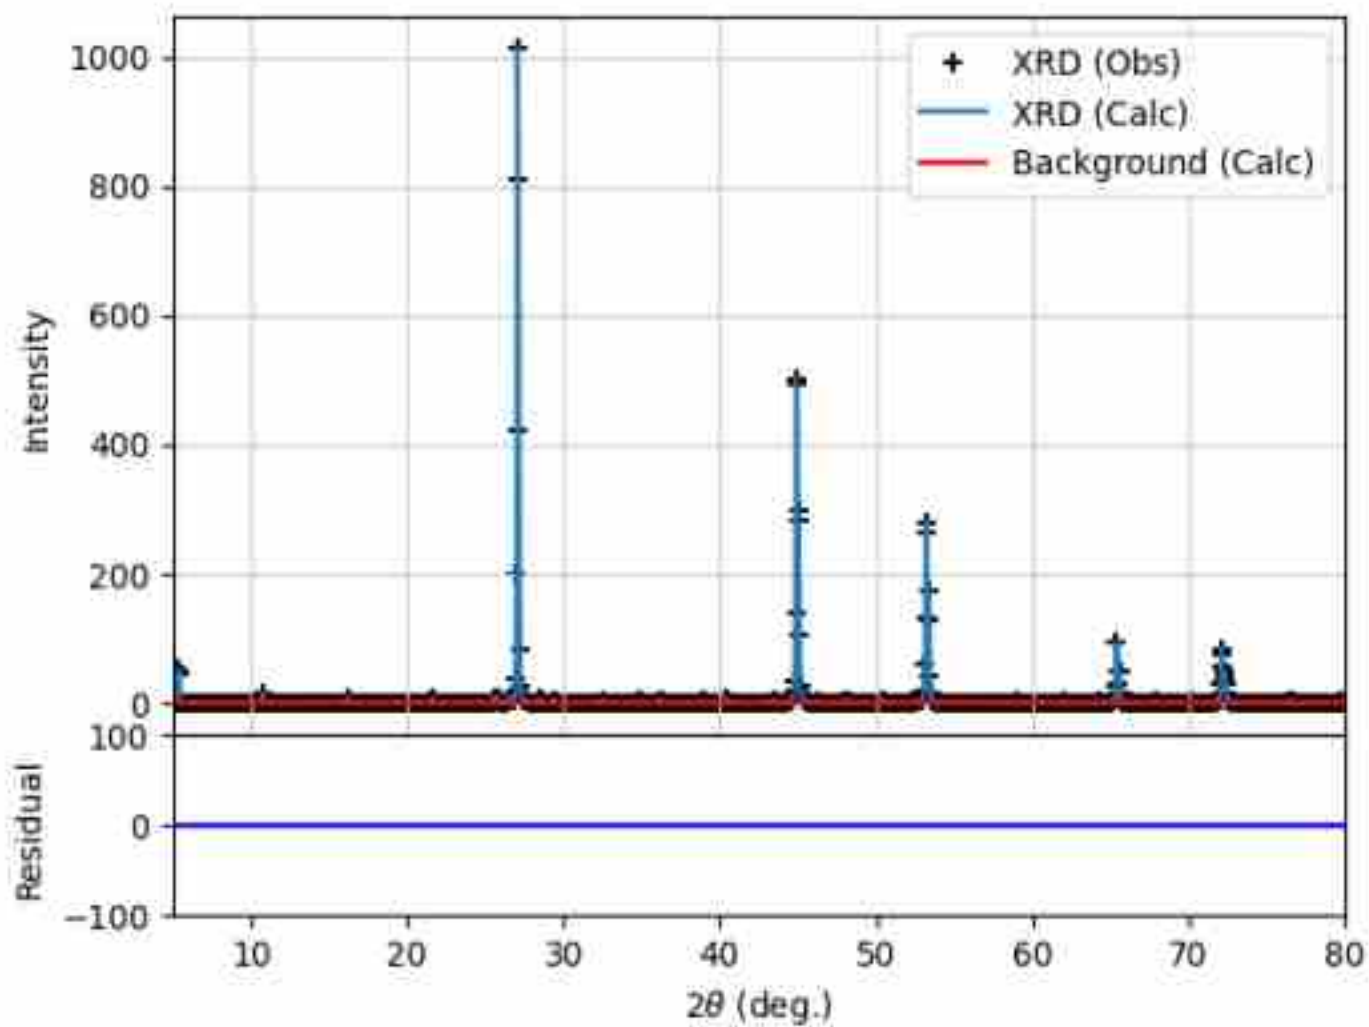

| RMSE before RR | Rwp     | RMSE after RR |
|----------------|---------|---------------|
| 0.018          | 0.00347 | 0.00034       |

# Zr<sub>2</sub>Ni<sub>1</sub>S<sub>4</sub>

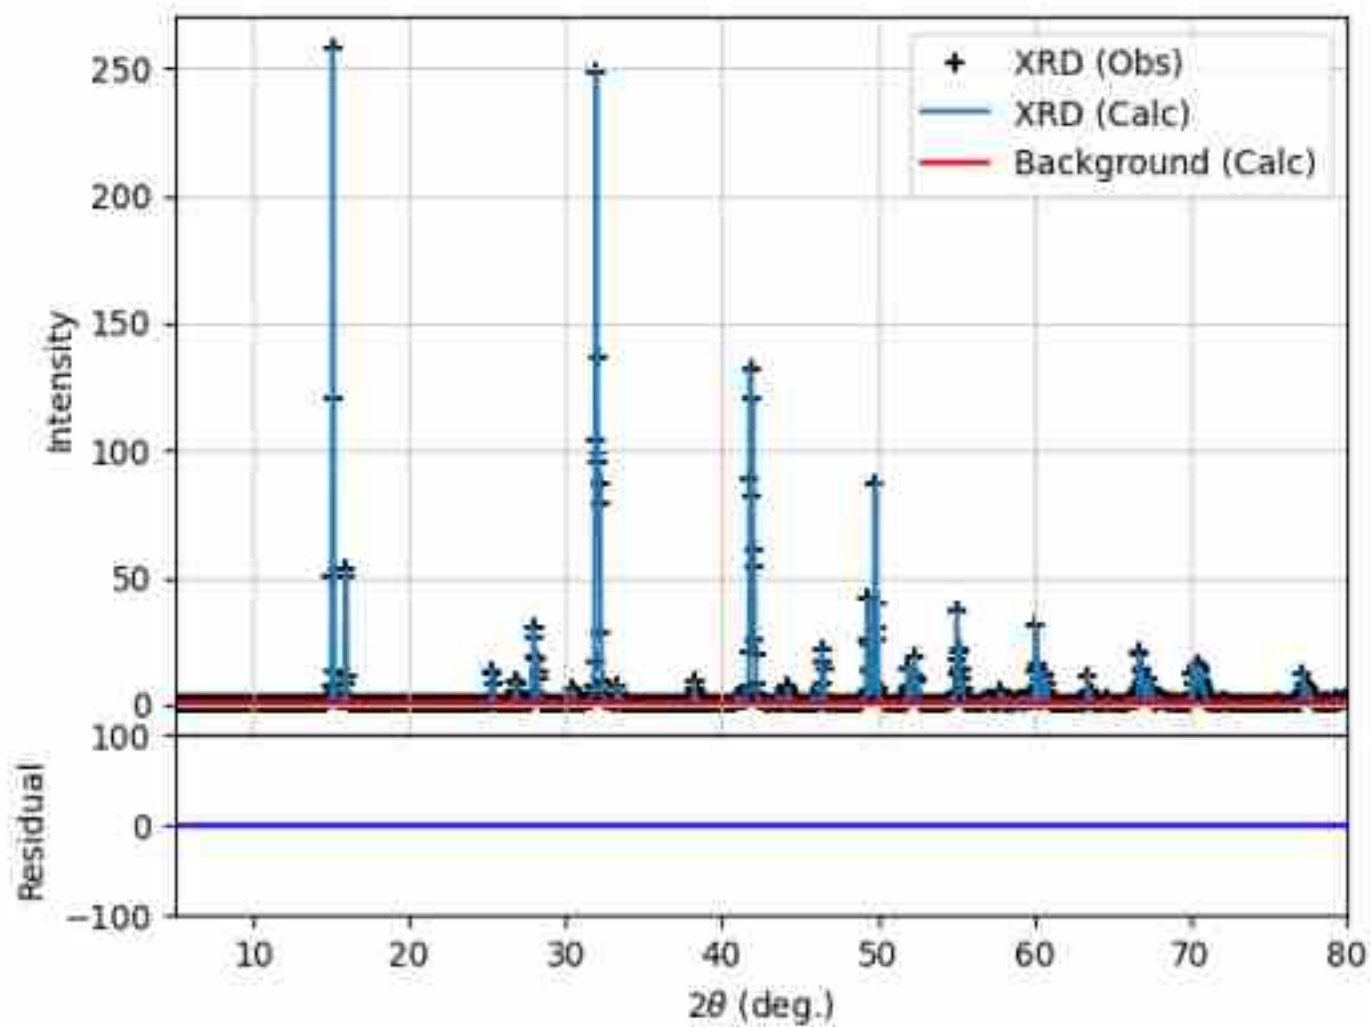

| RMSE before RR | Rwp     | RMSE after RR |
|----------------|---------|---------------|
| 0.018          | 0.00262 | 0.00022       |

# Zr<sub>2</sub>Ni<sub>2</sub>H<sub>6</sub>

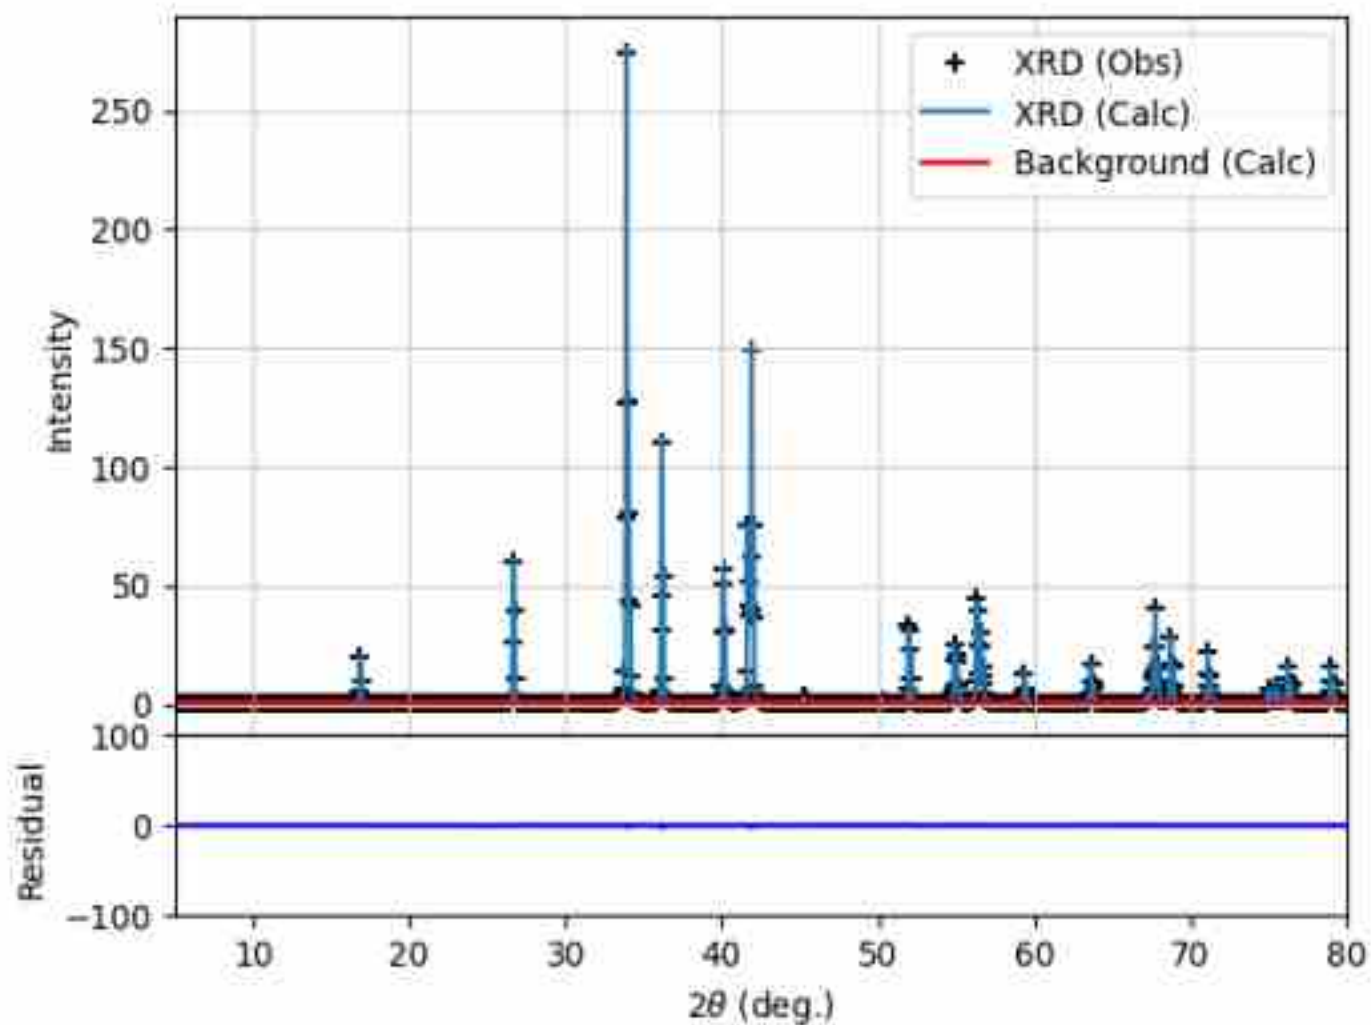

| RMSE before RR | Rwp     | RMSE after RR |
|----------------|---------|---------------|
| 0.018          | 0.98881 | 0.30026       |

# Zr<sub>2</sub>Ni<sub>6</sub>

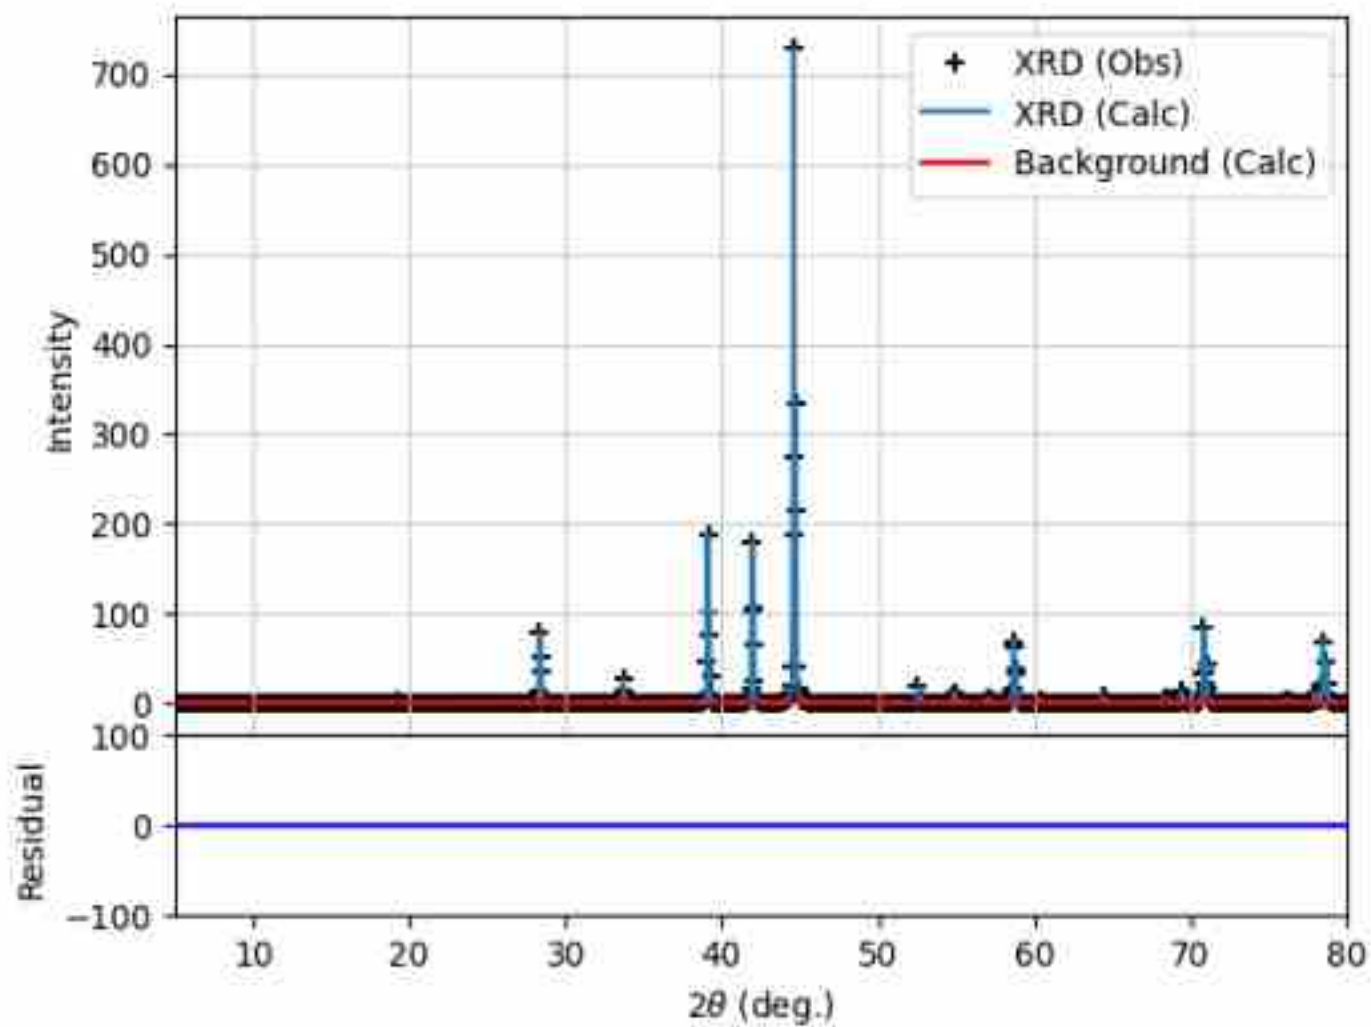

| RMSE before RR | Rwp     | RMSE after RR |
|----------------|---------|---------------|
| 0.018          | 0.07033 | 0.00564       |

# Zr<sub>4</sub>Mo<sub>1</sub>C<sub>5</sub>

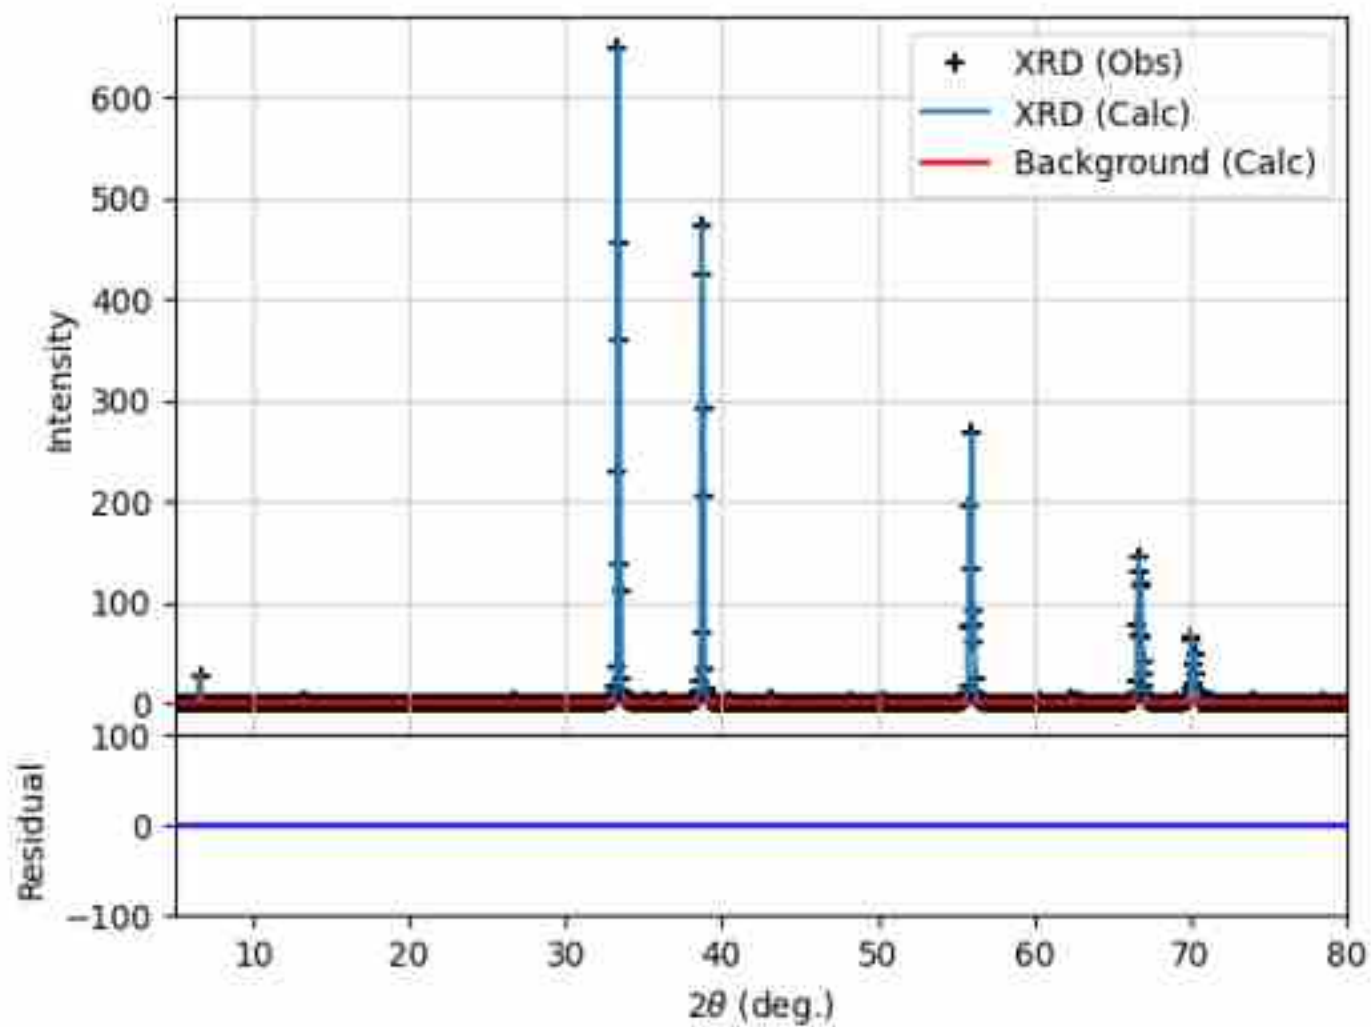

| RMSE before RR | Rwp   | RMSE after RR |
|----------------|-------|---------------|
| 0.018          | 0.004 | 0.00297       |



# Zr<sub>4</sub>V<sub>2</sub>Re<sub>6</sub>

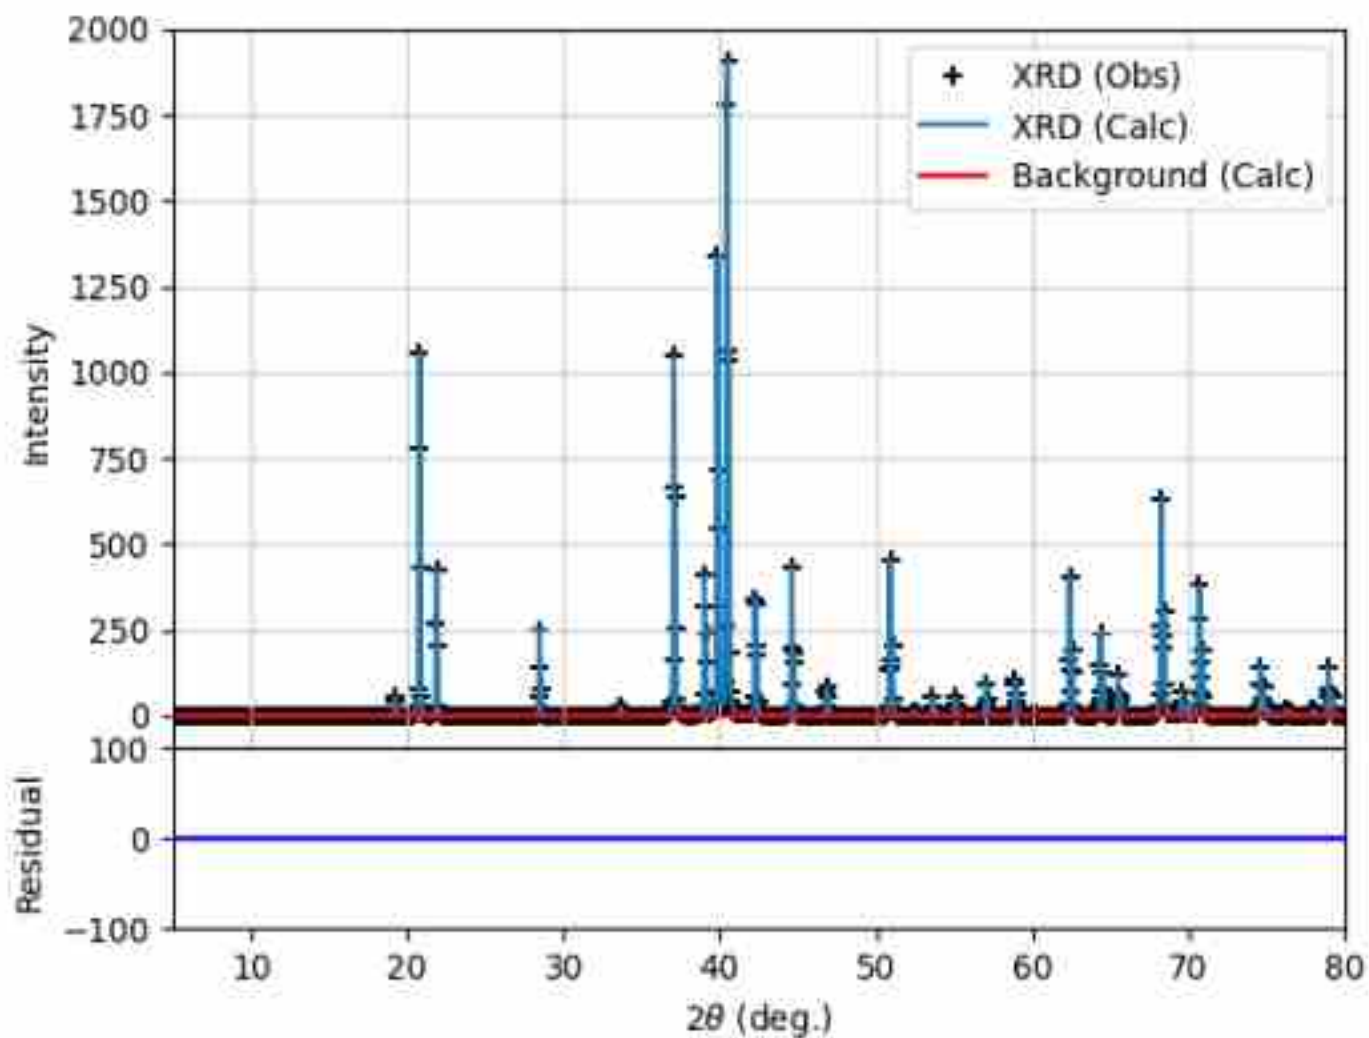

| RMSE before RR | Rwp     | RMSE after RR |
|----------------|---------|---------------|
| 0.018          | 0.02589 | 0.00164       |

# Ag1Bi1O2

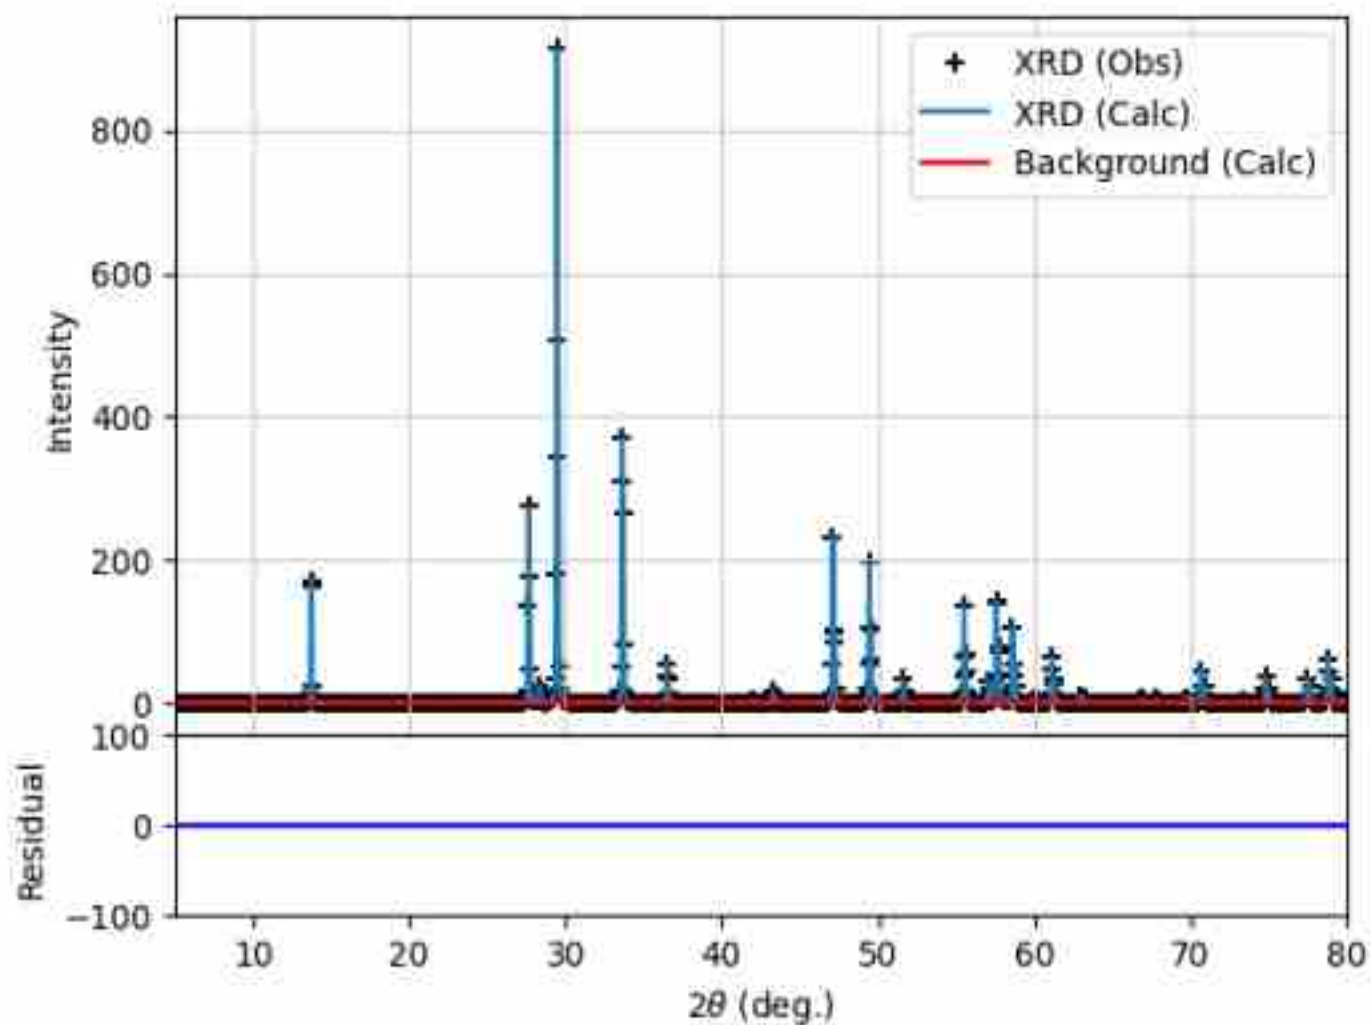

| RMSE before RR | Rwp     | RMSE after RR |
|----------------|---------|---------------|
| 0.019          | 0.00295 | 0.00085       |

# Al<sub>3</sub>Si<sub>1</sub>Mo<sub>12</sub>

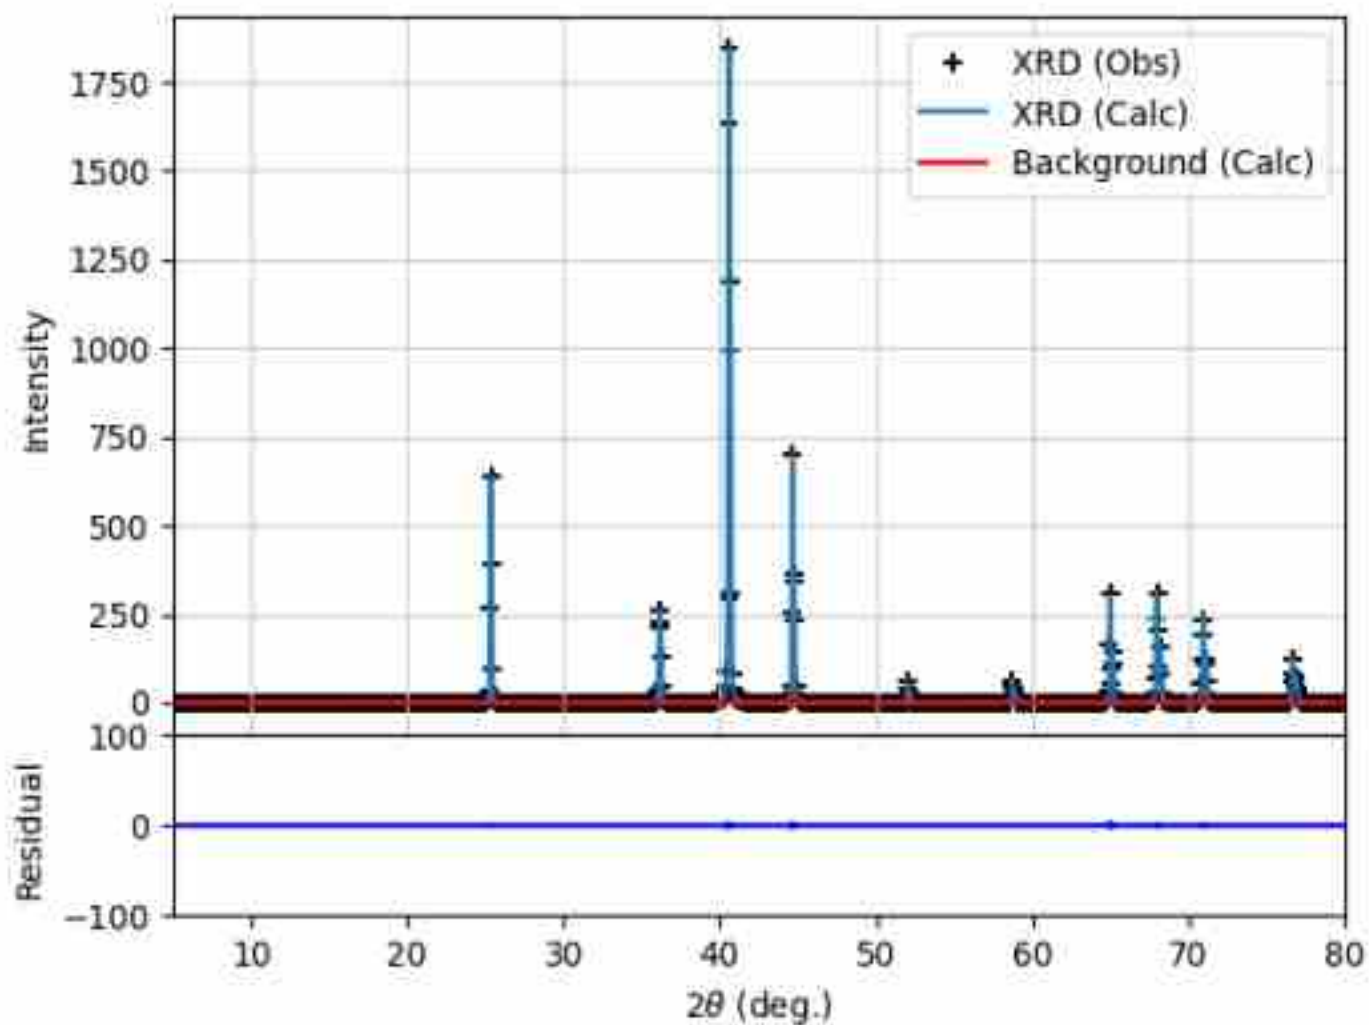

| RMSE before RR | Rwp    | RMSE after RR |
|----------------|--------|---------------|
| 0.019          | 0.3974 | 0.00337       |

# Al12Mo1

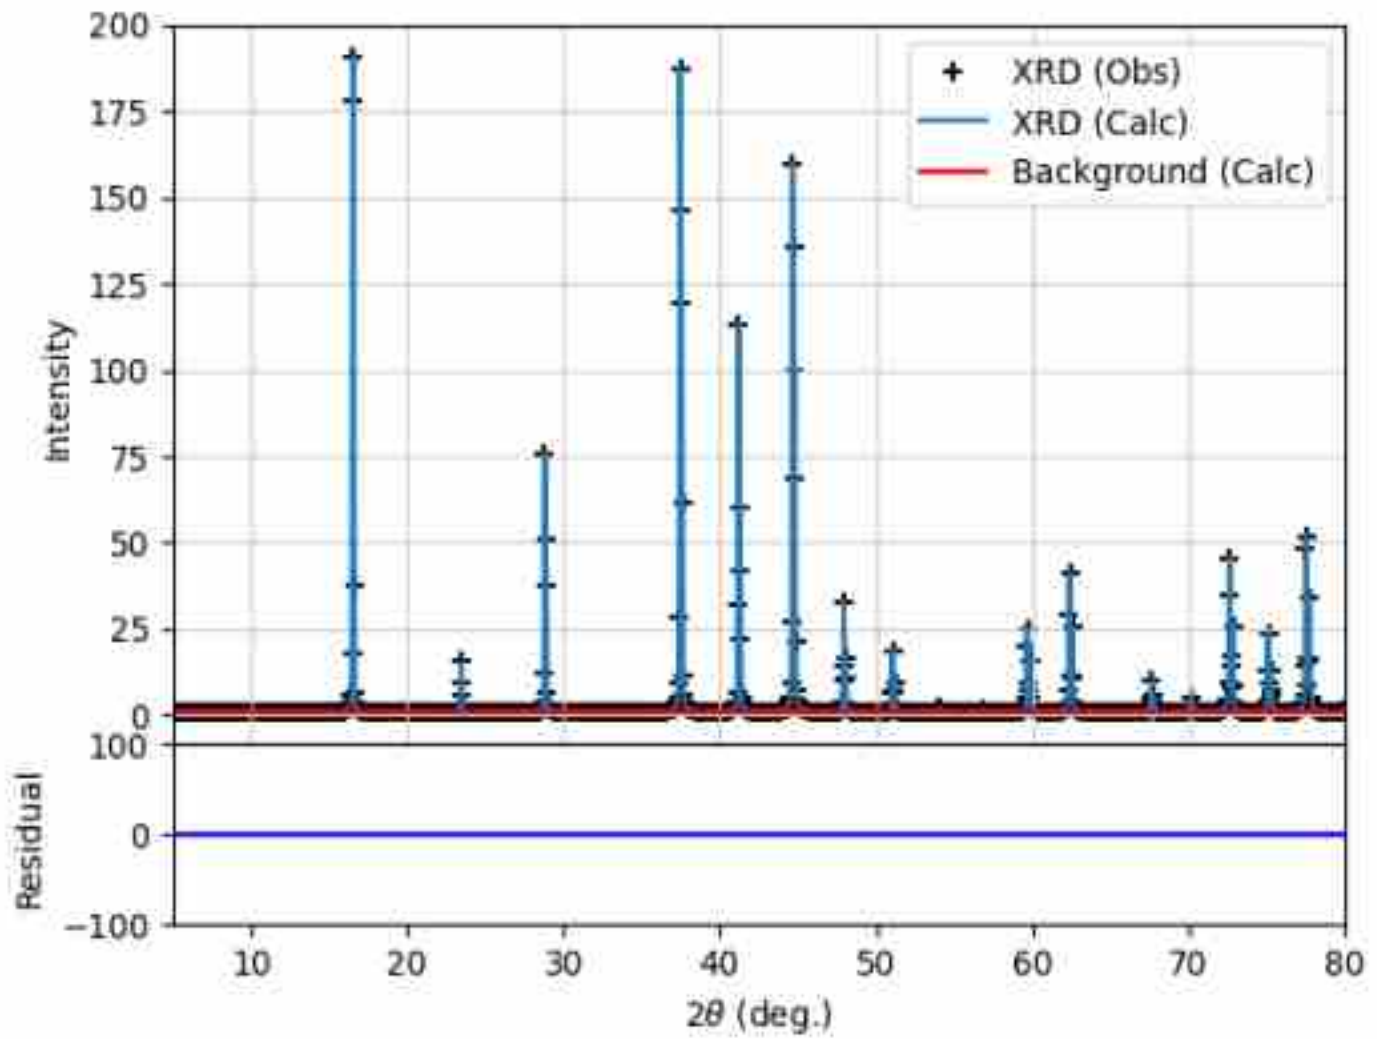

| RMSE before RR | Rwp     | RMSE after RR |
|----------------|---------|---------------|
| 0.019          | 0.00366 | 0.00076       |

Ba1Sr1Ca1Fe1O6

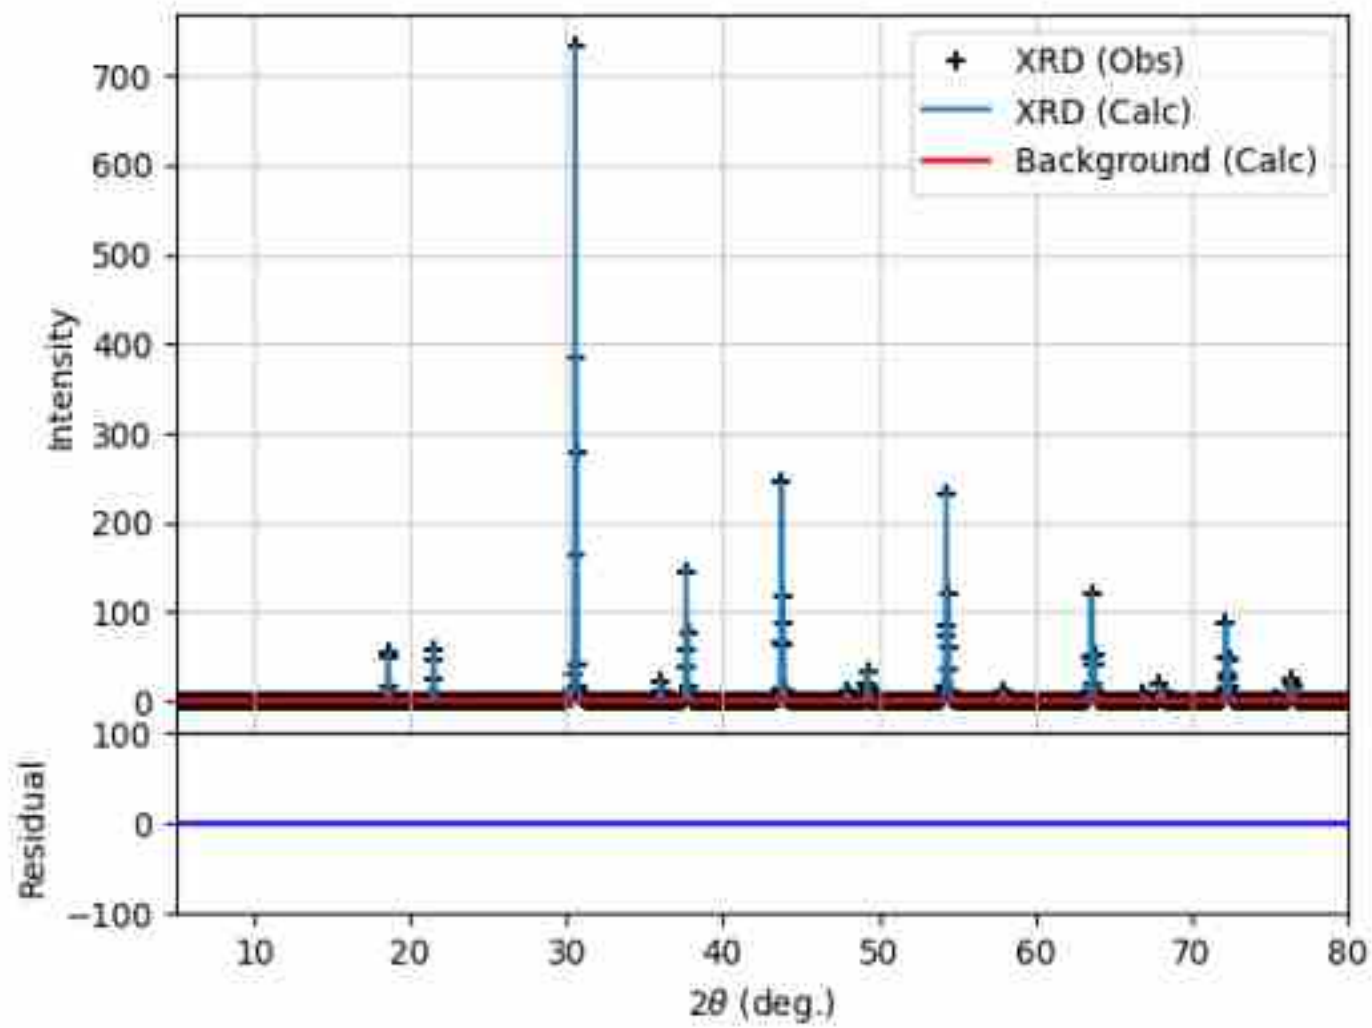

| RMSE before RR | Rwp     | RMSE after RR |
|----------------|---------|---------------|
| 0.019          | 0.01319 | 0.00458       |

# Ba<sub>2</sub>Cu<sub>2</sub>S<sub>4</sub>

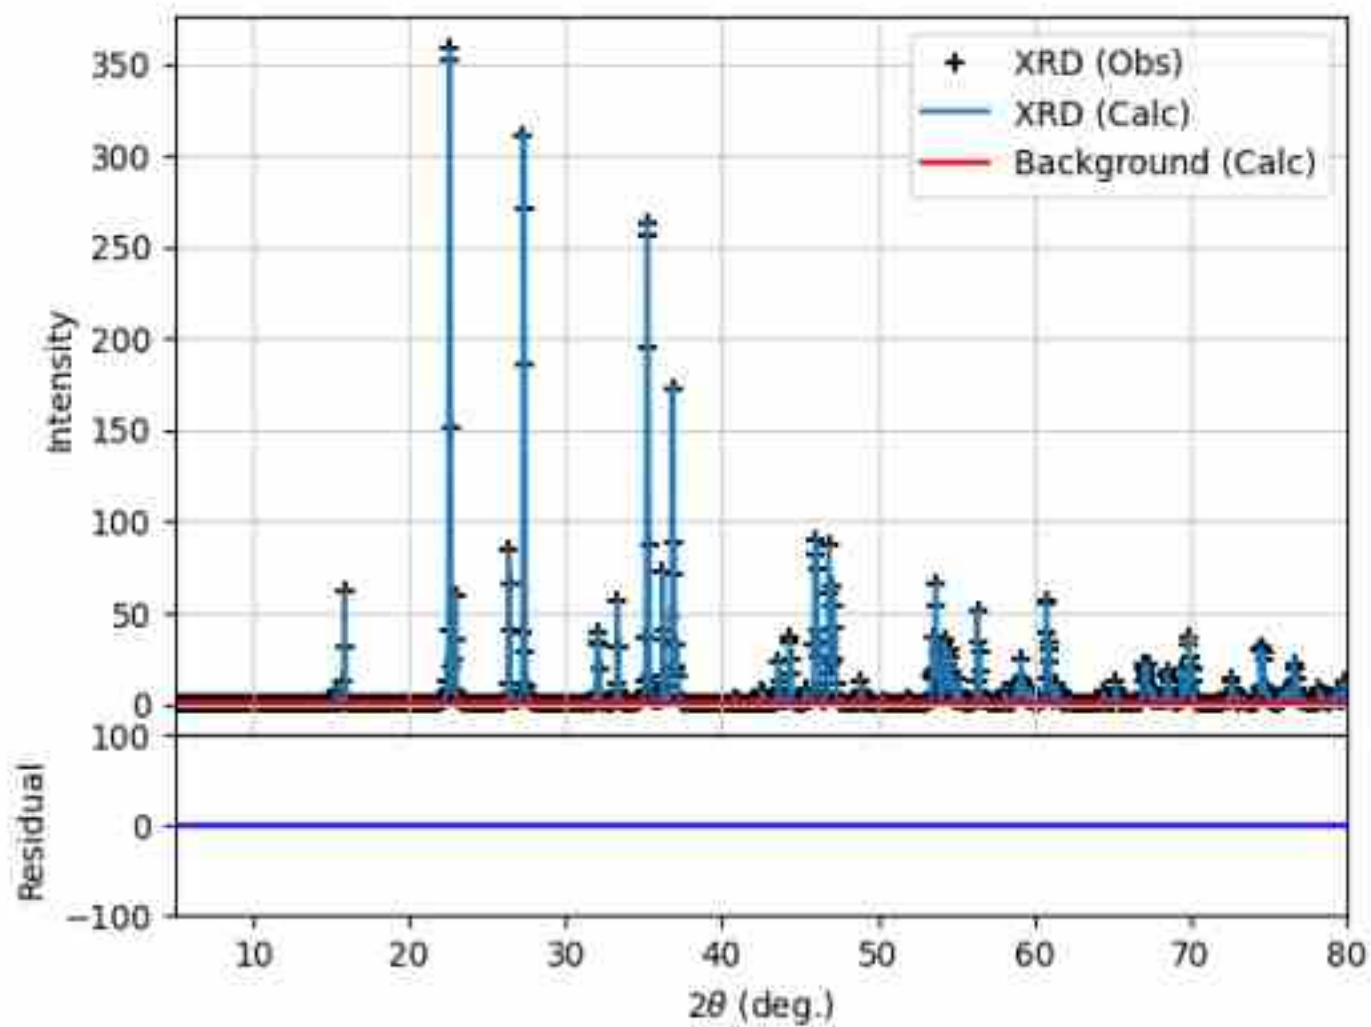

| RMSE before RR | Rwp     | RMSE after RR |
|----------------|---------|---------------|
| 0.019          | 0.00452 | 0.00045       |

# Ba<sub>2</sub>LiReO<sub>6</sub>

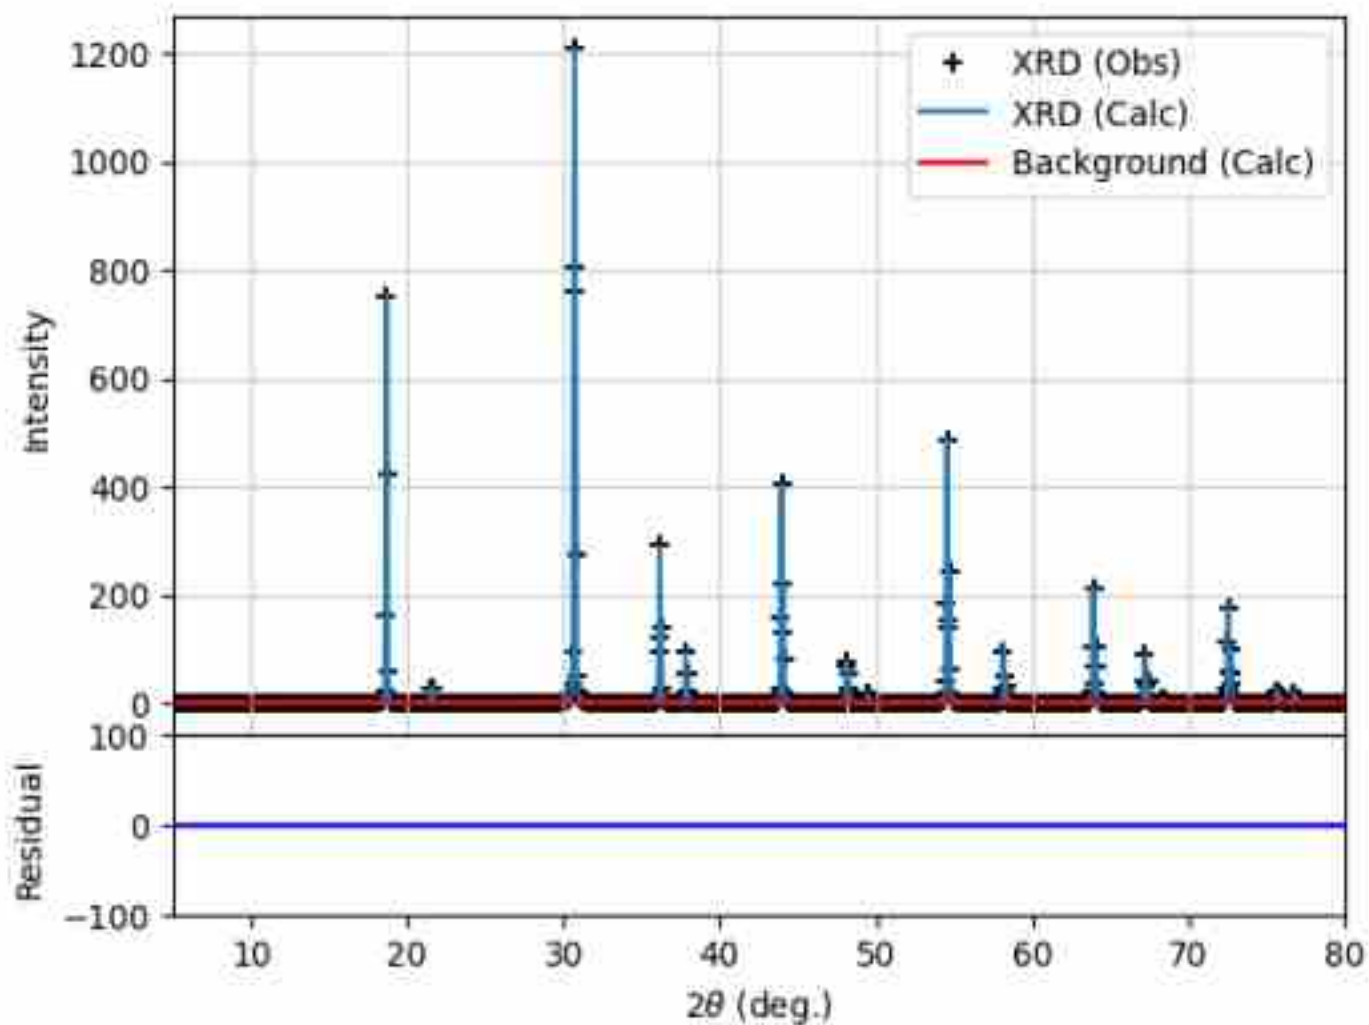

| RMSE before RR | Rwp     | RMSE after RR |
|----------------|---------|---------------|
| 0.019          | 0.01458 | 0.00667       |

# Ba<sub>2</sub>Nd<sub>2</sub>Fe<sub>4</sub>O<sub>10</sub>

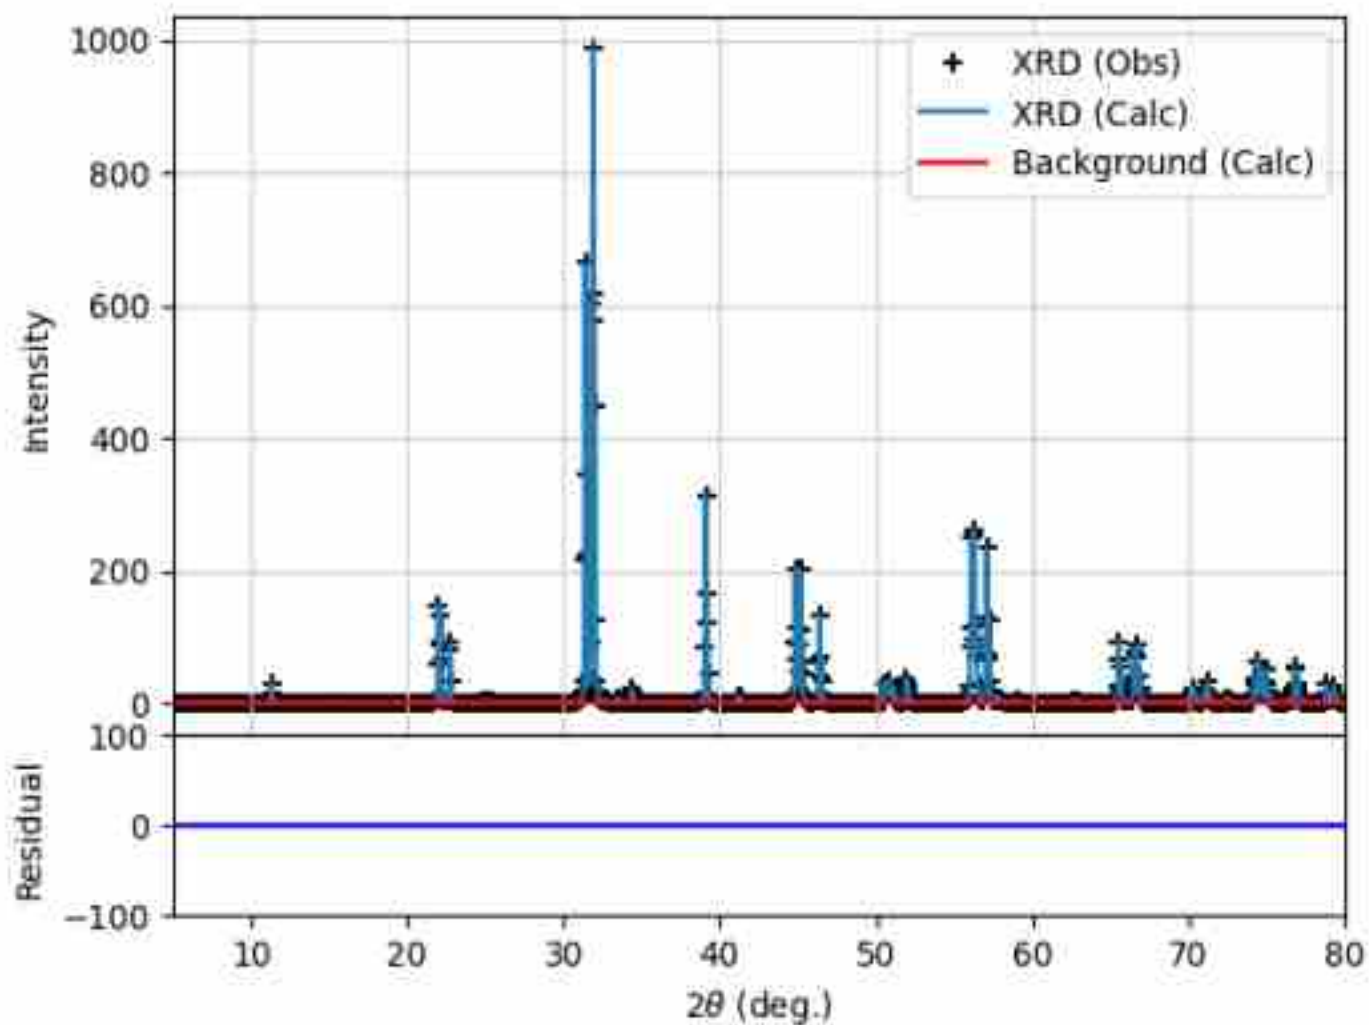

| RMSE before RR | Rwp     | RMSE after RR |
|----------------|---------|---------------|
| 0.019          | 0.00372 | 0.00096       |



# Ba2Sc1O3F1

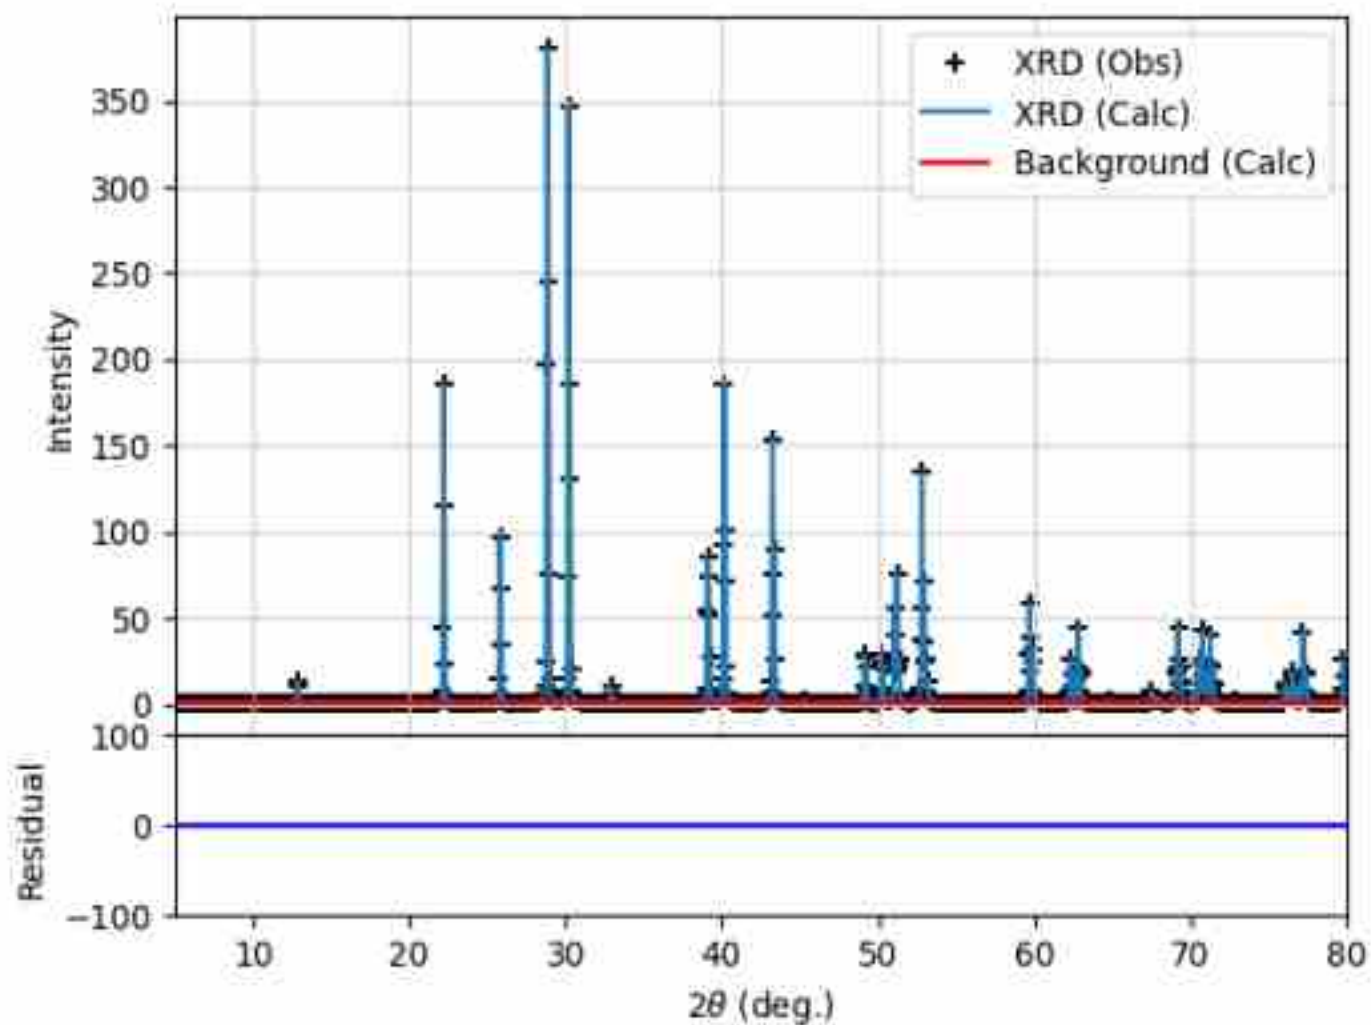

| RMSE before RR | Rwp    | RMSE after RR |
|----------------|--------|---------------|
| 0.019          | 0.0533 | 0.00102       |

# Ba<sub>2</sub>Sr<sub>1</sub>I<sub>6</sub>

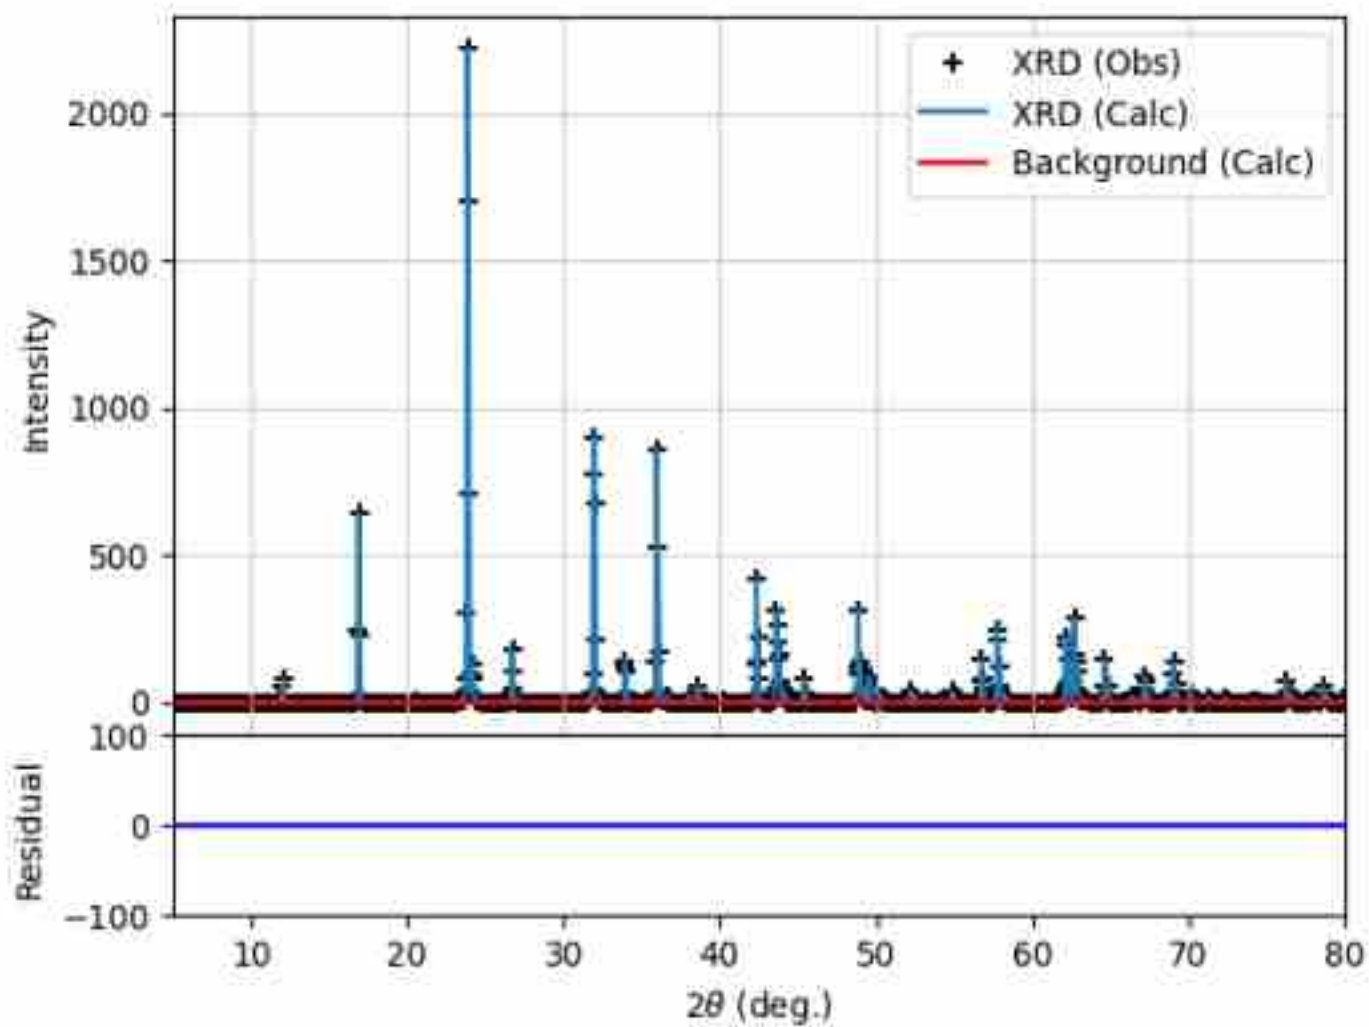

| RMSE before RR | Rwp     | RMSE after RR |
|----------------|---------|---------------|
| 0.019          | 0.00408 | 0.00021       |

# Ba<sub>2</sub>Sr<sub>2</sub>Si<sub>8</sub>

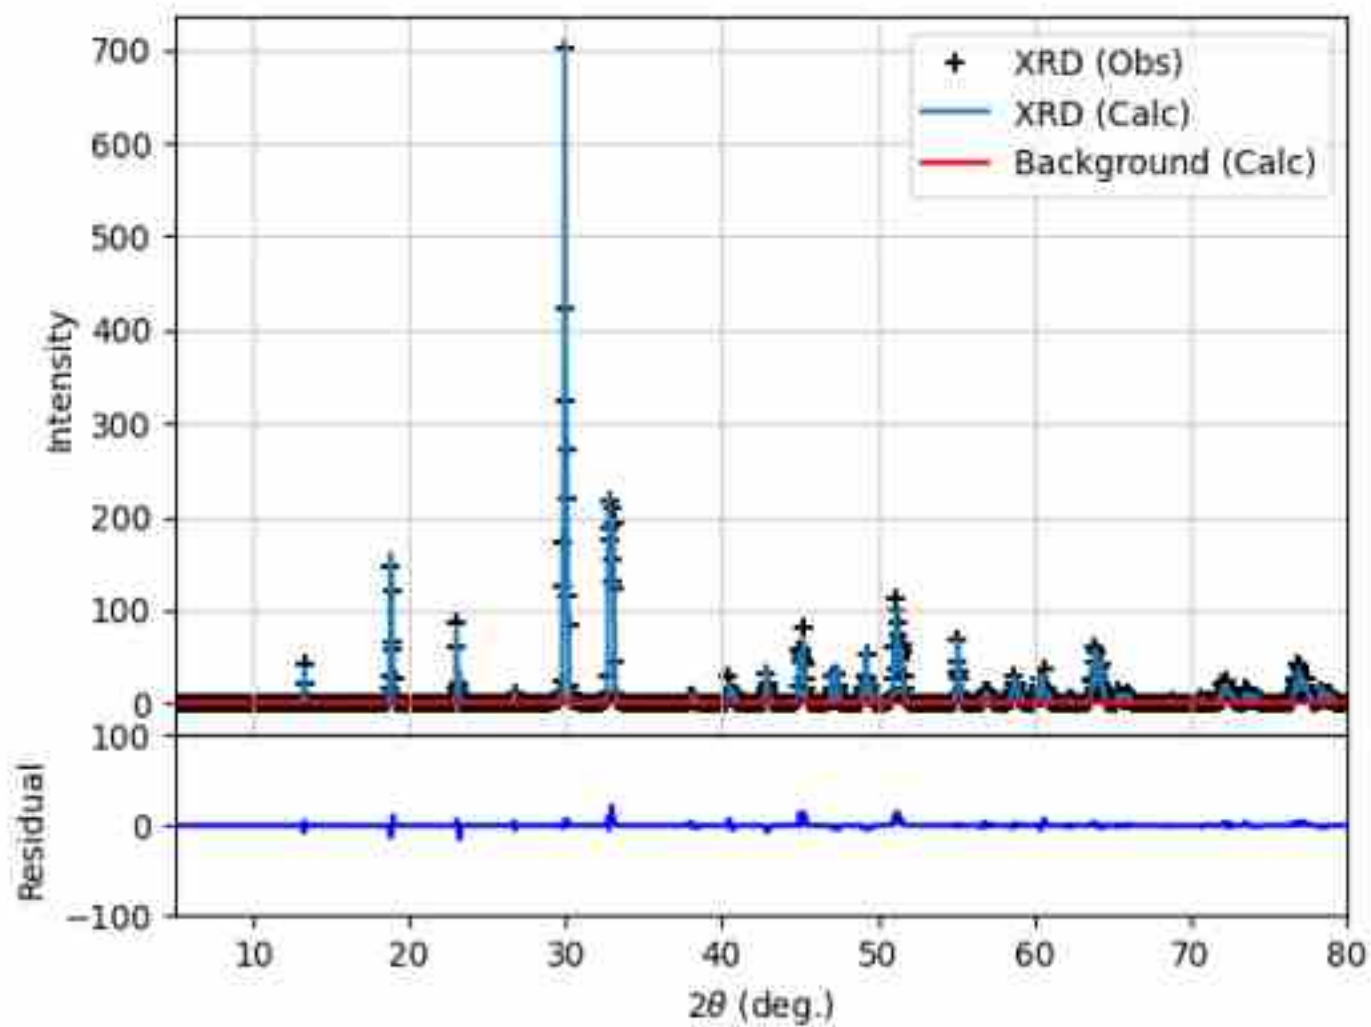

| RMSE before RR | Rwp     | RMSE after RR |
|----------------|---------|---------------|
| 0.019          | 12.4266 | 0.09018       |

# Ba<sub>2</sub>Tb<sub>2</sub>Eu<sub>2</sub>Sb<sub>2</sub>O<sub>12</sub>

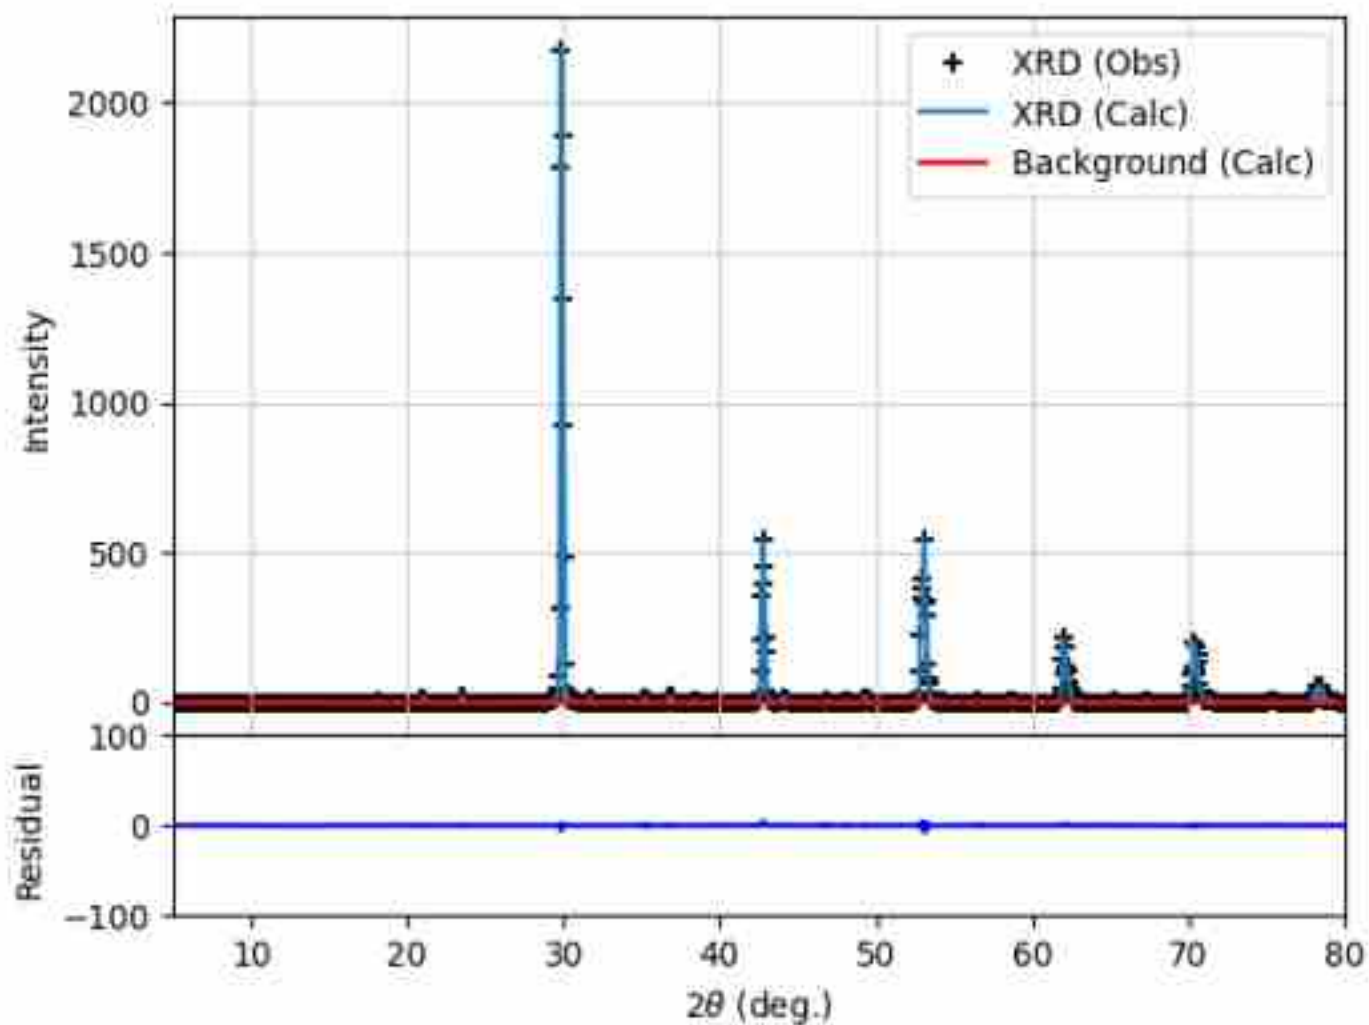

| RMSE before RR | Rwp     | RMSE after RR |
|----------------|---------|---------------|
| 0.019          | 1.63563 | 0.07237       |

# Ba<sub>2</sub>Tl<sub>3</sub>Au<sub>1</sub>

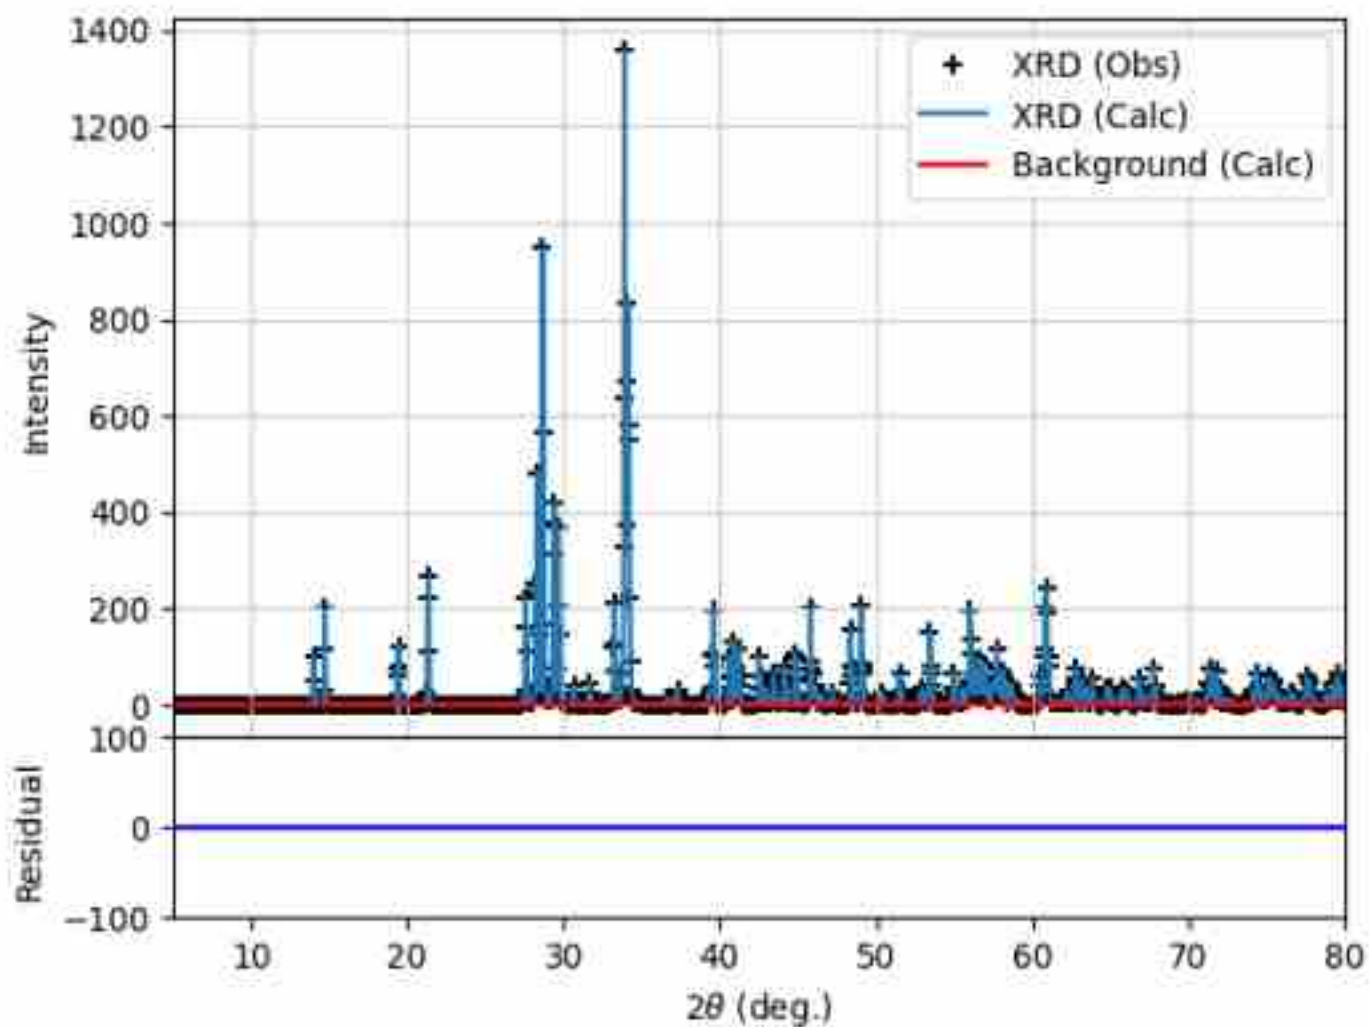

| RMSE before RR | Rwp     | RMSE after RR |
|----------------|---------|---------------|
| 0.019          | 0.00297 | 0.0001        |

# Ba<sub>2</sub>U<sub>1</sub>Pb<sub>1</sub>O<sub>6</sub>

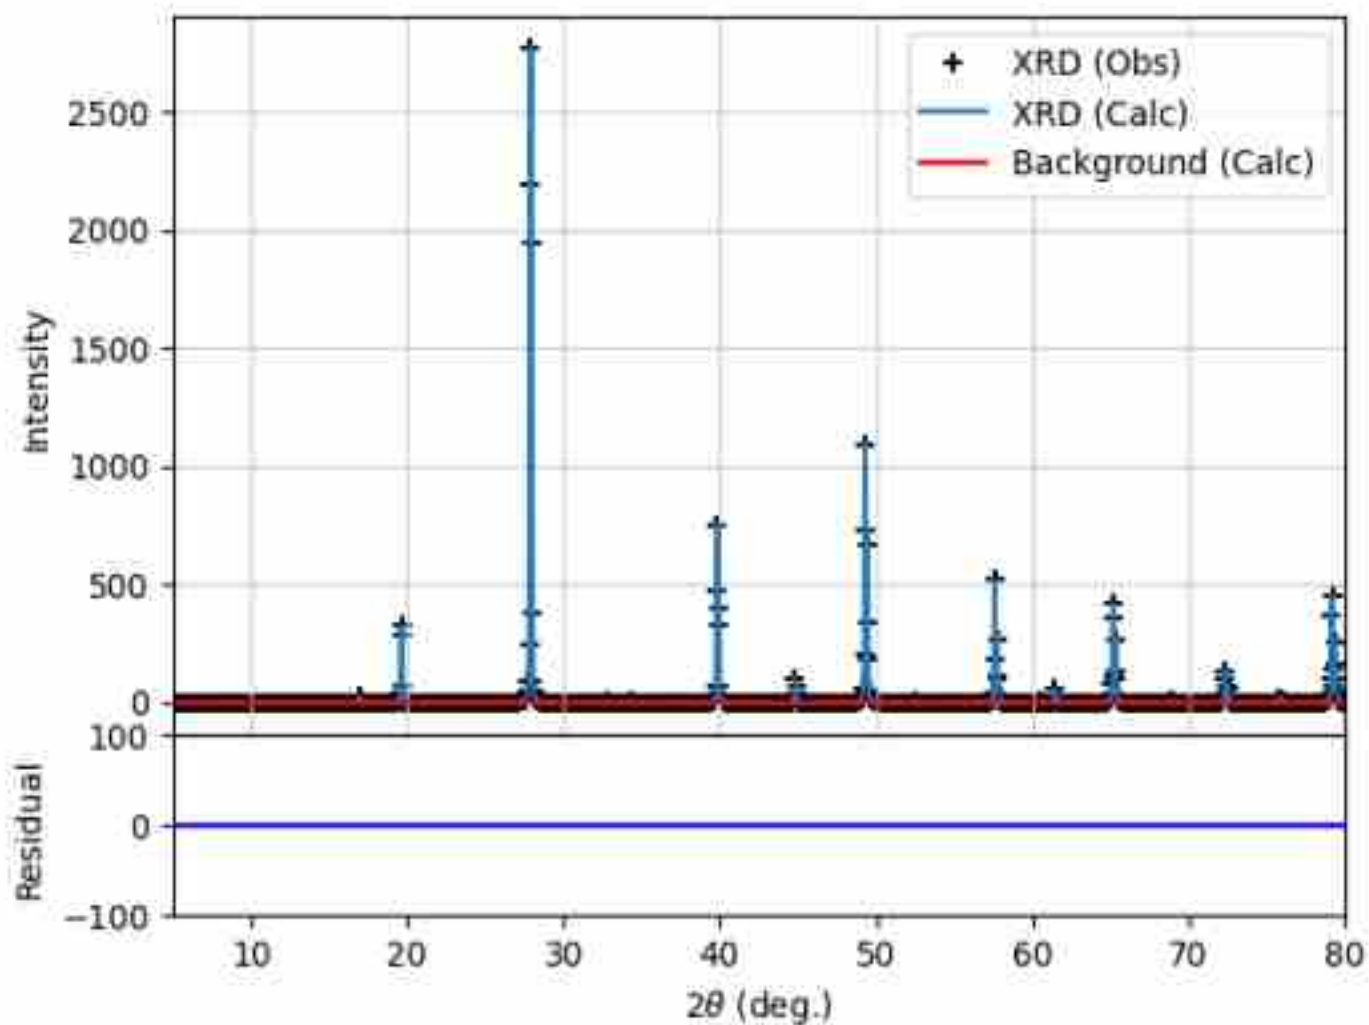

| RMSE before RR | Rwp     | RMSE after RR |
|----------------|---------|---------------|
| 0.019          | 0.01482 | 0.00451       |

# Ba<sub>2</sub>Y<sub>2</sub>Cu<sub>2</sub>Te<sub>6</sub>

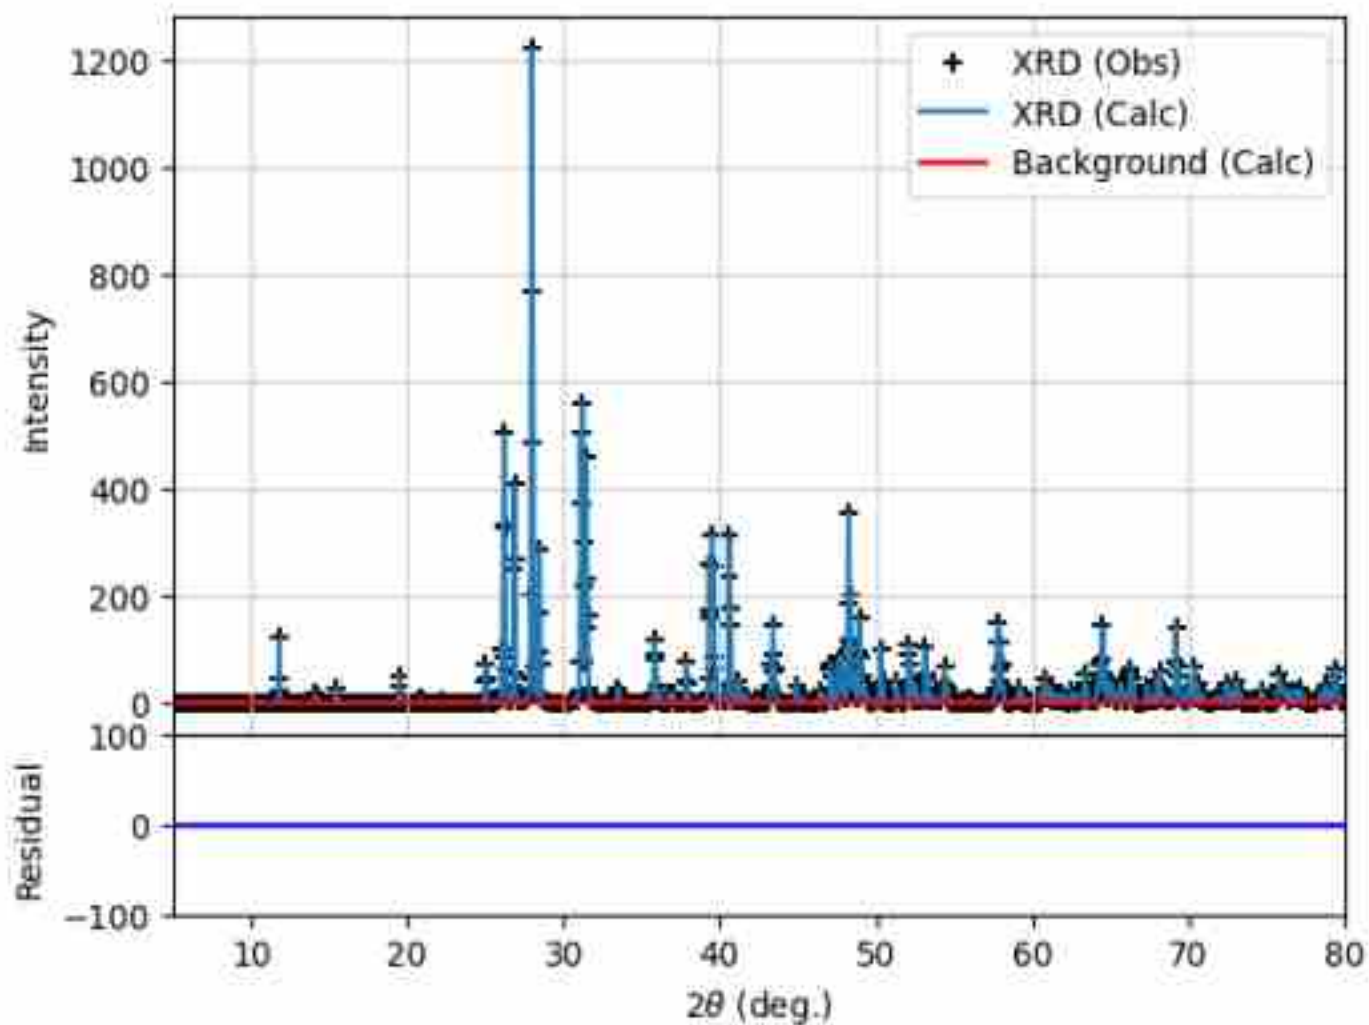

| RMSE before RR | Rwp     | RMSE after RR |
|----------------|---------|---------------|
| 0.019          | 0.00388 | 0.0004        |

# Ba<sub>2</sub>Zn<sub>2</sub>F<sub>8</sub>

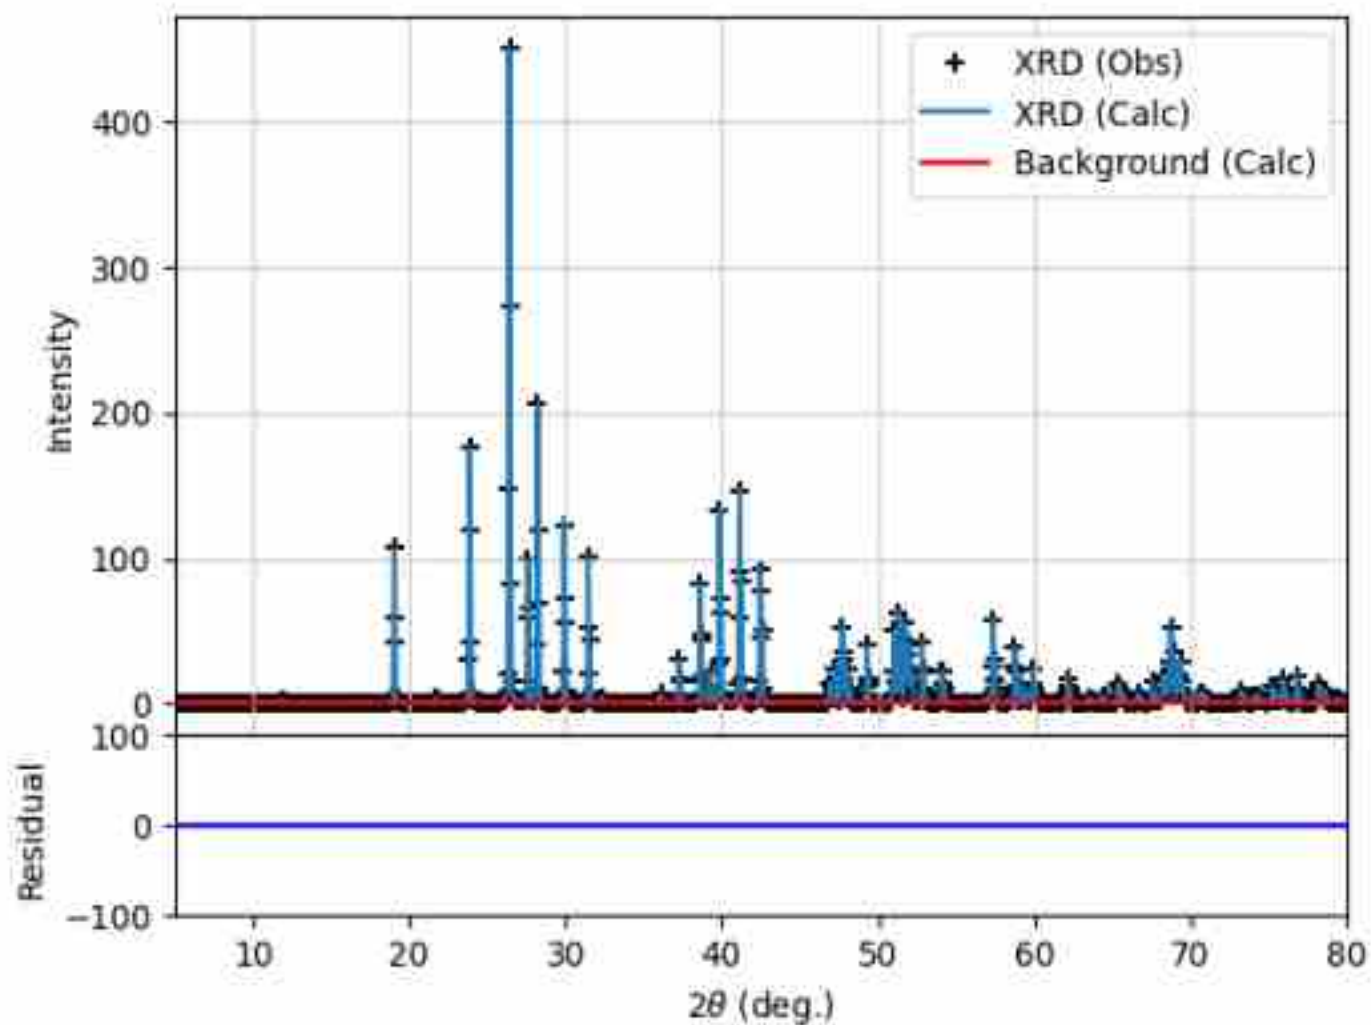

| RMSE before RR | Rwp     | RMSE after RR |
|----------------|---------|---------------|
| 0.019          | 0.00331 | 0.0008        |



# Ba<sub>3</sub>Na<sub>3</sub>Bi<sub>3</sub>

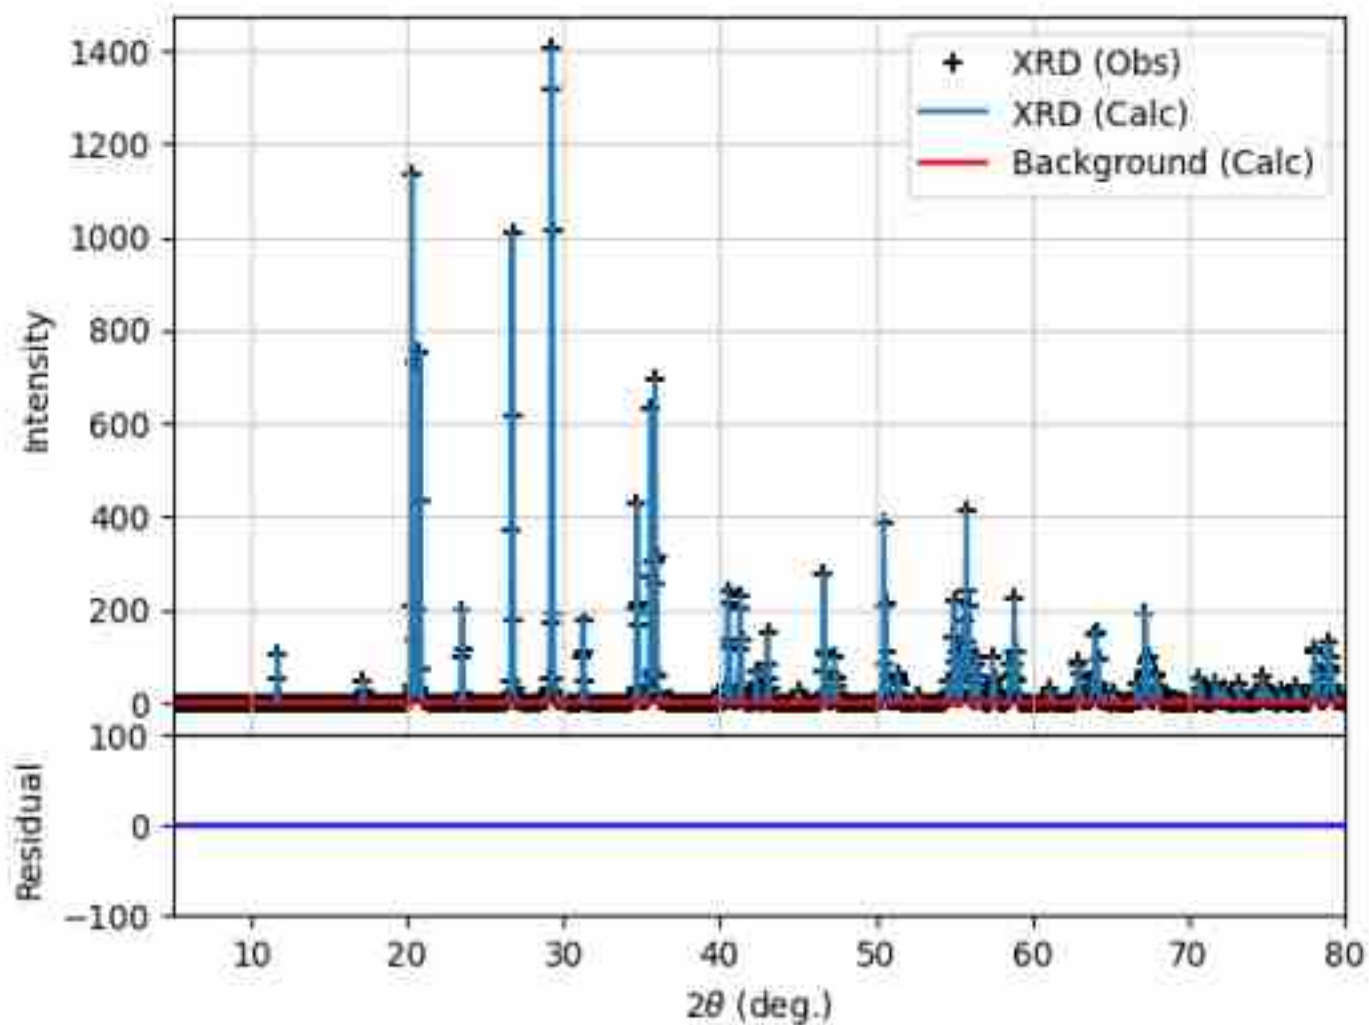

| RMSE before RR | Rwp     | RMSE after RR |
|----------------|---------|---------------|
| 0.019          | 0.00425 | 0.00159       |

# Ba<sub>3</sub>SrMg<sub>2</sub>Te<sub>2</sub>O<sub>12</sub>

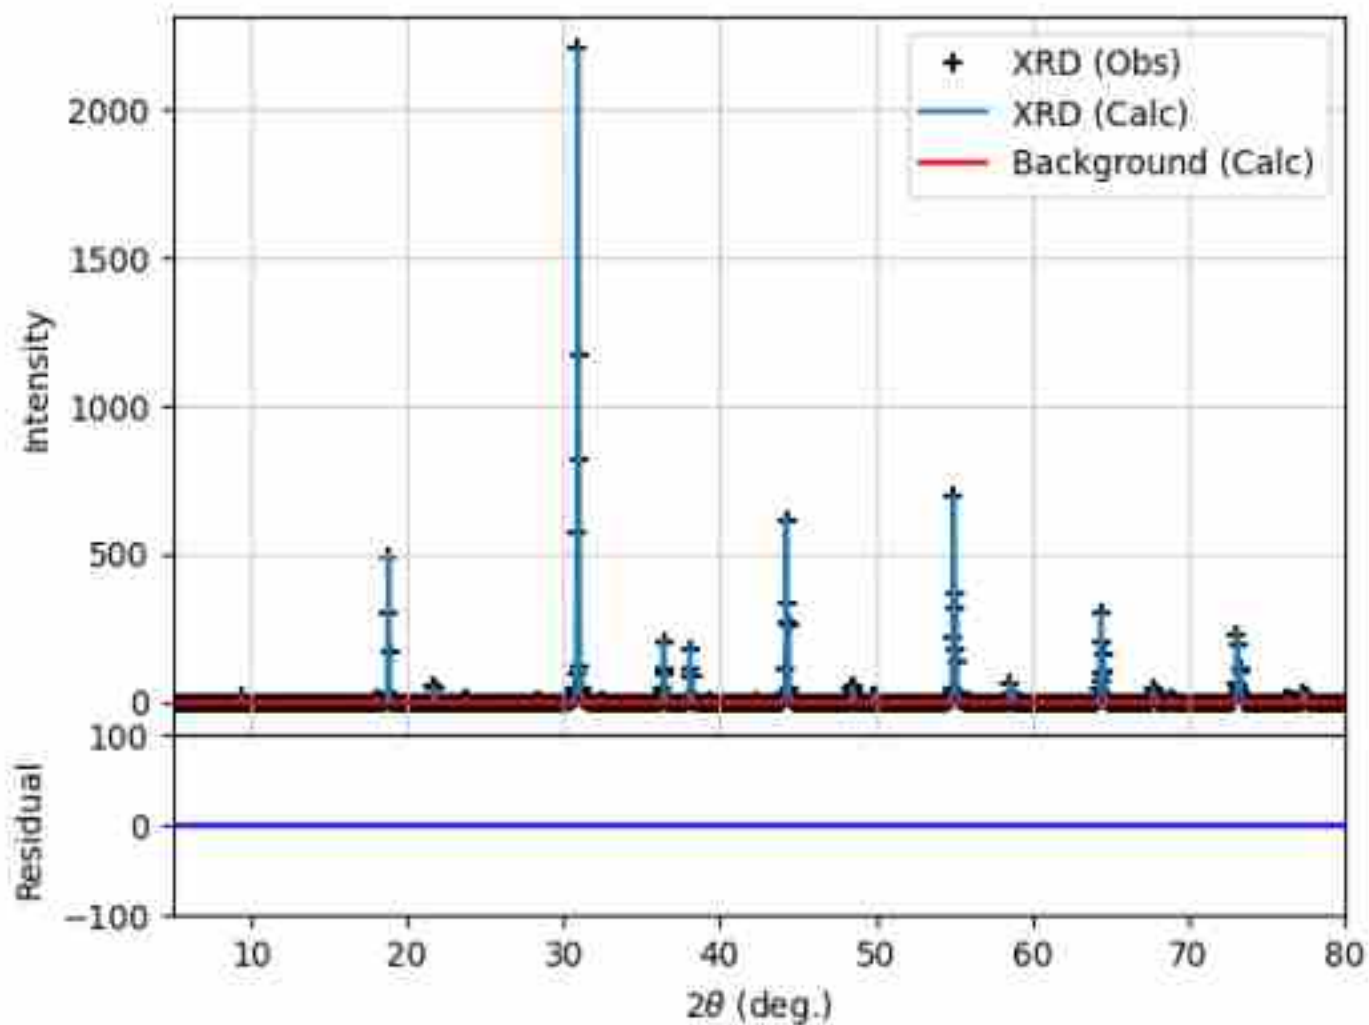

| RMSE before RR | Rwp     | RMSE after RR |
|----------------|---------|---------------|
| 0.019          | 0.01121 | 0.00411       |

# Ba<sub>4</sub>I<sub>4</sub>O<sub>2</sub>

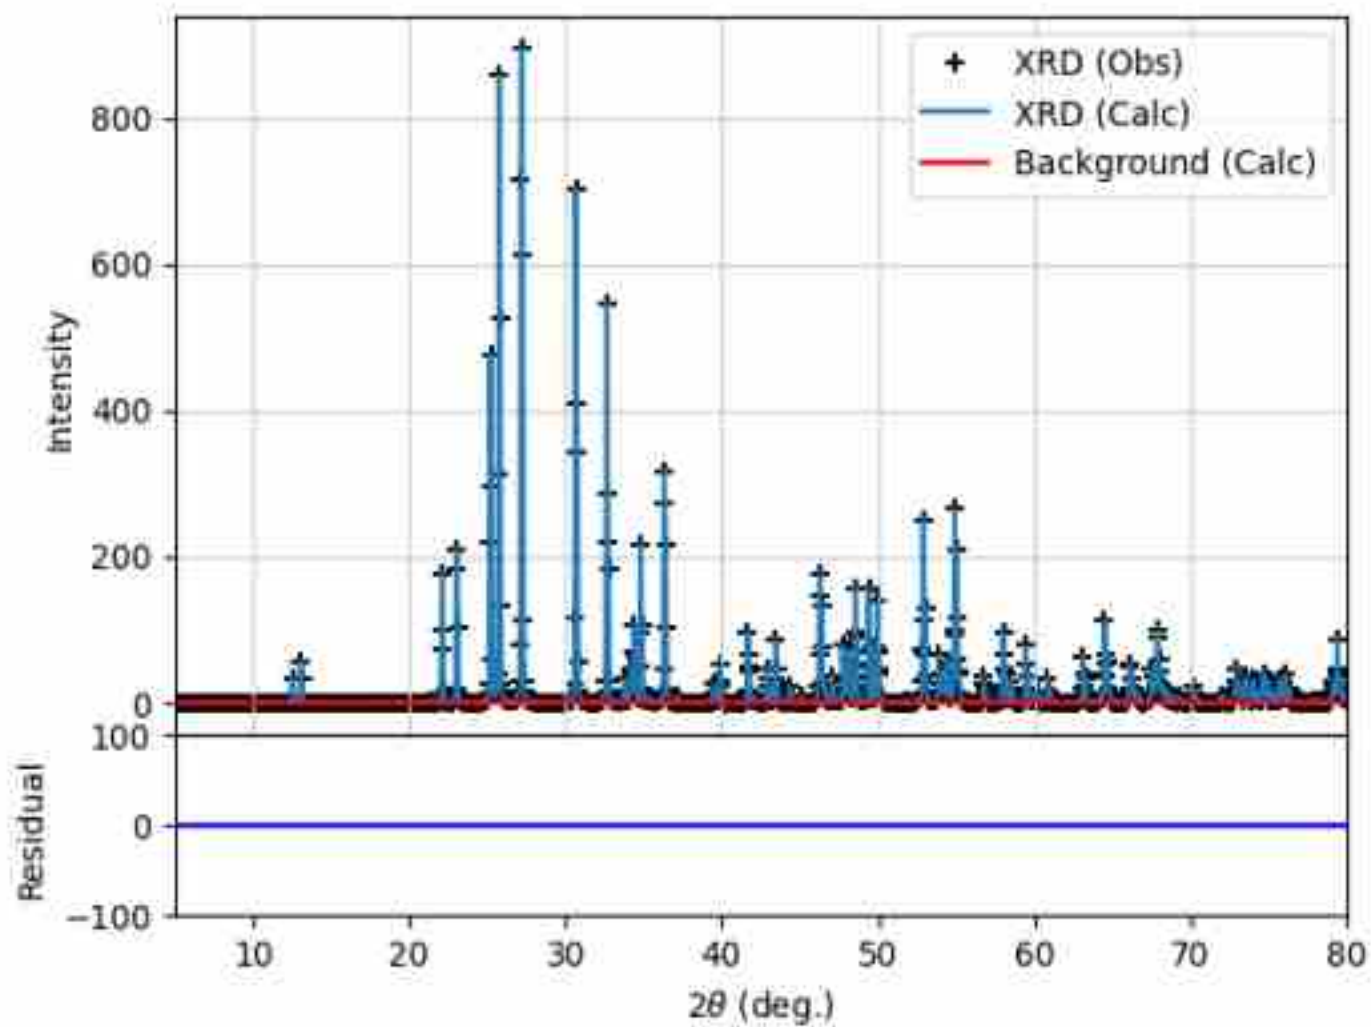

| RMSE before RR | Rwp     | RMSE after RR |
|----------------|---------|---------------|
| 0.019          | 0.00432 | 0.0006        |

# Ba6Re2N6

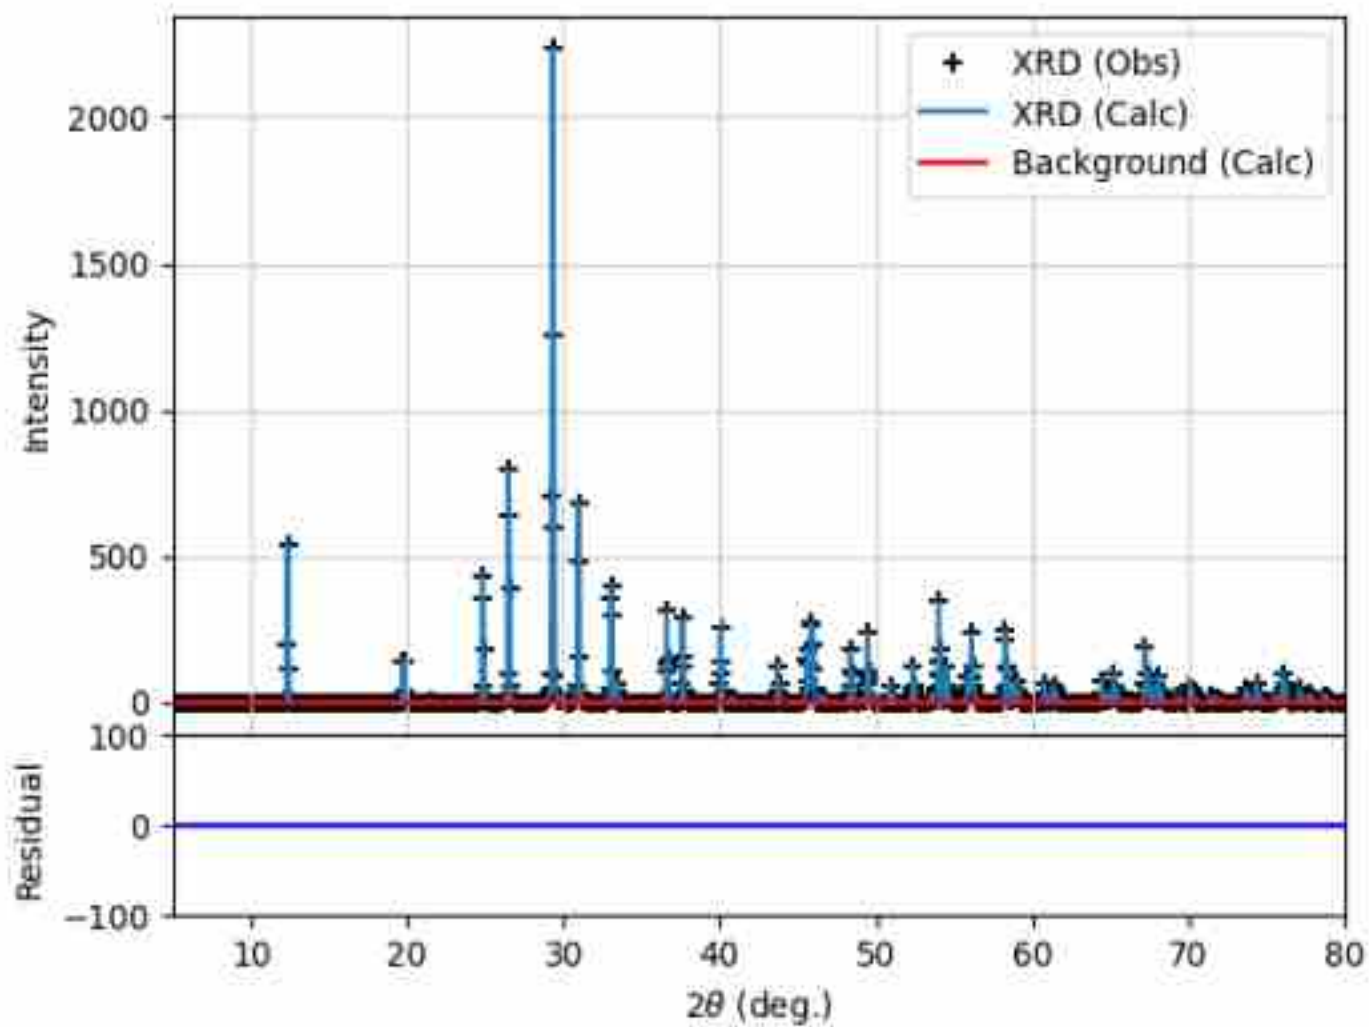

| RMSE before RR | Rwp     | RMSE after RR |
|----------------|---------|---------------|
| 0.019          | 0.00344 | 0.00174       |

# Ca1Mn1Fe1Ge2

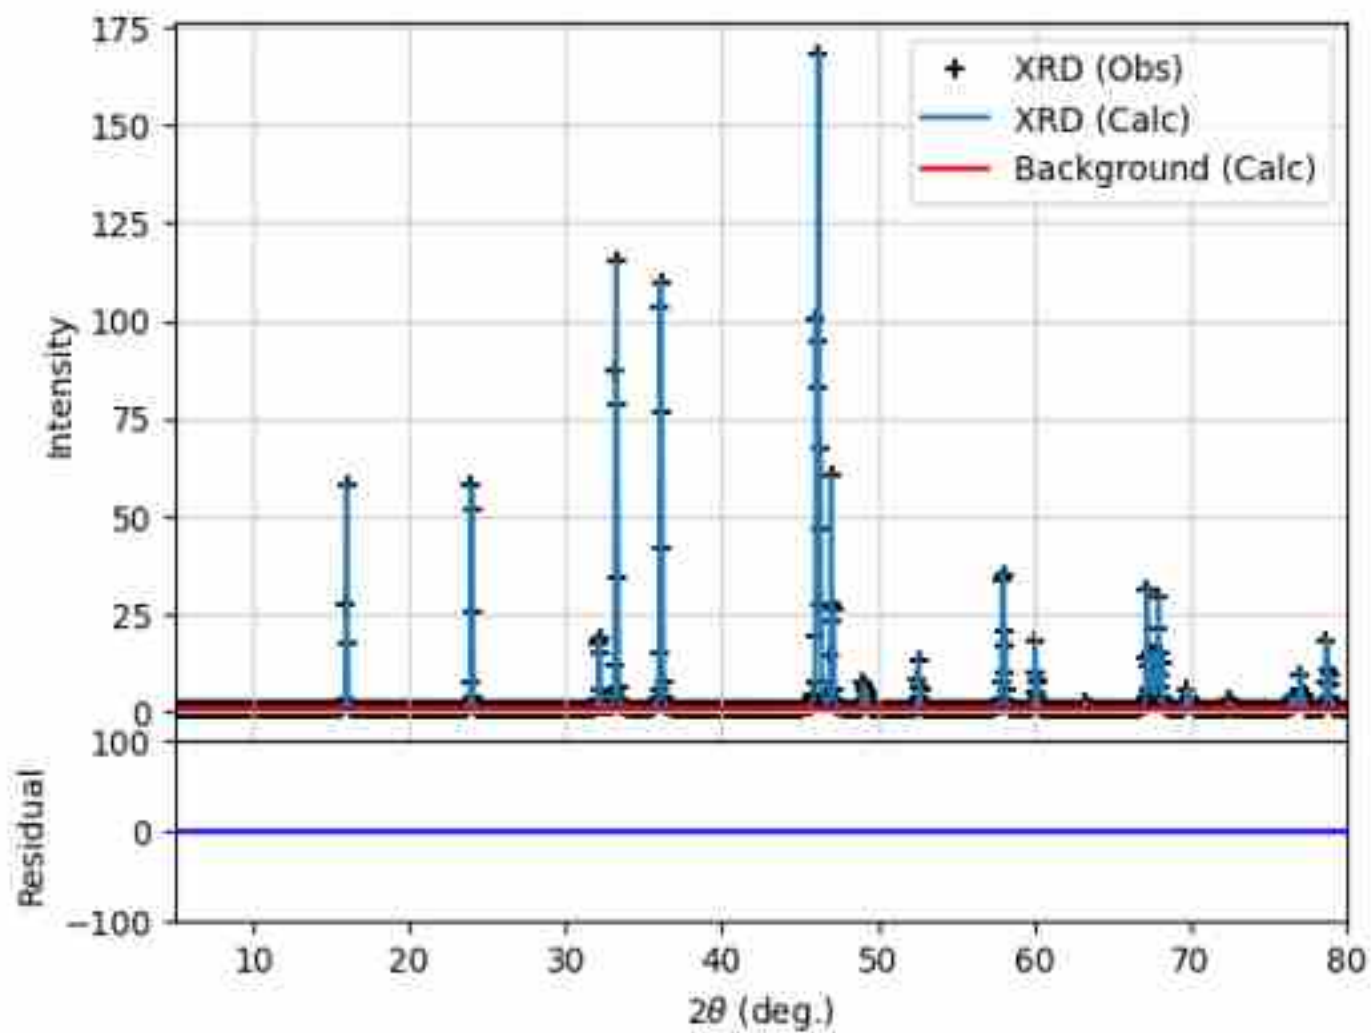

| RMSE before RR | Rwp    | RMSE after RR |
|----------------|--------|---------------|
| 0.019          | 0.0045 | 0.00072       |

# Ca1Sb12Os4

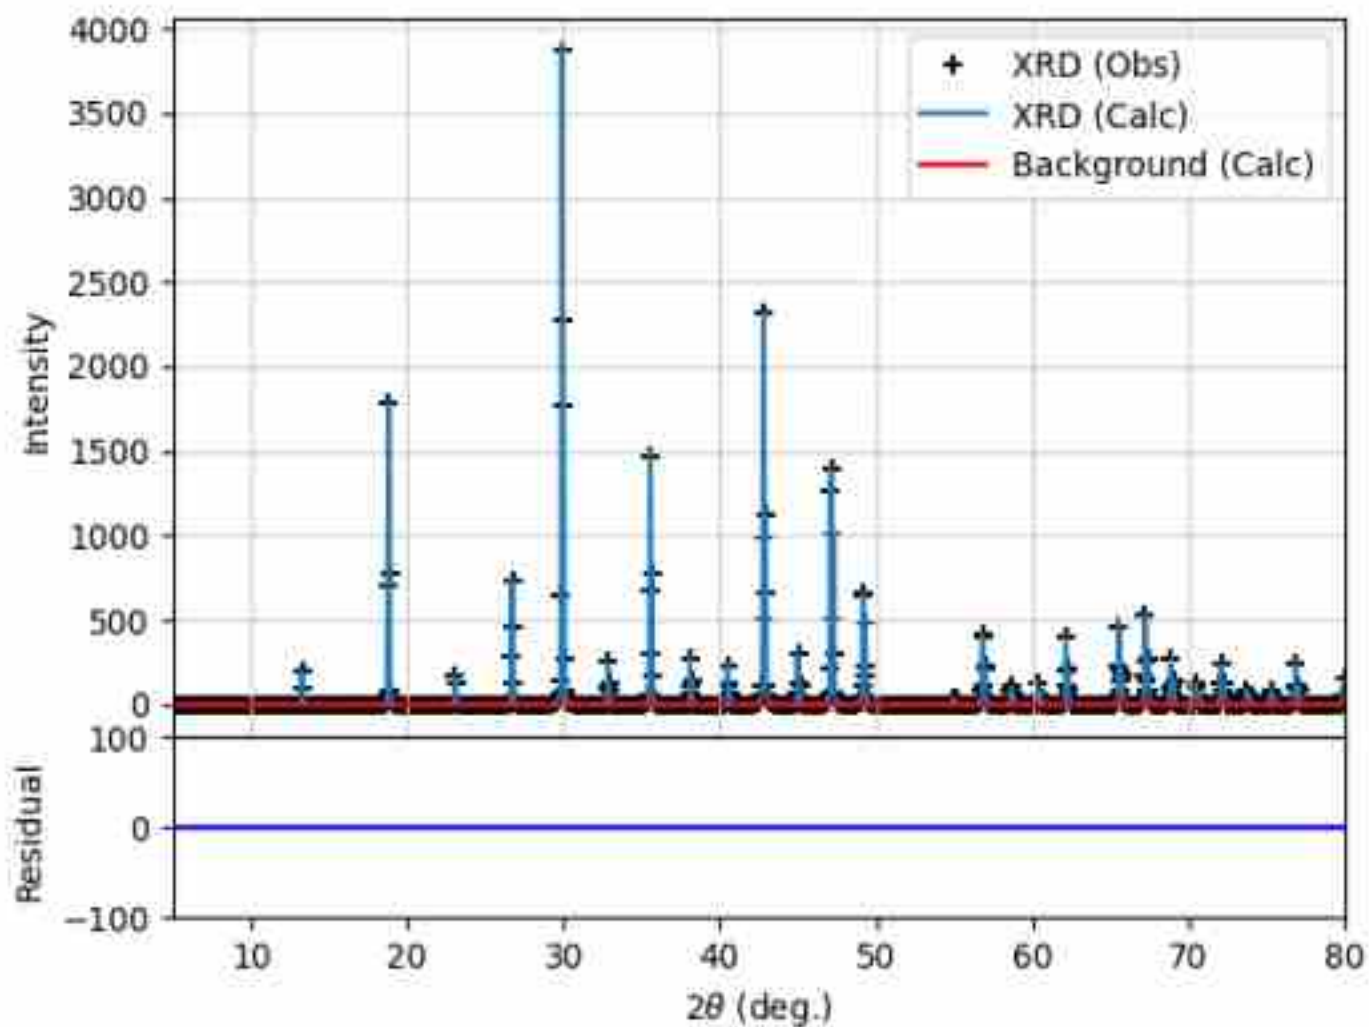

| RMSE before RR | Rwp     | RMSE after RR |
|----------------|---------|---------------|
| 0.019          | 0.00776 | 0.00085       |

# Ca<sub>2</sub>Lu<sub>2</sub>Mn<sub>4</sub>O<sub>12</sub>

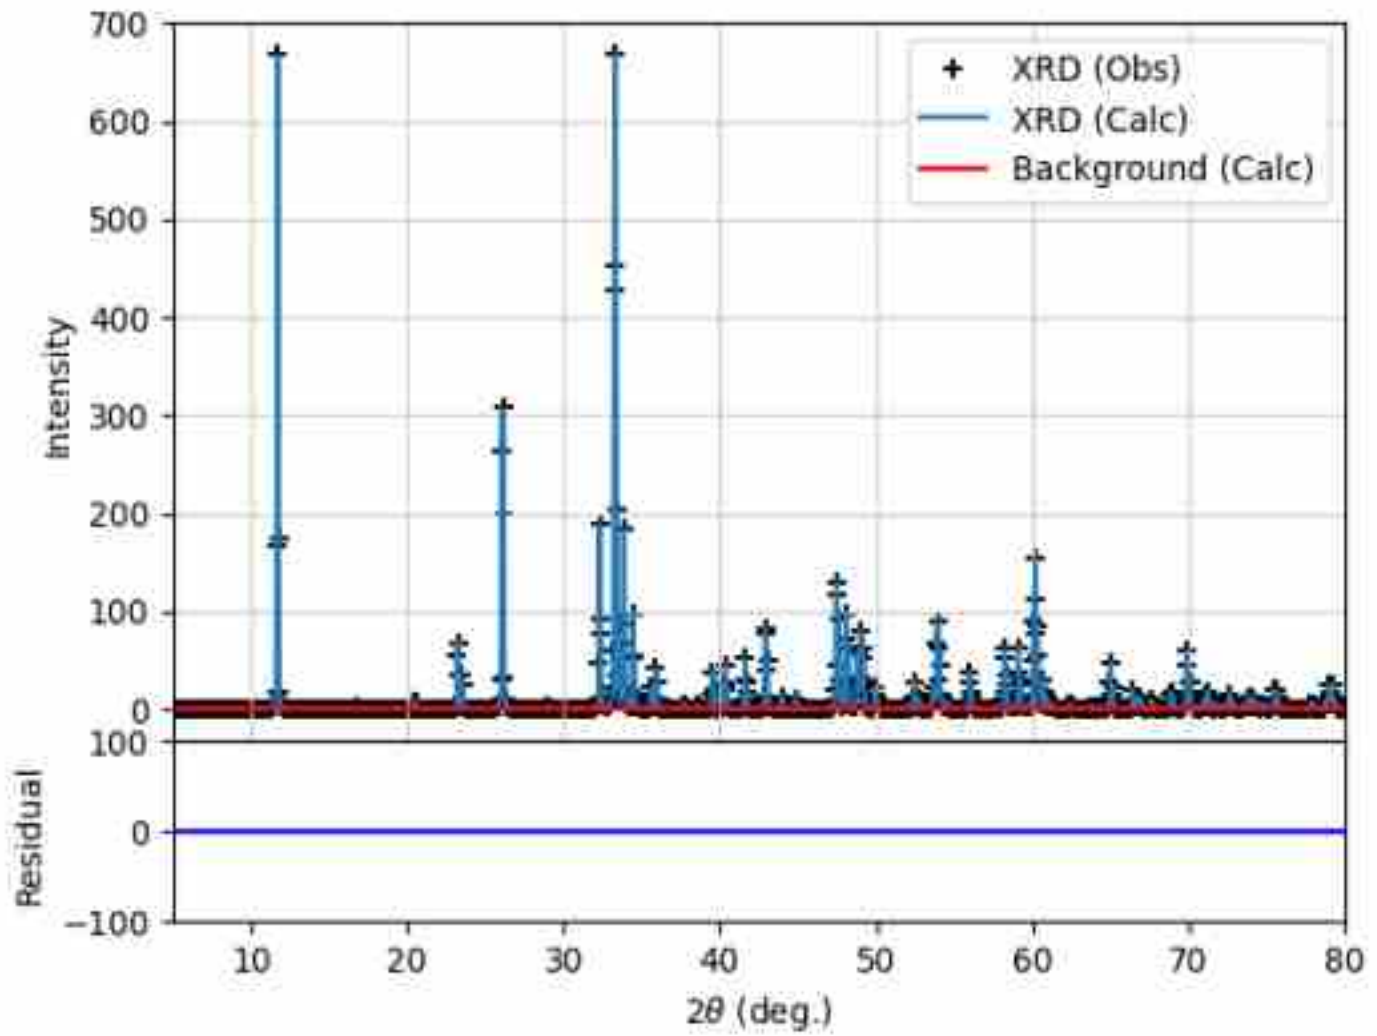

| RMSE before RR | Rwp     | RMSE after RR |
|----------------|---------|---------------|
| 0.019          | 0.00437 | 0.00138       |

# Ca<sub>2</sub>Ni<sub>4</sub>

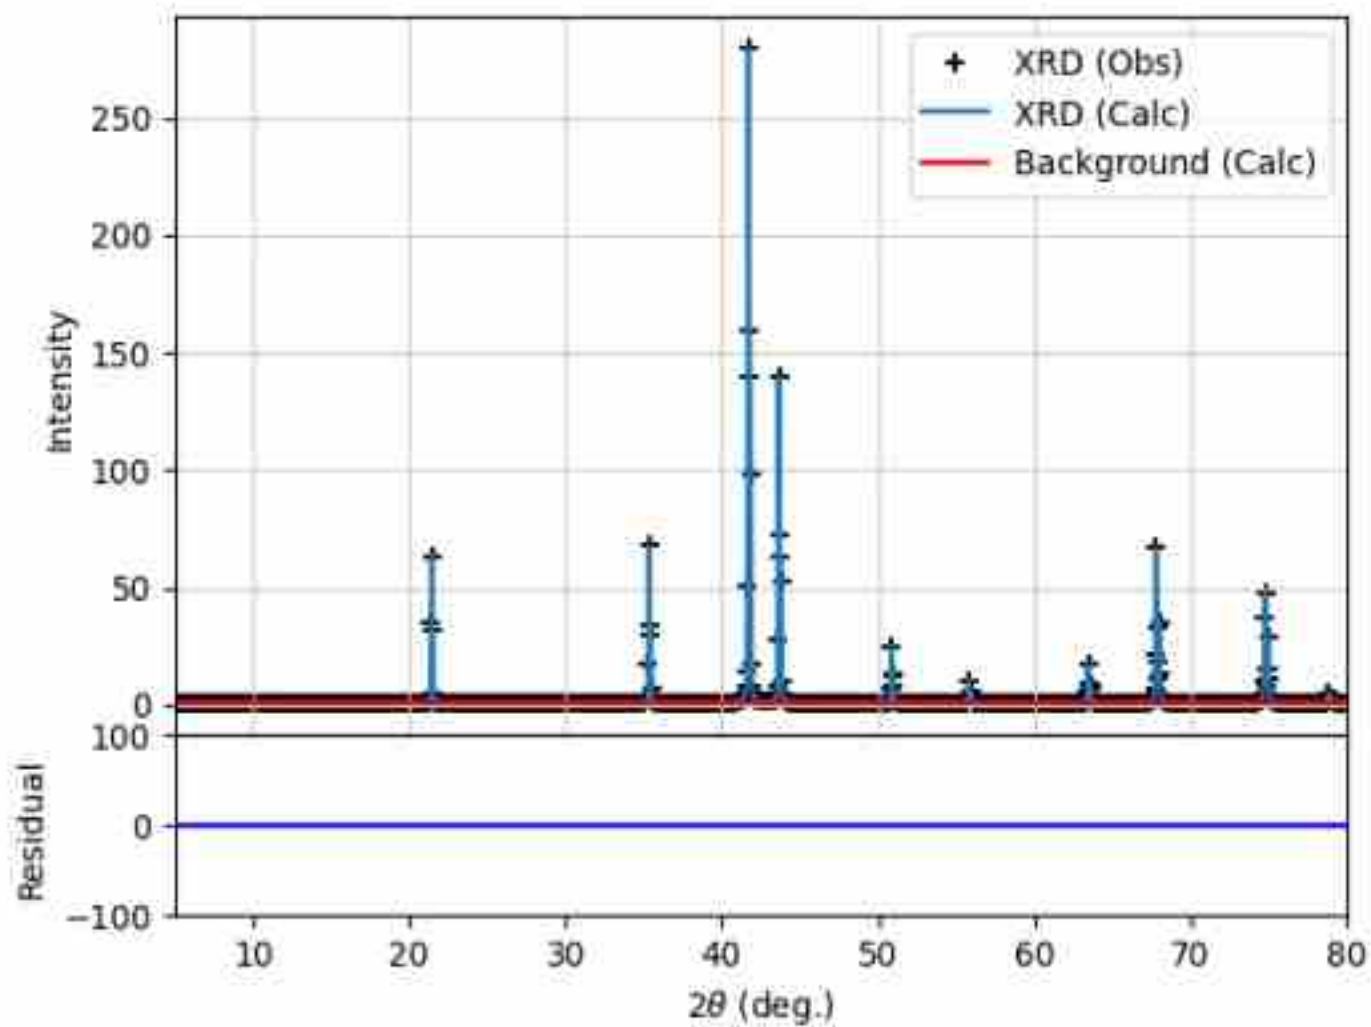

| RMSE before RR | Rwp    | RMSE after RR |
|----------------|--------|---------------|
| 0.019          | 0.0875 | 0.00332       |



# Ca<sub>2</sub>Ti<sub>3</sub>O<sub>8</sub>

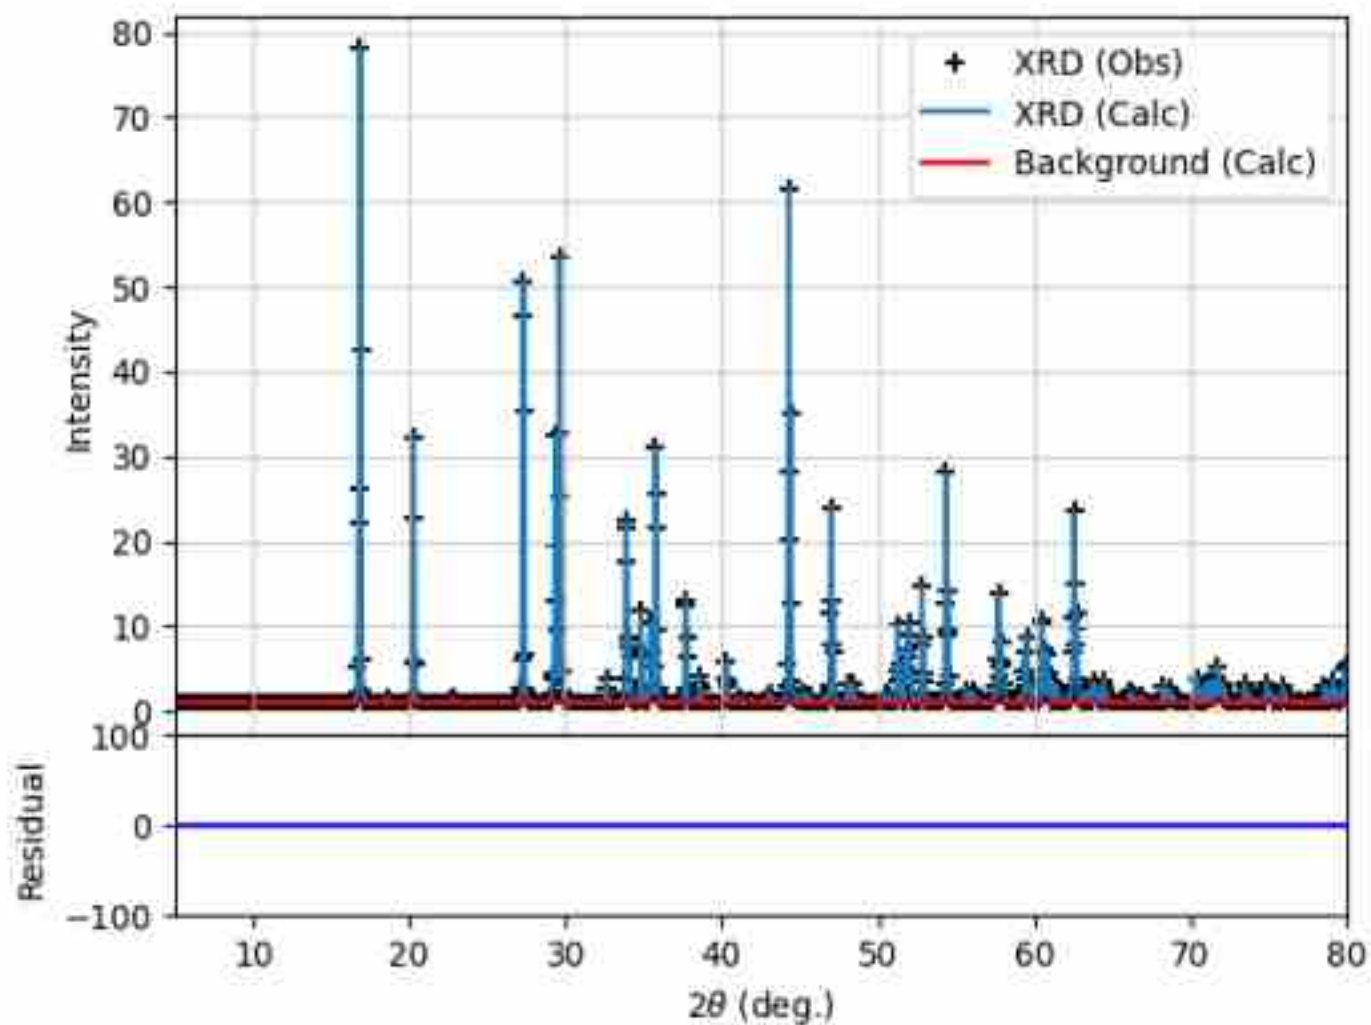

| RMSE before RR | Rwp     | RMSE after RR |
|----------------|---------|---------------|
| 0.019          | 0.00296 | 0.00087       |

# Ca<sub>2</sub>TlCd<sub>1</sub>

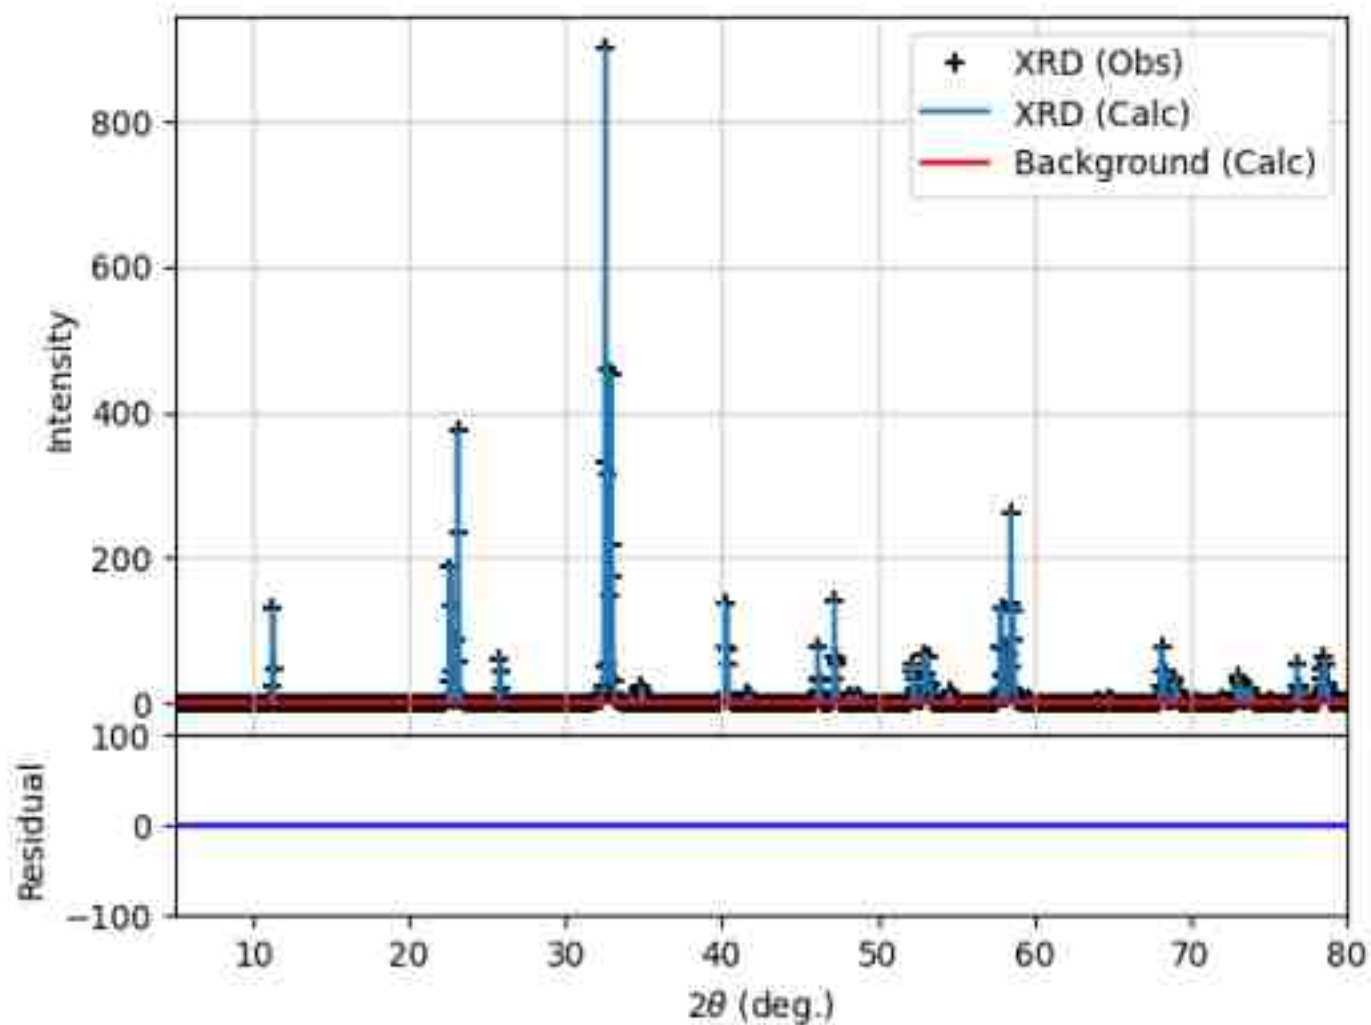

| RMSE before RR | Rwp    | RMSE after RR |
|----------------|--------|---------------|
| 0.019          | 0.0045 | 0.00037       |

# Ca<sub>2</sub>Zr<sub>1</sub>Ti<sub>1</sub>Ge<sub>2</sub>O<sub>10</sub>

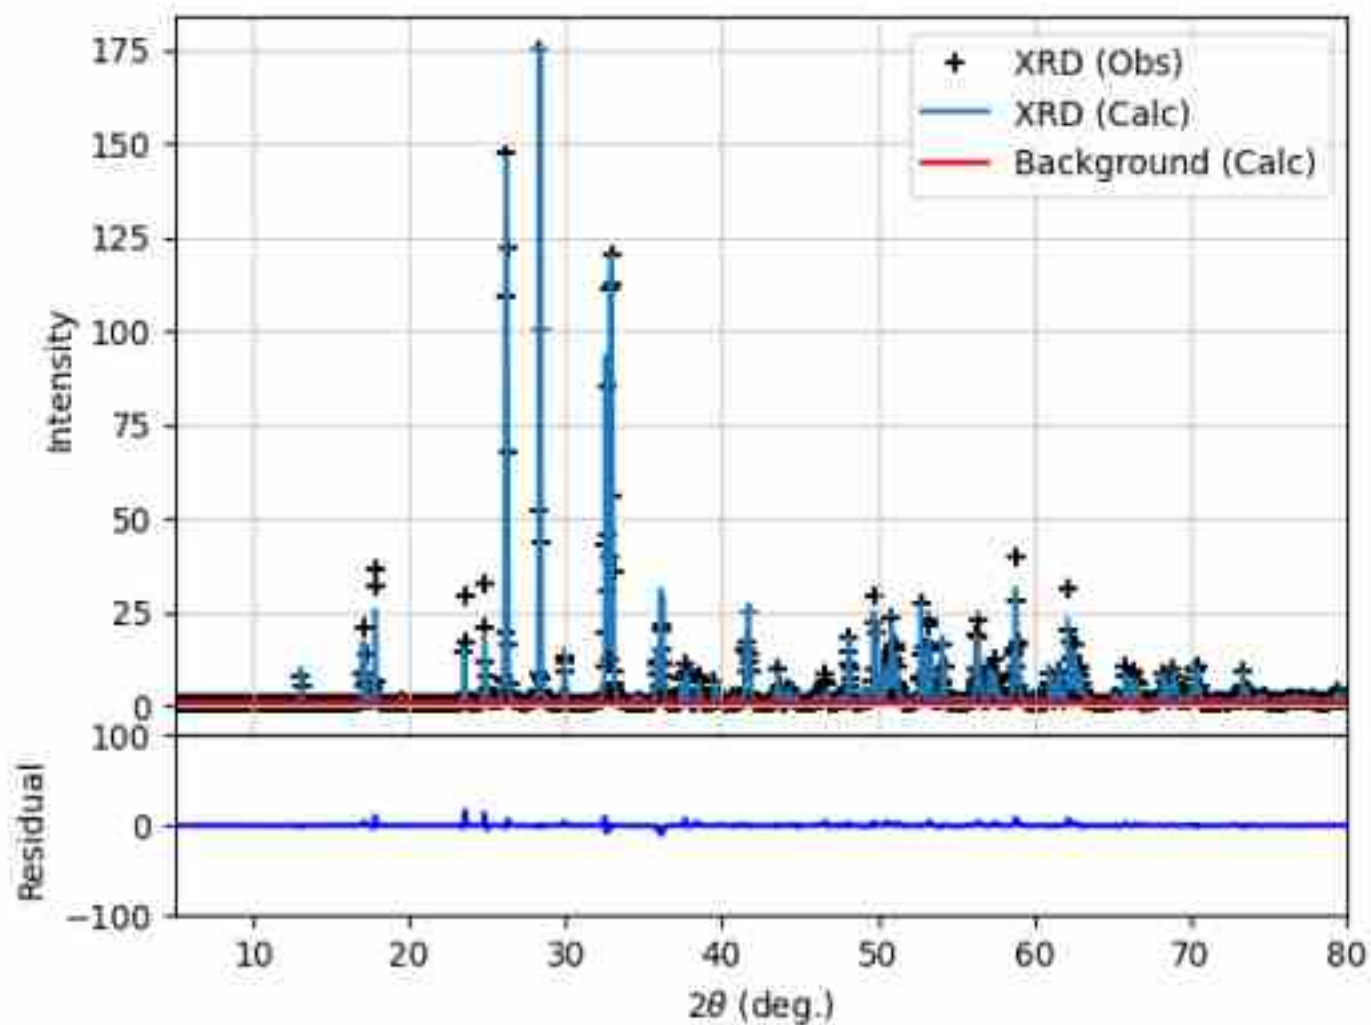

| RMSE before RR | Rwp      | RMSE after RR |
|----------------|----------|---------------|
| 0.019          | 18.44755 | 0.27079       |

# Ca4Cd8

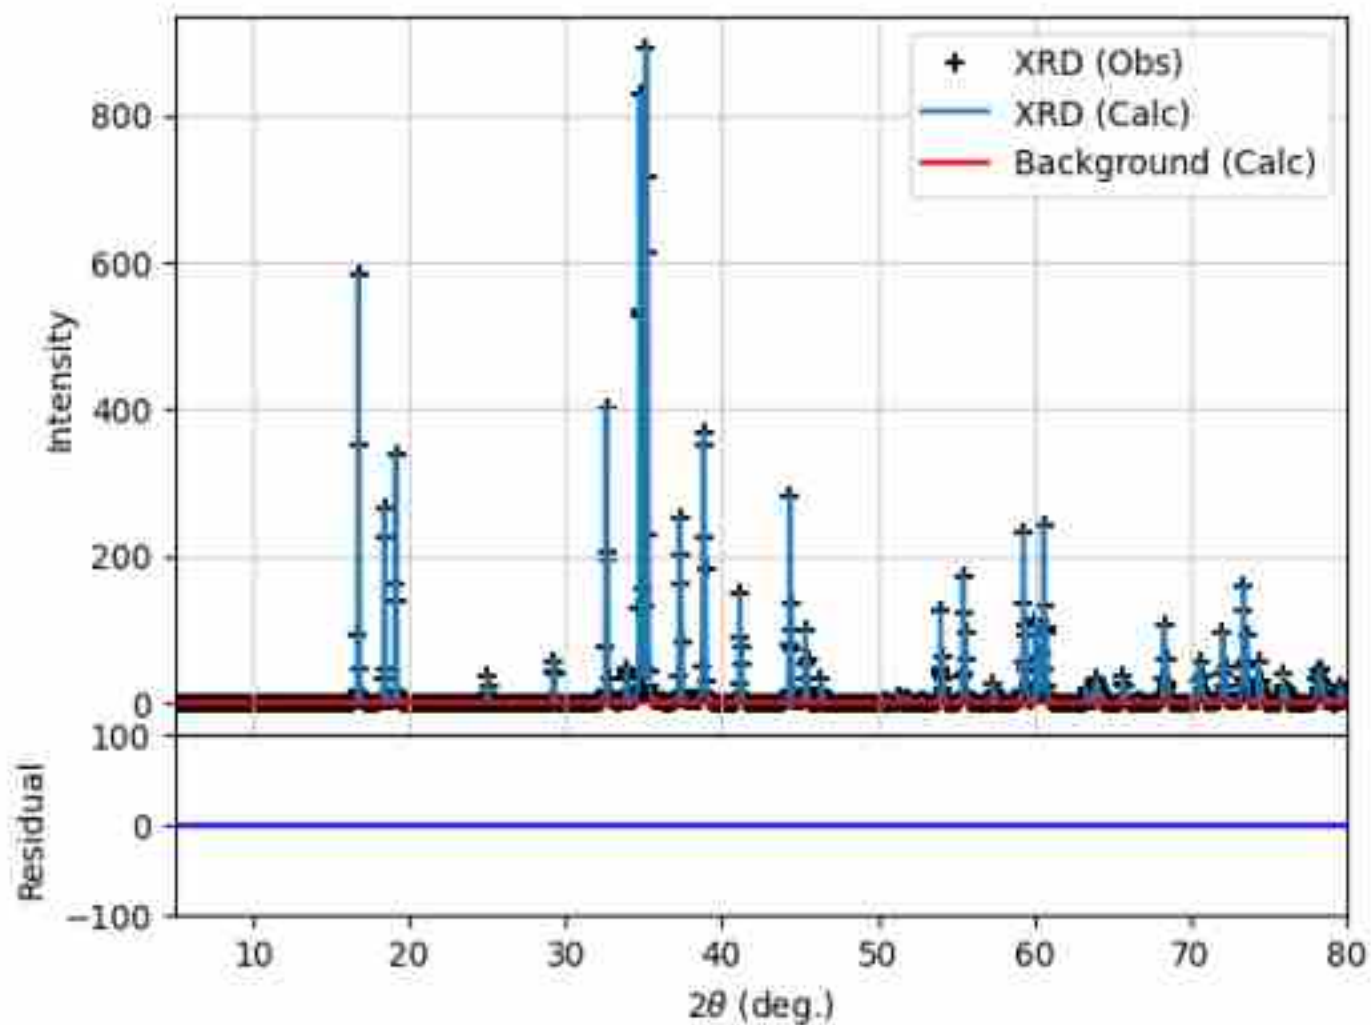

| RMSE before RR | Rwp     | RMSE after RR |
|----------------|---------|---------------|
| 0.019          | 0.00437 | 0.00053       |

# Ca<sub>4</sub>Ni<sub>4</sub>O<sub>12</sub>

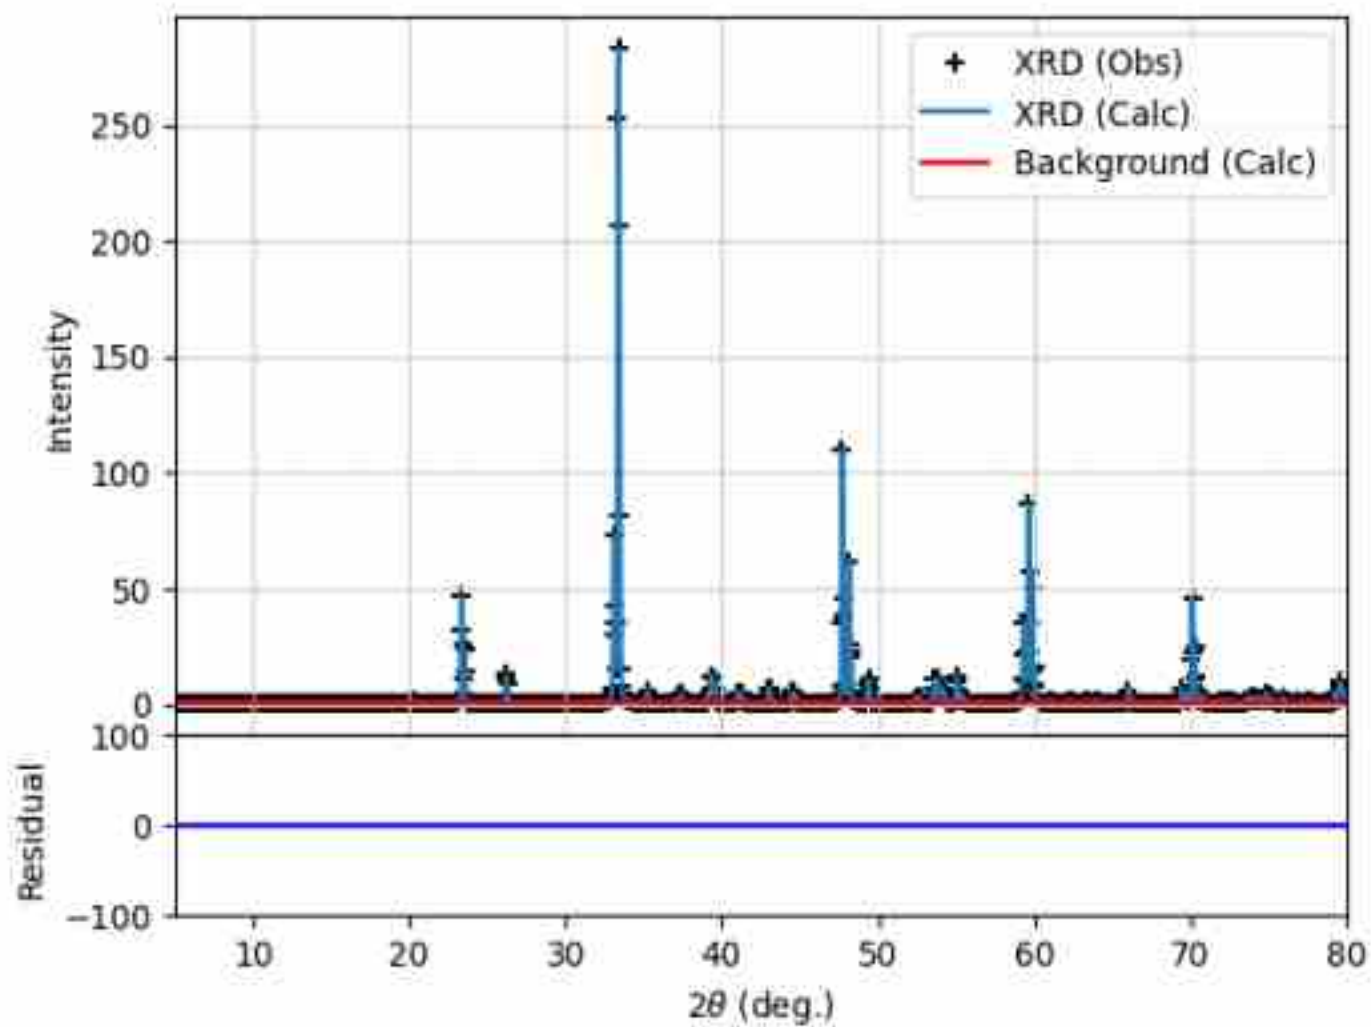

| RMSE before RR | Rwp     | RMSE after RR |
|----------------|---------|---------------|
| 0.019          | 0.00457 | 0.00114       |

# Ca<sub>4</sub>Sb<sub>2</sub>O<sub>1</sub>

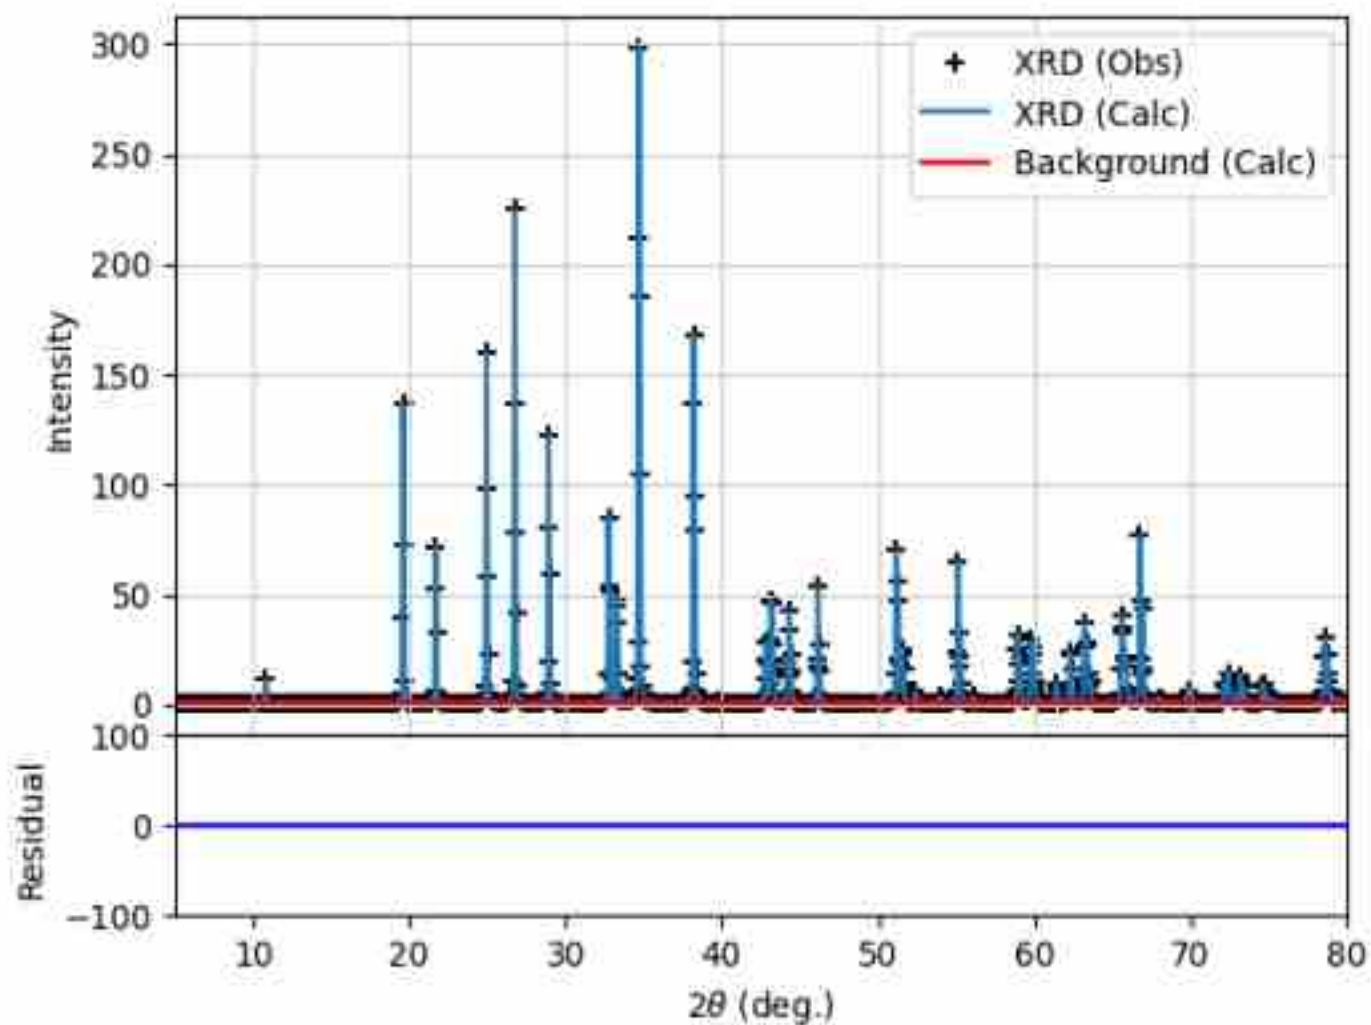

| RMSE before RR | Rwp     | RMSE after RR |
|----------------|---------|---------------|
| 0.019          | 0.00494 | 0.00085       |

# Cd<sub>1</sub>As<sub>2</sub>O<sub>6</sub>

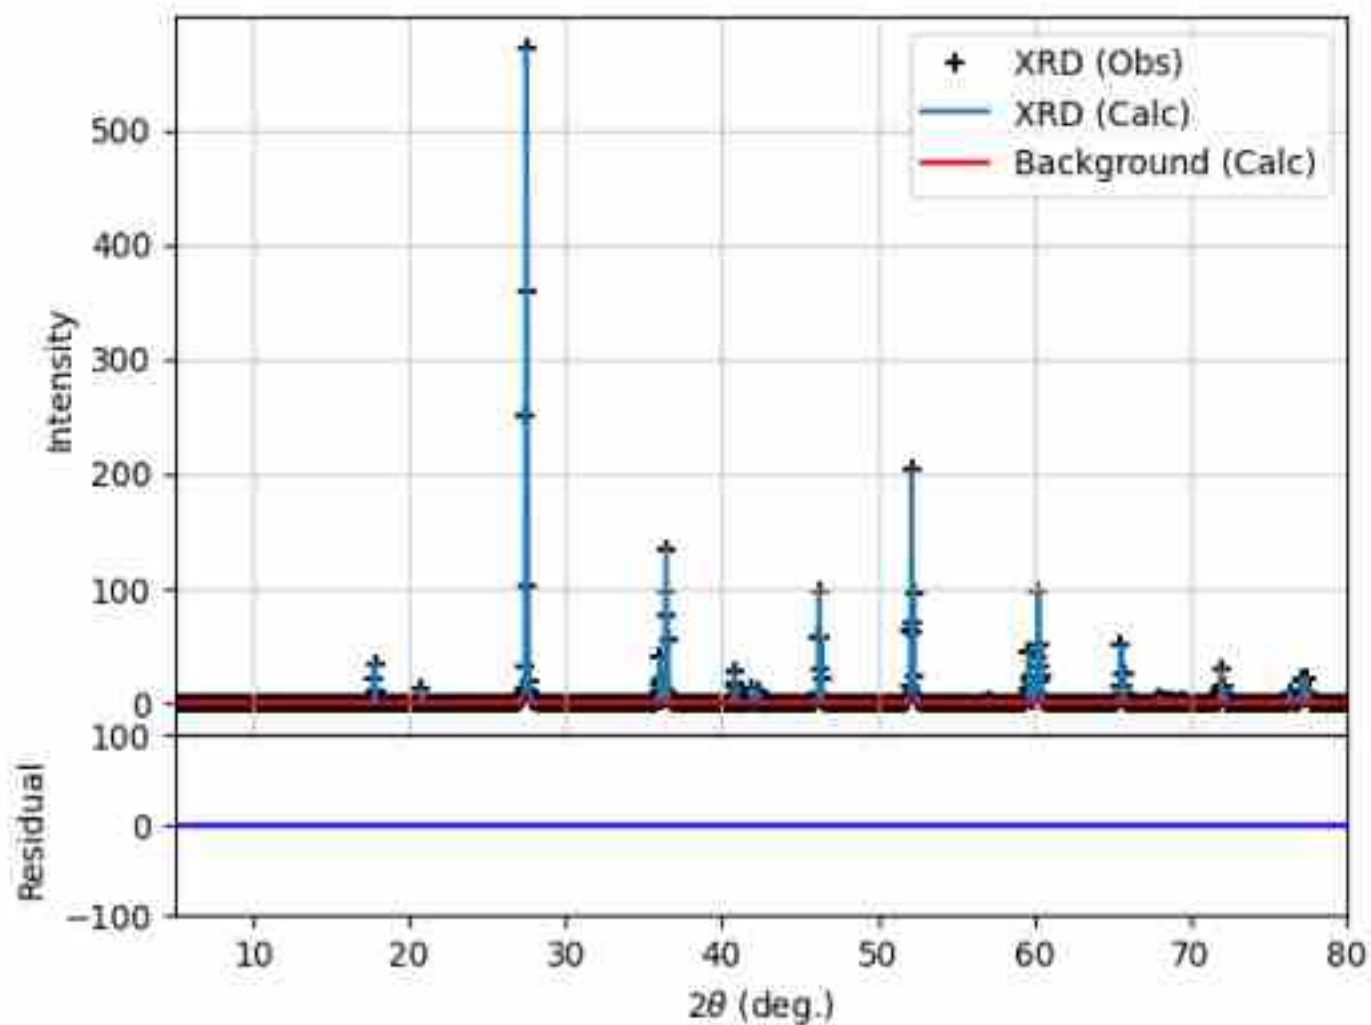

| RMSE before RR | Rwp     | RMSE after RR |
|----------------|---------|---------------|
| 0.019          | 0.00299 | 0.00153       |

# Cd1Pd1F6

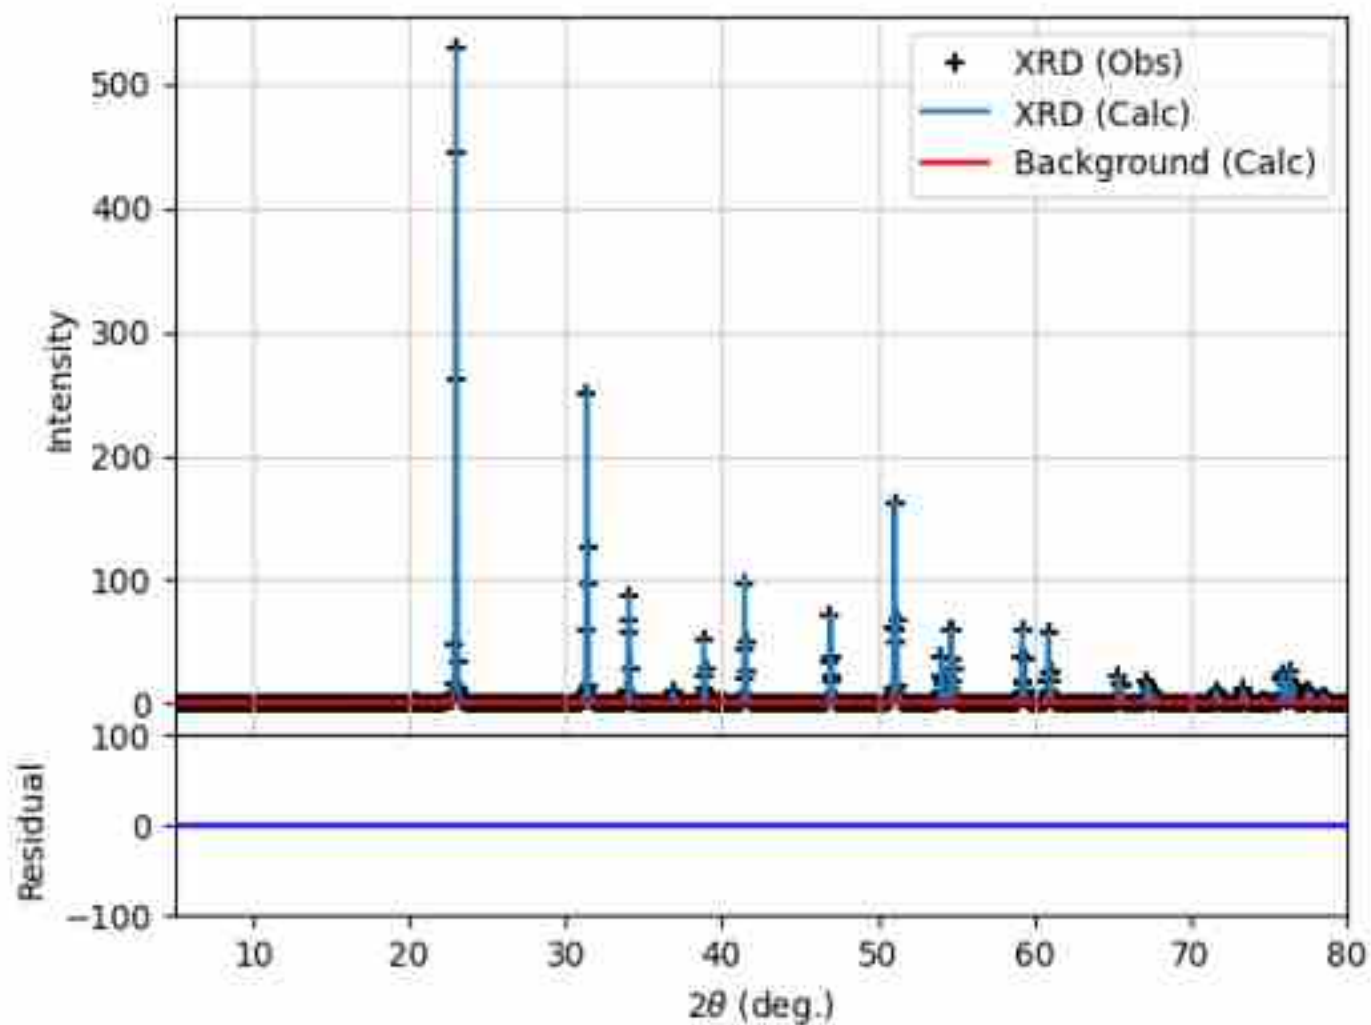

| RMSE before RR | Rwp     | RMSE after RR |
|----------------|---------|---------------|
| 0.019          | 0.00245 | 0.00117       |



Ce1Ga2Ni2

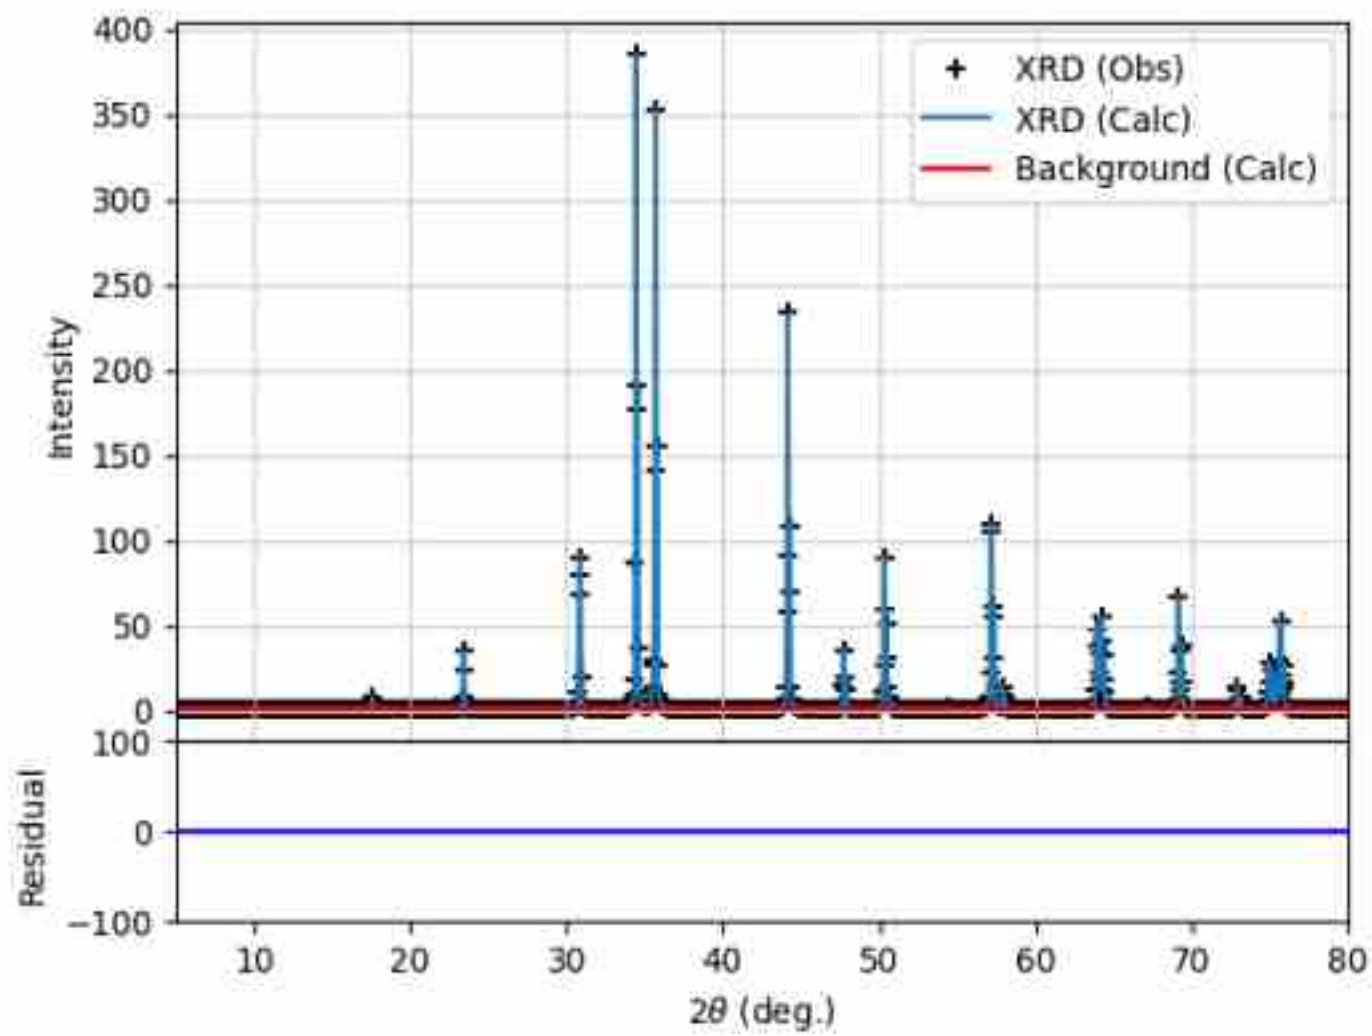

| RMSE before RR | Rwp     | RMSE after RR |
|----------------|---------|---------------|
| 0.019          | 0.00398 | 0.00052       |

# Ce1U4O10

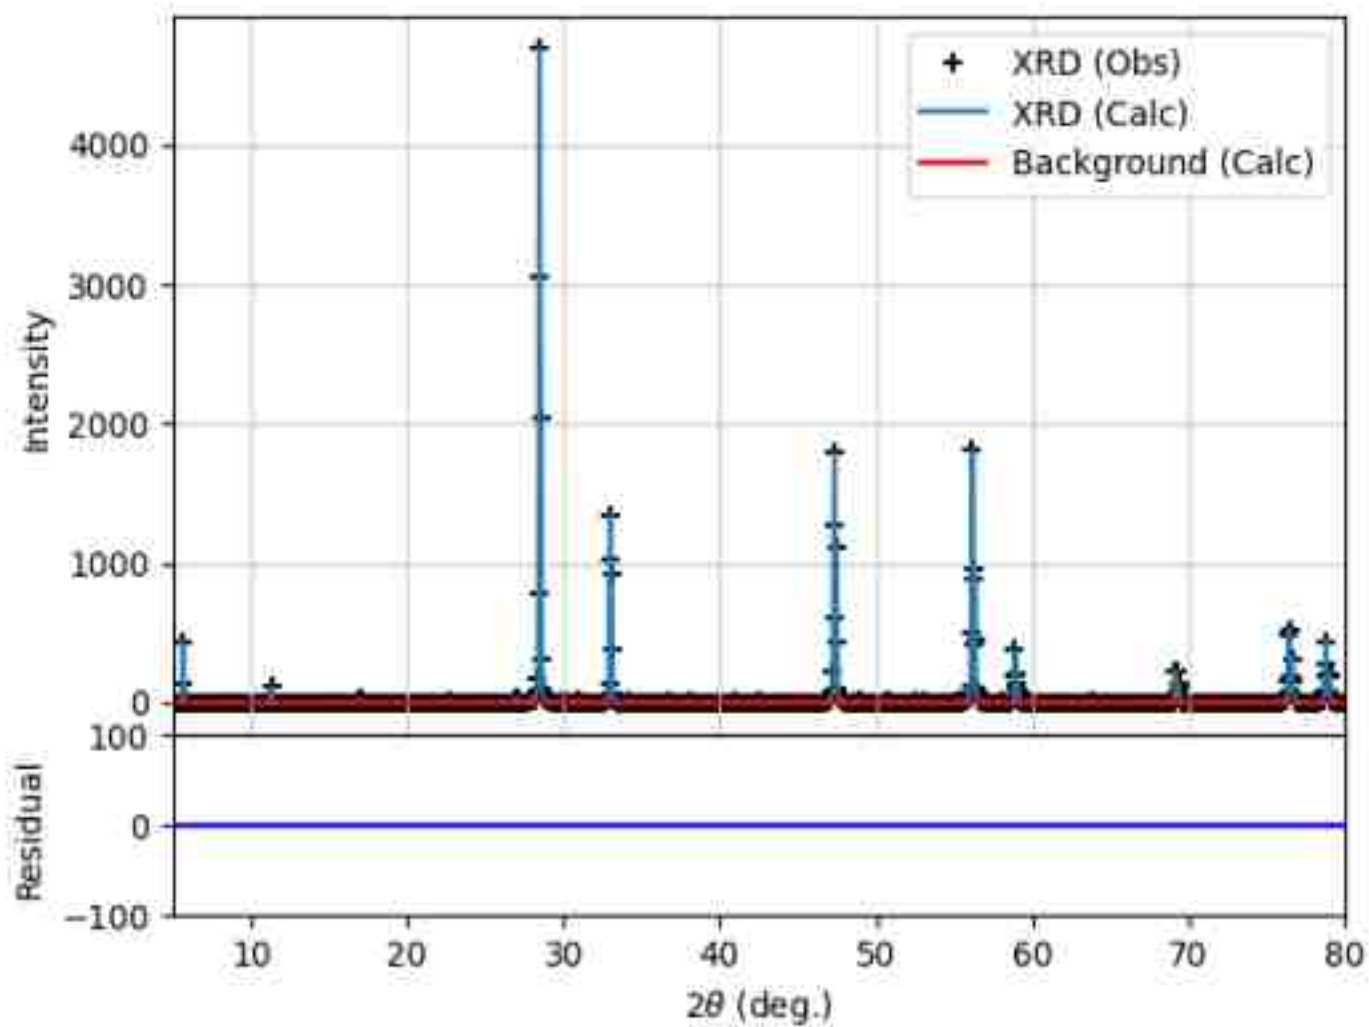

| RMSE before RR | Rwp    | RMSE after RR |
|----------------|--------|---------------|
| 0.019          | 0.0039 | 0.00208       |

# Ce<sub>2</sub>P<sub>2</sub>Ru<sub>4</sub>C<sub>2</sub>

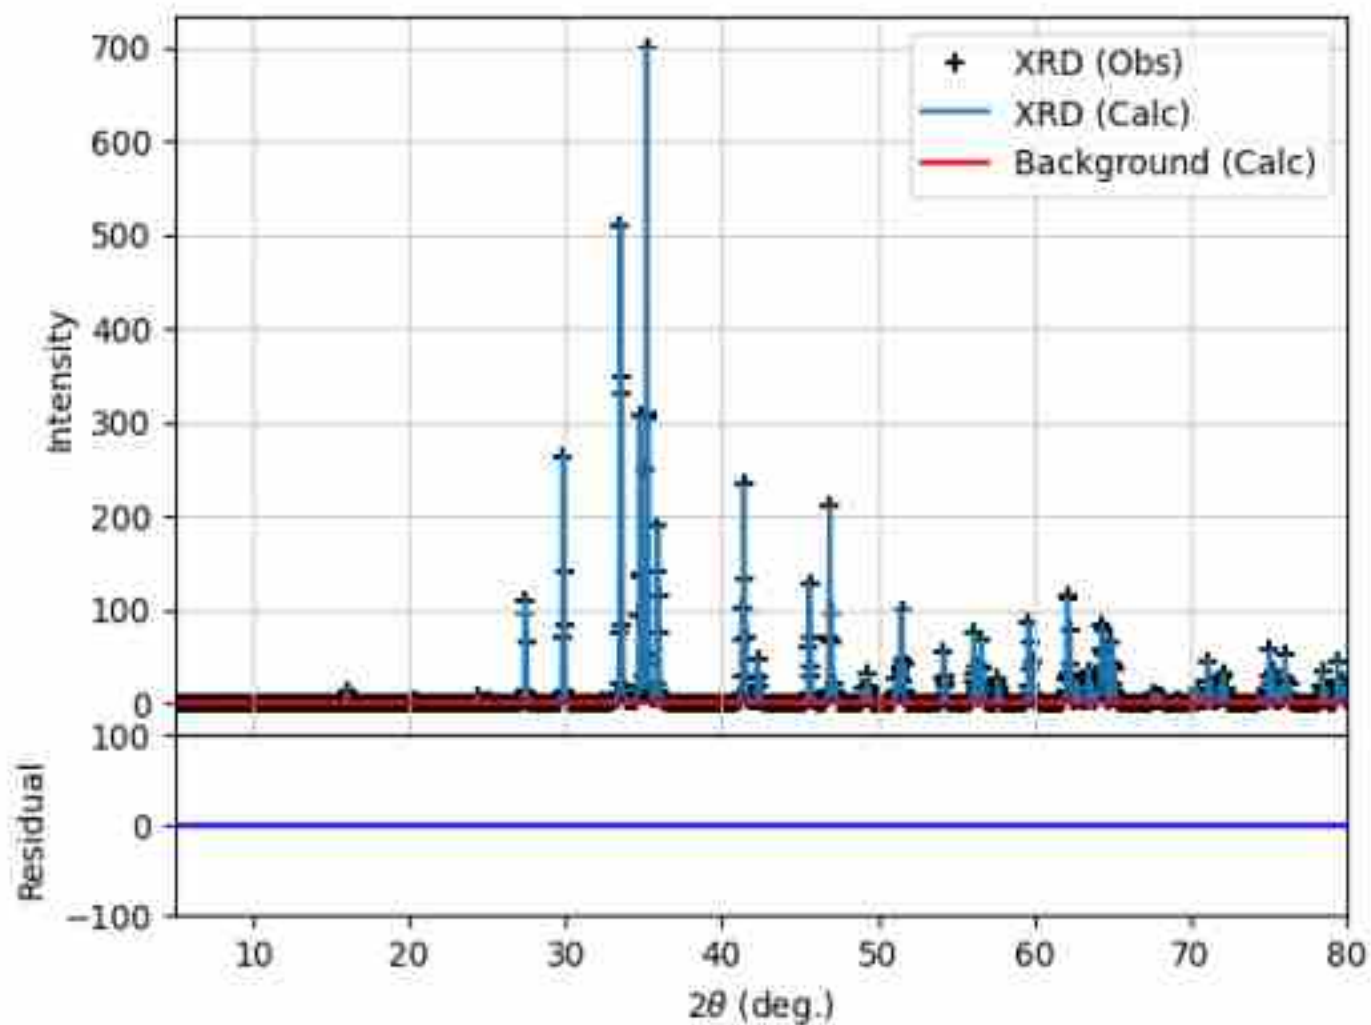

| RMSE before RR | Rwp     | RMSE after RR |
|----------------|---------|---------------|
| 0.019          | 0.00416 | 0.00114       |

# Ce<sub>2</sub>U<sub>3</sub>O<sub>10</sub>

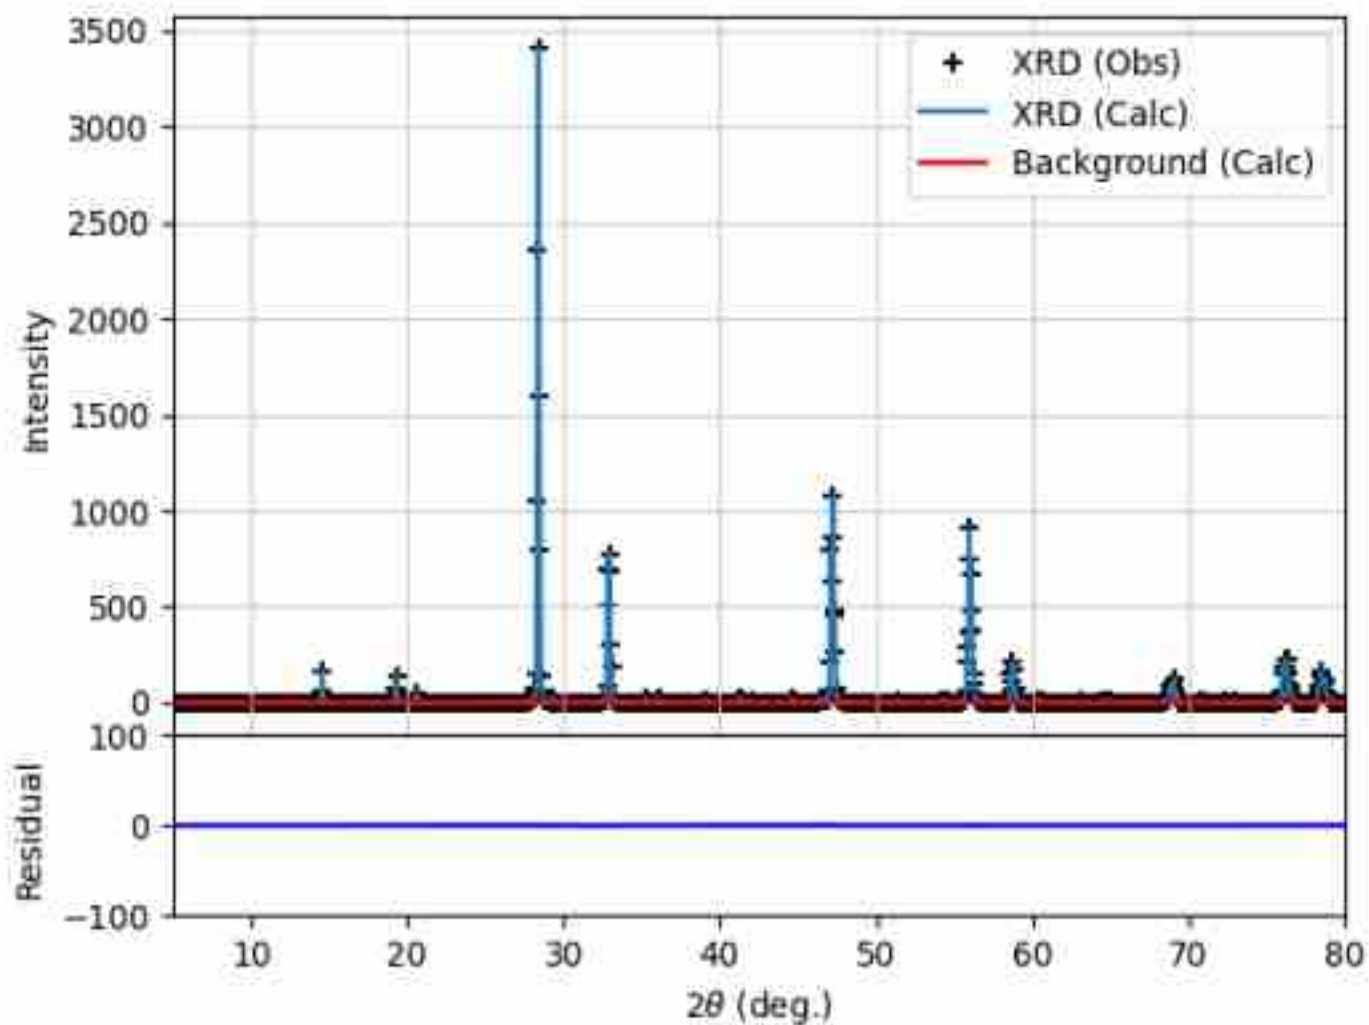

| RMSE before RR | Rwp     | RMSE after RR |
|----------------|---------|---------------|
| 0.019          | 0.18405 | 0.01311       |

# Ce8C12

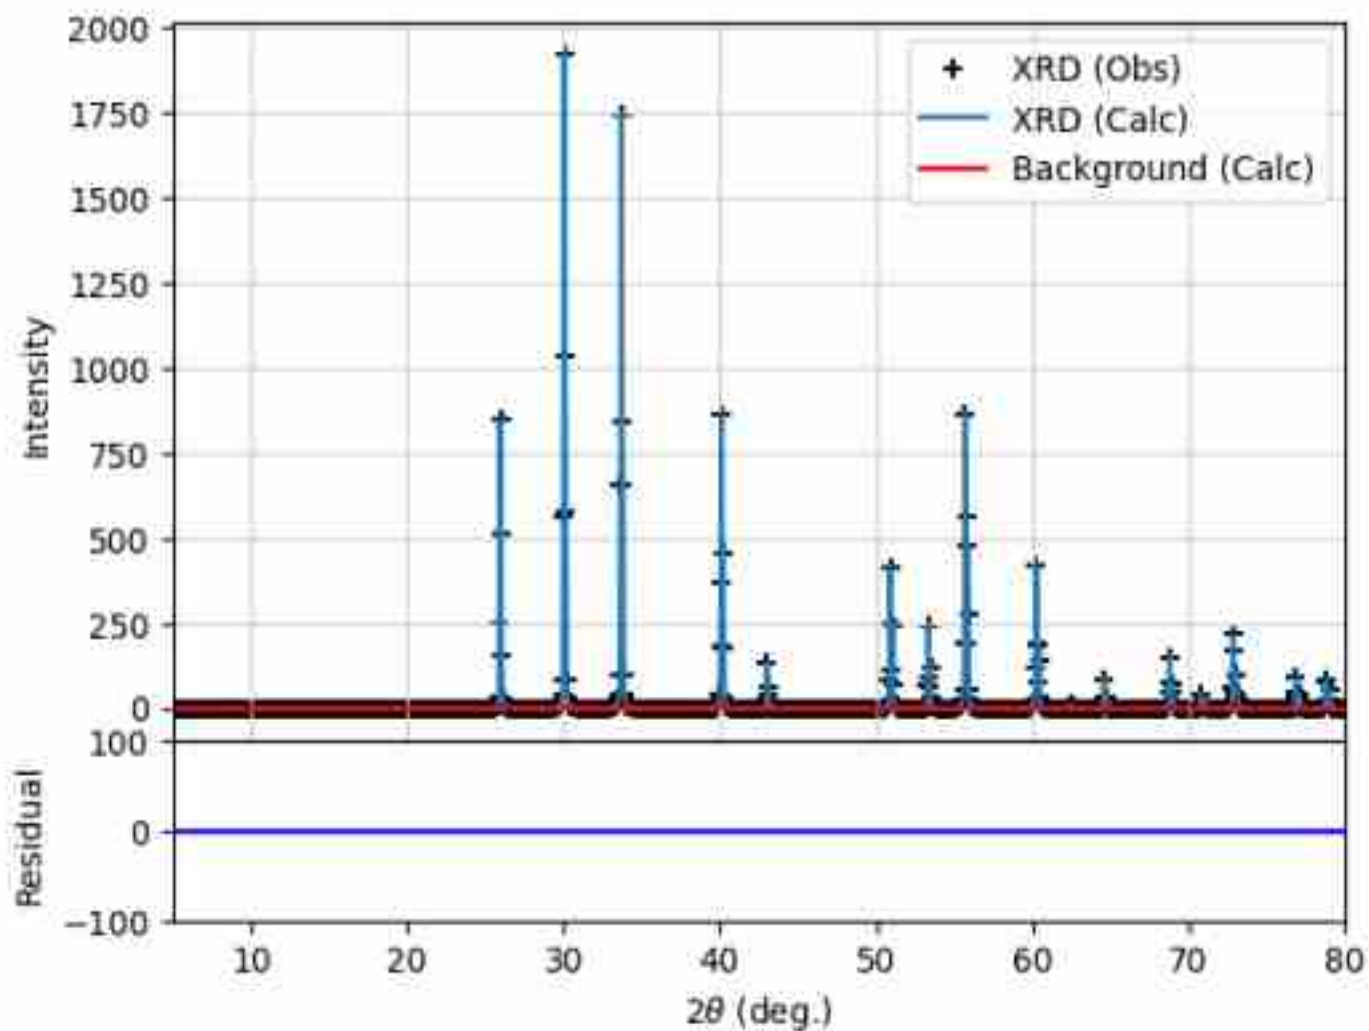

| RMSE before RR | Rwp     | RMSE after RR |
|----------------|---------|---------------|
| 0.019          | 0.01042 | 0.00298       |

# Co<sub>1</sub>Re<sub>2</sub>Mo<sub>2</sub>S<sub>8</sub>

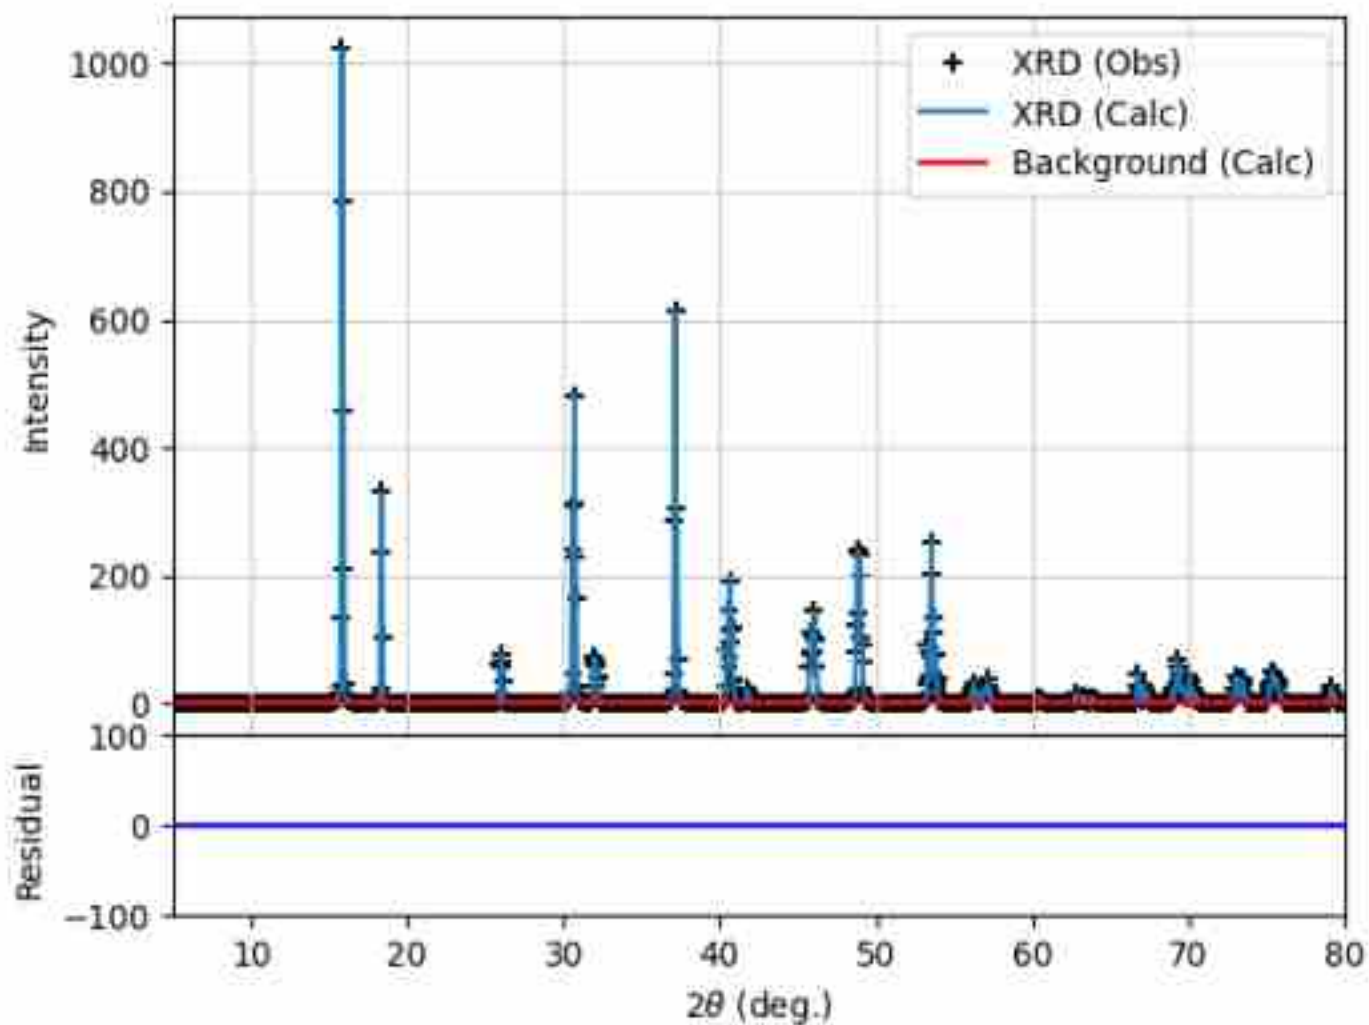

| RMSE before RR | Rwp     | RMSE after RR |
|----------------|---------|---------------|
| 0.019          | 0.00324 | 0.00088       |

# Co<sub>2</sub>As<sub>4</sub>O<sub>12</sub>

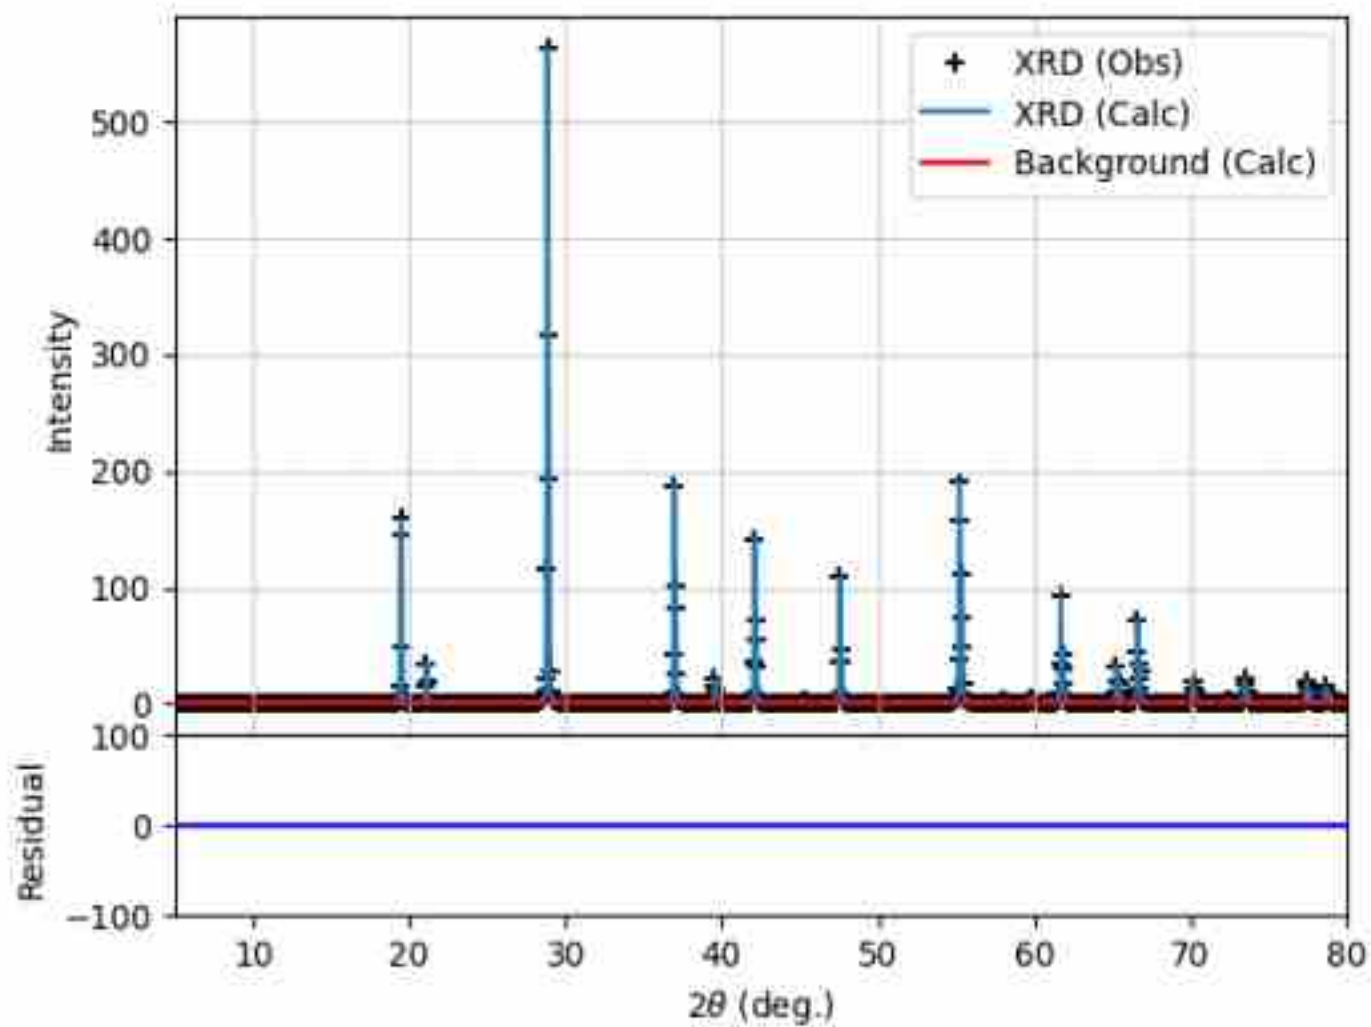

| RMSE before RR | Rwp     | RMSE after RR |
|----------------|---------|---------------|
| 0.019          | 0.00239 | 0.00095       |

# Cr<sub>2</sub>Co<sub>1</sub>Se<sub>4</sub>

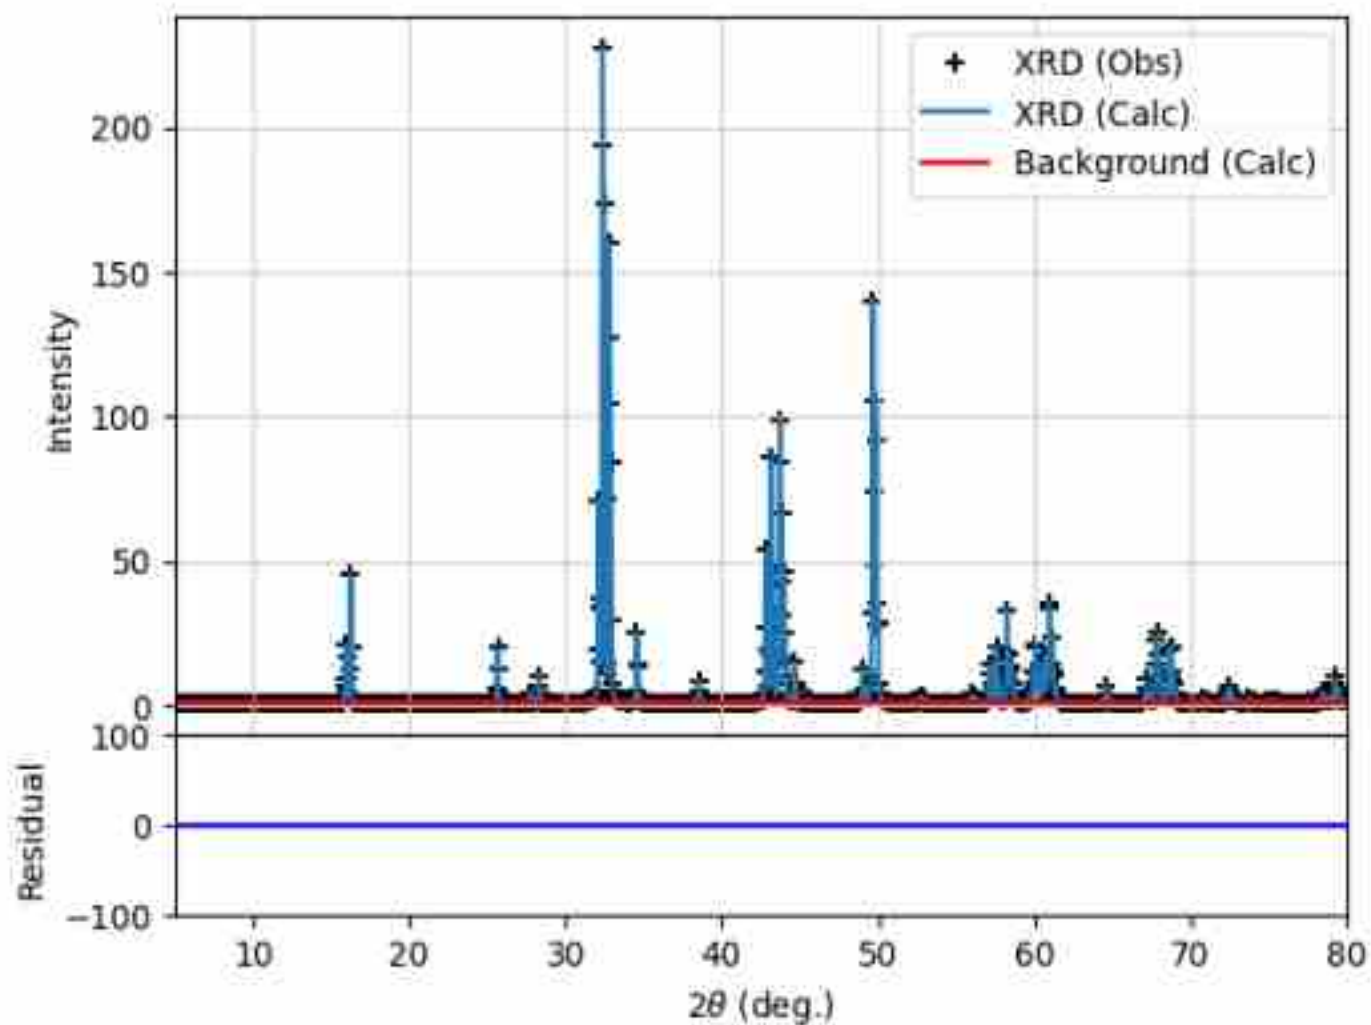

| RMSE before RR | Rwp     | RMSE after RR |
|----------------|---------|---------------|
| 0.019          | 0.00411 | 0.0003        |



# Cr<sub>2</sub>O<sub>4</sub>

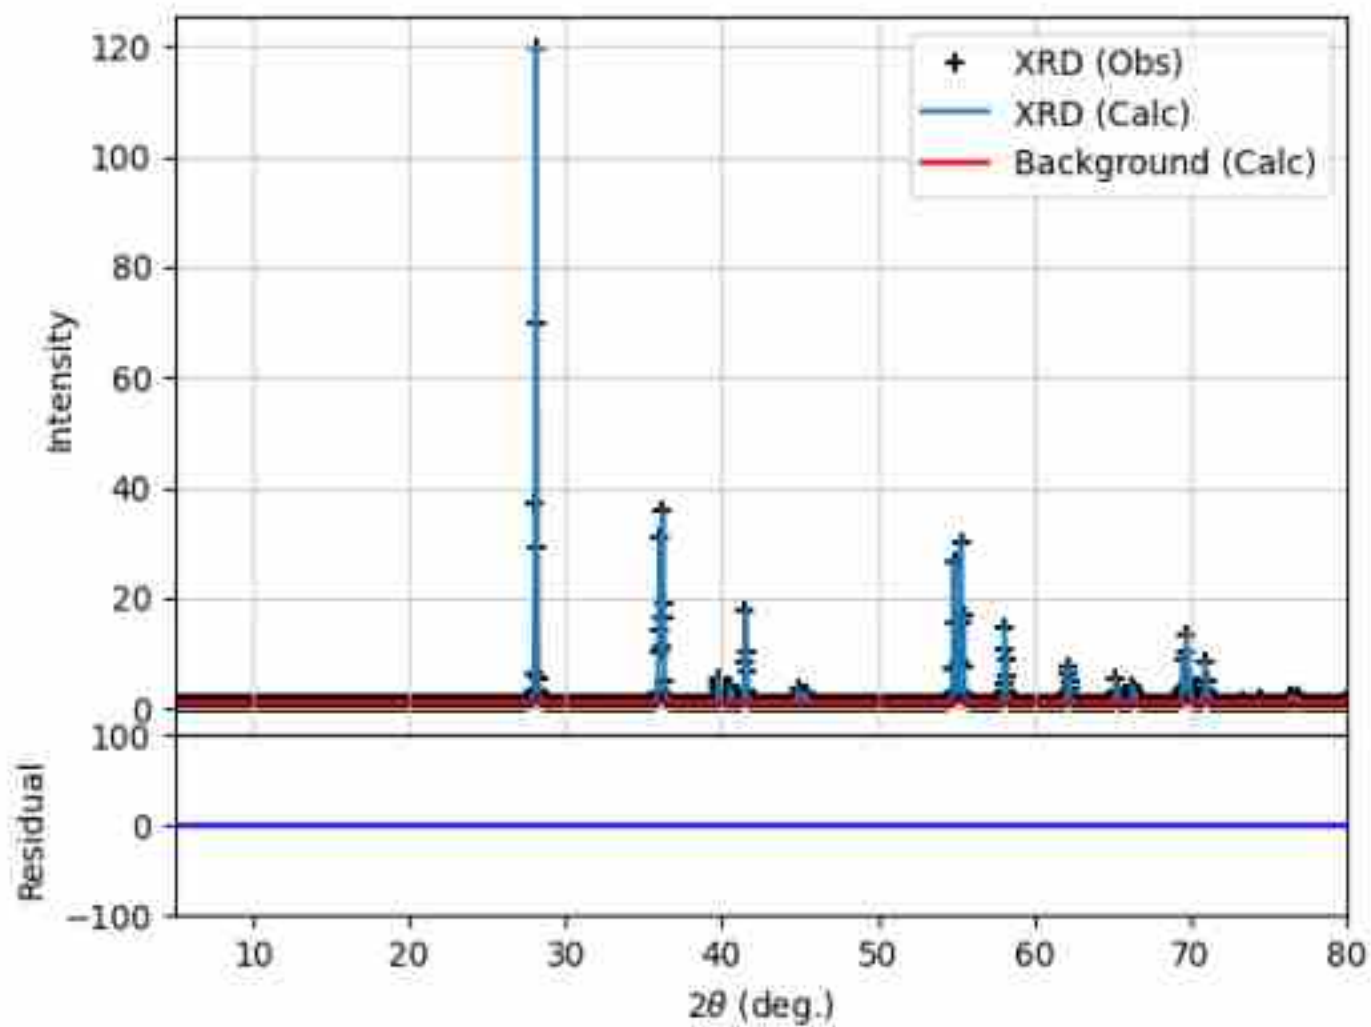

| RMSE before RR | Rwp     | RMSE after RR |
|----------------|---------|---------------|
| 0.019          | 0.00137 | 0.00056       |

# Cr<sub>4</sub>Cd<sub>1</sub>Fe<sub>1</sub>S<sub>8</sub>

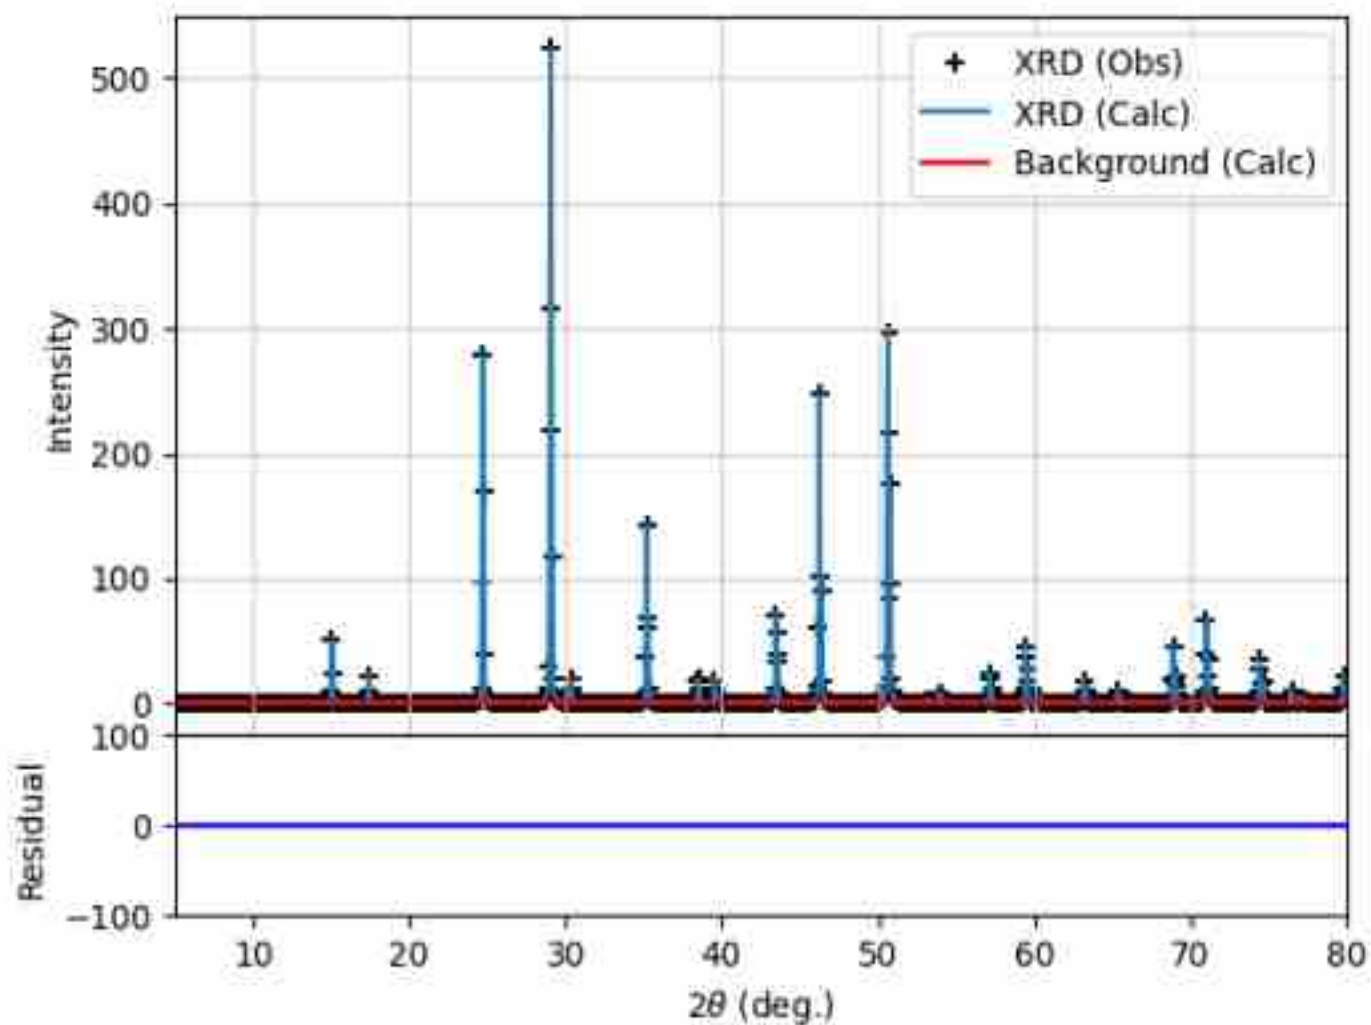

| RMSE before RR | Rwp     | RMSE after RR |
|----------------|---------|---------------|
| 0.019          | 0.07768 | 0.00525       |

# Cr<sub>4</sub>In<sub>1</sub>Ag<sub>1</sub>S<sub>8</sub>

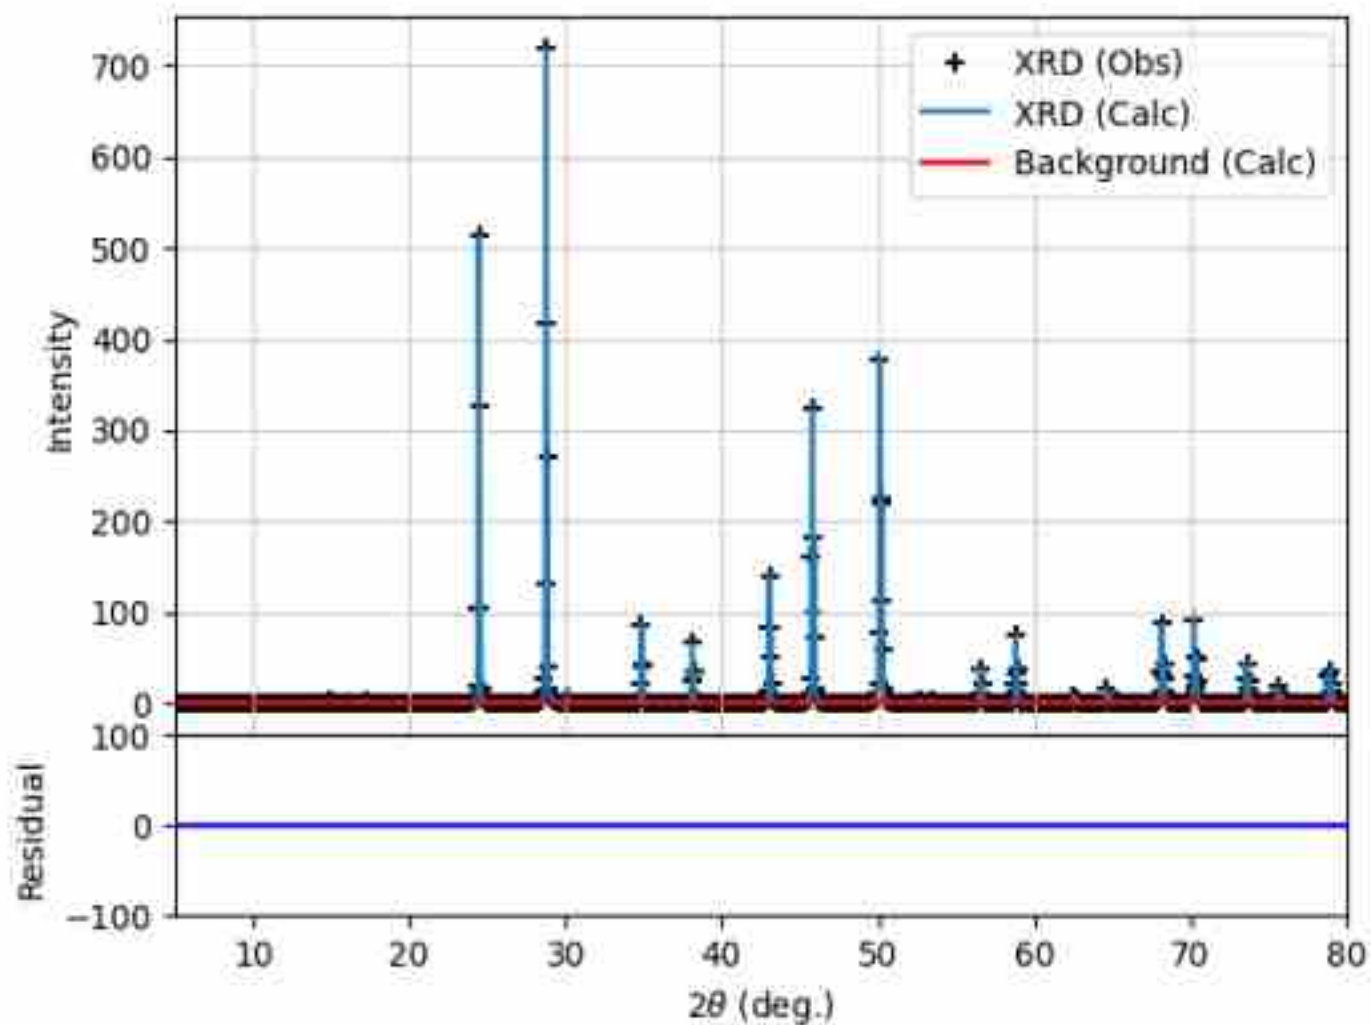

| RMSE before RR | Rwp     | RMSE after RR |
|----------------|---------|---------------|
| 0.019          | 0.07284 | 0.0053        |

# Cs1Rb2Al1F6

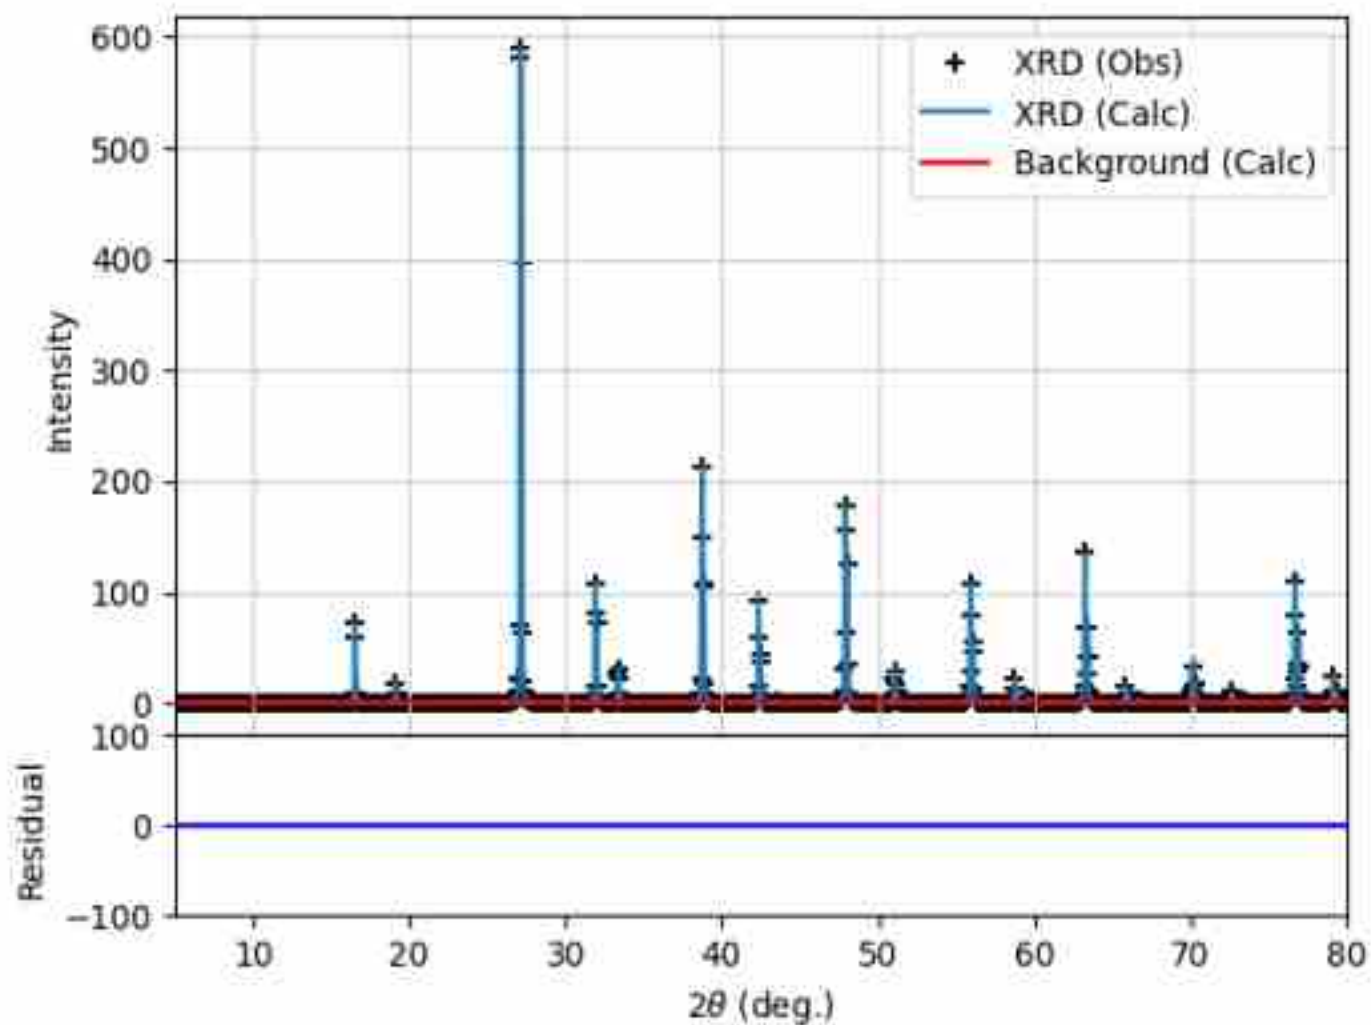

| RMSE before RR | Rwp    | RMSE after RR |
|----------------|--------|---------------|
| 0.019          | 0.1041 | 0.00981       |

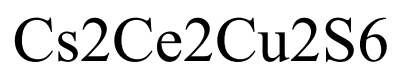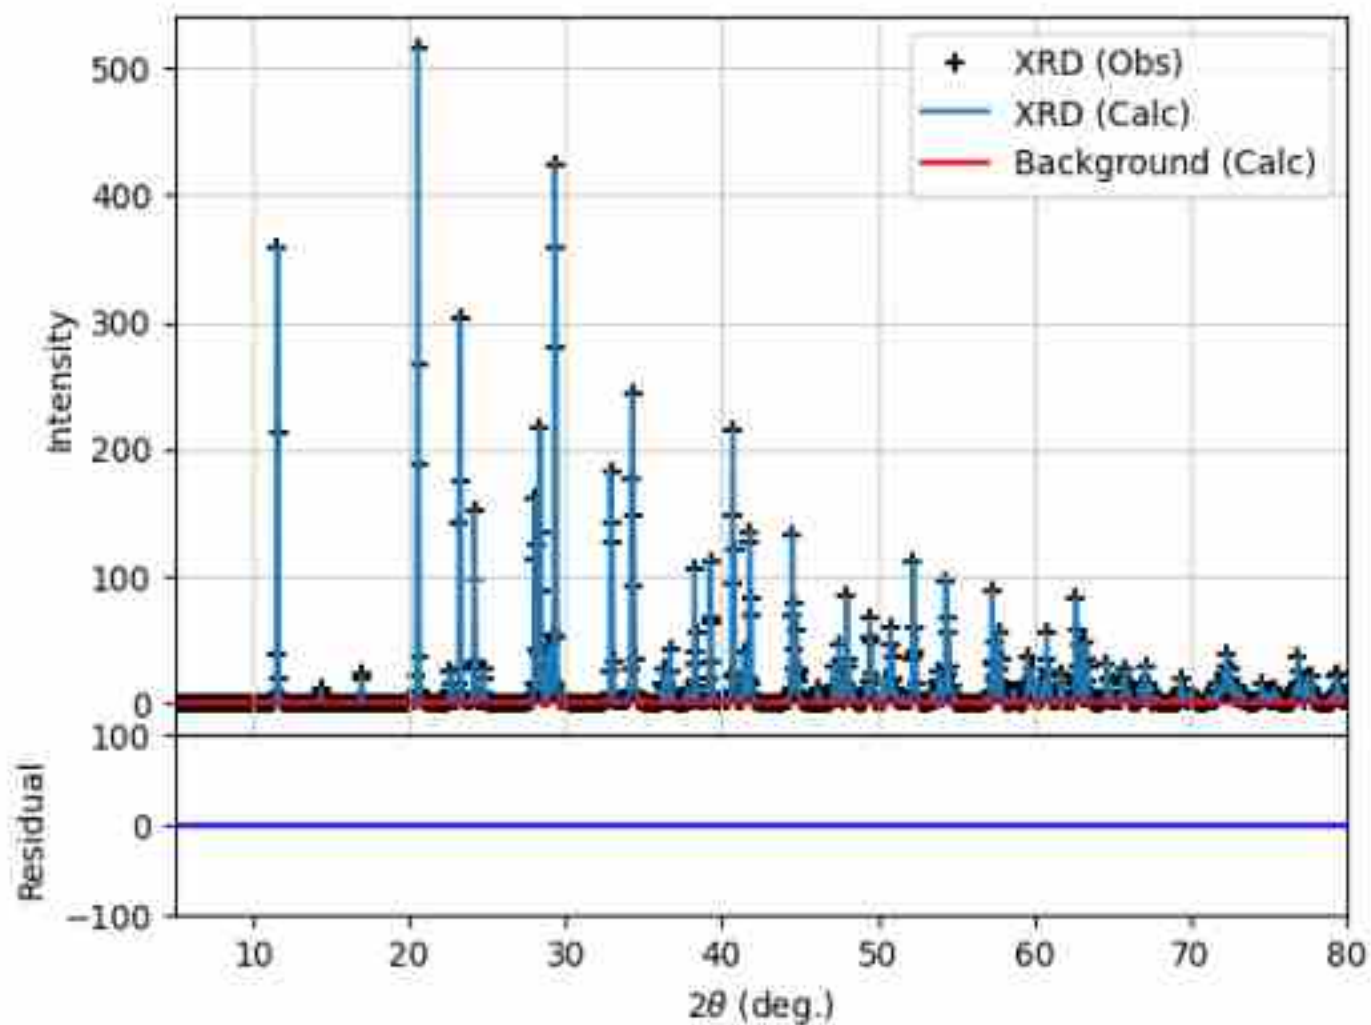

| RMSE before RR | Rwp    | RMSE after RR |
|----------------|--------|---------------|
| 0.019          | 0.0039 | 0.00073       |

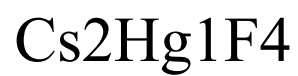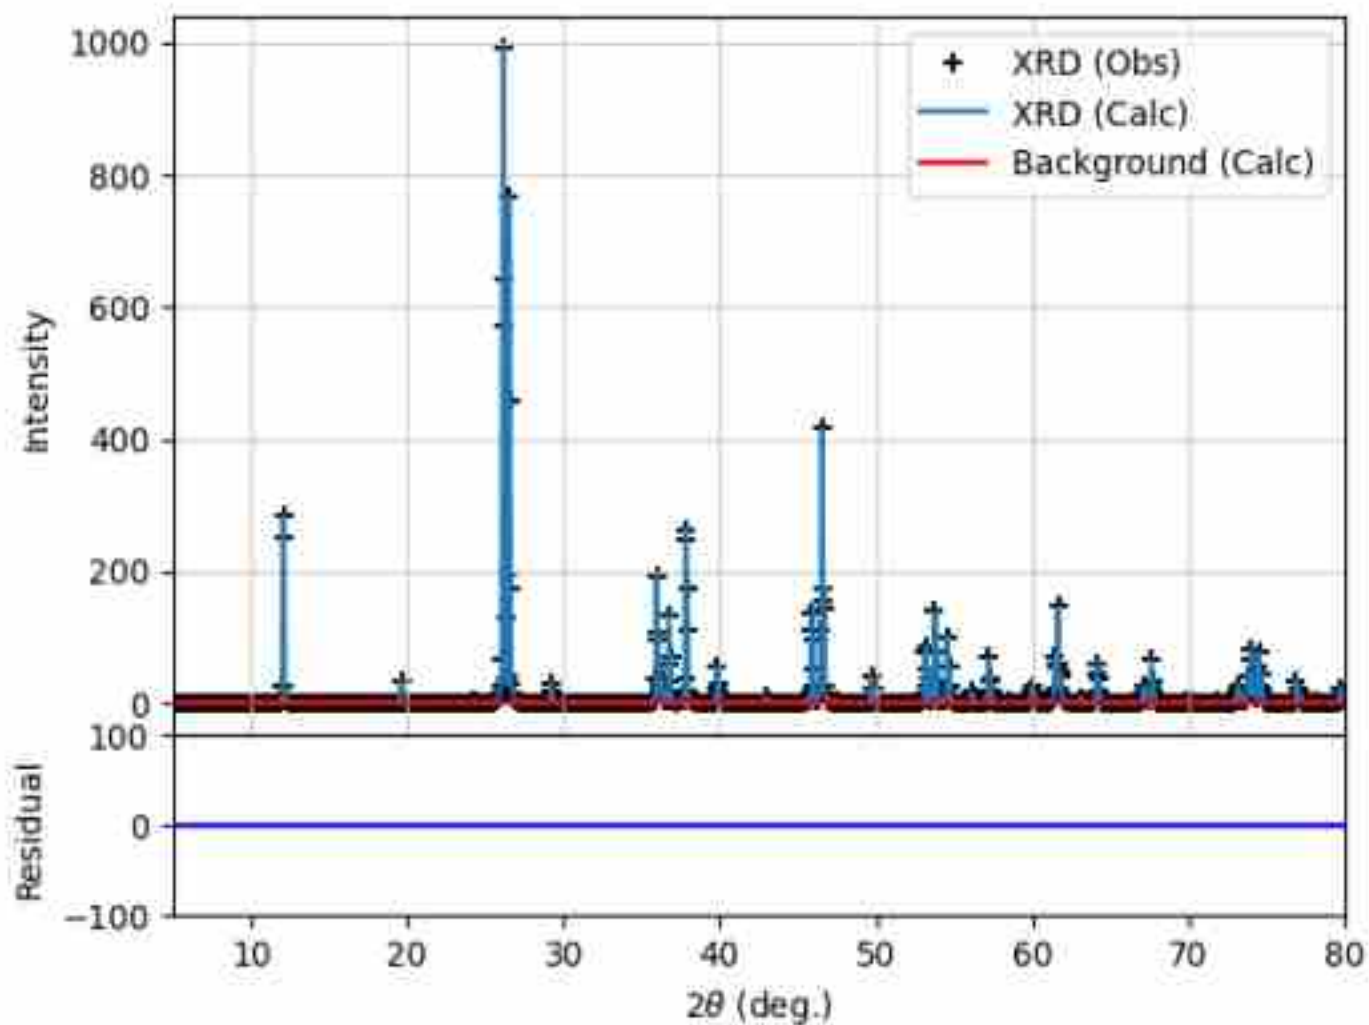

| RMSE before RR | Rwp     | RMSE after RR |
|----------------|---------|---------------|
| 0.019          | 0.00302 | 0.00071       |

# Cs<sub>2</sub>P<sub>2</sub>S<sub>6</sub>

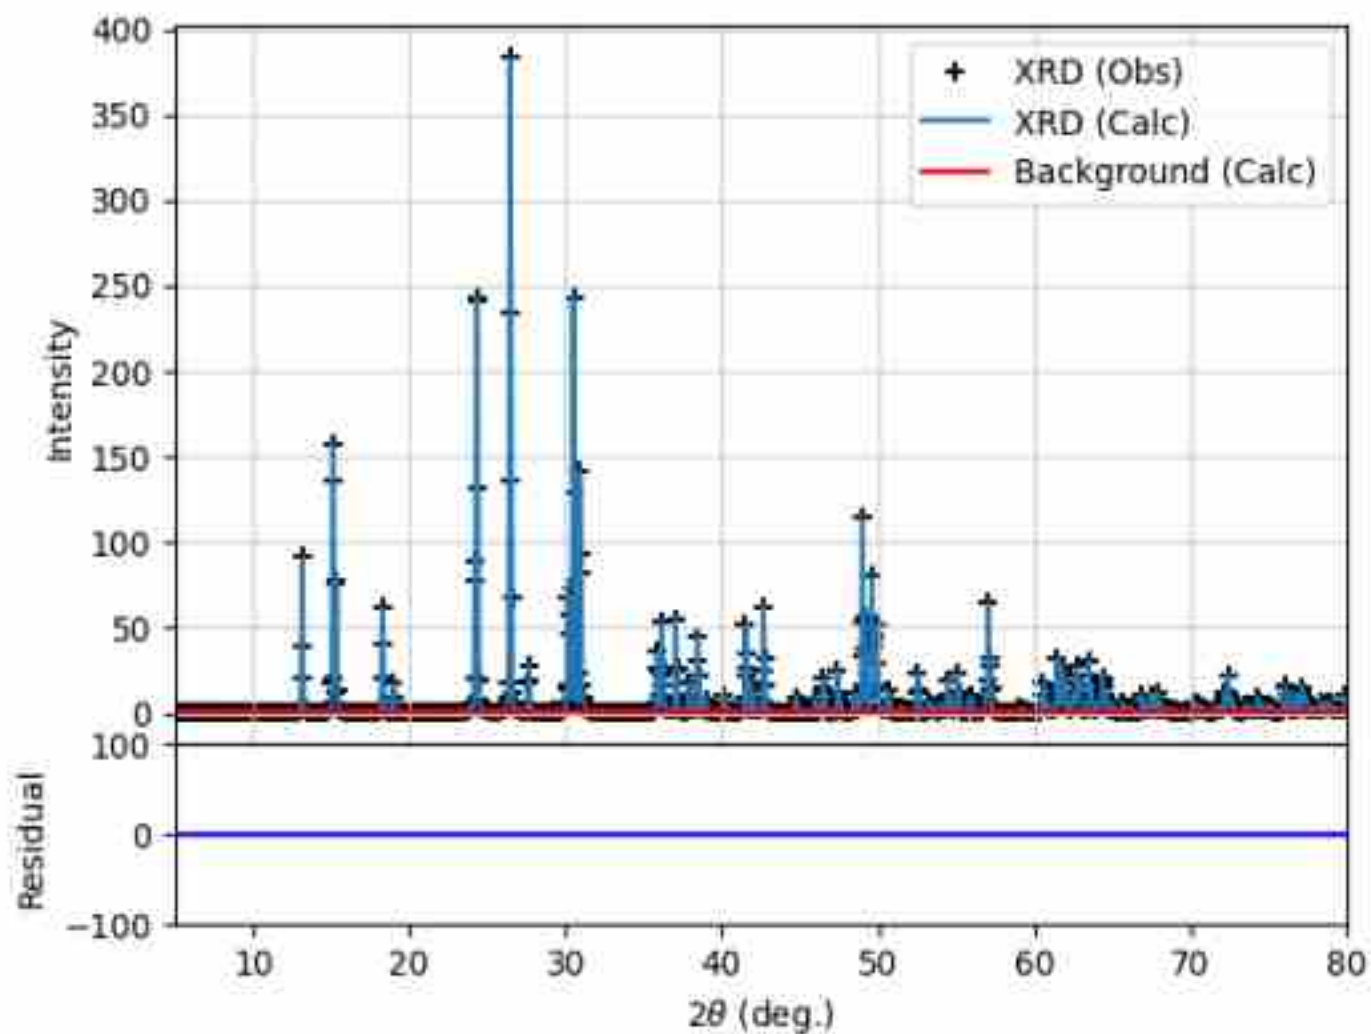

| RMSE before RR | Rwp     | RMSE after RR |
|----------------|---------|---------------|
| 0.019          | 0.00294 | 0.00041       |

# Cs<sub>2</sub>Tm<sub>2</sub>Co<sub>2</sub>S<sub>6</sub>

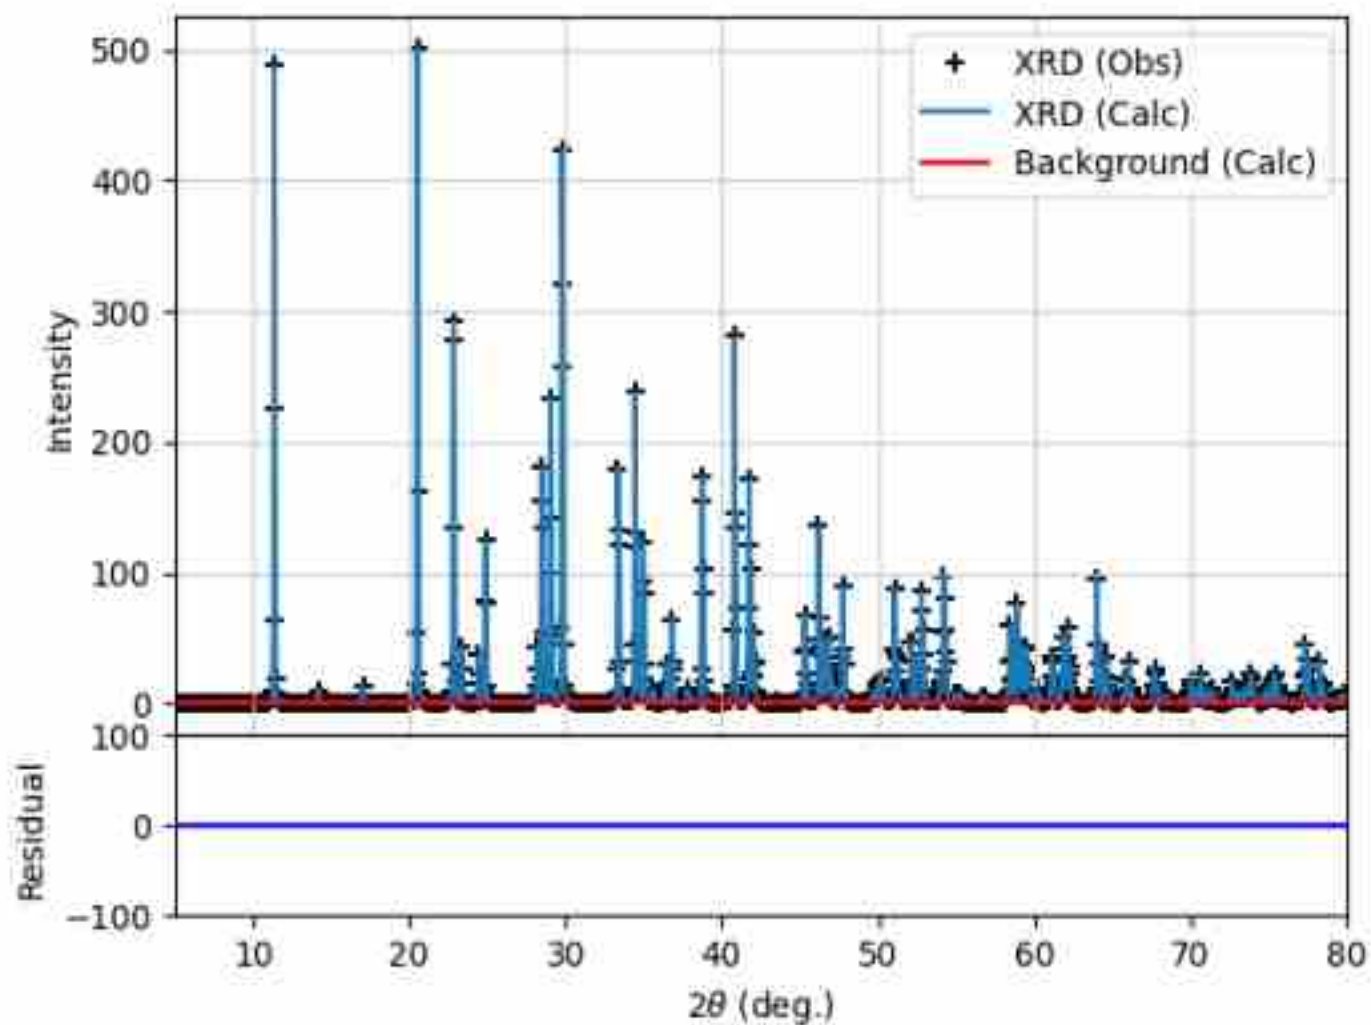

| RMSE before RR | Rwp     | RMSE after RR |
|----------------|---------|---------------|
| 0.019          | 0.00391 | 0.00088       |



# $\text{Cu}_3\text{Ag}_3\text{P}_2\text{S}_8$

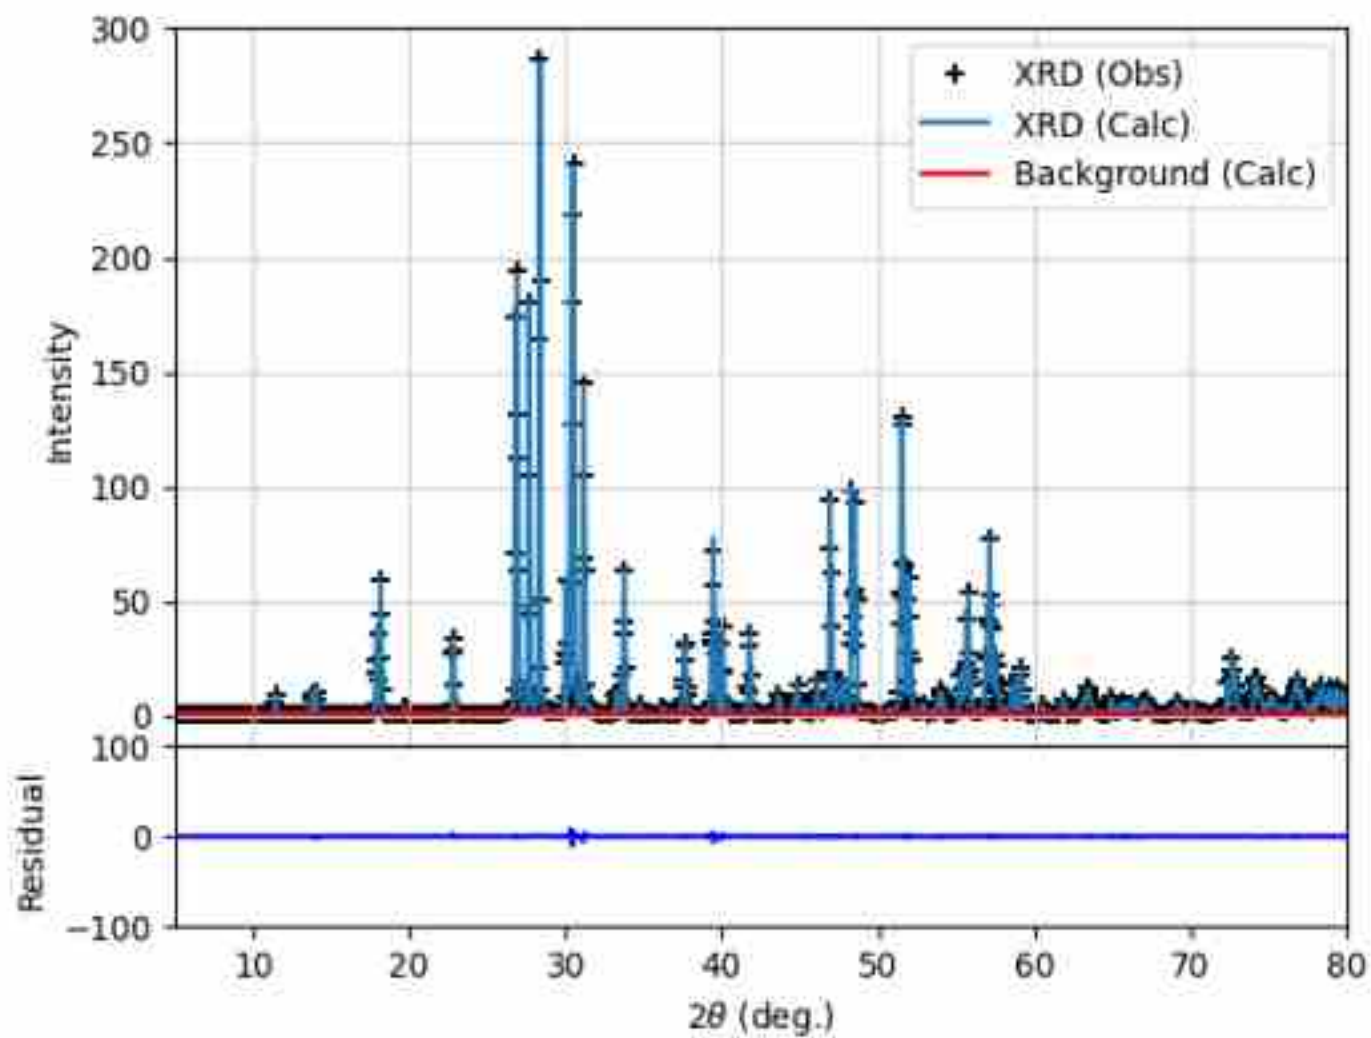

| RMSE before RR | Rwp     | RMSE after RR |
|----------------|---------|---------------|
| 0.019          | 3.61315 | 0.02491       |

# Dy1Cu5

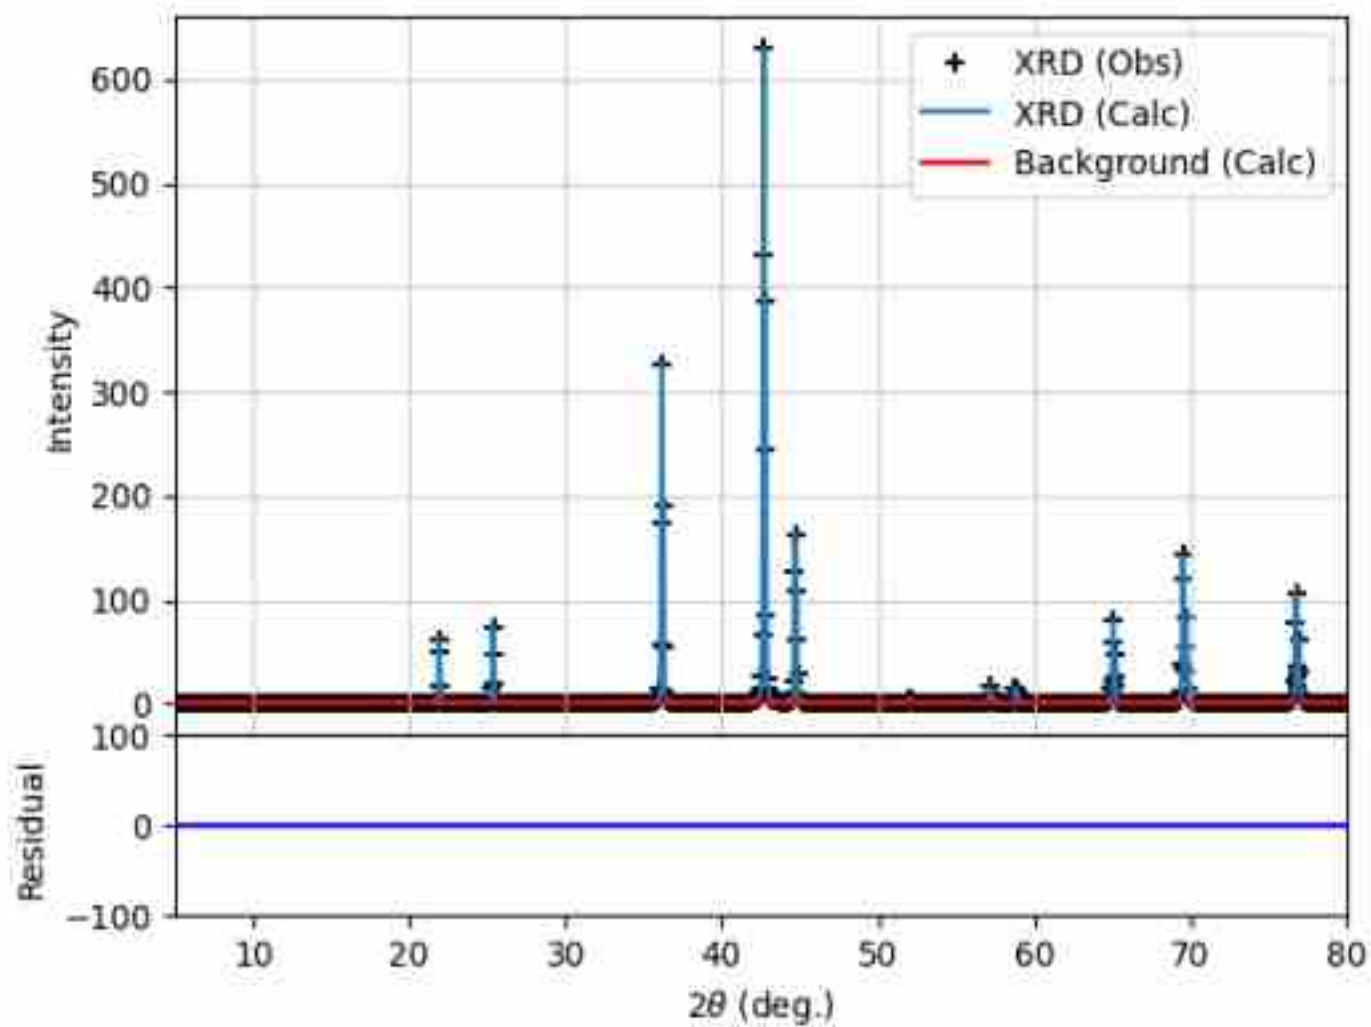

| RMSE before RR | Rwp     | RMSE after RR |
|----------------|---------|---------------|
| 0.019          | 0.02095 | 0.00262       |

# Dy<sub>1</sub>V<sub>2</sub>Co<sub>10</sub>

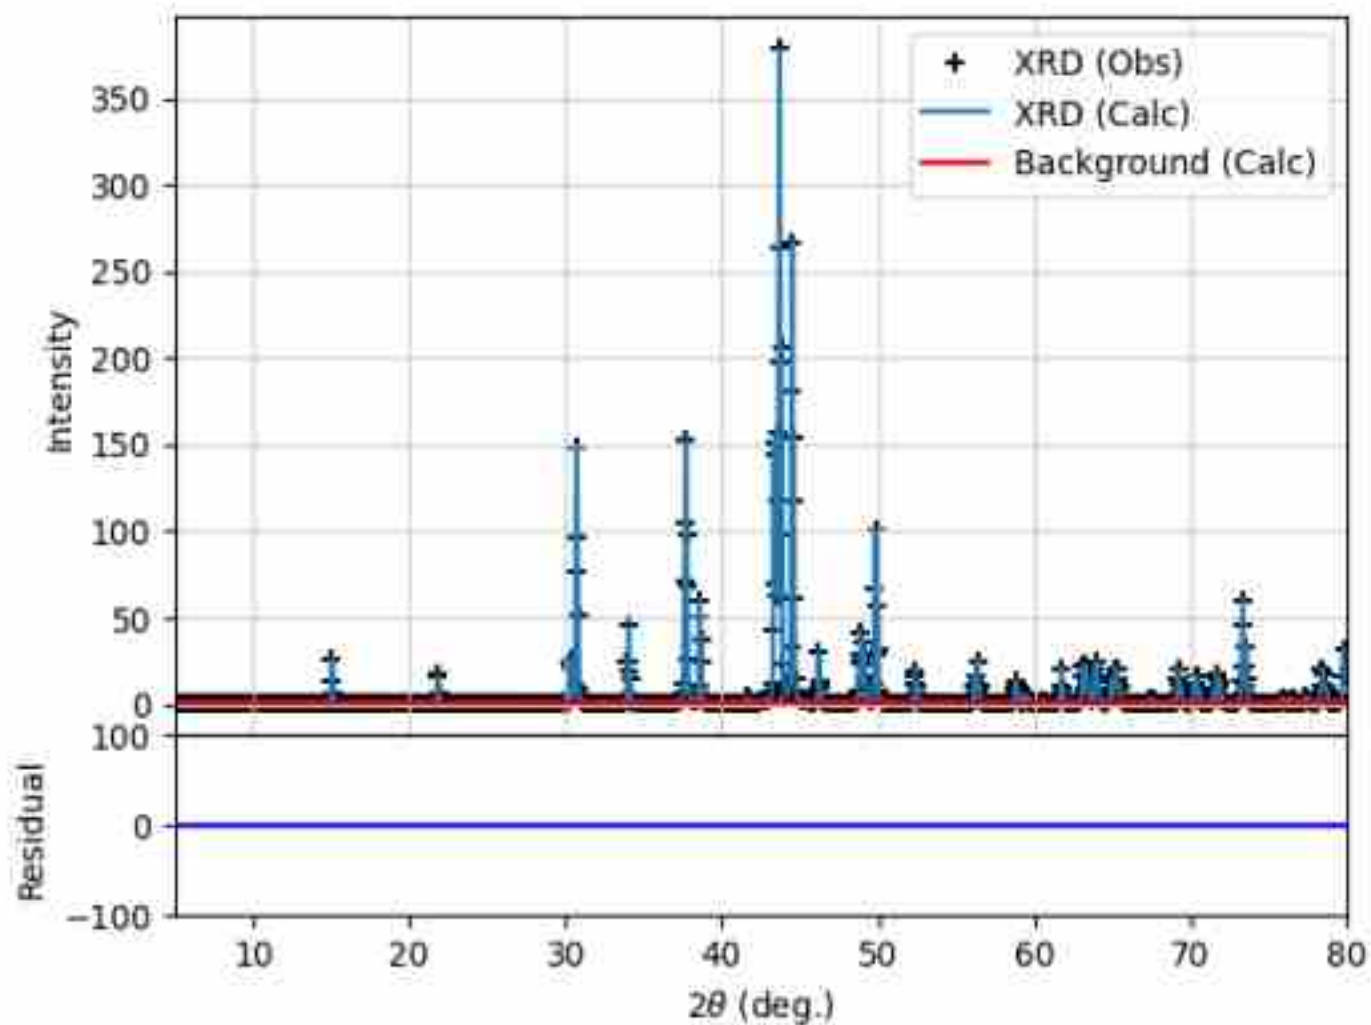

| RMSE before RR | Rwp     | RMSE after RR |
|----------------|---------|---------------|
| 0.019          | 0.00223 | 0.00032       |

# Dy<sub>2</sub>Ga<sub>8</sub>Ni<sub>2</sub>

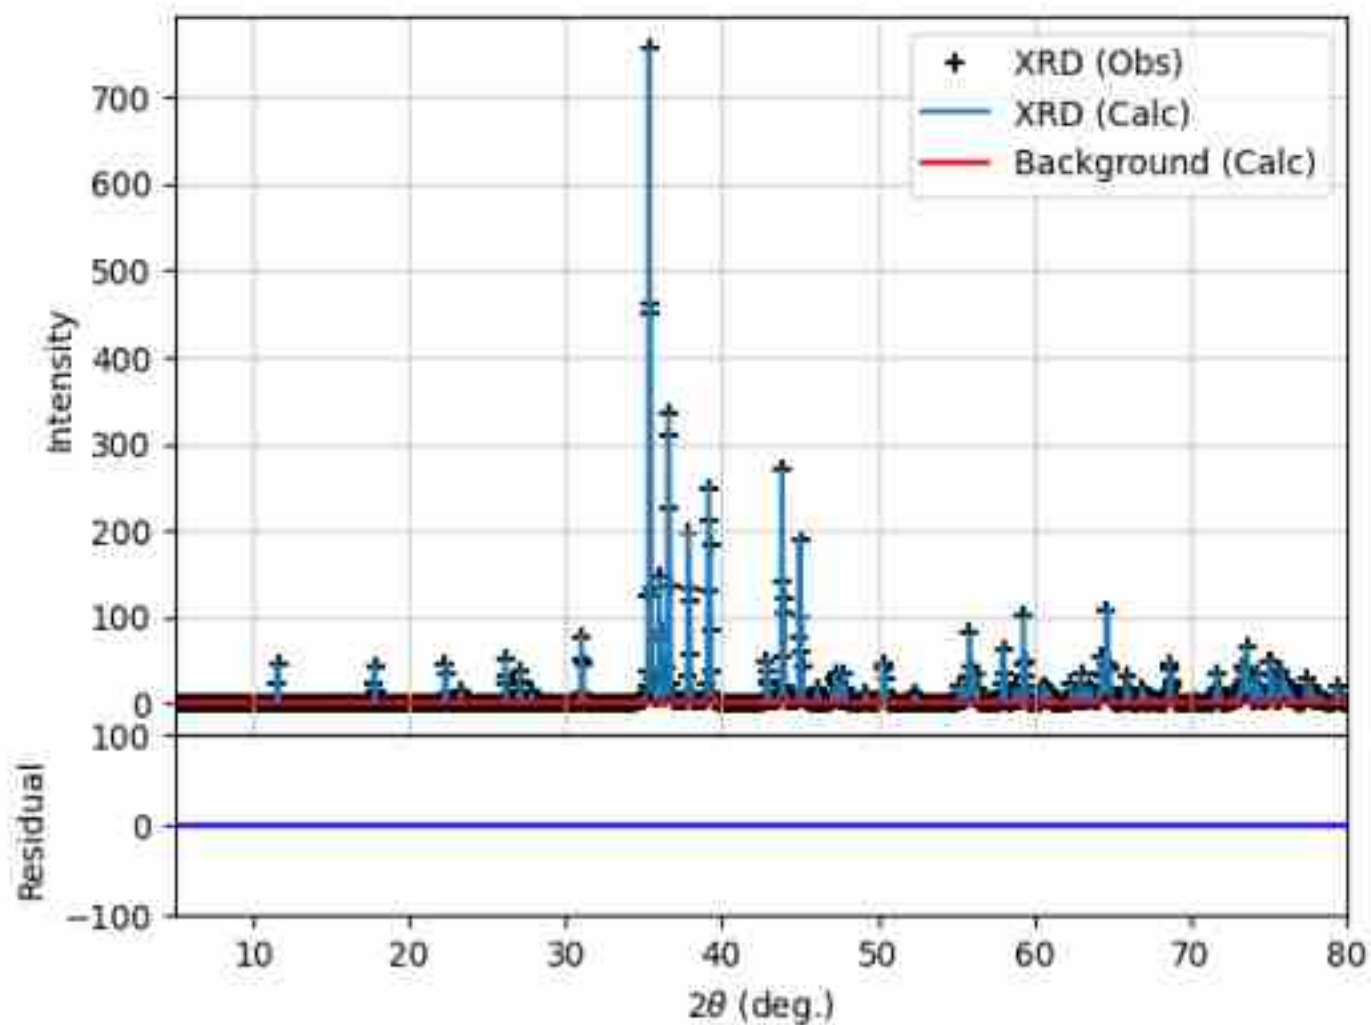

| RMSE before RR | Rwp     | RMSE after RR |
|----------------|---------|---------------|
| 0.019          | 0.00409 | 0.0005        |

# Dy<sub>8</sub>Re<sub>4</sub>C<sub>8</sub>

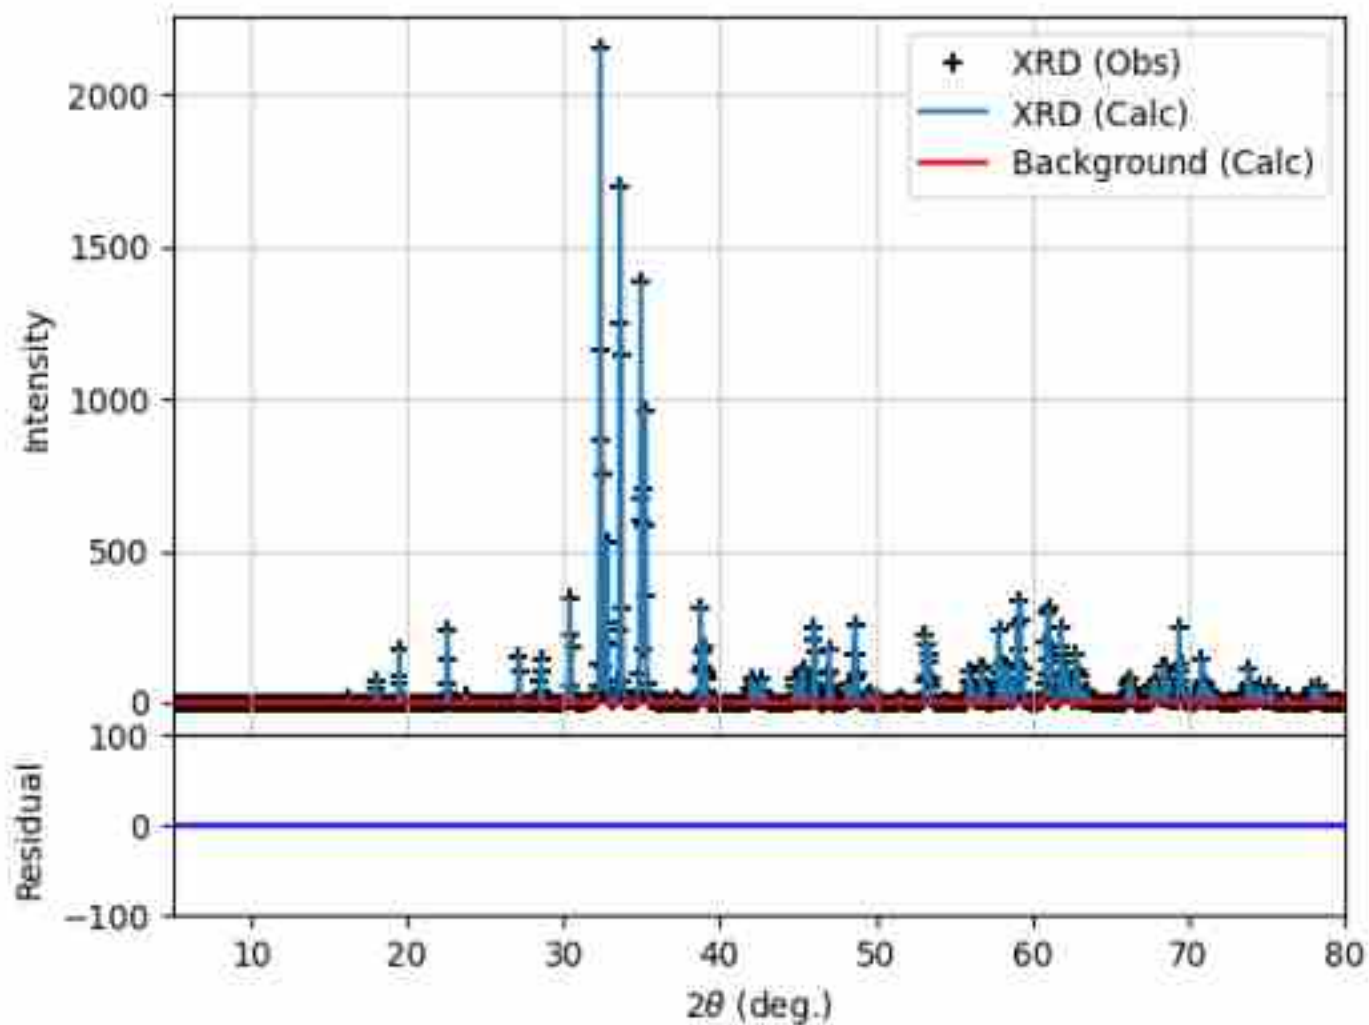

| RMSE before RR | Rwp     | RMSE after RR |
|----------------|---------|---------------|
| 0.019          | 0.00519 | 0.00266       |

# Dy10Ru4

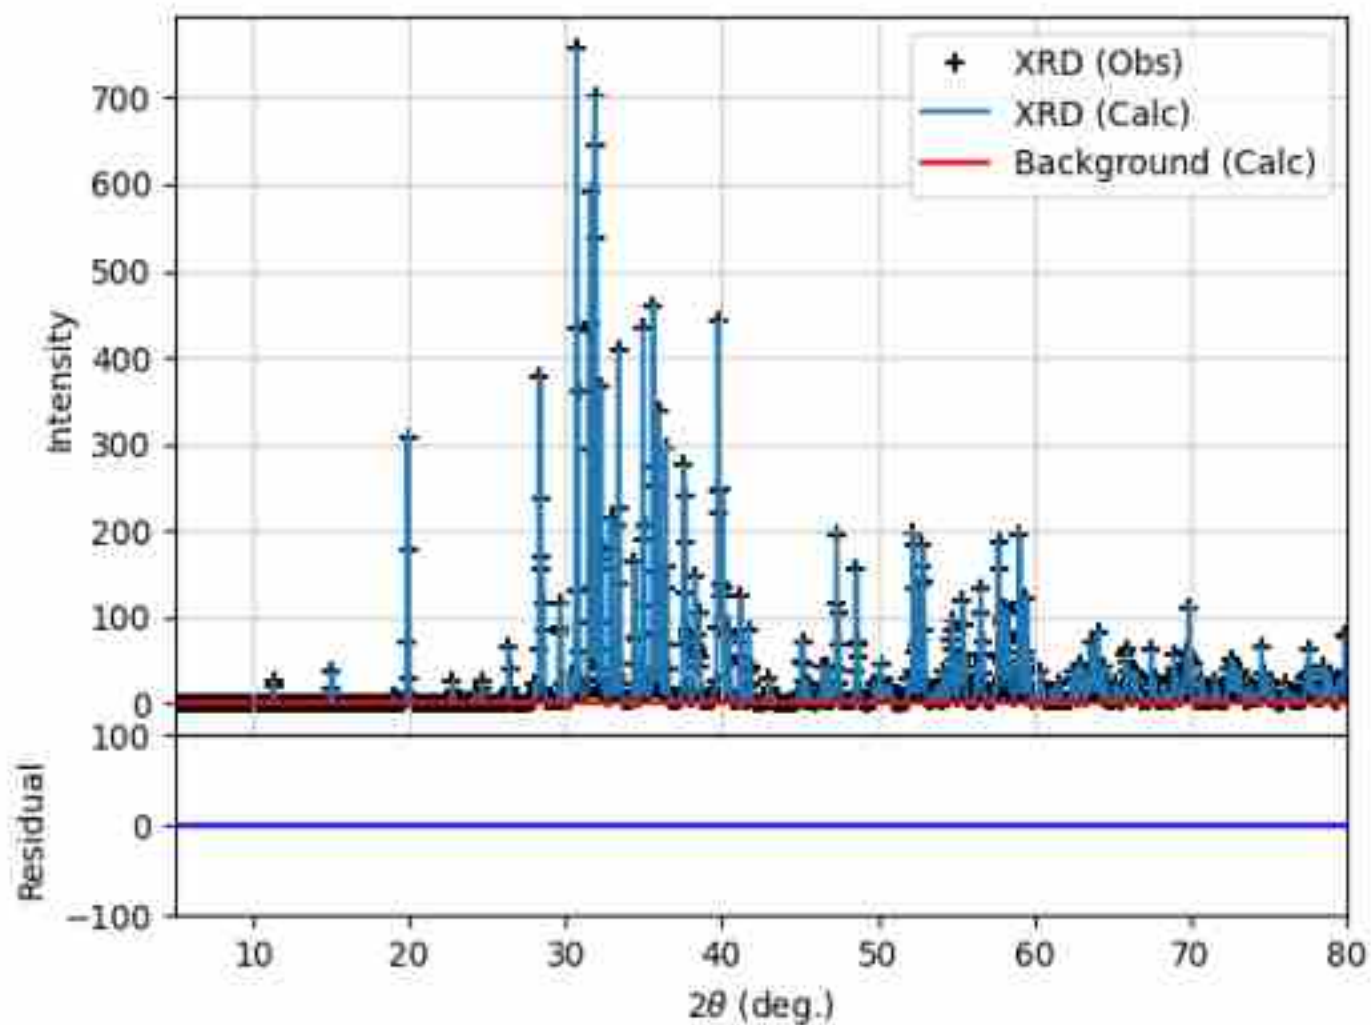

| RMSE before RR | Rwp     | RMSE after RR |
|----------------|---------|---------------|
| 0.019          | 0.00367 | 0.00021       |

# Dy<sub>12</sub>Co<sub>4</sub>Sn<sub>2</sub>

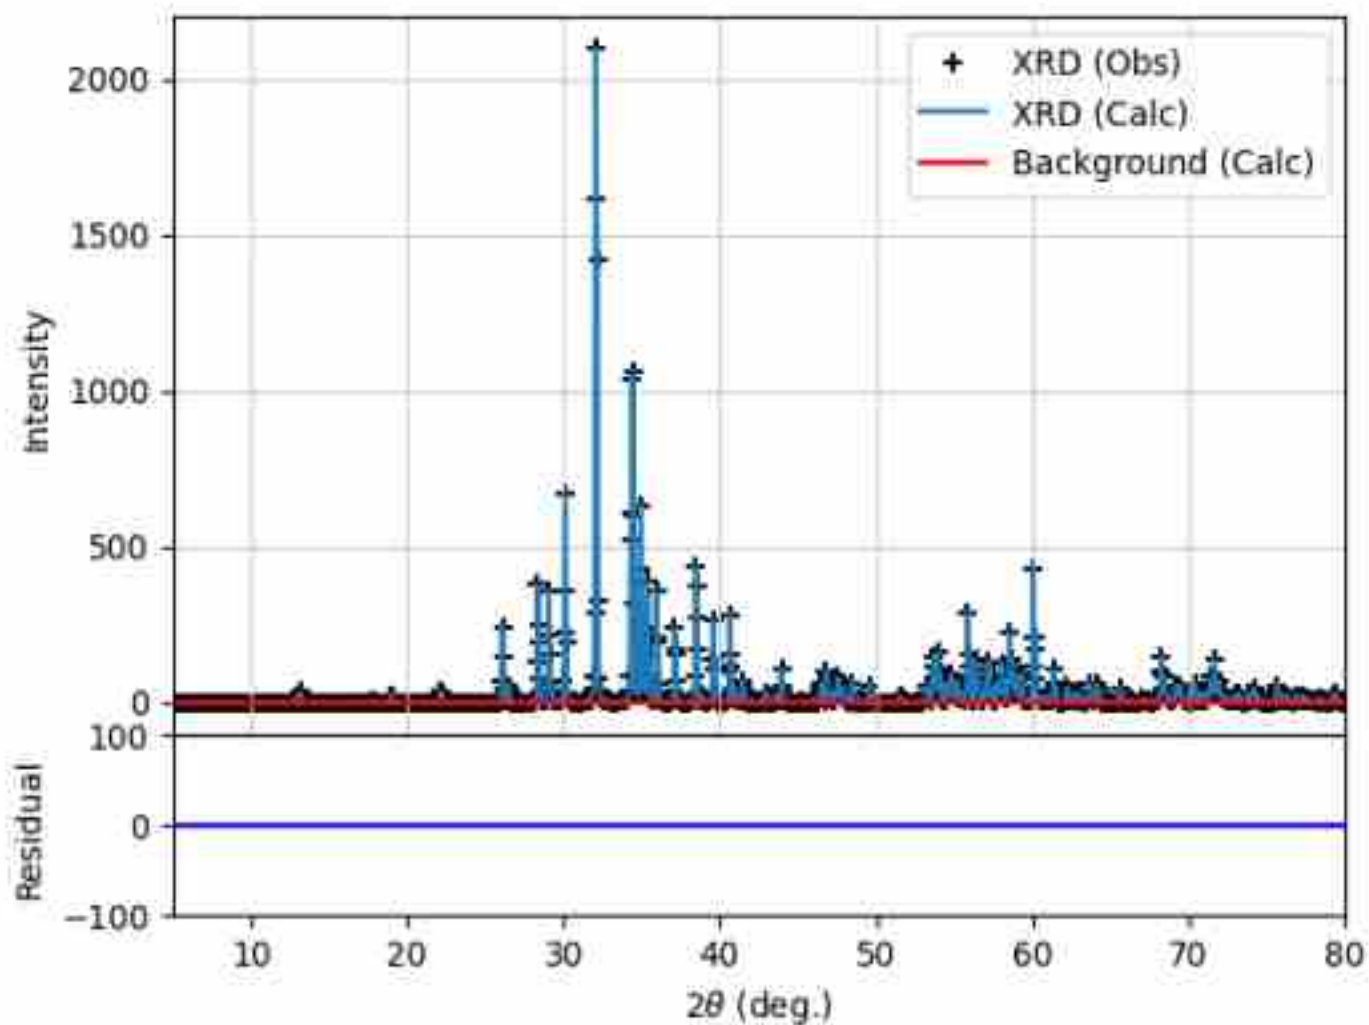

| RMSE before RR | Rwp     | RMSE after RR |
|----------------|---------|---------------|
| 0.019          | 0.00362 | 0.00025       |

# Dy<sub>12</sub>Ni<sub>4</sub>Sn<sub>2</sub>

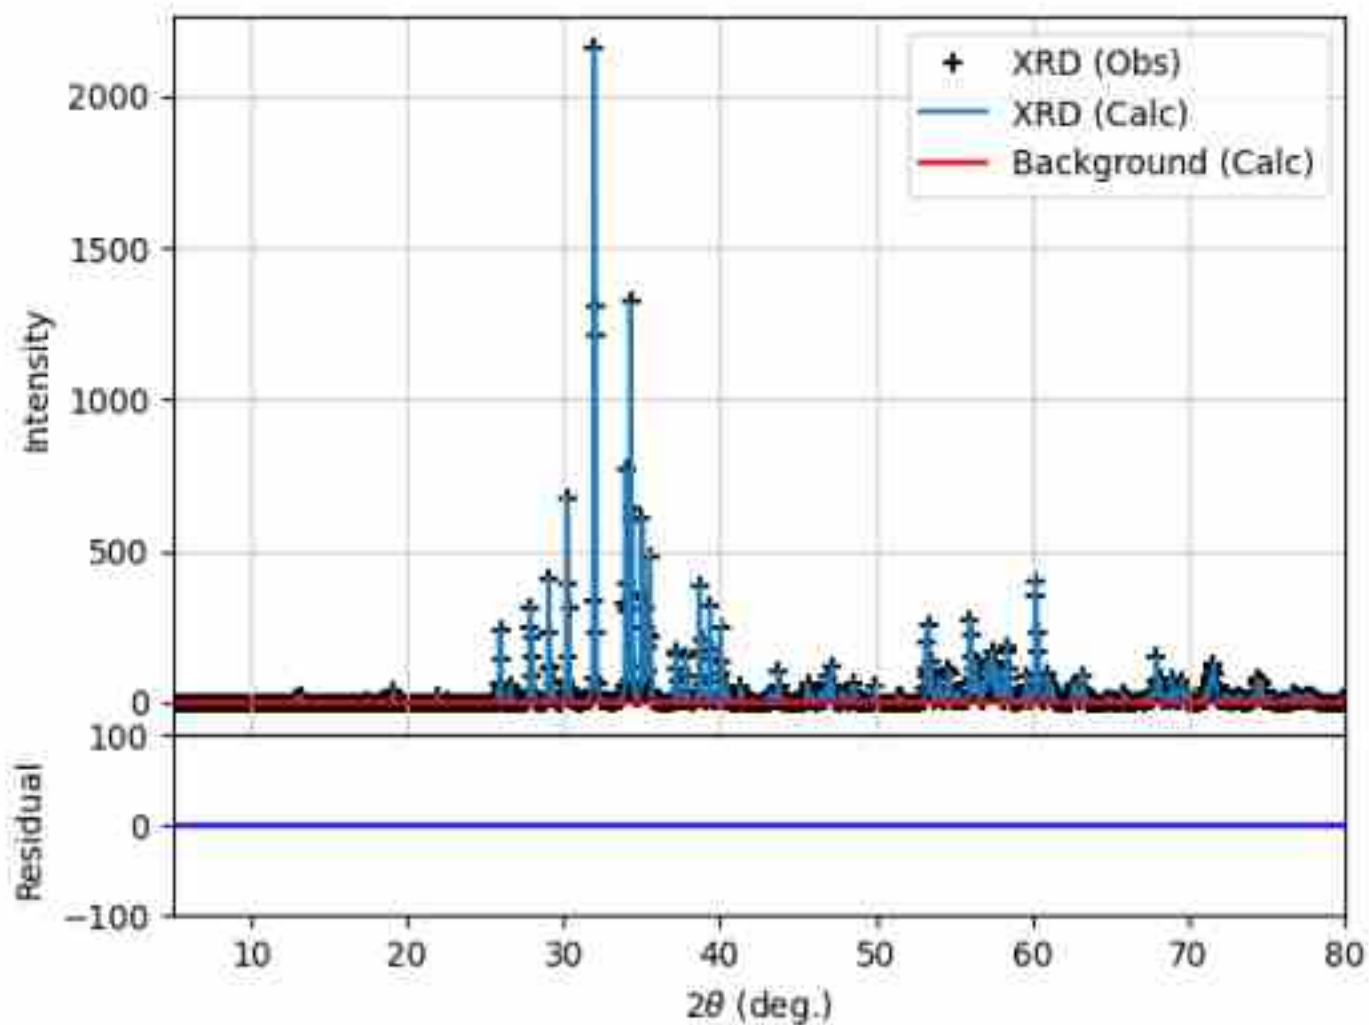

| RMSE before RR | Rwp     | RMSE after RR |
|----------------|---------|---------------|
| 0.019          | 0.00332 | 0.00042       |



# Er1Cu1W2O8

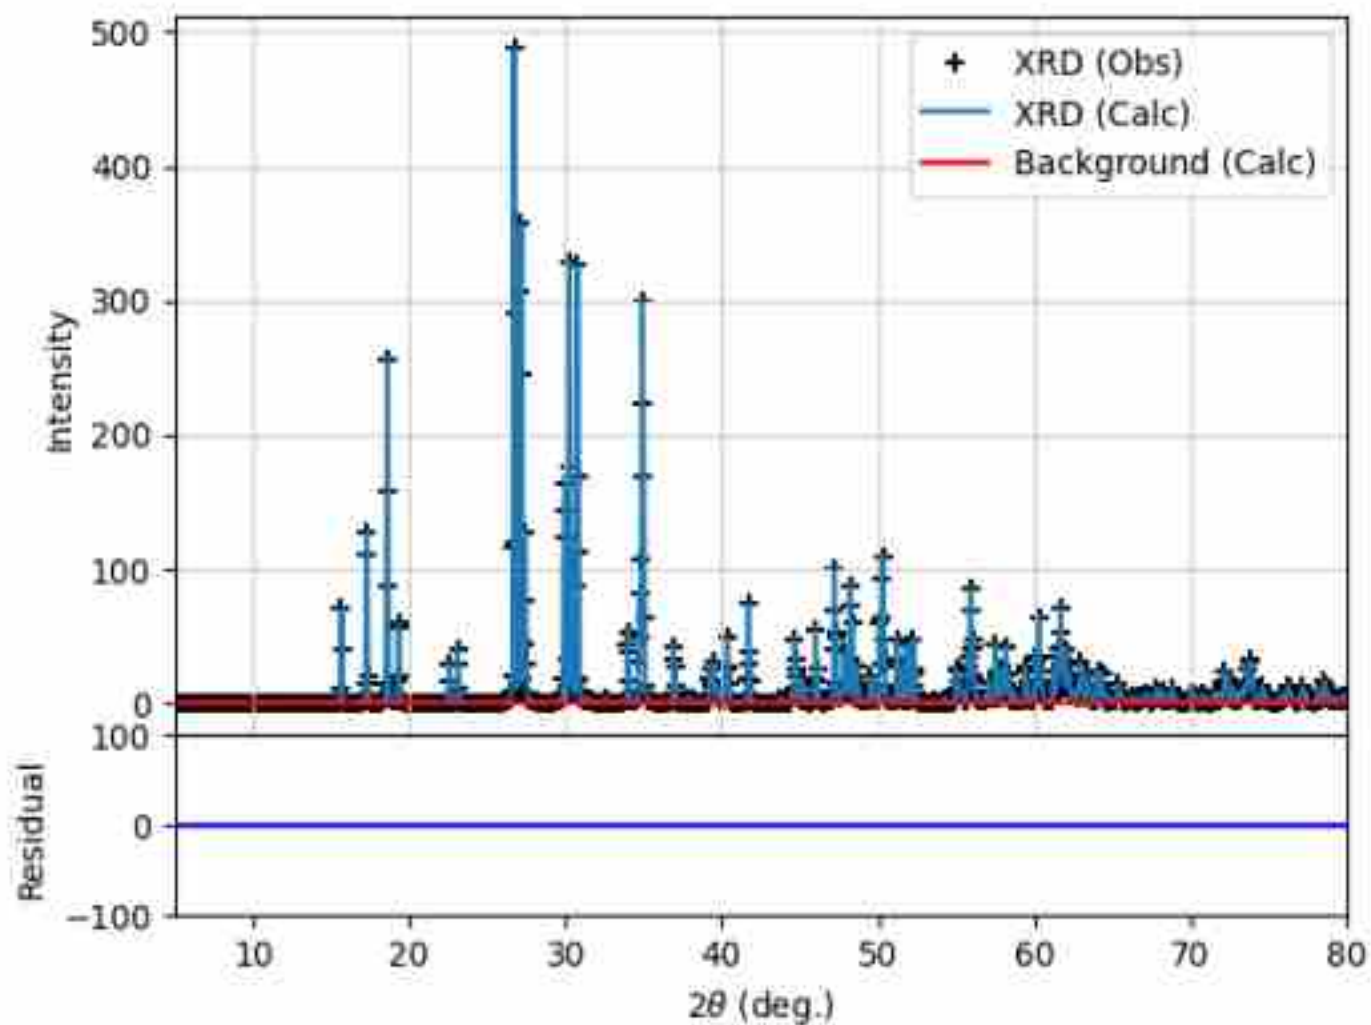

| RMSE before RR | Rwp   | RMSE after RR |
|----------------|-------|---------------|
| 0.019          | 6e-05 | 0.00013       |

# Er<sub>1</sub>Mn<sub>4</sub>Al<sub>8</sub>

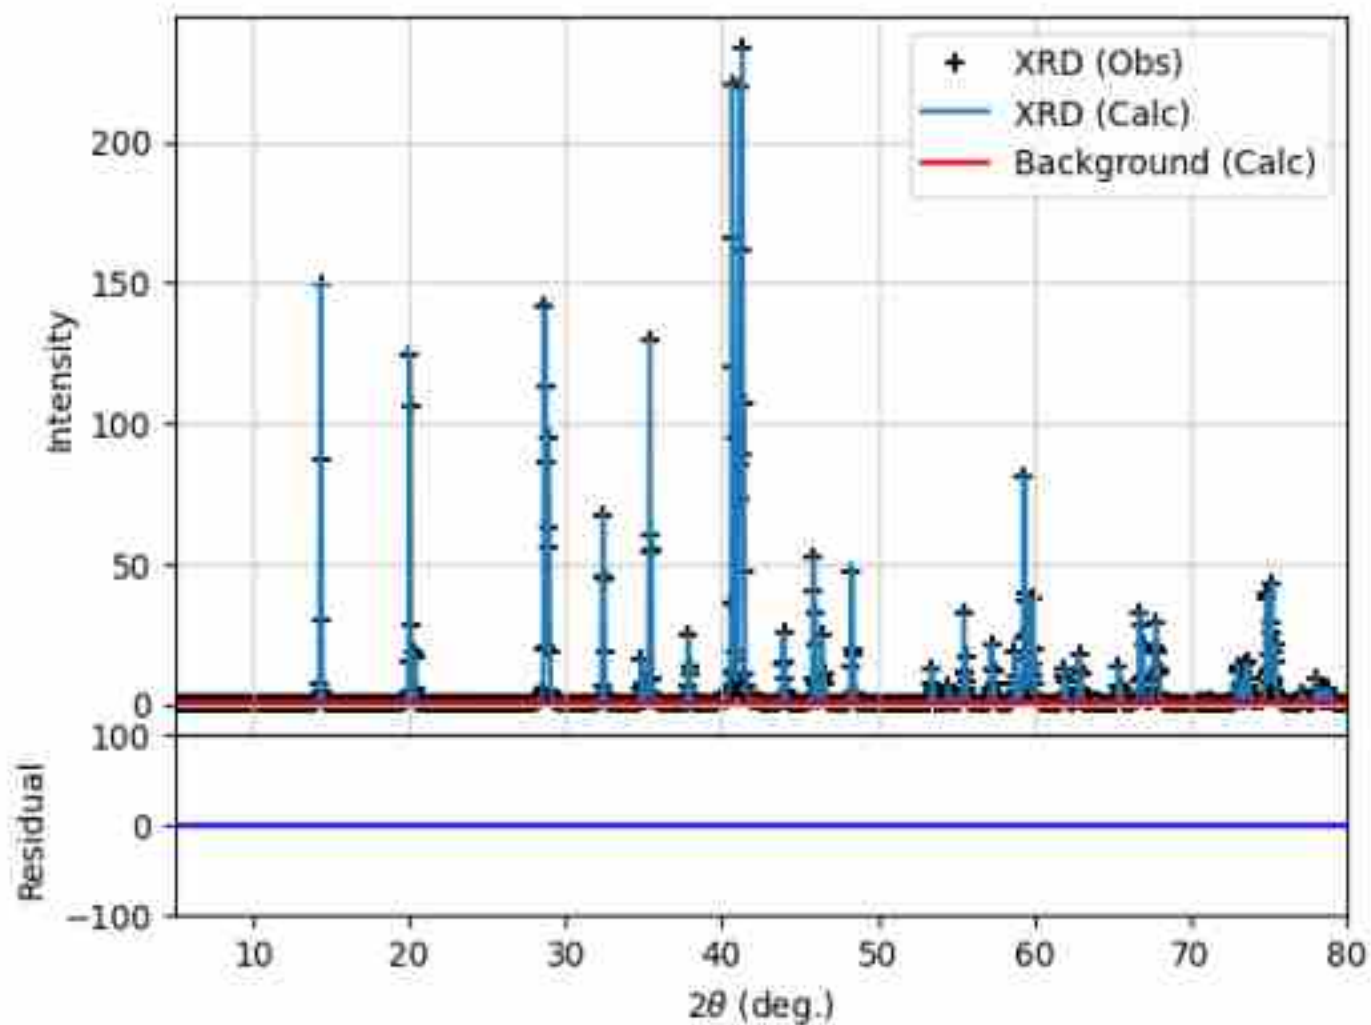

| RMSE before RR | Rwp     | RMSE after RR |
|----------------|---------|---------------|
| 0.019          | 0.00319 | 0.00082       |

# Er<sub>2</sub>Ga<sub>8</sub>Fe<sub>1</sub>

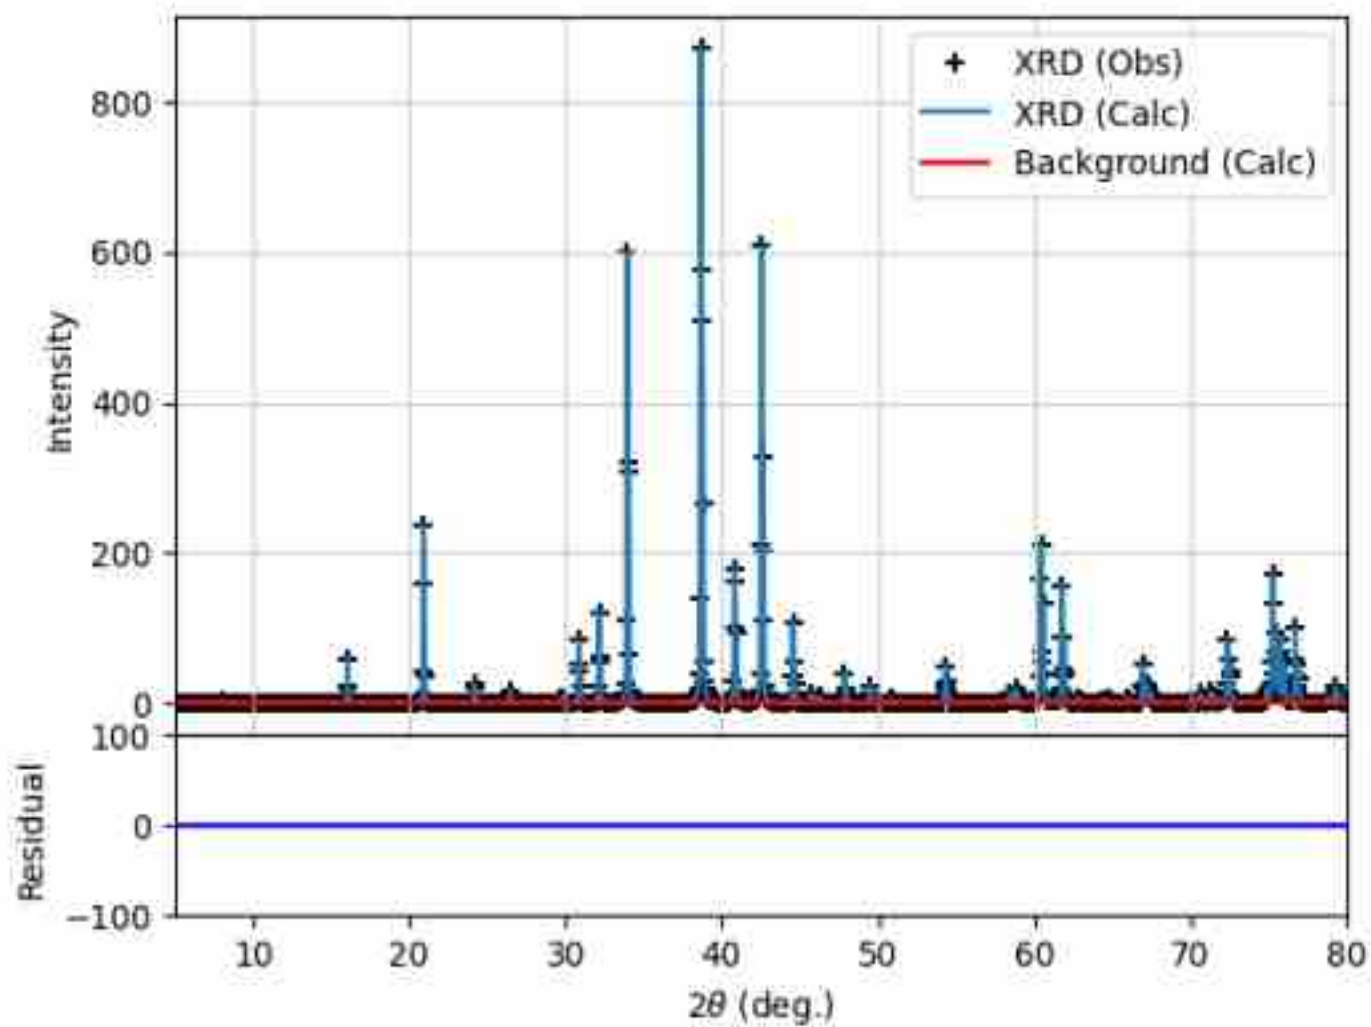

| RMSE before RR | Rwp     | RMSE after RR |
|----------------|---------|---------------|
| 0.019          | 0.02803 | 0.00145       |

# Er<sub>3</sub>Bi<sub>3</sub>Rh<sub>3</sub>

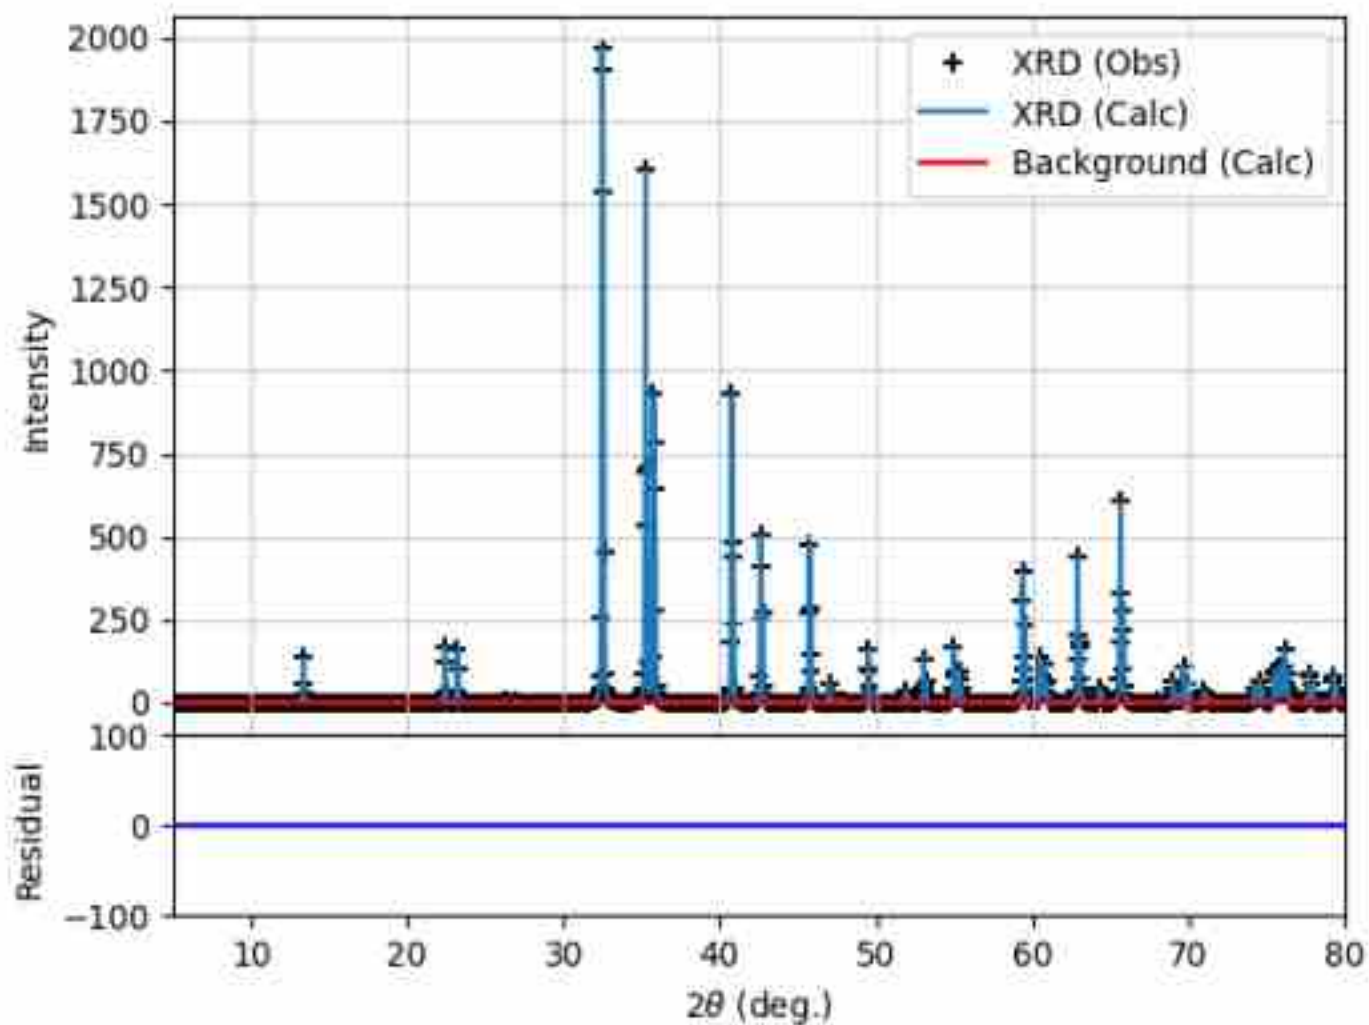

| RMSE before RR | Rwp    | RMSE after RR |
|----------------|--------|---------------|
| 0.019          | 0.0063 | 0.00103       |

# Er<sub>4</sub>Ni<sub>4</sub>Ge<sub>8</sub>

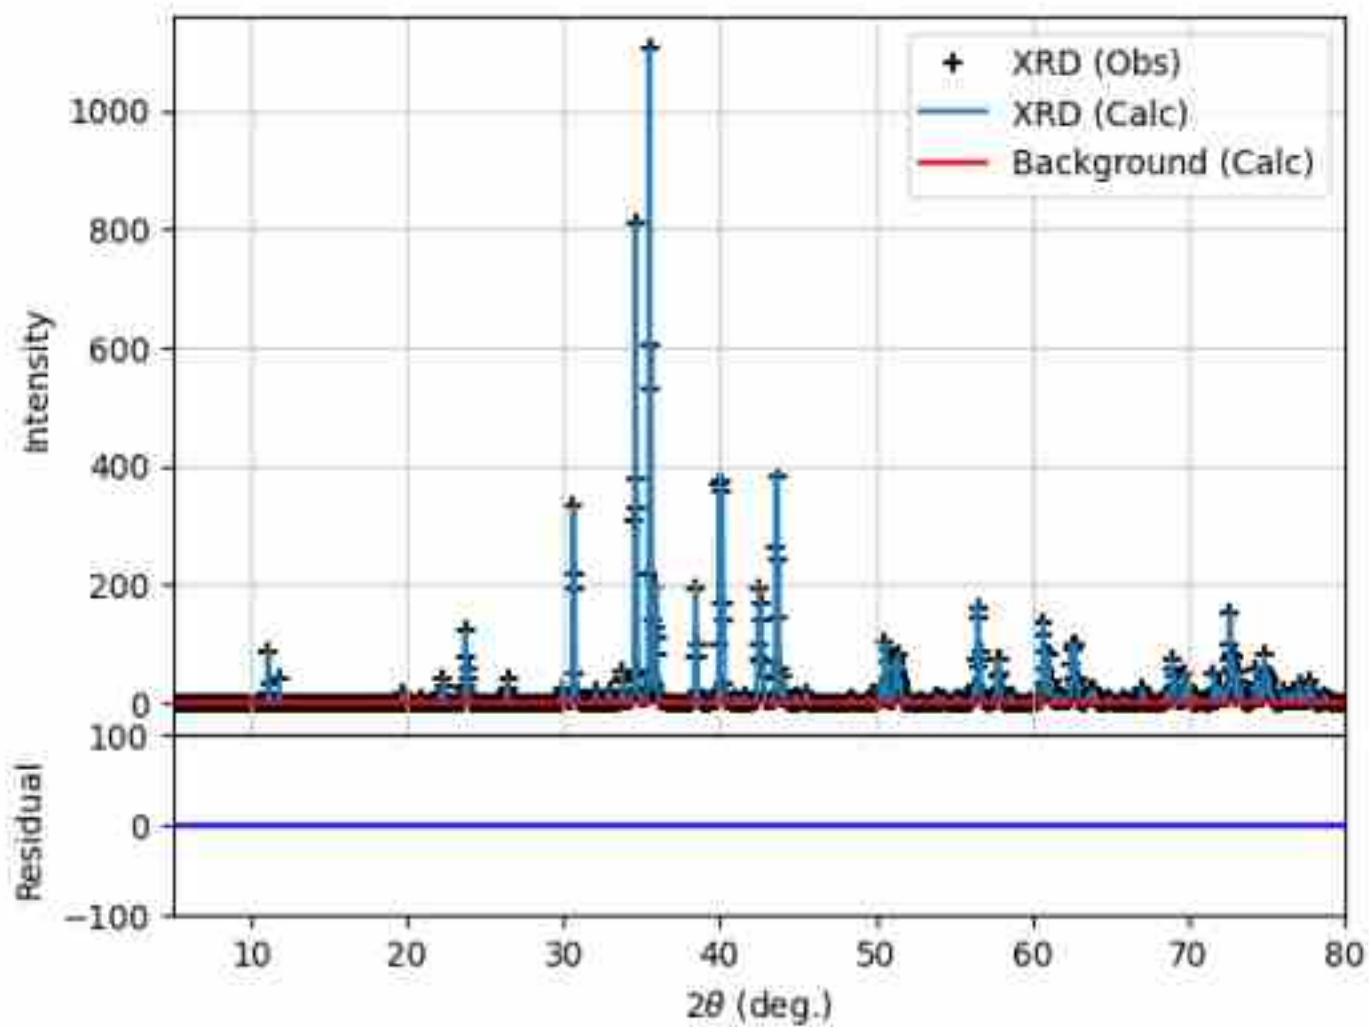

| RMSE before RR | Rwp     | RMSE after RR |
|----------------|---------|---------------|
| 0.019          | 0.00421 | 0.00046       |

# Er10Sn6

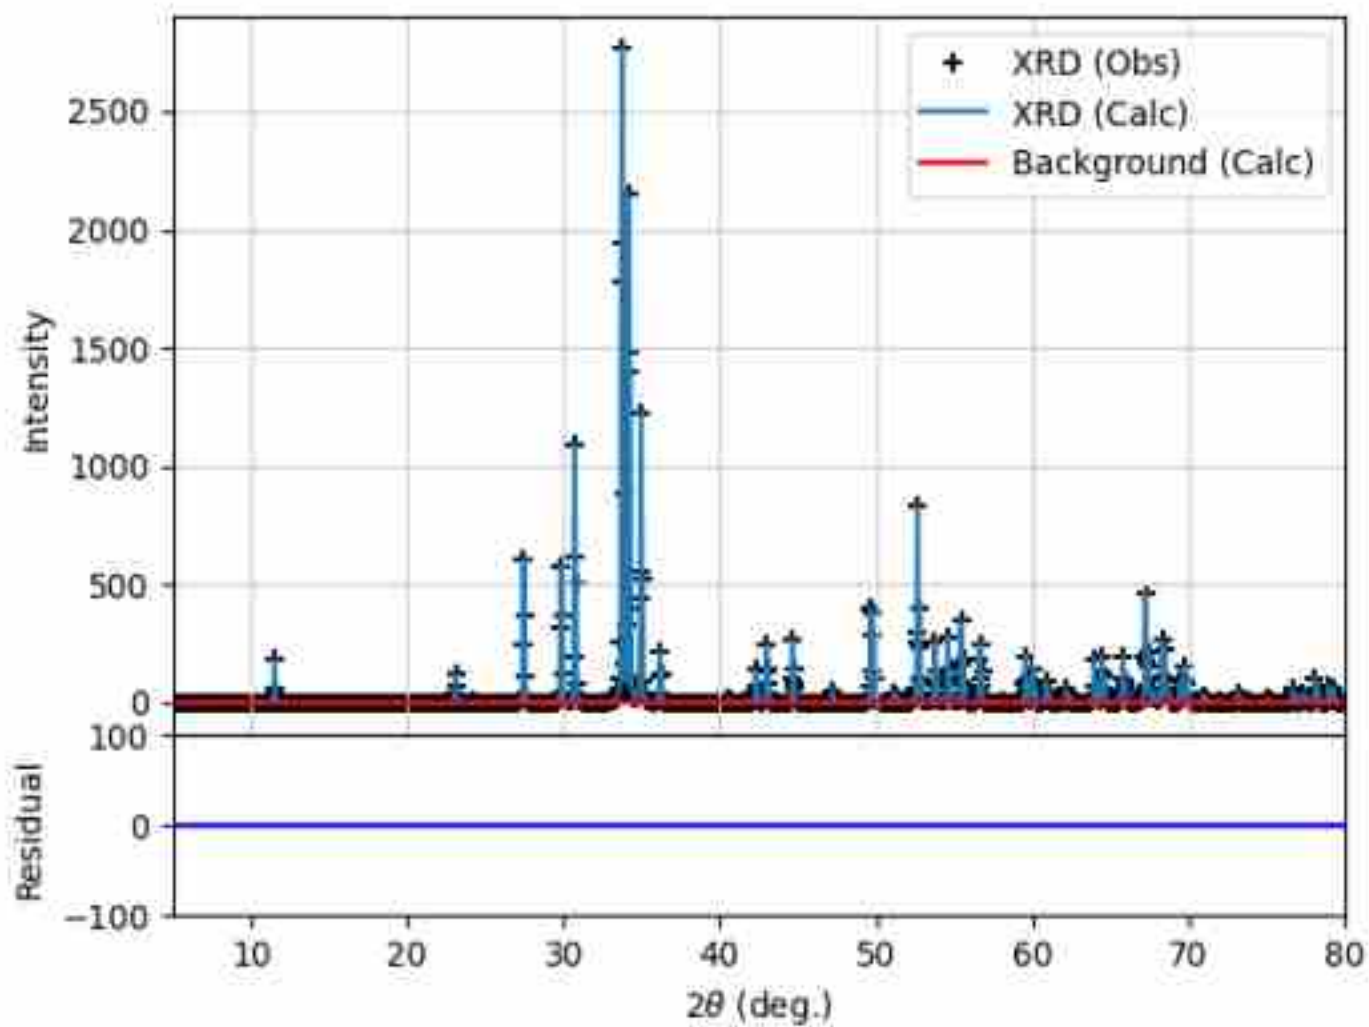

| RMSE before RR | Rwp     | RMSE after RR |
|----------------|---------|---------------|
| 0.019          | 0.00415 | 0.00033       |

# Eu<sub>2</sub>Ga<sub>2</sub>Ag<sub>2</sub>

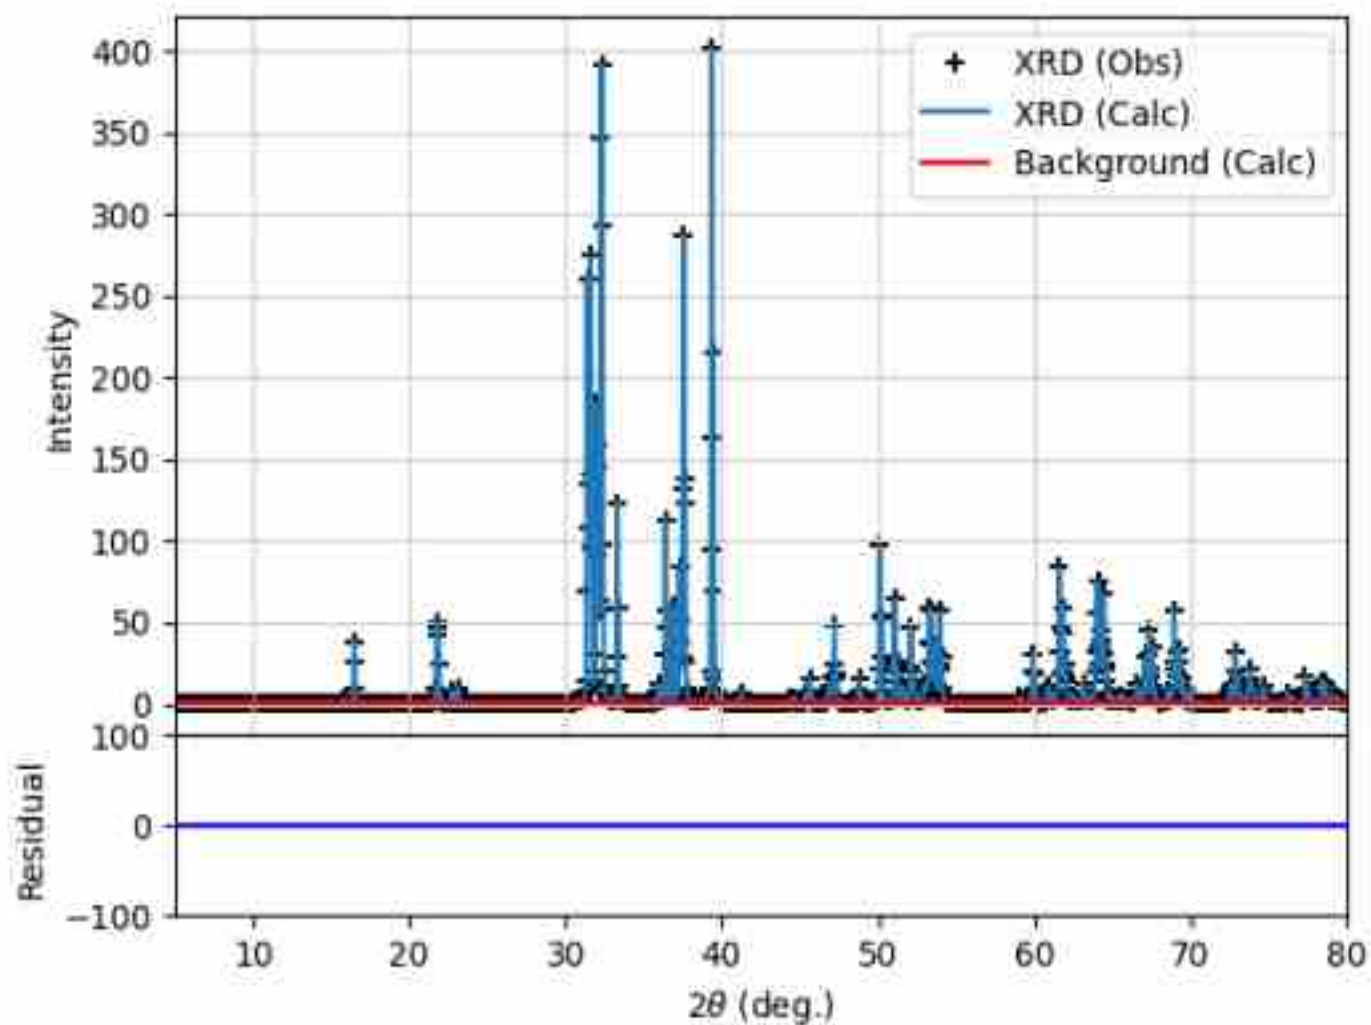

| RMSE before RR | Rwp     | RMSE after RR |
|----------------|---------|---------------|
| 0.019          | 0.00258 | 0.00017       |

# Eu<sub>2</sub>Ga<sub>6</sub>Ni<sub>4</sub>

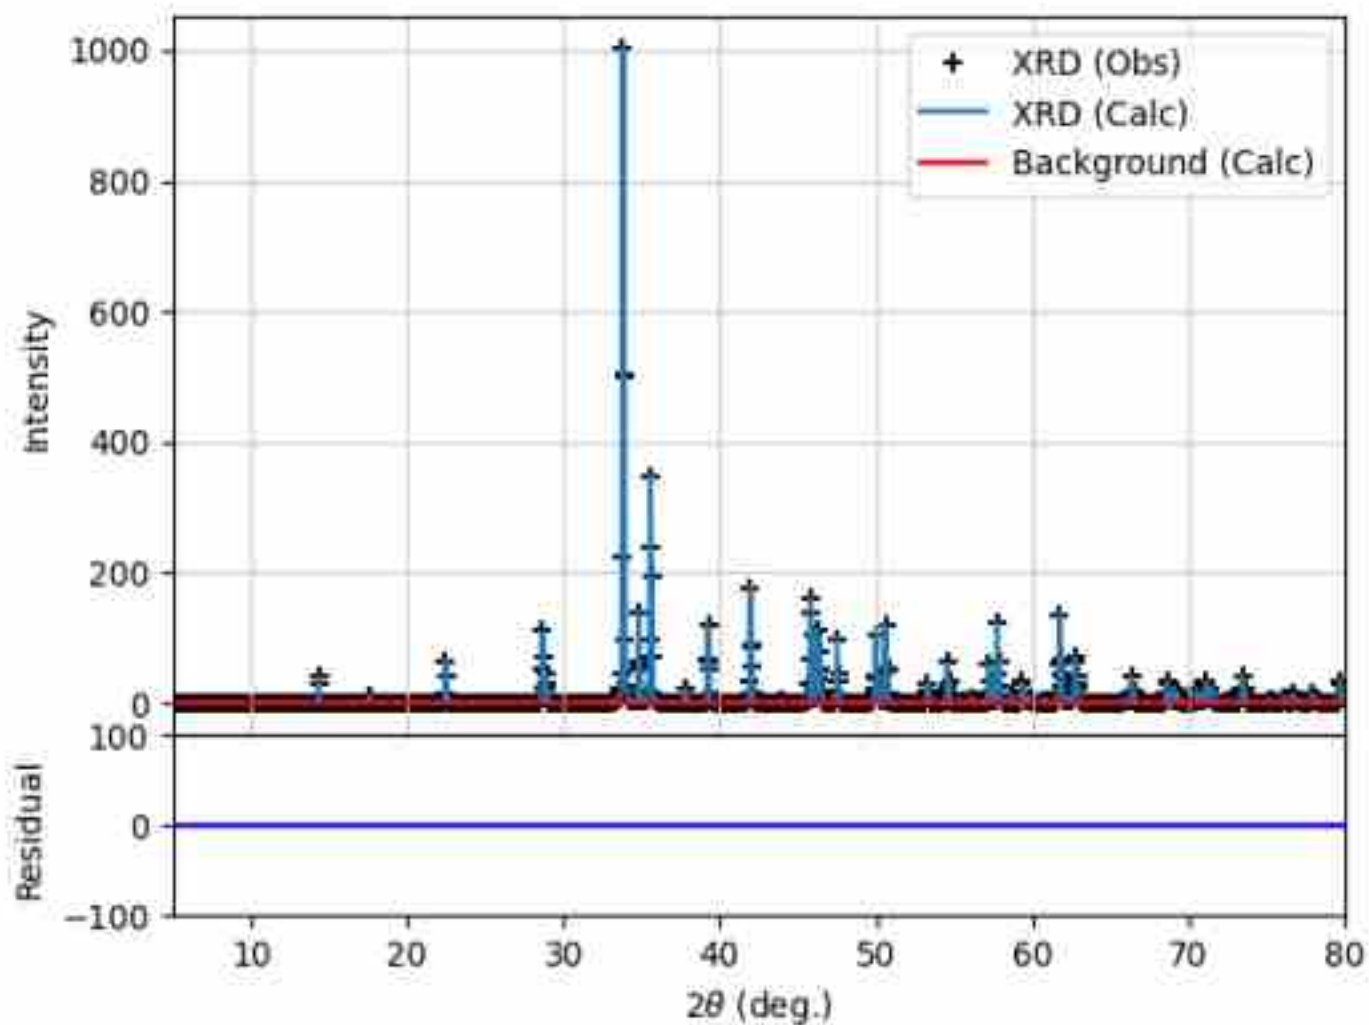

| RMSE before RR | Rwp     | RMSE after RR |
|----------------|---------|---------------|
| 0.019          | 0.00353 | 0.00052       |



# Eu<sub>2</sub>Gd<sub>4</sub>S<sub>8</sub>

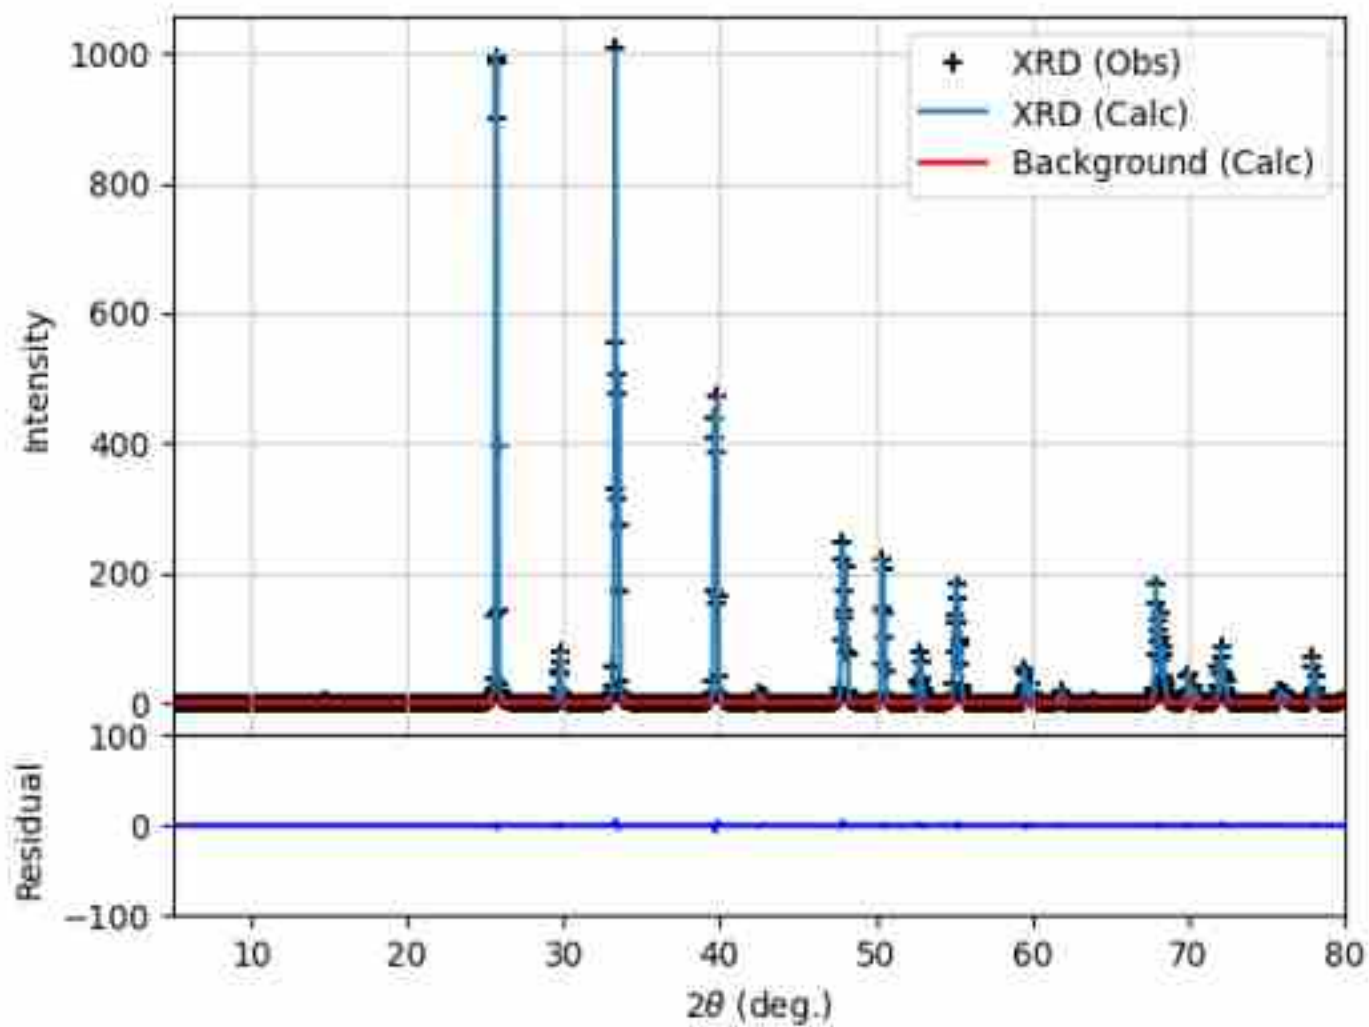

| RMSE before RR | Rwp    | RMSE after RR |
|----------------|--------|---------------|
| 0.019          | 1.1336 | 0.02991       |

# Eu<sub>4</sub>Ge<sub>2</sub>Se<sub>8</sub>

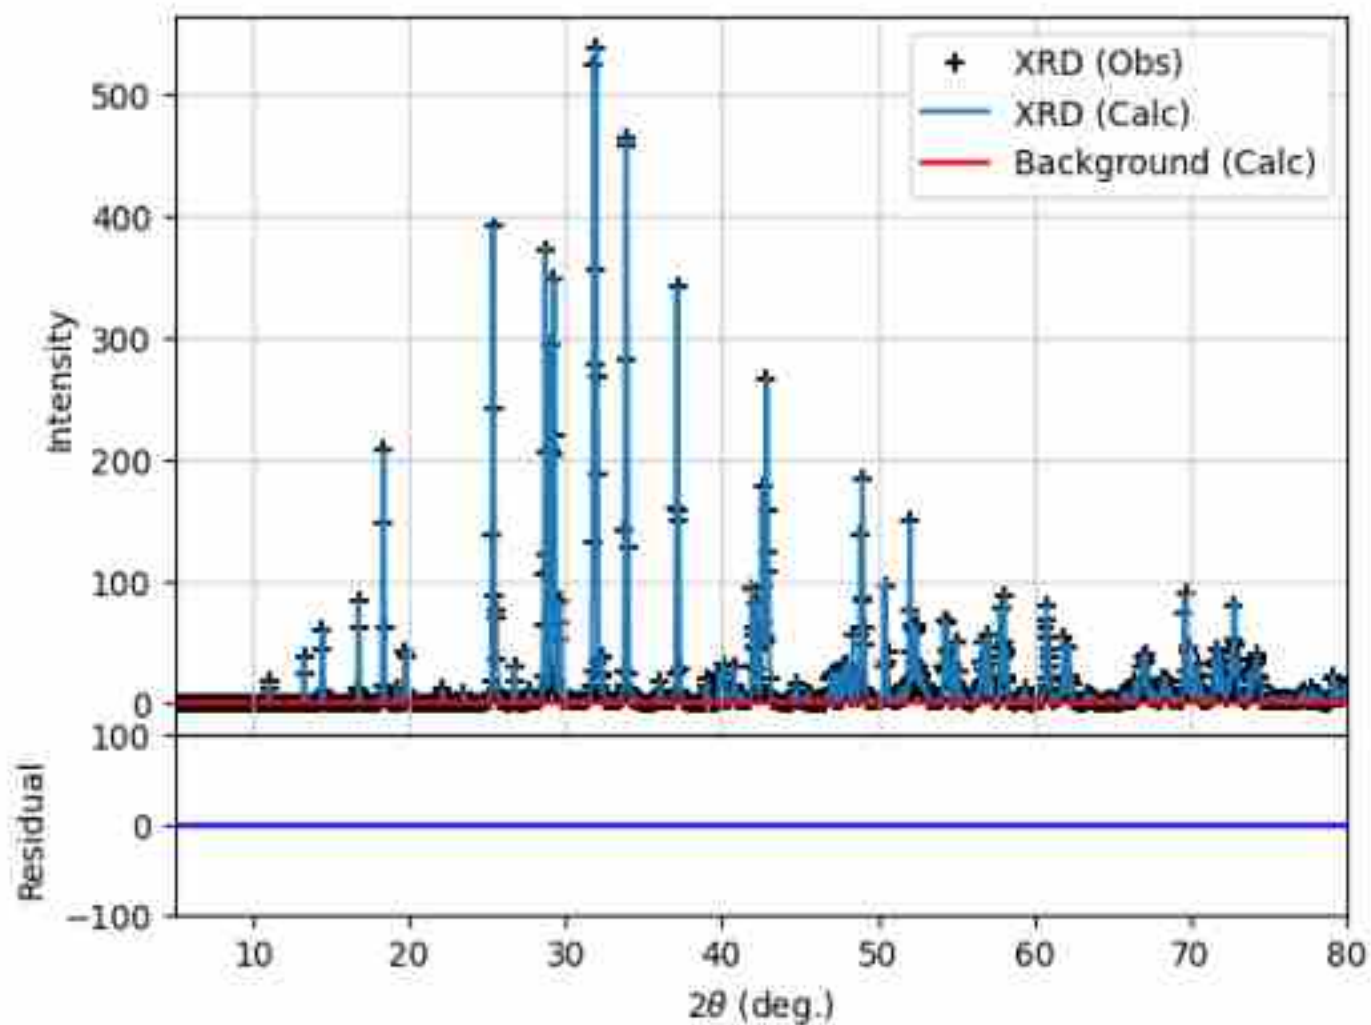

| RMSE before RR | Rwp     | RMSE after RR |
|----------------|---------|---------------|
| 0.019          | 0.00424 | 0.00031       |

# Eu4Mg4Pd4

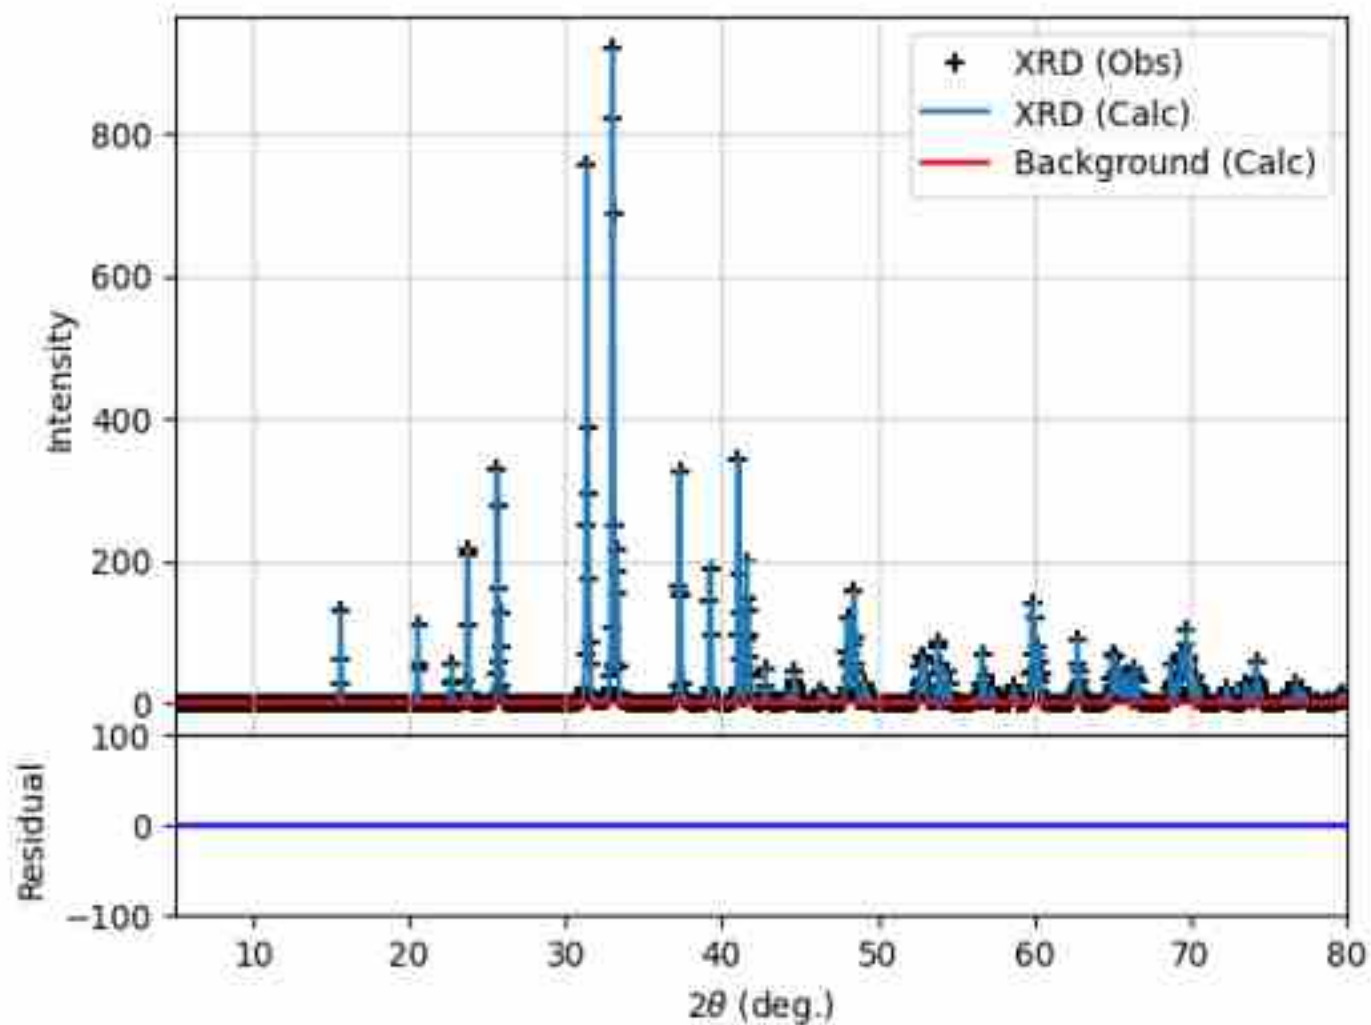

| RMSE before RR | Rwp     | RMSE after RR |
|----------------|---------|---------------|
| 0.019          | 0.00389 | 0.00053       |

# Eu4Sb2O1

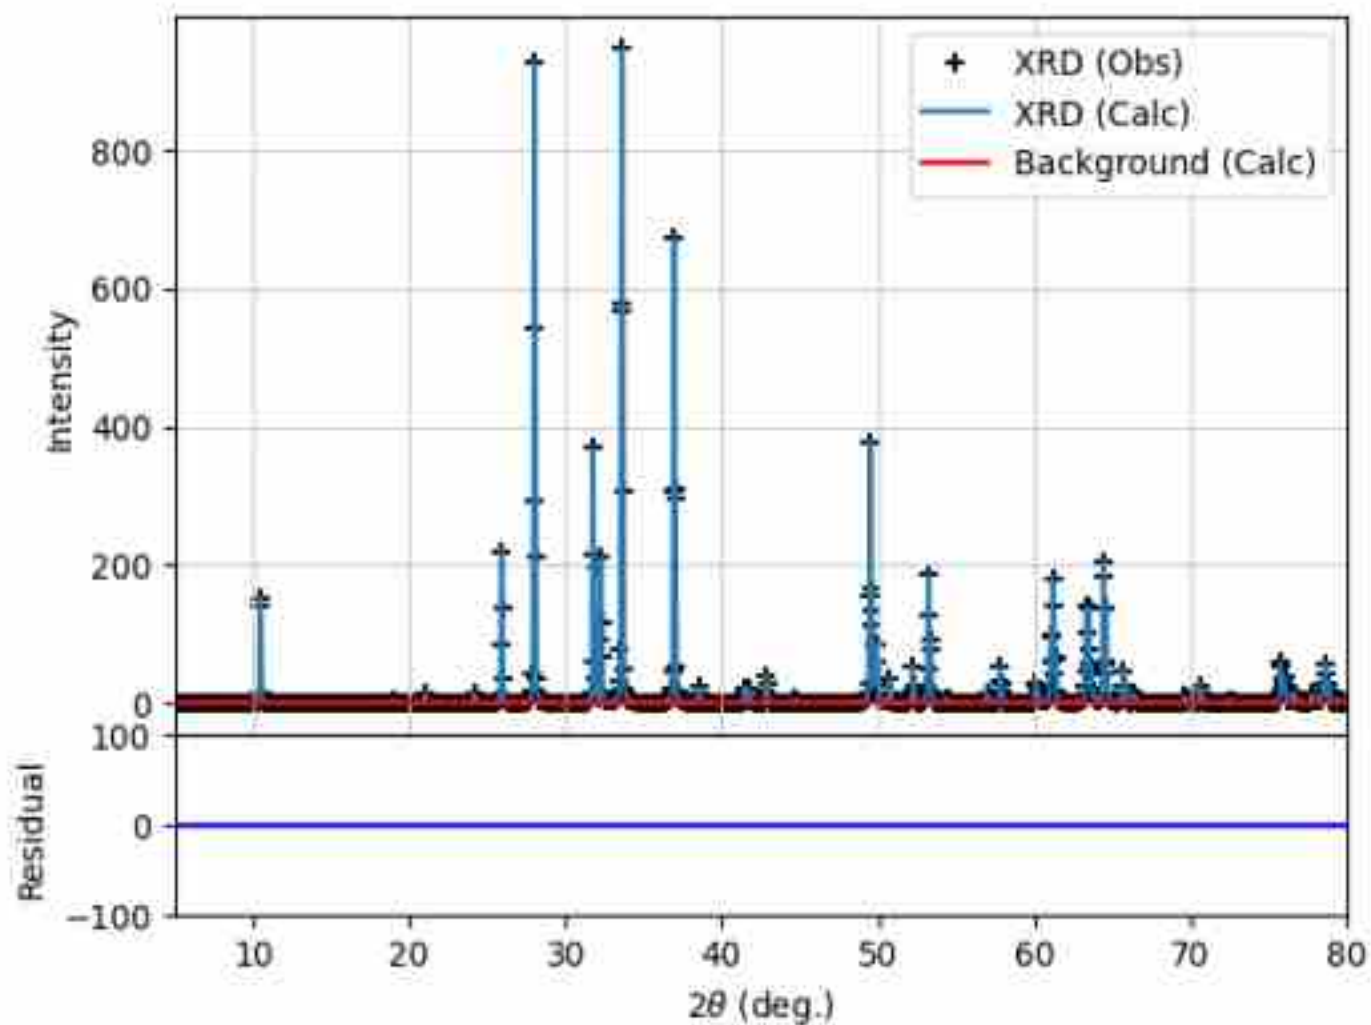

| RMSE before RR | Rwp     | RMSE after RR |
|----------------|---------|---------------|
| 0.019          | 0.00535 | 0.00065       |

# Eu6Fe2O12

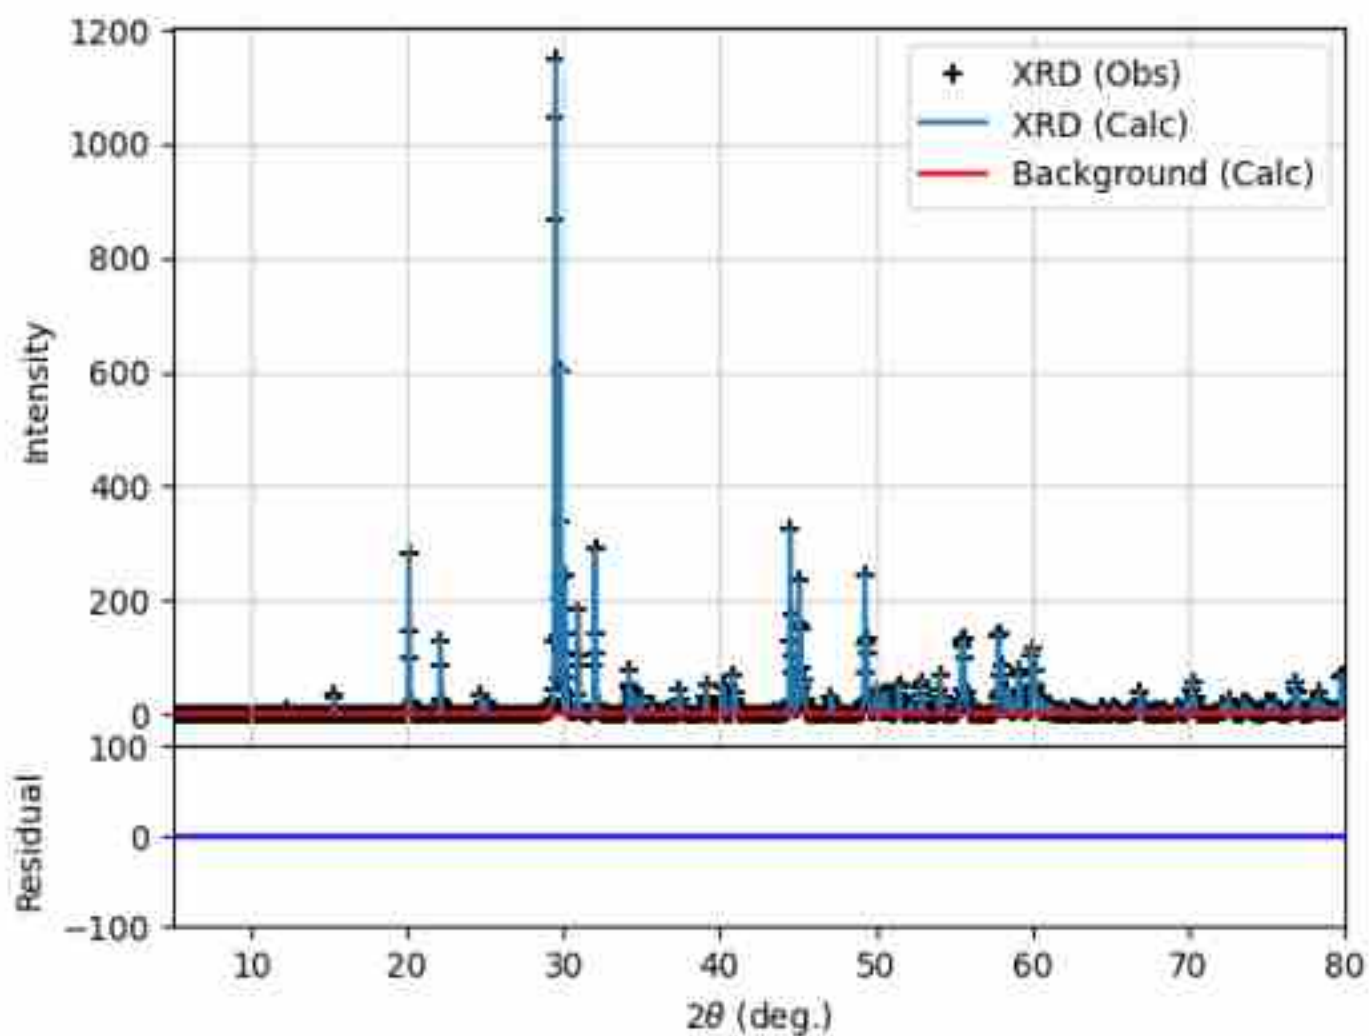

| RMSE before RR | Rwp     | RMSE after RR |
|----------------|---------|---------------|
| 0.019          | 0.00421 | 0.0009        |

# Fe7Ge4

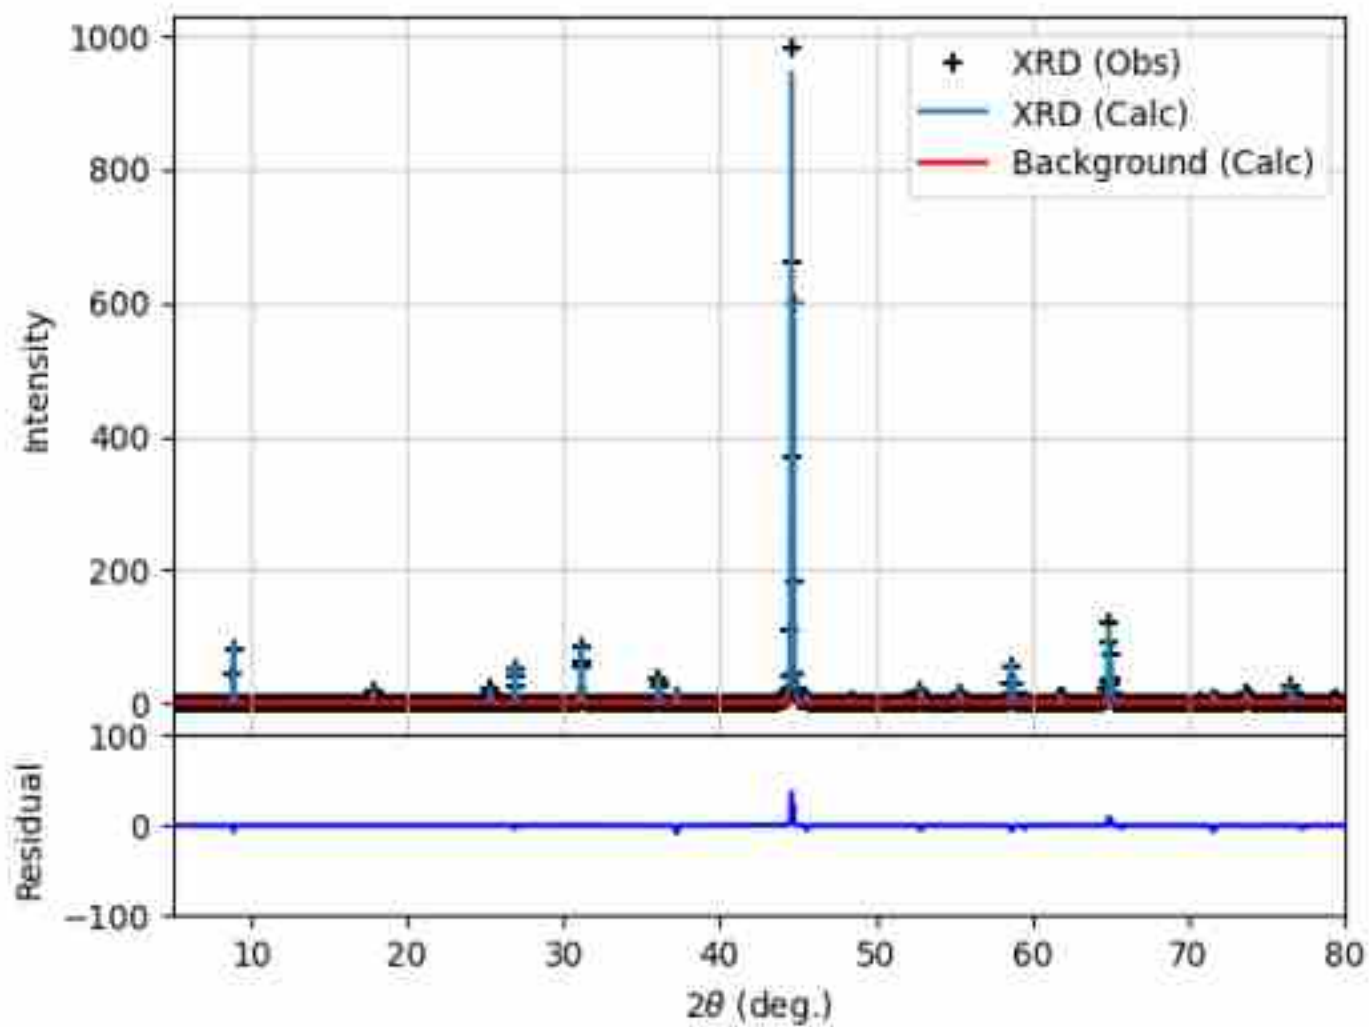

| RMSE before RR | Rwp      | RMSE after RR |
|----------------|----------|---------------|
| 0.019          | 11.49066 | 0.04404       |

# Ga<sub>2</sub>Ag<sub>2</sub>O<sub>4</sub>

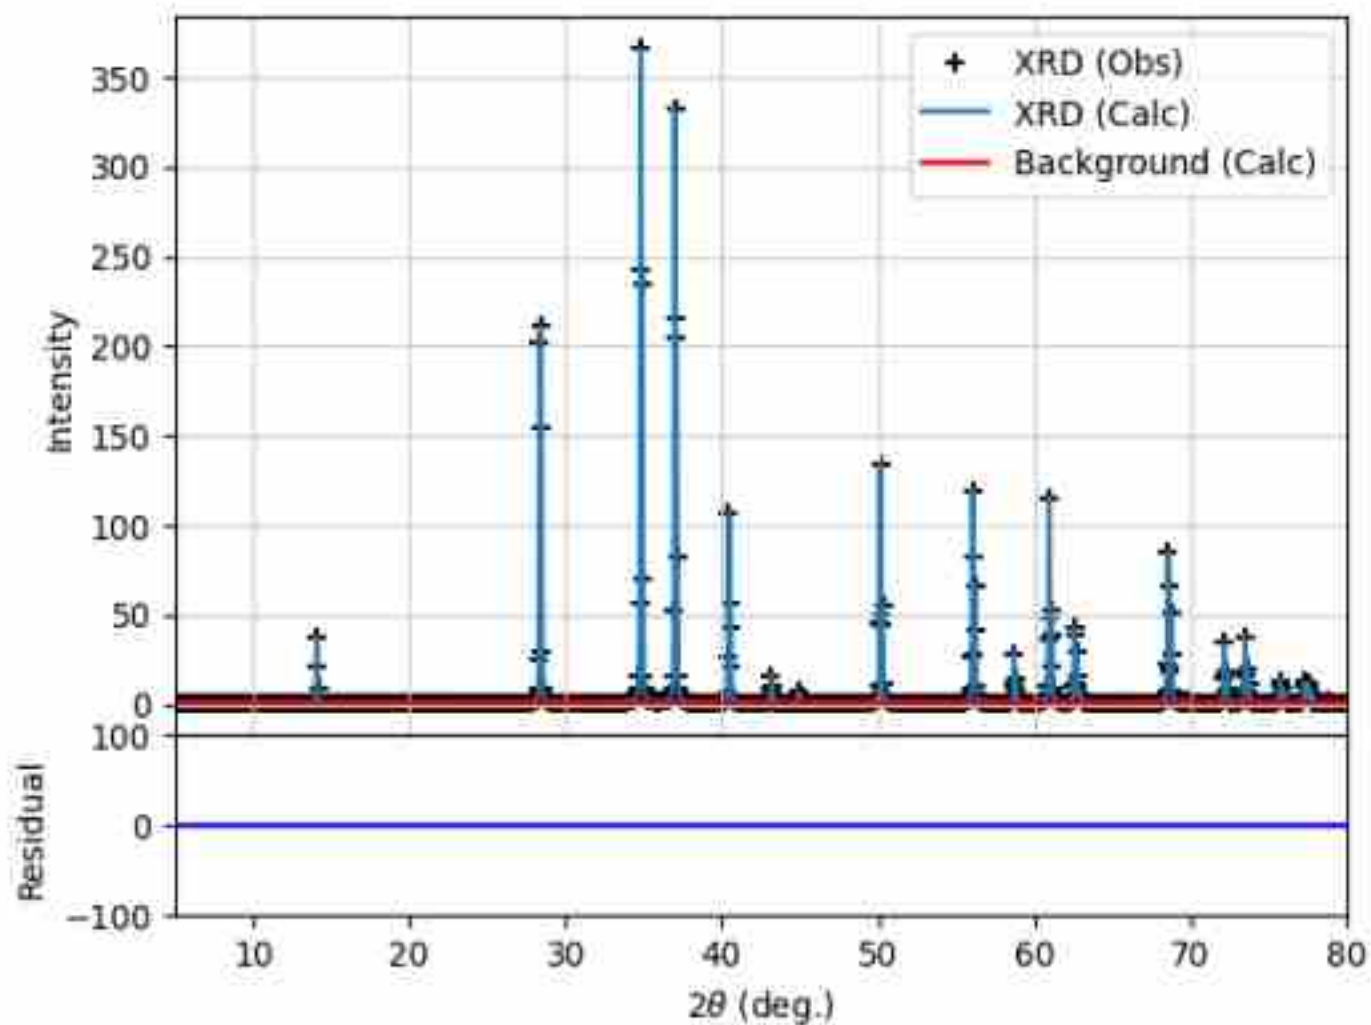

| RMSE before RR | Rwp     | RMSE after RR |
|----------------|---------|---------------|
| 0.019          | 0.00509 | 0.00132       |

# Gd1Ge4Rh6

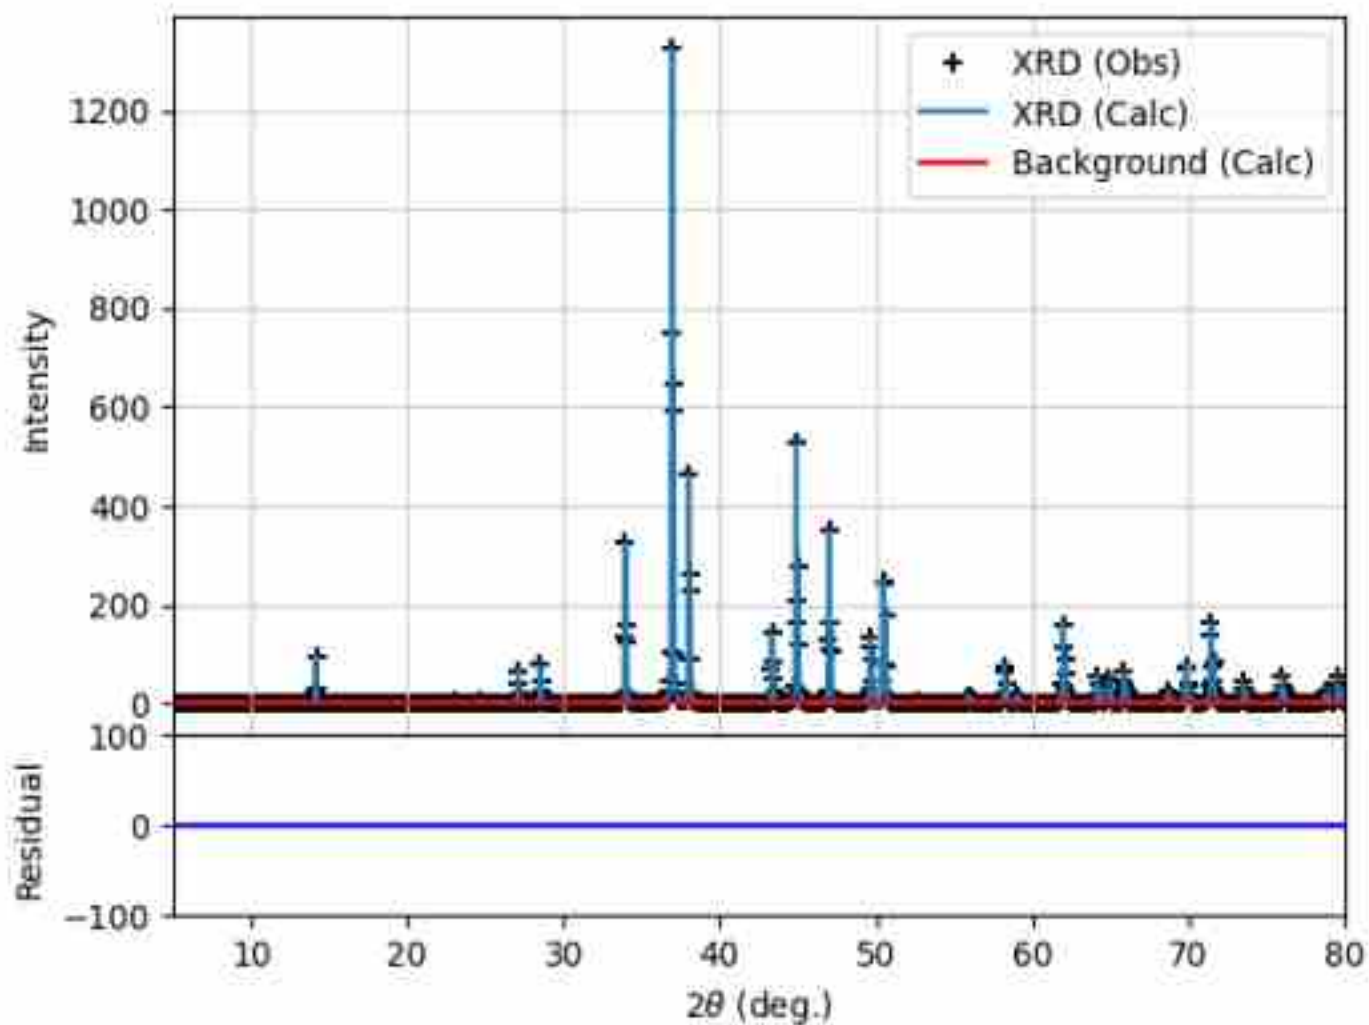

| RMSE before RR | Rwp     | RMSE after RR |
|----------------|---------|---------------|
| 0.019          | 0.00656 | 0.00106       |



# Gd<sub>2</sub>Cu<sub>1</sub>Ge<sub>4</sub>O<sub>12</sub>

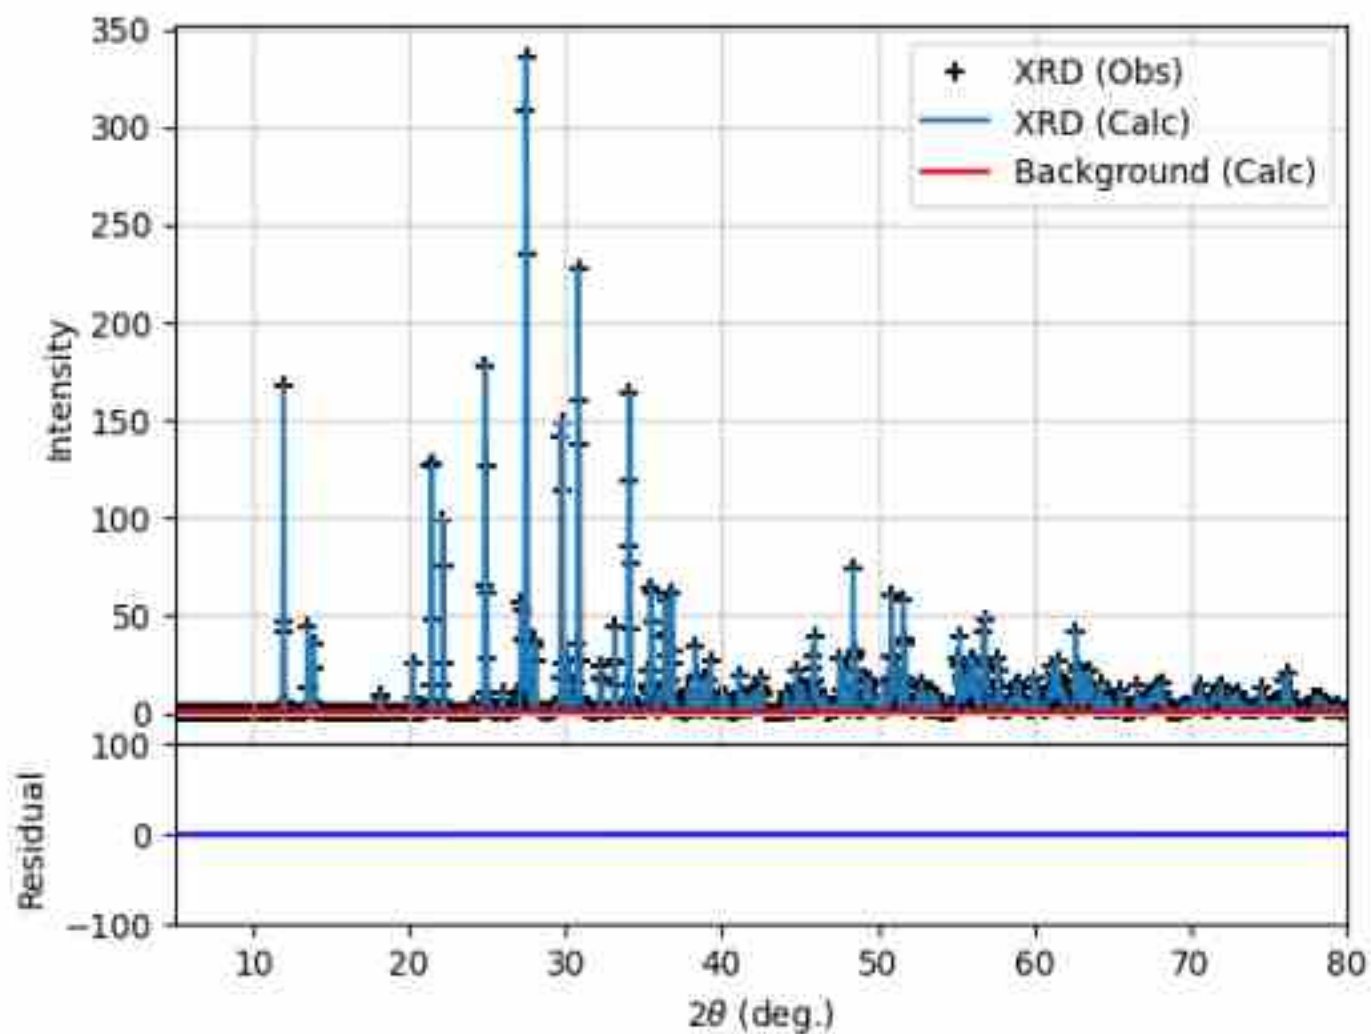

| RMSE before RR | Rwp     | RMSE after RR |
|----------------|---------|---------------|
| 0.019          | 0.24483 | 0.0122        |

# Gd<sub>2</sub>Ta<sub>2</sub>O<sub>8</sub>

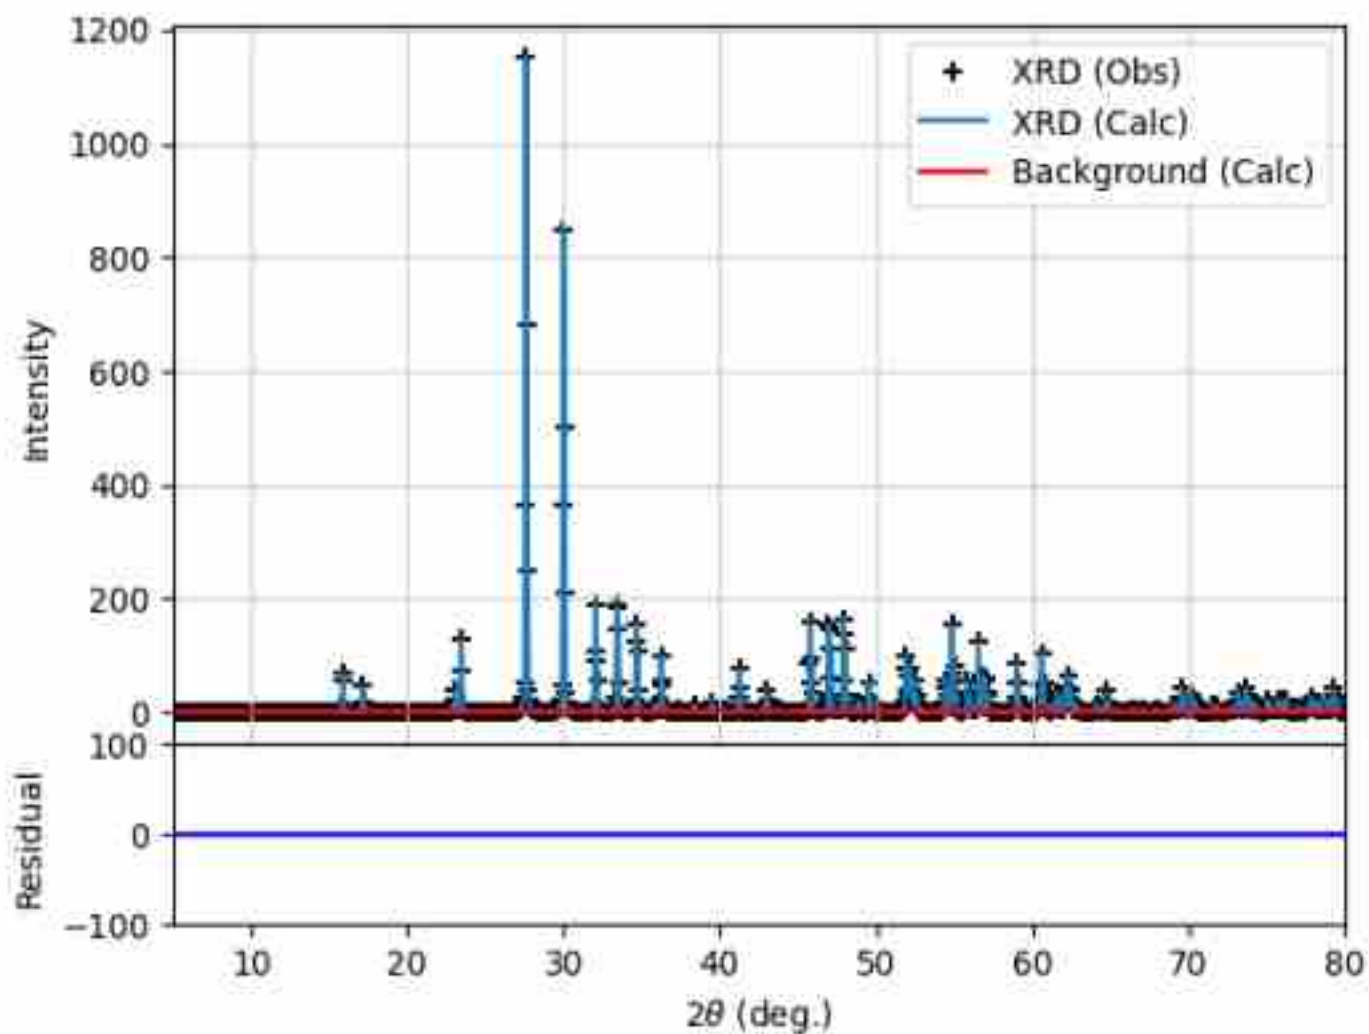

| RMSE before RR | Rwp     | RMSE after RR |
|----------------|---------|---------------|
| 0.019          | 0.00352 | 0.00073       |

# Gd<sub>4</sub>Co<sub>2</sub>Si<sub>4</sub>

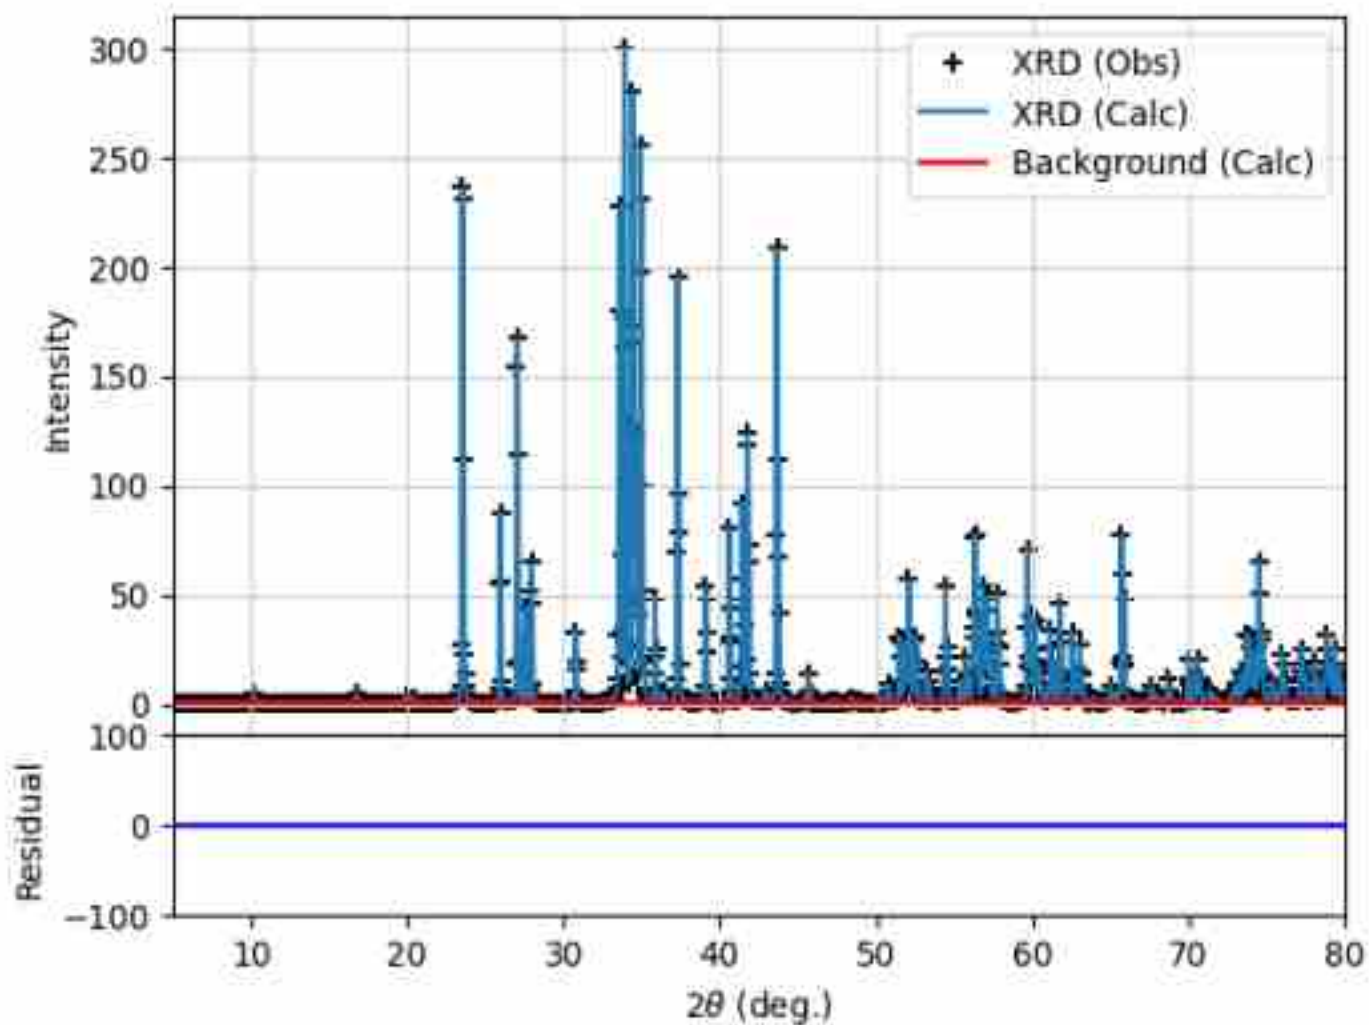

| RMSE before RR | Rwp     | RMSE after RR |
|----------------|---------|---------------|
| 0.019          | 0.00341 | 0.00084       |

# Gd4Ga4Pd8

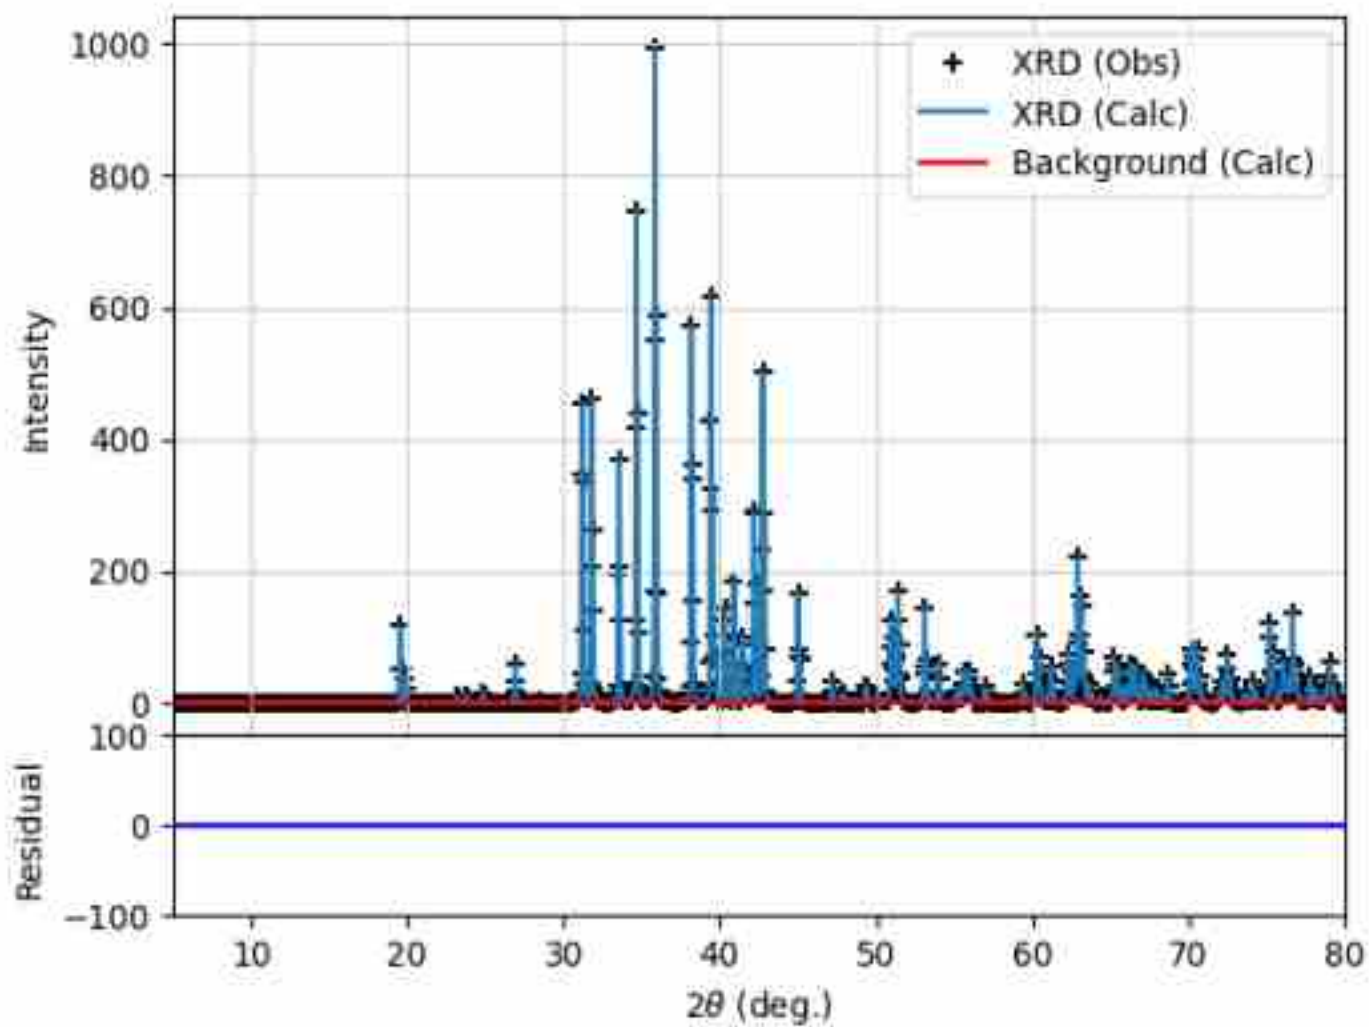

| RMSE before RR | Rwp     | RMSE after RR |
|----------------|---------|---------------|
| 0.019          | 0.00447 | 0.0004        |

# Gd4Mg2

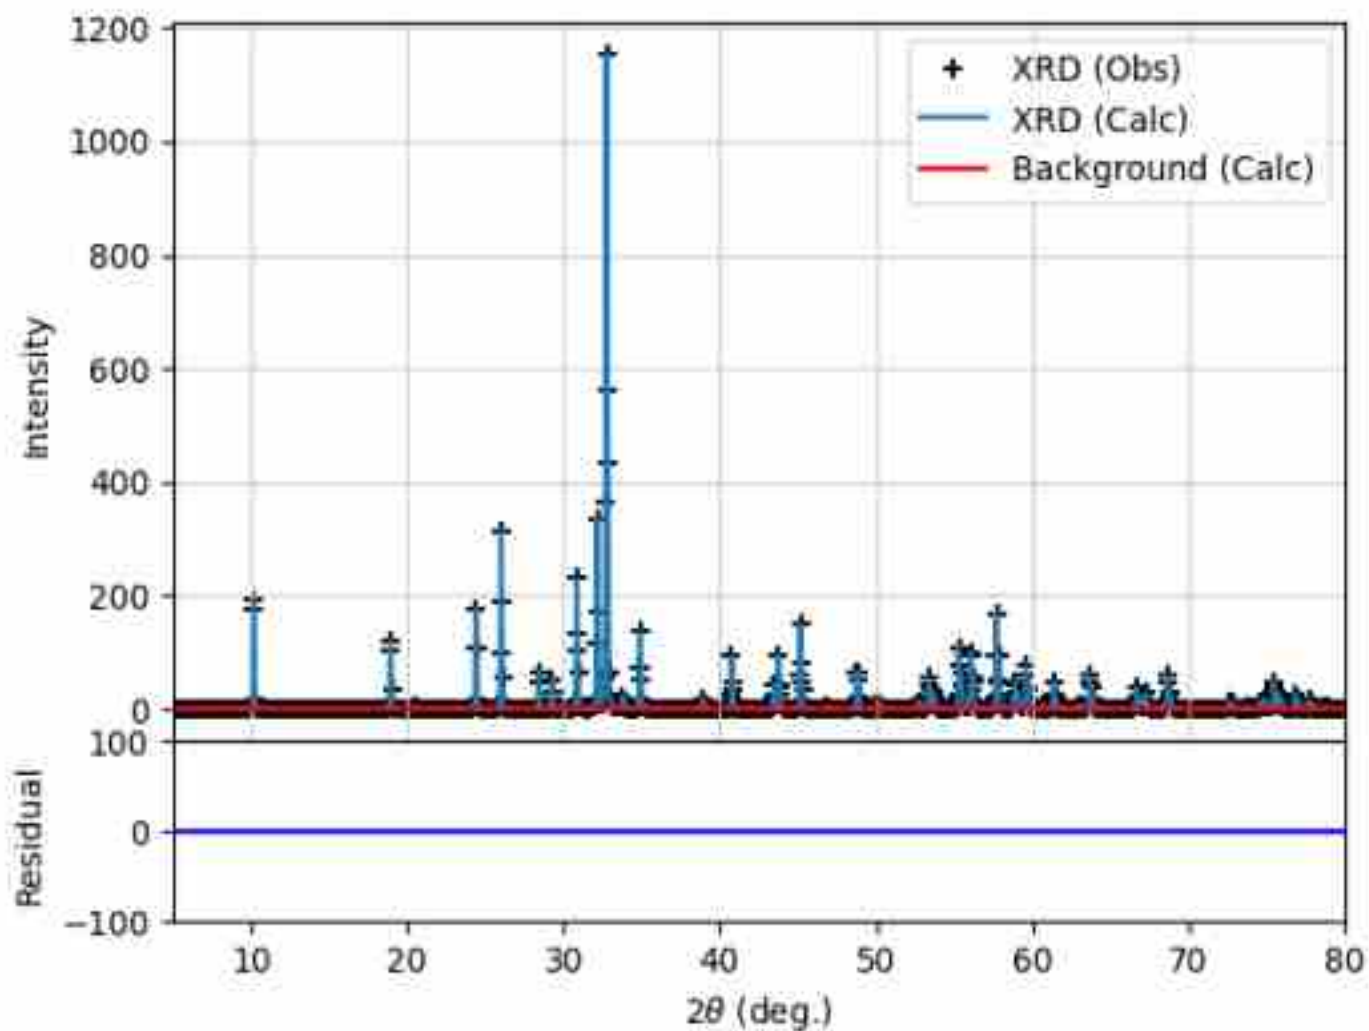

| RMSE before RR | Rwp     | RMSE after RR |
|----------------|---------|---------------|
| 0.019          | 0.00446 | 0.00089       |

# Hf1Zr2U1C4

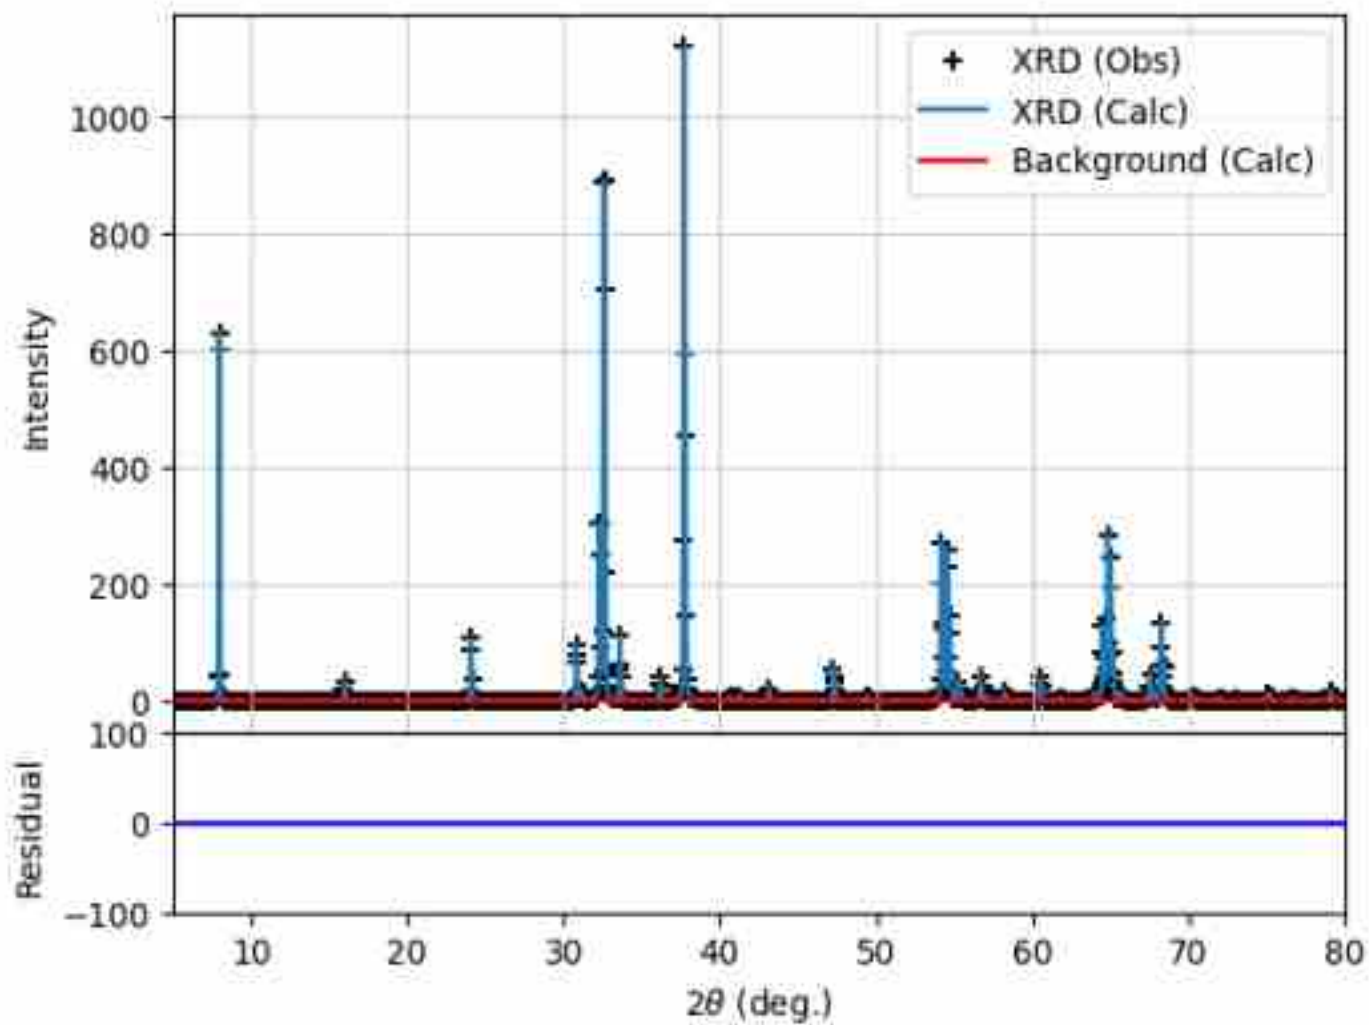

| RMSE before RR | Rwp     | RMSE after RR |
|----------------|---------|---------------|
| 0.019          | 0.00574 | 0.00131       |

# Hf2Br6

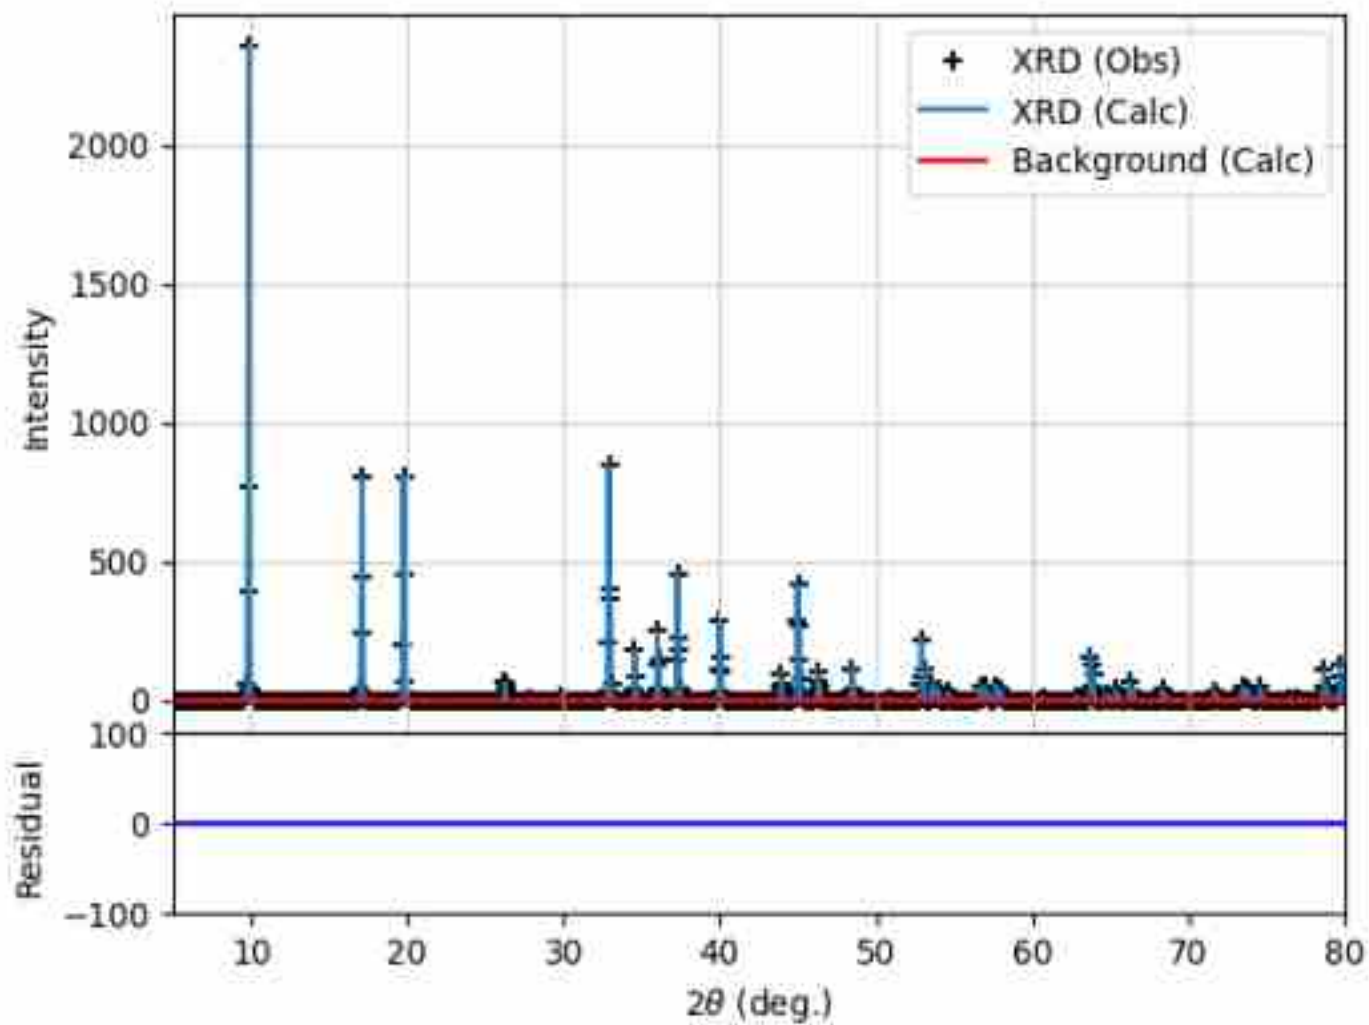

| RMSE before RR | Rwp     | RMSE after RR |
|----------------|---------|---------------|
| 0.019          | 0.00568 | 0.00074       |

# Hf2Hg1

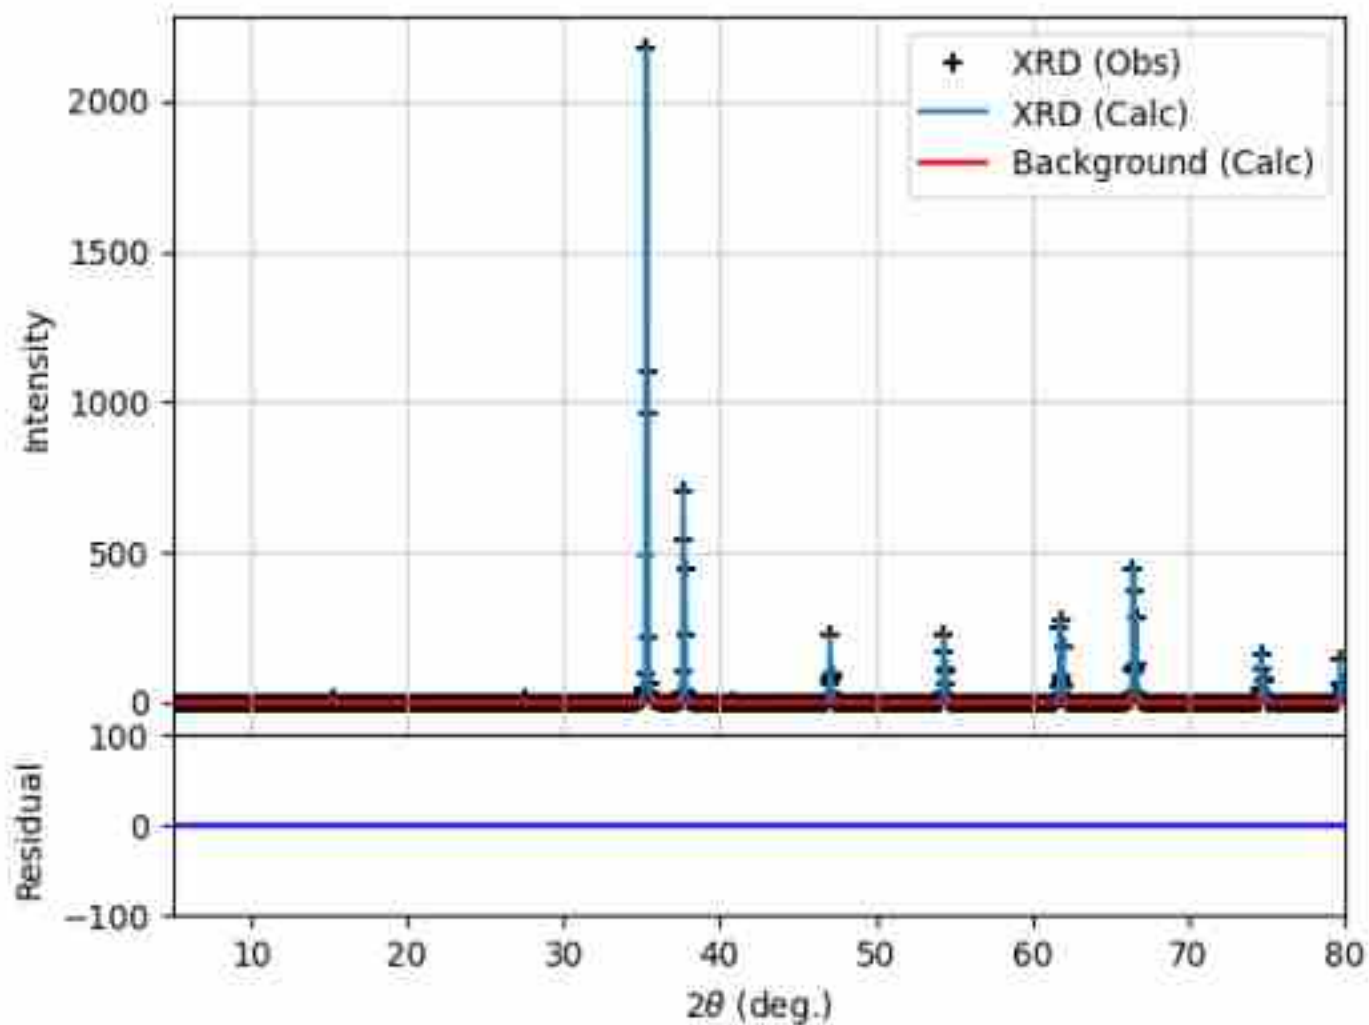

| RMSE before RR | Rwp     | RMSE after RR |
|----------------|---------|---------------|
| 0.019          | 0.01507 | 0.00081       |



# Hf2Ti6

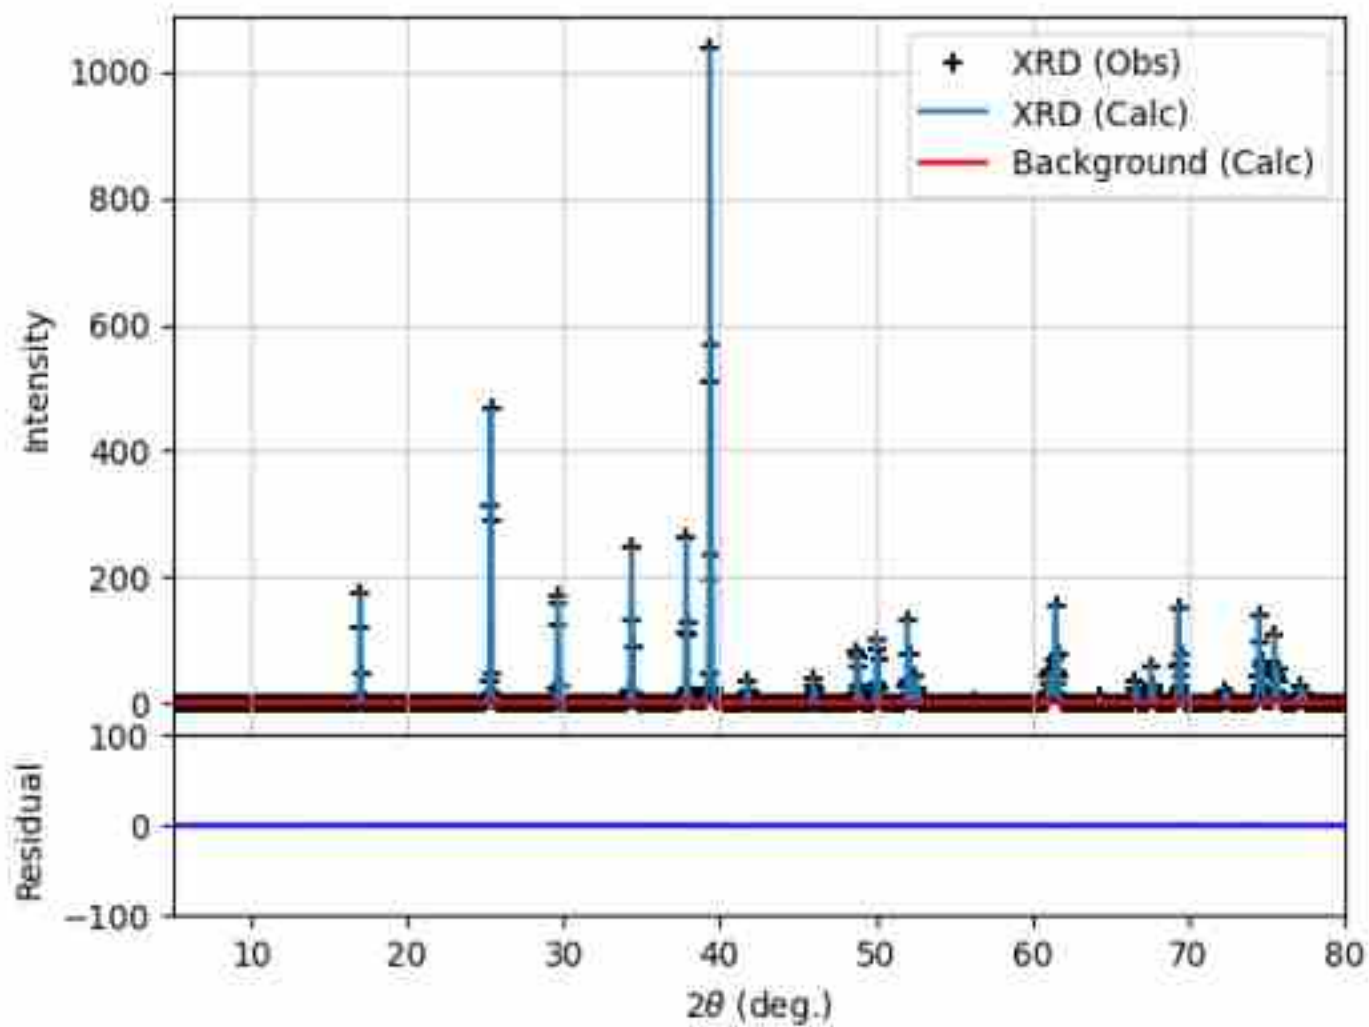

| RMSE before RR | Rwp     | RMSE after RR |
|----------------|---------|---------------|
| 0.019          | 0.38175 | 0.00574       |

# Hf<sub>3</sub>Ga<sub>3</sub>Co<sub>3</sub>

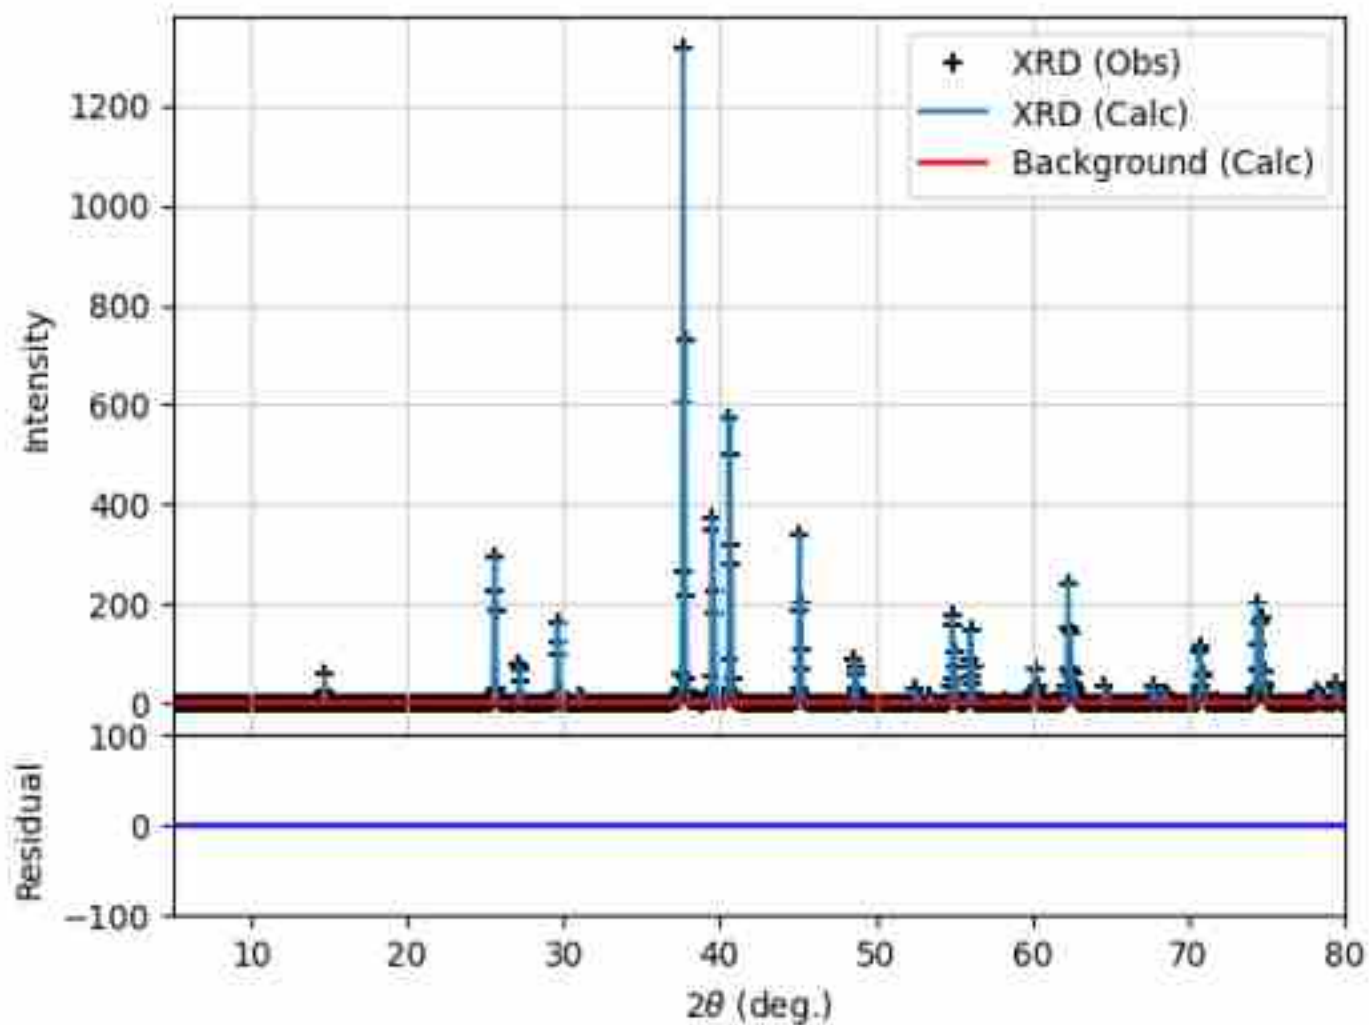

| RMSE before RR | Rwp     | RMSE after RR |
|----------------|---------|---------------|
| 0.019          | 0.00723 | 0.00207       |

# Hf4Al4Cu4

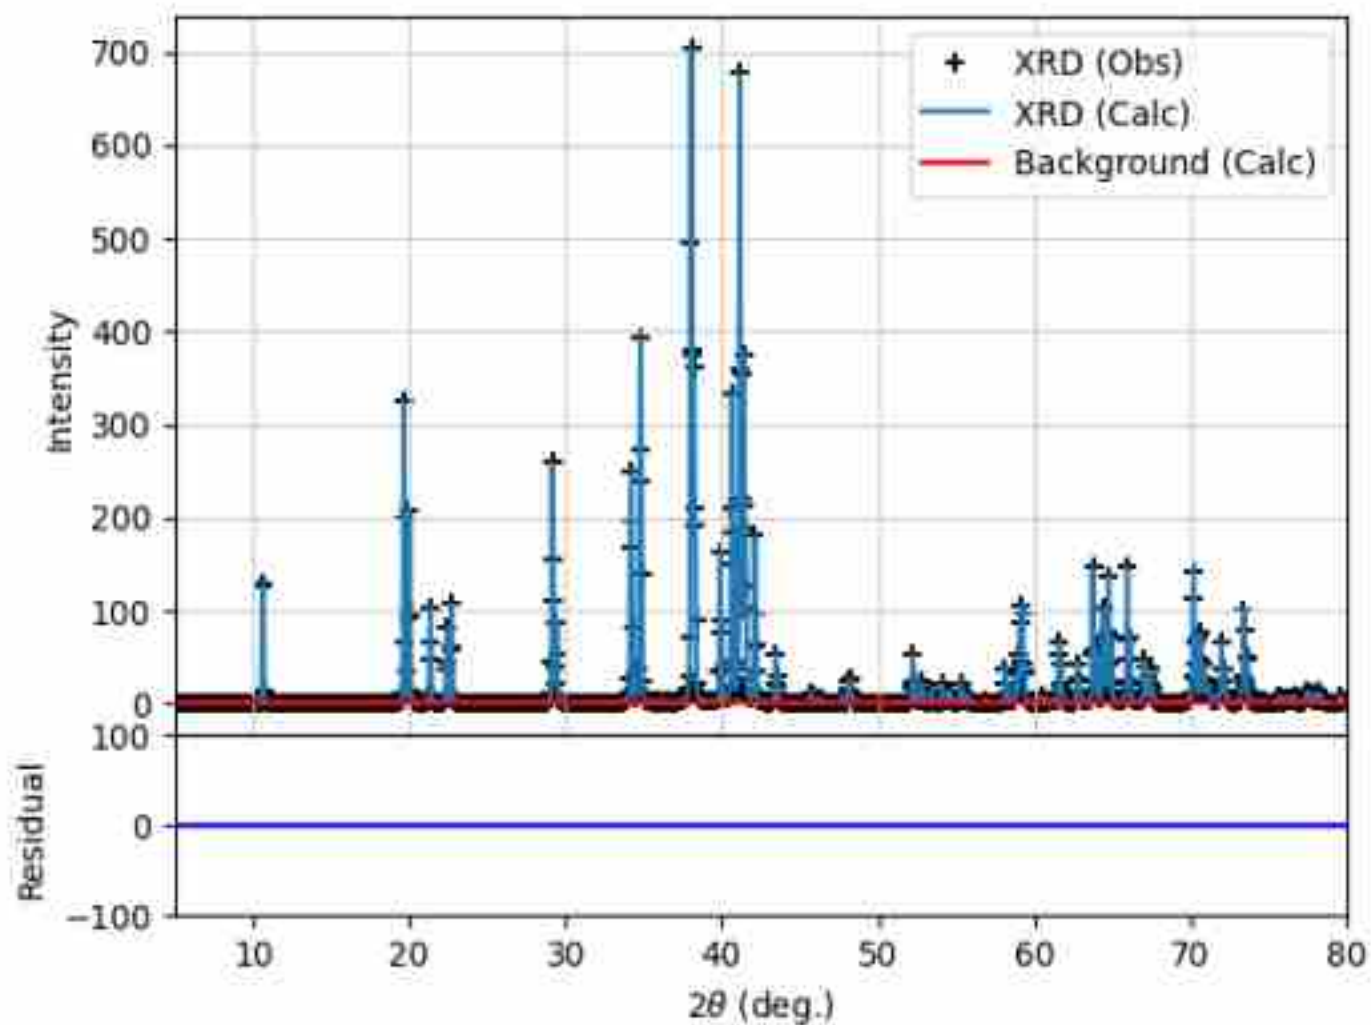

| RMSE before RR | Rwp     | RMSE after RR |
|----------------|---------|---------------|
| 0.019          | 0.00404 | 0.00048       |

# Hf4V6Ge2

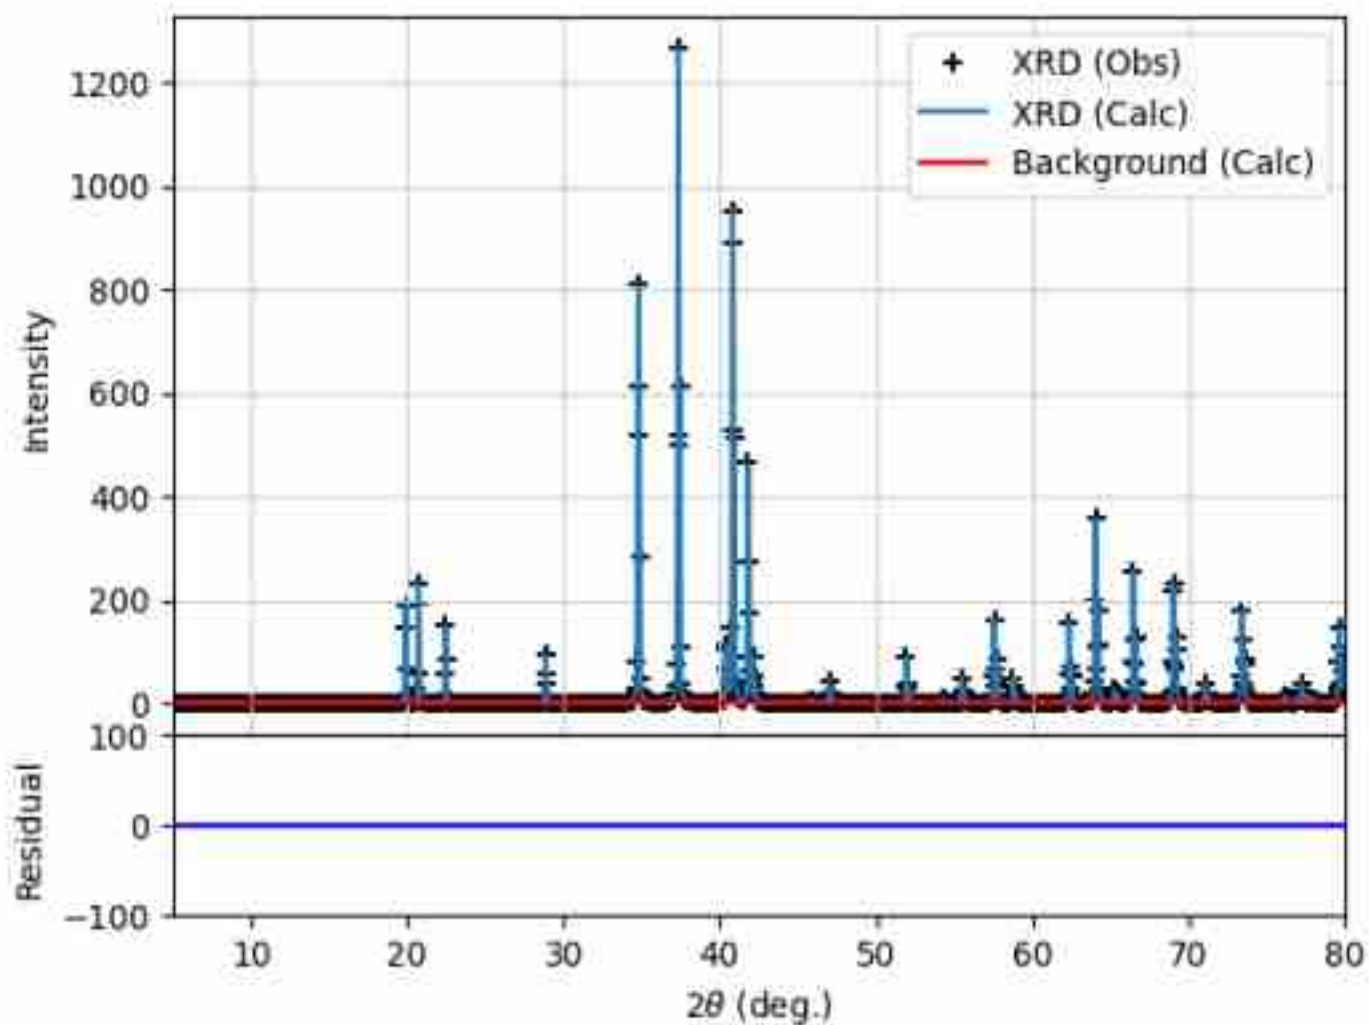

| RMSE before RR | Rwp     | RMSE after RR |
|----------------|---------|---------------|
| 0.019          | 0.00954 | 0.00095       |

# Ho<sub>2</sub>Ni<sub>2</sub>Pb<sub>1</sub>

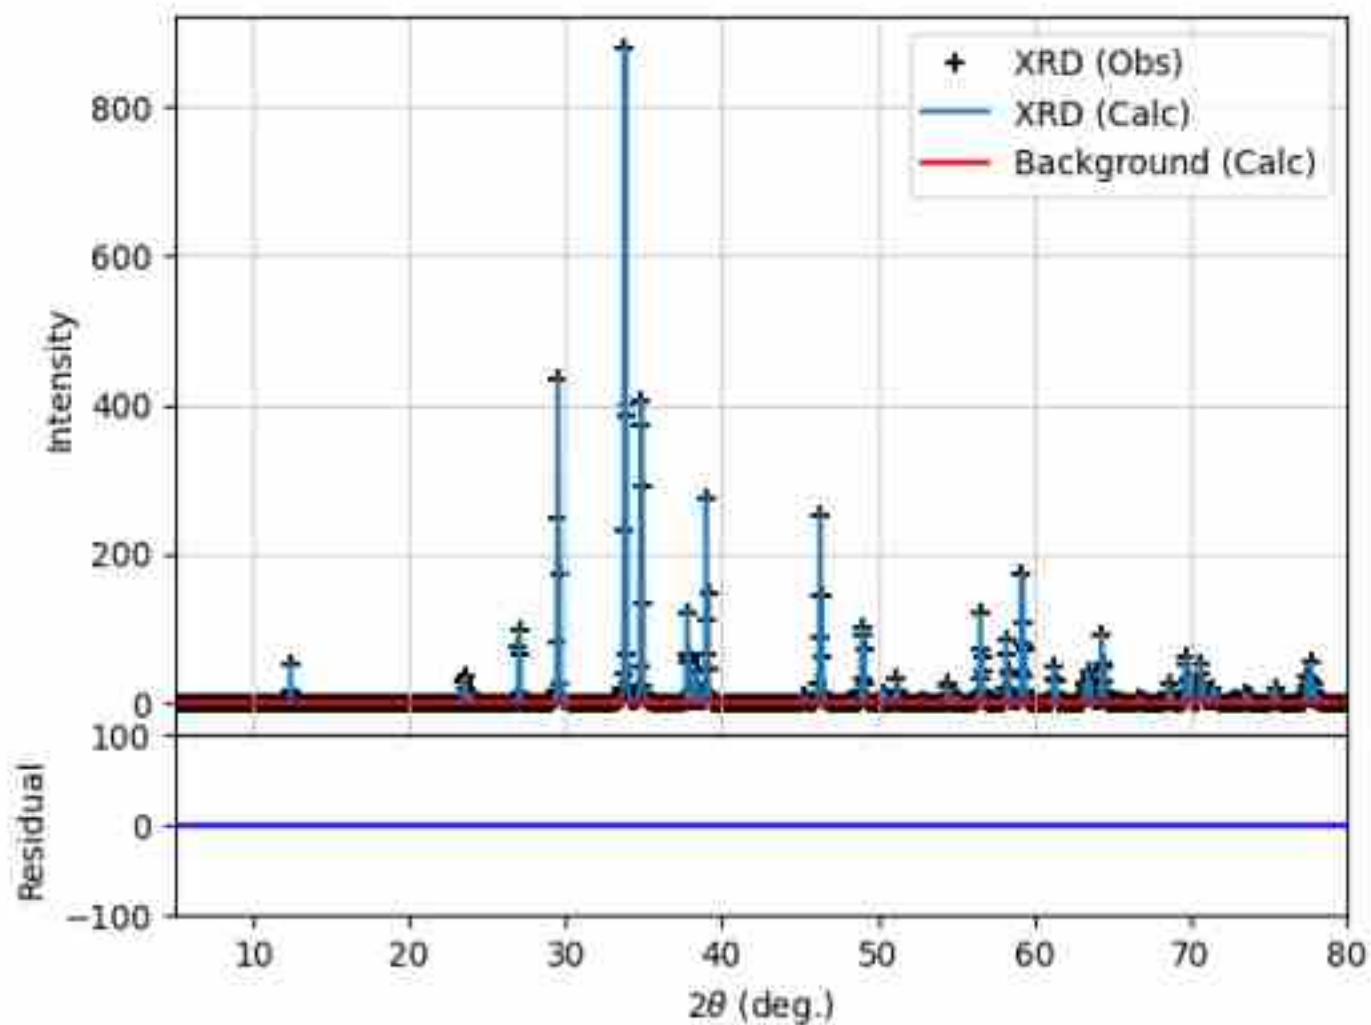

| RMSE before RR | Rwp     | RMSE after RR |
|----------------|---------|---------------|
| 0.019          | 0.00339 | 0.00023       |

# Ho<sub>3</sub>Tm<sub>1</sub>Mn<sub>8</sub>

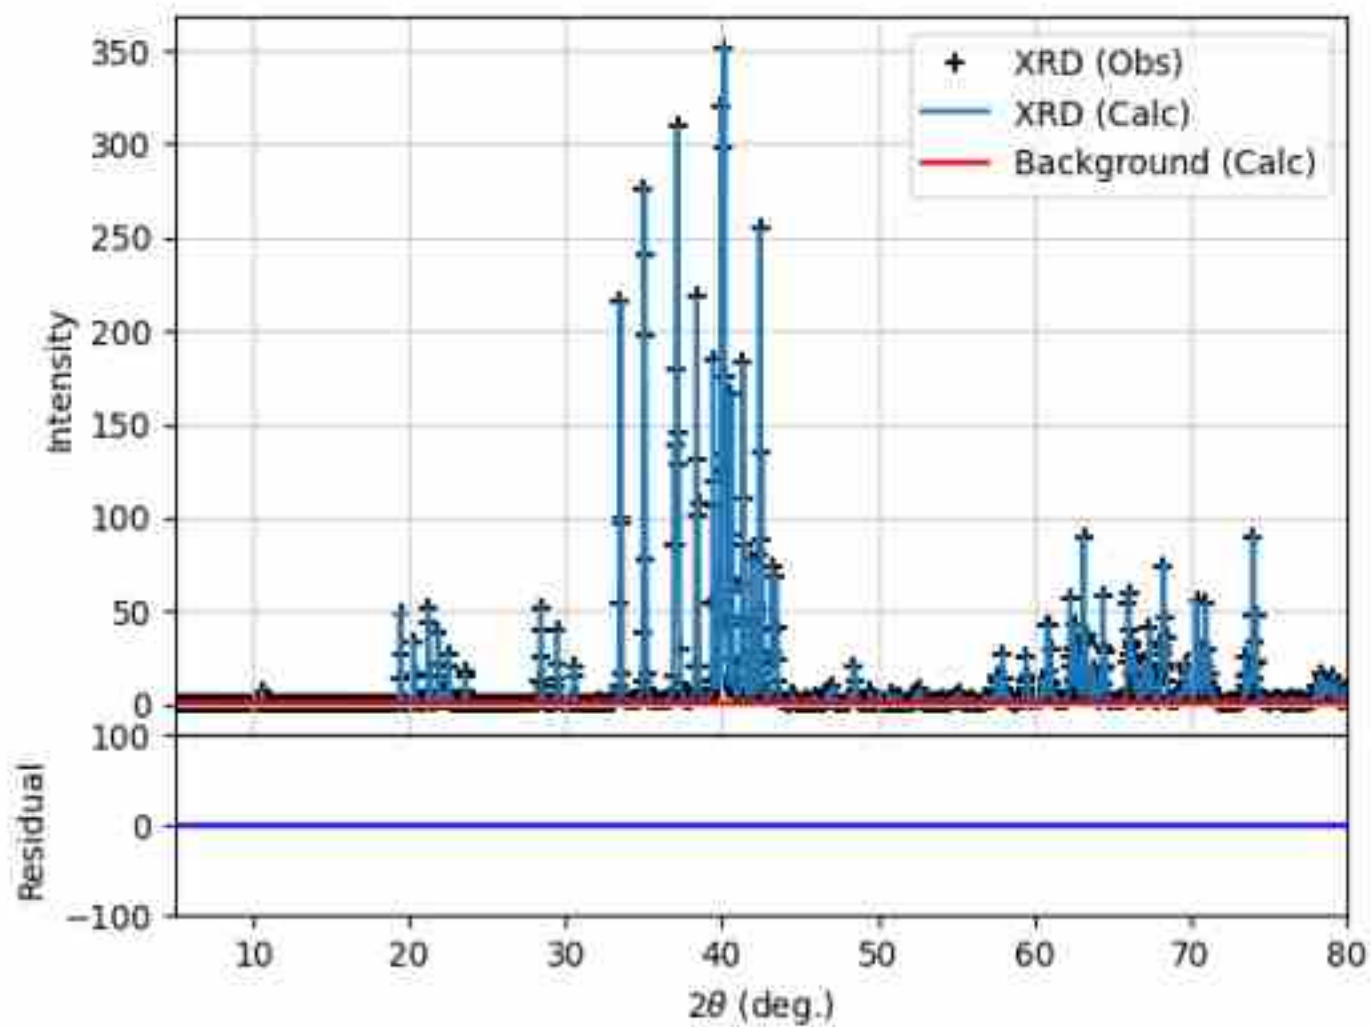

| RMSE before RR | Rwp     | RMSE after RR |
|----------------|---------|---------------|
| 0.019          | 0.00349 | 0.00027       |

# Ho4Rh4O12

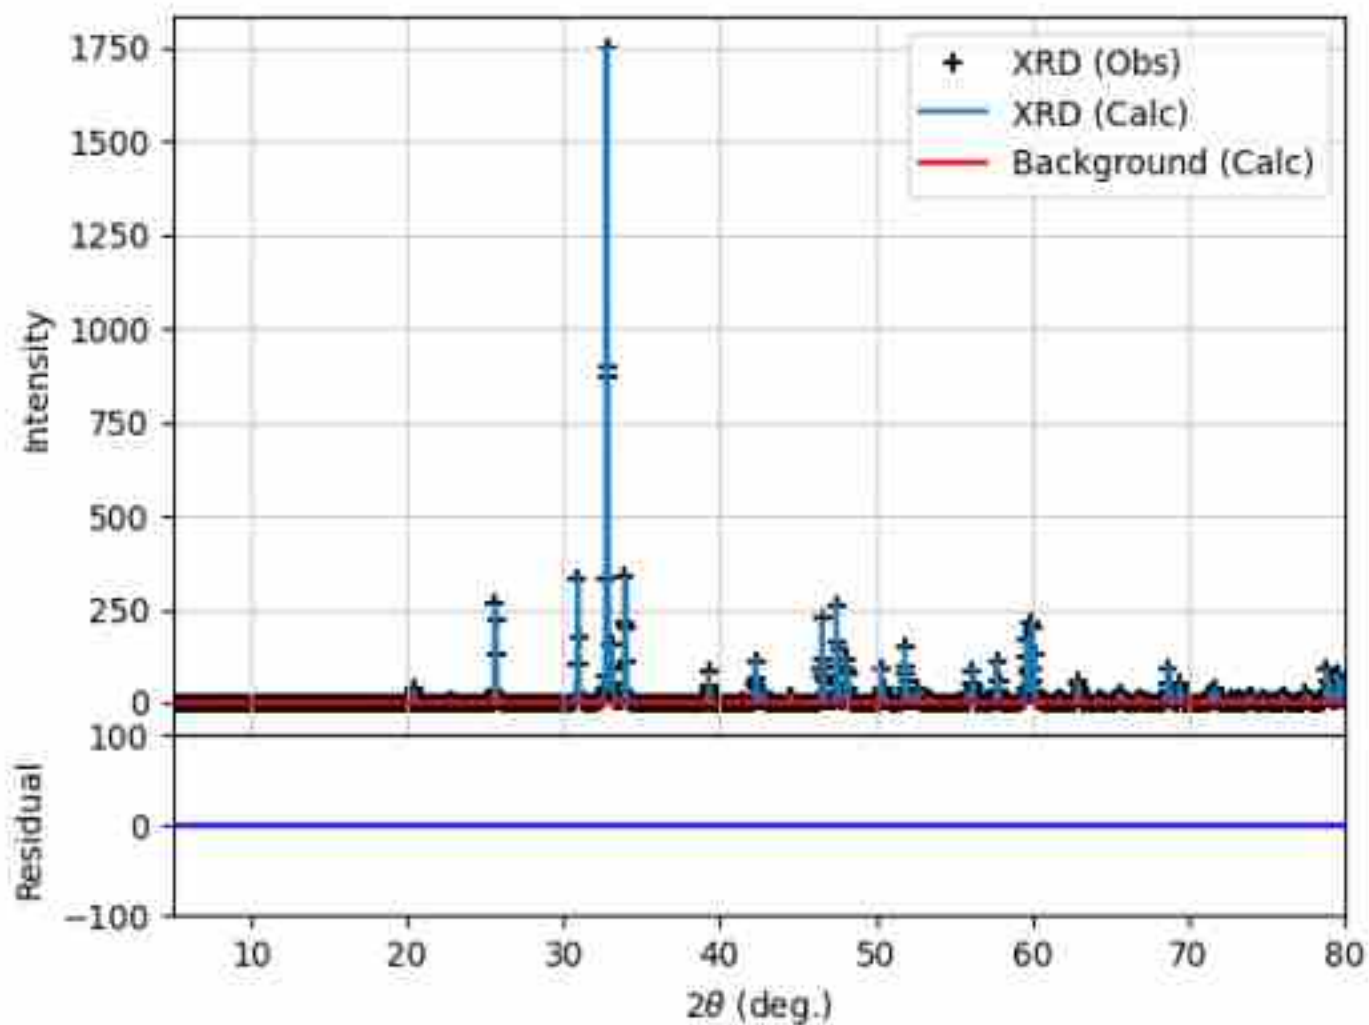

| RMSE before RR | Rwp     | RMSE after RR |
|----------------|---------|---------------|
| 0.019          | 0.00413 | 0.00085       |

# Ho6Tl10

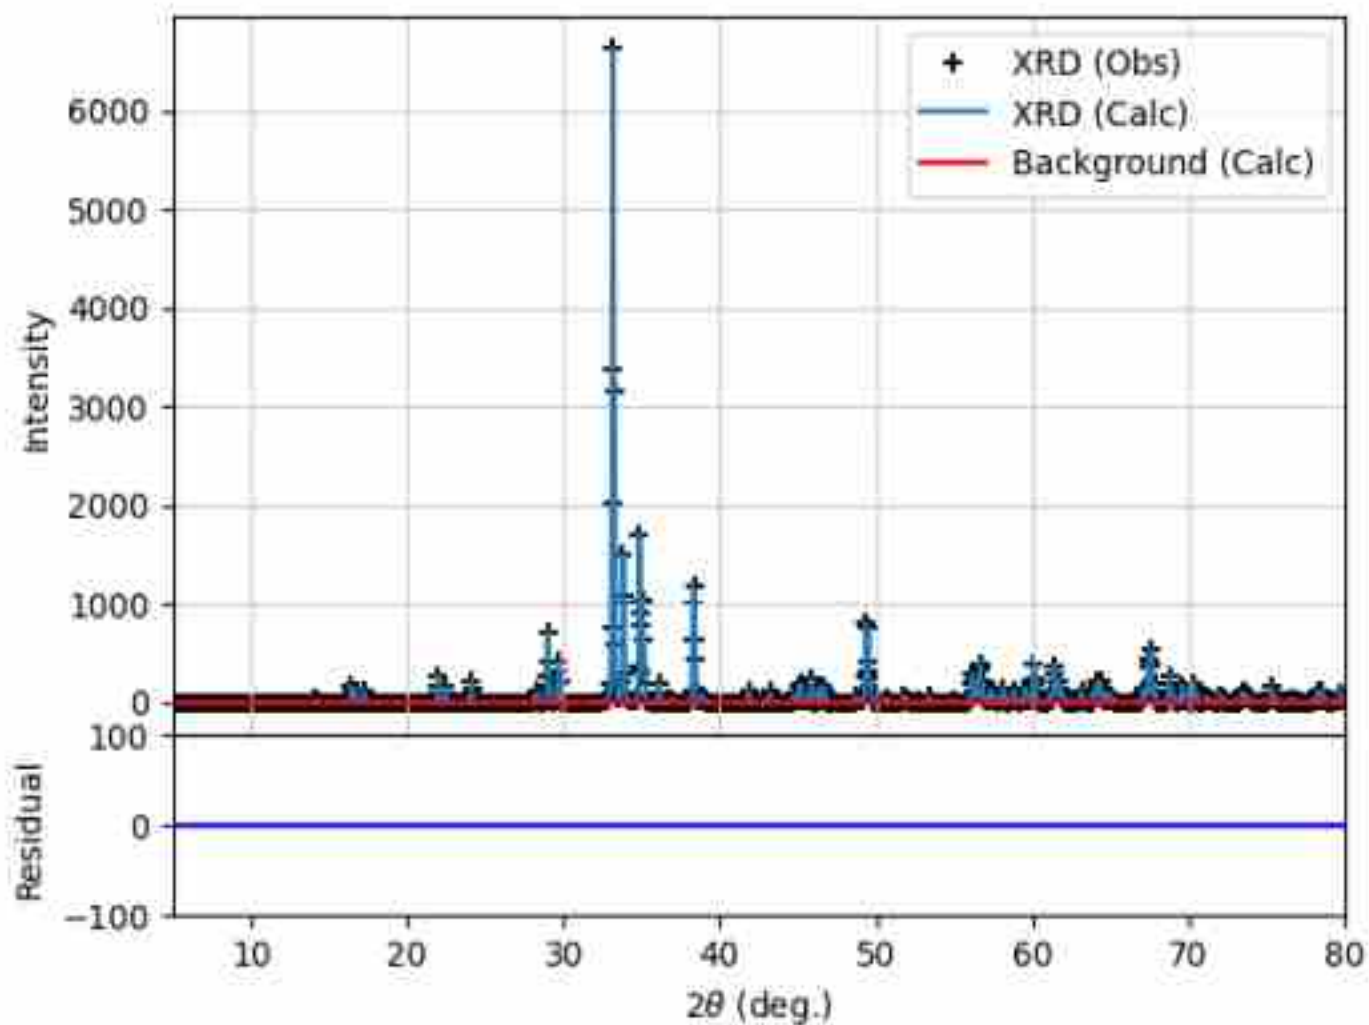

| RMSE before RR | Rwp     | RMSE after RR |
|----------------|---------|---------------|
| 0.019          | 0.00431 | 0.00032       |



# Ho8S12

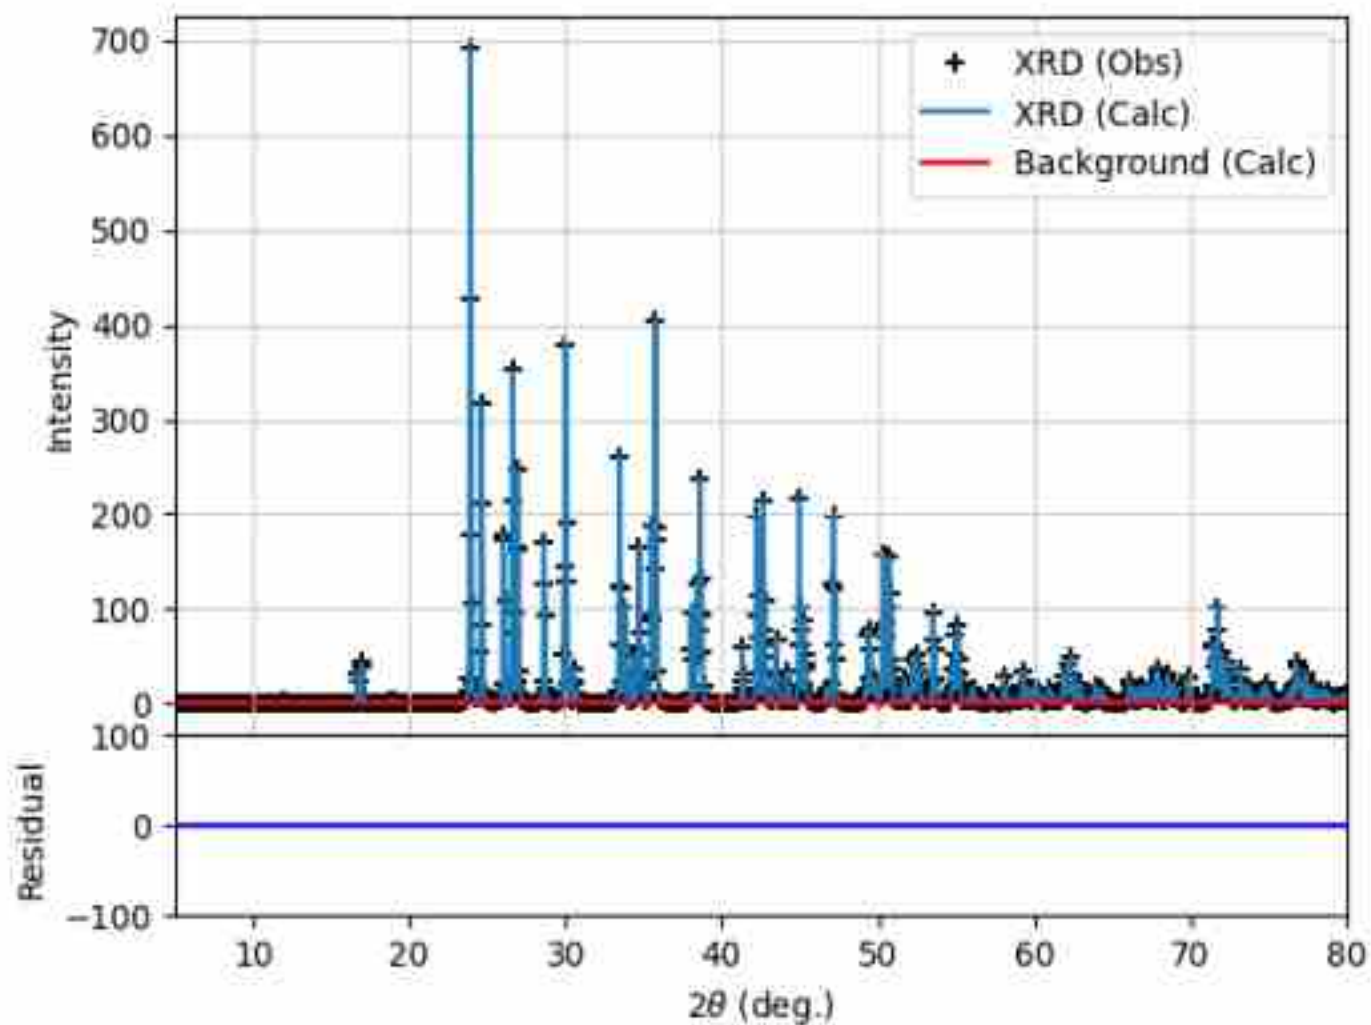

| RMSE before RR | Rwp     | RMSE after RR |
|----------------|---------|---------------|
| 0.019          | 0.00424 | 0.00073       |

# Ho10Tl6

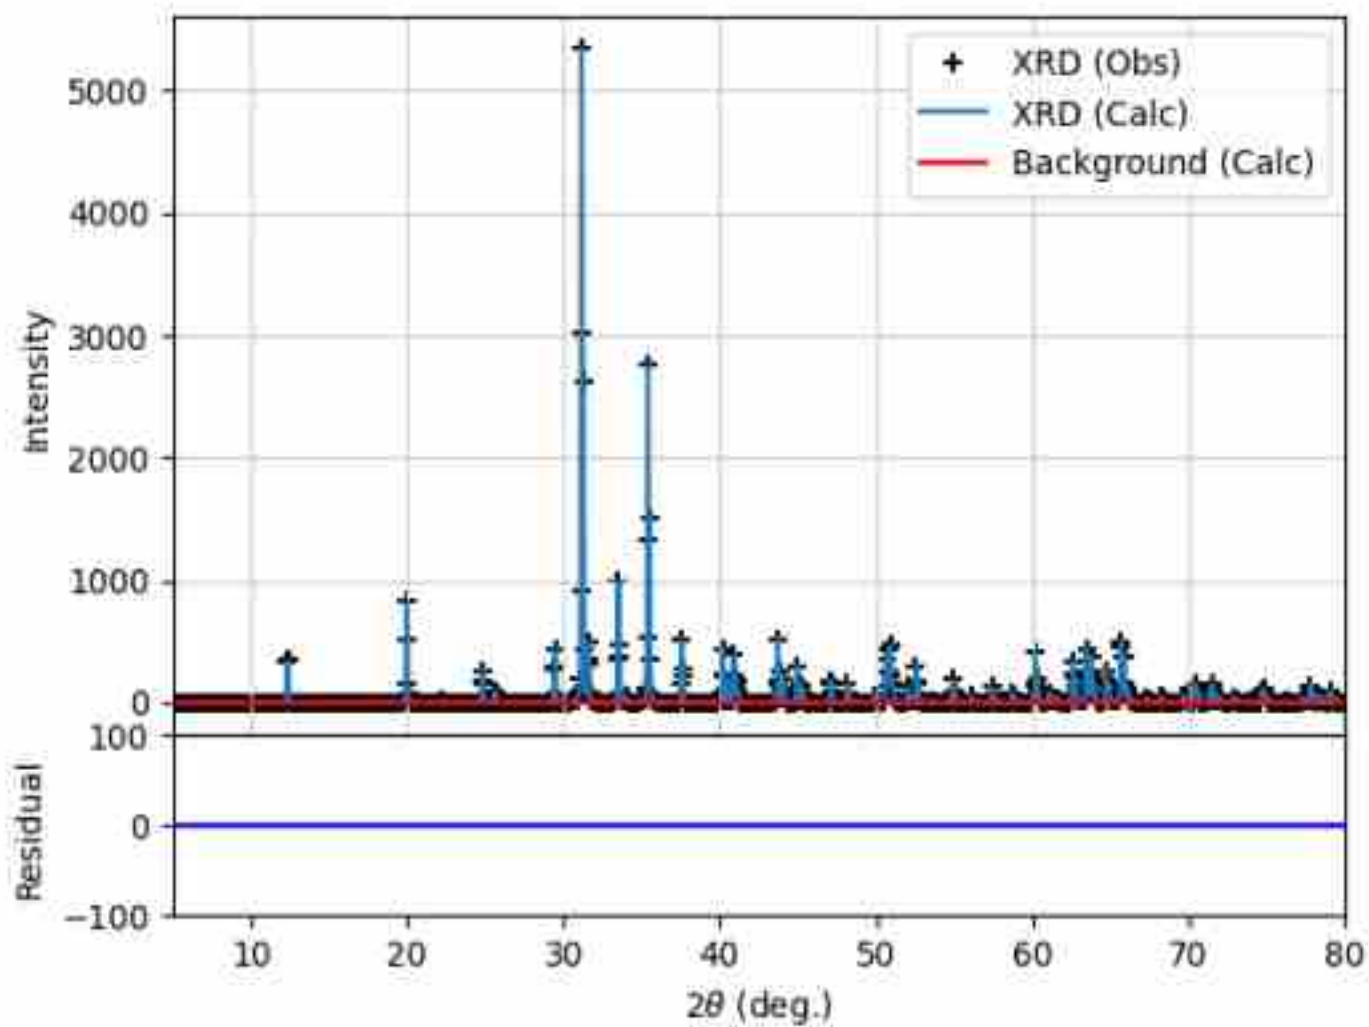

| RMSE before RR | Rwp     | RMSE after RR |
|----------------|---------|---------------|
| 0.019          | 0.00342 | 0.00023       |

# In1Cu1S2

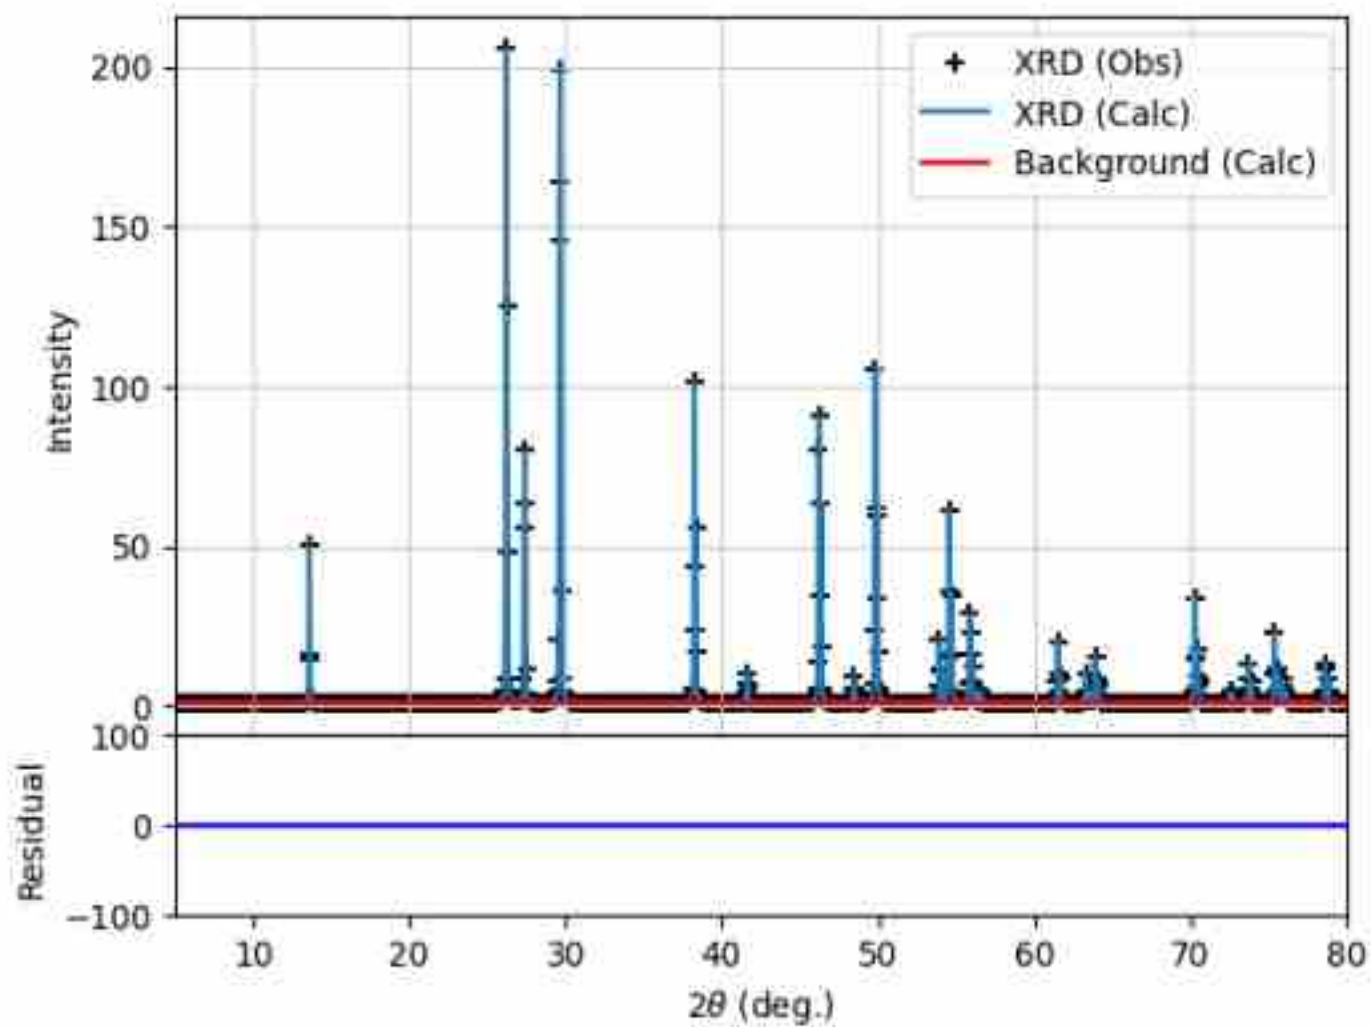

| RMSE before RR | Rwp    | RMSE after RR |
|----------------|--------|---------------|
| 0.019          | 0.0015 | 0.00017       |

# In<sub>2</sub>Mo<sub>6</sub>Se<sub>6</sub>

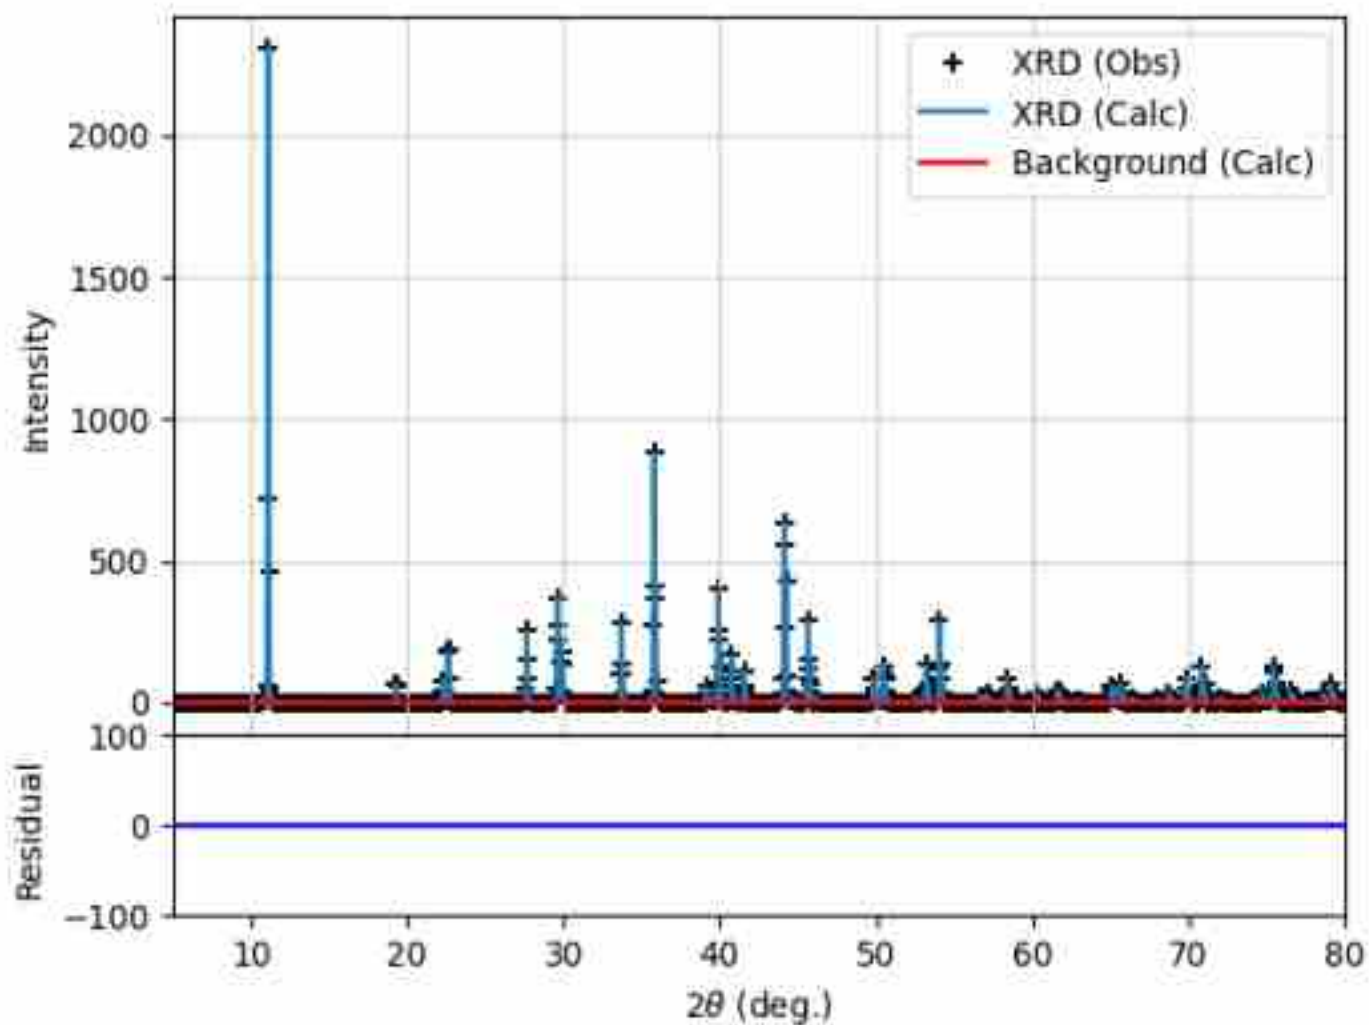

| RMSE before RR | Rwp     | RMSE after RR |
|----------------|---------|---------------|
| 0.019          | 0.00339 | 0.00078       |

# K1Ta1P2O8

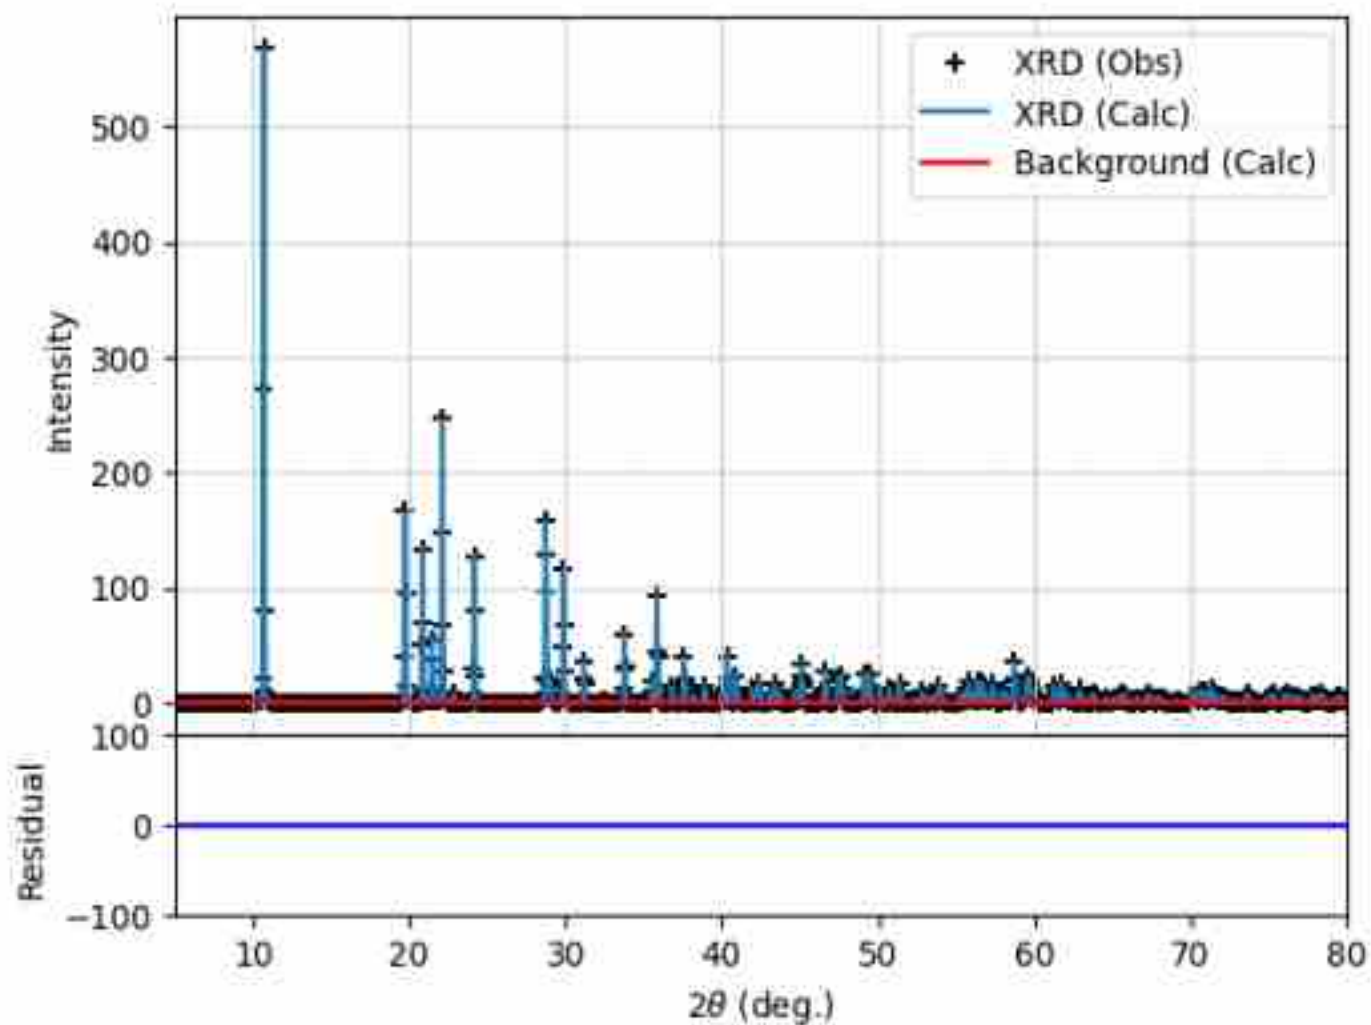

| RMSE before RR | Rwp     | RMSE after RR |
|----------------|---------|---------------|
| 0.019          | 0.00334 | 0.00093       |

# K2Br1Cl6F1

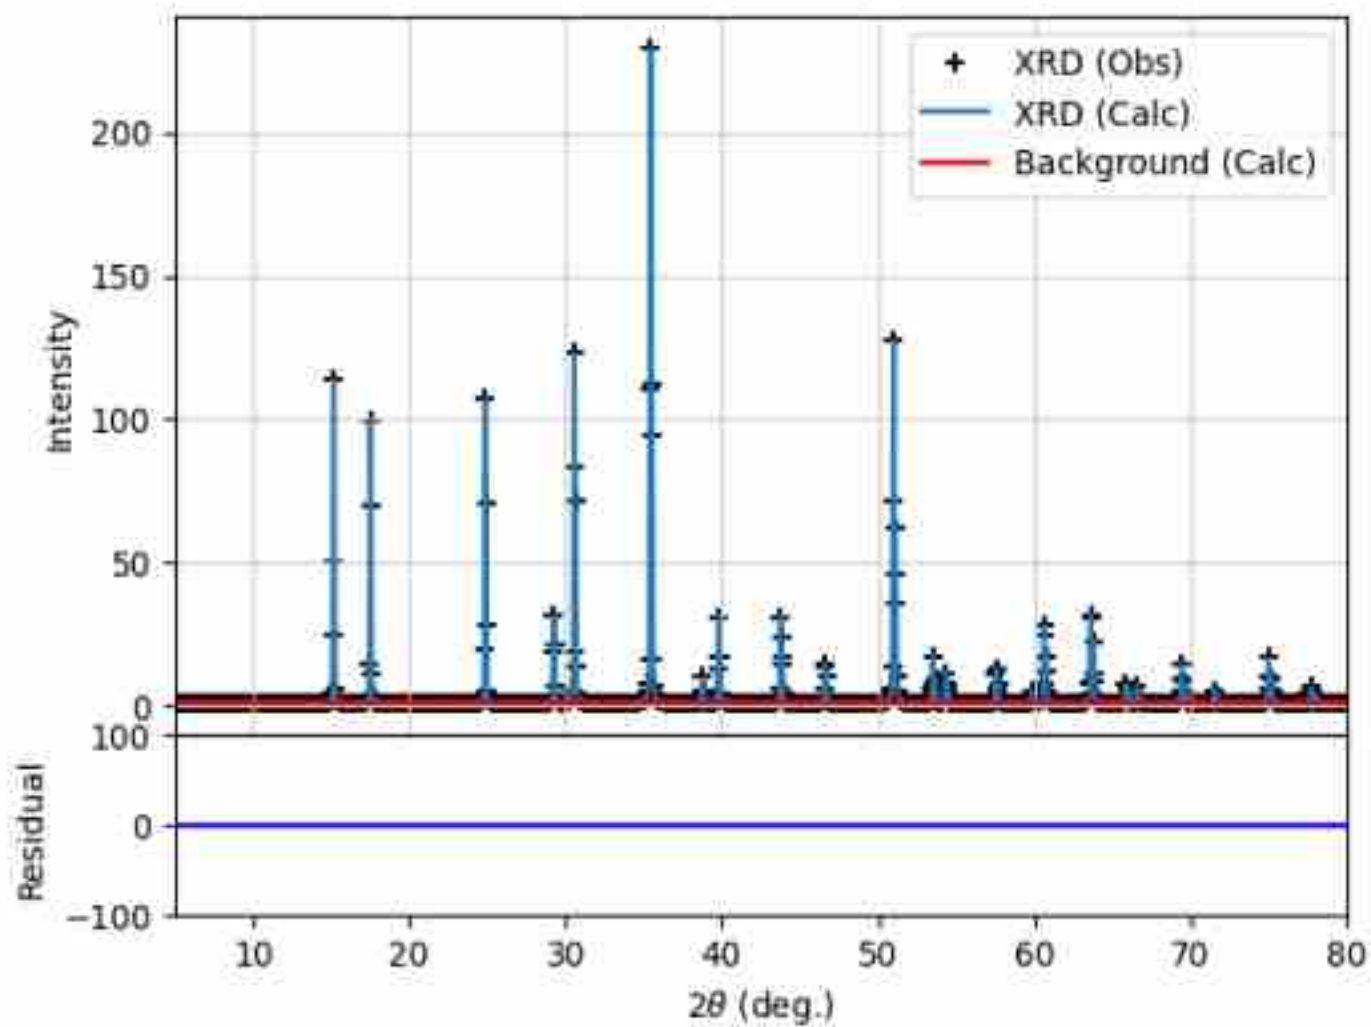

| RMSE before RR | Rwp     | RMSE after RR |
|----------------|---------|---------------|
| 0.019          | 0.03039 | 0.00254       |

# K<sub>2</sub>Na<sub>2</sub>Eu<sub>2</sub>Nb<sub>2</sub>O<sub>10</sub>

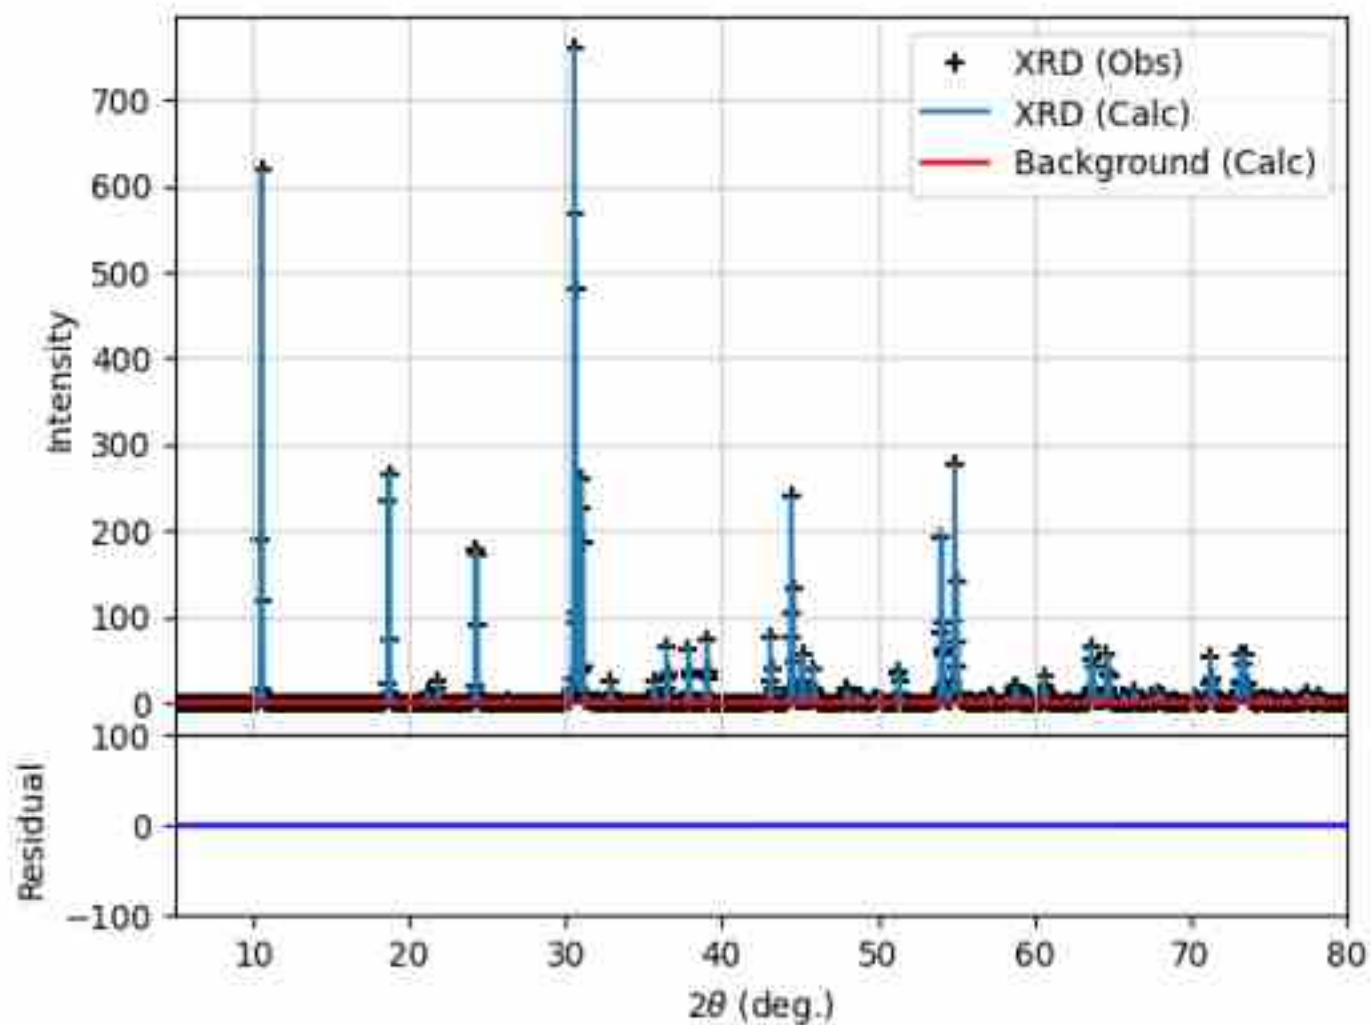

| RMSE before RR | Rwp    | RMSE after RR |
|----------------|--------|---------------|
| 0.019          | 0.4691 | 0.005         |

# K<sub>2</sub>Rb<sub>1</sub>Ti<sub>1</sub>F<sub>6</sub>

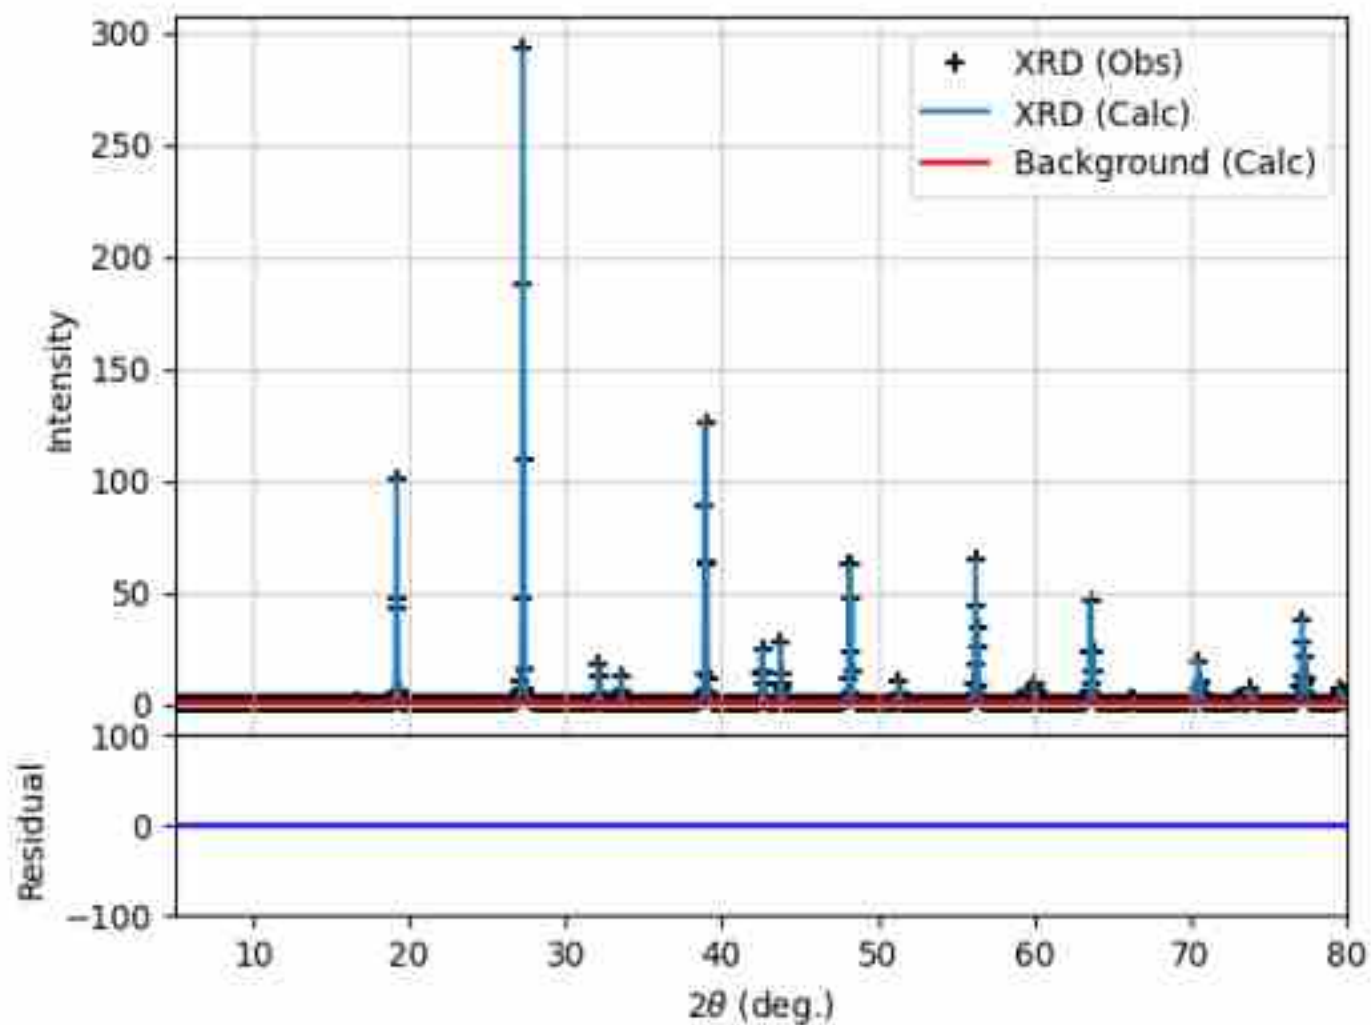

| RMSE before RR | Rwp     | RMSE after RR |
|----------------|---------|---------------|
| 0.019          | 0.01511 | 0.00319       |



# K<sub>2</sub>Si<sub>4</sub>N<sub>6</sub>

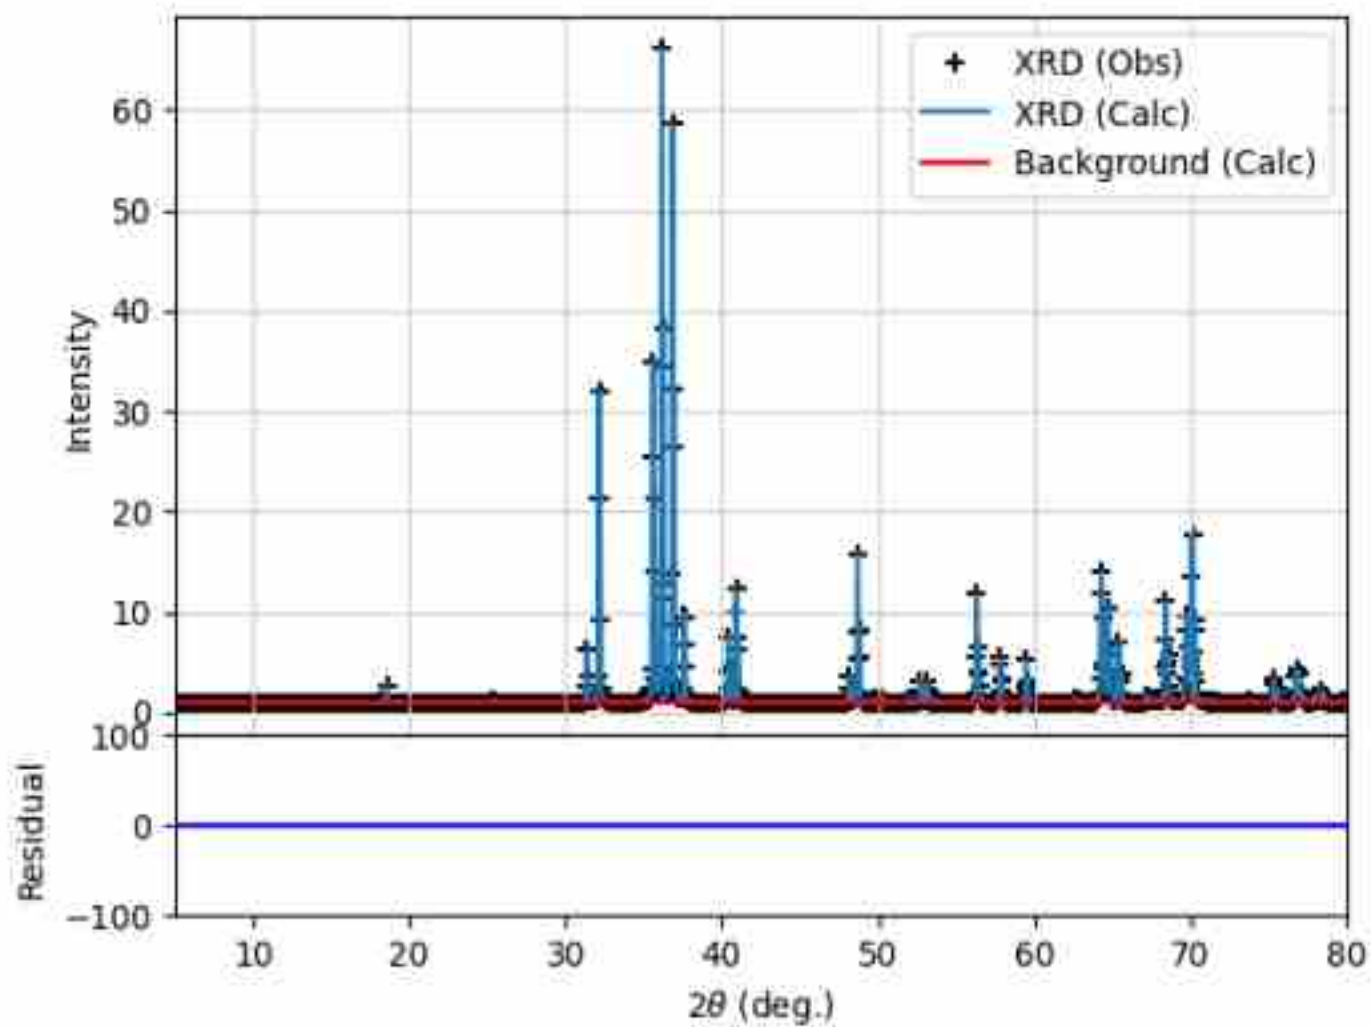

| RMSE before RR | Rwp     | RMSE after RR |
|----------------|---------|---------------|
| 0.019          | 0.00276 | 0.00069       |

# K3Rh1F6

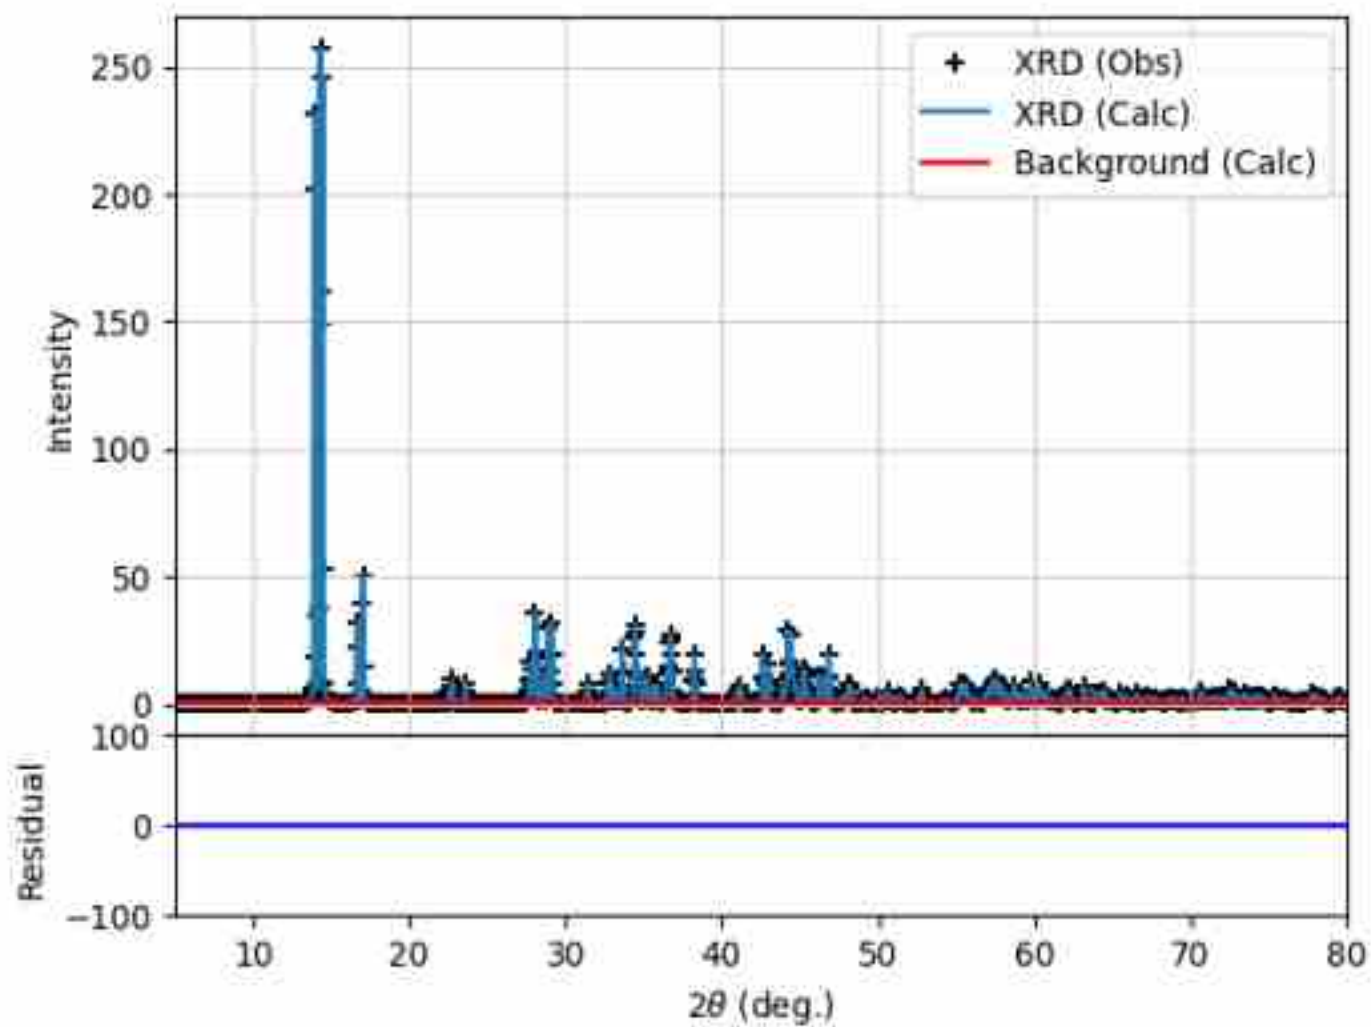

| RMSE before RR | Rwp     | RMSE after RR |
|----------------|---------|---------------|
| 0.019          | 0.00061 | 0.00027       |

# K4Ag8

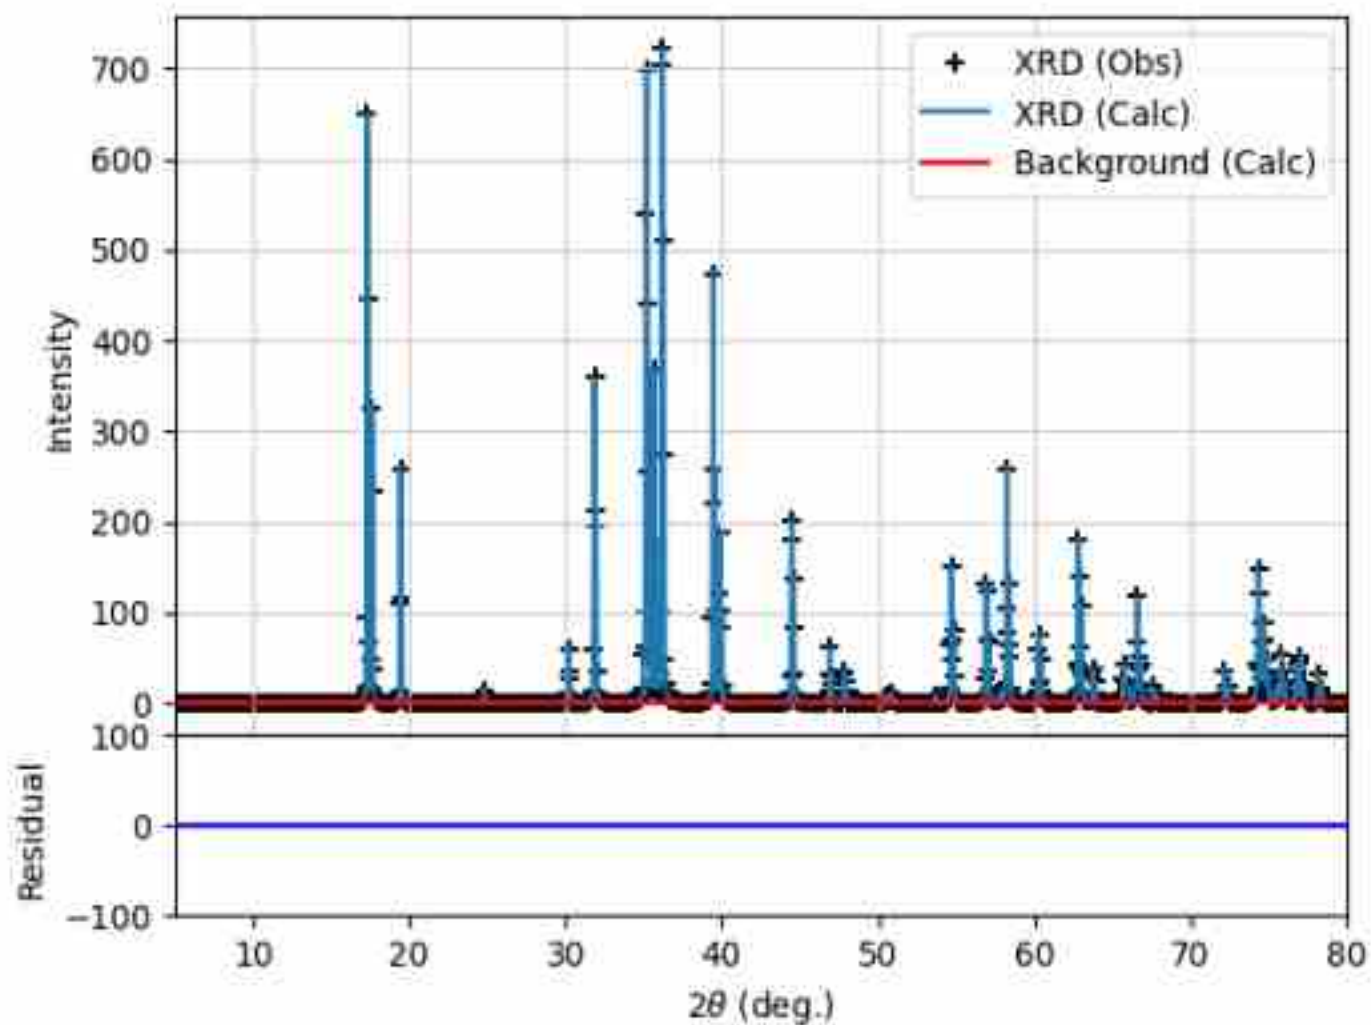

| RMSE before RR | Rwp     | RMSE after RR |
|----------------|---------|---------------|
| 0.019          | 0.00607 | 0.00089       |

# K<sub>4</sub>Na<sub>2</sub>Al<sub>2</sub>P<sub>4</sub>

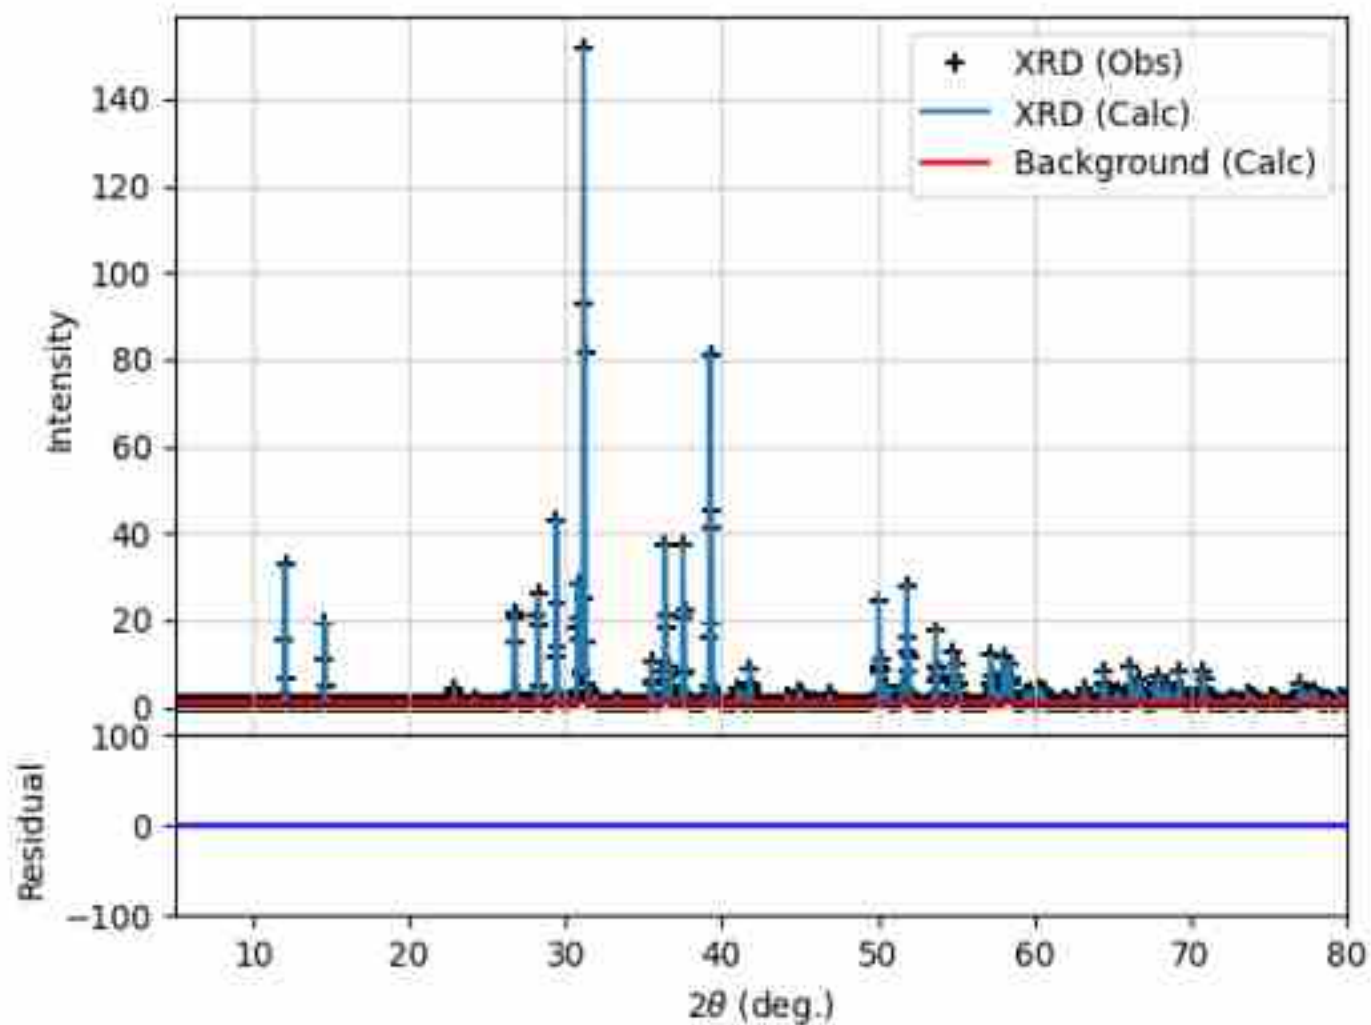

| RMSE before RR | Rwp     | RMSE after RR |
|----------------|---------|---------------|
| 0.019          | 0.00218 | 0.00036       |

# La1Nb2Cu1Cl1O7

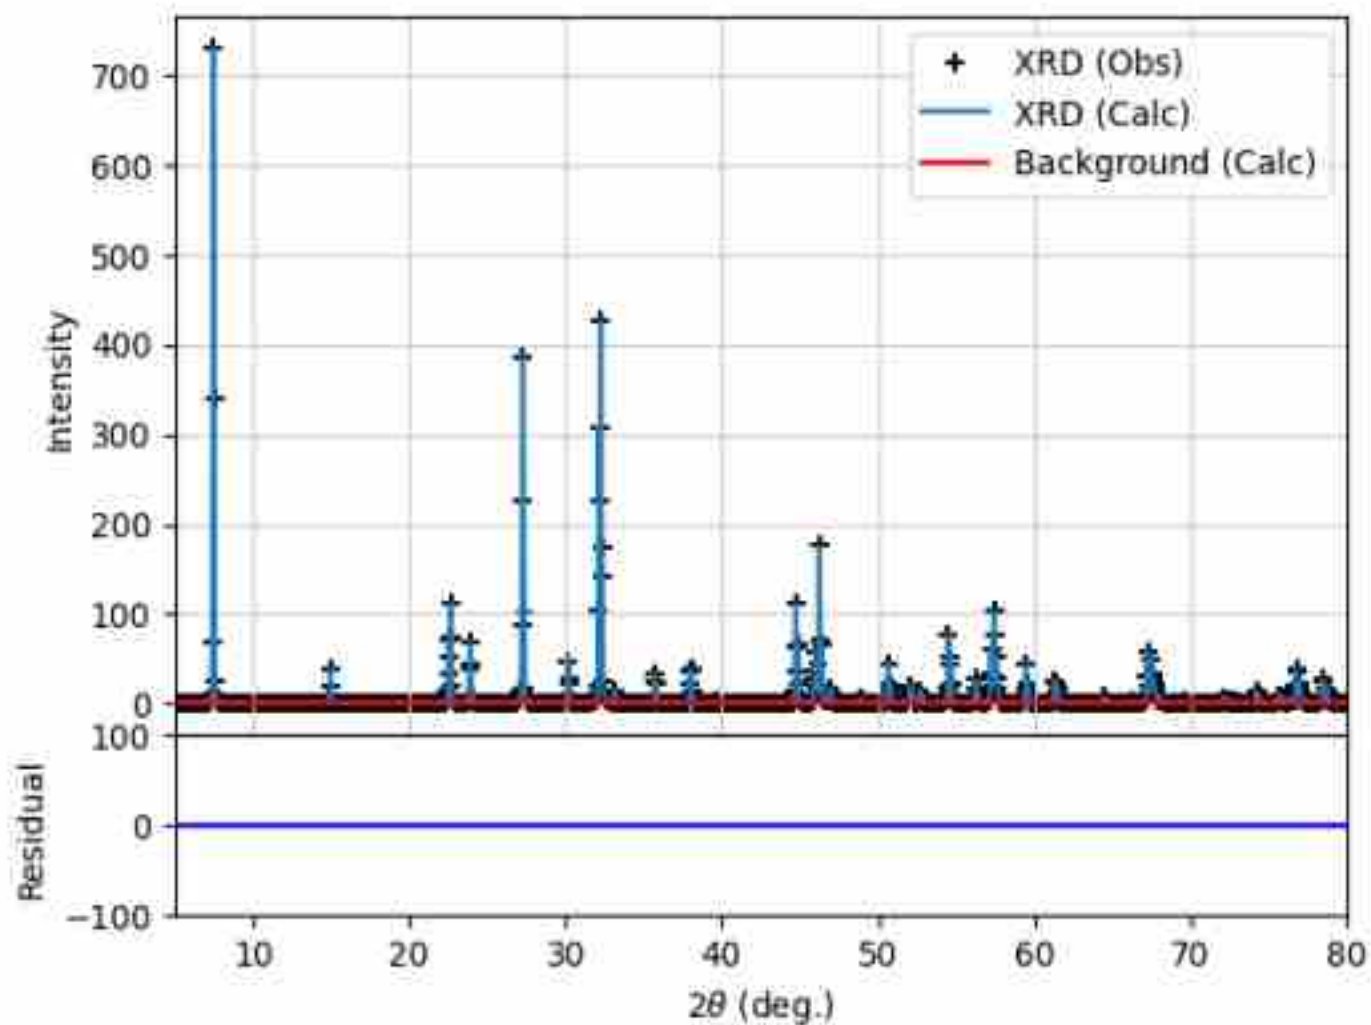

| RMSE before RR | Rwp     | RMSE after RR |
|----------------|---------|---------------|
| 0.019          | 0.01915 | 0.00245       |

# La<sub>2</sub>Fe<sub>4</sub>As<sub>2</sub>N<sub>2</sub>

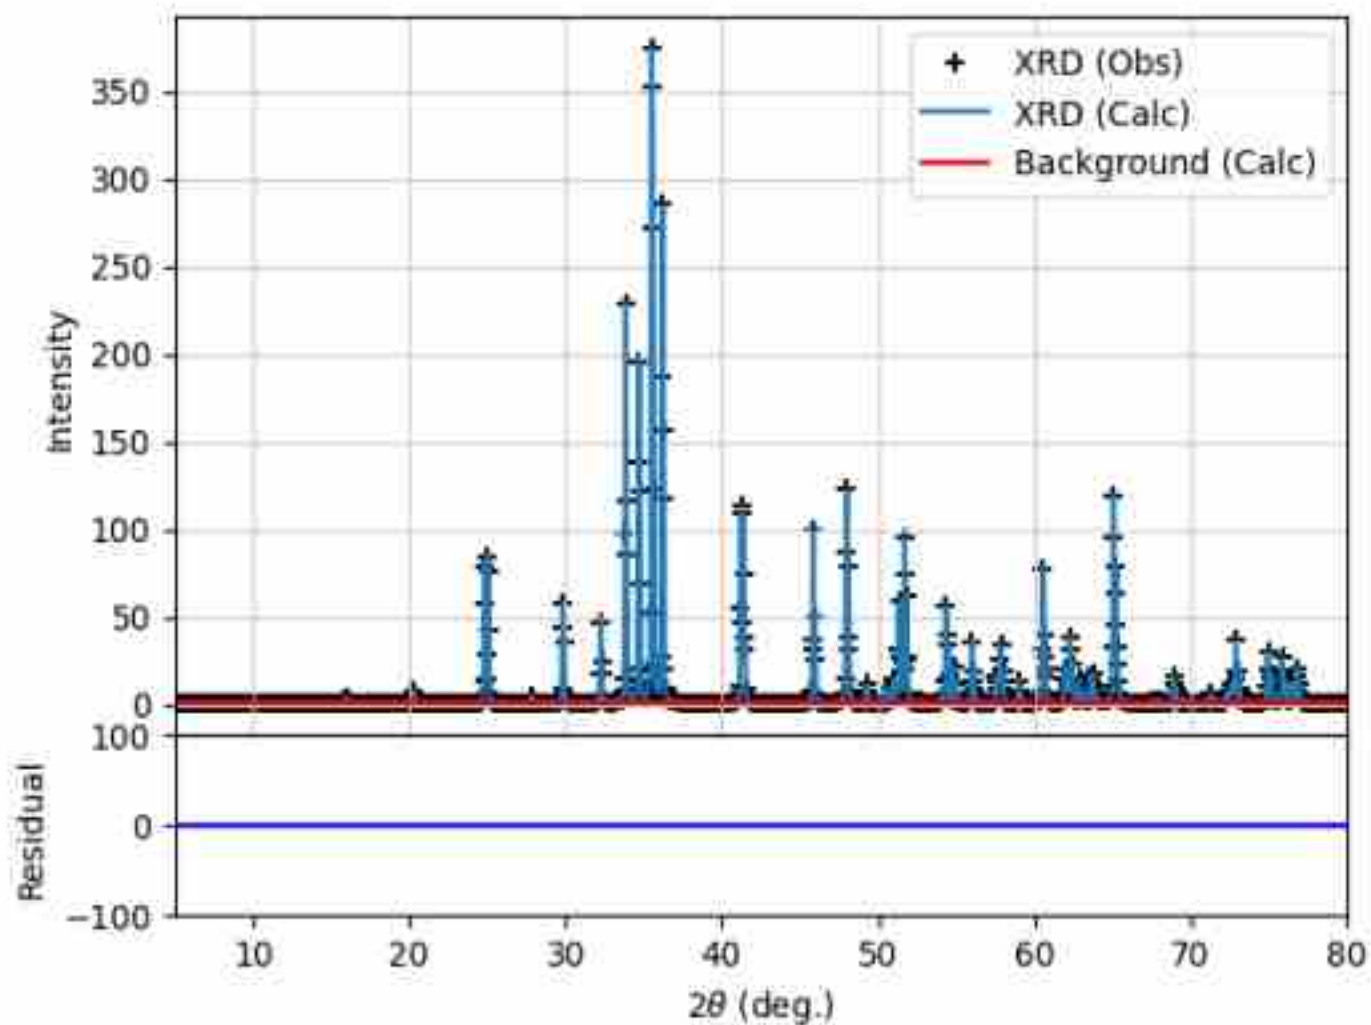

| RMSE before RR | Rwp     | RMSE after RR |
|----------------|---------|---------------|
| 0.019          | 0.00492 | 0.00116       |

# La<sub>2</sub>Nb<sub>2</sub>O<sub>8</sub>

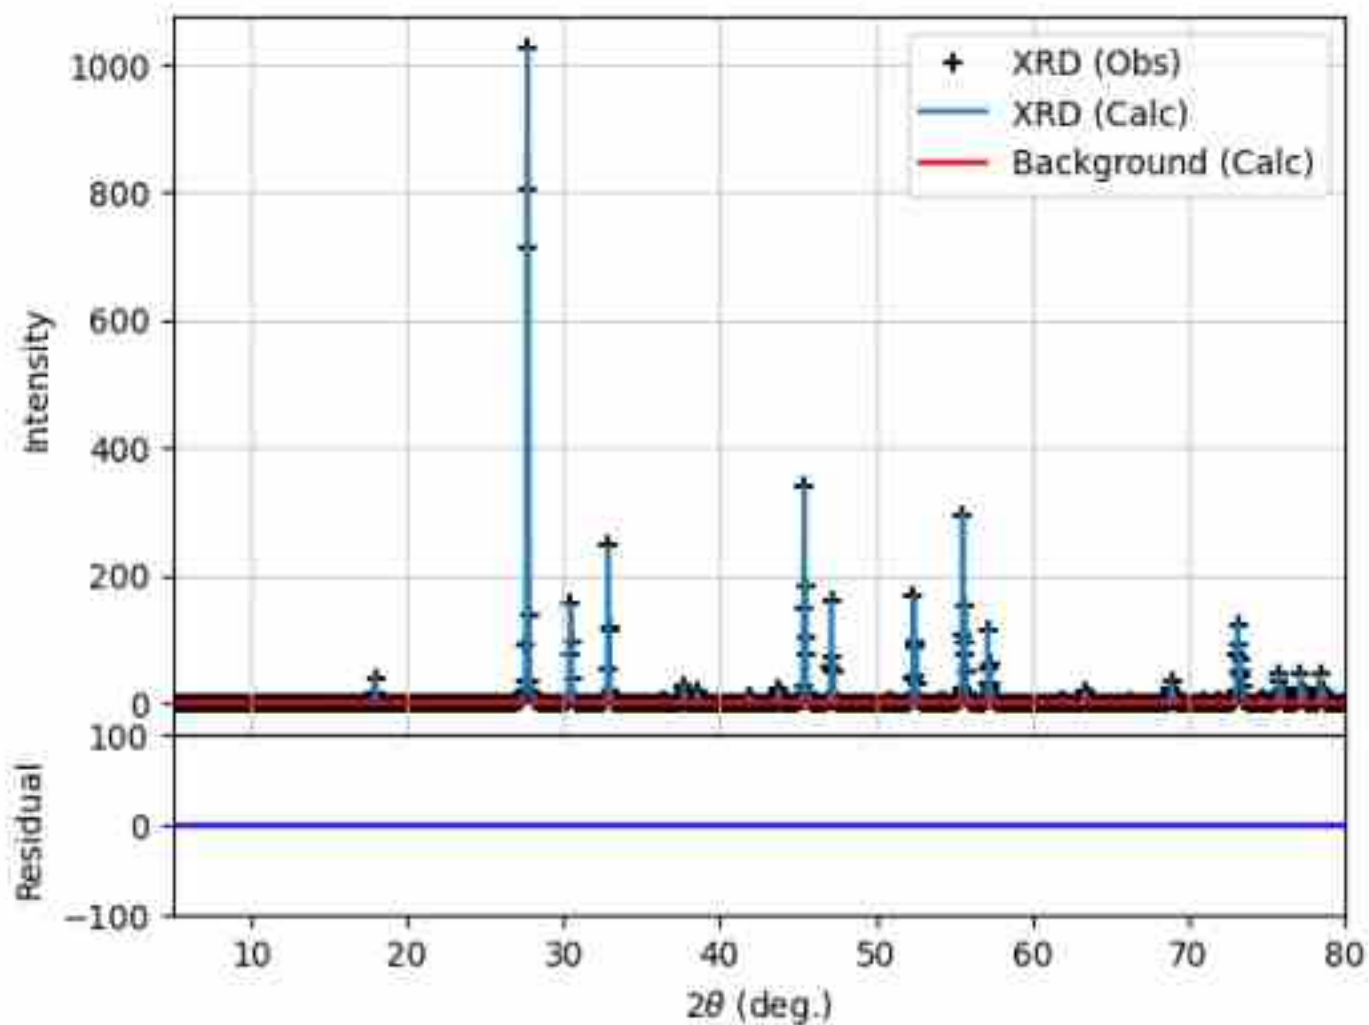

| RMSE before RR | Rwp     | RMSE after RR |
|----------------|---------|---------------|
| 0.019          | 0.00352 | 0.00139       |

# La<sub>4</sub>Mg<sub>4</sub>Si<sub>8</sub>

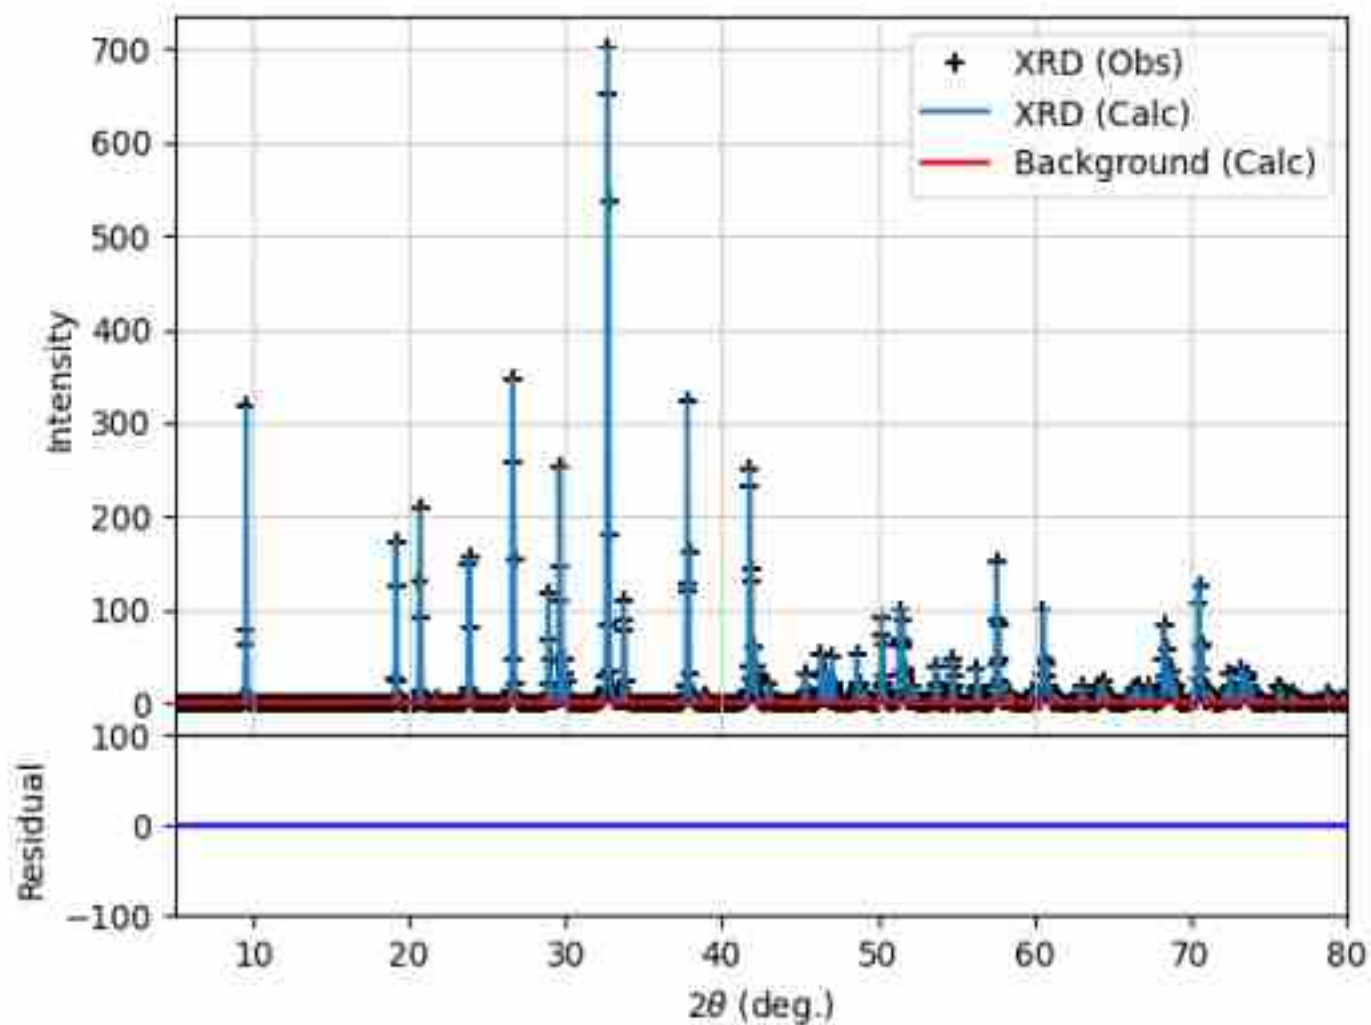

| RMSE before RR | Rwp     | RMSE after RR |
|----------------|---------|---------------|
| 0.019          | 0.00377 | 0.0006        |



# Li1Sm1W2O8

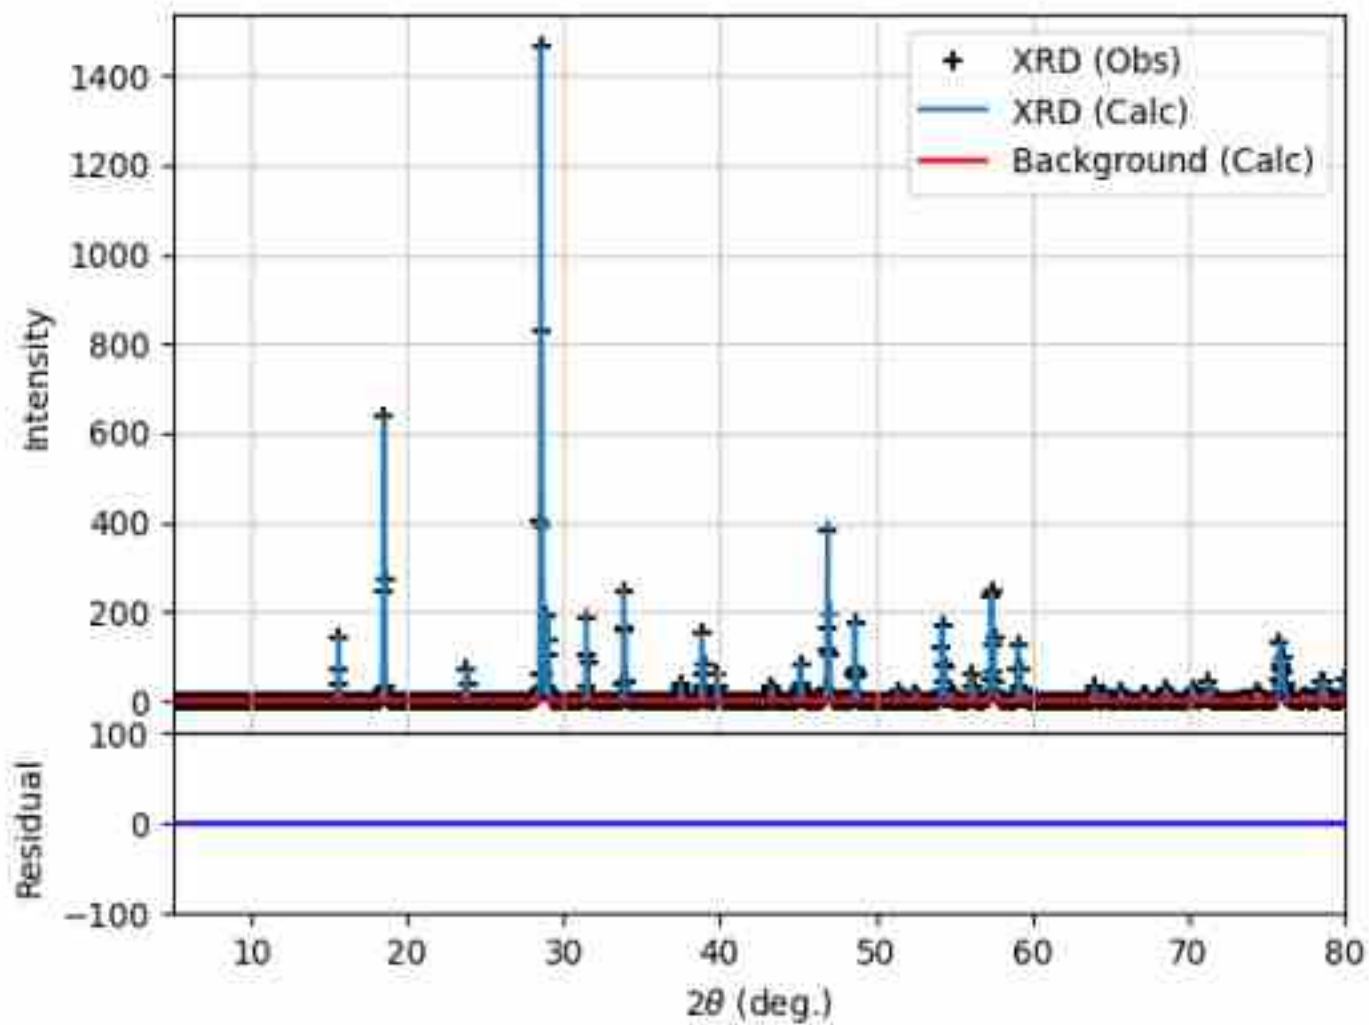

| RMSE before RR | Rwp     | RMSE after RR |
|----------------|---------|---------------|
| 0.019          | 0.00408 | 0.0027        |

# Li<sub>2</sub>Cr<sub>3</sub>Co<sub>10</sub>O<sub>8</sub>

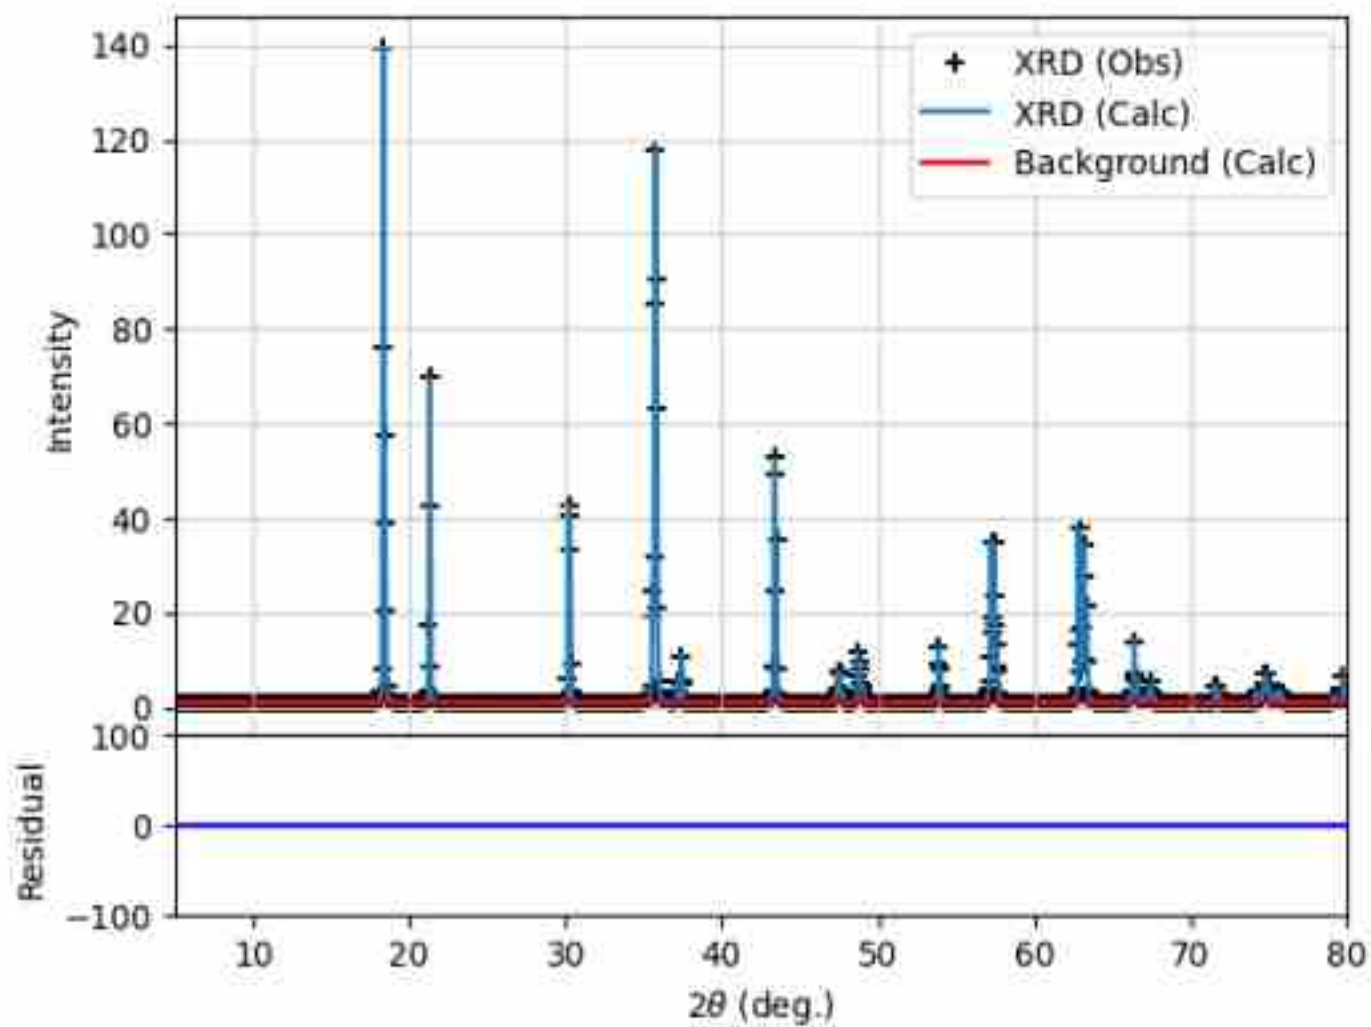

| RMSE before RR | Rwp     | RMSE after RR |
|----------------|---------|---------------|
| 0.019          | 0.00249 | 0.0012        |

# Li<sub>2</sub>Hf1N<sub>2</sub>

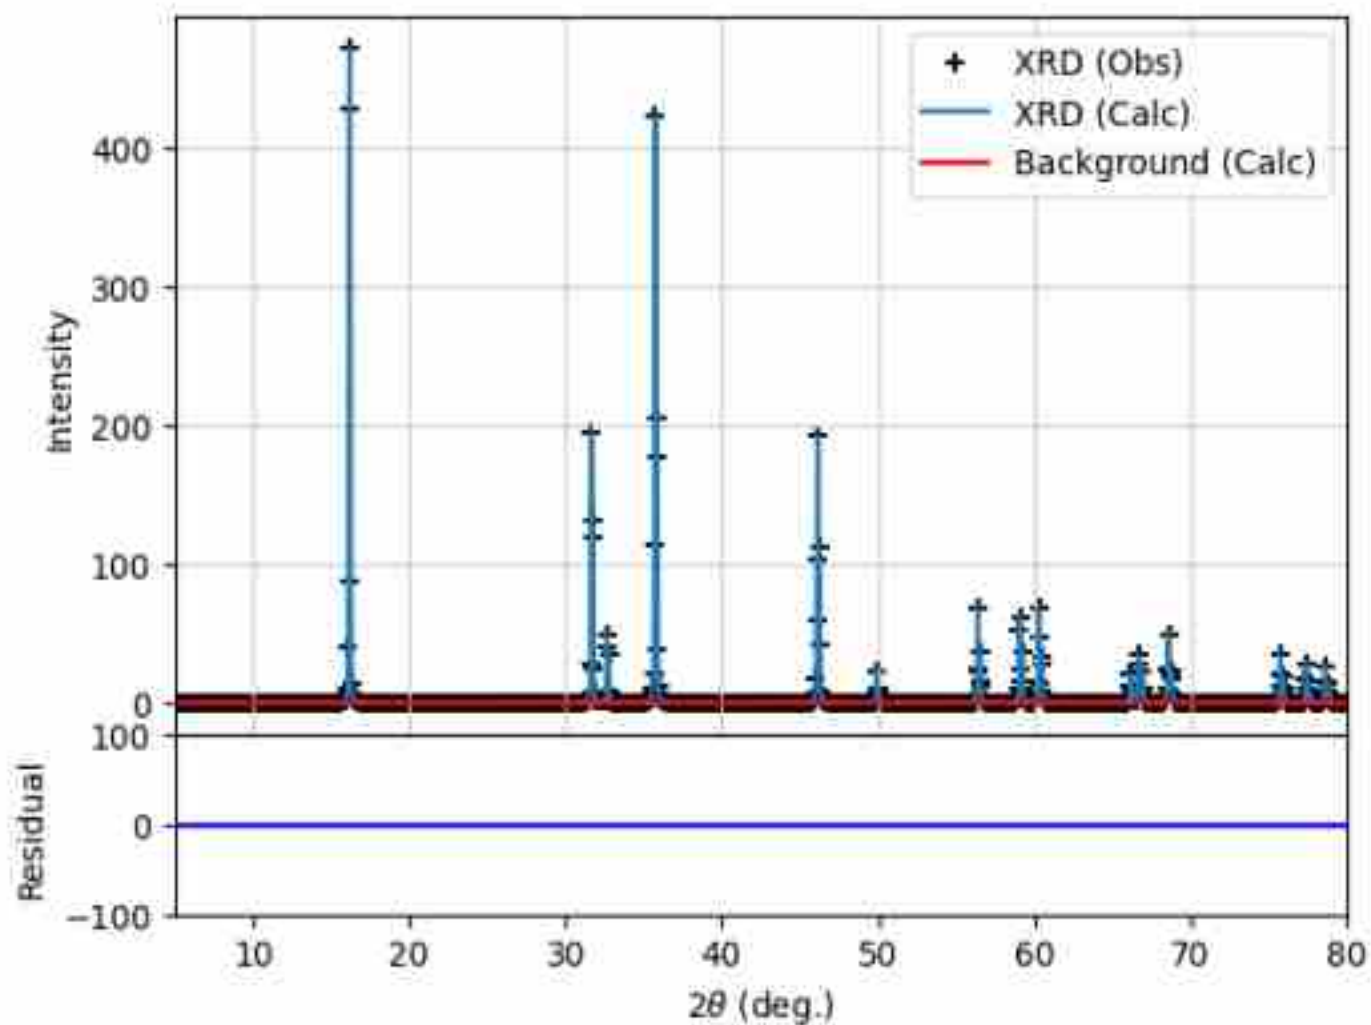

| RMSE before RR | Rwp     | RMSE after RR |
|----------------|---------|---------------|
| 0.019          | 0.00341 | 0.00649       |

# Li<sub>2</sub>Sm<sub>2</sub>Sn<sub>4</sub>

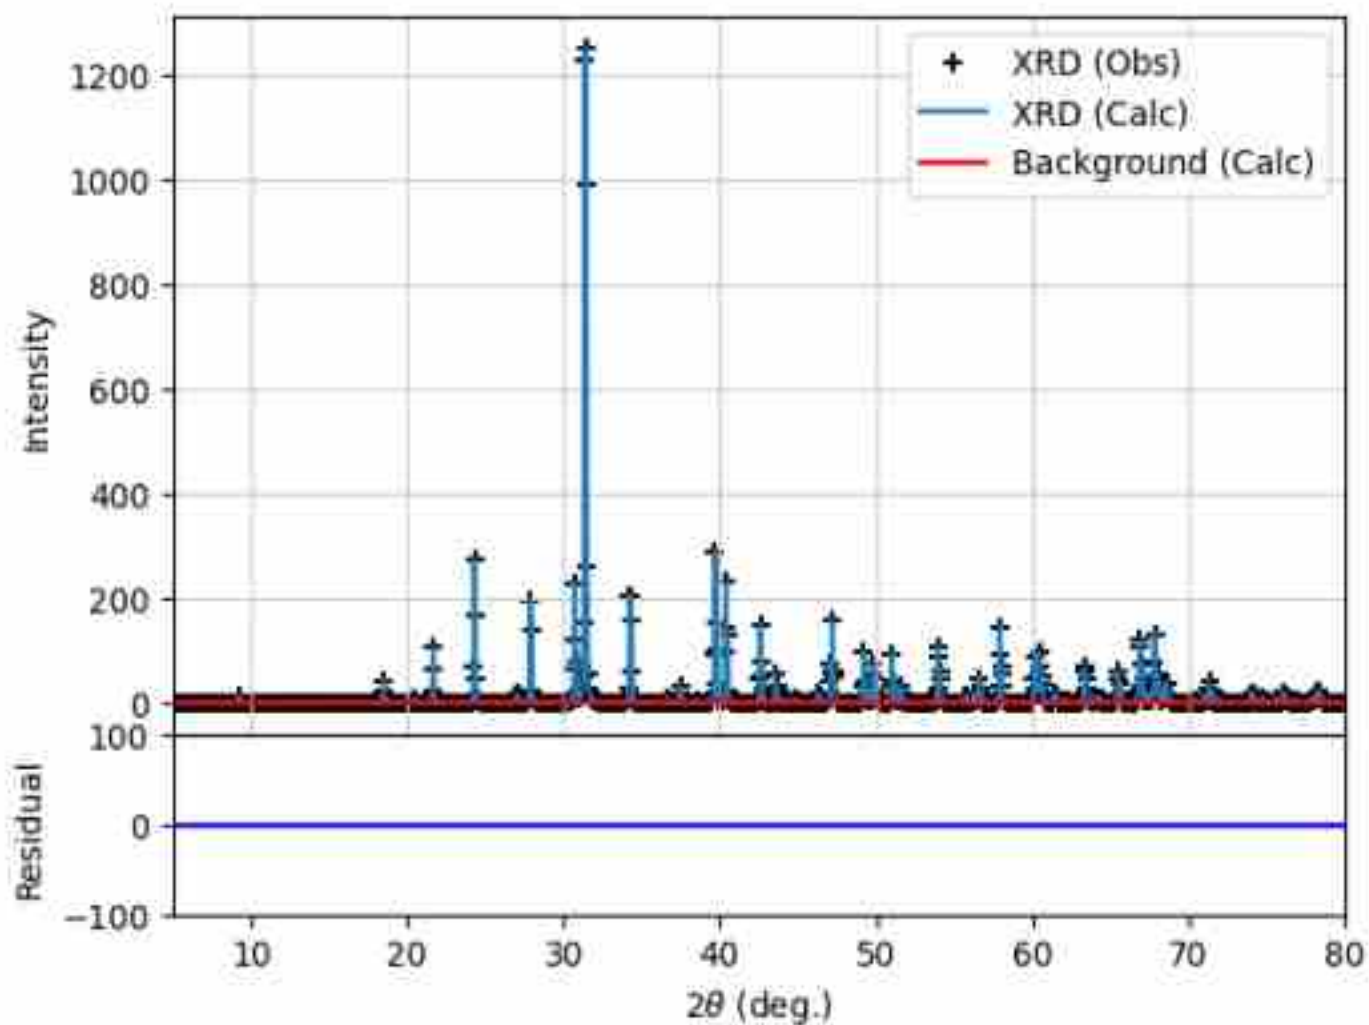

| RMSE before RR | Rwp    | RMSE after RR |
|----------------|--------|---------------|
| 0.019          | 0.0041 | 0.00268       |

# Li<sub>2</sub>V<sub>2</sub>Fe<sub>2</sub>O<sub>8</sub>

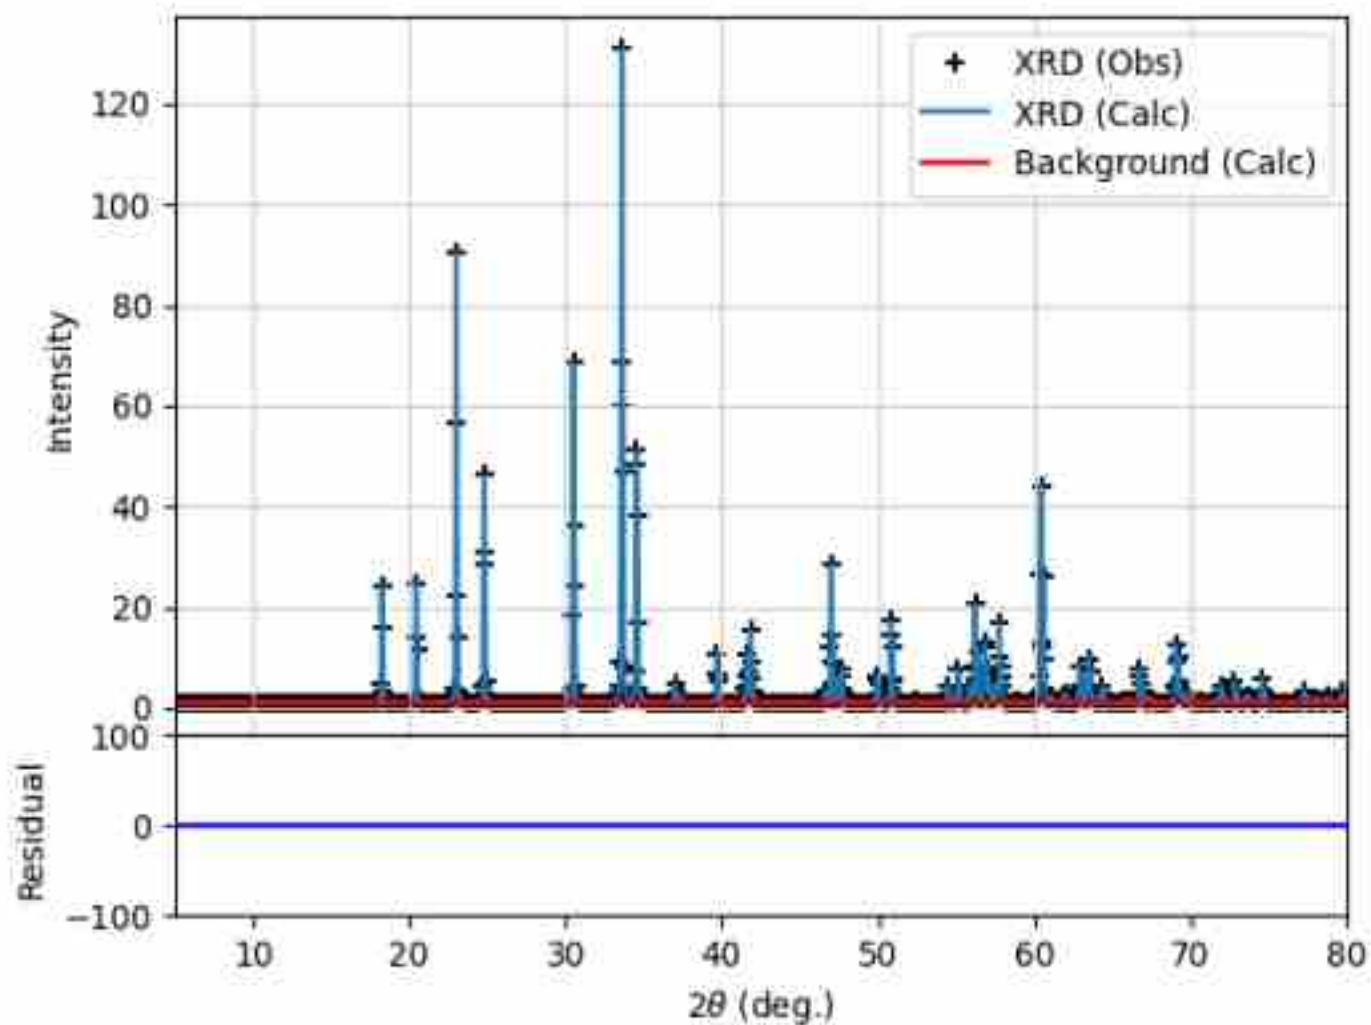

| RMSE before RR | Rwp     | RMSE after RR |
|----------------|---------|---------------|
| 0.019          | 0.00181 | 0.0006        |

# Li<sub>2</sub>Y<sub>2</sub>F<sub>8</sub>

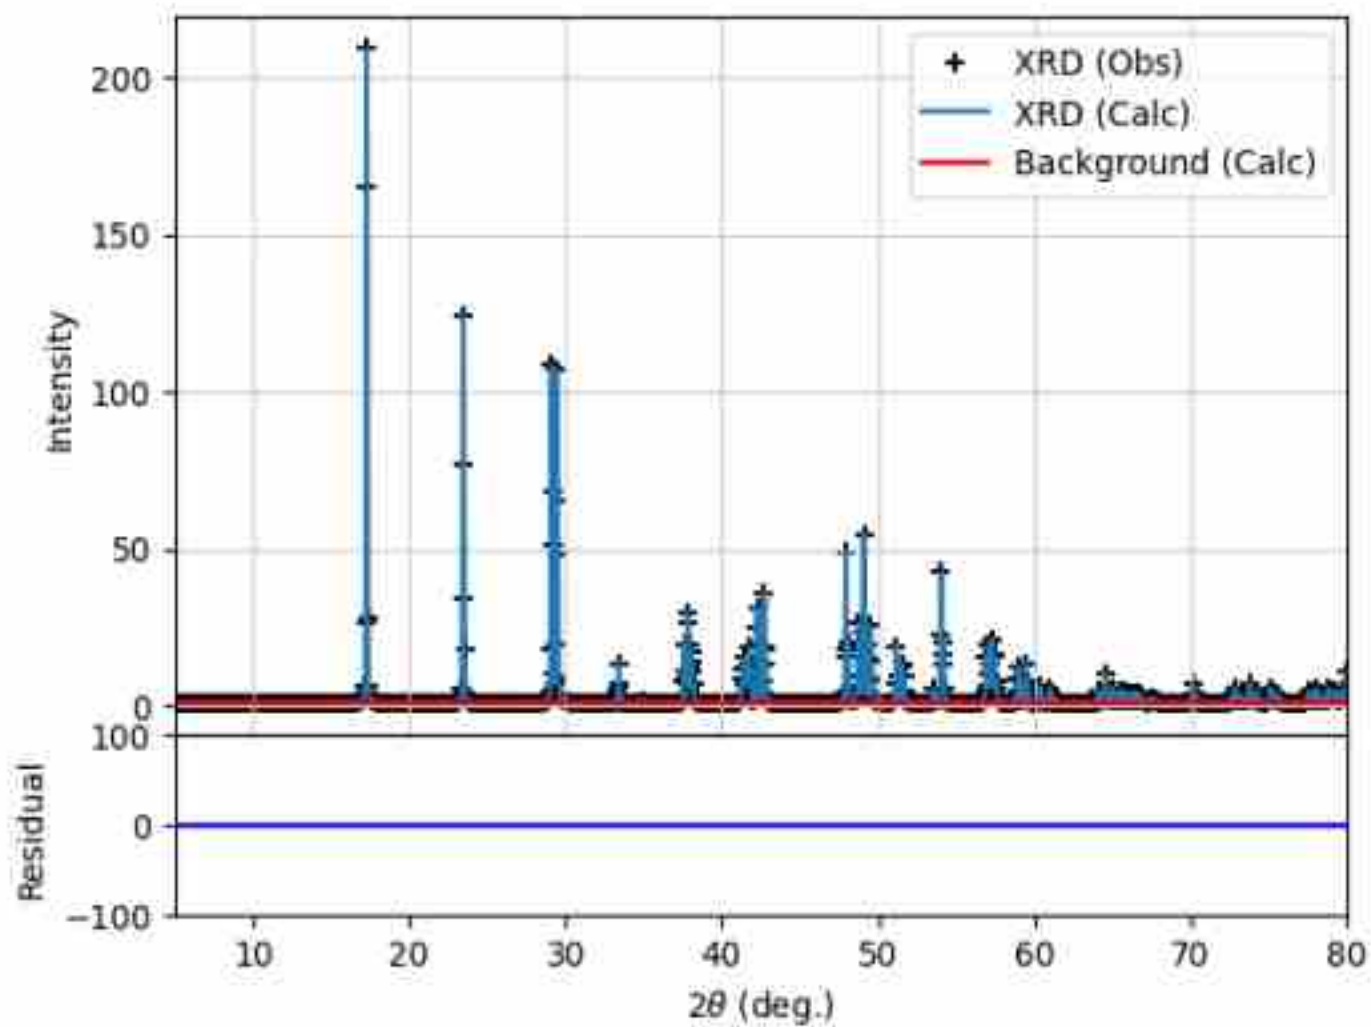

| RMSE before RR | Rwp     | RMSE after RR |
|----------------|---------|---------------|
| 0.019          | 0.00315 | 0.00078       |

# Li<sub>2</sub>Y<sub>2</sub>Se<sub>4</sub>

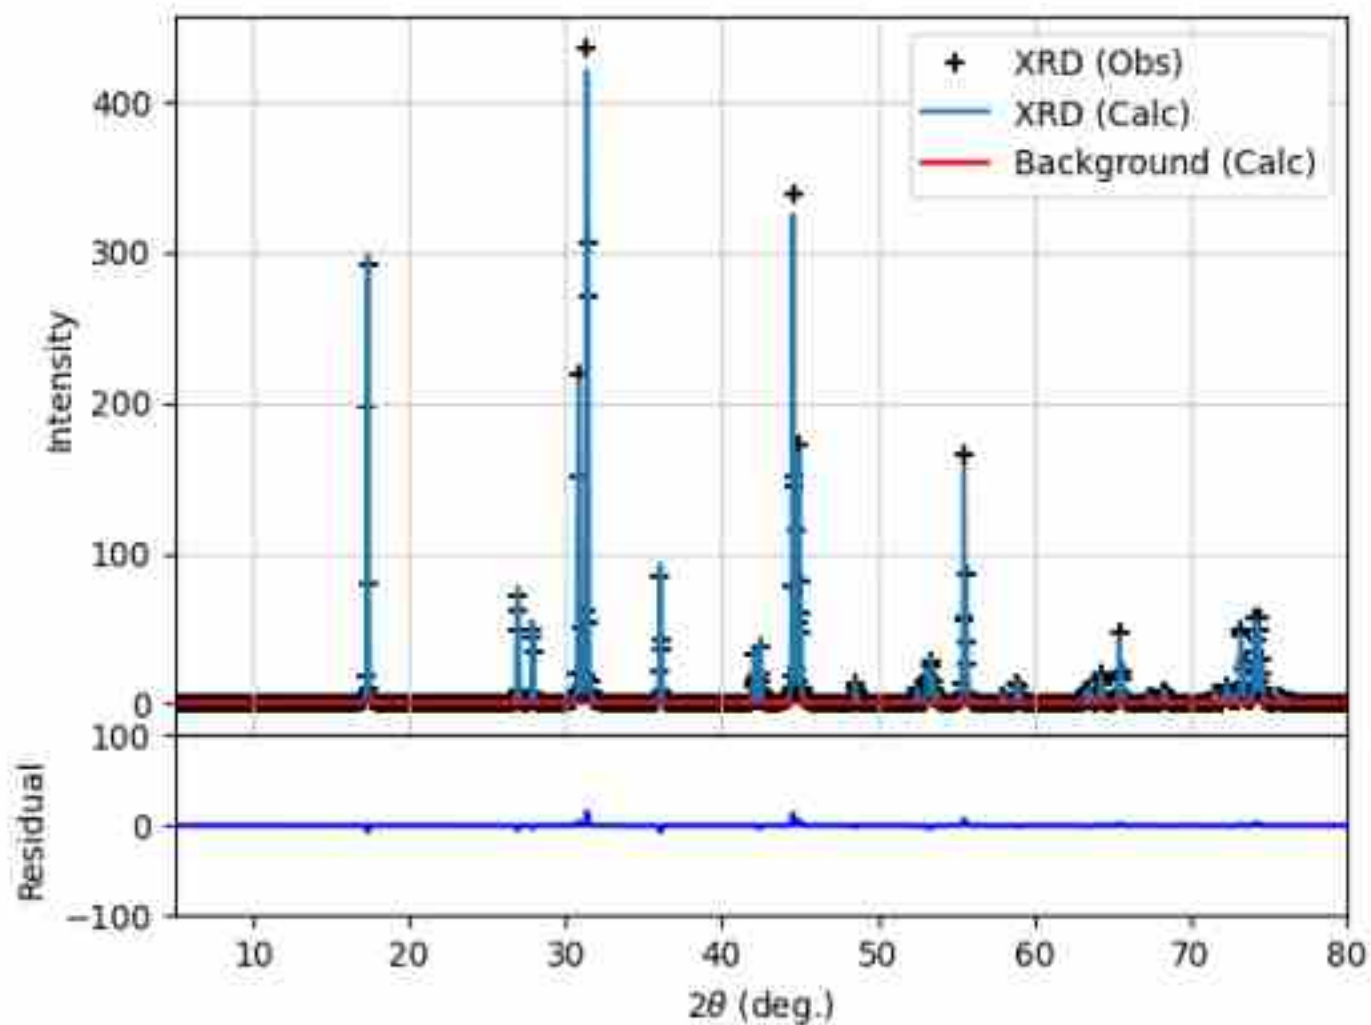

| RMSE before RR | Rwp     | RMSE after RR |
|----------------|---------|---------------|
| 0.019          | 4.26646 | 0.16618       |

# Li<sub>3</sub>Fe<sub>2</sub>Co<sub>1</sub>O<sub>6</sub>

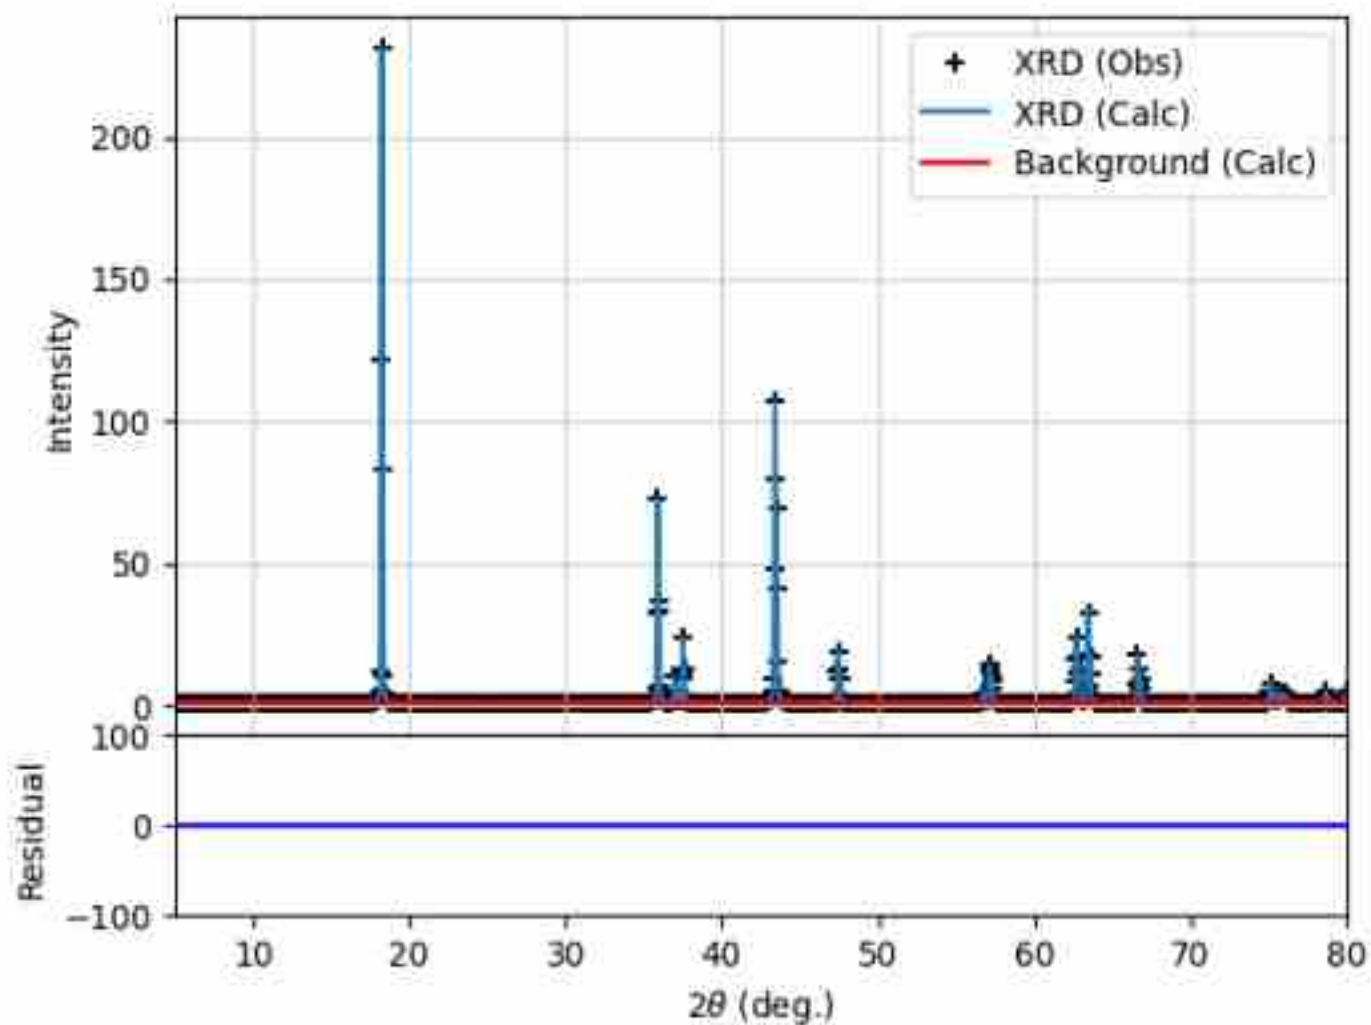

| RMSE before RR | Rwp    | RMSE after RR |
|----------------|--------|---------------|
| 0.019          | 0.0013 | 0.00077       |



# Li<sub>4</sub>Be<sub>2</sub>Si<sub>2</sub>O<sub>8</sub>

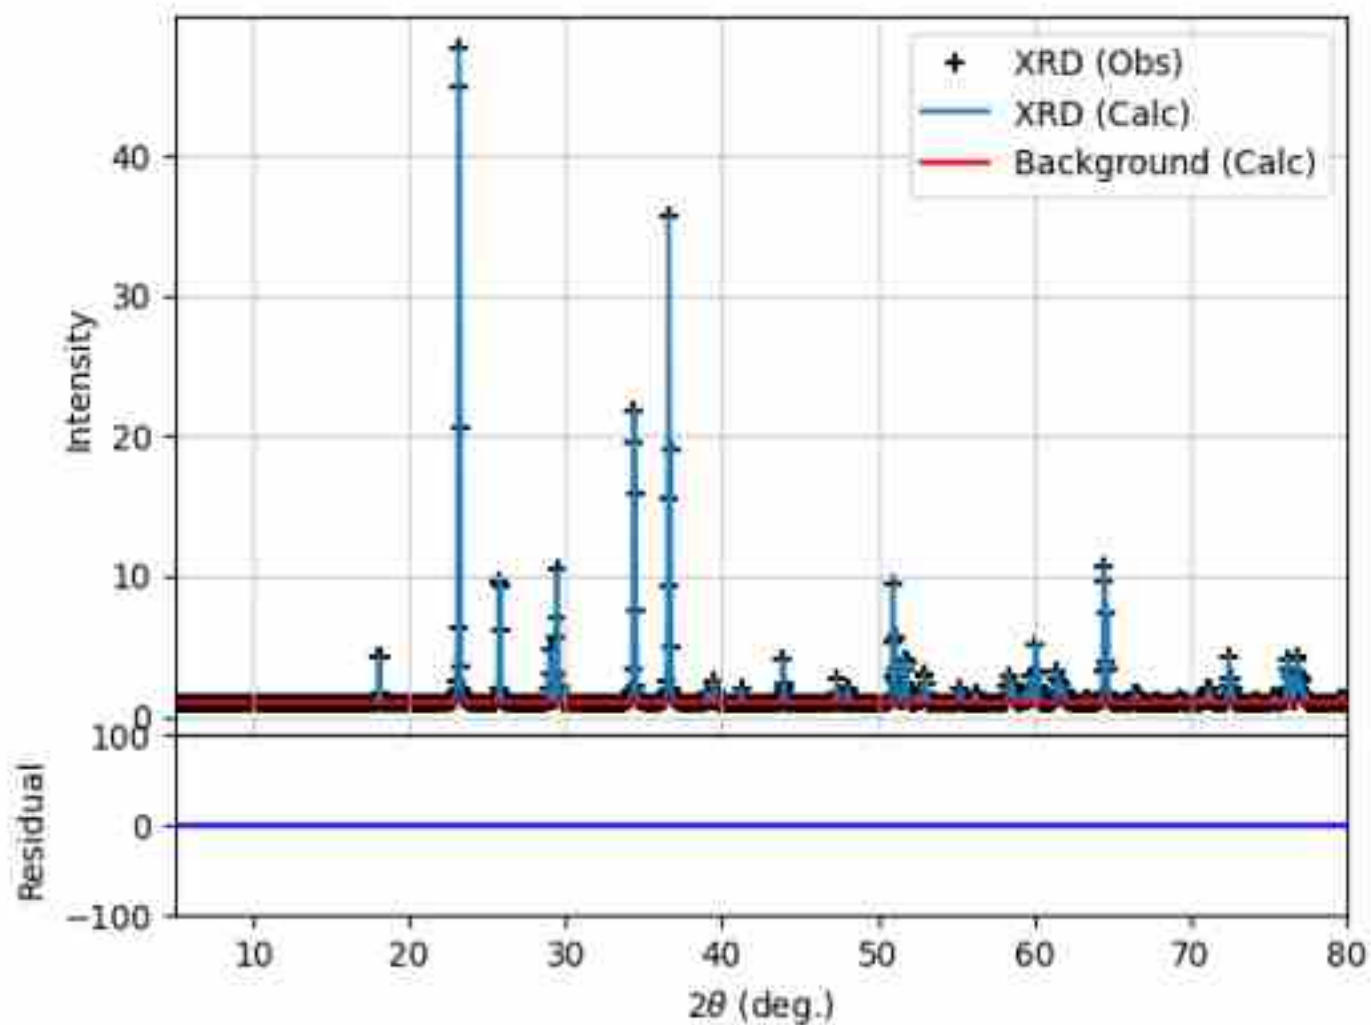

| RMSE before RR | Rwp     | RMSE after RR |
|----------------|---------|---------------|
| 0.019          | 0.00185 | 0.00086       |

# Li<sub>4</sub>Nd<sub>4</sub>Ge<sub>8</sub>

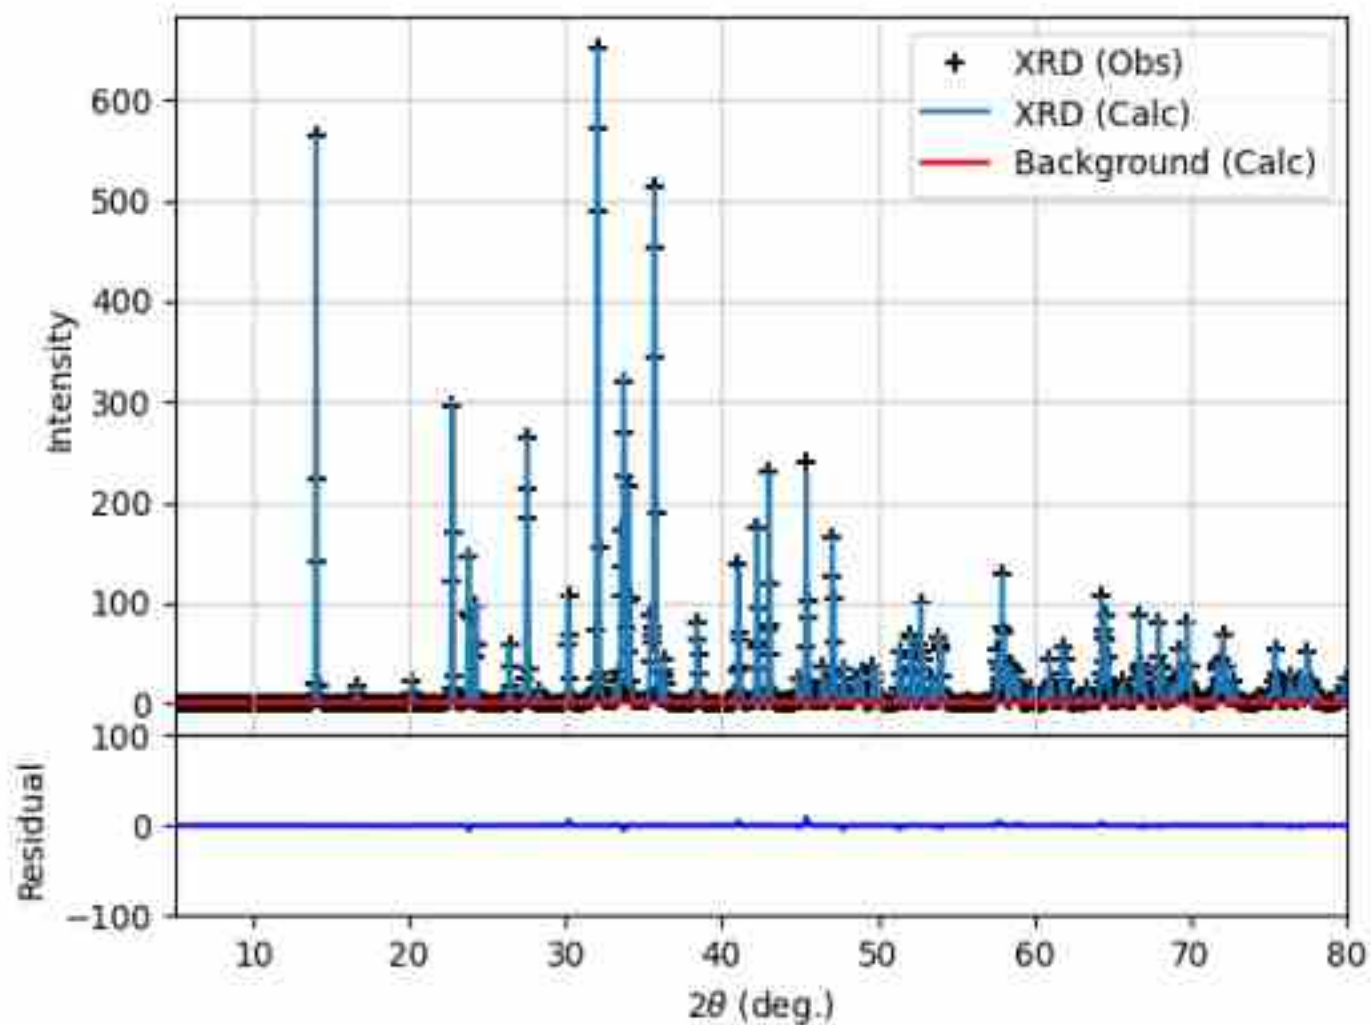

| RMSE before RR | Rwp     | RMSE after RR |
|----------------|---------|---------------|
| 0.019          | 2.42818 | 0.28094       |

# Li<sub>4</sub>Rh<sub>2</sub>F<sub>12</sub>

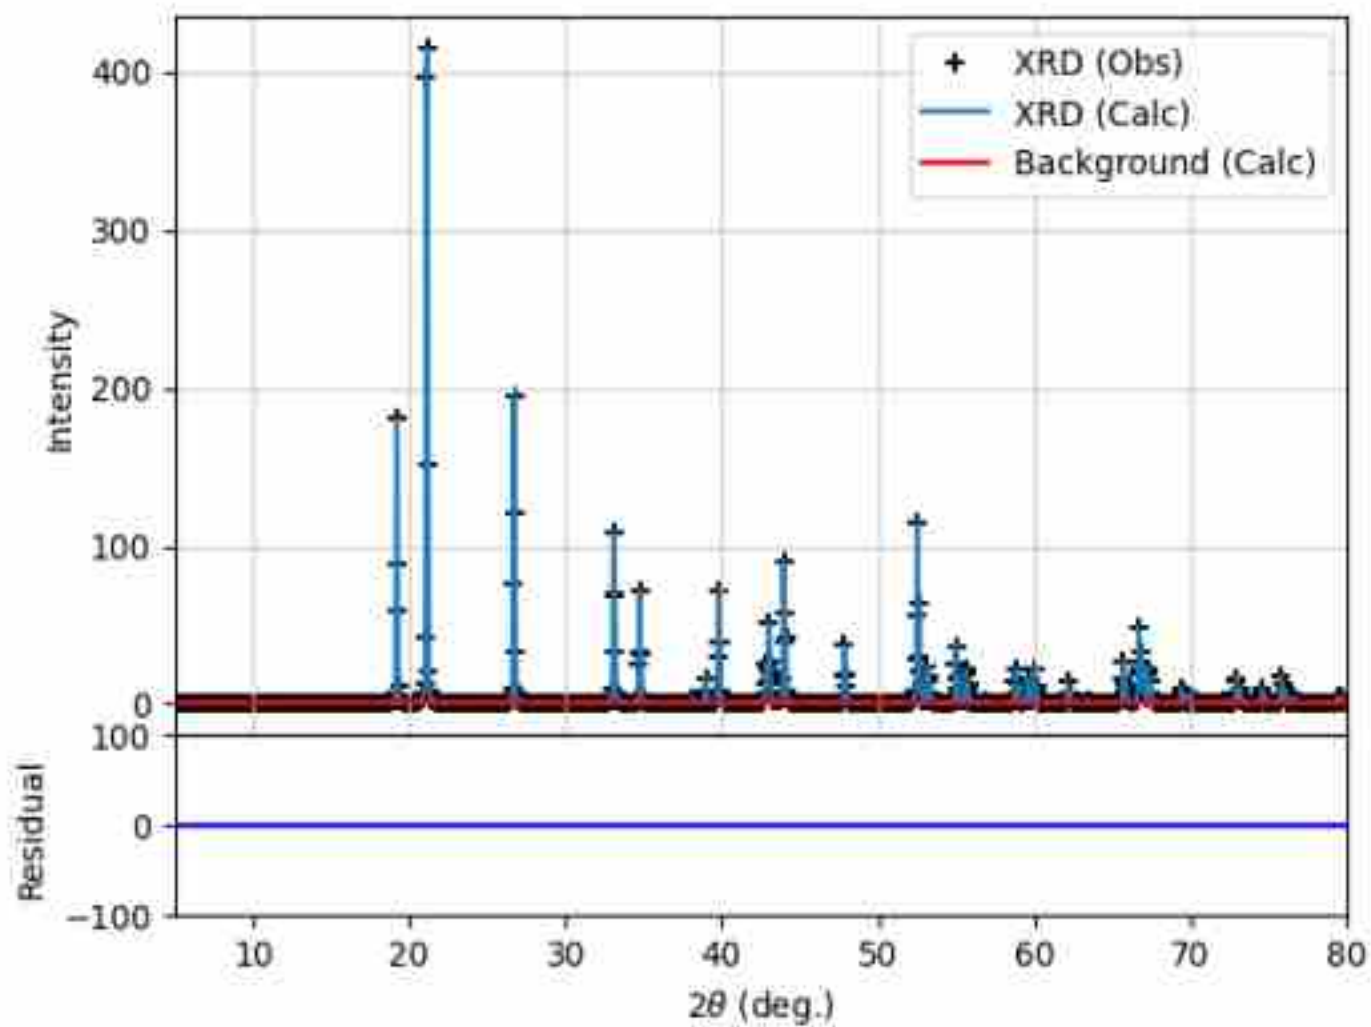

| RMSE before RR | Rwp     | RMSE after RR |
|----------------|---------|---------------|
| 0.019          | 0.00502 | 0.00264       |

# Lu<sub>2</sub>C16

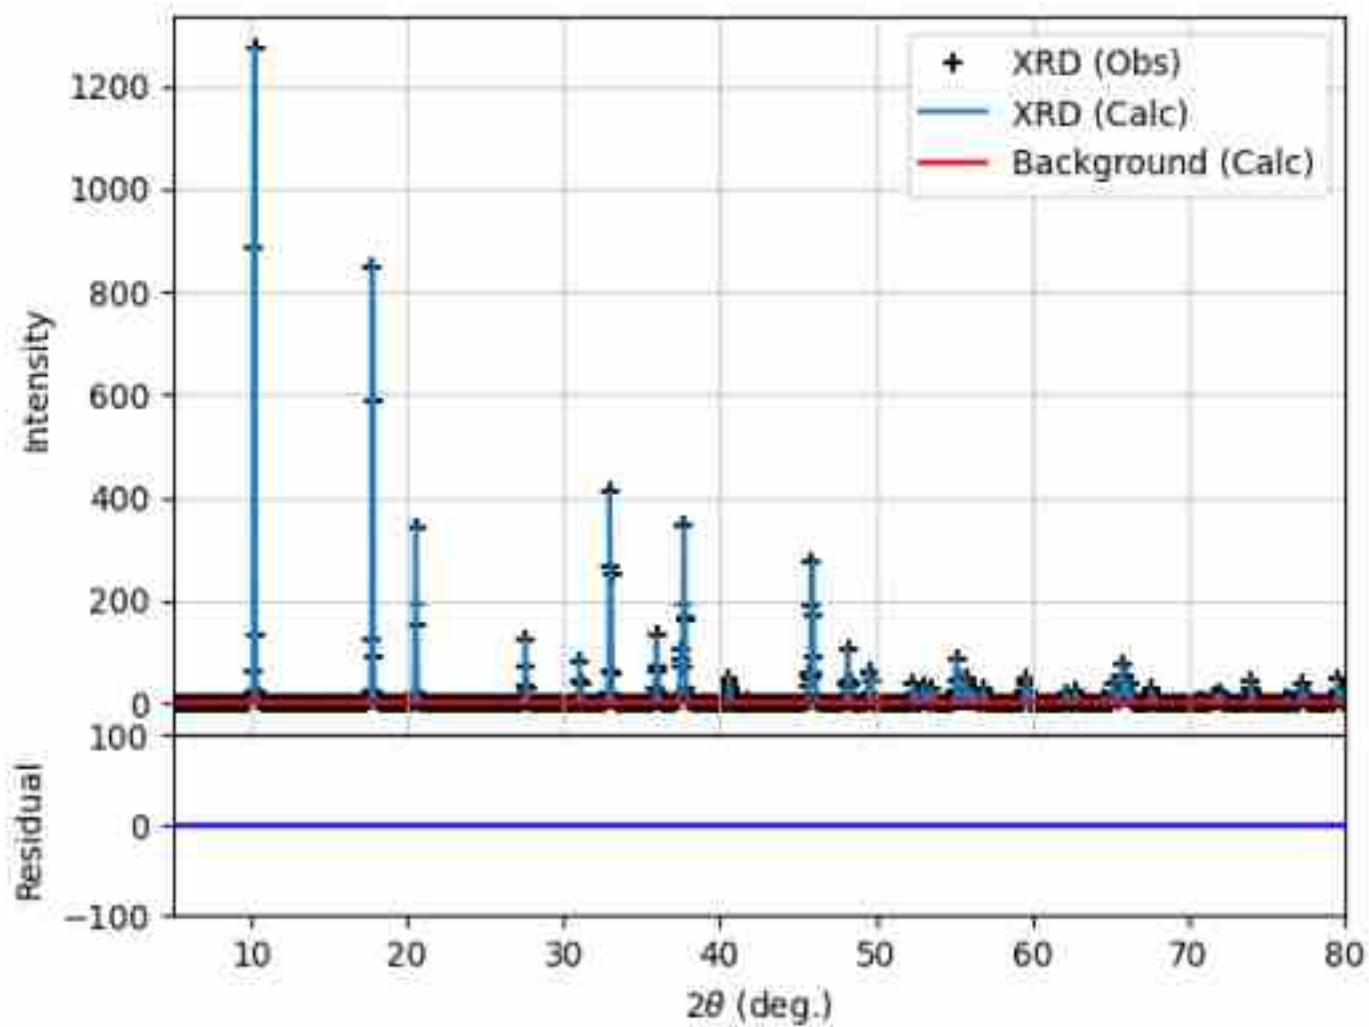

| RMSE before RR | Rwp     | RMSE after RR |
|----------------|---------|---------------|
| 0.019          | 0.01303 | 0.00253       |

# Lu<sub>2</sub>Cu<sub>2</sub>As<sub>4</sub>

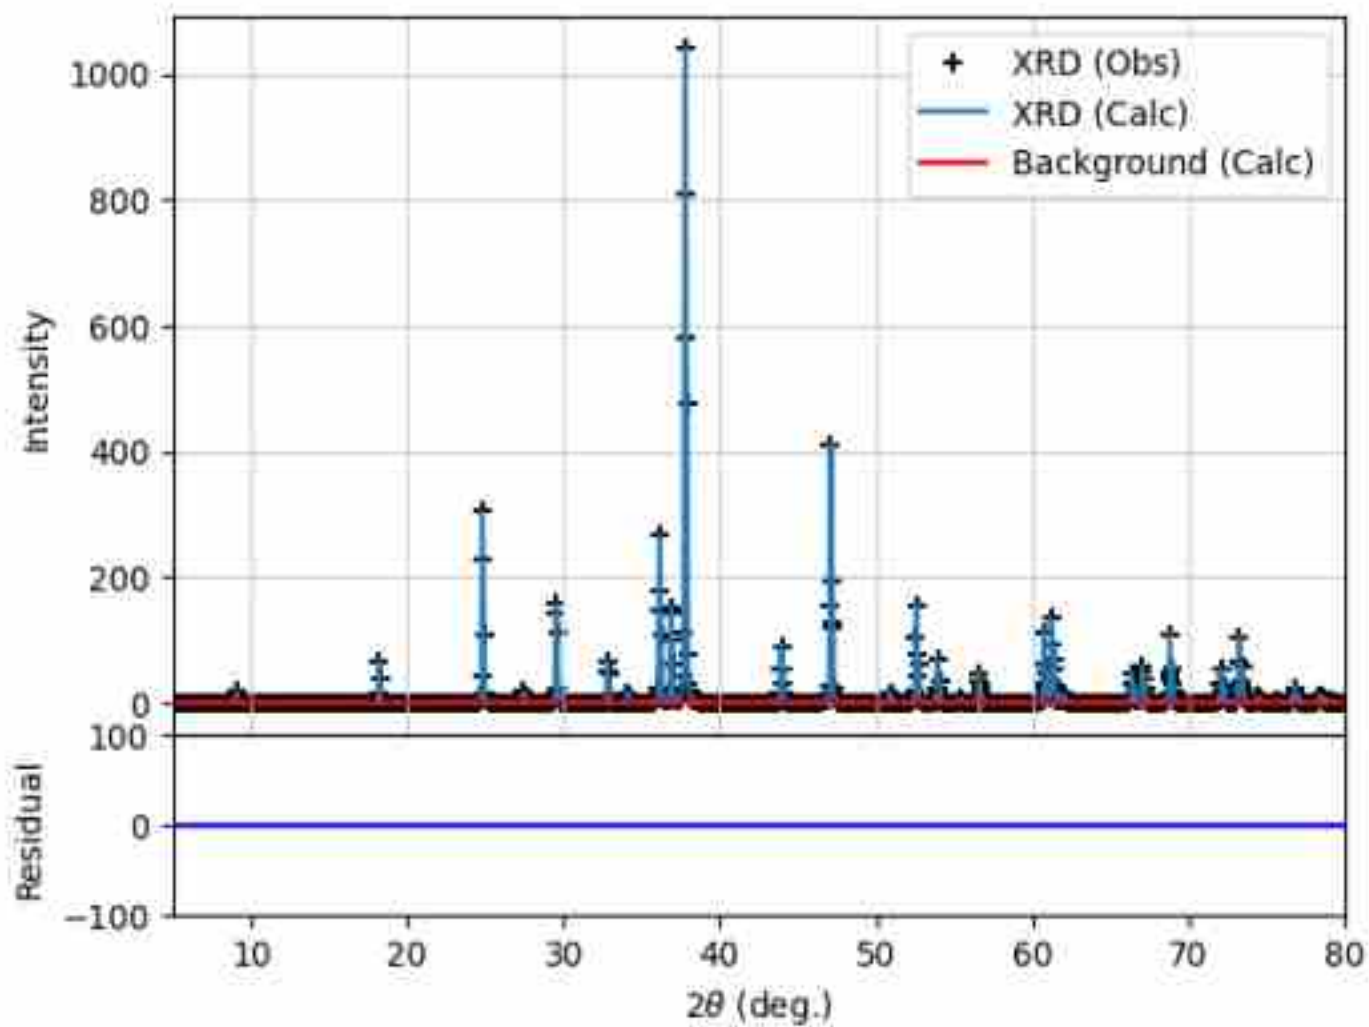

| RMSE before RR | Rwp     | RMSE after RR |
|----------------|---------|---------------|
| 0.019          | 0.00479 | 0.0006        |

# Lu4Cr4O12

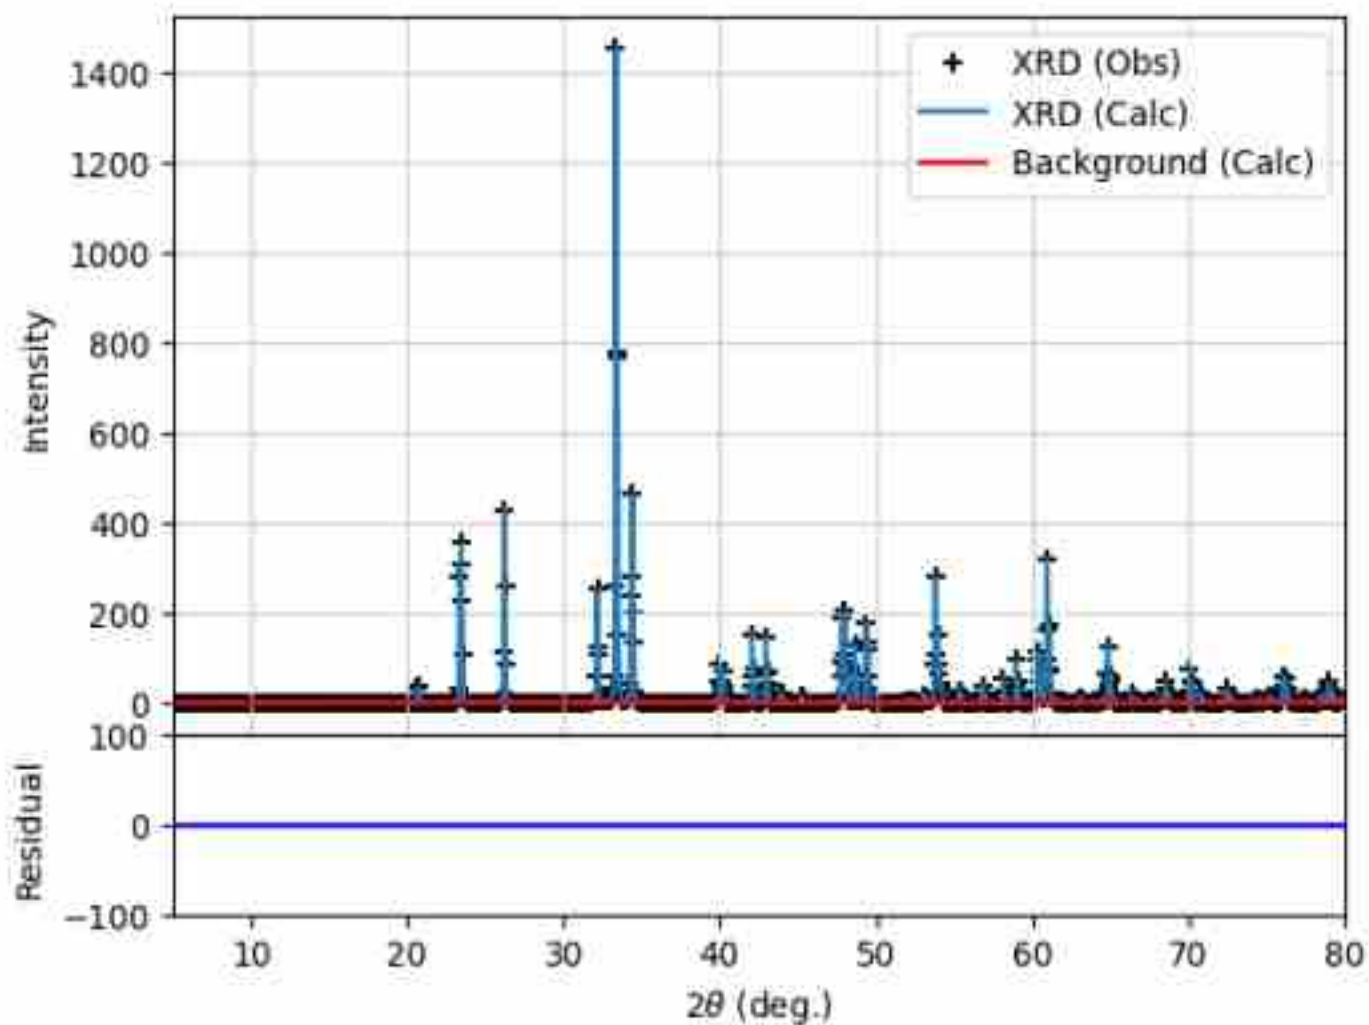

| RMSE before RR | Rwp     | RMSE after RR |
|----------------|---------|---------------|
| 0.019          | 0.00418 | 0.00131       |

# Lu<sub>4</sub>Ge<sub>8</sub>Ru<sub>1</sub>

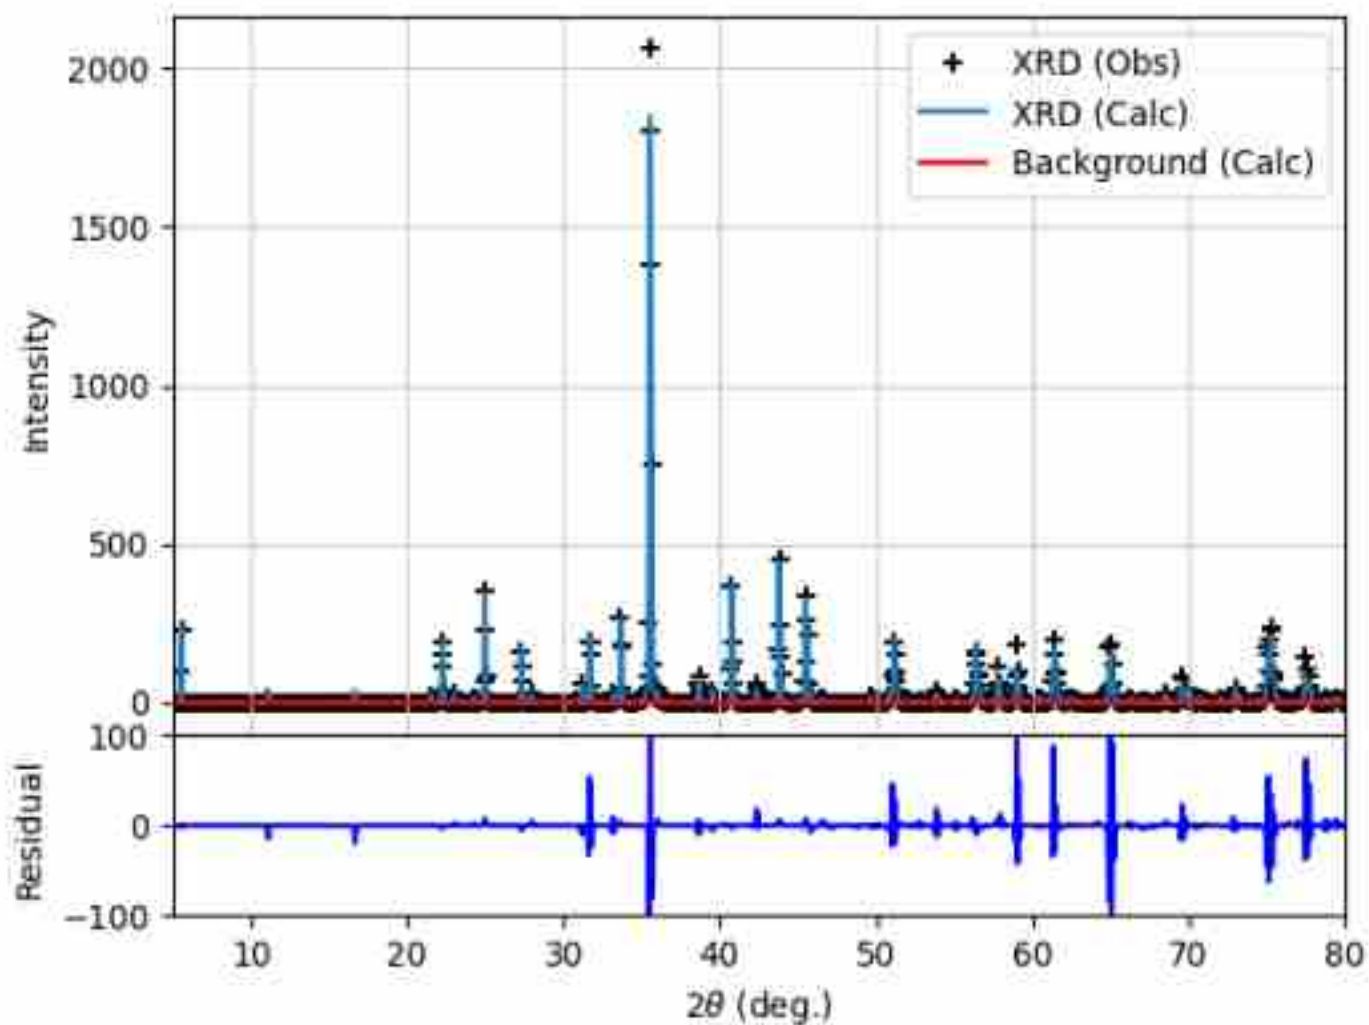

| RMSE before RR | Rwp      | RMSE after RR |
|----------------|----------|---------------|
| 0.019          | 31.69082 | 0.01882       |

# Lu<sub>4</sub>Si<sub>4</sub>Ru<sub>4</sub>

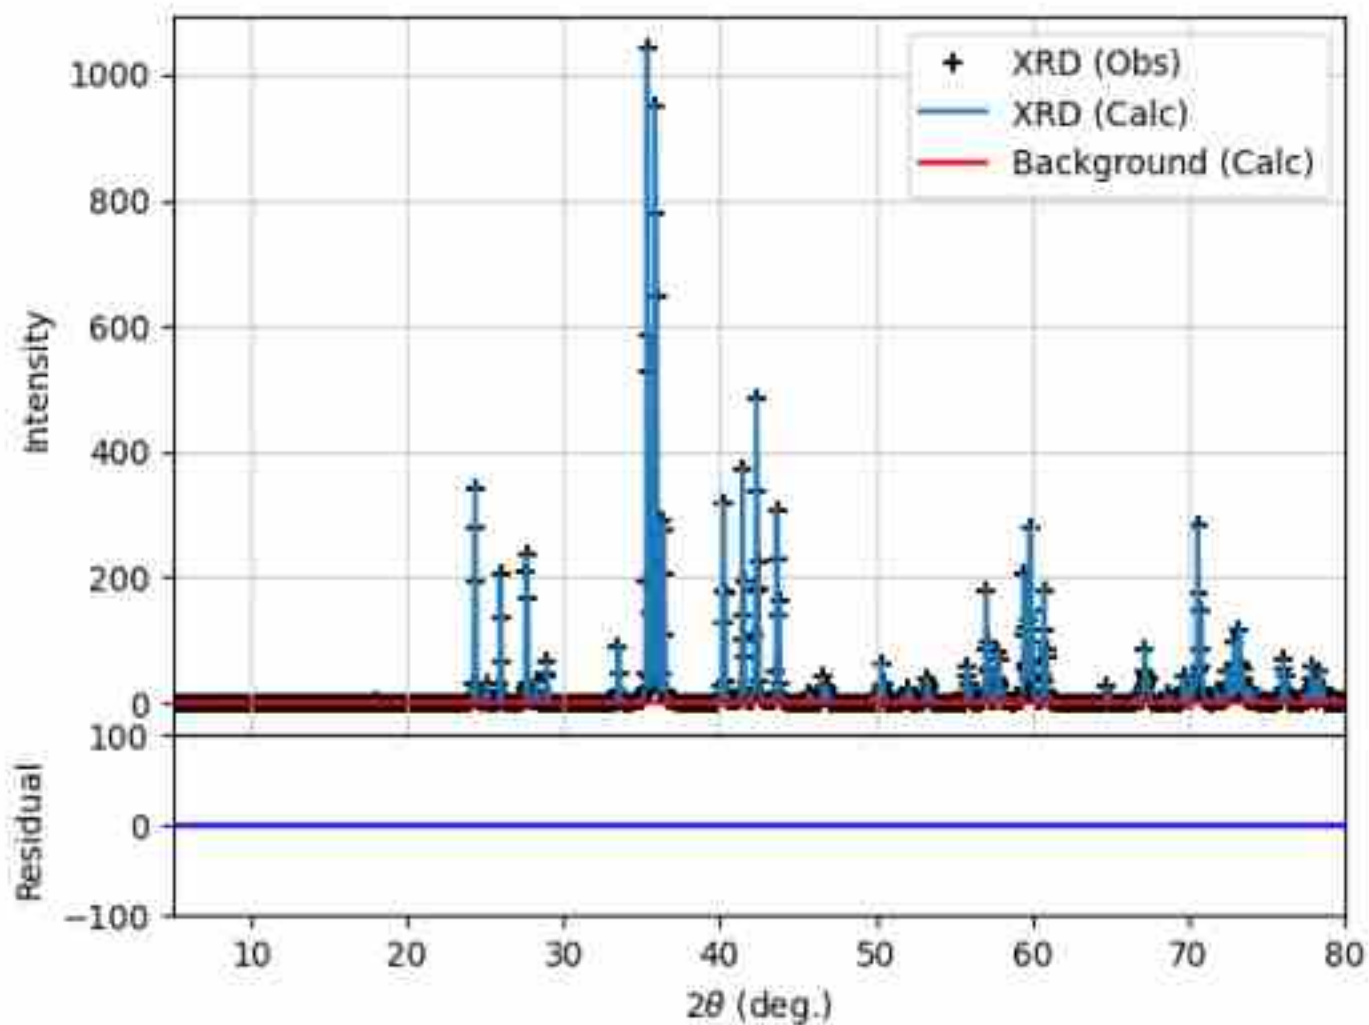

| RMSE before RR | Rwp     | RMSE after RR |
|----------------|---------|---------------|
| 0.019          | 0.00387 | 0.00051       |



# Lu10Cu2Pb6

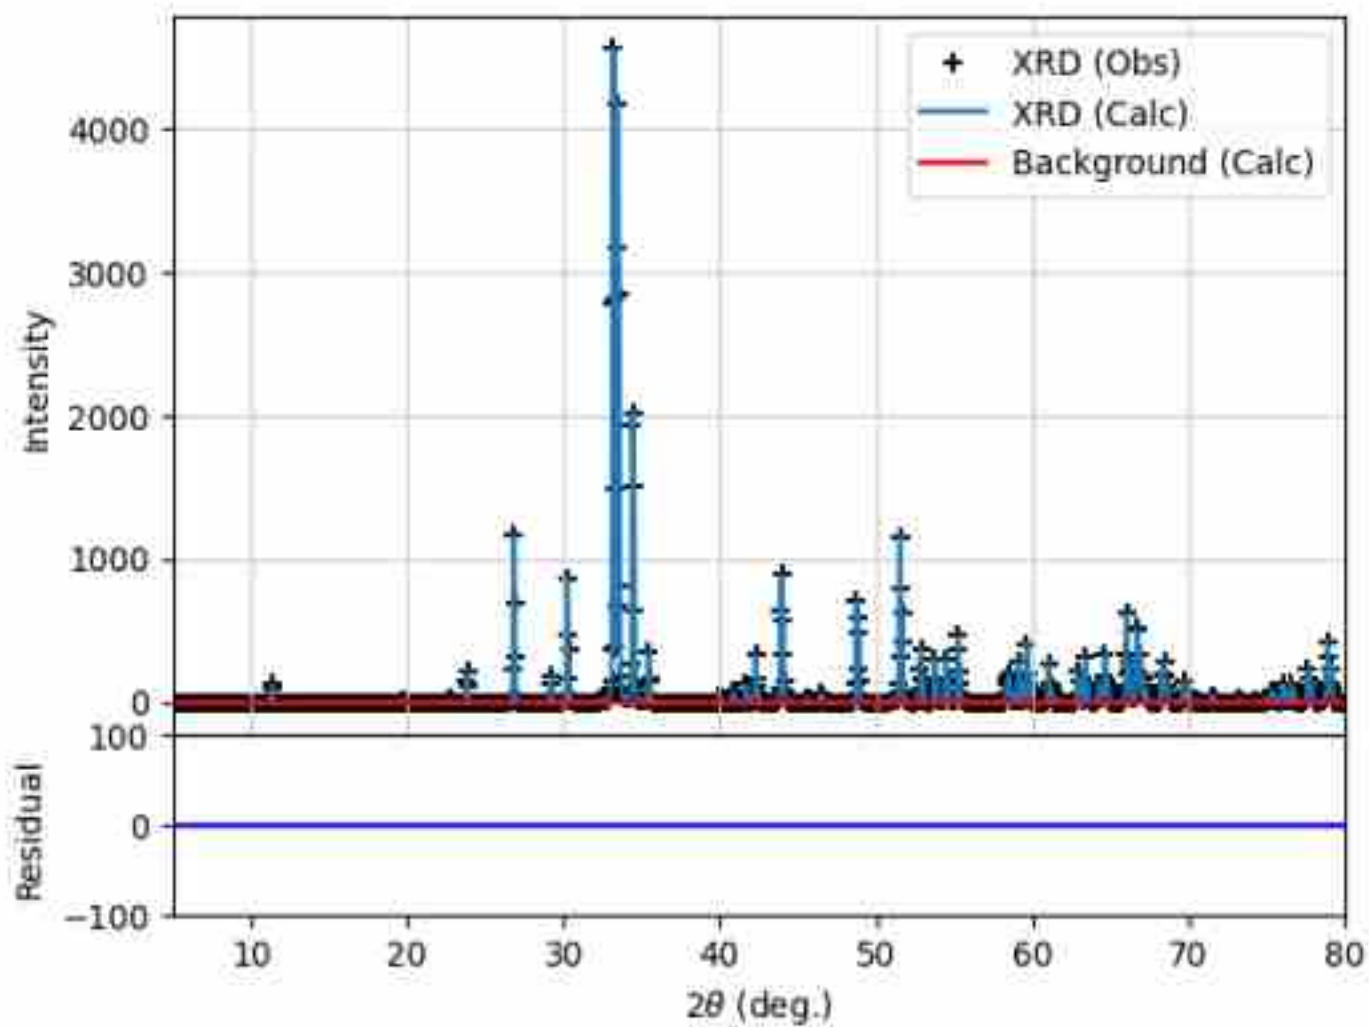

| RMSE before RR | Rwp     | RMSE after RR |
|----------------|---------|---------------|
| 0.019          | 0.00982 | 0.00079       |

# Lu10Ir4

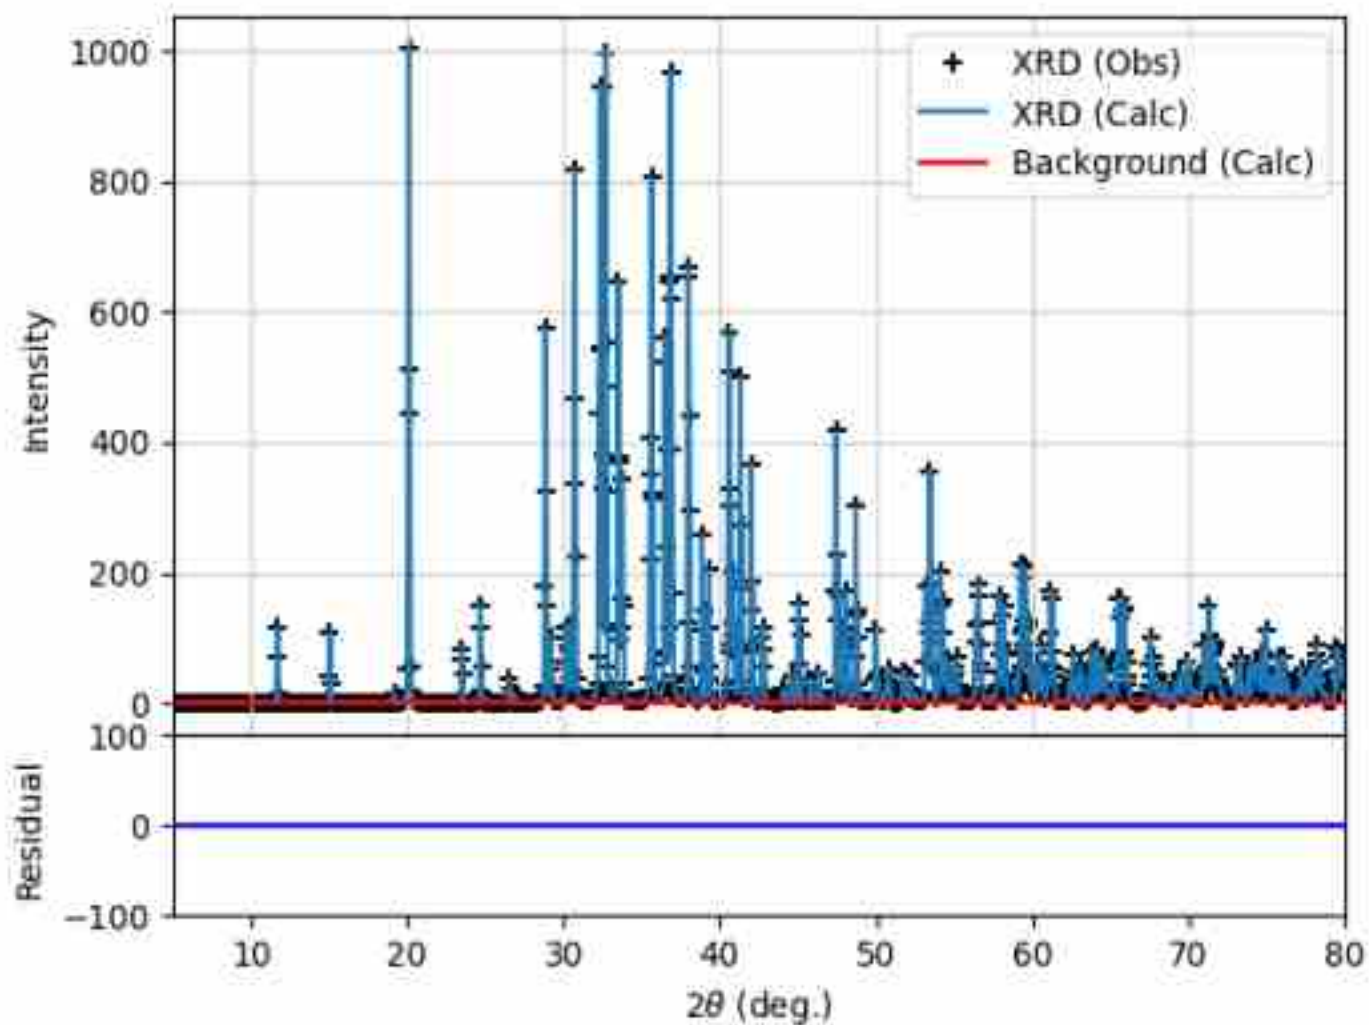

| RMSE before RR | Rwp     | RMSE after RR |
|----------------|---------|---------------|
| 0.019          | 0.00408 | 0.00019       |

# Mg<sub>1</sub>Fe<sub>4</sub>Ni<sub>1</sub>O<sub>8</sub>

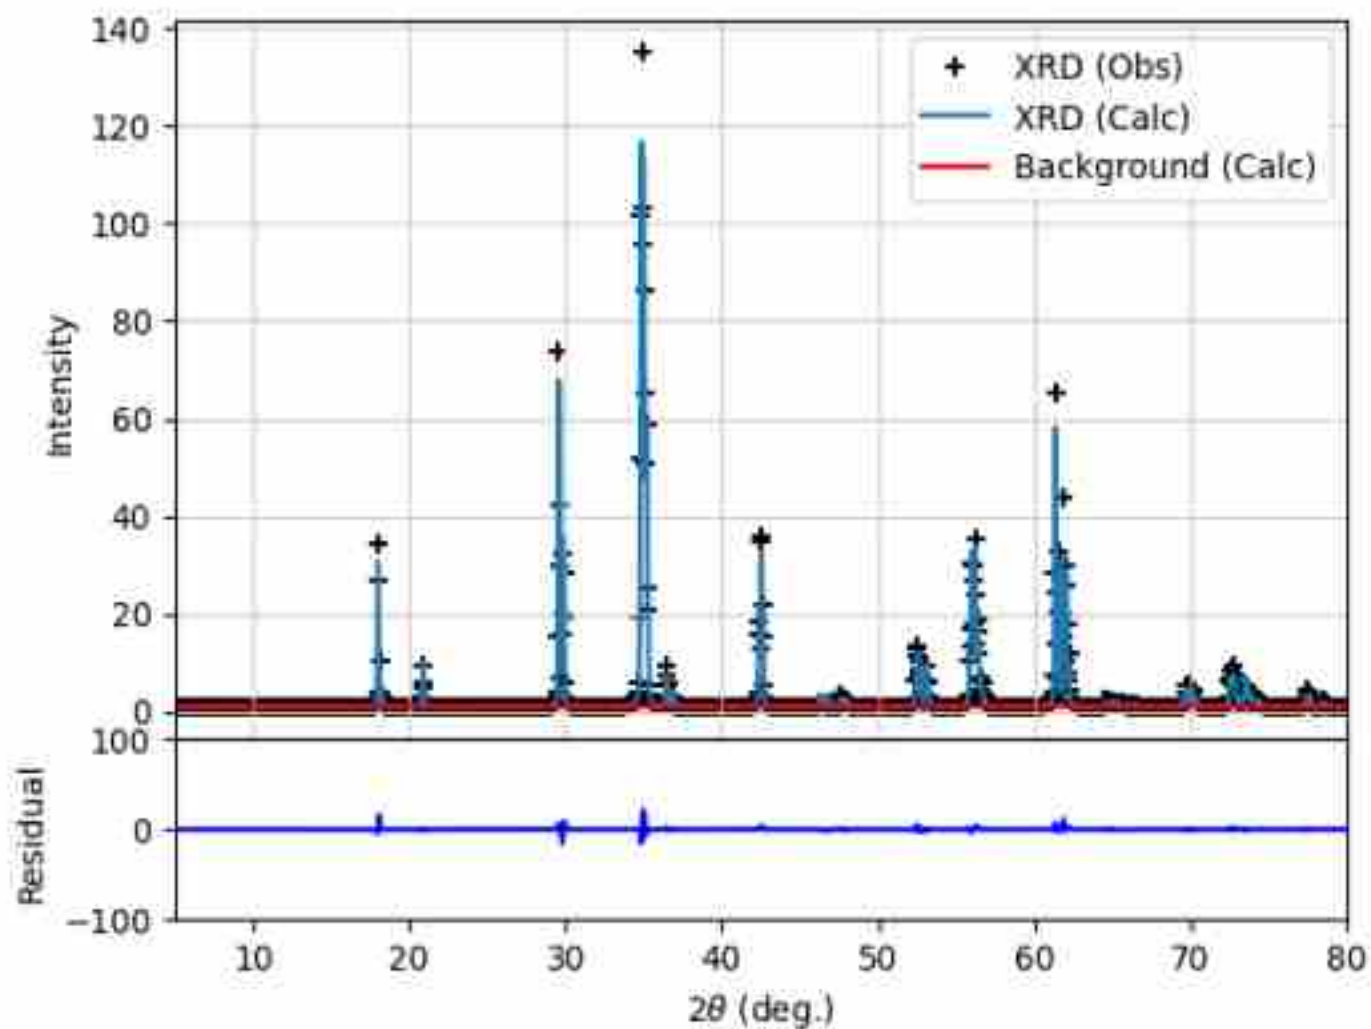

| RMSE before RR | Rwp     | RMSE after RR |
|----------------|---------|---------------|
| 0.019          | 15.4164 | 0.06087       |

# MgIn5

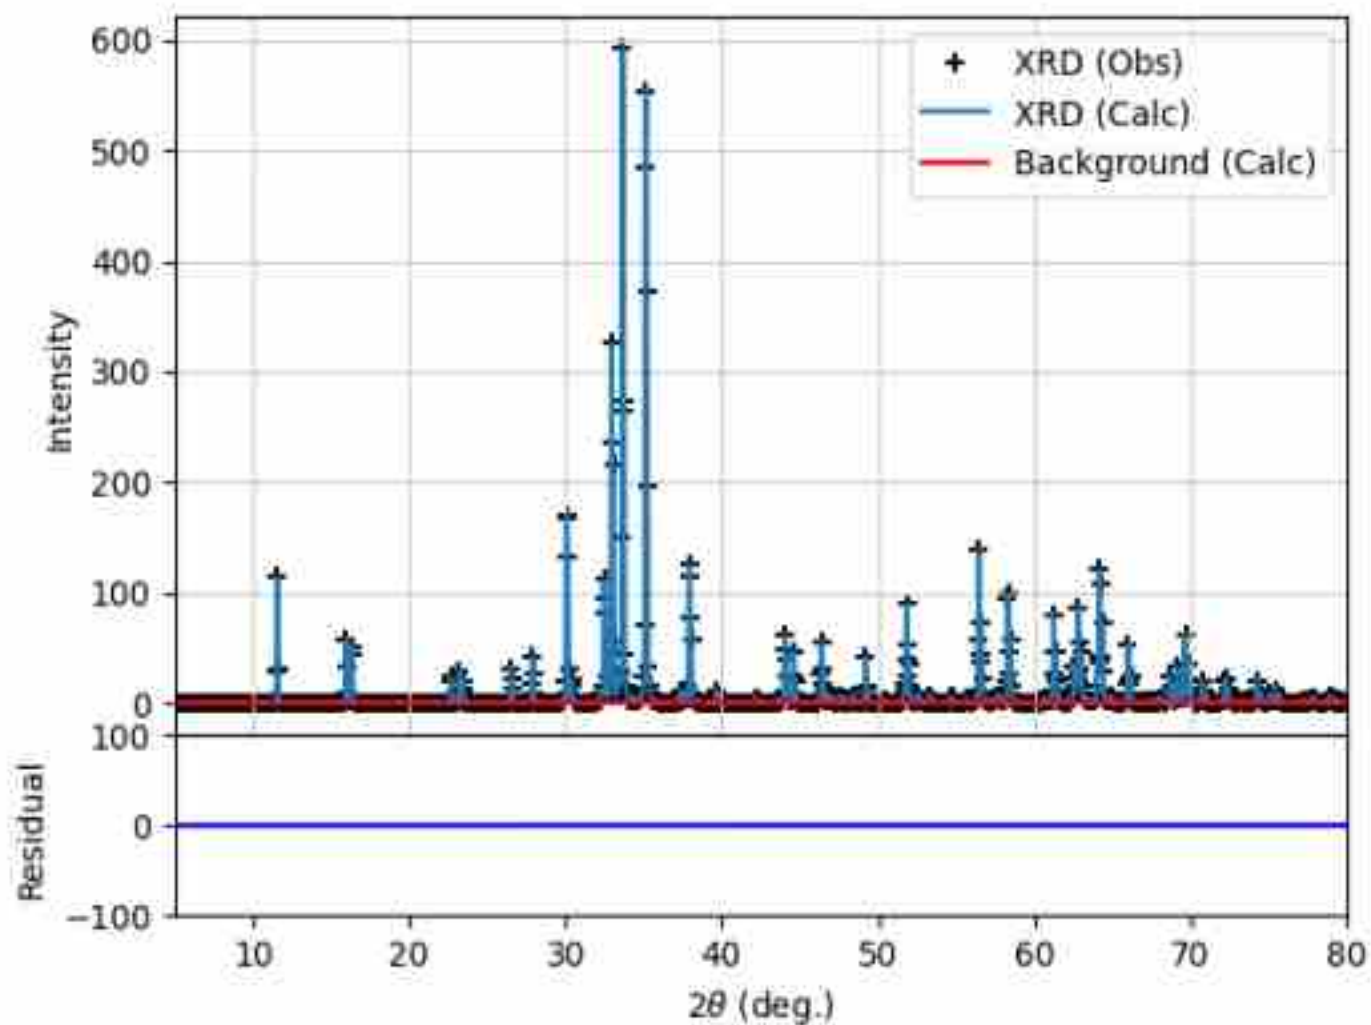

| RMSE before RR | Rwp     | RMSE after RR |
|----------------|---------|---------------|
| 0.019          | 0.67755 | 0.00387       |

# Mg<sub>2</sub>Sc<sub>2</sub>V<sub>2</sub>S<sub>8</sub>

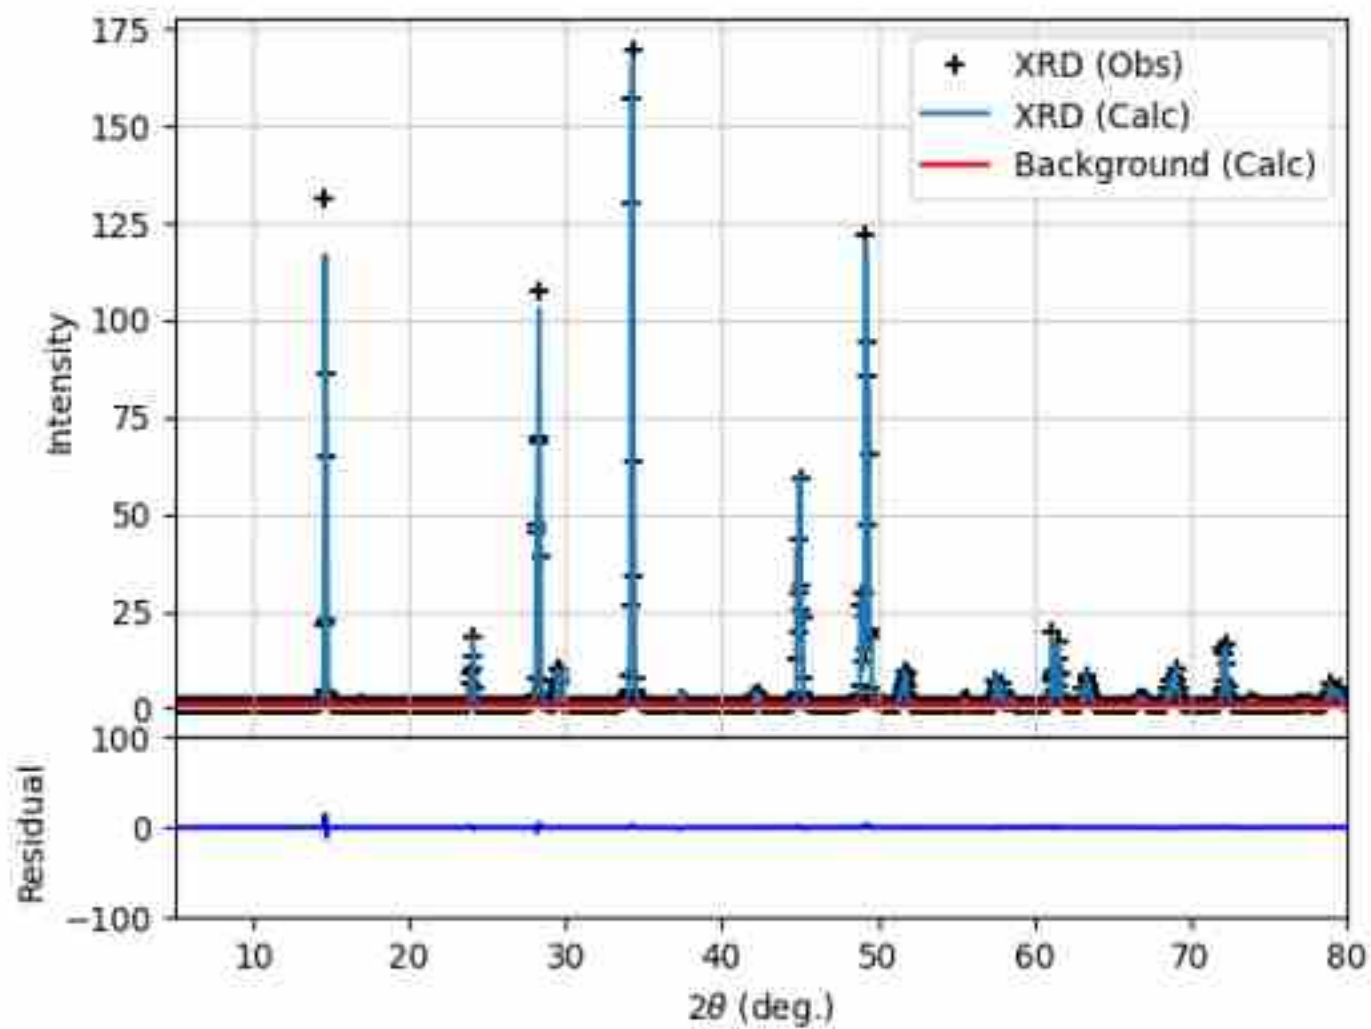

| RMSE before RR | Rwp     | RMSE after RR |
|----------------|---------|---------------|
| 0.019          | 6.11997 | 0.05667       |

# Mg<sub>2</sub>Sn<sub>2</sub>As<sub>4</sub>

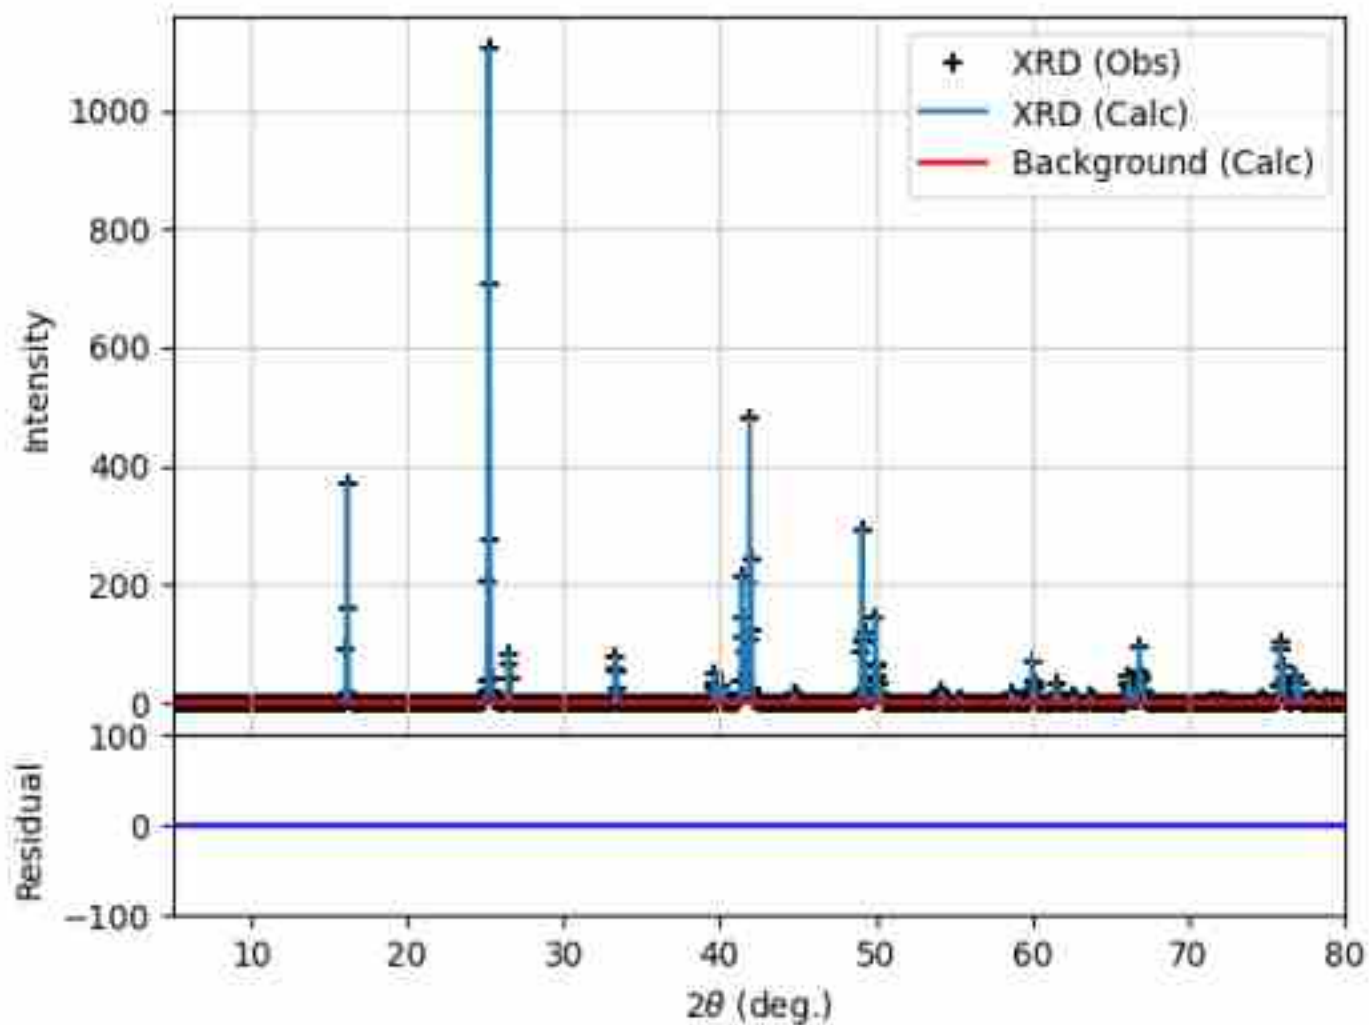

| RMSE before RR | Rwp     | RMSE after RR |
|----------------|---------|---------------|
| 0.019          | 0.00614 | 0.00081       |

# Mg5Ag1

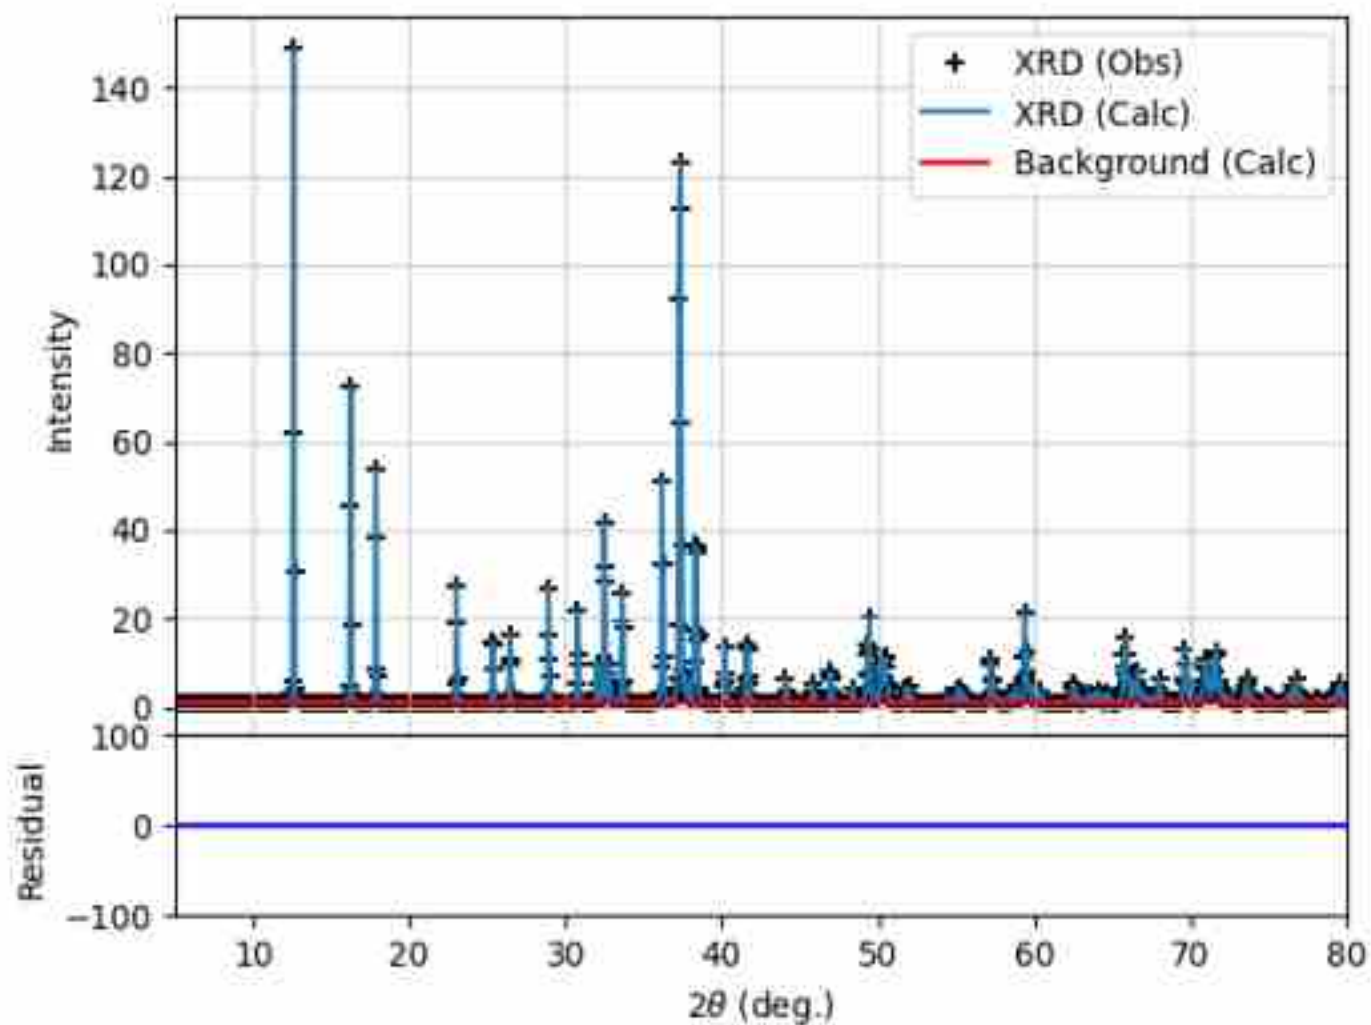

| RMSE before RR | Rwp     | RMSE after RR |
|----------------|---------|---------------|
| 0.019          | 0.00253 | 0.00037       |

# Mg15Mn1

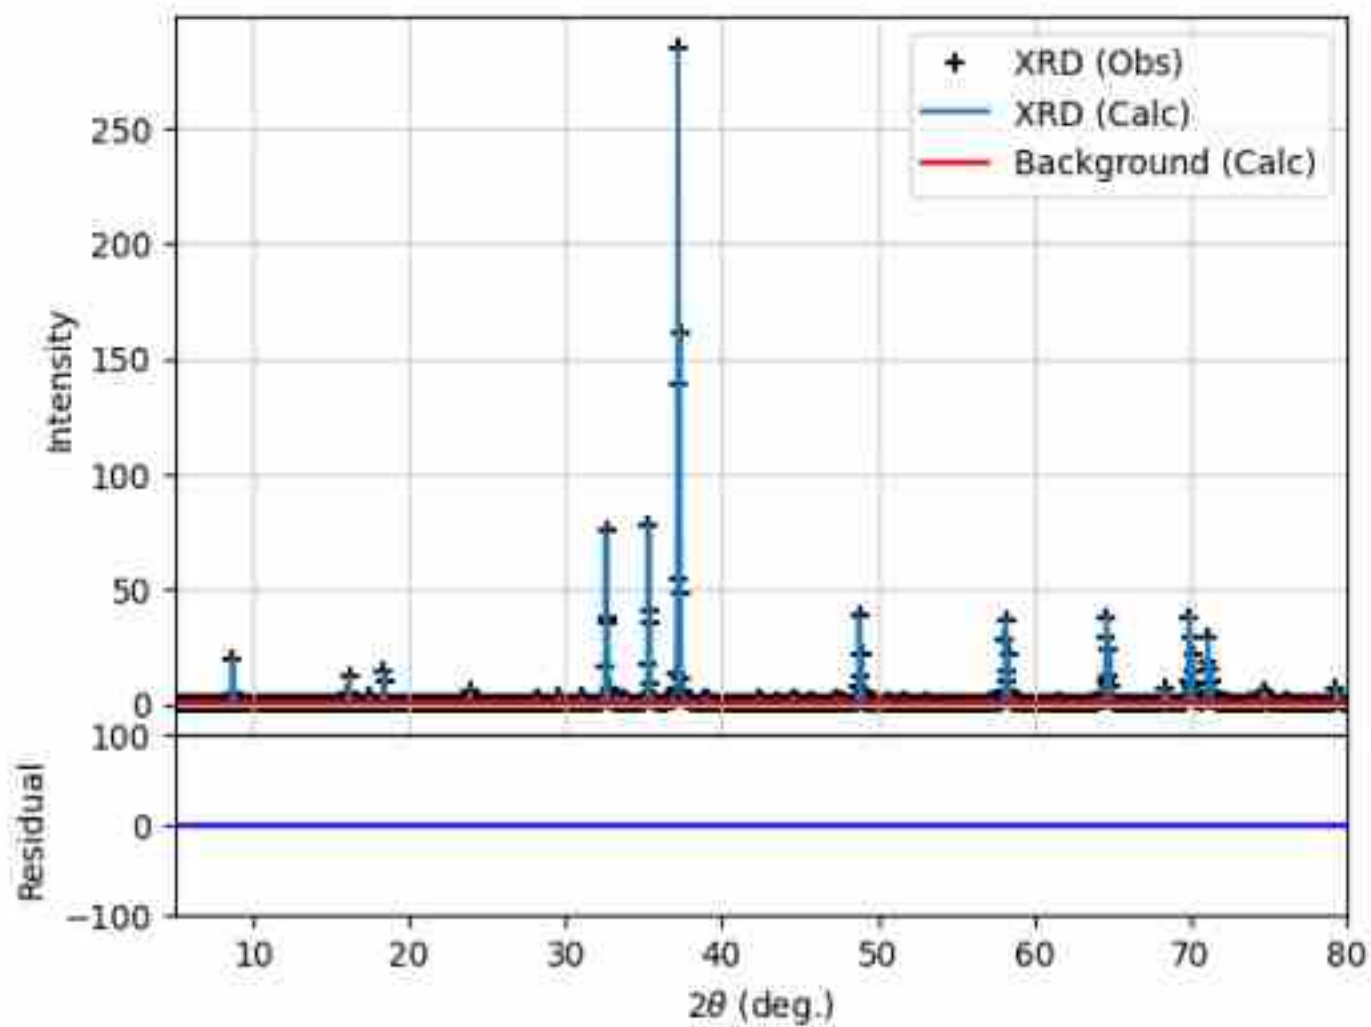

| RMSE before RR | Rwp     | RMSE after RR |
|----------------|---------|---------------|
| 0.019          | 0.01001 | 0.00146       |



# Mn1In2Se4

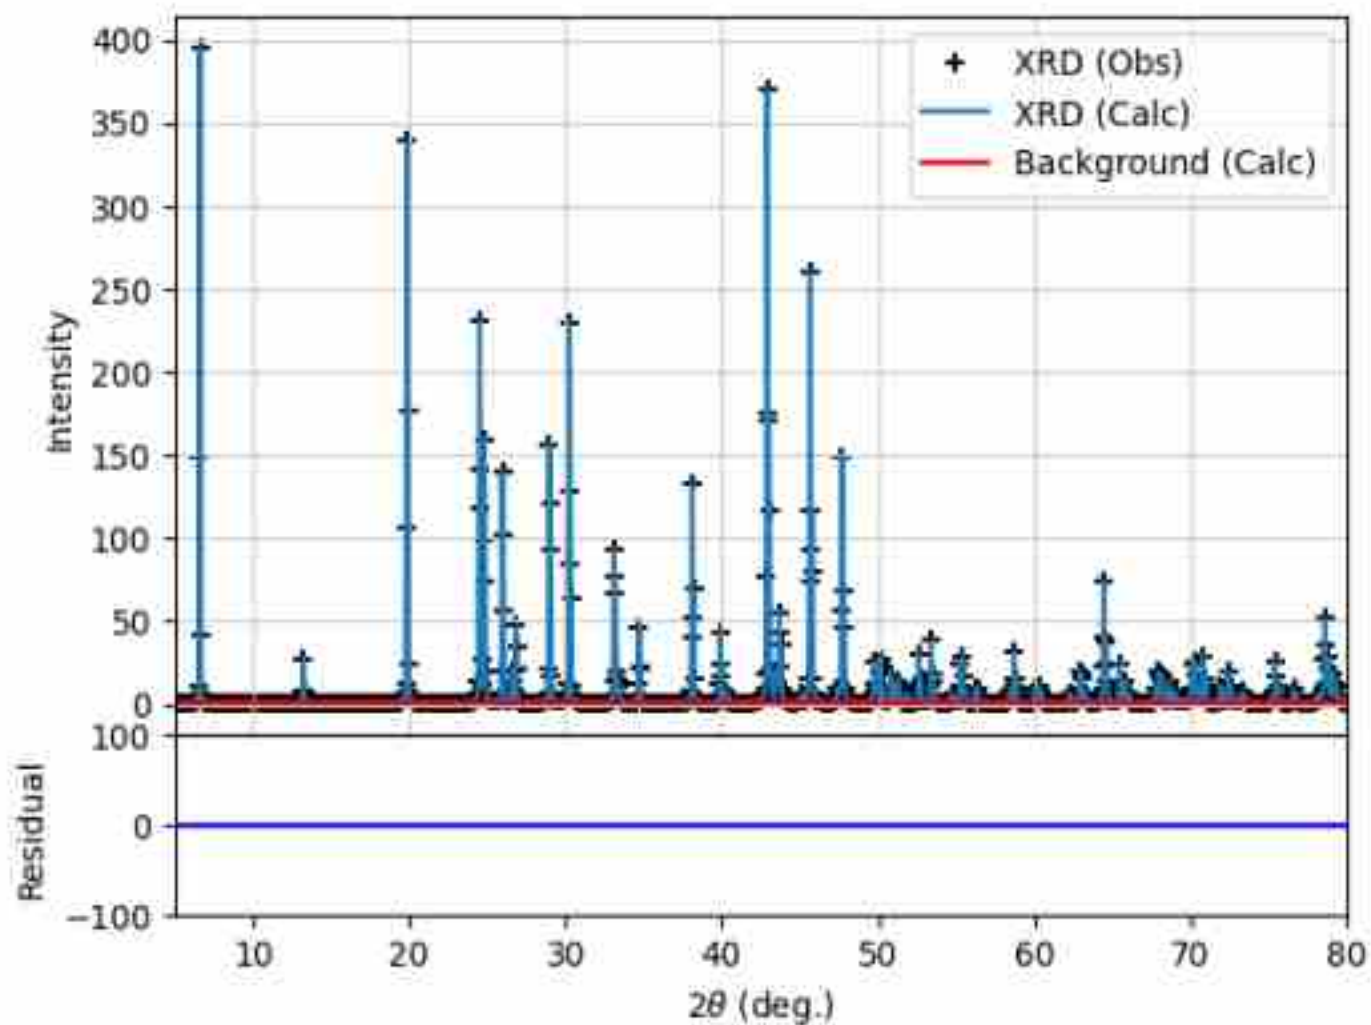

| RMSE before RR | Rwp     | RMSE after RR |
|----------------|---------|---------------|
| 0.019          | 0.00308 | 0.00021       |

# Mn<sub>2</sub>Co<sub>2</sub>Si<sub>4</sub>

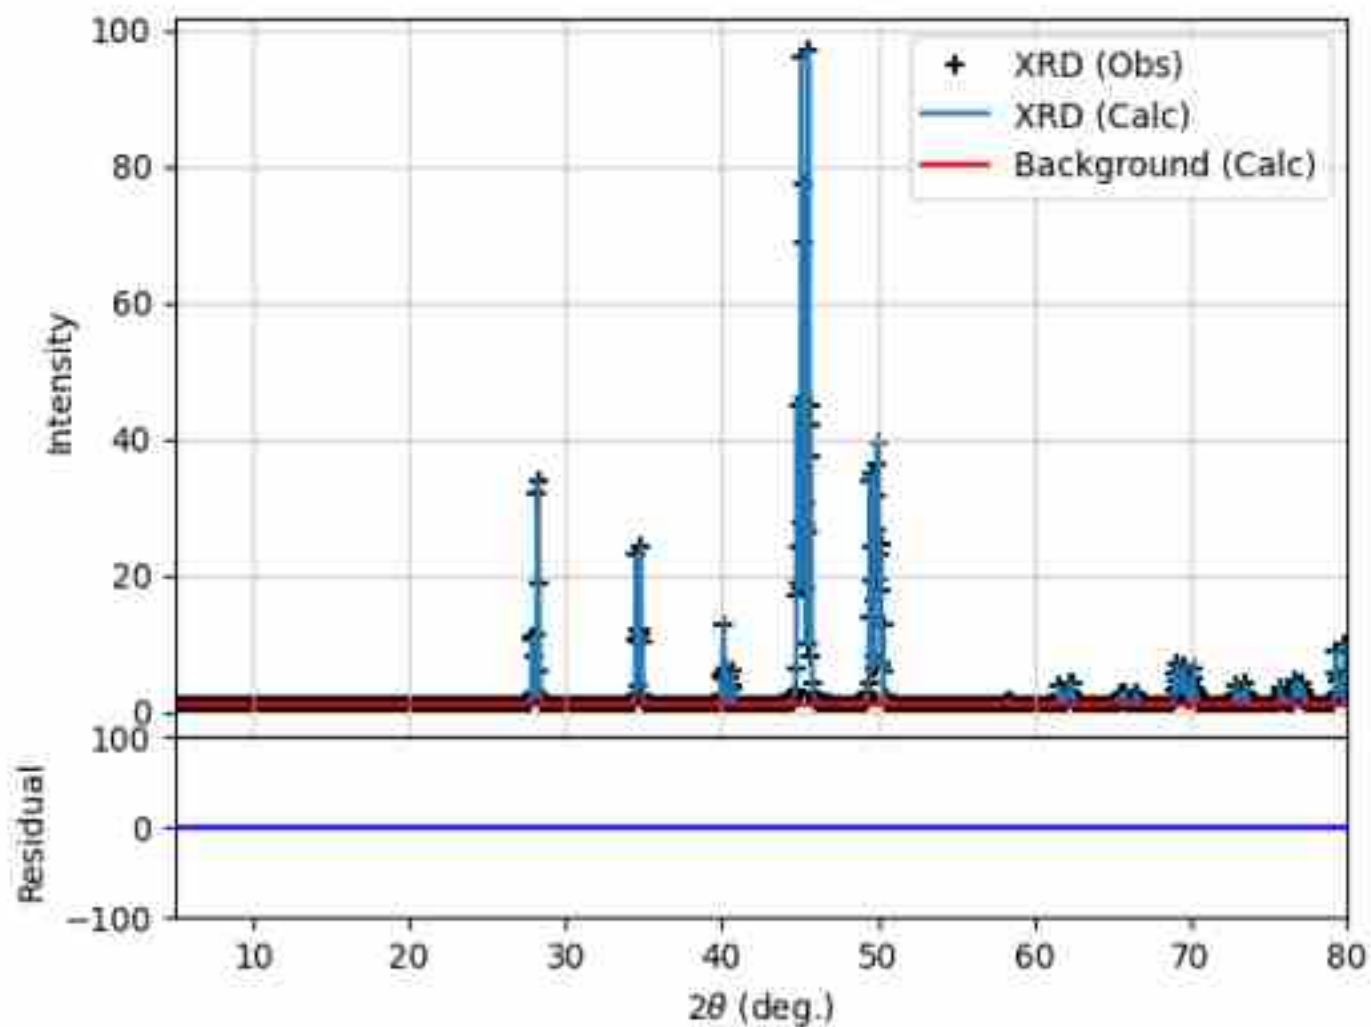

| RMSE before RR | Rwp     | RMSE after RR |
|----------------|---------|---------------|
| 0.019          | 0.24011 | 0.02601       |

# Mn<sub>2</sub>Fe<sub>2</sub>As<sub>2</sub>

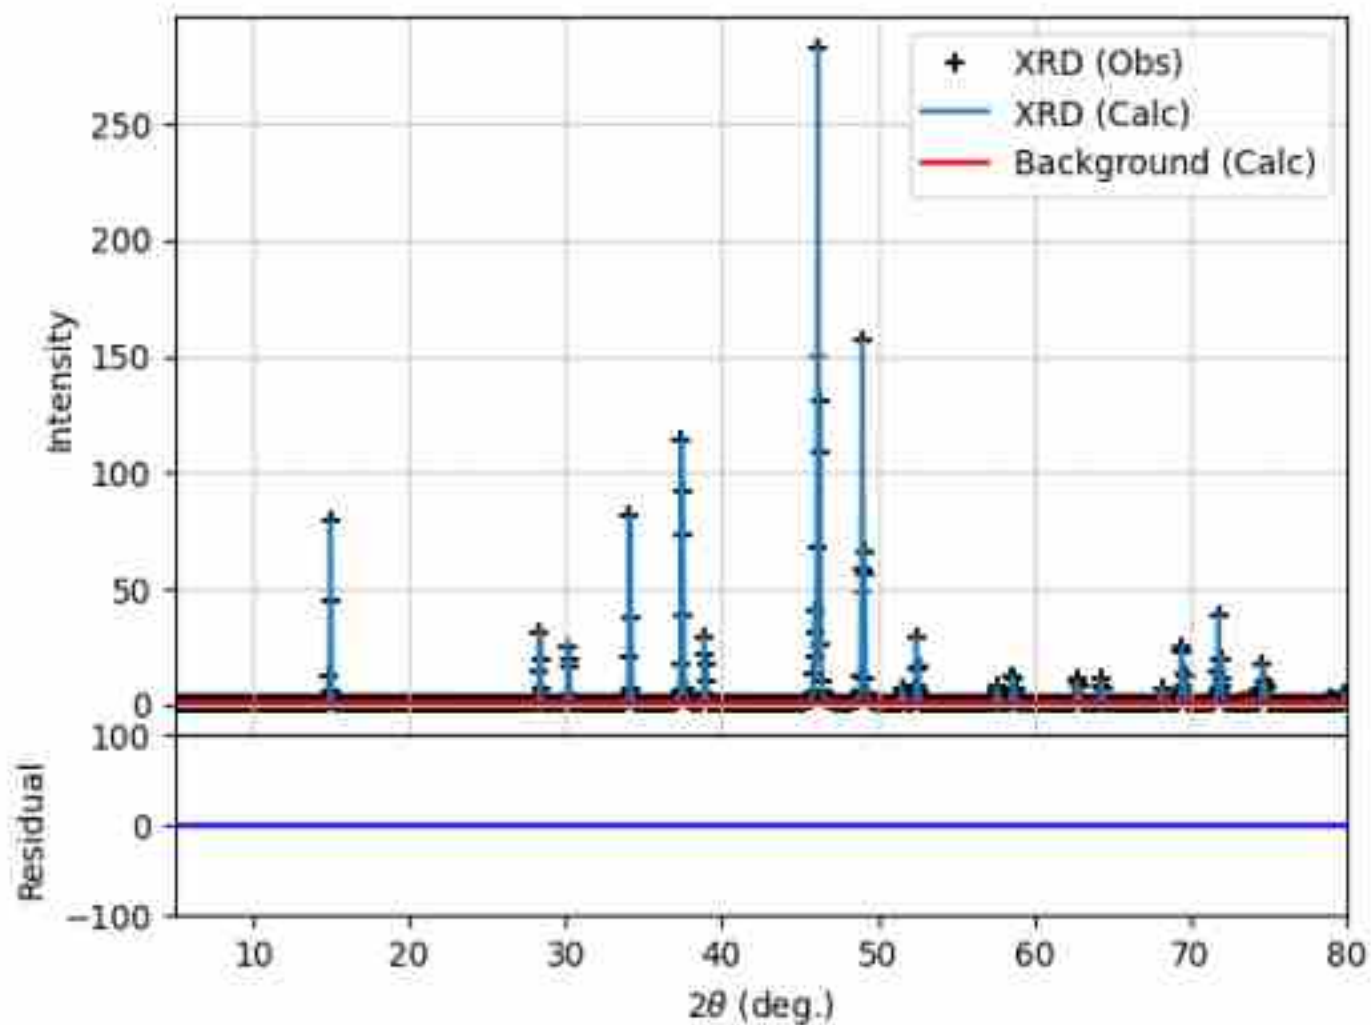

| RMSE before RR | Rwp     | RMSE after RR |
|----------------|---------|---------------|
| 0.019          | 0.00441 | 0.00067       |

# Mn<sub>2</sub>Ga<sub>2</sub>Ge<sub>2</sub>

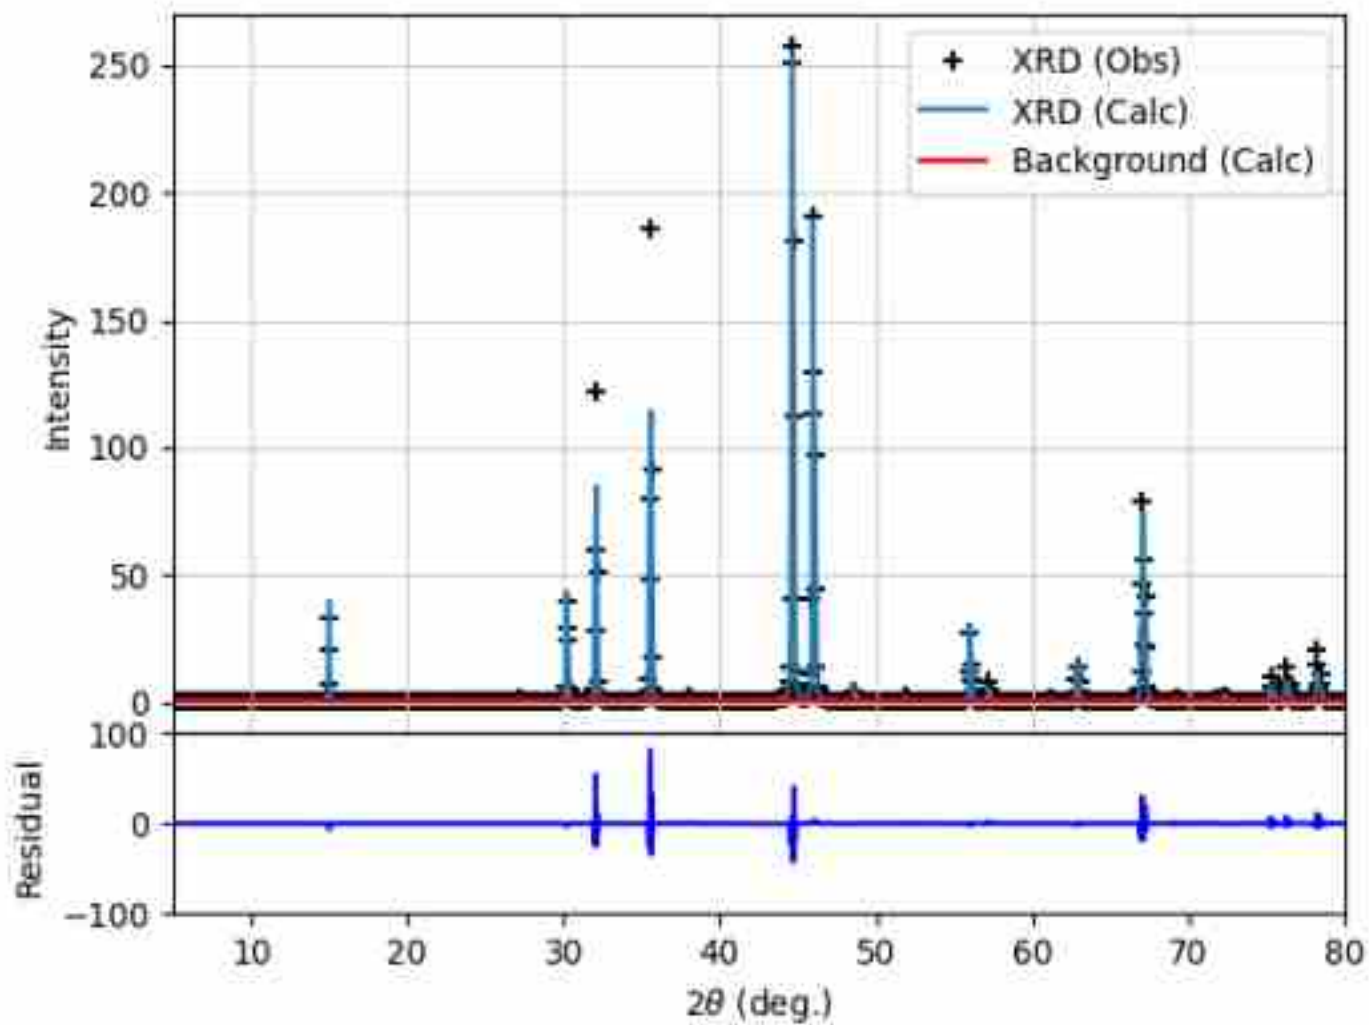

| RMSE before RR | Rwp      | RMSE after RR |
|----------------|----------|---------------|
| 0.019          | 25.71324 | 0.03253       |

# Mn<sub>2</sub>V<sub>2</sub>Ga<sub>10</sub>

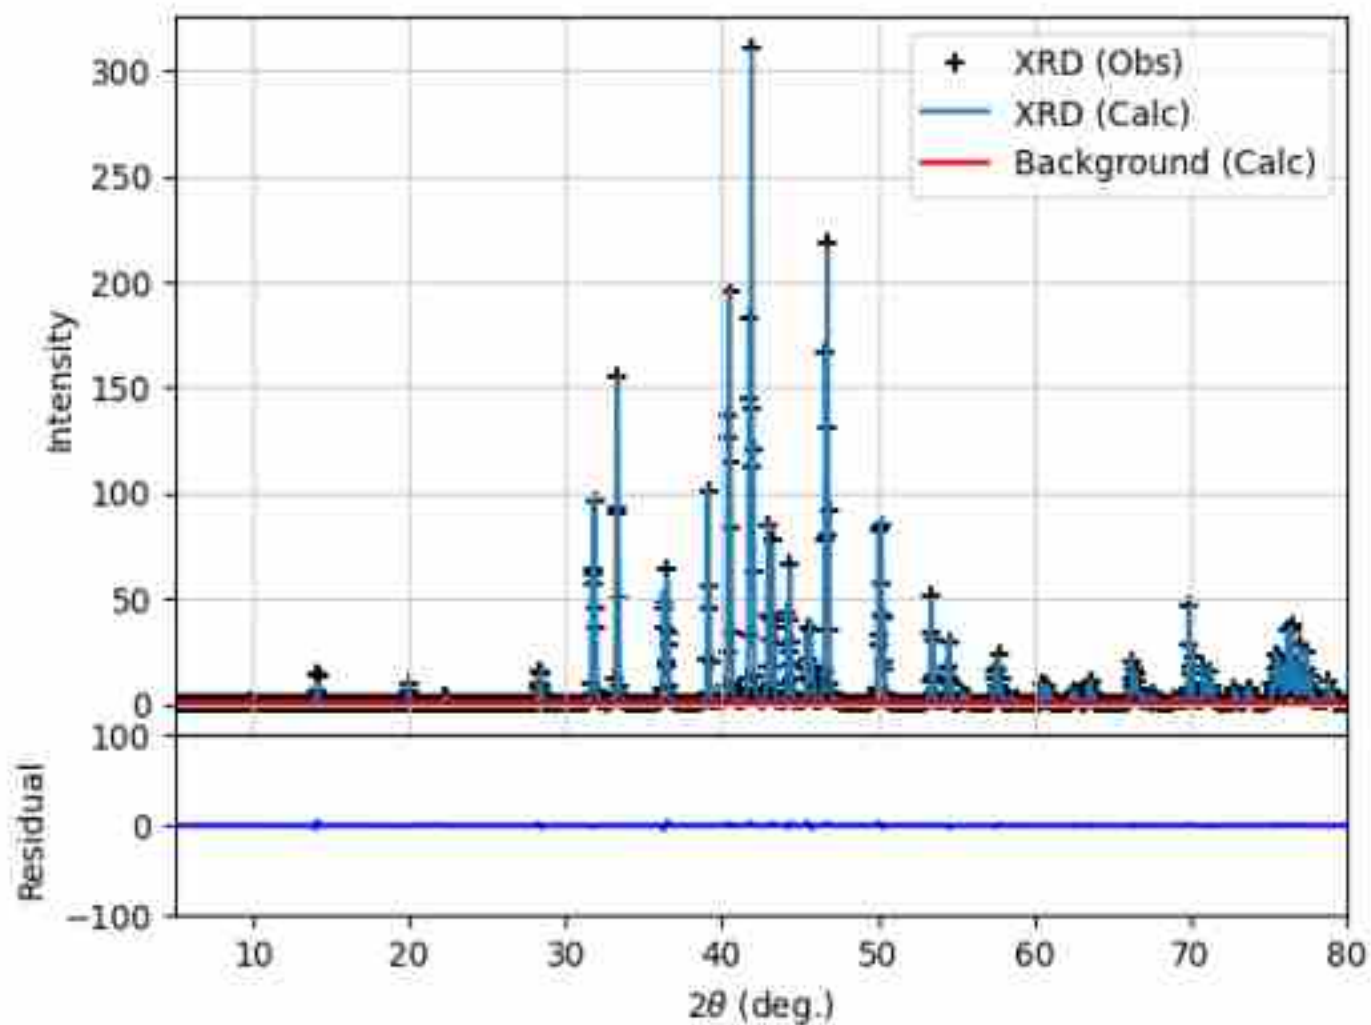

| RMSE before RR | Rwp     | RMSE after RR |
|----------------|---------|---------------|
| 0.019          | 4.42135 | 0.02496       |

# Mn<sub>4</sub>Co<sub>4</sub>As<sub>4</sub>

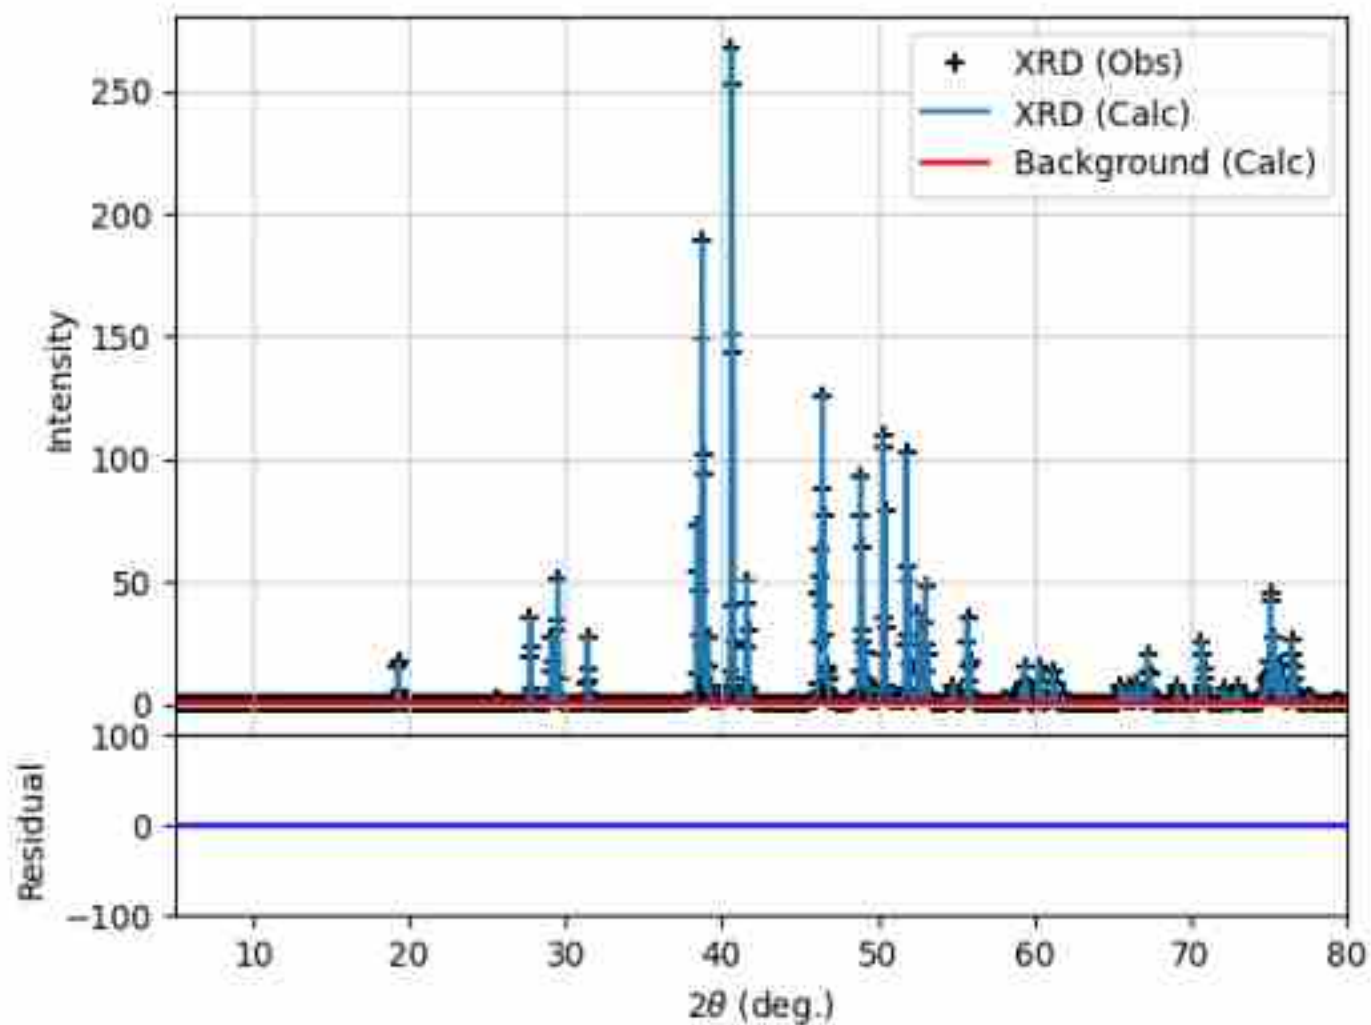

| RMSE before RR | Rwp     | RMSE after RR |
|----------------|---------|---------------|
| 0.019          | 0.00399 | 0.00043       |

# Mo1Pd2

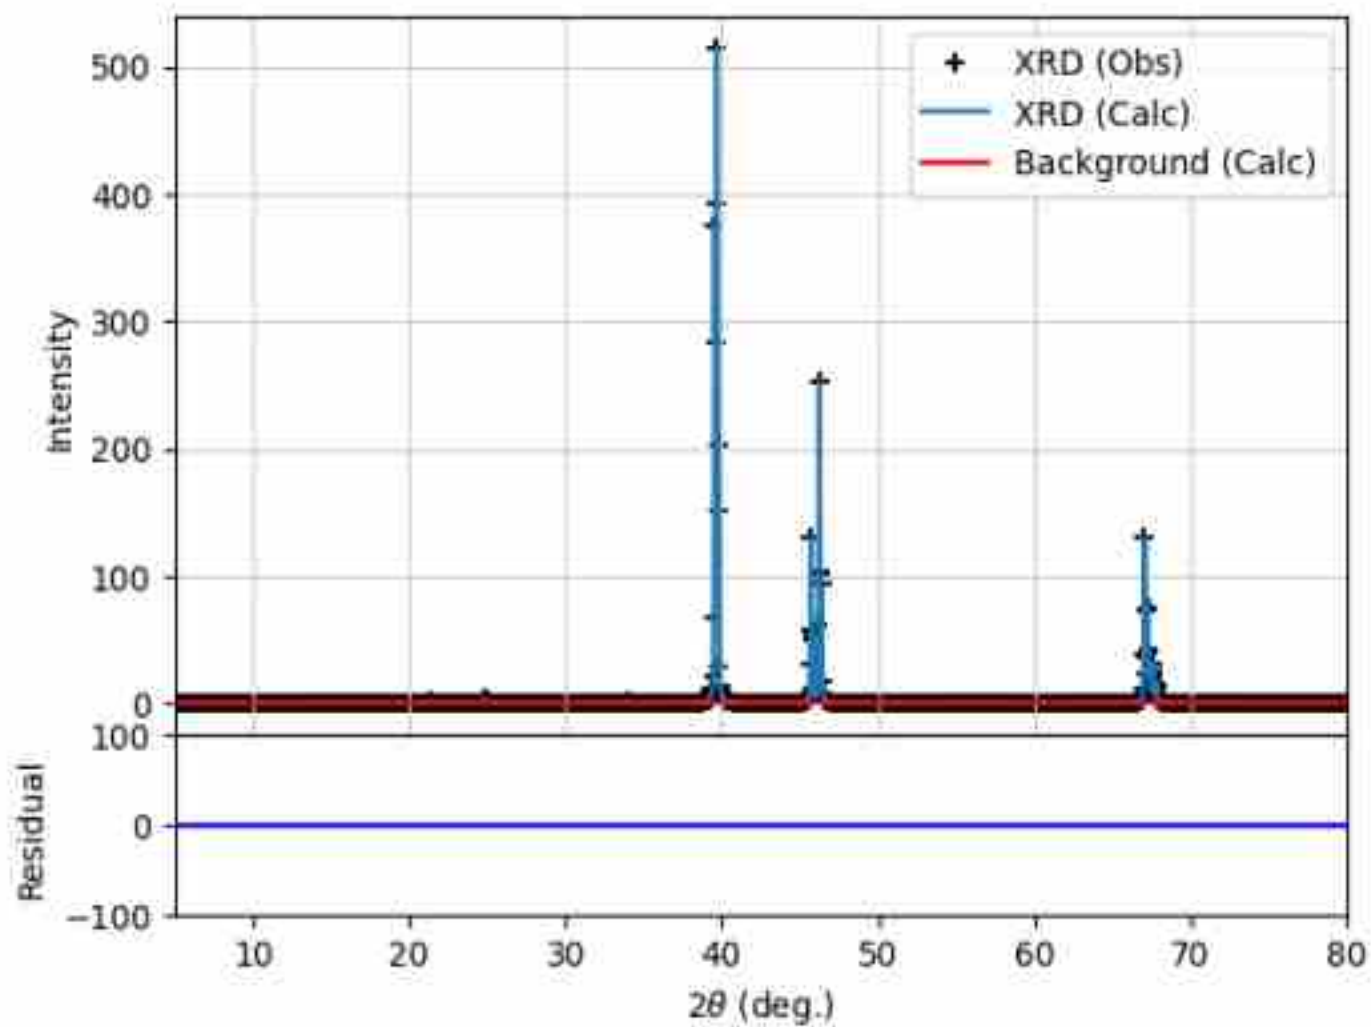

| RMSE before RR | Rwp     | RMSE after RR |
|----------------|---------|---------------|
| 0.019          | 0.00286 | 0.0001        |

# Mo2S4

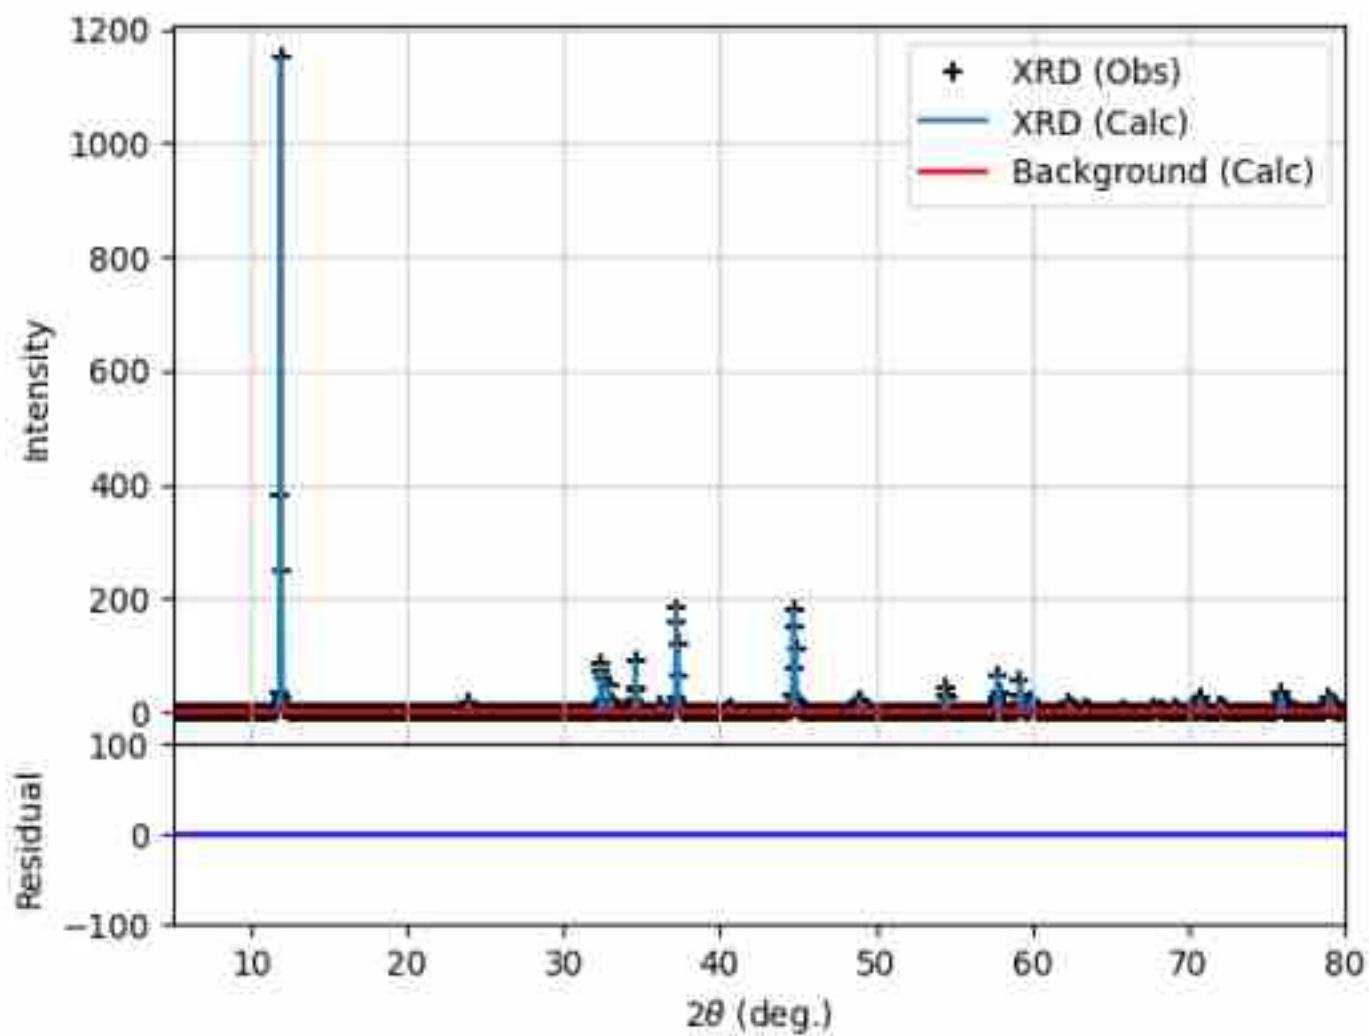

| RMSE before RR | Rwp     | RMSE after RR |
|----------------|---------|---------------|
| 0.019          | 0.00299 | 0.00069       |



# Mo<sub>2</sub>Se<sub>1</sub>S<sub>3</sub>

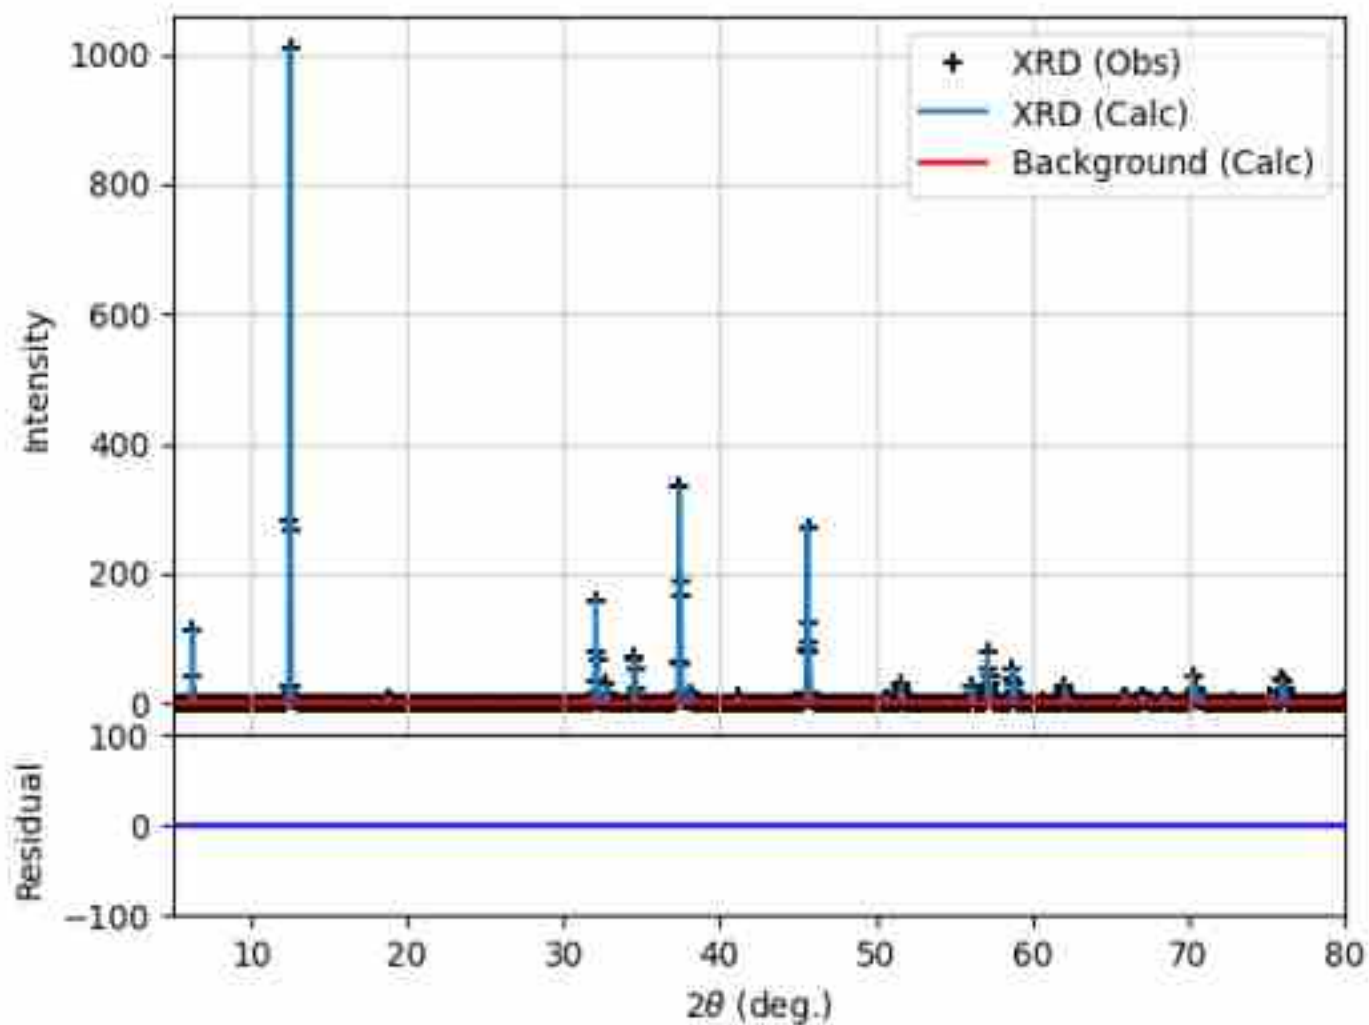

| RMSE before RR | Rwp     | RMSE after RR |
|----------------|---------|---------------|
| 0.019          | 0.00319 | 0.00076       |

# Na<sub>2</sub>Cu<sub>2</sub>Te<sub>2</sub>

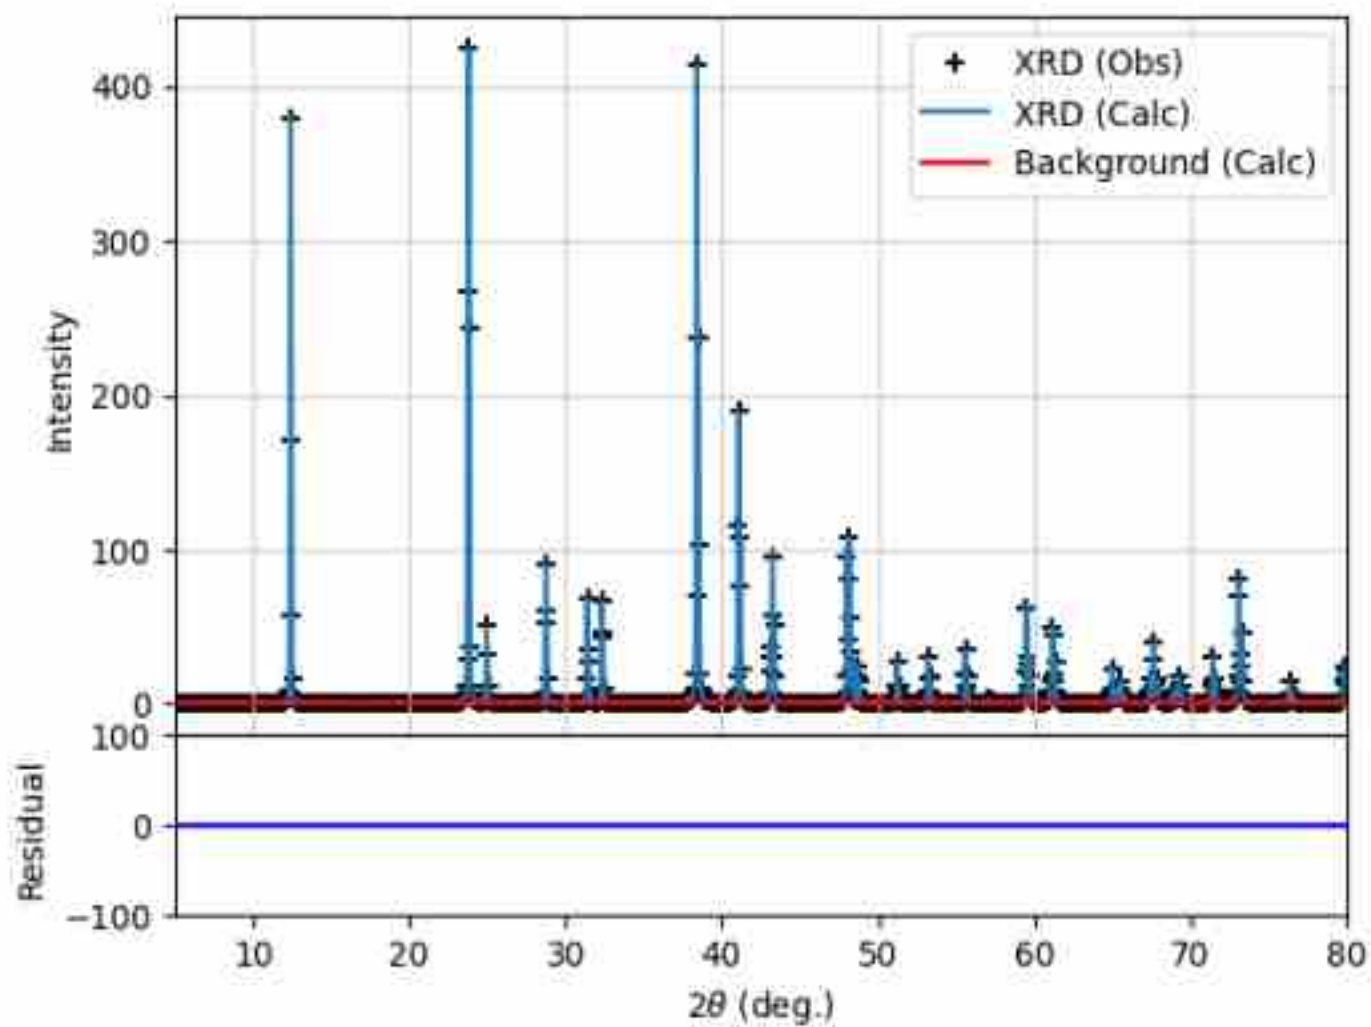

| RMSE before RR | Rwp     | RMSE after RR |
|----------------|---------|---------------|
| 0.019          | 0.00382 | 0.00091       |

# Na<sub>2</sub>Ni<sub>2</sub>O<sub>4</sub>

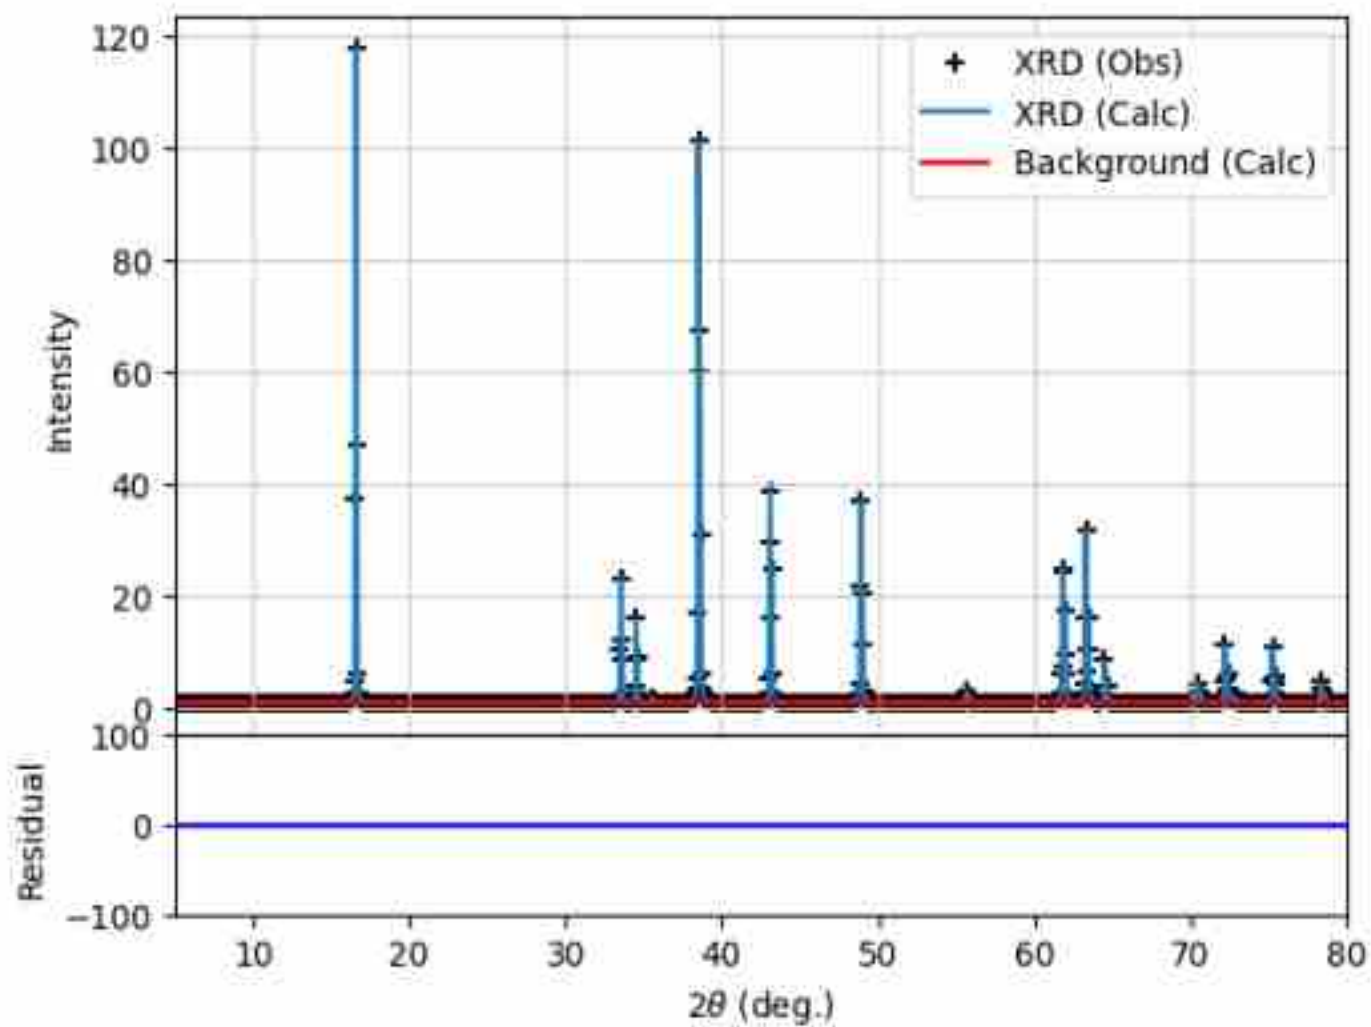

| RMSE before RR | Rwp     | RMSE after RR |
|----------------|---------|---------------|
| 0.019          | 0.00292 | 0.00085       |

# Na<sub>2</sub>Sb<sub>2</sub>Se<sub>4</sub>

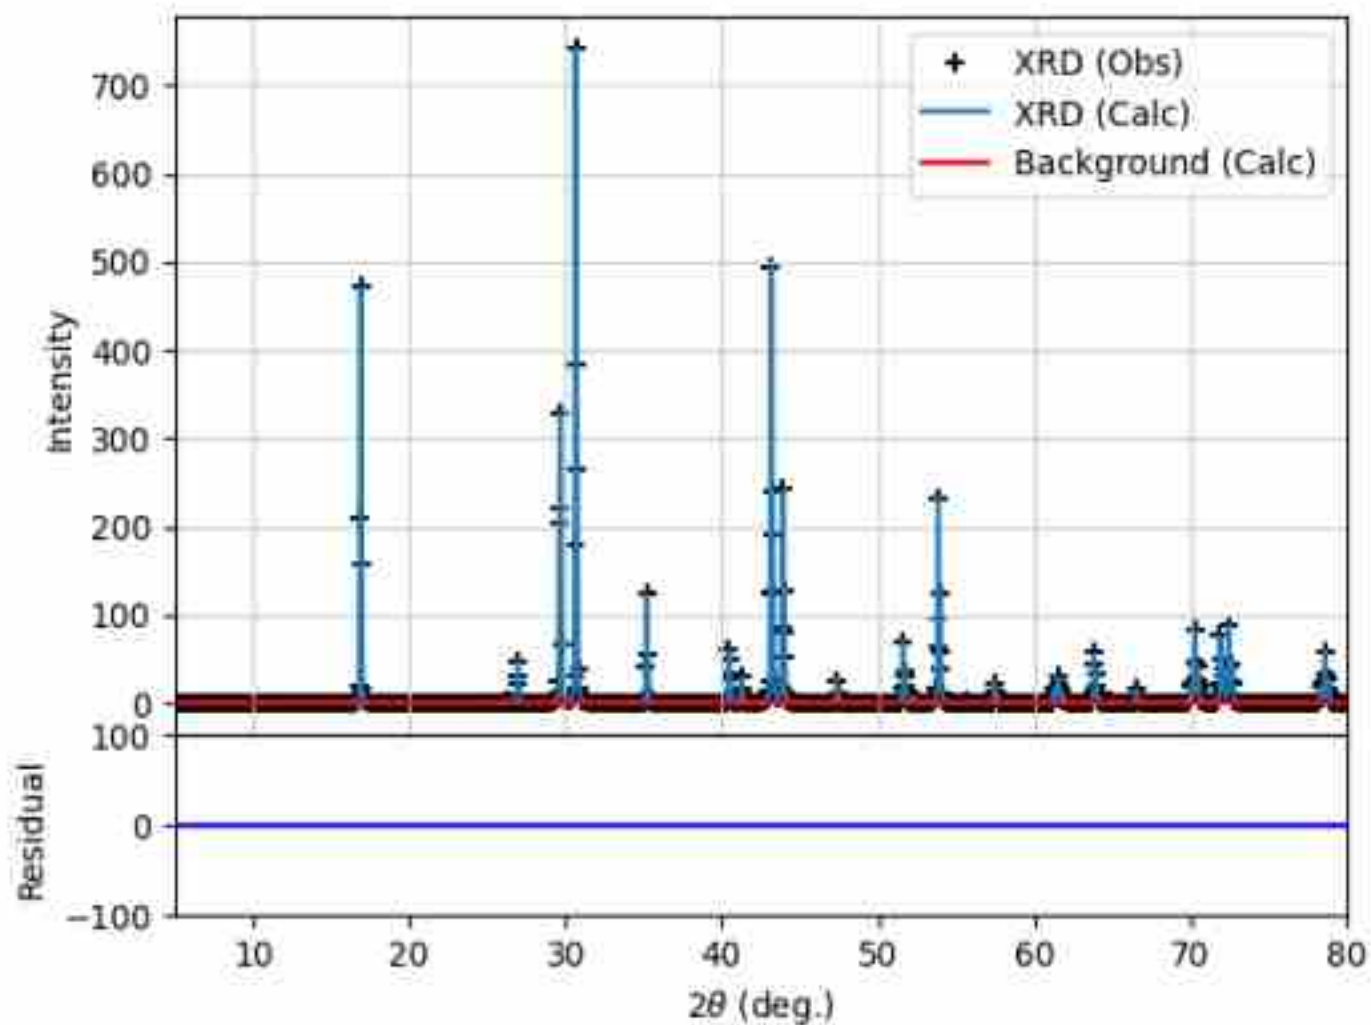

| RMSE before RR | Rwp     | RMSE after RR |
|----------------|---------|---------------|
| 0.019          | 0.00383 | 0.00067       |

# Na<sub>2</sub>Tb<sub>2</sub>Cl<sub>8</sub>

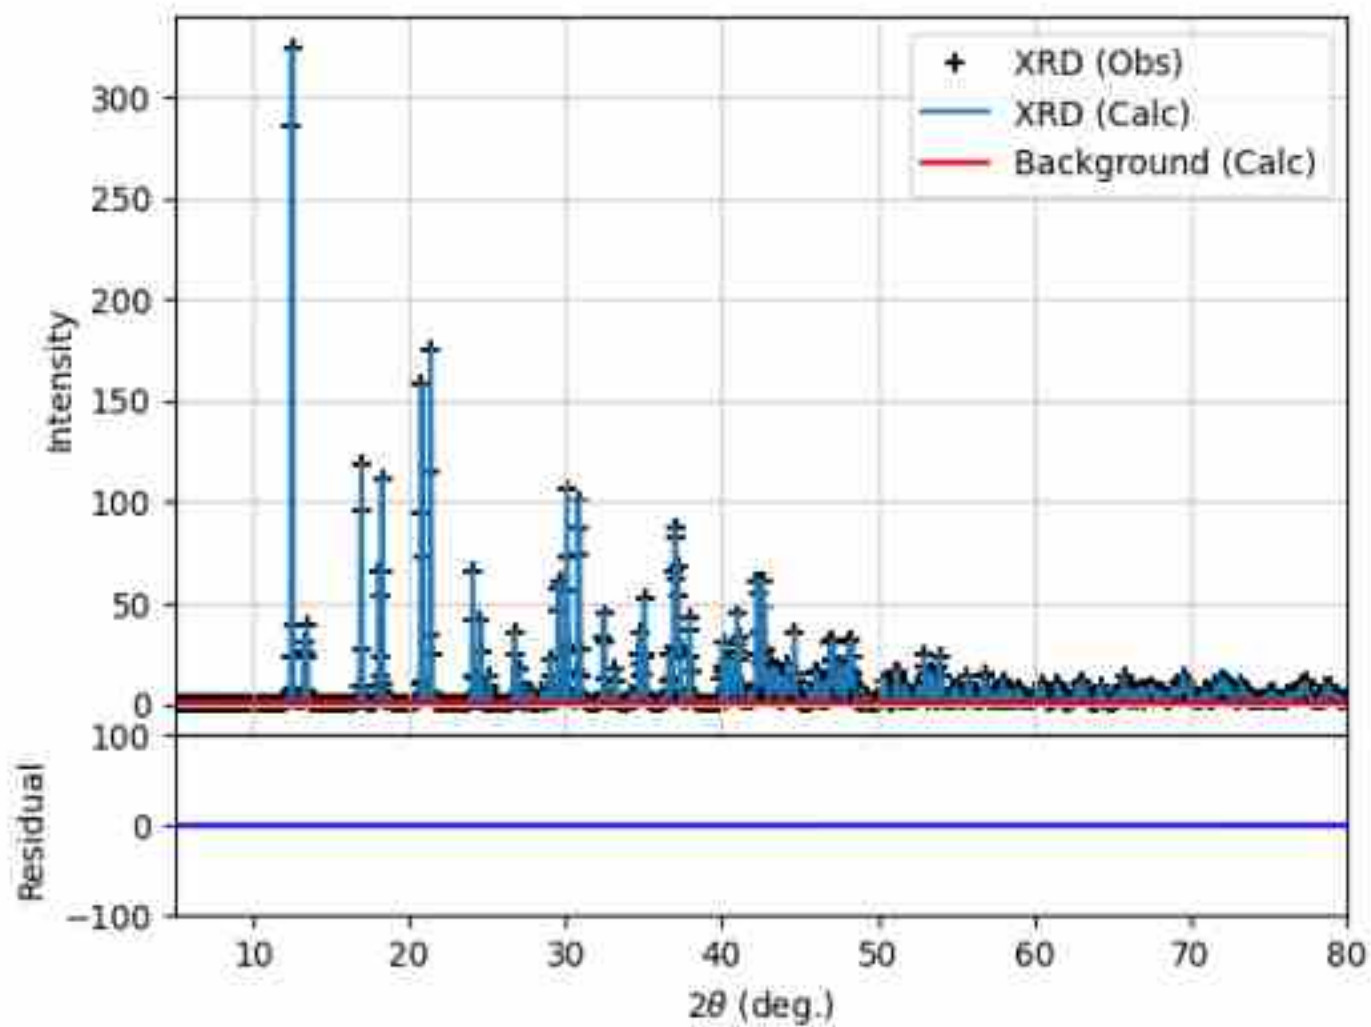

| RMSE before RR | Rwp     | RMSE after RR |
|----------------|---------|---------------|
| 0.019          | 0.08901 | 0.00195       |

# Na<sub>6</sub>Fe<sub>1</sub>Cl<sub>18</sub>

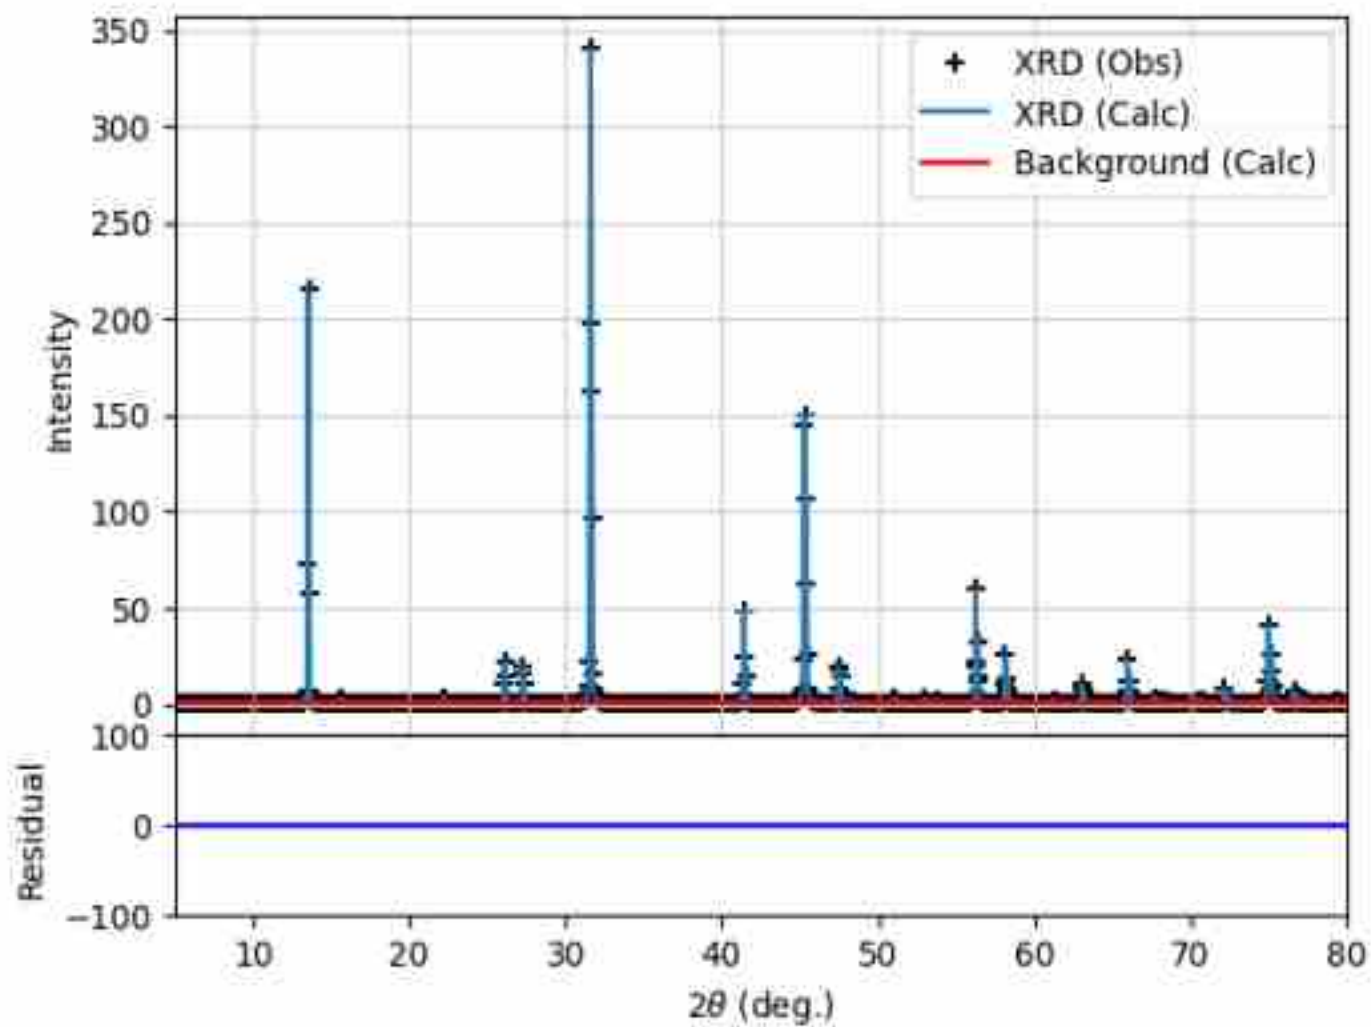

| RMSE before RR | Rwp    | RMSE after RR |
|----------------|--------|---------------|
| 0.019          | 0.1039 | 0.0042        |

# Nb1Cr3S8

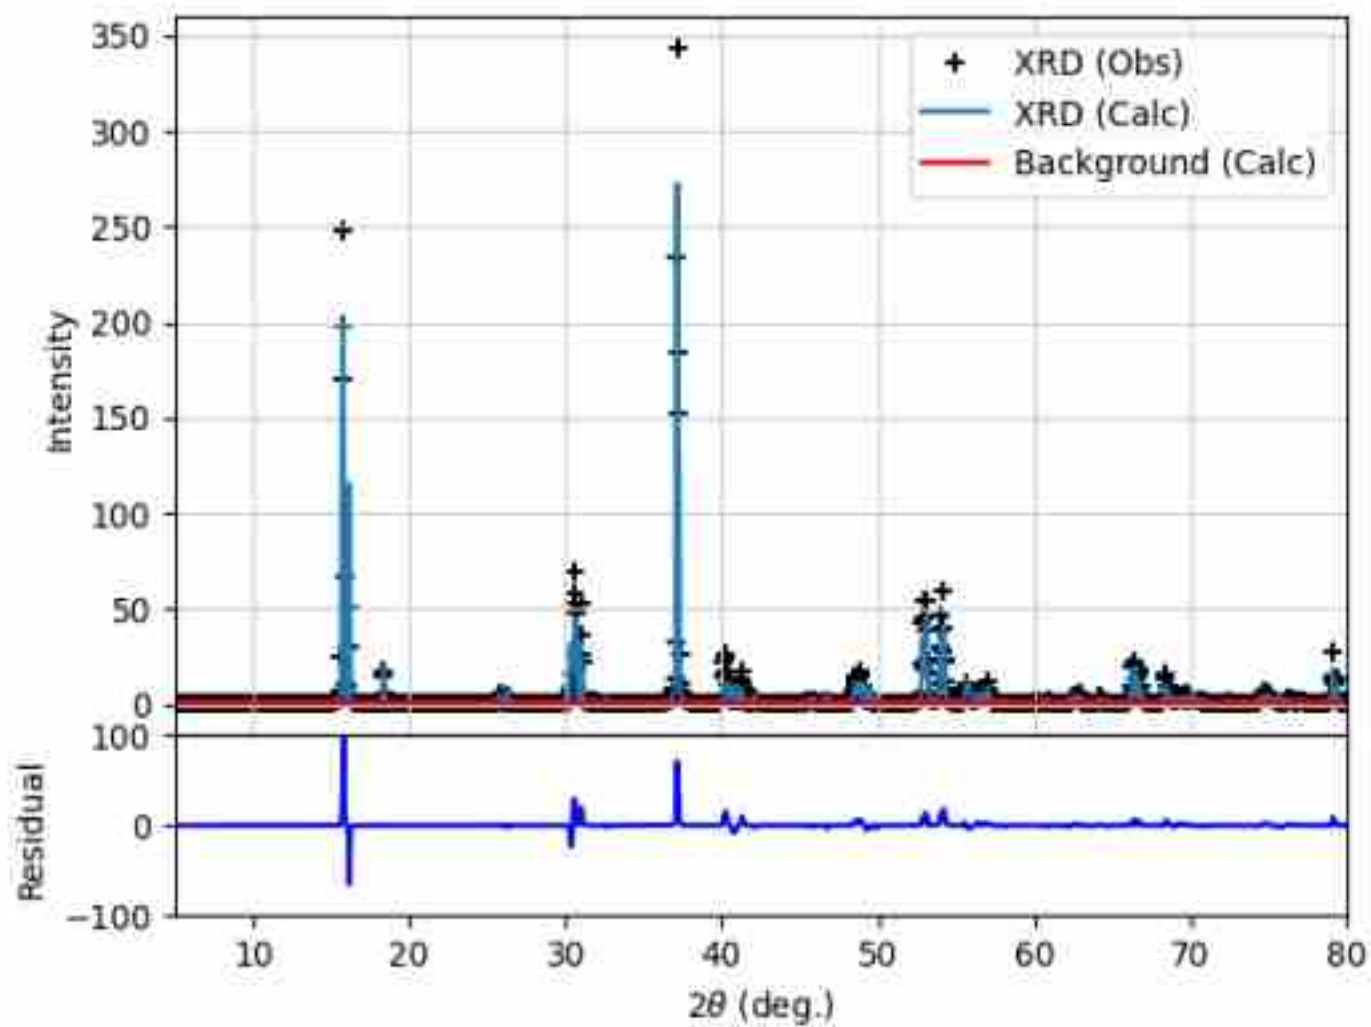

| RMSE before RR | Rwp      | RMSE after RR |
|----------------|----------|---------------|
| 0.019          | 40.22445 | 0.02127       |

# Nb<sub>2</sub>Fe<sub>2</sub>O<sub>8</sub>

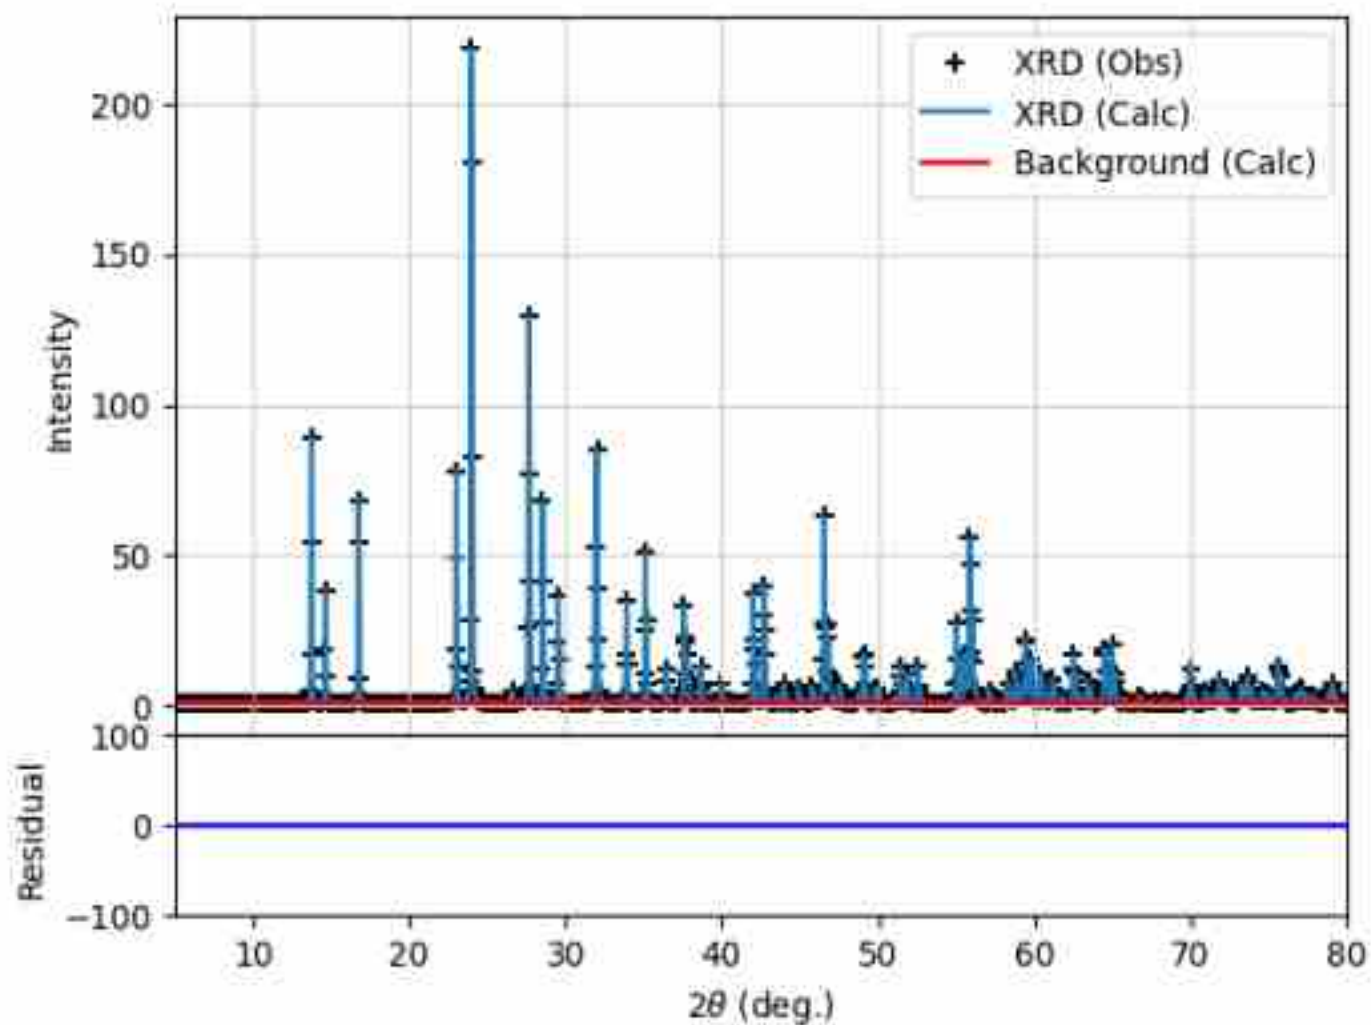

| RMSE before RR | Rwp     | RMSE after RR |
|----------------|---------|---------------|
| 0.019          | 0.00256 | 0.00097       |



# Nb<sub>6</sub>Ni<sub>2</sub>Se<sub>12</sub>

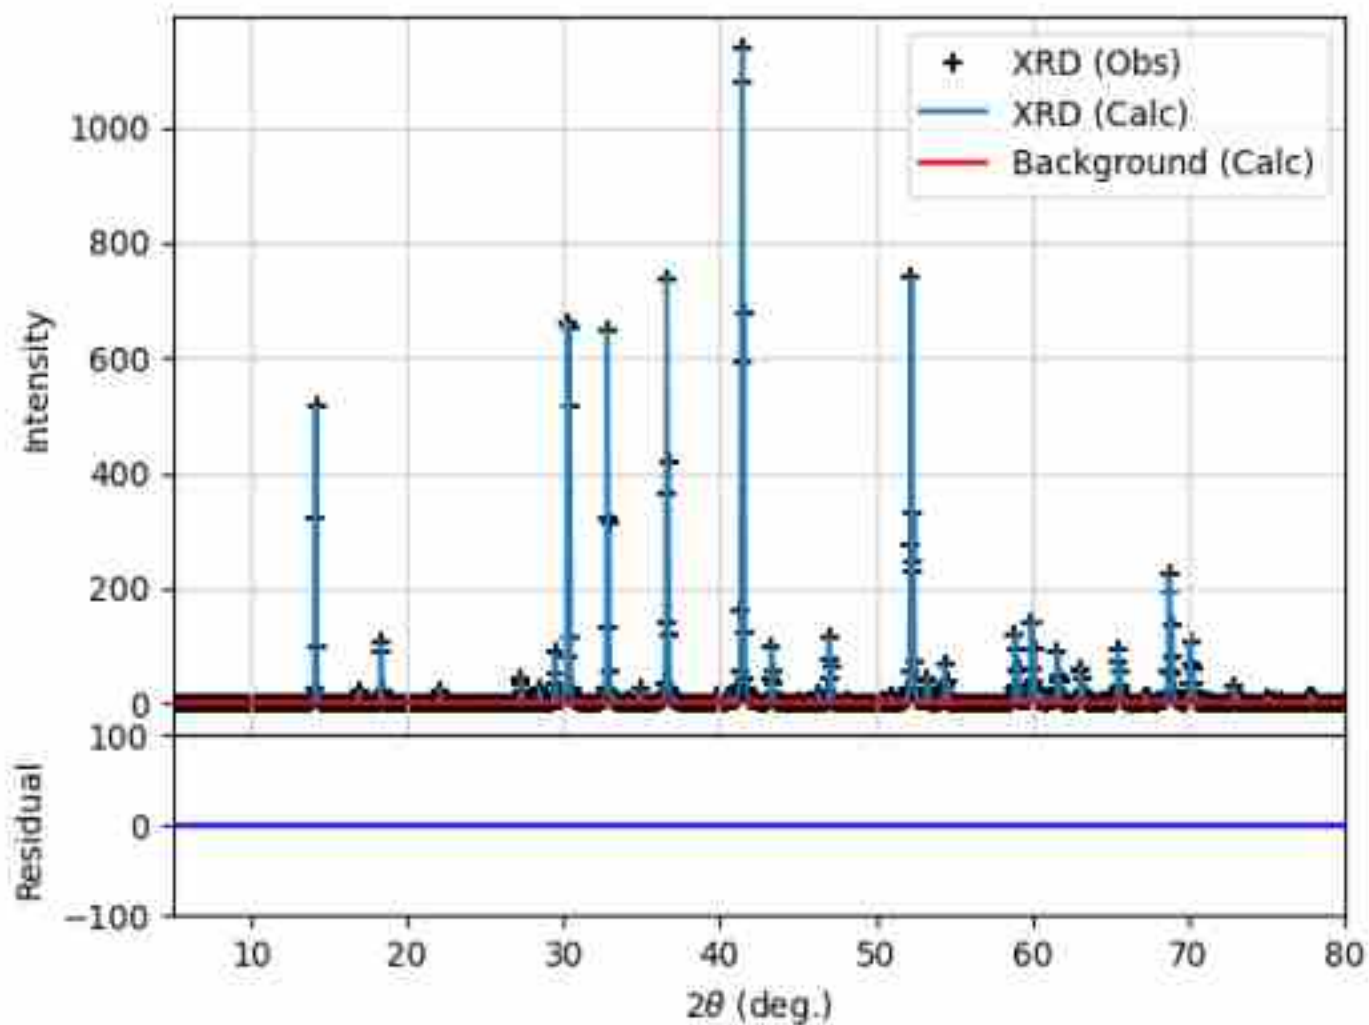

| RMSE before RR | Rwp     | RMSE after RR |
|----------------|---------|---------------|
| 0.019          | 0.00313 | 0.00037       |

# Nb<sub>10</sub>Si<sub>6</sub>N<sub>2</sub>

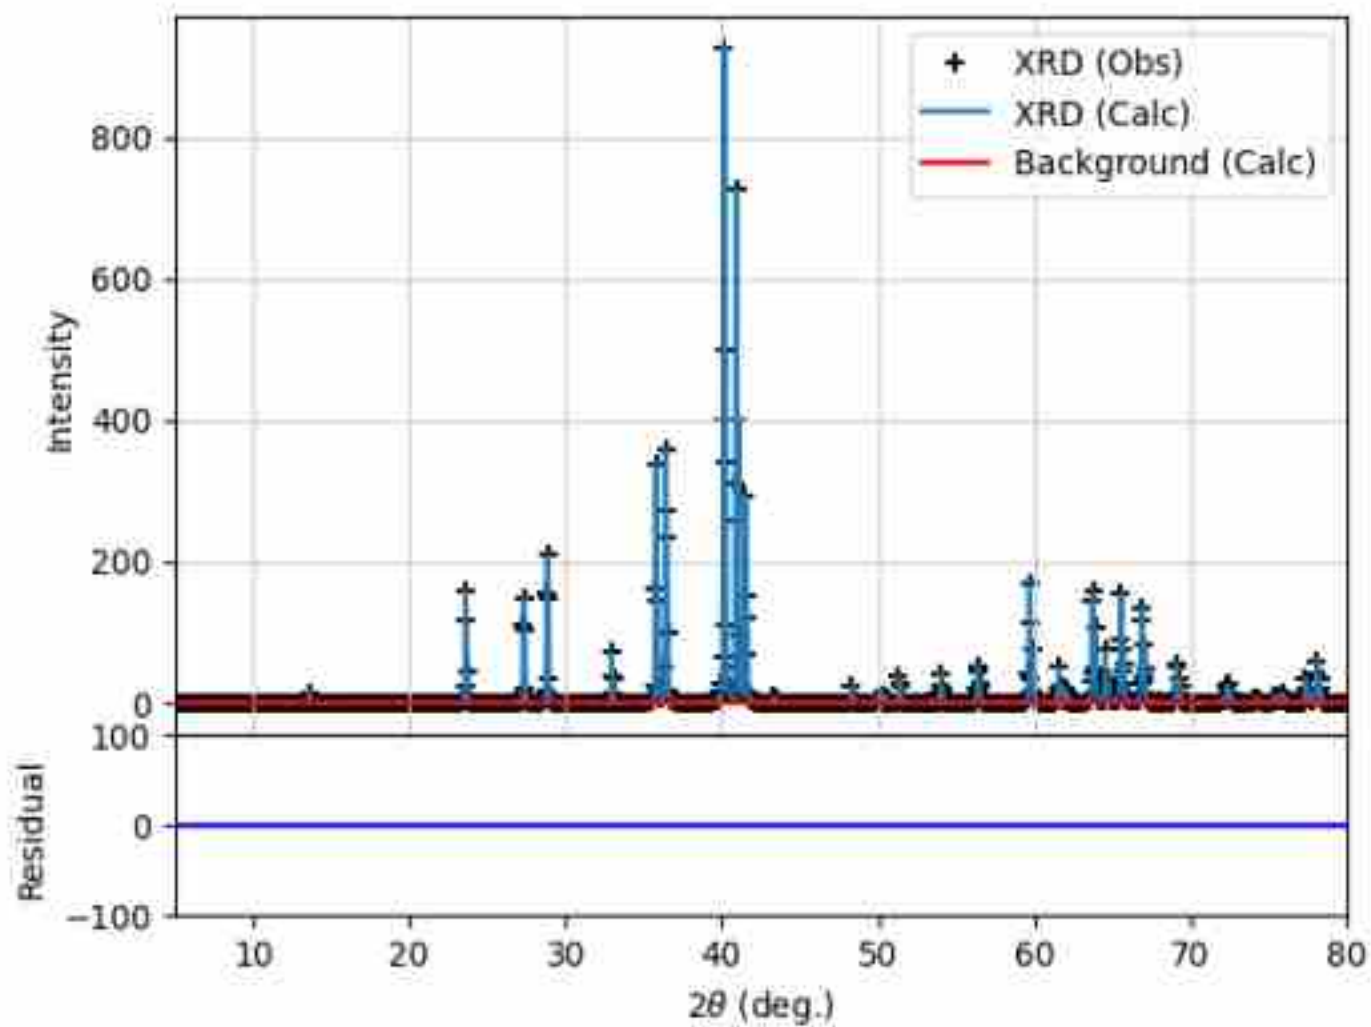

| RMSE before RR | Rwp     | RMSE after RR |
|----------------|---------|---------------|
| 0.019          | 0.00316 | 0.00059       |

# Nd1Cu4Pd1

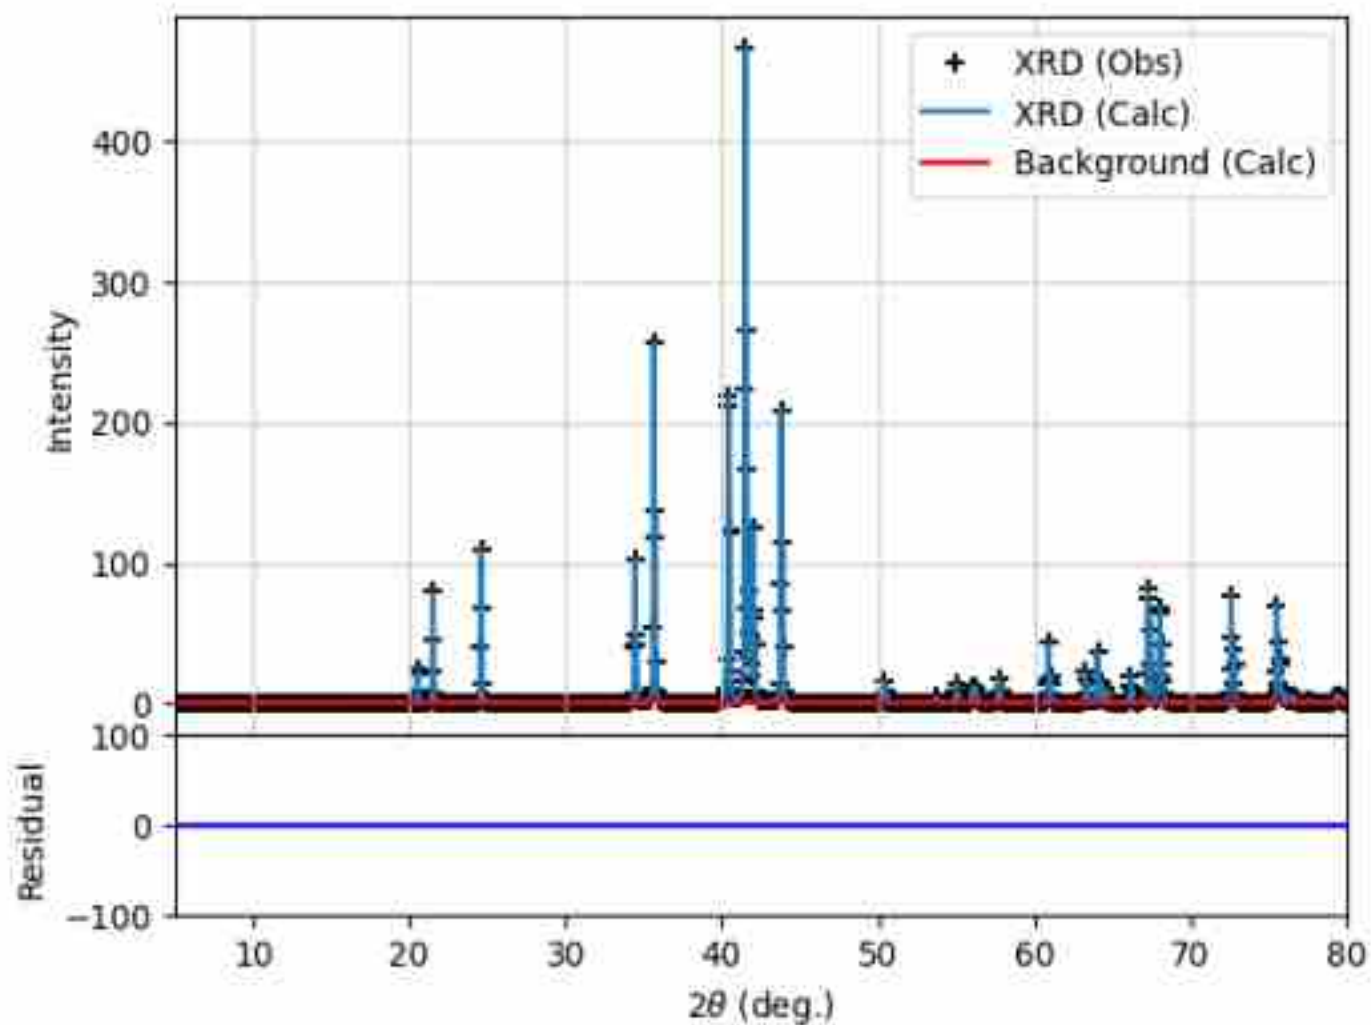

| RMSE before RR | Rwp     | RMSE after RR |
|----------------|---------|---------------|
| 0.019          | 0.00298 | 0.00035       |

# Nd<sub>4</sub>Cu<sub>4</sub>Se<sub>8</sub>

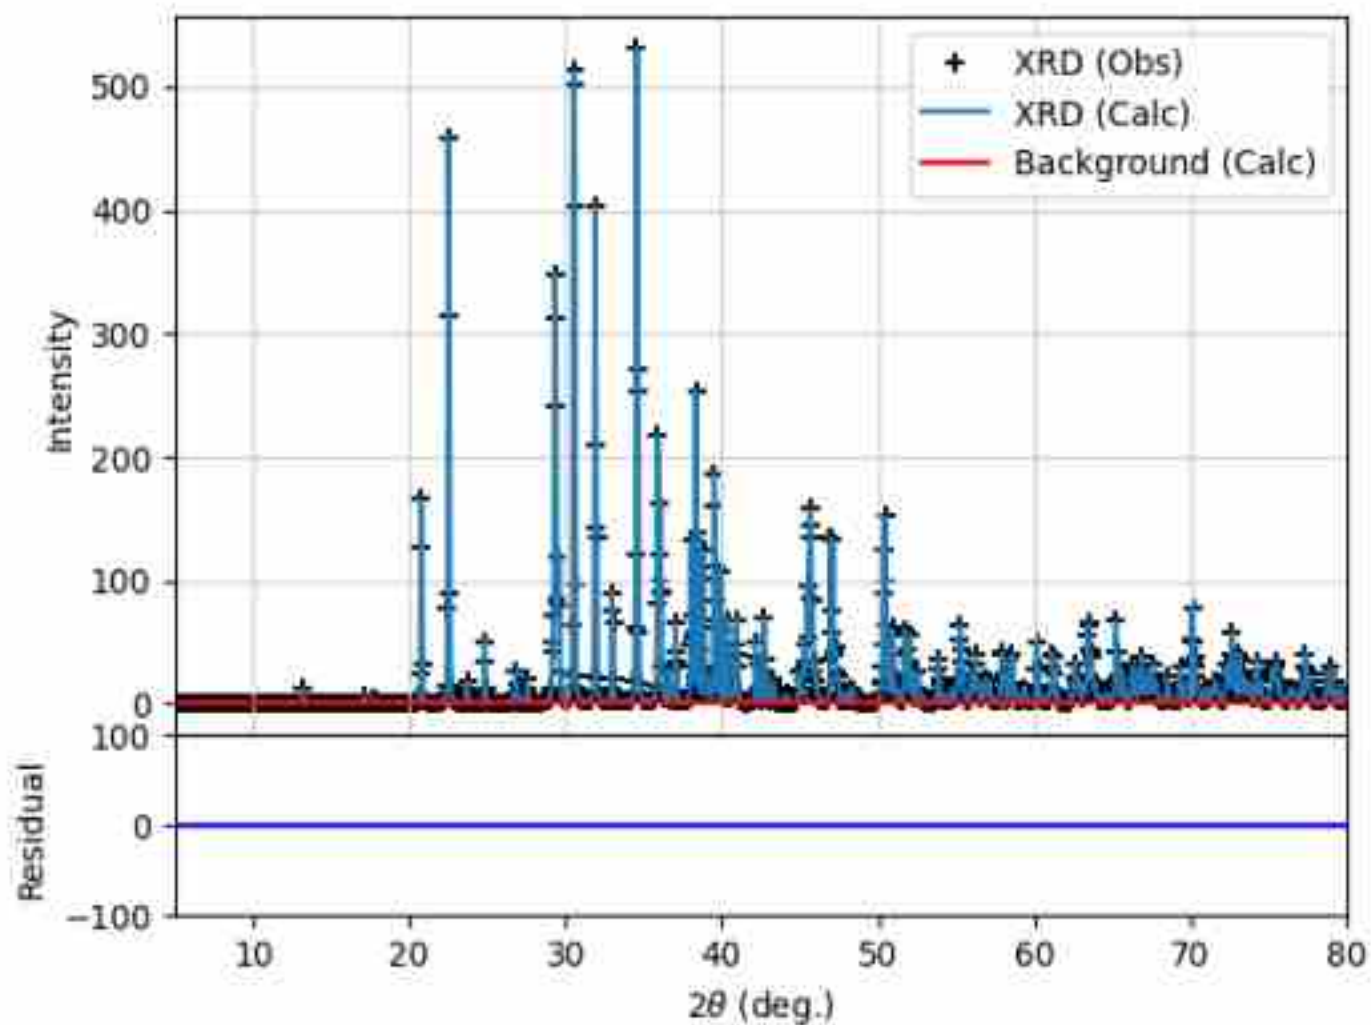

| RMSE before RR | Rwp     | RMSE after RR |
|----------------|---------|---------------|
| 0.019          | 0.00363 | 0.00043       |

# Nd<sub>4</sub>Ni<sub>4</sub>O<sub>12</sub>

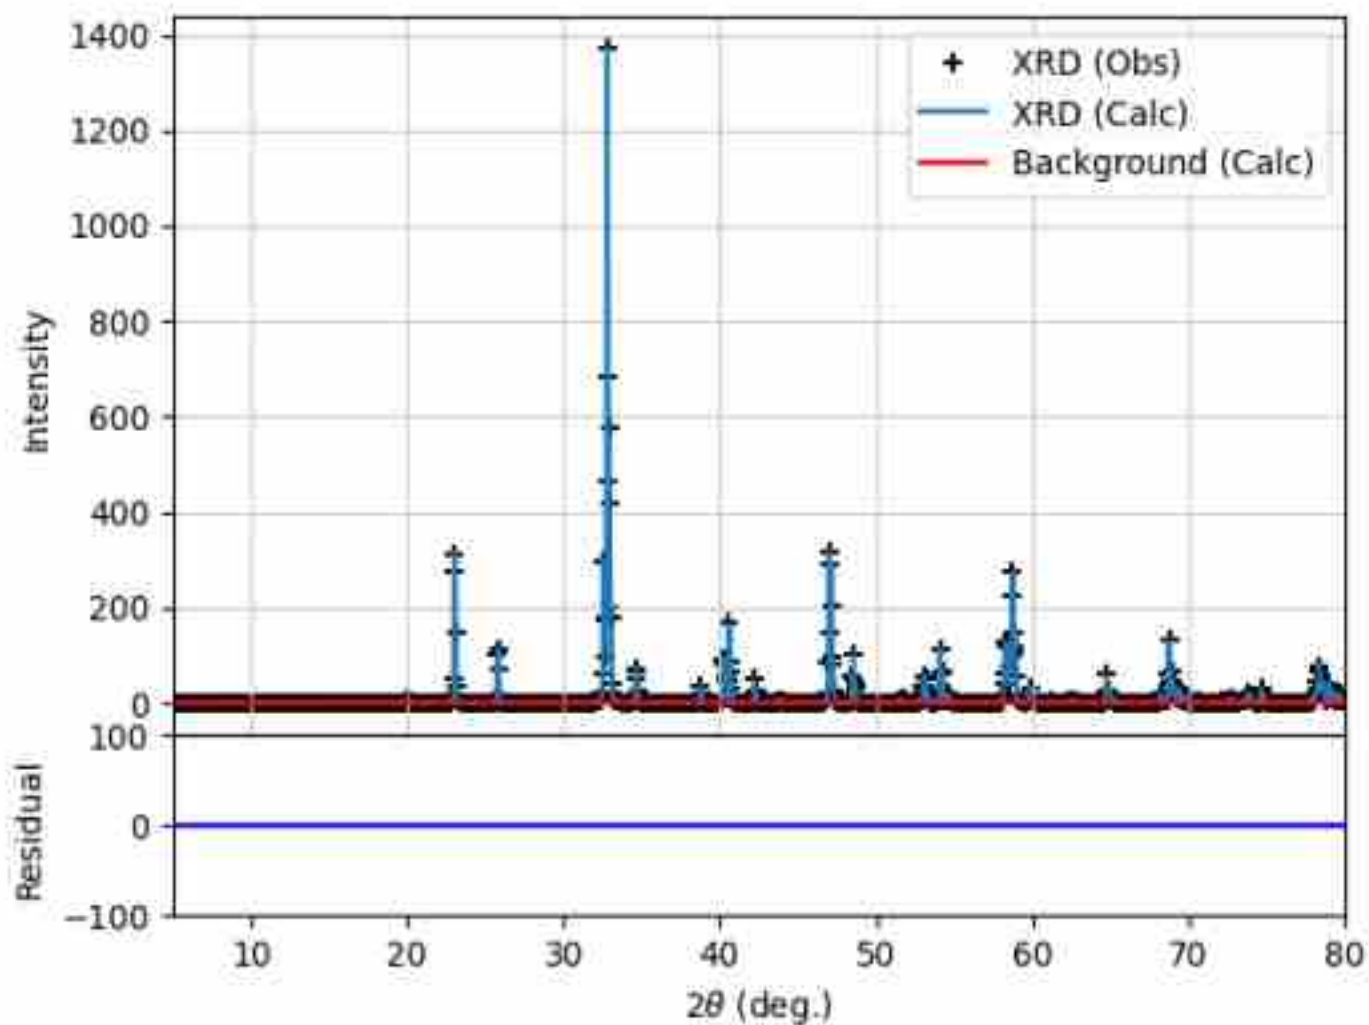

| RMSE before RR | Rwp     | RMSE after RR |
|----------------|---------|---------------|
| 0.019          | 0.00345 | 0.00113       |

# Nd4Se8

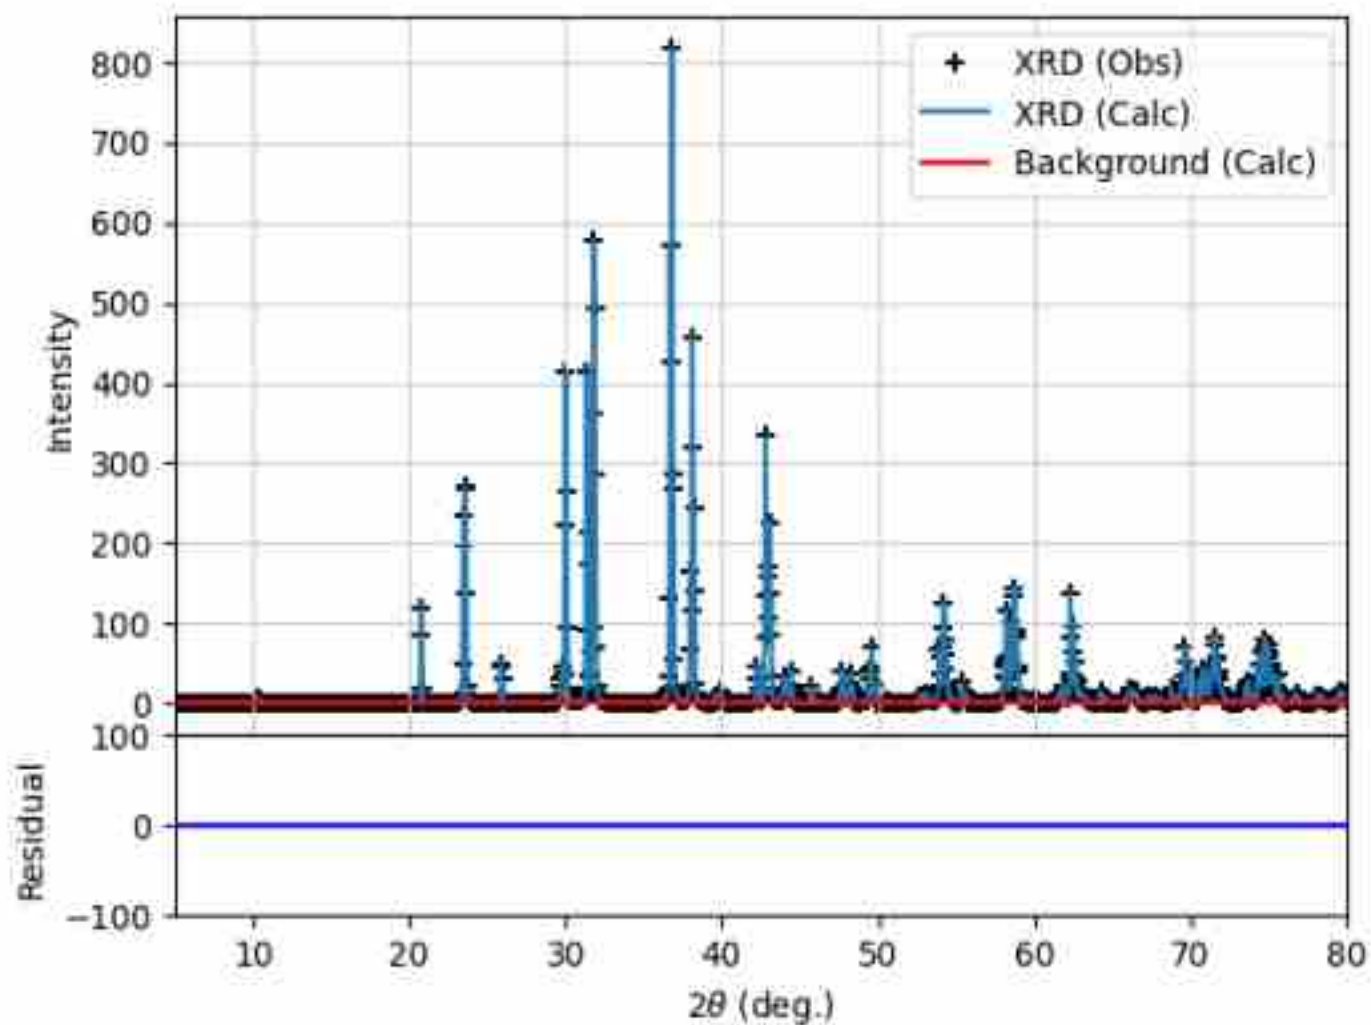

| RMSE before RR | Rwp     | RMSE after RR |
|----------------|---------|---------------|
| 0.019          | 0.02116 | 0.00111       |

# Ni6O2F10

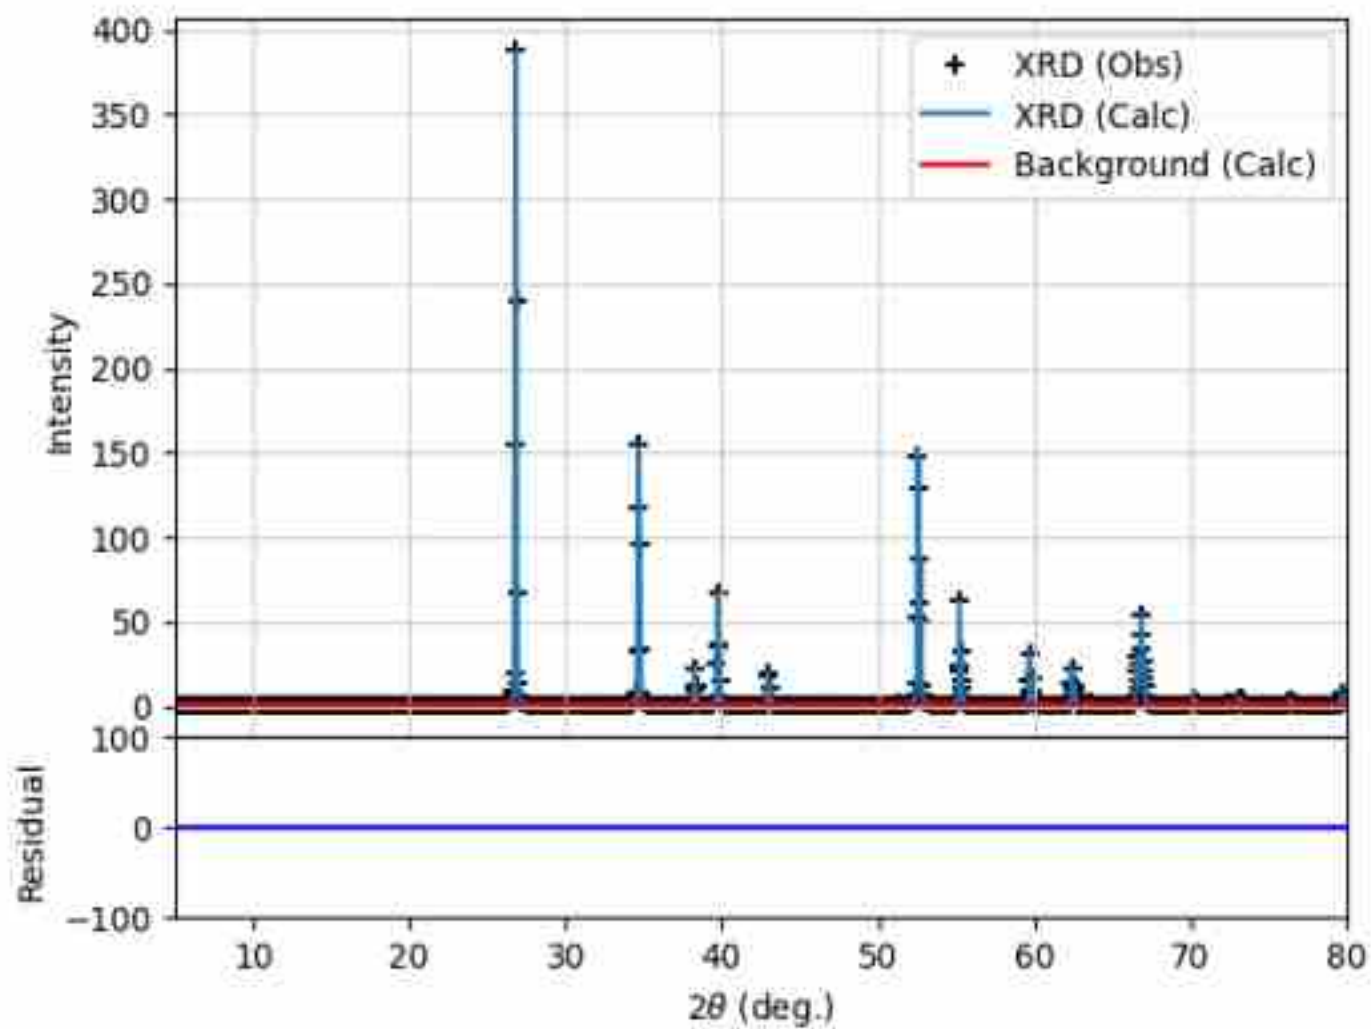

| RMSE before RR | Rwp     | RMSE after RR |
|----------------|---------|---------------|
| 0.019          | 0.00037 | 1e-05         |

# Os4S8

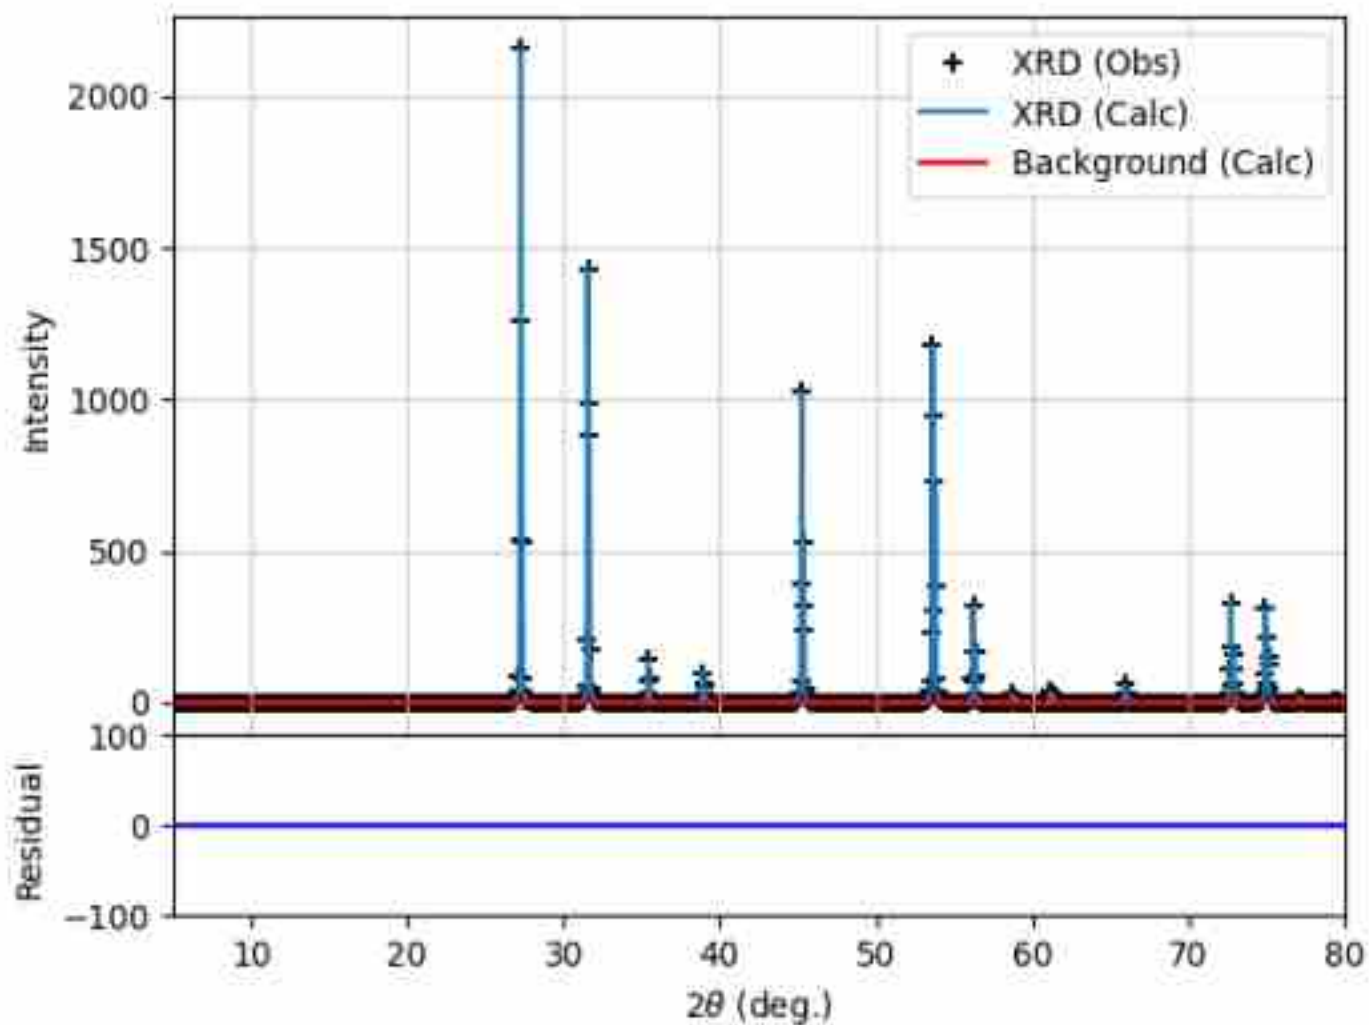

| RMSE before RR | Rwp    | RMSE after RR |
|----------------|--------|---------------|
| 0.019          | 0.0075 | 0.00076       |



# Pa6P8

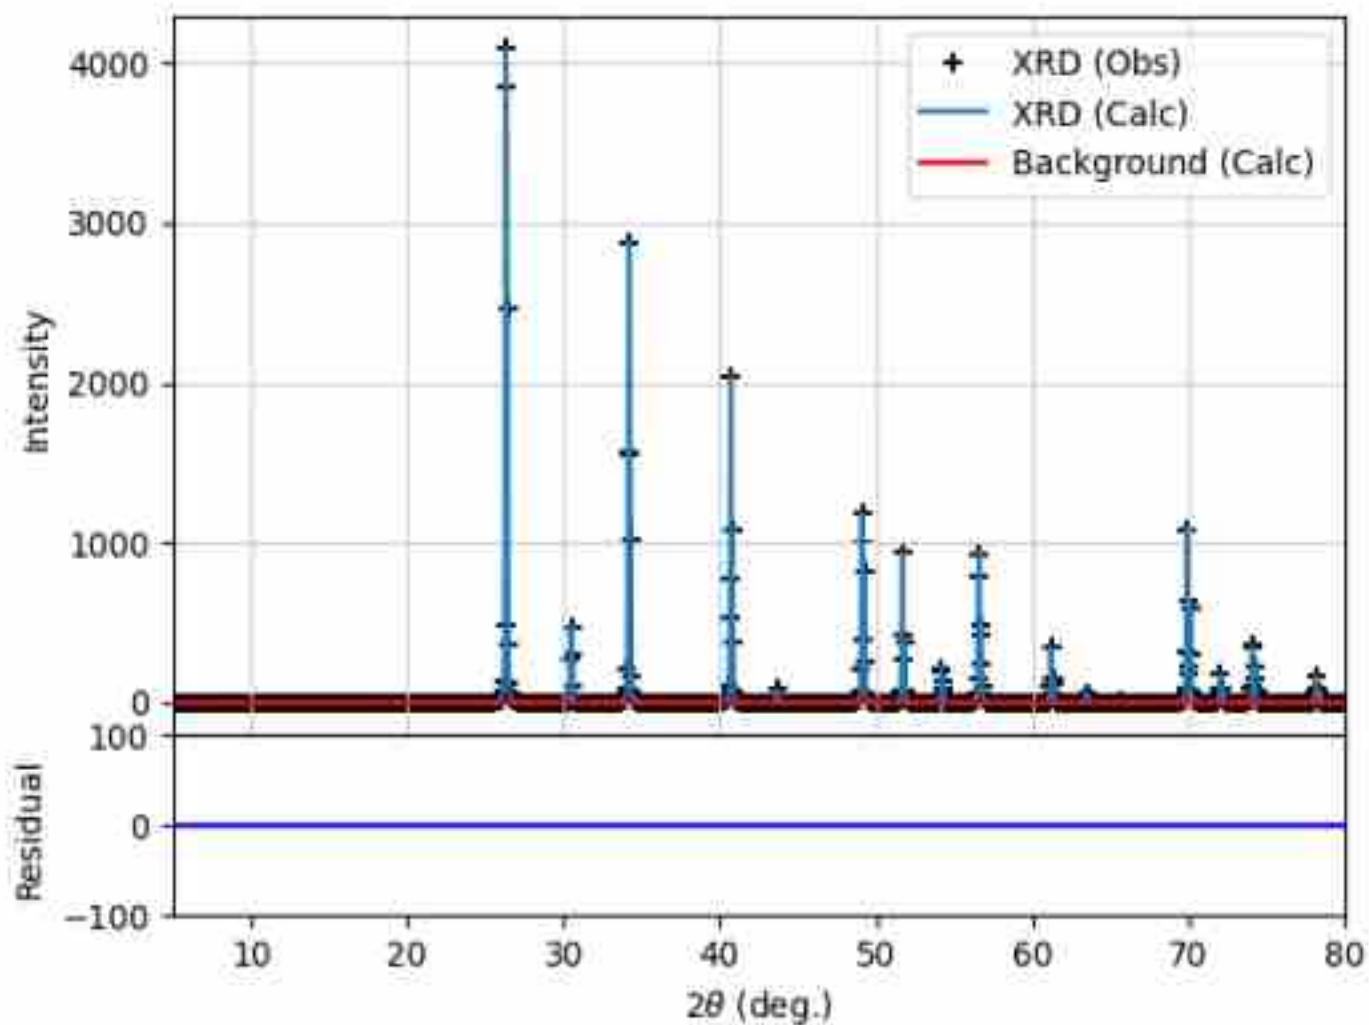

| RMSE before RR | Rwp     | RMSE after RR |
|----------------|---------|---------------|
| 0.019          | 0.00563 | 0.00144       |

# Pr<sub>2</sub>Au<sub>12</sub>

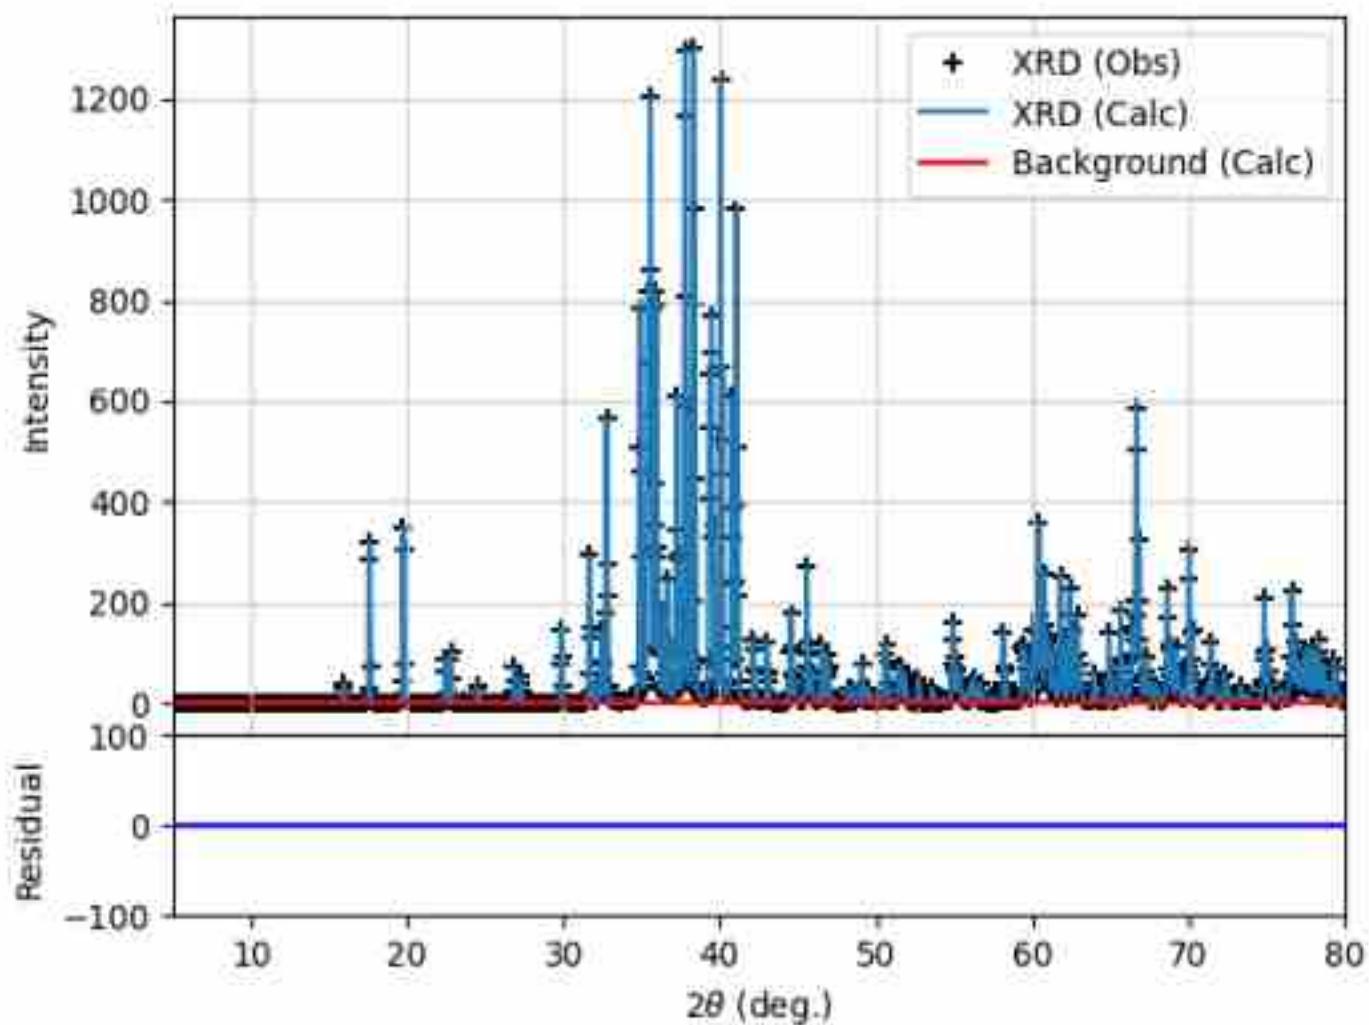

| RMSE before RR | Rwp     | RMSE after RR |
|----------------|---------|---------------|
| 0.019          | 0.00518 | 0.00031       |

# Pr<sub>4</sub>Ge<sub>10</sub>Ir<sub>6</sub>

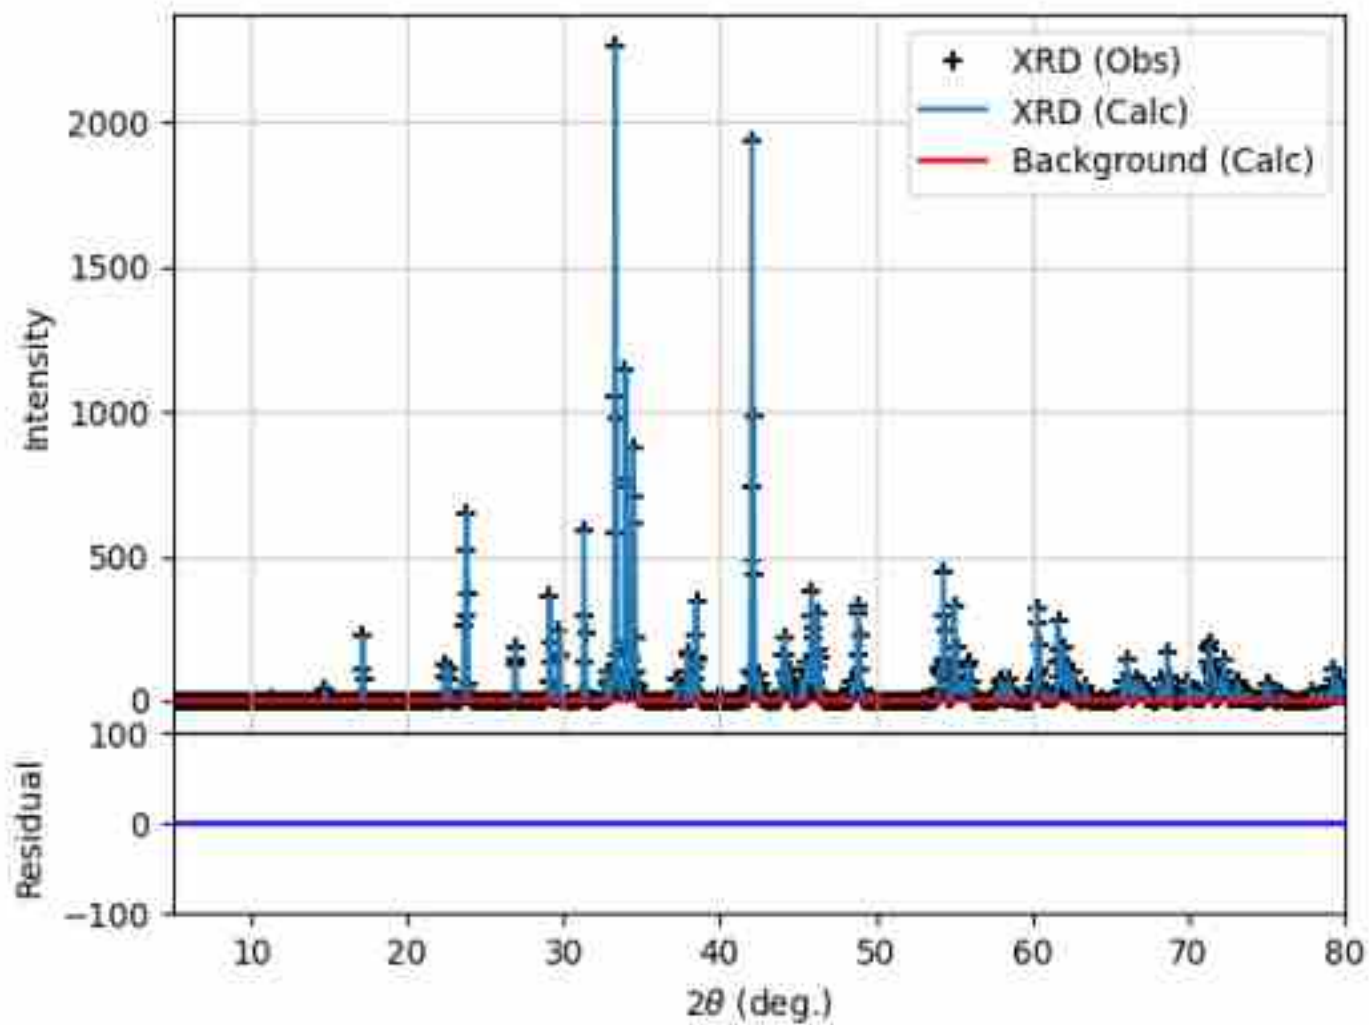

| RMSE before RR | Rwp     | RMSE after RR |
|----------------|---------|---------------|
| 0.019          | 0.00332 | 0.00045       |

# Pr<sub>7</sub>Fe<sub>11</sub>I<sub>12</sub>

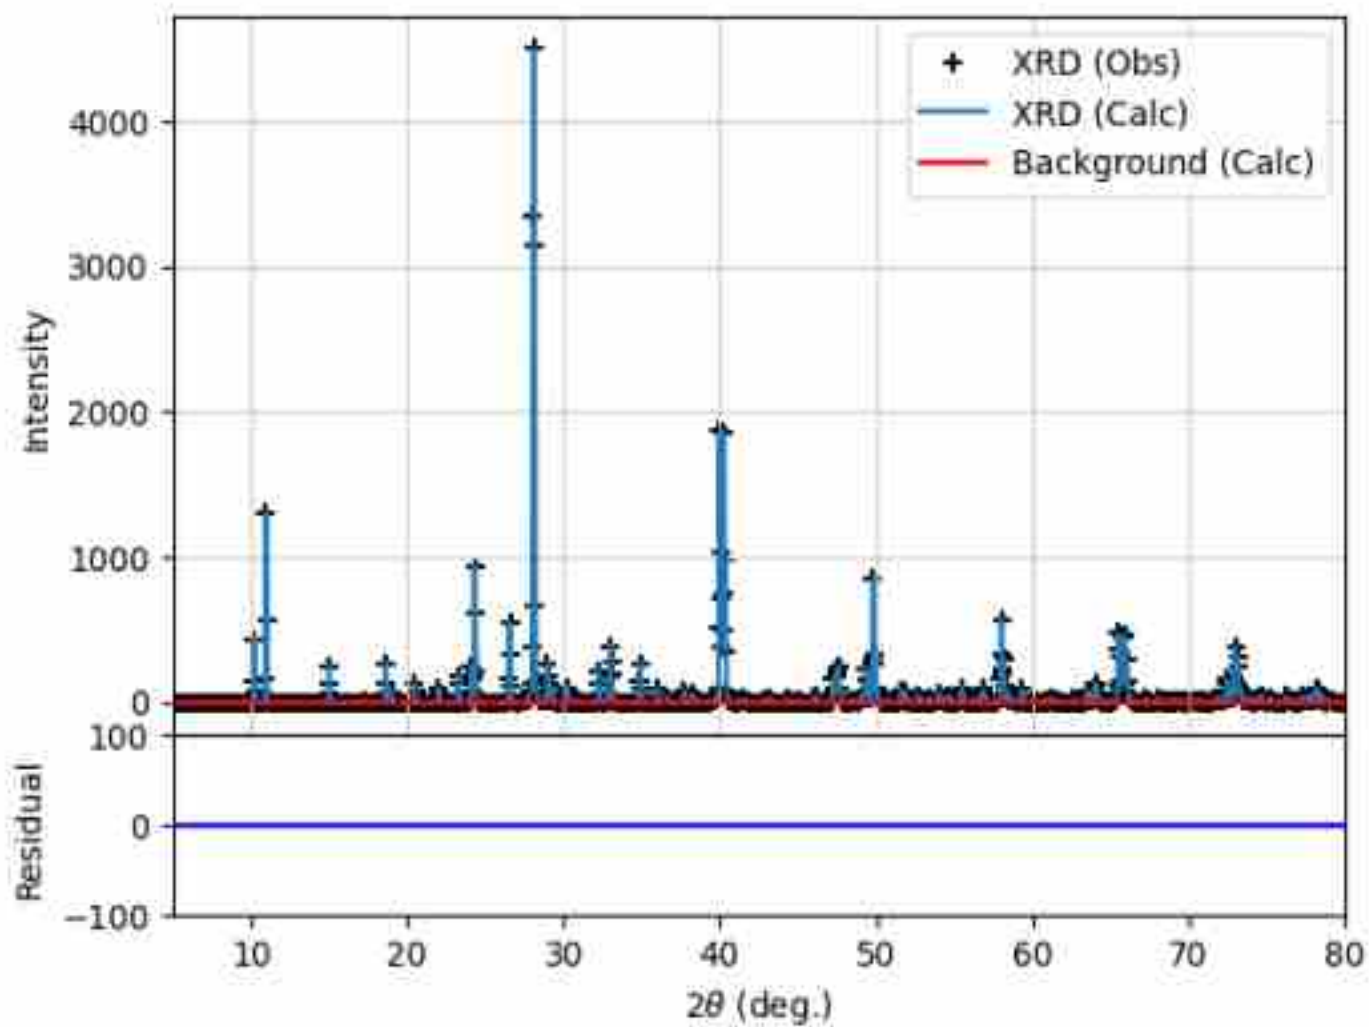

| RMSE before RR | Rwp     | RMSE after RR |
|----------------|---------|---------------|
| 0.019          | 0.00408 | 0.00027       |

# Pu2Pt2

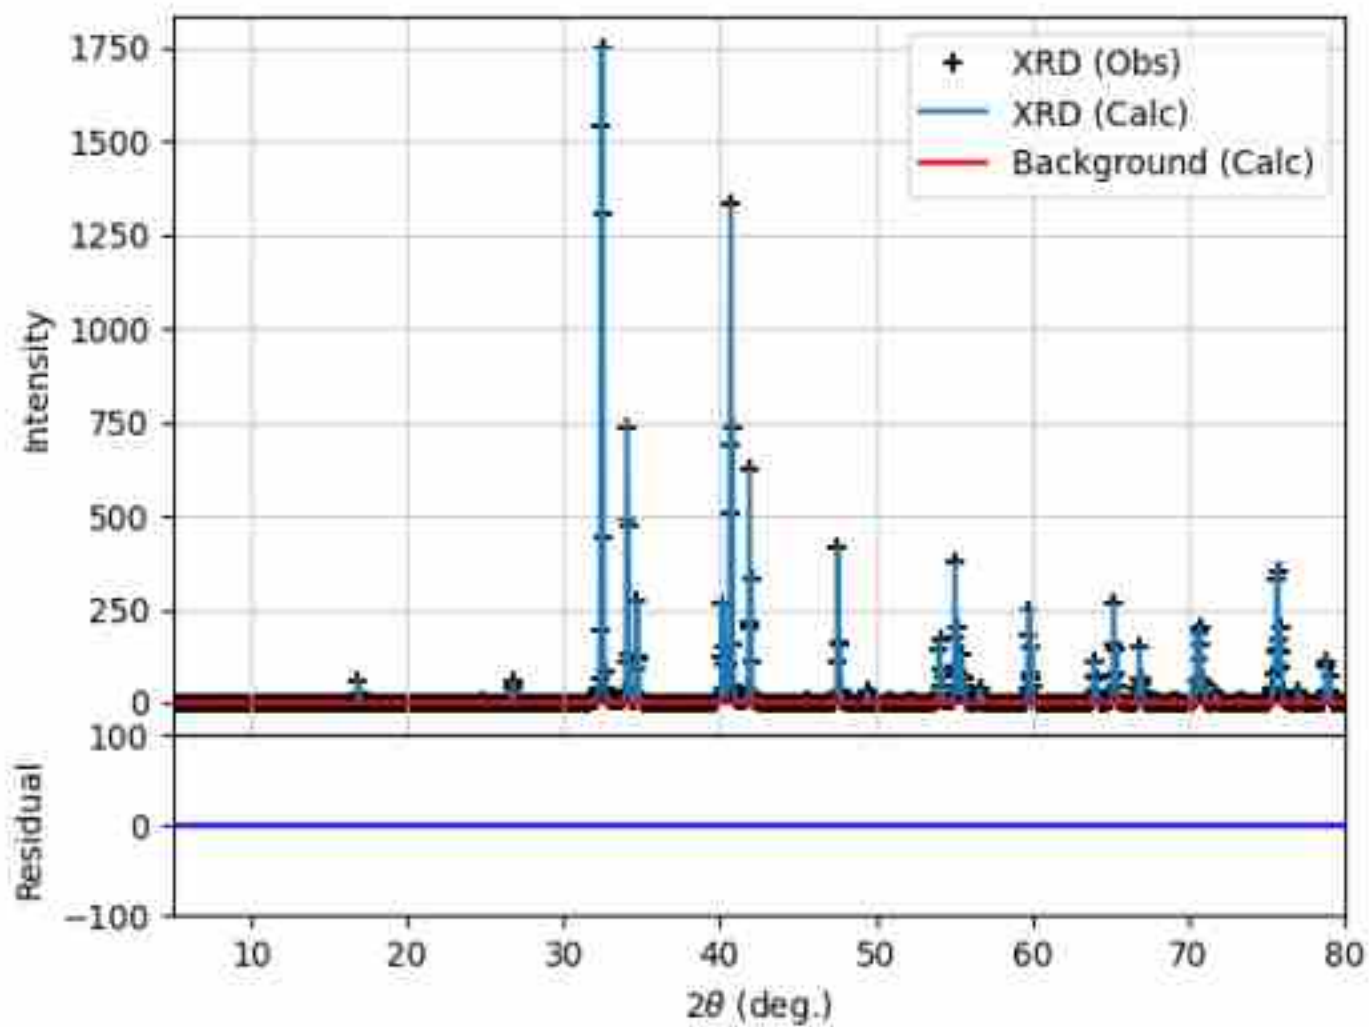

| RMSE before RR | Rwp     | RMSE after RR |
|----------------|---------|---------------|
| 0.019          | 0.00403 | 0.00029       |

# Rb1Pr1W2O8

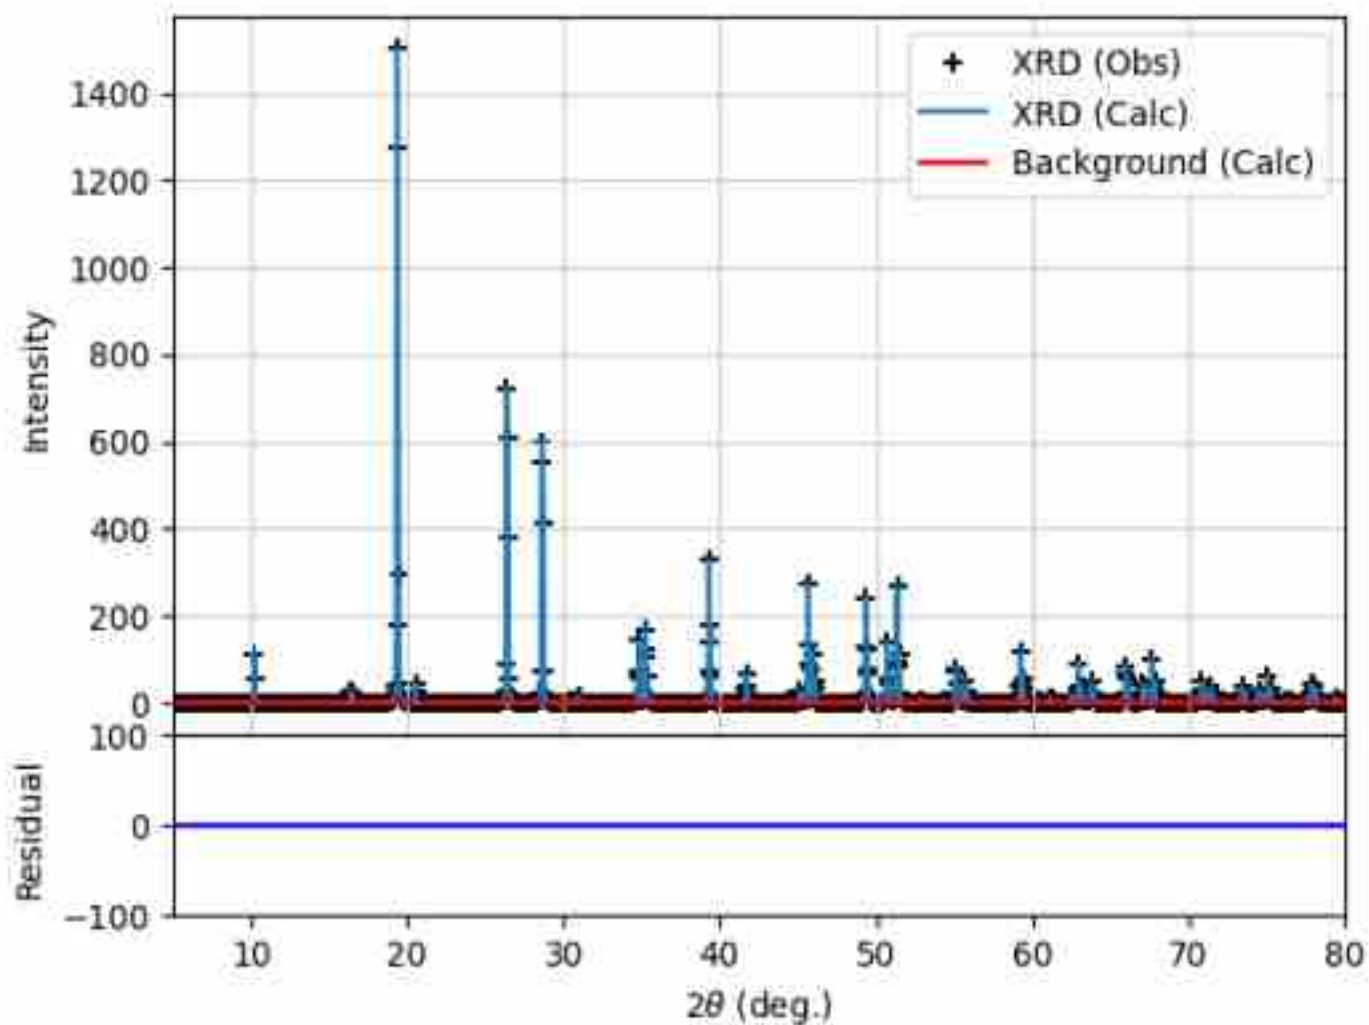

| RMSE before RR | Rwp     | RMSE after RR |
|----------------|---------|---------------|
| 0.019          | 0.00872 | 0.00365       |

# Rb<sub>2</sub>Au<sub>2</sub>Se<sub>2</sub>

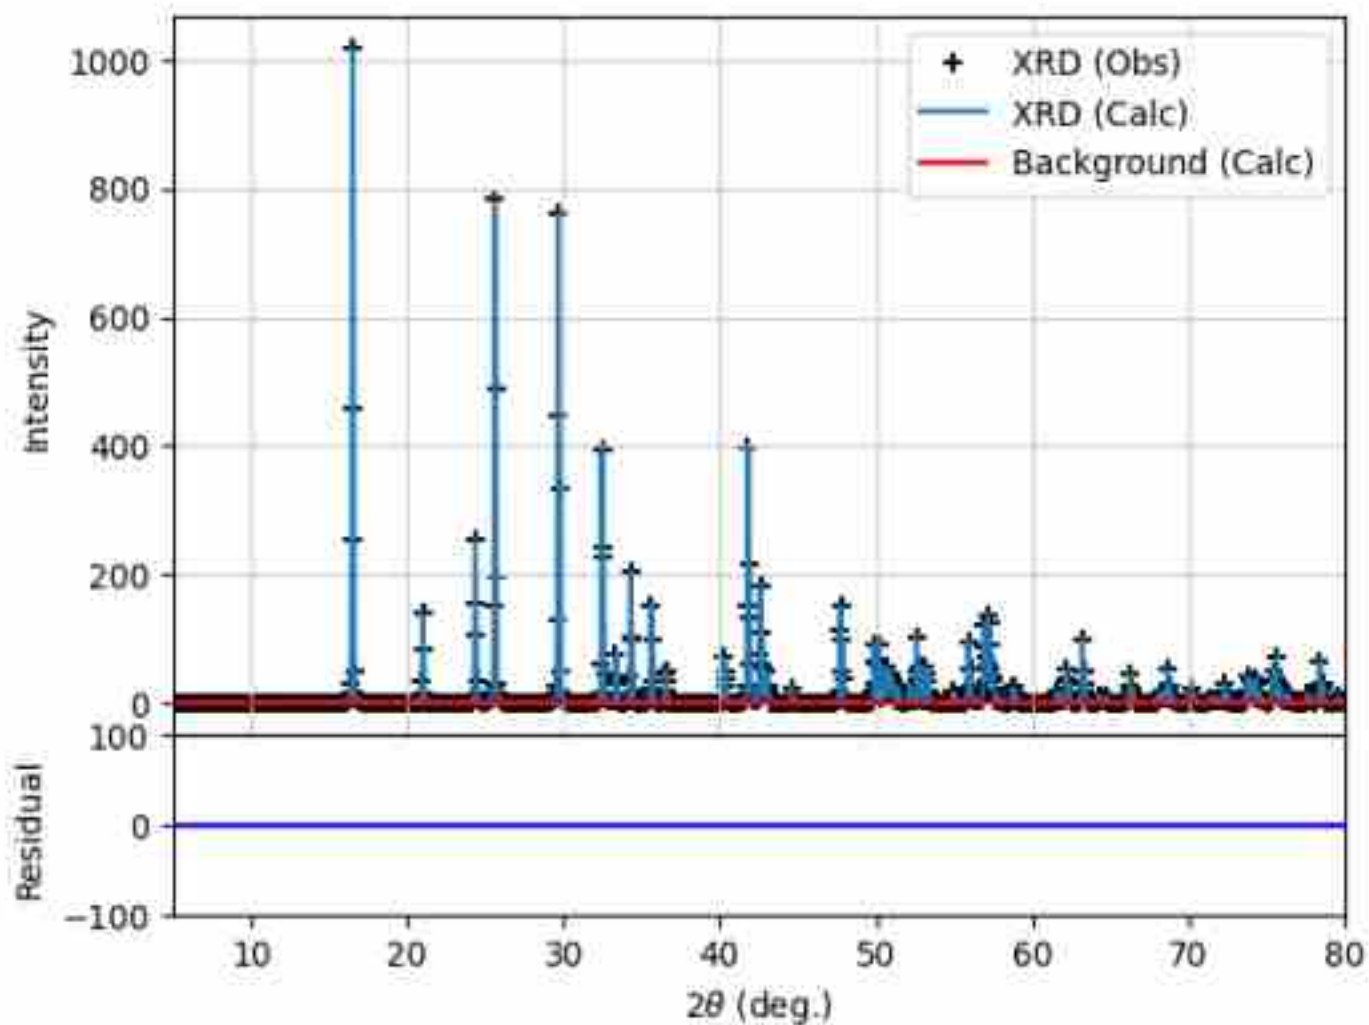

| RMSE before RR | Rwp     | RMSE after RR |
|----------------|---------|---------------|
| 0.019          | 0.00404 | 0.00031       |

# Rb2Ca1H4

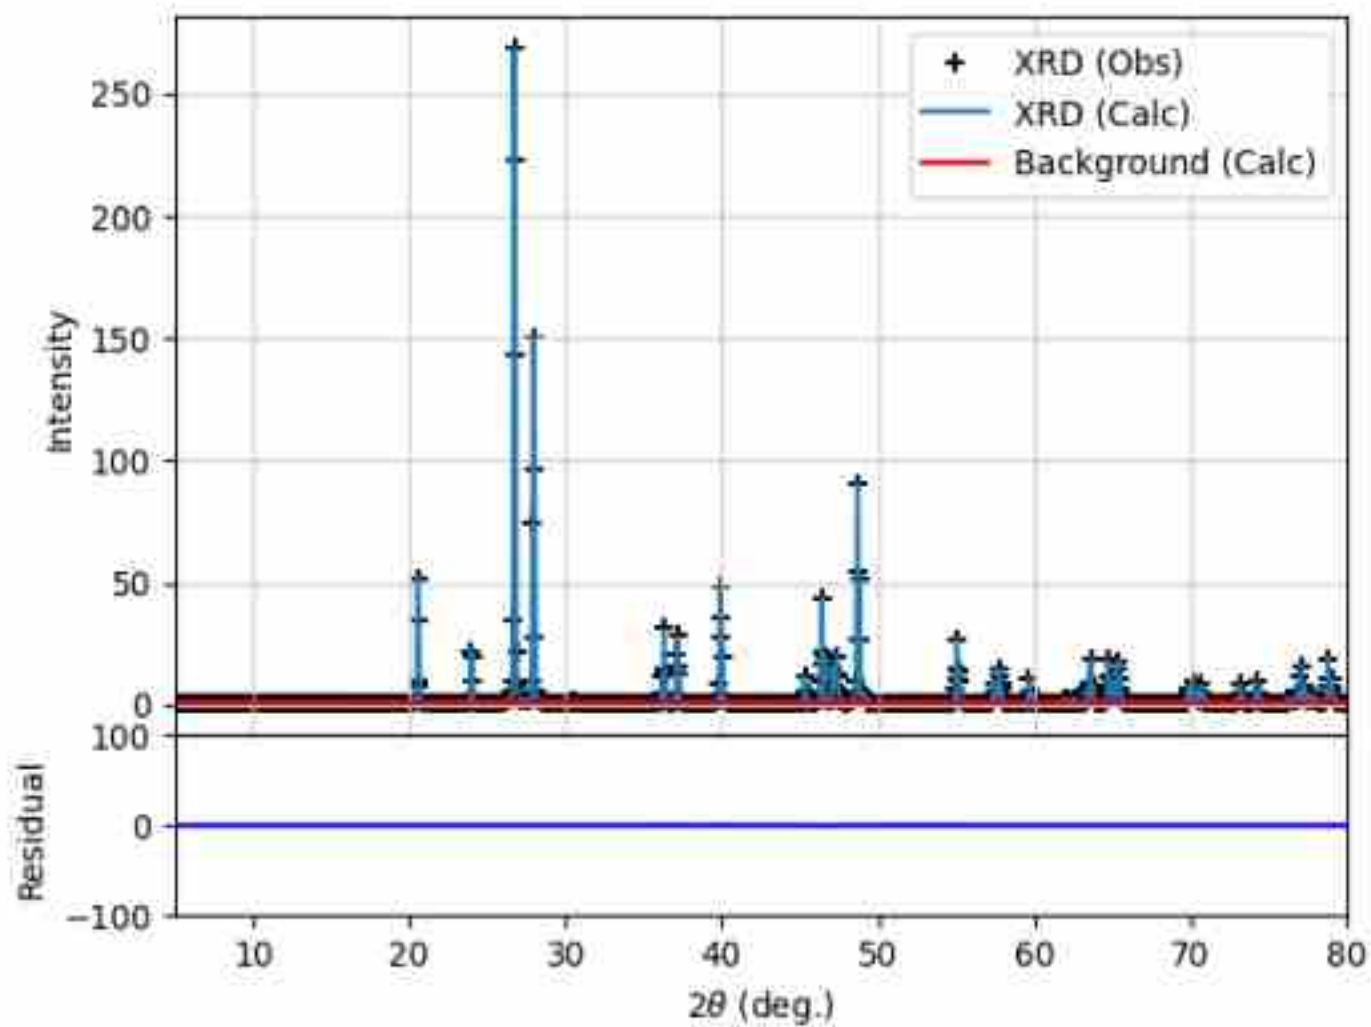

| RMSE before RR | Rwp     | RMSE after RR |
|----------------|---------|---------------|
| 0.019          | 0.96431 | 0.49321       |



# Rb<sub>2</sub>Lu<sub>2</sub>Be<sub>2</sub>F<sub>12</sub>

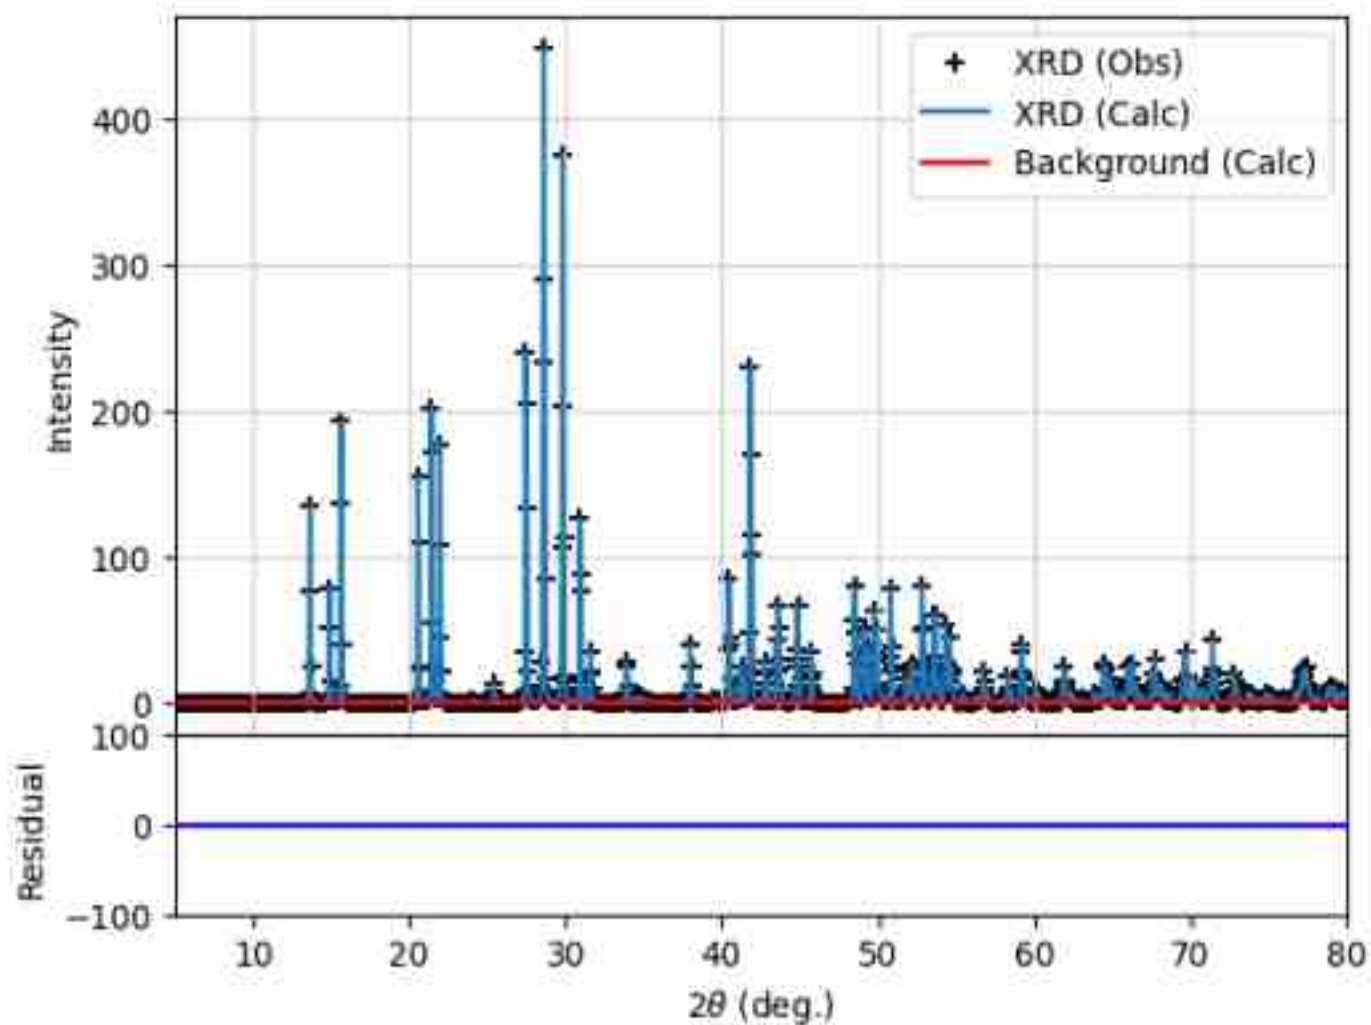

| RMSE before RR | Rwp     | RMSE after RR |
|----------------|---------|---------------|
| 0.019          | 0.00344 | 0.00084       |

# Rb<sub>2</sub>PtF<sub>6</sub>

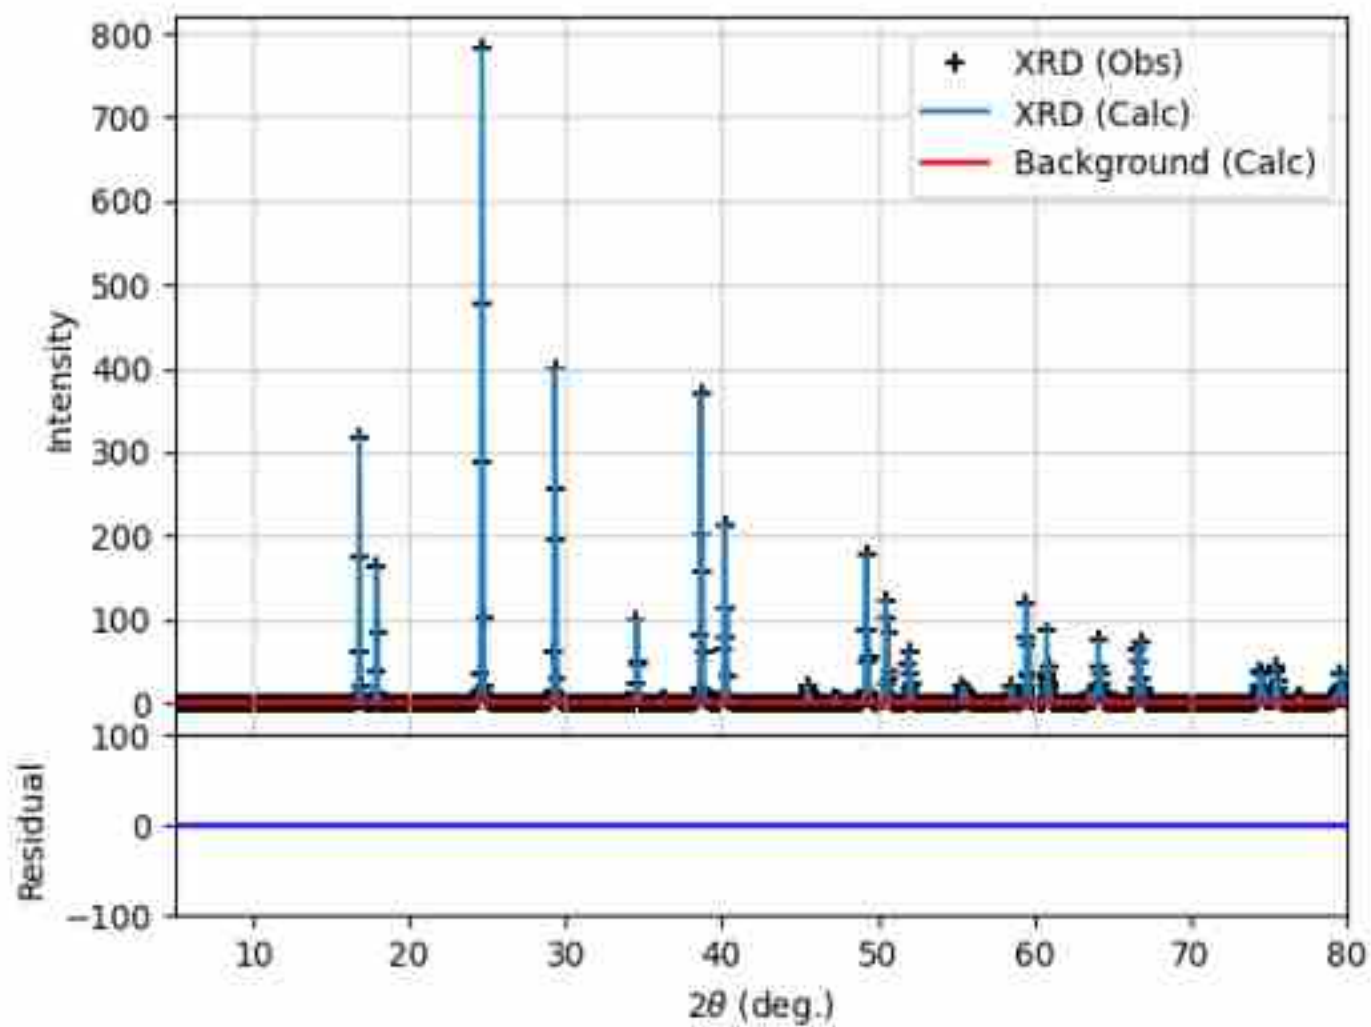

| RMSE before RR | Rwp     | RMSE after RR |
|----------------|---------|---------------|
| 0.019          | 0.00366 | 0.002         |

# Rb<sub>2</sub>Rh1F<sub>6</sub>

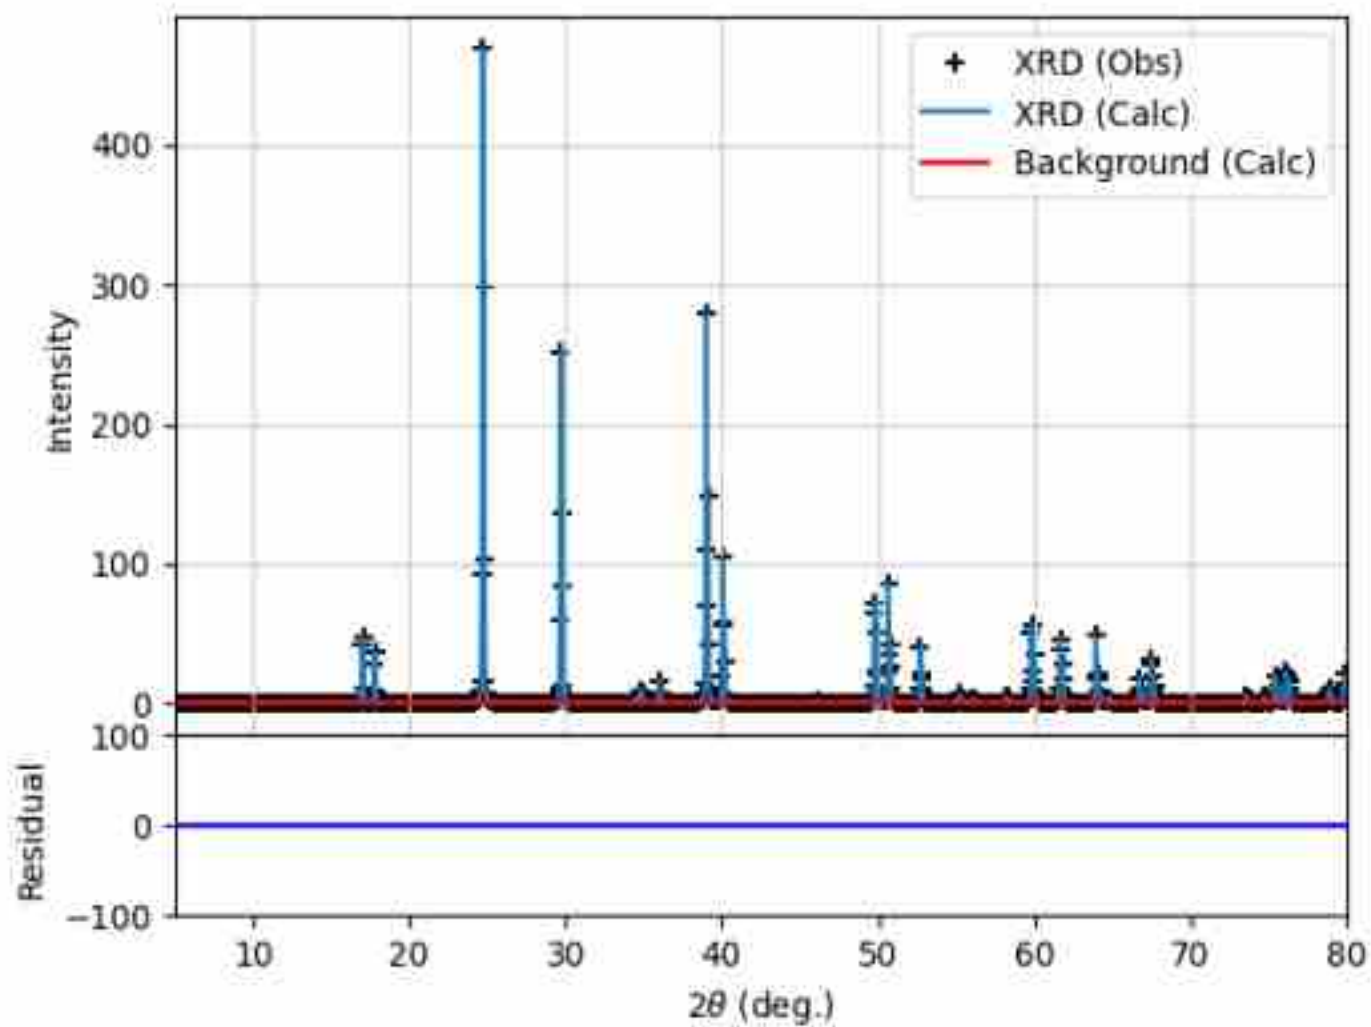

| RMSE before RR | Rwp     | RMSE after RR |
|----------------|---------|---------------|
| 0.019          | 0.00303 | 0.00128       |

# Rb<sub>2</sub>Sn<sub>1</sub>Hg<sub>1</sub>Te<sub>4</sub>

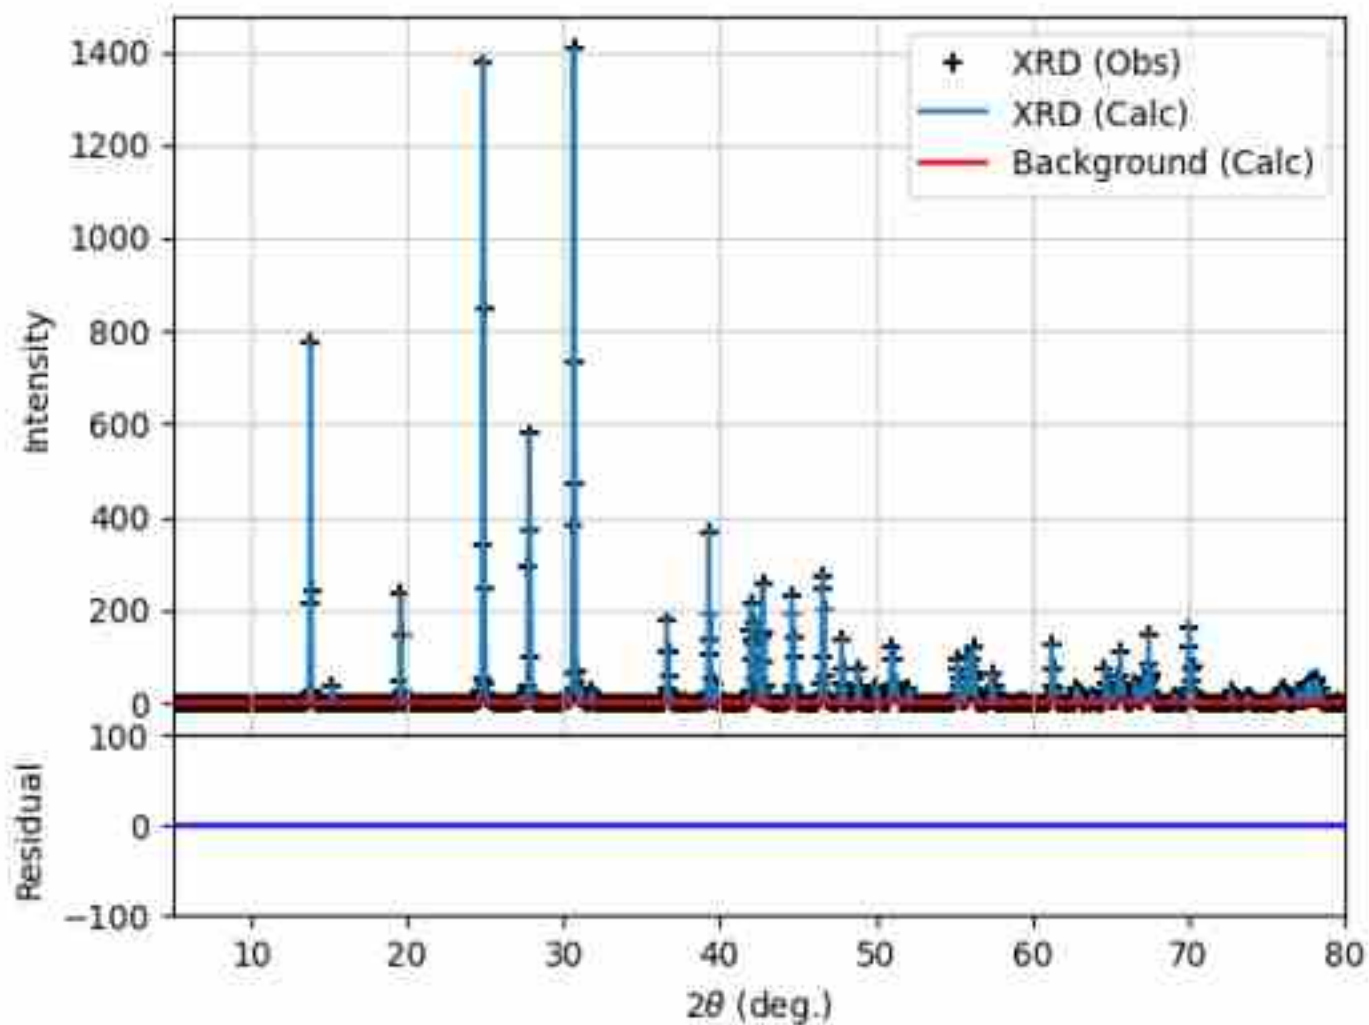

| RMSE before RR | Rwp     | RMSE after RR |
|----------------|---------|---------------|
| 0.019          | 0.00439 | 0.00026       |

# Rb<sub>4</sub>Br<sub>2</sub>O<sub>1</sub>

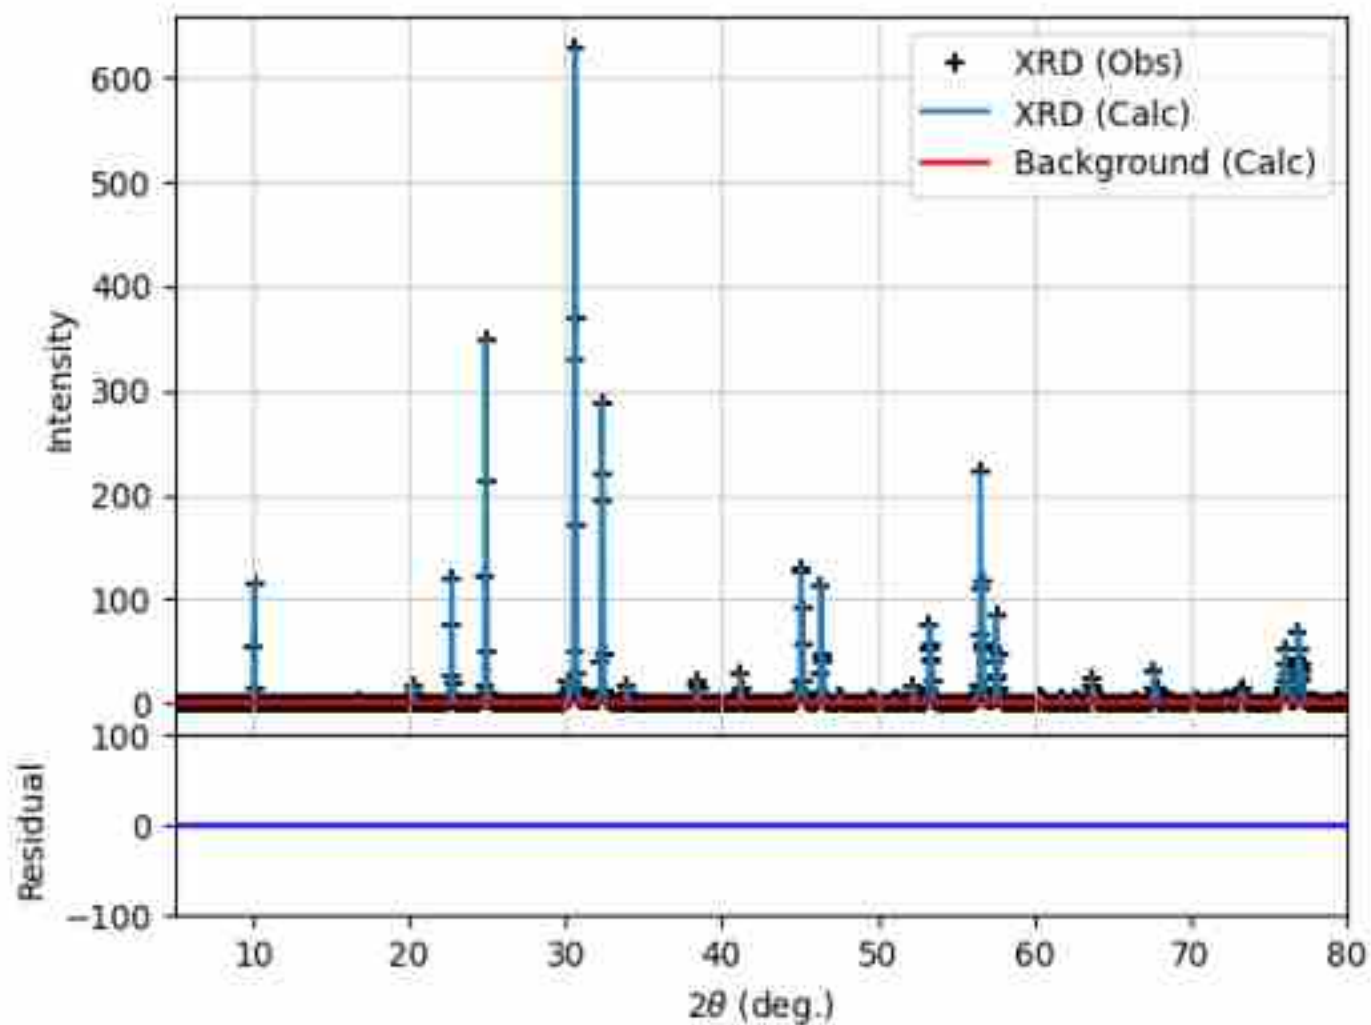

| RMSE before RR | Rwp     | RMSE after RR |
|----------------|---------|---------------|
| 0.019          | 0.00381 | 0.00045       |

# Rb<sub>4</sub>W<sub>2</sub>O<sub>8</sub>

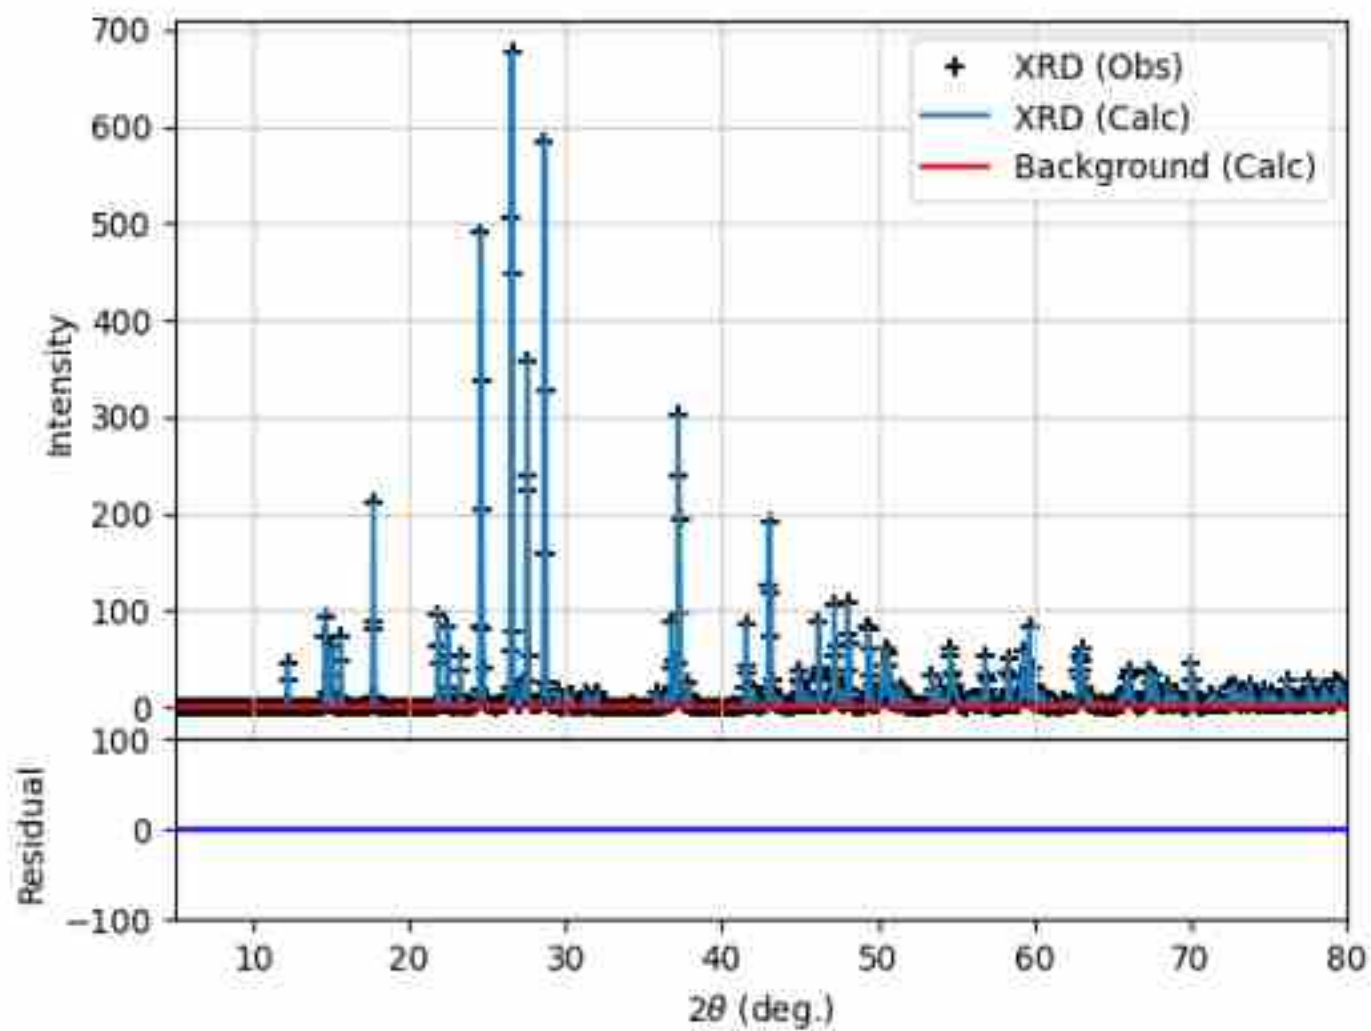

| RMSE before RR | Rwp     | RMSE after RR |
|----------------|---------|---------------|
| 0.019          | 0.00313 | 0.00056       |

# Sc1Ag1O2

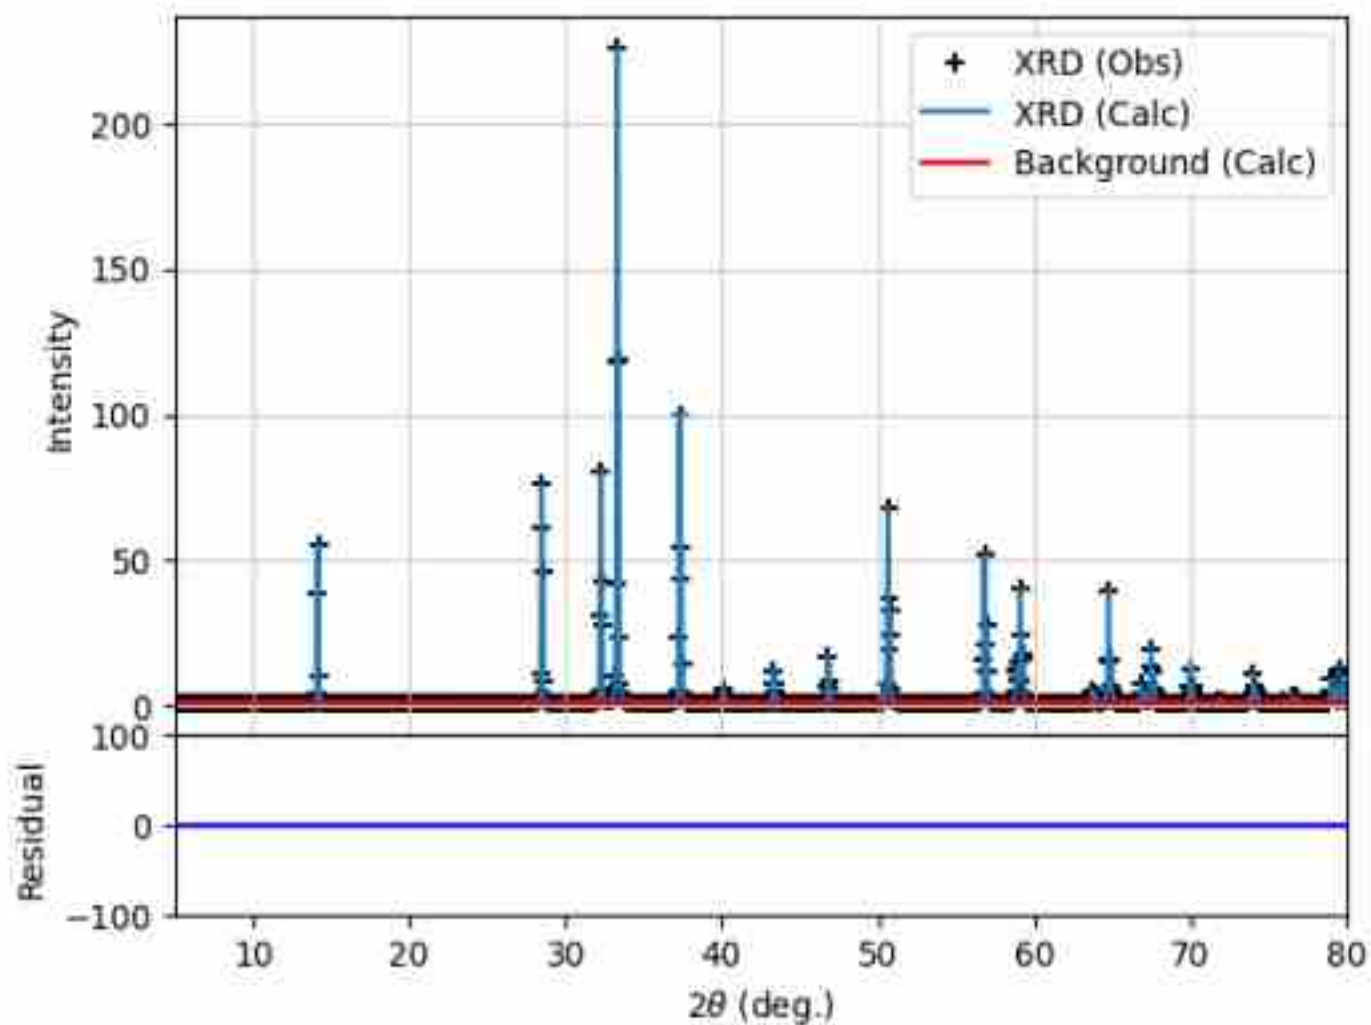

| RMSE before RR | Rwp     | RMSE after RR |
|----------------|---------|---------------|
| 0.019          | 0.00391 | 0.00111       |

# Sc<sub>4</sub>Ni<sub>2</sub>B<sub>4</sub>Ir<sub>10</sub>

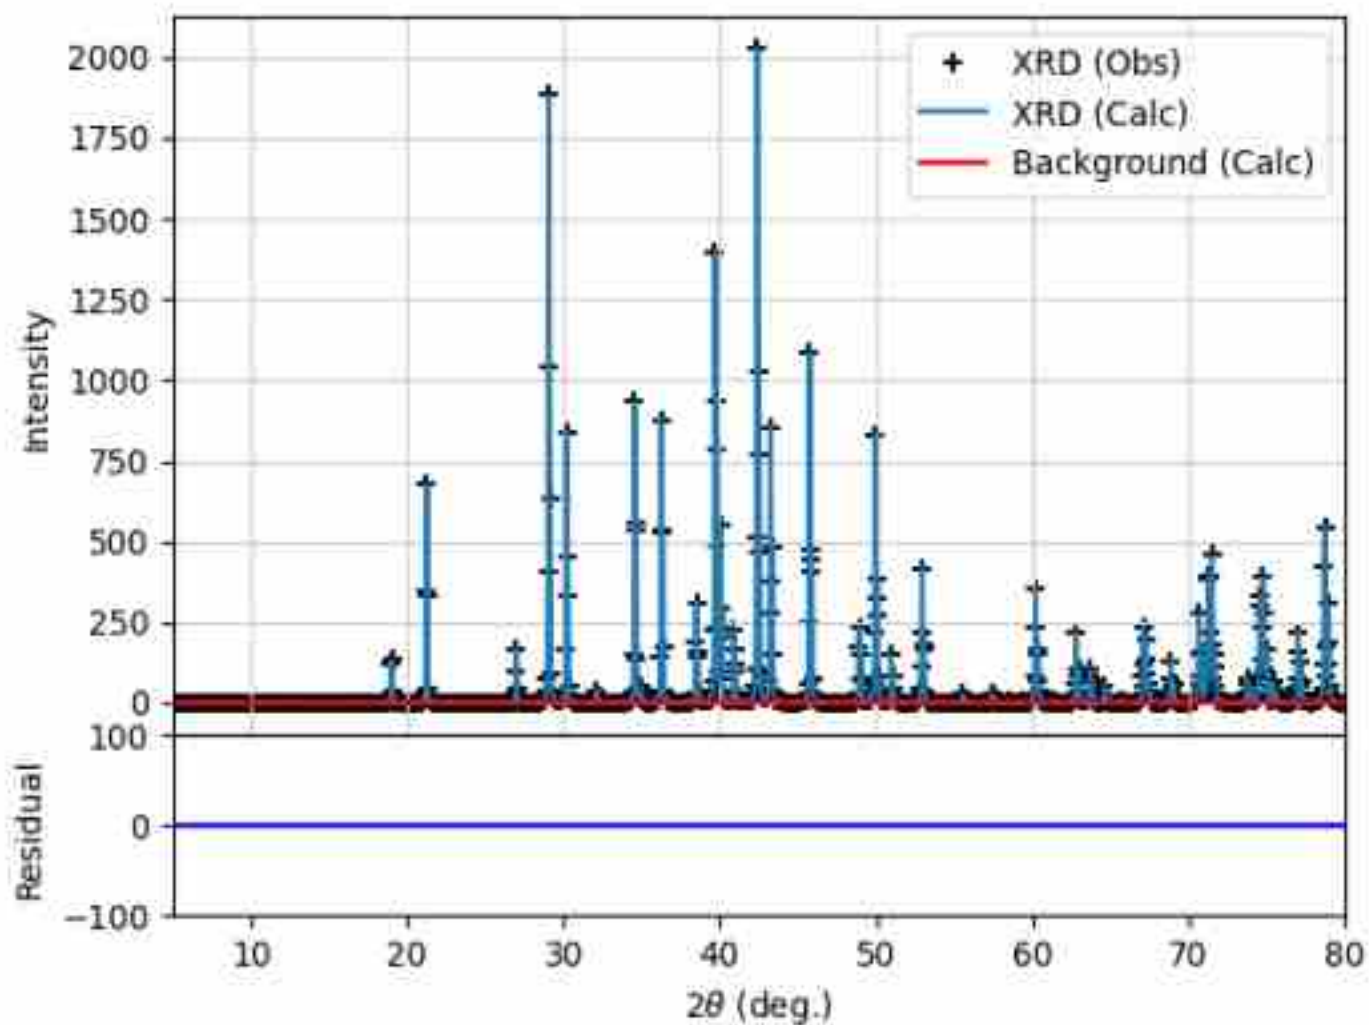

| RMSE before RR | Rwp     | RMSE after RR |
|----------------|---------|---------------|
| 0.019          | 0.00706 | 0.00269       |



# Sm1Er1Fe4

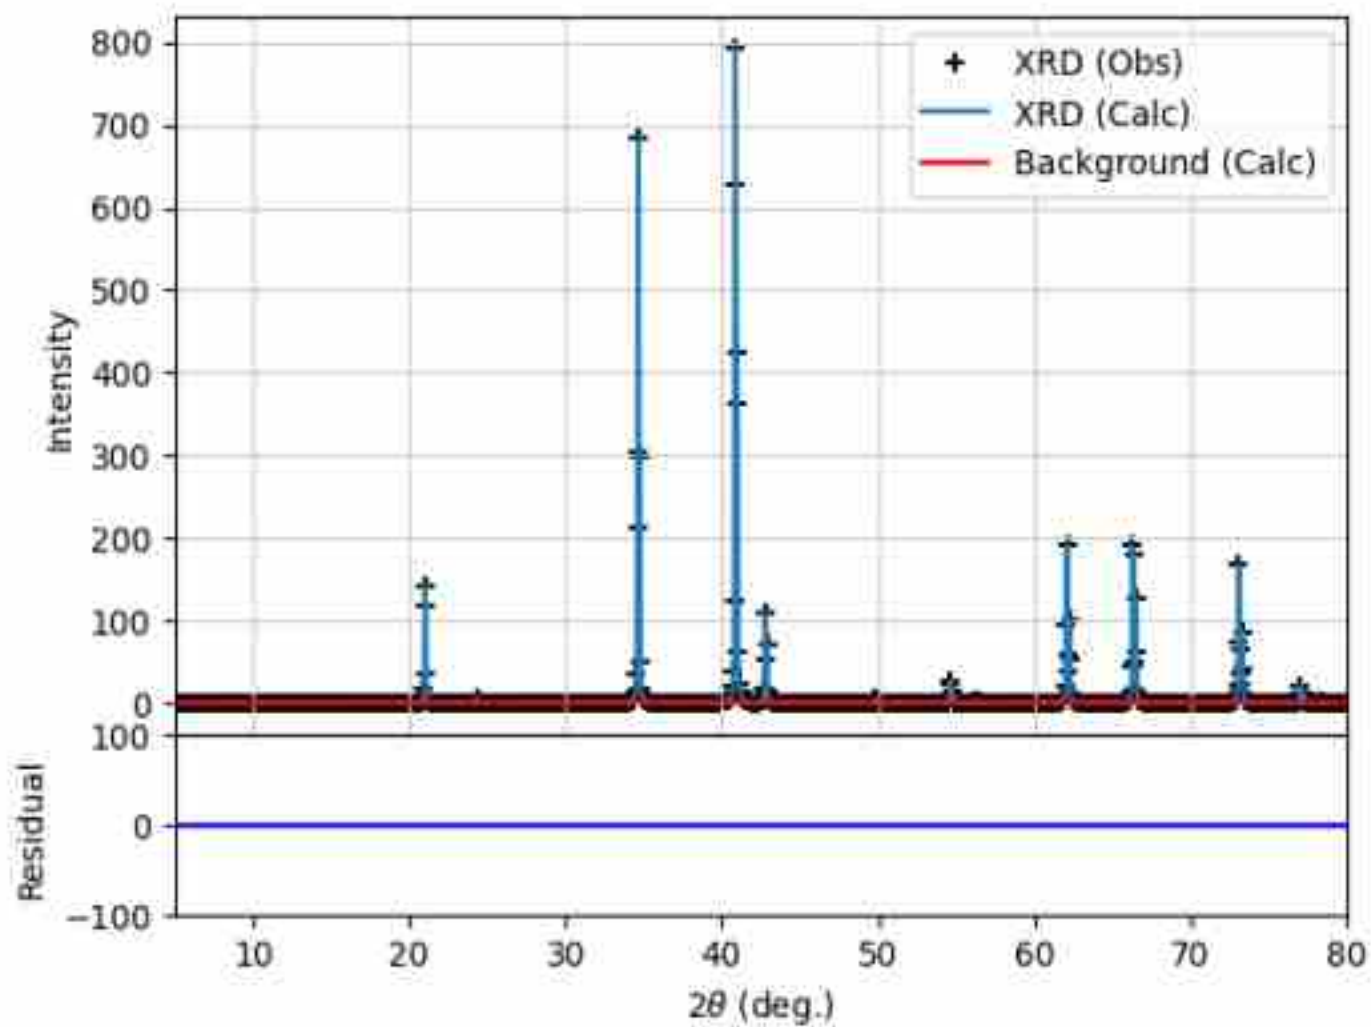

| RMSE before RR | Rwp     | RMSE after RR |
|----------------|---------|---------------|
| 0.019          | 0.00381 | 0.00106       |

# Sm1Ni2P2

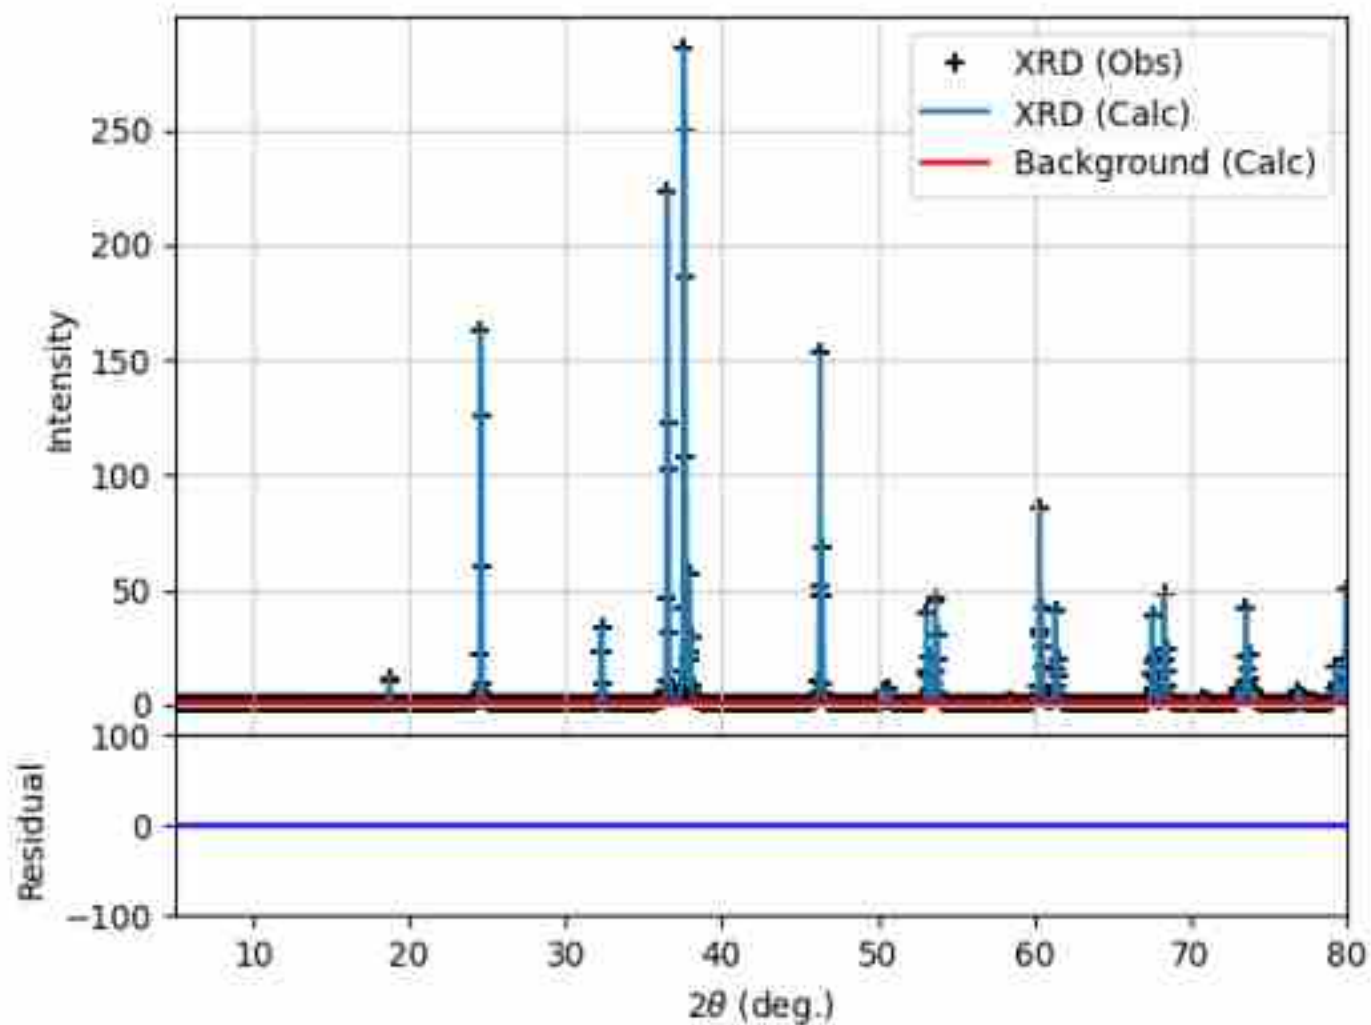

| RMSE before RR | Rwp     | RMSE after RR |
|----------------|---------|---------------|
| 0.019          | 0.00334 | 0.00069       |

# Sm2B4Ir4

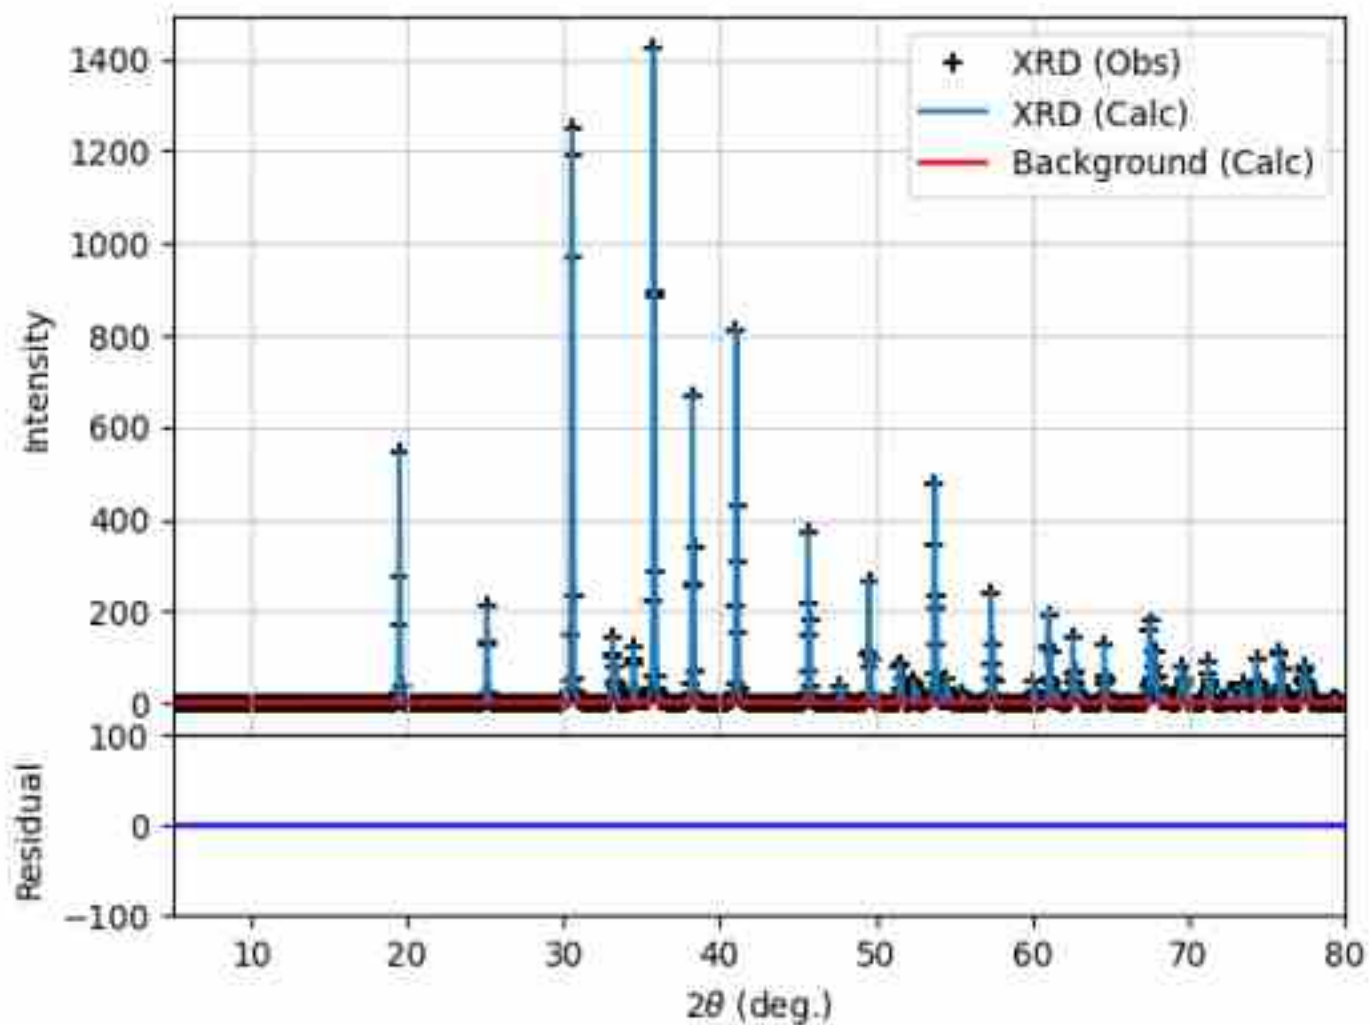

| RMSE before RR | Rwp     | RMSE after RR |
|----------------|---------|---------------|
| 0.019          | 0.00411 | 0.00202       |

# Sm2Co2C4

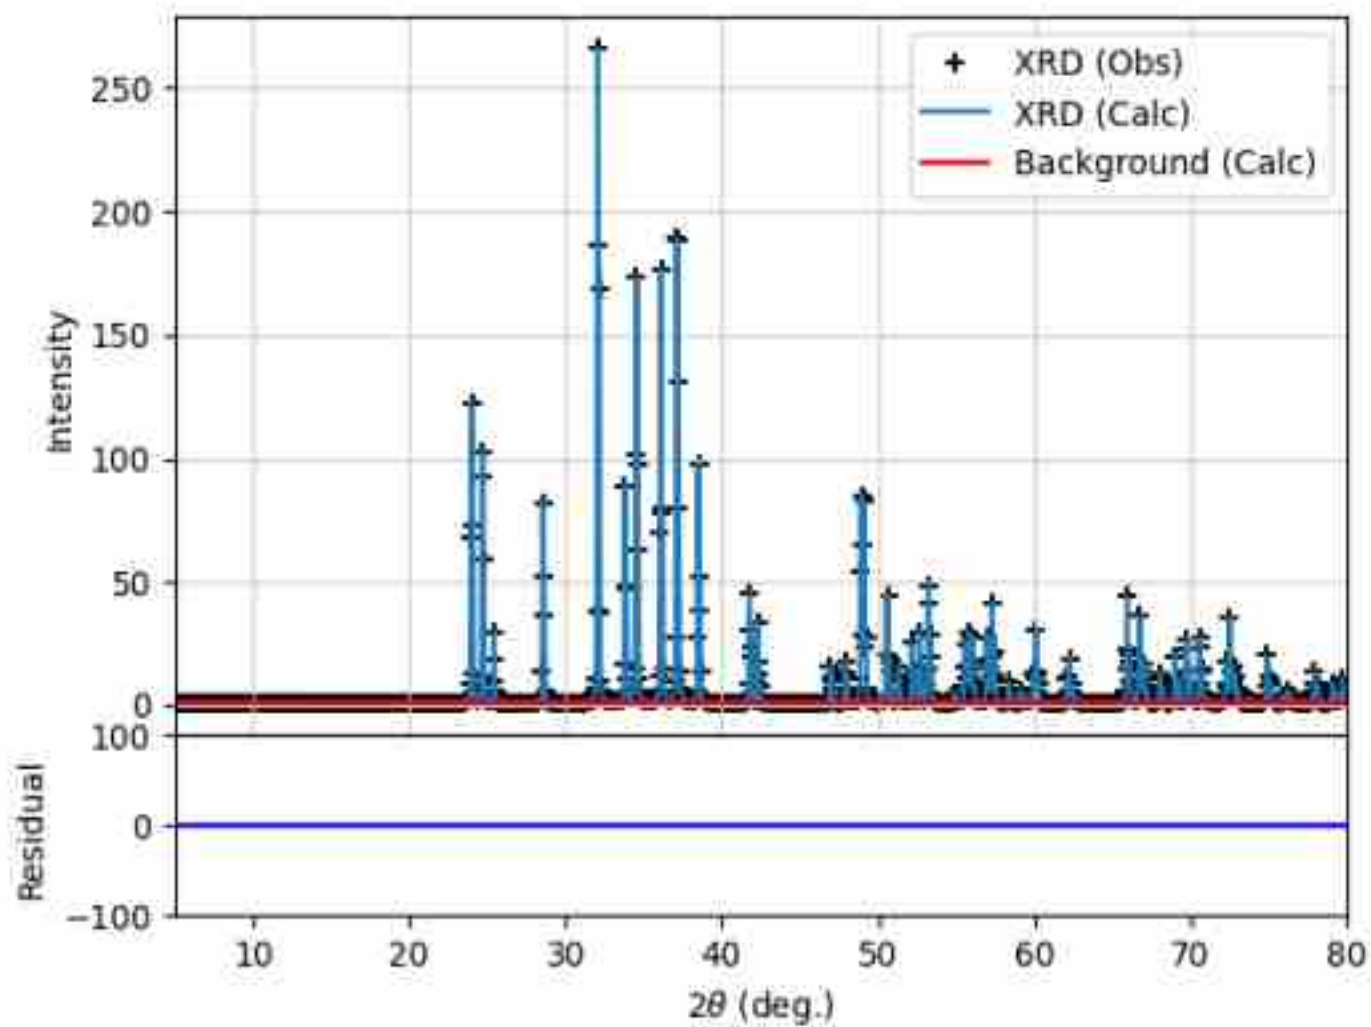

| RMSE before RR | Rwp     | RMSE after RR |
|----------------|---------|---------------|
| 0.019          | 0.00339 | 0.00071       |

# Sm<sub>2</sub>Ti<sub>2</sub>S<sub>2</sub>O<sub>5</sub>

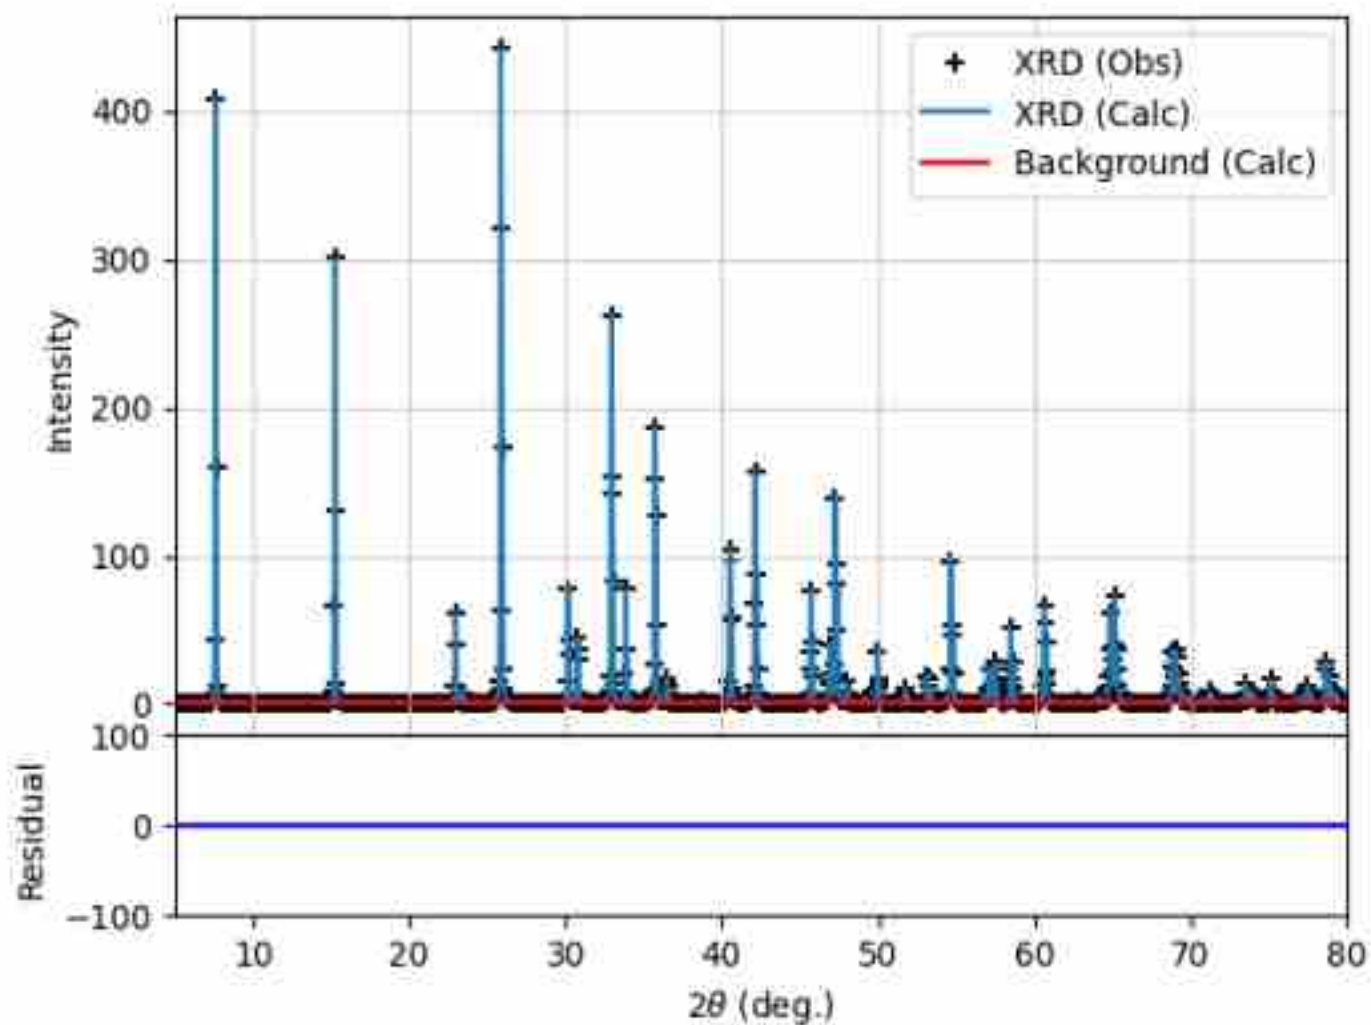

| RMSE before RR | Rwp     | RMSE after RR |
|----------------|---------|---------------|
| 0.019          | 0.00395 | 0.00121       |

# Sm4Bi4Rh4

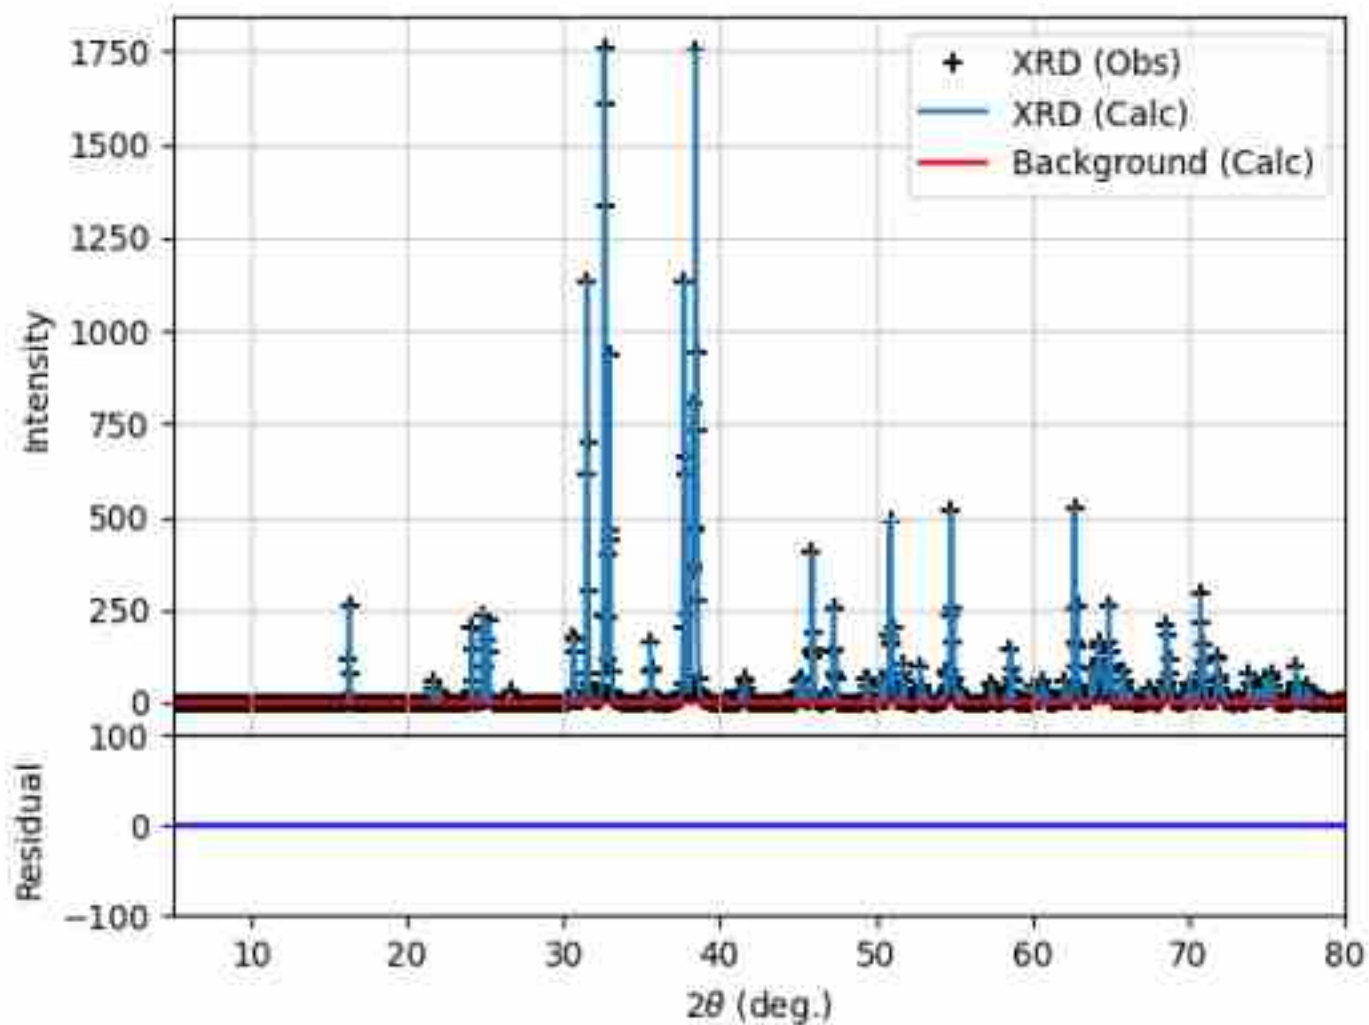

| RMSE before RR | Rwp     | RMSE after RR |
|----------------|---------|---------------|
| 0.019          | 0.00596 | 0.00037       |

# Sm4Ge8Pd4

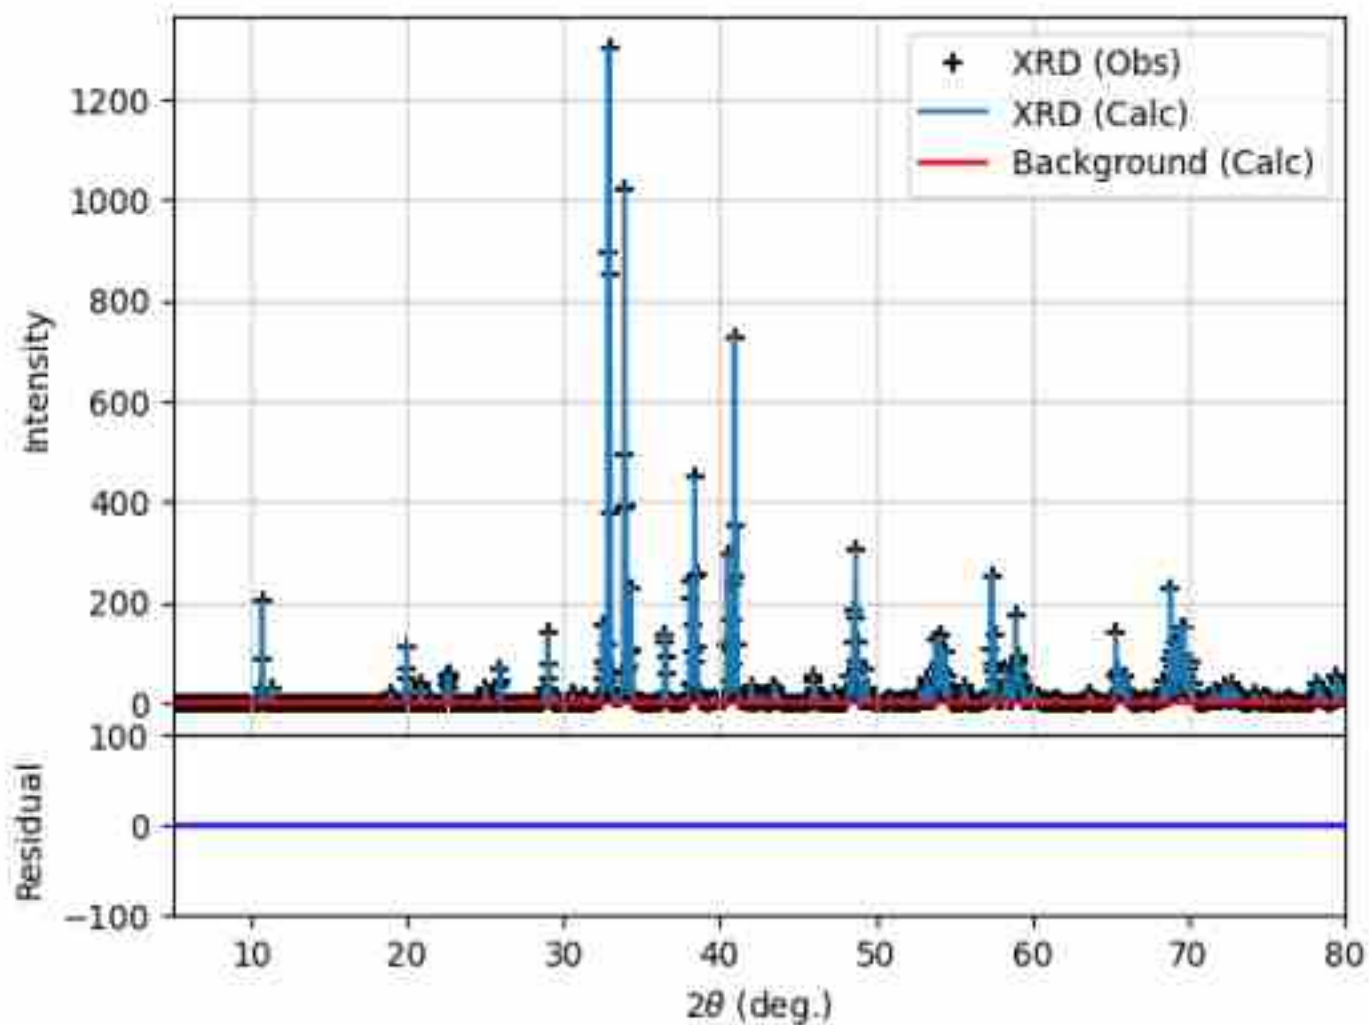

| RMSE before RR | Rwp     | RMSE after RR |
|----------------|---------|---------------|
| 0.019          | 0.00437 | 0.00058       |

# Sm<sub>4</sub>Mn<sub>2</sub>Rh<sub>2</sub>O<sub>12</sub>

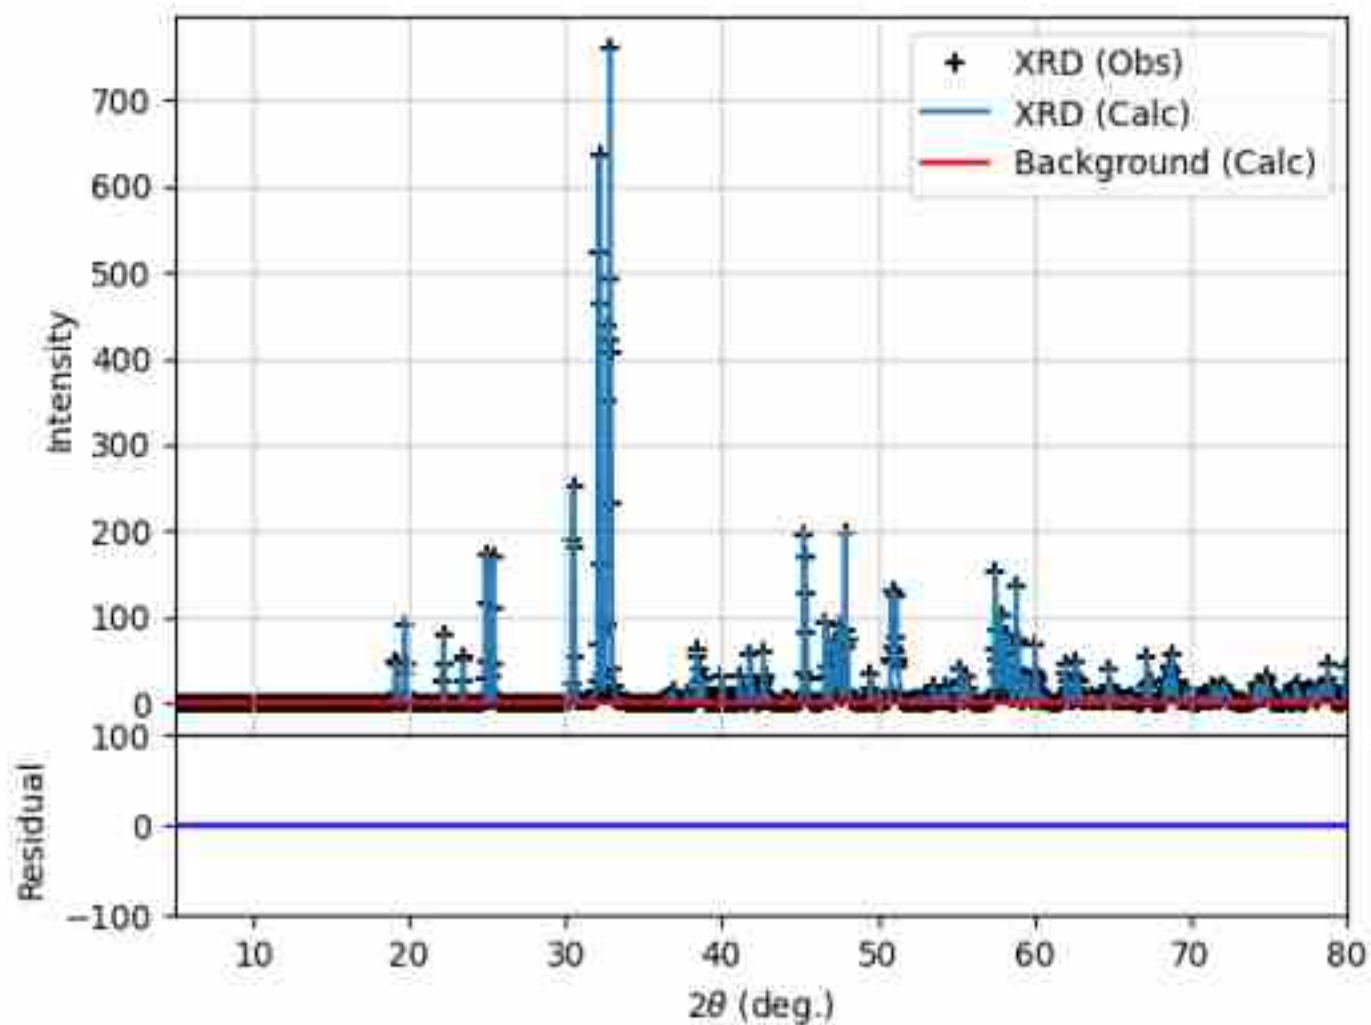

| RMSE before RR | Rwp     | RMSE after RR |
|----------------|---------|---------------|
| 0.019          | 0.00491 | 0.00121       |



# Sm4Sb4Rh4

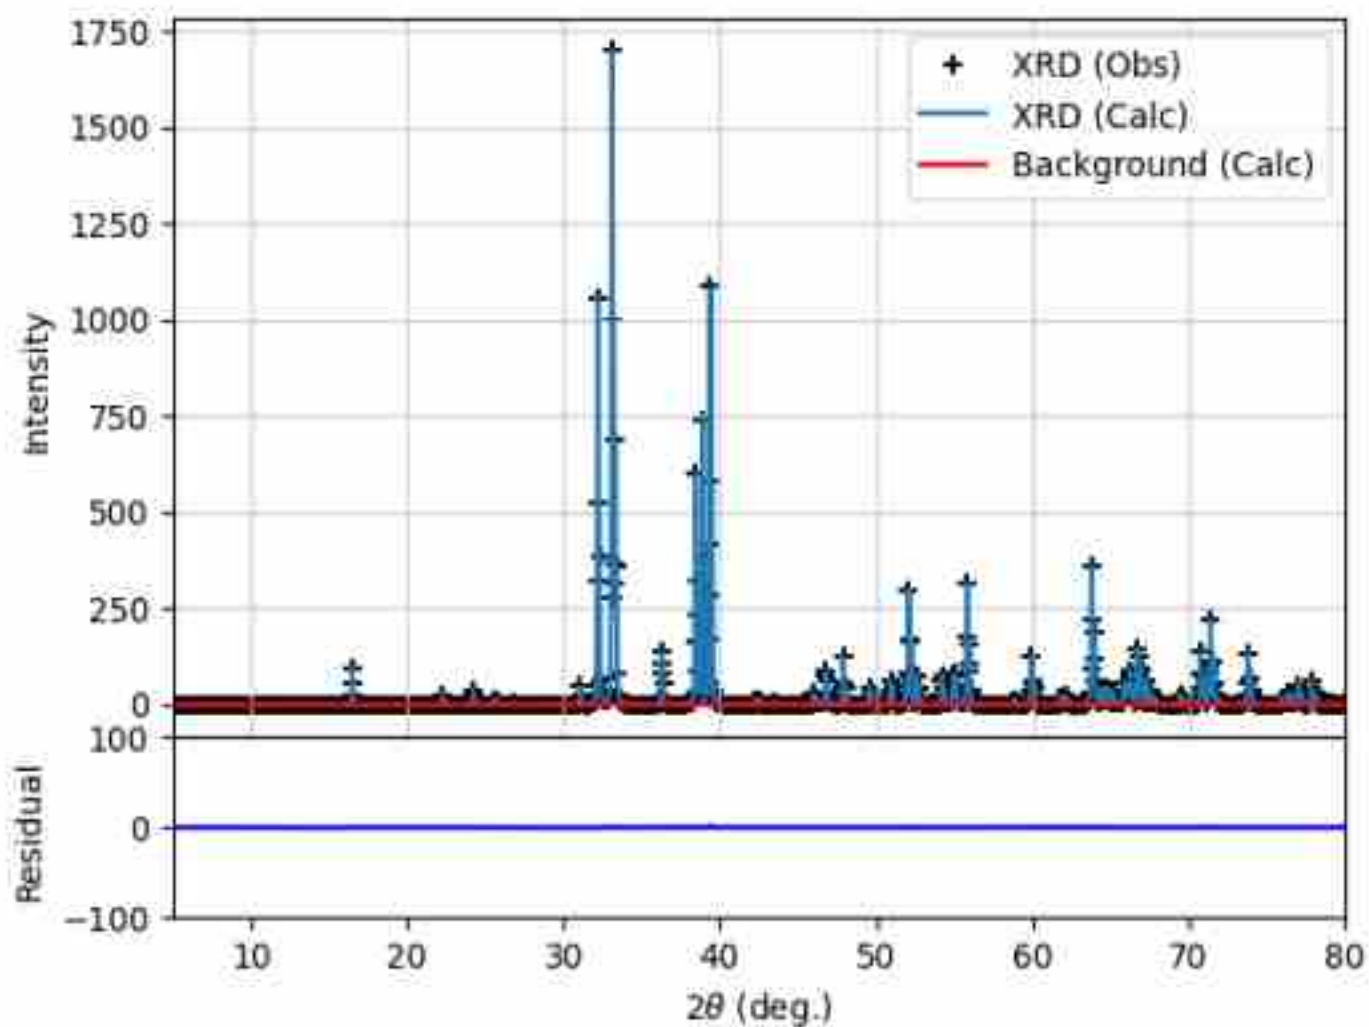

| RMSE before RR | Rwp    | RMSE after RR |
|----------------|--------|---------------|
| 0.019          | 0.3266 | 0.00637       |

# Sm4Sn10

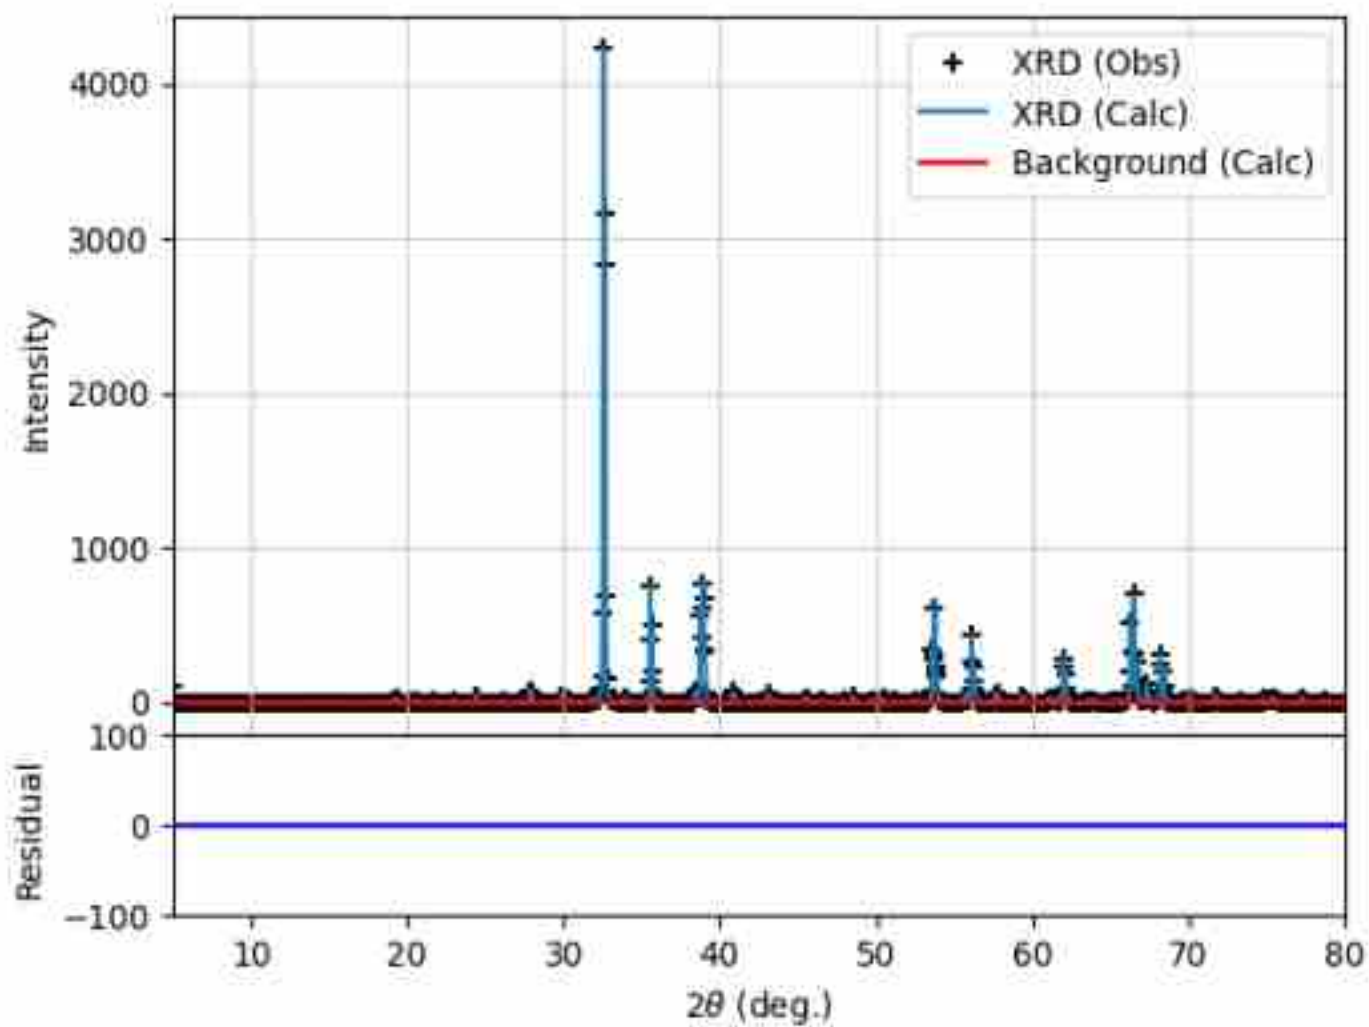

| RMSE before RR | Rwp     | RMSE after RR |
|----------------|---------|---------------|
| 0.019          | 0.00401 | 0.00022       |

# Sm10Cu2Pb6

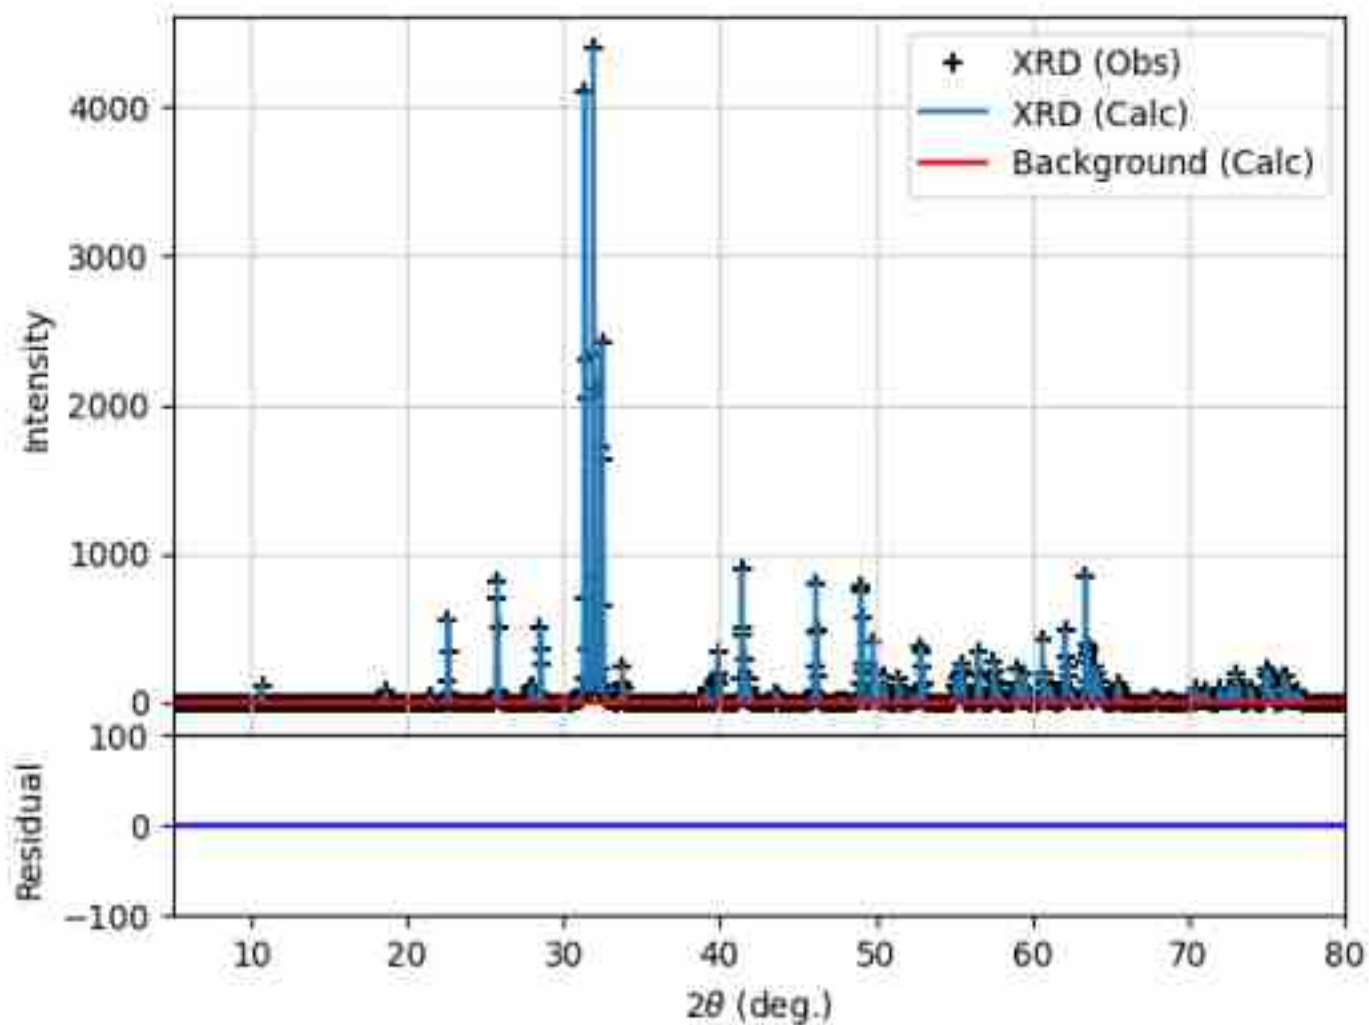

| RMSE before RR | Rwp     | RMSE after RR |
|----------------|---------|---------------|
| 0.019          | 0.00452 | 0.00041       |

# Sr1Cu3Ru4O12

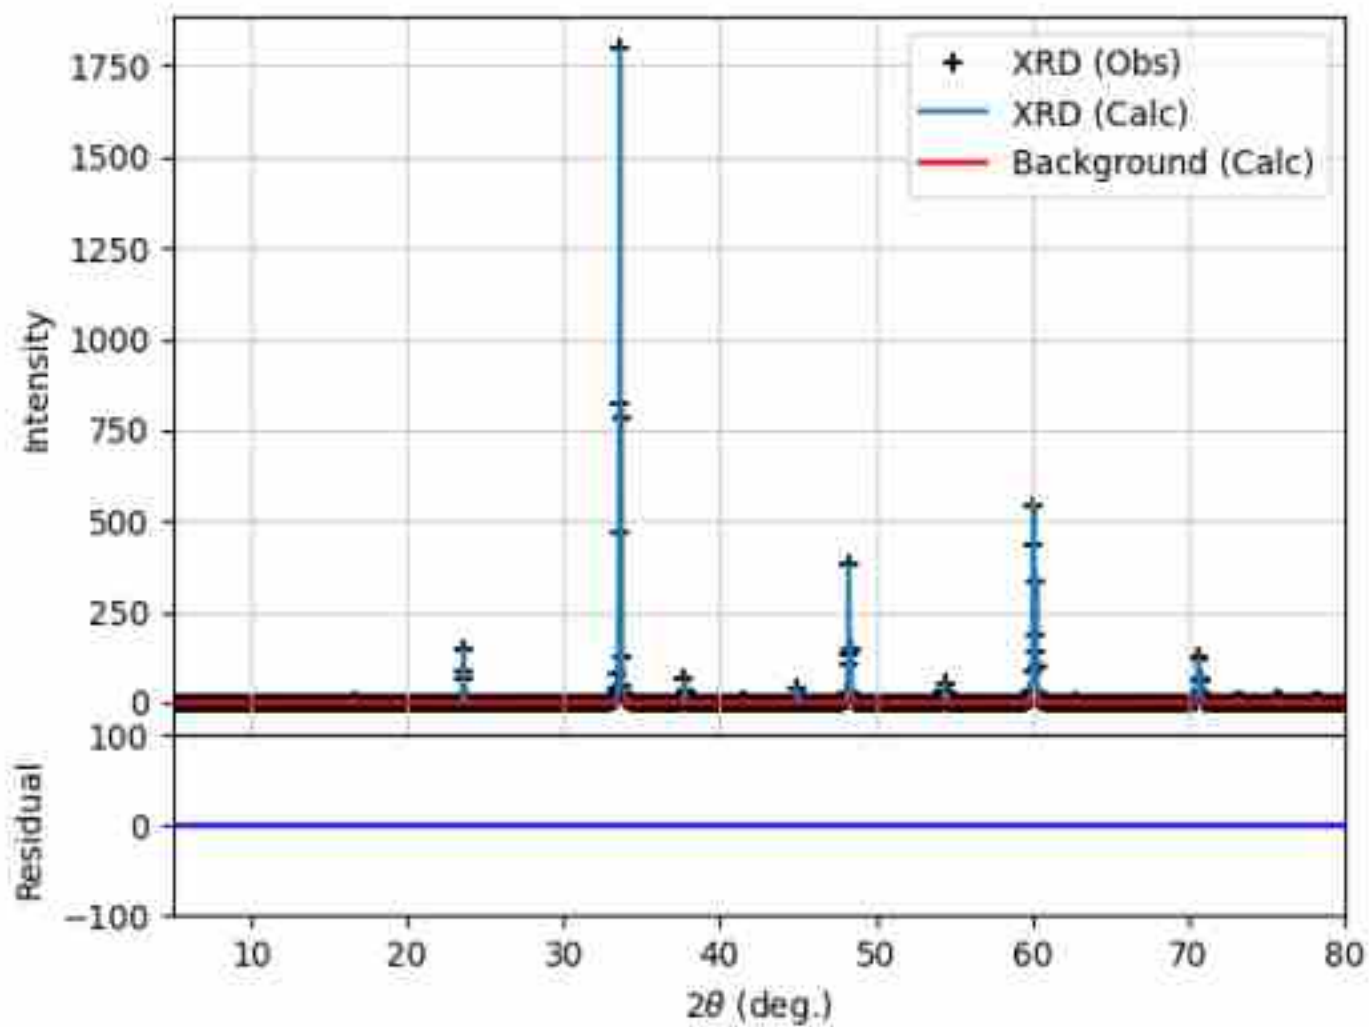

| RMSE before RR | Rwp     | RMSE after RR |
|----------------|---------|---------------|
| 0.019          | 0.00917 | 0.00284       |

# Sr<sub>2</sub>B<sub>4</sub>Ir<sub>4</sub>

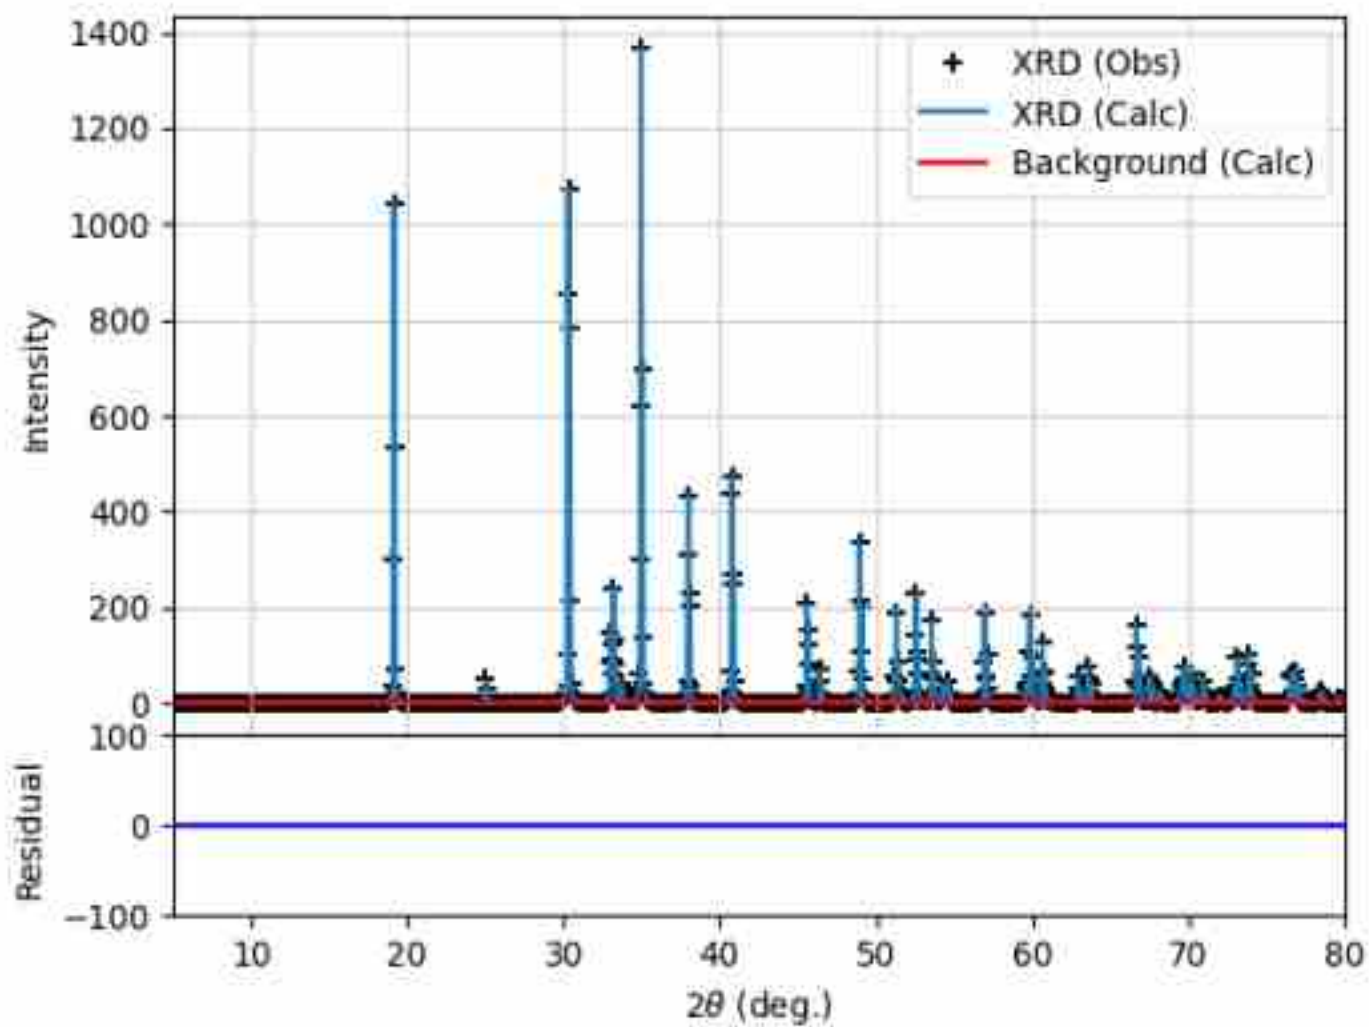

| RMSE before RR | Rwp    | RMSE after RR |
|----------------|--------|---------------|
| 0.019          | 0.0041 | 0.00331       |

# Sr<sub>2</sub>Cu<sub>2</sub>S<sub>2</sub>F<sub>2</sub>

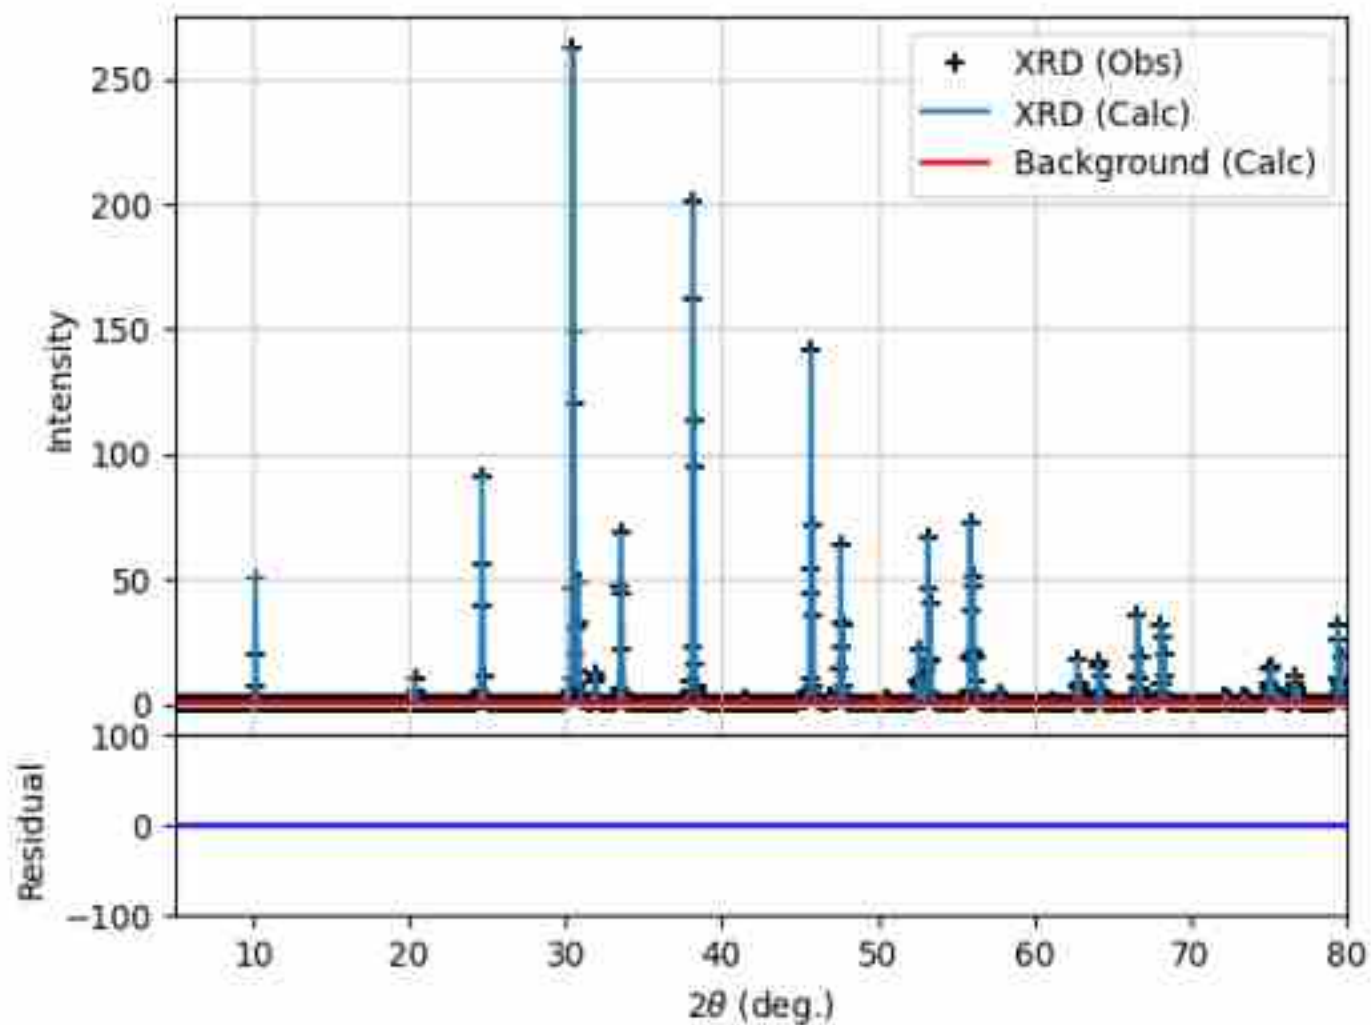

| RMSE before RR | Rwp     | RMSE after RR |
|----------------|---------|---------------|
| 0.019          | 0.00403 | 0.00038       |

# Sr<sub>2</sub>Fe<sub>1</sub>Sn<sub>1</sub>O<sub>6</sub>

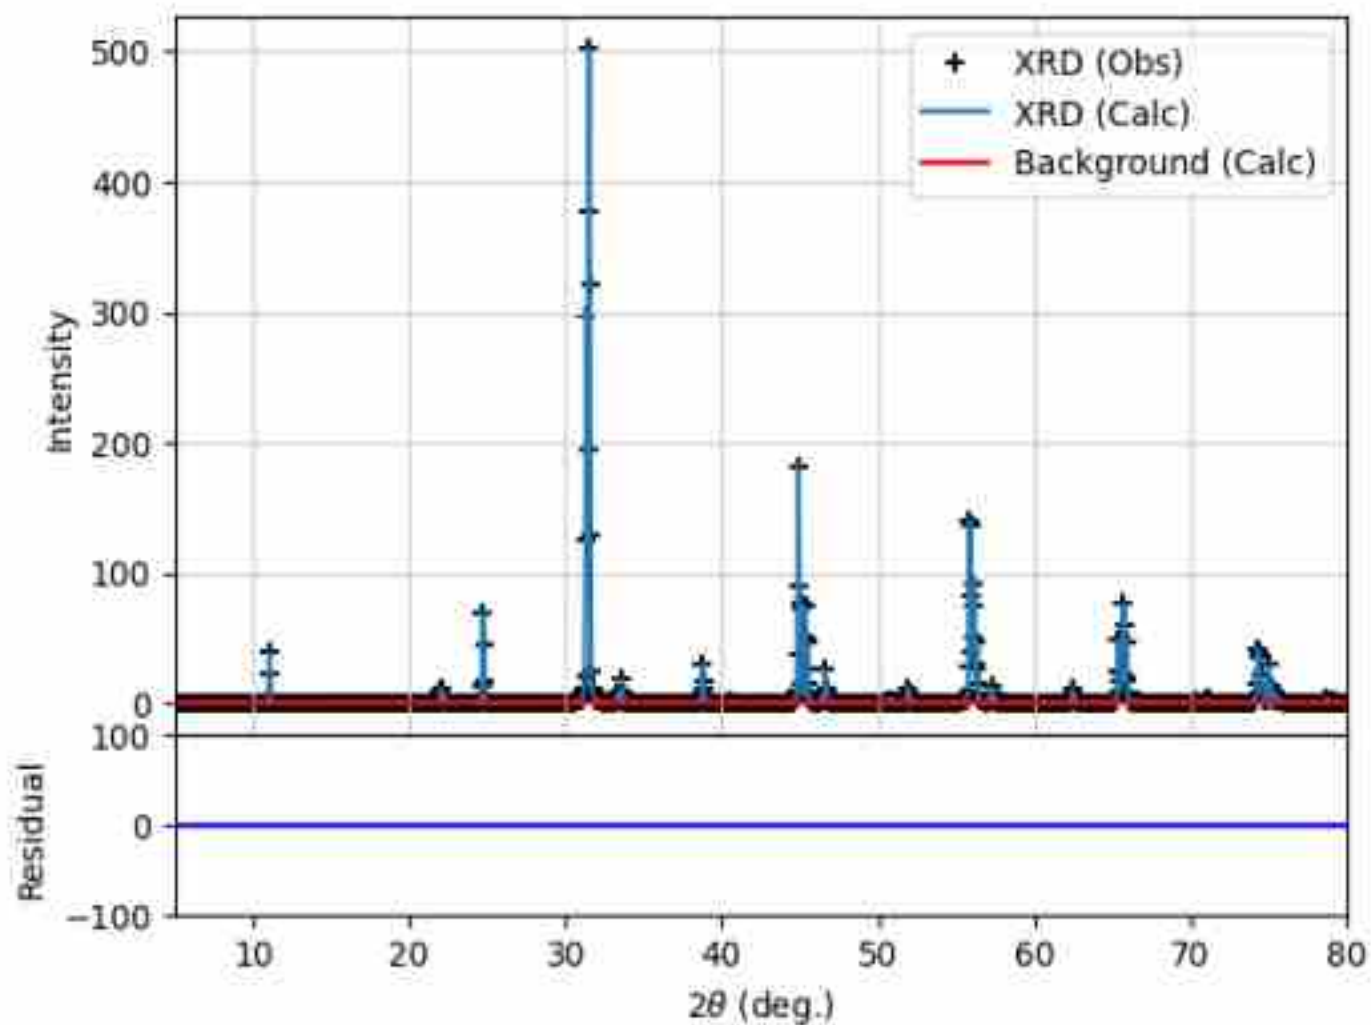

| RMSE before RR | Rwp     | RMSE after RR |
|----------------|---------|---------------|
| 0.019          | 0.00457 | 0.00116       |

# Sr<sub>2</sub>Gd<sub>4</sub>S<sub>8</sub>

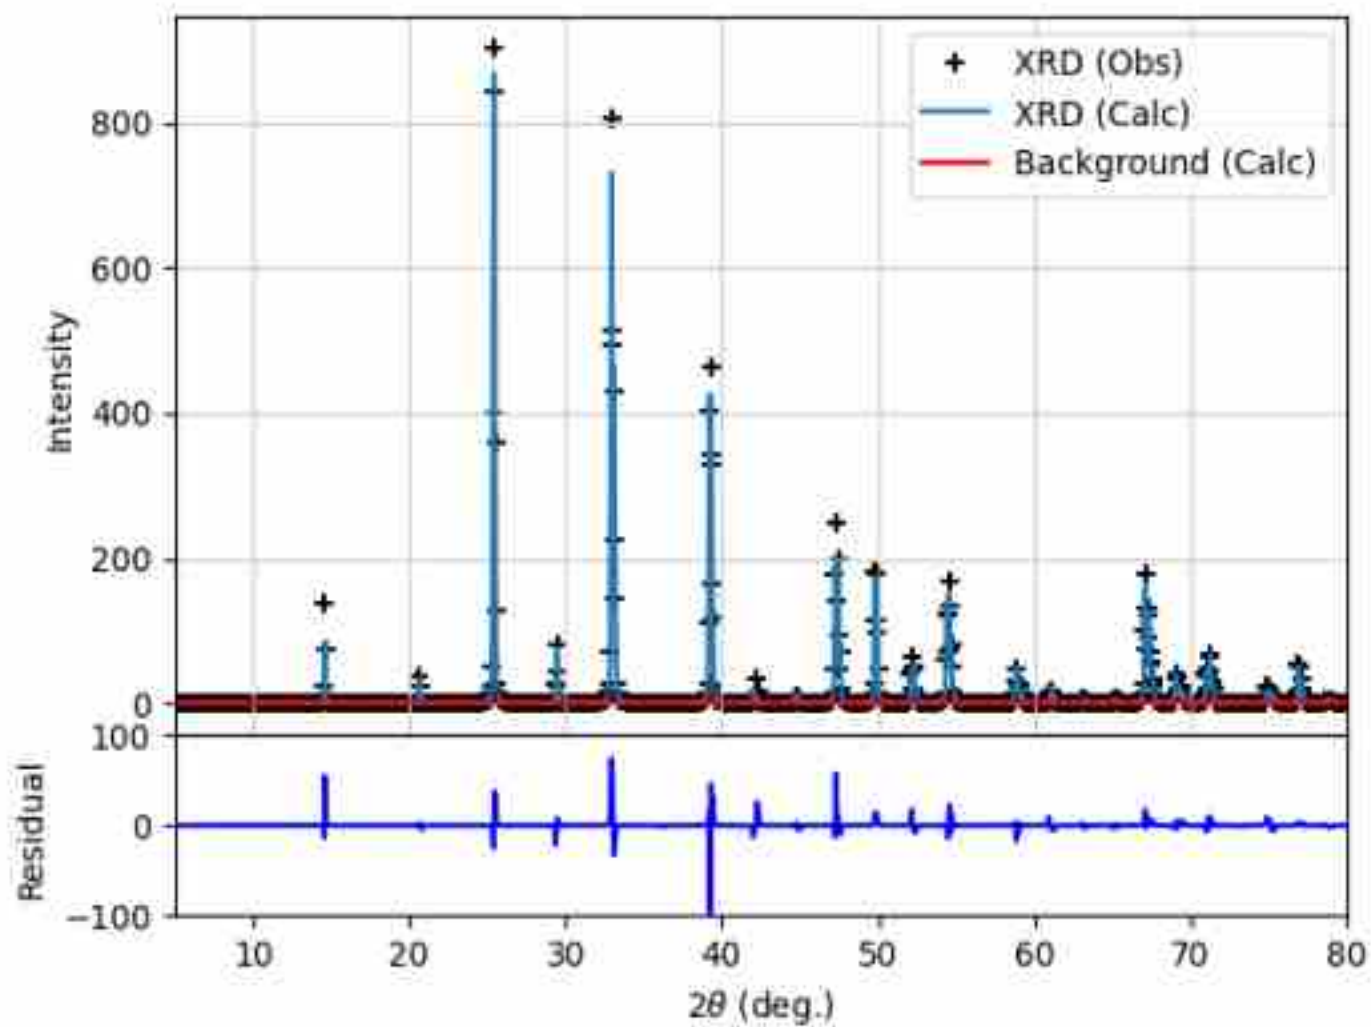

| RMSE before RR | Rwp      | RMSE after RR |
|----------------|----------|---------------|
| 0.019          | 17.66555 | 0.0584        |



# Sr<sub>2</sub>La<sub>2</sub>Mg<sub>2</sub>Ru<sub>2</sub>O<sub>12</sub>

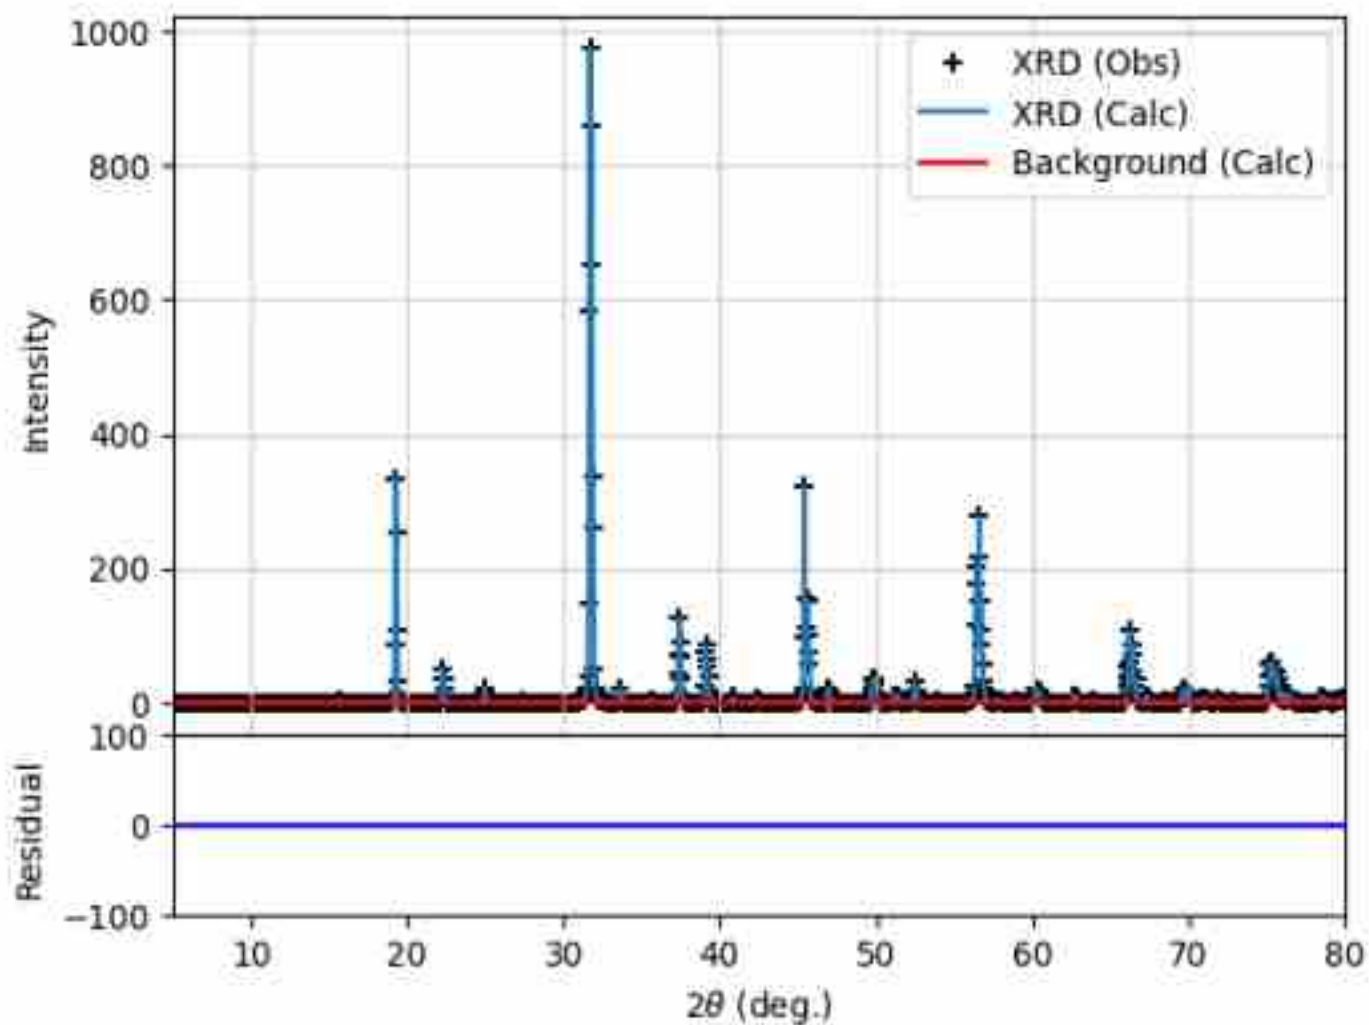

| RMSE before RR | Rwp     | RMSE after RR |
|----------------|---------|---------------|
| 0.019          | 0.00303 | 0.00114       |

# Sr<sub>2</sub>W<sub>2</sub>O<sub>8</sub>

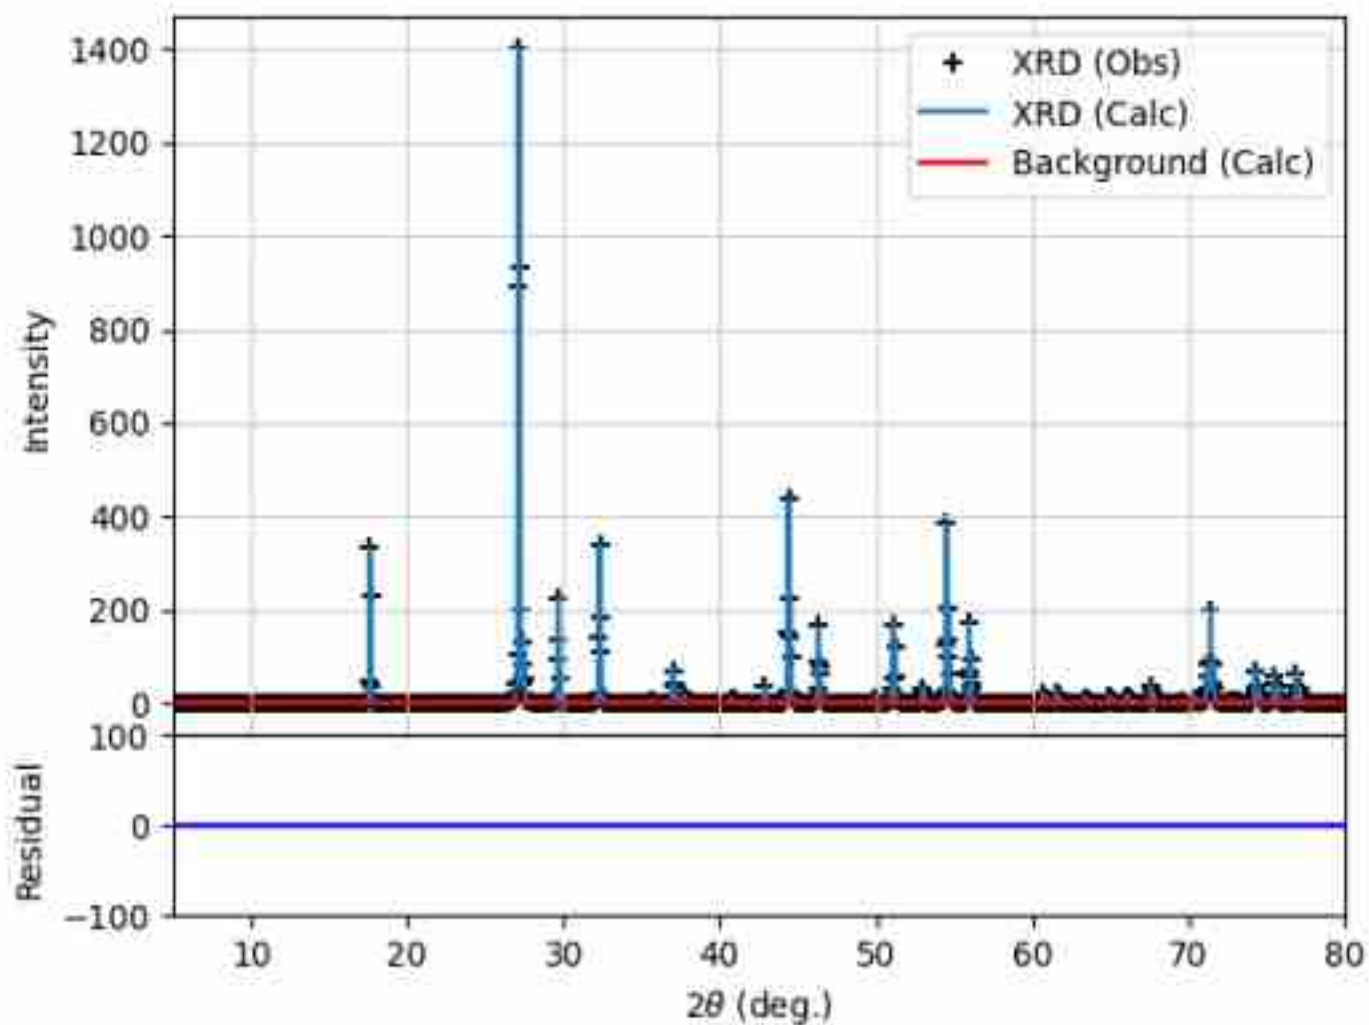

| RMSE before RR | Rwp    | RMSE after RR |
|----------------|--------|---------------|
| 0.019          | 0.0036 | 0.00127       |

# Sr<sub>3</sub>Ca<sub>1</sub>V<sub>4</sub>O<sub>12</sub>

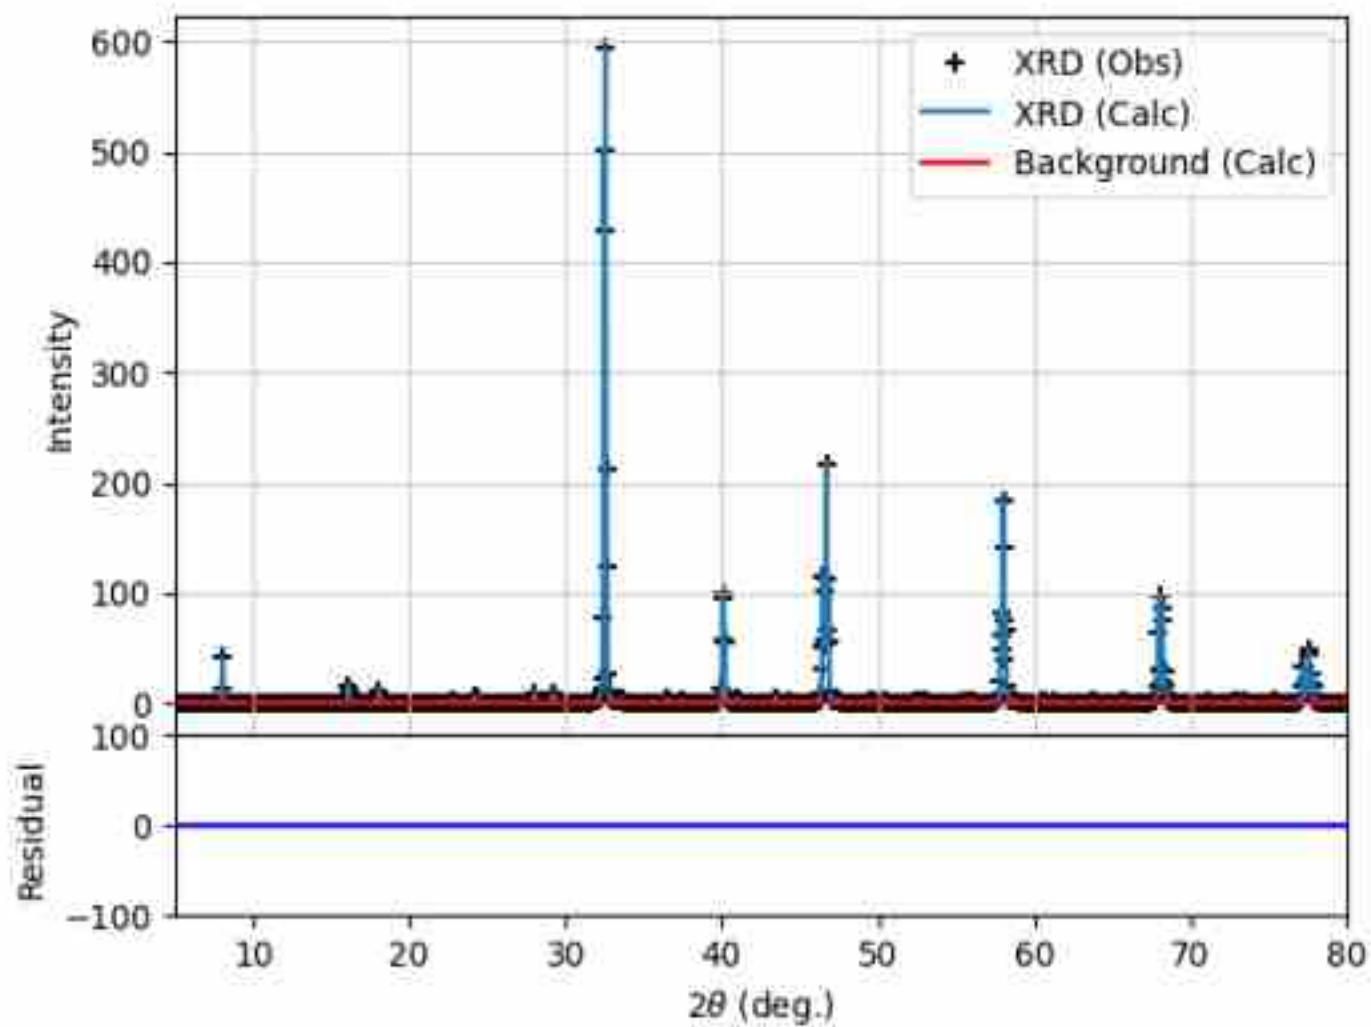

| RMSE before RR | Rwp     | RMSE after RR |
|----------------|---------|---------------|
| 0.019          | 0.00444 | 0.00114       |

# Sr<sub>3</sub>Fe<sub>2</sub>O<sub>6</sub>

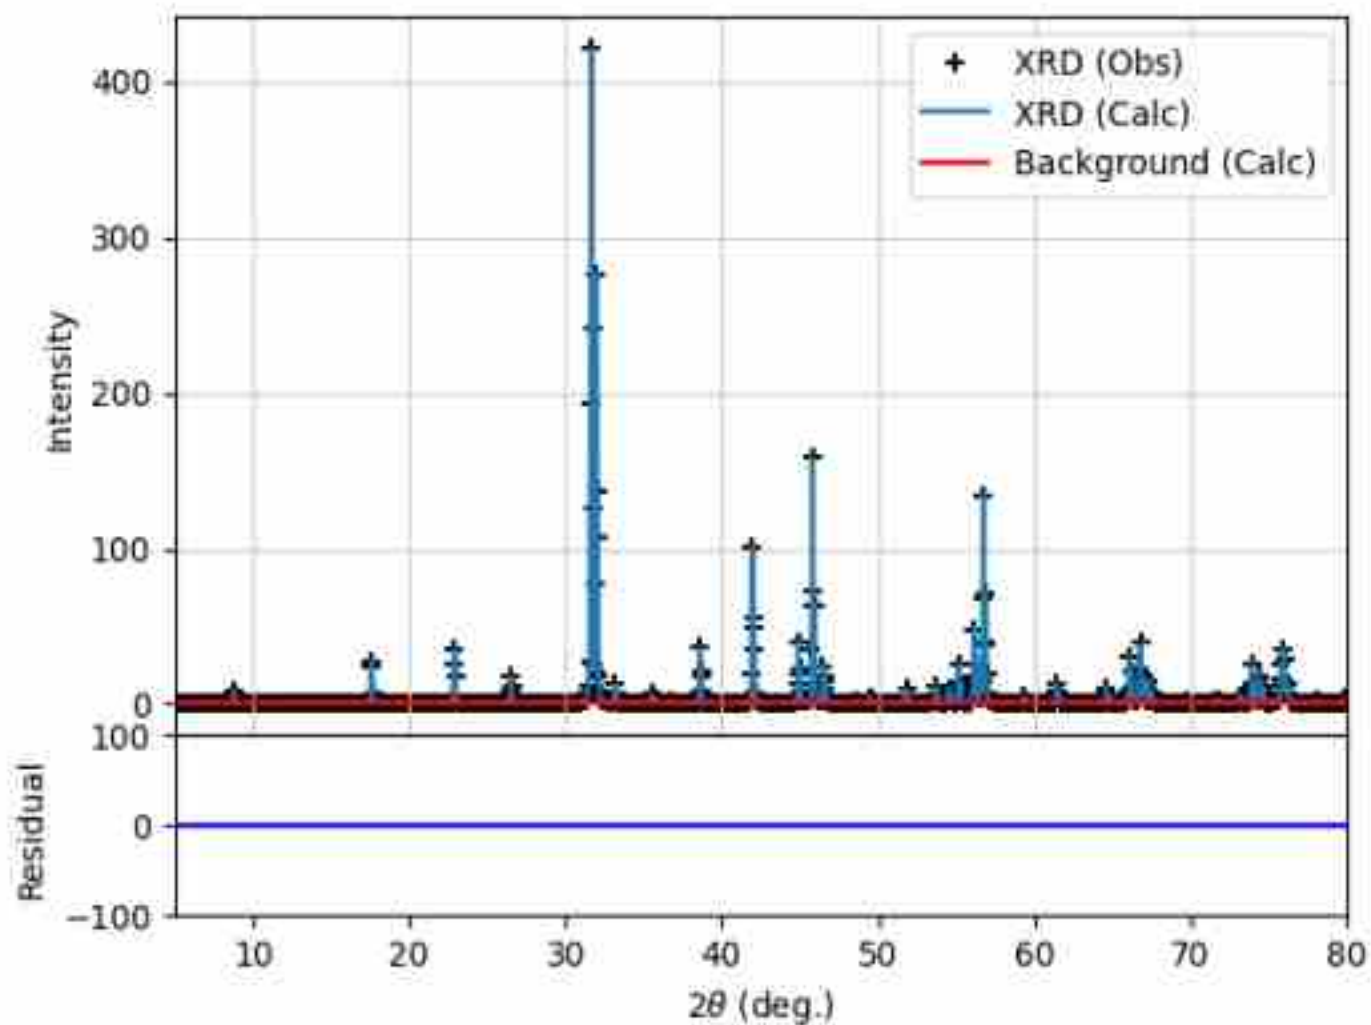

| RMSE before RR | Rwp     | RMSE after RR |
|----------------|---------|---------------|
| 0.019          | 0.00433 | 0.00176       |

# Sr3Nd1Co2O8

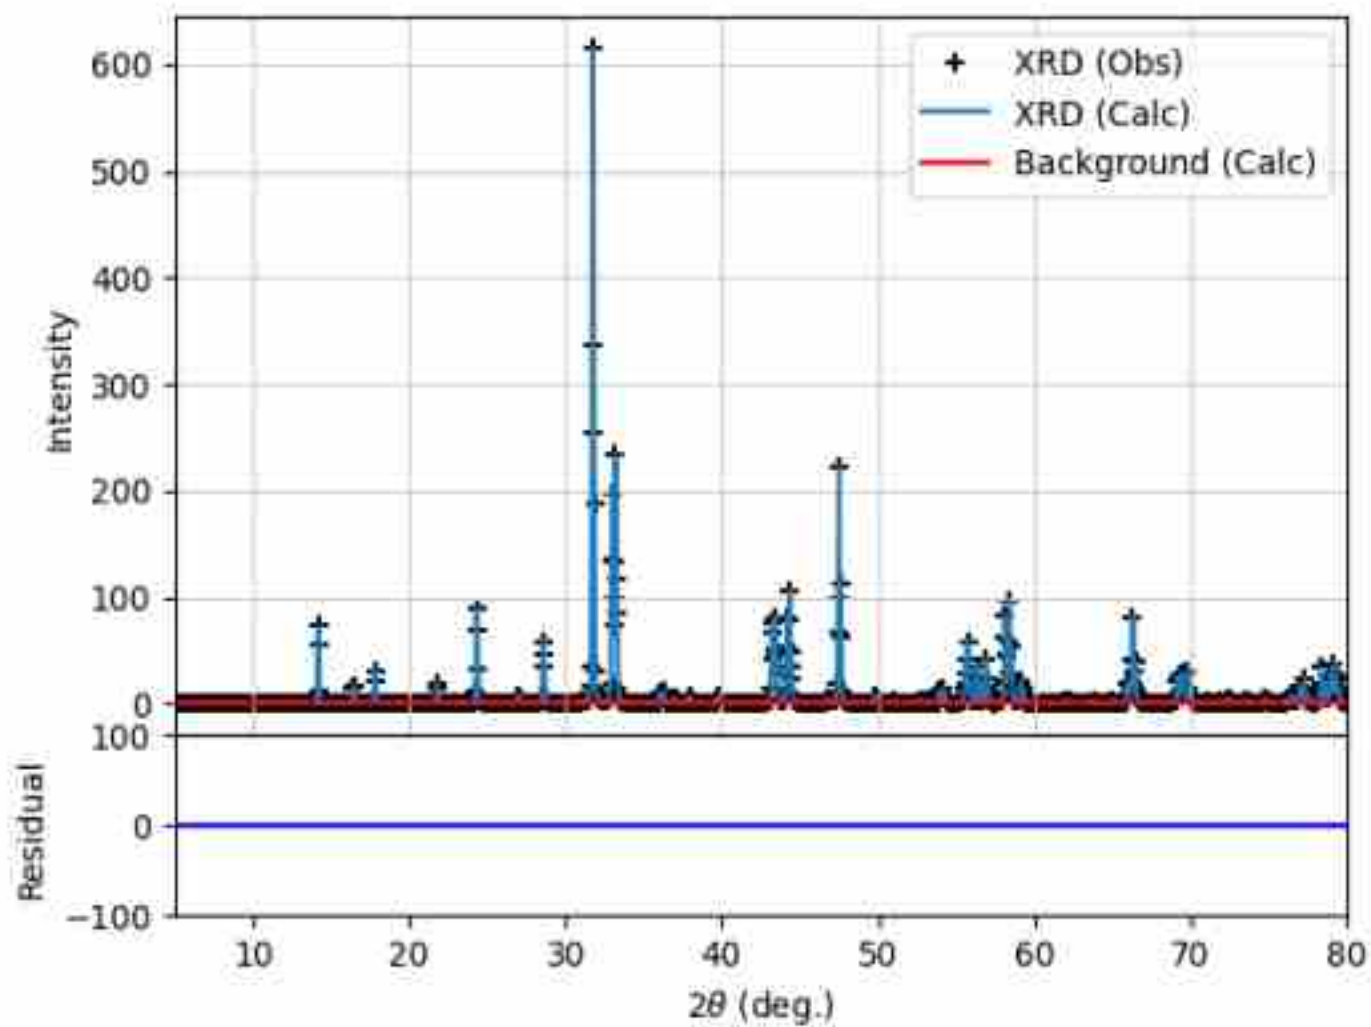

| RMSE before RR | Rwp     | RMSE after RR |
|----------------|---------|---------------|
| 0.019          | 0.00264 | 0.00071       |

# Sr4I4O2

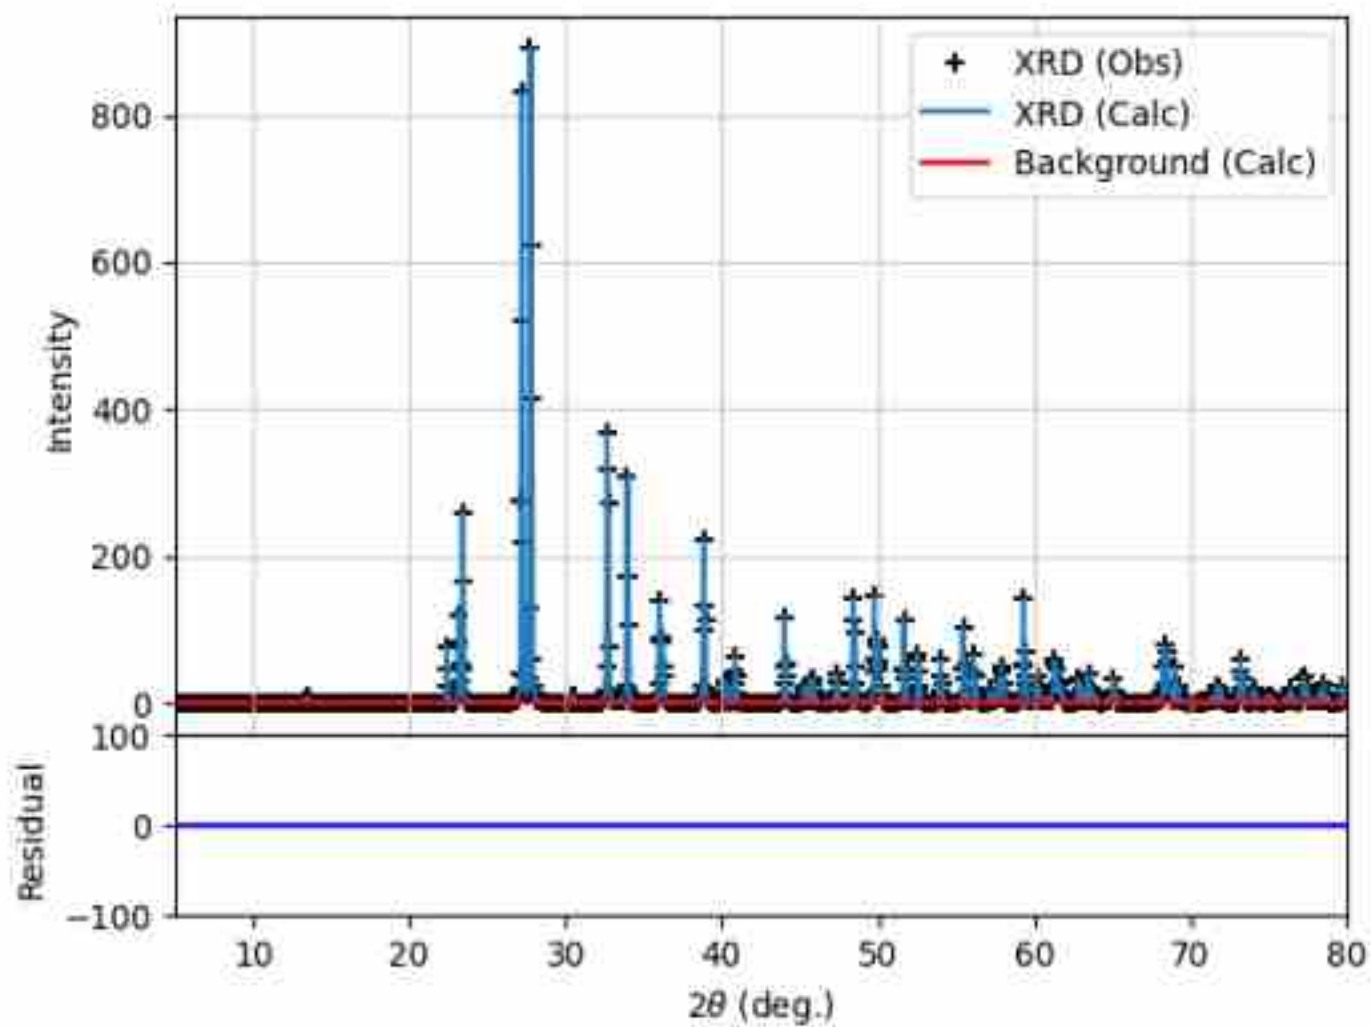

| RMSE before RR | Rwp     | RMSE after RR |
|----------------|---------|---------------|
| 0.019          | 0.00295 | 0.00056       |

# Sr4Mg2

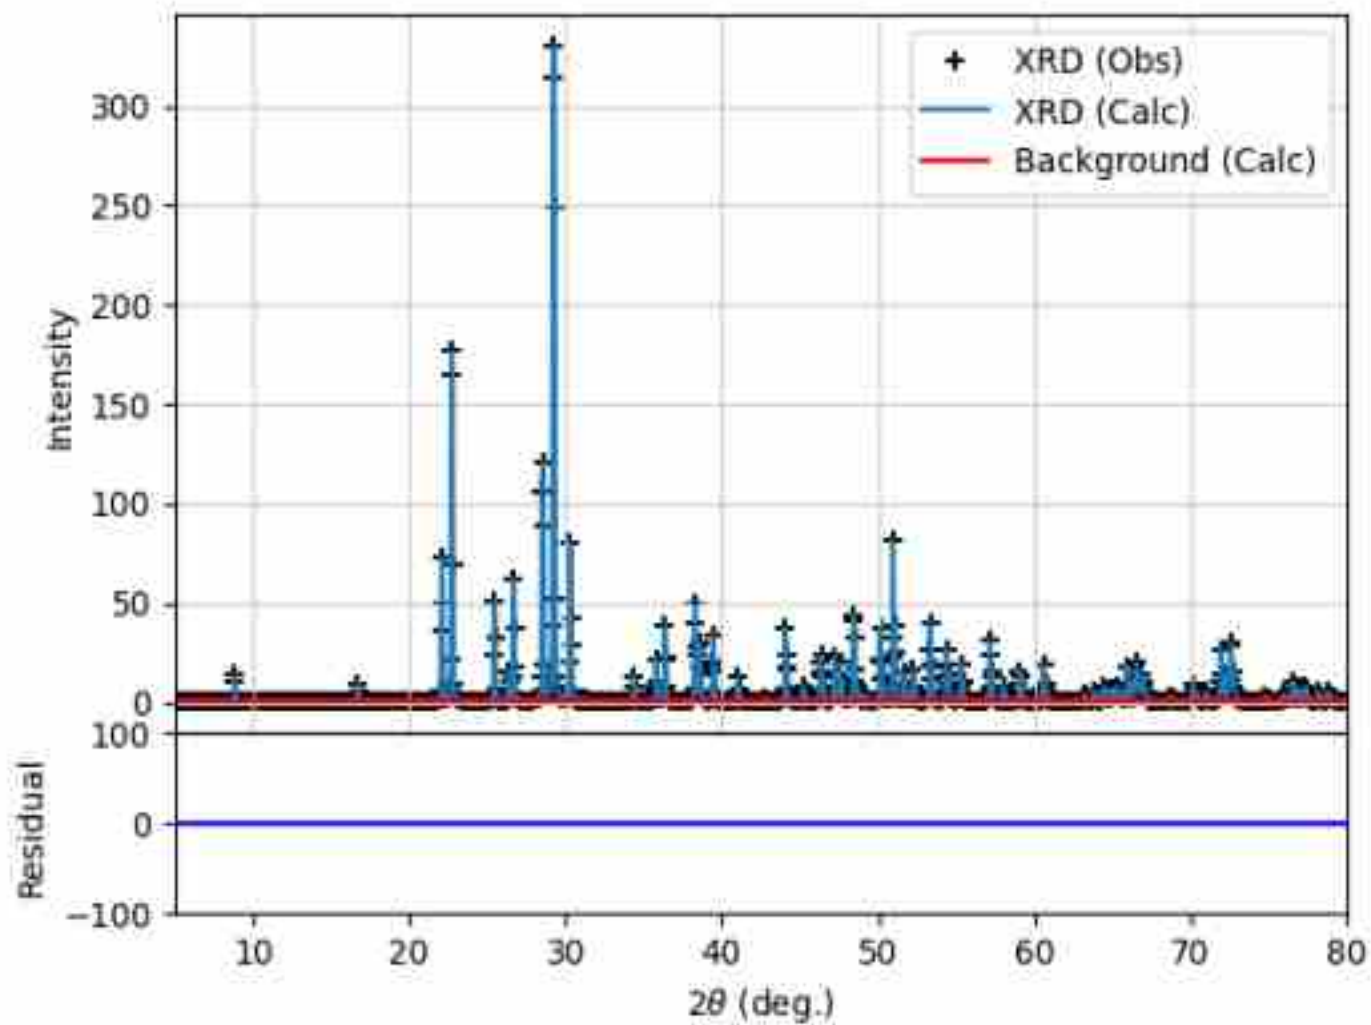

| RMSE before RR | Rwp     | RMSE after RR |
|----------------|---------|---------------|
| 0.019          | 0.00336 | 0.00065       |

# Sr<sub>4</sub>Ni<sub>2</sub>W<sub>2</sub>O<sub>12</sub>

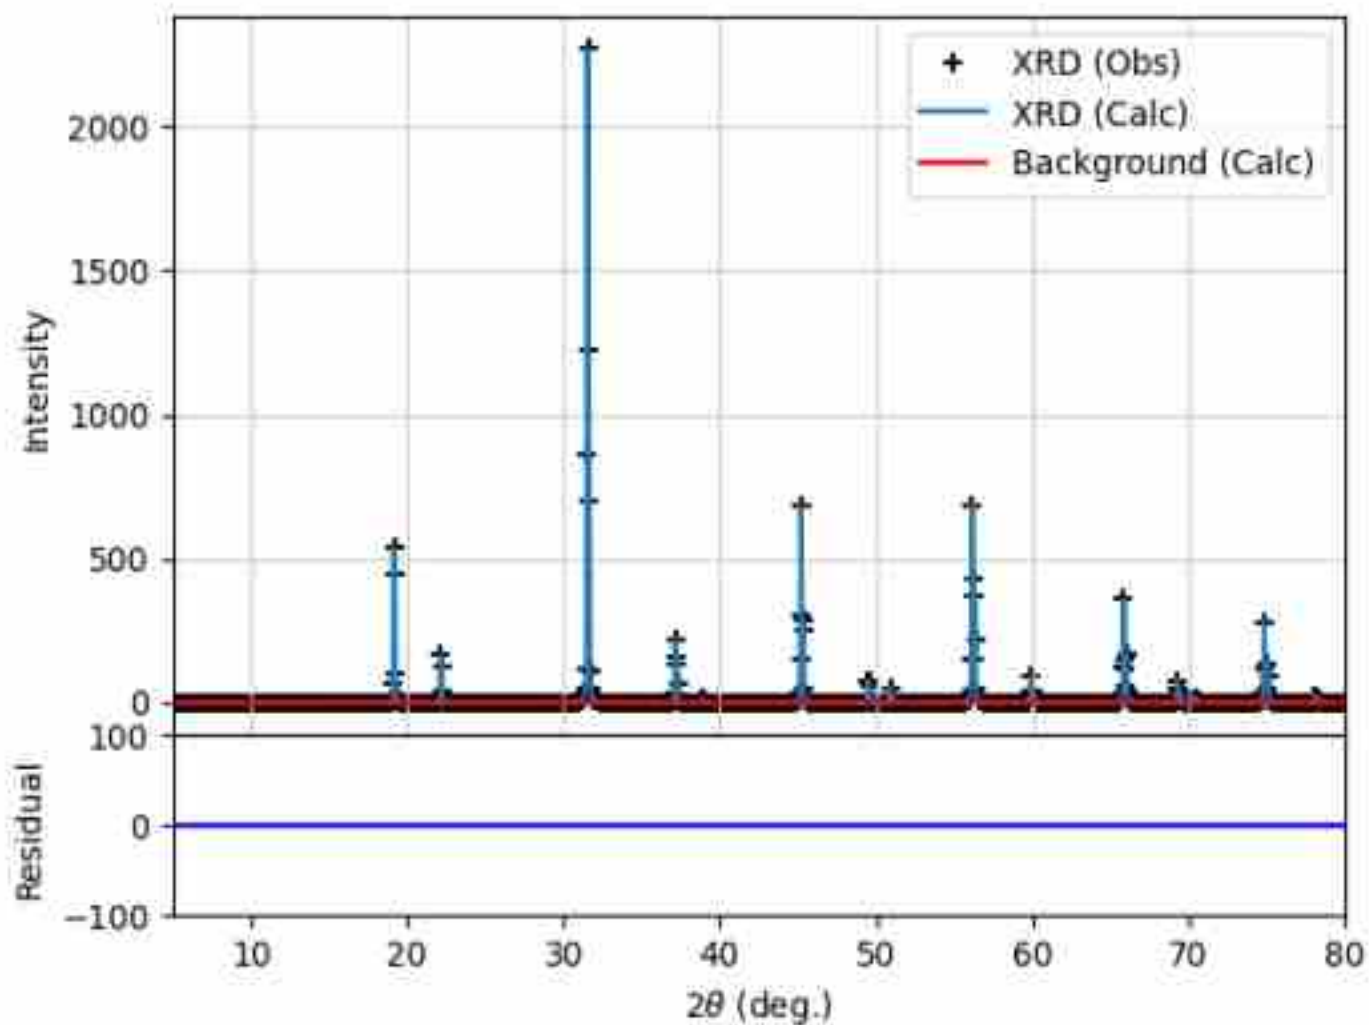

| RMSE before RR | Rwp     | RMSE after RR |
|----------------|---------|---------------|
| 0.019          | 0.00662 | 0.00366       |



# Ta6Cr2S12

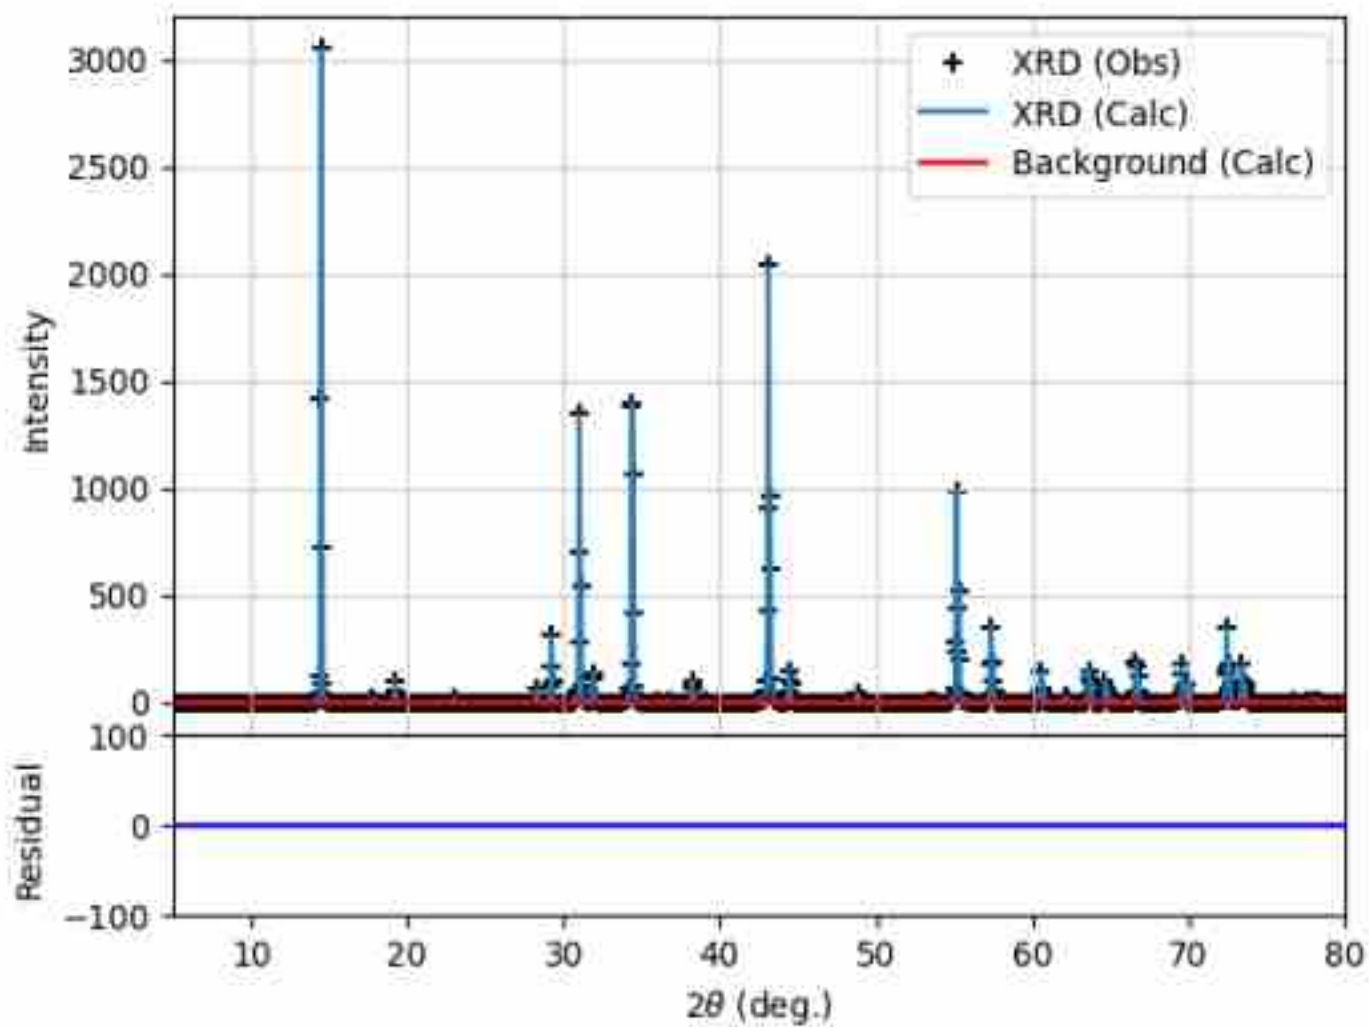

| RMSE before RR | Rwp     | RMSE after RR |
|----------------|---------|---------------|
| 0.019          | 0.01475 | 0.00174       |

# Ta10Ga6

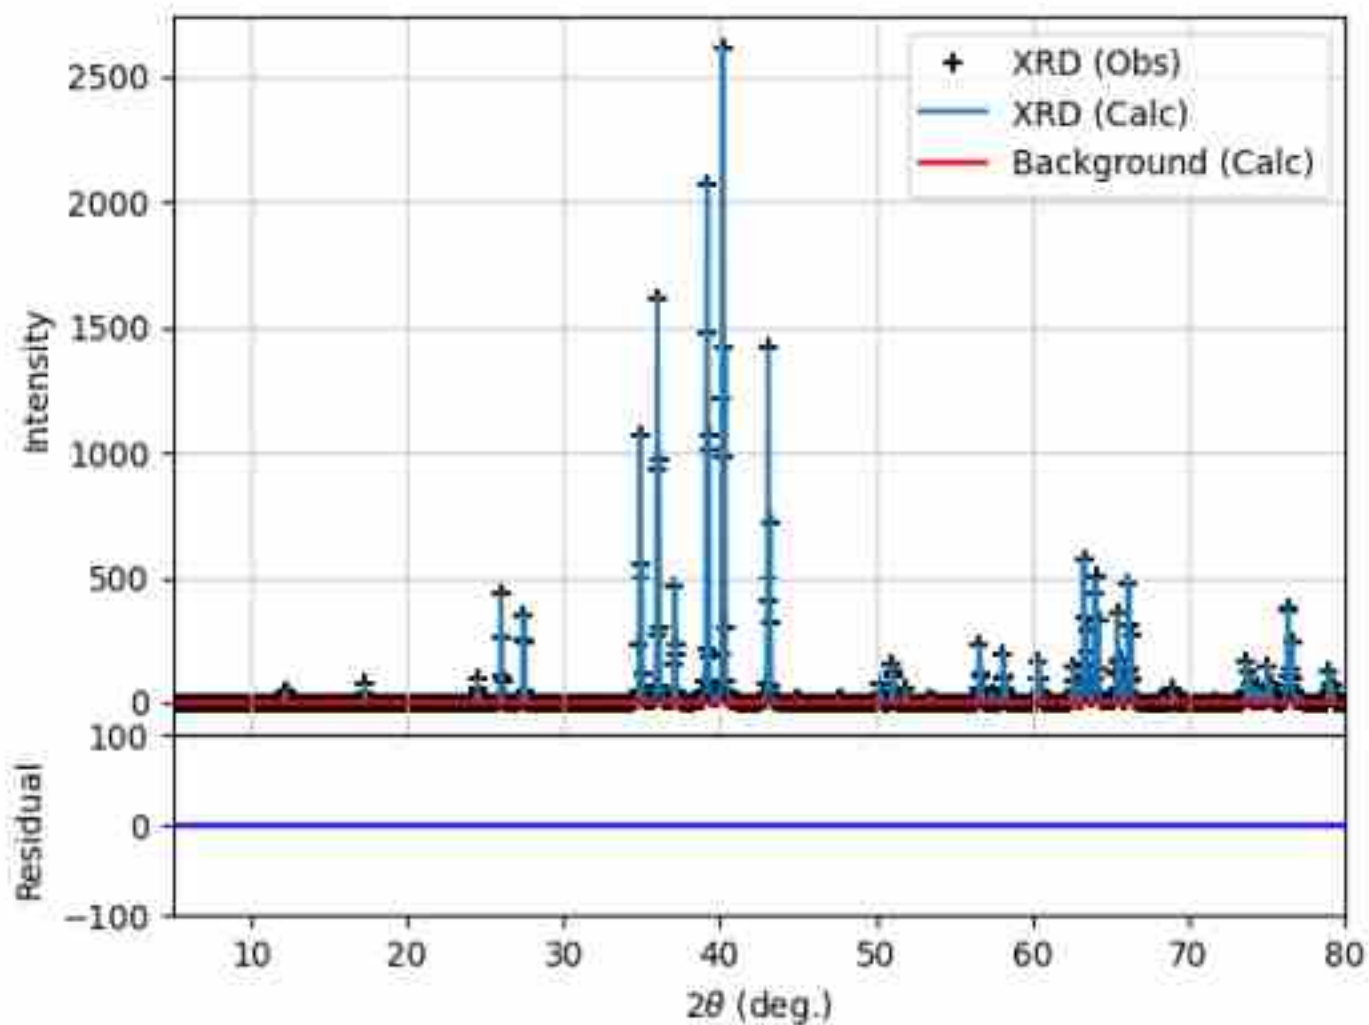

| RMSE before RR | Rwp     | RMSE after RR |
|----------------|---------|---------------|
| 0.019          | 0.00473 | 0.00085       |

# Tb1Al4Fe8

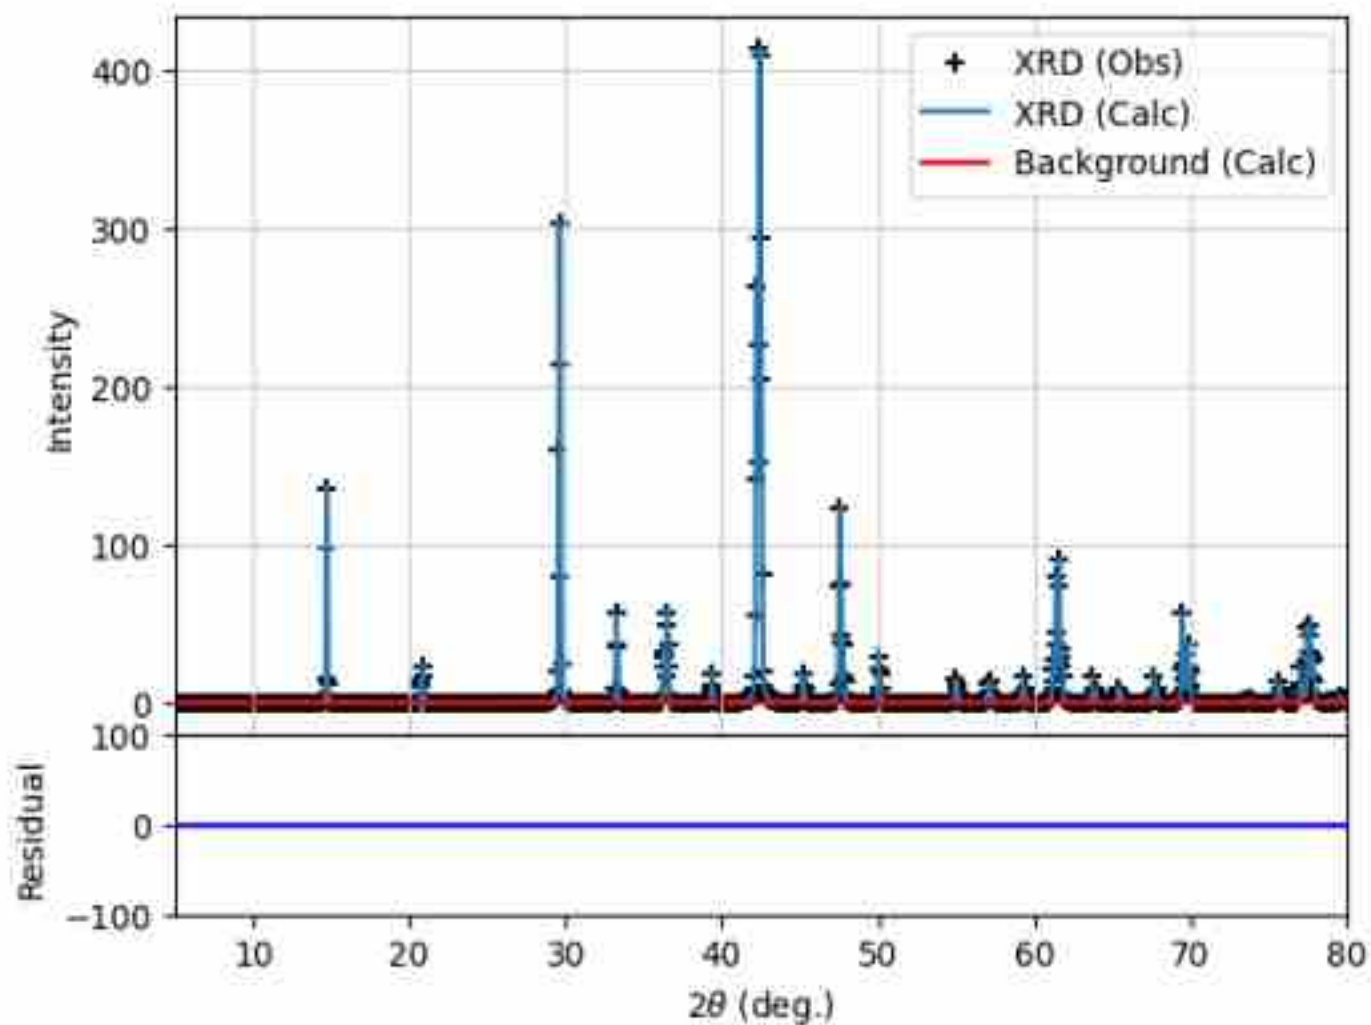

| RMSE before RR | Rwp     | RMSE after RR |
|----------------|---------|---------------|
| 0.019          | 0.00242 | 0.00076       |

# Tb<sub>4</sub>Co<sub>4</sub>O<sub>12</sub>

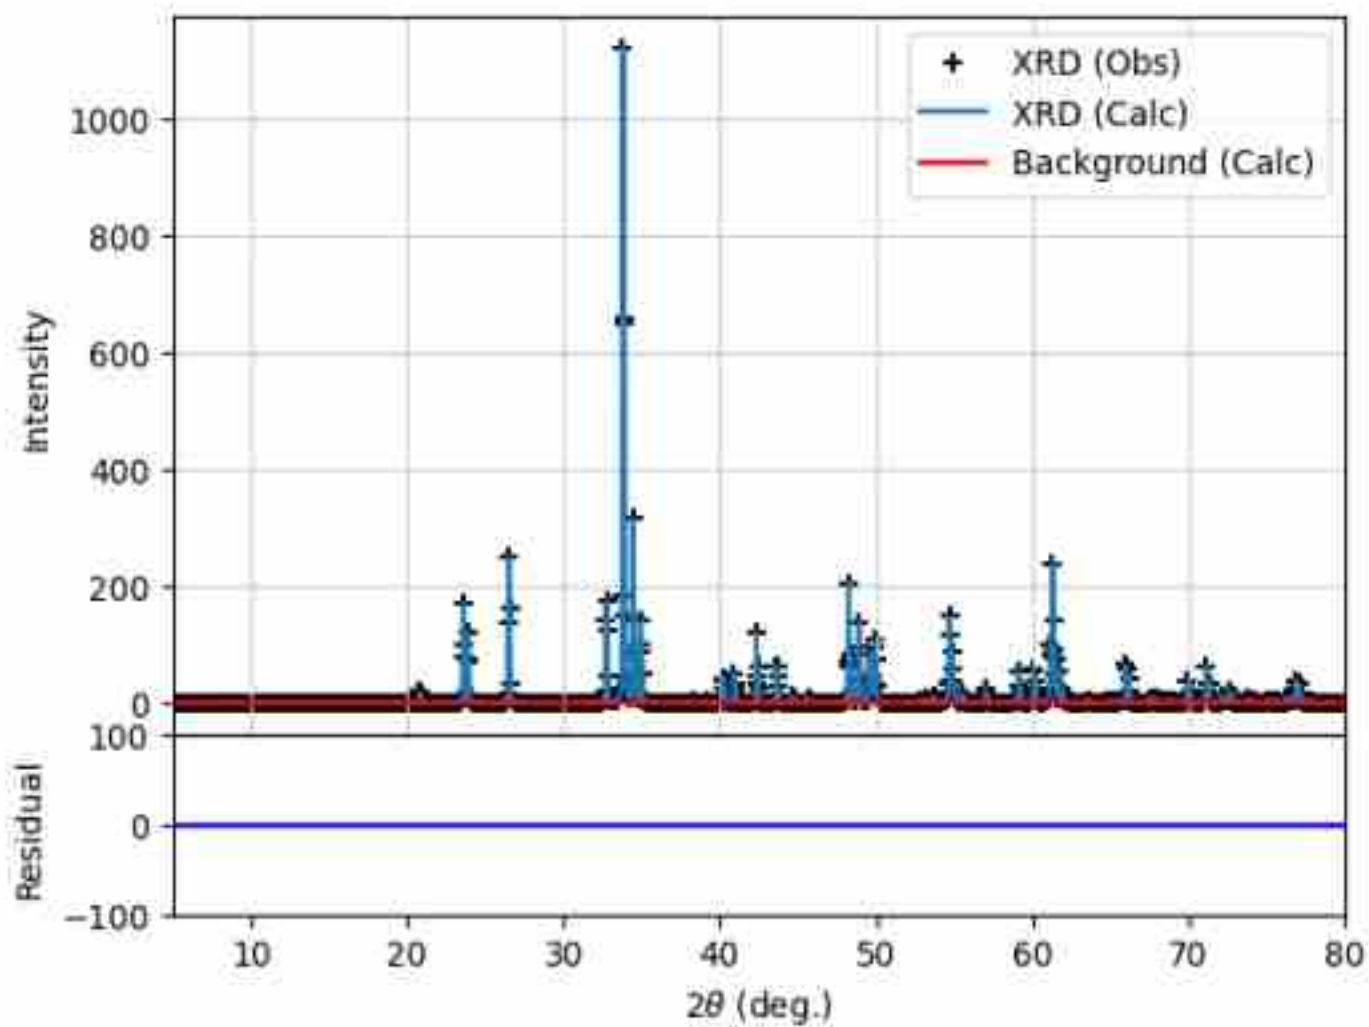

| RMSE before RR | Rwp     | RMSE after RR |
|----------------|---------|---------------|
| 0.019          | 0.00402 | 0.00125       |

# Tb<sub>4</sub>Co<sub>6</sub>Si<sub>10</sub>

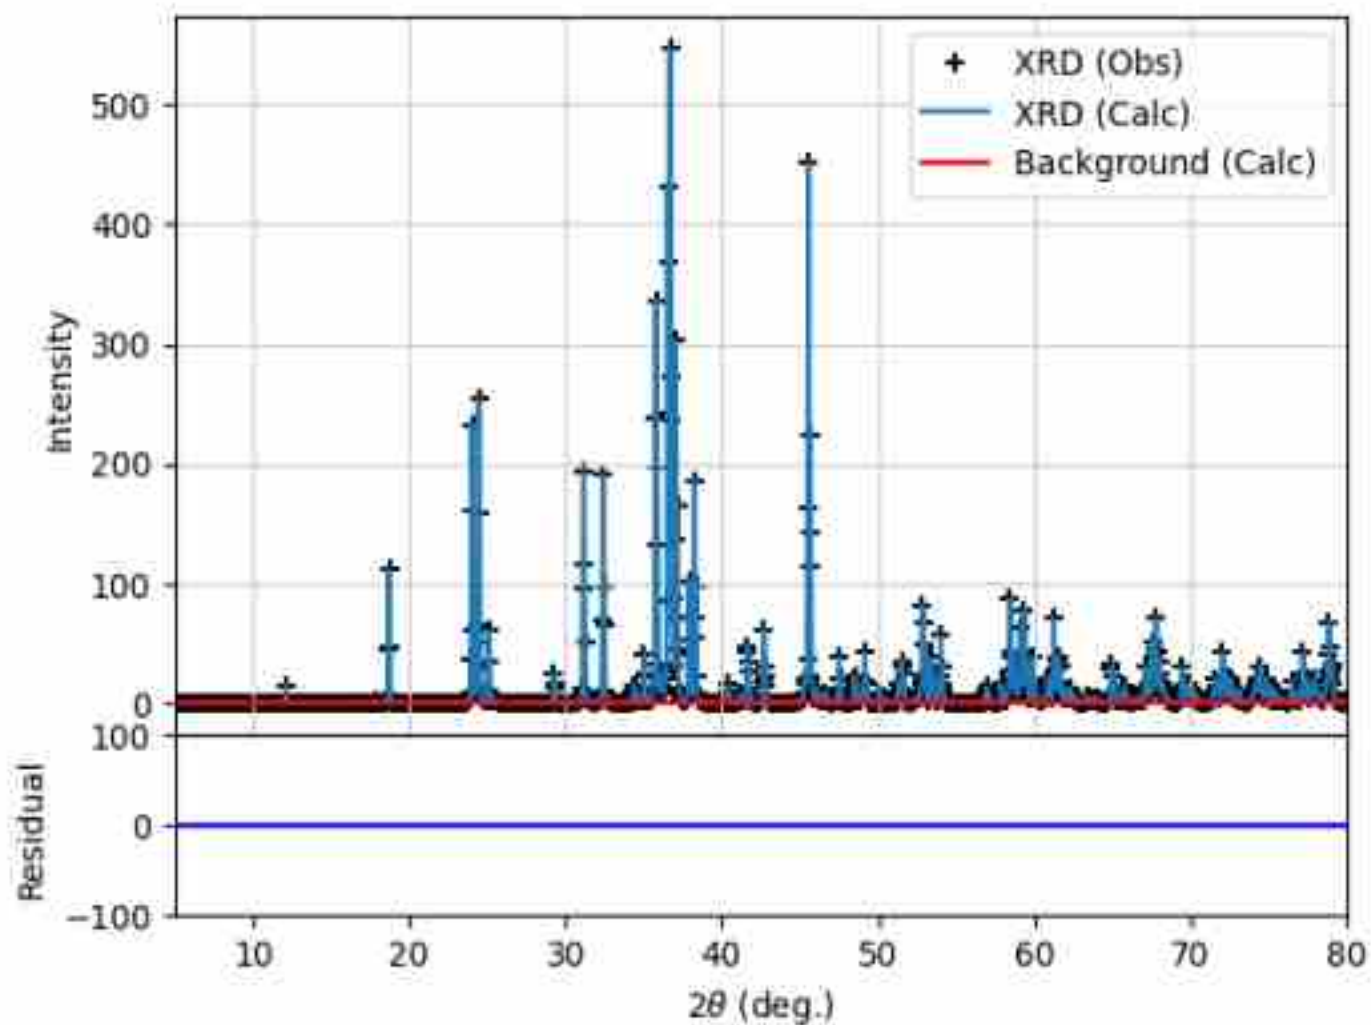

| RMSE before RR | Rwp     | RMSE after RR |
|----------------|---------|---------------|
| 0.019          | 0.00393 | 0.00066       |

# Tb<sub>4</sub>Fe<sub>1</sub>Ge<sub>8</sub>

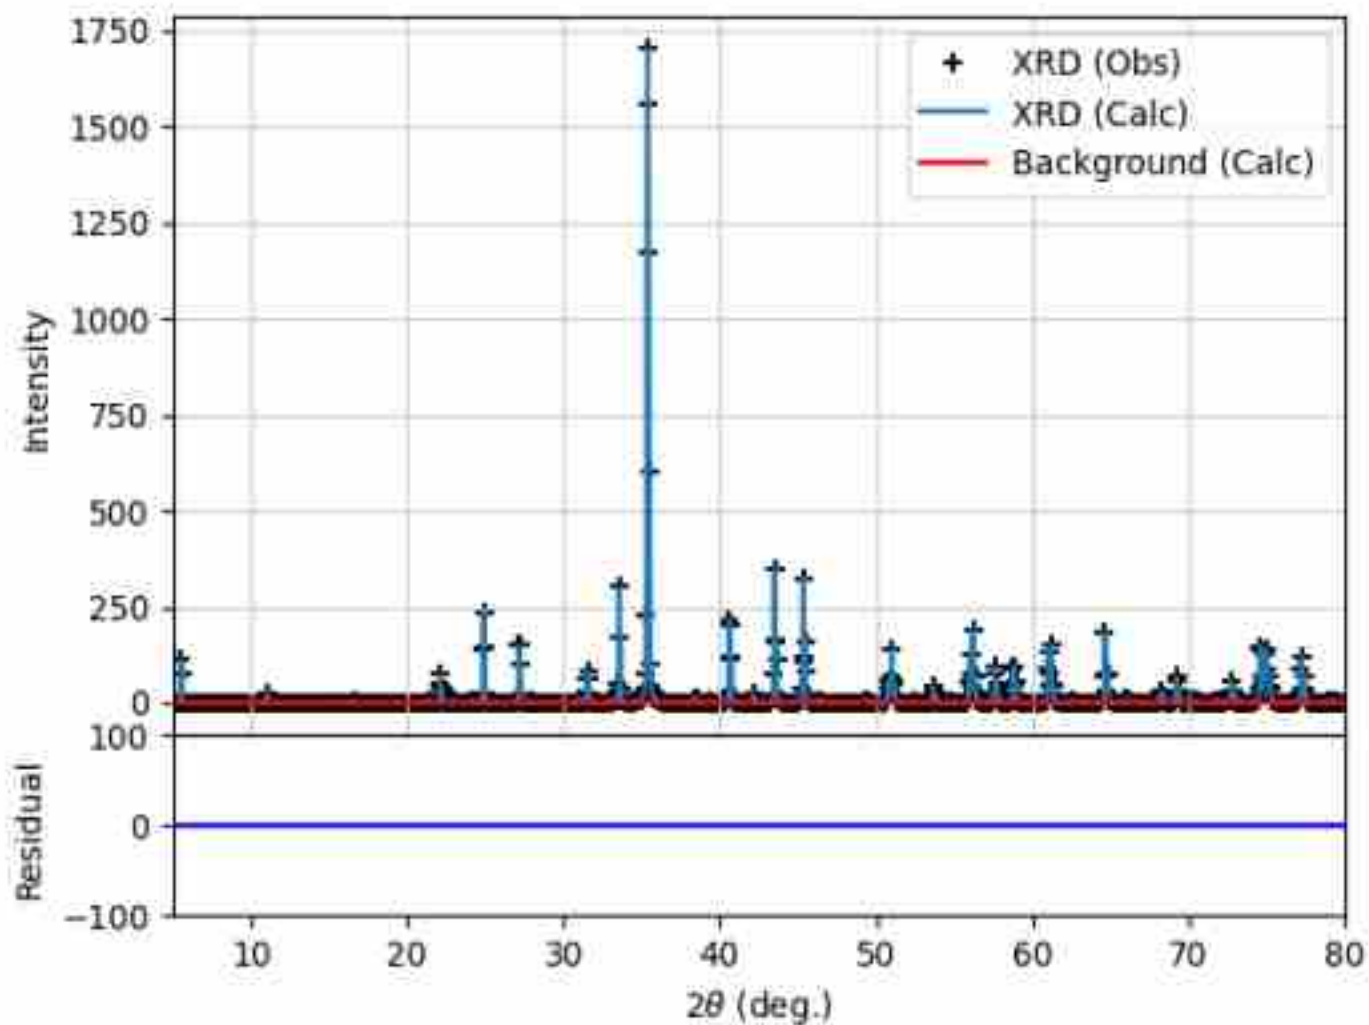

| RMSE before RR | Rwp     | RMSE after RR |
|----------------|---------|---------------|
| 0.019          | 0.00473 | 0.00035       |

# Tb<sub>4</sub>Ge<sub>10</sub>Ir<sub>6</sub>

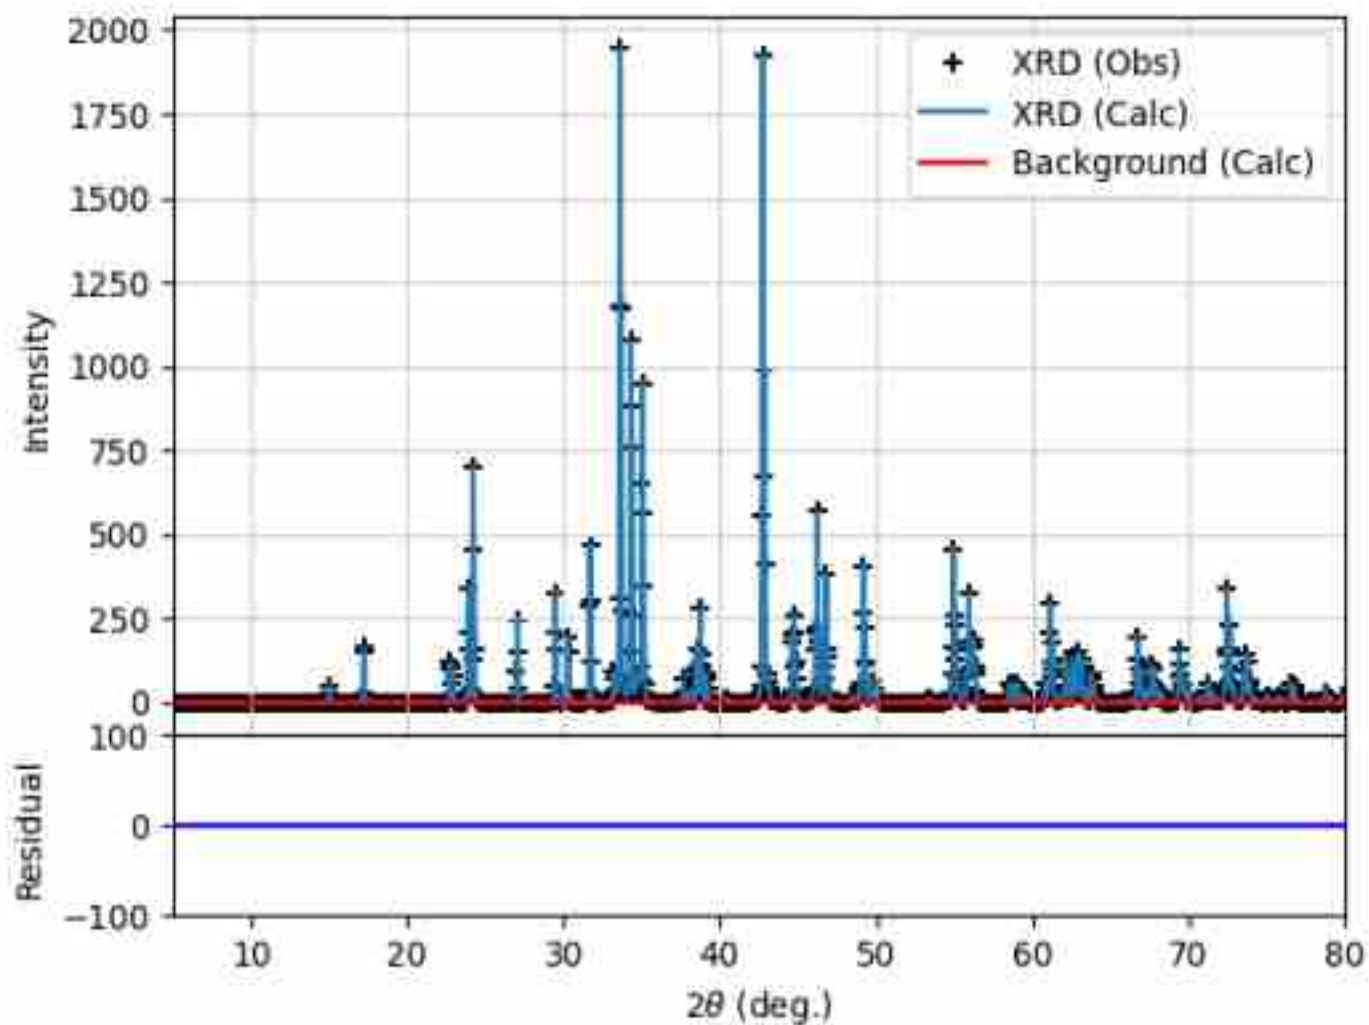

| RMSE before RR | Rwp     | RMSE after RR |
|----------------|---------|---------------|
| 0.019          | 0.00367 | 0.0004        |

# Tb<sub>4</sub>Ni<sub>4</sub>Ge<sub>4</sub>

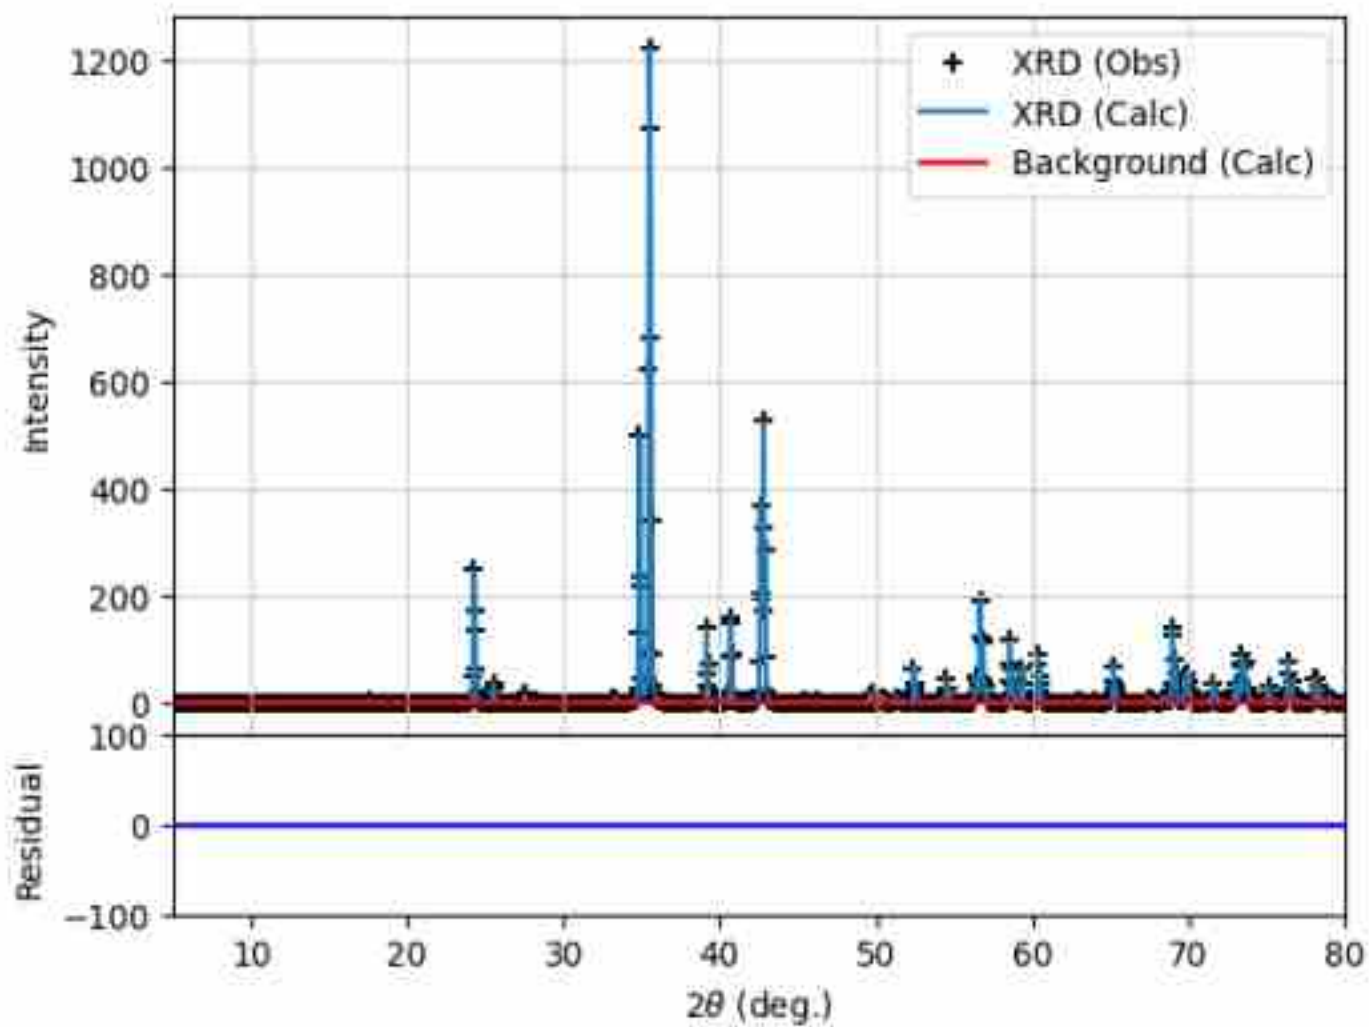

| RMSE before RR | Rwp    | RMSE after RR |
|----------------|--------|---------------|
| 0.019          | 0.0047 | 0.00046       |



# Tb<sub>4</sub>Yb<sub>2</sub>S<sub>8</sub>

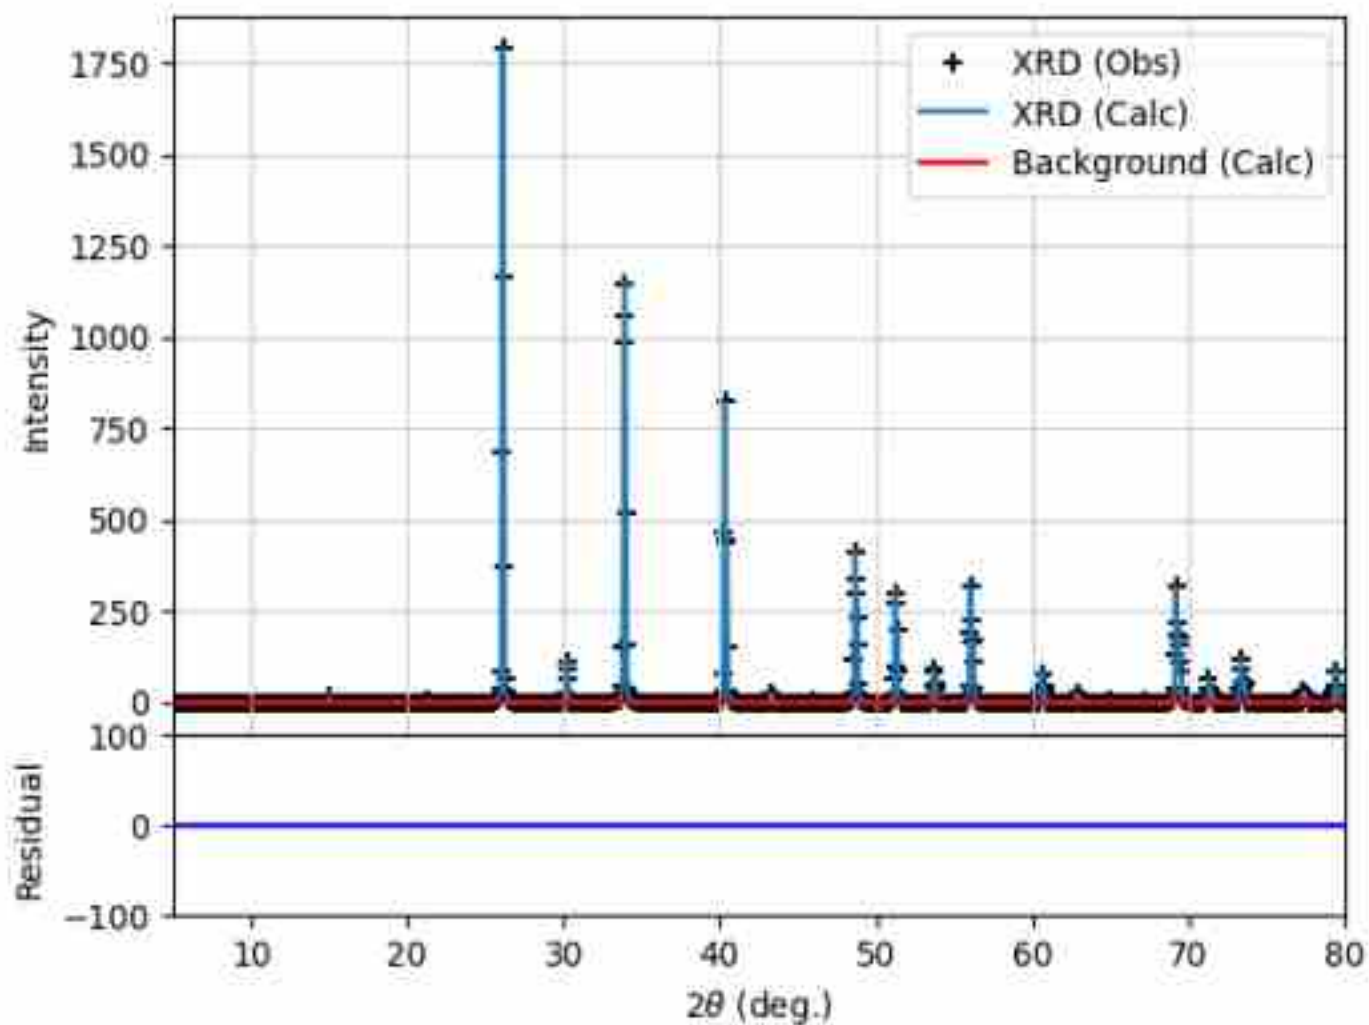

| RMSE before RR | Rwp     | RMSE after RR |
|----------------|---------|---------------|
| 0.019          | 0.00208 | 0.00057       |

# Th1B2Rh2C1

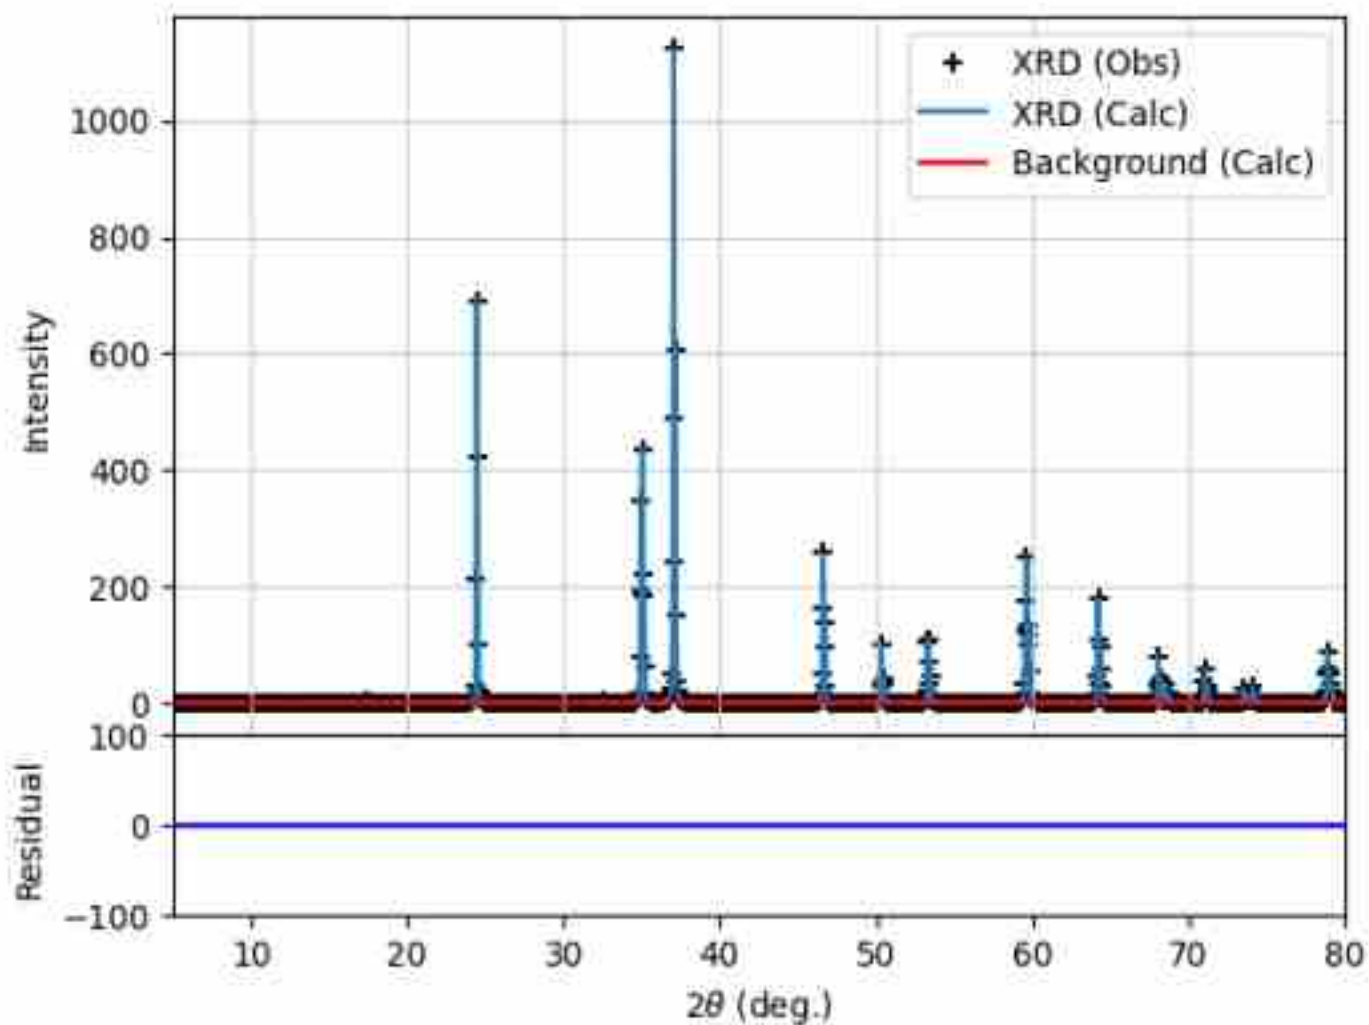

| RMSE before RR | Rwp     | RMSE after RR |
|----------------|---------|---------------|
| 0.019          | 0.00383 | 0.00238       |

# Ti1V1H4

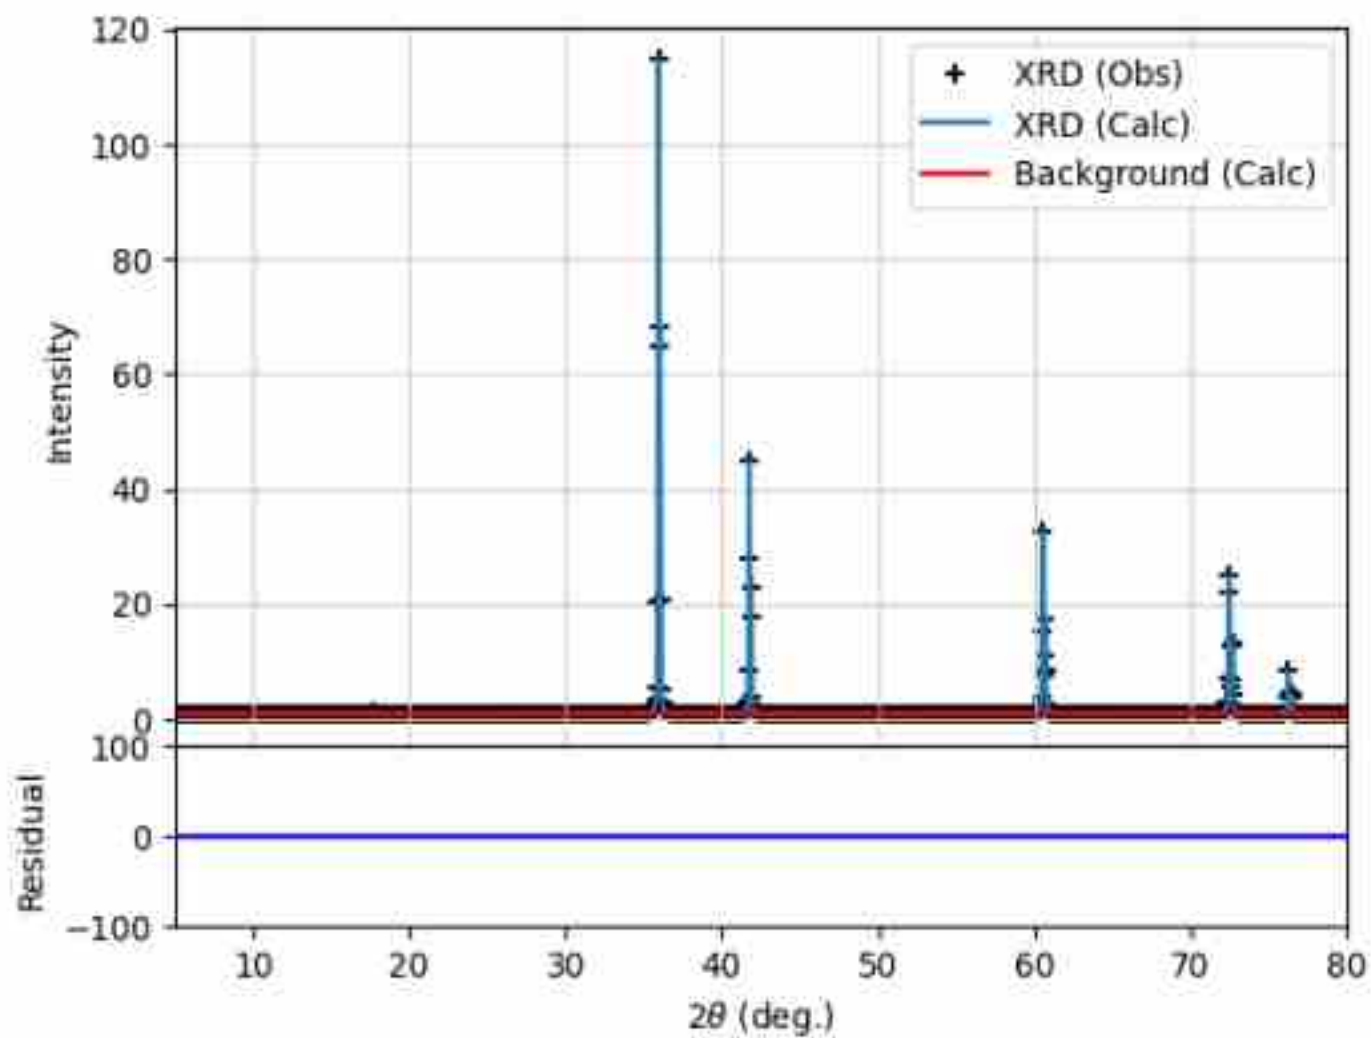

| RMSE before RR | Rwp     | RMSE after RR |
|----------------|---------|---------------|
| 0.019          | 0.00322 | 0.00849       |

# Ti10Si2Sb4

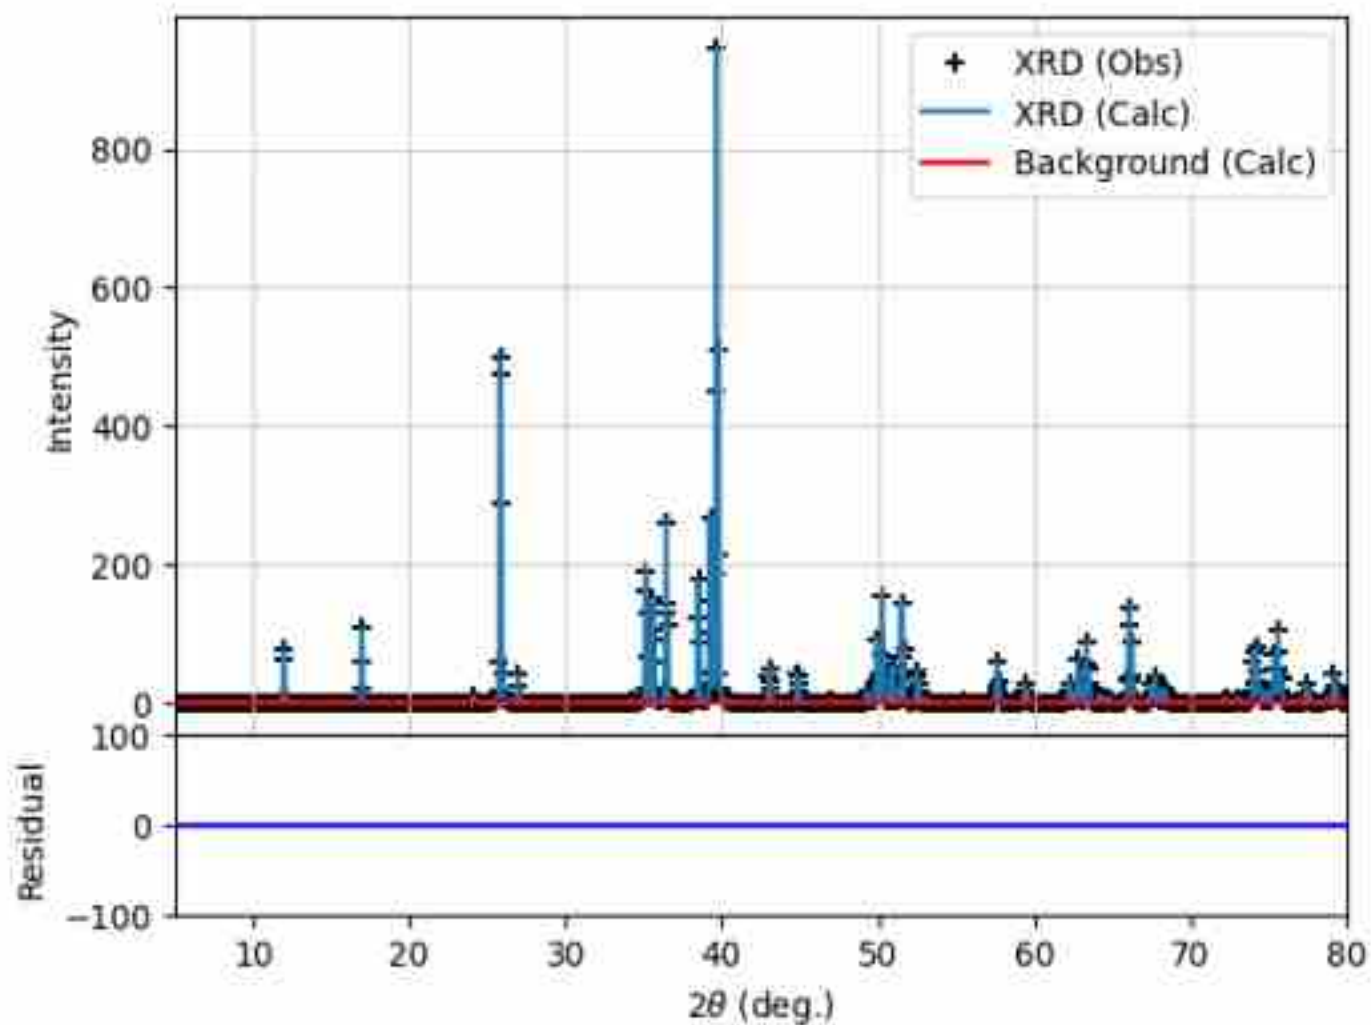

| RMSE before RR | Rwp     | RMSE after RR |
|----------------|---------|---------------|
| 0.019          | 0.01347 | 0.00171       |

# Tl1Hg5Cl11

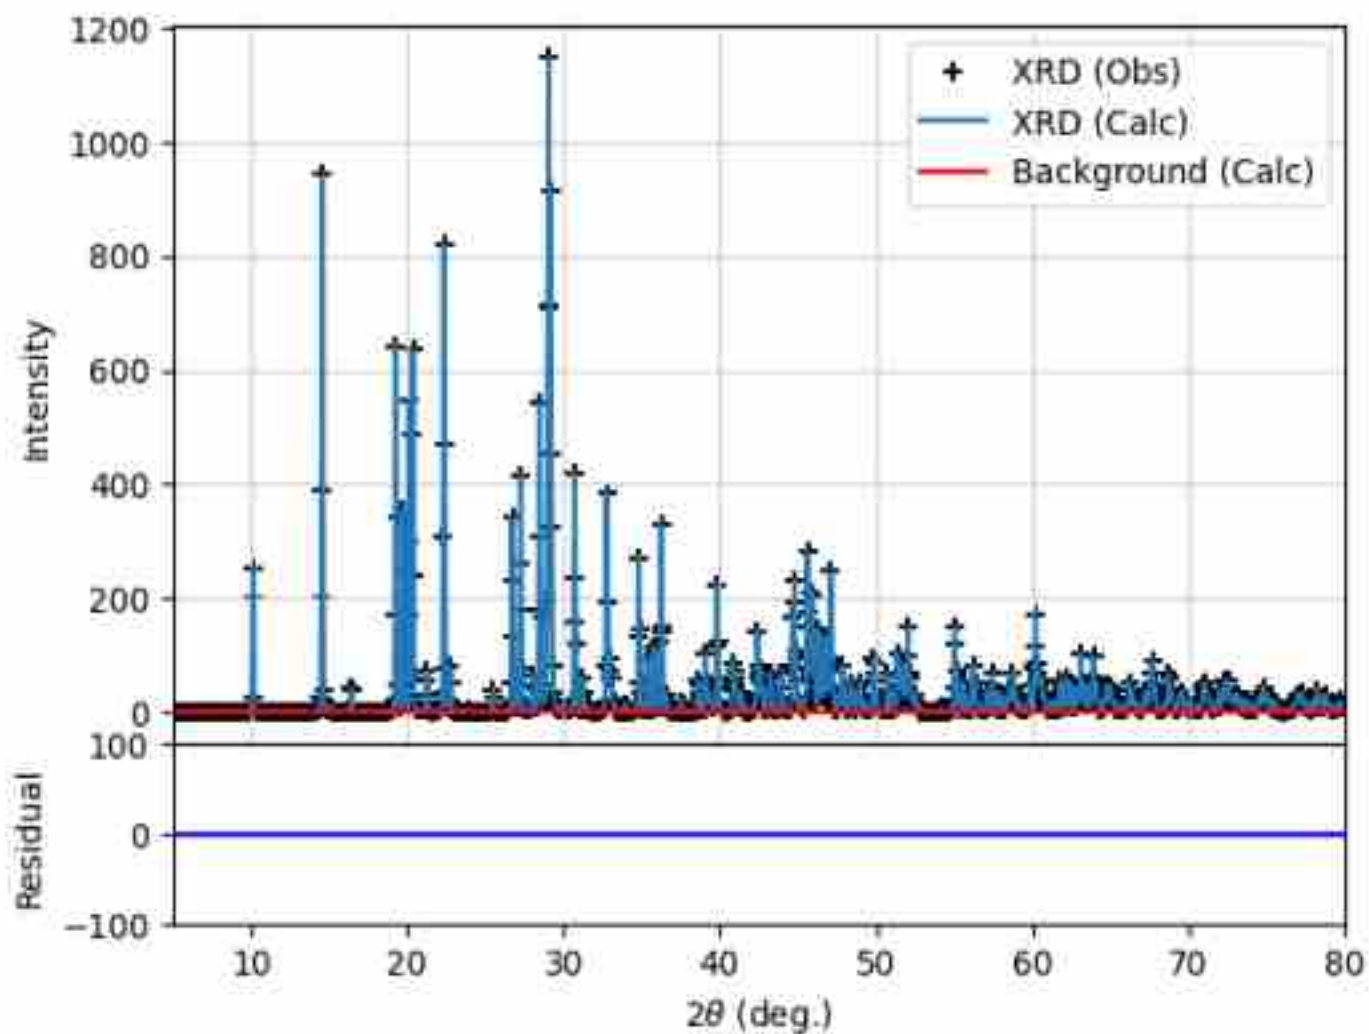

| RMSE before RR | Rwp     | RMSE after RR |
|----------------|---------|---------------|
| 0.019          | 0.00385 | 0.00067       |

# Tl<sub>2</sub>NiF<sub>4</sub>

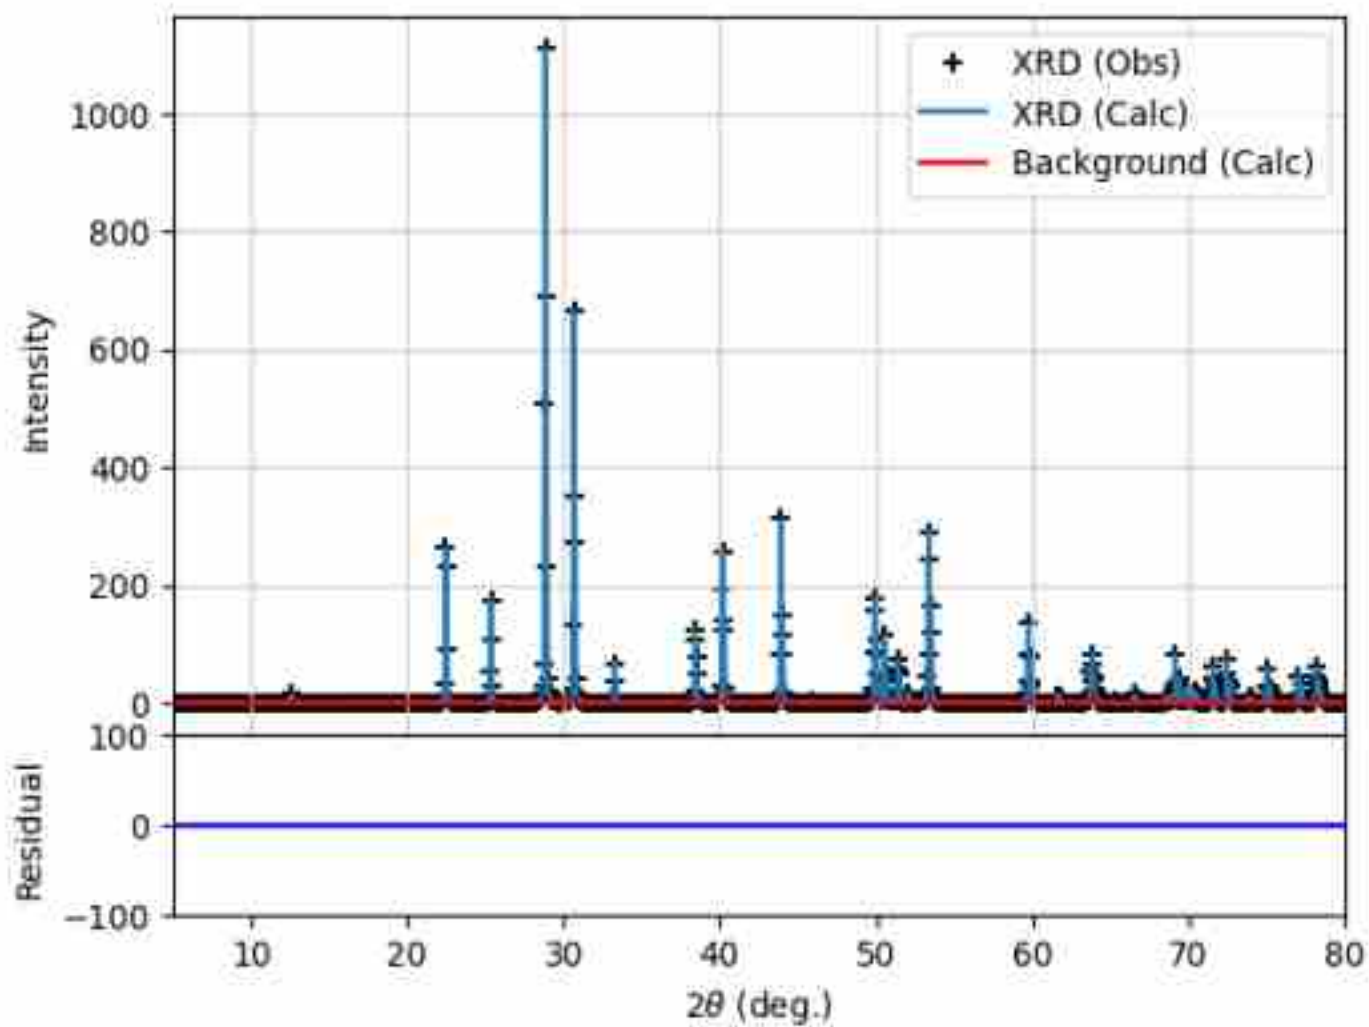

| RMSE before RR | Rwp     | RMSE after RR |
|----------------|---------|---------------|
| 0.019          | 0.00401 | 0.00287       |

# Tl3V1Se4

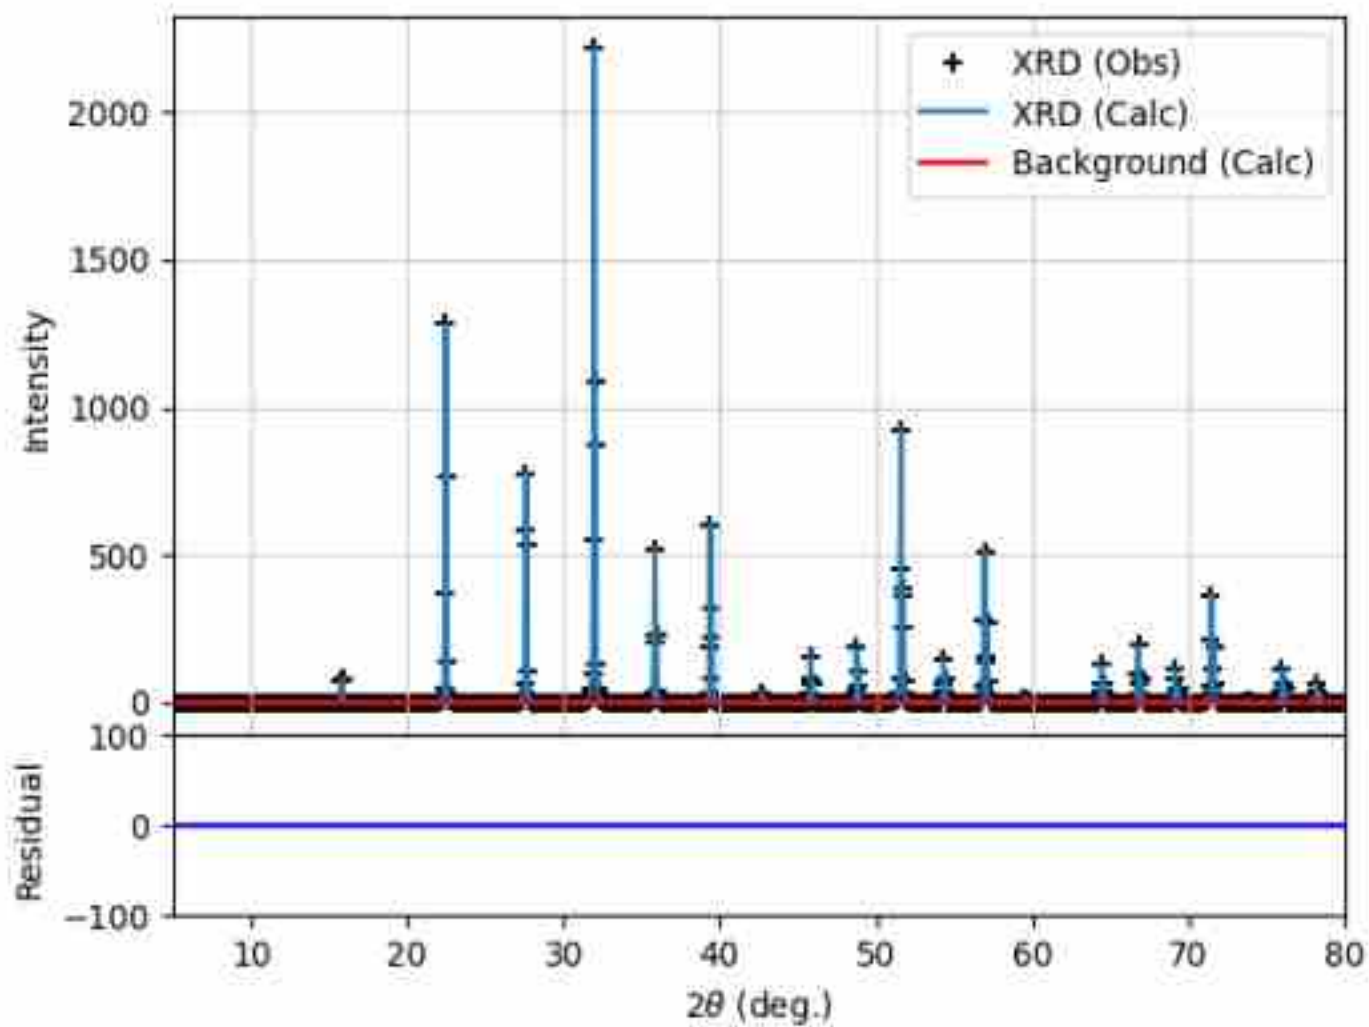

| RMSE before RR | Rwp     | RMSE after RR |
|----------------|---------|---------------|
| 0.019          | 0.00568 | 0.00087       |

# Tm<sub>4</sub>Cd<sub>2</sub>Se<sub>8</sub>

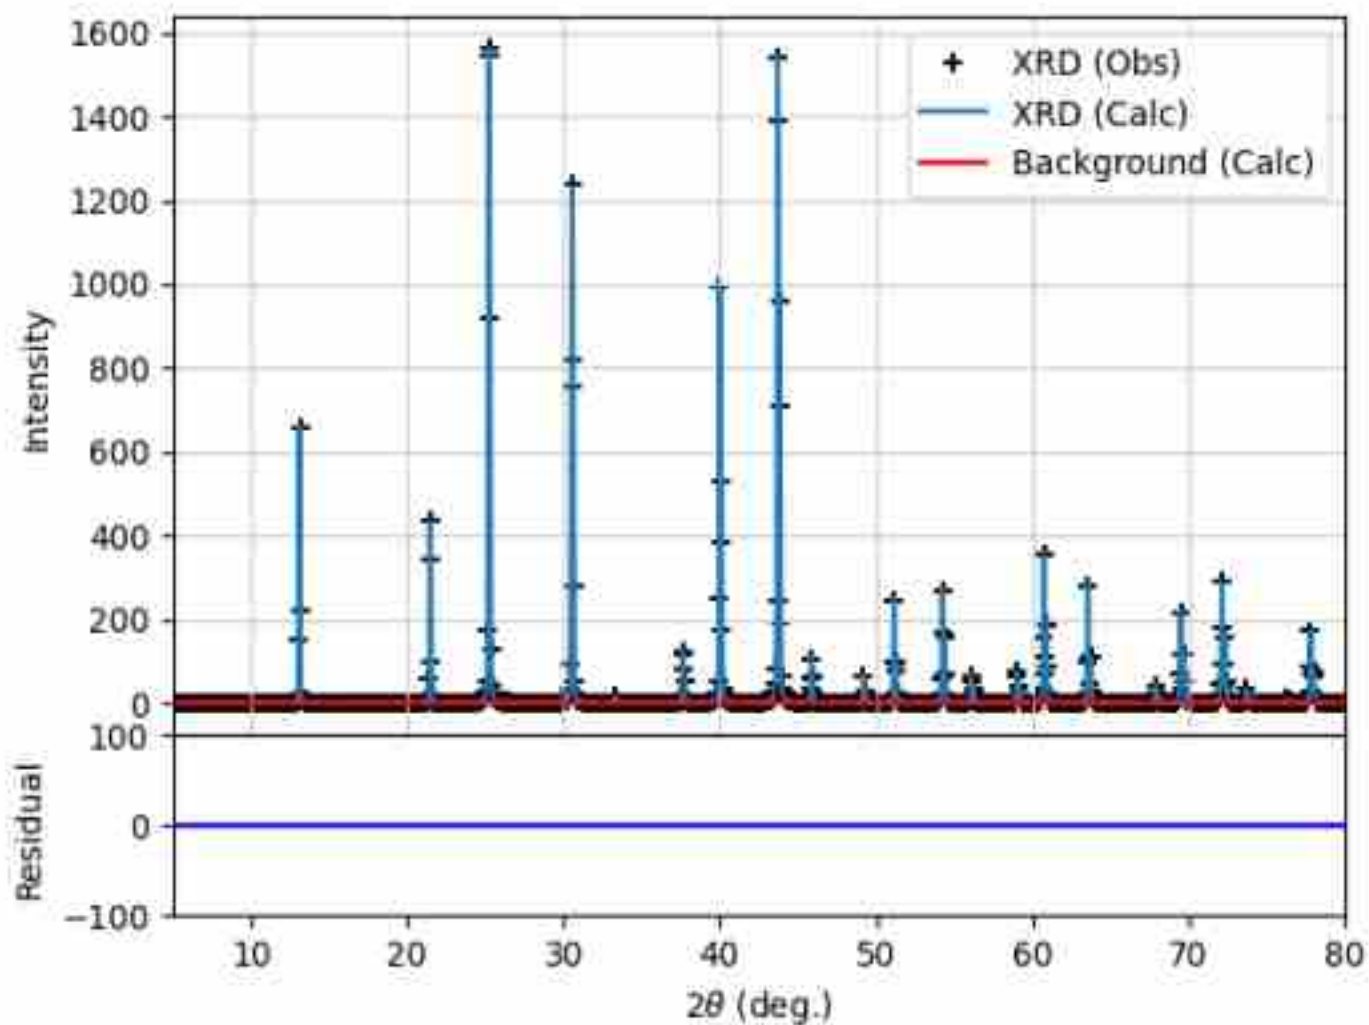

| RMSE before RR | Rwp     | RMSE after RR |
|----------------|---------|---------------|
| 0.019          | 0.00913 | 0.00104       |



# Tm<sub>4</sub>Co<sub>4</sub>O<sub>12</sub>

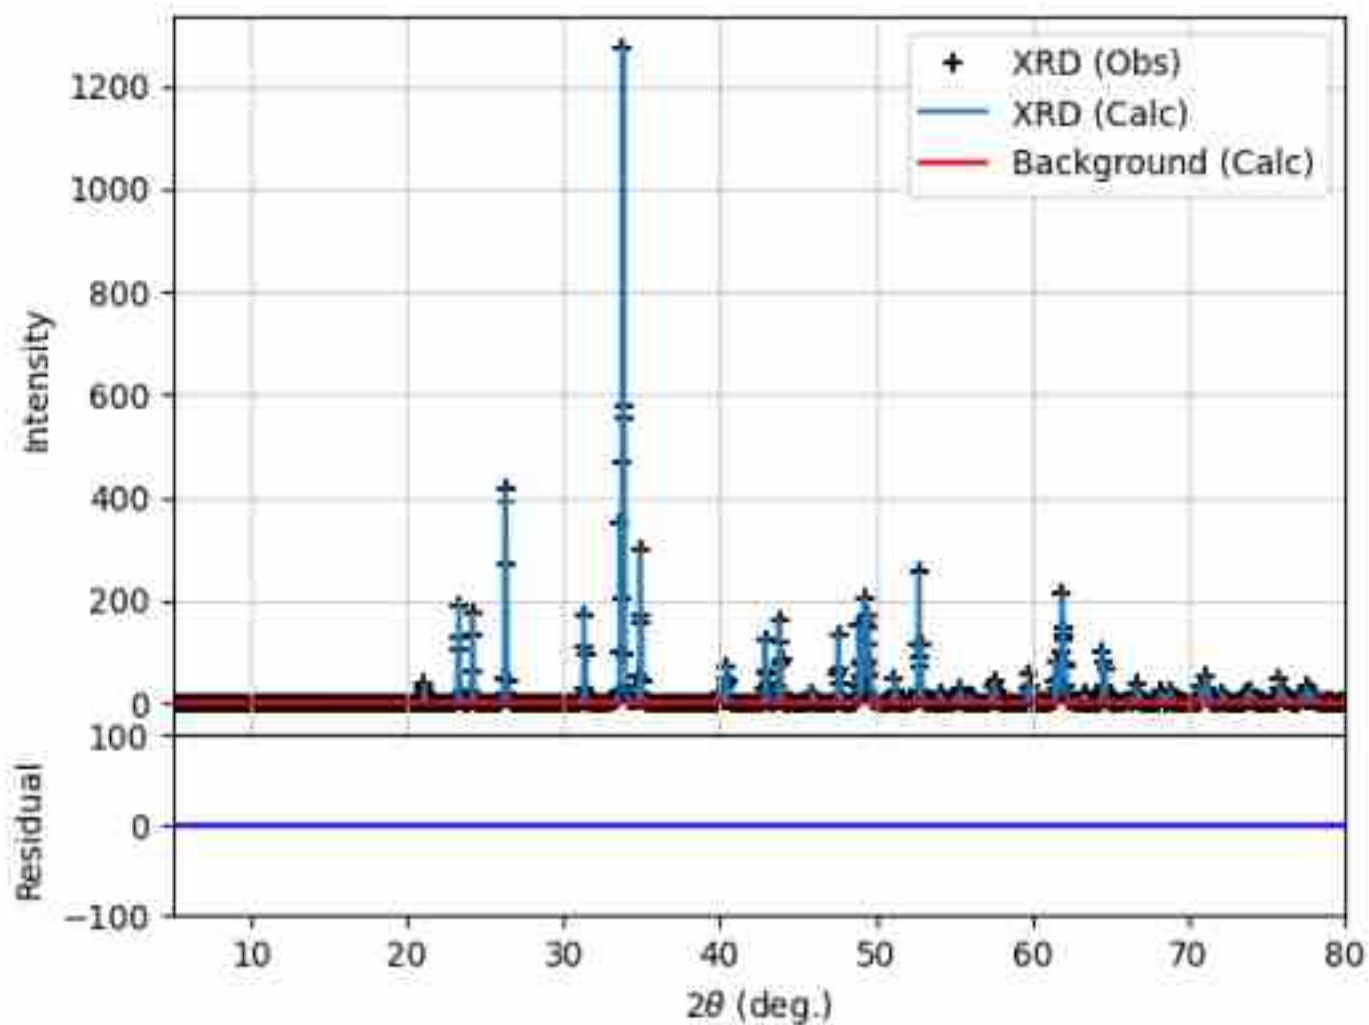

| RMSE before RR | Rwp     | RMSE after RR |
|----------------|---------|---------------|
| 0.019          | 0.00431 | 0.00151       |

# Tm4Re8

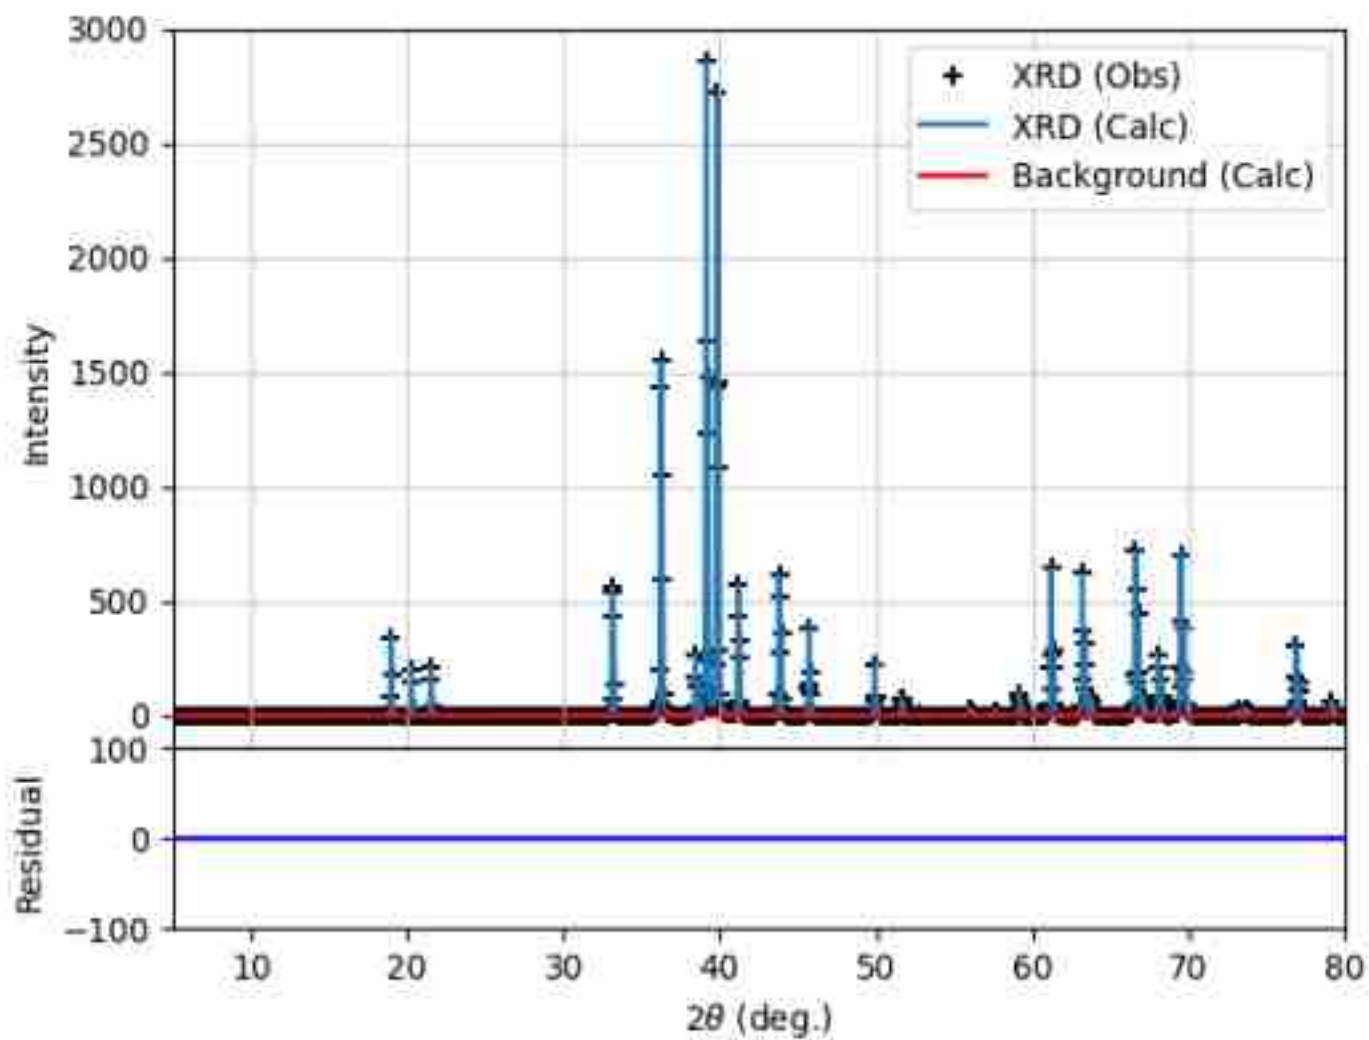

| RMSE before RR | Rwp     | RMSE after RR |
|----------------|---------|---------------|
| 0.019          | 0.00477 | 0.0004        |

# Tm10Tl6

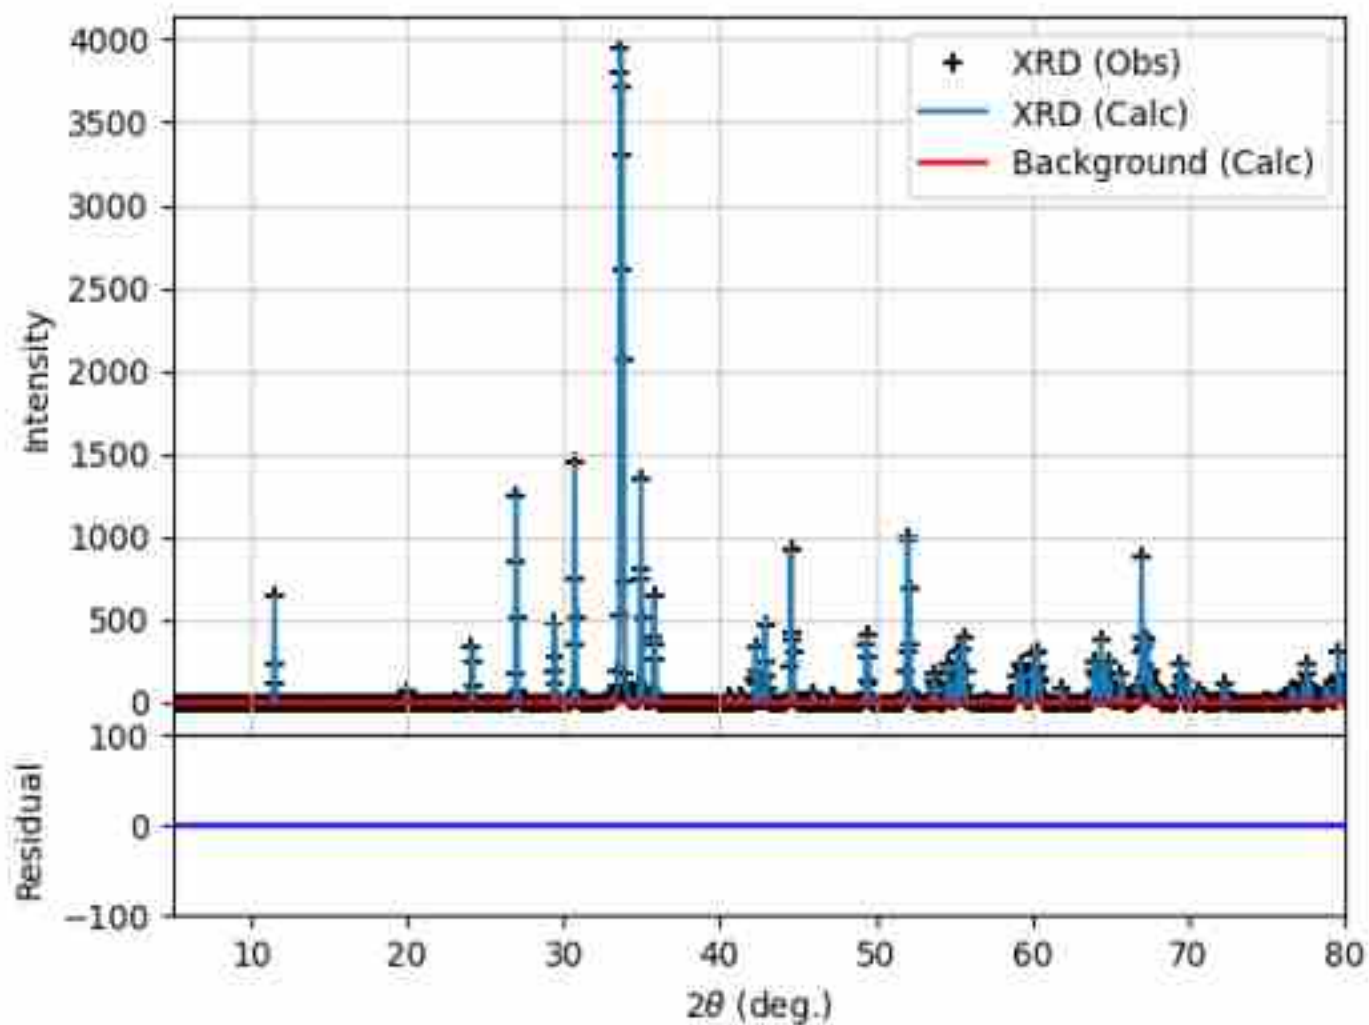

| RMSE before RR | Rwp     | RMSE after RR |
|----------------|---------|---------------|
| 0.019          | 0.00352 | 0.00042       |

# U<sub>2</sub>N<sub>3</sub>

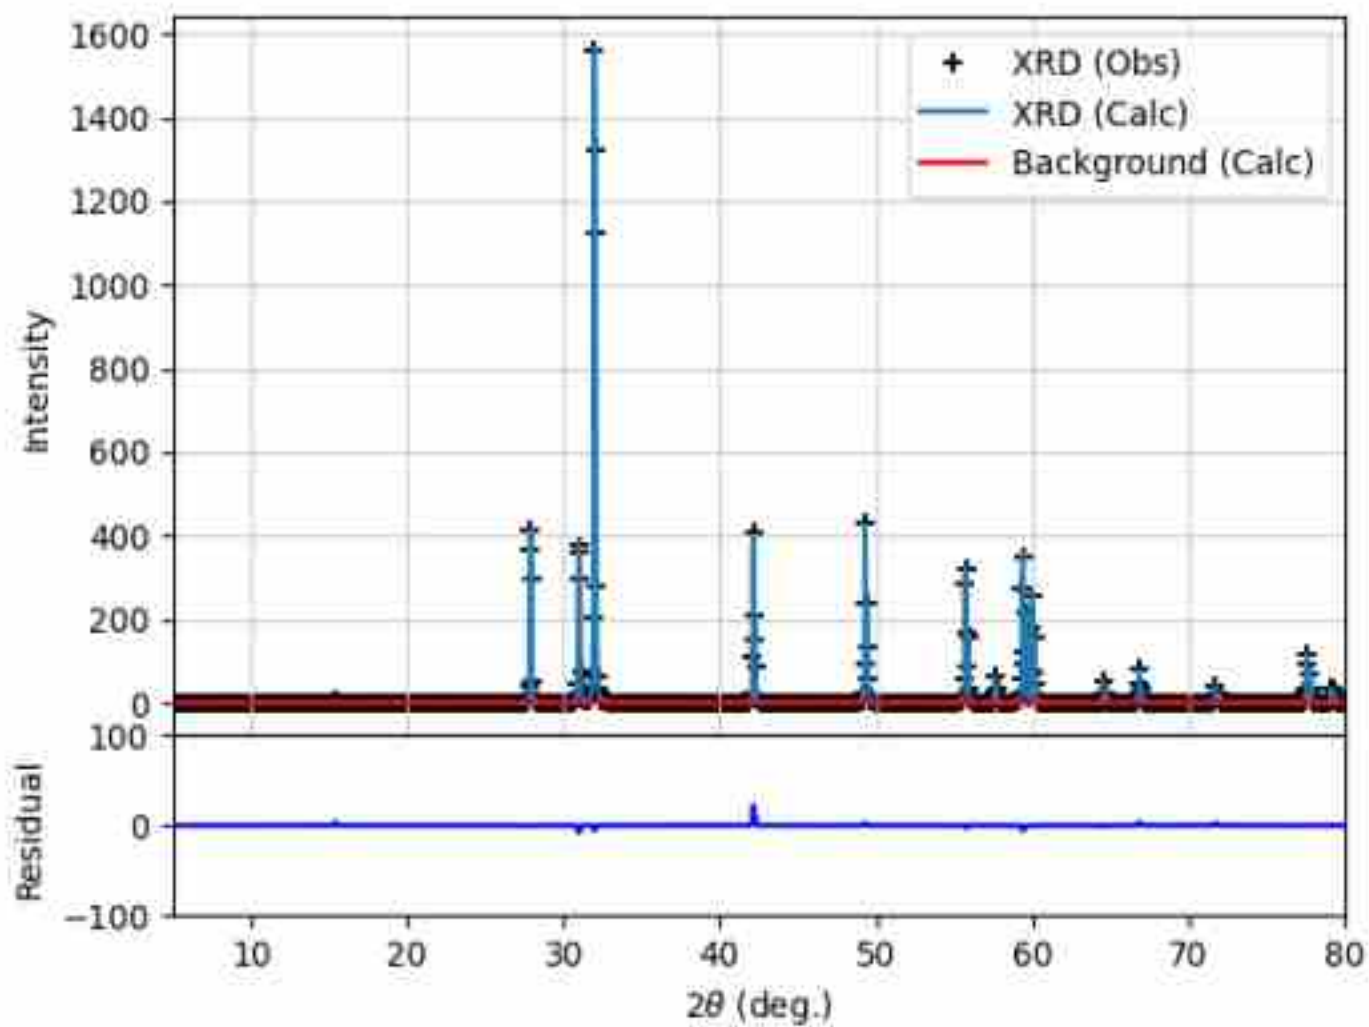

| RMSE before RR | Rwp     | RMSE after RR |
|----------------|---------|---------------|
| 0.019          | 2.37178 | 0.05393       |

# U<sub>2</sub>Ni<sub>4</sub>As<sub>4</sub>

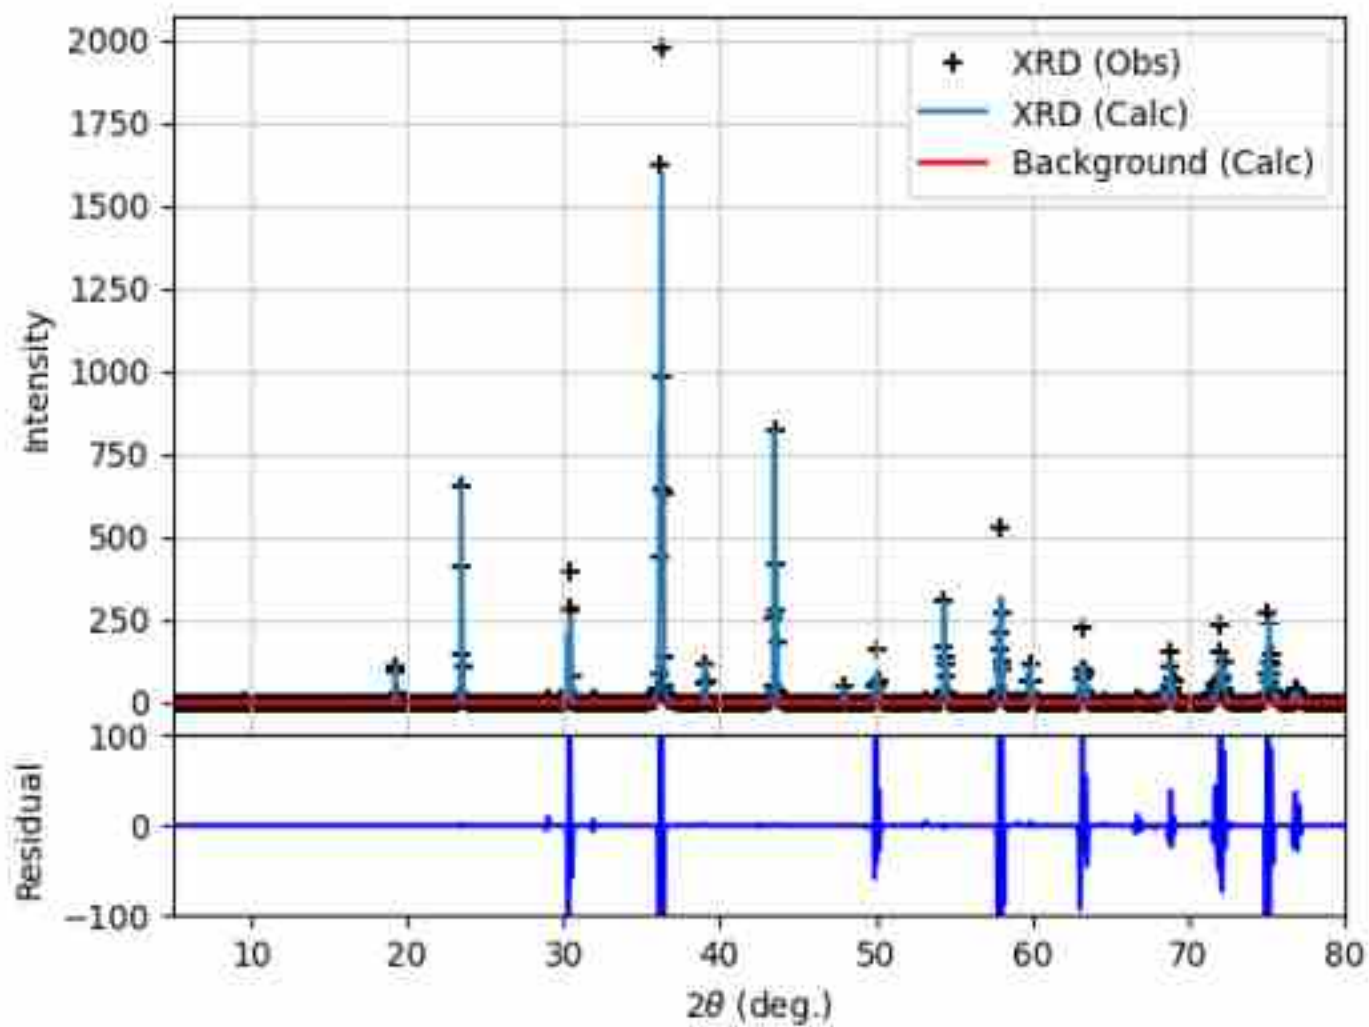

| RMSE before RR | Rwp      | RMSE after RR |
|----------------|----------|---------------|
| 0.019          | 65.71828 | 0.03505       |

# U2Pt1C2

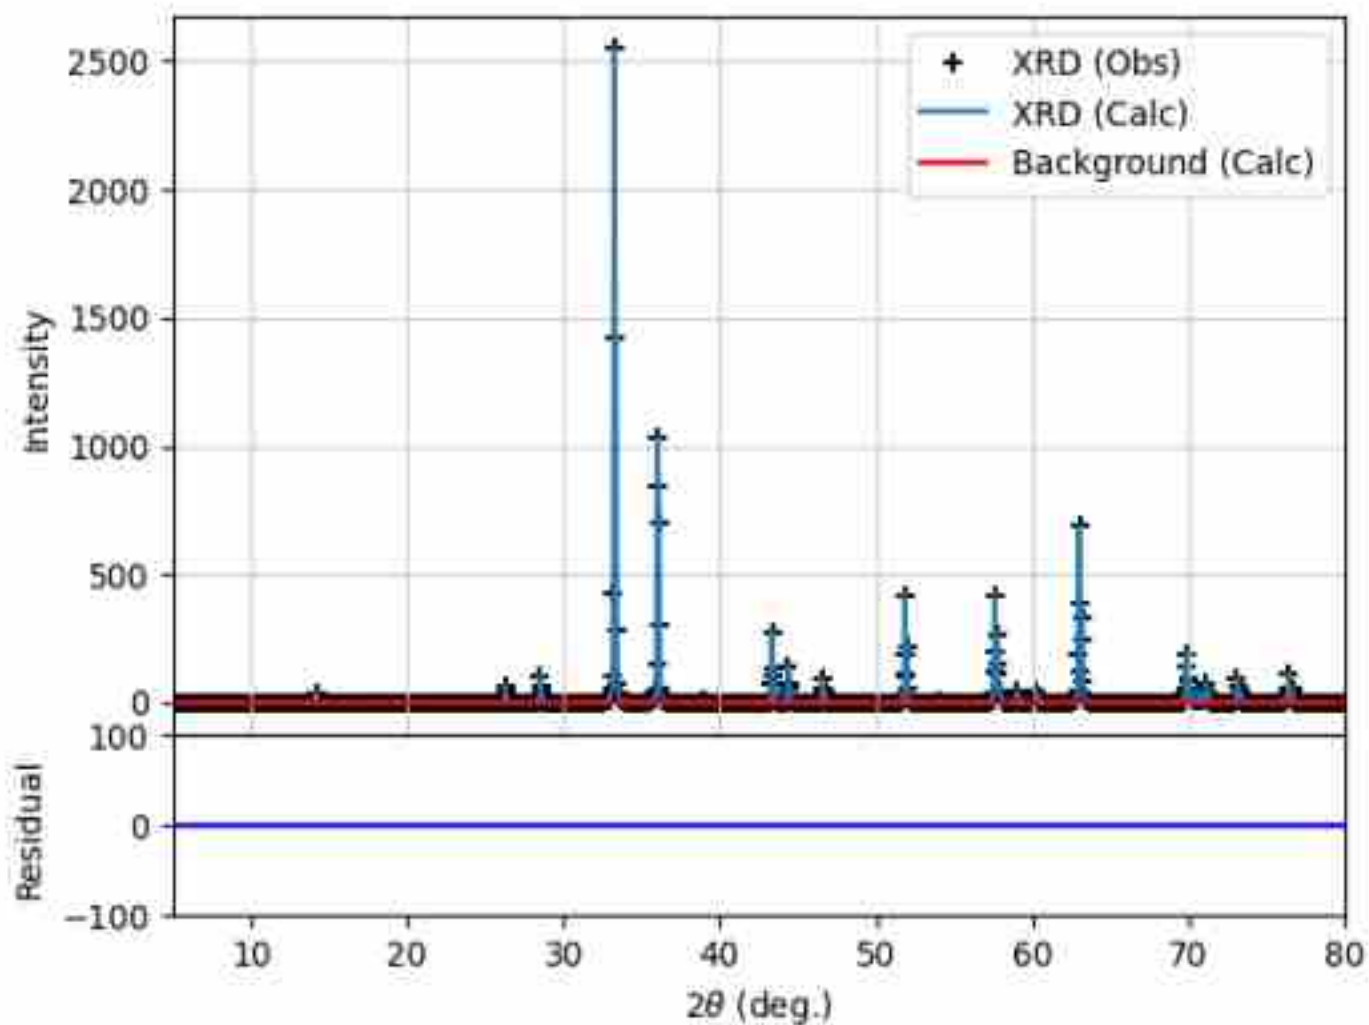

| RMSE before RR | Rwp     | RMSE after RR |
|----------------|---------|---------------|
| 0.019          | 0.00411 | 0.00302       |

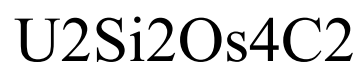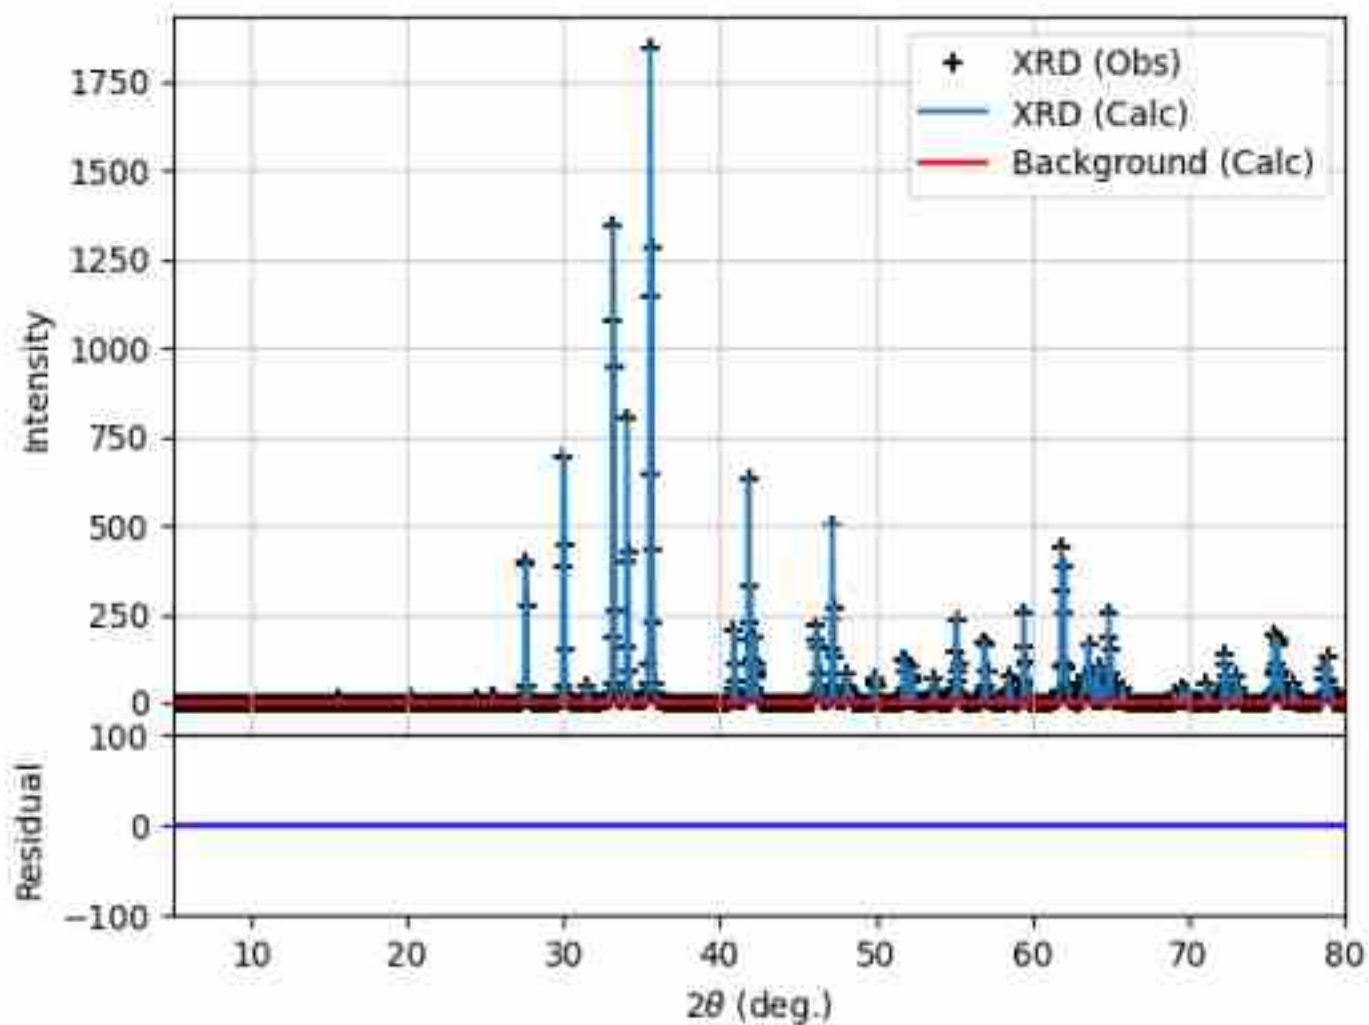

| RMSE before RR | Rwp     | RMSE after RR |
|----------------|---------|---------------|
| 0.019          | 0.00498 | 0.00196       |

# V<sub>2</sub>Bi<sub>2</sub>O<sub>8</sub>

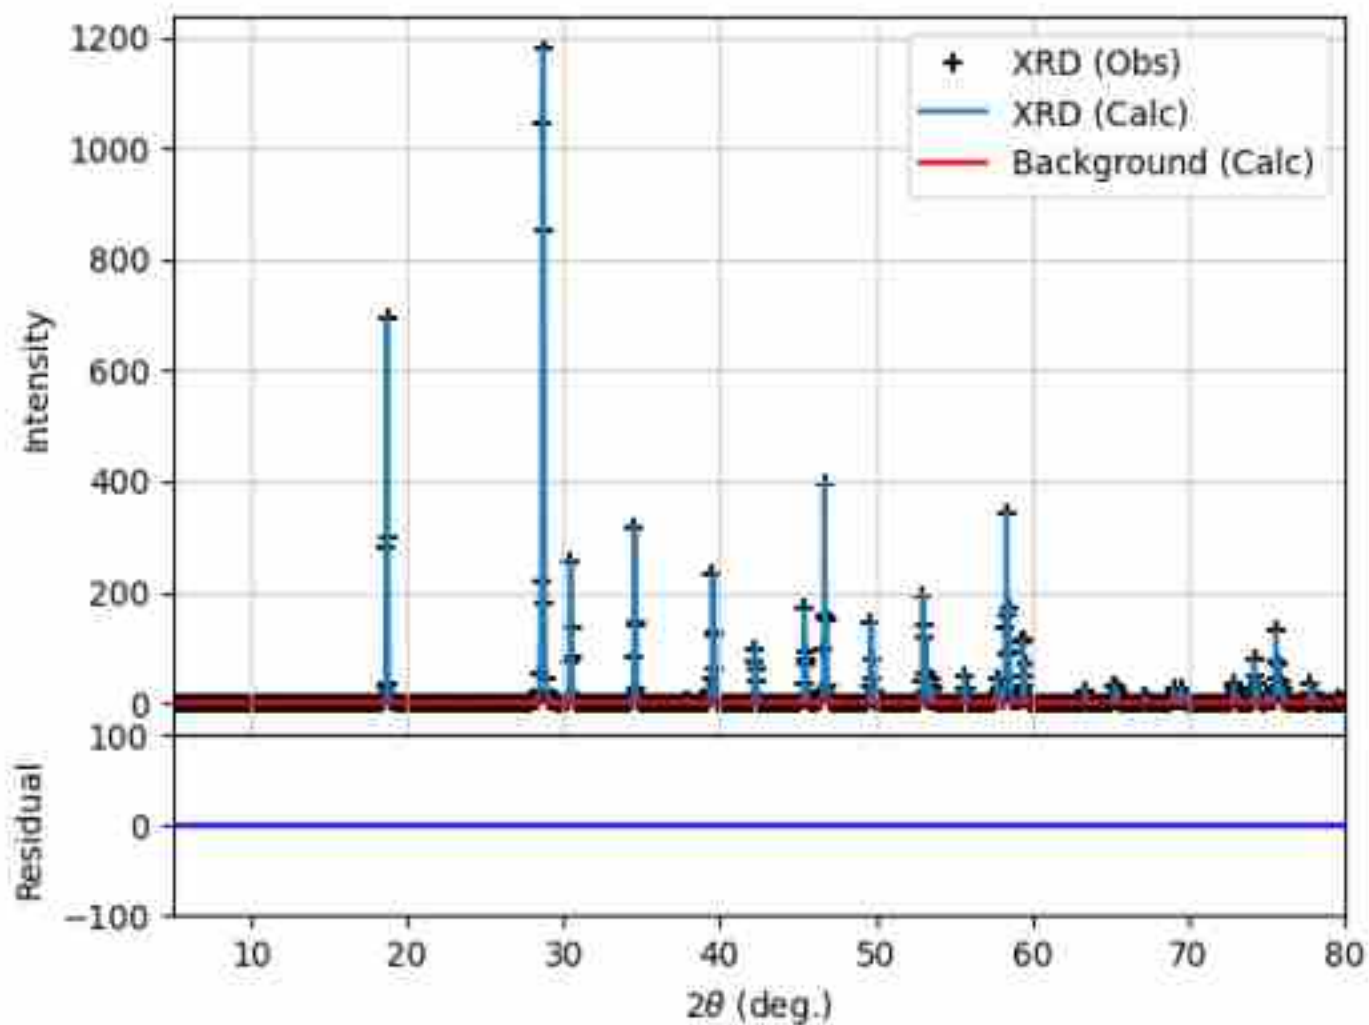

| RMSE before RR | Rwp     | RMSE after RR |
|----------------|---------|---------------|
| 0.019          | 0.00368 | 0.00156       |



# V4Co4As4

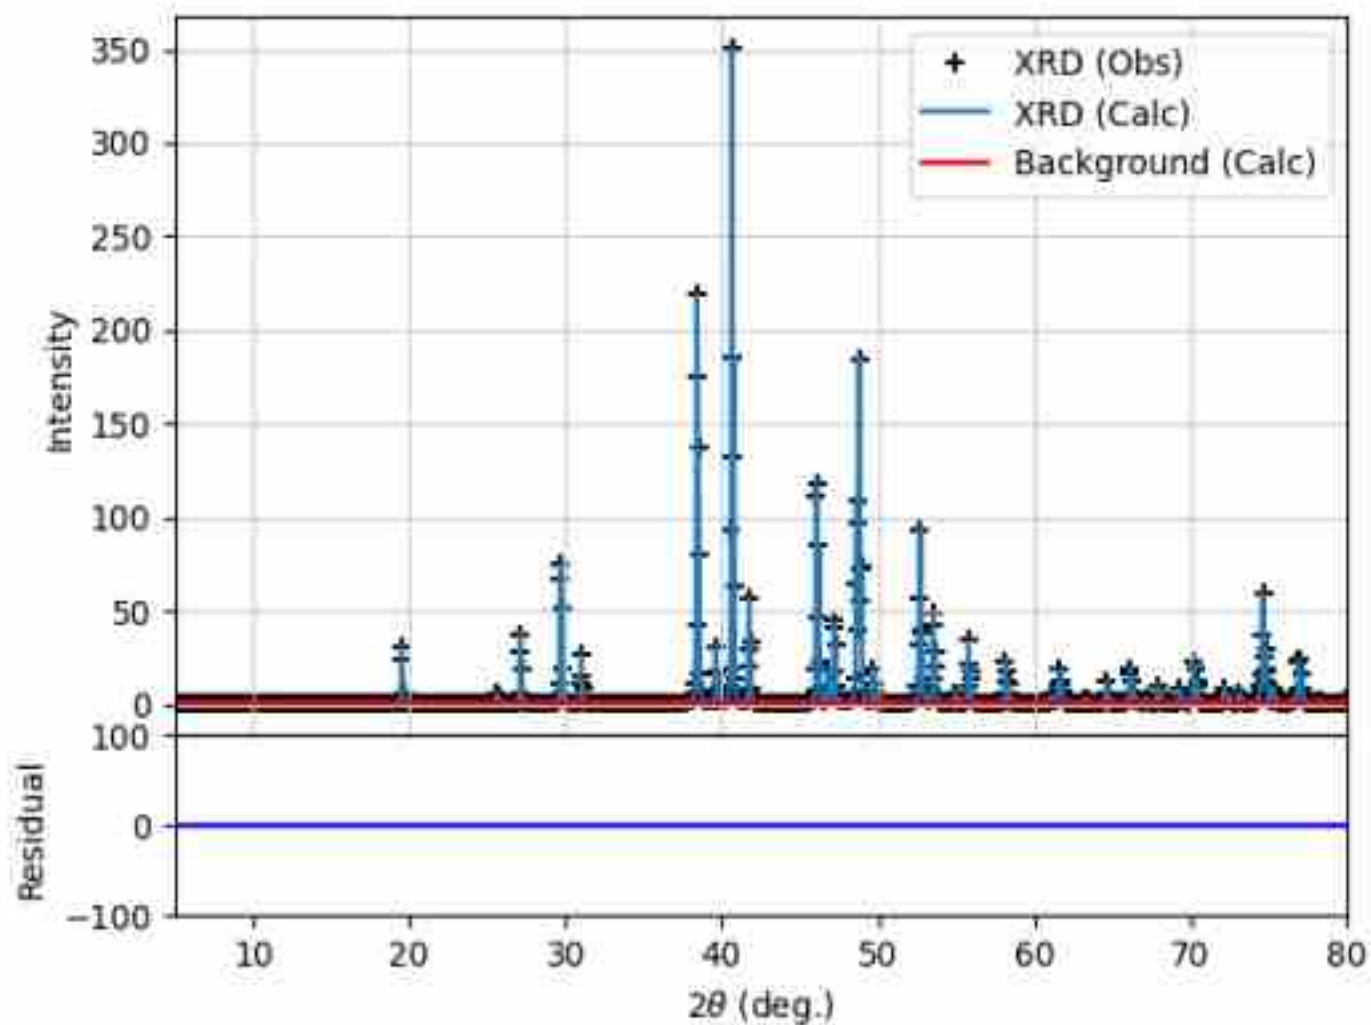

| RMSE before RR | Rwp     | RMSE after RR |
|----------------|---------|---------------|
| 0.019          | 0.00384 | 0.00045       |

# V6O10F2

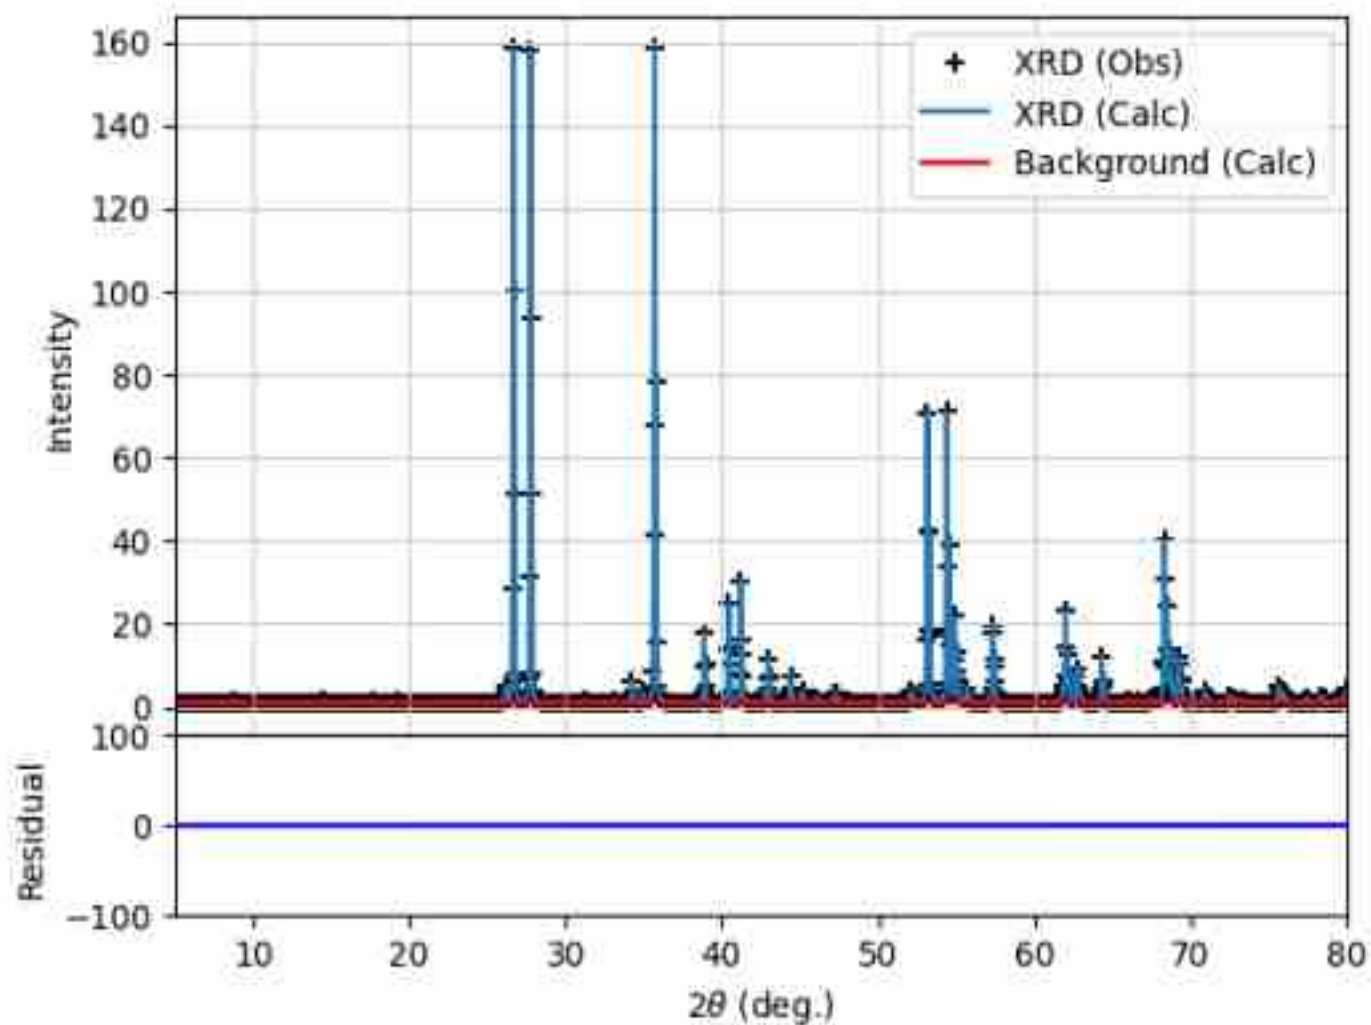

| RMSE before RR | Rwp     | RMSE after RR |
|----------------|---------|---------------|
| 0.019          | 0.40043 | 0.01151       |

# Y1Sc1N2

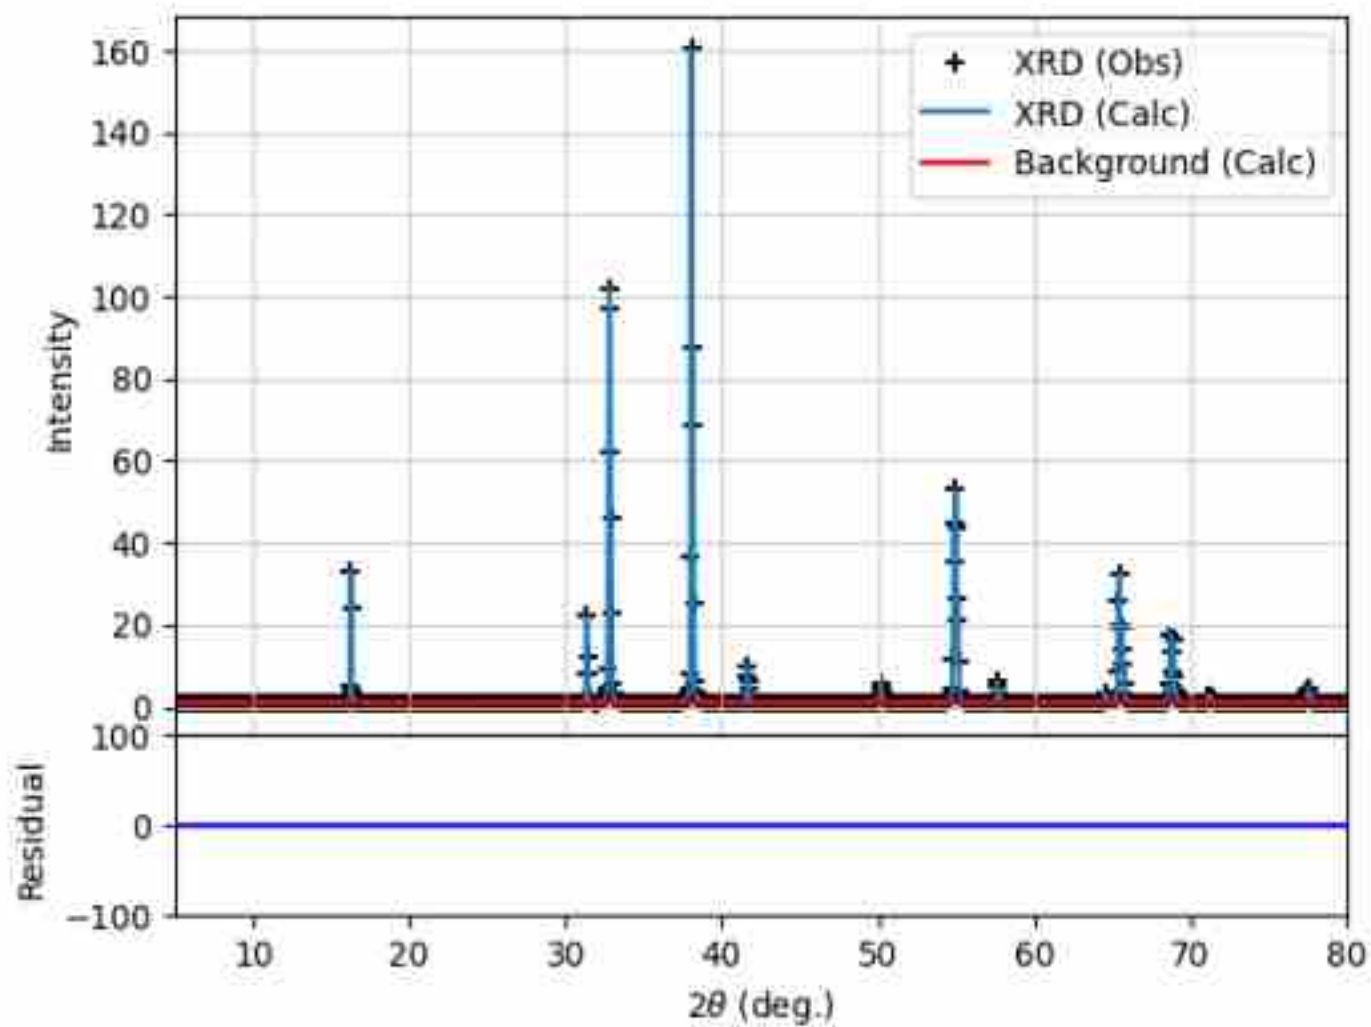

| RMSE before RR | Rwp     | RMSE after RR |
|----------------|---------|---------------|
| 0.019          | 0.00255 | 0.00061       |

# Y2Al2O6

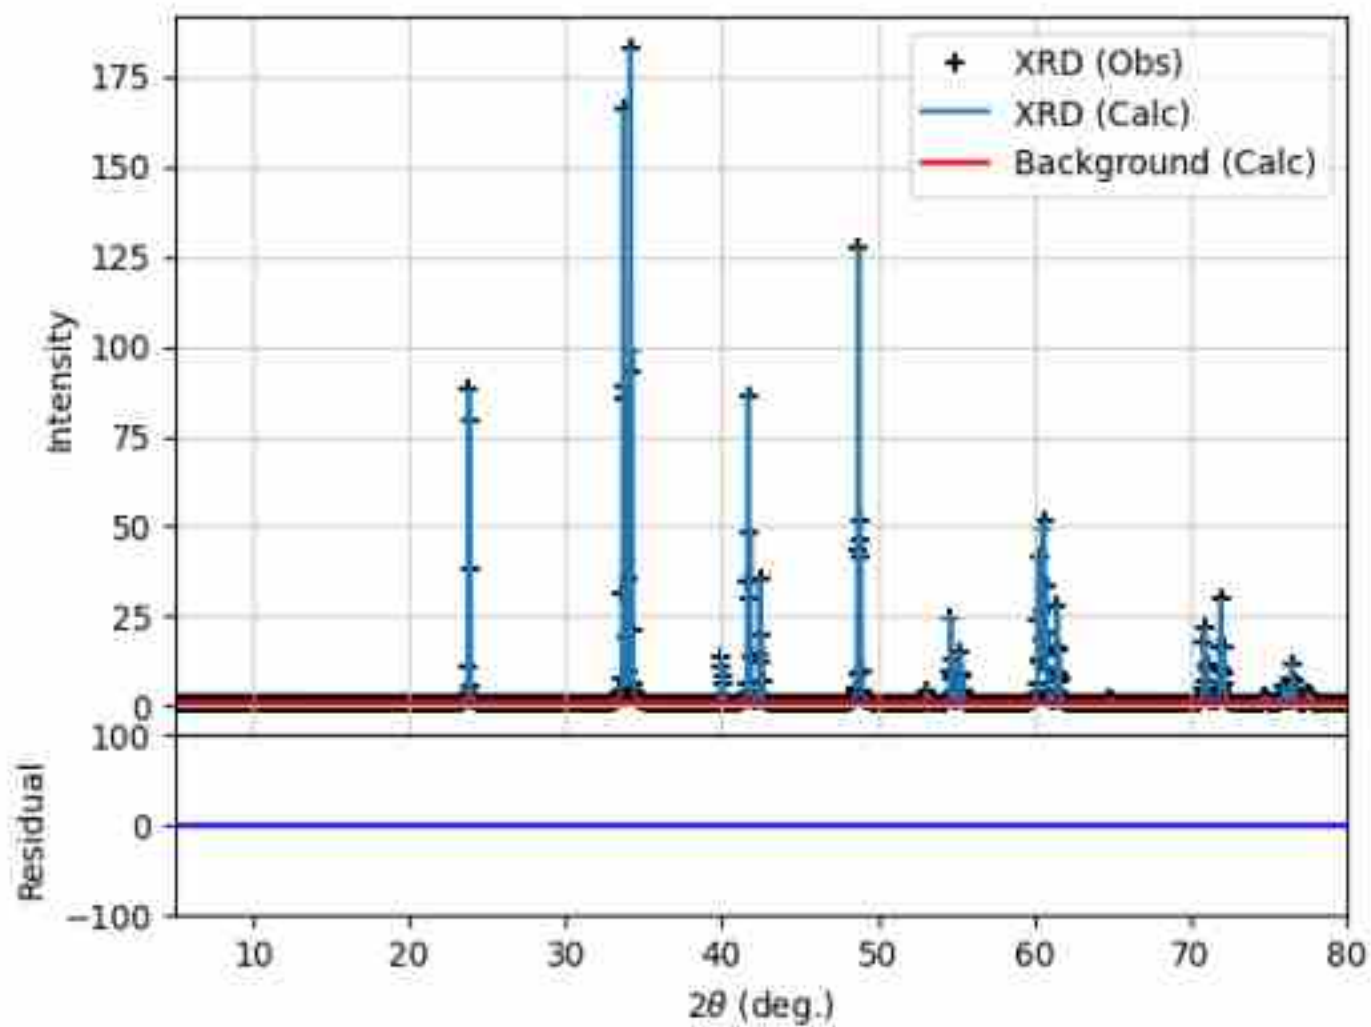

| RMSE before RR | Rwp     | RMSE after RR |
|----------------|---------|---------------|
| 0.019          | 0.00355 | 0.00139       |

# Y<sub>2</sub>Au<sub>2</sub>O<sub>4</sub>

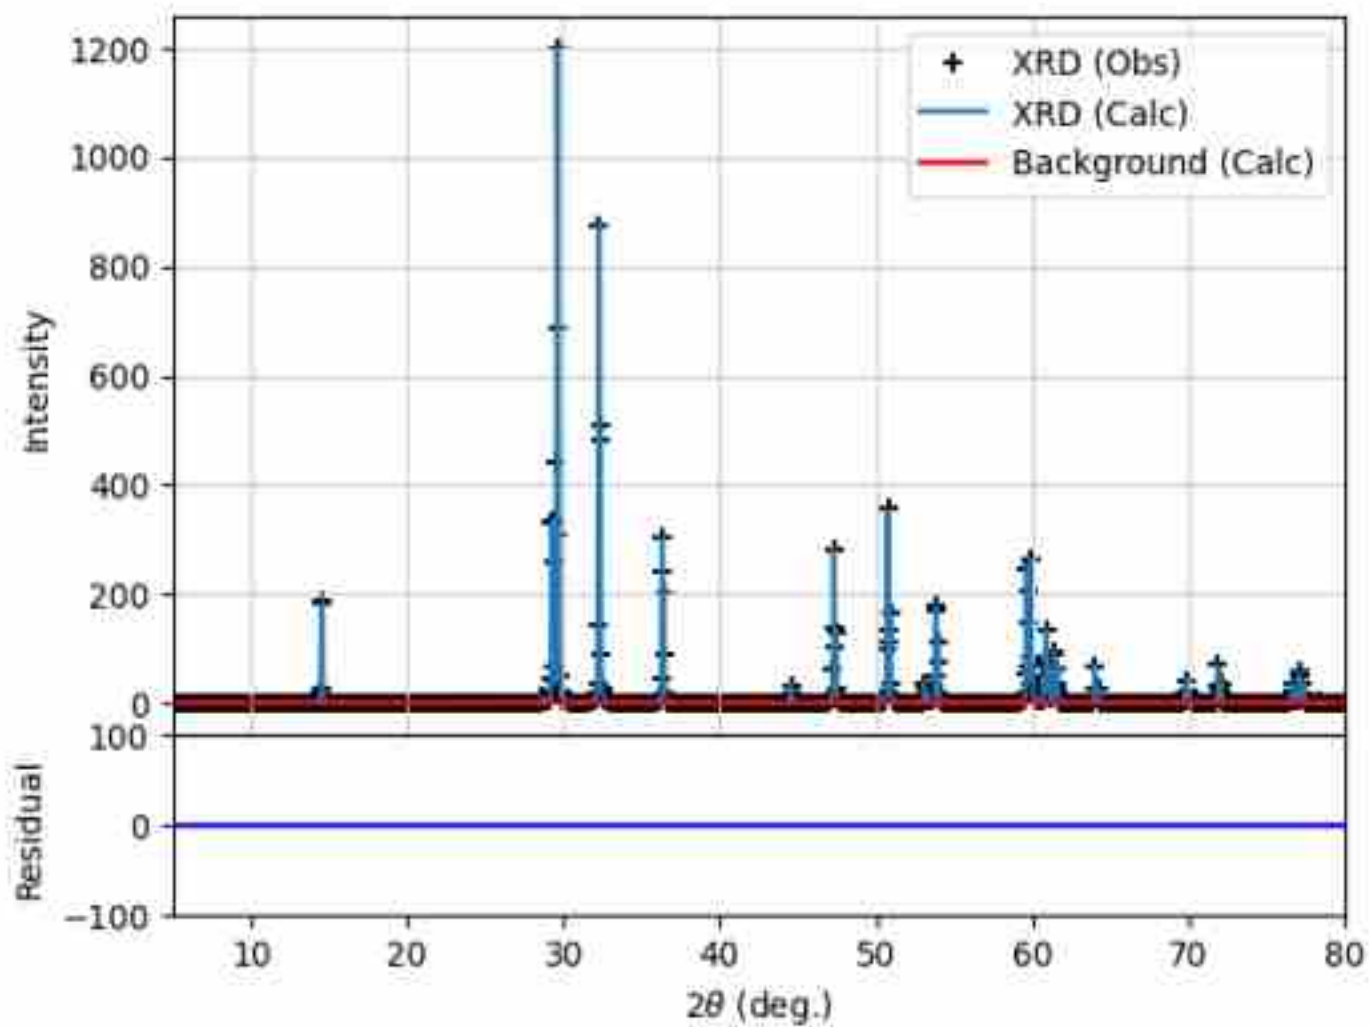

| RMSE before RR | Rwp   | RMSE after RR |
|----------------|-------|---------------|
| 0.019          | 0.004 | 0.00109       |

# Y2Cr1H6

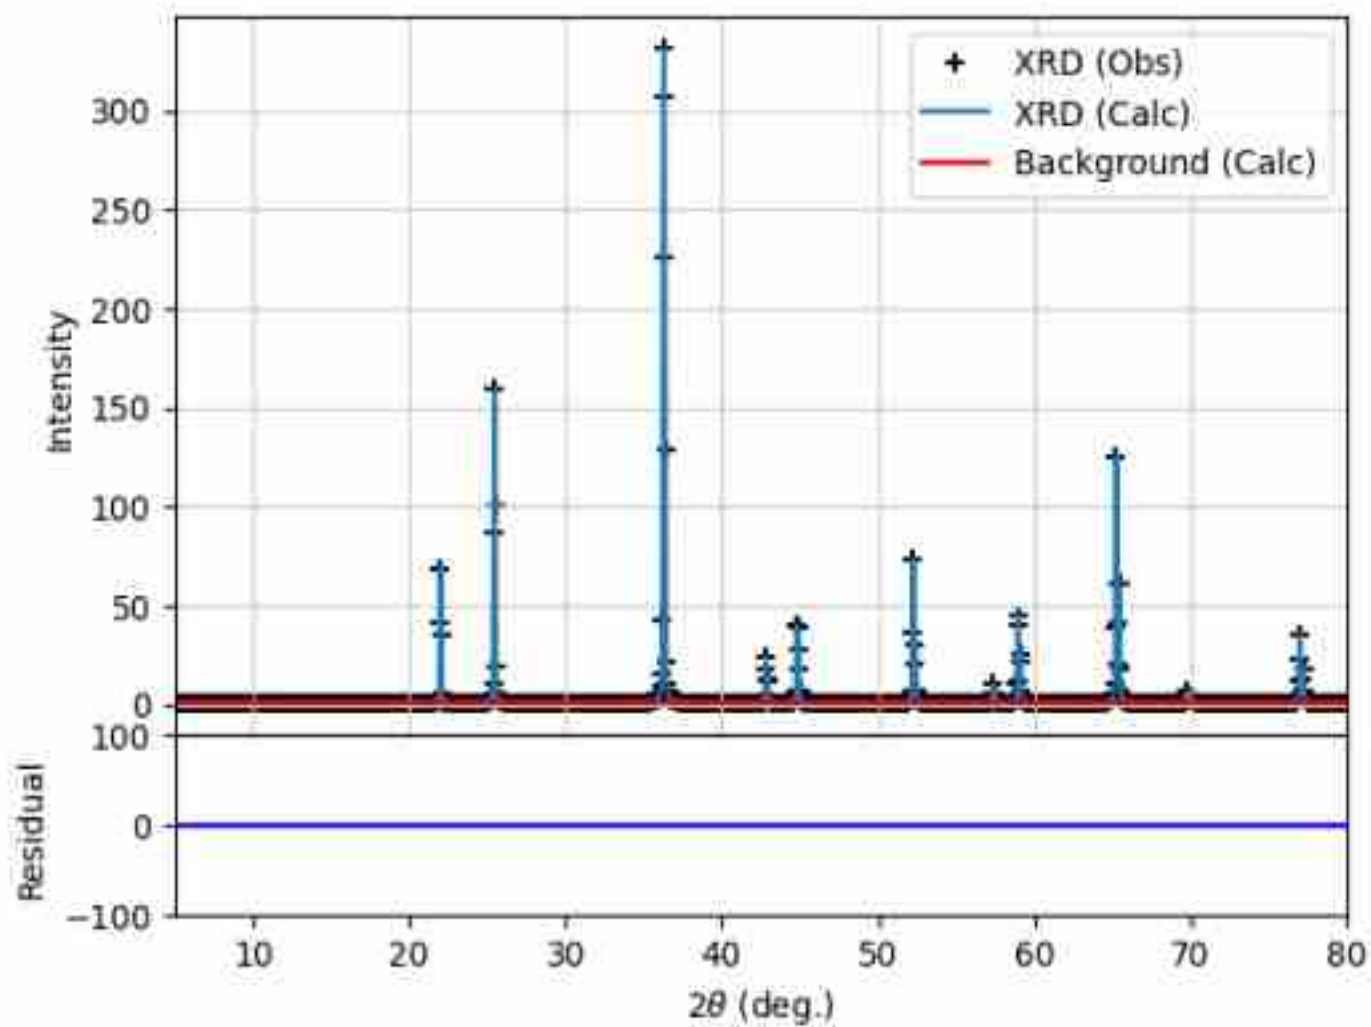

| RMSE before RR | Rwp     | RMSE after RR |
|----------------|---------|---------------|
| 0.019          | 0.02889 | 0.0246        |

# Y<sub>3</sub>Ag<sub>4</sub>Ge<sub>4</sub>

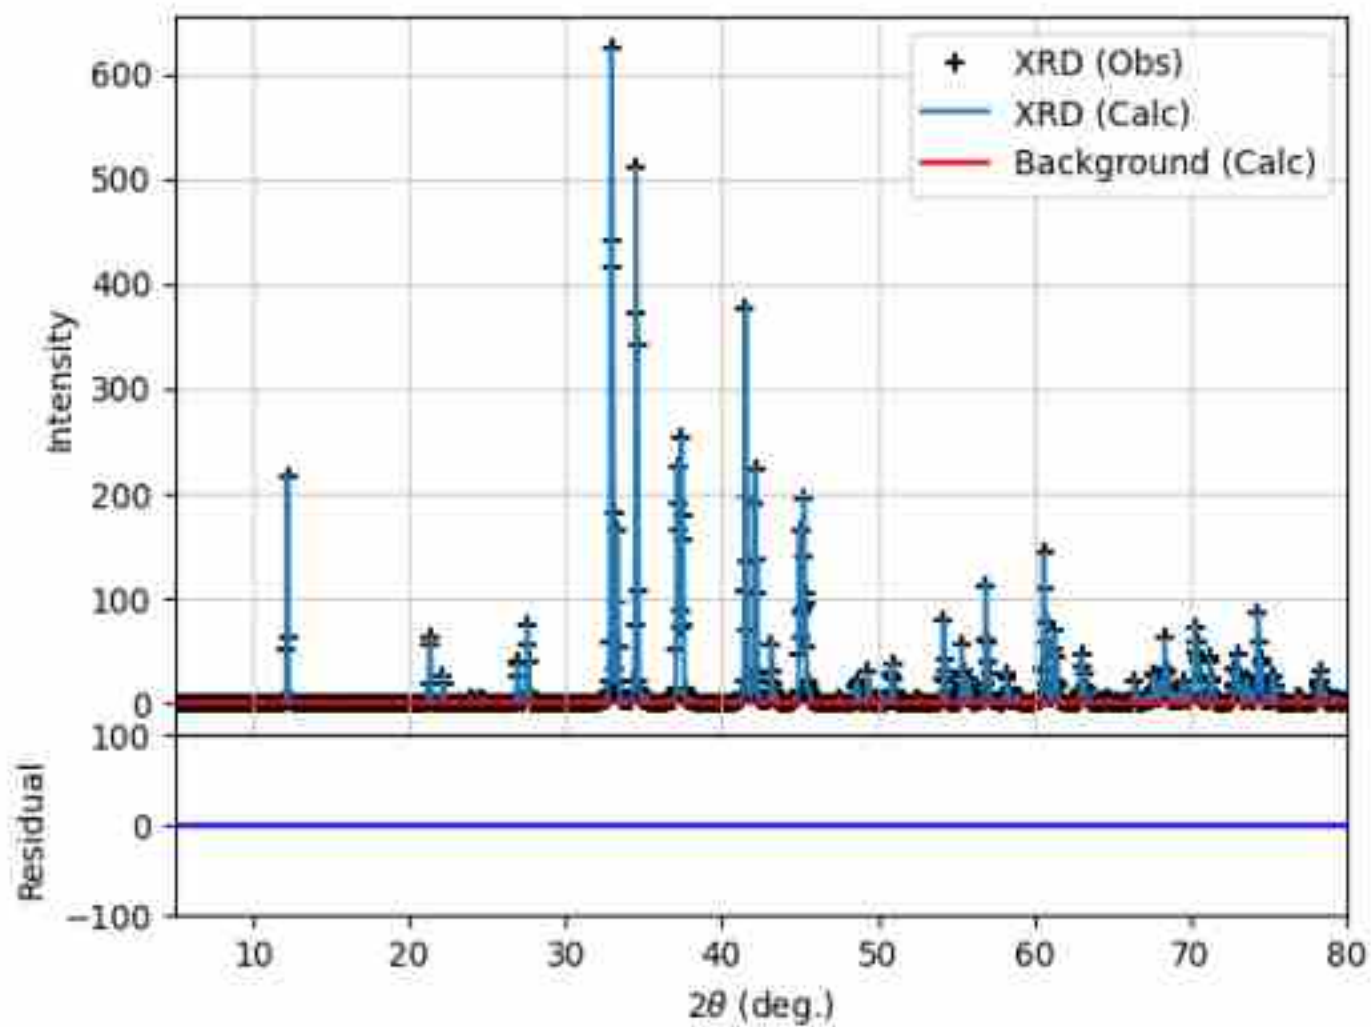

| RMSE before RR | Rwp     | RMSE after RR |
|----------------|---------|---------------|
| 0.019          | 0.00346 | 0.00028       |

# Y3Co9

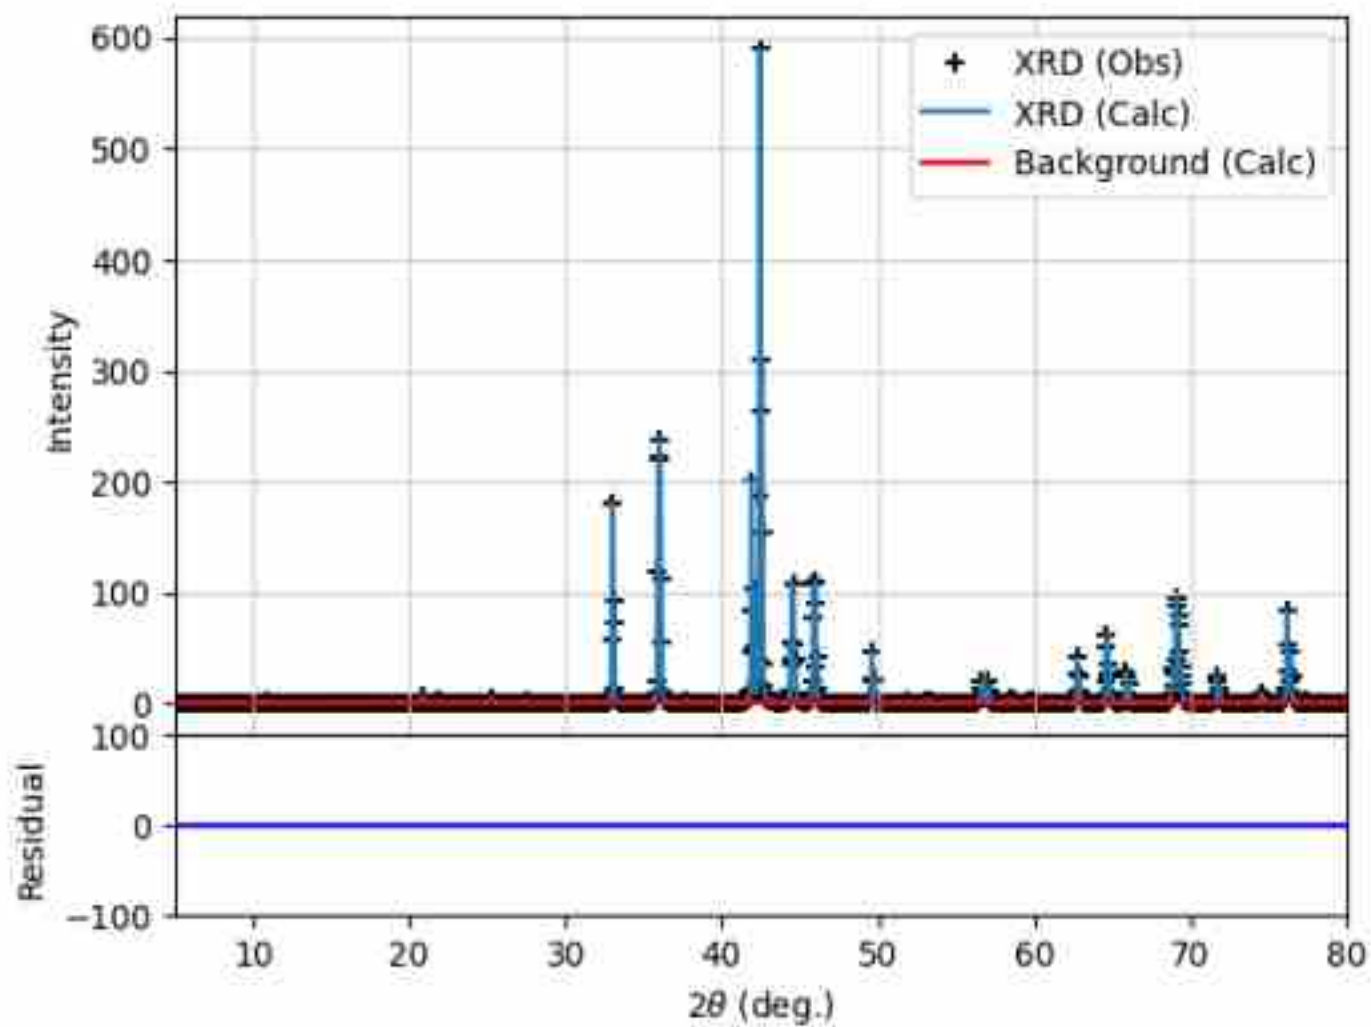

| RMSE before RR | Rwp     | RMSE after RR |
|----------------|---------|---------------|
| 0.019          | 0.00385 | 0.00073       |



# Y8S8O4

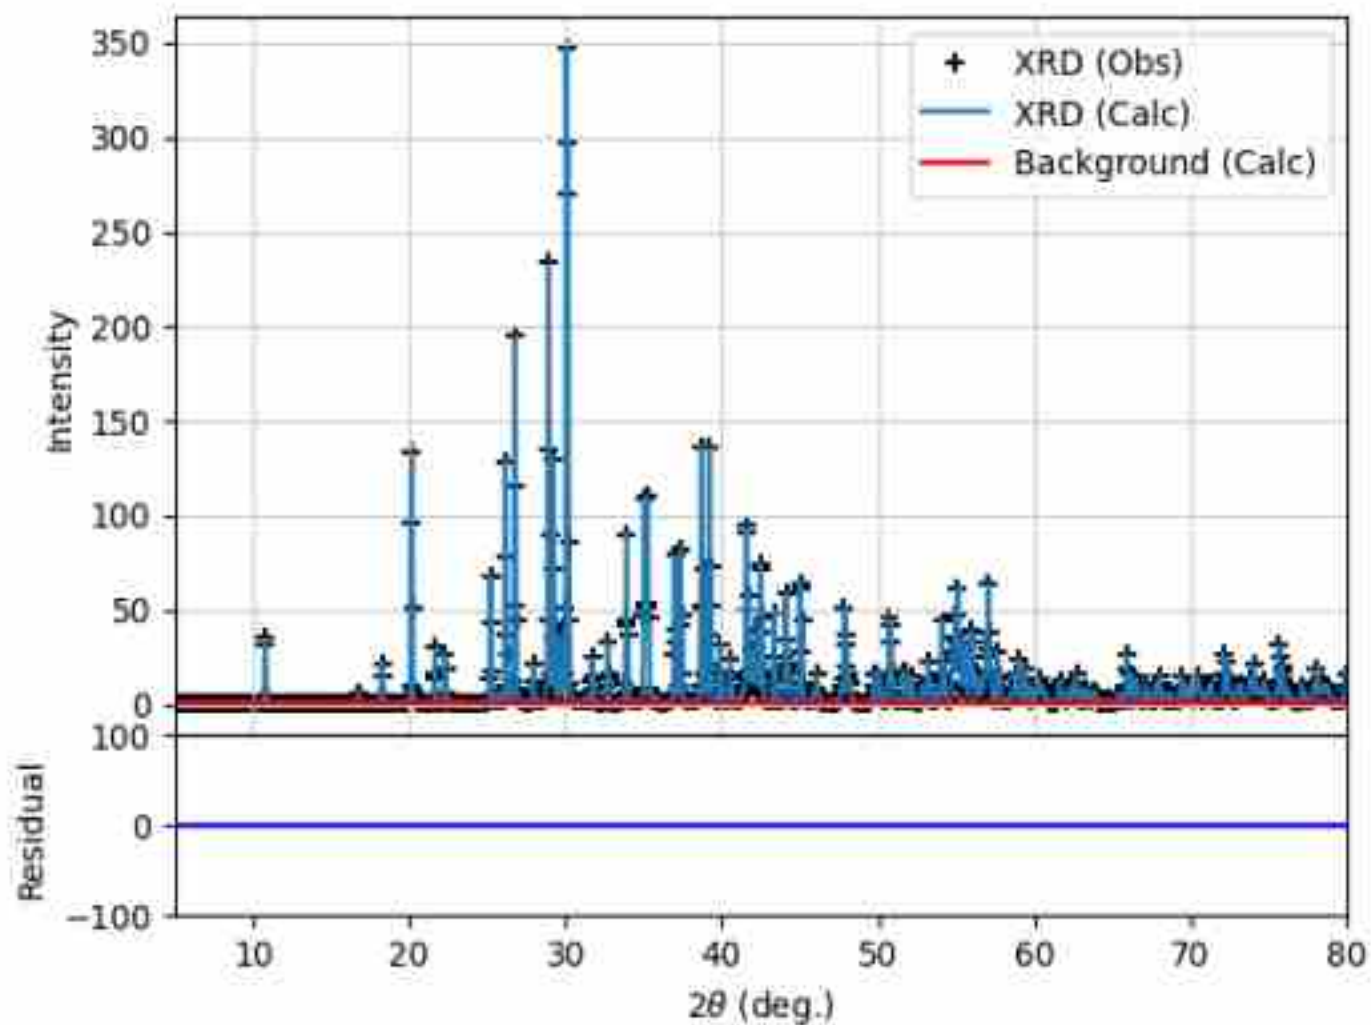

| RMSE before RR | Rwp    | RMSE after RR |
|----------------|--------|---------------|
| 0.019          | 0.0035 | 0.00055       |

# Y12Ru4

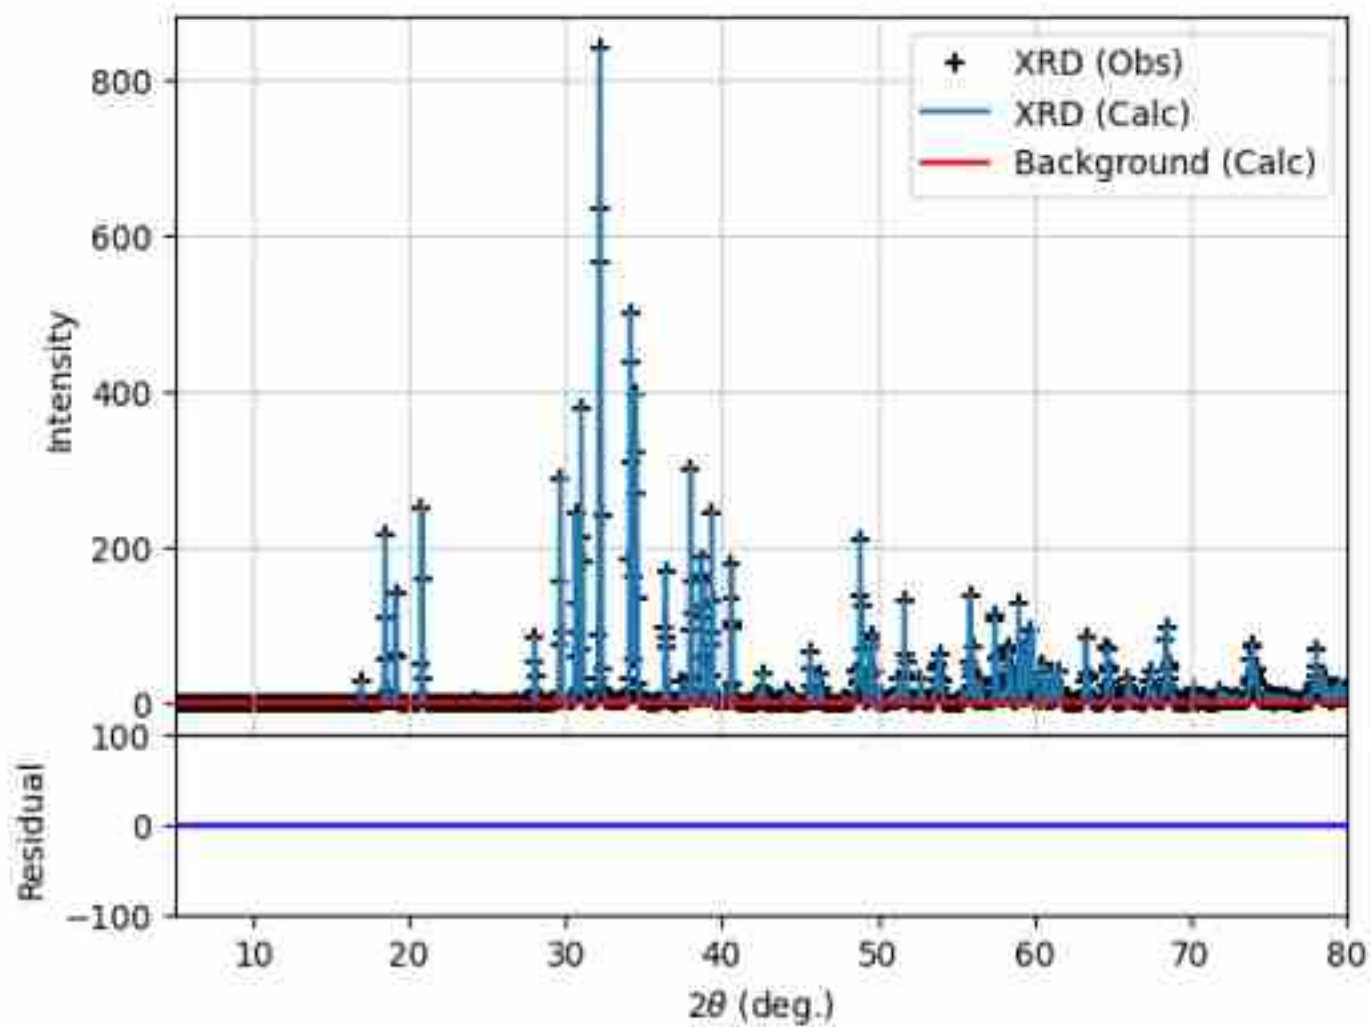

| RMSE before RR | Rwp     | RMSE after RR |
|----------------|---------|---------------|
| 0.019          | 0.00395 | 0.00025       |

# Yb1Cu4Ag1

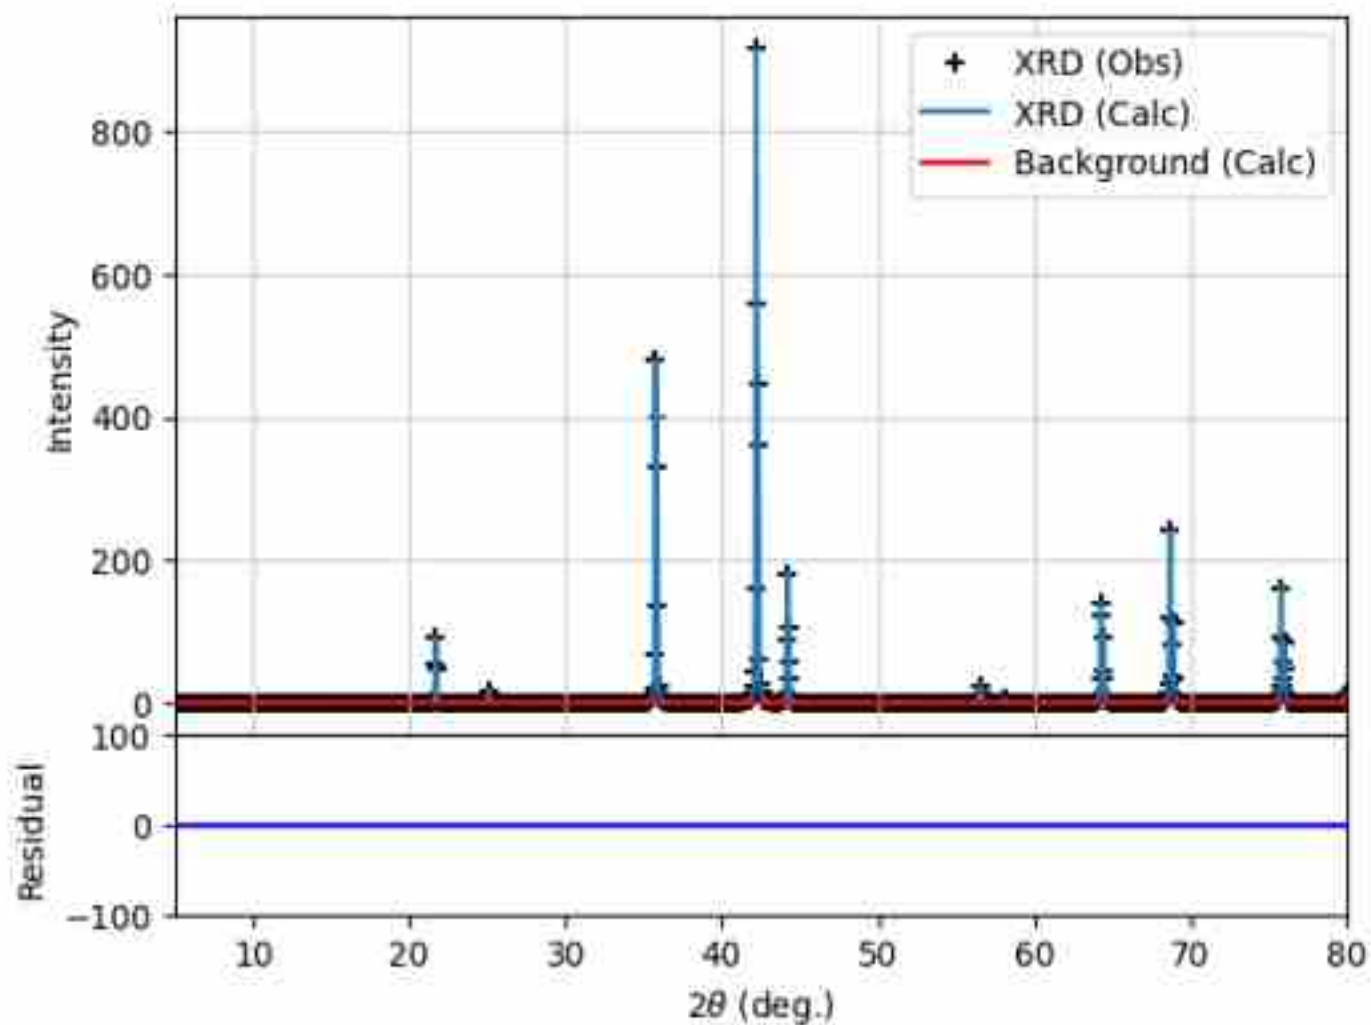

| RMSE before RR | Rwp     | RMSE after RR |
|----------------|---------|---------------|
| 0.019          | 0.11064 | 0.00509       |

# Yb1Ho2Se4

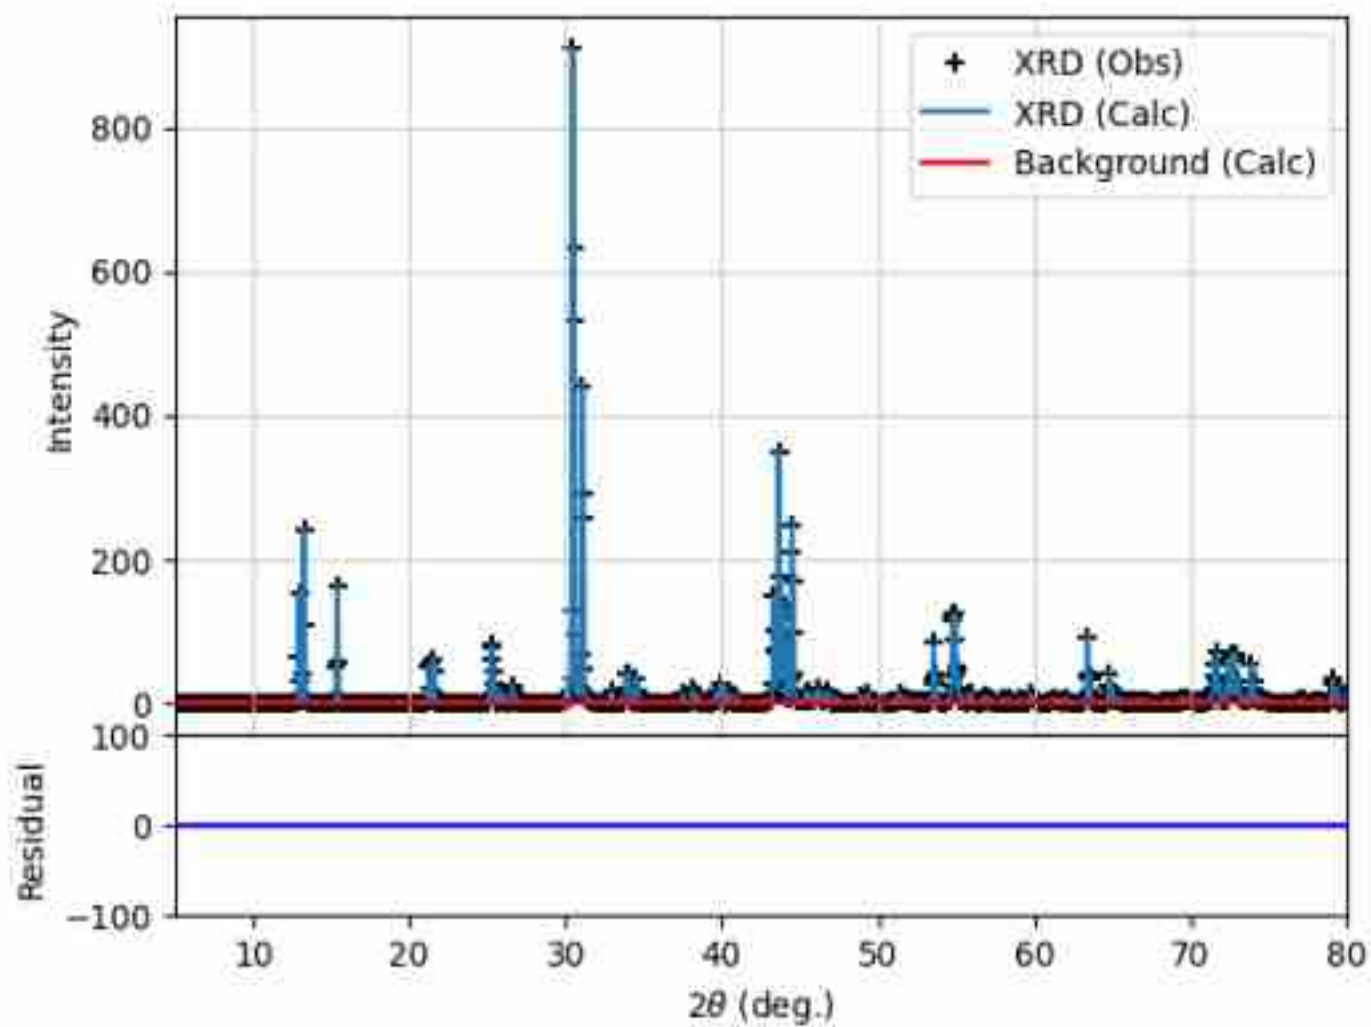

| RMSE before RR | Rwp     | RMSE after RR |
|----------------|---------|---------------|
| 0.019          | 0.00375 | 0.00026       |

# Yb2Sm4S8

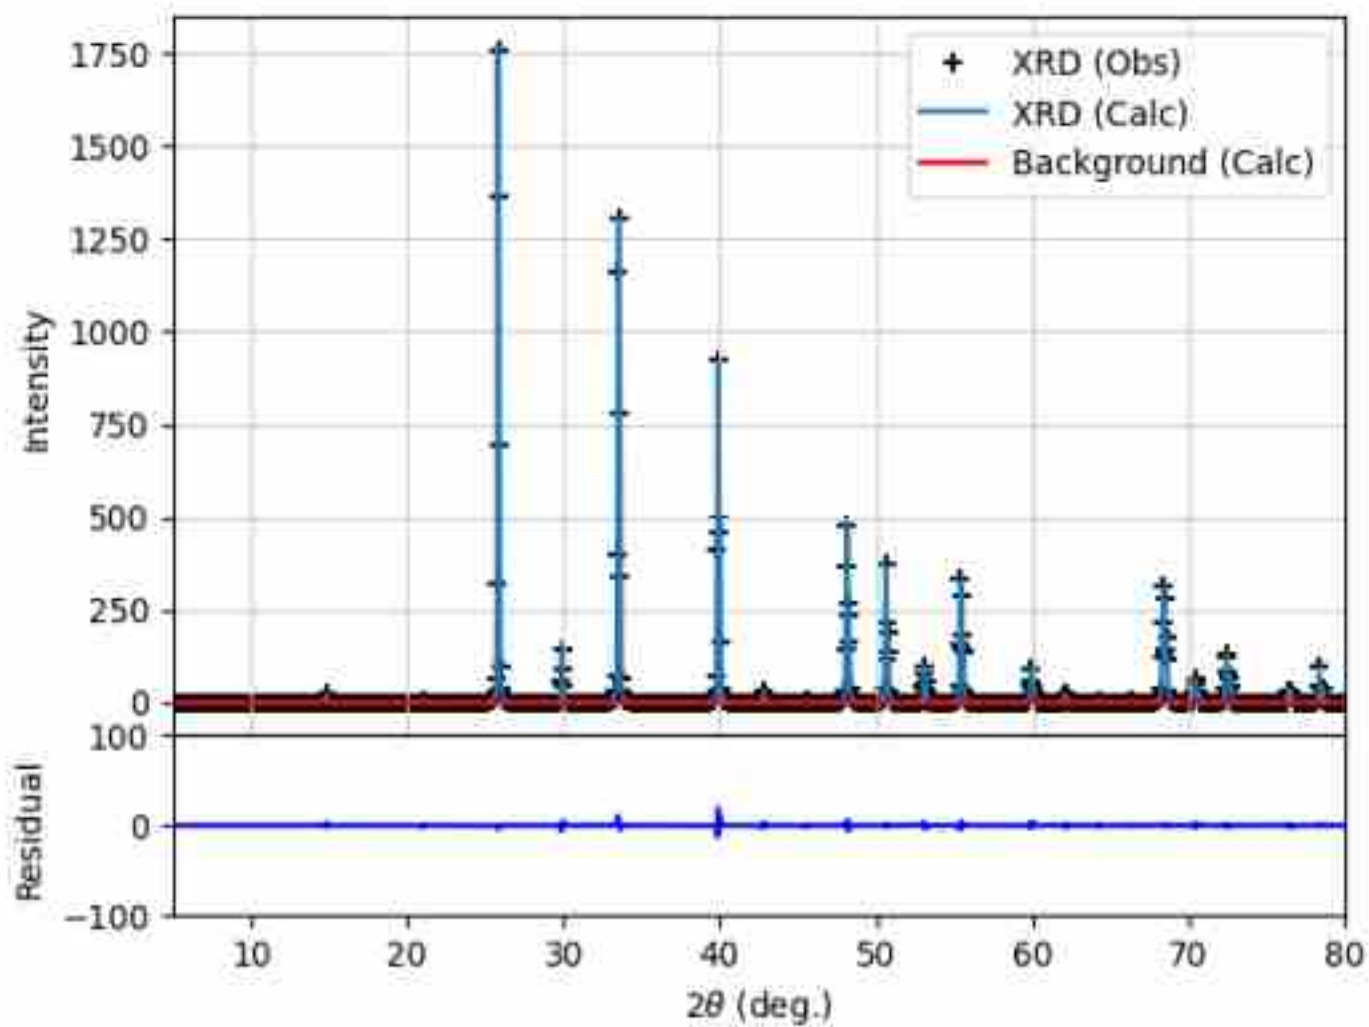

| RMSE before RR | Rwp     | RMSE after RR |
|----------------|---------|---------------|
| 0.019          | 2.51953 | 0.01953       |

# Yb<sub>4</sub>As<sub>2</sub>O<sub>1</sub>

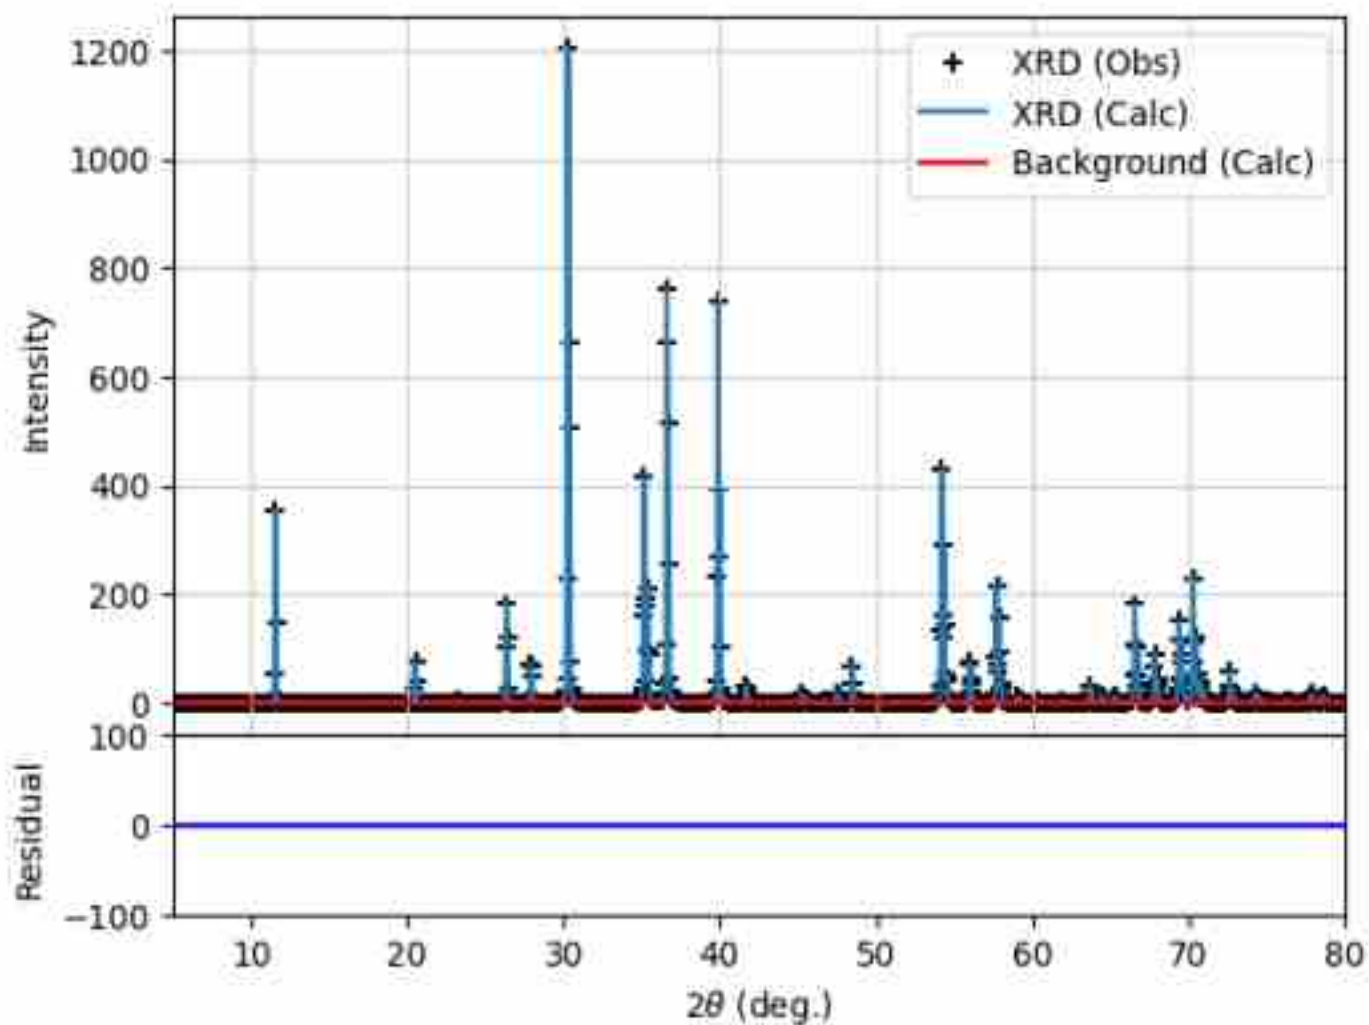

| RMSE before RR | Rwp     | RMSE after RR |
|----------------|---------|---------------|
| 0.019          | 0.00436 | 0.00092       |

# Yb<sub>4</sub>Mg<sub>4</sub>Au<sub>4</sub>

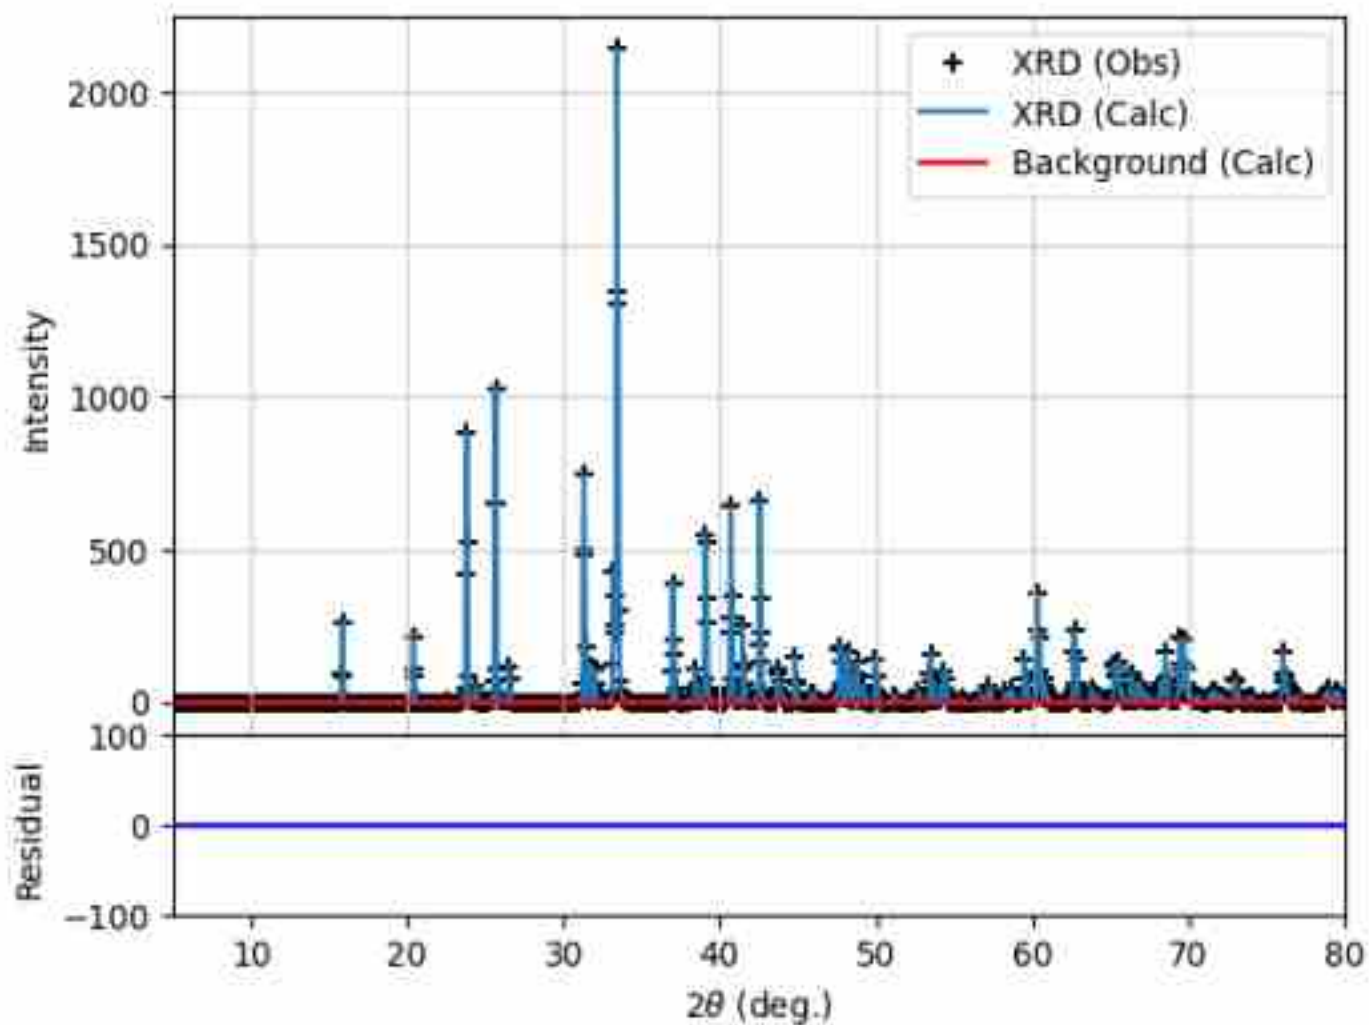

| RMSE before RR | Rwp    | RMSE after RR |
|----------------|--------|---------------|
| 0.019          | 0.0045 | 0.00082       |

# Yb<sub>4</sub>Sn<sub>2</sub>Pd<sub>4</sub>

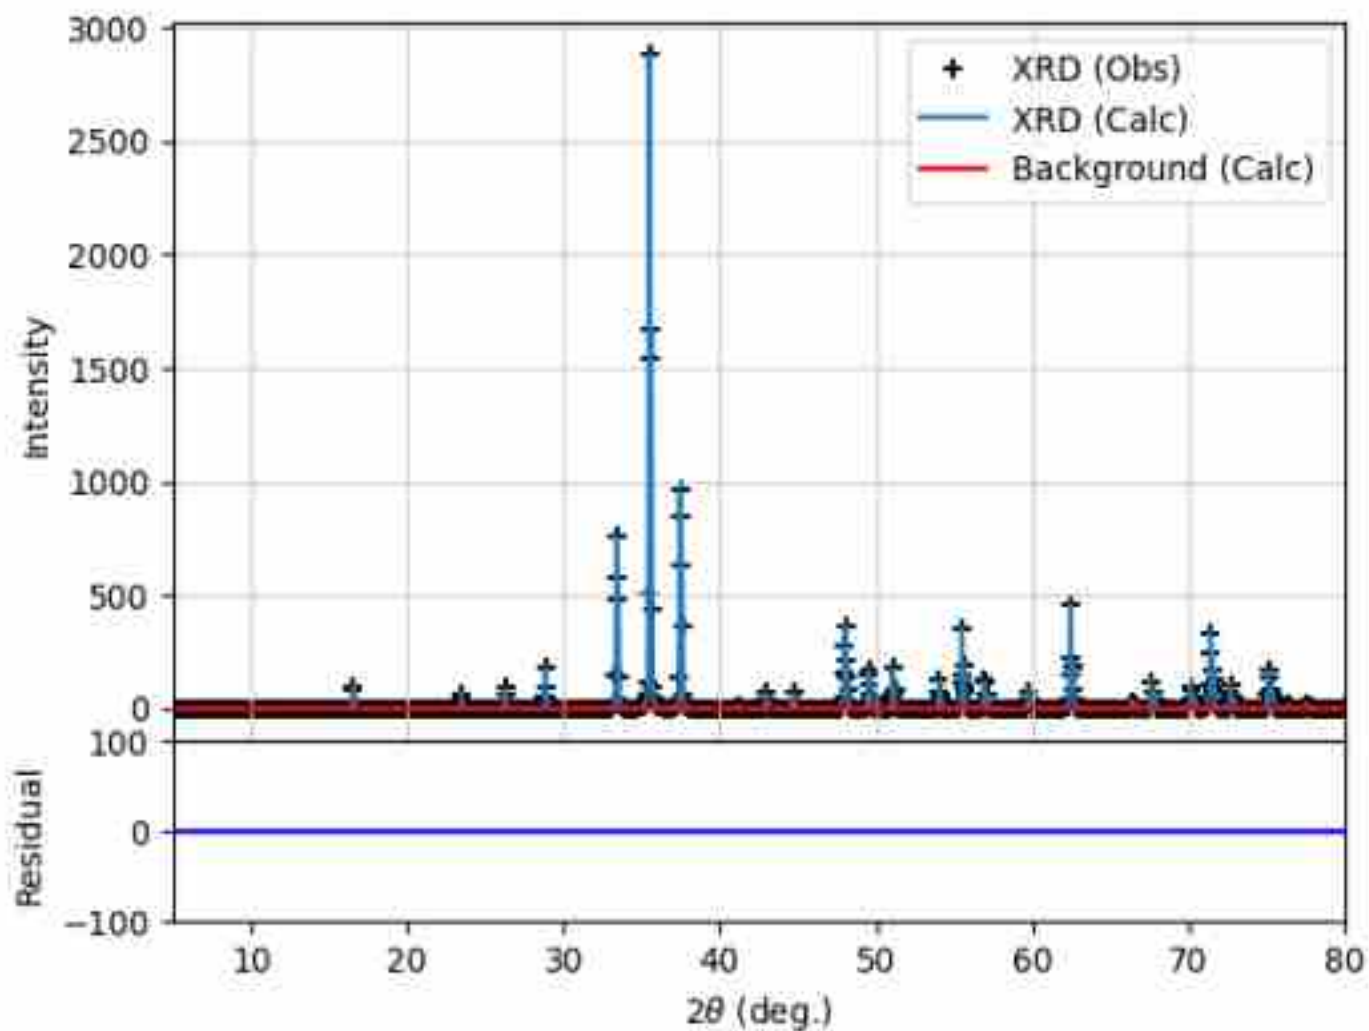

| RMSE before RR | Rwp     | RMSE after RR |
|----------------|---------|---------------|
| 0.019          | 0.00478 | 0.0005        |



# Zn<sub>2</sub>Cr<sub>2</sub>Fe<sub>2</sub>O<sub>8</sub>

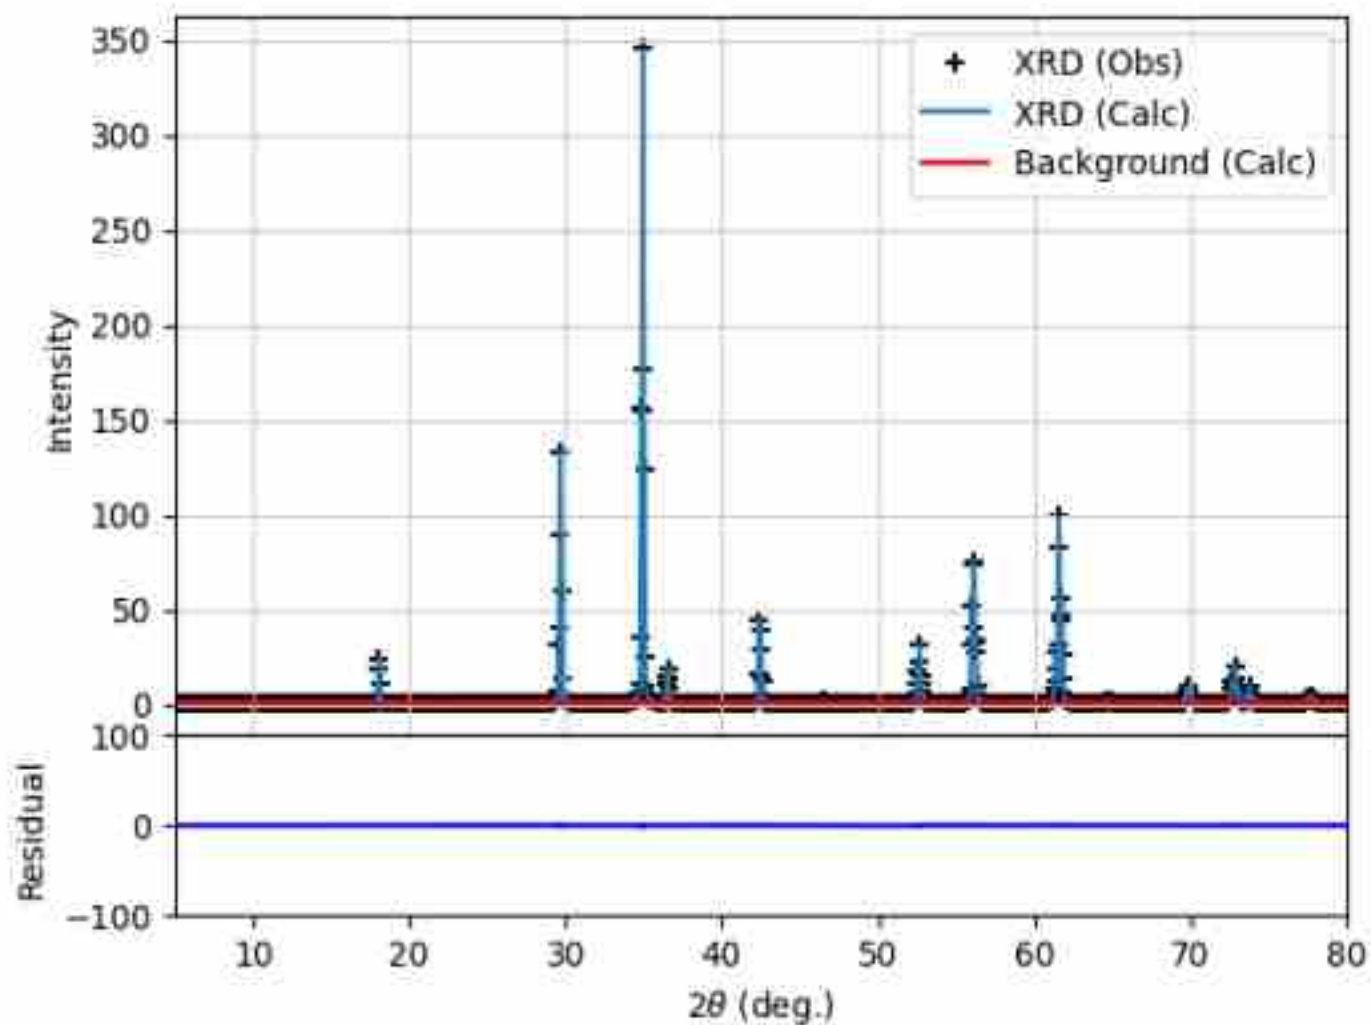

| RMSE before RR | Rwp     | RMSE after RR |
|----------------|---------|---------------|
| 0.019          | 0.89849 | 0.01885       |

# Zn<sub>6</sub>In<sub>2</sub>Ag<sub>2</sub>S<sub>10</sub>

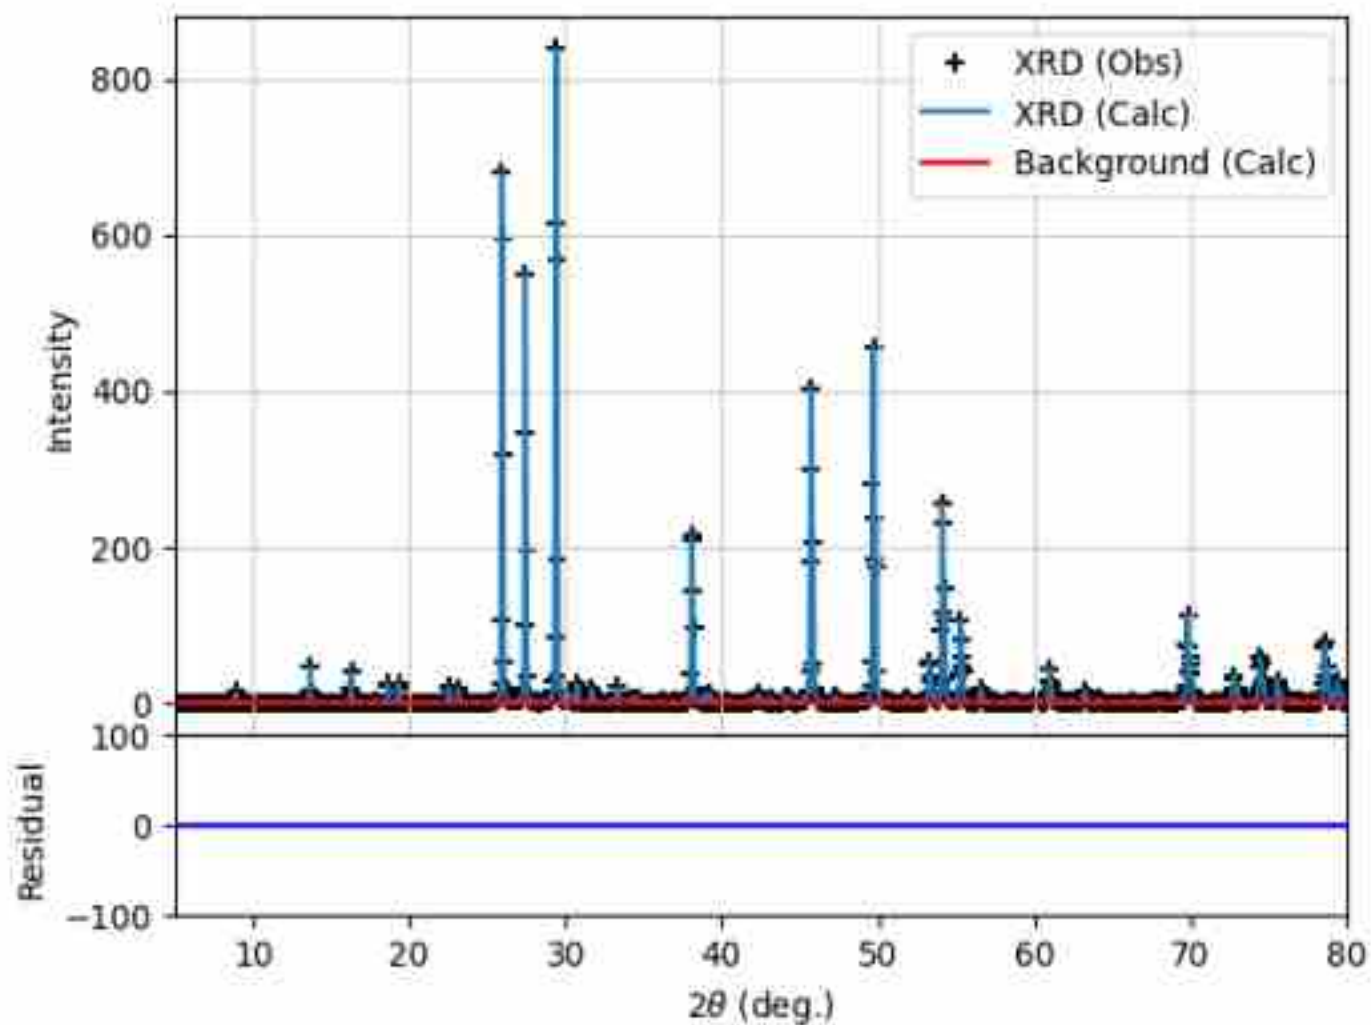

| RMSE before RR | Rwp     | RMSE after RR |
|----------------|---------|---------------|
| 0.019          | 0.20546 | 0.02809       |

# Zr<sub>2</sub>Ge<sub>2</sub>Te<sub>2</sub>

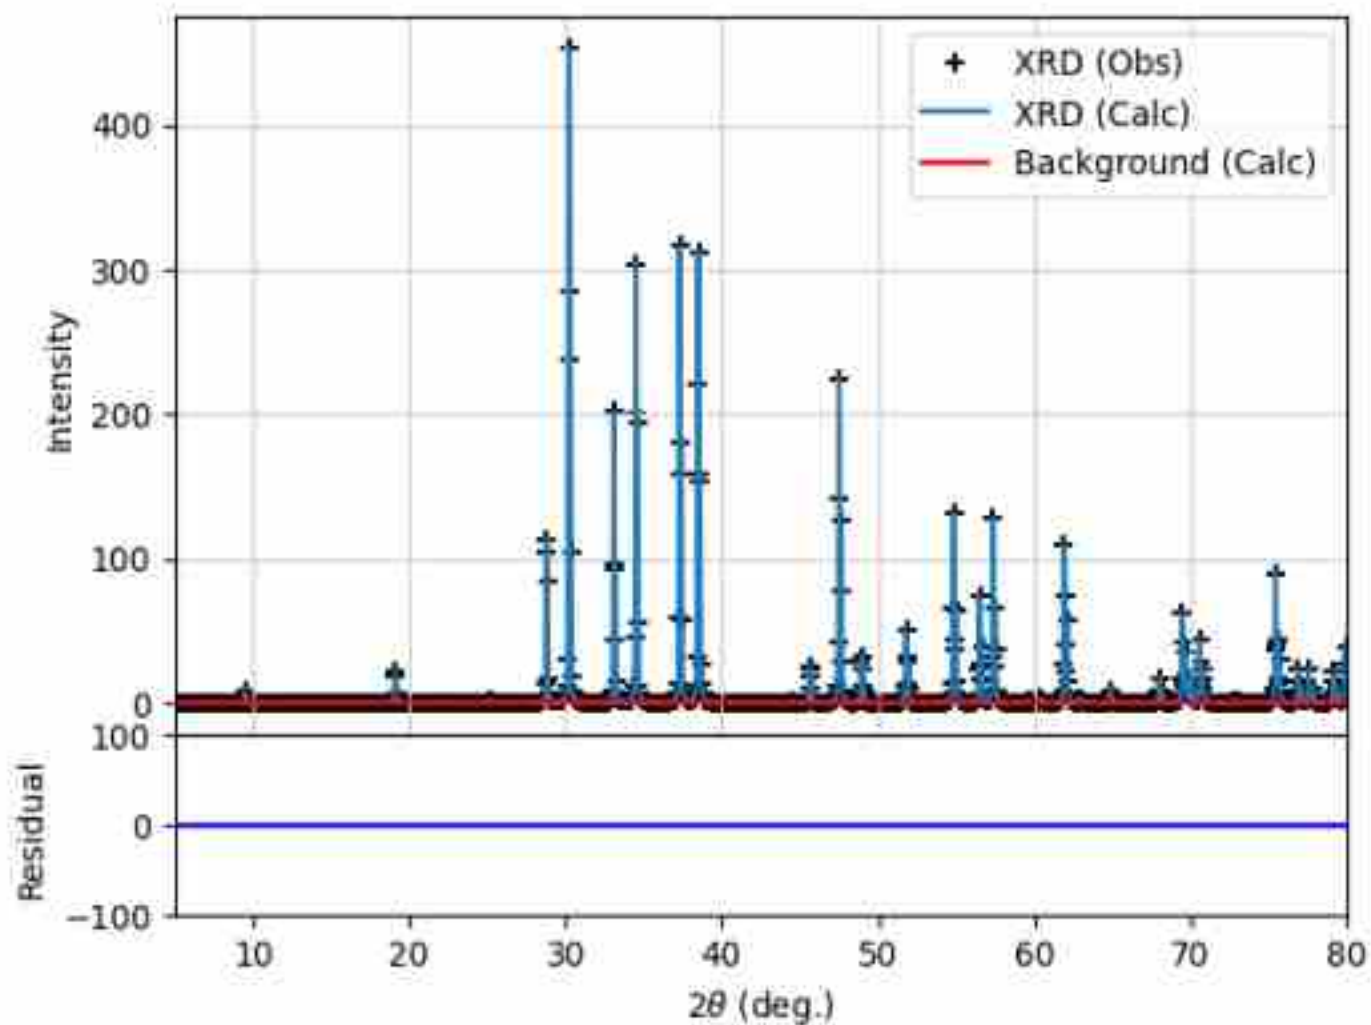

| RMSE before RR | Rwp     | RMSE after RR |
|----------------|---------|---------------|
| 0.019          | 0.00511 | 0.00059       |

# Zr<sub>4</sub>Co<sub>4</sub>P<sub>4</sub>

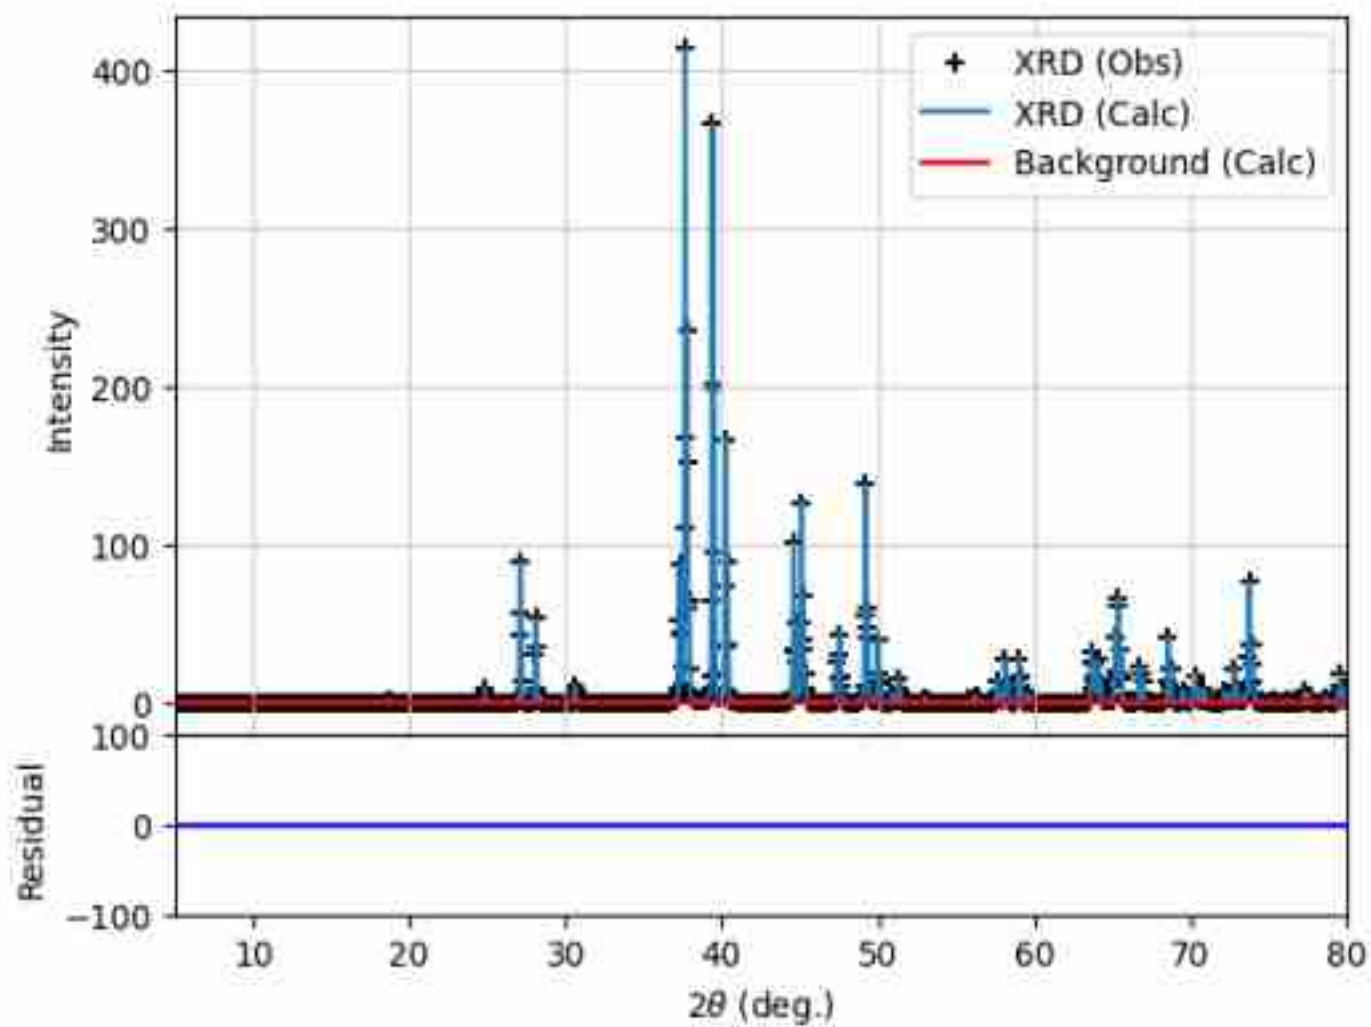

| RMSE before RR | Rwp     | RMSE after RR |
|----------------|---------|---------------|
| 0.019          | 0.00407 | 0.00027       |

# Zr<sub>6</sub>Ni<sub>1</sub>Sn<sub>2</sub>

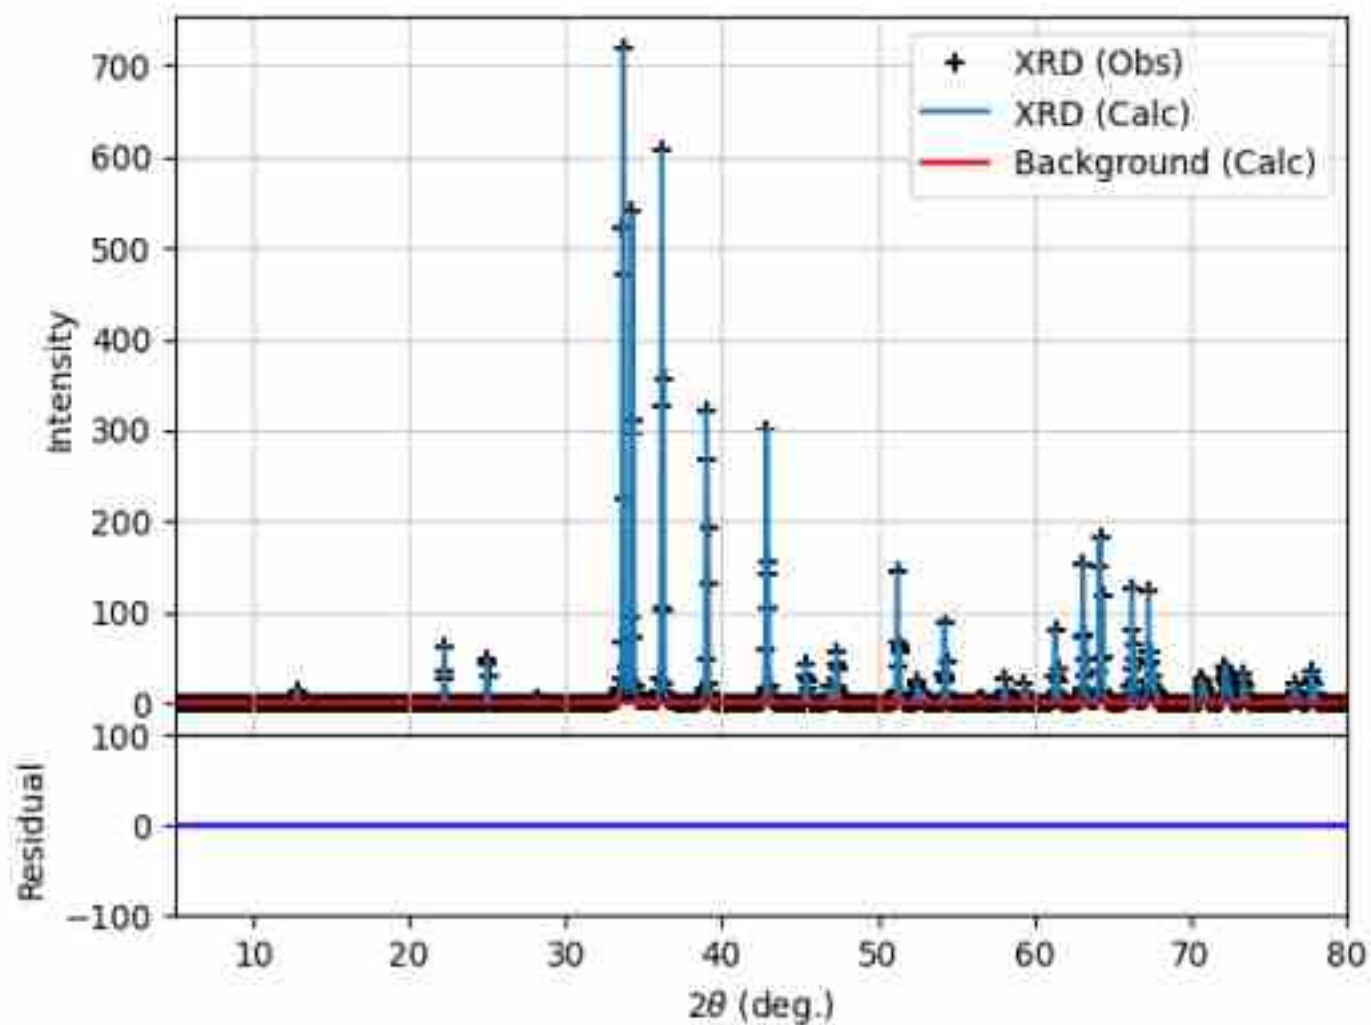

| RMSE before RR | Rwp     | RMSE after RR |
|----------------|---------|---------------|
| 0.019          | 0.00389 | 0.00063       |

# Zr10Al12Sb6

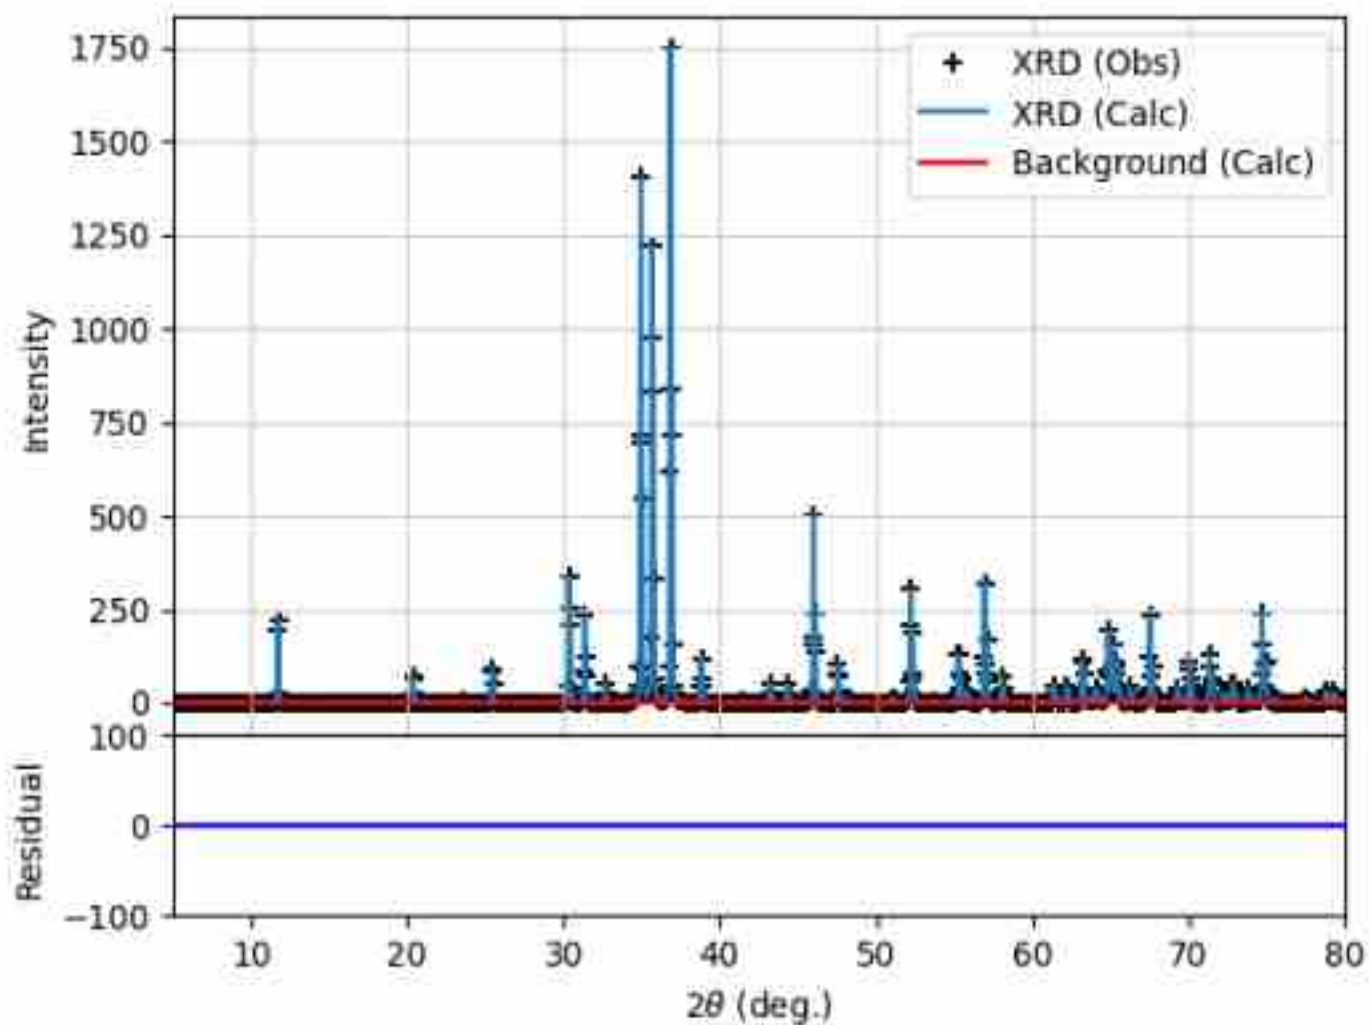

| RMSE before RR | Rwp     | RMSE after RR |
|----------------|---------|---------------|
| 0.019          | 0.00511 | 0.00073       |

# Zr<sub>10</sub>Cu<sub>2</sub>Bi<sub>6</sub>

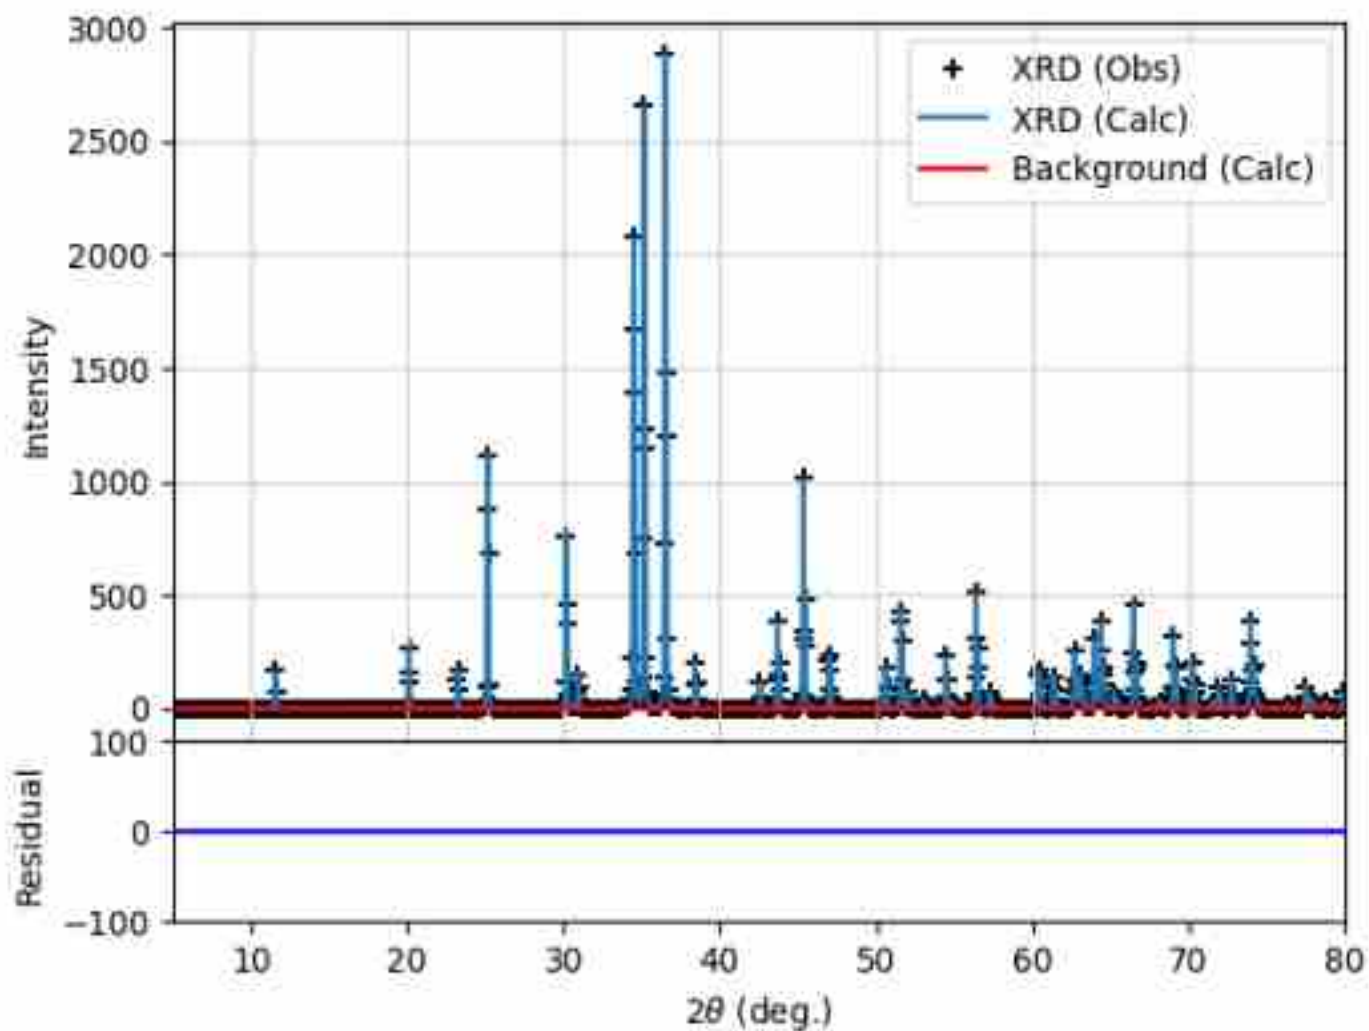

| RMSE before RR | Rwp     | RMSE after RR |
|----------------|---------|---------------|
| 0.019          | 0.00842 | 0.00088       |

# As<sub>4</sub>Os<sub>4</sub>S<sub>4</sub>

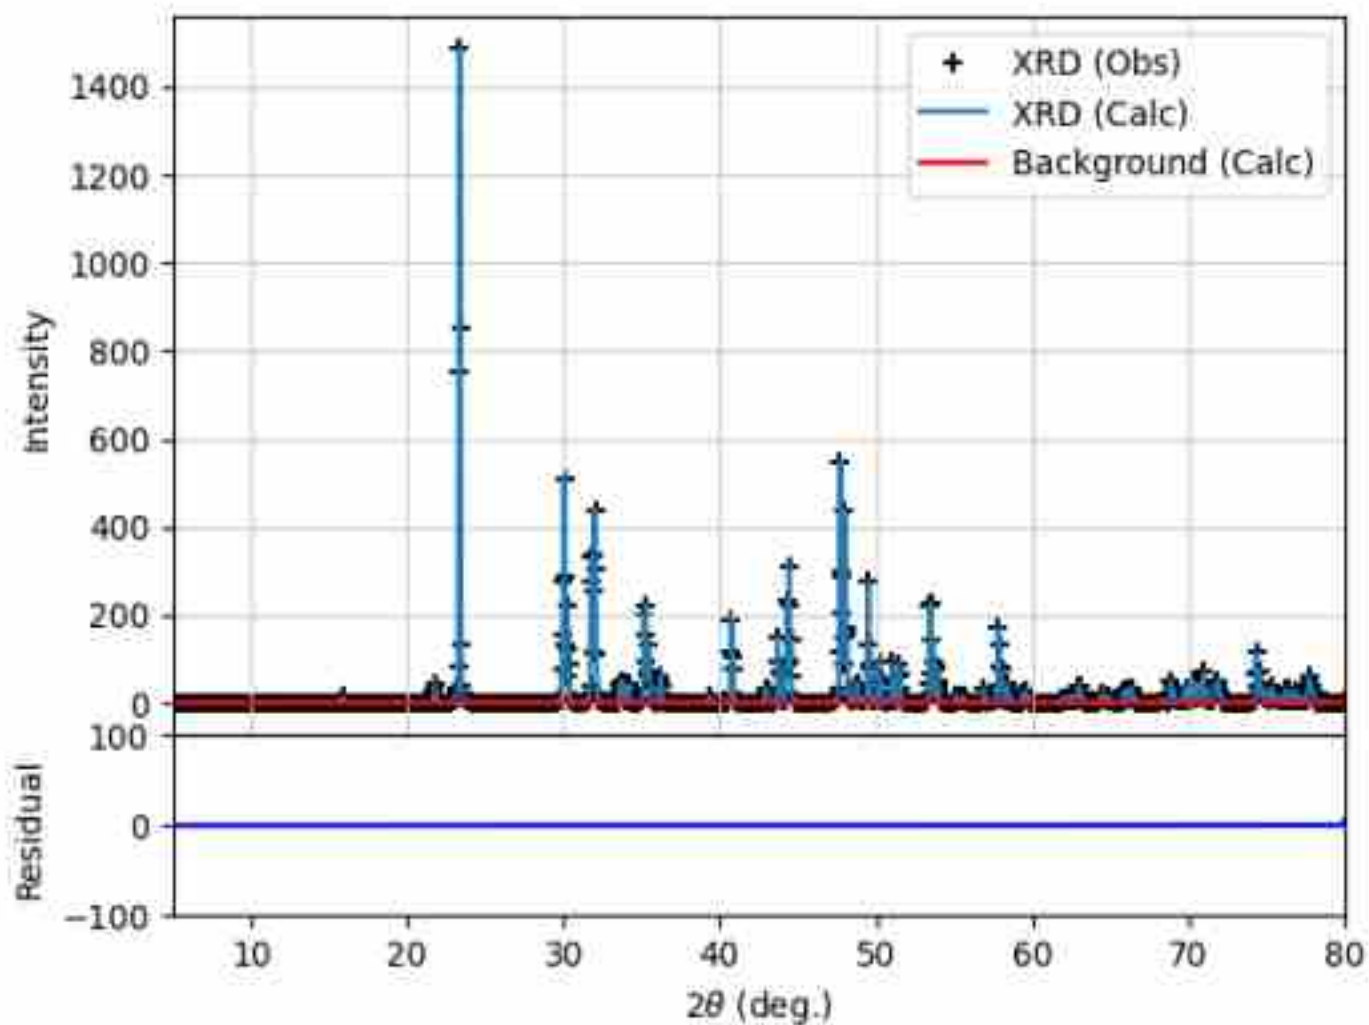

| RMSE before RR | Rwp   | RMSE after RR |
|----------------|-------|---------------|
| 0.021          | 2.225 | 0.00705       |



# B4Mo4

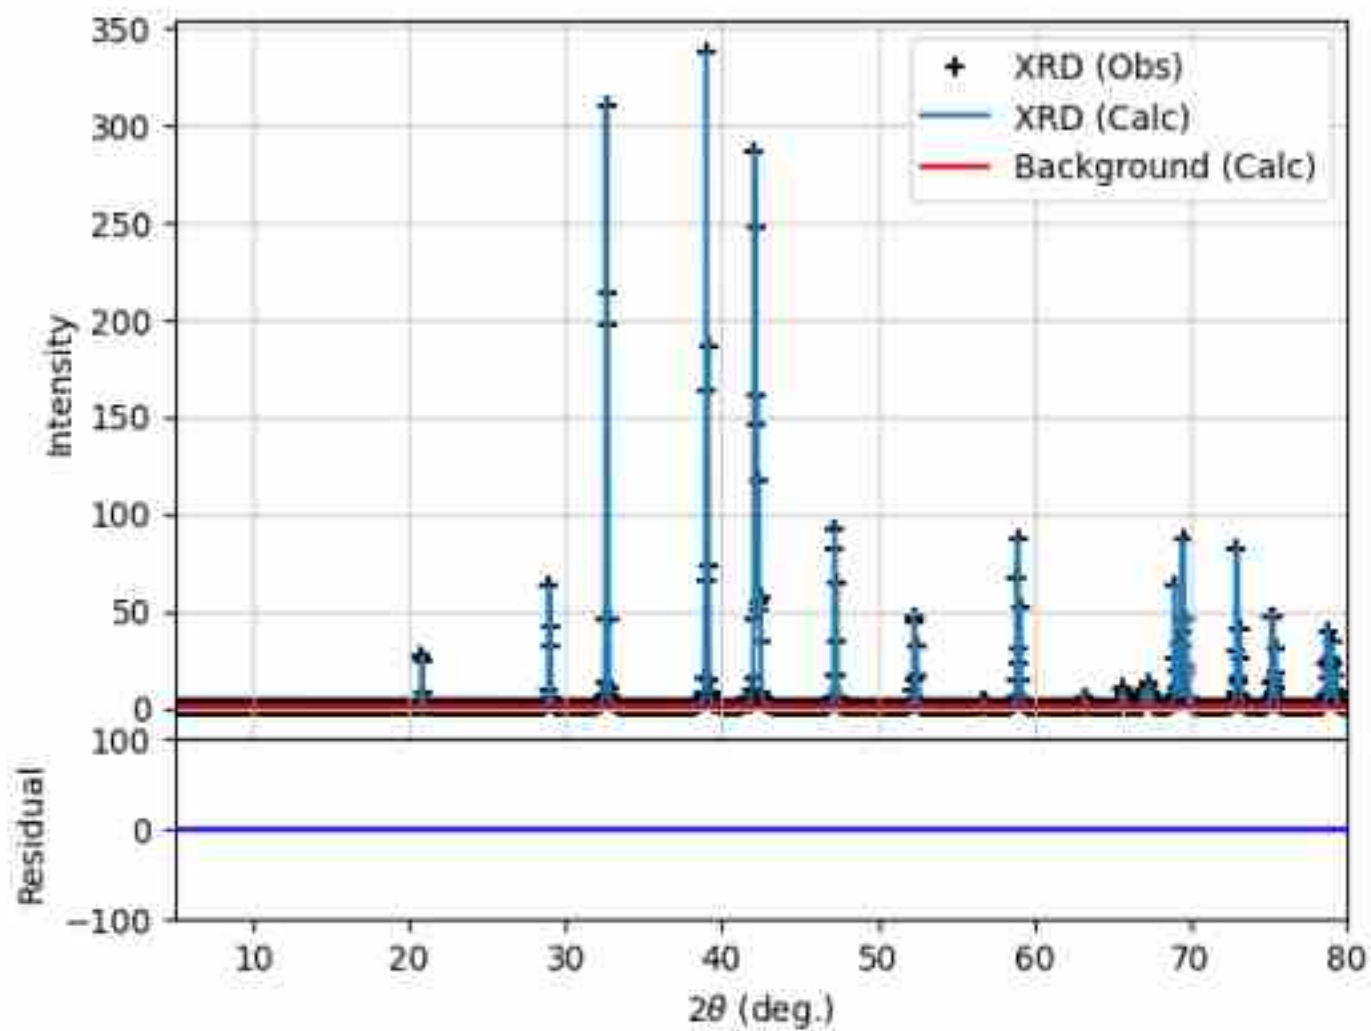

| RMSE before RR | Rwp     | RMSE after RR |
|----------------|---------|---------------|
| 0.021          | 0.00404 | 0.00183       |

# Ba<sub>1</sub>Eu<sub>2</sub>Co<sub>1</sub>O<sub>5</sub>

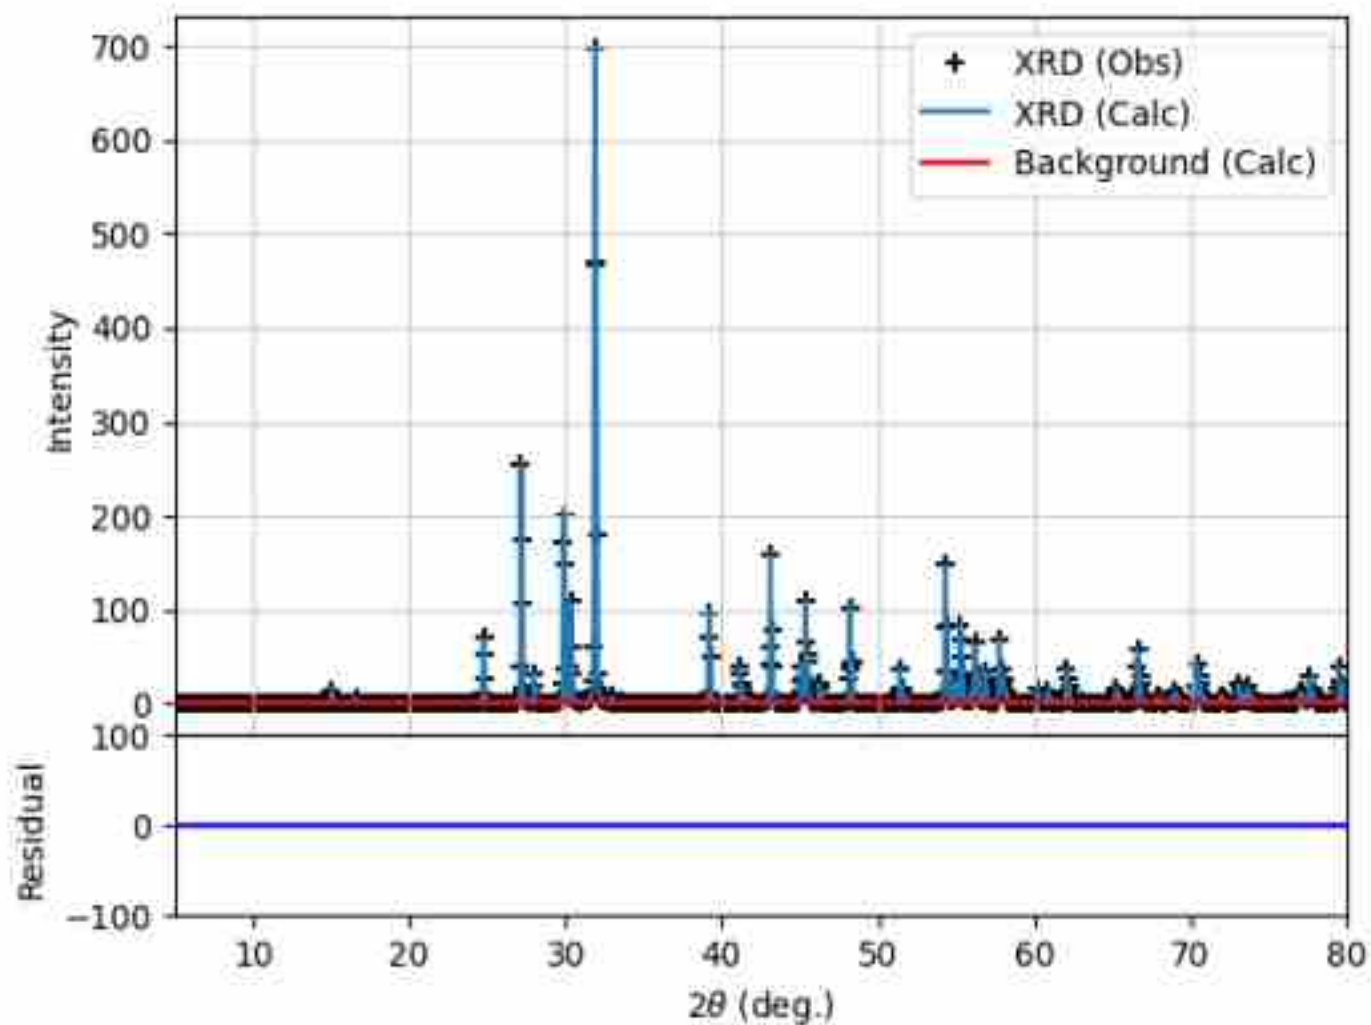

| RMSE before RR | Rwp     | RMSE after RR |
|----------------|---------|---------------|
| 0.021          | 0.00284 | 0.00073       |

# Ba1Sb12Os4

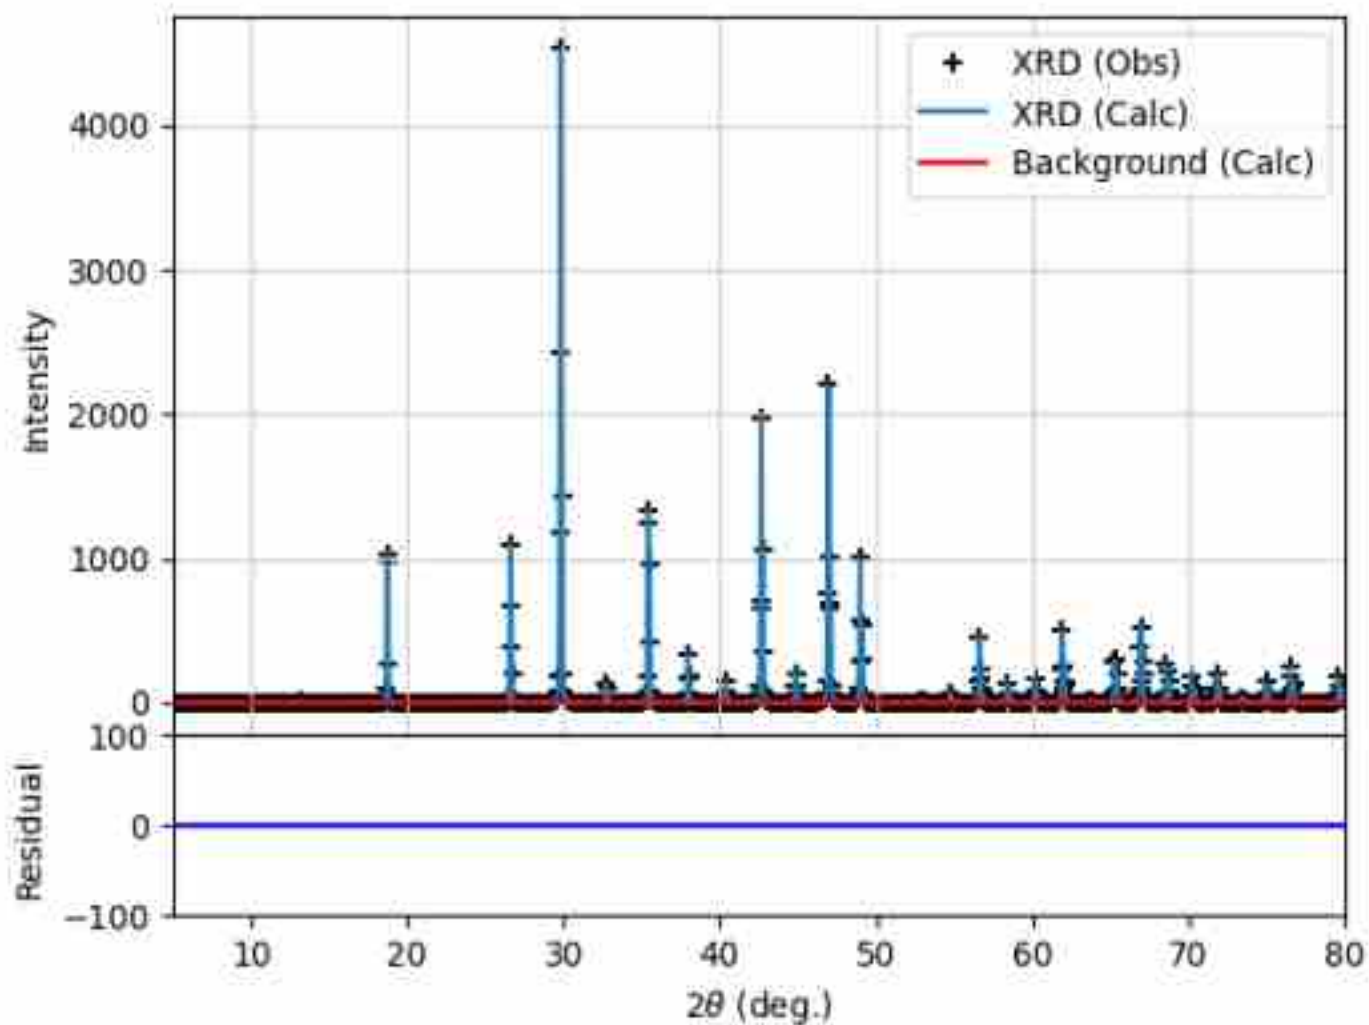

| RMSE before RR | Rwp     | RMSE after RR |
|----------------|---------|---------------|
| 0.021          | 0.00616 | 0.00089       |

# Ba1Sn3Au1

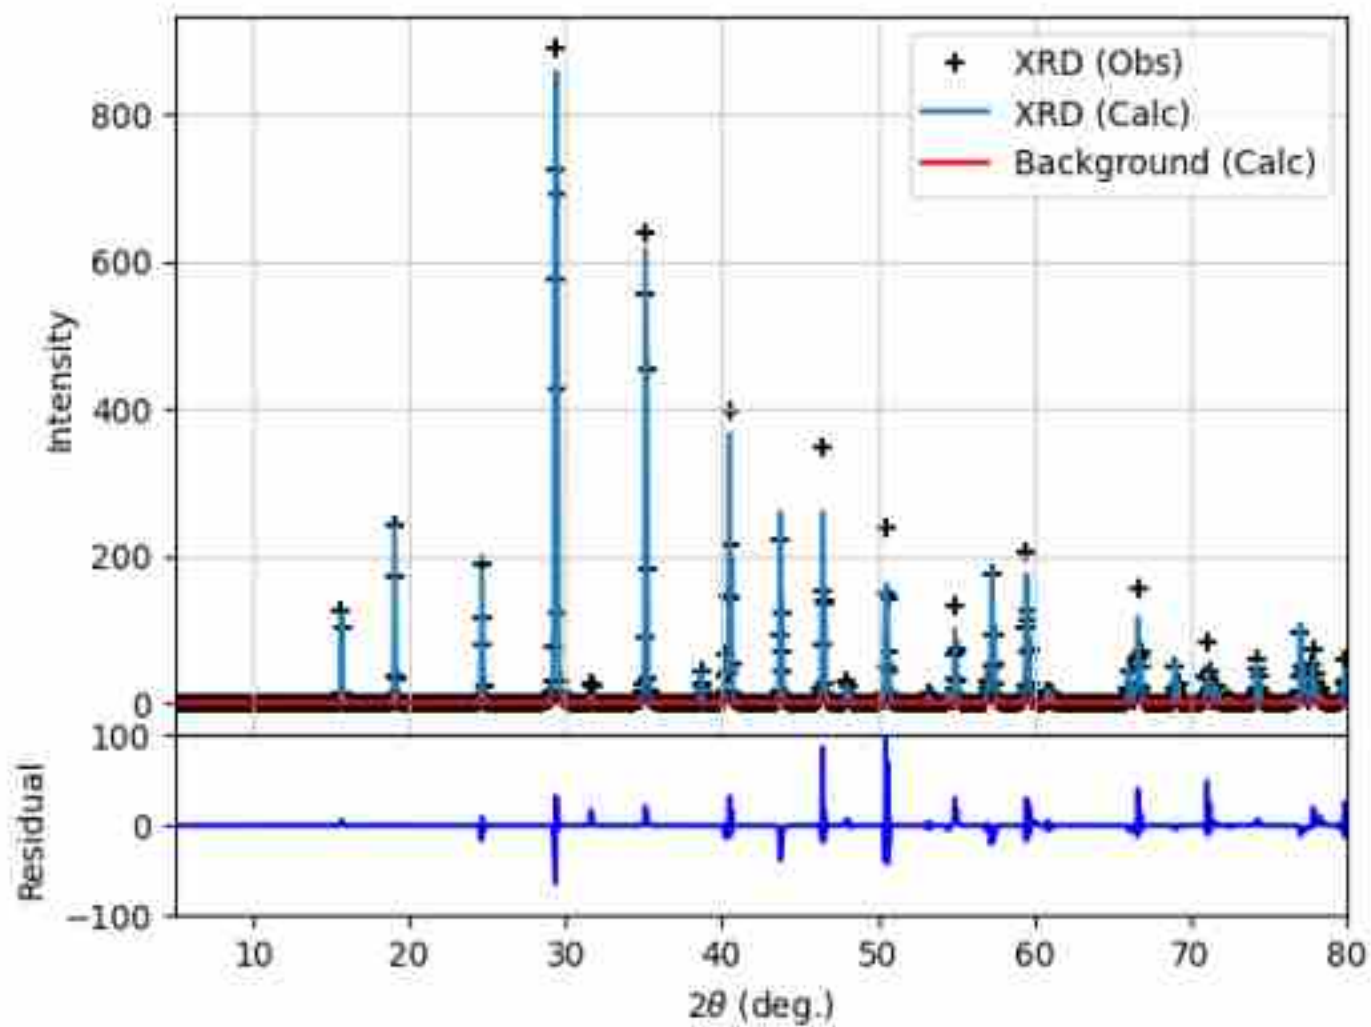

| RMSE before RR | Rwp      | RMSE after RR |
|----------------|----------|---------------|
| 0.021          | 18.22311 | 0.03925       |

# Ba<sub>2</sub>HoCu<sub>3</sub>O<sub>6</sub>

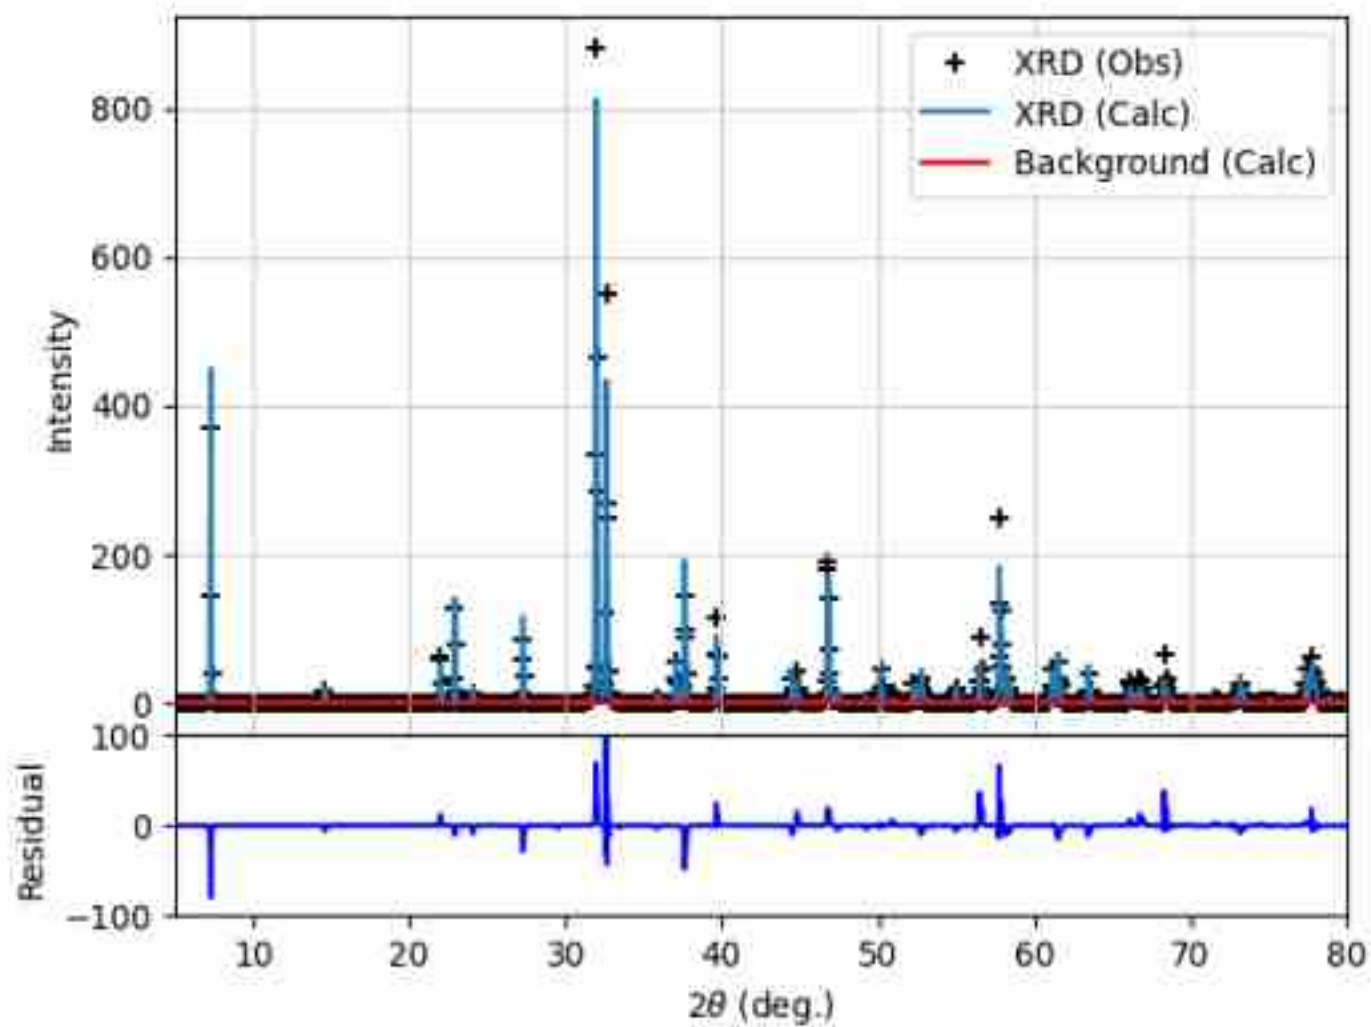

| RMSE before RR | Rwp      | RMSE after RR |
|----------------|----------|---------------|
| 0.021          | 21.28286 | None          |

# Ba<sub>2</sub>Mn<sub>2</sub>O<sub>4</sub>

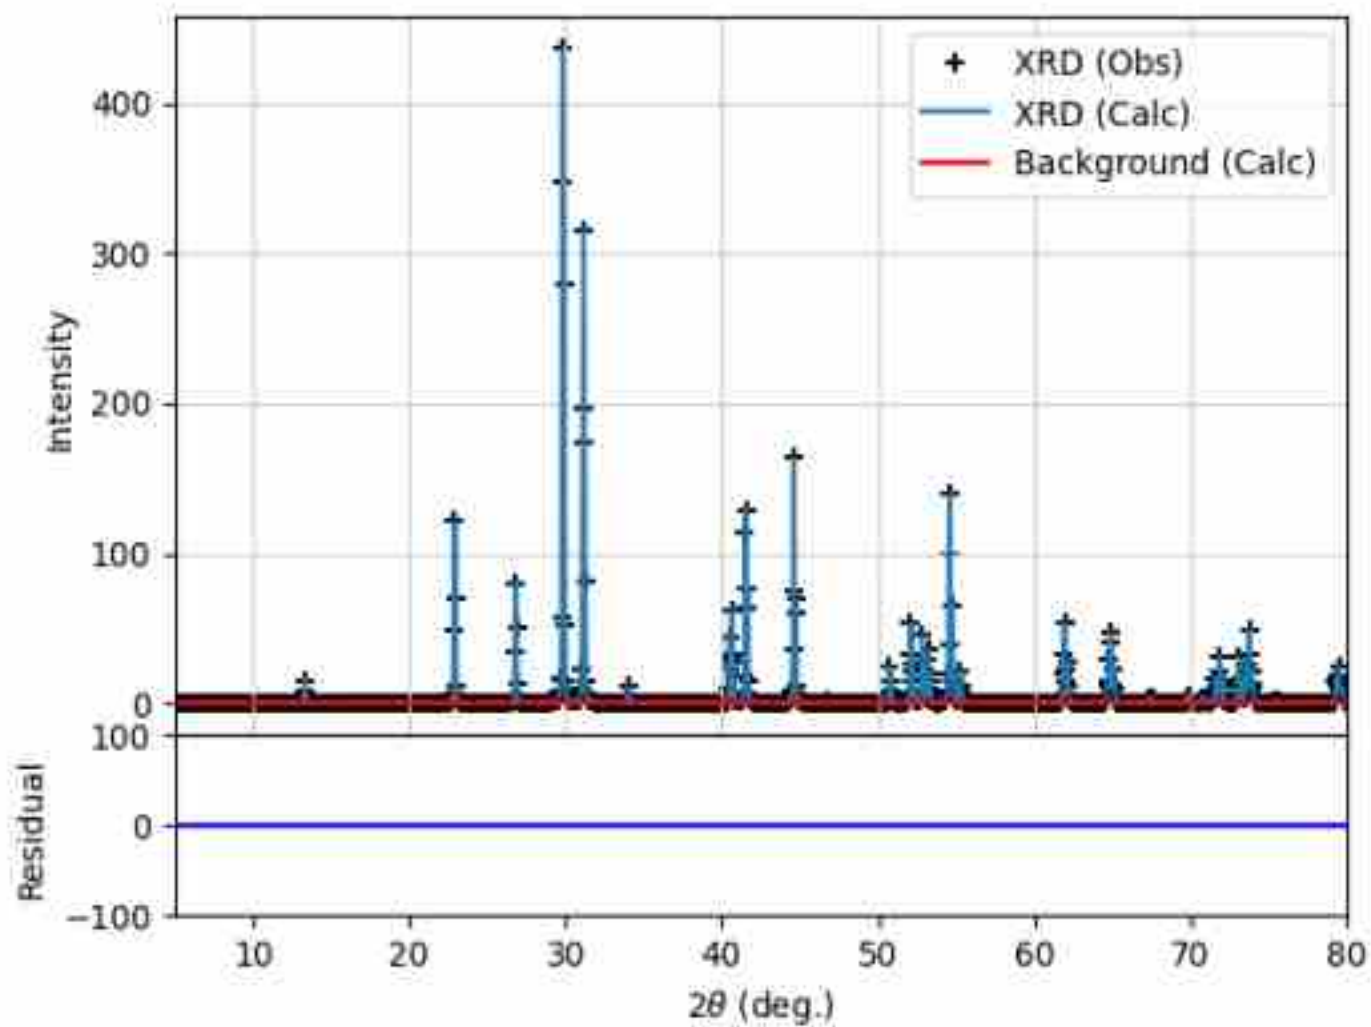

| RMSE before RR | Rwp     | RMSE after RR |
|----------------|---------|---------------|
| 0.021          | 0.00197 | 0.00074       |

# Ba<sub>2</sub>Sr<sub>2</sub>Y<sub>2</sub>W<sub>2</sub>O<sub>12</sub>

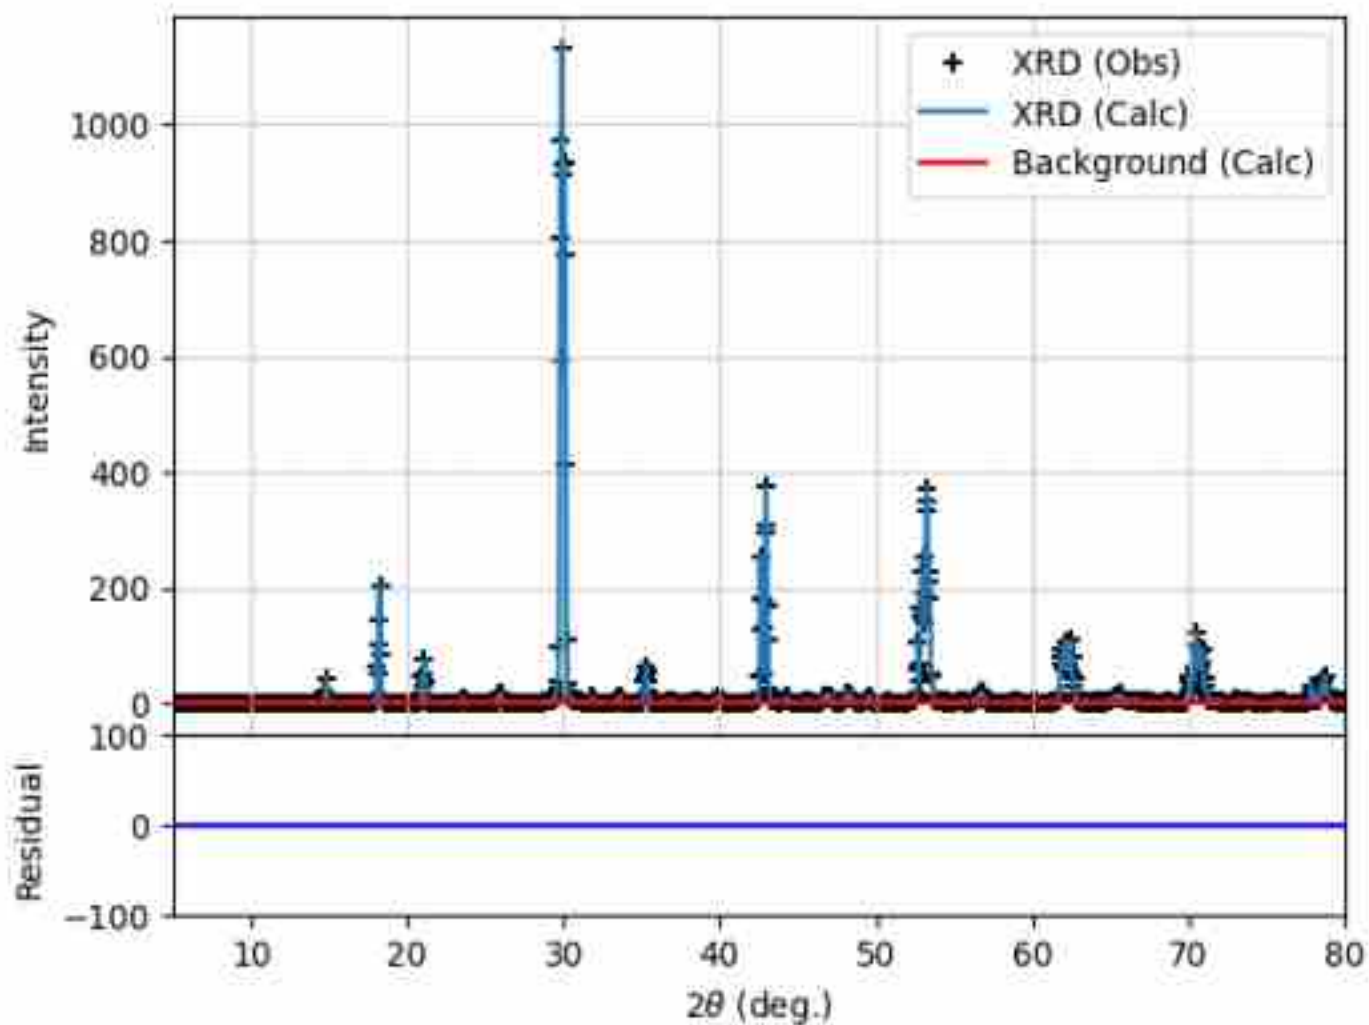

| RMSE before RR | Rwp     | RMSE after RR |
|----------------|---------|---------------|
| 0.021          | 0.00099 | 0.00029       |

# Ba<sub>2</sub>Ta<sub>1</sub>Bi<sub>1</sub>O<sub>6</sub>

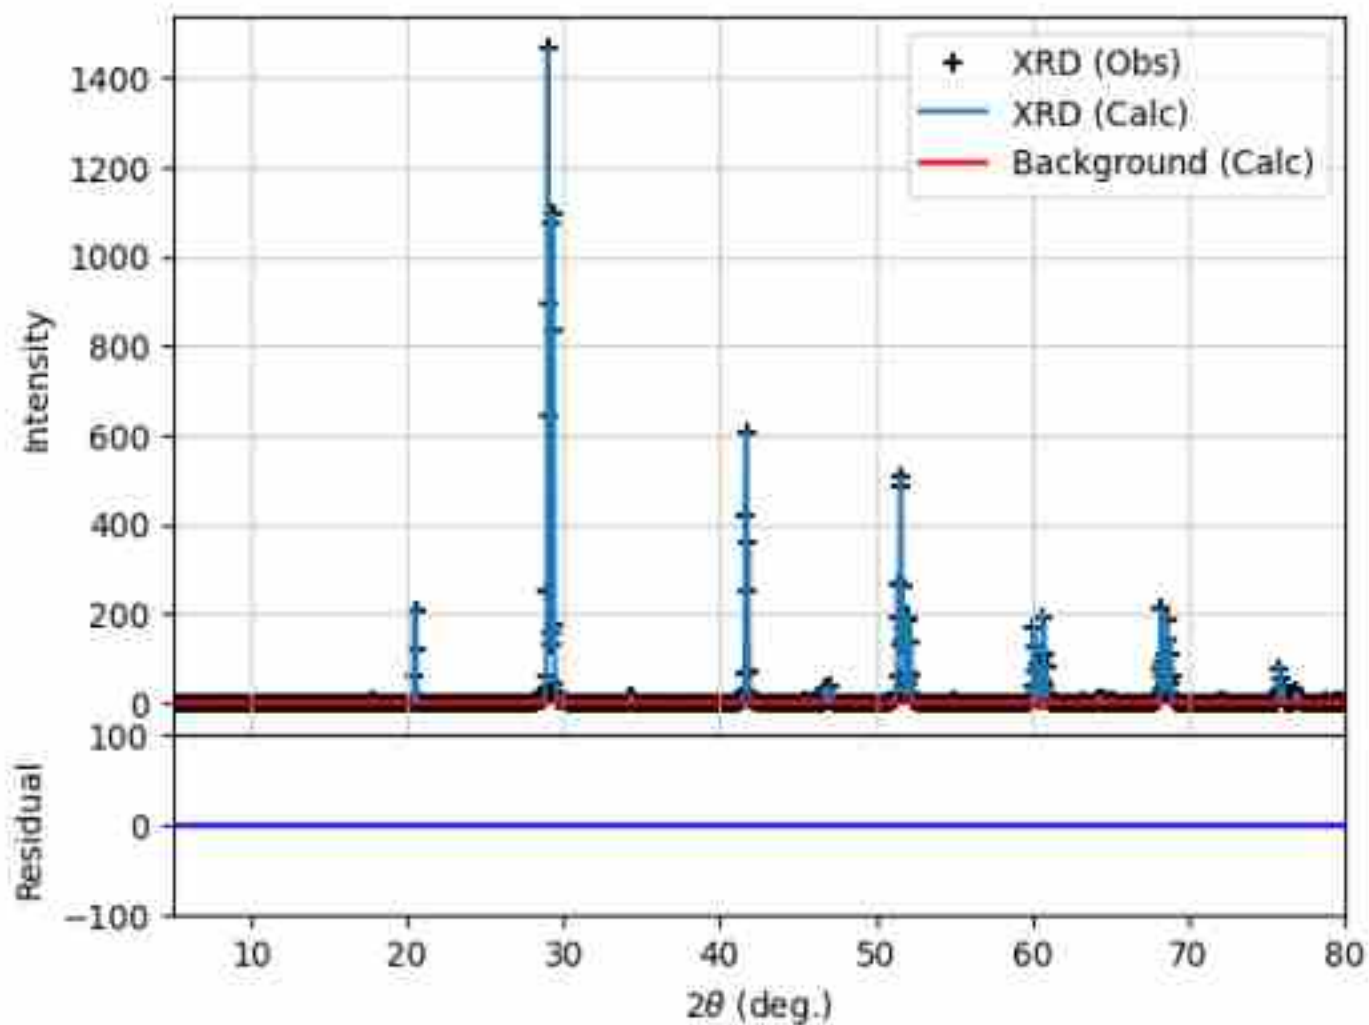

| RMSE before RR | Rwp     | RMSE after RR |
|----------------|---------|---------------|
| 0.021          | 0.00267 | 0.00113       |



# Ba<sub>4</sub>Ge<sub>2</sub>Se<sub>8</sub>

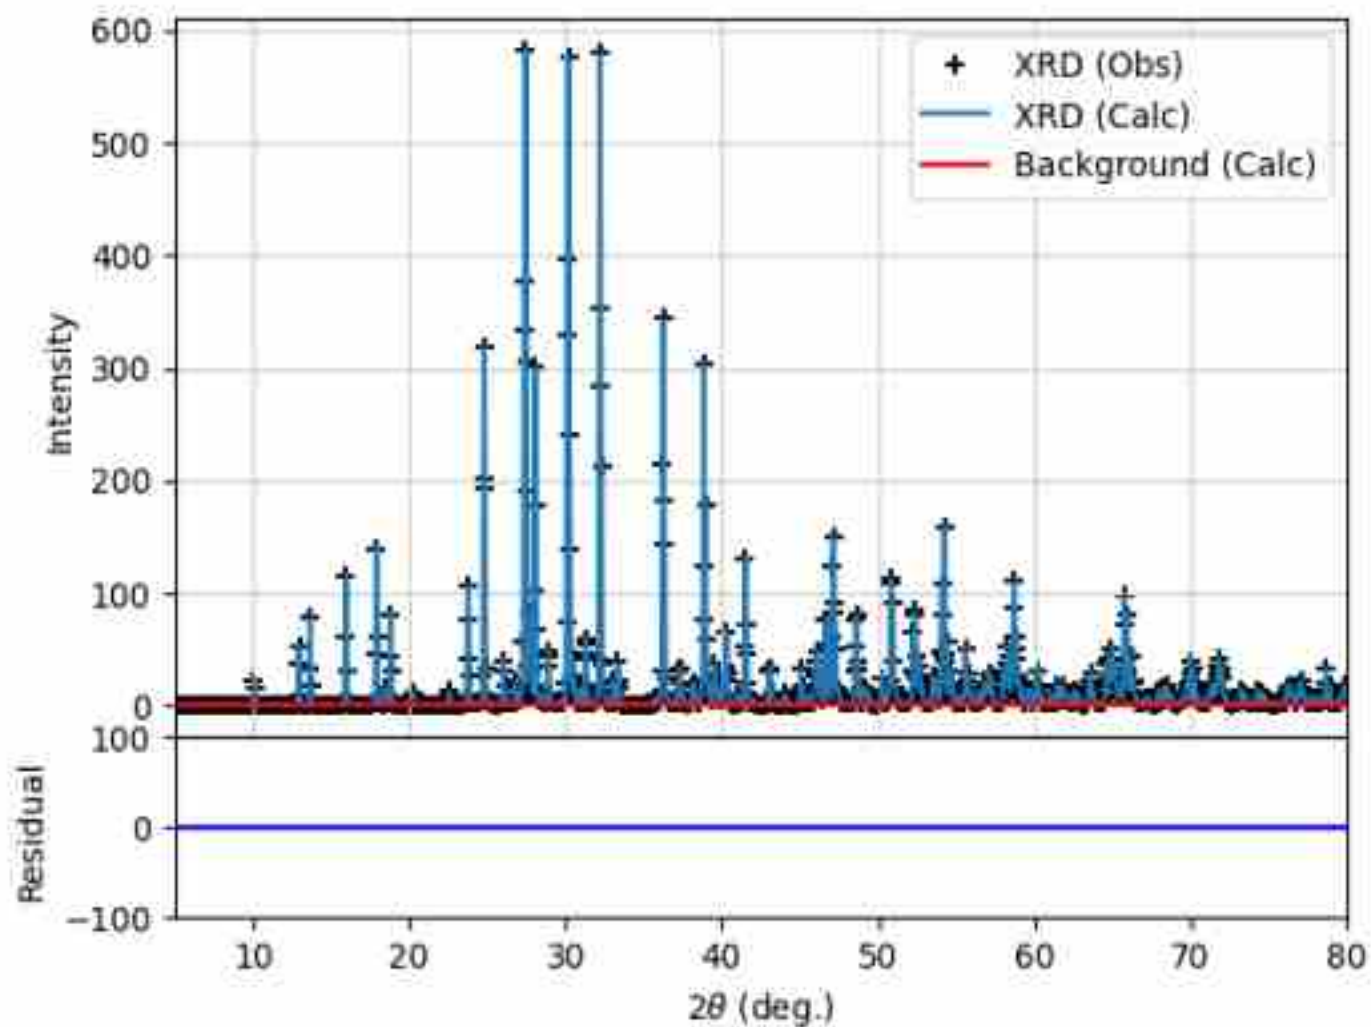

| RMSE before RR | Rwp     | RMSE after RR |
|----------------|---------|---------------|
| 0.021          | 0.00344 | 0.00026       |

# Bi1Sb3Te6

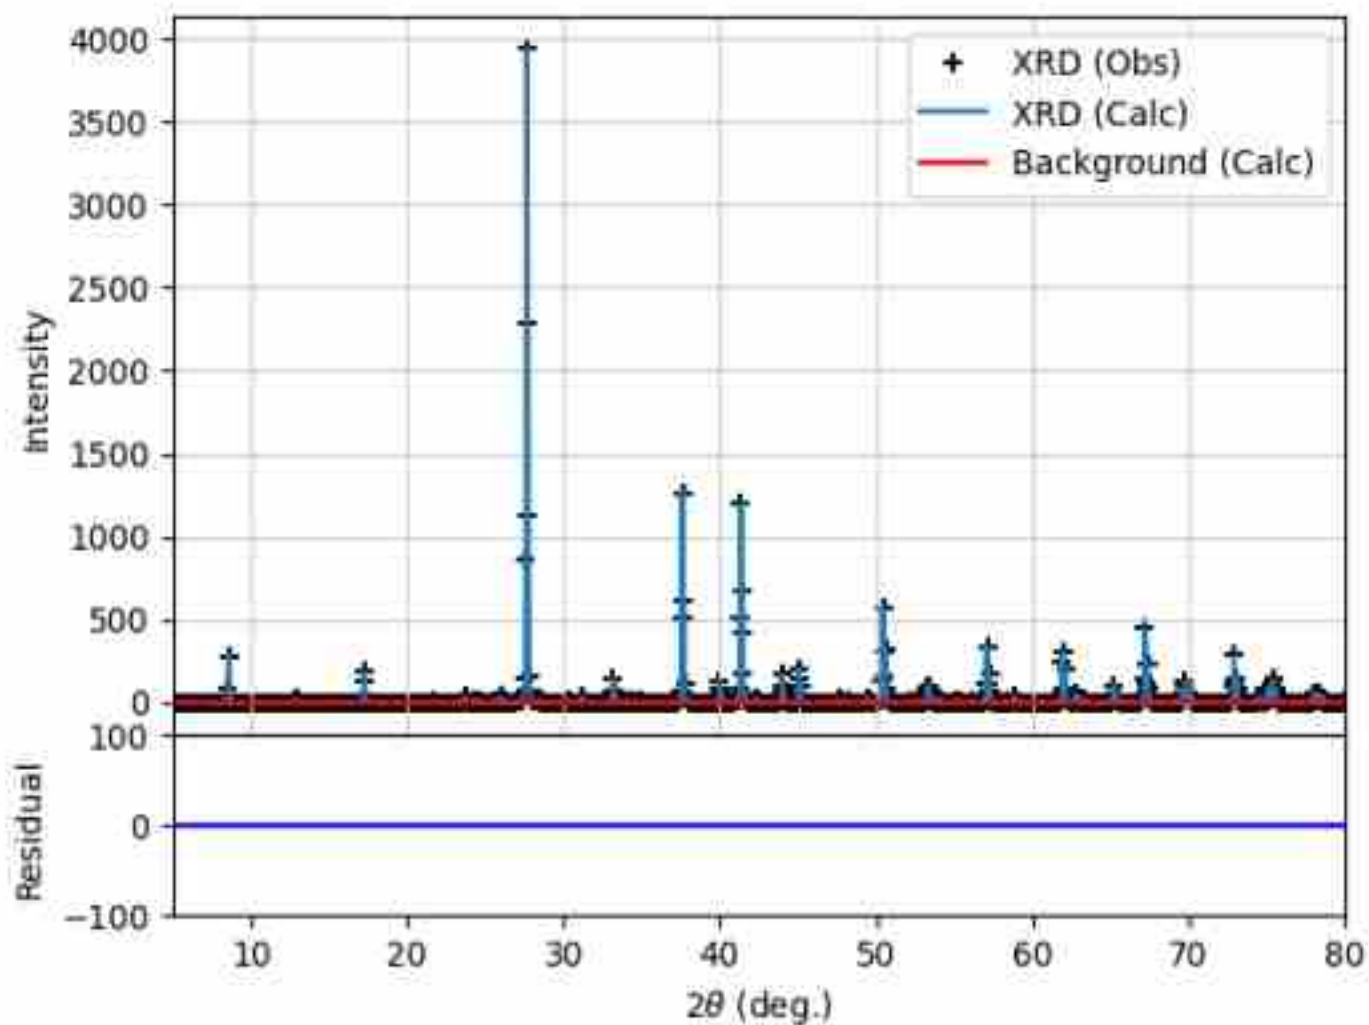

| RMSE before RR | Rwp     | RMSE after RR |
|----------------|---------|---------------|
| 0.021          | 0.00268 | 0.00014       |

# Ca1Al9Co2

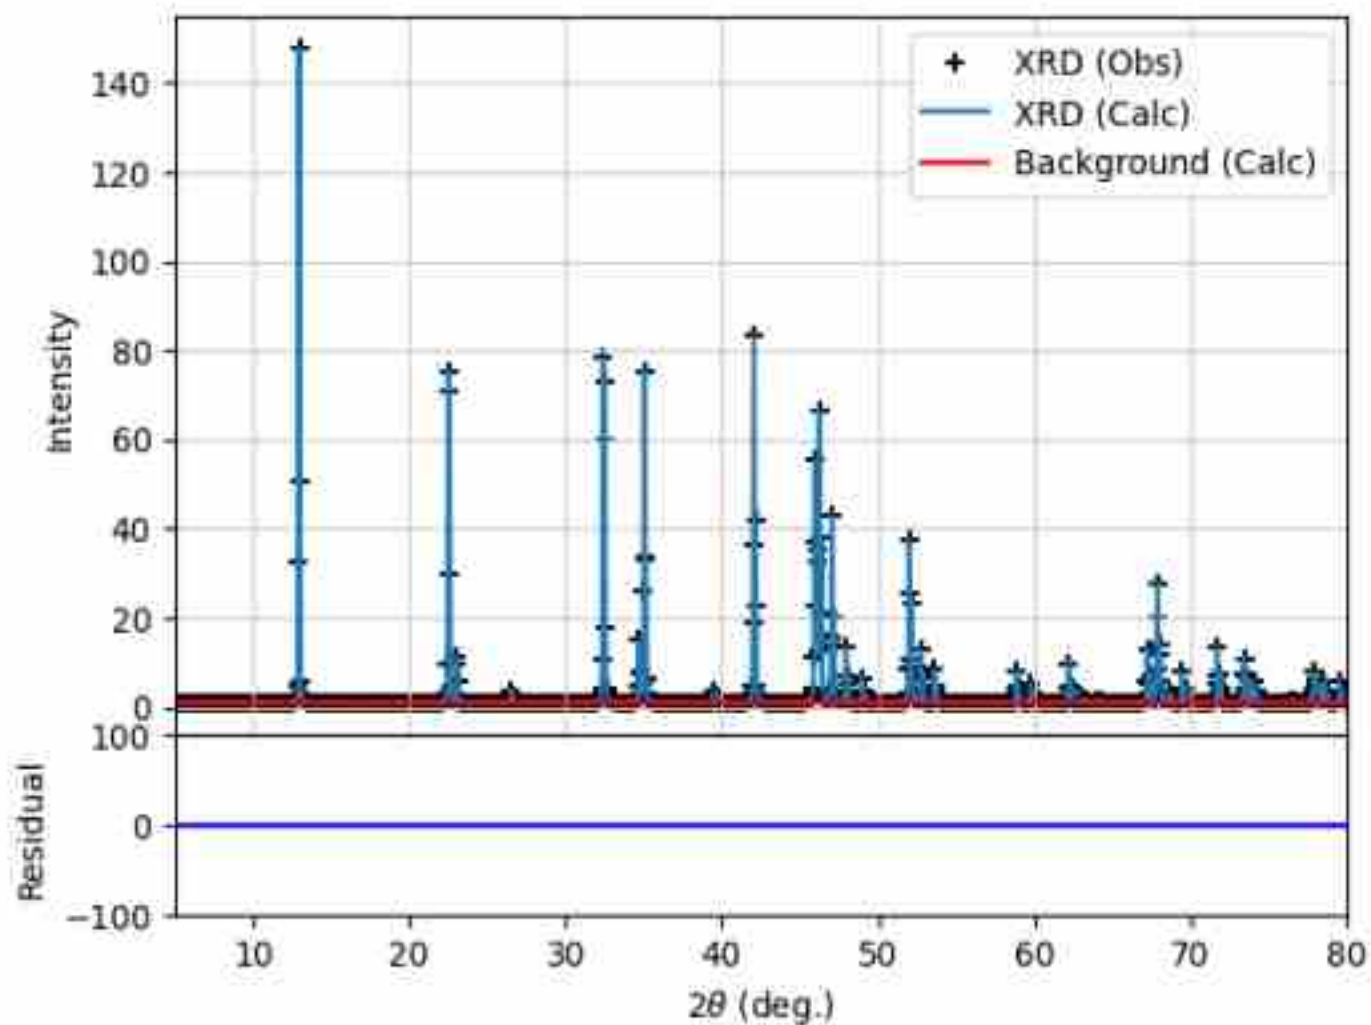

| RMSE before RR | Rwp     | RMSE after RR |
|----------------|---------|---------------|
| 0.021          | 0.01361 | 0.00265       |

# Ca<sub>1</sub>Au<sub>2</sub>F<sub>12</sub>

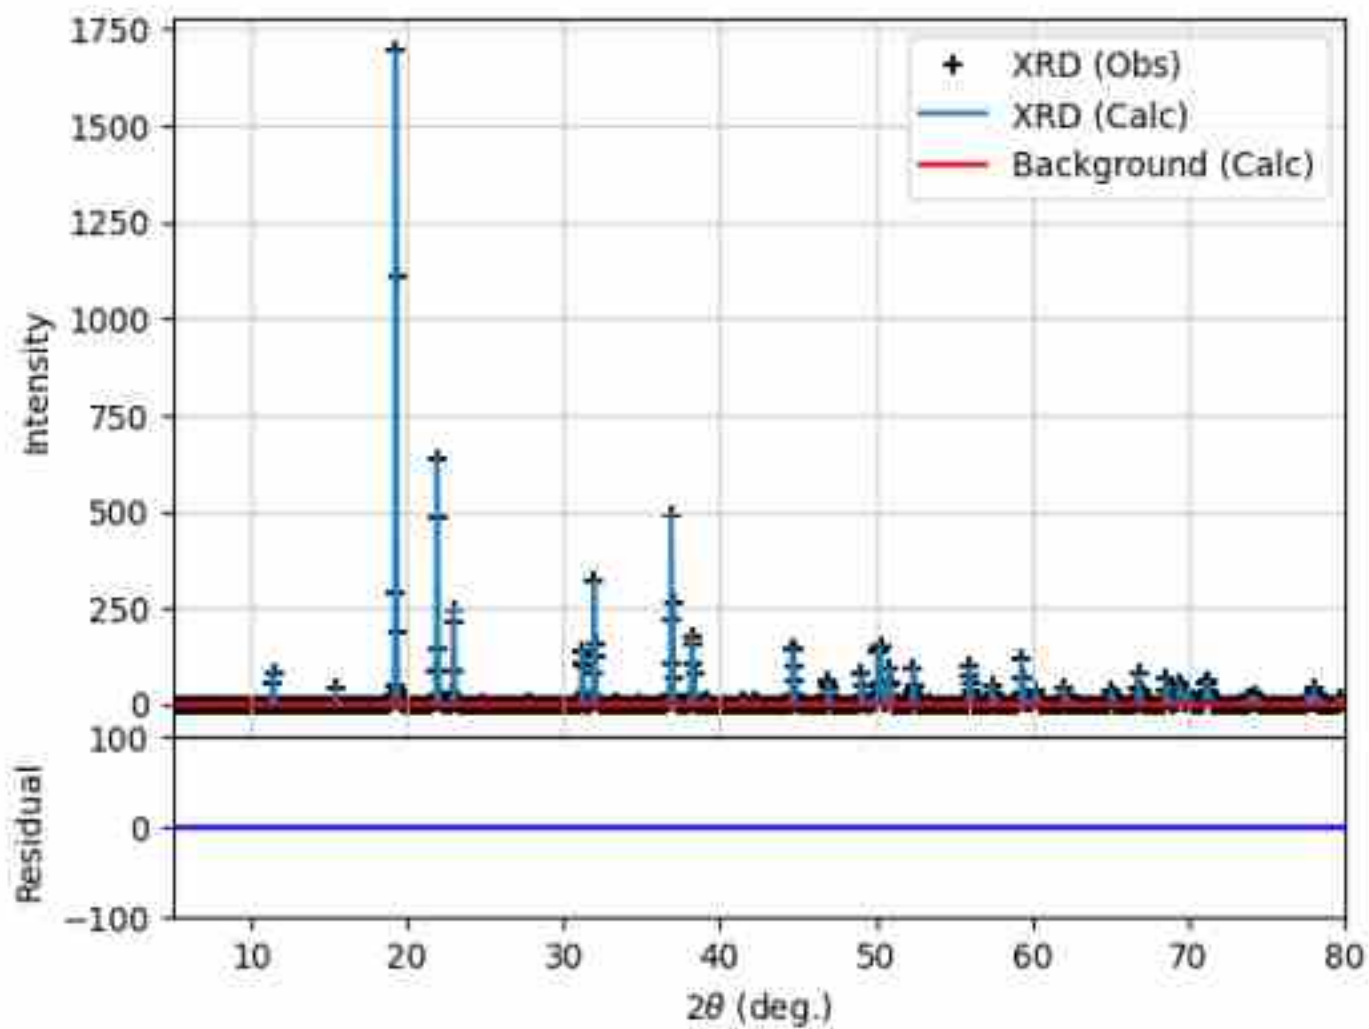

| RMSE before RR | Rwp     | RMSE after RR |
|----------------|---------|---------------|
| 0.021          | 0.00449 | 0.00124       |

# Ca<sub>2</sub>Cd<sub>1</sub>N<sub>2</sub>

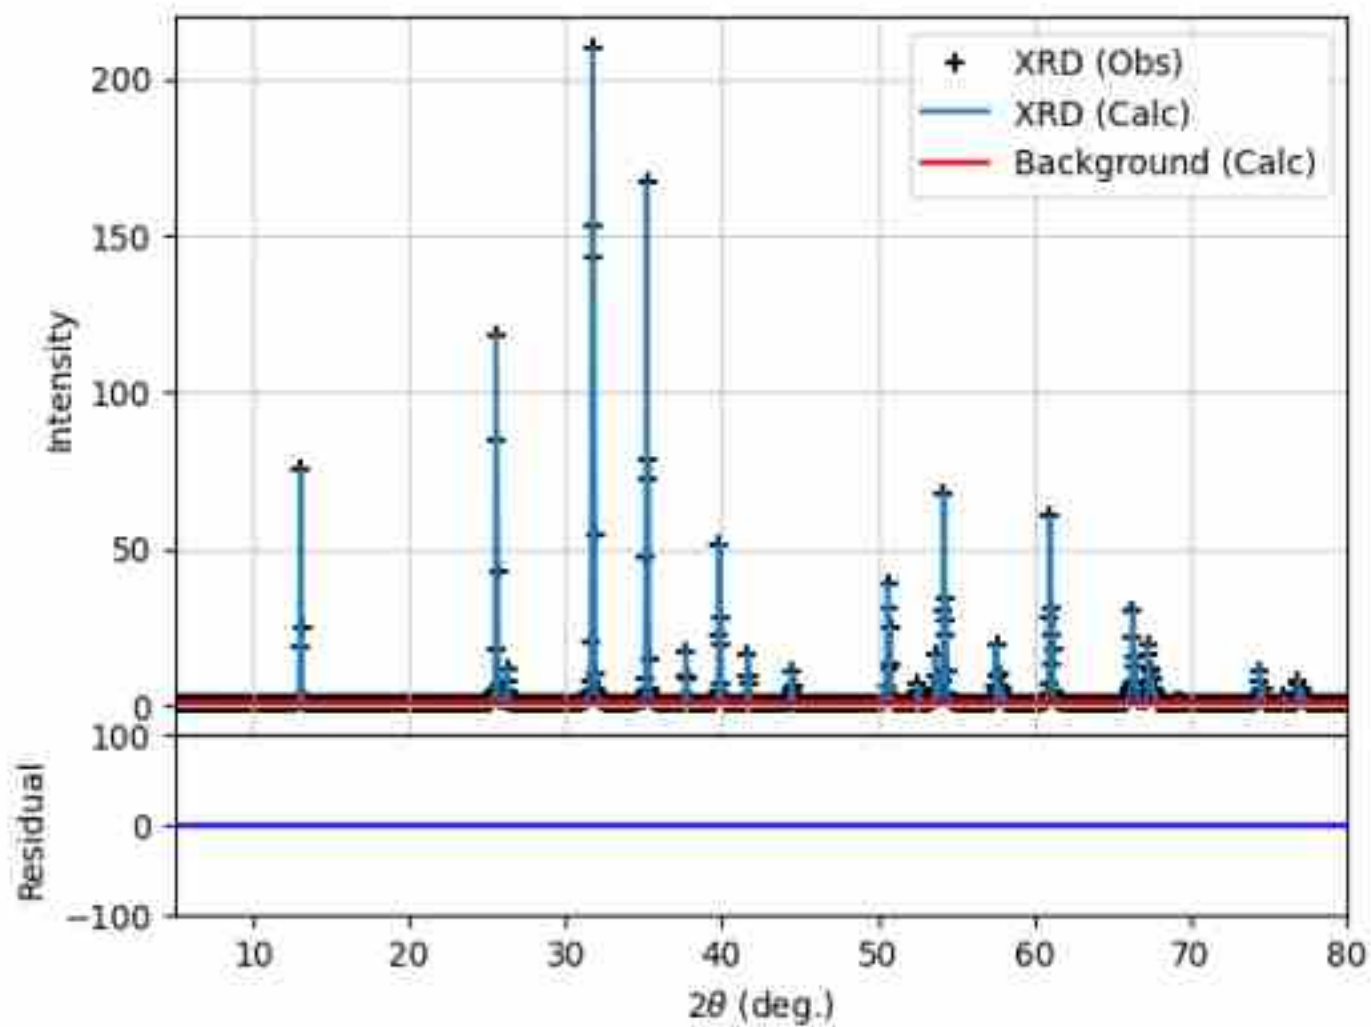

| RMSE before RR | Rwp     | RMSE after RR |
|----------------|---------|---------------|
| 0.021          | 0.00177 | 0.00057       |

# Ca<sub>2</sub>CuCl<sub>2</sub>O<sub>2</sub>

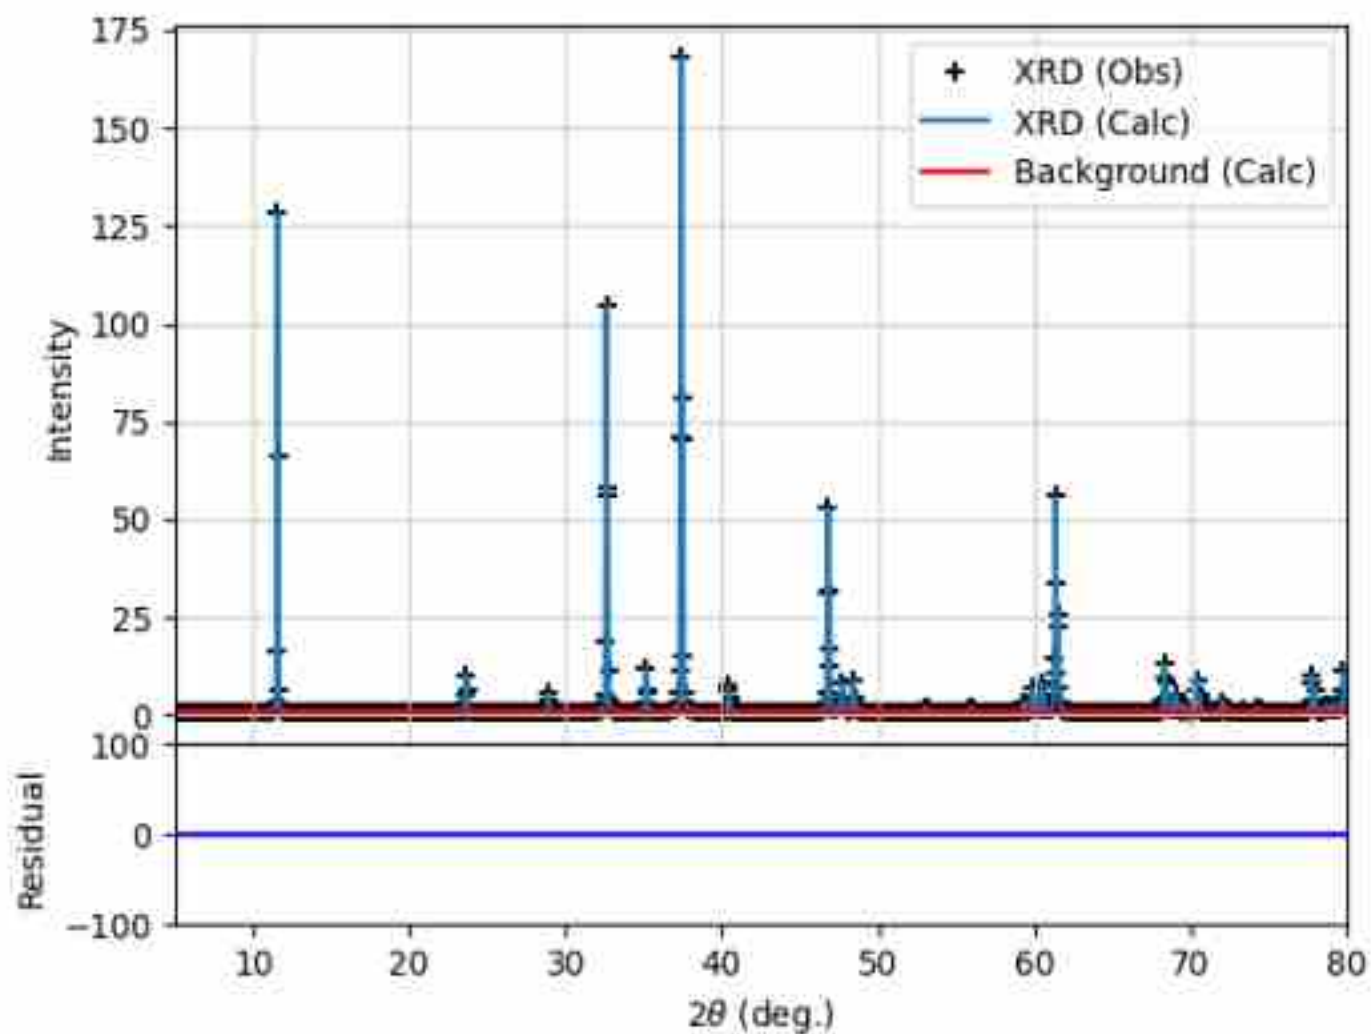

| RMSE before RR | Rwp     | RMSE after RR |
|----------------|---------|---------------|
| 0.021          | 0.00562 | 0.00256       |

# Ca<sub>2</sub>Ge<sub>4</sub>O<sub>10</sub>

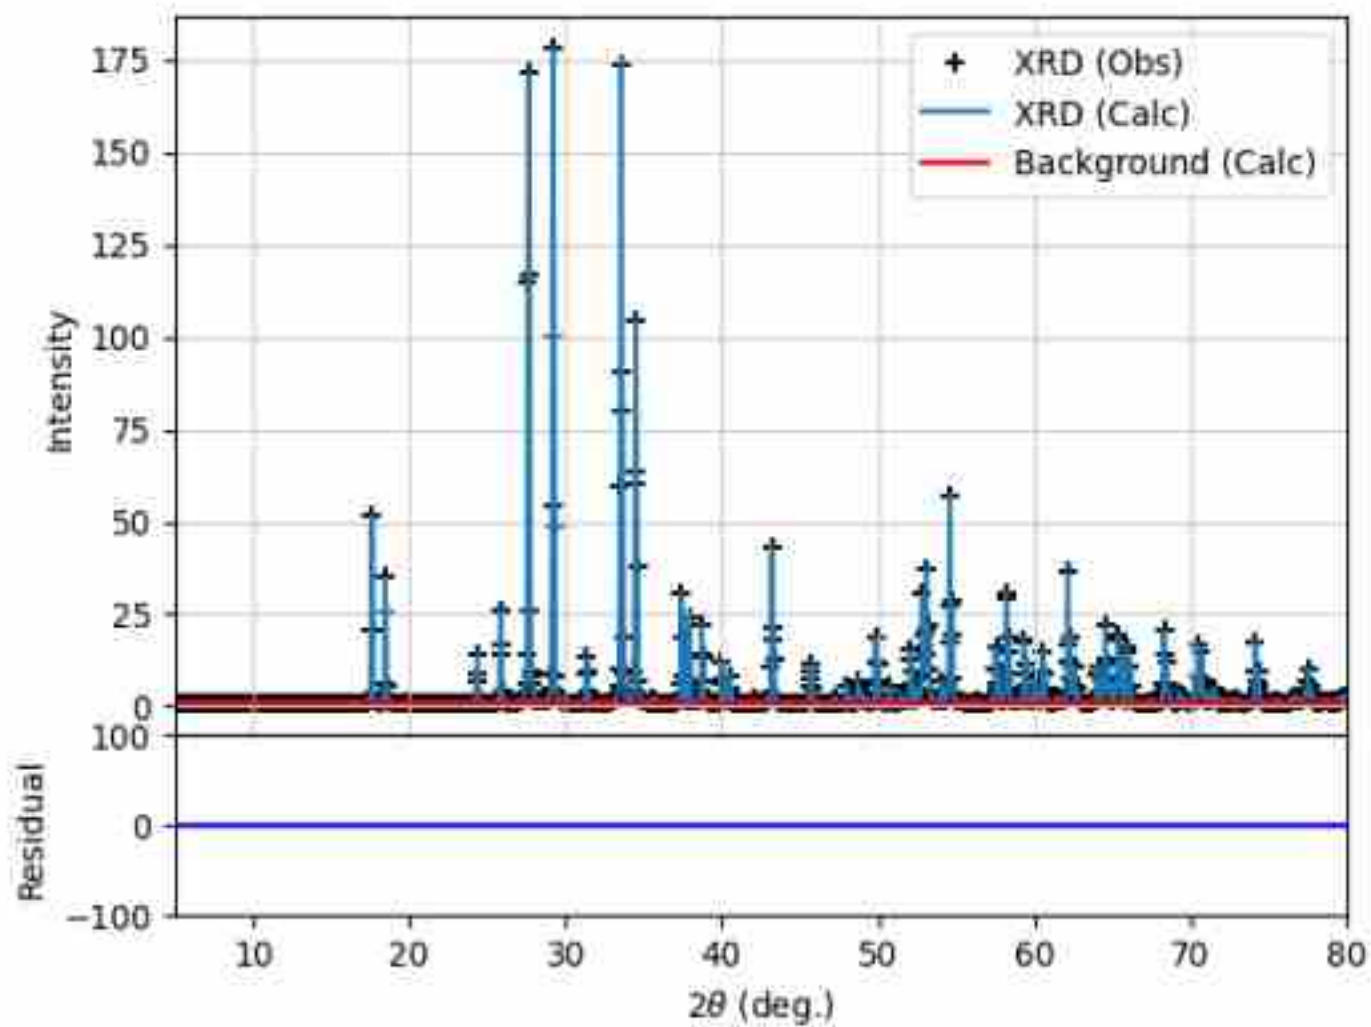

| RMSE before RR | Rwp     | RMSE after RR |
|----------------|---------|---------------|
| 0.021          | 0.00321 | 0.0007        |

# Ca<sub>2</sub>La<sub>2</sub>Ga<sub>2</sub>Cu<sub>2</sub>O<sub>10</sub>

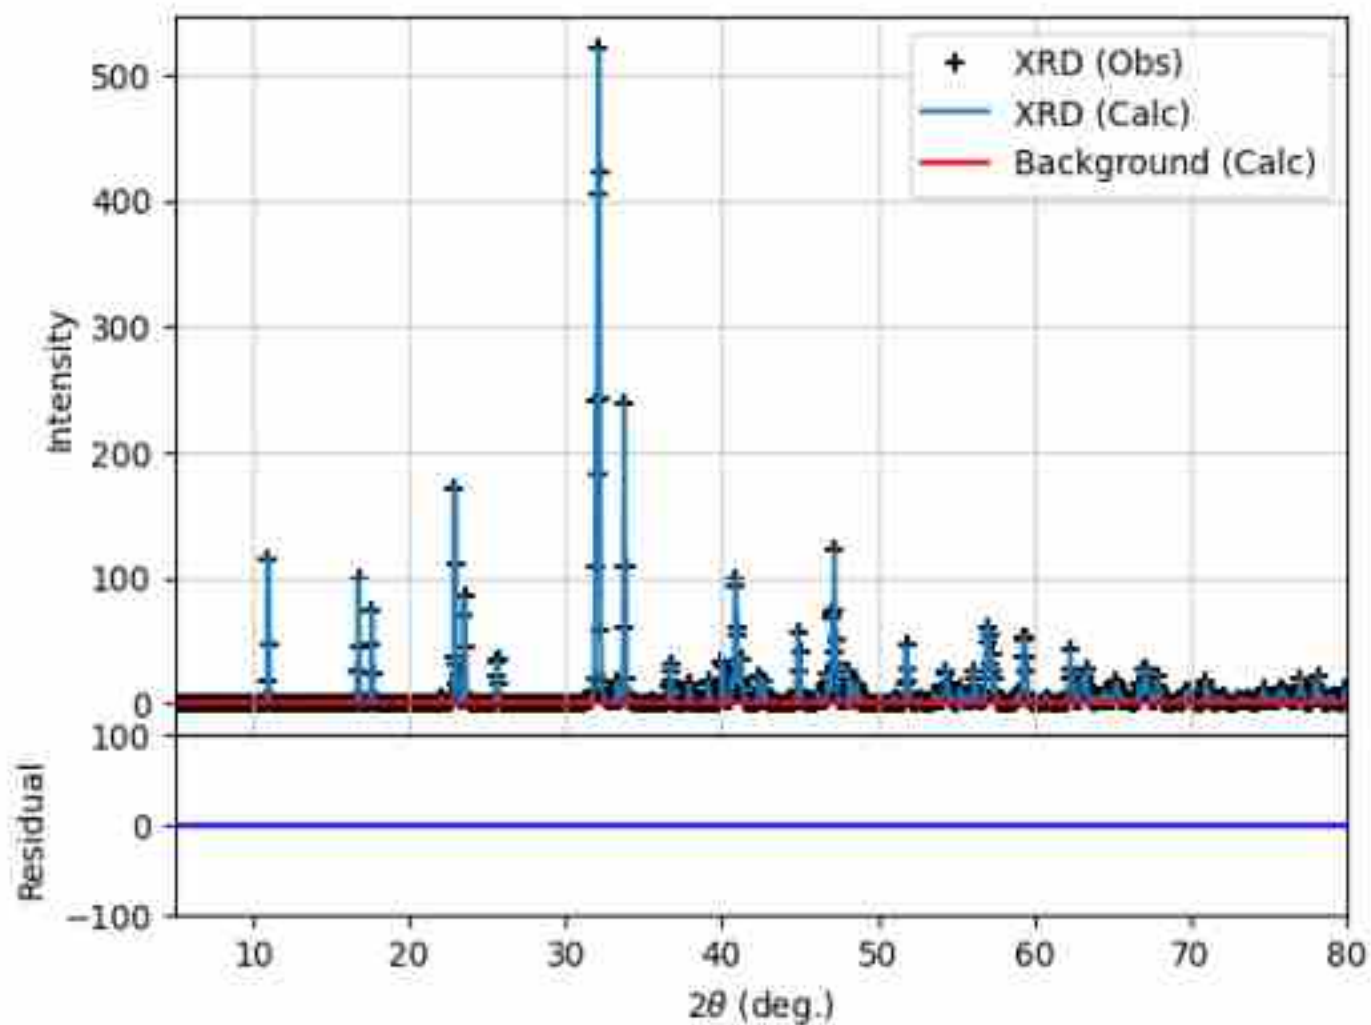

| RMSE before RR | Rwp     | RMSE after RR |
|----------------|---------|---------------|
| 0.021          | 0.00259 | 0.00064       |



# Ca<sub>2</sub>Mn<sub>4</sub>O<sub>8</sub>

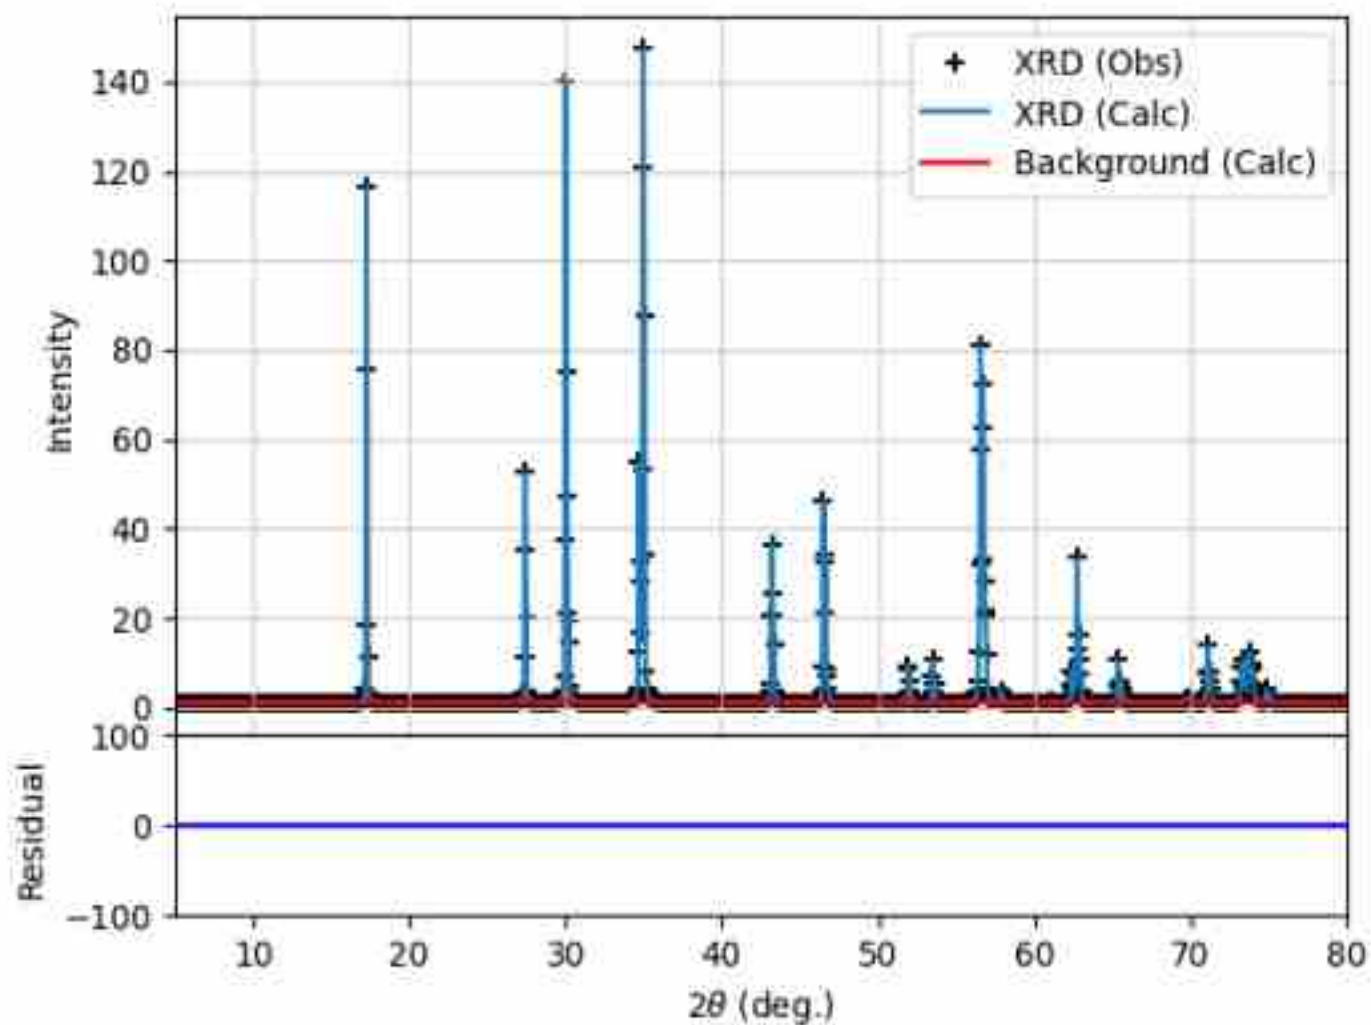

| RMSE before RR | Rwp     | RMSE after RR |
|----------------|---------|---------------|
| 0.021          | 0.00165 | 0.00086       |

# Ca<sub>2</sub>Nd<sub>2</sub>Co<sub>2</sub>O<sub>8</sub>

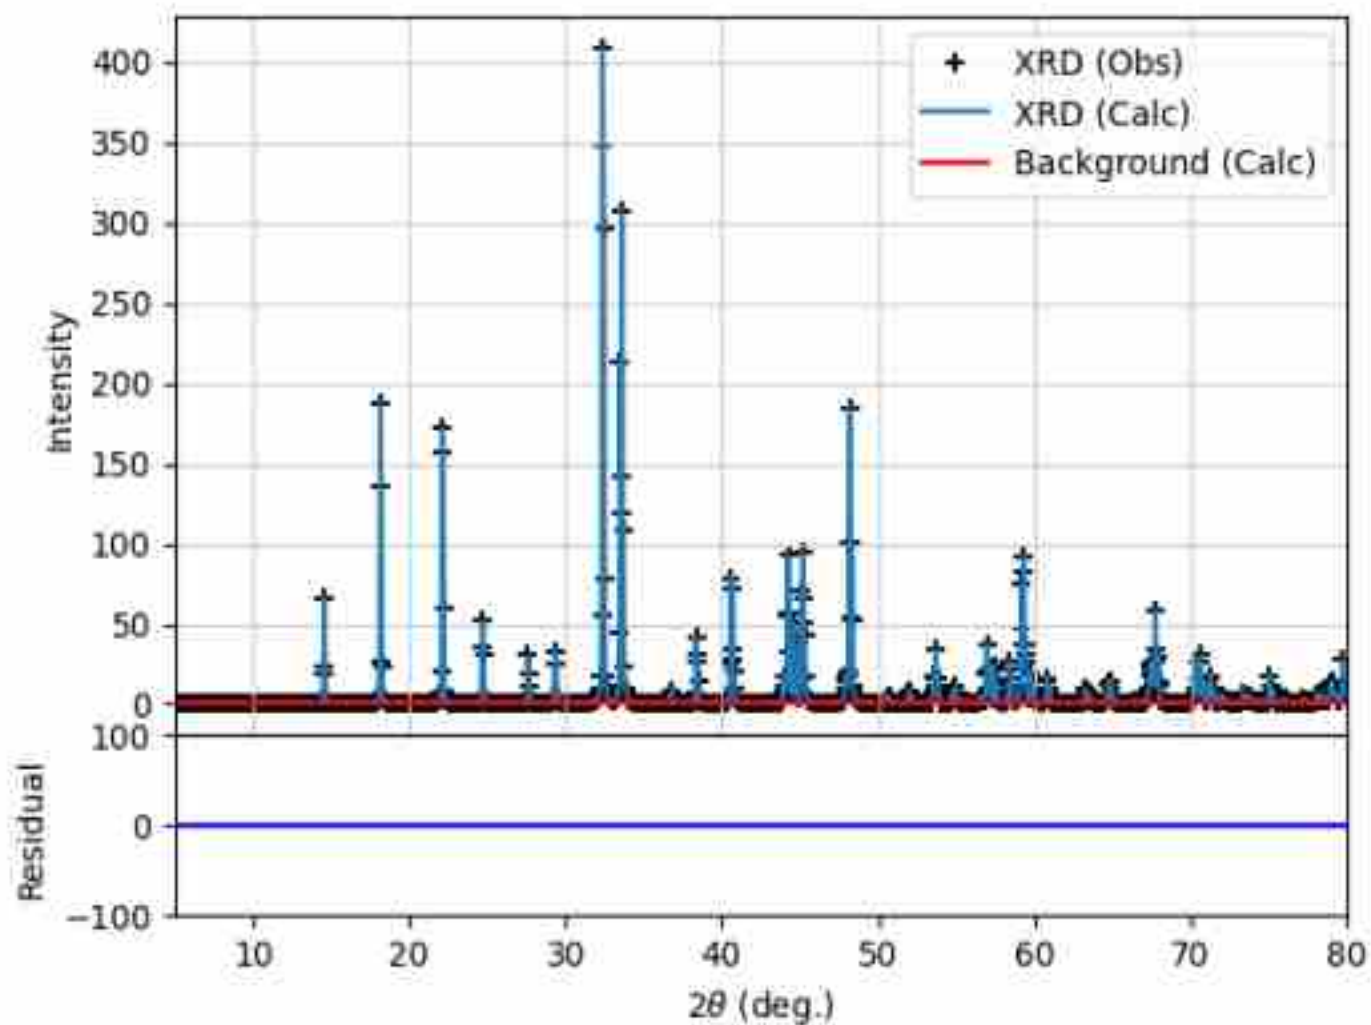

| RMSE before RR | Rwp    | RMSE after RR |
|----------------|--------|---------------|
| 0.021          | 0.0033 | 0.00074       |

# Ca<sub>2</sub>TiAlSi<sub>2</sub>O<sub>9</sub>F

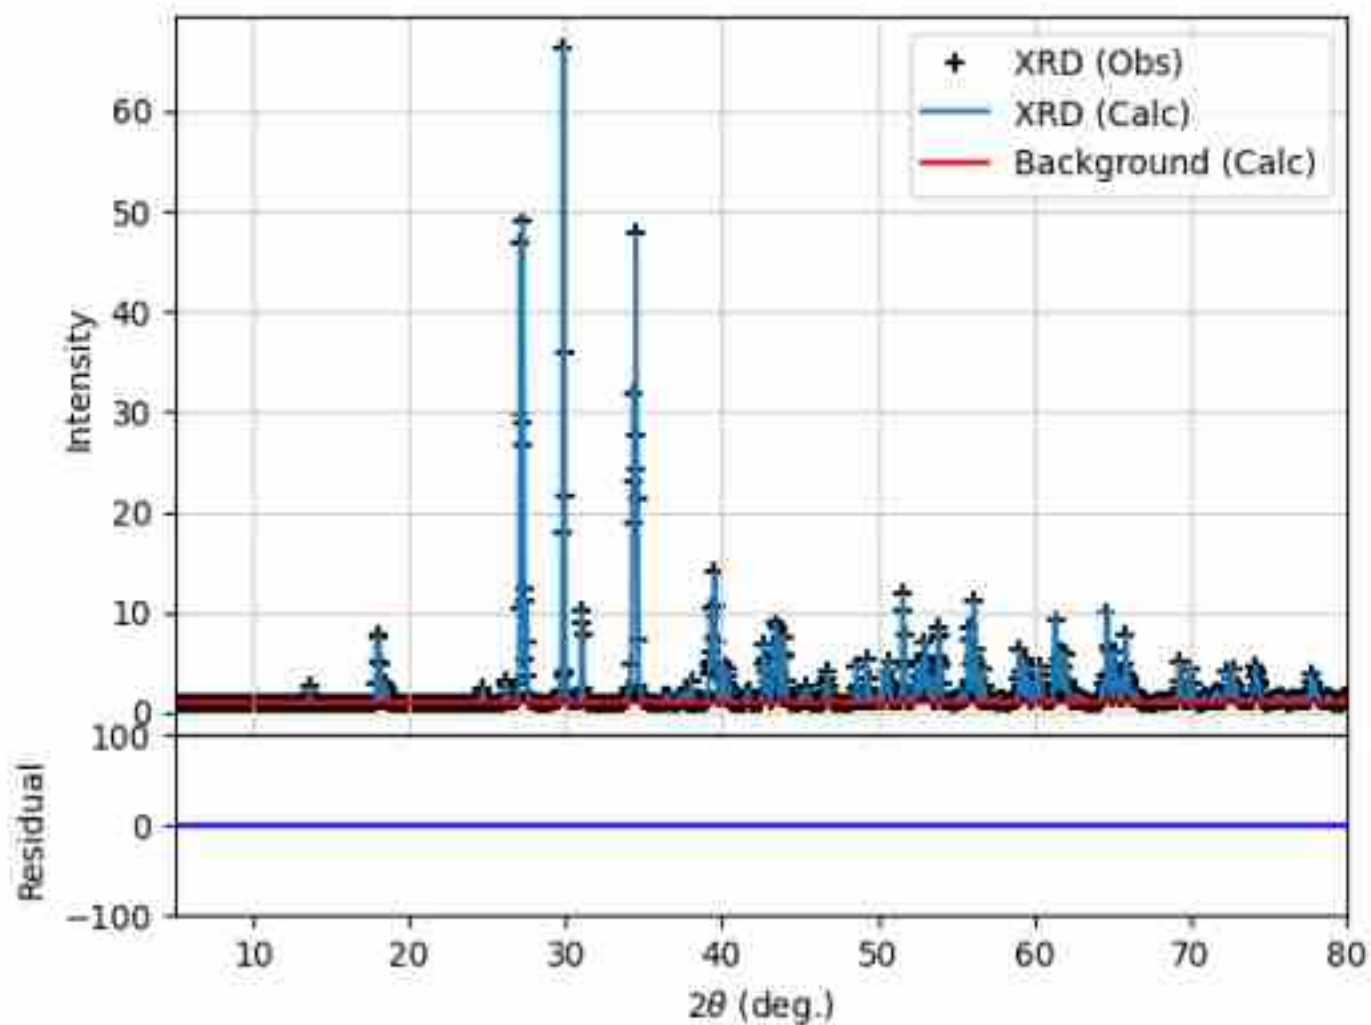

| RMSE before RR | Rwp     | RMSE after RR |
|----------------|---------|---------------|
| 0.021          | 0.00104 | 0.0           |

# Ca<sub>2</sub>Ti<sub>2</sub>O<sub>6</sub>

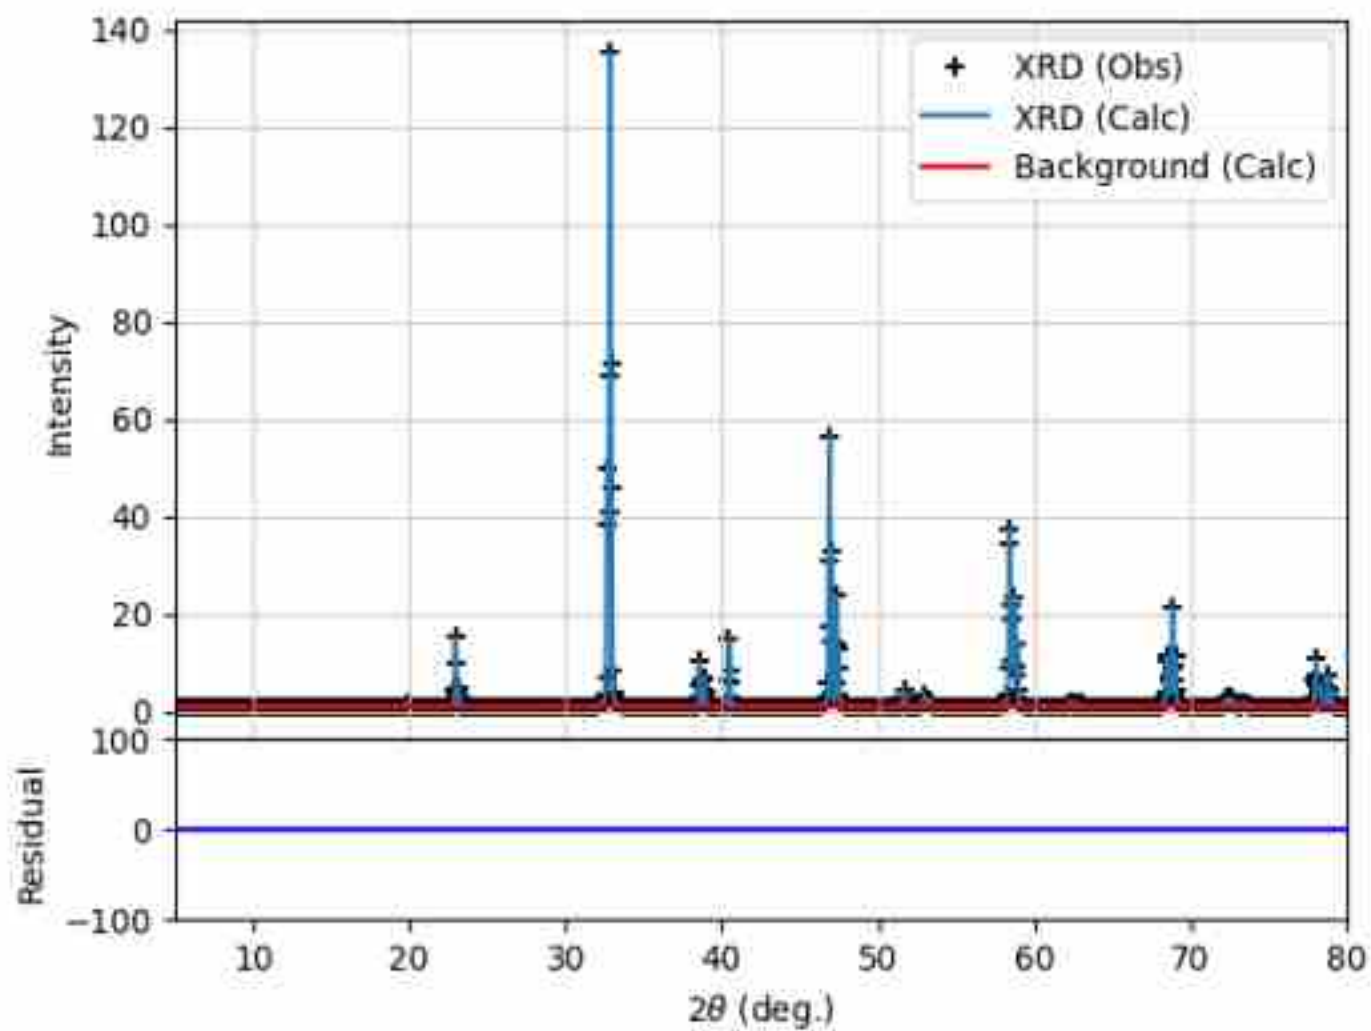

| RMSE before RR | Rwp     | RMSE after RR |
|----------------|---------|---------------|
| 0.021          | 0.00228 | 0.0011        |

# Ca<sub>4</sub>Cd<sub>2</sub>As<sub>4</sub>

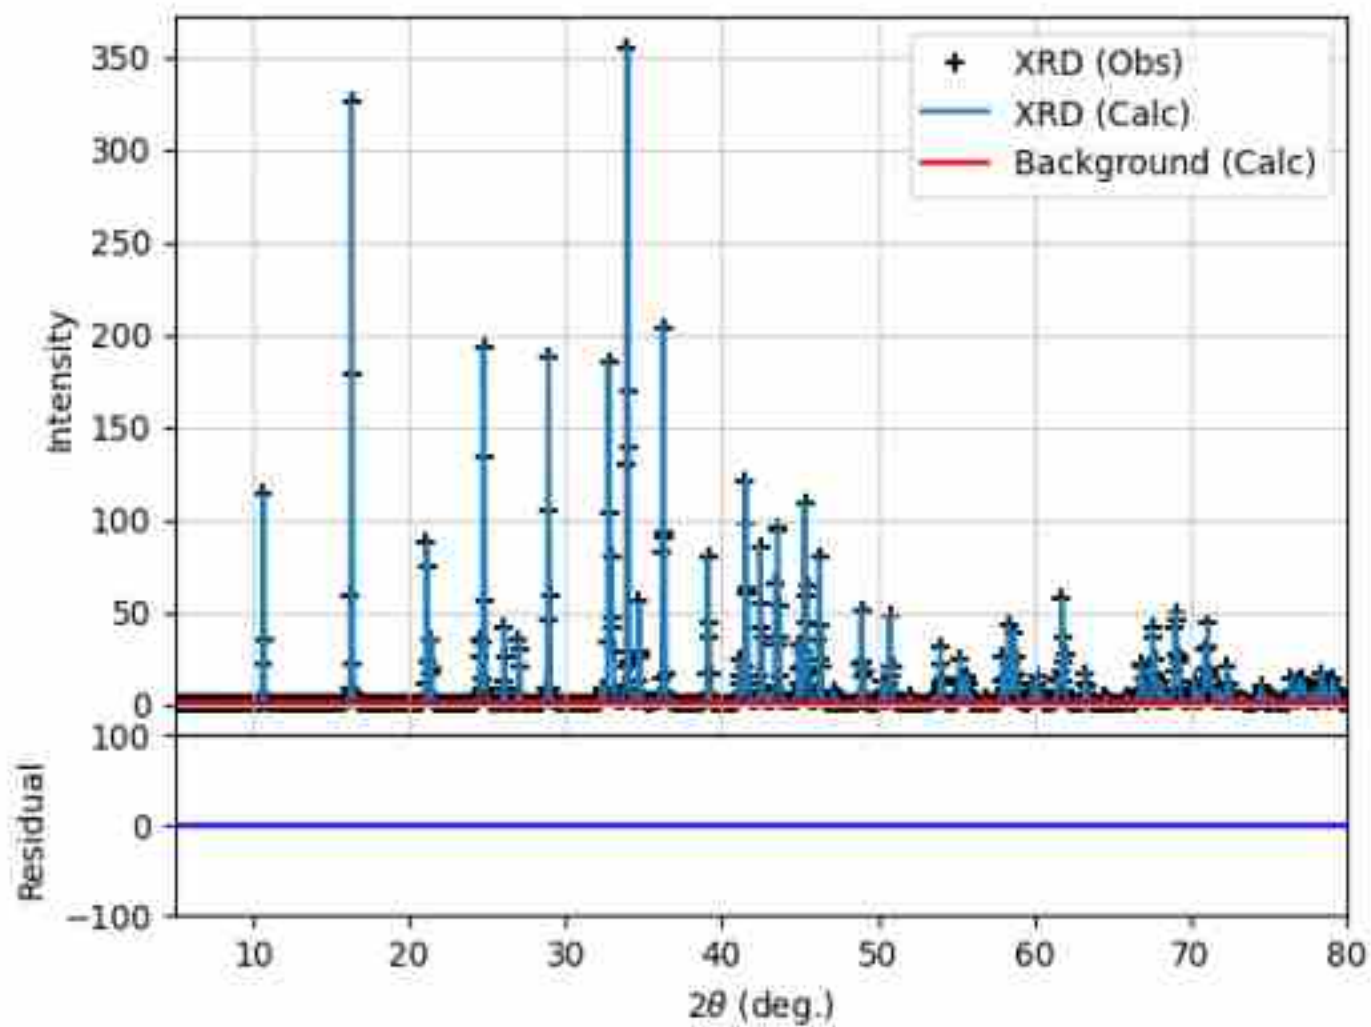

| RMSE before RR | Rwp     | RMSE after RR |
|----------------|---------|---------------|
| 0.021          | 0.00333 | 0.00058       |

# Ca<sub>4</sub>Gd<sub>1</sub>B<sub>3</sub>O<sub>10</sub>

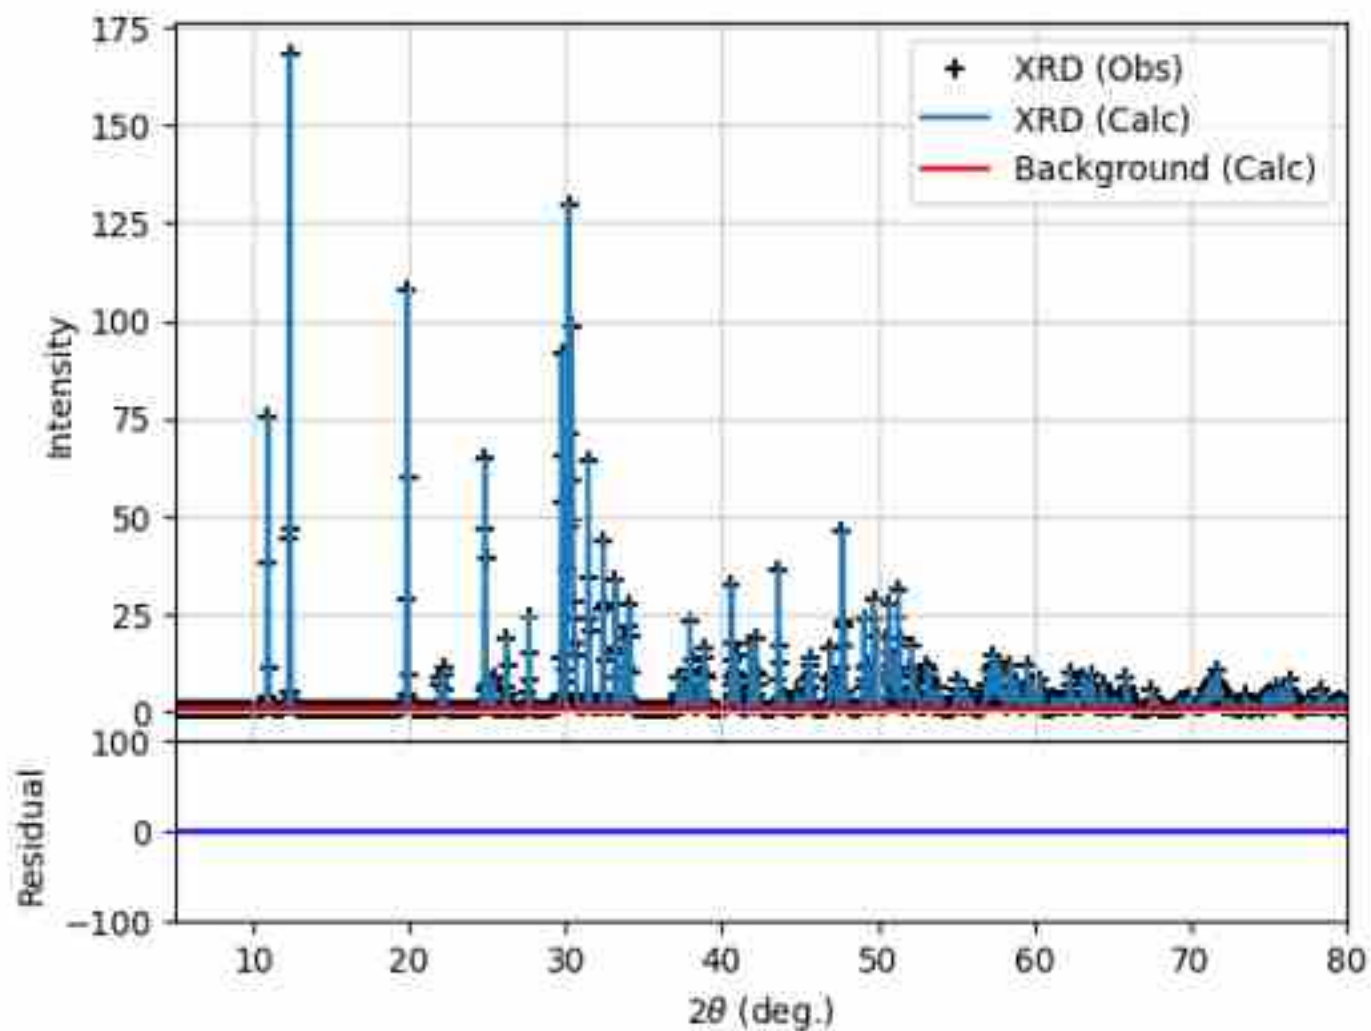

| RMSE before RR | Rwp     | RMSE after RR |
|----------------|---------|---------------|
| 0.021          | 0.00296 | 0.00091       |

# Ca6U2O12

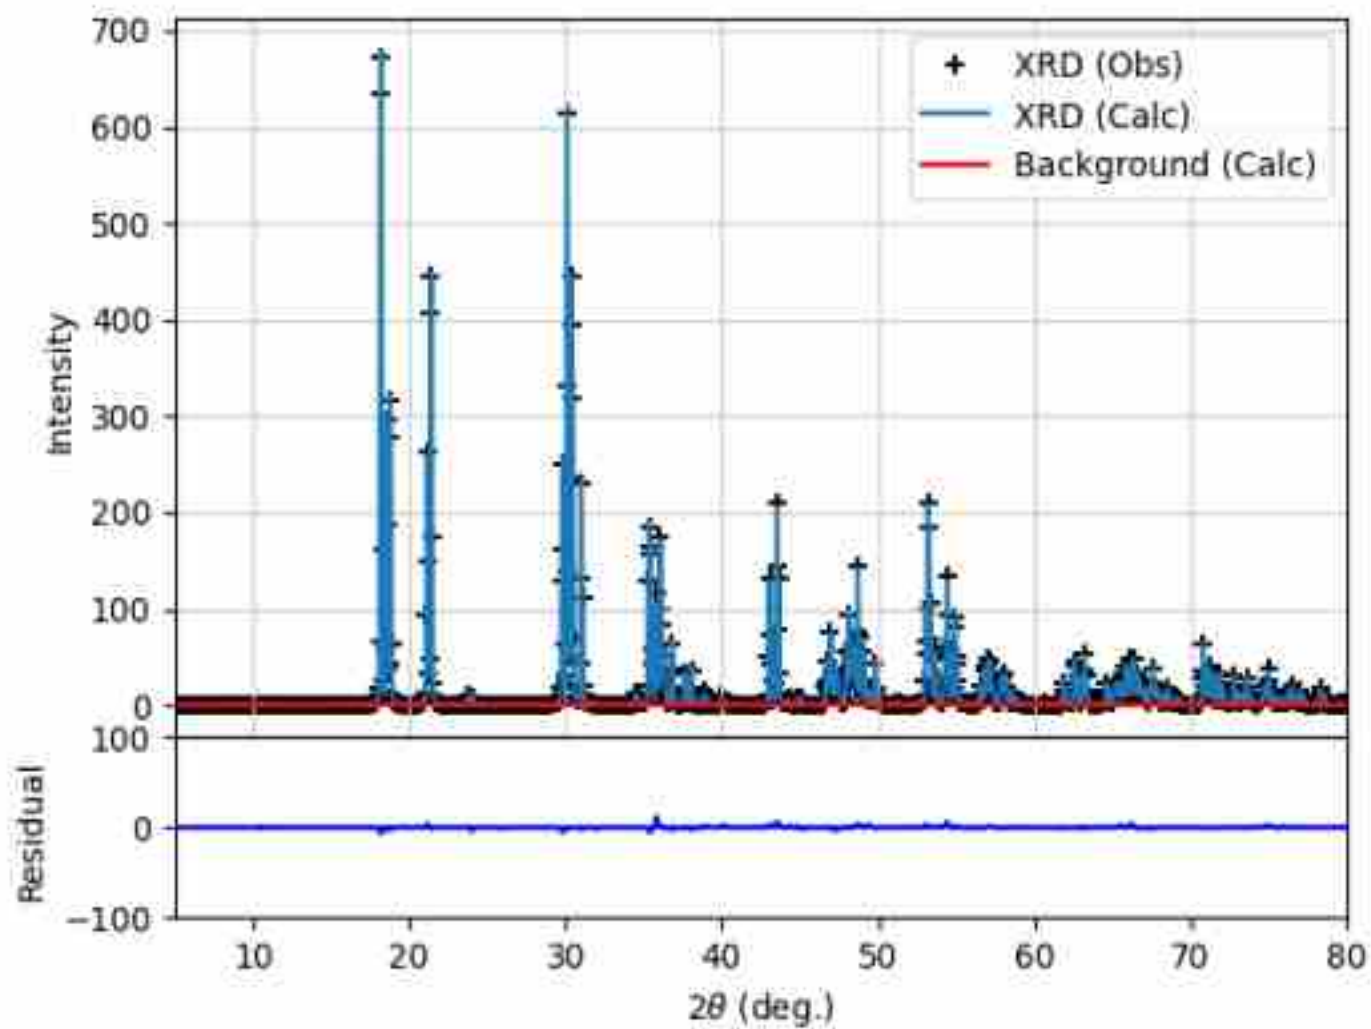

| RMSE before RR | Rwp     | RMSE after RR |
|----------------|---------|---------------|
| 0.021          | 4.69138 | 0.35404       |

# Ca10Au4

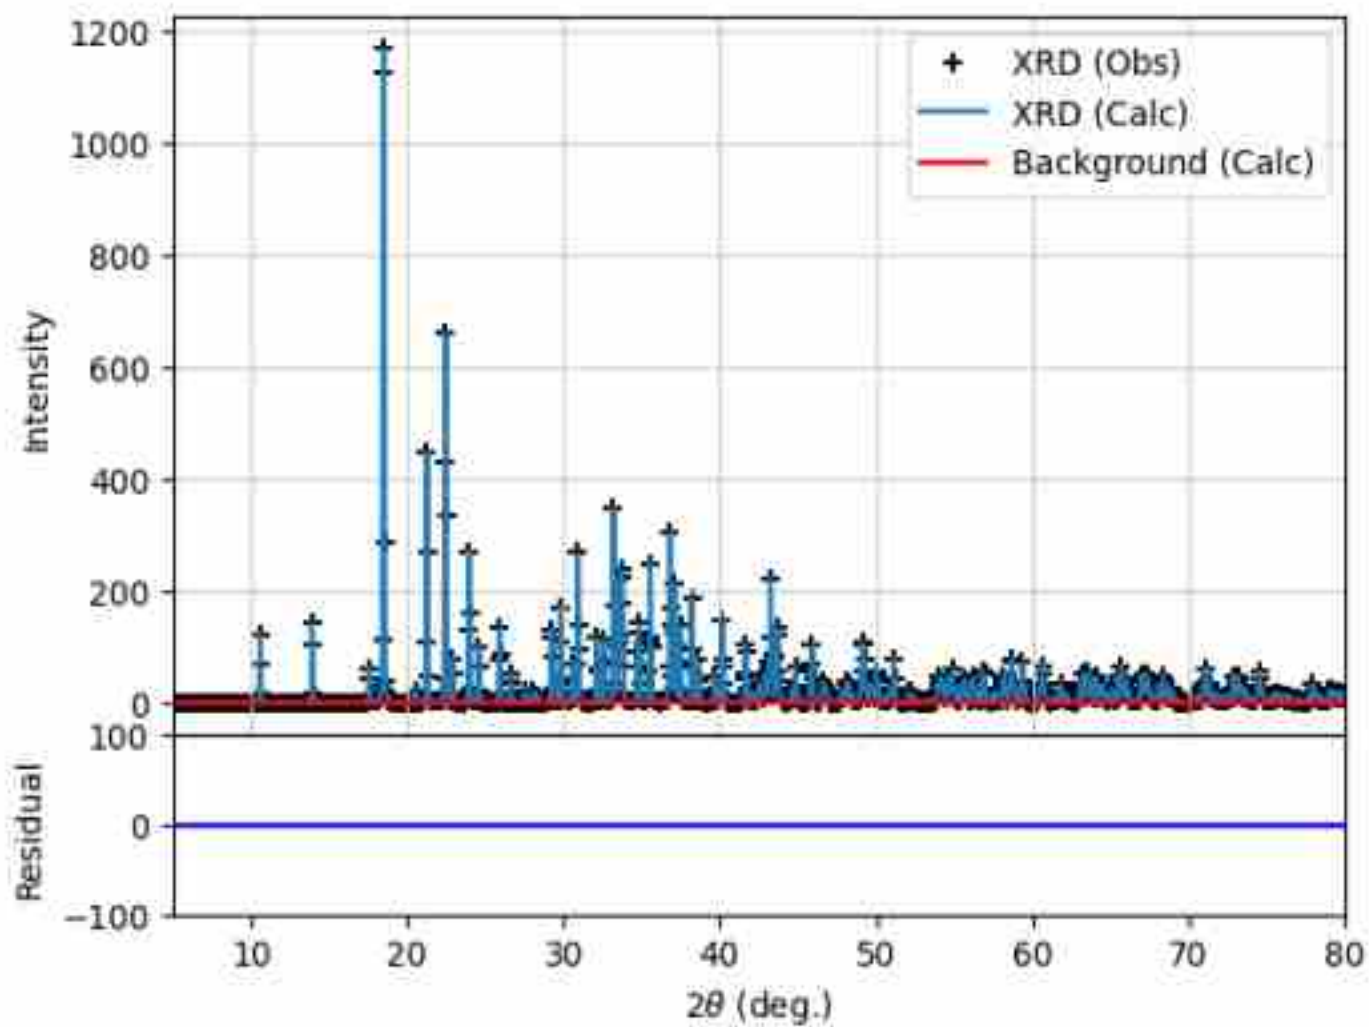

| RMSE before RR | Rwp     | RMSE after RR |
|----------------|---------|---------------|
| 0.021          | 0.00393 | 0.00057       |



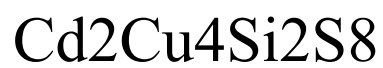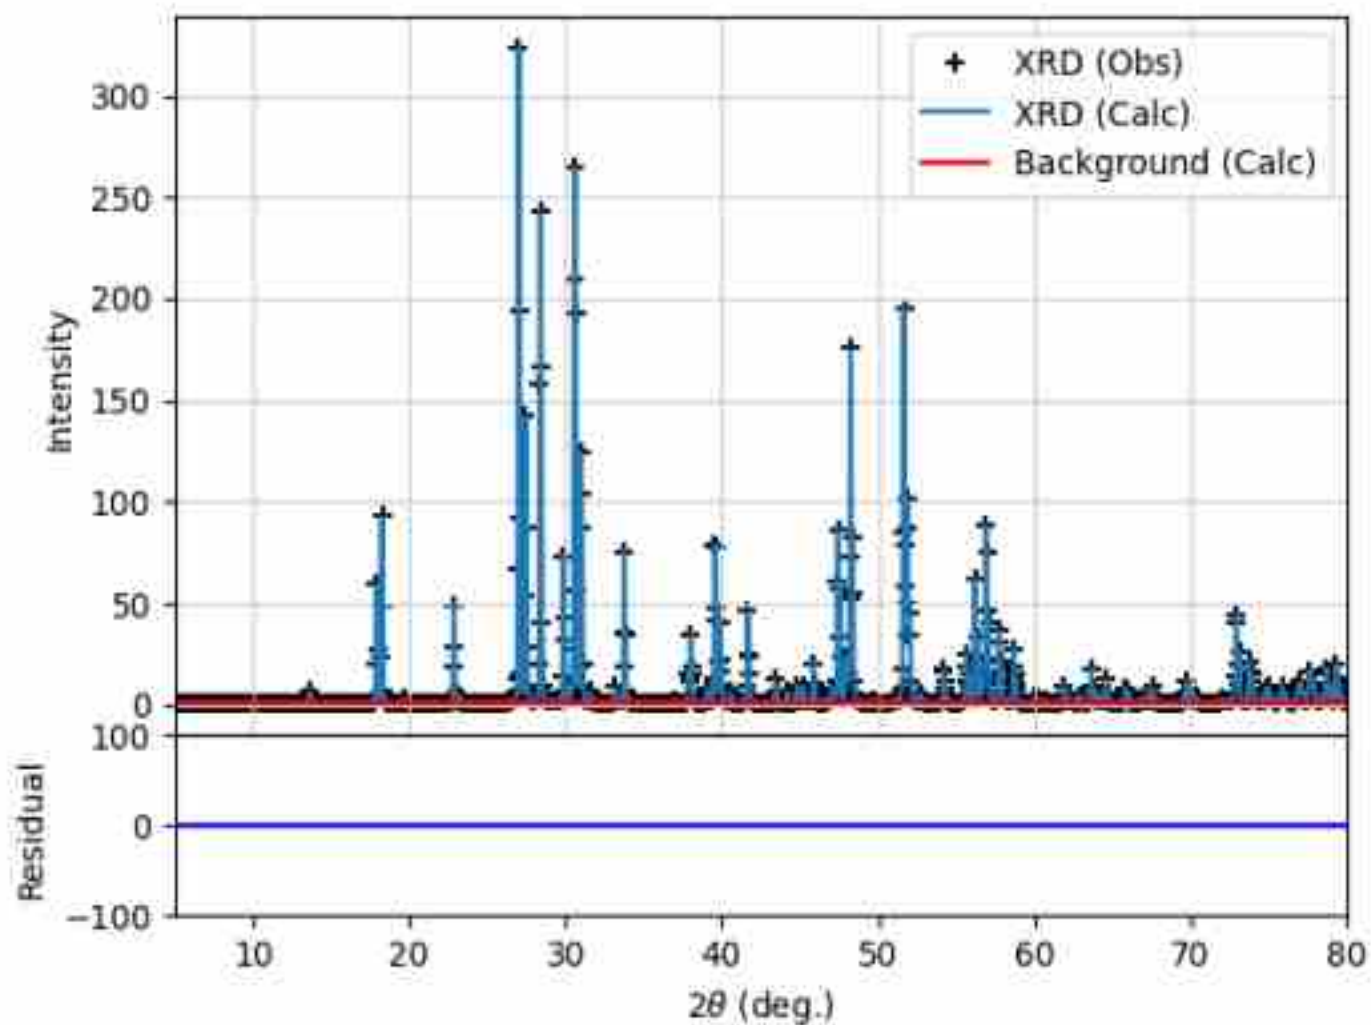

| RMSE before RR | Rwp     | RMSE after RR |
|----------------|---------|---------------|
| 0.021          | 0.00414 | 0.00058       |

# Cd4F8

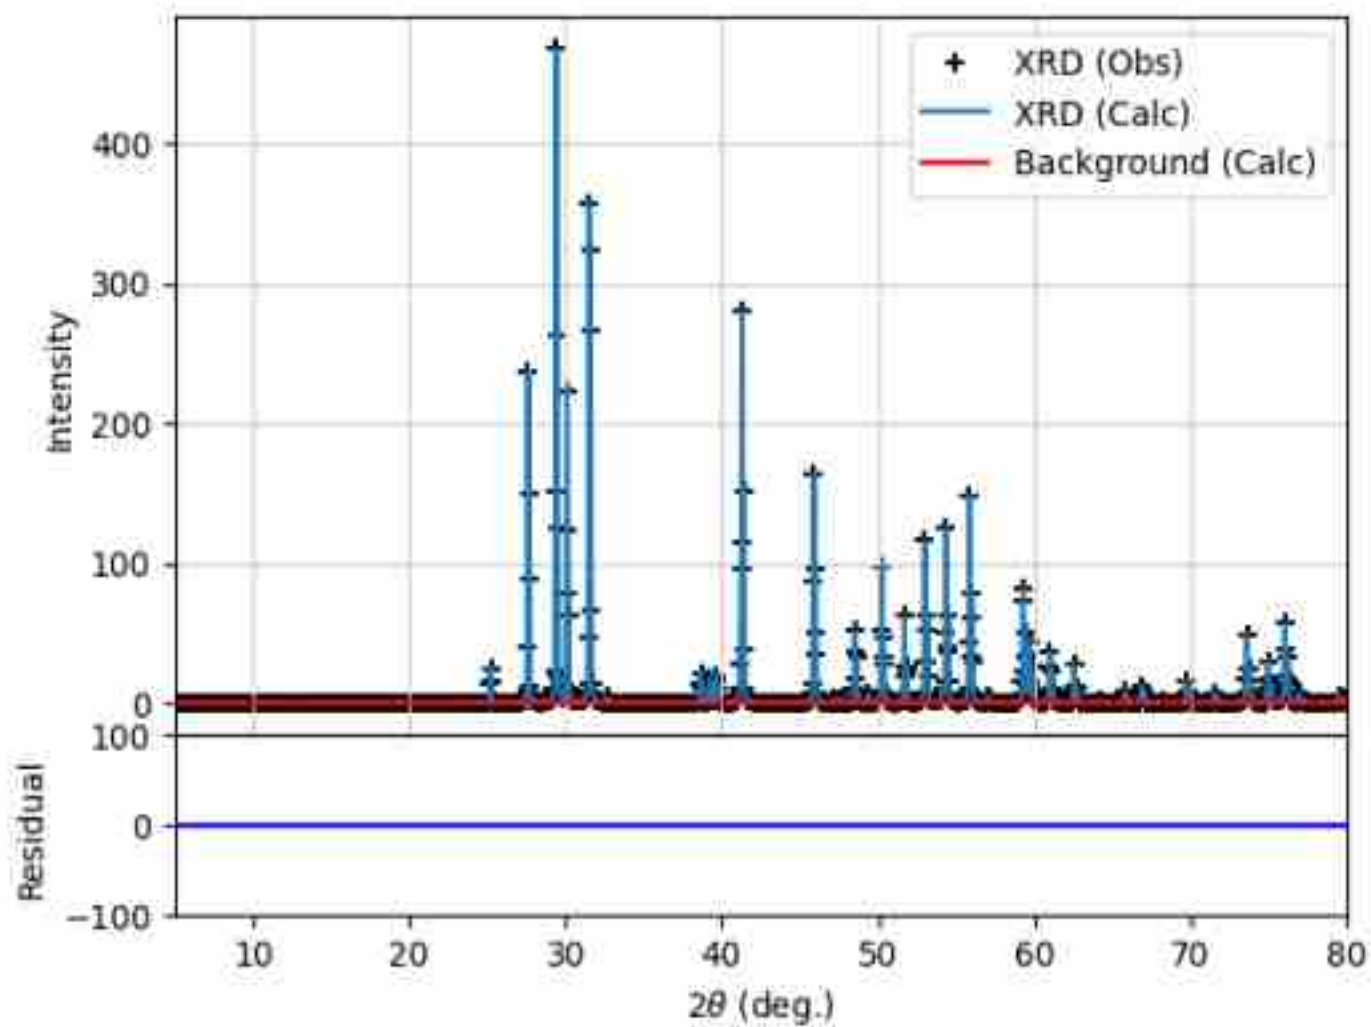

| RMSE before RR | Rwp     | RMSE after RR |
|----------------|---------|---------------|
| 0.021          | 0.00375 | 0.00115       |

# Ce<sub>2</sub>Ir<sub>4</sub>

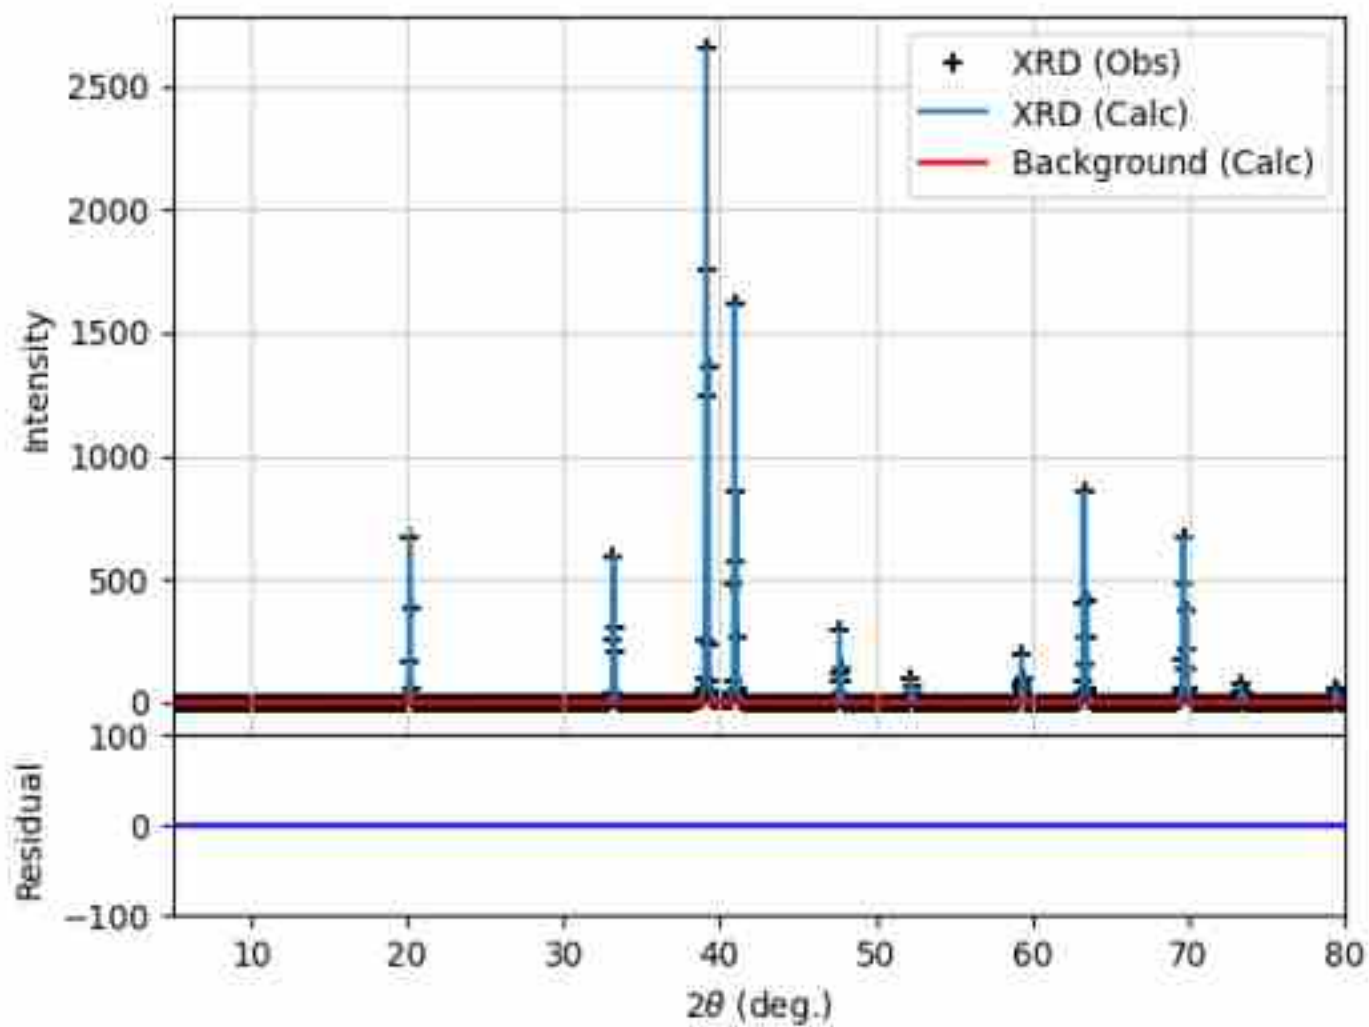

| RMSE before RR | Rwp     | RMSE after RR |
|----------------|---------|---------------|
| 0.021          | 0.01354 | 0.00071       |

# Ce3Al11

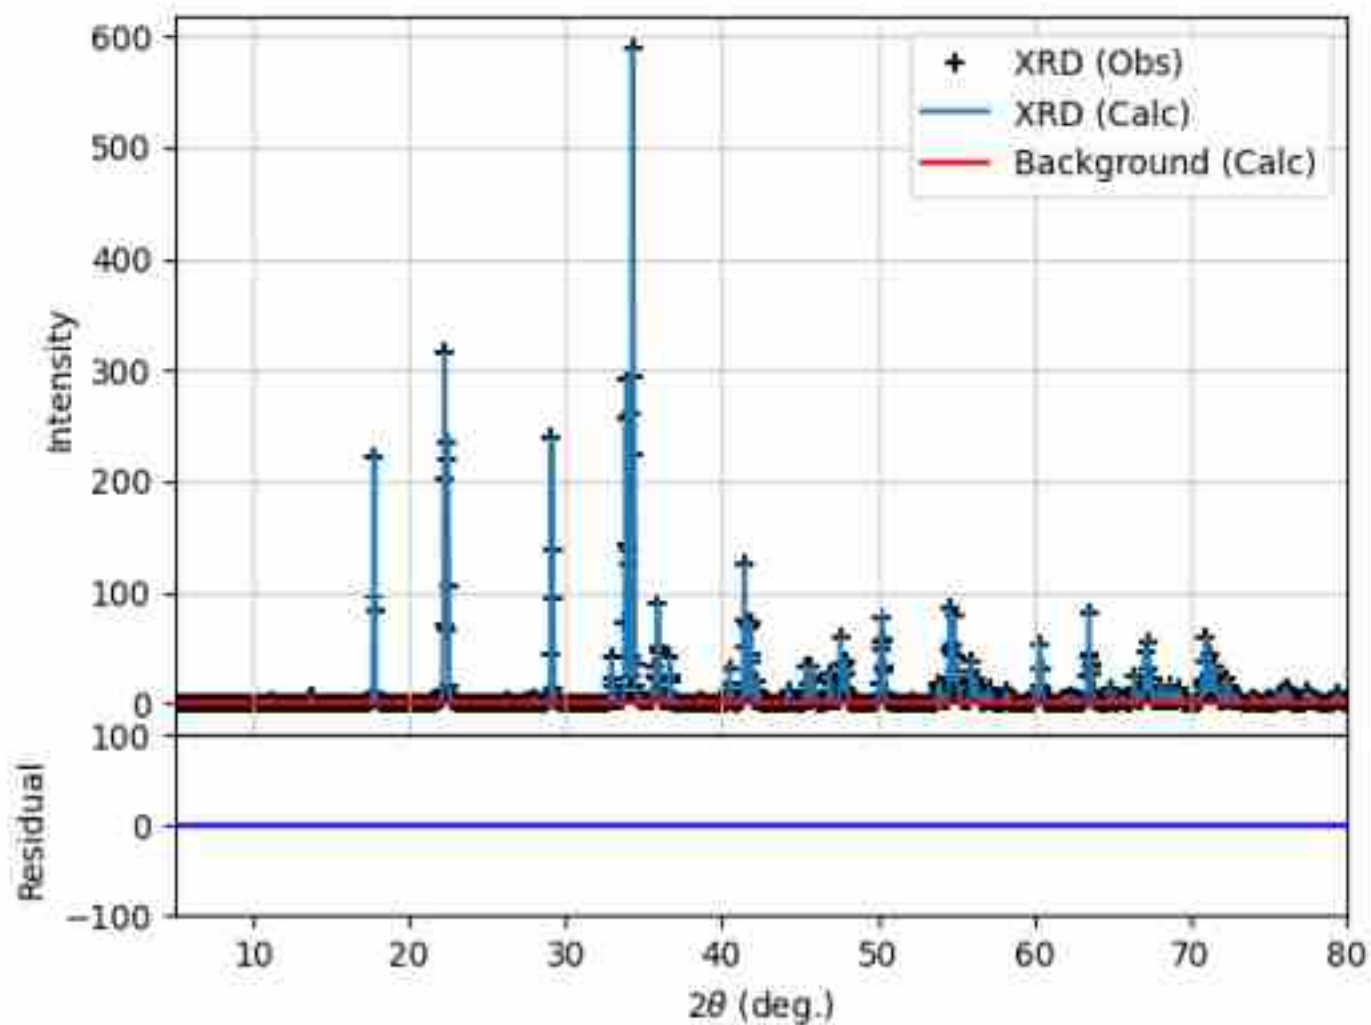

| RMSE before RR | Rwp     | RMSE after RR |
|----------------|---------|---------------|
| 0.021          | 0.00505 | 0.00131       |

# Co1Ni1Te4

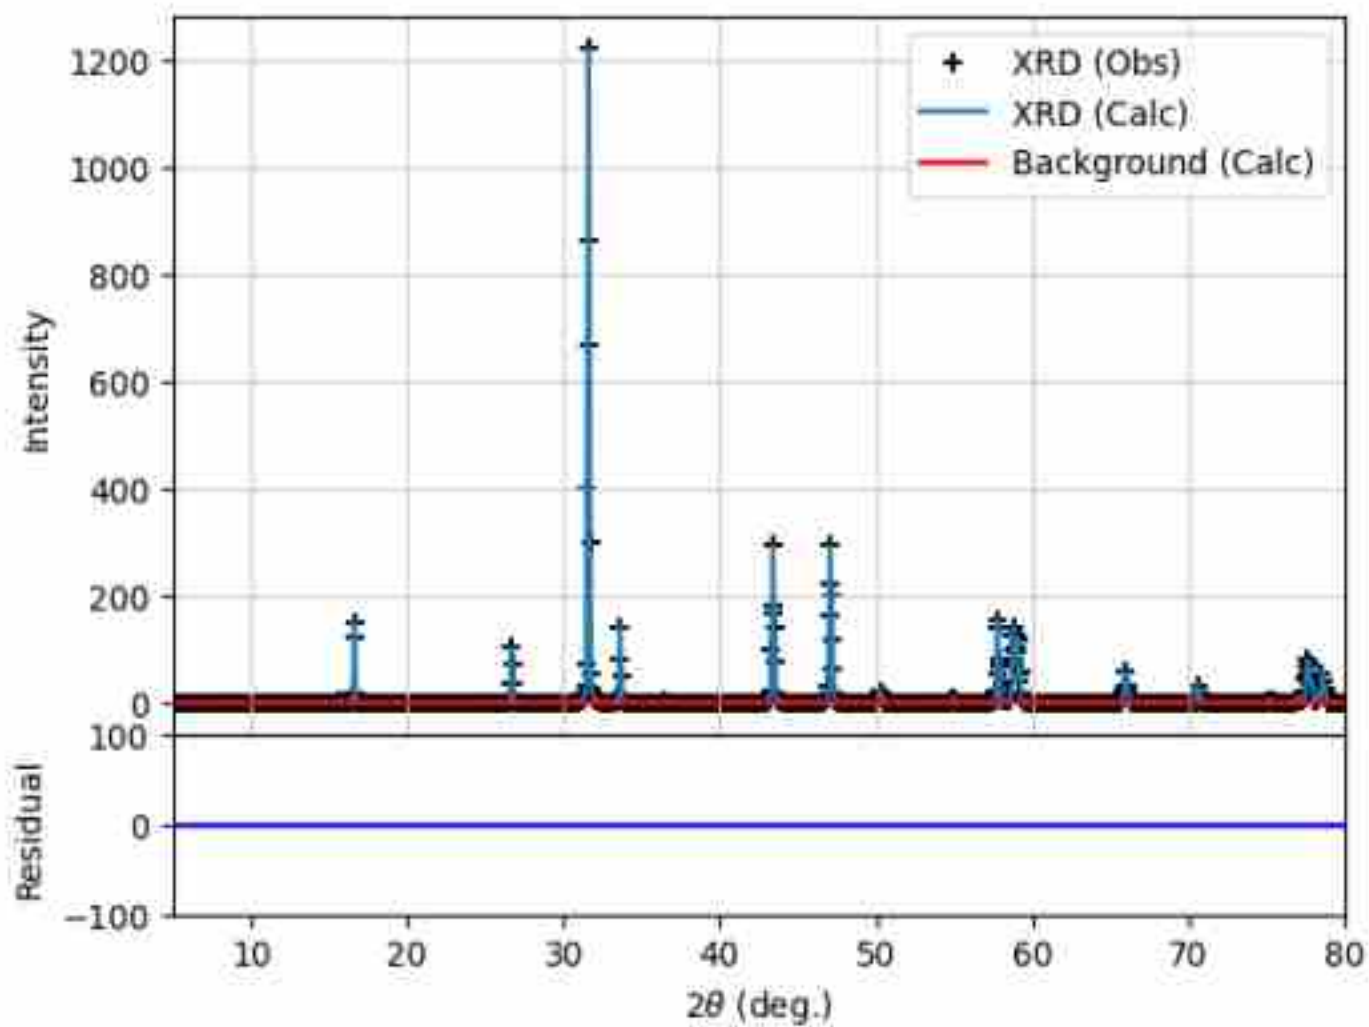

| RMSE before RR | Rwp     | RMSE after RR |
|----------------|---------|---------------|
| 0.021          | 0.00195 | 0.00019       |

# Co<sub>2</sub>Cu<sub>2</sub>Ni<sub>2</sub>S<sub>8</sub>

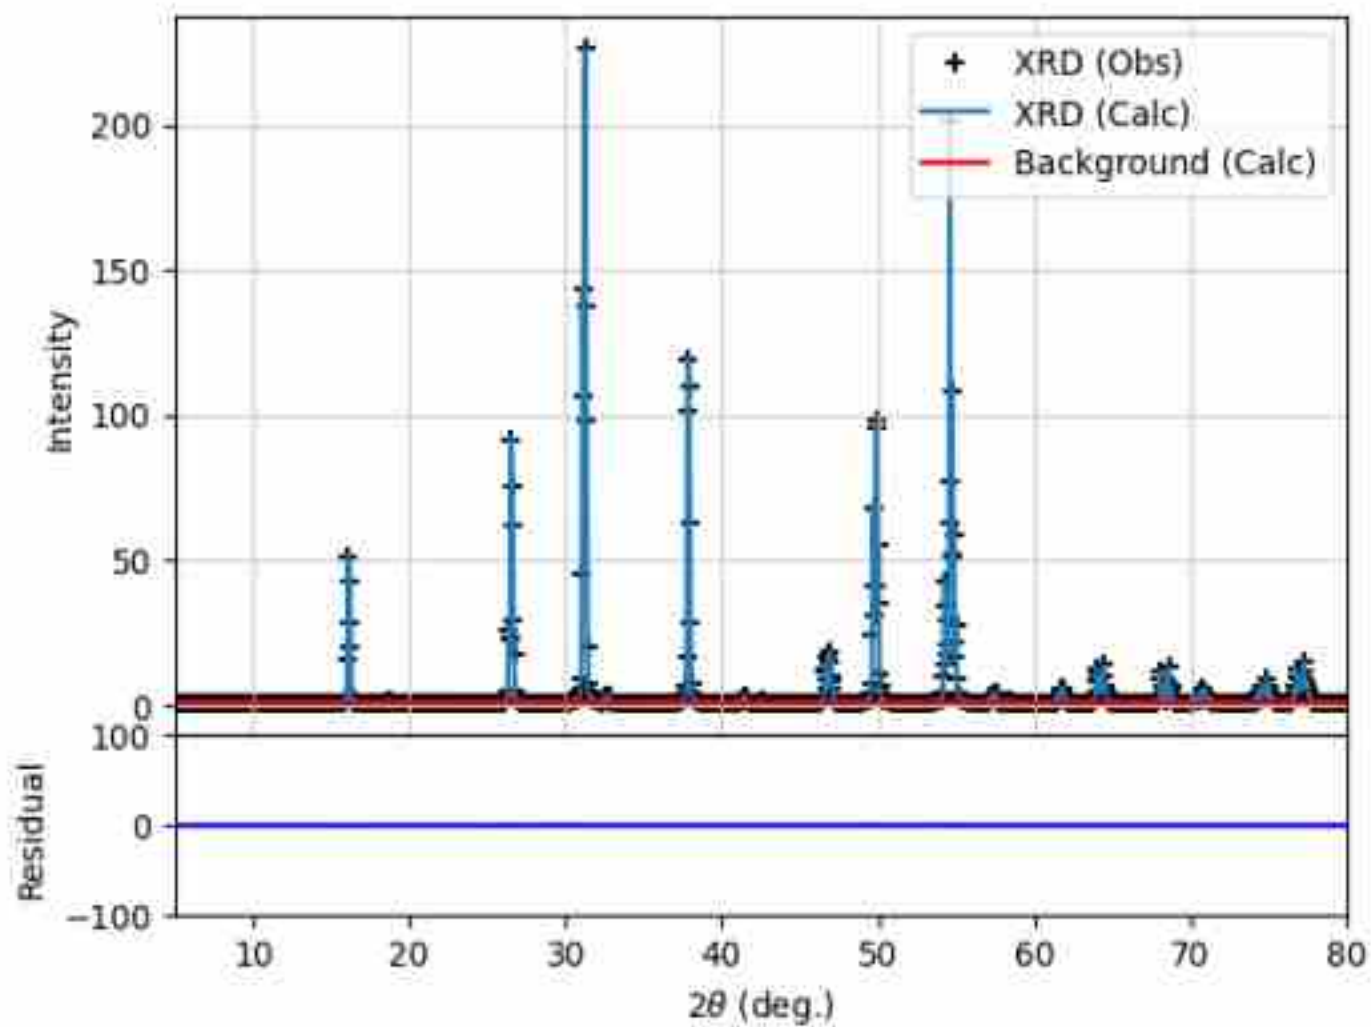

| RMSE before RR | Rwp     | RMSE after RR |
|----------------|---------|---------------|
| 0.021          | 0.98561 | 0.0141        |

# Cr<sub>2</sub>Ni<sub>1</sub>S<sub>4</sub>

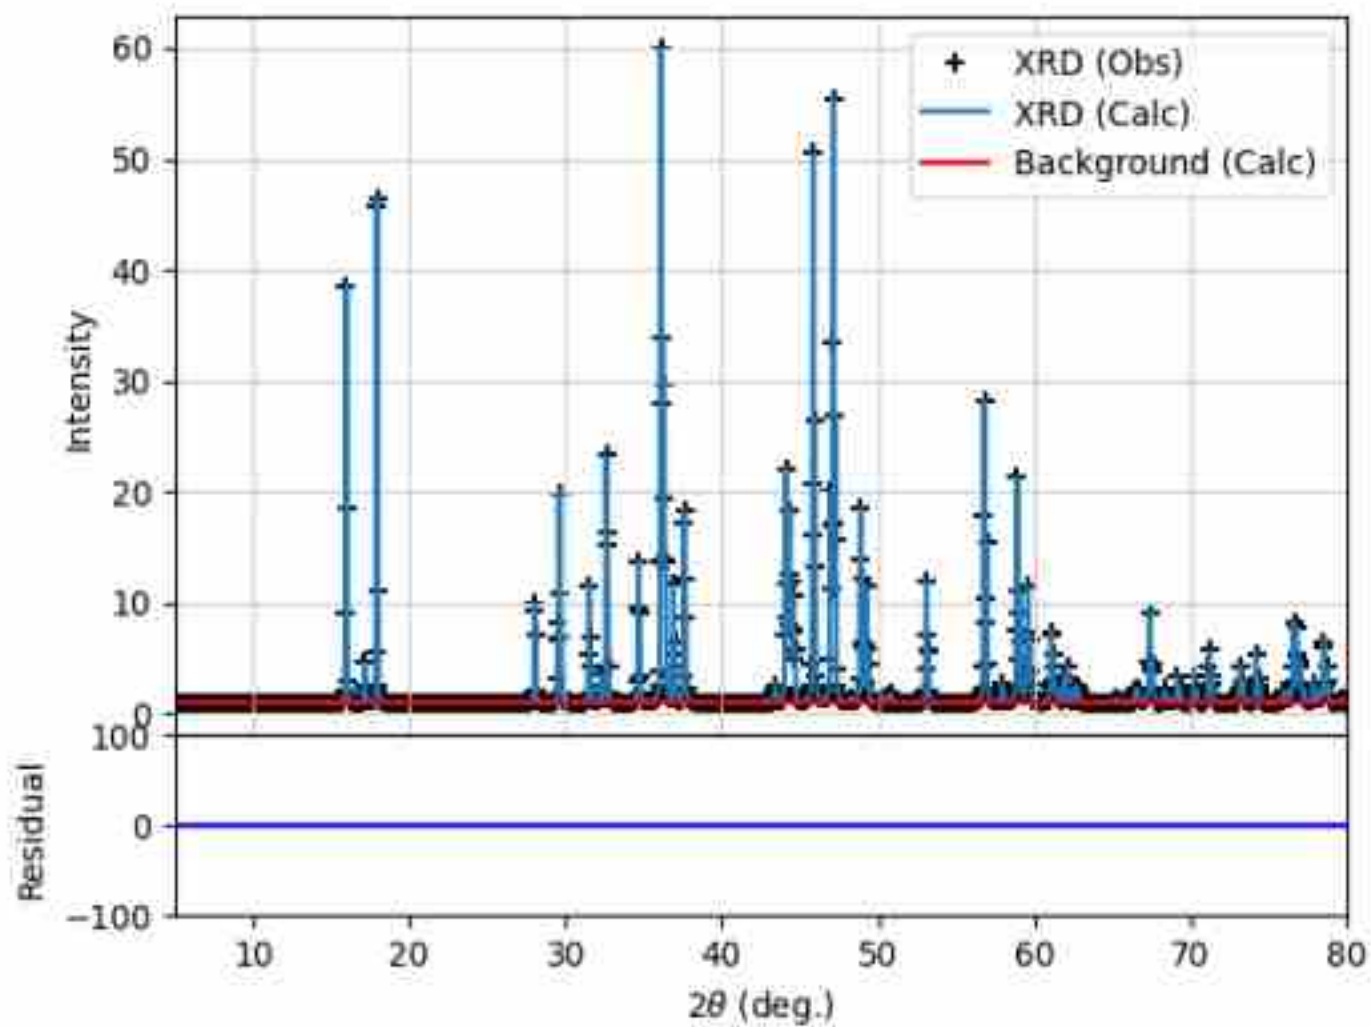

| RMSE before RR | Rwp     | RMSE after RR |
|----------------|---------|---------------|
| 0.021          | 0.00282 | 0.00045       |

# Cr<sub>4</sub>Cd<sub>1</sub>Cu<sub>1</sub>O<sub>8</sub>

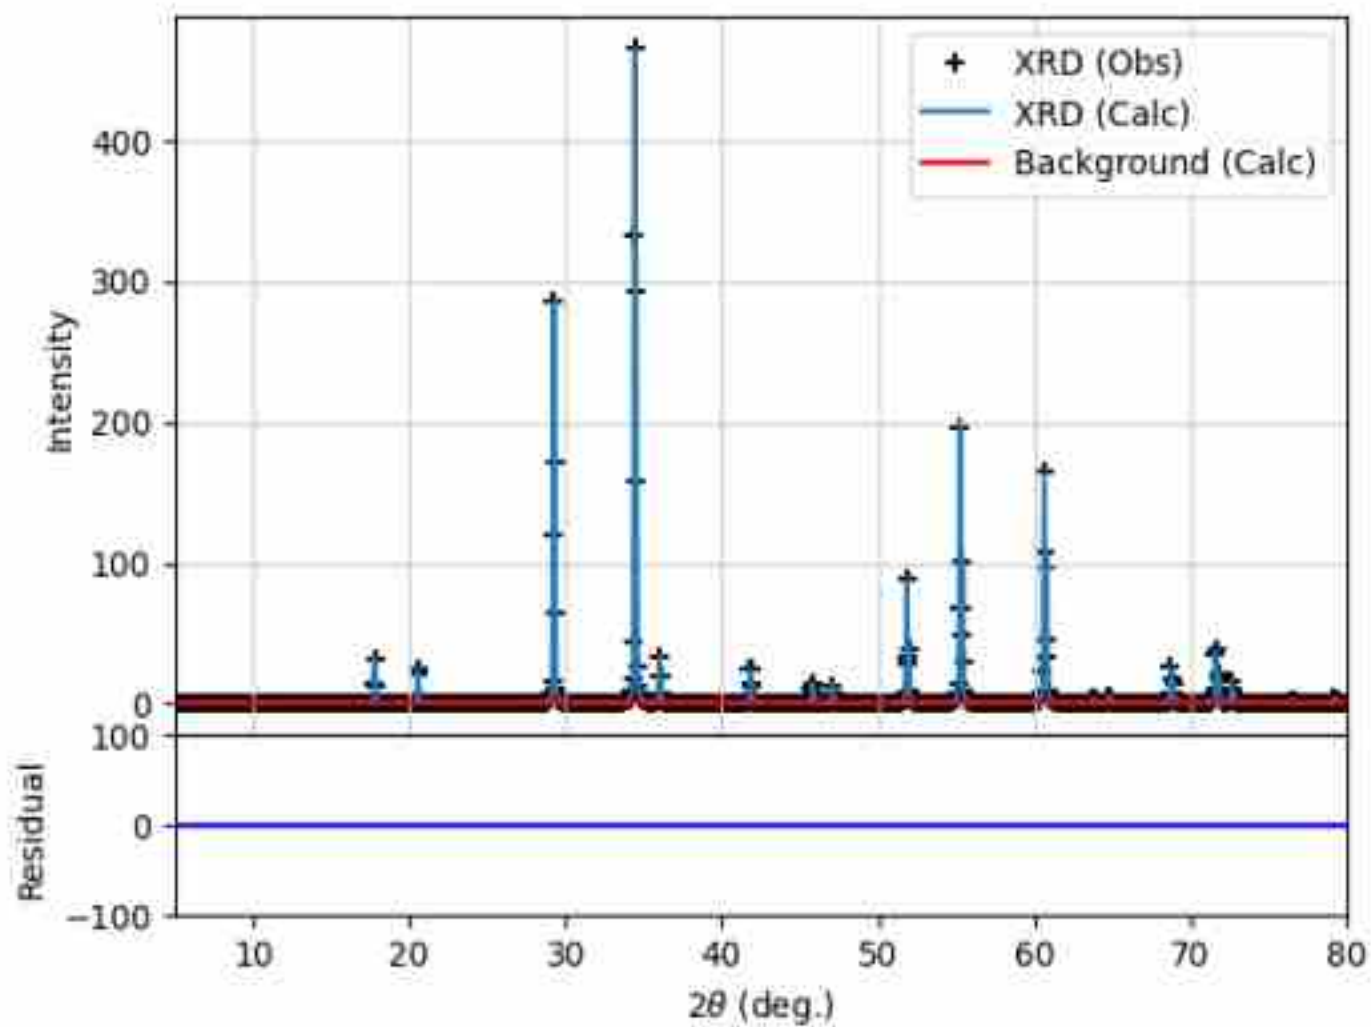

| RMSE before RR | Rwp     | RMSE after RR |
|----------------|---------|---------------|
| 0.021          | 0.09868 | 0.00852       |



# Cs1Rb2Au7

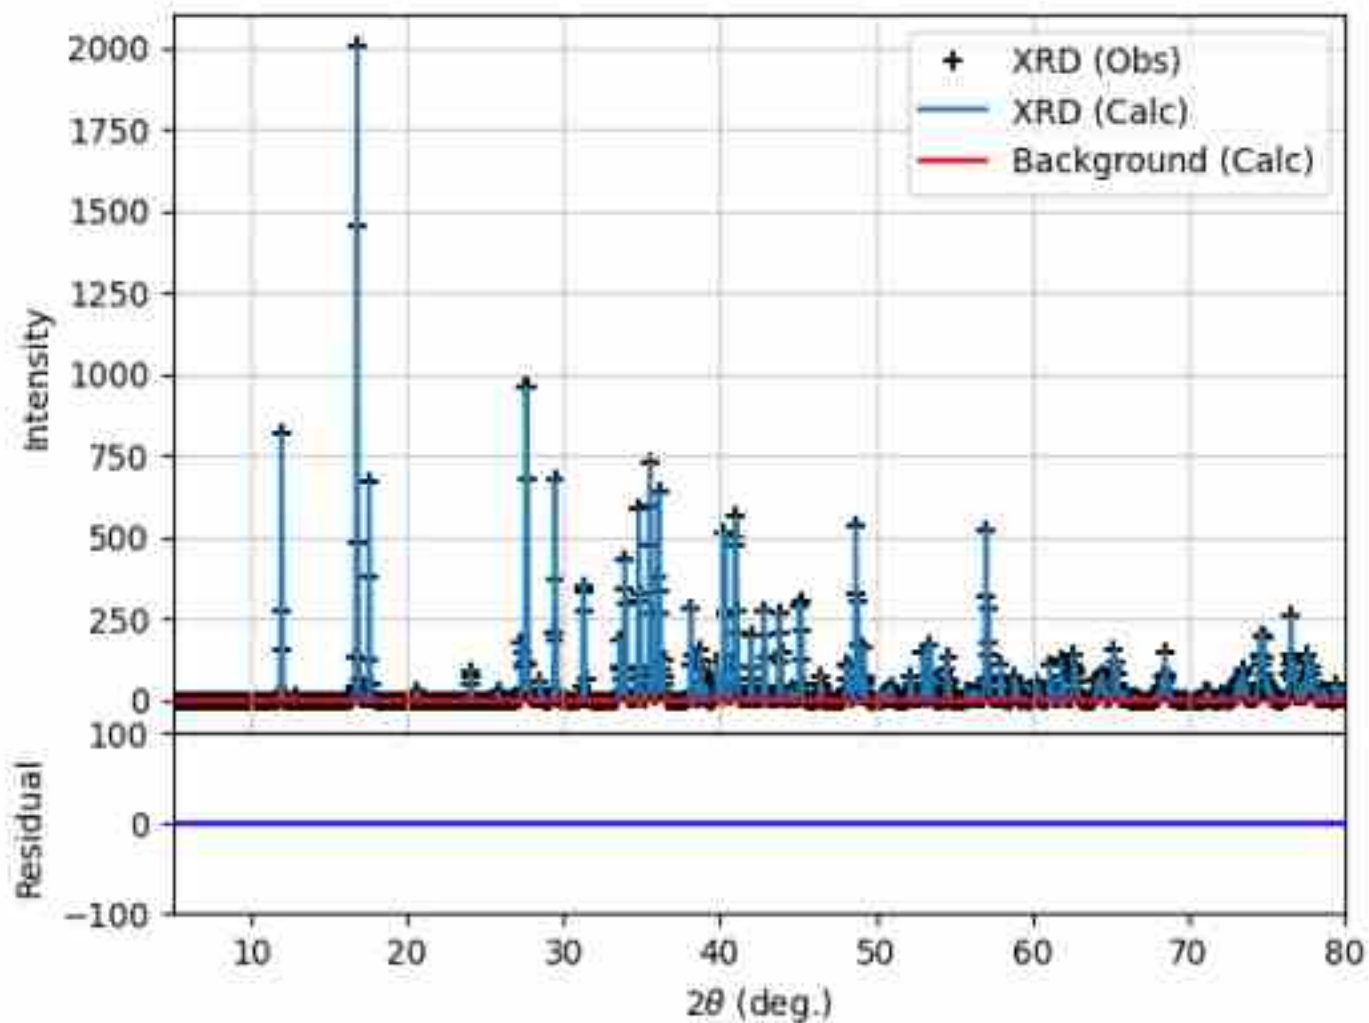

| RMSE before RR | Rwp     | RMSE after RR |
|----------------|---------|---------------|
| 0.021          | 0.00439 | 0.00023       |

# Cs<sub>2</sub>Cd<sub>2</sub>Br<sub>6</sub>

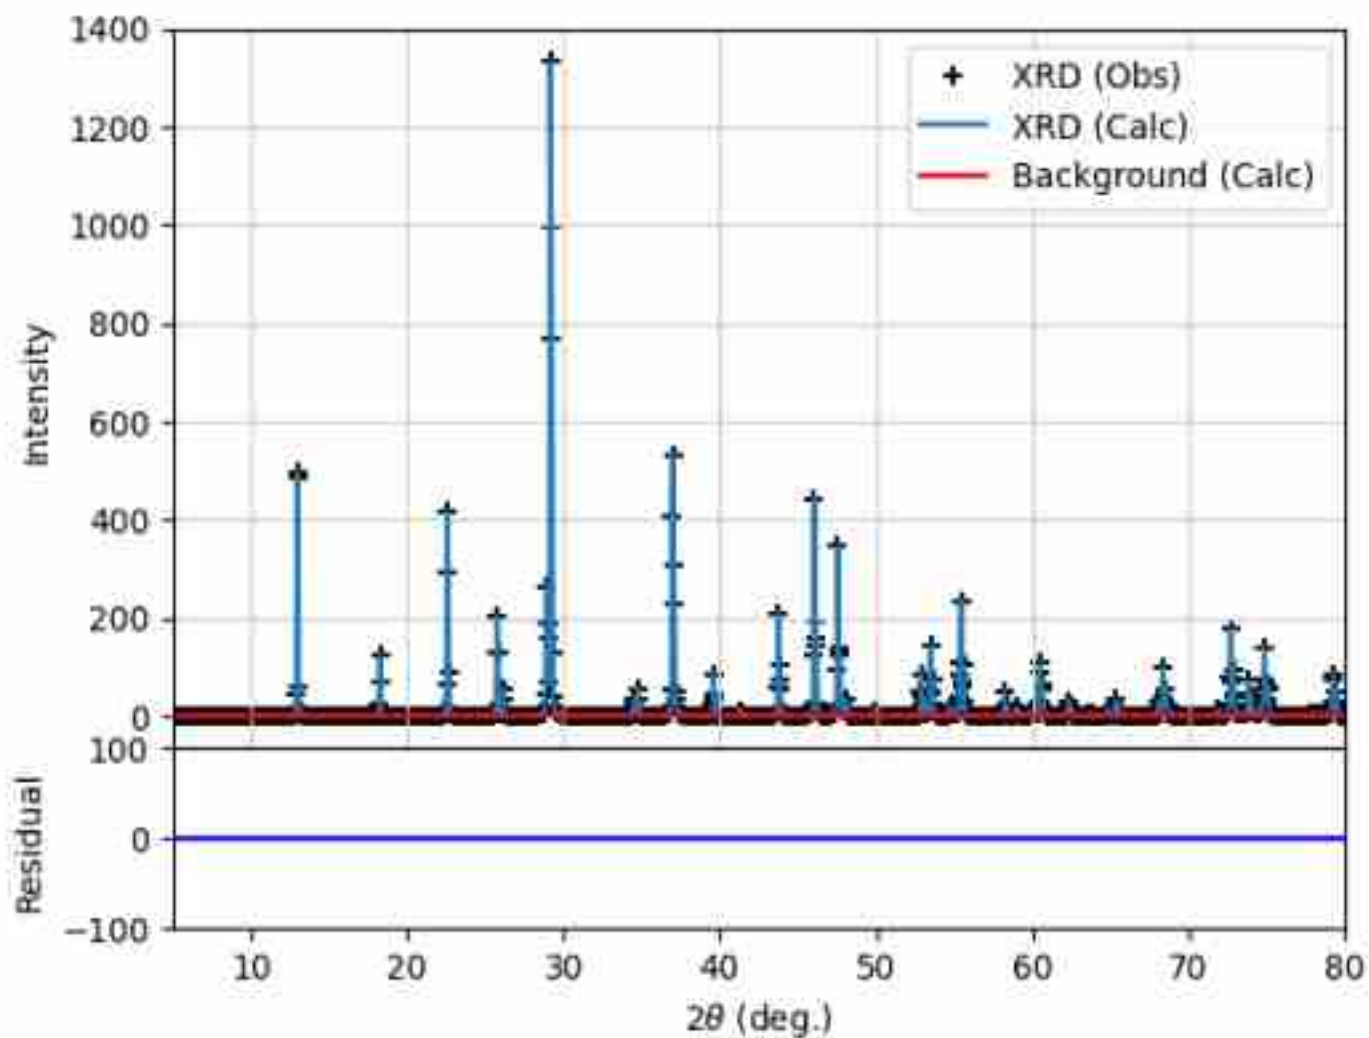

| RMSE before RR | Rwp     | RMSE after RR |
|----------------|---------|---------------|
| 0.021          | 0.02498 | 0.00173       |

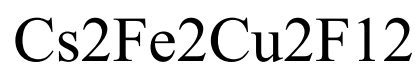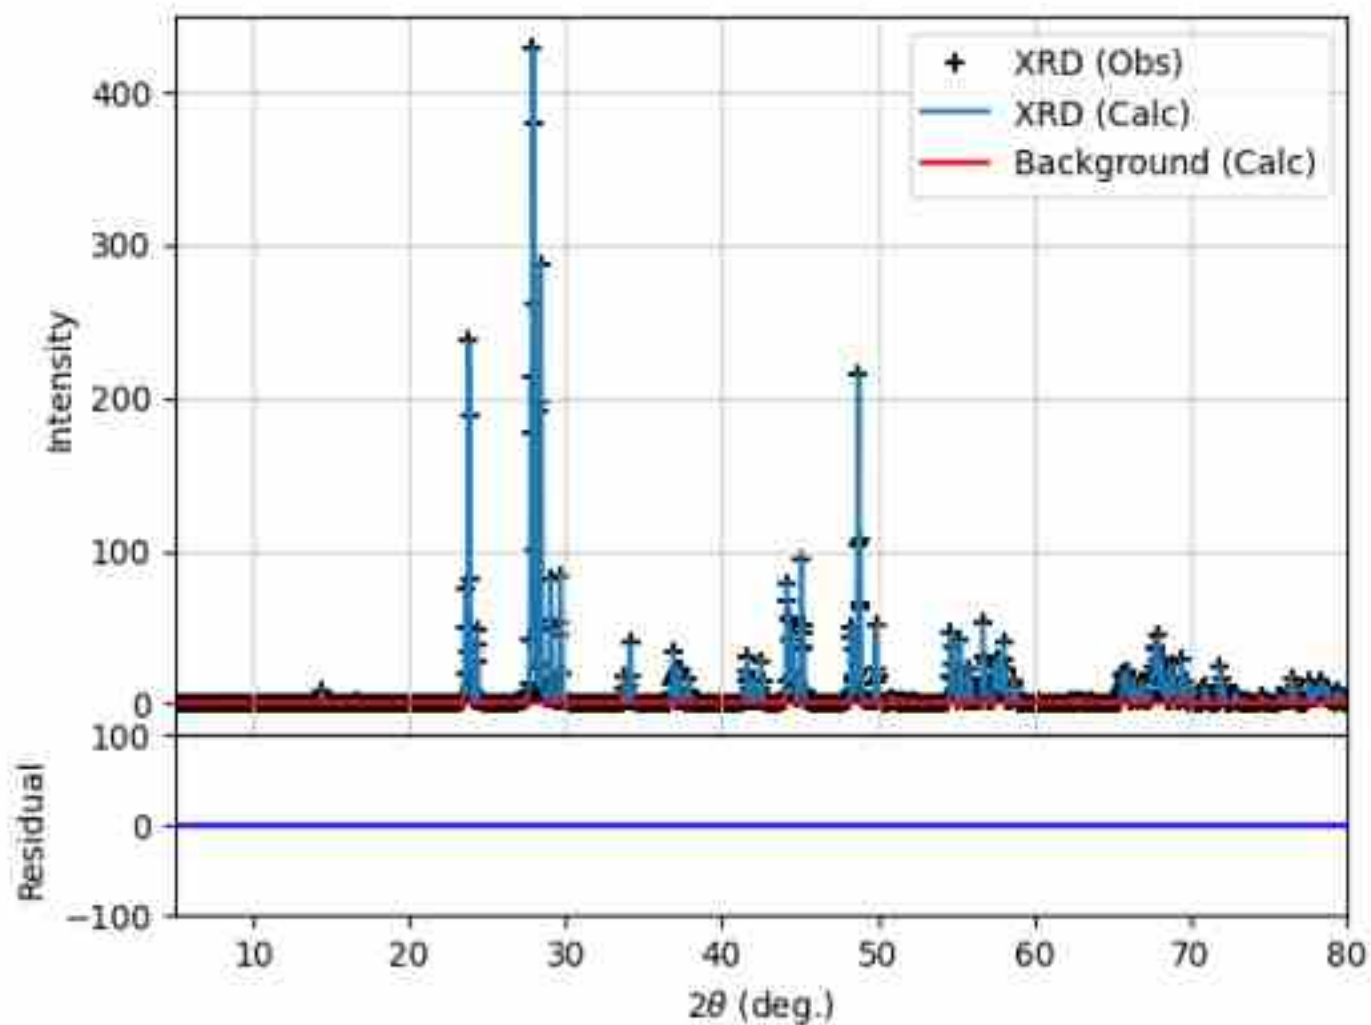

| RMSE before RR | Rwp    | RMSE after RR |
|----------------|--------|---------------|
| 0.021          | 0.0035 | 0.00073       |

# Cs<sub>2</sub>La<sub>2</sub>Hg<sub>2</sub>Se<sub>6</sub>

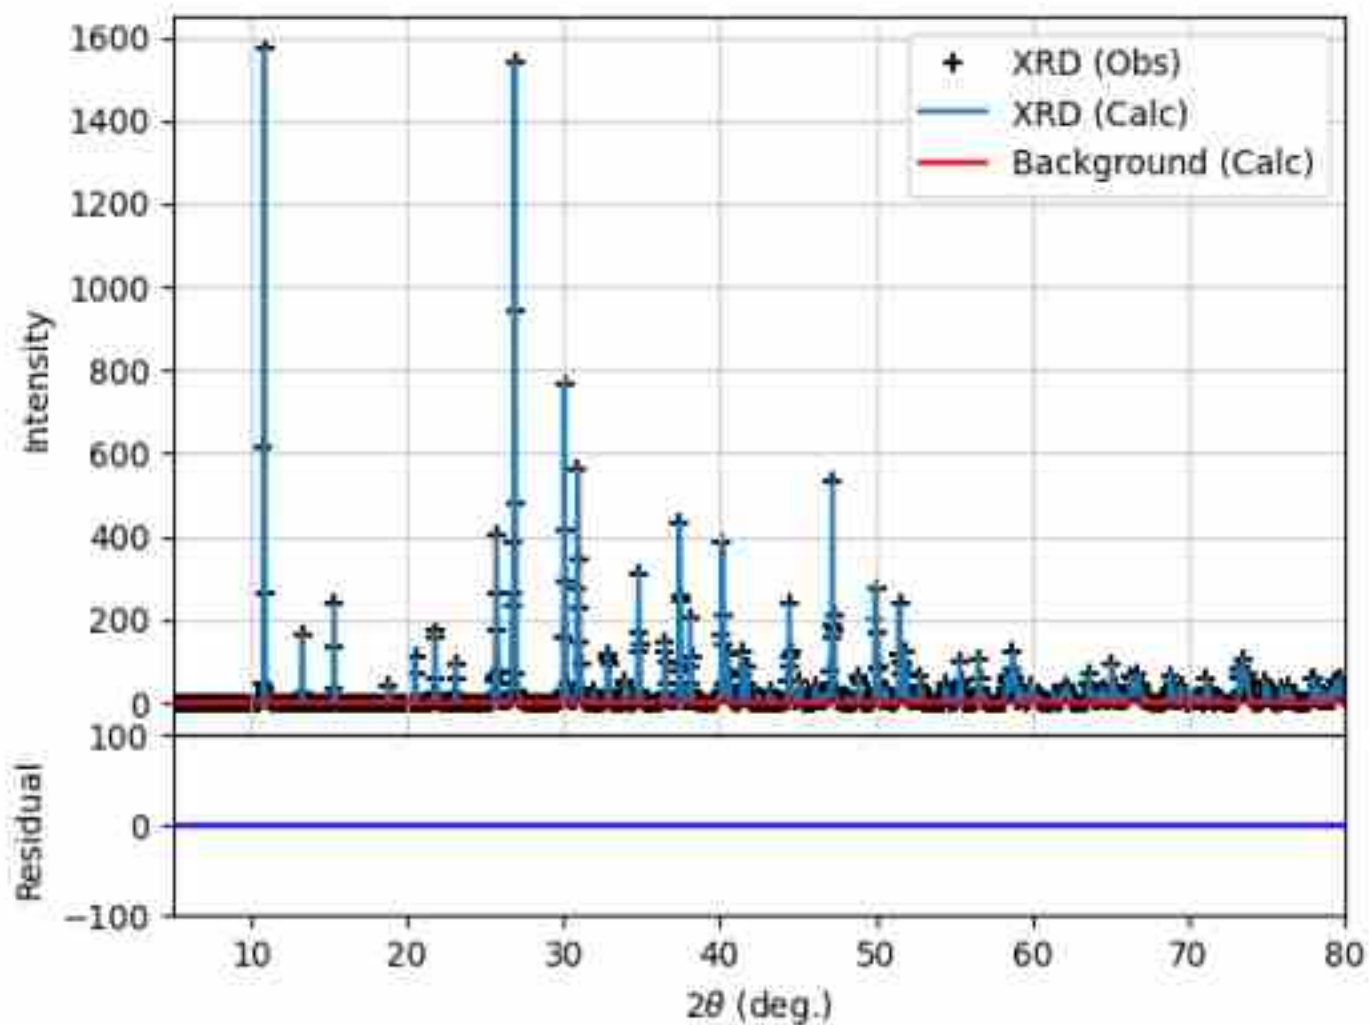

| RMSE before RR | Rwp     | RMSE after RR |
|----------------|---------|---------------|
| 0.021          | 0.00352 | 0.0003        |

# Cs<sub>2</sub>Mg<sub>2</sub>Br<sub>6</sub>

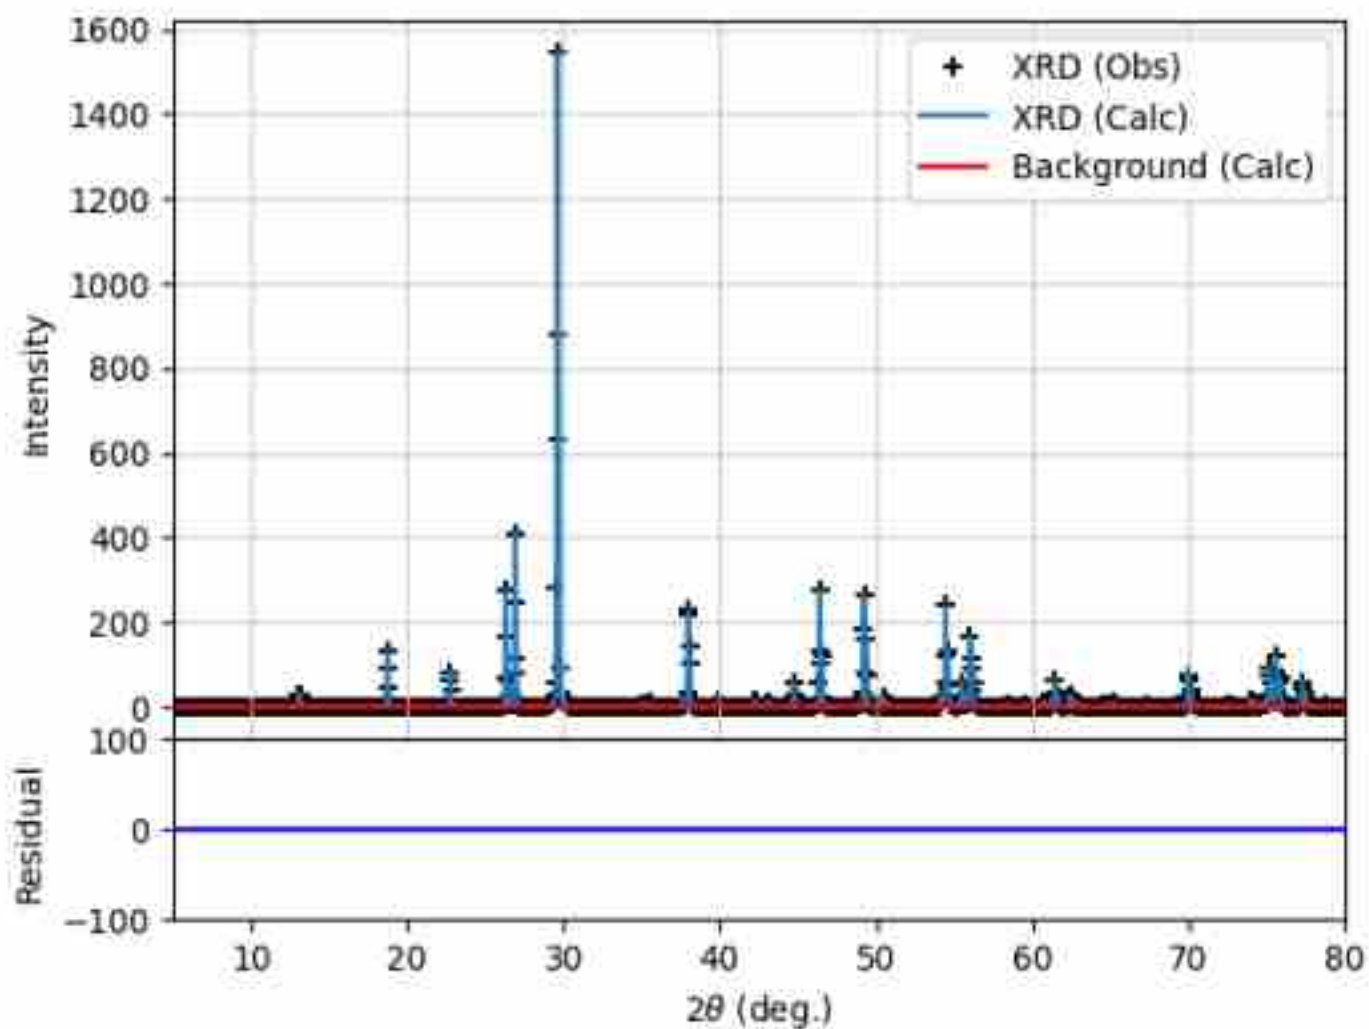

| RMSE before RR | Rwp     | RMSE after RR |
|----------------|---------|---------------|
| 0.021          | 0.02698 | 0.00163       |

# Cs<sub>2</sub>PtF<sub>6</sub>

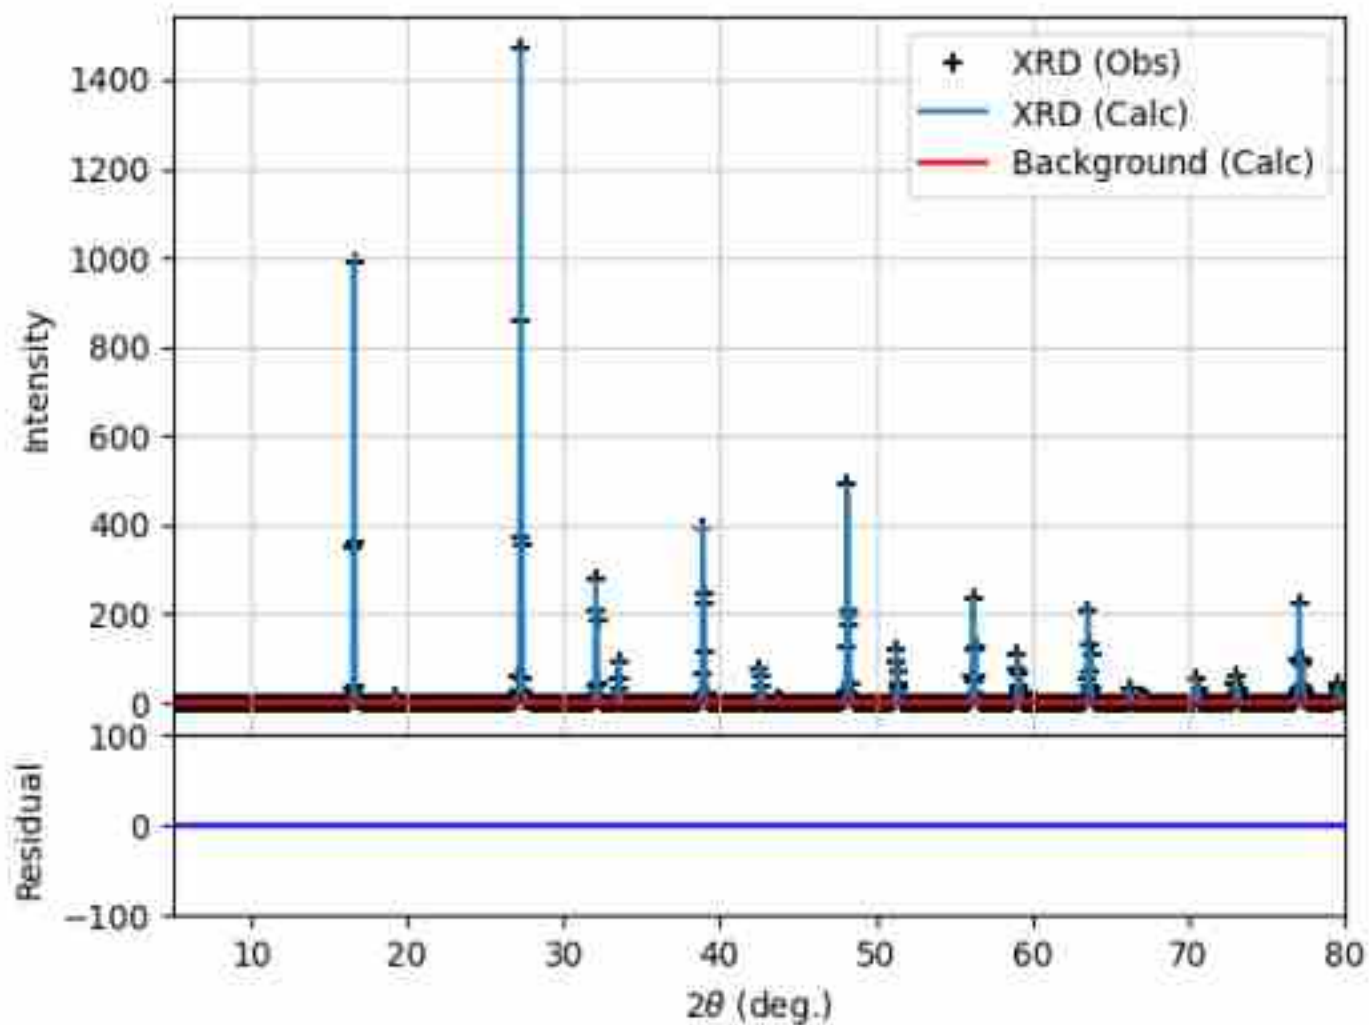

| RMSE before RR | Rwp     | RMSE after RR |
|----------------|---------|---------------|
| 0.021          | 0.03785 | 0.00662       |

# Cs<sub>3</sub>Mg<sub>2</sub>Cl<sub>7</sub>

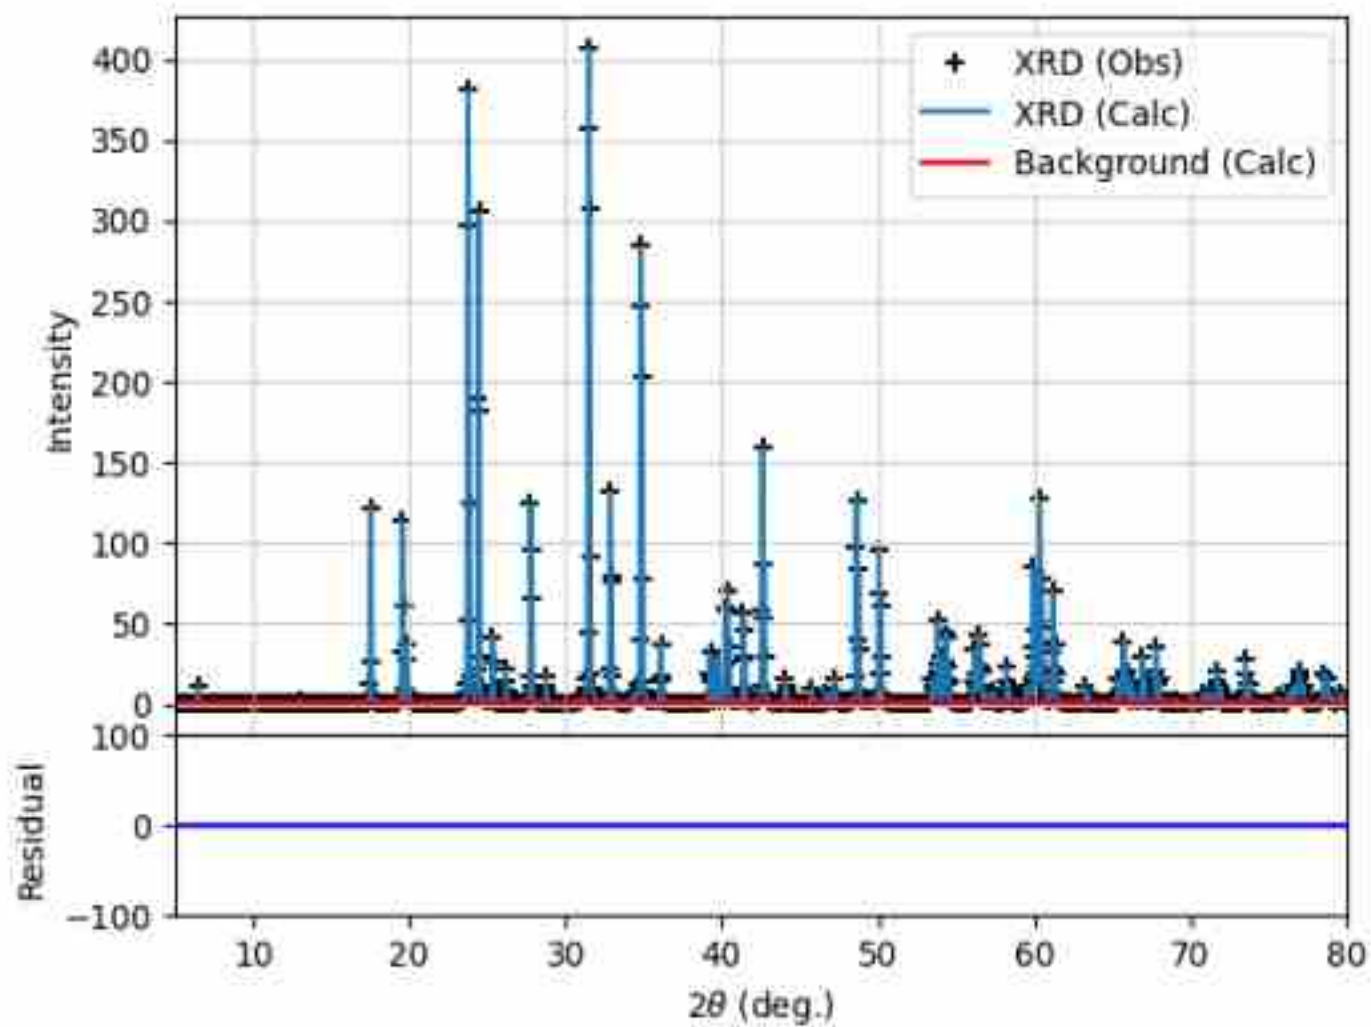

| RMSE before RR | Rwp    | RMSE after RR |
|----------------|--------|---------------|
| 0.021          | 0.0042 | 0.00067       |

# Cs<sub>4</sub>Au<sub>4</sub>O<sub>4</sub>

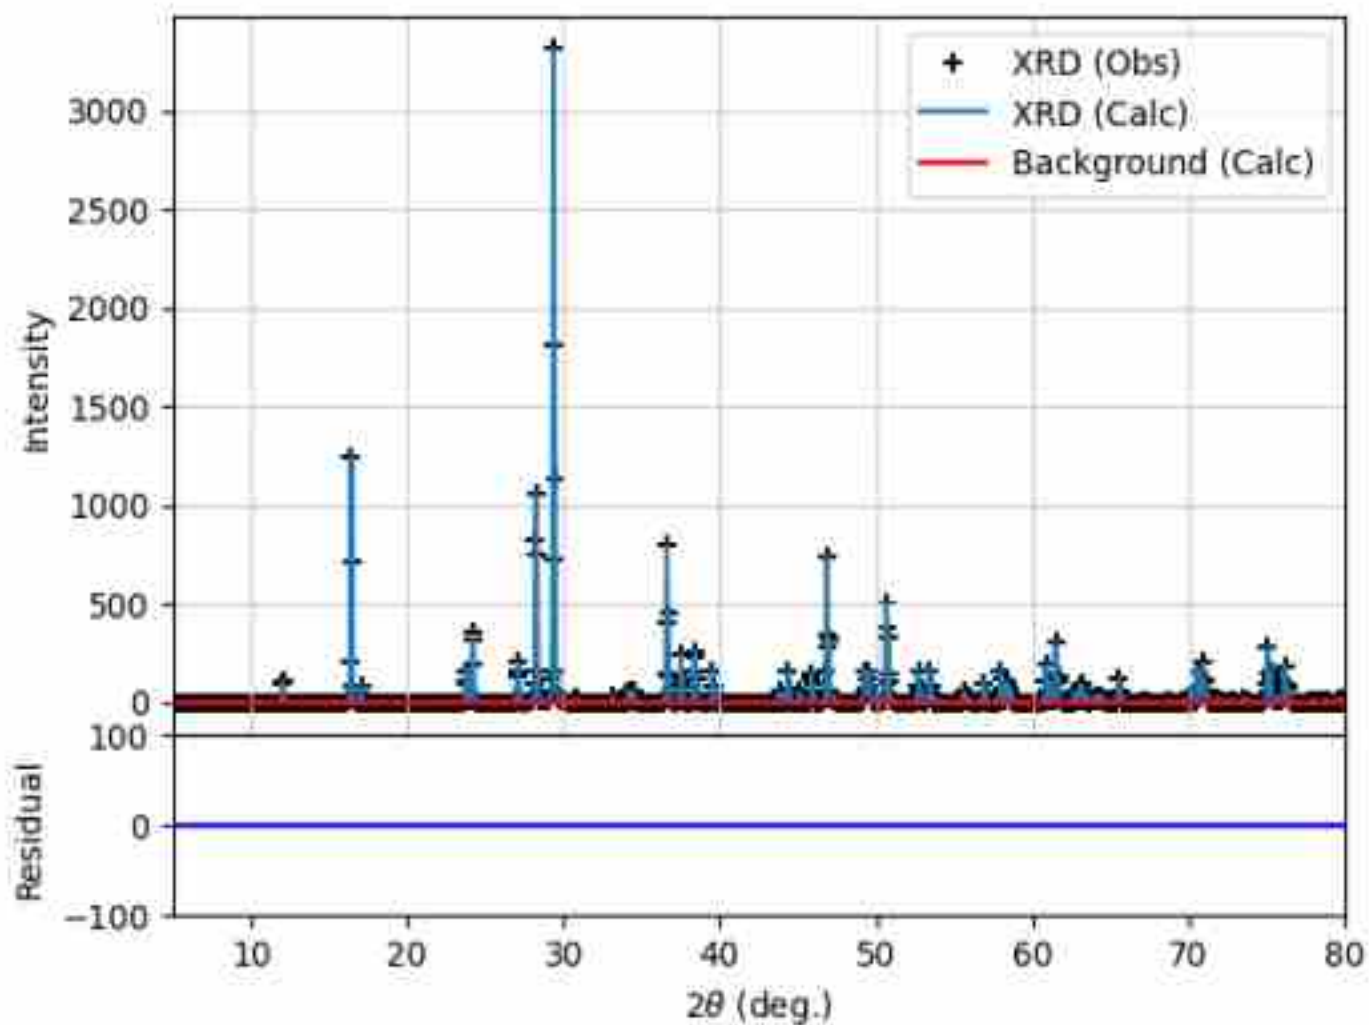

| RMSE before RR | Rwp     | RMSE after RR |
|----------------|---------|---------------|
| 0.021          | 0.00648 | 0.00177       |



# Cs<sub>4</sub>Co<sub>2</sub>Se<sub>4</sub>

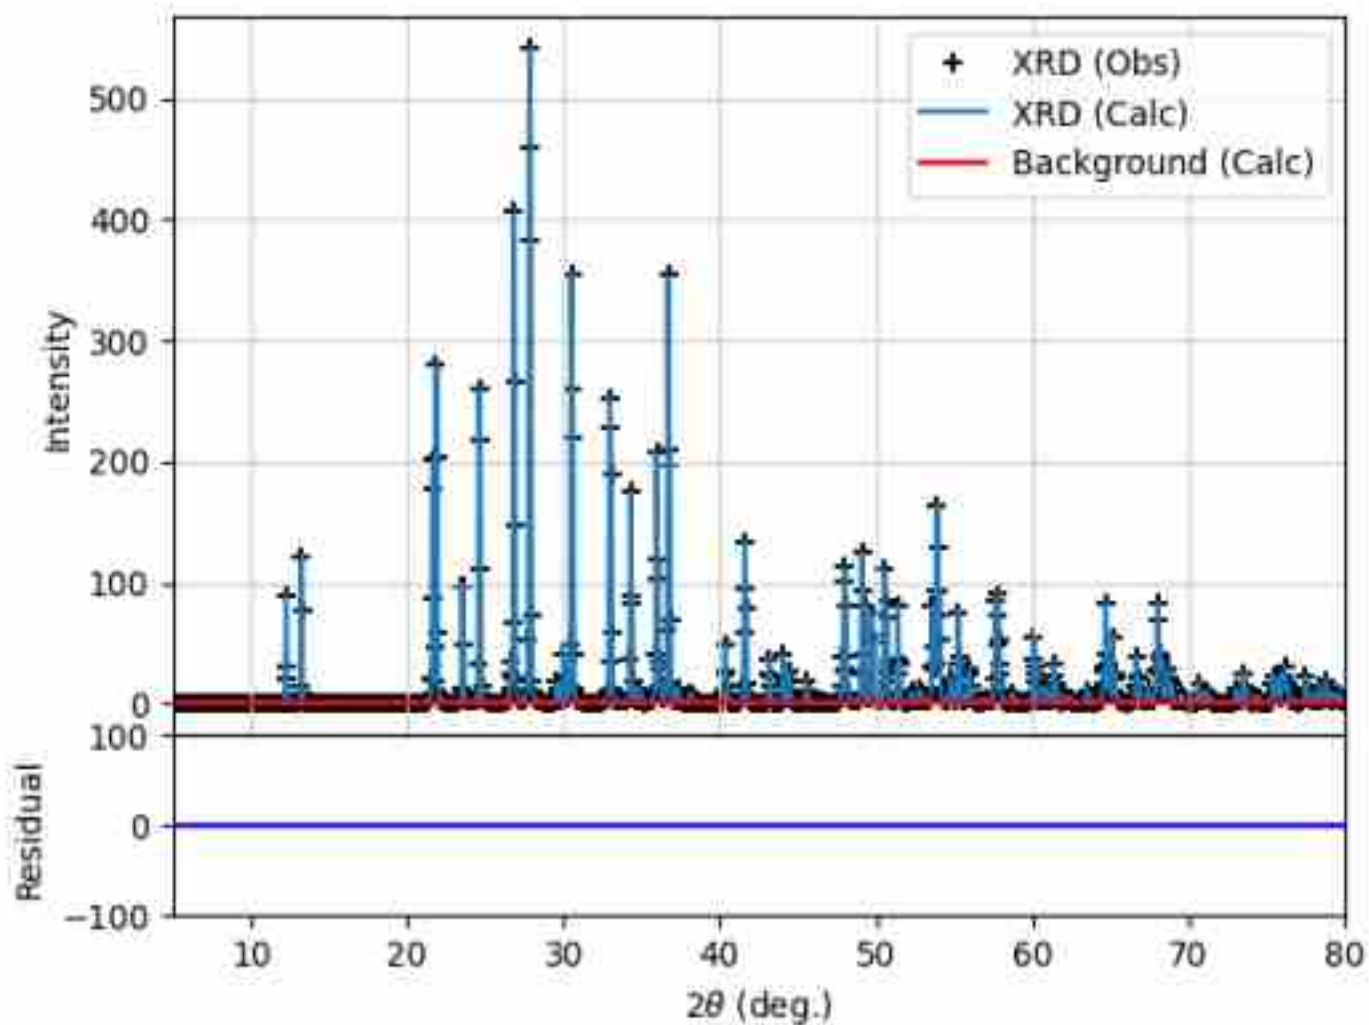

| RMSE before RR | Rwp     | RMSE after RR |
|----------------|---------|---------------|
| 0.021          | 0.00282 | 0.00025       |

# Cs<sub>4</sub>Sn<sub>2</sub>As<sub>4</sub>

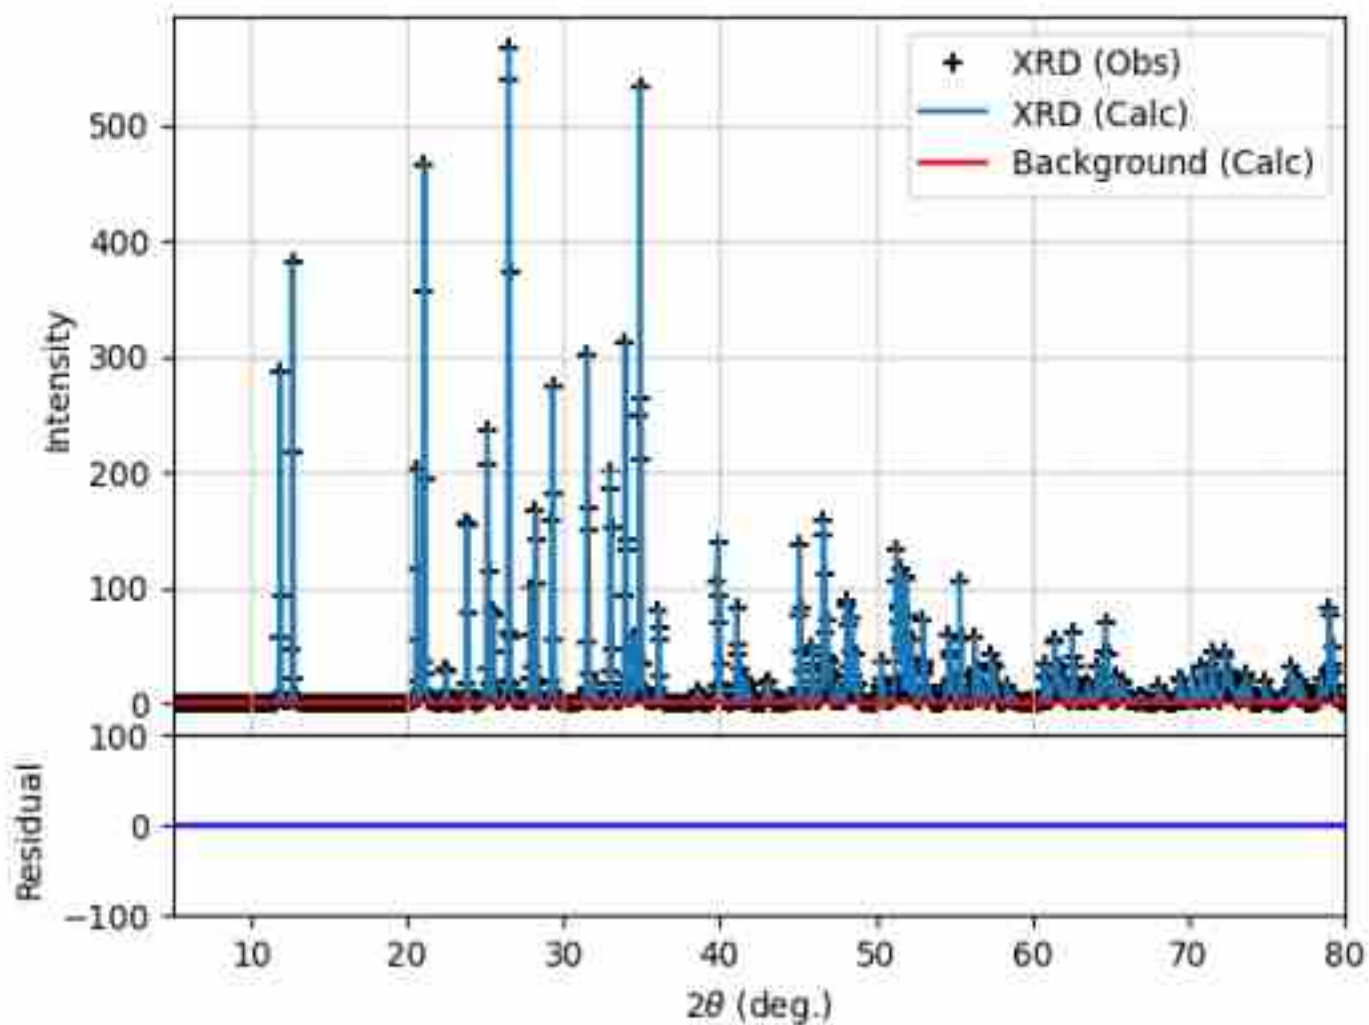

| RMSE before RR | Rwp     | RMSE after RR |
|----------------|---------|---------------|
| 0.021          | 0.00395 | 0.00023       |

# Cs6I2O2

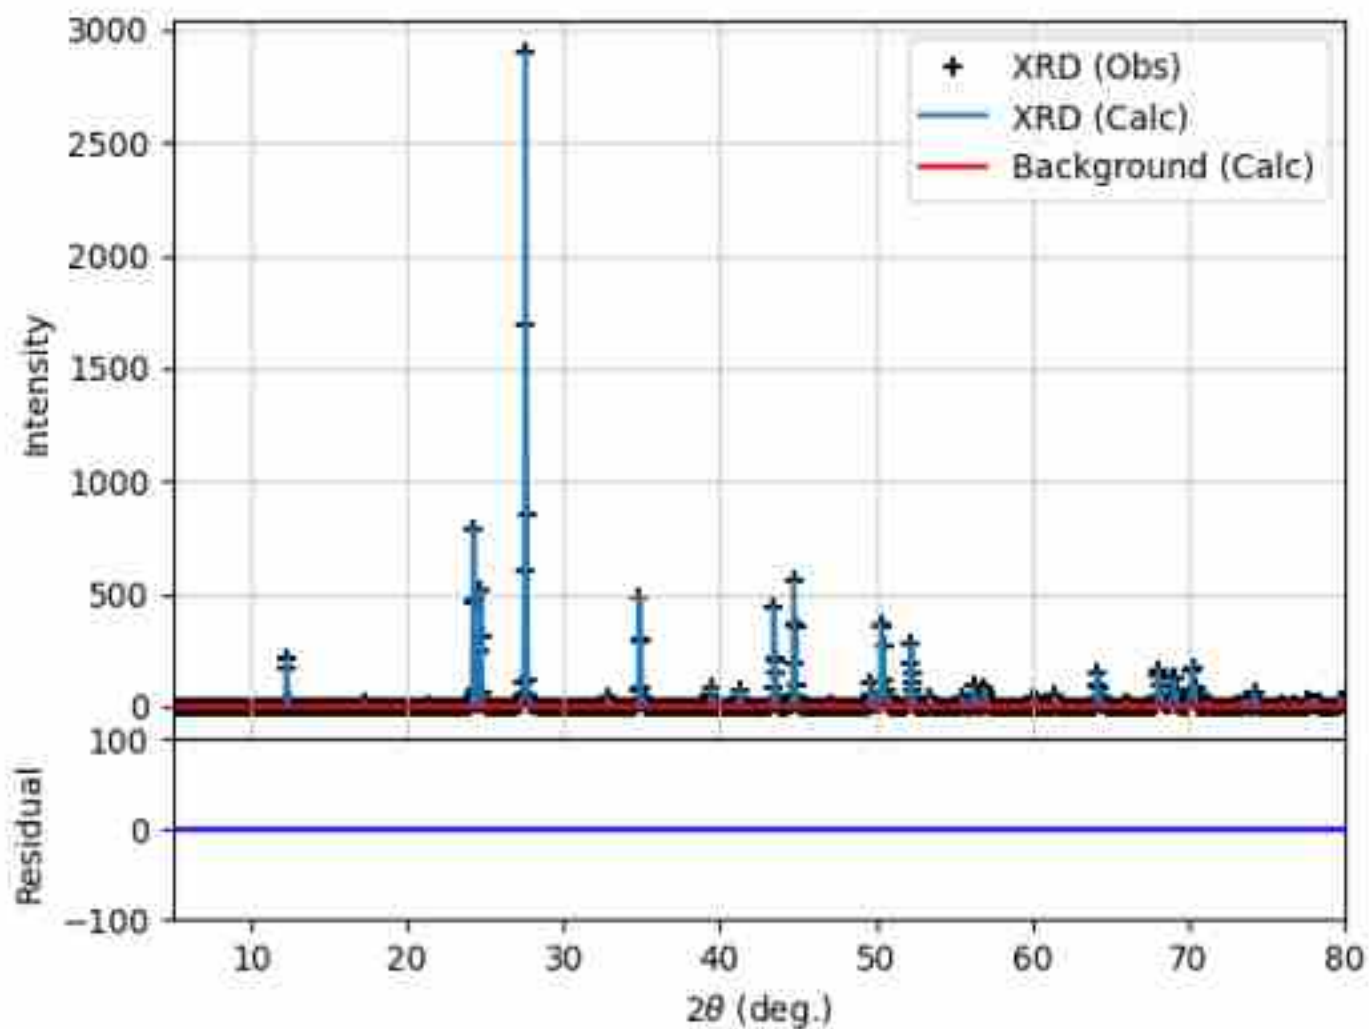

| RMSE before RR | Rwp     | RMSE after RR |
|----------------|---------|---------------|
| 0.021          | 0.04076 | 0.00279       |

# Cu<sub>2</sub>Sn<sub>1</sub>Te<sub>3</sub>

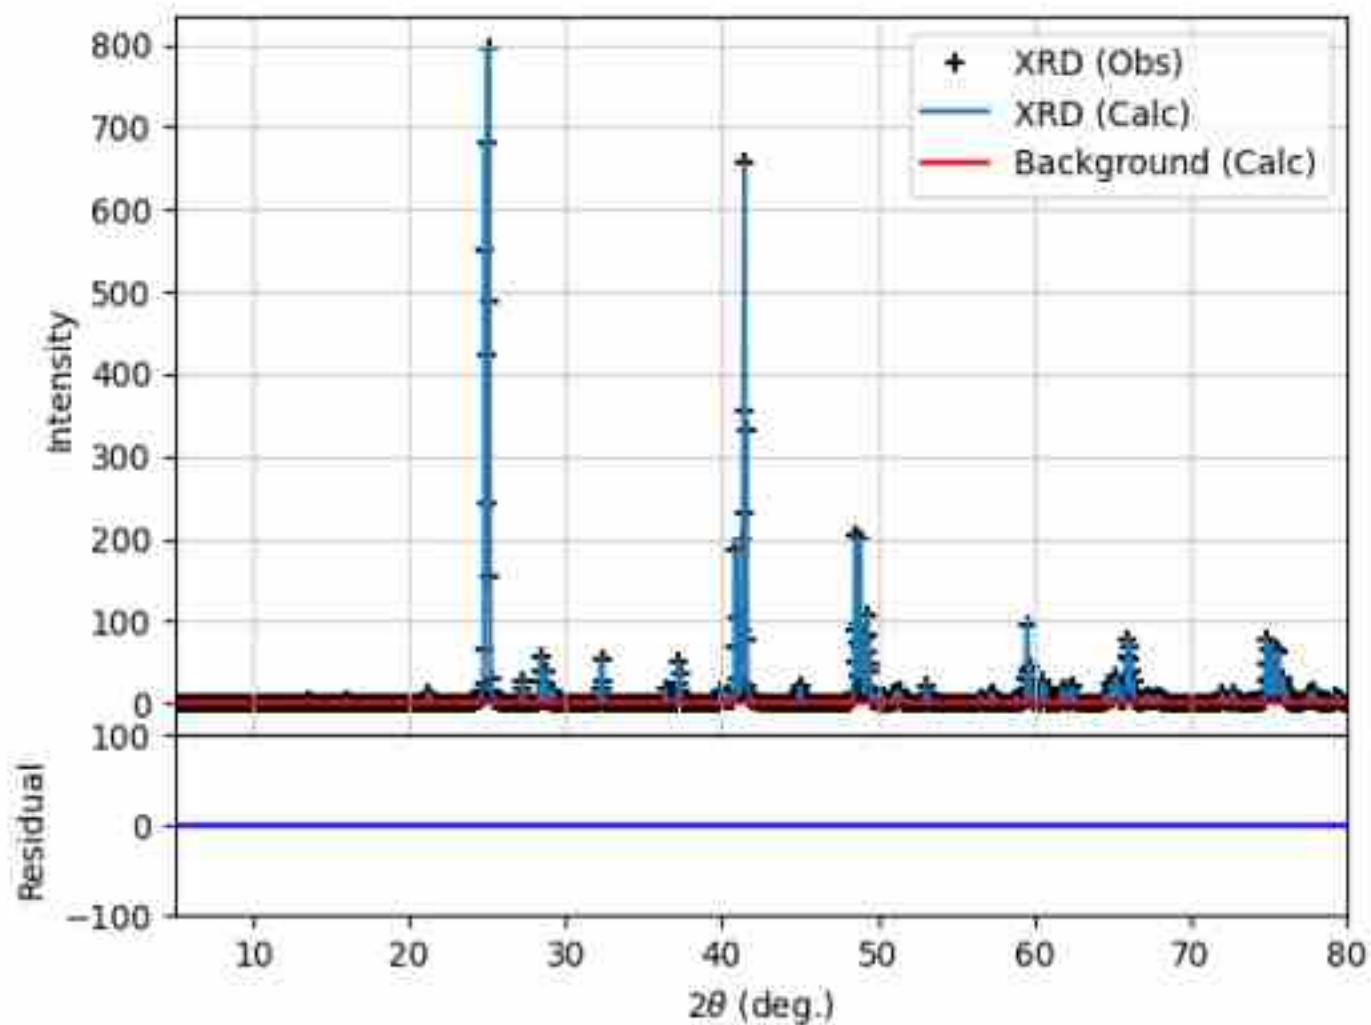

| RMSE before RR | Rwp     | RMSE after RR |
|----------------|---------|---------------|
| 0.021          | 0.00308 | 0.0003        |

# Dy<sub>1</sub>Fe<sub>4</sub>Cu<sub>3</sub>O<sub>12</sub>

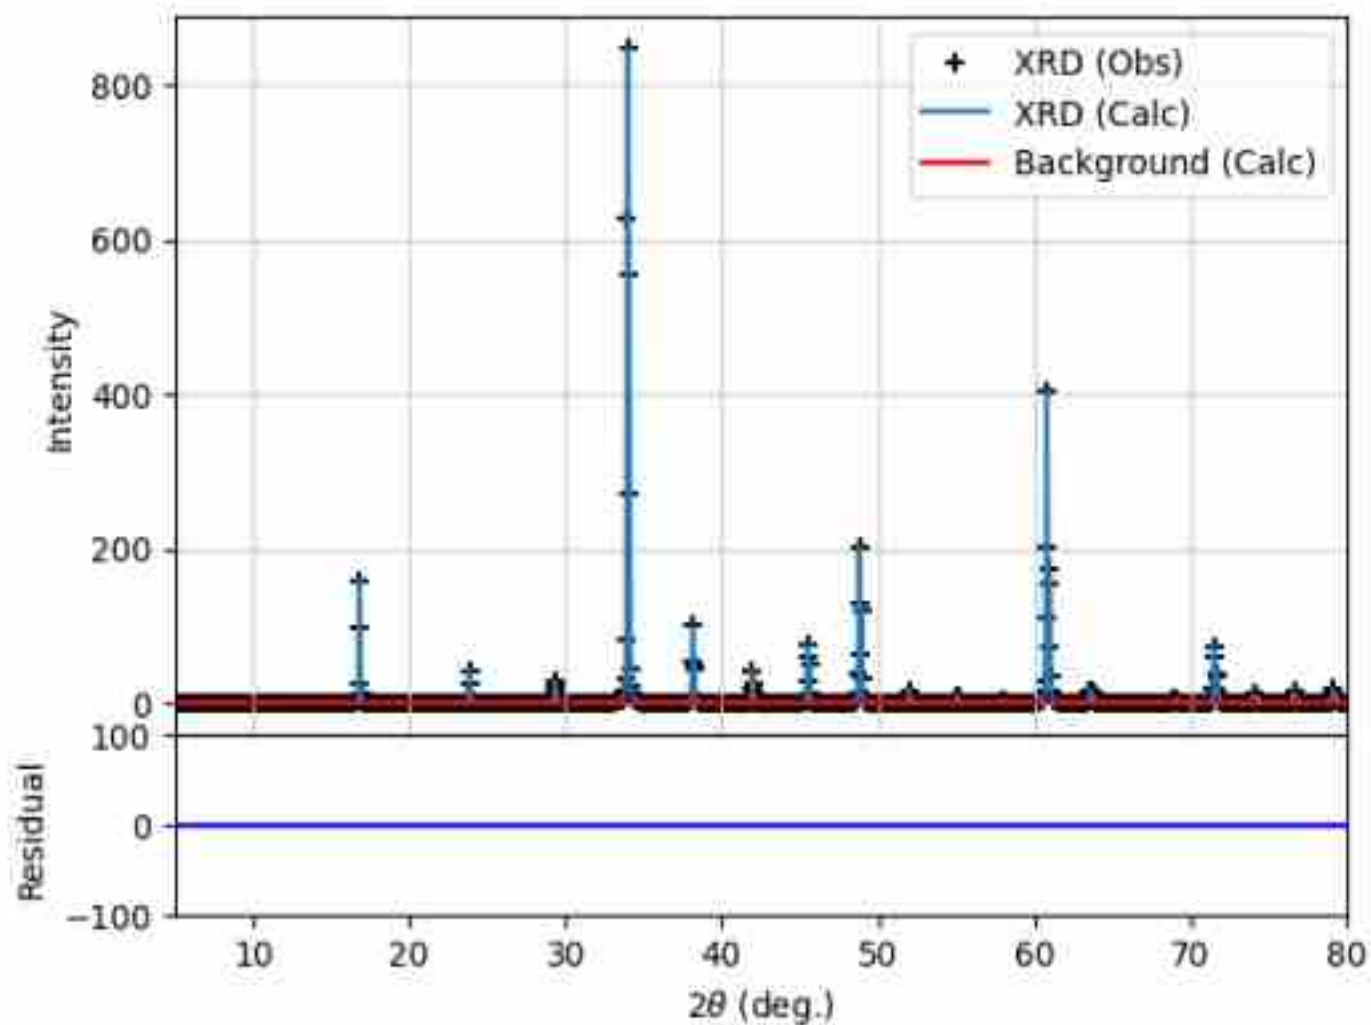

| RMSE before RR | Rwp     | RMSE after RR |
|----------------|---------|---------------|
| 0.021          | 0.01249 | 0.00415       |

# Dy<sub>2</sub>Ag<sub>2</sub>Sb<sub>4</sub>

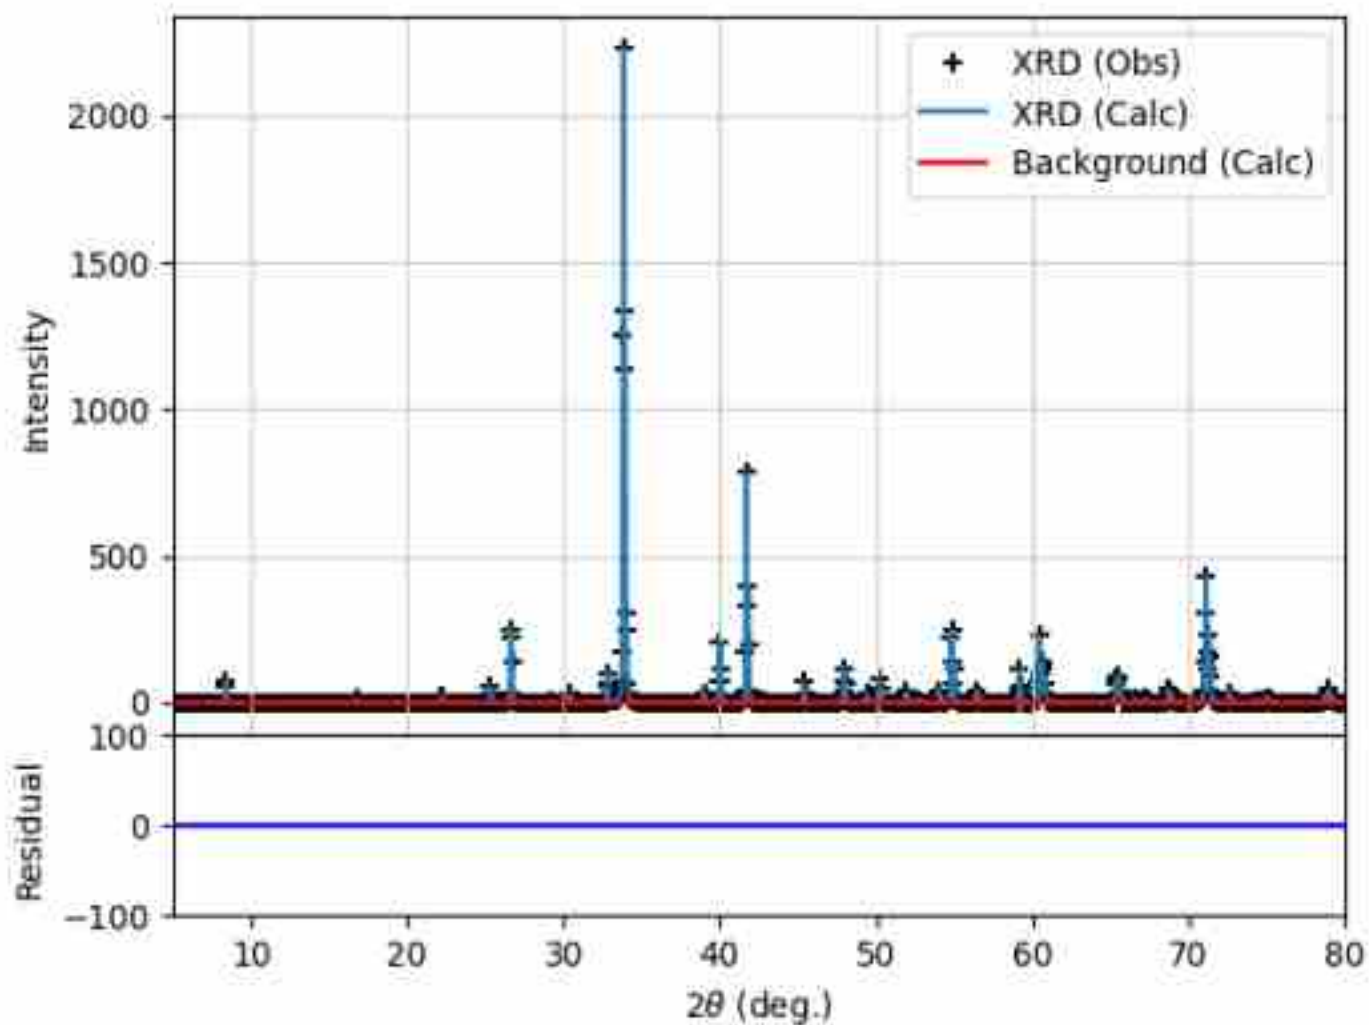

| RMSE before RR | Rwp     | RMSE after RR |
|----------------|---------|---------------|
| 0.021          | 0.00407 | 0.00022       |

# Dy<sub>2</sub>Ag<sub>2</sub>Sn<sub>2</sub>

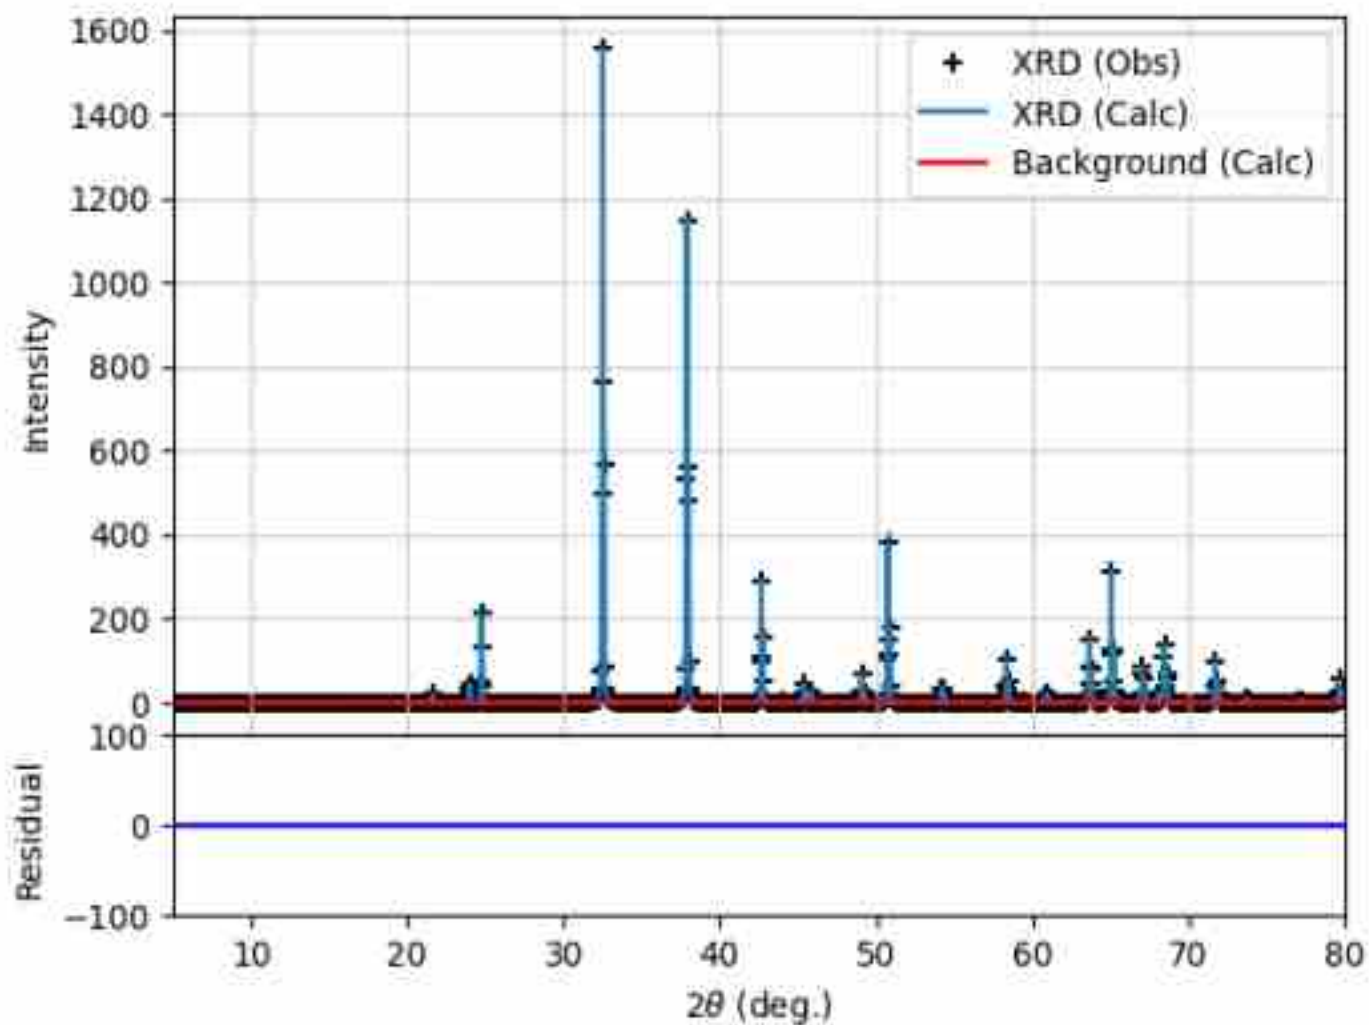

| RMSE before RR | Rwp     | RMSE after RR |
|----------------|---------|---------------|
| 0.021          | 0.00405 | 0.00024       |

# Dy<sub>2</sub>Cl<sub>6</sub>

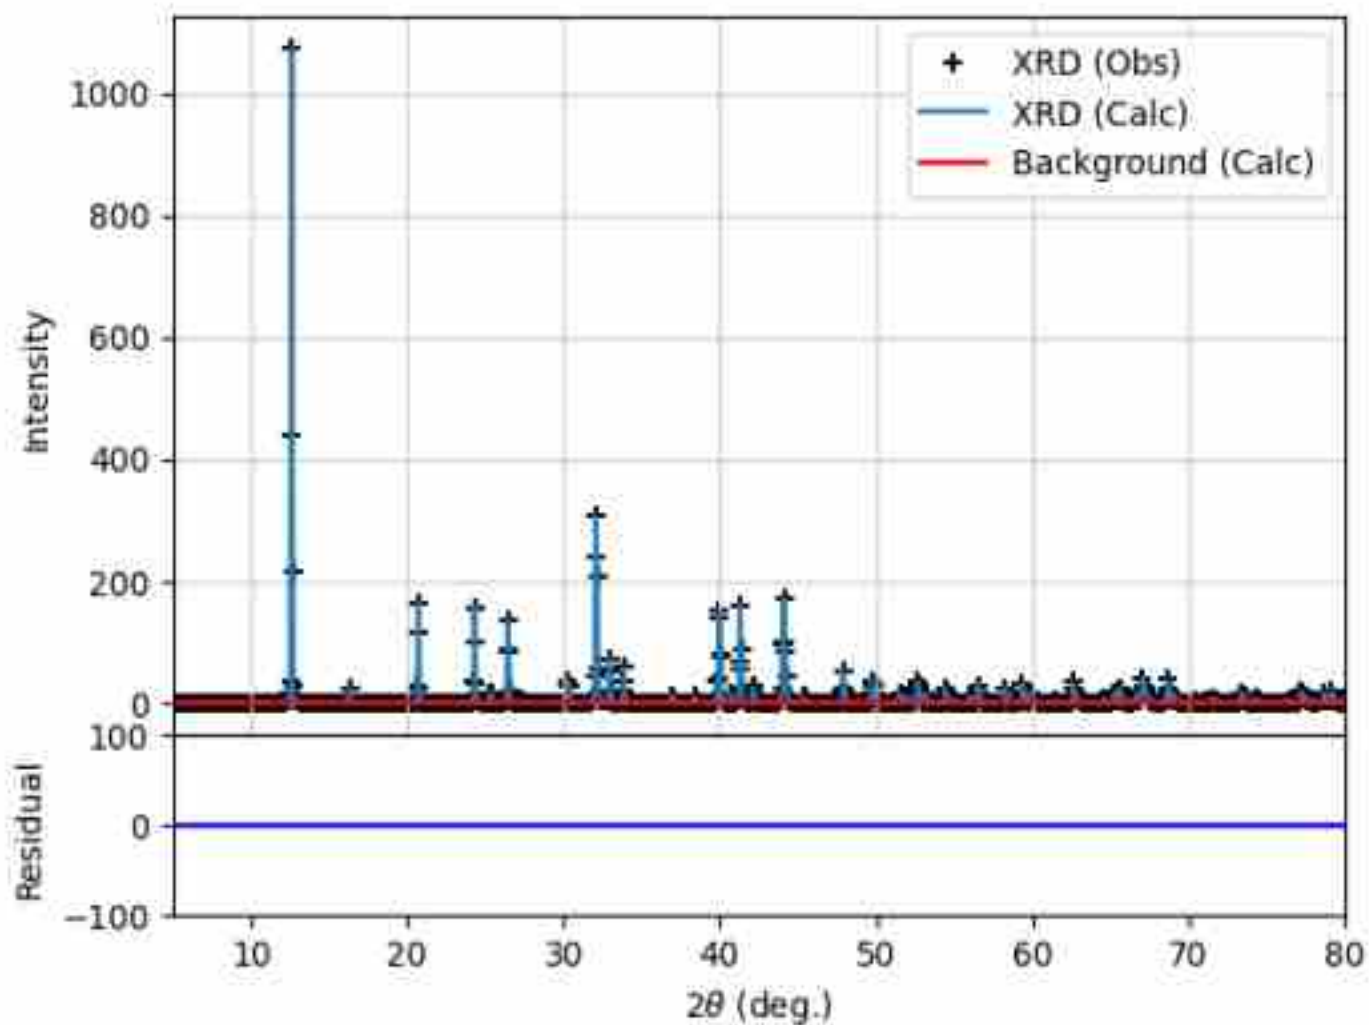

| RMSE before RR | Rwp     | RMSE after RR |
|----------------|---------|---------------|
| 0.021          | 0.00285 | 0.0004        |



# Dy<sub>4</sub>Co<sub>4</sub>Sn<sub>4</sub>

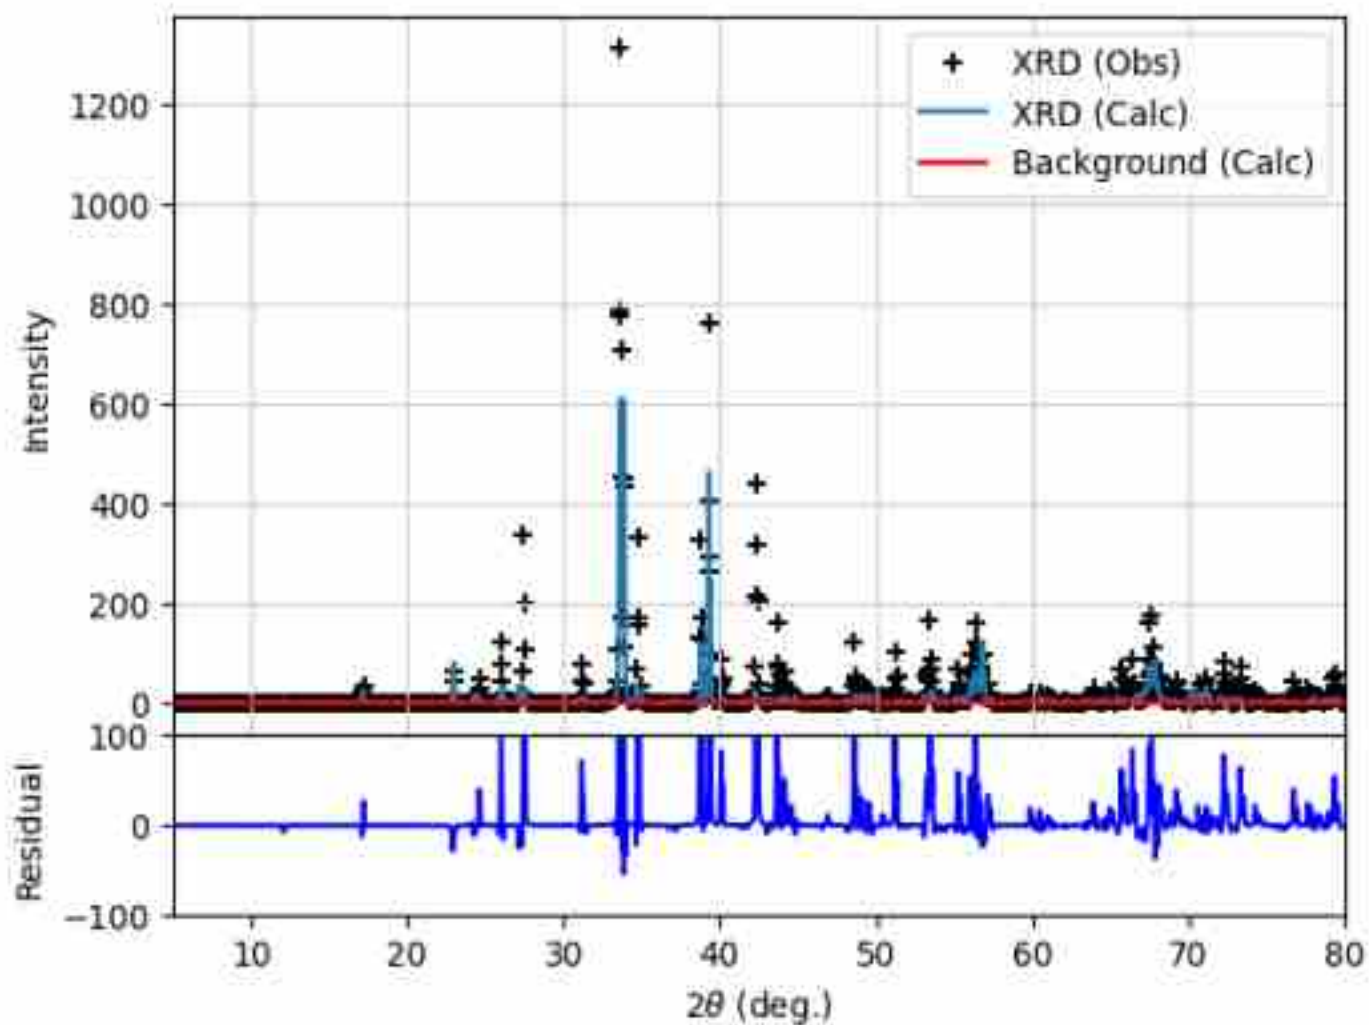

| RMSE before RR | Rwp      | RMSE after RR |
|----------------|----------|---------------|
| 0.021          | 67.85852 | 0.23448       |

# Dy<sub>4</sub>Ga<sub>4</sub>Pd<sub>8</sub>

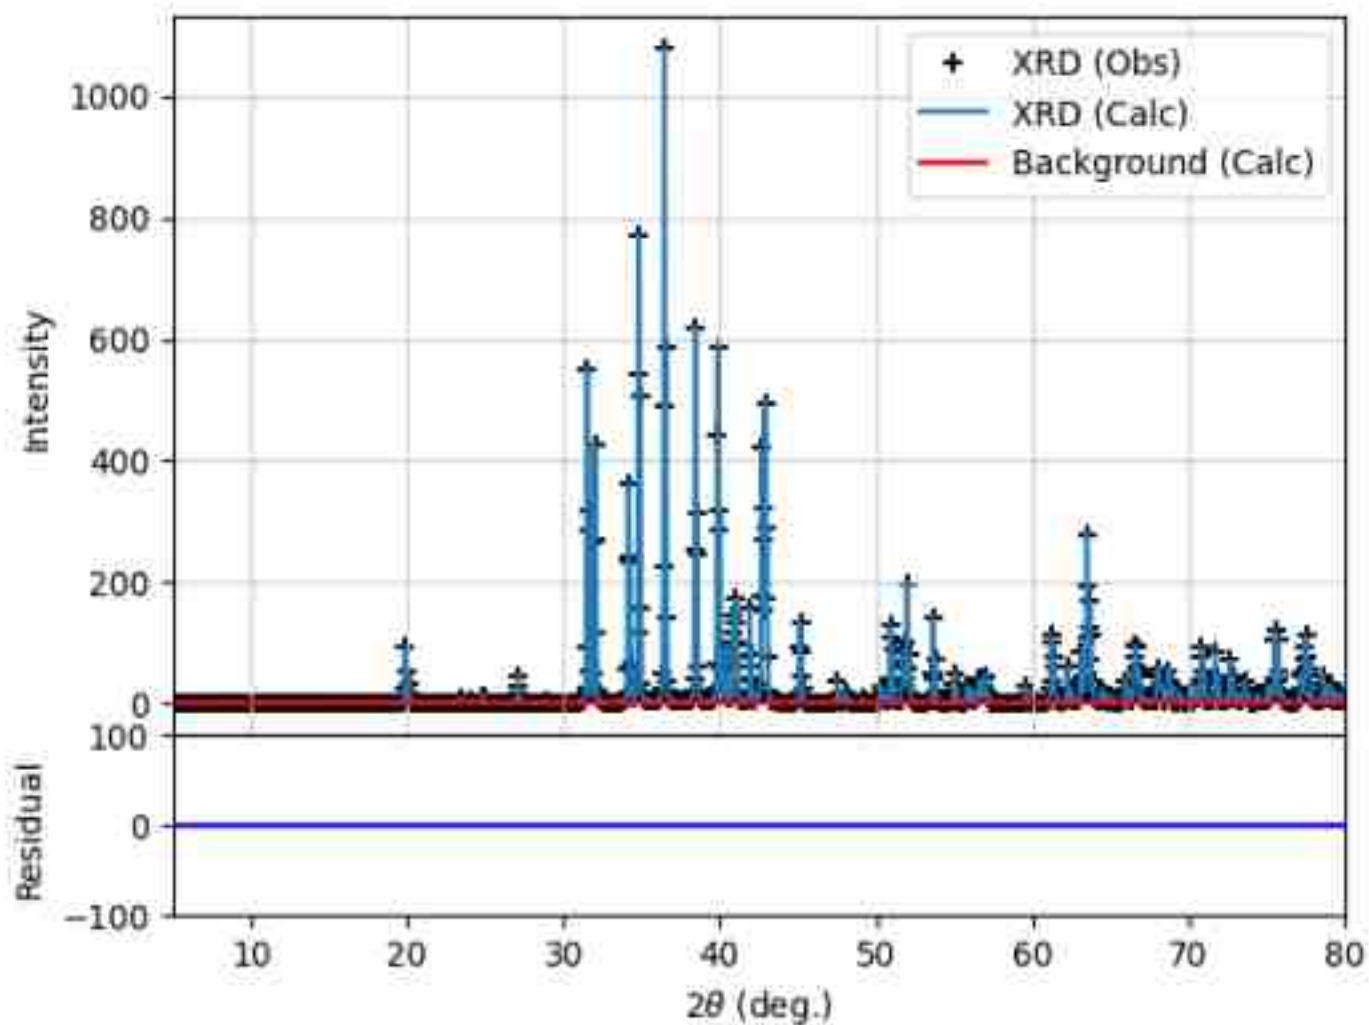

| RMSE before RR | Rwp     | RMSE after RR |
|----------------|---------|---------------|
| 0.021          | 0.00454 | 0.00053       |

# Dy<sub>4</sub>Sc<sub>4</sub>O<sub>12</sub>

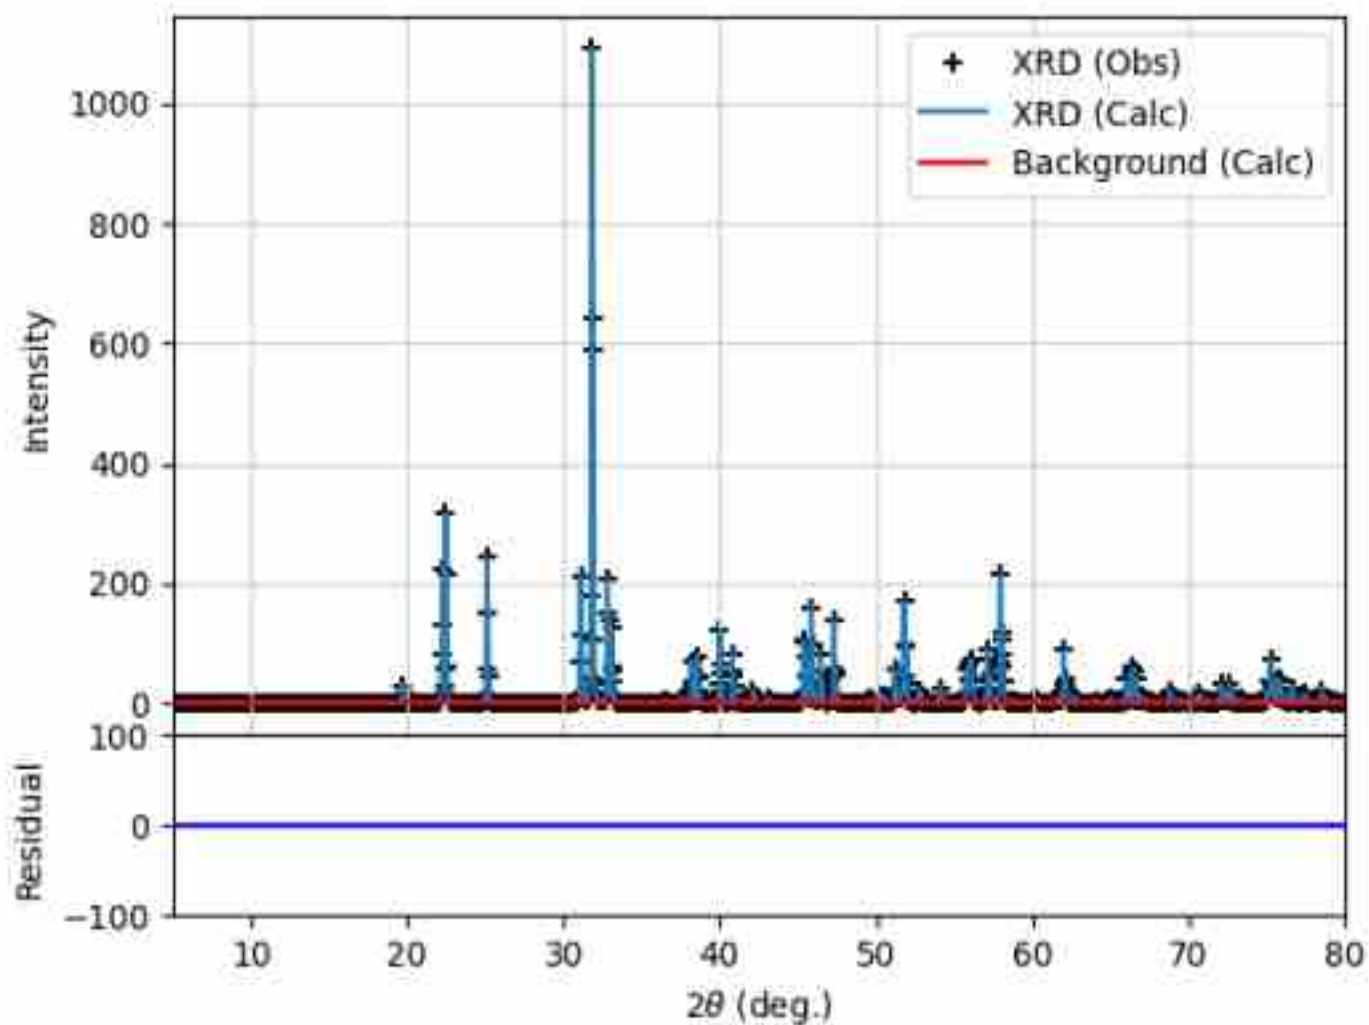

| RMSE before RR | Rwp     | RMSE after RR |
|----------------|---------|---------------|
| 0.021          | 0.00476 | 0.00135       |

# Er<sub>3</sub>Mg<sub>3</sub>Tl<sub>3</sub>

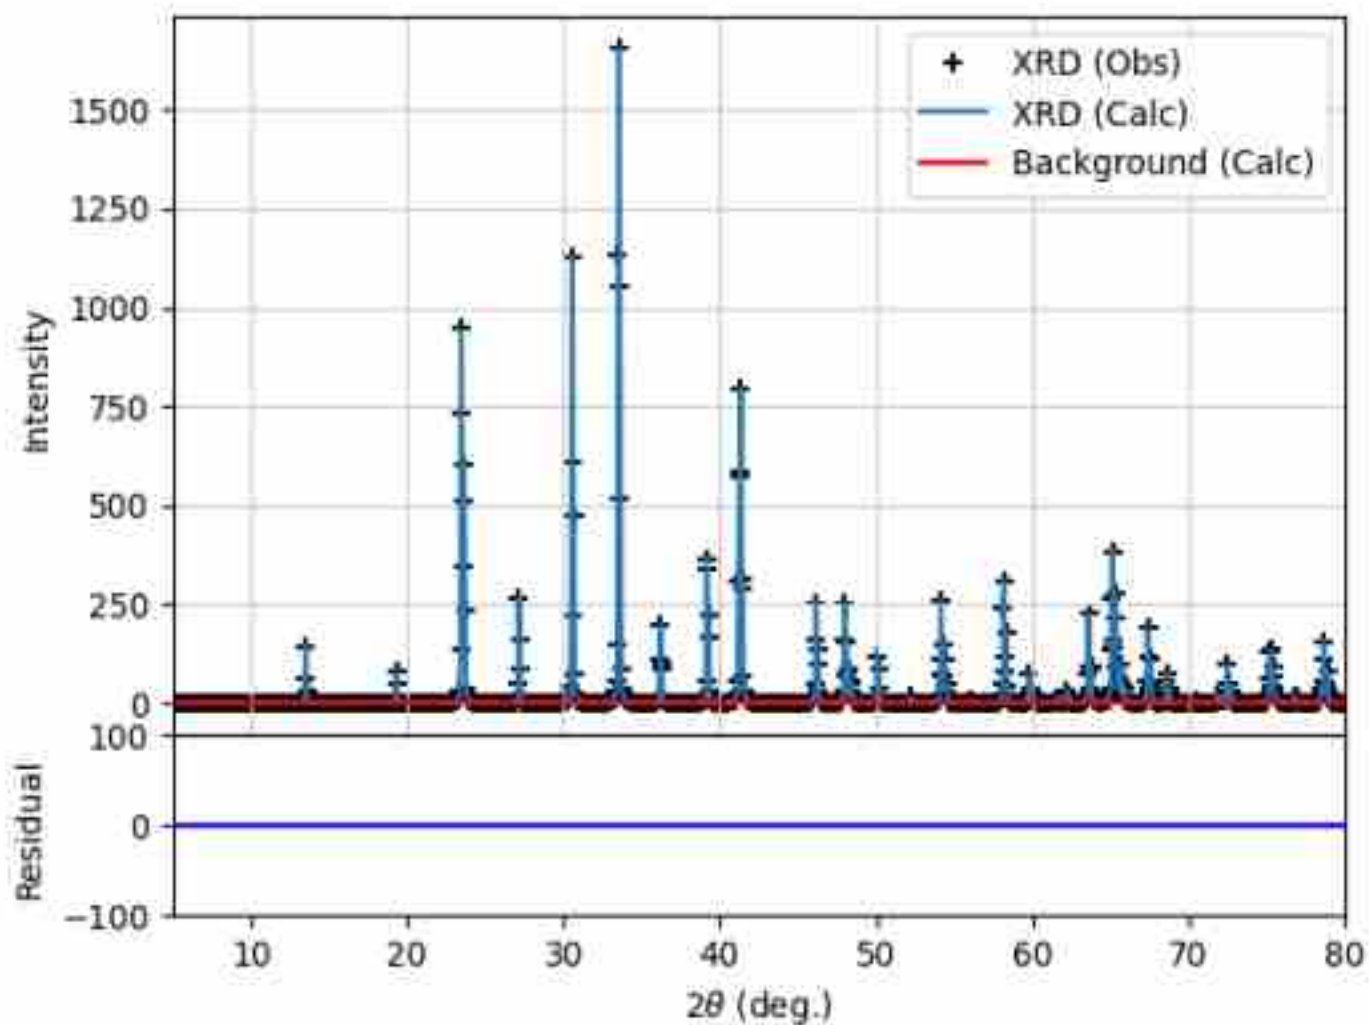

| RMSE before RR | Rwp     | RMSE after RR |
|----------------|---------|---------------|
| 0.021          | 0.00367 | 0.00109       |

# Er10Bi2Pd4

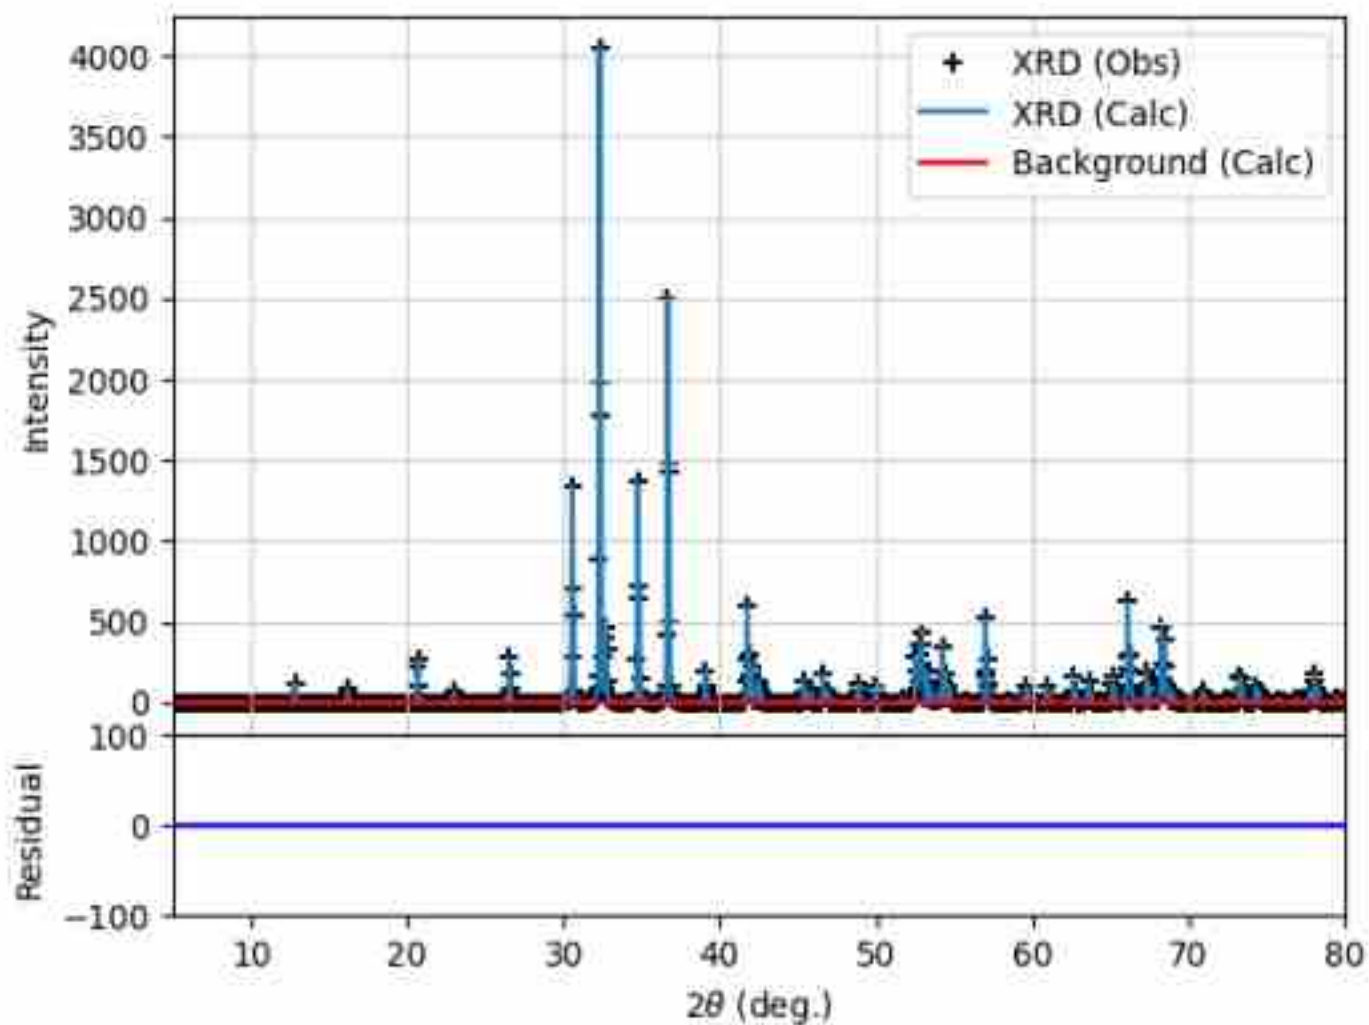

| RMSE before RR | Rwp     | RMSE after RR |
|----------------|---------|---------------|
| 0.021          | 0.00358 | 0.00022       |

# Er10Sb2Pt4

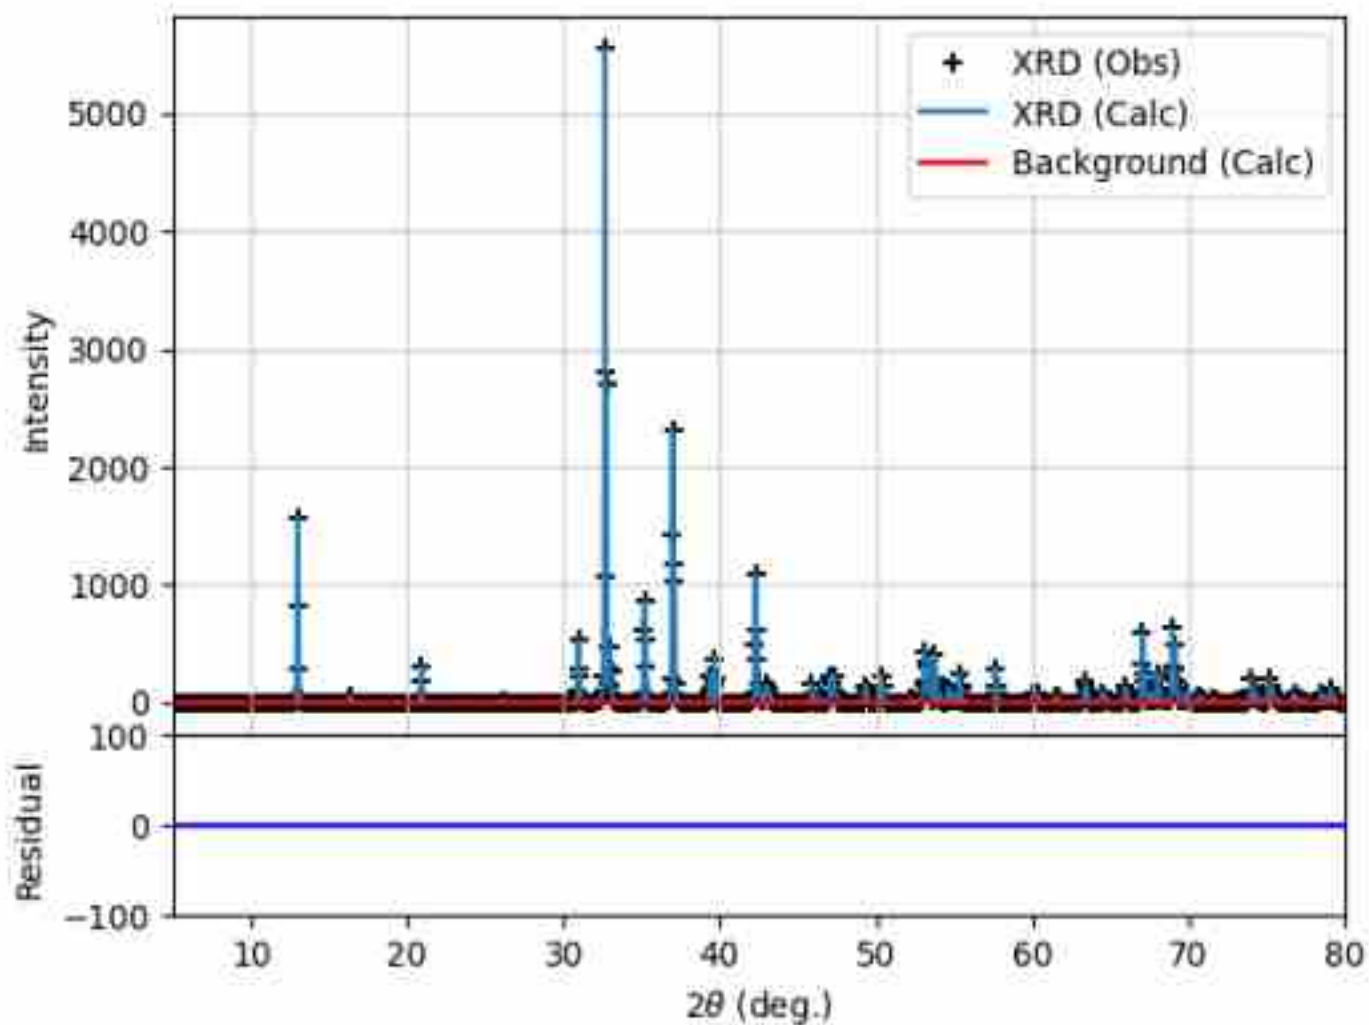

| RMSE before RR | Rwp     | RMSE after RR |
|----------------|---------|---------------|
| 0.021          | 0.00429 | 0.00034       |

# Eu1Ga3B4O12

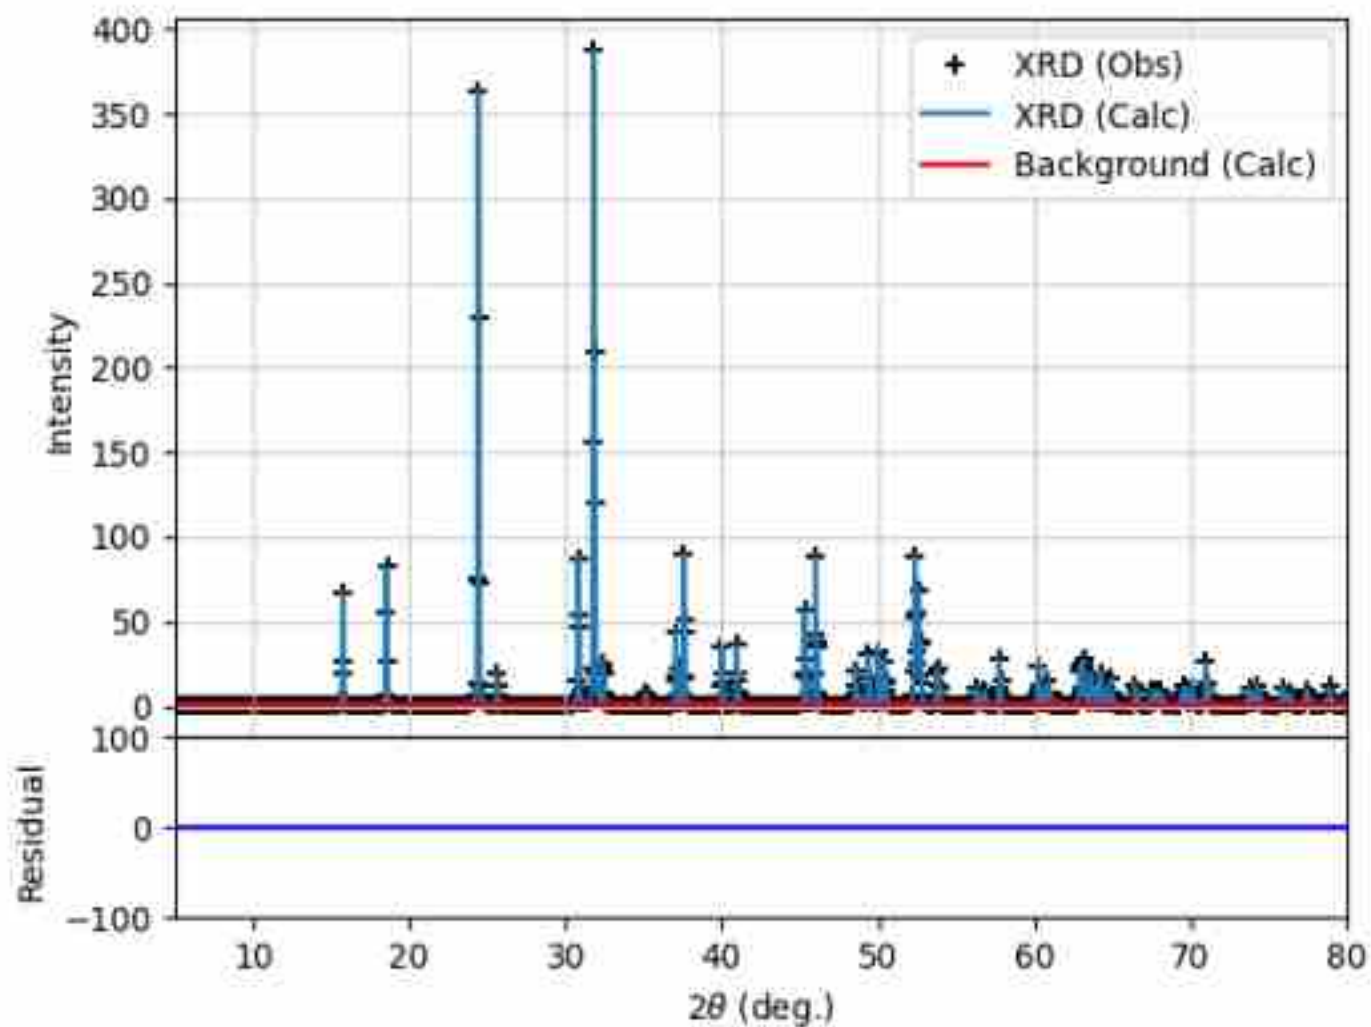

| RMSE before RR | Rwp     | RMSE after RR |
|----------------|---------|---------------|
| 0.021          | 0.00453 | 0.00311       |

# Eu<sub>2</sub>Ag<sub>2</sub>Sn<sub>2</sub>

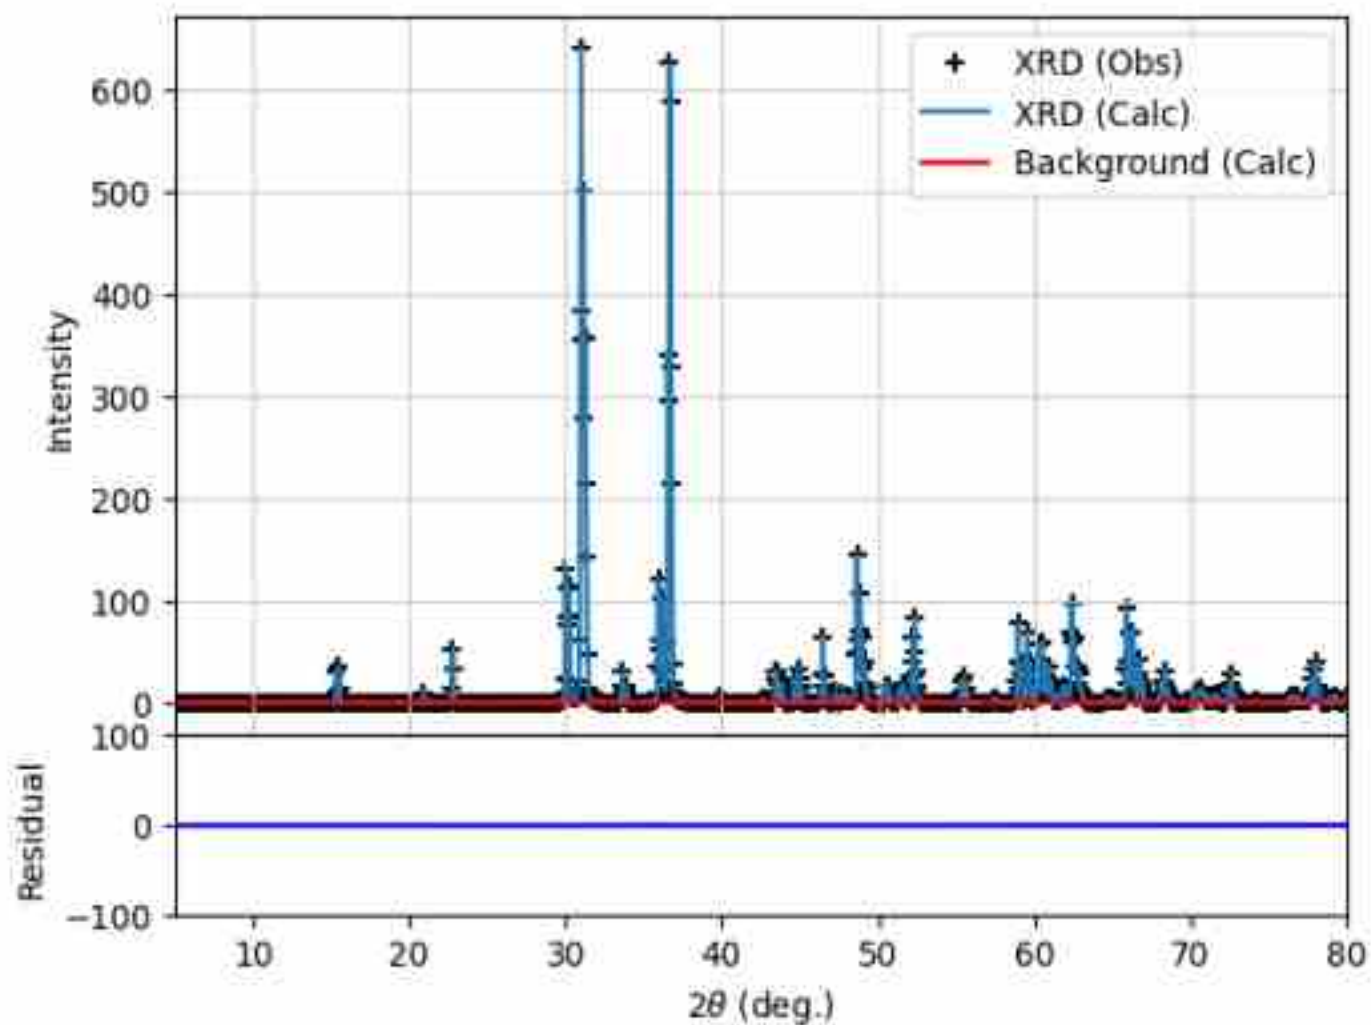

| RMSE before RR | Rwp     | RMSE after RR |
|----------------|---------|---------------|
| 0.021          | 0.56883 | 0.00394       |



# Eu<sub>2</sub>ZnSb<sub>2</sub>

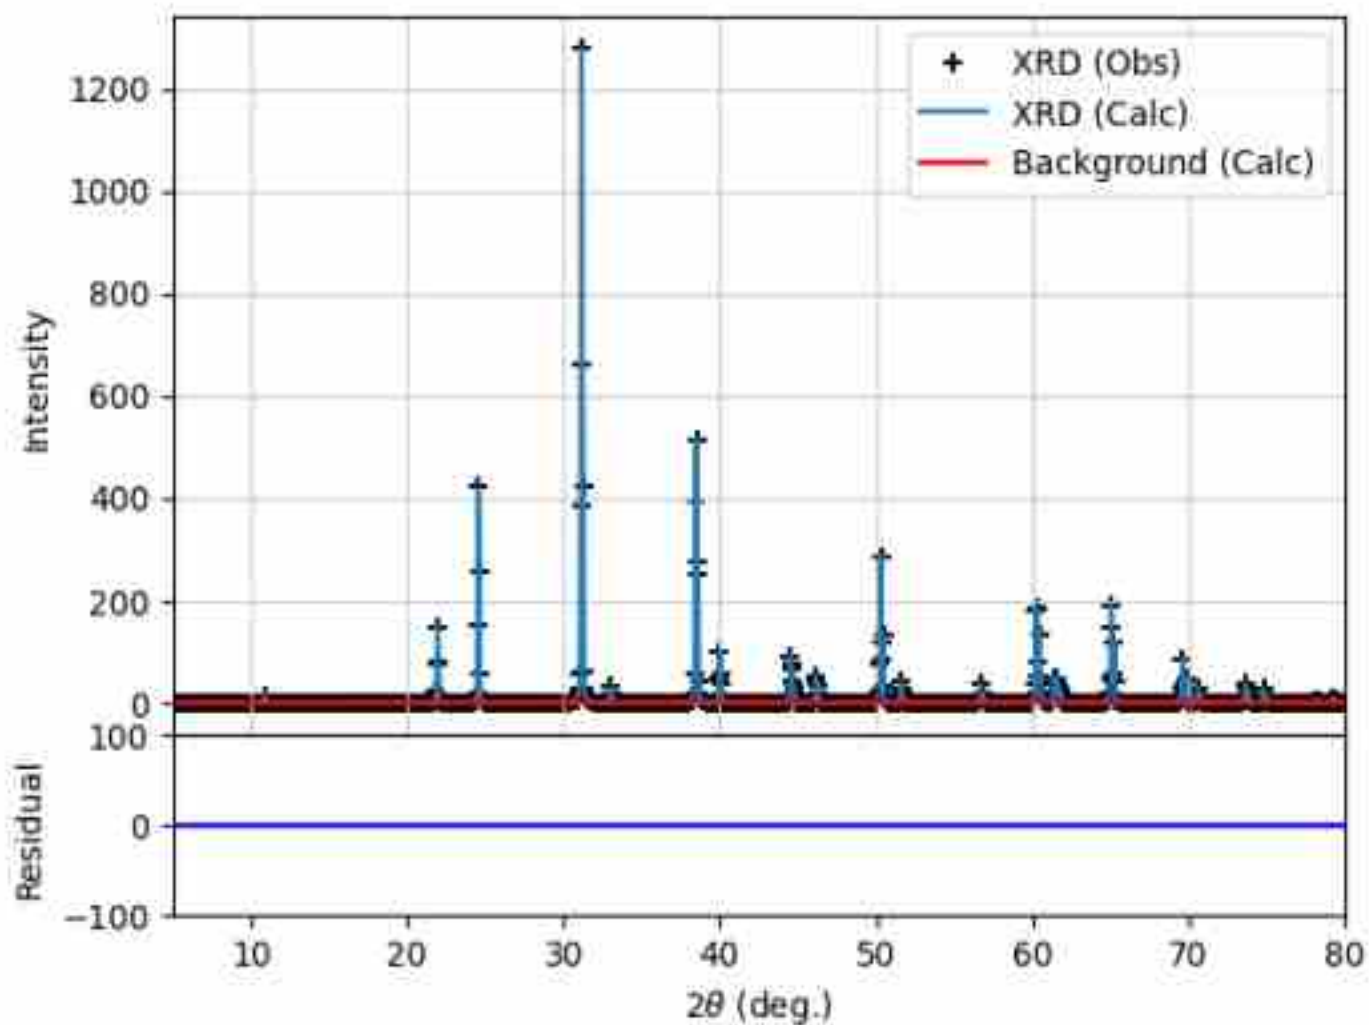

| RMSE before RR | Rwp     | RMSE after RR |
|----------------|---------|---------------|
| 0.021          | 0.00393 | 0.00033       |

# Eu<sub>4</sub>Np<sub>4</sub>O<sub>12</sub>

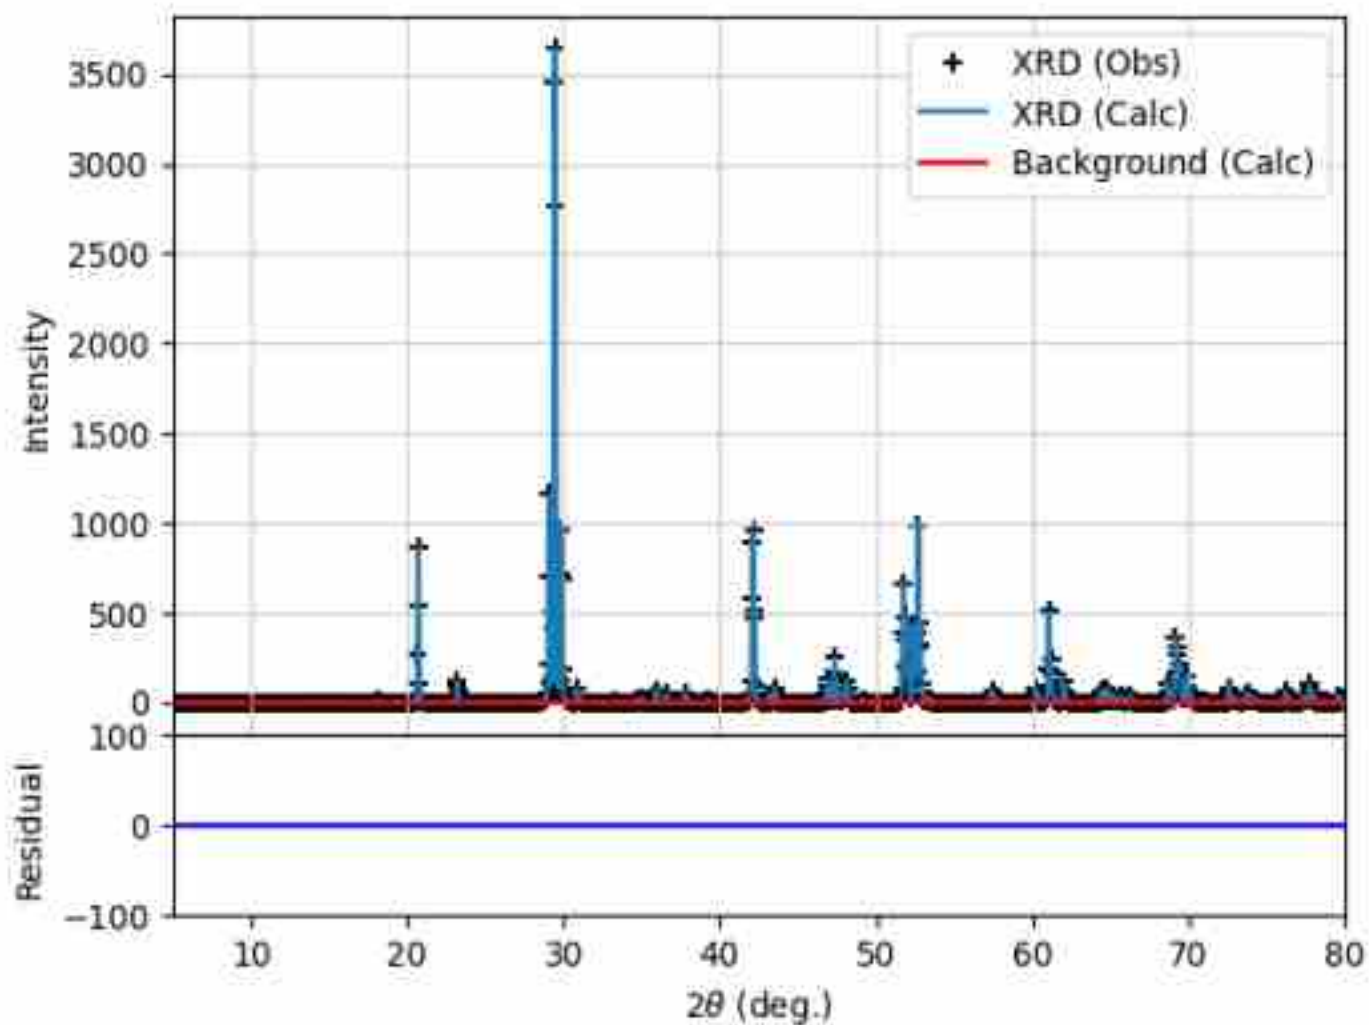

| RMSE before RR | Rwp     | RMSE after RR |
|----------------|---------|---------------|
| 0.021          | 0.00401 | 0.00157       |

# Eu<sub>4</sub>Sb<sub>4</sub>Pd<sub>4</sub>

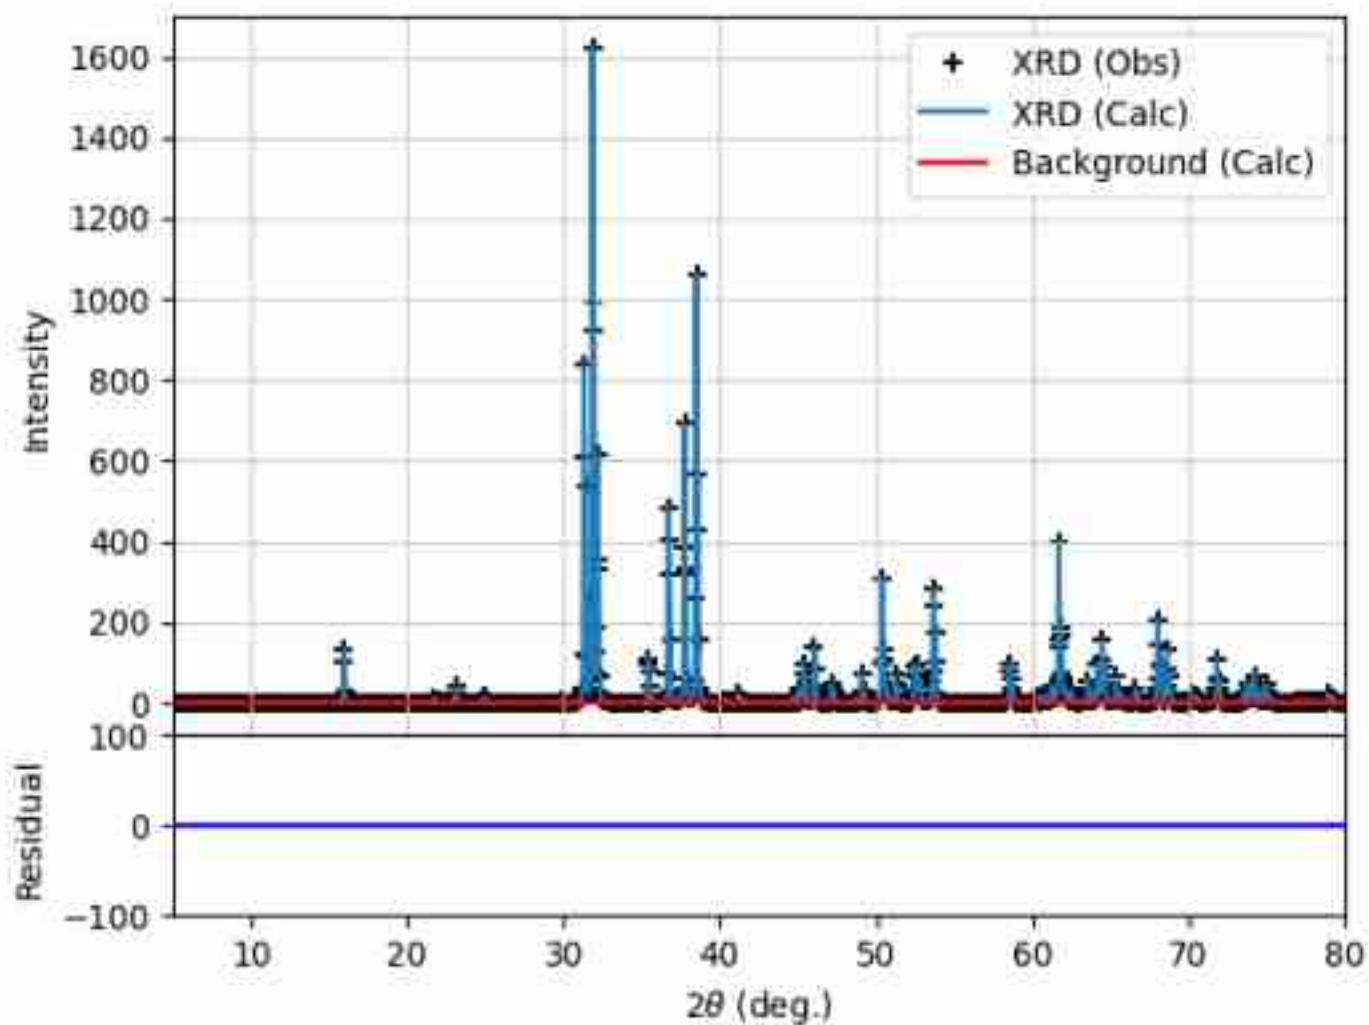

| RMSE before RR | Rwp     | RMSE after RR |
|----------------|---------|---------------|
| 0.021          | 0.00381 | 0.00029       |

# Eu<sub>4</sub>Ti<sub>4</sub>O<sub>12</sub>

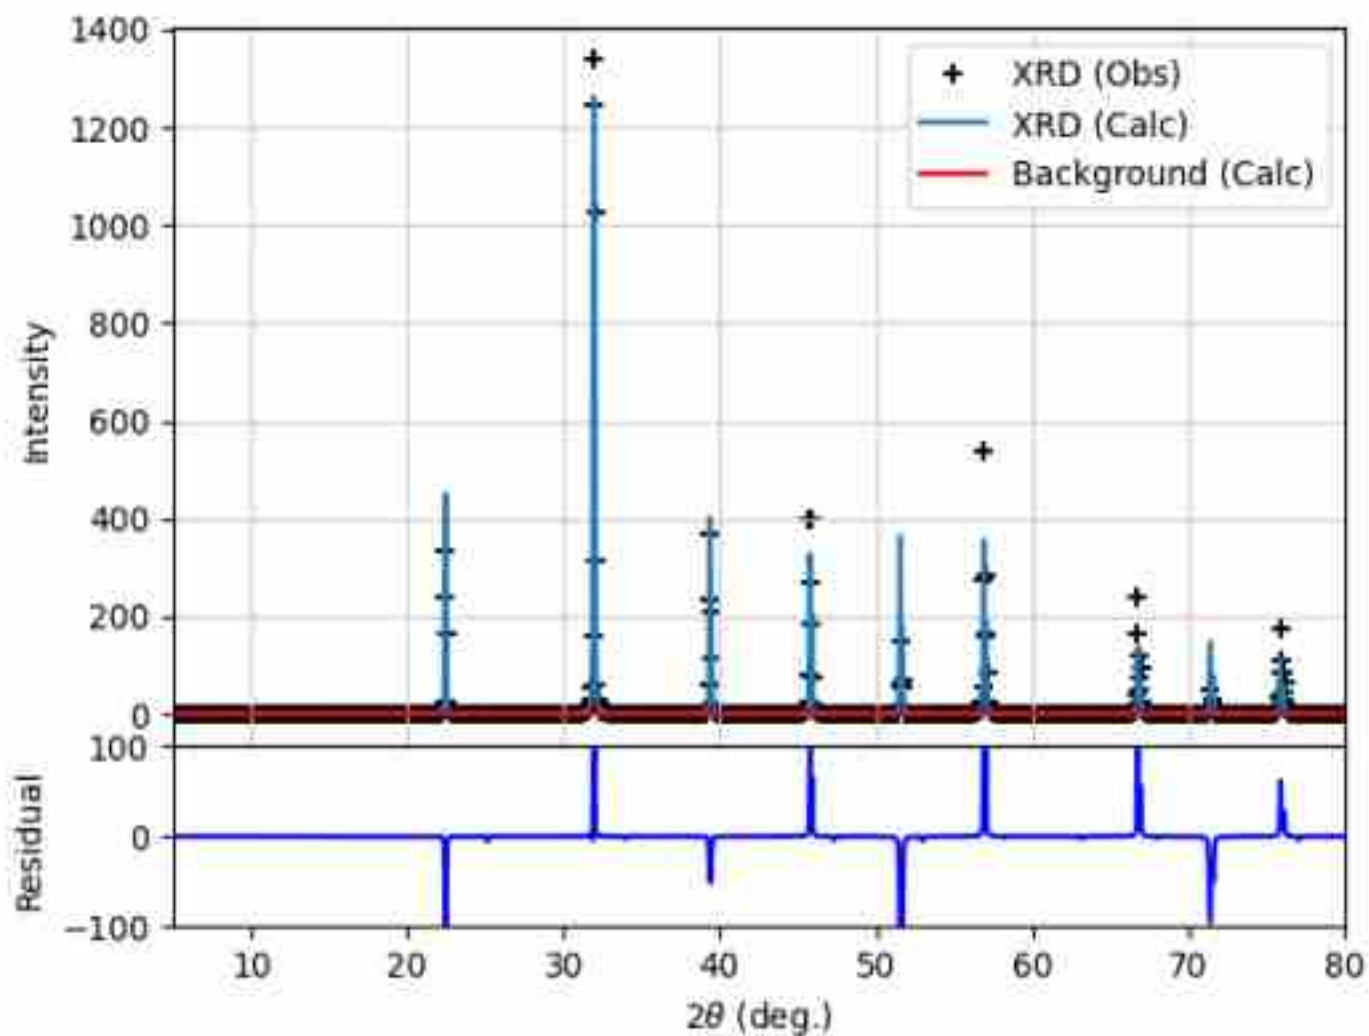

| RMSE before RR | Rwp      | RMSE after RR |
|----------------|----------|---------------|
| 0.021          | 43.69192 | None          |

# Fe<sub>2</sub>Ni<sub>4</sub>O<sub>8</sub>

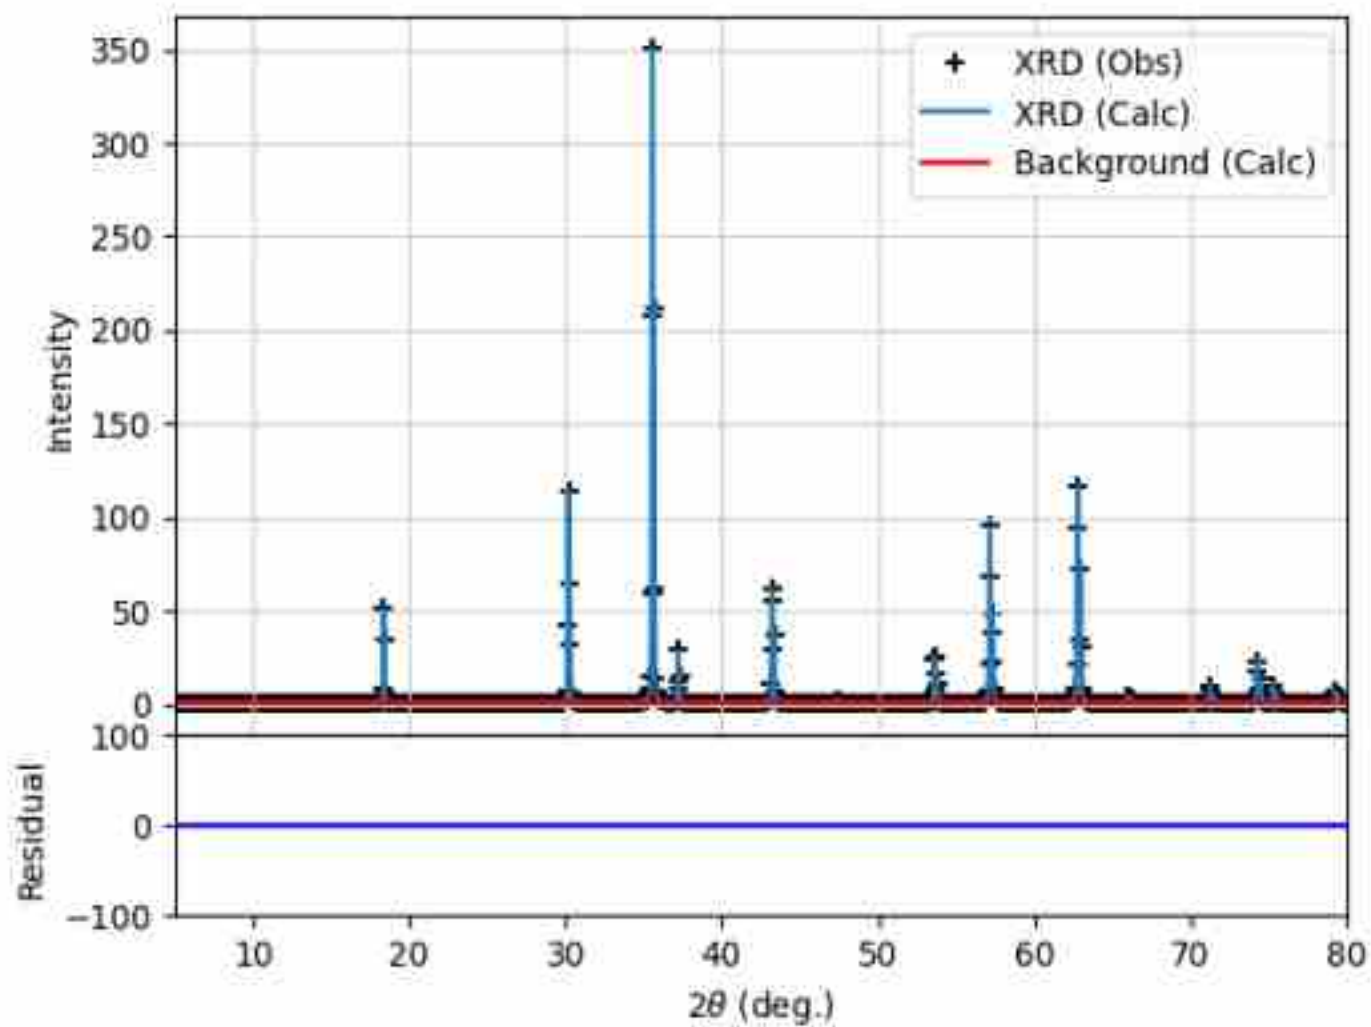

| RMSE before RR | Rwp     | RMSE after RR |
|----------------|---------|---------------|
| 0.021          | 0.00261 | 0.00154       |

# Ga1Cu1I4

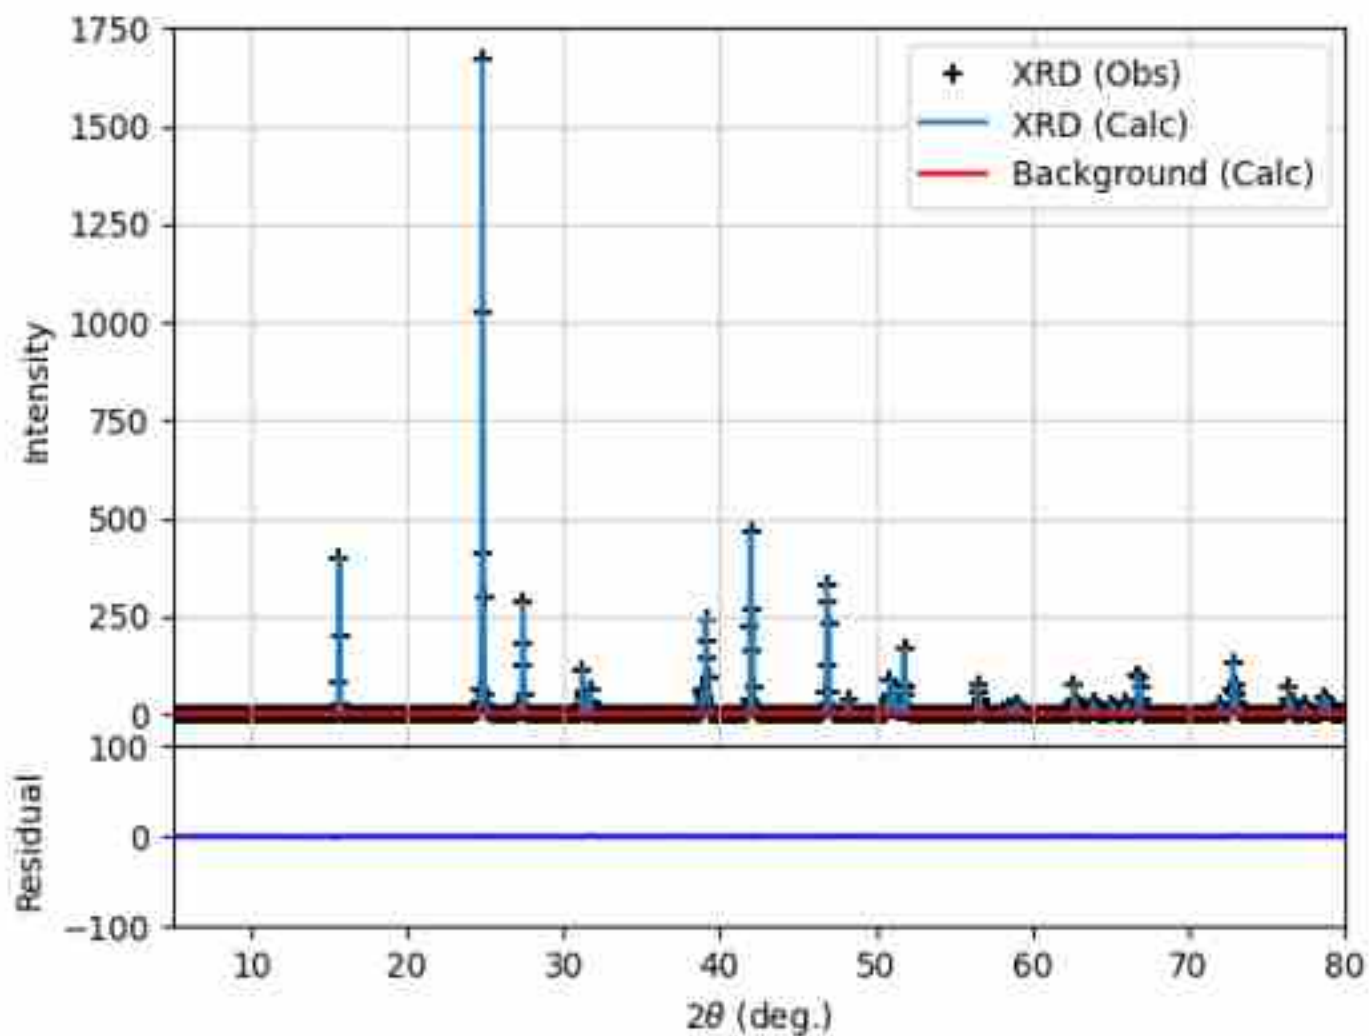

| RMSE before RR | Rwp    | RMSE after RR |
|----------------|--------|---------------|
| 0.021          | 1.2486 | 0.02156       |

# Gd<sub>2</sub>H<sub>6</sub>O<sub>6</sub>

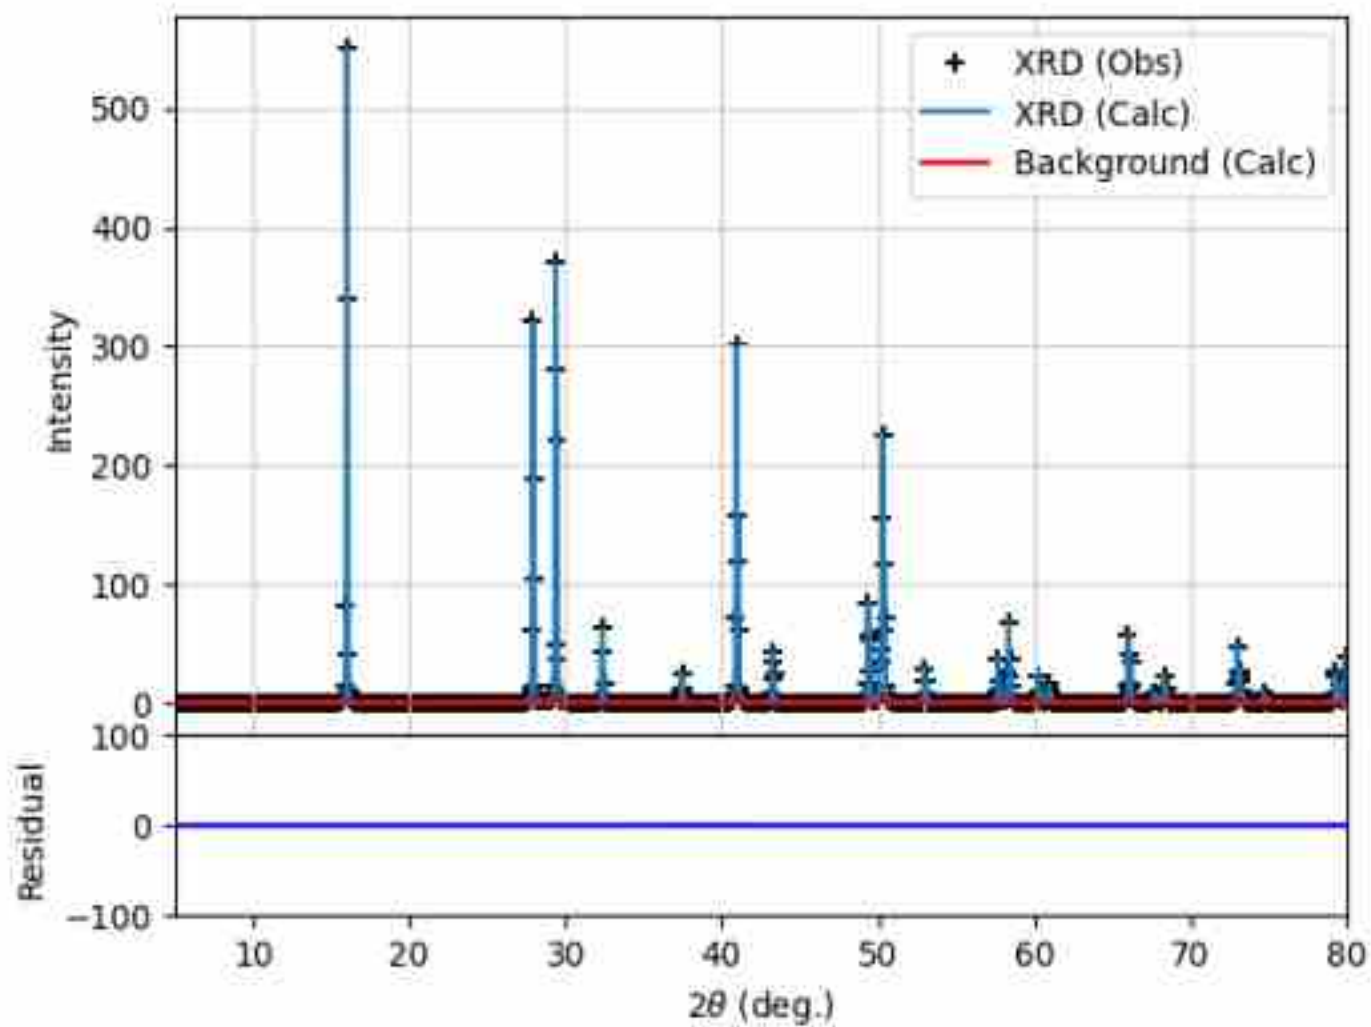

| RMSE before RR | Rwp     | RMSE after RR |
|----------------|---------|---------------|
| 0.021          | 0.12928 | 0.05023       |

# Gd10Pb6

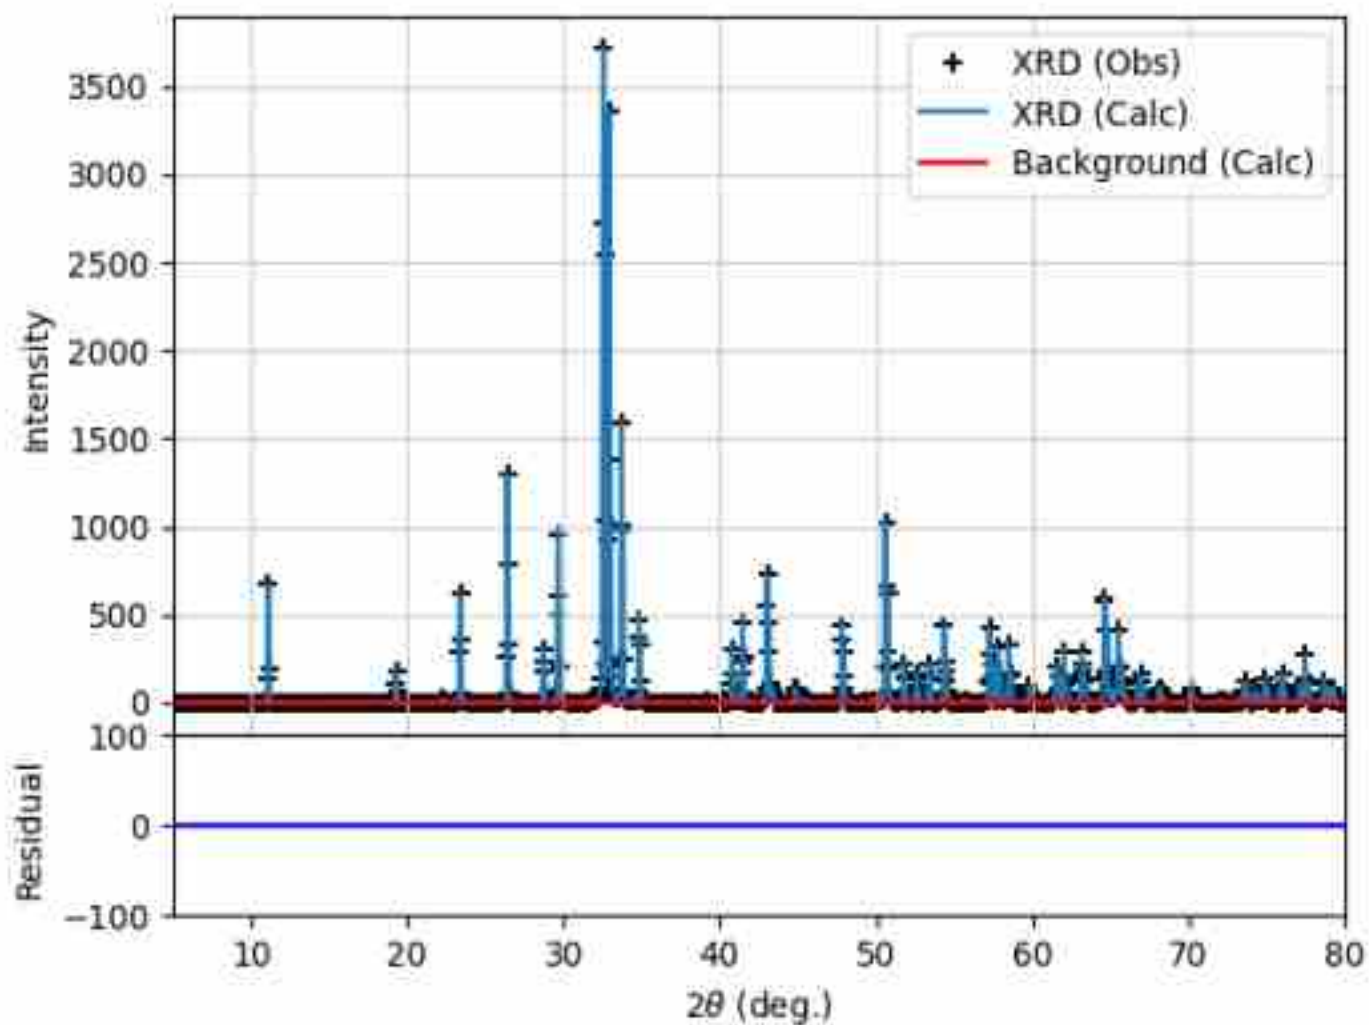

| RMSE before RR | Rwp     | RMSE after RR |
|----------------|---------|---------------|
| 0.021          | 0.00357 | 0.00031       |



# H4Br1N1

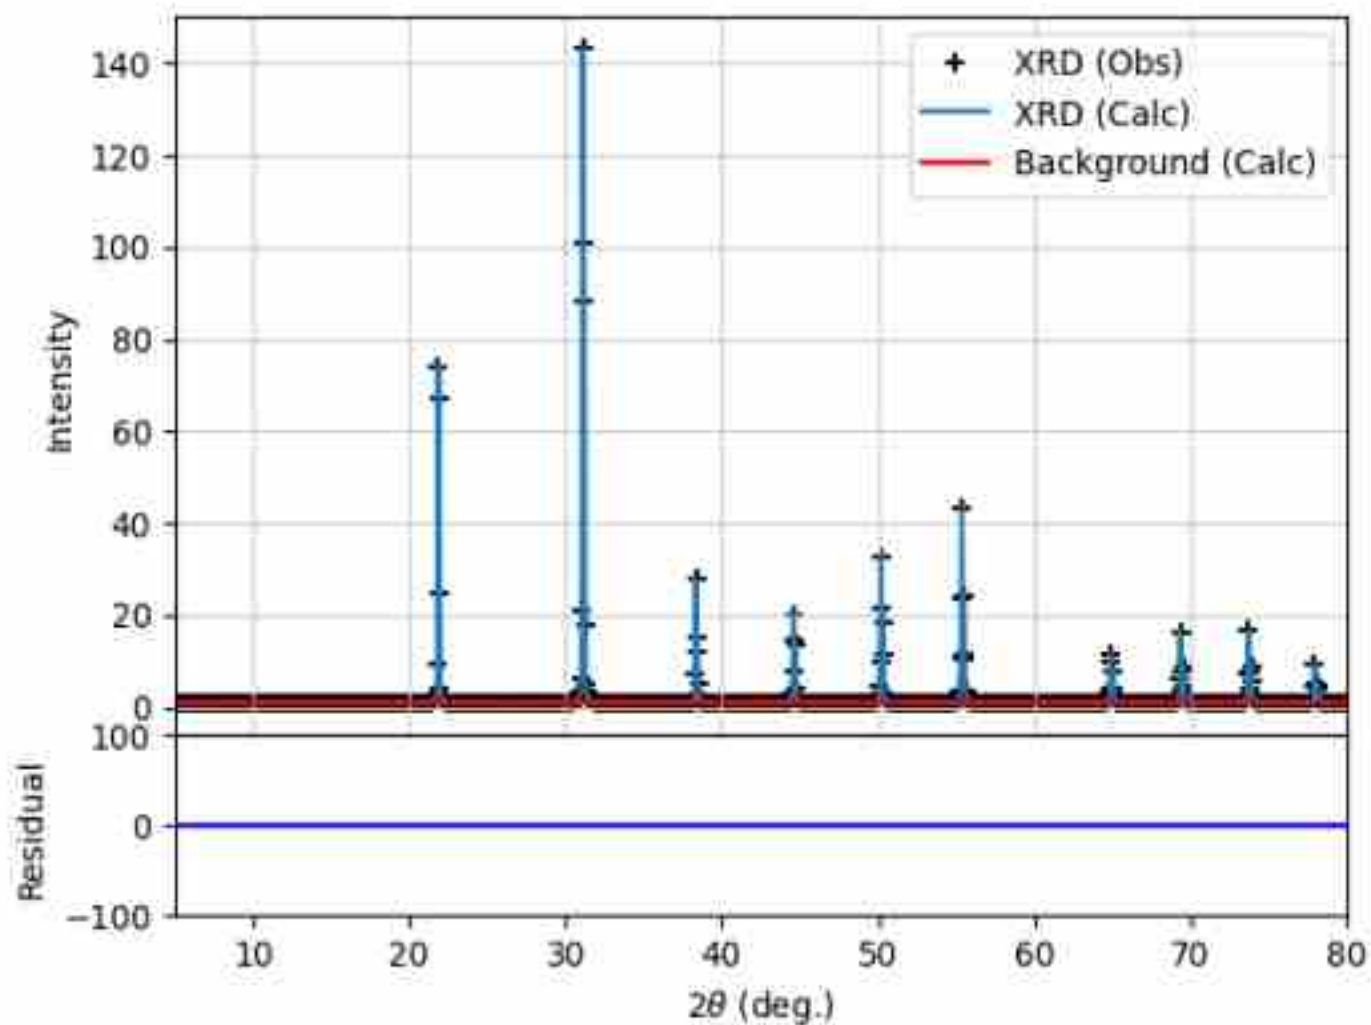

| RMSE before RR | Rwp     | RMSE after RR |
|----------------|---------|---------------|
| 0.021          | 0.00258 | 0.01045       |

# Hf4Al6Pd2

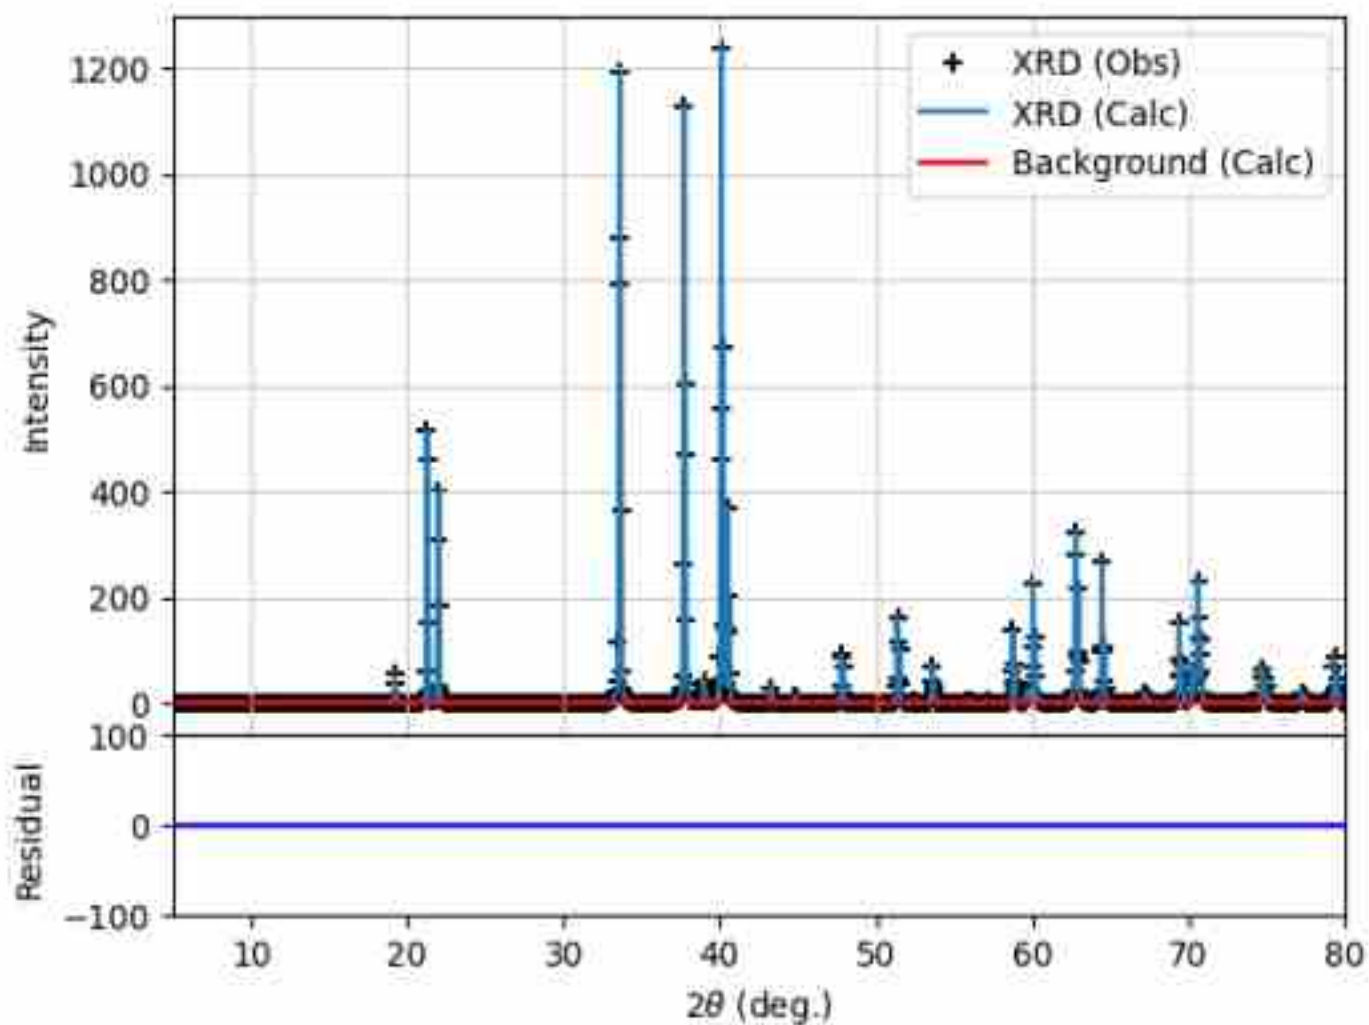

| RMSE before RR | Rwp     | RMSE after RR |
|----------------|---------|---------------|
| 0.021          | 0.00404 | 0.00081       |

# Hf4Mg4N8

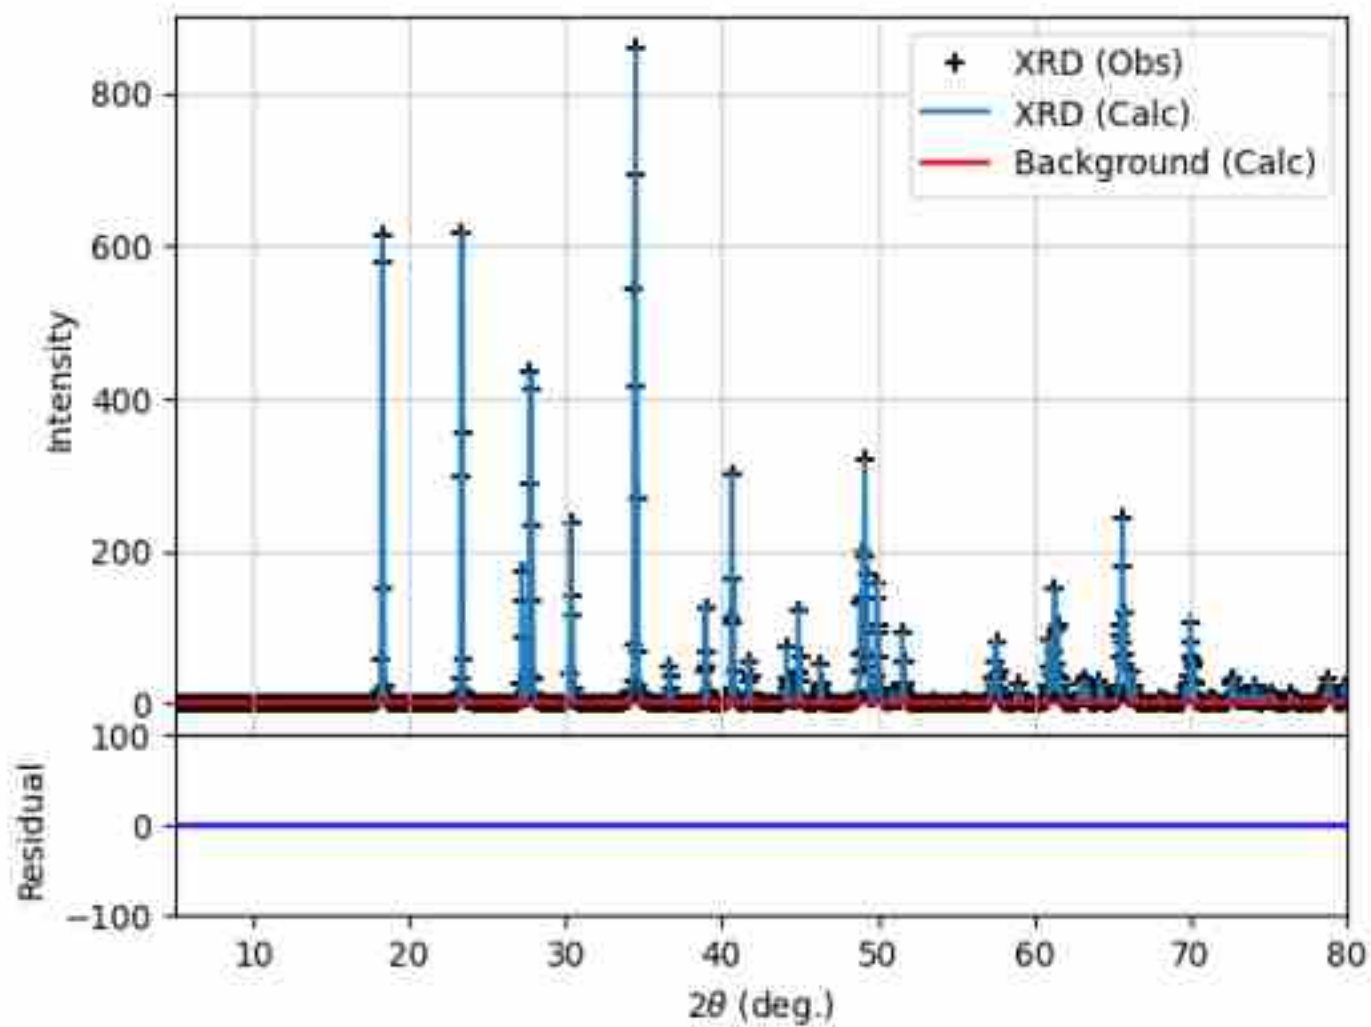

| RMSE before RR | Rwp     | RMSE after RR |
|----------------|---------|---------------|
| 0.021          | 0.00366 | 0.00158       |

# Ho<sub>2</sub>Bi<sub>4</sub>O<sub>12</sub>

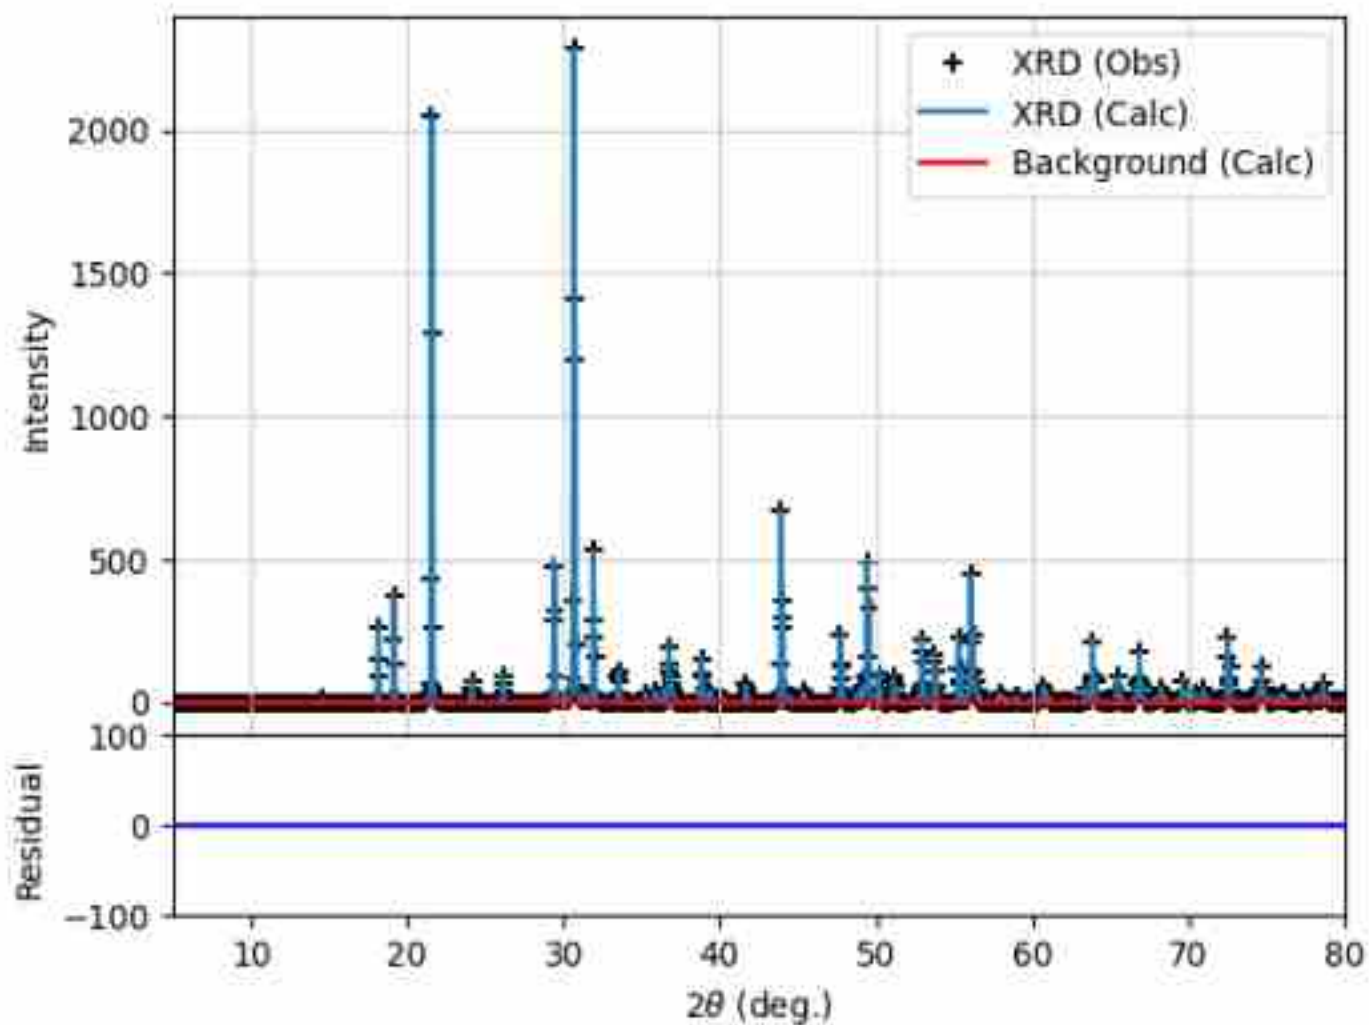

| RMSE before RR | Rwp     | RMSE after RR |
|----------------|---------|---------------|
| 0.021          | 0.00449 | 0.00202       |

# Ho2Rh4

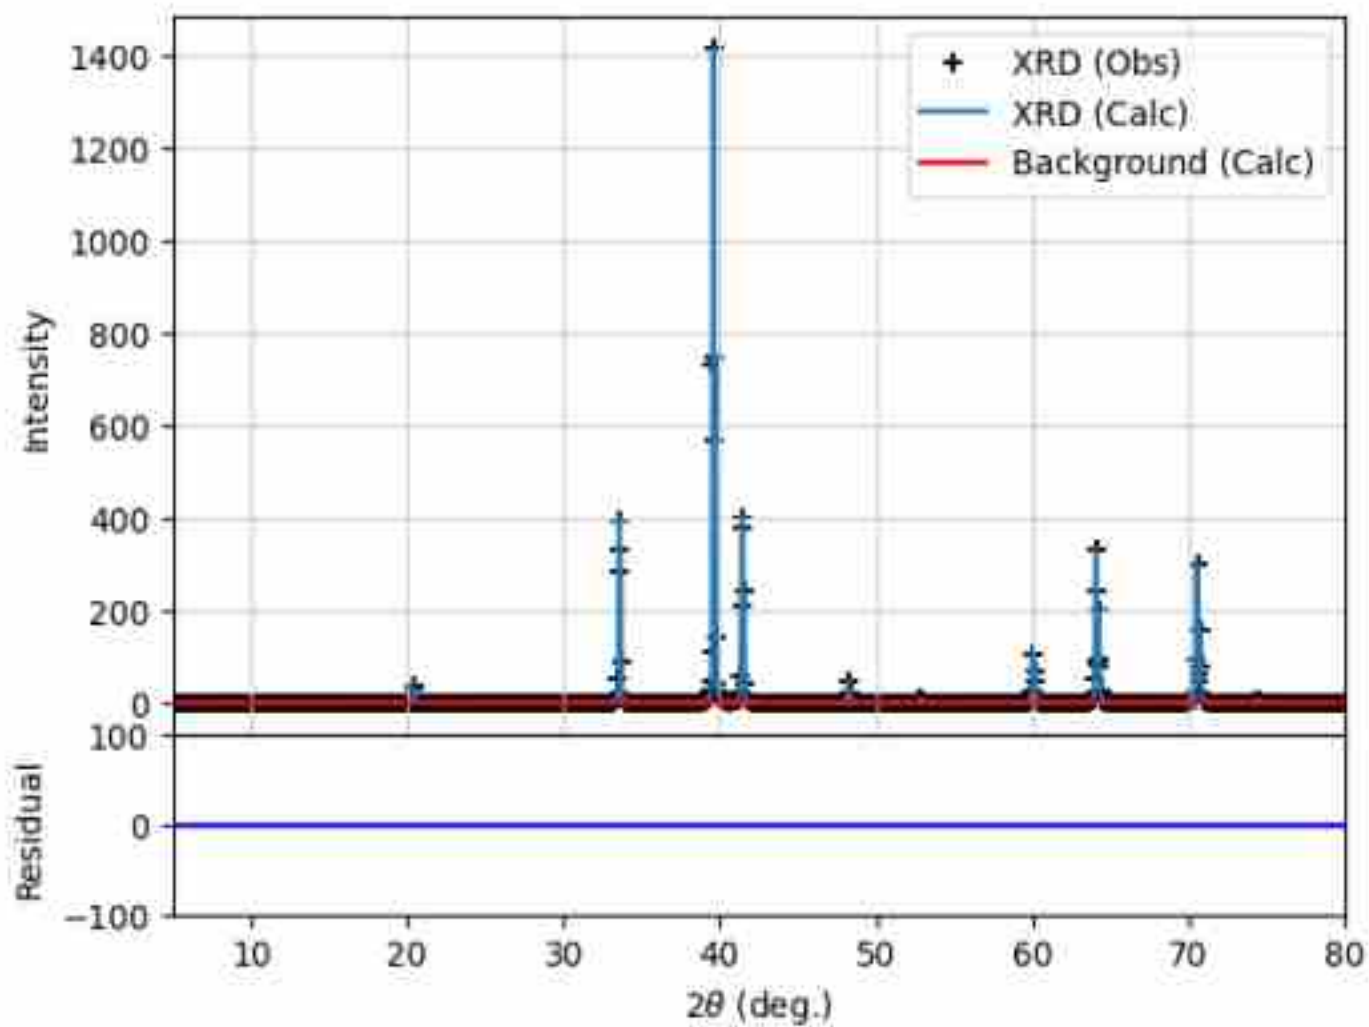

| RMSE before RR | Rwp     | RMSE after RR |
|----------------|---------|---------------|
| 0.021          | 0.00414 | 0.00059       |

# Ho<sub>3</sub>Ga<sub>6</sub>Ni<sub>9</sub>

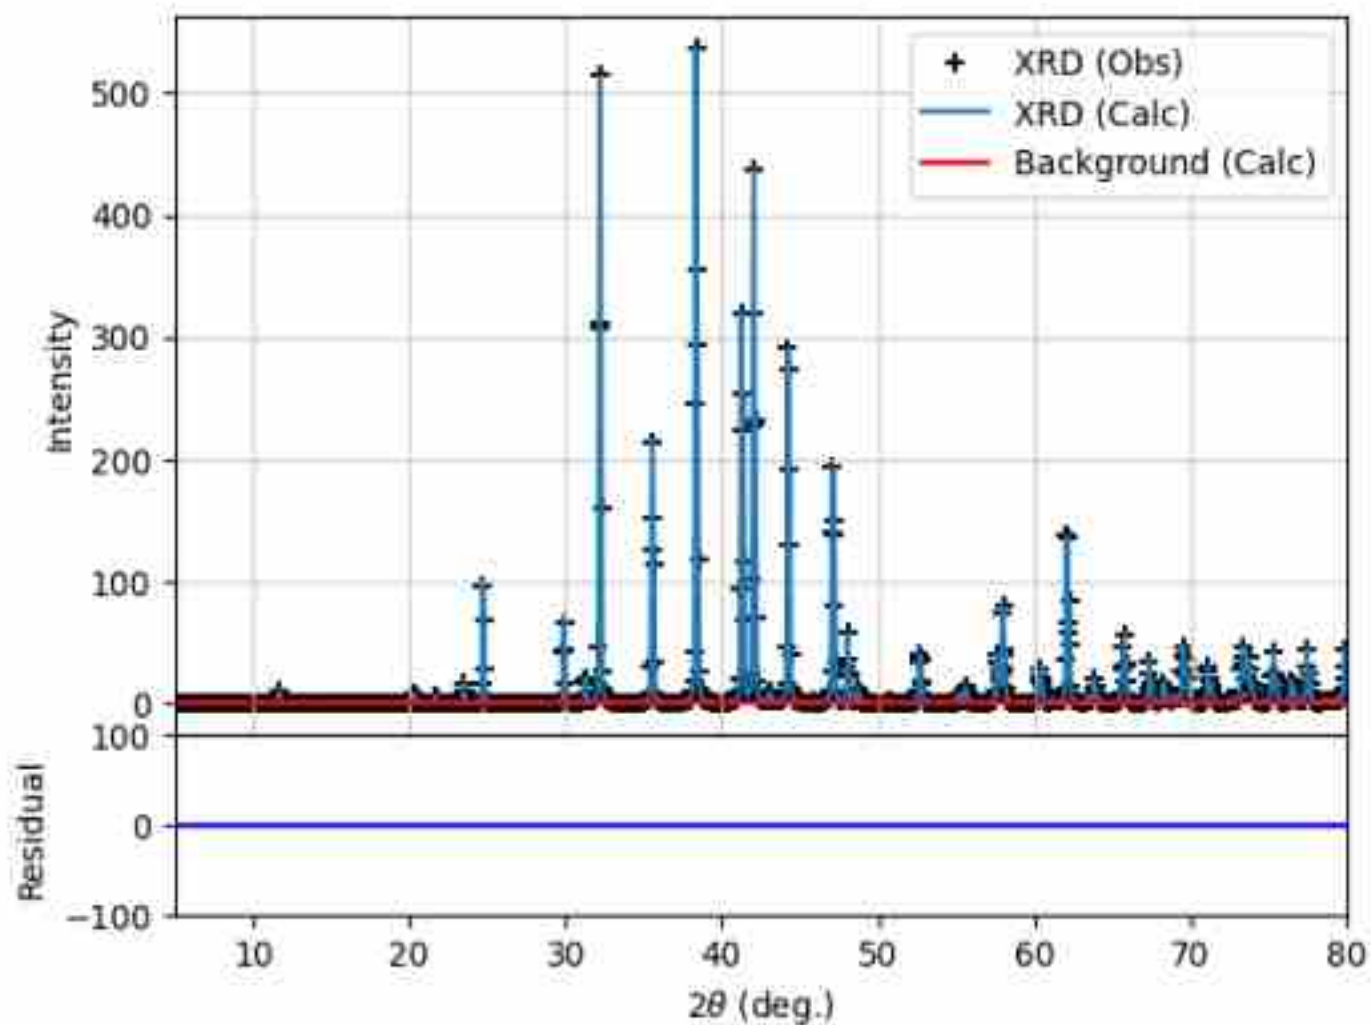

| RMSE before RR | Rwp     | RMSE after RR |
|----------------|---------|---------------|
| 0.021          | 0.00303 | 0.00039       |

# Ho<sub>4</sub>Co<sub>6</sub>Ge<sub>10</sub>

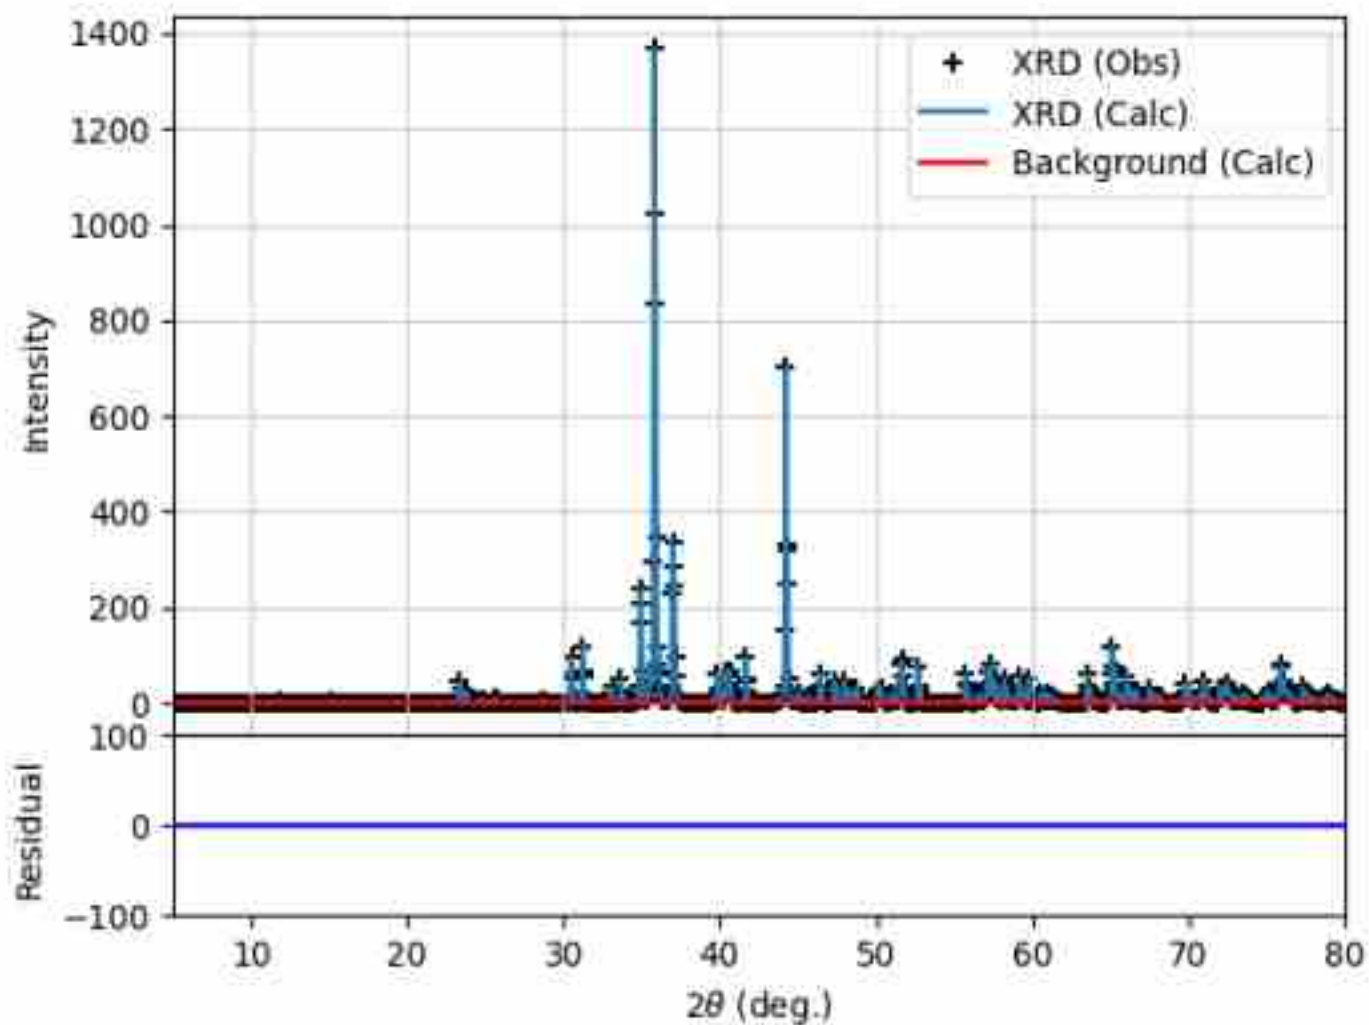

| RMSE before RR | Rwp     | RMSE after RR |
|----------------|---------|---------------|
| 0.021          | 0.00364 | 0.00054       |

# Ho<sub>4</sub>Ge<sub>4</sub>Pd<sub>8</sub>

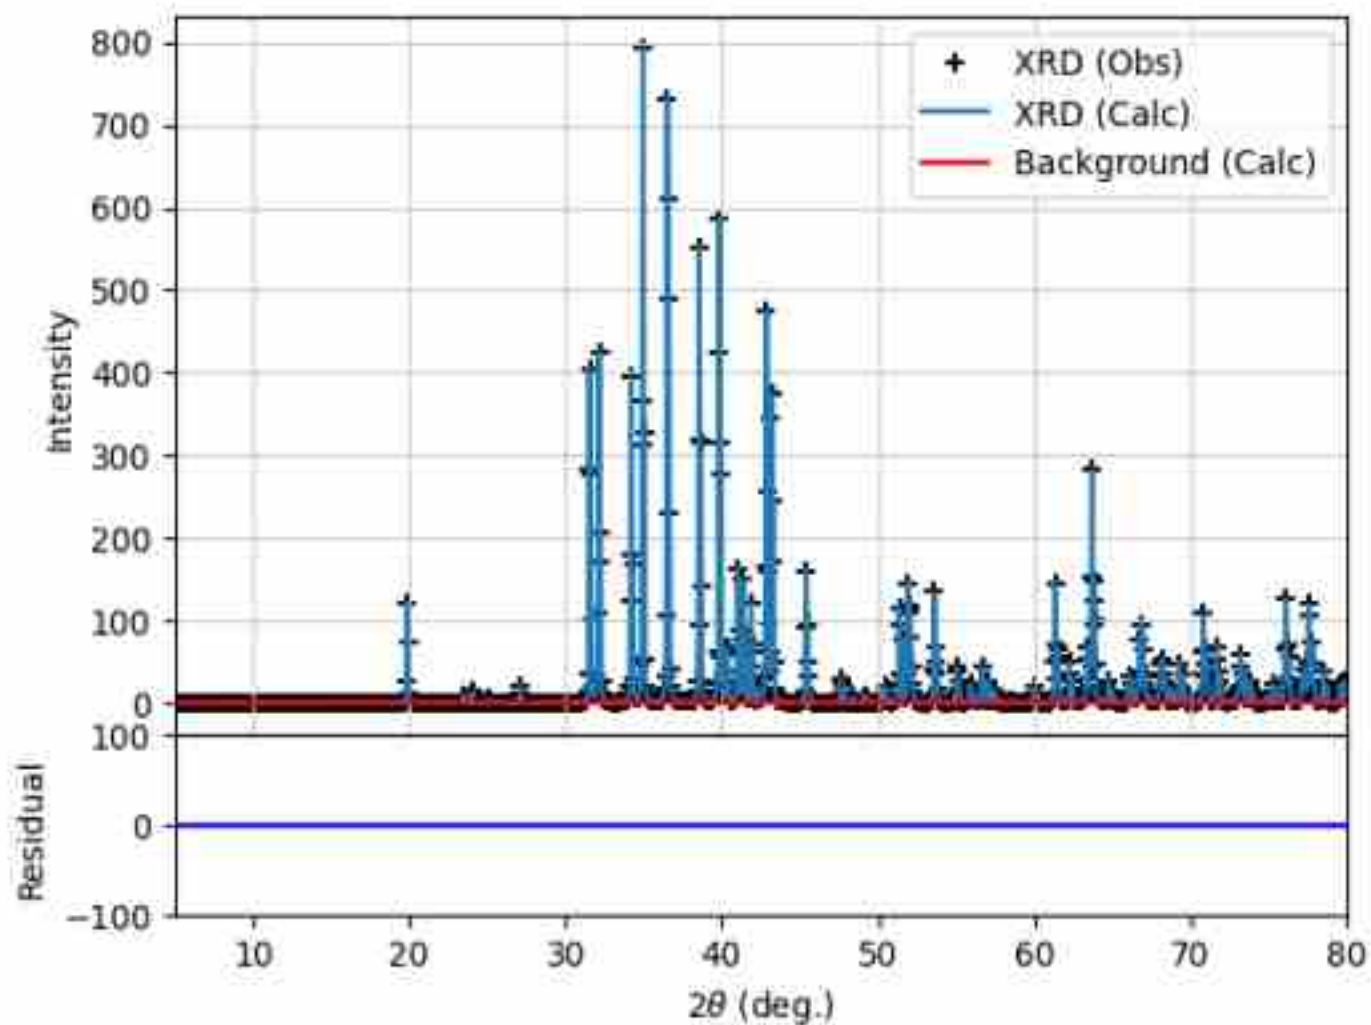

| RMSE before RR | Rwp     | RMSE after RR |
|----------------|---------|---------------|
| 0.021          | 0.00434 | 0.00045       |



# Ho<sub>4</sub>Ge<sub>8</sub>Pd<sub>4</sub>

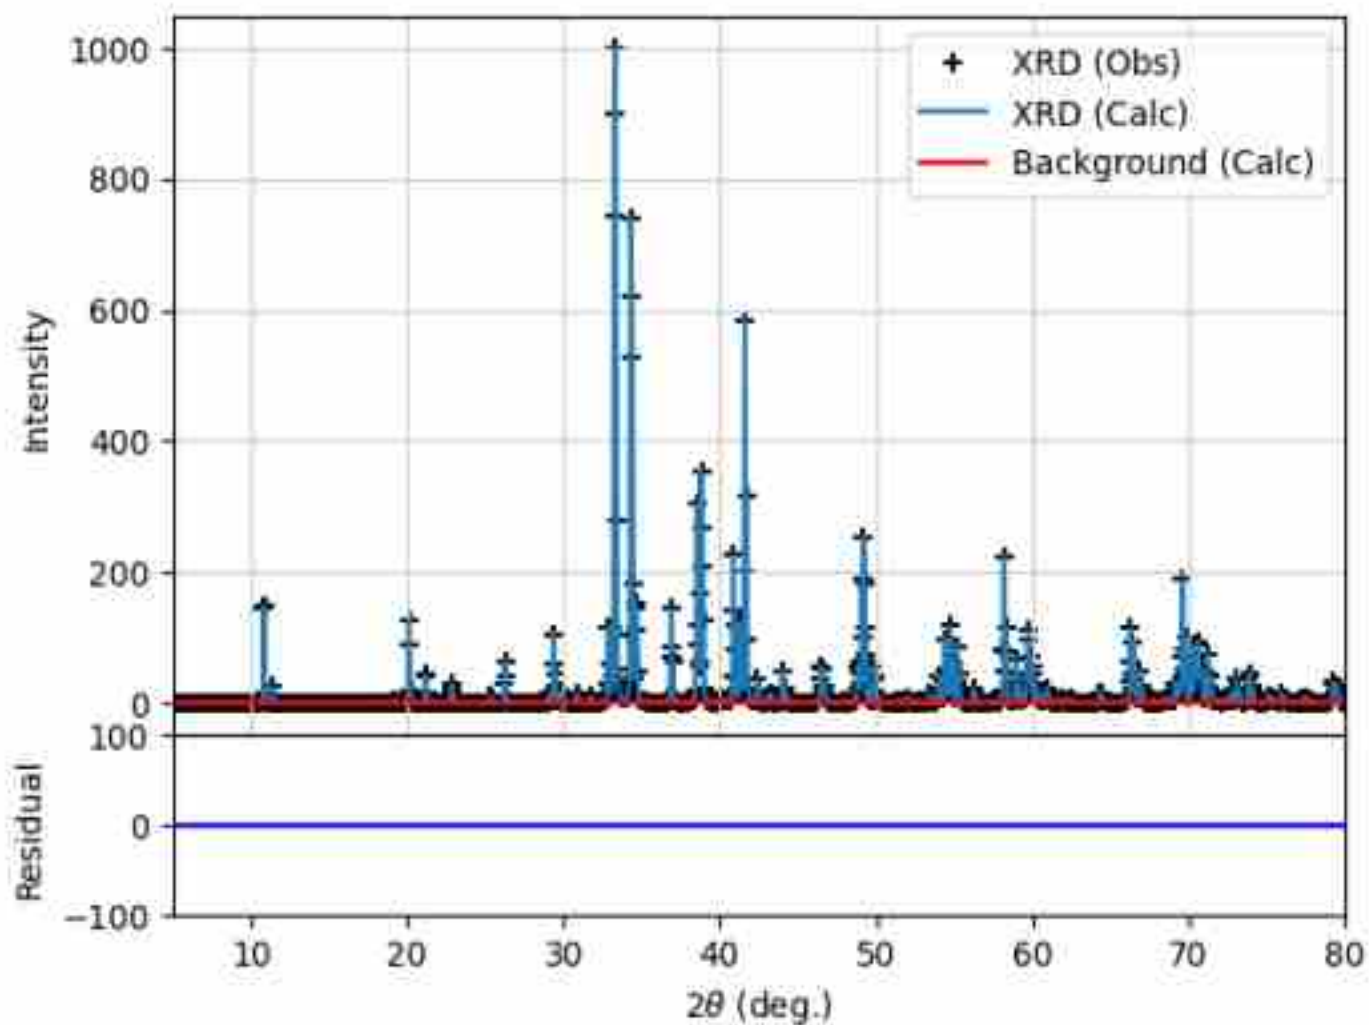

| RMSE before RR | Rwp     | RMSE after RR |
|----------------|---------|---------------|
| 0.021          | 0.00431 | 0.00043       |

# Ho<sub>4</sub>Ge<sub>10</sub>Ru<sub>6</sub>

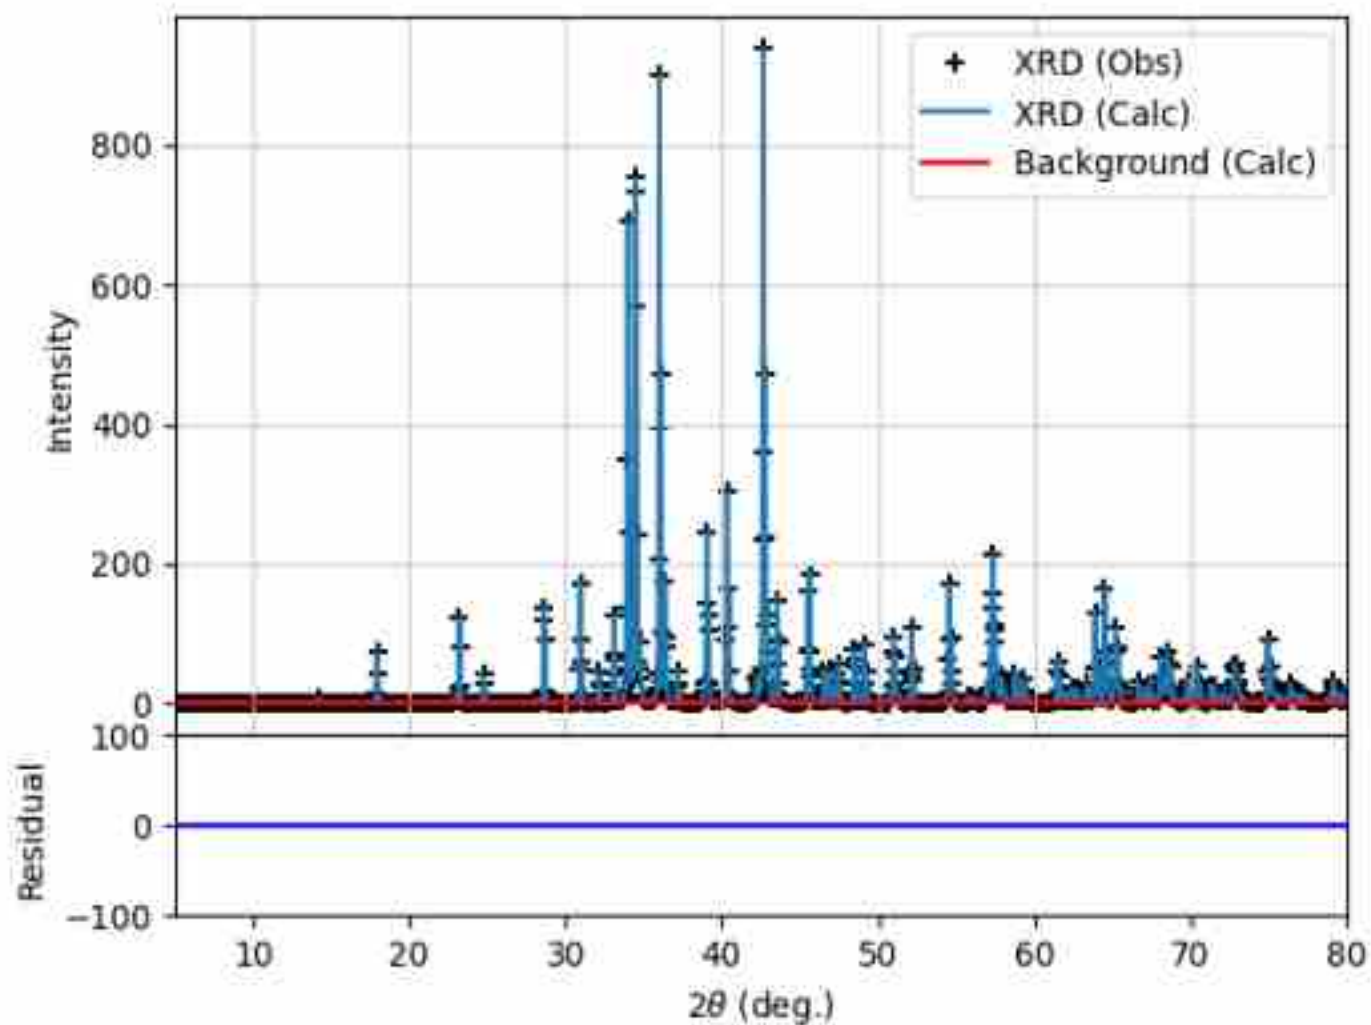

| RMSE before RR | Rwp     | RMSE after RR |
|----------------|---------|---------------|
| 0.021          | 0.00365 | 0.00038       |

# Ho<sub>4</sub>Si<sub>4</sub>Pt<sub>4</sub>

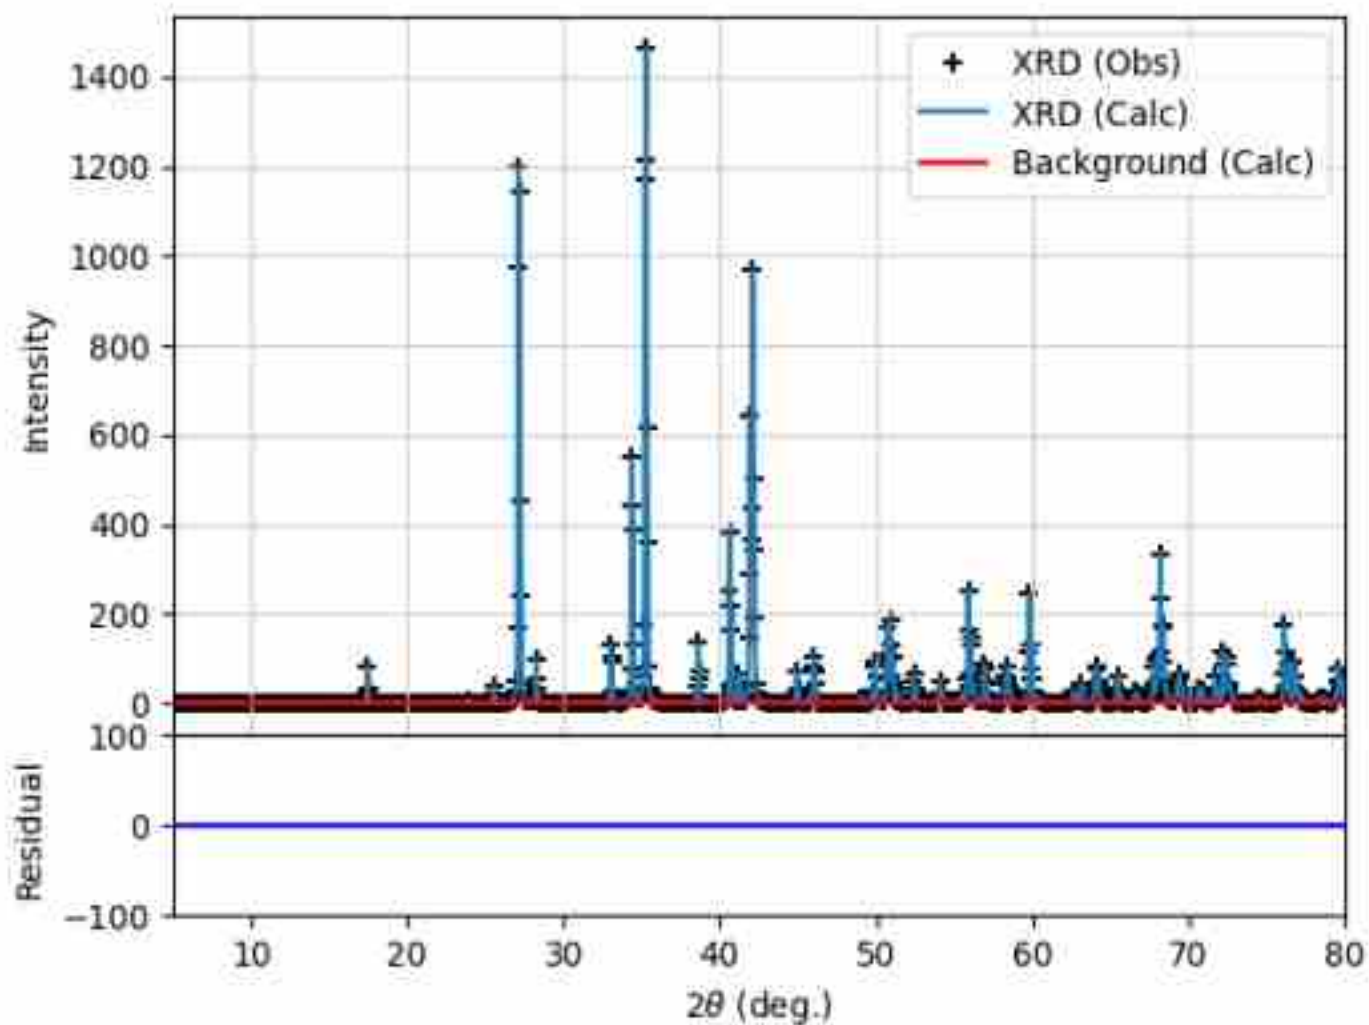

| RMSE before RR | Rwp     | RMSE after RR |
|----------------|---------|---------------|
| 0.021          | 0.00471 | 0.00063       |

# Ho<sub>4</sub>Si<sub>4</sub>Pt<sub>8</sub>

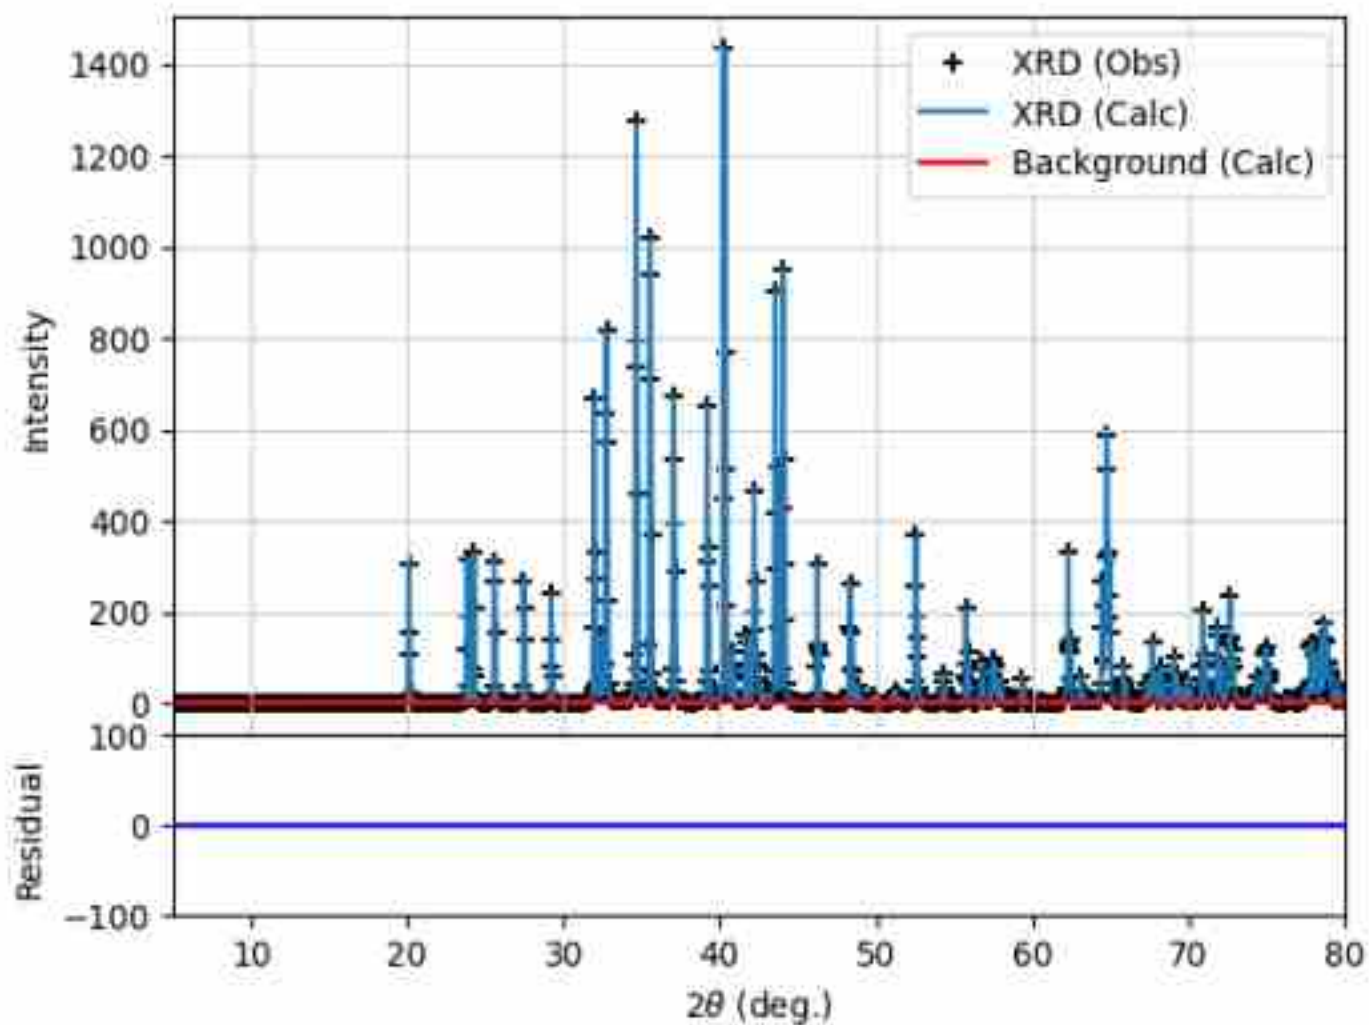

| RMSE before RR | Rwp     | RMSE after RR |
|----------------|---------|---------------|
| 0.021          | 0.00479 | 0.0007        |

# Ho6W1O12

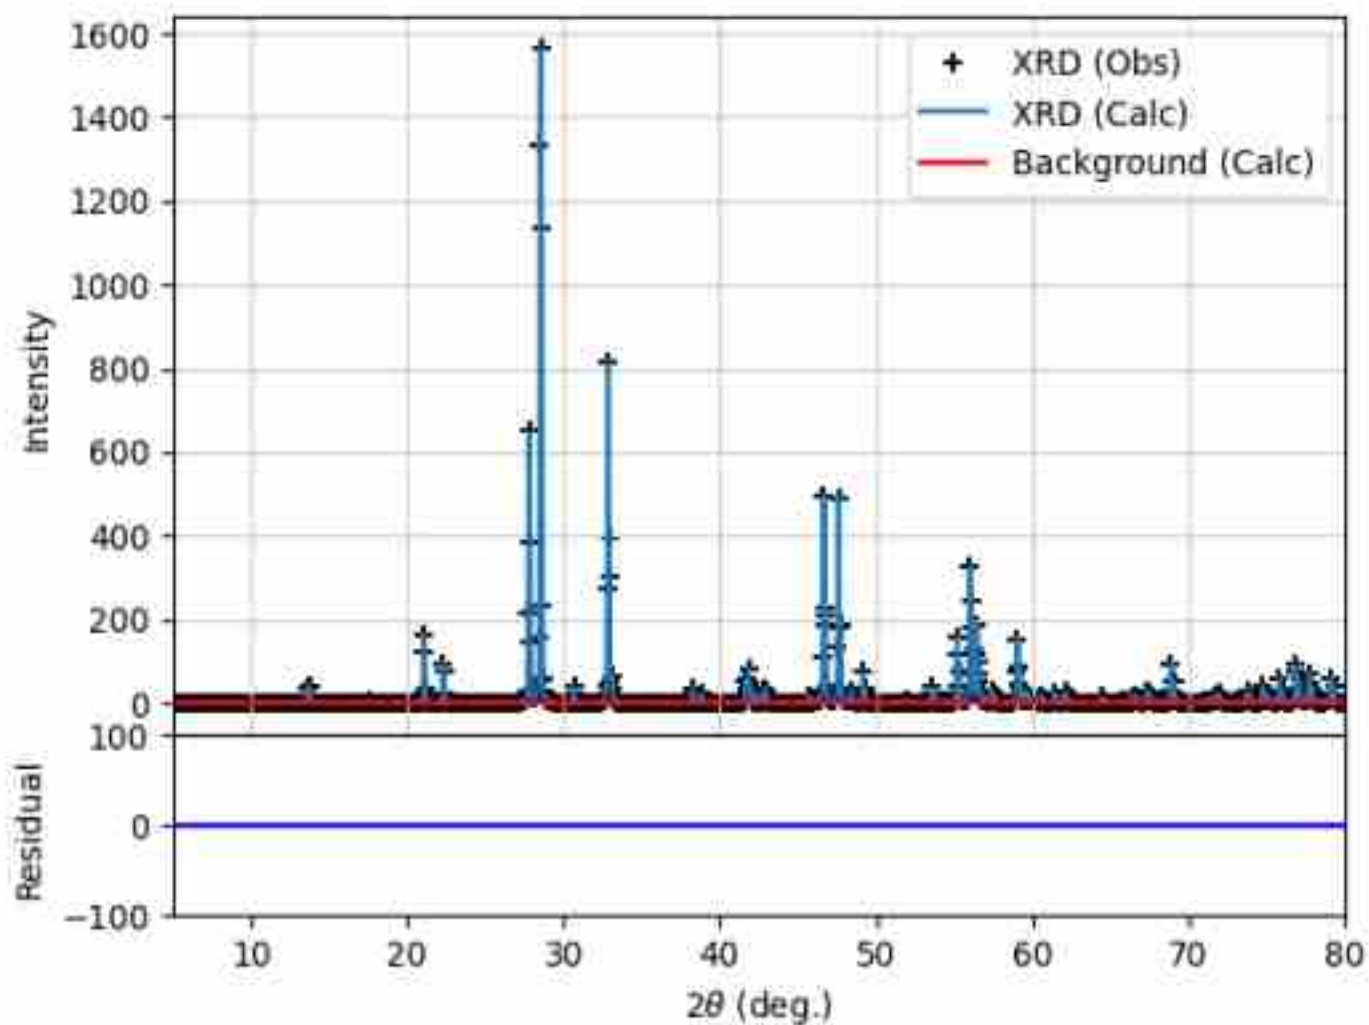

| RMSE before RR | Rwp   | RMSE after RR |
|----------------|-------|---------------|
| 0.021          | 0.003 | 0.00089       |

# Ho10Si4Sb4

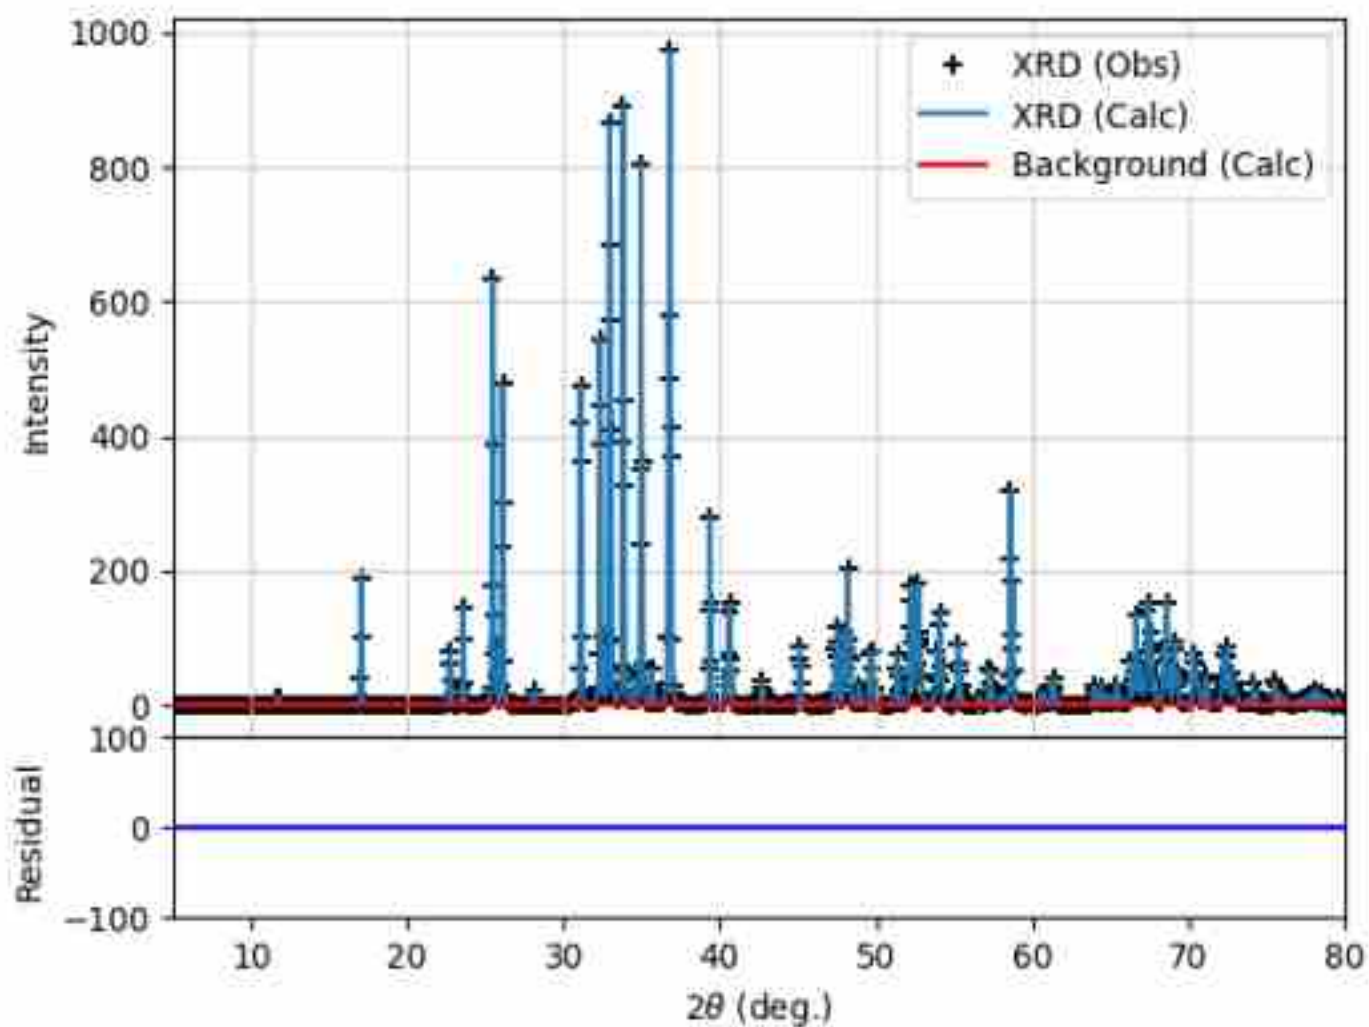

| RMSE before RR | Rwp     | RMSE after RR |
|----------------|---------|---------------|
| 0.021          | 0.00356 | 0.00038       |

# K1N1O3

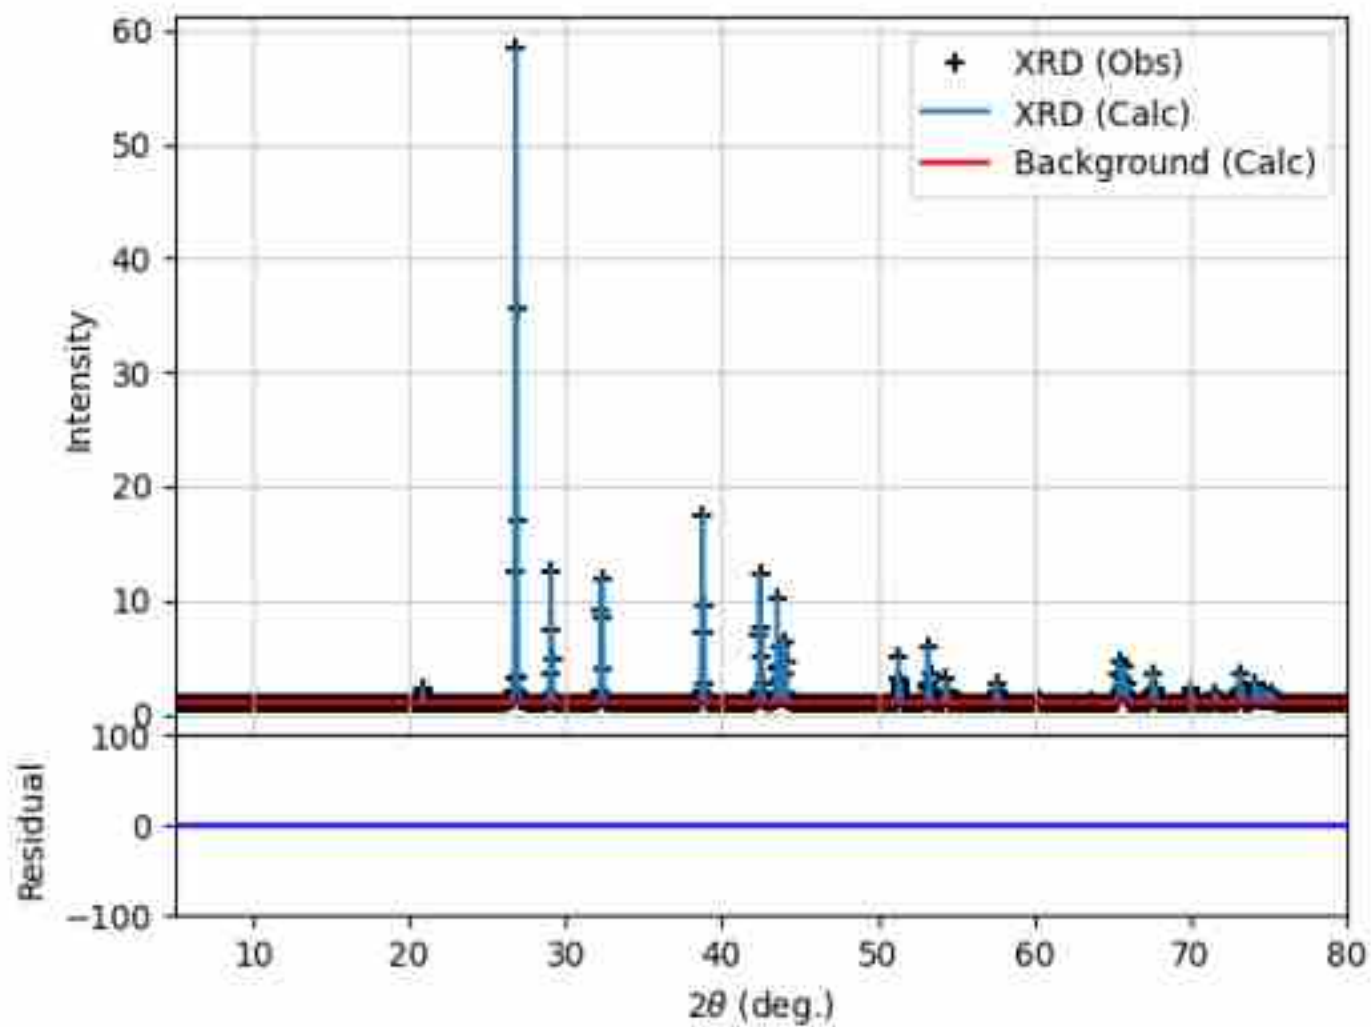

| RMSE before RR | Rwp     | RMSE after RR |
|----------------|---------|---------------|
| 0.021          | 0.00102 | 0.00038       |

# K1V5S8

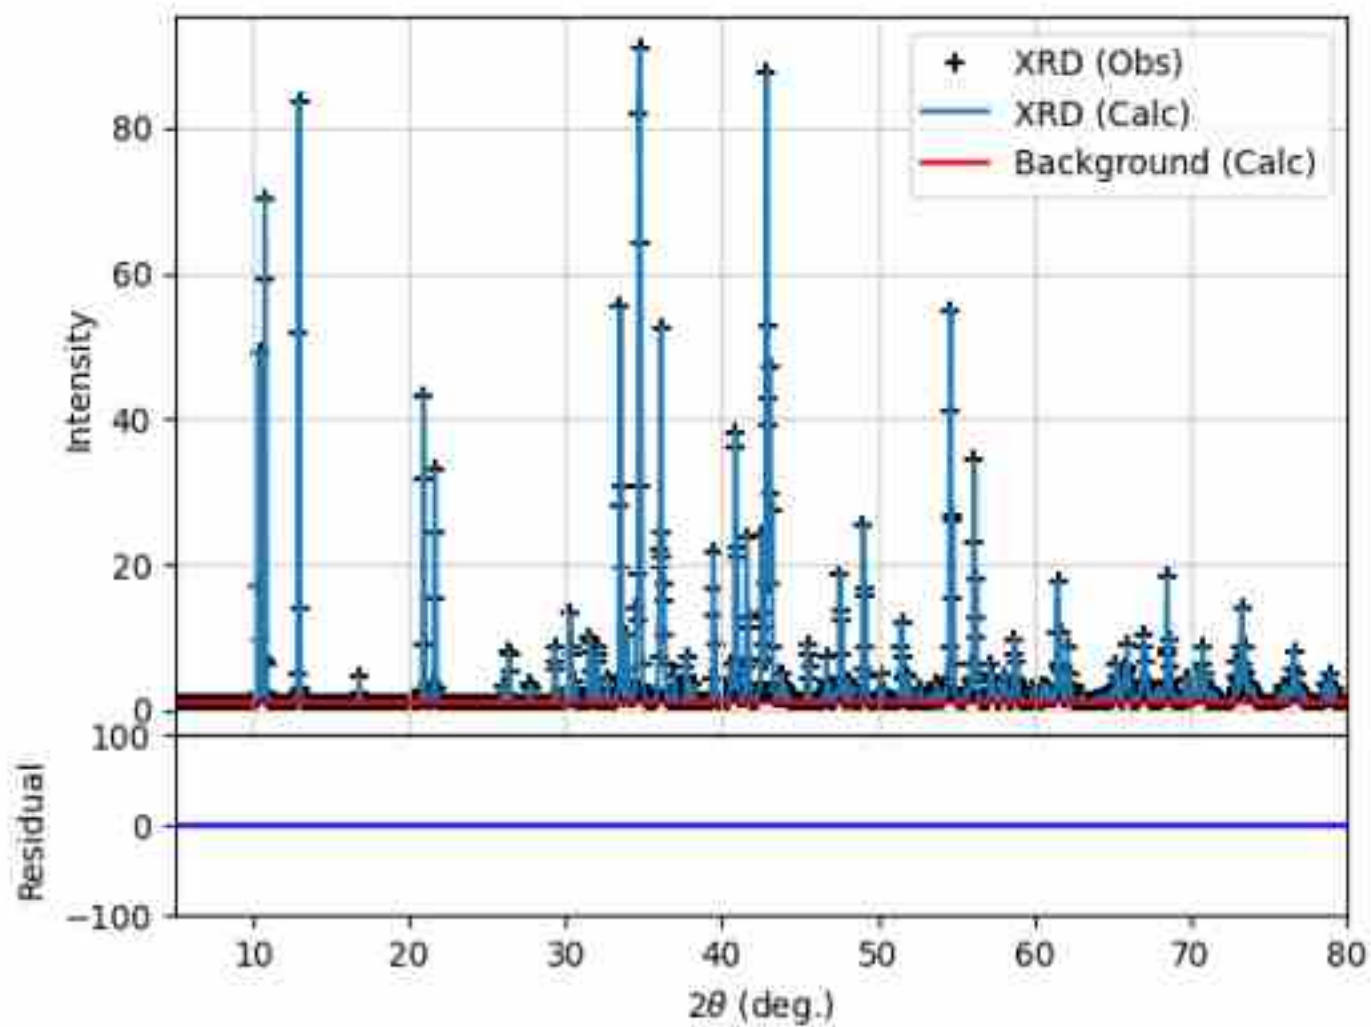

| RMSE before RR | Rwp     | RMSE after RR |
|----------------|---------|---------------|
| 0.021          | 0.00209 | 0.00024       |



# K<sub>2</sub>H<sub>2</sub>F<sub>4</sub>

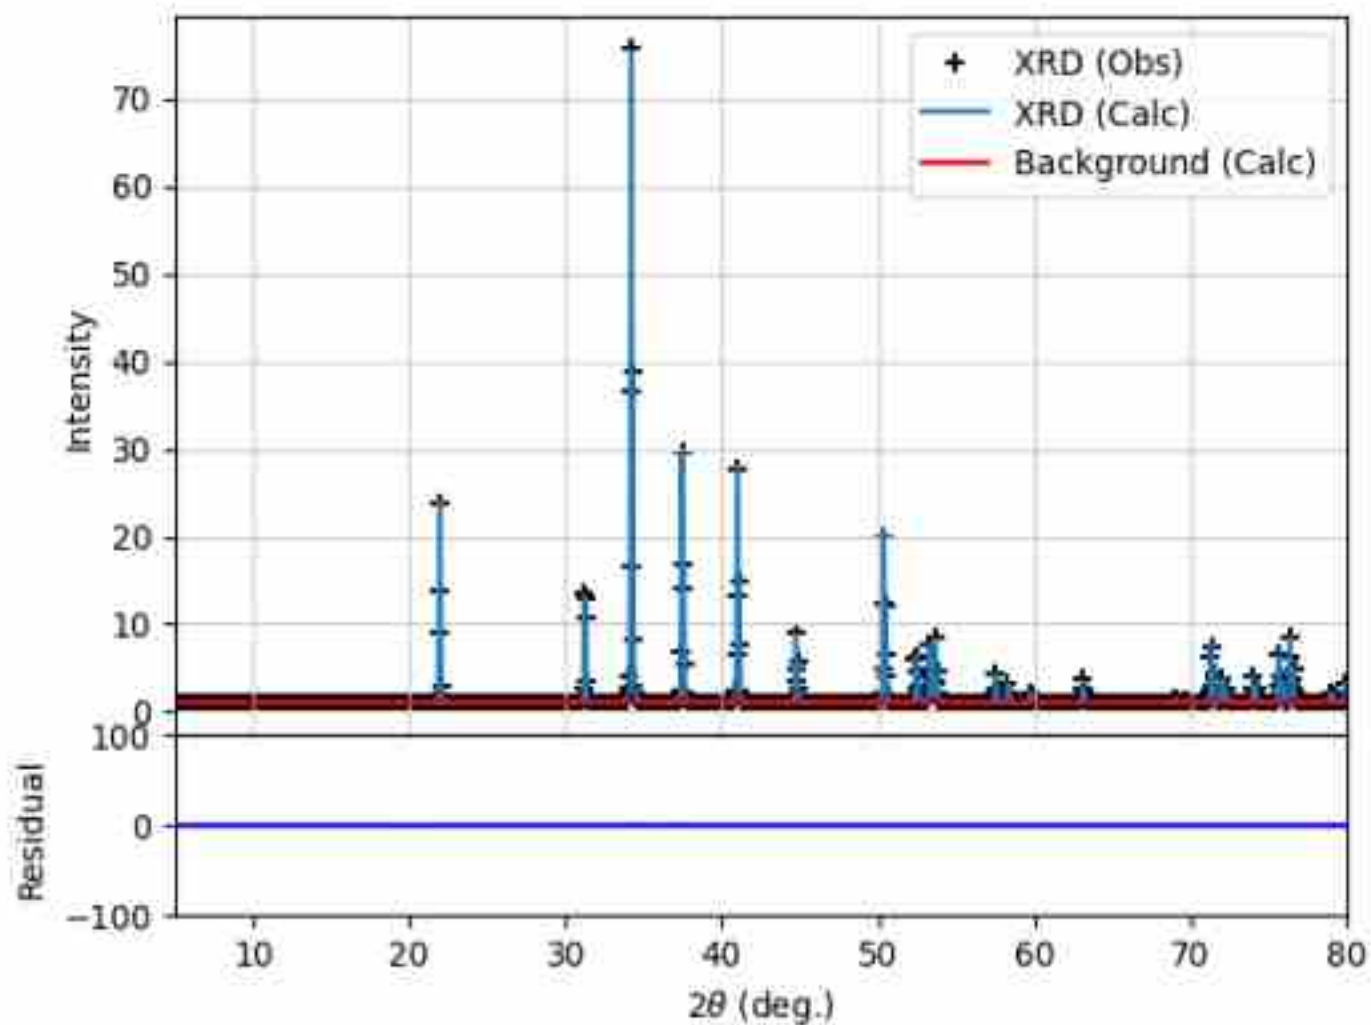

| RMSE before RR | Rwp     | RMSE after RR |
|----------------|---------|---------------|
| 0.021          | 0.66633 | 0.02615       |

# K<sub>2</sub>Na<sub>2</sub>Nd<sub>2</sub>Nb<sub>2</sub>O<sub>10</sub>

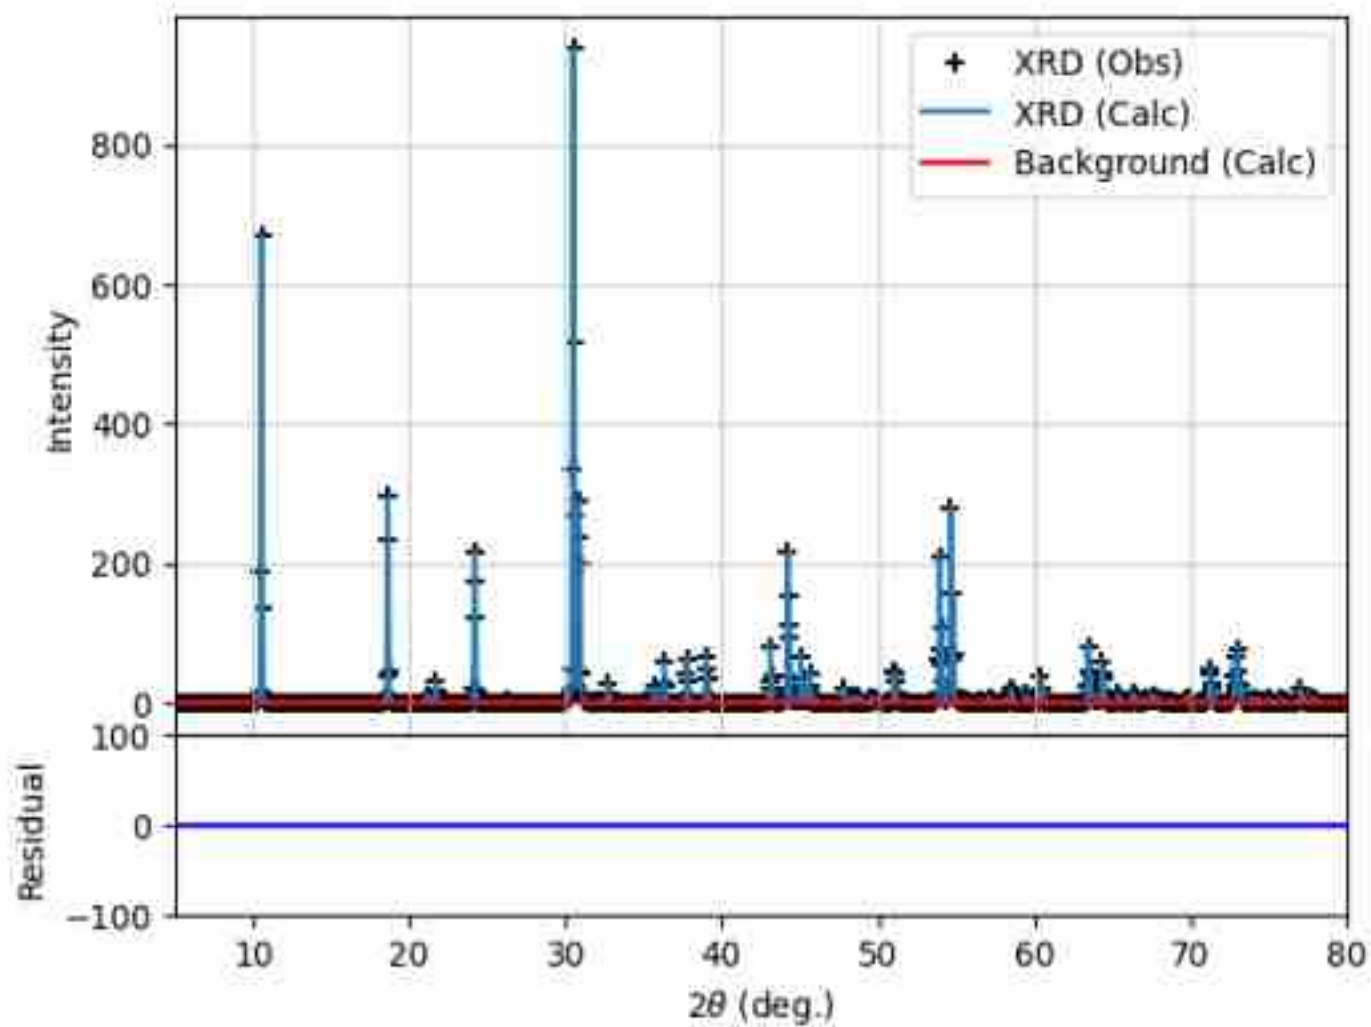

| RMSE before RR | Rwp     | RMSE after RR |
|----------------|---------|---------------|
| 0.021          | 0.00402 | 0.00118       |

# K3V1O4

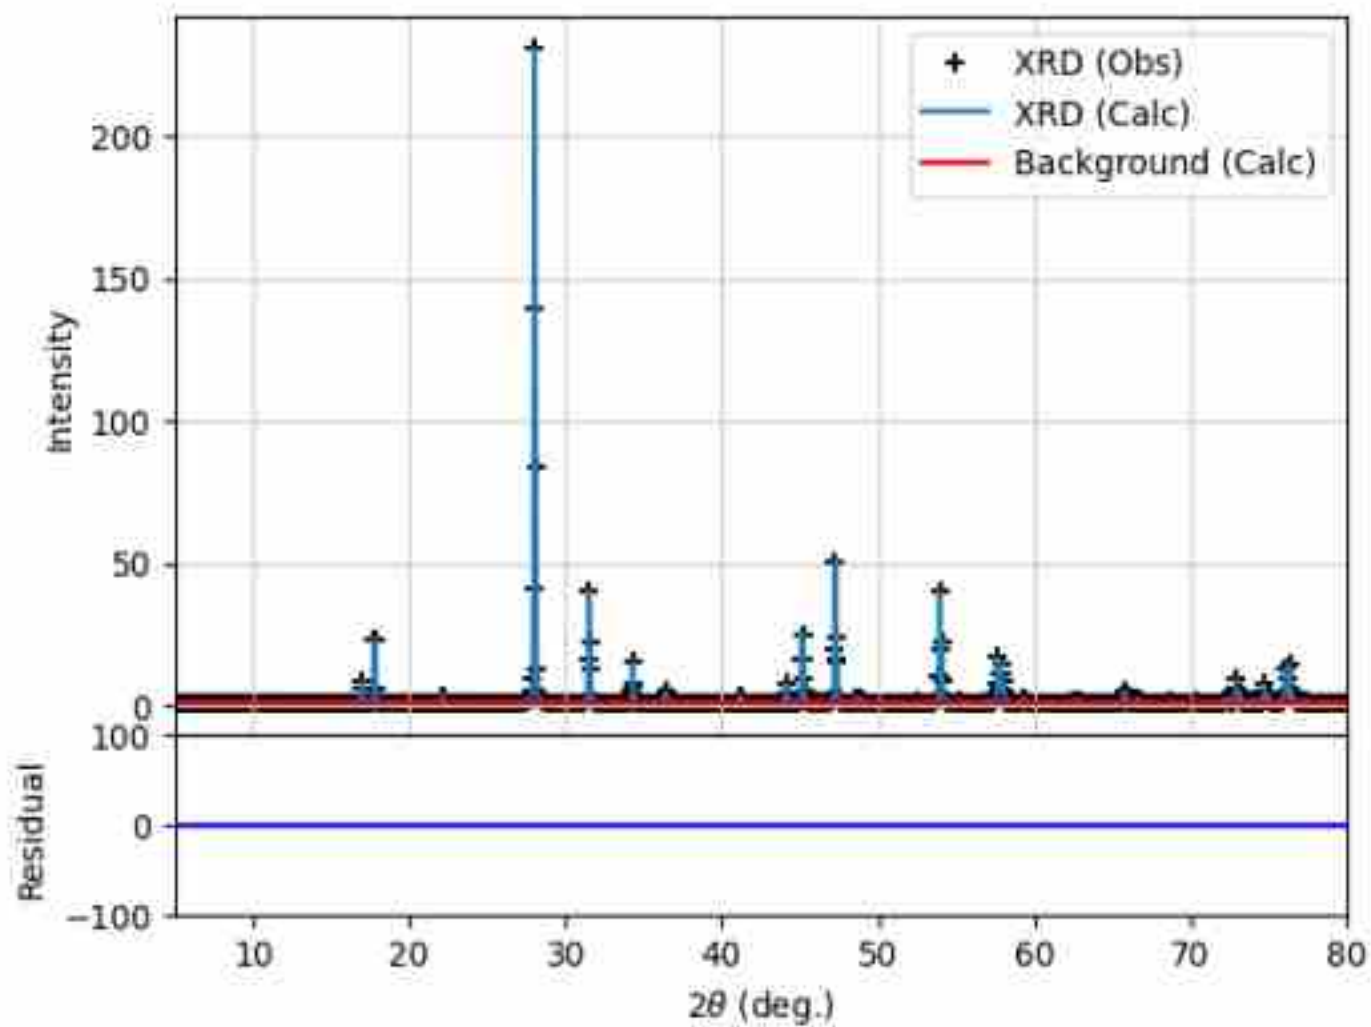

| RMSE before RR | Rwp     | RMSE after RR |
|----------------|---------|---------------|
| 0.021          | 0.00206 | 0.00061       |

# K4Be1As2

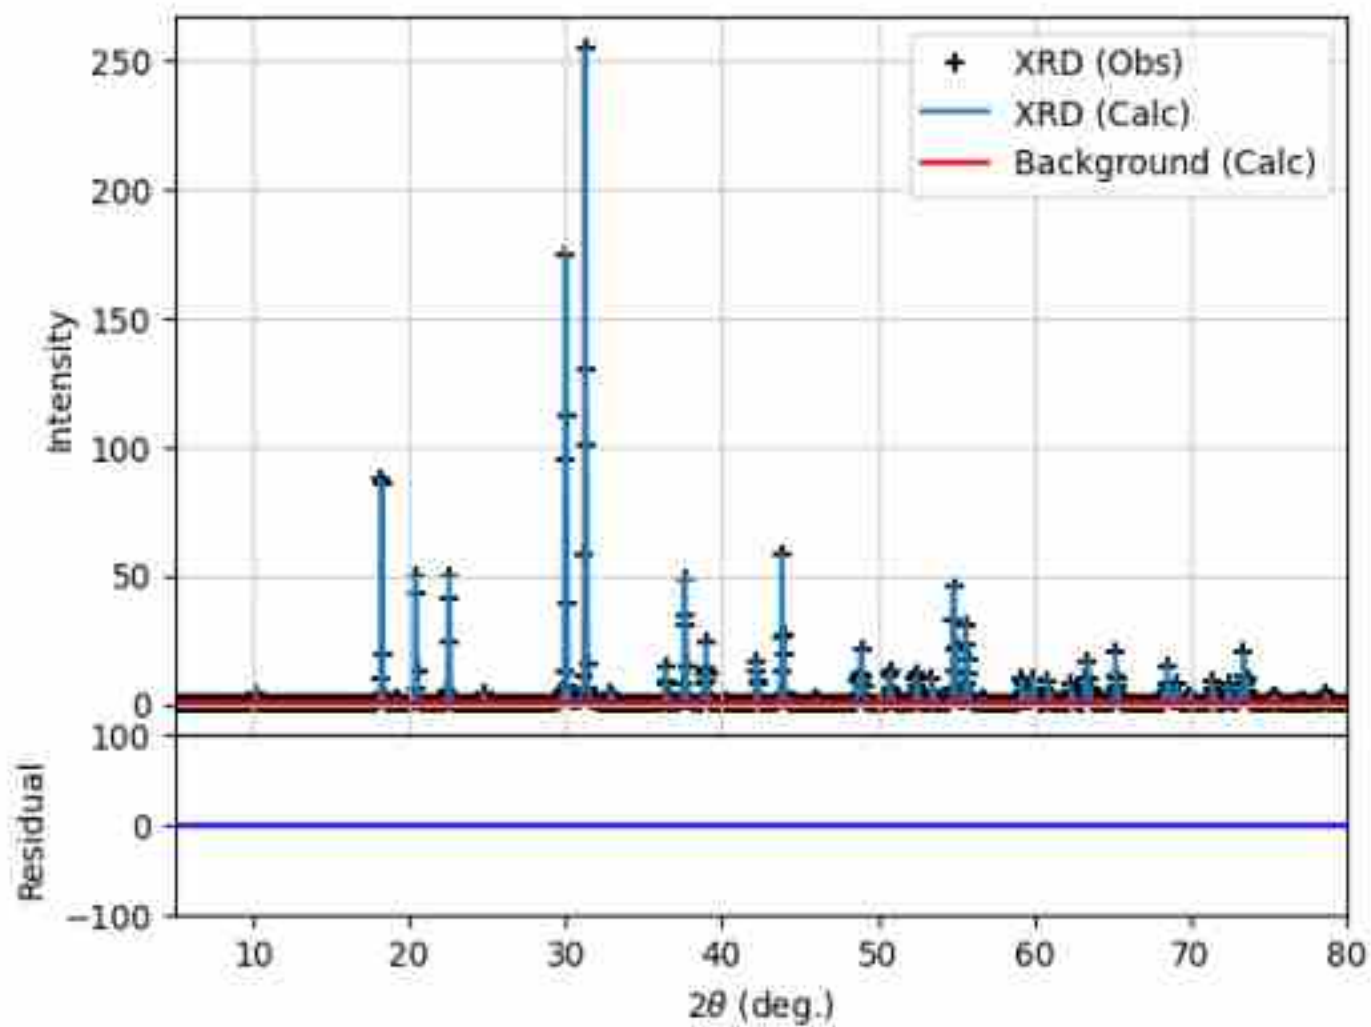

| RMSE before RR | Rwp     | RMSE after RR |
|----------------|---------|---------------|
| 0.021          | 0.00425 | 0.00123       |

# K8Cr2O8

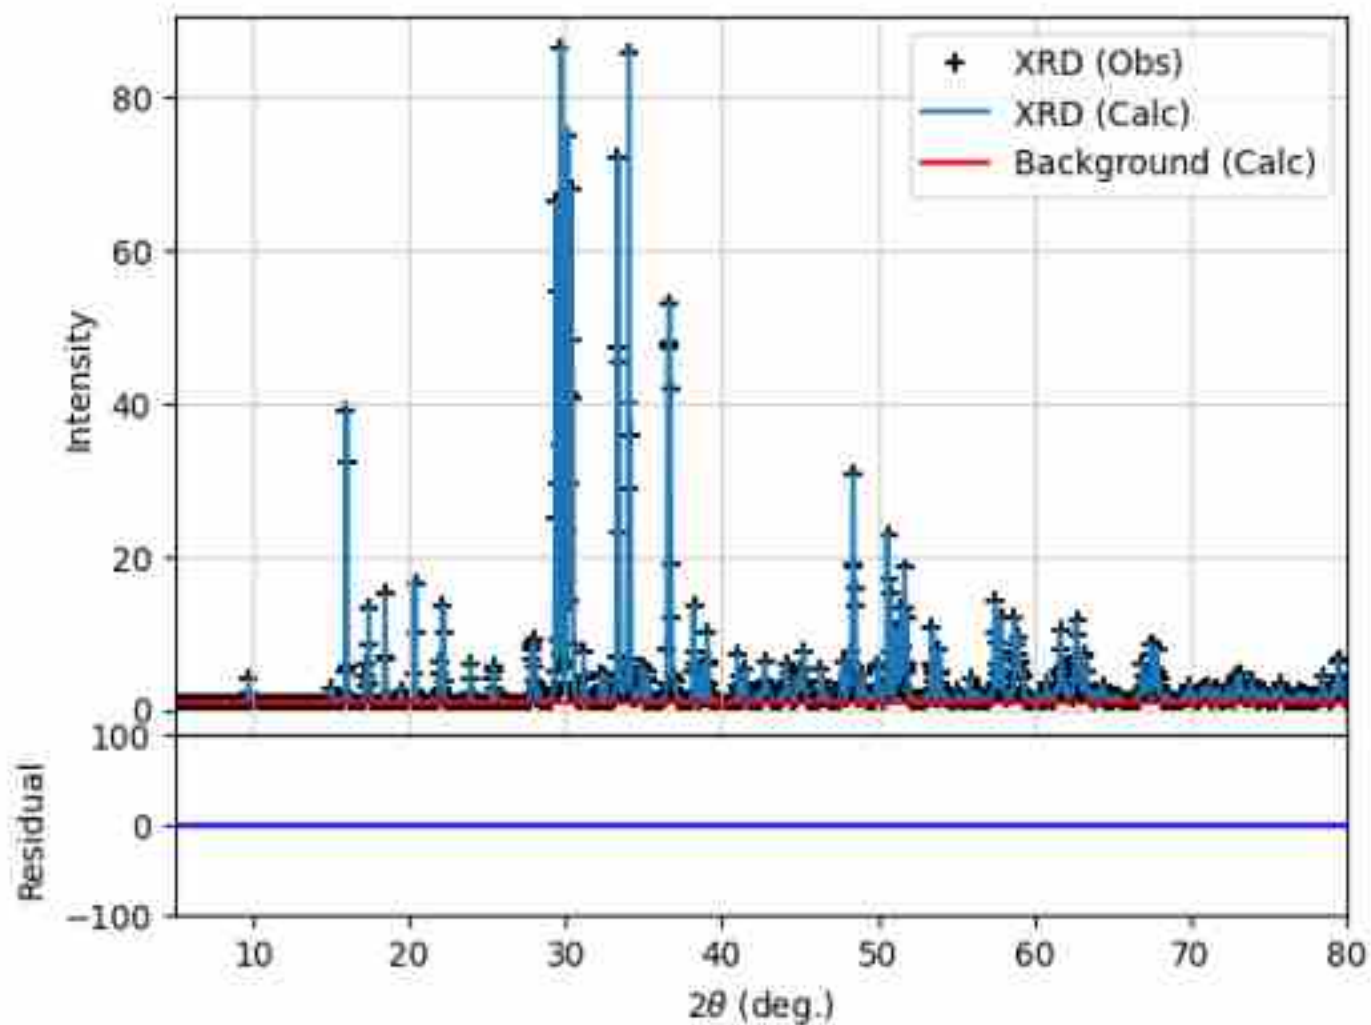

| RMSE before RR | Rwp     | RMSE after RR |
|----------------|---------|---------------|
| 0.021          | 0.00145 | 0.00047       |

# La1Ce1Rh4

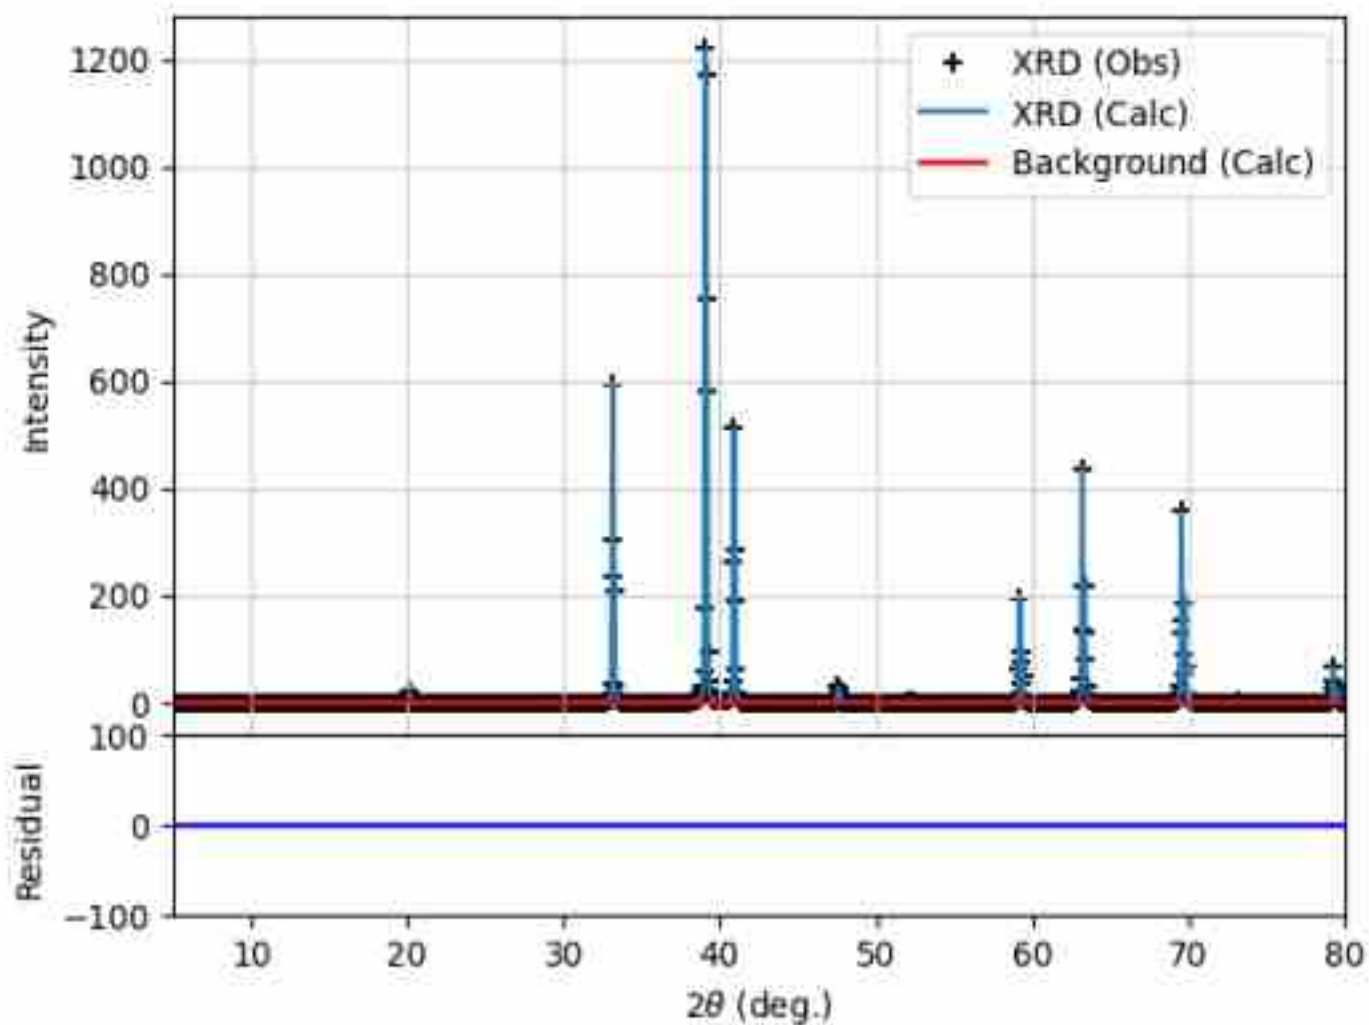

| RMSE before RR | Rwp     | RMSE after RR |
|----------------|---------|---------------|
| 0.021          | 0.00934 | 0.00058       |

# La<sub>1</sub>Fe<sub>4</sub>Cu<sub>3</sub>O<sub>12</sub>

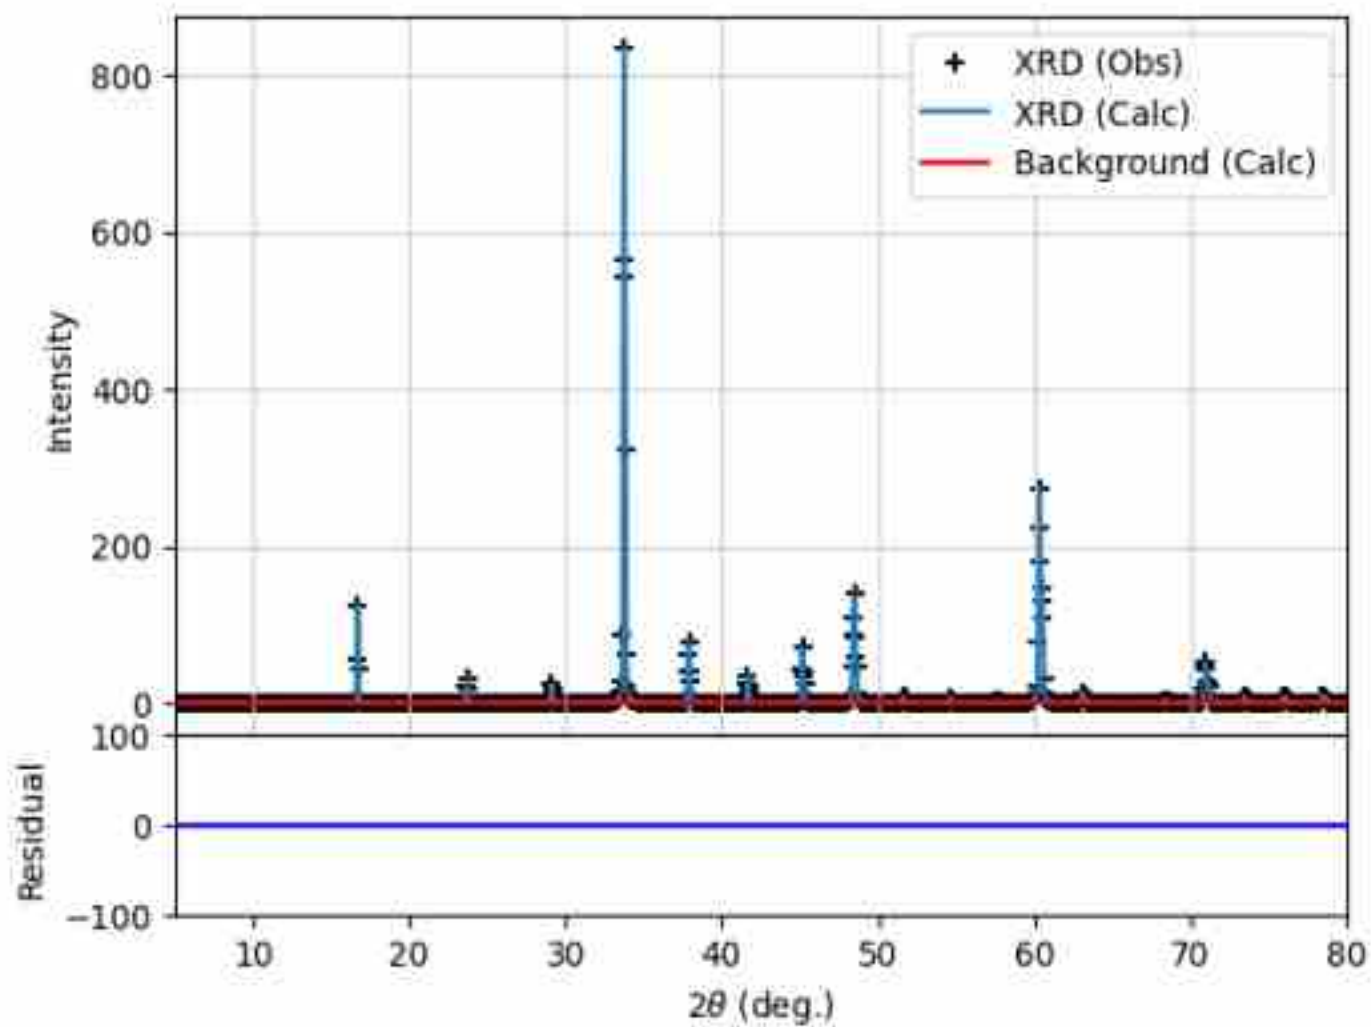

| RMSE before RR | Rwp     | RMSE after RR |
|----------------|---------|---------------|
| 0.021          | 0.00232 | 0.00156       |

# La1Ge12Pt4

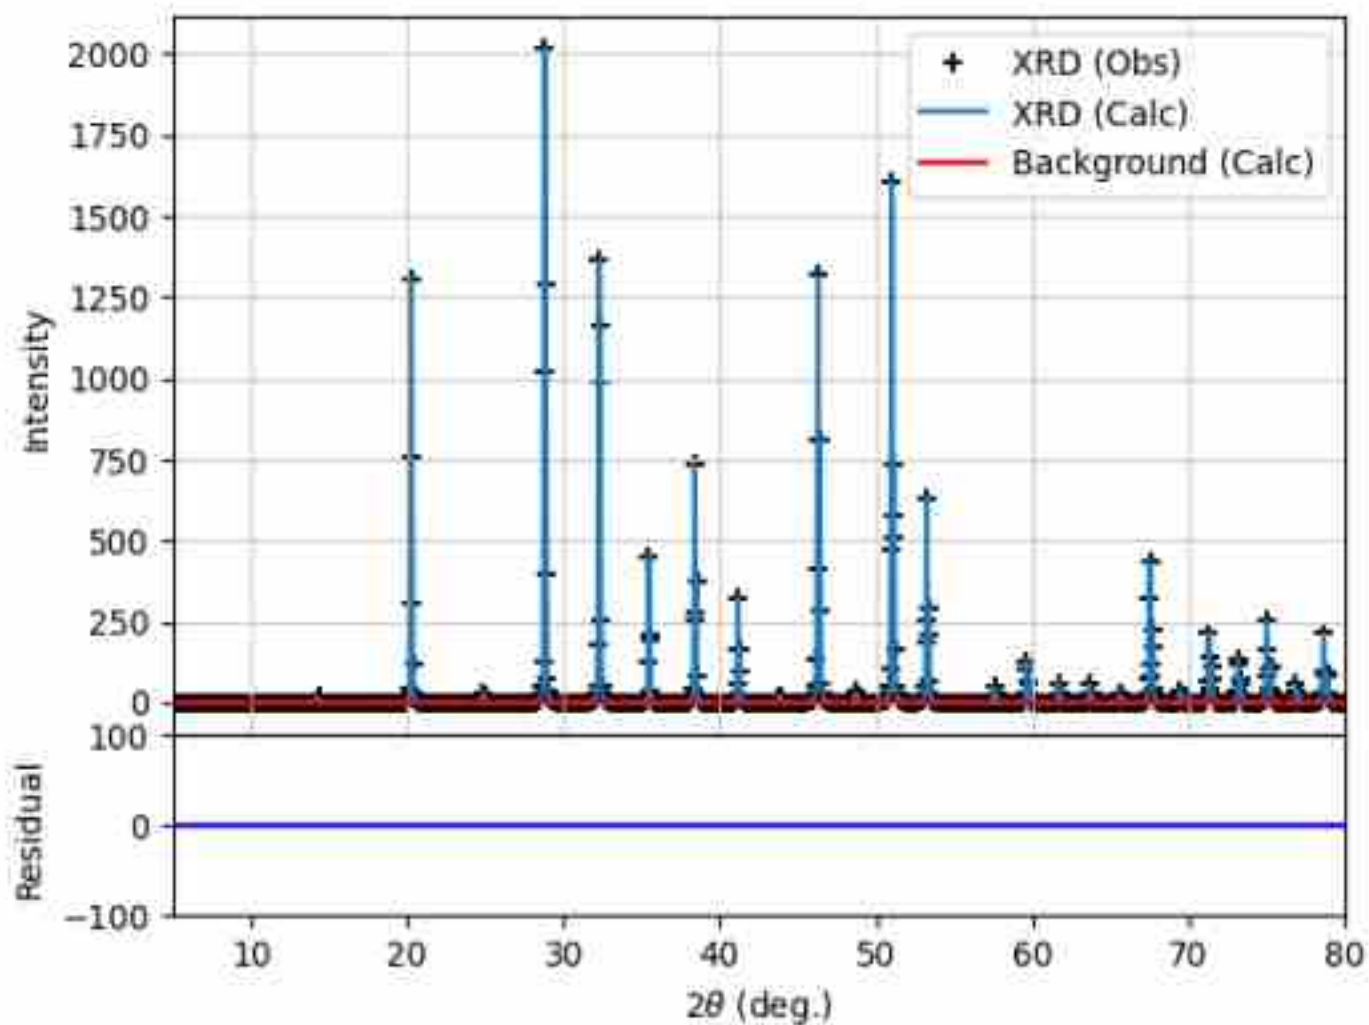

| RMSE before RR | Rwp     | RMSE after RR |
|----------------|---------|---------------|
| 0.021          | 0.01437 | 0.00243       |



# La<sub>2</sub>Cu<sub>2</sub>O<sub>6</sub>

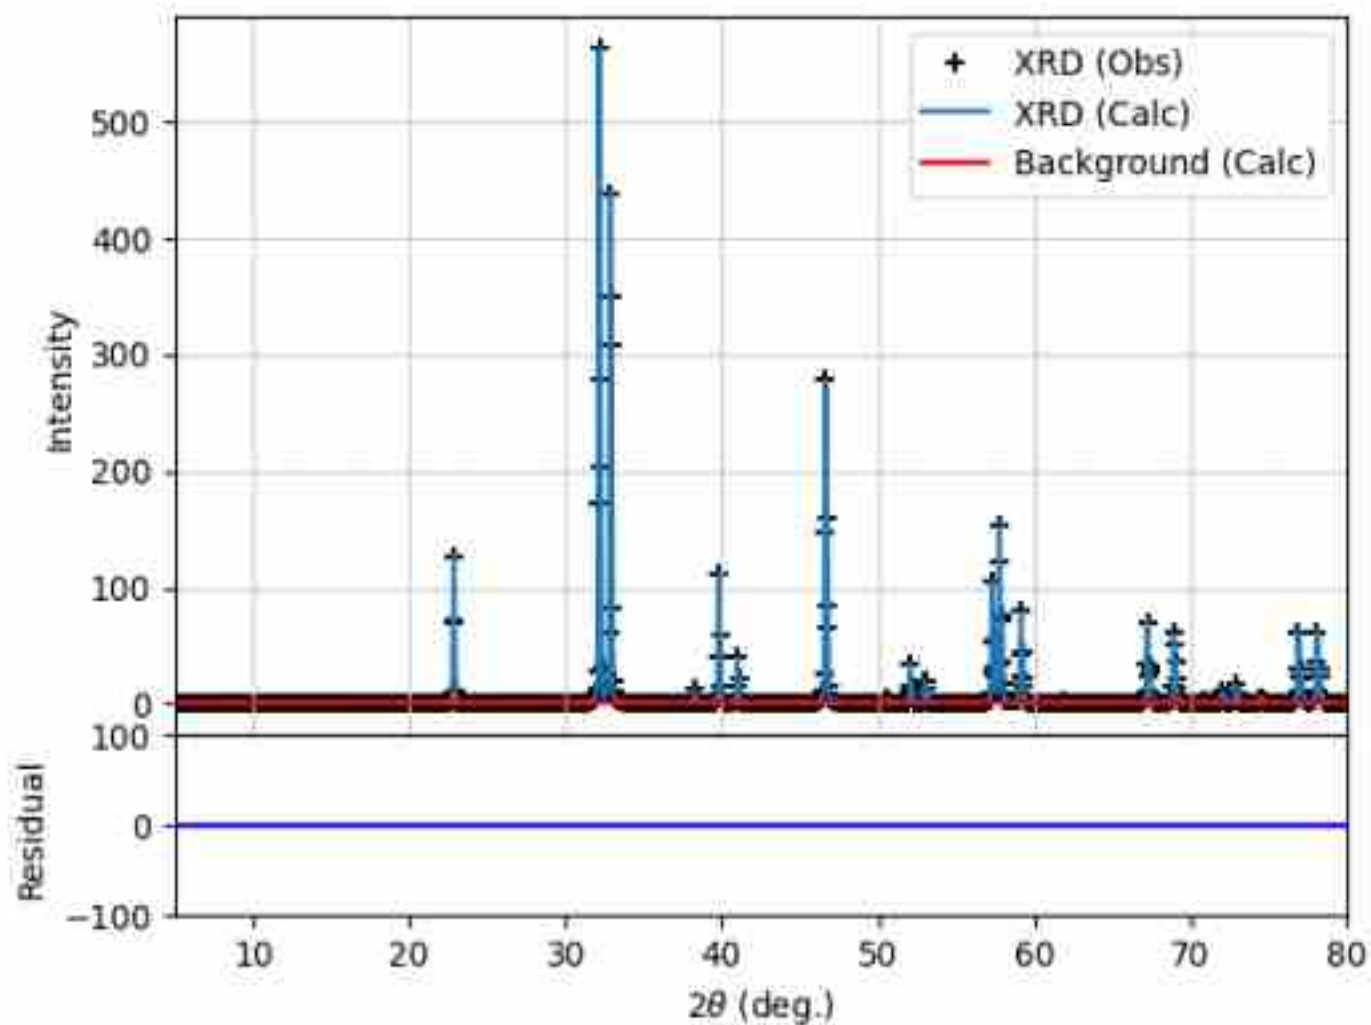

| RMSE before RR | Rwp     | RMSE after RR |
|----------------|---------|---------------|
| 0.021          | 0.00423 | 0.00134       |

# La<sub>2</sub>Fe<sub>2</sub>Se<sub>2</sub>O<sub>3</sub>

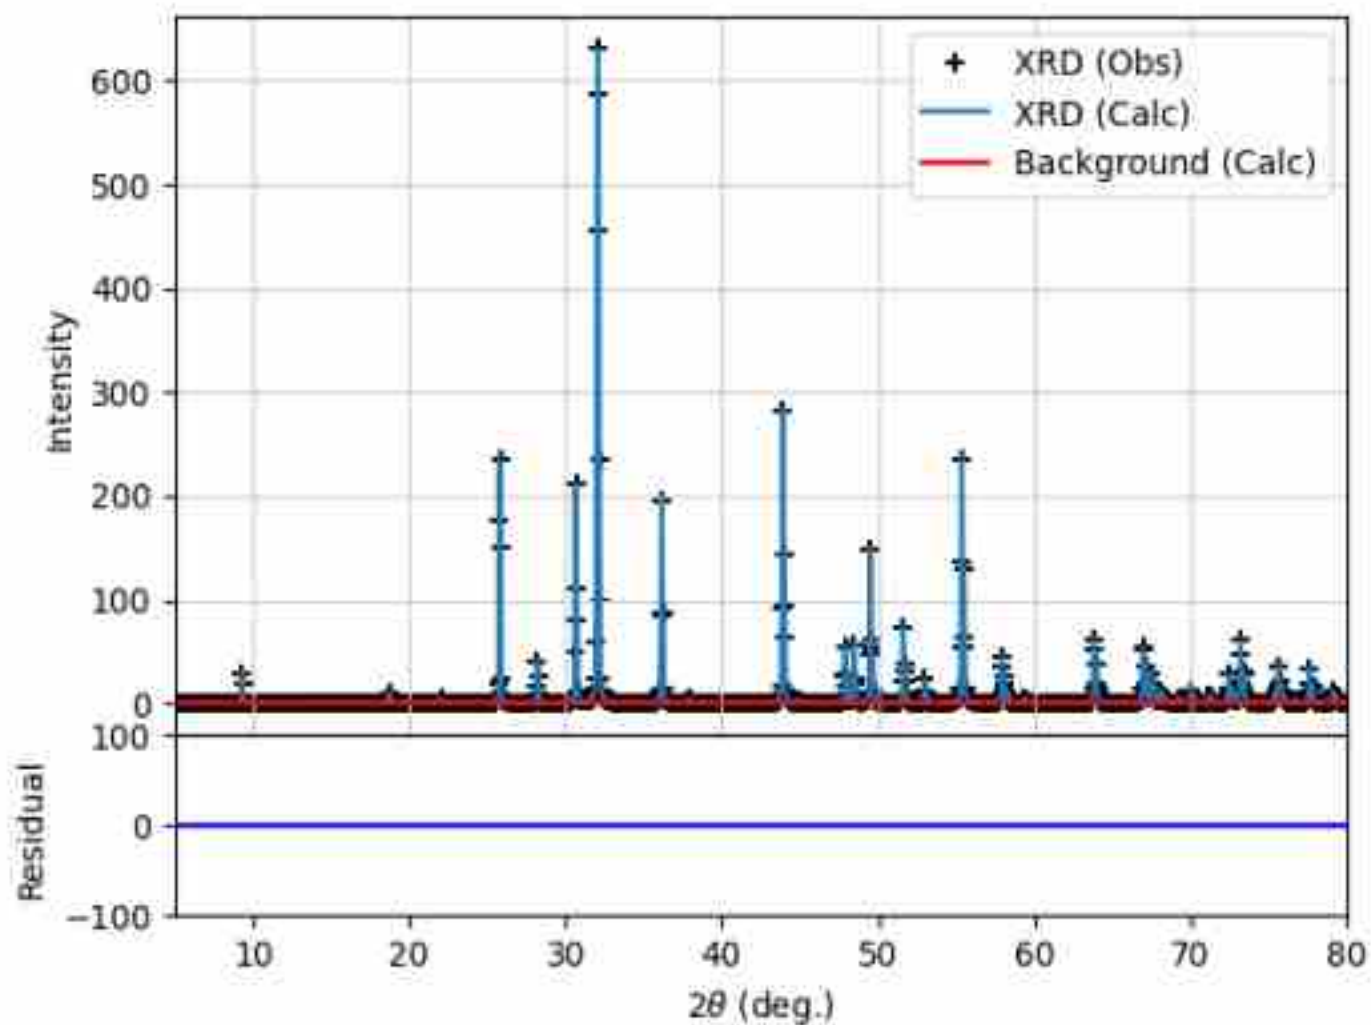

| RMSE before RR | Rwp     | RMSE after RR |
|----------------|---------|---------------|
| 0.021          | 0.00251 | 0.00042       |

# La<sub>2</sub>In<sub>2</sub>Pd<sub>4</sub>

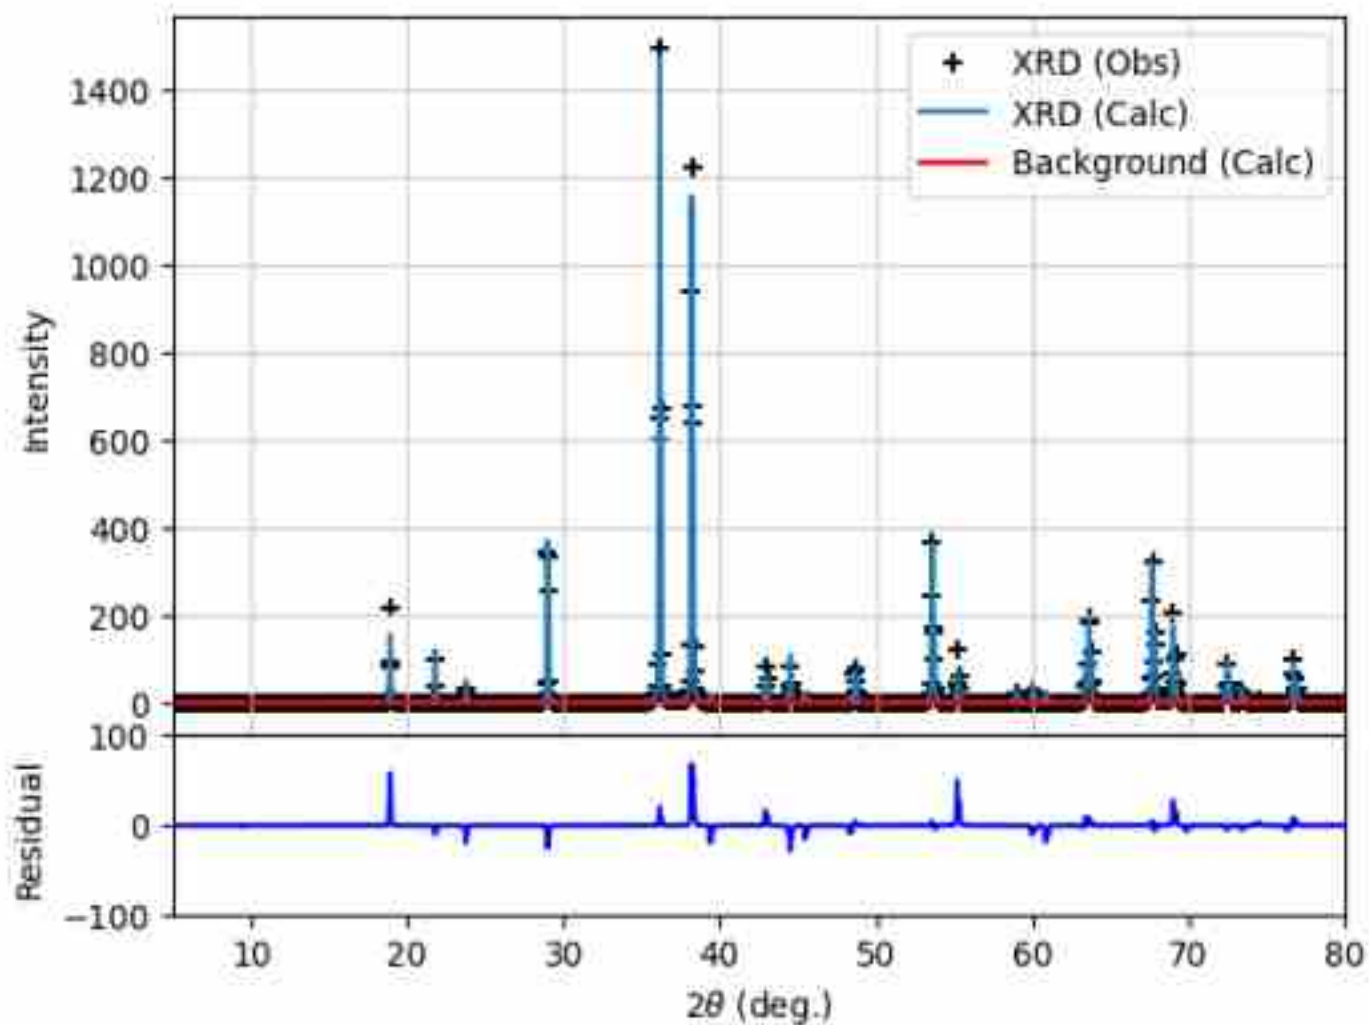

| RMSE before RR | Rwp      | RMSE after RR |
|----------------|----------|---------------|
| 0.021          | 23.74603 | 0.03379       |

# La<sub>4</sub>Sn<sub>2</sub>S<sub>10</sub>

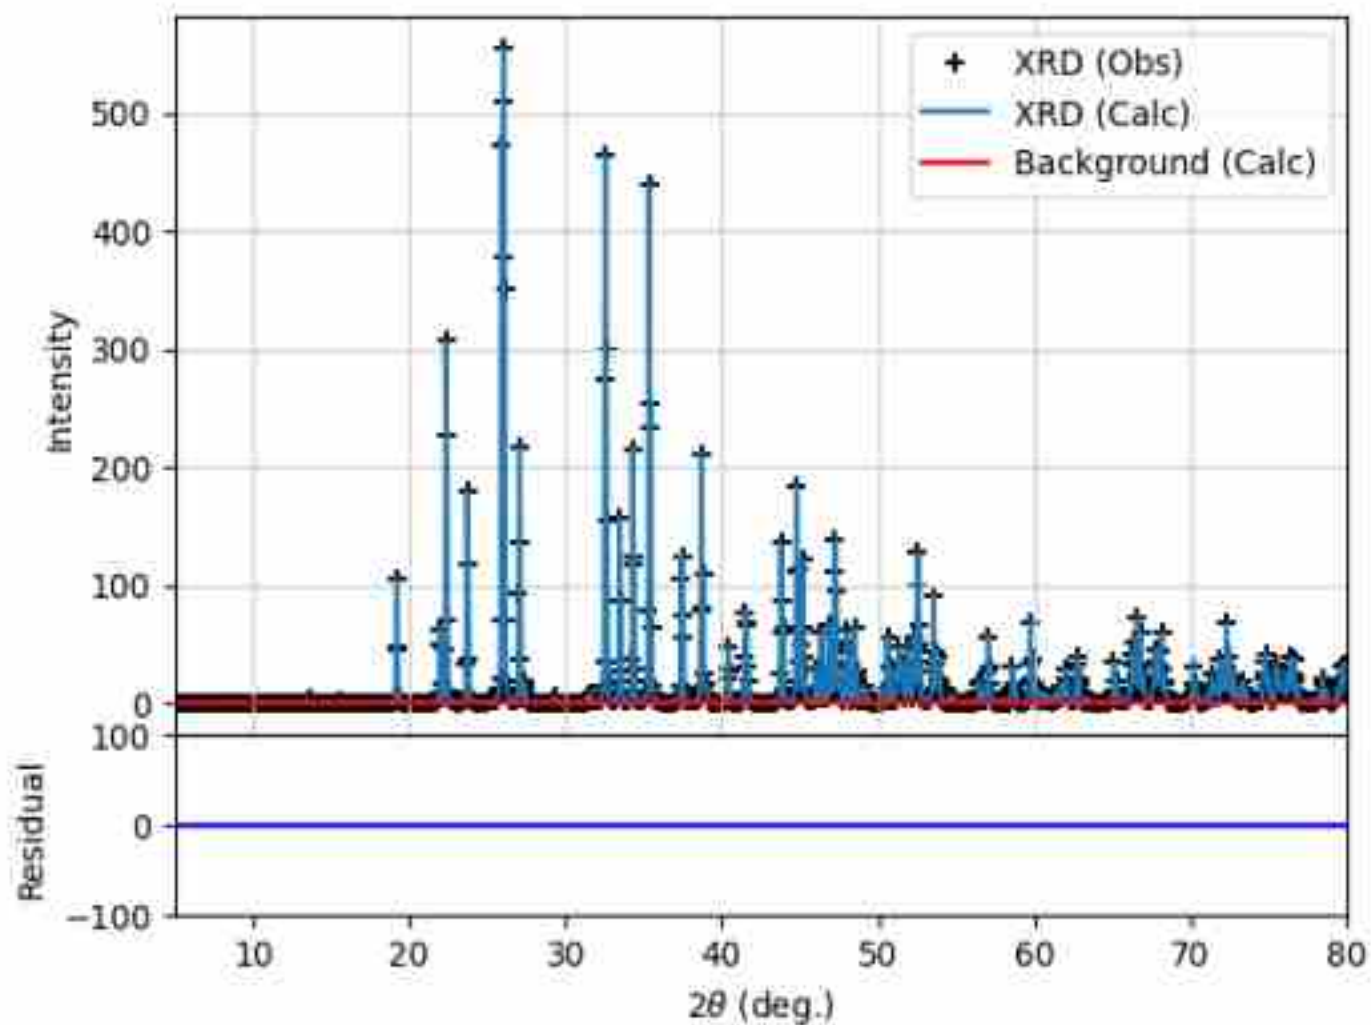

| RMSE before RR | Rwp     | RMSE after RR |
|----------------|---------|---------------|
| 0.021          | 0.00388 | 0.0006        |

# La<sub>4</sub>U<sub>2</sub>Se<sub>8</sub>

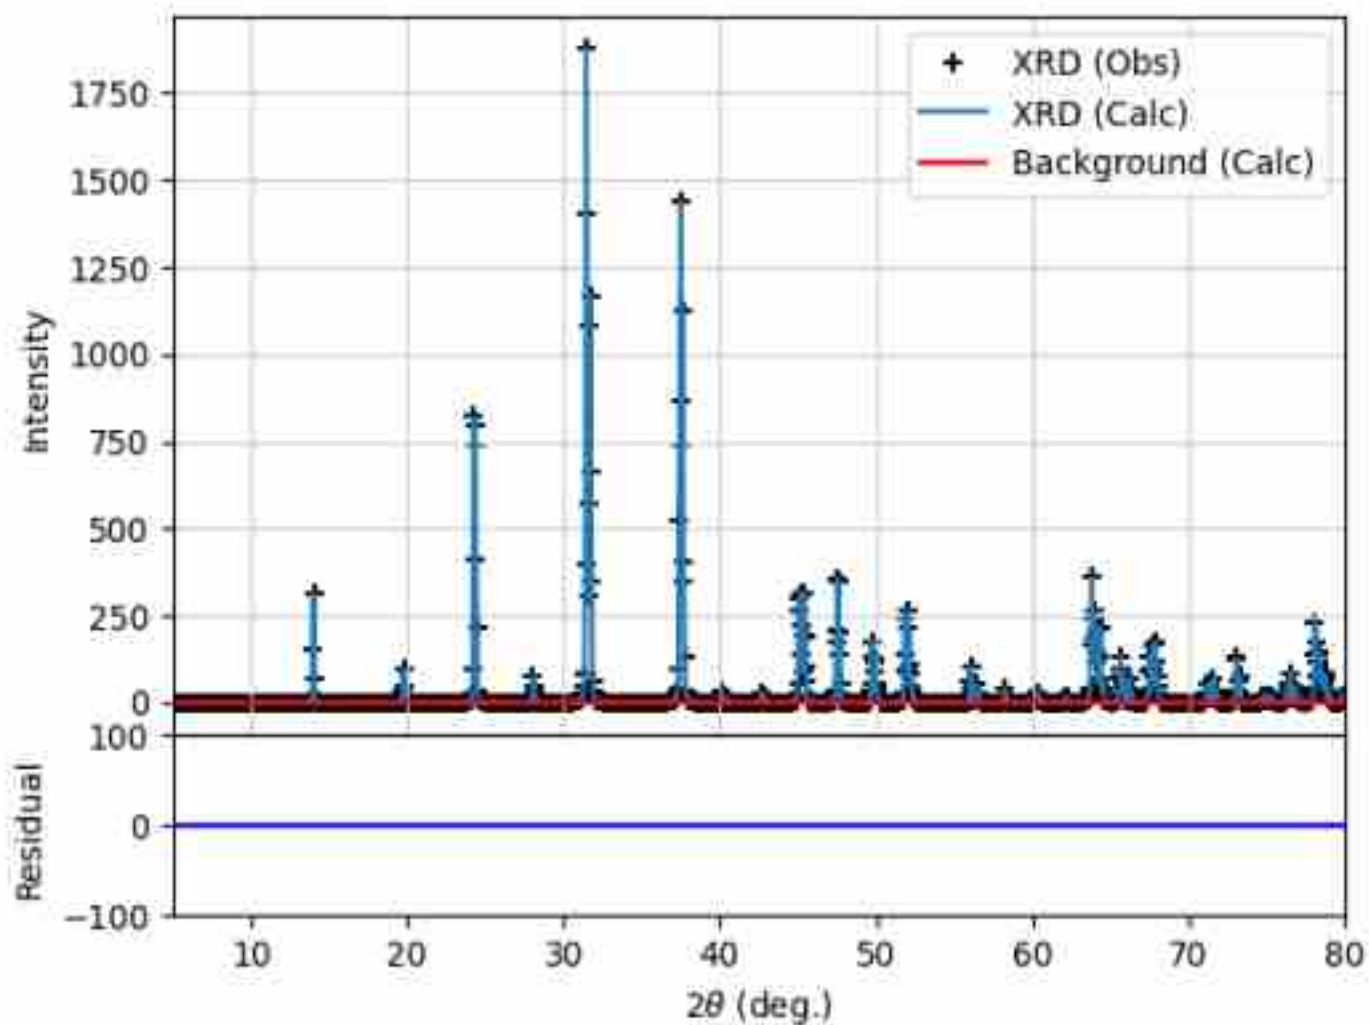

| RMSE before RR | Rwp     | RMSE after RR |
|----------------|---------|---------------|
| 0.021          | 0.00345 | 0.0006        |

# Li1Fe1Co2O6

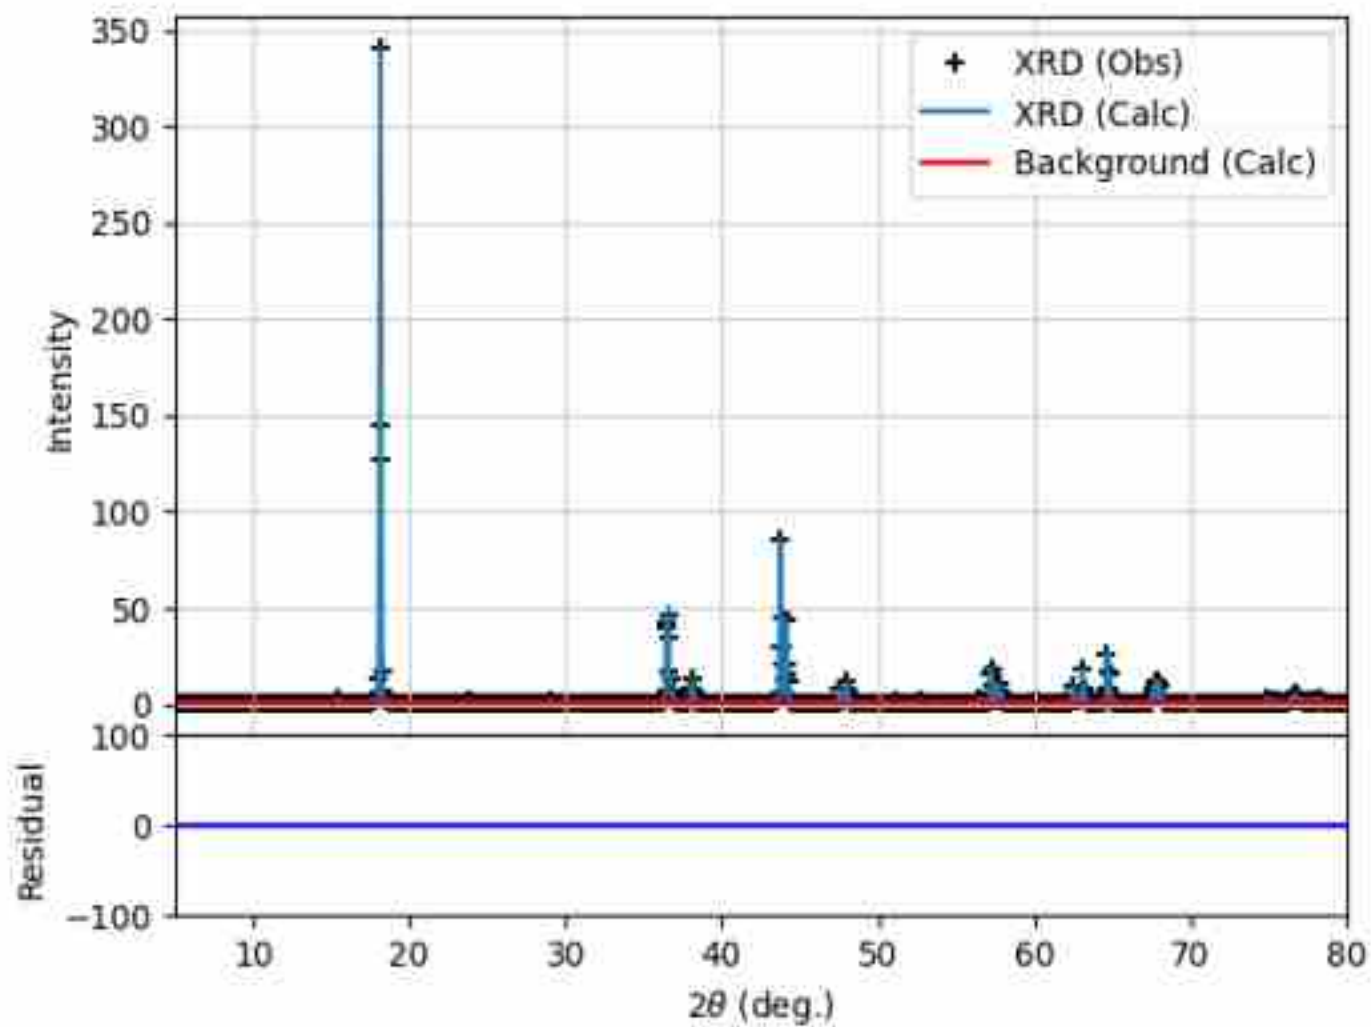

| RMSE before RR | Rwp     | RMSE after RR |
|----------------|---------|---------------|
| 0.021          | 0.00064 | 0.00015       |

# Li1Lu1O2

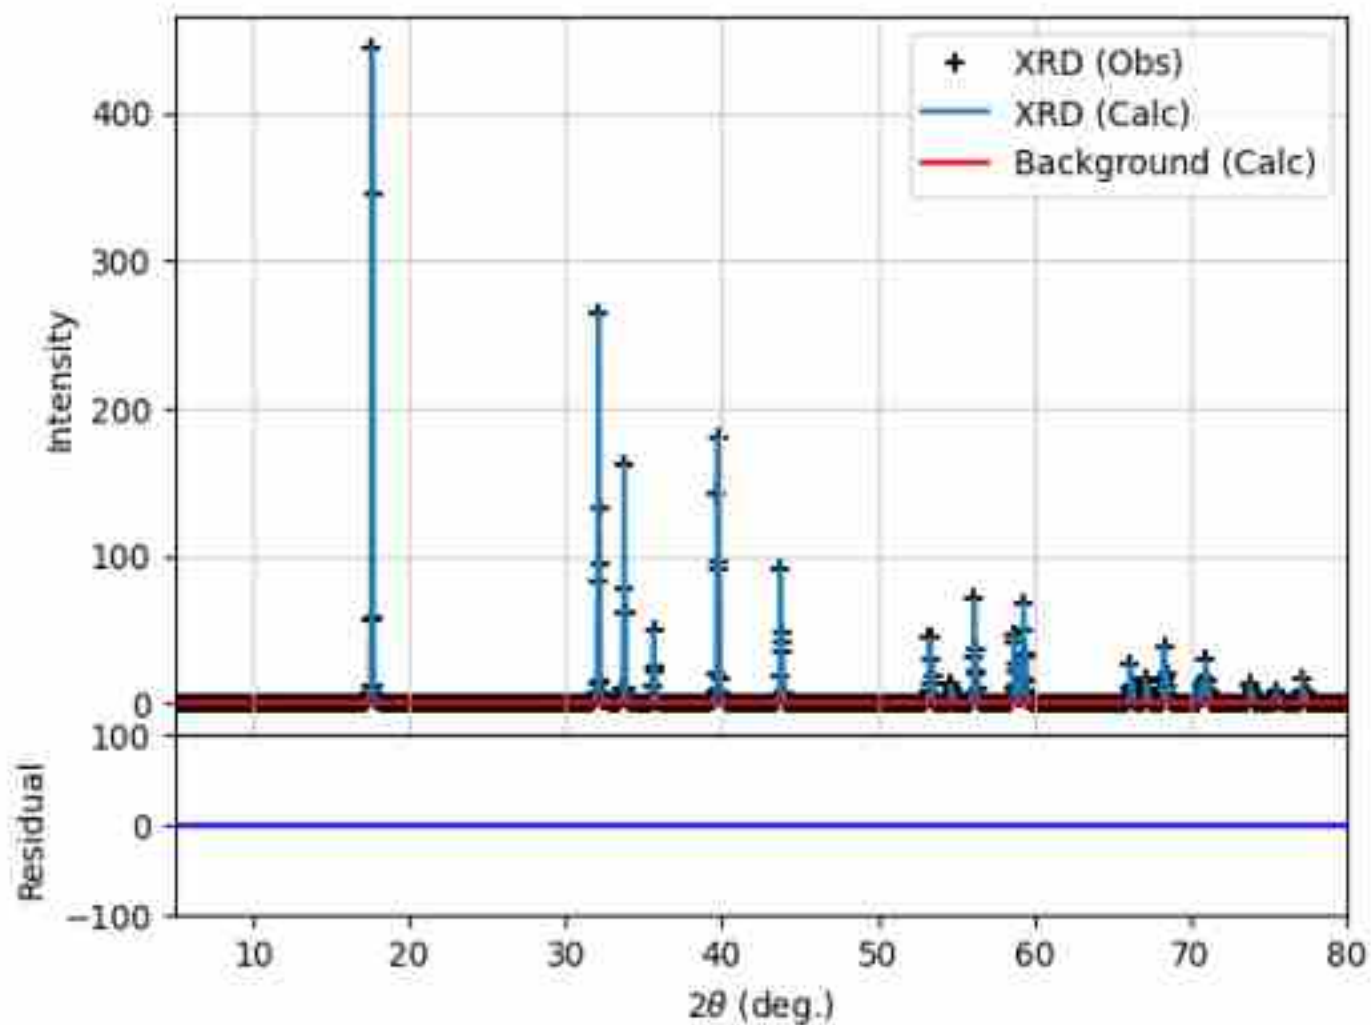

| RMSE before RR | Rwp     | RMSE after RR |
|----------------|---------|---------------|
| 0.021          | 0.00332 | 0.00249       |

# Li1P1F6

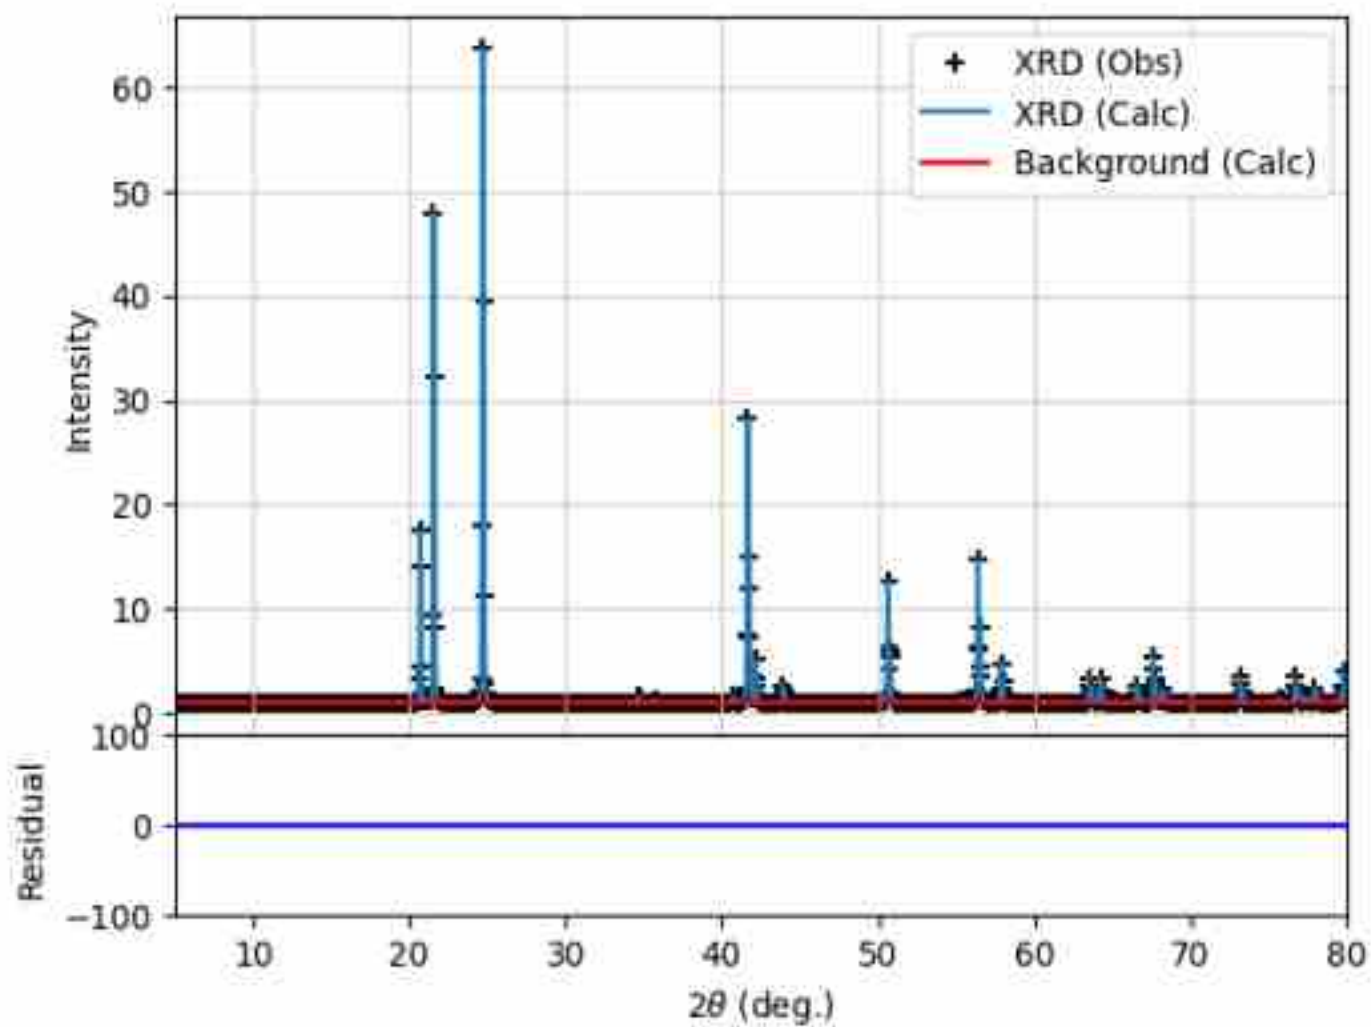

| RMSE before RR | Rwp     | RMSE after RR |
|----------------|---------|---------------|
| 0.021          | 0.00135 | 0.00099       |



# Li<sub>2</sub>Ca<sub>6</sub>

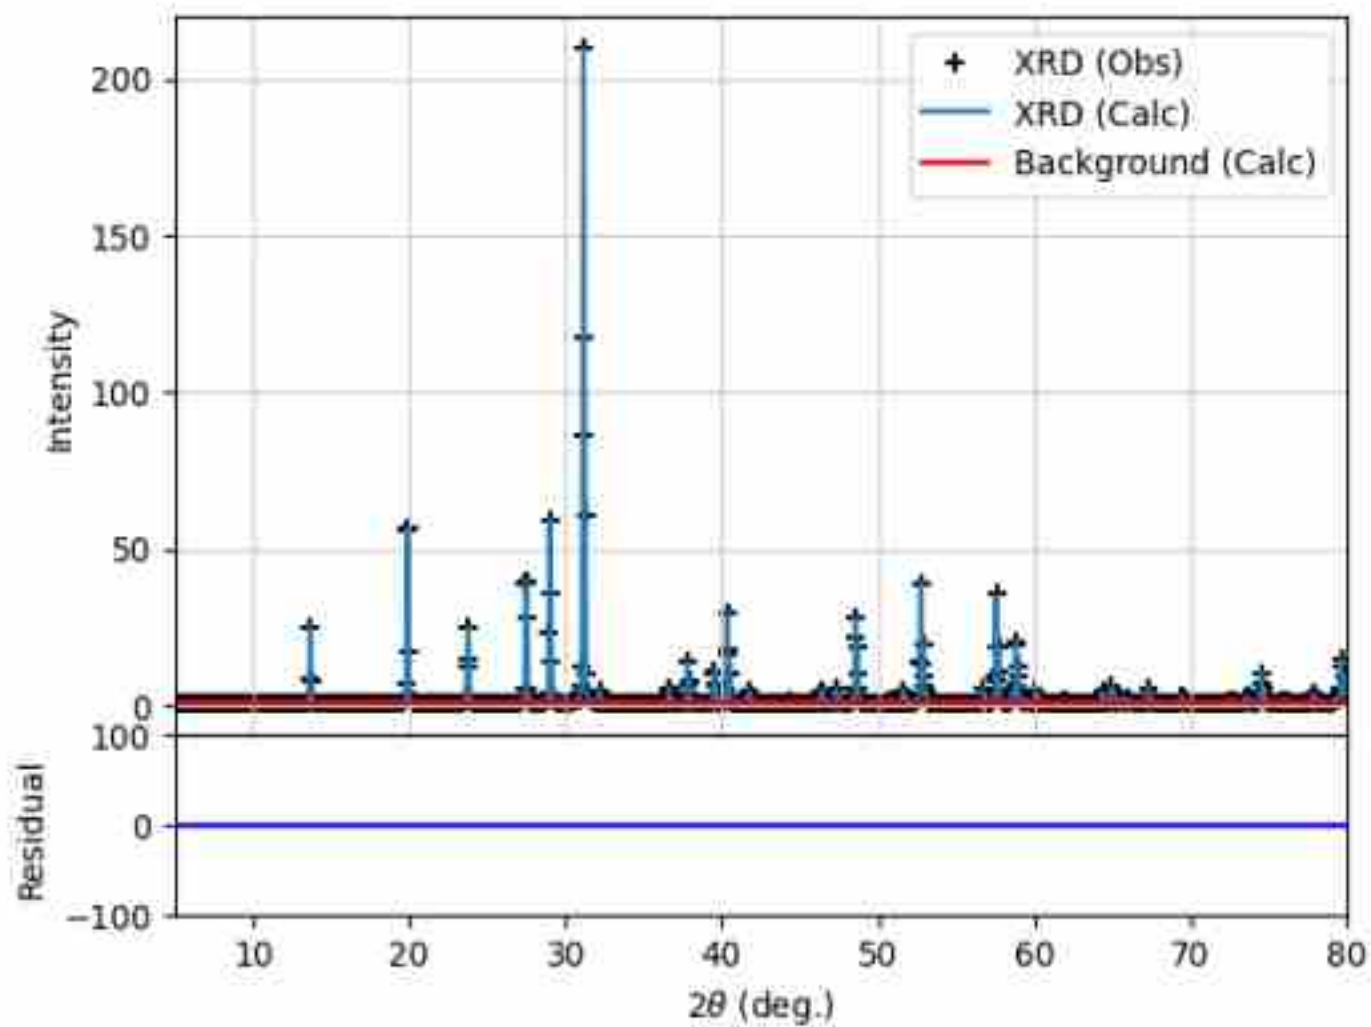

| RMSE before RR | Rwp     | RMSE after RR |
|----------------|---------|---------------|
| 0.021          | 0.07947 | 0.00717       |

# Li<sub>2</sub>LaTa<sub>2</sub>O<sub>7</sub>

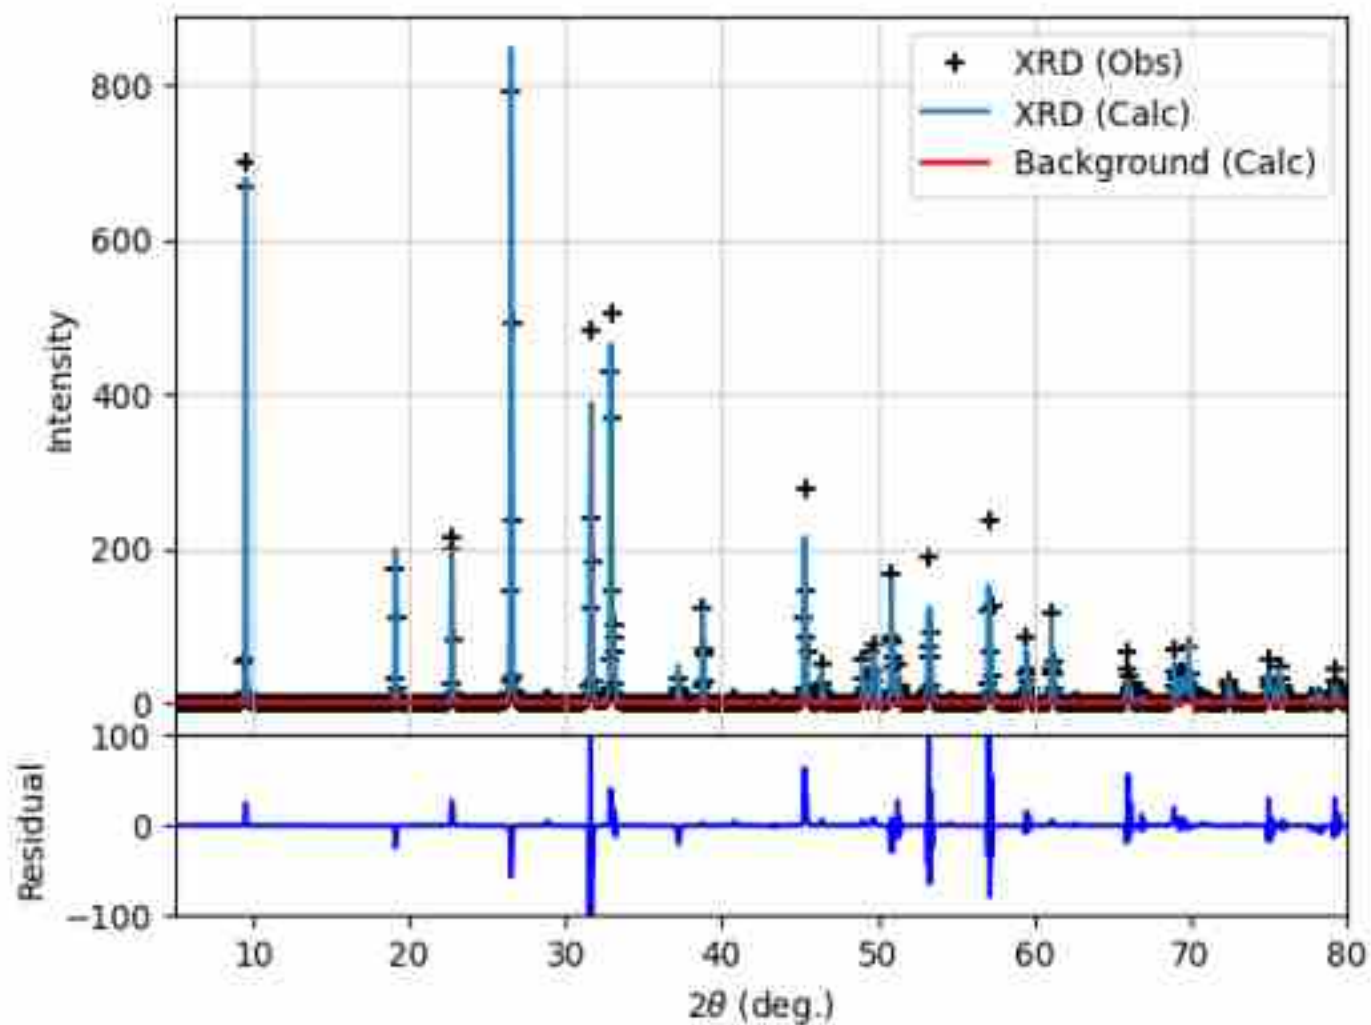

| RMSE before RR | Rwp      | RMSE after RR |
|----------------|----------|---------------|
| 0.021          | 32.36255 | 0.40192       |

# Li<sub>2</sub>Mg<sub>3</sub>Si<sub>2</sub>

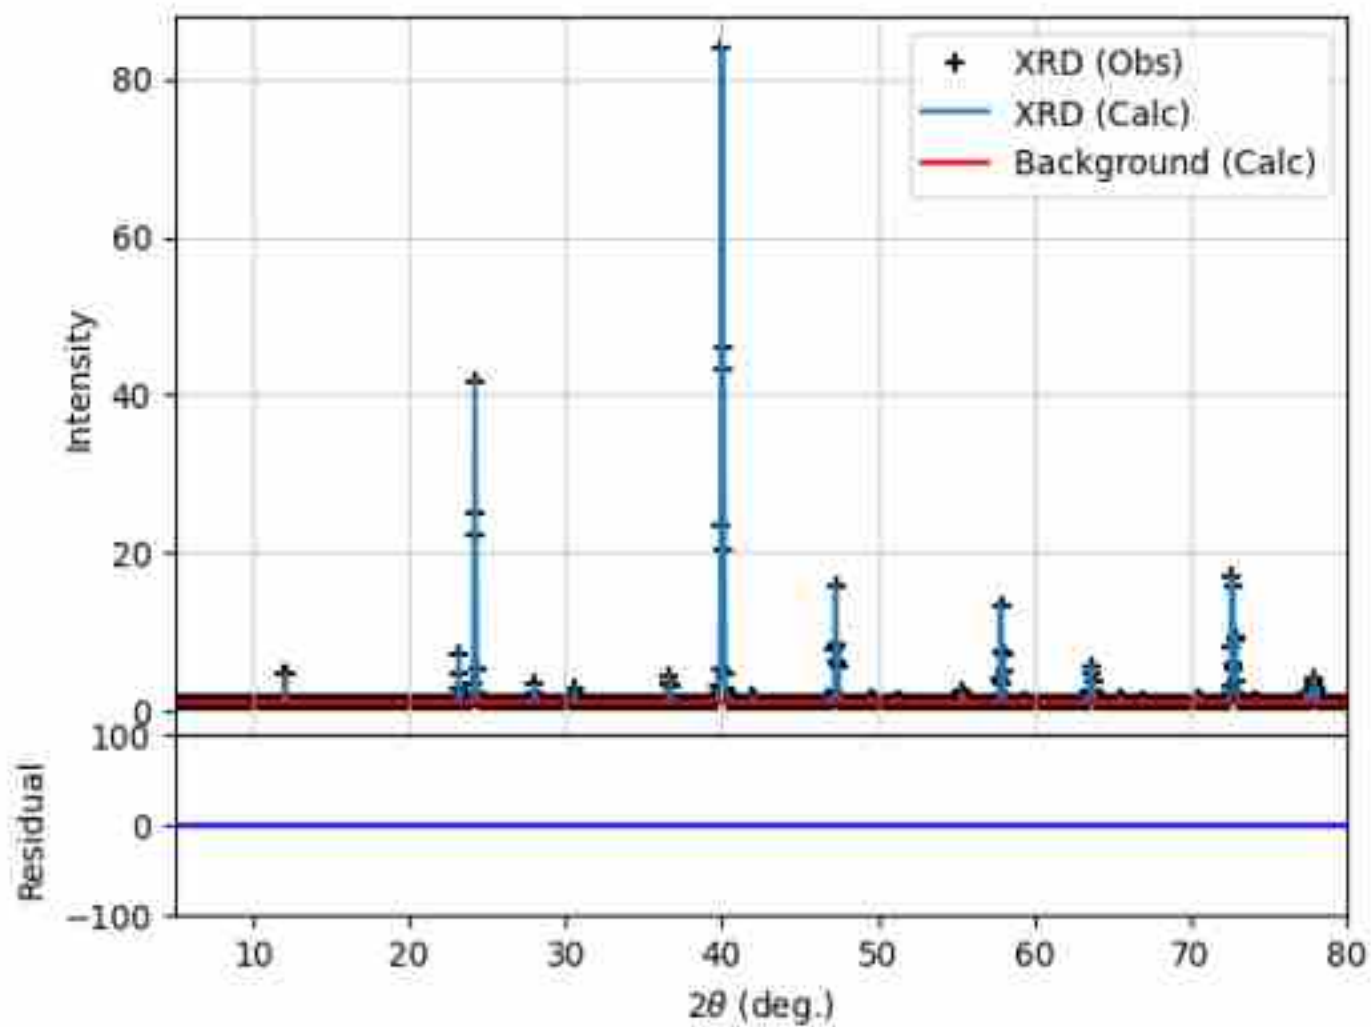

| RMSE before RR | Rwp     | RMSE after RR |
|----------------|---------|---------------|
| 0.021          | 0.00128 | 0.0002        |

# Li<sub>2</sub>Mn<sub>3</sub>Cu<sub>1</sub>O<sub>8</sub>

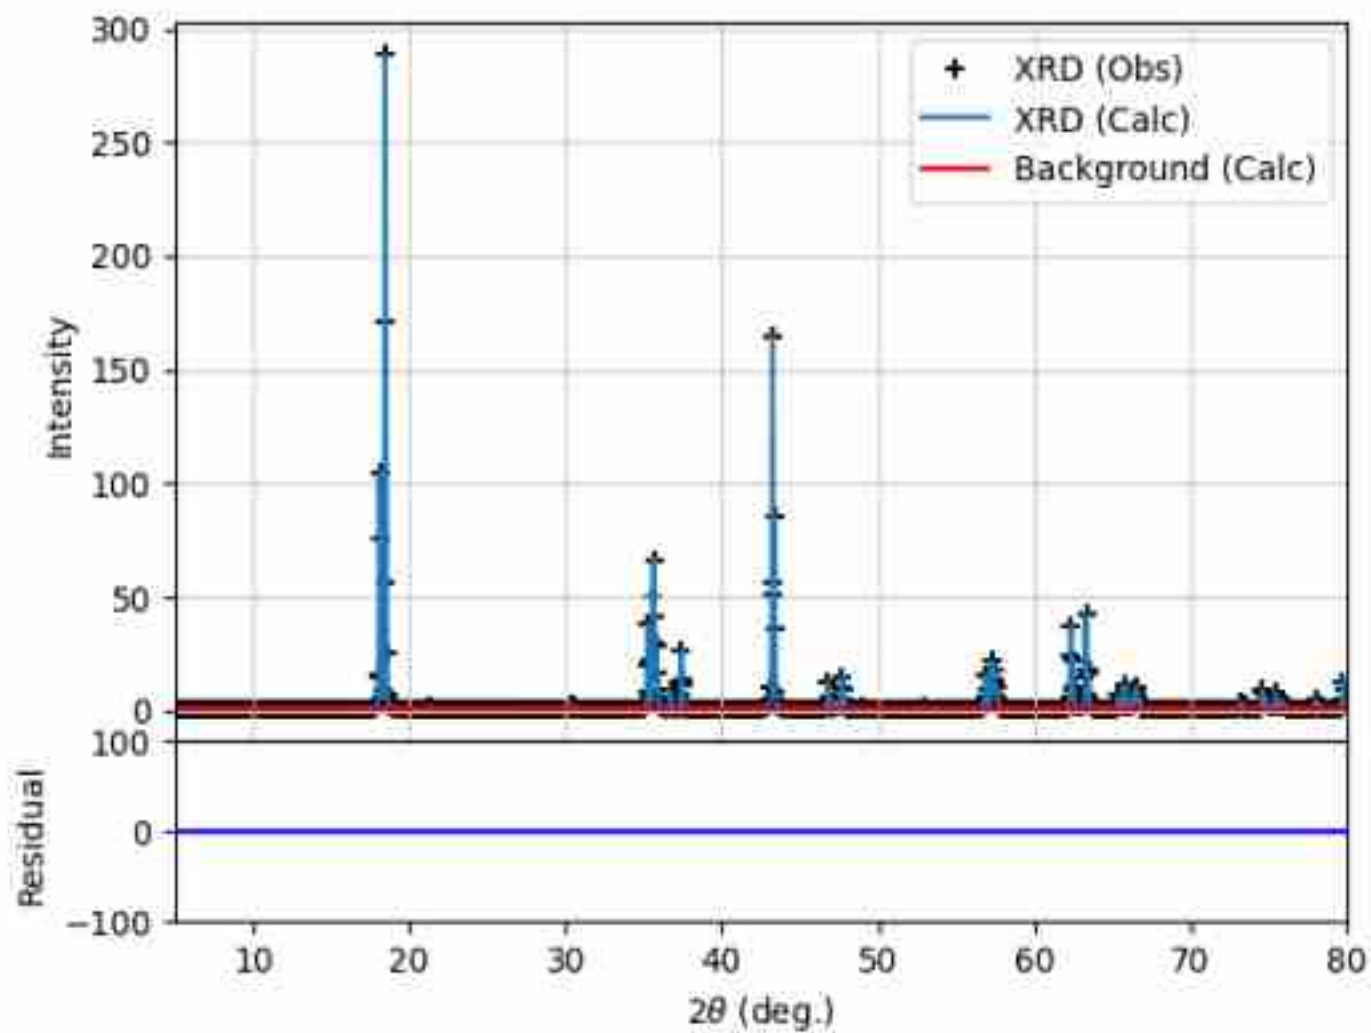

| RMSE before RR | Rwp     | RMSE after RR |
|----------------|---------|---------------|
| 0.021          | 0.00432 | 0.00153       |

# Li<sub>2</sub>Sm<sub>2</sub>S<sub>4</sub>

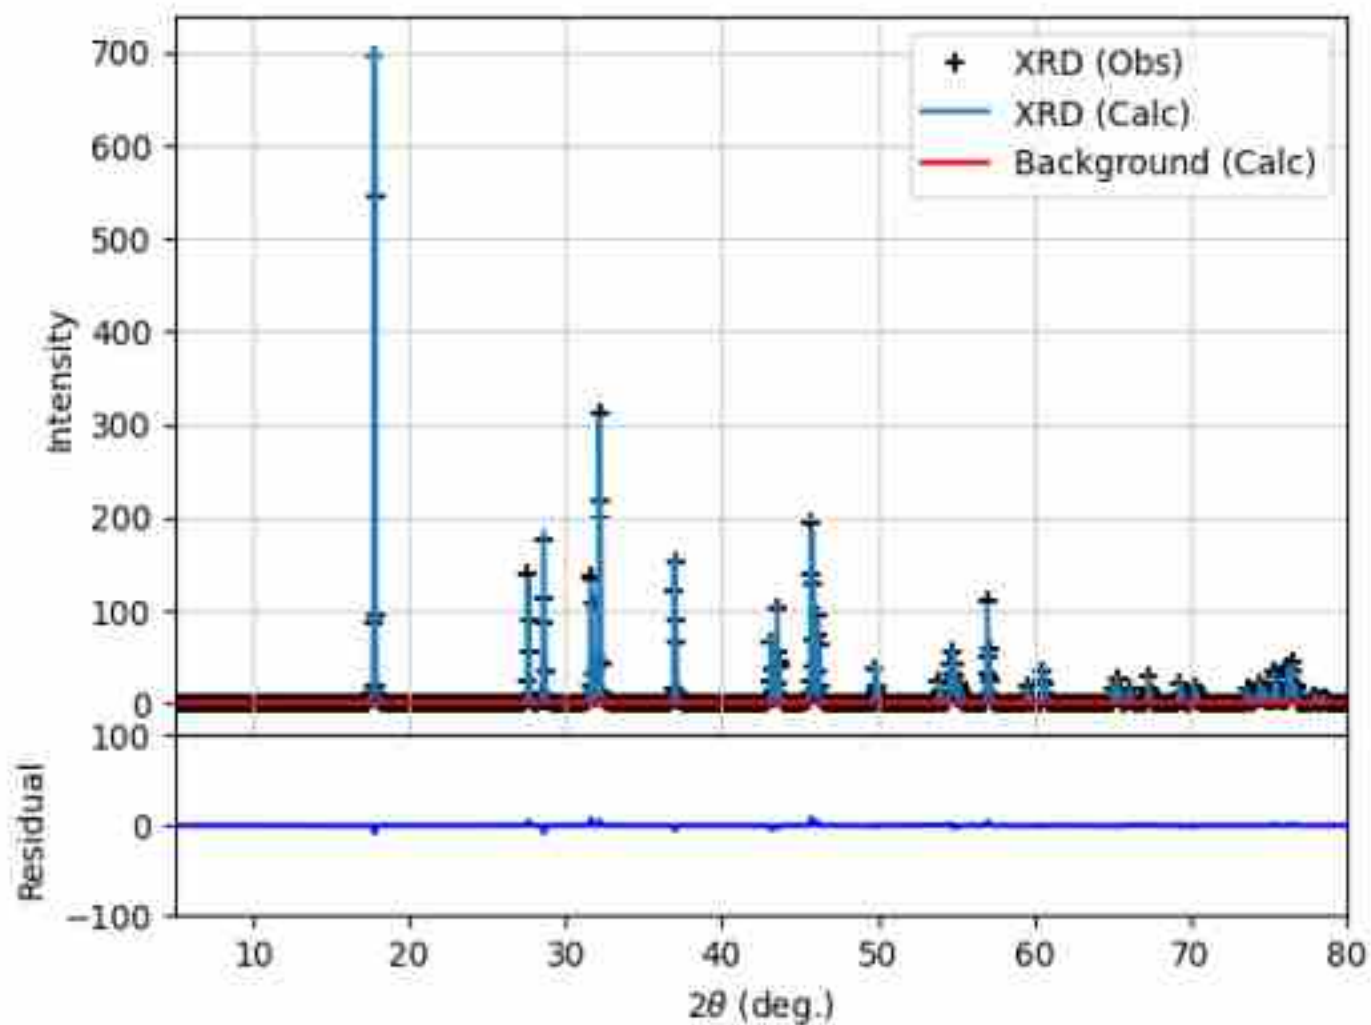

| RMSE before RR | Rwp     | RMSE after RR |
|----------------|---------|---------------|
| 0.021          | 3.36079 | 0.16975       |

# Li<sub>4</sub>Ti<sub>2</sub>Fe<sub>4</sub>O<sub>10</sub>

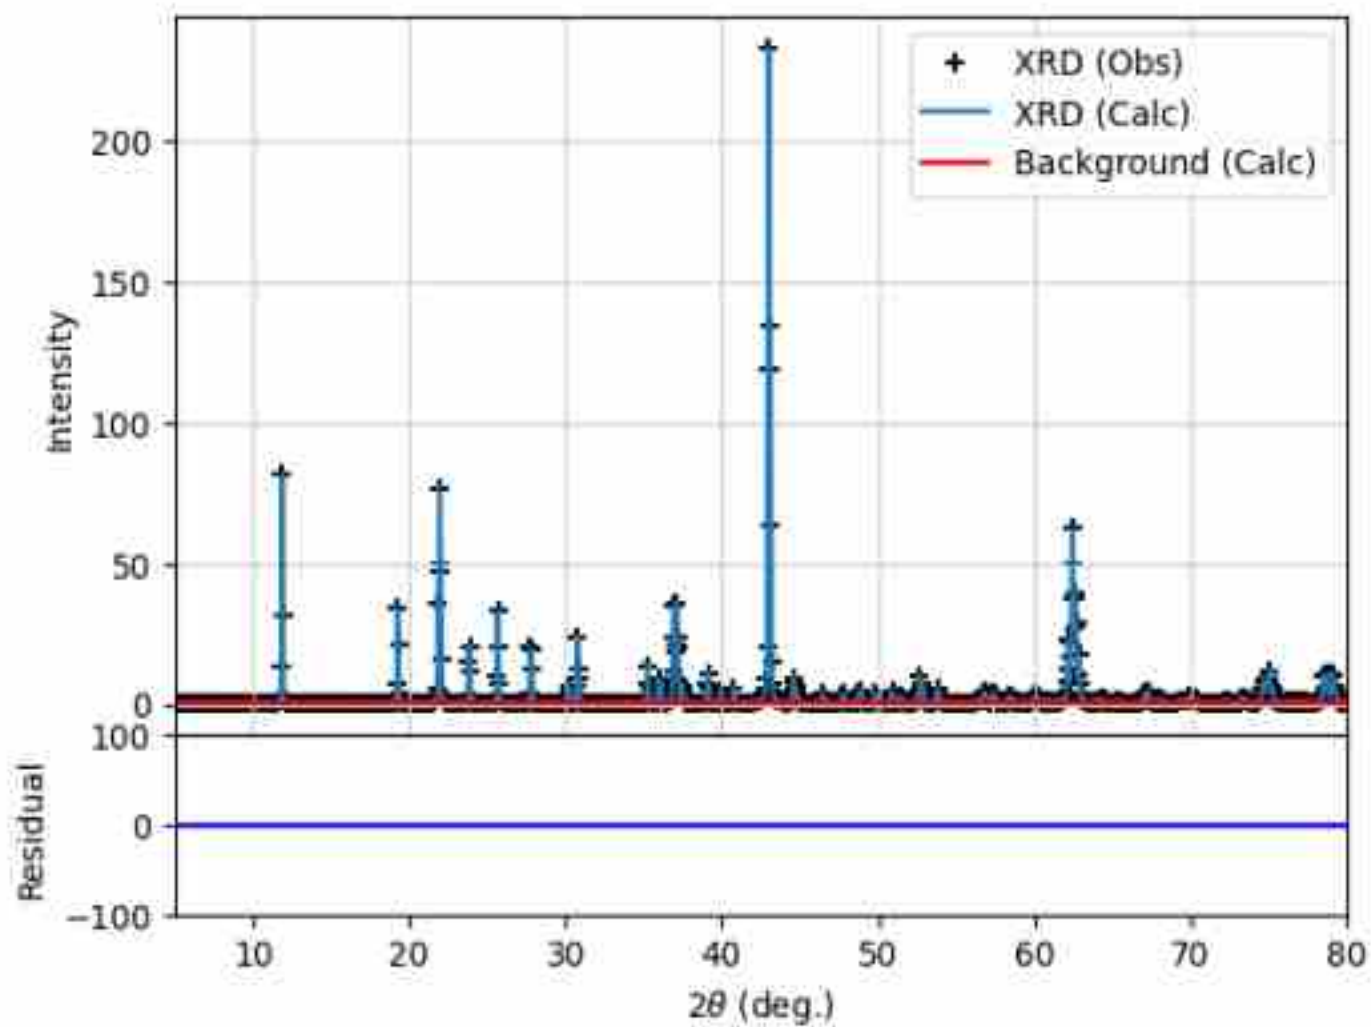

| RMSE before RR | Rwp     | RMSE after RR |
|----------------|---------|---------------|
| 0.021          | 0.07532 | 0.01493       |

# Li<sub>4</sub>V<sub>2</sub>F<sub>12</sub>

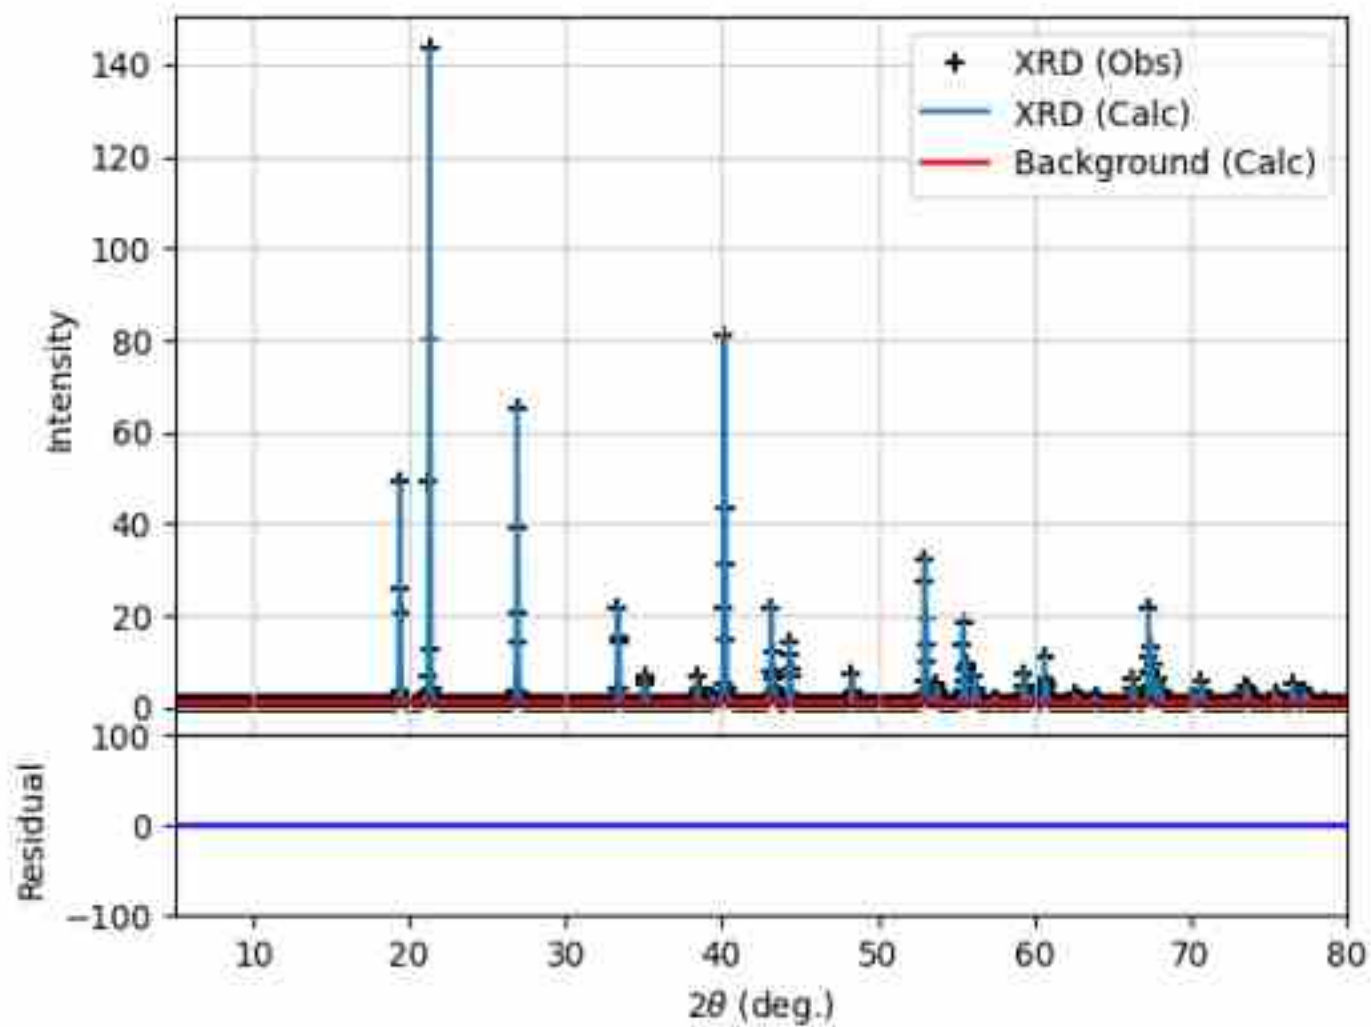

| RMSE before RR | Rwp     | RMSE after RR |
|----------------|---------|---------------|
| 0.021          | 0.00306 | 0.00126       |

# Li<sub>4</sub>V<sub>2</sub>Fe<sub>2</sub>O<sub>10</sub>

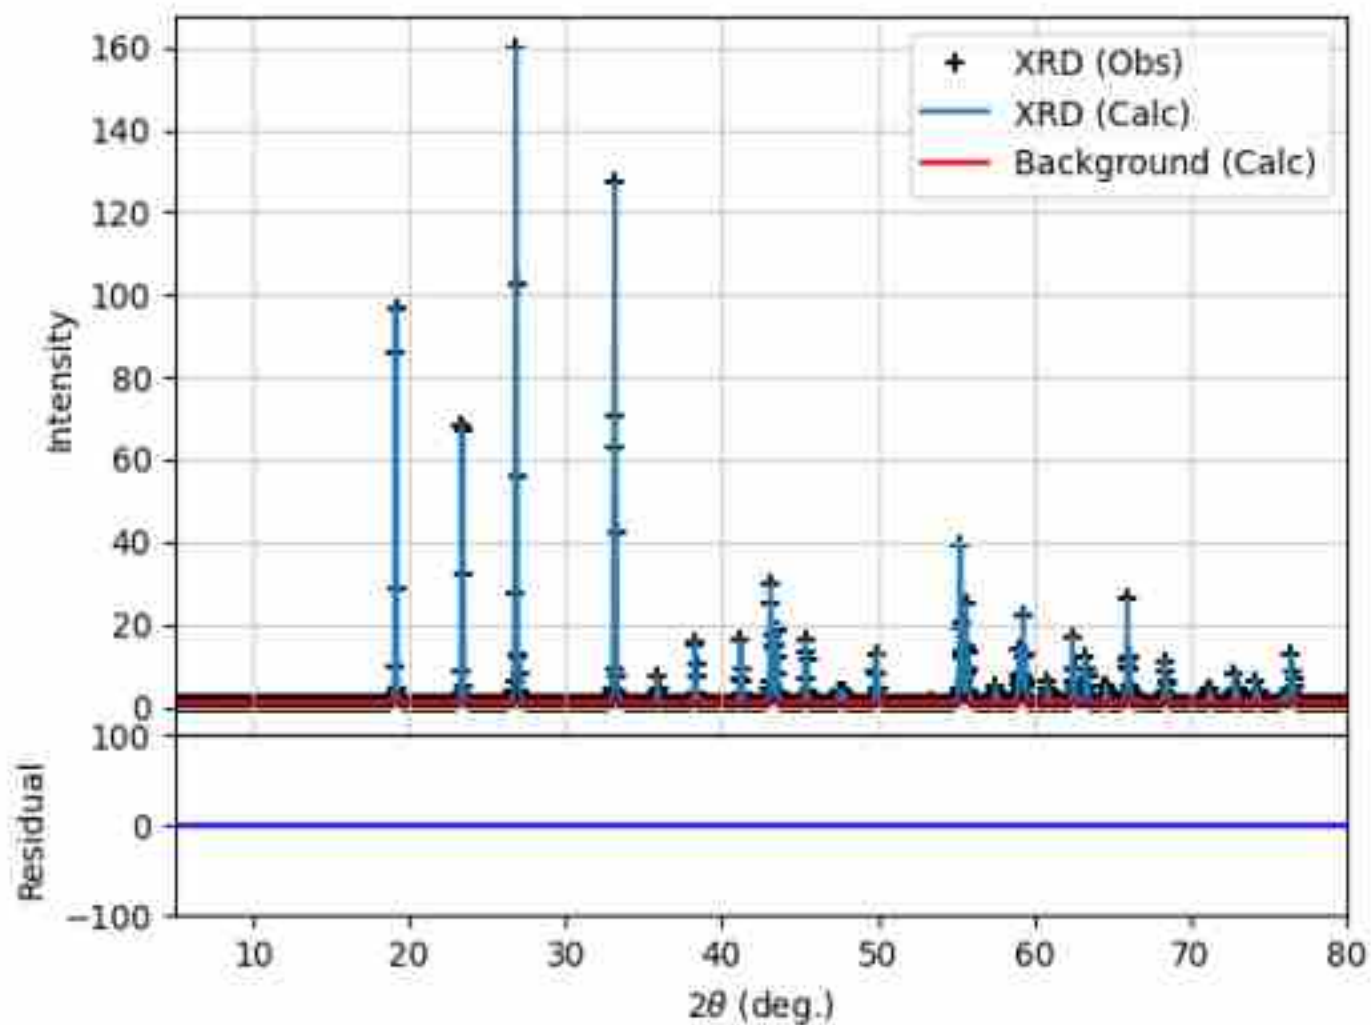

| RMSE before RR | Rwp     | RMSE after RR |
|----------------|---------|---------------|
| 0.021          | 0.00286 | 0.00082       |



# Li<sub>6</sub>Mn<sub>2</sub>Co<sub>2</sub>O<sub>10</sub>

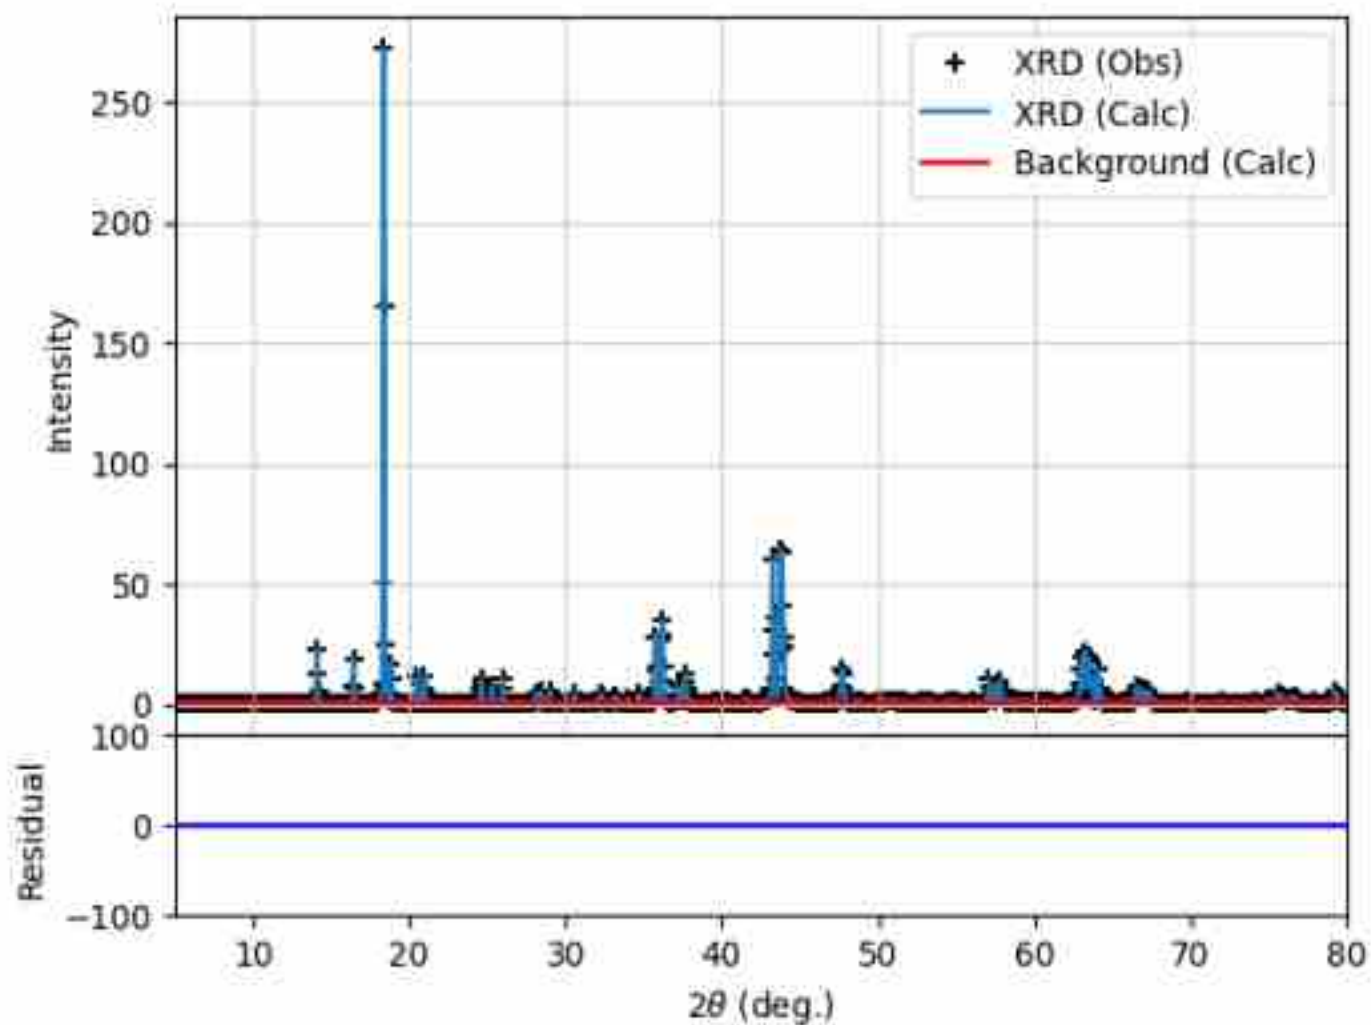

| RMSE before RR | Rwp     | RMSE after RR |
|----------------|---------|---------------|
| 0.021          | 0.00066 | 2e-05         |

# Li<sub>8</sub>Ir<sub>10</sub>O<sub>6</sub>

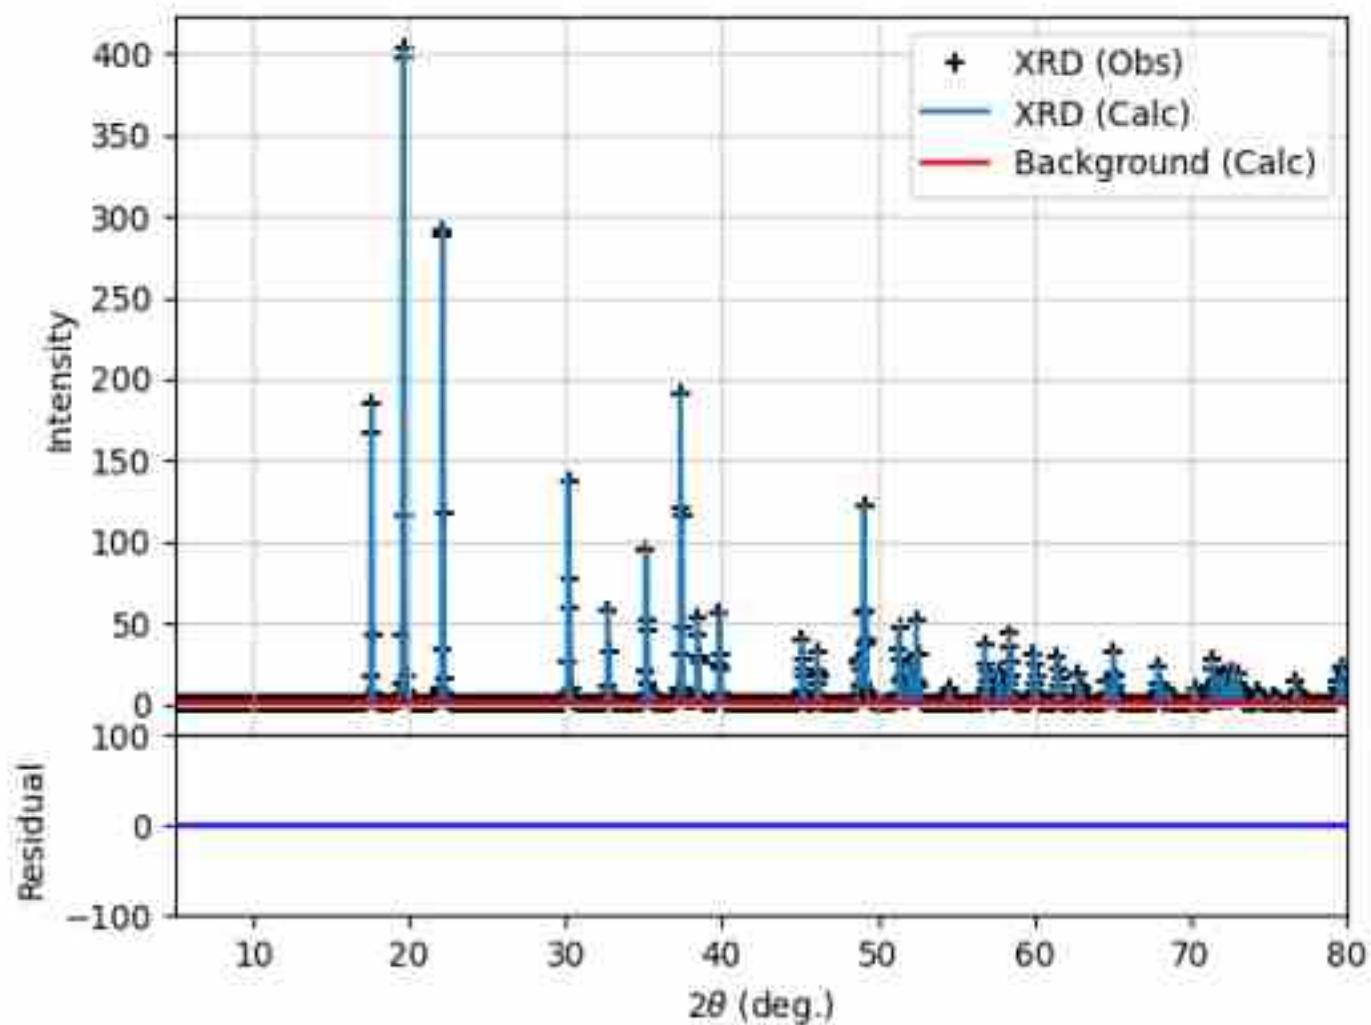

| RMSE before RR | Rwp     | RMSE after RR |
|----------------|---------|---------------|
| 0.021          | 0.00457 | 0.00328       |

# Lu1Al8Fe4

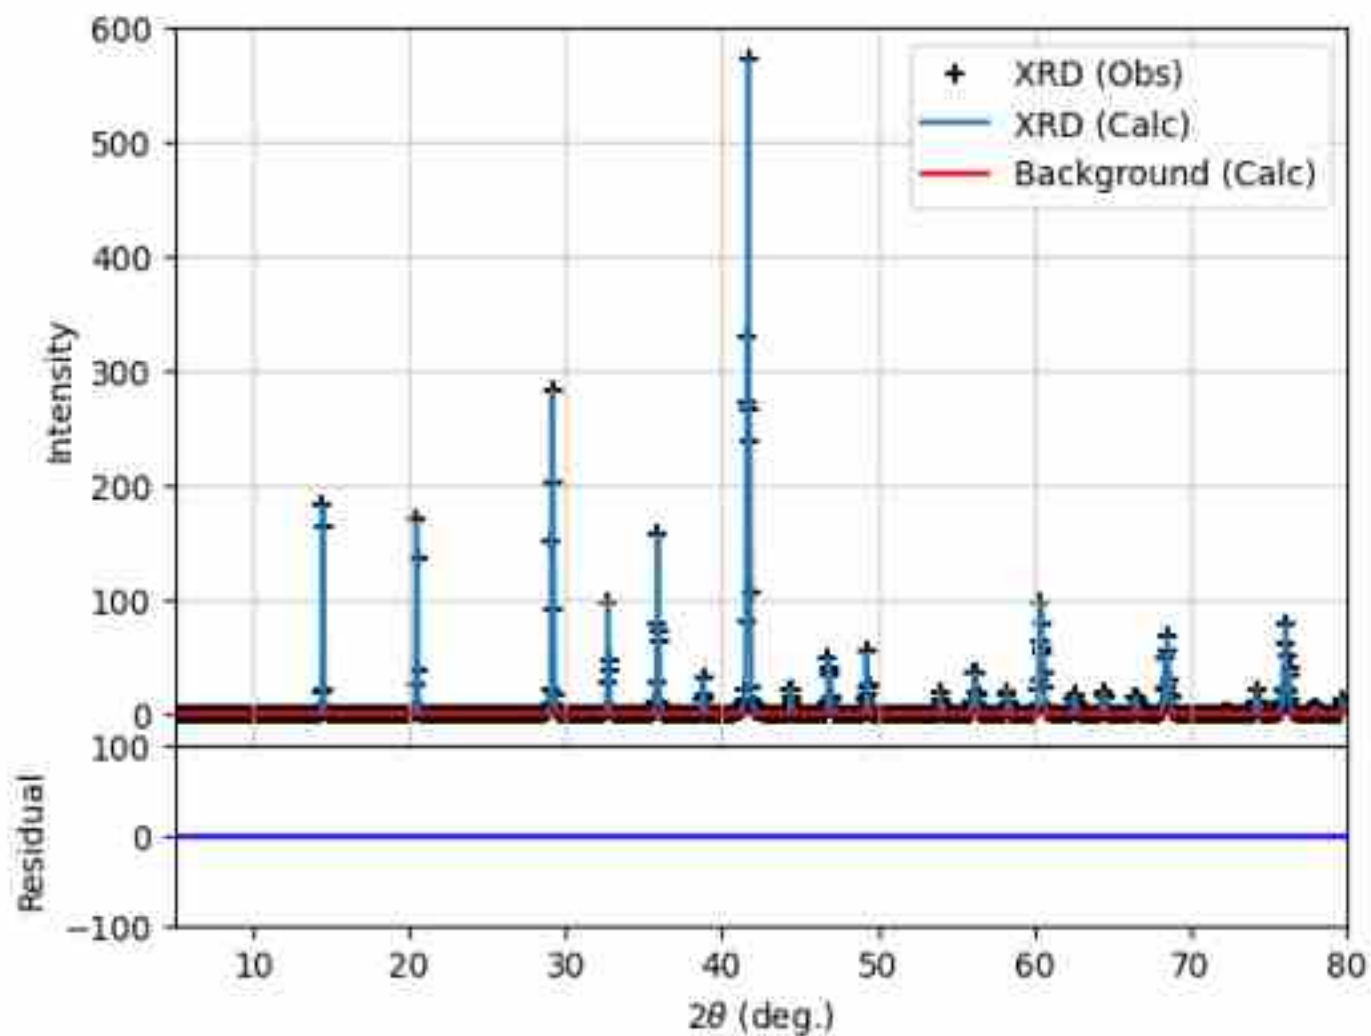

| RMSE before RR | Rwp     | RMSE after RR |
|----------------|---------|---------------|
| 0.021          | 0.00275 | 0.00099       |

# Lu1Fe4Cu3O12

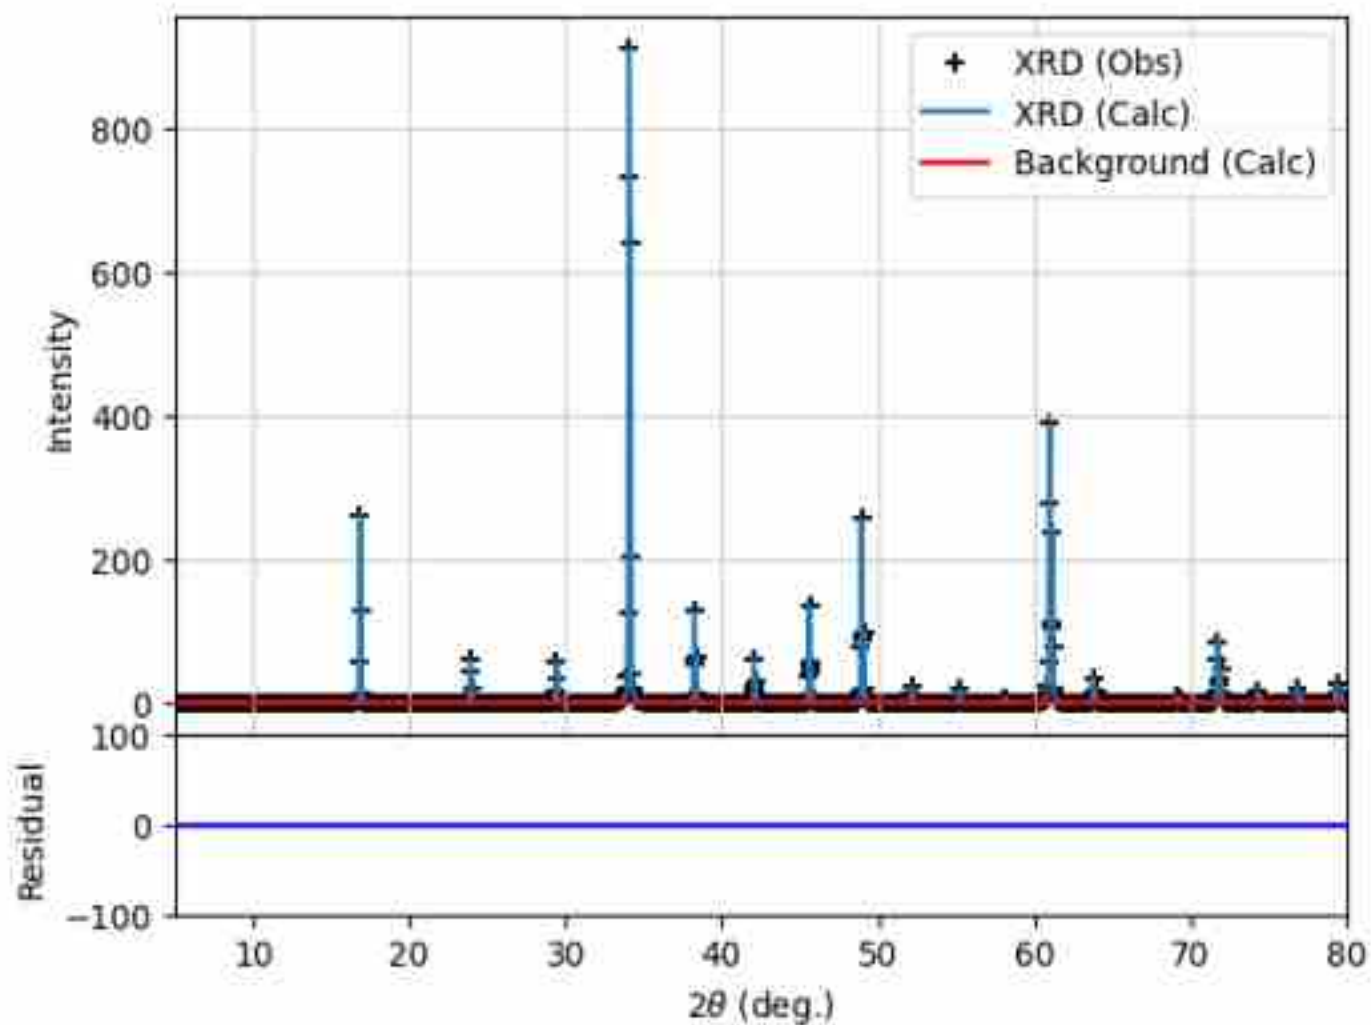

| RMSE before RR | Rwp     | RMSE after RR |
|----------------|---------|---------------|
| 0.021          | 0.01675 | 0.00624       |

# Lu<sub>2</sub>Cu<sub>2</sub>Pb<sub>2</sub>Se<sub>6</sub>

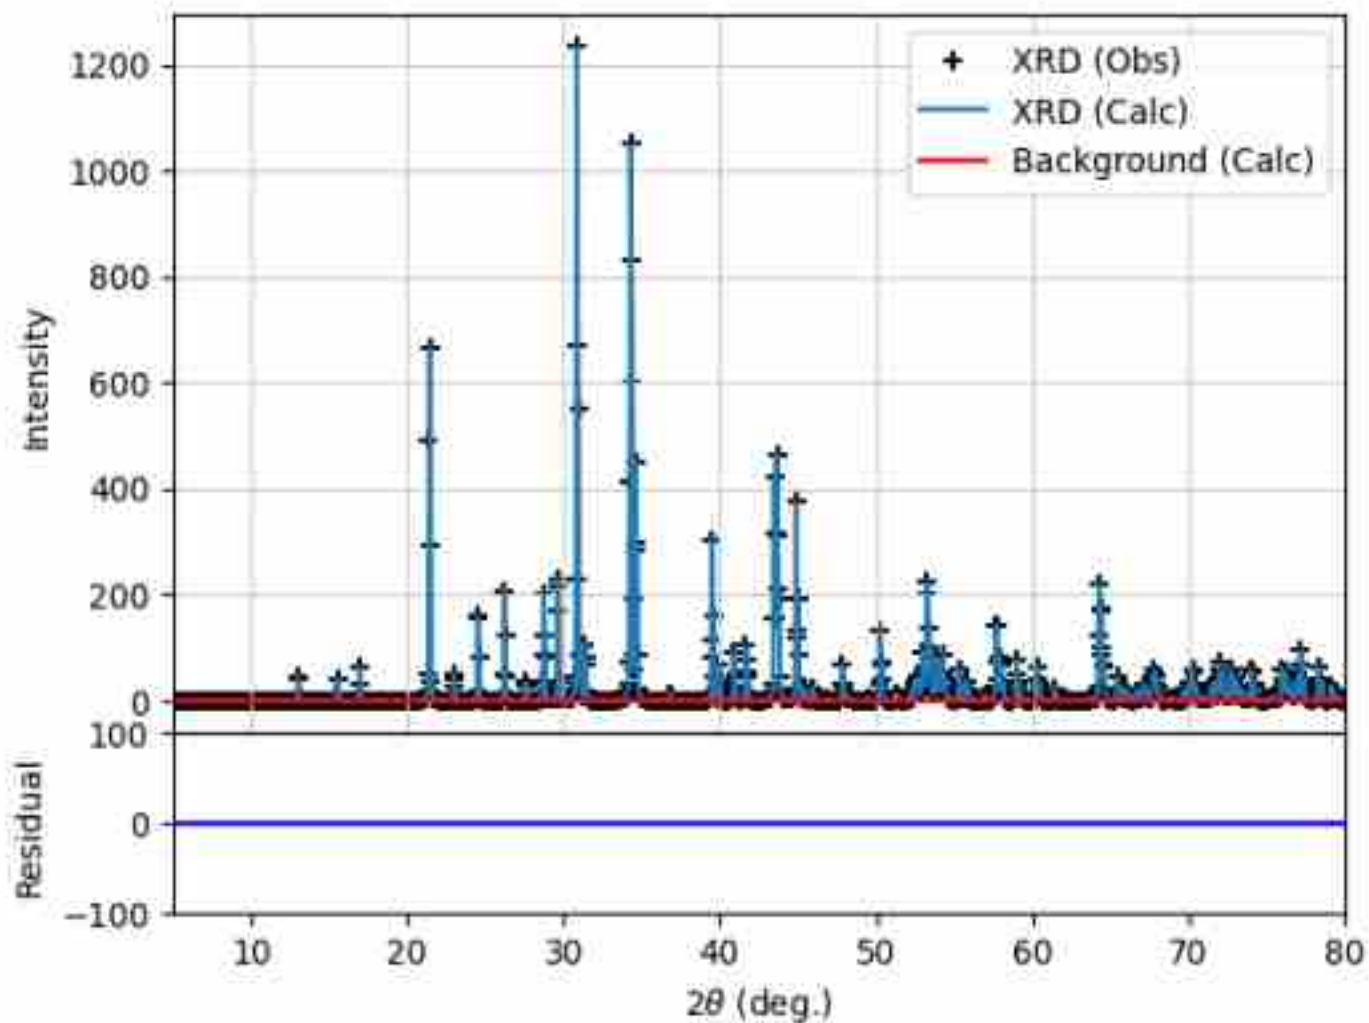

| RMSE before RR | Rwp    | RMSE after RR |
|----------------|--------|---------------|
| 0.021          | 0.0032 | 0.00026       |

# Lu<sub>2</sub>Ga<sub>4</sub>Ni<sub>2</sub>

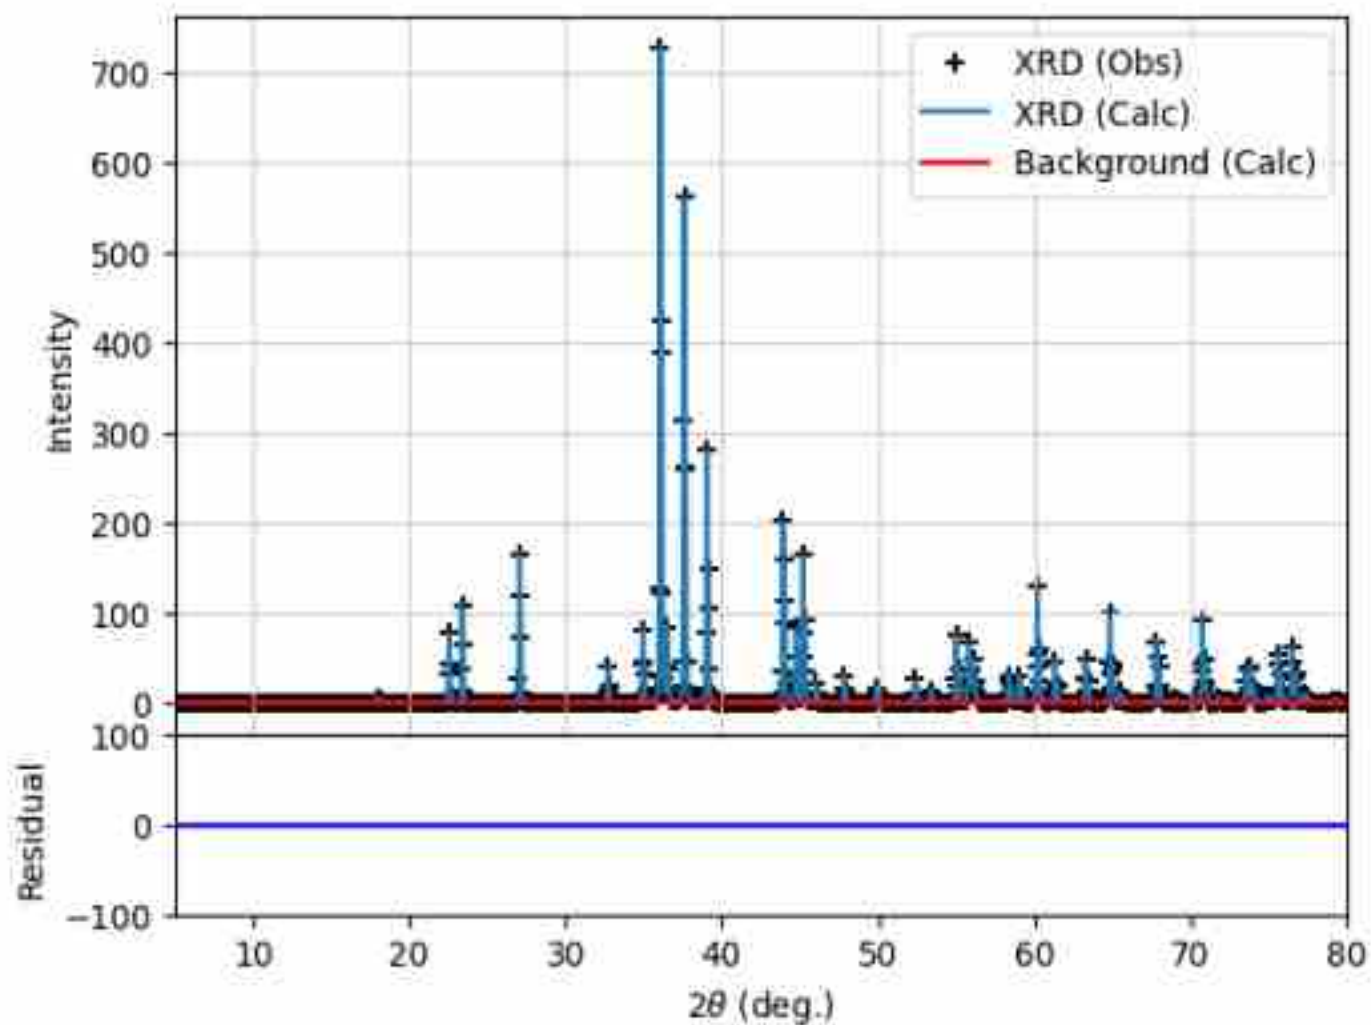

| RMSE before RR | Rwp     | RMSE after RR |
|----------------|---------|---------------|
| 0.021          | 0.00532 | 0.00059       |

# Lu<sub>2</sub>P<sub>2</sub>O<sub>8</sub>

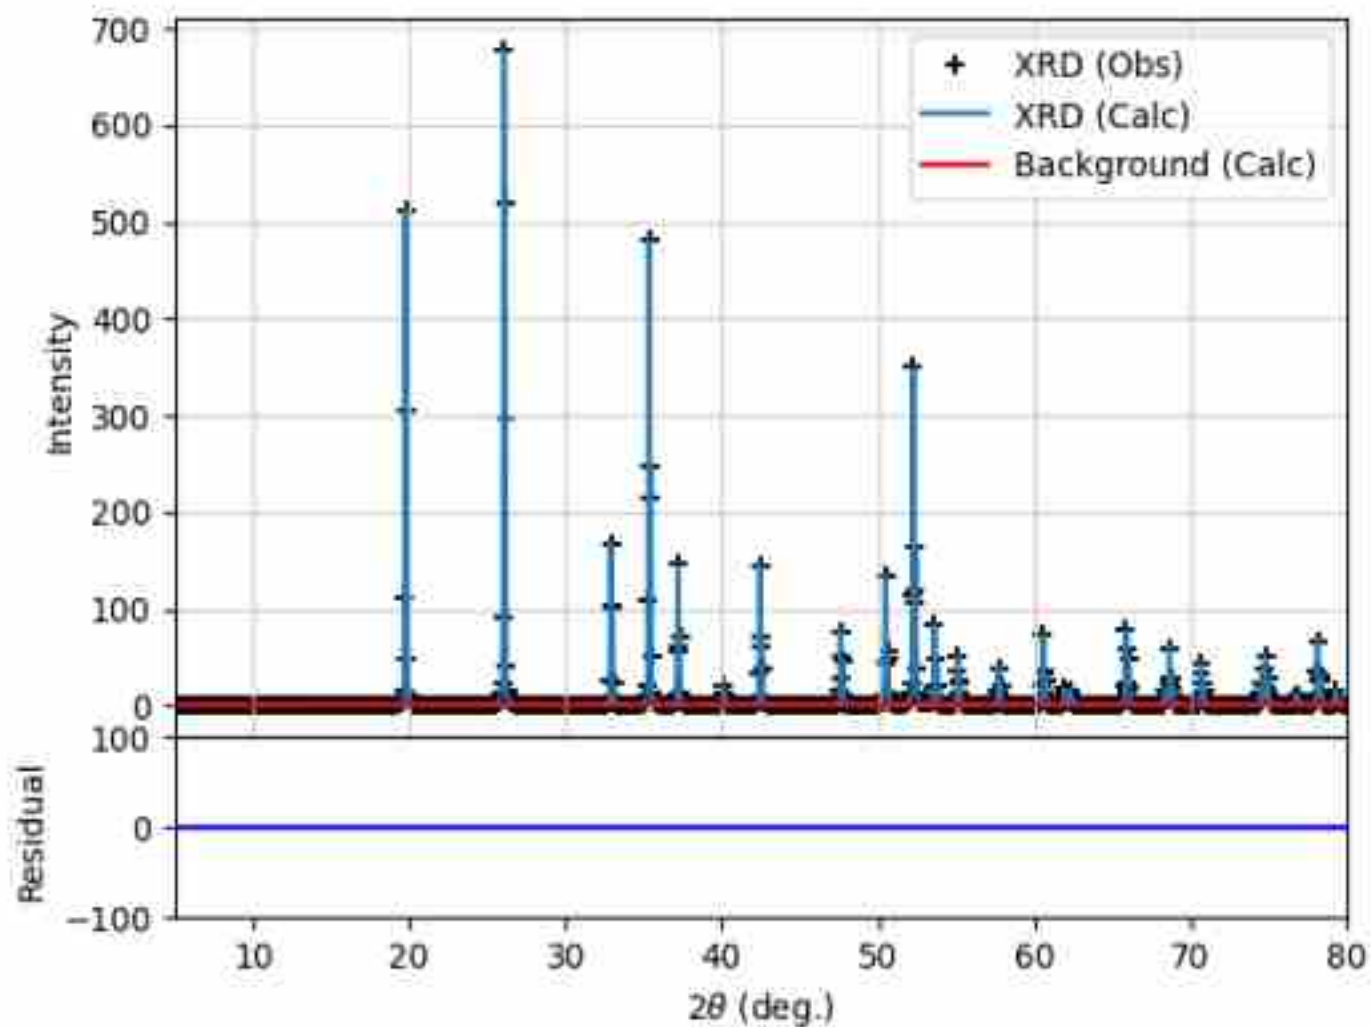

| RMSE before RR | Rwp     | RMSE after RR |
|----------------|---------|---------------|
| 0.021          | 0.00329 | 0.00129       |

# Lu4Ru8

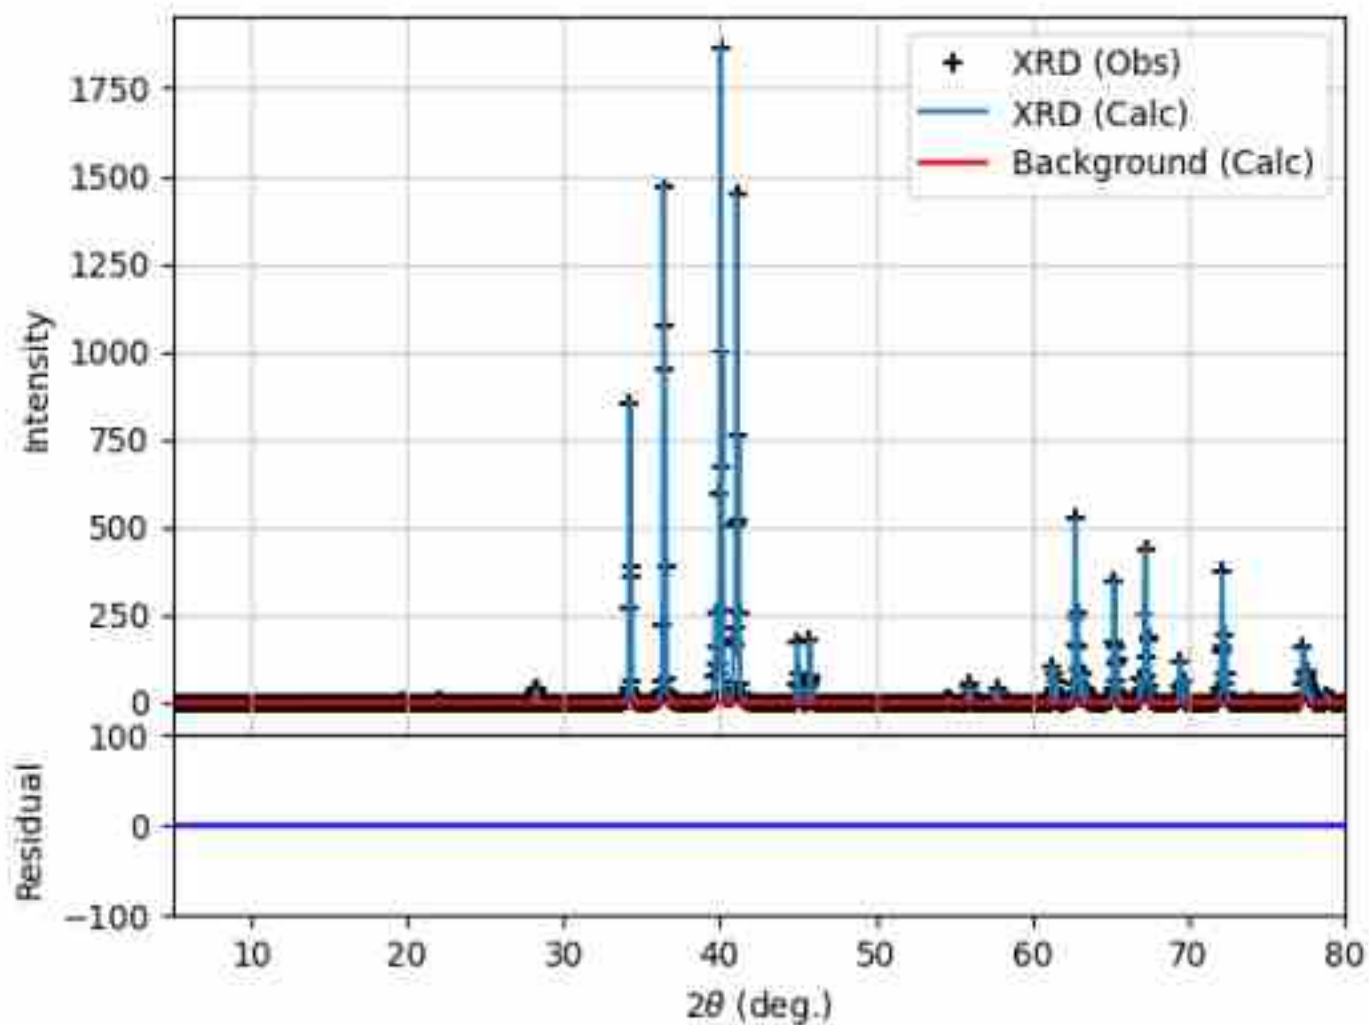

| RMSE before RR | Rwp     | RMSE after RR |
|----------------|---------|---------------|
| 0.021          | 0.00436 | 0.00043       |



# Lu<sub>12</sub>In<sub>2</sub>Co<sub>4</sub>

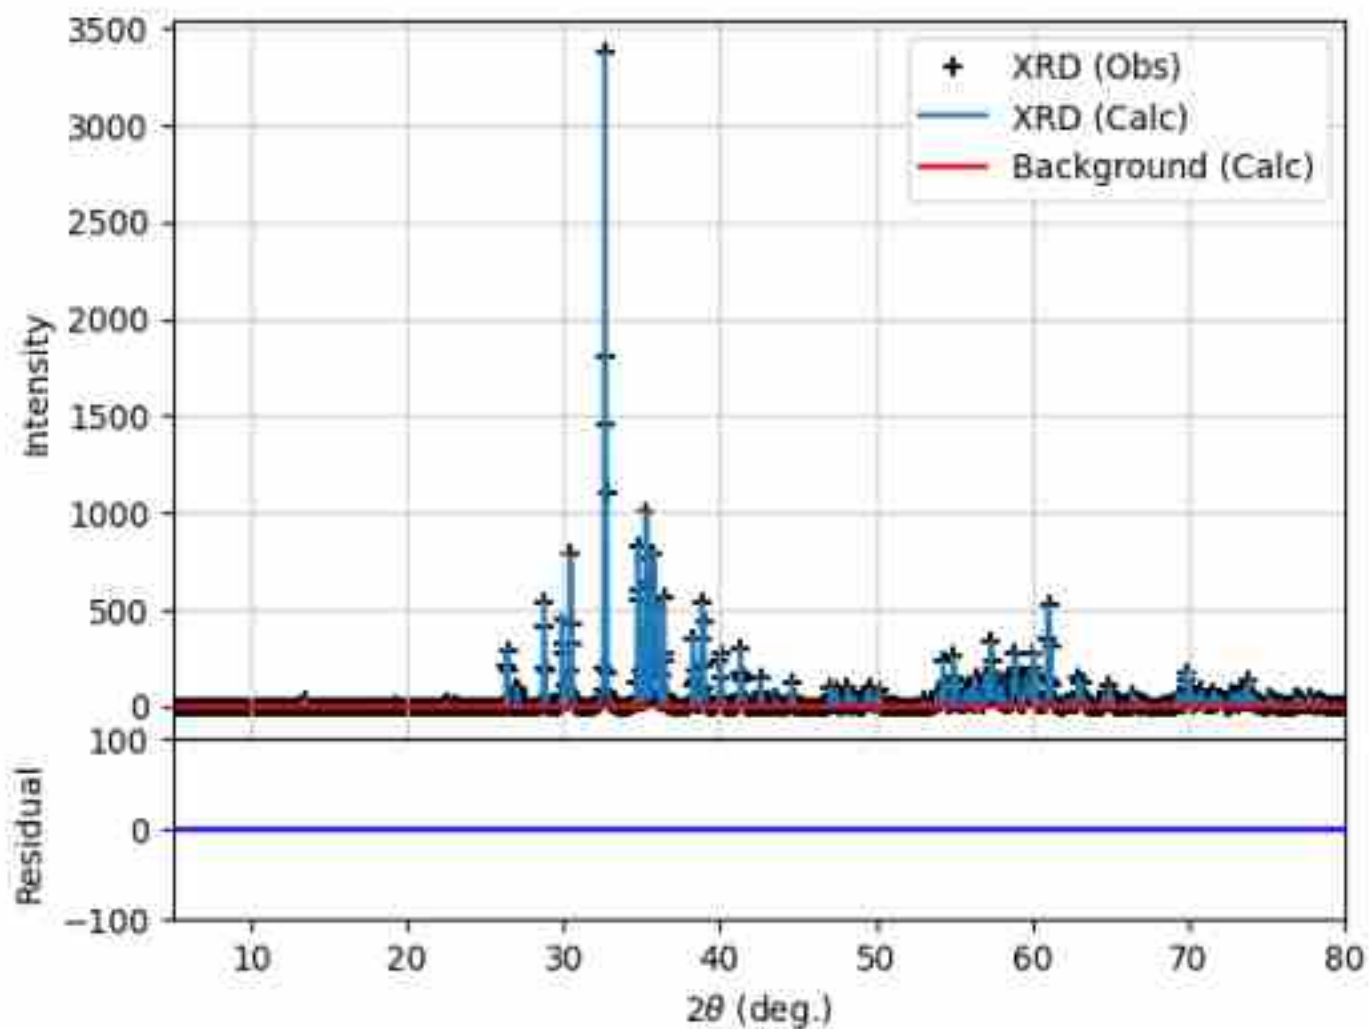

| RMSE before RR | Rwp     | RMSE after RR |
|----------------|---------|---------------|
| 0.021          | 0.00465 | 0.00045       |

# Mg<sub>2</sub>Al<sub>4</sub>O<sub>8</sub>

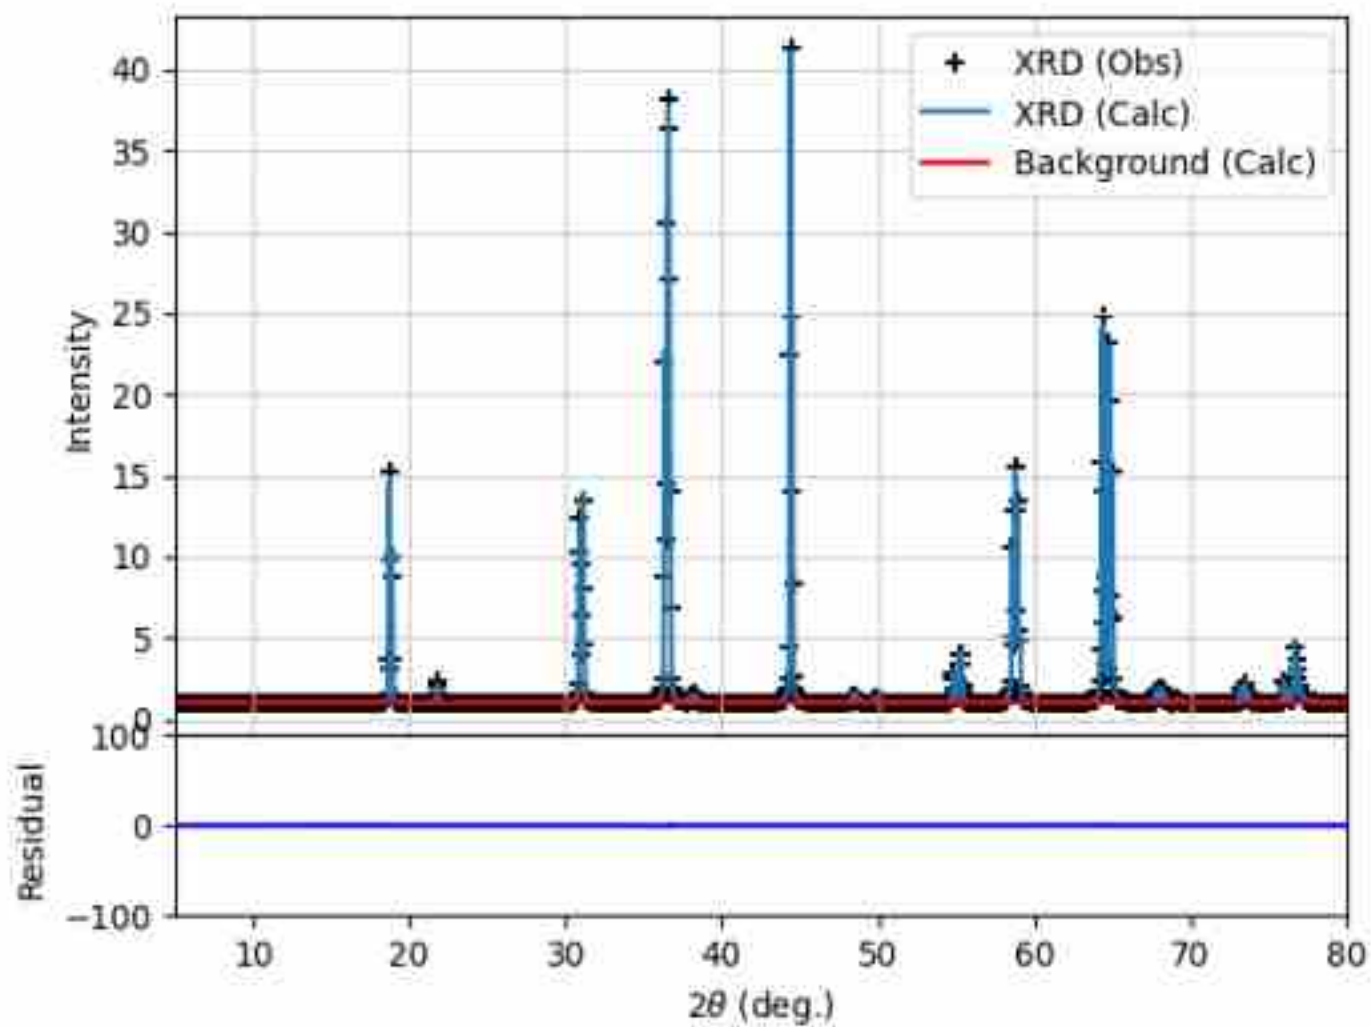

| RMSE before RR | Rwp     | RMSE after RR |
|----------------|---------|---------------|
| 0.021          | 1.52595 | 0.05967       |

# Mg<sub>2</sub>Cr<sub>2</sub>Ga<sub>2</sub>S<sub>8</sub>

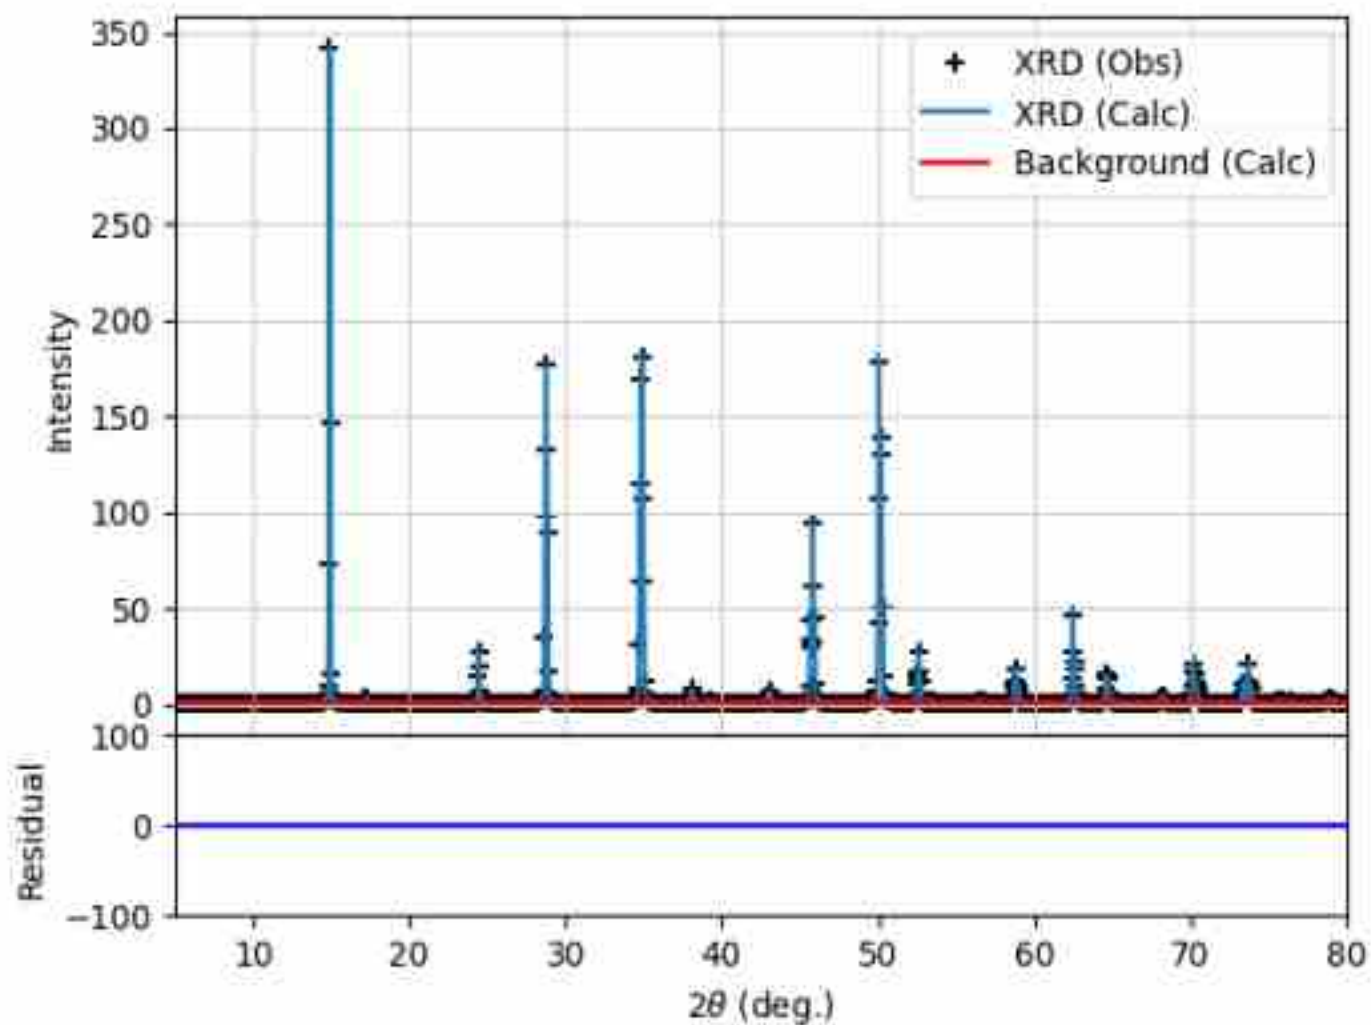

| RMSE before RR | Rwp     | RMSE after RR |
|----------------|---------|---------------|
| 0.021          | 0.00208 | 0.00041       |

# Mg<sub>2</sub>Ga<sub>4</sub>O<sub>8</sub>

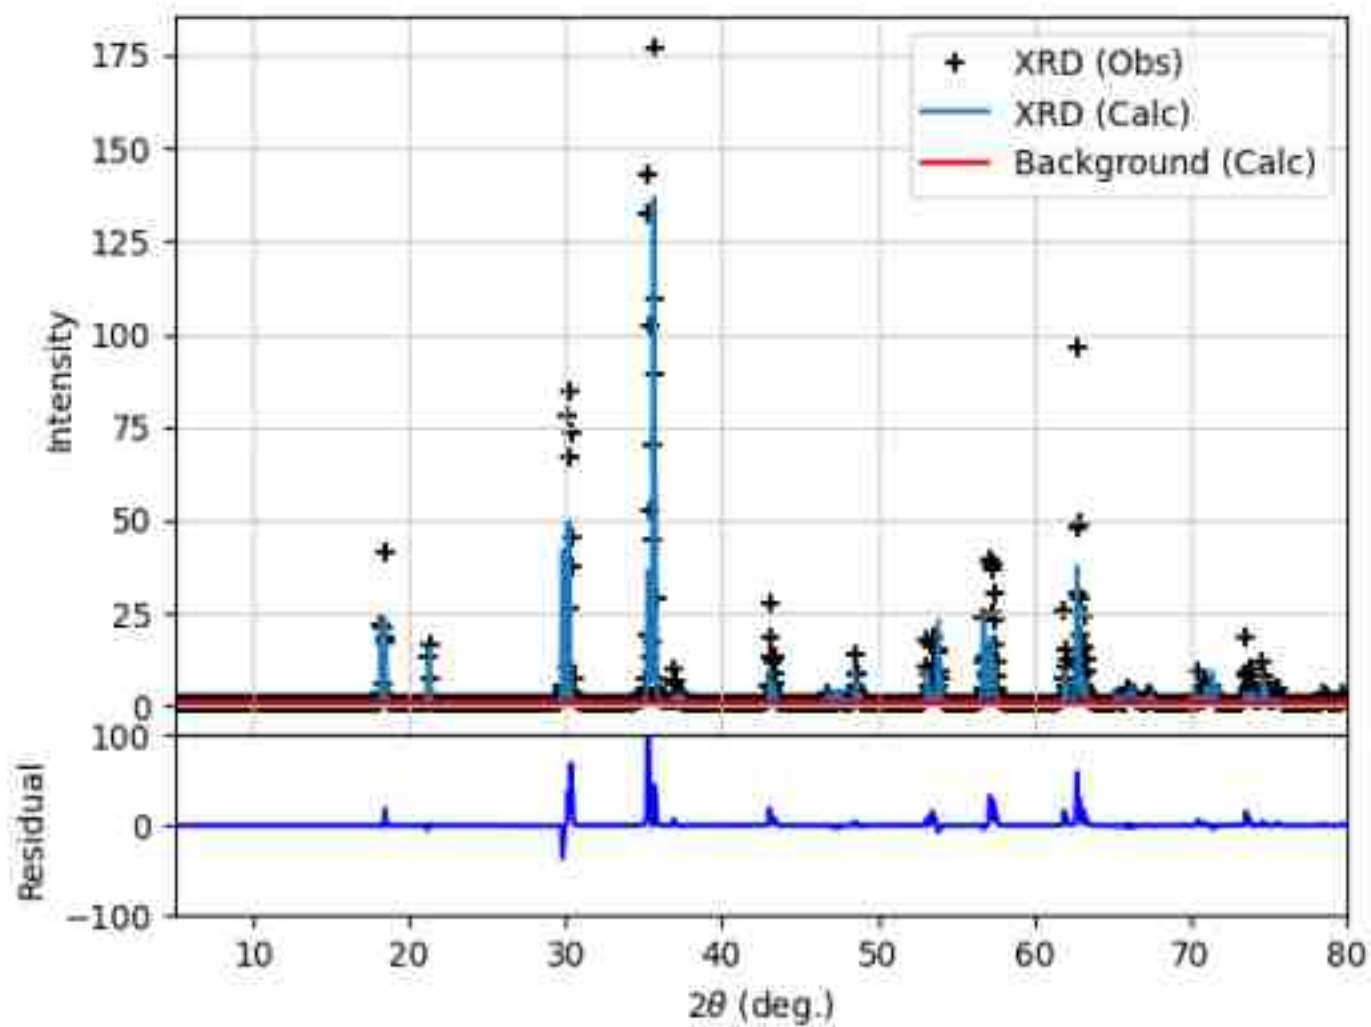

| RMSE before RR | Rwp      | RMSE after RR |
|----------------|----------|---------------|
| 0.021          | 56.92376 | 0.02631       |

# Mg<sub>4</sub>Ga<sub>2</sub>

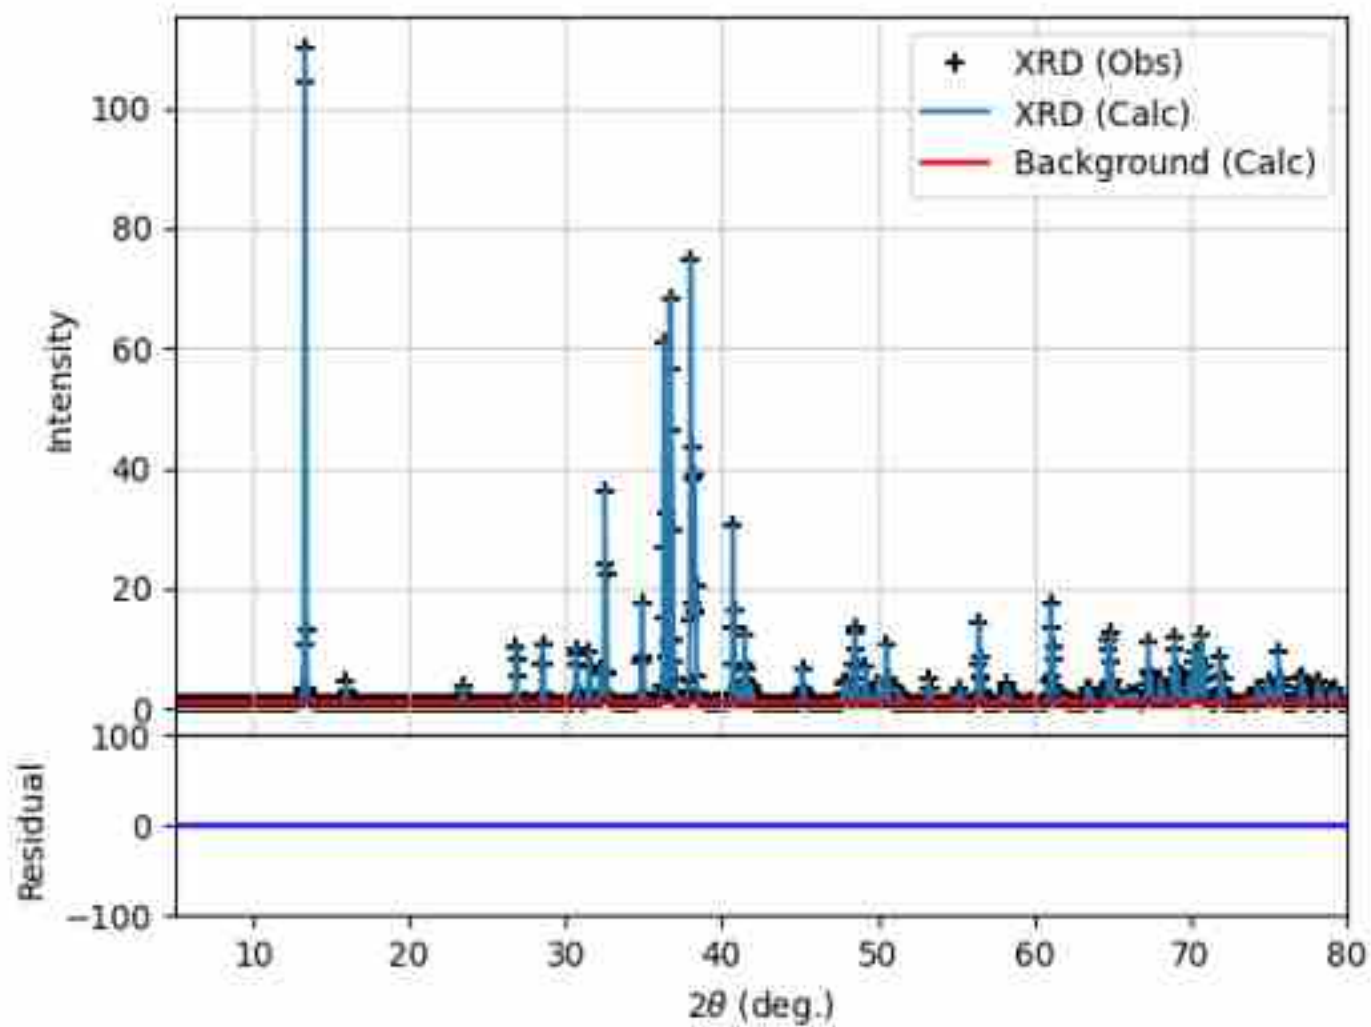

| RMSE before RR | Rwp     | RMSE after RR |
|----------------|---------|---------------|
| 0.021          | 0.00255 | 0.00034       |

# Mg<sub>4</sub>Mo<sub>2</sub>W<sub>2</sub>O<sub>12</sub>

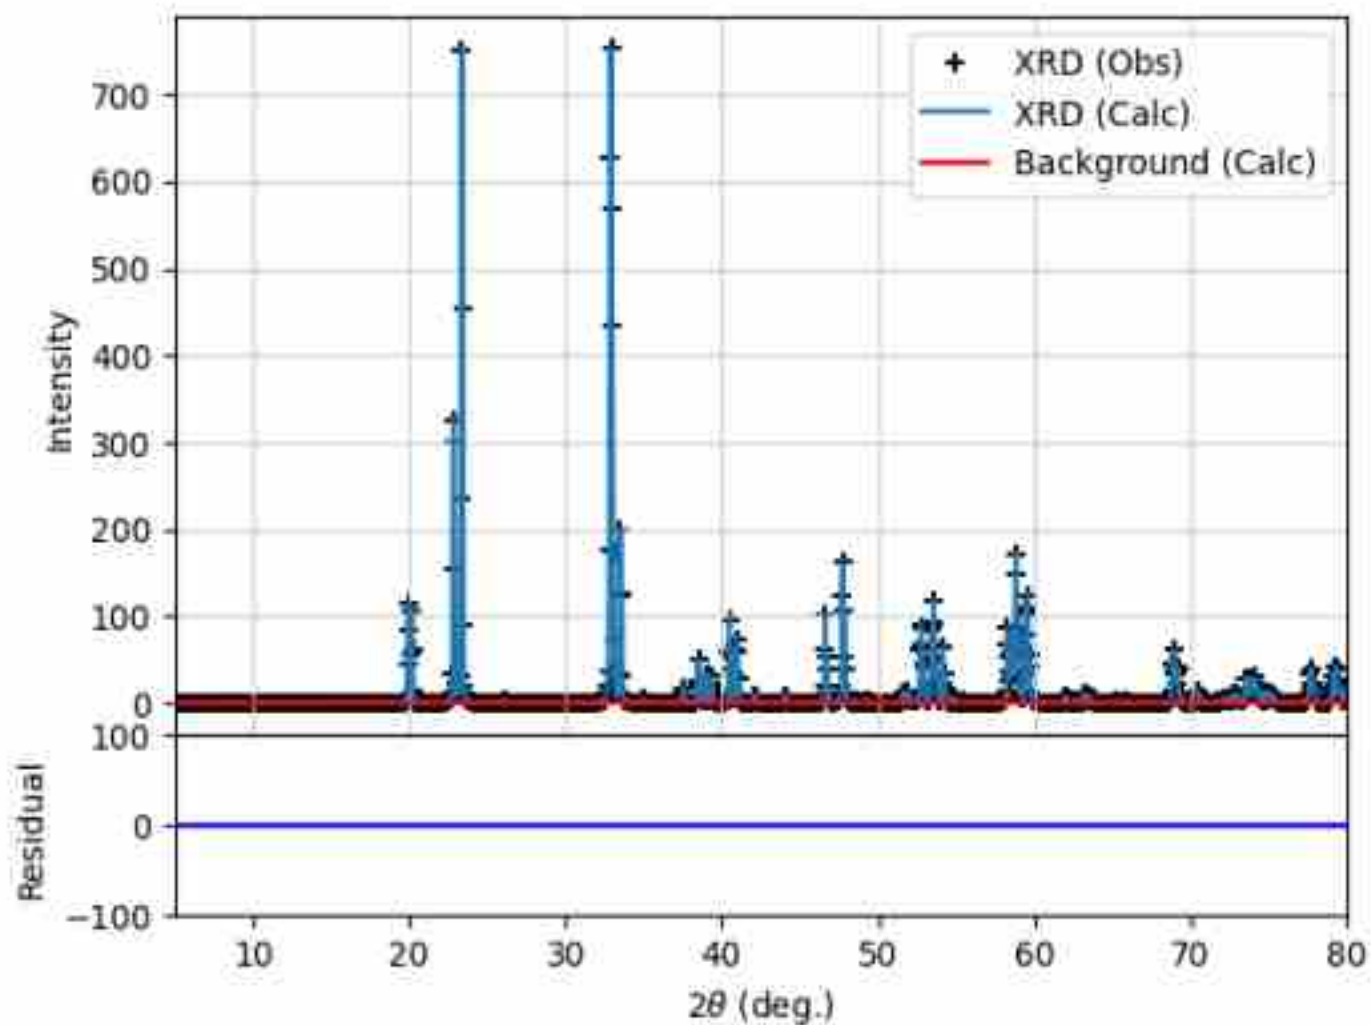

| RMSE before RR | Rwp    | RMSE after RR |
|----------------|--------|---------------|
| 0.021          | 0.0036 | 0.00143       |

# Mg<sub>4</sub>Zn<sub>2</sub>

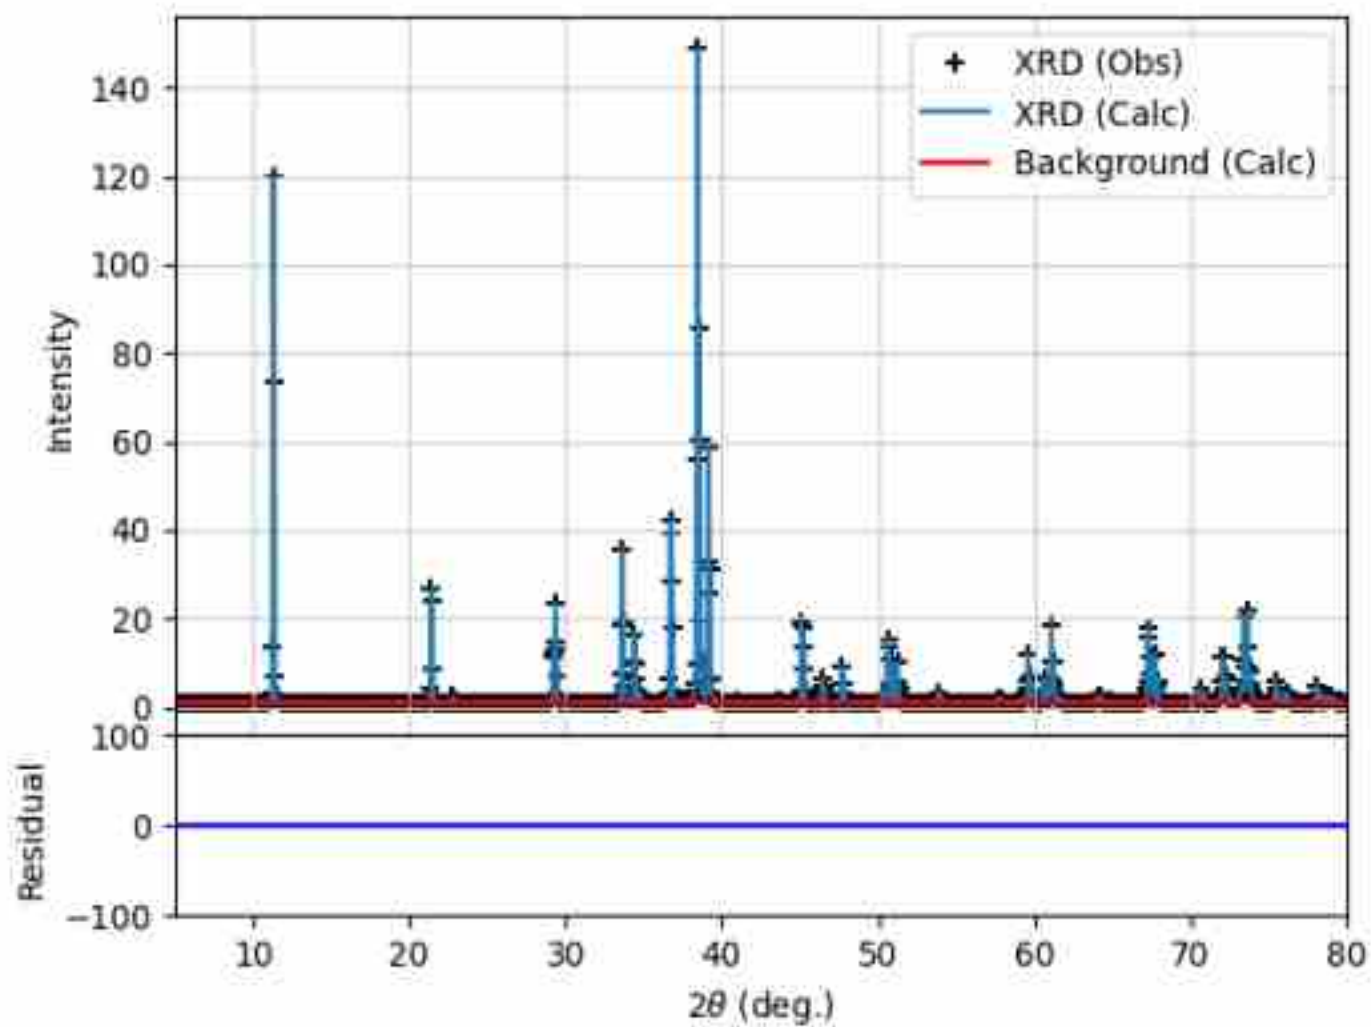

| RMSE before RR | Rwp     | RMSE after RR |
|----------------|---------|---------------|
| 0.021          | 0.00271 | 0.00057       |

# Mn1Be12

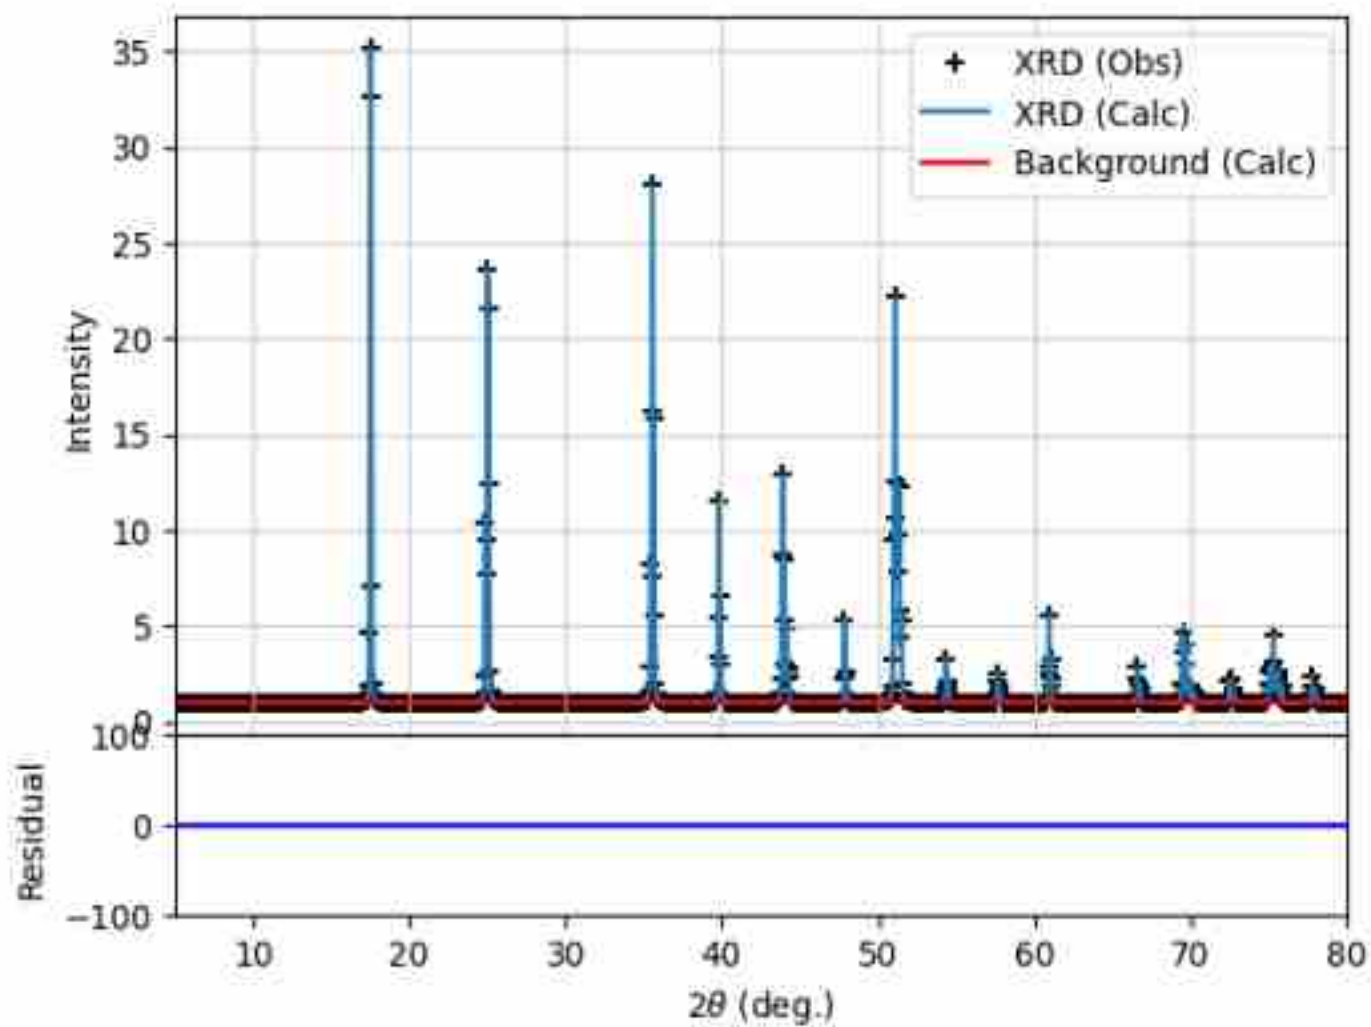

| RMSE before RR | Rwp     | RMSE after RR |
|----------------|---------|---------------|
| 0.021          | 0.00356 | 0.00373       |



# Mn1Zn1Ga4Se8

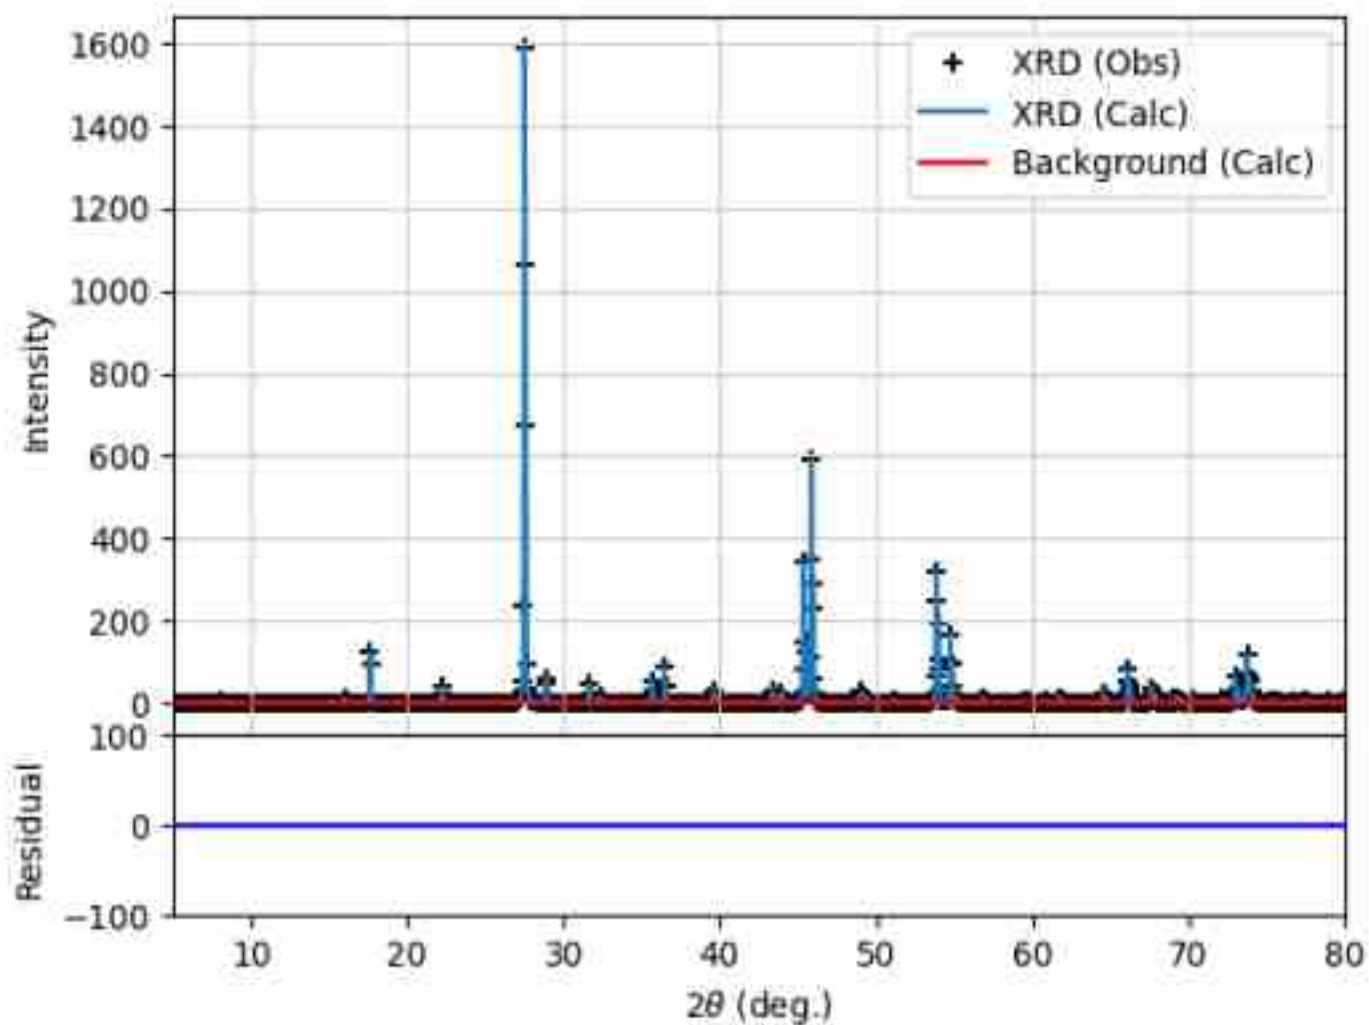

| RMSE before RR | Rwp     | RMSE after RR |
|----------------|---------|---------------|
| 0.021          | 0.00305 | 0.00053       |

# Mn<sub>2</sub>Cu<sub>2</sub>Se<sub>8</sub>

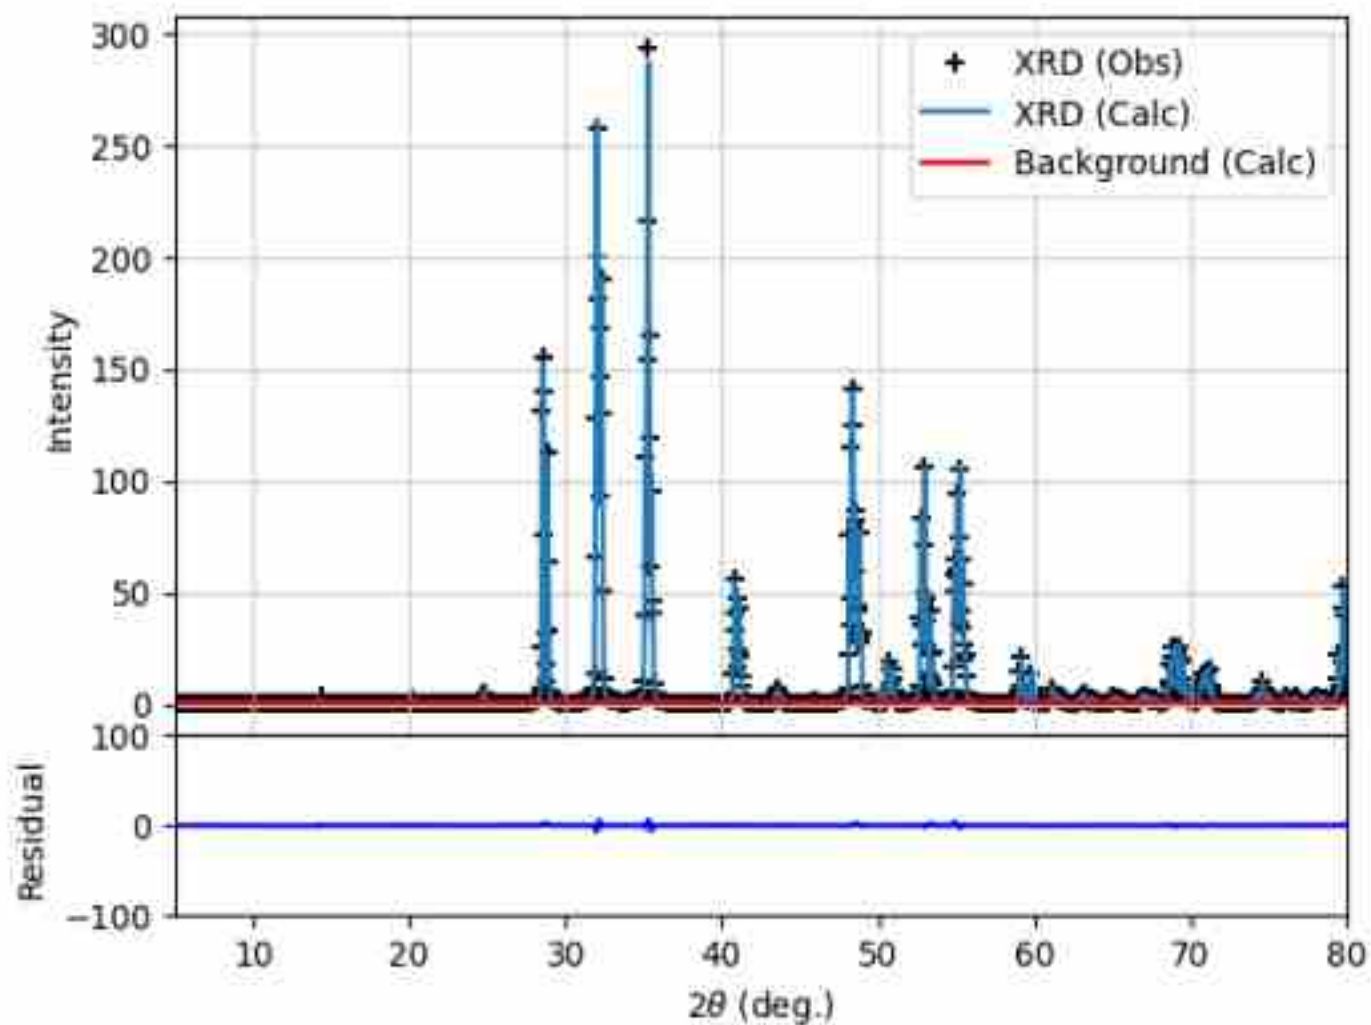

| RMSE before RR | Rwp     | RMSE after RR |
|----------------|---------|---------------|
| 0.021          | 3.28897 | 0.02081       |

# Mn<sub>2</sub>Cu<sub>4</sub>Si<sub>2</sub>S<sub>8</sub>

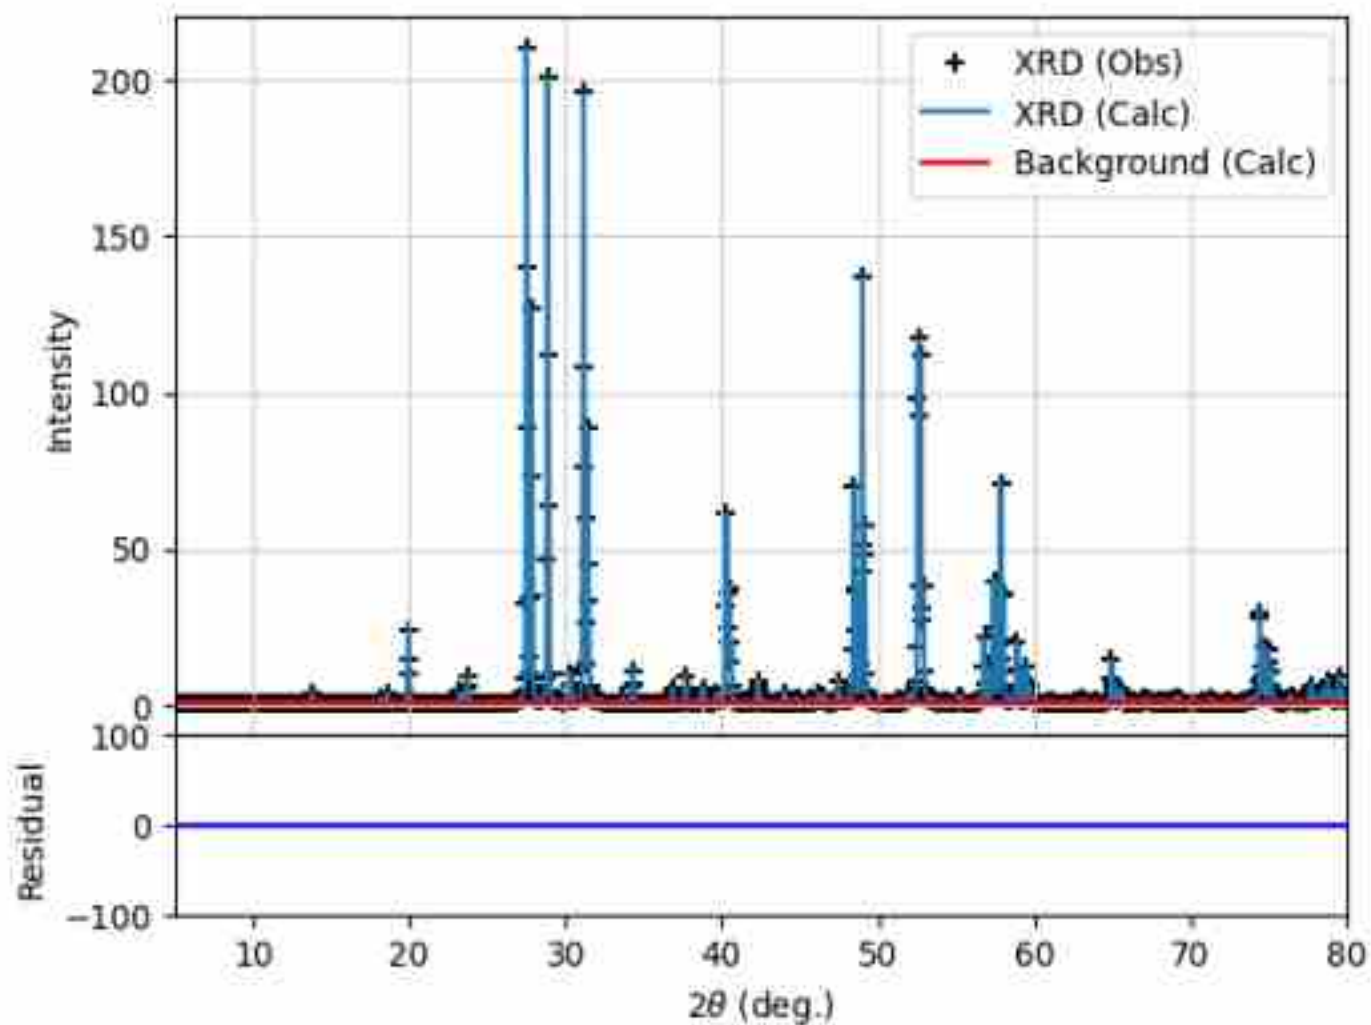

| RMSE before RR | Rwp     | RMSE after RR |
|----------------|---------|---------------|
| 0.021          | 0.00341 | 0.00042       |

# Mn<sub>2</sub>V<sub>2</sub>As<sub>4</sub>

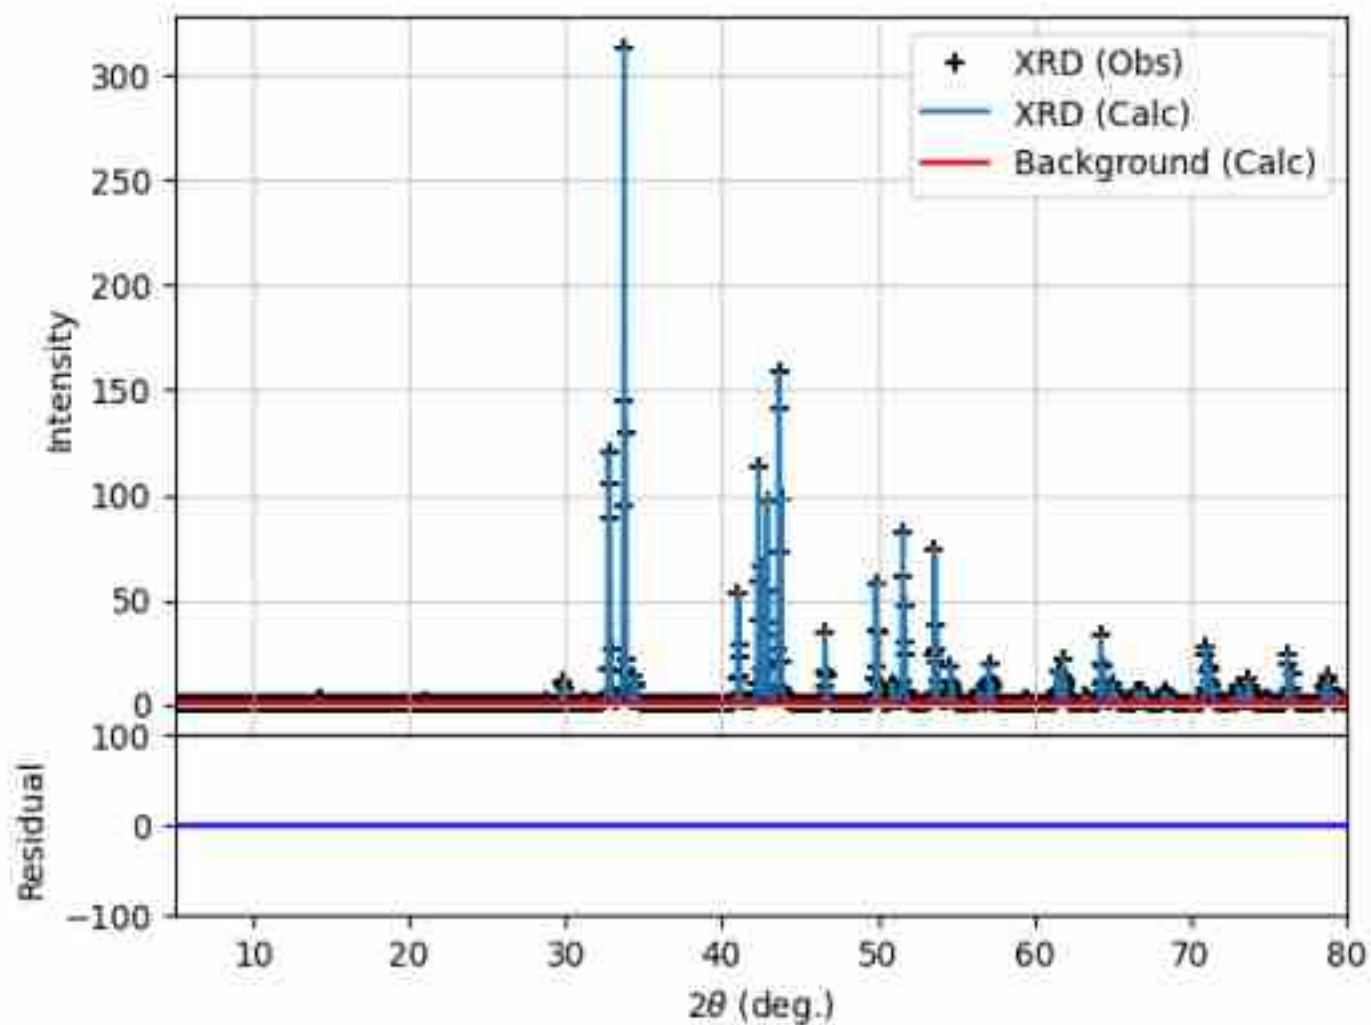

| RMSE before RR | Rwp     | RMSE after RR |
|----------------|---------|---------------|
| 0.021          | 0.00347 | 0.00026       |

# Mn<sub>3</sub>Ga<sub>4</sub>Ni<sub>9</sub>

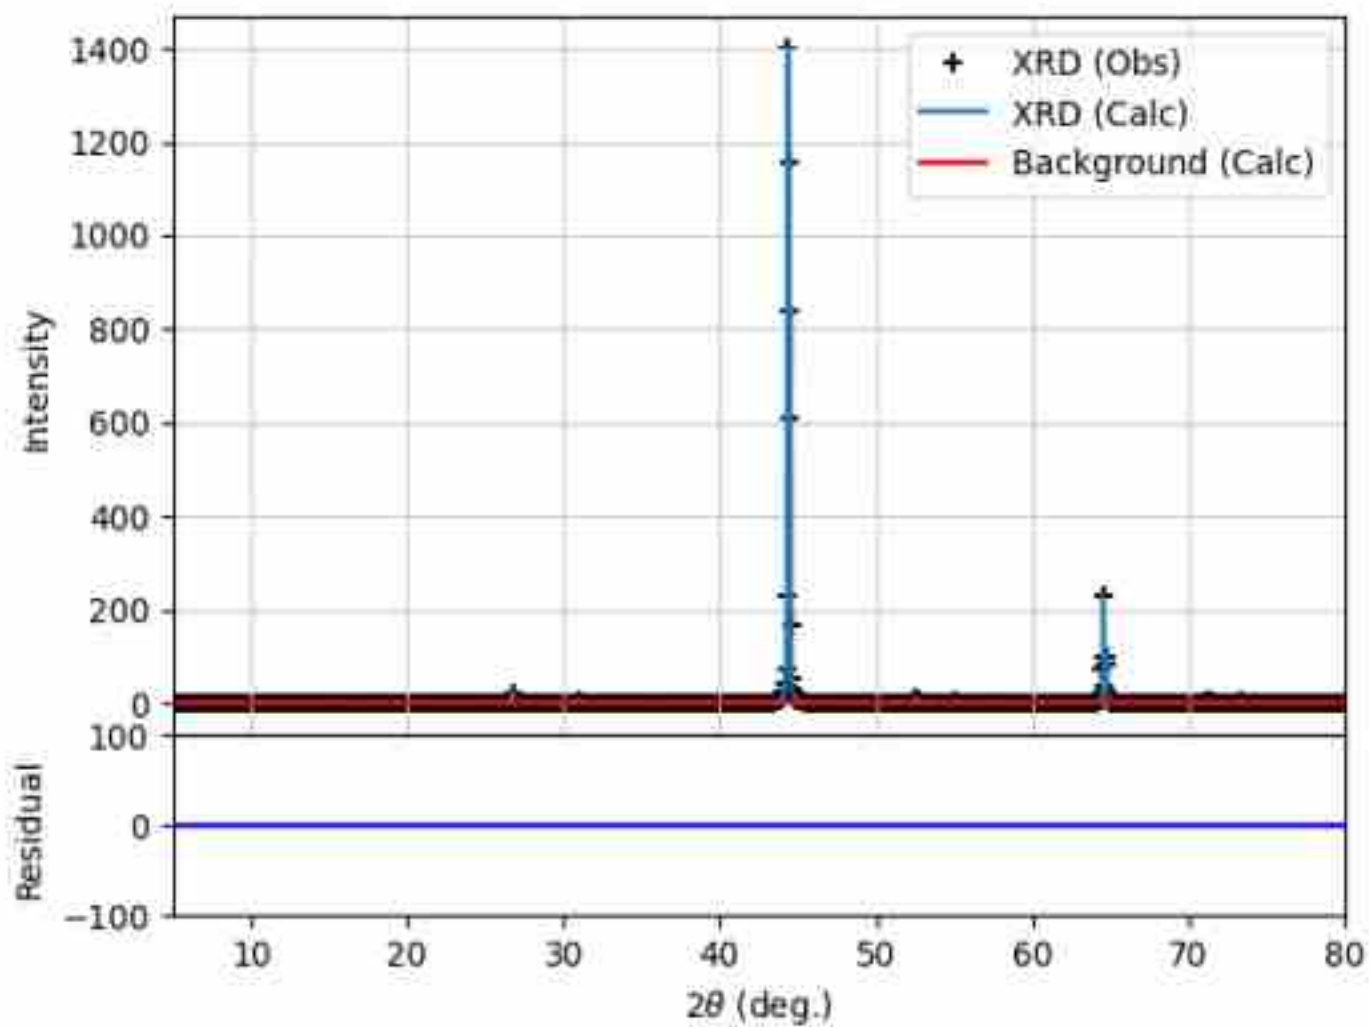

| RMSE before RR | Rwp     | RMSE after RR |
|----------------|---------|---------------|
| 0.021          | 0.00671 | 0.00057       |

# Mn<sub>4</sub>Ni<sub>2</sub>O<sub>8</sub>

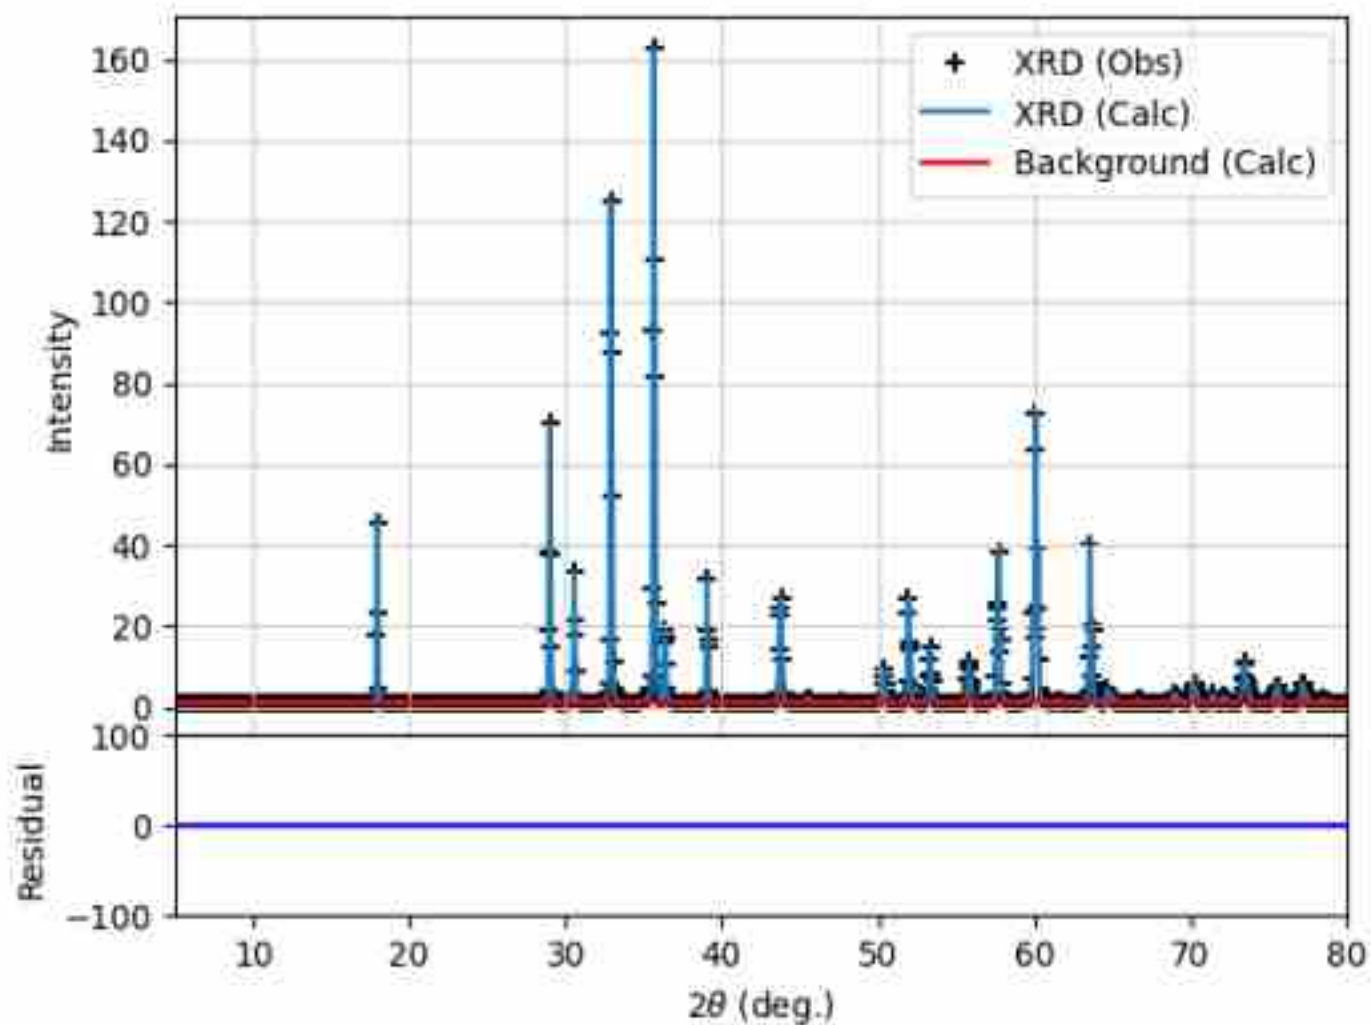

| RMSE before RR | Rwp     | RMSE after RR |
|----------------|---------|---------------|
| 0.021          | 0.00236 | 0.00075       |

# Mn6O11F1

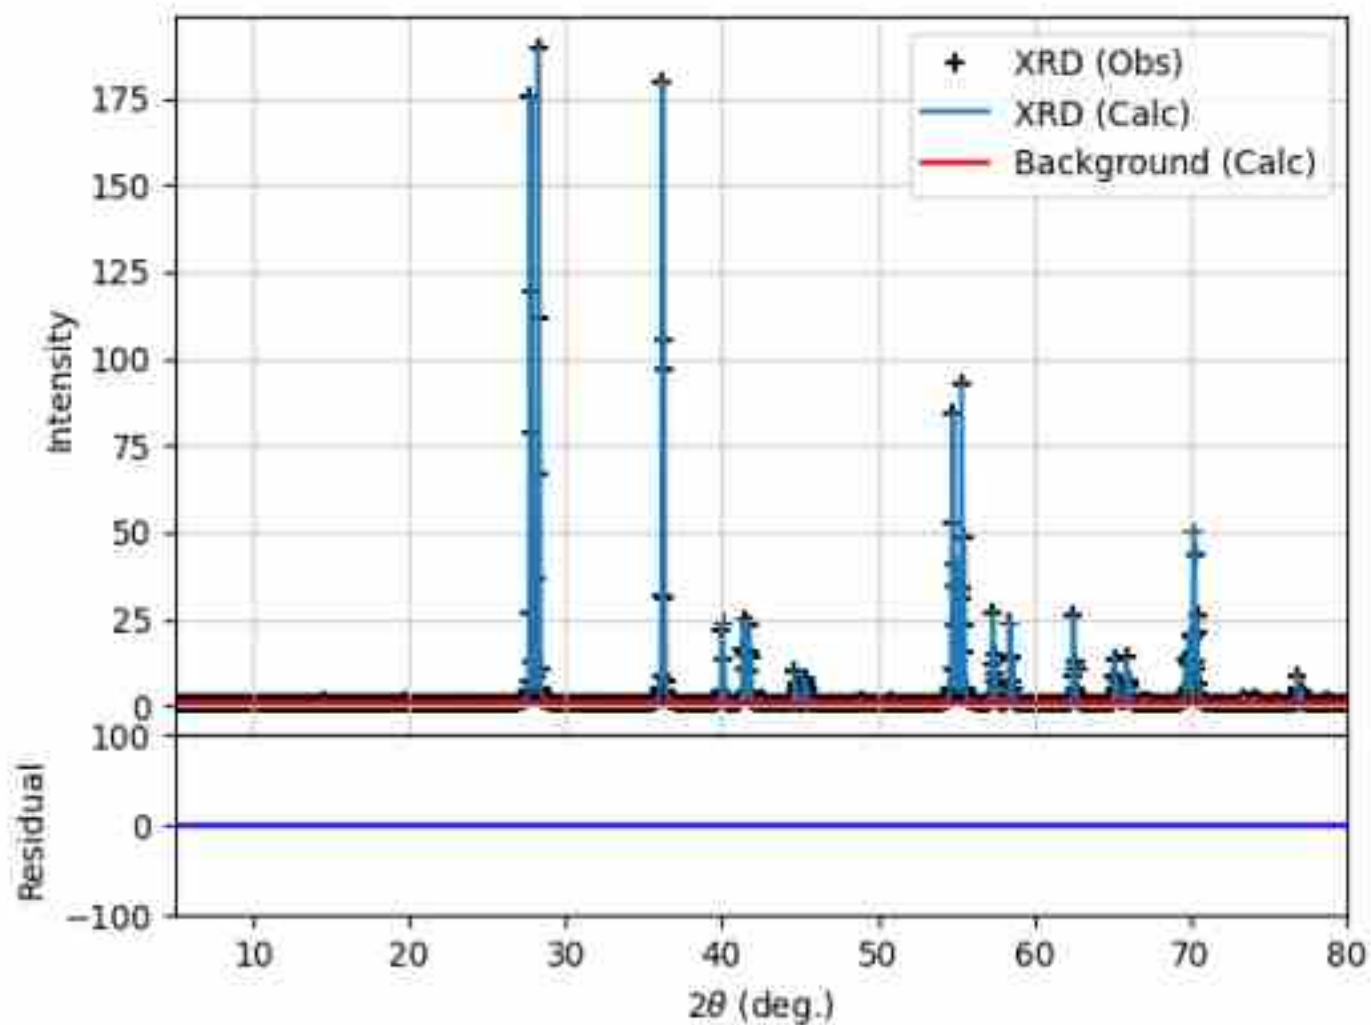

| RMSE before RR | Rwp     | RMSE after RR |
|----------------|---------|---------------|
| 0.021          | 0.00265 | 0.00081       |

# Mn6Re2O12

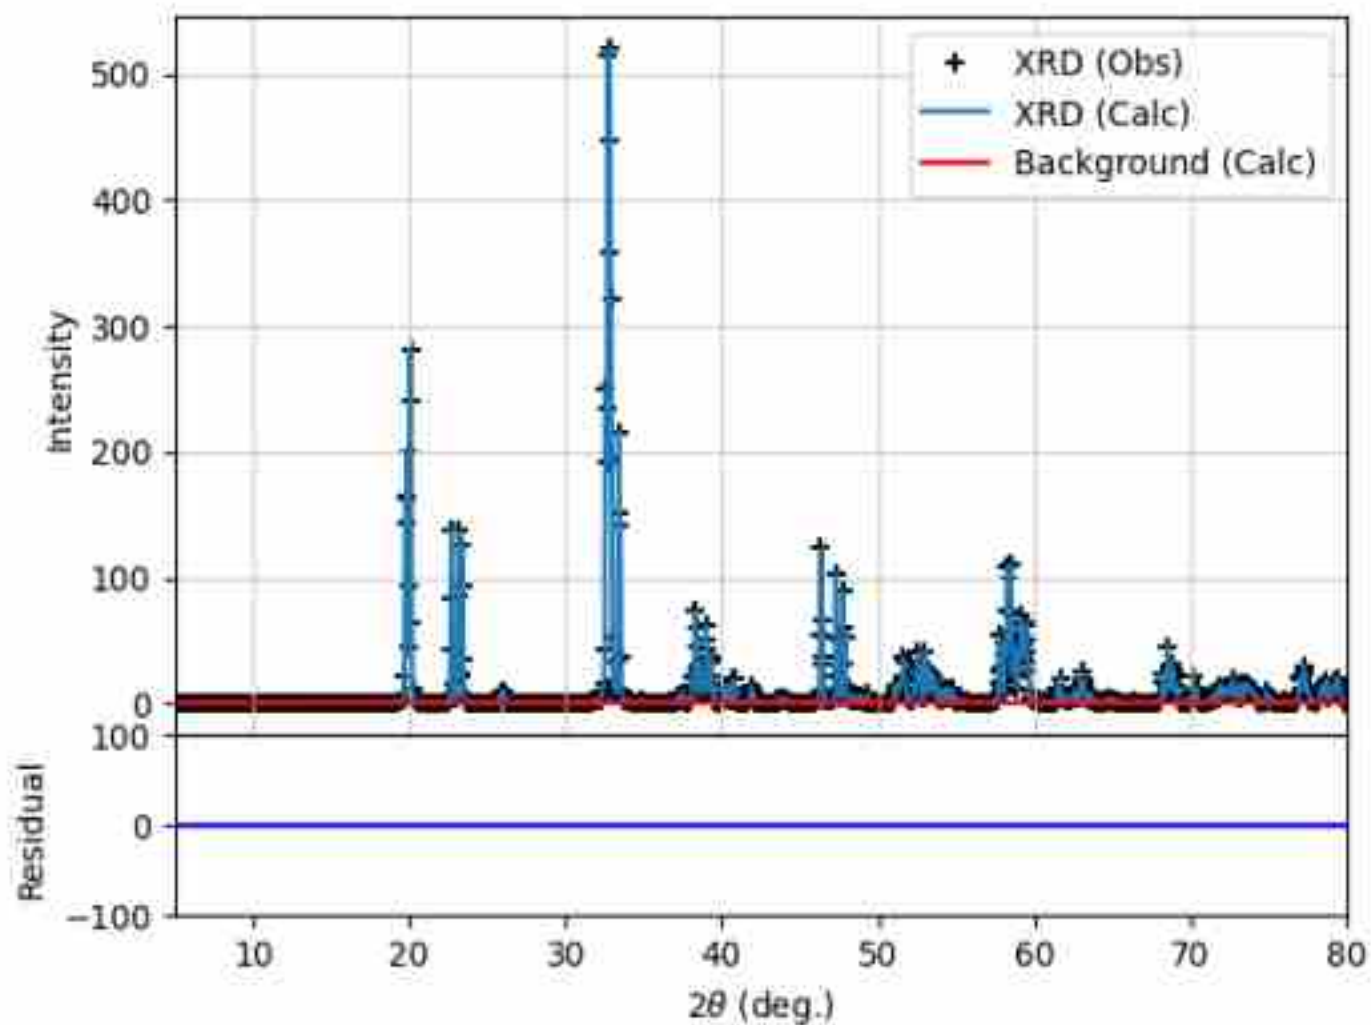

| RMSE before RR | Rwp     | RMSE after RR |
|----------------|---------|---------------|
| 0.021          | 0.00075 | 0.0003        |



# Mn8N4

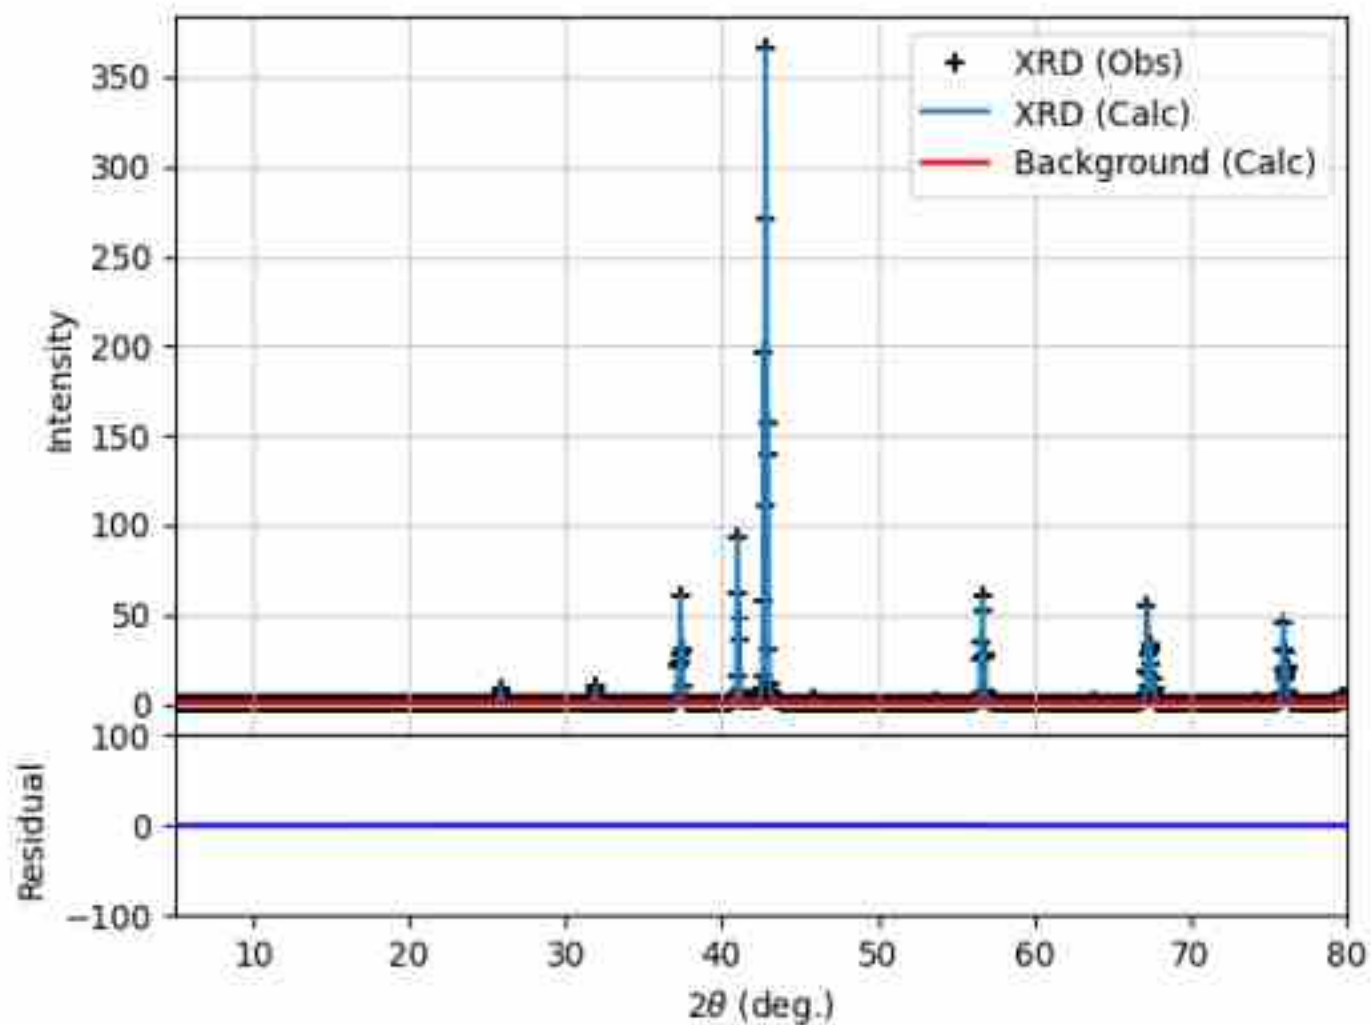

| RMSE before RR | Rwp     | RMSE after RR |
|----------------|---------|---------------|
| 0.021          | 0.80376 | 0.02586       |

# Na<sub>2</sub>I<sub>2</sub>O<sub>8</sub>

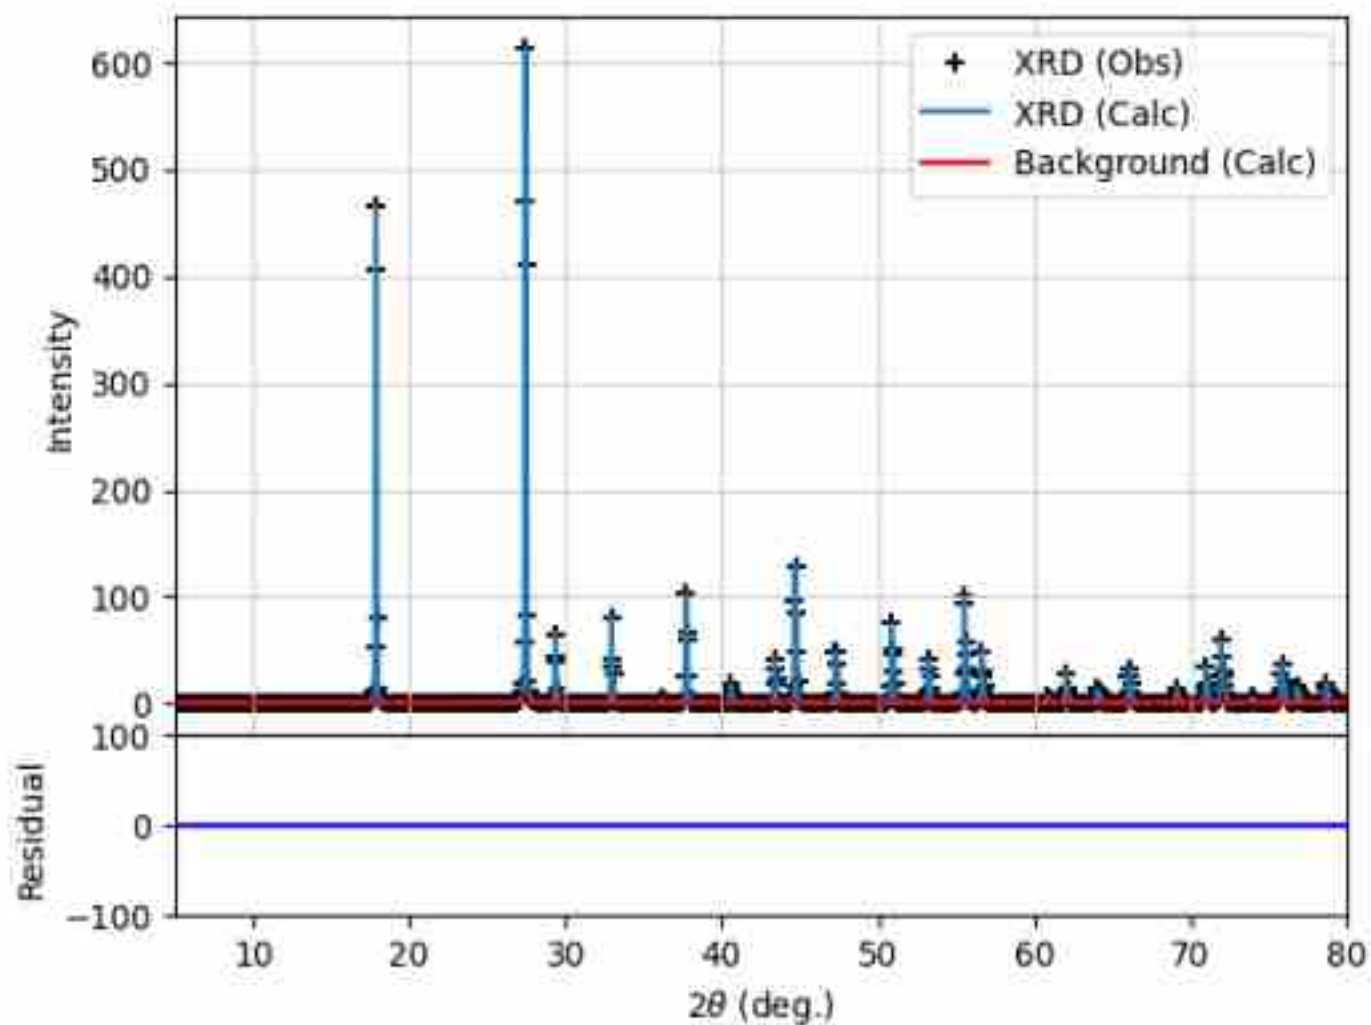

| RMSE before RR | Rwp     | RMSE after RR |
|----------------|---------|---------------|
| 0.021          | 0.00376 | 0.0016        |

# Na<sub>4</sub>Hg<sub>1</sub>P<sub>2</sub>

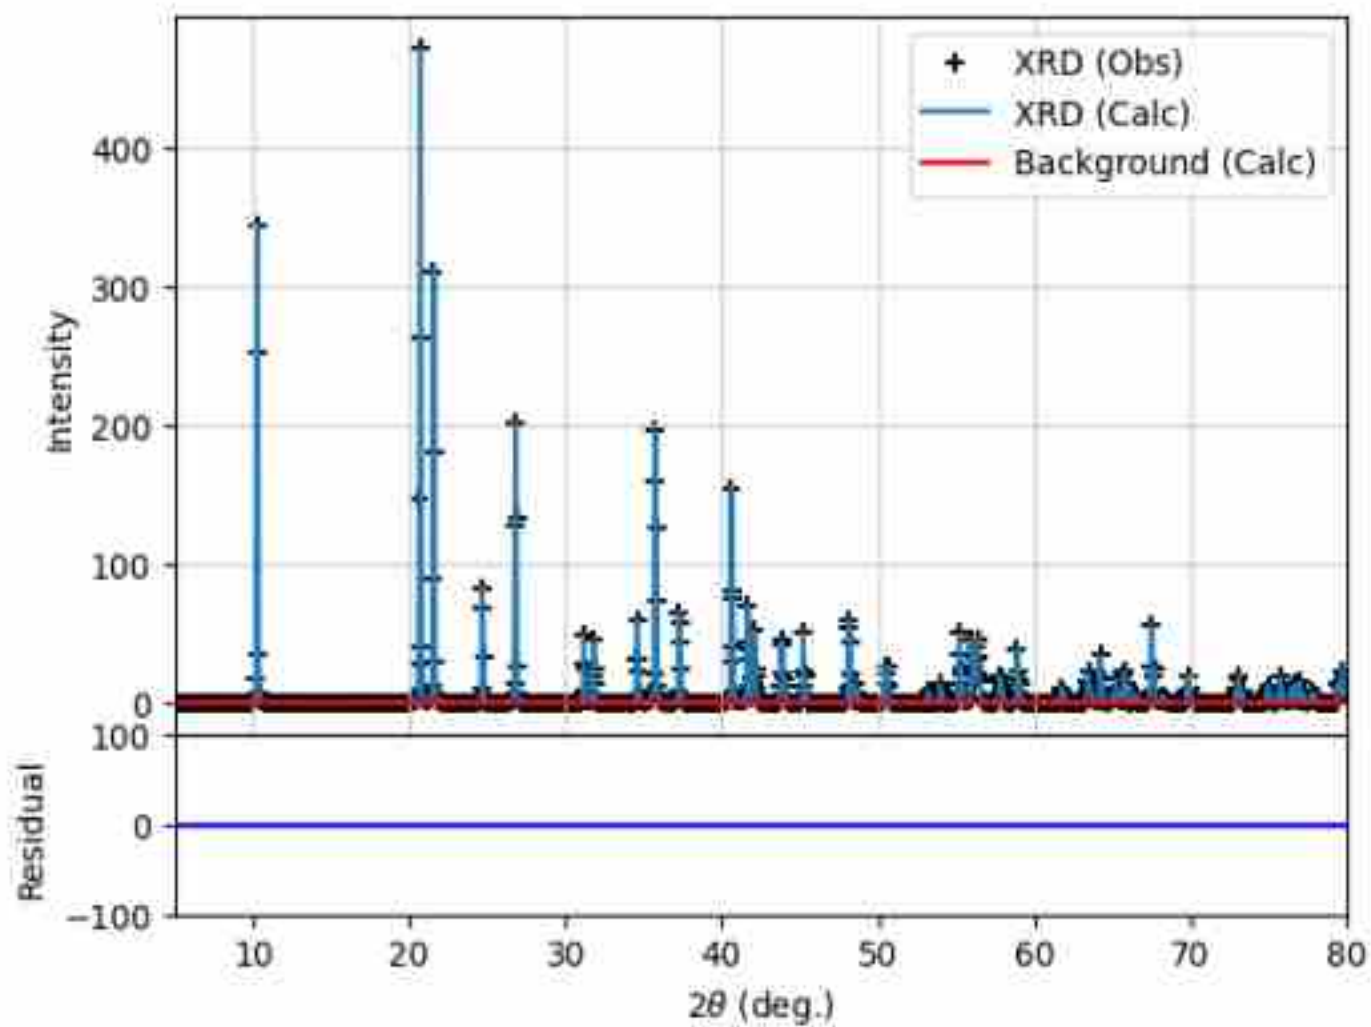

| RMSE before RR | Rwp     | RMSE after RR |
|----------------|---------|---------------|
| 0.021          | 0.00387 | 0.00121       |

# Na<sub>6</sub>Cu<sub>2</sub>O<sub>4</sub>

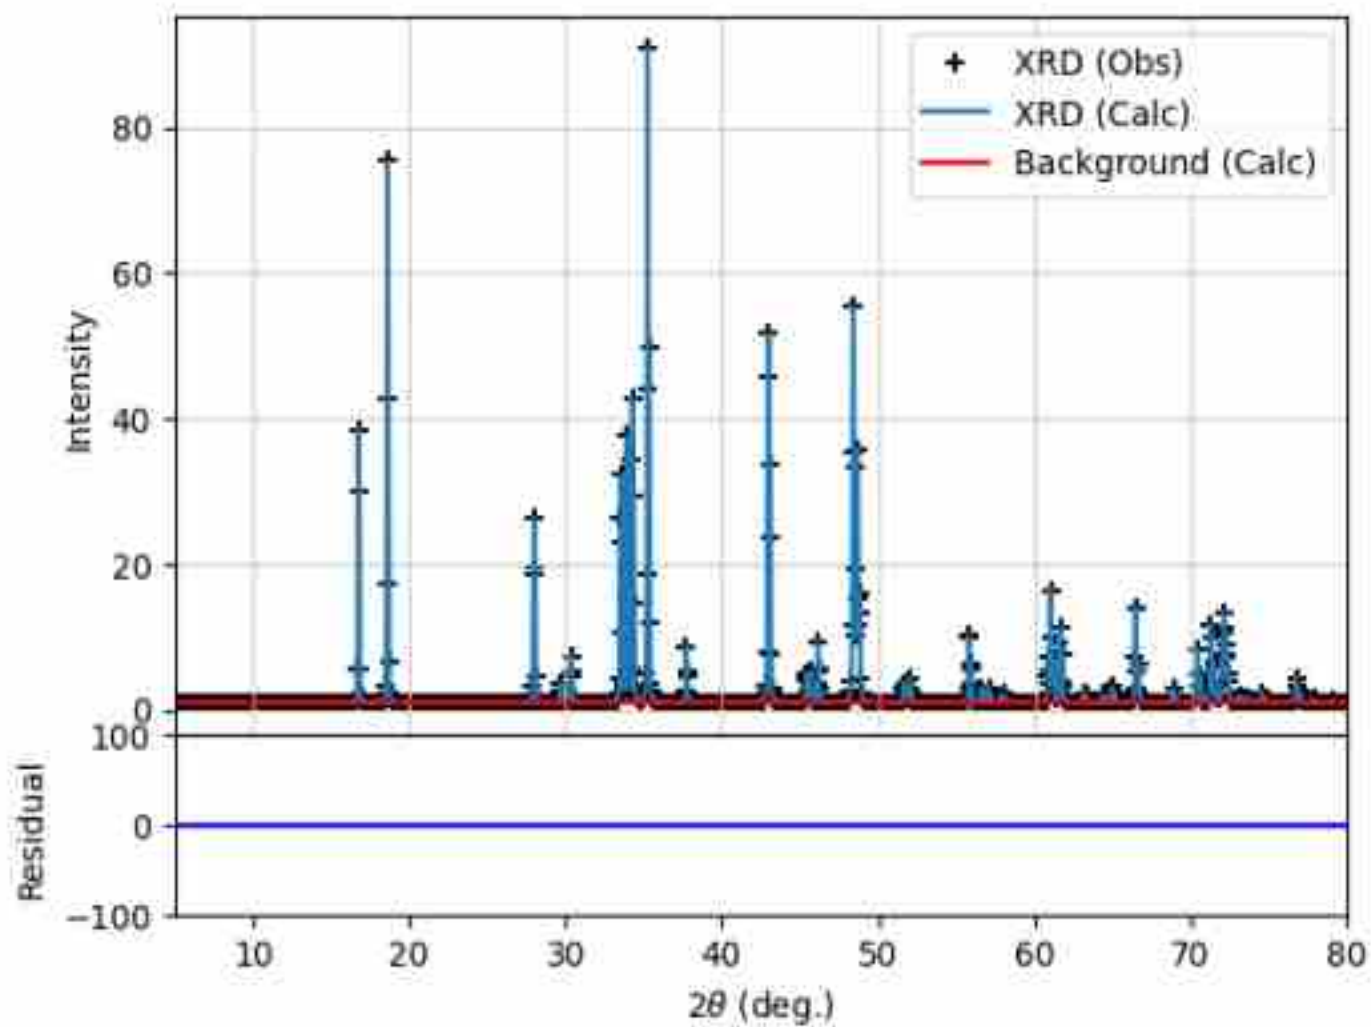

| RMSE before RR | Rwp     | RMSE after RR |
|----------------|---------|---------------|
| 0.021          | 0.00271 | 0.00055       |

# Nb<sub>1</sub>Hg<sub>3</sub>F<sub>6</sub>

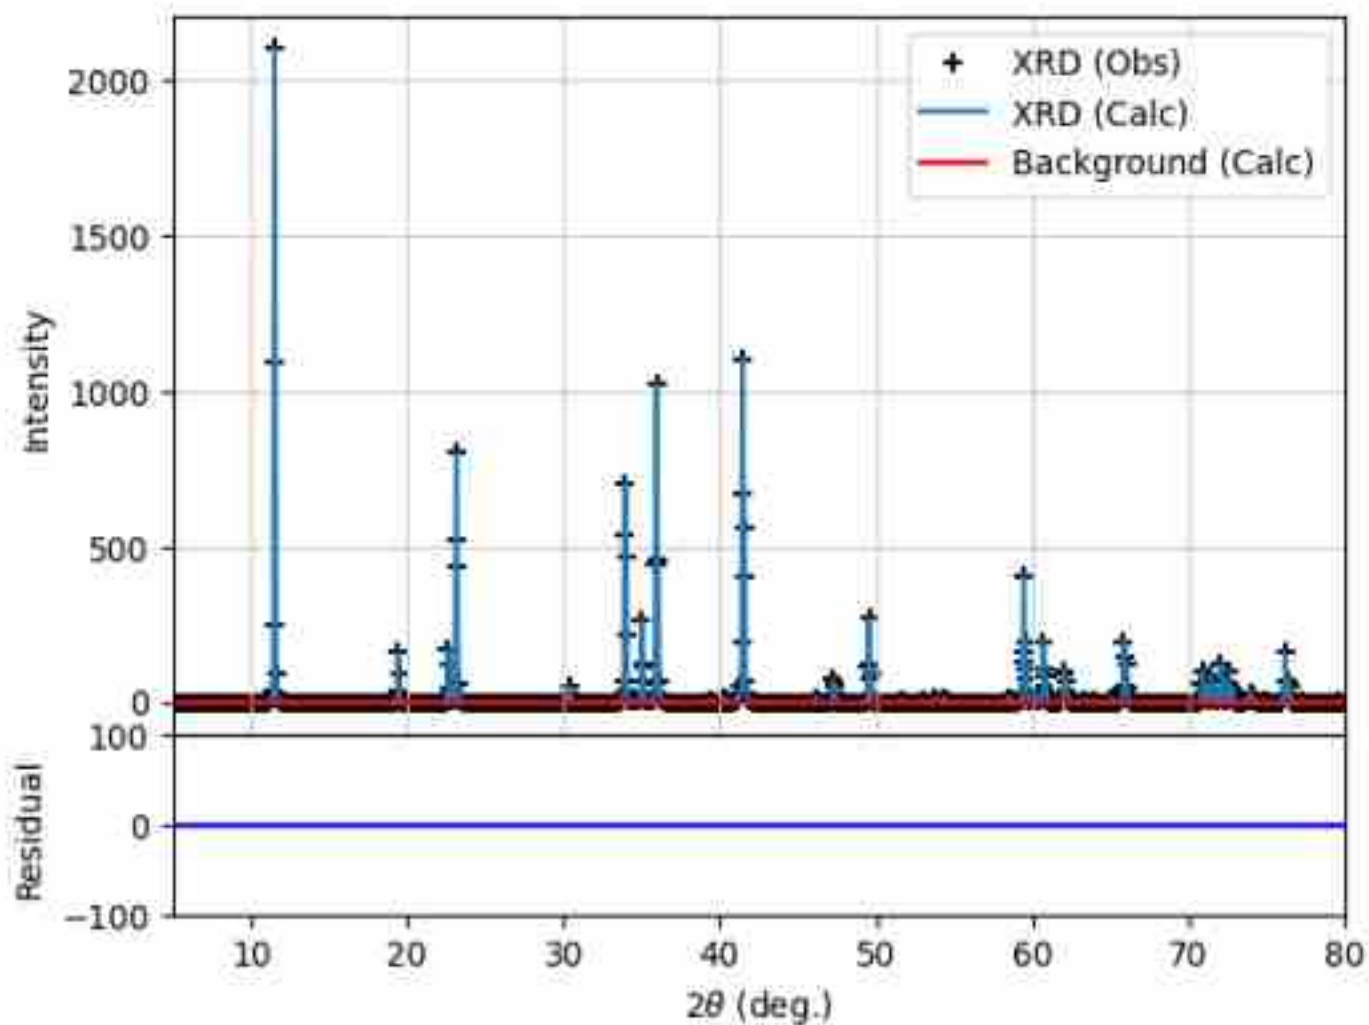

| RMSE before RR | Rwp     | RMSE after RR |
|----------------|---------|---------------|
| 0.021          | 0.00295 | 0.00124       |

# Nb10Ge6

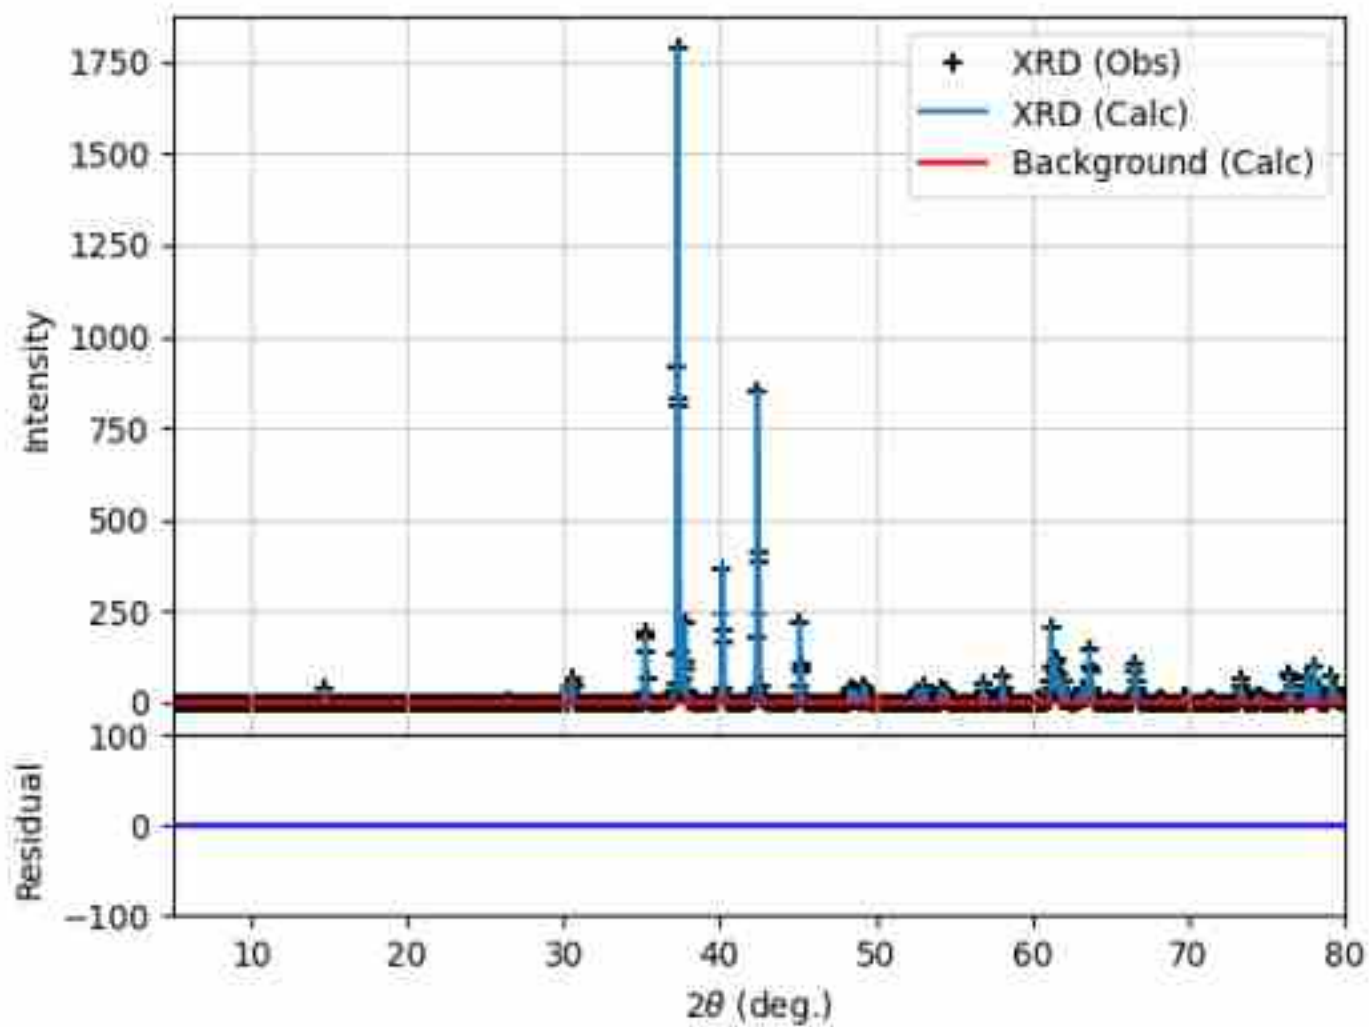

| RMSE before RR | Rwp     | RMSE after RR |
|----------------|---------|---------------|
| 0.021          | 0.00519 | 0.00055       |

# Nb<sub>12</sub>In<sub>1</sub>Sn<sub>3</sub>

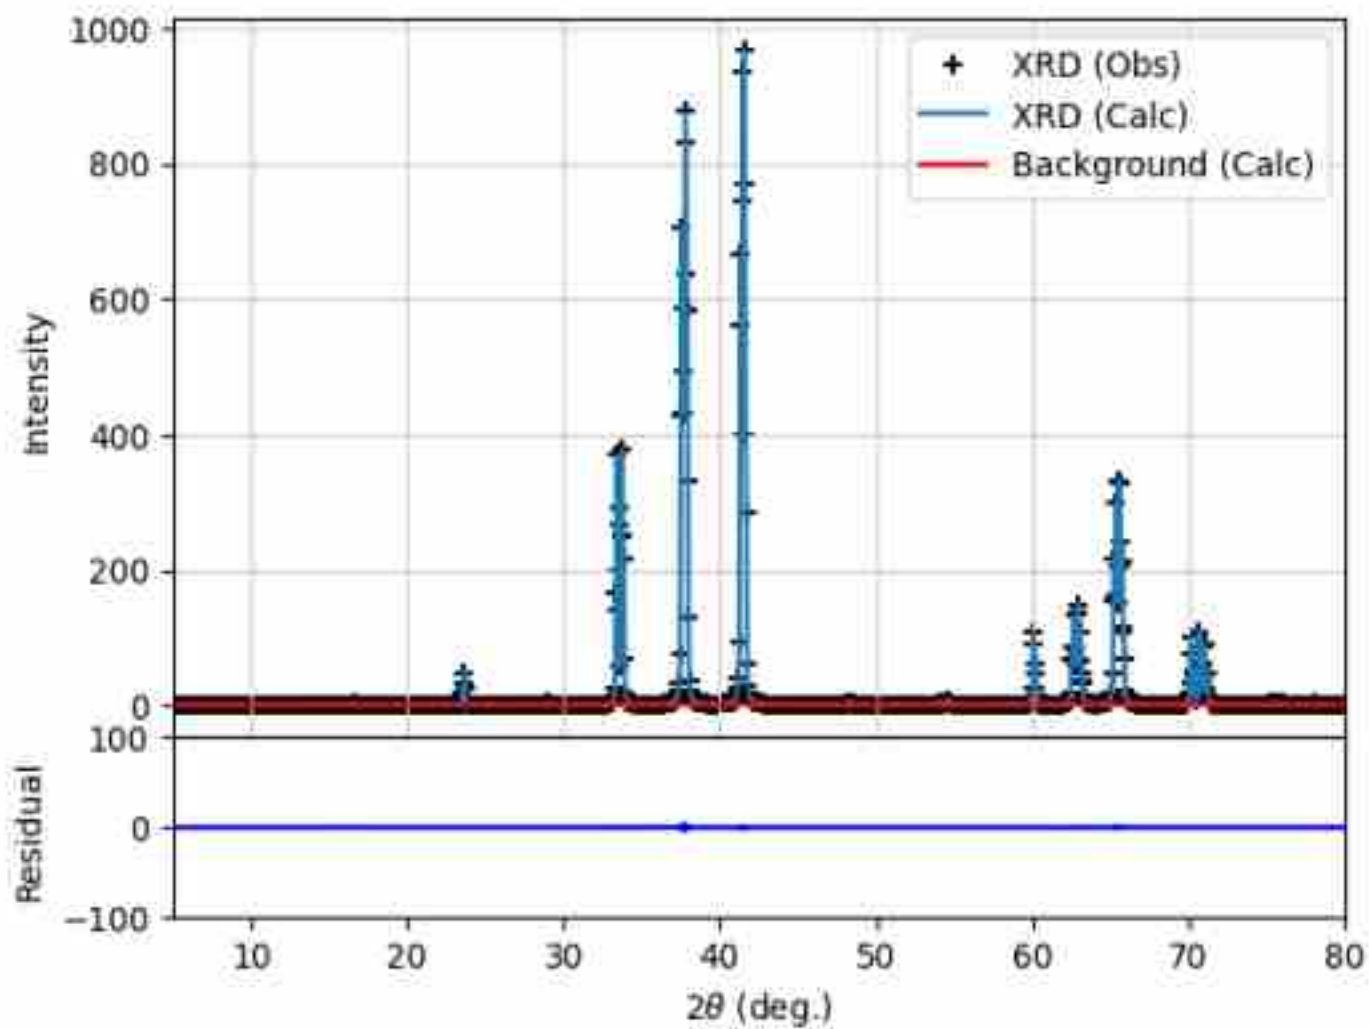

| RMSE before RR | Rwp     | RMSE after RR |
|----------------|---------|---------------|
| 0.021          | 0.49635 | 0.01813       |

# Nd<sub>2</sub>Co<sub>1</sub>Sn<sub>4</sub>

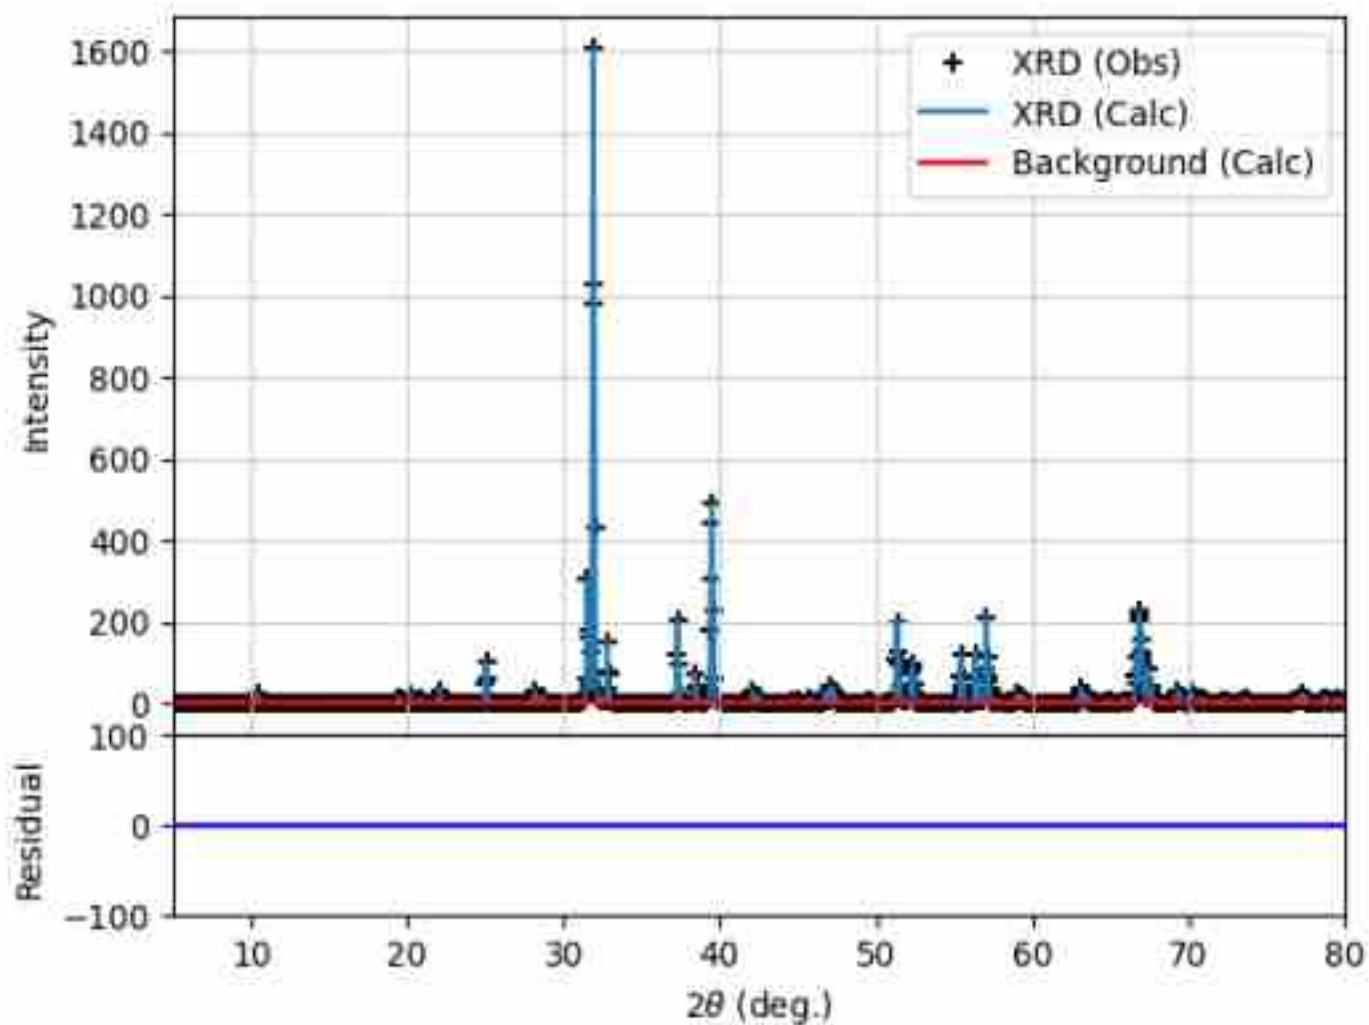

| RMSE before RR | Rwp     | RMSE after RR |
|----------------|---------|---------------|
| 0.021          | 0.00351 | 0.00022       |



# Nd<sub>2</sub>Lu<sub>2</sub>Se<sub>6</sub>

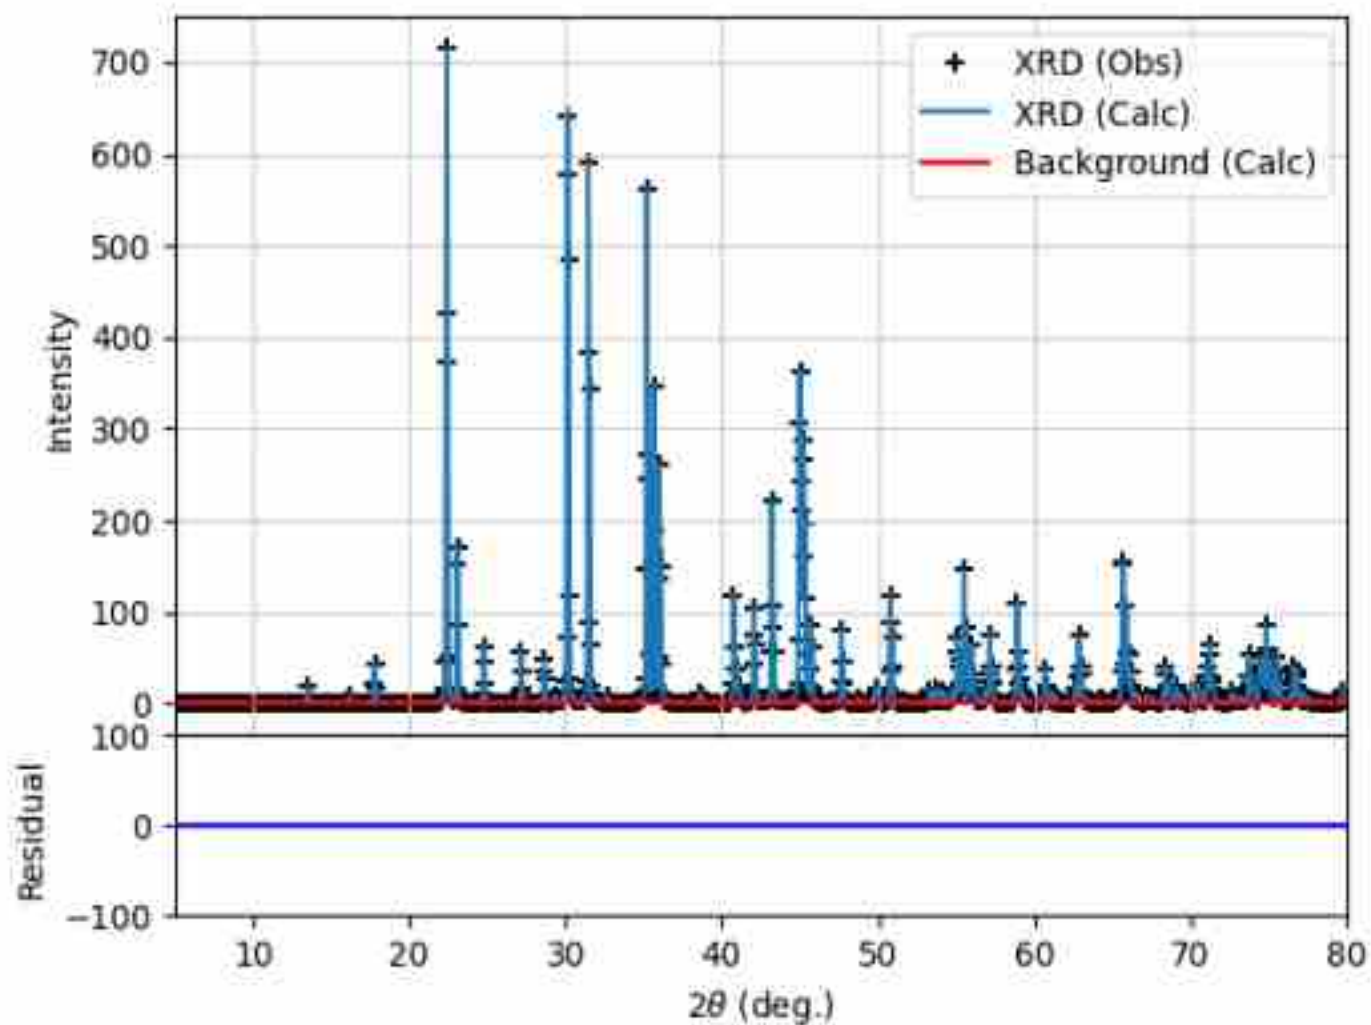

| RMSE before RR | Rwp     | RMSE after RR |
|----------------|---------|---------------|
| 0.021          | 0.00379 | 0.00032       |

# Nd<sub>3</sub>Ga<sub>6</sub>Co<sub>9</sub>

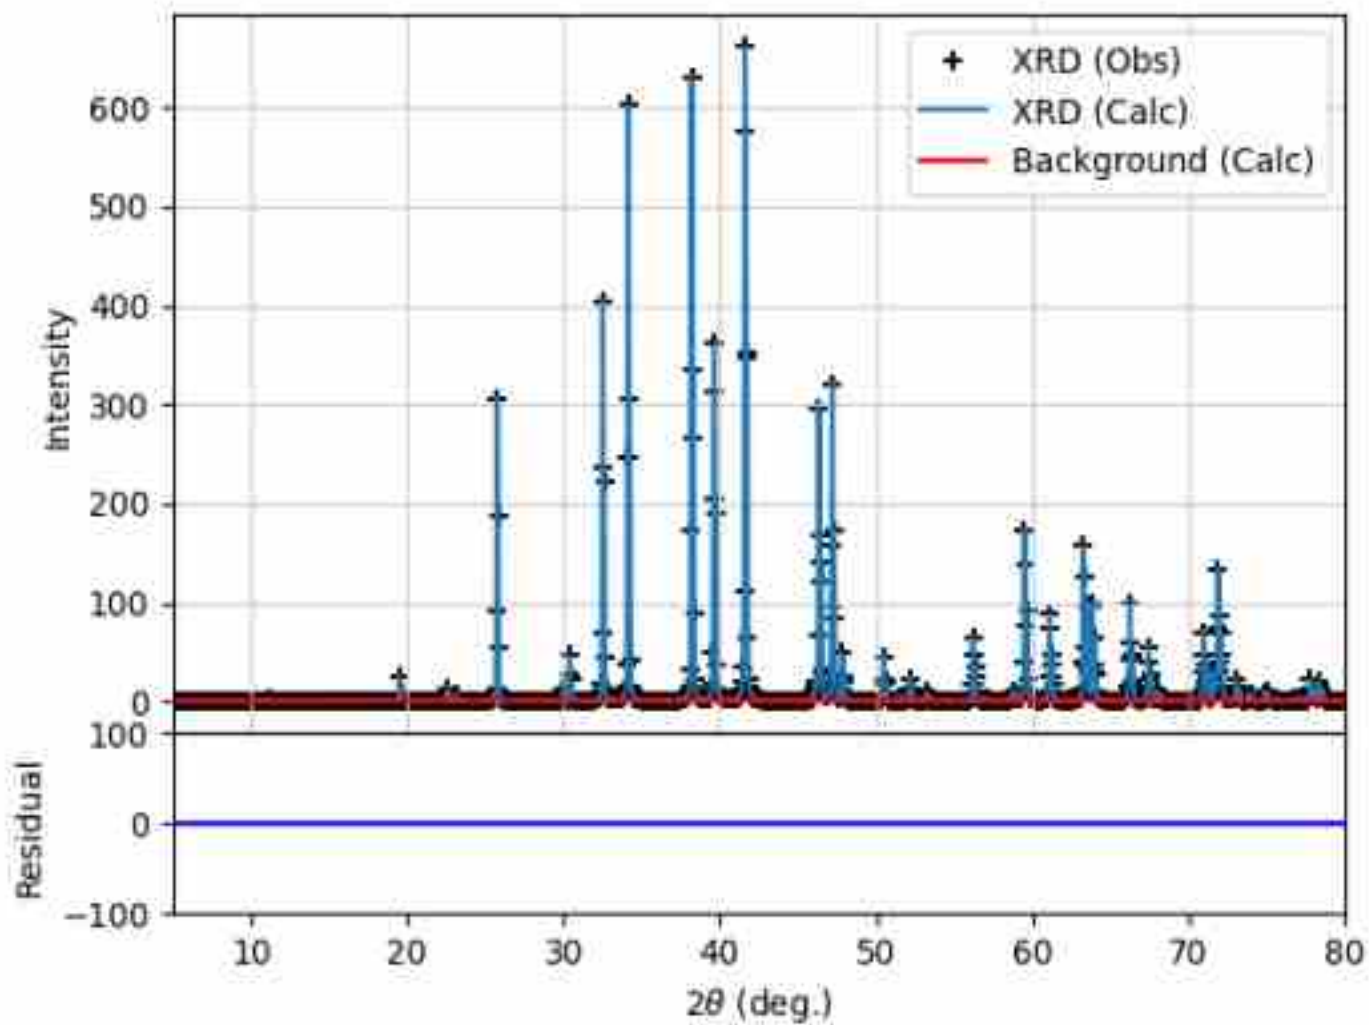

| RMSE before RR | Rwp     | RMSE after RR |
|----------------|---------|---------------|
| 0.021          | 0.00338 | 0.00068       |

# Nd<sub>4</sub>Al<sub>4</sub>Pd<sub>8</sub>

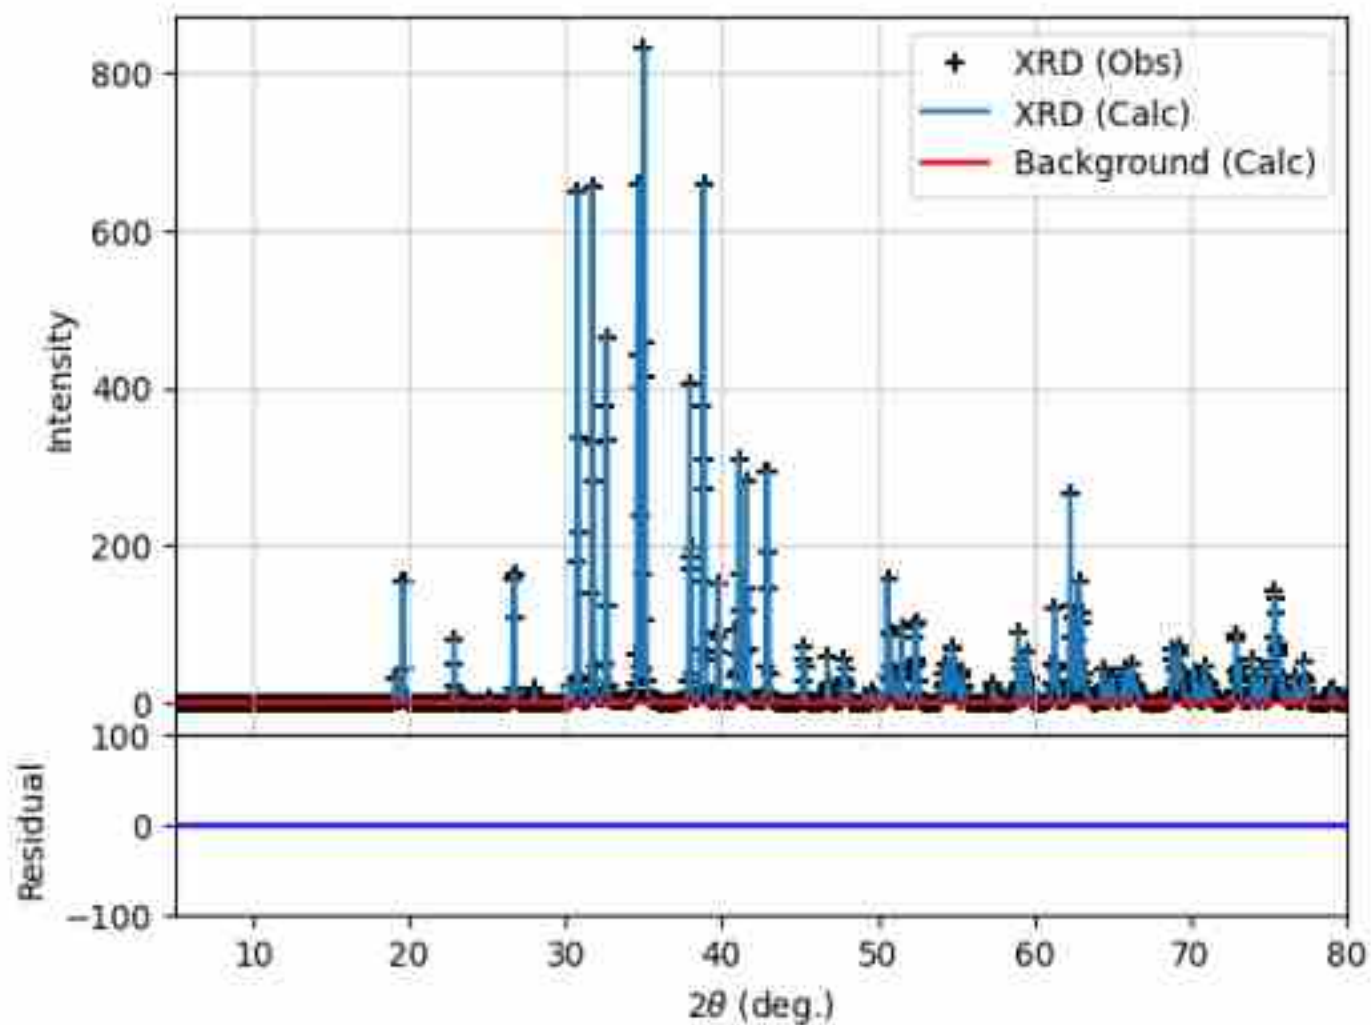

| RMSE before RR | Rwp     | RMSE after RR |
|----------------|---------|---------------|
| 0.021          | 0.00427 | 0.0005        |

# Nd<sub>4</sub>Ni<sub>2</sub>O<sub>8</sub>

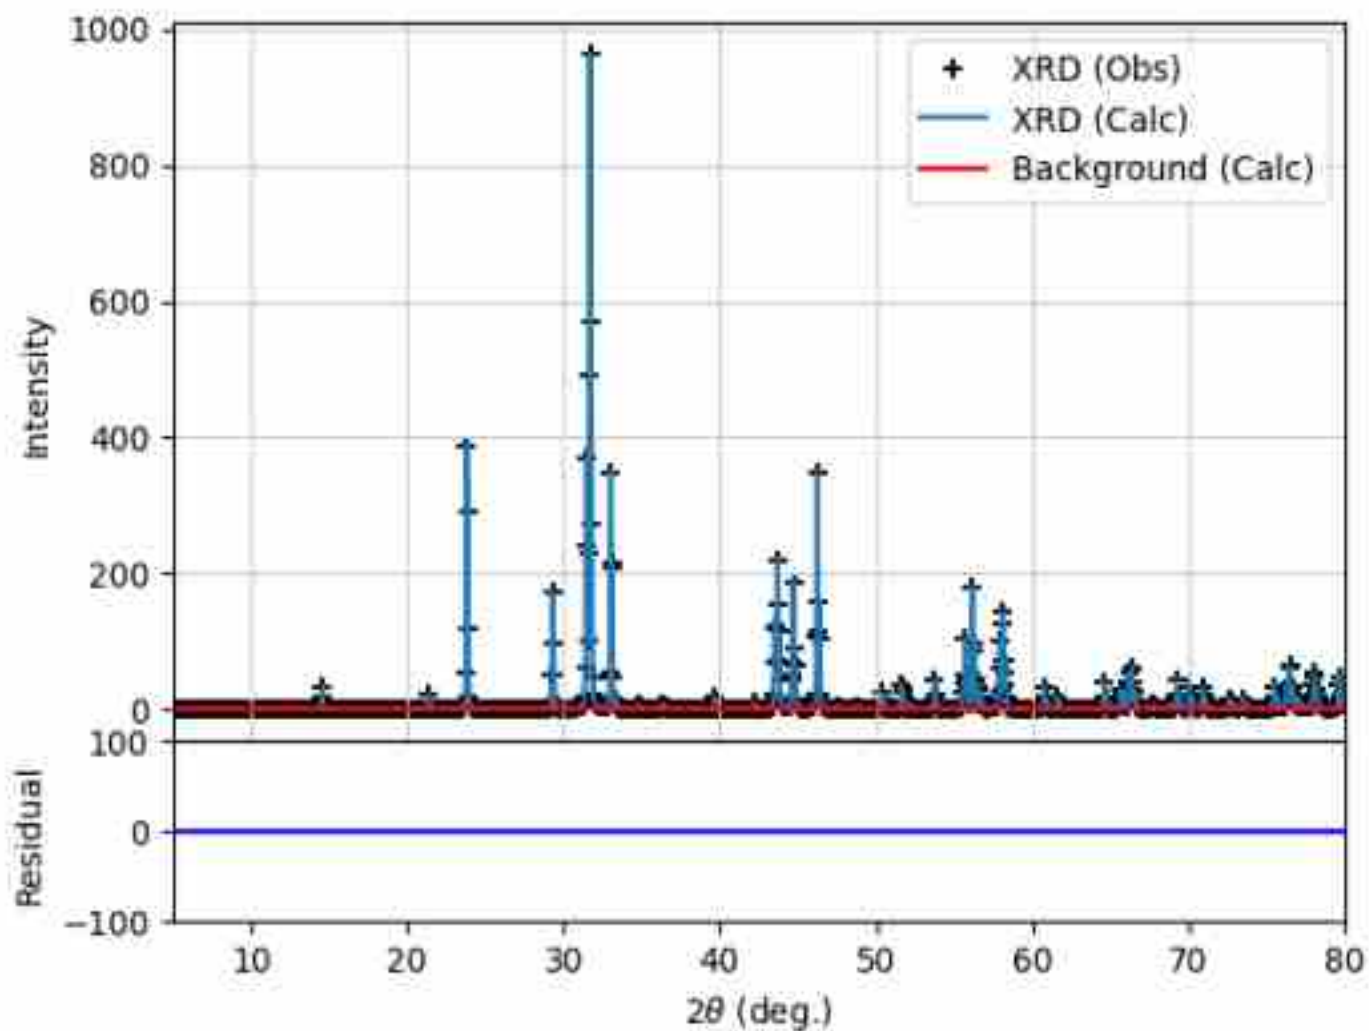

| RMSE before RR | Rwp     | RMSE after RR |
|----------------|---------|---------------|
| 0.021          | 0.00346 | 0.00156       |

# Nd4Sb4Ir4

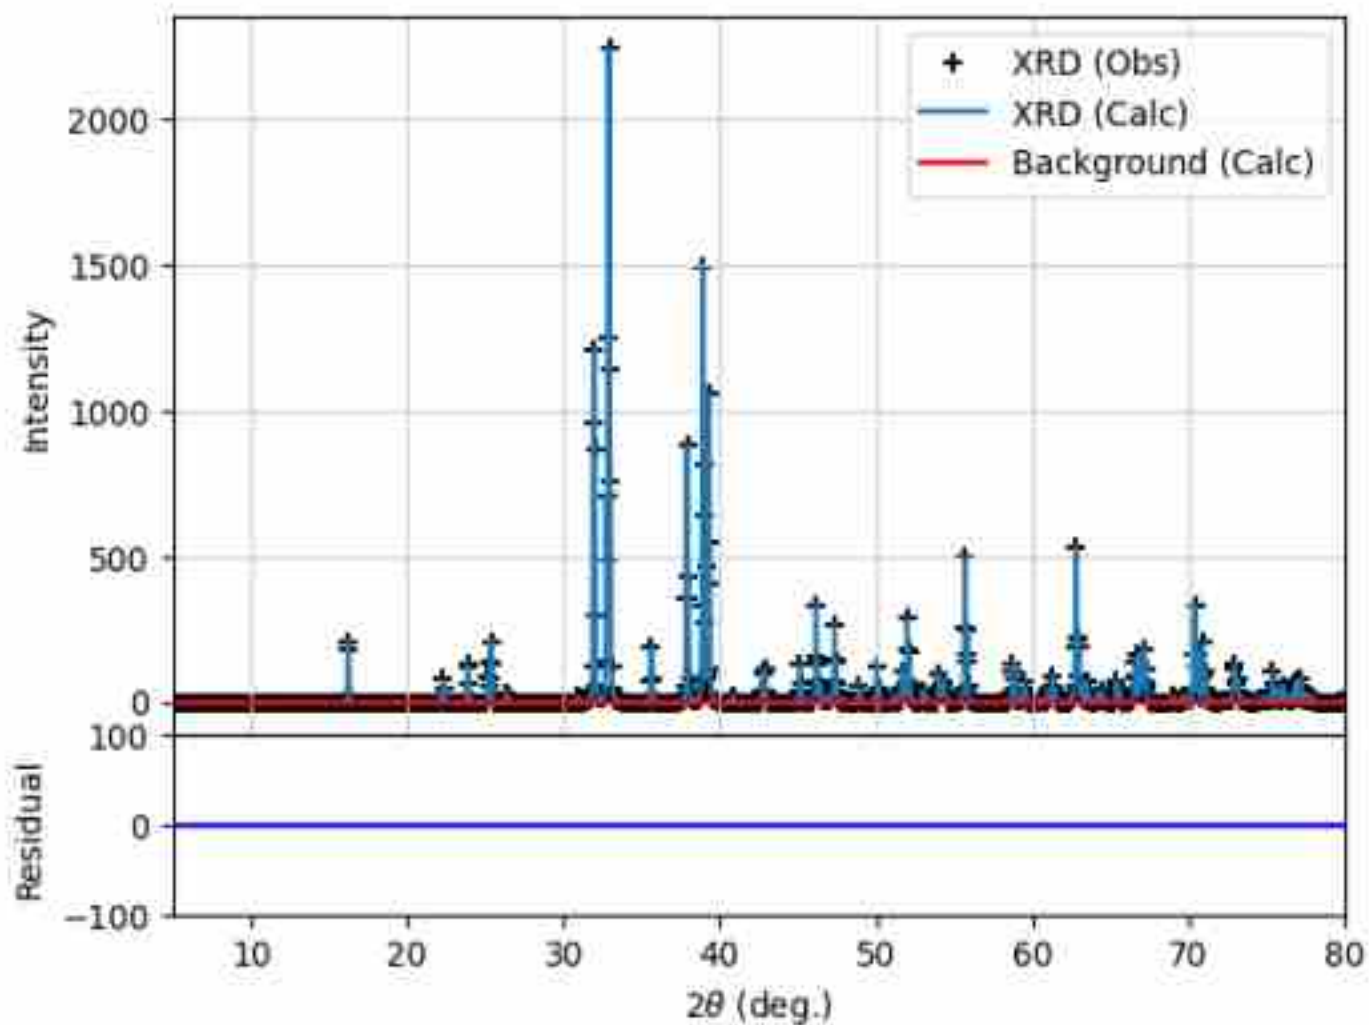

| RMSE before RR | Rwp    | RMSE after RR |
|----------------|--------|---------------|
| 0.021          | 0.0048 | 0.00037       |

# Nd10Ru4

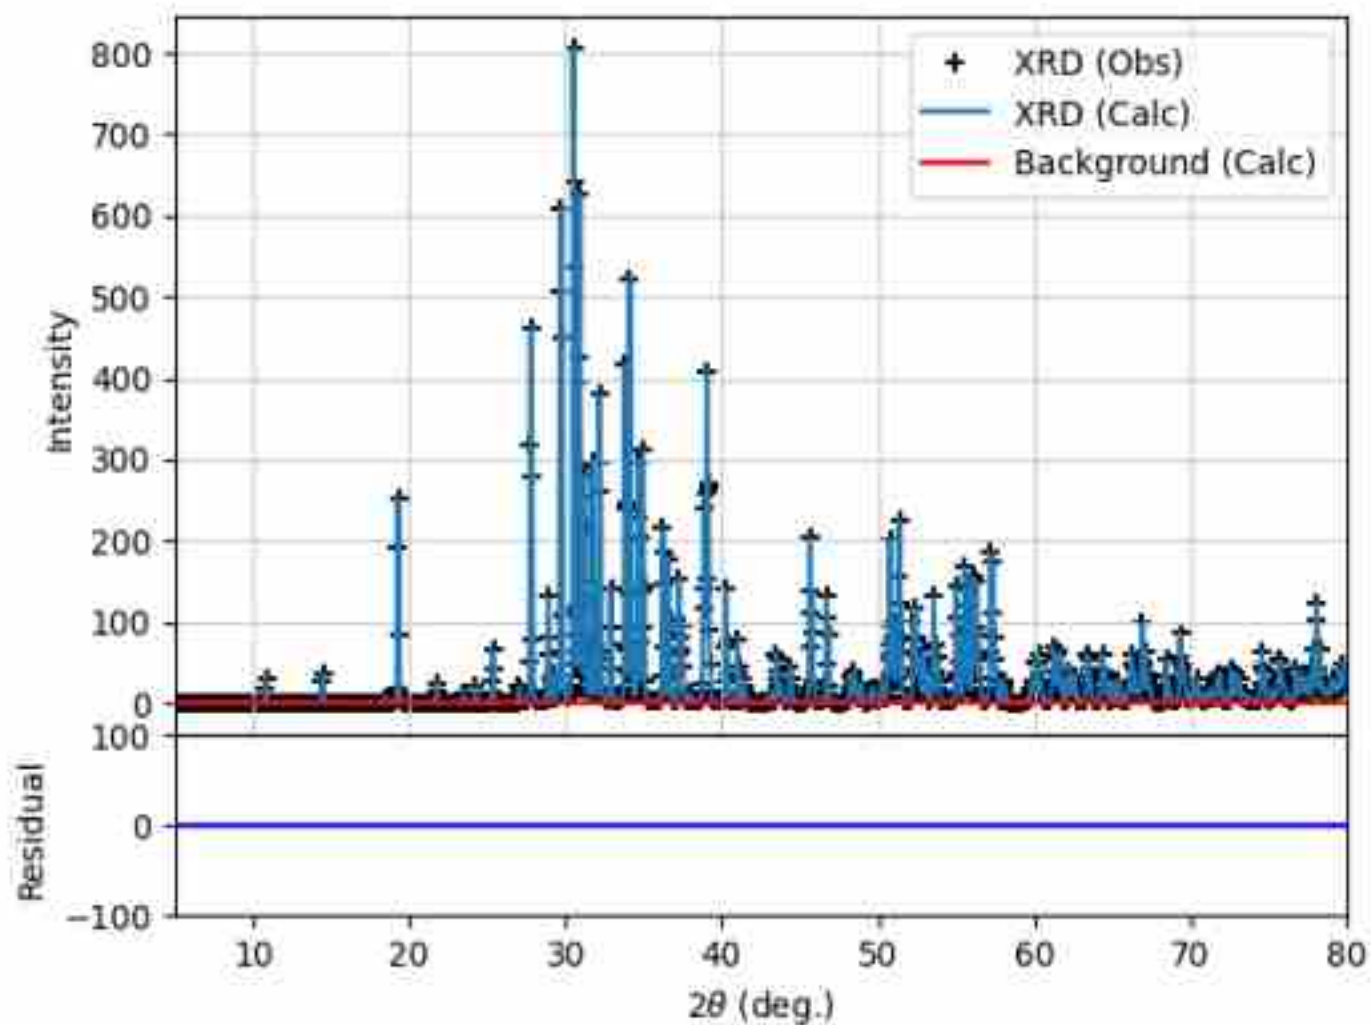

| RMSE before RR | Rwp     | RMSE after RR |
|----------------|---------|---------------|
| 0.021          | 0.00367 | 0.00022       |

# Np<sub>4</sub>Cu<sub>4</sub>Se<sub>8</sub>

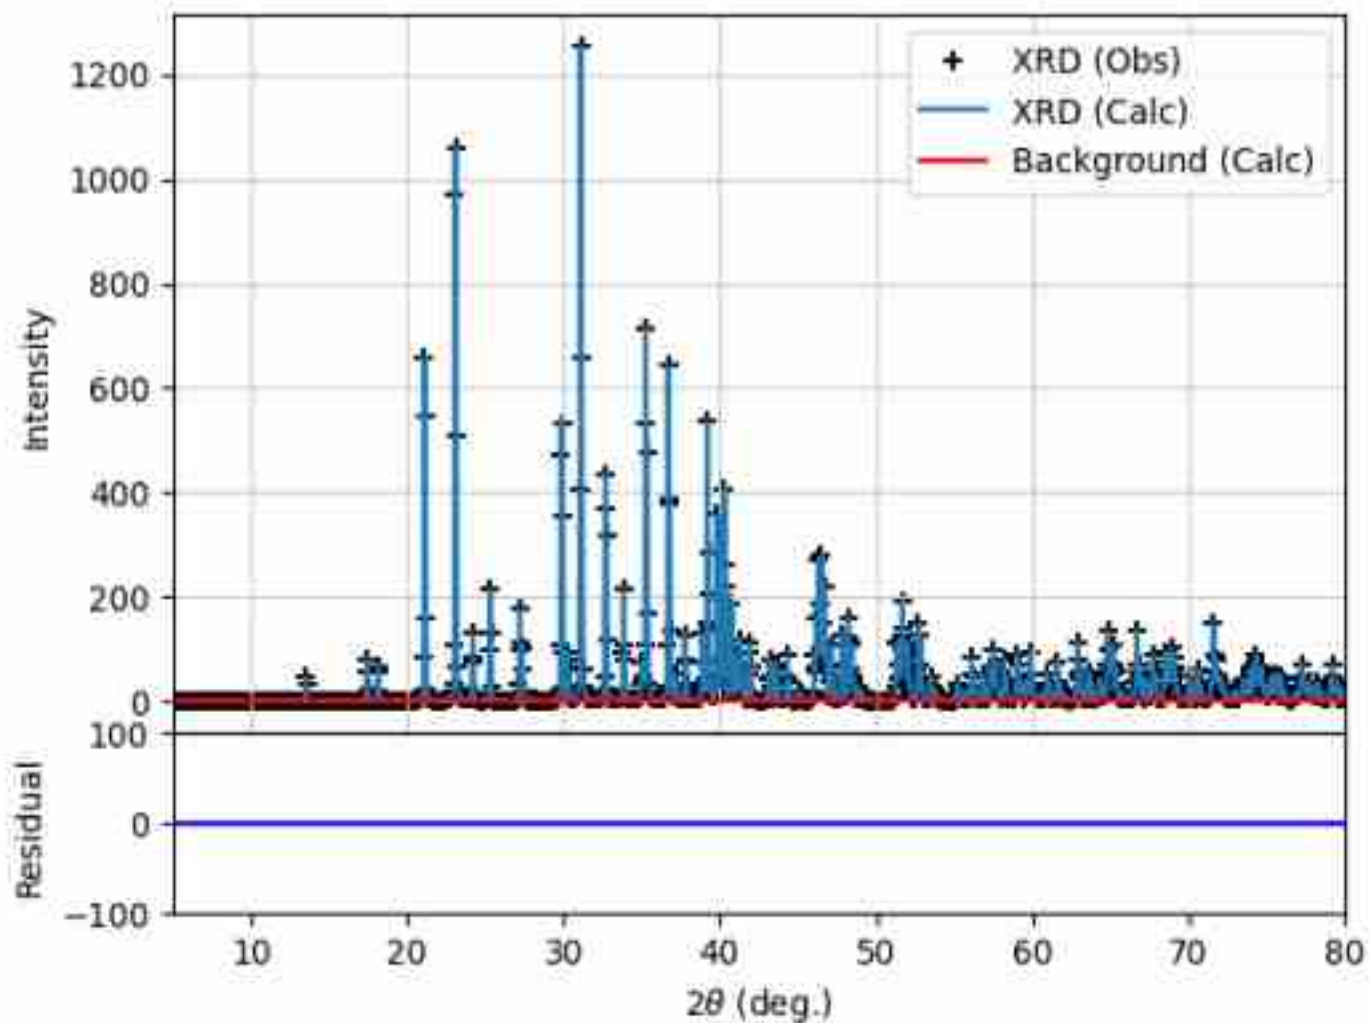

| RMSE before RR | Rwp     | RMSE after RR |
|----------------|---------|---------------|
| 0.021          | 0.00416 | 0.00053       |

# Pb2Au4

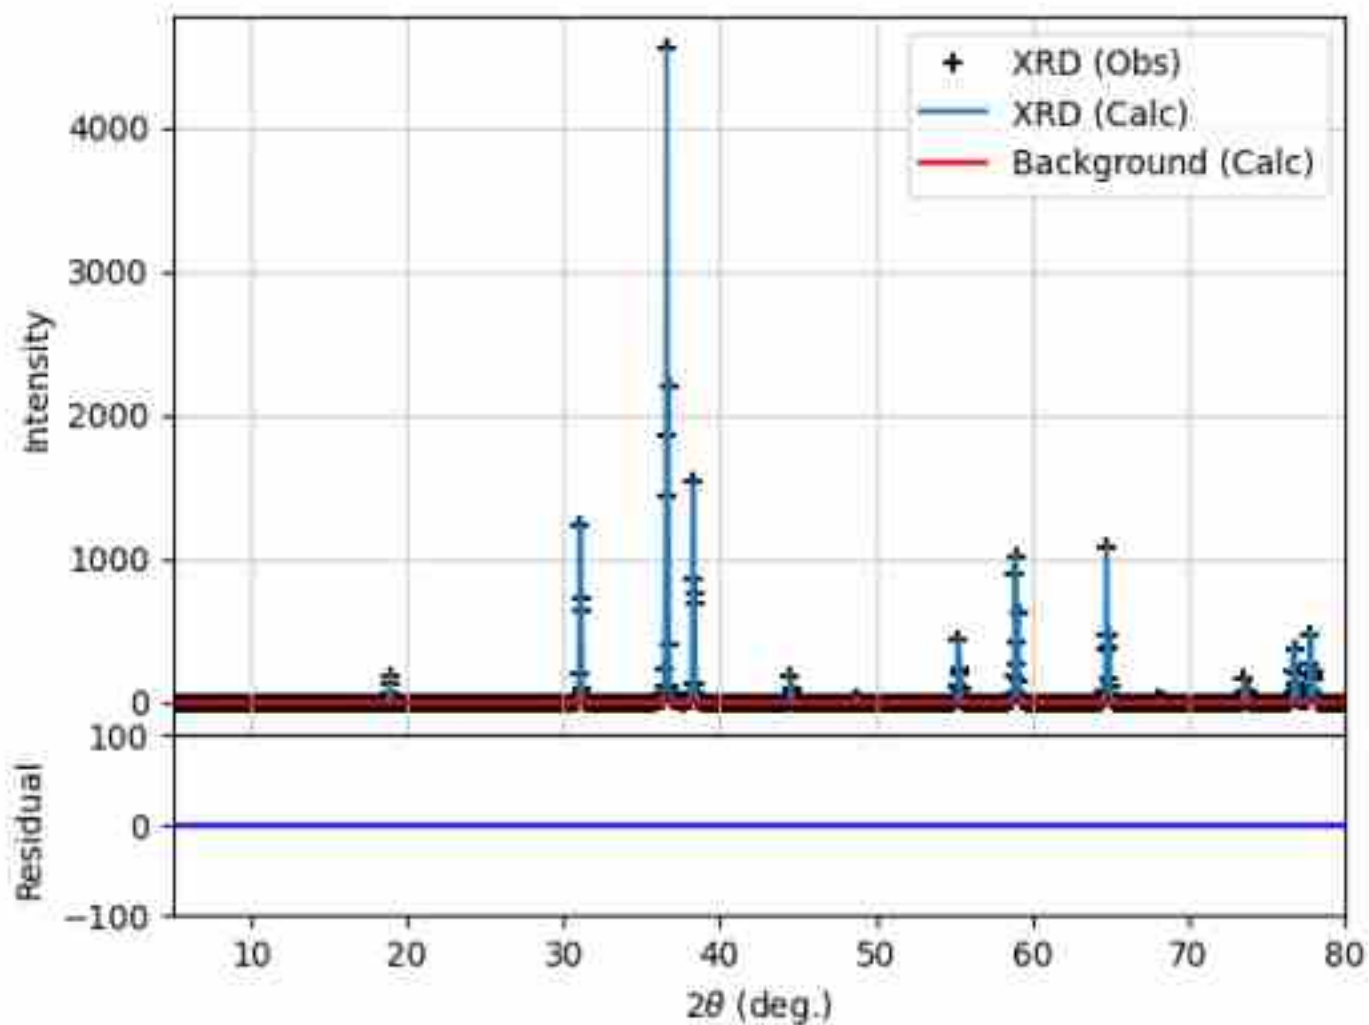

| RMSE before RR | Rwp     | RMSE after RR |
|----------------|---------|---------------|
| 0.021          | 0.00901 | 0.00059       |



# Pr<sub>3</sub>Cd<sub>3</sub>Au<sub>3</sub>

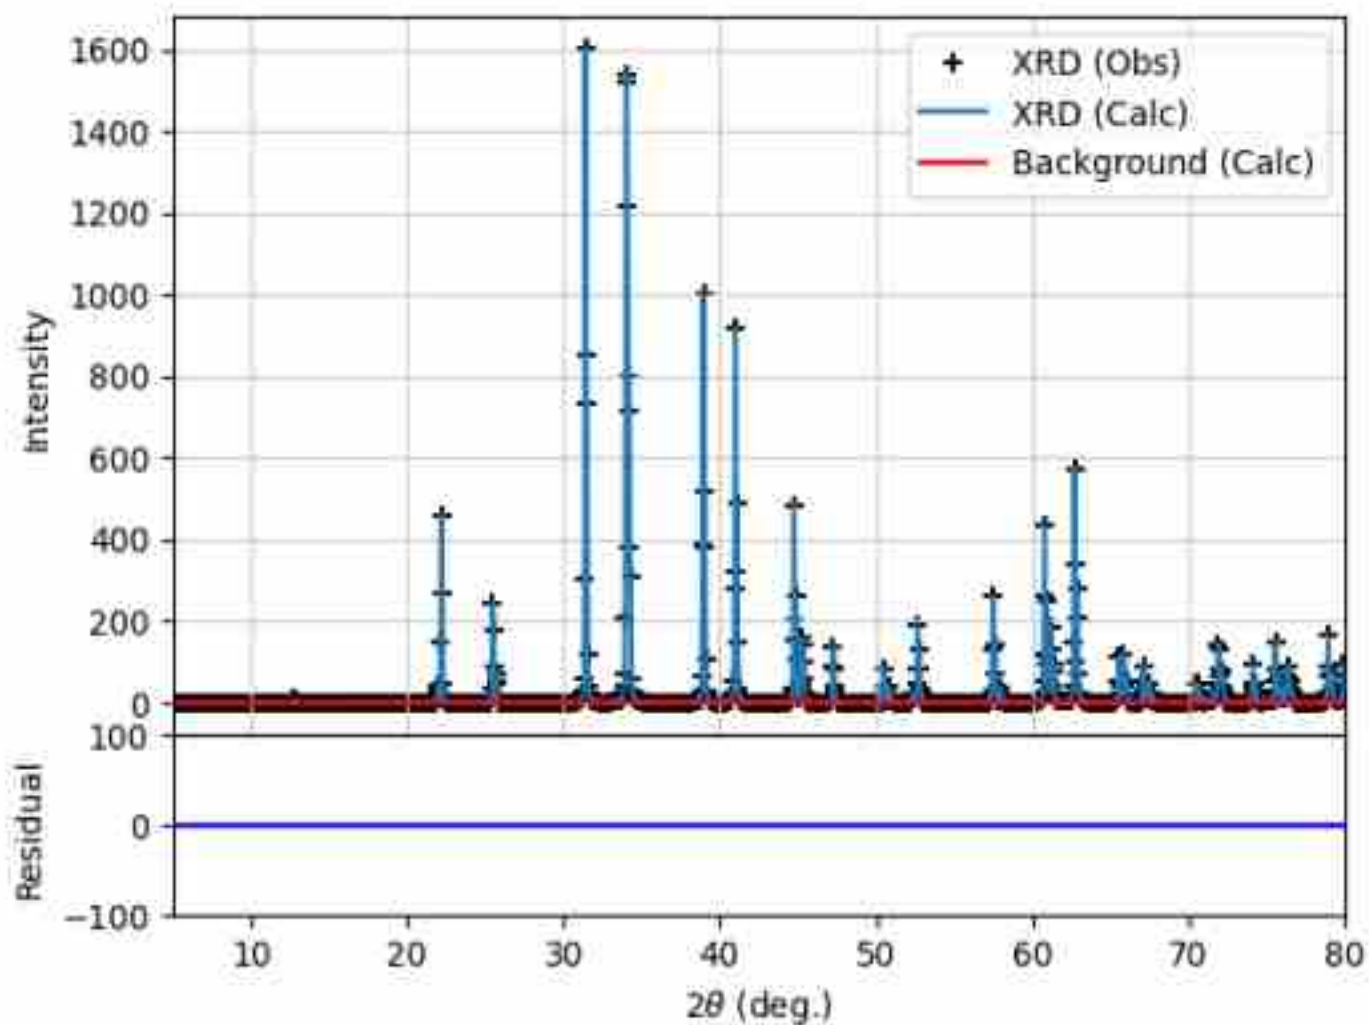

| RMSE before RR | Rwp     | RMSE after RR |
|----------------|---------|---------------|
| 0.021          | 0.00612 | 0.00146       |

# Pr<sub>4</sub>Si<sub>10</sub>Pt<sub>6</sub>

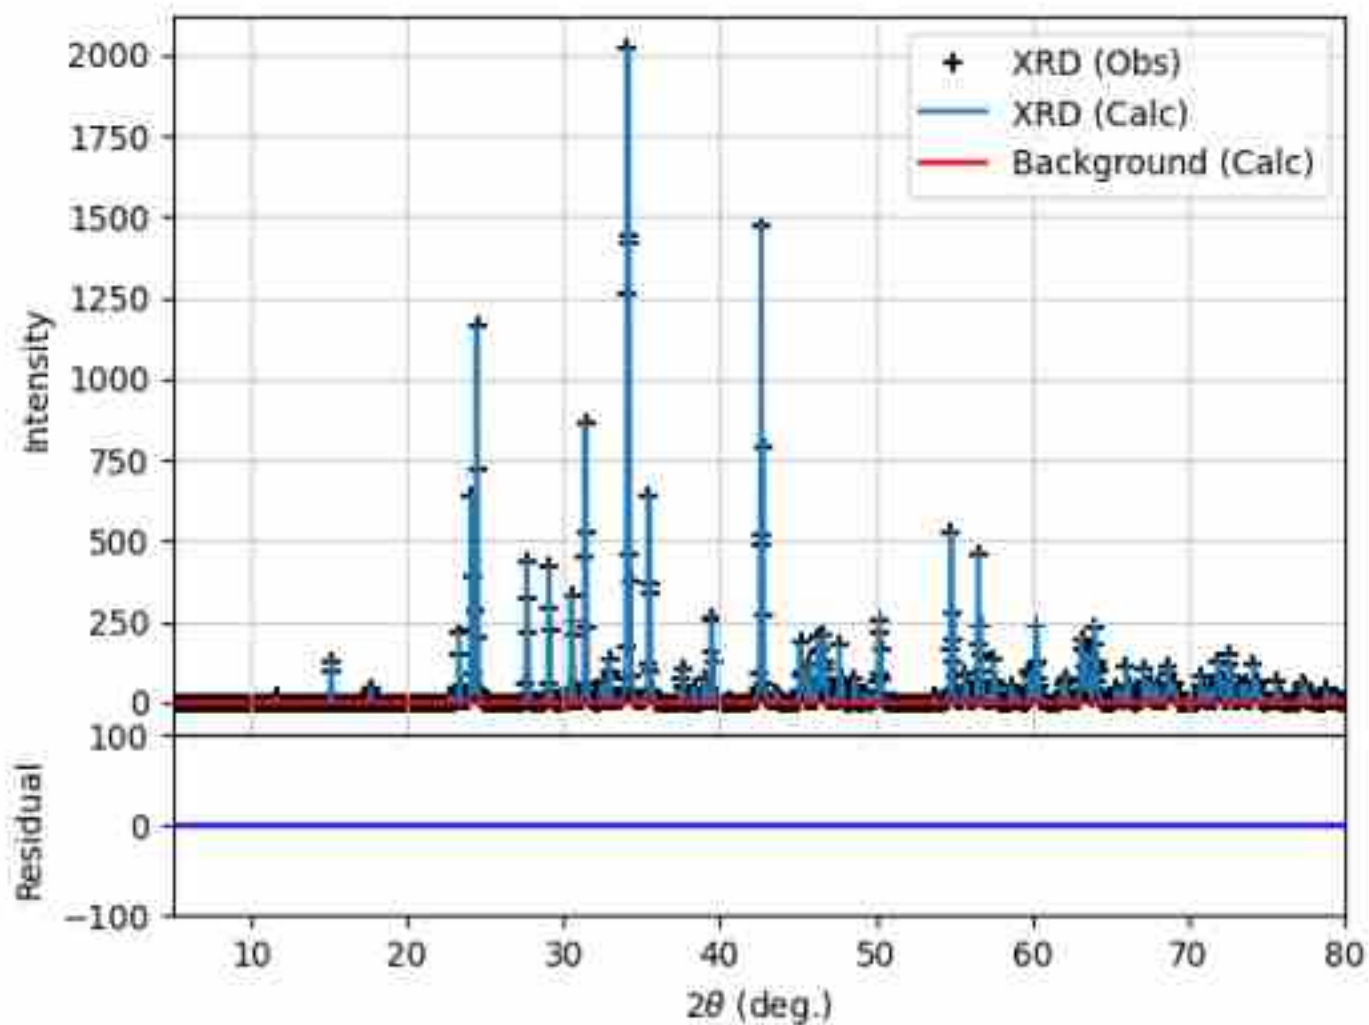

| RMSE before RR | Rwp     | RMSE after RR |
|----------------|---------|---------------|
| 0.021          | 0.00359 | 0.00111       |

# Rb1Sc1S2O8

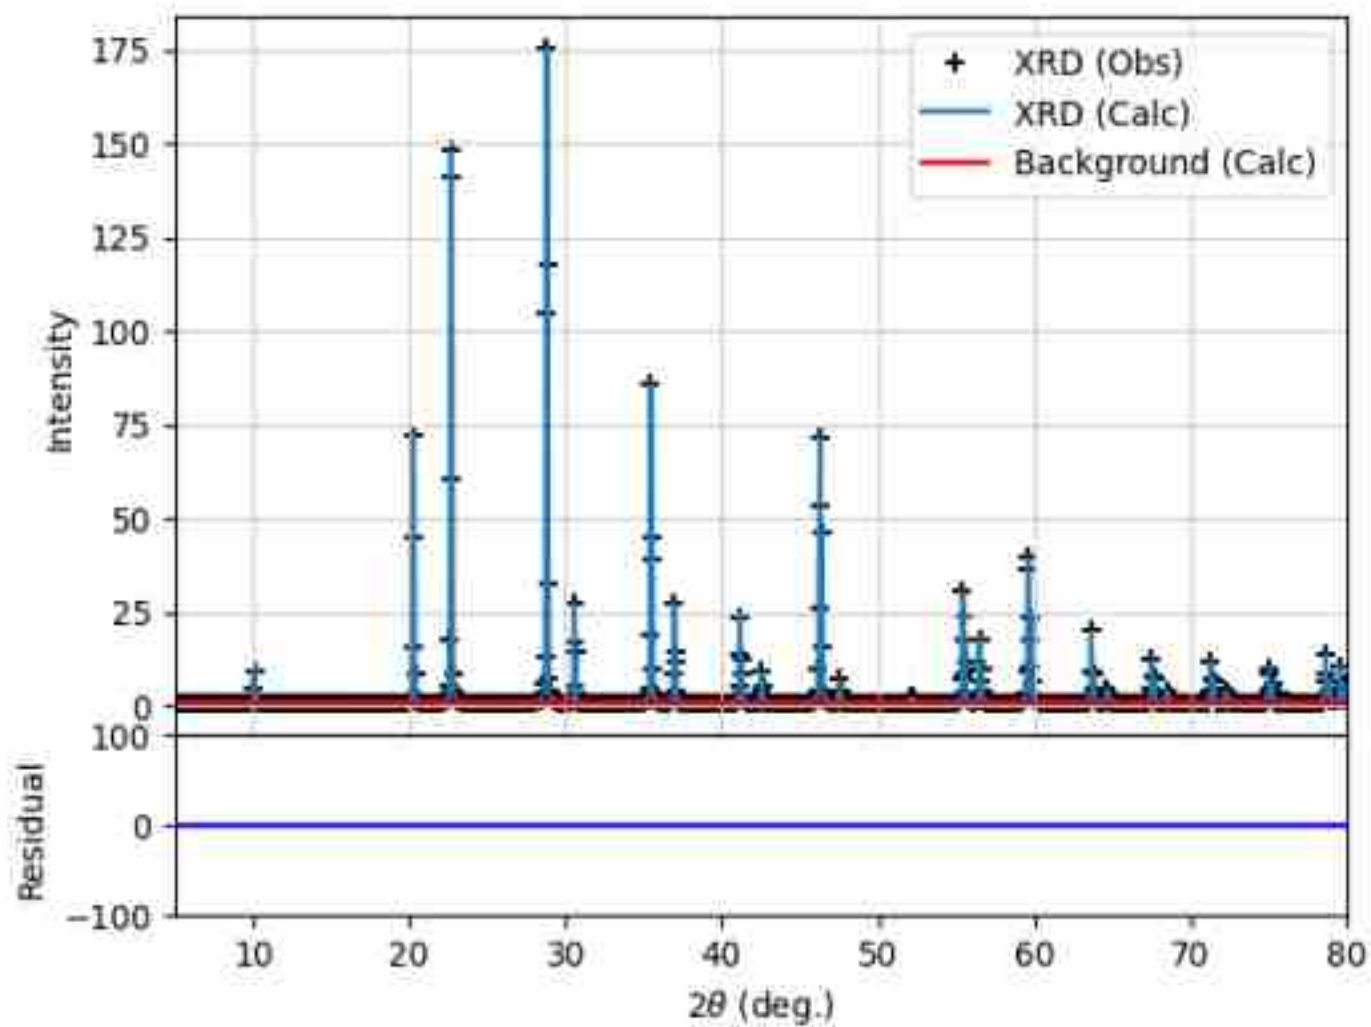

| RMSE before RR | Rwp     | RMSE after RR |
|----------------|---------|---------------|
| 0.021          | 0.00237 | 0.00166       |

# Rb<sub>2</sub>Ta<sub>2</sub>Cl<sub>12</sub>

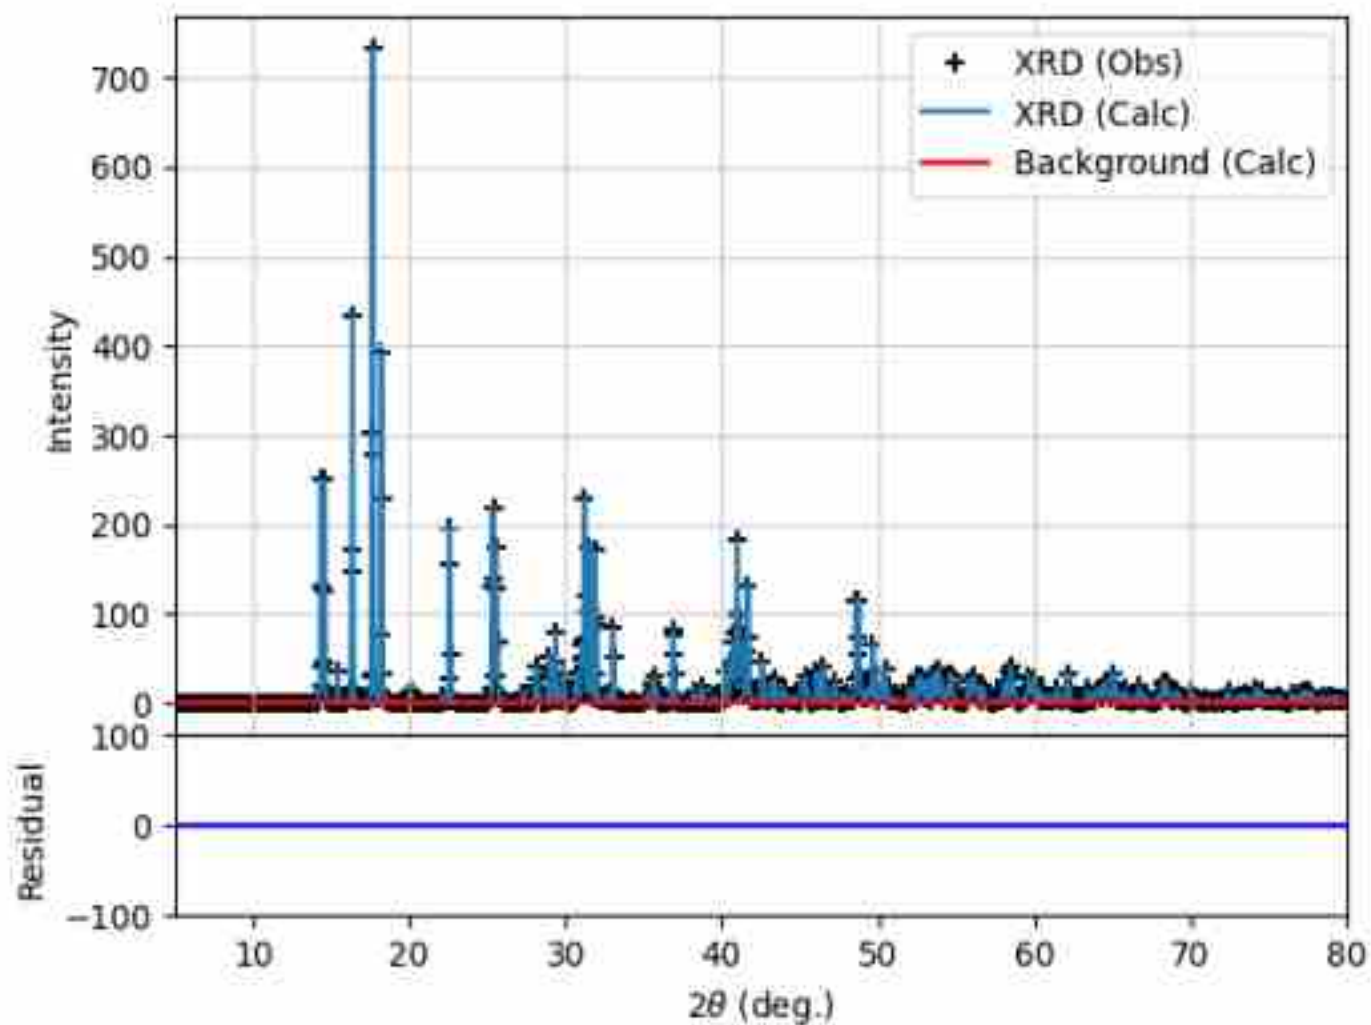

| RMSE before RR | Rwp     | RMSE after RR |
|----------------|---------|---------------|
| 0.021          | 0.00369 | 0.00024       |

# Rb<sub>2</sub>ZrF<sub>6</sub>

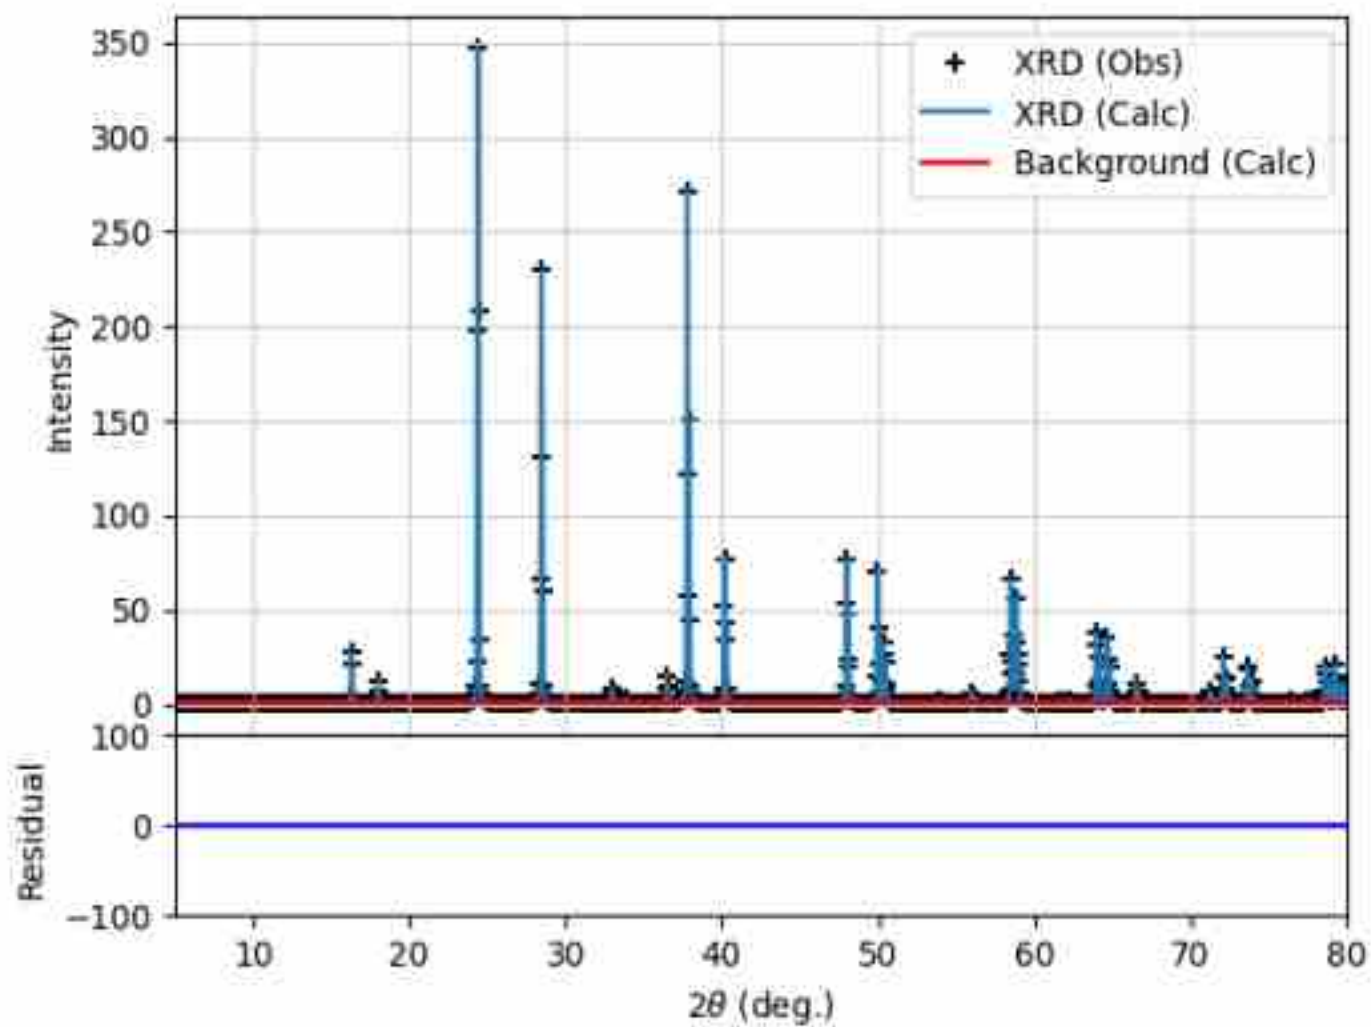

| RMSE before RR | Rwp     | RMSE after RR |
|----------------|---------|---------------|
| 0.021          | 0.00415 | 0.00162       |

# Rb3Gd1F6

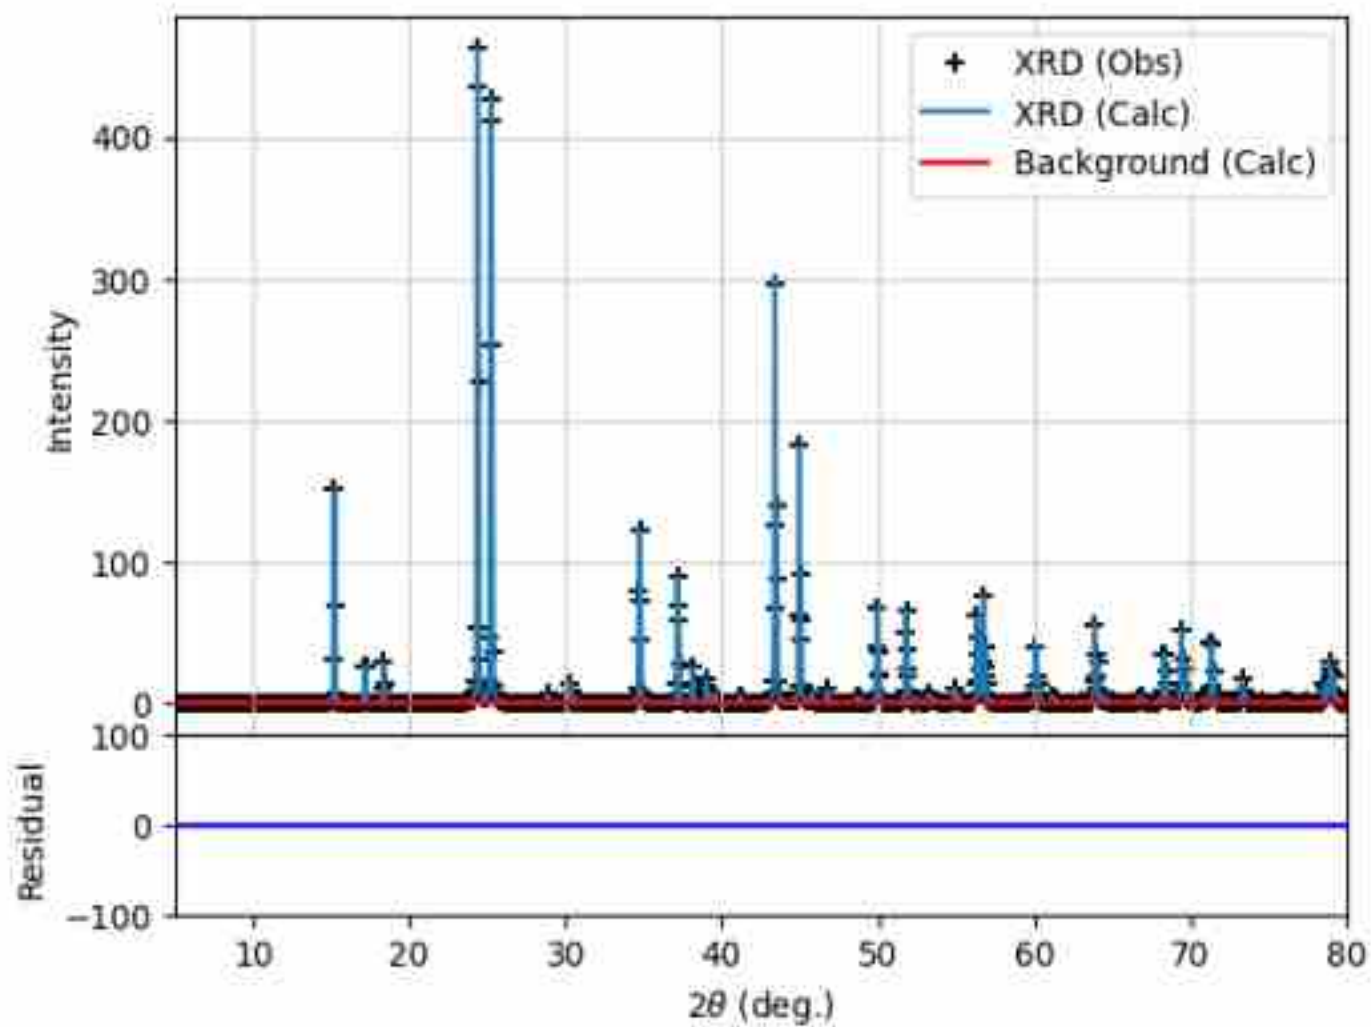

| RMSE before RR | Rwp     | RMSE after RR |
|----------------|---------|---------------|
| 0.021          | 0.00291 | 0.00076       |

# Rb<sub>4</sub>Ag<sub>4</sub>O<sub>4</sub>

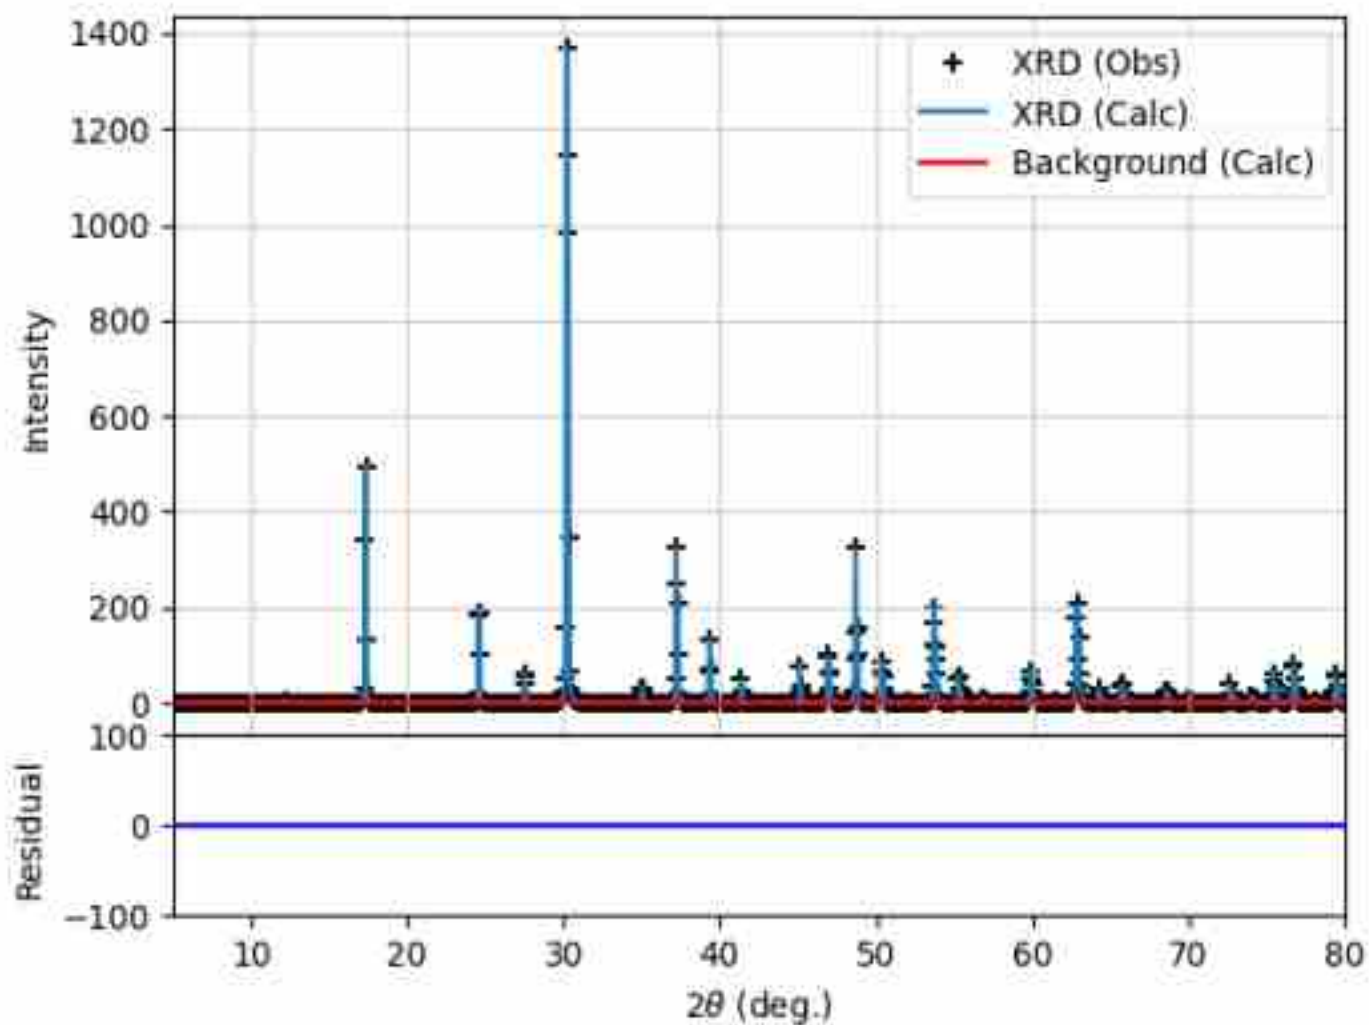

| RMSE before RR | Rwp     | RMSE after RR |
|----------------|---------|---------------|
| 0.021          | 0.00303 | 0.00082       |

# Rh2C16

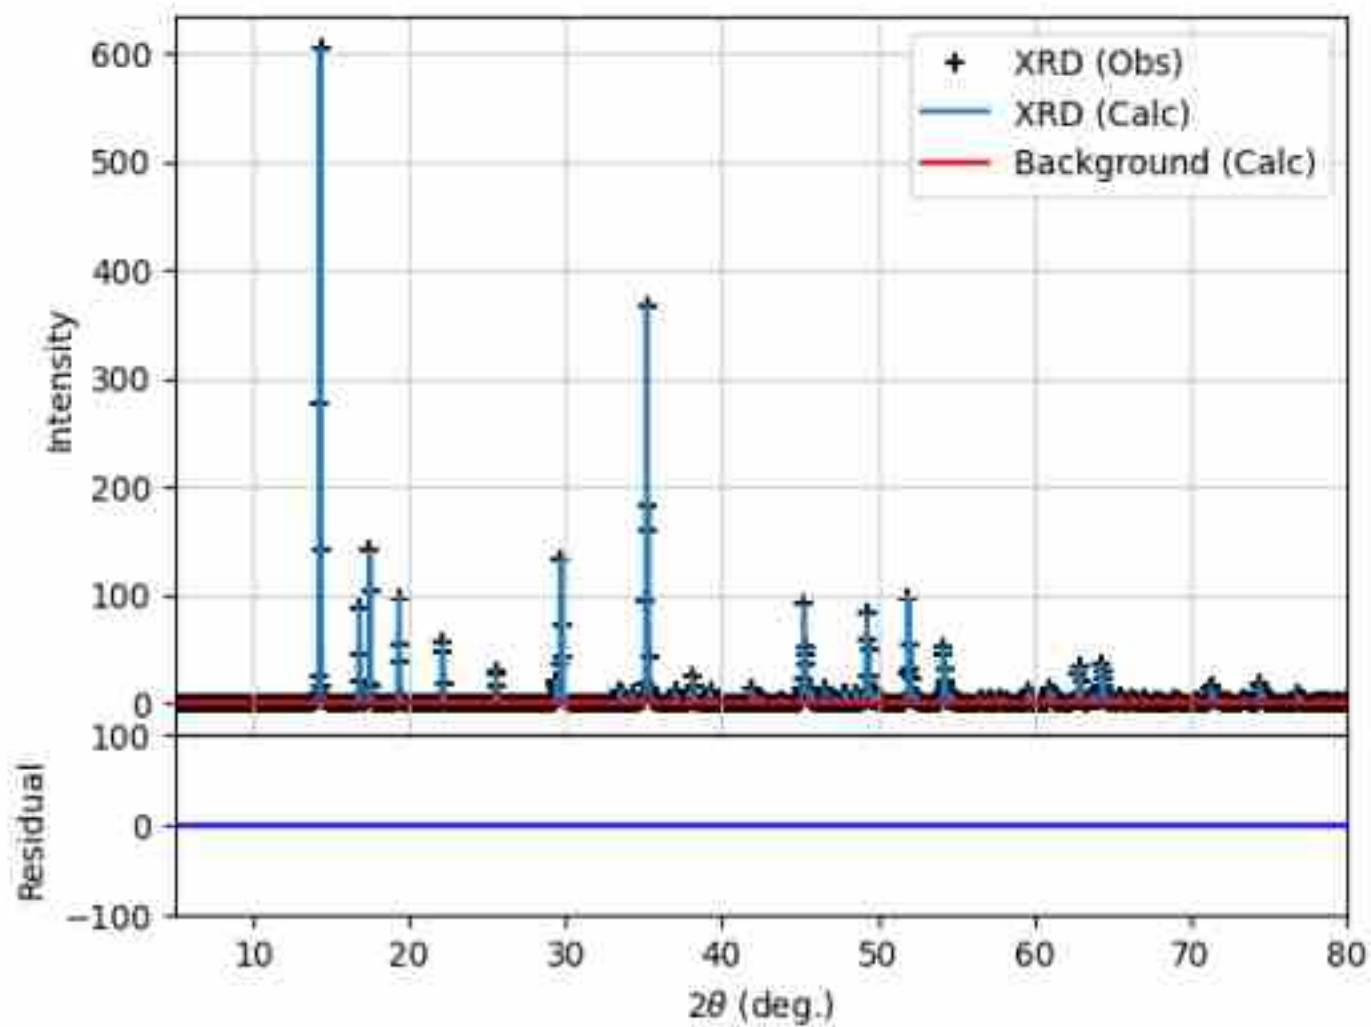

| RMSE before RR | Rwp    | RMSE after RR |
|----------------|--------|---------------|
| 0.021          | 0.0029 | 0.00035       |



# Rh4W2O12

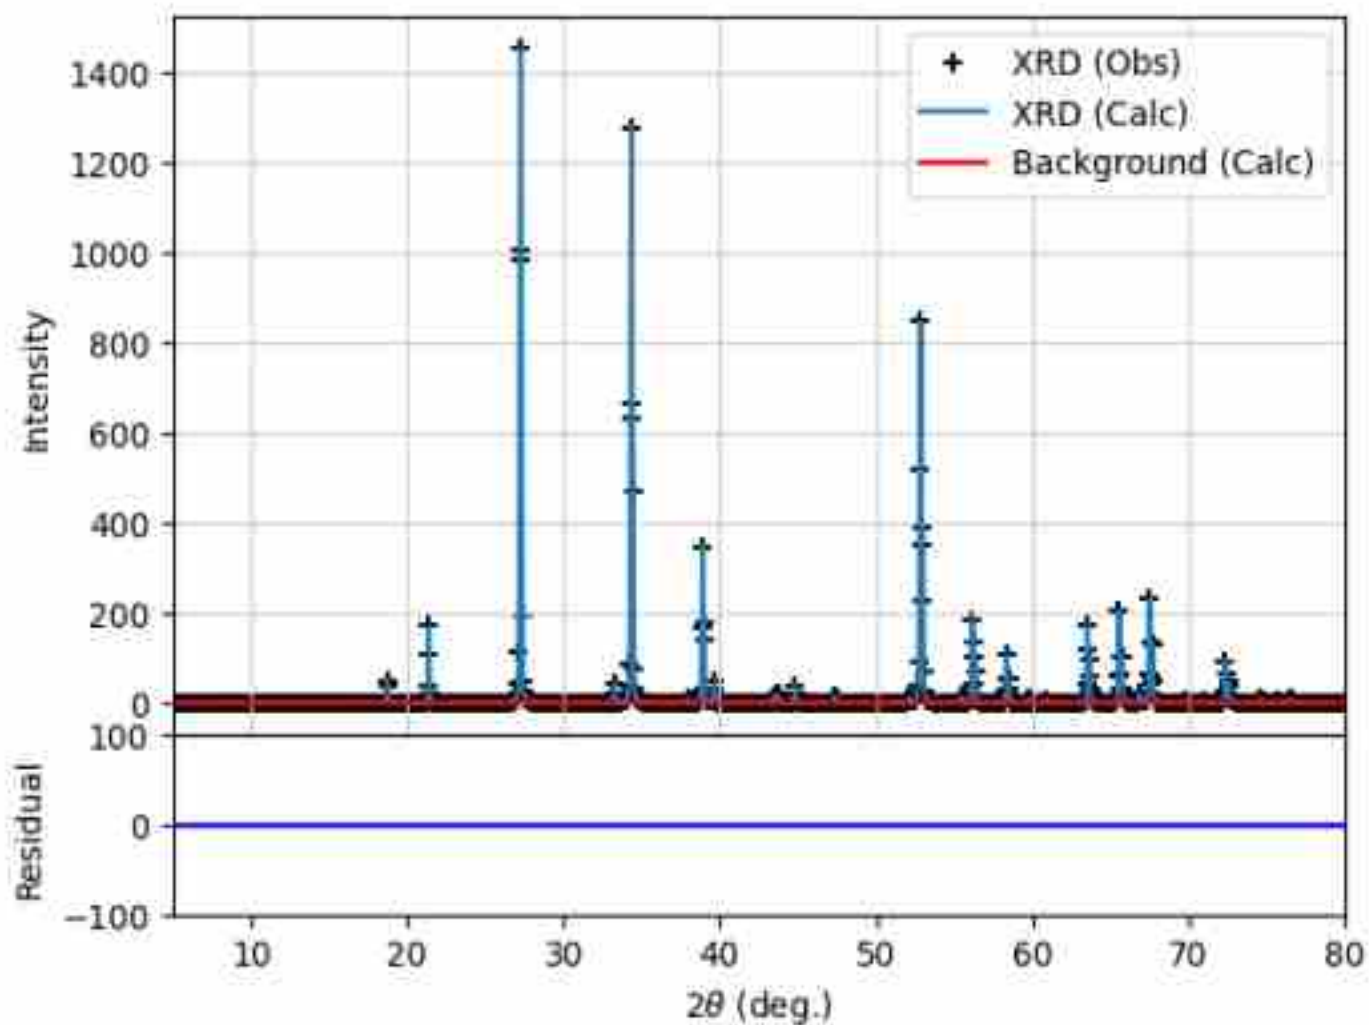

| RMSE before RR | Rwp     | RMSE after RR |
|----------------|---------|---------------|
| 0.021          | 0.00434 | 0.00087       |

# Sb<sub>2</sub>O<sub>4</sub>F<sub>2</sub>

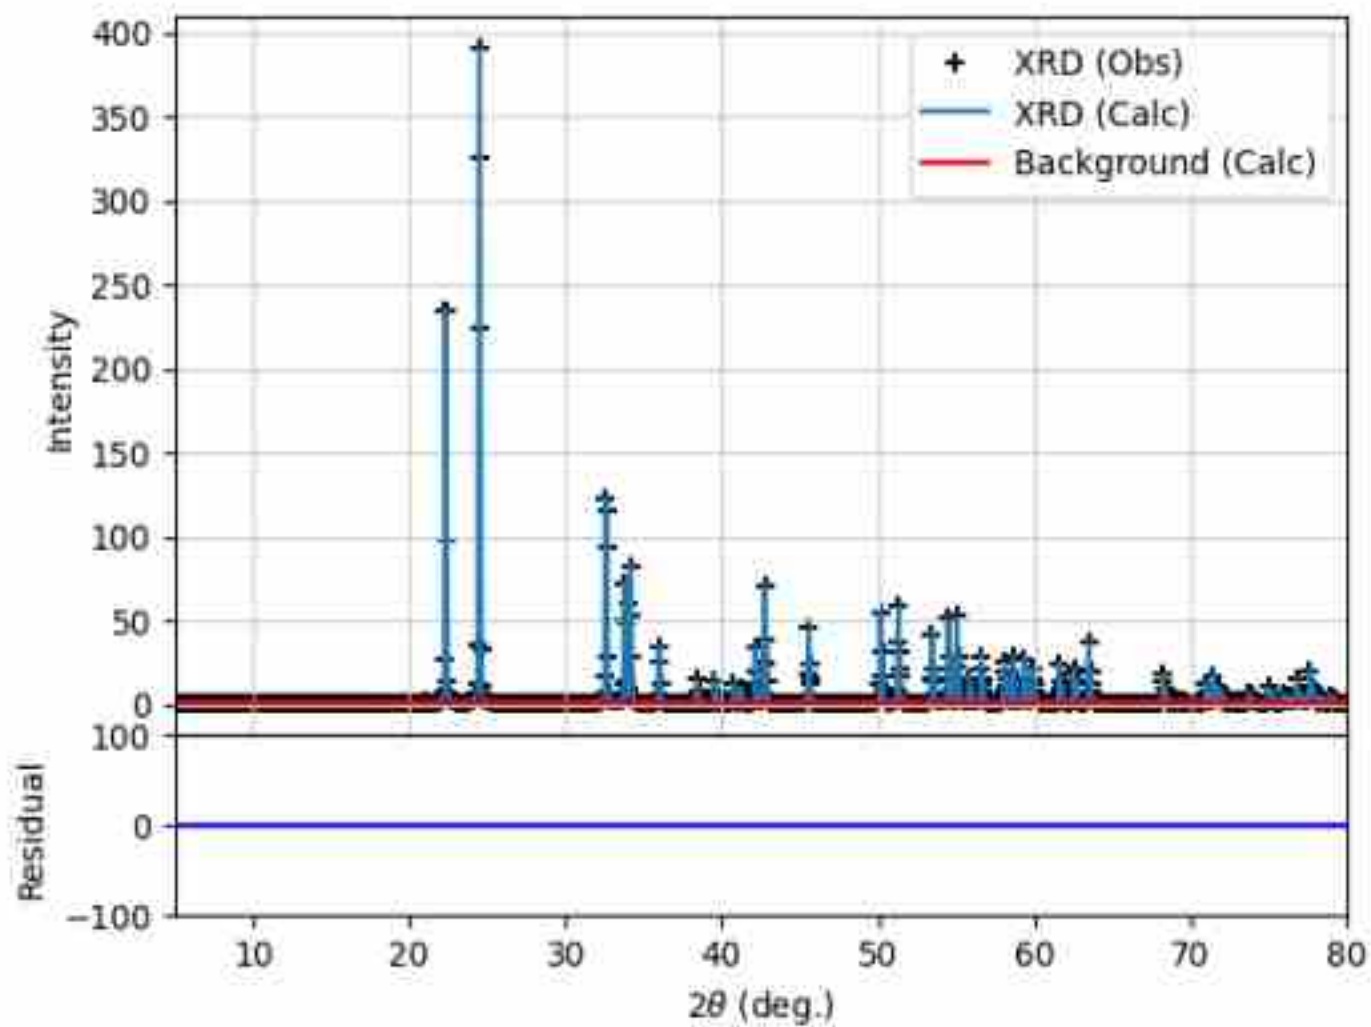

| RMSE before RR | Rwp    | RMSE after RR |
|----------------|--------|---------------|
| 0.021          | 0.0032 | 0.00068       |

# Sc<sub>3</sub>Ni<sub>3</sub>Sn<sub>3</sub>

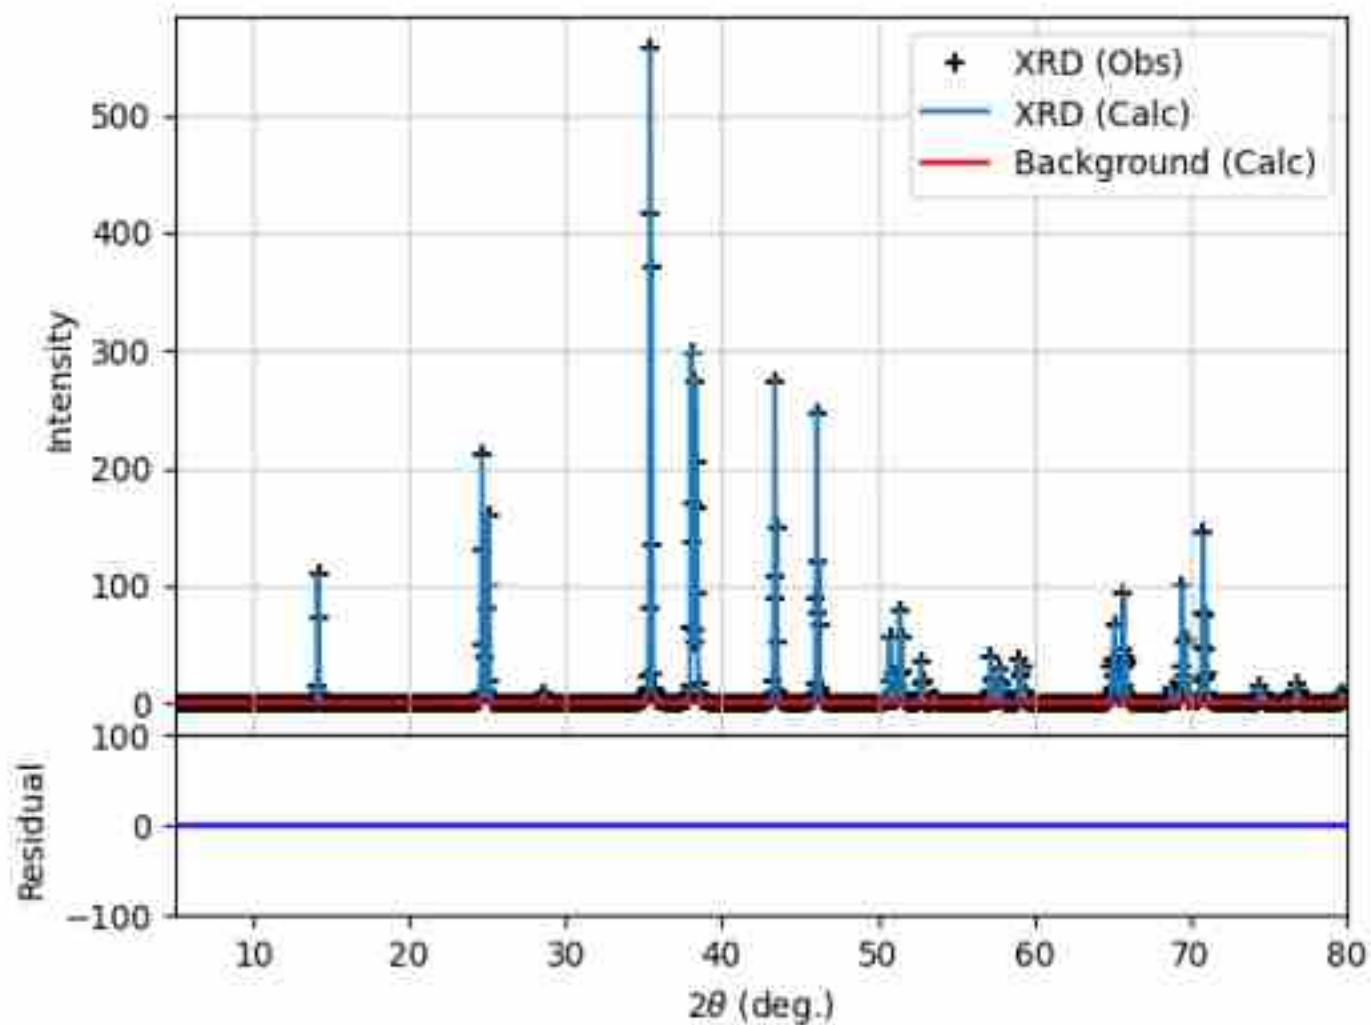

| RMSE before RR | Rwp     | RMSE after RR |
|----------------|---------|---------------|
| 0.021          | 0.00495 | 0.0009        |

# Sc4Cr2B4Rh10

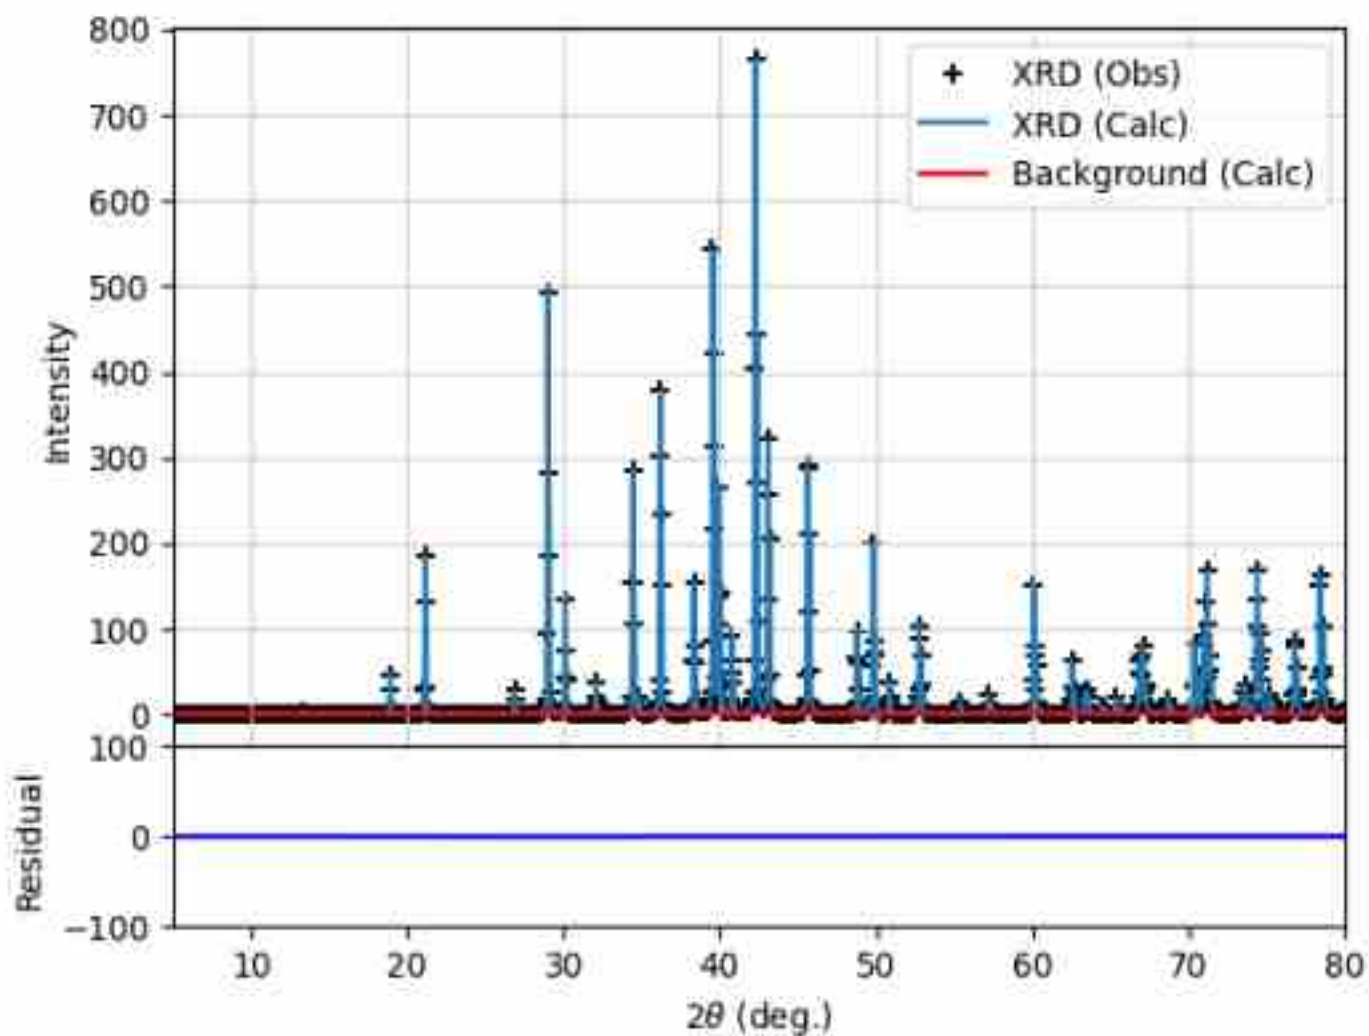

| RMSE before RR | Rwp     | RMSE after RR |
|----------------|---------|---------------|
| 0.021          | 0.41205 | 0.02564       |

# Sc4Os8

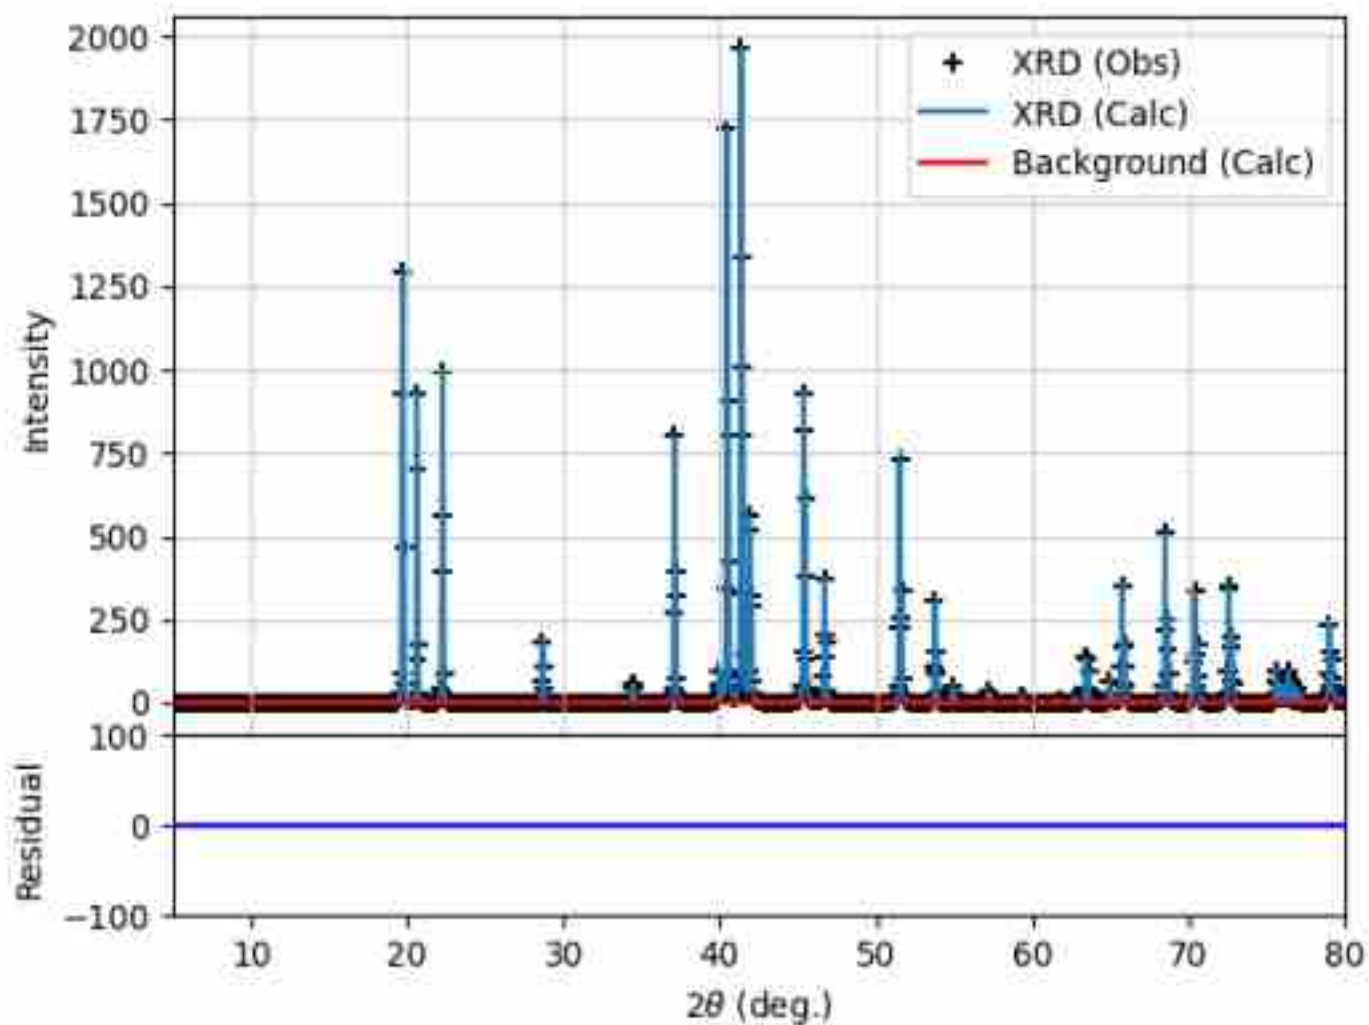

| RMSE before RR | Rwp     | RMSE after RR |
|----------------|---------|---------------|
| 0.021          | 0.00868 | 0.00097       |

# Sc4Si4Rh4

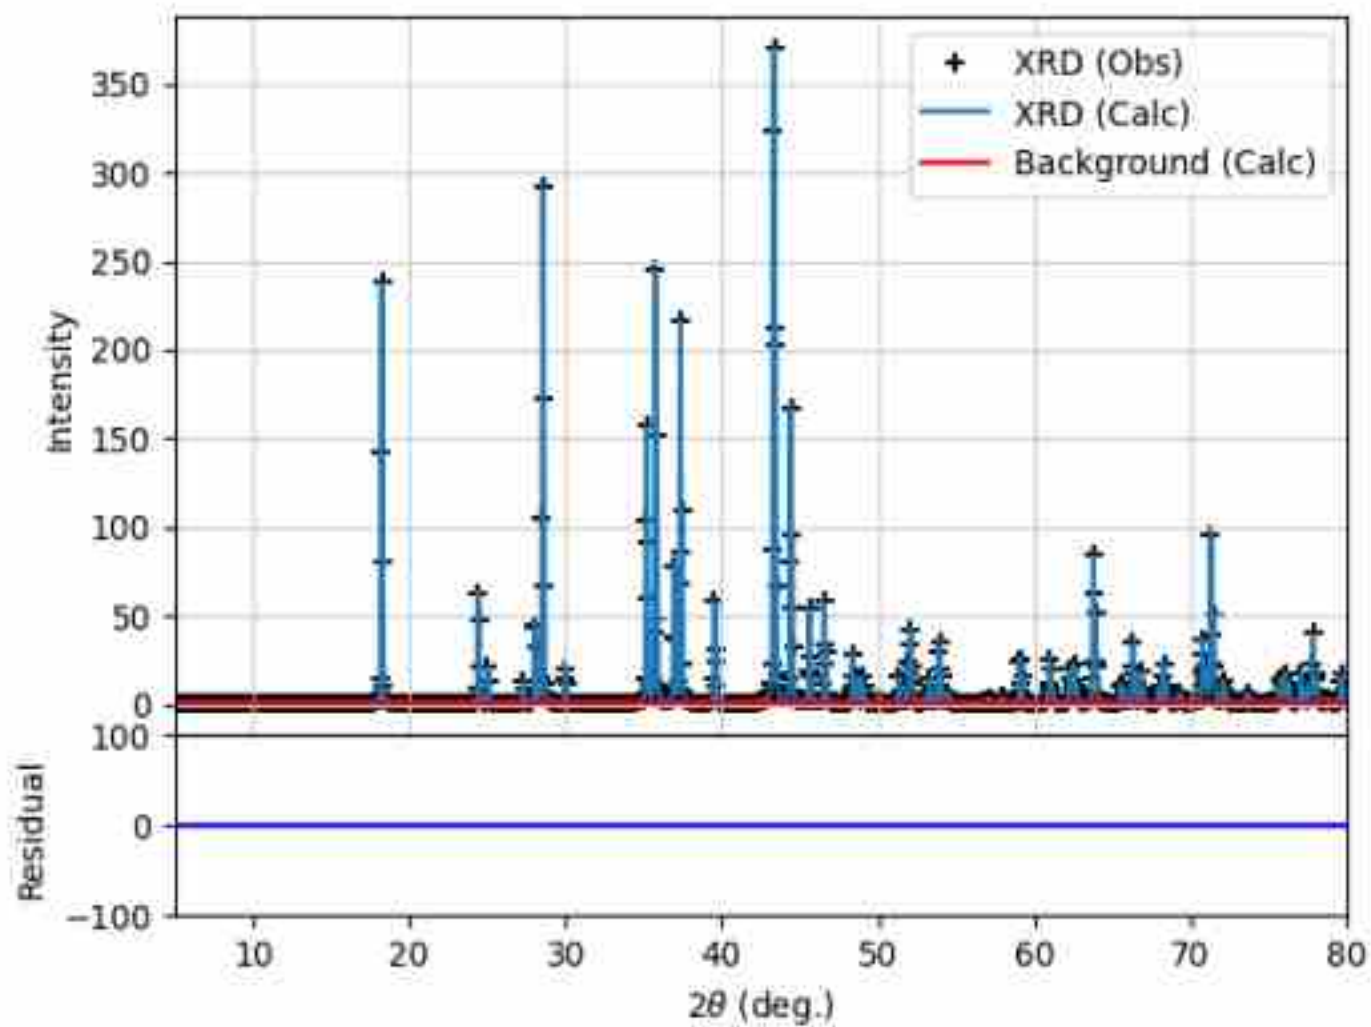

| RMSE before RR | Rwp     | RMSE after RR |
|----------------|---------|---------------|
| 0.021          | 0.00471 | 0.0006        |

# Si<sub>2</sub>C<sub>4</sub>N<sub>8</sub>

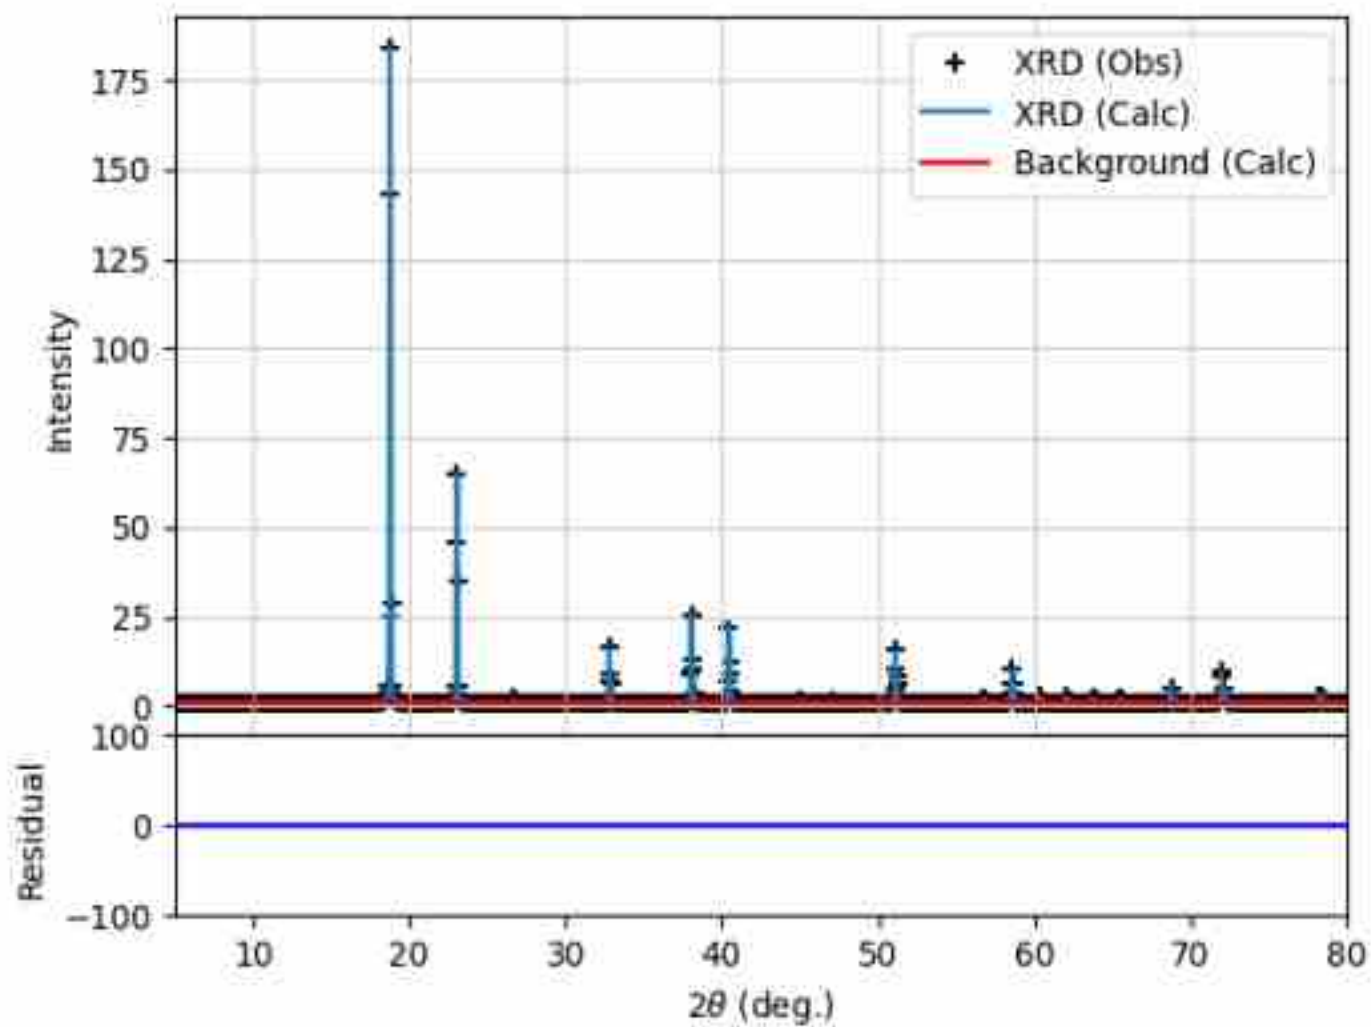

| RMSE before RR | Rwp     | RMSE after RR |
|----------------|---------|---------------|
| 0.021          | 0.00285 | 0.00095       |

# Sm4Tm4O12

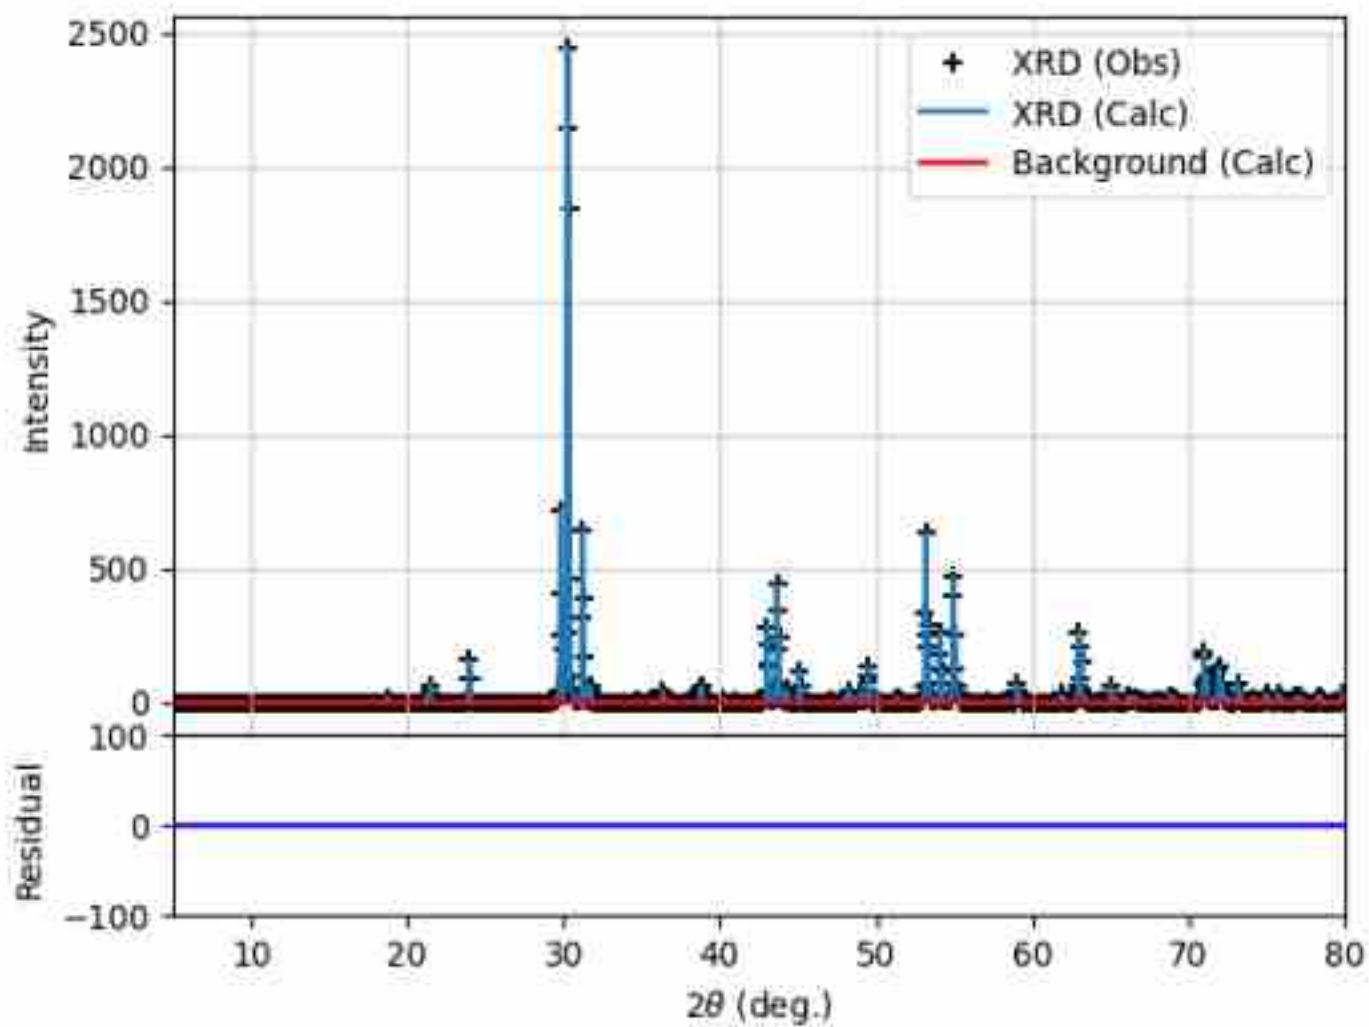

| RMSE before RR | Rwp     | RMSE after RR |
|----------------|---------|---------------|
| 0.021          | 0.00407 | 0.00131       |



# Sm6Ti2Sb10

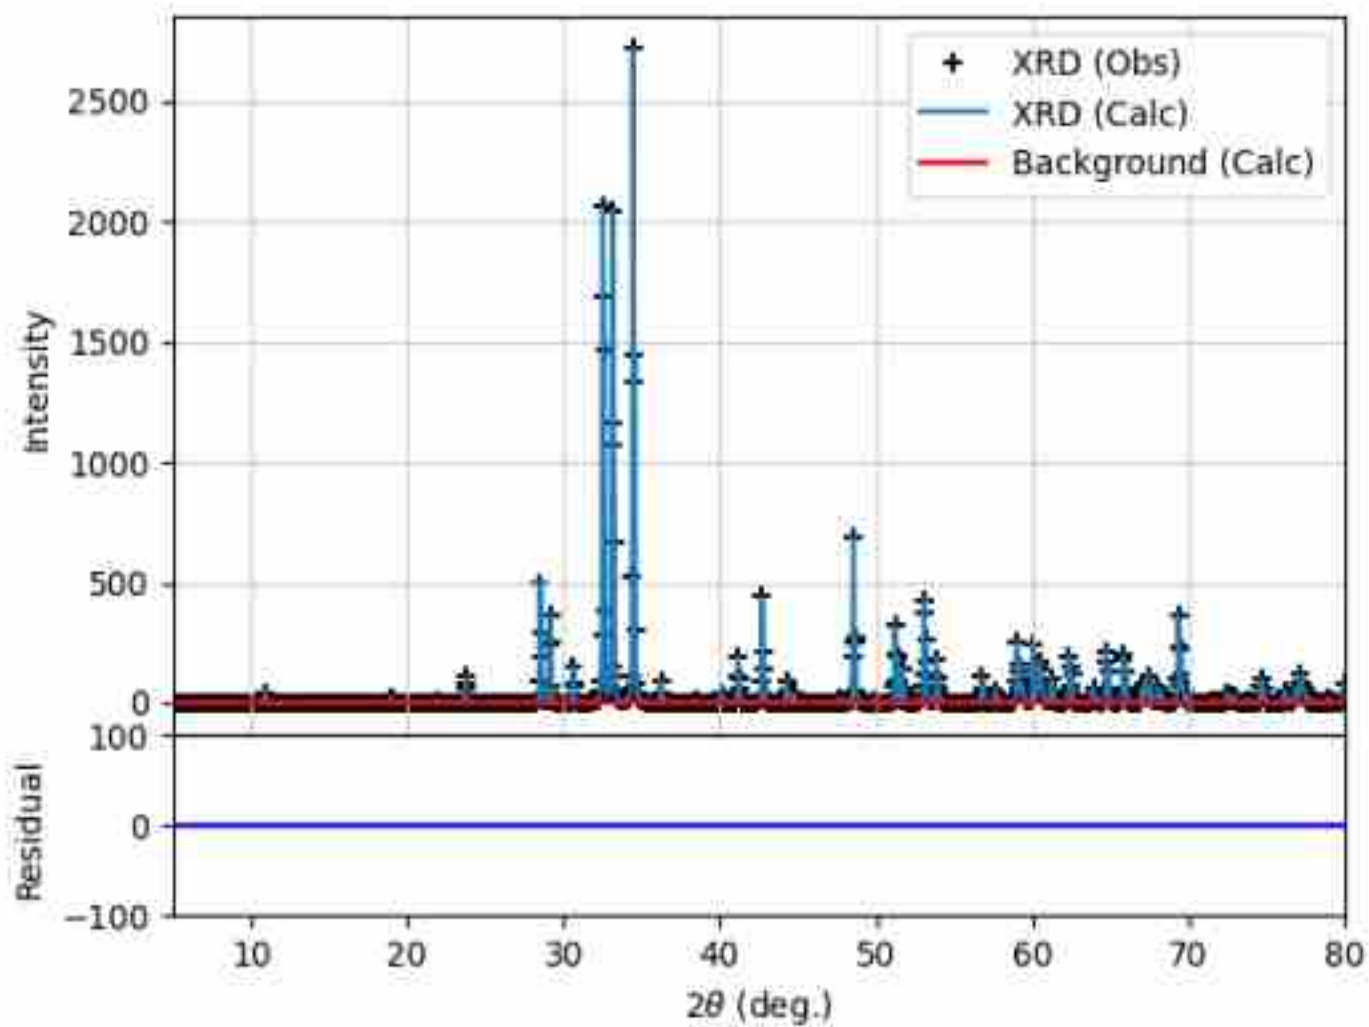

| RMSE before RR | Rwp     | RMSE after RR |
|----------------|---------|---------------|
| 0.021          | 0.00685 | 0.0007        |

# Sm12Co4

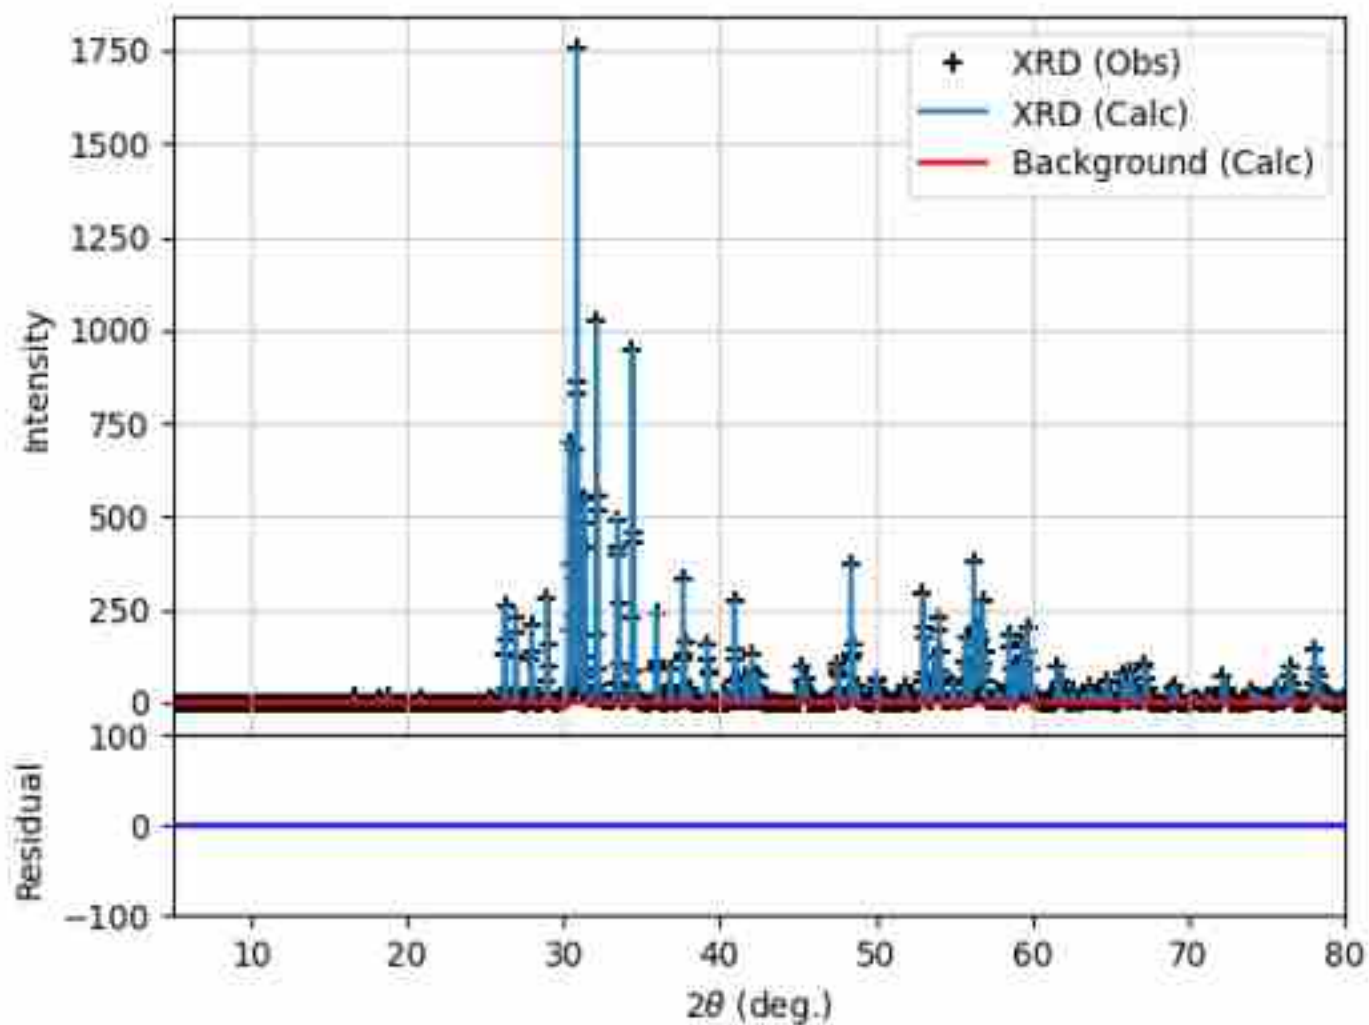

| RMSE before RR | Rwp     | RMSE after RR |
|----------------|---------|---------------|
| 0.021          | 0.00463 | 0.00039       |

# Sn8Pt2

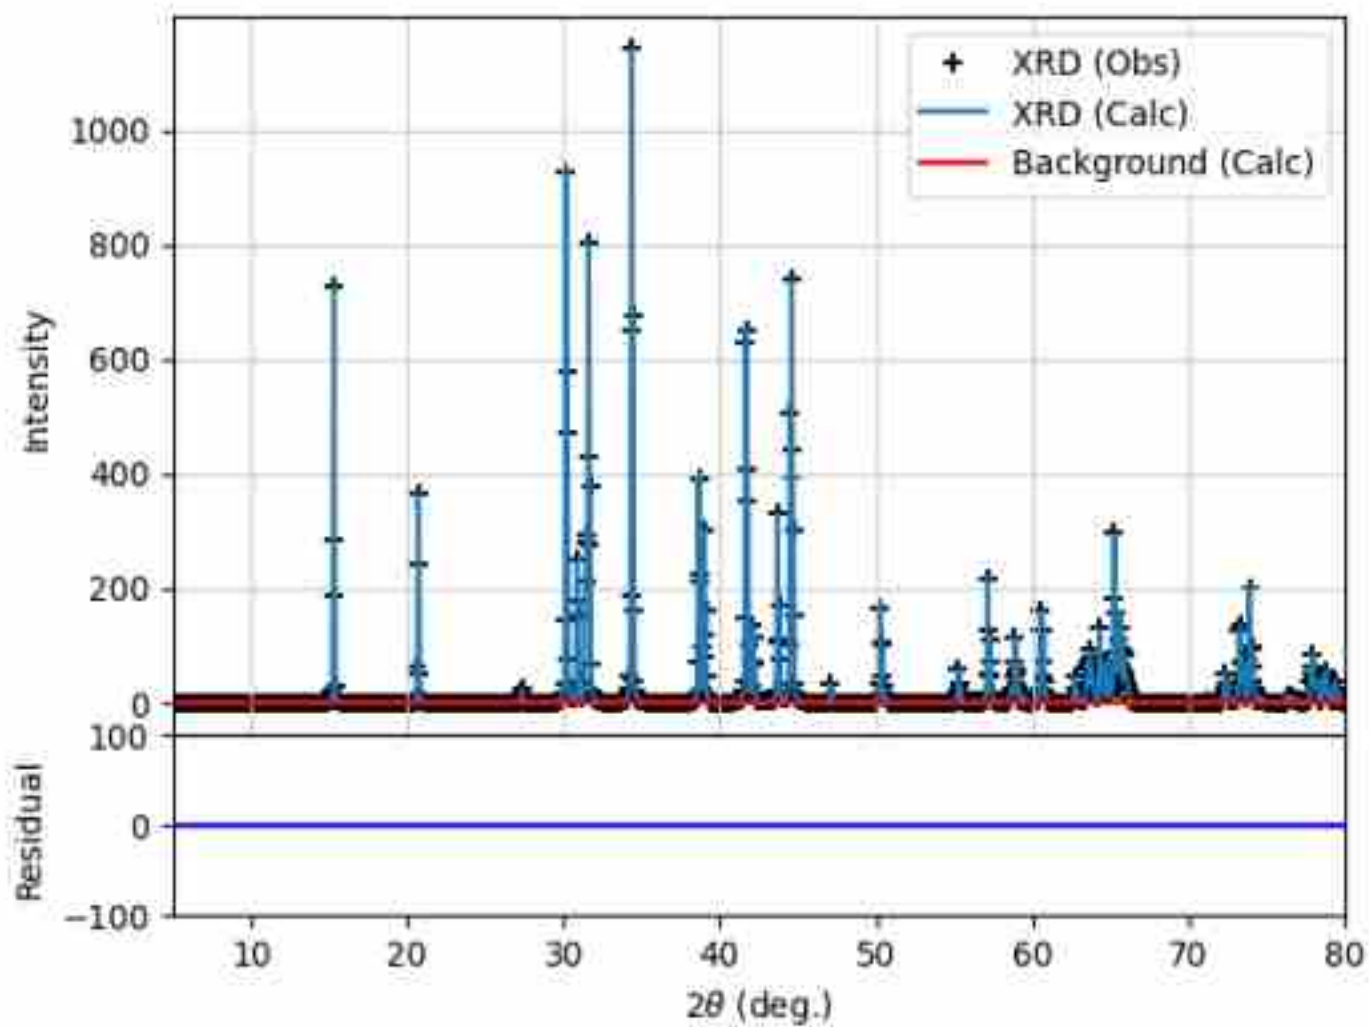

| RMSE before RR | Rwp     | RMSE after RR |
|----------------|---------|---------------|
| 0.021          | 0.00325 | 0.00016       |

# Sr1Ni1F6

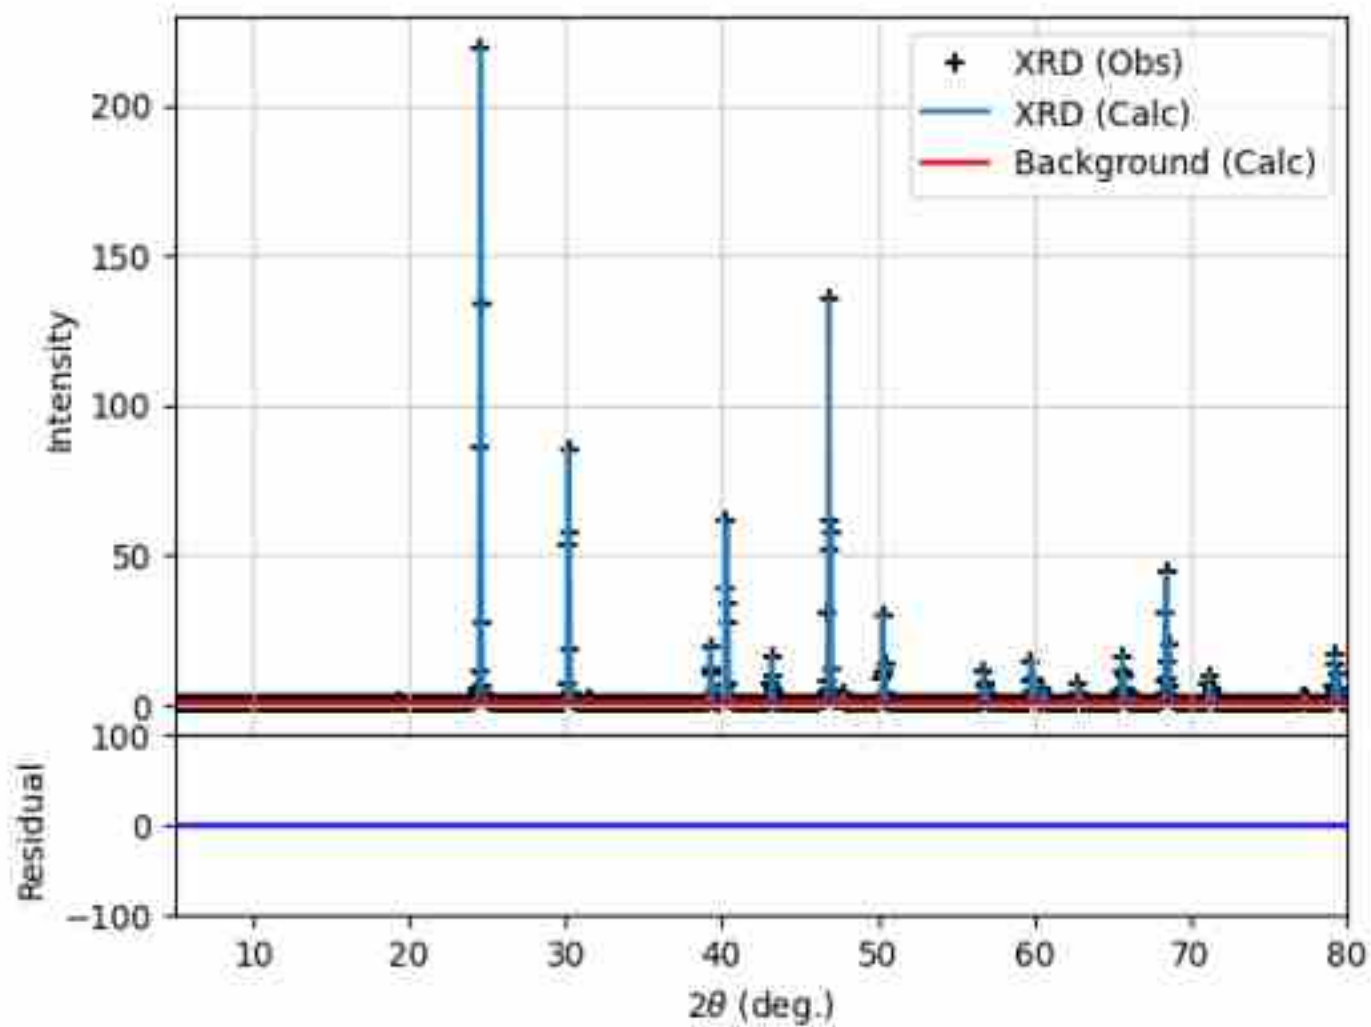

| RMSE before RR | Rwp    | RMSE after RR |
|----------------|--------|---------------|
| 0.021          | 0.0038 | 0.00148       |

# Sr2HfN1

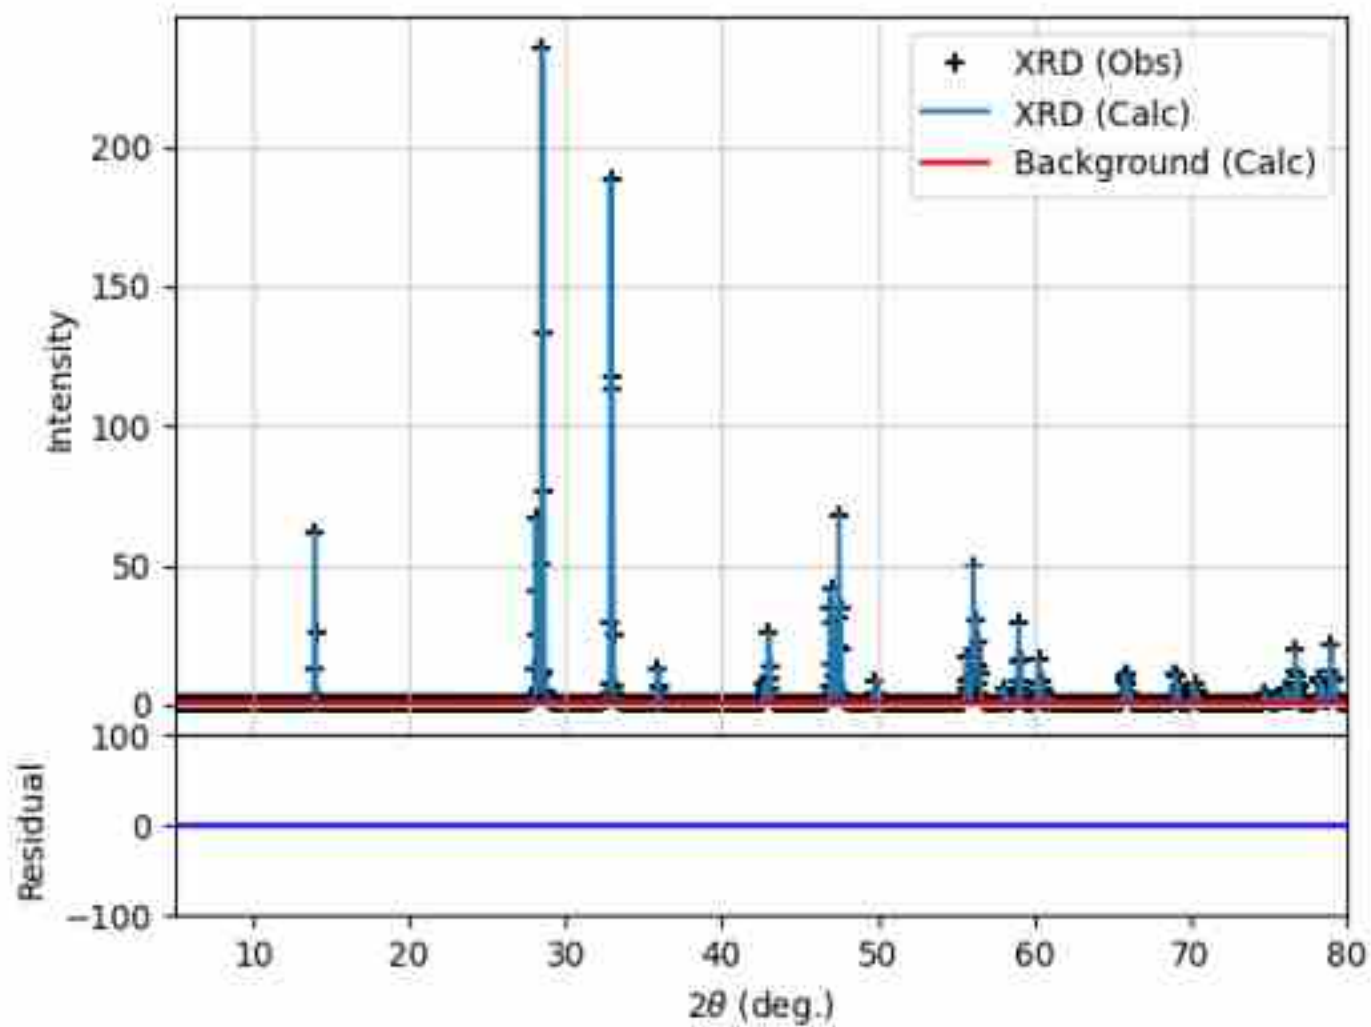

| RMSE before RR | Rwp    | RMSE after RR |
|----------------|--------|---------------|
| 0.021          | 0.1226 | 0.00337       |

# Sr<sub>2</sub>In<sub>8</sub>Pt<sub>2</sub>

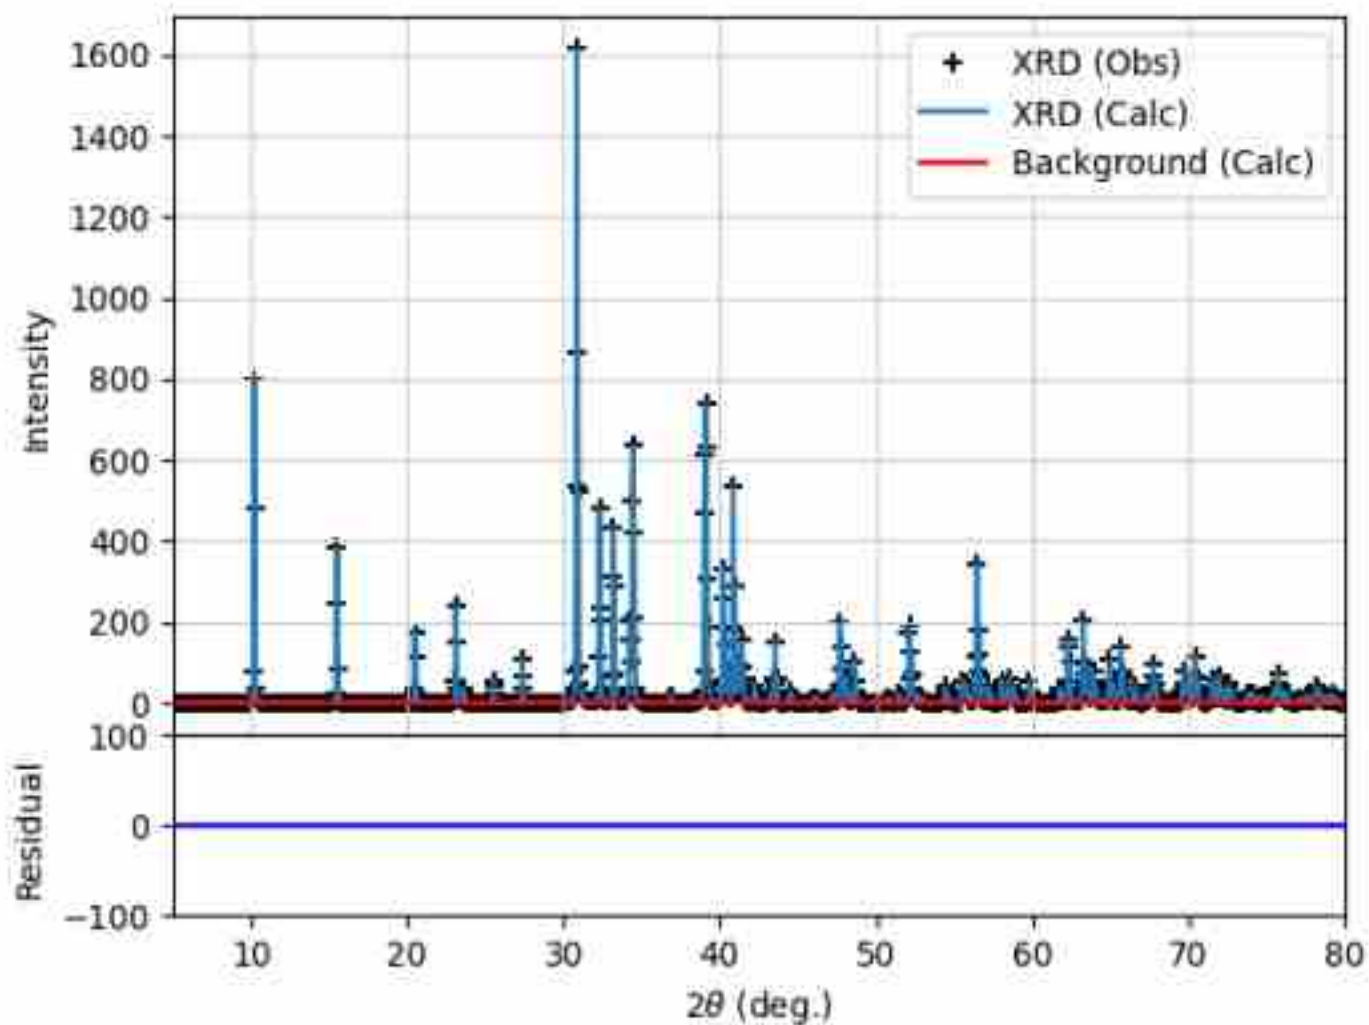

| RMSE before RR | Rwp     | RMSE after RR |
|----------------|---------|---------------|
| 0.021          | 0.00389 | 0.00032       |

# Sr2Sn8

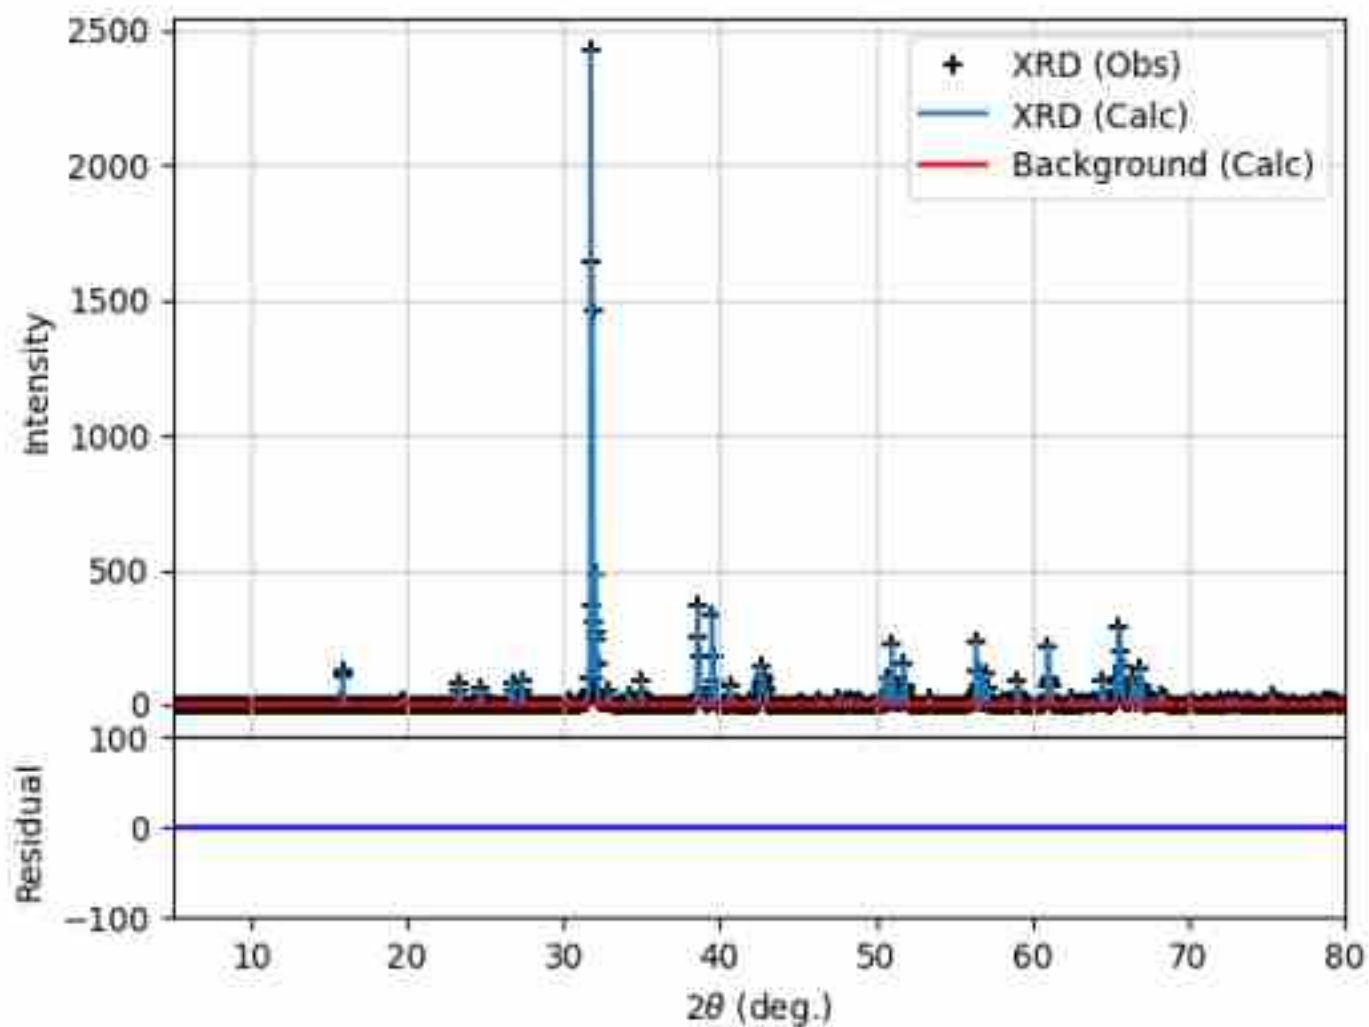

| RMSE before RR | Rwp     | RMSE after RR |
|----------------|---------|---------------|
| 0.021          | 0.00403 | 0.00044       |

# Sr<sub>2</sub>Ti<sub>1</sub>Fe<sub>1</sub>O<sub>6</sub>

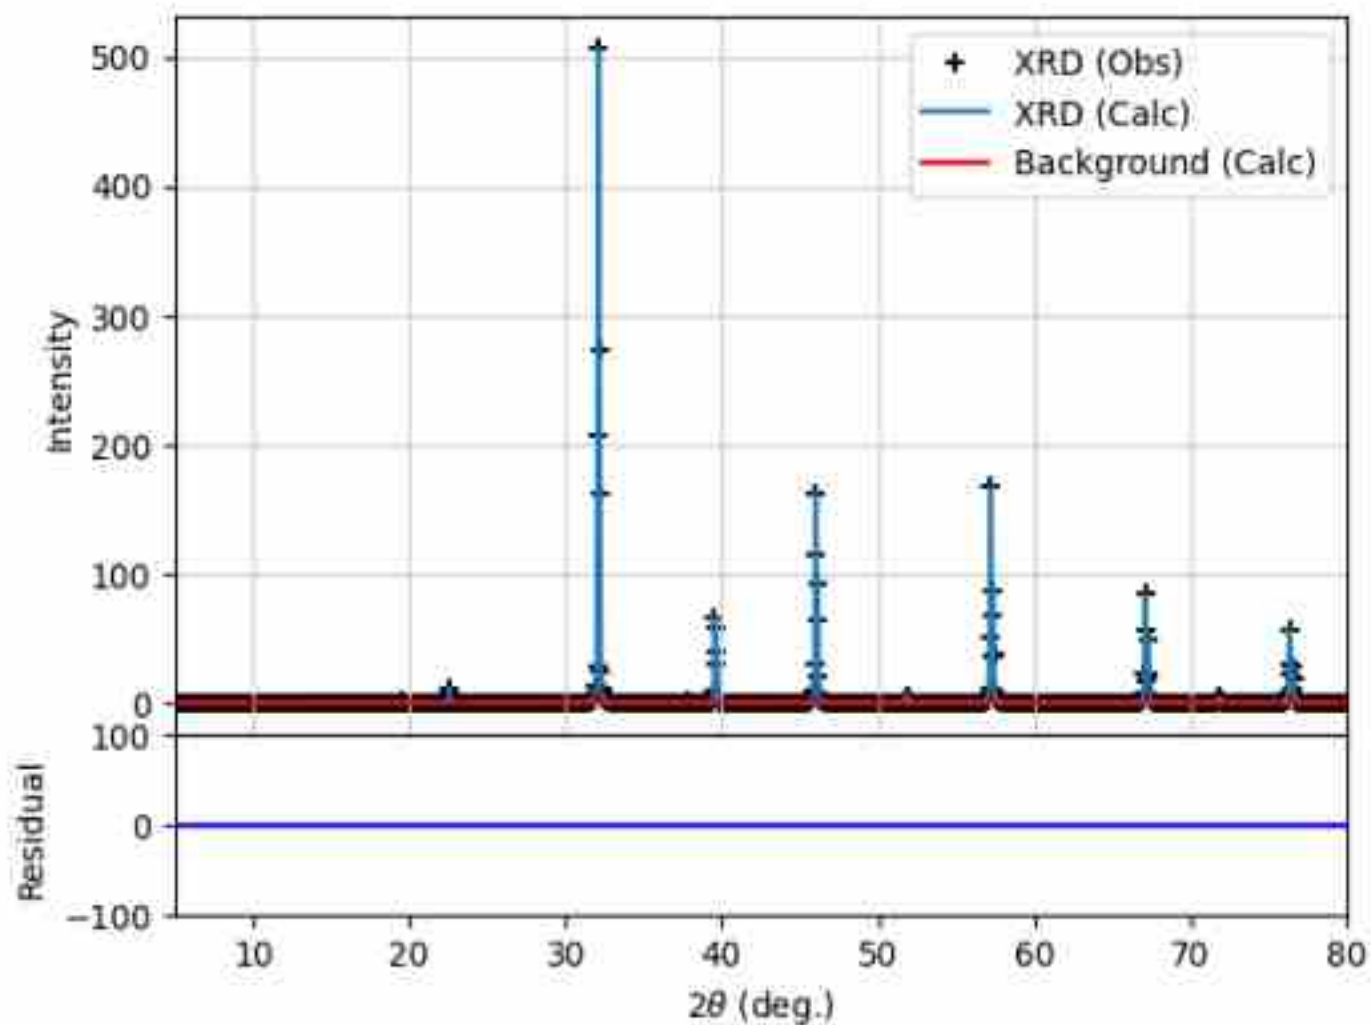

| RMSE before RR | Rwp     | RMSE after RR |
|----------------|---------|---------------|
| 0.021          | 0.03645 | 0.00374       |



# Sr3Ca1Fe4O12

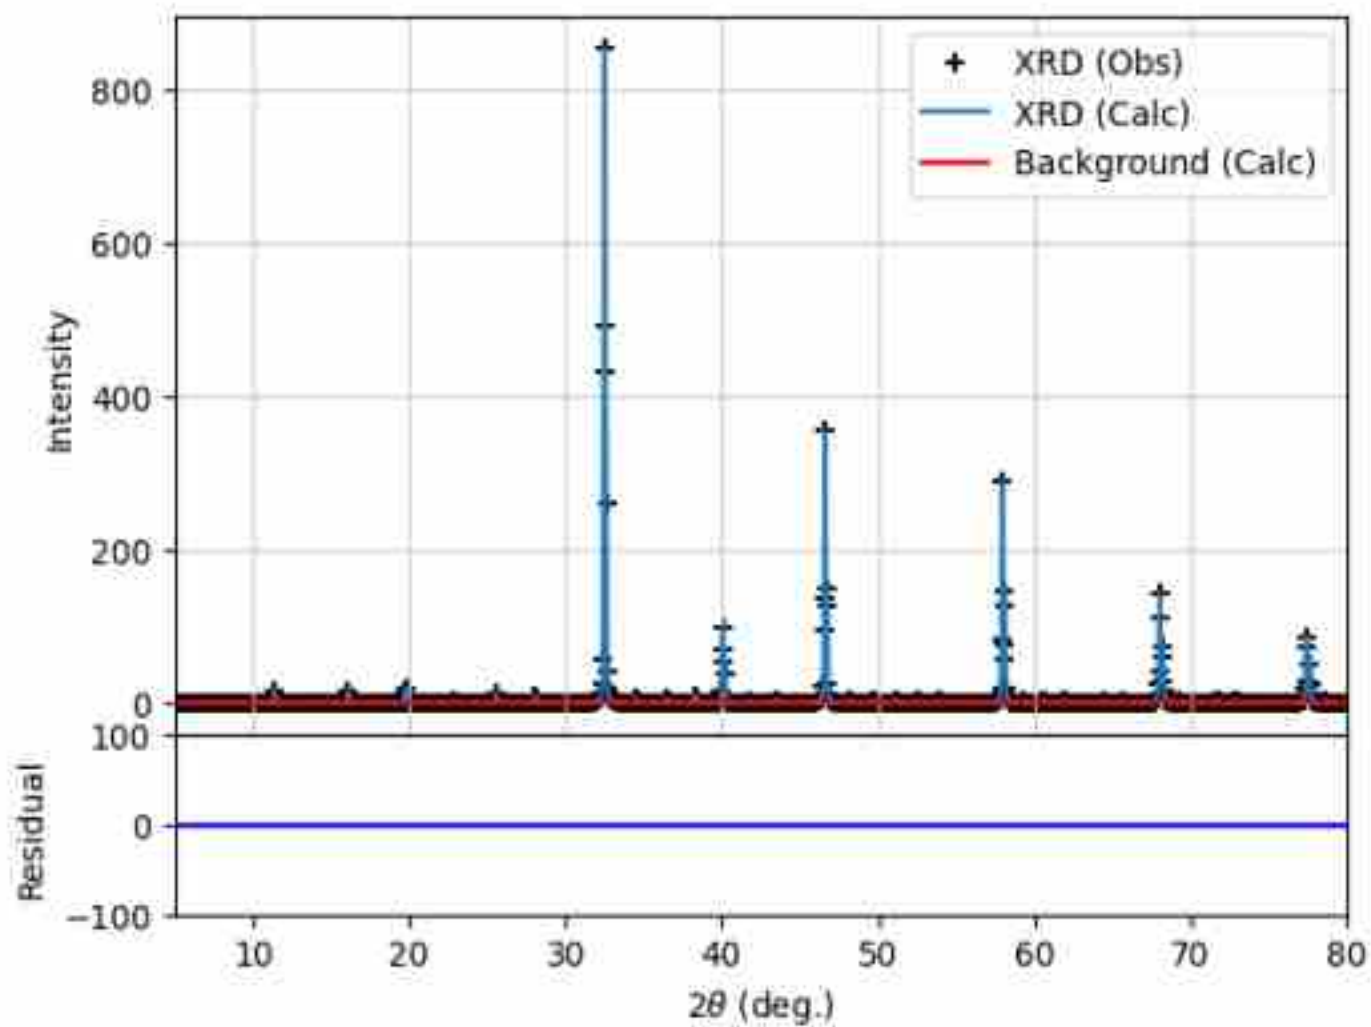

| RMSE before RR | Rwp     | RMSE after RR |
|----------------|---------|---------------|
| 0.021          | 0.00744 | 0.0016        |

# Sr<sub>3</sub>Fe<sub>2</sub>O<sub>7</sub>

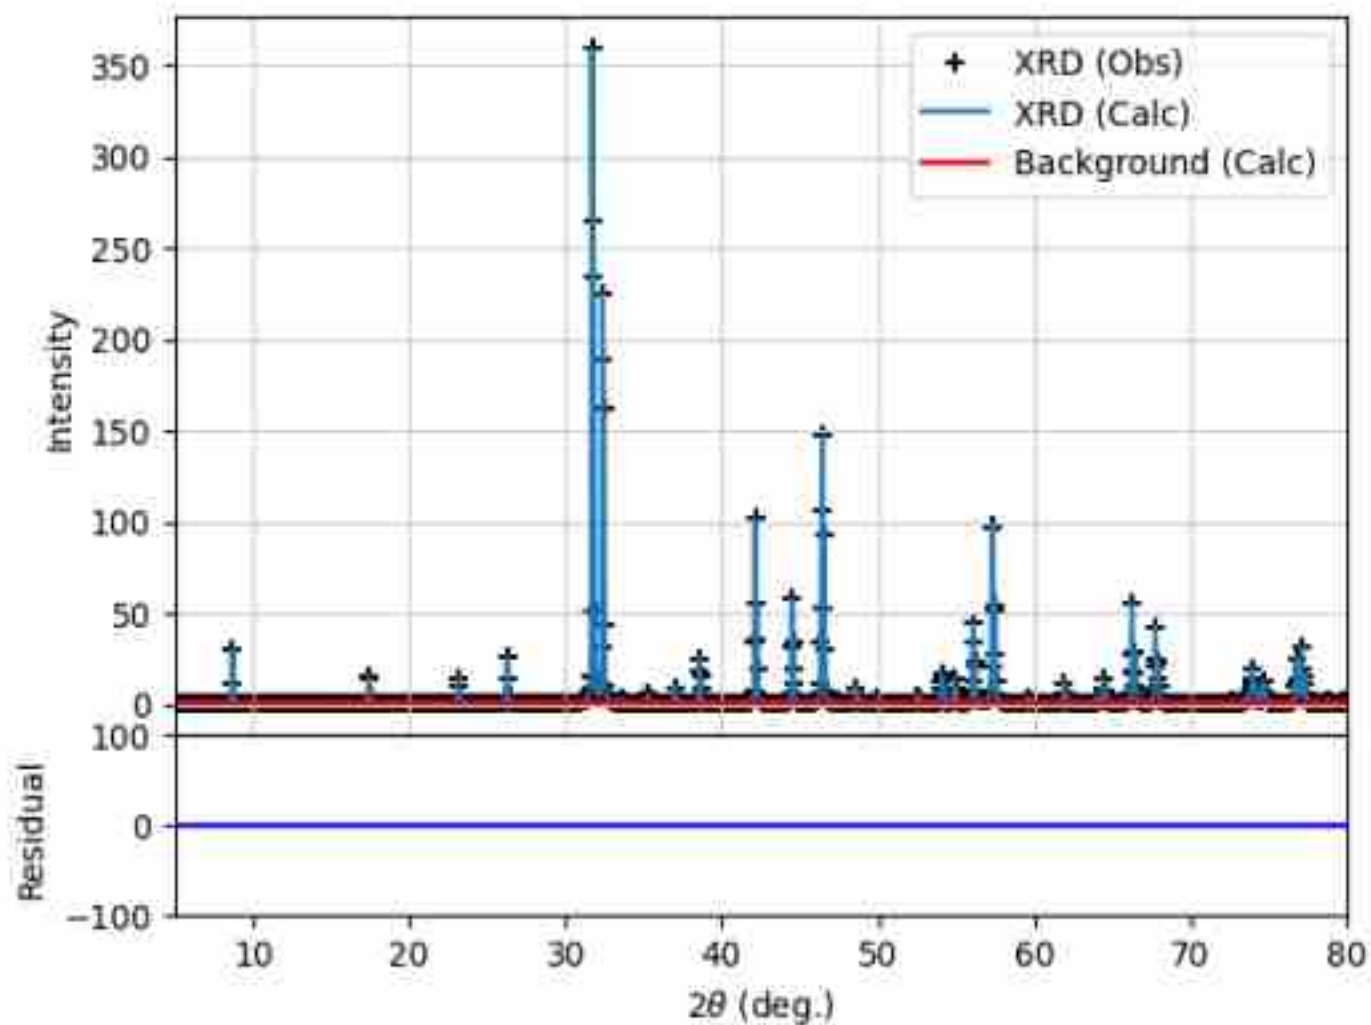

| RMSE before RR | Rwp     | RMSE after RR |
|----------------|---------|---------------|
| 0.021          | 0.00367 | 0.00093       |

# Sr<sub>3</sub>Fe<sub>2</sub>Ru<sub>1</sub>O<sub>9</sub>

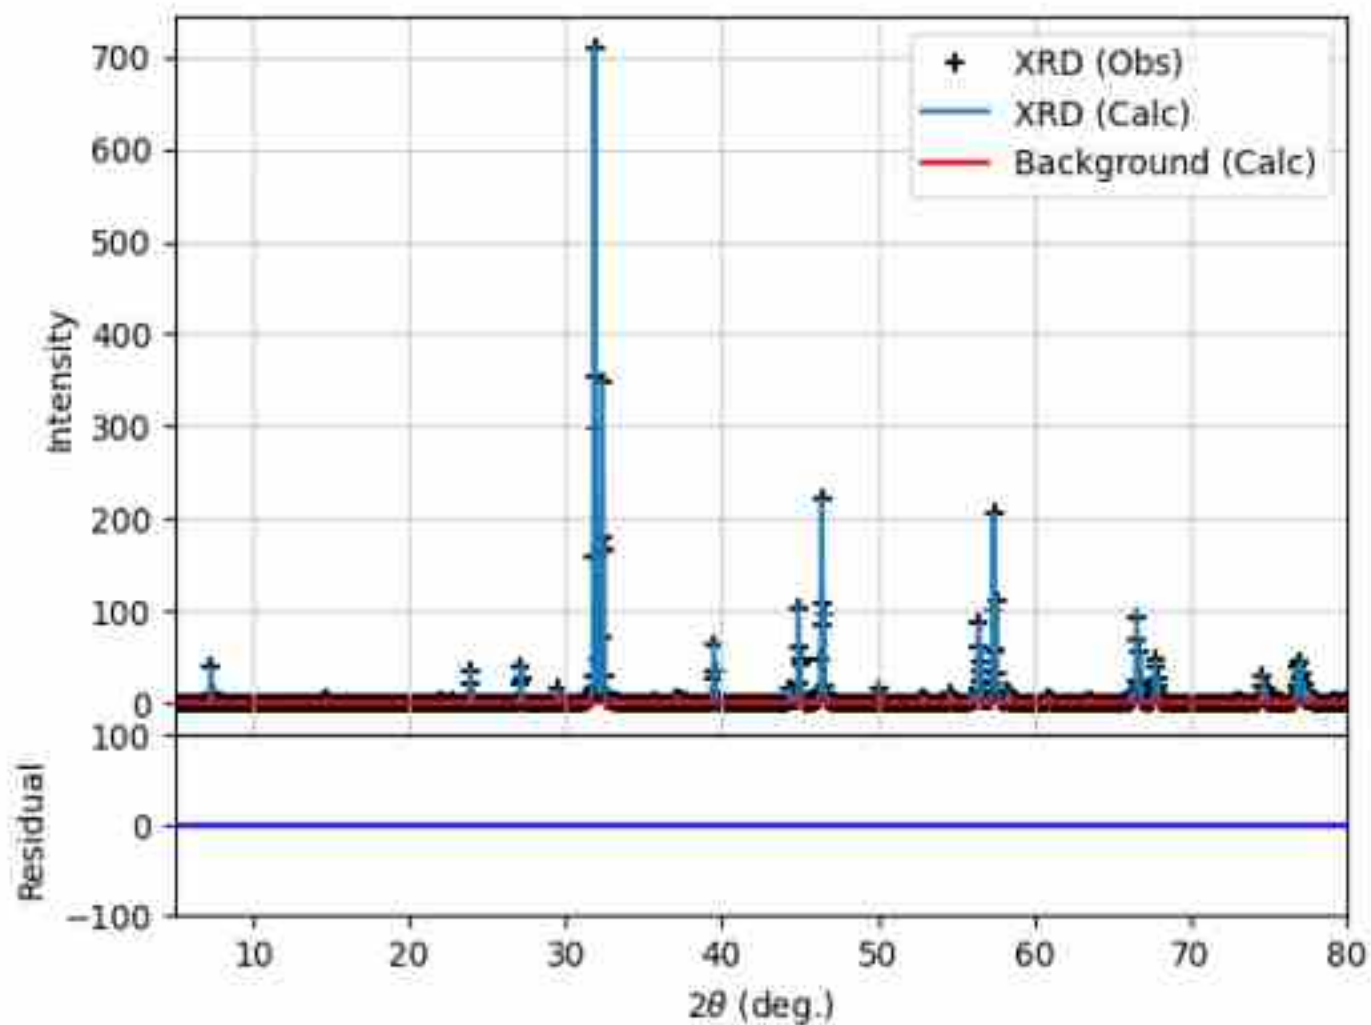

| RMSE before RR | Rwp    | RMSE after RR |
|----------------|--------|---------------|
| 0.021          | 0.0054 | 0.00176       |

Sr3La1Cu1Ru1O8

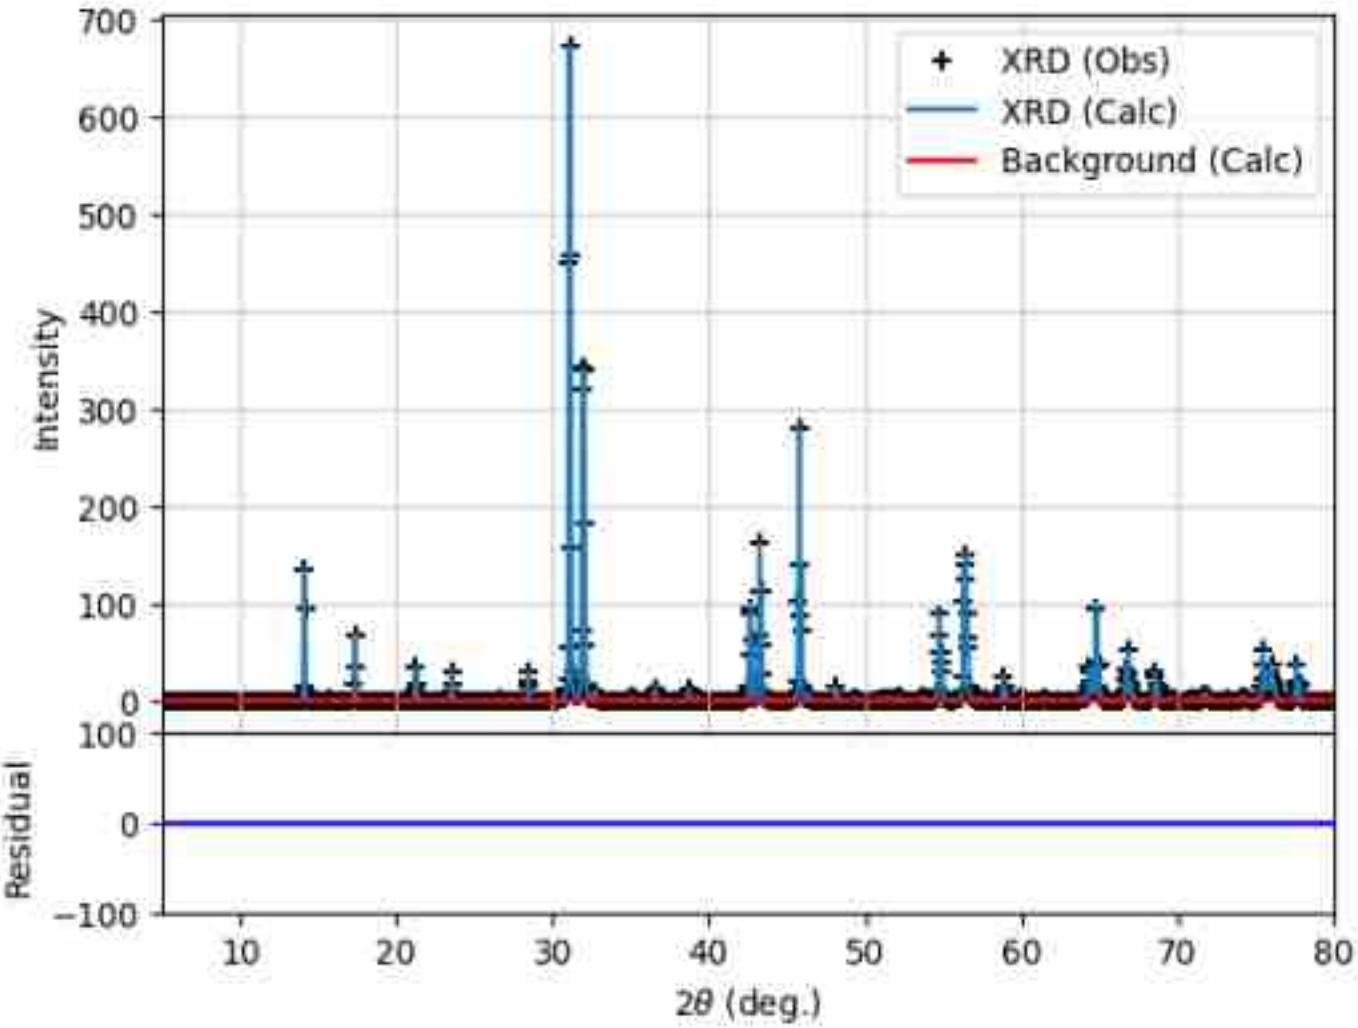

| RMSE before RR | Rwp     | RMSE after RR |
|----------------|---------|---------------|
| 0.021          | 0.00368 | 0.00133       |

# Sr<sub>4</sub>Ca<sub>2</sub>Ir<sub>2</sub>O<sub>12</sub>

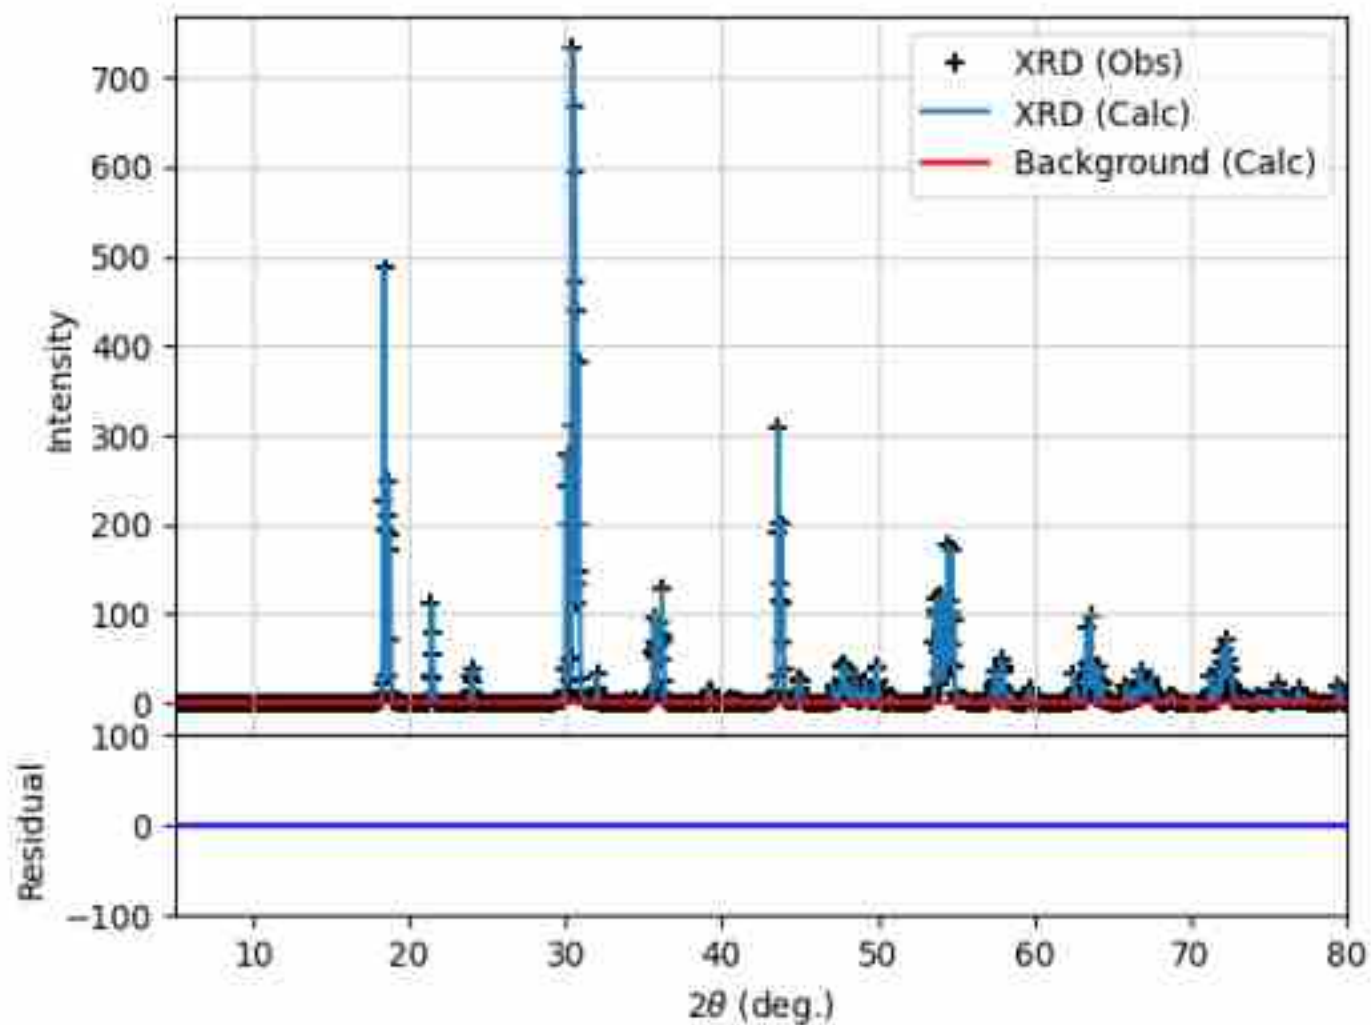

| RMSE before RR | Rwp     | RMSE after RR |
|----------------|---------|---------------|
| 0.021          | 0.00362 | 0.00124       |

# Ta<sub>4</sub>Sn<sub>8</sub>

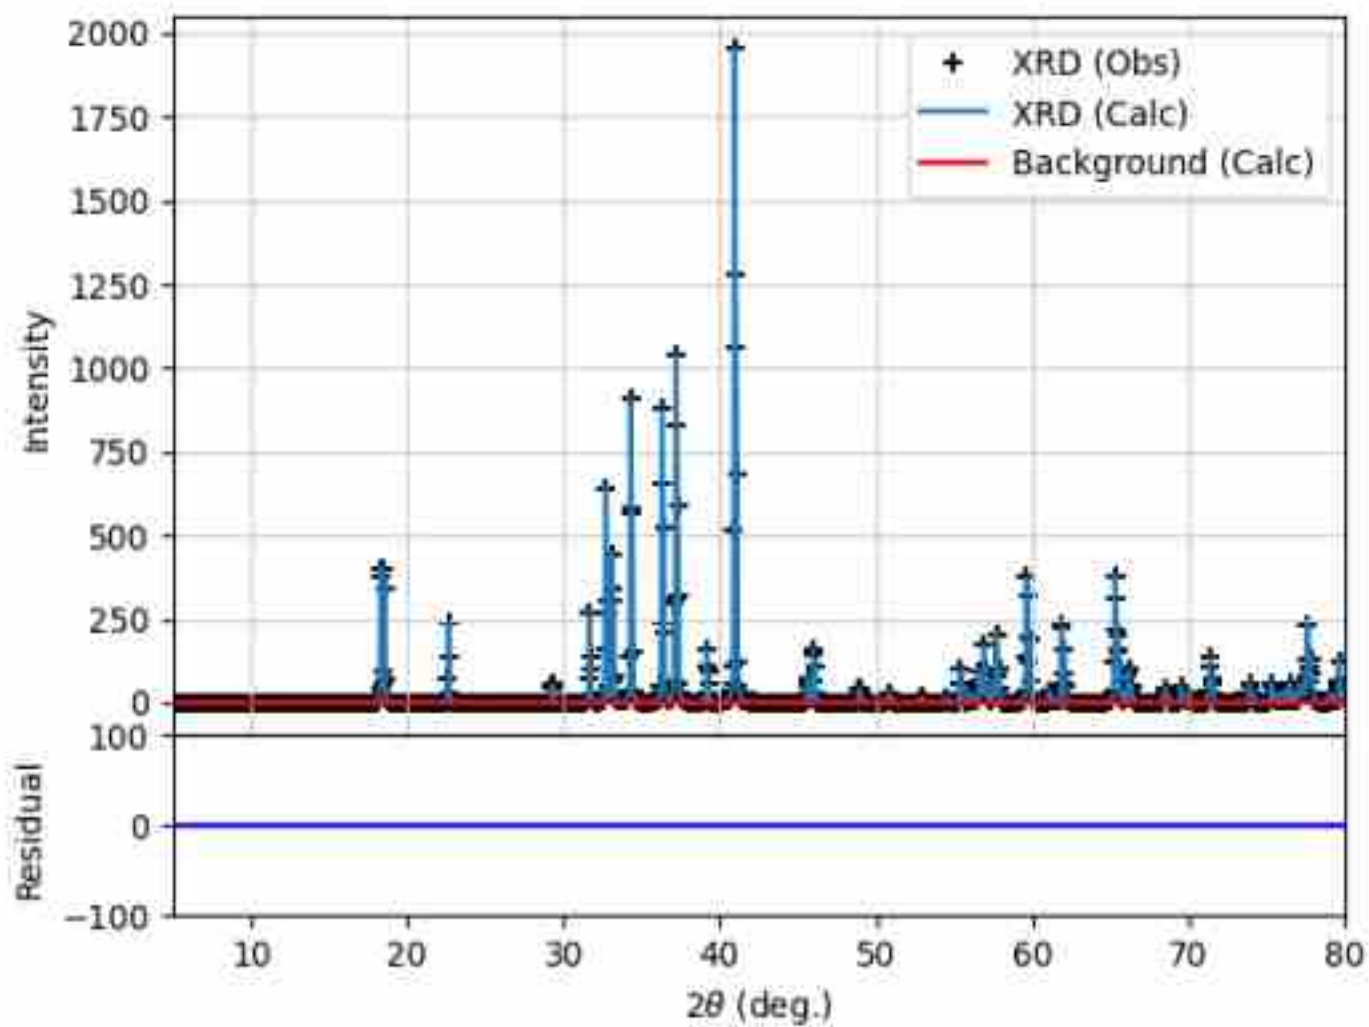

| RMSE before RR | Rwp     | RMSE after RR |
|----------------|---------|---------------|
| 0.021          | 0.00331 | 0.00021       |

# Tb1Fe6Co5W1

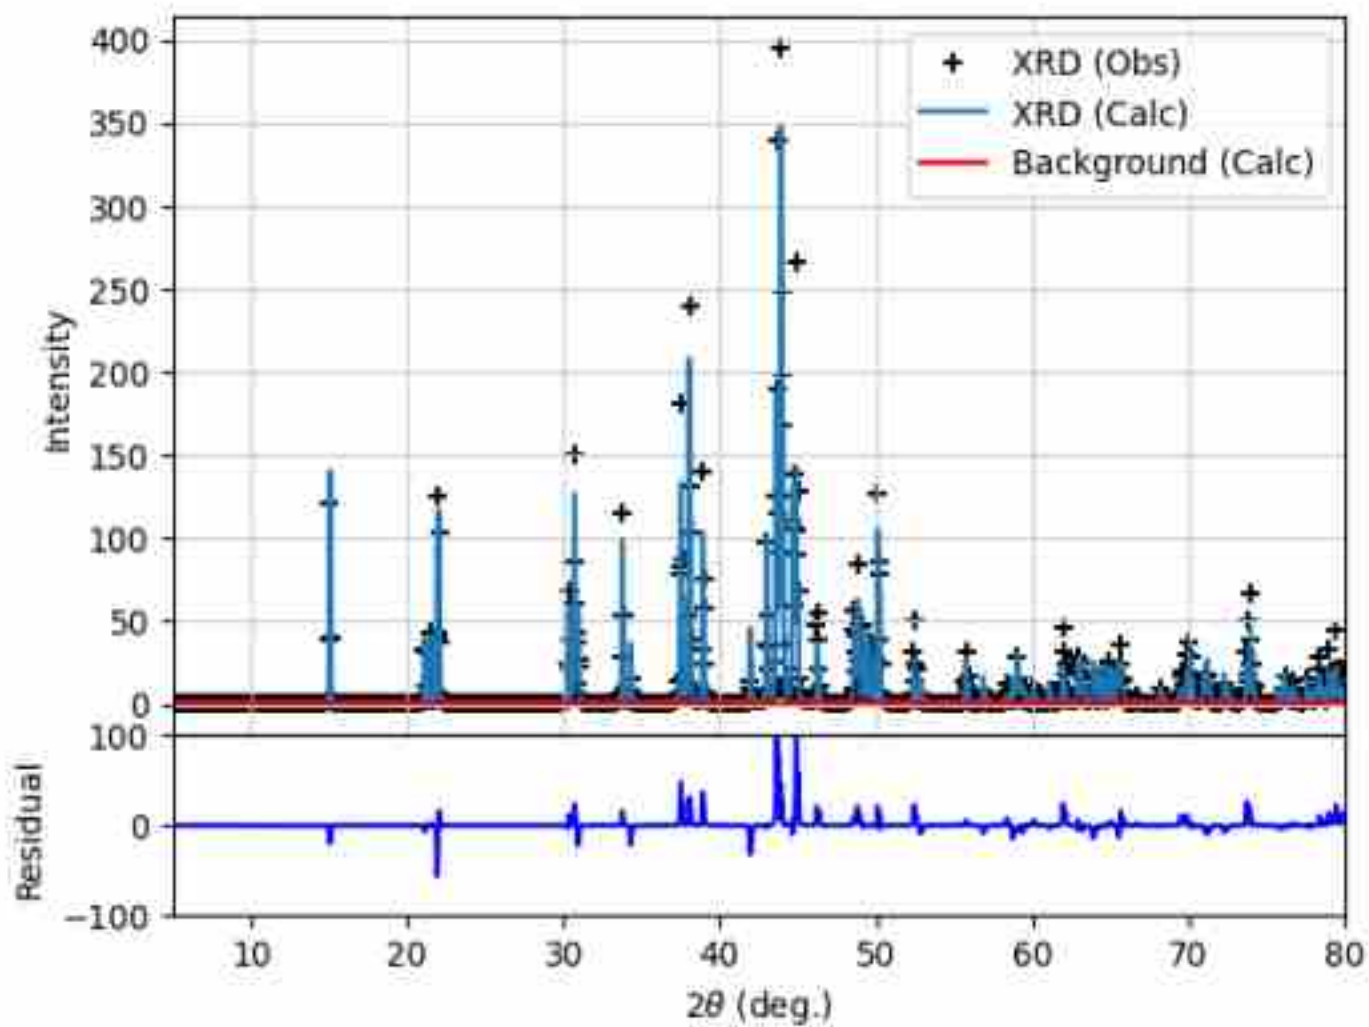

| RMSE before RR | Rwp      | RMSE after RR |
|----------------|----------|---------------|
| 0.021          | 35.79229 | 0.14477       |

# Tb2Ag6

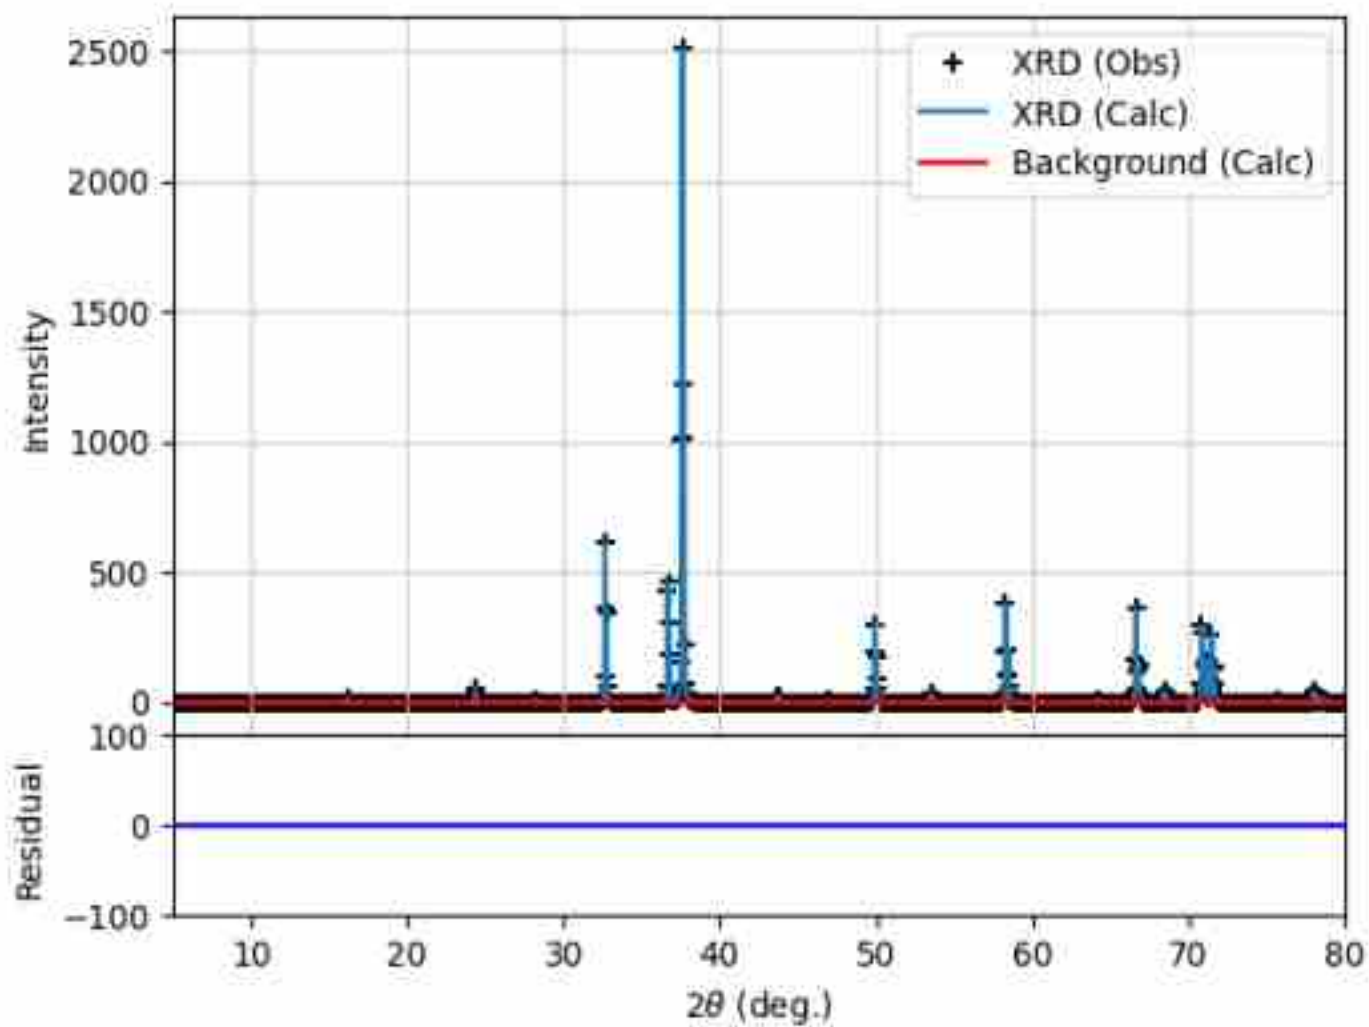

| RMSE before RR | Rwp     | RMSE after RR |
|----------------|---------|---------------|
| 0.021          | 0.01363 | 0.00086       |



# Tb<sub>2</sub>Mn<sub>4</sub>Si<sub>2</sub>C<sub>2</sub>

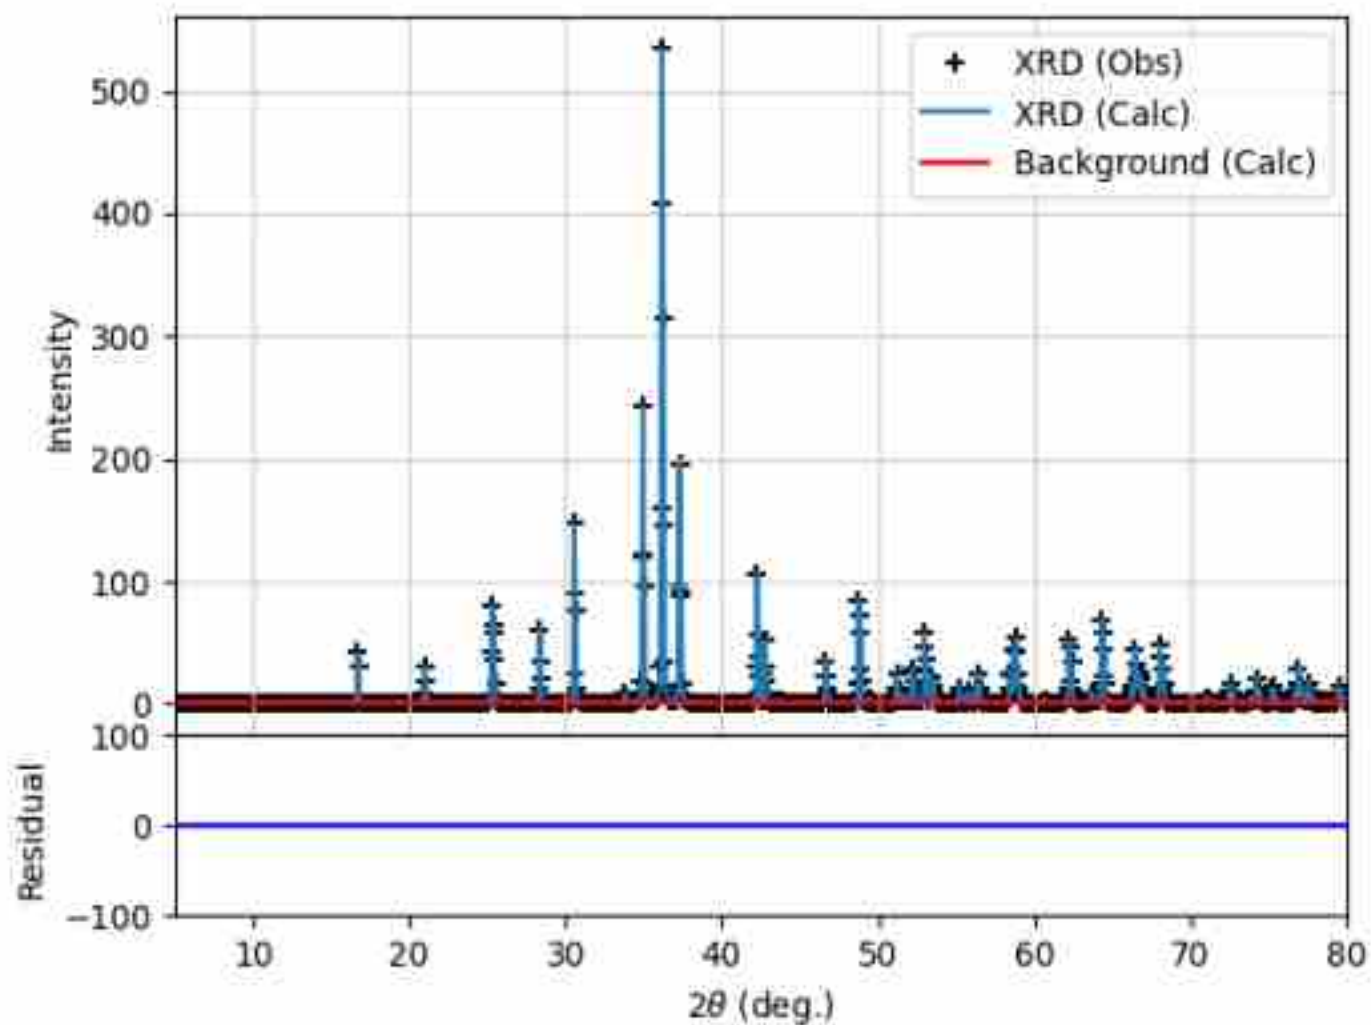

| RMSE before RR | Rwp     | RMSE after RR |
|----------------|---------|---------------|
| 0.021          | 0.00371 | 0.00104       |

# Tb<sub>2</sub>Sn<sub>2</sub>Au<sub>2</sub>

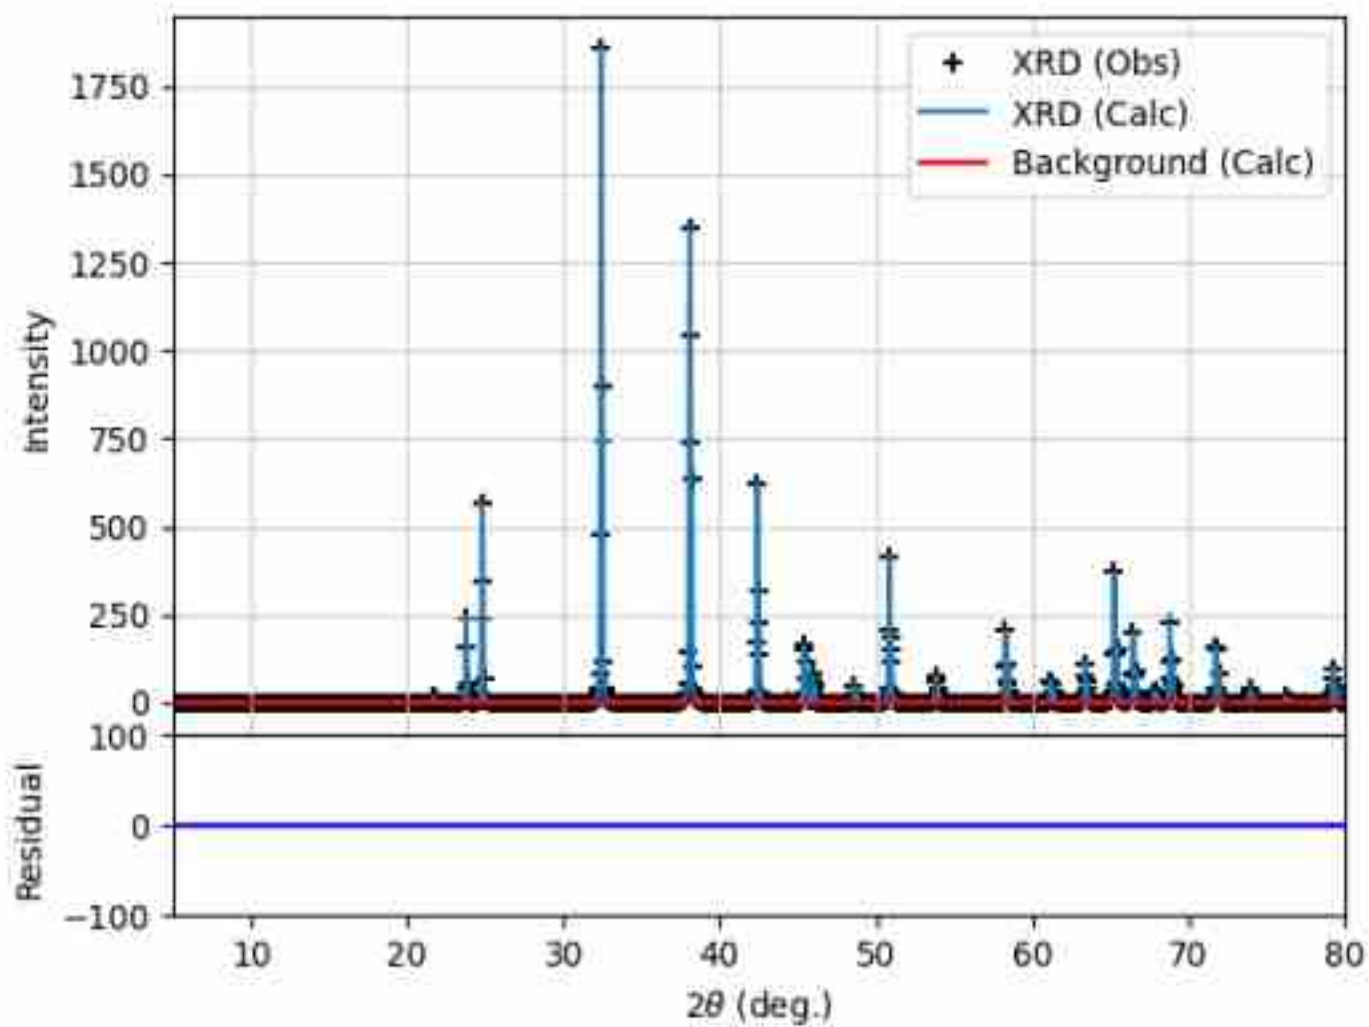

| RMSE before RR | Rwp     | RMSE after RR |
|----------------|---------|---------------|
| 0.021          | 0.00352 | 0.00033       |

# Th<sub>2</sub>Si<sub>2</sub>Ge<sub>2</sub>

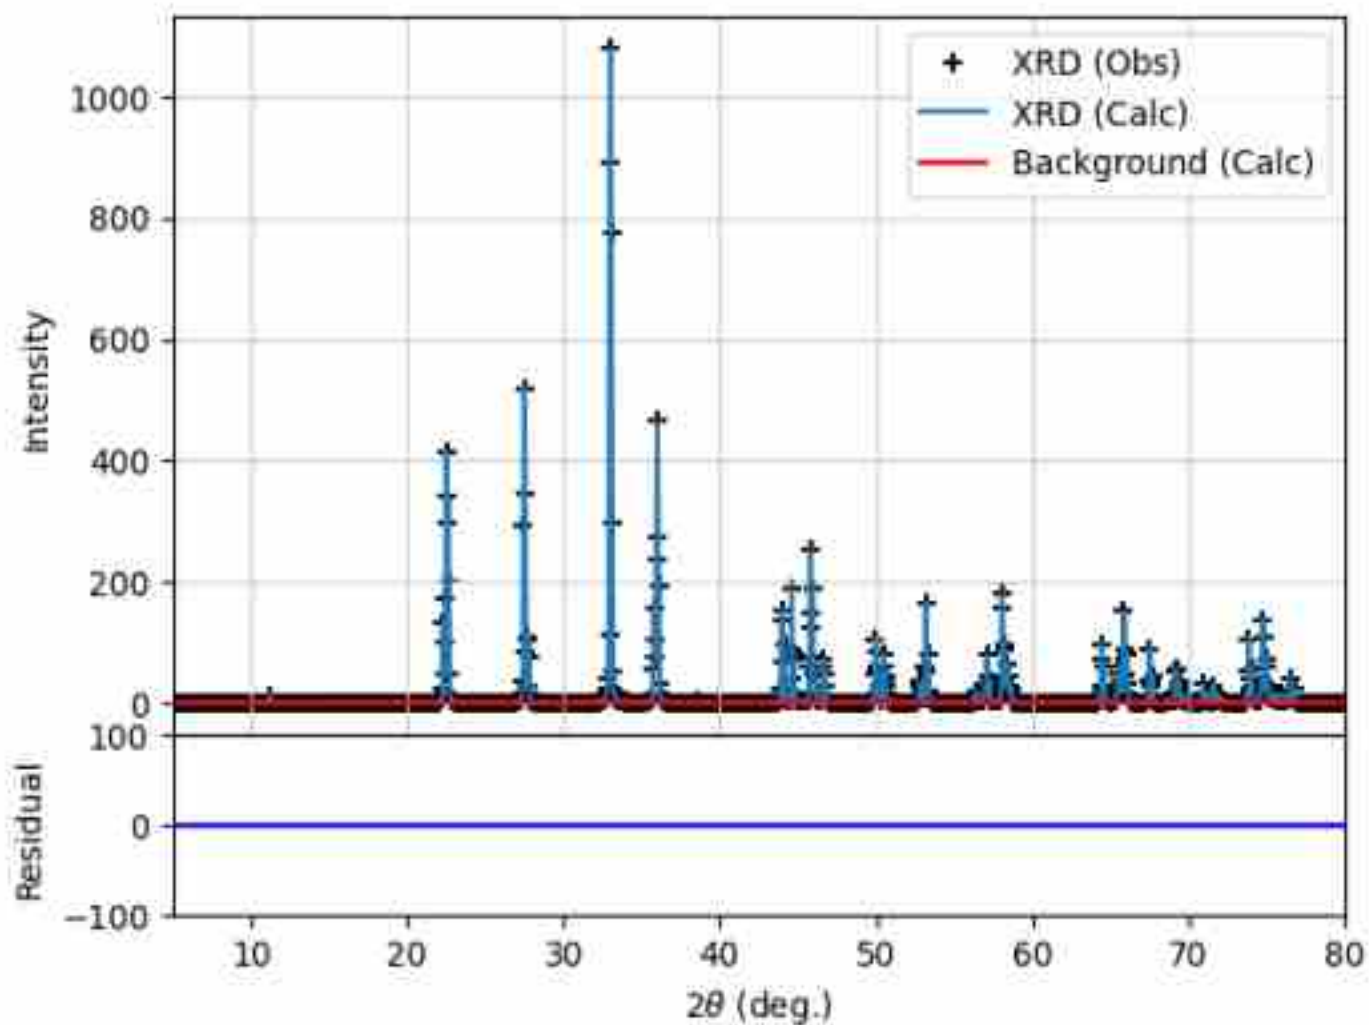

| RMSE before RR | Rwp    | RMSE after RR |
|----------------|--------|---------------|
| 0.021          | 0.0029 | 0.00053       |

# Th<sub>2</sub>U<sub>2</sub>Re<sub>8</sub>

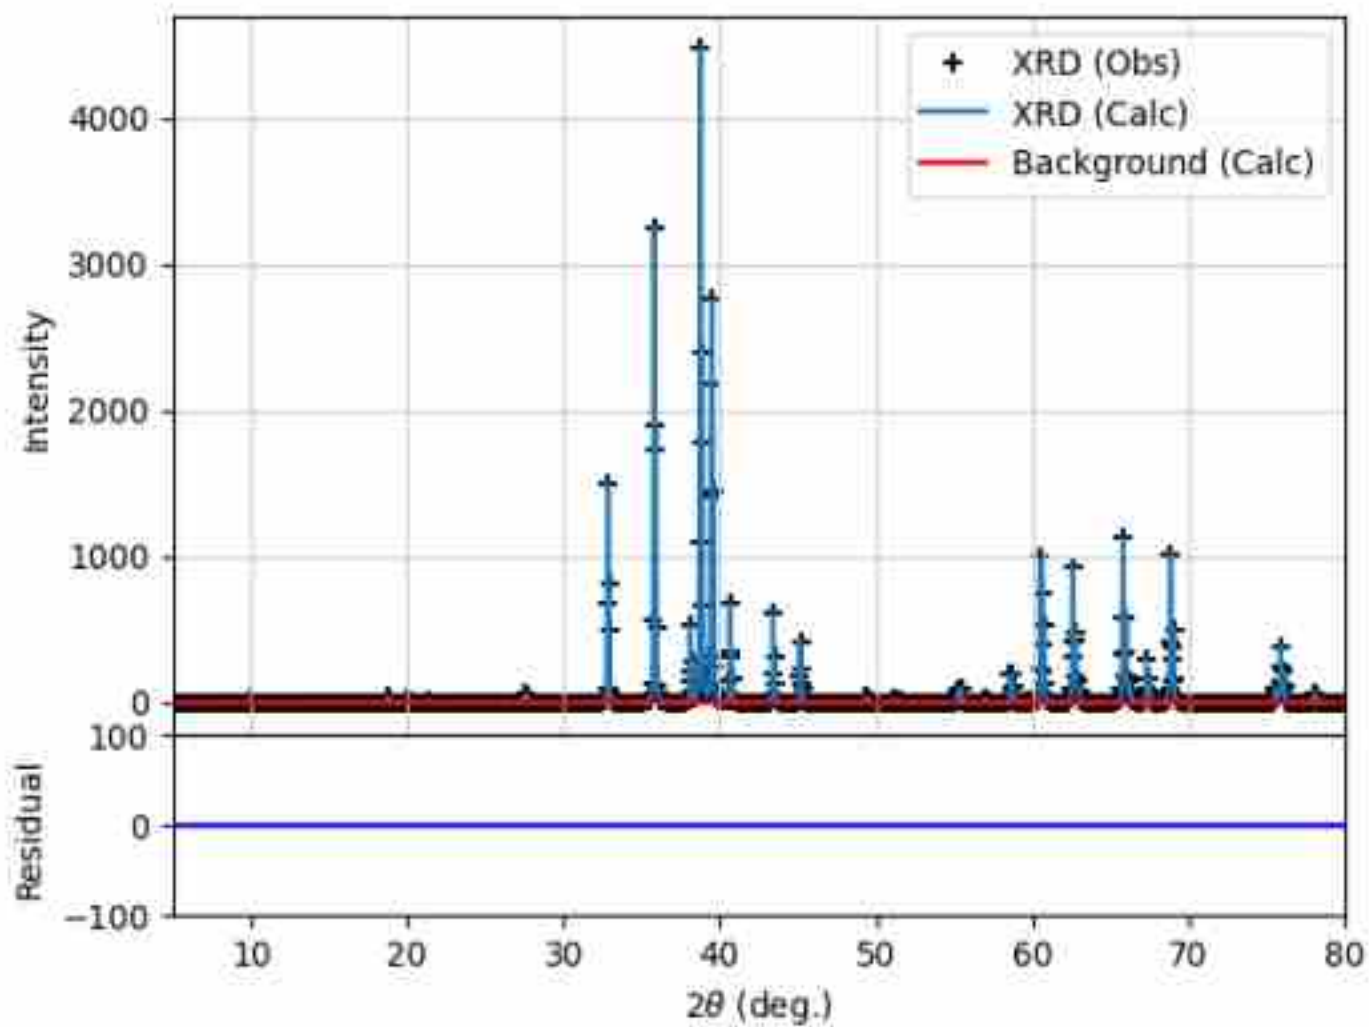

| RMSE before RR | Rwp     | RMSE after RR |
|----------------|---------|---------------|
| 0.021          | 0.00487 | 0.00028       |

# Th<sub>3</sub>Al<sub>3</sub>Rh<sub>3</sub>

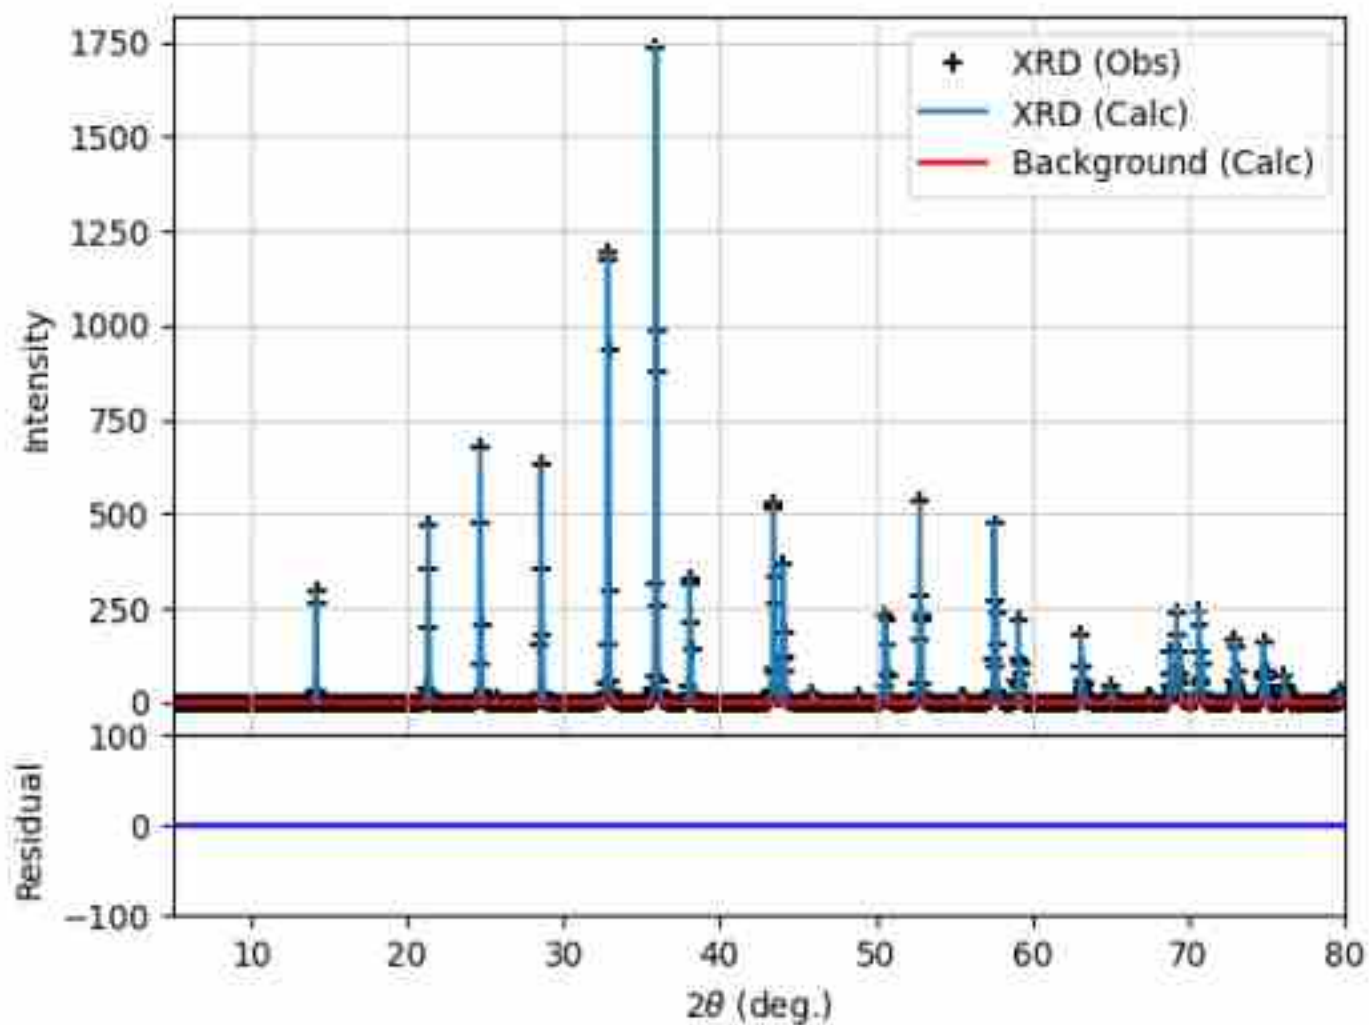

| RMSE before RR | Rwp     | RMSE after RR |
|----------------|---------|---------------|
| 0.021          | 0.00307 | 0.00083       |

# Ti<sub>2</sub>Mn<sub>1</sub>Fe<sub>1</sub>O<sub>6</sub>

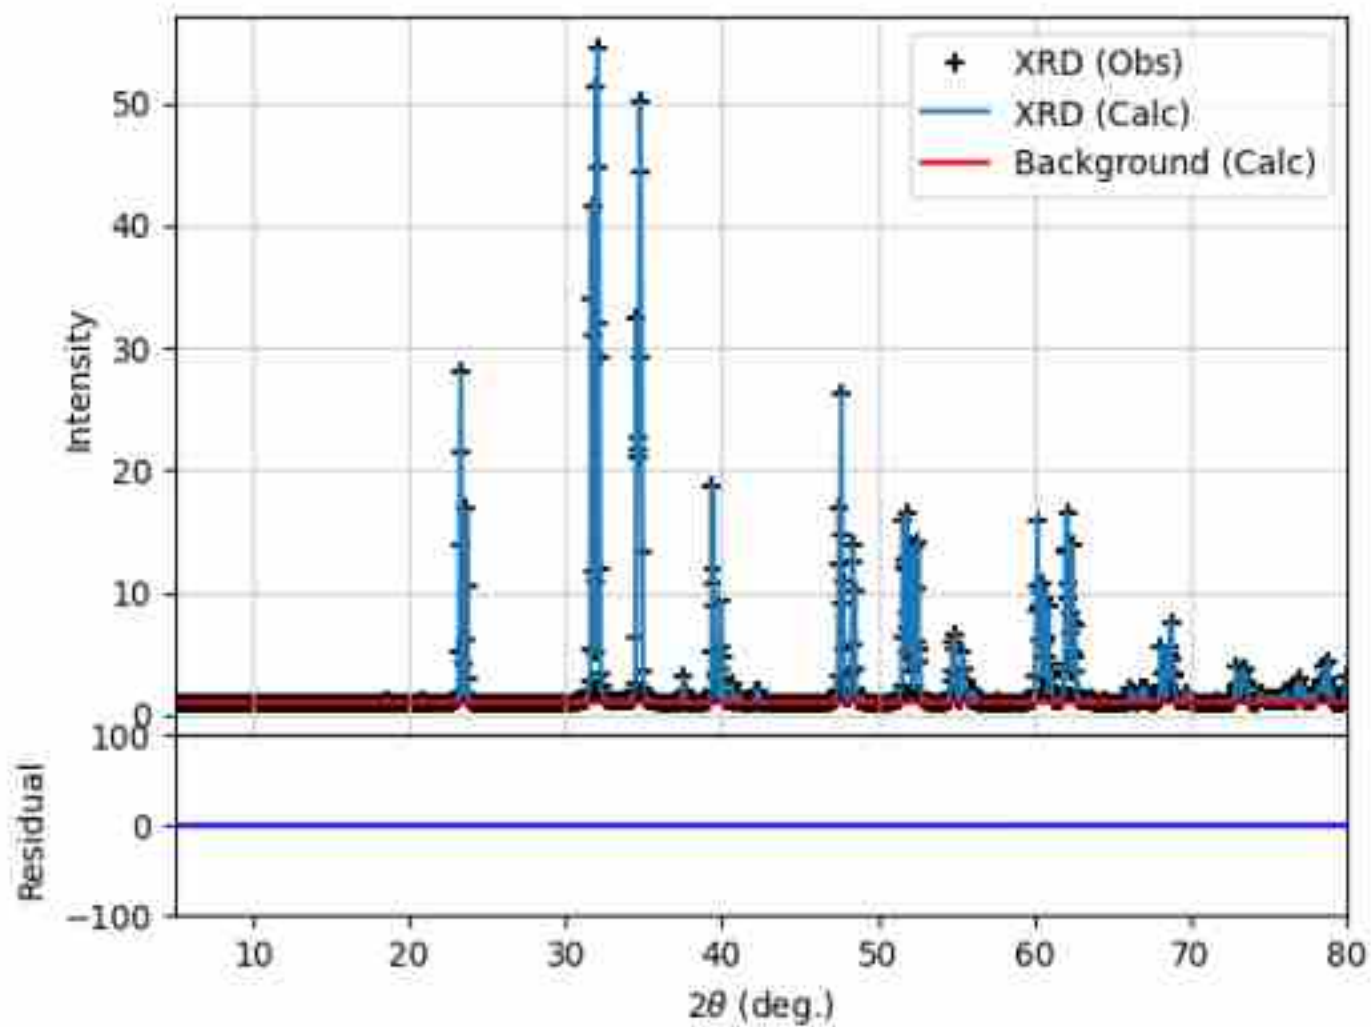

| RMSE before RR | Rwp     | RMSE after RR |
|----------------|---------|---------------|
| 0.021          | 0.14901 | 0.00301       |

# Ti10Ga6

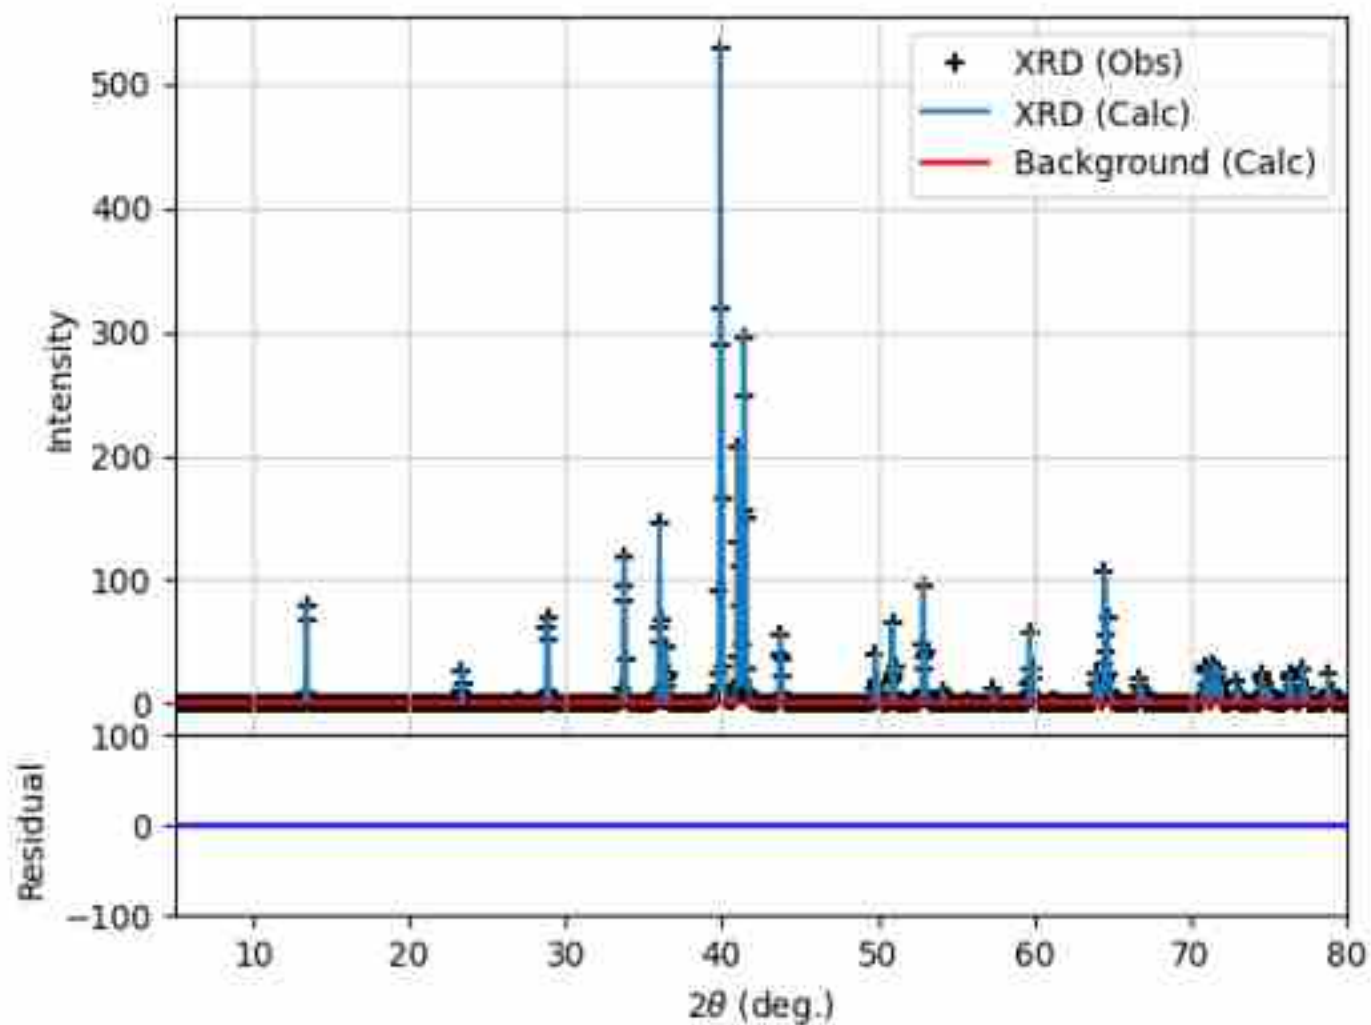

| RMSE before RR | Rwp     | RMSE after RR |
|----------------|---------|---------------|
| 0.021          | 0.00451 | 0.00057       |

# Ti10Mn2Sb4

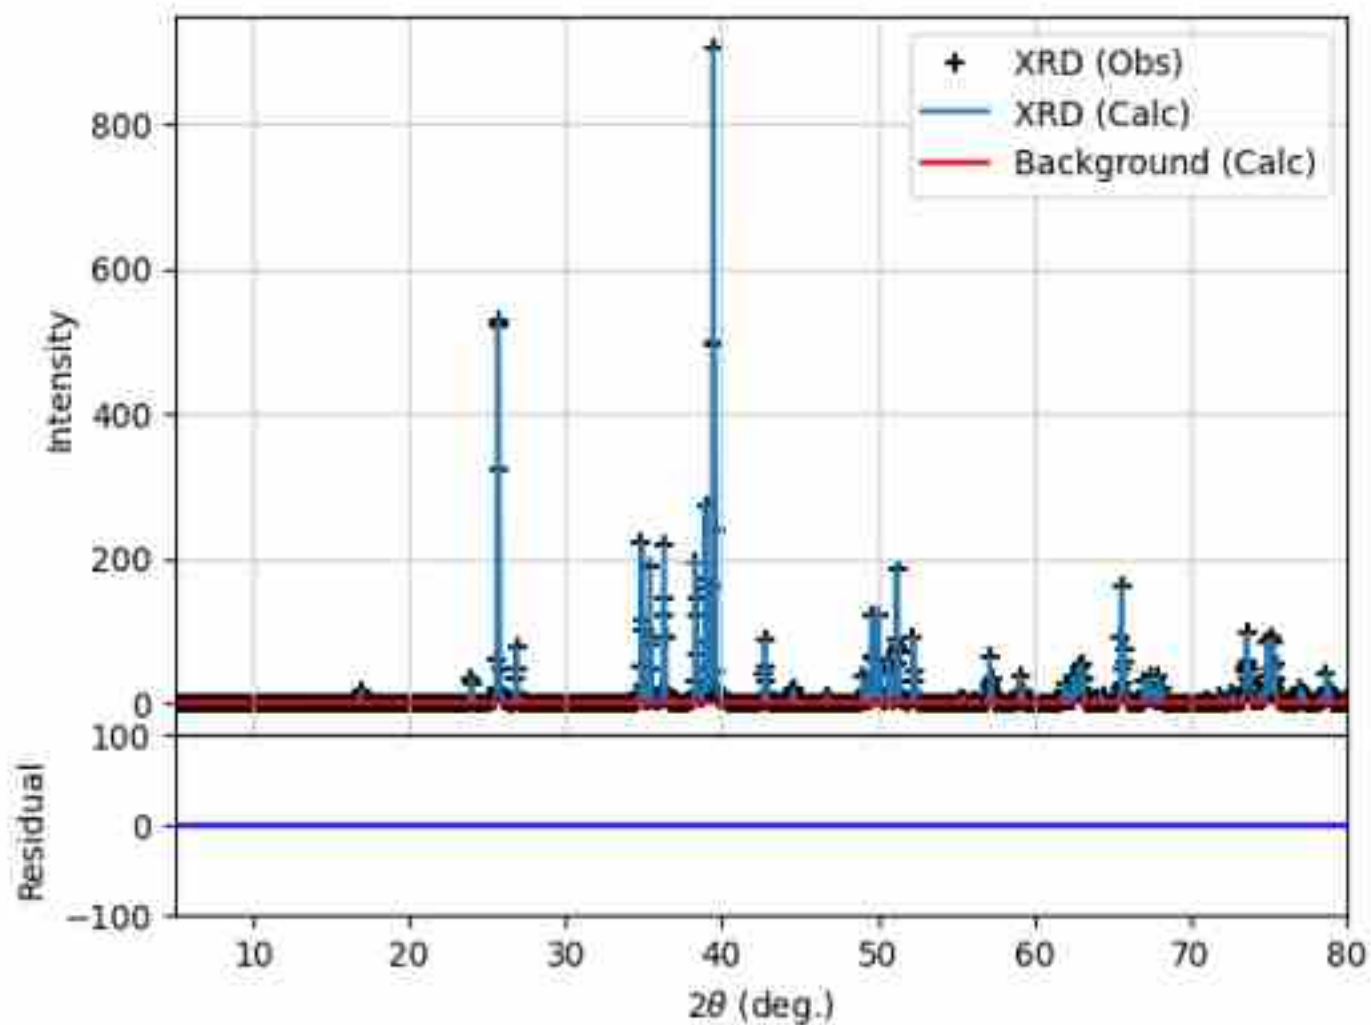

| RMSE before RR | Rwp     | RMSE after RR |
|----------------|---------|---------------|
| 0.021          | 0.00299 | 0.00047       |



# Ti10Sb4Rh2

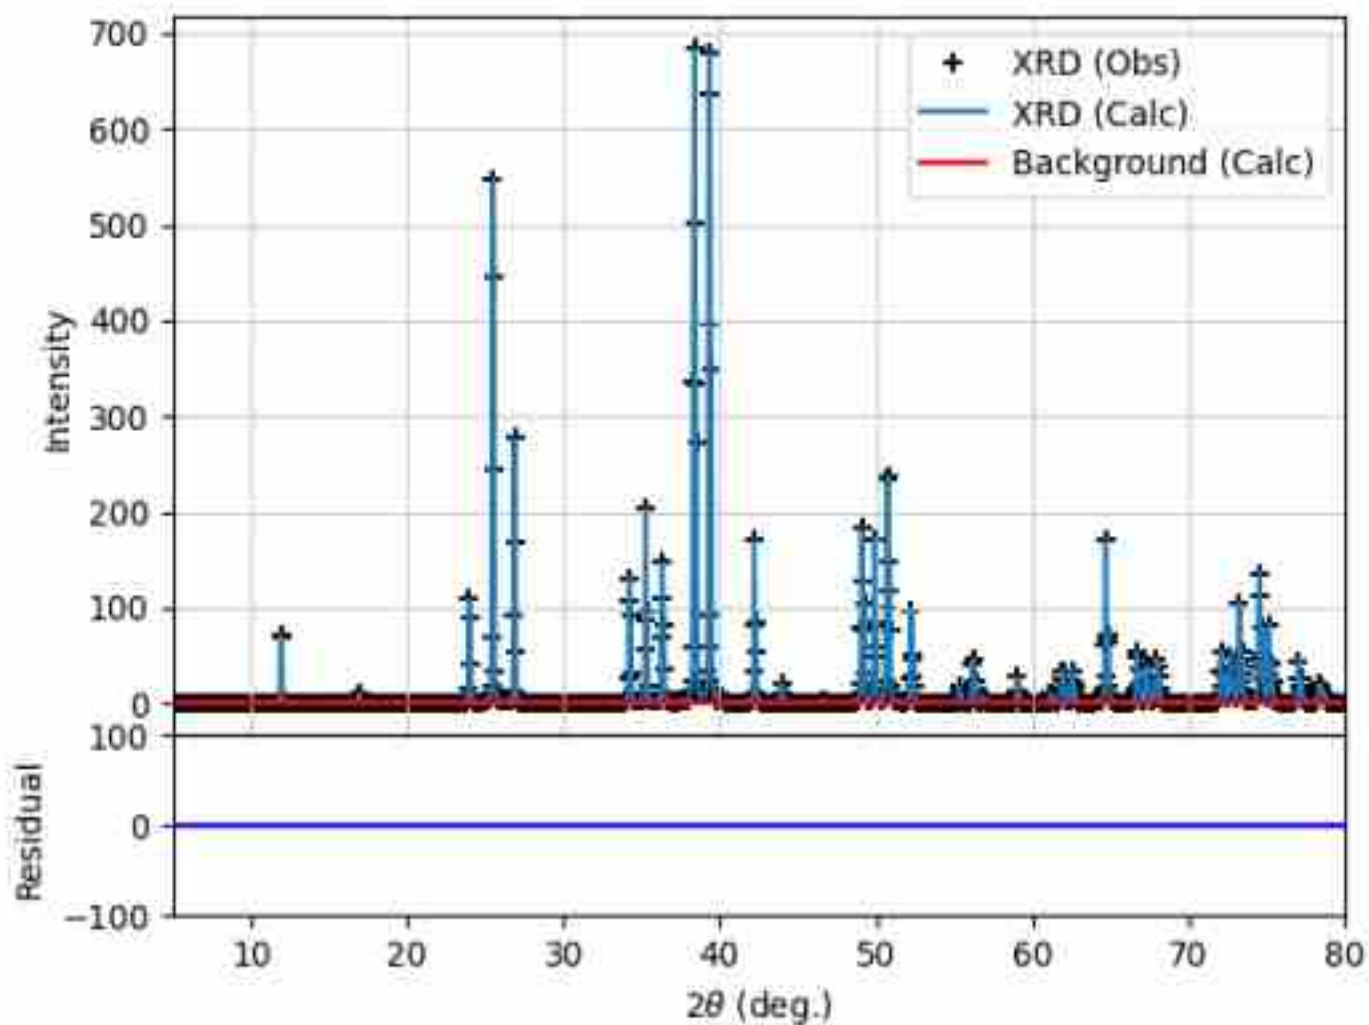

| RMSE before RR | Rwp     | RMSE after RR |
|----------------|---------|---------------|
| 0.021          | 0.00392 | 0.00049       |

# Tl4Fe4Br12

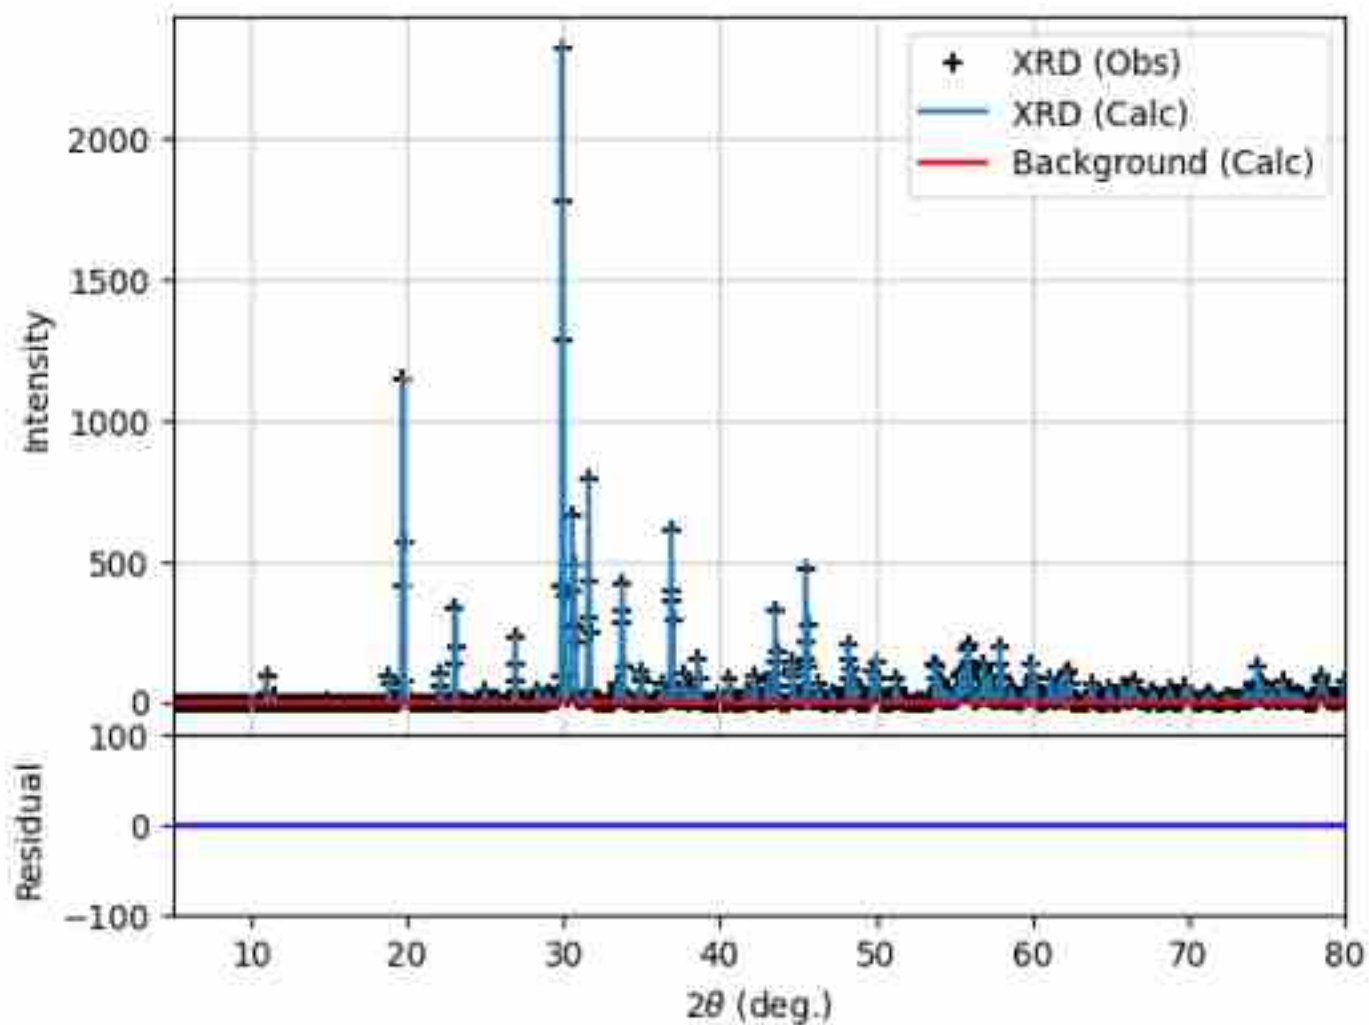

| RMSE before RR | Rwp     | RMSE after RR |
|----------------|---------|---------------|
| 0.021          | 0.00355 | 0.00049       |

# Tm<sub>2</sub>Ga<sub>8</sub>Ni<sub>2</sub>

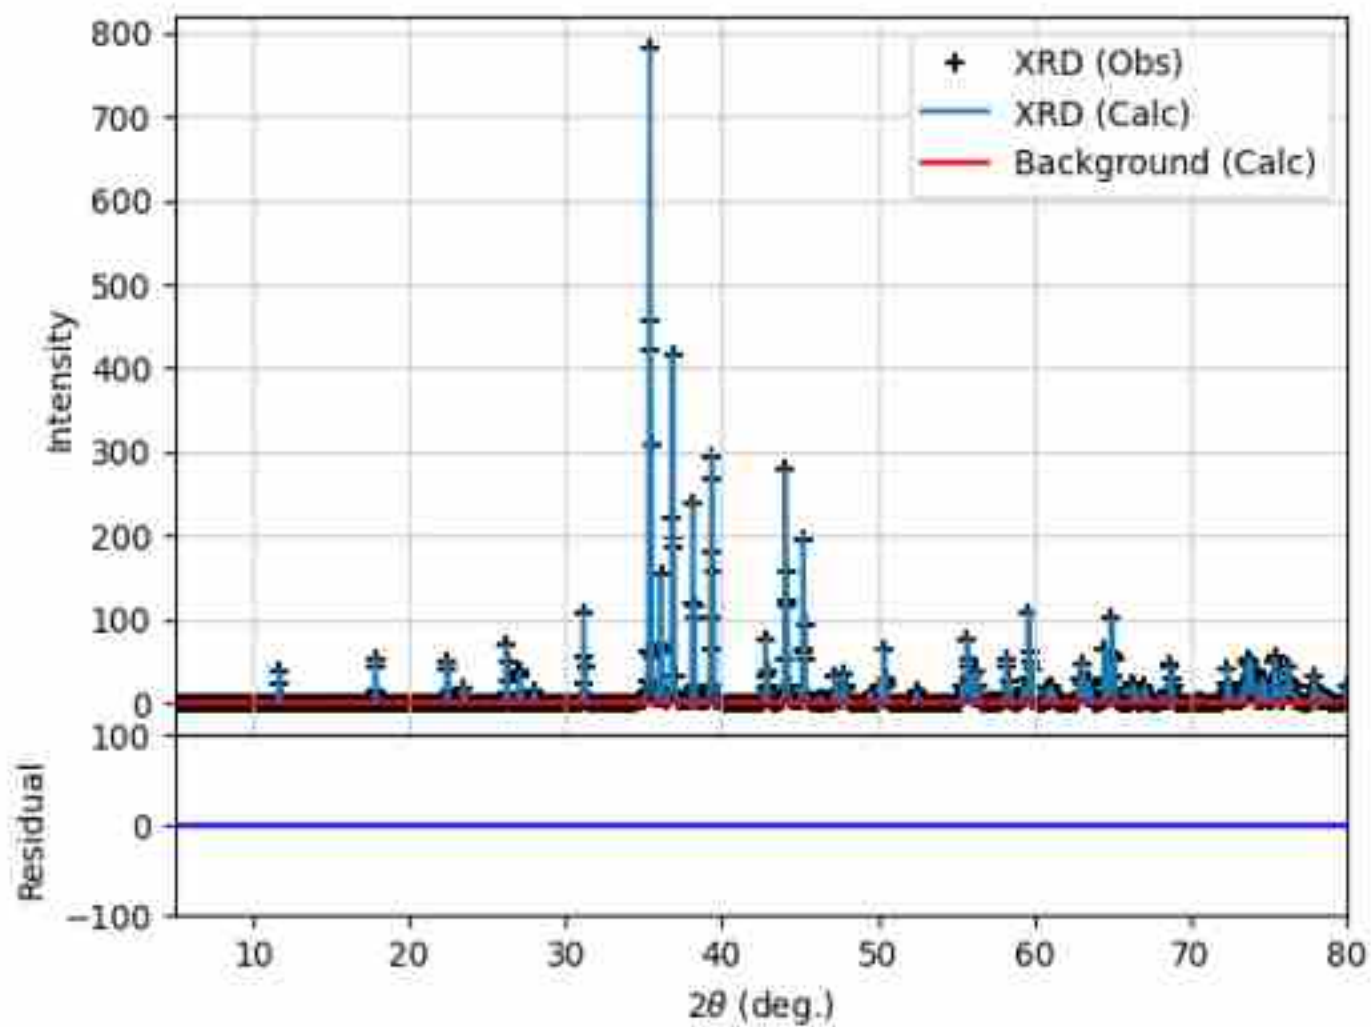

| RMSE before RR | Rwp     | RMSE after RR |
|----------------|---------|---------------|
| 0.021          | 0.00417 | 0.00044       |

# Tm<sub>2</sub>Ni<sub>2</sub>Pb<sub>1</sub>

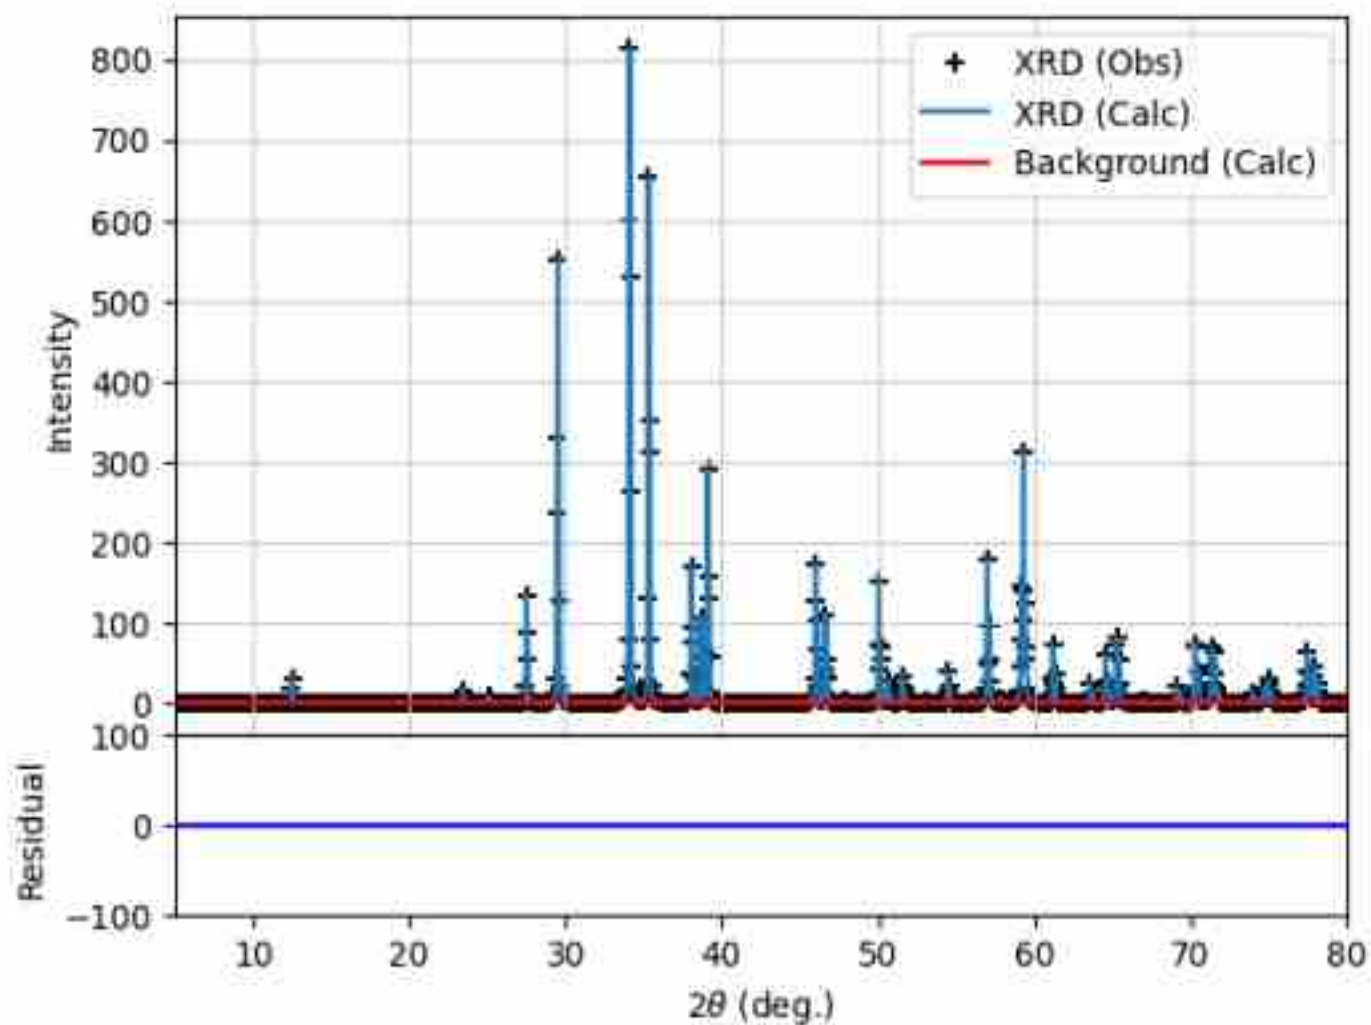

| RMSE before RR | Rwp     | RMSE after RR |
|----------------|---------|---------------|
| 0.021          | 0.00472 | 0.00041       |

# Tm<sub>4</sub>Ni<sub>4</sub>P<sub>4</sub>

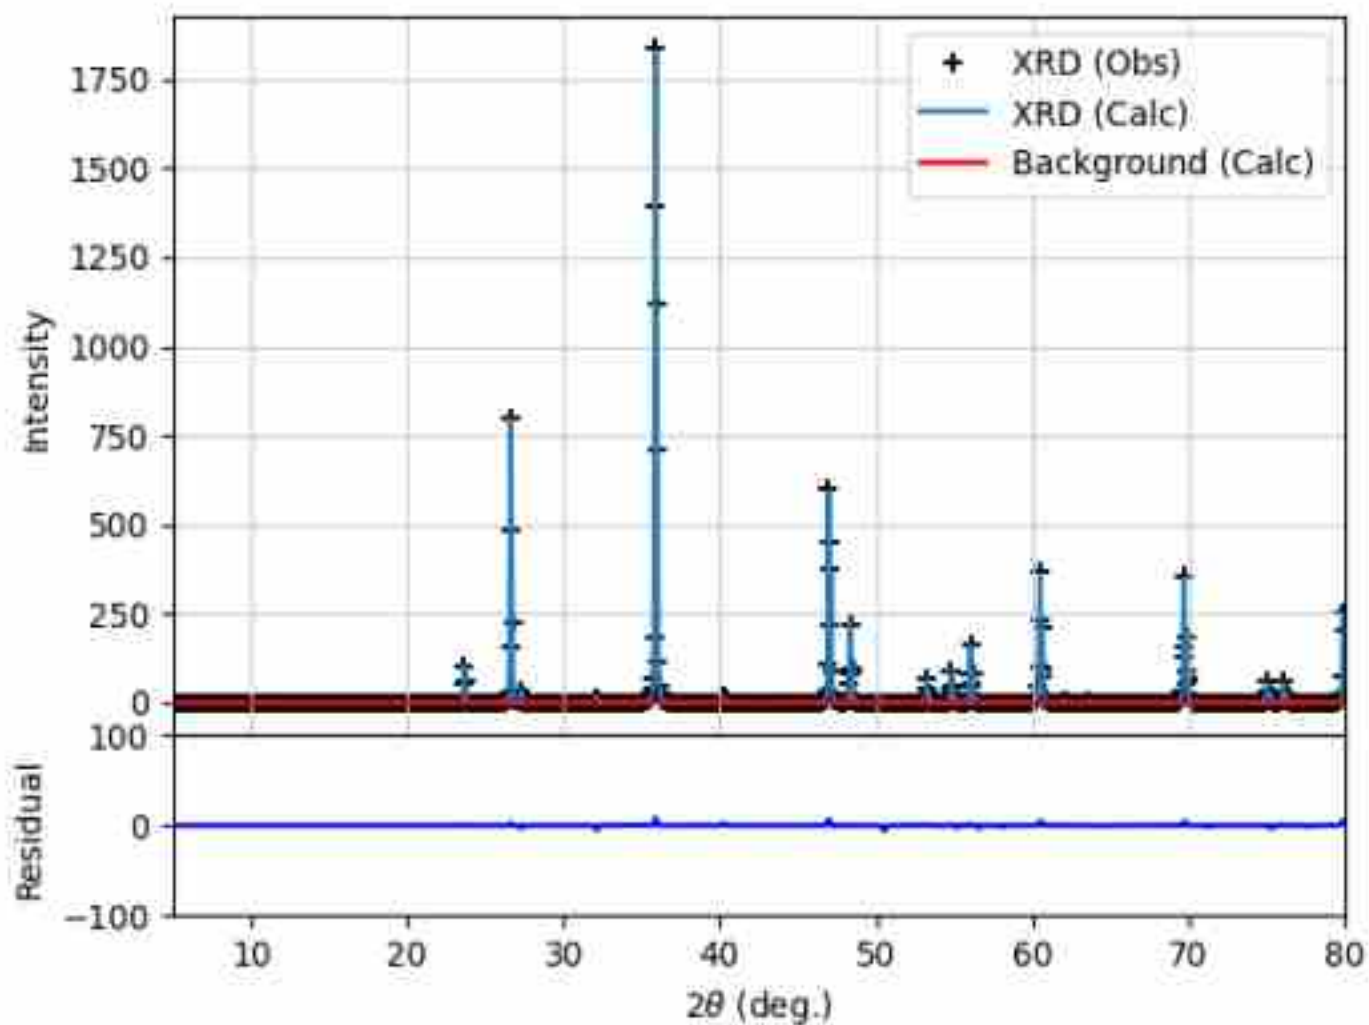

| RMSE before RR | Rwp     | RMSE after RR |
|----------------|---------|---------------|
| 0.021          | 7.05891 | 0.07518       |

# U<sub>2</sub>Fe<sub>4</sub>

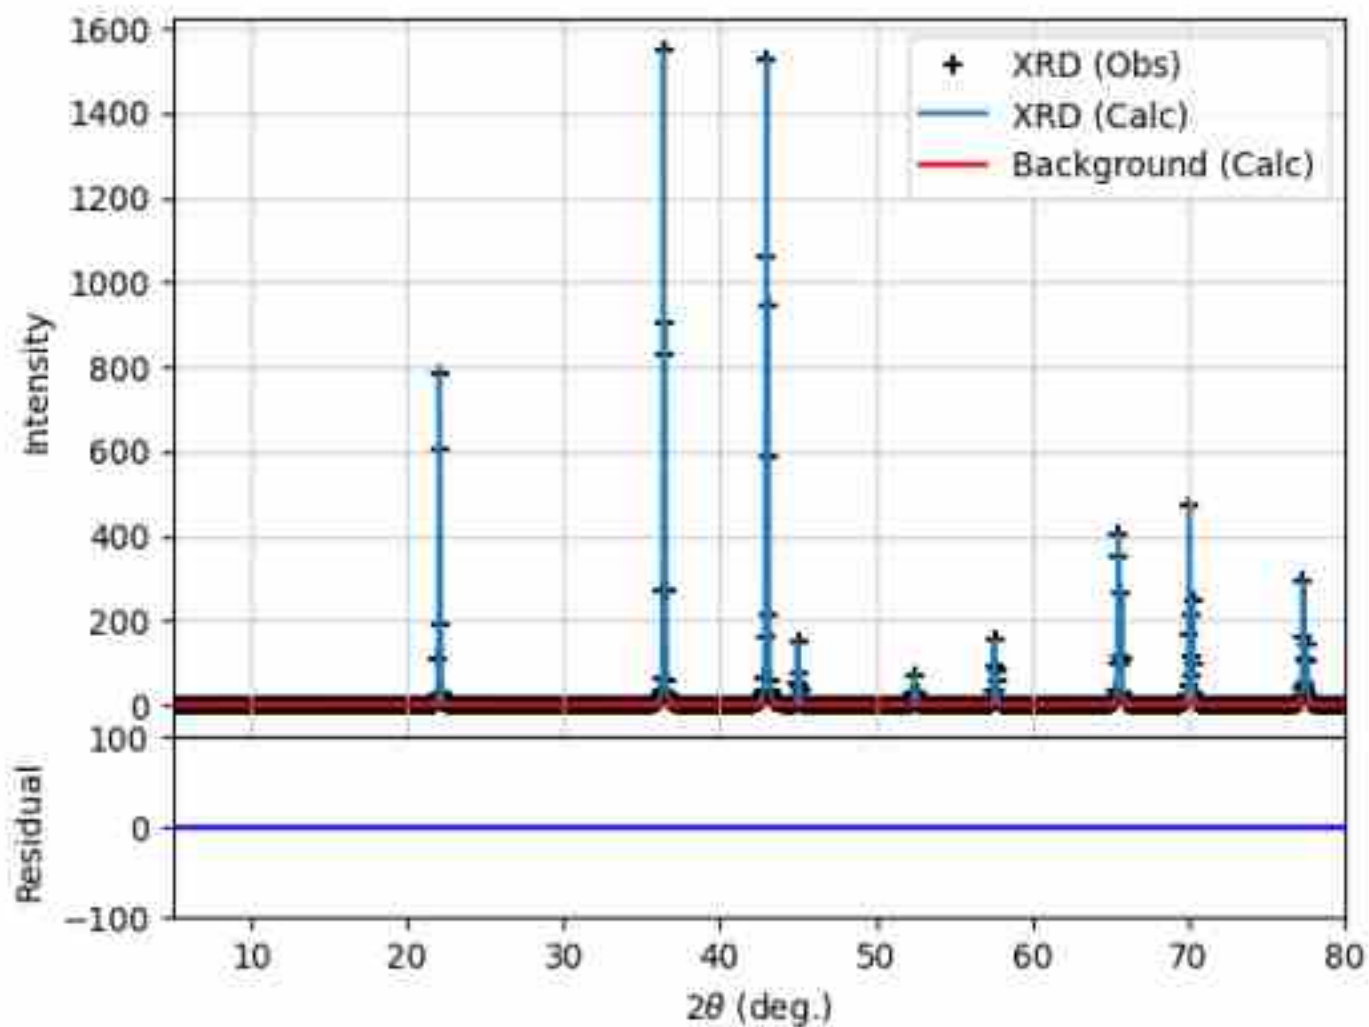

| RMSE before RR | Rwp     | RMSE after RR |
|----------------|---------|---------------|
| 0.021          | 0.10482 | 0.00499       |

# U4V4S12

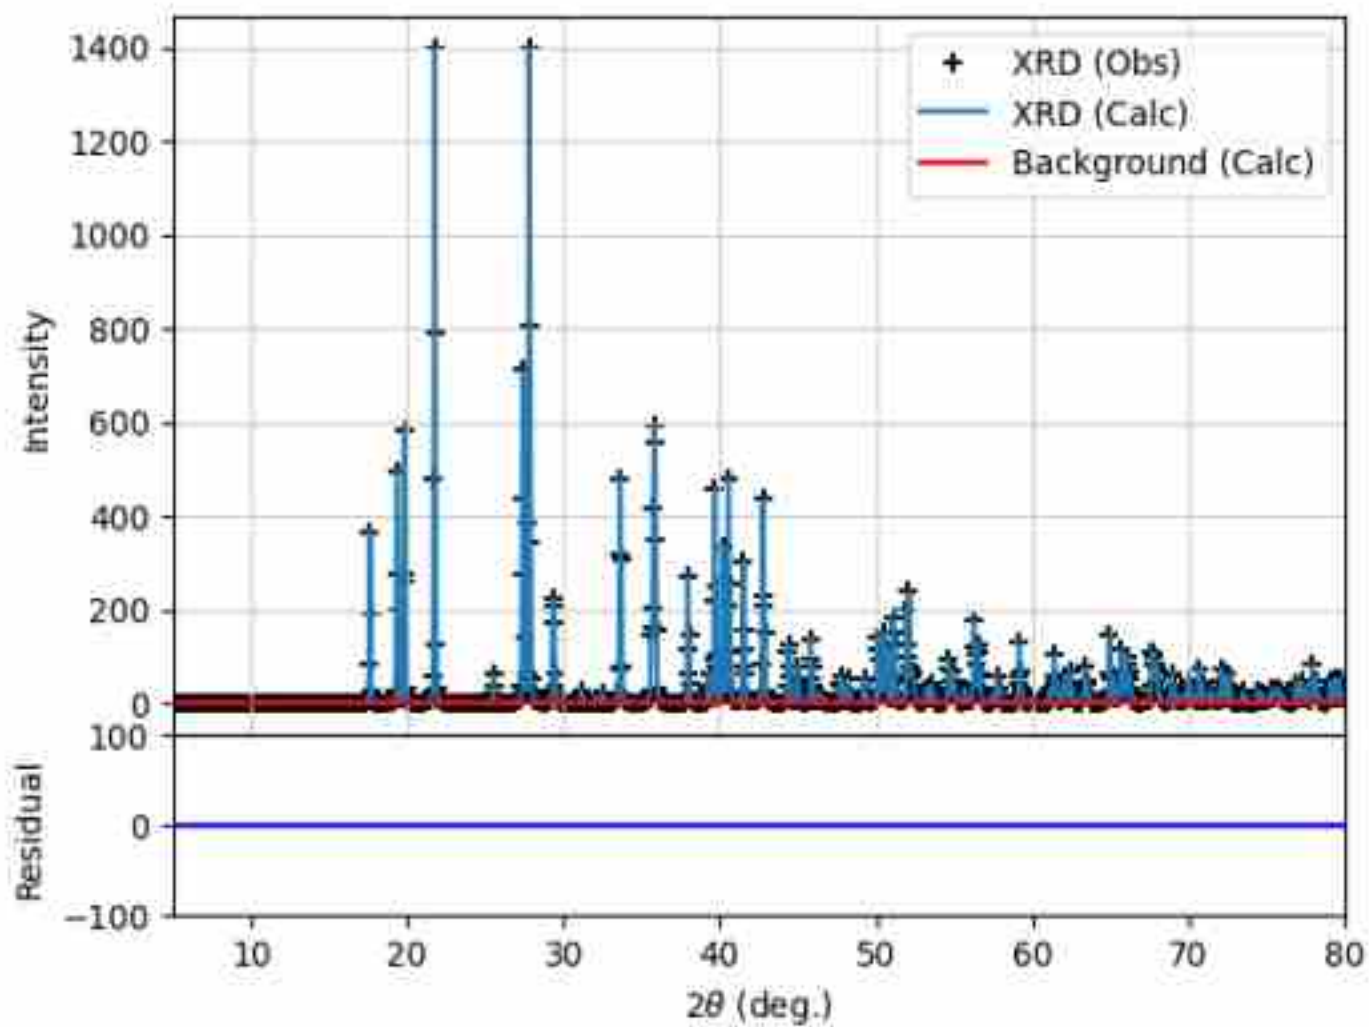

| RMSE before RR | Rwp     | RMSE after RR |
|----------------|---------|---------------|
| 0.021          | 0.00452 | 0.00071       |

# V6O11F1

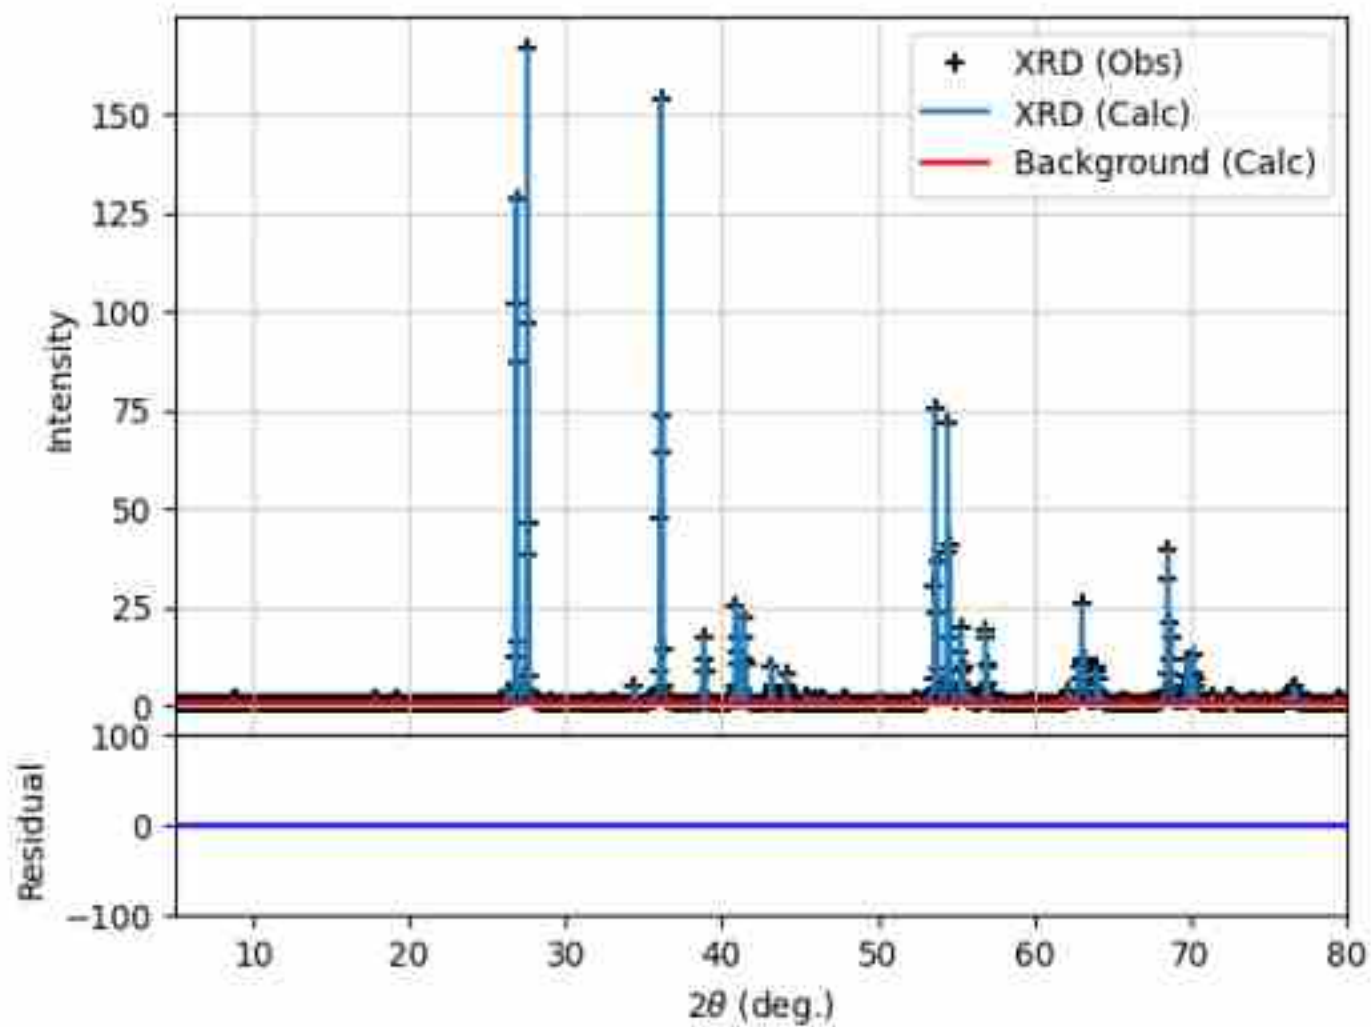

| RMSE before RR | Rwp     | RMSE after RR |
|----------------|---------|---------------|
| 0.021          | 0.24041 | 0.0114        |



# W3O7F1

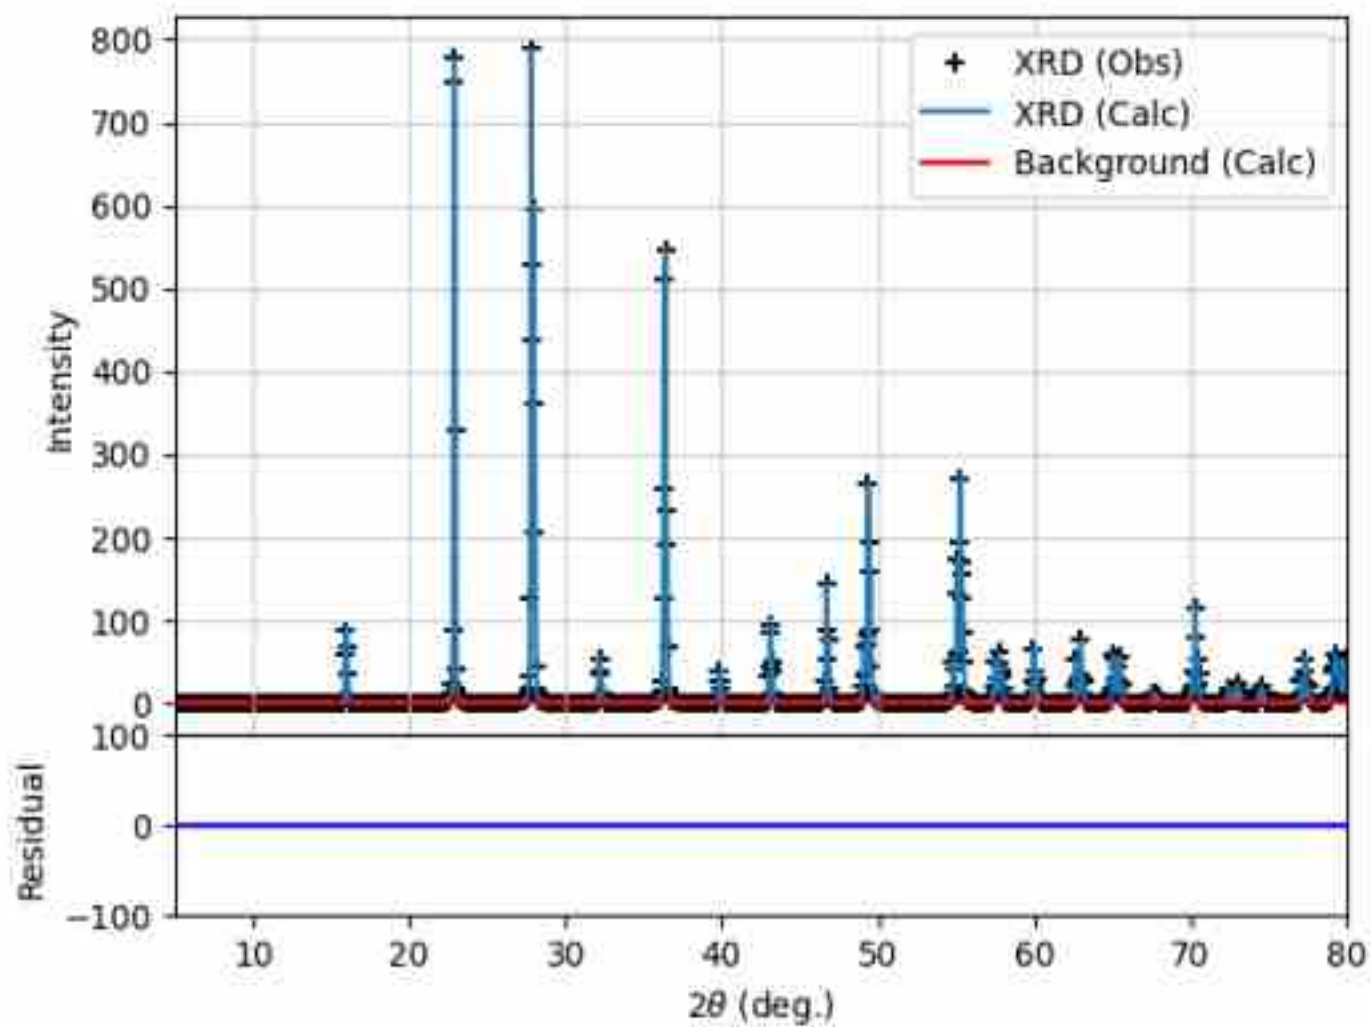

| RMSE before RR | Rwp     | RMSE after RR |
|----------------|---------|---------------|
| 0.021          | 0.00327 | 0.00211       |

# Y2U1S3O2

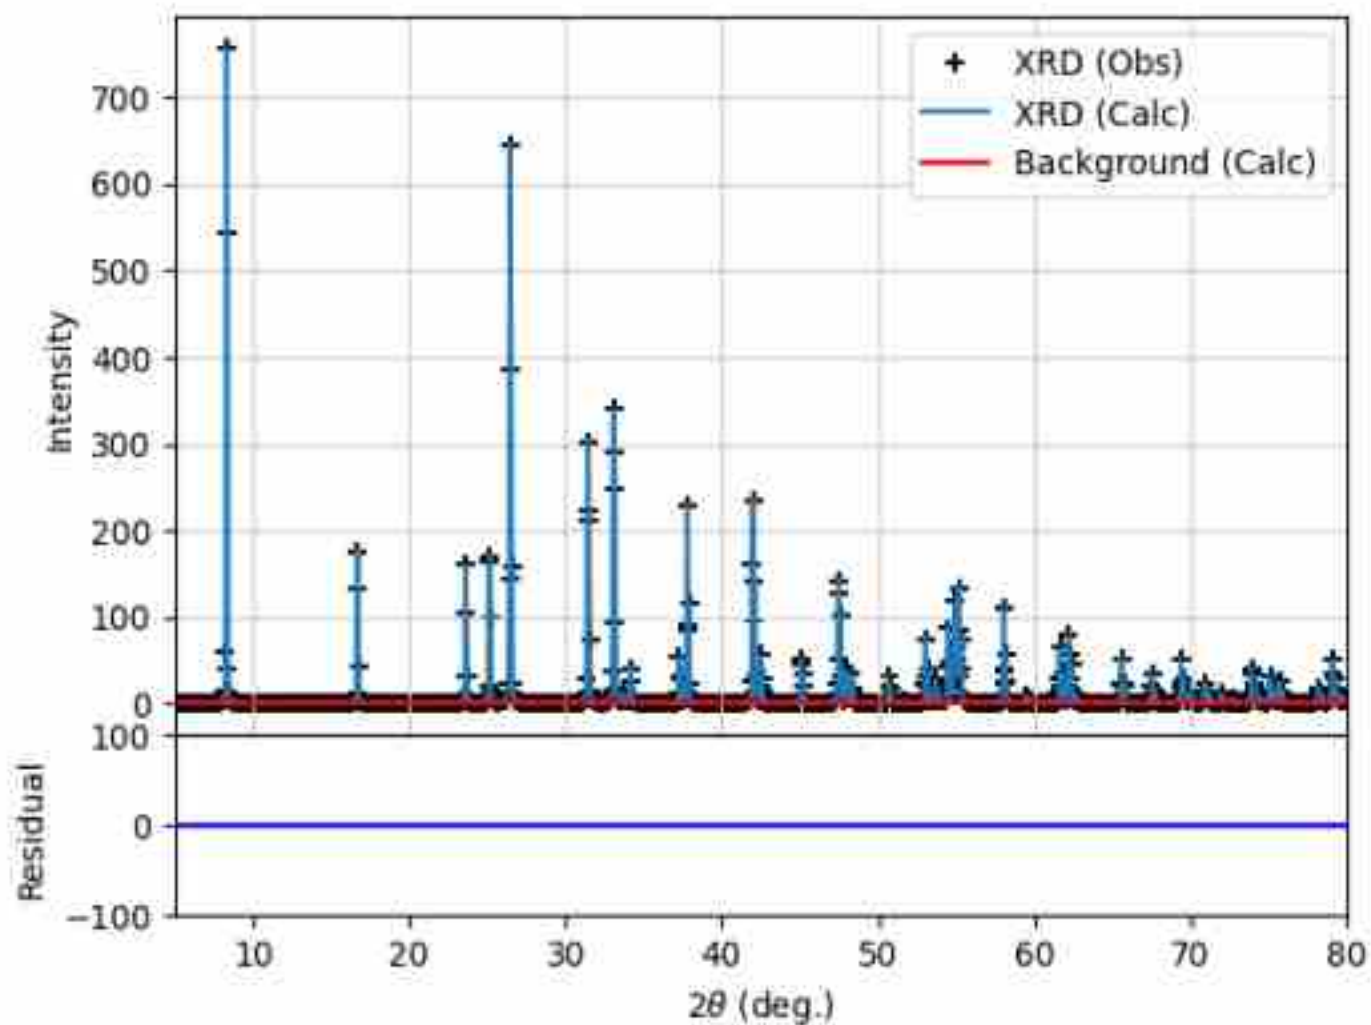

| RMSE before RR | Rwp     | RMSE after RR |
|----------------|---------|---------------|
| 0.021          | 0.00342 | 0.00081       |

# Y4Ge10Rh6

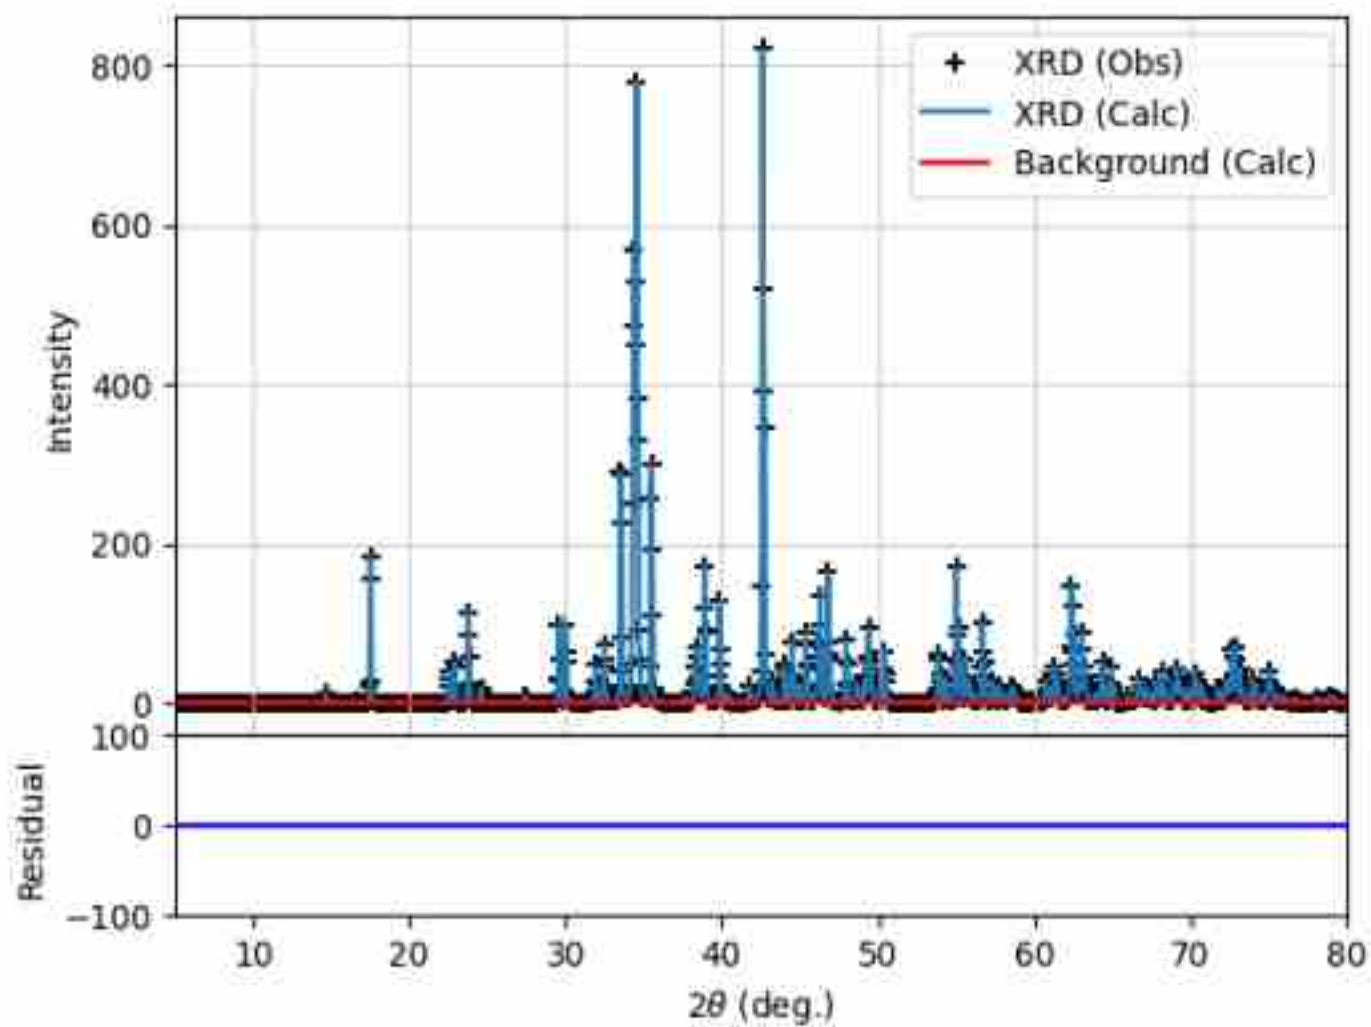

| RMSE before RR | Rwp     | RMSE after RR |
|----------------|---------|---------------|
| 0.021          | 0.00309 | 0.00031       |

# Y4Ge10Ru6

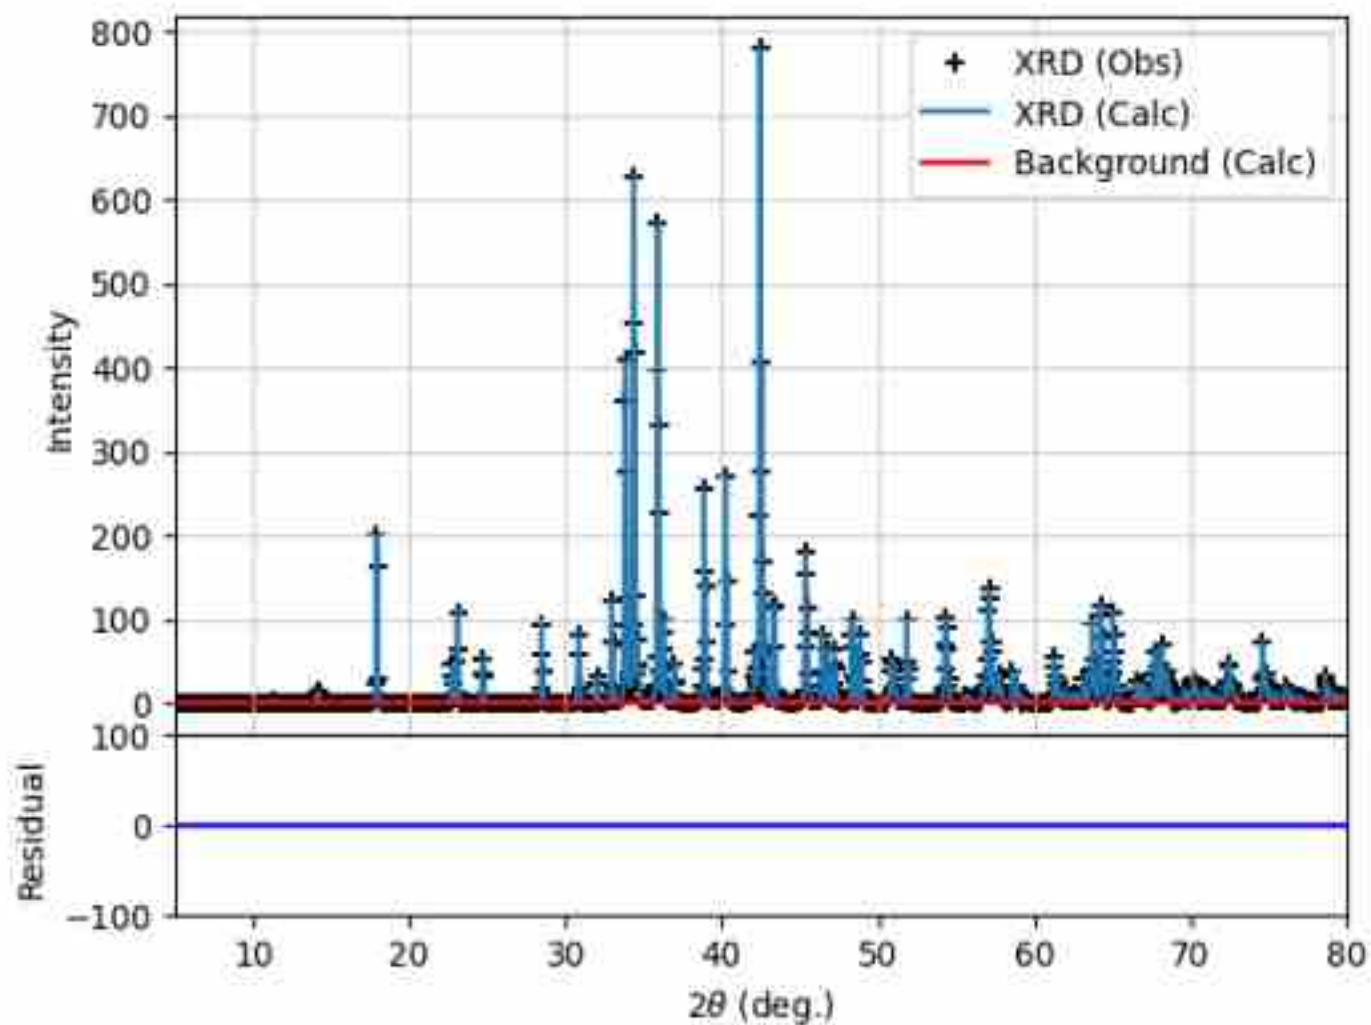

| RMSE before RR | Rwp     | RMSE after RR |
|----------------|---------|---------------|
| 0.021          | 0.00288 | 0.00026       |

# Y<sub>4</sub>Si<sub>4</sub>Pt<sub>8</sub>

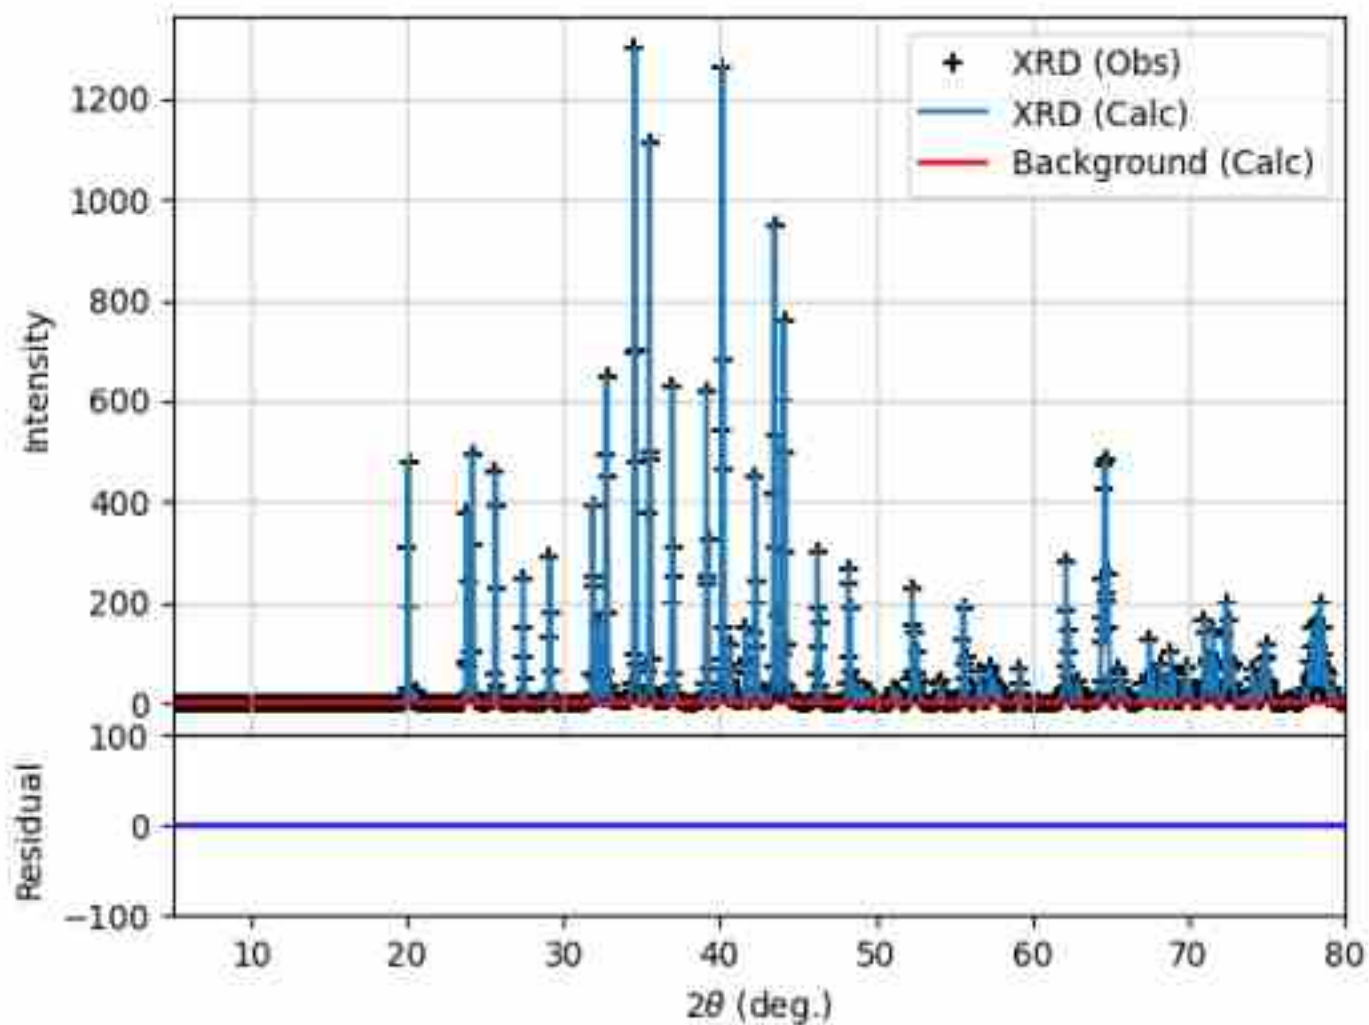

| RMSE before RR | Rwp     | RMSE after RR |
|----------------|---------|---------------|
| 0.021          | 0.00482 | 0.00045       |

# Y6Al2O12

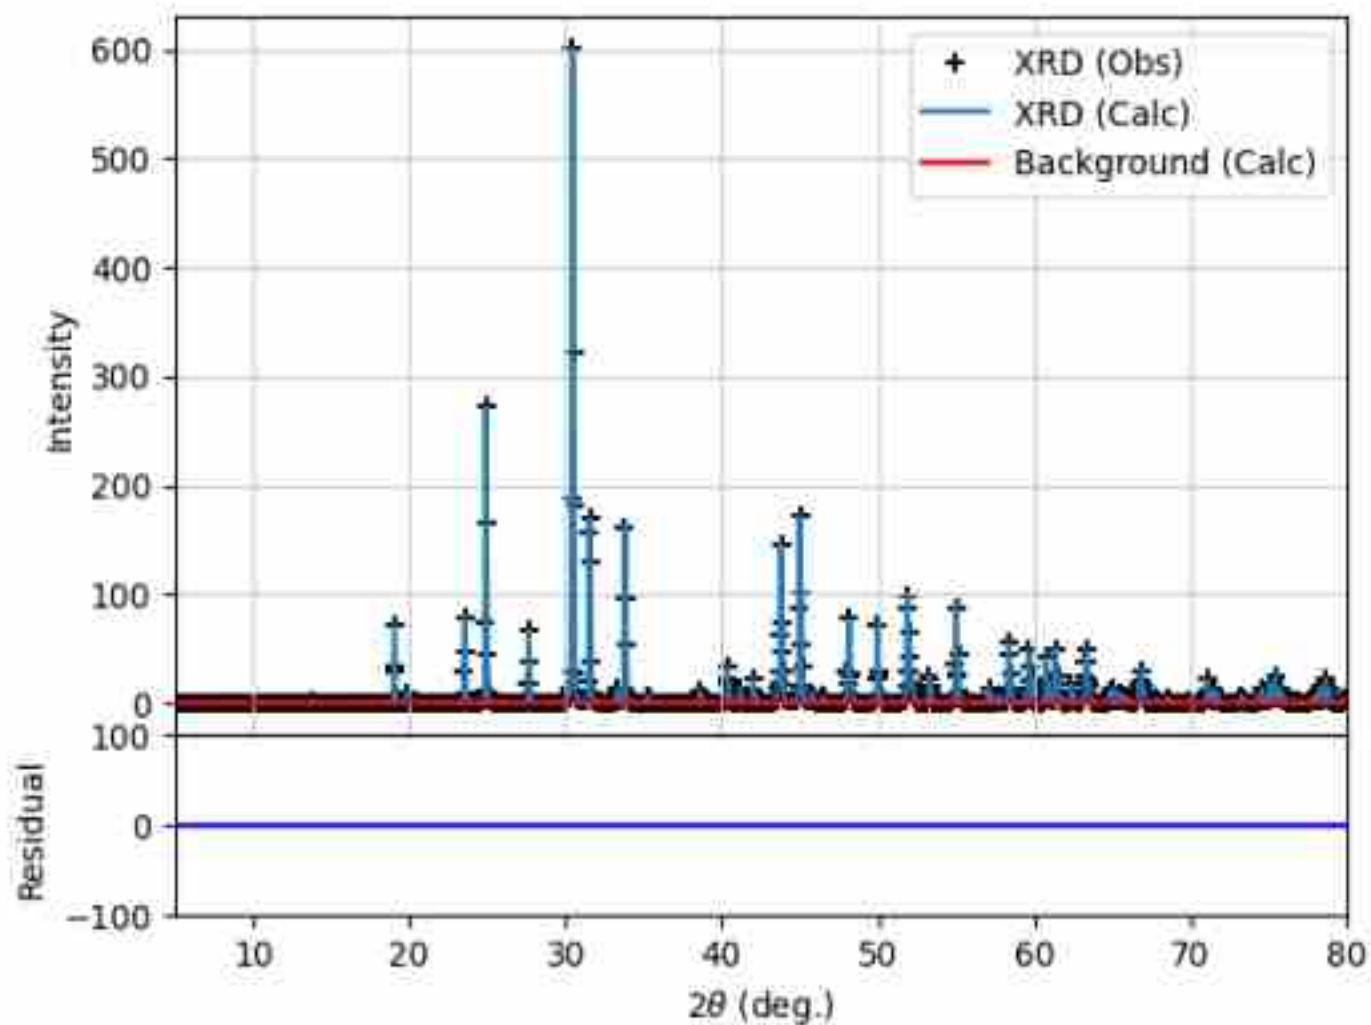

| RMSE before RR | Rwp     | RMSE after RR |
|----------------|---------|---------------|
| 0.021          | 0.00368 | 0.00088       |

# Yb1Ag1Mo2O8

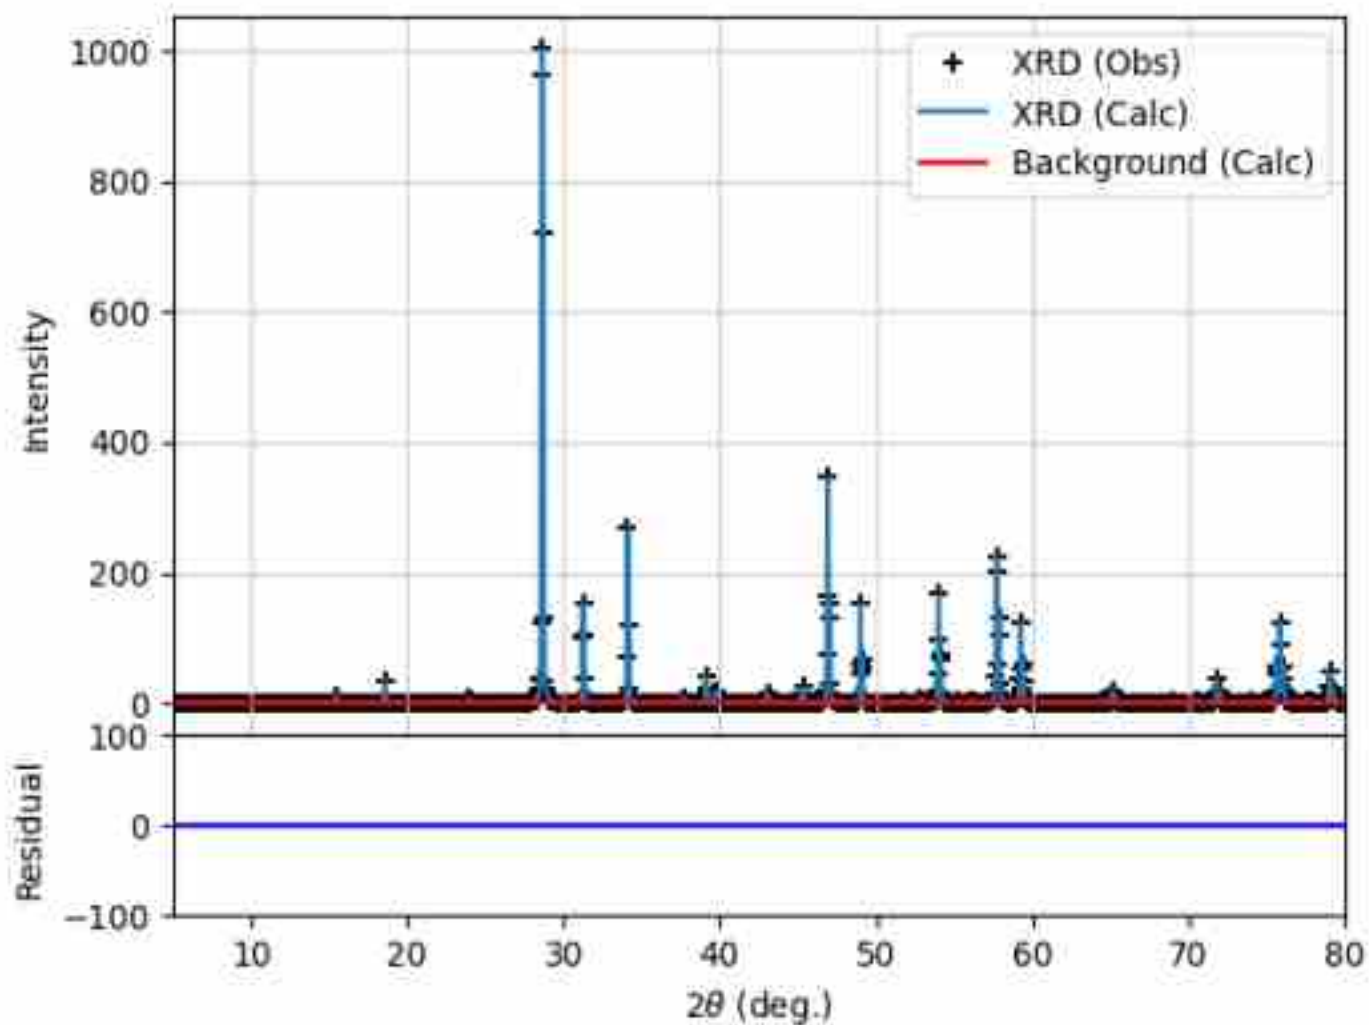

| RMSE before RR | Rwp     | RMSE after RR |
|----------------|---------|---------------|
| 0.021          | 0.00577 | 0.00239       |

# Yb1Ga6Fe6

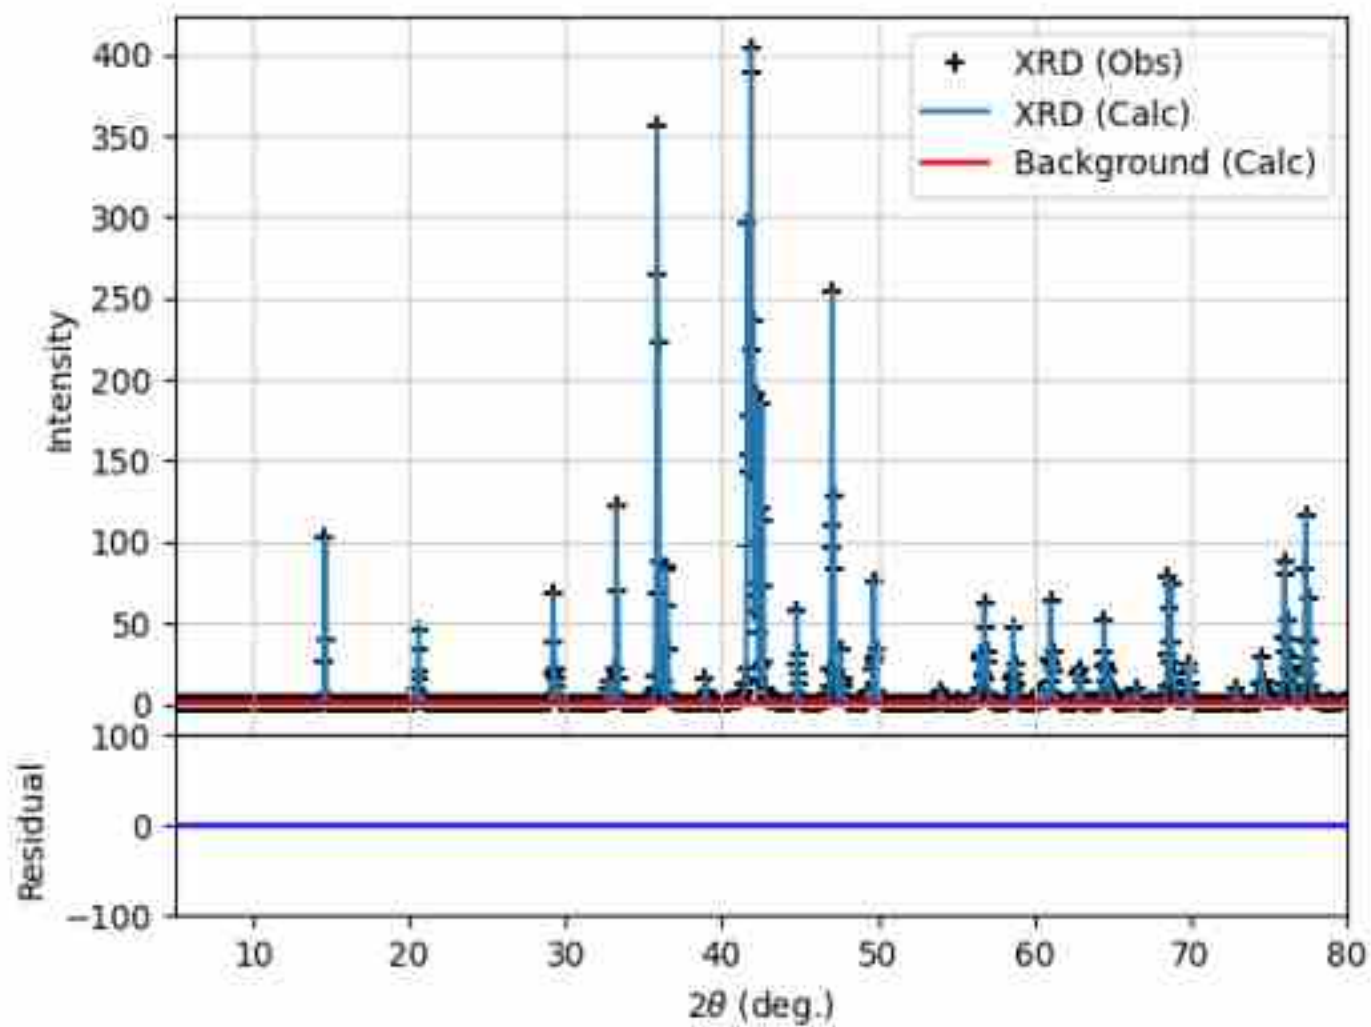

| RMSE before RR | Rwp    | RMSE after RR |
|----------------|--------|---------------|
| 0.021          | 0.0036 | 0.00067       |



# Yb8Au4

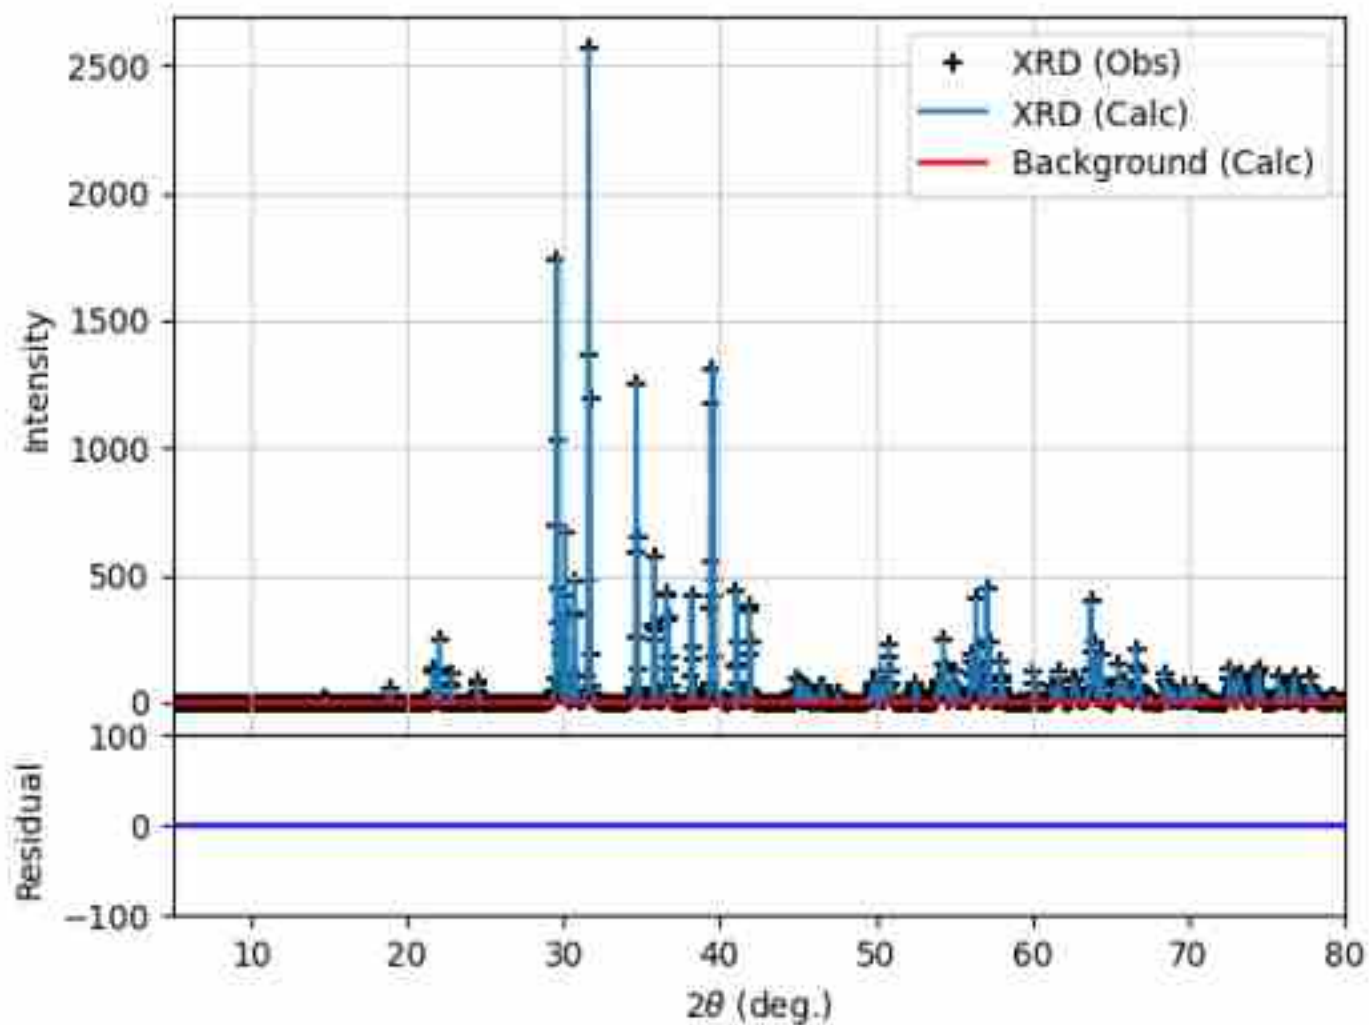

| RMSE before RR | Rwp     | RMSE after RR |
|----------------|---------|---------------|
| 0.021          | 0.00462 | 0.00039       |

# Yb12Pd4

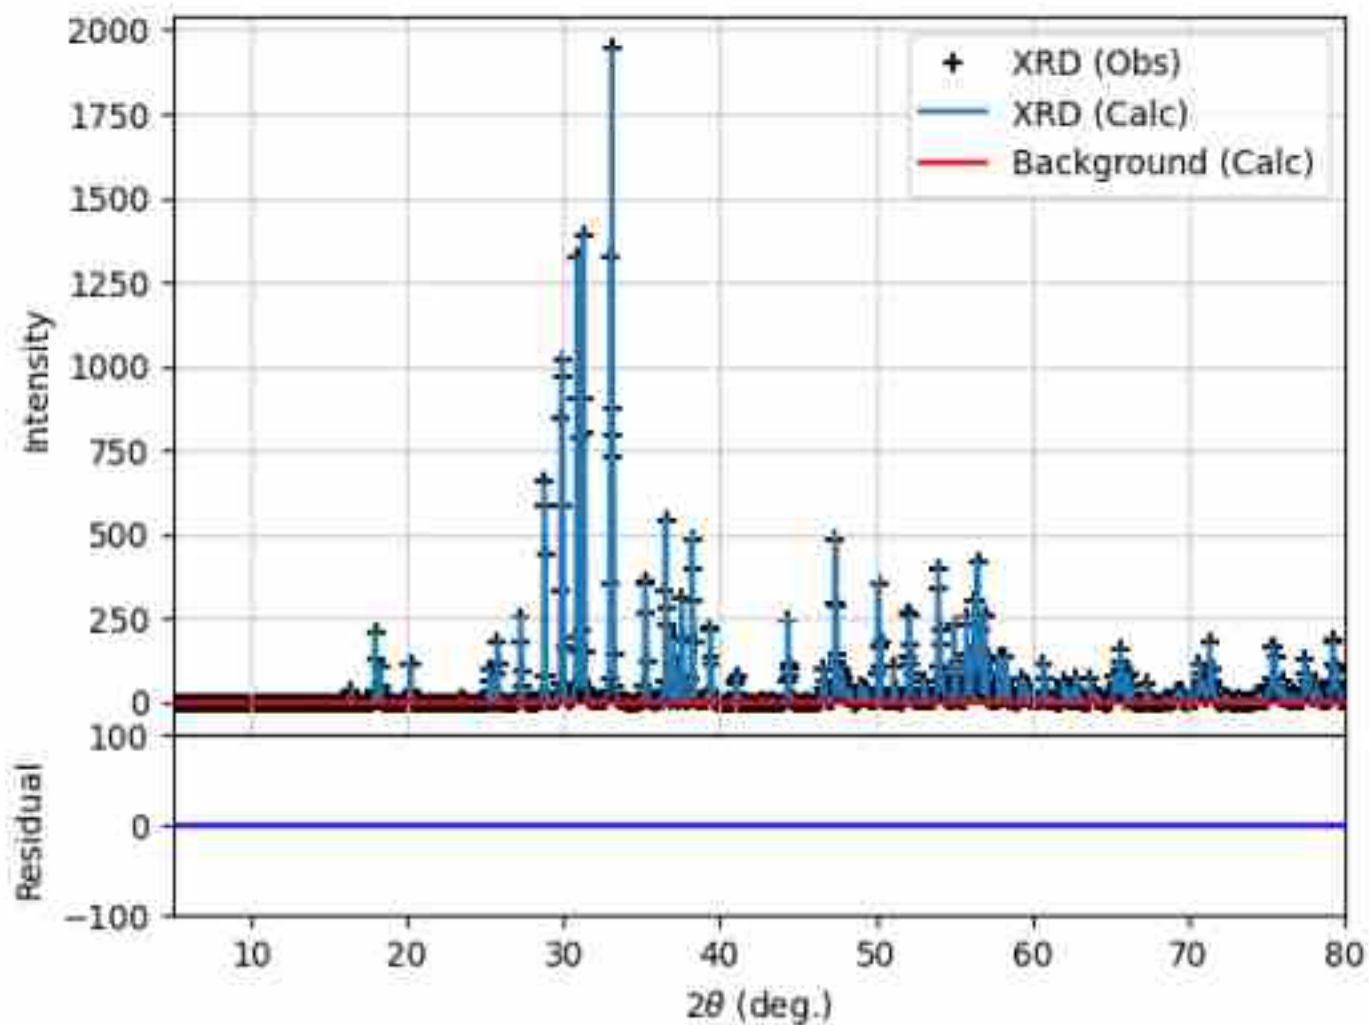

| RMSE before RR | Rwp    | RMSE after RR |
|----------------|--------|---------------|
| 0.021          | 0.0043 | 0.00025       |

# Zn<sub>2</sub>GaAgSe<sub>4</sub>

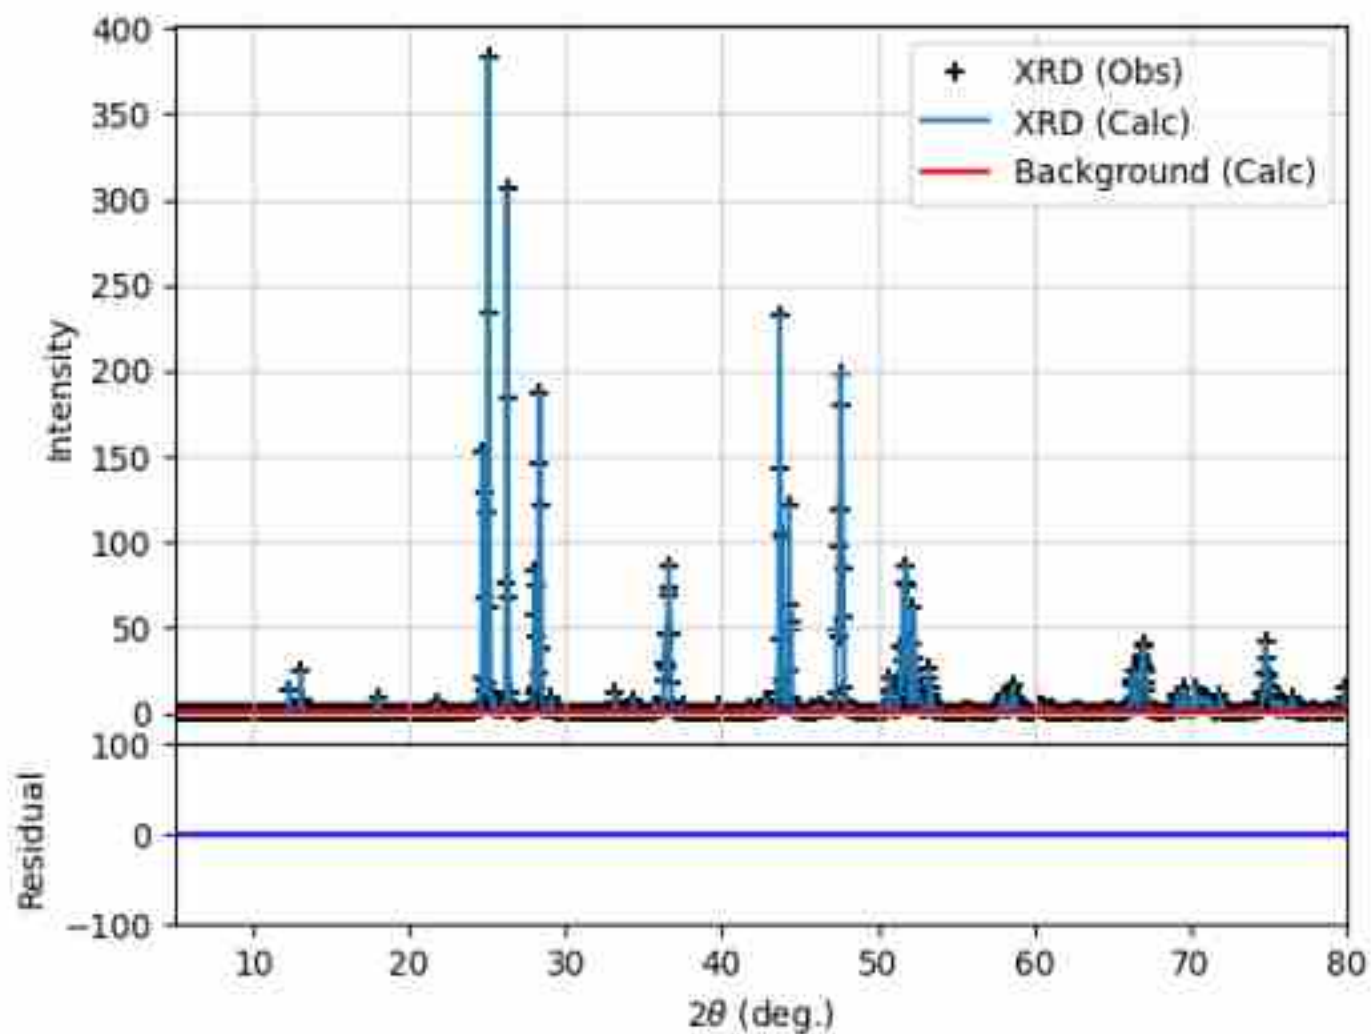

| RMSE before RR | Rwp     | RMSE after RR |
|----------------|---------|---------------|
| 0.021          | 0.00283 | 0.00011       |

# Zr<sub>2</sub>Cr<sub>2</sub>Ag<sub>2</sub>S<sub>8</sub>

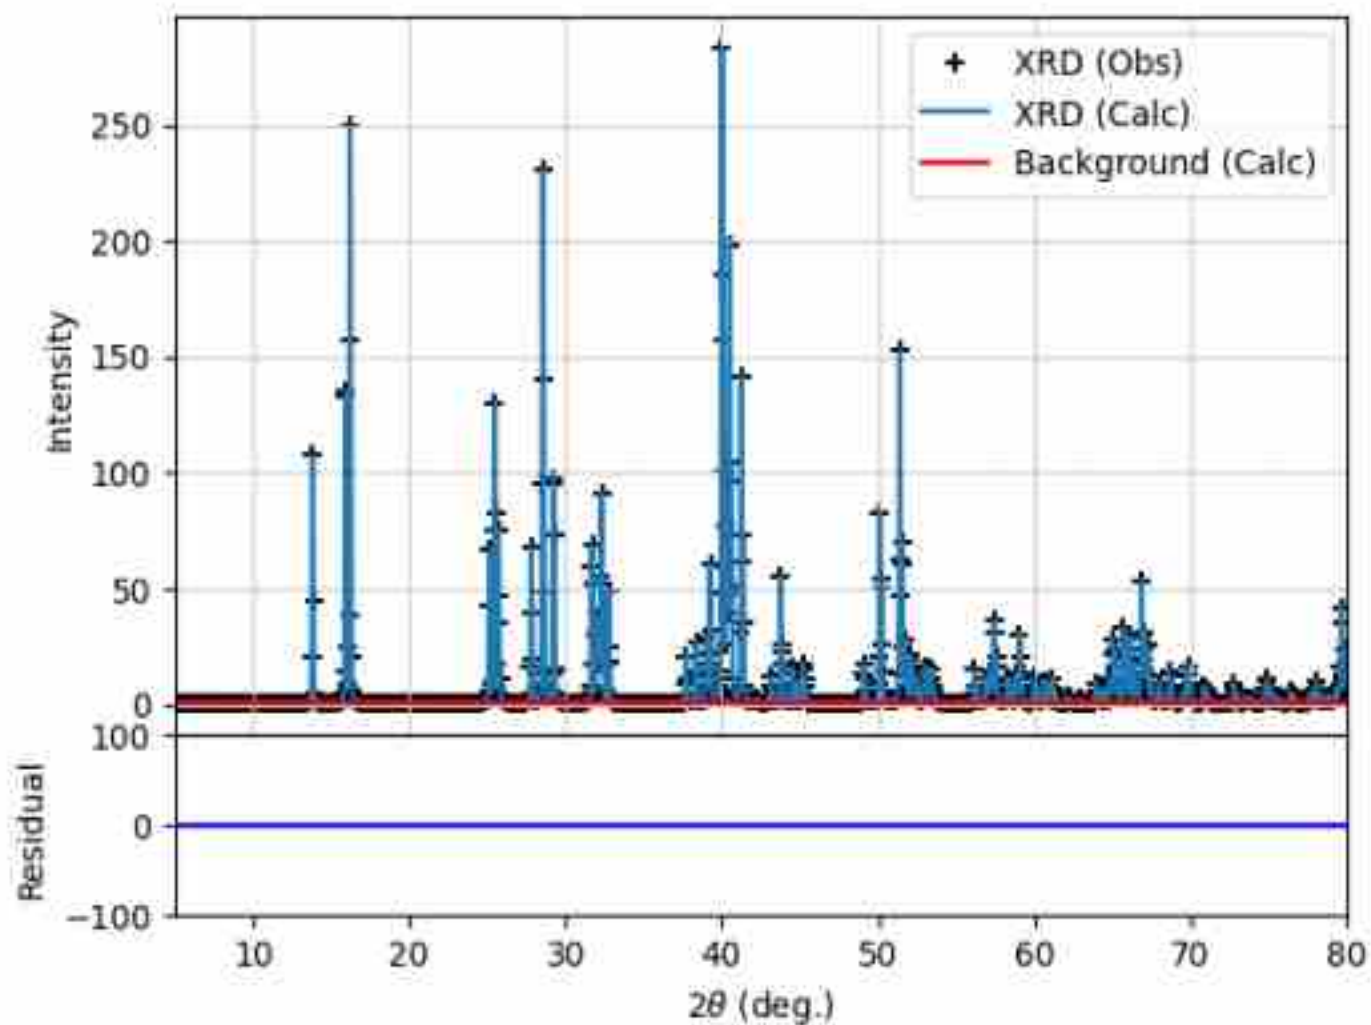

| RMSE before RR | Rwp     | RMSE after RR |
|----------------|---------|---------------|
| 0.021          | 0.00349 | 0.00031       |

# Zr<sub>4</sub>Mn<sub>4</sub>Si<sub>4</sub>

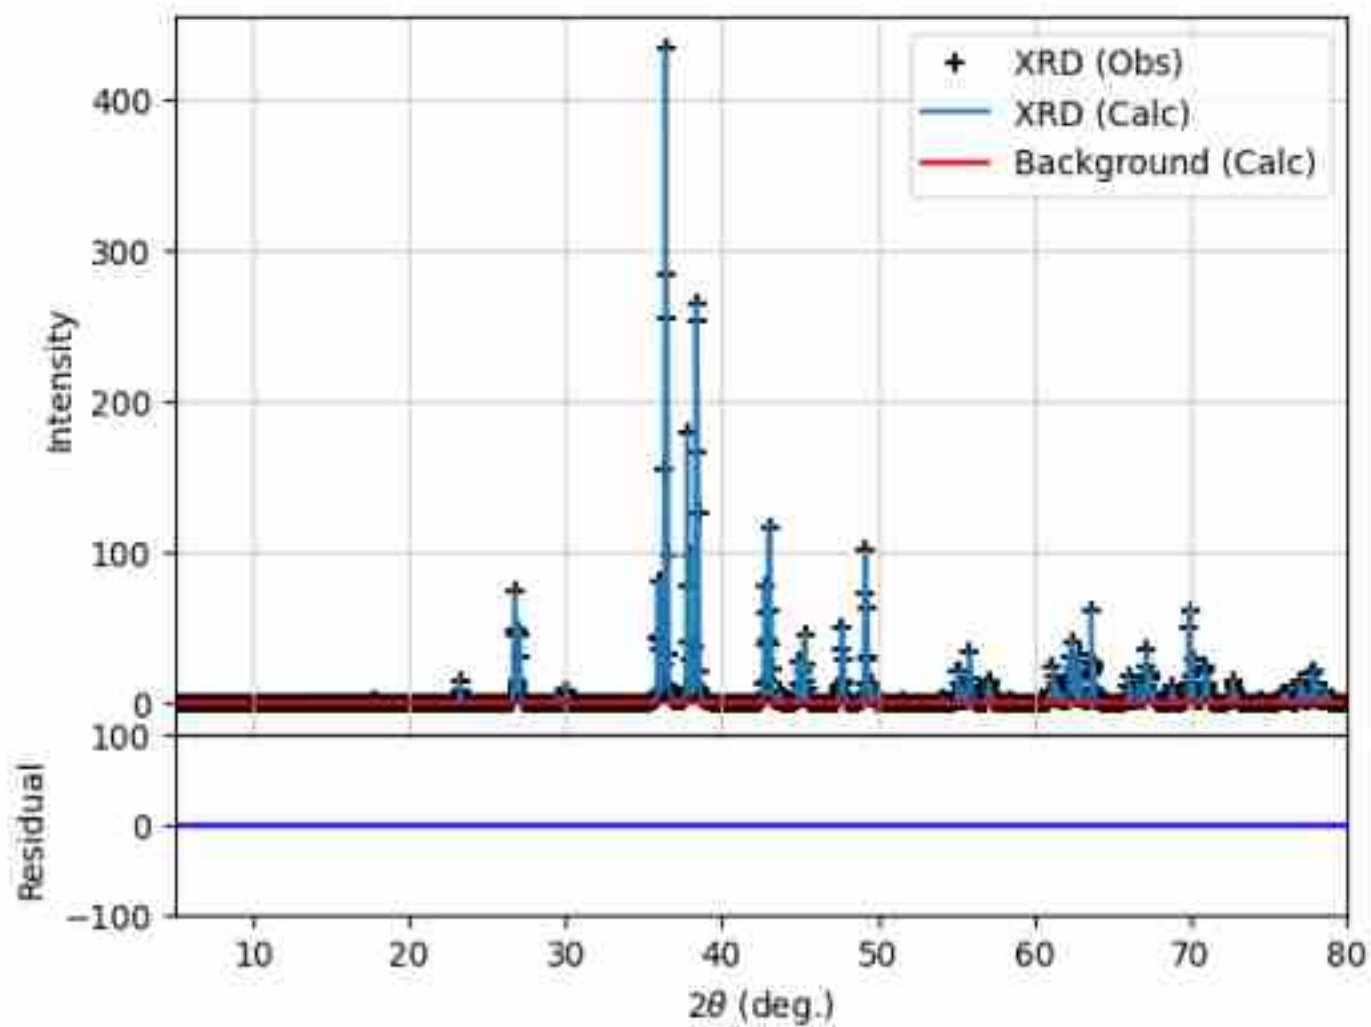

| RMSE before RR | Rwp     | RMSE after RR |
|----------------|---------|---------------|
| 0.021          | 0.00382 | 0.00038       |

# Zr10Co2Sb6

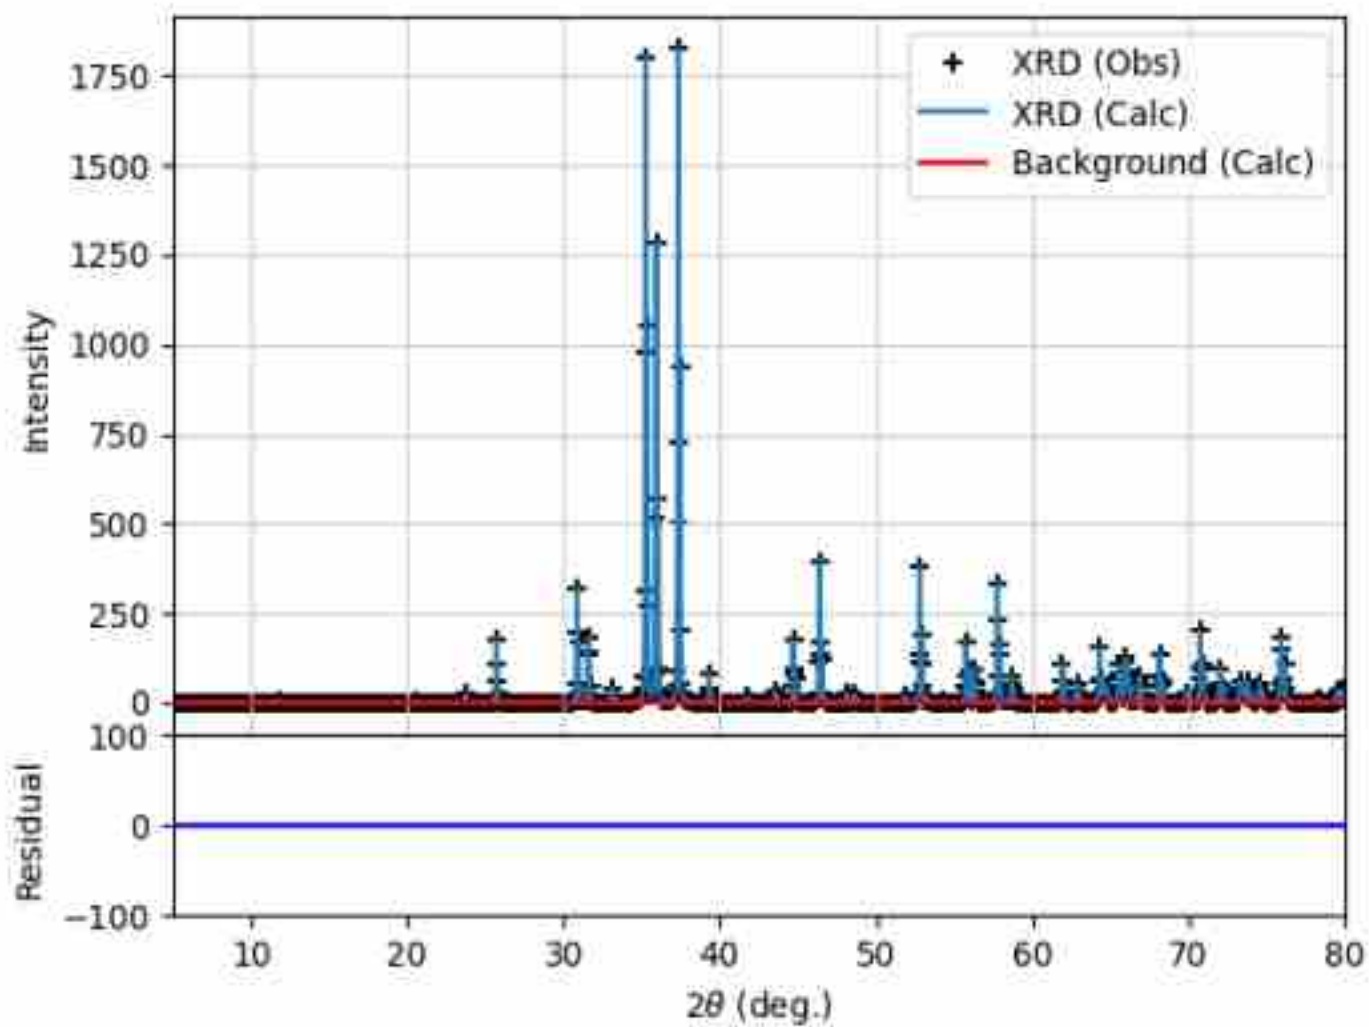

| RMSE before RR | Rwp     | RMSE after RR |
|----------------|---------|---------------|
| 0.021          | 0.01405 | 0.00132       |

# Zr10Ga6

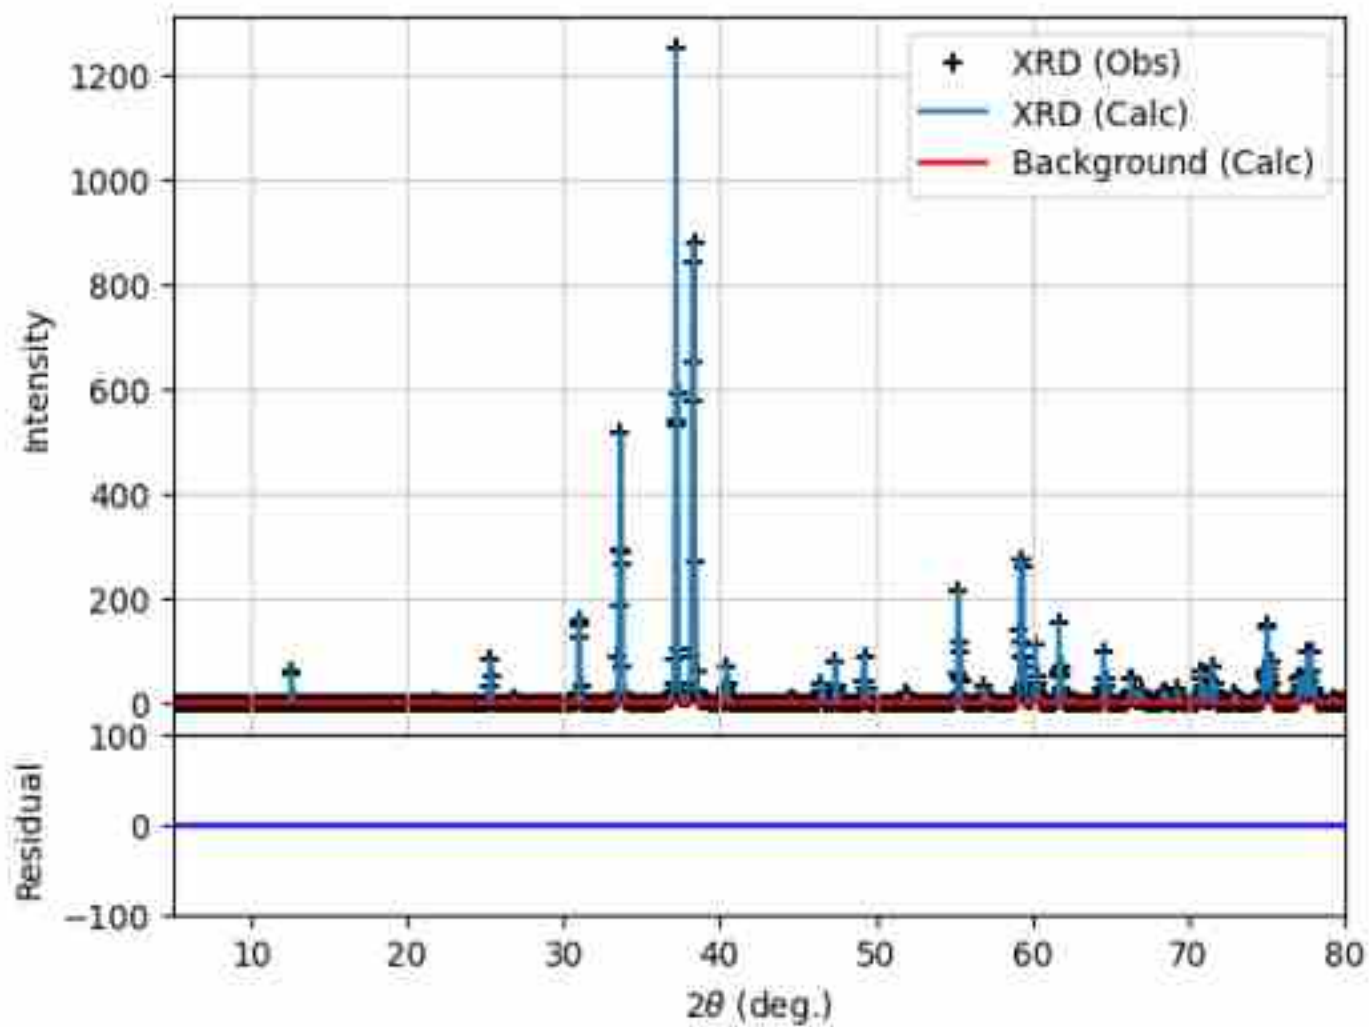

| RMSE before RR | Rwp     | RMSE after RR |
|----------------|---------|---------------|
| 0.021          | 0.00597 | 0.00069       |

# Ag<sub>2</sub>Ru<sub>2</sub>O<sub>8</sub>

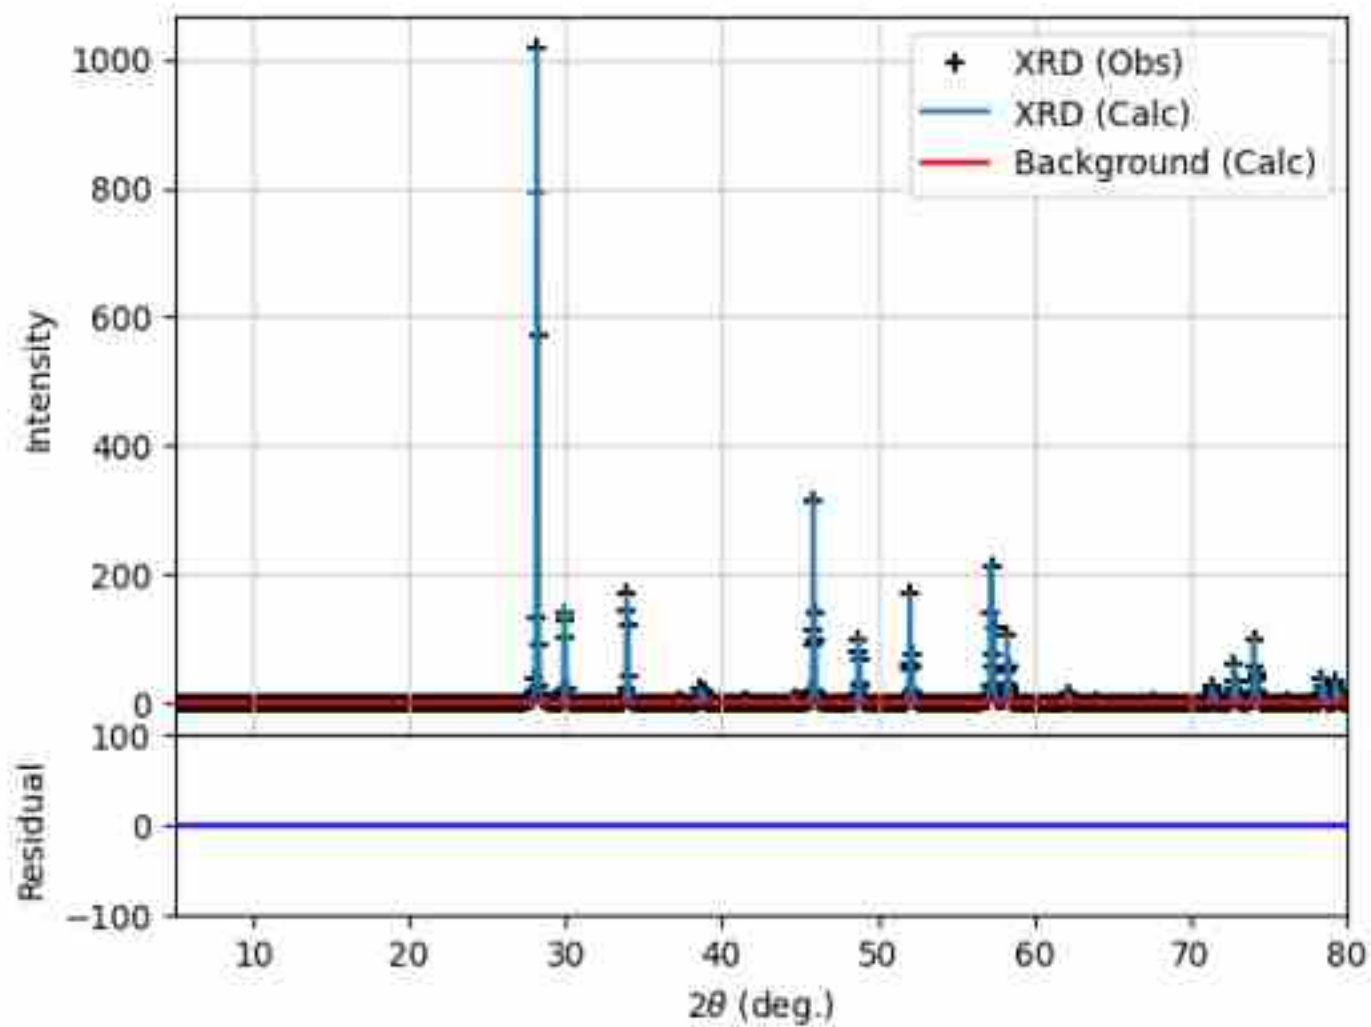

| RMSE before RR | Rwp     | RMSE after RR |
|----------------|---------|---------------|
| 0.022          | 0.00333 | 0.00148       |



# Al<sub>2</sub>In<sub>4</sub>N<sub>6</sub>

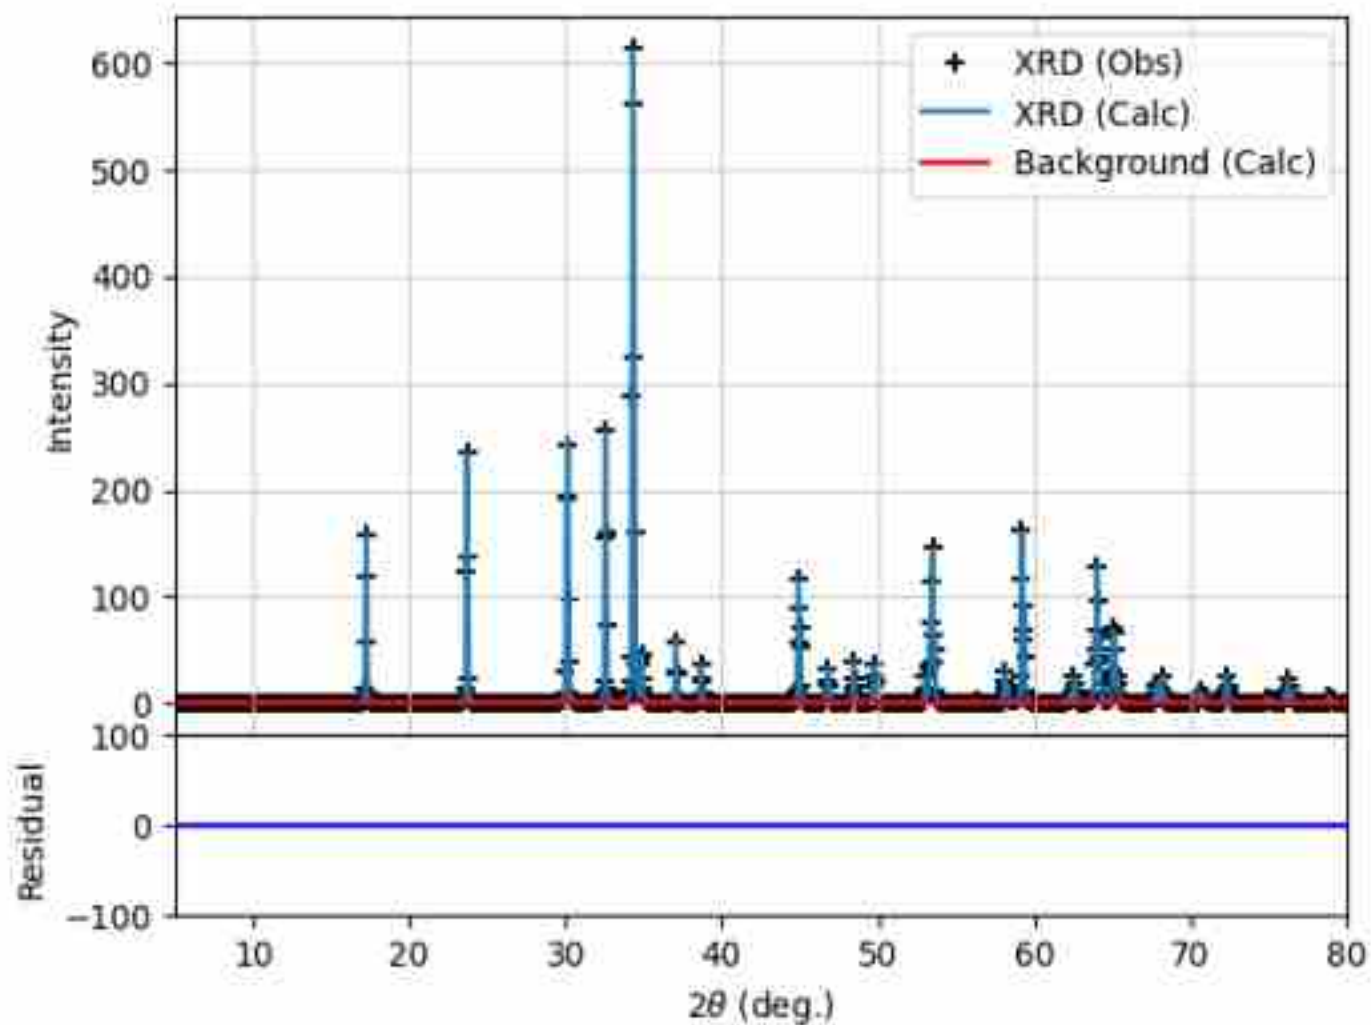

| RMSE before RR | Rwp     | RMSE after RR |
|----------------|---------|---------------|
| 0.022          | 0.00388 | 0.00102       |

# Al<sub>4</sub>In<sub>2</sub>N<sub>6</sub>

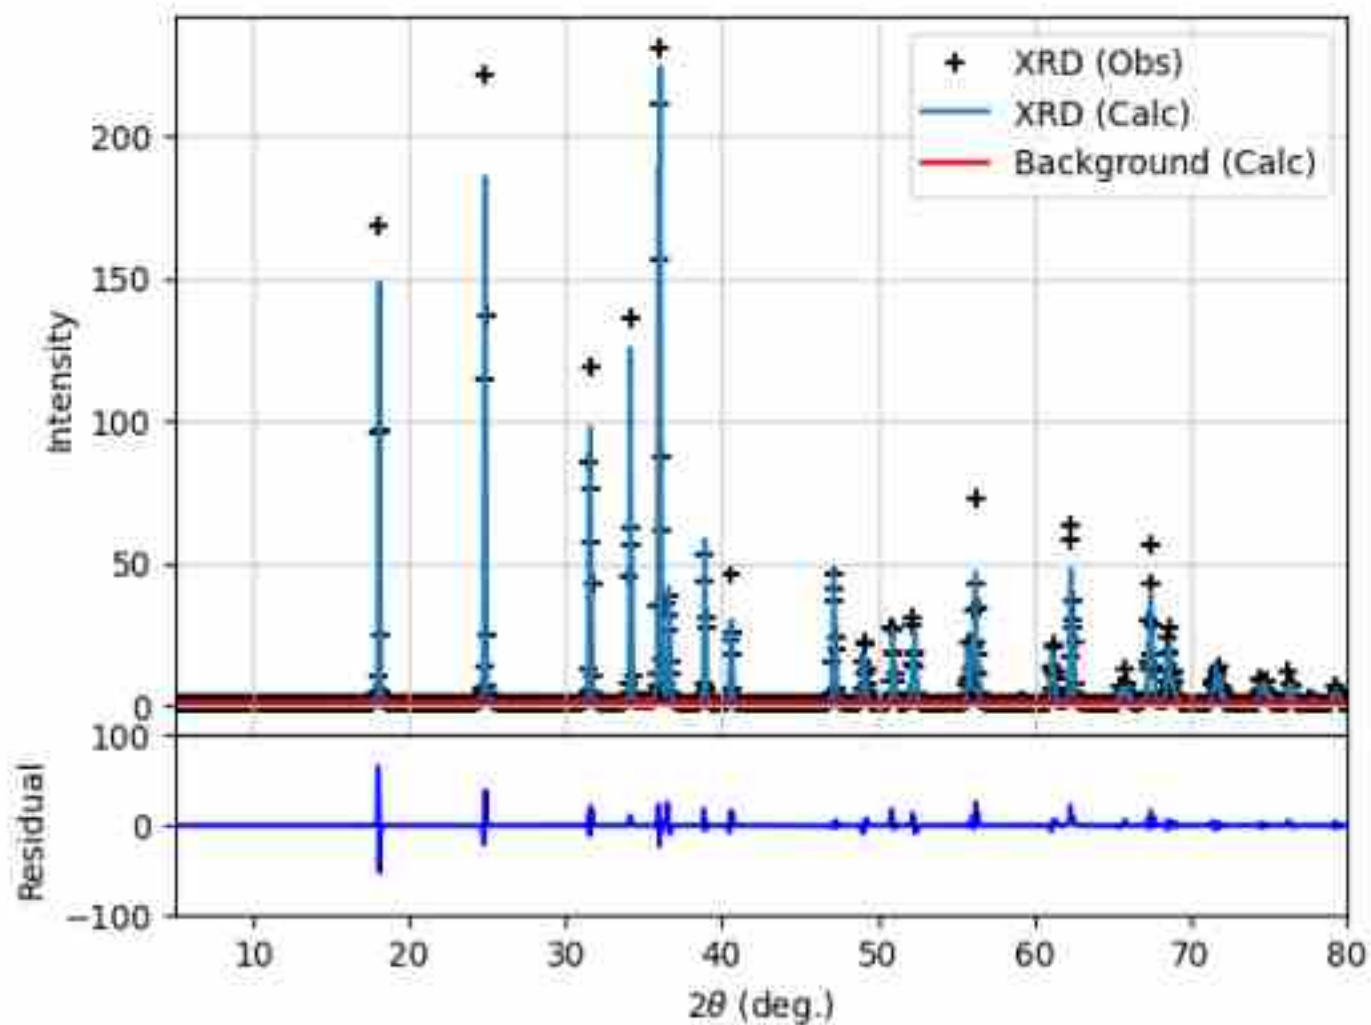

| RMSE before RR | Rwp      | RMSE after RR |
|----------------|----------|---------------|
| 0.022          | 26.48332 | 0.27007       |

# Al12Fe2

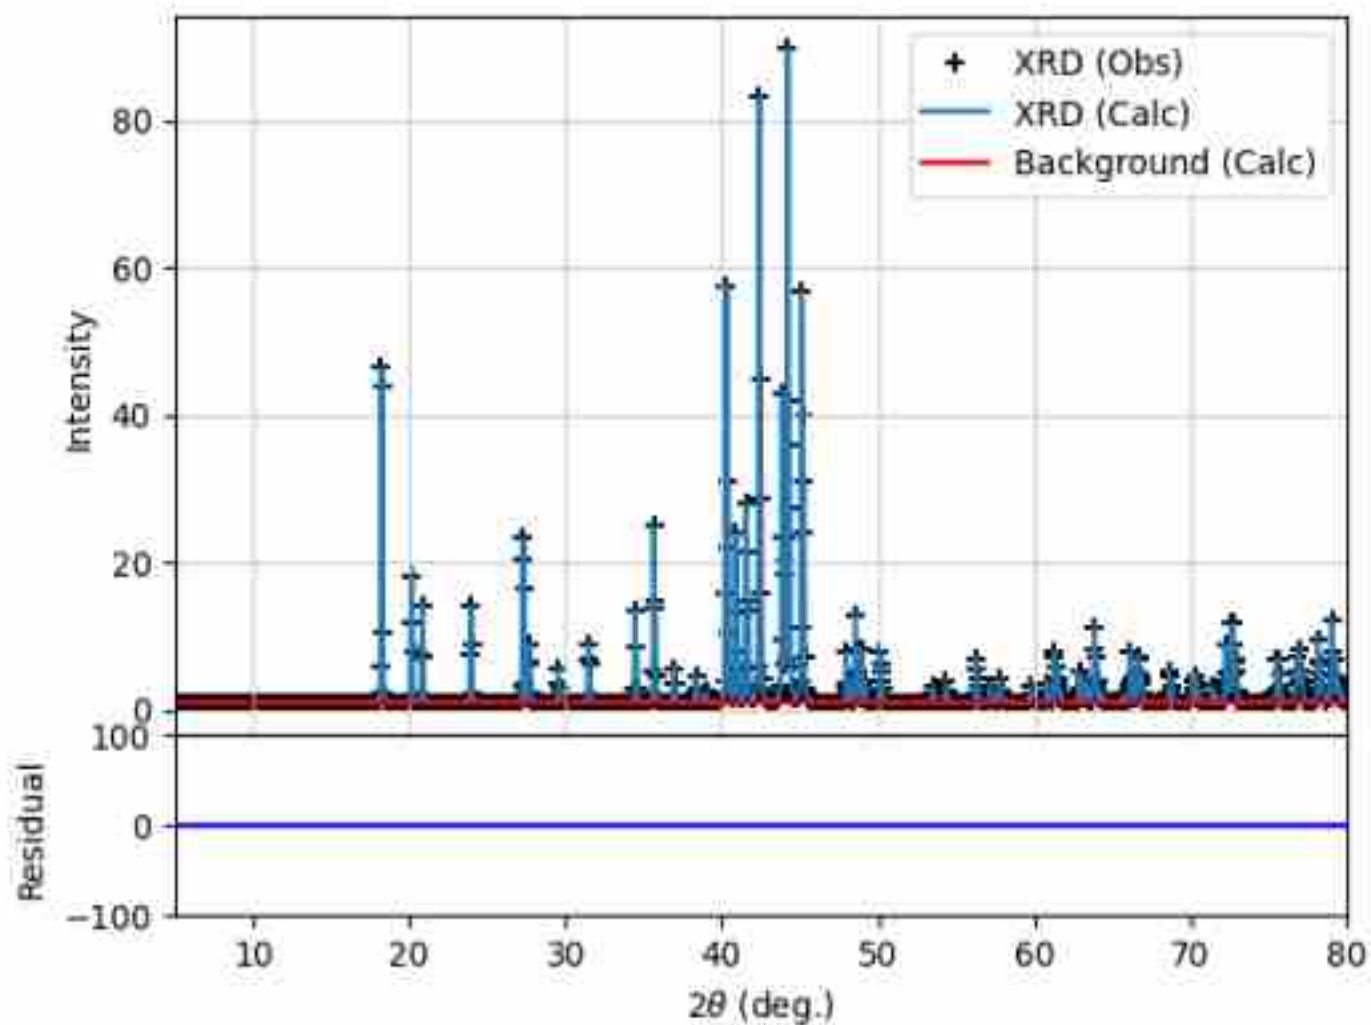

| RMSE before RR | Rwp     | RMSE after RR |
|----------------|---------|---------------|
| 0.022          | 0.00311 | 0.00057       |

# As<sub>2</sub>Rh<sub>2</sub>O<sub>8</sub>

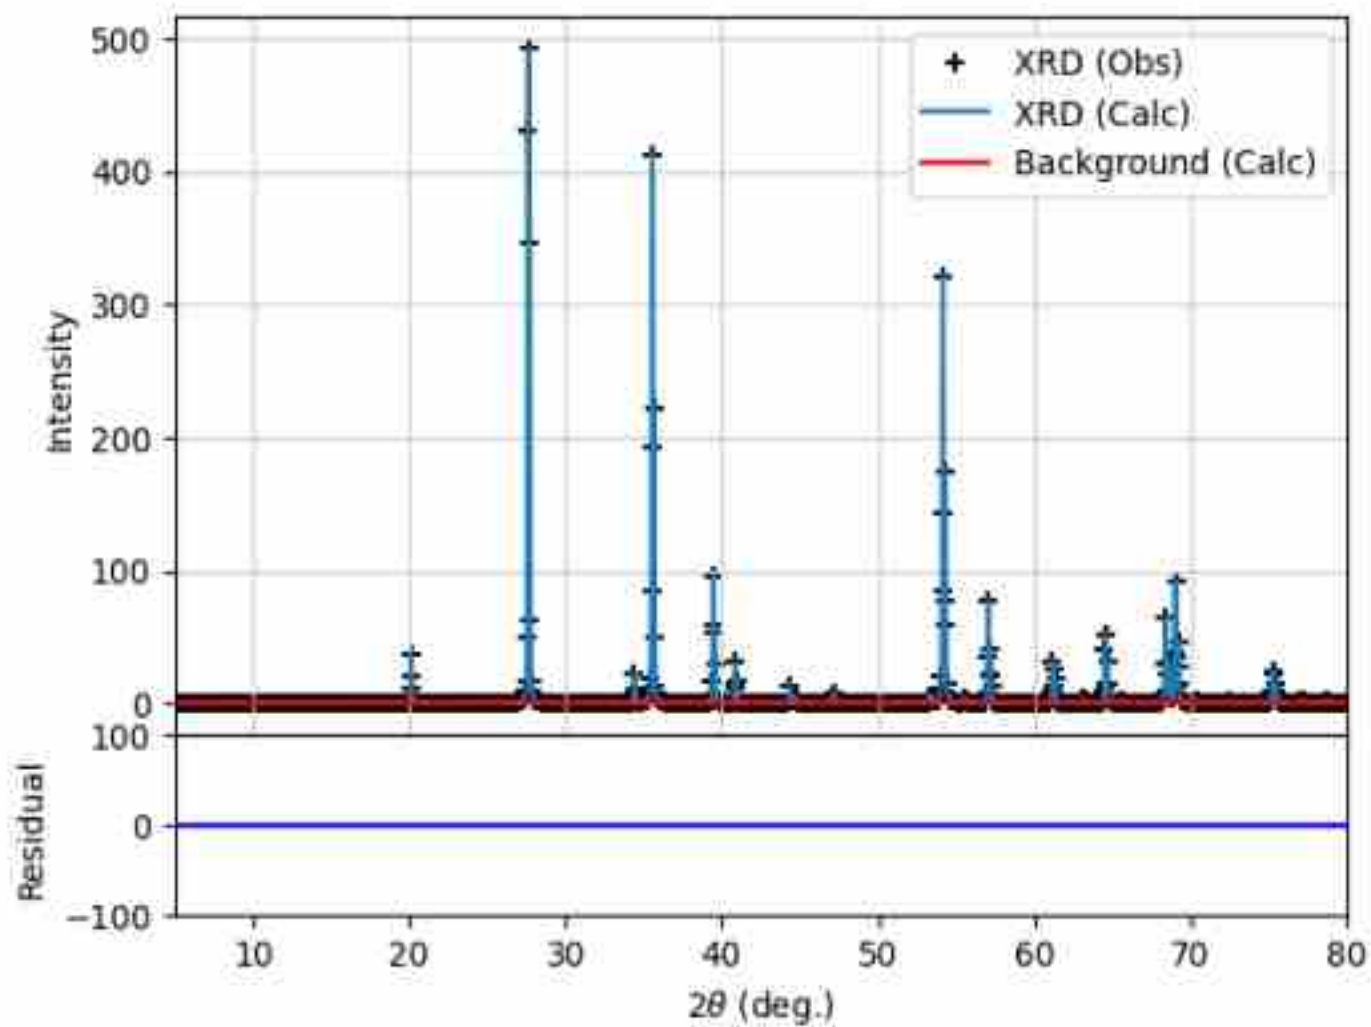

| RMSE before RR | Rwp     | RMSE after RR |
|----------------|---------|---------------|
| 0.022          | 0.00416 | 0.00087       |

# Ba<sub>2</sub>Ga<sub>4</sub>Se<sub>8</sub>

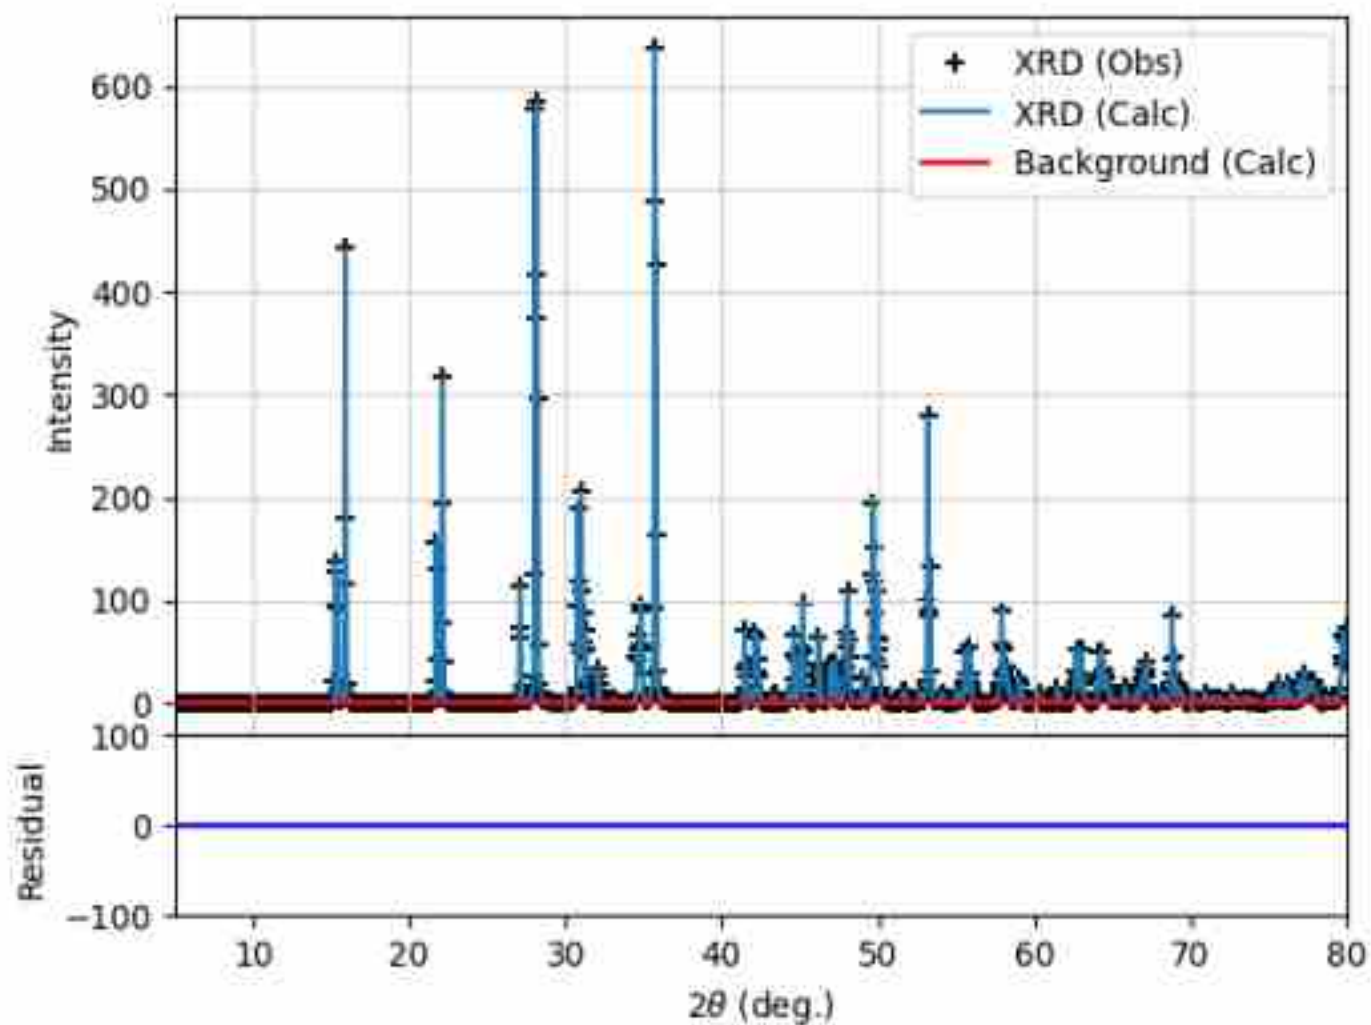

| RMSE before RR | Rwp    | RMSE after RR |
|----------------|--------|---------------|
| 0.022          | 0.0034 | 0.00037       |

# Ba2La4S8

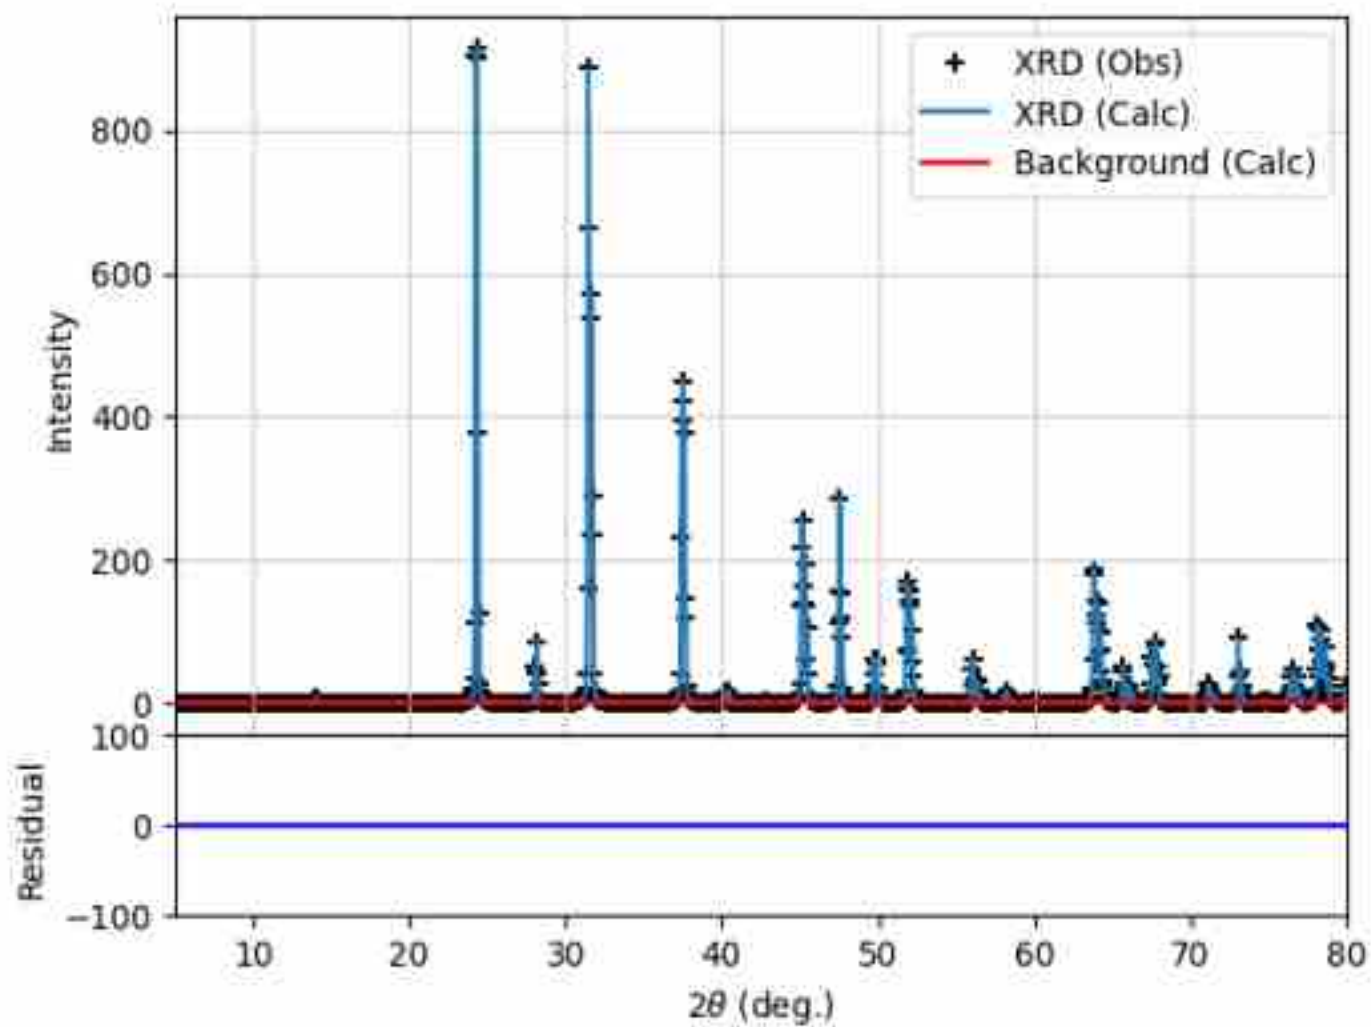

| RMSE before RR | Rwp     | RMSE after RR |
|----------------|---------|---------------|
| 0.022          | 0.00259 | 0.00047       |

# Ba<sub>2</sub>Nd<sub>4</sub>Pd<sub>2</sub>O<sub>10</sub>

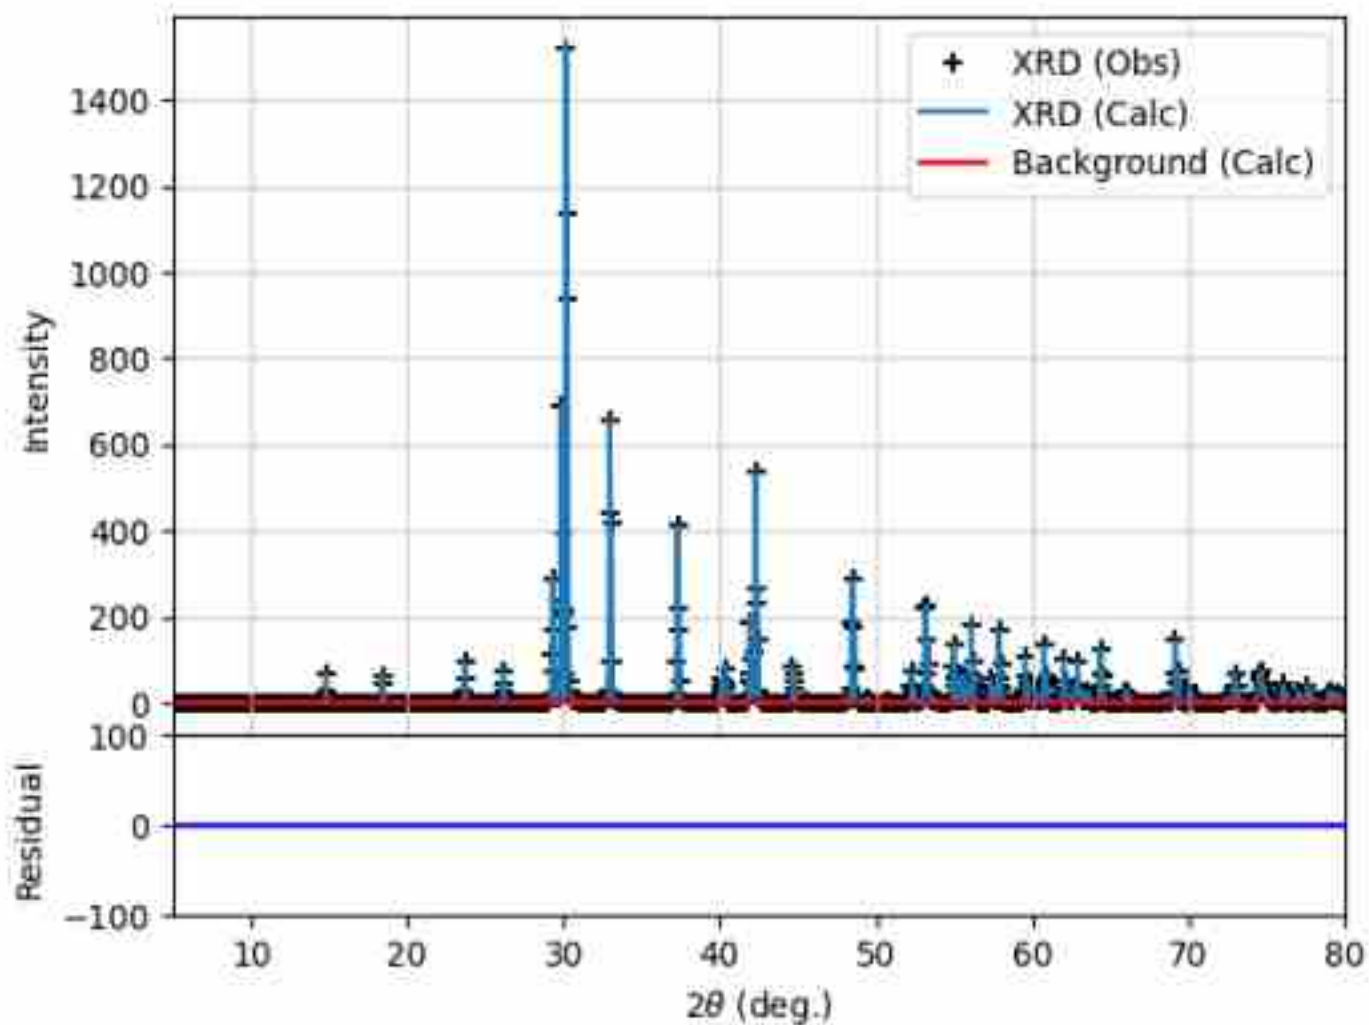

| RMSE before RR | Rwp     | RMSE after RR |
|----------------|---------|---------------|
| 0.022          | 0.00441 | 0.00131       |

# Ba2Si2

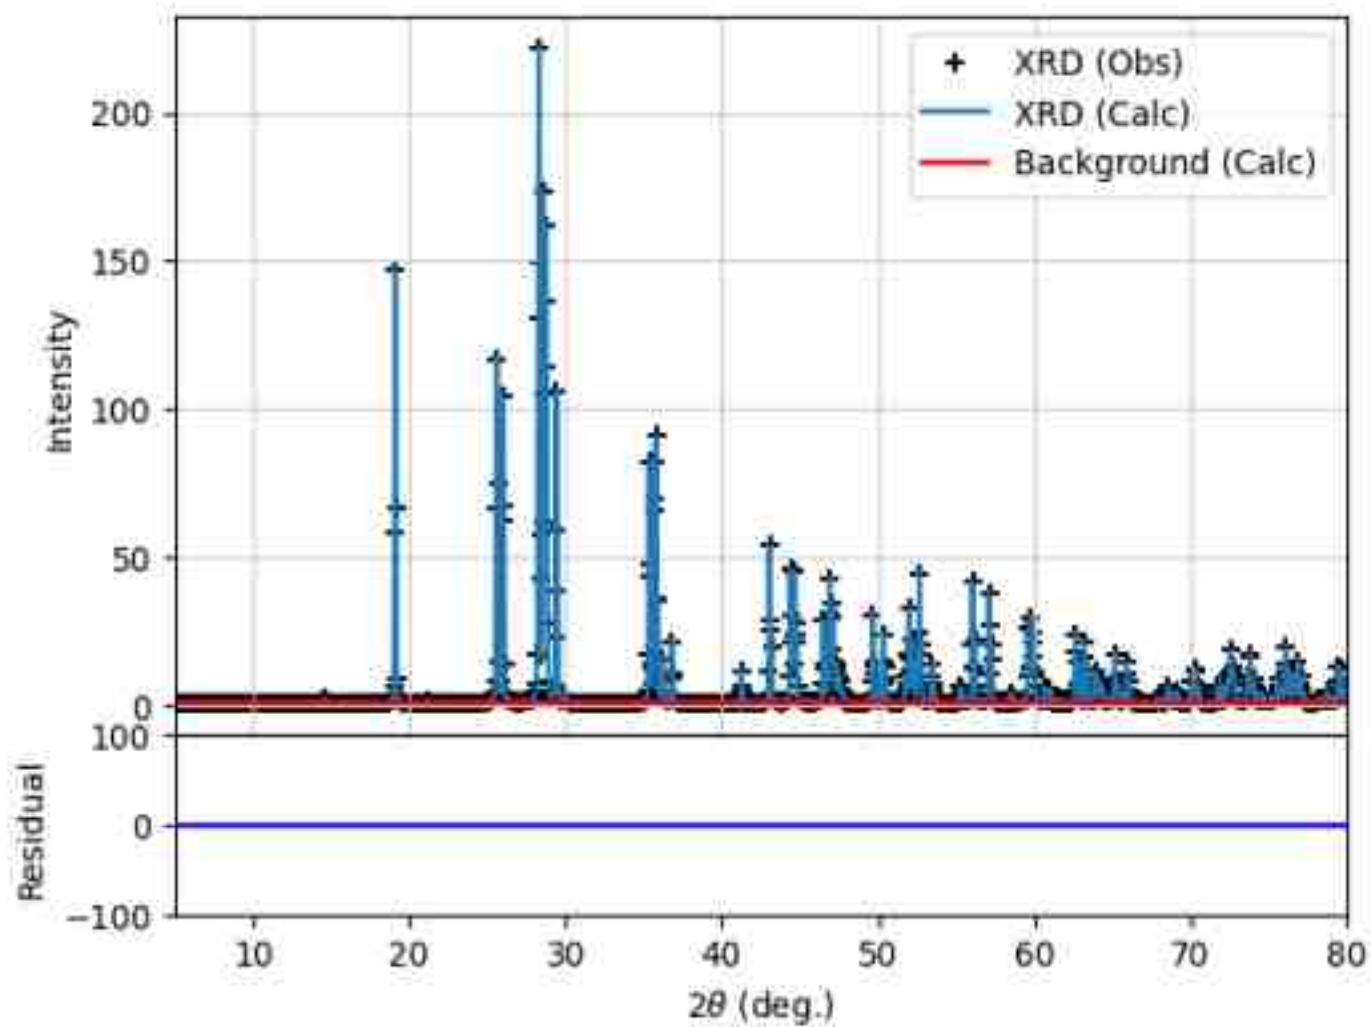

| RMSE before RR | Rwp     | RMSE after RR |
|----------------|---------|---------------|
| 0.022          | 0.00142 | 0.00014       |



# Ba<sub>2</sub>Sm<sub>4</sub>Fe<sub>2</sub>S<sub>10</sub>

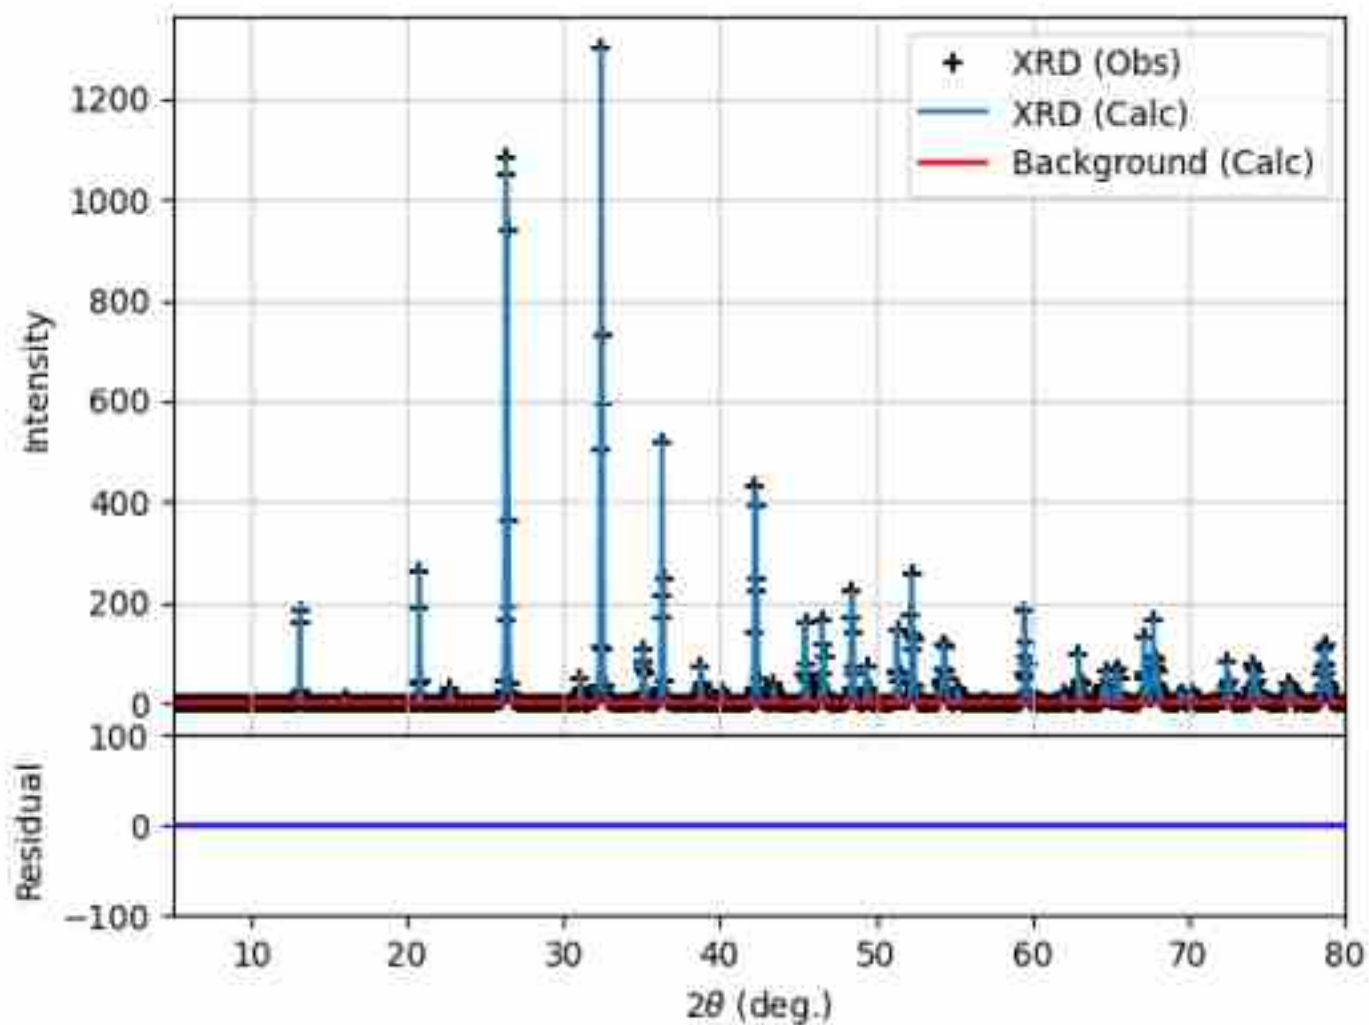

| RMSE before RR | Rwp     | RMSE after RR |
|----------------|---------|---------------|
| 0.022          | 0.00341 | 0.00065       |

# Ba<sub>2</sub>Sr<sub>2</sub>Dy<sub>2</sub>W<sub>2</sub>O<sub>12</sub>

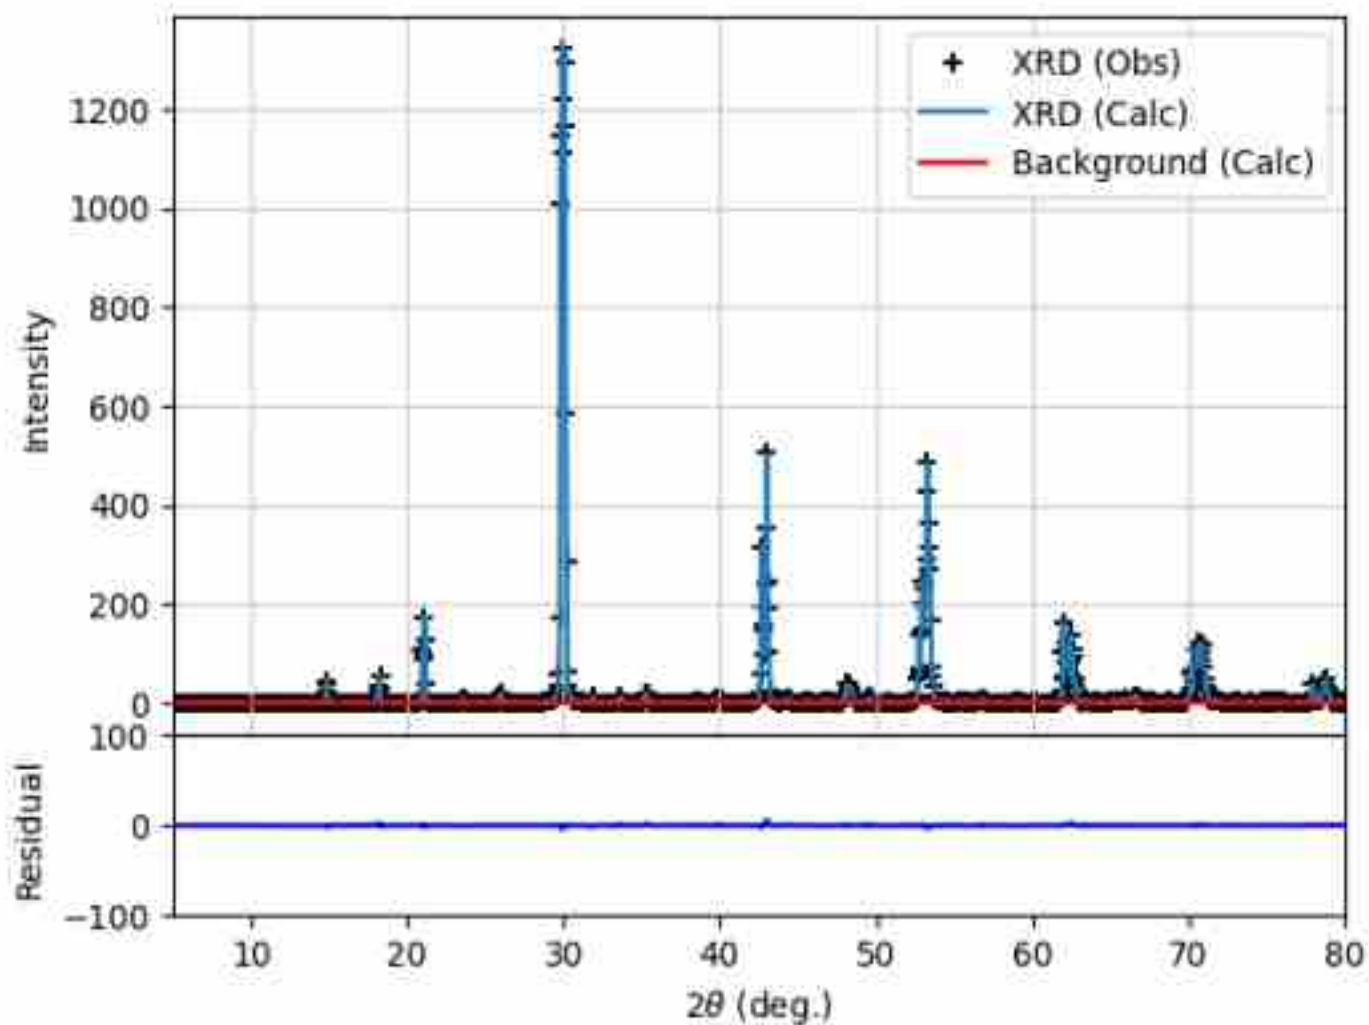

| RMSE before RR | Rwp     | RMSE after RR |
|----------------|---------|---------------|
| 0.022          | 2.32022 | 0.10171       |

# Ba<sub>2</sub>Y<sub>1</sub>Ti<sub>3</sub>O<sub>8</sub>

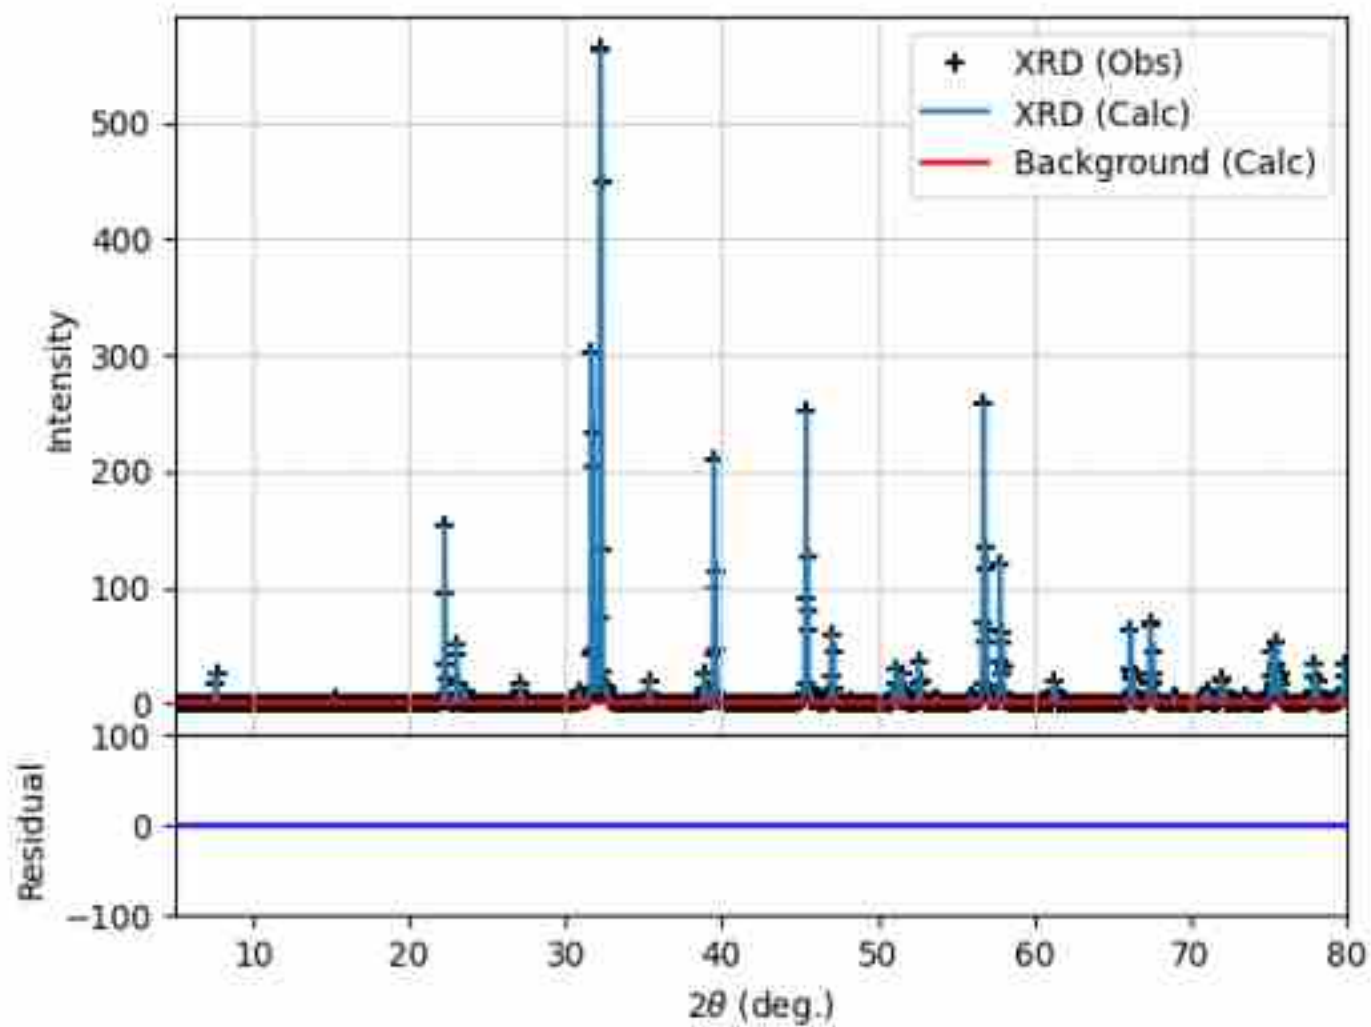

| RMSE before RR | Rwp    | RMSE after RR |
|----------------|--------|---------------|
| 0.022          | 0.0055 | 0.0014        |

# Ba<sub>2</sub>Zr<sub>2</sub>Se<sub>6</sub>

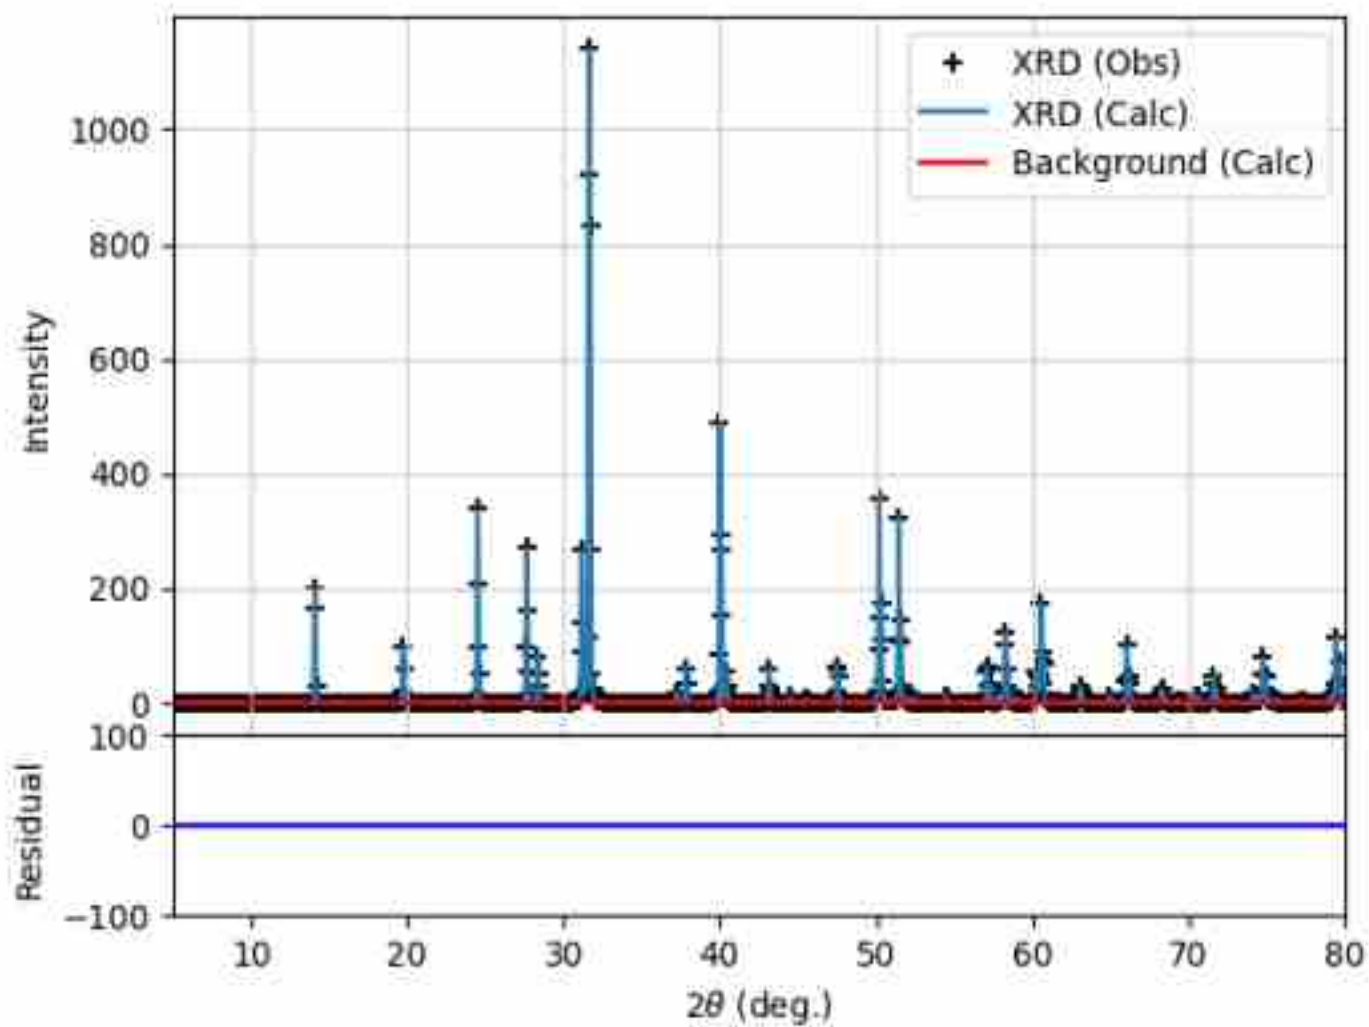

| RMSE before RR | Rwp     | RMSE after RR |
|----------------|---------|---------------|
| 0.022          | 0.00492 | 0.00049       |

# Ba<sub>3</sub>Sr<sub>1</sub>Lu<sub>2</sub>Bi<sub>2</sub>O<sub>12</sub>

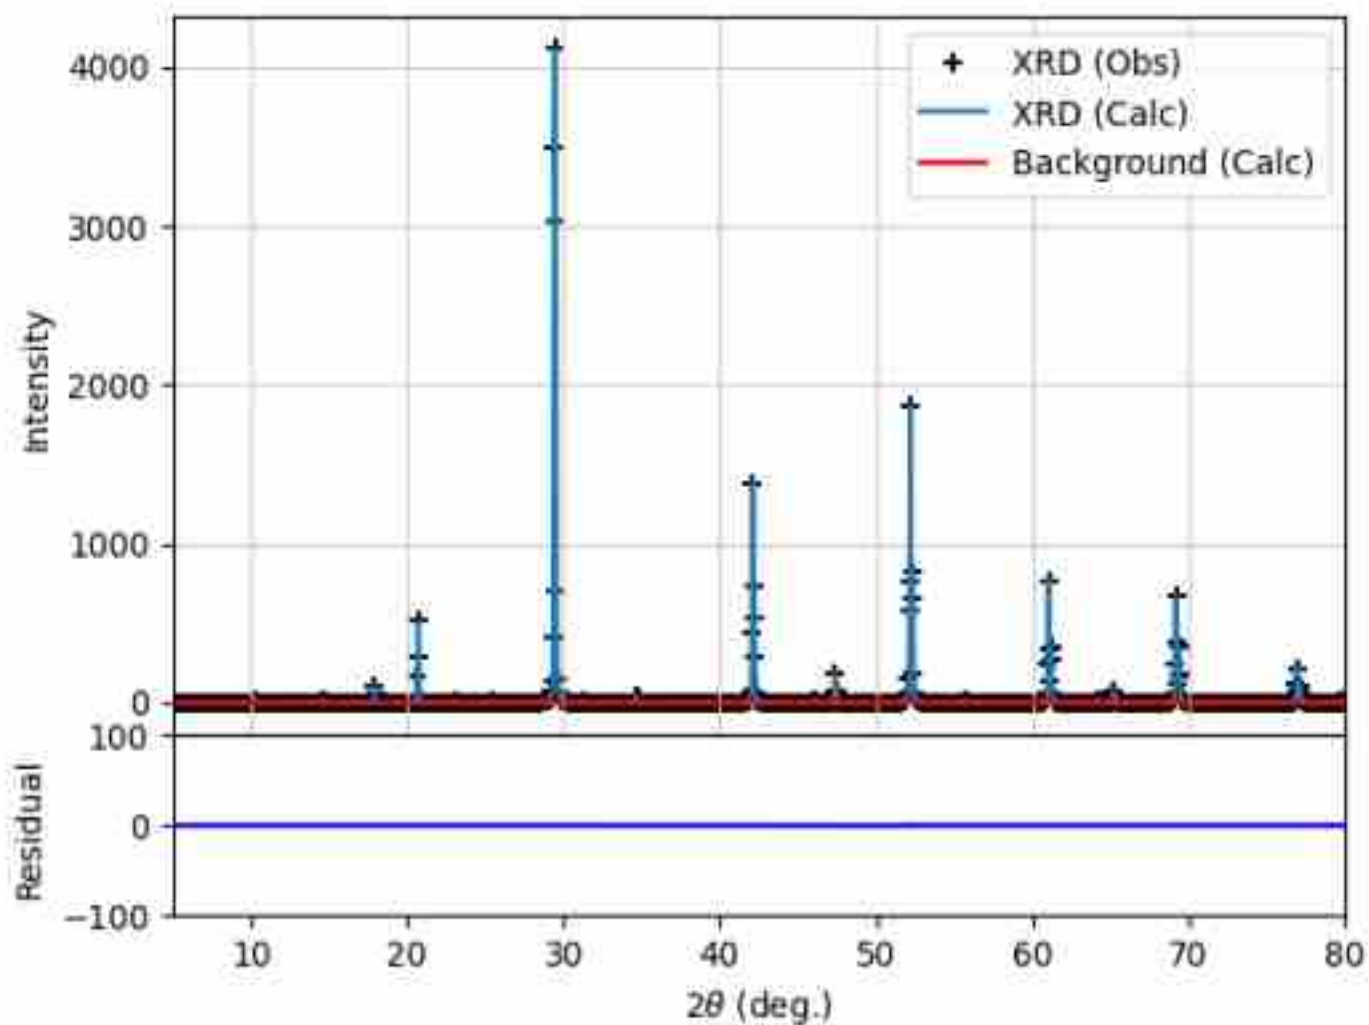

| RMSE before RR | Rwp     | RMSE after RR |
|----------------|---------|---------------|
| 0.022          | 0.01771 | 0.00251       |

# Ba4Br4O2

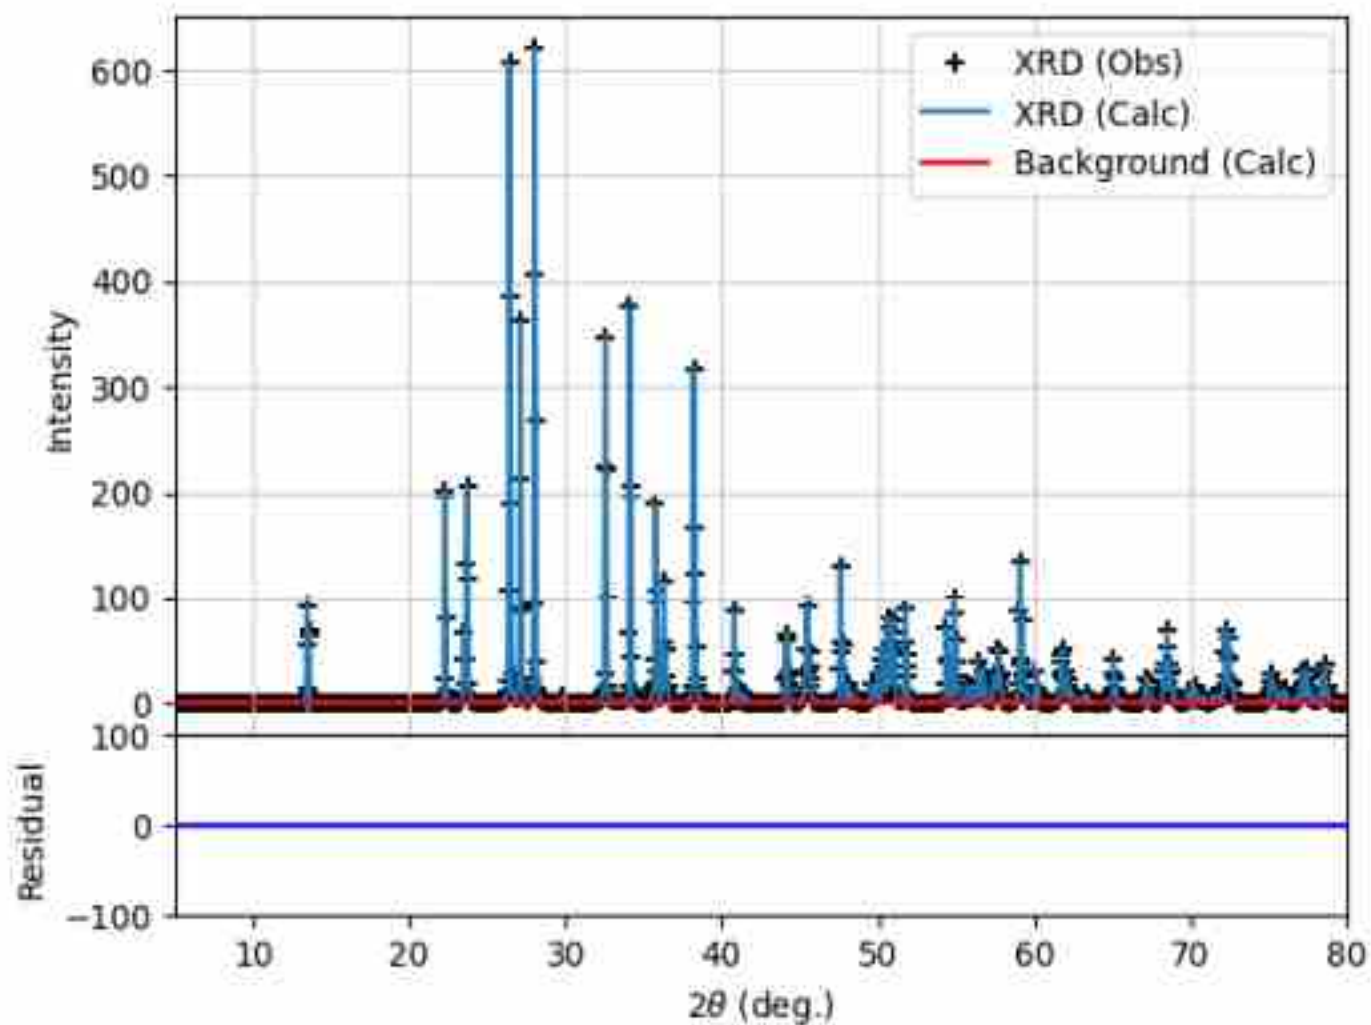

| RMSE before RR | Rwp     | RMSE after RR |
|----------------|---------|---------------|
| 0.022          | 0.00315 | 0.00068       |

# Ba<sub>4</sub>Ca<sub>1</sub>Bi<sub>3</sub>O<sub>12</sub>

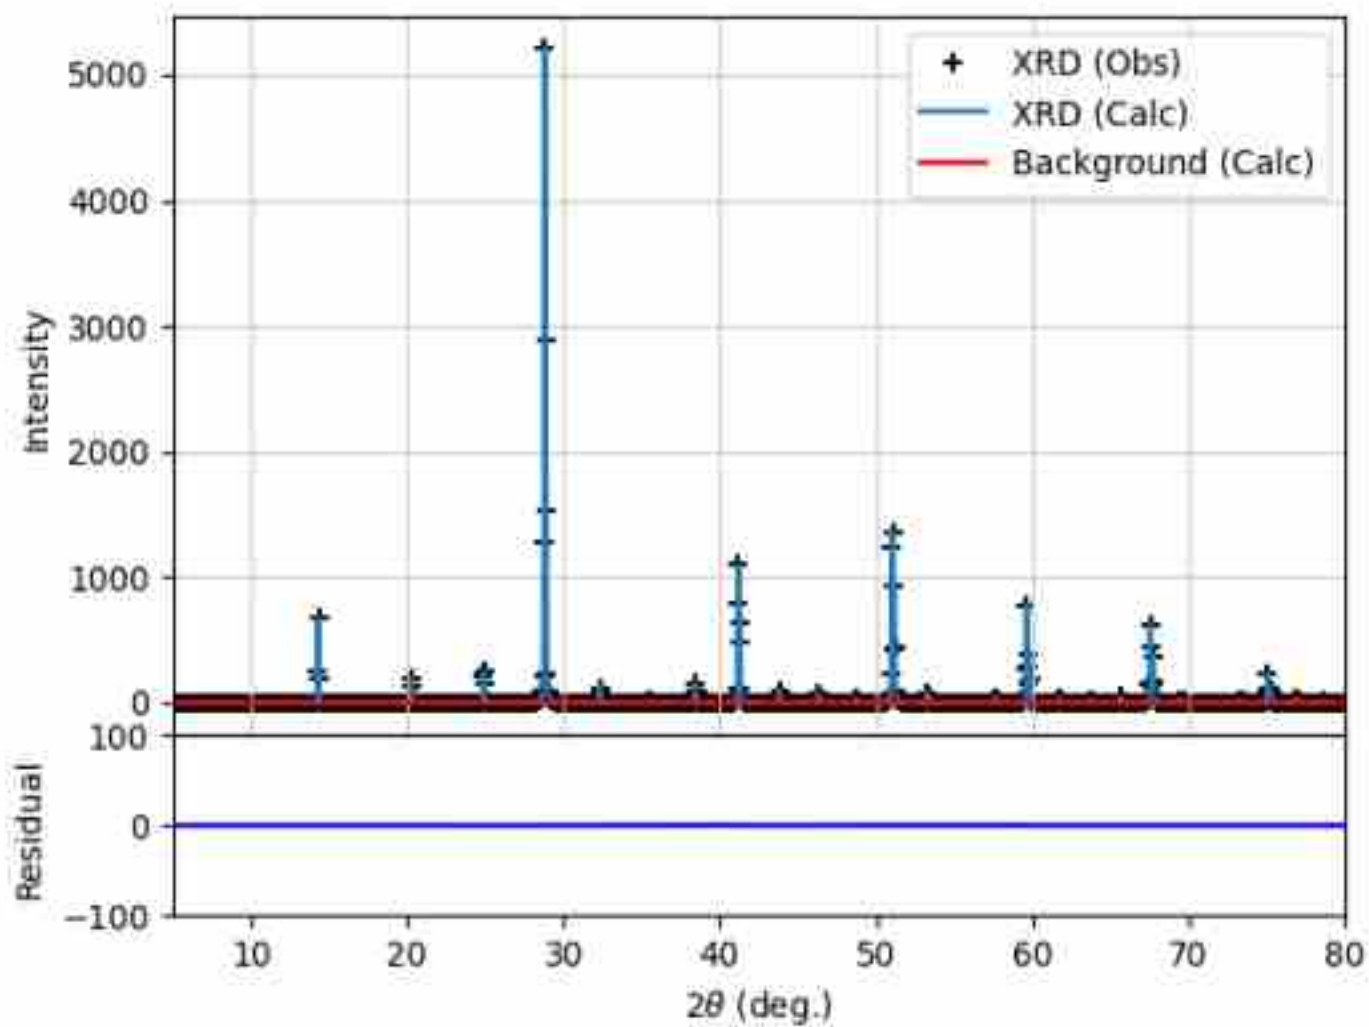

| RMSE before RR | Rwp     | RMSE after RR |
|----------------|---------|---------------|
| 0.022          | 0.04508 | 0.00785       |

# Ba<sub>4</sub>Hf<sub>3</sub>S<sub>10</sub>

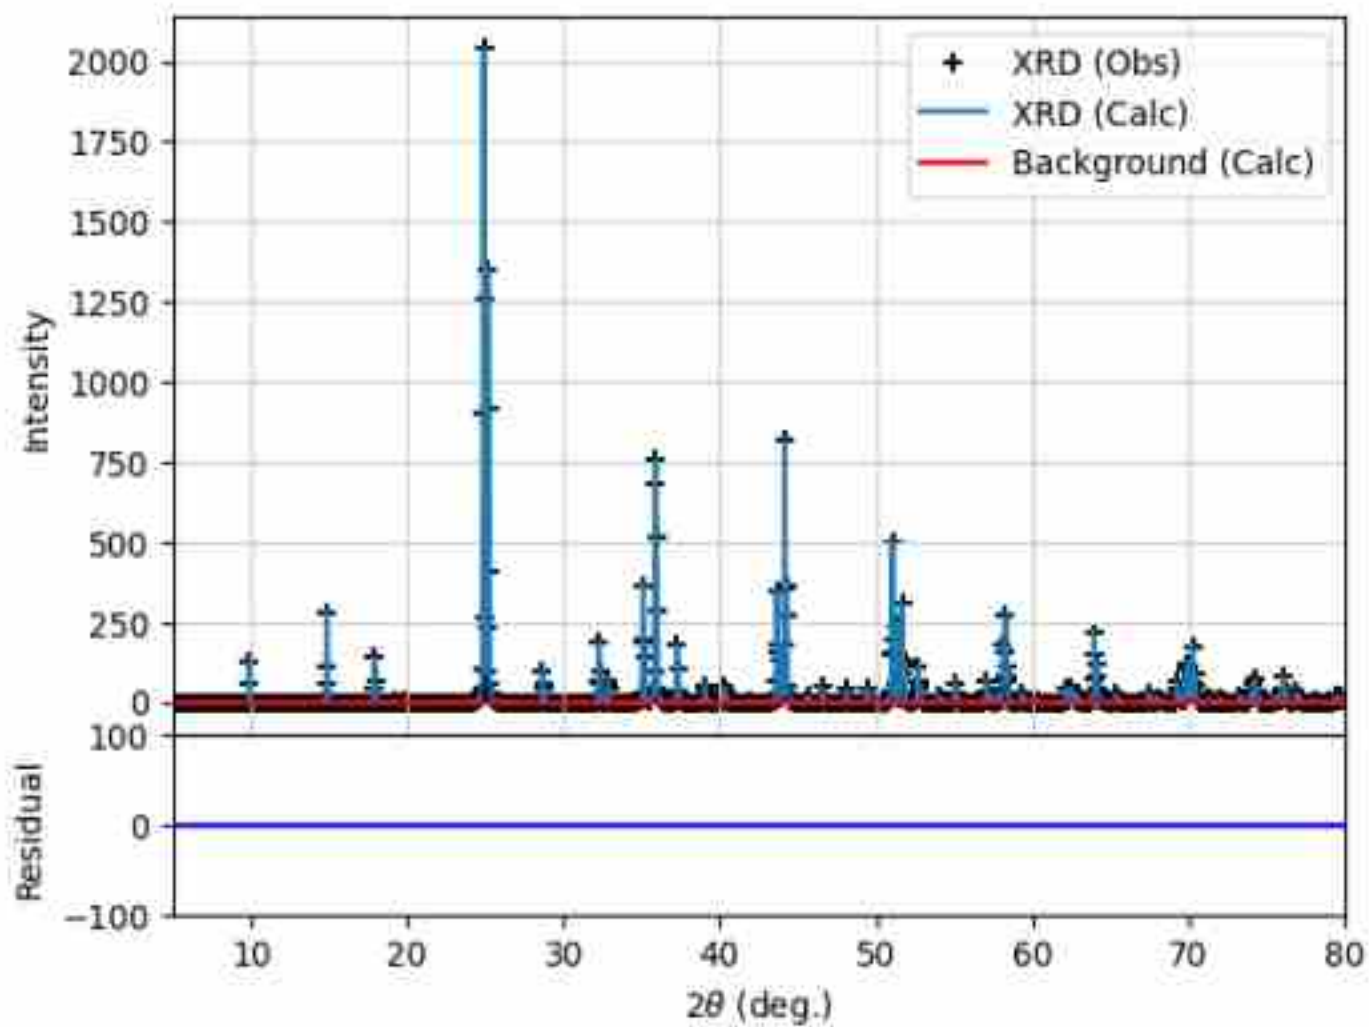

| RMSE before RR | Rwp     | RMSE after RR |
|----------------|---------|---------------|
| 0.022          | 0.00369 | 0.00042       |



# Ba<sub>4</sub>I<sub>4</sub>Br<sub>4</sub>

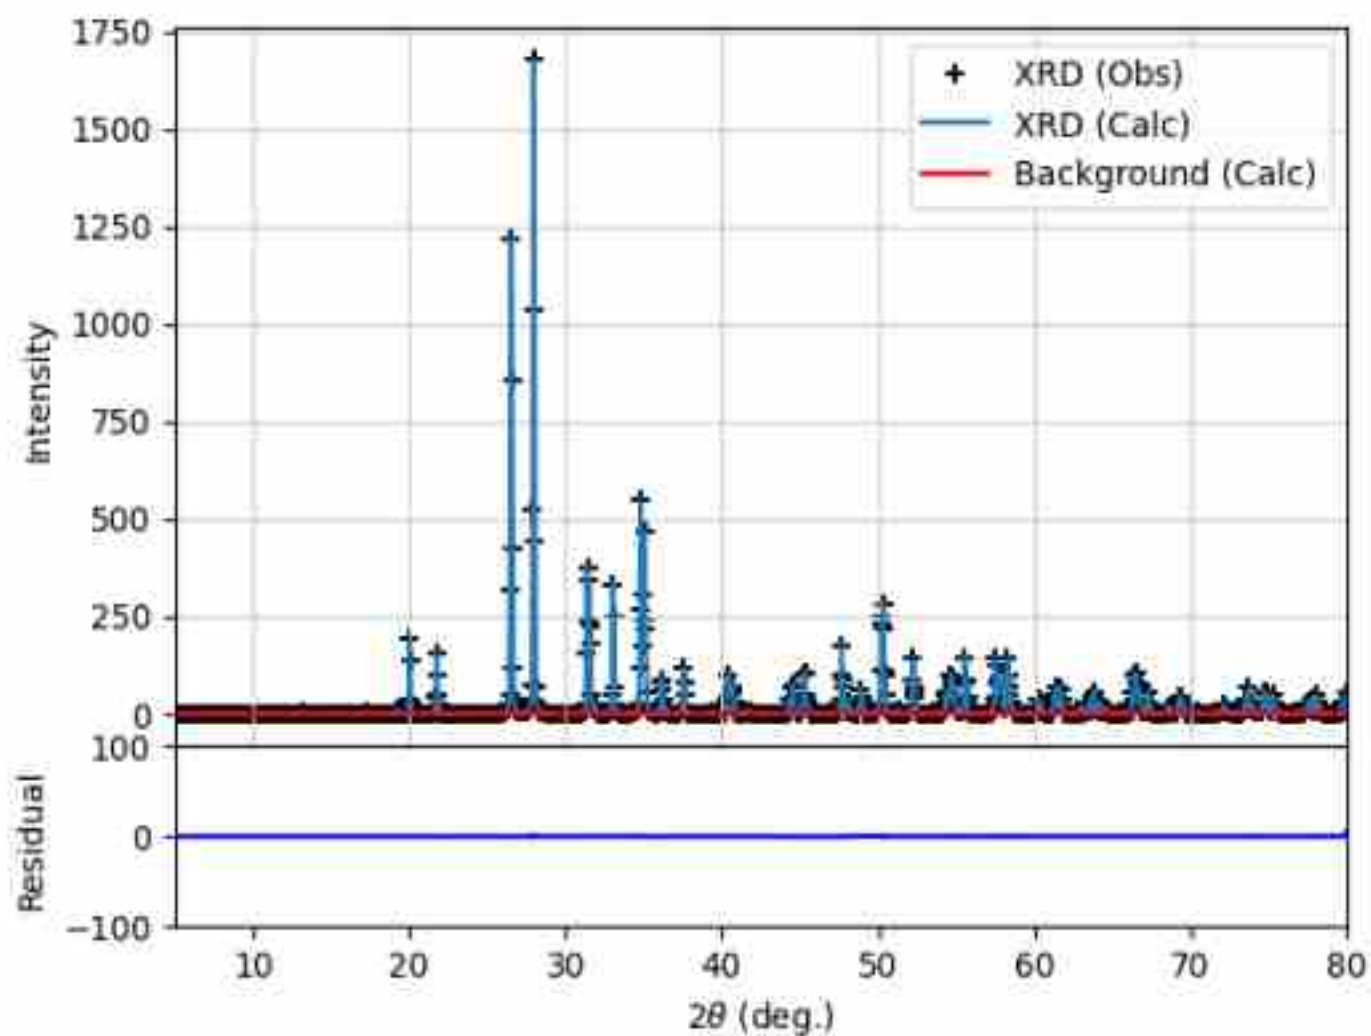

| RMSE before RR | Rwp     | RMSE after RR |
|----------------|---------|---------------|
| 0.022          | 0.72852 | 0.00574       |

# Be<sub>12</sub>W<sub>1</sub>

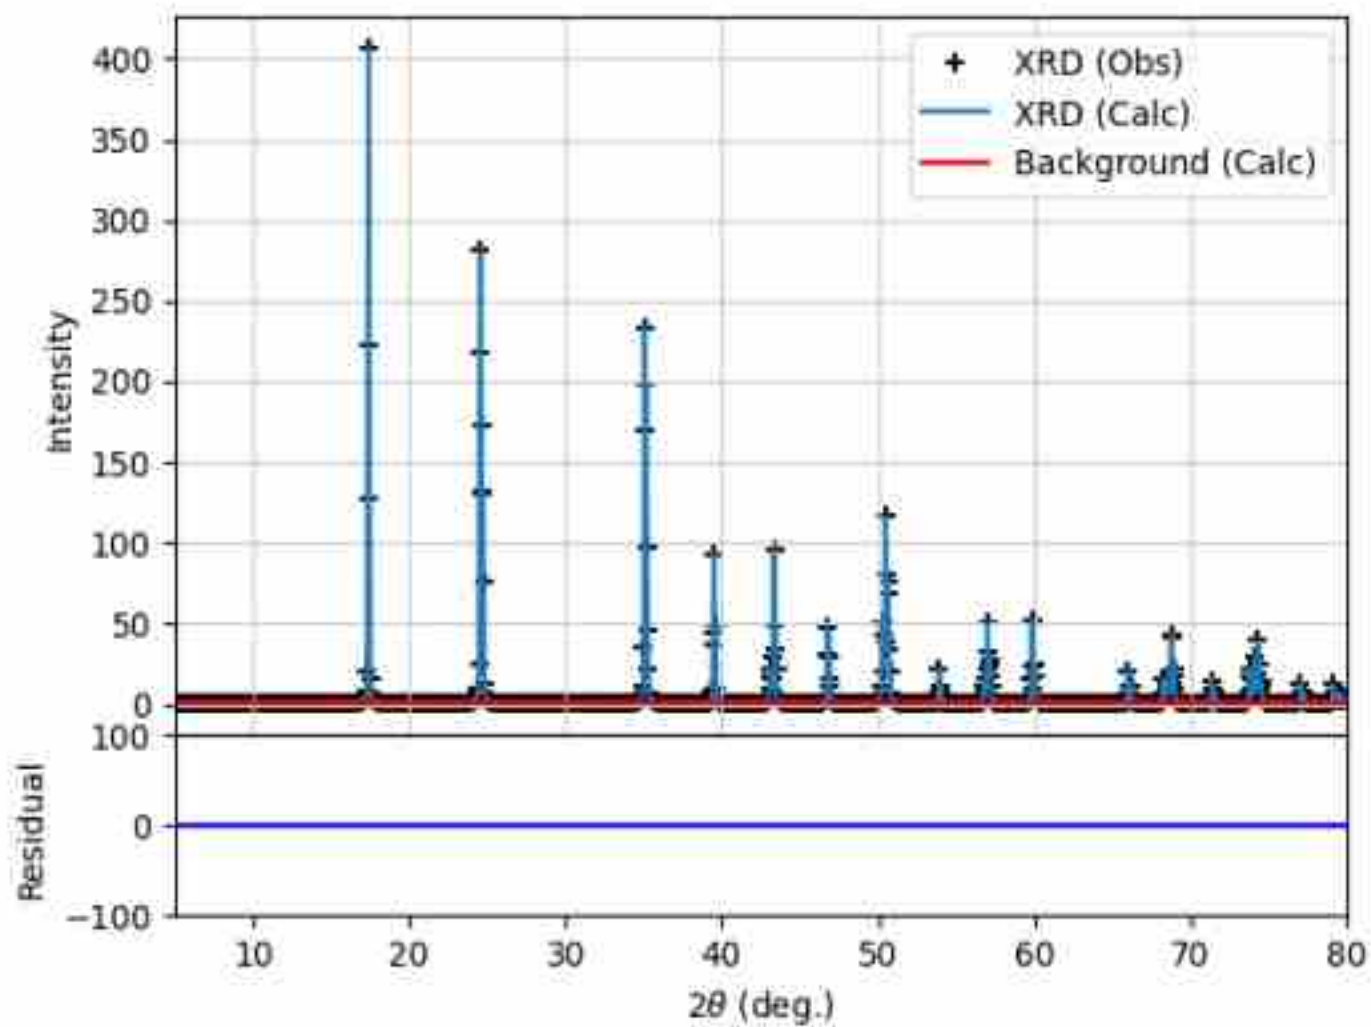

| RMSE before RR | Rwp     | RMSE after RR |
|----------------|---------|---------------|
| 0.022          | 0.01374 | 0.00638       |

# Bi3Pd12Pb1

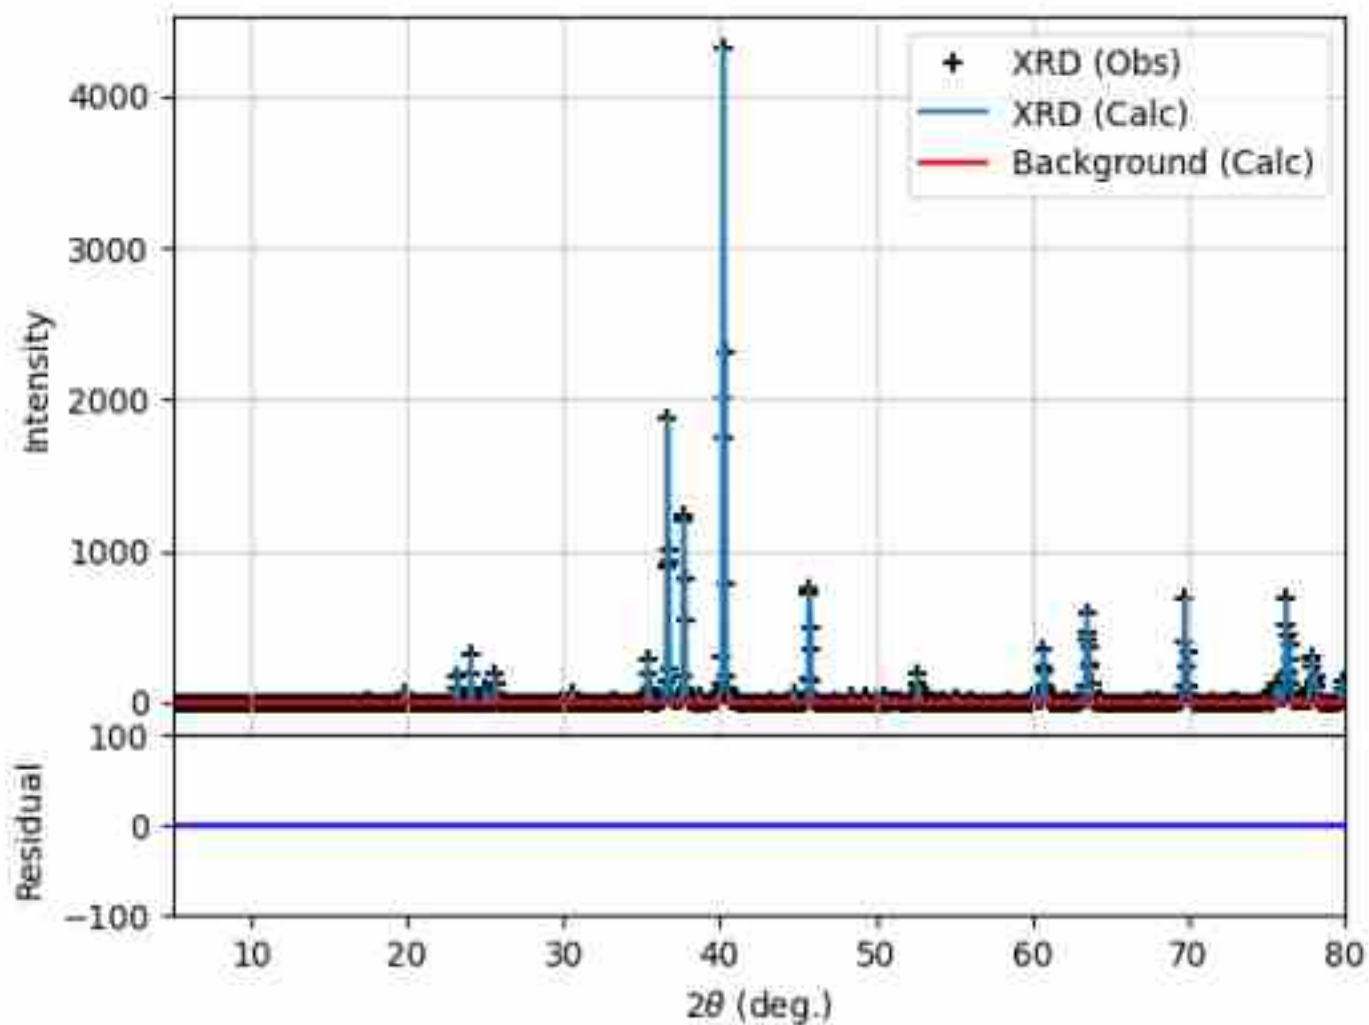

| RMSE before RR | Rwp     | RMSE after RR |
|----------------|---------|---------------|
| 0.022          | 0.00501 | 0.00023       |

# Ca1Cr4Cu3O12

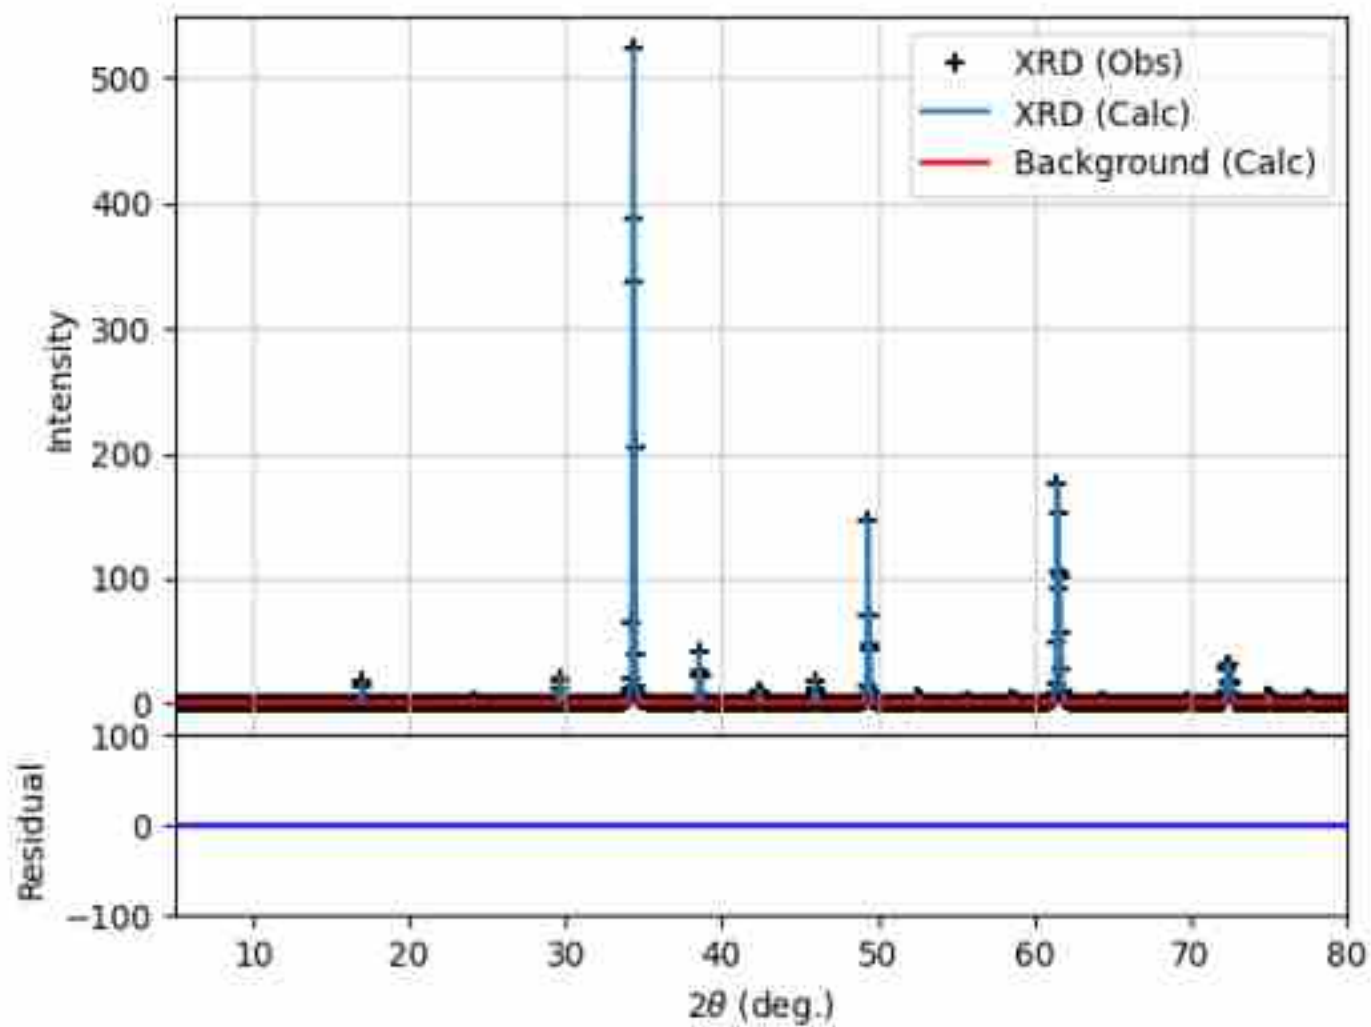

| RMSE before RR | Rwp     | RMSE after RR |
|----------------|---------|---------------|
| 0.022          | 0.00469 | 0.00314       |

# Ca<sub>2</sub>Ag<sub>4</sub>O<sub>8</sub>

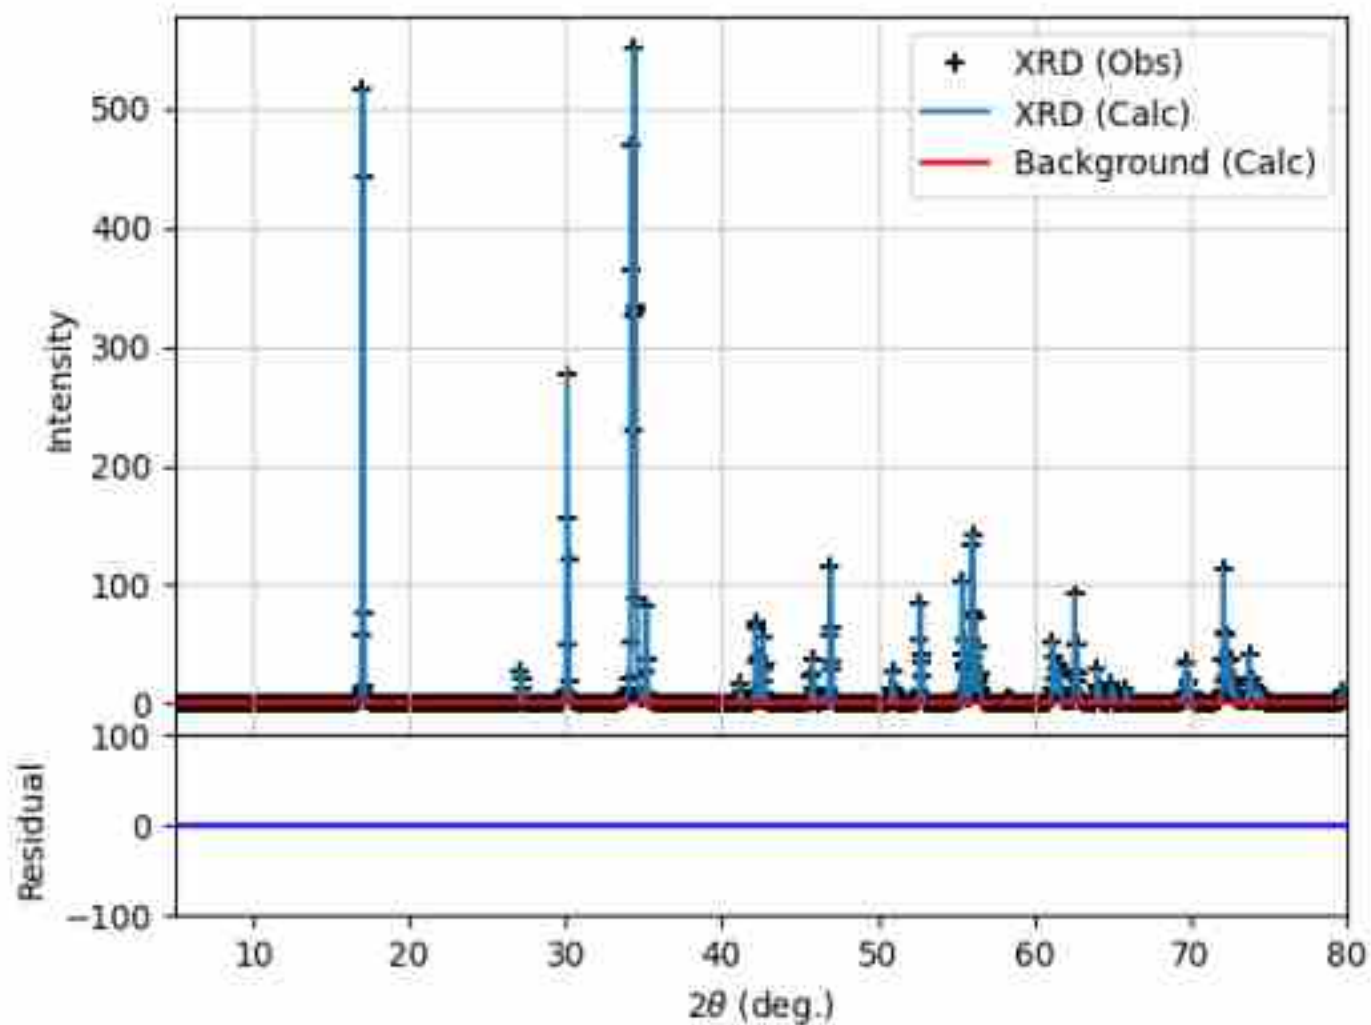

| RMSE before RR | Rwp     | RMSE after RR |
|----------------|---------|---------------|
| 0.022          | 0.00281 | 0.00149       |

# Ca<sub>2</sub>Ga<sub>6</sub>Co<sub>4</sub>

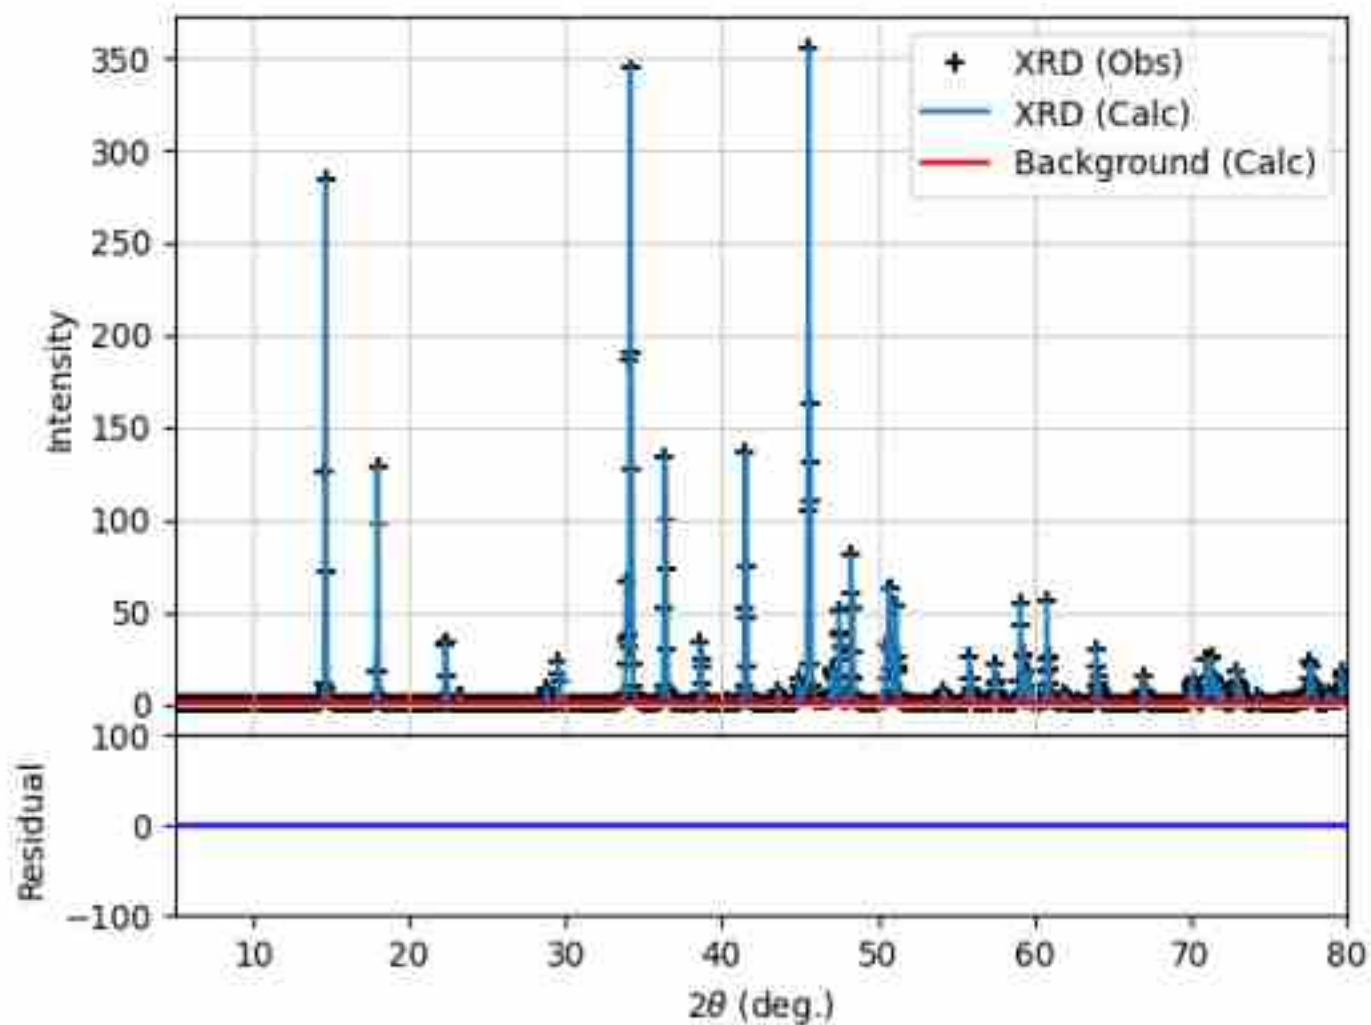

| RMSE before RR | Rwp     | RMSE after RR |
|----------------|---------|---------------|
| 0.022          | 0.00324 | 0.00048       |

# Ca<sub>2</sub>Mn<sub>2</sub>F<sub>10</sub>

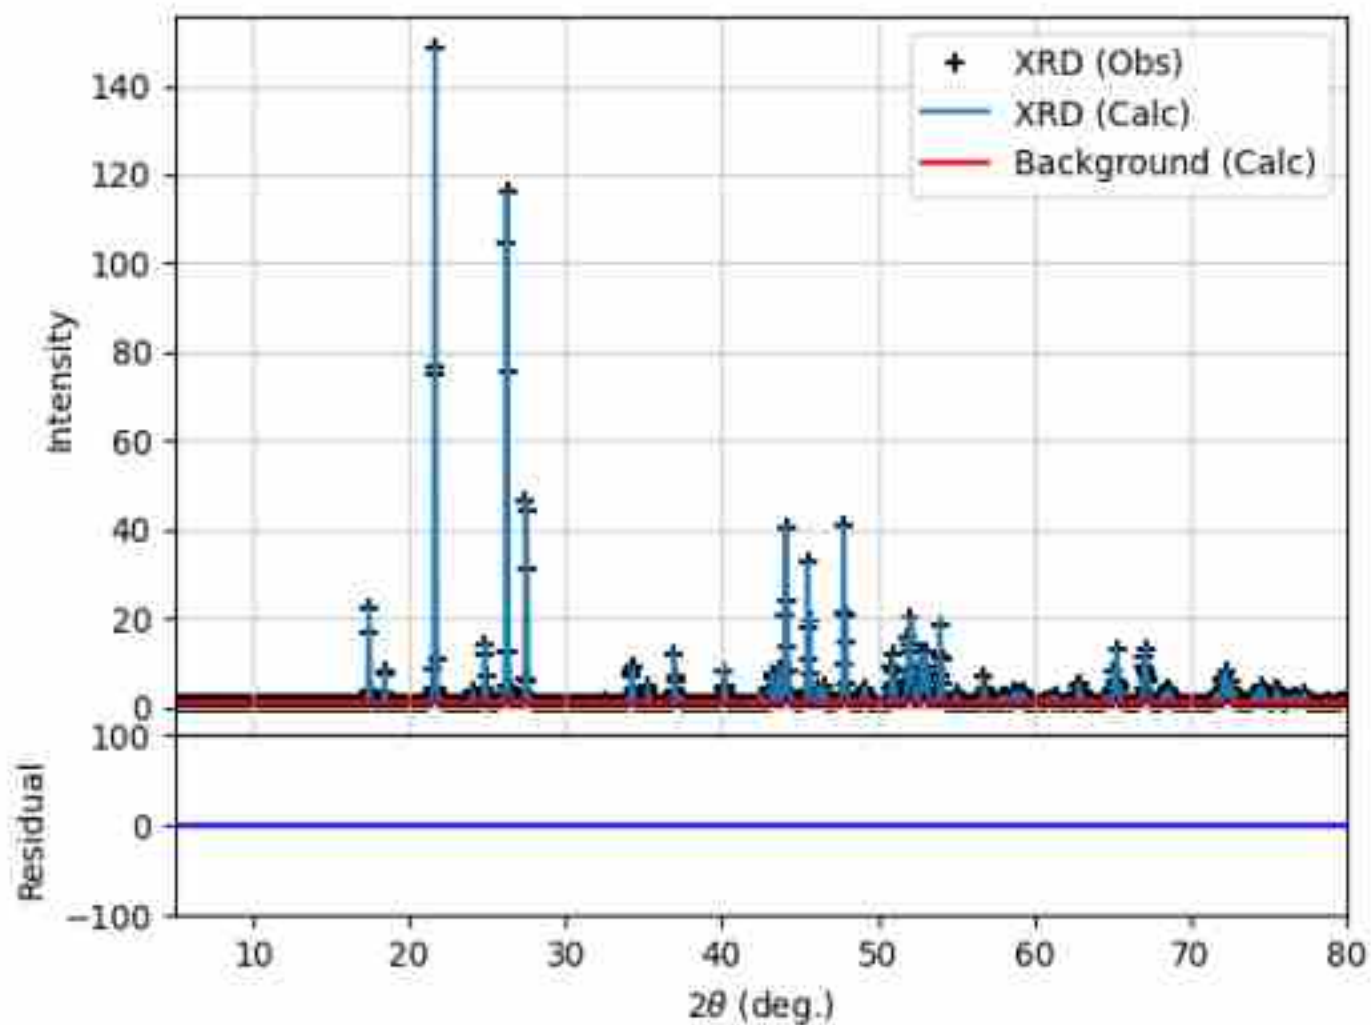

| RMSE before RR | Rwp     | RMSE after RR |
|----------------|---------|---------------|
| 0.022          | 0.00199 | 0.00052       |

# Ca<sub>3</sub>Ag<sub>3</sub>P<sub>3</sub>

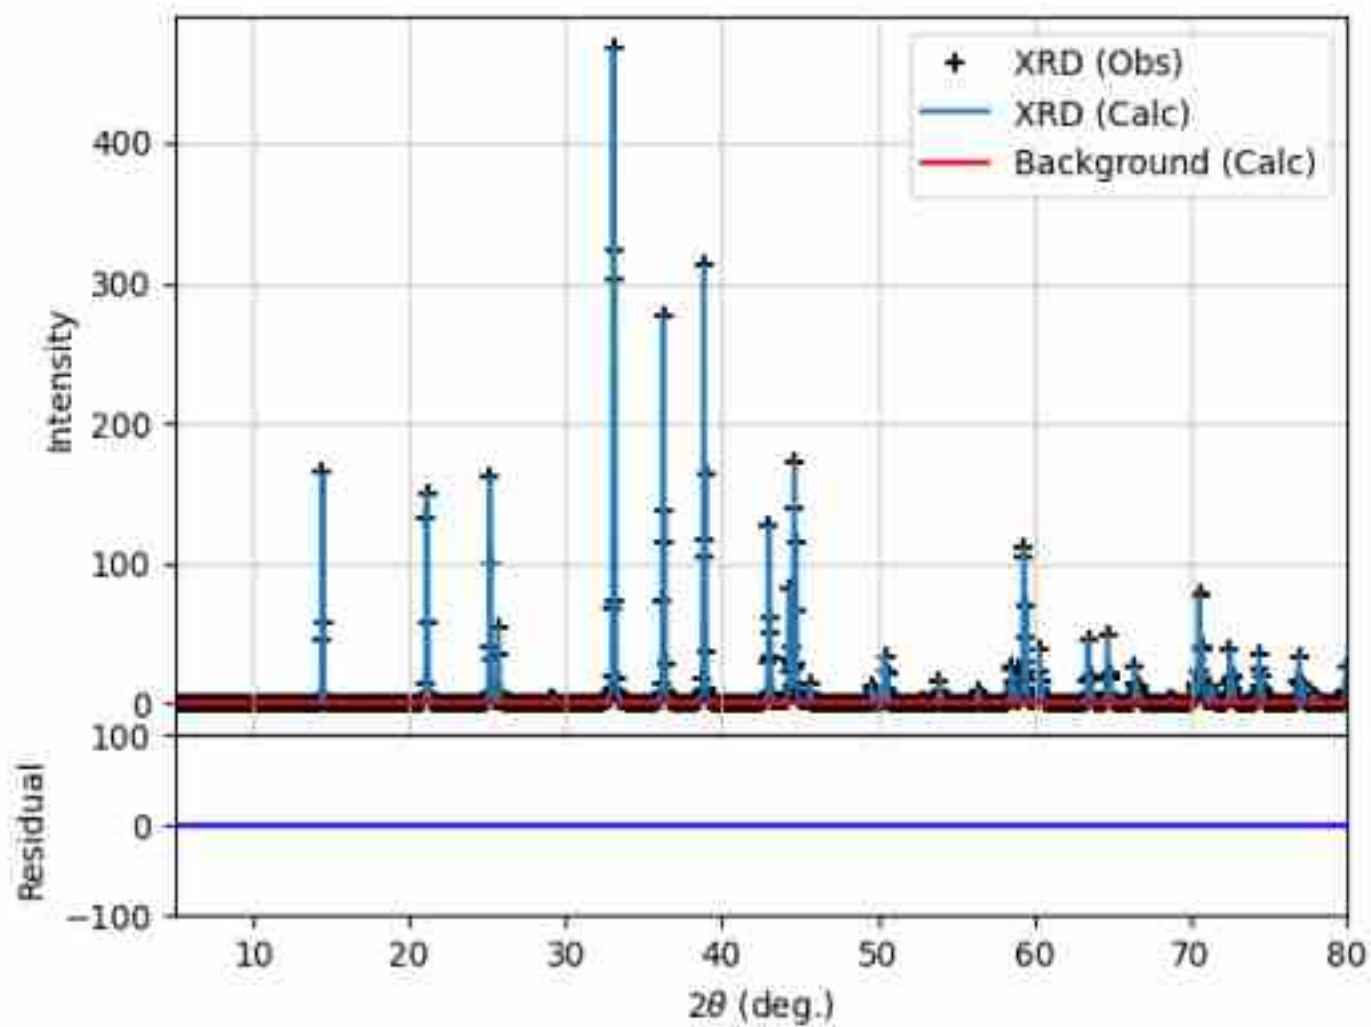

| RMSE before RR | Rwp     | RMSE after RR |
|----------------|---------|---------------|
| 0.022          | 0.00381 | 0.0011        |



# Ca<sub>3</sub>LaMn<sub>4</sub>O<sub>12</sub>

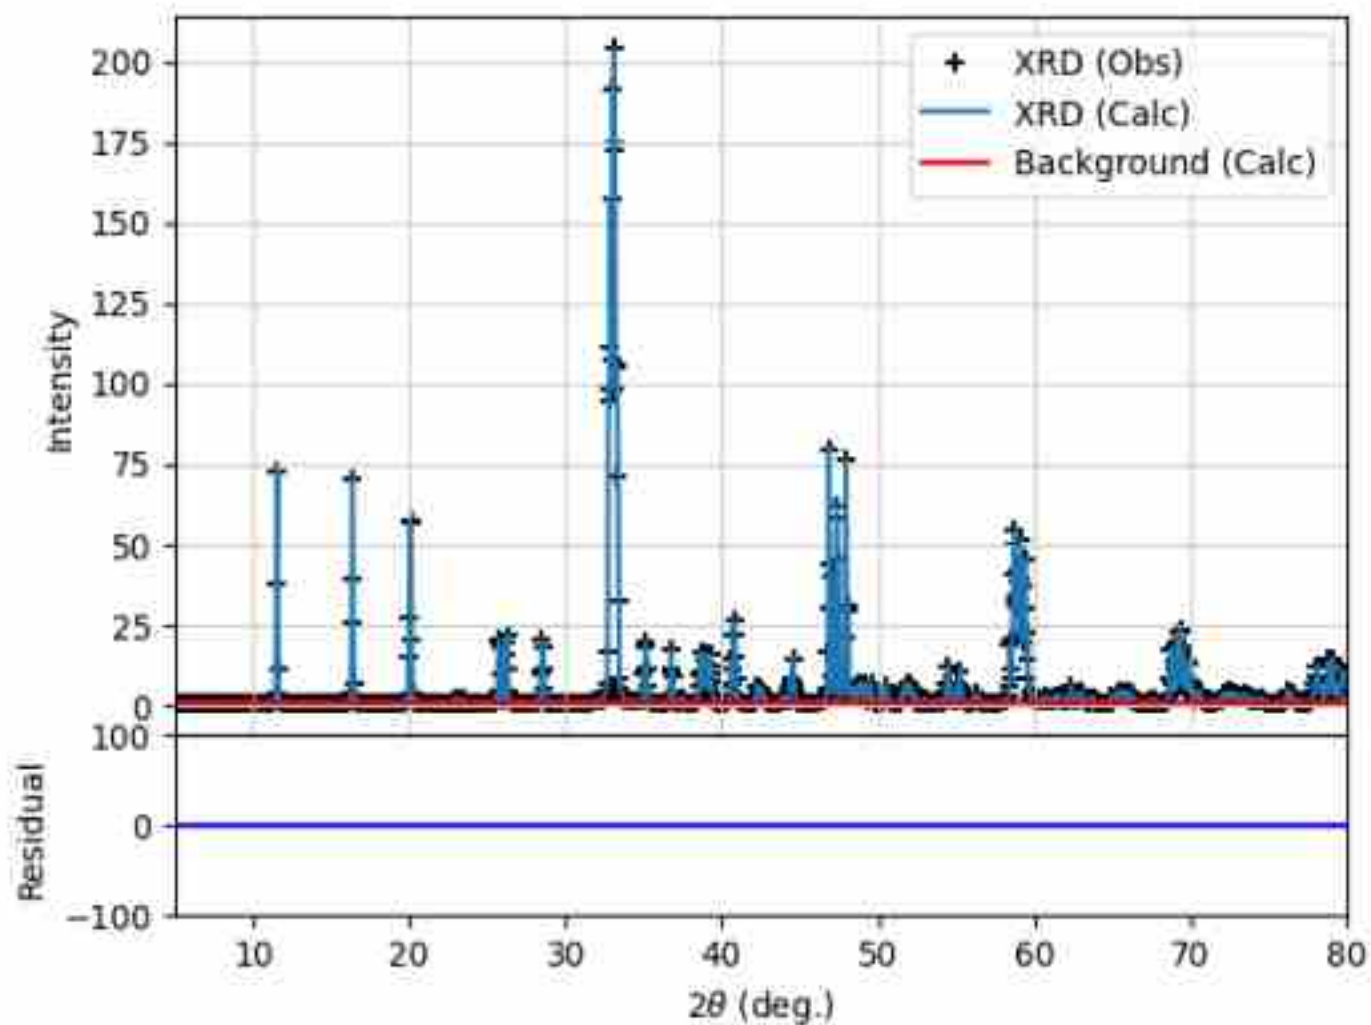

| RMSE before RR | Rwp     | RMSE after RR |
|----------------|---------|---------------|
| 0.022          | 0.00172 | 1e-05         |

# Ca<sub>4</sub>Al<sub>2</sub>Pt<sub>4</sub>

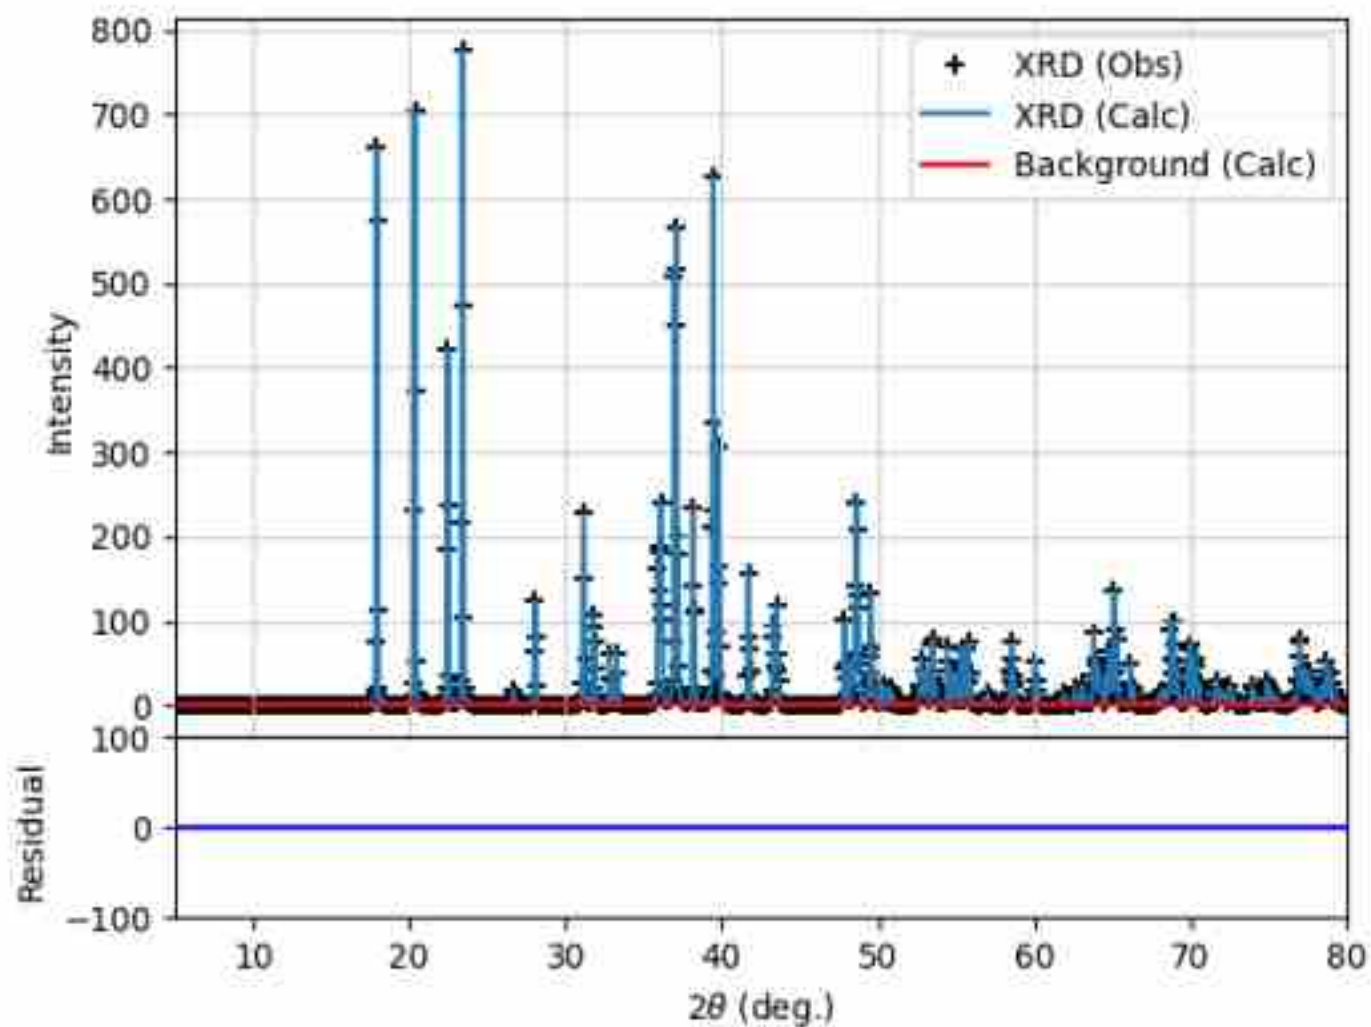

| RMSE before RR | Rwp     | RMSE after RR |
|----------------|---------|---------------|
| 0.022          | 0.00406 | 0.00051       |

# Ca<sub>4</sub>Al<sub>4</sub>O<sub>10</sub>

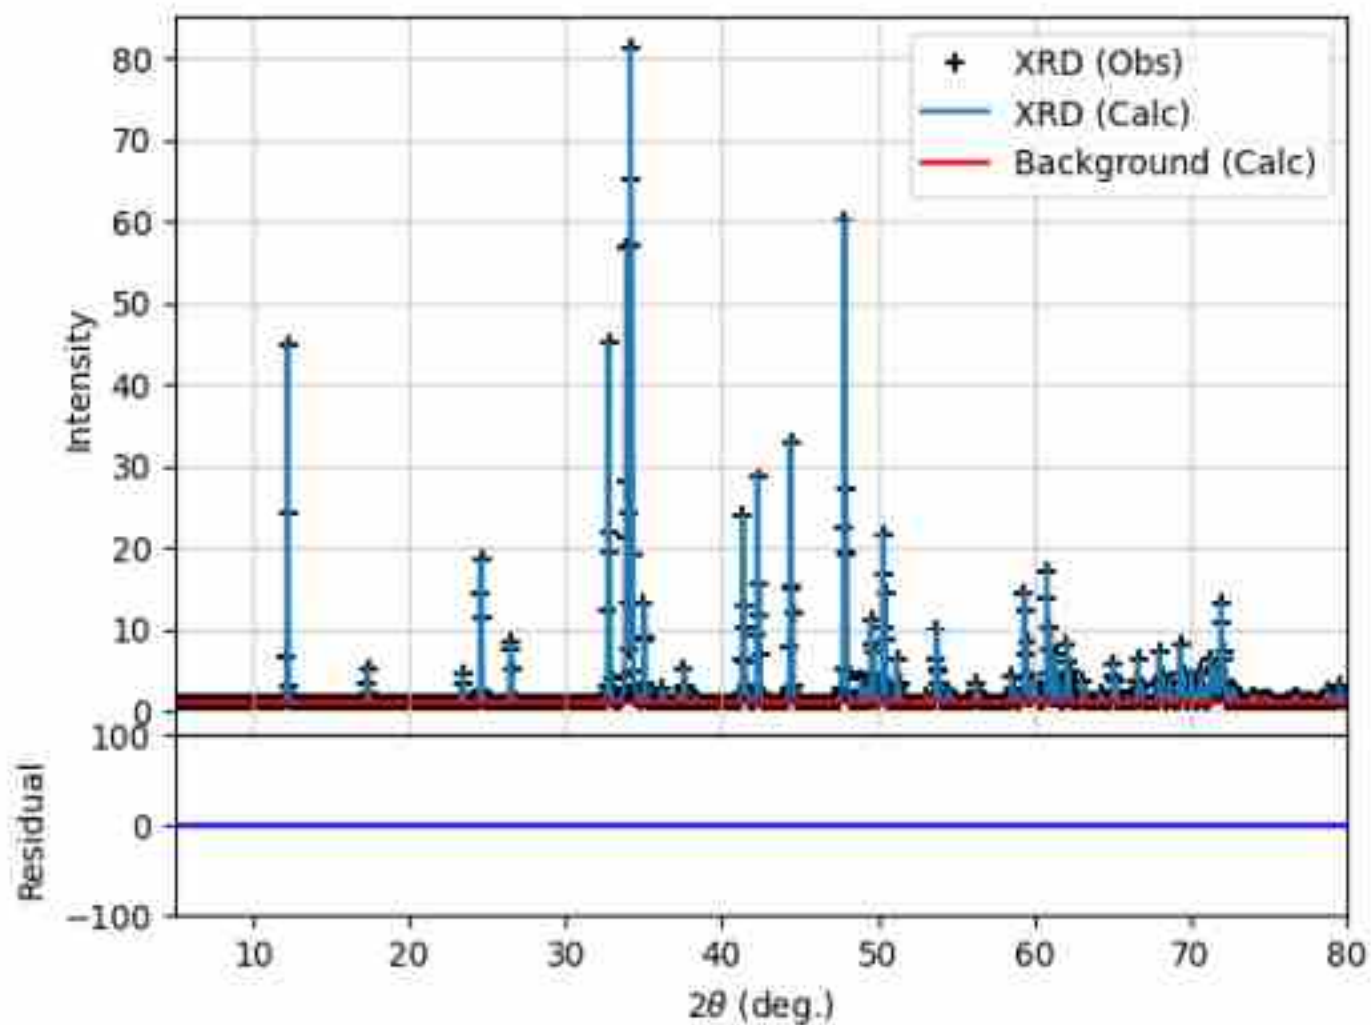

| RMSE before RR | Rwp     | RMSE after RR |
|----------------|---------|---------------|
| 0.022          | 0.00291 | 0.00068       |

# Ca<sub>4</sub>Sb<sub>4</sub>Pt<sub>4</sub>

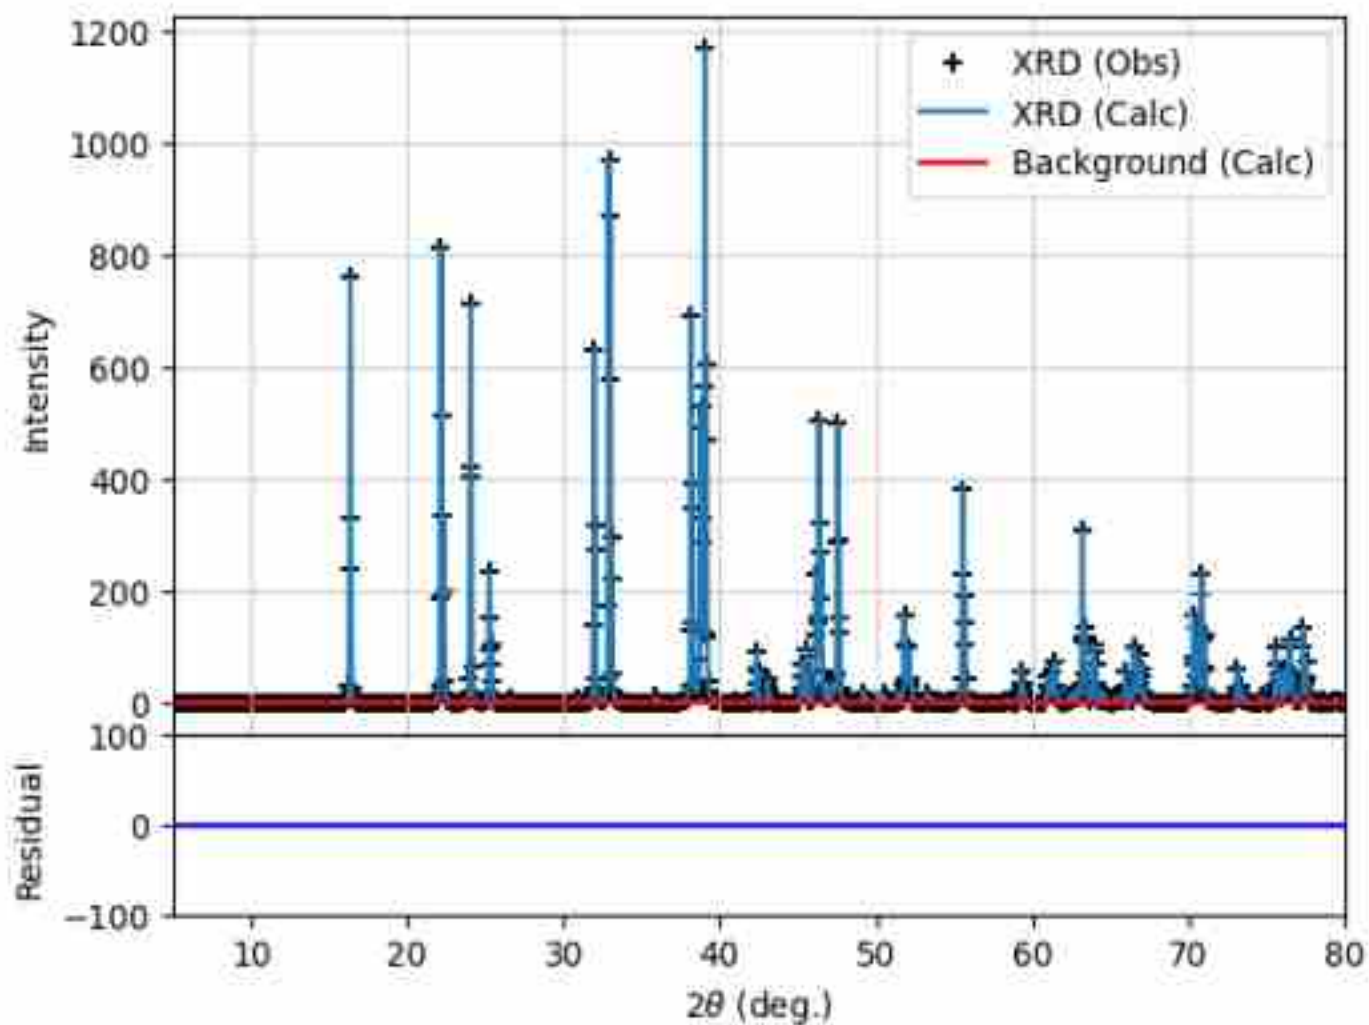

| RMSE before RR | Rwp     | RMSE after RR |
|----------------|---------|---------------|
| 0.022          | 0.00407 | 0.00039       |

# Ca9Pt6

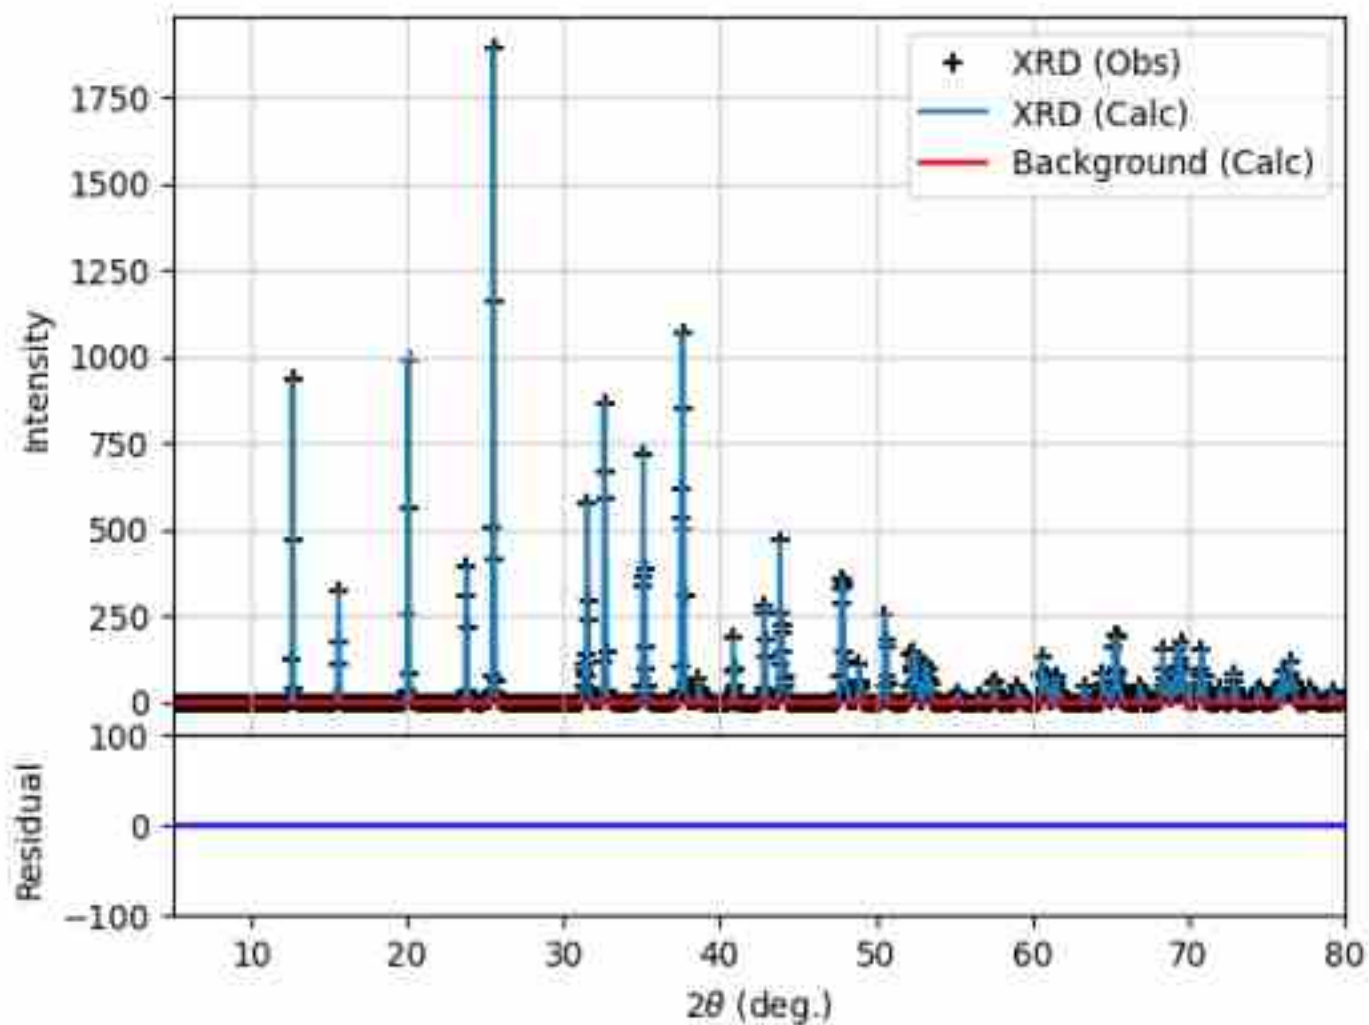

| RMSE before RR | Rwp     | RMSE after RR |
|----------------|---------|---------------|
| 0.022          | 0.00315 | 0.00061       |

# Ca10Ag6

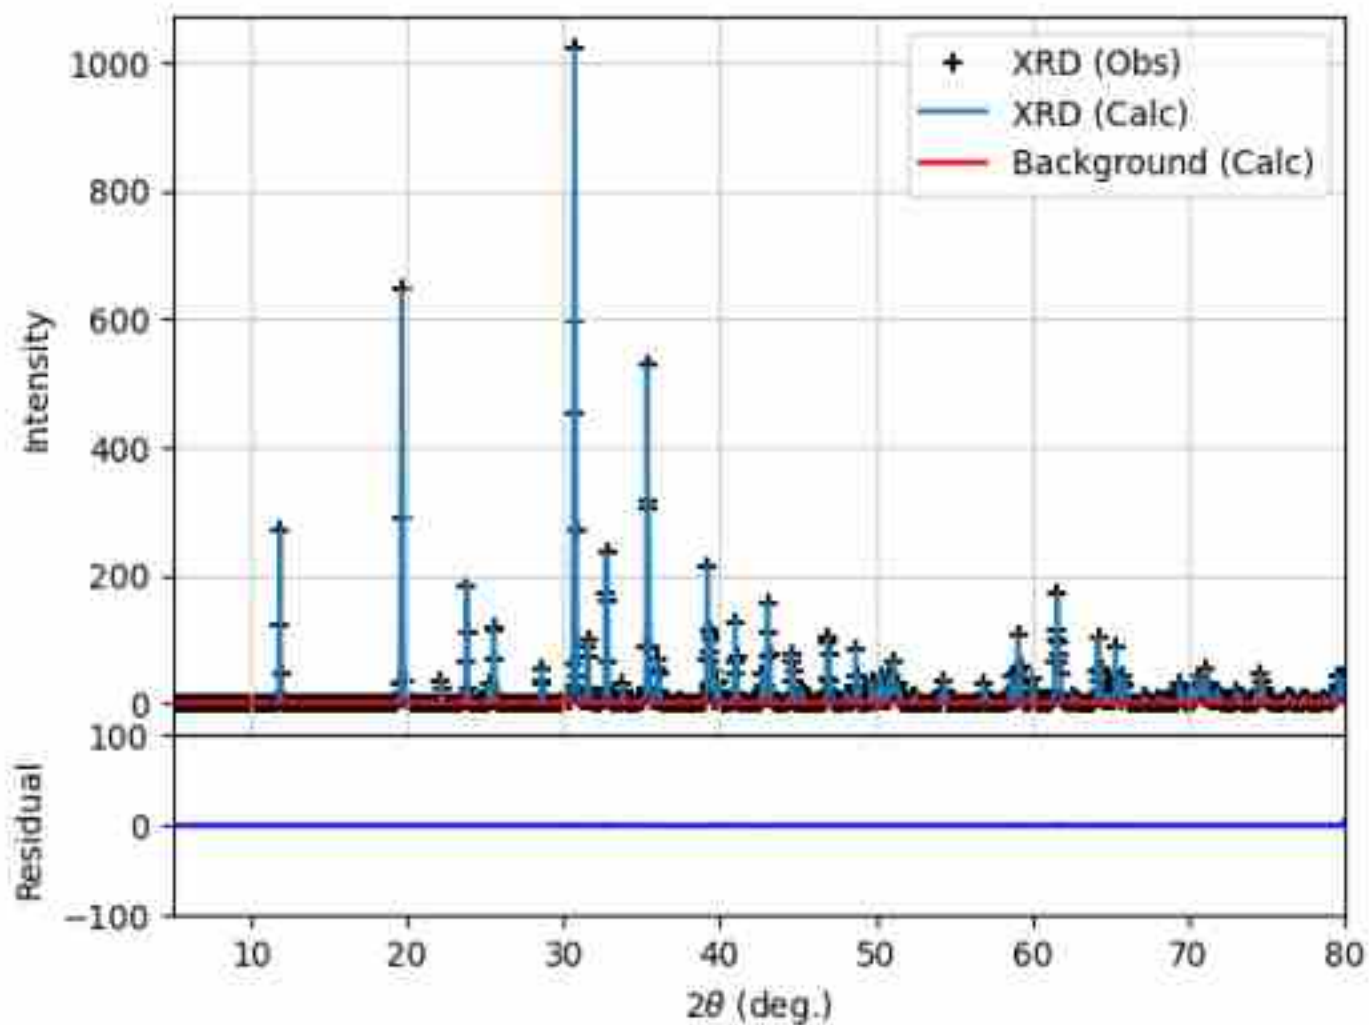

| RMSE before RR | Rwp     | RMSE after RR |
|----------------|---------|---------------|
| 0.022          | 1.41095 | 0.01043       |

# Cd<sub>2</sub>In<sub>1</sub>Ag<sub>1</sub>S<sub>4</sub>

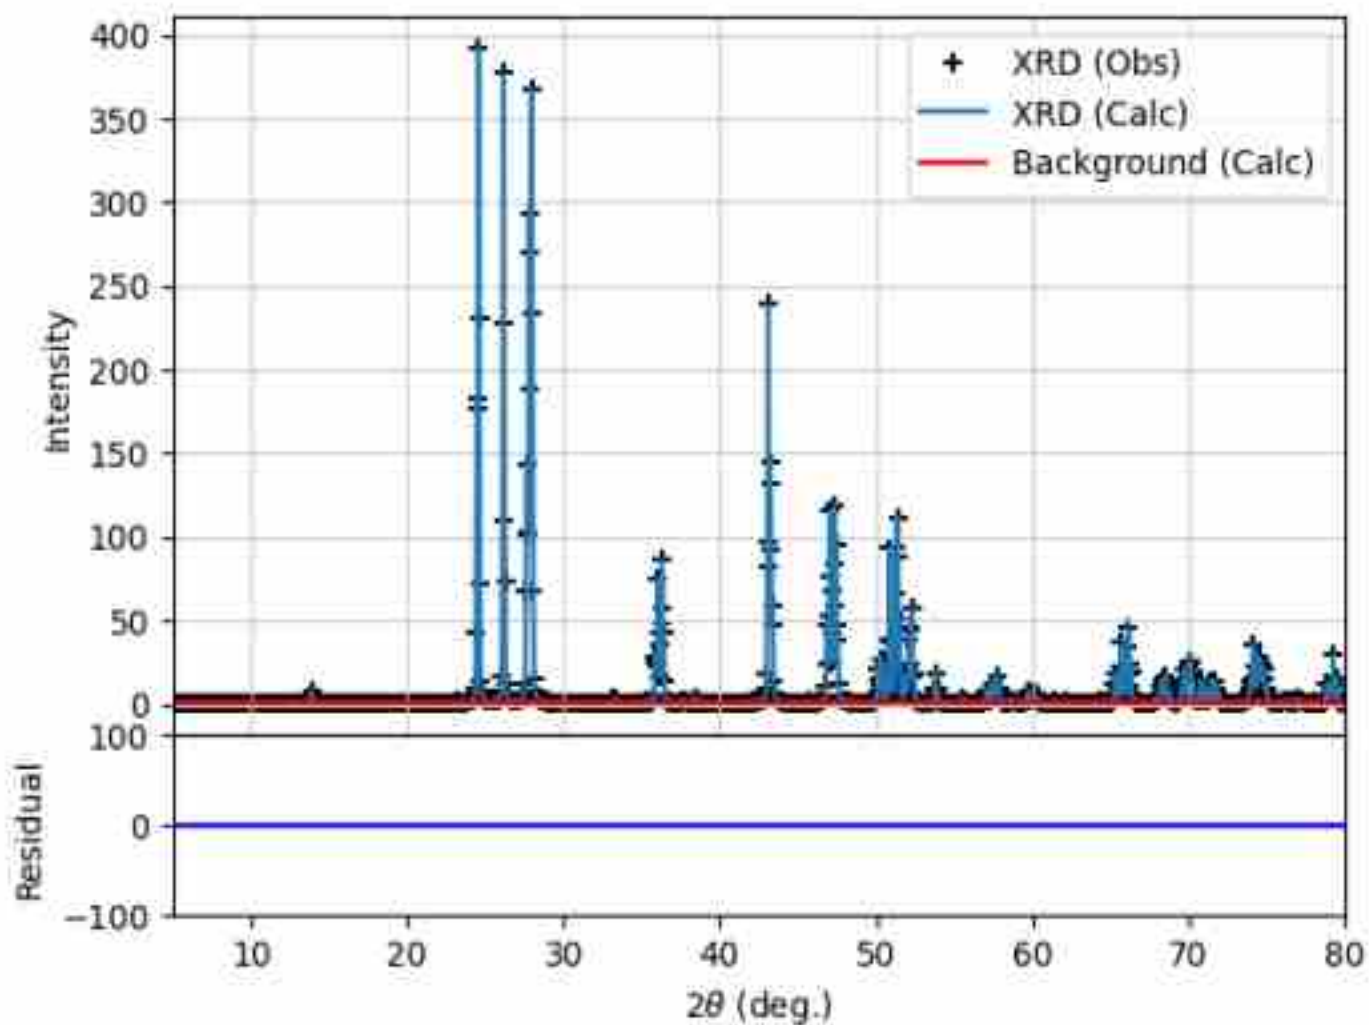

| RMSE before RR | Rwp     | RMSE after RR |
|----------------|---------|---------------|
| 0.022          | 0.35201 | 0.02894       |

# Cd<sub>2</sub>Sb<sub>2</sub>S<sub>4</sub>Br<sub>2</sub>

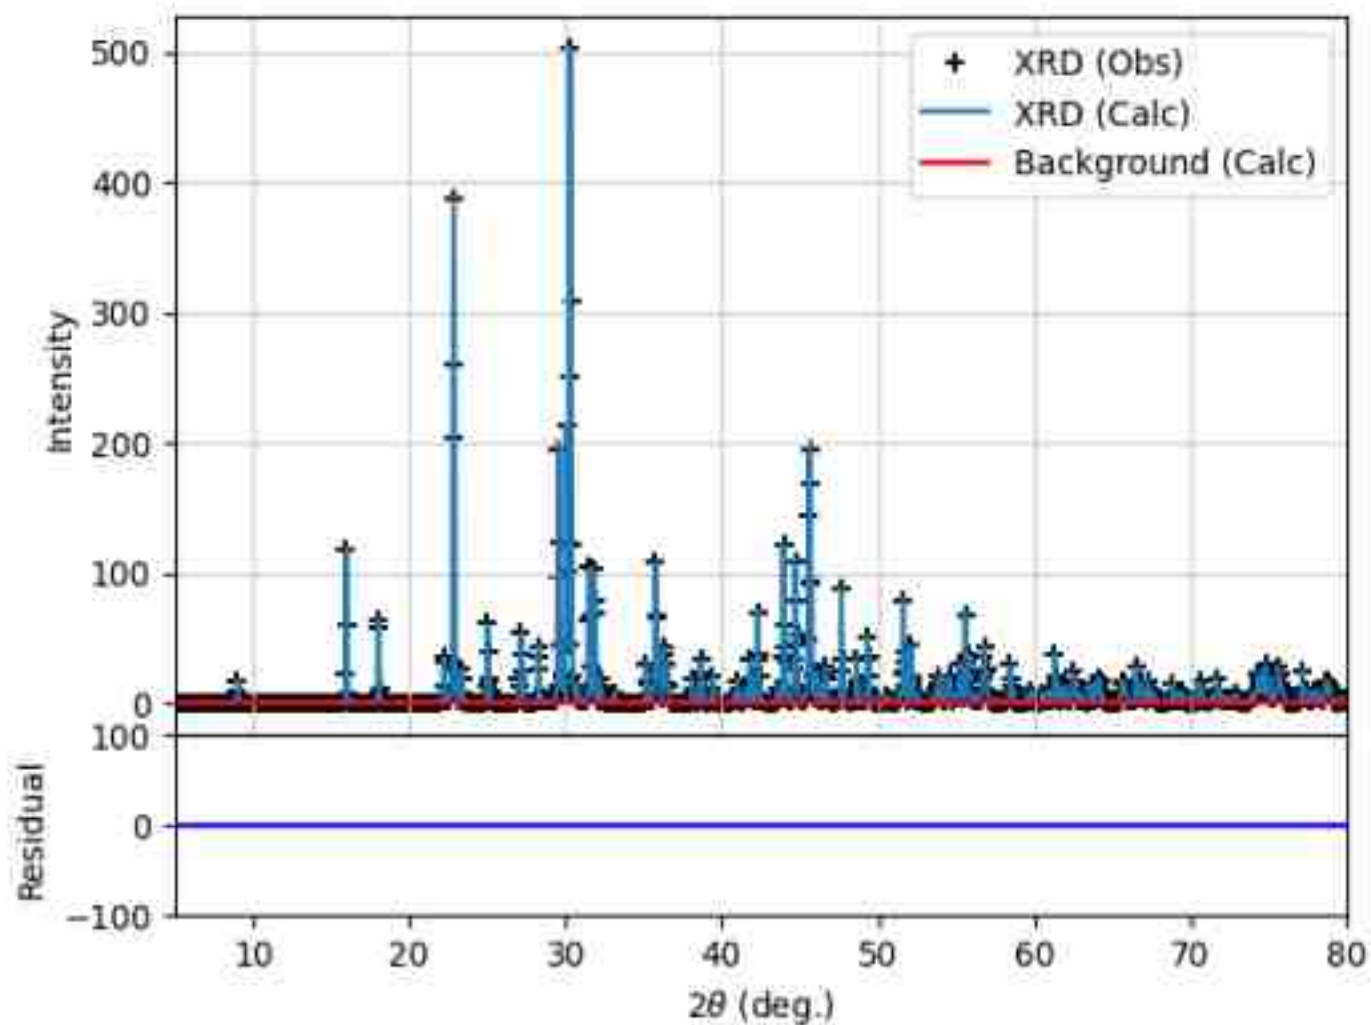

| RMSE before RR | Rwp     | RMSE after RR |
|----------------|---------|---------------|
| 0.022          | 0.00386 | 0.00064       |



# Cd<sub>2</sub>Sn<sub>2</sub>As<sub>4</sub>

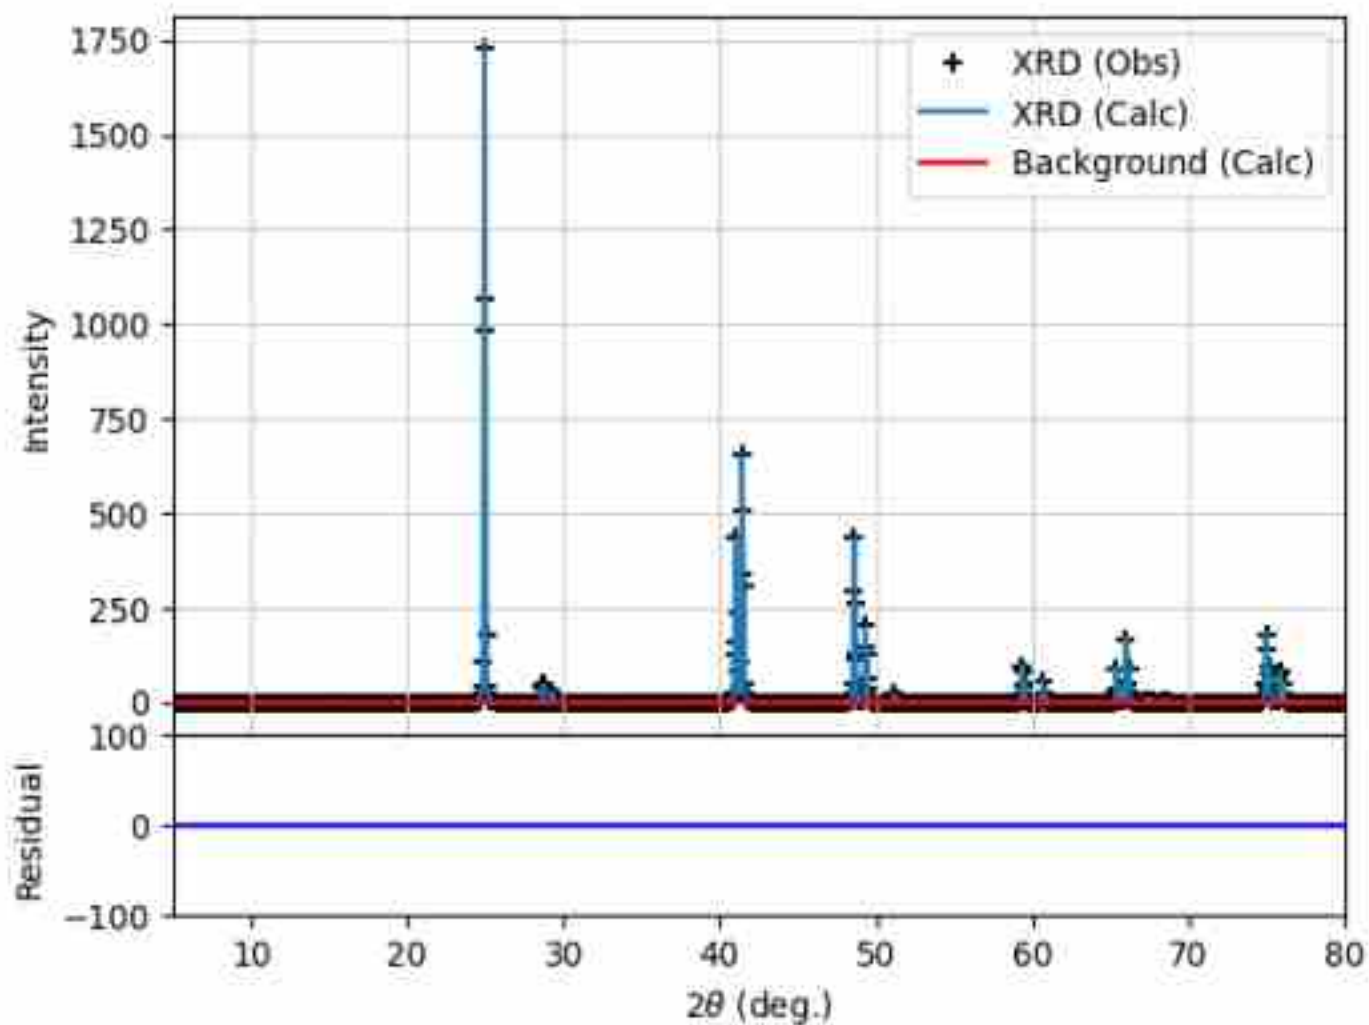

| RMSE before RR | Rwp     | RMSE after RR |
|----------------|---------|---------------|
| 0.022          | 0.00418 | 0.00048       |

# Ce<sub>2</sub>Cr<sub>2</sub>Se<sub>4</sub>O<sub>2</sub>

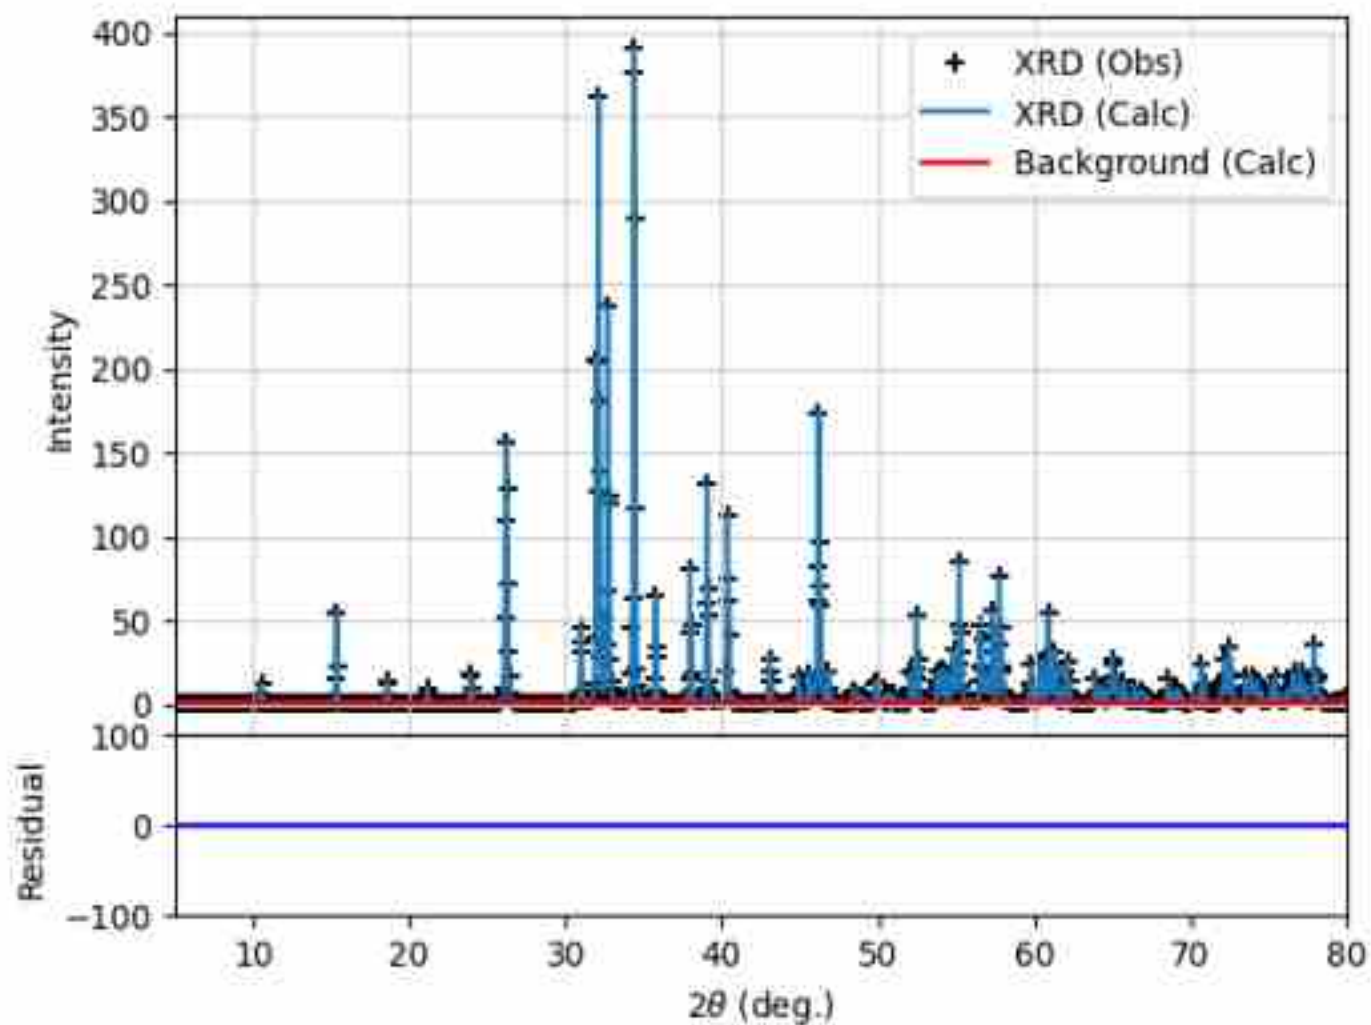

| RMSE before RR | Rwp     | RMSE after RR |
|----------------|---------|---------------|
| 0.022          | 0.00197 | 0.00079       |

# Ce2In4Pd2

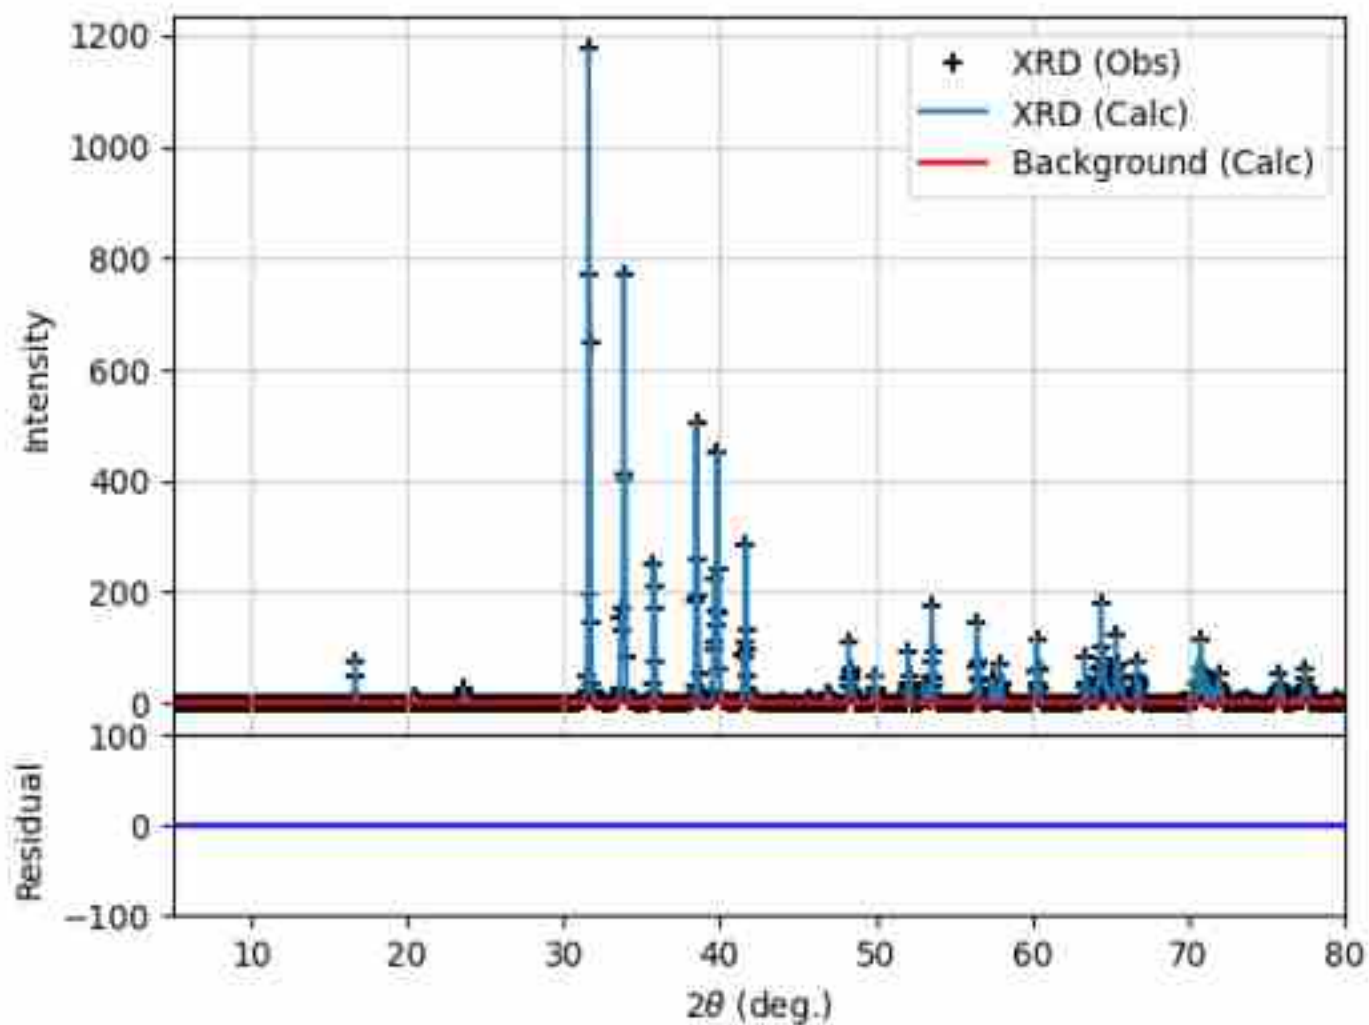

| RMSE before RR | Rwp     | RMSE after RR |
|----------------|---------|---------------|
| 0.022          | 0.00435 | 0.0003        |

Ce2Rh4

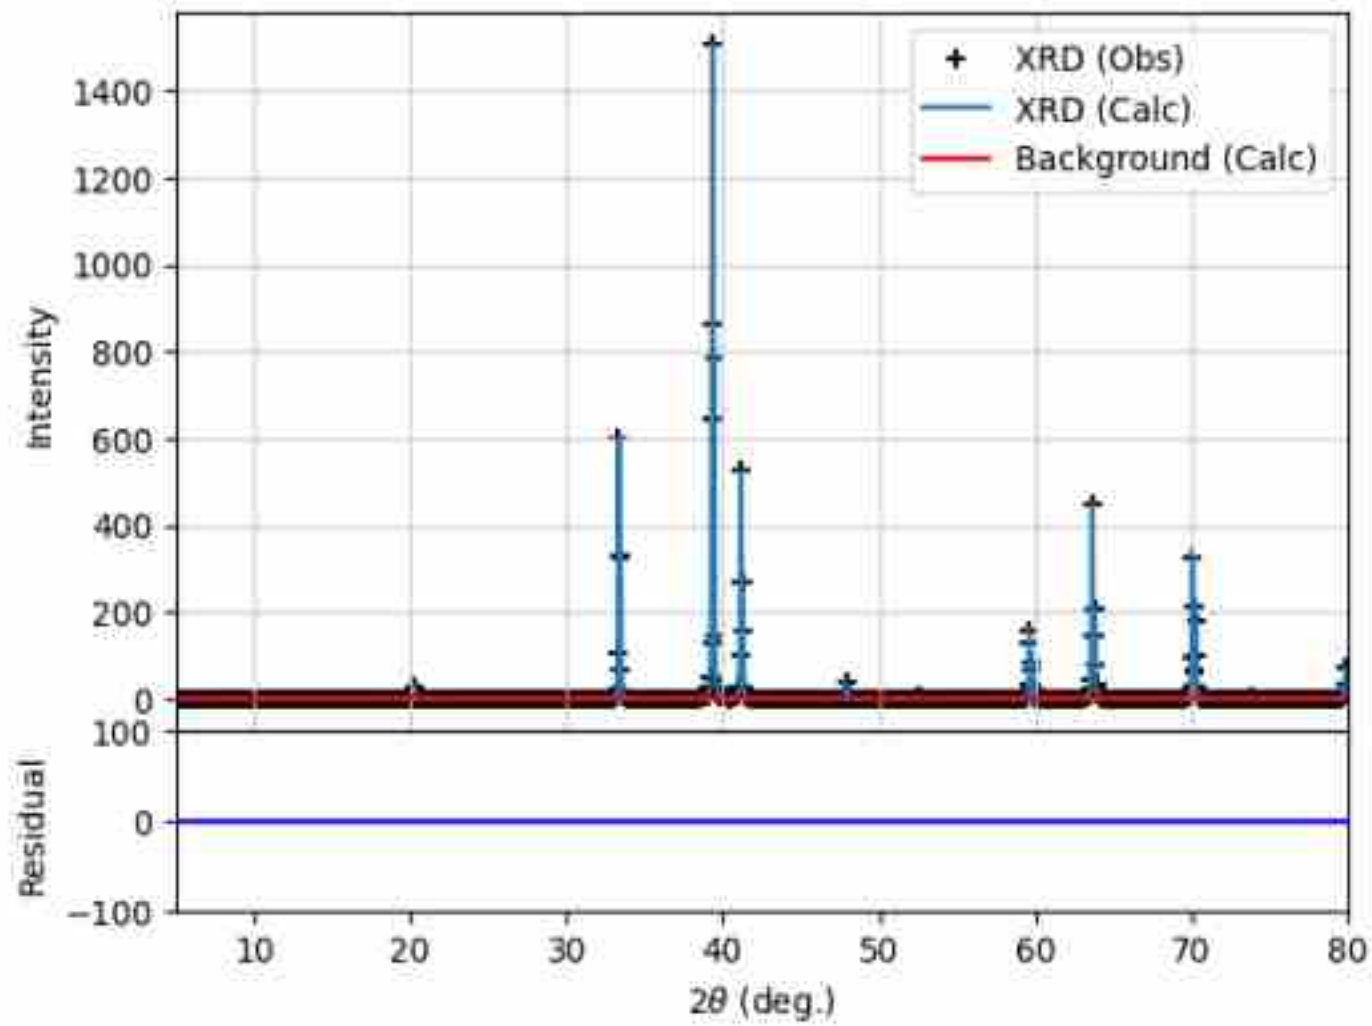

| RMSE before RR | Rwp     | RMSE after RR |
|----------------|---------|---------------|
| 0.022          | 0.00503 | 0.00026       |

# Ce<sub>2</sub>Sm<sub>4</sub>S<sub>8</sub>

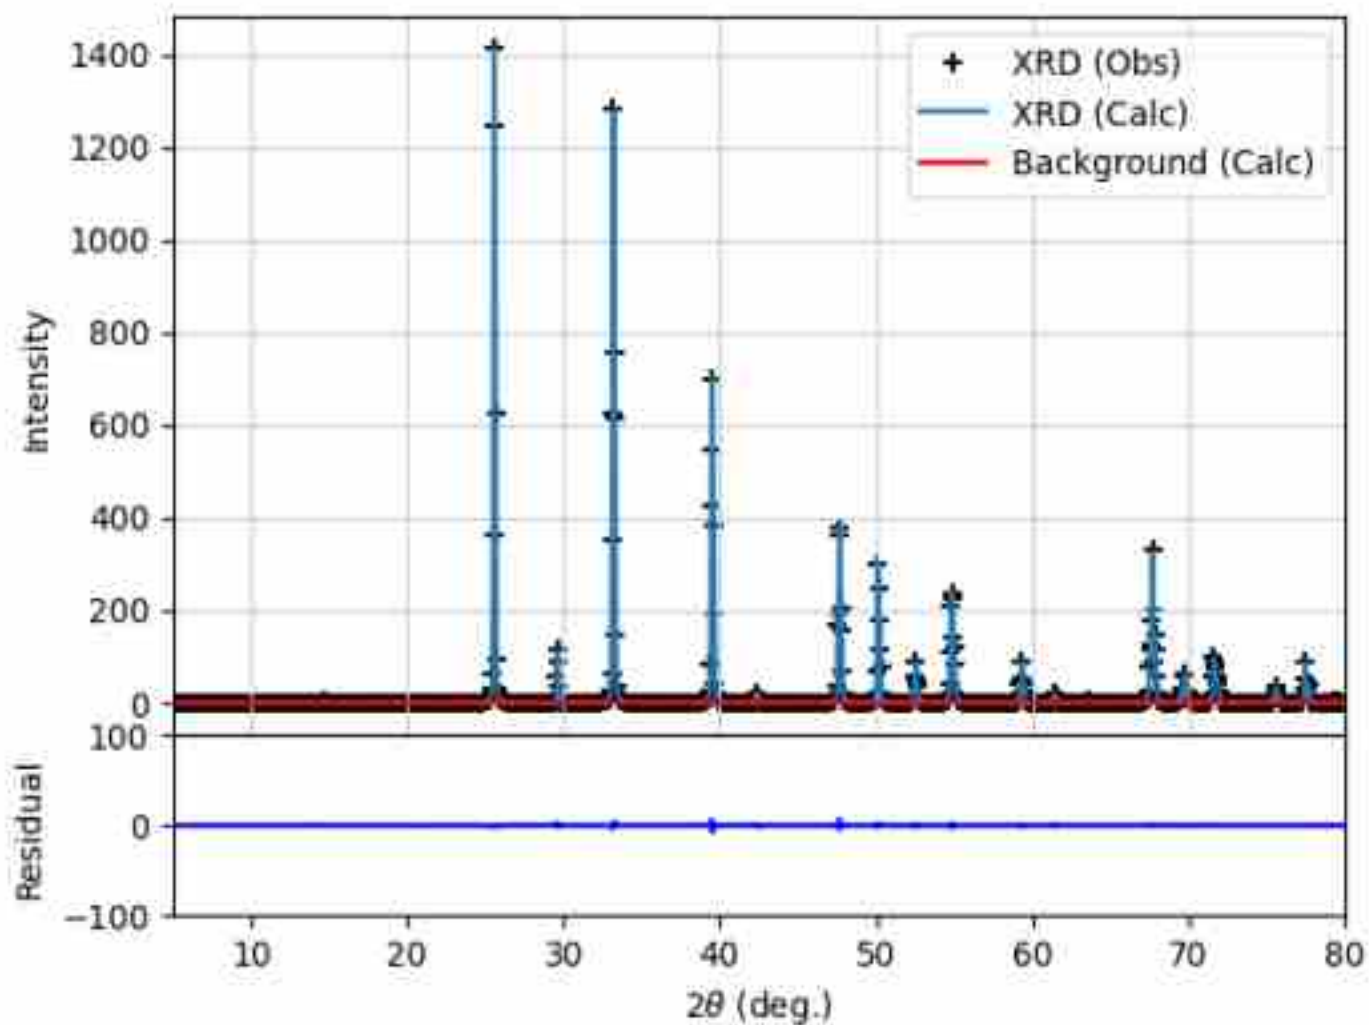

| RMSE before RR | Rwp     | RMSE after RR |
|----------------|---------|---------------|
| 0.022          | 1.18345 | 0.01621       |

# Ce<sub>2</sub>V<sub>2</sub>O<sub>8</sub>

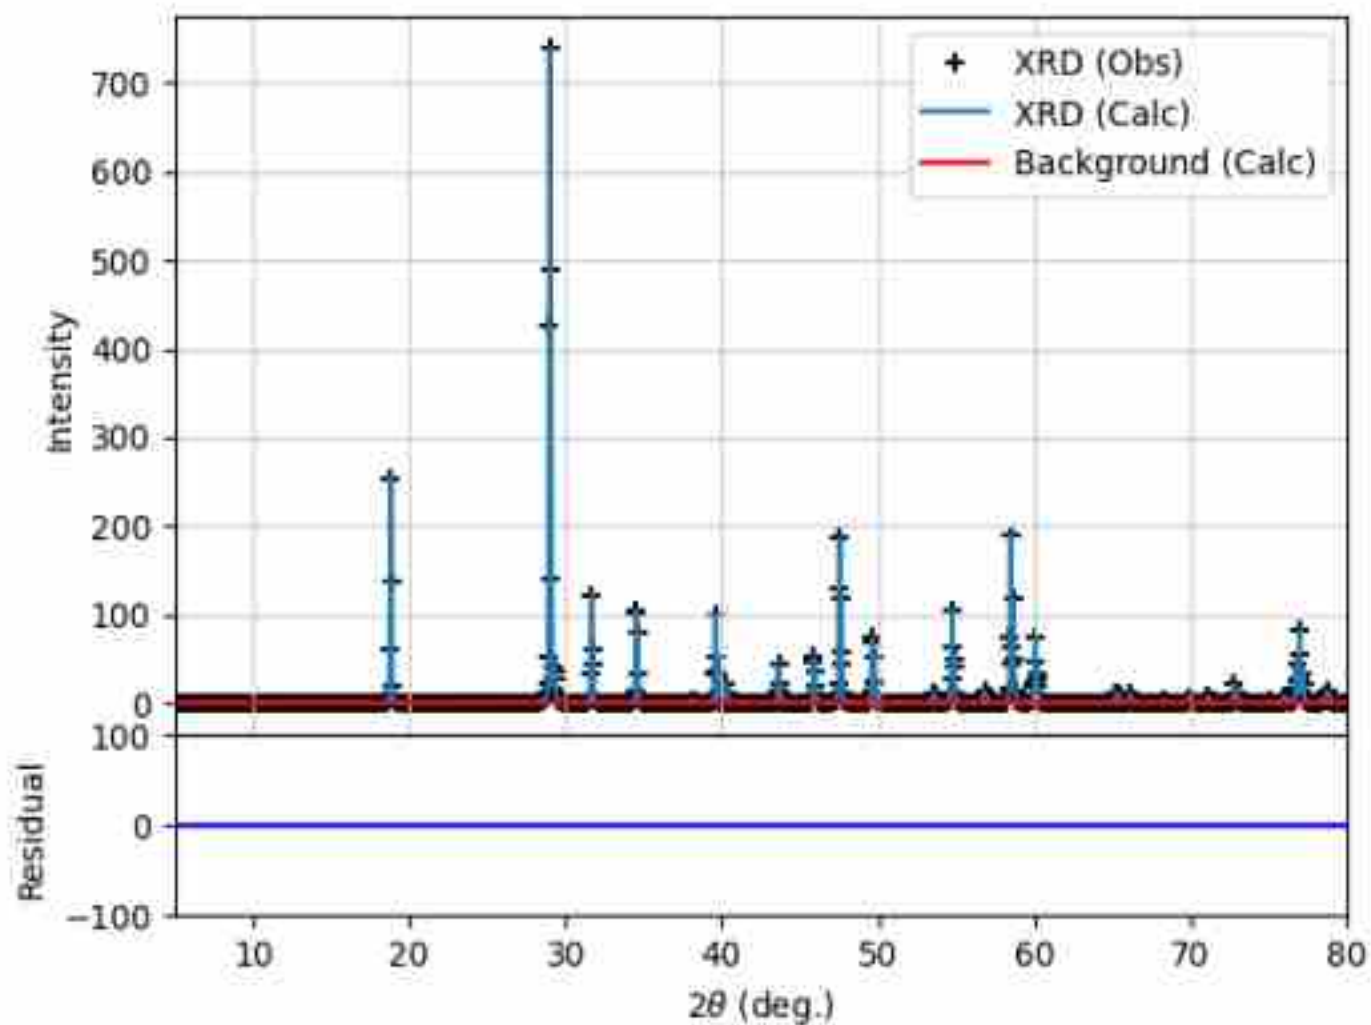

| RMSE before RR | Rwp    | RMSE after RR |
|----------------|--------|---------------|
| 0.022          | 0.0029 | 0.0013        |

# Cr<sub>2</sub>Co<sub>2</sub>O<sub>8</sub>

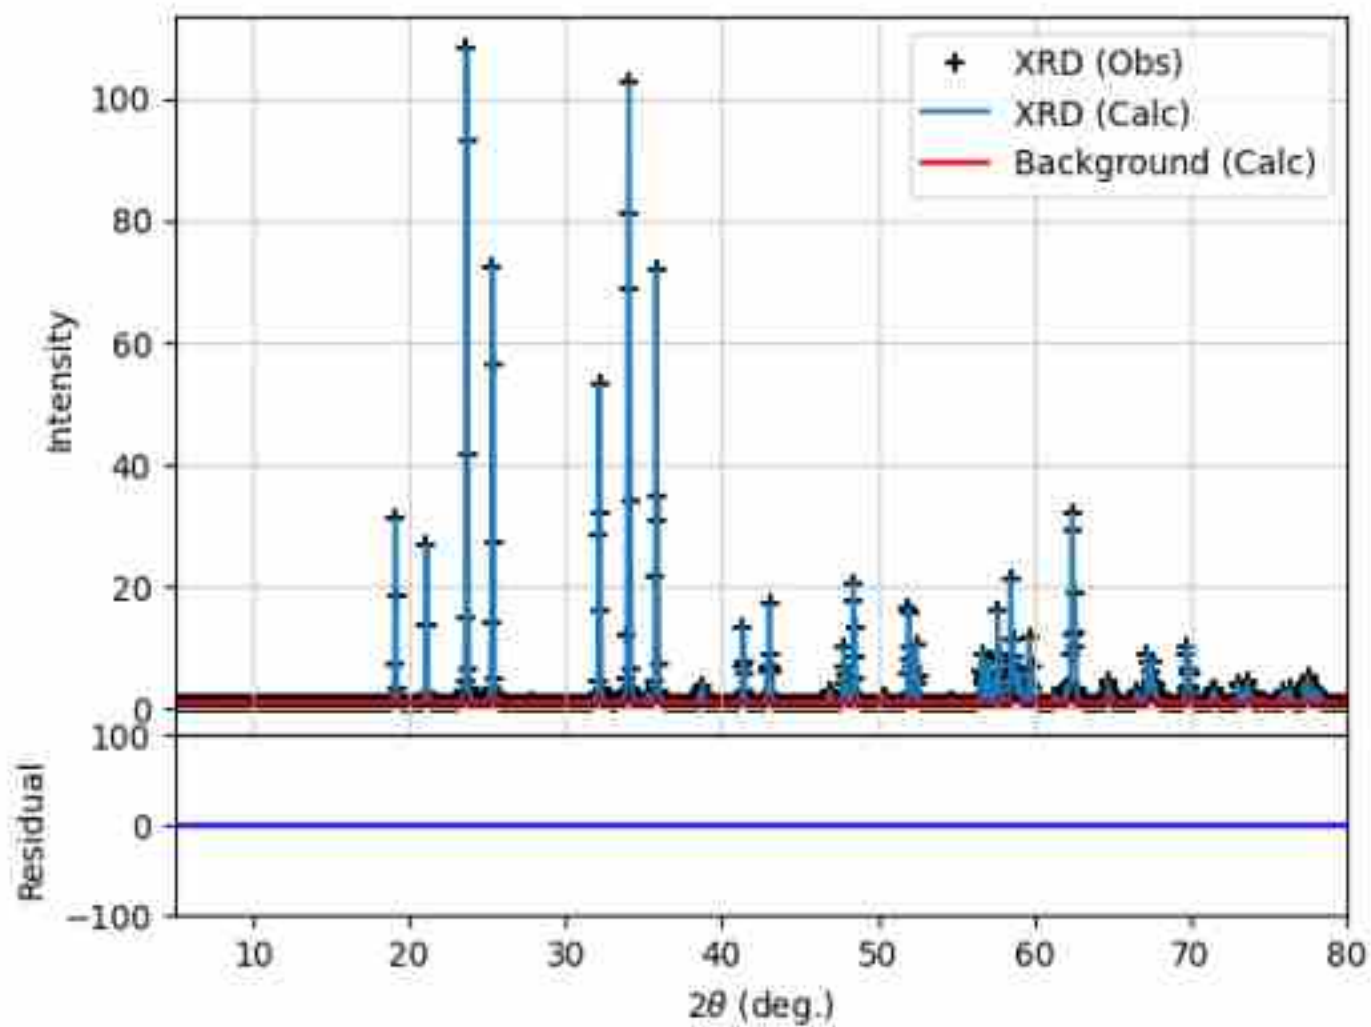

| RMSE before RR | Rwp     | RMSE after RR |
|----------------|---------|---------------|
| 0.022          | 0.08798 | 0.00679       |

# Cr<sub>2</sub>Co<sub>2</sub>Si<sub>4</sub>

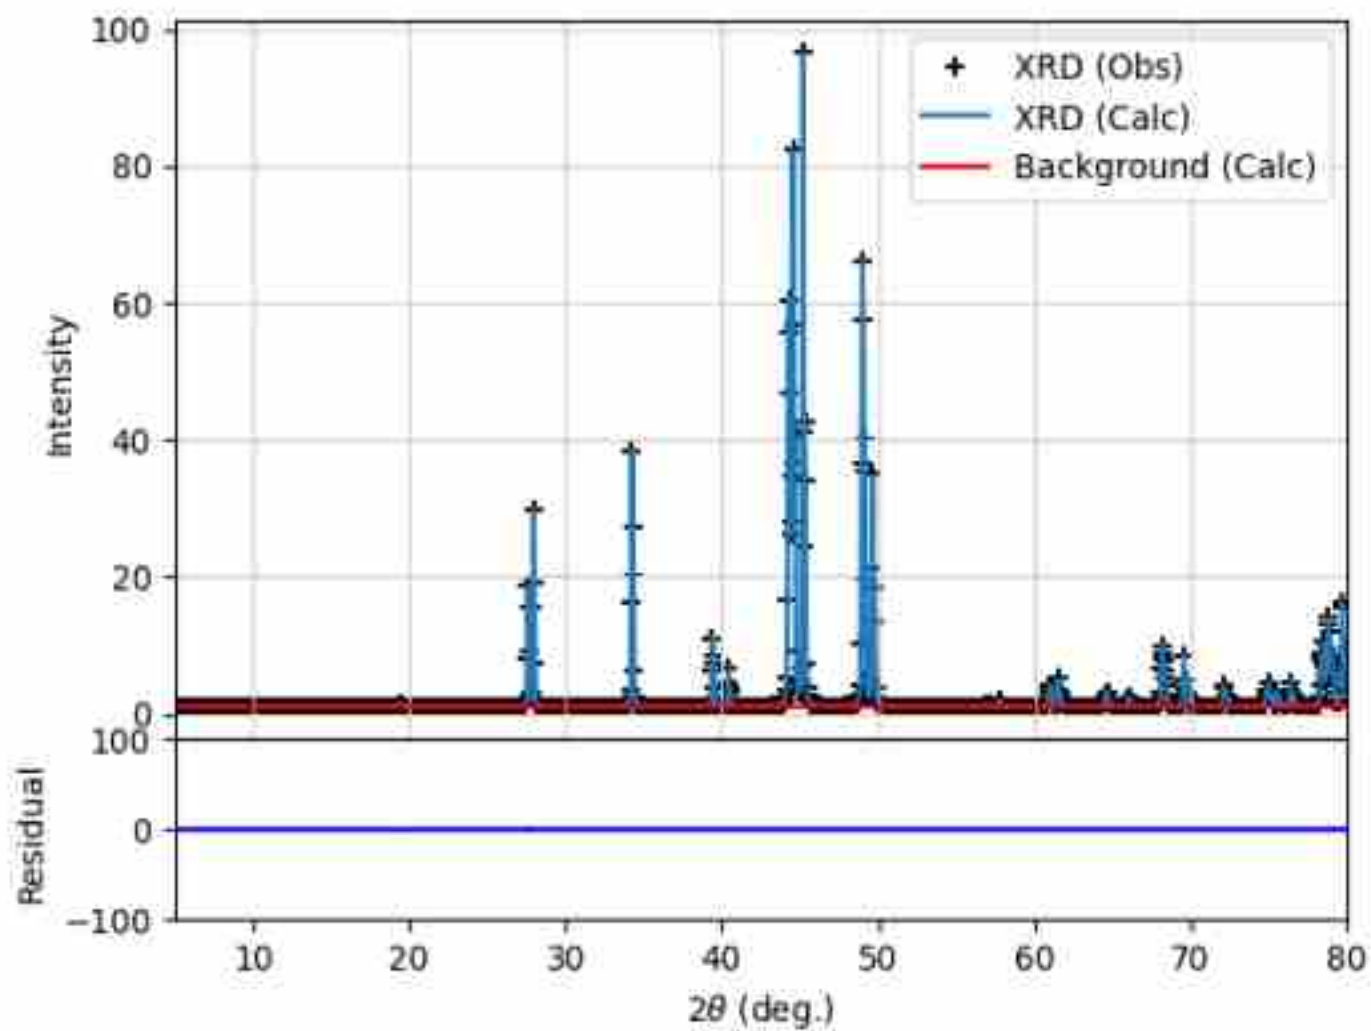

| RMSE before RR | Rwp     | RMSE after RR |
|----------------|---------|---------------|
| 0.022          | 1.26768 | 0.04196       |



# Cr<sub>4</sub>Hg<sub>2</sub>Se<sub>8</sub>

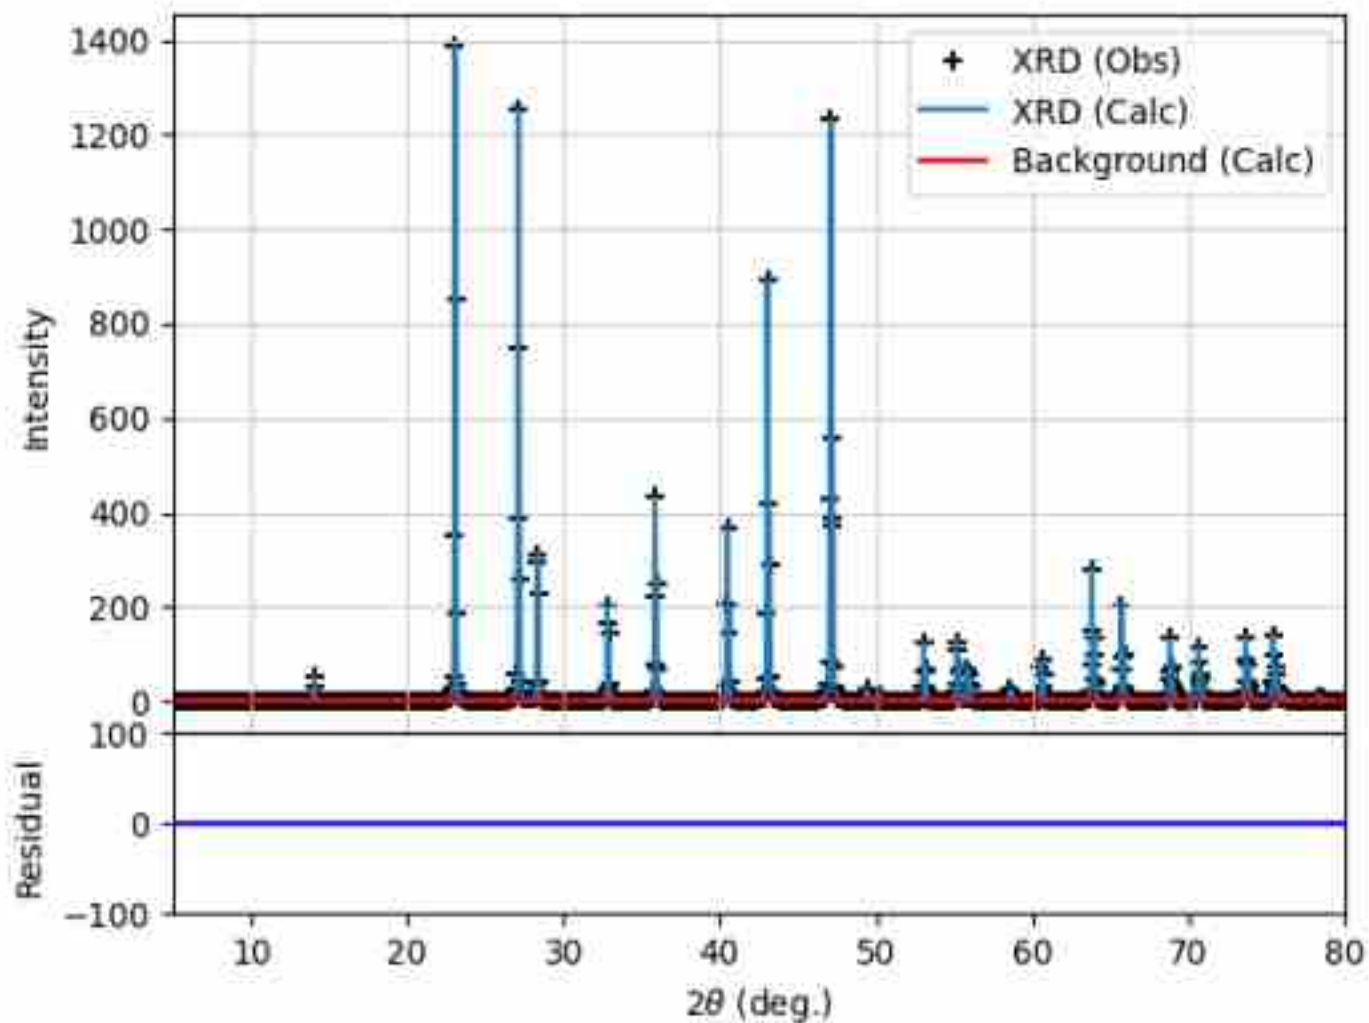

| RMSE before RR | Rwp     | RMSE after RR |
|----------------|---------|---------------|
| 0.022          | 0.07502 | 0.00246       |

# Cr<sub>4</sub>Se<sub>3</sub>S<sub>3</sub>

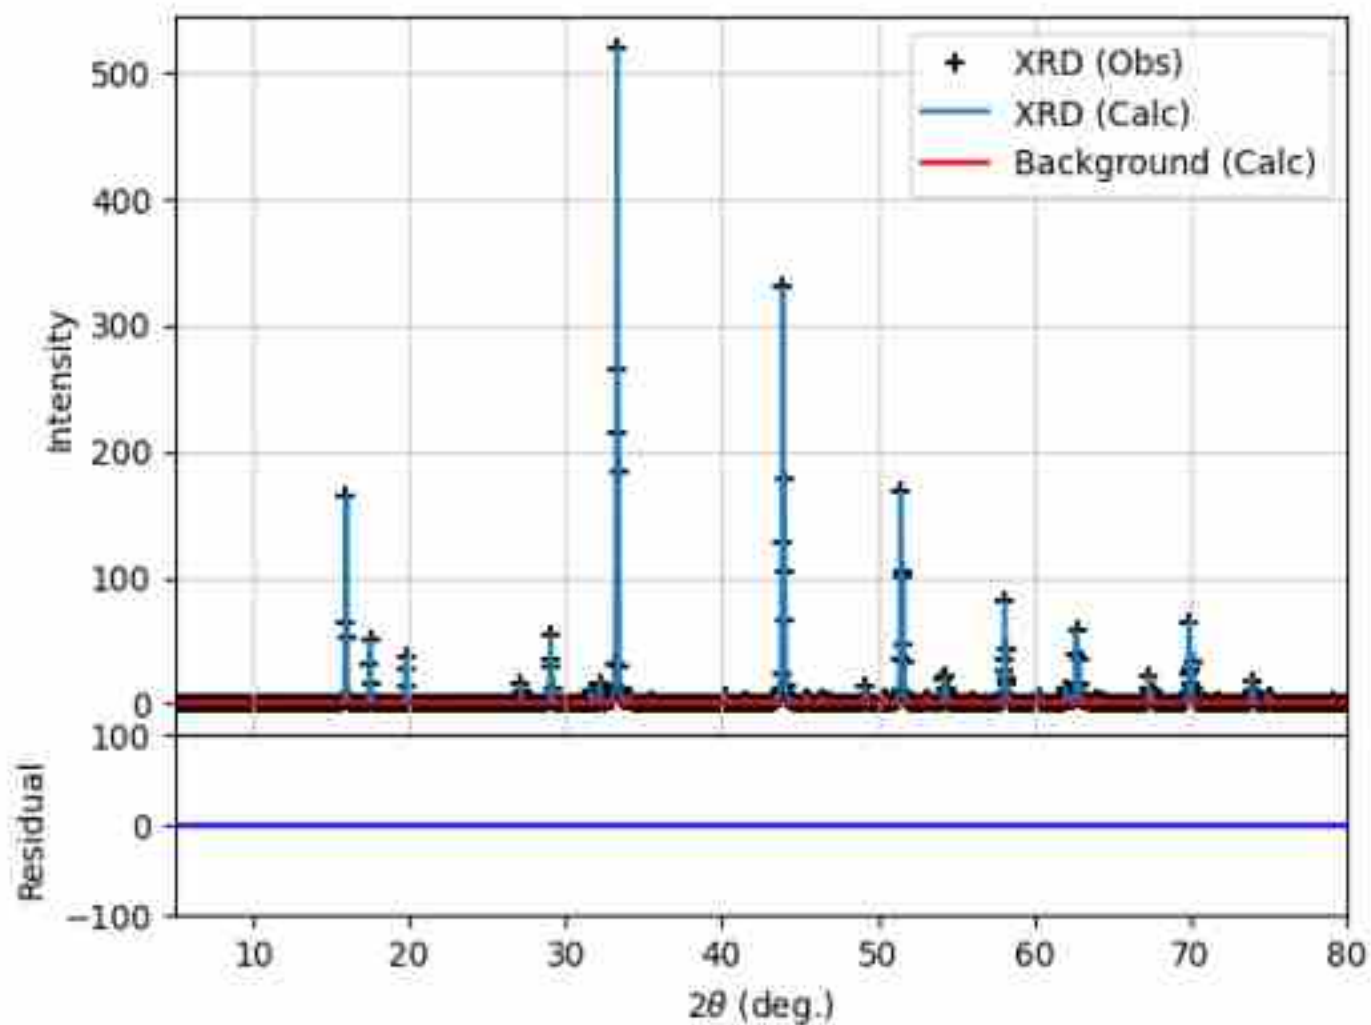

| RMSE before RR | Rwp     | RMSE after RR |
|----------------|---------|---------------|
| 0.022          | 0.00344 | 0.0009        |

# Cs<sub>1</sub>Sr<sub>2</sub>Nb<sub>3</sub>O<sub>10</sub>

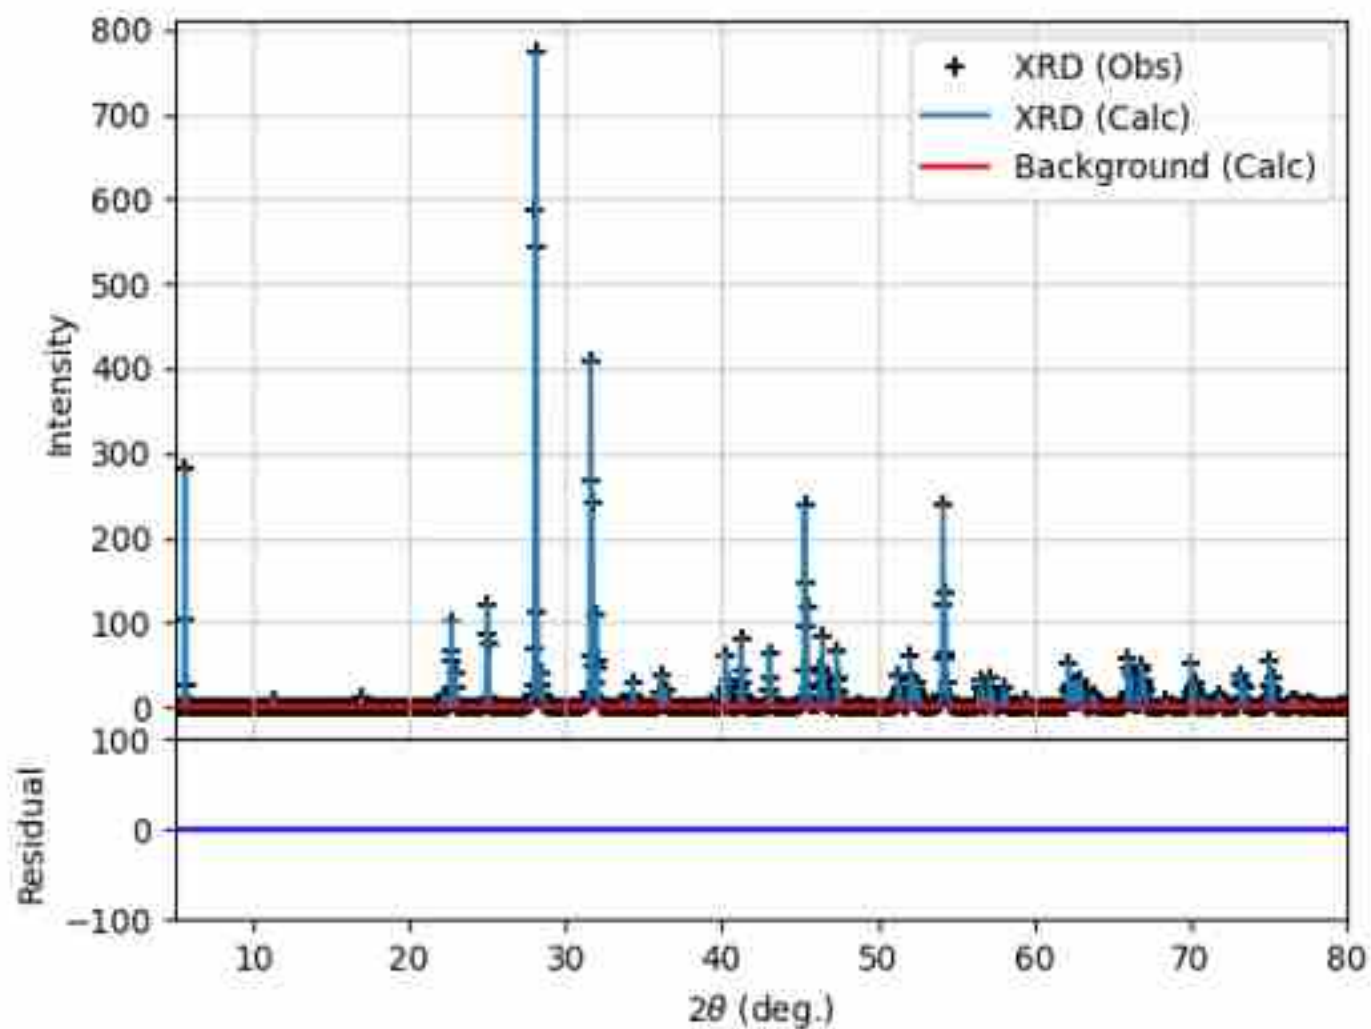

| RMSE before RR | Rwp     | RMSE after RR |
|----------------|---------|---------------|
| 0.022          | 0.00486 | 0.00184       |

# Cs<sub>2</sub>Cr<sub>2</sub>Br<sub>6</sub>

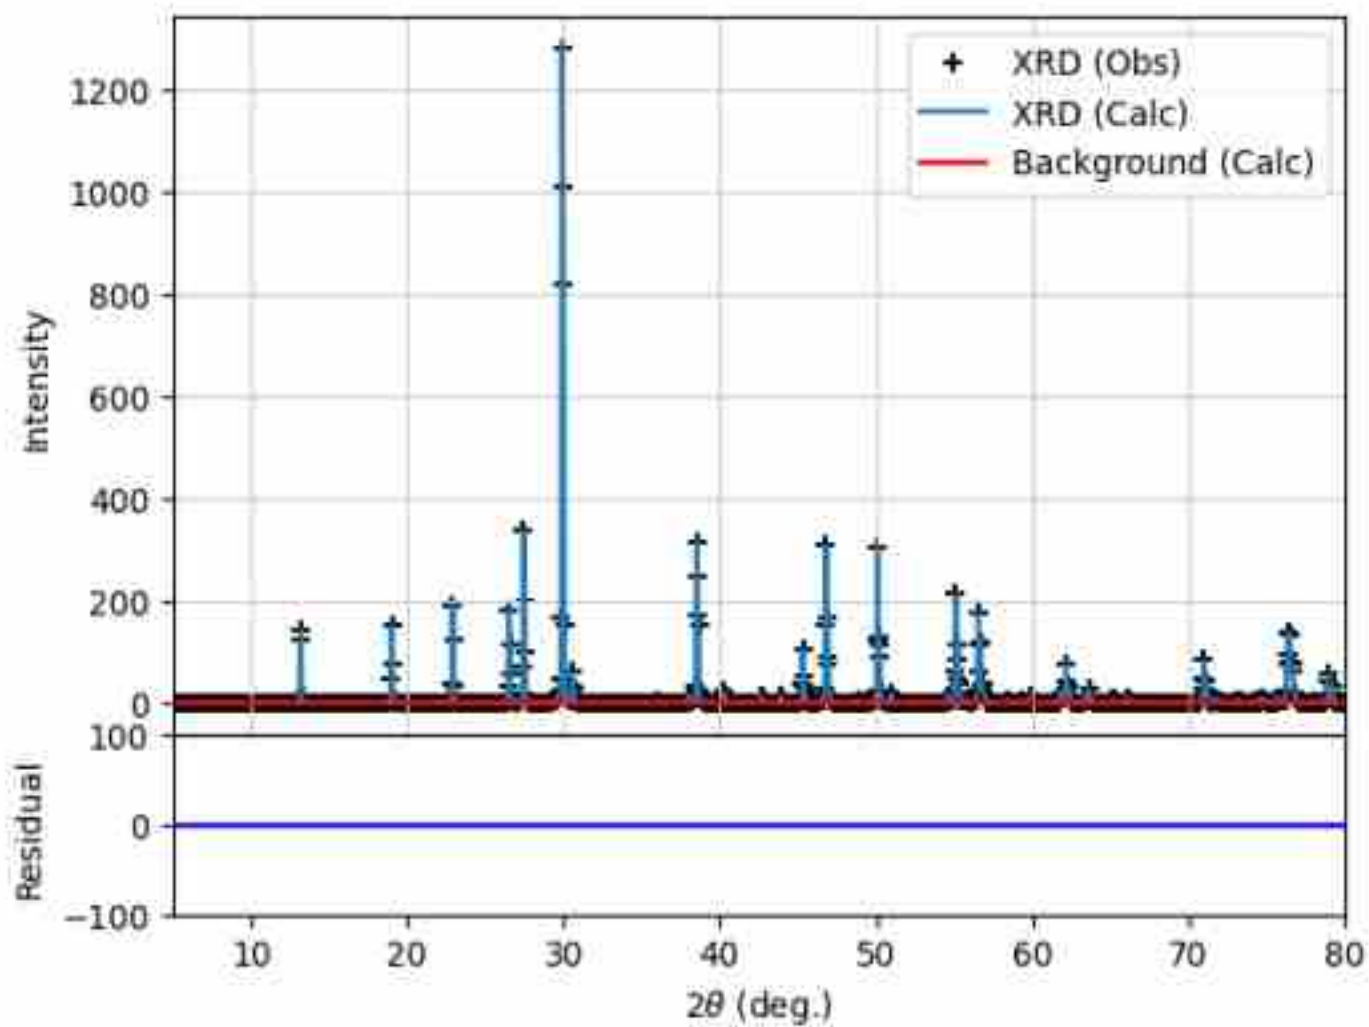

| RMSE before RR | Rwp     | RMSE after RR |
|----------------|---------|---------------|
| 0.022          | 0.00958 | 0.00093       |

# Cs<sub>2</sub>Cr<sub>2</sub>I<sub>6</sub>

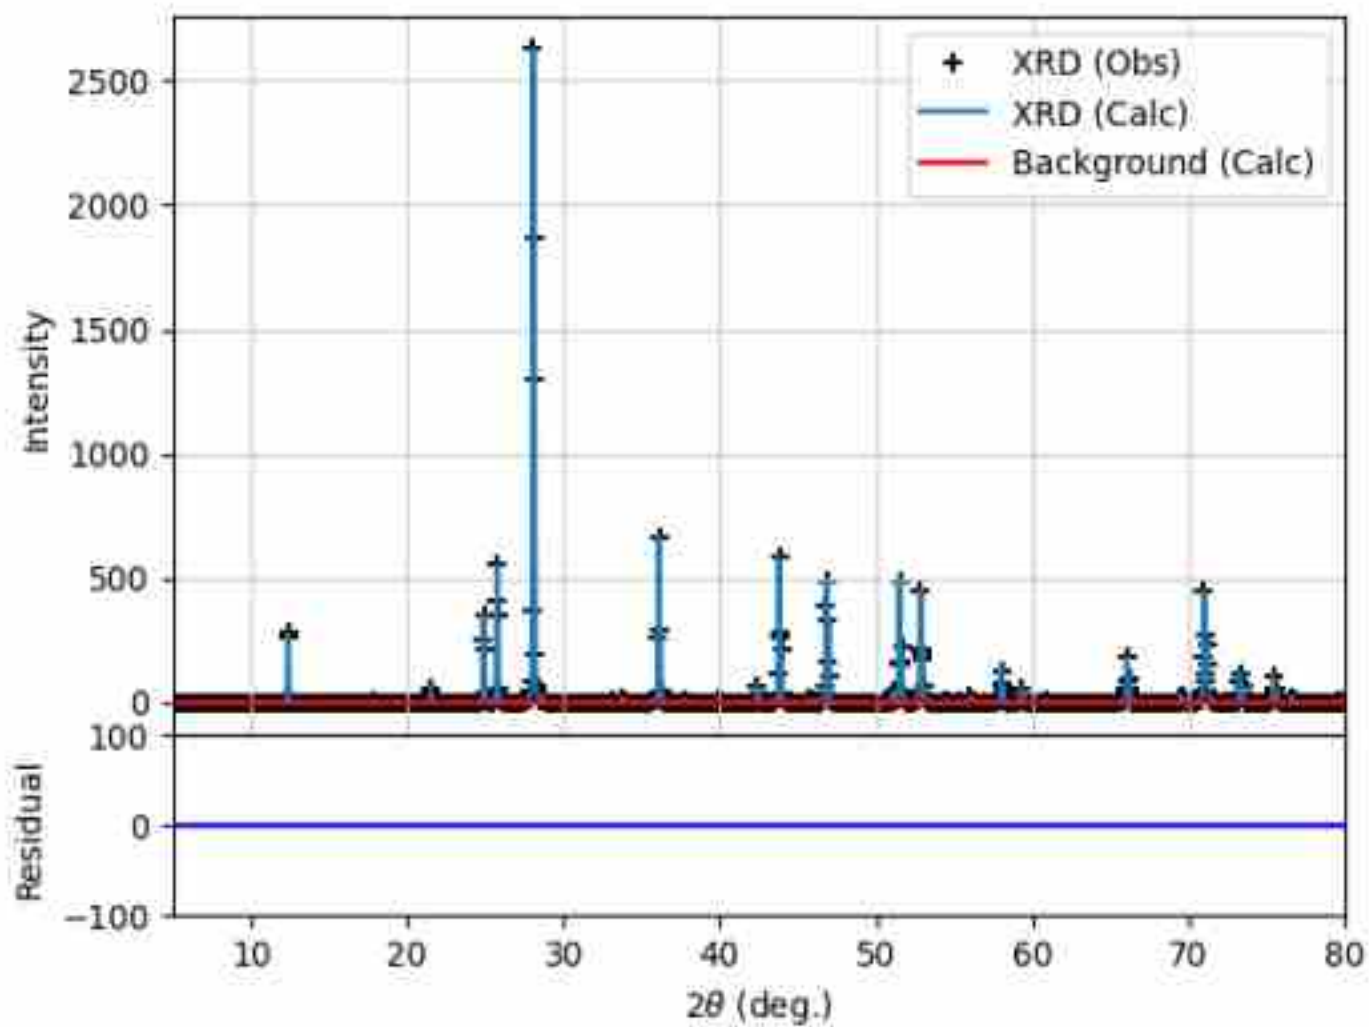

| RMSE before RR | Rwp     | RMSE after RR |
|----------------|---------|---------------|
| 0.022          | 0.03219 | 0.00234       |

# Cs<sub>2</sub>Nb<sub>2</sub>N<sub>4</sub>

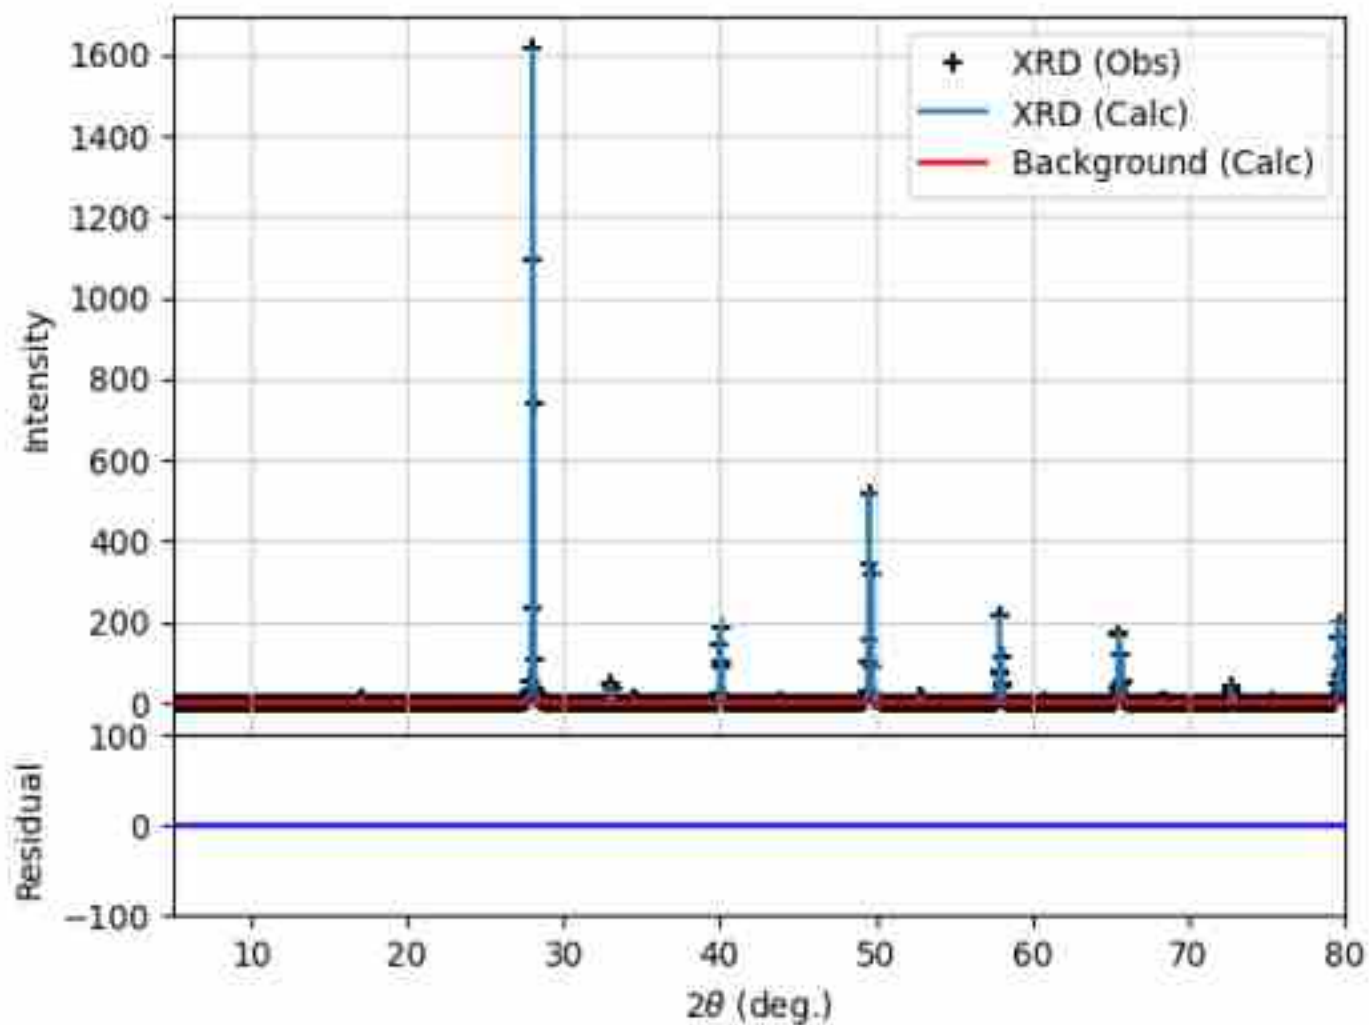

| RMSE before RR | Rwp     | RMSE after RR |
|----------------|---------|---------------|
| 0.022          | 0.00512 | 0.00255       |

# Cs<sub>2</sub>Ni<sub>2</sub>Cl<sub>6</sub>

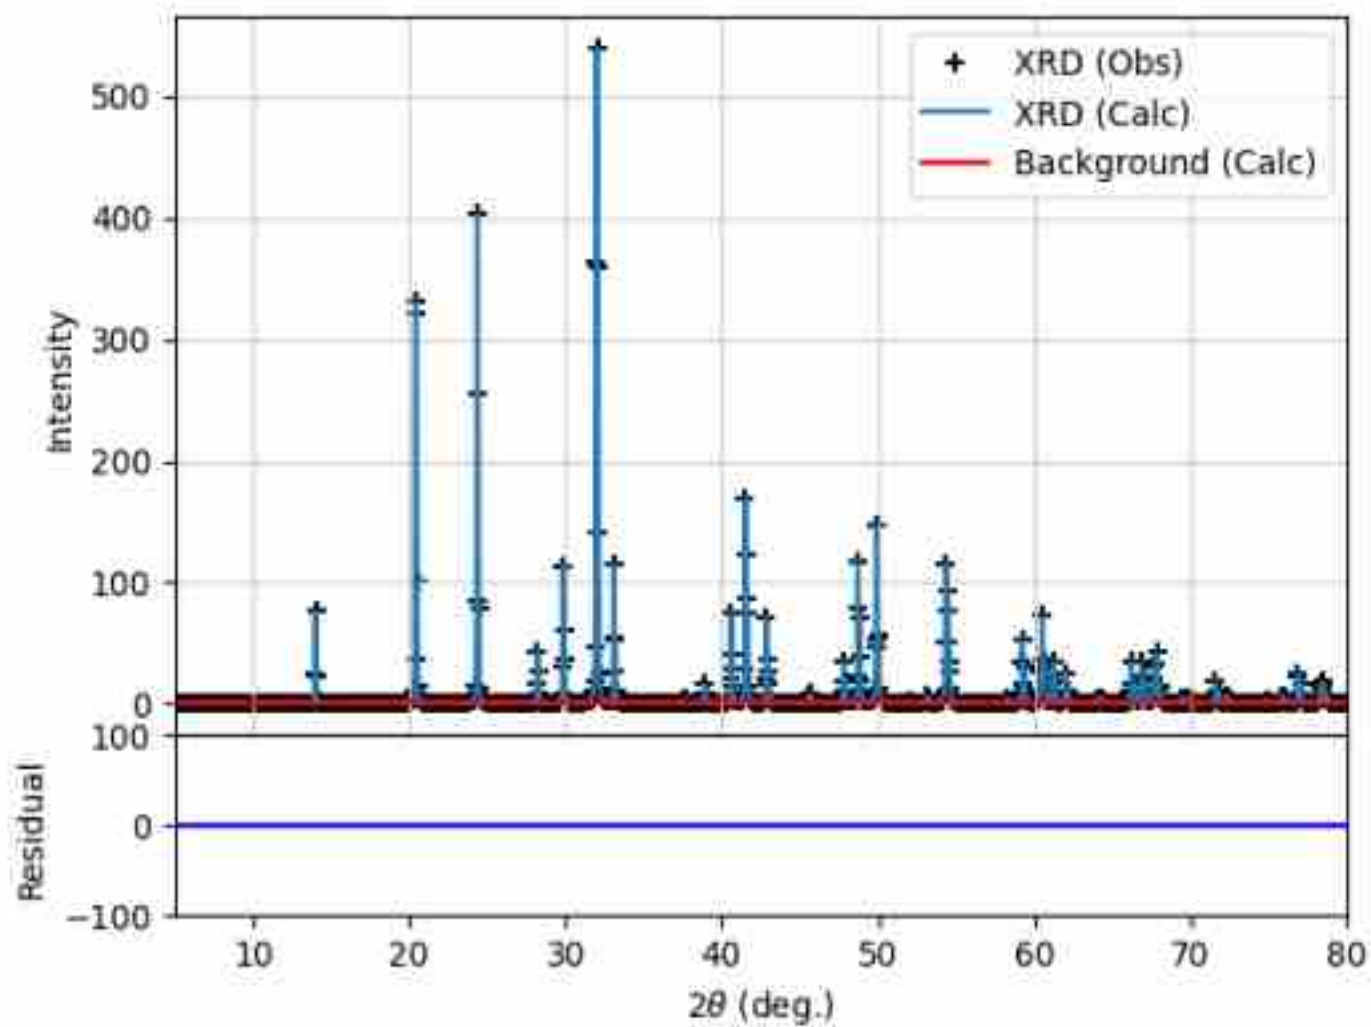

| RMSE before RR | Rwp     | RMSE after RR |
|----------------|---------|---------------|
| 0.022          | 0.00359 | 0.0008        |

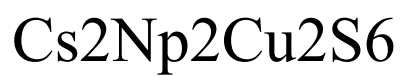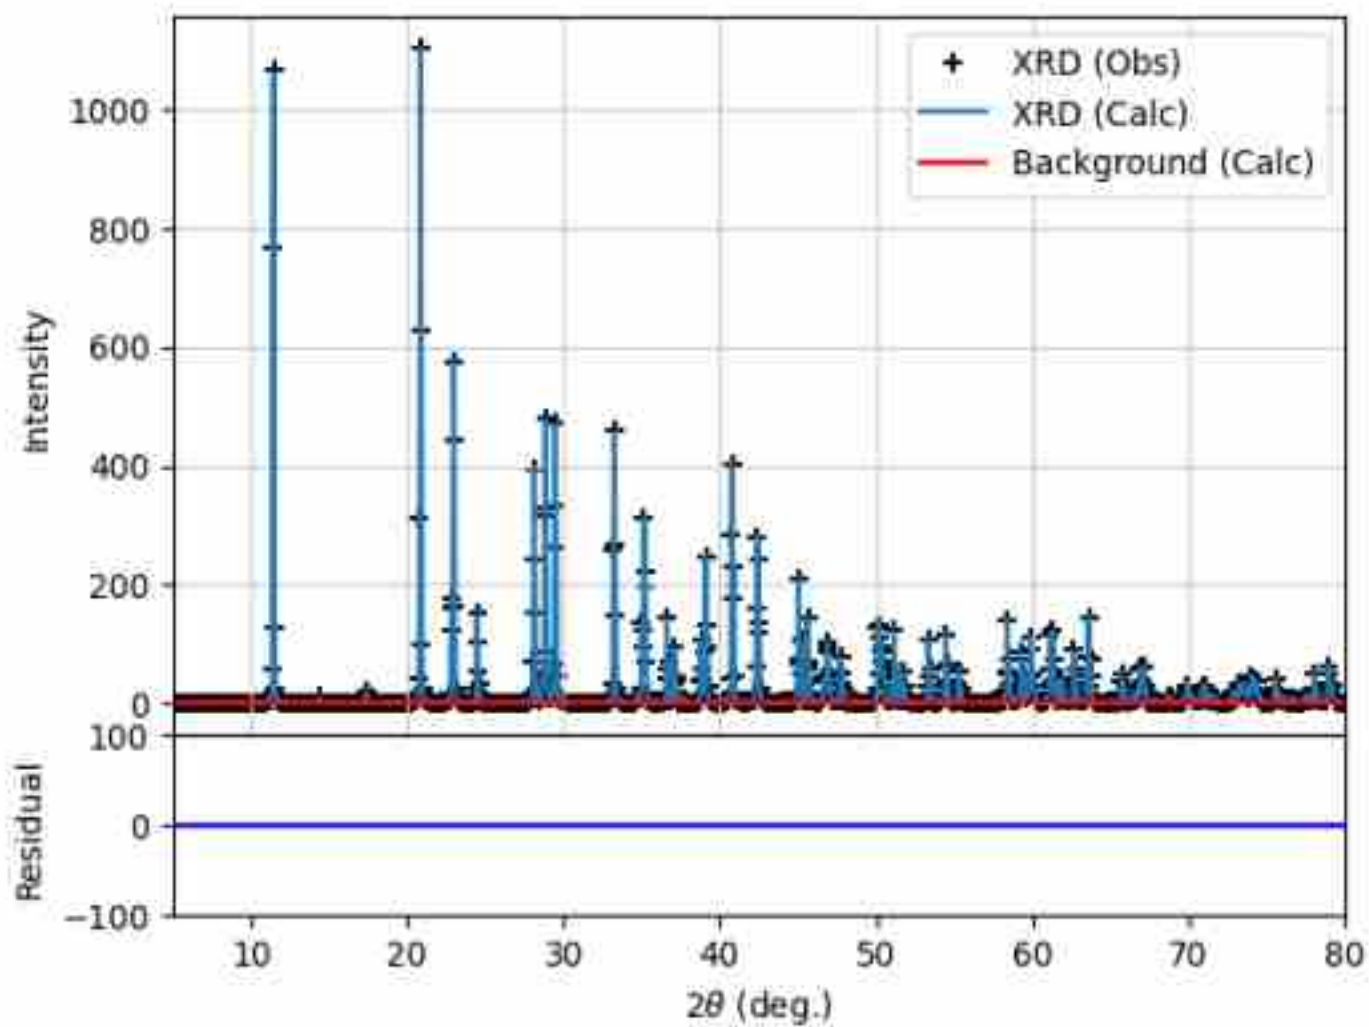

| RMSE before RR | Rwp     | RMSE after RR |
|----------------|---------|---------------|
| 0.022          | 0.00364 | 0.00051       |



# Cs<sub>2</sub>Sm<sub>2</sub>Cd<sub>2</sub>Te<sub>6</sub>

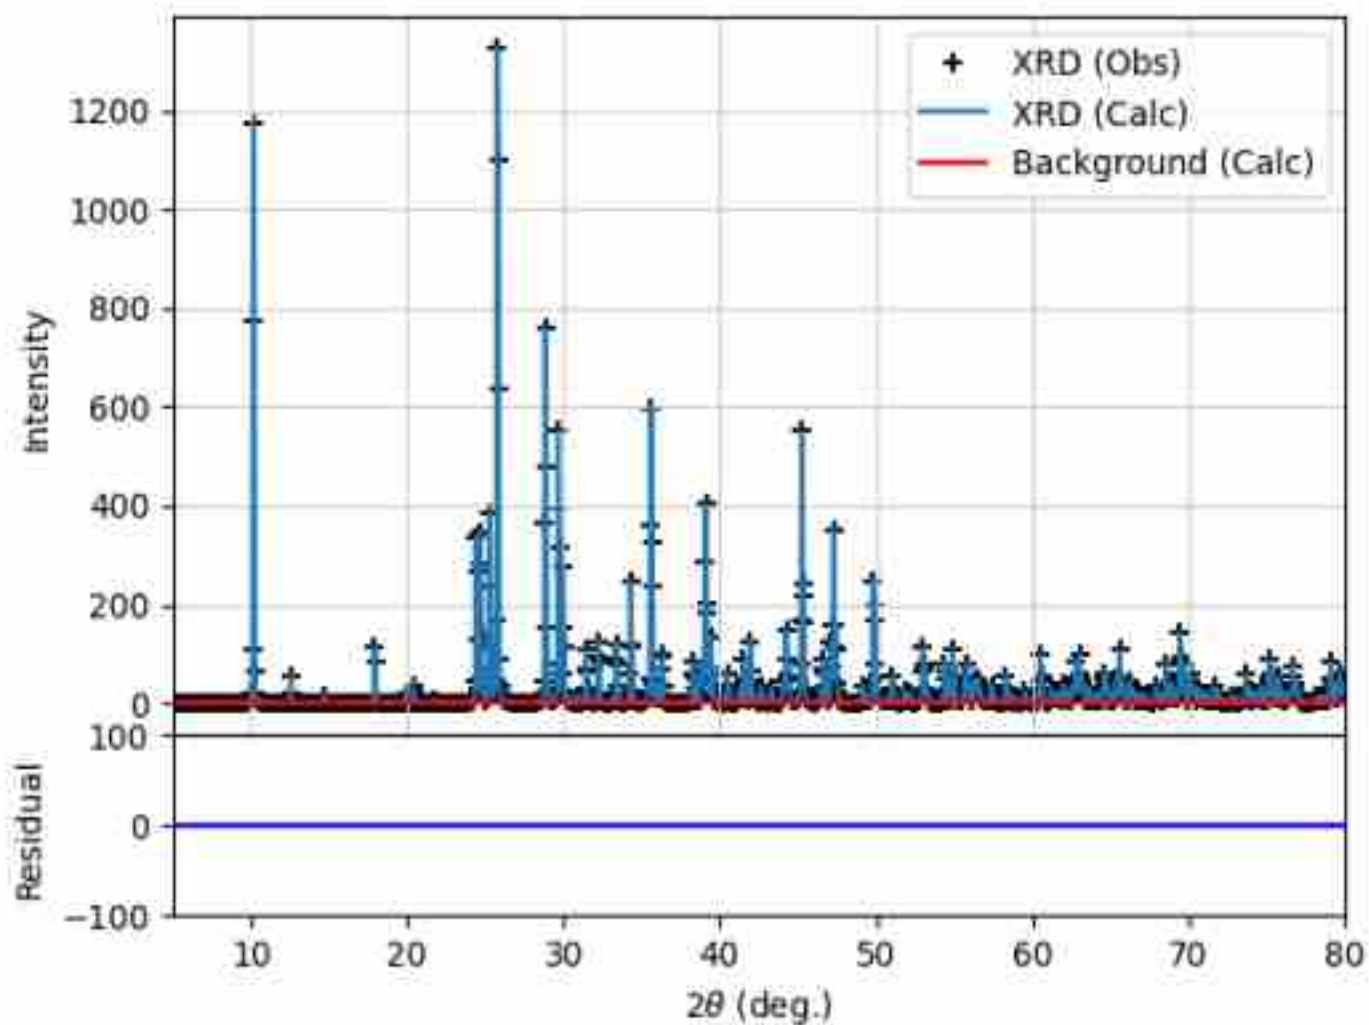

| RMSE before RR | Rwp     | RMSE after RR |
|----------------|---------|---------------|
| 0.022          | 0.00373 | 0.00026       |

# Cs<sub>2</sub>Tl<sub>1</sub>As<sub>1</sub>F<sub>6</sub>

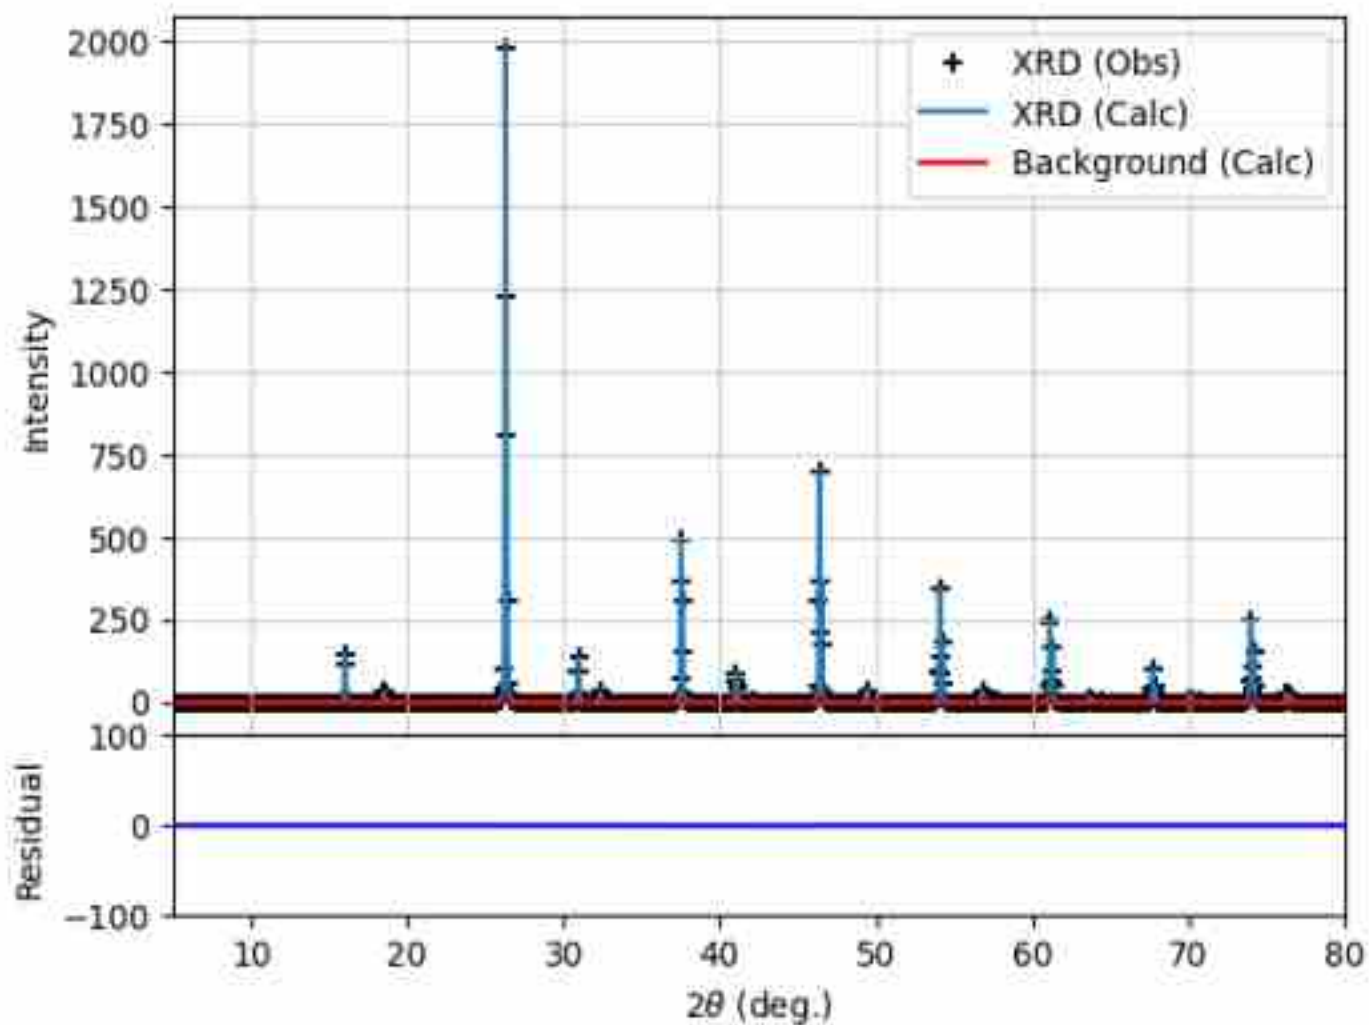

| RMSE before RR | Rwp     | RMSE after RR |
|----------------|---------|---------------|
| 0.022          | 0.05122 | 0.00854       |

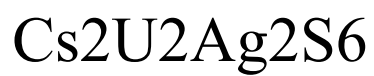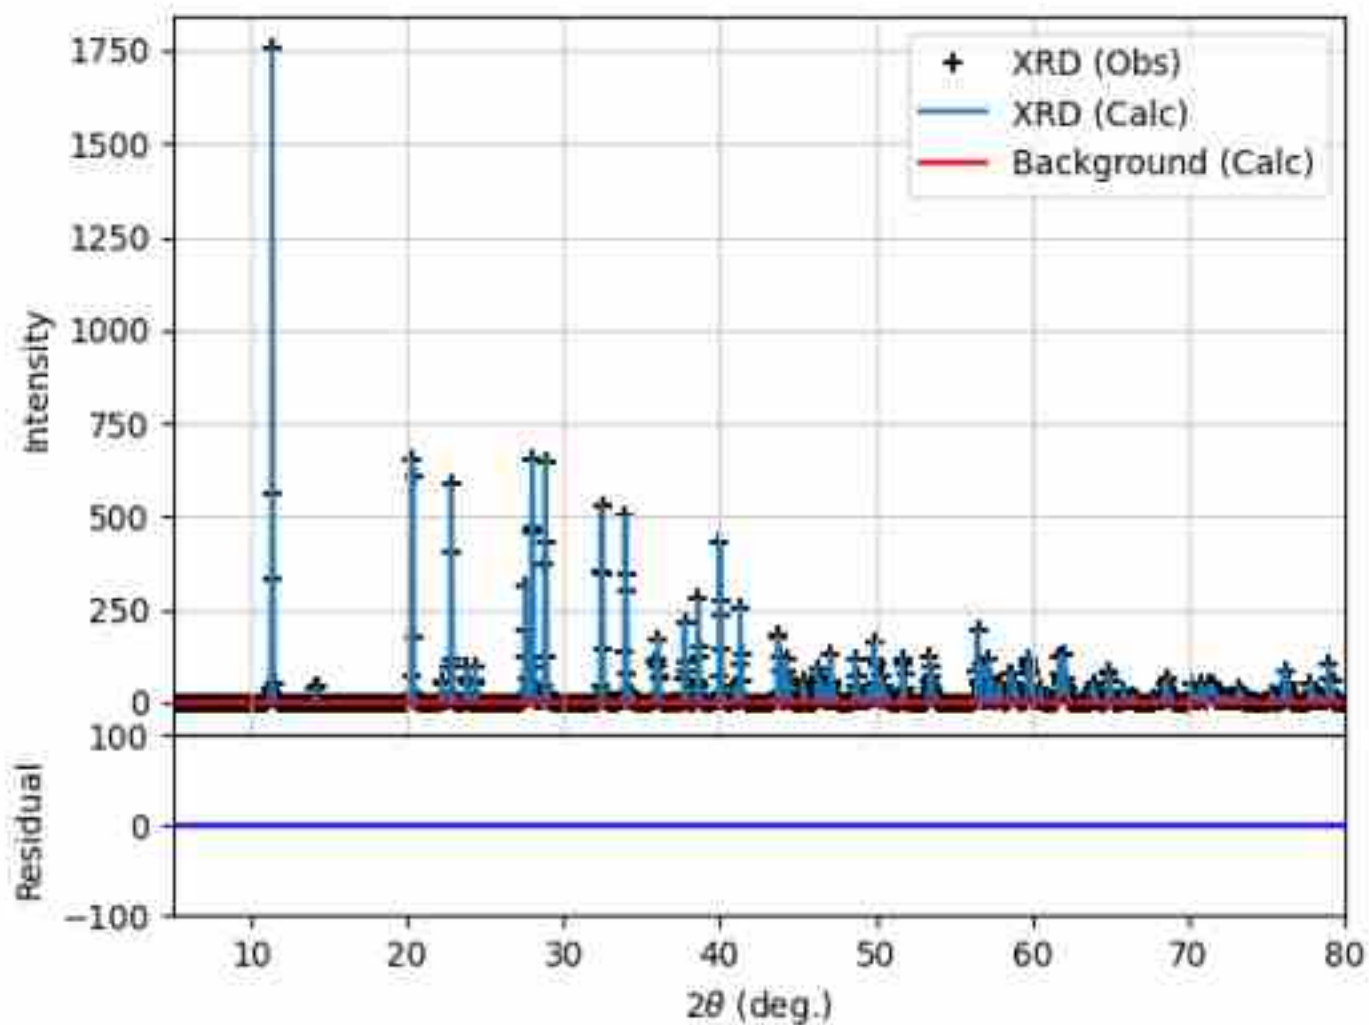

| RMSE before RR | Rwp     | RMSE after RR |
|----------------|---------|---------------|
| 0.022          | 0.00358 | 0.00052       |

# Cu<sub>6</sub>Sn<sub>1</sub>W<sub>1</sub>S<sub>8</sub>

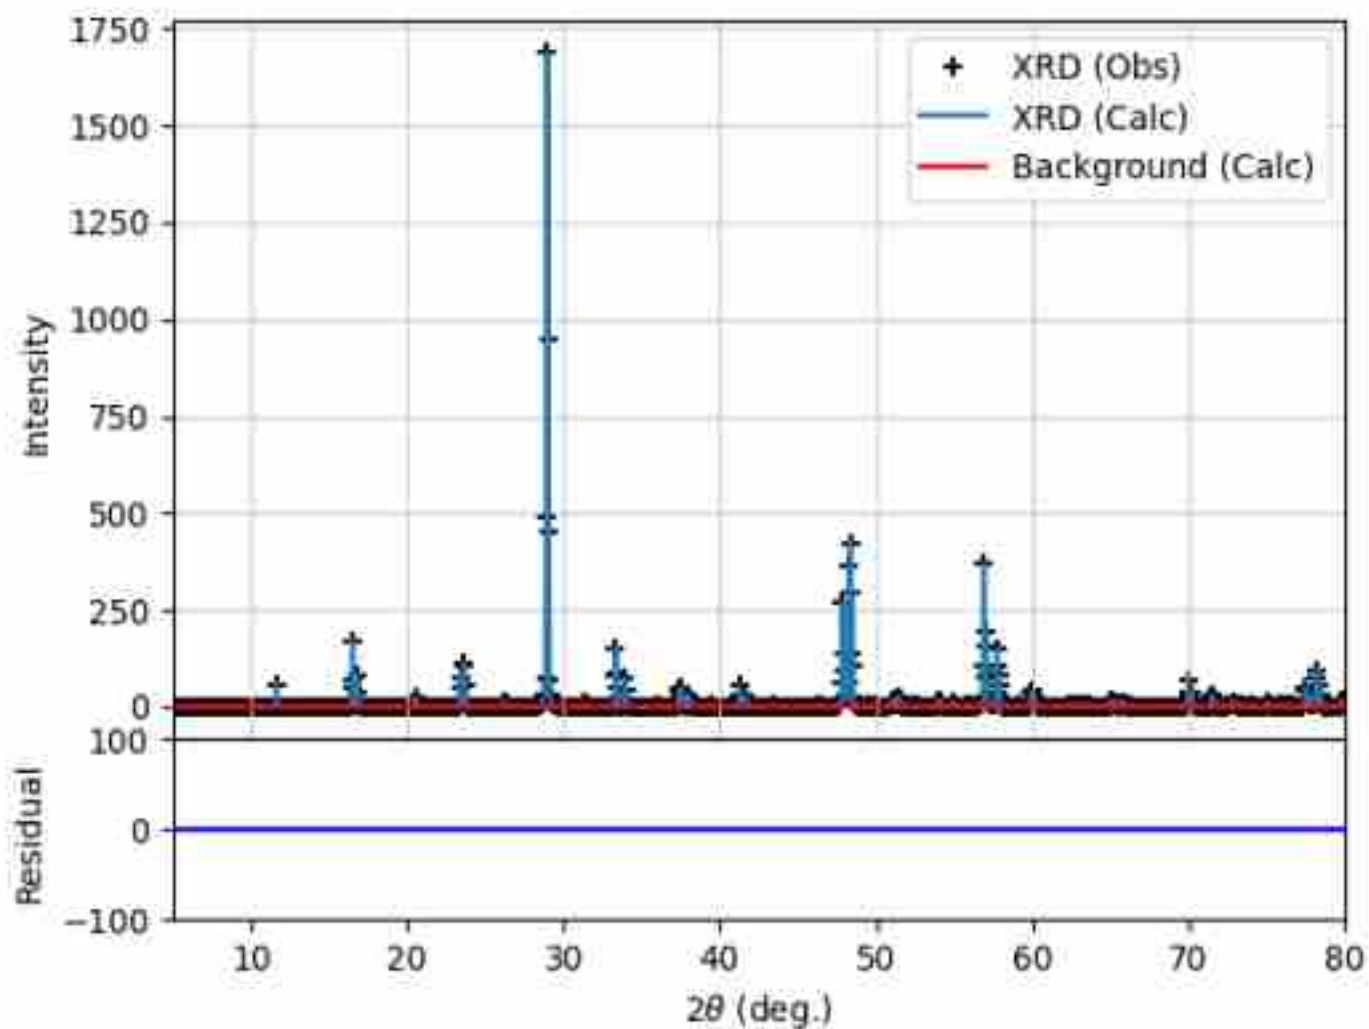

| RMSE before RR | Rwp     | RMSE after RR |
|----------------|---------|---------------|
| 0.022          | 0.00527 | 0.00073       |

# Dy<sub>2</sub>Nb<sub>2</sub>O<sub>8</sub>

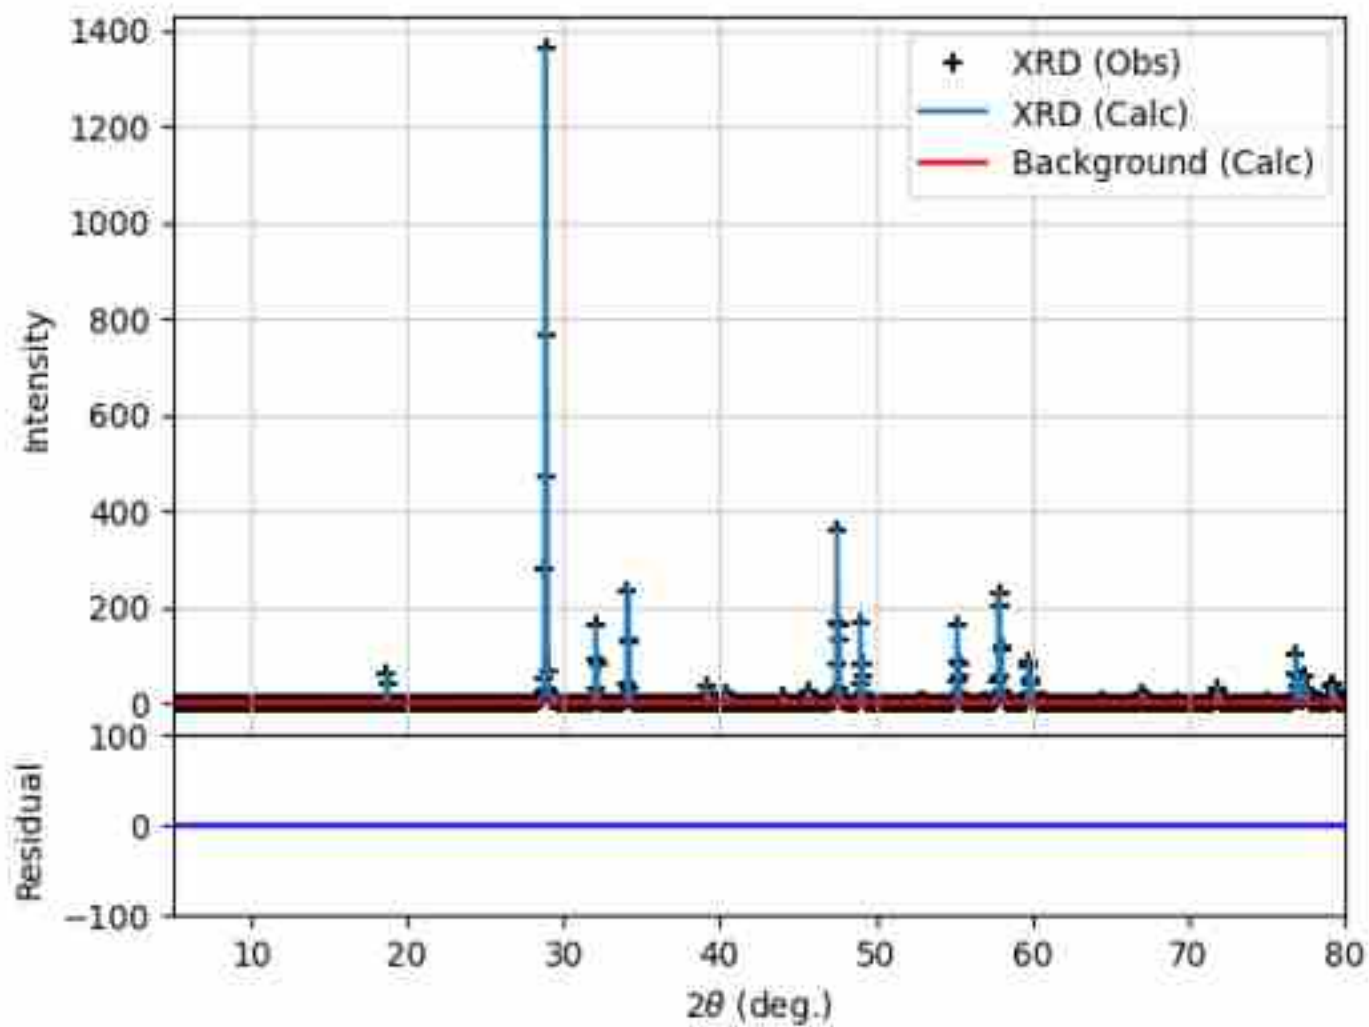

| RMSE before RR | Rwp     | RMSE after RR |
|----------------|---------|---------------|
| 0.022          | 0.00367 | 0.00117       |

# Dy<sub>2</sub>Te<sub>1</sub>S<sub>2</sub>

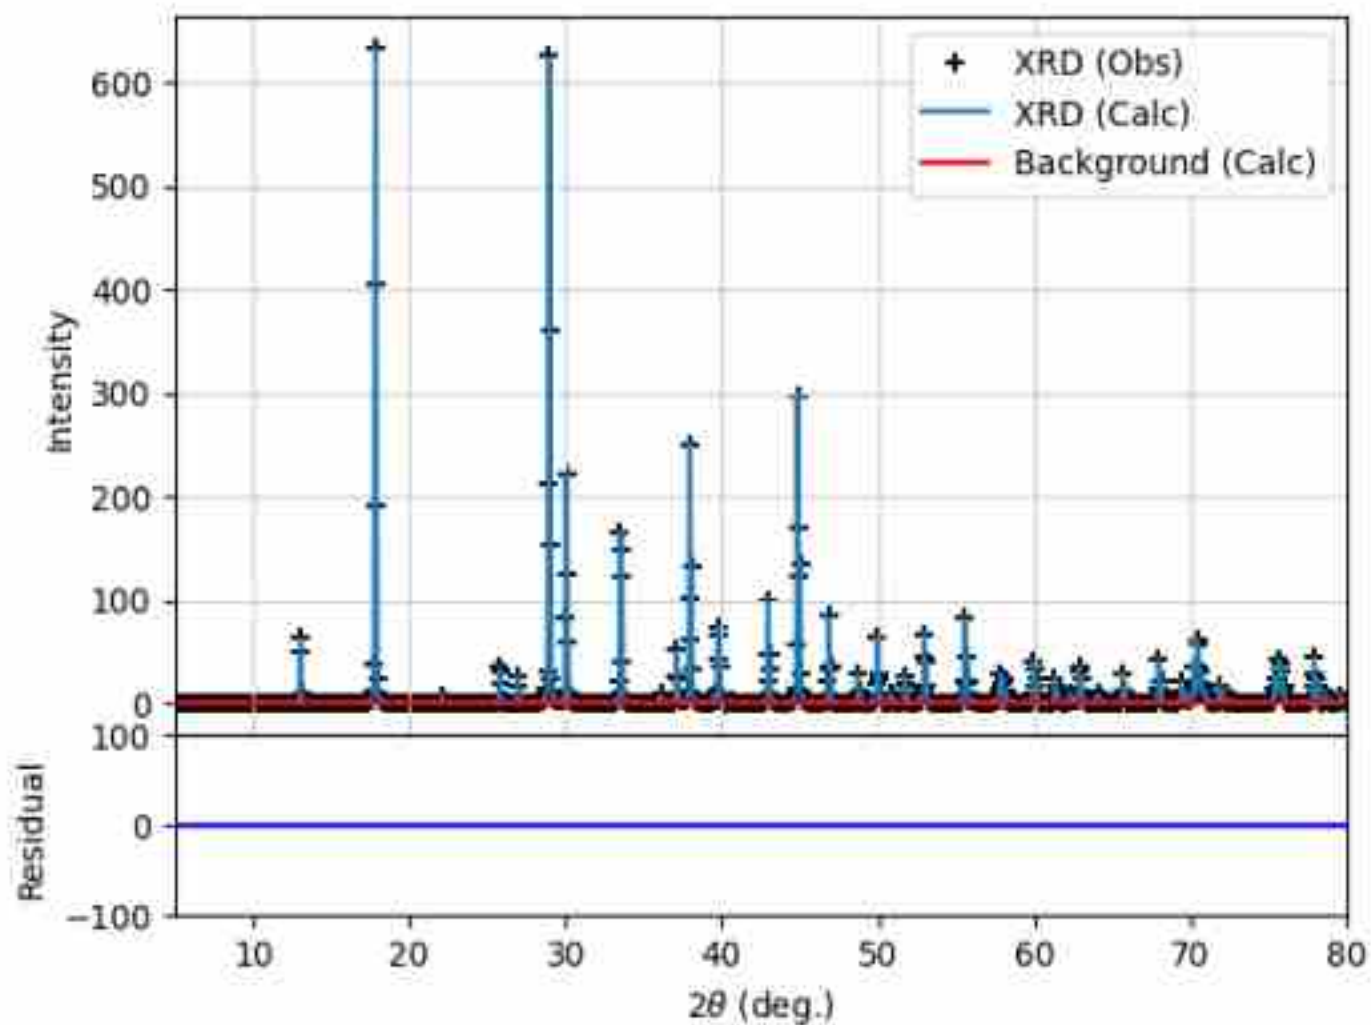

| RMSE before RR | Rwp    | RMSE after RR |
|----------------|--------|---------------|
| 0.022          | 0.0042 | 0.00052       |

# Dy5Al15

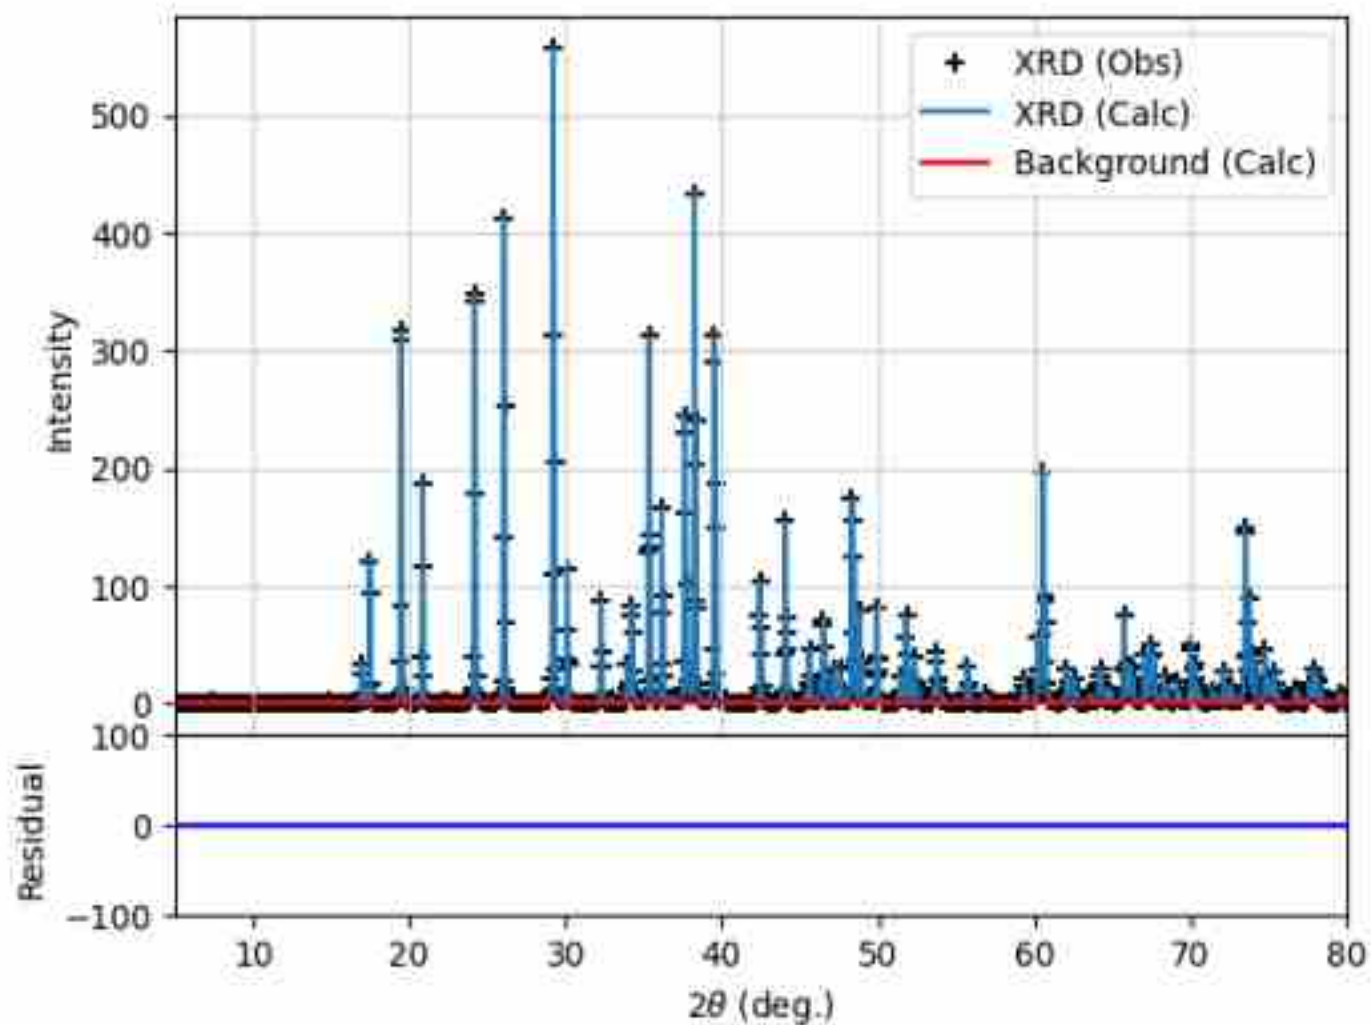

| RMSE before RR | Rwp    | RMSE after RR |
|----------------|--------|---------------|
| 0.022          | 0.0044 | 0.00119       |

# Dy<sub>8</sub>O<sub>s</sub>4C<sub>8</sub>

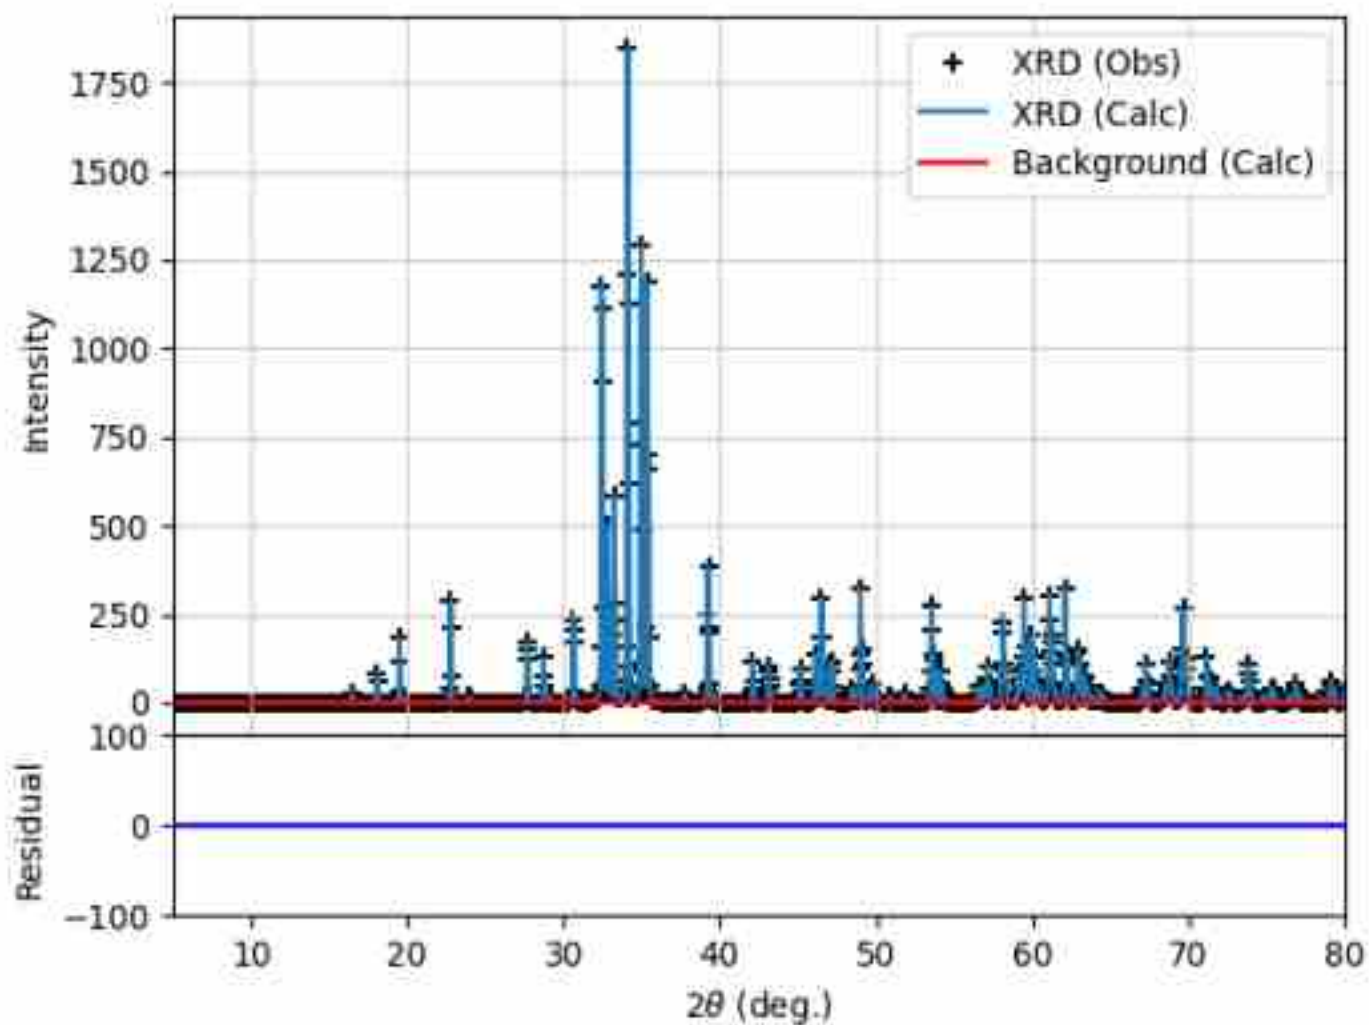

| RMSE before RR | Rwp     | RMSE after RR |
|----------------|---------|---------------|
| 0.022          | 0.00788 | 0.00405       |



# Dy10Ge6

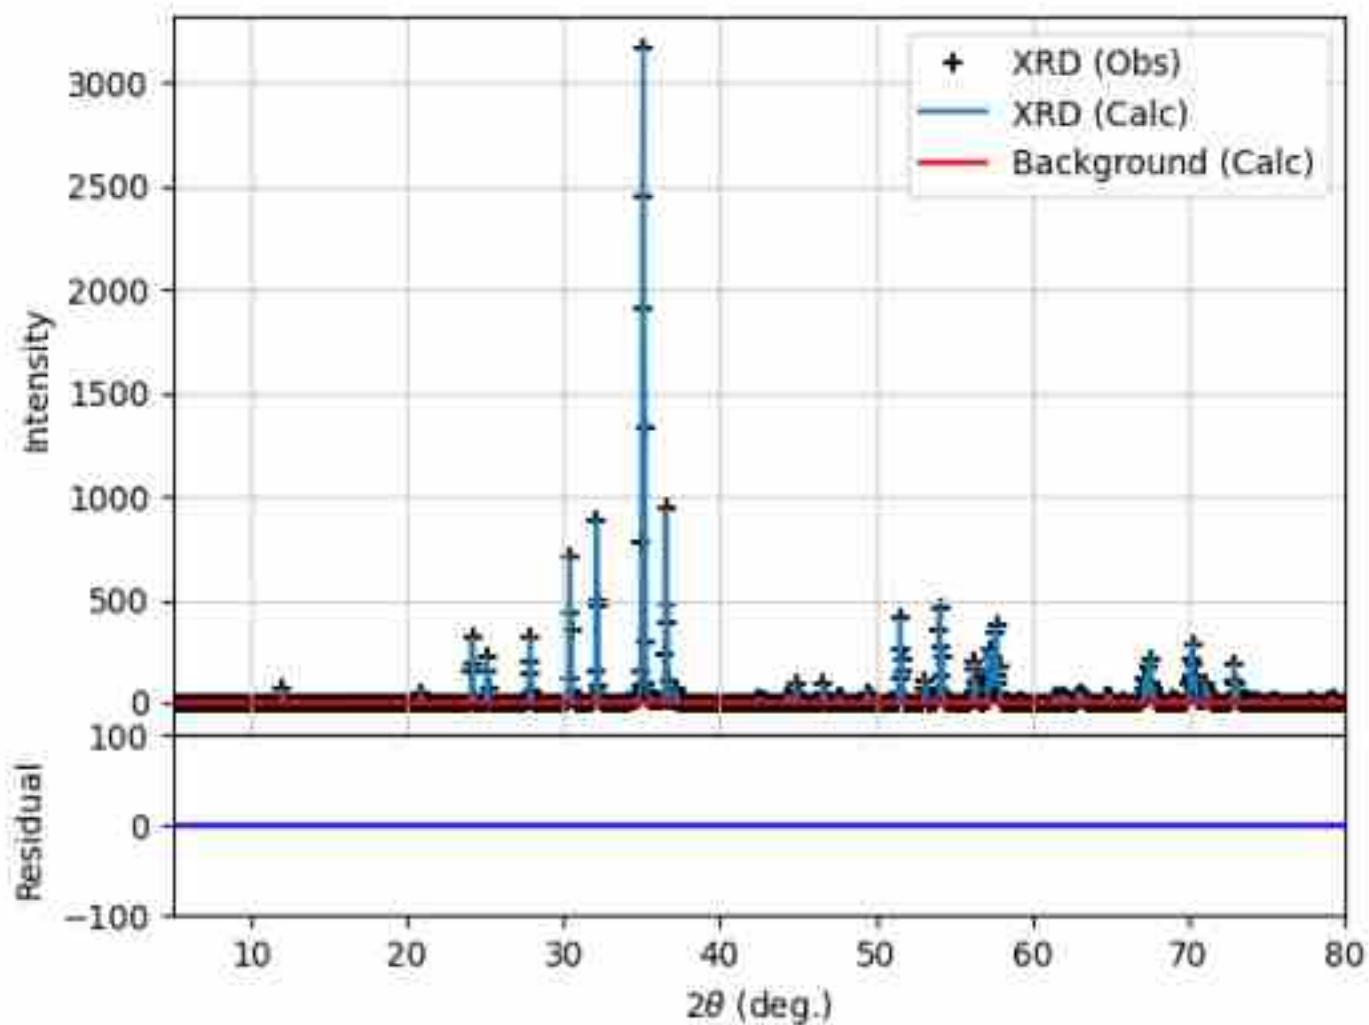

| RMSE before RR | Rwp     | RMSE after RR |
|----------------|---------|---------------|
| 0.022          | 0.00296 | 0.00031       |

# Er1Ni4Au1

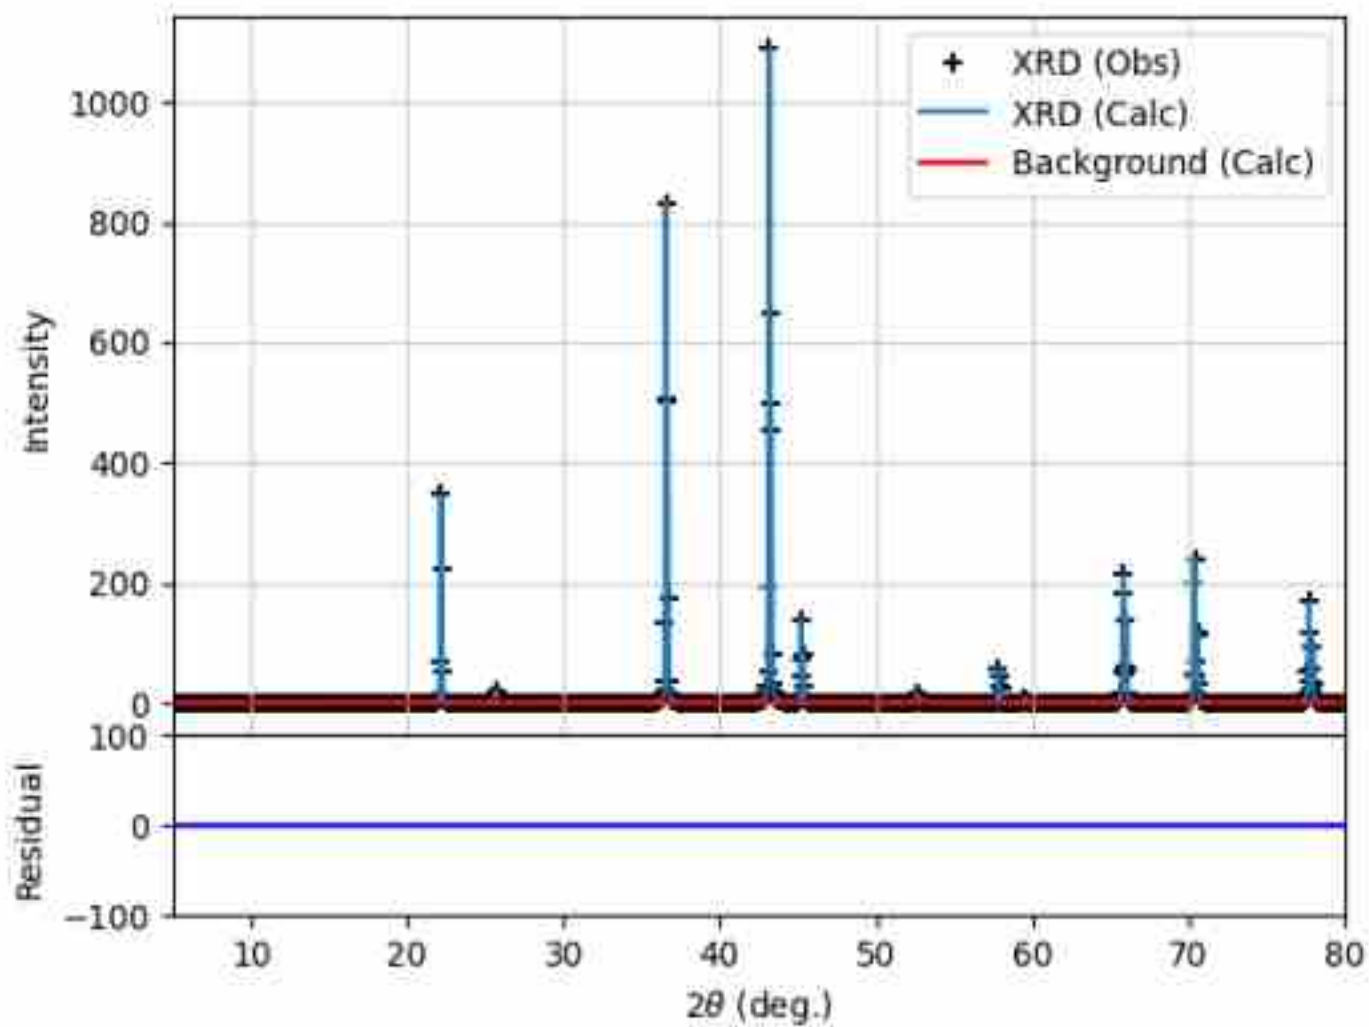

| RMSE before RR | Rwp     | RMSE after RR |
|----------------|---------|---------------|
| 0.022          | 0.05997 | 0.00509       |

# Er10Bi2Au4

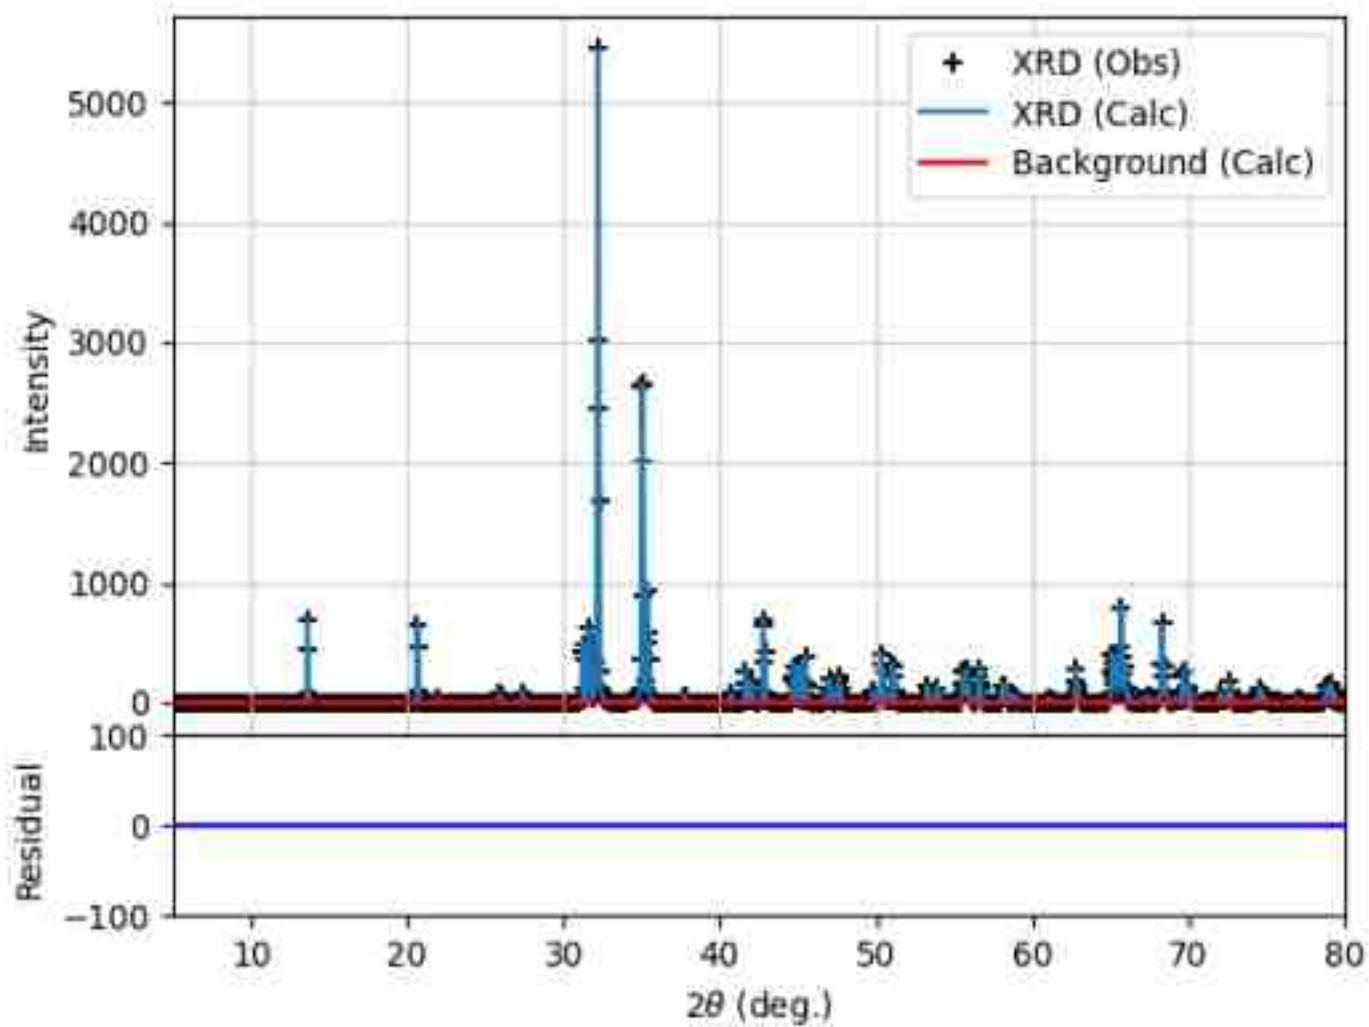

| RMSE before RR | Rwp     | RMSE after RR |
|----------------|---------|---------------|
| 0.022          | 0.00382 | 0.0003        |

# Eu<sub>2</sub>In<sub>8</sub>Cu<sub>2</sub>

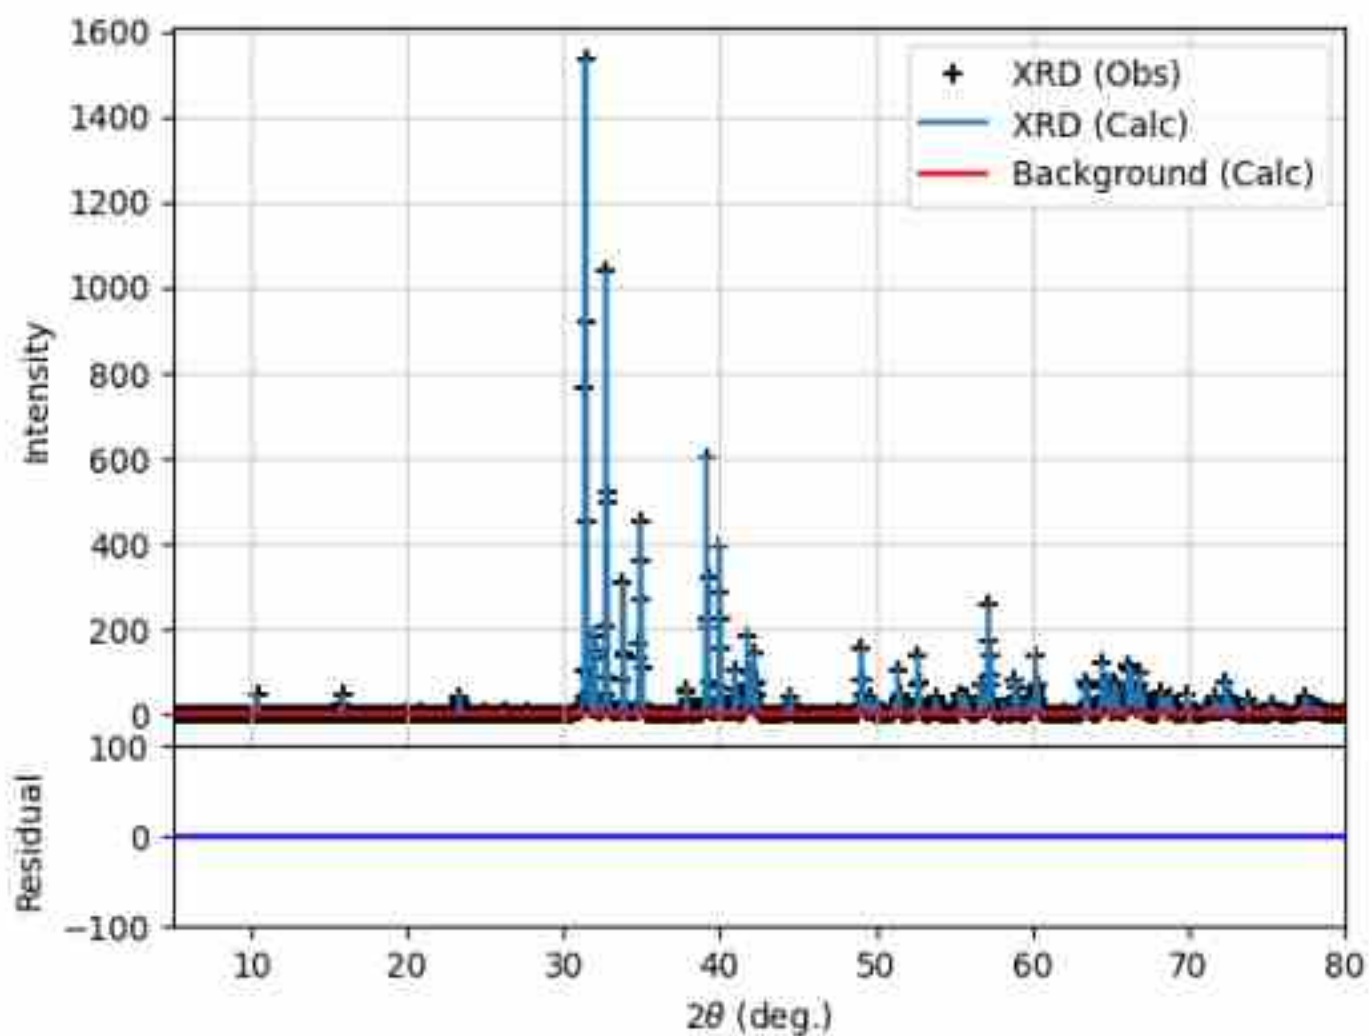

| RMSE before RR | Rwp     | RMSE after RR |
|----------------|---------|---------------|
| 0.022          | 0.00434 | 0.00033       |

# Eu8Cu4

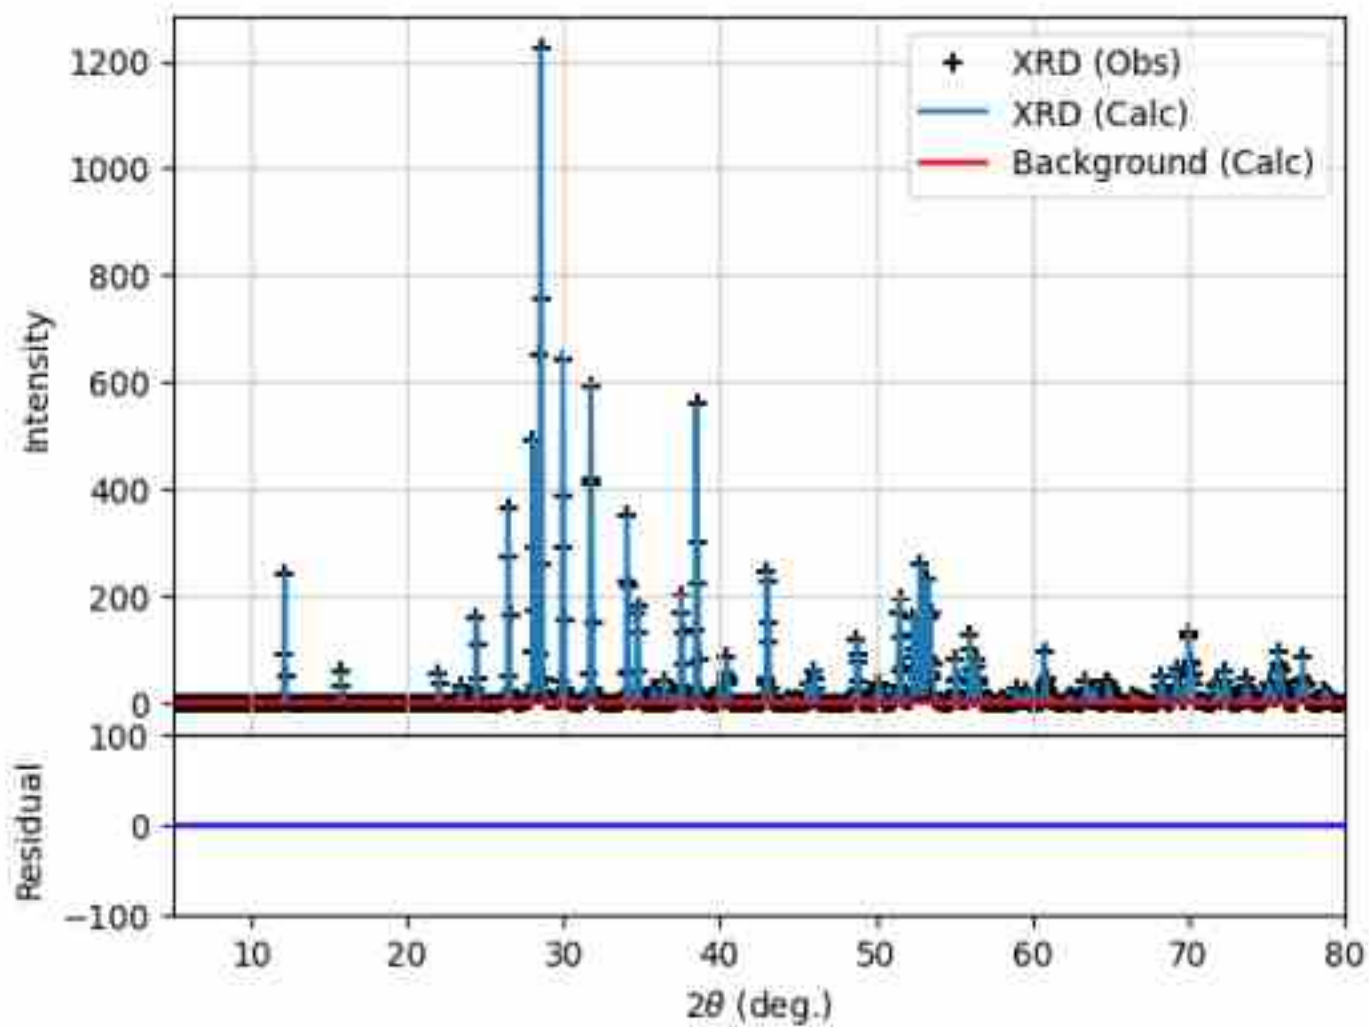

| RMSE before RR | Rwp     | RMSE after RR |
|----------------|---------|---------------|
| 0.022          | 0.00401 | 0.00027       |

# Fe<sub>2</sub>Ni<sub>2</sub>Te<sub>8</sub>

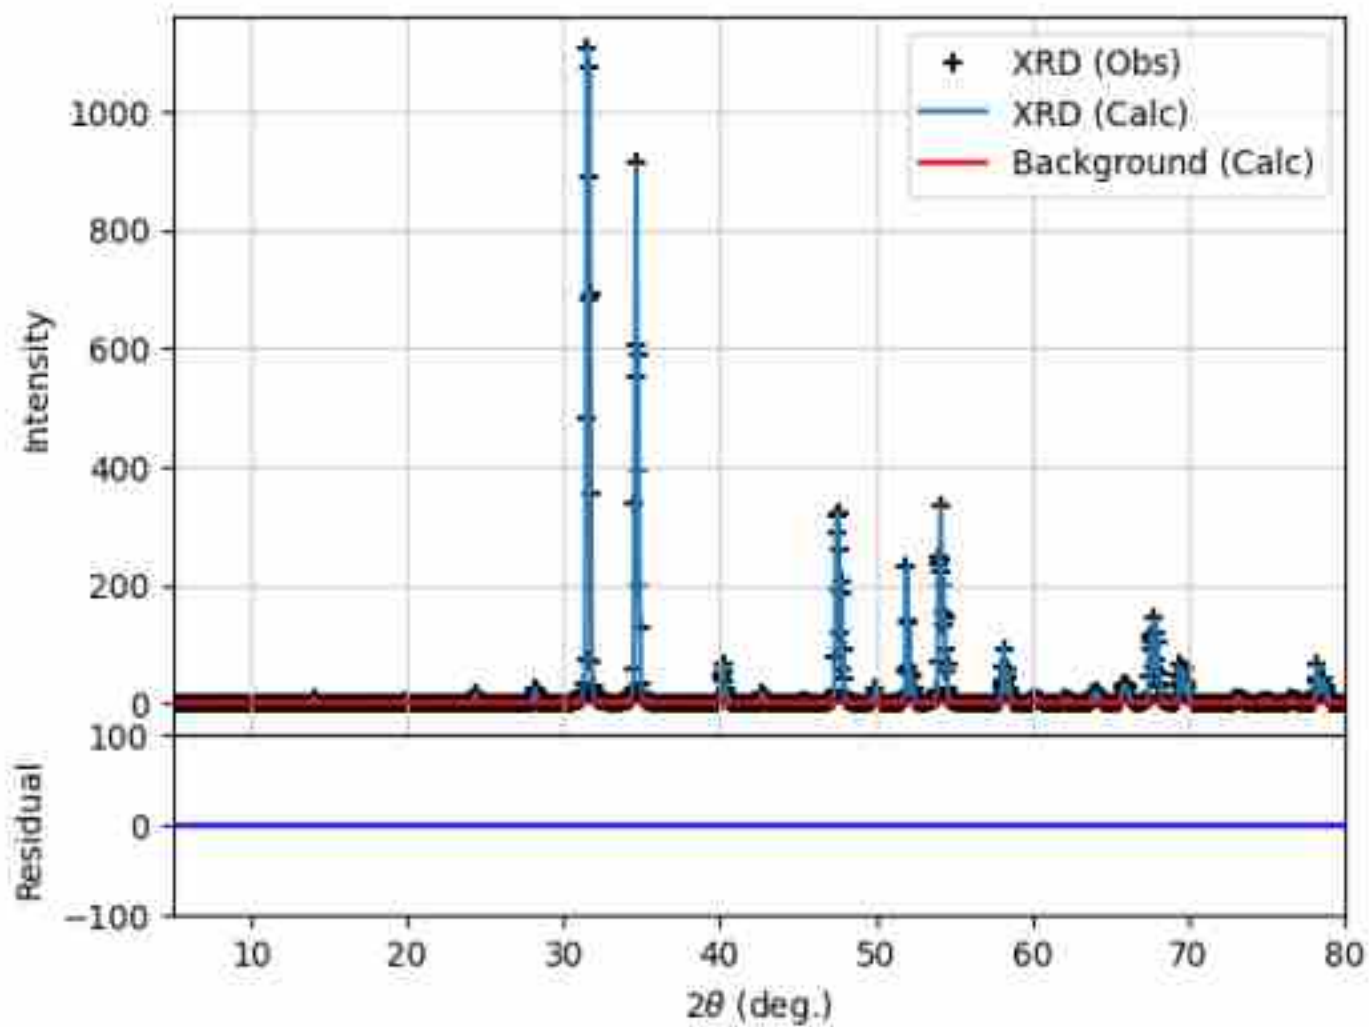

| RMSE before RR | Rwp     | RMSE after RR |
|----------------|---------|---------------|
| 0.022          | 0.00271 | 0.00052       |

# Fe<sub>2</sub>Sb<sub>2</sub>O<sub>8</sub>

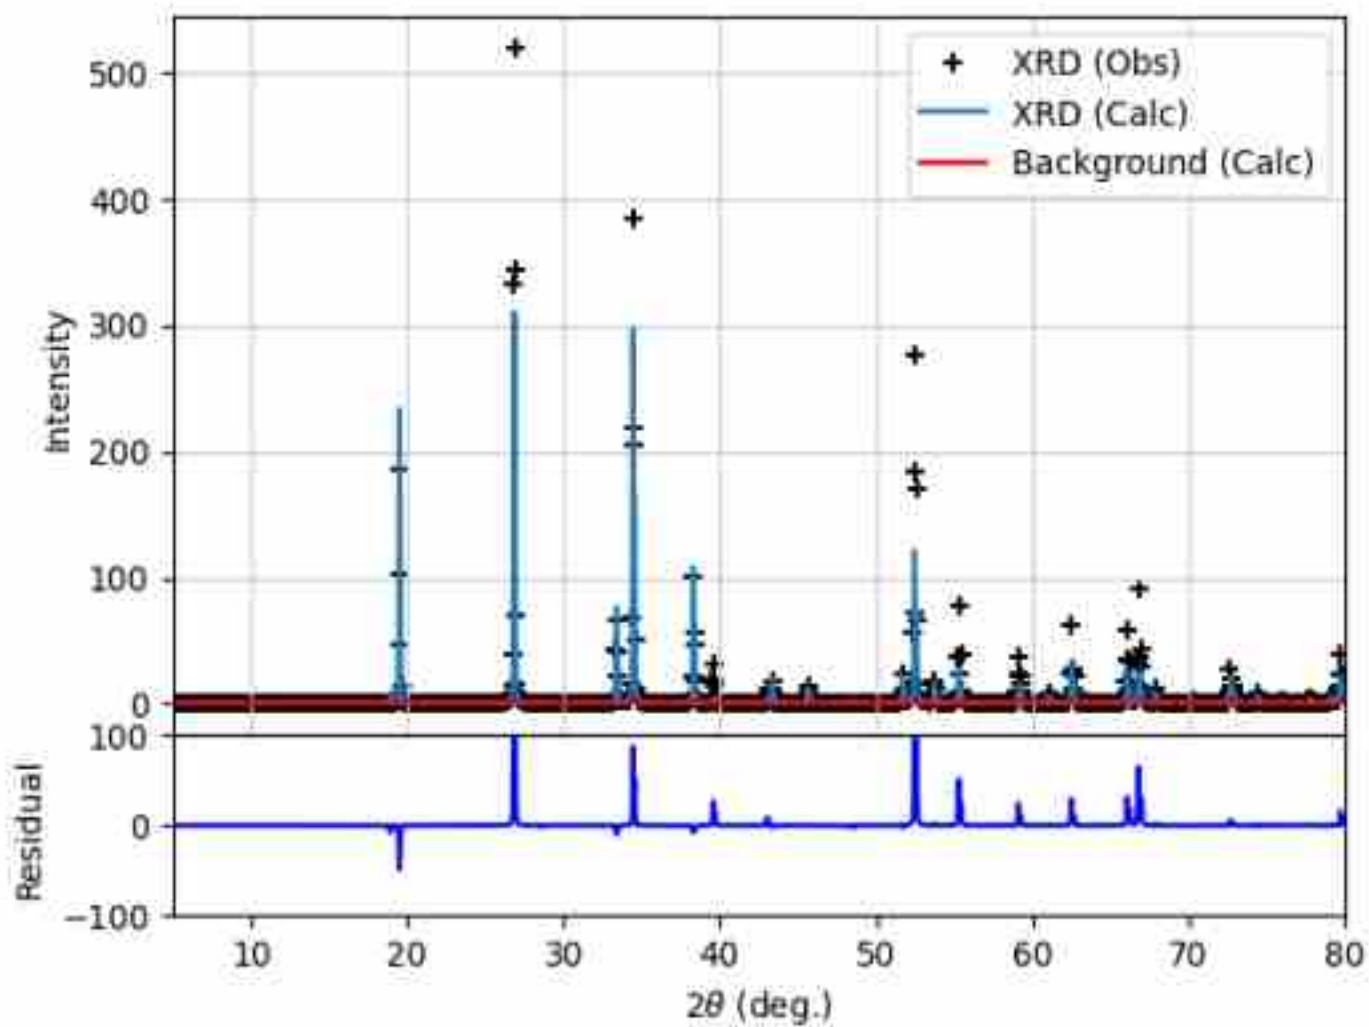

| RMSE before RR | Rwp      | RMSE after RR |
|----------------|----------|---------------|
| 0.022          | 38.17778 | None          |

# Fe<sub>4</sub>As<sub>4</sub>Se<sub>4</sub>

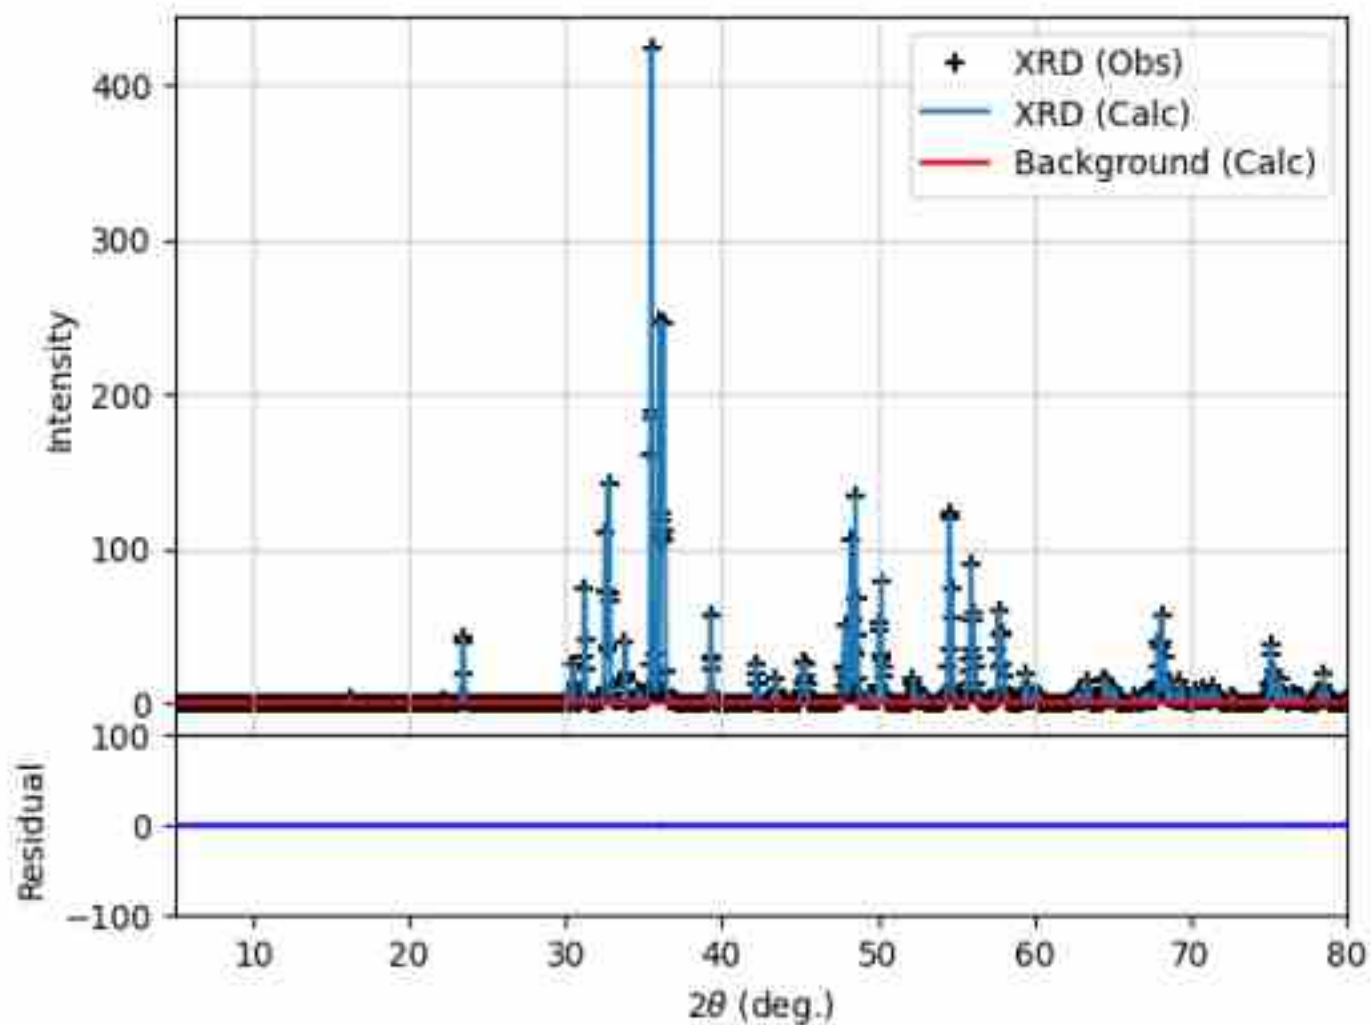

| RMSE before RR | Rwp    | RMSE after RR |
|----------------|--------|---------------|
| 0.022          | 0.9318 | 0.00874       |



# Fe<sub>4</sub>O<sub>4</sub>F<sub>4</sub>

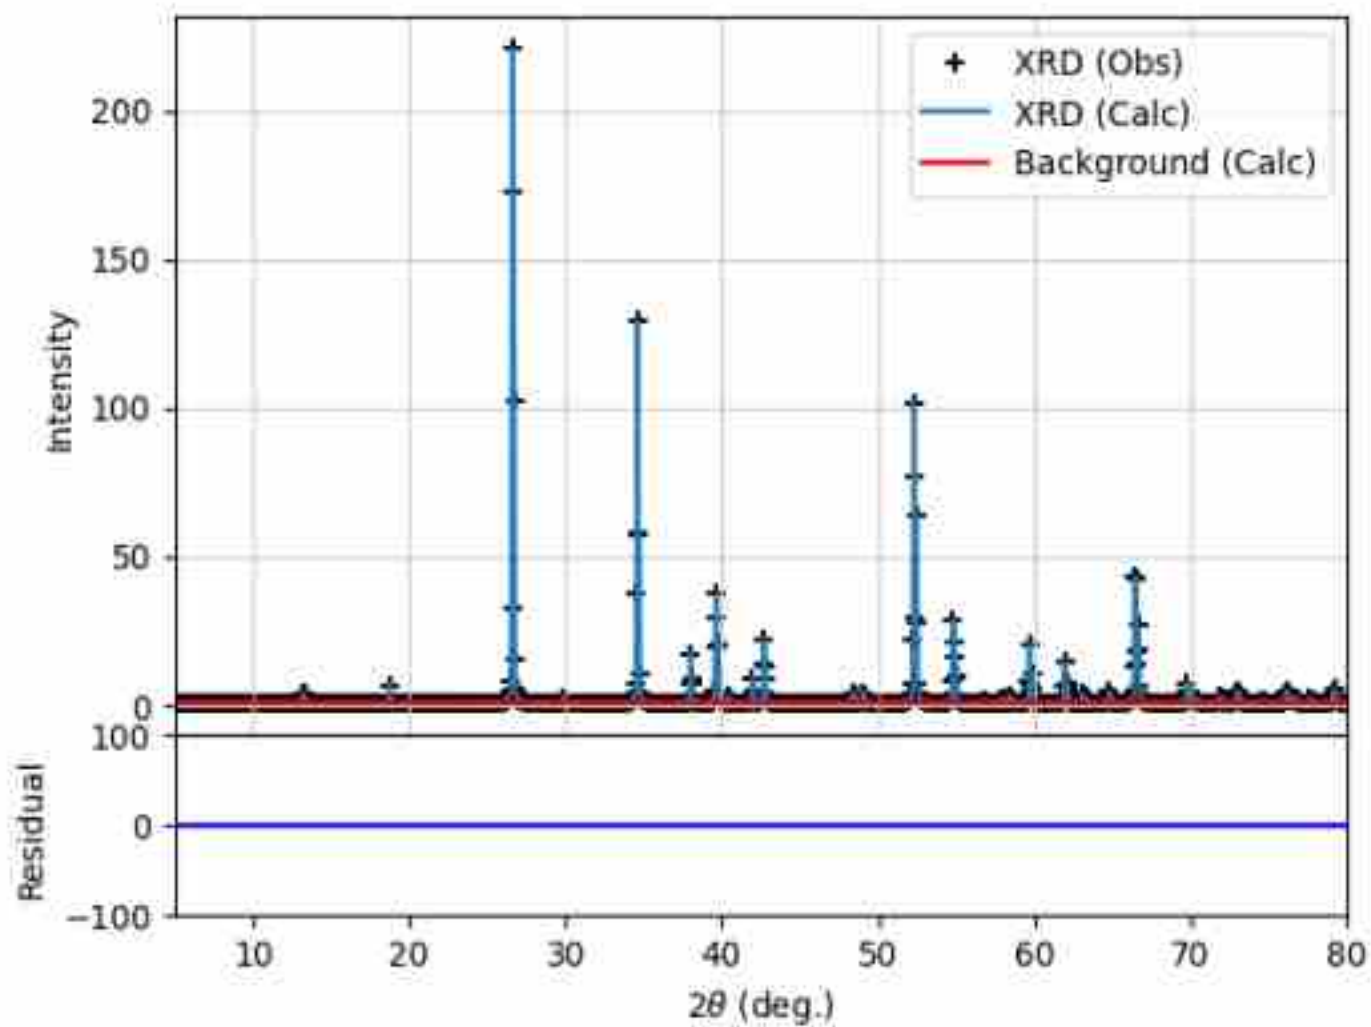

| RMSE before RR | Rwp     | RMSE after RR |
|----------------|---------|---------------|
| 0.022          | 0.00242 | 0.00082       |

# Ga5Cu1Te8

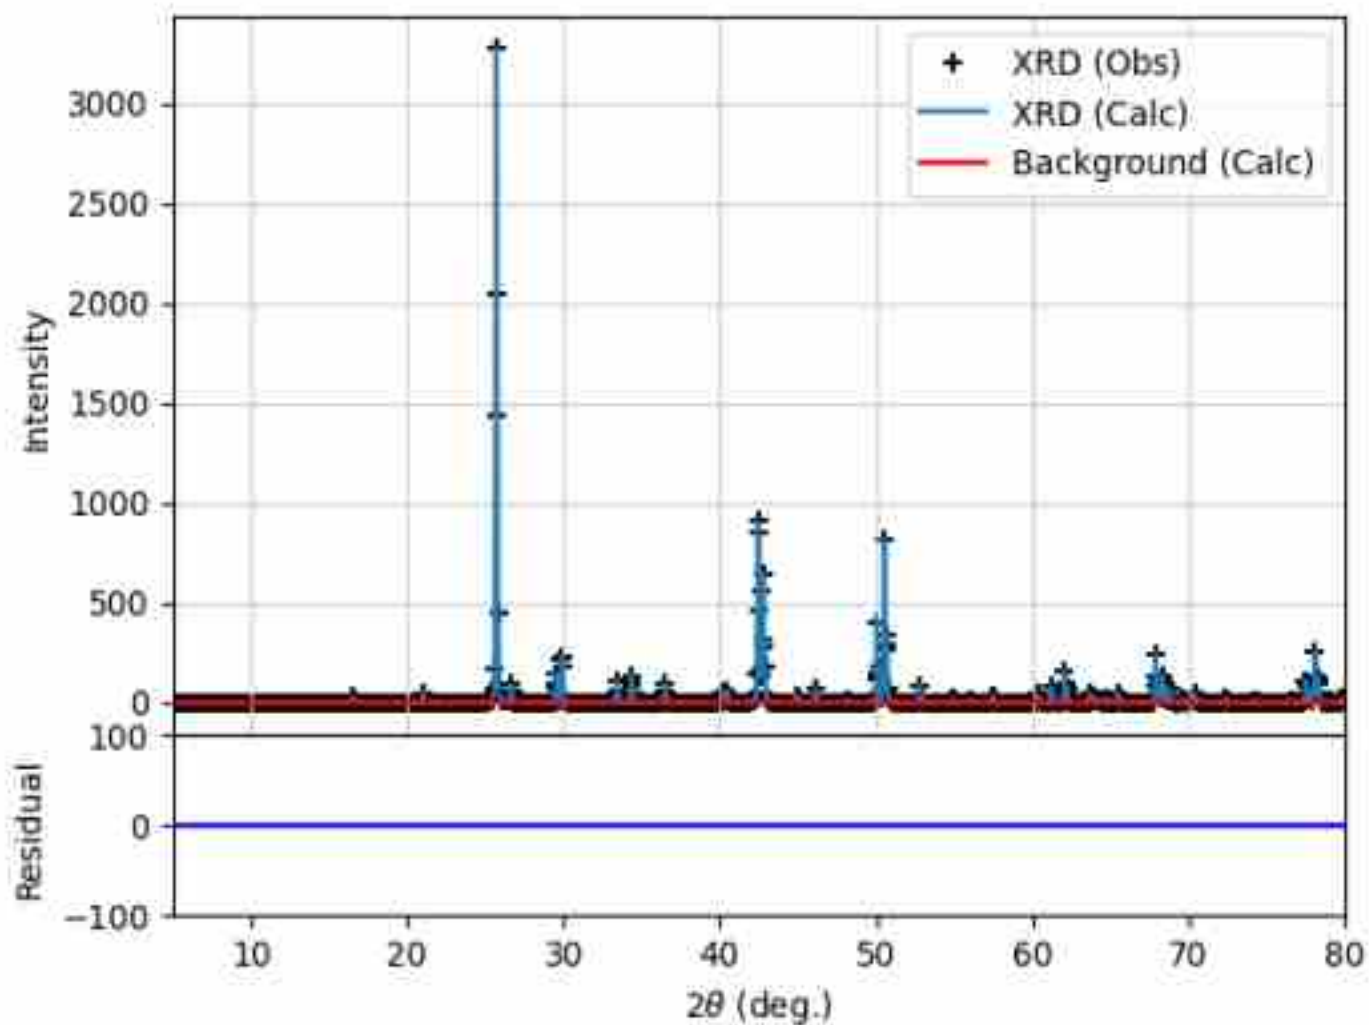

| RMSE before RR | Rwp     | RMSE after RR |
|----------------|---------|---------------|
| 0.022          | 0.00355 | 0.00027       |

# Gd<sub>4</sub>Mn<sub>2</sub>S<sub>8</sub>

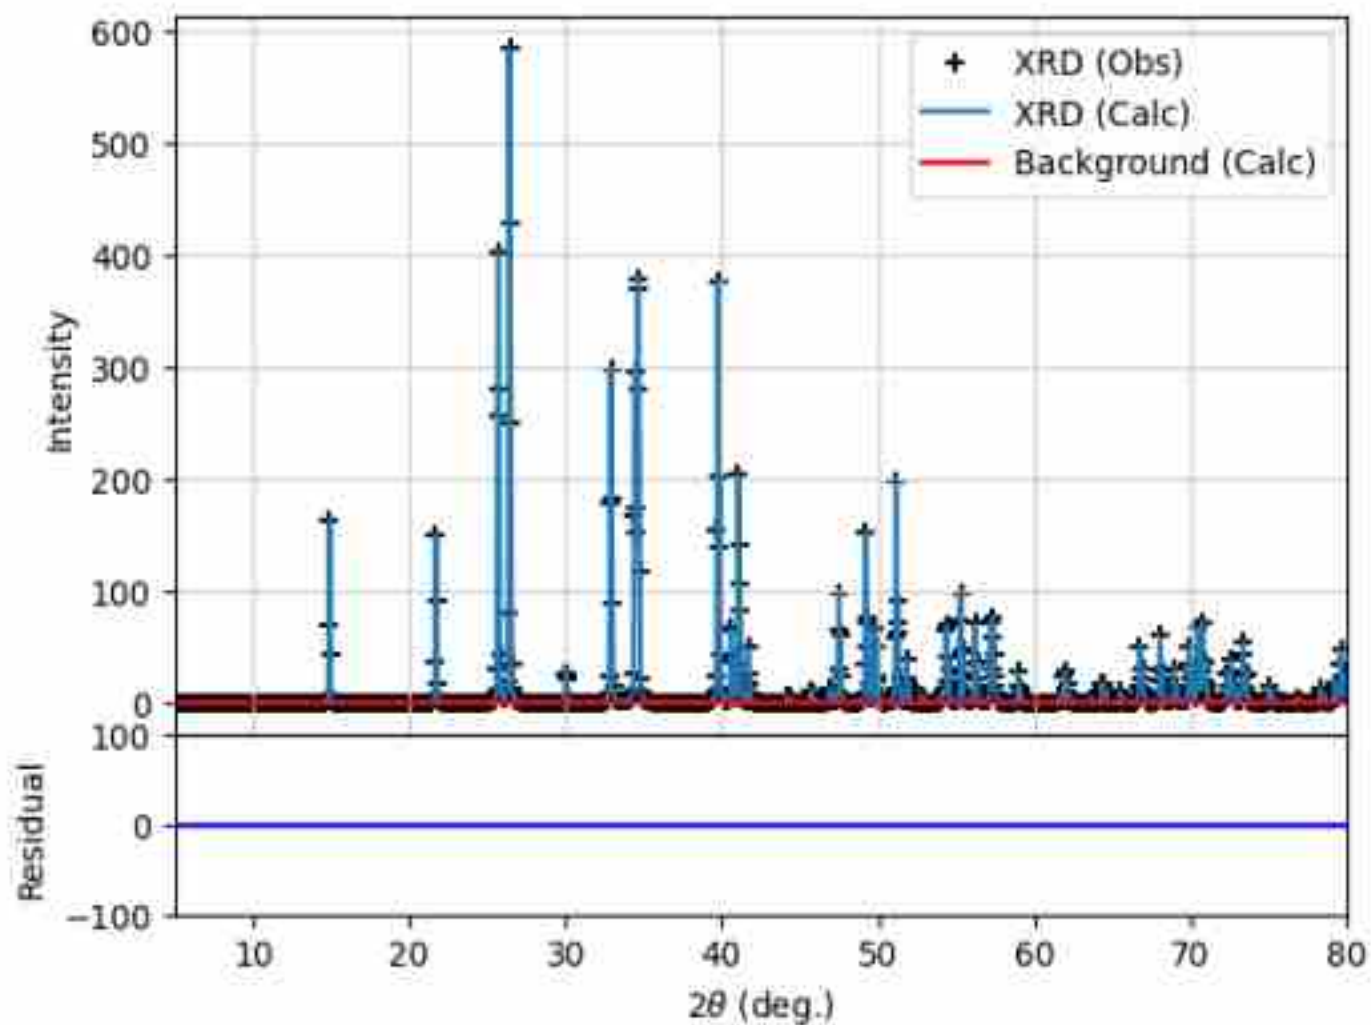

| RMSE before RR | Rwp     | RMSE after RR |
|----------------|---------|---------------|
| 0.022          | 0.00347 | 0.0006        |

# Gd8S8O4

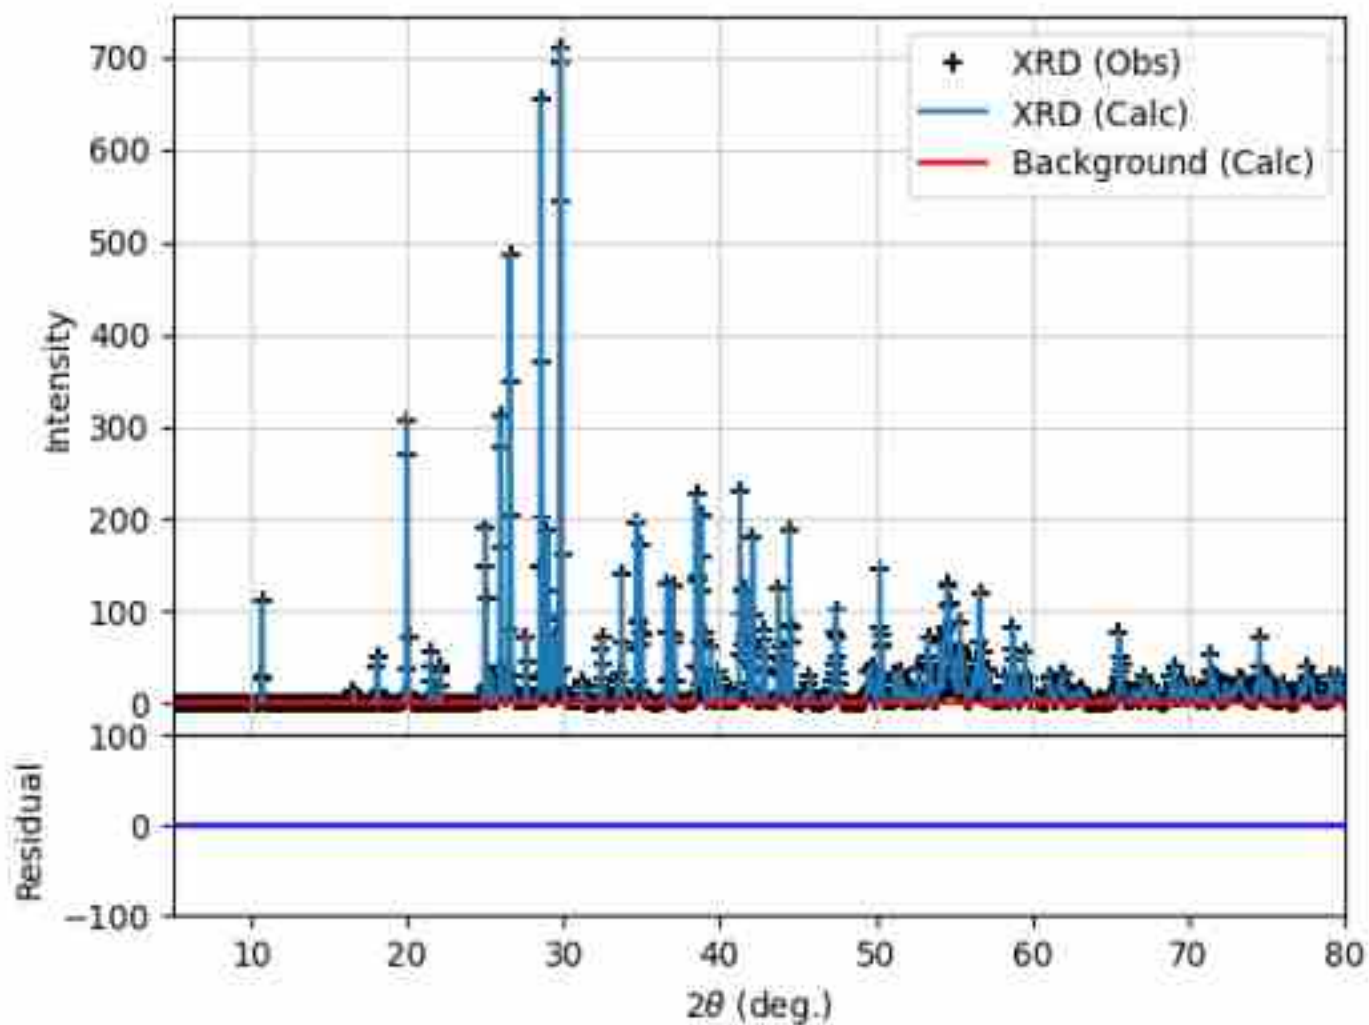

| RMSE before RR | Rwp     | RMSE after RR |
|----------------|---------|---------------|
| 0.022          | 0.00357 | 0.0006        |

# Ge<sub>2</sub>Se<sub>4</sub>

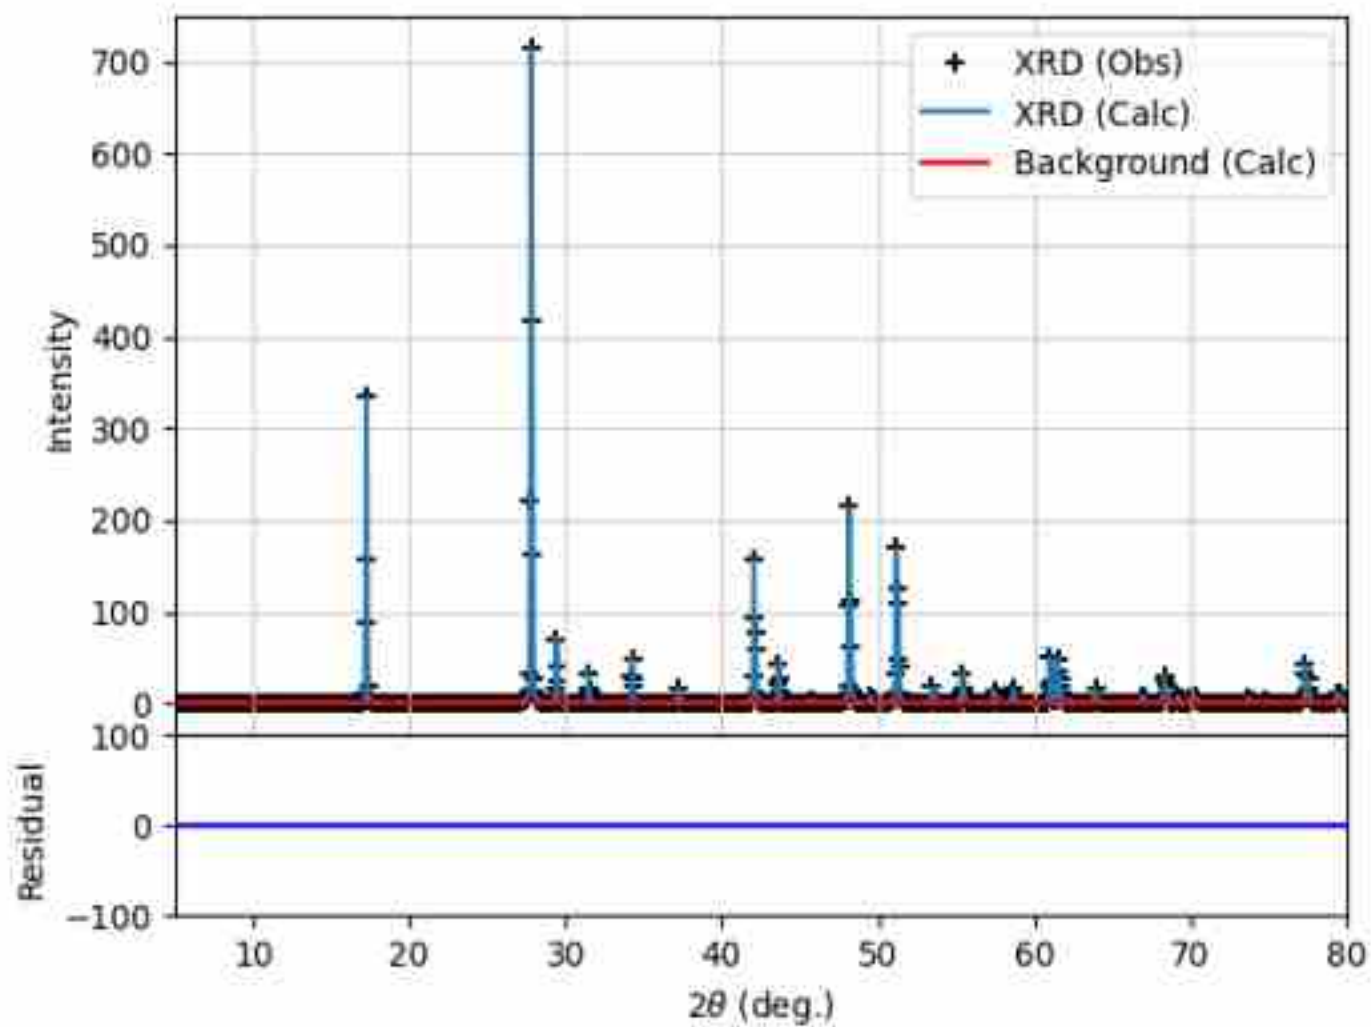

| RMSE before RR | Rwp     | RMSE after RR |
|----------------|---------|---------------|
| 0.022          | 0.00366 | 0.00053       |

# Hf<sub>3</sub>Tl<sub>2</sub>Cu<sub>2</sub>Se<sub>8</sub>

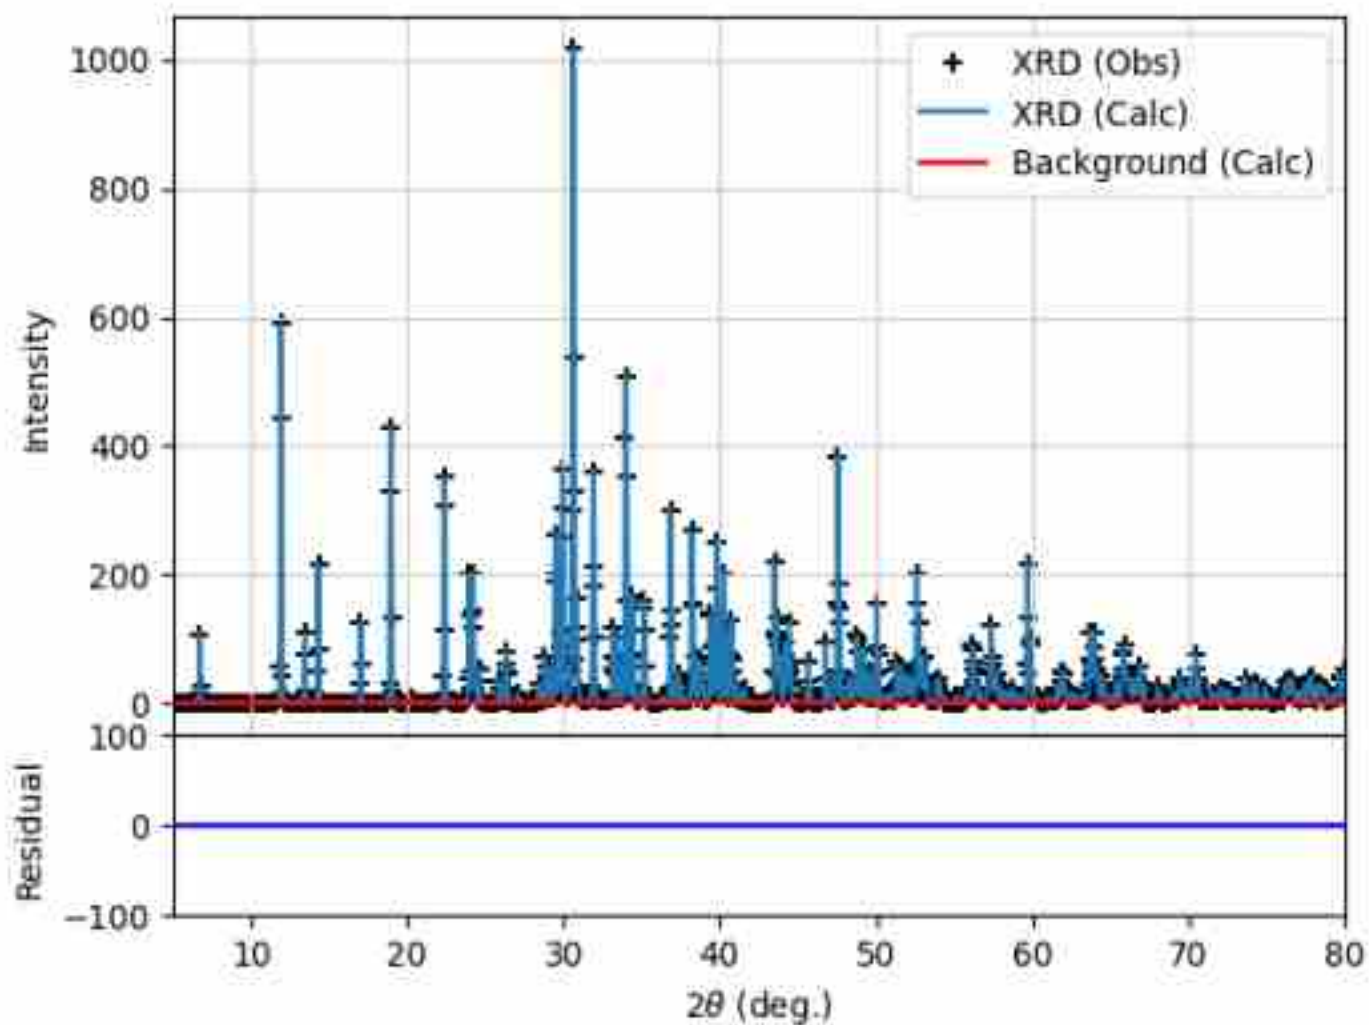

| RMSE before RR | Rwp     | RMSE after RR |
|----------------|---------|---------------|
| 0.022          | 0.00264 | 0.00029       |

# Hf4A16

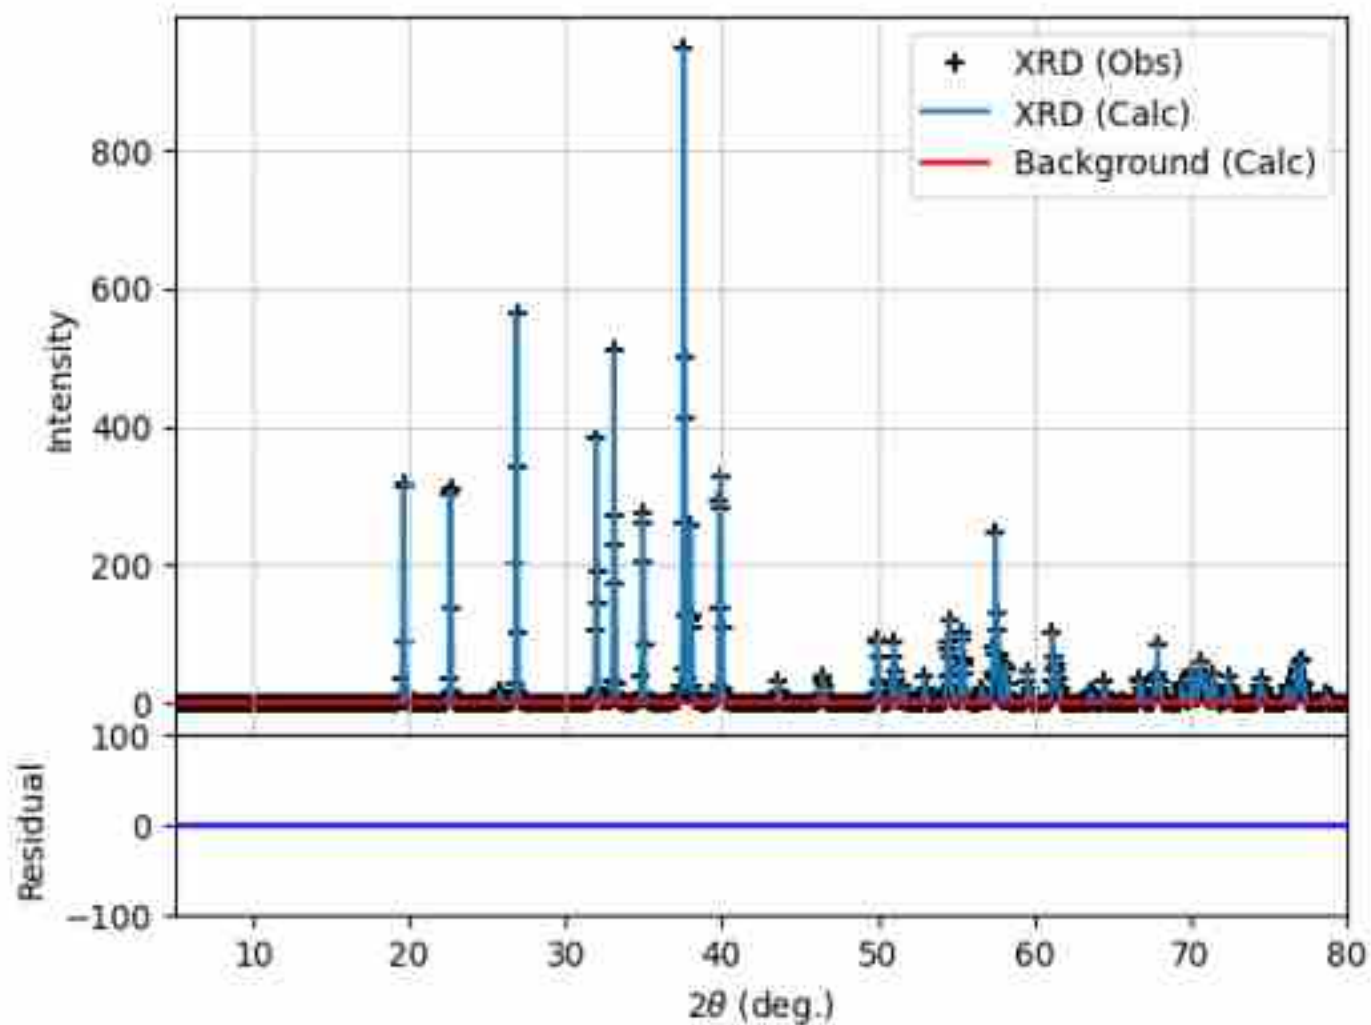

| RMSE before RR | Rwp     | RMSE after RR |
|----------------|---------|---------------|
| 0.022          | 0.00412 | 0.00103       |

# Hf4C1N3

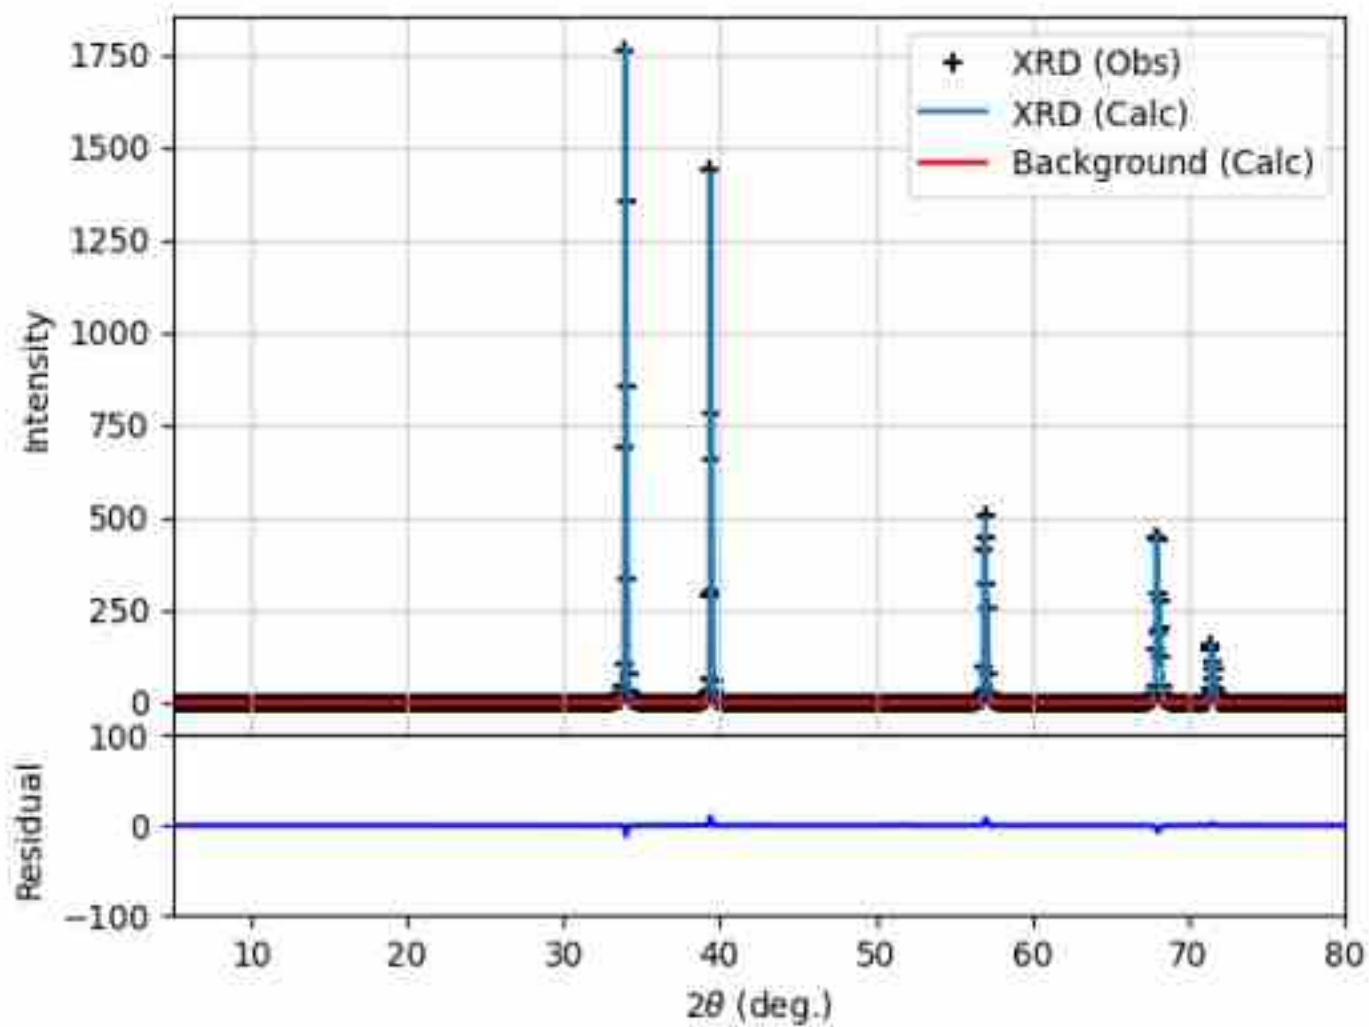

| RMSE before RR | Rwp     | RMSE after RR |
|----------------|---------|---------------|
| 0.022          | 1.80144 | 0.06291       |



# Hf4Pb4O12

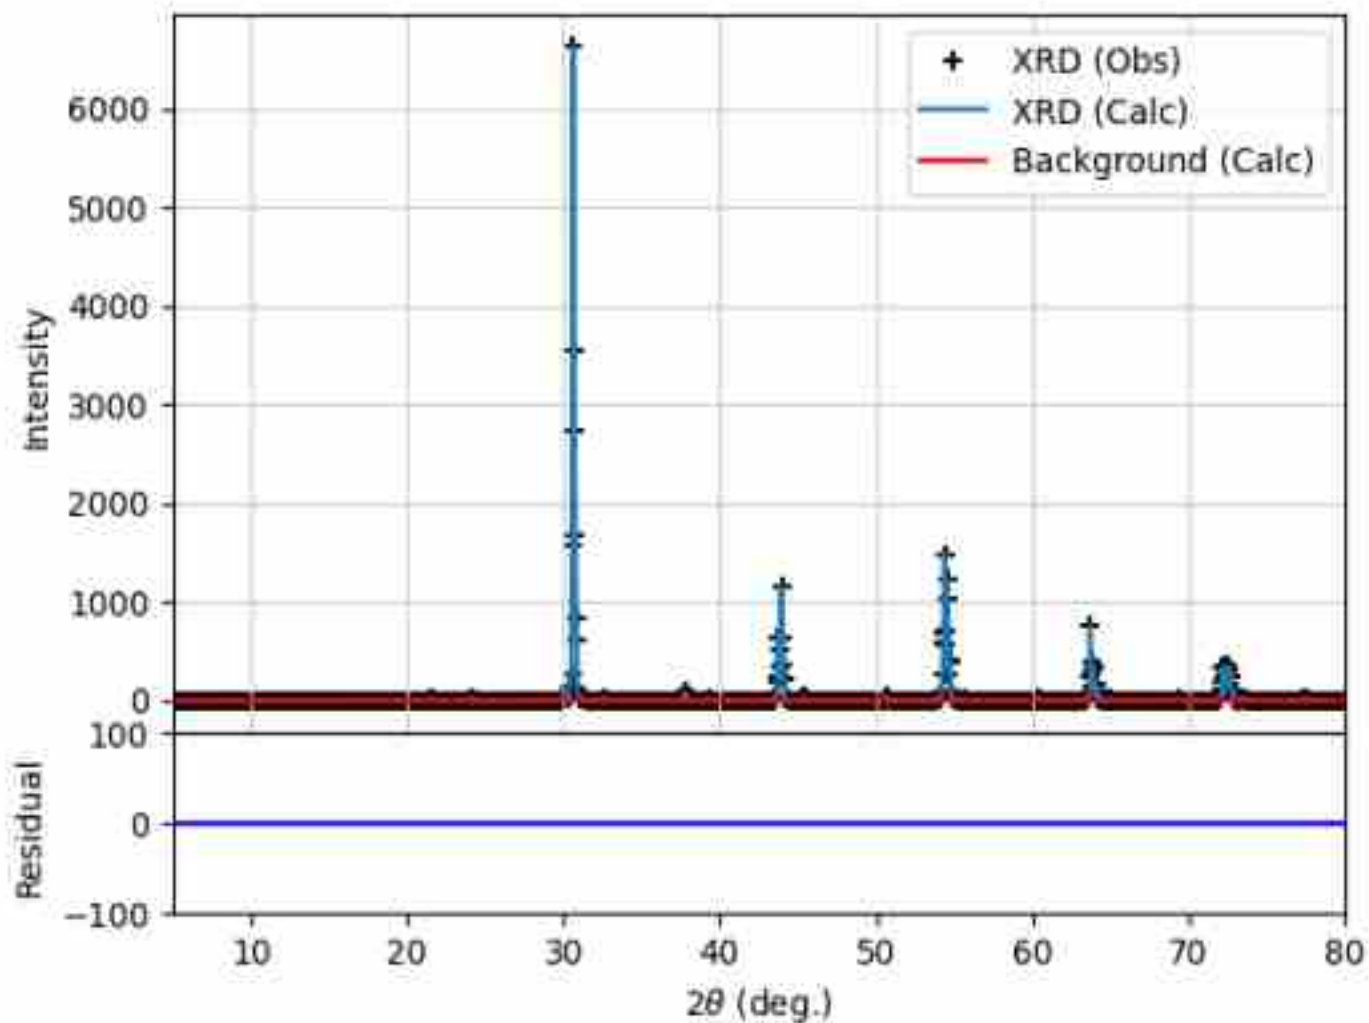

| RMSE before RR | Rwp     | RMSE after RR |
|----------------|---------|---------------|
| 0.022          | 0.00273 | 0.0015        |

# Hf10V1Sb5

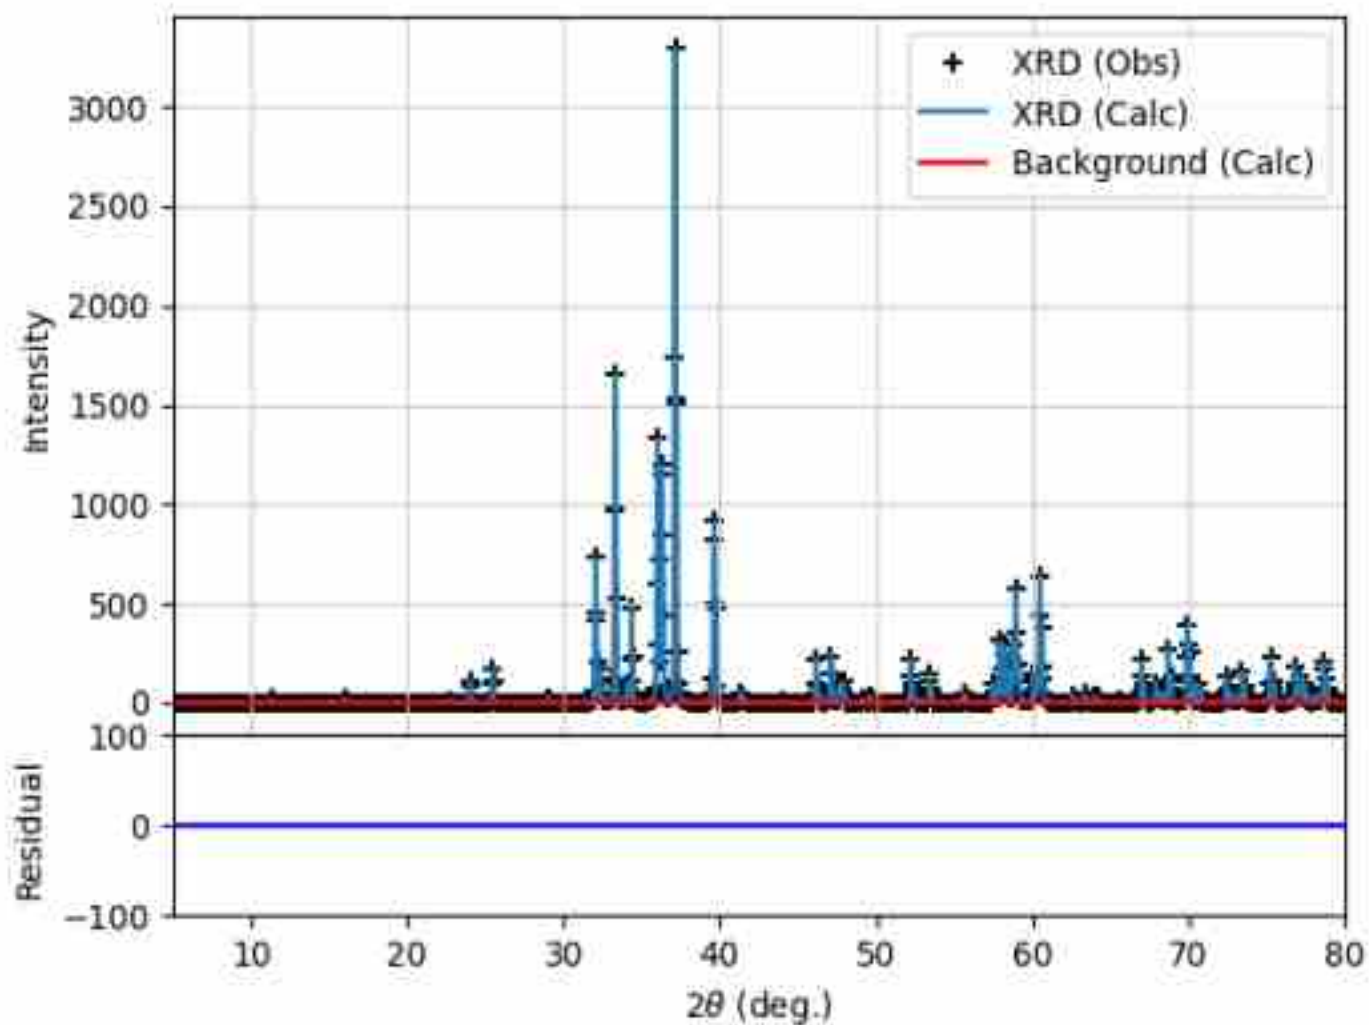

| RMSE before RR | Rwp     | RMSE after RR |
|----------------|---------|---------------|
| 0.022          | 0.00417 | 0.00032       |

# Ho<sub>2</sub>Ag<sub>2</sub>Sn<sub>2</sub>

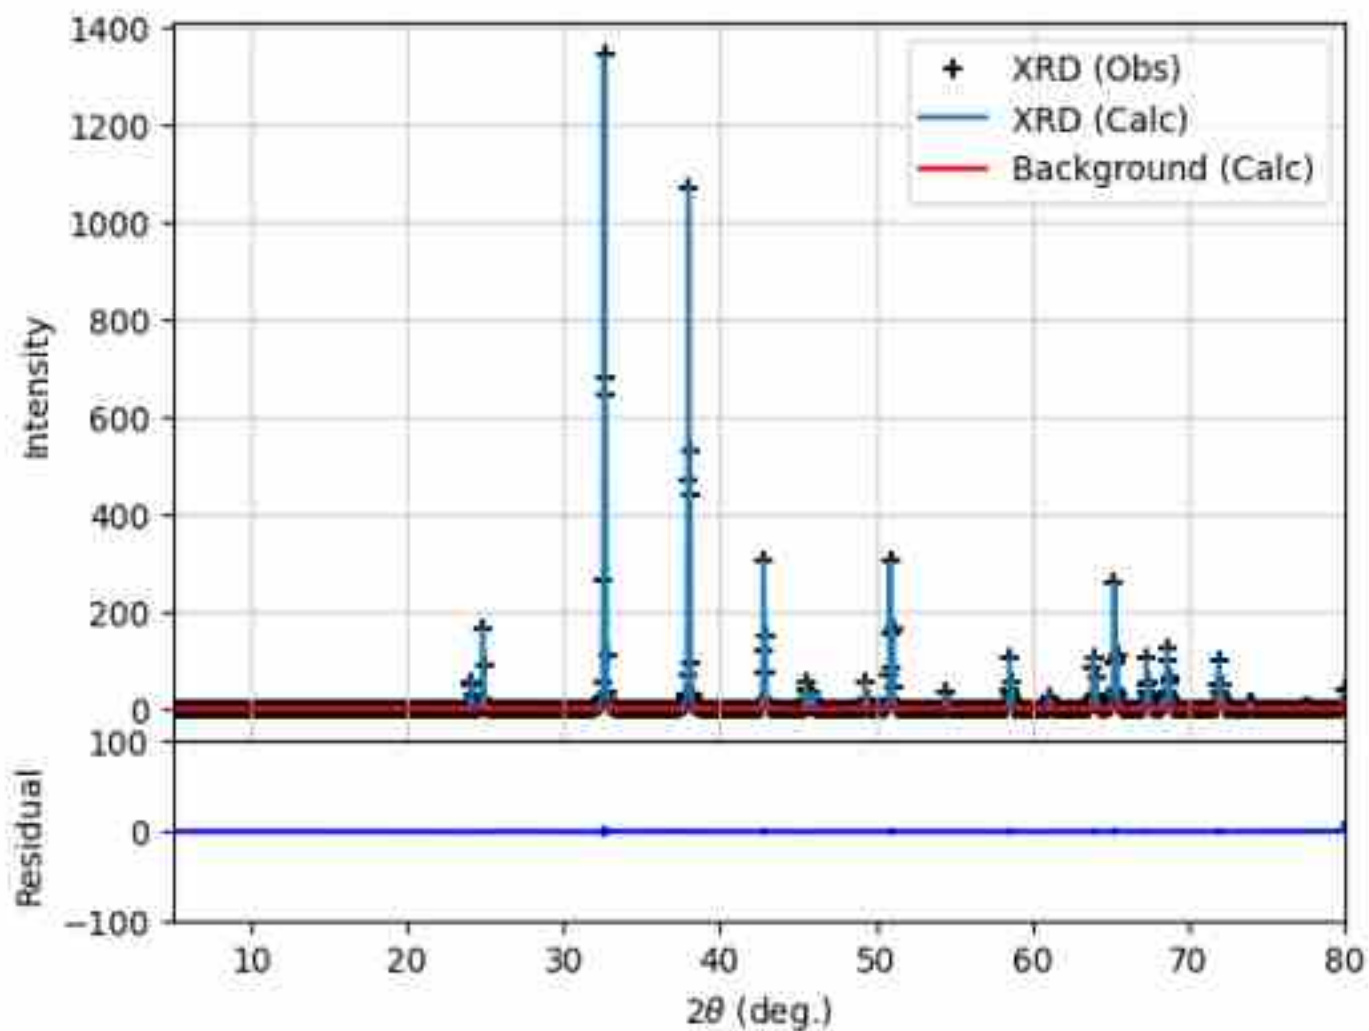

| RMSE before RR | Rwp     | RMSE after RR |
|----------------|---------|---------------|
| 0.022          | 2.23722 | 0.00613       |

# Ho4Sb4Rh4

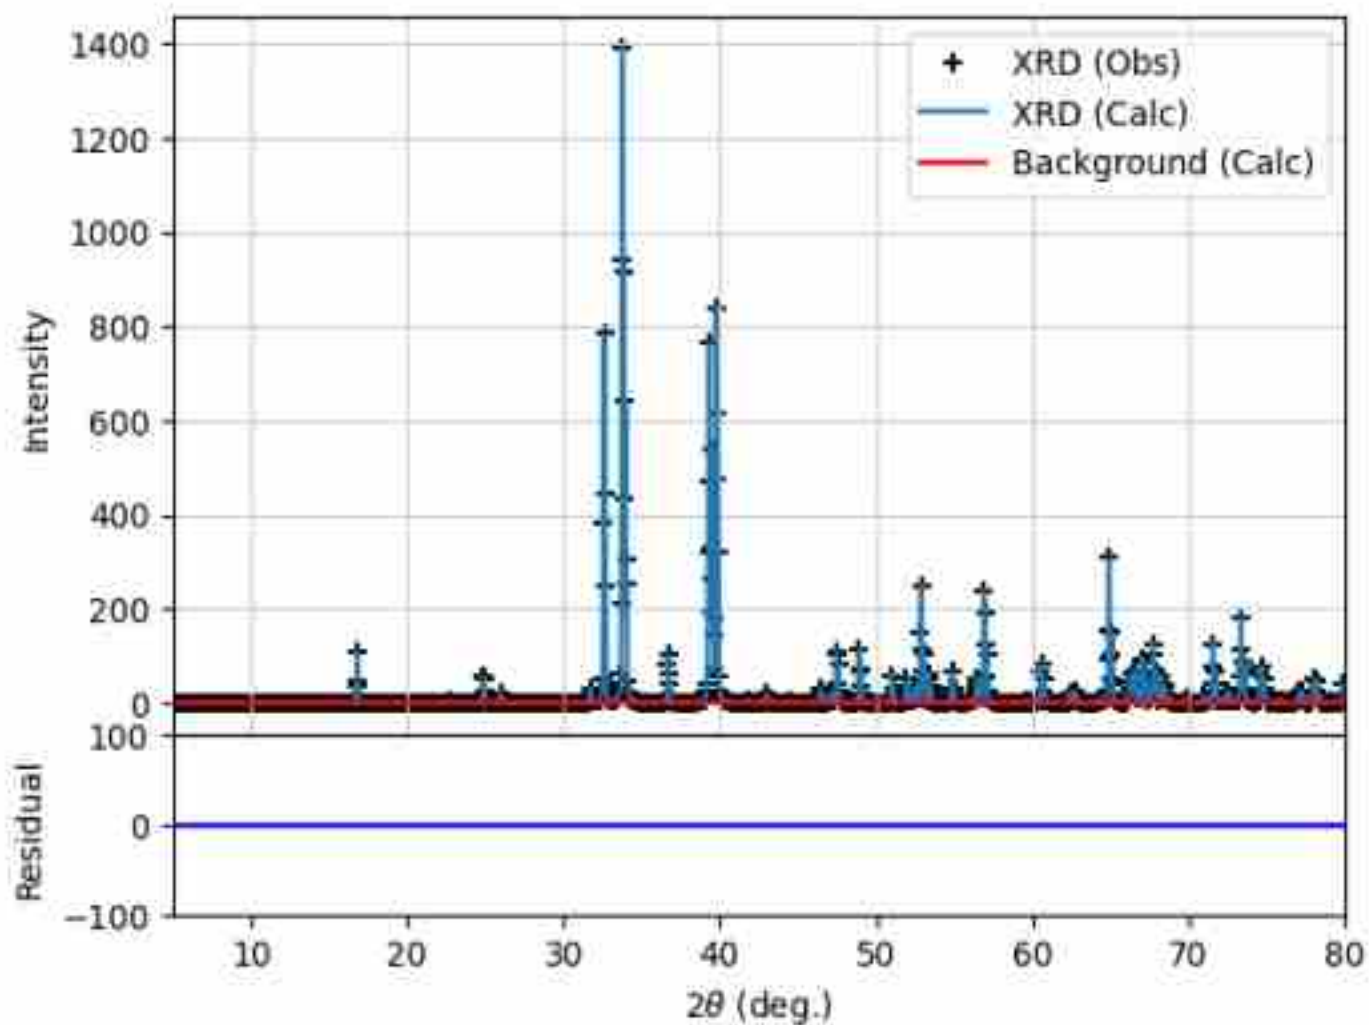

| RMSE before RR | Rwp     | RMSE after RR |
|----------------|---------|---------------|
| 0.022          | 0.00493 | 0.00038       |

# In1Ga1N2

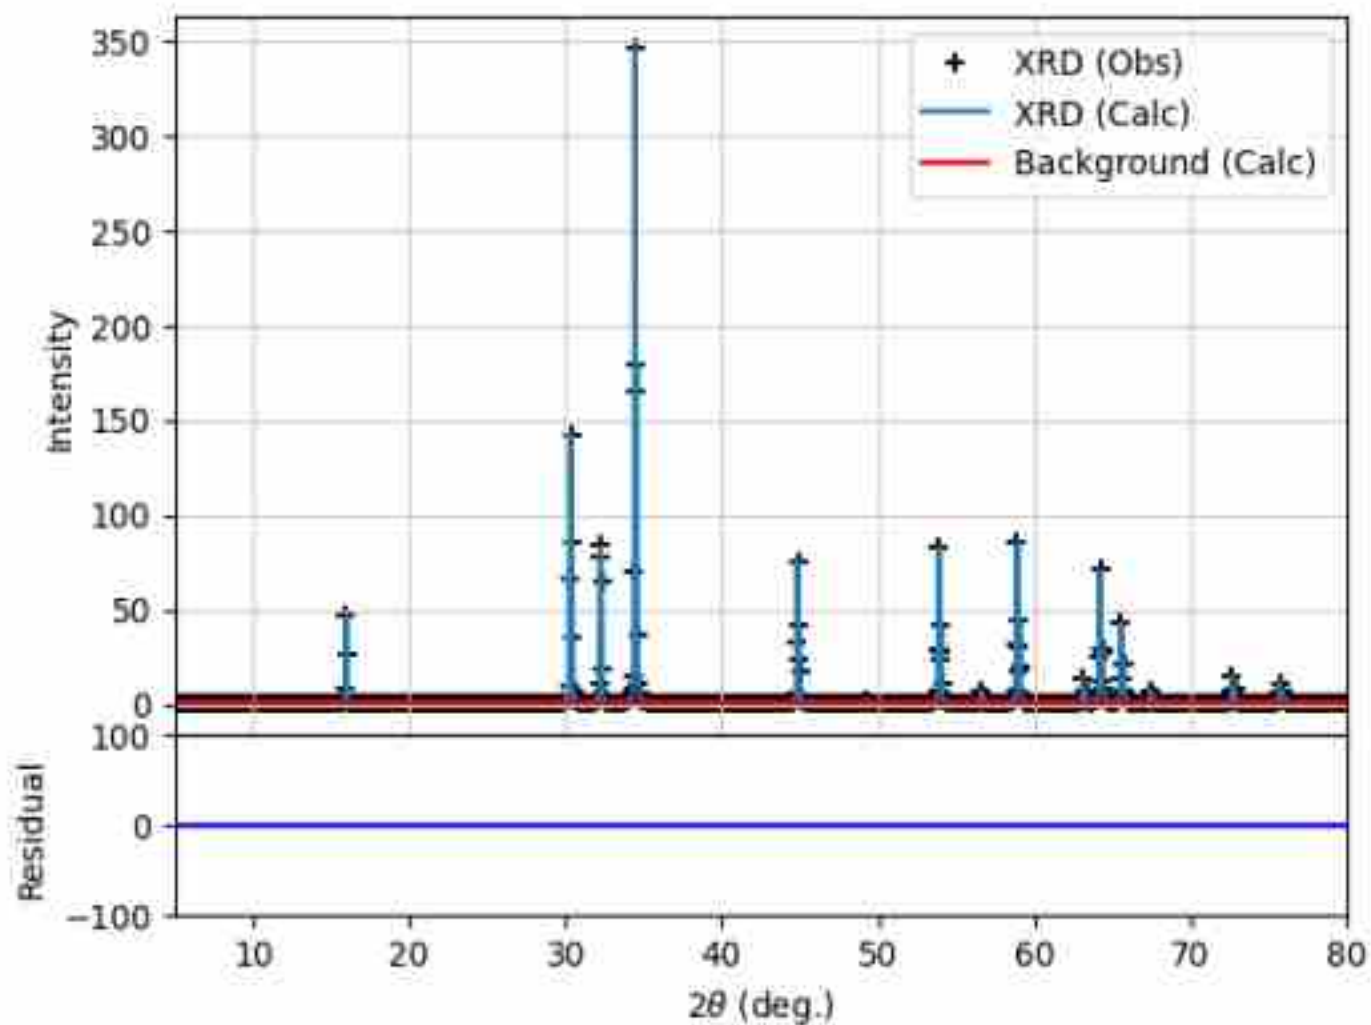

| RMSE before RR | Rwp     | RMSE after RR |
|----------------|---------|---------------|
| 0.022          | 0.00196 | 0.00067       |

# In2B2O6

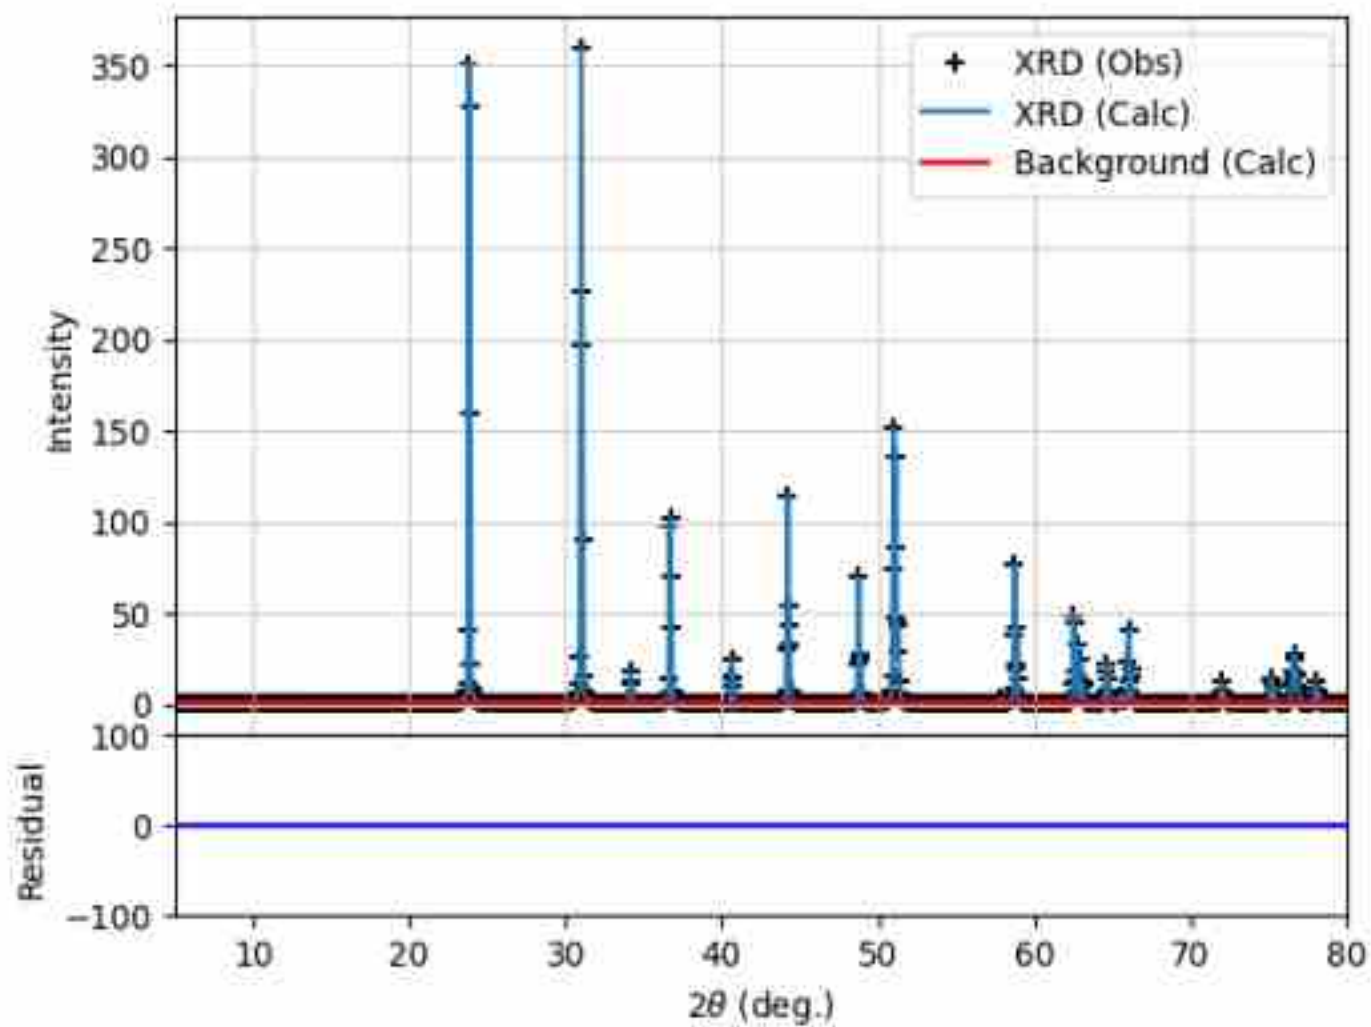

| RMSE before RR | Rwp     | RMSE after RR |
|----------------|---------|---------------|
| 0.022          | 0.00327 | 0.00185       |

# K<sub>2</sub>Na<sub>2</sub>La<sub>2</sub>Nb<sub>2</sub>O<sub>10</sub>

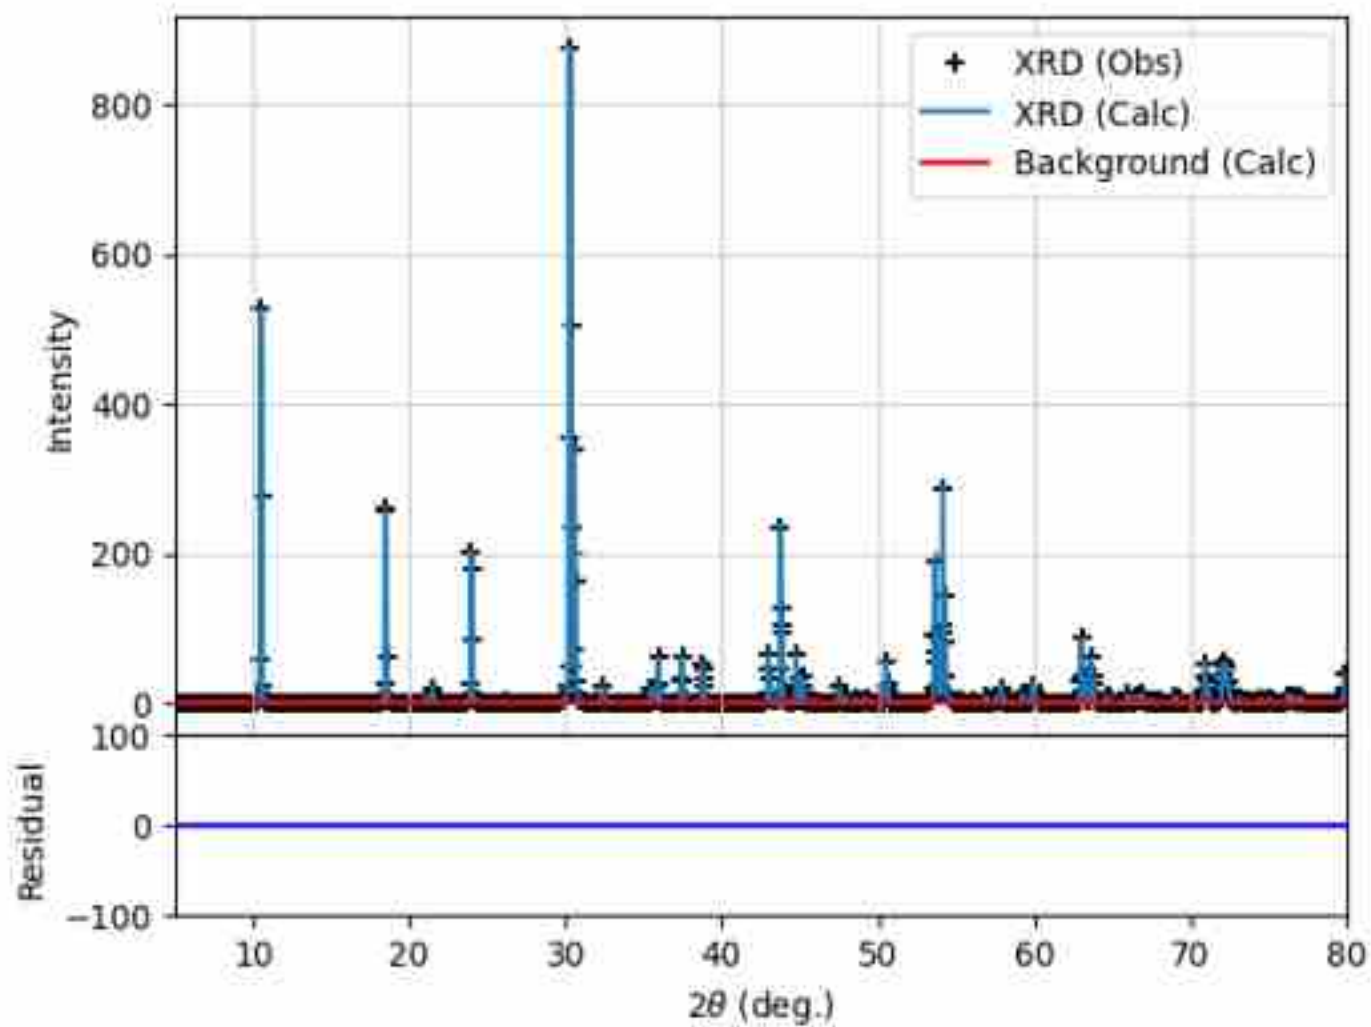

| RMSE before RR | Rwp   | RMSE after RR |
|----------------|-------|---------------|
| 0.022          | 0.004 | 0.00105       |

# K<sub>2</sub>Na<sub>2</sub>Nd<sub>2</sub>Ta<sub>2</sub>O<sub>10</sub>

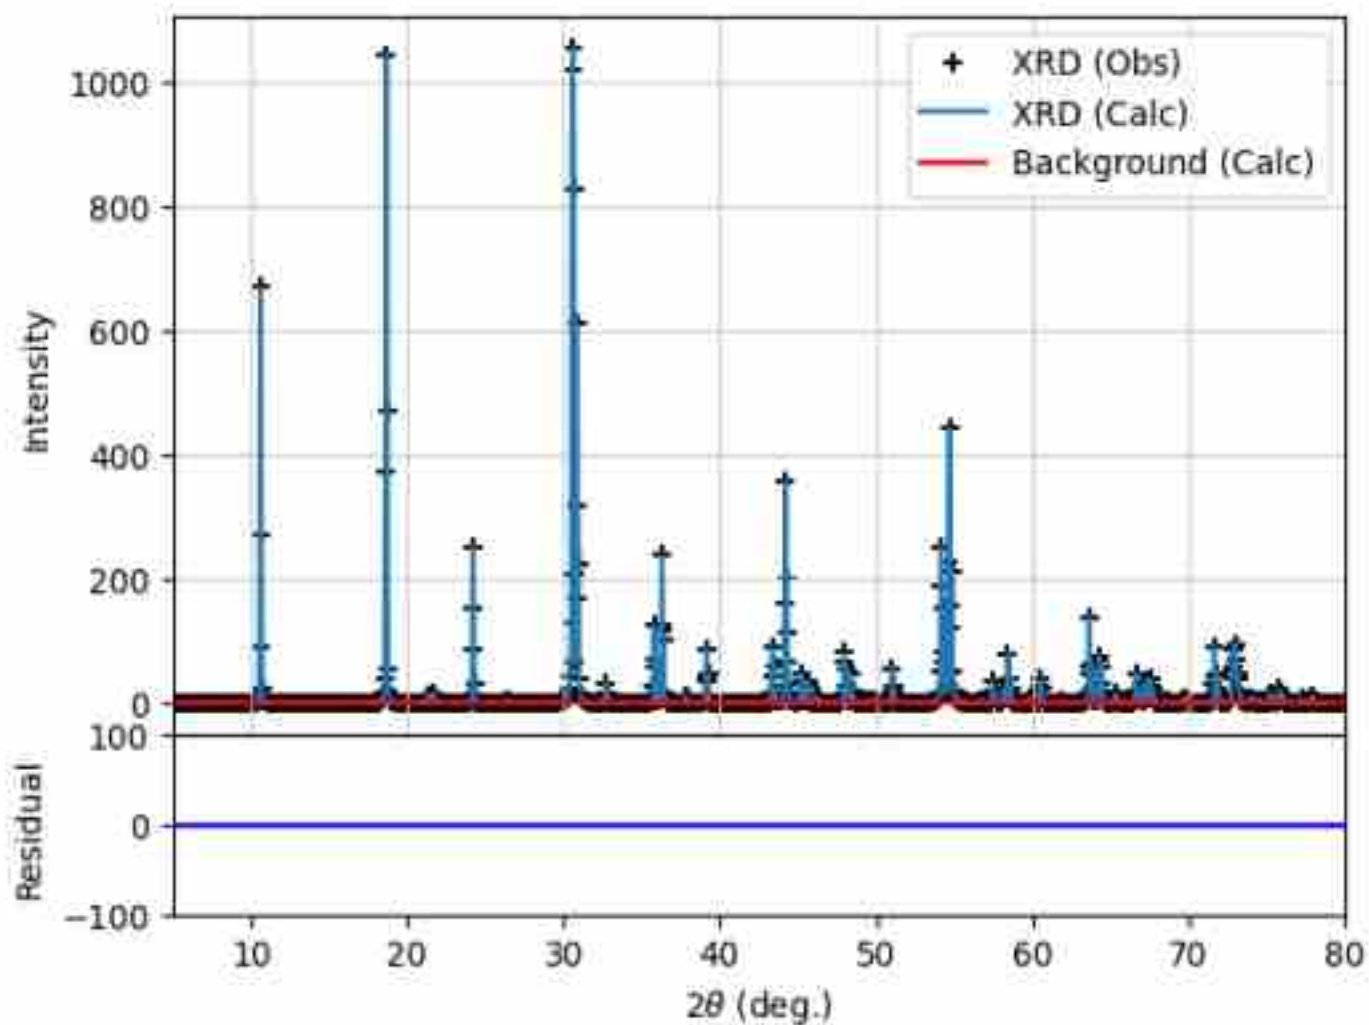

| RMSE before RR | Rwp     | RMSE after RR |
|----------------|---------|---------------|
| 0.022          | 0.00365 | 0.00132       |



# K2Rb1Dy1V2O8

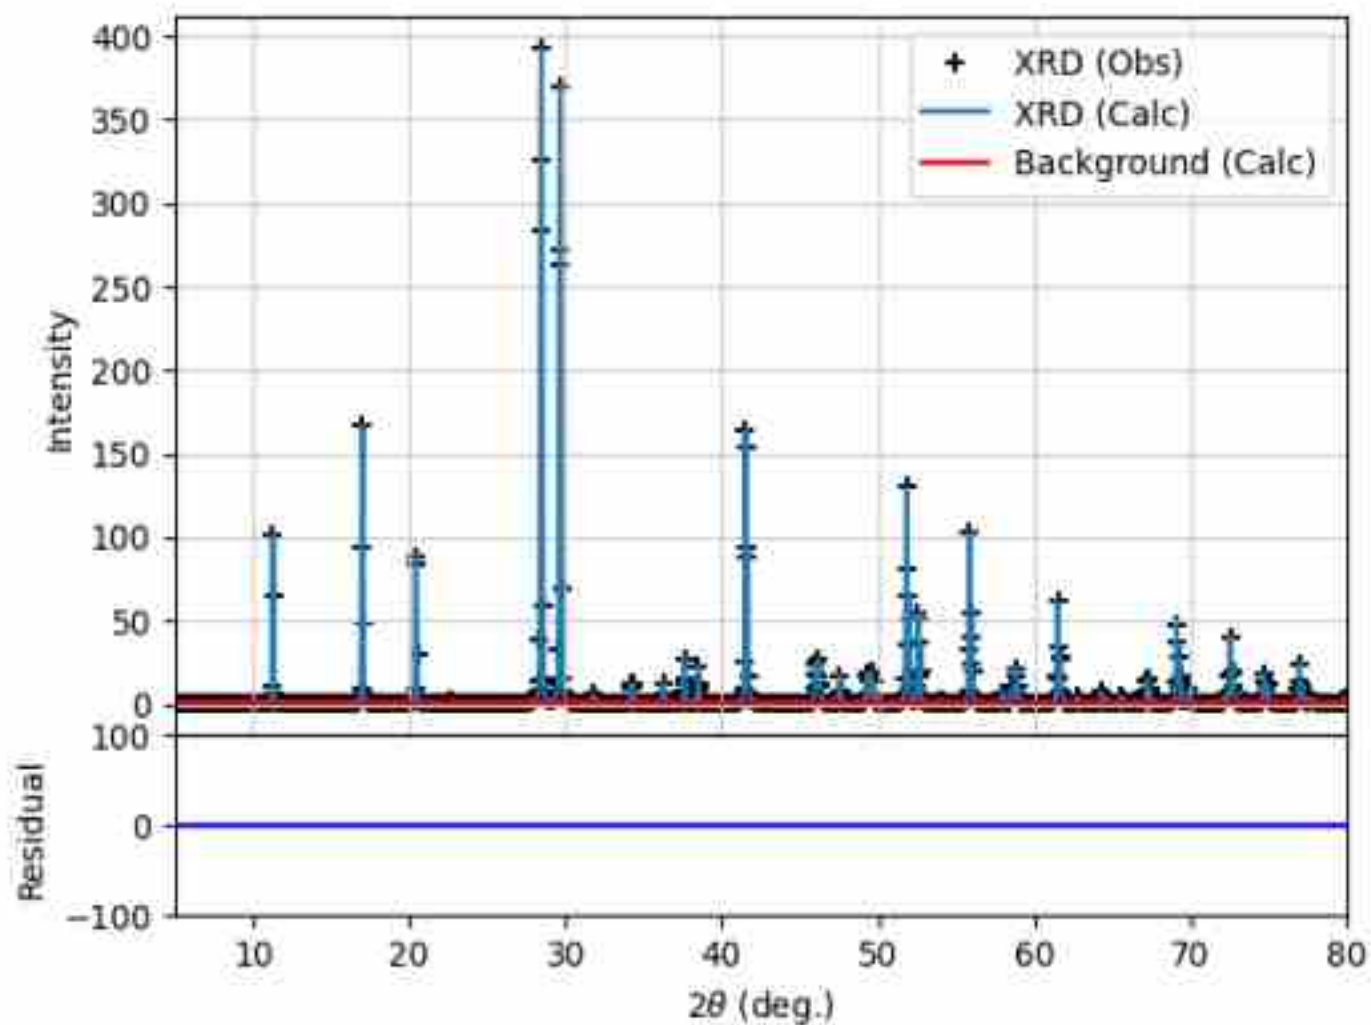

| RMSE before RR | Rwp     | RMSE after RR |
|----------------|---------|---------------|
| 0.022          | 0.00473 | 0.00214       |

# K<sub>2</sub>Rb<sub>1</sub>Sm<sub>1</sub>V<sub>2</sub>O<sub>8</sub>

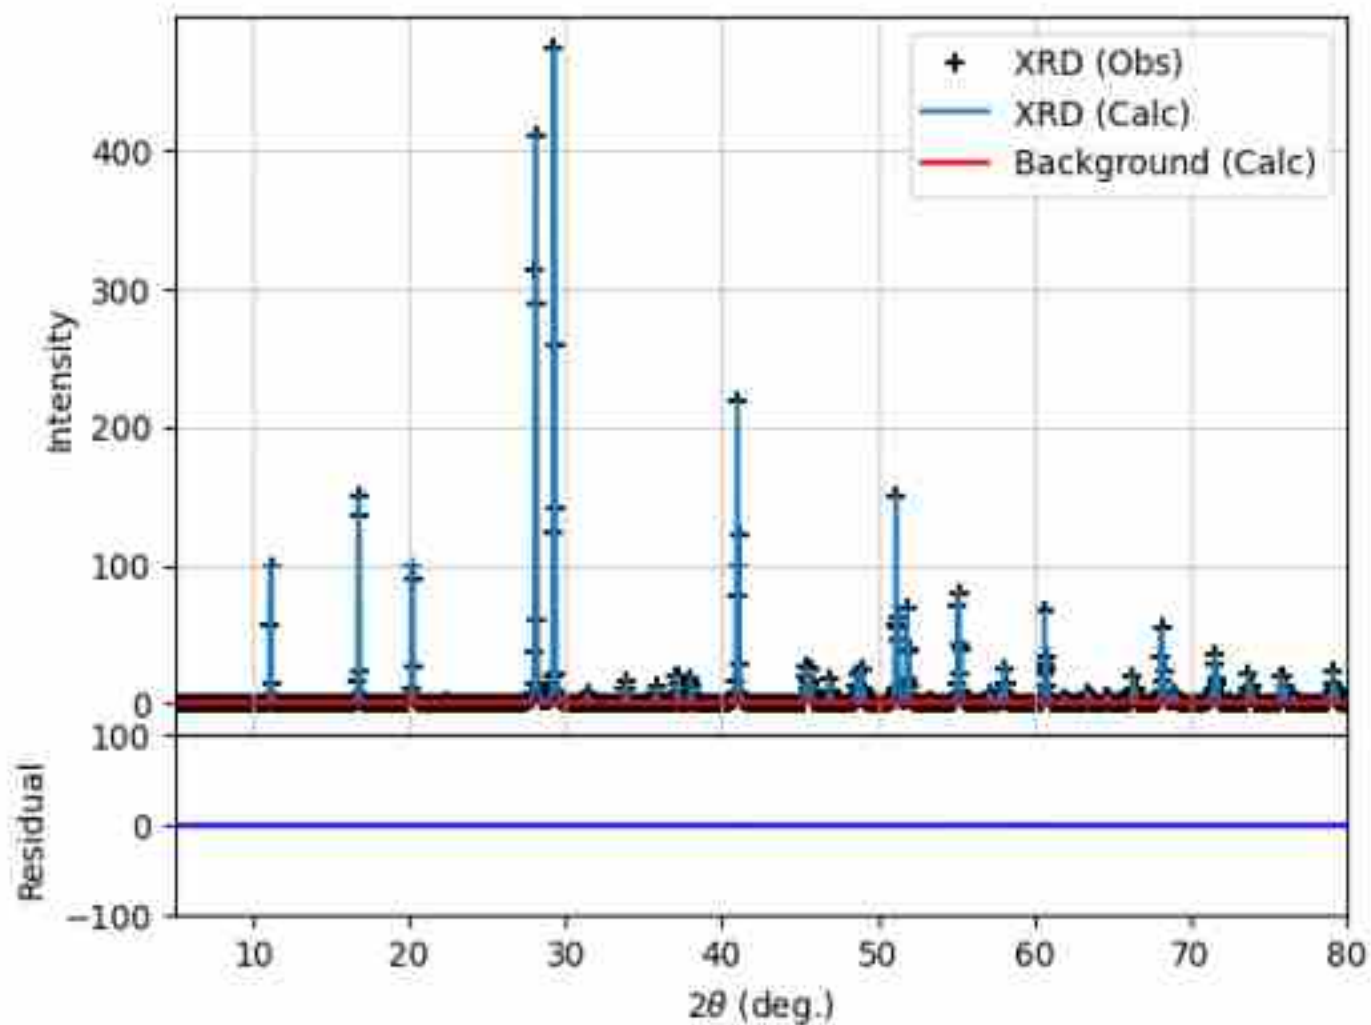

| RMSE before RR | Rwp     | RMSE after RR |
|----------------|---------|---------------|
| 0.022          | 0.38592 | 0.0148        |

# K<sub>2</sub>Sb<sub>2</sub>Cl<sub>12</sub>

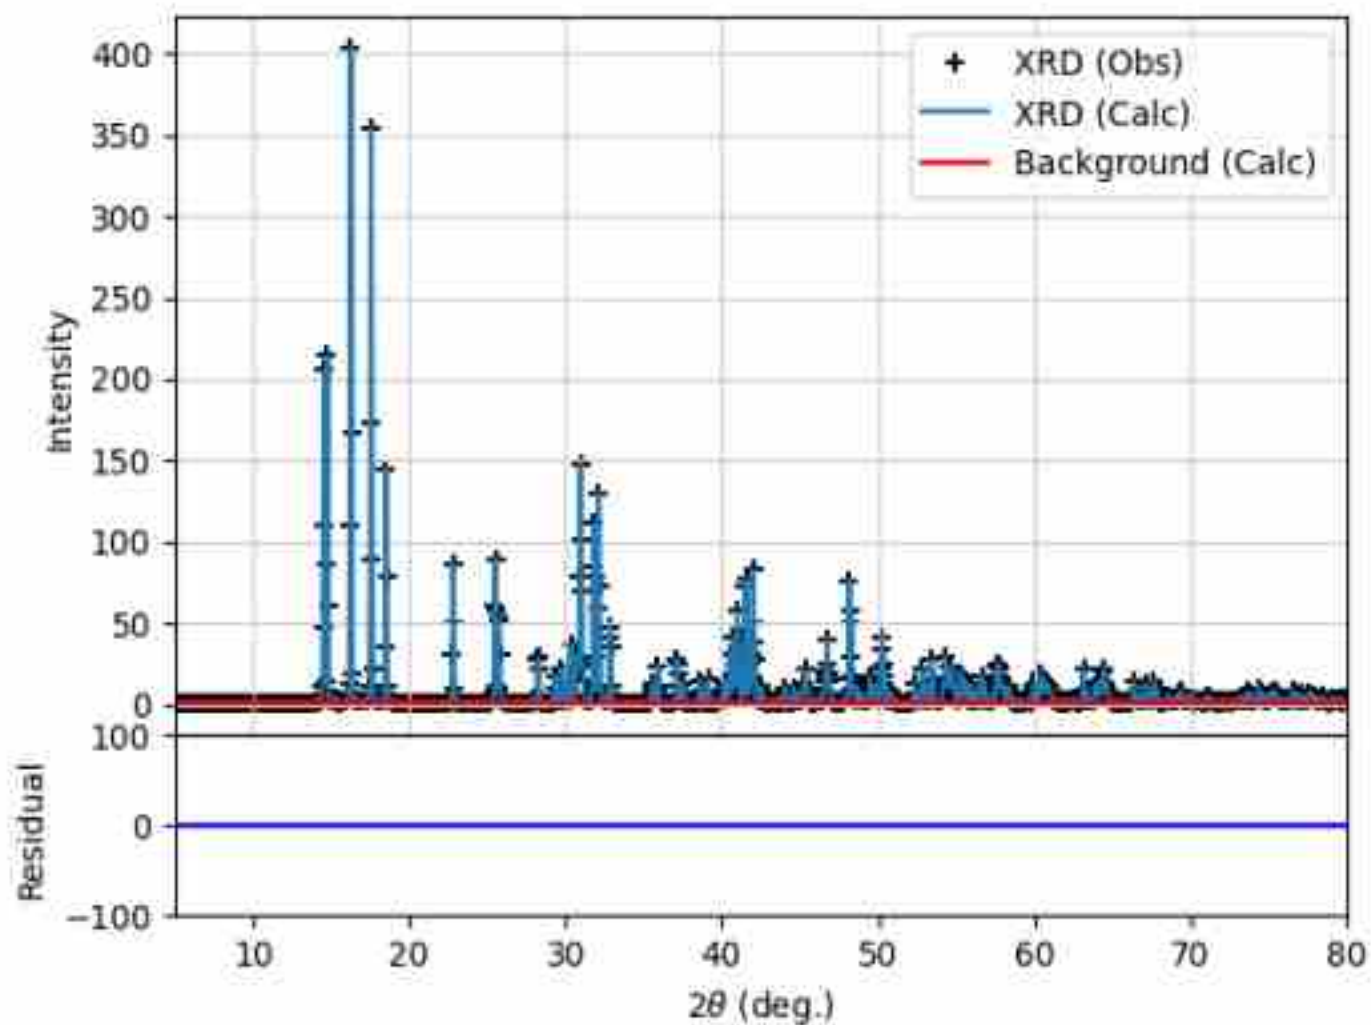

| RMSE before RR | Rwp     | RMSE after RR |
|----------------|---------|---------------|
| 0.022          | 0.00329 | 0.00025       |

# K3Na1Fe1Cl6

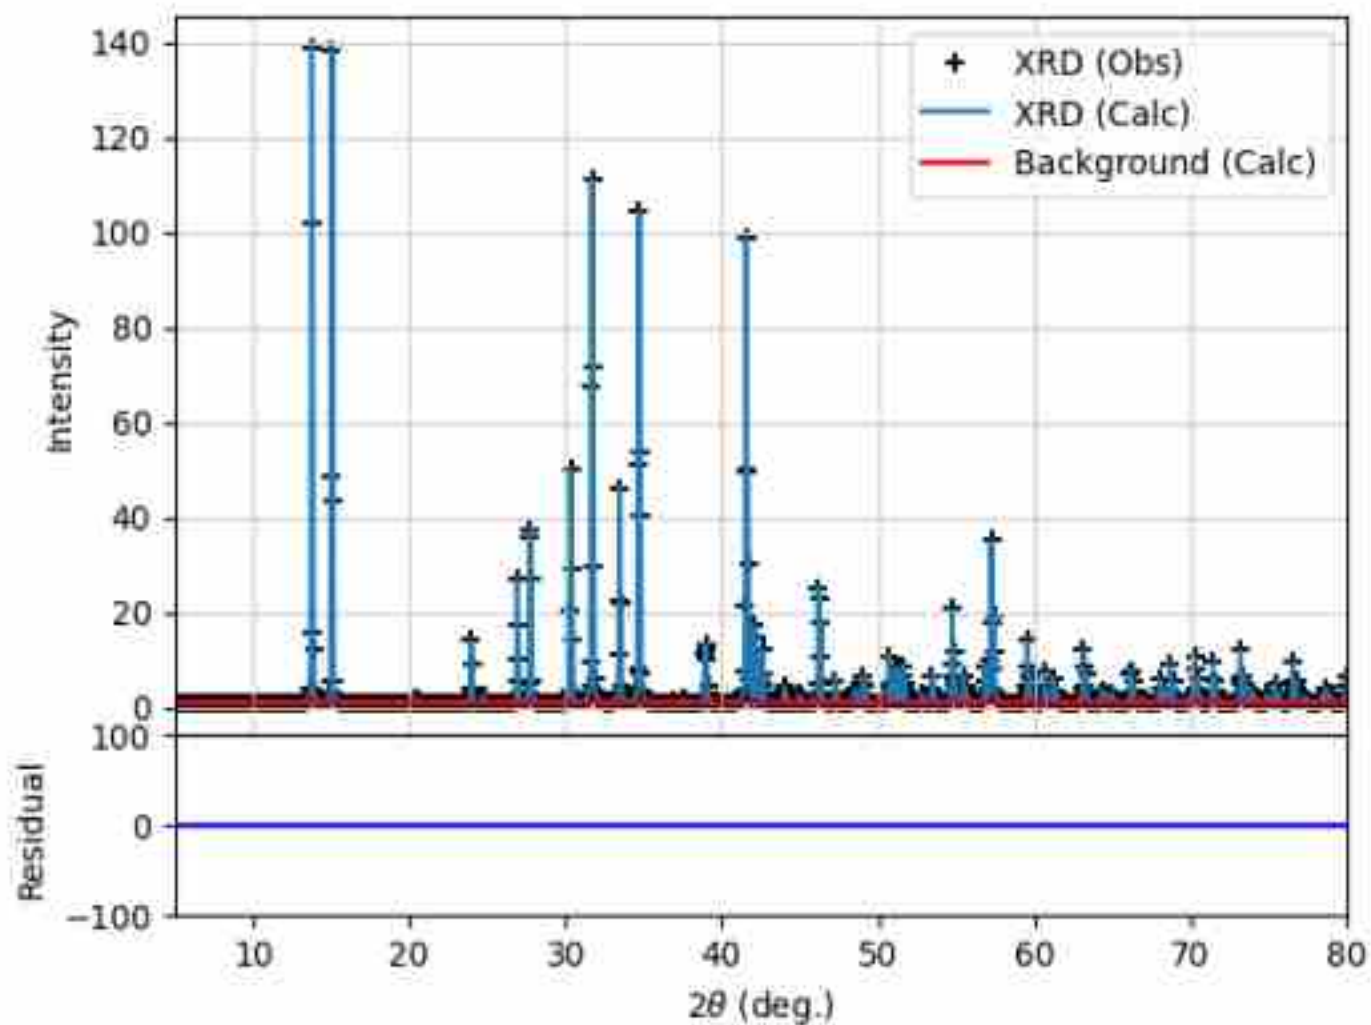

| RMSE before RR | Rwp     | RMSE after RR |
|----------------|---------|---------------|
| 0.022          | 0.00274 | 0.00055       |

# K4Cd4F12

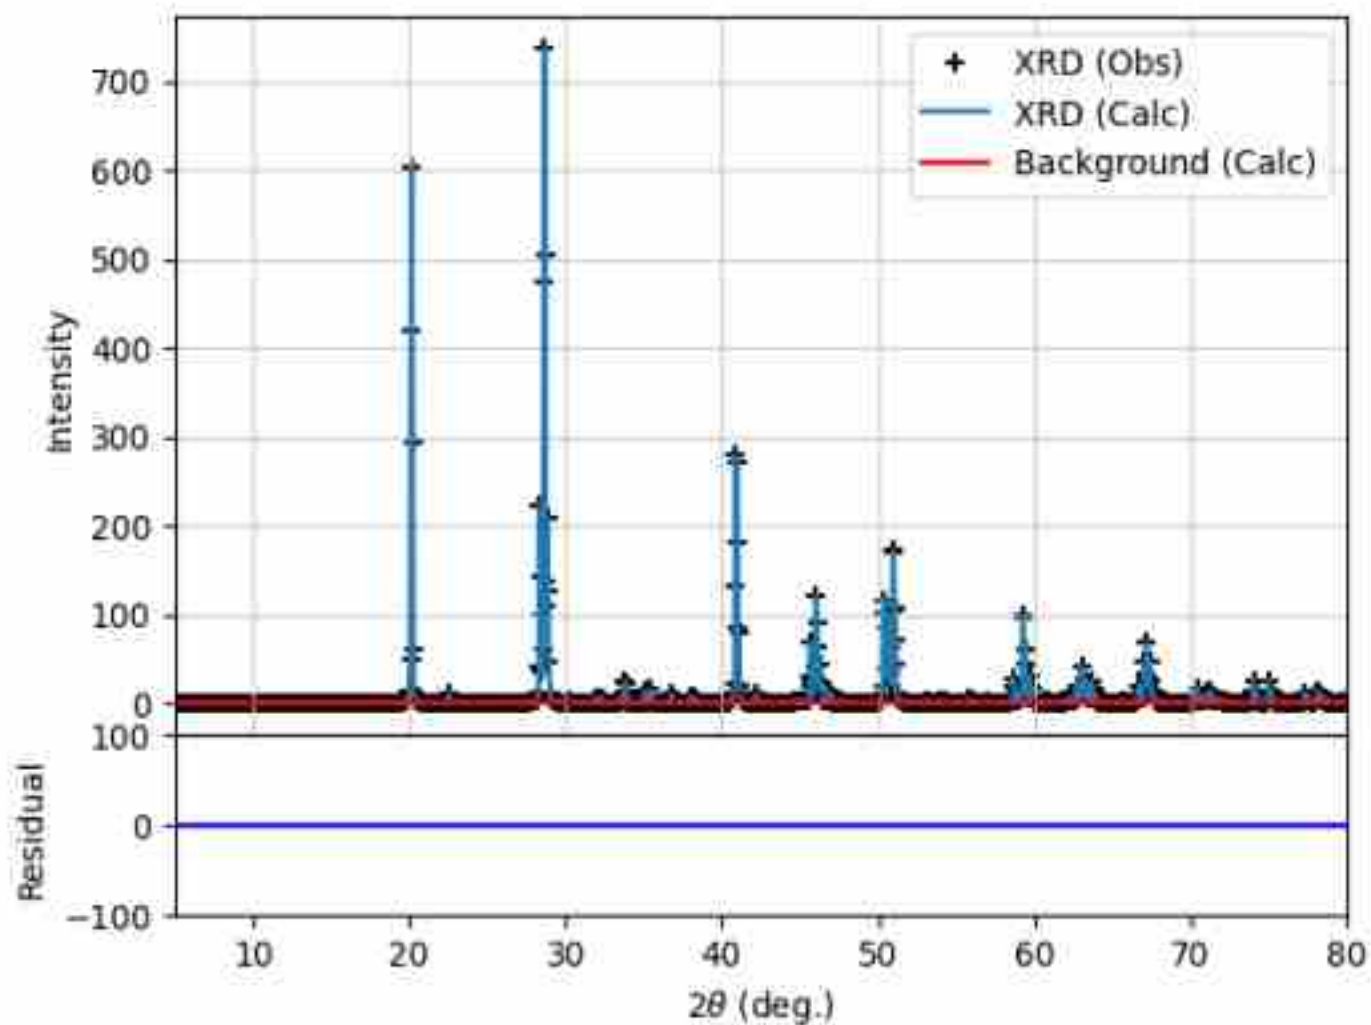

| RMSE before RR | Rwp     | RMSE after RR |
|----------------|---------|---------------|
| 0.022          | 0.00356 | 0.00091       |

# K4Re2C110O1

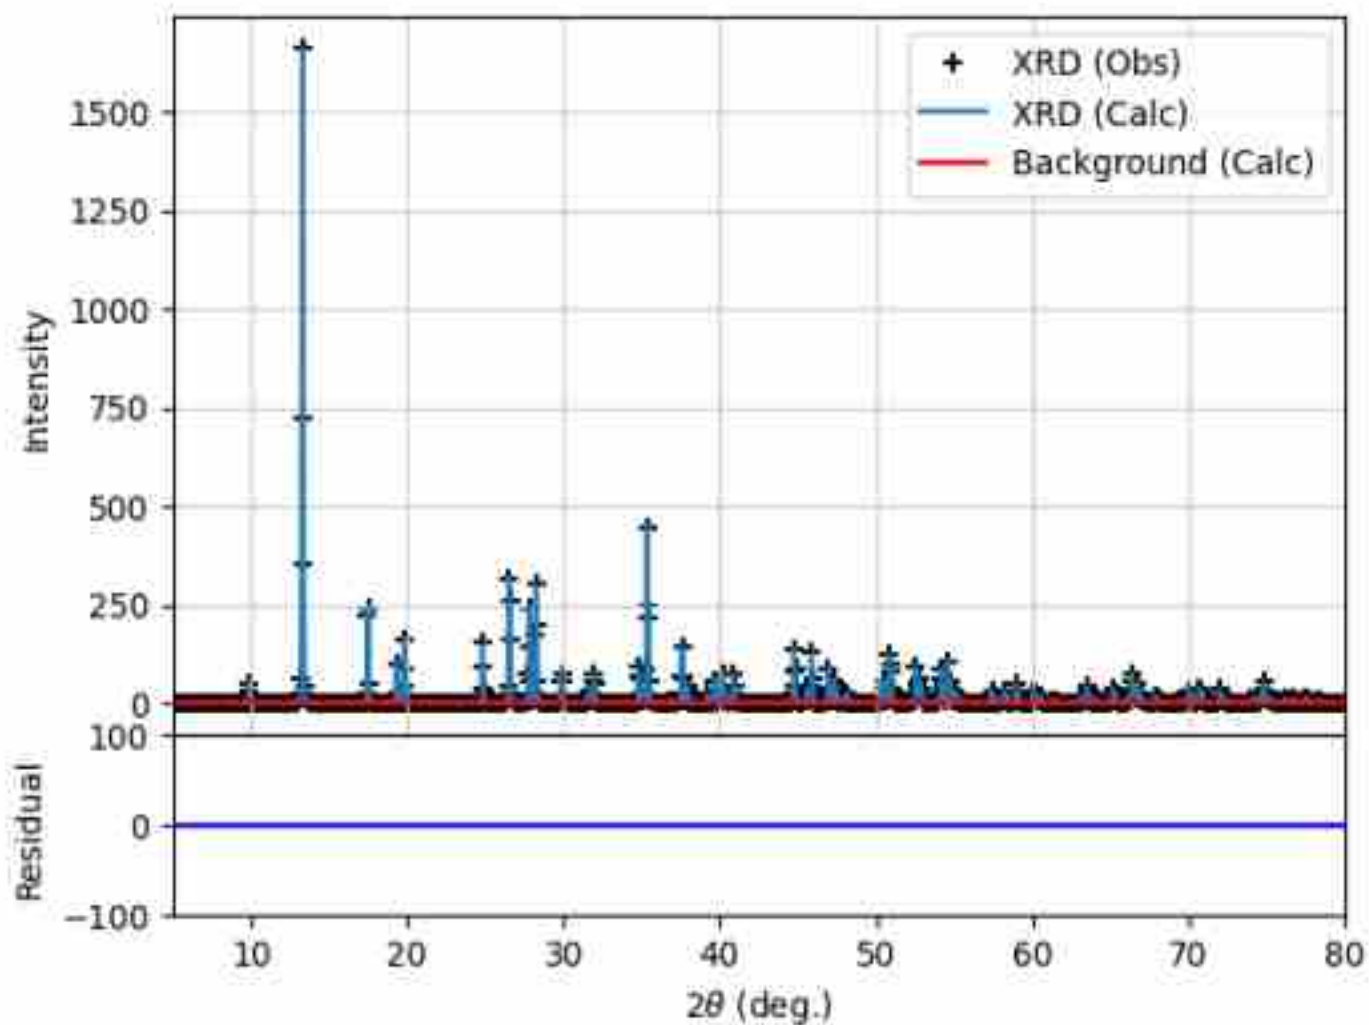

| RMSE before RR | Rwp    | RMSE after RR |
|----------------|--------|---------------|
| 0.022          | 0.0044 | 0.00103       |

# K6Al2O6

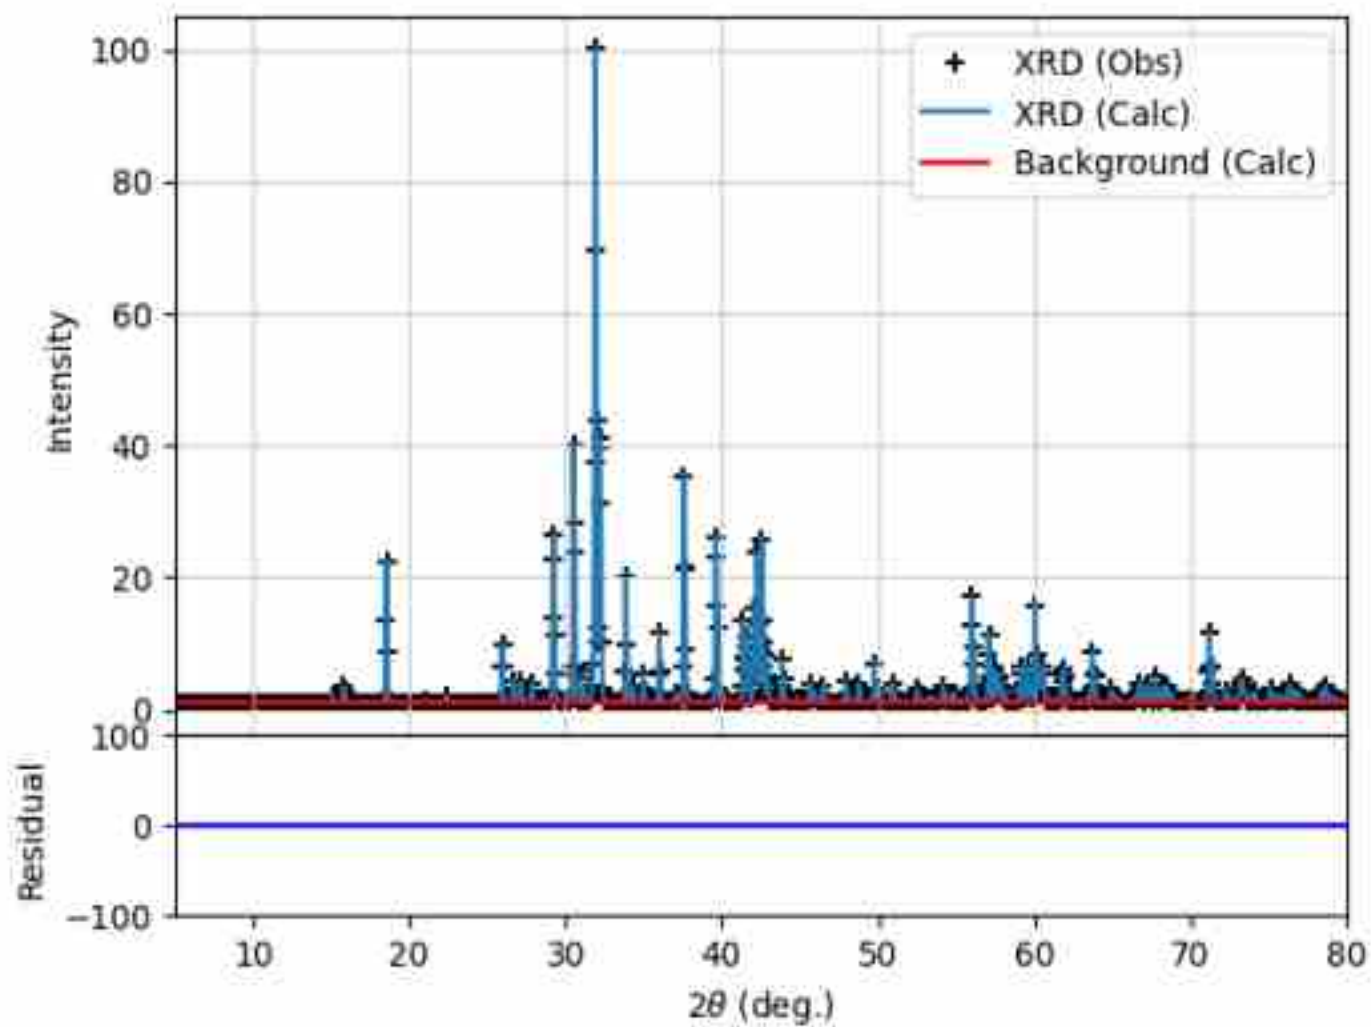

| RMSE before RR | Rwp    | RMSE after RR |
|----------------|--------|---------------|
| 0.022          | 0.0026 | 0.00049       |

# La<sub>2</sub>Mg<sub>1</sub>Ni<sub>1</sub>O<sub>6</sub>

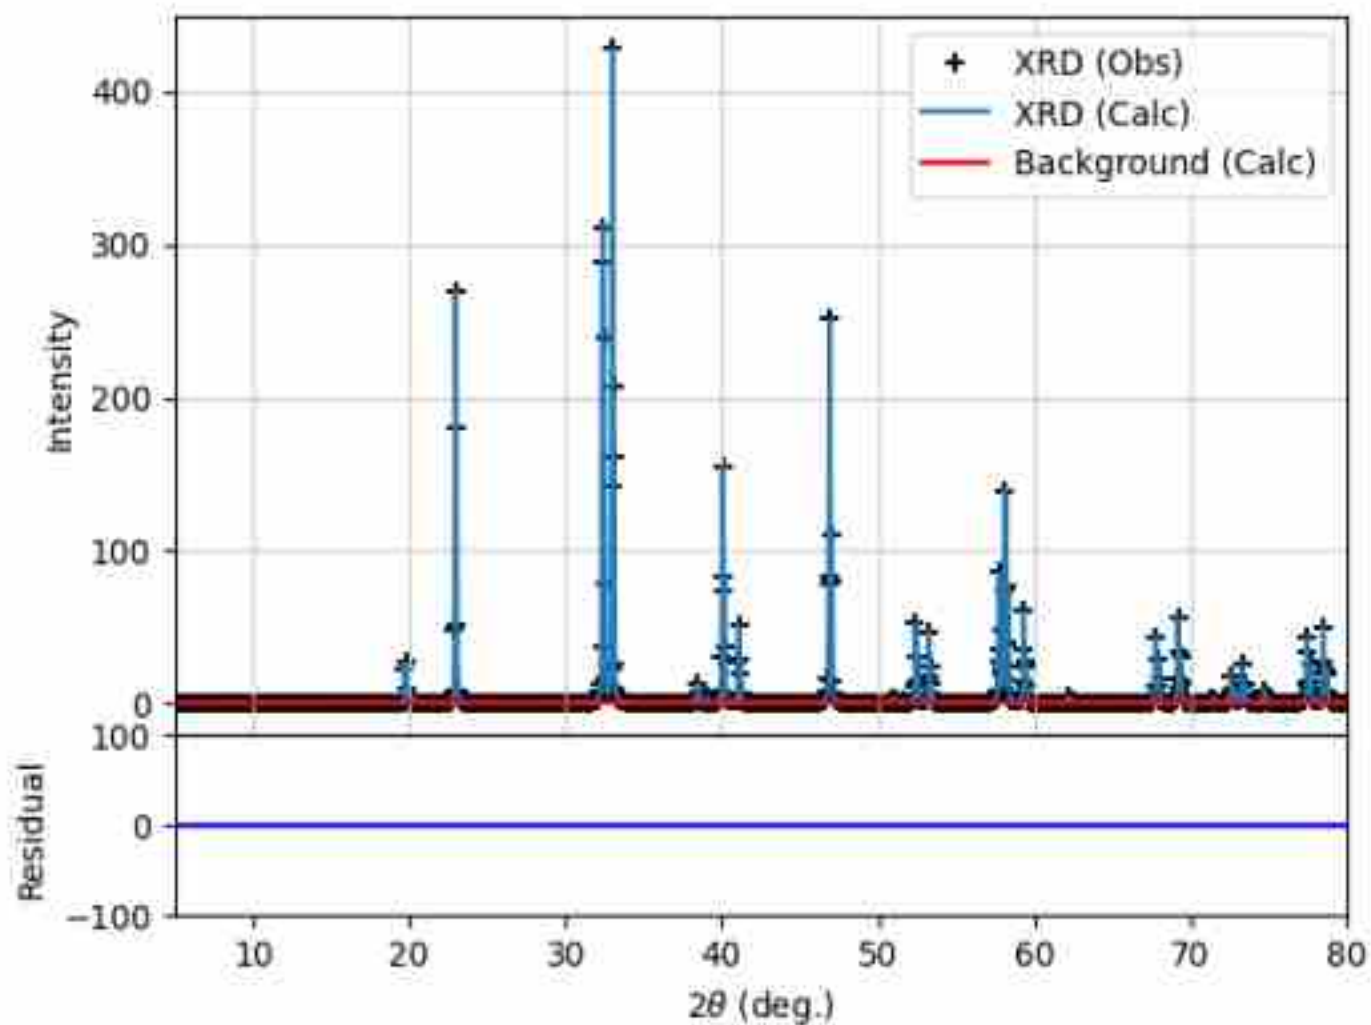

| RMSE before RR | Rwp     | RMSE after RR |
|----------------|---------|---------------|
| 0.022          | 0.00518 | 0.00149       |



# La<sub>2</sub>Mn<sub>2</sub>Se<sub>2</sub>O<sub>3</sub>

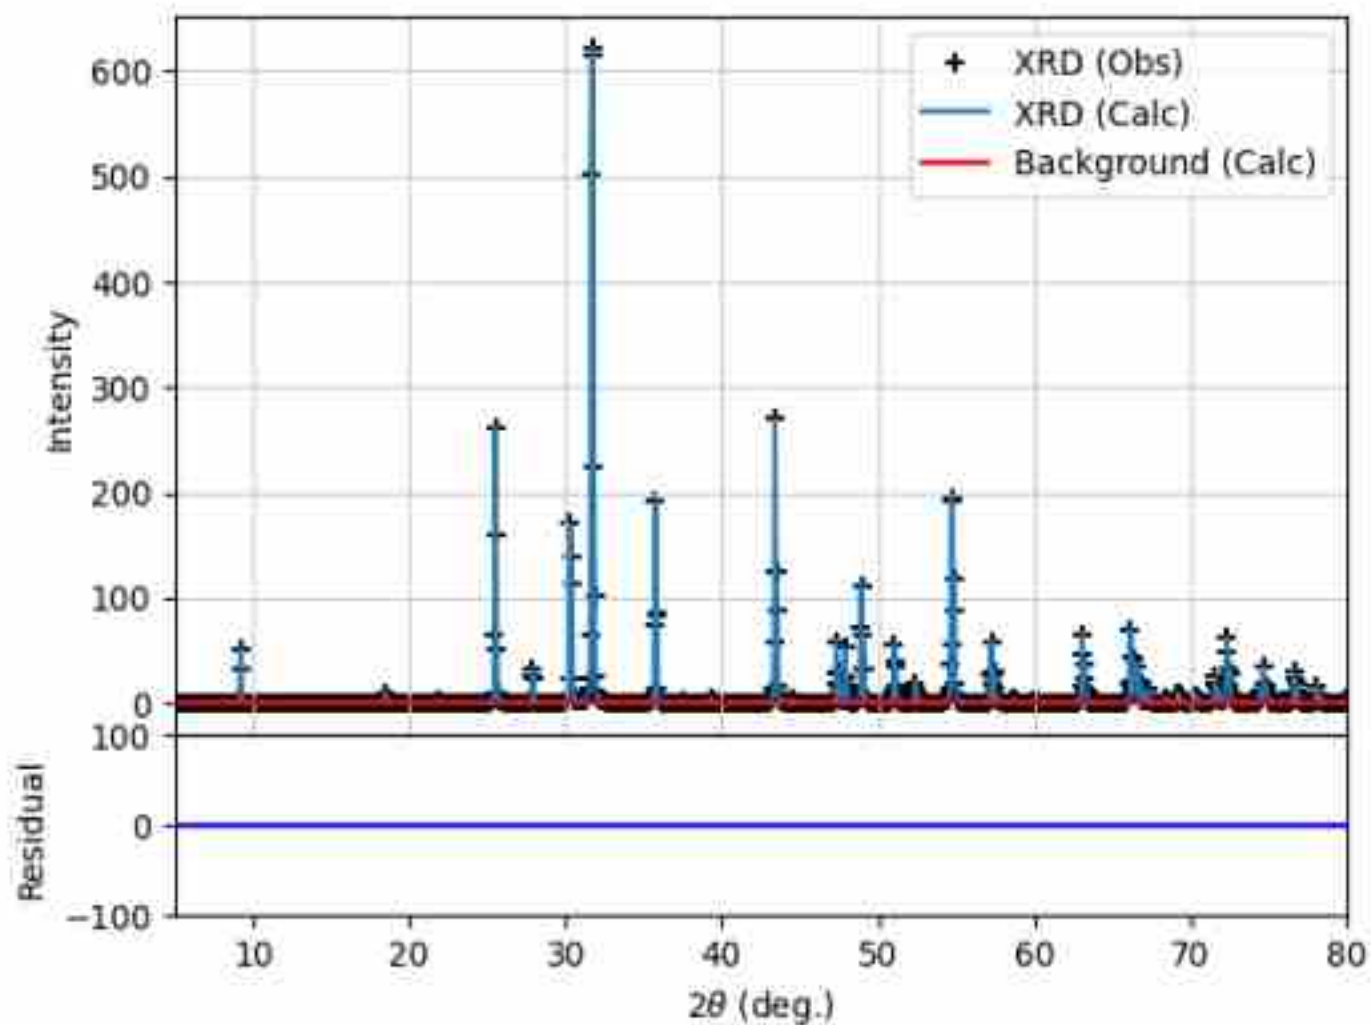

| RMSE before RR | Rwp     | RMSE after RR |
|----------------|---------|---------------|
| 0.022          | 0.00228 | 0.00077       |

# La<sub>3</sub>Nb<sub>2</sub>N<sub>6</sub>

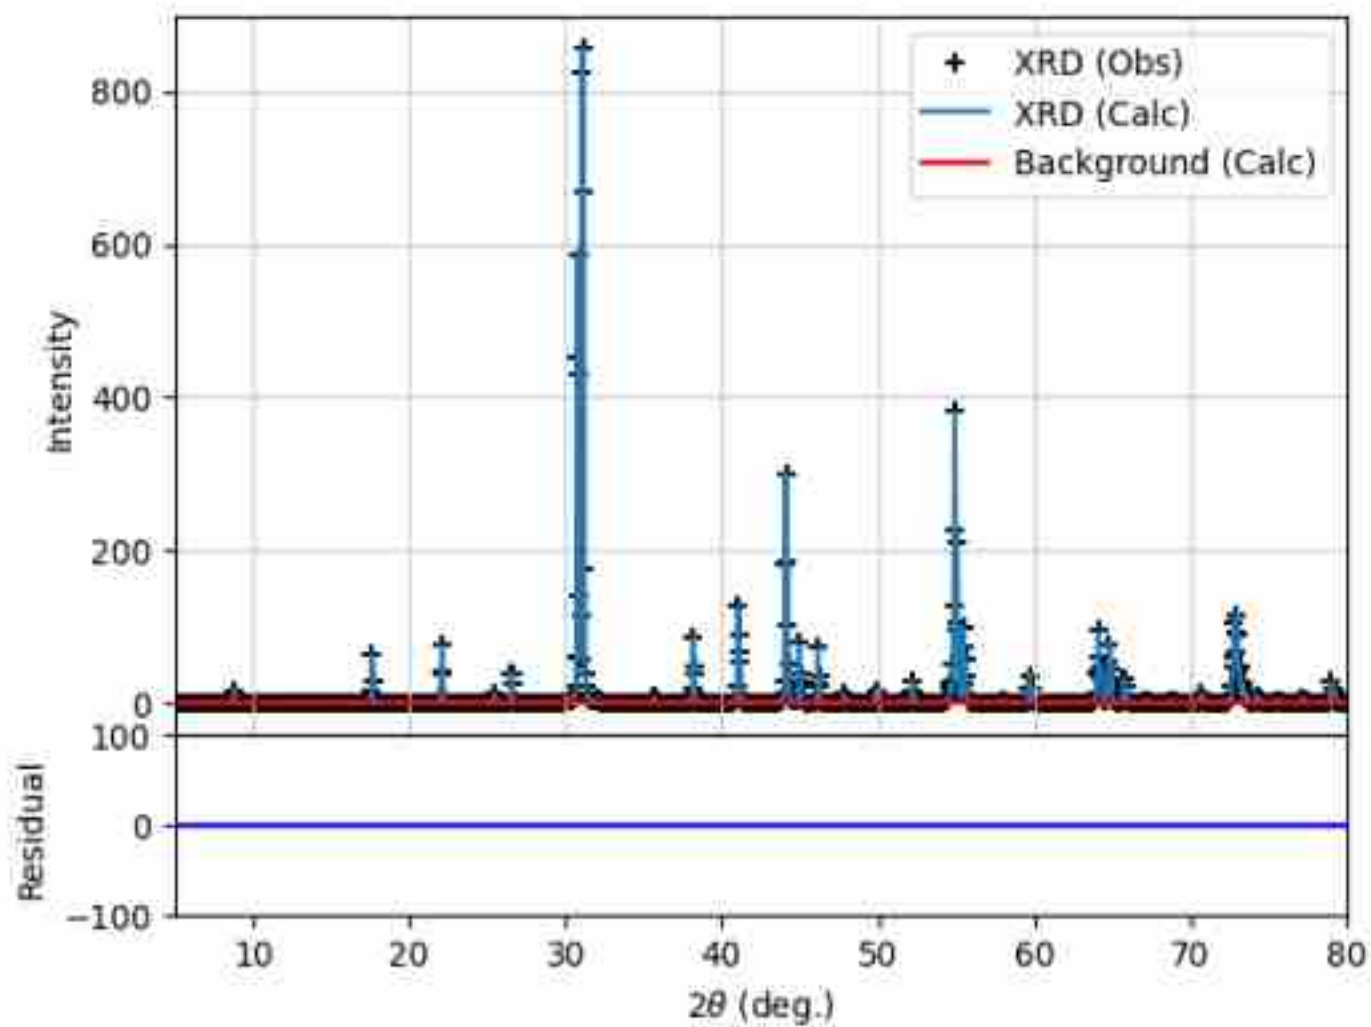

| RMSE before RR | Rwp     | RMSE after RR |
|----------------|---------|---------------|
| 0.022          | 0.00421 | 0.0013        |

# La<sub>4</sub>Mn<sub>2</sub>Co<sub>2</sub>O<sub>12</sub>

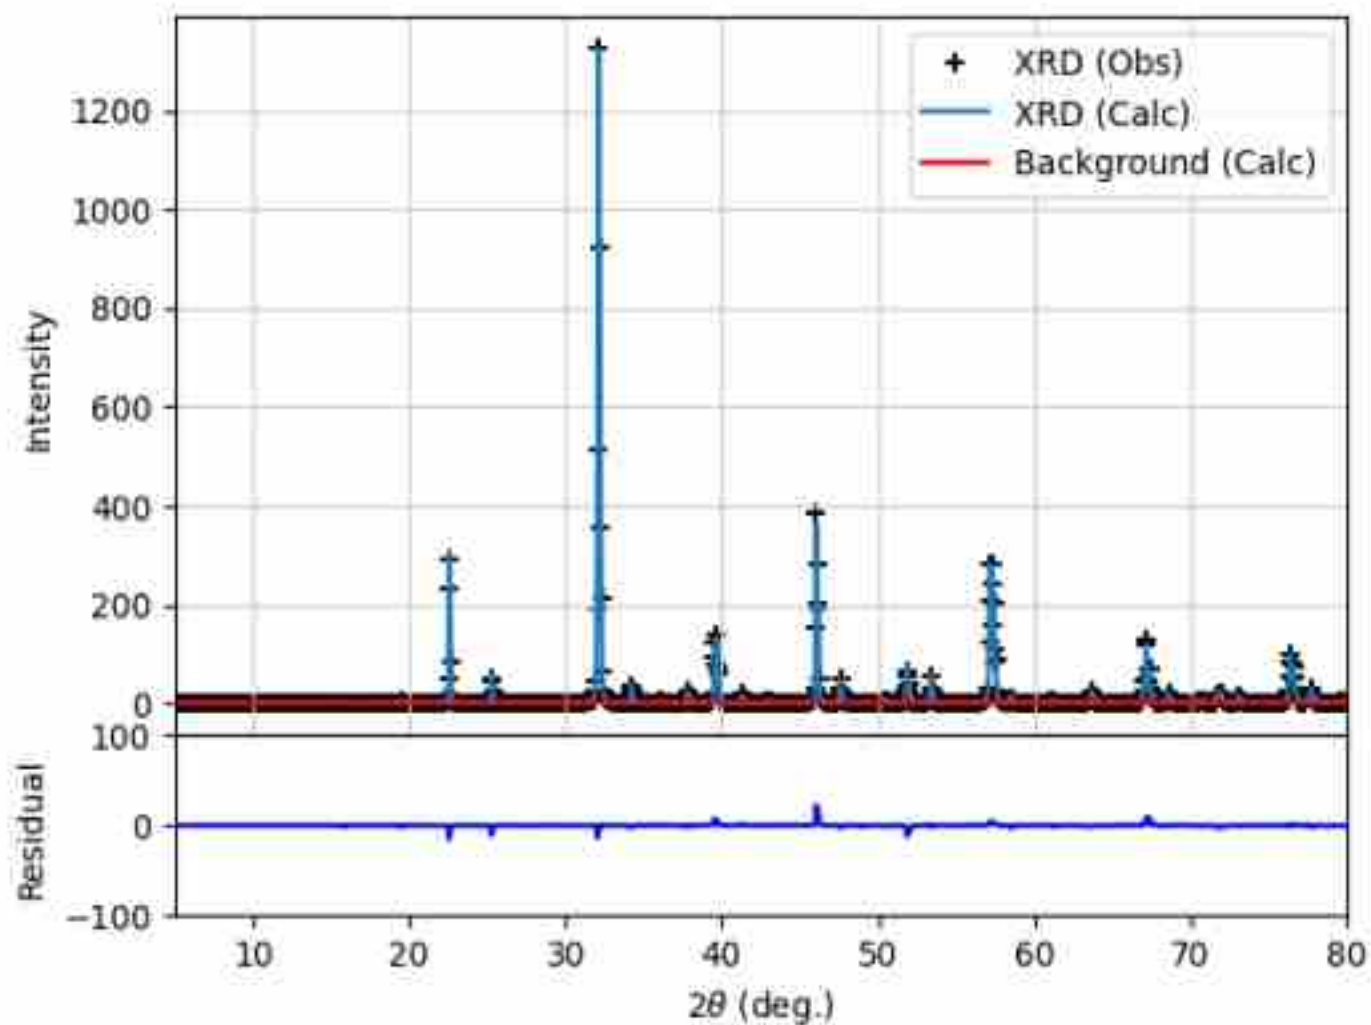

| RMSE before RR | Rwp     | RMSE after RR |
|----------------|---------|---------------|
| 0.022          | 6.82961 | 0.17941       |

# La<sub>4</sub>Pb<sub>2</sub>Se<sub>8</sub>

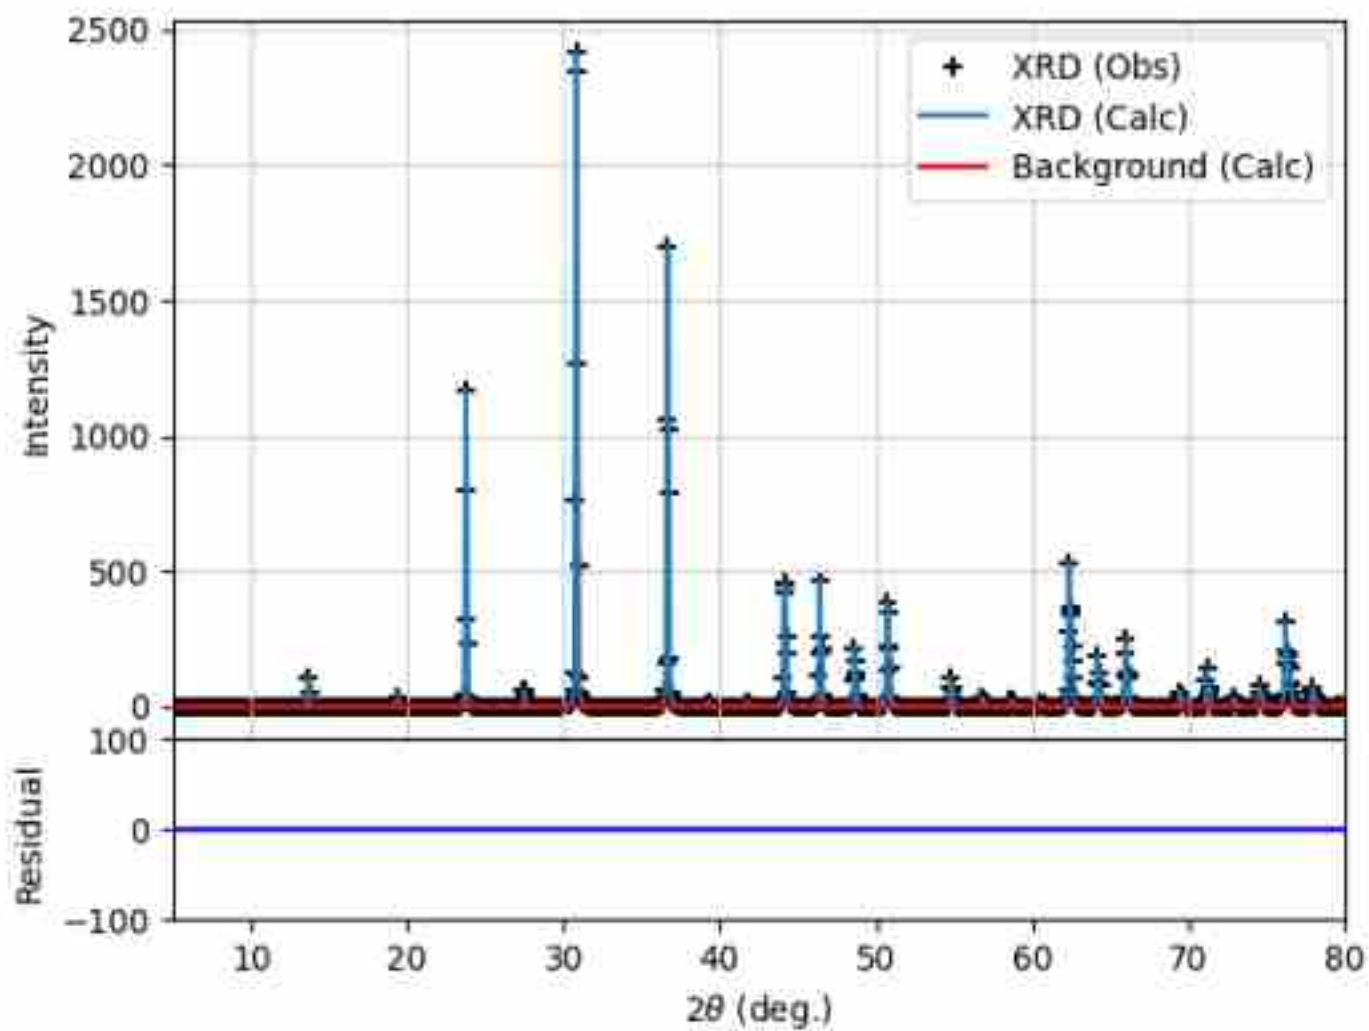

| RMSE before RR | Rwp     | RMSE after RR |
|----------------|---------|---------------|
| 0.022          | 0.00231 | 0.00049       |

# La6Bi8Pt6

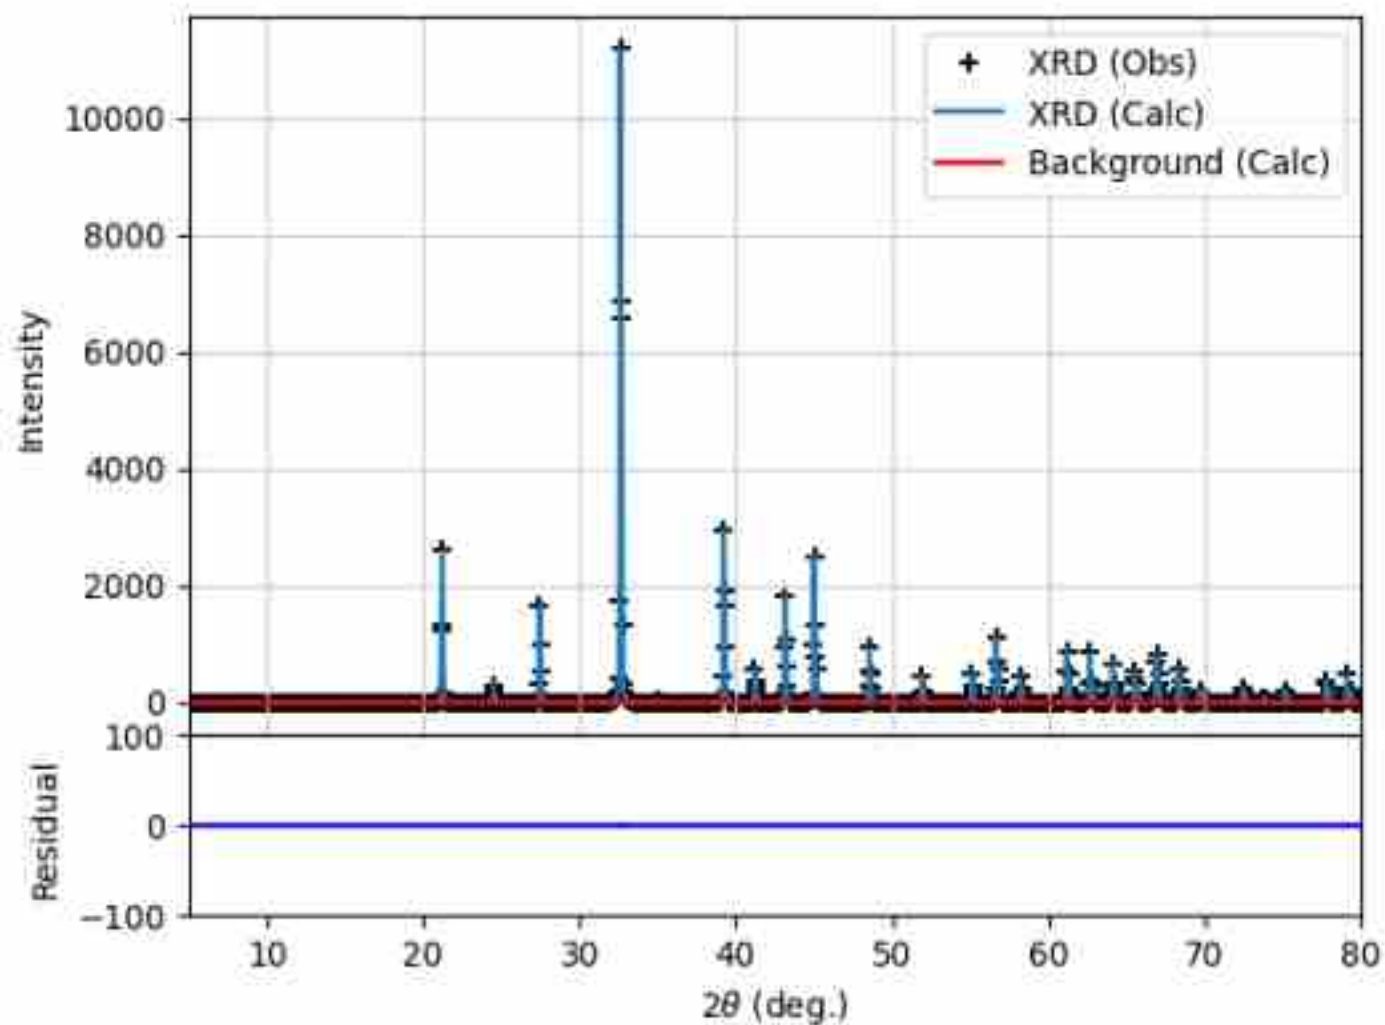

| RMSE before RR | Rwp     | RMSE after RR |
|----------------|---------|---------------|
| 0.022          | 0.01508 | 0.00102       |

# La6Sb2O6

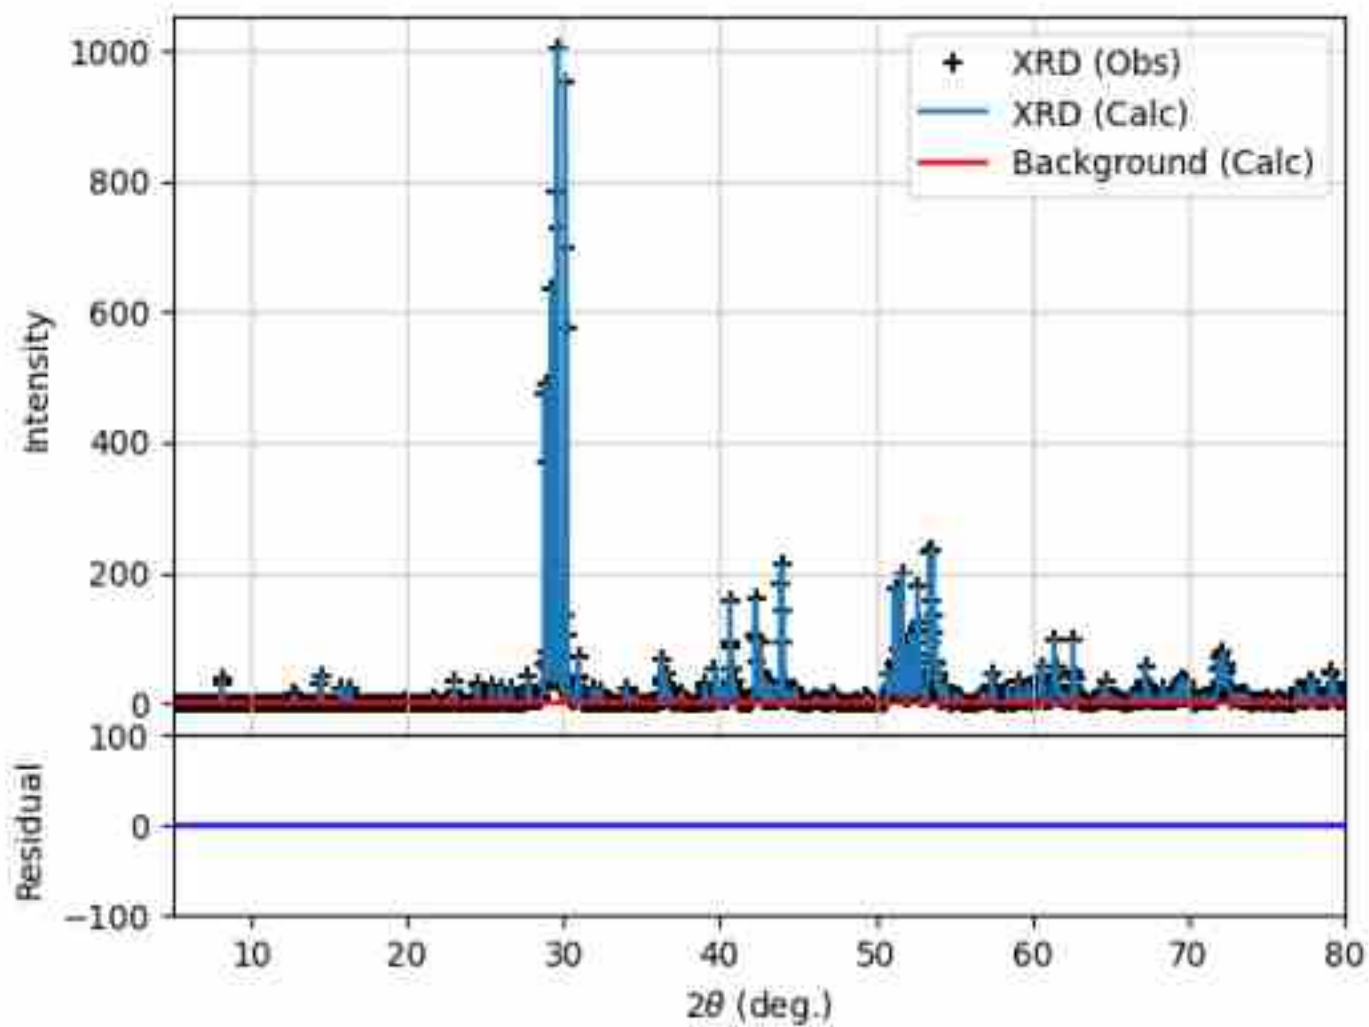

| RMSE before RR | Rwp     | RMSE after RR |
|----------------|---------|---------------|
| 0.022          | 0.00317 | 0.00054       |

# Li1Fe6Ge4

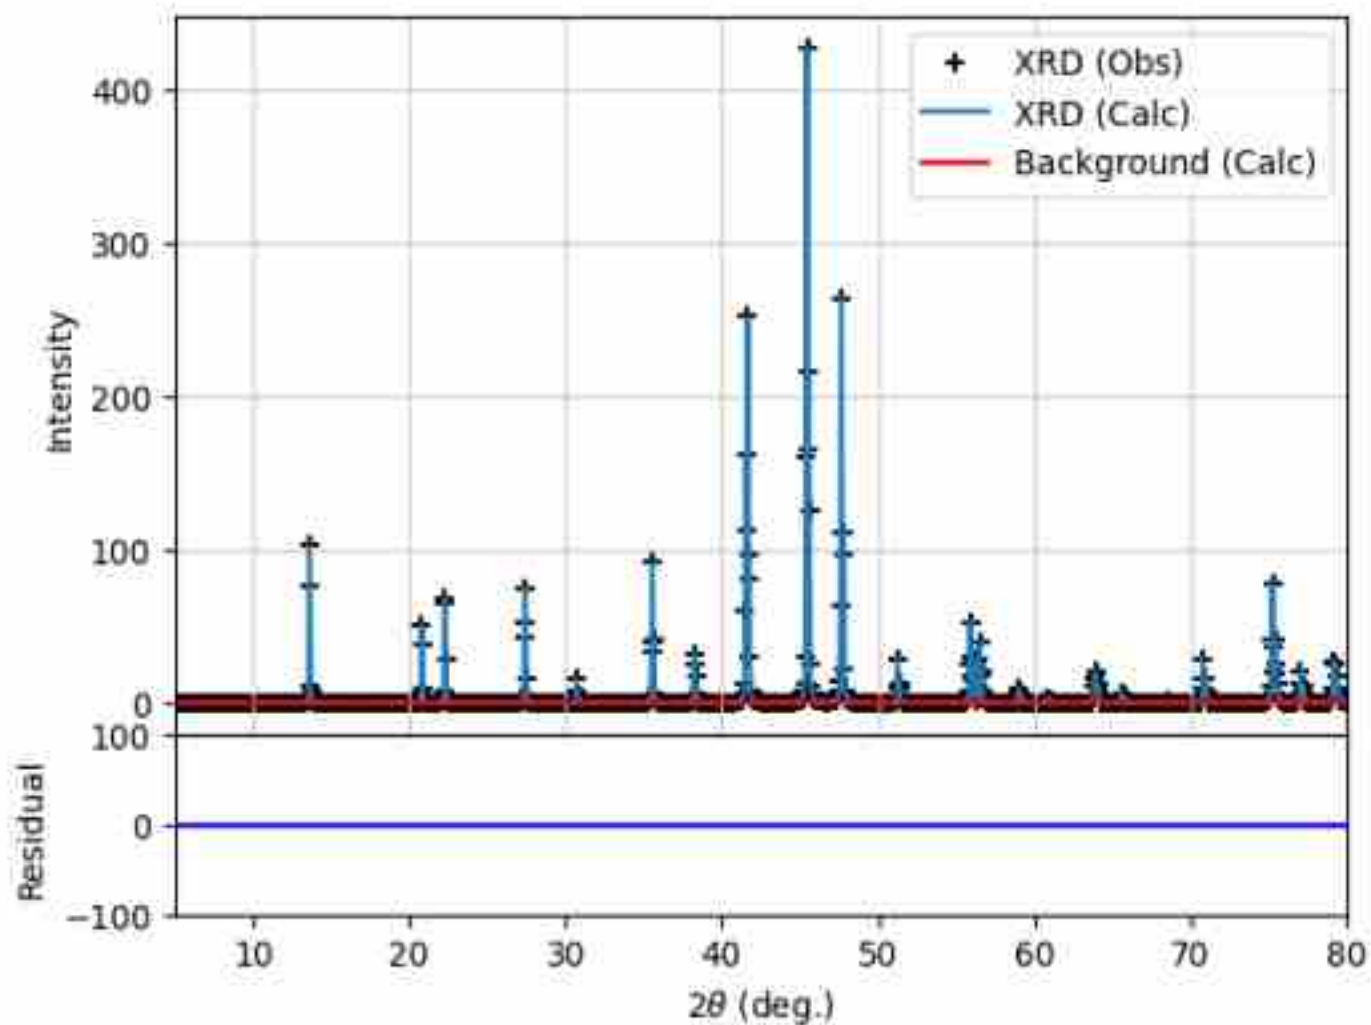

| RMSE before RR | Rwp     | RMSE after RR |
|----------------|---------|---------------|
| 0.022          | 0.00548 | 0.00179       |

# Li3Co1Ni2O6

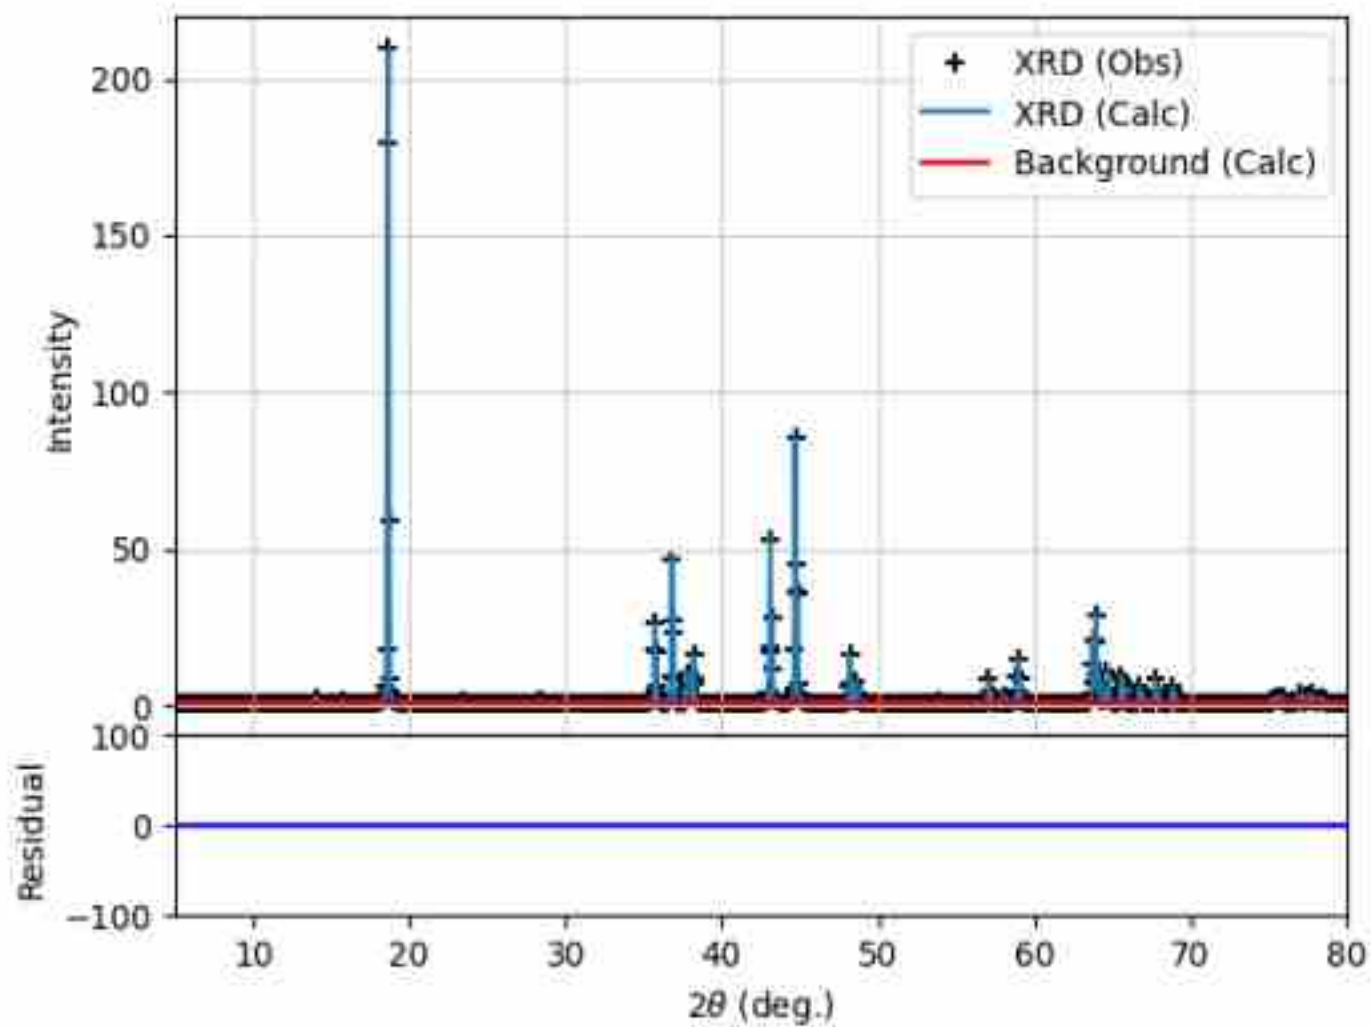

| RMSE before RR | Rwp     | RMSE after RR |
|----------------|---------|---------------|
| 0.022          | 0.00253 | 0.00072       |



# Li<sub>3</sub>Fe<sub>1</sub>P<sub>2</sub>O<sub>8</sub>

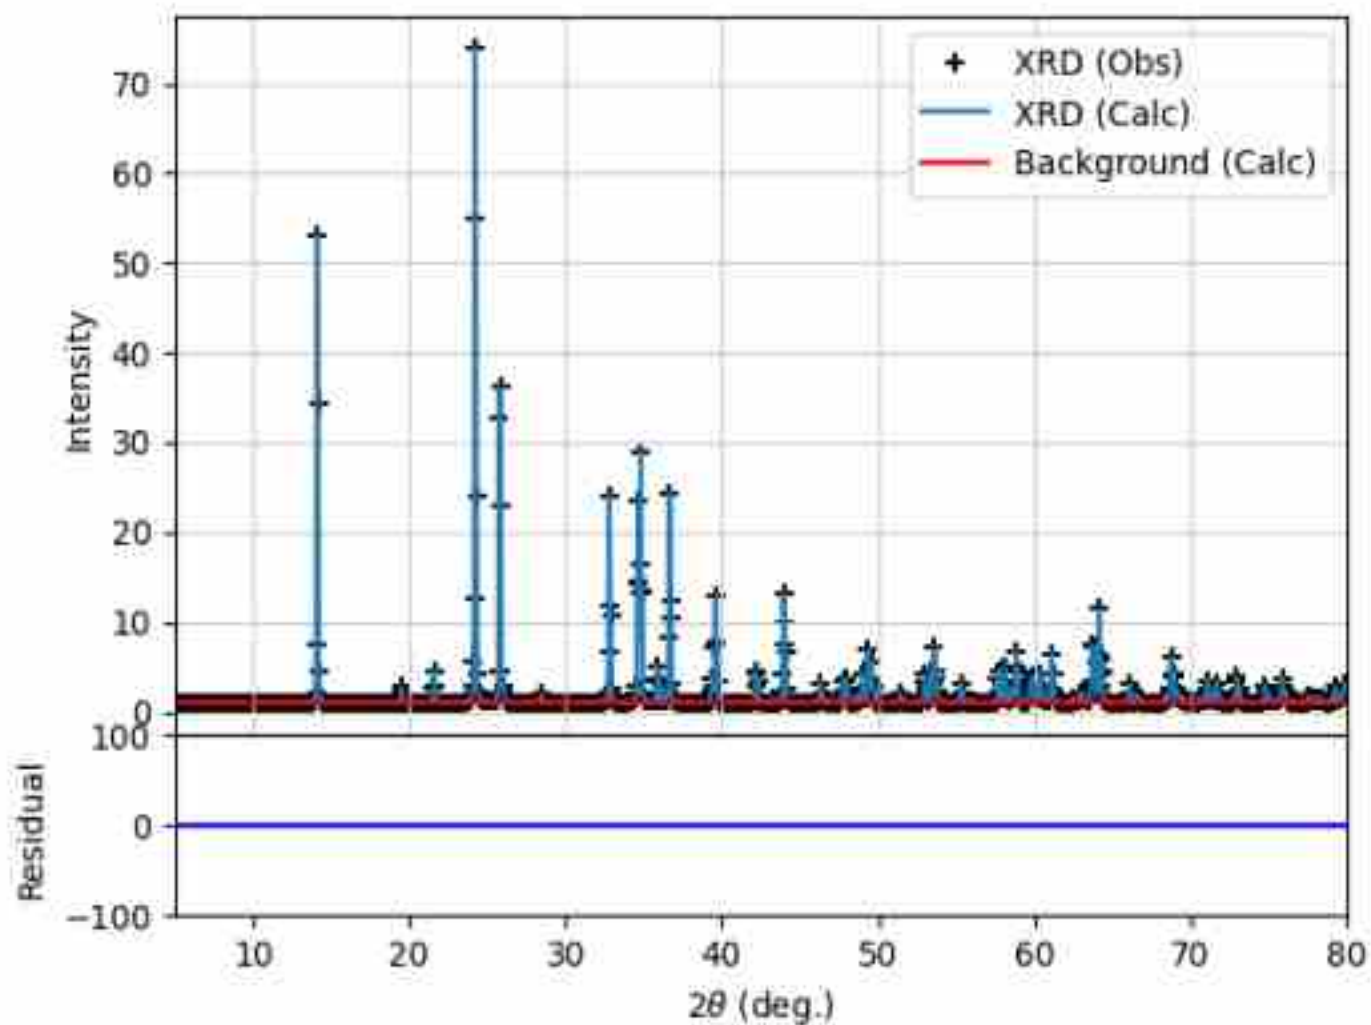

| RMSE before RR | Rwp     | RMSE after RR |
|----------------|---------|---------------|
| 0.022          | 0.00191 | 0.00081       |

# Li<sub>4</sub>Eu<sub>4</sub>Ge<sub>8</sub>

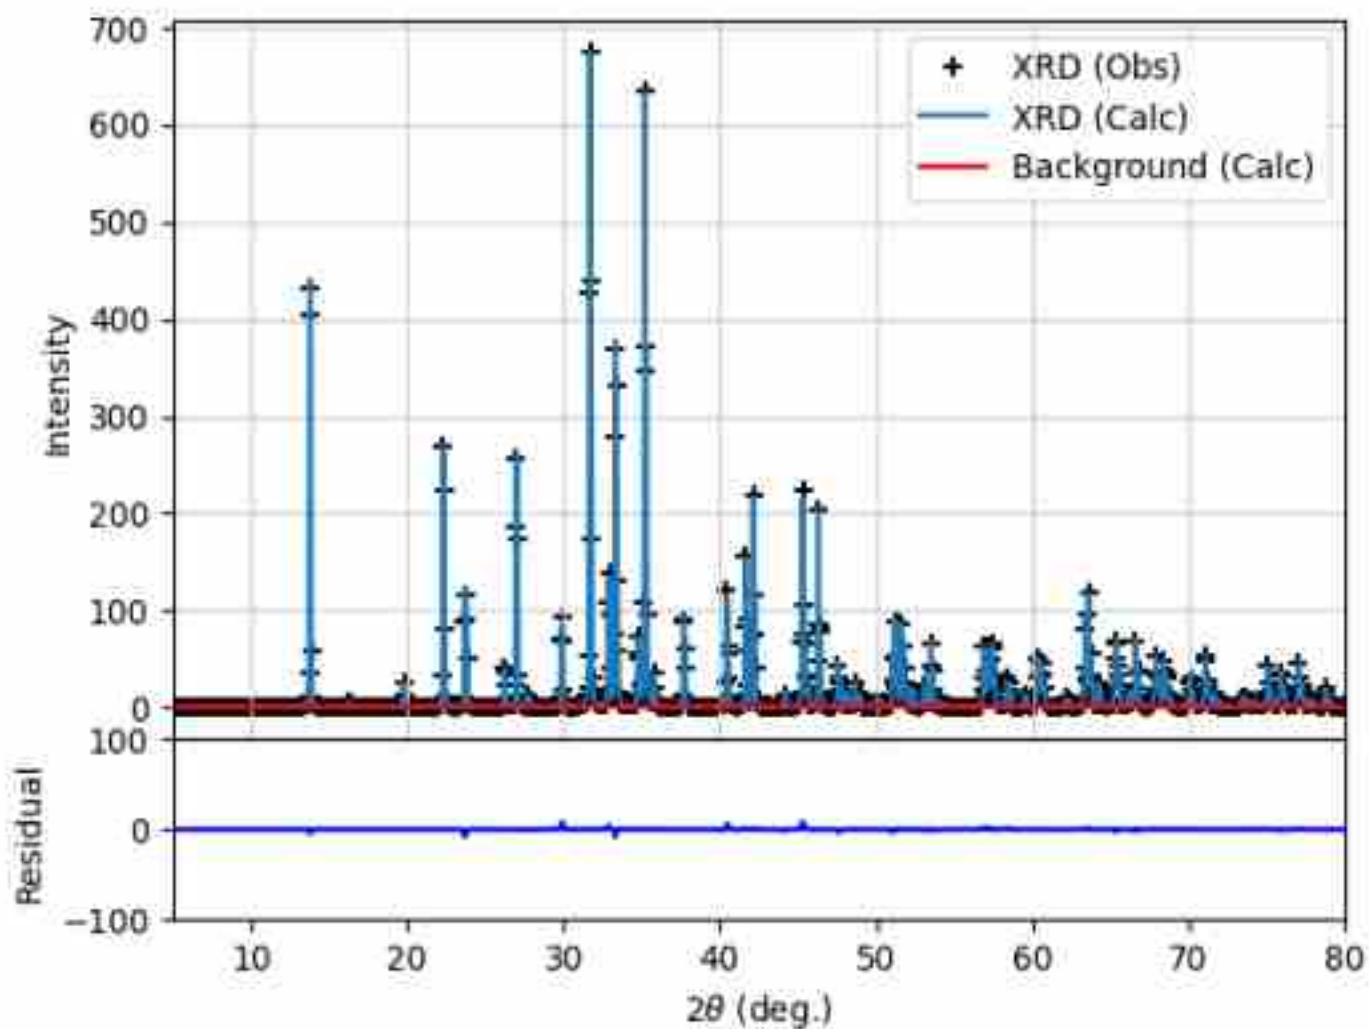

| RMSE before RR | Rwp     | RMSE after RR |
|----------------|---------|---------------|
| 0.022          | 2.45344 | 0.1685        |

# Li<sub>4</sub>Mn<sub>2</sub>F<sub>12</sub>

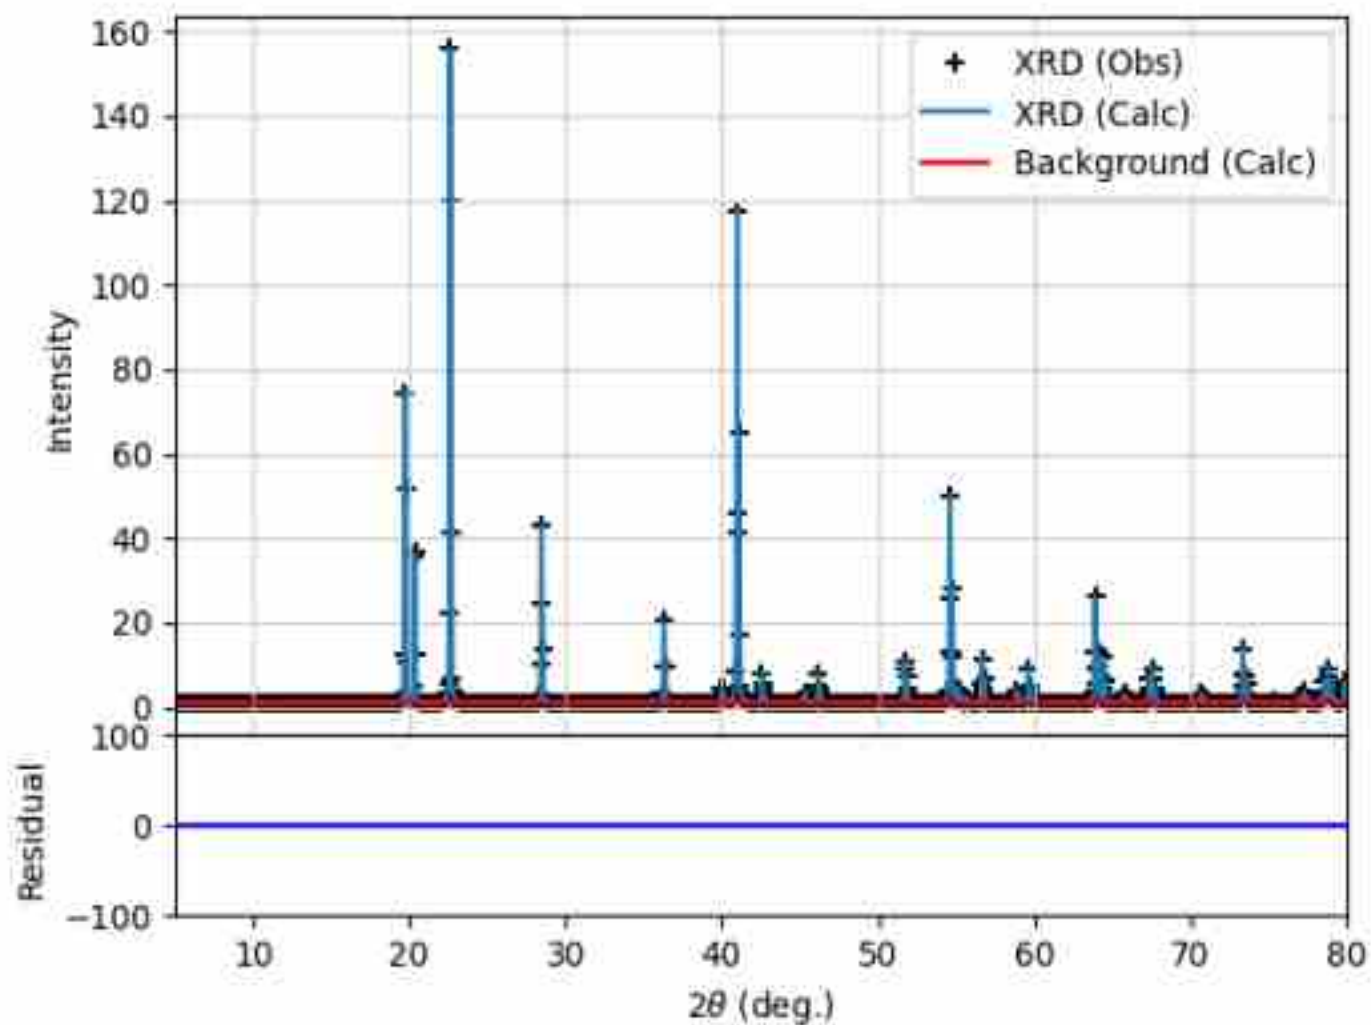

| RMSE before RR | Rwp     | RMSE after RR |
|----------------|---------|---------------|
| 0.022          | 0.00182 | 0.00134       |

# Li<sub>4</sub>Mn<sub>2</sub>Ni<sub>2</sub>O<sub>8</sub>

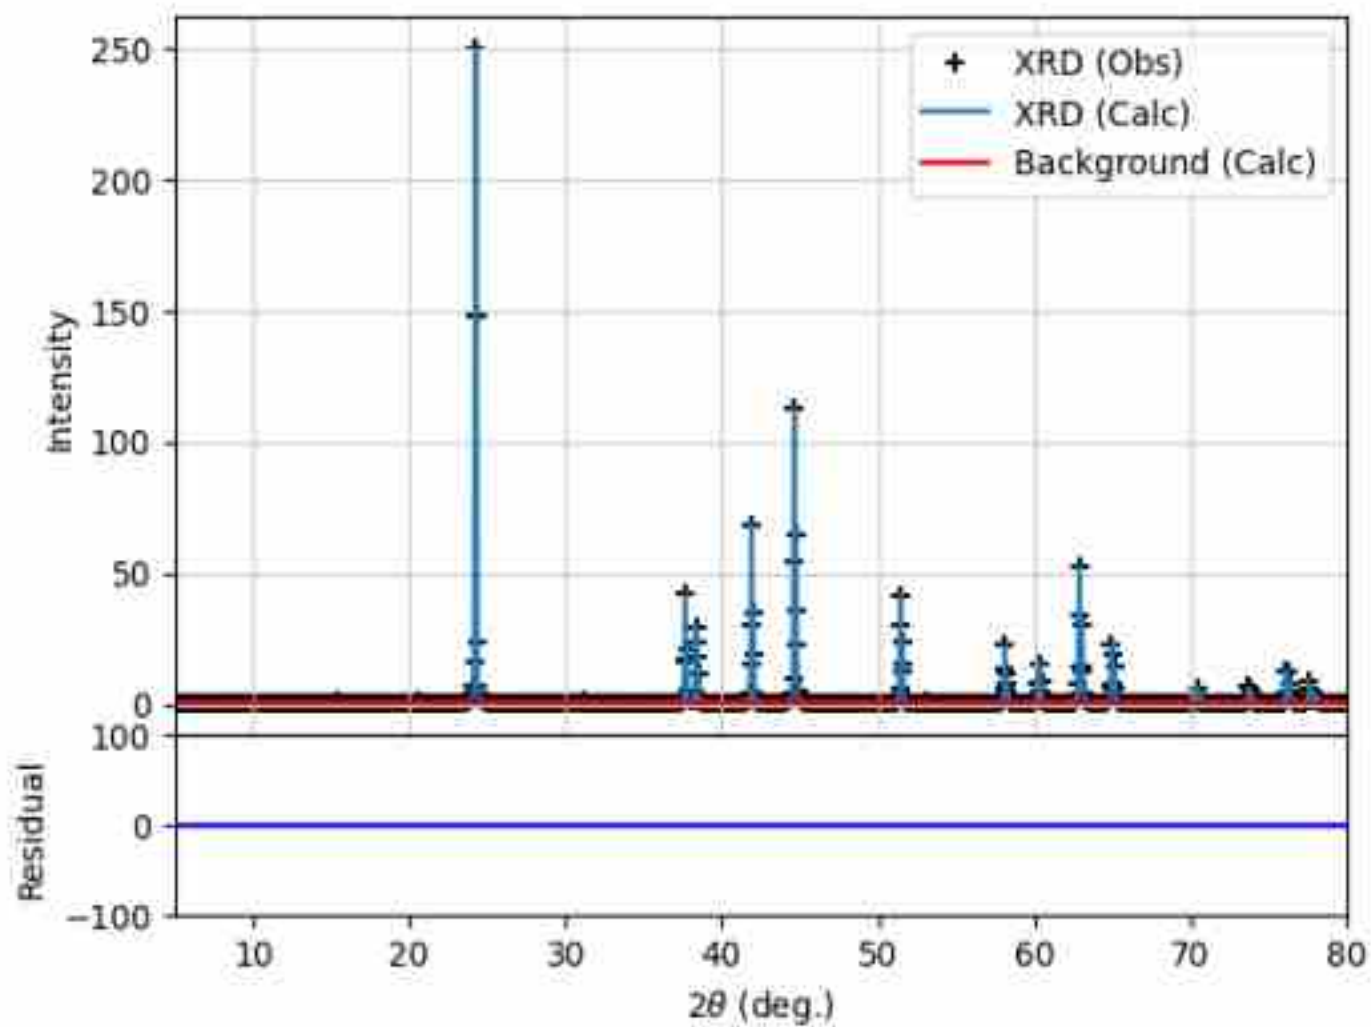

| RMSE before RR | Rwp     | RMSE after RR |
|----------------|---------|---------------|
| 0.022          | 0.21018 | 0.02455       |

# Li<sub>4</sub>Si<sub>2</sub>Ni<sub>2</sub>O<sub>8</sub>

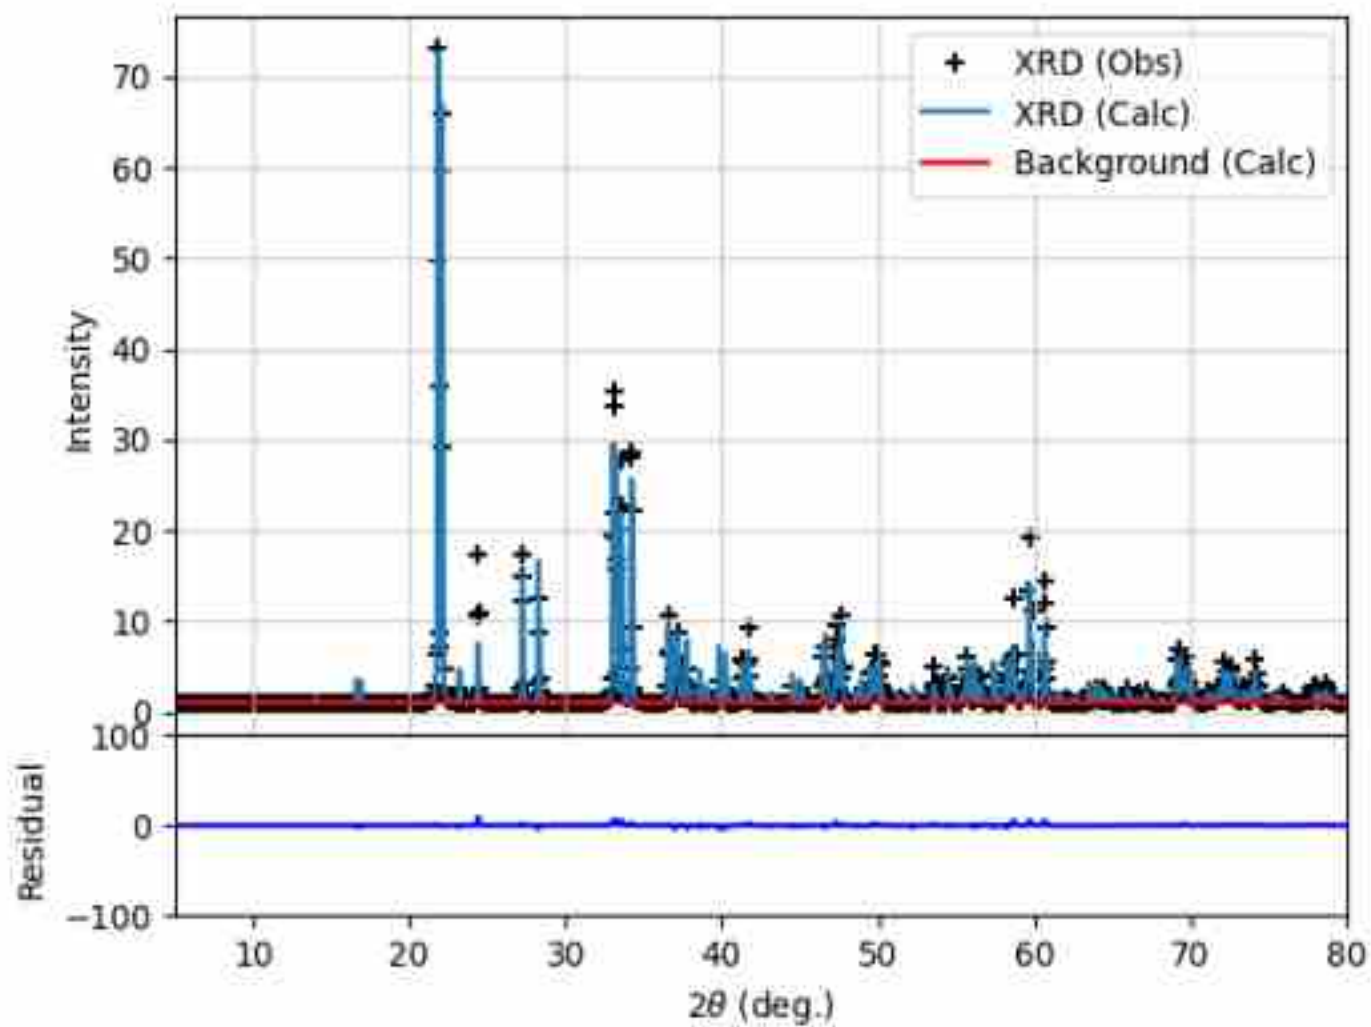

| RMSE before RR | Rwp      | RMSE after RR |
|----------------|----------|---------------|
| 0.022          | 21.02723 | 0.31248       |

# Li<sub>4</sub>Sm<sub>4</sub>Si<sub>6</sub>

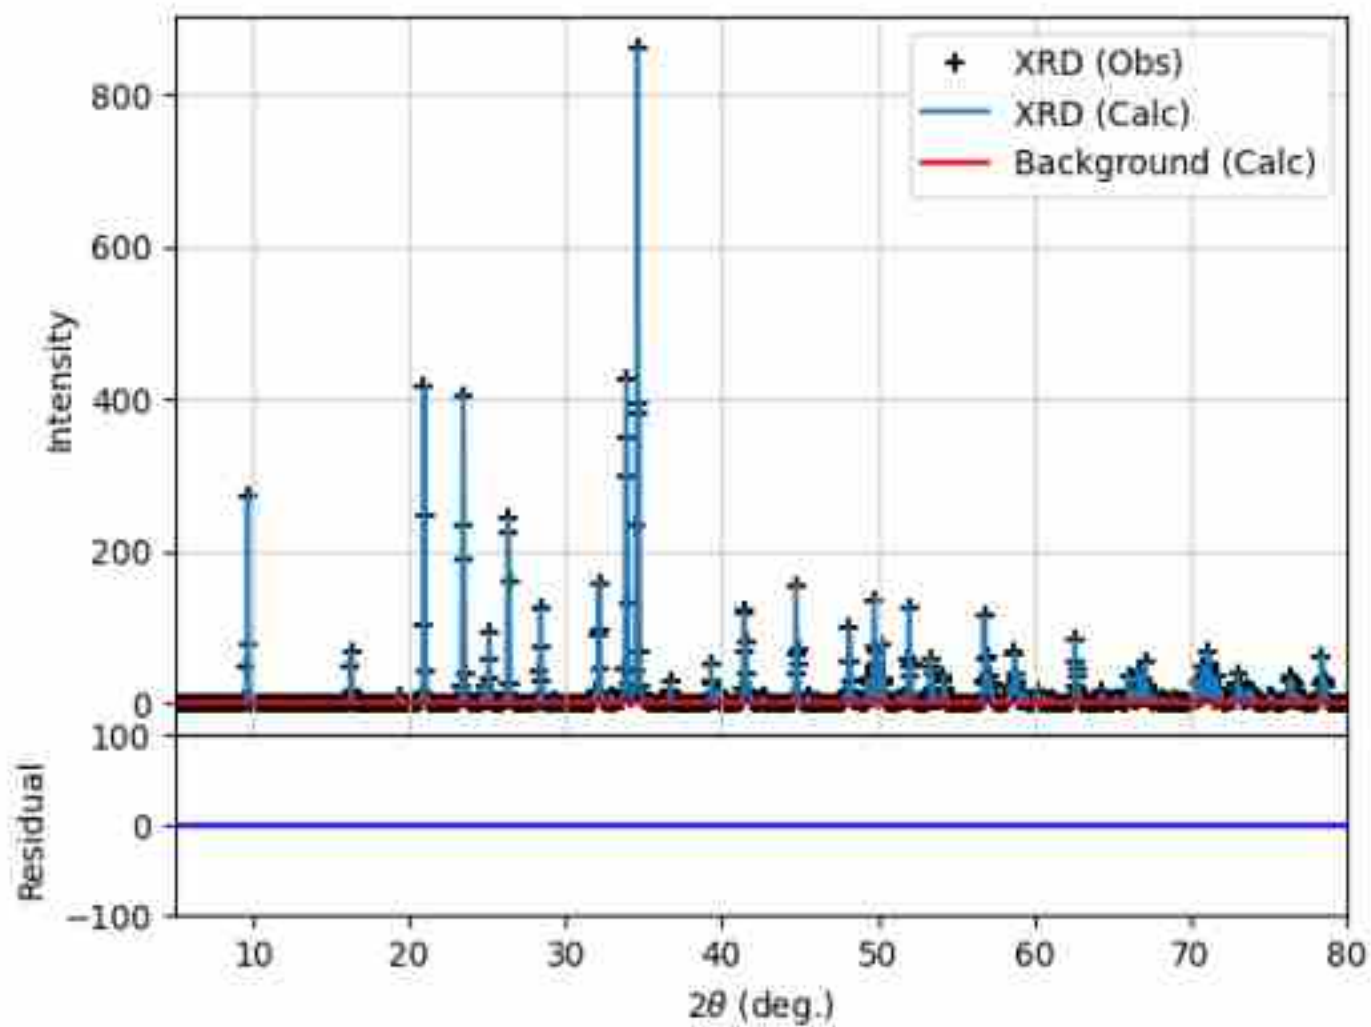

| RMSE before RR | Rwp     | RMSE after RR |
|----------------|---------|---------------|
| 0.022          | 0.00386 | 0.00225       |

# Lu1U2S3O2

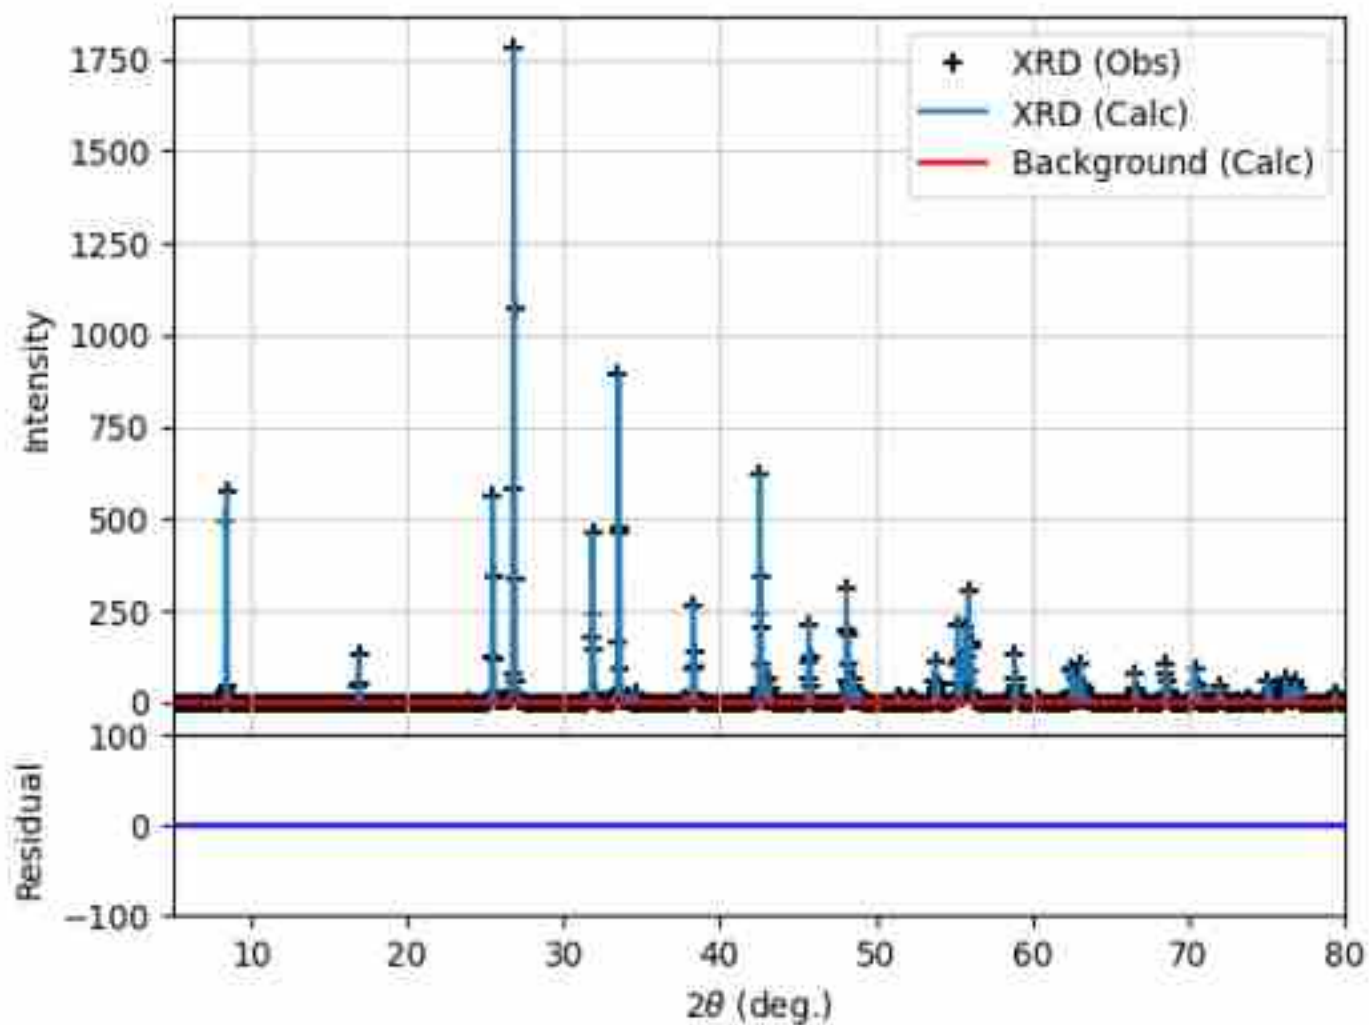

| RMSE before RR | Rwp     | RMSE after RR |
|----------------|---------|---------------|
| 0.022          | 0.00349 | 0.00049       |

# Lu<sub>2</sub>B<sub>2</sub>O<sub>6</sub>

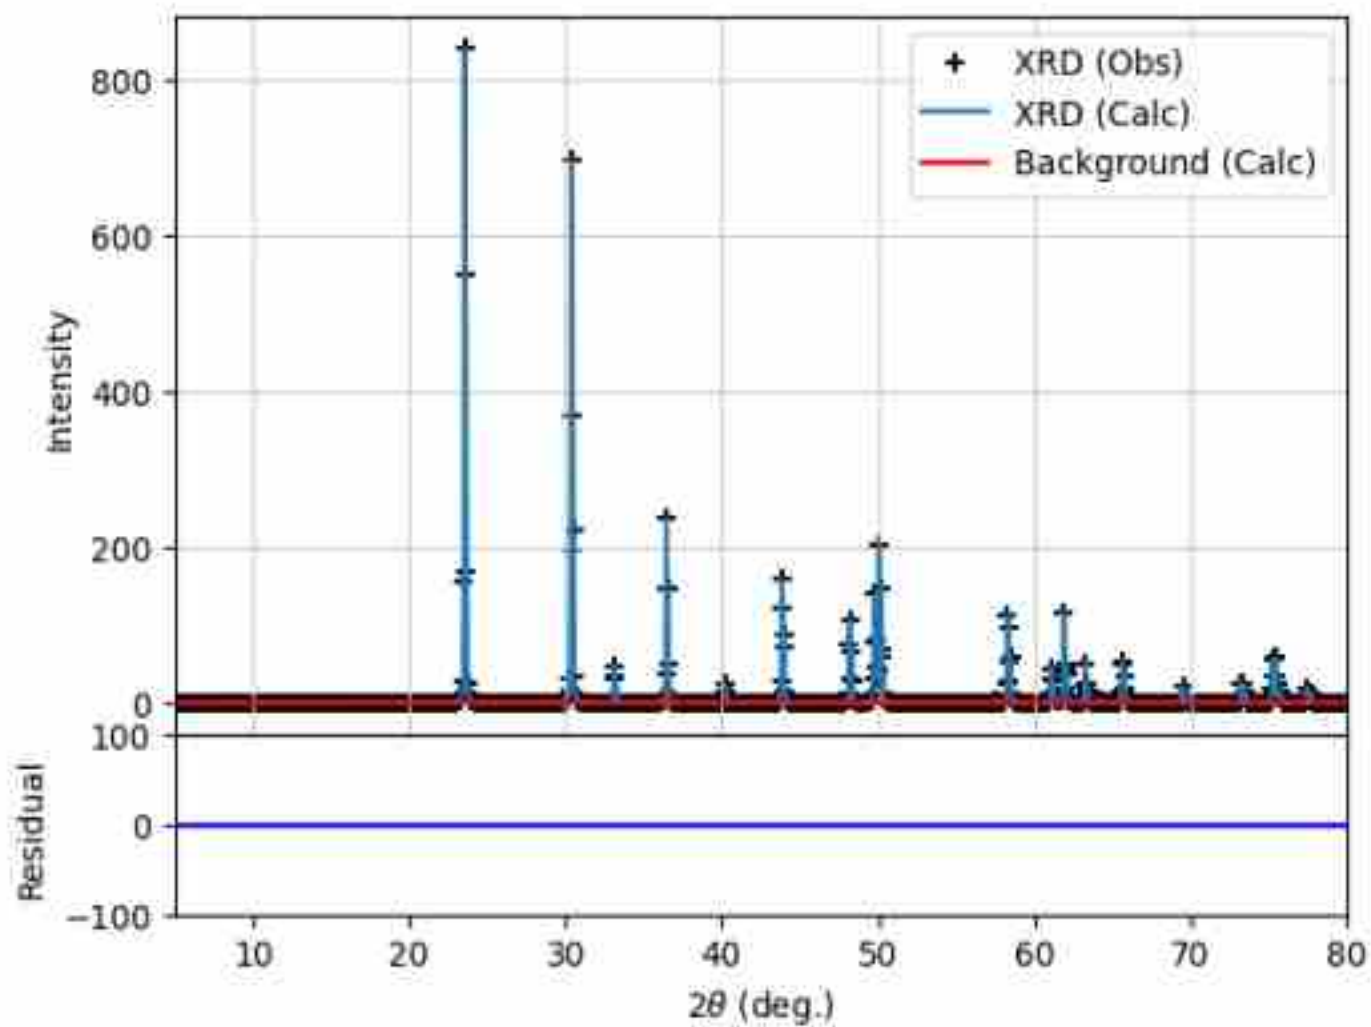

| RMSE before RR | Rwp     | RMSE after RR |
|----------------|---------|---------------|
| 0.022          | 0.00258 | 0.0011        |



# Lu4Sc4O12

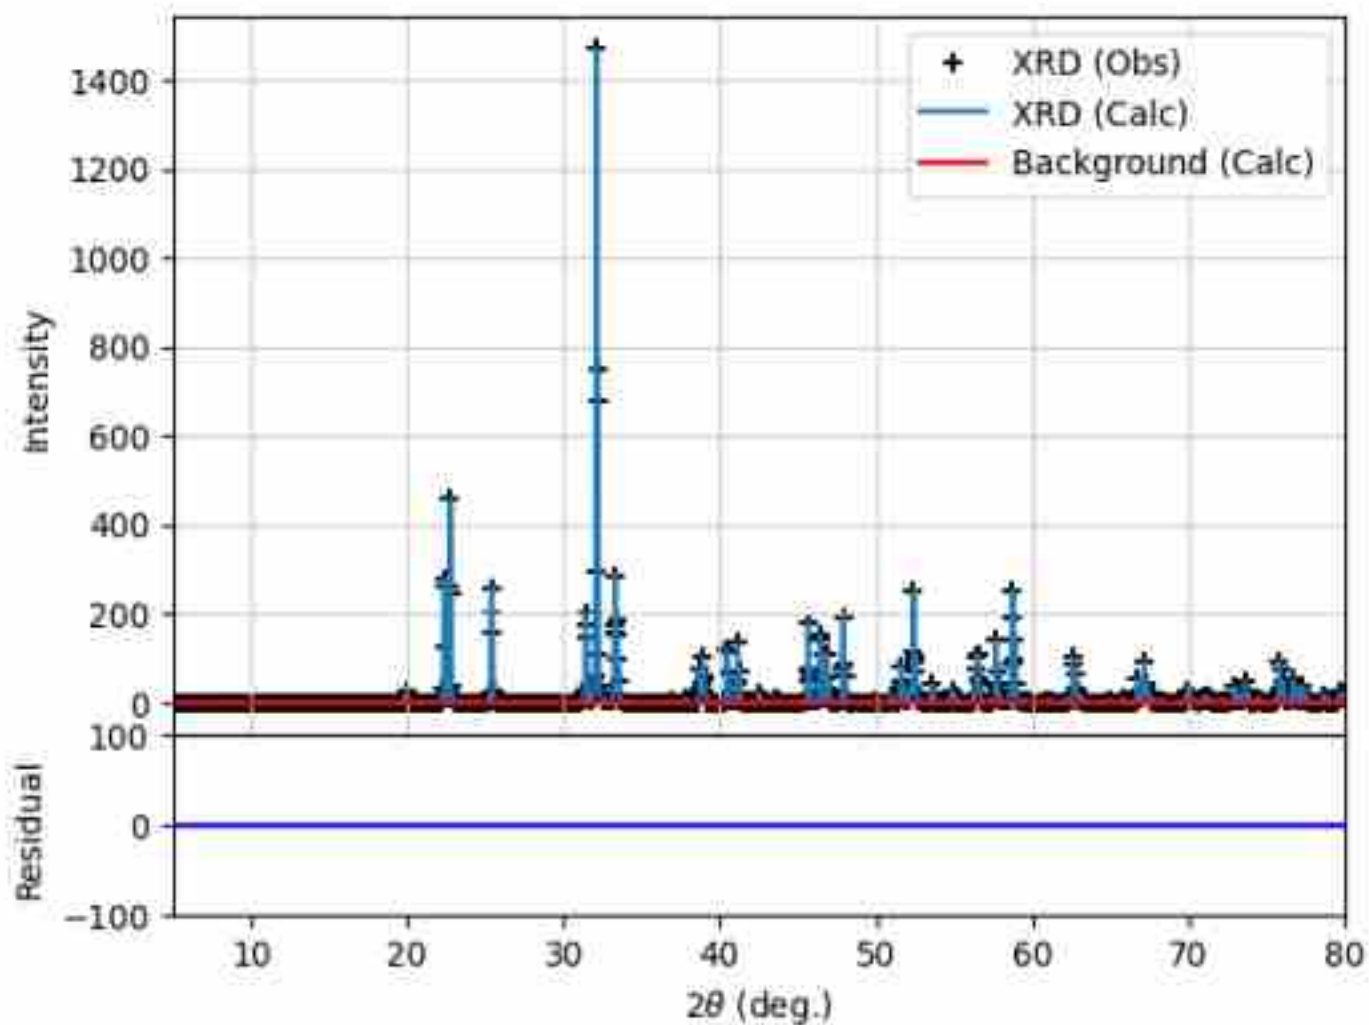

| RMSE before RR | Rwp     | RMSE after RR |
|----------------|---------|---------------|
| 0.022          | 0.00448 | 0.00139       |

# Mg<sub>1</sub>Co<sub>4</sub>Cu<sub>3</sub>O<sub>12</sub>

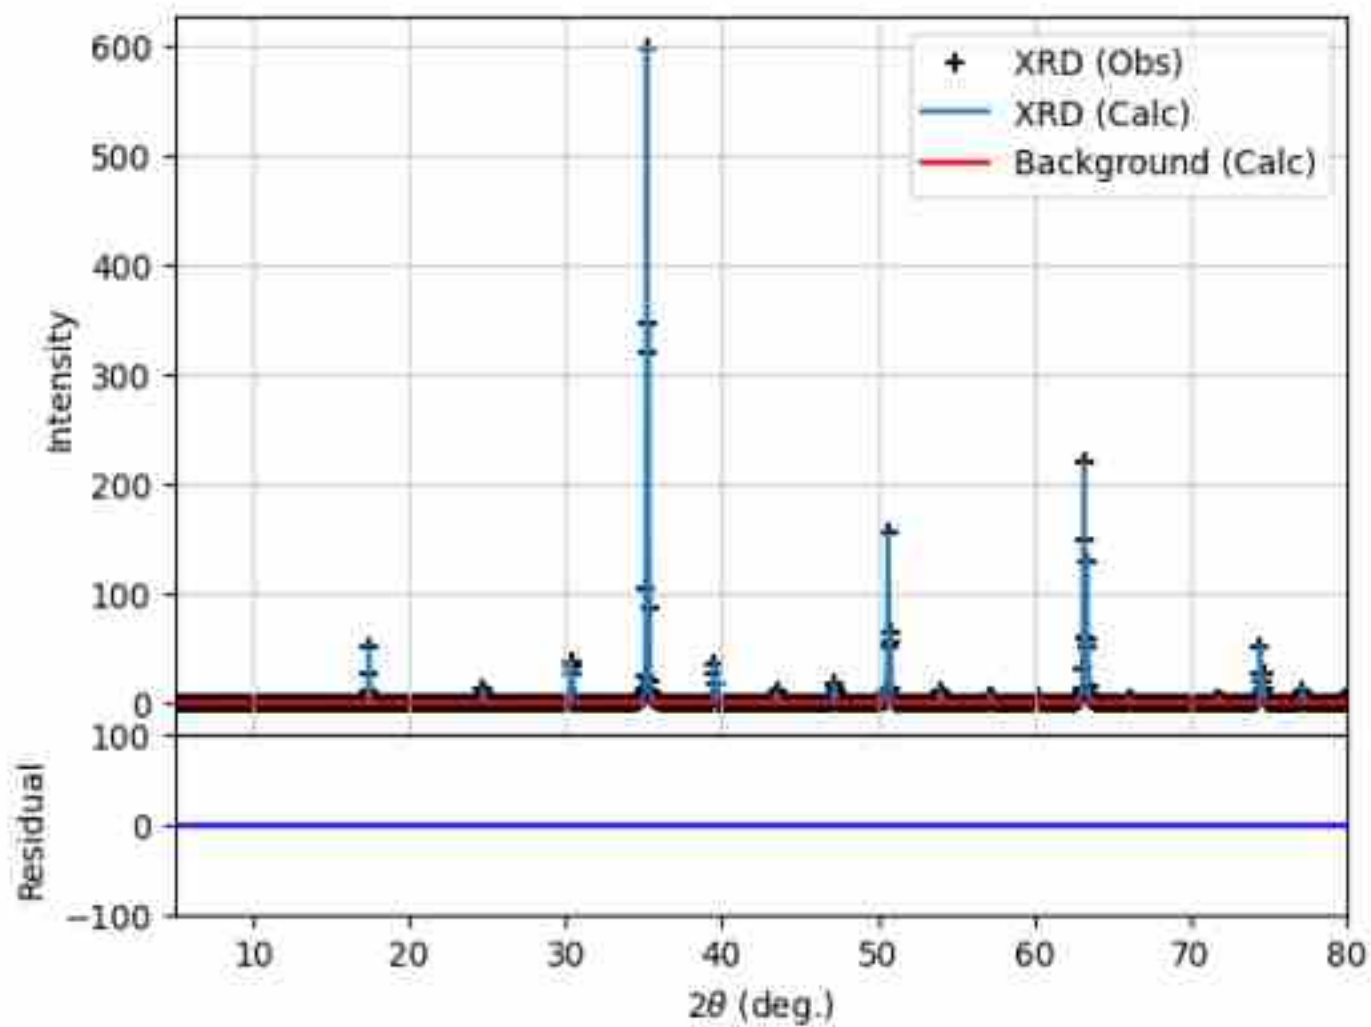

| RMSE before RR | Rwp     | RMSE after RR |
|----------------|---------|---------------|
| 0.022          | 0.00859 | 0.00428       |

# Mg1Cu5

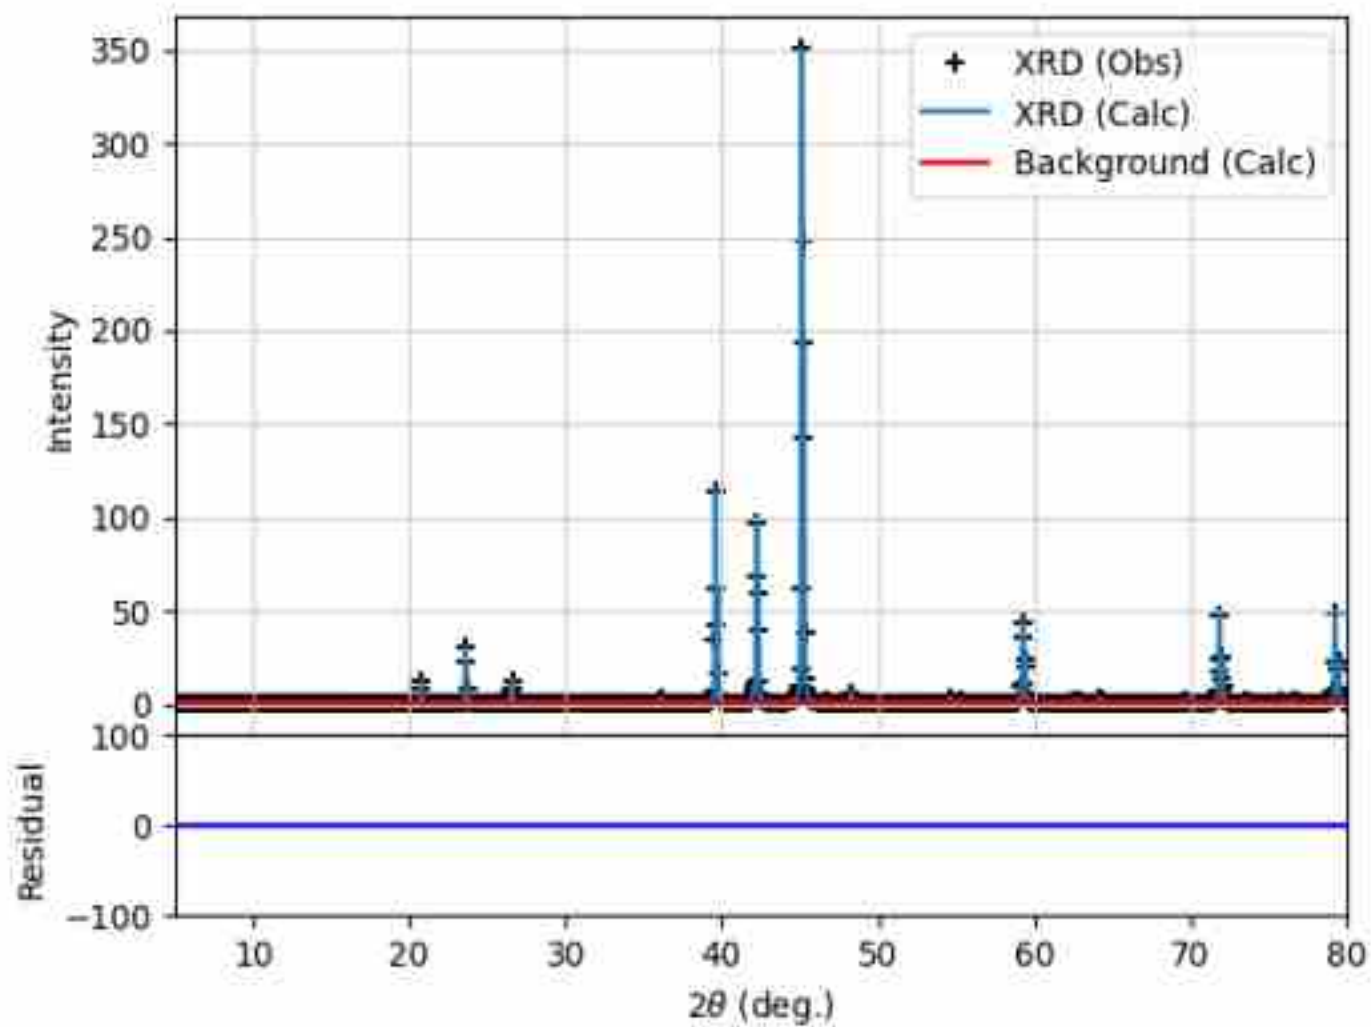

| RMSE before RR | Rwp     | RMSE after RR |
|----------------|---------|---------------|
| 0.022          | 0.00279 | 0.00057       |

# Mg<sub>3</sub>As<sub>2</sub>

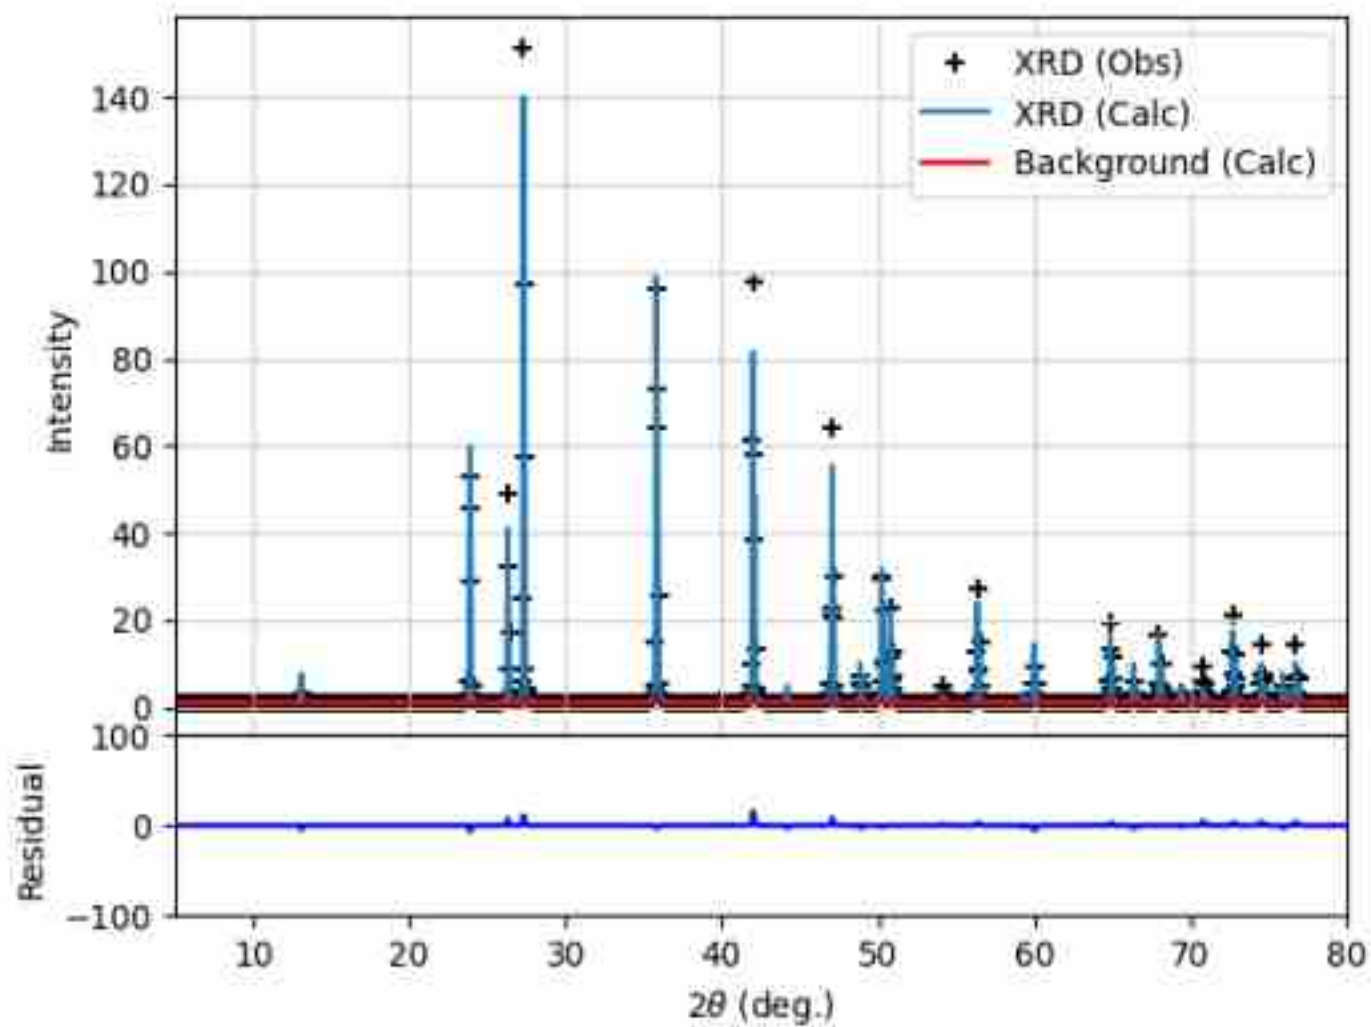

| RMSE before RR | Rwp     | RMSE after RR |
|----------------|---------|---------------|
| 0.022          | 16.3858 | 0.05232       |

# Mg<sub>4</sub>Mn<sub>4</sub>O<sub>12</sub>

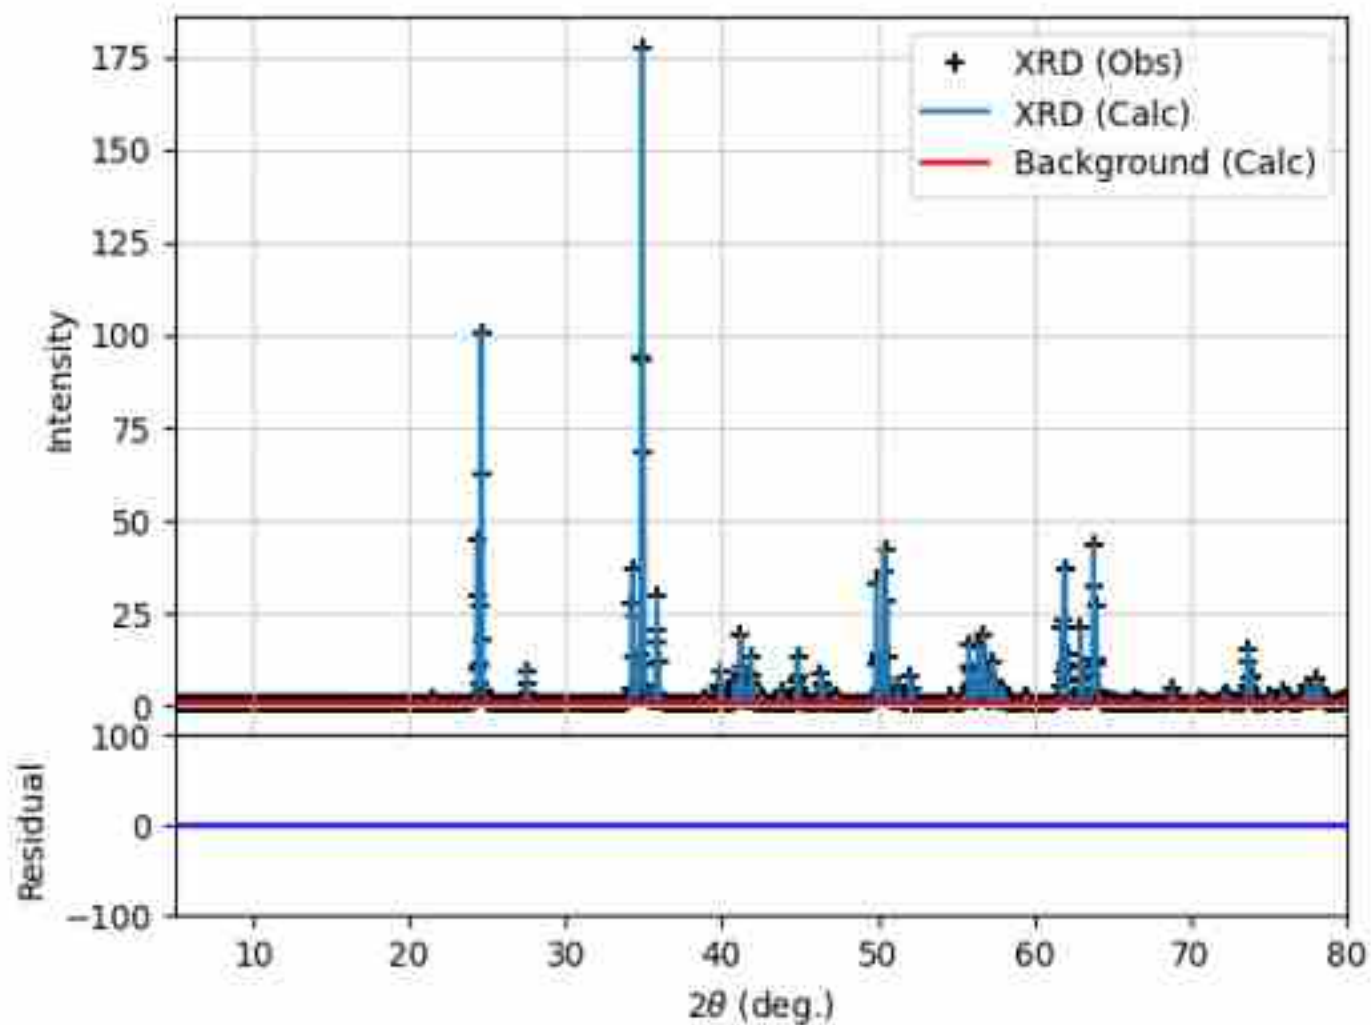

| RMSE before RR | Rwp     | RMSE after RR |
|----------------|---------|---------------|
| 0.022          | 0.00303 | 0.00065       |

# Mg<sub>7</sub>Cu<sub>2</sub>O<sub>9</sub>

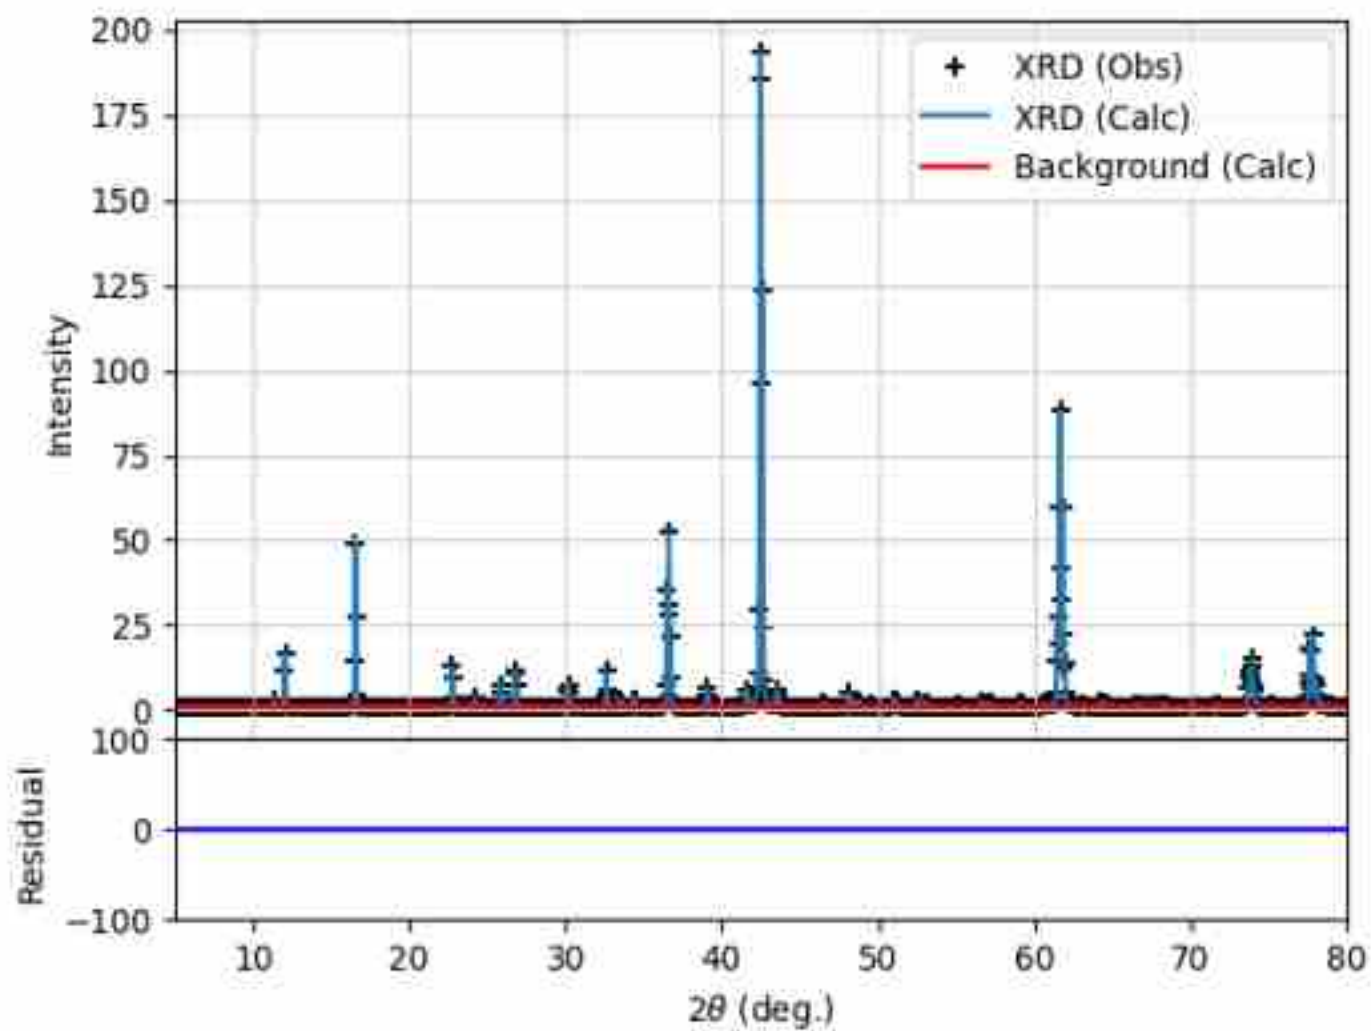

| RMSE before RR | Rwp     | RMSE after RR |
|----------------|---------|---------------|
| 0.022          | 0.00237 | 0.00092       |

# Mn1Cd1Ga4Se8

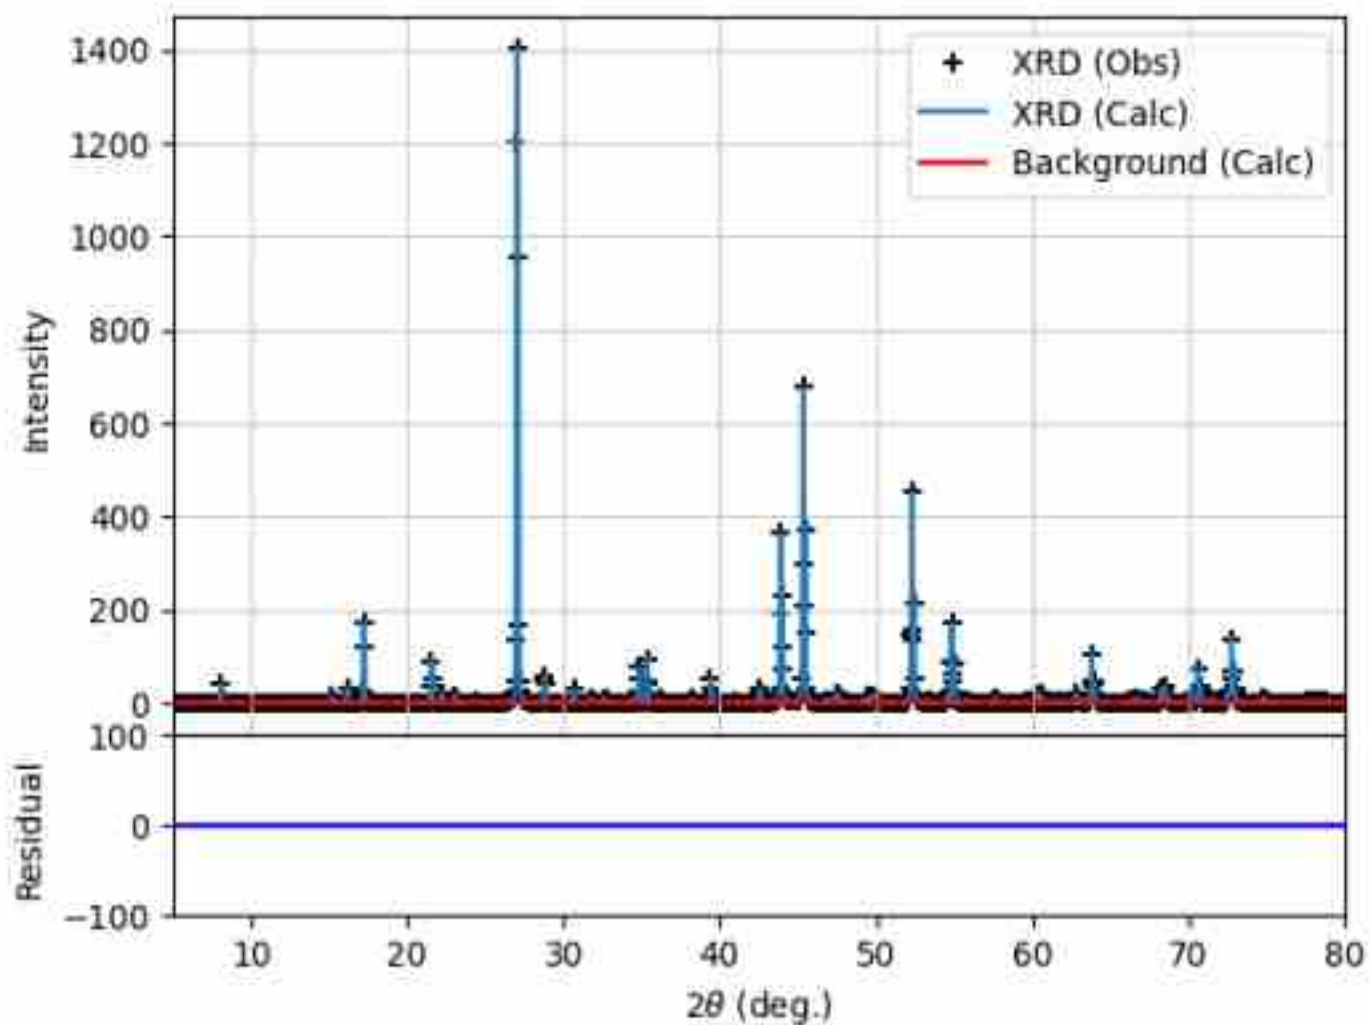

| RMSE before RR | Rwp     | RMSE after RR |
|----------------|---------|---------------|
| 0.022          | 0.00412 | 0.00048       |

# Mn<sub>2</sub>FeSbO<sub>6</sub>

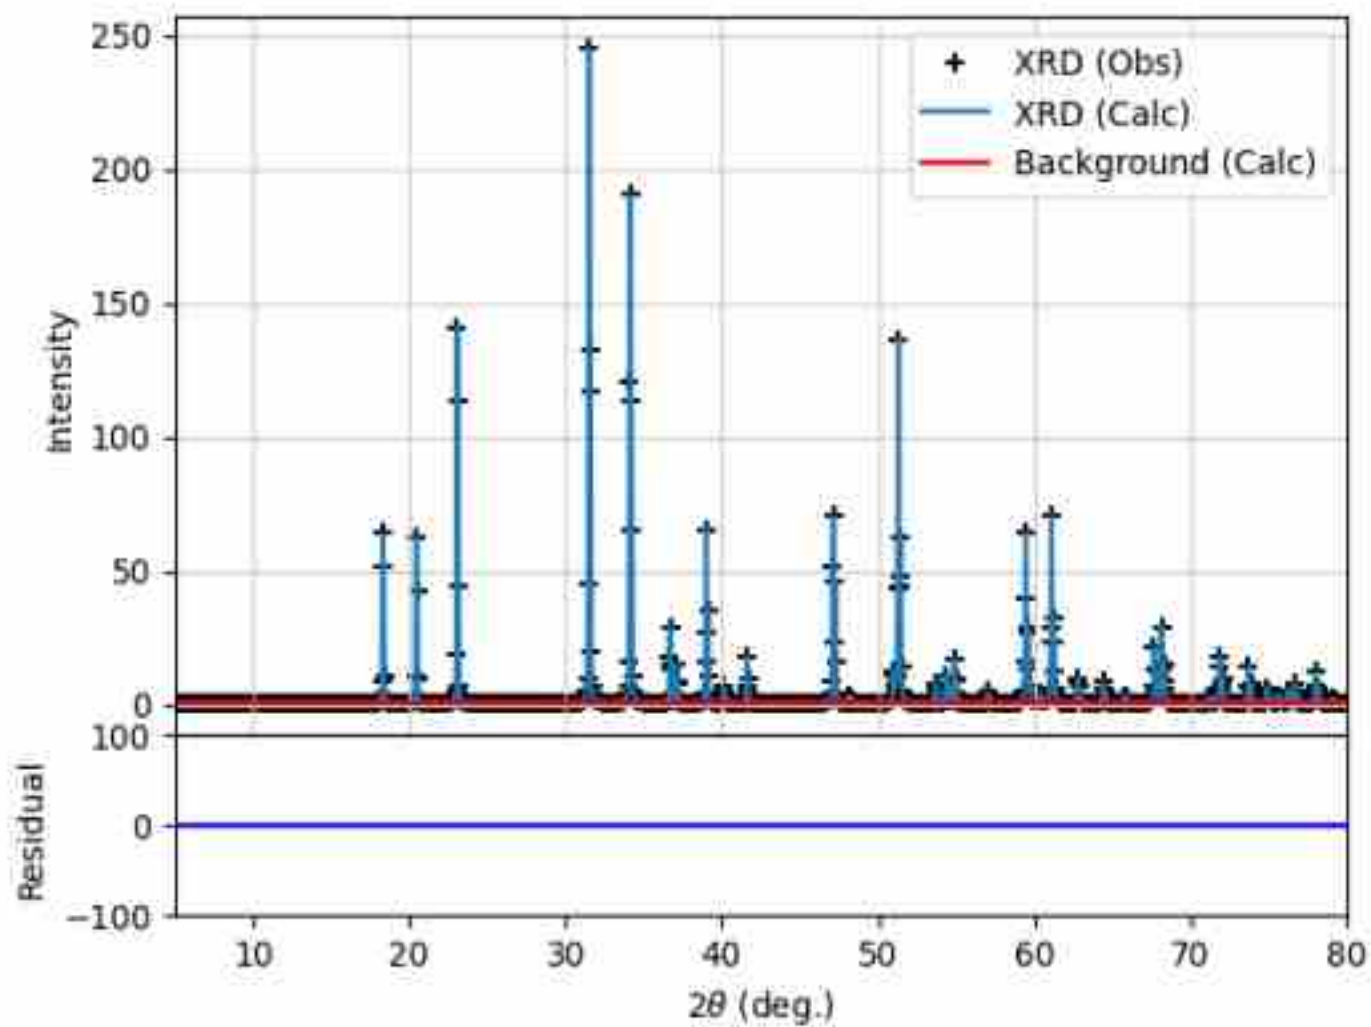

| RMSE before RR | Rwp     | RMSE after RR |
|----------------|---------|---------------|
| 0.022          | 0.00233 | 0.00097       |



# Mo<sub>2</sub>Se<sub>2</sub>S<sub>2</sub>

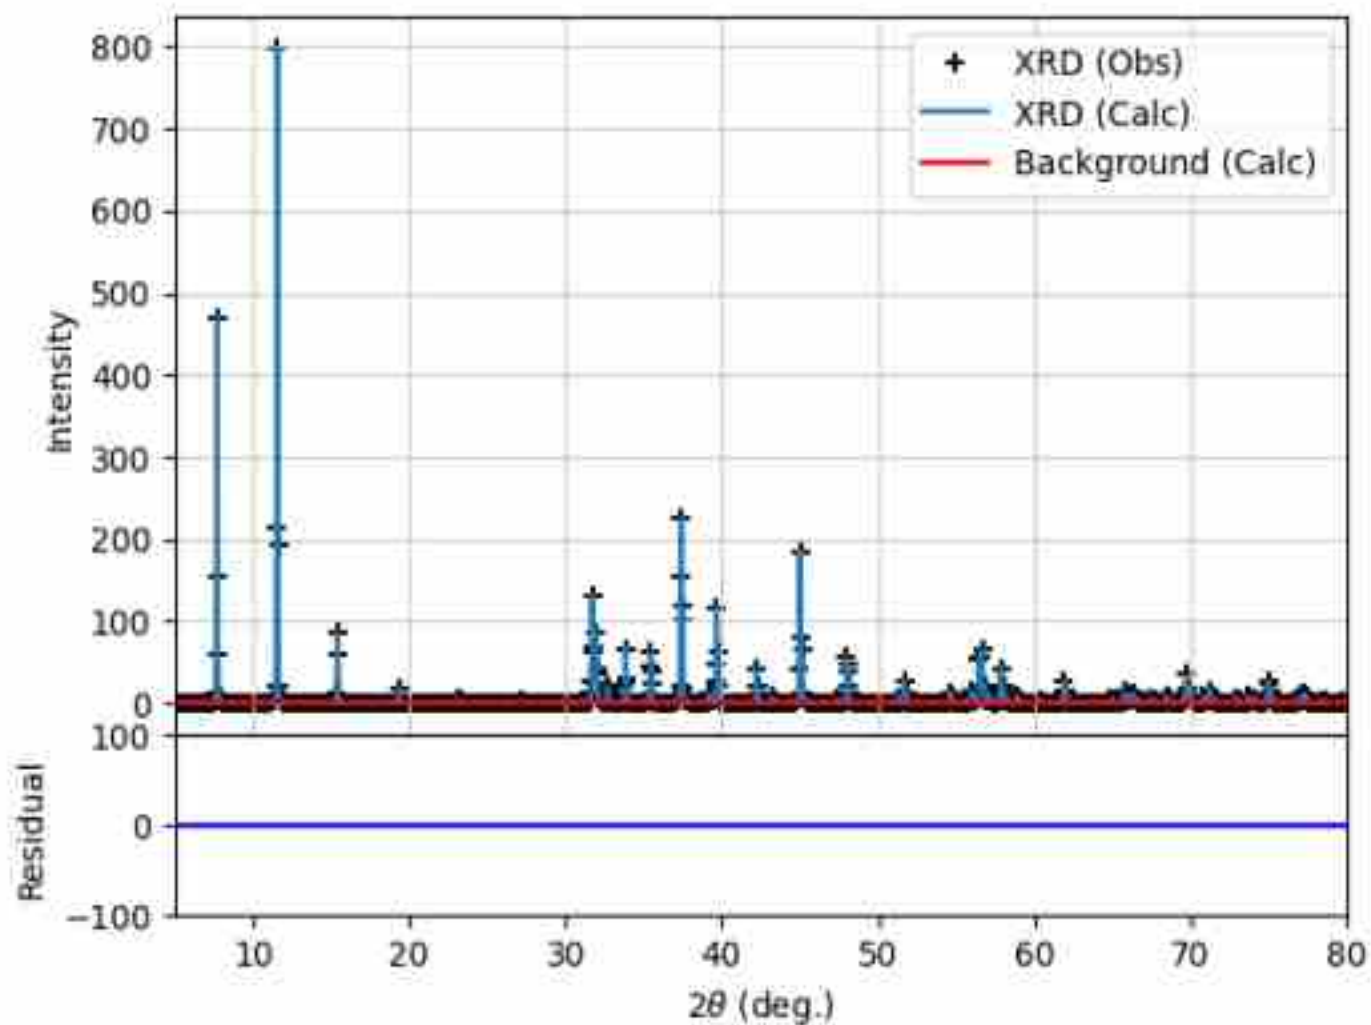

| RMSE before RR | Rwp    | RMSE after RR |
|----------------|--------|---------------|
| 0.022          | 0.0026 | 0.00034       |

# Na1Eu1S2

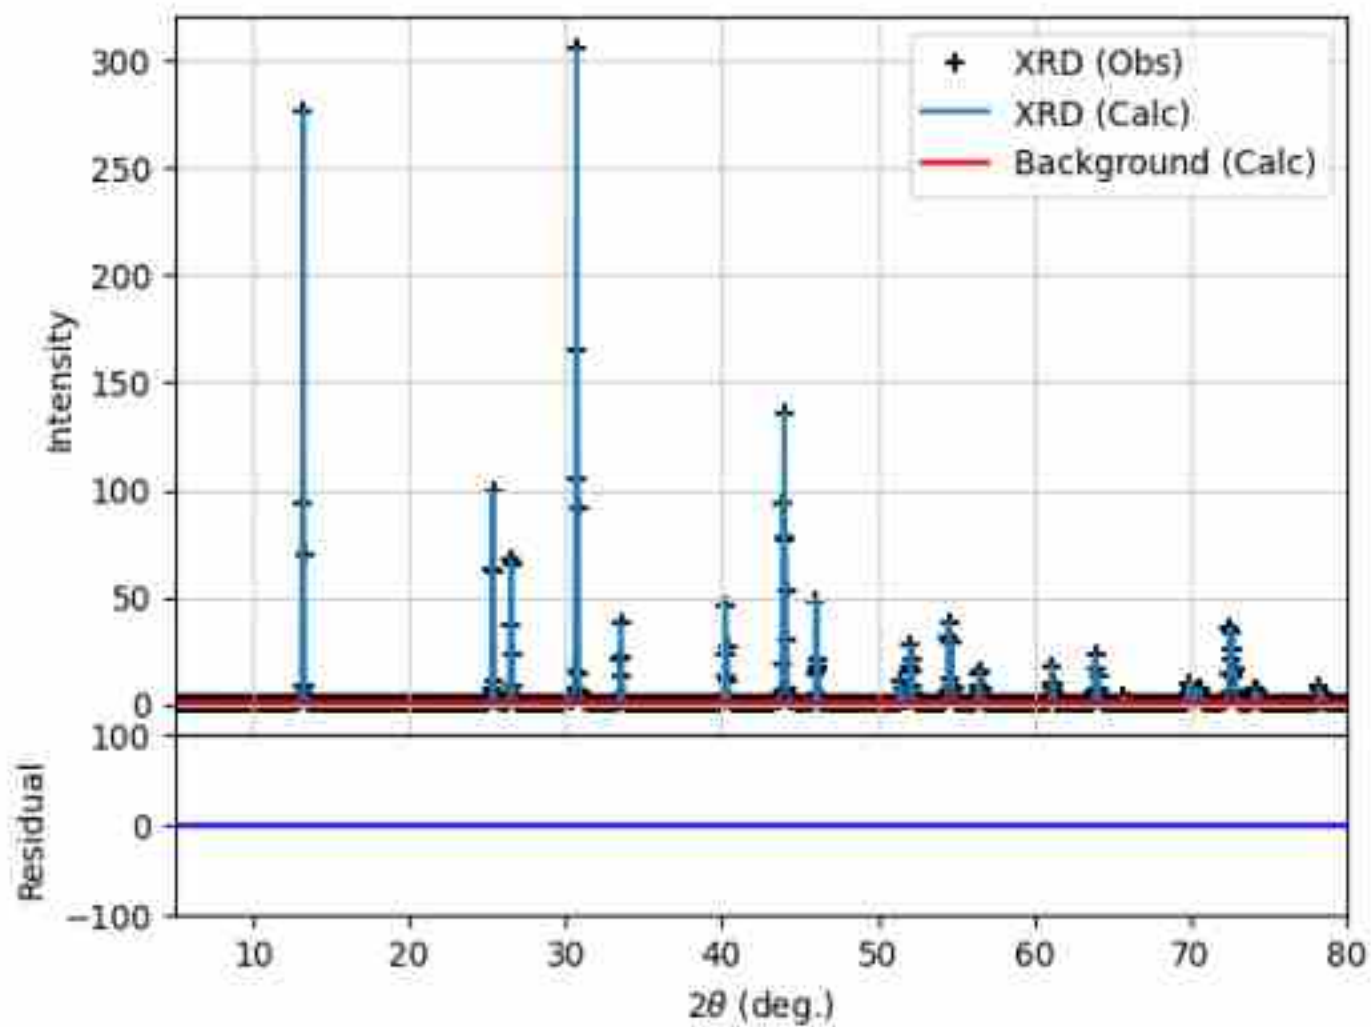

| RMSE before RR | Rwp     | RMSE after RR |
|----------------|---------|---------------|
| 0.022          | 0.00278 | 0.00087       |

# Na<sub>2</sub>Ho<sub>2</sub>F<sub>8</sub>

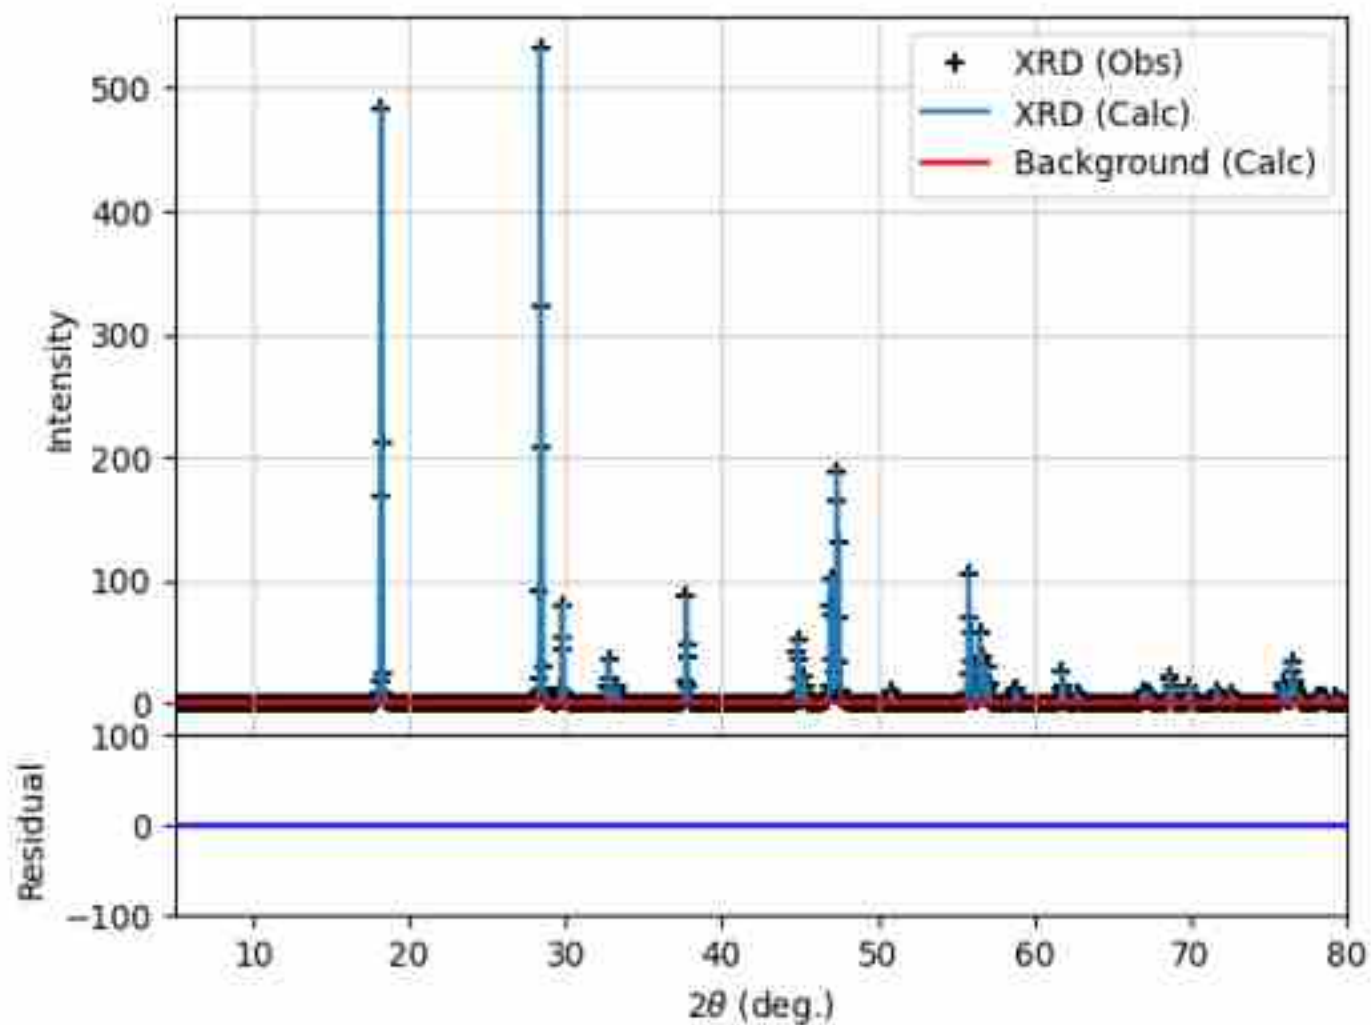

| RMSE before RR | Rwp     | RMSE after RR |
|----------------|---------|---------------|
| 0.022          | 0.00405 | 0.00167       |

# Na<sub>2</sub>La<sub>2</sub>Mg<sub>2</sub>W<sub>2</sub>O<sub>12</sub>

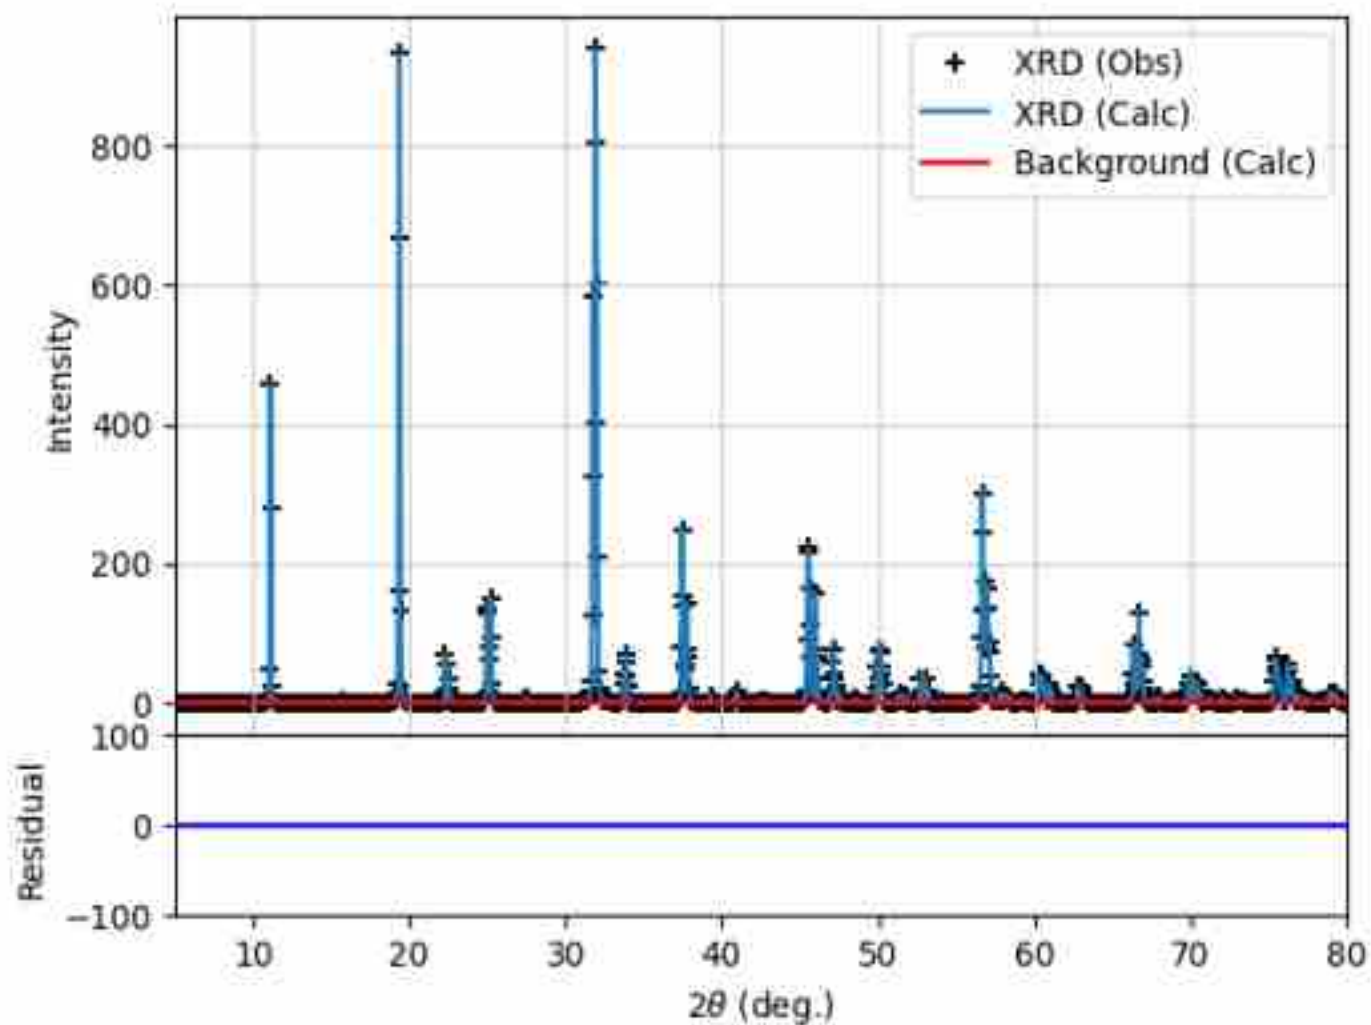

| RMSE before RR | Rwp     | RMSE after RR |
|----------------|---------|---------------|
| 0.022          | 0.00275 | 0.00103       |

# Na<sub>3</sub>Eu<sub>1</sub>V<sub>2</sub>O<sub>8</sub>

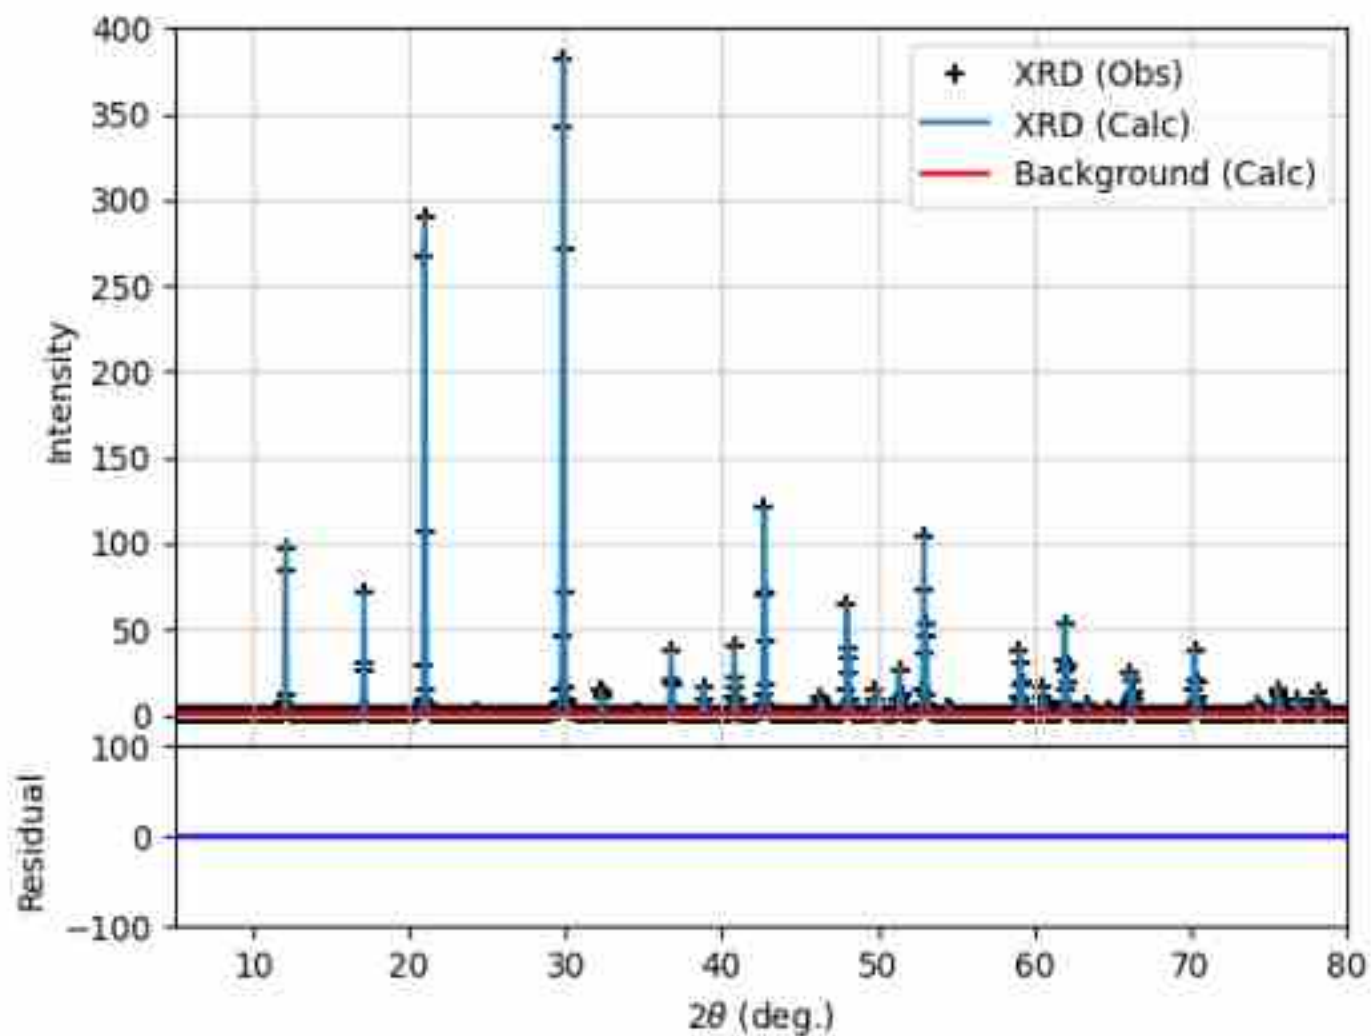

| RMSE before RR | Rwp     | RMSE after RR |
|----------------|---------|---------------|
| 0.022          | 0.00555 | 0.00279       |

# Na<sub>3</sub>P<sub>1</sub>S<sub>4</sub>

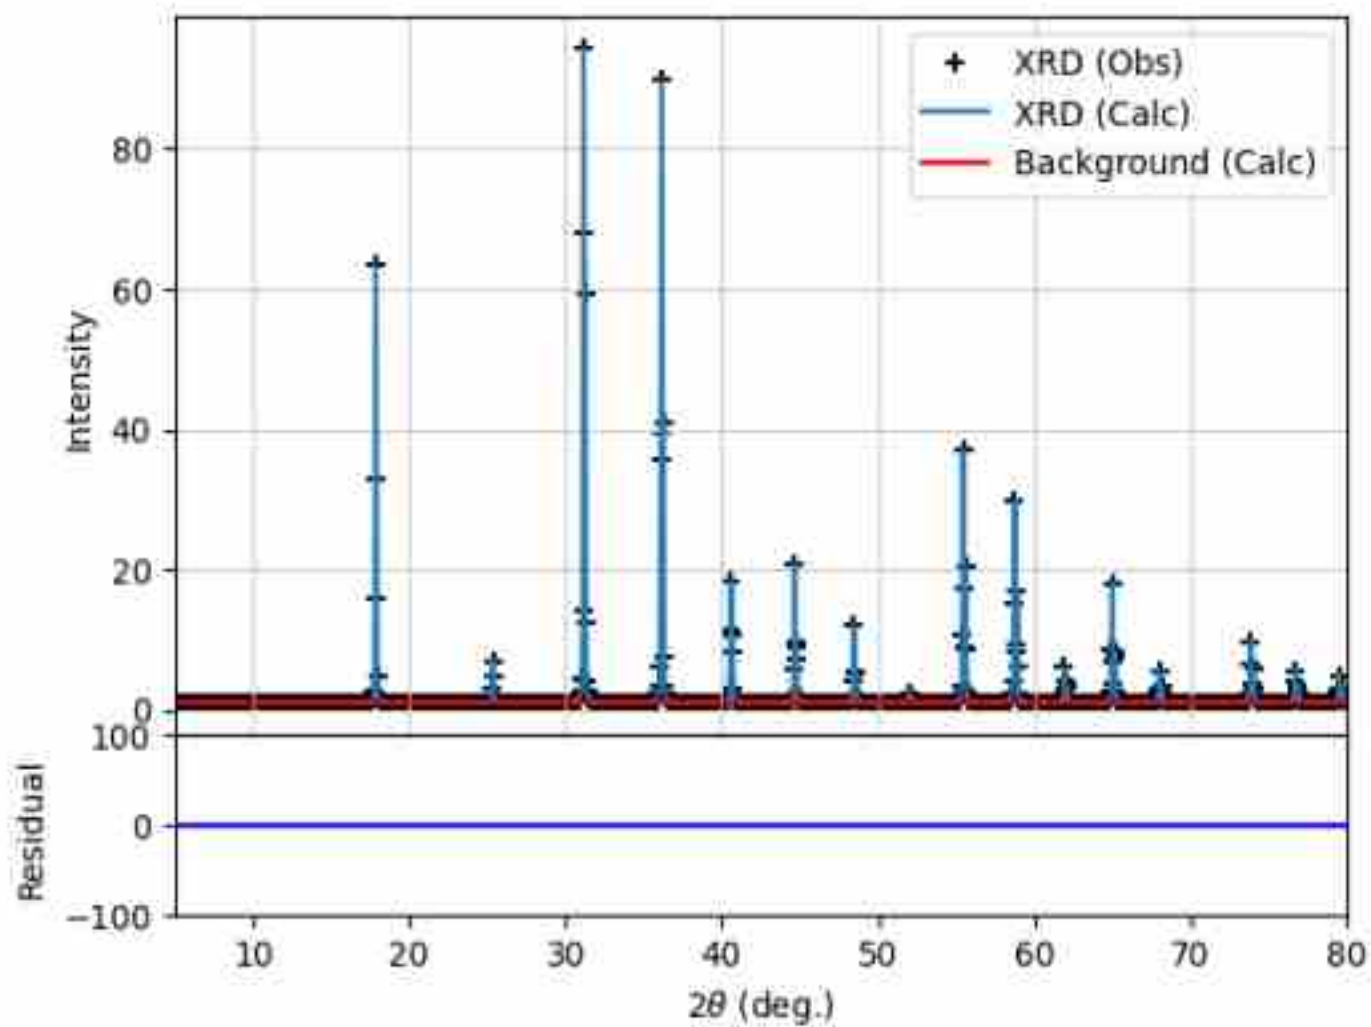

| RMSE before RR | Rwp     | RMSE after RR |
|----------------|---------|---------------|
| 0.022          | 0.00226 | 0.00081       |

# Na<sub>6</sub>Au<sub>2</sub>S<sub>4</sub>

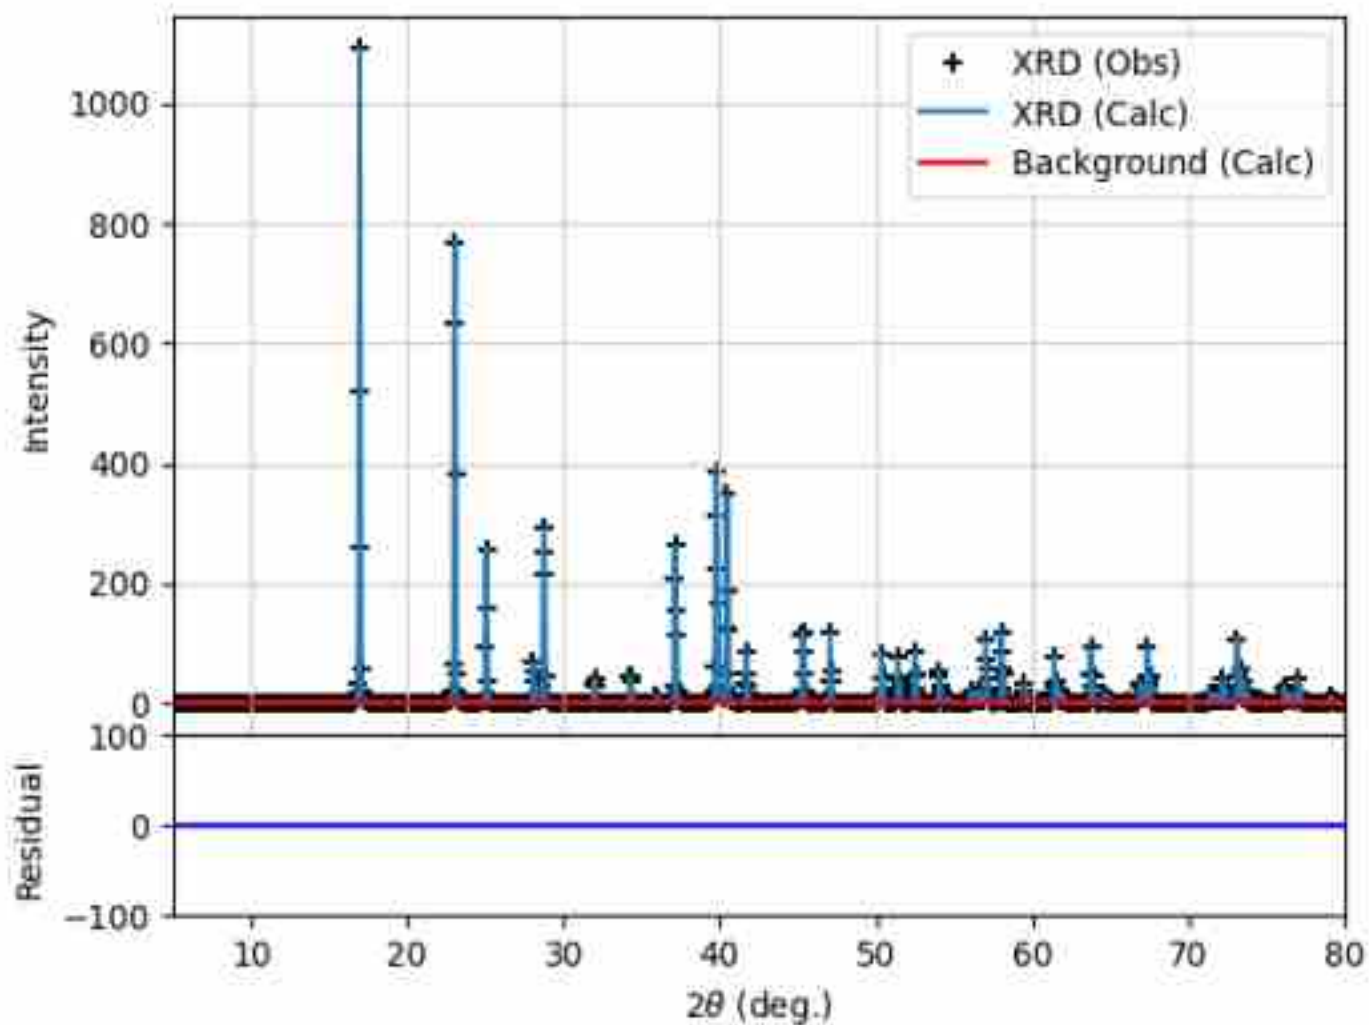

| RMSE before RR | Rwp     | RMSE after RR |
|----------------|---------|---------------|
| 0.022          | 0.00248 | 0.0005        |

# Na<sub>6</sub>Co<sub>2</sub>O<sub>6</sub>

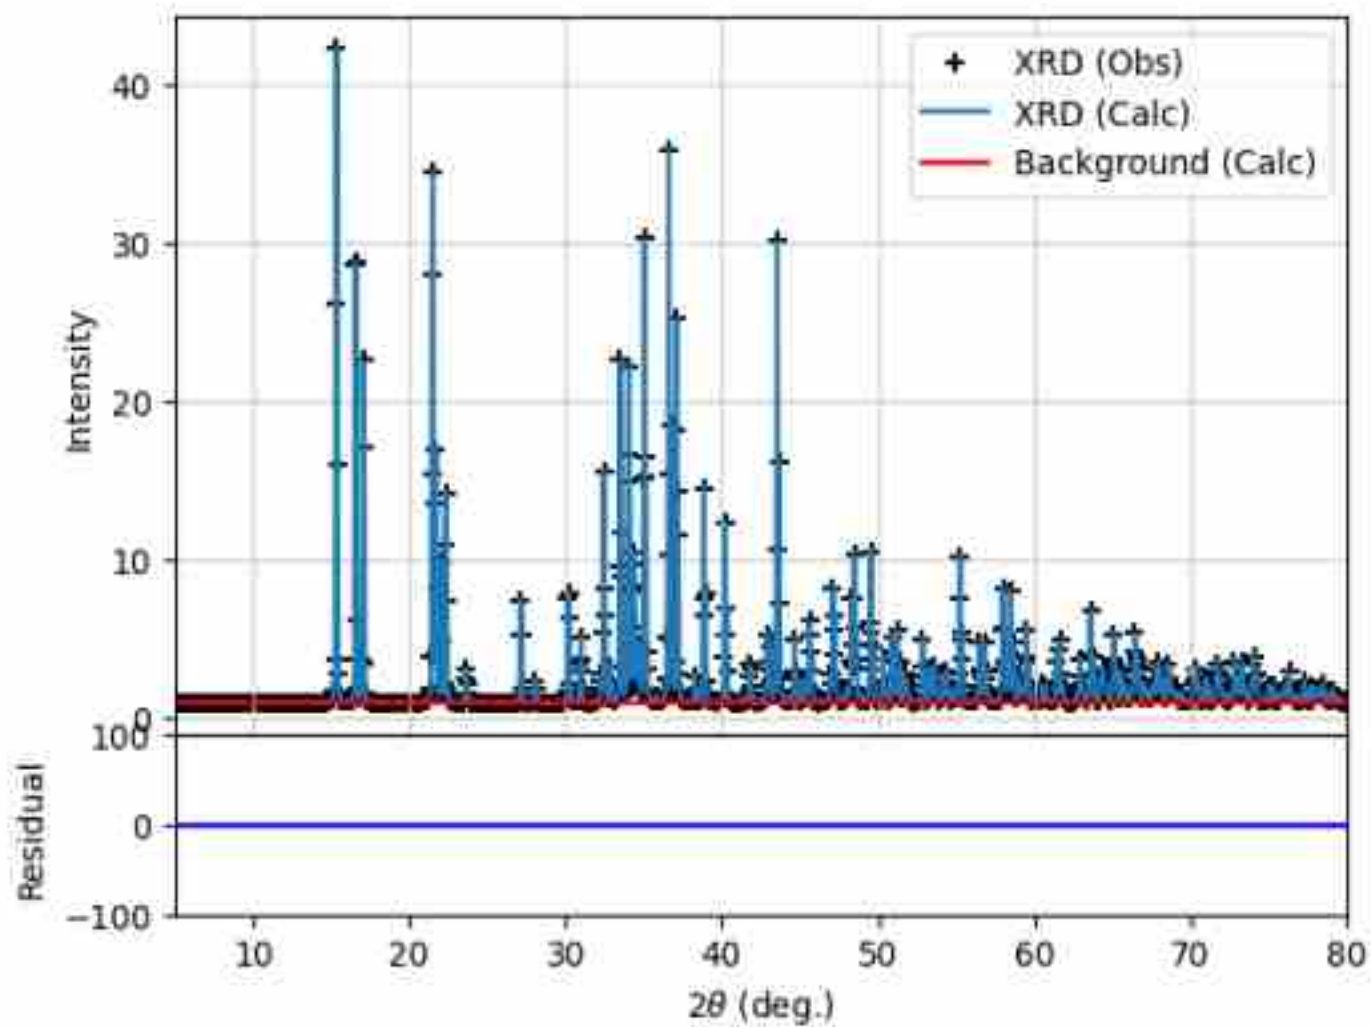

| RMSE before RR | Rwp     | RMSE after RR |
|----------------|---------|---------------|
| 0.022          | 0.00115 | 0.00022       |



# Nb1W1Se4

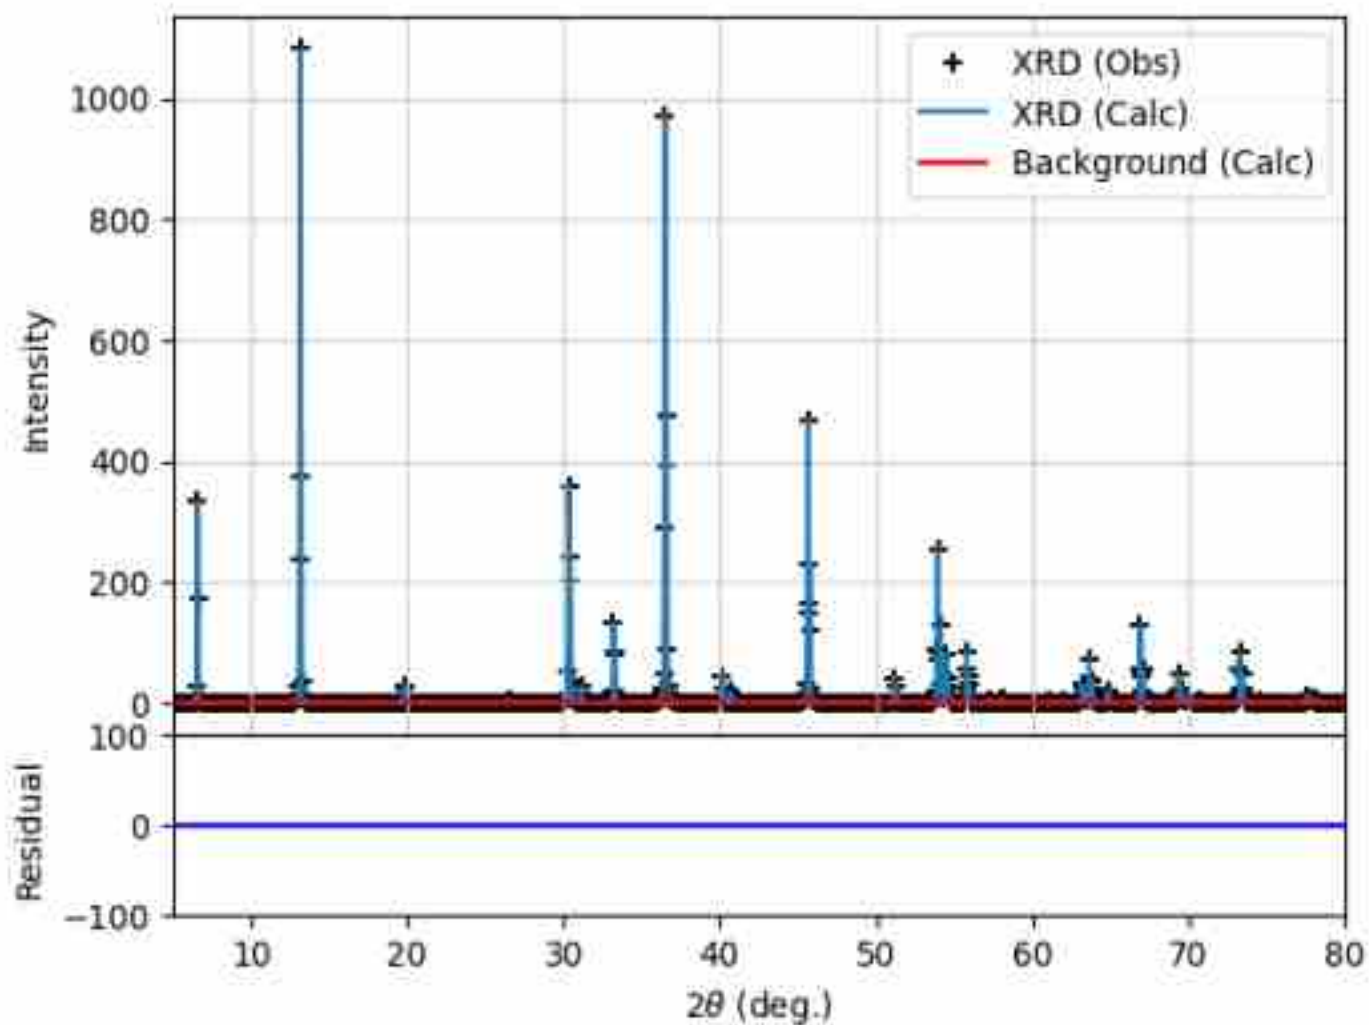

| RMSE before RR | Rwp     | RMSE after RR |
|----------------|---------|---------------|
| 0.022          | 0.00506 | 0.00032       |

# Nb<sub>4</sub>Co<sub>4</sub>As<sub>4</sub>

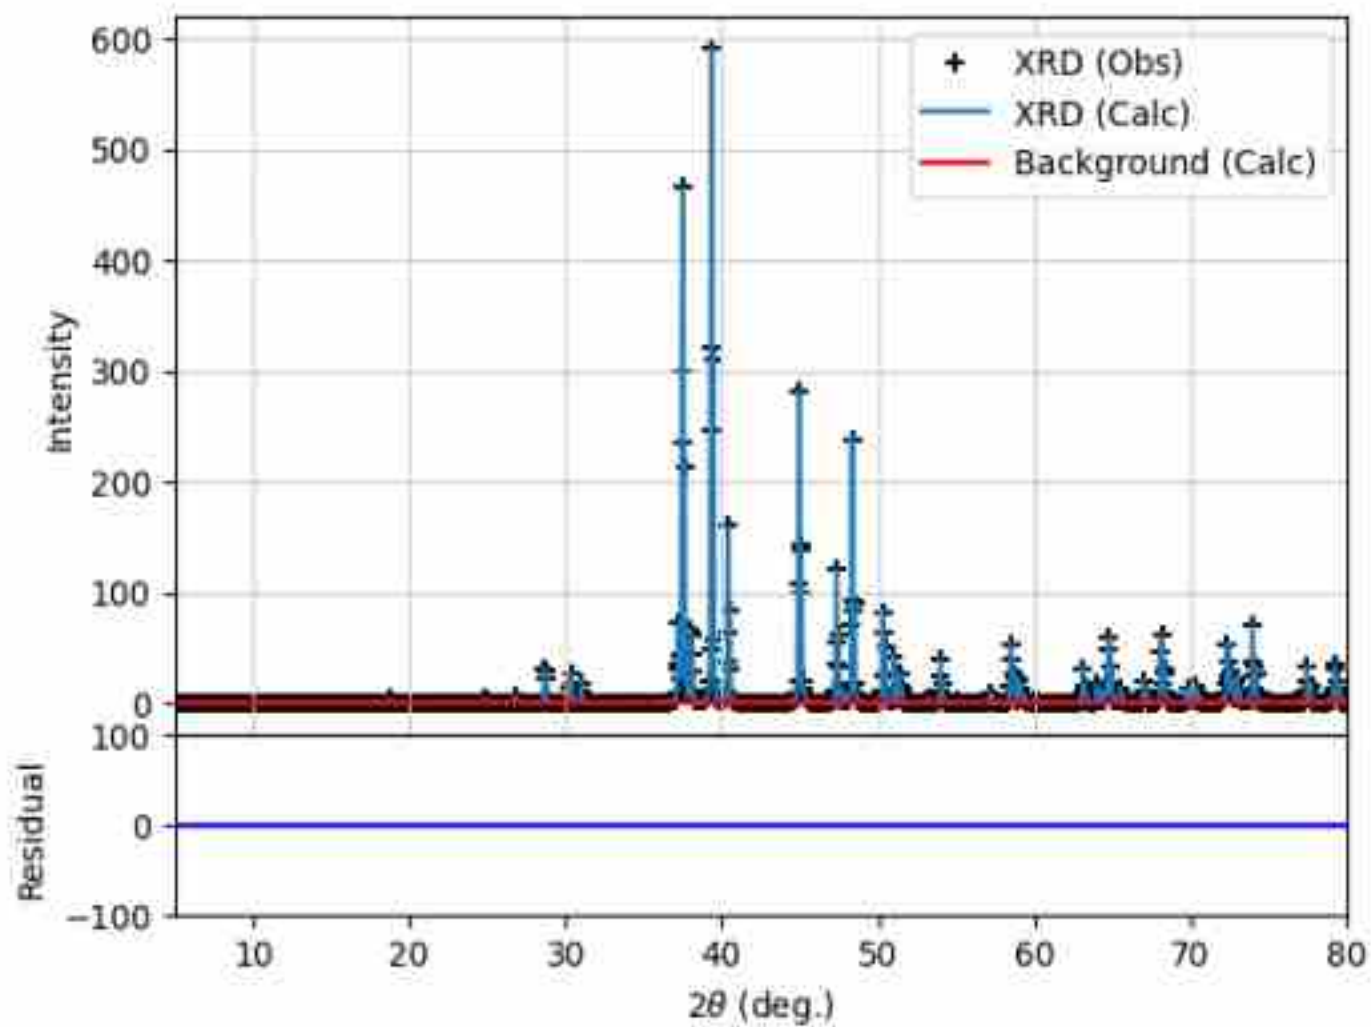

| RMSE before RR | Rwp     | RMSE after RR |
|----------------|---------|---------------|
| 0.022          | 0.00461 | 0.00057       |

# Nb12Ga3Ge1

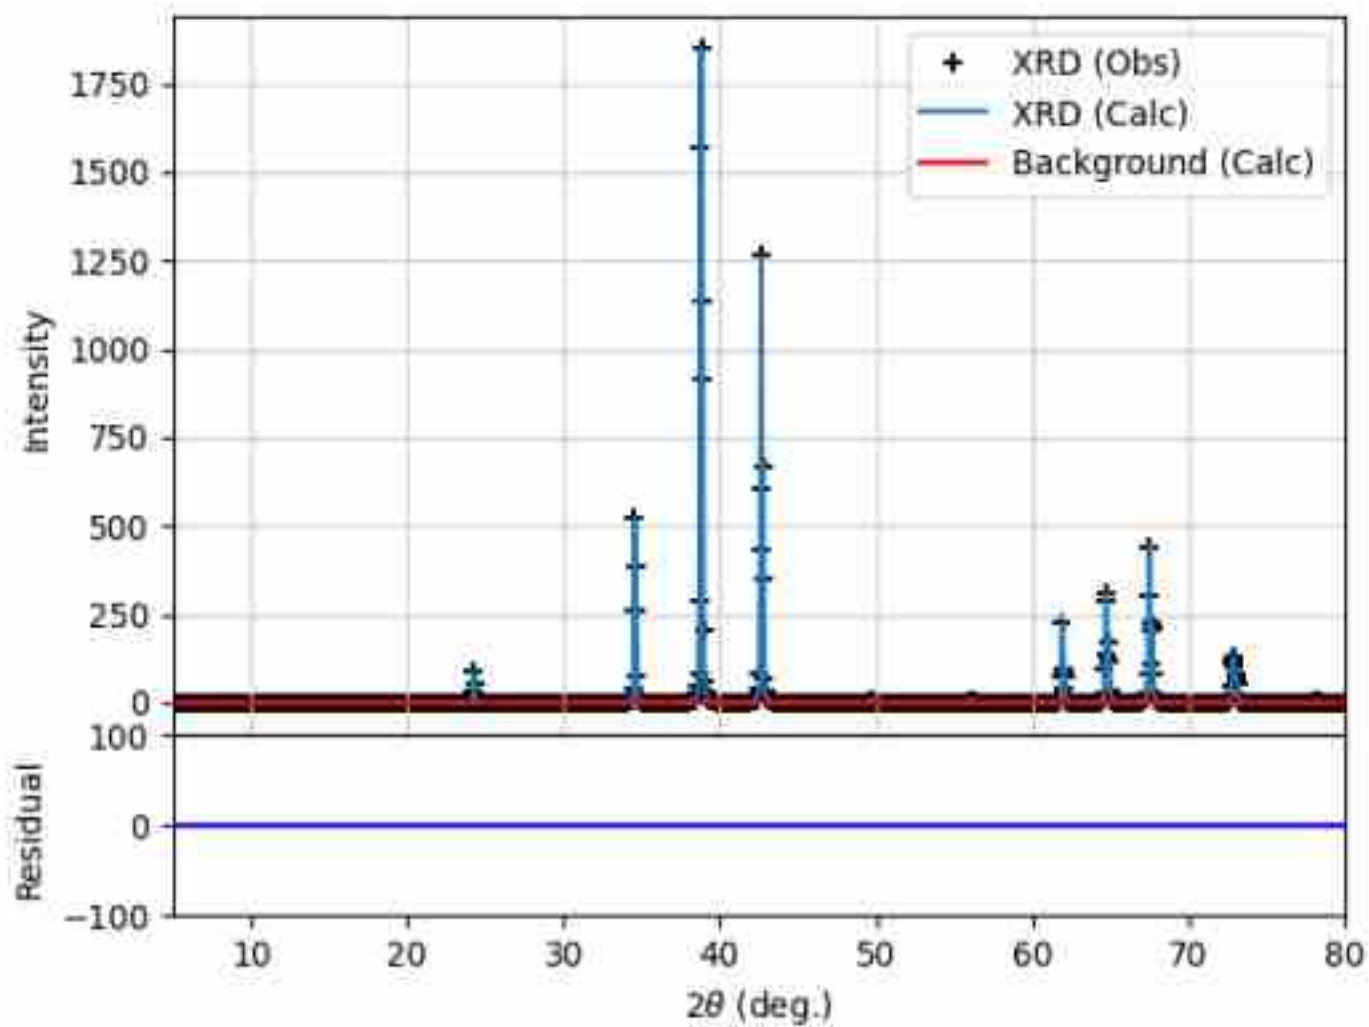

| RMSE before RR | Rwp     | RMSE after RR |
|----------------|---------|---------------|
| 0.022          | 0.00184 | 0.00018       |

# Nd<sub>2</sub>Fe<sub>2</sub>Se<sub>2</sub>O<sub>3</sub>

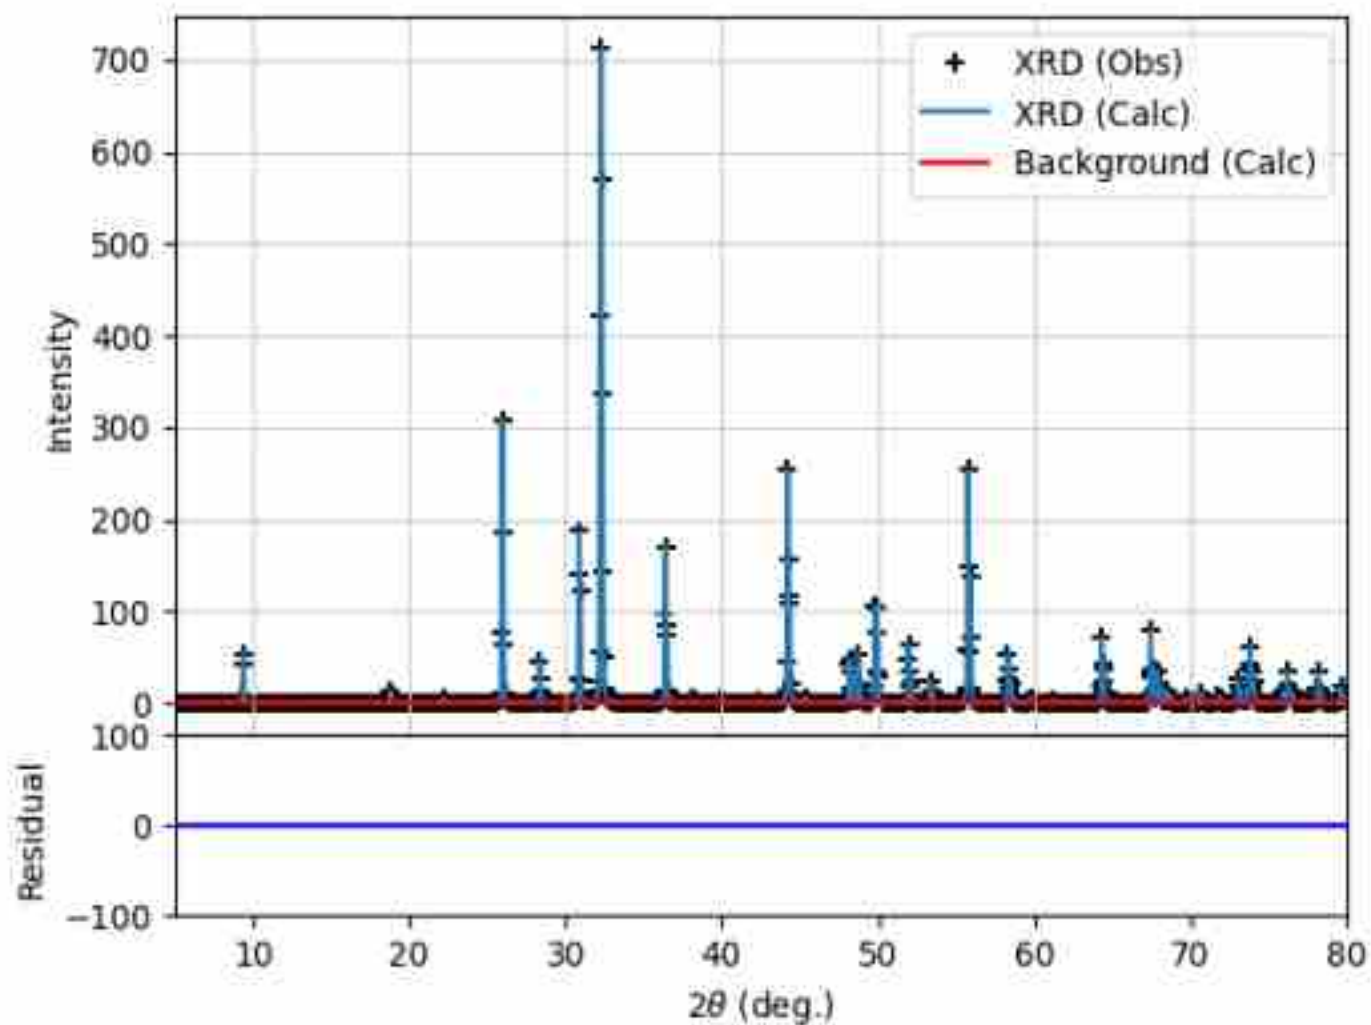

| RMSE before RR | Rwp     | RMSE after RR |
|----------------|---------|---------------|
| 0.022          | 0.00437 | 0.00155       |

# Nd<sub>2</sub>Si<sub>2</sub>Ru<sub>4</sub>C<sub>2</sub>

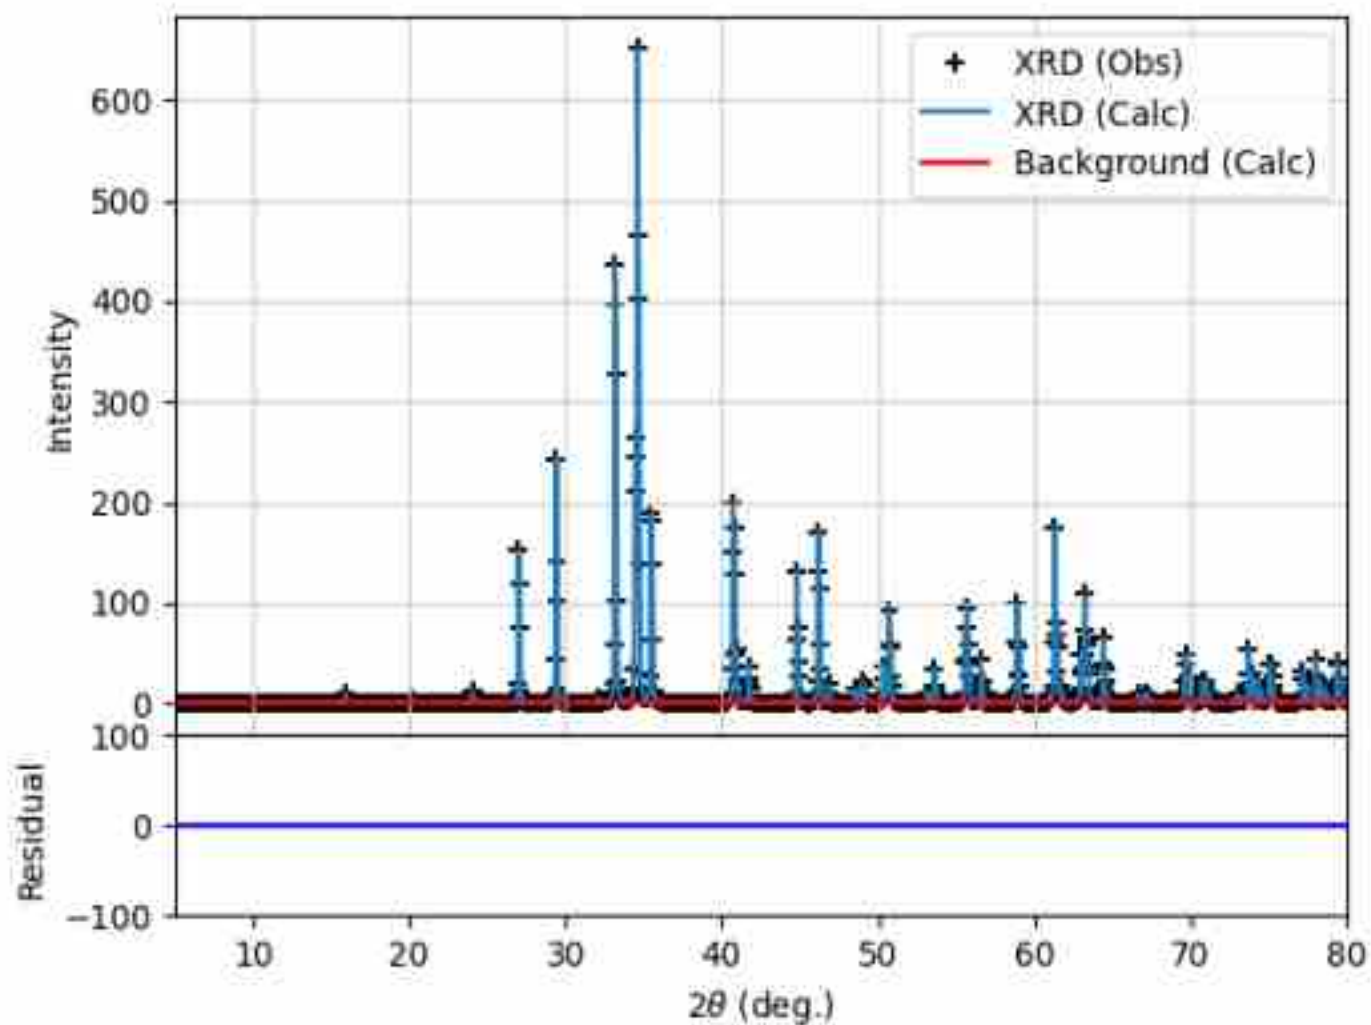

| RMSE before RR | Rwp     | RMSE after RR |
|----------------|---------|---------------|
| 0.022          | 0.00497 | 0.00075       |

# Nd<sub>3</sub>Al<sub>12</sub>

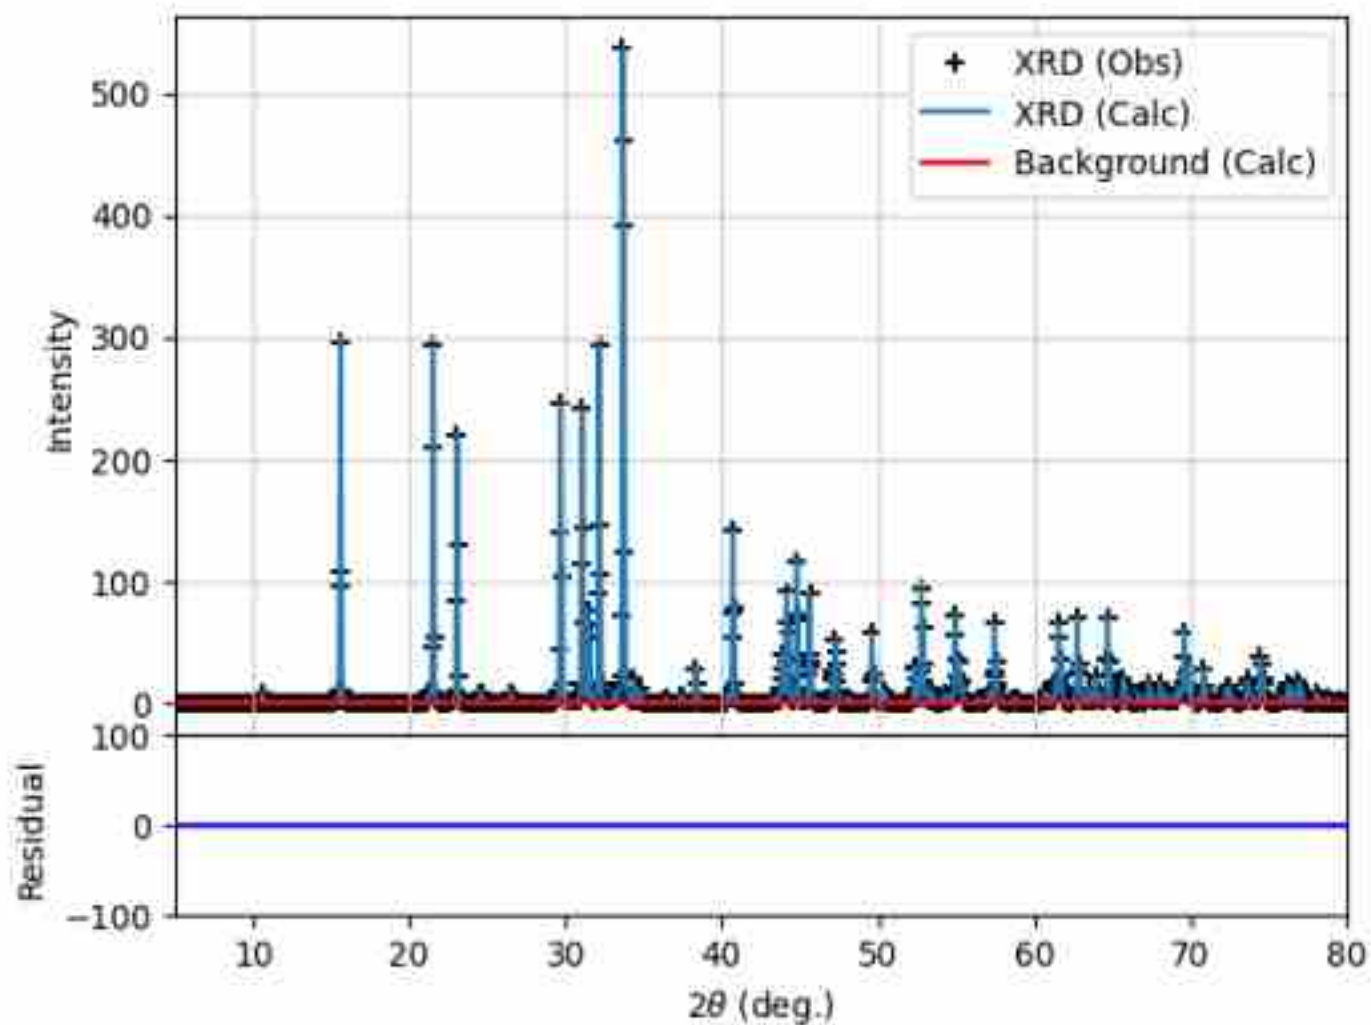

| RMSE before RR | Rwp     | RMSE after RR |
|----------------|---------|---------------|
| 0.022          | 0.01264 | 0.00999       |

# Nd<sub>4</sub>Mn<sub>4</sub>O<sub>12</sub>

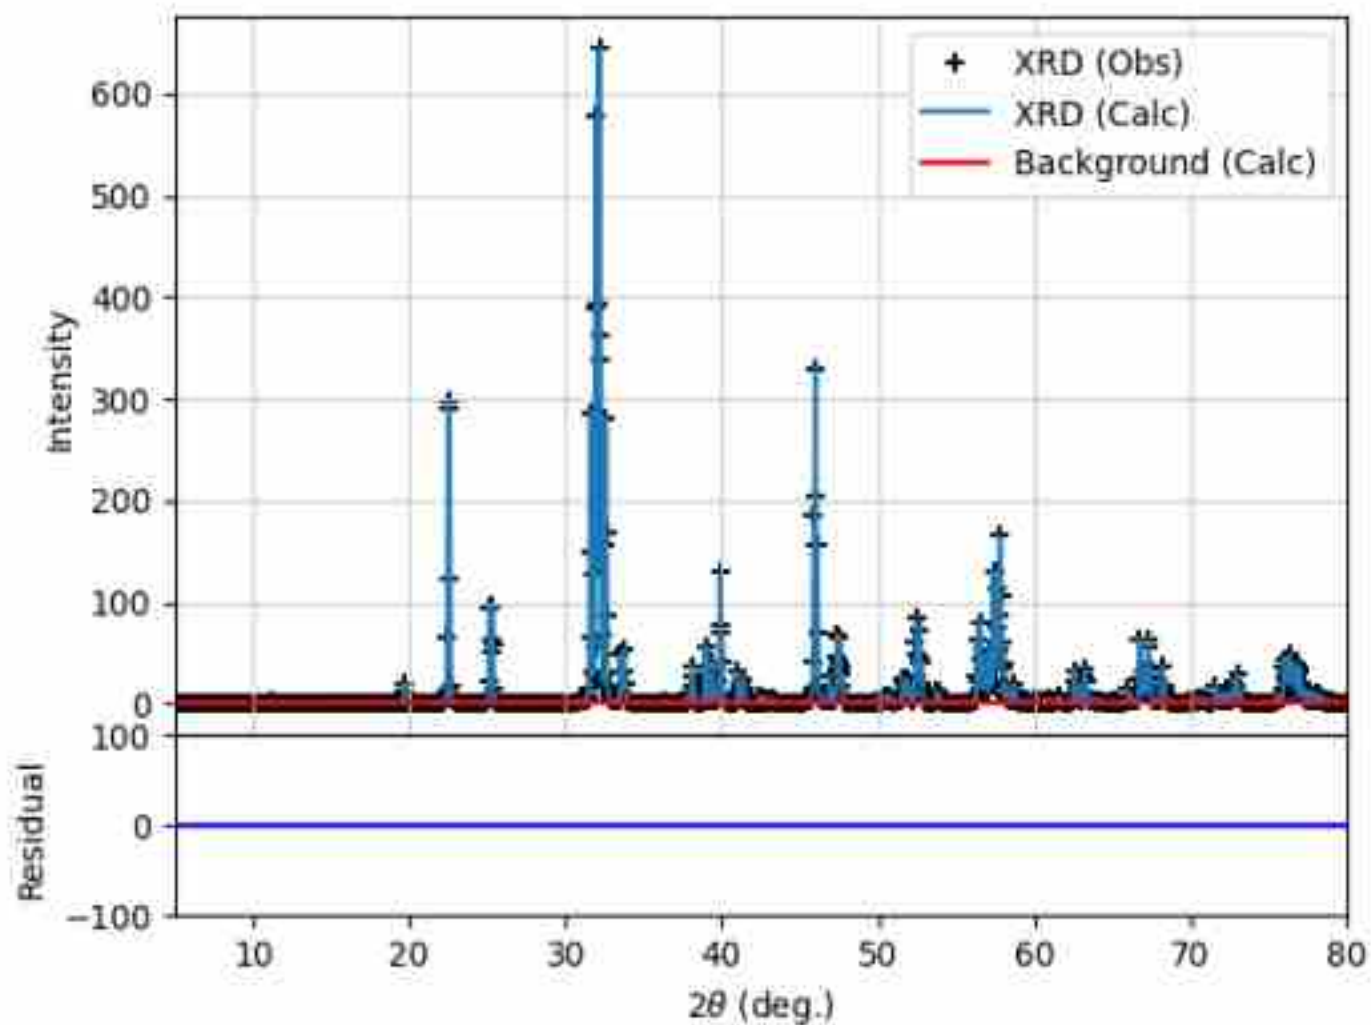

| RMSE before RR | Rwp   | RMSE after RR |
|----------------|-------|---------------|
| 0.022          | 0.004 | 0.00123       |

# Ni12P4

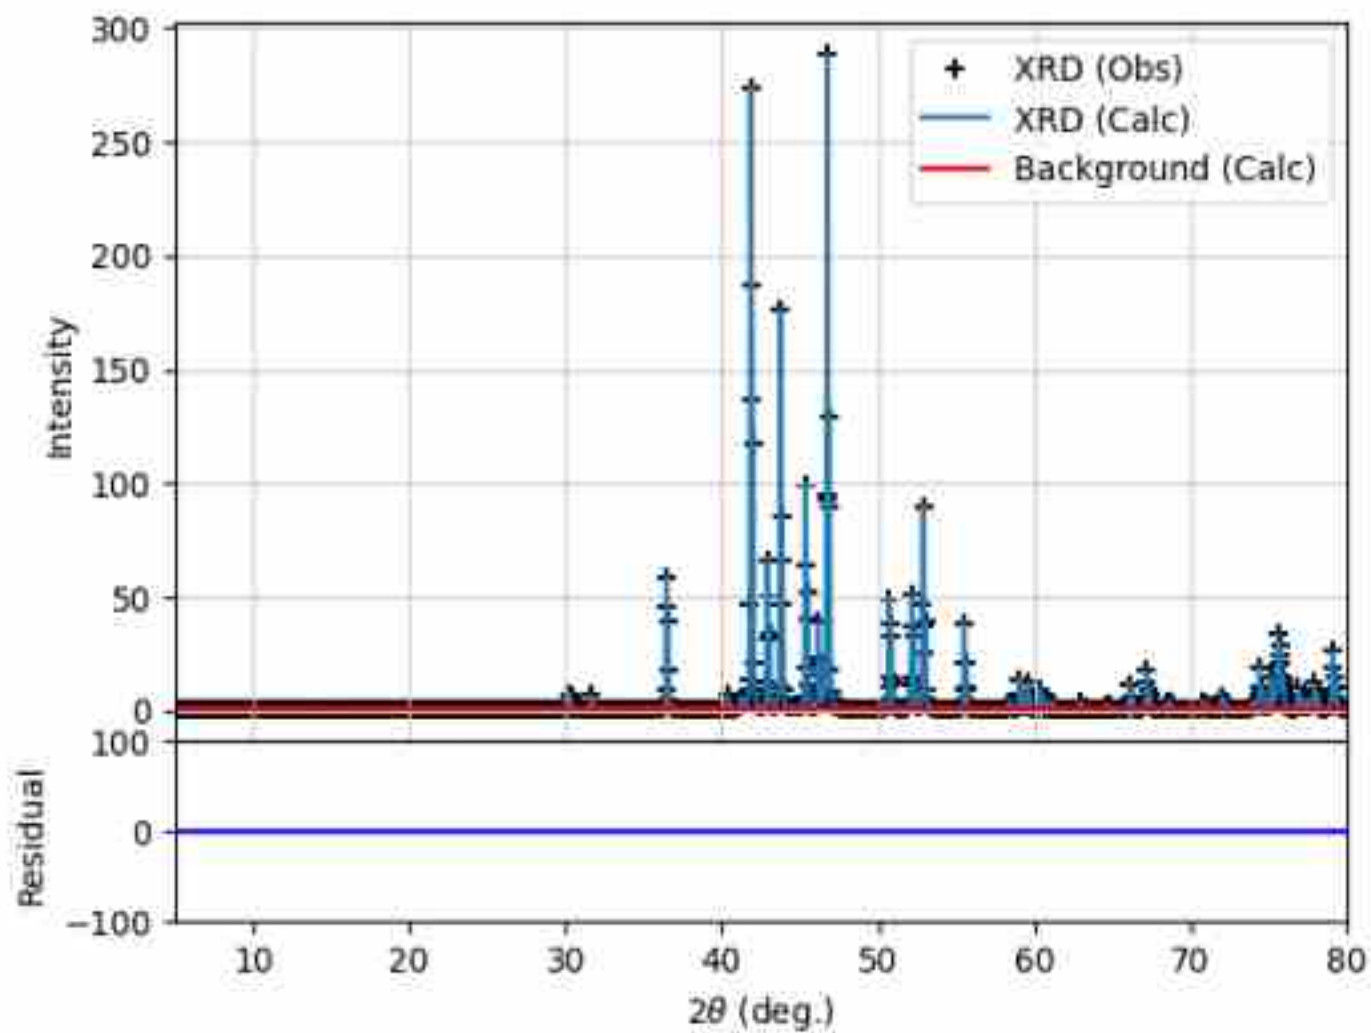

| RMSE before RR | Rwp     | RMSE after RR |
|----------------|---------|---------------|
| 0.022          | 0.00266 | 0.00065       |



# P4Ir4S4

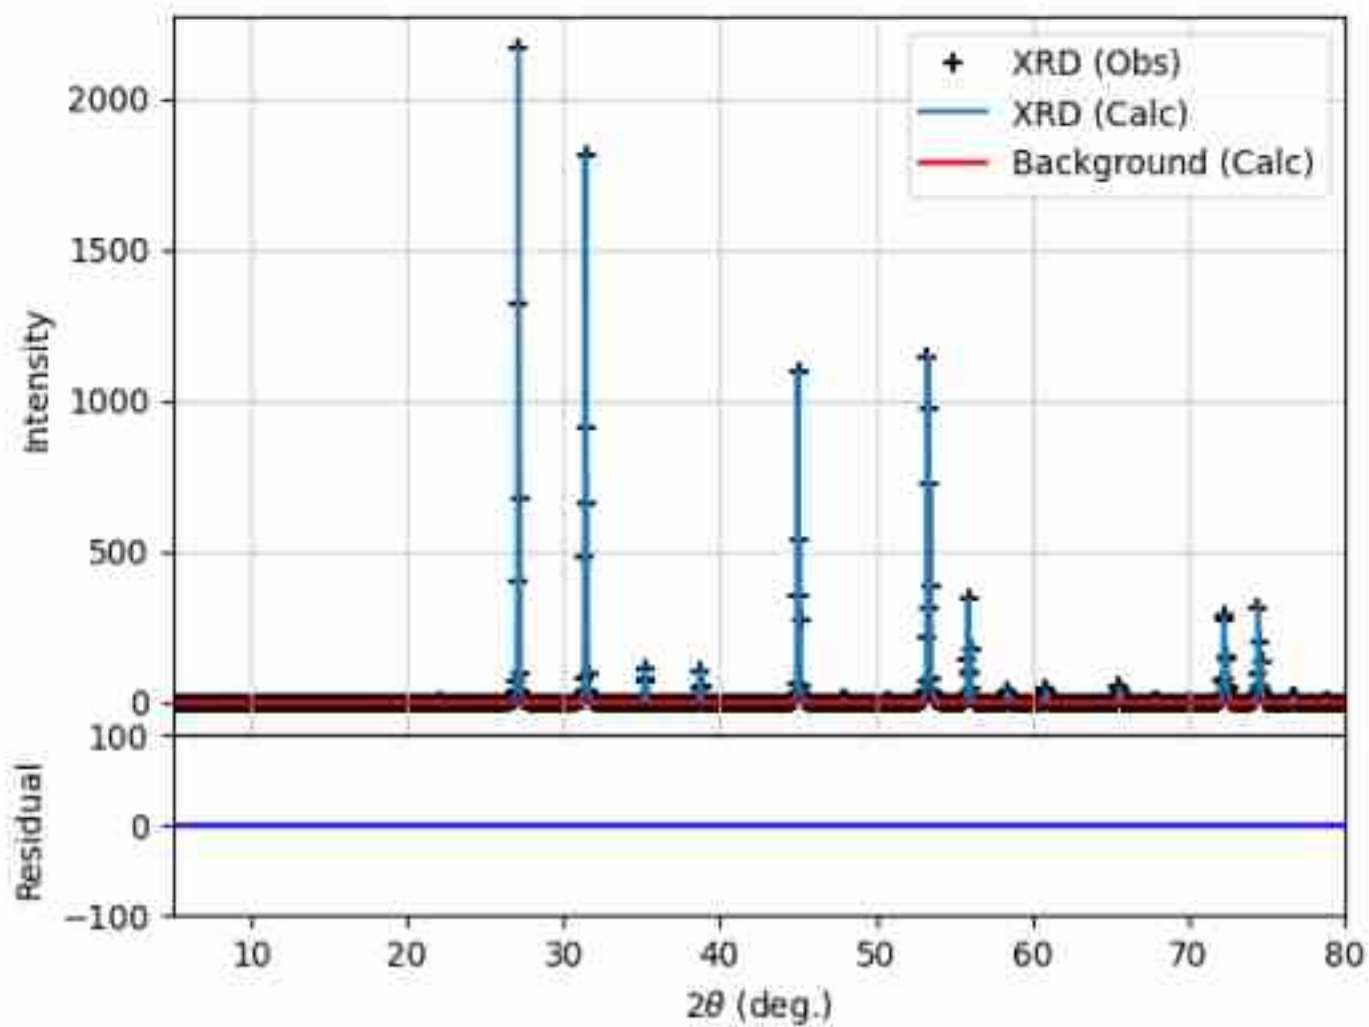

| RMSE before RR | Rwp     | RMSE after RR |
|----------------|---------|---------------|
| 0.022          | 0.01131 | 0.00286       |

# Pr<sub>4</sub>Pb<sub>2</sub>Se<sub>8</sub>

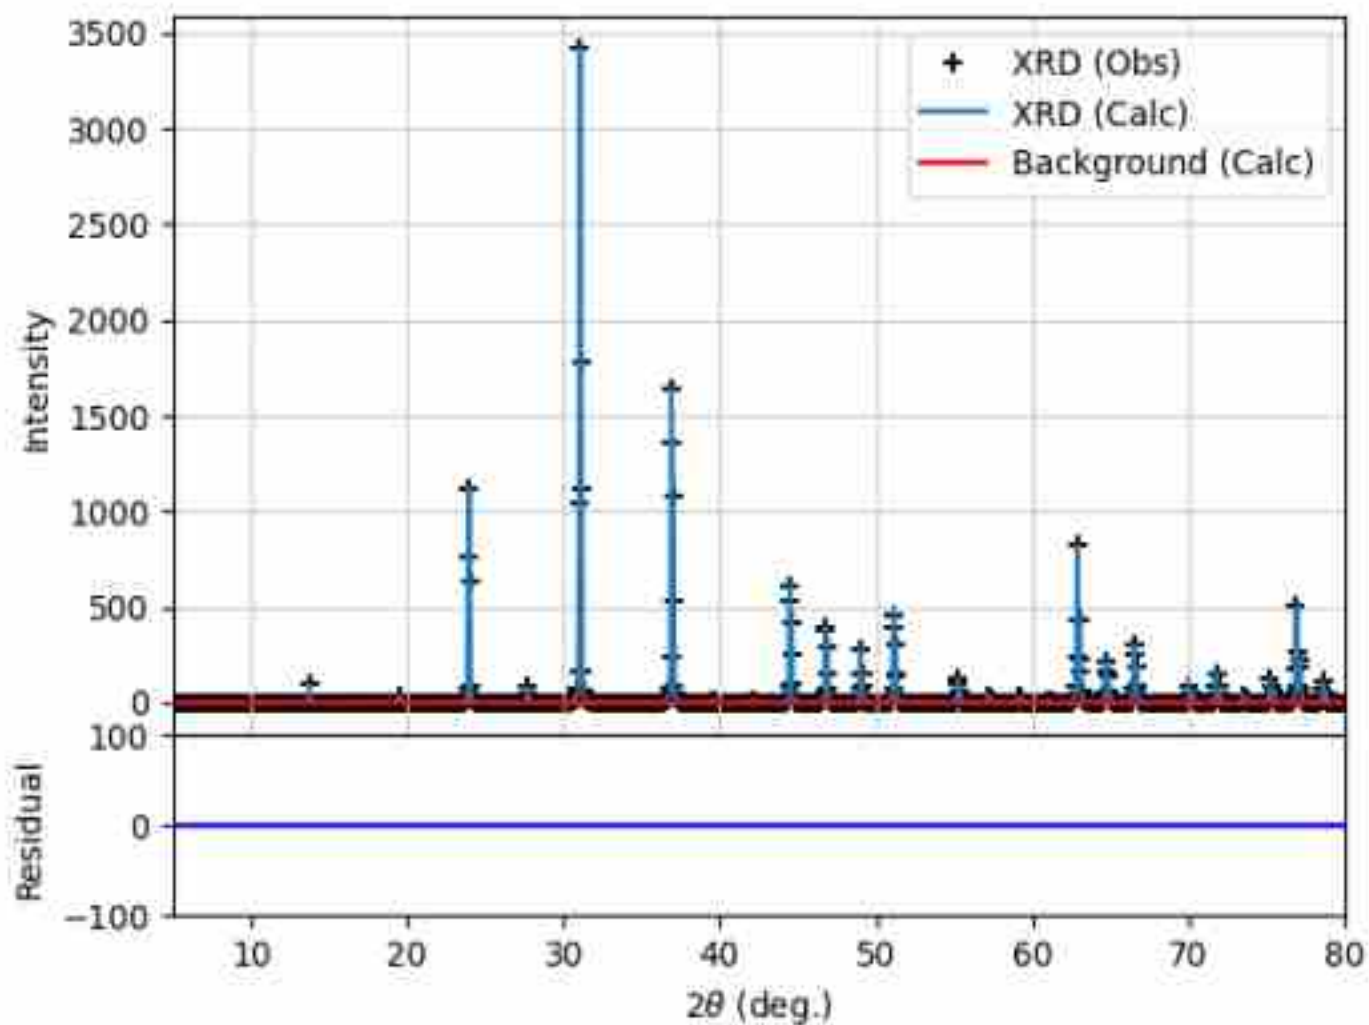

| RMSE before RR | Rwp     | RMSE after RR |
|----------------|---------|---------------|
| 0.022          | 0.00216 | 0.00042       |

# Pr<sub>4</sub>Sn<sub>10</sub>

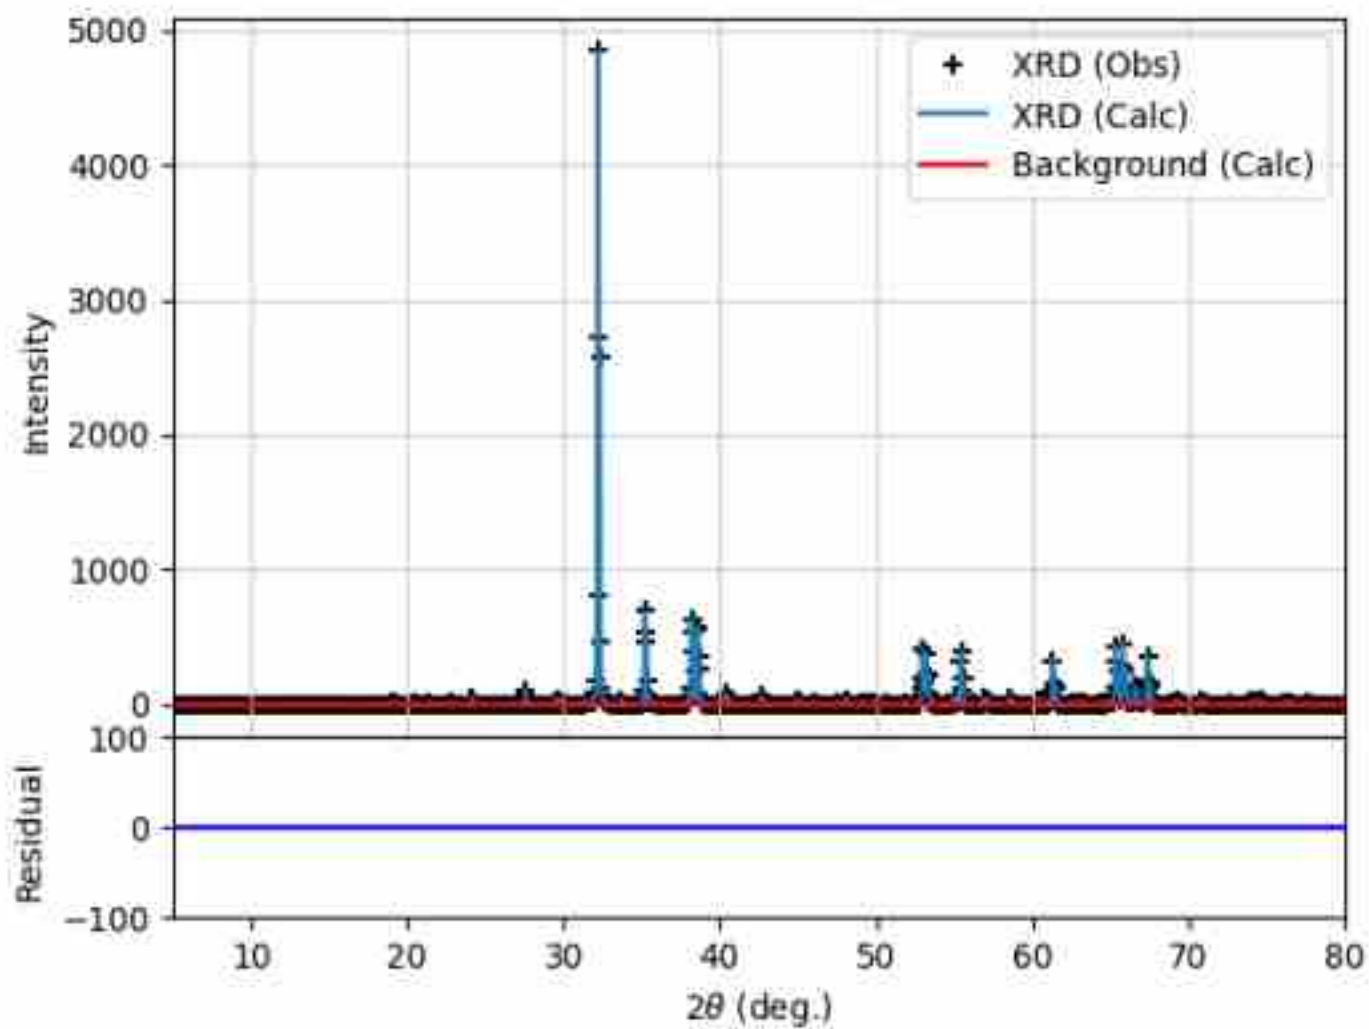

| RMSE before RR | Rwp     | RMSE after RR |
|----------------|---------|---------------|
| 0.022          | 0.00534 | 0.00044       |

# Pr<sub>5</sub>Ag<sub>1</sub>Se<sub>8</sub>

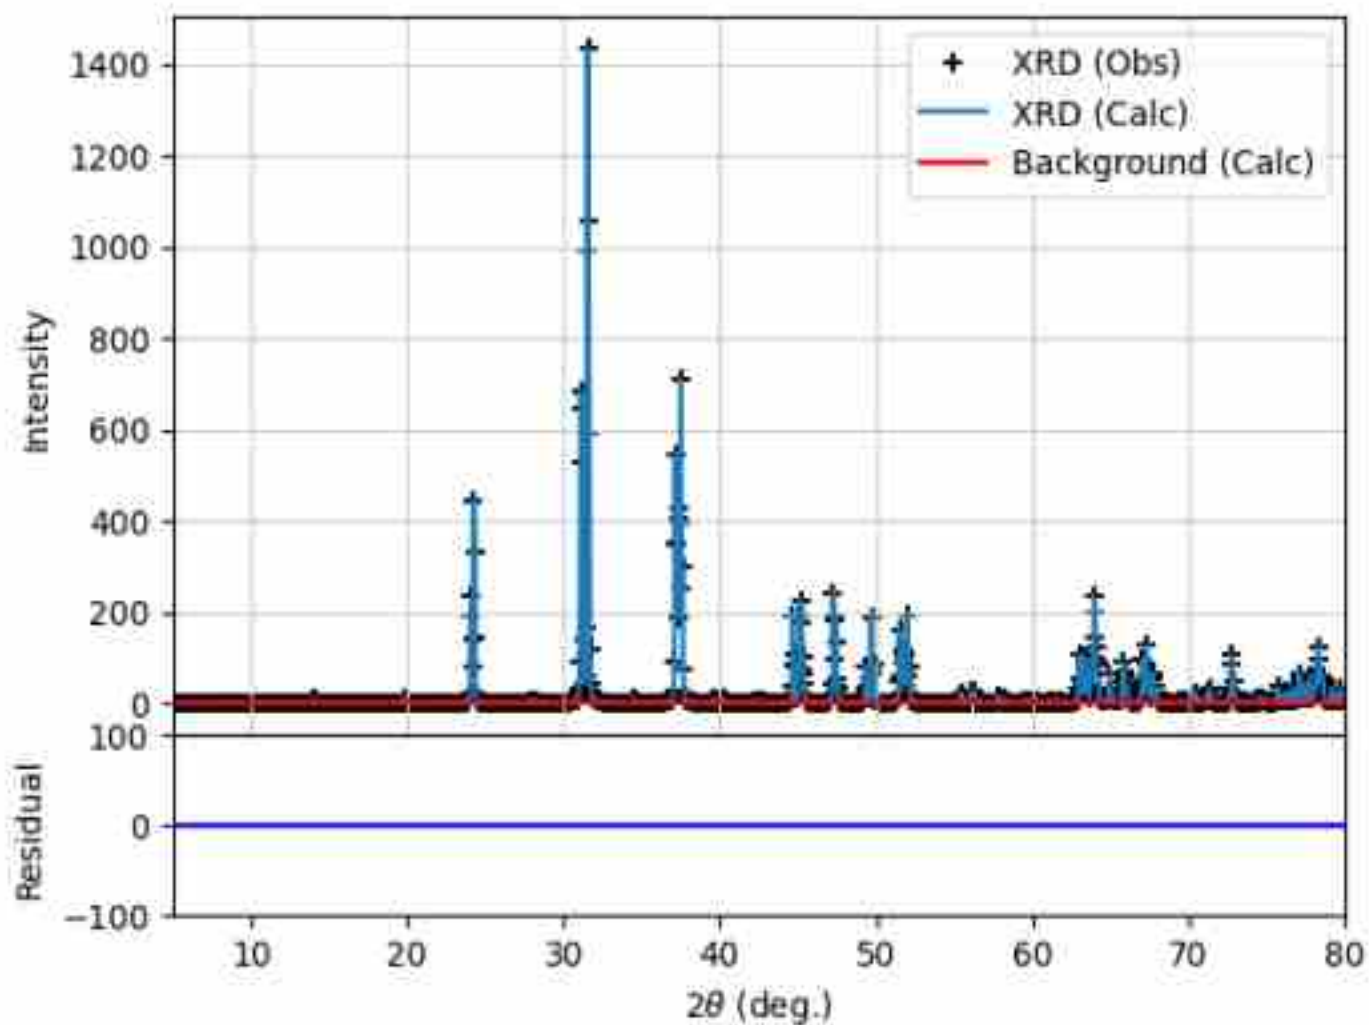

| RMSE before RR | Rwp     | RMSE after RR |
|----------------|---------|---------------|
| 0.022          | 0.00243 | 0.00038       |

# Pr<sub>6</sub>Ni<sub>6</sub>Bi<sub>8</sub>

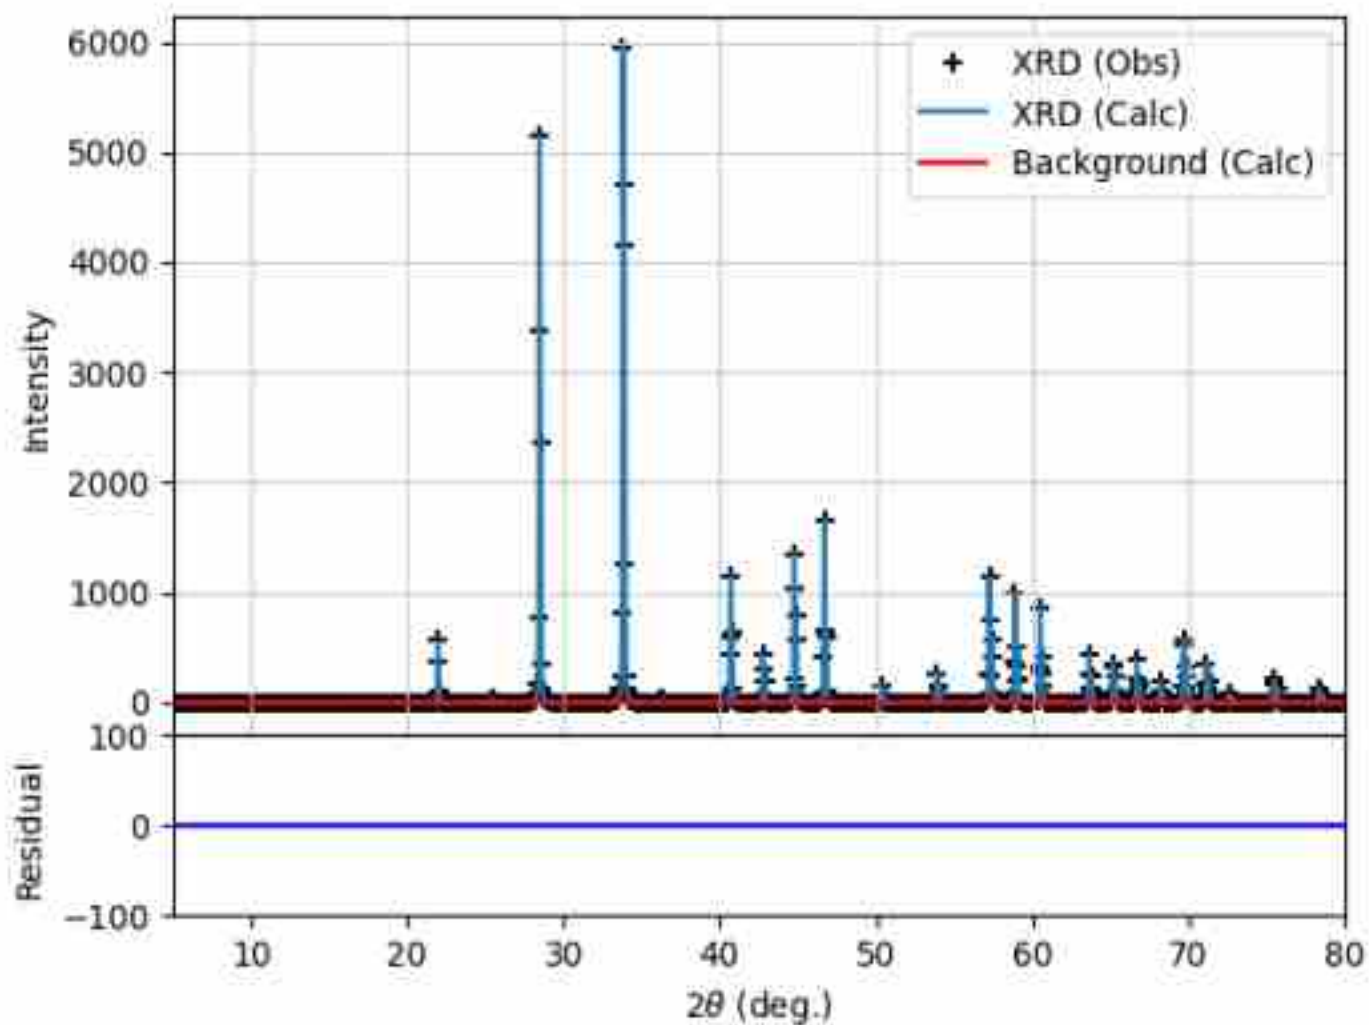

| RMSE before RR | Rwp     | RMSE after RR |
|----------------|---------|---------------|
| 0.022          | 0.02111 | 0.00146       |

# Pr8Sn12

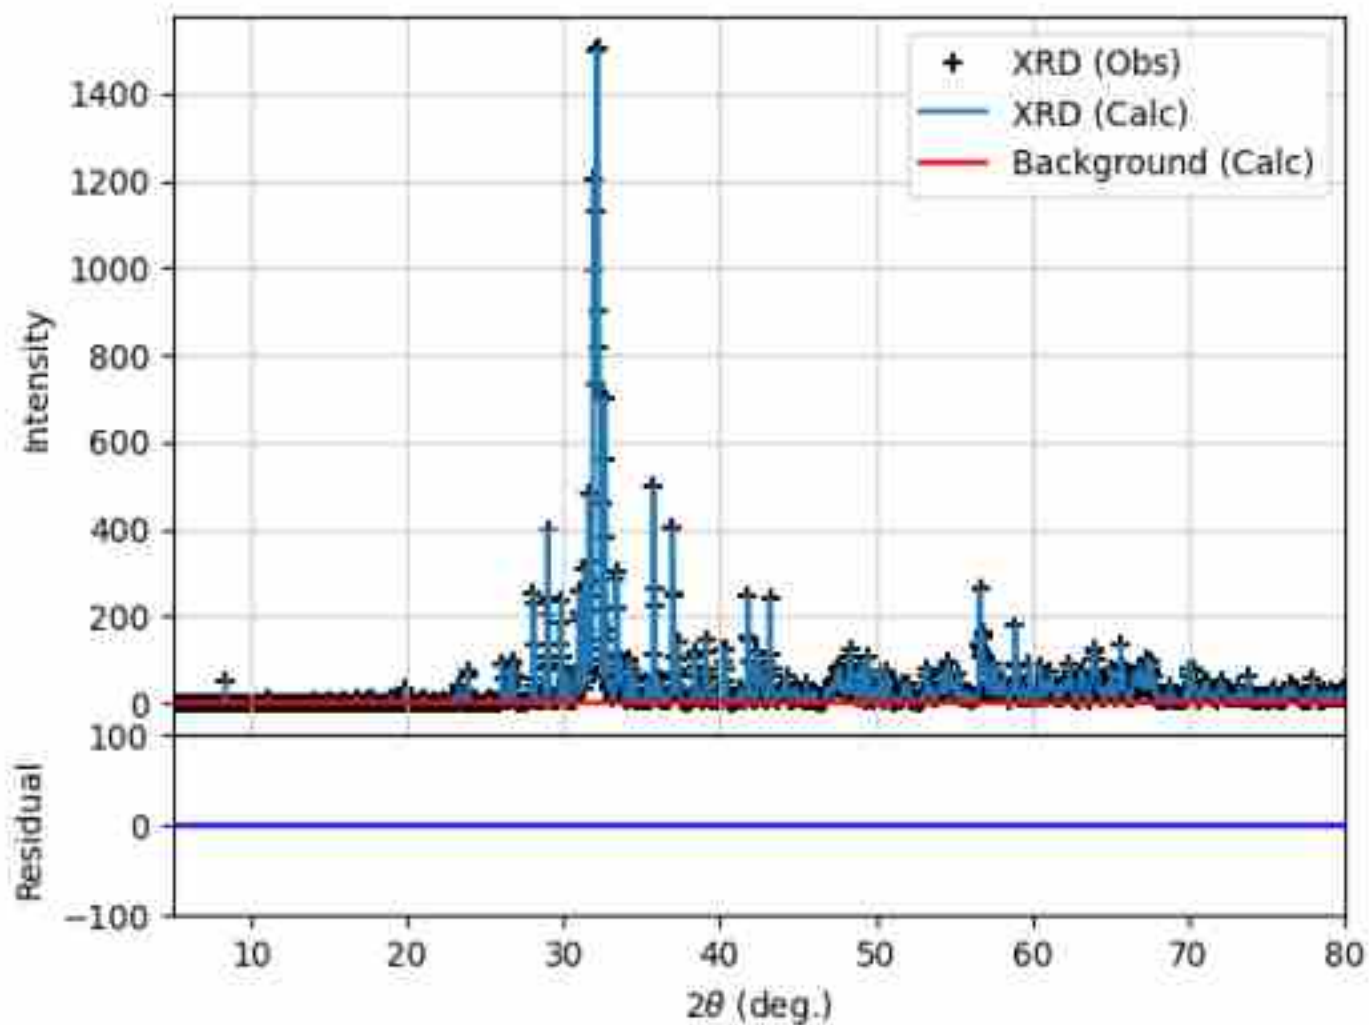

| RMSE before RR | Rwp     | RMSE after RR |
|----------------|---------|---------------|
| 0.022          | 0.00088 | 0.00015       |

# Rb1Yb1W2O8

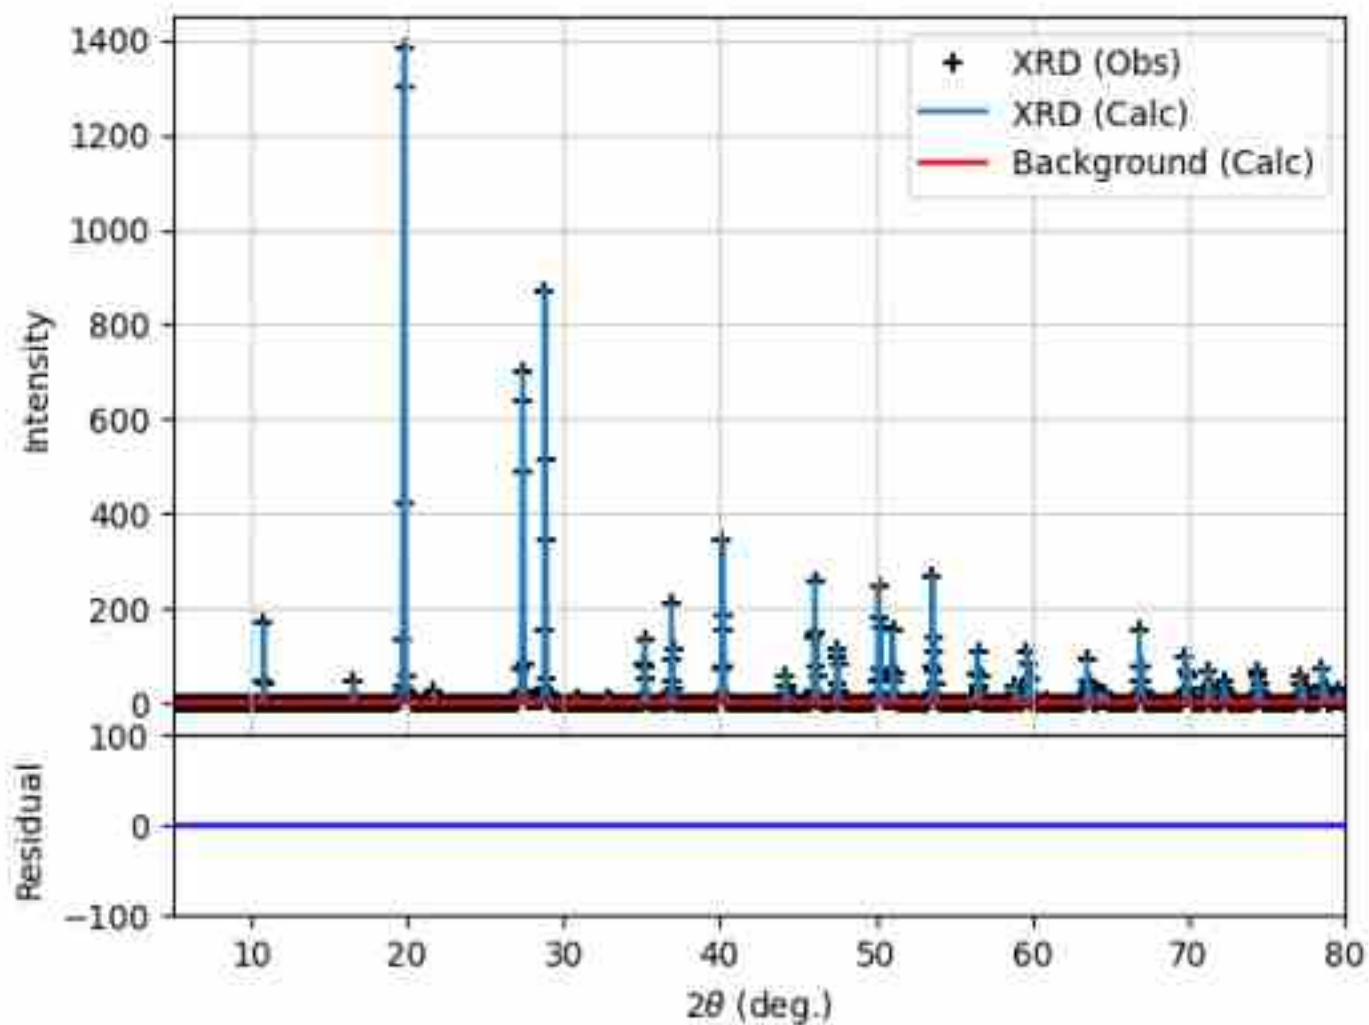

| RMSE before RR | Rwp     | RMSE after RR |
|----------------|---------|---------------|
| 0.022          | 0.00397 | 0.0015        |

# Rb<sub>2</sub>La<sub>2</sub>Mn<sub>2</sub>W<sub>2</sub>O<sub>12</sub>

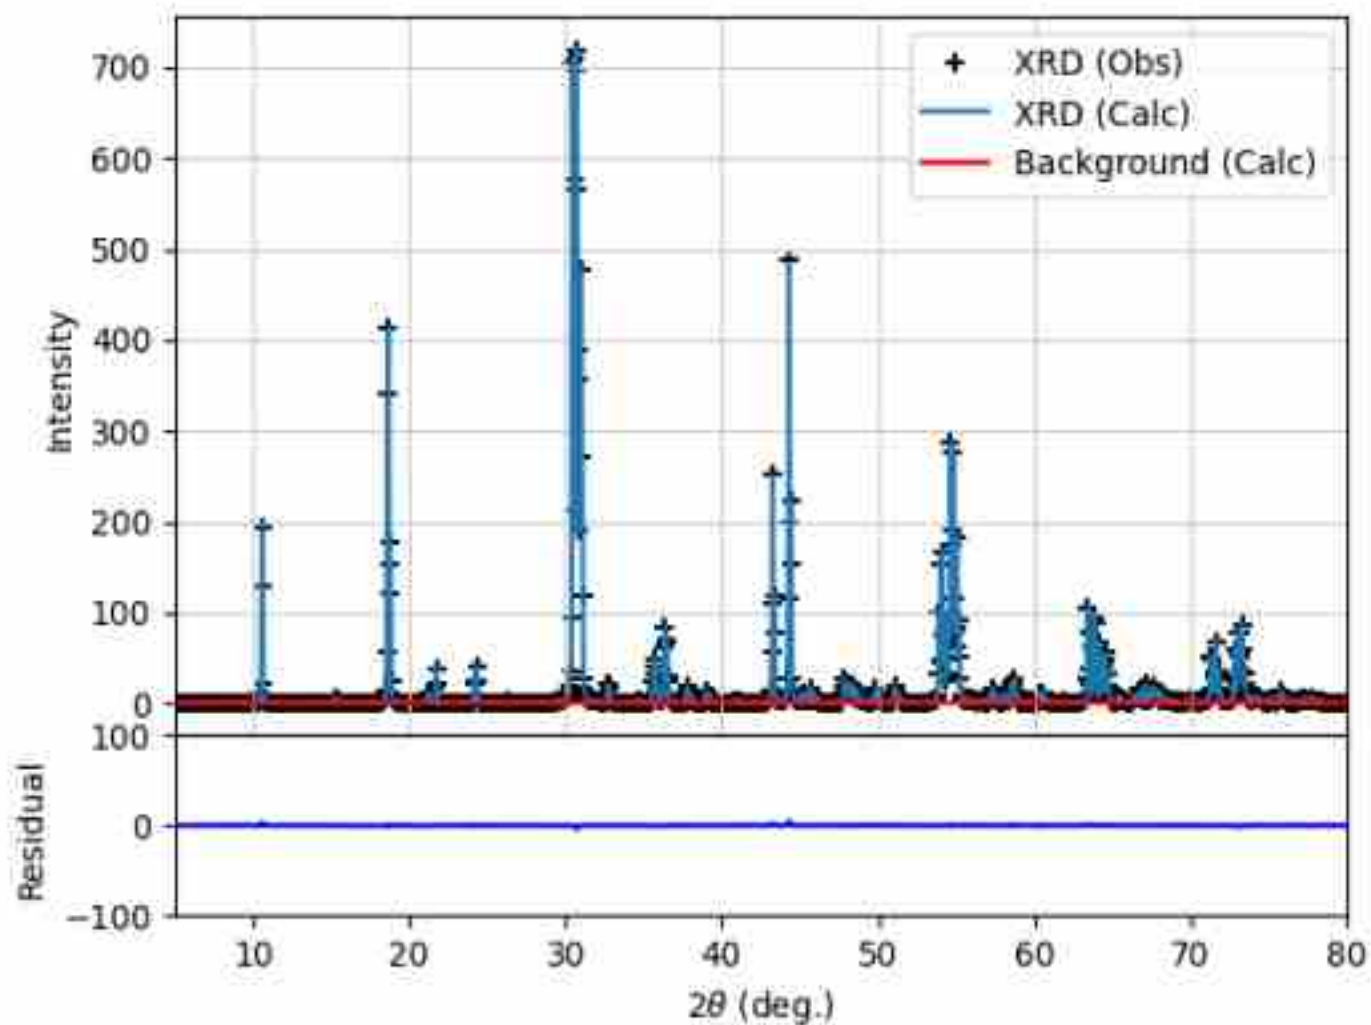

| RMSE before RR | Rwp     | RMSE after RR |
|----------------|---------|---------------|
| 0.022          | 1.43149 | 0.08157       |



# Rb<sub>2</sub>Zr<sub>2</sub>Cd<sub>2</sub>F<sub>14</sub>

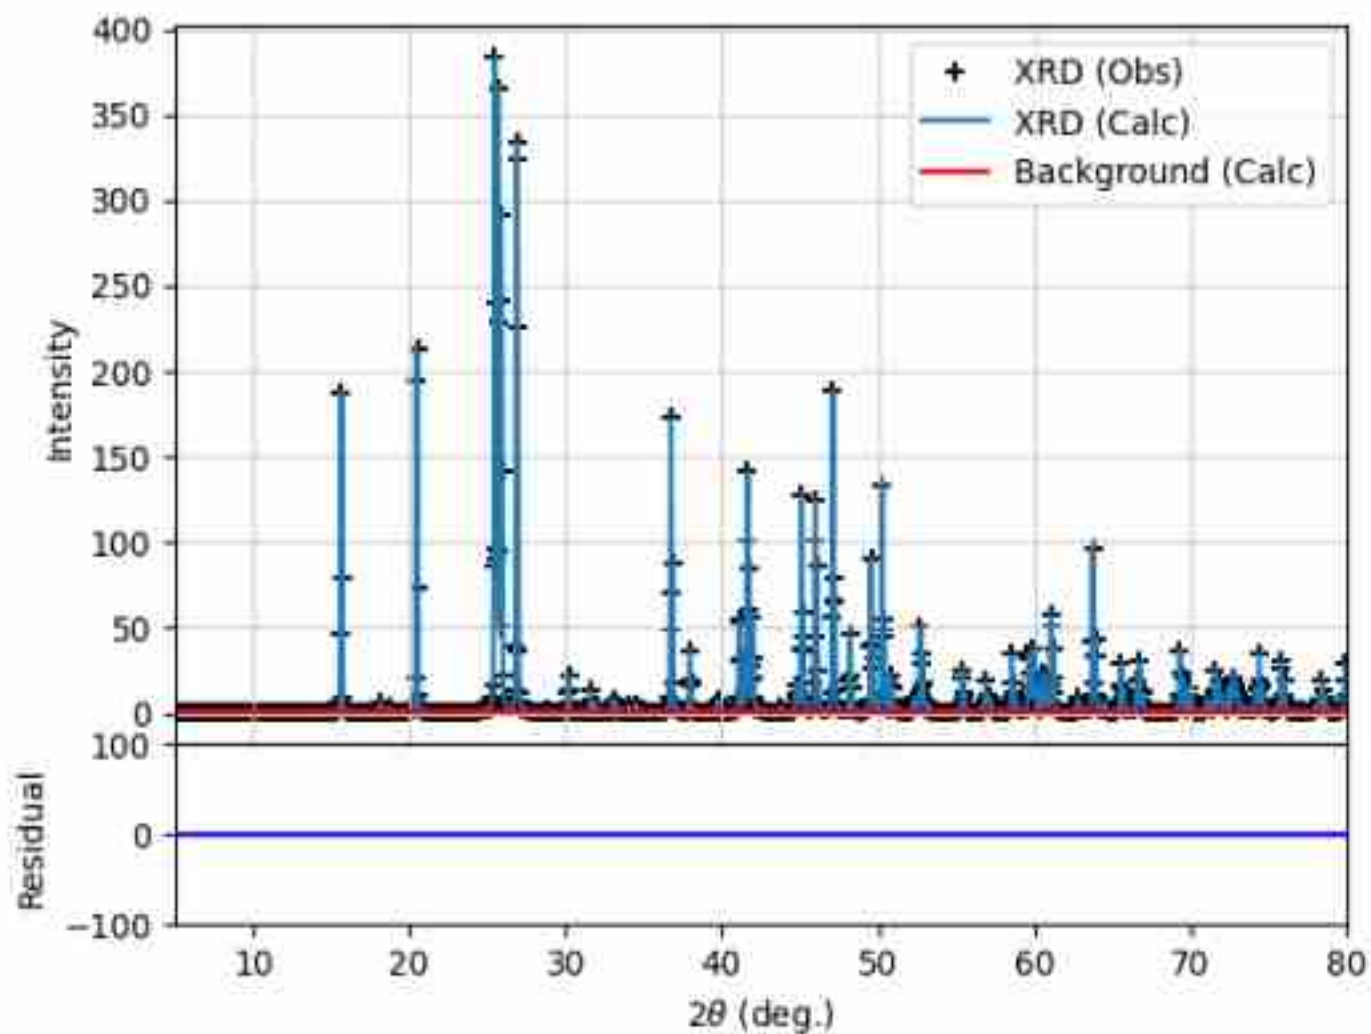

| RMSE before RR | Rwp     | RMSE after RR |
|----------------|---------|---------------|
| 0.022          | 0.00354 | 0.00062       |

# Rb<sub>3</sub>Mn<sub>2</sub>Br<sub>7</sub>

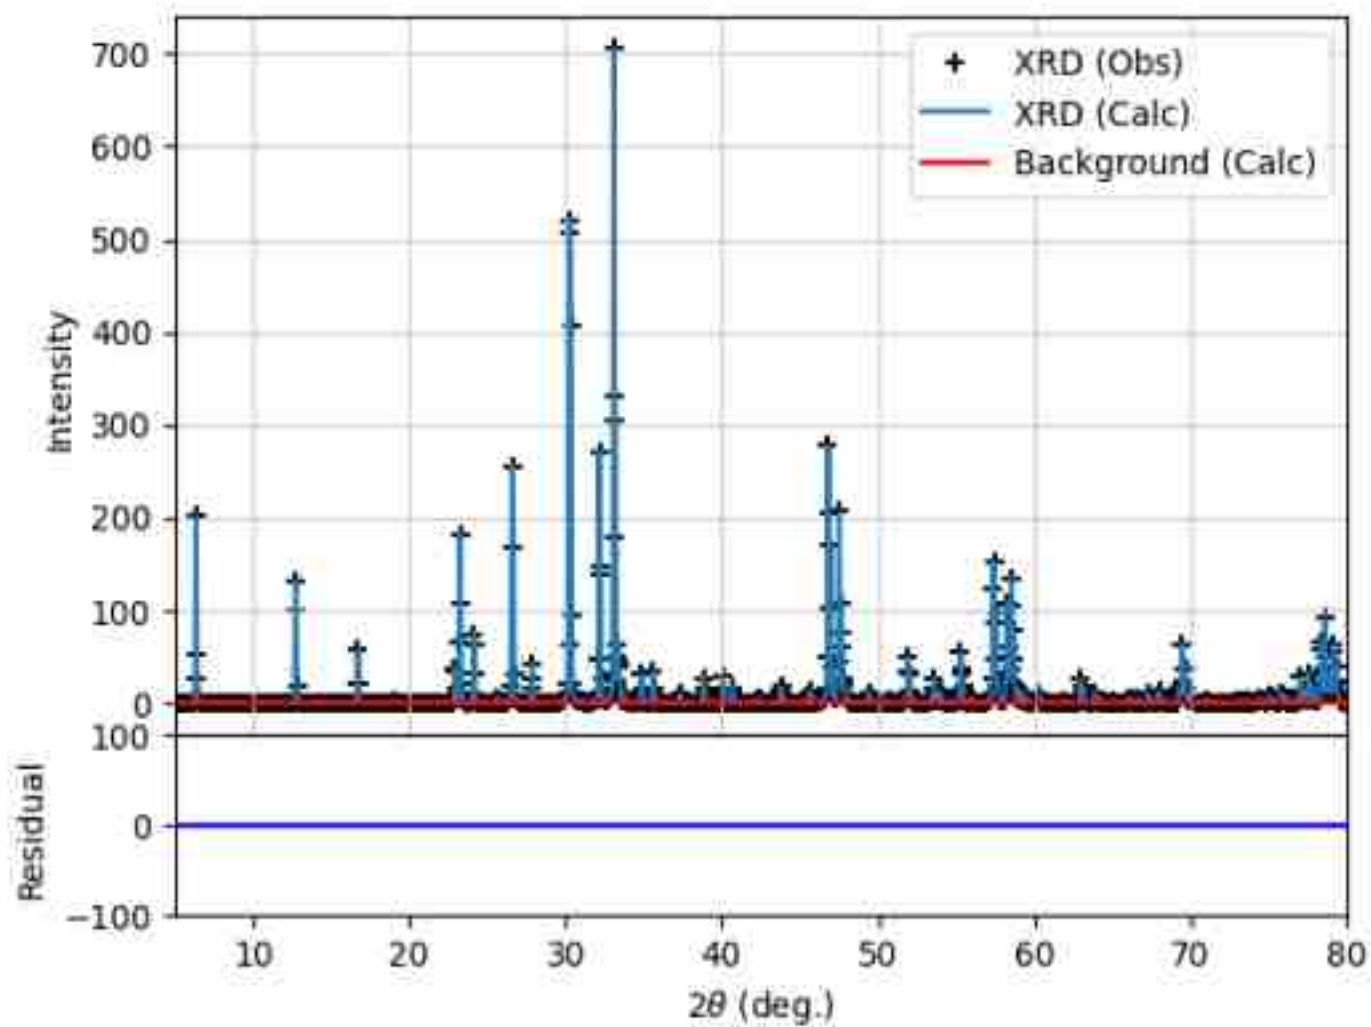

| RMSE before RR | Rwp     | RMSE after RR |
|----------------|---------|---------------|
| 0.022          | 0.00314 | 0.00018       |

# Rb<sub>4</sub>Ba<sub>2</sub>Cl<sub>8</sub>

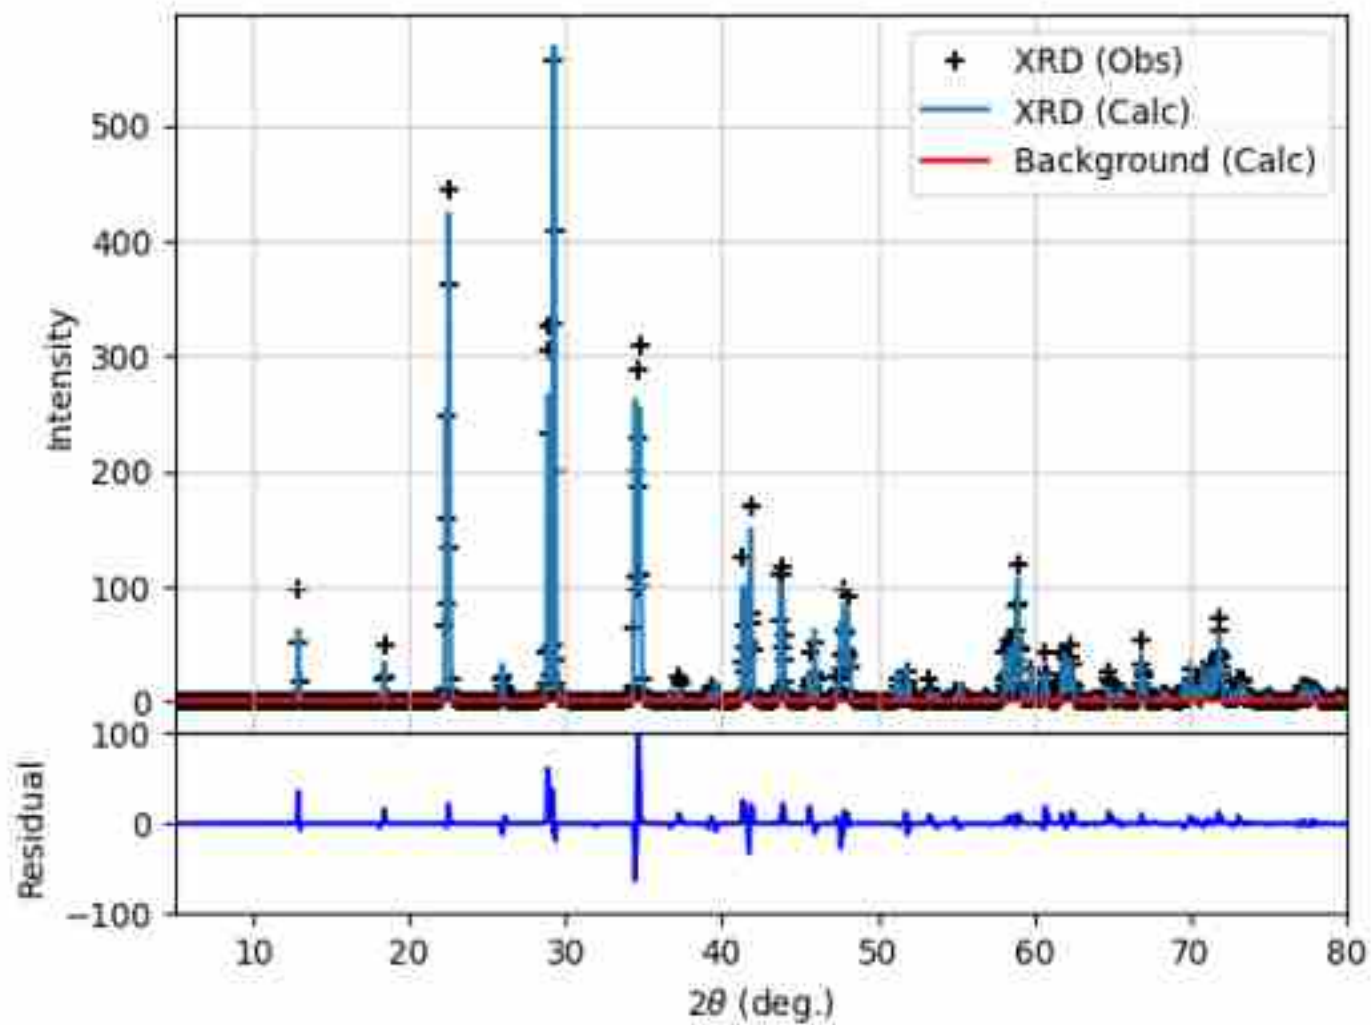

| RMSE before RR | Rwp      | RMSE after RR |
|----------------|----------|---------------|
| 0.022          | 24.10662 | 0.07601       |

# Rb<sub>4</sub>Ni<sub>2</sub>As<sub>4</sub>

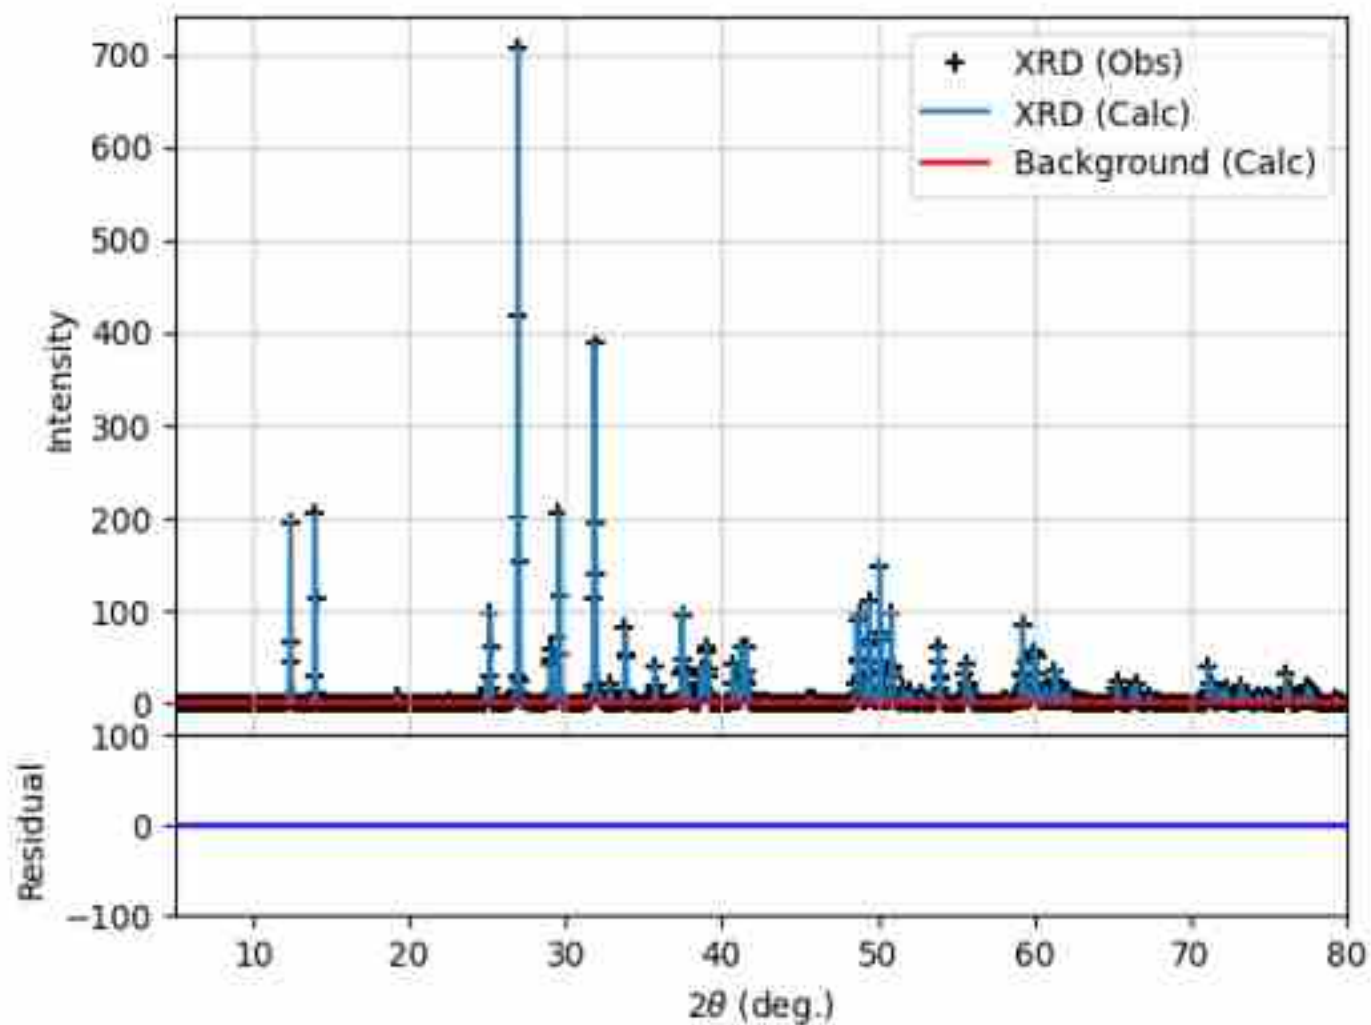

| RMSE before RR | Rwp     | RMSE after RR |
|----------------|---------|---------------|
| 0.022          | 0.00347 | 0.00024       |

# Rb<sub>4</sub>Yb<sub>4</sub>Br<sub>12</sub>

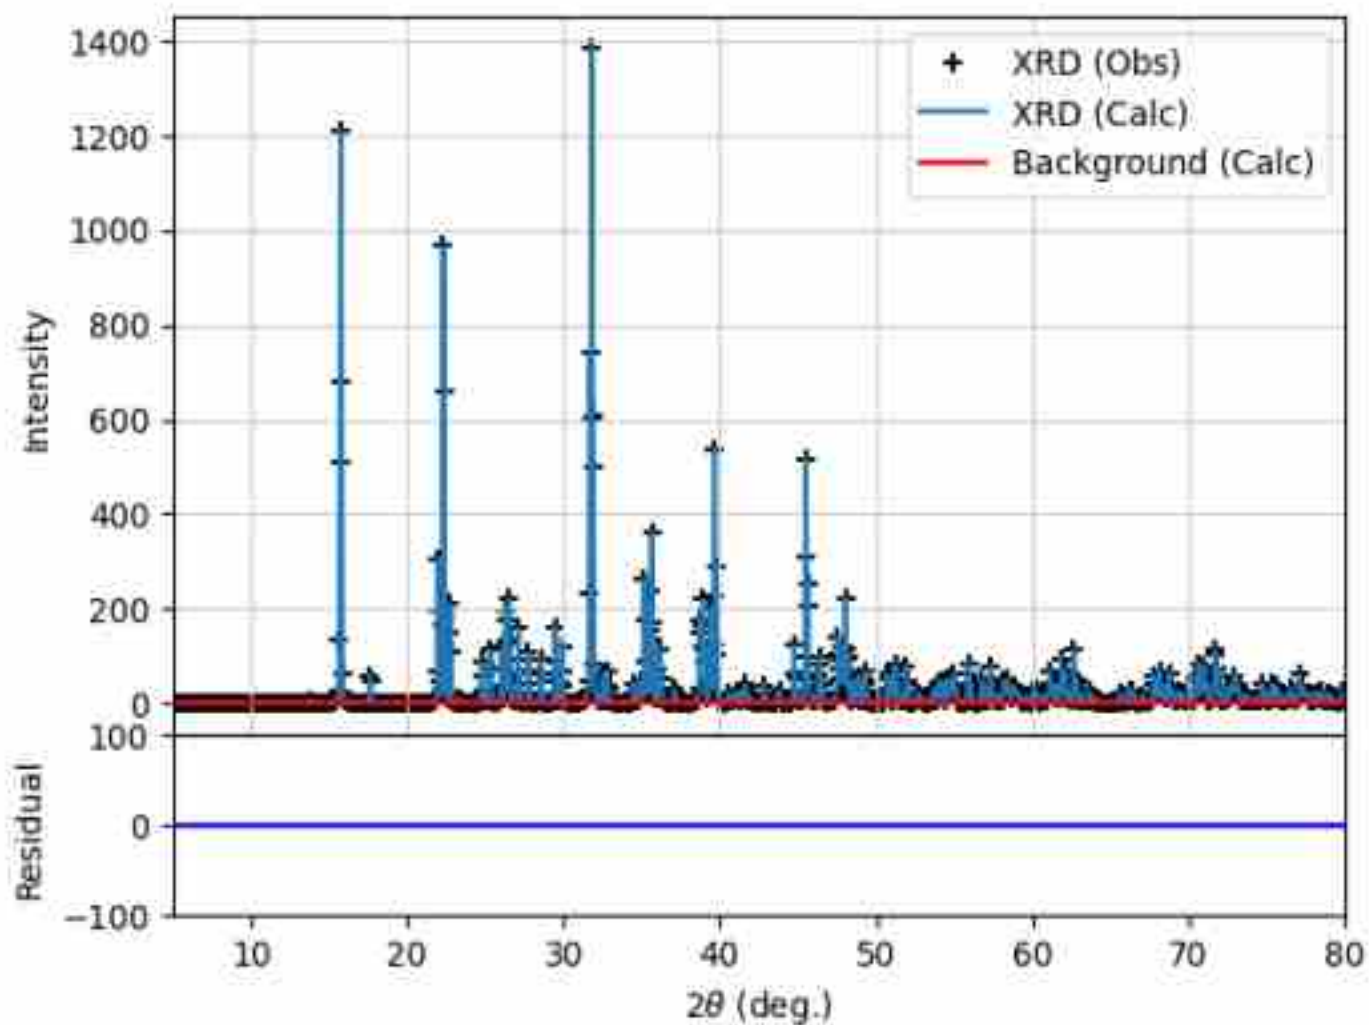

| RMSE before RR | Rwp     | RMSE after RR |
|----------------|---------|---------------|
| 0.022          | 0.00409 | 0.00029       |

# Sb<sub>4</sub>Ir<sub>4</sub>Se<sub>4</sub>

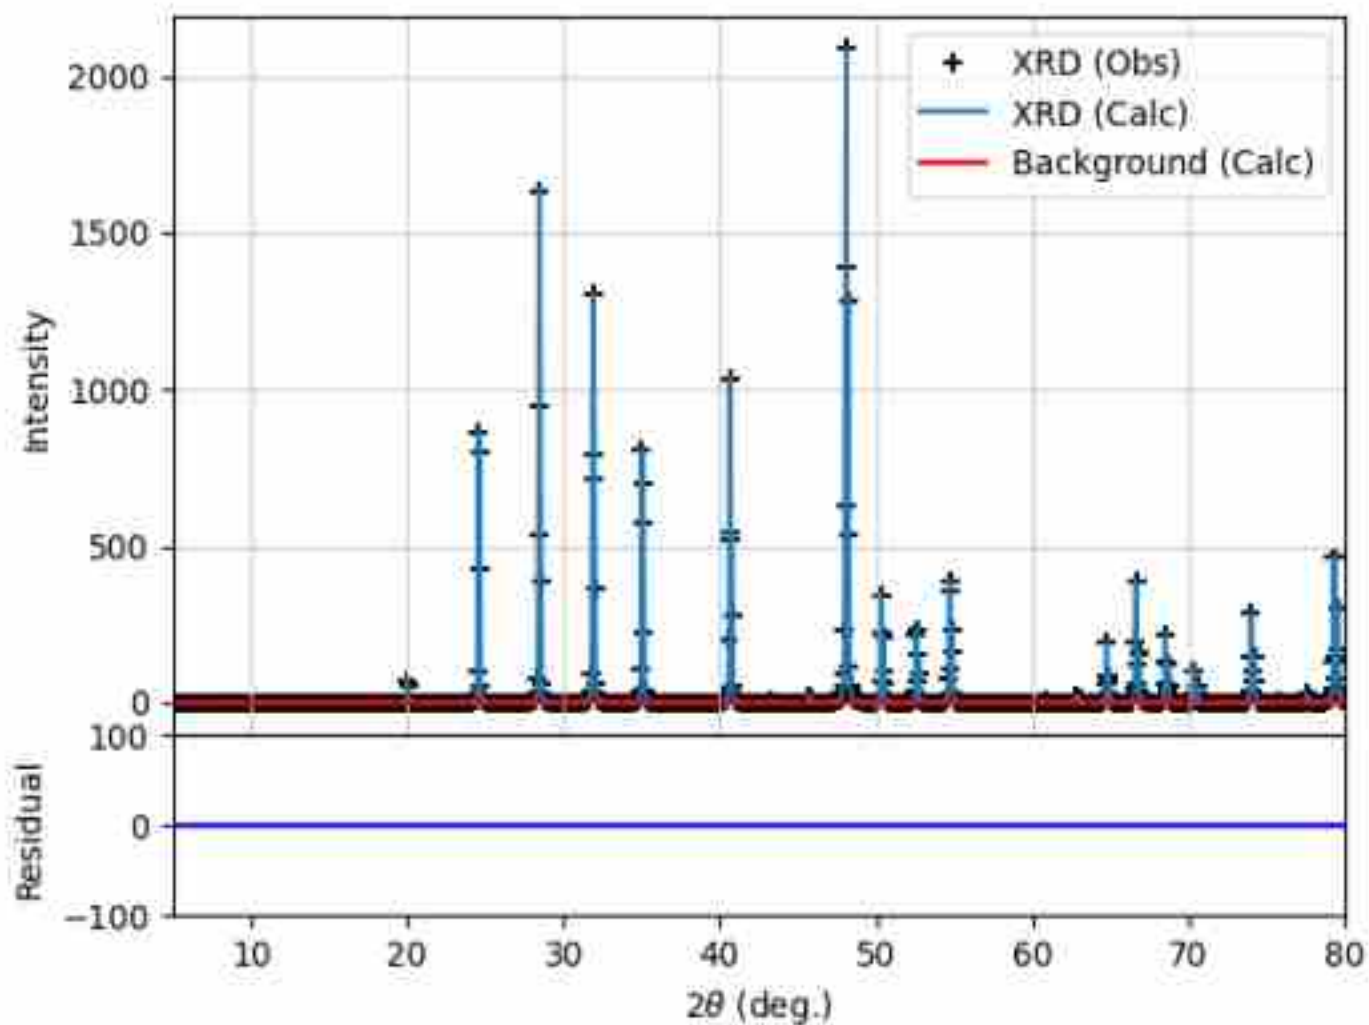

| RMSE before RR | Rwp     | RMSE after RR |
|----------------|---------|---------------|
| 0.022          | 0.00472 | 0.00038       |

# Sc1Ga4Fe3Co8

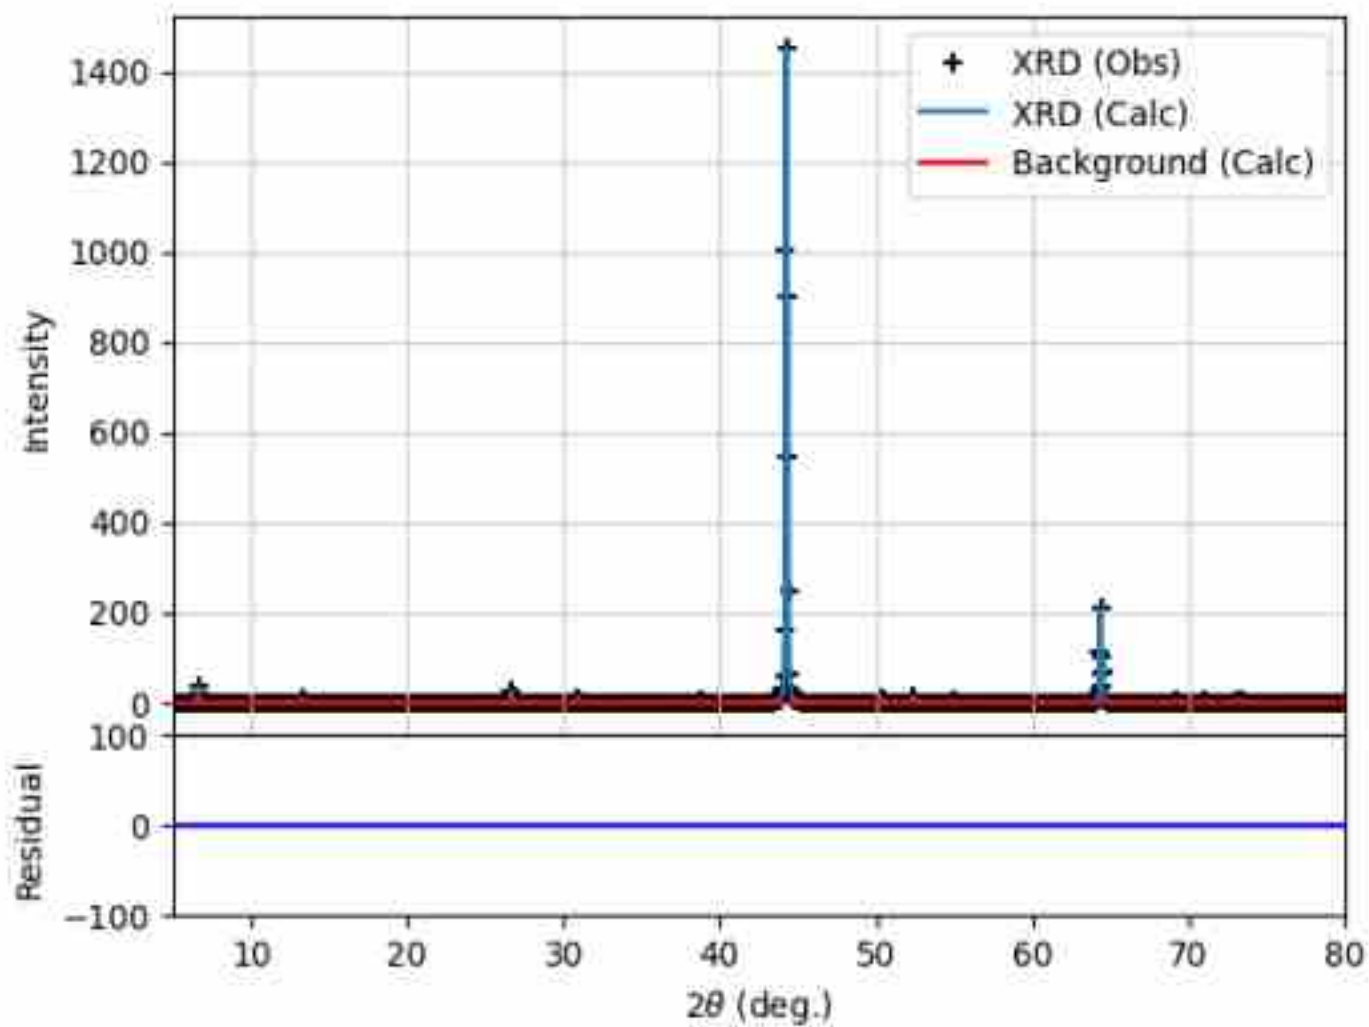

| RMSE before RR | Rwp     | RMSE after RR |
|----------------|---------|---------------|
| 0.022          | 0.00239 | 0.00051       |

# Sc1Zn12

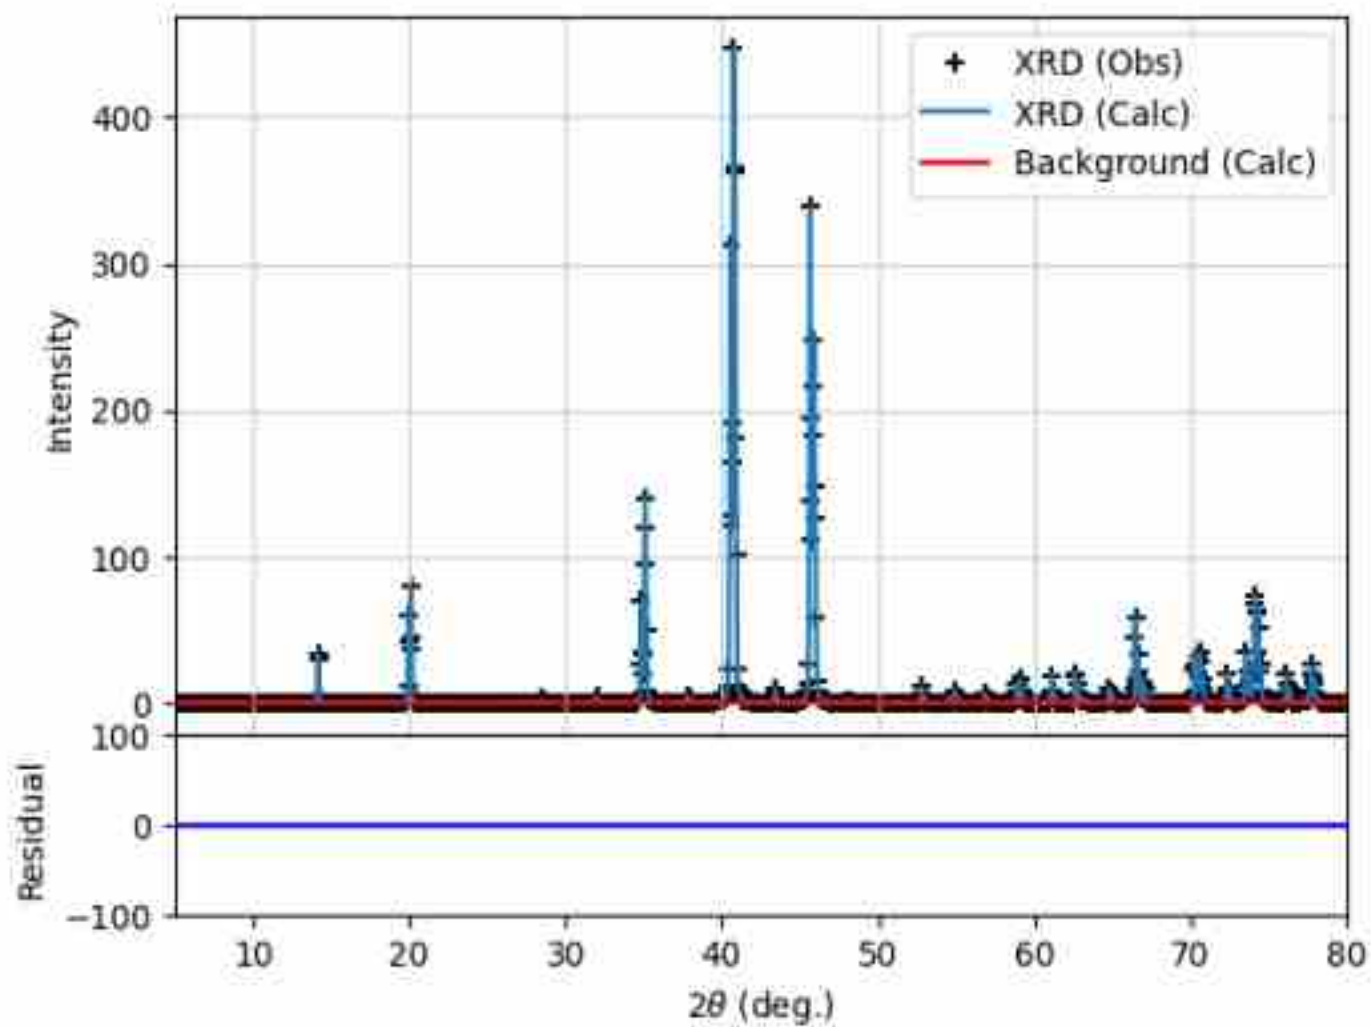

| RMSE before RR | Rwp     | RMSE after RR |
|----------------|---------|---------------|
| 0.022          | 0.00337 | 0.00048       |



# Sc<sub>2</sub>Al<sub>6</sub>C<sub>6</sub>

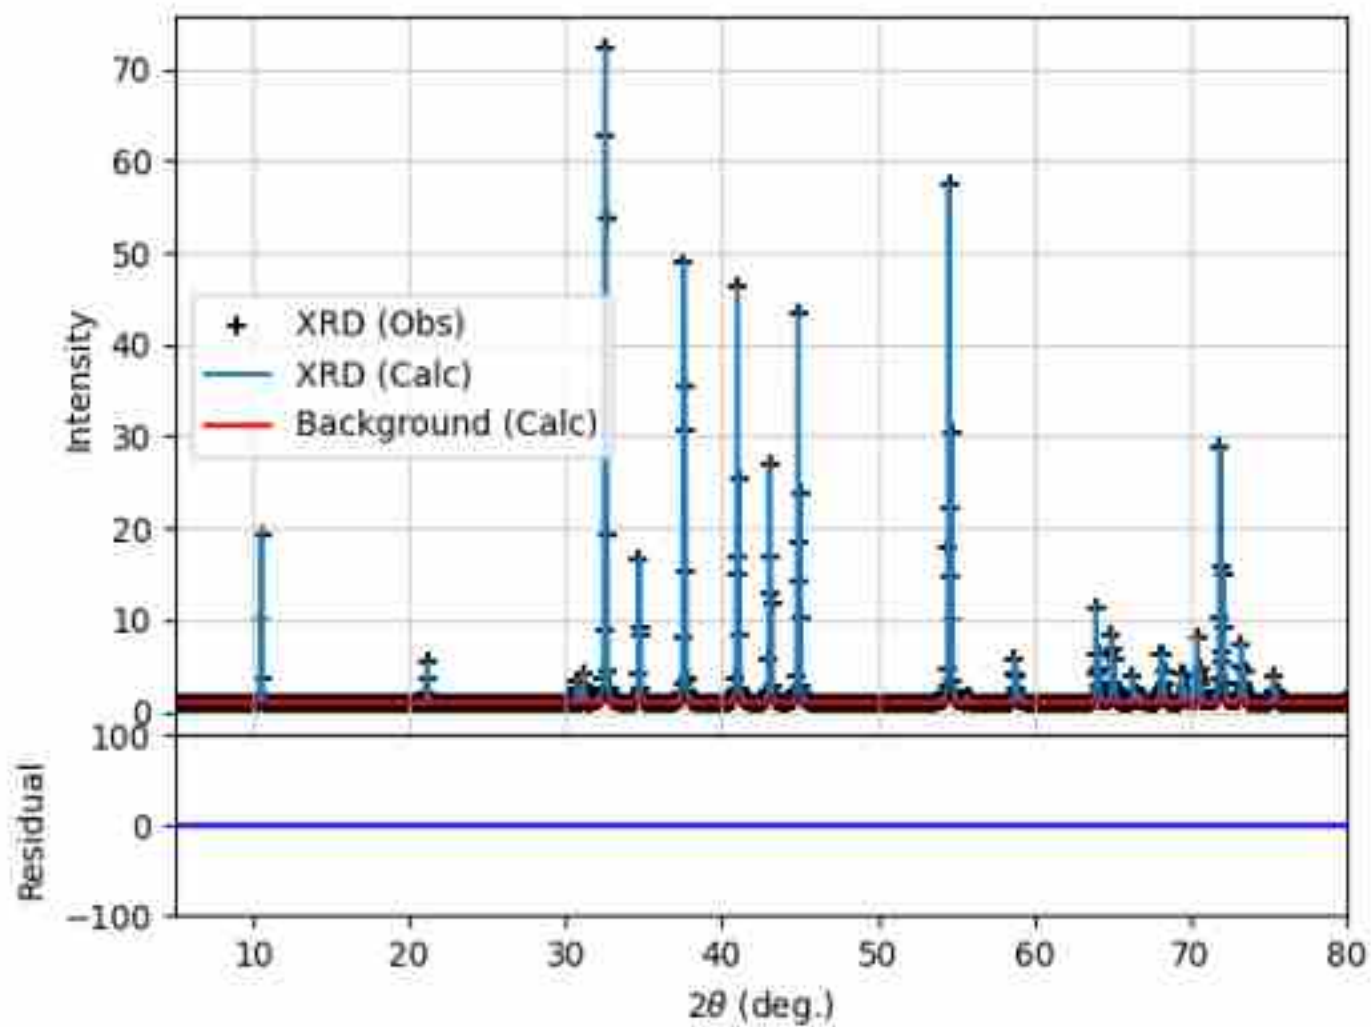

| RMSE before RR | Rwp     | RMSE after RR |
|----------------|---------|---------------|
| 0.022          | 0.00248 | 0.00109       |

# Sc3Ir1C4

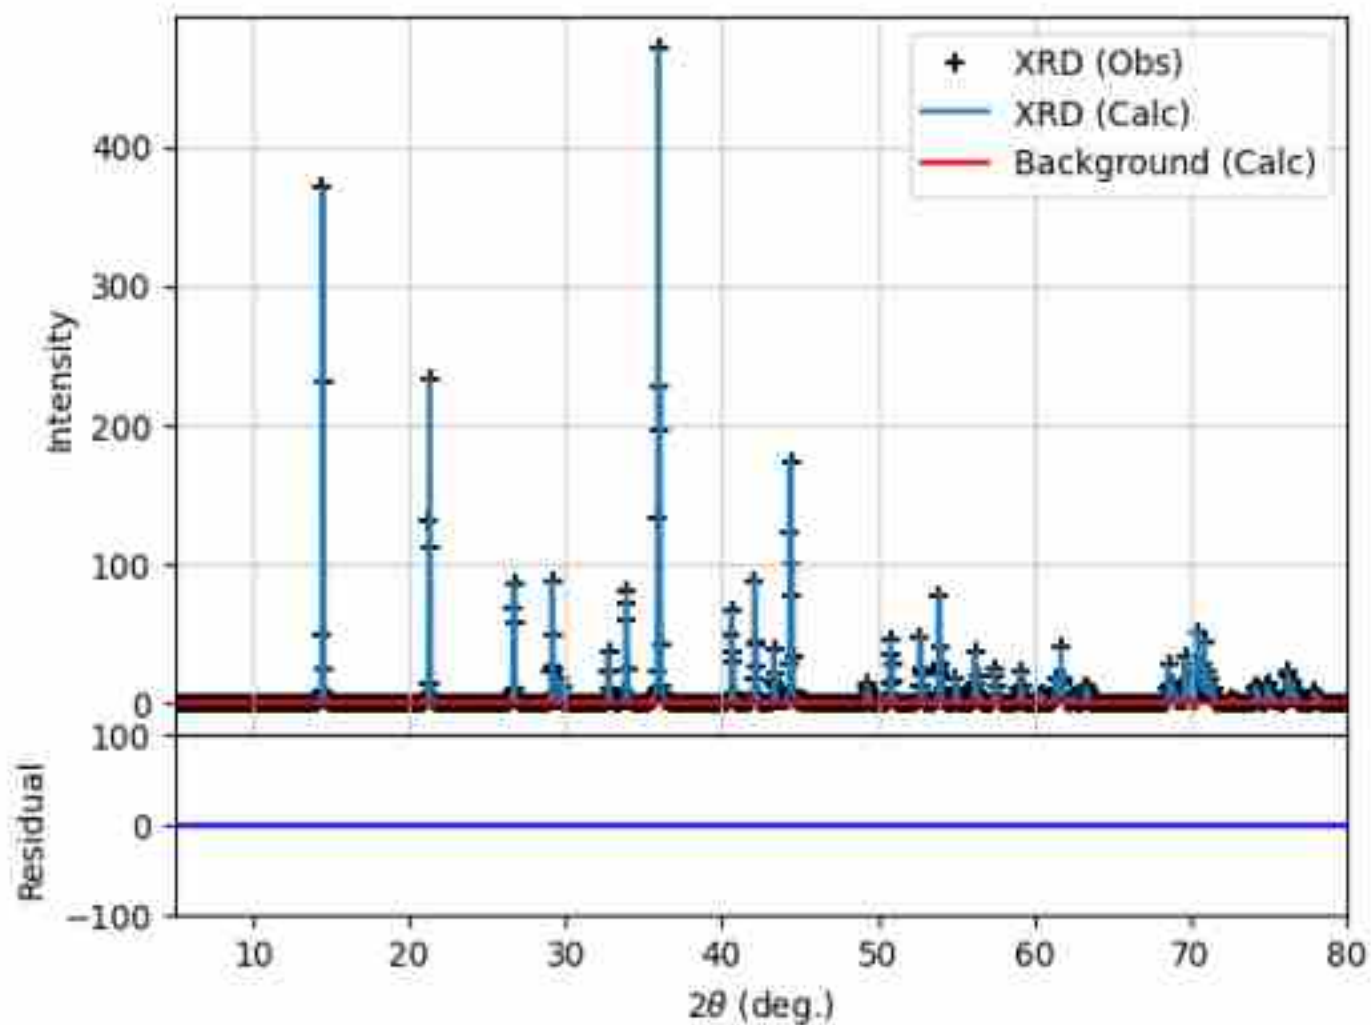

| RMSE before RR | Rwp     | RMSE after RR |
|----------------|---------|---------------|
| 0.022          | 0.00336 | 0.00196       |

# Sc4Si4Ru4

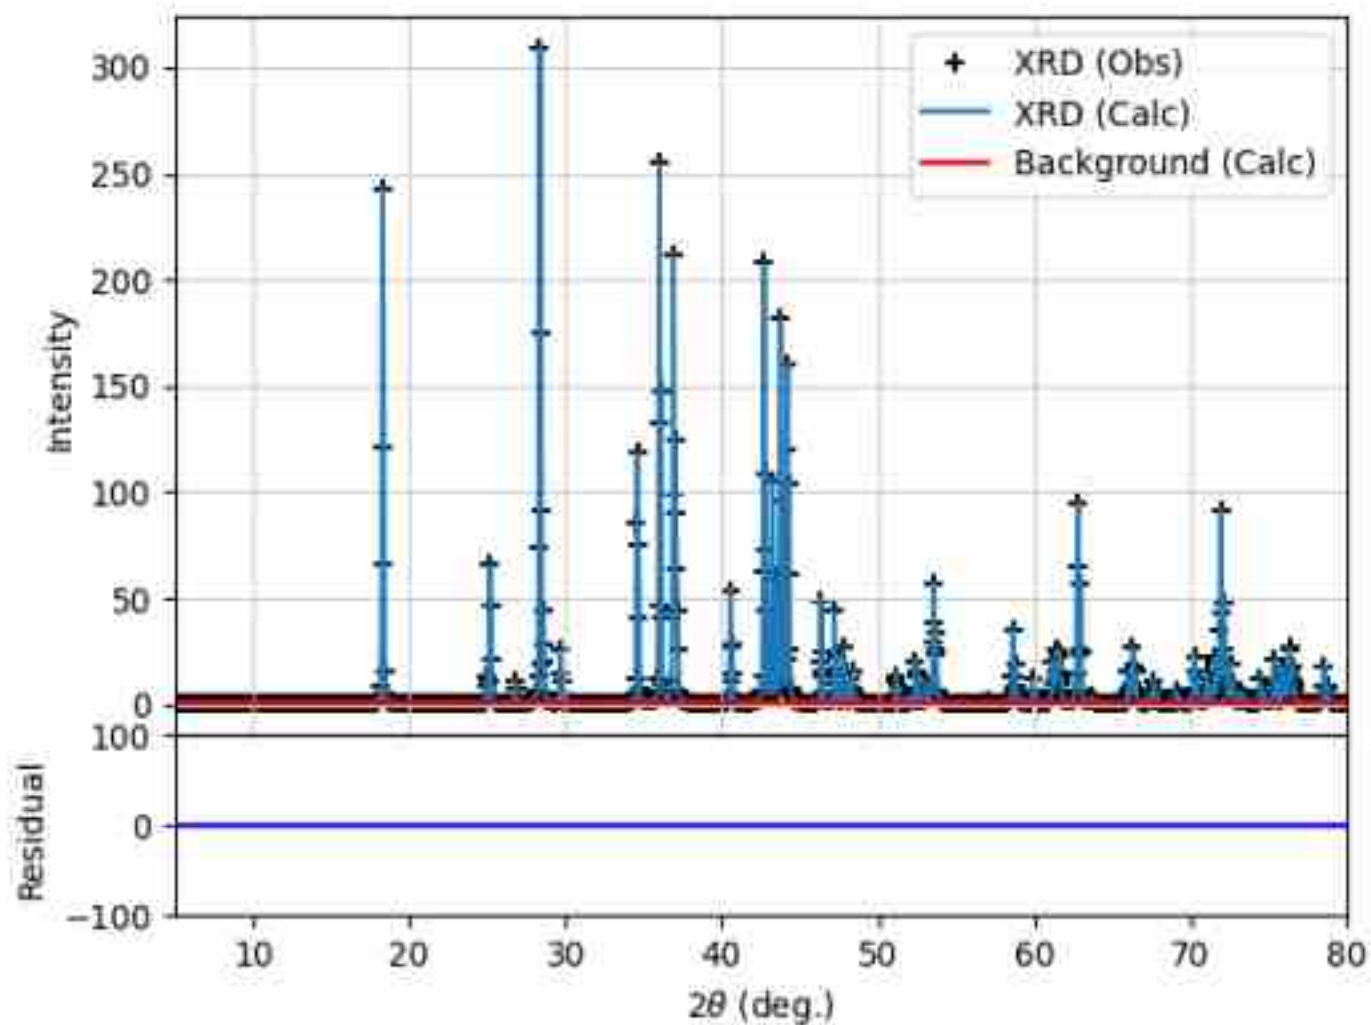

| RMSE before RR | Rwp     | RMSE after RR |
|----------------|---------|---------------|
| 0.022          | 0.00417 | 0.00065       |

# Si3P3Ir1

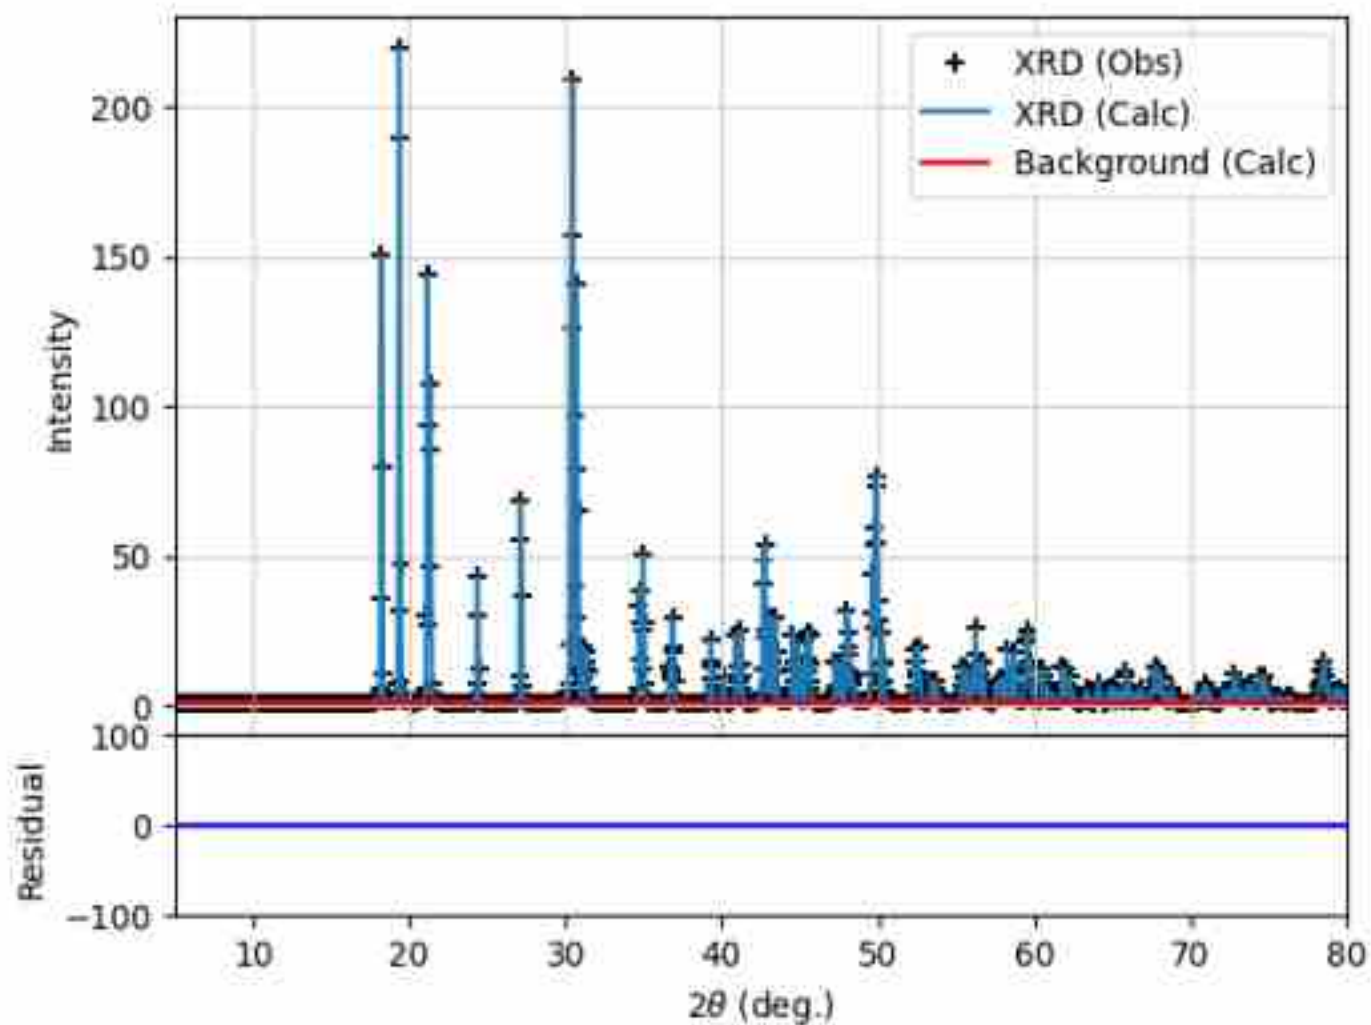

| RMSE before RR | Rwp     | RMSE after RR |
|----------------|---------|---------------|
| 0.022          | 0.00011 | 0.0           |

# Sm4Cr4Sb12

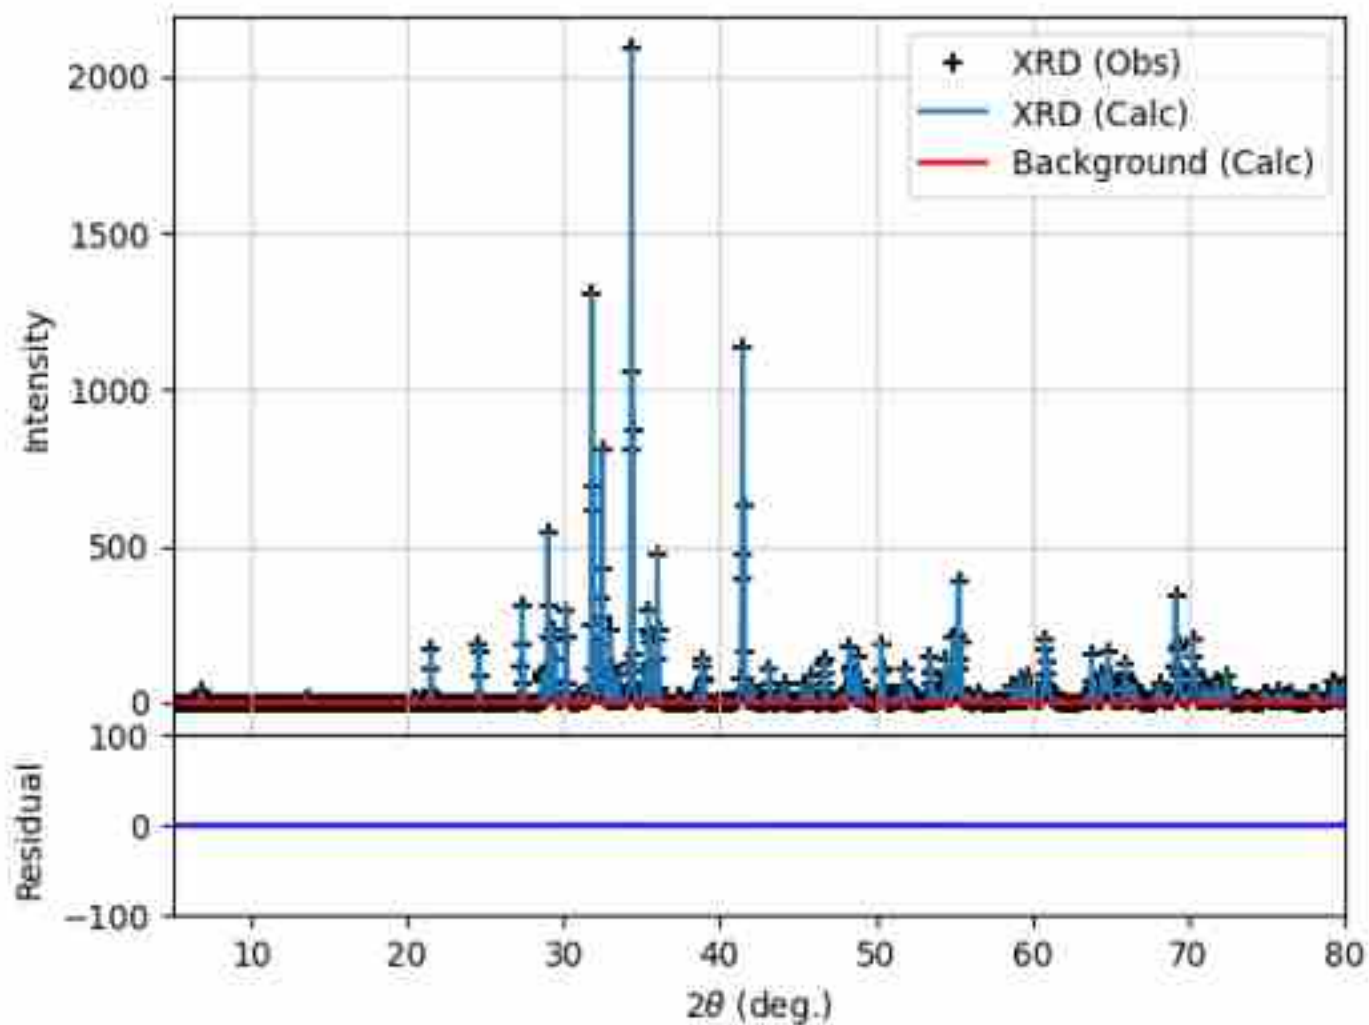

| RMSE before RR | Rwp    | RMSE after RR |
|----------------|--------|---------------|
| 0.022          | 0.2887 | 0.00453       |

# Sm6Hf2Sb10

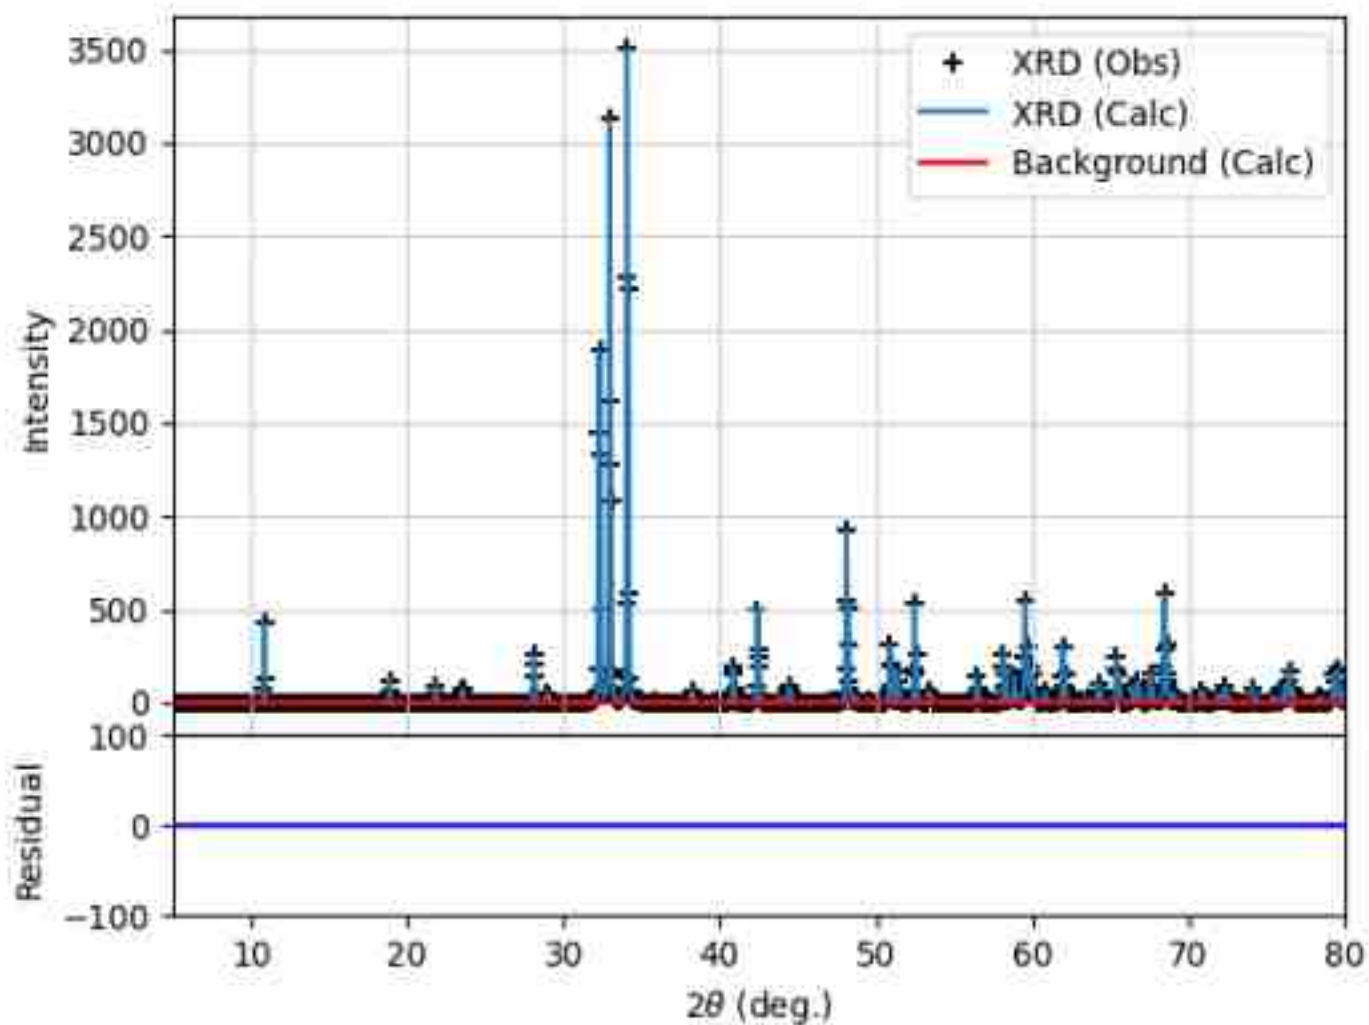

| RMSE before RR | Rwp     | RMSE after RR |
|----------------|---------|---------------|
| 0.022          | 0.00475 | 0.00036       |

# Sr1Mg5

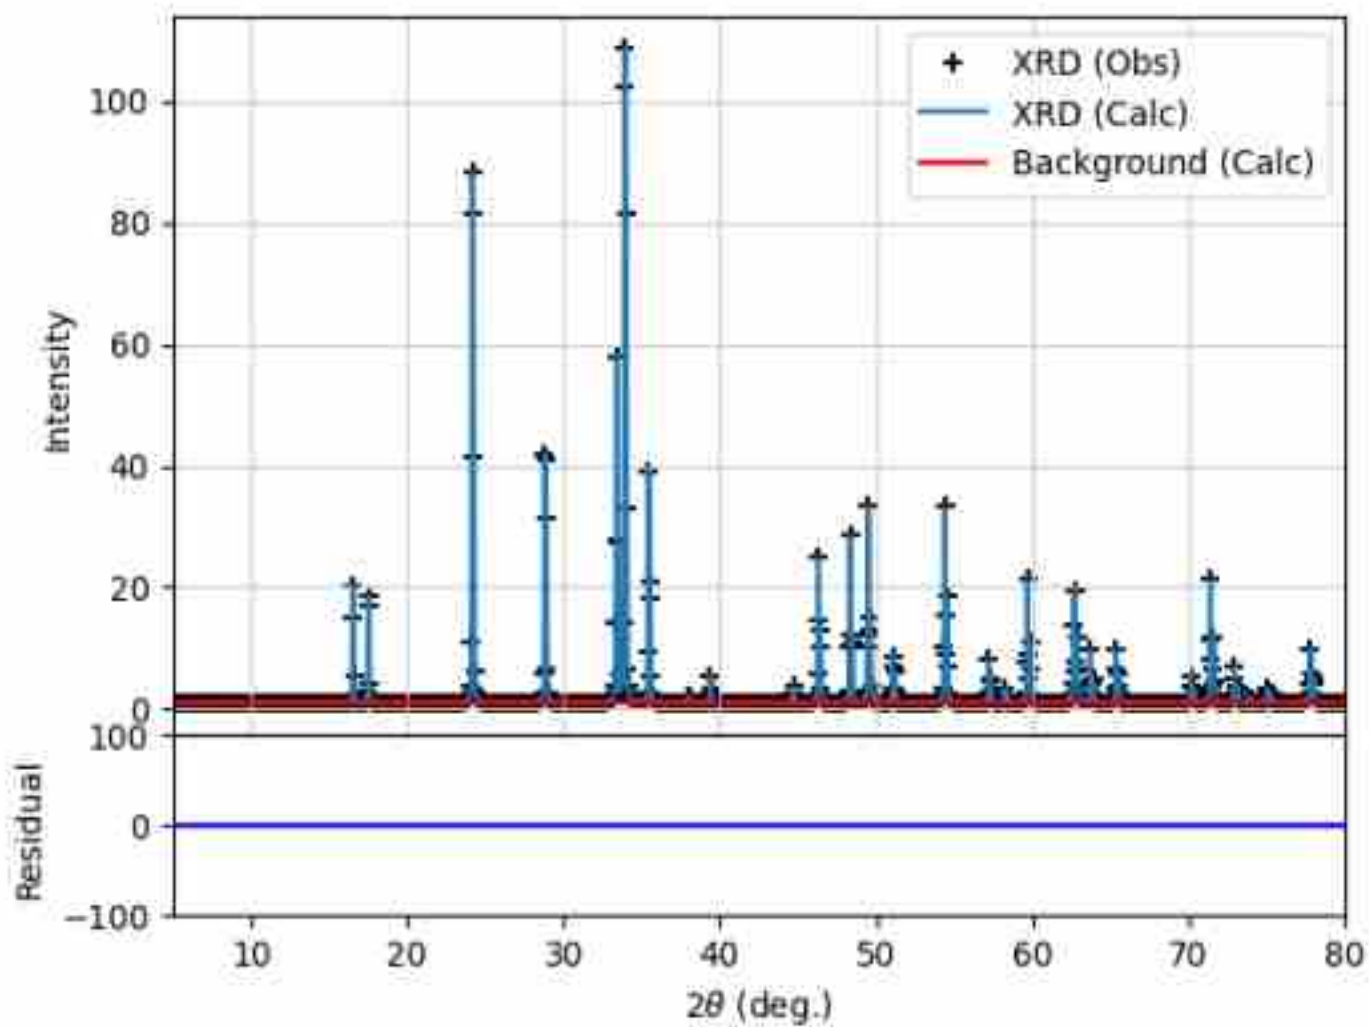

| RMSE before RR | Rwp     | RMSE after RR |
|----------------|---------|---------------|
| 0.022          | 0.07853 | 0.00284       |

# Sr<sub>2</sub>Ca<sub>2</sub>Mn<sub>2</sub>Ga<sub>2</sub>O<sub>10</sub>

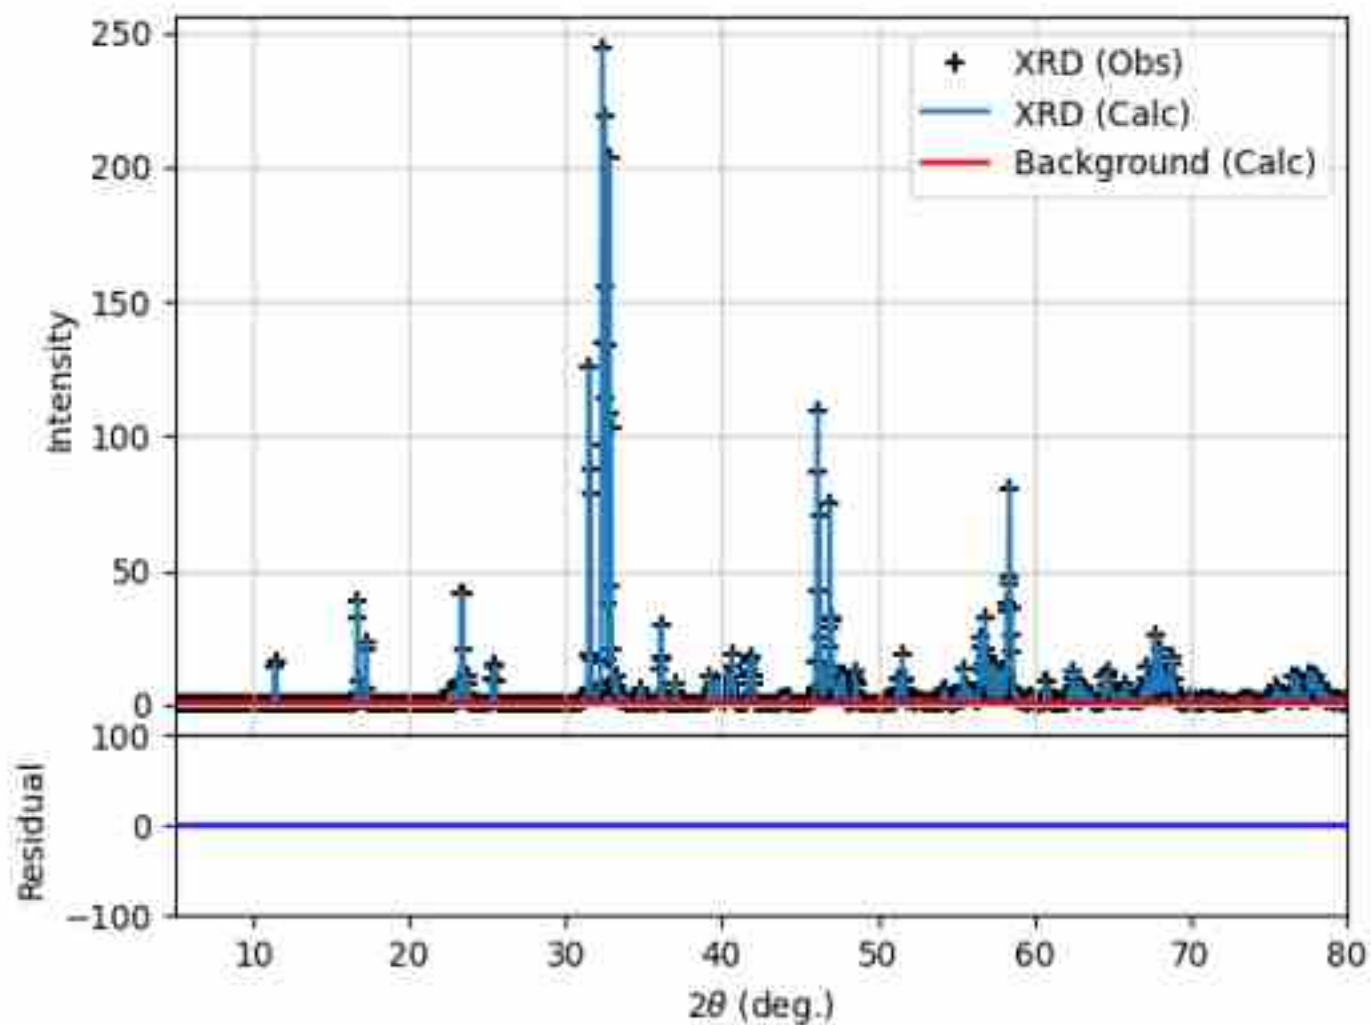

| RMSE before RR | Rwp     | RMSE after RR |
|----------------|---------|---------------|
| 0.022          | 0.00017 | 0.0           |



# Sr<sub>2</sub>Mg<sub>2</sub>F<sub>8</sub>

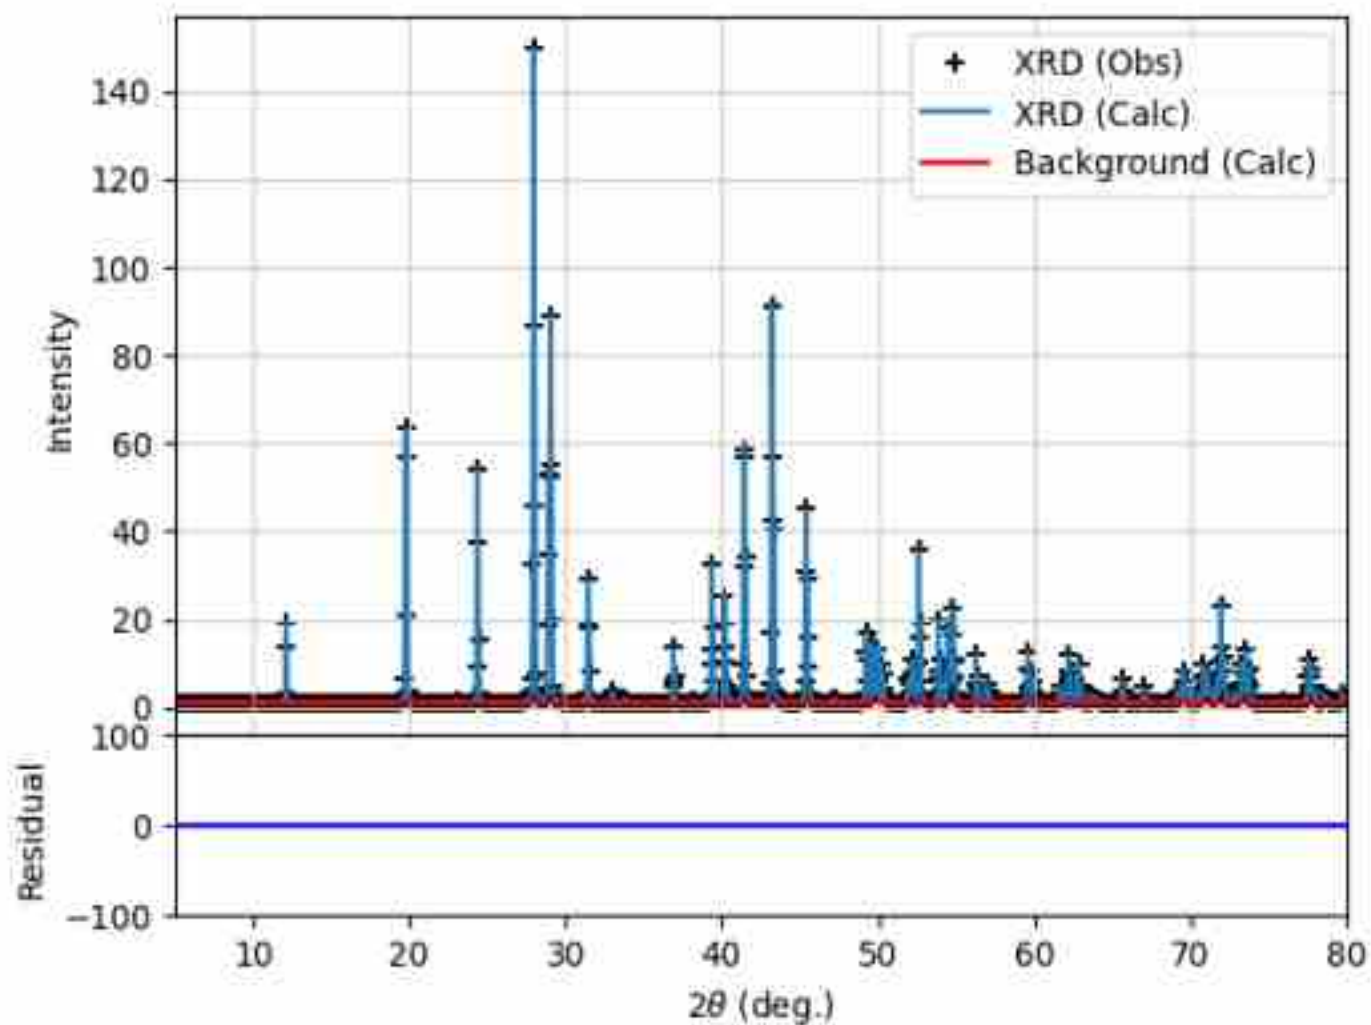

| RMSE before RR | Rwp     | RMSE after RR |
|----------------|---------|---------------|
| 0.022          | 0.00306 | 0.00112       |

# Sr<sub>2</sub>Mn<sub>3</sub>As<sub>2</sub>O<sub>2</sub>

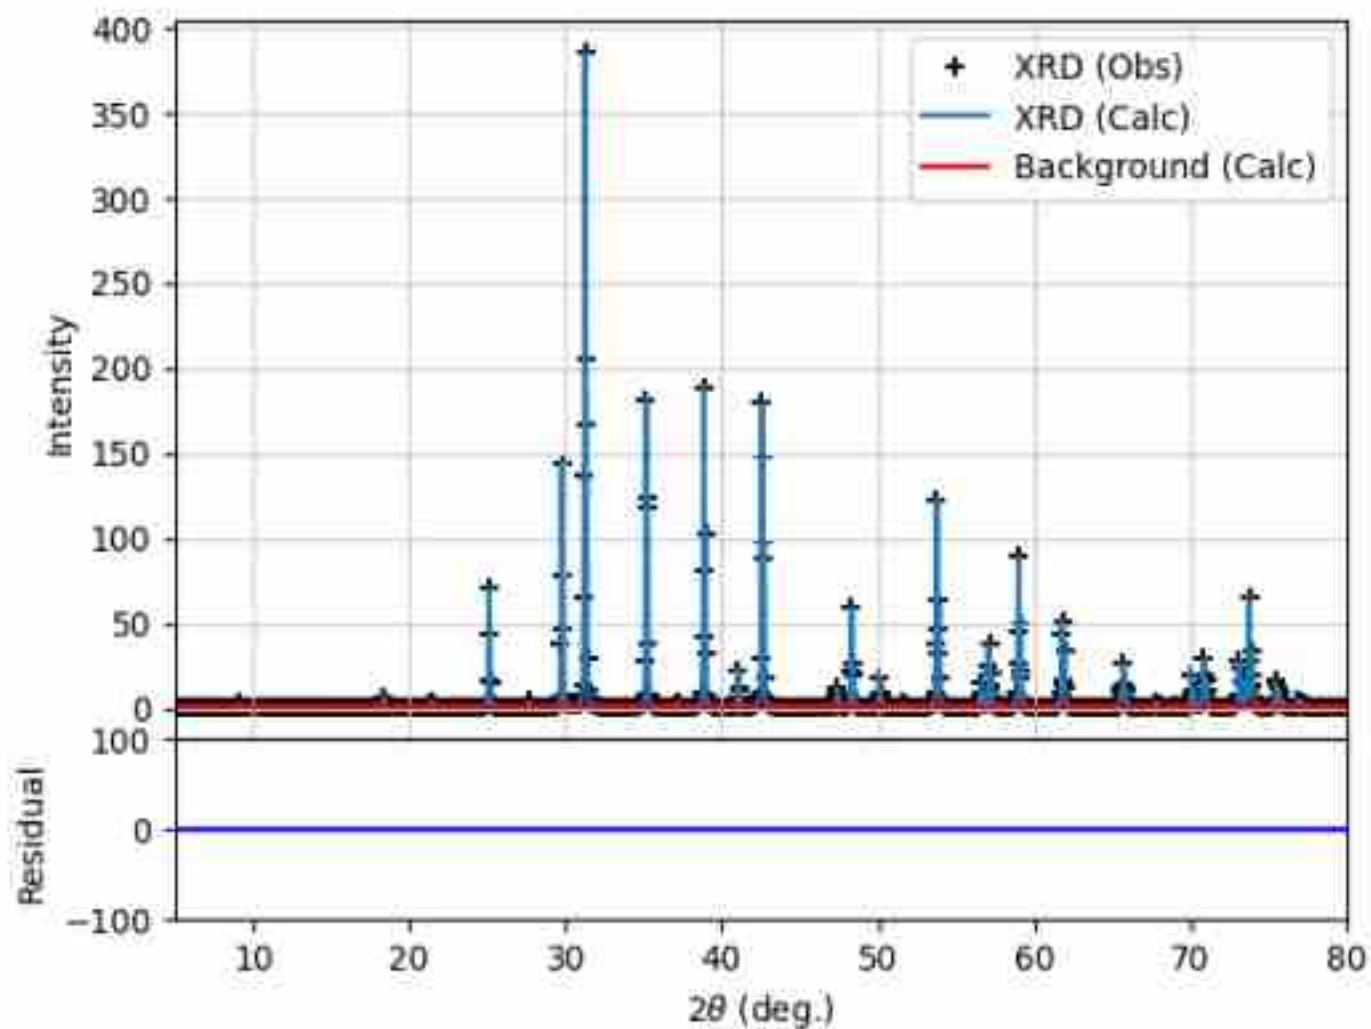

| RMSE before RR | Rwp     | RMSE after RR |
|----------------|---------|---------------|
| 0.022          | 0.01799 | 0.00076       |

# Sr<sub>2</sub>NiIrO<sub>6</sub>

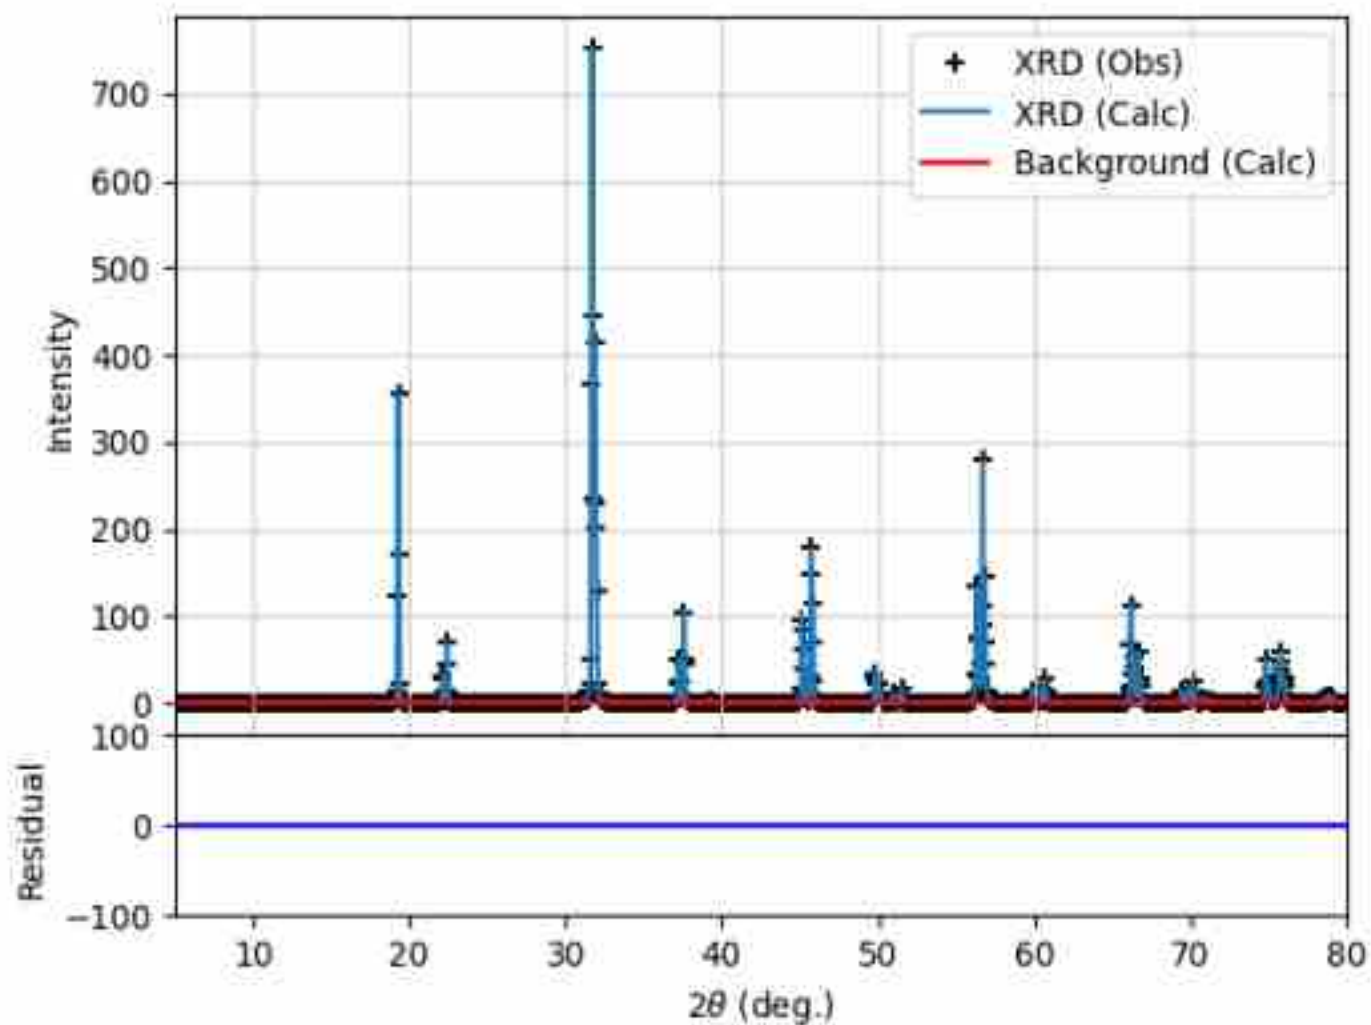

| RMSE before RR | Rwp    | RMSE after RR |
|----------------|--------|---------------|
| 0.022          | 0.0041 | 0.00183       |

# Sr<sub>2</sub>Ni<sub>1</sub>N<sub>2</sub>

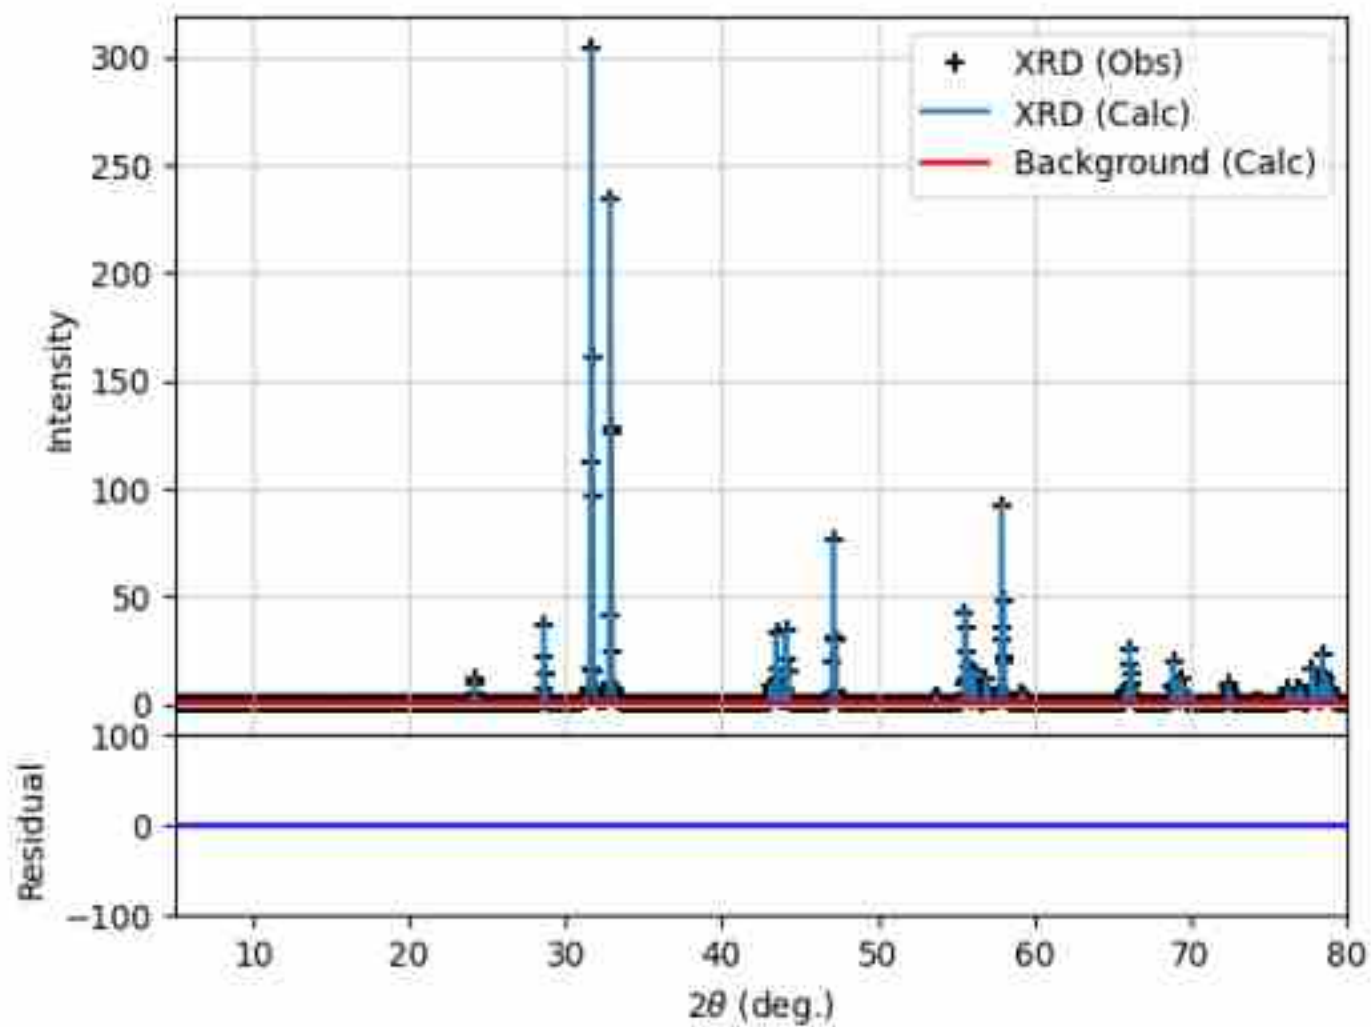

| RMSE before RR | Rwp    | RMSE after RR |
|----------------|--------|---------------|
| 0.022          | 0.0039 | 0.00096       |

# Sr<sub>2</sub>Pr<sub>2</sub>Eu<sub>2</sub>Nb<sub>2</sub>O<sub>12</sub>

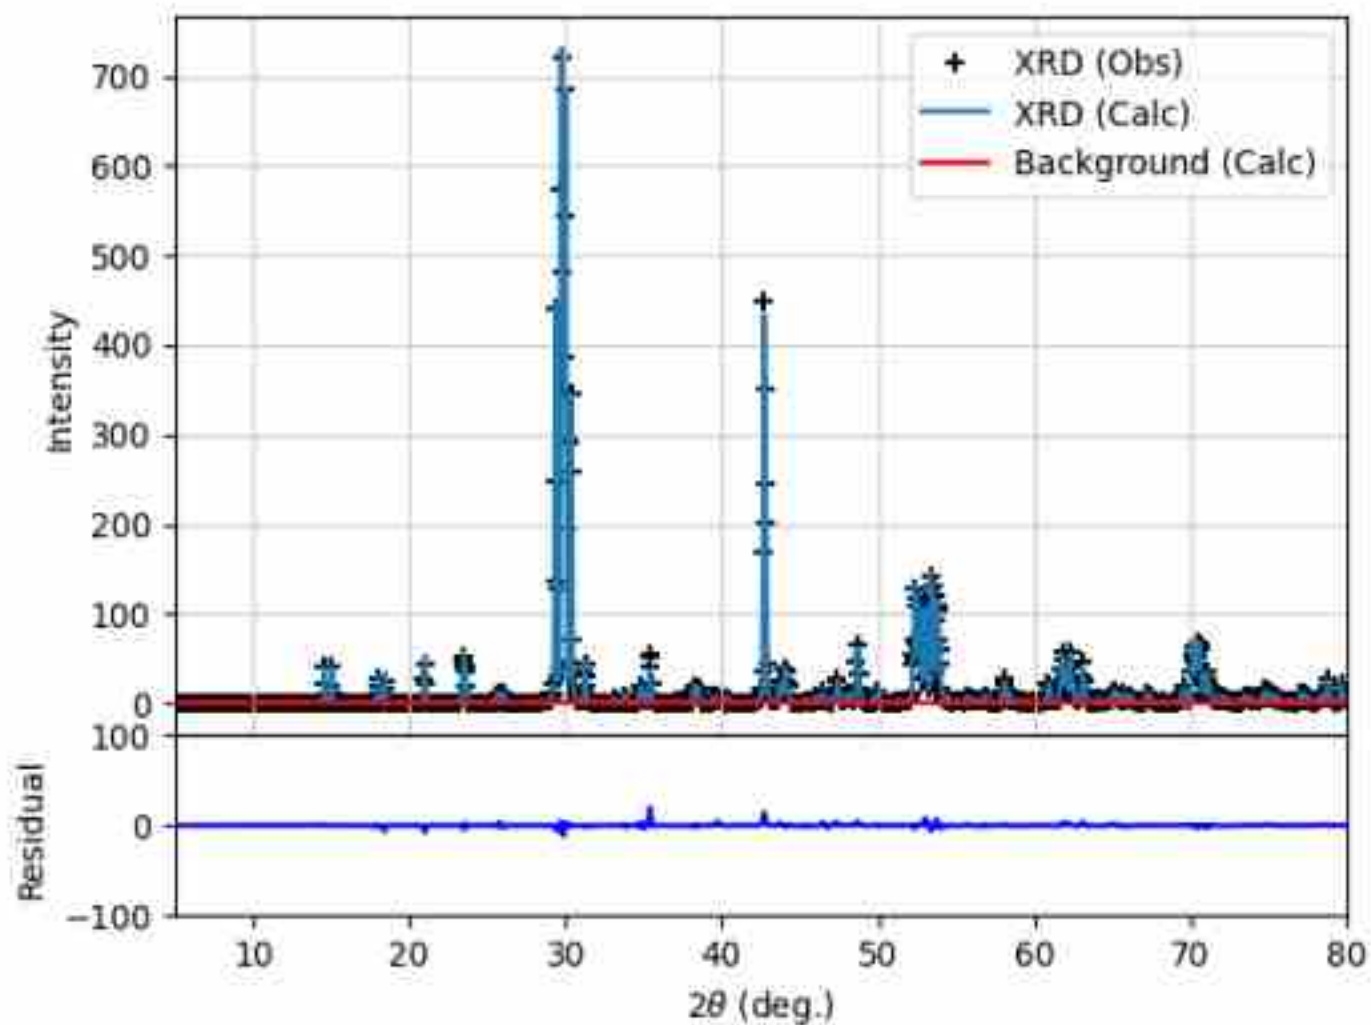

| RMSE before RR | Rwp    | RMSE after RR |
|----------------|--------|---------------|
| 0.022          | 6.8473 | 0.26437       |

# Sr<sub>2</sub>Y<sub>1</sub>Fe<sub>3</sub>O<sub>8</sub>

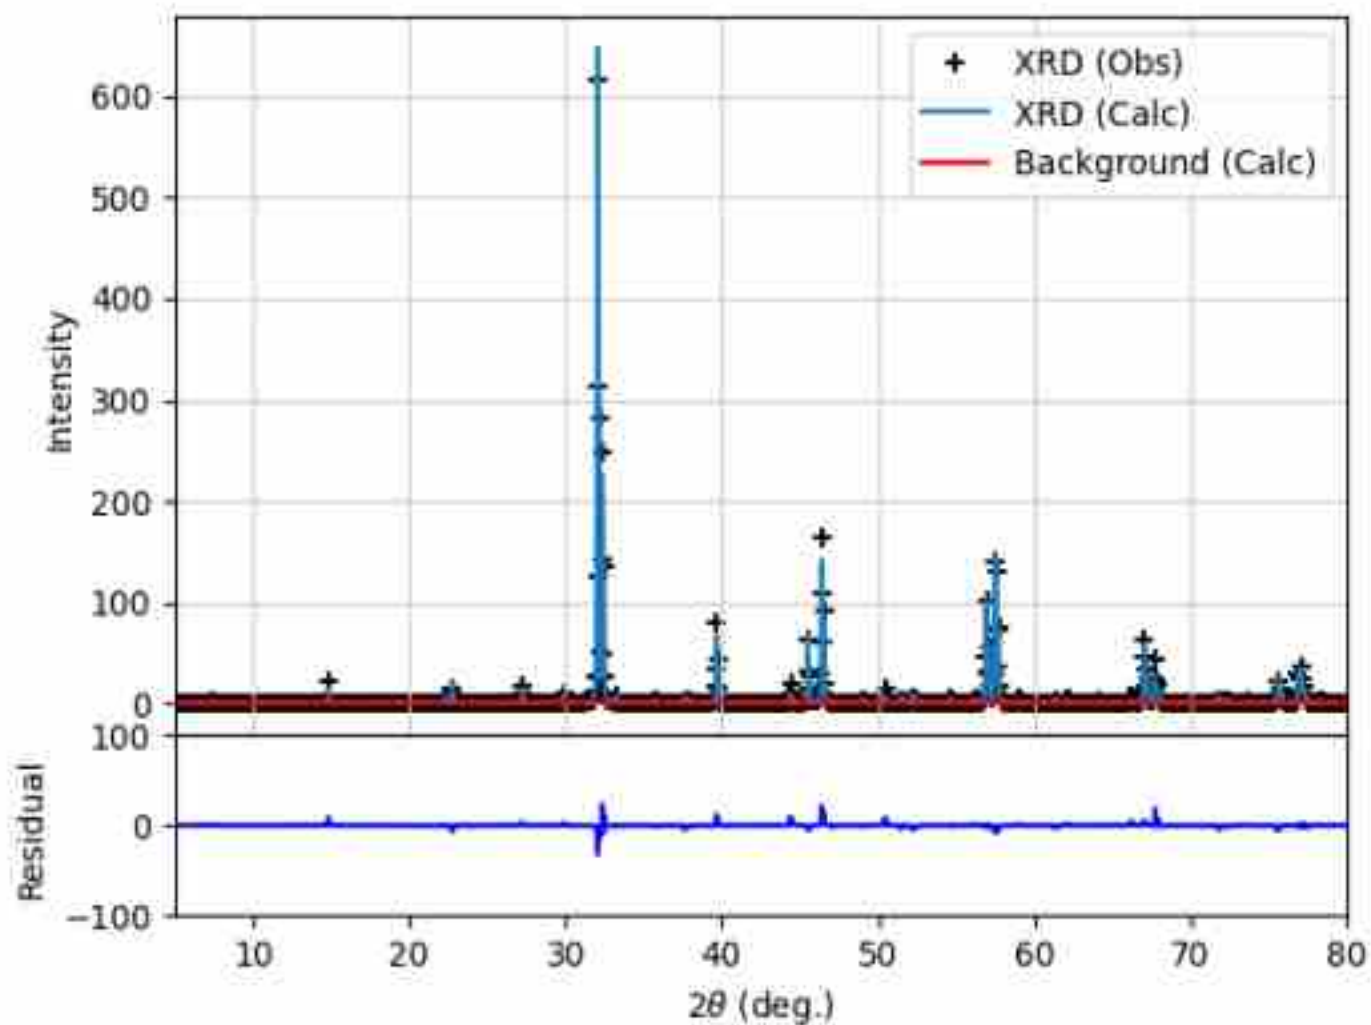

| RMSE before RR | Rwp      | RMSE after RR |
|----------------|----------|---------------|
| 0.022          | 17.35495 | 0.03622       |

# Sr<sub>4</sub>Ce<sub>2</sub>Ir<sub>2</sub>O<sub>12</sub>

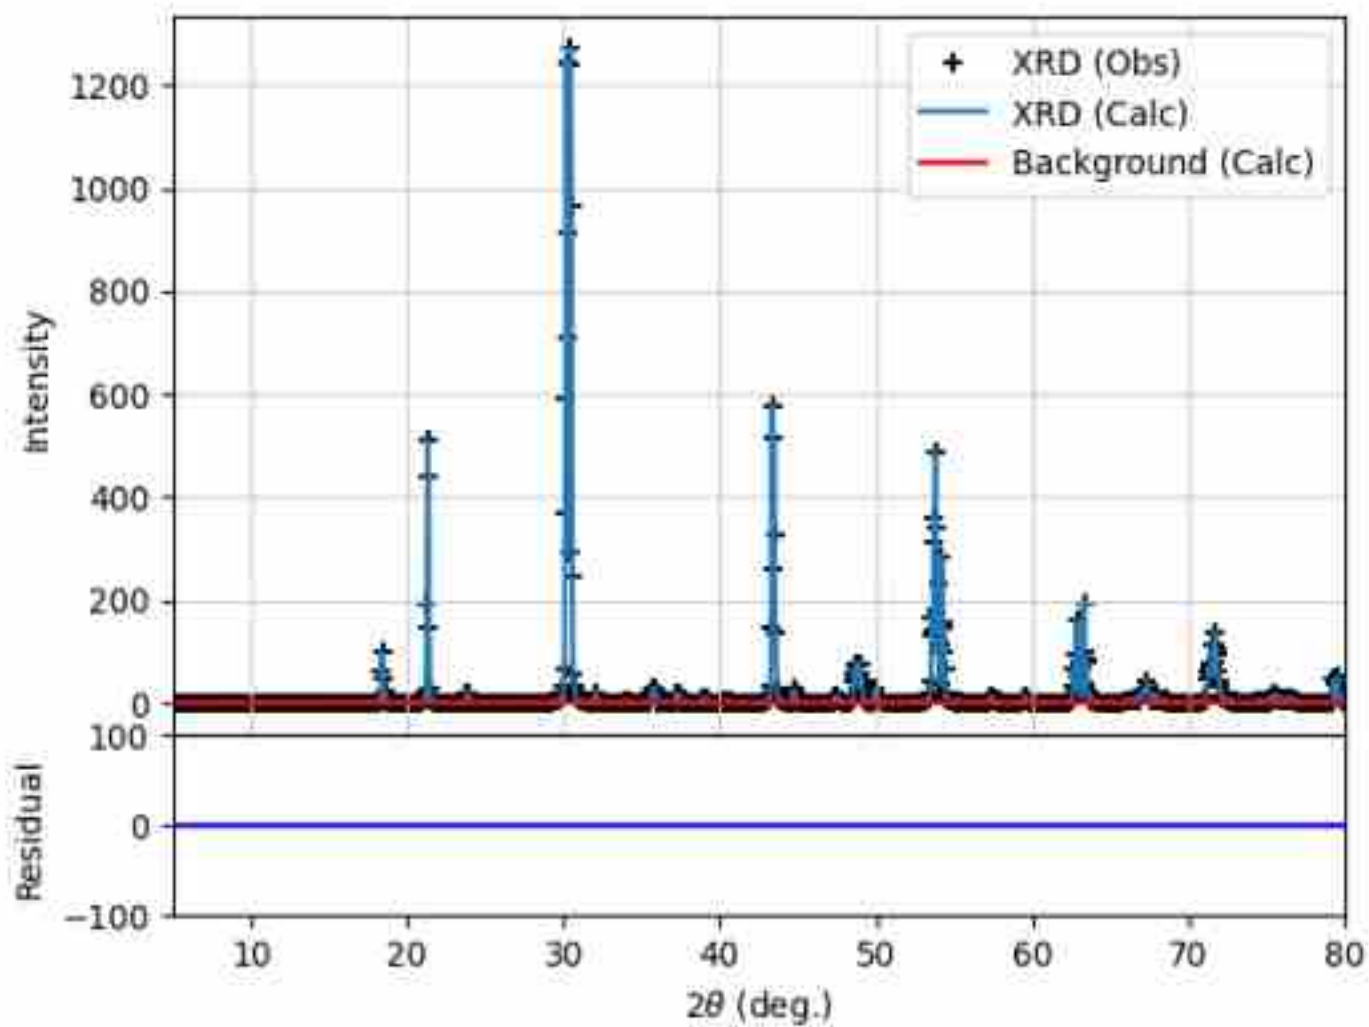

| RMSE before RR | Rwp     | RMSE after RR |
|----------------|---------|---------------|
| 0.022          | 0.00343 | 0.00113       |

# Sr<sub>4</sub>Co<sub>3</sub>Re<sub>1</sub>O<sub>12</sub>

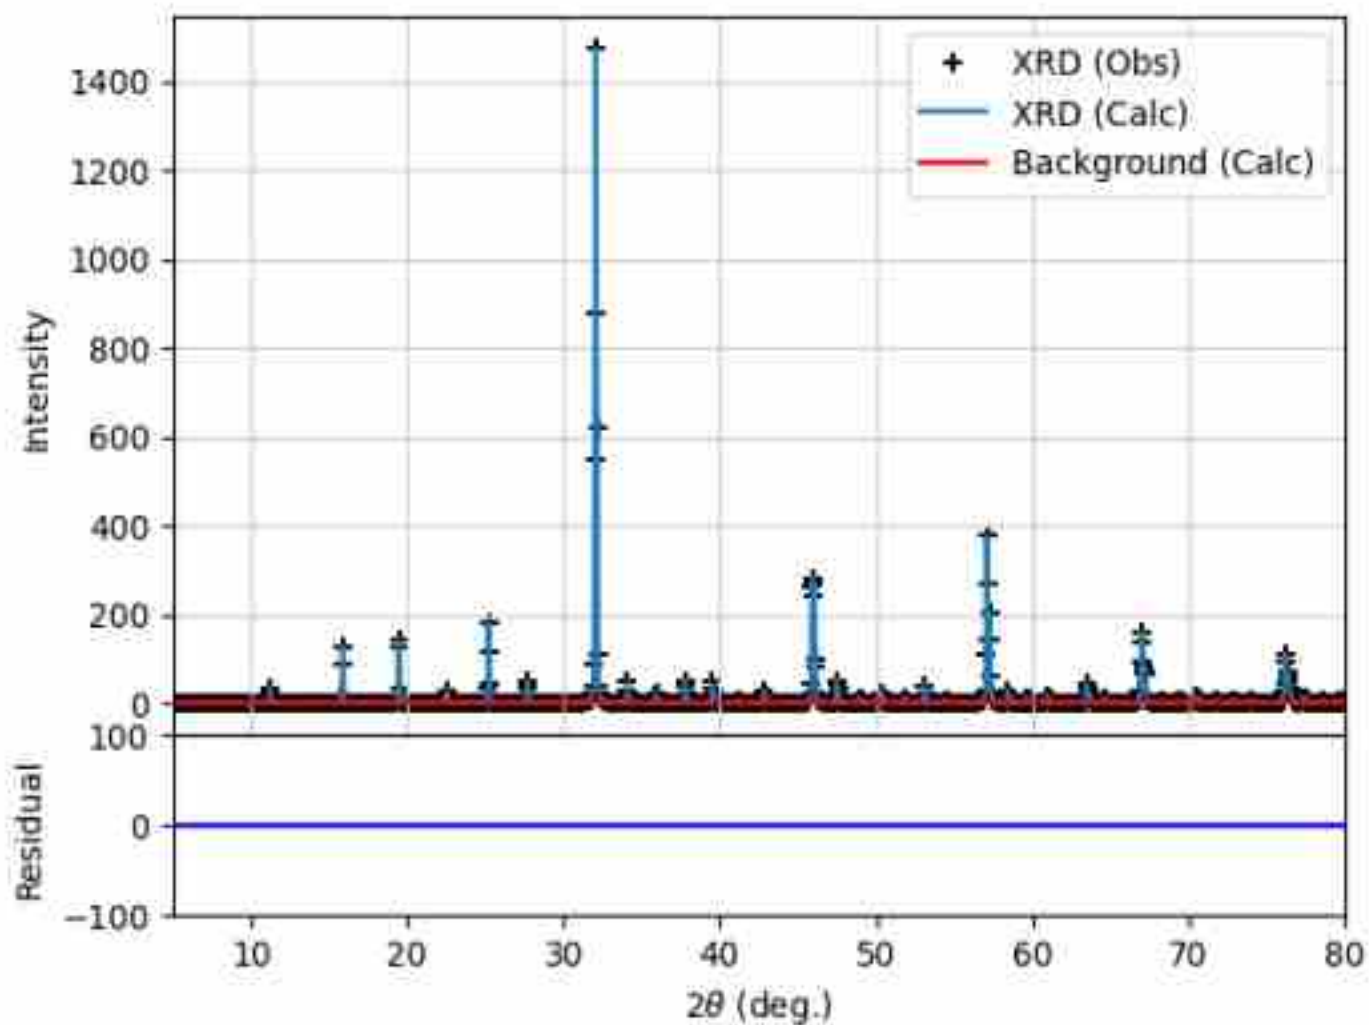

| RMSE before RR | Rwp     | RMSE after RR |
|----------------|---------|---------------|
| 0.022          | 0.00376 | 0.00168       |



# Sr<sub>4</sub>Cu<sub>2</sub>F<sub>12</sub>

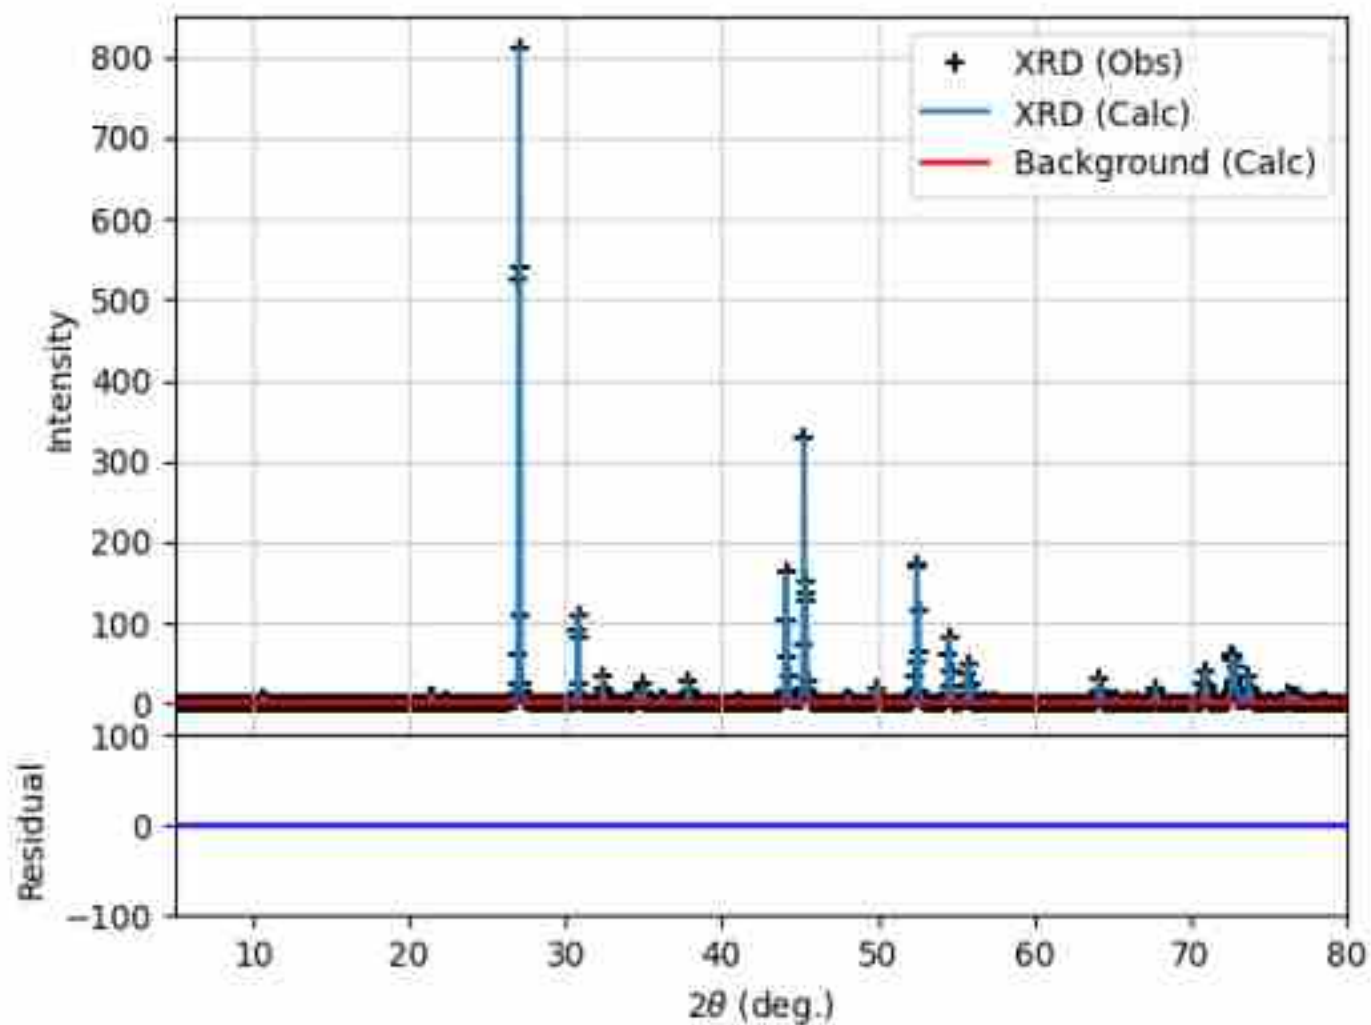

| RMSE before RR | Rwp     | RMSE after RR |
|----------------|---------|---------------|
| 0.022          | 0.00315 | 0.00064       |

# Sr<sub>4</sub>Ho<sub>2</sub>Ta<sub>2</sub>O<sub>12</sub>

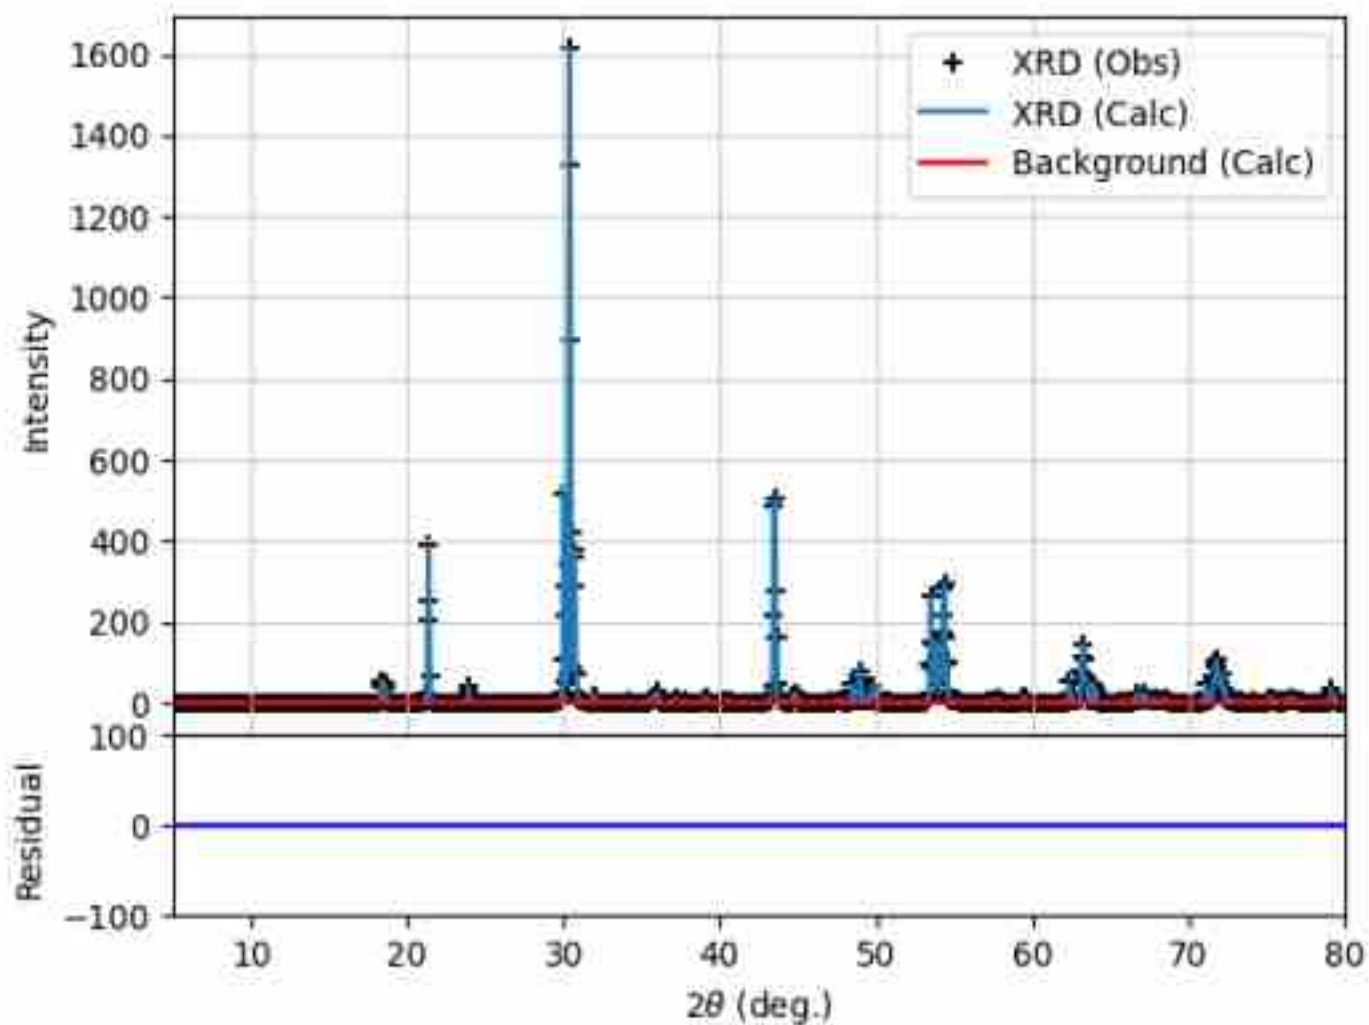

| RMSE before RR | Rwp     | RMSE after RR |
|----------------|---------|---------------|
| 0.022          | 0.00313 | 0.00141       |

# Sr<sub>4</sub>Yb<sub>2</sub>Sb<sub>2</sub>O<sub>12</sub>

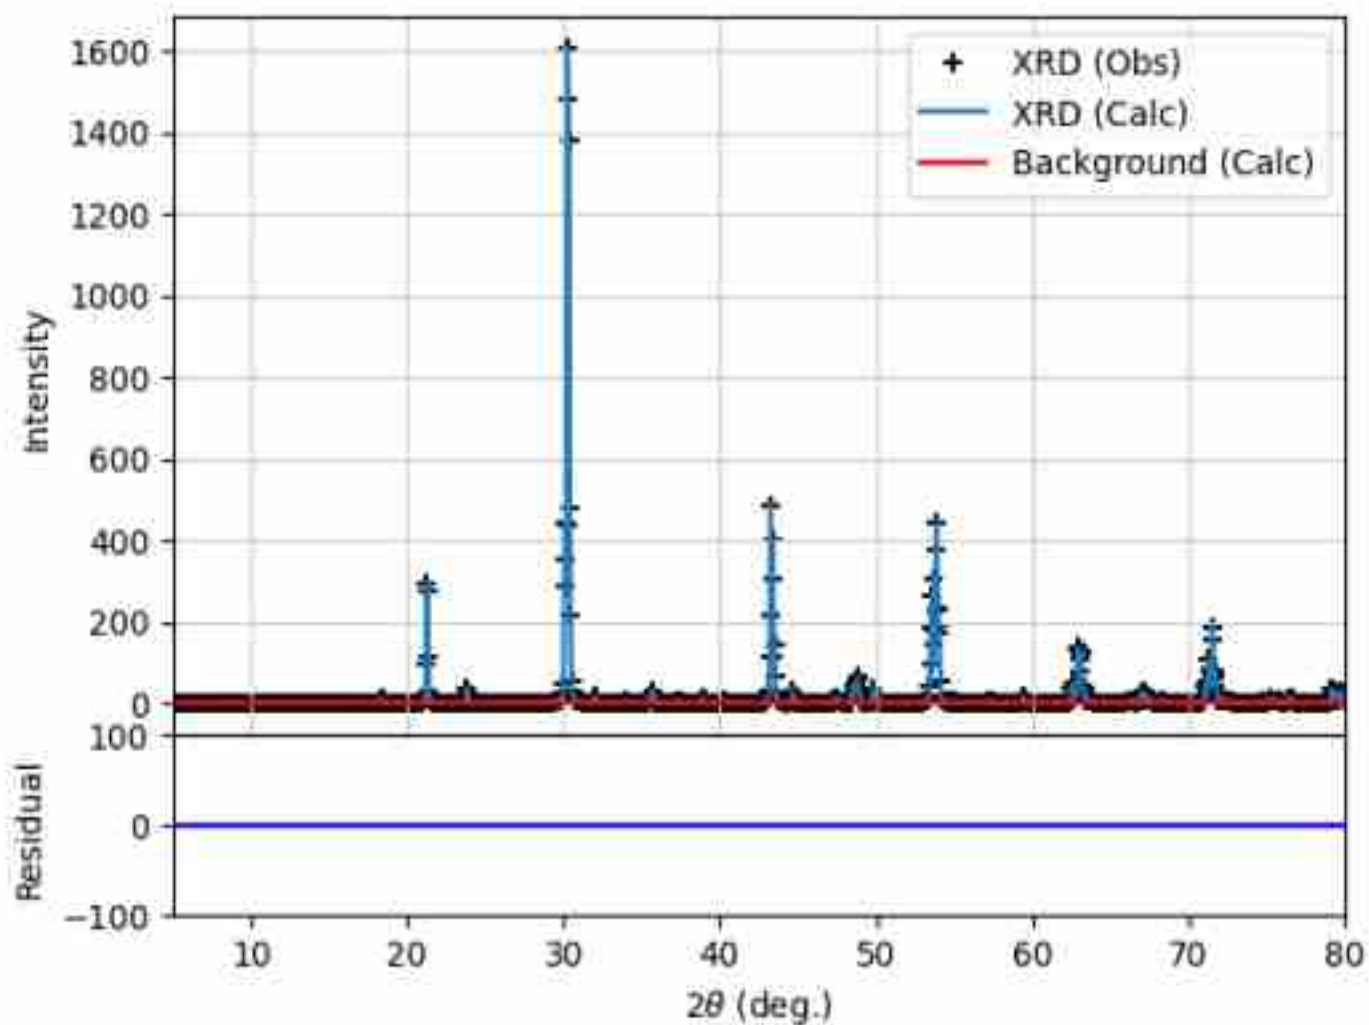

| RMSE before RR | Rwp     | RMSE after RR |
|----------------|---------|---------------|
| 0.022          | 0.00299 | 0.00103       |

# Sr<sub>4</sub>Yb<sub>2</sub>Ta<sub>2</sub>O<sub>12</sub>

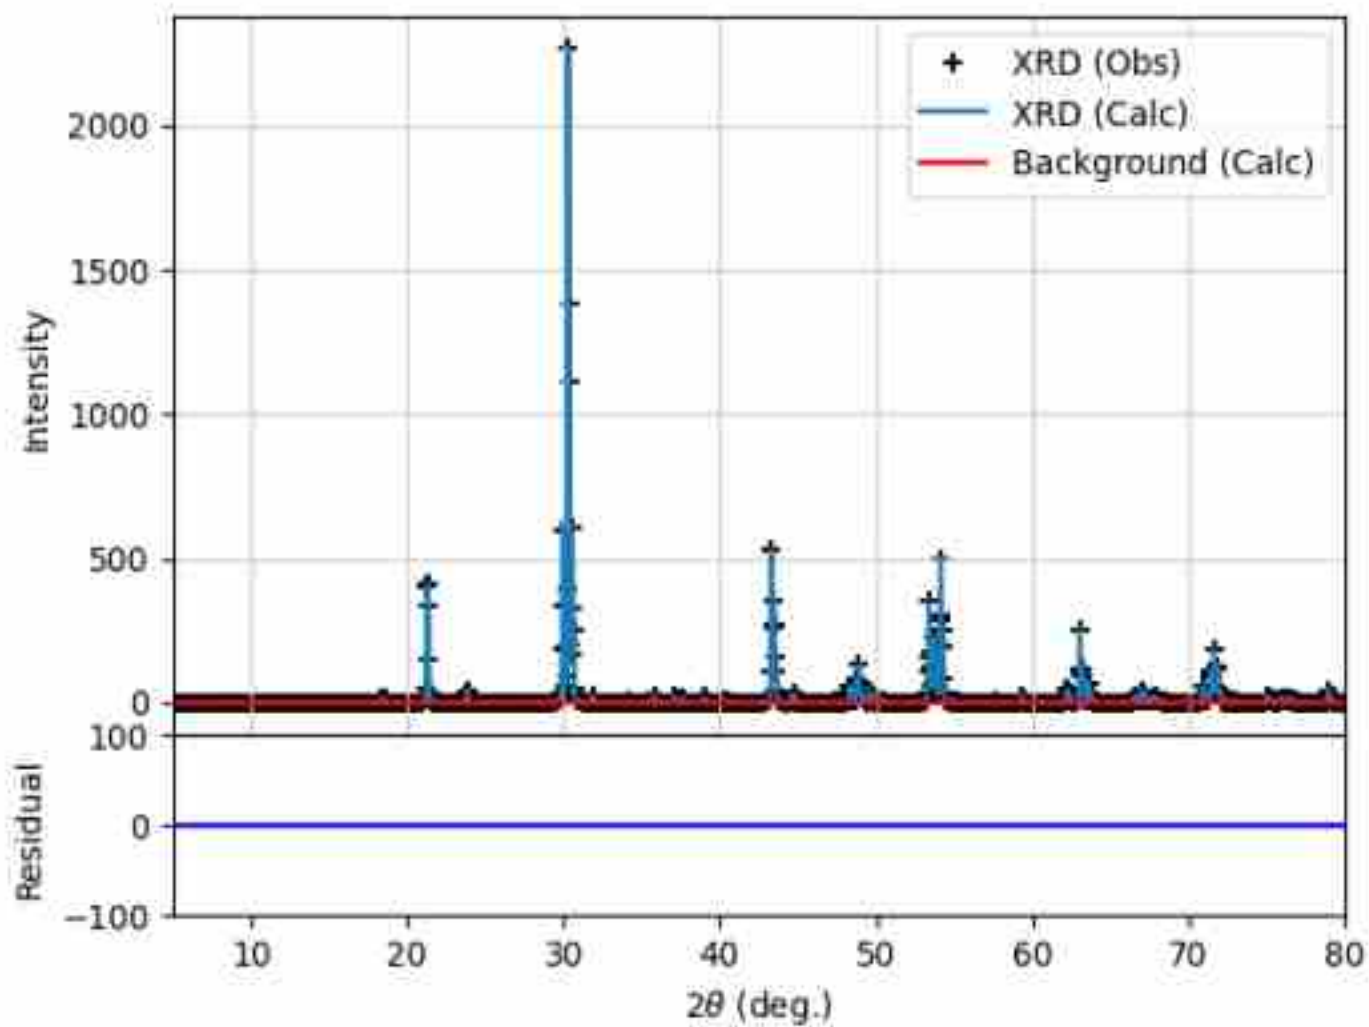

| RMSE before RR | Rwp     | RMSE after RR |
|----------------|---------|---------------|
| 0.022          | 0.00292 | 0.0014        |

# Ta<sub>4</sub>Co<sub>4</sub>Te<sub>8</sub>

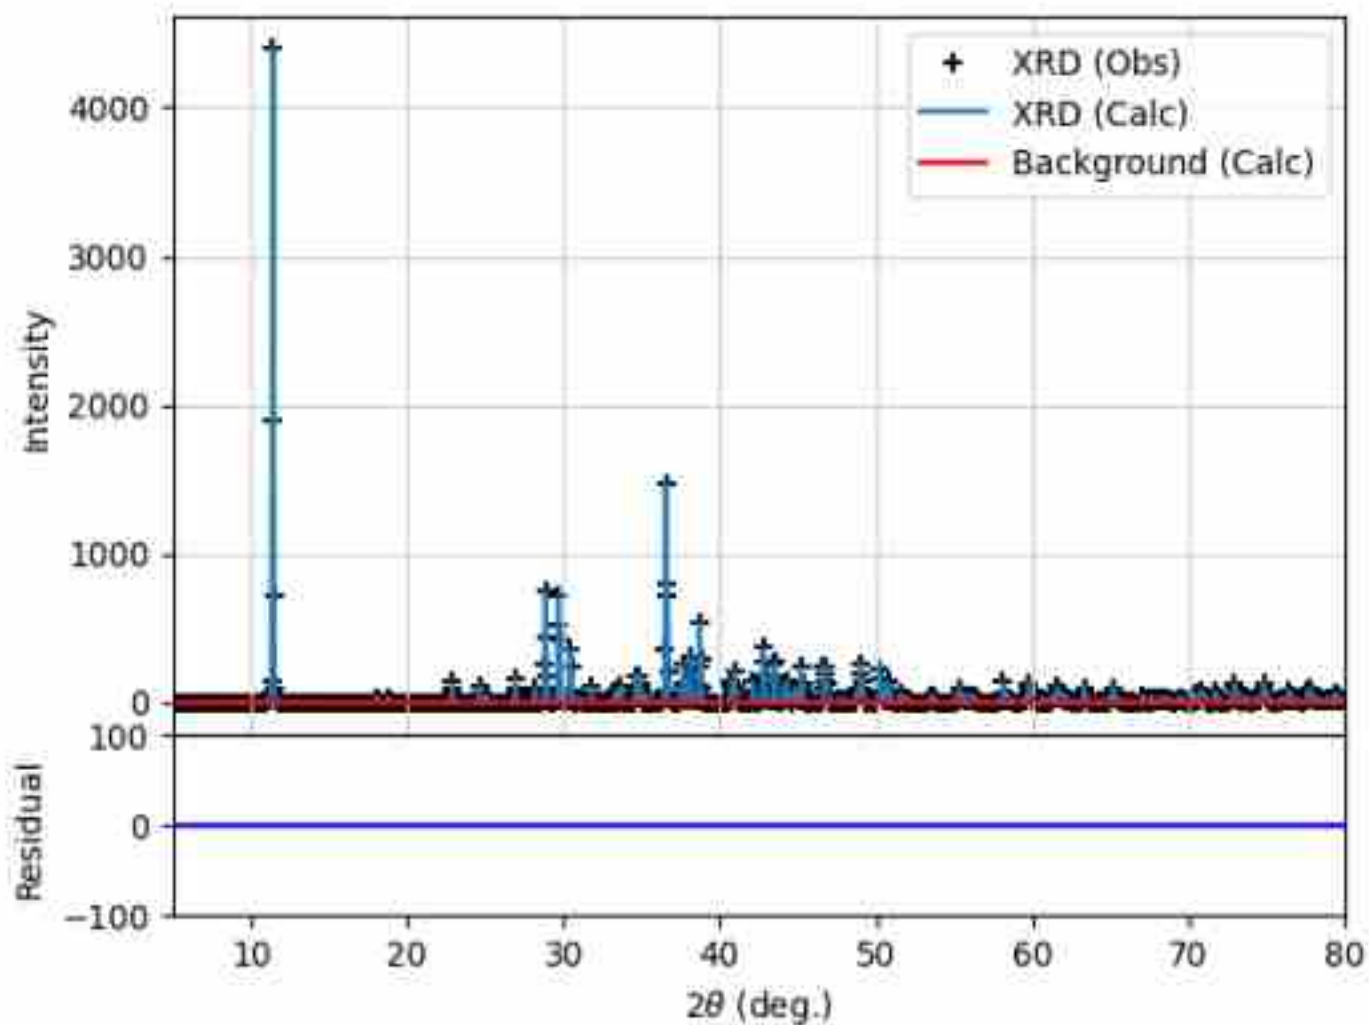

| RMSE before RR | Rwp     | RMSE after RR |
|----------------|---------|---------------|
| 0.022          | 0.00335 | 0.00039       |

# Ta4O10

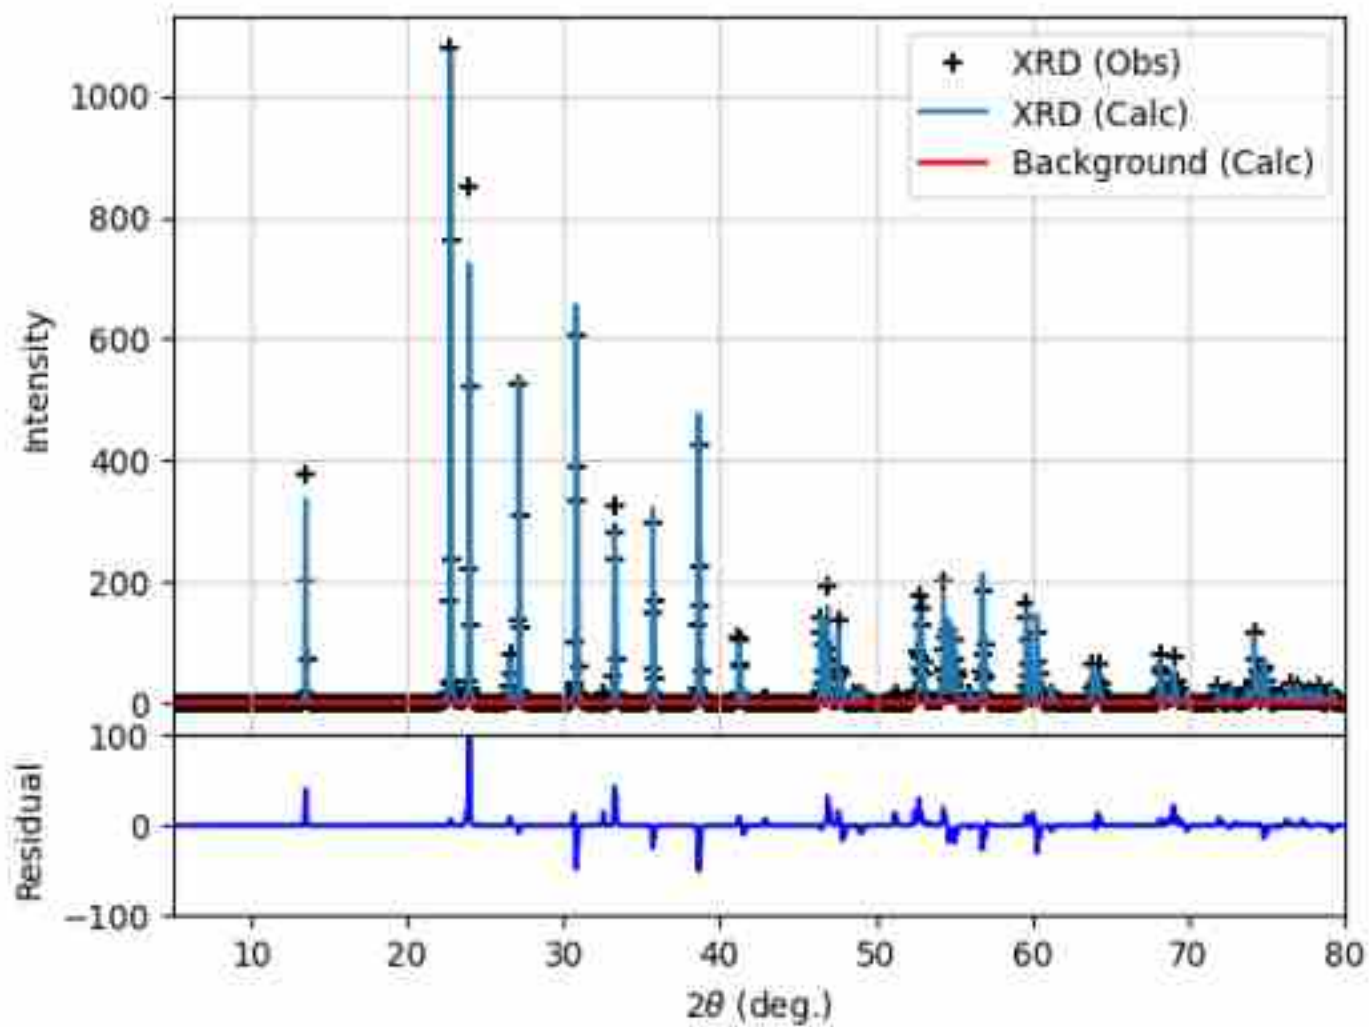

| RMSE before RR | Rwp     | RMSE after RR |
|----------------|---------|---------------|
| 0.022          | 16.7084 | 0.03277       |

# Ta<sub>4</sub>V<sub>6</sub>Cu<sub>2</sub>

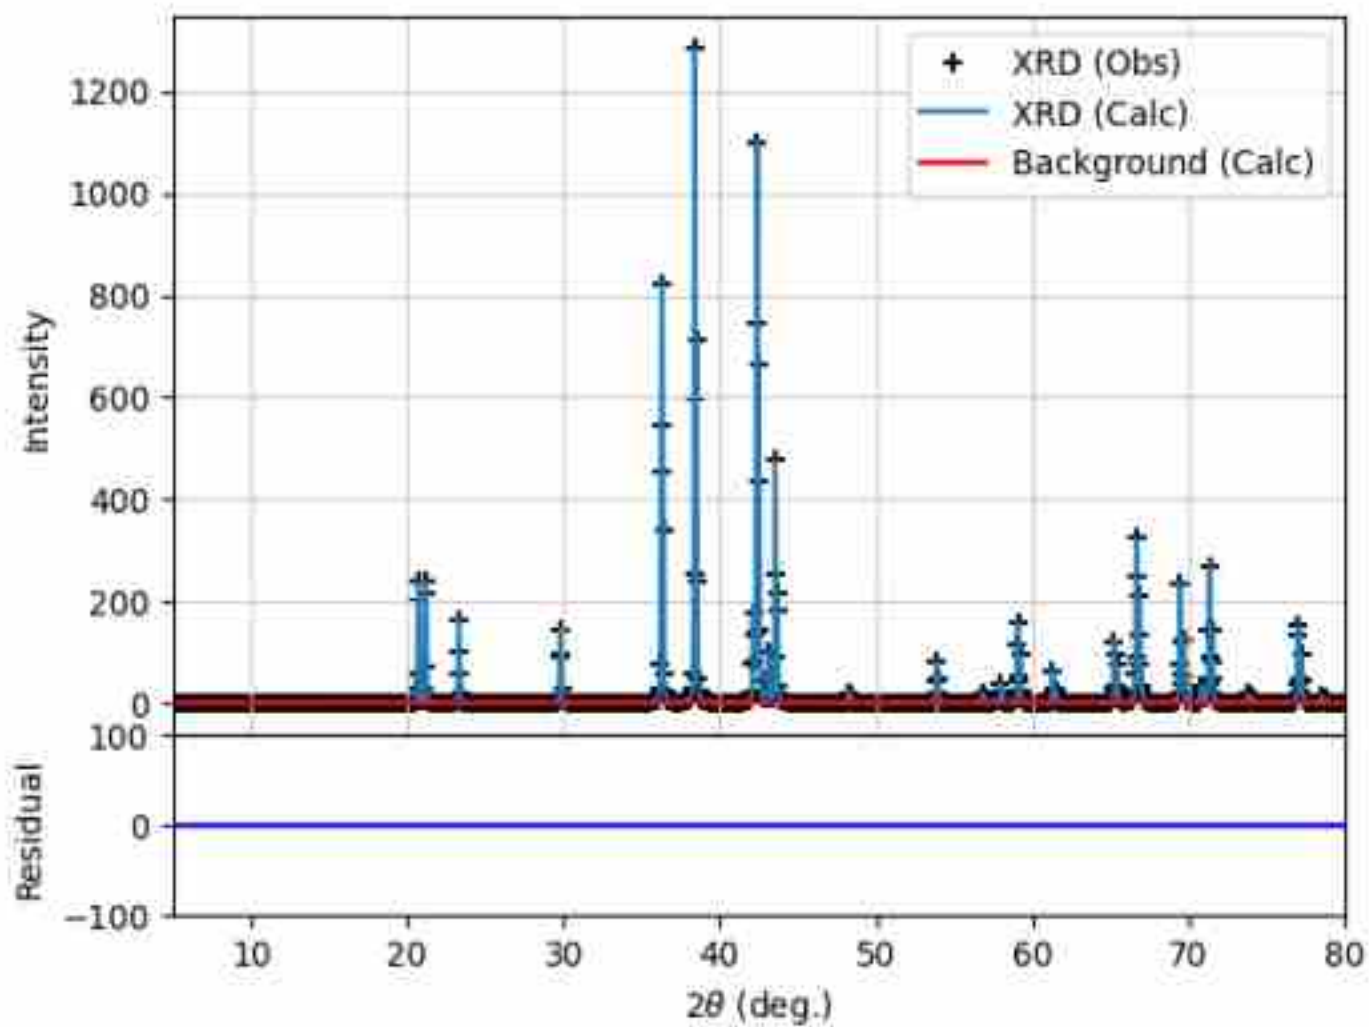

| RMSE before RR | Rwp     | RMSE after RR |
|----------------|---------|---------------|
| 0.022          | 0.00373 | 0.00066       |

# Tb1Ga3B4O12

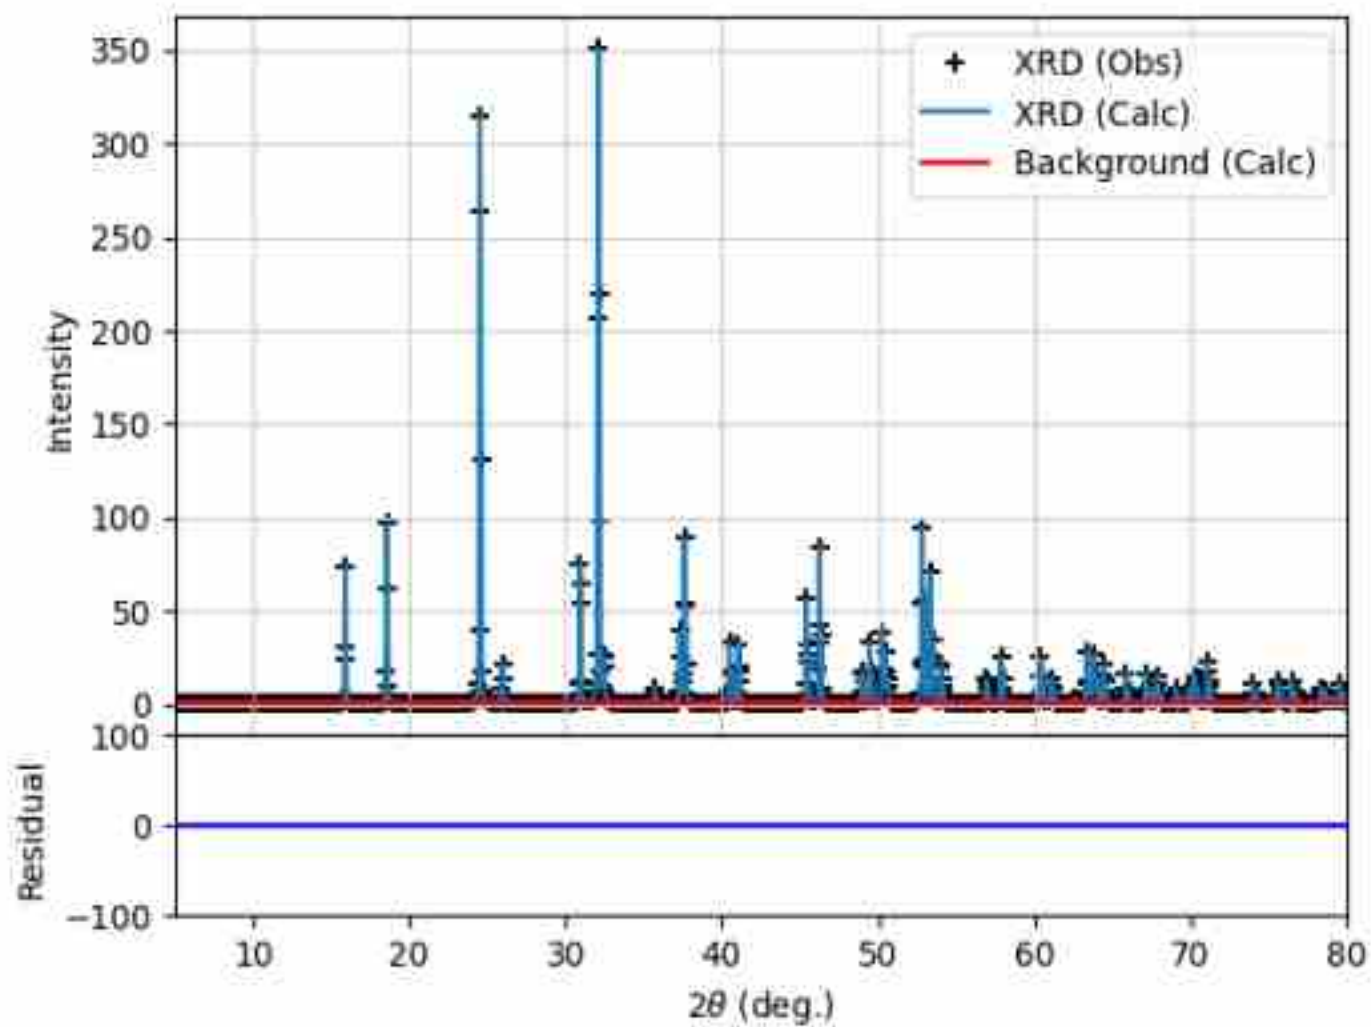

| RMSE before RR | Rwp     | RMSE after RR |
|----------------|---------|---------------|
| 0.022          | 0.00444 | 0.00251       |



# Tb<sub>2</sub>Ag<sub>2</sub>As<sub>4</sub>

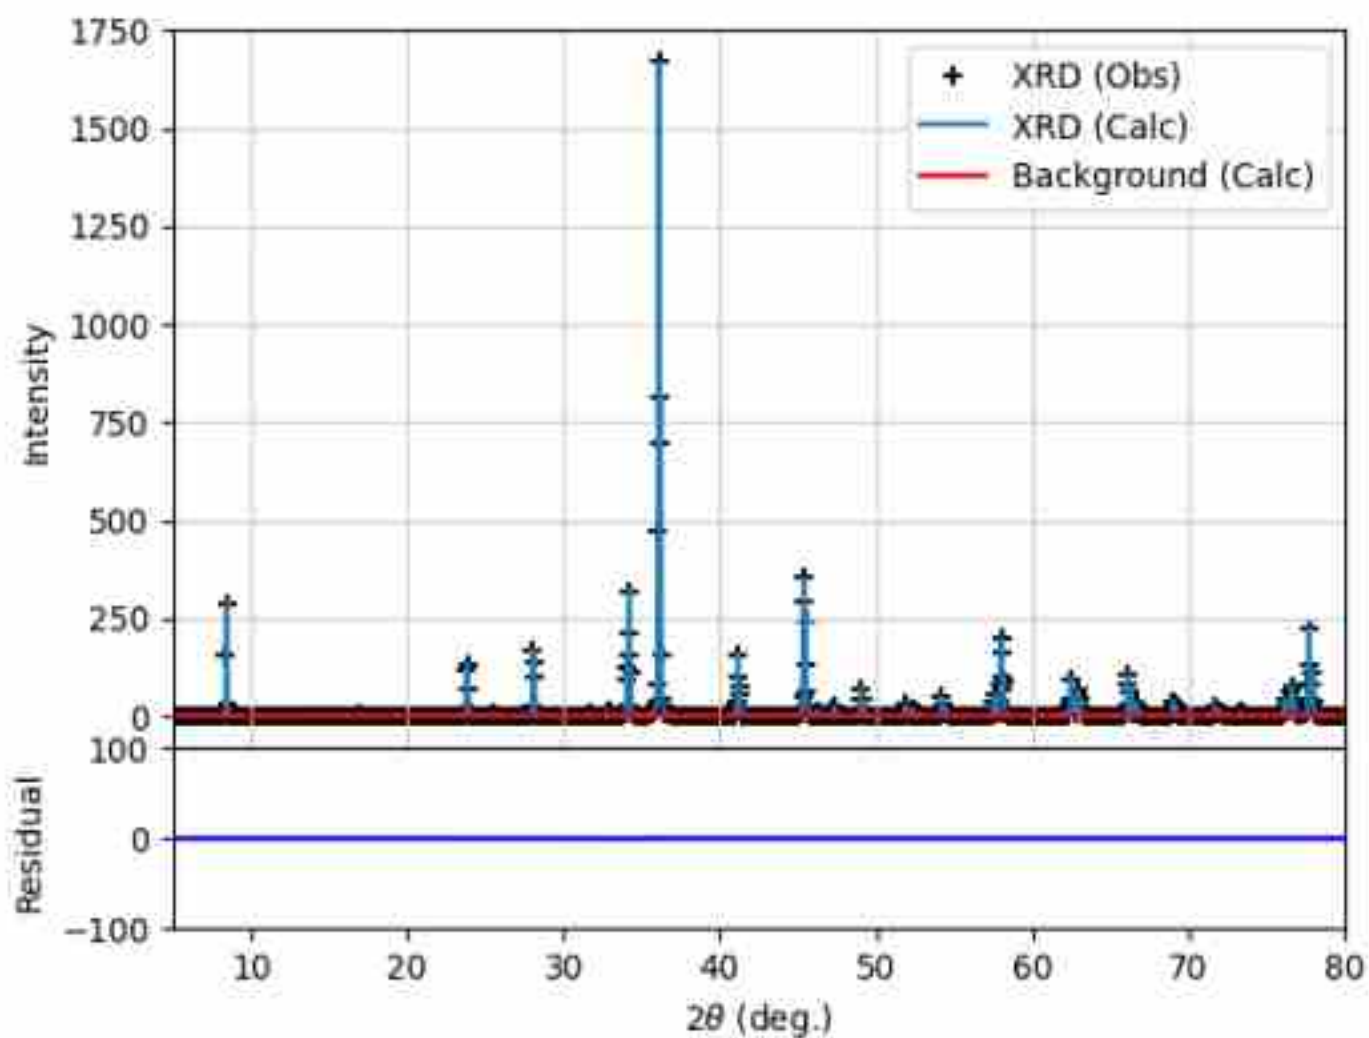

| RMSE before RR | Rwp     | RMSE after RR |
|----------------|---------|---------------|
| 0.022          | 0.02416 | 0.00068       |

# Tb<sub>2</sub>B<sub>8</sub>Ir<sub>8</sub>

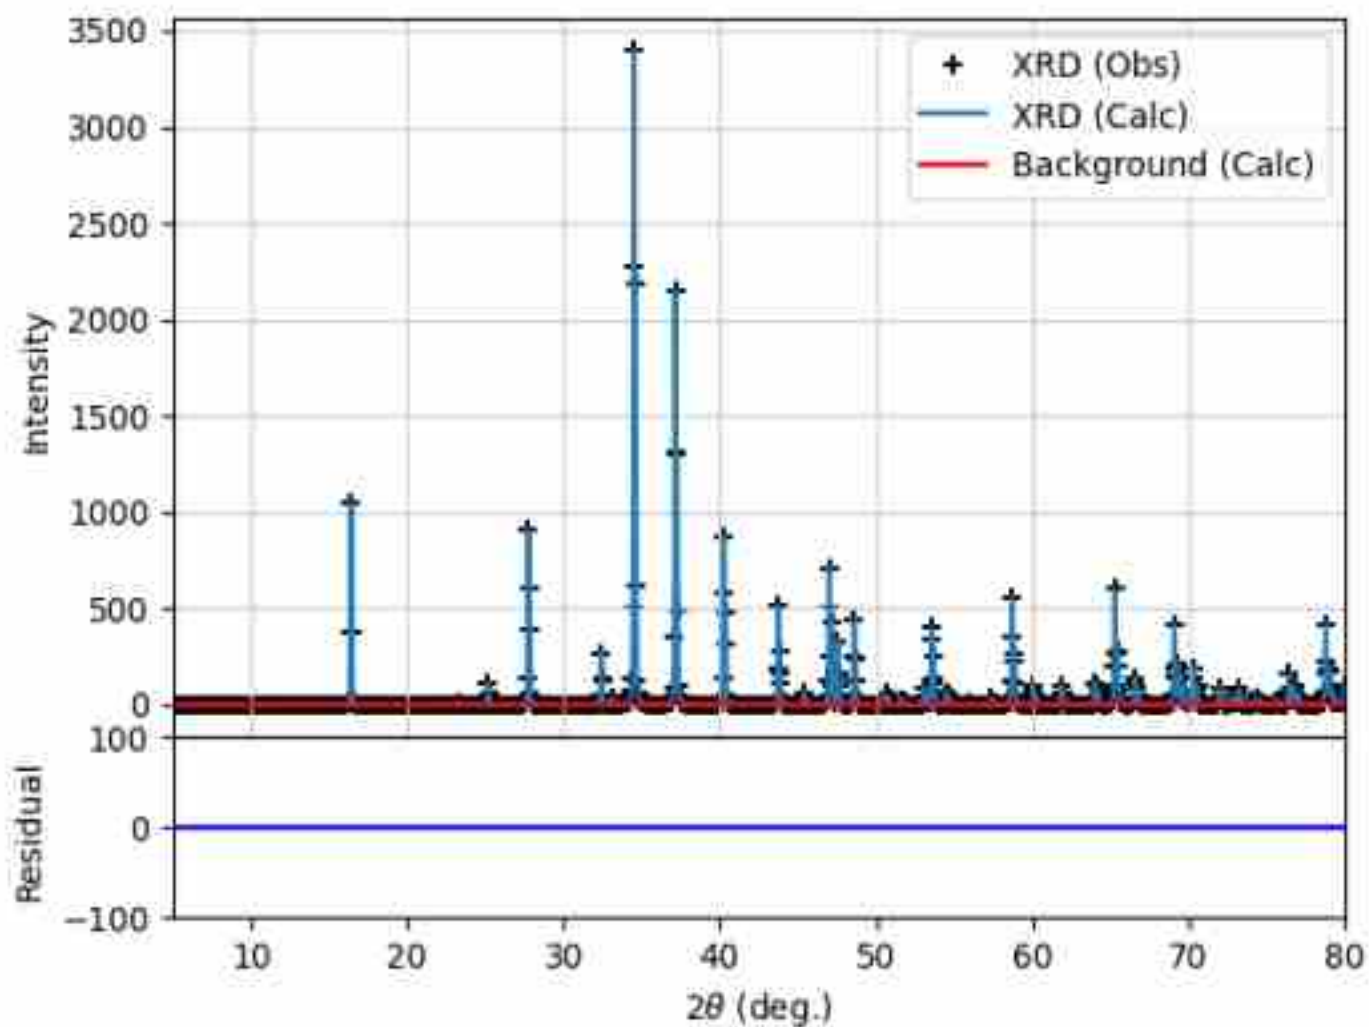

| RMSE before RR | Rwp     | RMSE after RR |
|----------------|---------|---------------|
| 0.022          | 0.00542 | 0.00306       |

# Tb<sub>2</sub>Cr<sub>2</sub>O<sub>8</sub>

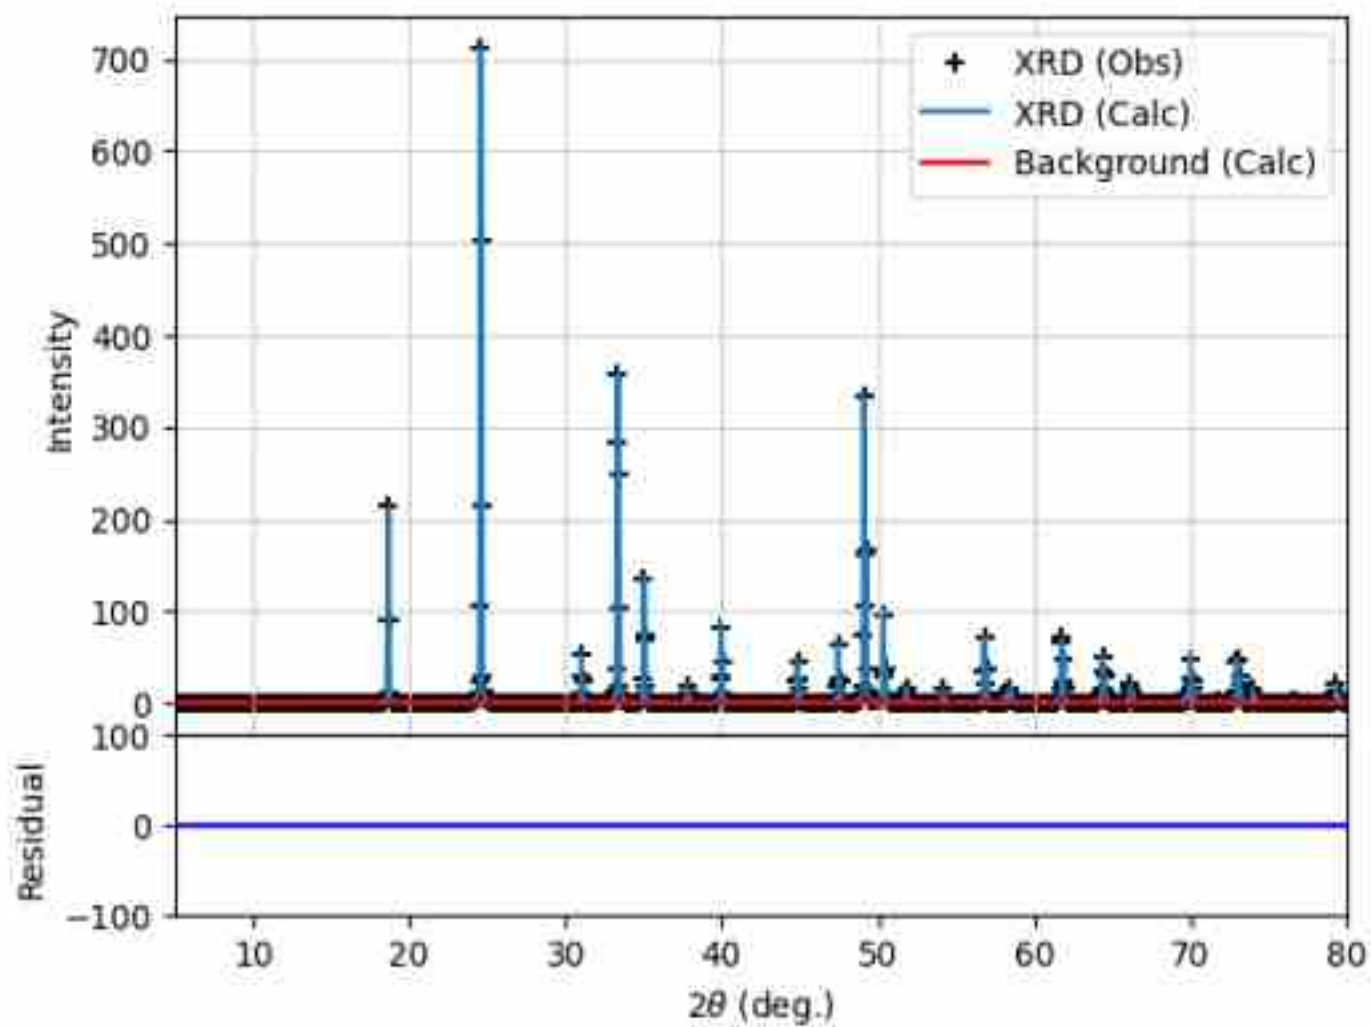

| RMSE before RR | Rwp     | RMSE after RR |
|----------------|---------|---------------|
| 0.022          | 0.00385 | 0.00116       |

# Tb<sub>4</sub>Si<sub>4</sub>Pt<sub>8</sub>

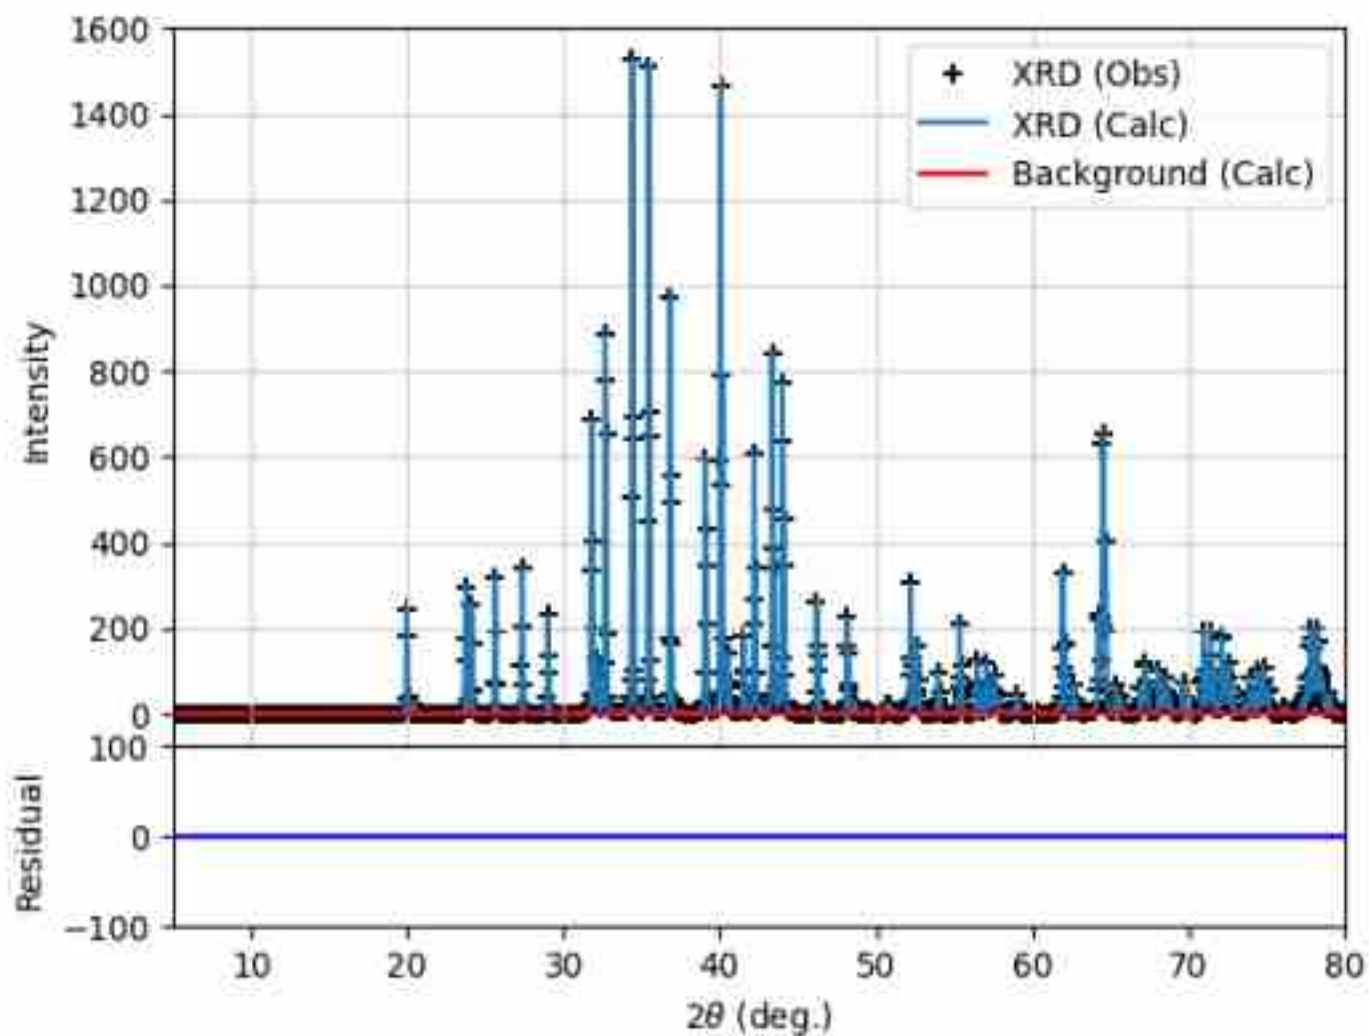

| RMSE before RR | Rwp     | RMSE after RR |
|----------------|---------|---------------|
| 0.022          | 0.00513 | 0.00092       |

# Tb10Si4Sb4

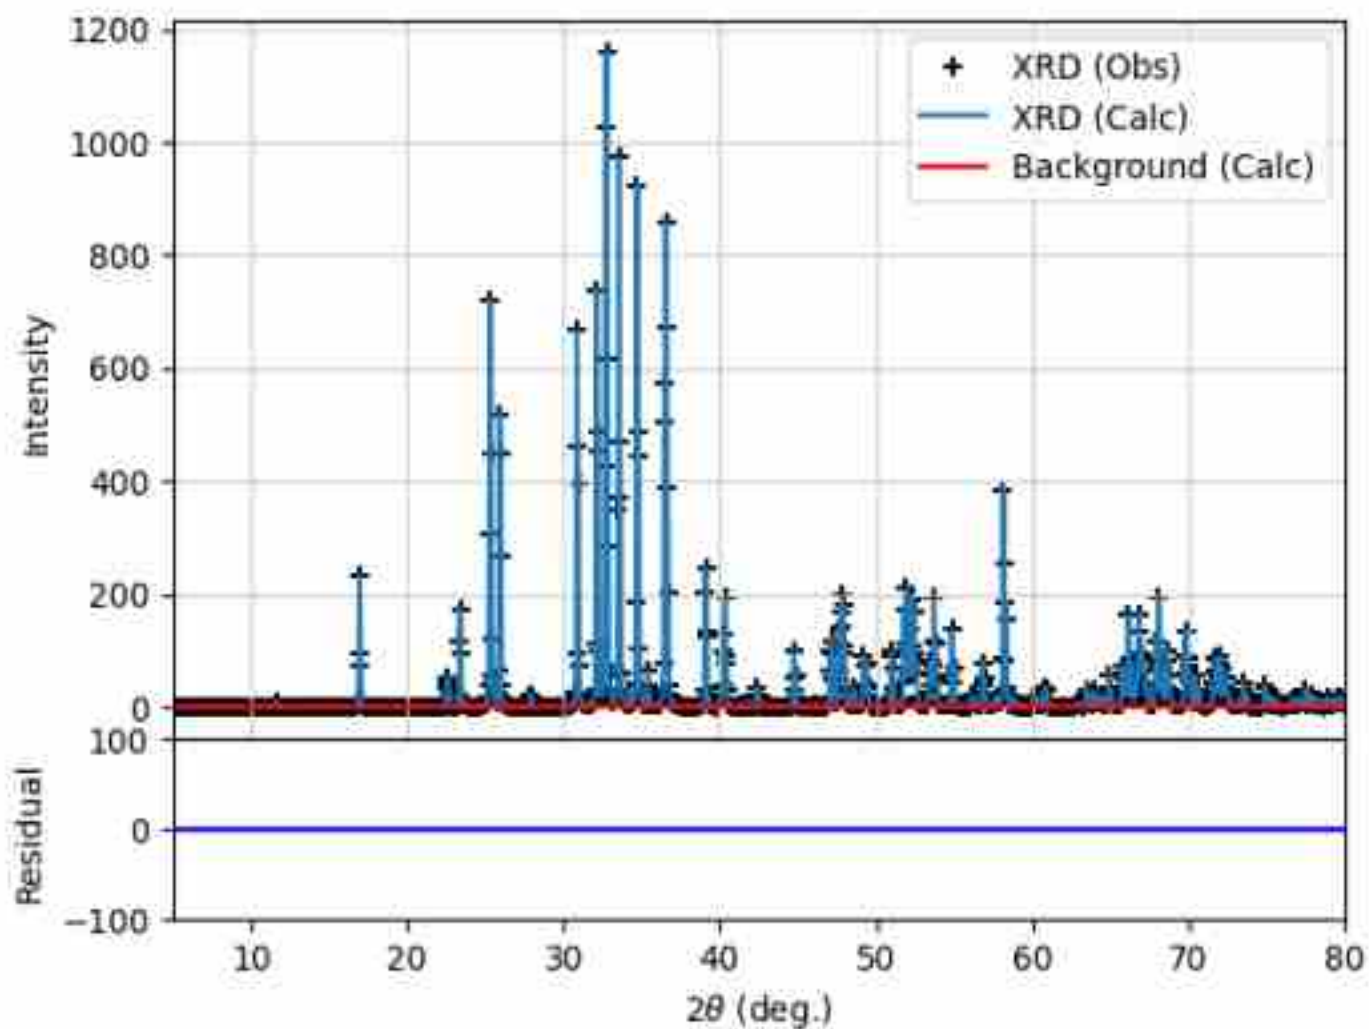

| RMSE before RR | Rwp     | RMSE after RR |
|----------------|---------|---------------|
| 0.022          | 0.00313 | 0.0003        |

# Te<sub>2</sub>Rh<sub>4</sub>O<sub>12</sub>

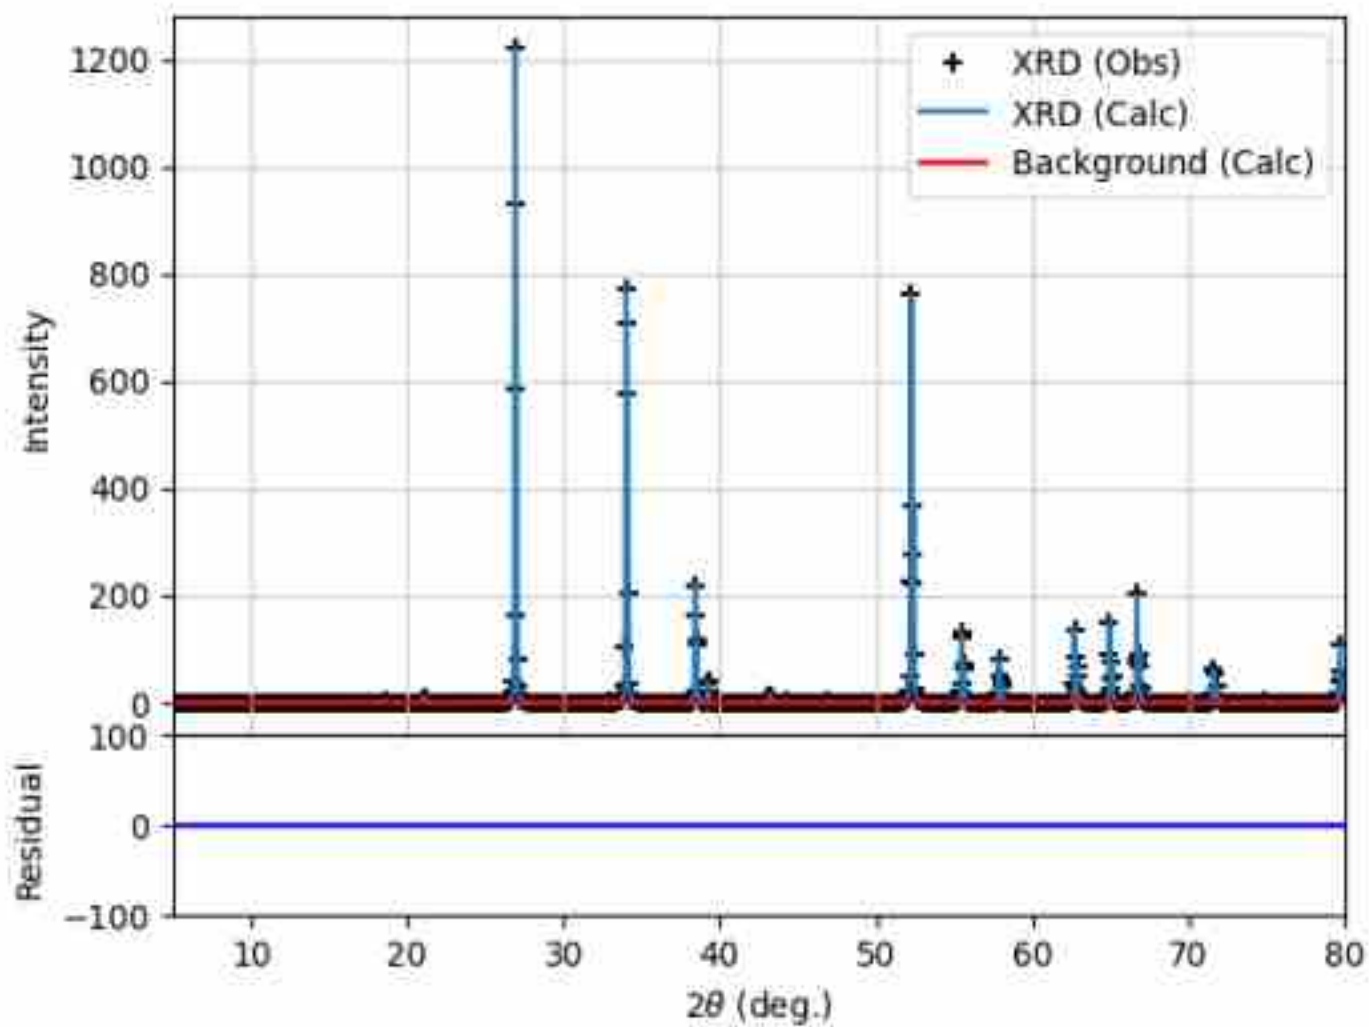

| RMSE before RR | Rwp     | RMSE after RR |
|----------------|---------|---------------|
| 0.022          | 0.00364 | 0.00081       |

# Te4Pt4Pb4

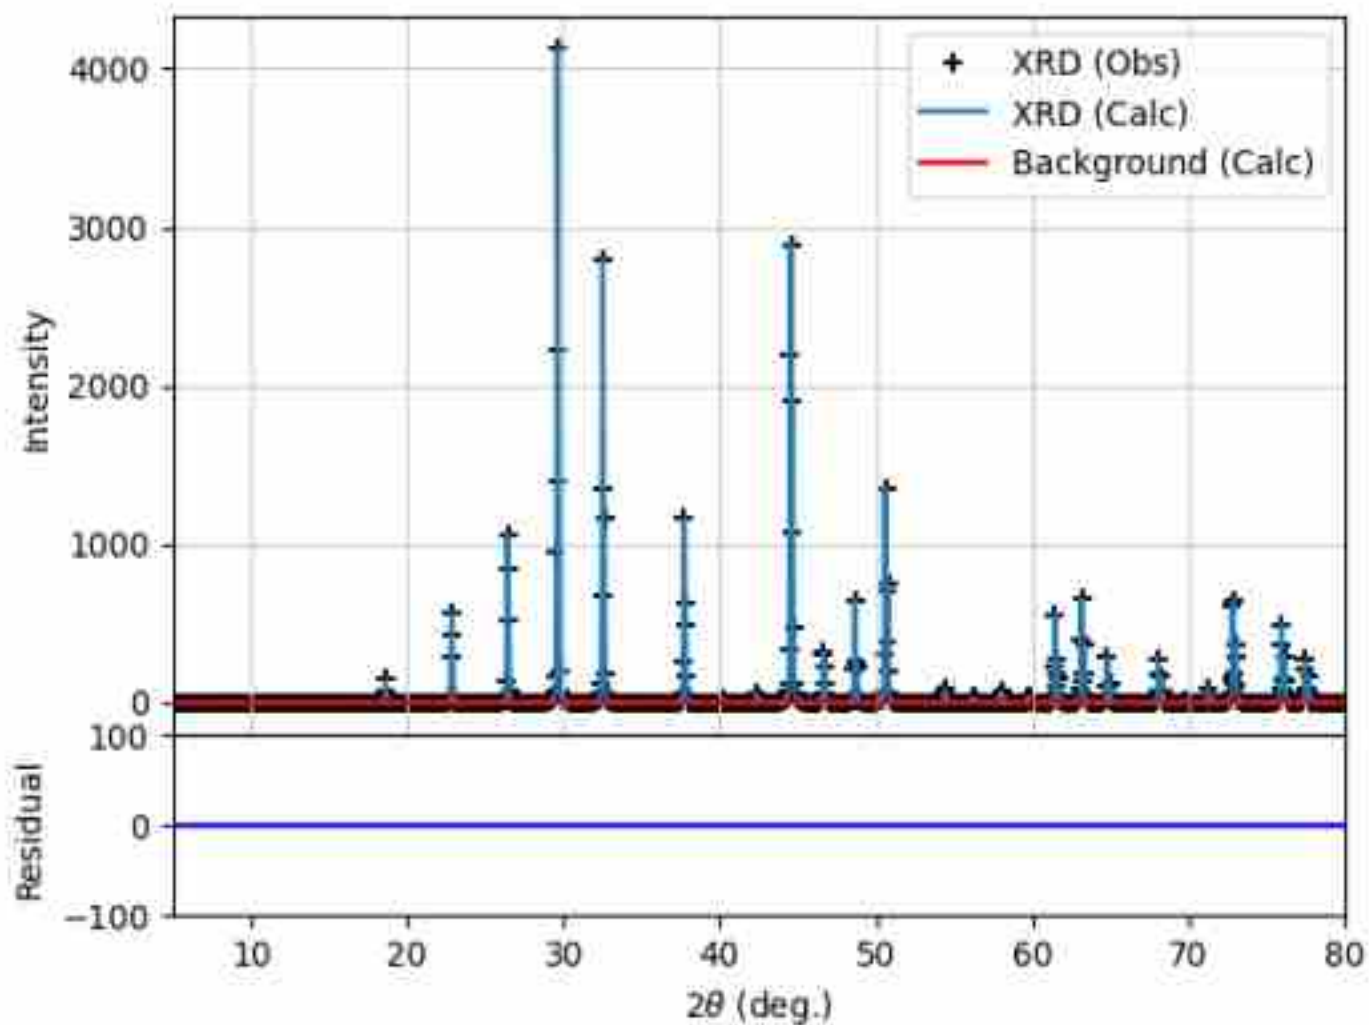

| RMSE before RR | Rwp     | RMSE after RR |
|----------------|---------|---------------|
| 0.022          | 0.00712 | 0.00062       |

# Ti<sub>2</sub>FeSe<sub>4</sub>

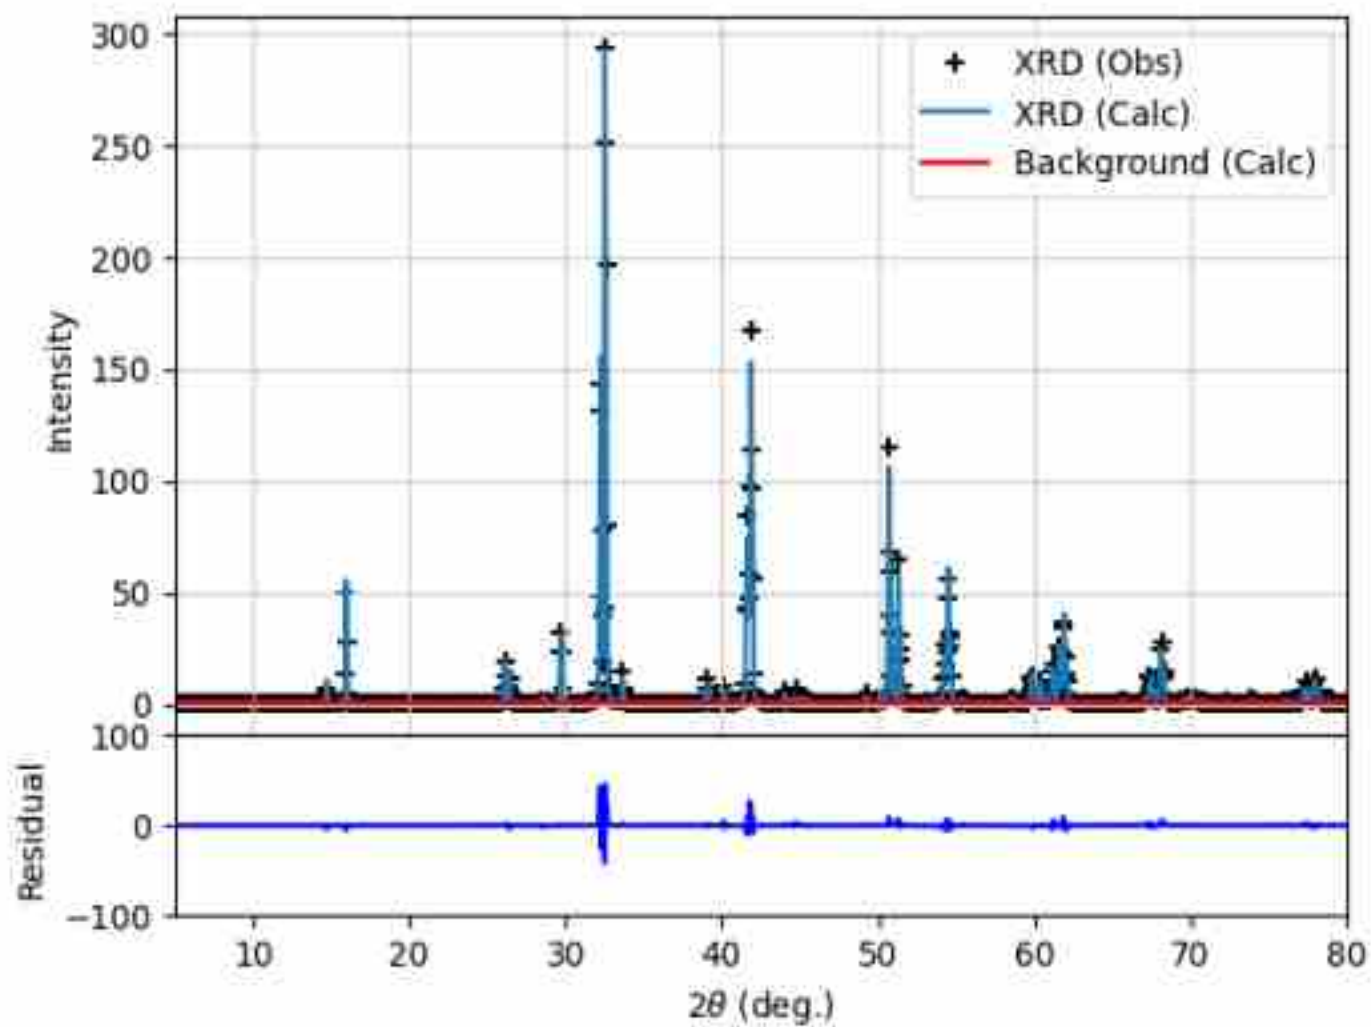

| RMSE before RR | Rwp      | RMSE after RR |
|----------------|----------|---------------|
| 0.022          | 15.59616 | 0.05275       |



# Ti<sub>2</sub>Ge<sub>2</sub>Sb<sub>2</sub>

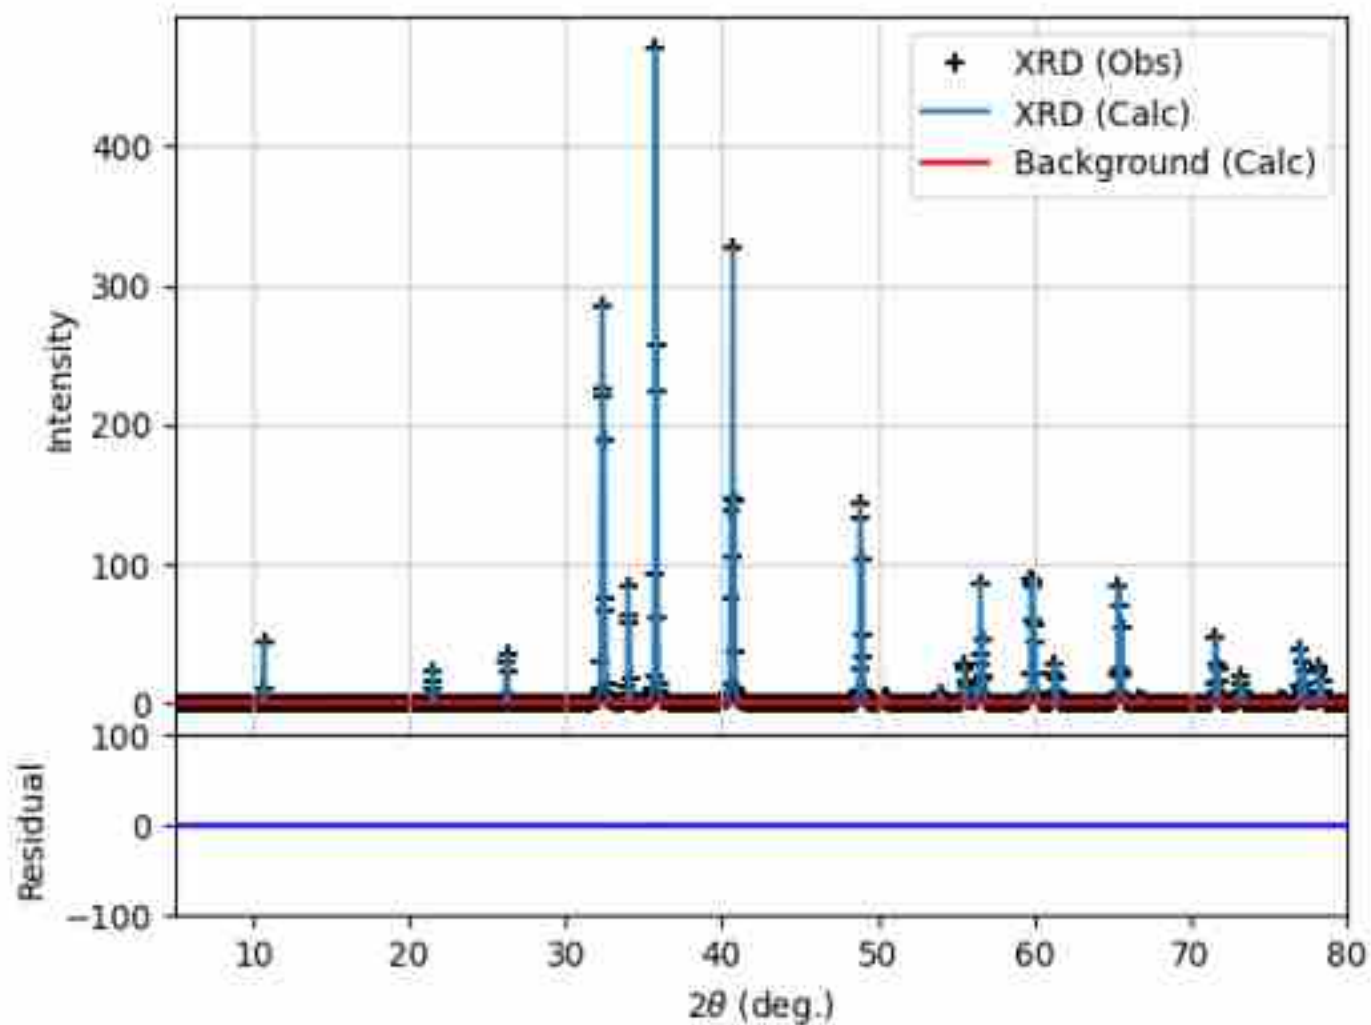

| RMSE before RR | Rwp     | RMSE after RR |
|----------------|---------|---------------|
| 0.022          | 0.04486 | 0.00085       |

# Ti4O6

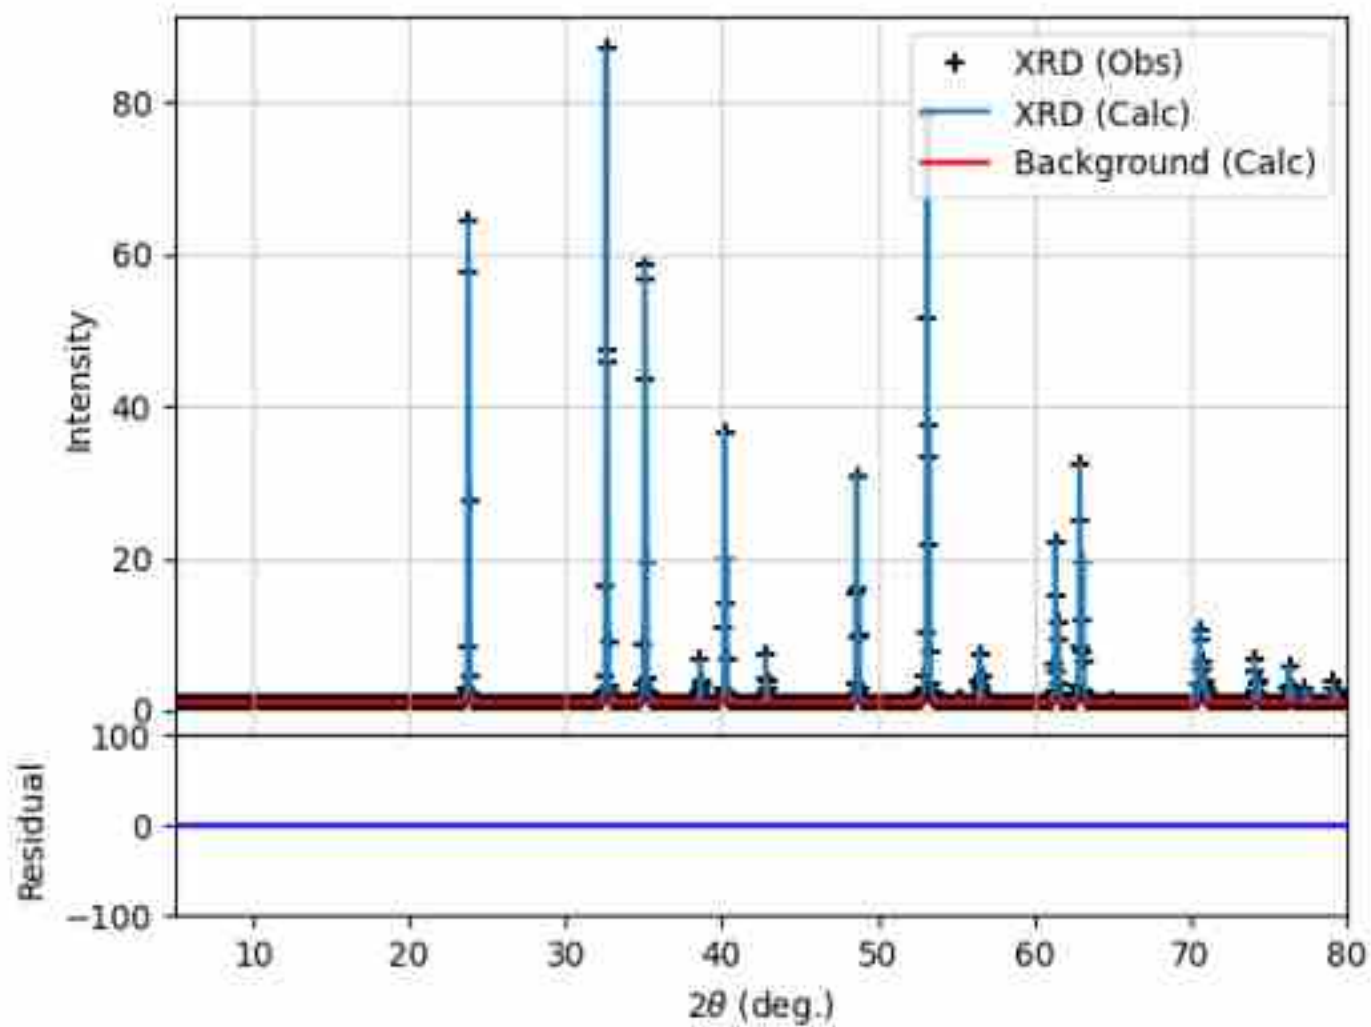

| RMSE before RR | Rwp     | RMSE after RR |
|----------------|---------|---------------|
| 0.022          | 0.00225 | 0.00087       |

# Ti10Co2Sb6

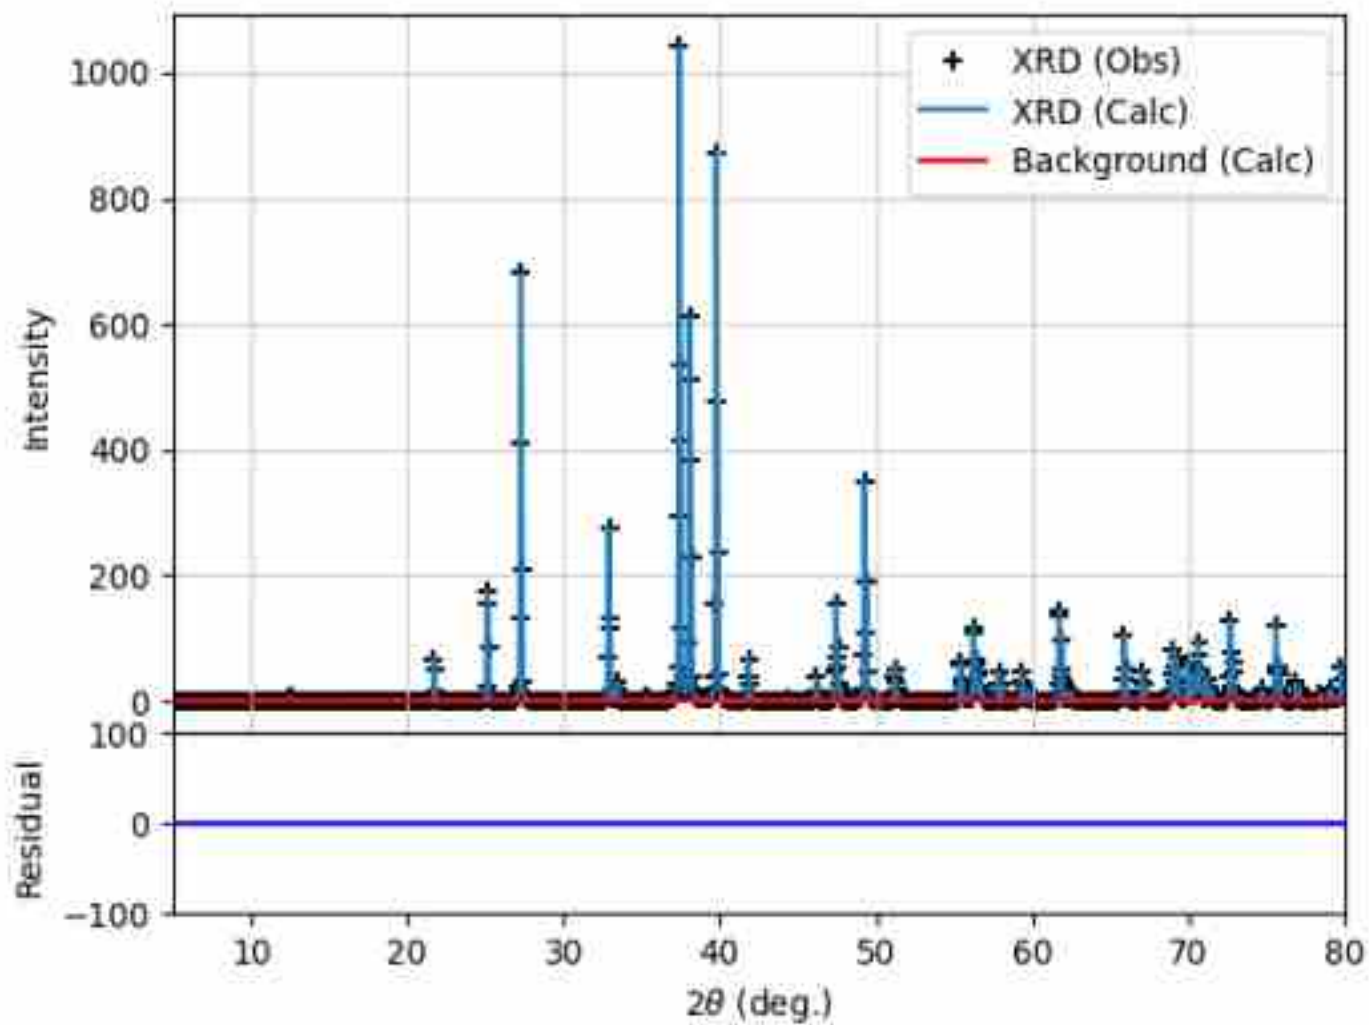

| RMSE before RR | Rwp     | RMSE after RR |
|----------------|---------|---------------|
| 0.022          | 0.04634 | 0.00215       |

# Ti10Si6C2

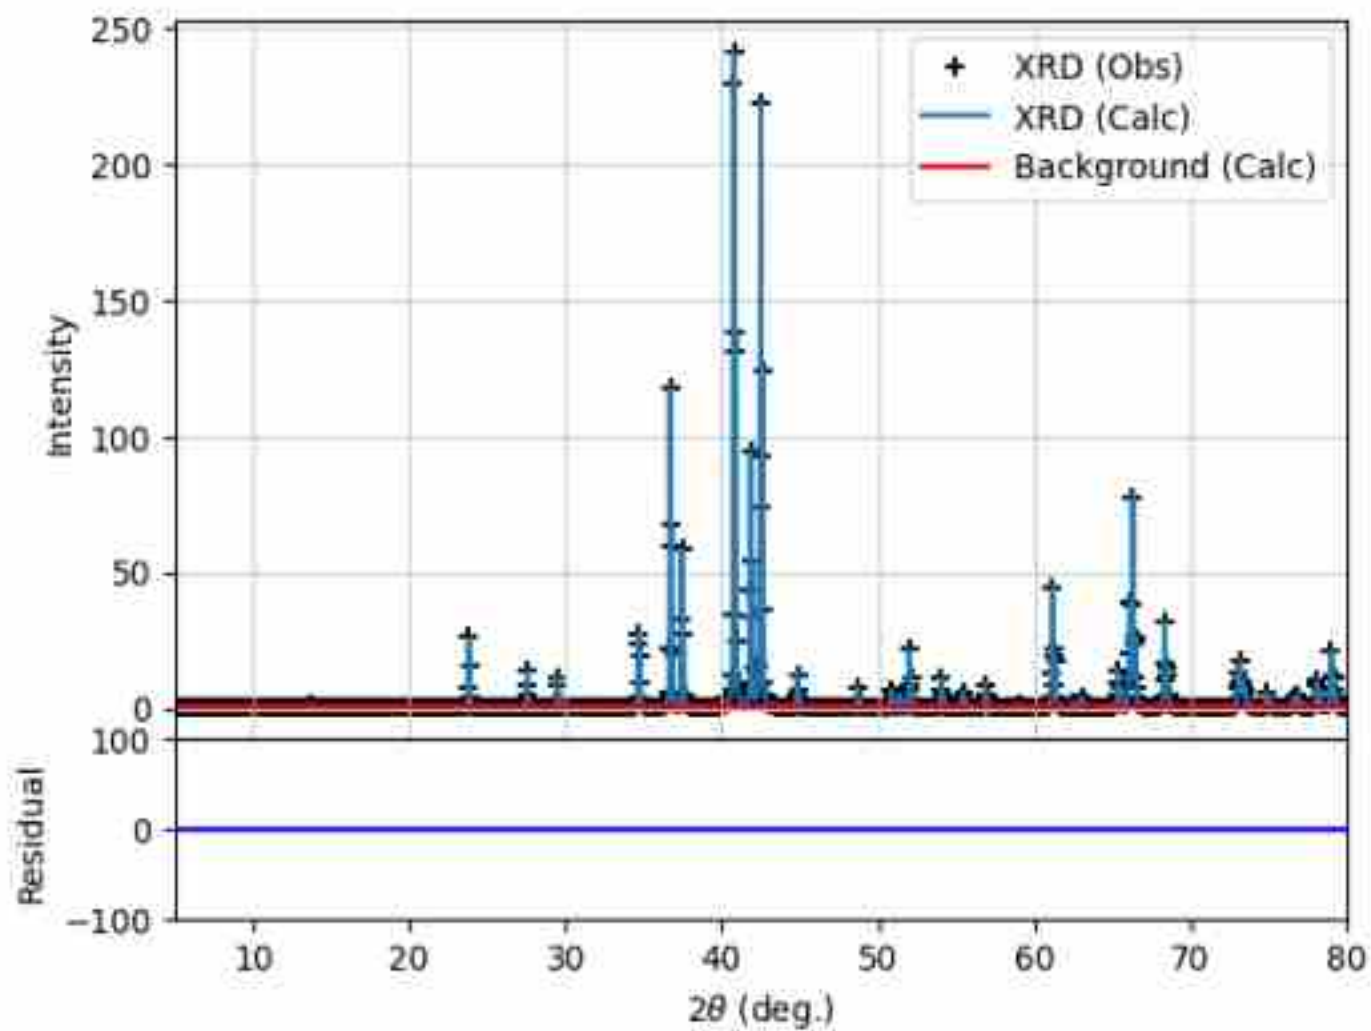

| RMSE before RR | Rwp     | RMSE after RR |
|----------------|---------|---------------|
| 0.022          | 0.00272 | 0.00058       |

# Tl8Sn1Te6Pb1

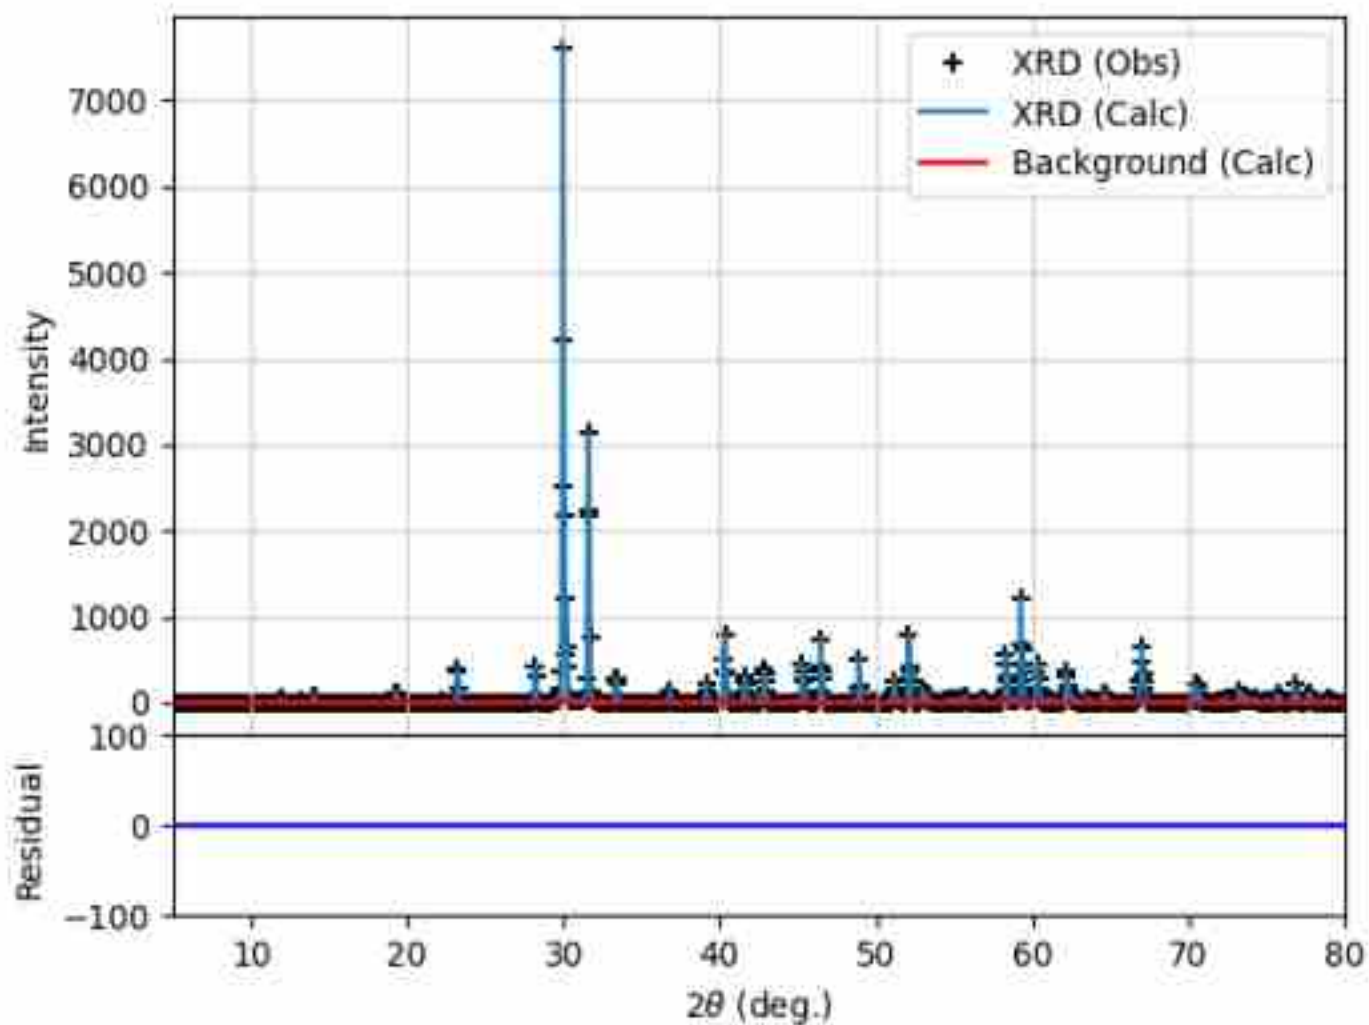

| RMSE before RR | Rwp    | RMSE after RR |
|----------------|--------|---------------|
| 0.022          | 0.0031 | 0.00018       |

# Tm1In1Cu4

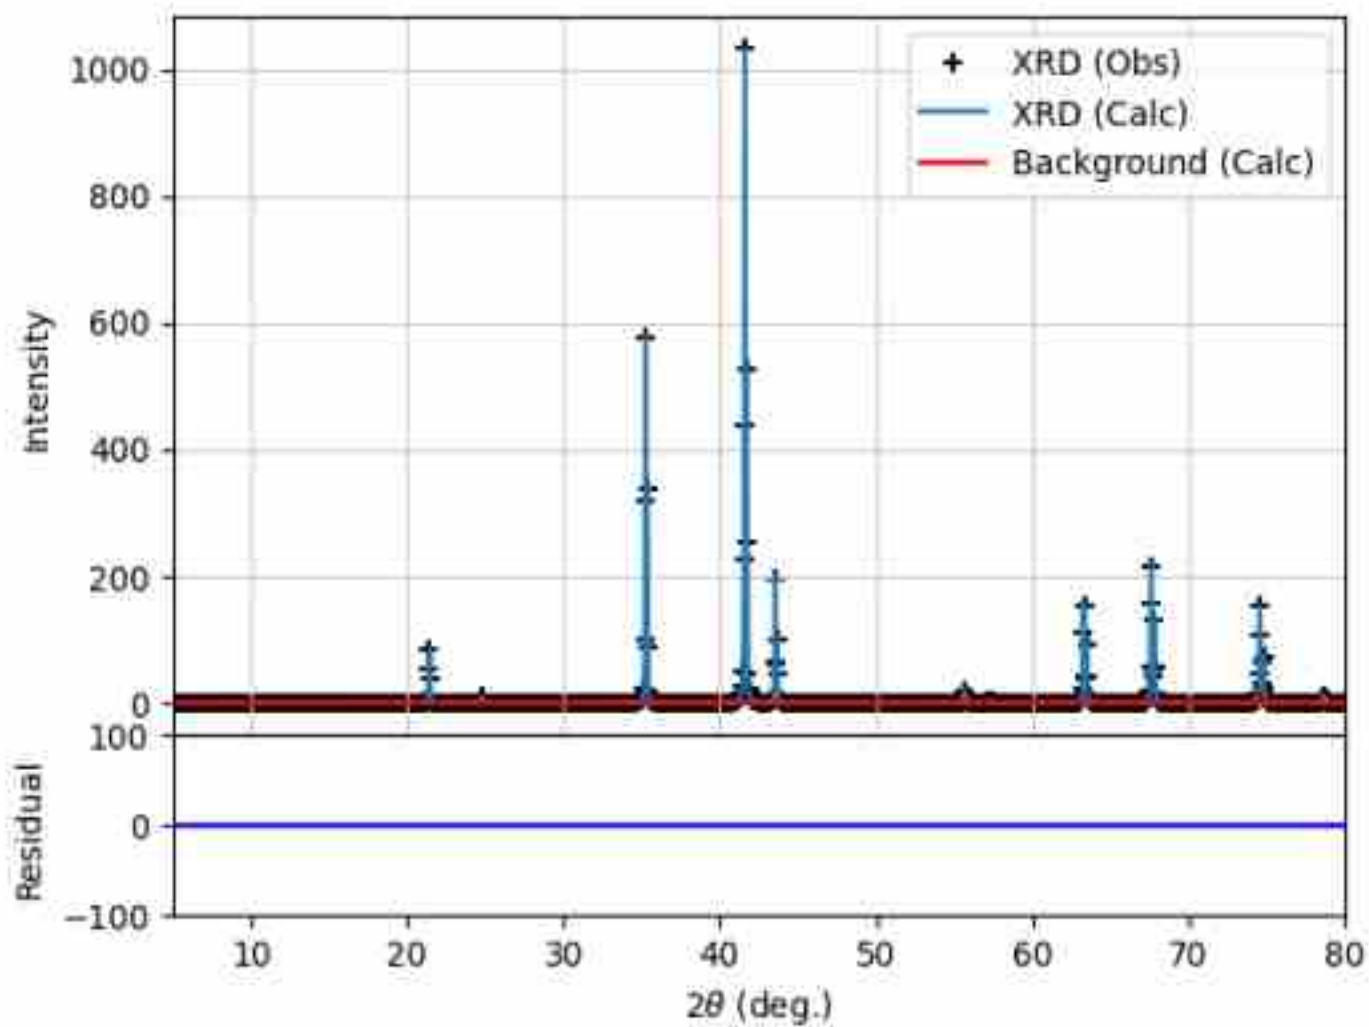

| RMSE before RR | Rwp     | RMSE after RR |
|----------------|---------|---------------|
| 0.022          | 0.03933 | 0.00262       |

# Tm<sub>2</sub>Ga<sub>4</sub>Ni<sub>2</sub>

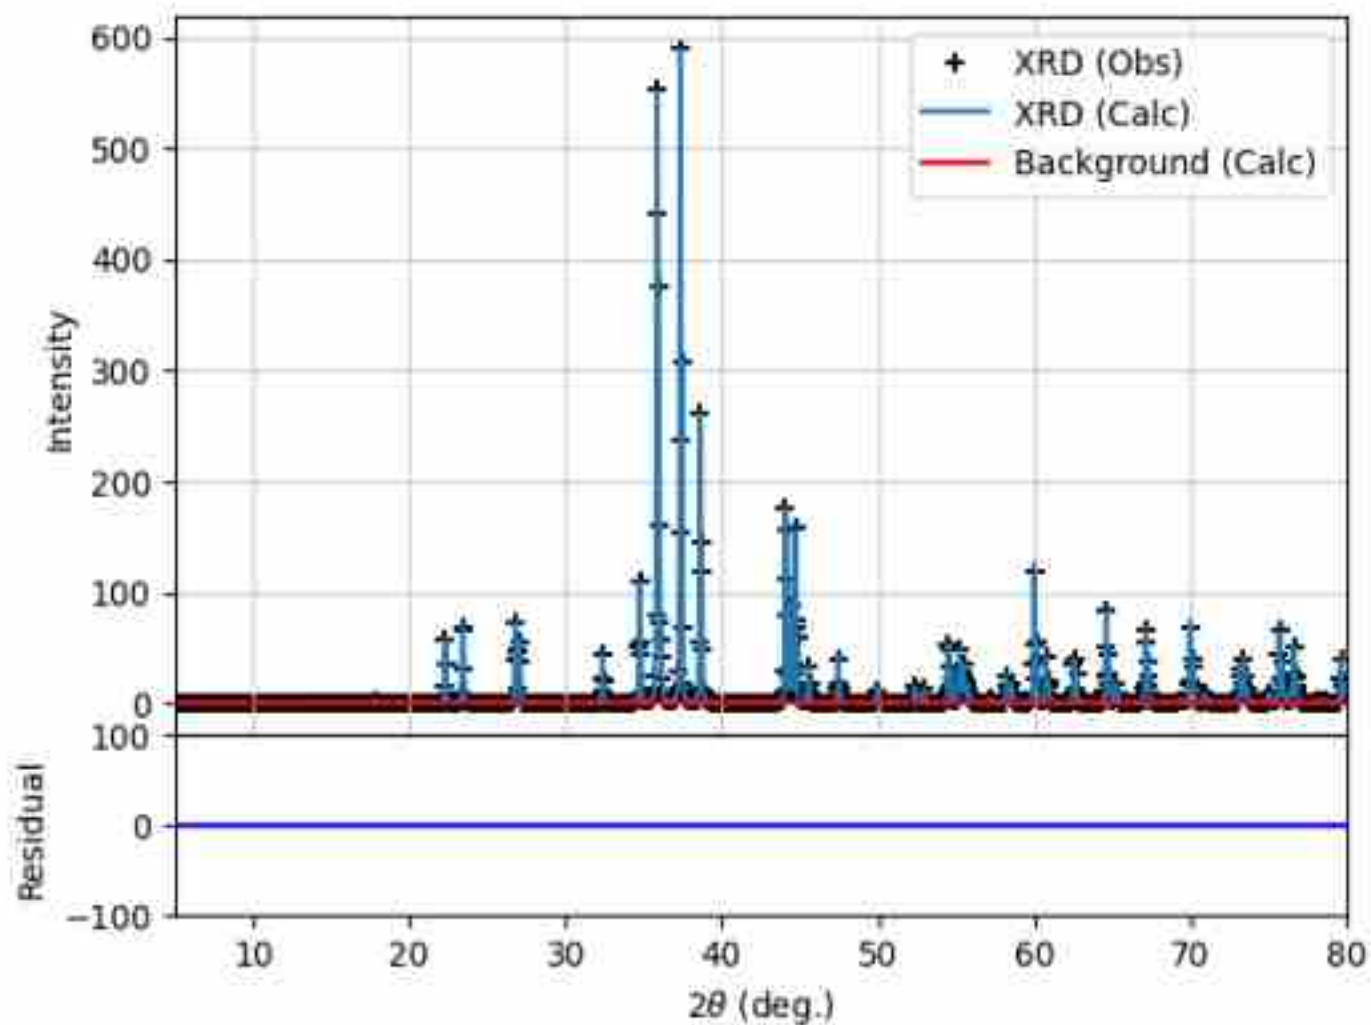

| RMSE before RR | Rwp     | RMSE after RR |
|----------------|---------|---------------|
| 0.022          | 0.00445 | 0.00033       |

# Tm<sub>3</sub>Ga<sub>9</sub>Ru<sub>3</sub>

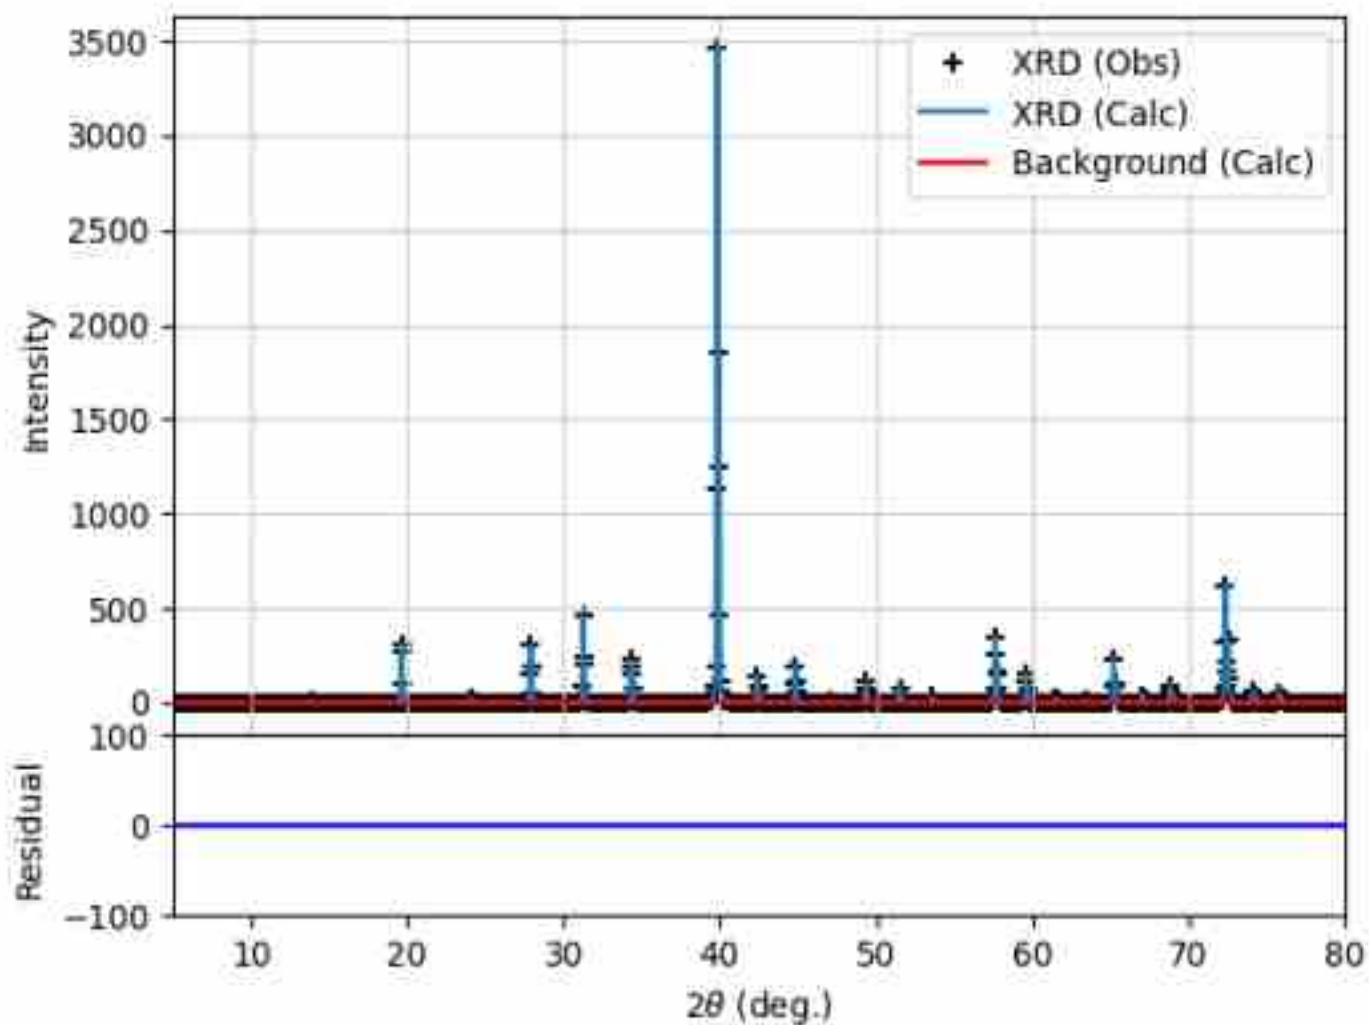

| RMSE before RR | Rwp     | RMSE after RR |
|----------------|---------|---------------|
| 0.022          | 0.00517 | 0.00069       |



# Tm<sub>3</sub>Mg<sub>3</sub>Tl<sub>3</sub>

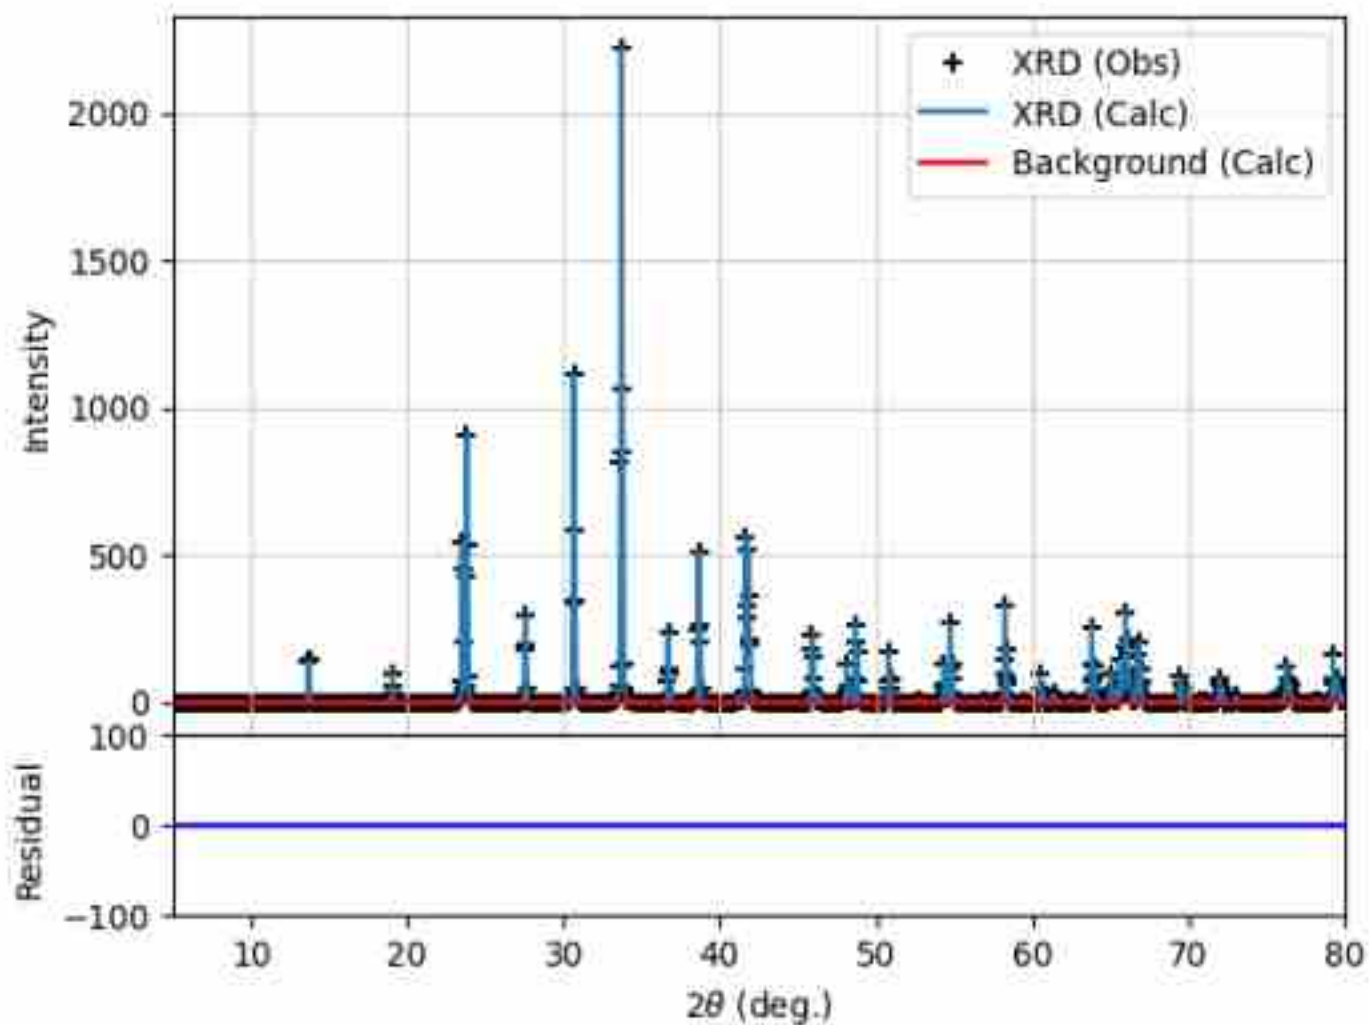

| RMSE before RR | Rwp     | RMSE after RR |
|----------------|---------|---------------|
| 0.022          | 0.00315 | 0.00129       |

# Tm10Bi2Pt4

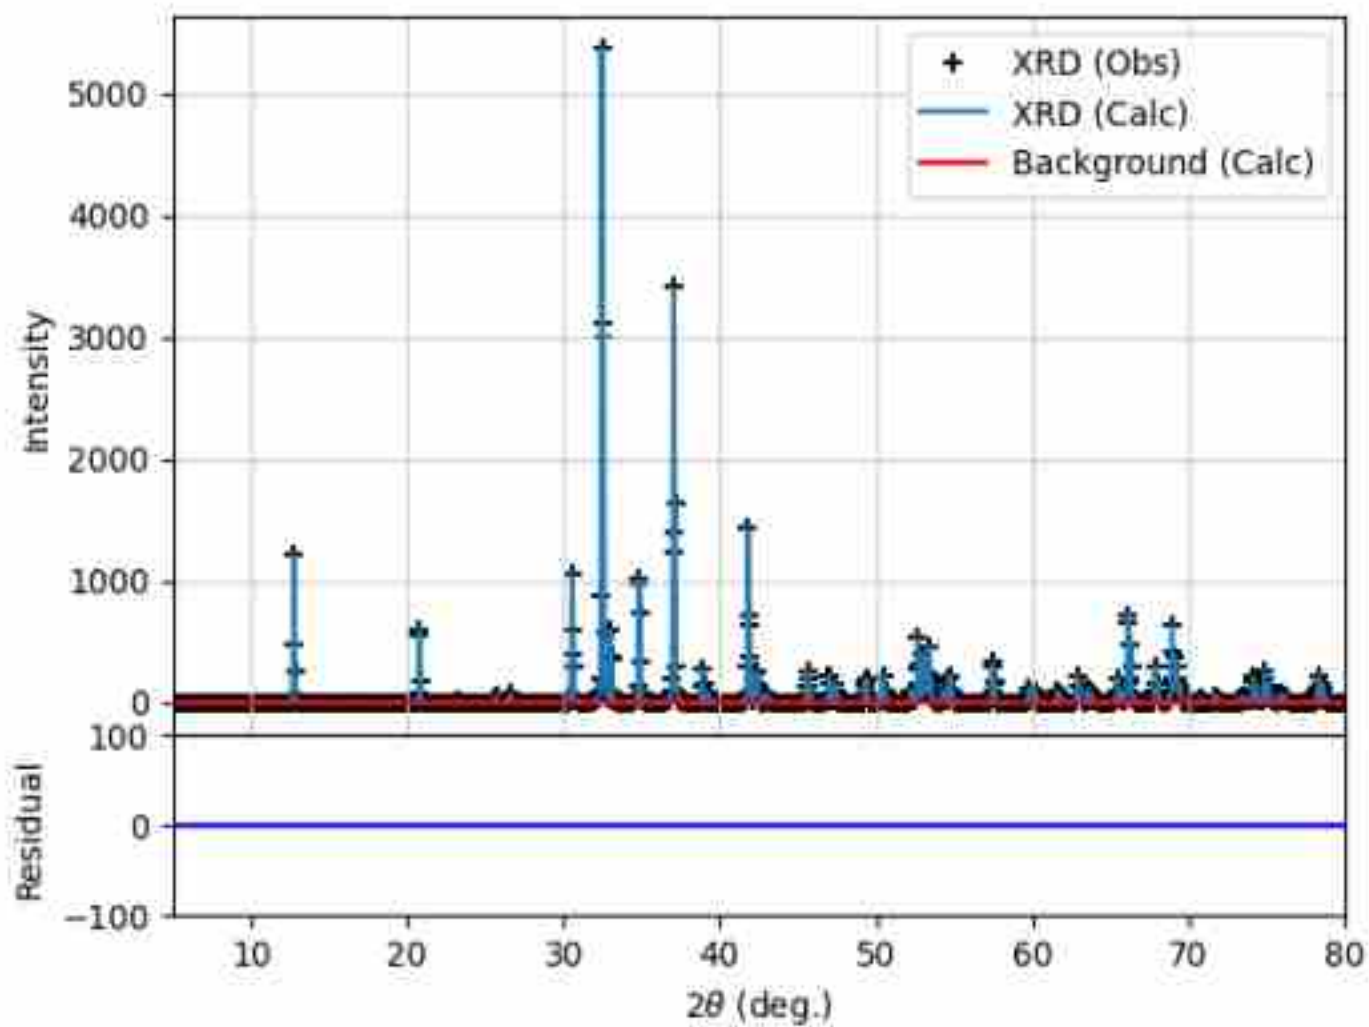

| RMSE before RR | Rwp     | RMSE after RR |
|----------------|---------|---------------|
| 0.022          | 0.00583 | 0.00052       |

# Tm10Ge4Sb4

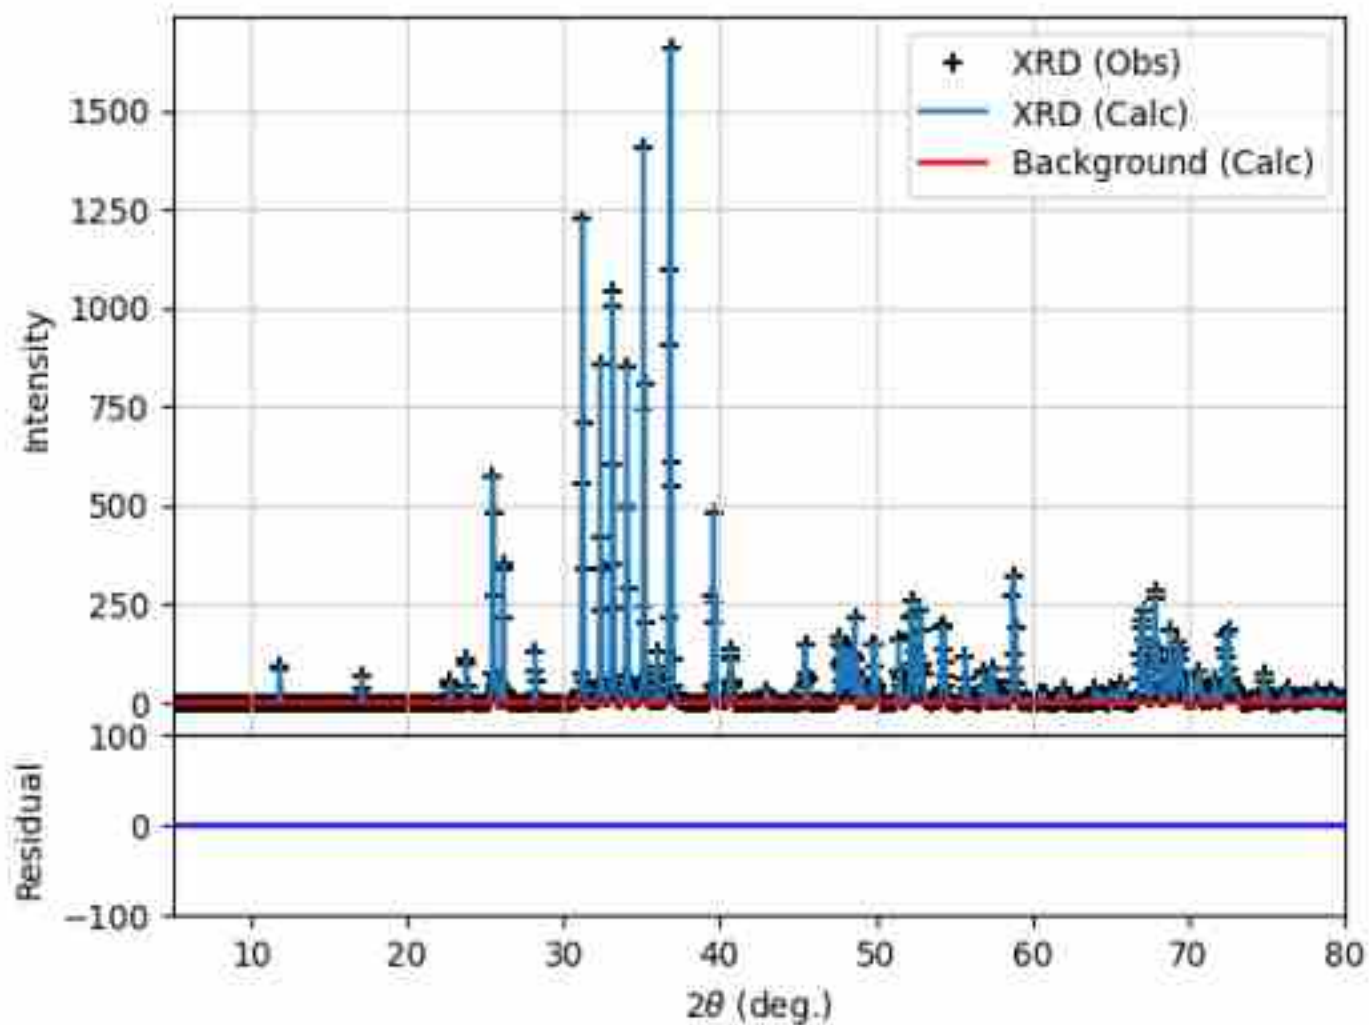

| RMSE before RR | Rwp     | RMSE after RR |
|----------------|---------|---------------|
| 0.022          | 0.00393 | 0.00031       |

# Tm<sub>10</sub>Si<sub>4</sub>Sb<sub>4</sub>

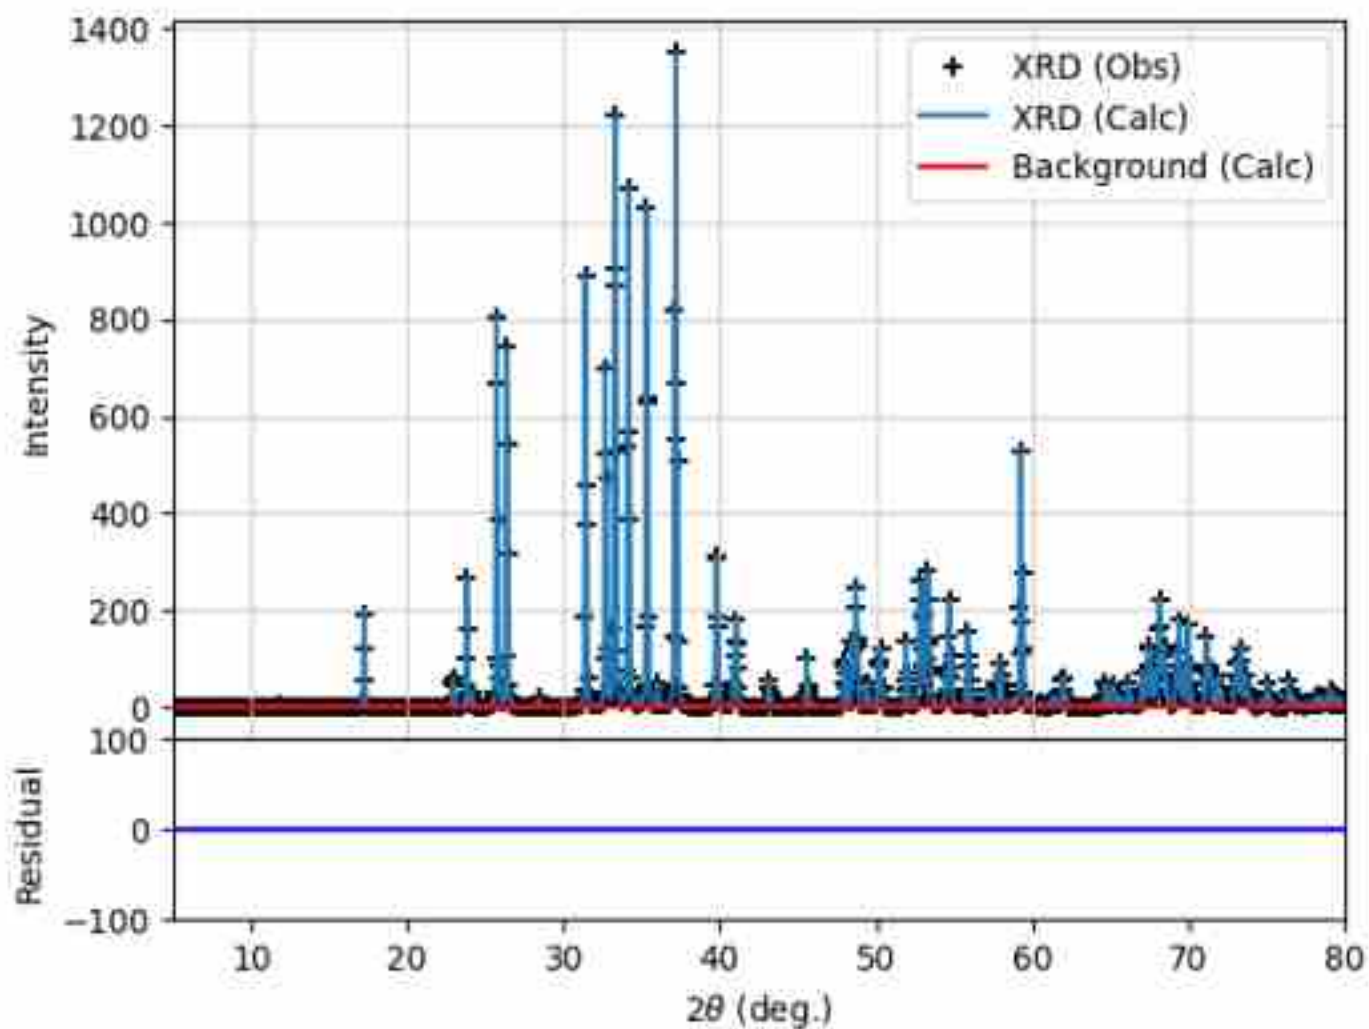

| RMSE before RR | Rwp    | RMSE after RR |
|----------------|--------|---------------|
| 0.022          | 0.0049 | 0.00086       |

# Tm12Ni4Sn2

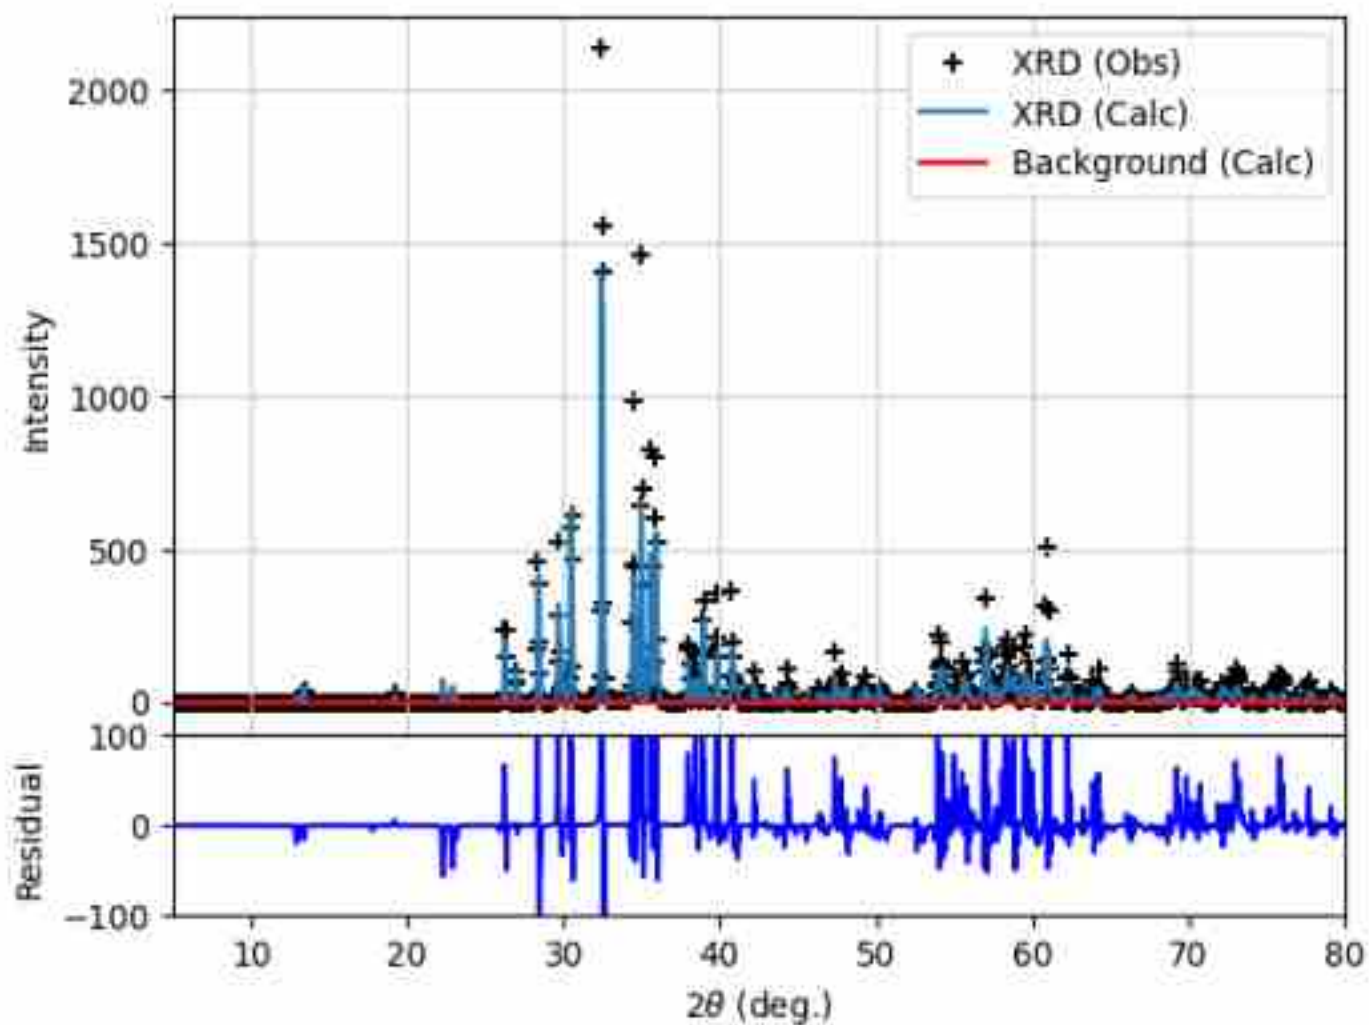

| RMSE before RR | Rwp     | RMSE after RR |
|----------------|---------|---------------|
| 0.022          | 52.6432 | 0.22247       |

# U1Ni5

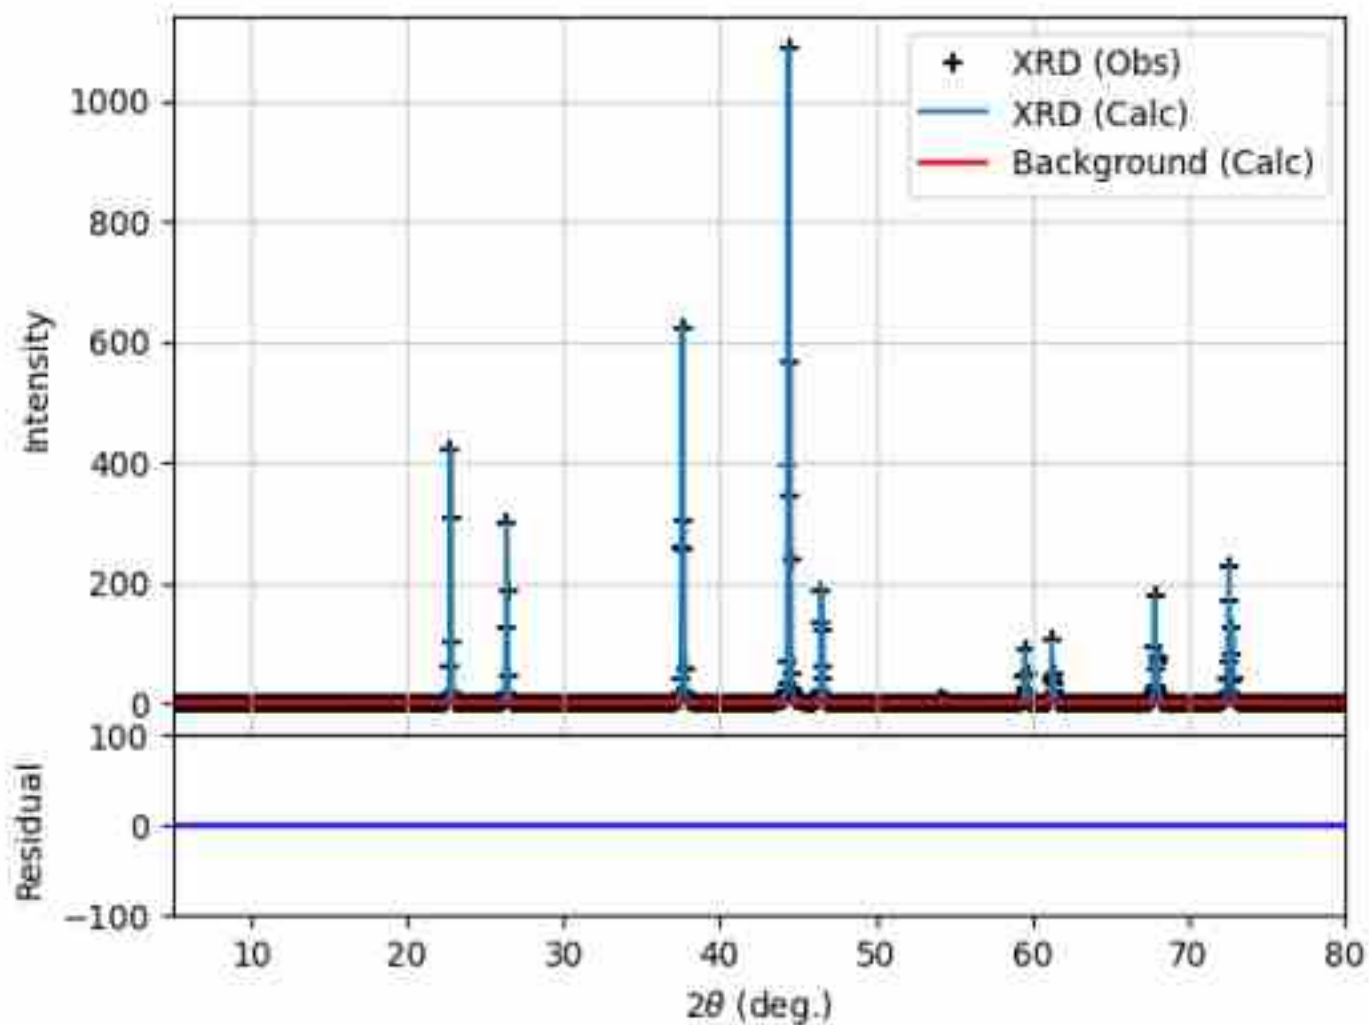

| RMSE before RR | Rwp     | RMSE after RR |
|----------------|---------|---------------|
| 0.022          | 0.03374 | 0.00572       |

# V2Cr2As4

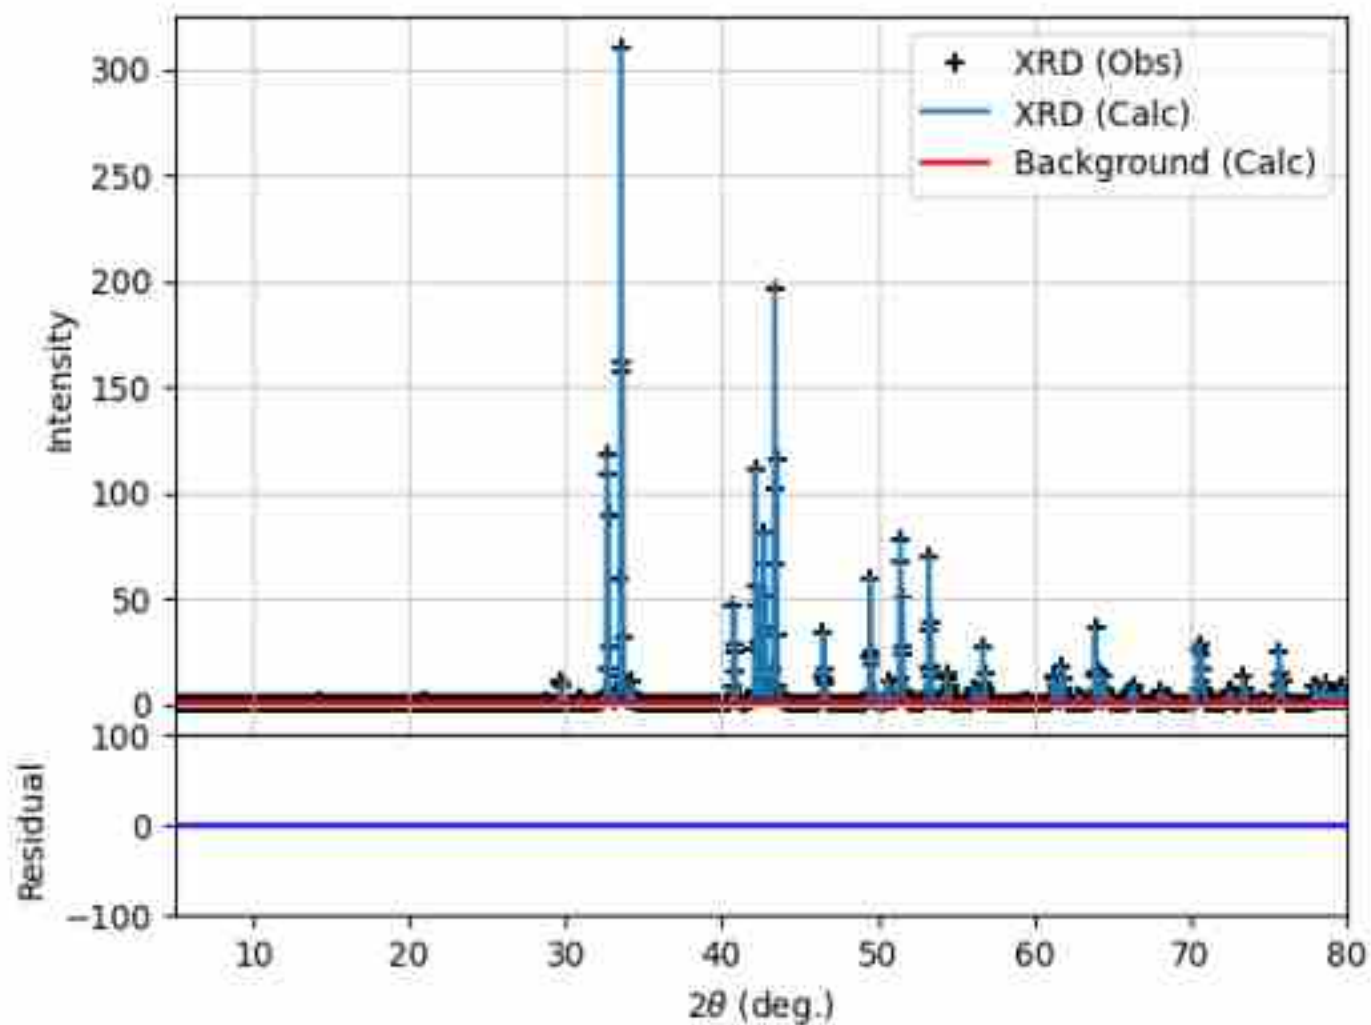

| RMSE before RR | Rwp     | RMSE after RR |
|----------------|---------|---------------|
| 0.022          | 0.00416 | 0.00049       |

# V6O8F4

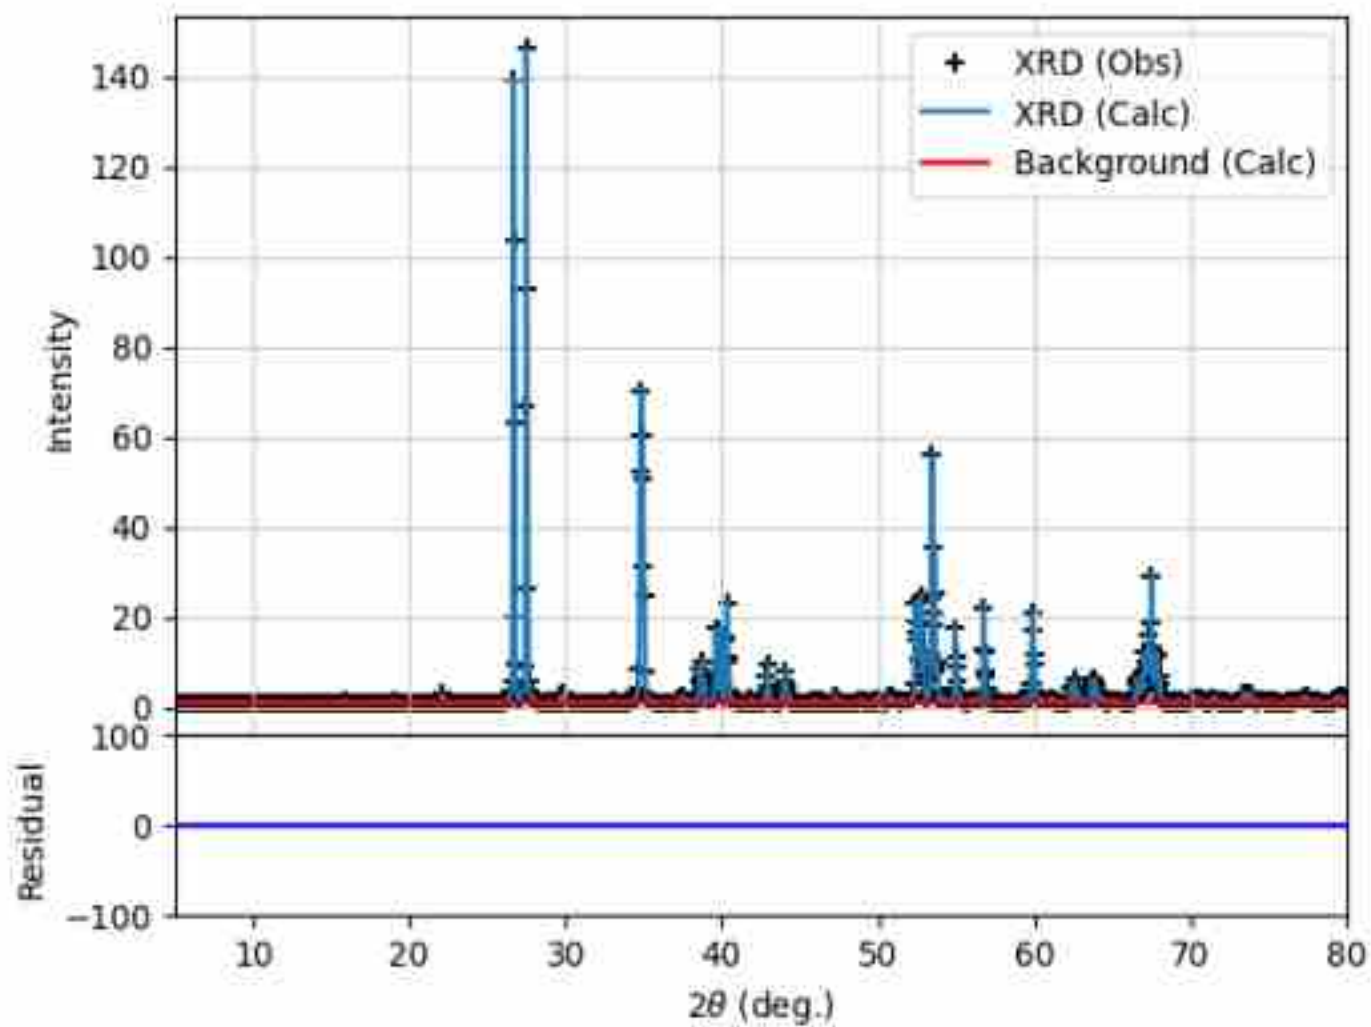

| RMSE before RR | Rwp     | RMSE after RR |
|----------------|---------|---------------|
| 0.022          | 0.00139 | 0.0           |



# Y1Th1B4Ru6

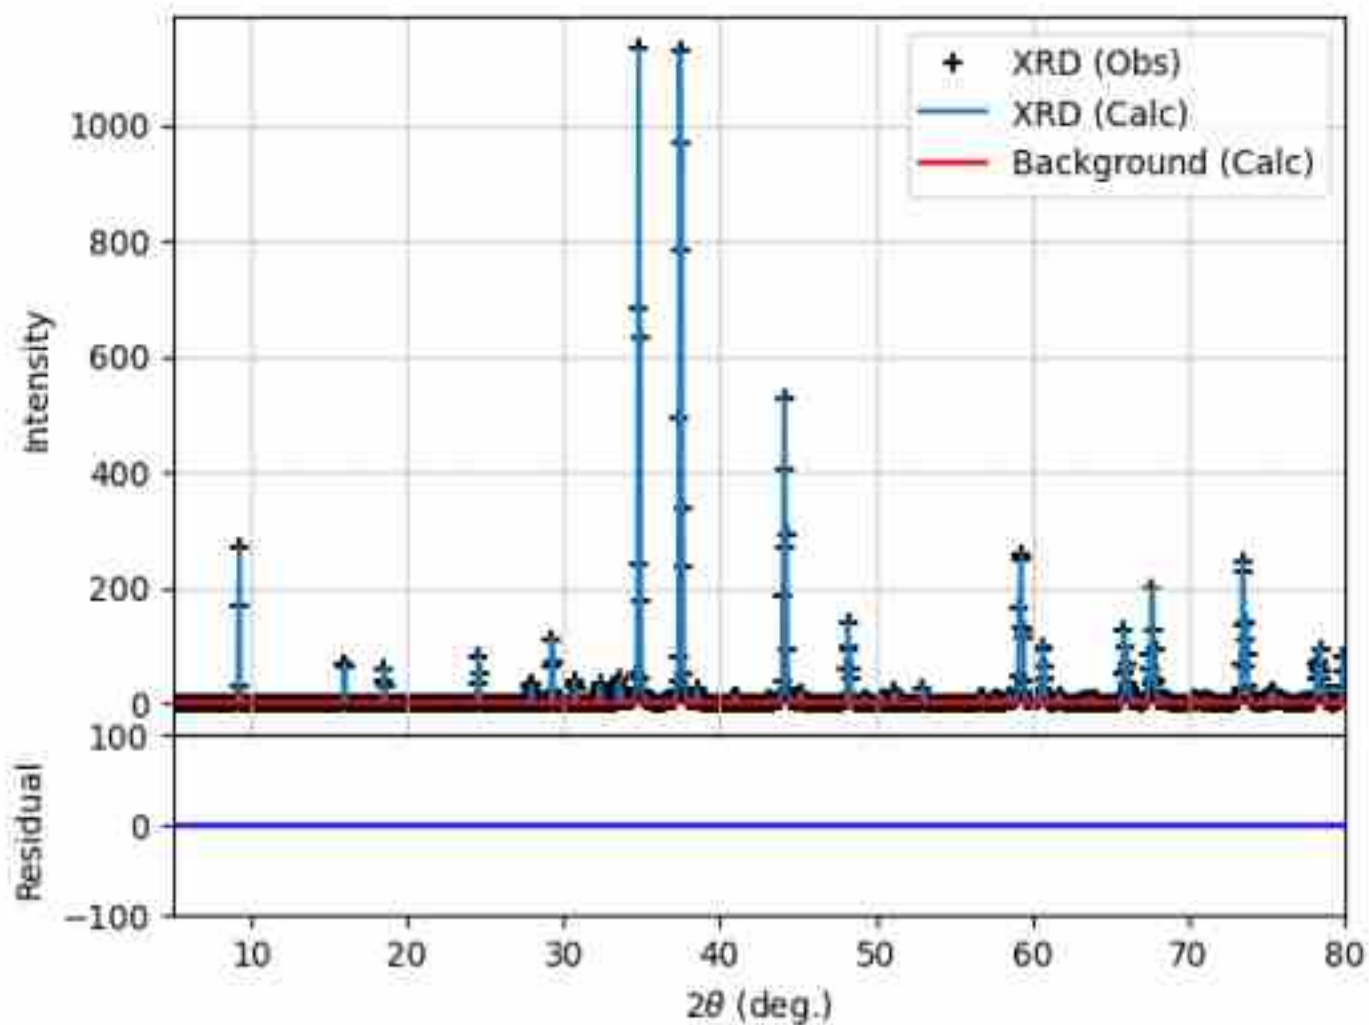

| RMSE before RR | Rwp     | RMSE after RR |
|----------------|---------|---------------|
| 0.022          | 0.00324 | 0.00162       |

# Y<sub>2</sub>Cu<sub>2</sub>O<sub>4</sub>

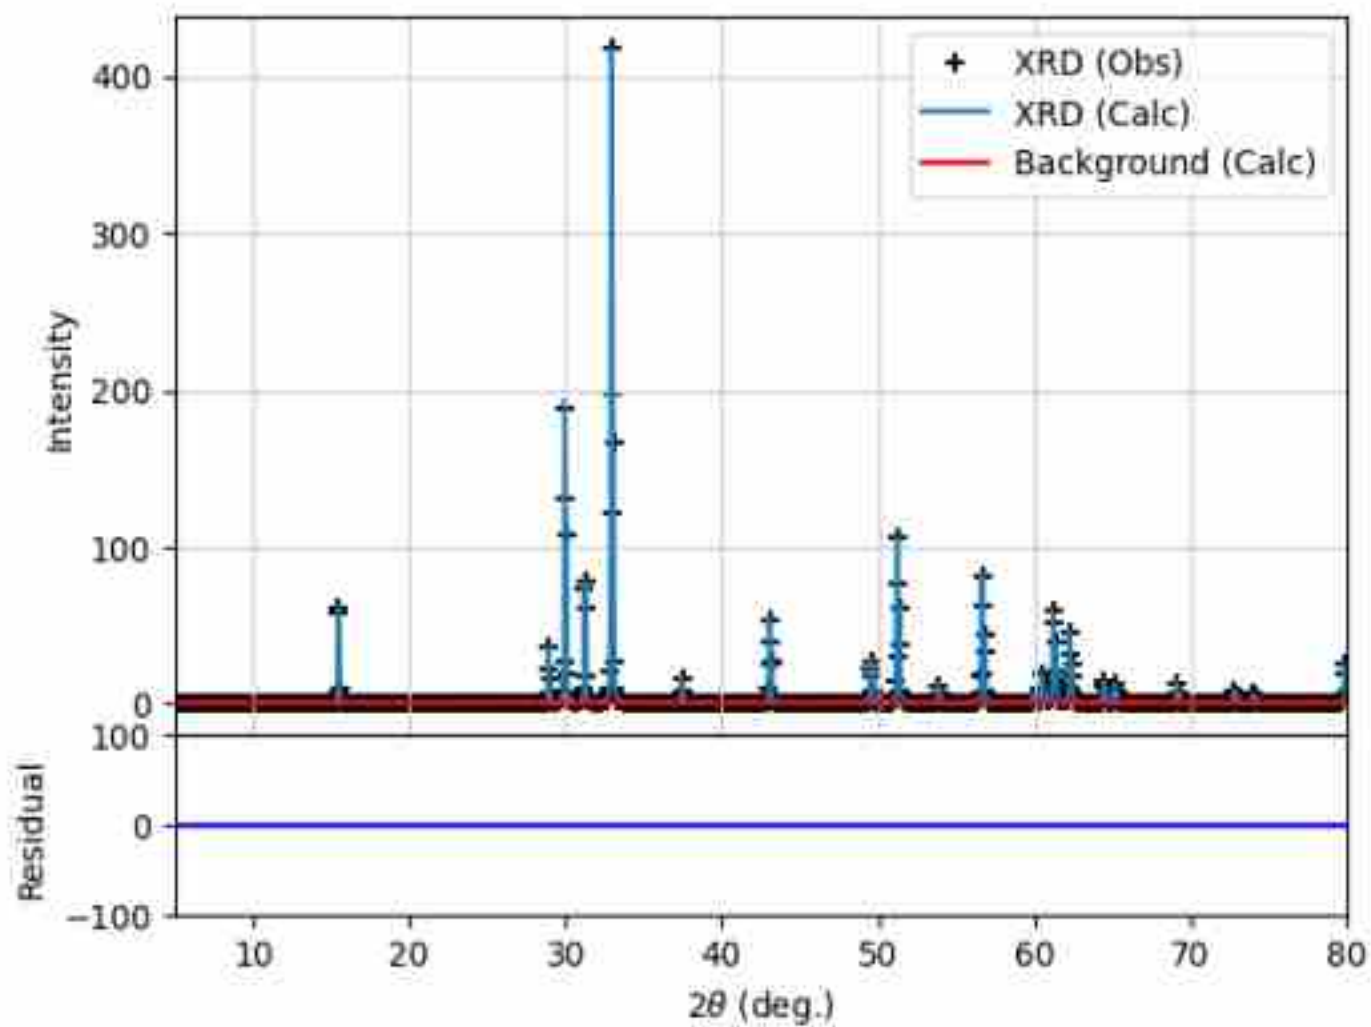

| RMSE before RR | Rwp     | RMSE after RR |
|----------------|---------|---------------|
| 0.022          | 0.00295 | 0.00064       |

# Y<sub>2</sub>Ga<sub>4</sub>Pd<sub>2</sub>

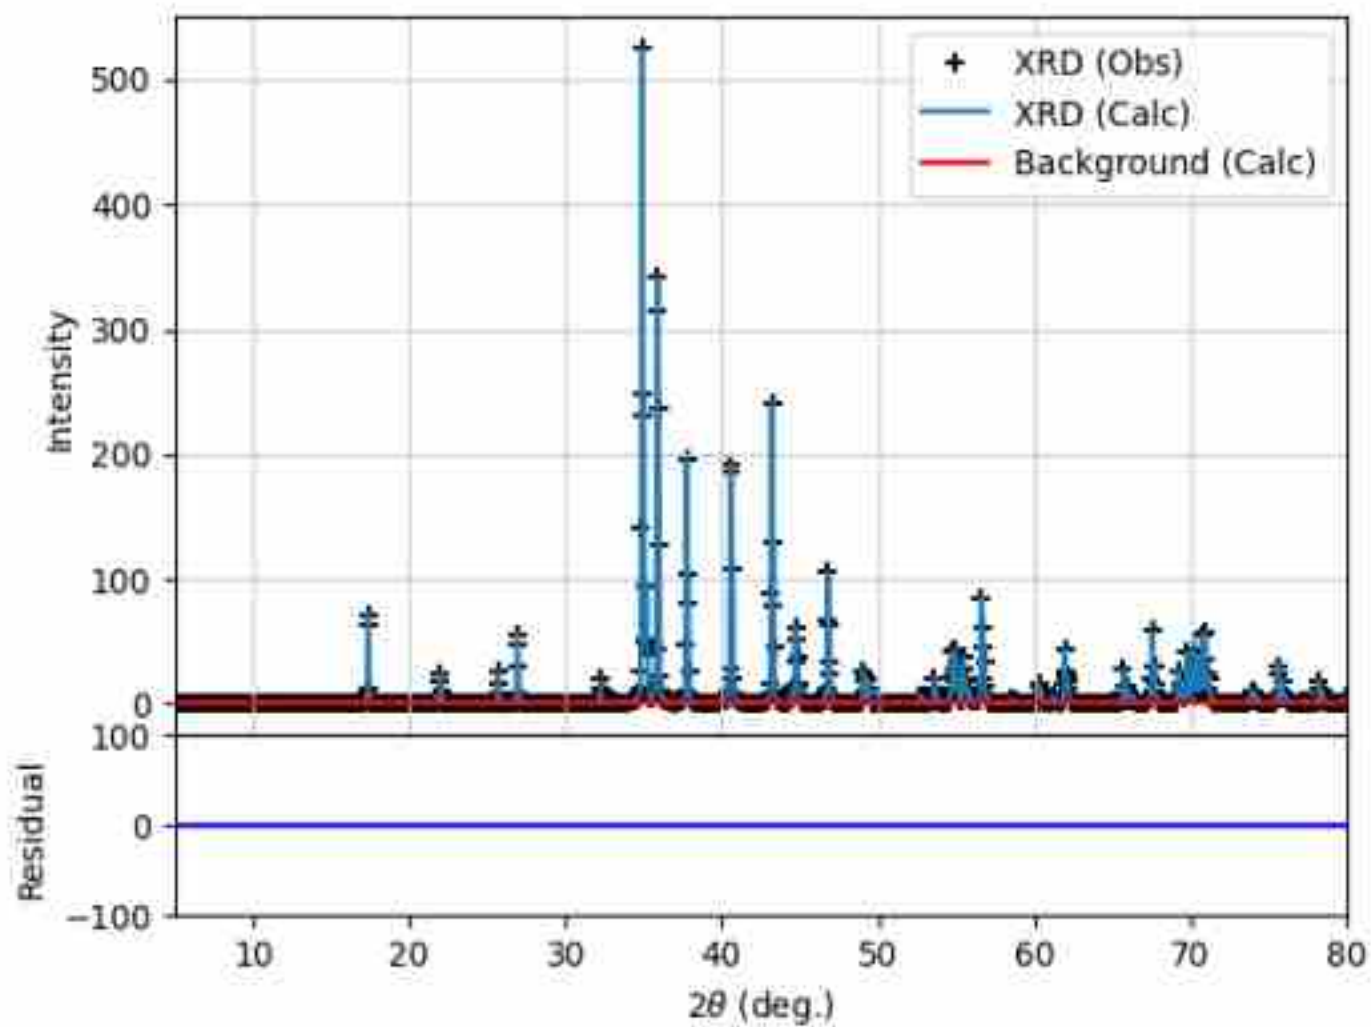

| RMSE before RR | Rwp    | RMSE after RR |
|----------------|--------|---------------|
| 0.022          | 0.0042 | 0.00025       |

# Y2N2O8

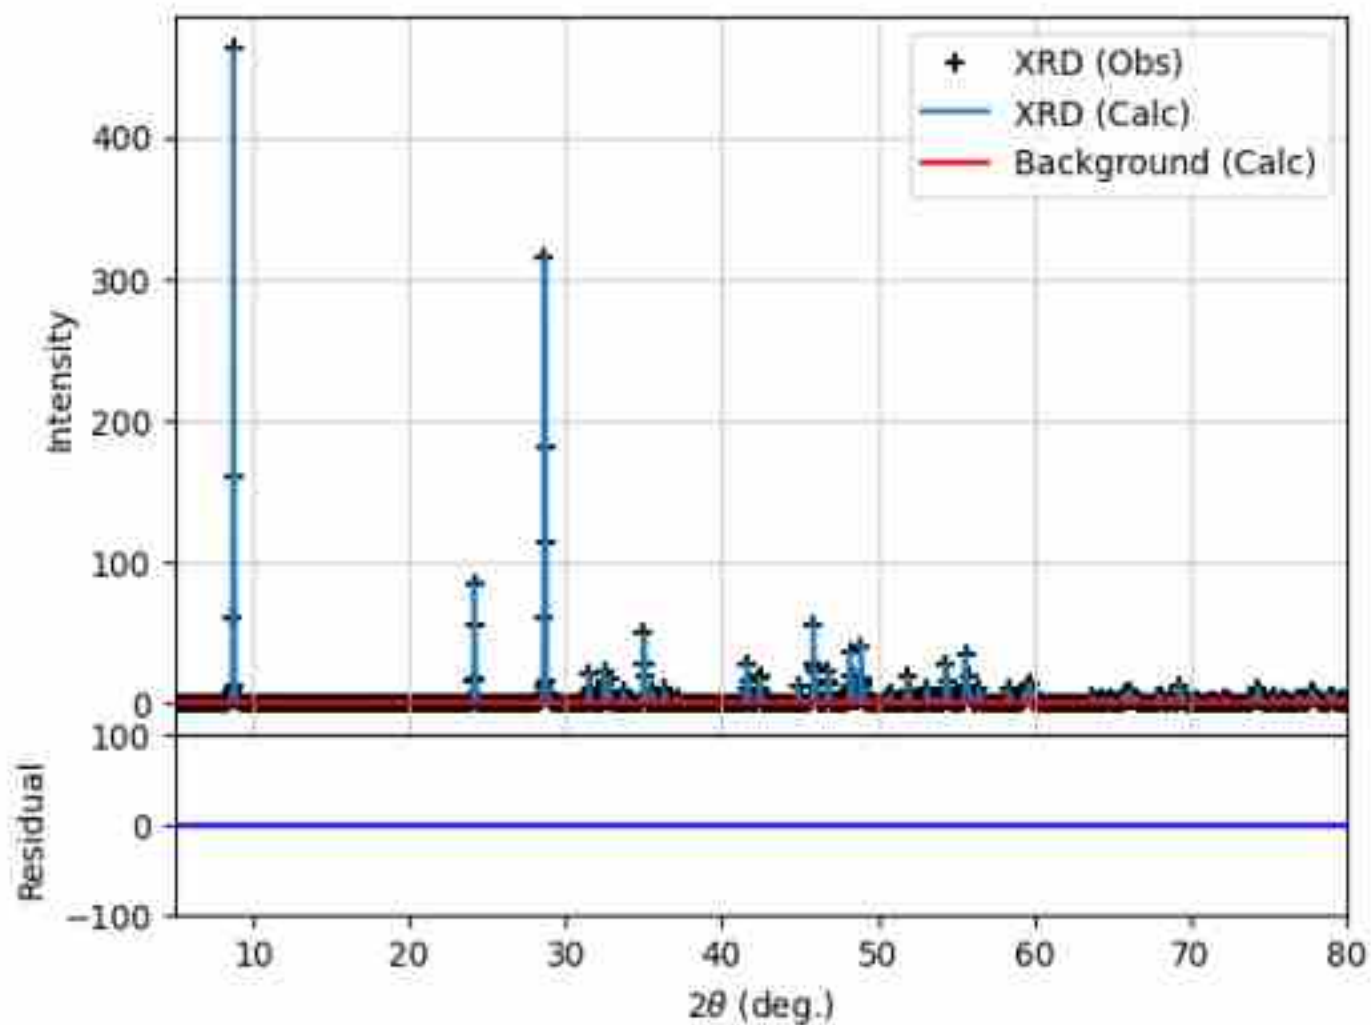

| RMSE before RR | Rwp     | RMSE after RR |
|----------------|---------|---------------|
| 0.022          | 0.00963 | 0.00174       |

# Y4Cd2S8

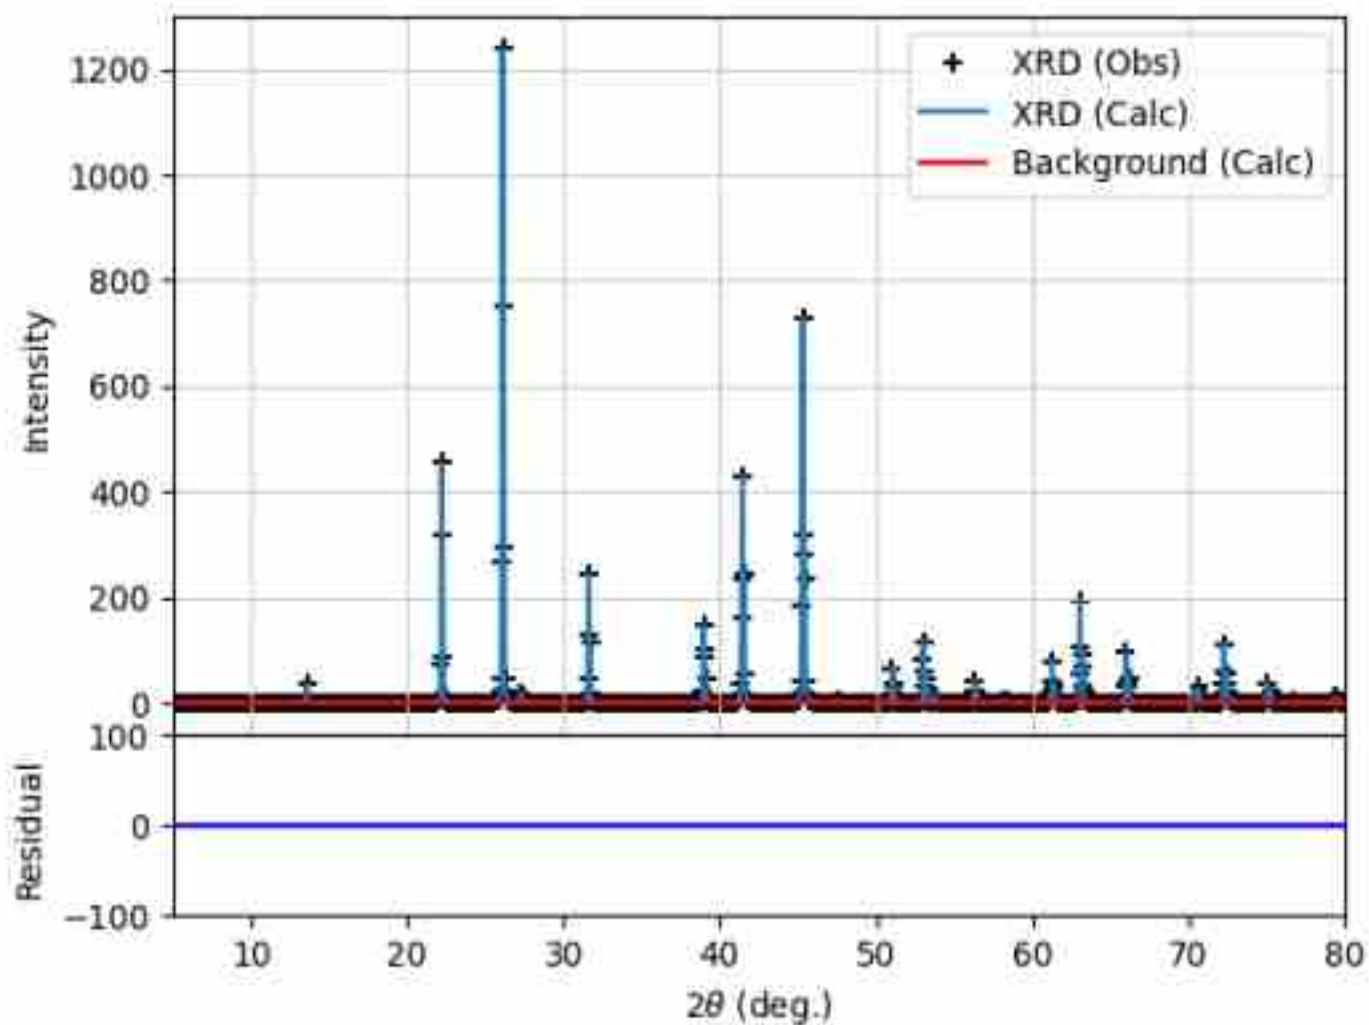

| RMSE before RR | Rwp     | RMSE after RR |
|----------------|---------|---------------|
| 0.022          | 0.10105 | 0.00395       |

# Y4Ga4Ir4

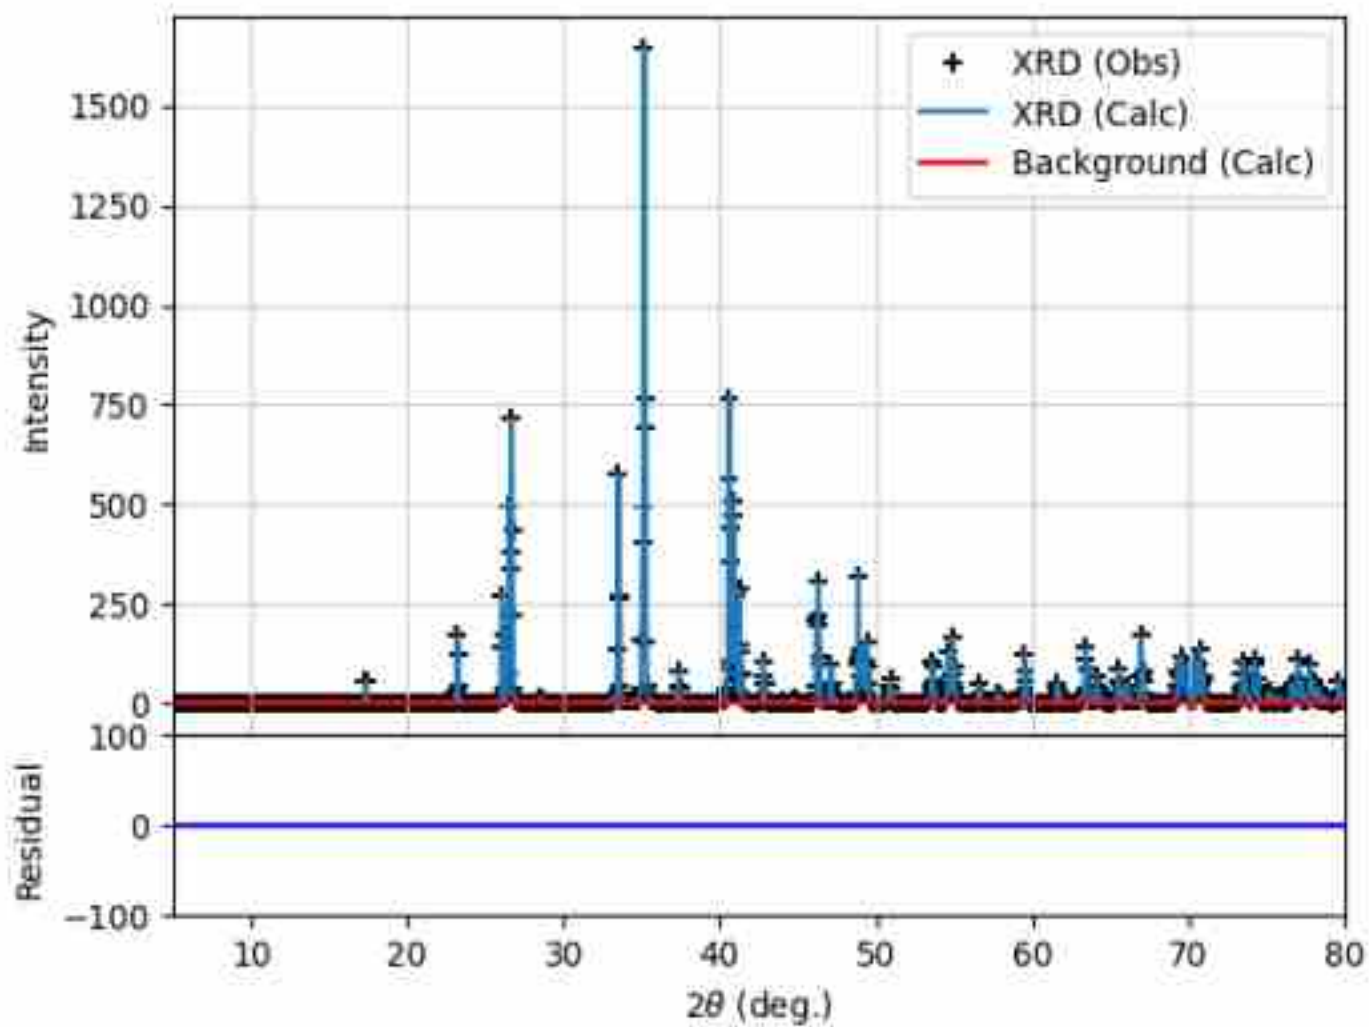

| RMSE before RR | Rwp    | RMSE after RR |
|----------------|--------|---------------|
| 0.022          | 0.0051 | 0.00044       |

# Y<sub>4</sub>Zr<sub>3</sub>O<sub>12</sub>

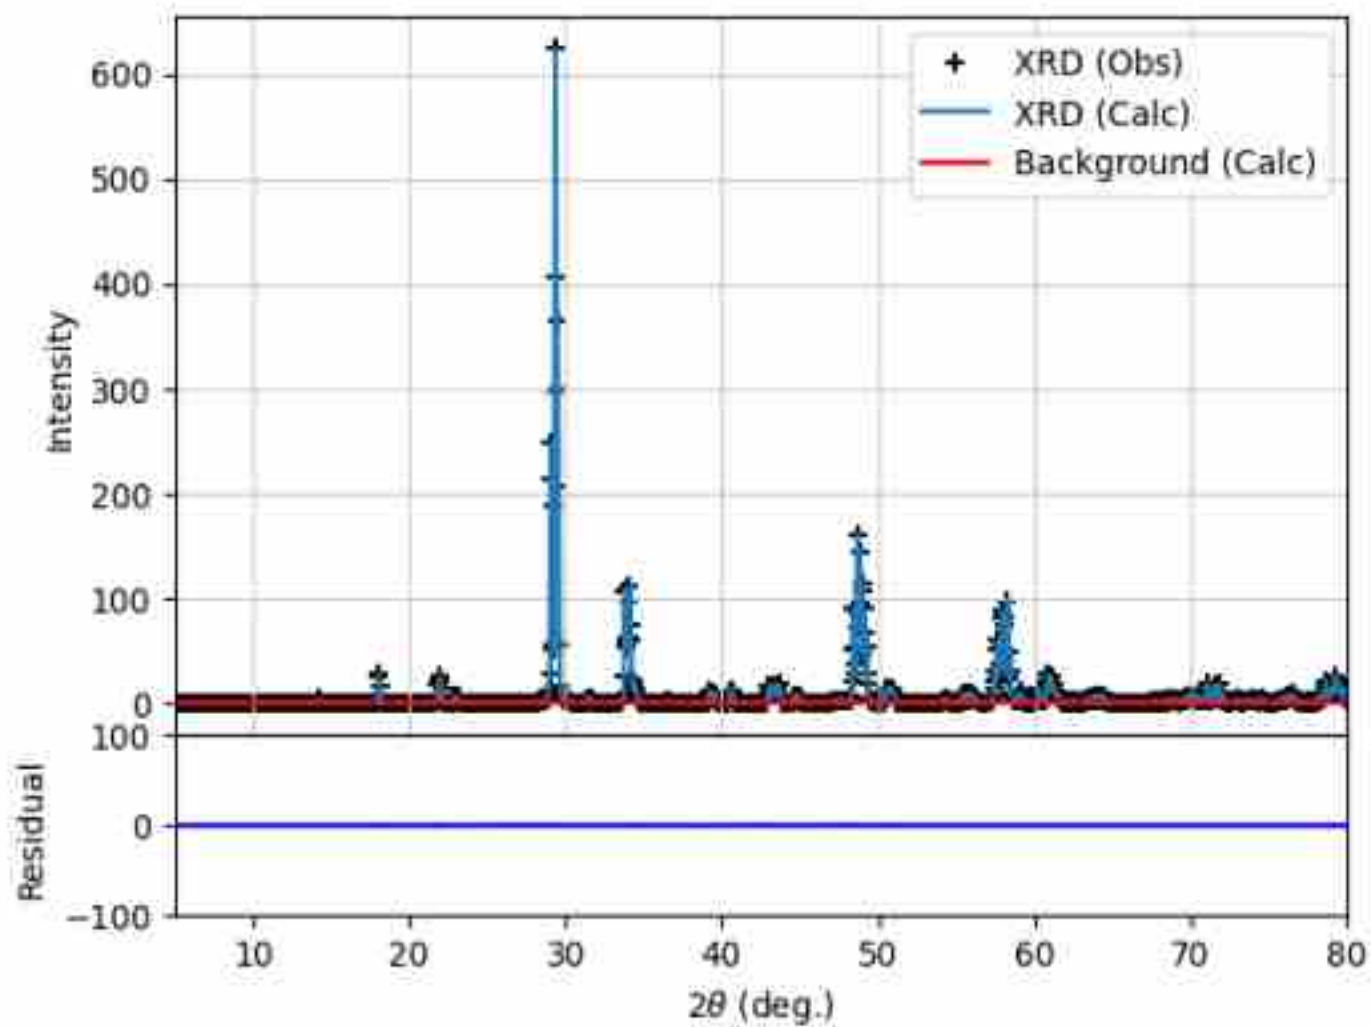

| RMSE before RR | Rwp     | RMSE after RR |
|----------------|---------|---------------|
| 0.022          | 0.74516 | 0.05418       |

# Y8Sb6

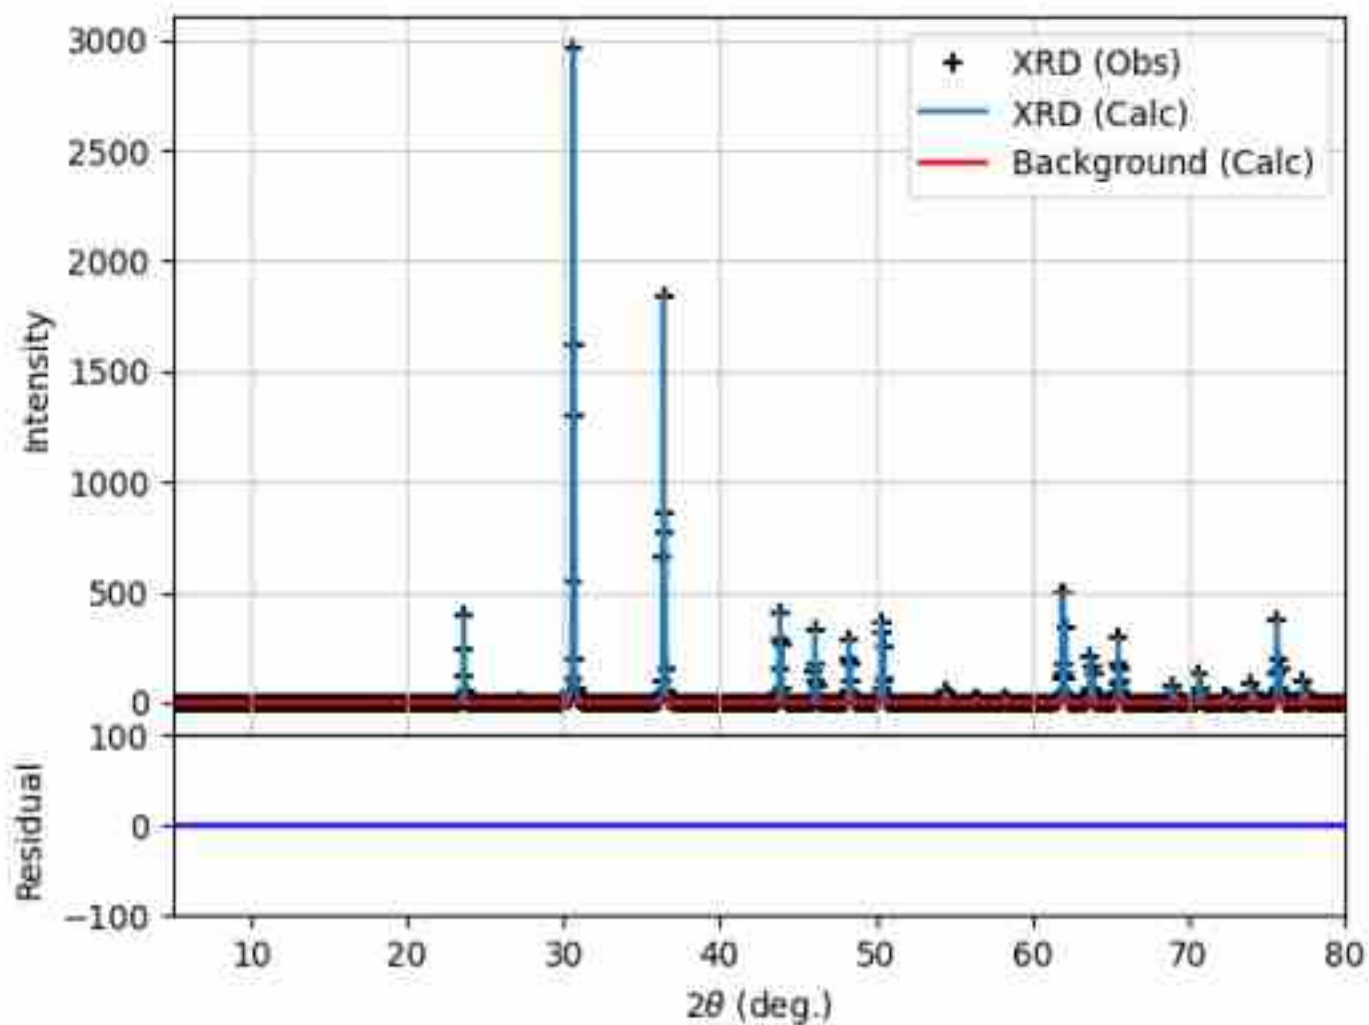

| RMSE before RR | Rwp    | RMSE after RR |
|----------------|--------|---------------|
| 0.022          | 0.0102 | 0.00085       |



# Yb1Ga4

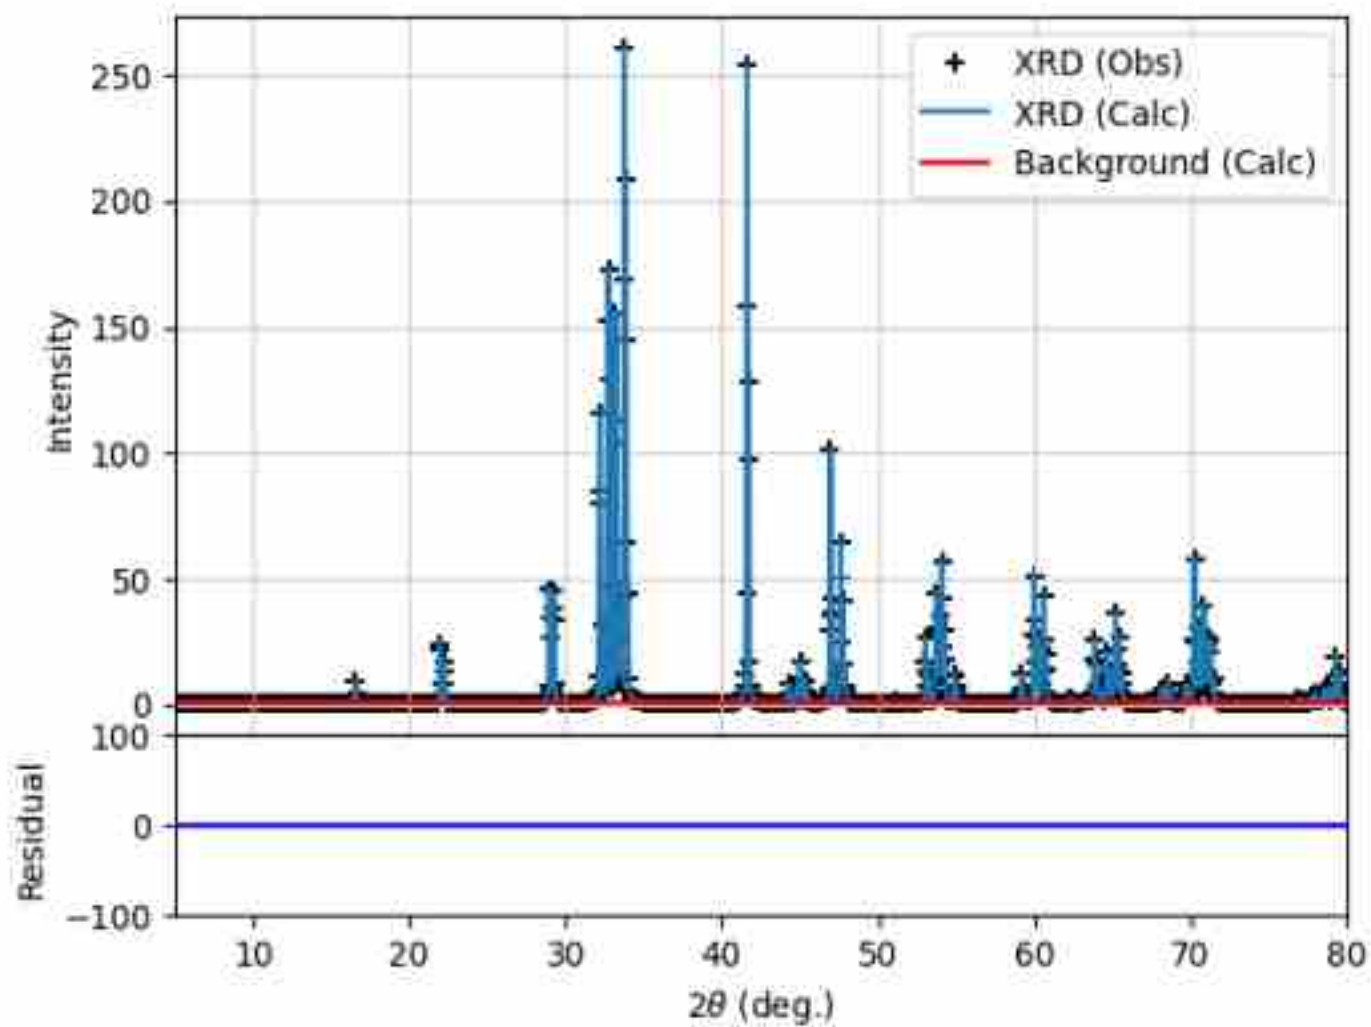

| RMSE before RR | Rwp     | RMSE after RR |
|----------------|---------|---------------|
| 0.022          | 0.00365 | 0.0004        |

# Yb1Sm4S5

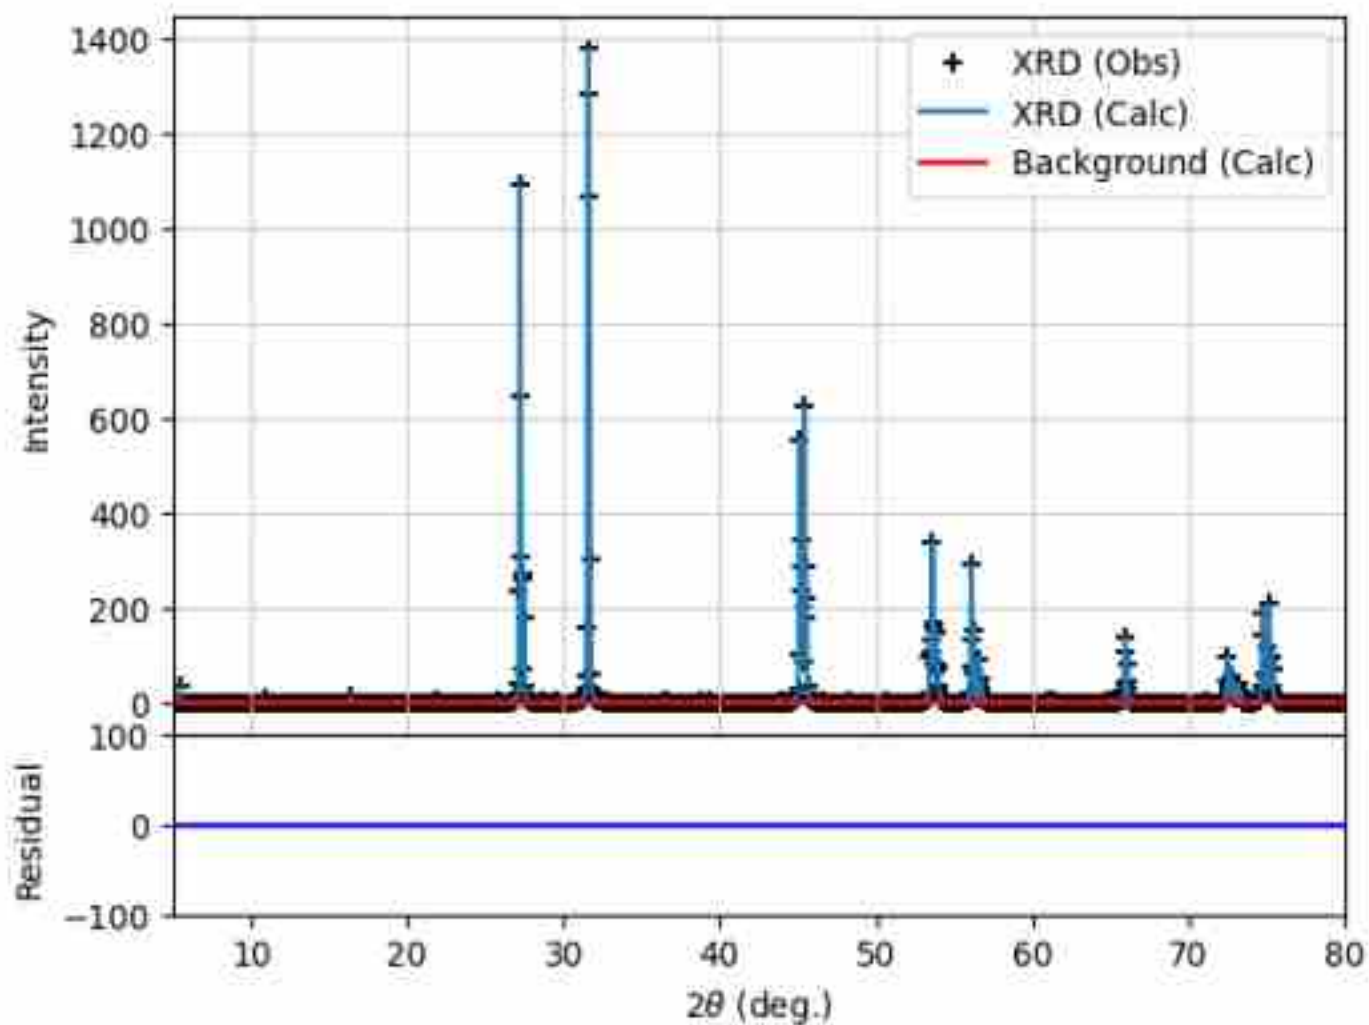

| RMSE before RR | Rwp     | RMSE after RR |
|----------------|---------|---------------|
| 0.022          | 0.00303 | 0.0003        |

# Yb<sub>2</sub>Al<sub>3</sub>Cu<sub>1</sub>

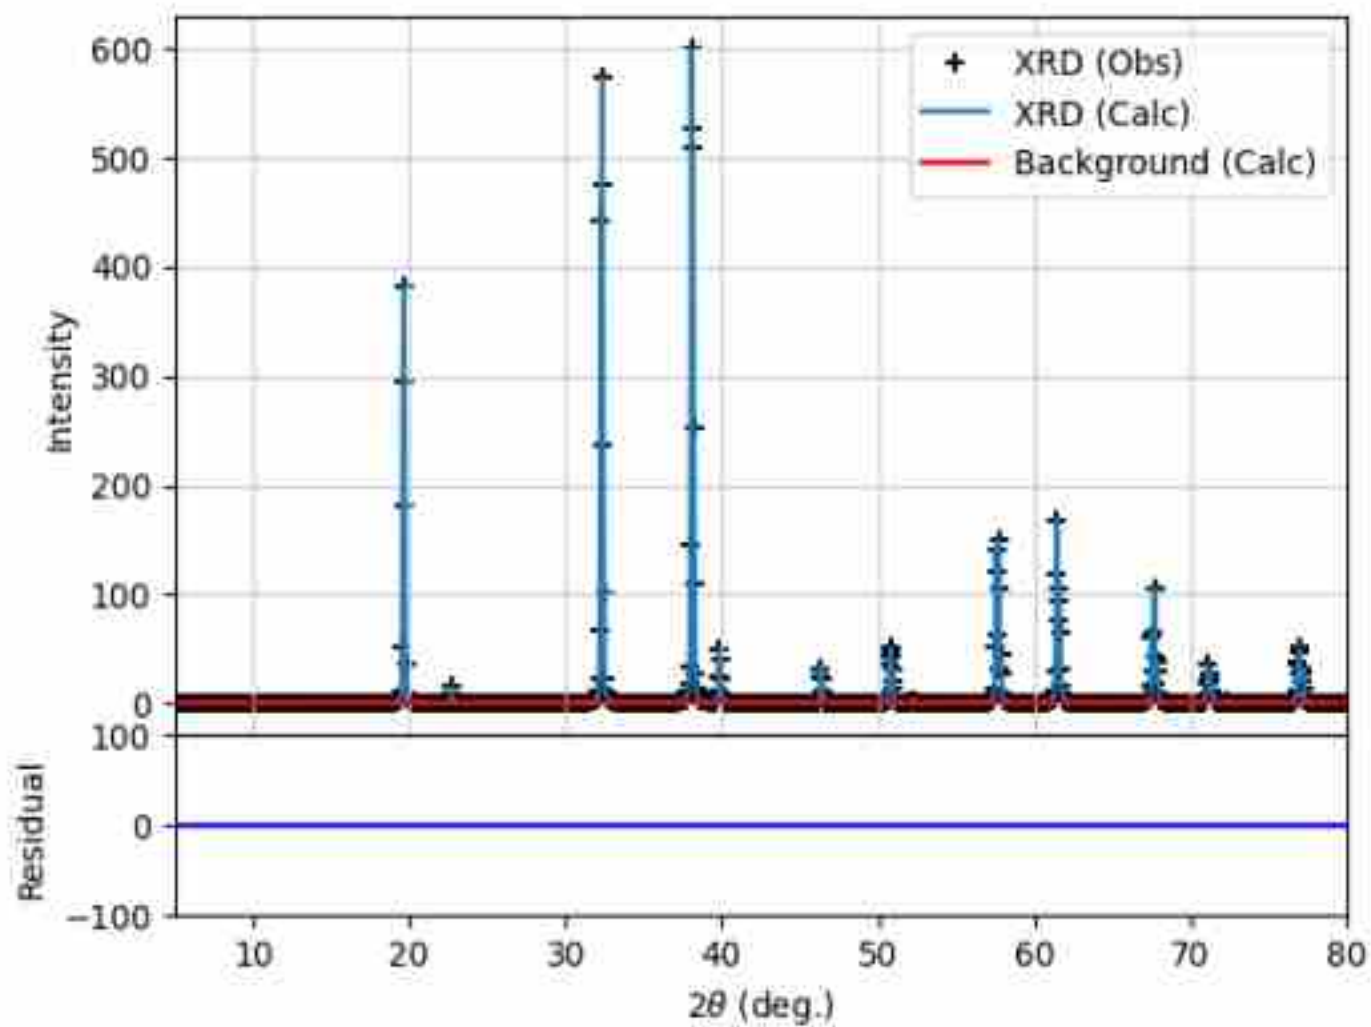

| RMSE before RR | Rwp     | RMSE after RR |
|----------------|---------|---------------|
| 0.022          | 0.00357 | 0.00085       |

# Yb<sub>2</sub>Cr<sub>2</sub>O<sub>8</sub>

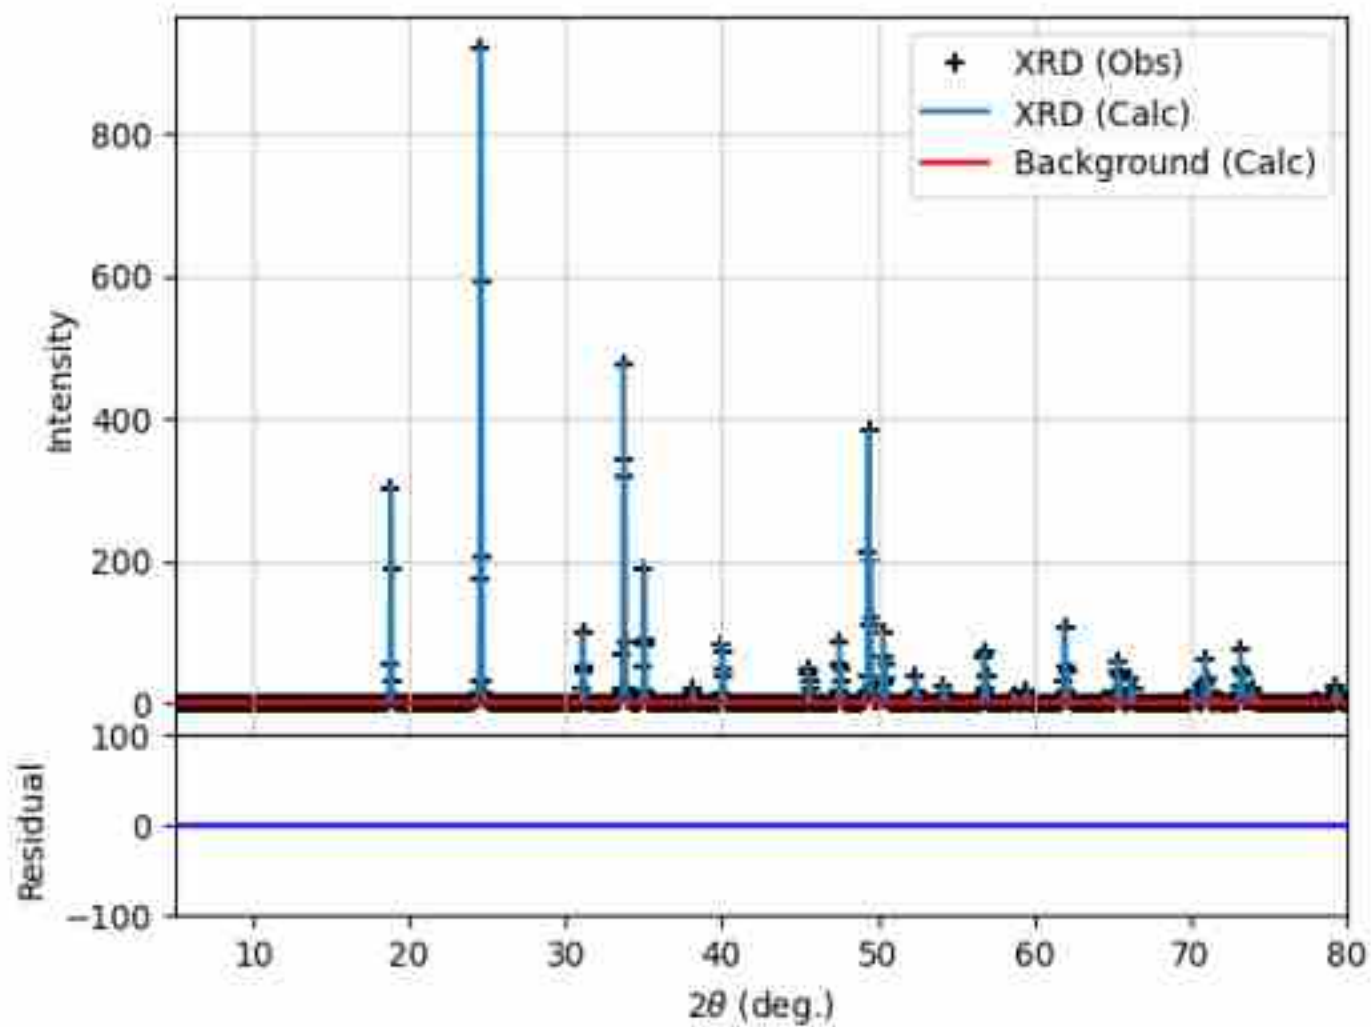

| RMSE before RR | Rwp     | RMSE after RR |
|----------------|---------|---------------|
| 0.022          | 0.00346 | 0.00137       |

# Yb<sub>2</sub>Zn<sub>6</sub>

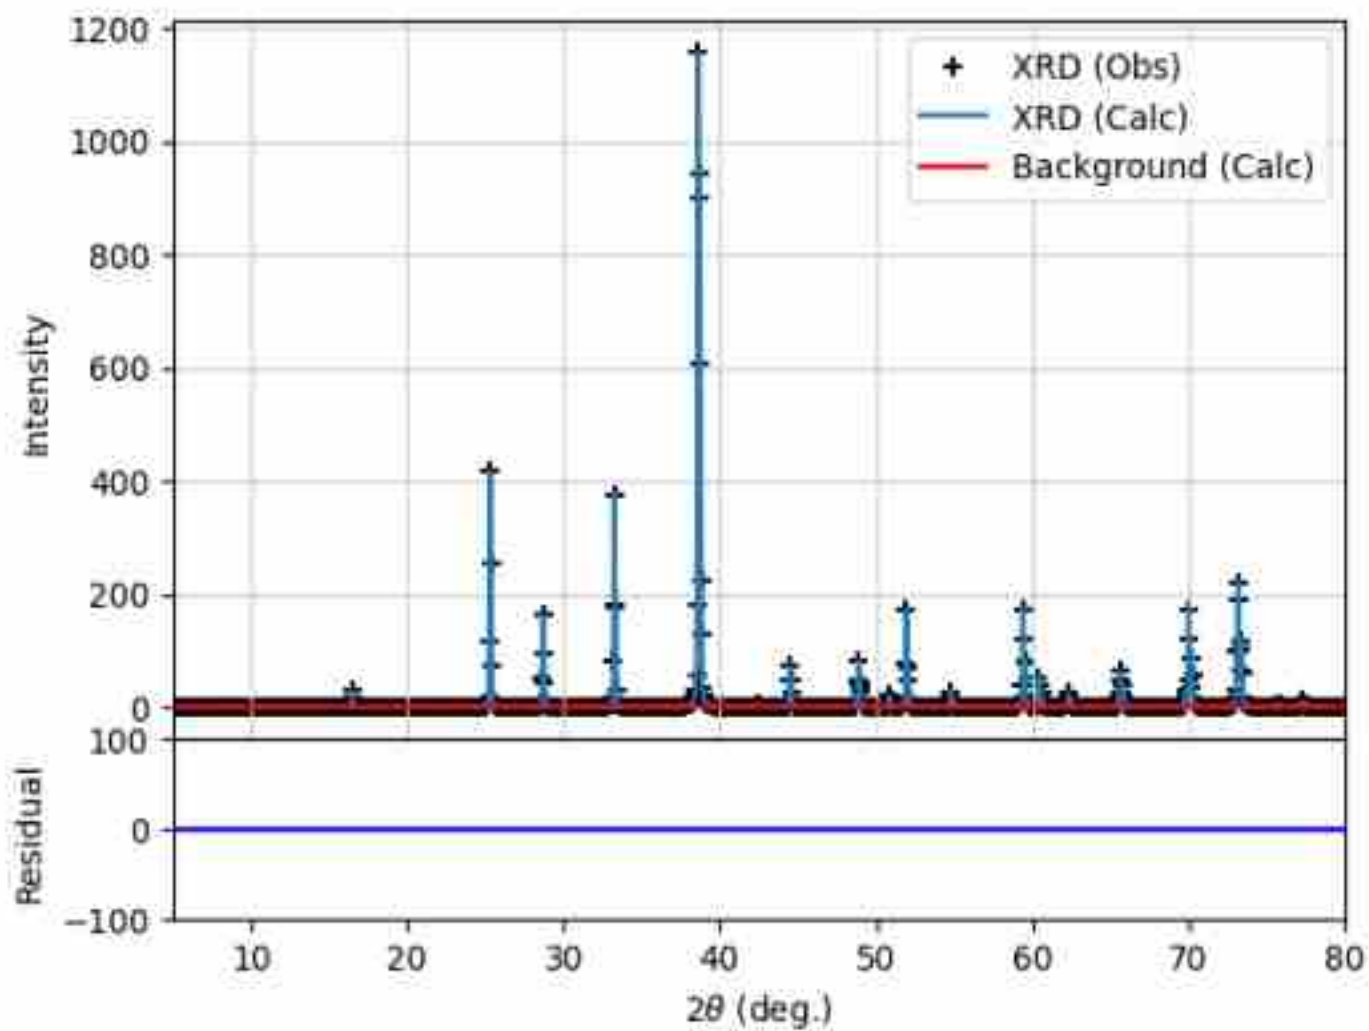

| RMSE before RR | Rwp     | RMSE after RR |
|----------------|---------|---------------|
| 0.022          | 0.02832 | 0.0022        |

# Yb<sub>4</sub>Zn<sub>4</sub>Au<sub>4</sub>

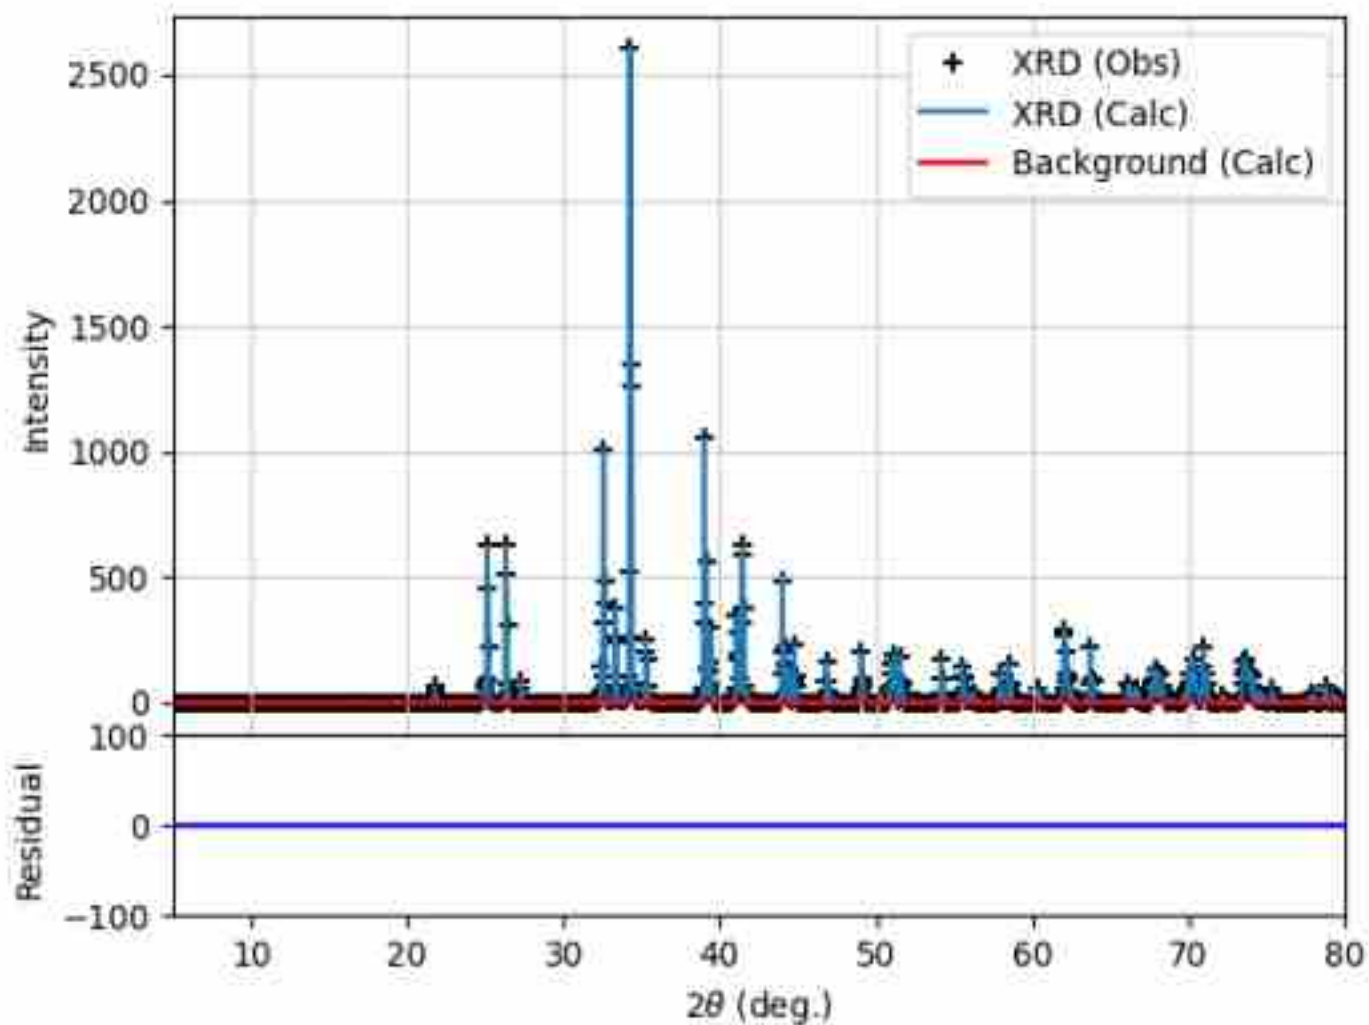

| RMSE before RR | Rwp     | RMSE after RR |
|----------------|---------|---------------|
| 0.022          | 0.00478 | 0.00034       |

# Yb10Sb6

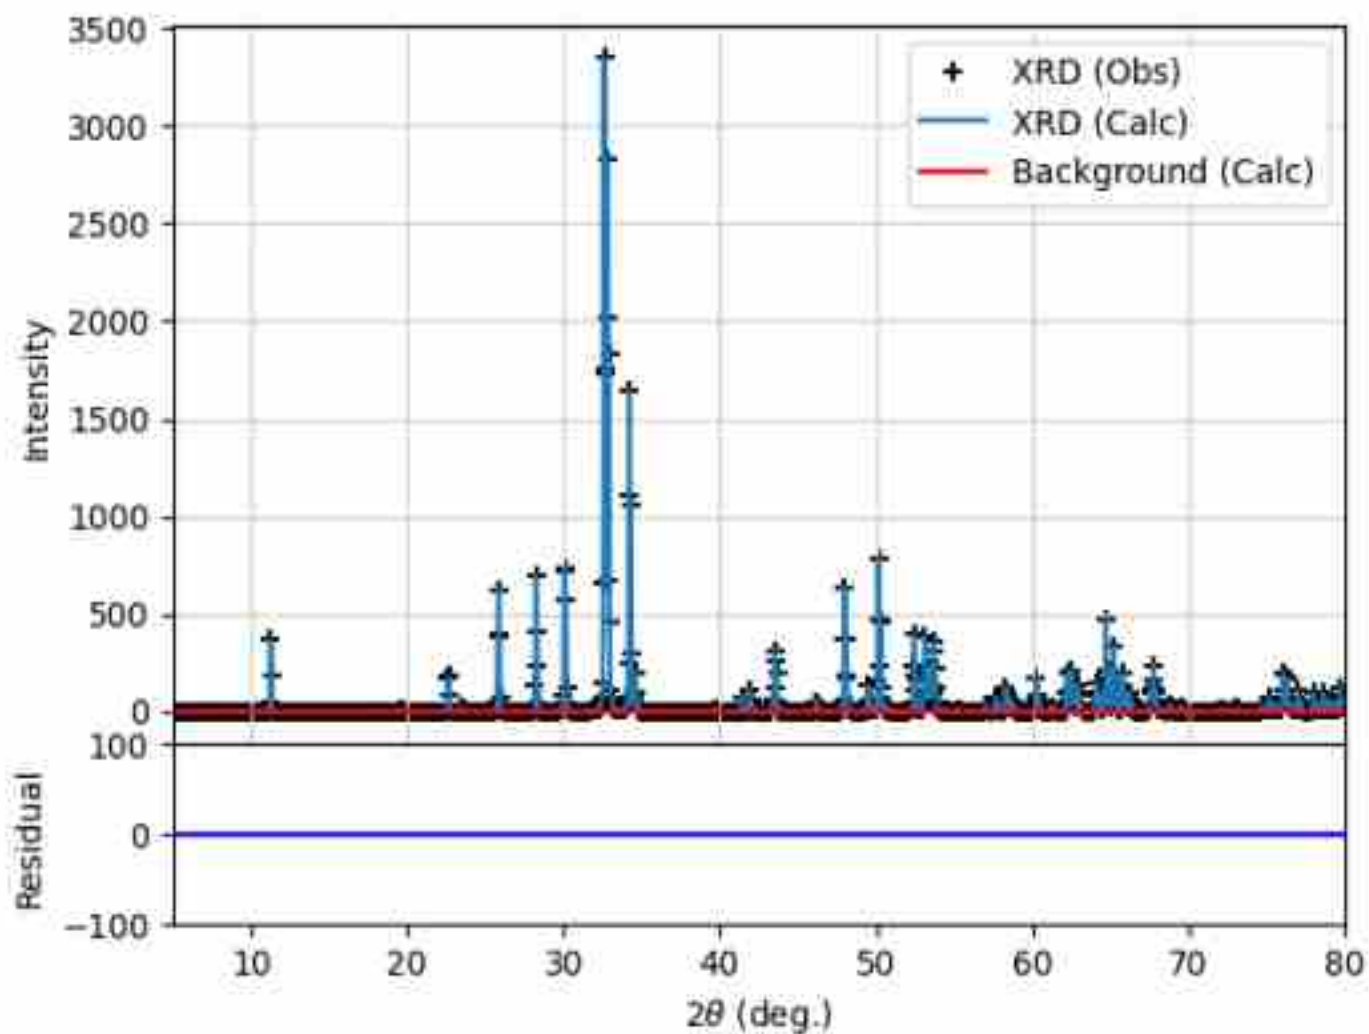

| RMSE before RR | Rwp    | RMSE after RR |
|----------------|--------|---------------|
| 0.022          | 0.0055 | 0.00051       |

# Zr1Ti1C2

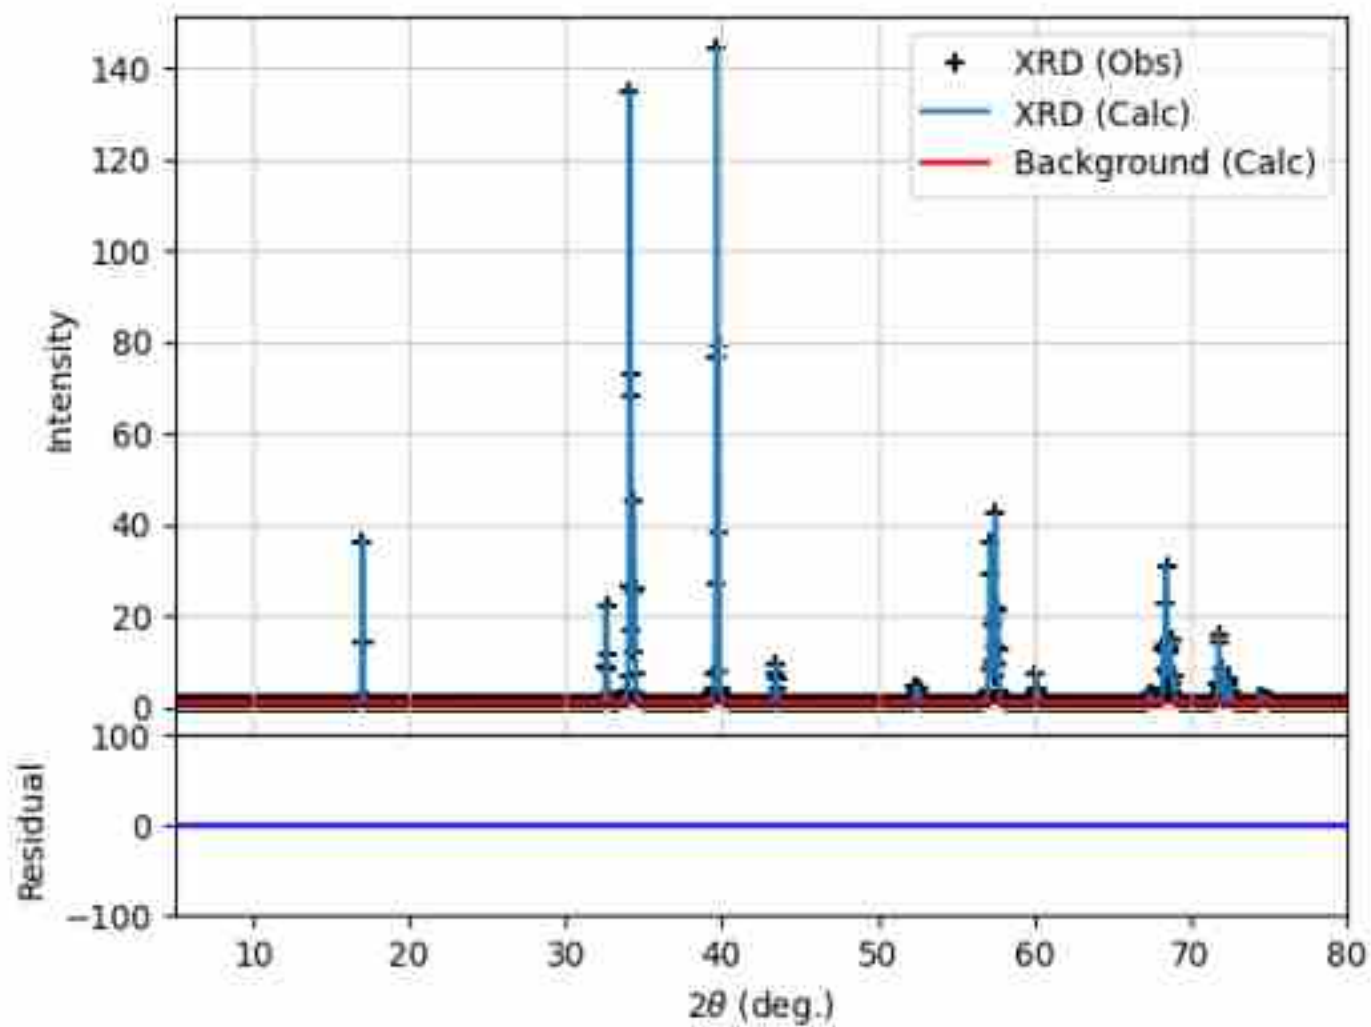

| RMSE before RR | Rwp     | RMSE after RR |
|----------------|---------|---------------|
| 0.022          | 0.00243 | 0.0017        |



# Zr<sub>2</sub>Tl<sub>2</sub>Cu<sub>2</sub>Se<sub>6</sub>

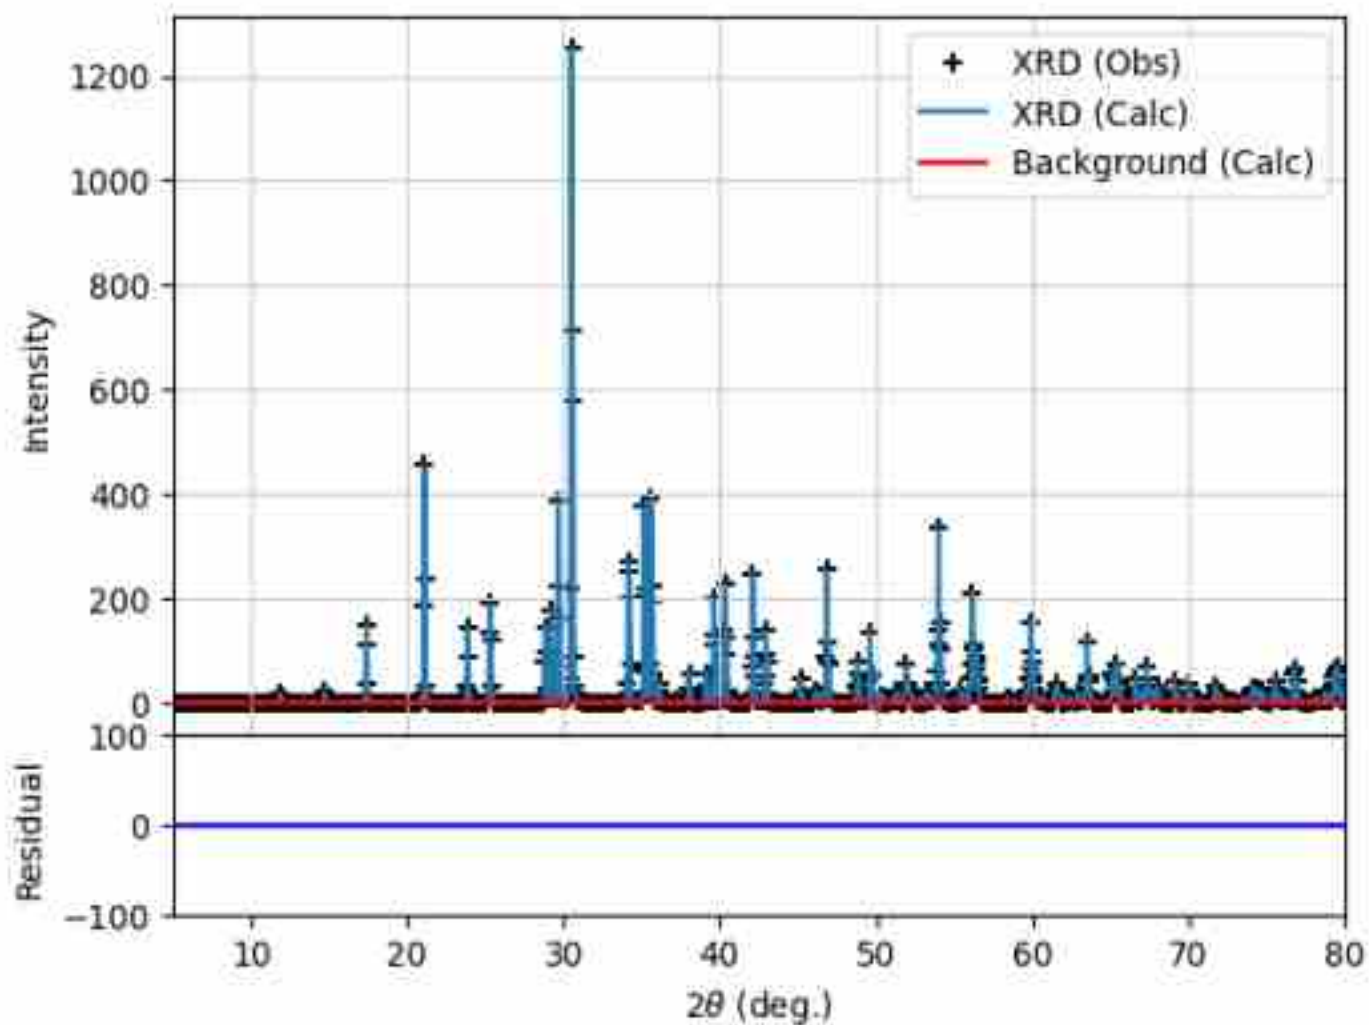

| RMSE before RR | Rwp    | RMSE after RR |
|----------------|--------|---------------|
| 0.022          | 0.0045 | 0.00038       |

# Zr<sub>4</sub>C<sub>1</sub>N<sub>3</sub>

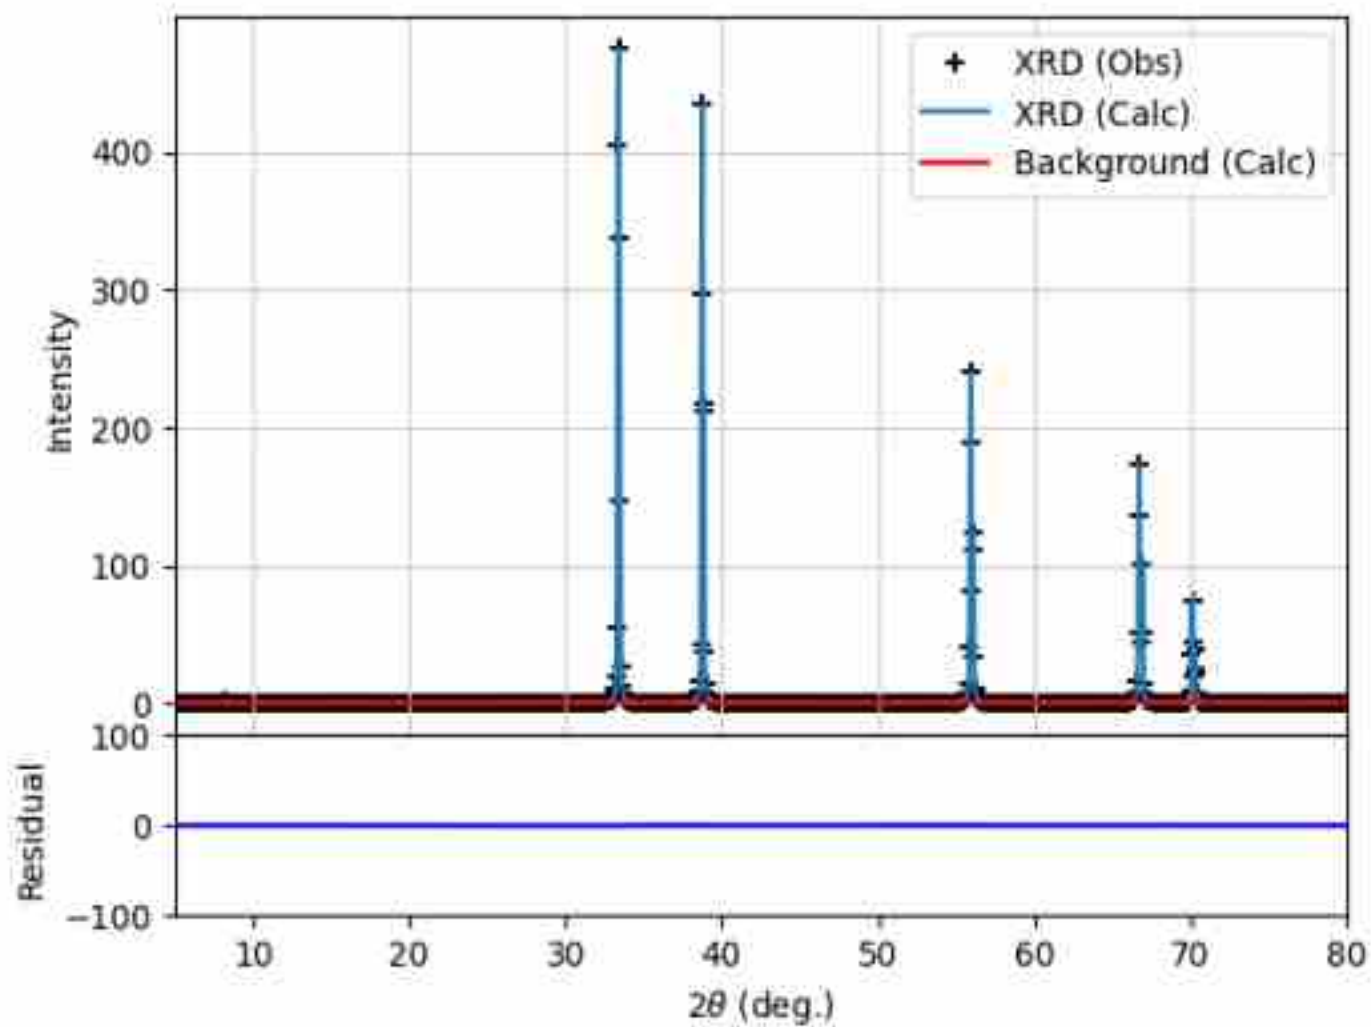

| RMSE before RR | Rwp     | RMSE after RR |
|----------------|---------|---------------|
| 0.022          | 0.83291 | 0.01579       |

# Zr<sub>4</sub>Ni<sub>2</sub>P<sub>4</sub>

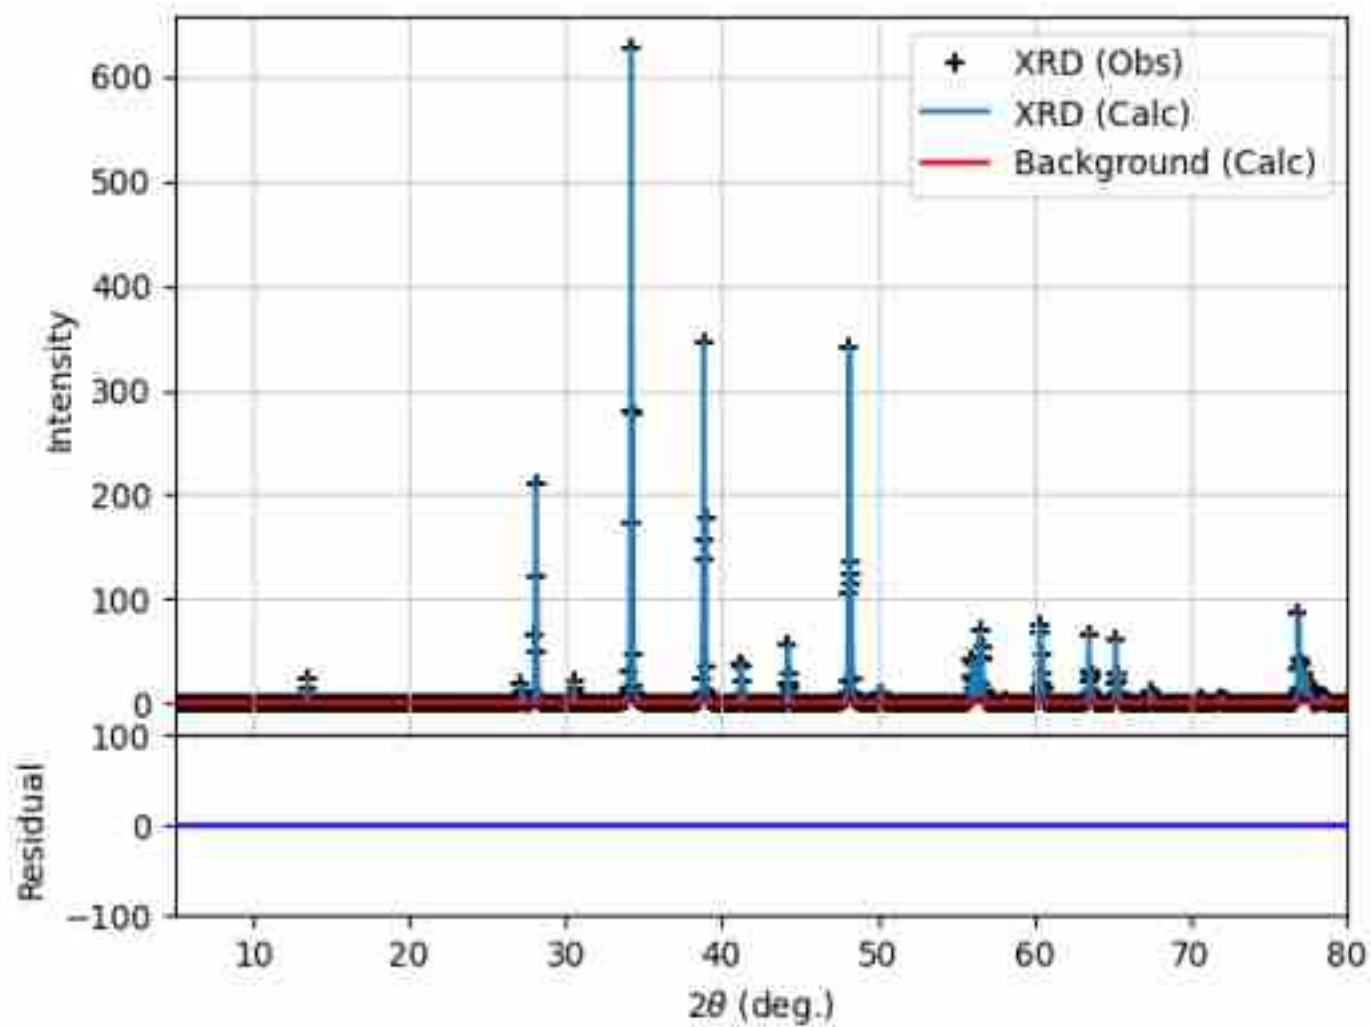

| RMSE before RR | Rwp    | RMSE after RR |
|----------------|--------|---------------|
| 0.022          | 0.0051 | 0.0006        |

# Zr<sub>8</sub>In<sub>4</sub>Ni<sub>8</sub>

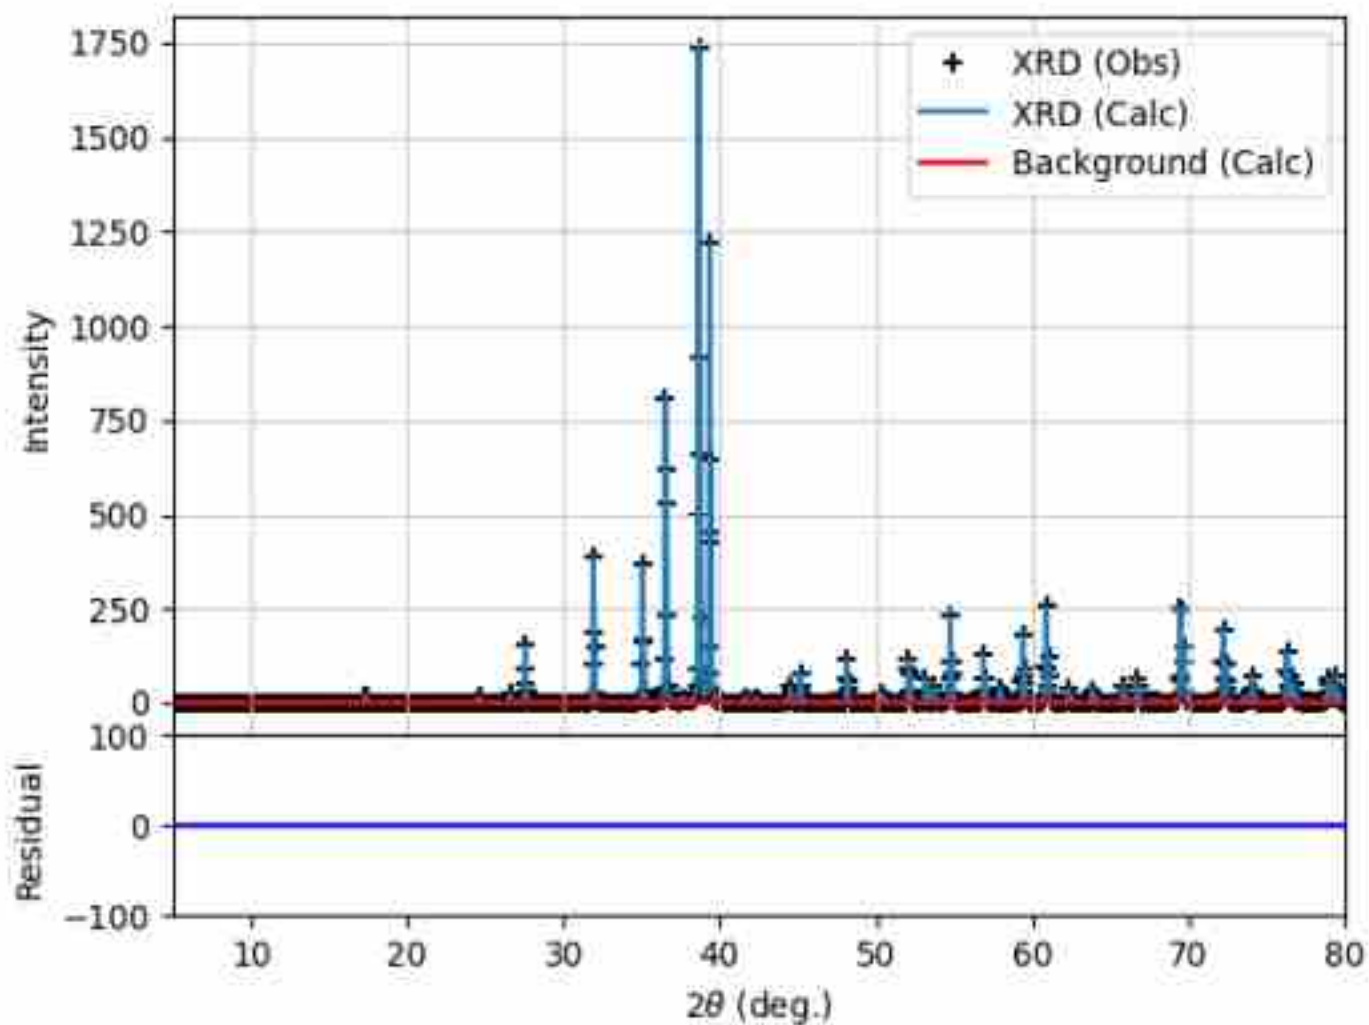

| RMSE before RR | Rwp     | RMSE after RR |
|----------------|---------|---------------|
| 0.022          | 0.00539 | 0.00037       |

# Al<sub>4</sub>Hg<sub>2</sub>Se<sub>8</sub>

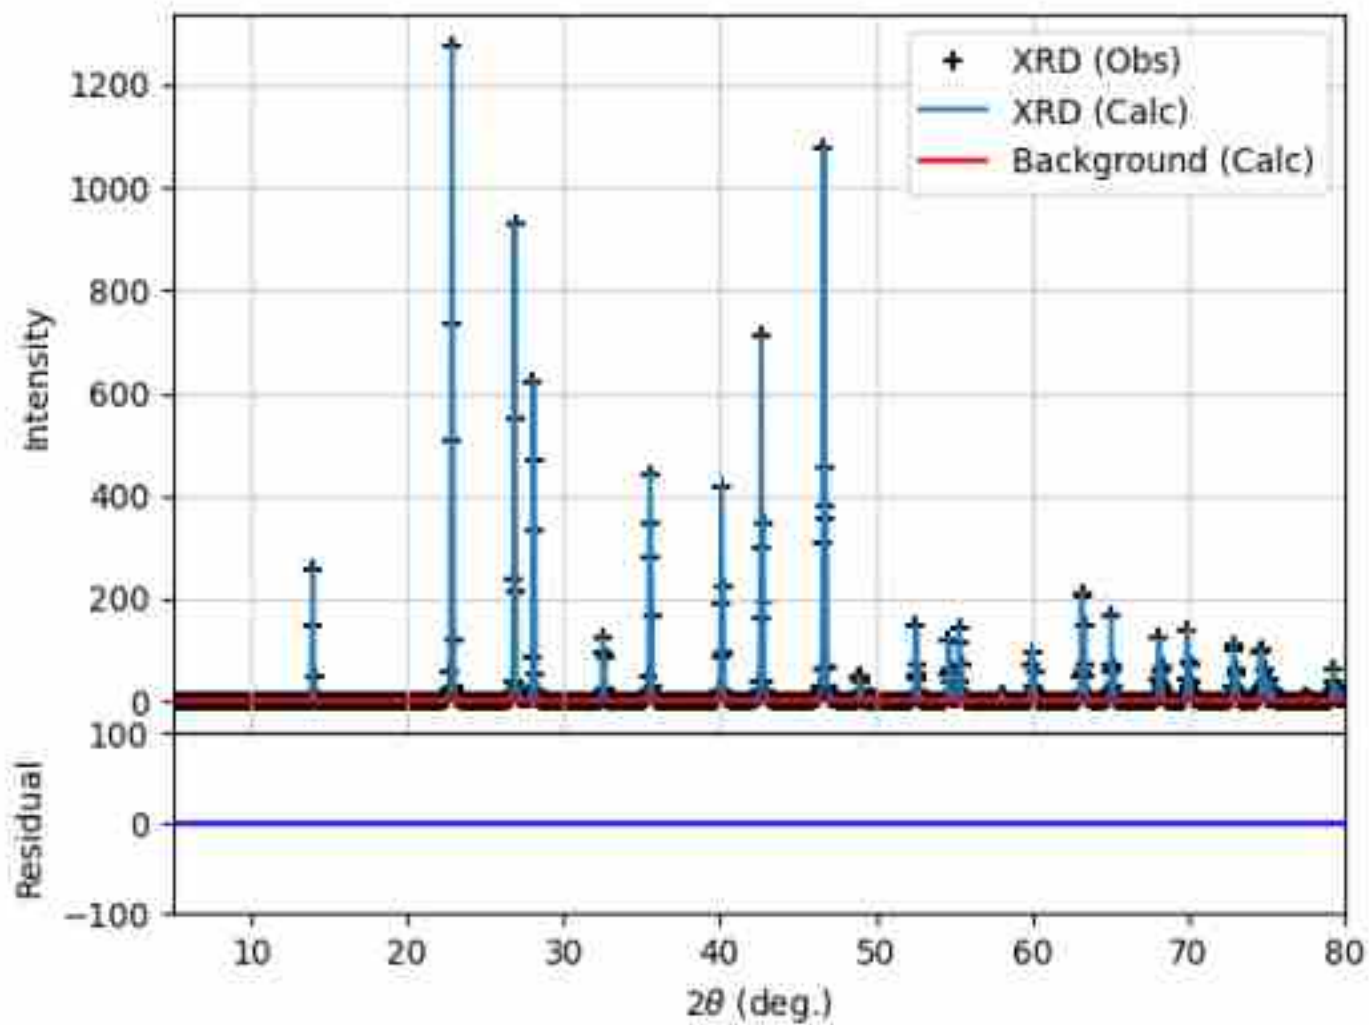

| RMSE before RR | Rwp     | RMSE after RR |
|----------------|---------|---------------|
| 0.023          | 0.00969 | 0.00178       |

# Al<sub>4</sub>In<sub>1</sub>Cu<sub>1</sub>S<sub>8</sub>

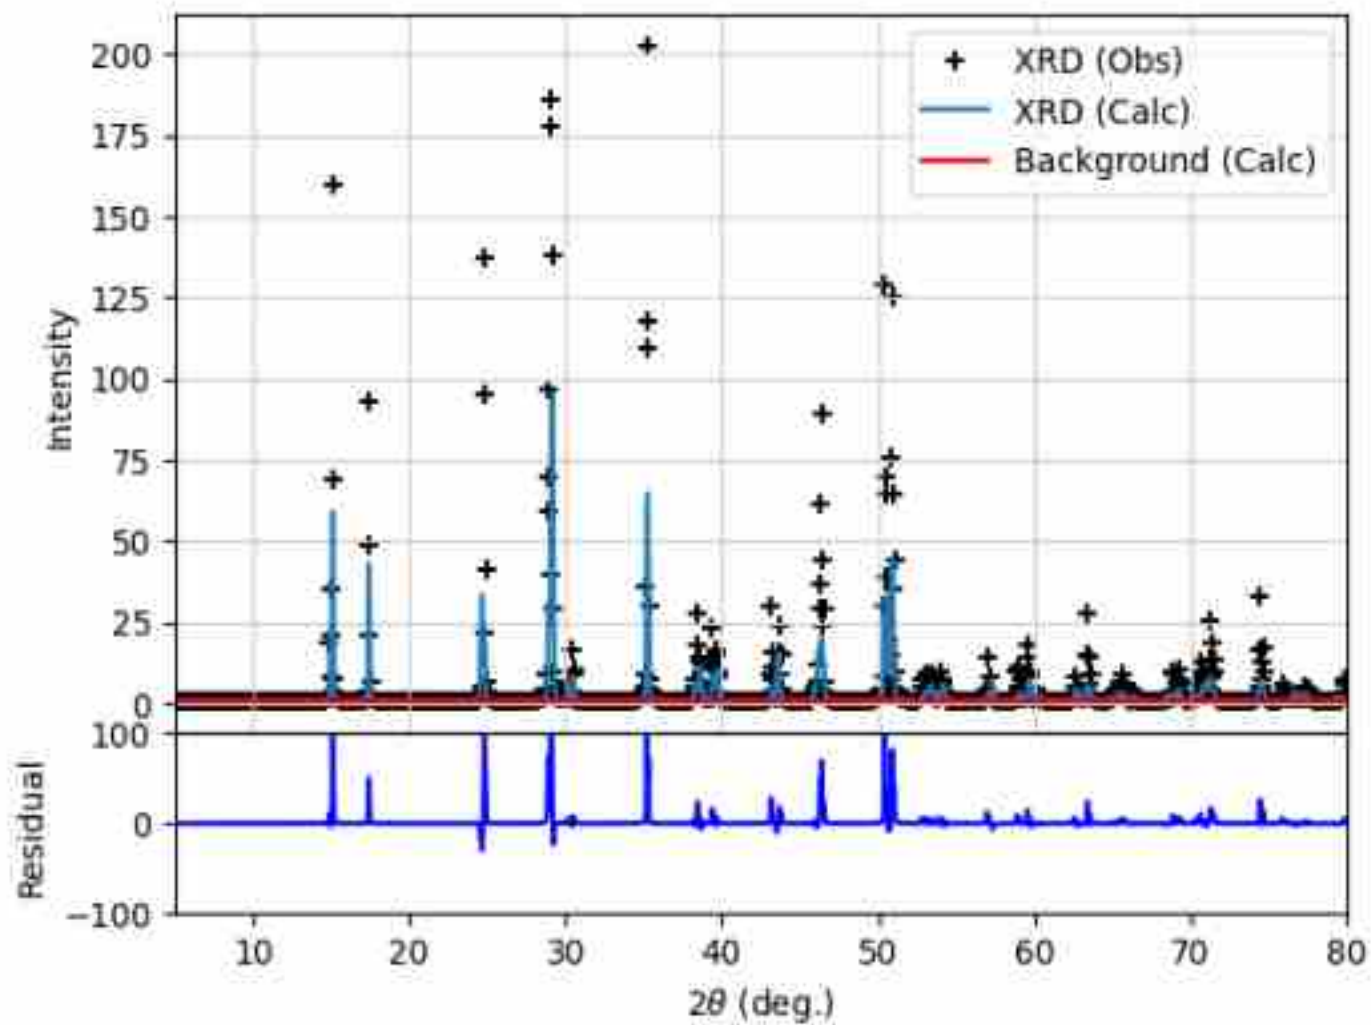

| RMSE before RR | Rwp     | RMSE after RR |
|----------------|---------|---------------|
| 0.023          | 63.7993 | 0.02995       |

# Al<sub>4</sub>Pb<sub>2</sub>Se<sub>8</sub>

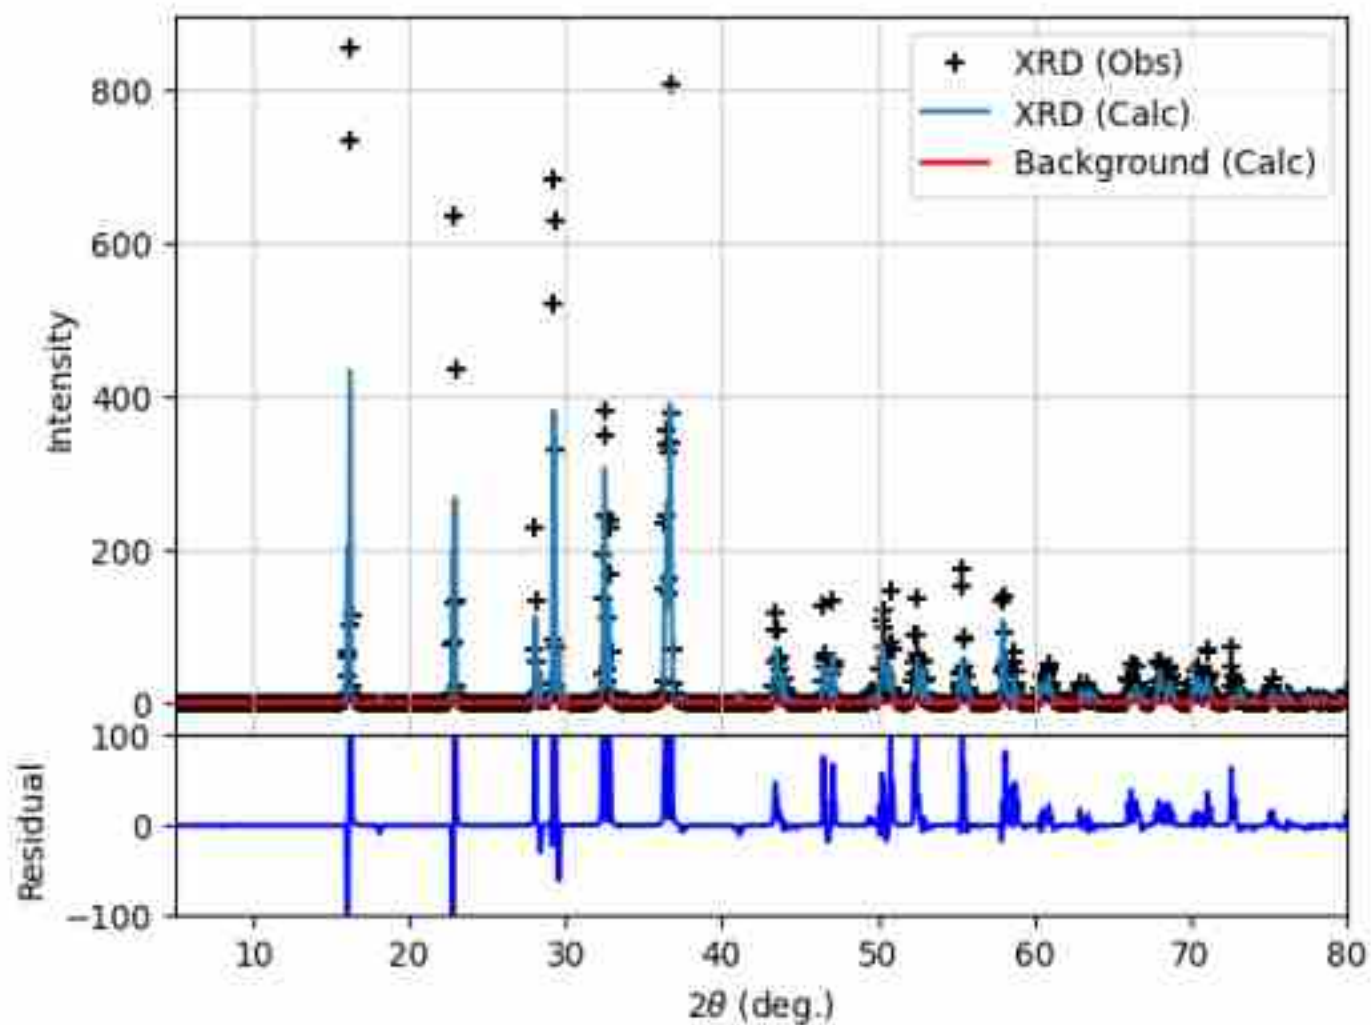

| RMSE before RR | Rwp      | RMSE after RR |
|----------------|----------|---------------|
| 0.023          | 56.40551 | 0.20042       |

# As<sub>4</sub>Ru<sub>4</sub>Se<sub>4</sub>

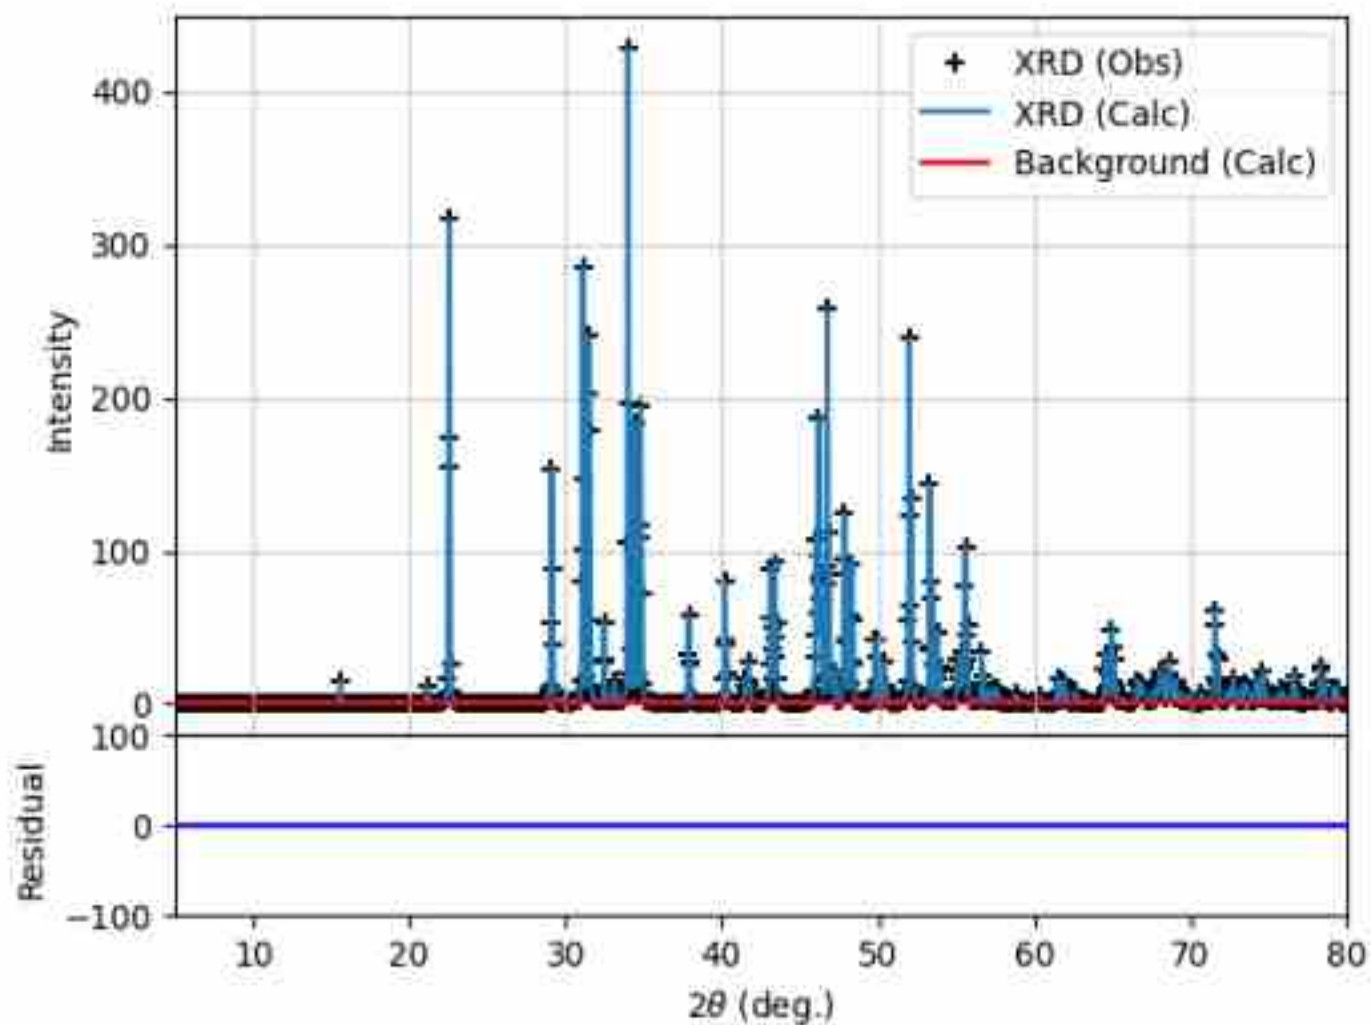

| RMSE before RR | Rwp     | RMSE after RR |
|----------------|---------|---------------|
| 0.023          | 0.00381 | 0.00026       |



# Ba1In9Ir2

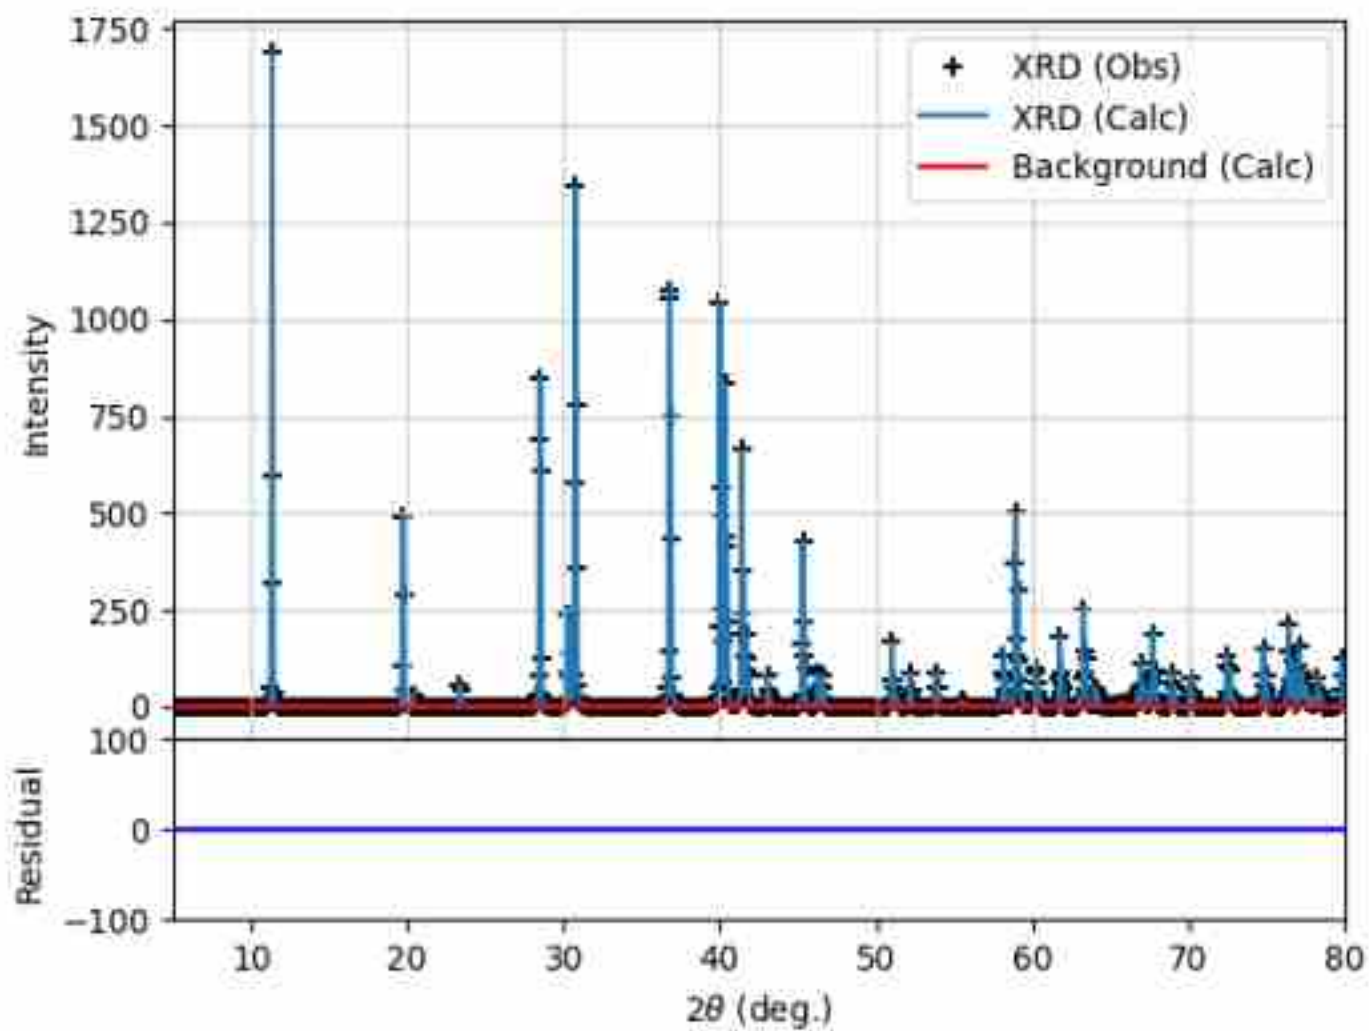

| RMSE before RR | Rwp     | RMSE after RR |
|----------------|---------|---------------|
| 0.023          | 0.00497 | 0.00076       |

# Ba<sub>2</sub>Co<sub>1</sub>W<sub>1</sub>O<sub>6</sub>

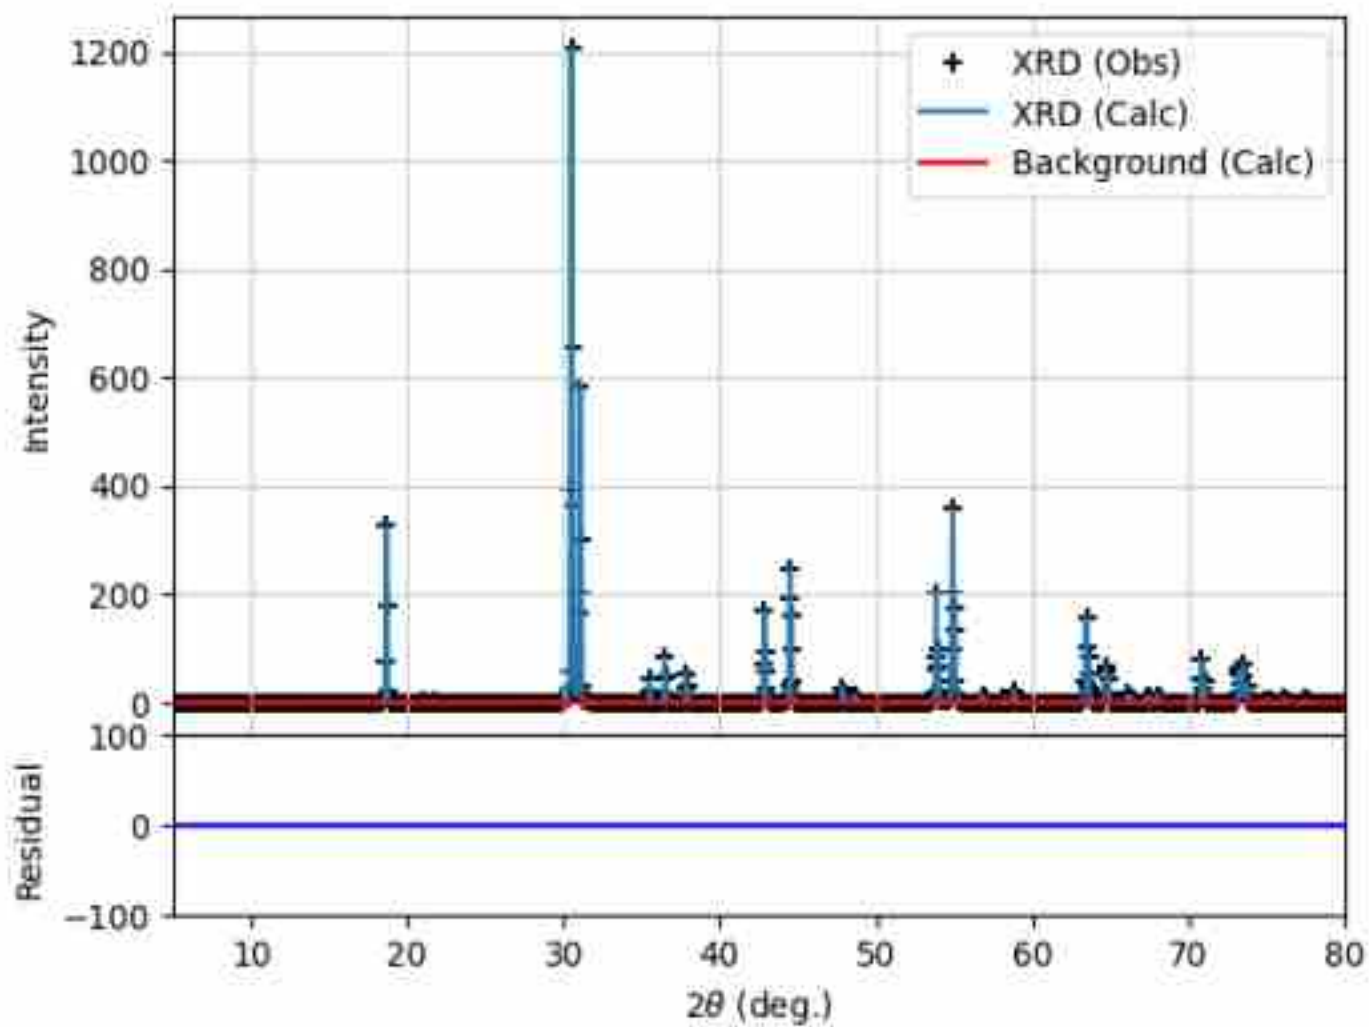

| RMSE before RR | Rwp     | RMSE after RR |
|----------------|---------|---------------|
| 0.023          | 0.00234 | 0.00078       |

# Ba<sub>2</sub>La<sub>2</sub>Ti<sub>2</sub>Cu<sub>2</sub>O<sub>11</sub>

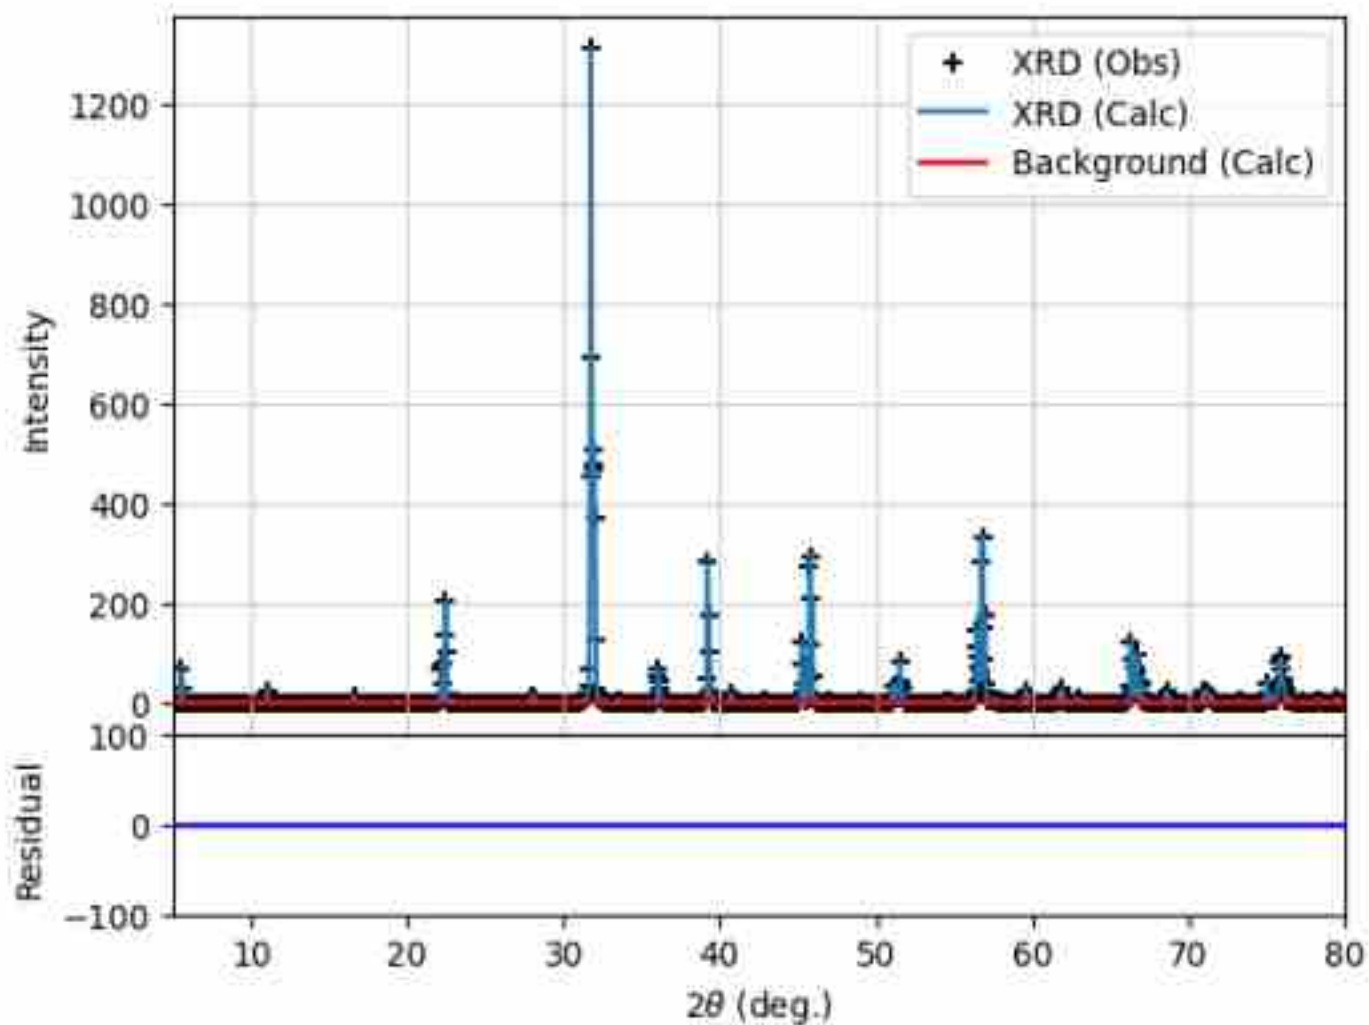

| RMSE before RR | Rwp     | RMSE after RR |
|----------------|---------|---------------|
| 0.023          | 0.00423 | 0.00135       |

# Ba<sub>2</sub>Pr<sub>4</sub>Zn<sub>2</sub>S<sub>10</sub>

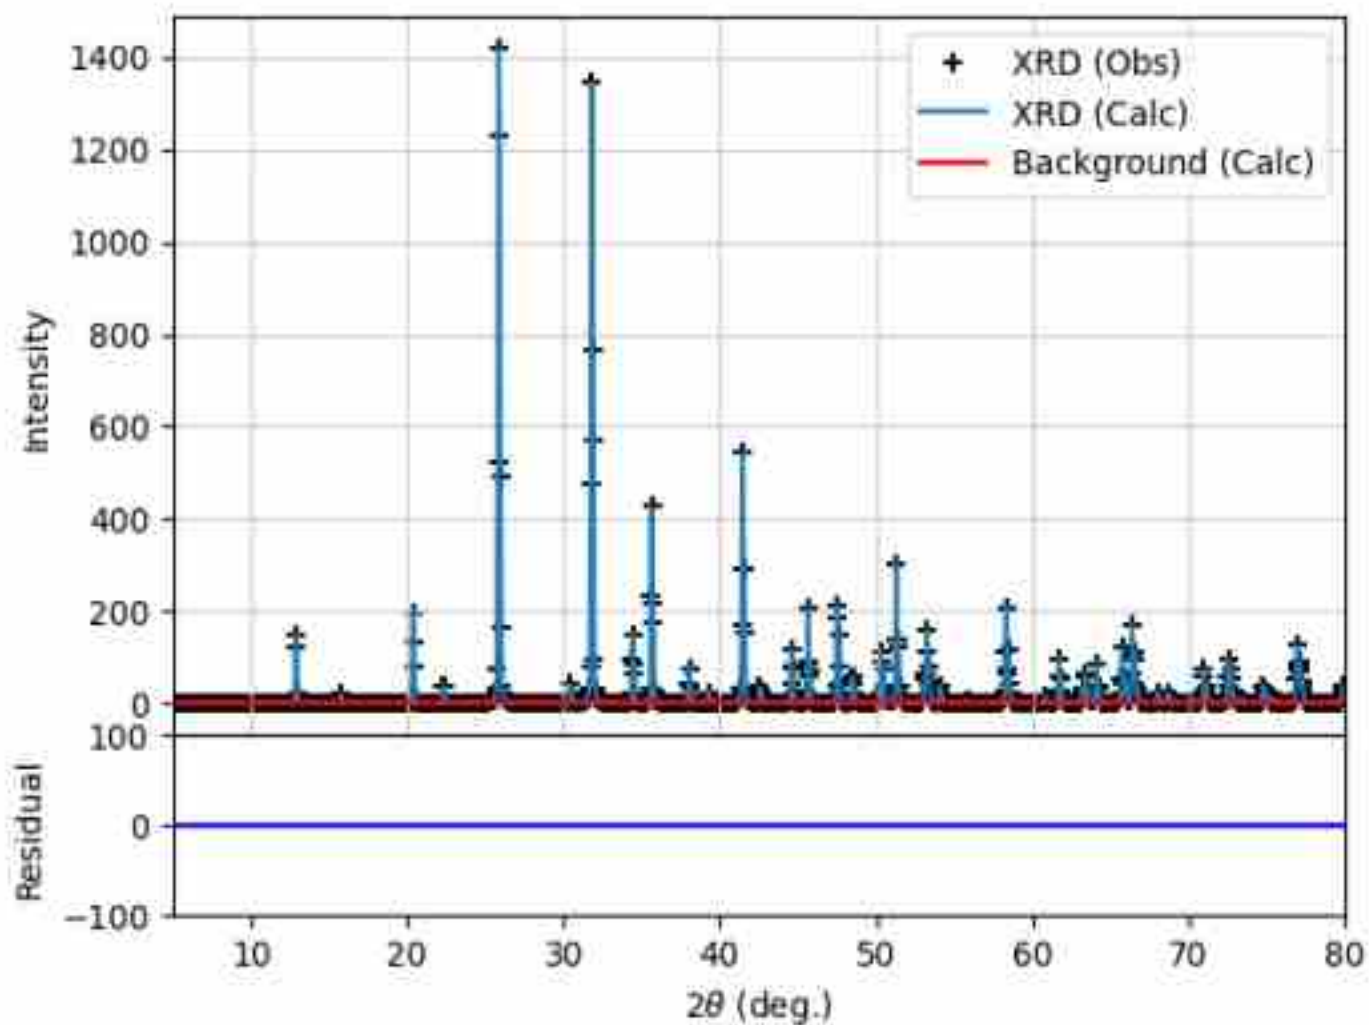

| RMSE before RR | Rwp     | RMSE after RR |
|----------------|---------|---------------|
| 0.023          | 0.00329 | 0.00095       |

# Ba<sub>2</sub>Sm<sub>2</sub>Eu<sub>2</sub>Bi<sub>2</sub>O<sub>12</sub>

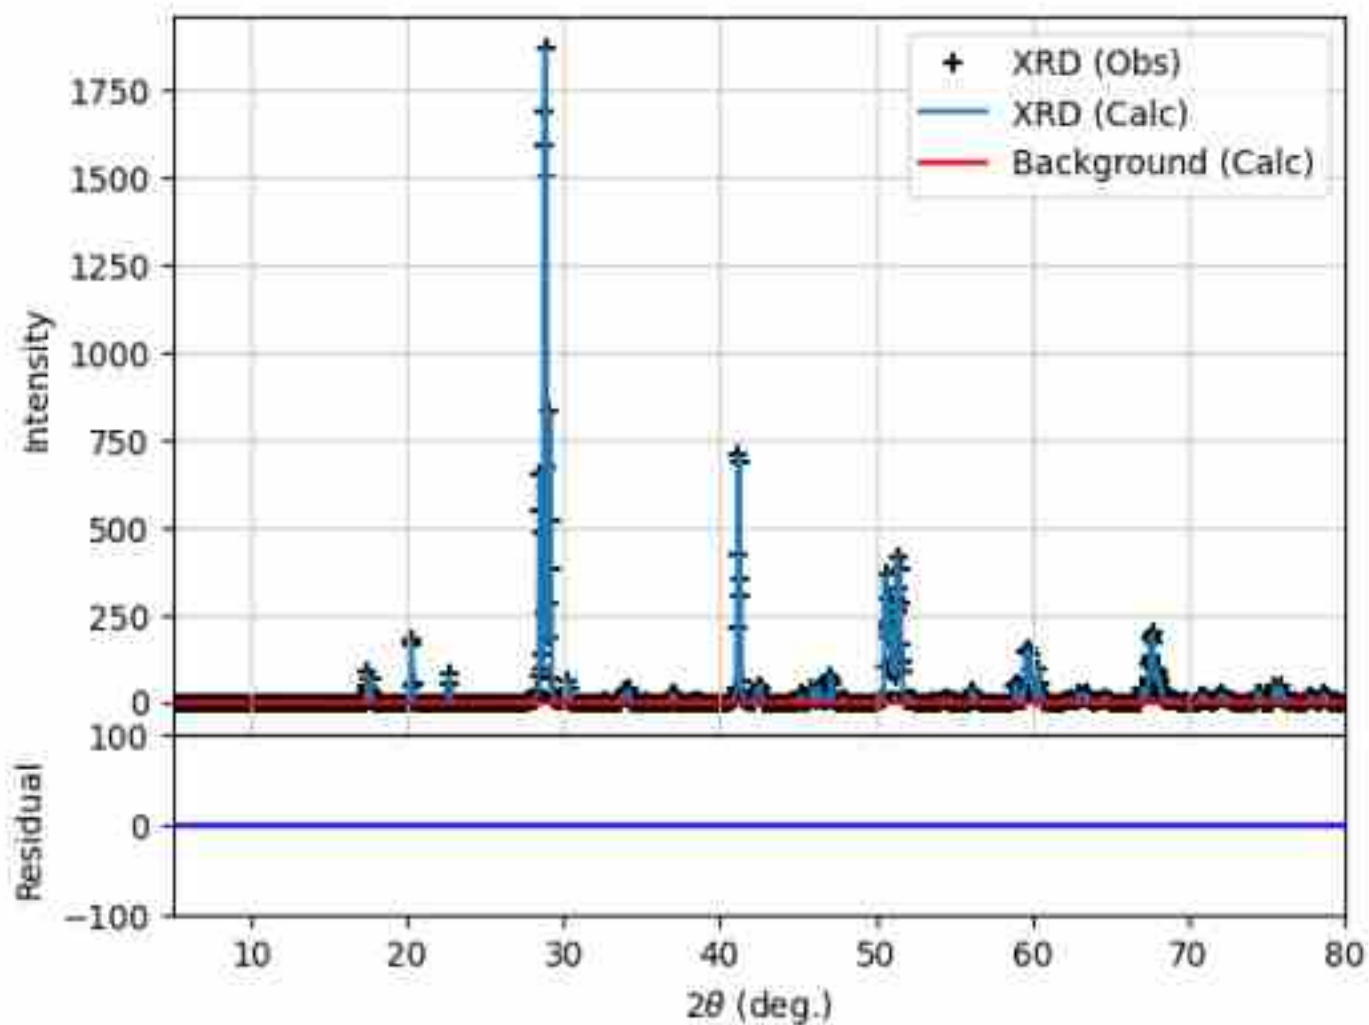

| RMSE before RR | Rwp     | RMSE after RR |
|----------------|---------|---------------|
| 0.023          | 0.00025 | 0.00015       |

# Ba<sub>2</sub>Sr<sub>2</sub>Dy<sub>2</sub>Nb<sub>2</sub>O<sub>12</sub>

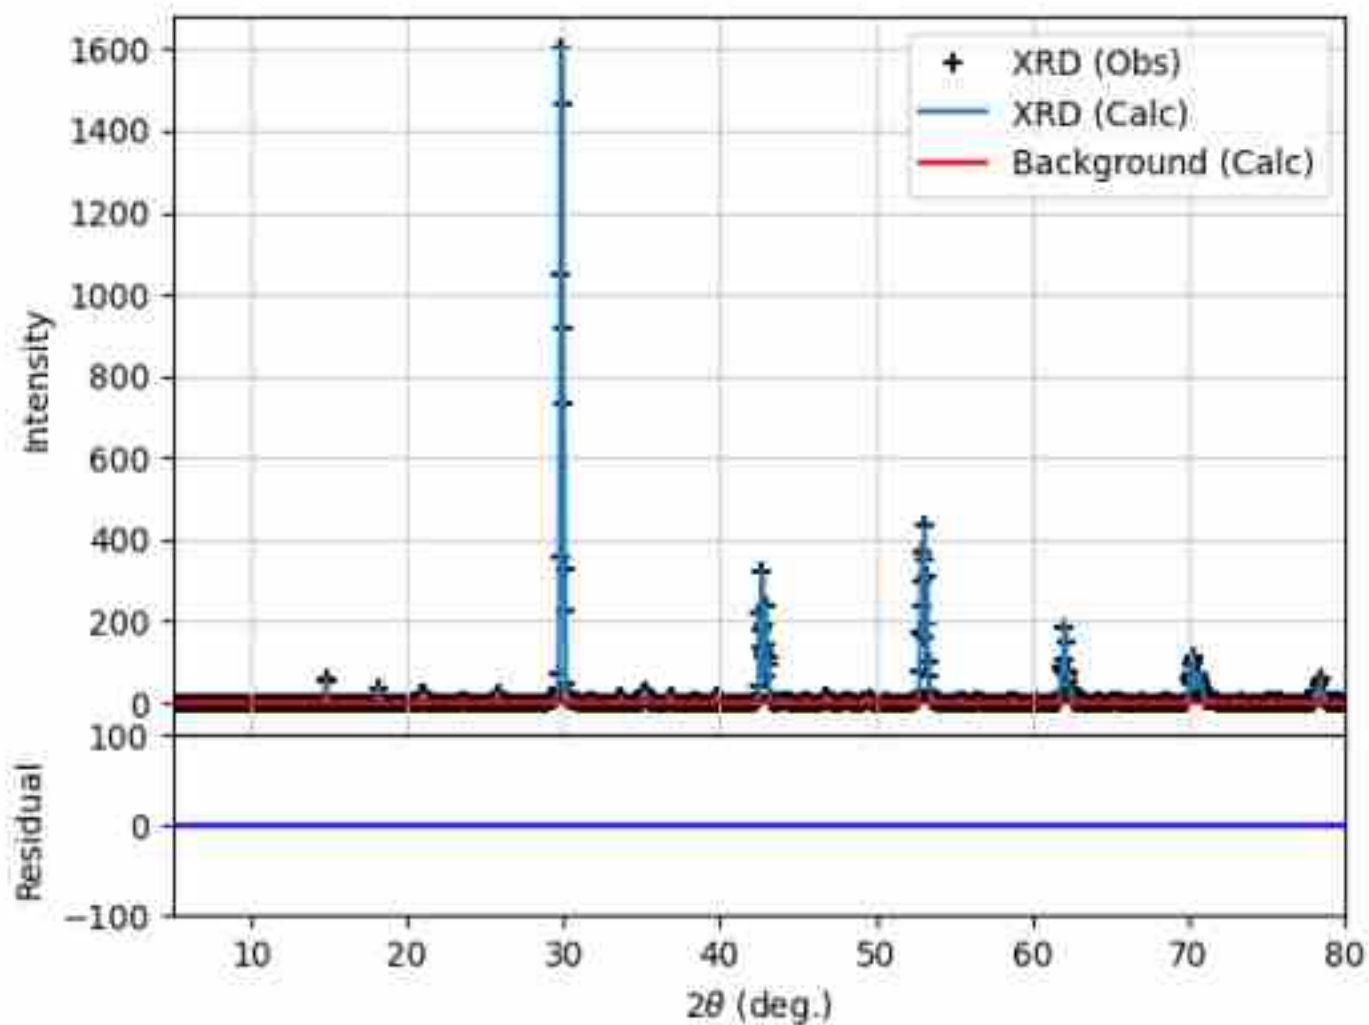

| RMSE before RR | Rwp     | RMSE after RR |
|----------------|---------|---------------|
| 0.023          | 0.00125 | 0.00062       |

# Ba<sub>2</sub>Ta<sub>1</sub>Co<sub>1</sub>O<sub>6</sub>

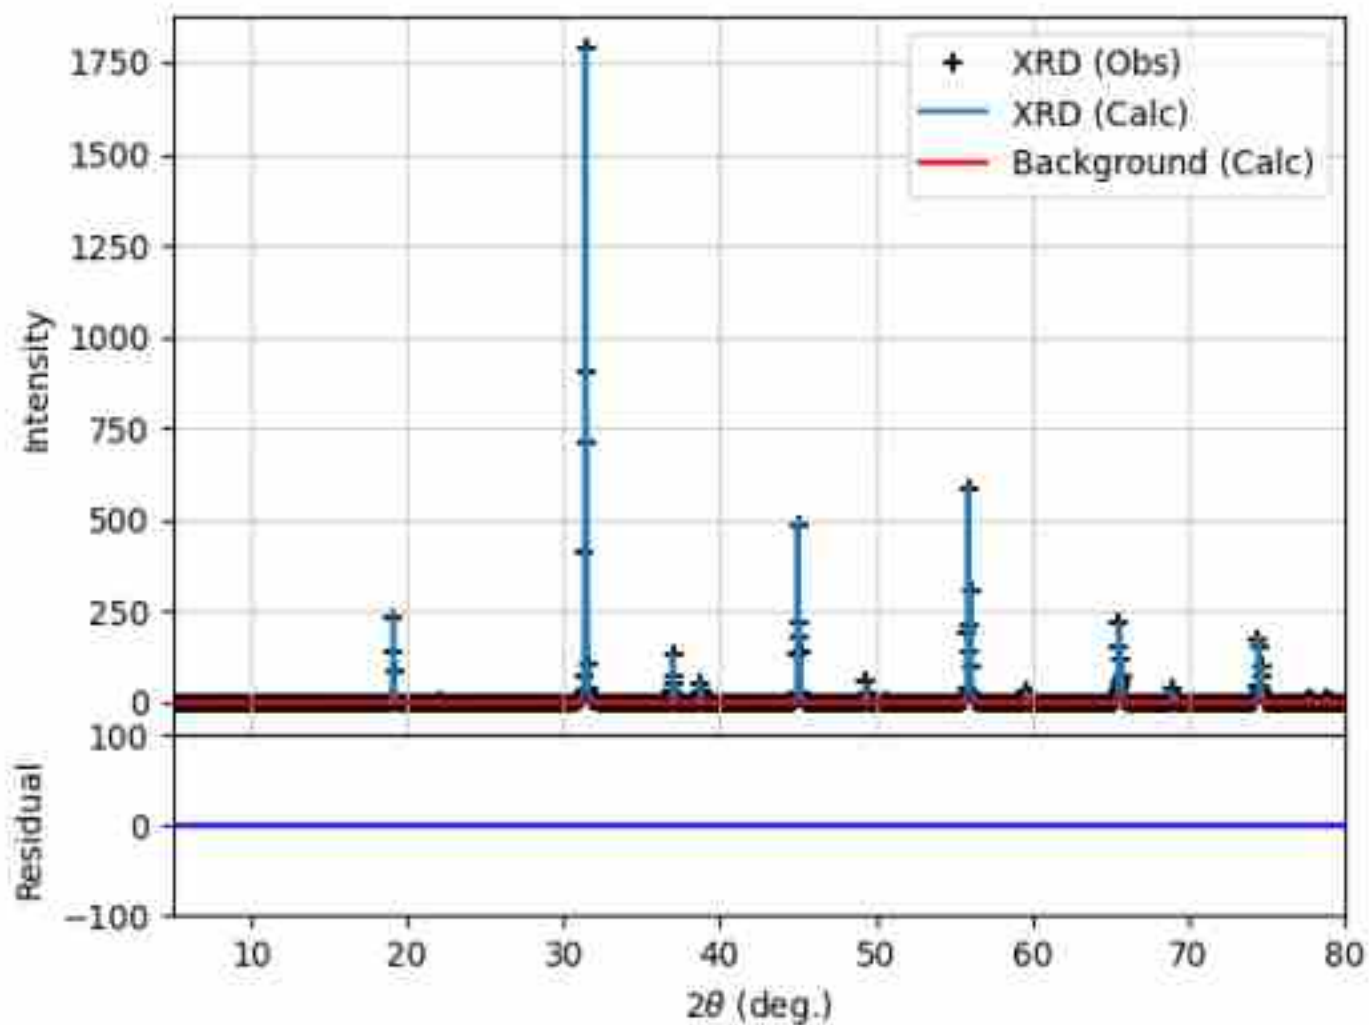

| RMSE before RR | Rwp     | RMSE after RR |
|----------------|---------|---------------|
| 0.023          | 0.01001 | 0.00412       |

# Ba<sub>2</sub>Yb<sub>2</sub>Cd<sub>2</sub>Sb<sub>4</sub>

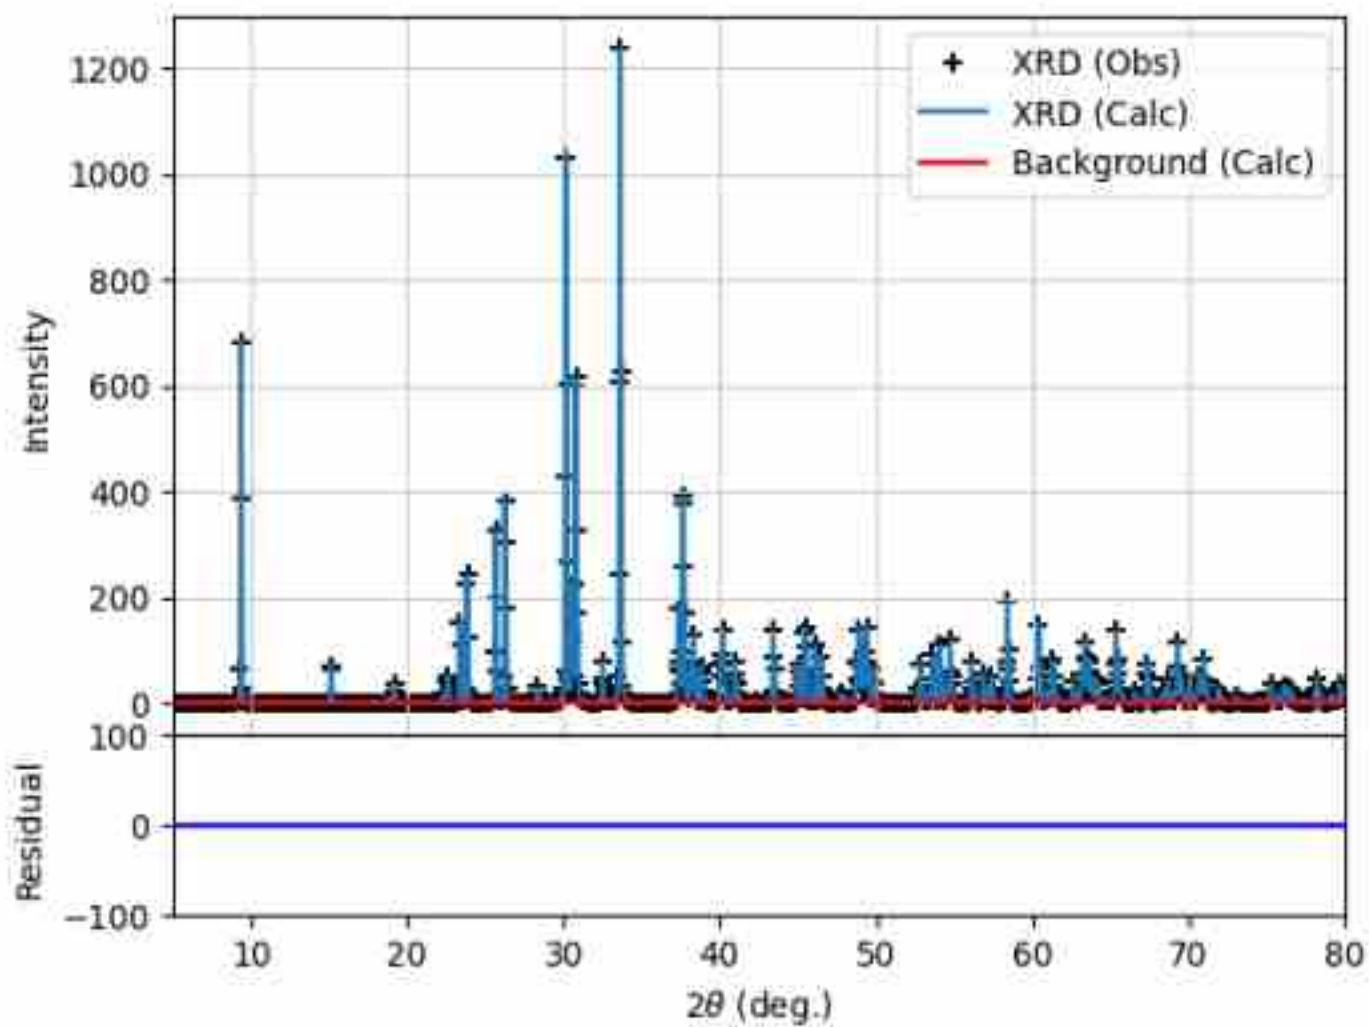

| RMSE before RR | Rwp     | RMSE after RR |
|----------------|---------|---------------|
| 0.023          | 0.00335 | 0.00028       |



# Ba6Br2N3Cl1

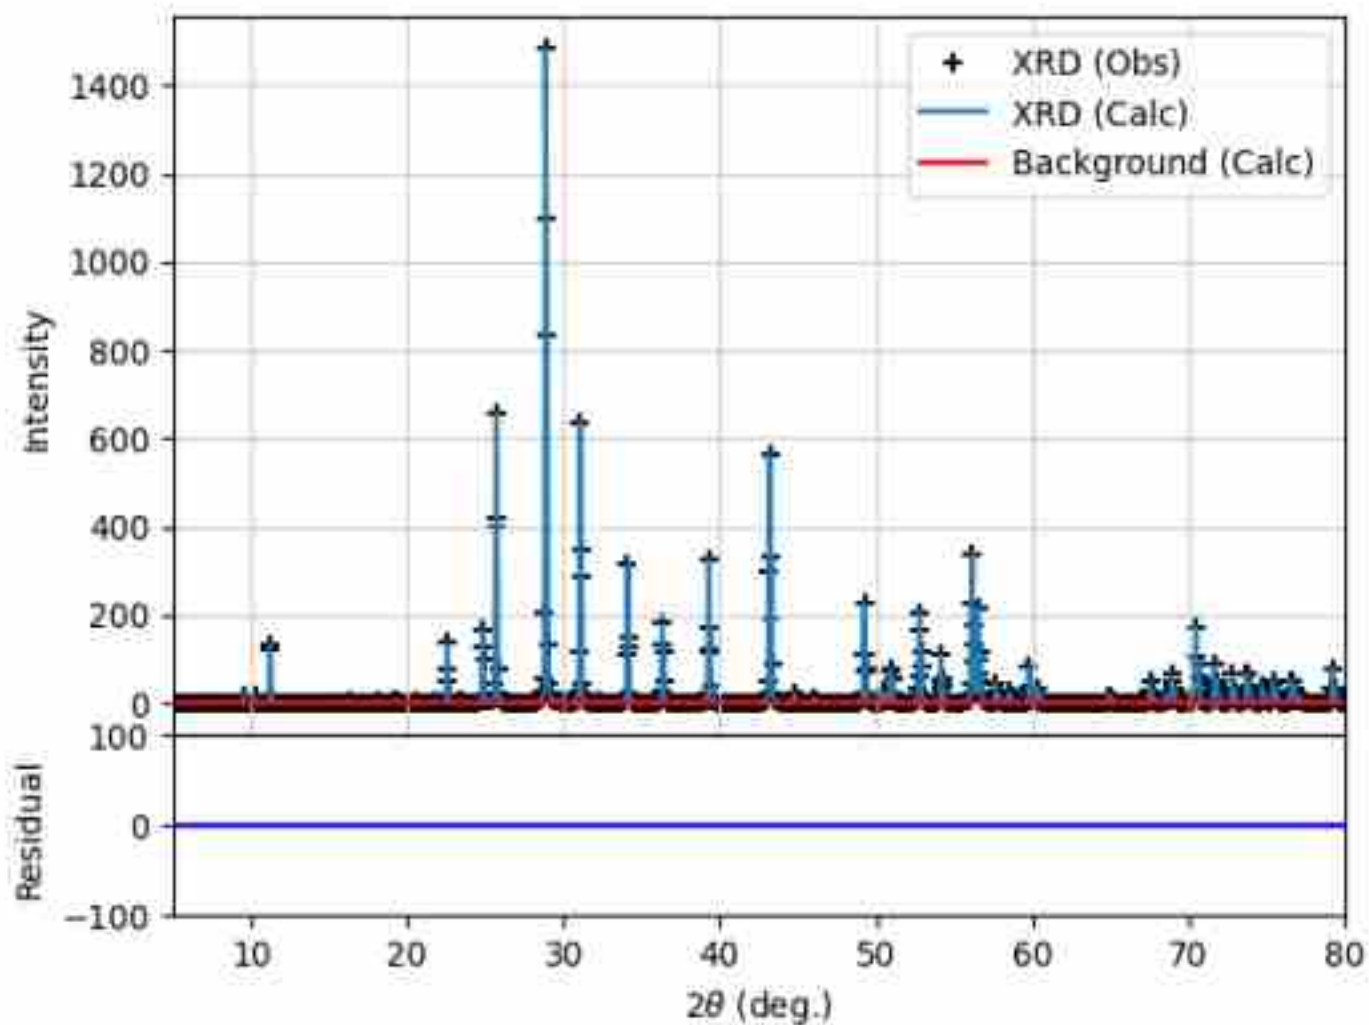

| RMSE before RR | Rwp     | RMSE after RR |
|----------------|---------|---------------|
| 0.023          | 0.00317 | 0.00063       |

# Be12Mo1

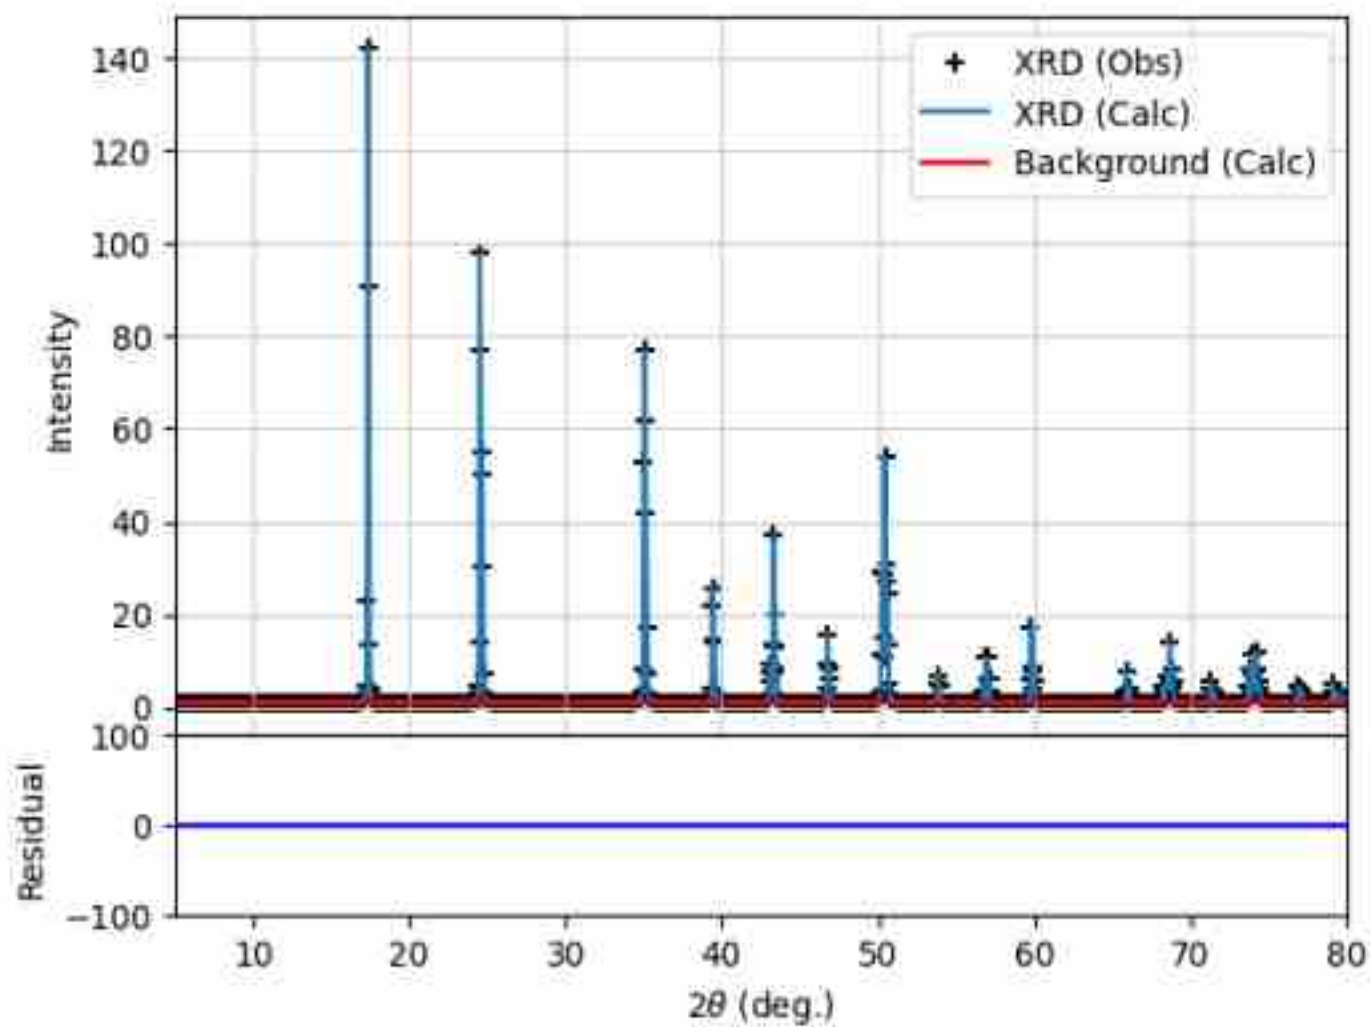

| RMSE before RR | Rwp     | RMSE after RR |
|----------------|---------|---------------|
| 0.023          | 0.00335 | 0.00345       |

# Ca1Sb1F6

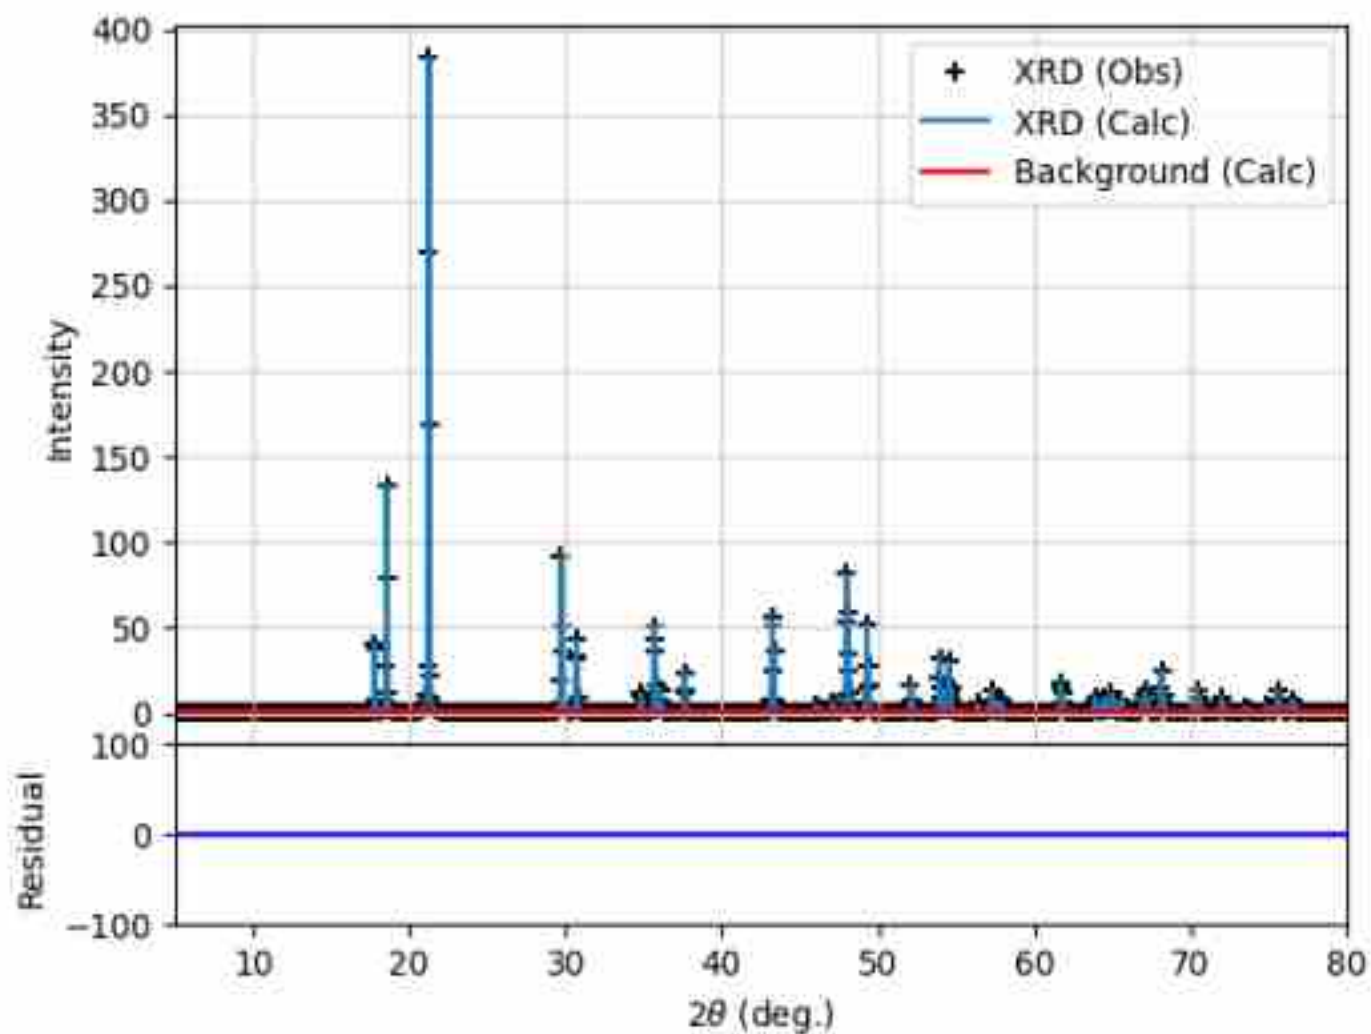

| RMSE before RR | Rwp     | RMSE after RR |
|----------------|---------|---------------|
| 0.023          | 0.00242 | 0.00066       |

Ca2Bi2O6

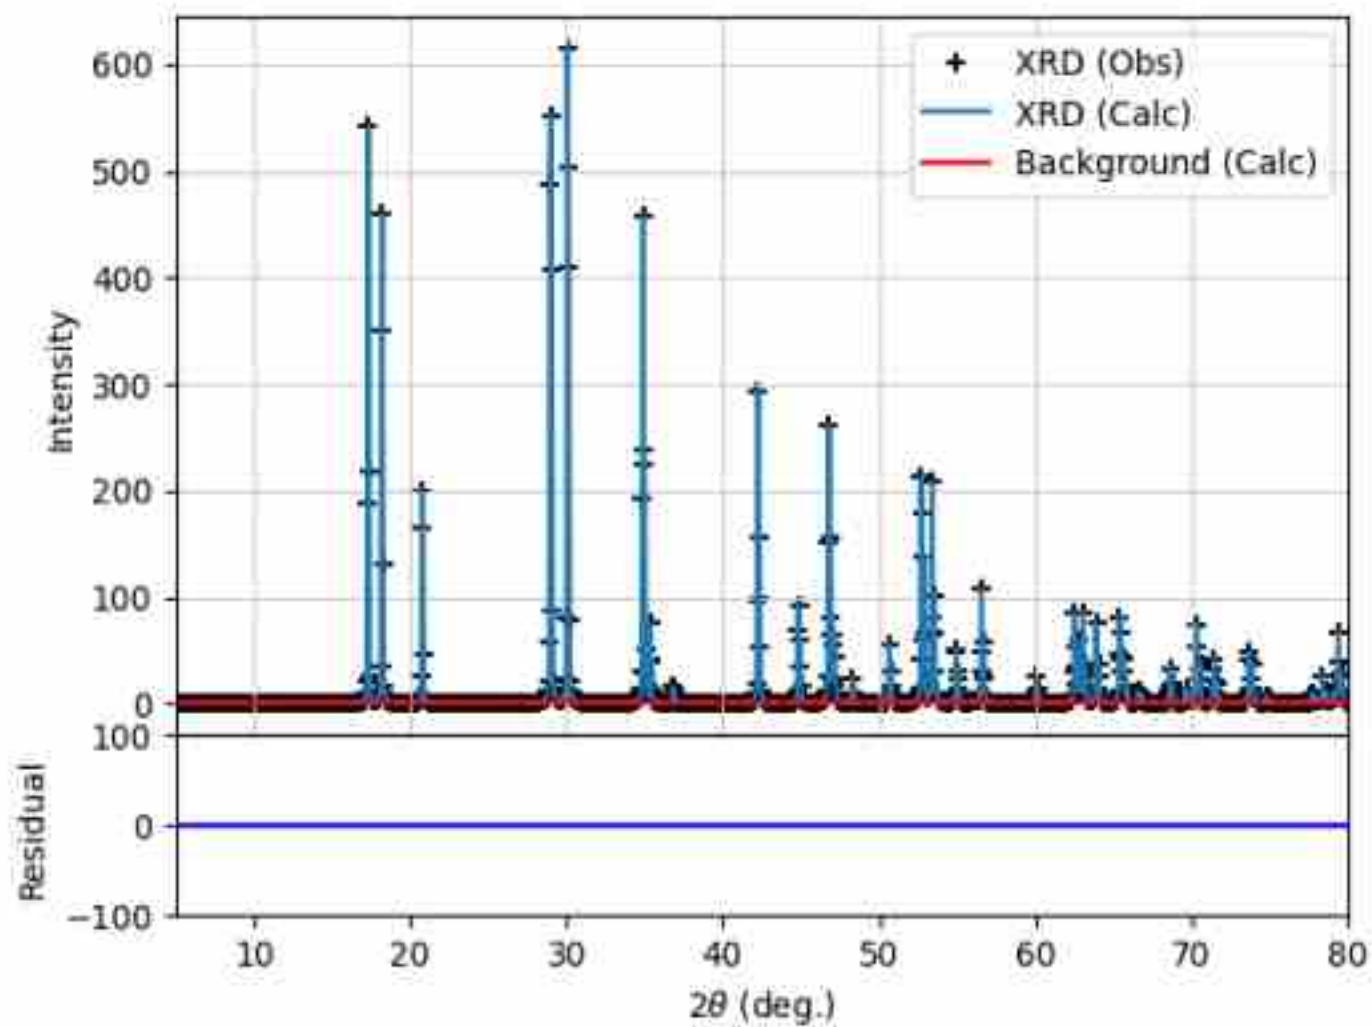

| RMSE before RR | Rwp     | RMSE after RR |
|----------------|---------|---------------|
| 0.023          | 0.00388 | 0.0023        |

# Ca<sub>2</sub>La<sub>2</sub>Fe<sub>2</sub>Cu<sub>2</sub>O<sub>12</sub>

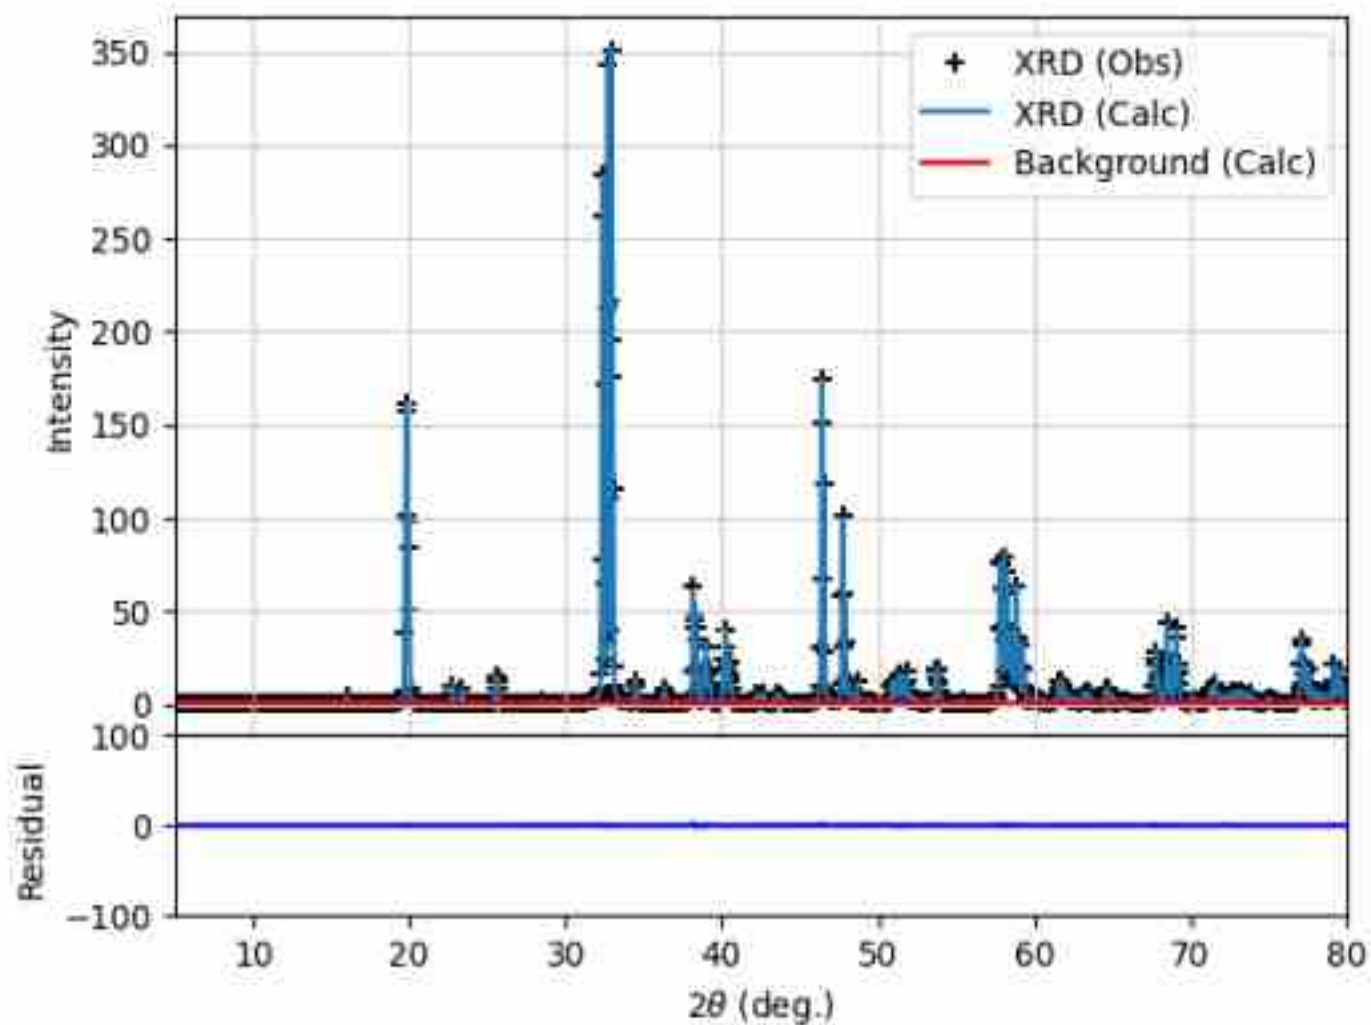

| RMSE before RR | Rwp     | RMSE after RR |
|----------------|---------|---------------|
| 0.023          | 1.67851 | 0.05018       |

# Ca<sub>2</sub>La<sub>4</sub>Te<sub>8</sub>

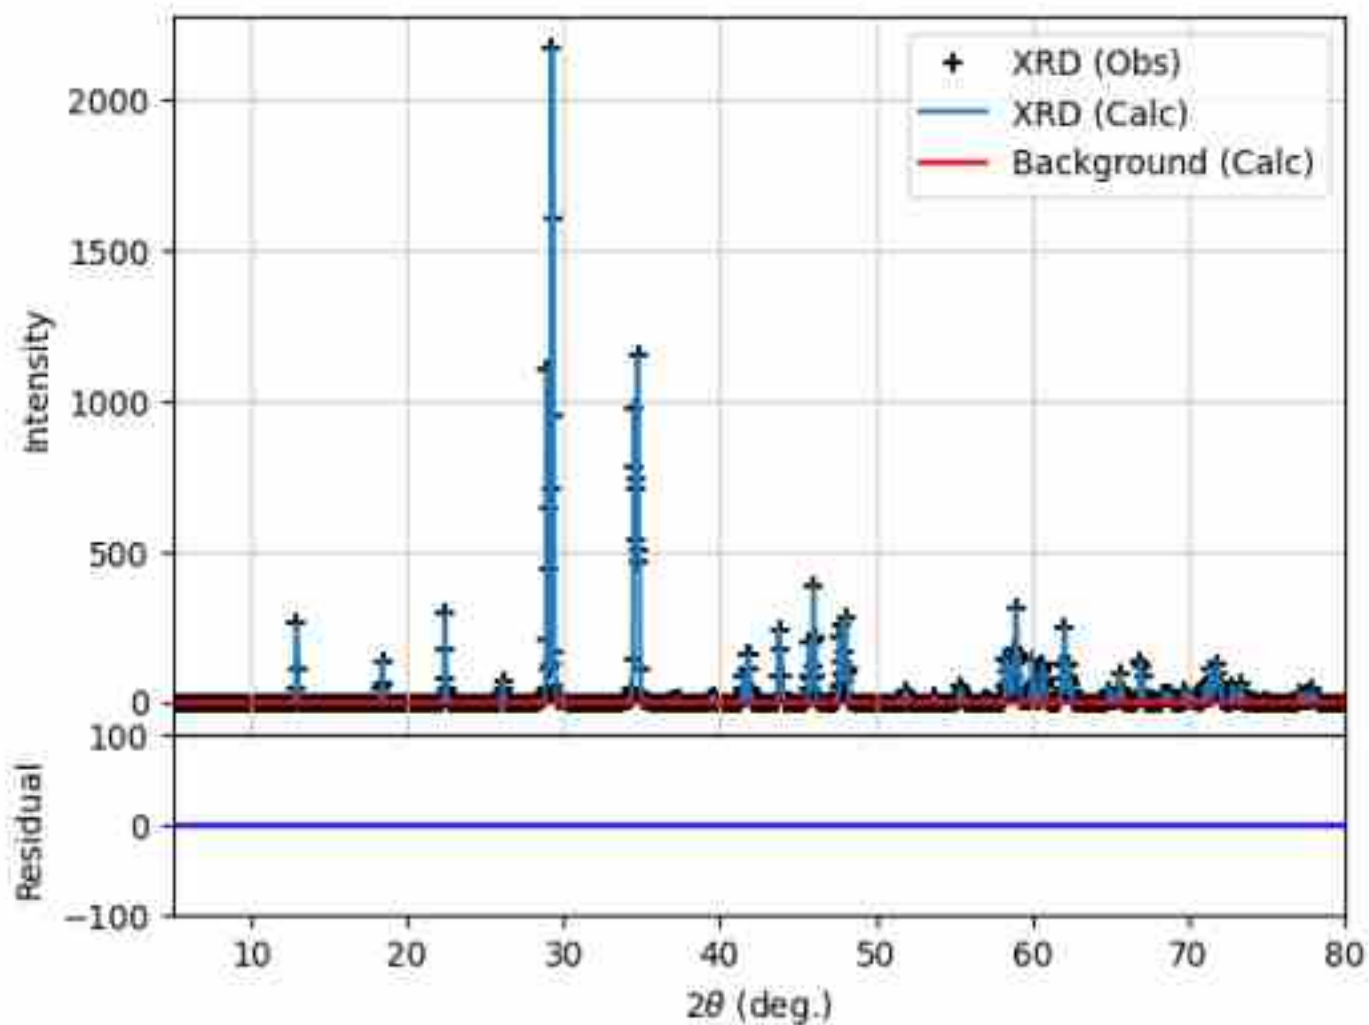

| RMSE before RR | Rwp     | RMSE after RR |
|----------------|---------|---------------|
| 0.023          | 0.00265 | 0.00035       |

# Ca<sub>4</sub>Mo<sub>4</sub>O<sub>12</sub>

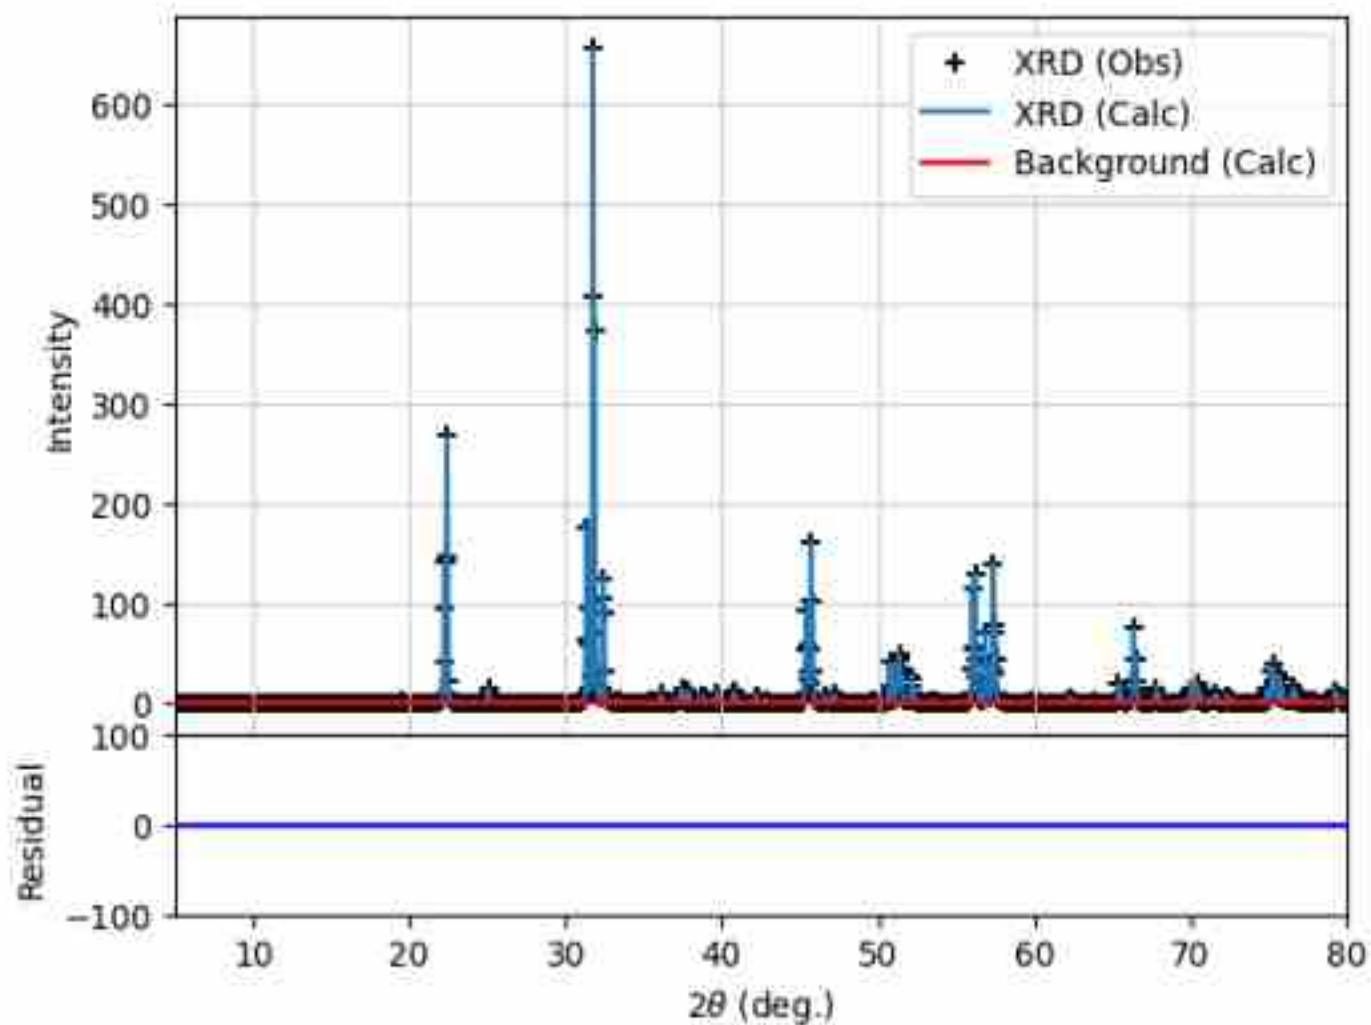

| RMSE before RR | Rwp     | RMSE after RR |
|----------------|---------|---------------|
| 0.023          | 0.00408 | 0.00087       |

# Ca<sub>4</sub>Nd<sub>1</sub>B<sub>3</sub>O<sub>10</sub>

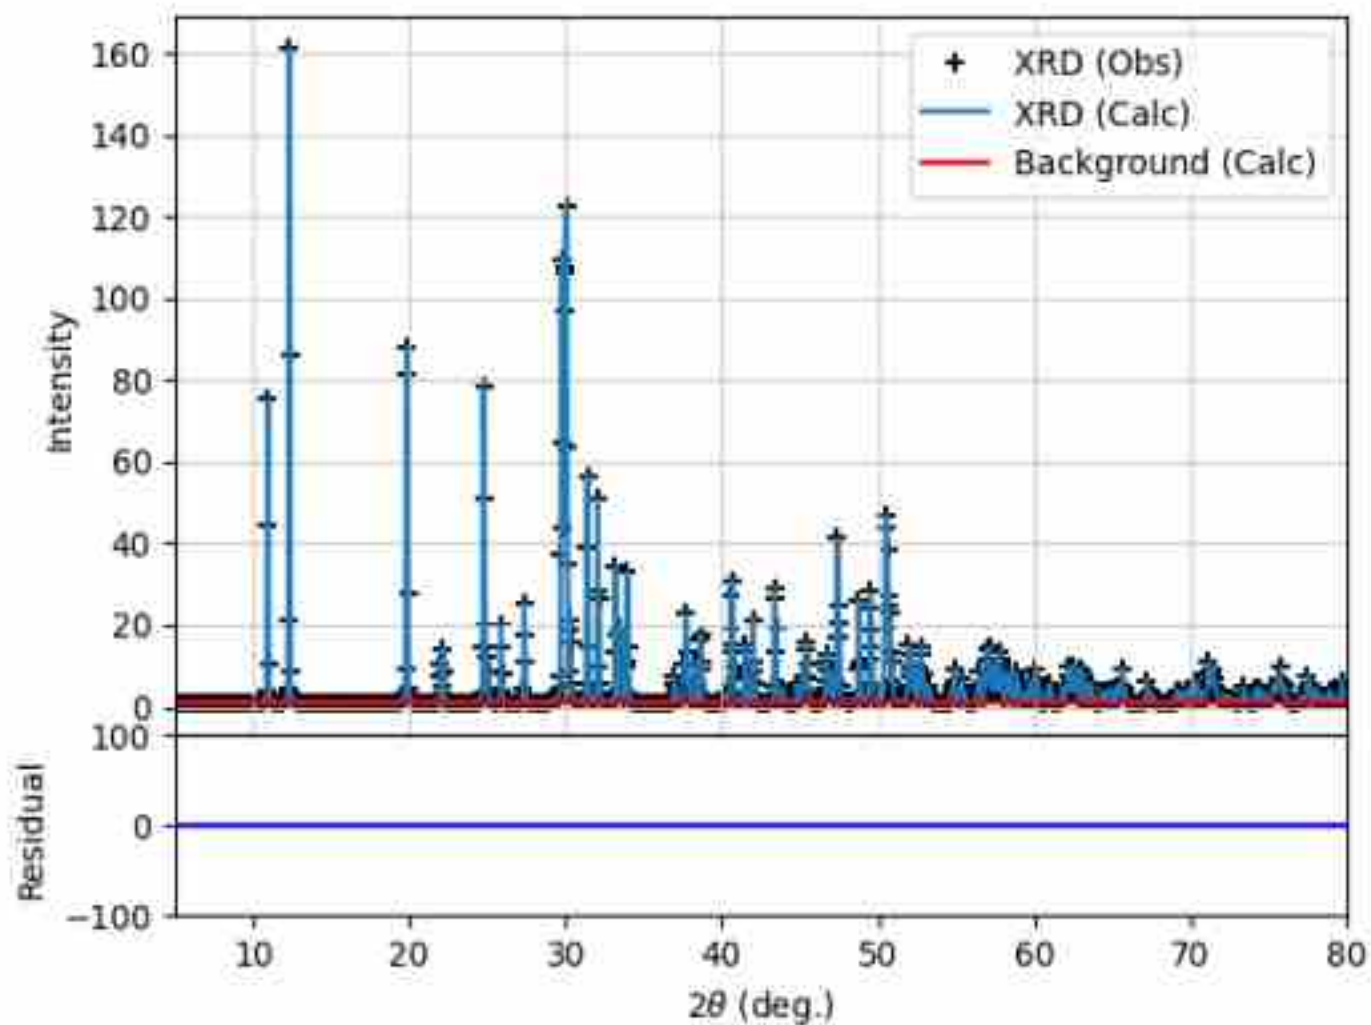

| RMSE before RR | Rwp     | RMSE after RR |
|----------------|---------|---------------|
| 0.023          | 0.00232 | 0.00082       |



# Ca<sub>4</sub>W<sub>4</sub>O<sub>12</sub>

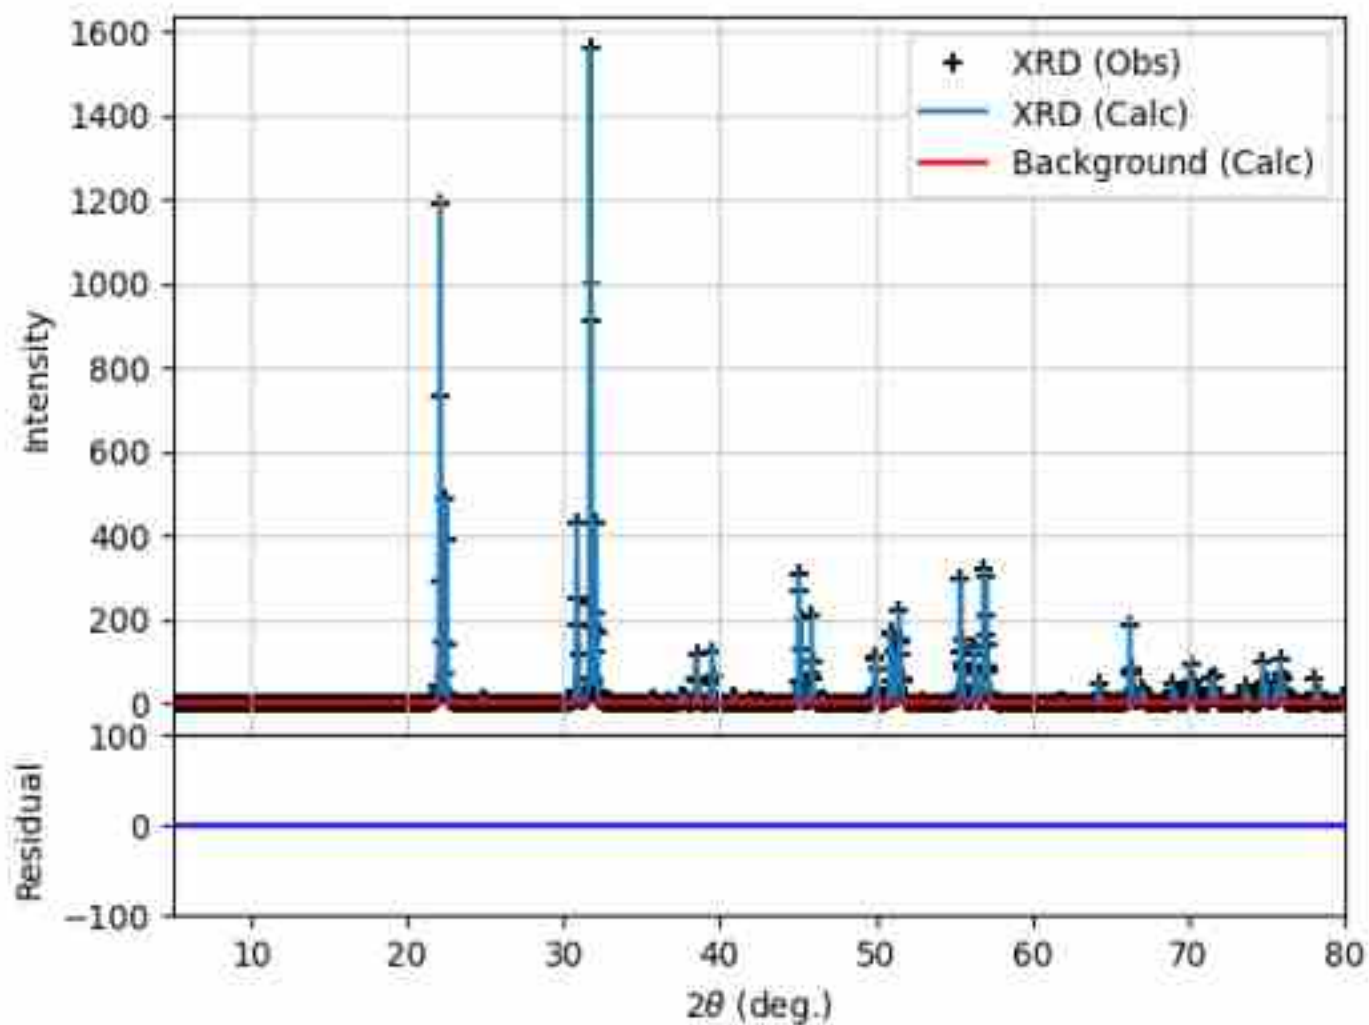

| RMSE before RR | Rwp     | RMSE after RR |
|----------------|---------|---------------|
| 0.023          | 0.00481 | 0.002         |

# Ca<sub>6</sub>Mn<sub>2</sub>N<sub>6</sub>

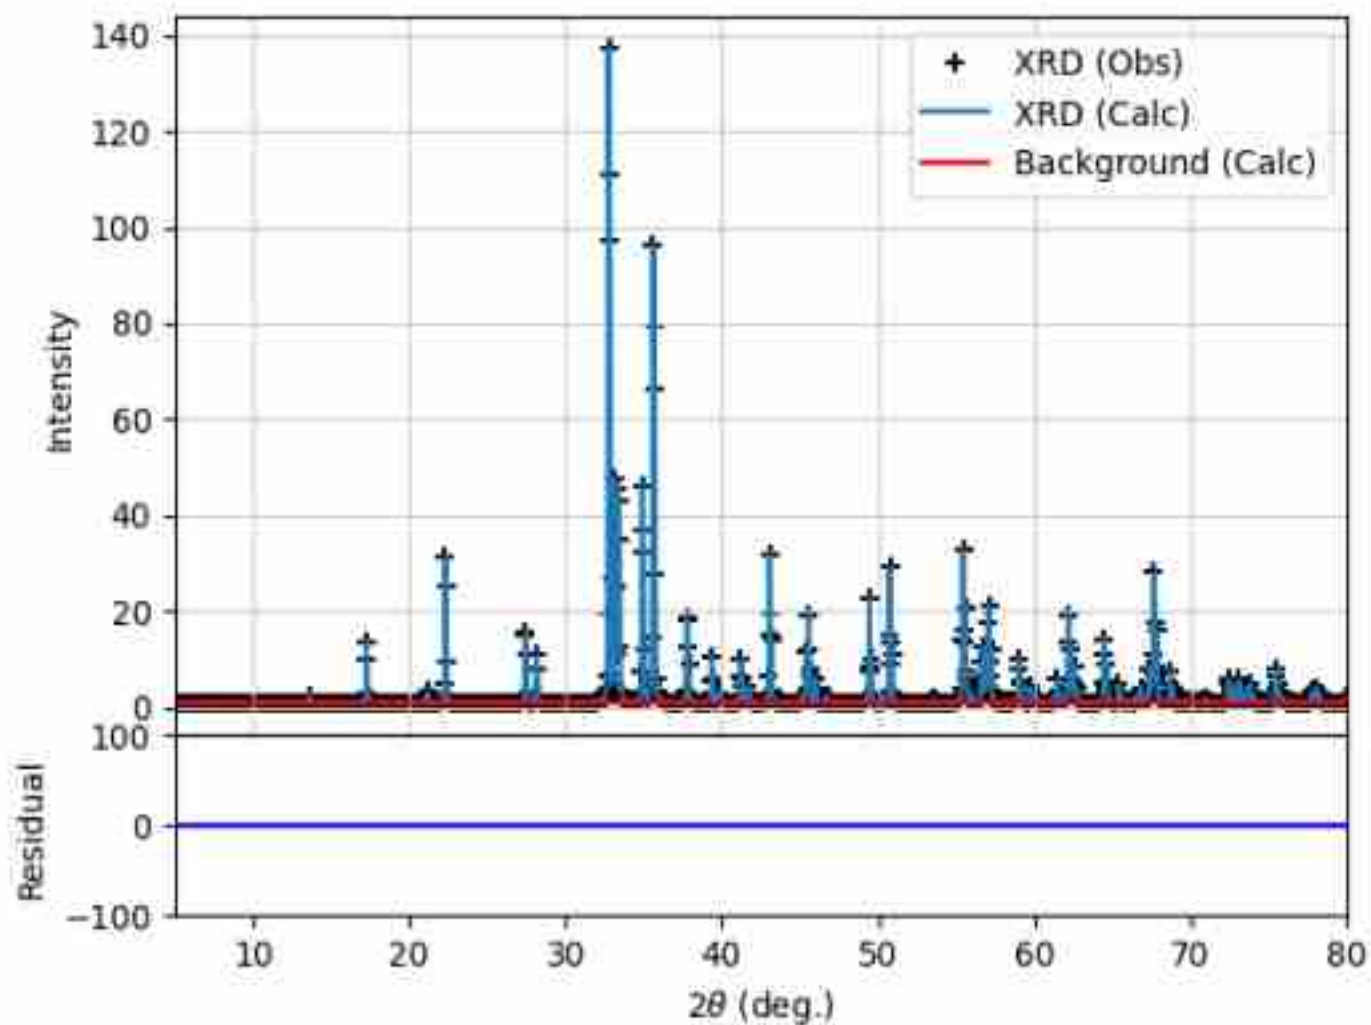

| RMSE before RR | Rwp     | RMSE after RR |
|----------------|---------|---------------|
| 0.023          | 0.00368 | 0.00095       |

# Ca<sub>8</sub>Hf<sub>2</sub>N<sub>8</sub>

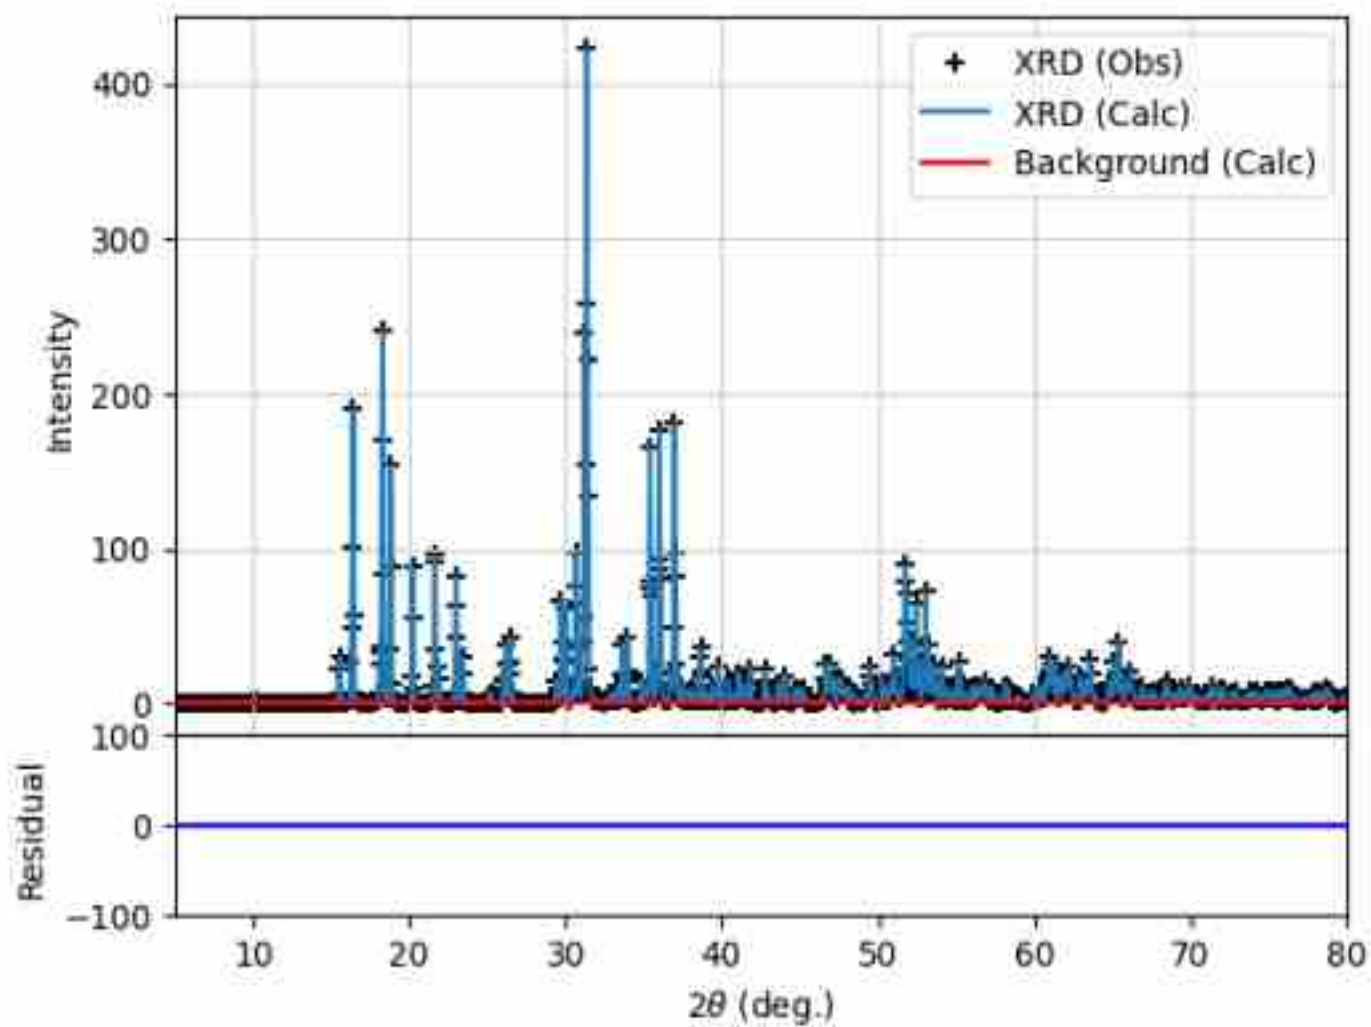

| RMSE before RR | Rwp     | RMSE after RR |
|----------------|---------|---------------|
| 0.023          | 0.00024 | 0.00019       |

# Ca8Pb4

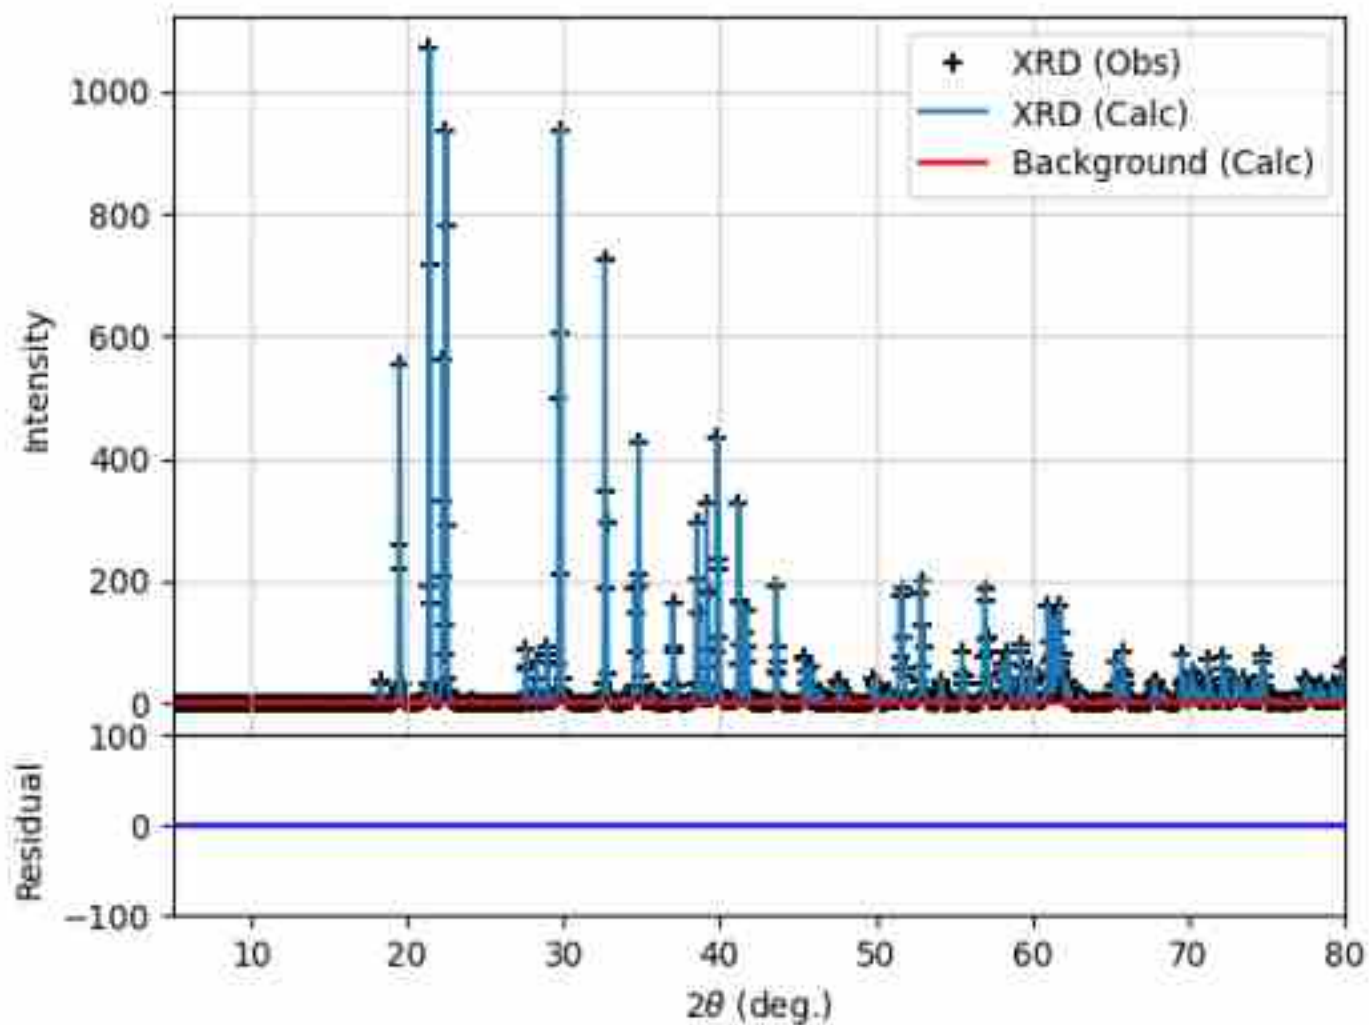

| RMSE before RR | Rwp     | RMSE after RR |
|----------------|---------|---------------|
| 0.023          | 0.00464 | 0.00051       |

# Cd<sub>2</sub>W<sub>2</sub>O<sub>8</sub>

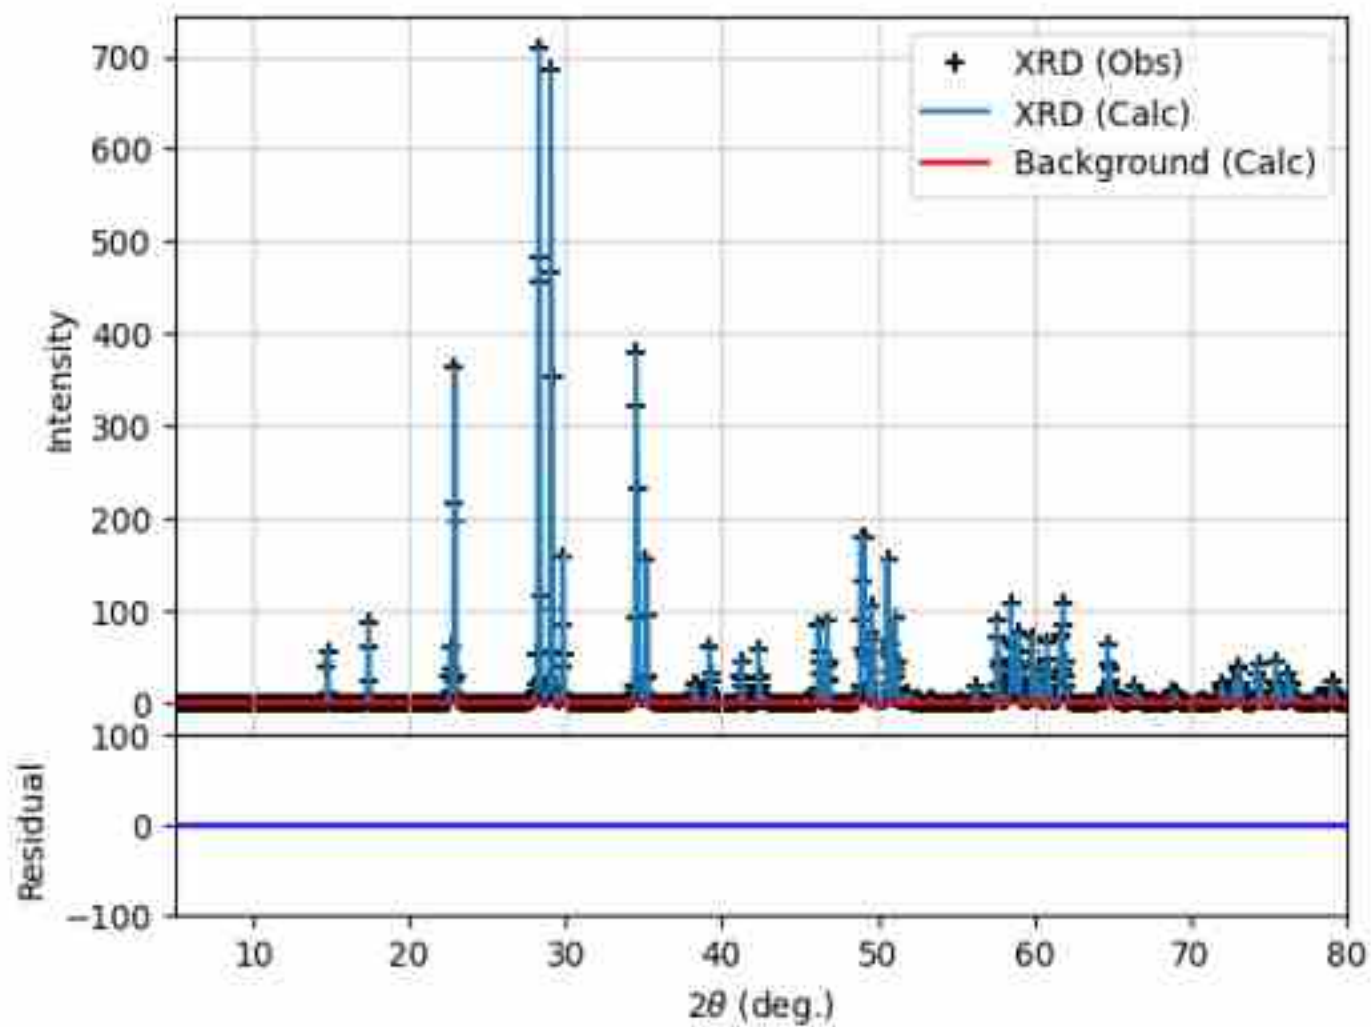

| RMSE before RR | Rwp     | RMSE after RR |
|----------------|---------|---------------|
| 0.023          | 0.00386 | 0.00164       |

Ce1In1Pt4

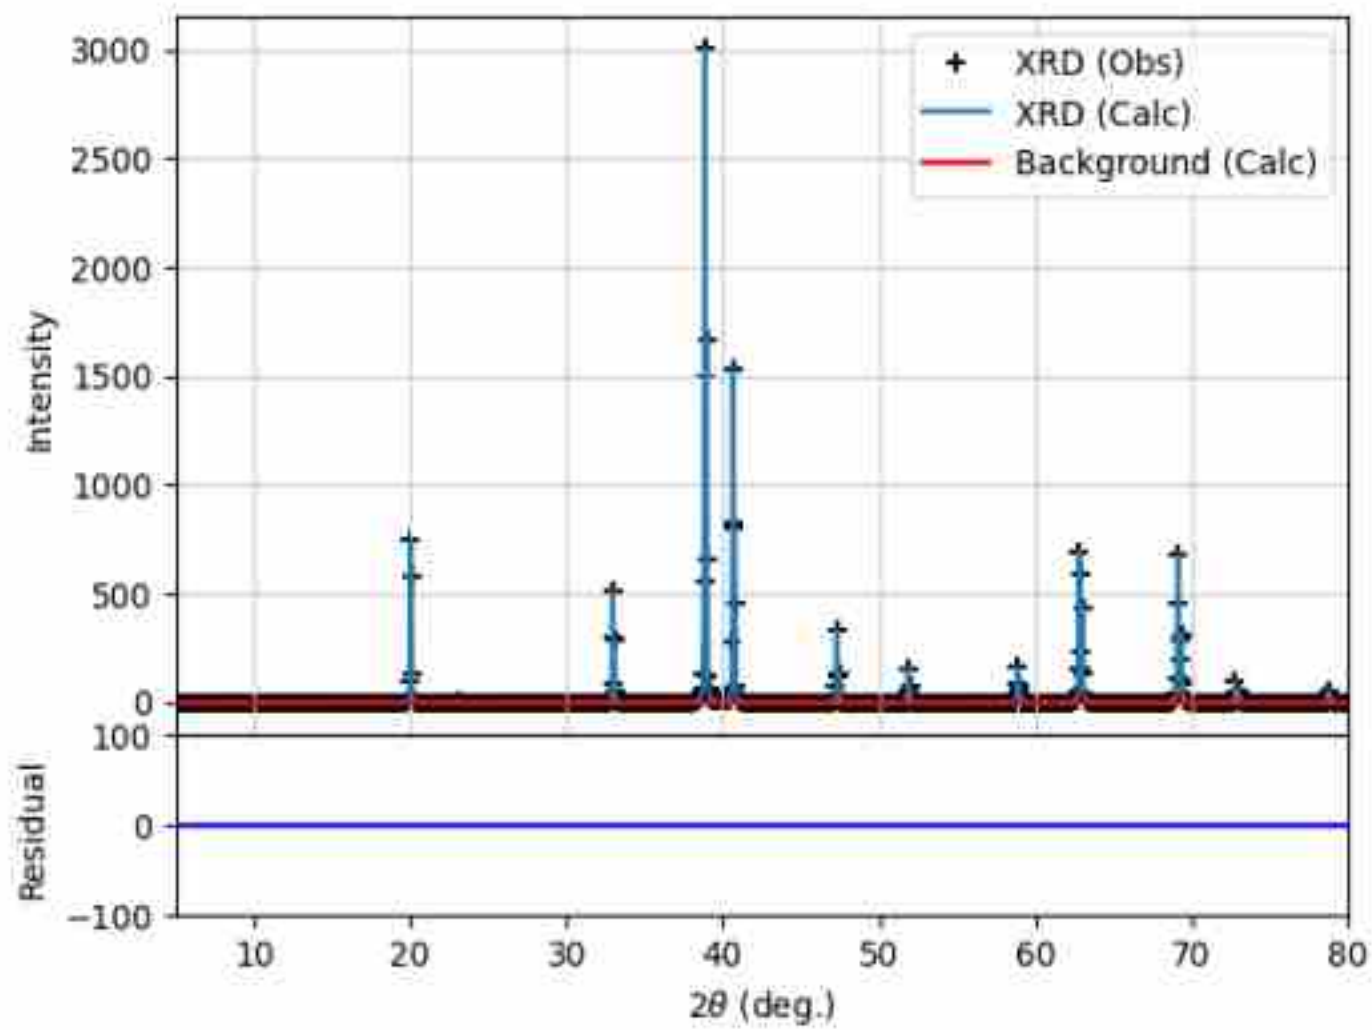

| RMSE before RR | Rwp     | RMSE after RR |
|----------------|---------|---------------|
| 0.023          | 0.09131 | 0.00233       |

# Ce<sub>2</sub>P<sub>2</sub>O<sub>8</sub>

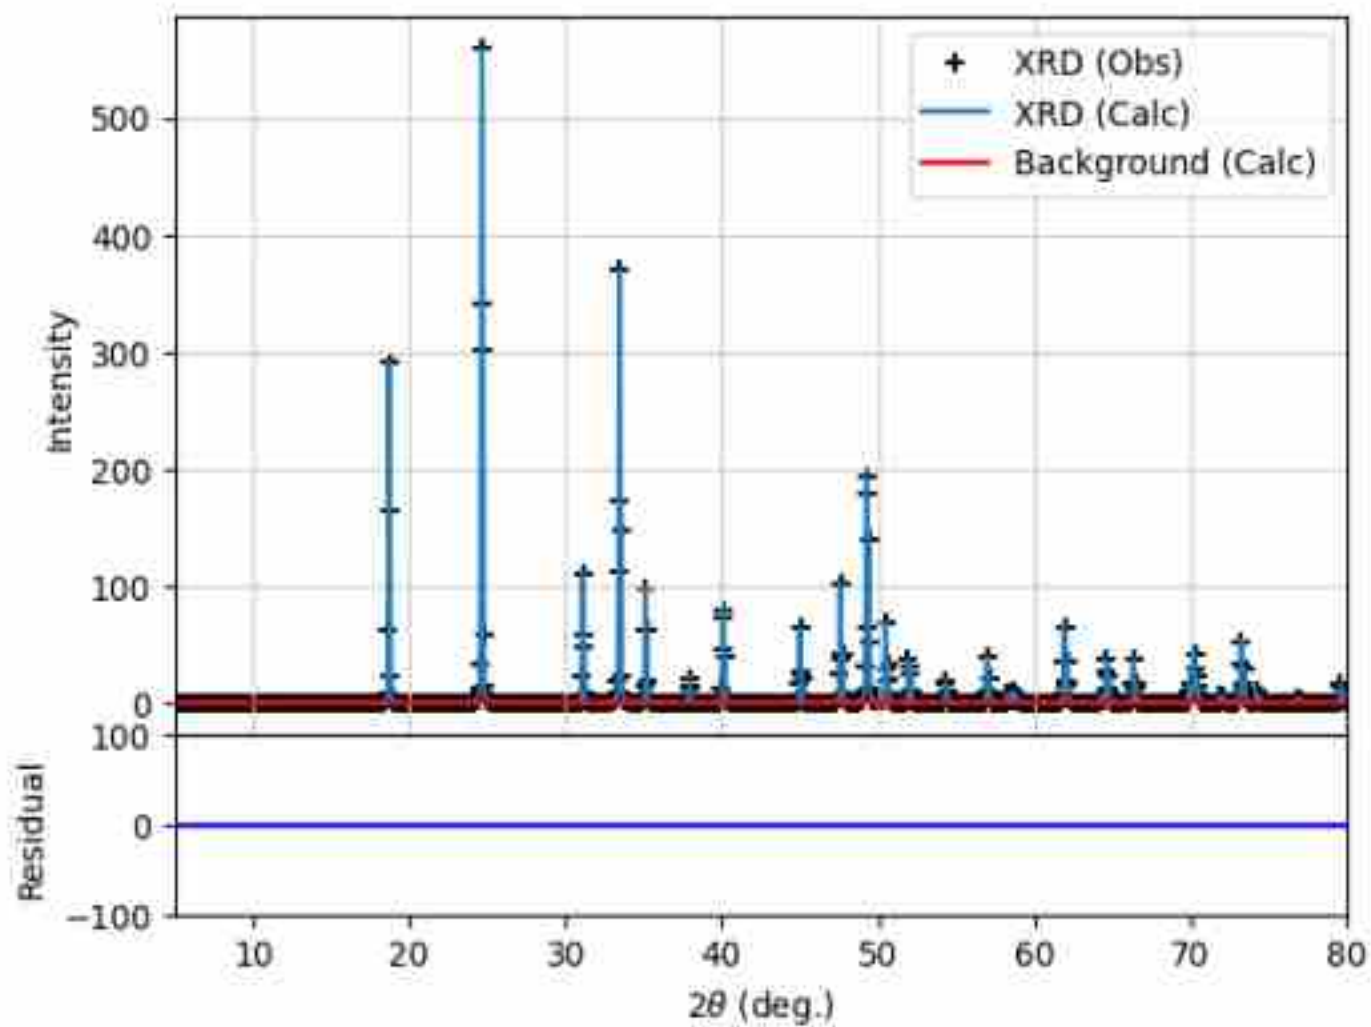

| RMSE before RR | Rwp     | RMSE after RR |
|----------------|---------|---------------|
| 0.023          | 0.00444 | 0.00181       |

# Ce<sub>4</sub>Ge<sub>10</sub>Ir<sub>6</sub>

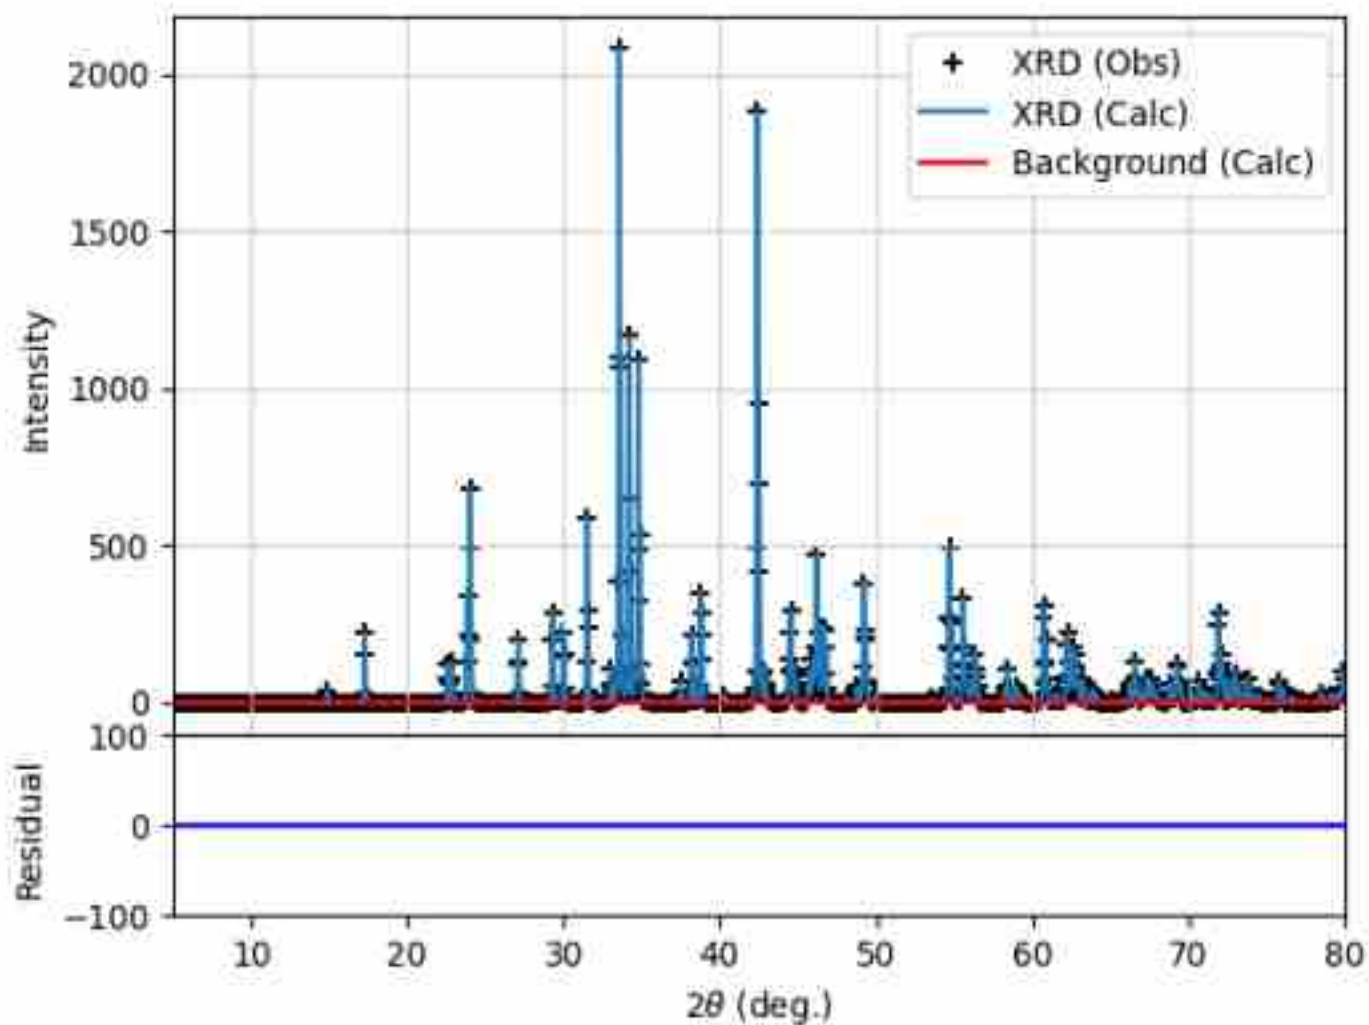

| RMSE before RR | Rwp     | RMSE after RR |
|----------------|---------|---------------|
| 0.023          | 0.00349 | 0.0004        |



# Co1Ni5S8

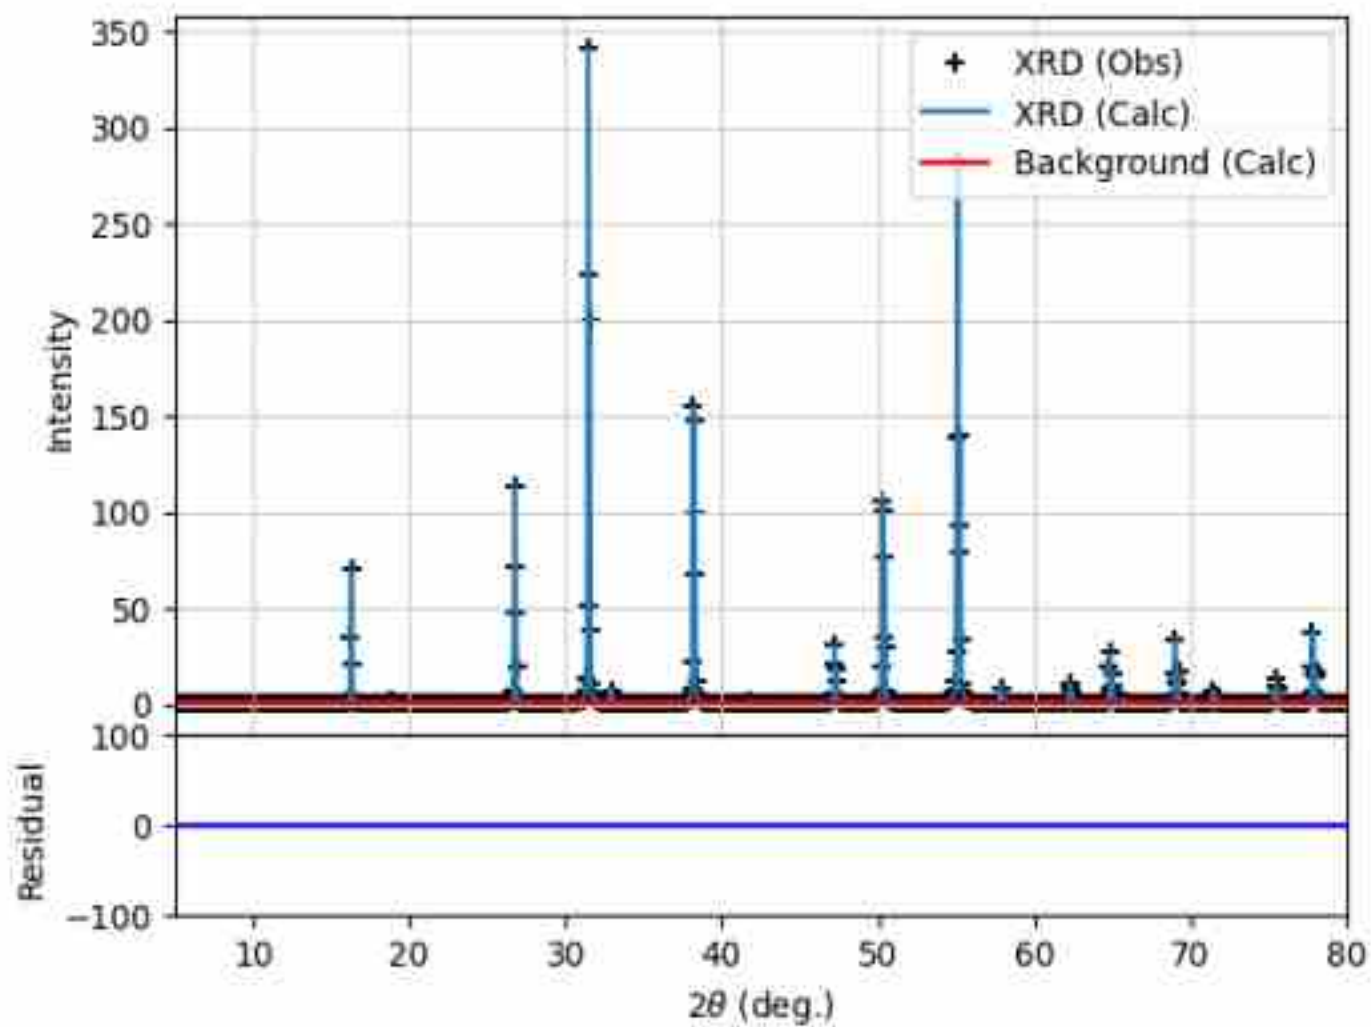

| RMSE before RR | Rwp     | RMSE after RR |
|----------------|---------|---------------|
| 0.023          | 0.03408 | 0.00759       |

# Co<sub>2</sub>Rh<sub>4</sub>S<sub>8</sub>

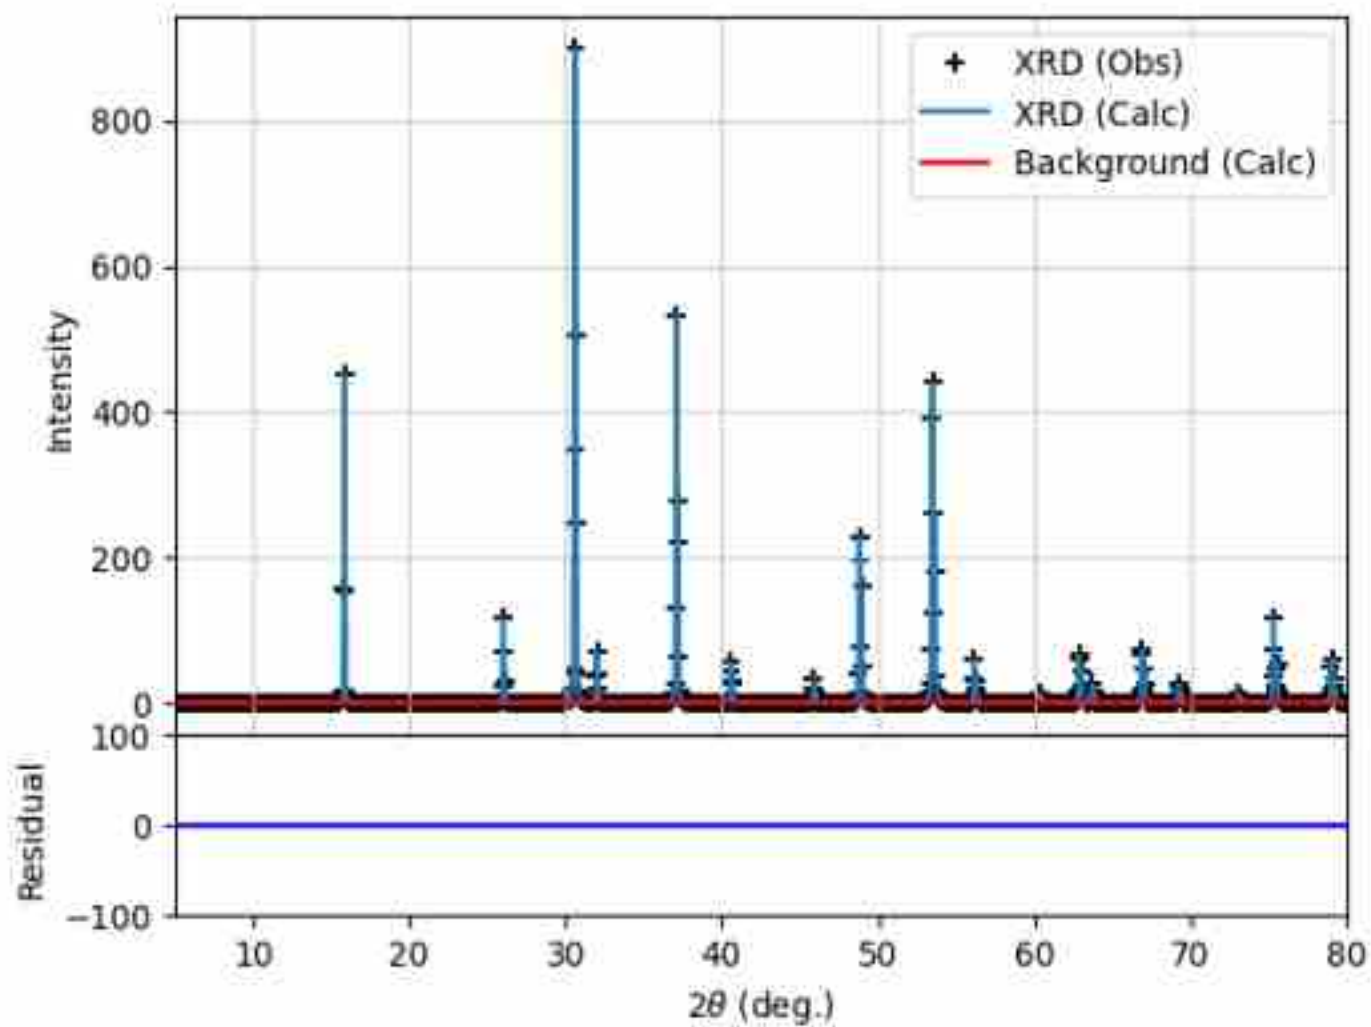

| RMSE before RR | Rwp     | RMSE after RR |
|----------------|---------|---------------|
| 0.023          | 0.03271 | 0.00361       |

# Co4Sb12

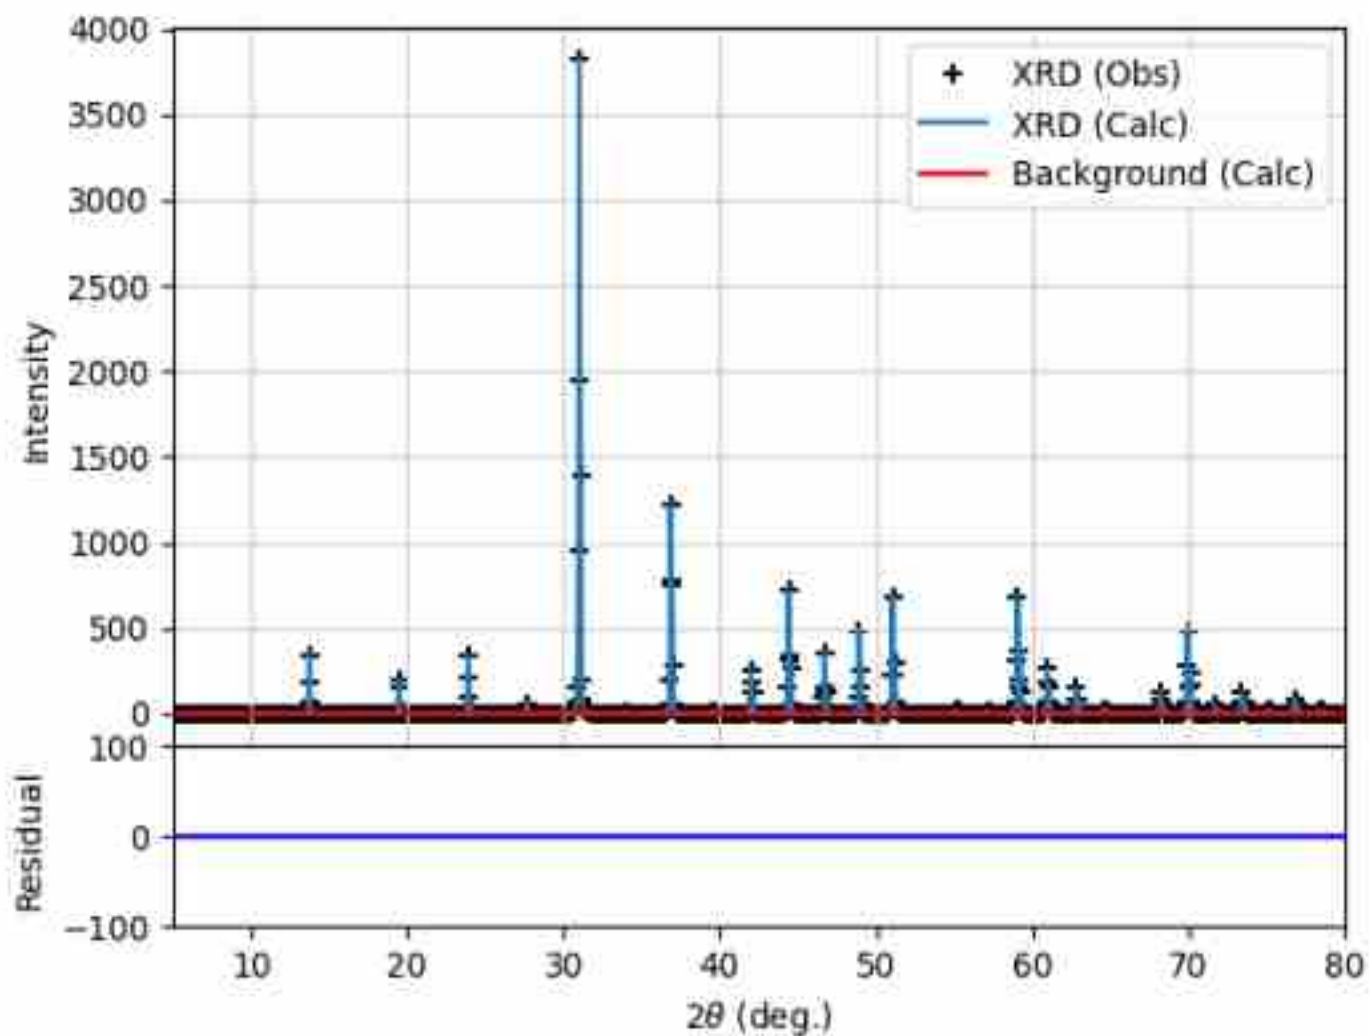

| RMSE before RR | Rwp     | RMSE after RR |
|----------------|---------|---------------|
| 0.023          | 0.01295 | 0.00108       |

# Cs1Nd5Se8

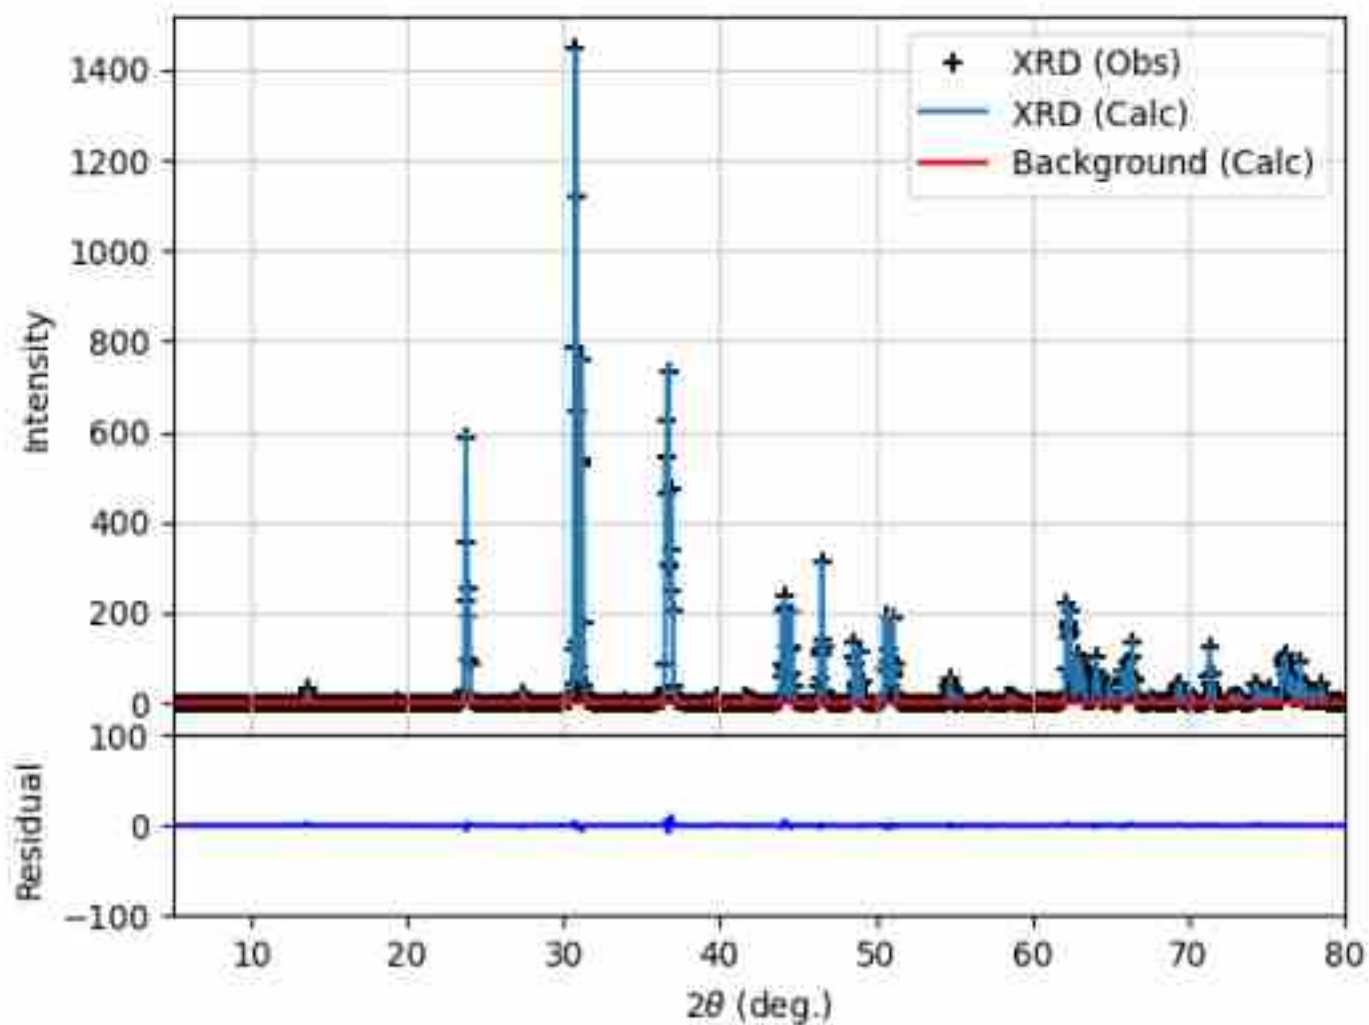

| RMSE before RR | Rwp     | RMSE after RR |
|----------------|---------|---------------|
| 0.023          | 1.54953 | 0.06831       |

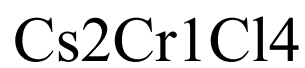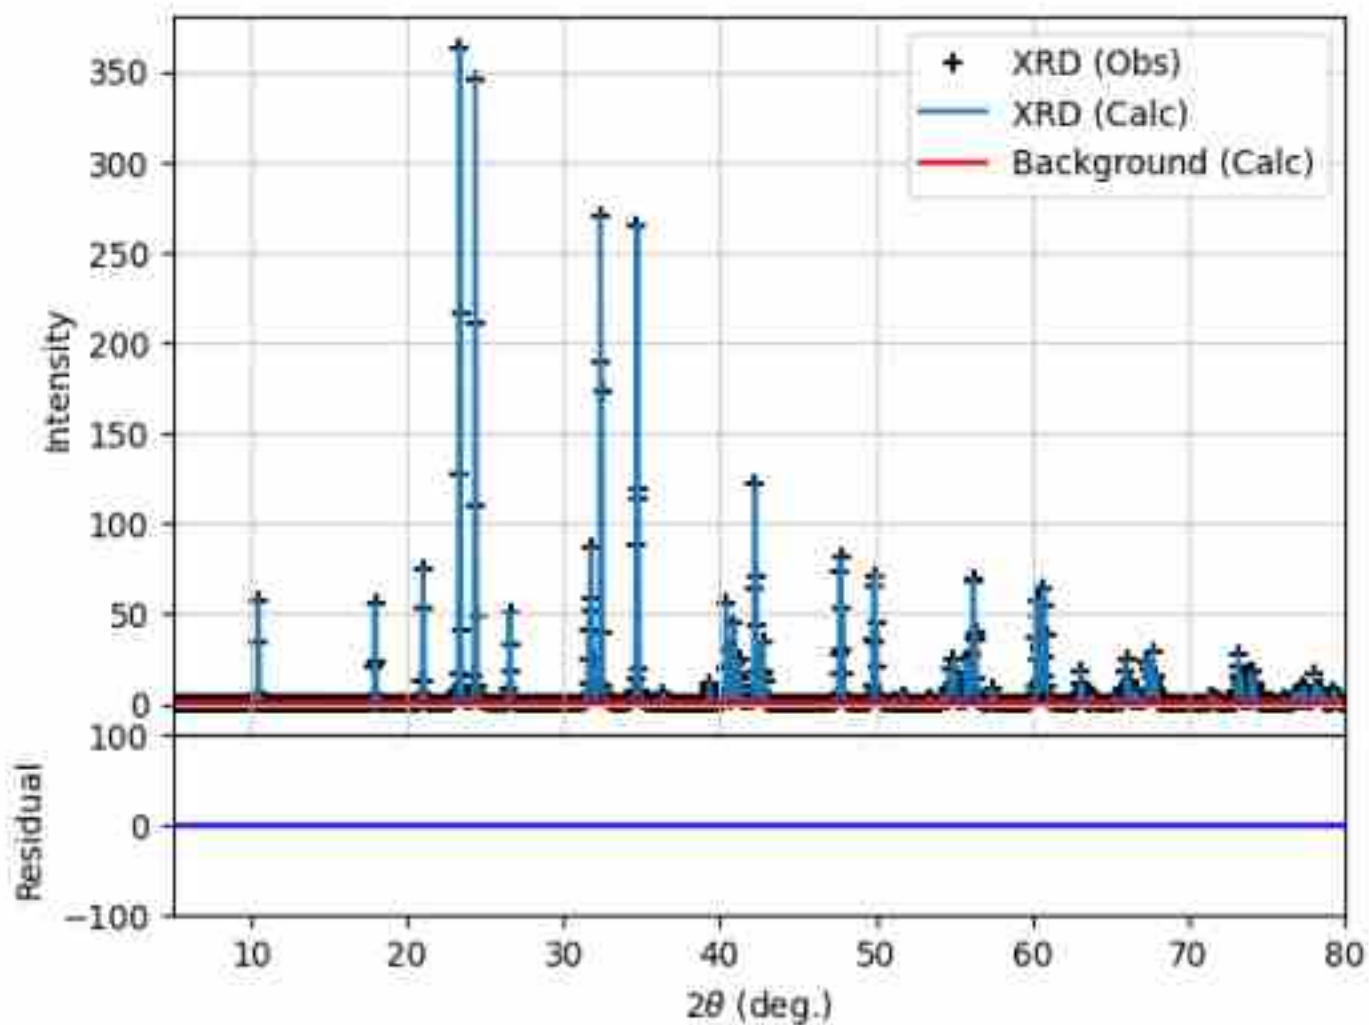

| RMSE before RR | Rwp     | RMSE after RR |
|----------------|---------|---------------|
| 0.023          | 0.00366 | 0.00096       |

# Cs<sub>2</sub>Fe<sub>2</sub>Ni<sub>2</sub>F<sub>12</sub>

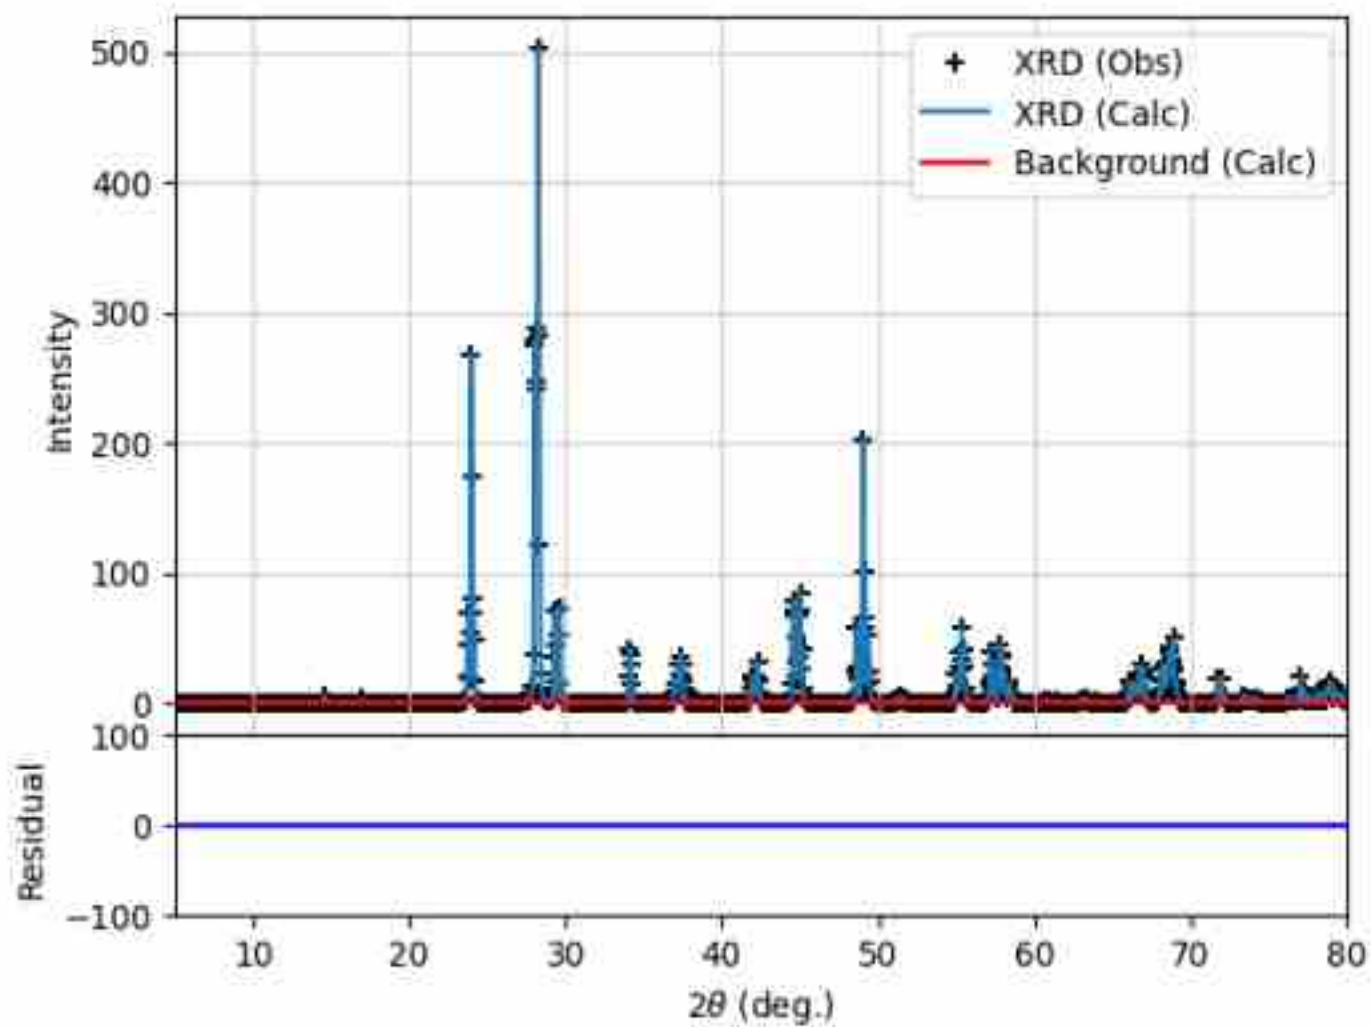

| RMSE before RR | Rwp     | RMSE after RR |
|----------------|---------|---------------|
| 0.023          | 0.00284 | 0.00088       |

# Cs<sub>2</sub>Ho<sub>2</sub>Mn<sub>2</sub>Se<sub>6</sub>

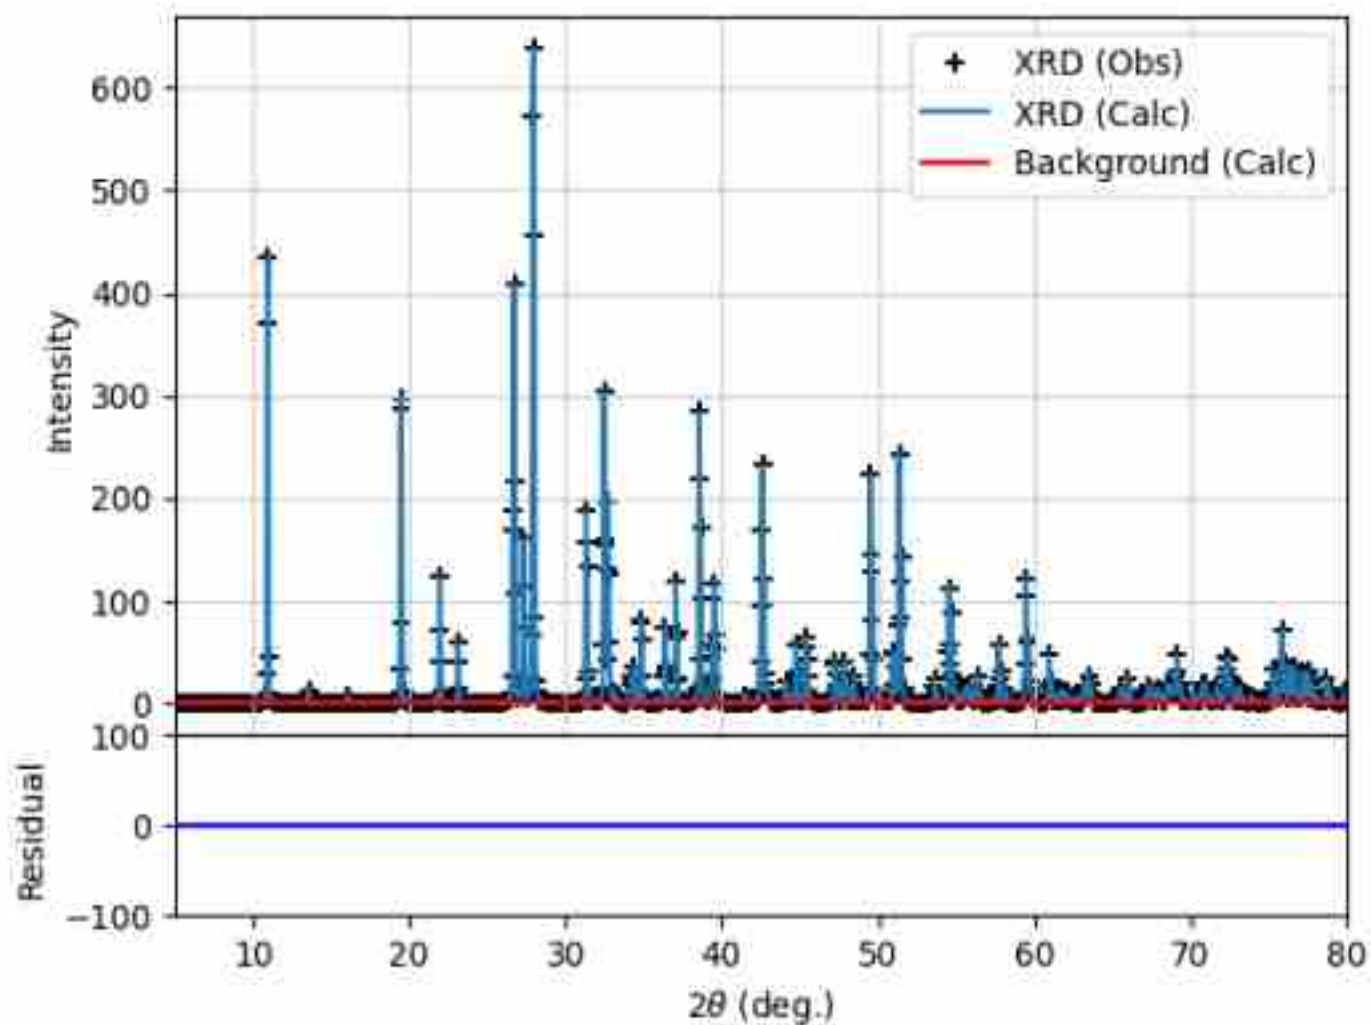

| RMSE before RR | Rwp     | RMSE after RR |
|----------------|---------|---------------|
| 0.023          | 0.00368 | 0.00024       |

# Cs<sub>2</sub>NaAlH<sub>6</sub>

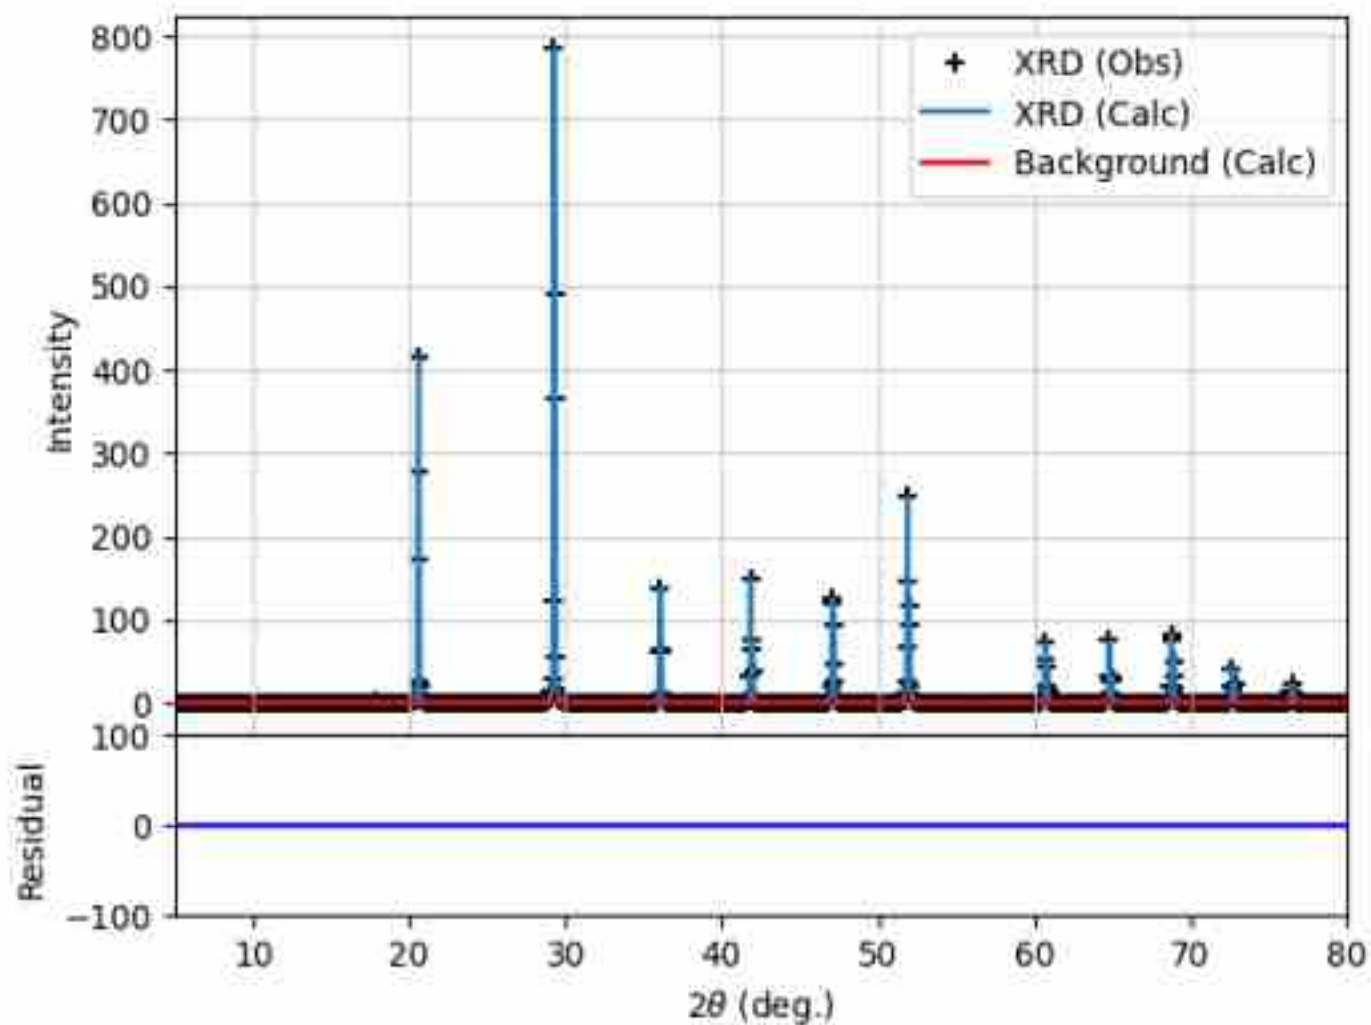

| RMSE before RR | Rwp     | RMSE after RR |
|----------------|---------|---------------|
| 0.023          | 0.03442 | 0.02154       |



# Cs<sub>2</sub>Pr<sub>2</sub>Zn<sub>2</sub>Te<sub>6</sub>

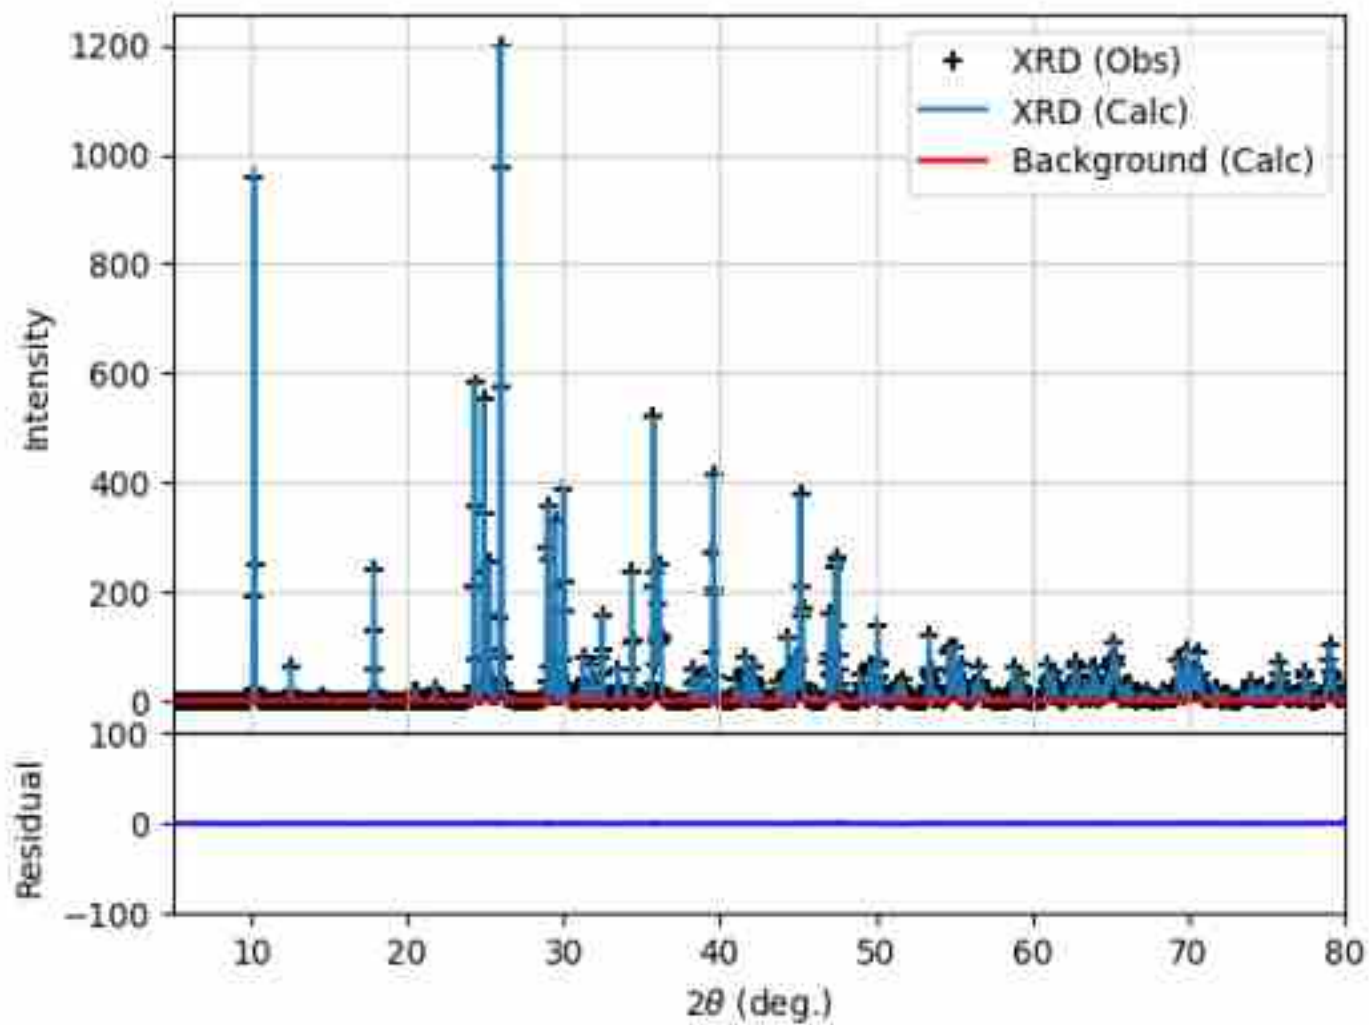

| RMSE before RR | Rwp     | RMSE after RR |
|----------------|---------|---------------|
| 0.023          | 0.74205 | 0.00775       |

# Cs<sub>2</sub>S<sub>2</sub>

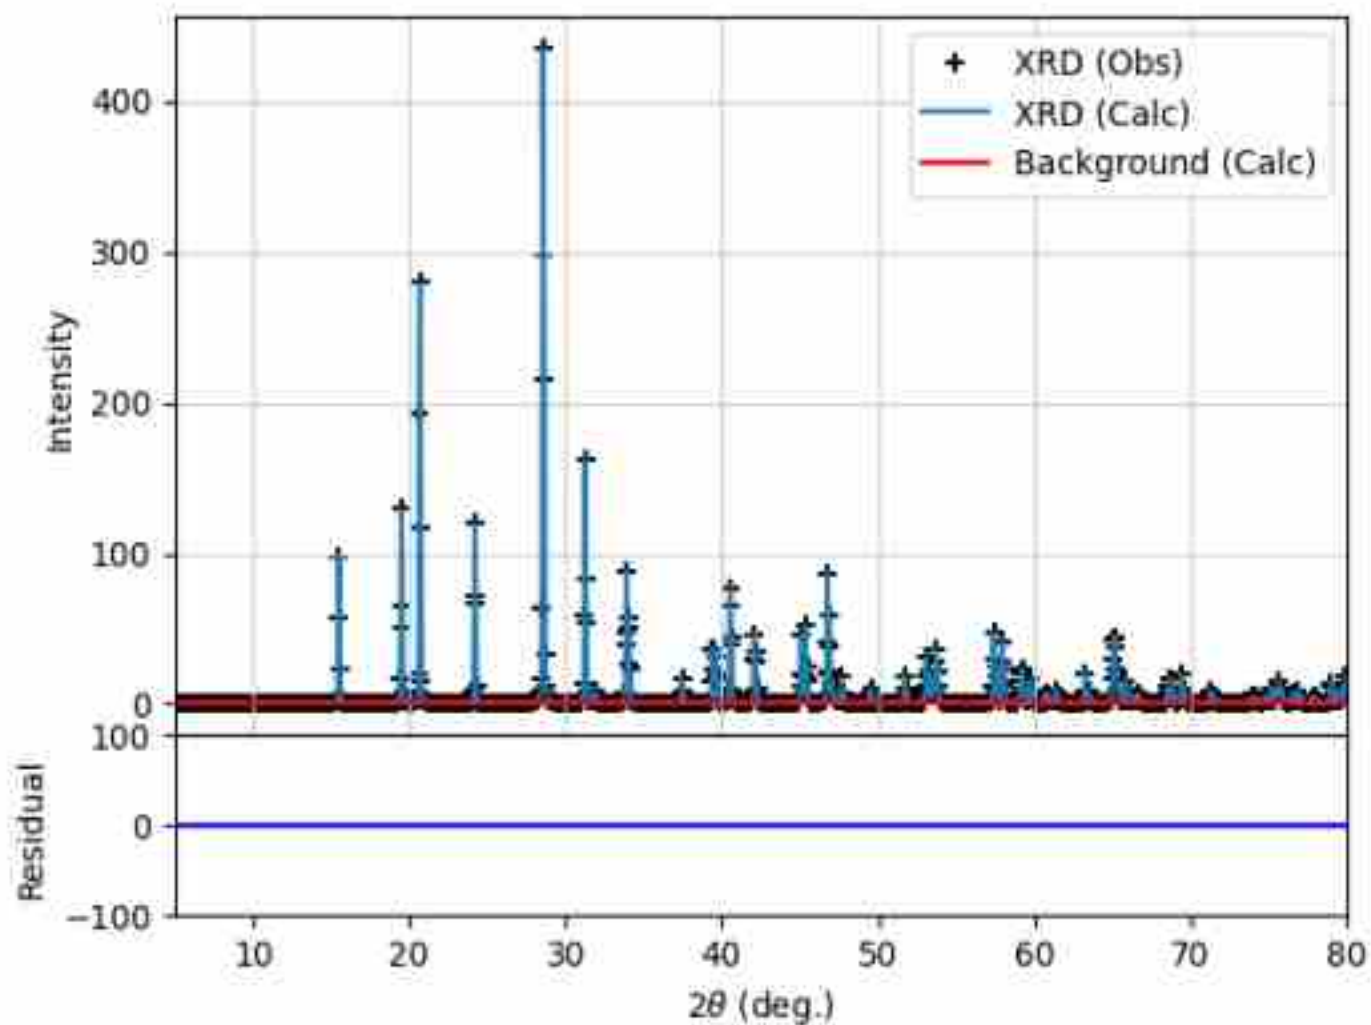

| RMSE before RR | Rwp     | RMSE after RR |
|----------------|---------|---------------|
| 0.023          | 0.00351 | 0.00045       |

# Cs<sub>4</sub>Li<sub>4</sub>Ti<sub>2</sub>O<sub>8</sub>

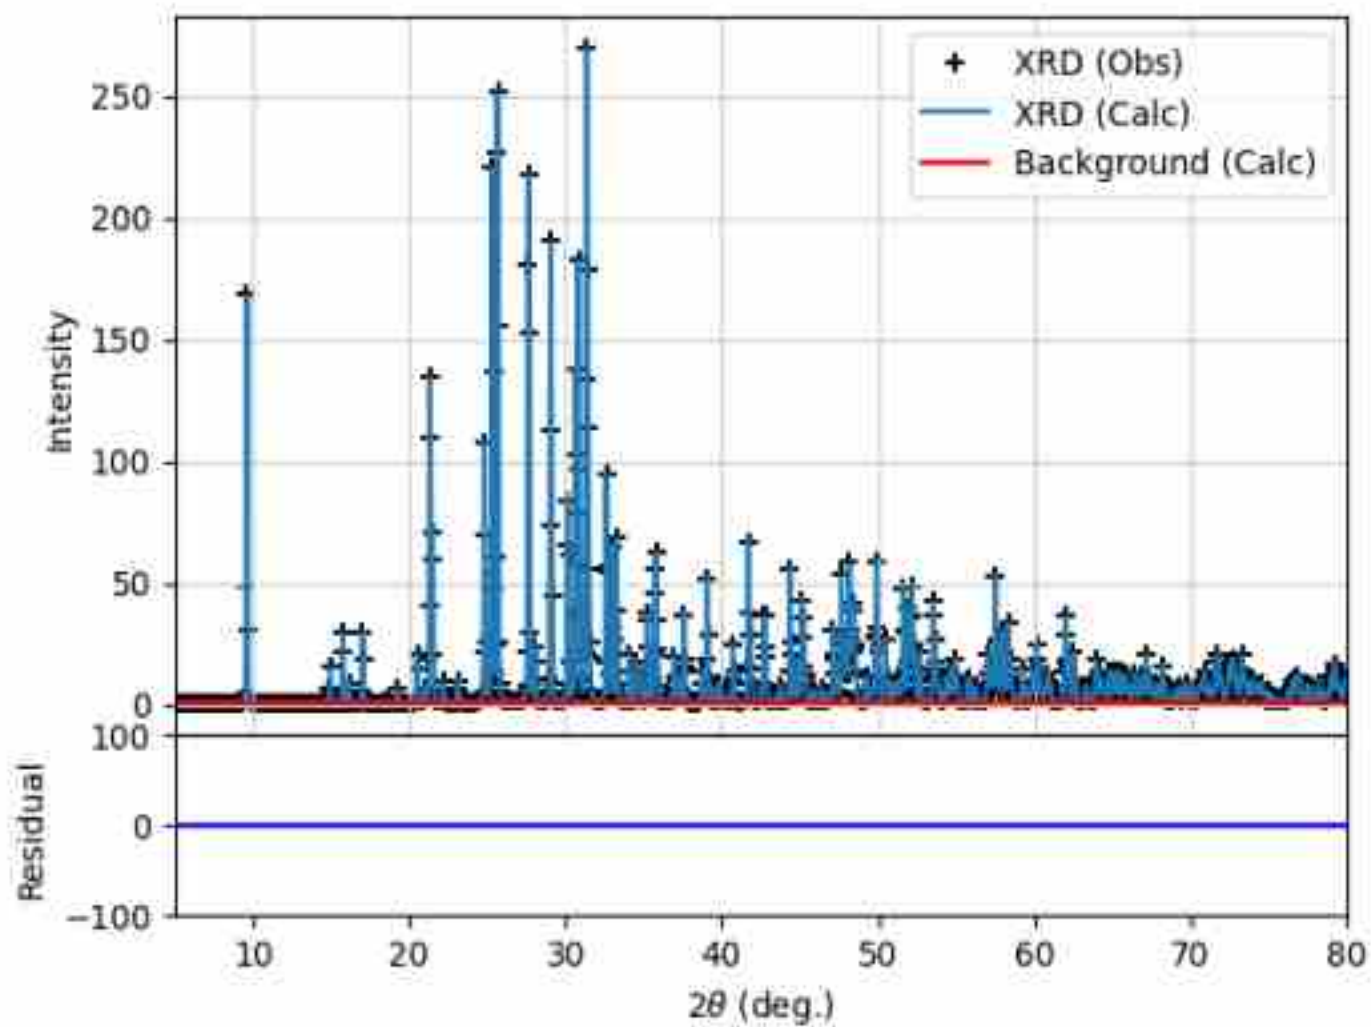

| RMSE before RR | Rwp     | RMSE after RR |
|----------------|---------|---------------|
| 0.023          | 0.00018 | 0.00041       |

# Dy<sub>2</sub>Al<sub>8</sub>Ni<sub>2</sub>

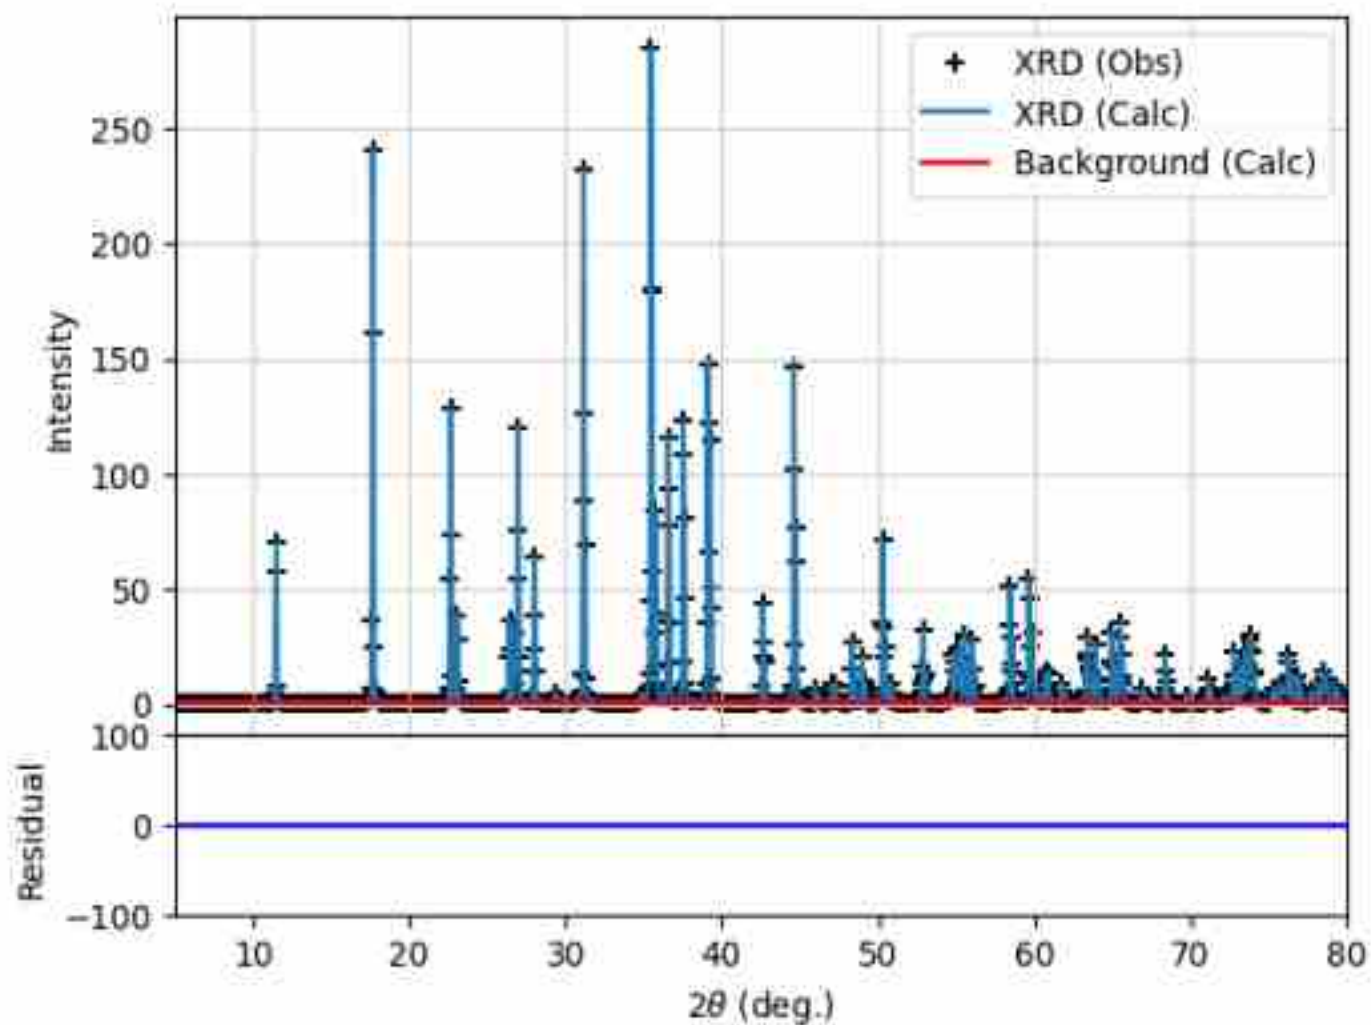

| RMSE before RR | Rwp     | RMSE after RR |
|----------------|---------|---------------|
| 0.023          | 0.00369 | 0.00065       |

# Dy<sub>3</sub>Ga<sub>6</sub>Ni<sub>9</sub>

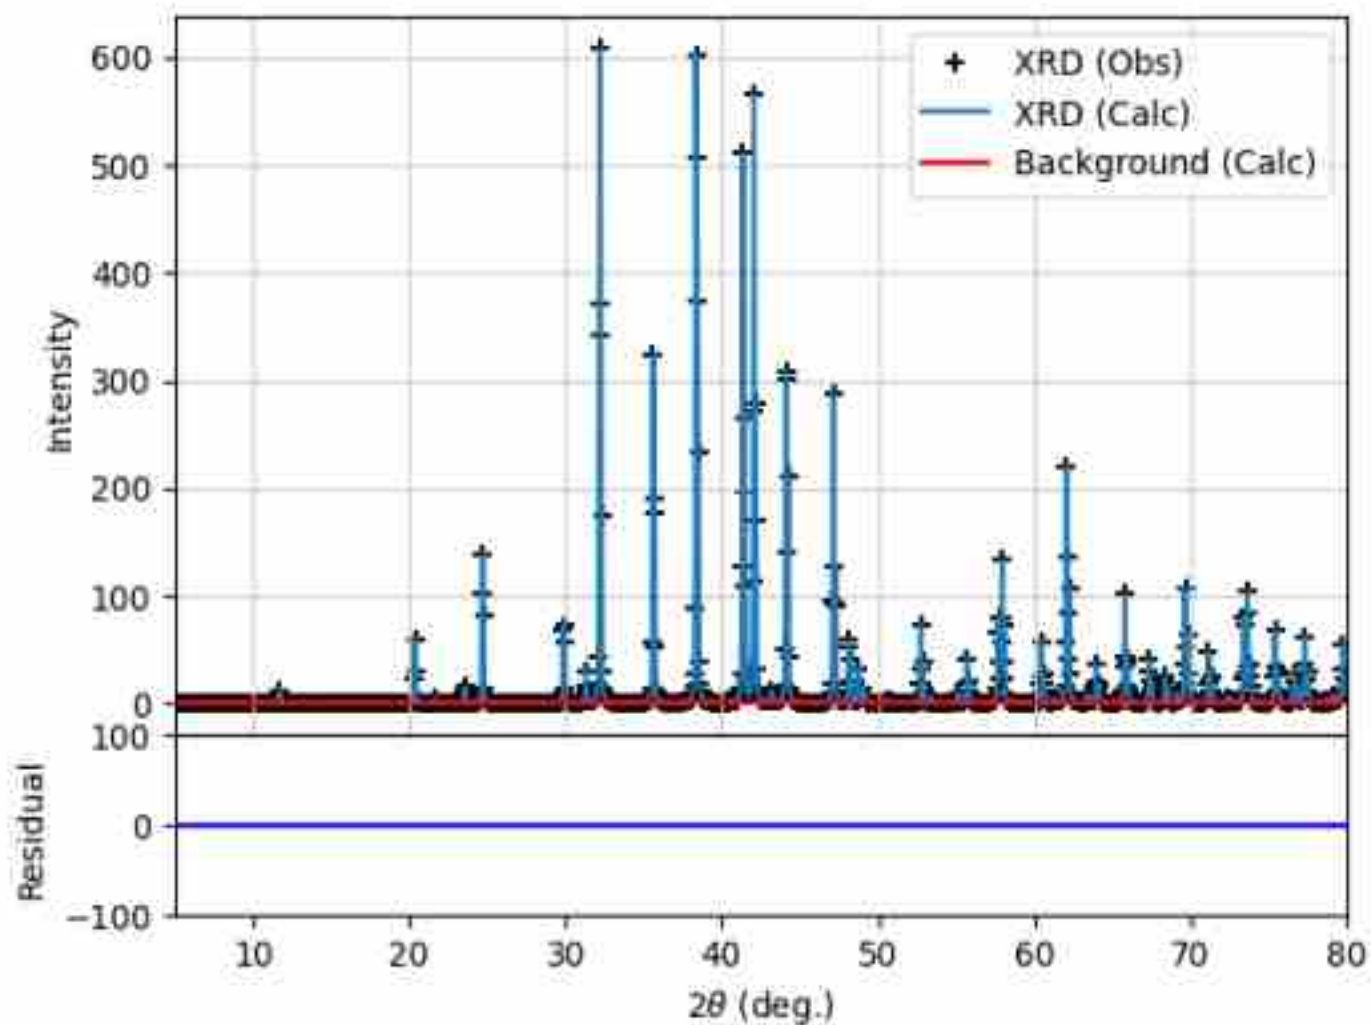

| RMSE before RR | Rwp     | RMSE after RR |
|----------------|---------|---------------|
| 0.023          | 0.00375 | 0.00083       |

# Dy<sub>4</sub>B<sub>4</sub>O<sub>12</sub>

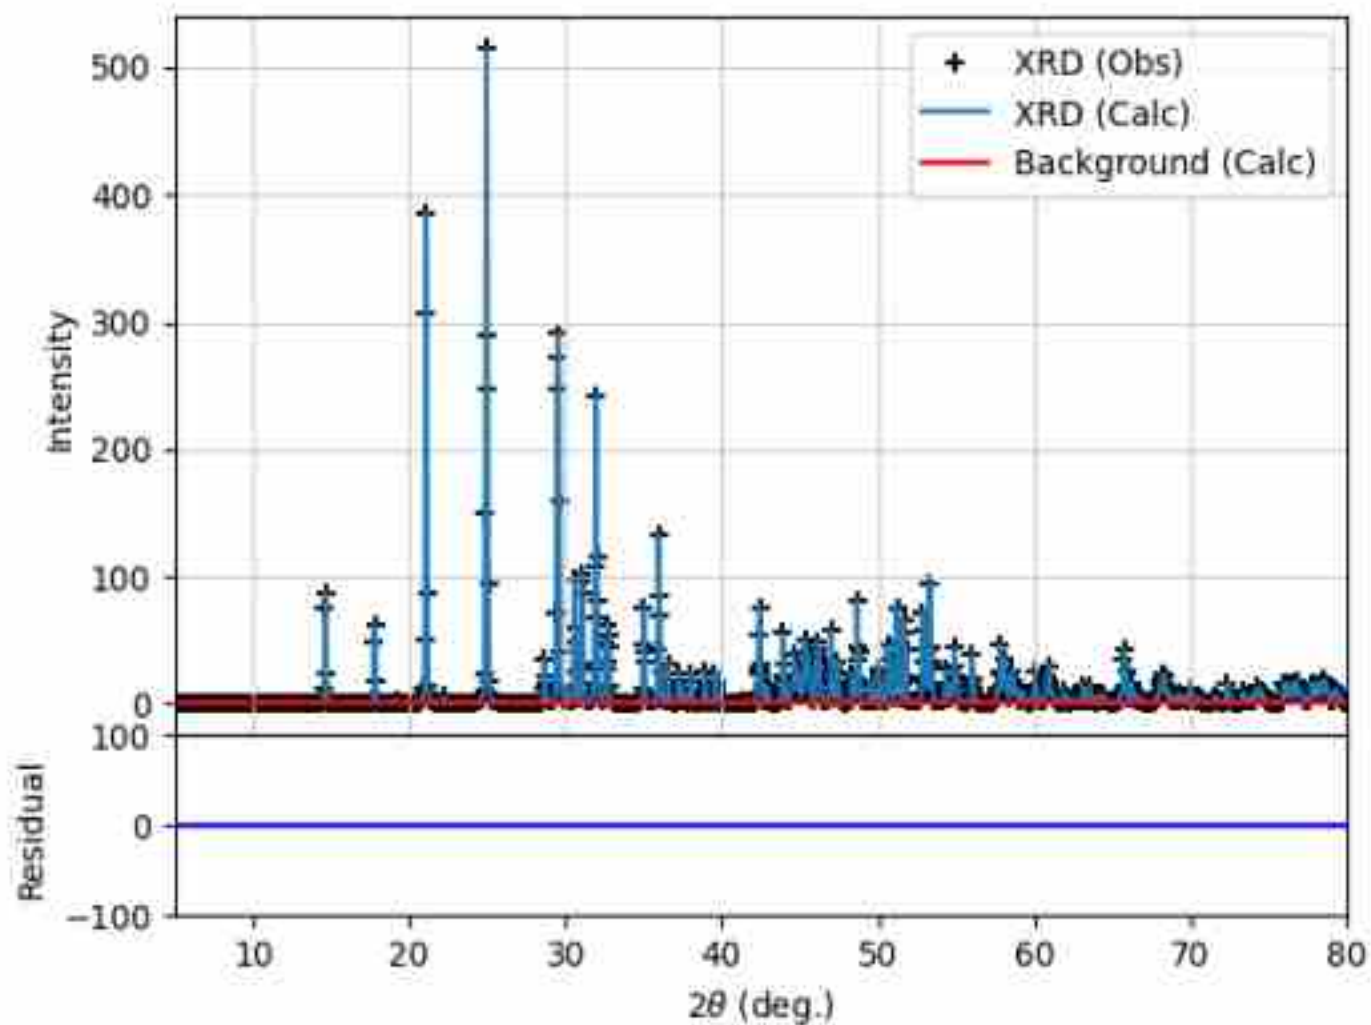

| RMSE before RR | Rwp     | RMSE after RR |
|----------------|---------|---------------|
| 0.023          | 0.00049 | 0.00059       |

# Dy<sub>4</sub>Ge<sub>10</sub>Ir<sub>6</sub>

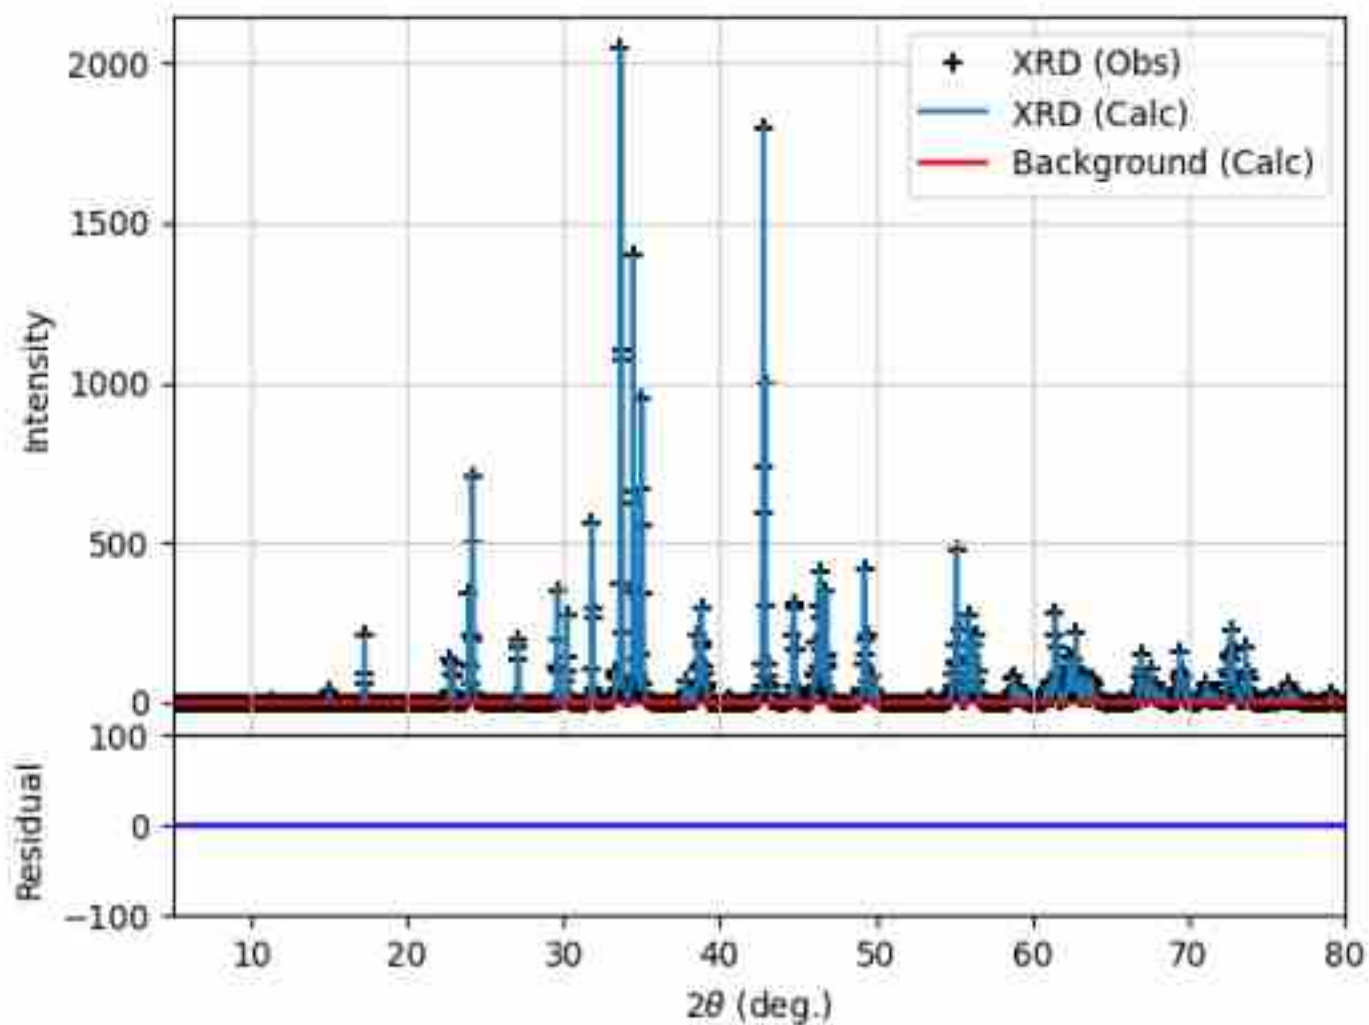

| RMSE before RR | Rwp     | RMSE after RR |
|----------------|---------|---------------|
| 0.023          | 0.00441 | 0.0006        |

# Dy<sub>10</sub>Bi<sub>2</sub>Pt<sub>4</sub>

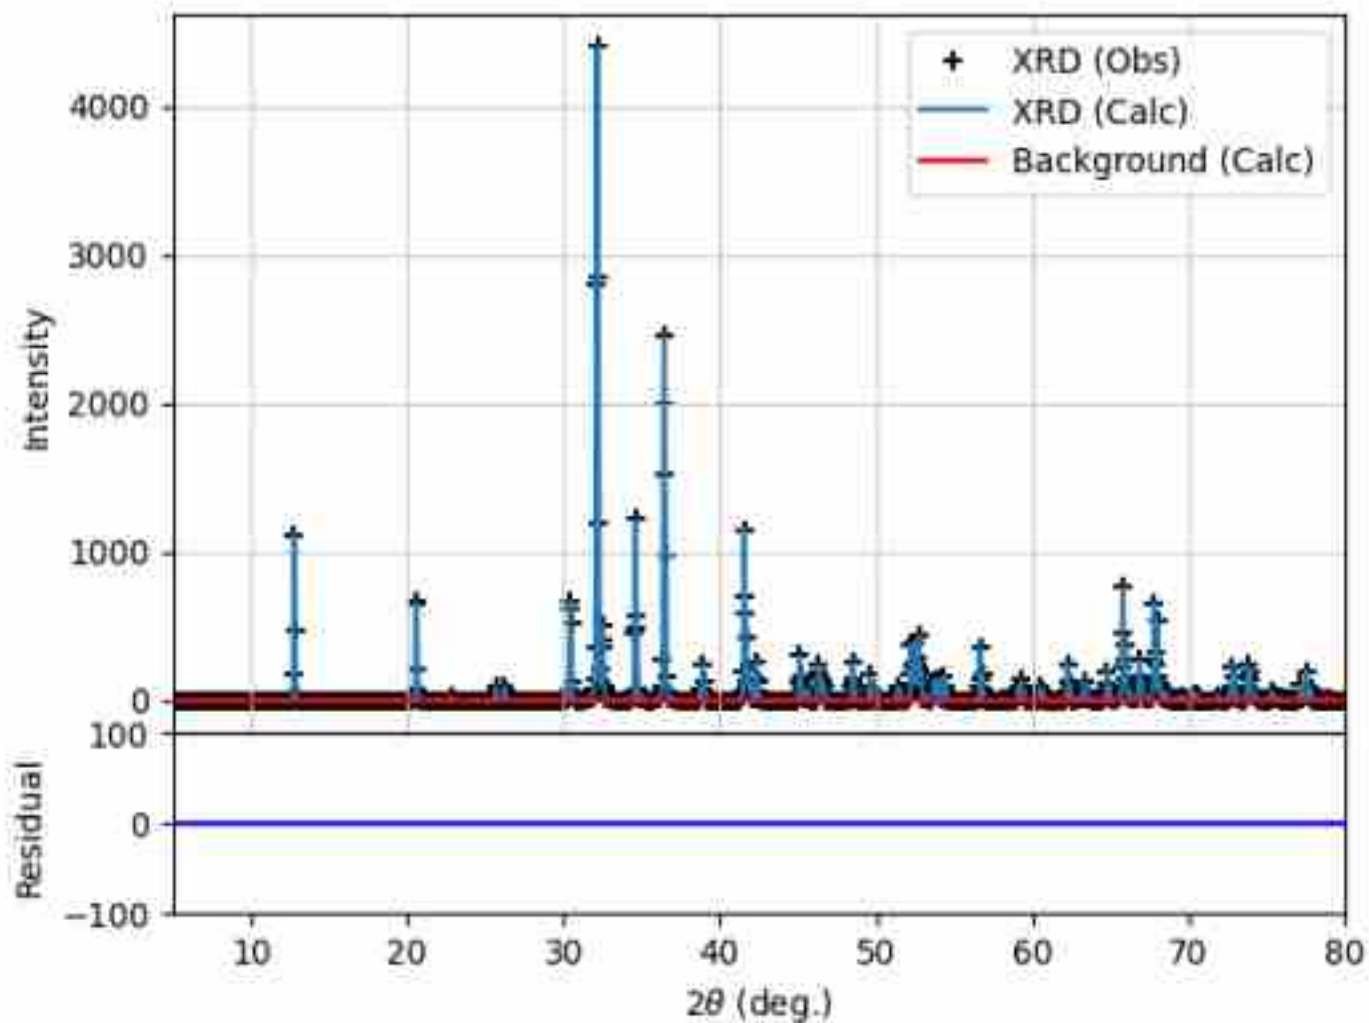

| RMSE before RR | Rwp     | RMSE after RR |
|----------------|---------|---------------|
| 0.023          | 0.00388 | 0.00027       |



# Dy14Rh6

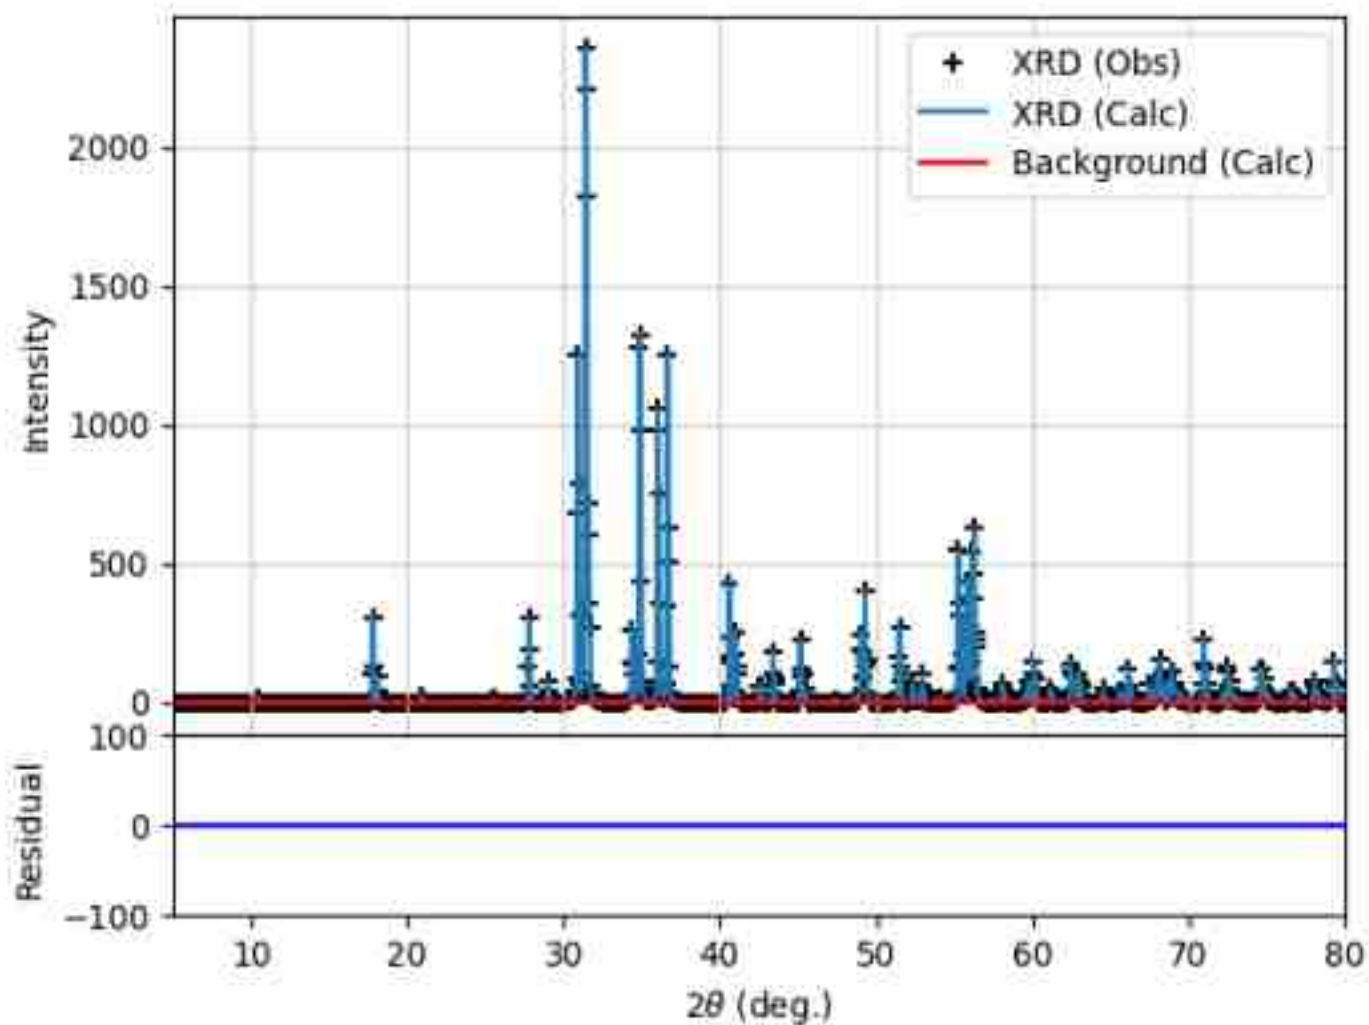

| RMSE before RR | Rwp     | RMSE after RR |
|----------------|---------|---------------|
| 0.023          | 0.00262 | 0.00032       |

# Er1Co10Mo2

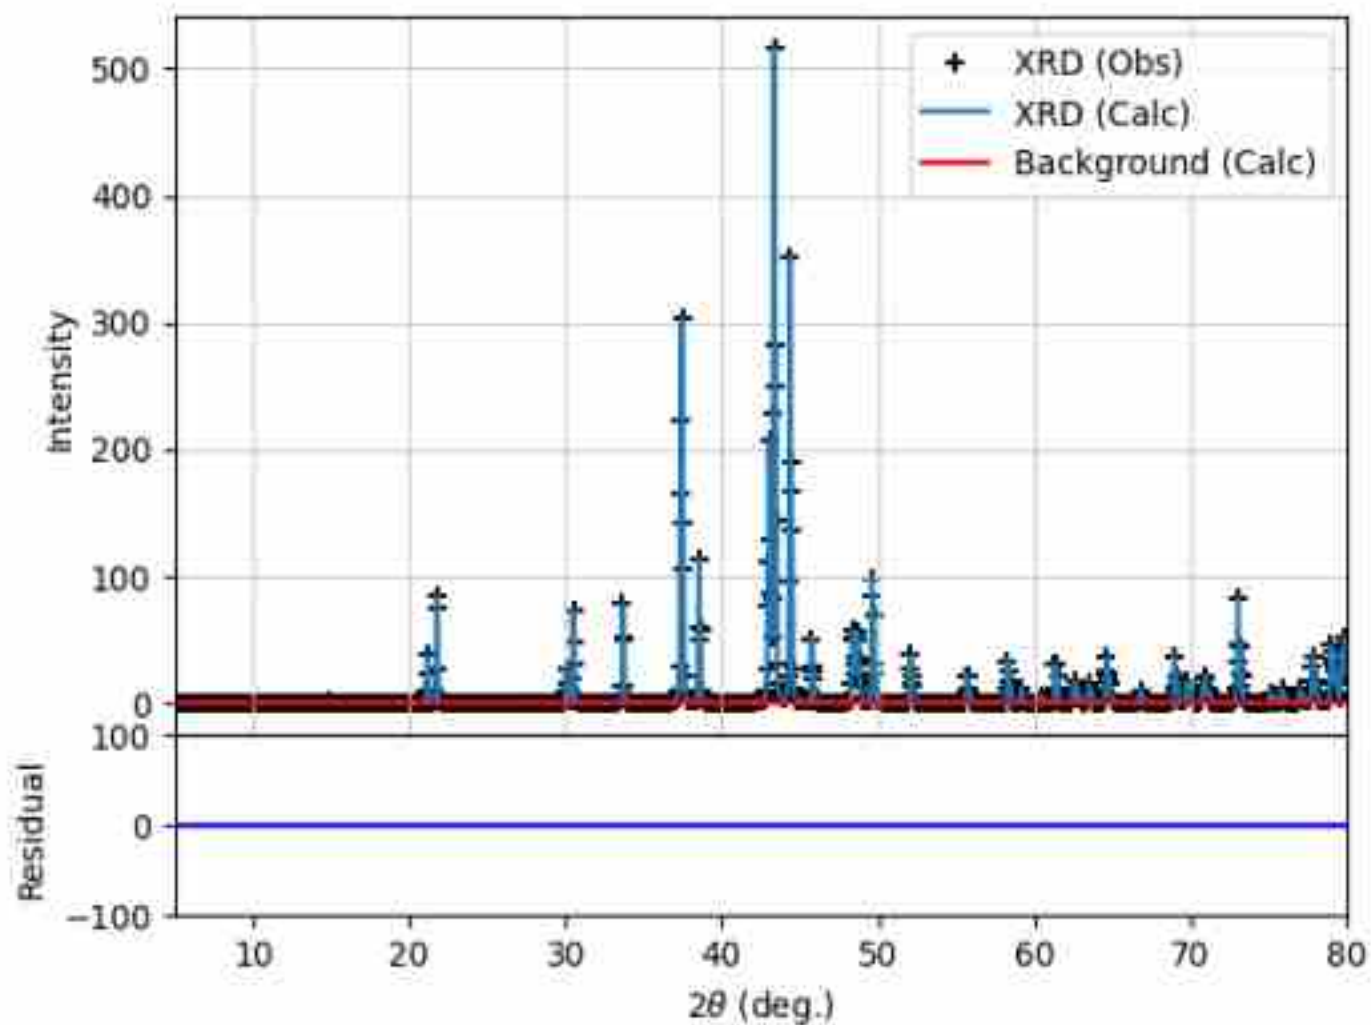

| RMSE before RR | Rwp     | RMSE after RR |
|----------------|---------|---------------|
| 0.023          | 0.00336 | 0.00059       |

# Er<sub>1</sub>Fe<sub>4</sub>Cu<sub>3</sub>O<sub>12</sub>

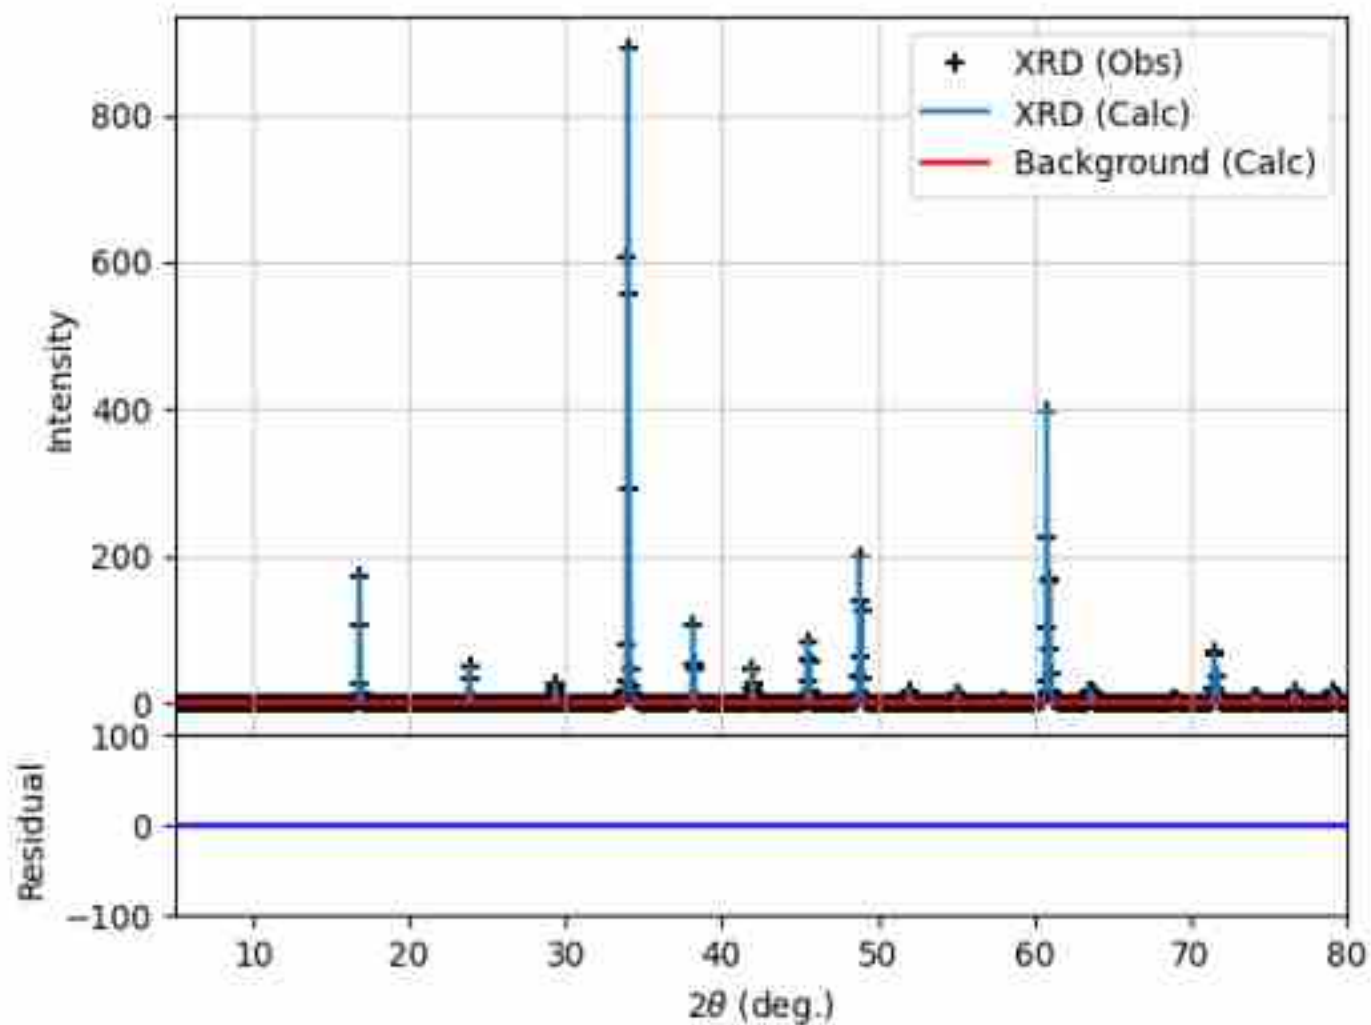

| RMSE before RR | Rwp     | RMSE after RR |
|----------------|---------|---------------|
| 0.023          | 0.01393 | 0.00523       |

# Er<sub>4</sub>Ga<sub>12</sub>Ni<sub>1</sub>

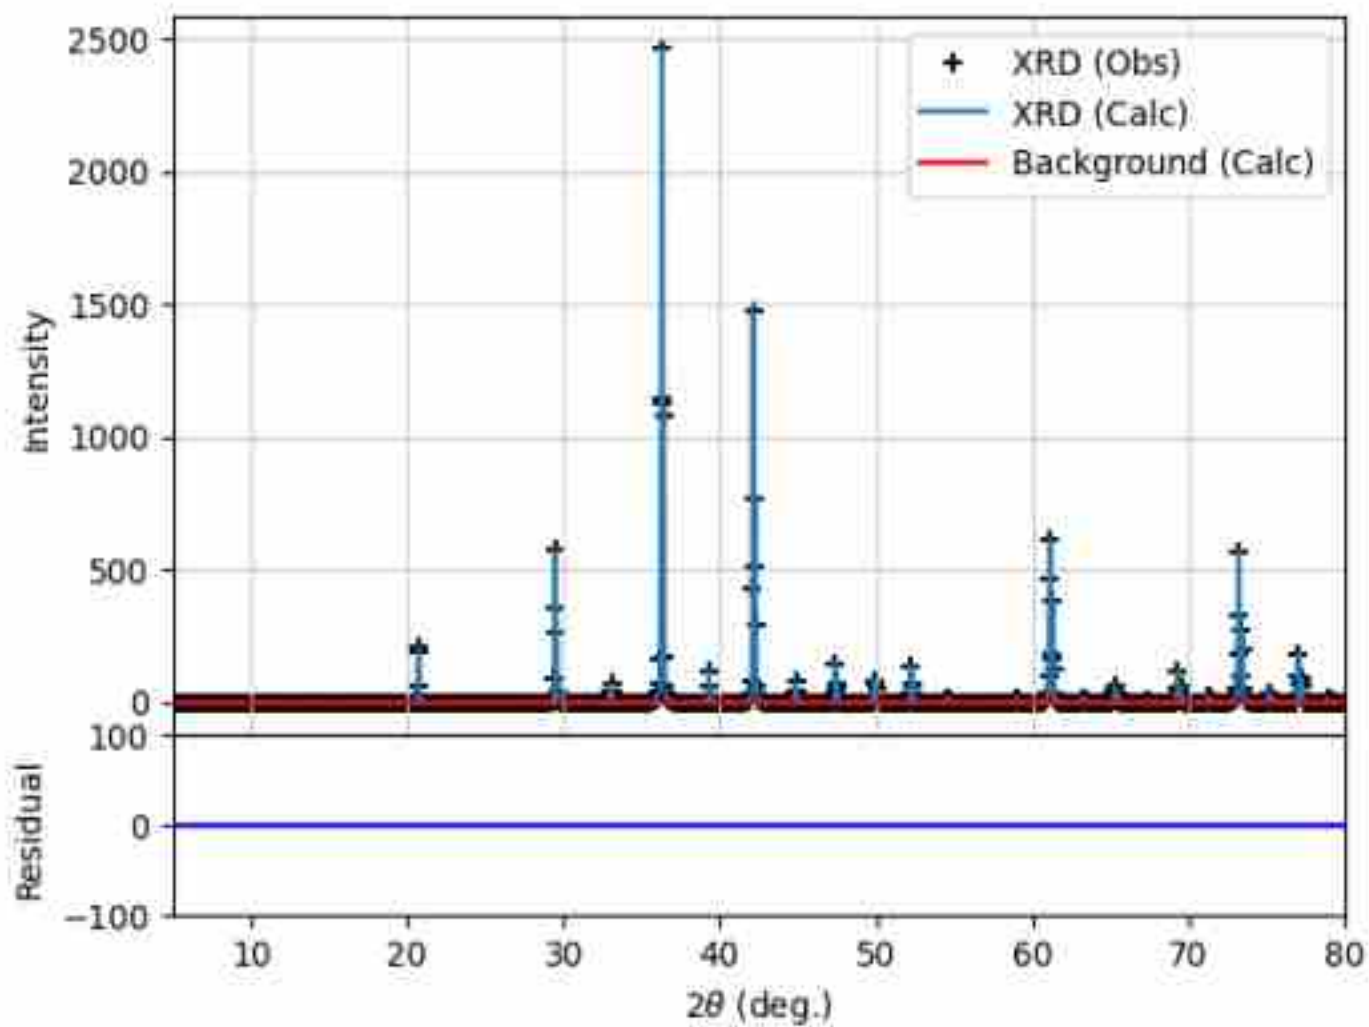

| RMSE before RR | Rwp     | RMSE after RR |
|----------------|---------|---------------|
| 0.023          | 0.00543 | 0.00099       |

# Eu<sub>2</sub>Ga<sub>4</sub>Te<sub>8</sub>

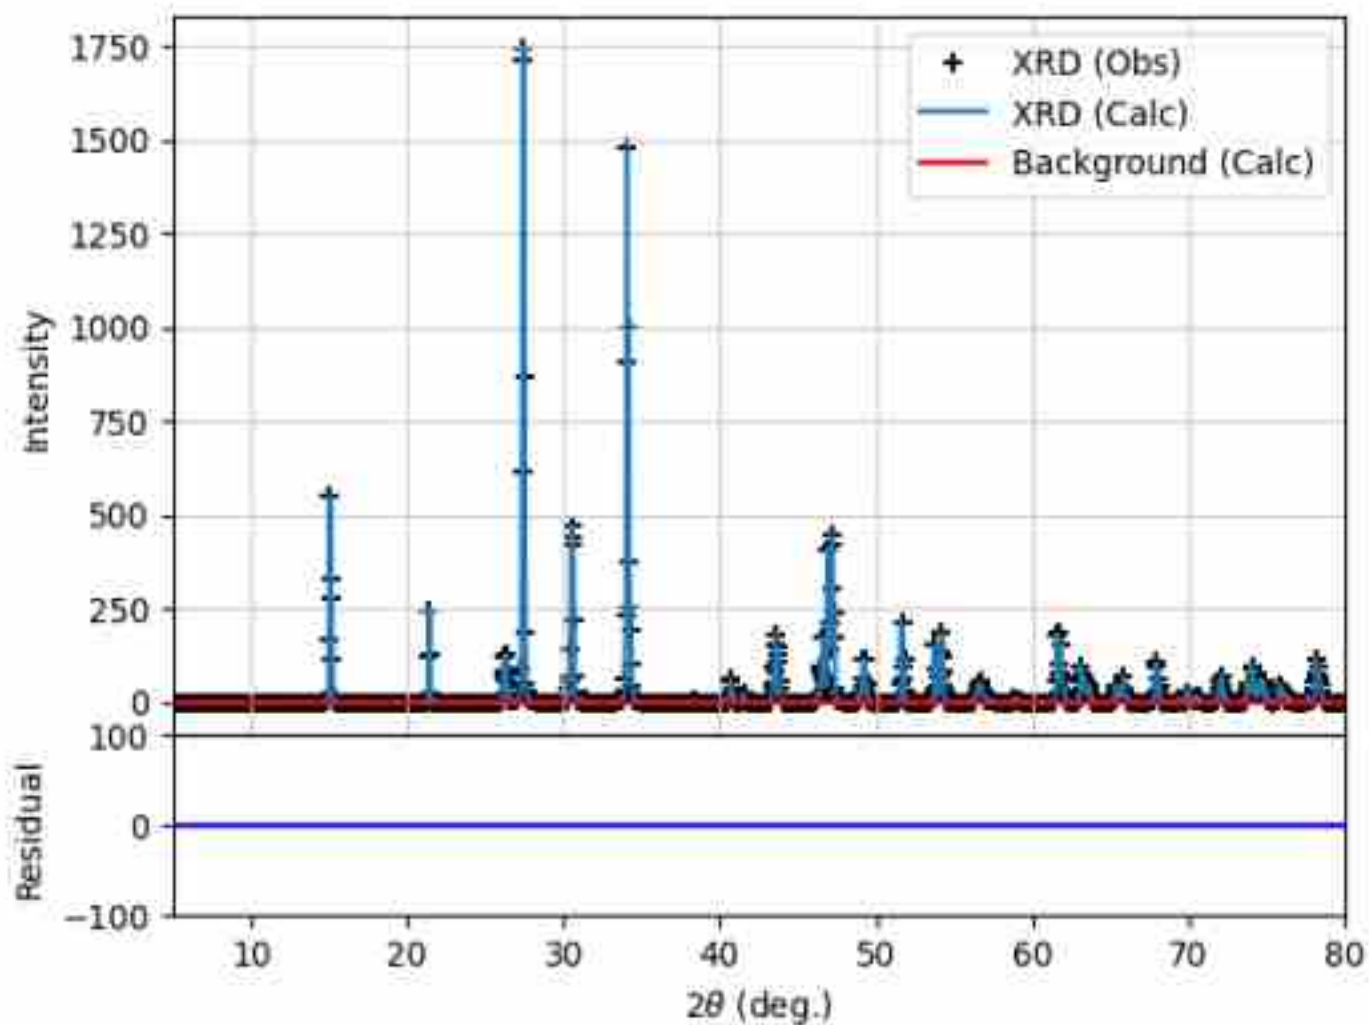

| RMSE before RR | Rwp    | RMSE after RR |
|----------------|--------|---------------|
| 0.023          | 0.0027 | 0.00031       |

# Eu2Rh4

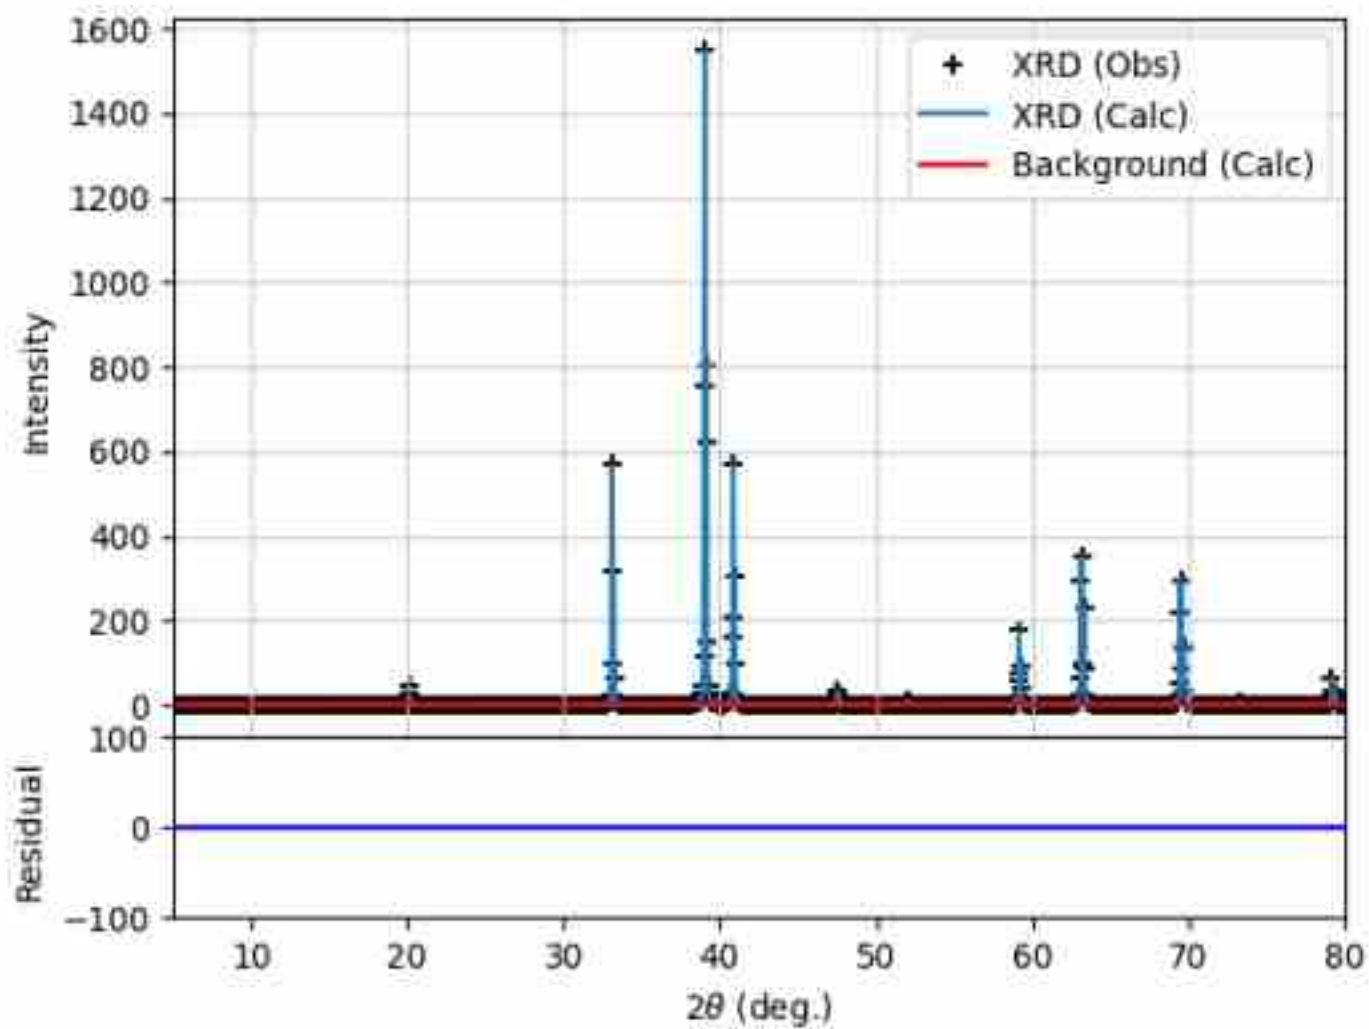

| RMSE before RR | Rwp     | RMSE after RR |
|----------------|---------|---------------|
| 0.023          | 0.00819 | 0.00041       |

# Eu<sub>4</sub>In<sub>4</sub>Au<sub>4</sub>

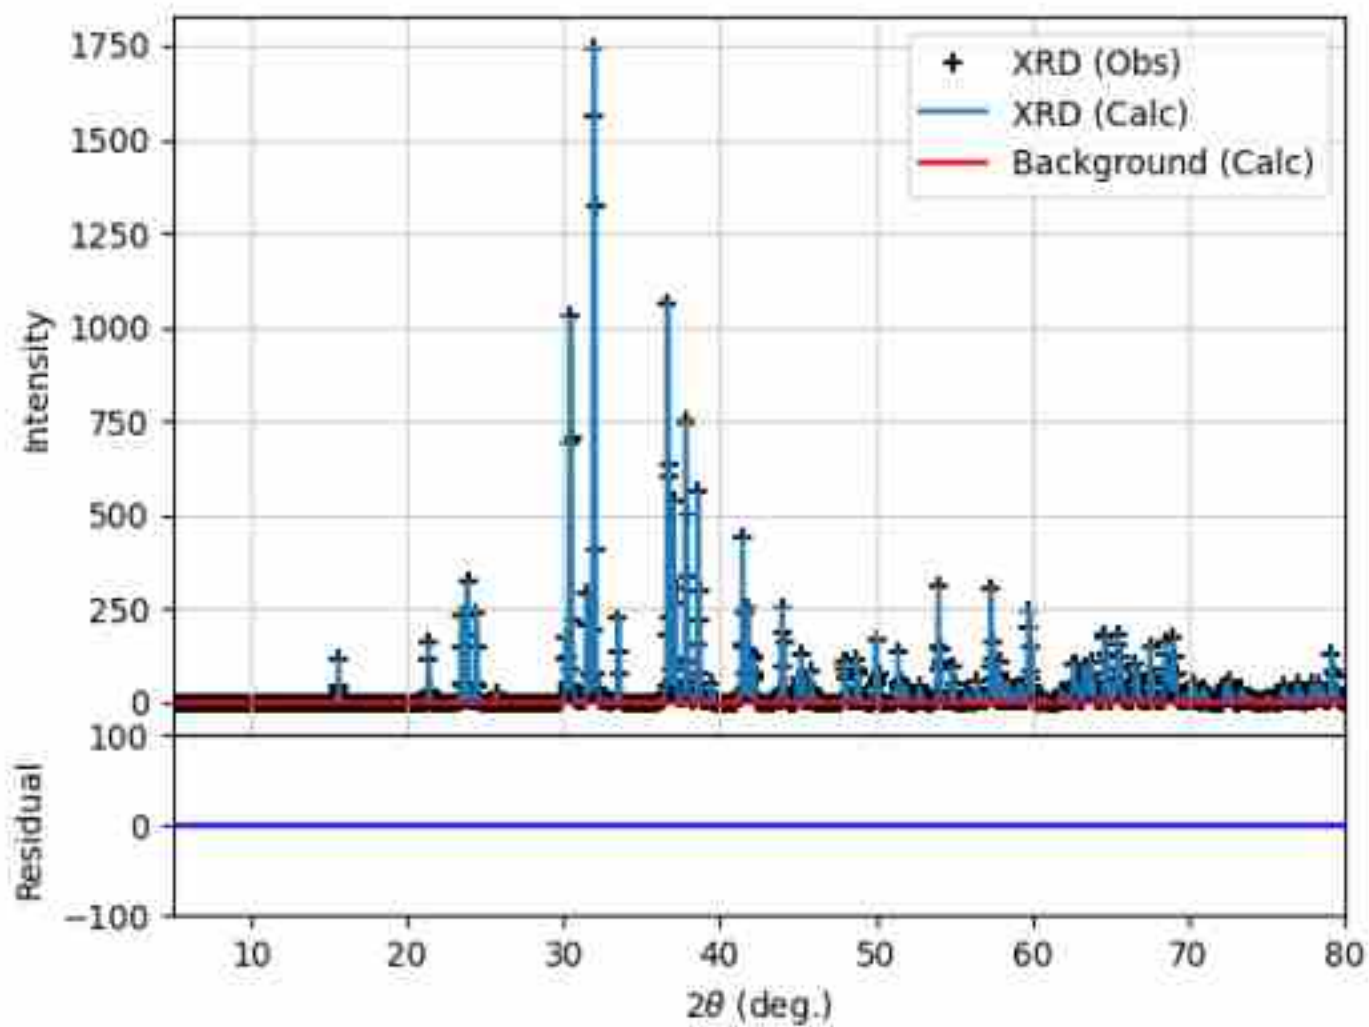

| RMSE before RR | Rwp     | RMSE after RR |
|----------------|---------|---------------|
| 0.023          | 0.00368 | 0.00022       |

# Eu4Mn4O12

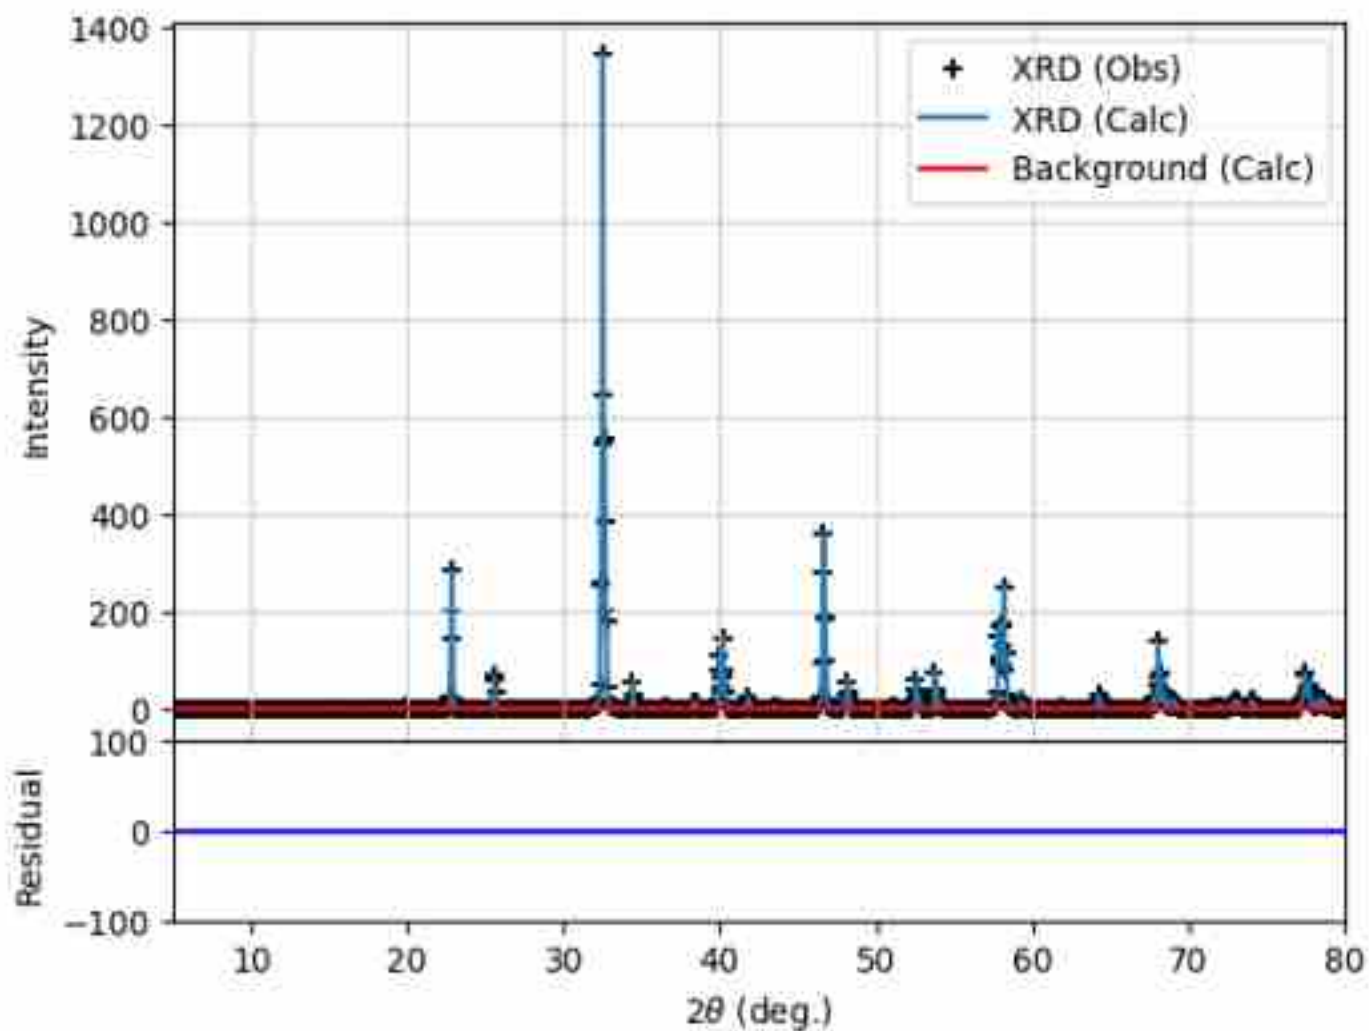

| RMSE before RR | Rwp     | RMSE after RR |
|----------------|---------|---------------|
| 0.023          | 0.00419 | 0.00124       |



# Fe4O6

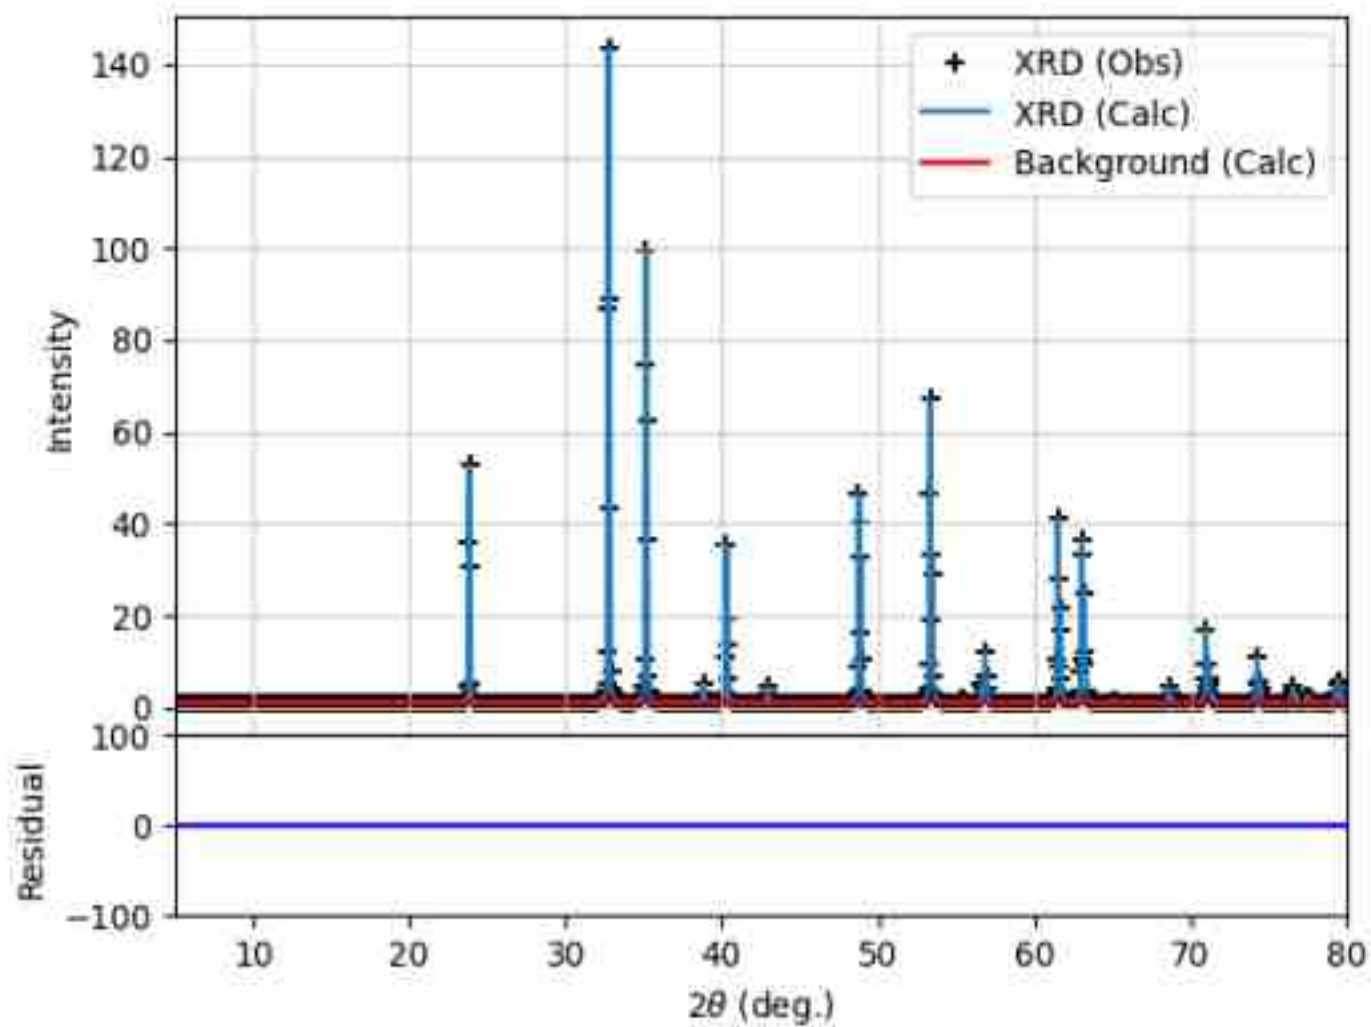

| RMSE before RR | Rwp     | RMSE after RR |
|----------------|---------|---------------|
| 0.023          | 0.00229 | 0.00085       |

# Fe<sub>4</sub>P<sub>2</sub>O<sub>10</sub>

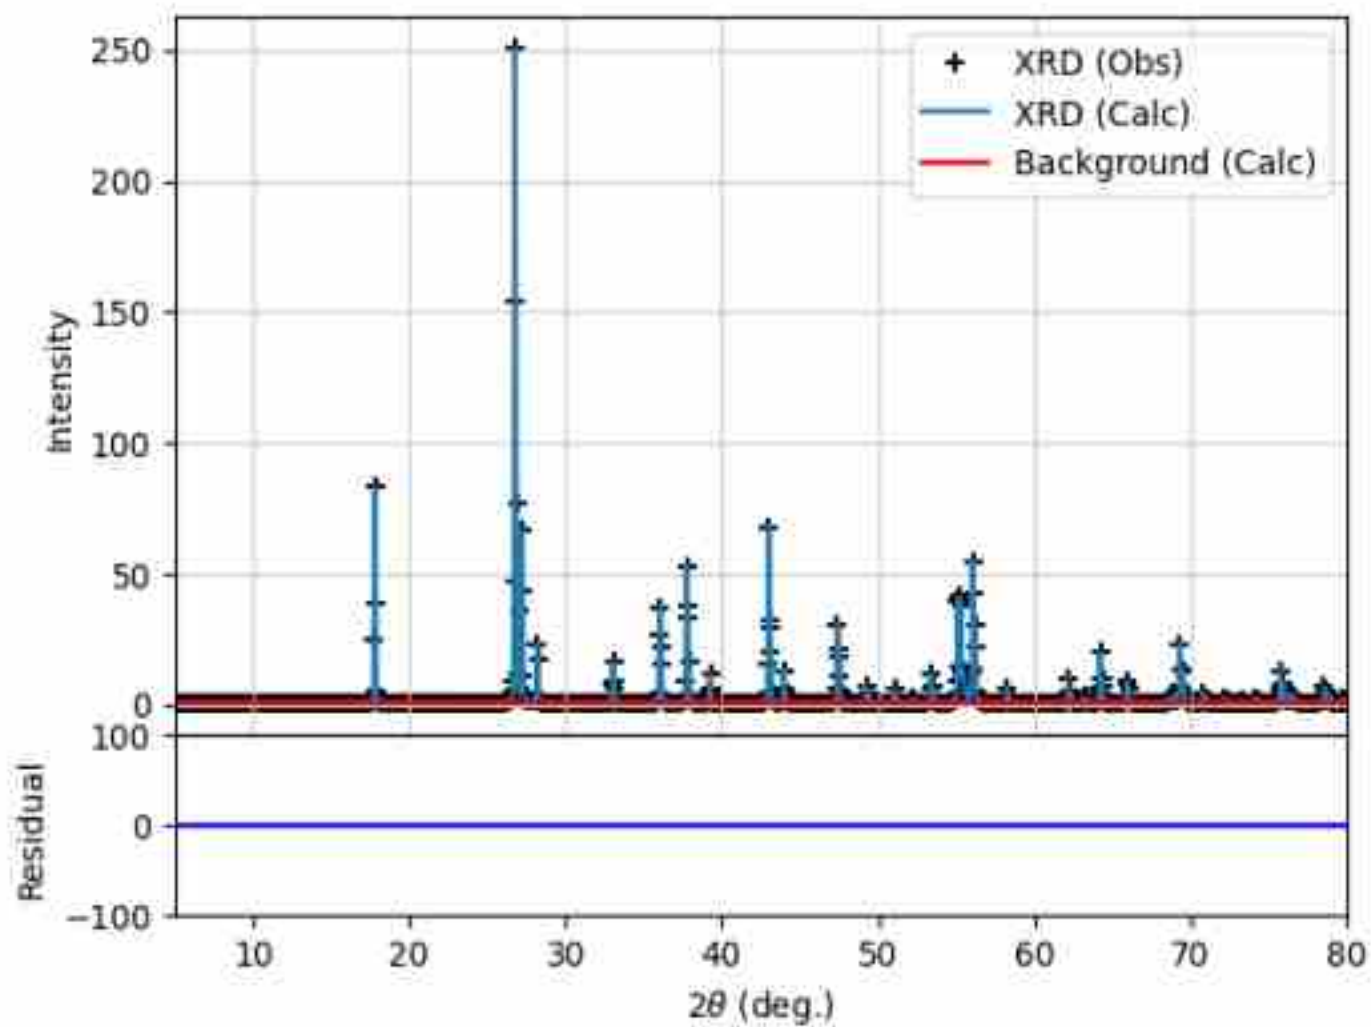

| RMSE before RR | Rwp     | RMSE after RR |
|----------------|---------|---------------|
| 0.023          | 0.00265 | 0.00101       |

# Fe12N6

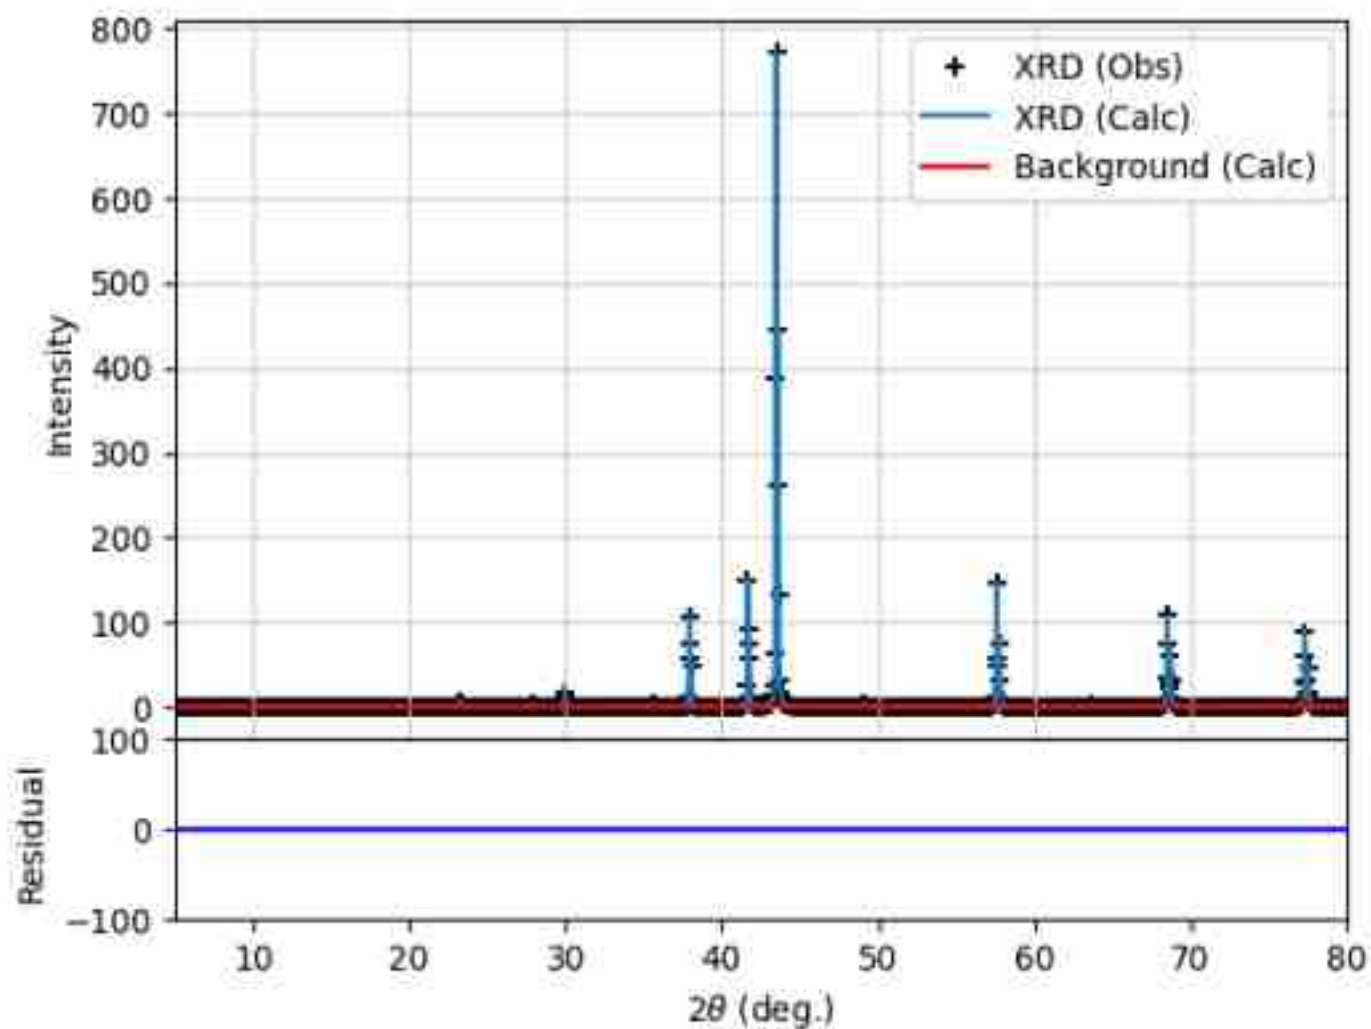

| RMSE before RR | Rwp     | RMSE after RR |
|----------------|---------|---------------|
| 0.023          | 0.00969 | 0.00395       |

# Hf<sub>3</sub>Ge<sub>3</sub>Ru<sub>3</sub>

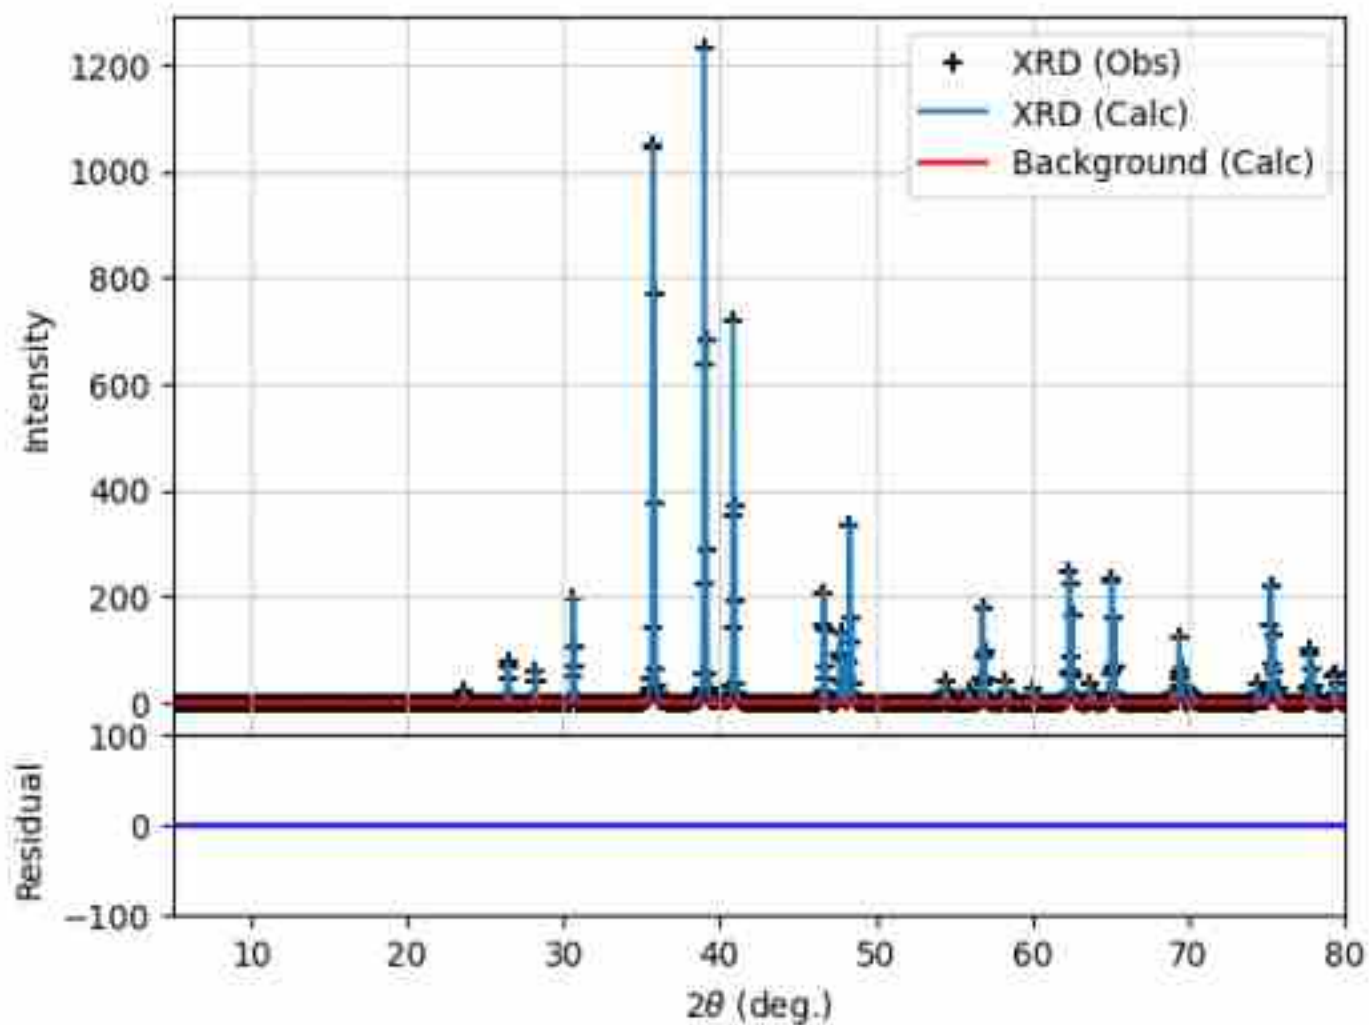

| RMSE before RR | Rwp     | RMSE after RR |
|----------------|---------|---------------|
| 0.023          | 0.01005 | 0.00106       |

# Ho1Cd1Cu4

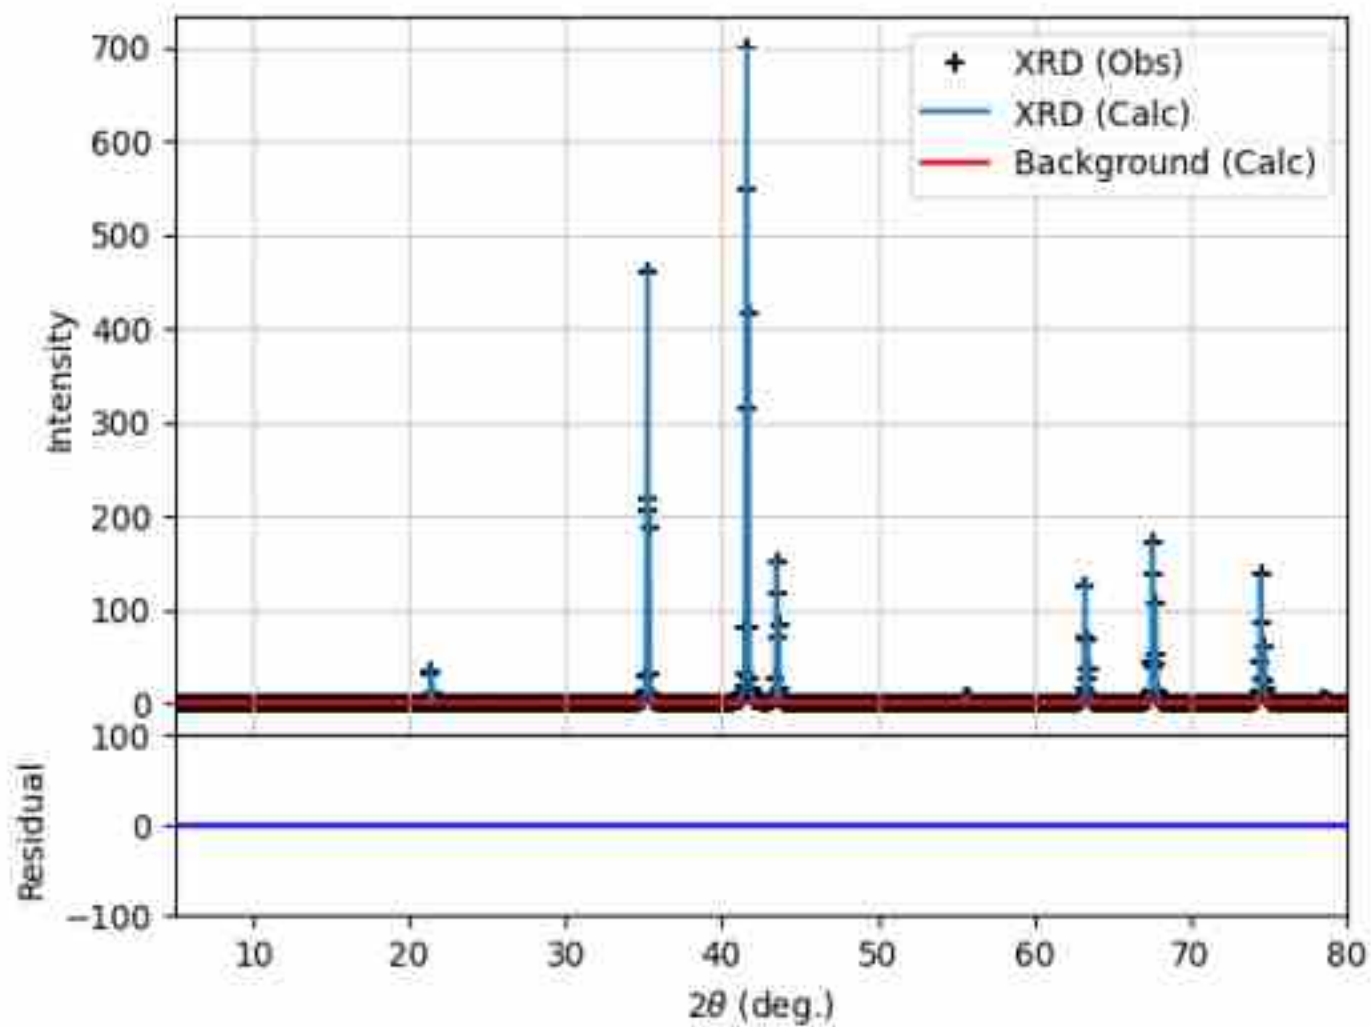

| RMSE before RR | Rwp    | RMSE after RR |
|----------------|--------|---------------|
| 0.023          | 0.0041 | 0.00029       |

# Ho<sub>1</sub>Fe<sub>4</sub>Cu<sub>3</sub>O<sub>12</sub>

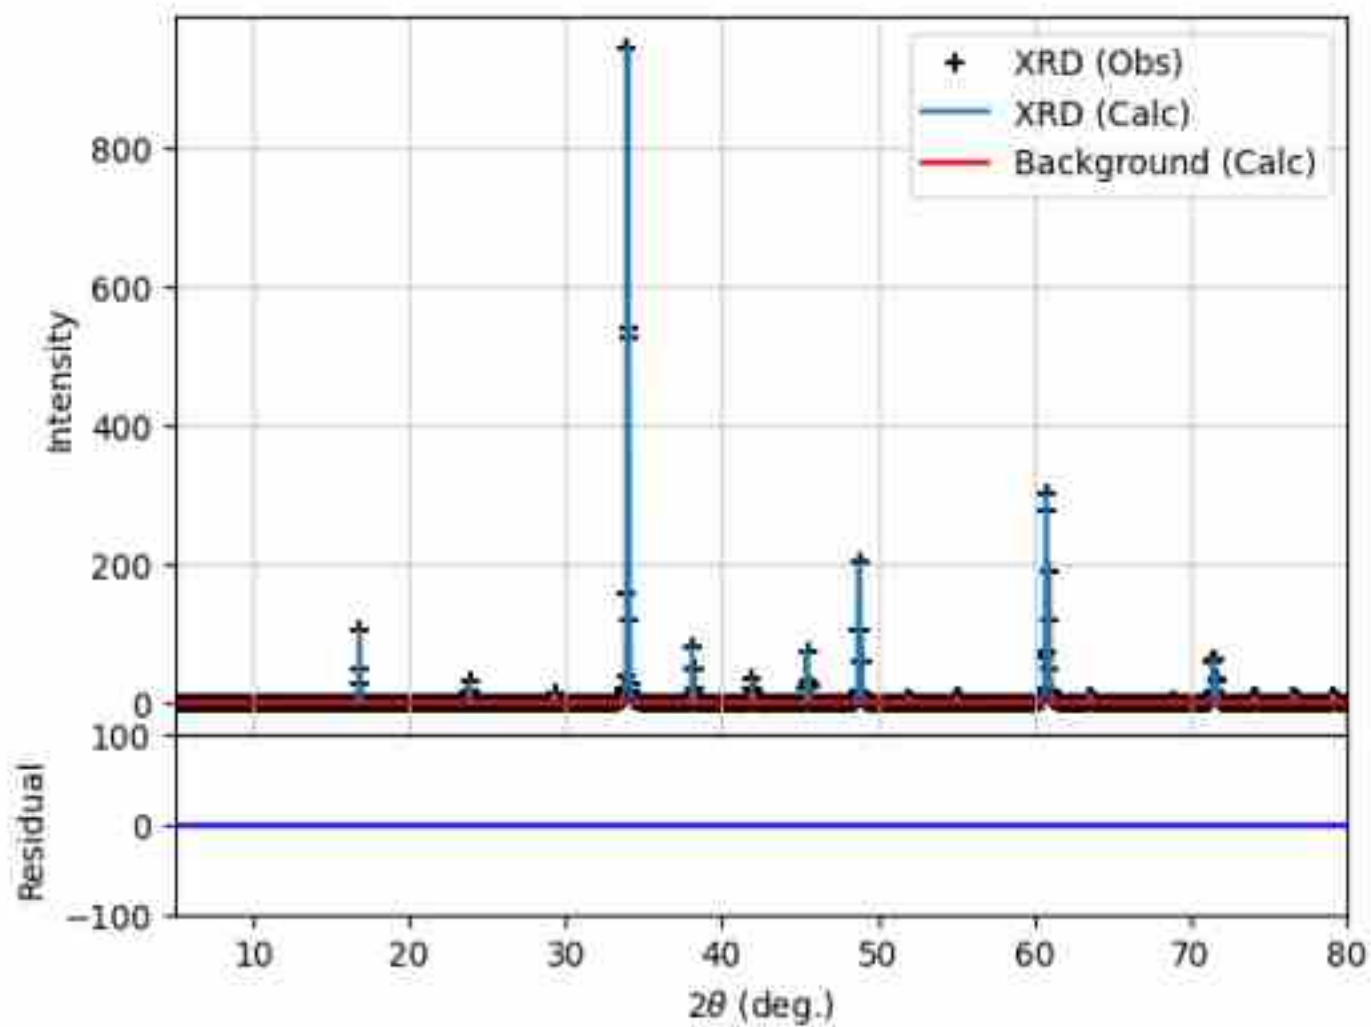

| RMSE before RR | Rwp     | RMSE after RR |
|----------------|---------|---------------|
| 0.023          | 0.02853 | 0.00703       |

# Ho1Hg2

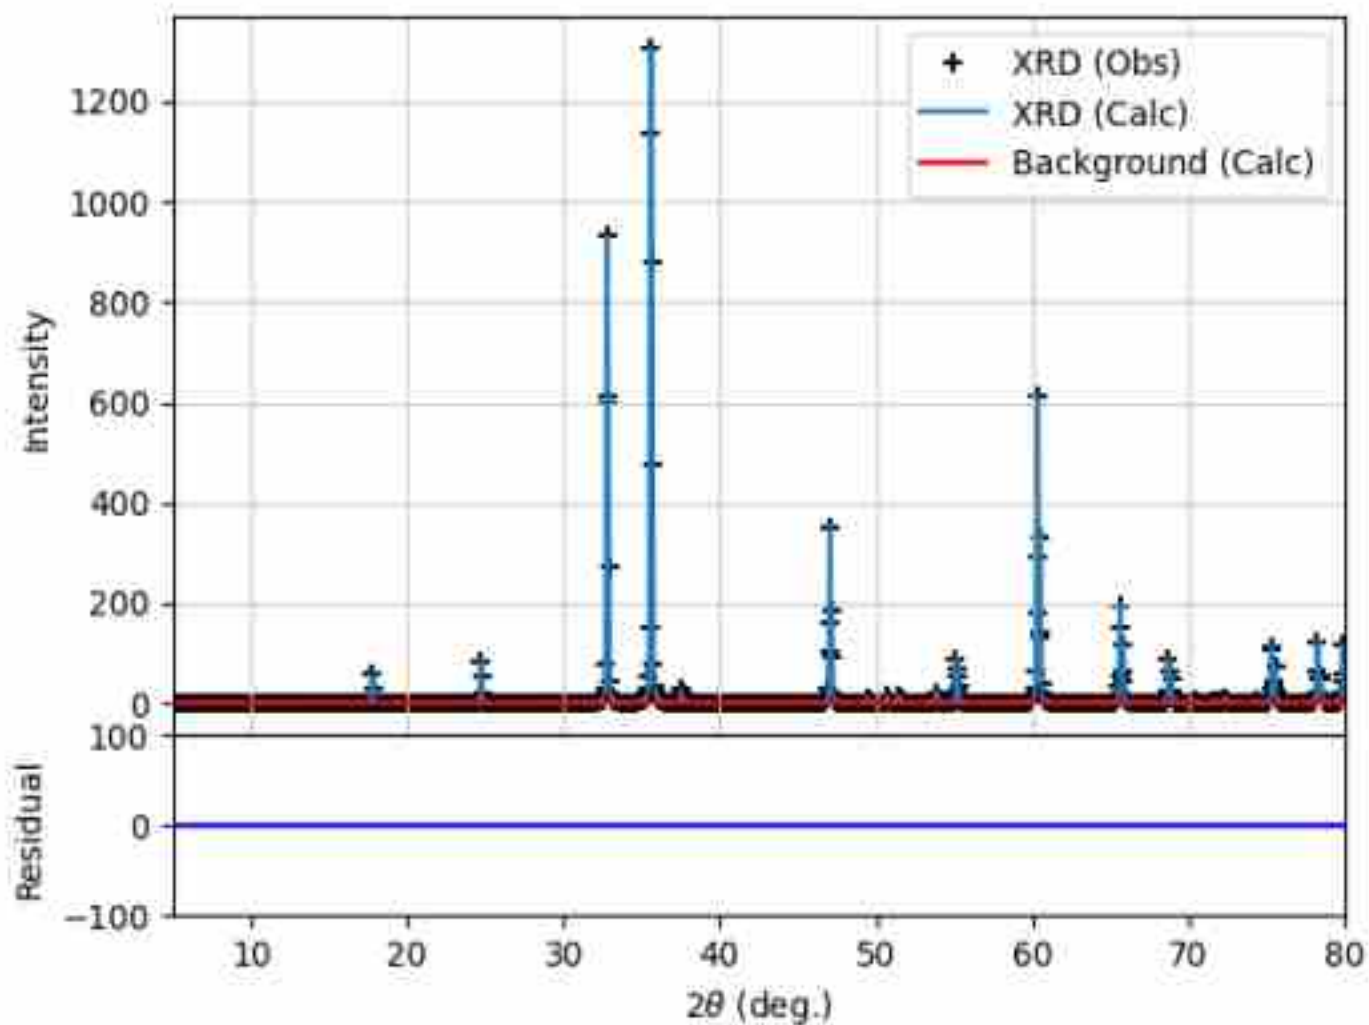

| RMSE before RR | Rwp     | RMSE after RR |
|----------------|---------|---------------|
| 0.023          | 0.03086 | 0.00099       |

# Ho4Ni1Sn8

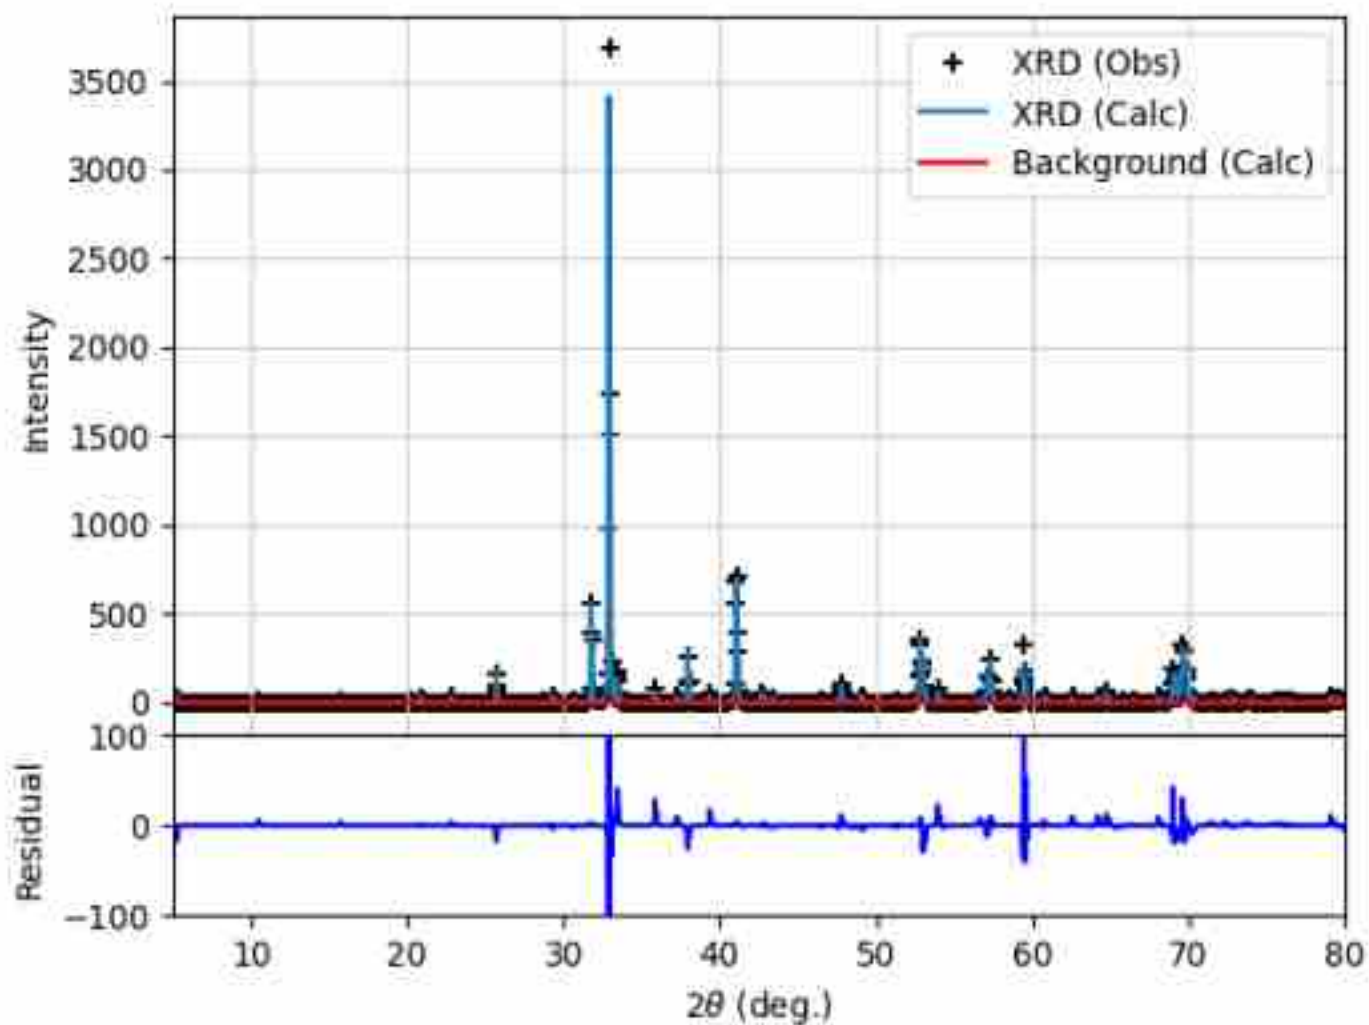

| RMSE before RR | Rwp      | RMSE after RR |
|----------------|----------|---------------|
| 0.023          | 12.14312 | 0.02263       |



# In12Ru4

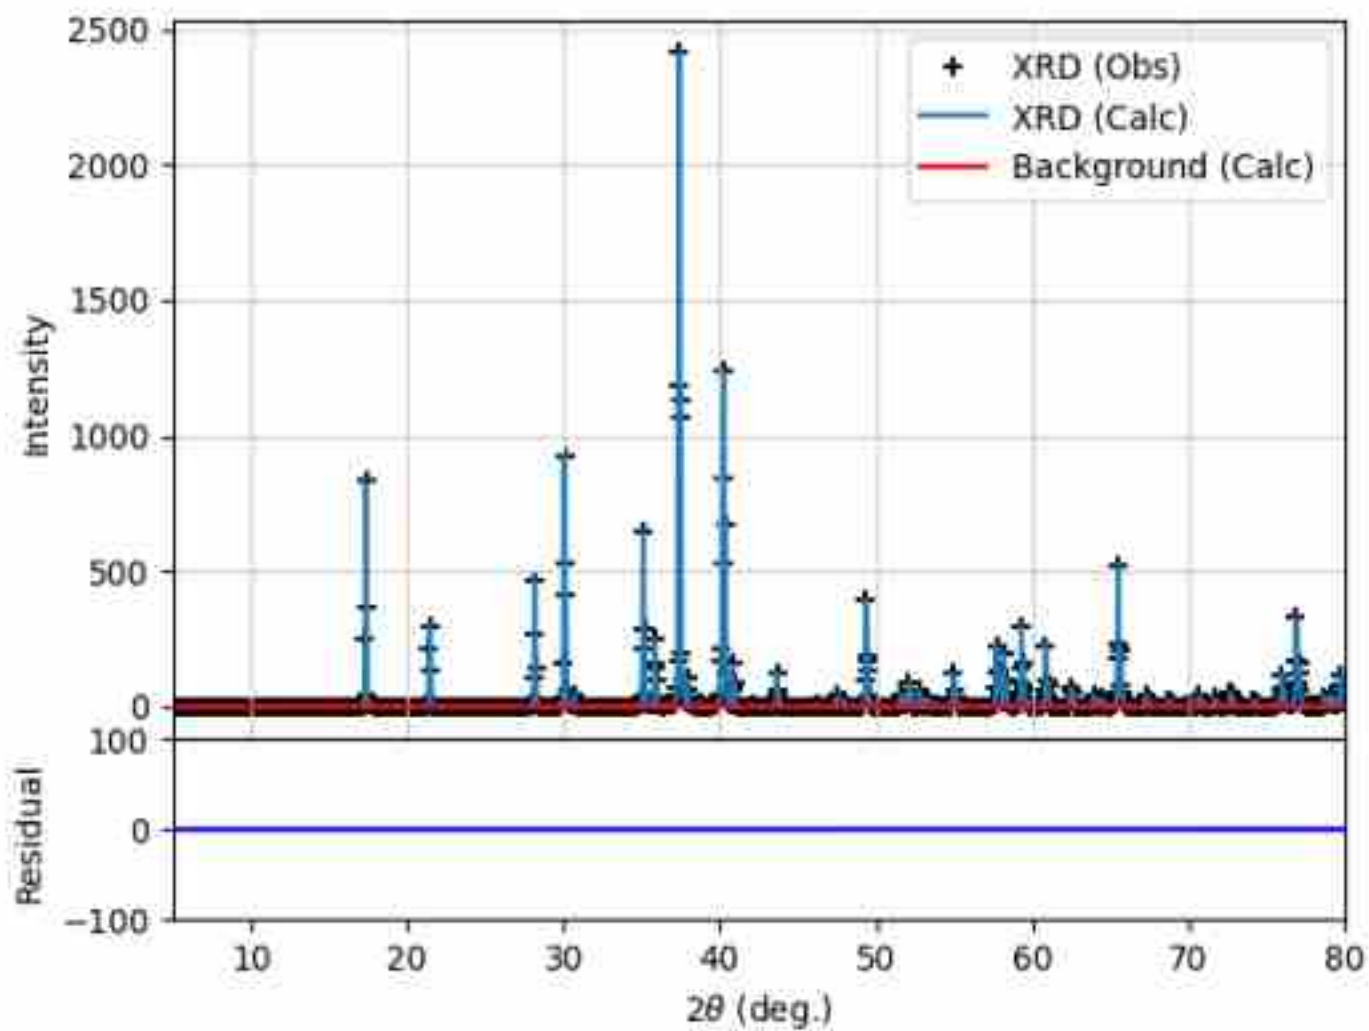

| RMSE before RR | Rwp     | RMSE after RR |
|----------------|---------|---------------|
| 0.023          | 0.06316 | 0.00213       |

# K<sub>2</sub>Na<sub>2</sub>Mo<sub>1</sub>W<sub>3</sub>O<sub>12</sub>

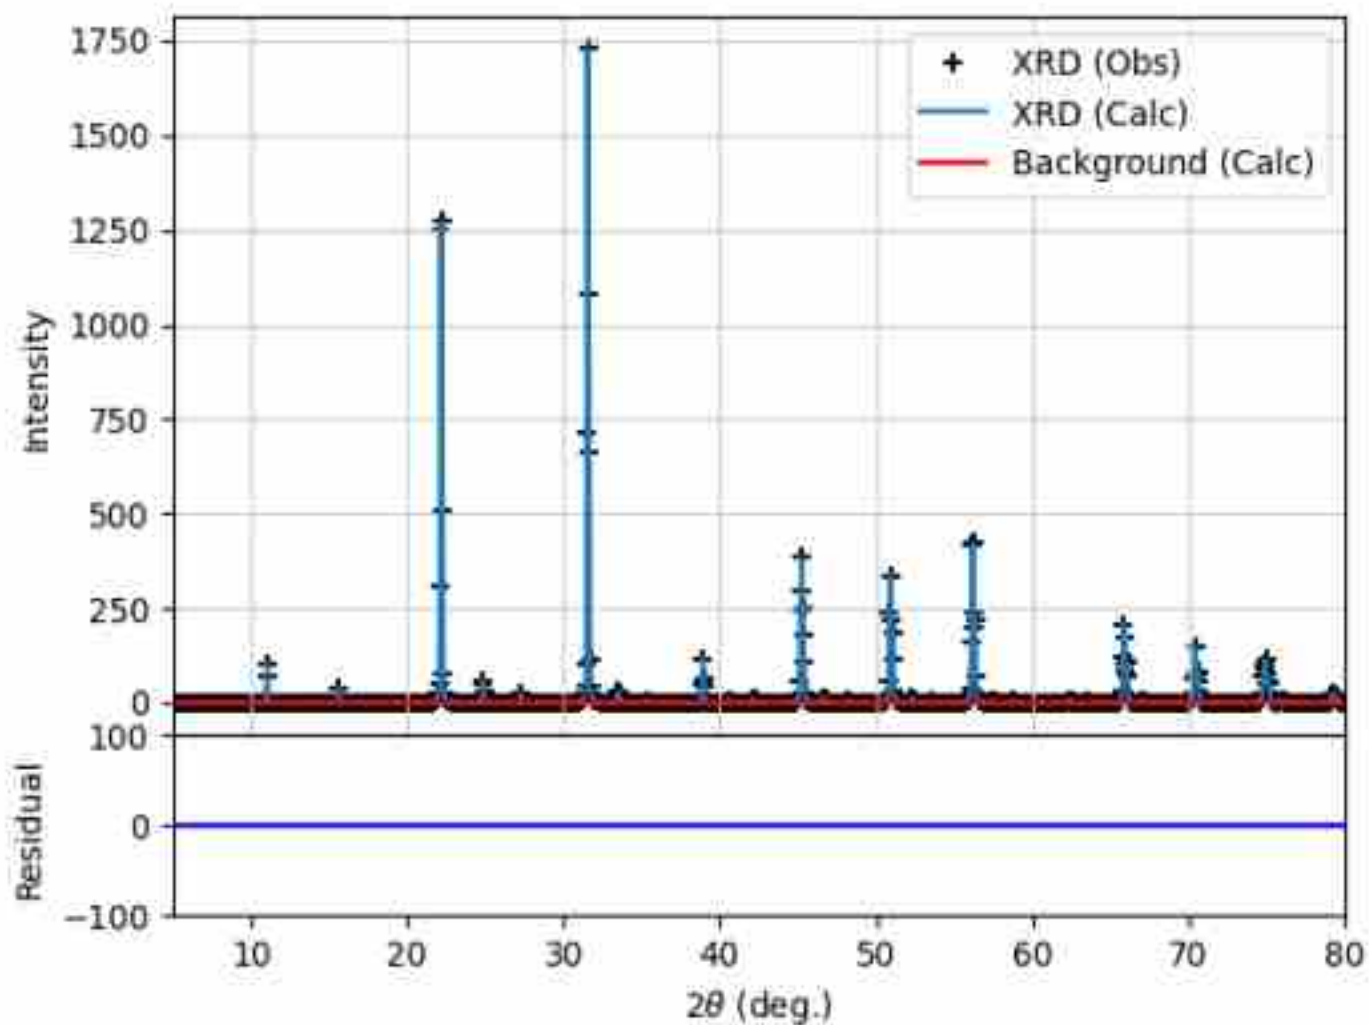

| RMSE before RR | Rwp     | RMSE after RR |
|----------------|---------|---------------|
| 0.023          | 0.00311 | 0.00138       |

# K<sub>4</sub>H<sub>2</sub>Br<sub>2</sub>O<sub>2</sub>

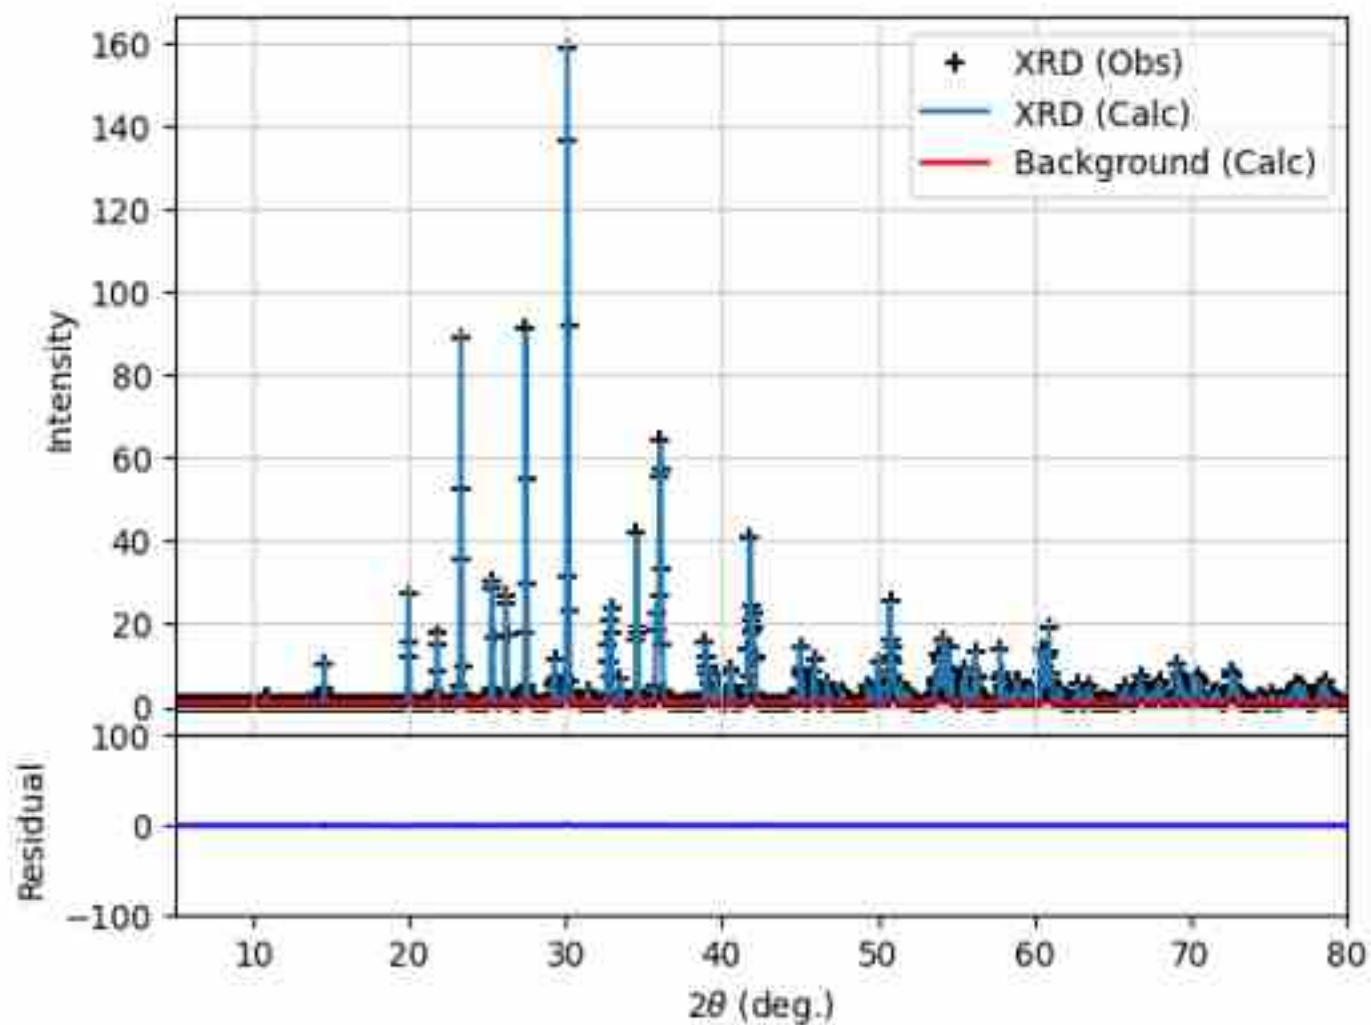

| RMSE before RR | Rwp     | RMSE after RR |
|----------------|---------|---------------|
| 0.023          | 1.41235 | None          |

# K4Mn2I8

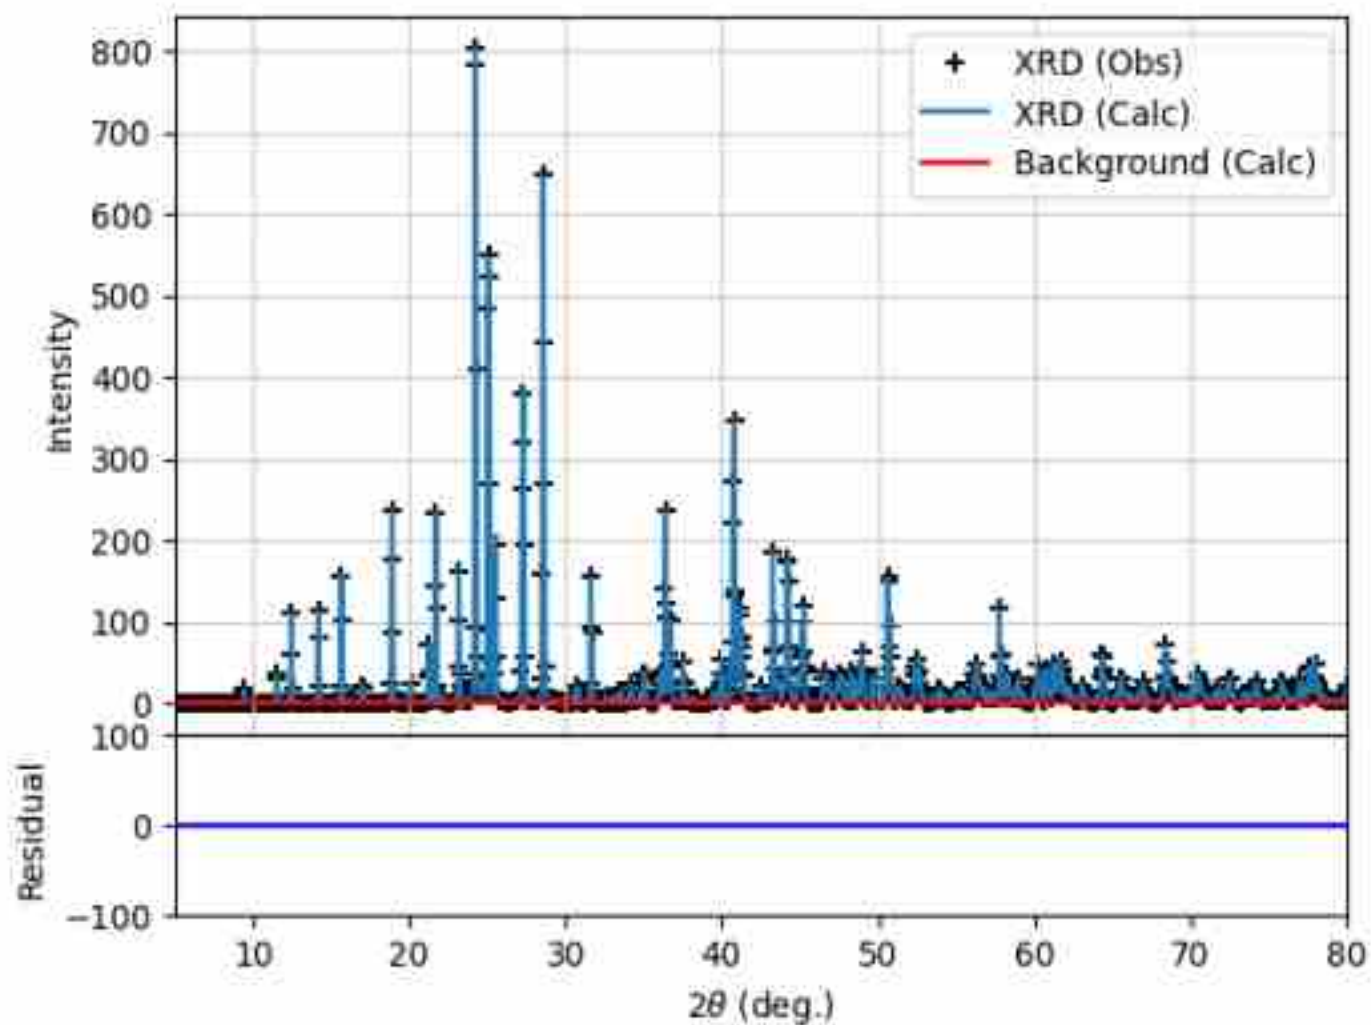

| RMSE before RR | Rwp     | RMSE after RR |
|----------------|---------|---------------|
| 0.023          | 0.00296 | 0.00049       |

# LaIn1Pt4

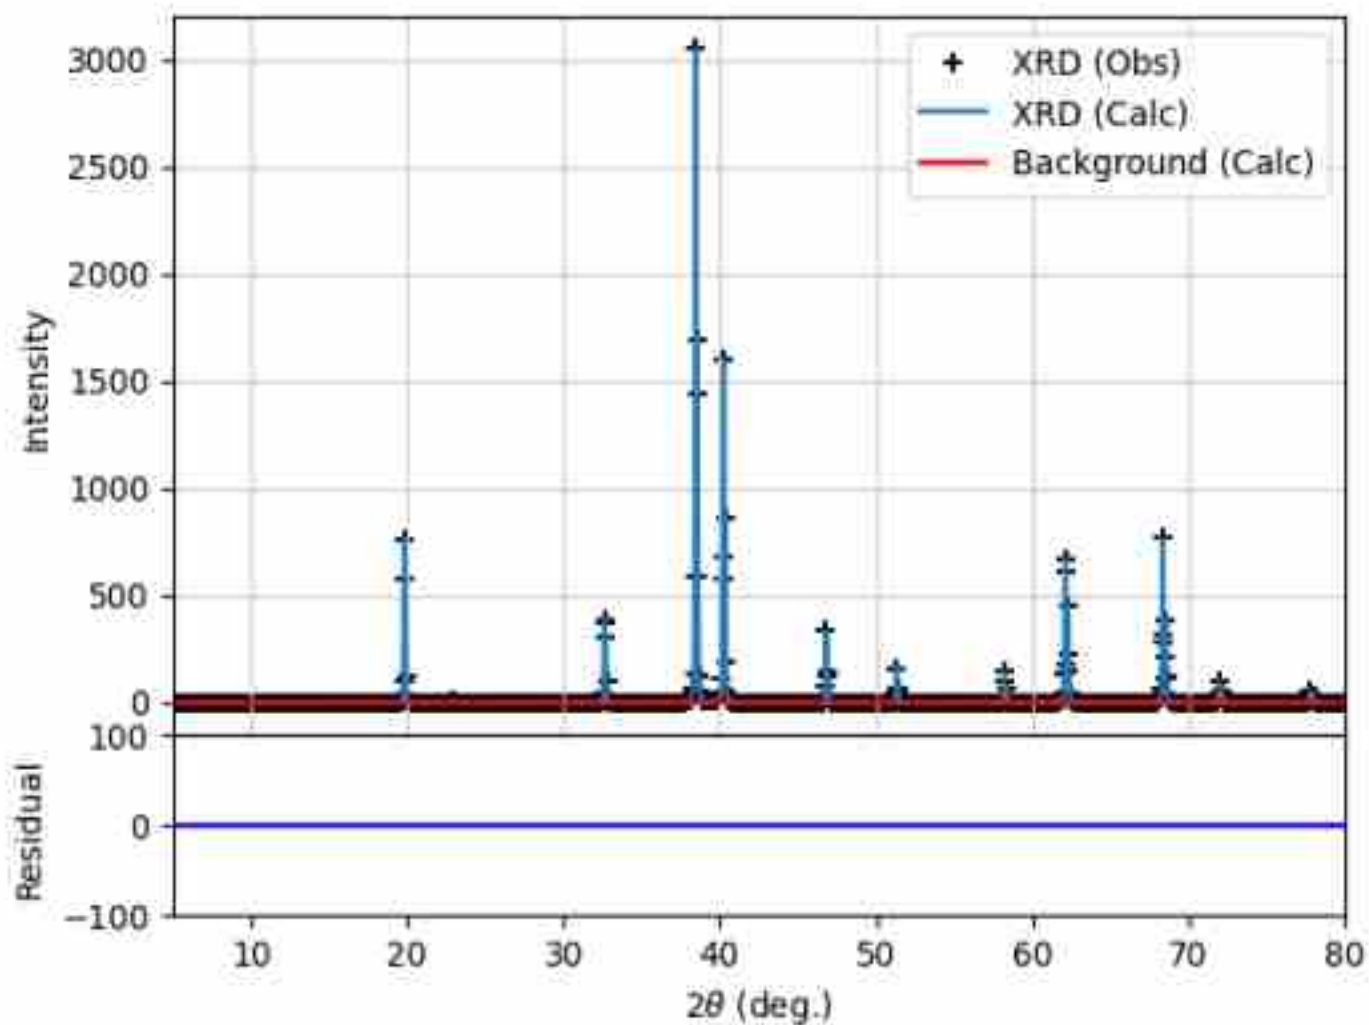

| RMSE before RR | Rwp     | RMSE after RR |
|----------------|---------|---------------|
| 0.023          | 0.08316 | 0.00227       |

# La1Pr1Co4P4

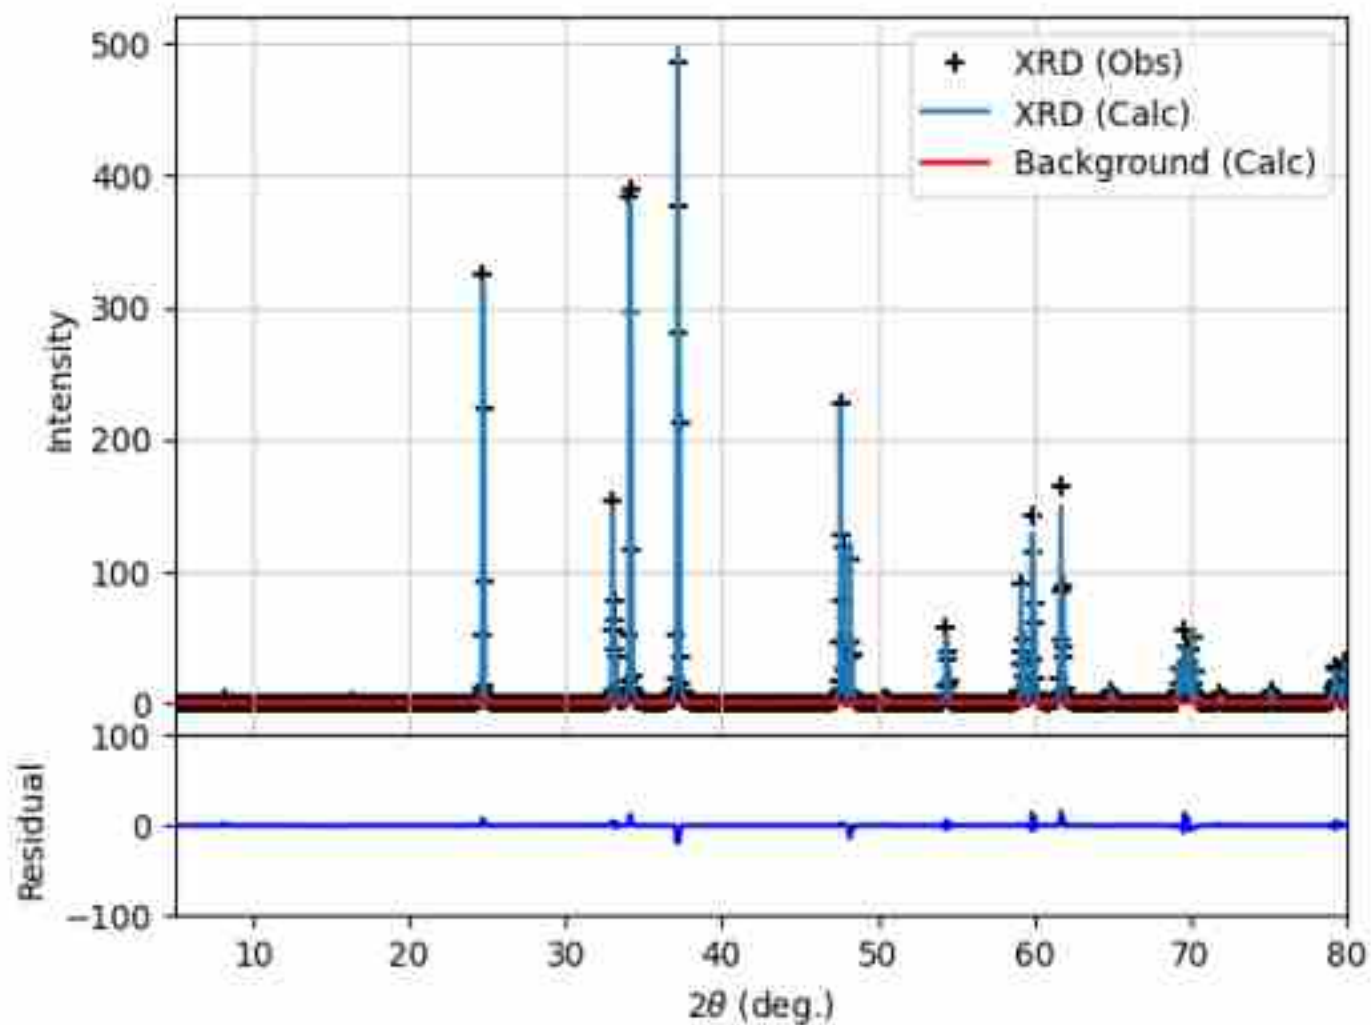

| RMSE before RR | Rwp     | RMSE after RR |
|----------------|---------|---------------|
| 0.023          | 8.37383 | 0.02325       |

# La<sub>2</sub>Ga<sub>2</sub>O<sub>6</sub>

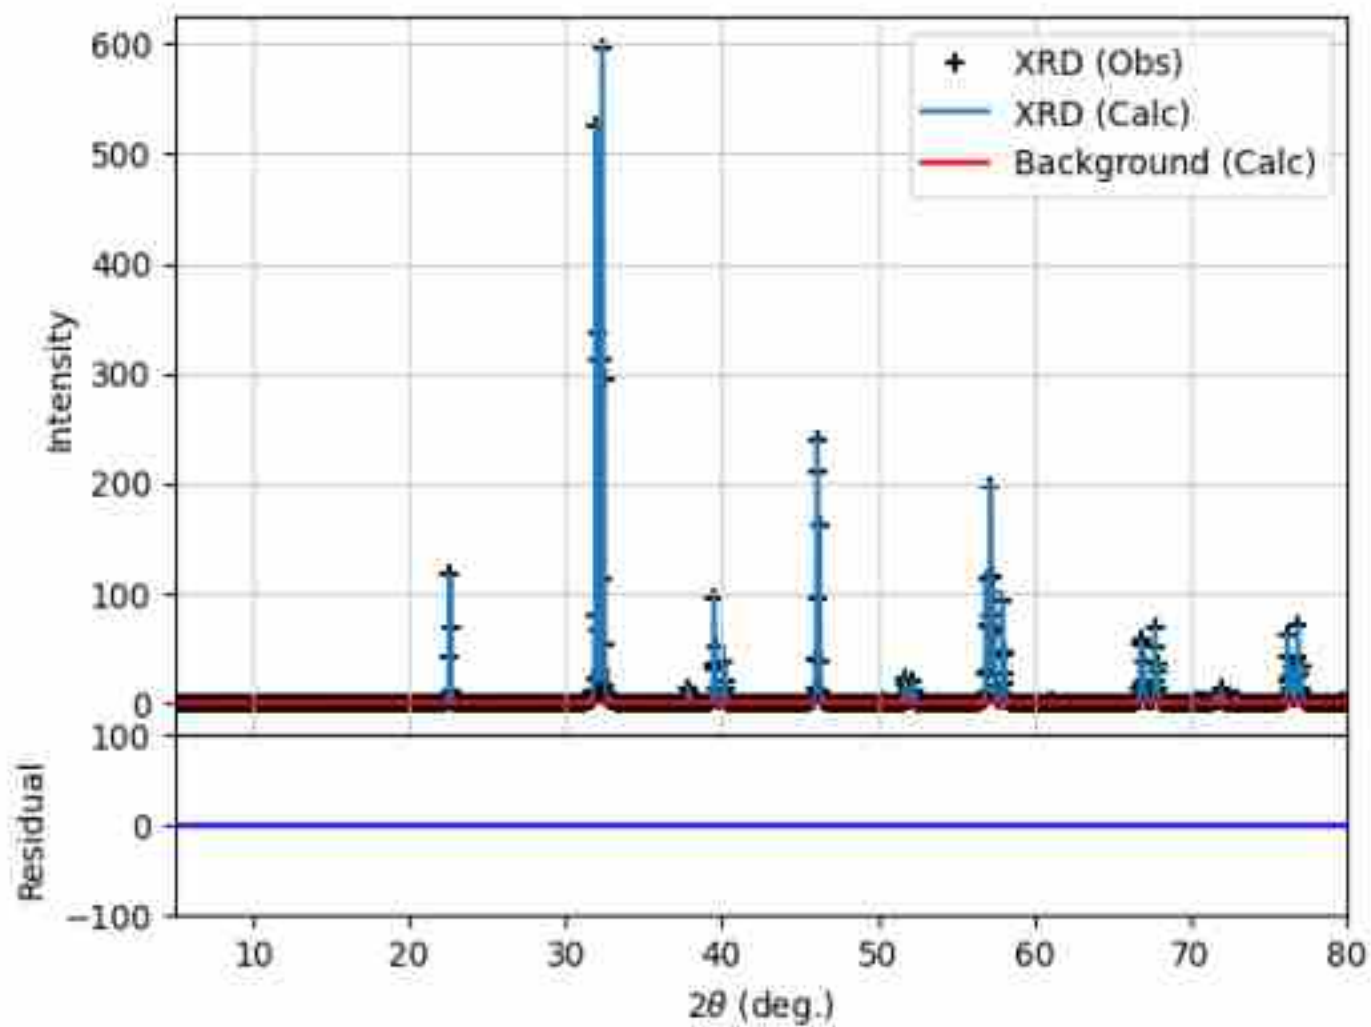

| RMSE before RR | Rwp    | RMSE after RR |
|----------------|--------|---------------|
| 0.023          | 0.0042 | 0.00105       |

# La6C2I10

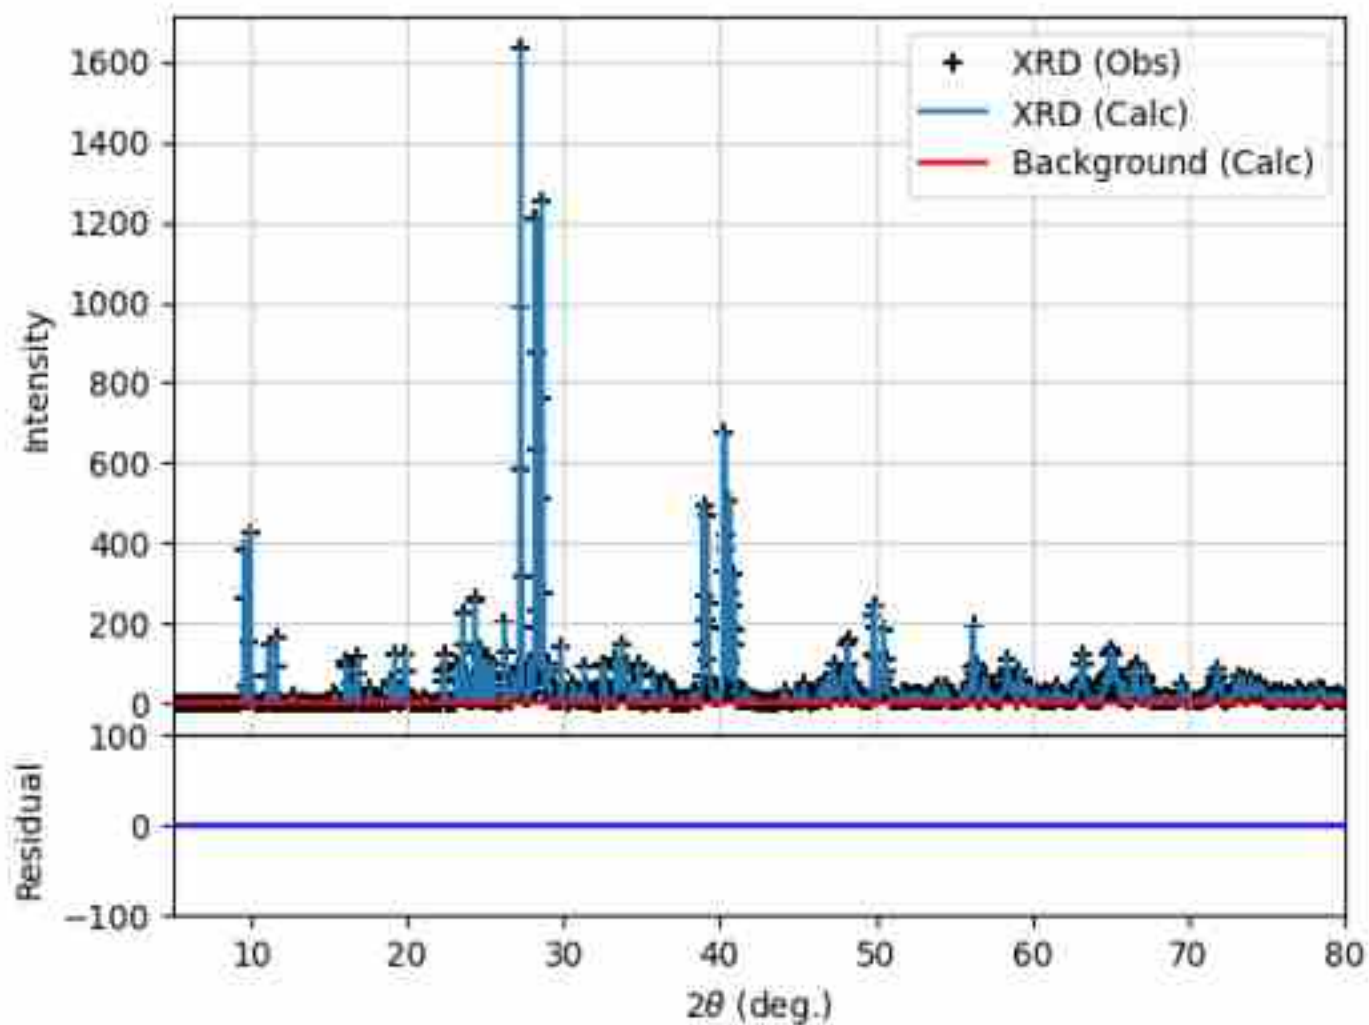

| RMSE before RR | Rwp    | RMSE after RR |
|----------------|--------|---------------|
| 0.023          | 0.0018 | 0.00032       |



La14Ir6

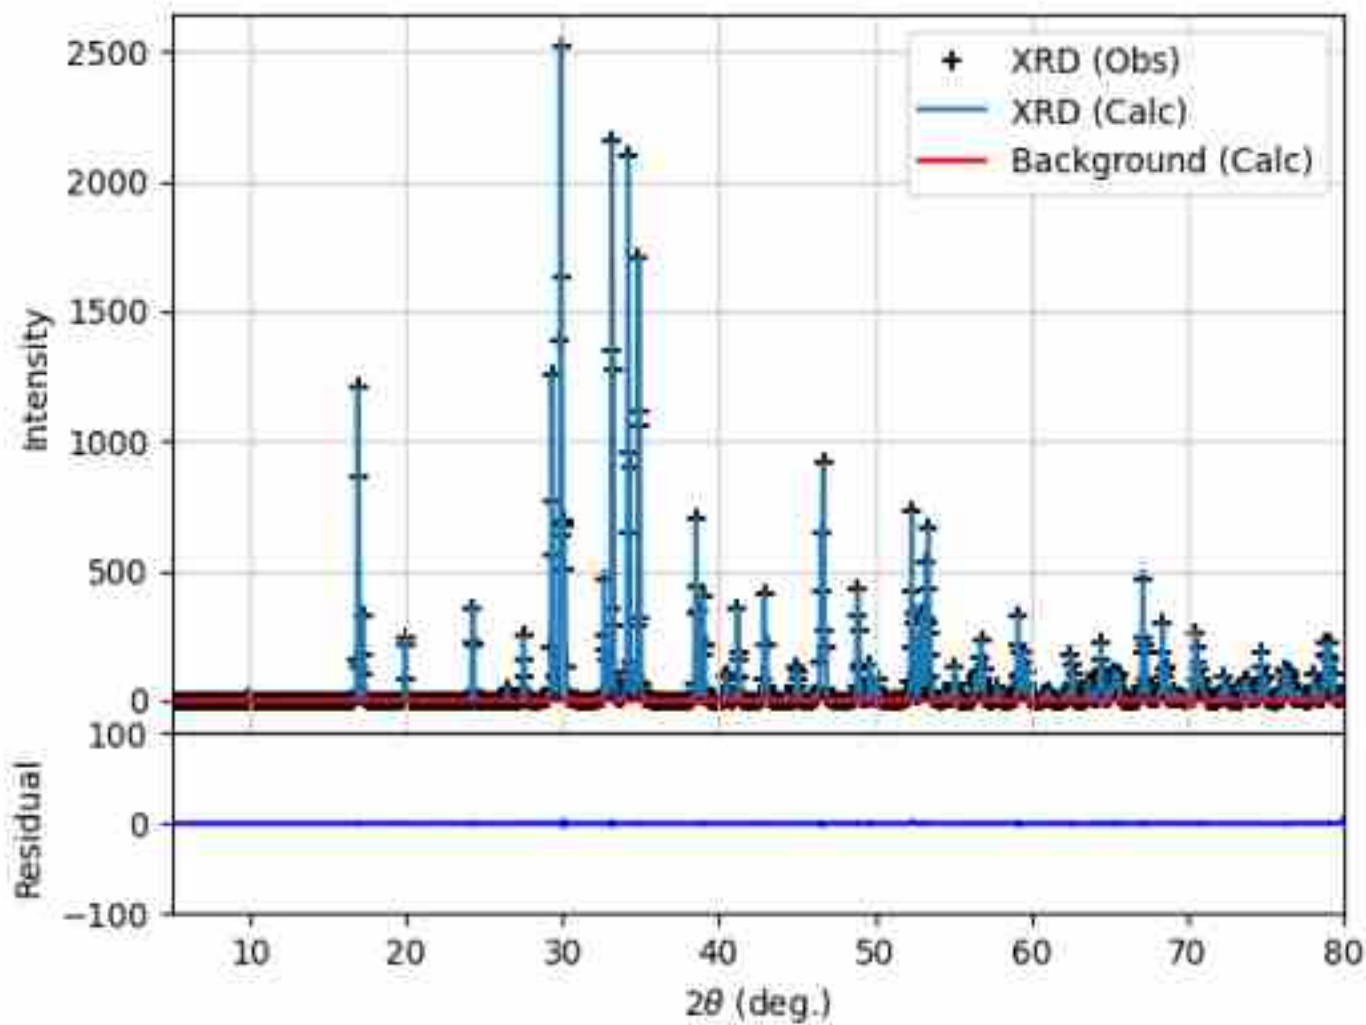

| RMSE before RR | Rwp     | RMSE after RR |
|----------------|---------|---------------|
| 0.023          | 0.64698 | 0.00548       |

# Li<sub>2</sub>Bi<sub>2</sub>S<sub>4</sub>

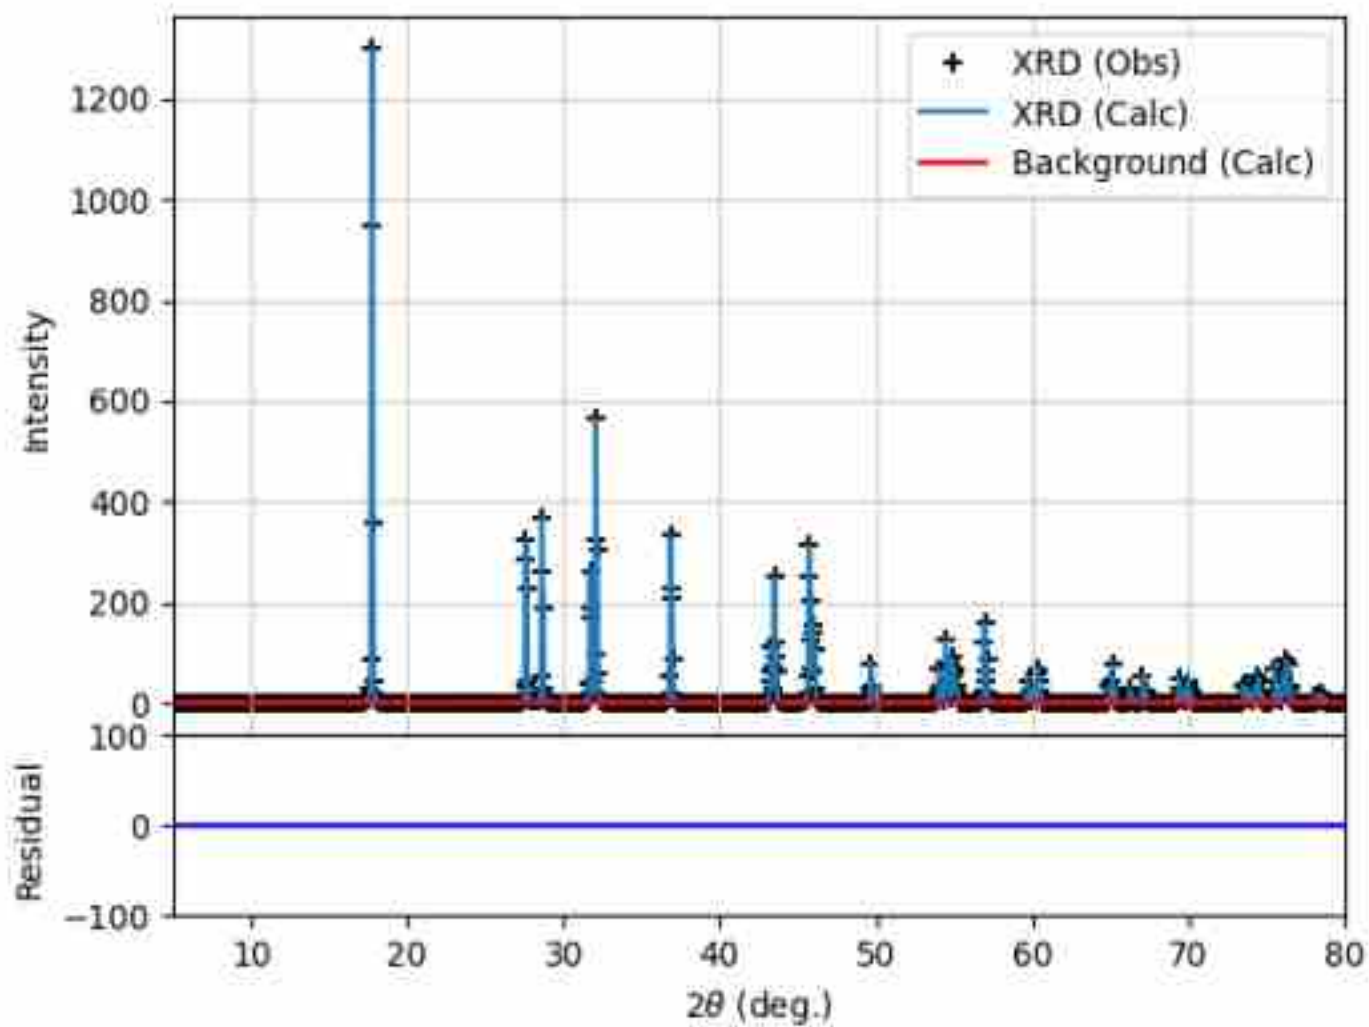

| RMSE before RR | Rwp     | RMSE after RR |
|----------------|---------|---------------|
| 0.023          | 0.00545 | 0.00363       |

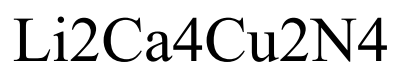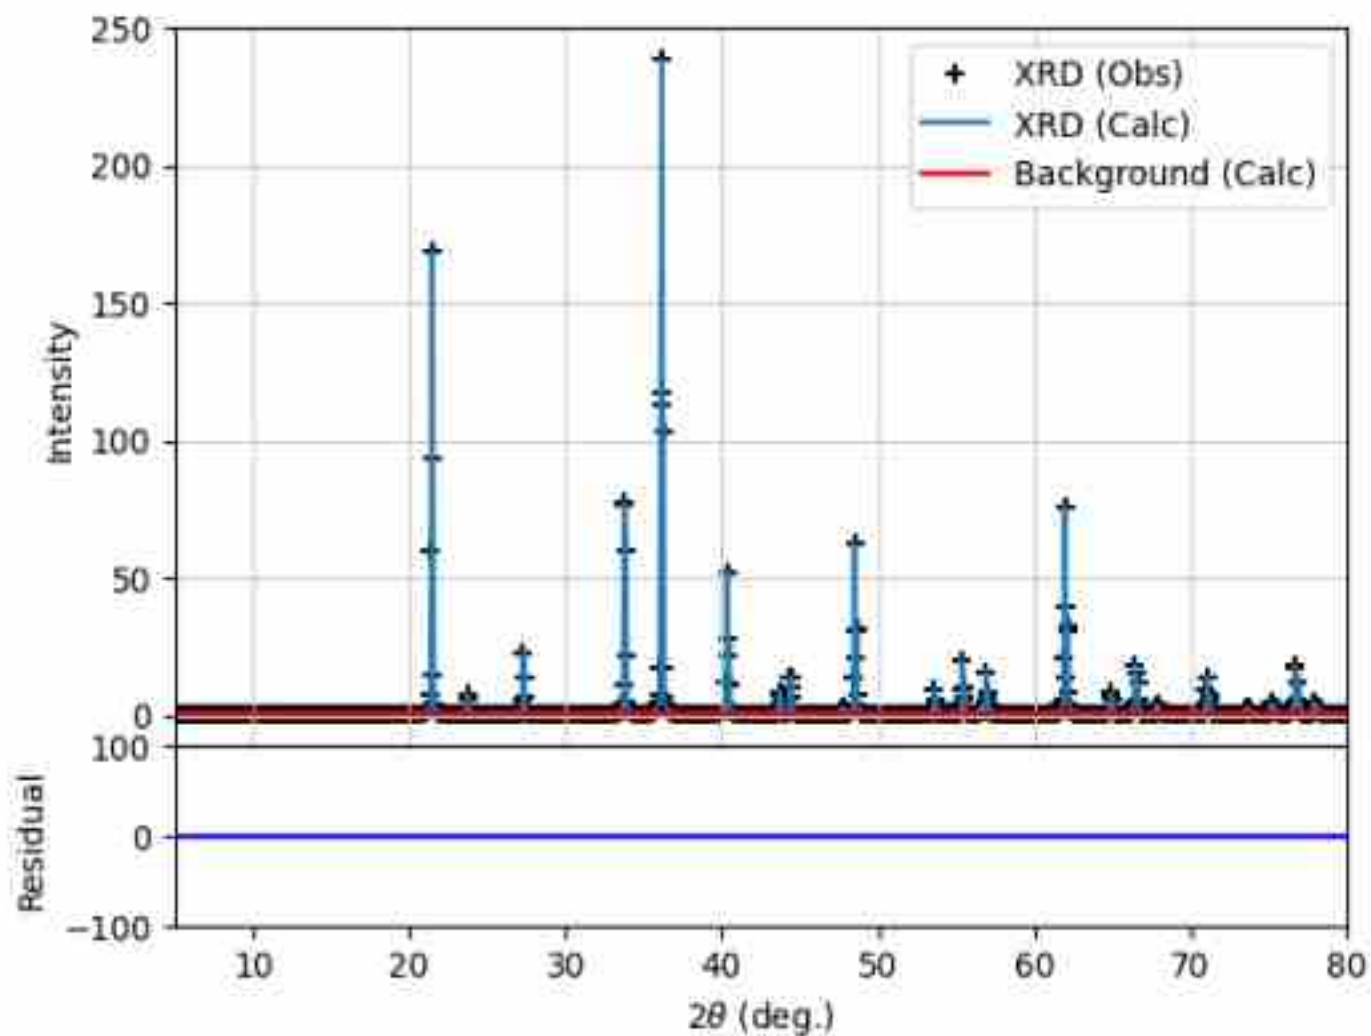

| RMSE before RR | Rwp     | RMSE after RR |
|----------------|---------|---------------|
| 0.023          | 0.02191 | 0.00267       |

# Li<sub>2</sub>Cr<sub>2</sub>Cd<sub>2</sub>F<sub>12</sub>

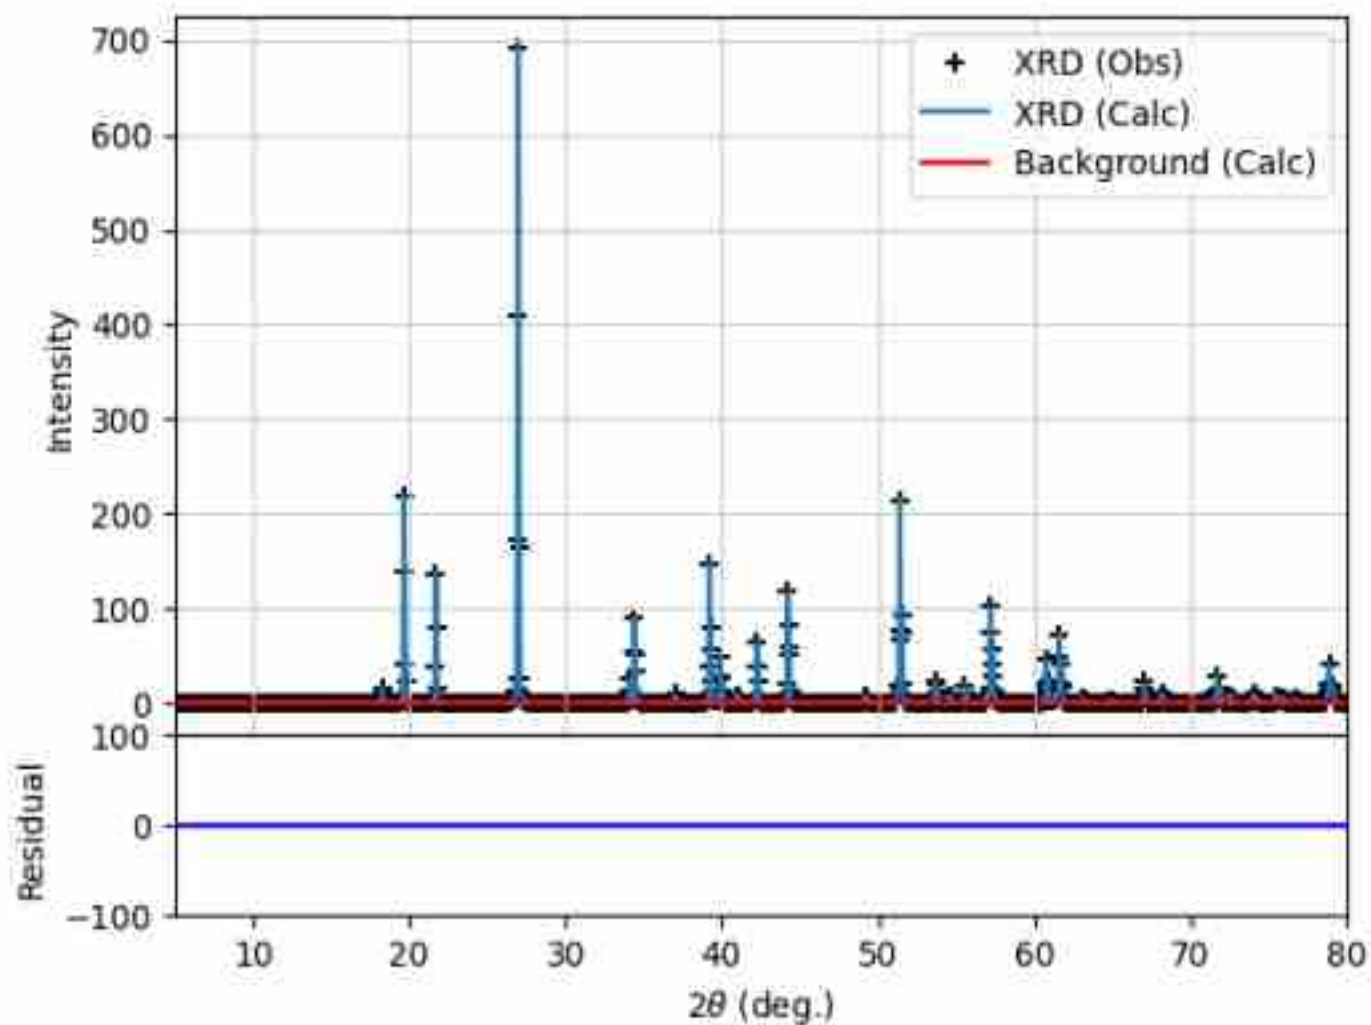

| RMSE before RR | Rwp     | RMSE after RR |
|----------------|---------|---------------|
| 0.023          | 0.00393 | 0.00155       |

# Li<sub>2</sub>Ge<sub>1</sub>Te<sub>1</sub>O<sub>6</sub>

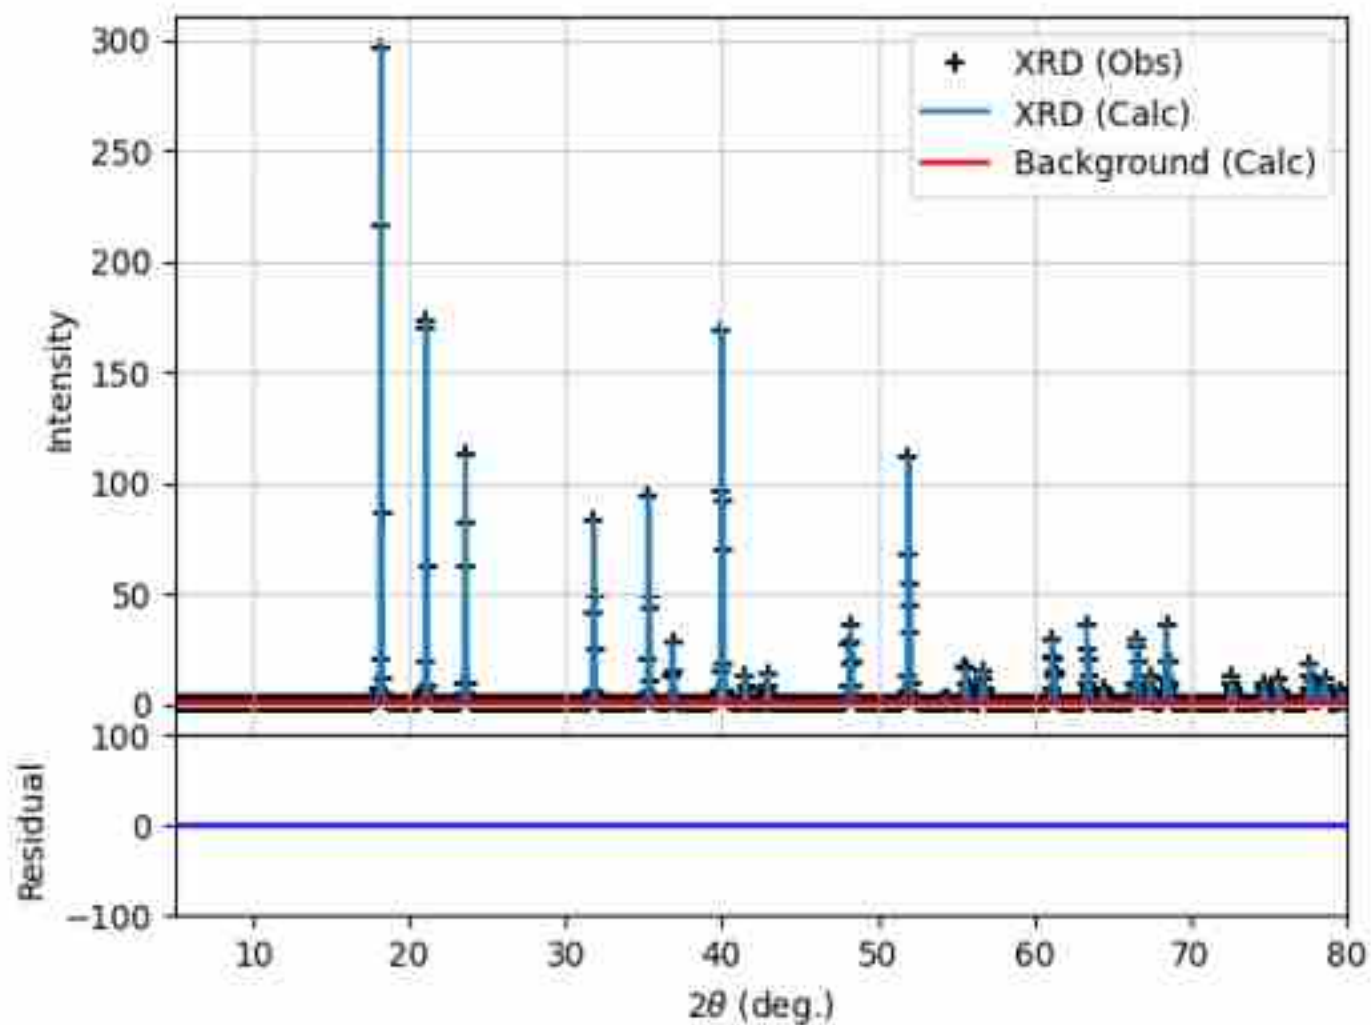

| RMSE before RR | Rwp     | RMSE after RR |
|----------------|---------|---------------|
| 0.023          | 0.00425 | 0.00333       |

# Li<sub>2</sub>Ni<sub>2</sub>Rh<sub>2</sub>F<sub>12</sub>

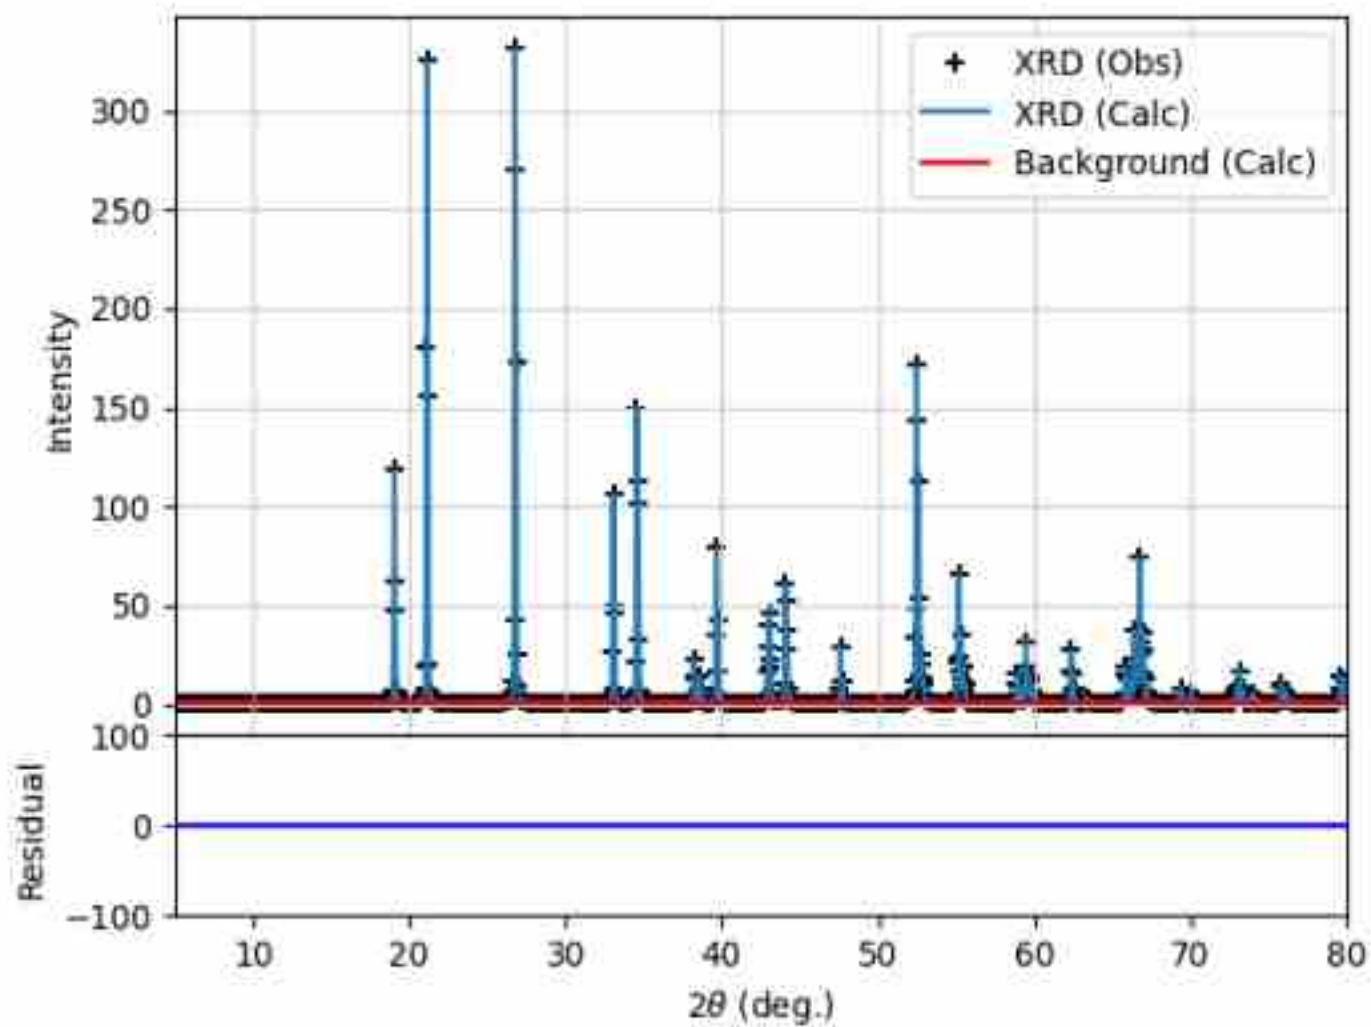

| RMSE before RR | Rwp     | RMSE after RR |
|----------------|---------|---------------|
| 0.023          | 0.00537 | 0.00181       |

# Li<sub>2</sub>Ti<sub>2</sub>Si<sub>2</sub>O<sub>8</sub>

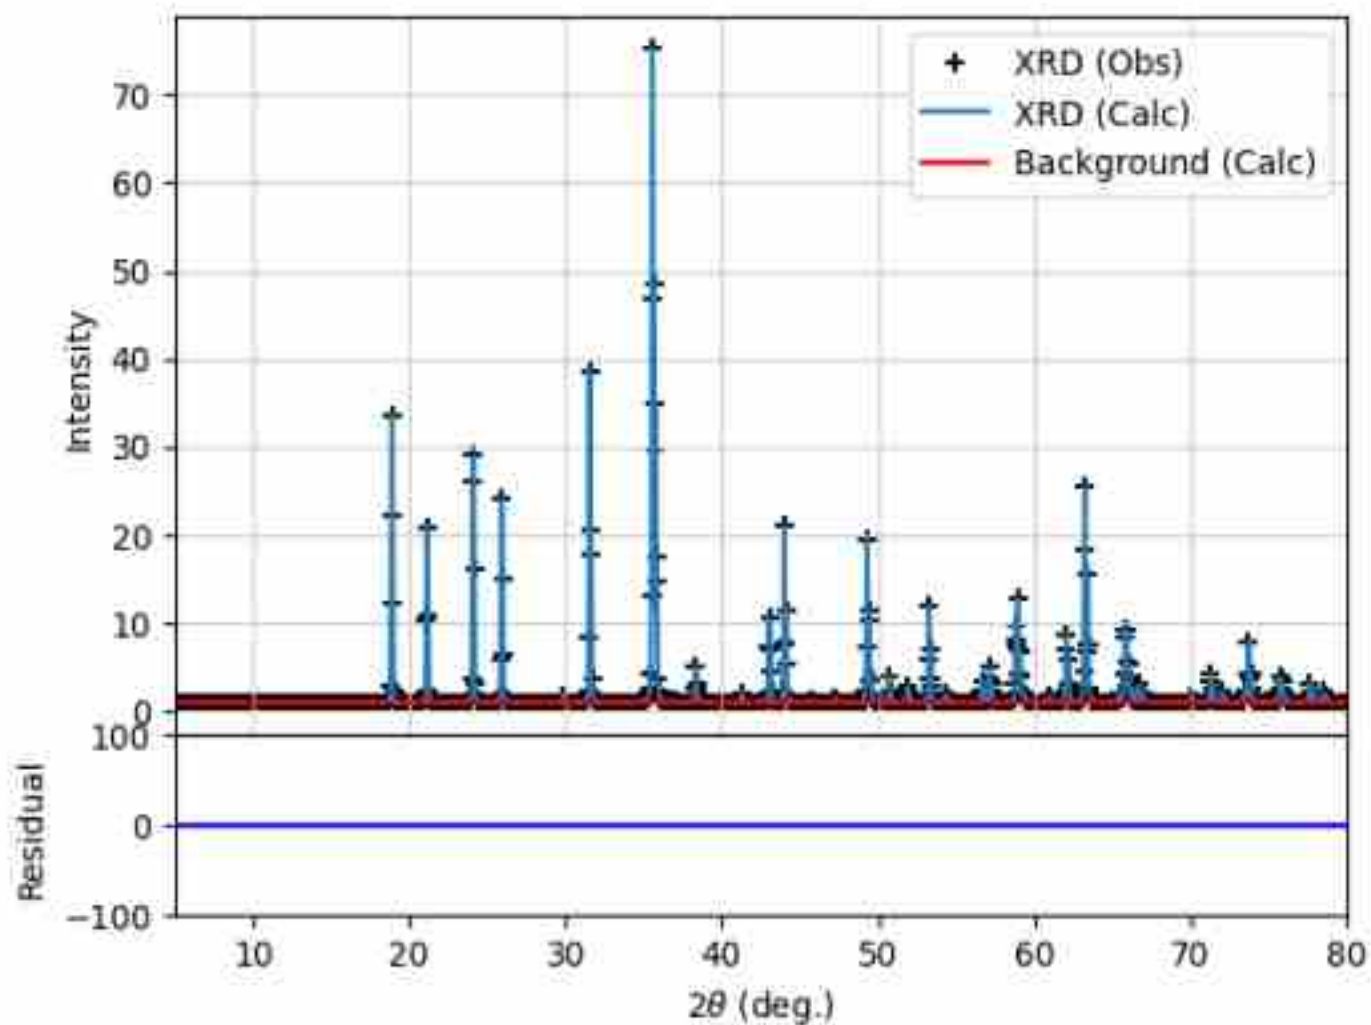

| RMSE before RR | Rwp     | RMSE after RR |
|----------------|---------|---------------|
| 0.023          | 0.00267 | 0.00105       |

# Li<sub>2</sub>V<sub>3</sub>Cu<sub>1</sub>O<sub>8</sub>

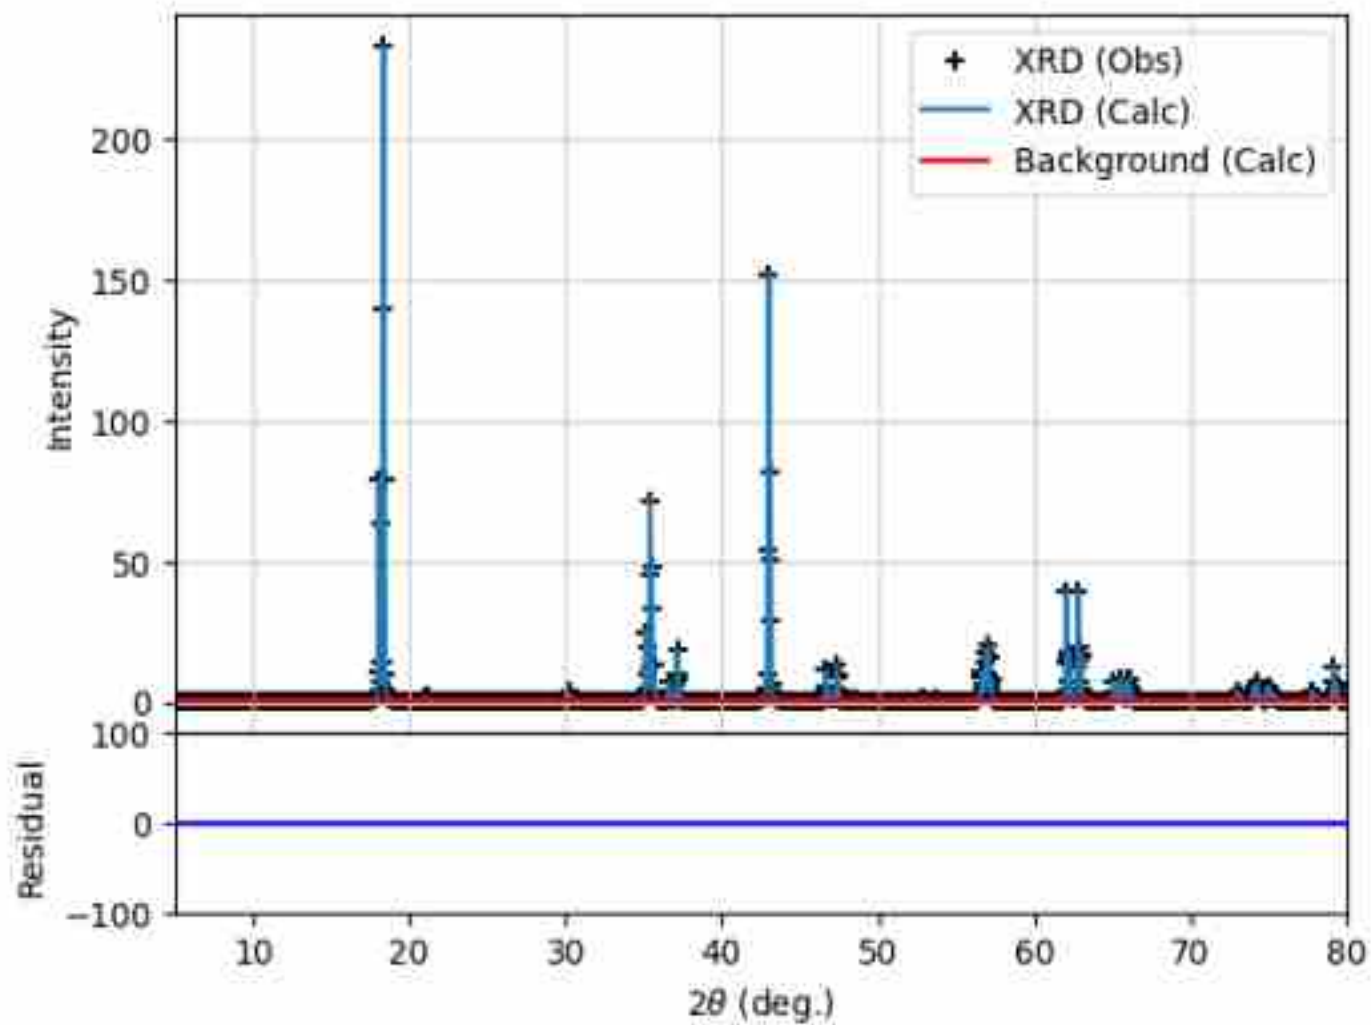

| RMSE before RR | Rwp     | RMSE after RR |
|----------------|---------|---------------|
| 0.023          | 0.00306 | 0.00163       |



# Li<sub>2</sub>V<sub>4</sub>Cr<sub>1</sub>Cu<sub>1</sub>O<sub>12</sub>

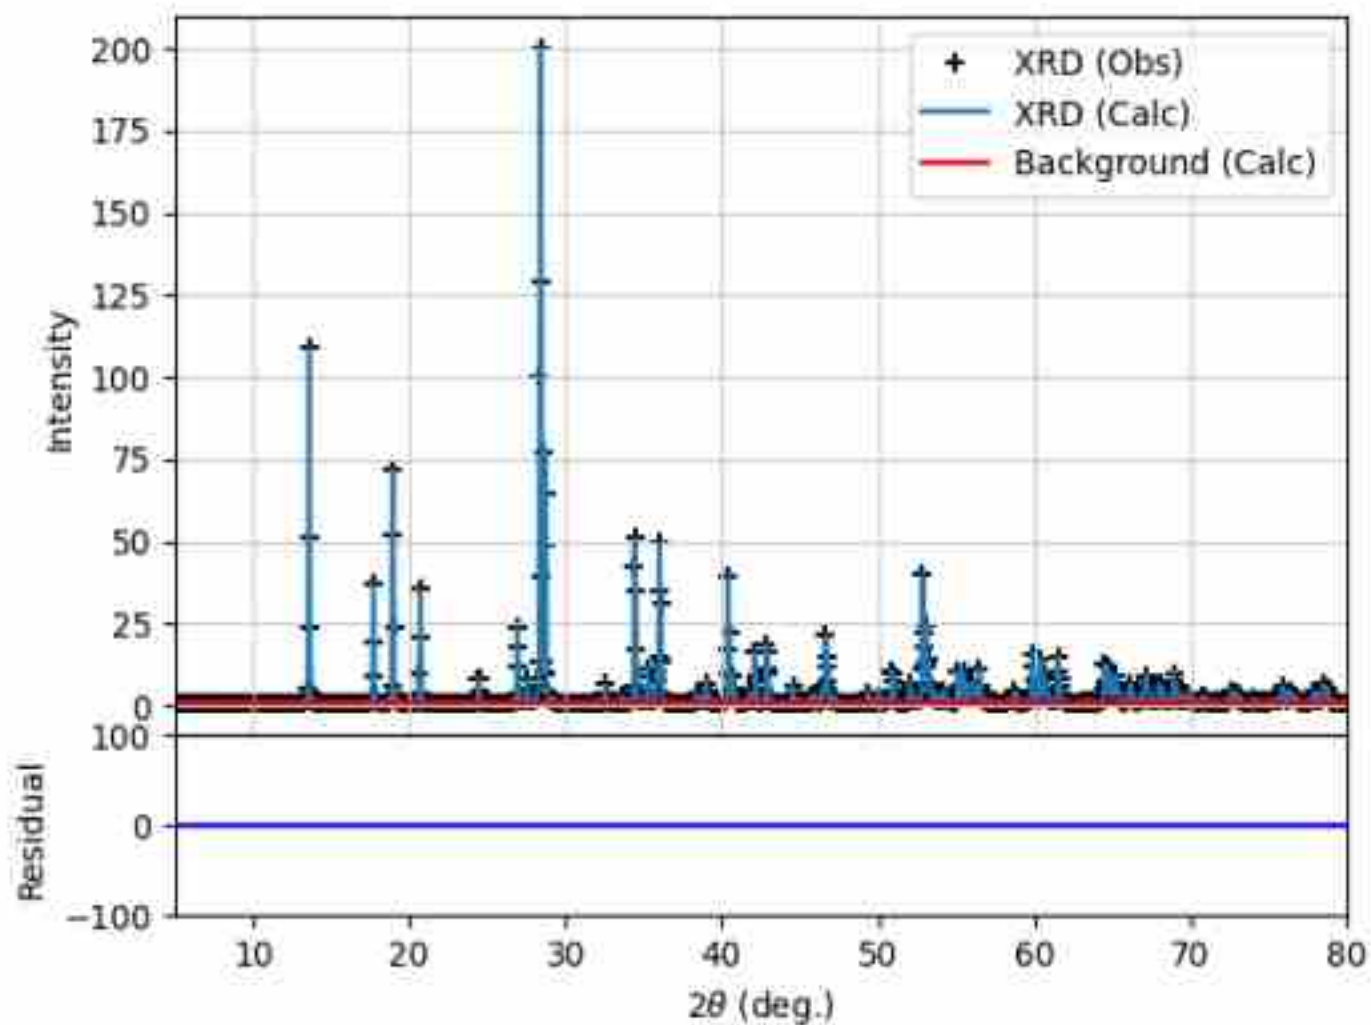

| RMSE before RR | Rwp     | RMSE after RR |
|----------------|---------|---------------|
| 0.023          | 0.00196 | 0.00053       |

# Li<sub>3</sub>MnNi<sub>4</sub>O<sub>8</sub>

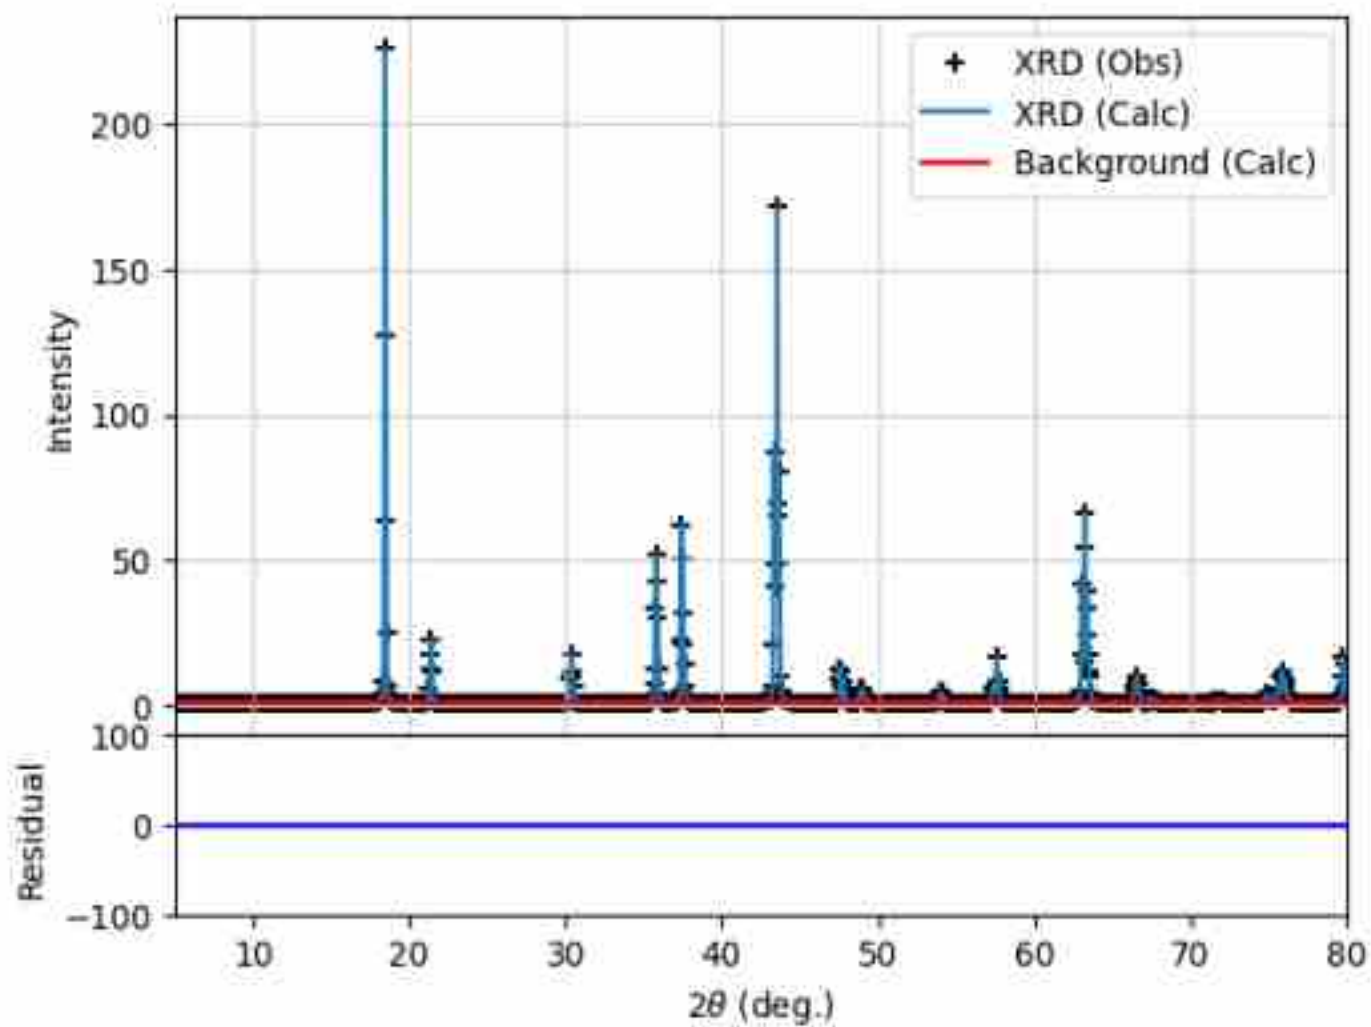

| RMSE before RR | Rwp     | RMSE after RR |
|----------------|---------|---------------|
| 0.023          | 0.00163 | 0.00109       |

# Li<sub>4</sub>C<sub>2</sub>O<sub>6</sub>

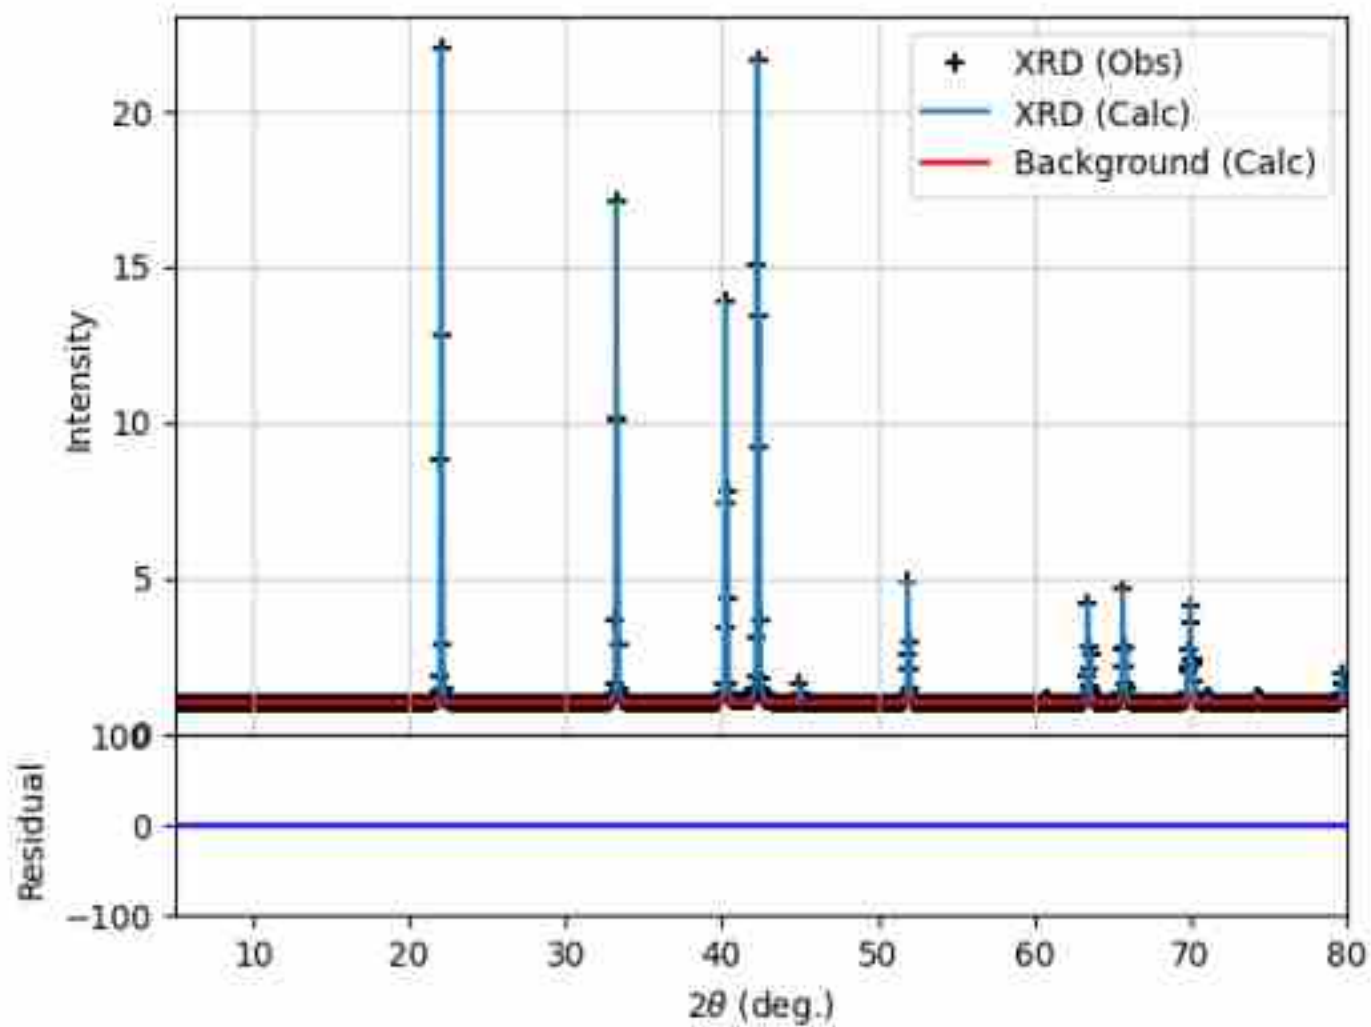

| RMSE before RR | Rwp     | RMSE after RR |
|----------------|---------|---------------|
| 0.023          | 0.01029 | 0.00528       |

# Li<sub>4</sub>Fe<sub>4</sub>F<sub>12</sub>

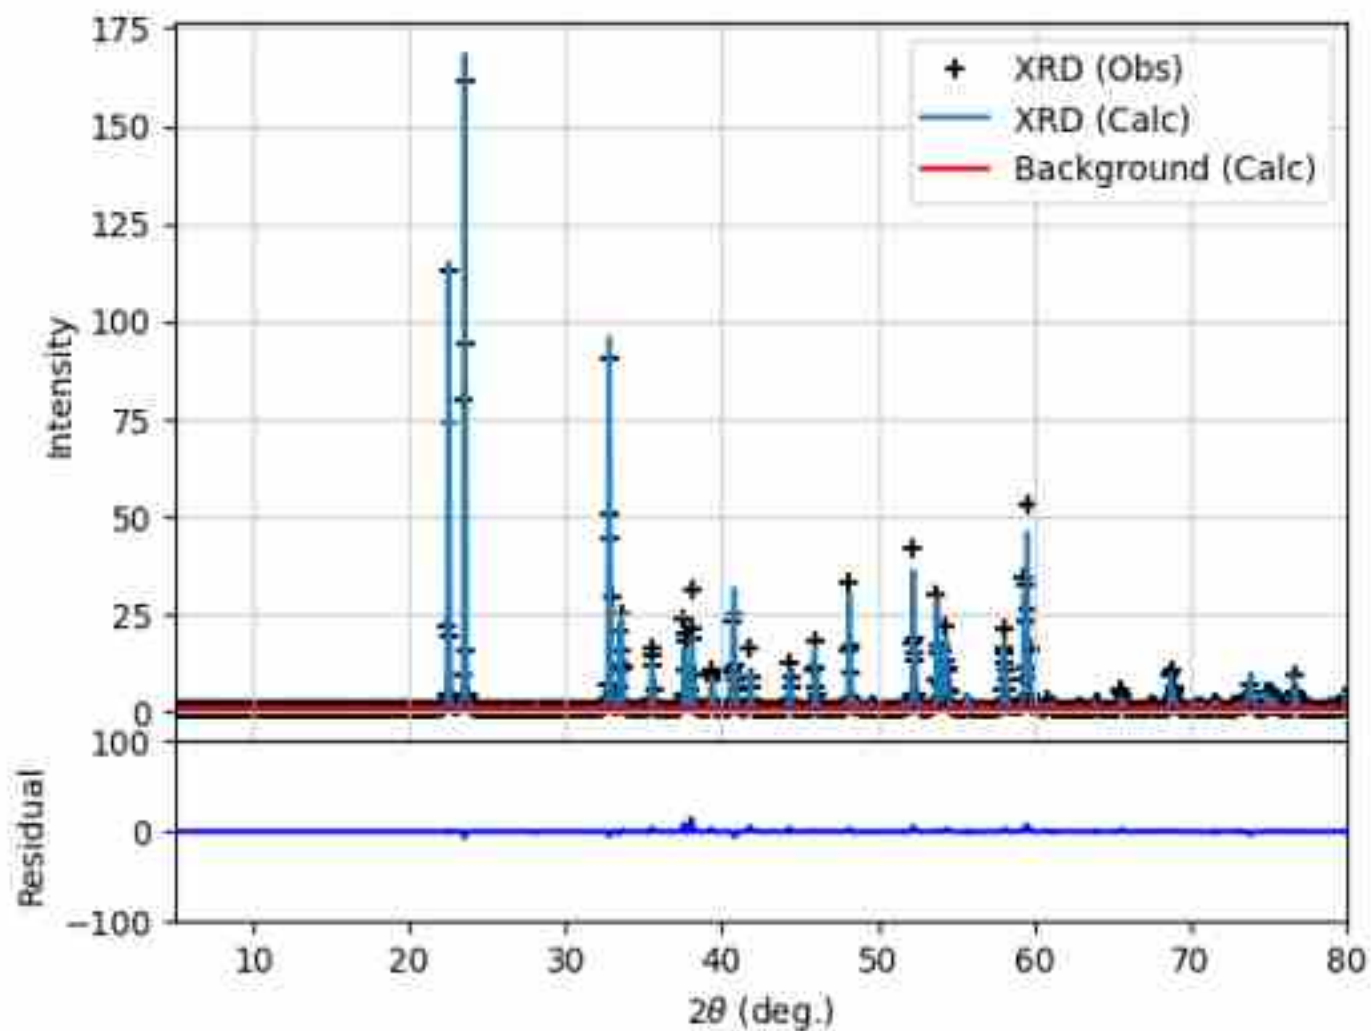

| RMSE before RR | Rwp      | RMSE after RR |
|----------------|----------|---------------|
| 0.023          | 14.69492 | 0.27339       |

# Li<sub>4</sub>Ti1Fe3O<sub>8</sub>

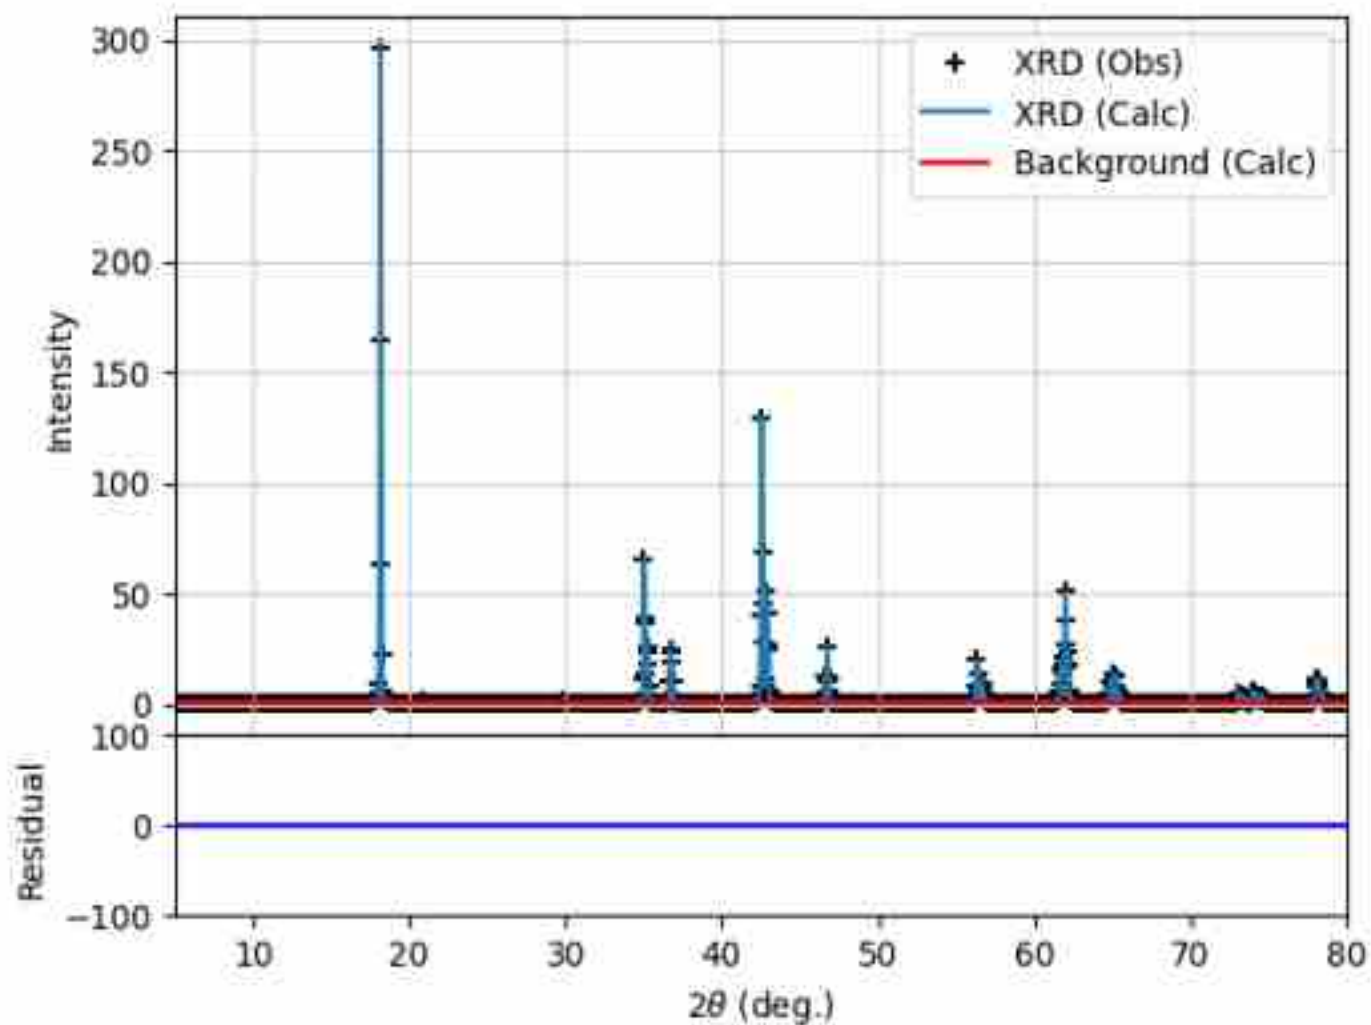

| RMSE before RR | Rwp     | RMSE after RR |
|----------------|---------|---------------|
| 0.023          | 0.00405 | 0.00195       |

# Li<sub>4</sub>V<sub>2</sub>Cr<sub>2</sub>O<sub>8</sub>

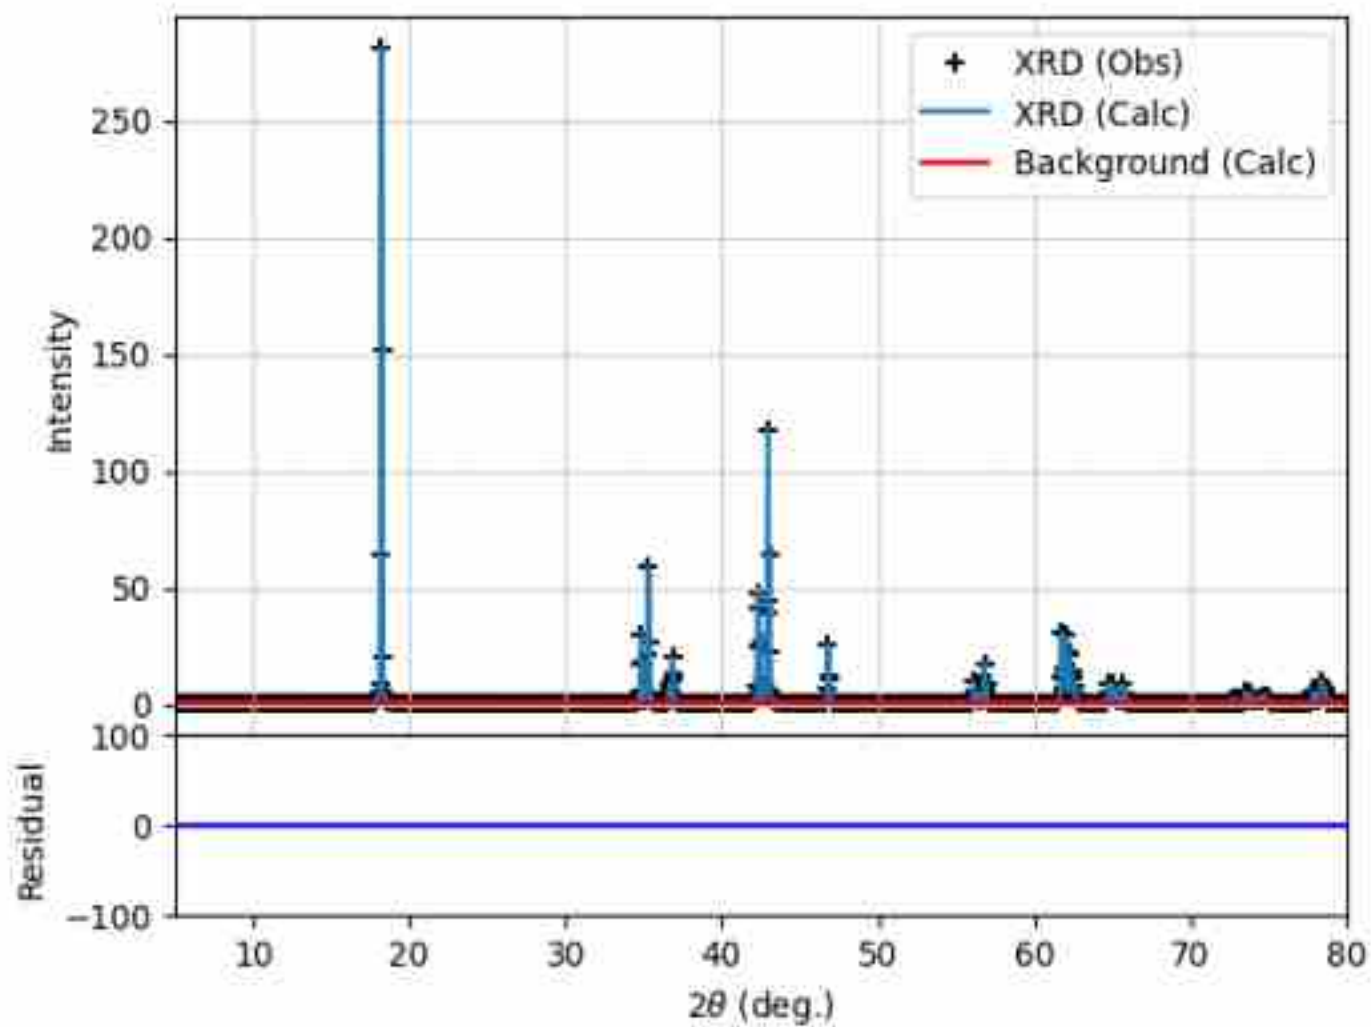

| RMSE before RR | Rwp     | RMSE after RR |
|----------------|---------|---------------|
| 0.023          | 0.00189 | 0.00096       |

# Li<sub>5</sub>Al<sub>11</sub>Si<sub>2</sub>O<sub>8</sub>

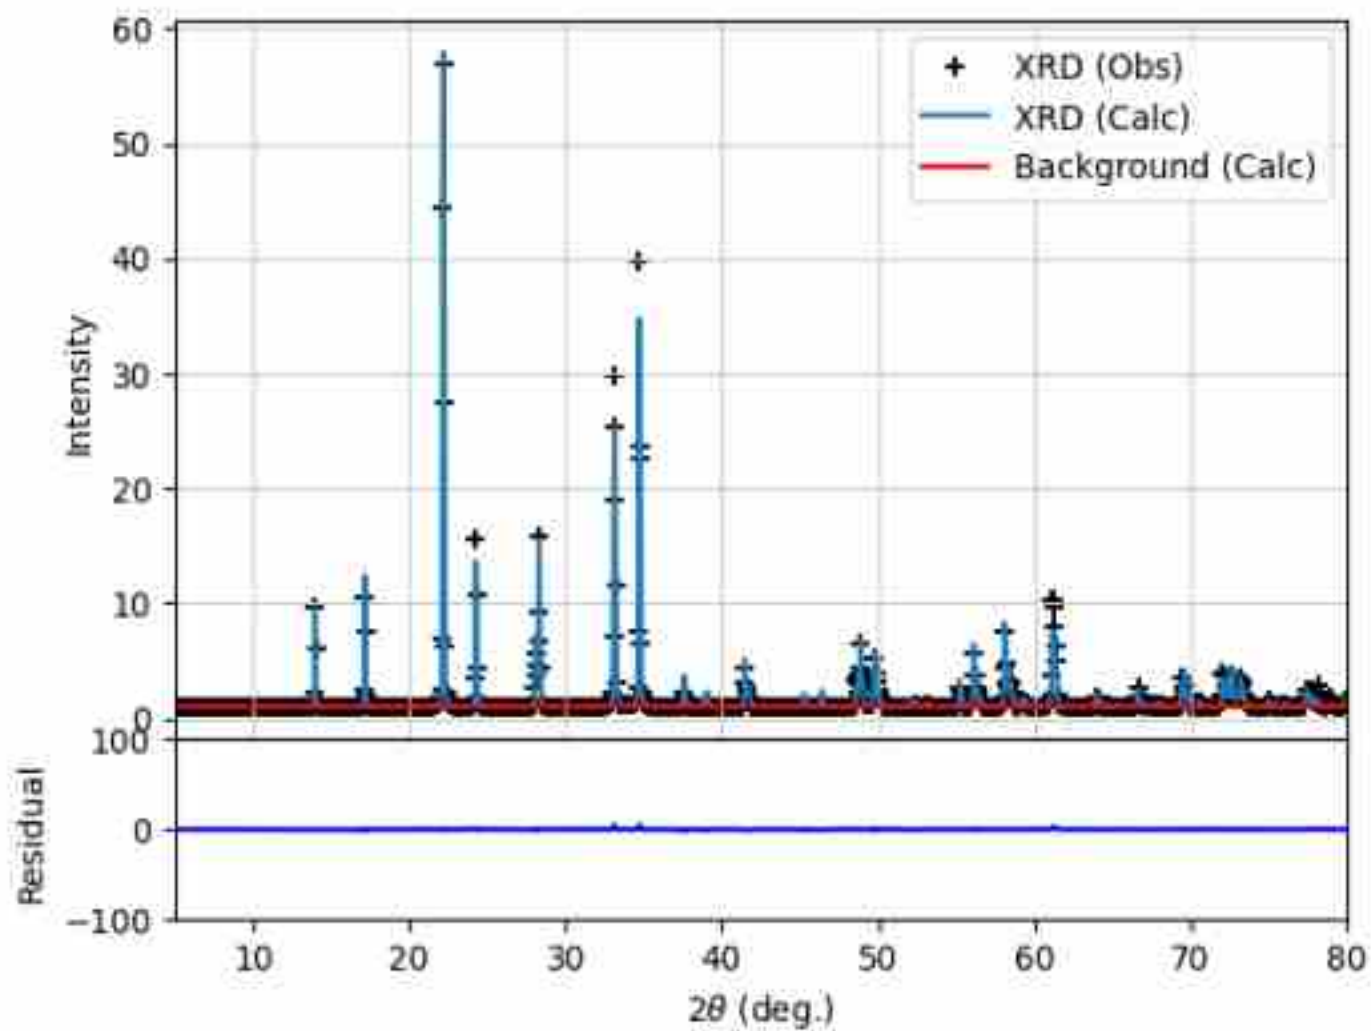

| RMSE before RR | Rwp      | RMSE after RR |
|----------------|----------|---------------|
| 0.023          | 11.16382 | 0.19469       |

# Li<sub>6</sub>Mn<sub>2</sub>Co<sub>2</sub>O<sub>10</sub>

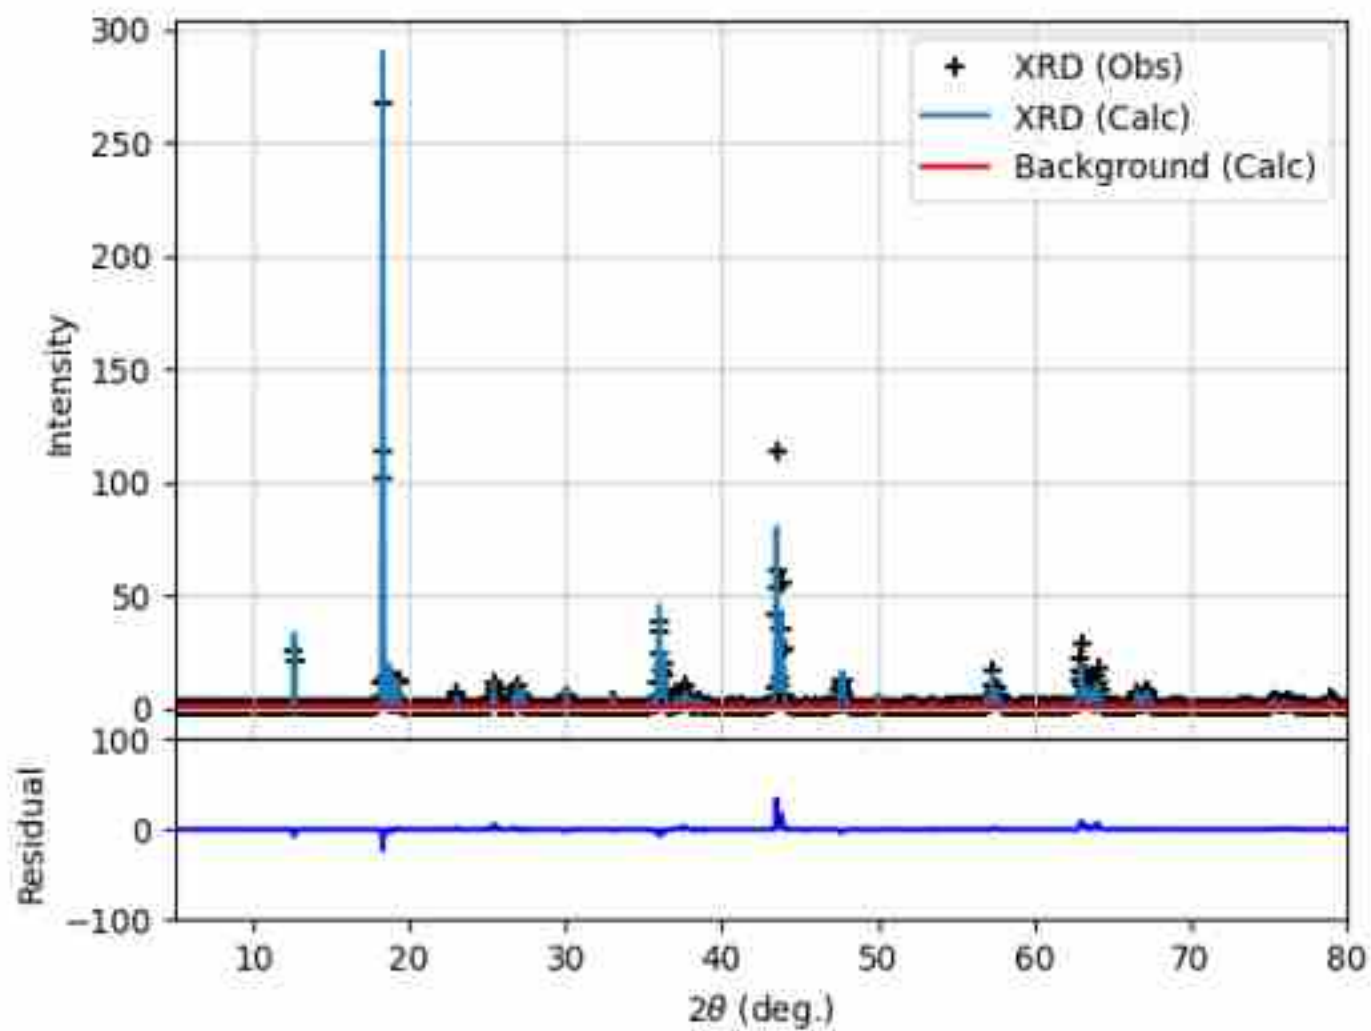

| RMSE before RR | Rwp      | RMSE after RR |
|----------------|----------|---------------|
| 0.023          | 18.85991 | None          |



# Li<sub>6</sub>Ni<sub>1</sub>C<sub>18</sub>

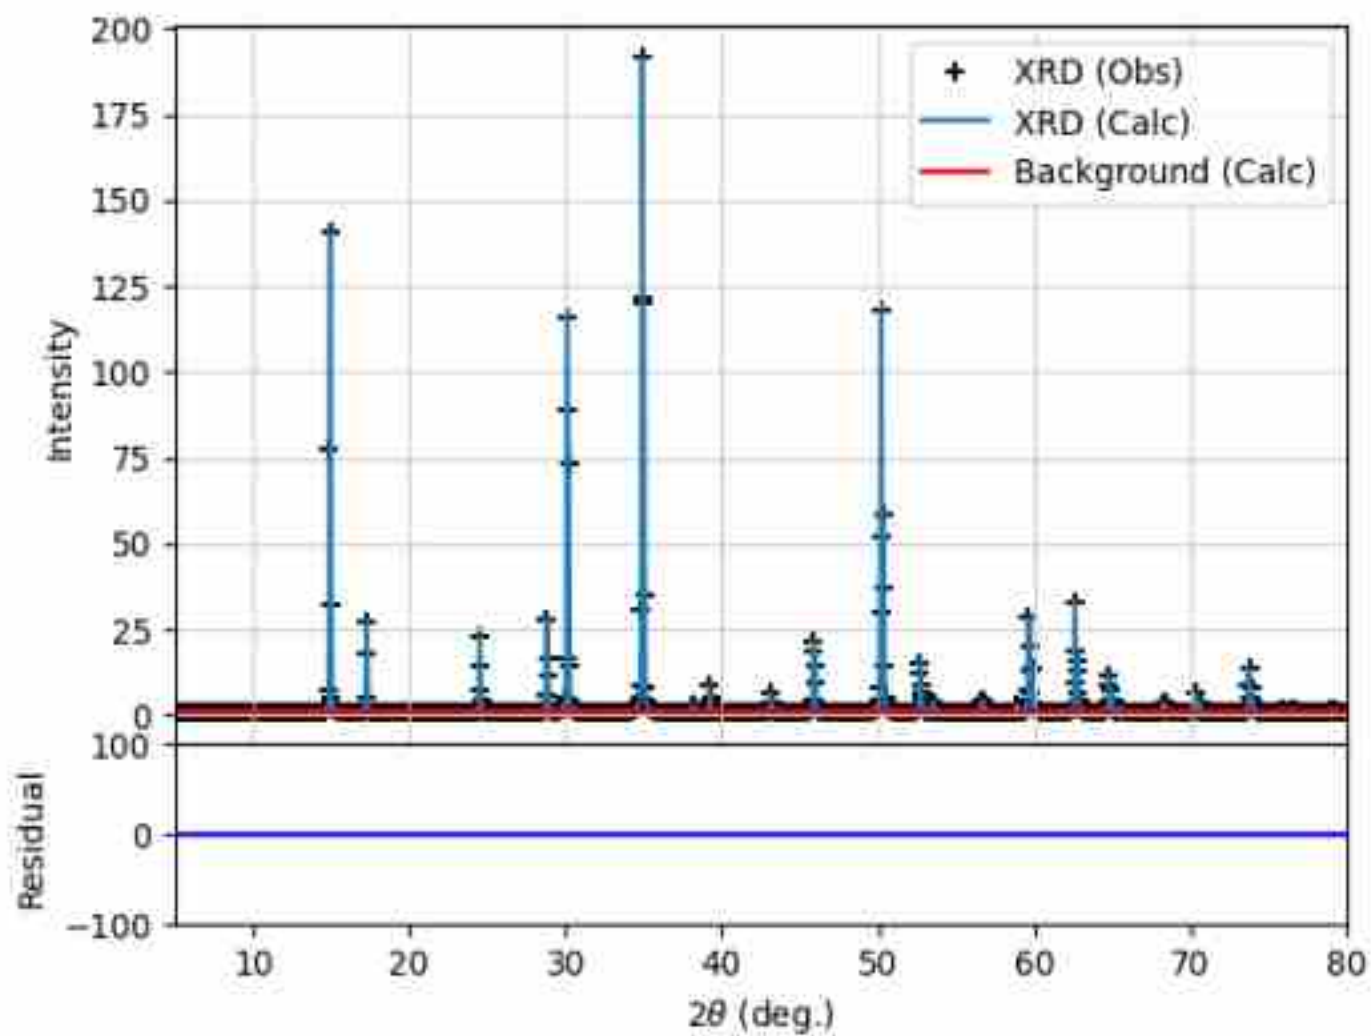

| RMSE before RR | Rwp    | RMSE after RR |
|----------------|--------|---------------|
| 0.023          | 0.0523 | 0.01064       |

# Lu<sub>4</sub>Ga<sub>12</sub>Pd<sub>1</sub>

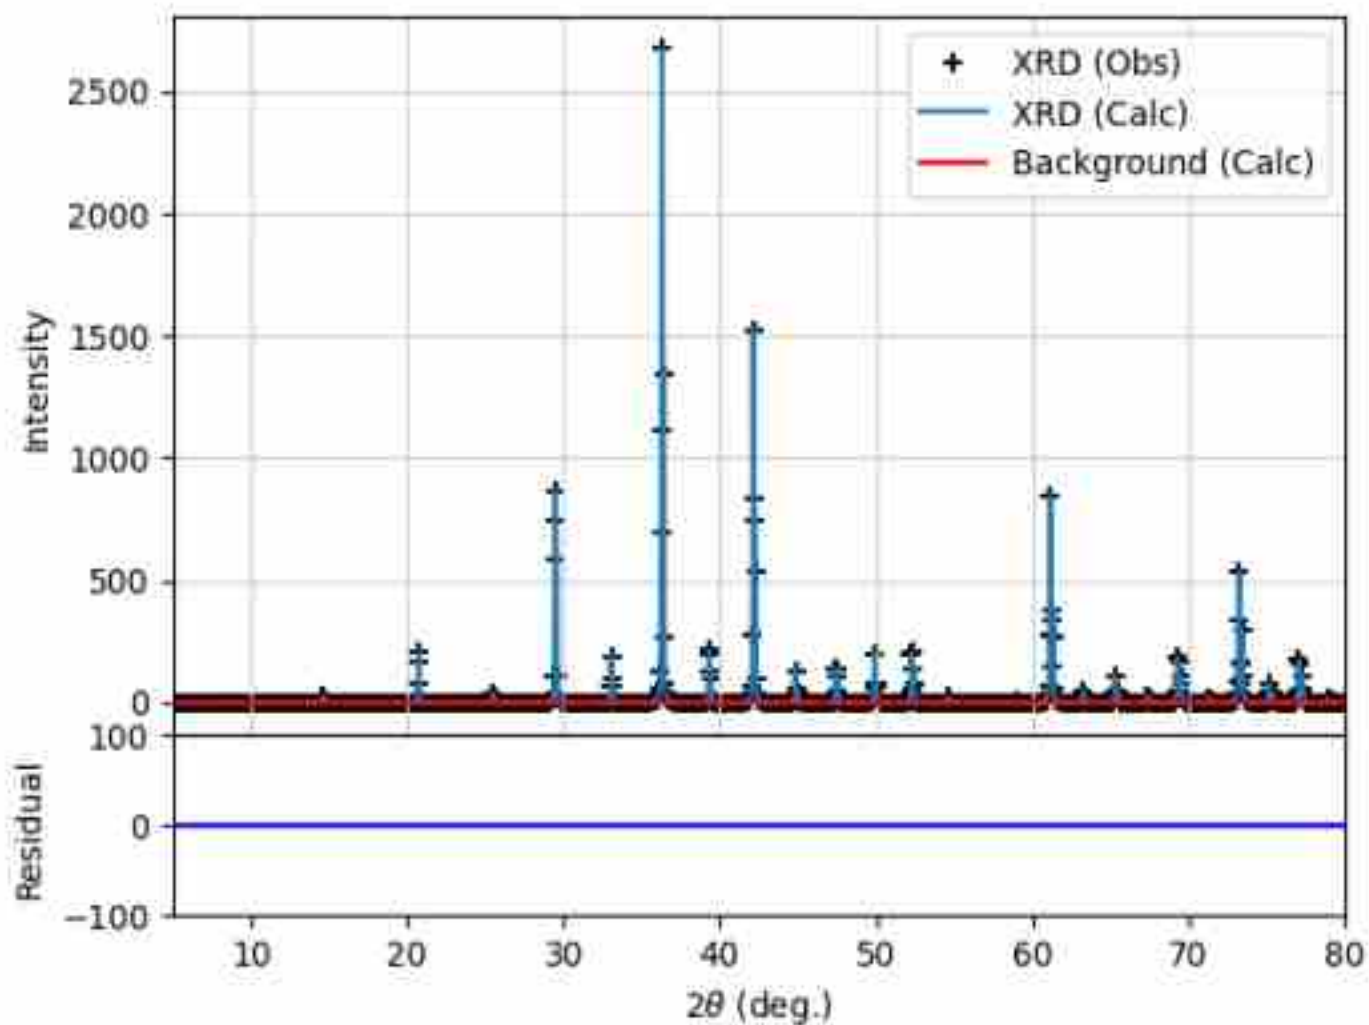

| RMSE before RR | Rwp     | RMSE after RR |
|----------------|---------|---------------|
| 0.023          | 0.00688 | 0.00161       |

# Lu8S12

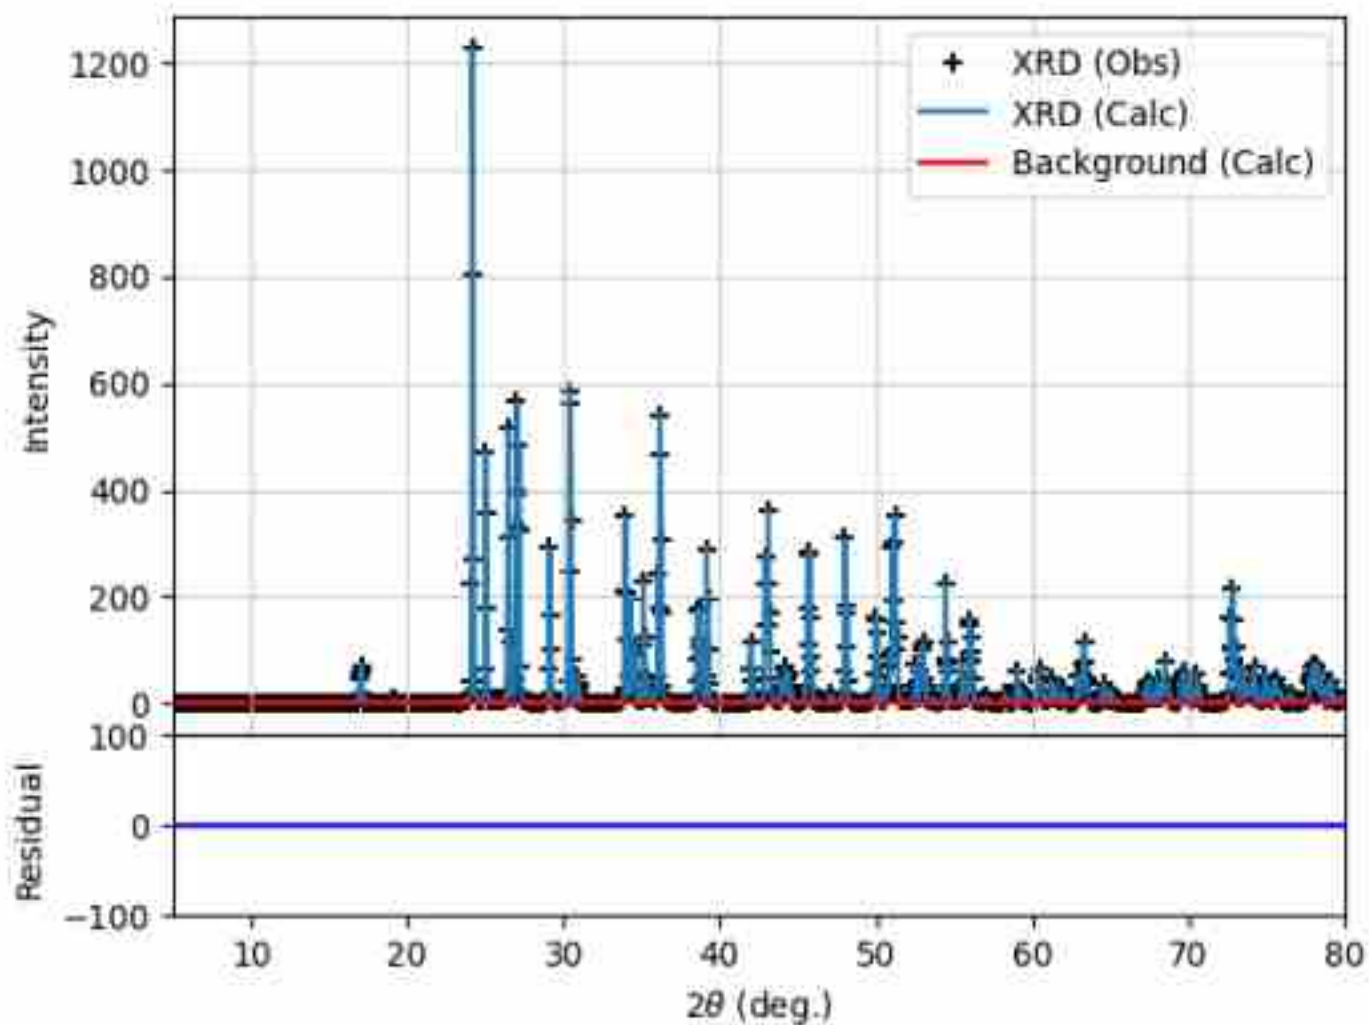

| RMSE before RR | Rwp    | RMSE after RR |
|----------------|--------|---------------|
| 0.023          | 0.0041 | 0.00064       |

# Mg<sub>2</sub>Cu<sub>4</sub>Si<sub>2</sub>S<sub>8</sub>

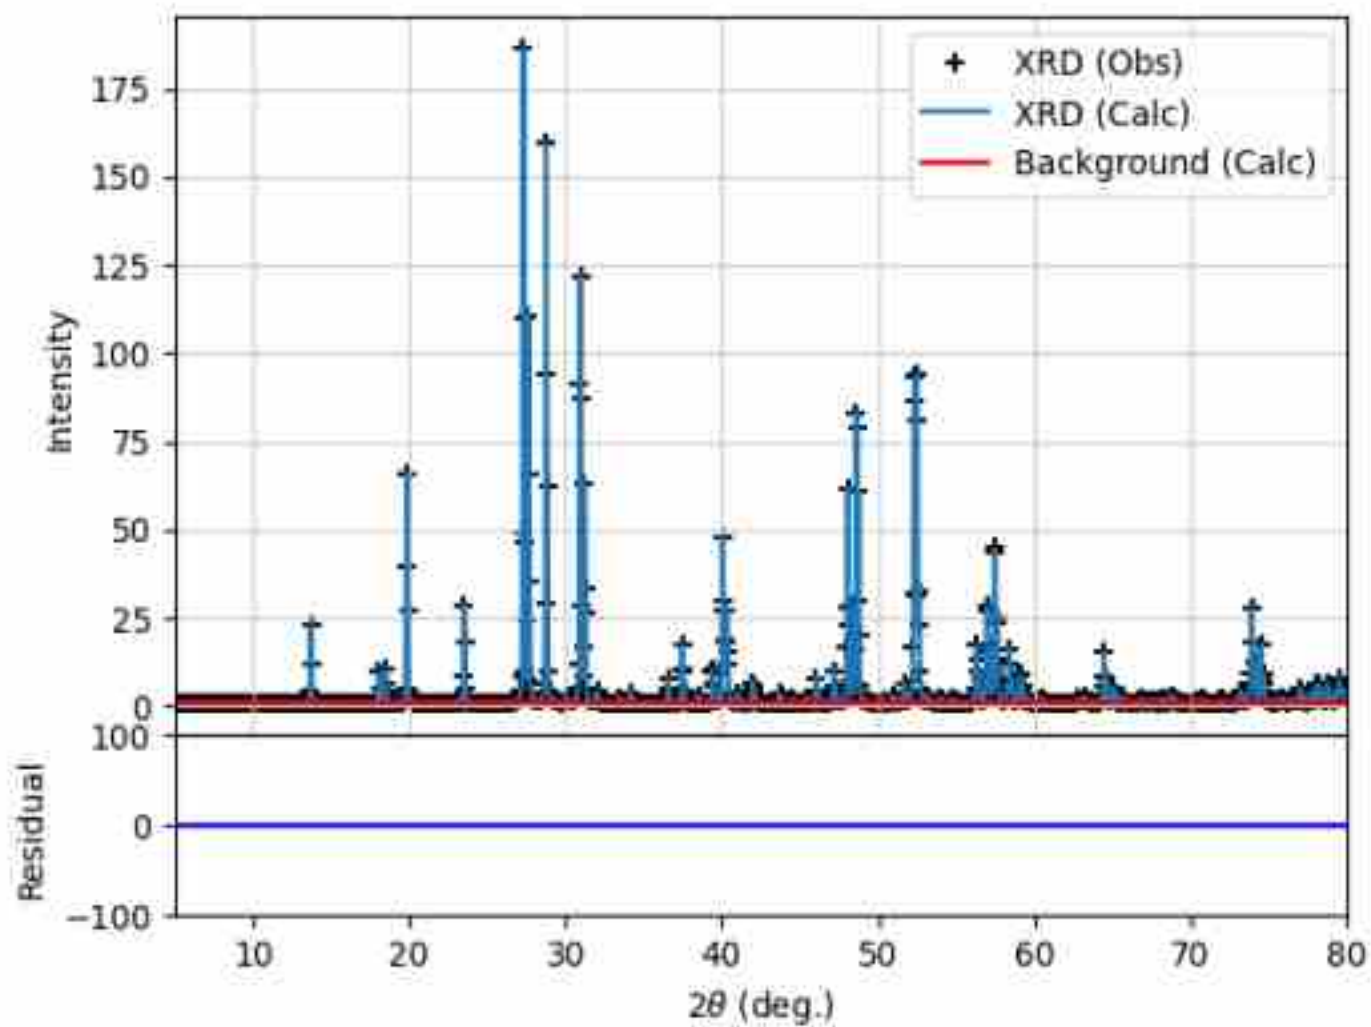

| RMSE before RR | Rwp     | RMSE after RR |
|----------------|---------|---------------|
| 0.023          | 0.00289 | 0.00062       |

# Mg<sub>2</sub>Ta<sub>4</sub>O<sub>12</sub>

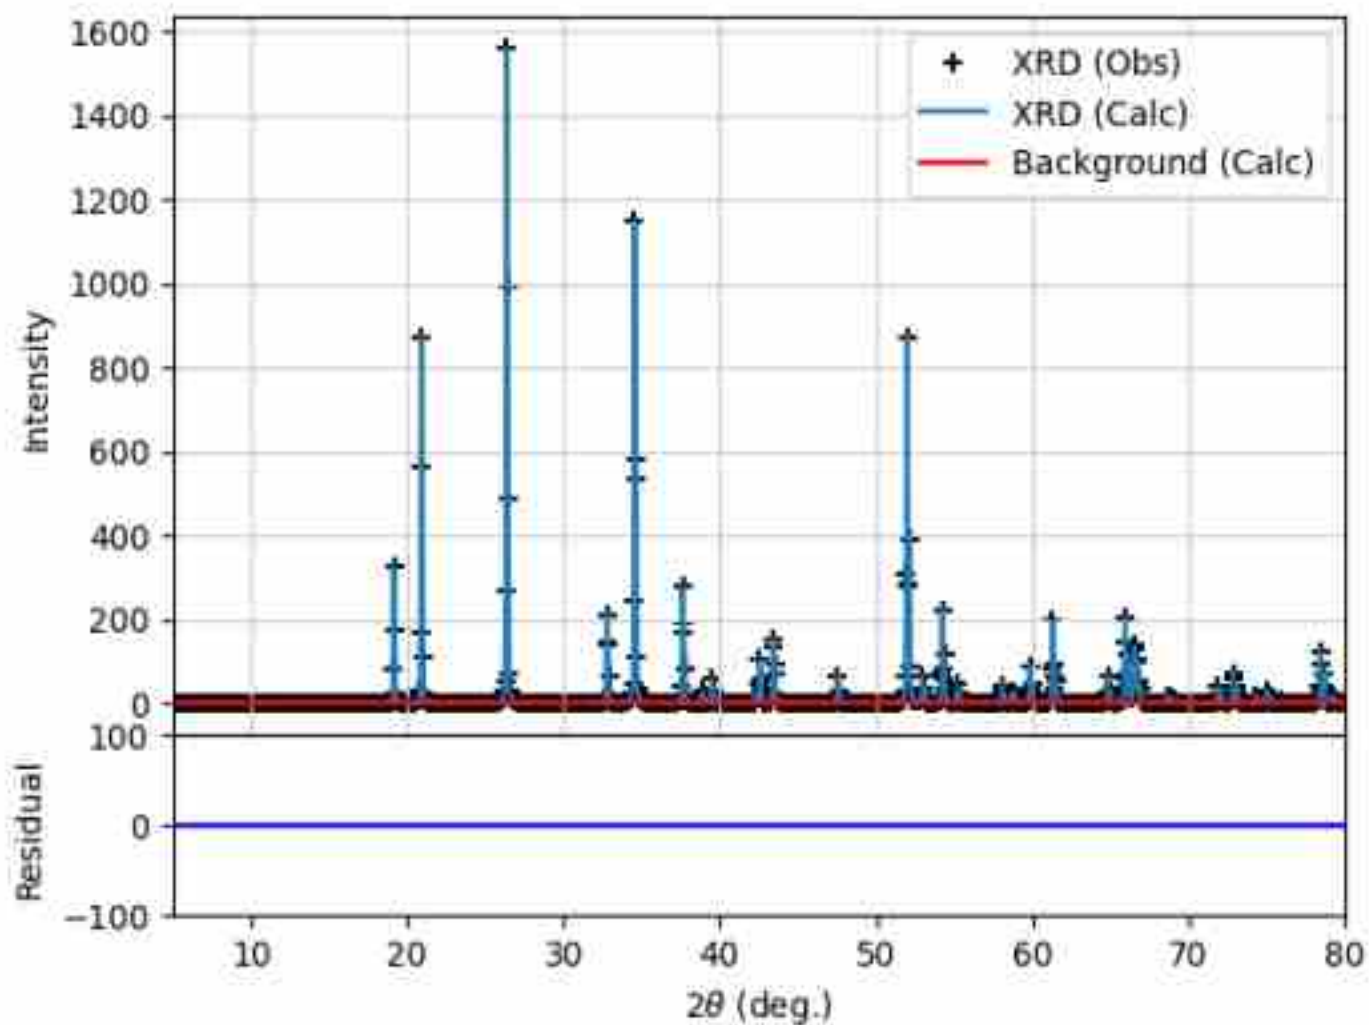

| RMSE before RR | Rwp    | RMSE after RR |
|----------------|--------|---------------|
| 0.023          | 0.0045 | 0.00116       |

# Mg<sub>2</sub>V<sub>2</sub>Cr<sub>2</sub>S<sub>8</sub>

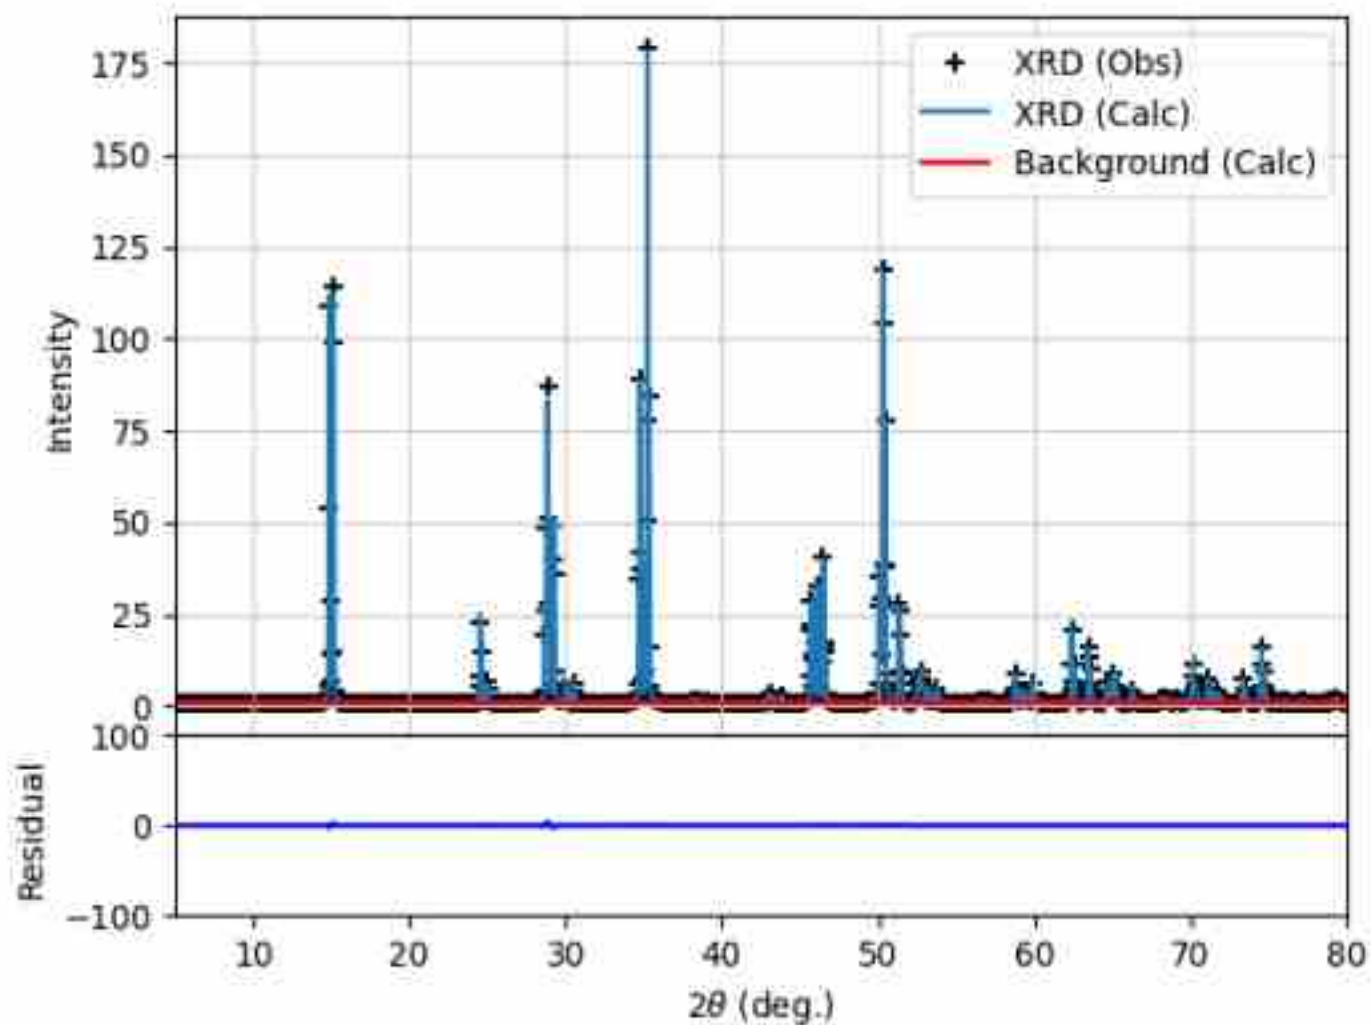

| RMSE before RR | Rwp     | RMSE after RR |
|----------------|---------|---------------|
| 0.023          | 2.28772 | 0.02131       |

# Mg<sub>4</sub>Fe<sub>2</sub>Sb<sub>2</sub>O<sub>12</sub>

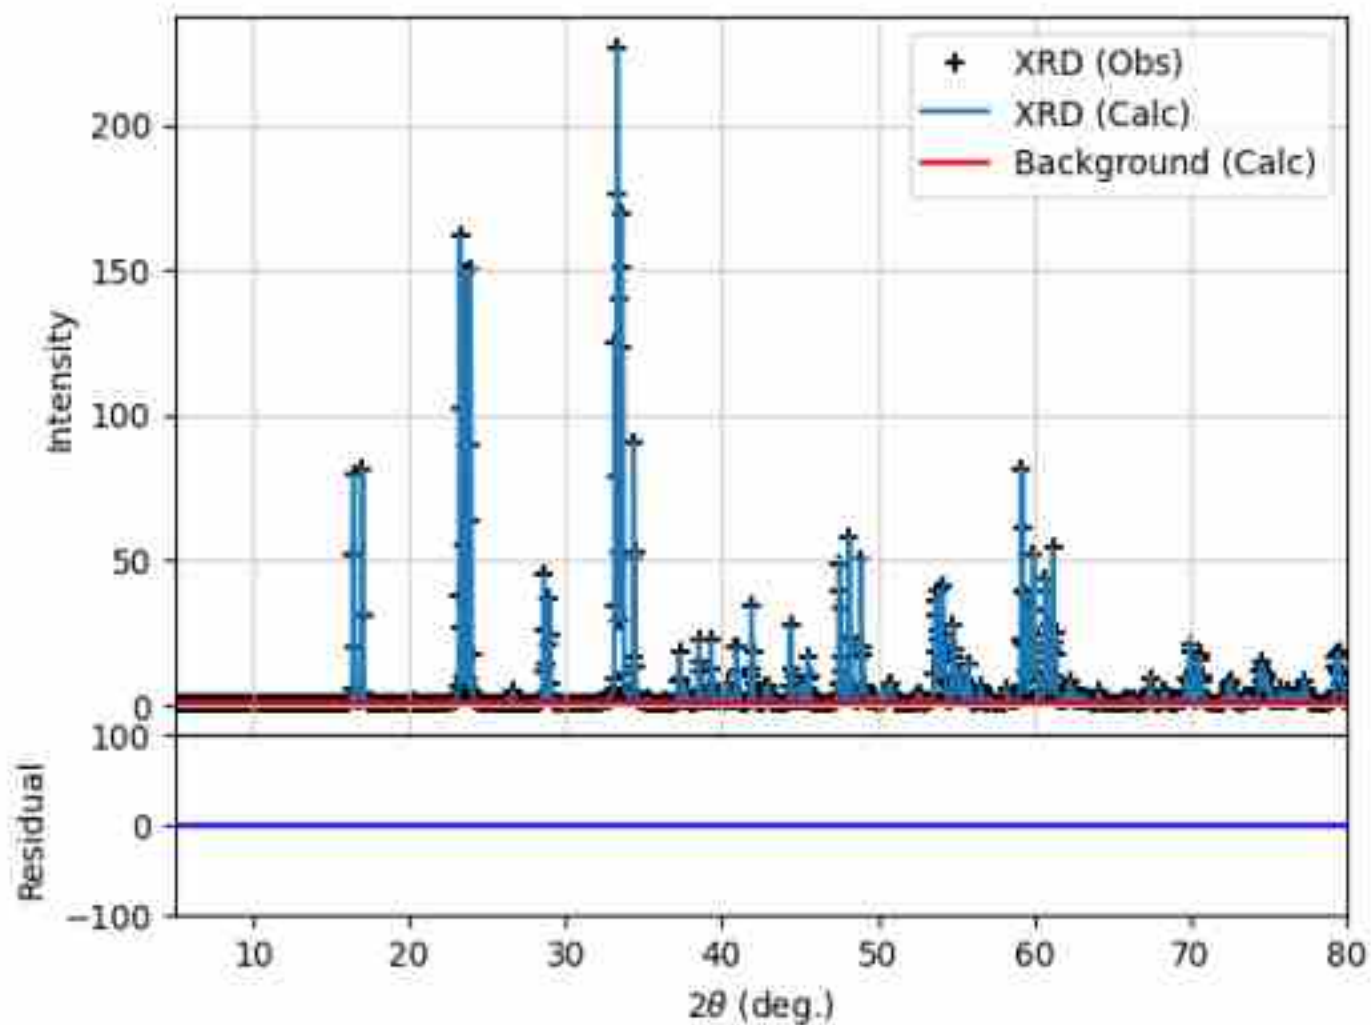

| RMSE before RR | Rwp     | RMSE after RR |
|----------------|---------|---------------|
| 0.023          | 0.00331 | 0.00068       |

# Mn1Bi2Te4

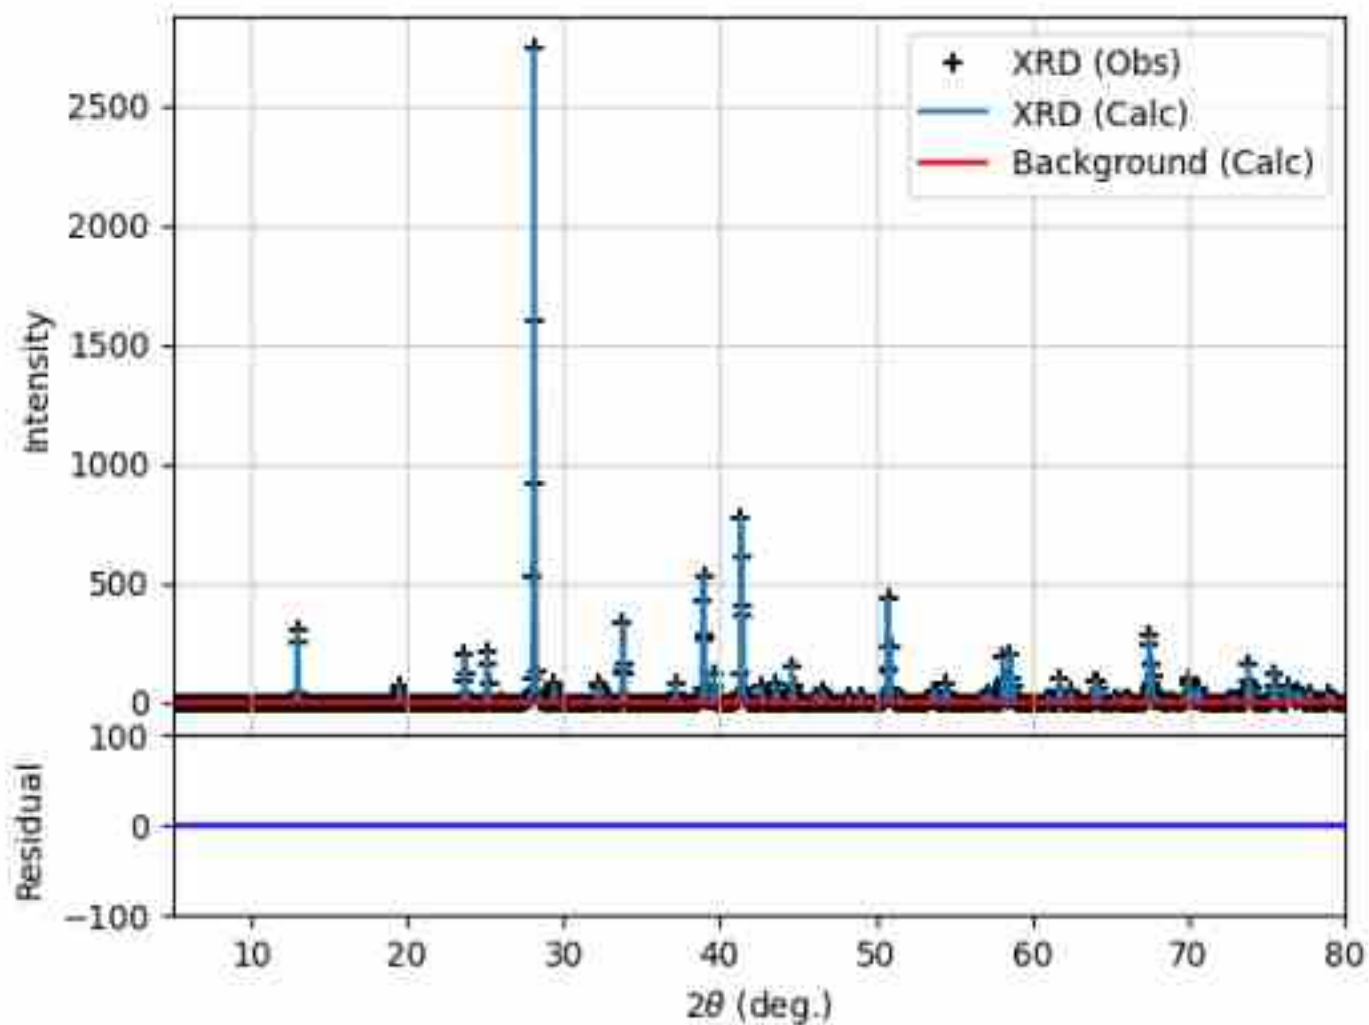

| RMSE before RR | Rwp     | RMSE after RR |
|----------------|---------|---------------|
| 0.023          | 0.00424 | 0.00038       |



# Mn<sub>2</sub>F<sub>6</sub>

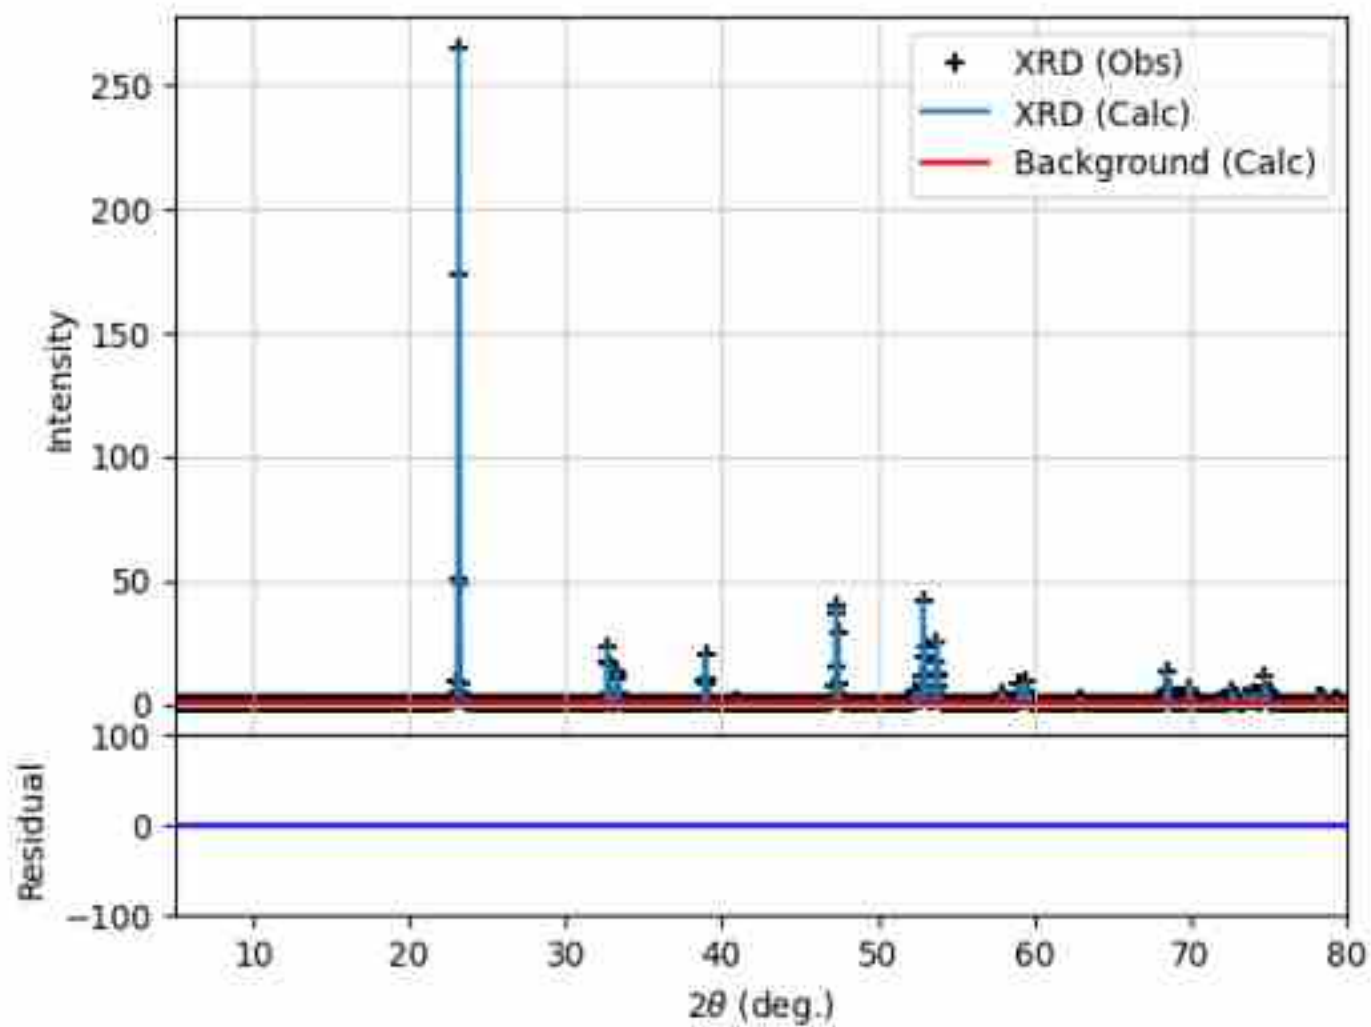

| RMSE before RR | Rwp     | RMSE after RR |
|----------------|---------|---------------|
| 0.023          | 0.00321 | 0.00101       |

# Mn<sub>2</sub>Si<sub>2</sub>Ag<sub>4</sub>Te<sub>8</sub>

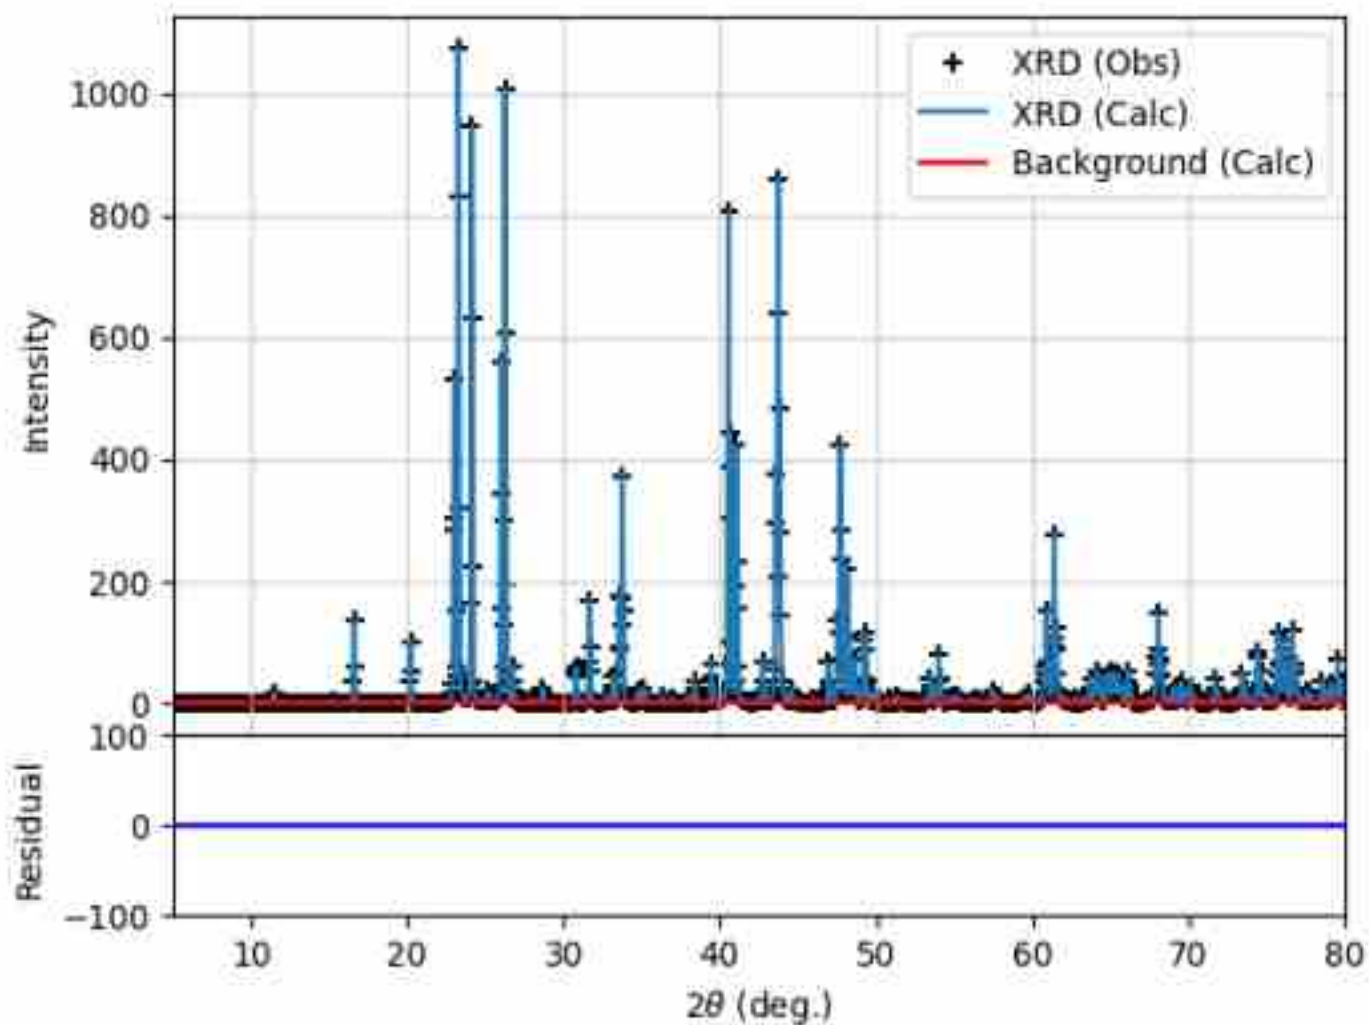

| RMSE before RR | Rwp     | RMSE after RR |
|----------------|---------|---------------|
| 0.023          | 0.00446 | 0.00071       |

# Mn<sub>4</sub>Cr<sub>2</sub>O<sub>8</sub>

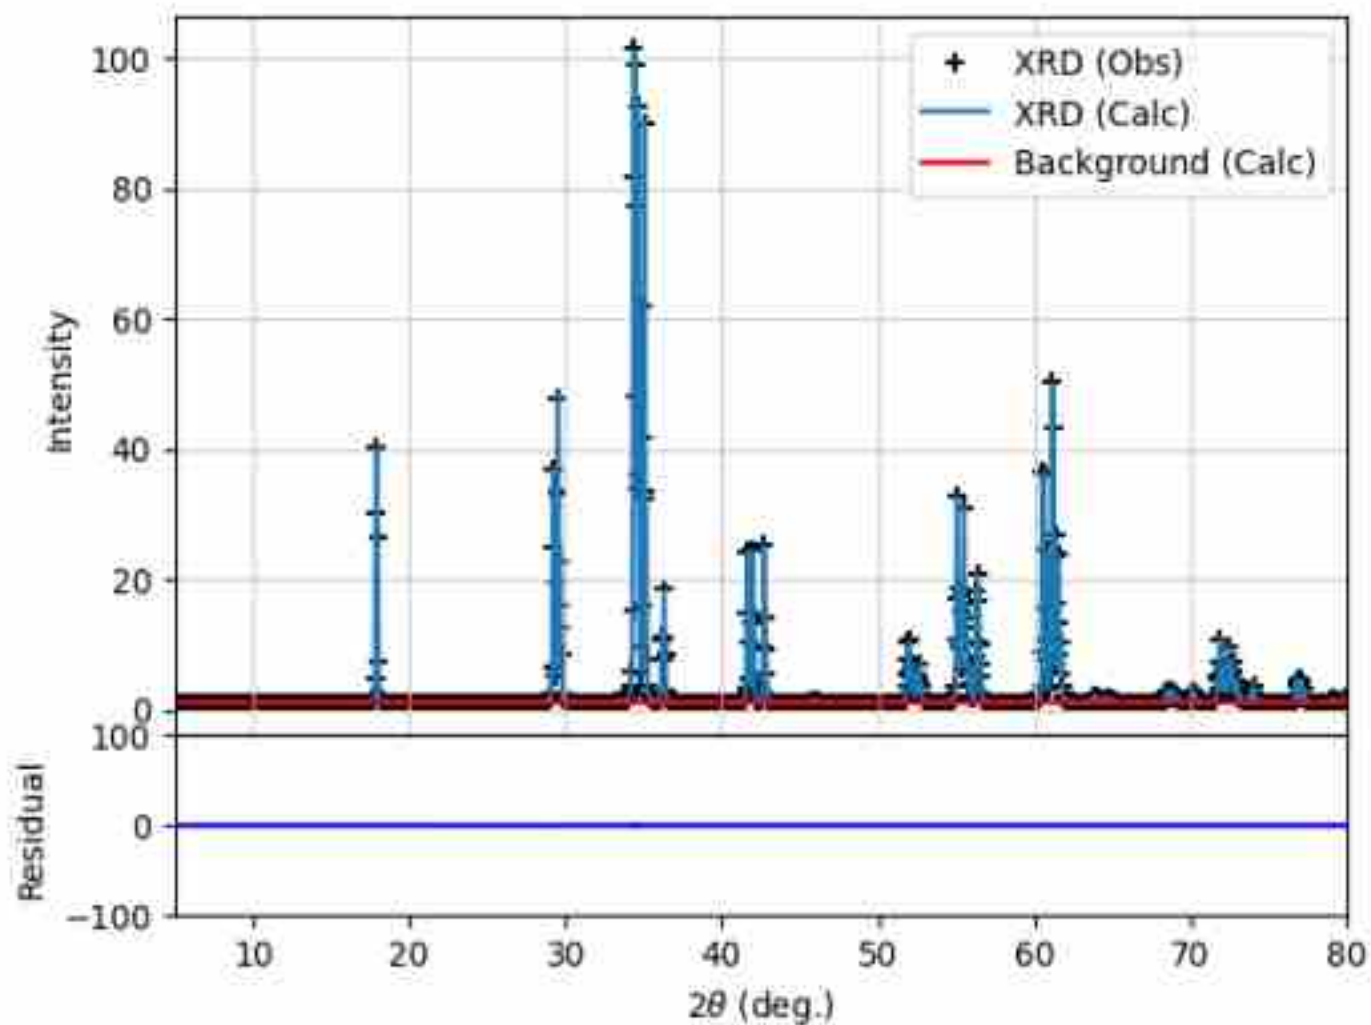

| RMSE before RR | Rwp     | RMSE after RR |
|----------------|---------|---------------|
| 0.023          | 0.62365 | 0.03056       |

# Mo2W1S6

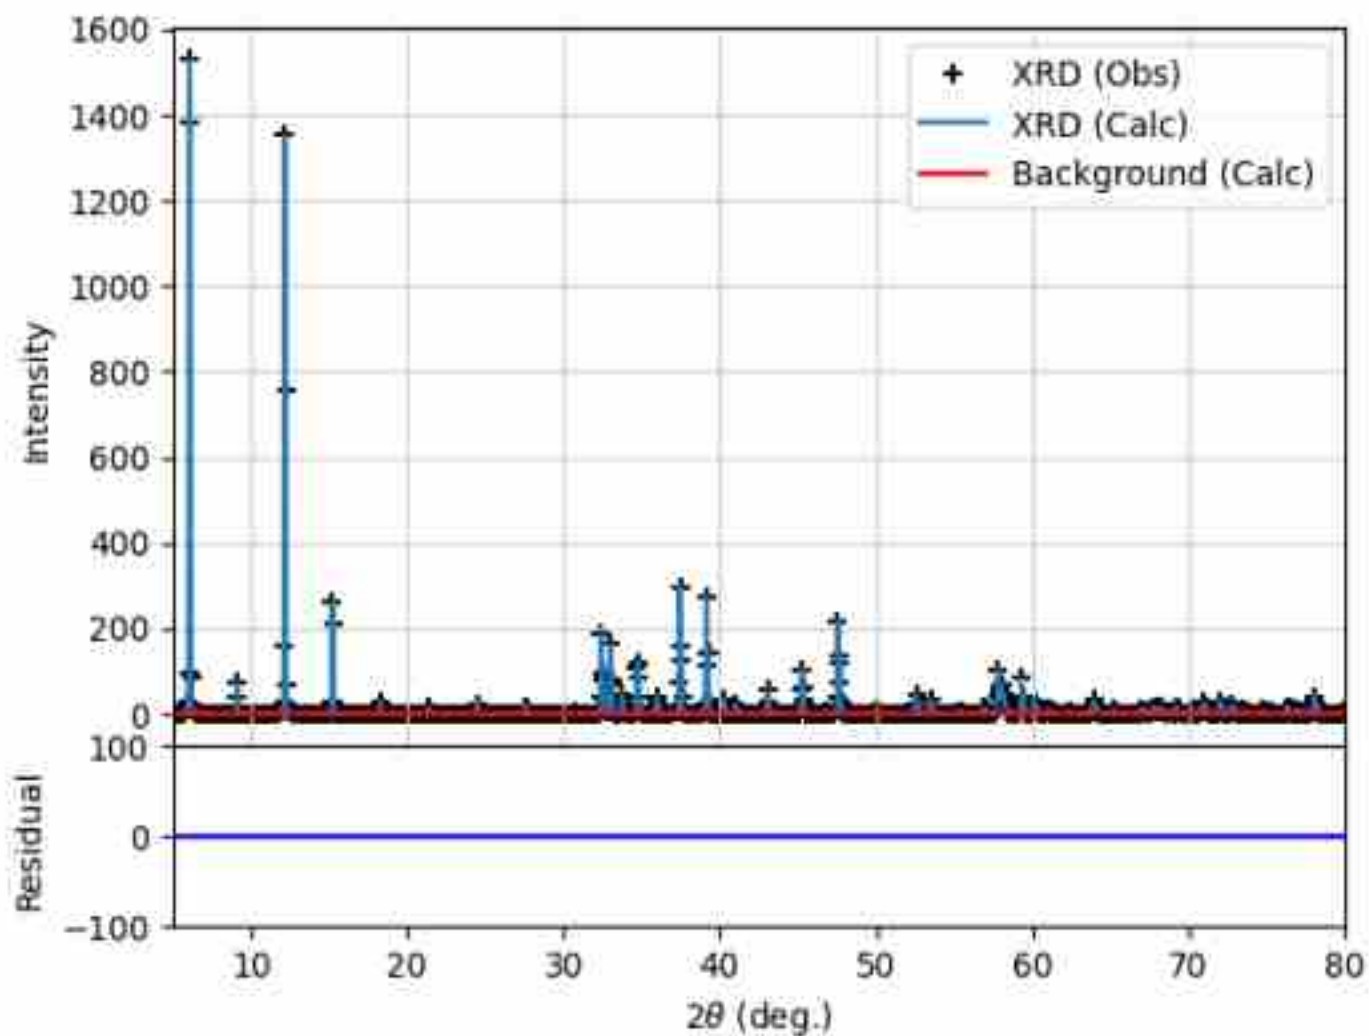

| RMSE before RR | Rwp     | RMSE after RR |
|----------------|---------|---------------|
| 0.023          | 0.00239 | 0.00033       |

# Na<sub>1</sub>AsF<sub>6</sub>

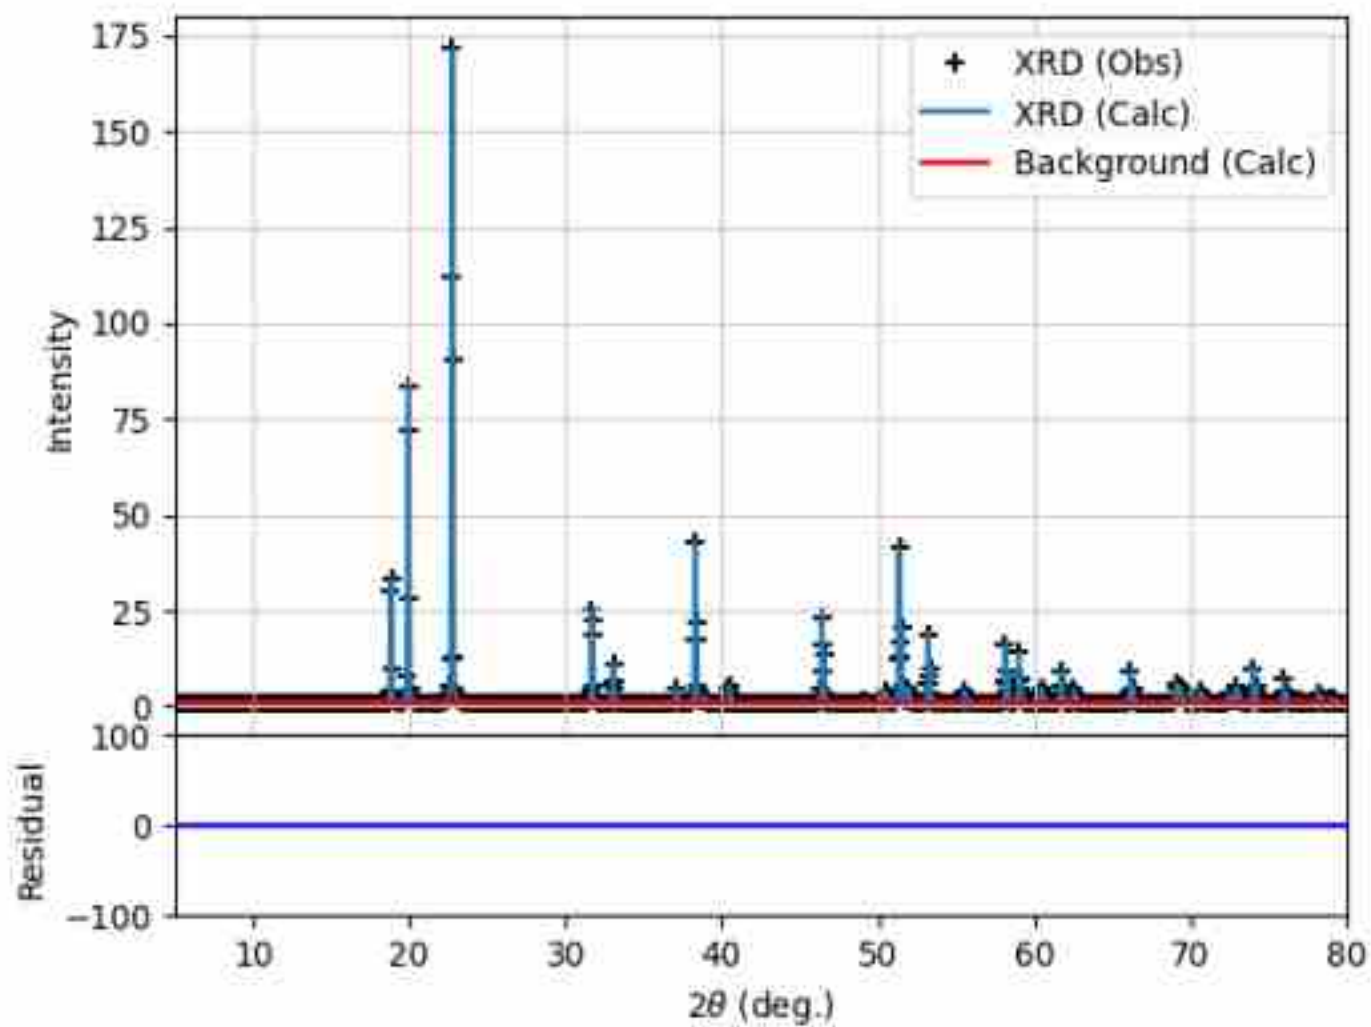

| RMSE before RR | Rwp     | RMSE after RR |
|----------------|---------|---------------|
| 0.023          | 0.00202 | 0.00095       |

# Na<sub>2</sub>Mn<sub>2</sub>O<sub>4</sub>

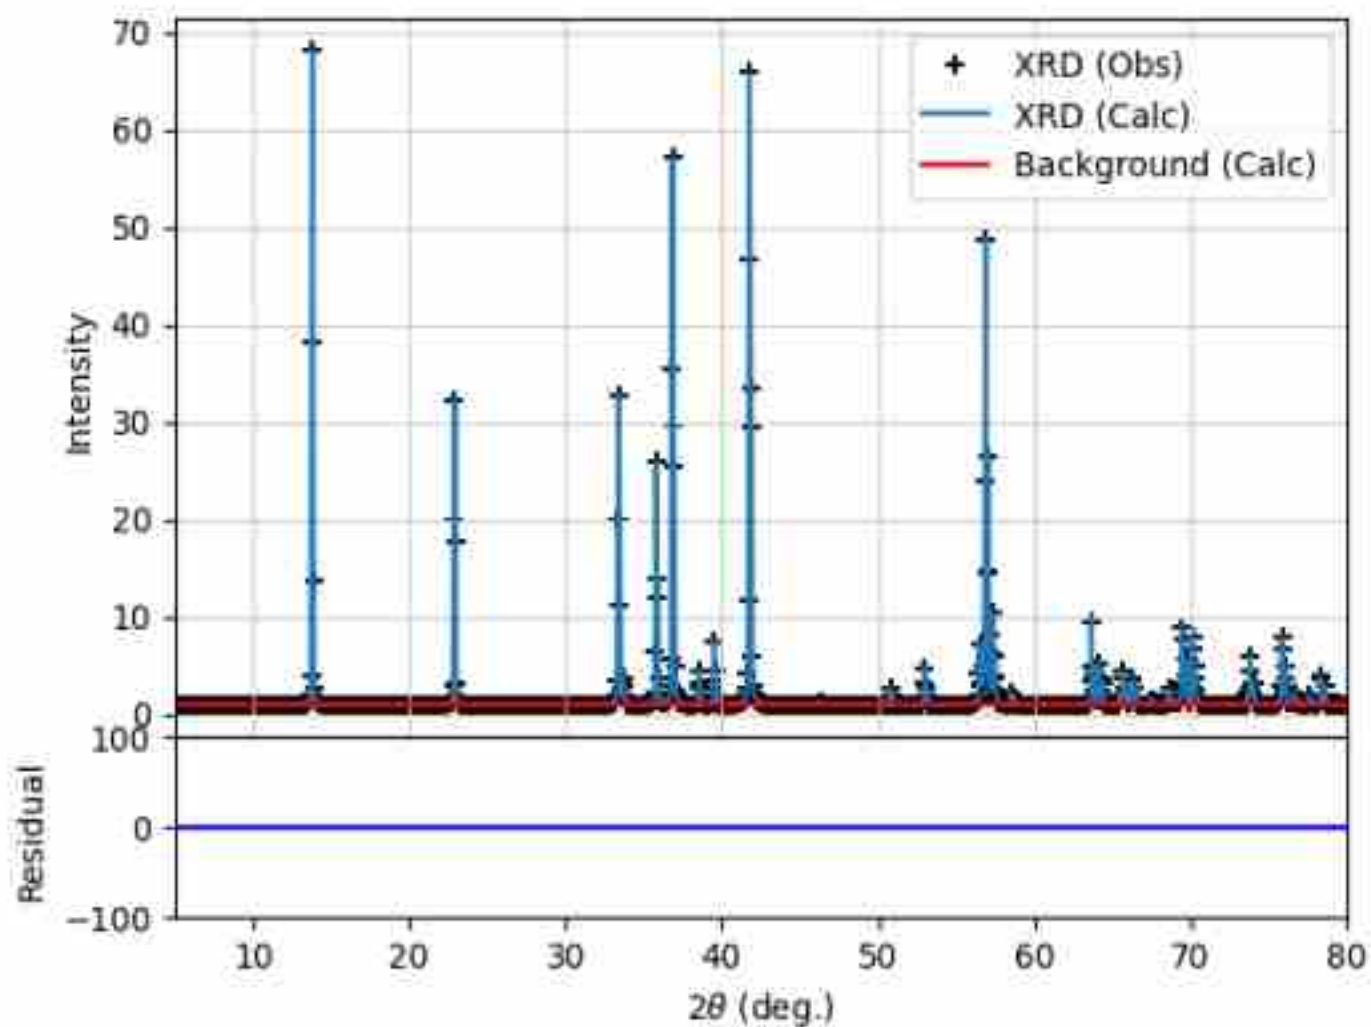

| RMSE before RR | Rwp     | RMSE after RR |
|----------------|---------|---------------|
| 0.023          | 0.00437 | 0.0016        |

# Na<sub>3</sub>ErTi<sub>2</sub>Nb<sub>2</sub>O<sub>12</sub>

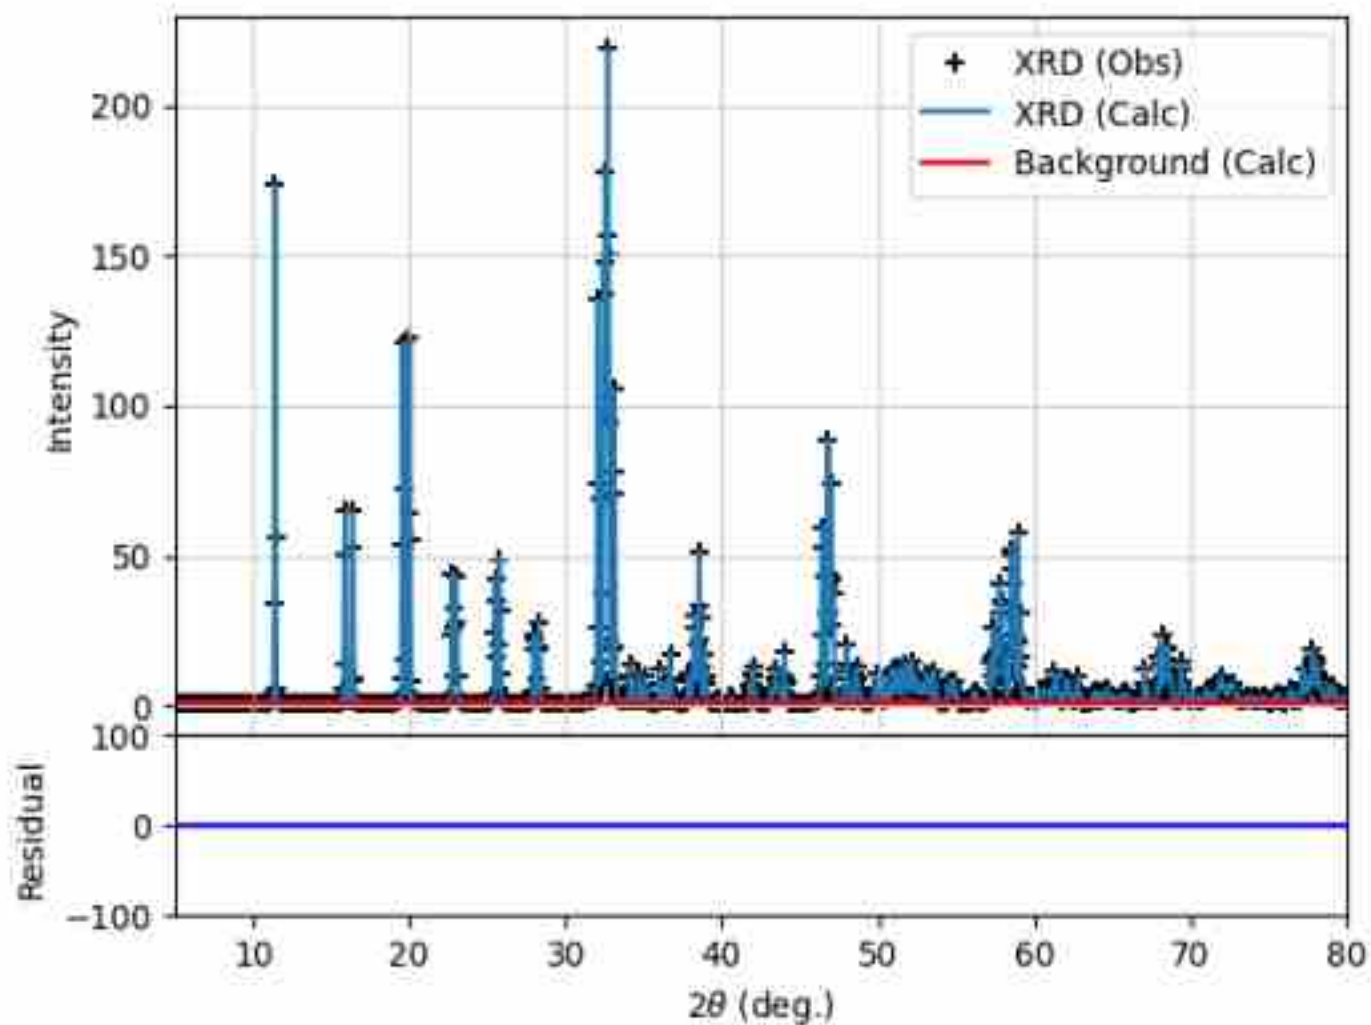

| RMSE before RR | Rwp     | RMSE after RR |
|----------------|---------|---------------|
| 0.023          | 0.00272 | 1e-05         |

# Na<sub>4</sub>Al<sub>3</sub>Fe<sub>1</sub>O<sub>8</sub>

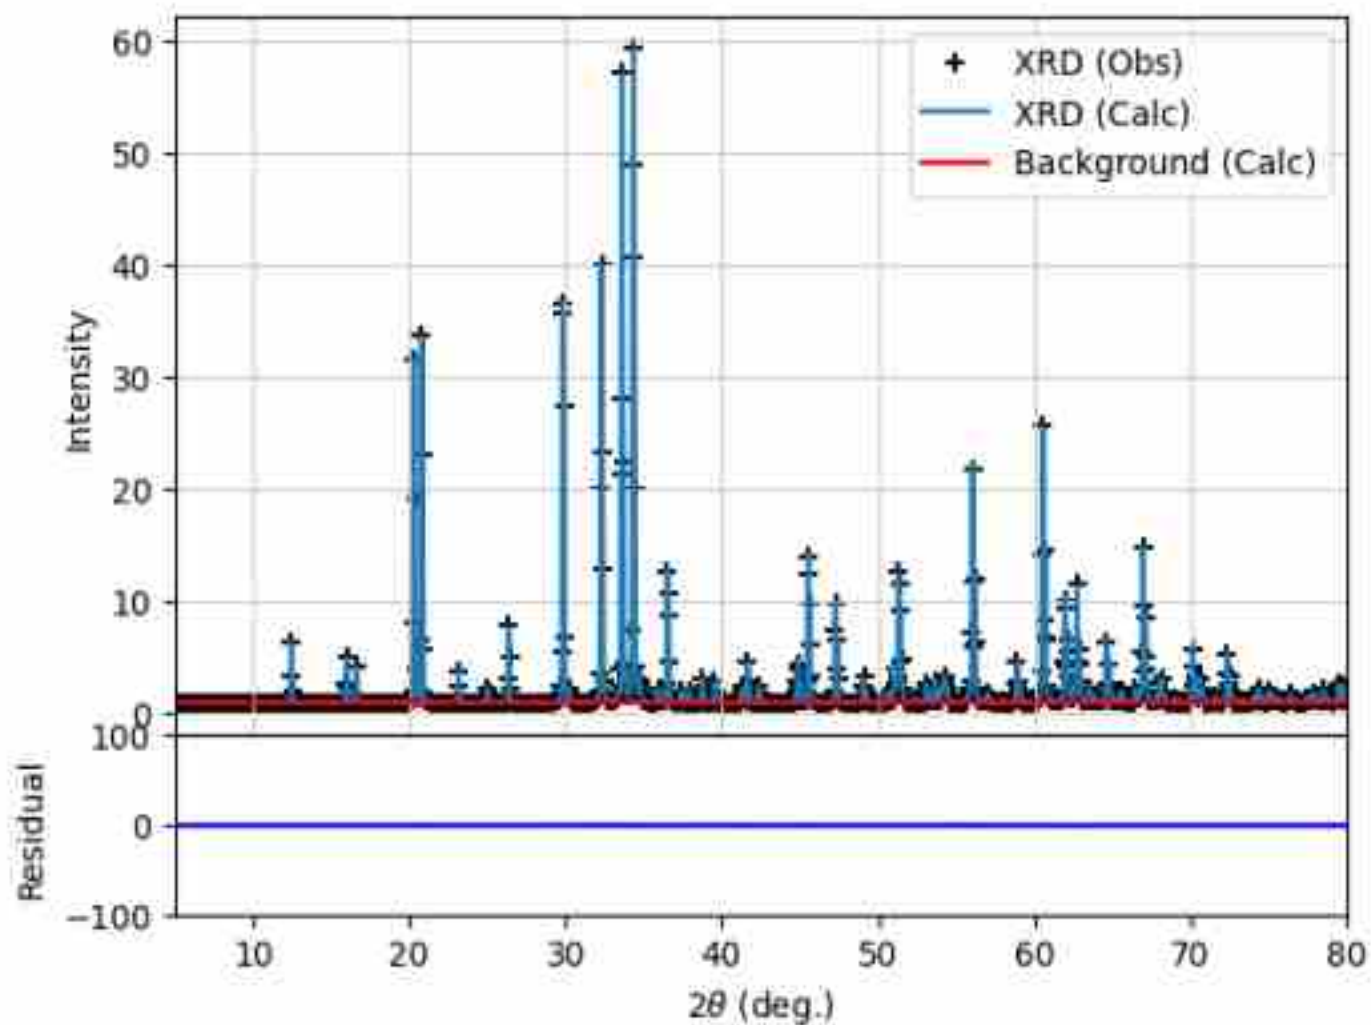

| RMSE before RR | Rwp     | RMSE after RR |
|----------------|---------|---------------|
| 0.023          | 1.47939 | 0.01499       |



# Na<sub>4</sub>Mg<sub>4</sub>H<sub>12</sub>

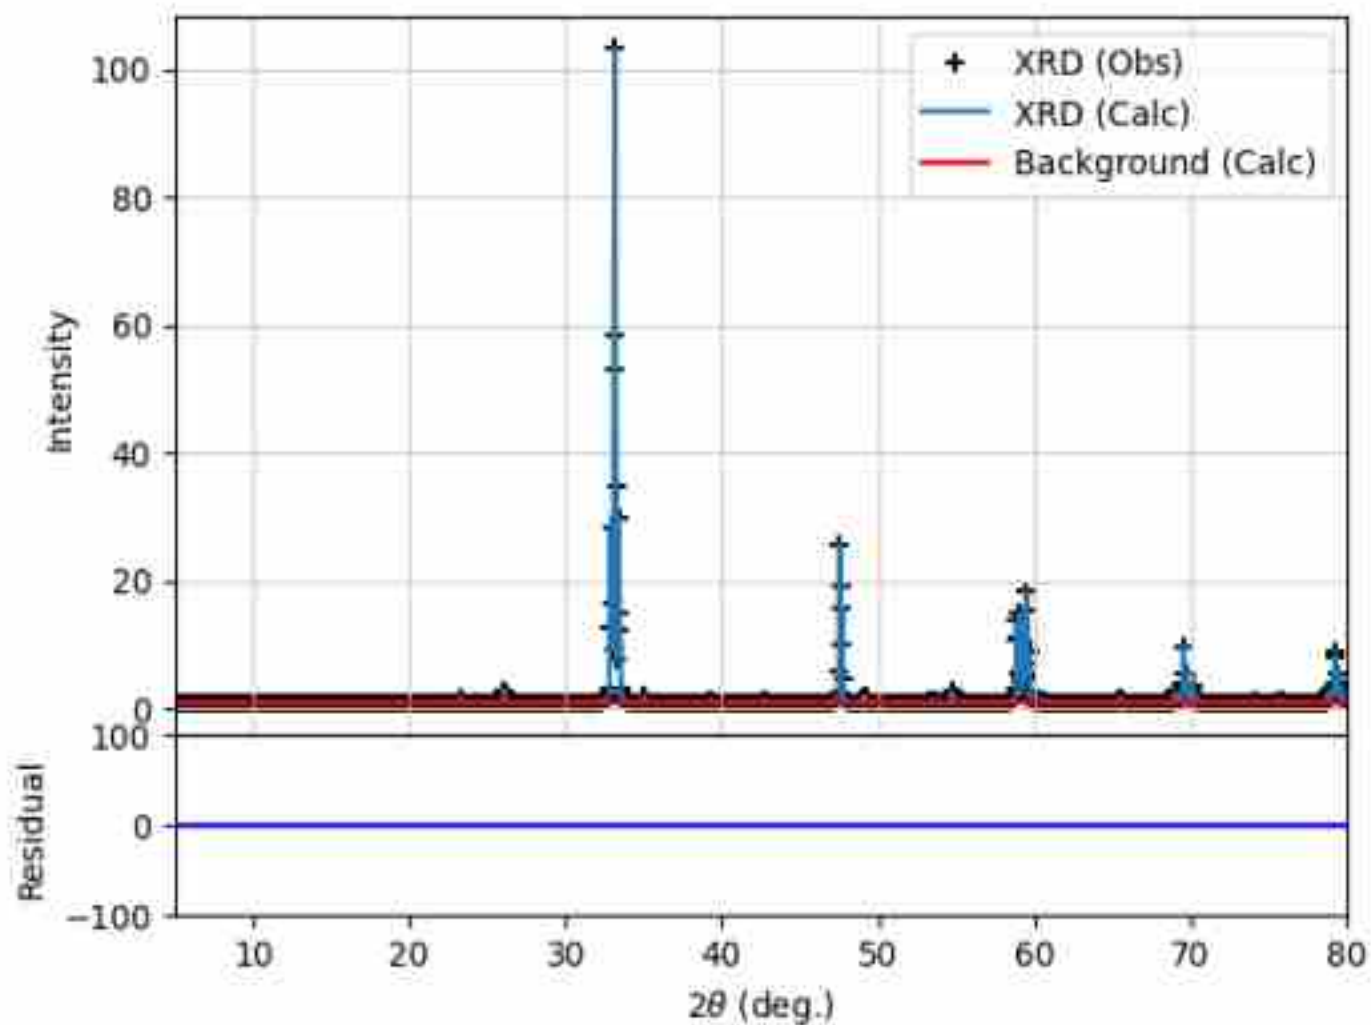

| RMSE before RR | Rwp     | RMSE after RR |
|----------------|---------|---------------|
| 0.023          | 0.00225 | 0.00438       |

# Na<sub>6</sub>Cd<sub>1</sub>Cl<sub>8</sub>

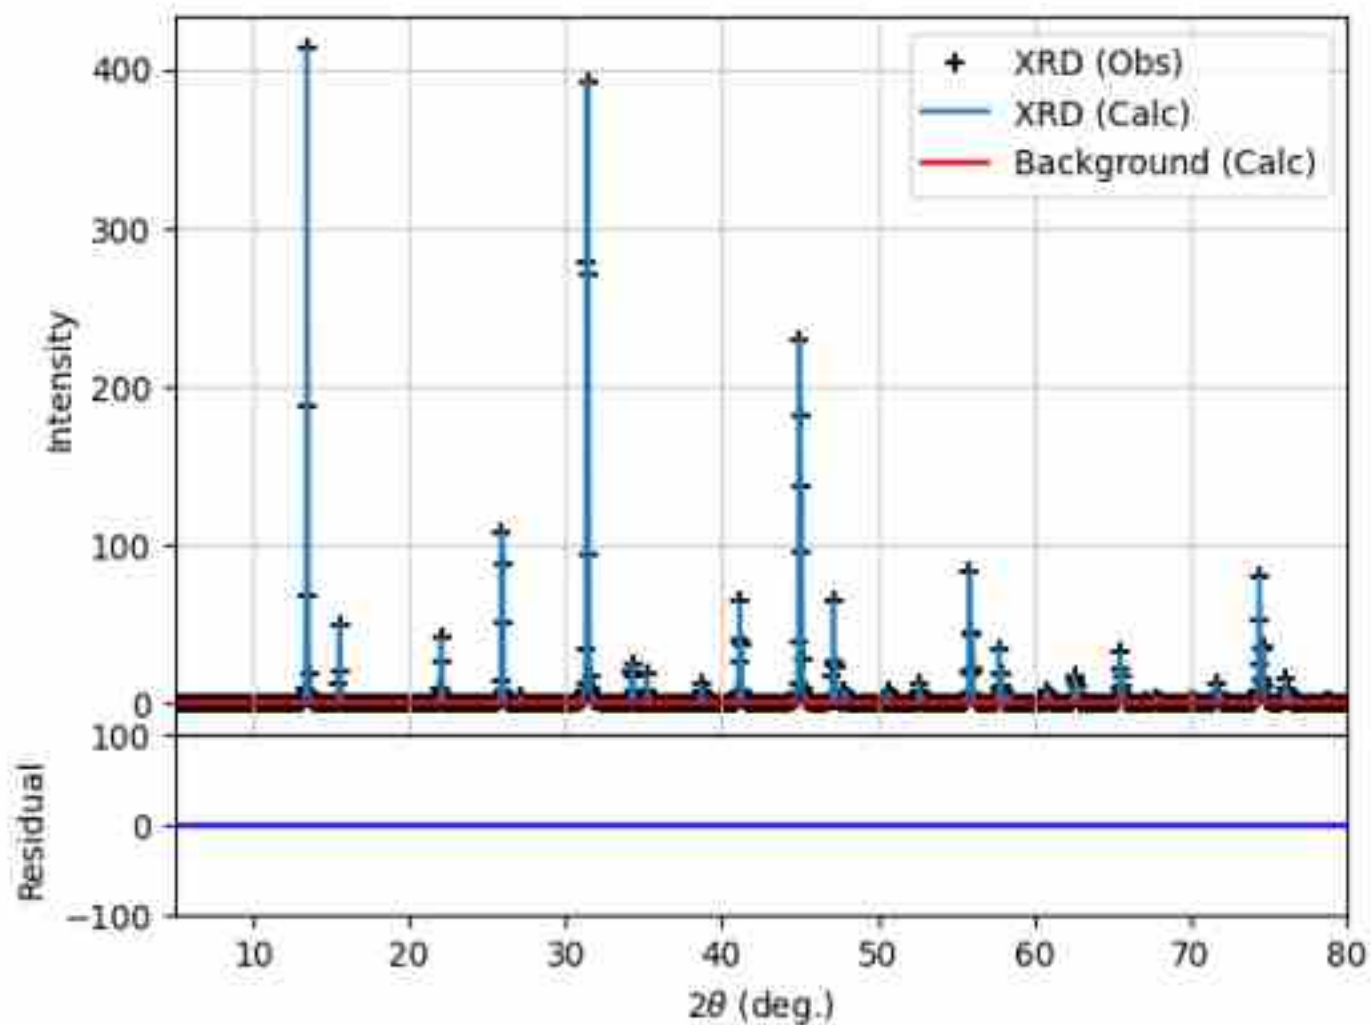

| RMSE before RR | Rwp     | RMSE after RR |
|----------------|---------|---------------|
| 0.023          | 0.01781 | 0.0021        |

# Na<sub>6</sub>Cr<sub>2</sub>F<sub>12</sub>

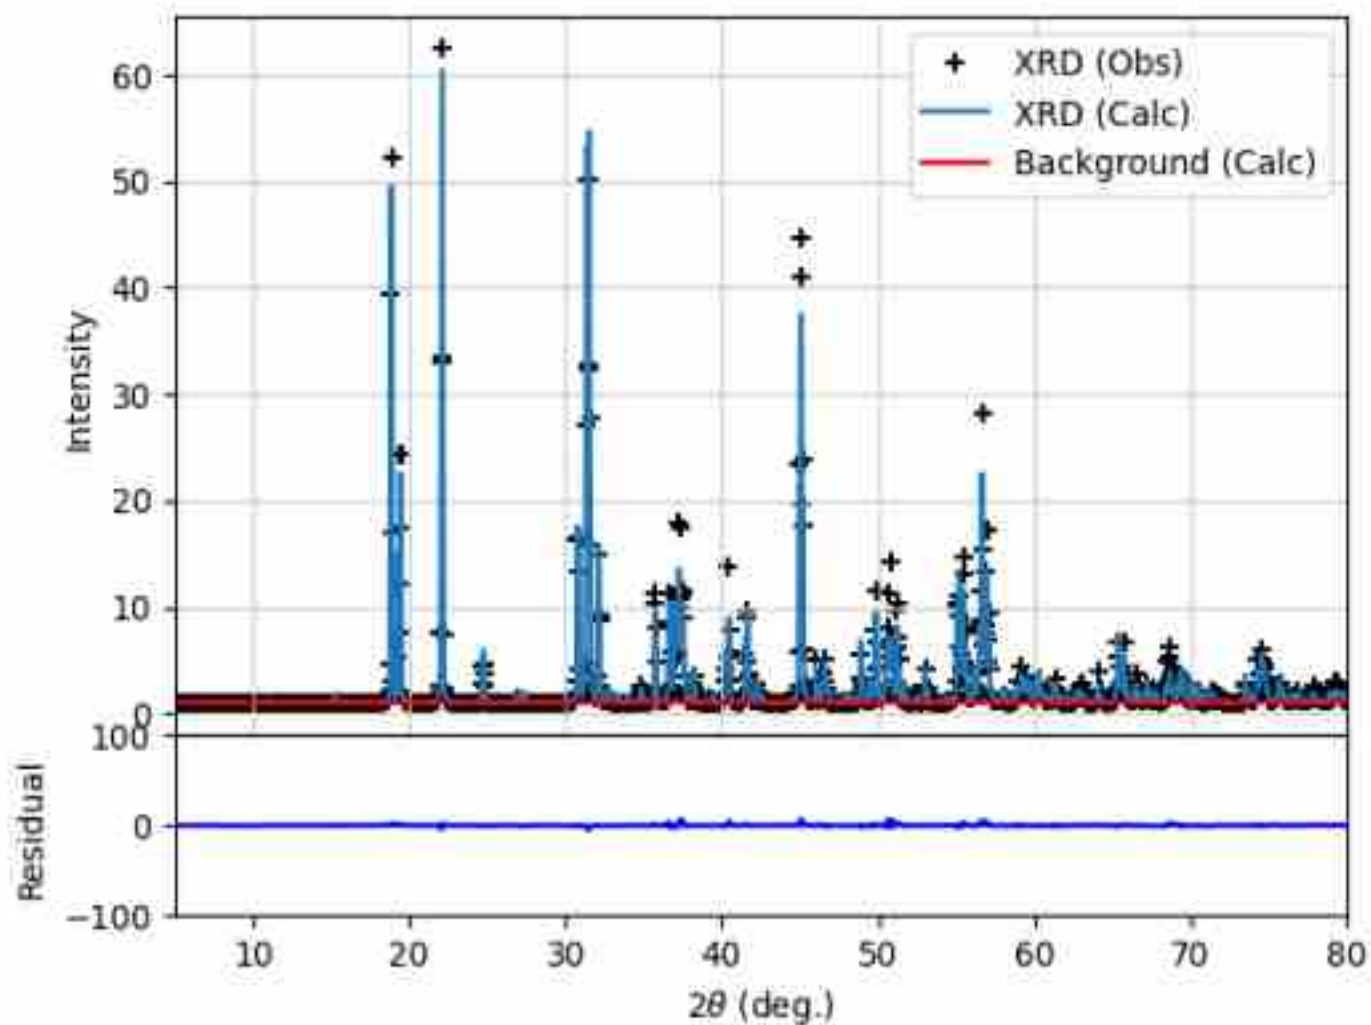

| RMSE before RR | Rwp      | RMSE after RR |
|----------------|----------|---------------|
| 0.023          | 17.68711 | 0.2102        |

# Na<sub>6</sub>Sc<sub>2</sub>C112

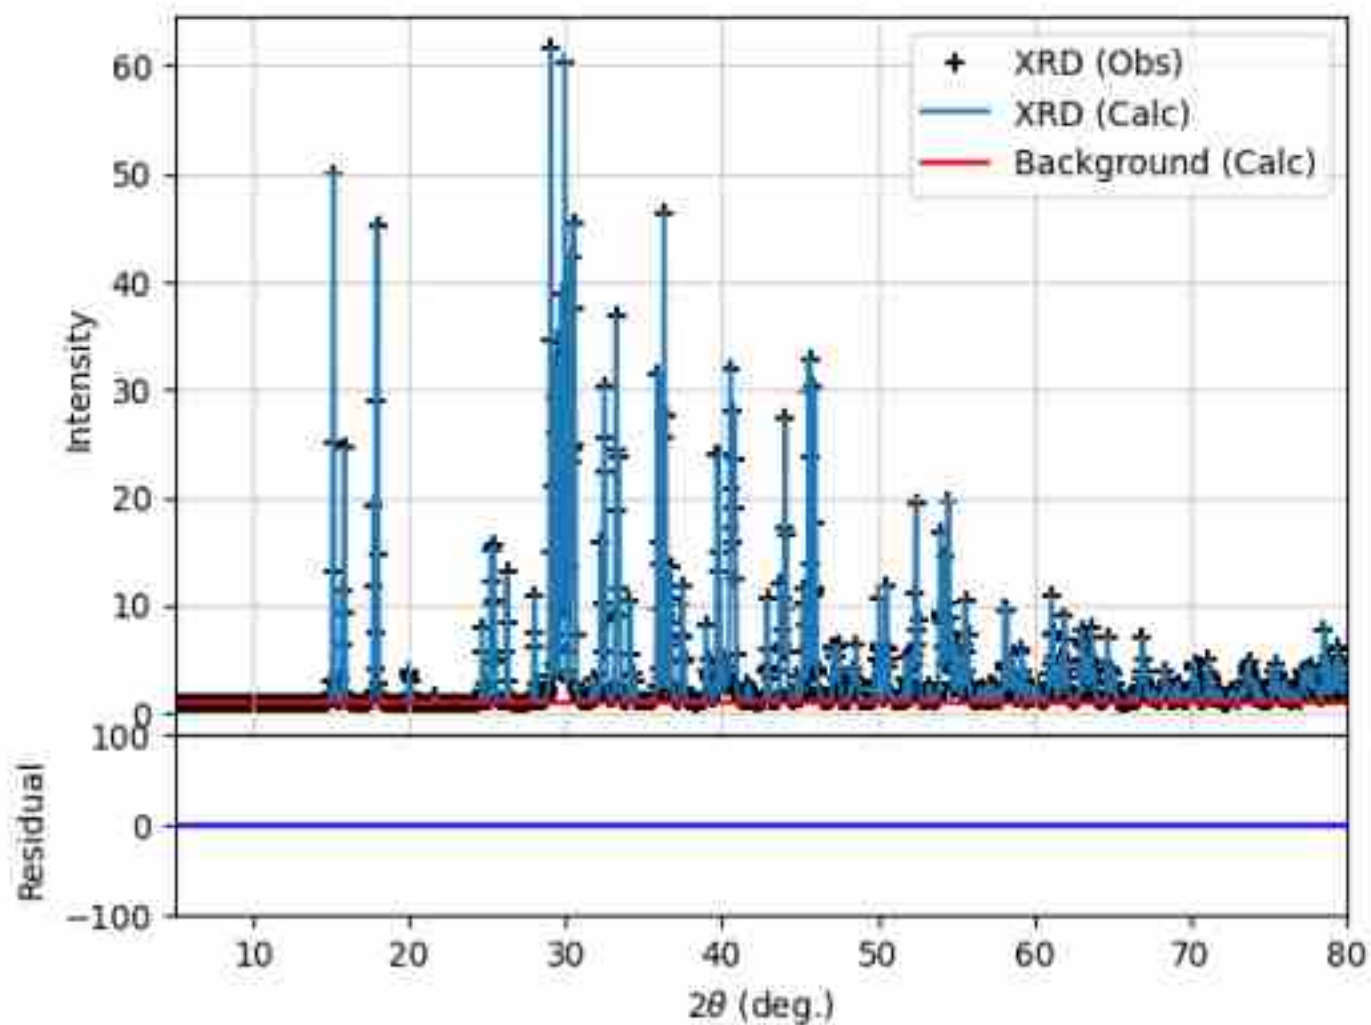

| RMSE before RR | Rwp     | RMSE after RR |
|----------------|---------|---------------|
| 0.023          | 0.00286 | 0.00039       |

# Nb<sub>2</sub>Cr<sub>2</sub>O<sub>8</sub>

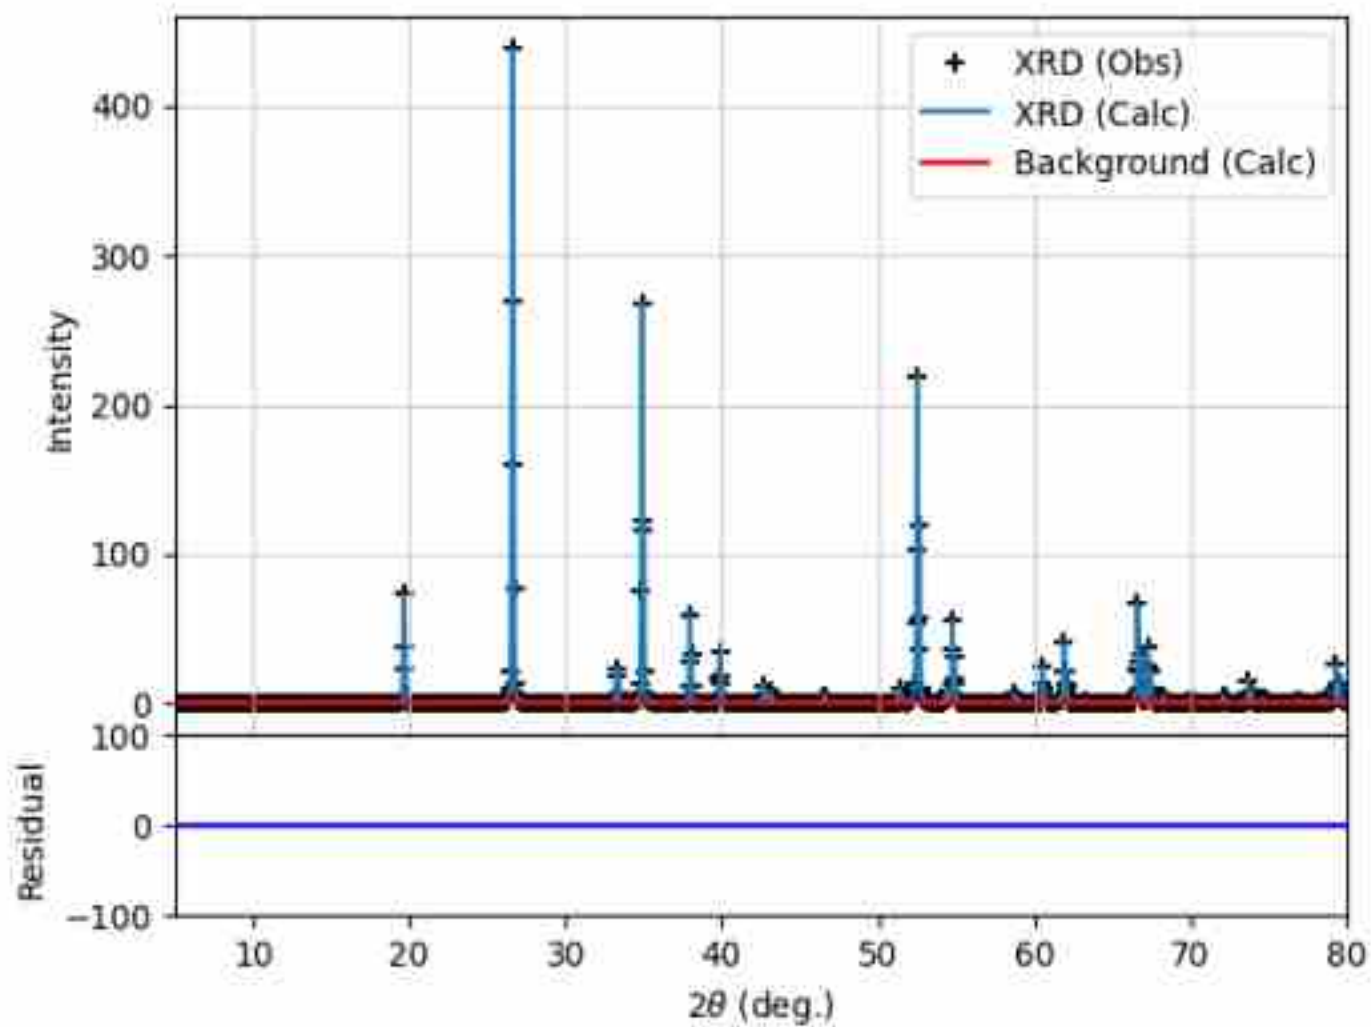

| RMSE before RR | Rwp     | RMSE after RR |
|----------------|---------|---------------|
| 0.023          | 0.00193 | 0.00068       |

# Nb6Pb1S8

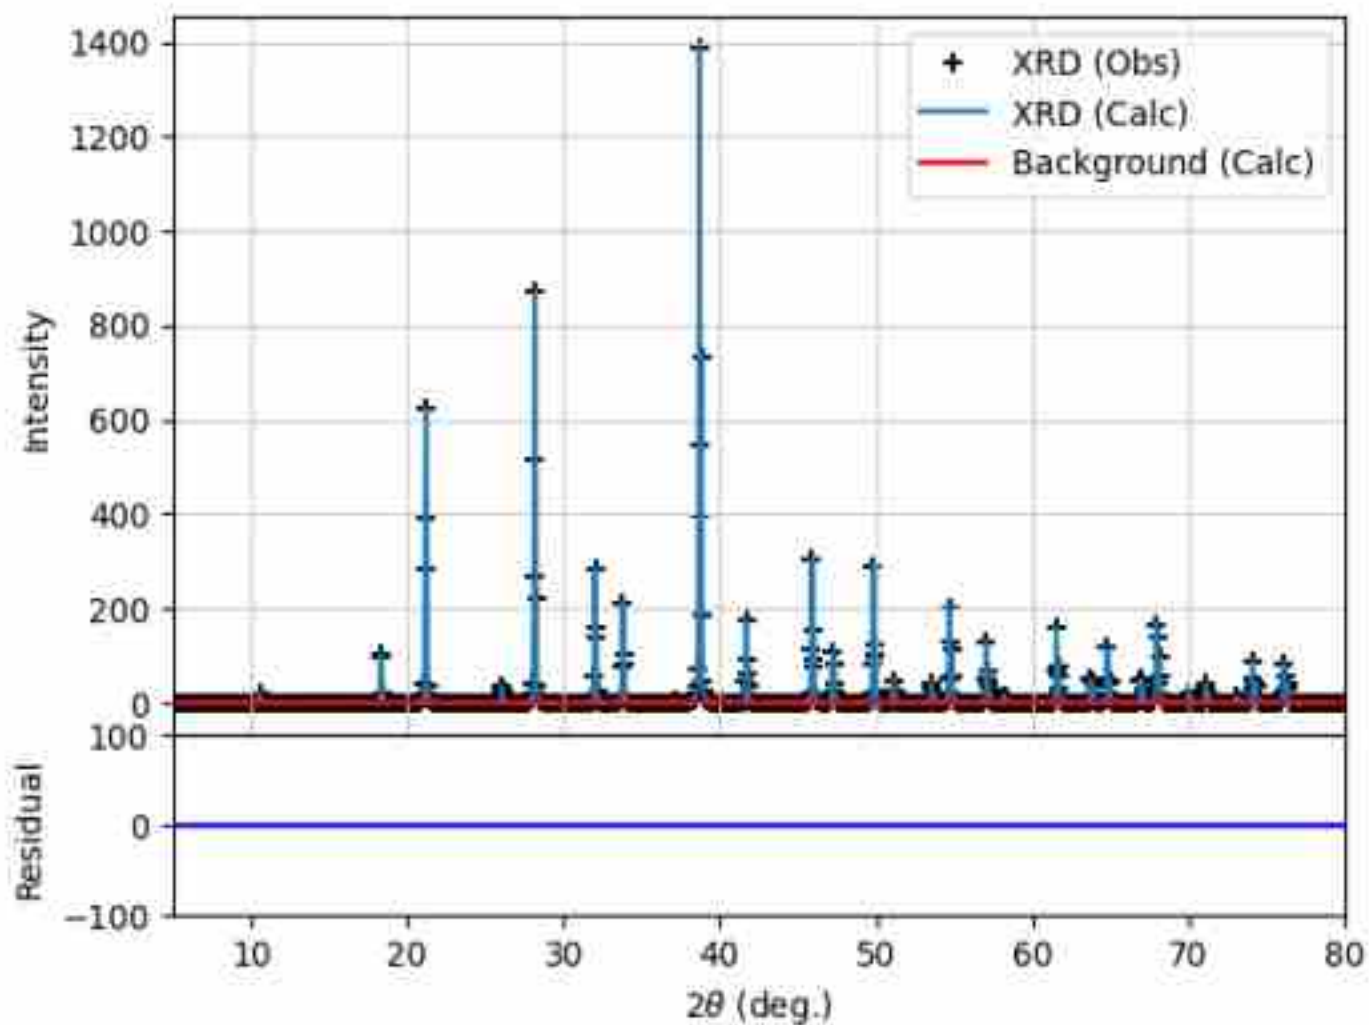

| RMSE before RR | Rwp     | RMSE after RR |
|----------------|---------|---------------|
| 0.023          | 0.00482 | 0.00133       |

# Nb<sub>6</sub>Rh<sub>2</sub>Se<sub>12</sub>

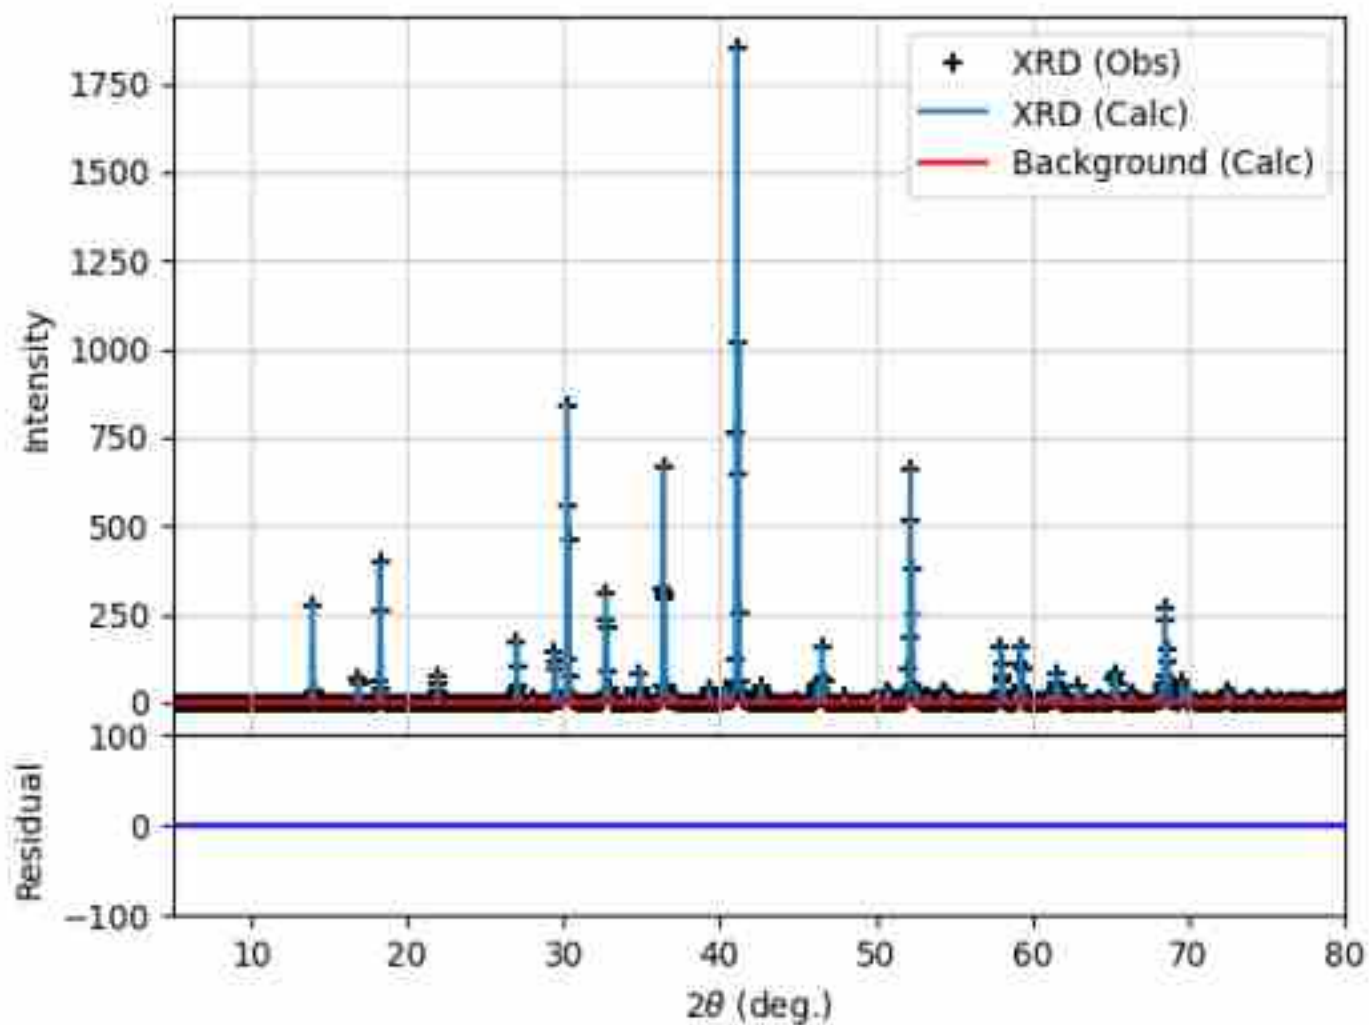

| RMSE before RR | Rwp     | RMSE after RR |
|----------------|---------|---------------|
| 0.023          | 0.00303 | 0.00037       |

# Nd<sub>3</sub>Ga<sub>10</sub>Ni<sub>1</sub>

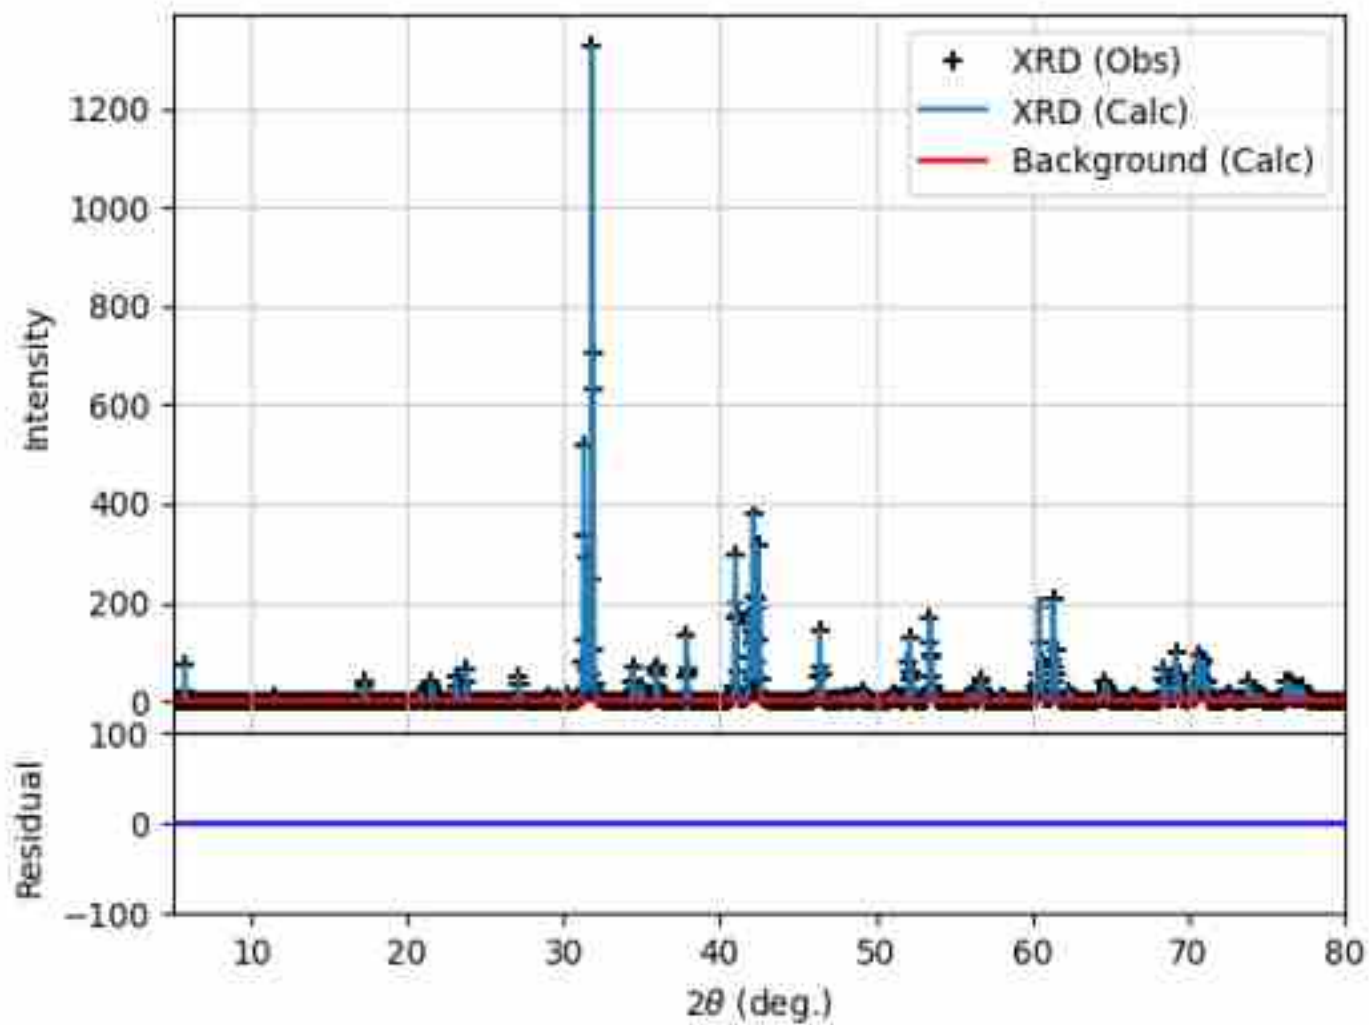

| RMSE before RR | Rwp     | RMSE after RR |
|----------------|---------|---------------|
| 0.023          | 0.00472 | 0.00054       |



# Nd<sub>4</sub>Cu<sub>2</sub>O<sub>8</sub>

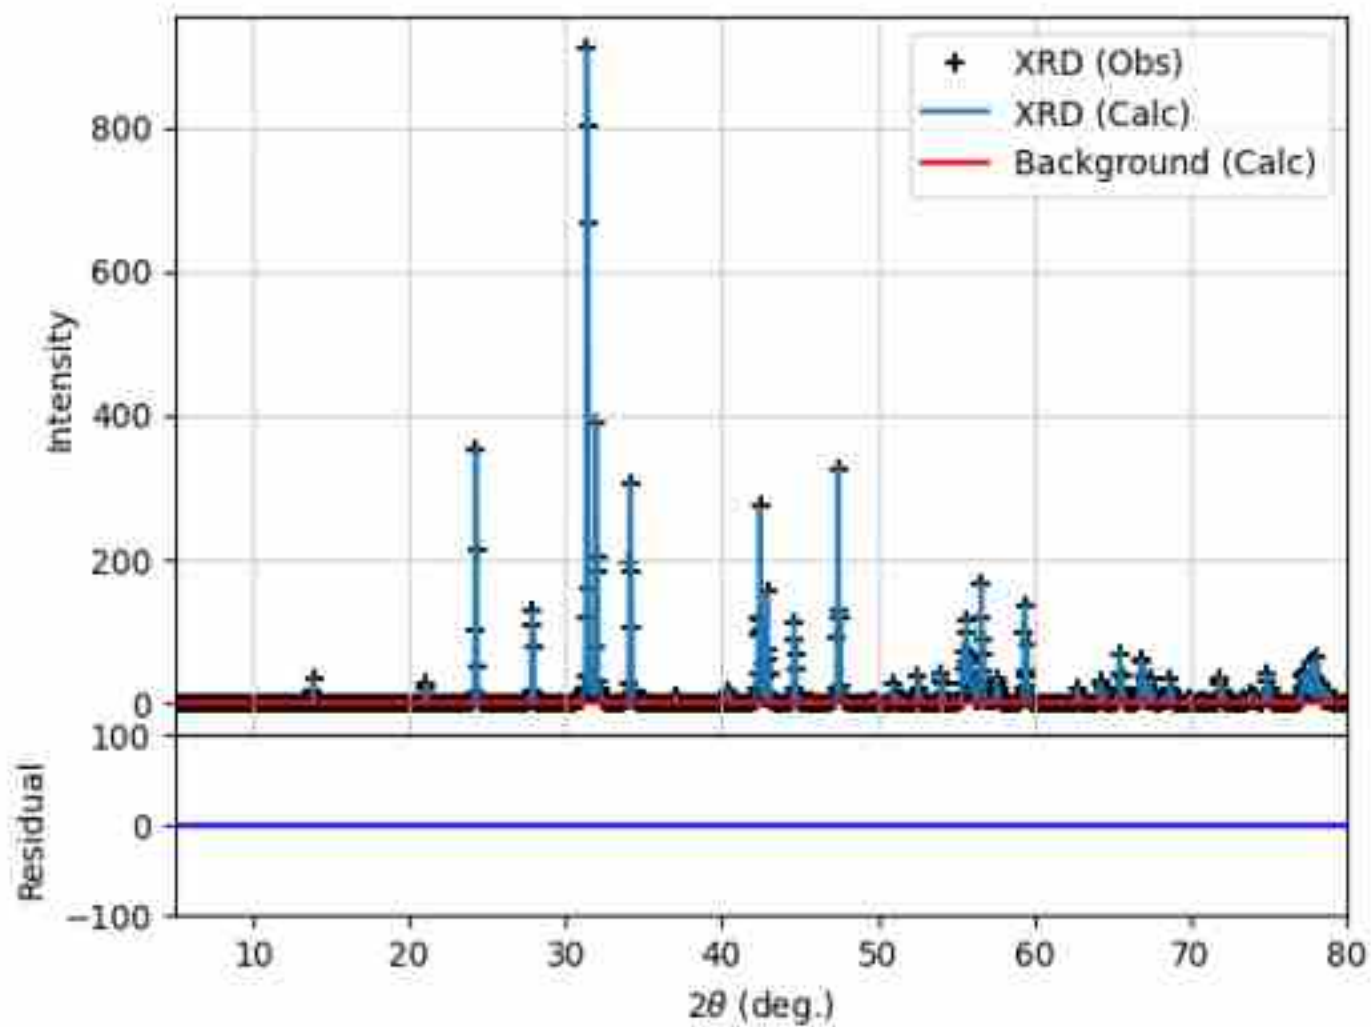

| RMSE before RR | Rwp     | RMSE after RR |
|----------------|---------|---------------|
| 0.023          | 0.00323 | 0.00123       |

# Nd6Hf2Sb10

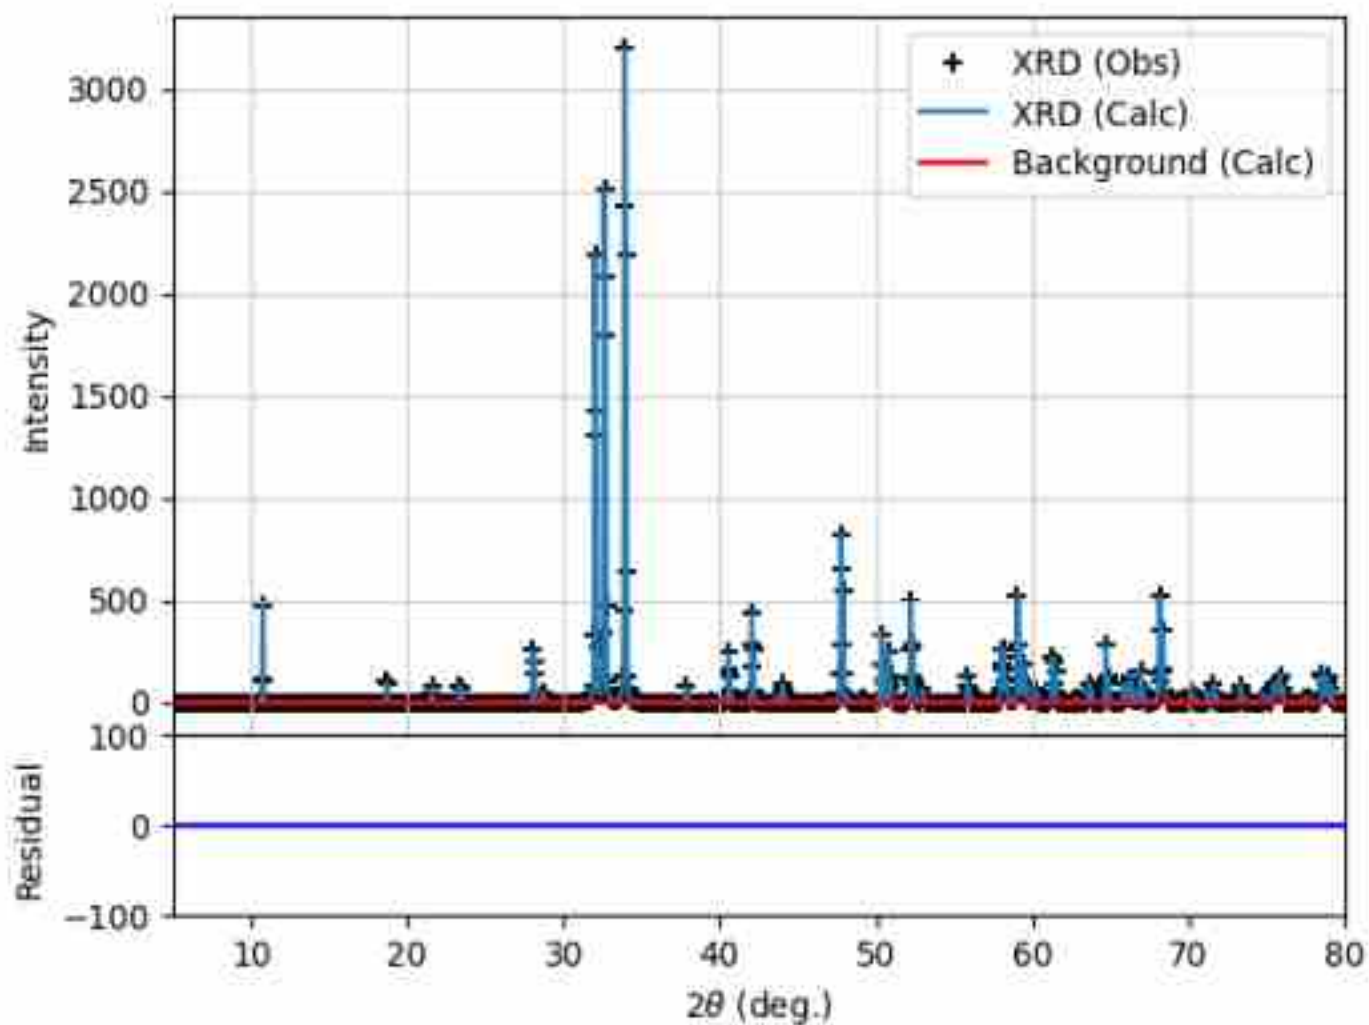

| RMSE before RR | Rwp     | RMSE after RR |
|----------------|---------|---------------|
| 0.023          | 0.00281 | 0.0003        |

# P2H2Pb2O8

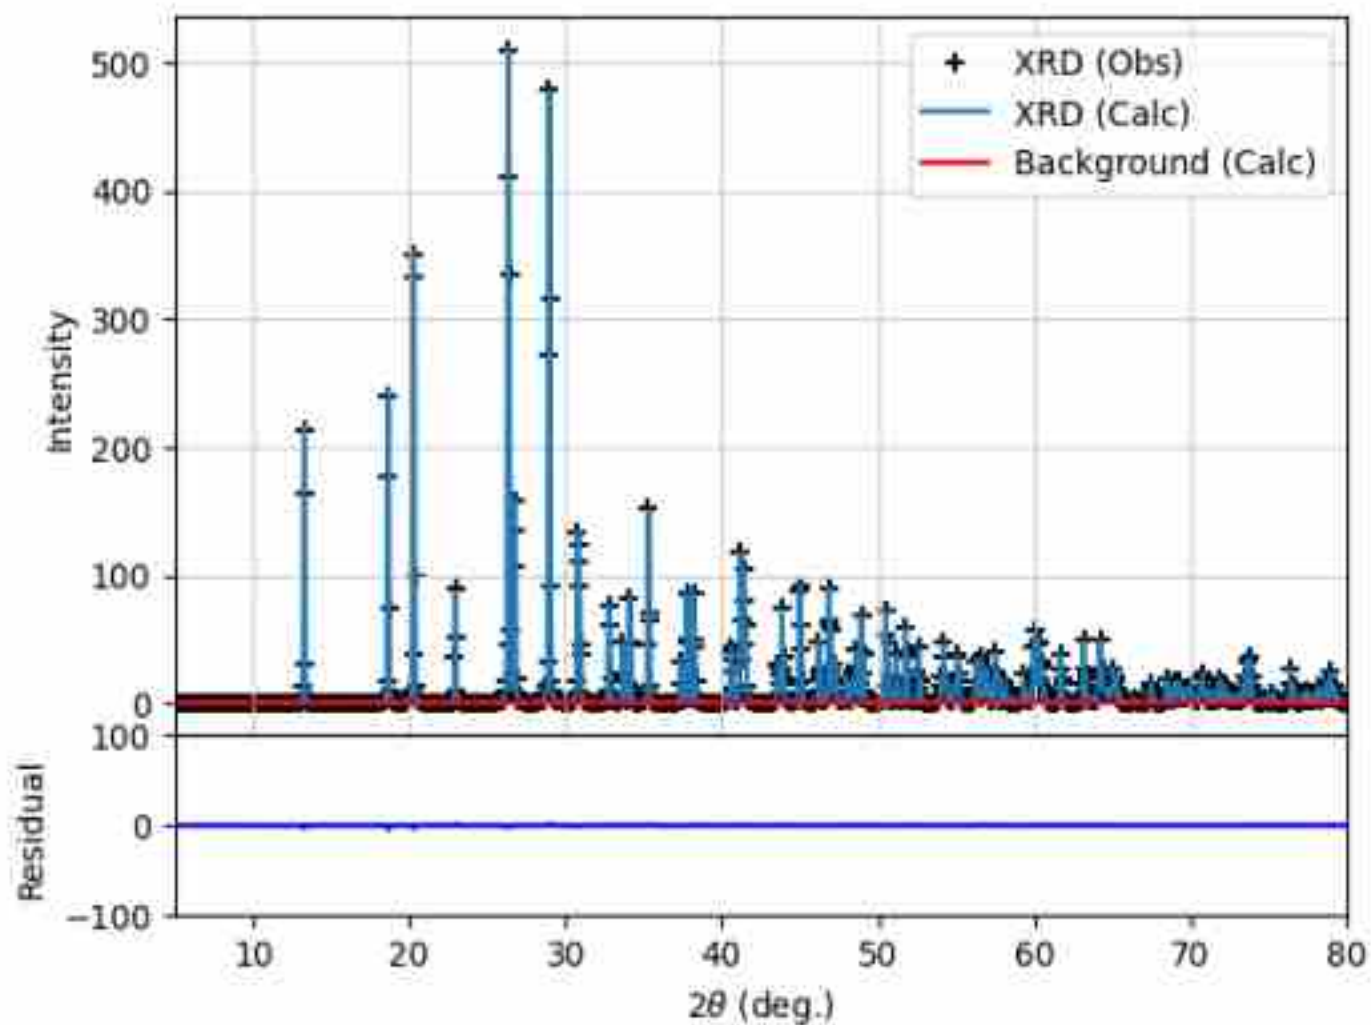

| RMSE before RR | Rwp     | RMSE after RR |
|----------------|---------|---------------|
| 0.023          | 0.79555 | 0.35162       |

# Pb1S1

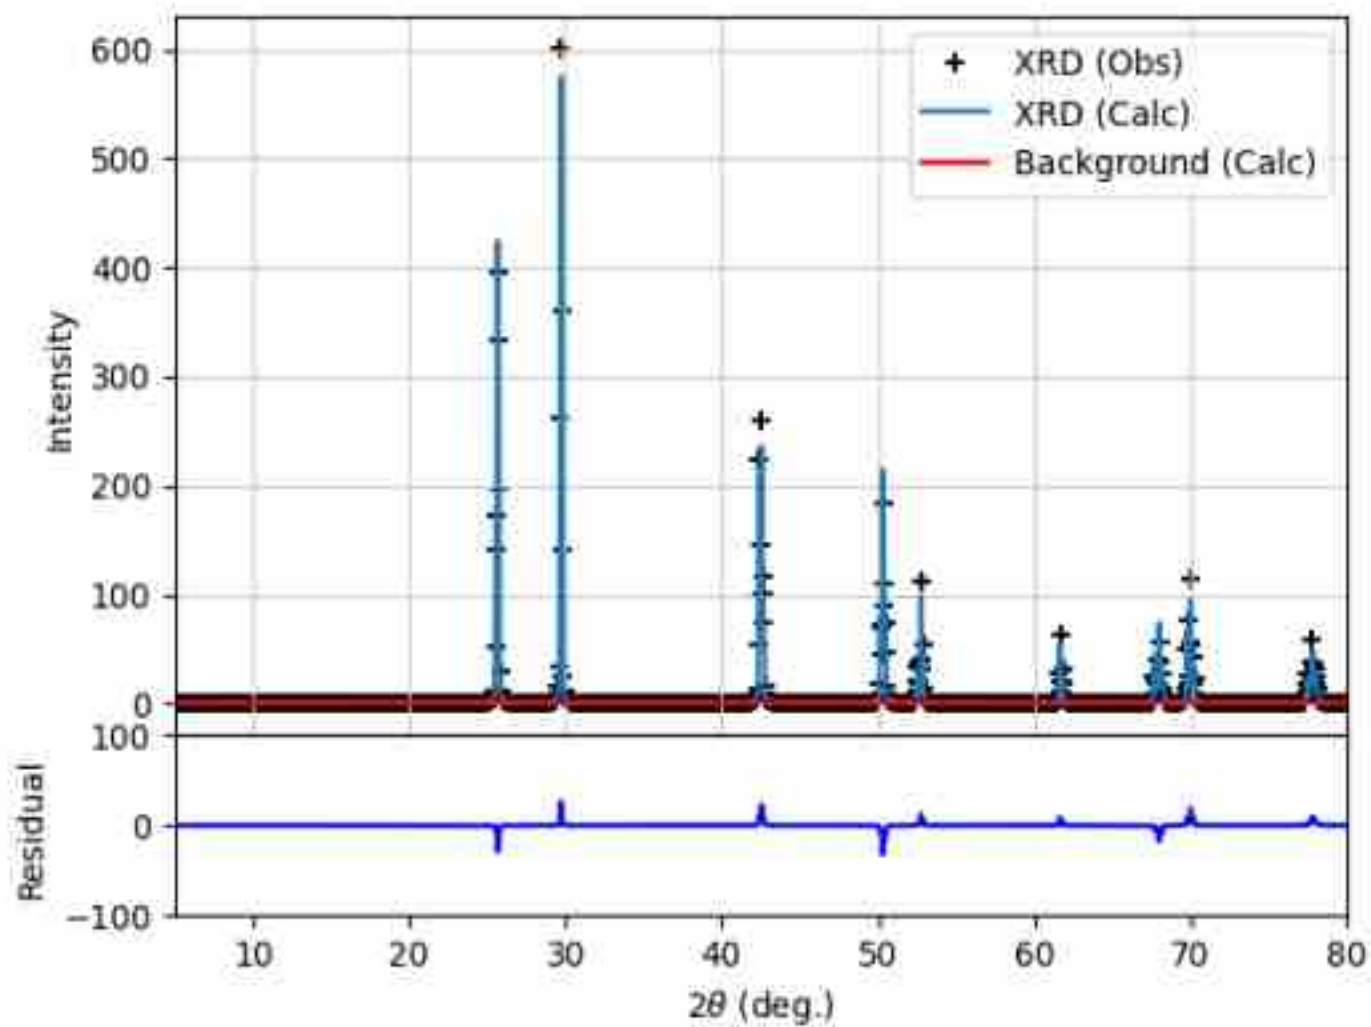

| RMSE before RR | Rwp      | RMSE after RR |
|----------------|----------|---------------|
| 0.023          | 10.57283 | 0.02204       |

# Pr1In1Pt4

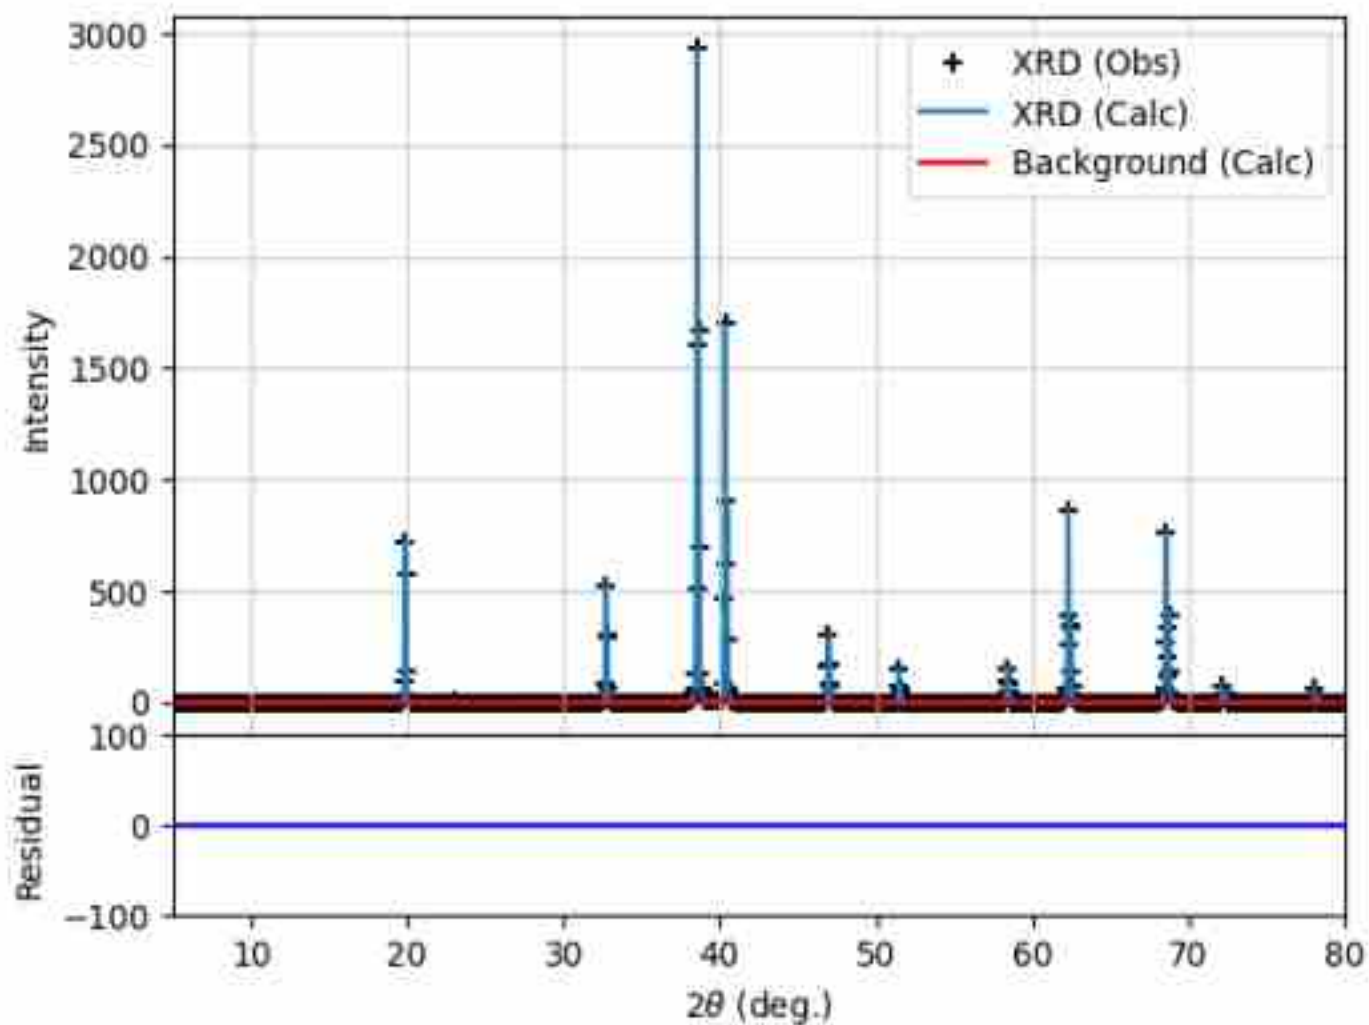

| RMSE before RR | Rwp    | RMSE after RR |
|----------------|--------|---------------|
| 0.023          | 0.0732 | 0.00194       |

# Pr<sub>4</sub>Eu<sub>2</sub>S<sub>8</sub>

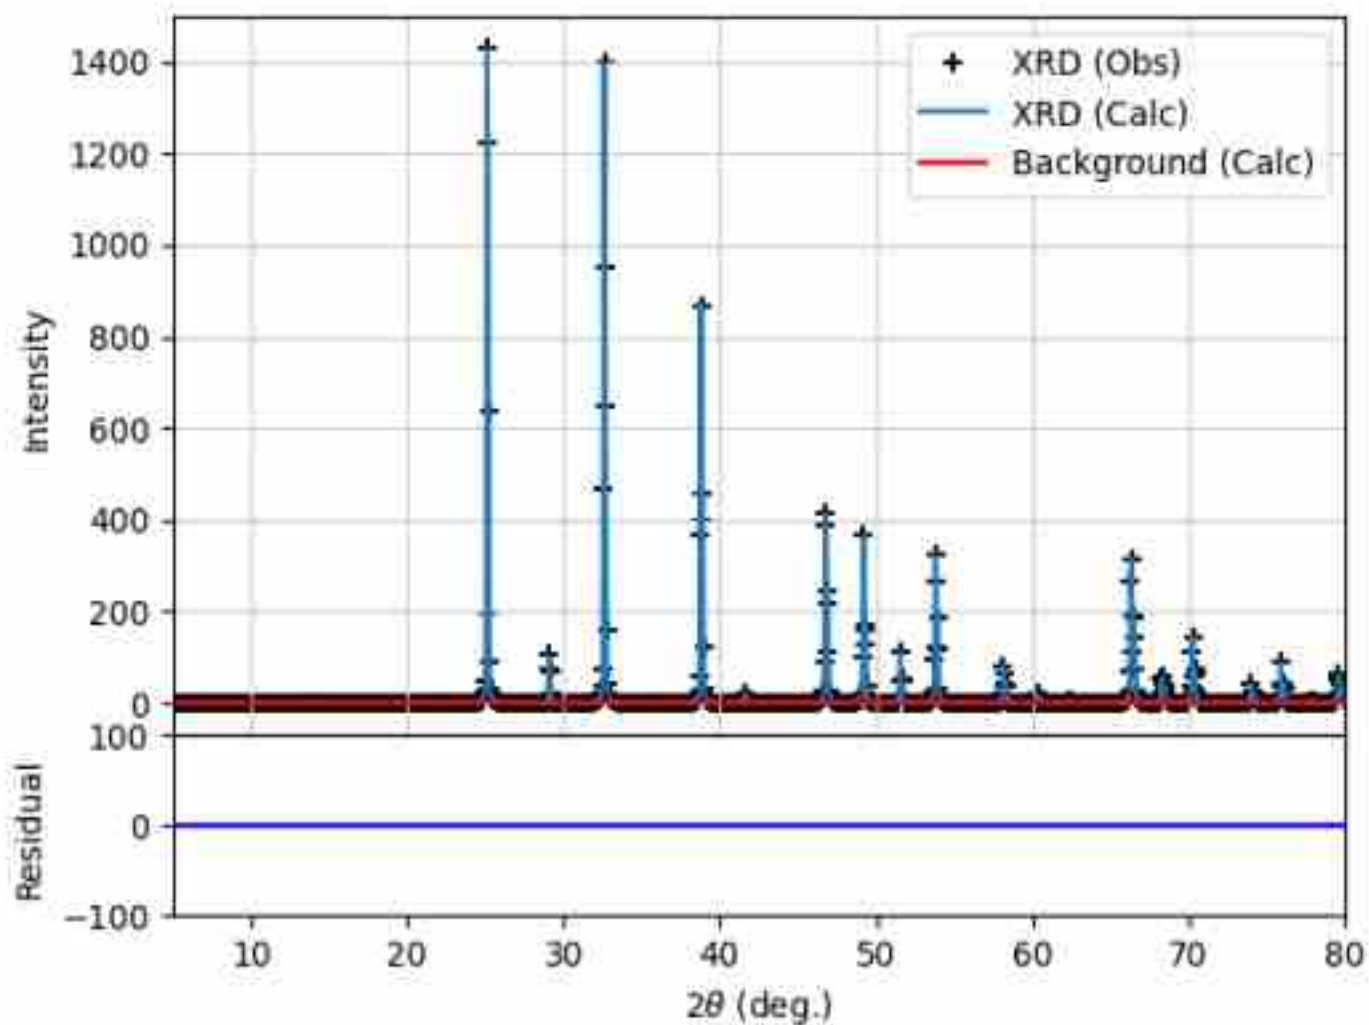

| RMSE before RR | Rwp     | RMSE after RR |
|----------------|---------|---------------|
| 0.023          | 0.00272 | 0.00074       |

# Pr<sub>10</sub>Cu<sub>2</sub>Bi<sub>6</sub>

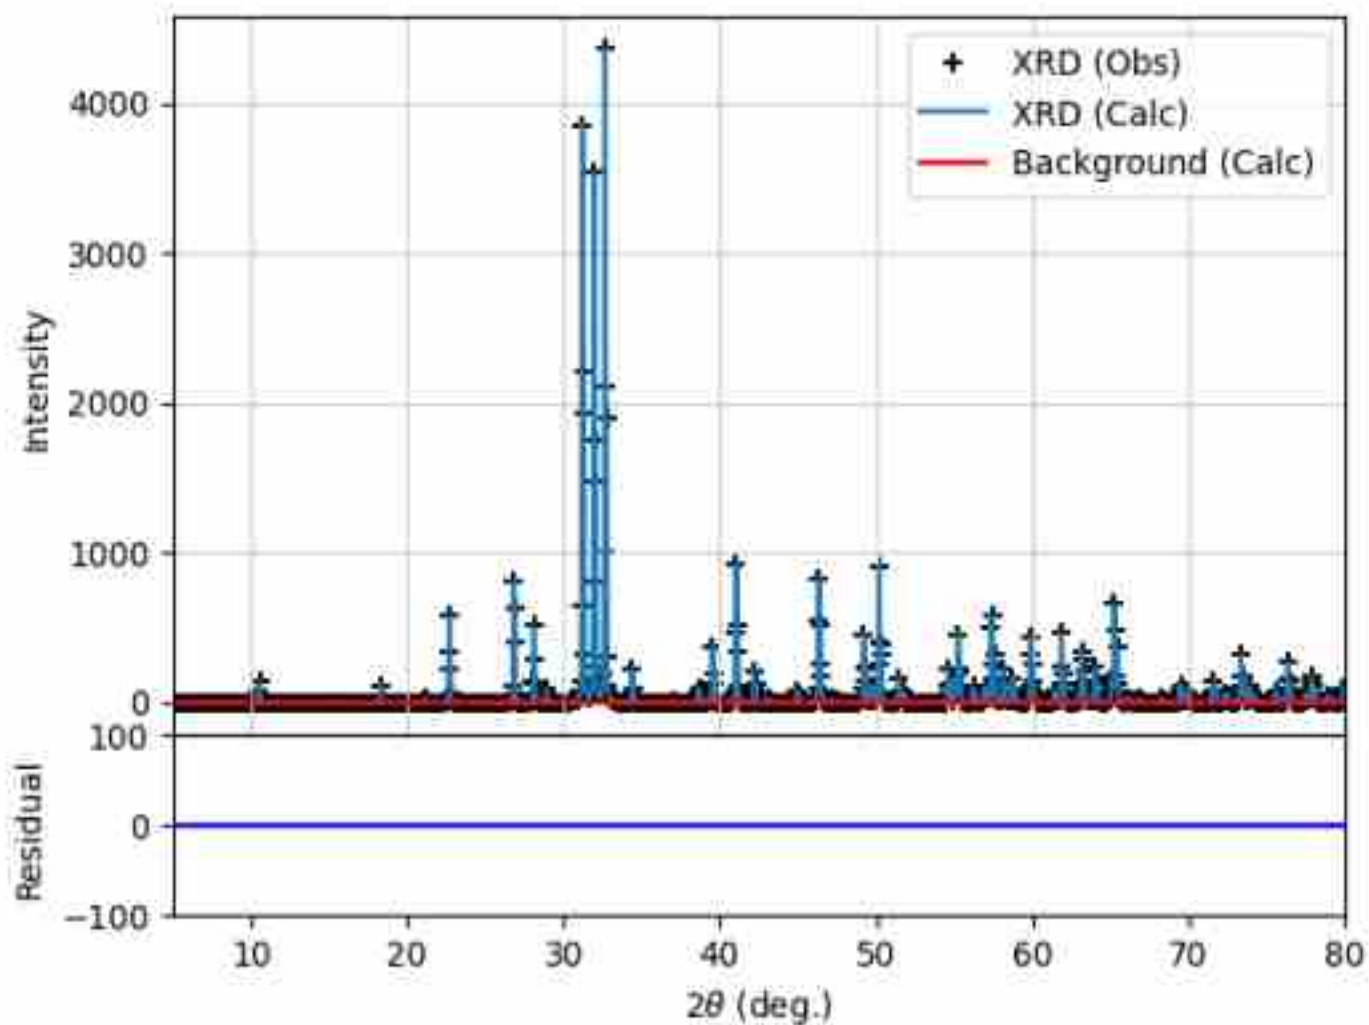

| RMSE before RR | Rwp     | RMSE after RR |
|----------------|---------|---------------|
| 0.023          | 0.00986 | 0.00091       |

# Rb1C11O3

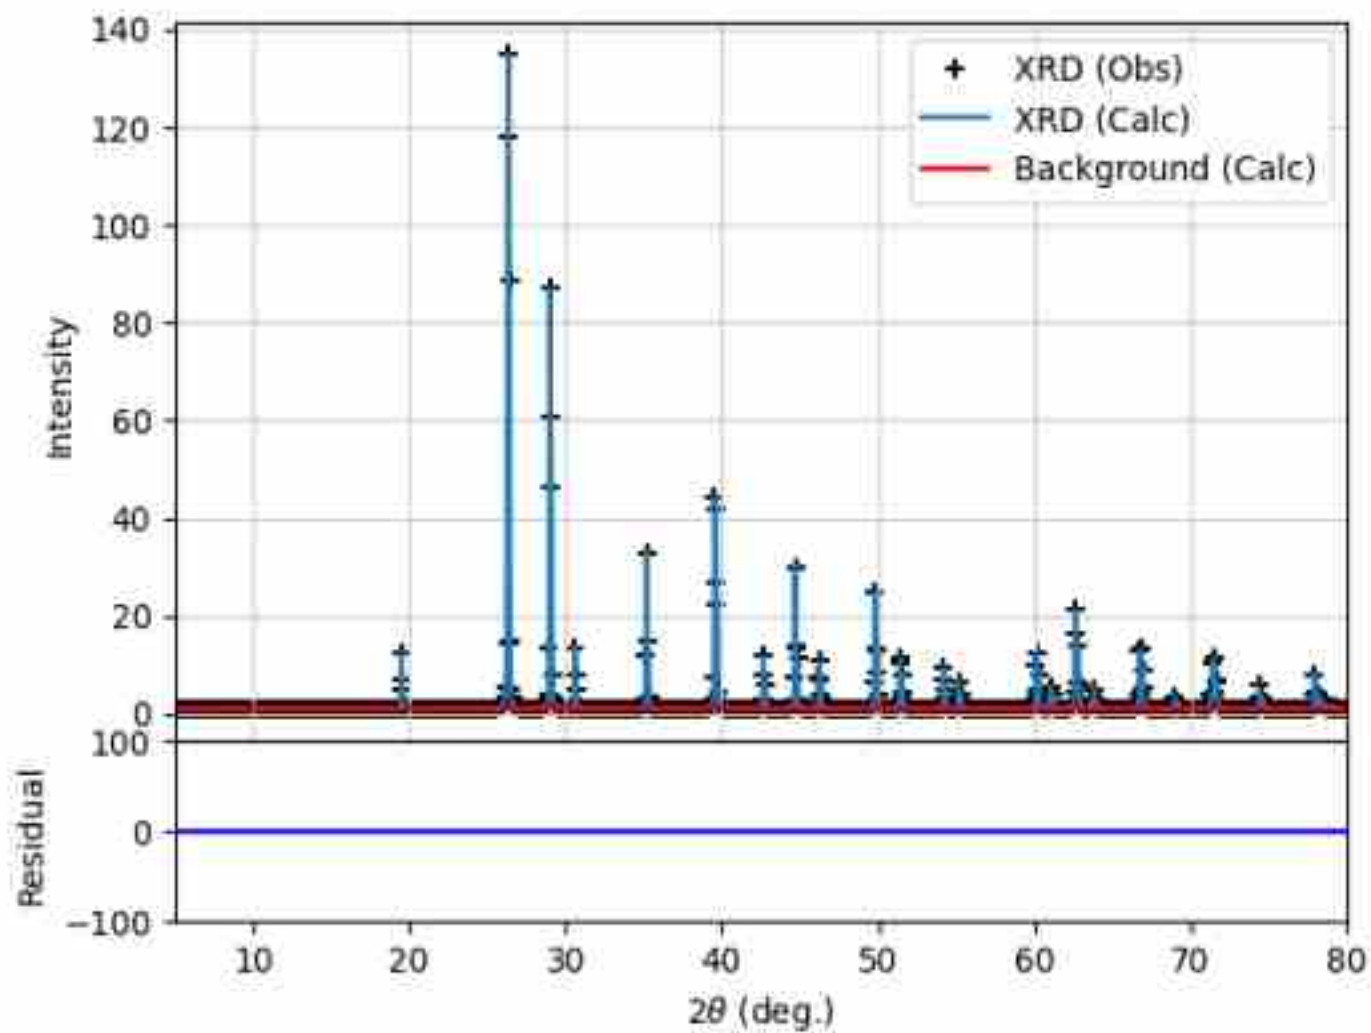

| RMSE before RR | Rwp     | RMSE after RR |
|----------------|---------|---------------|
| 0.023          | 0.00257 | 0.00048       |



# Rb3Tb1F6

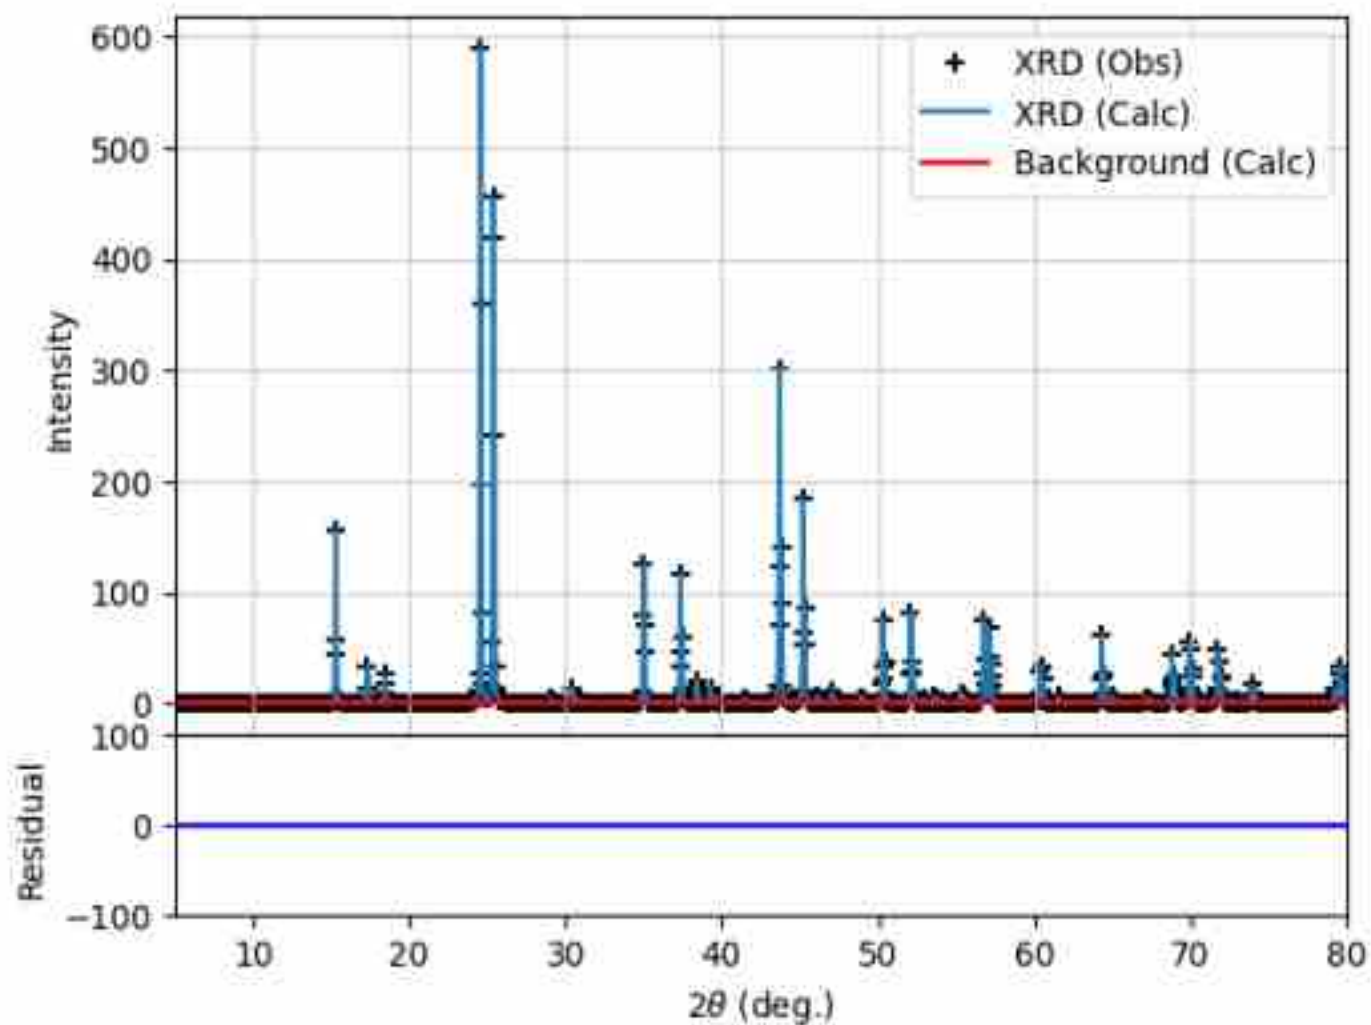

| RMSE before RR | Rwp     | RMSE after RR |
|----------------|---------|---------------|
| 0.023          | 0.00325 | 0.00089       |

# Rb<sub>4</sub>Sn<sub>2</sub>As<sub>4</sub>

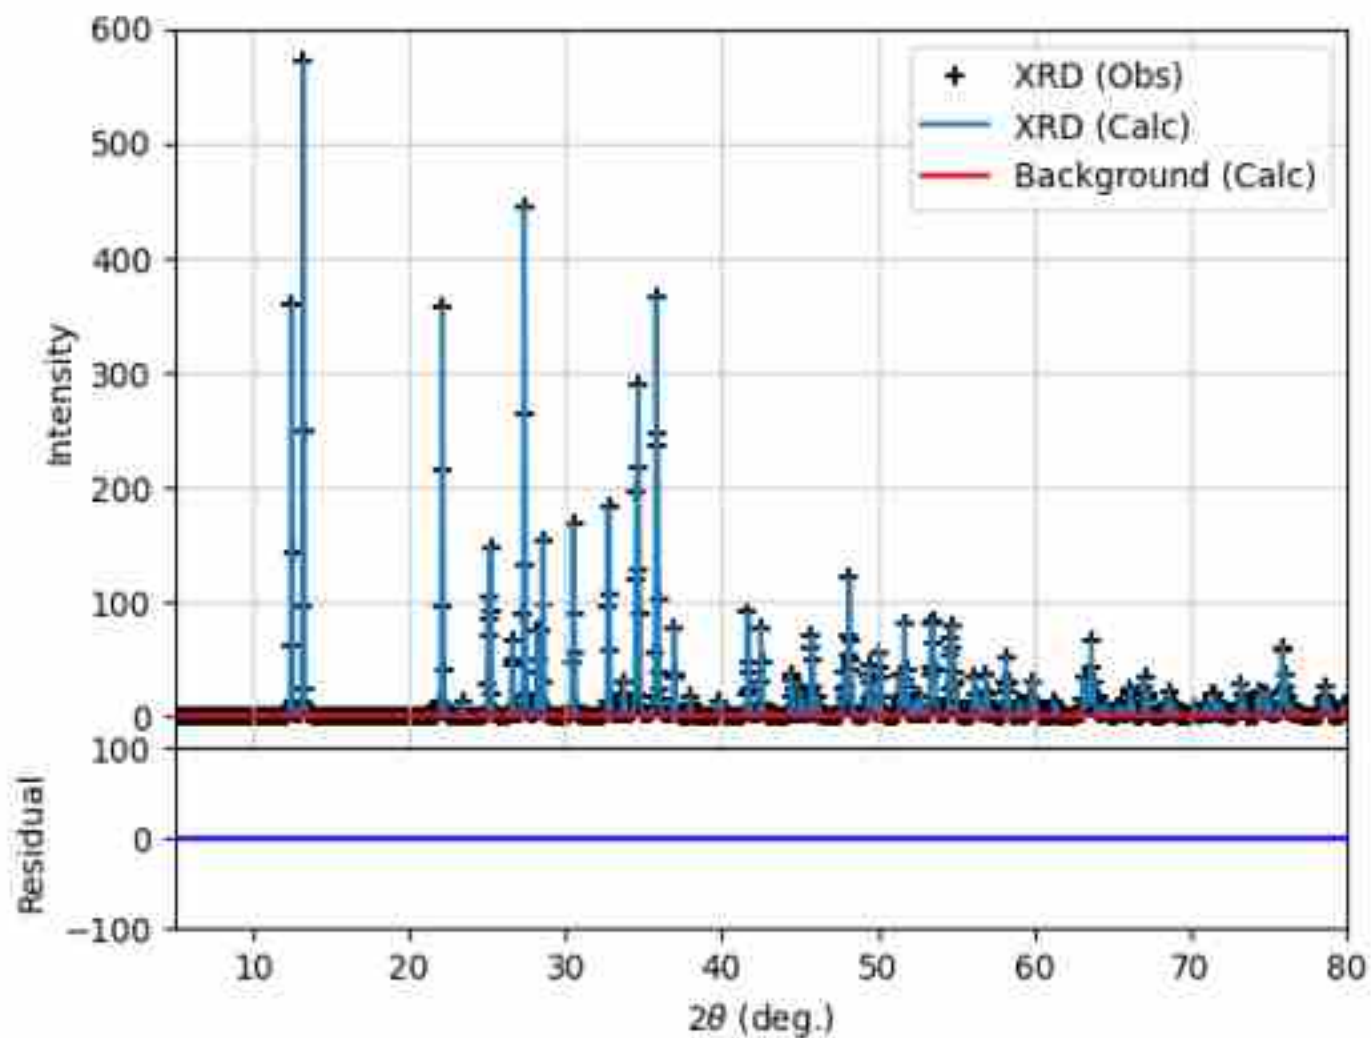

| RMSE before RR | Rwp     | RMSE after RR |
|----------------|---------|---------------|
| 0.023          | 0.02301 | 0.00083       |

# Rb6Ho2O6

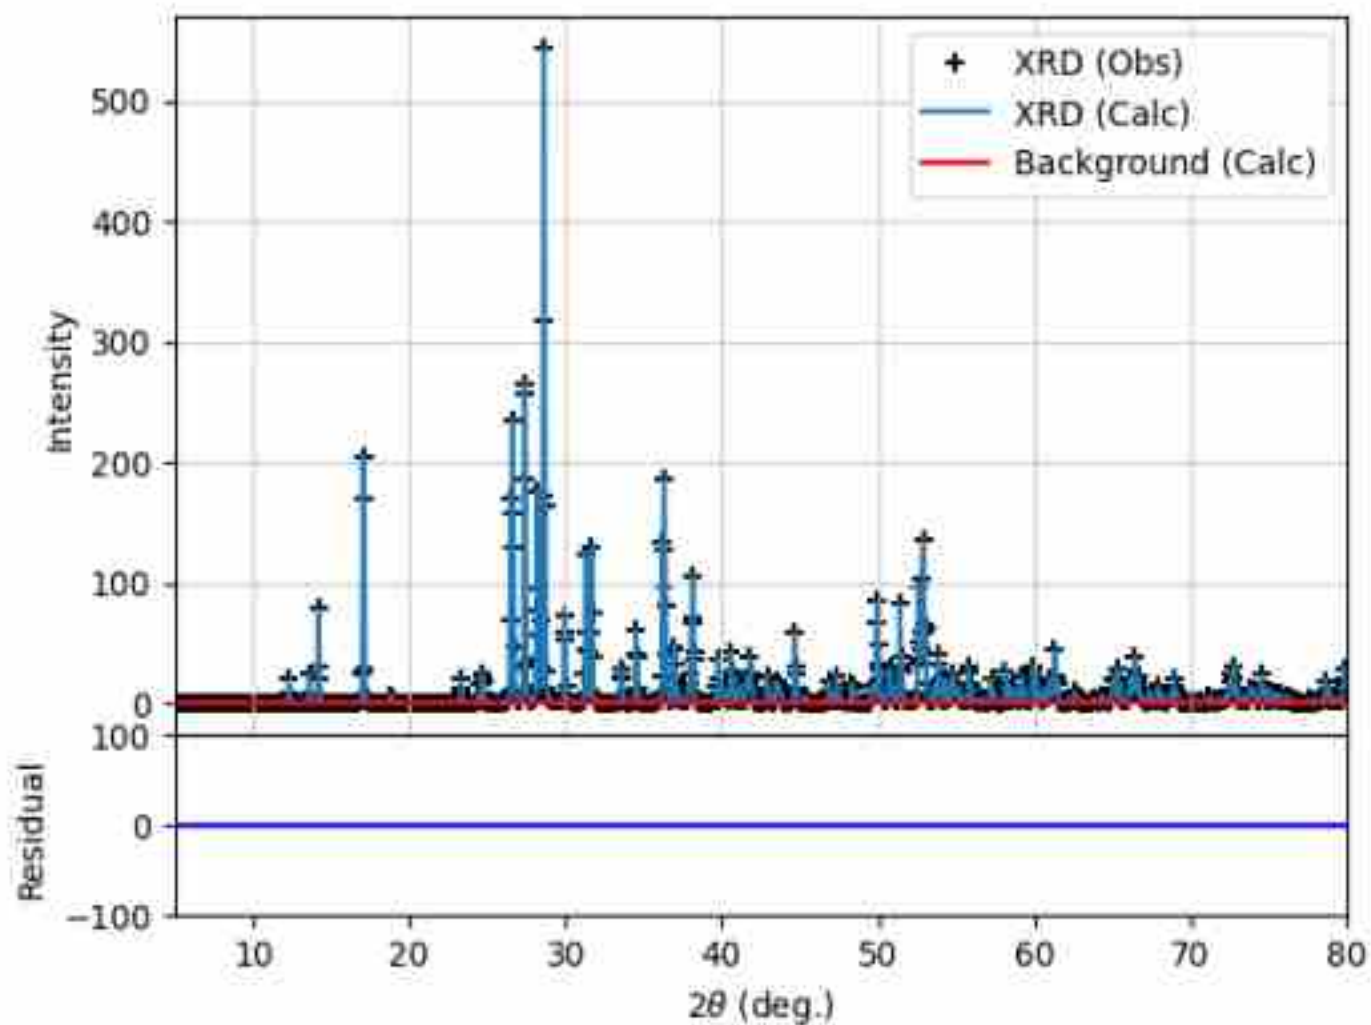

| RMSE before RR | Rwp     | RMSE after RR |
|----------------|---------|---------------|
| 0.023          | 0.00279 | 0.0008        |

# Ru2Rh6

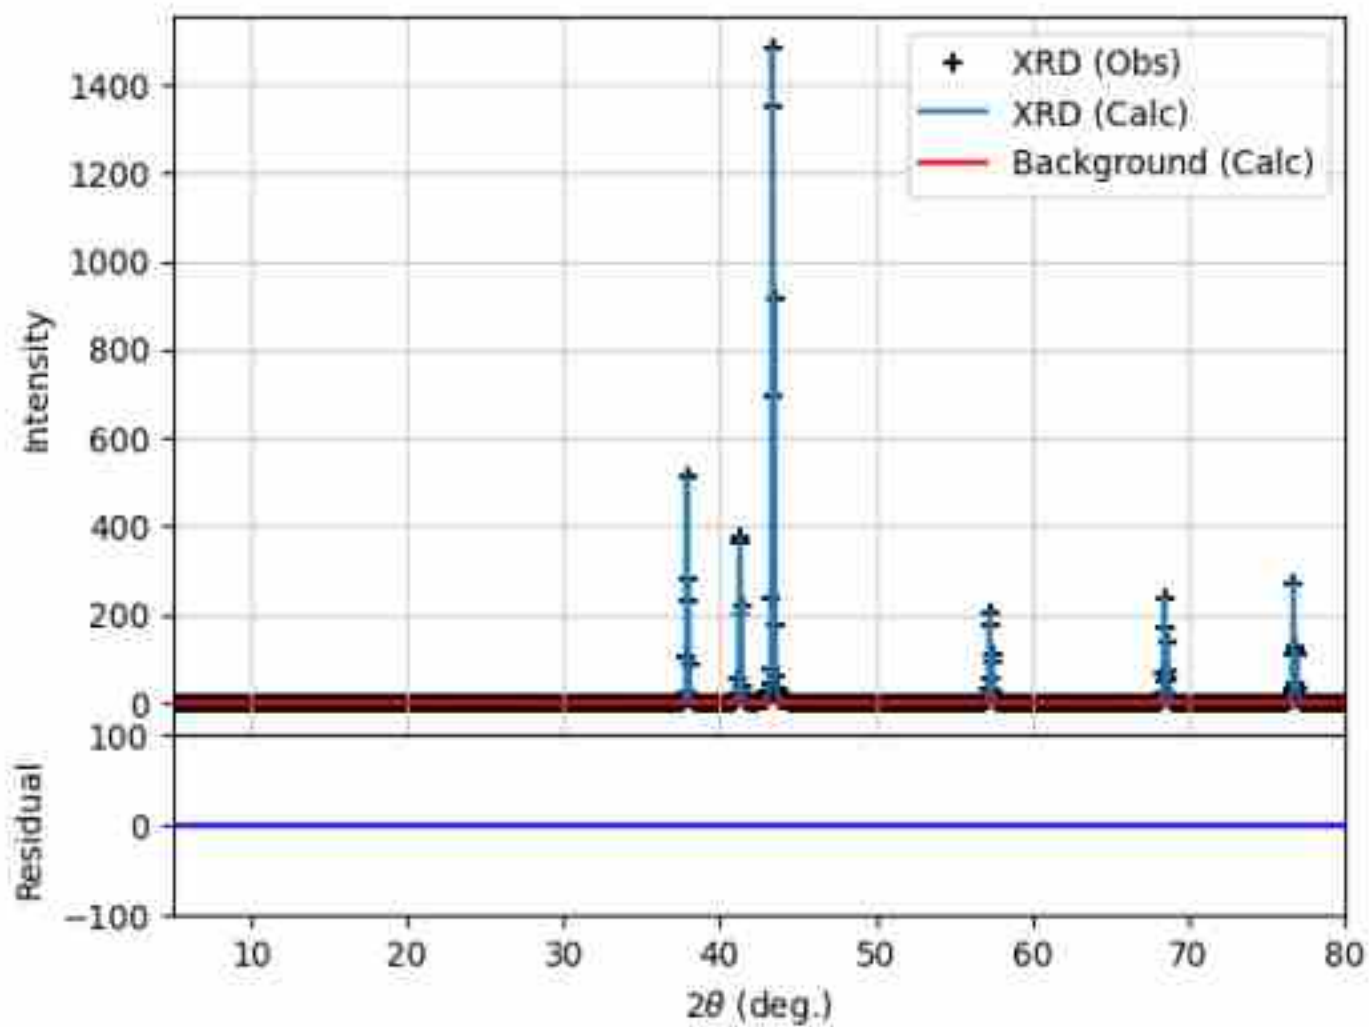

| RMSE before RR | Rwp     | RMSE after RR |
|----------------|---------|---------------|
| 0.023          | 0.01313 | 0.00078       |

# Sc1Tl1S2O8

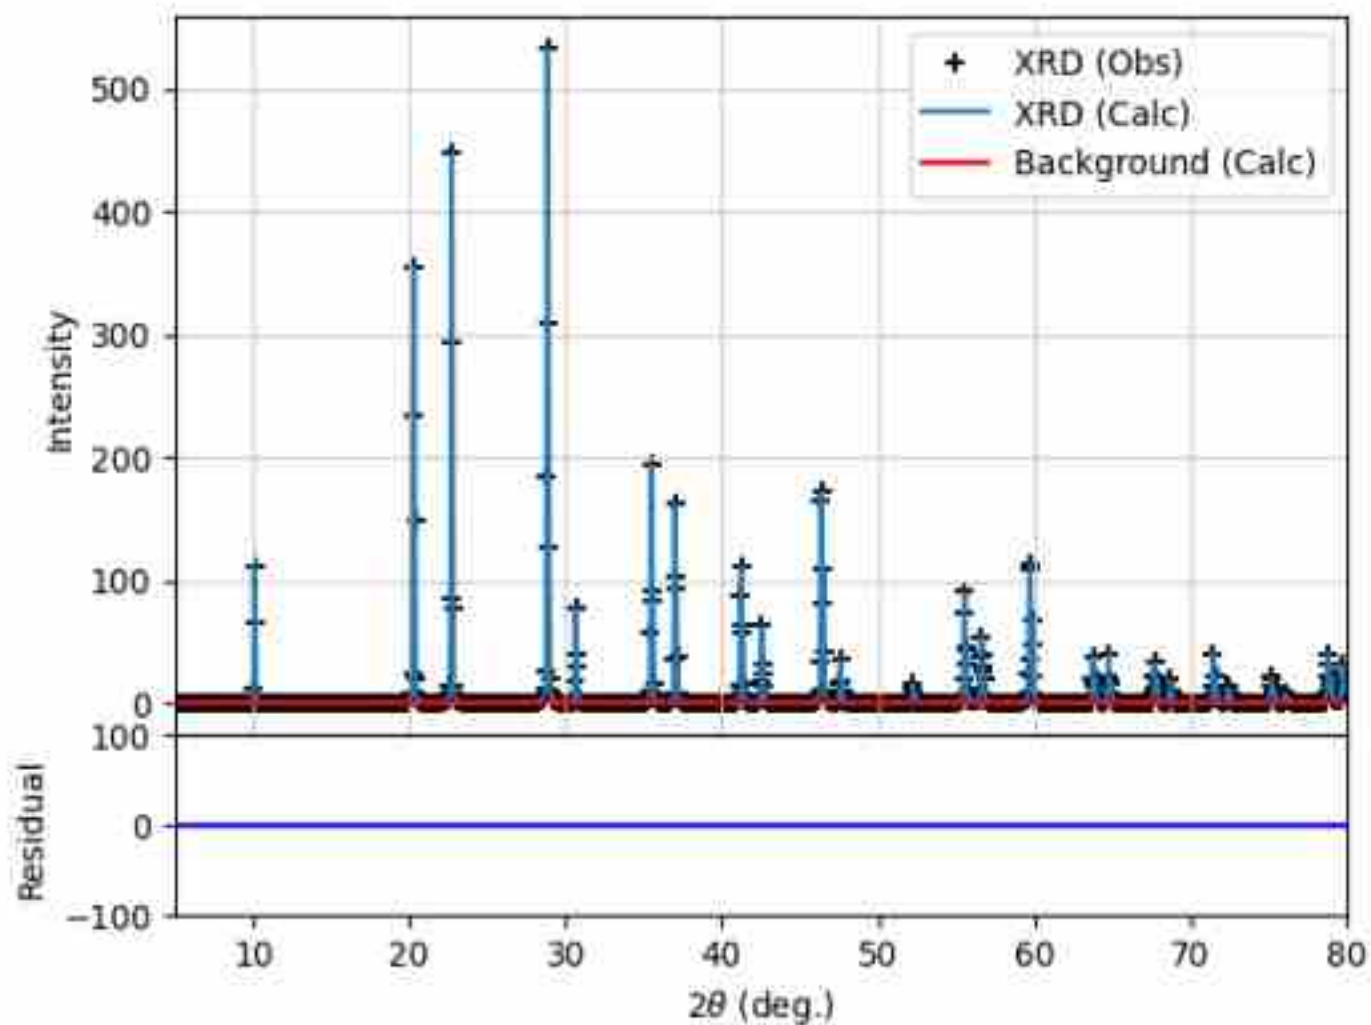

| RMSE before RR | Rwp     | RMSE after RR |
|----------------|---------|---------------|
| 0.023          | 0.00356 | 0.00329       |

# Sc6Bi2

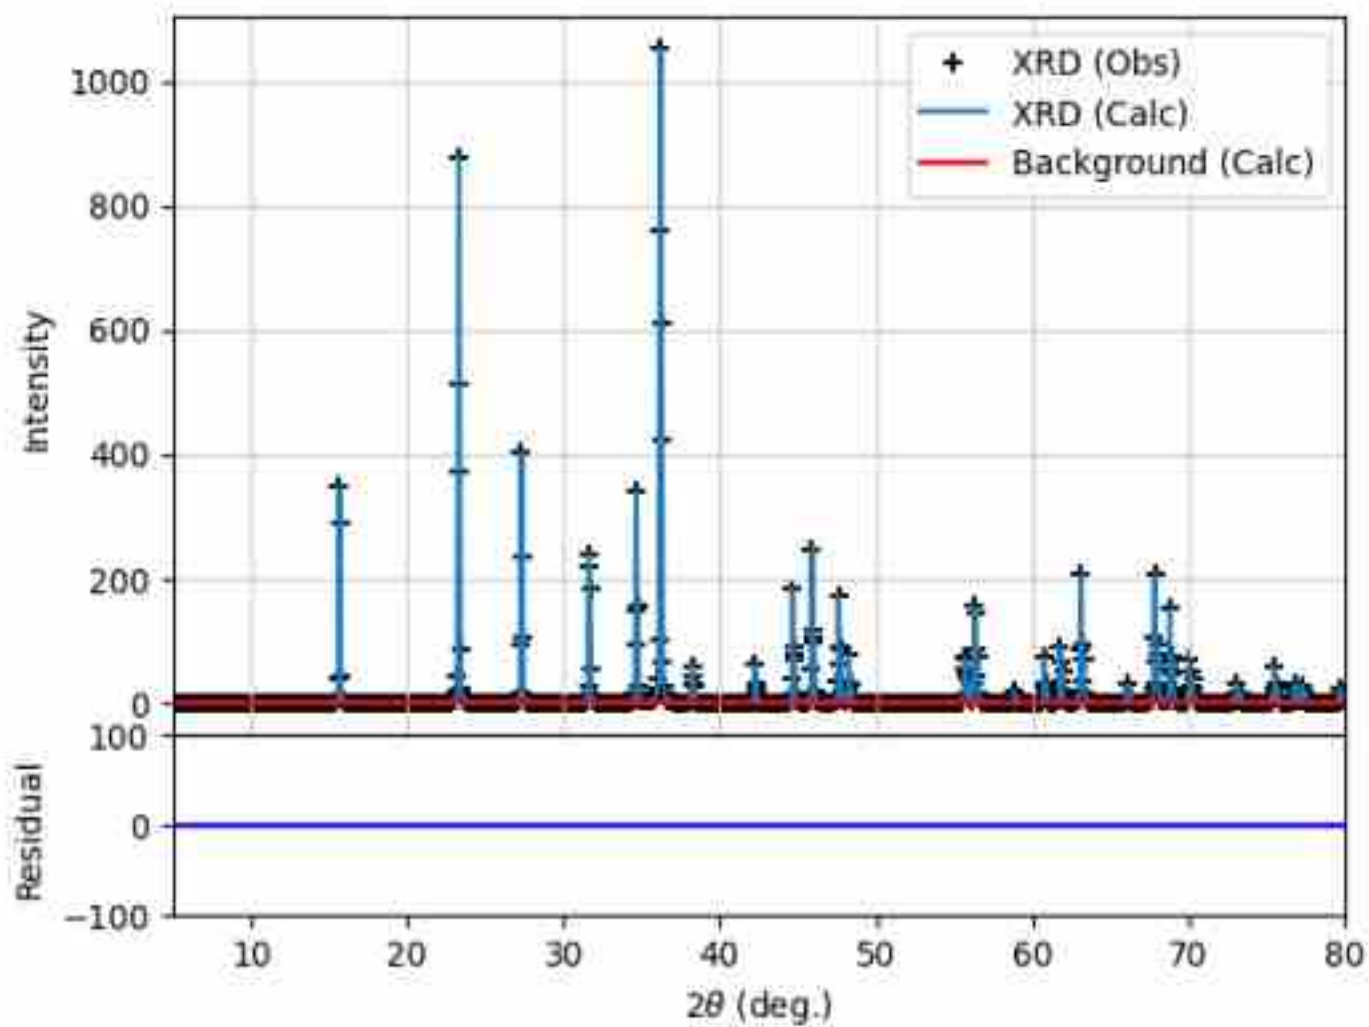

| RMSE before RR | Rwp     | RMSE after RR |
|----------------|---------|---------------|
| 0.023          | 0.02445 | 0.00335       |

# Sm<sub>2</sub>In<sub>3</sub>Cu<sub>1</sub>

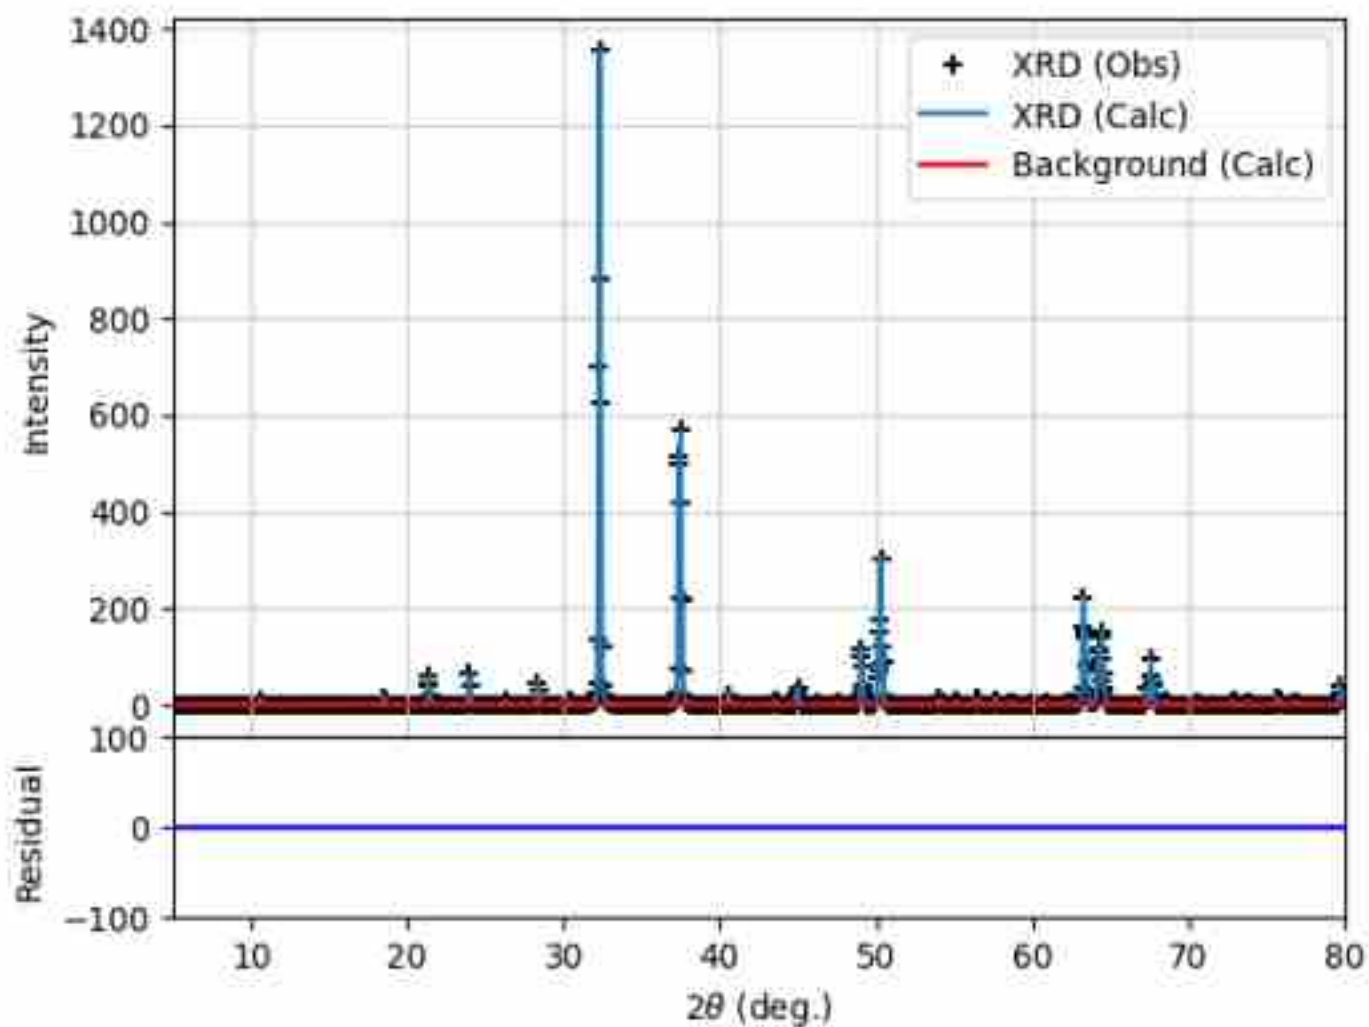

| RMSE before RR | Rwp     | RMSE after RR |
|----------------|---------|---------------|
| 0.023          | 0.00292 | 0.0001        |

# Sm2Pd6S8

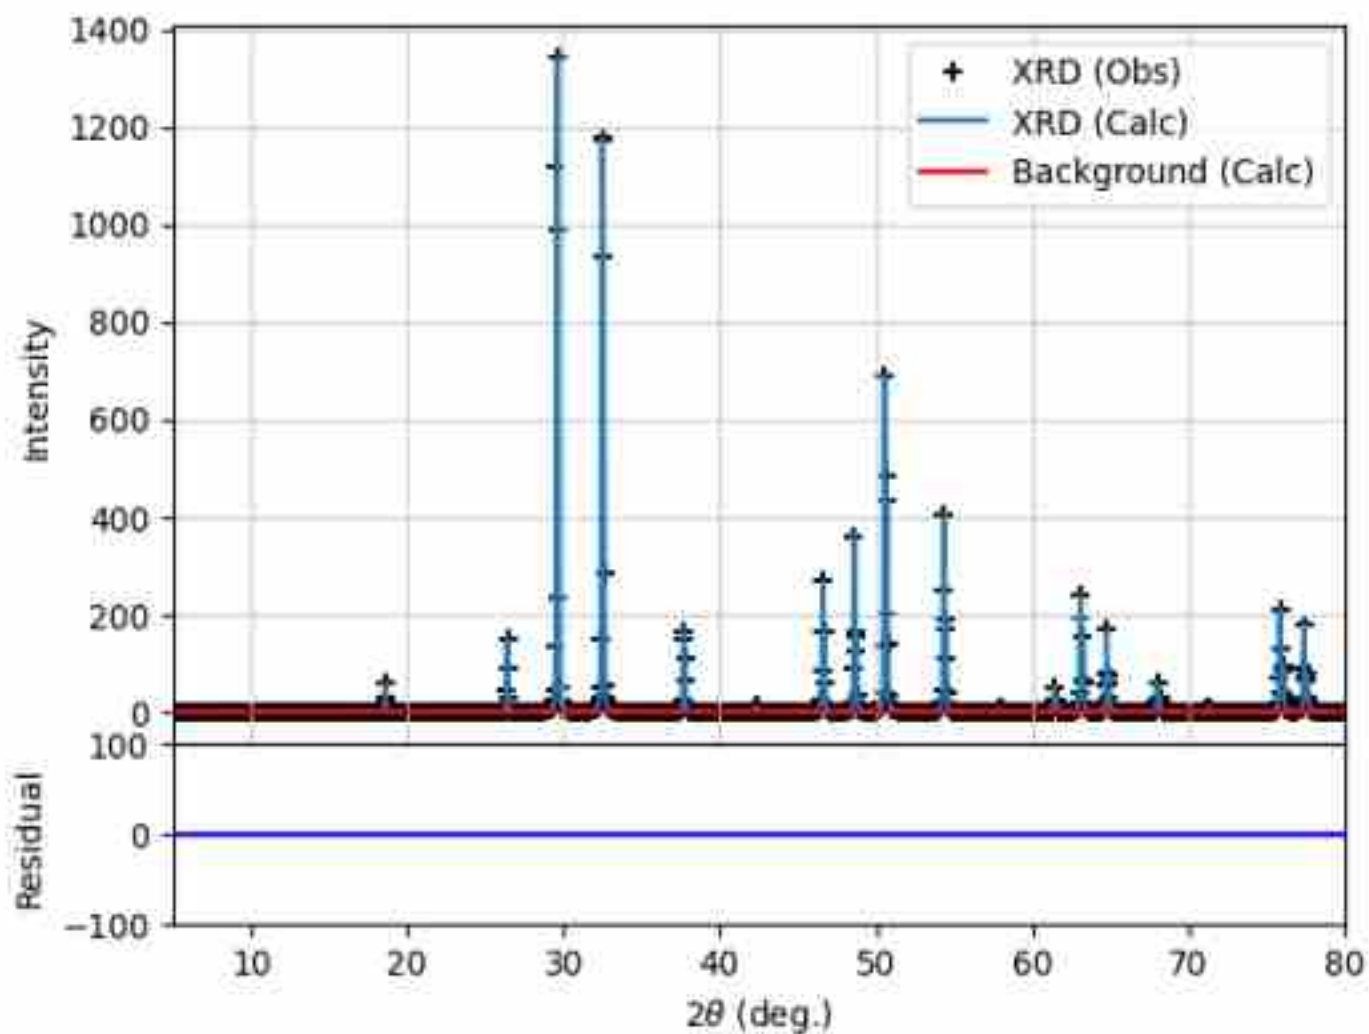

| RMSE before RR | Rwp     | RMSE after RR |
|----------------|---------|---------------|
| 0.023          | 0.02836 | 0.00214       |



# Sr1Ca3Pb2O8

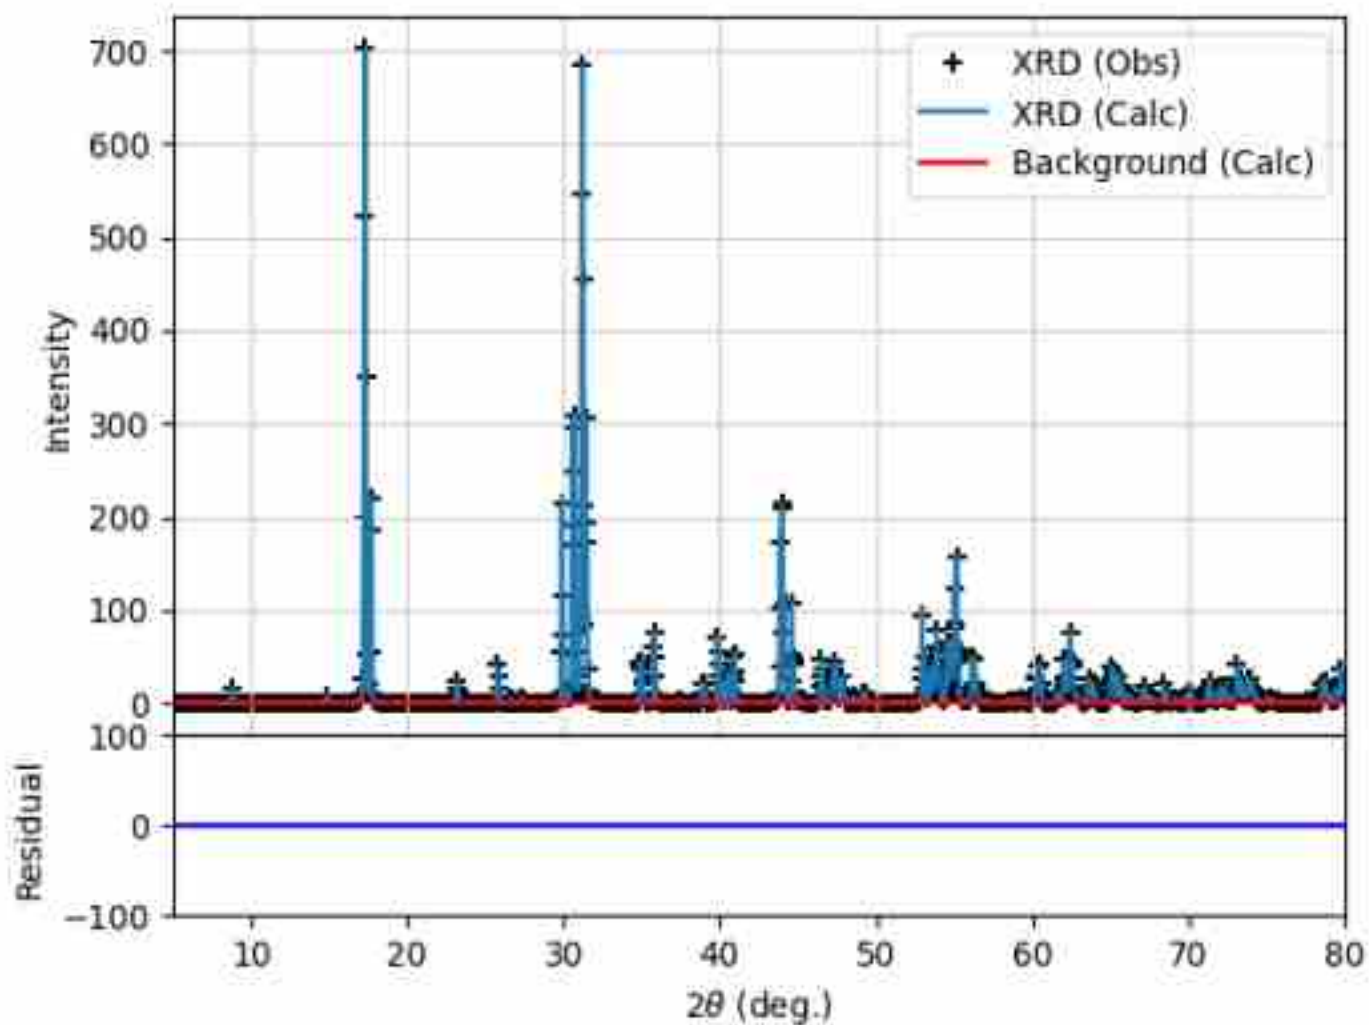

| RMSE before RR | Rwp     | RMSE after RR |
|----------------|---------|---------------|
| 0.023          | 0.00287 | 0.00086       |

# Sr<sub>2</sub>Ca<sub>2</sub>Hf<sub>4</sub>O<sub>12</sub>

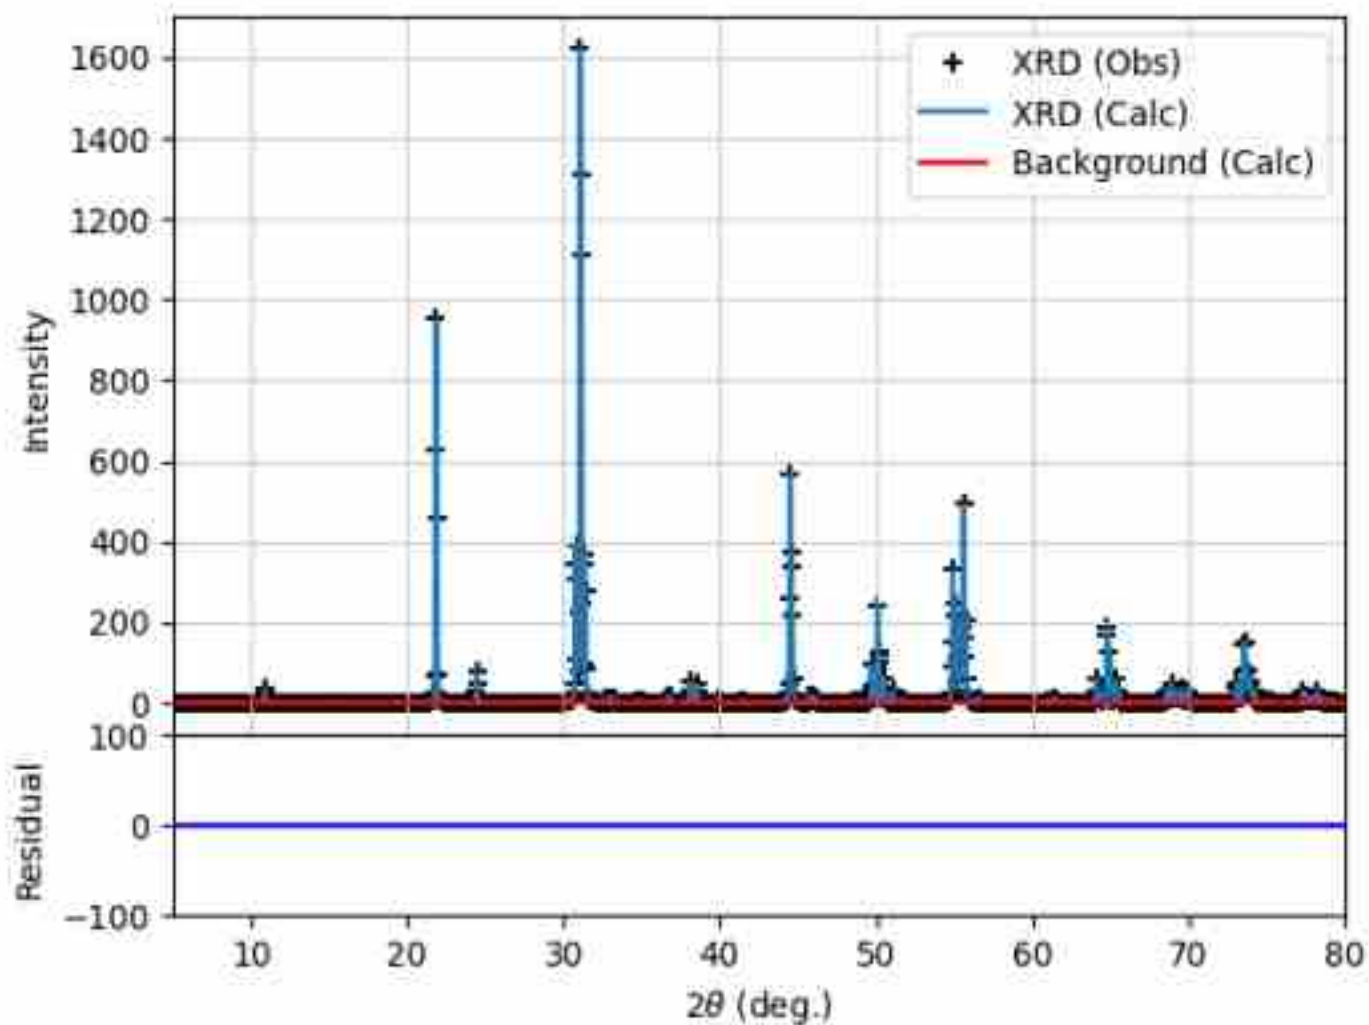

| RMSE before RR | Rwp     | RMSE after RR |
|----------------|---------|---------------|
| 0.023          | 0.00283 | 0.00093       |

# Sr<sub>2</sub>Ca<sub>4</sub>I<sub>12</sub>

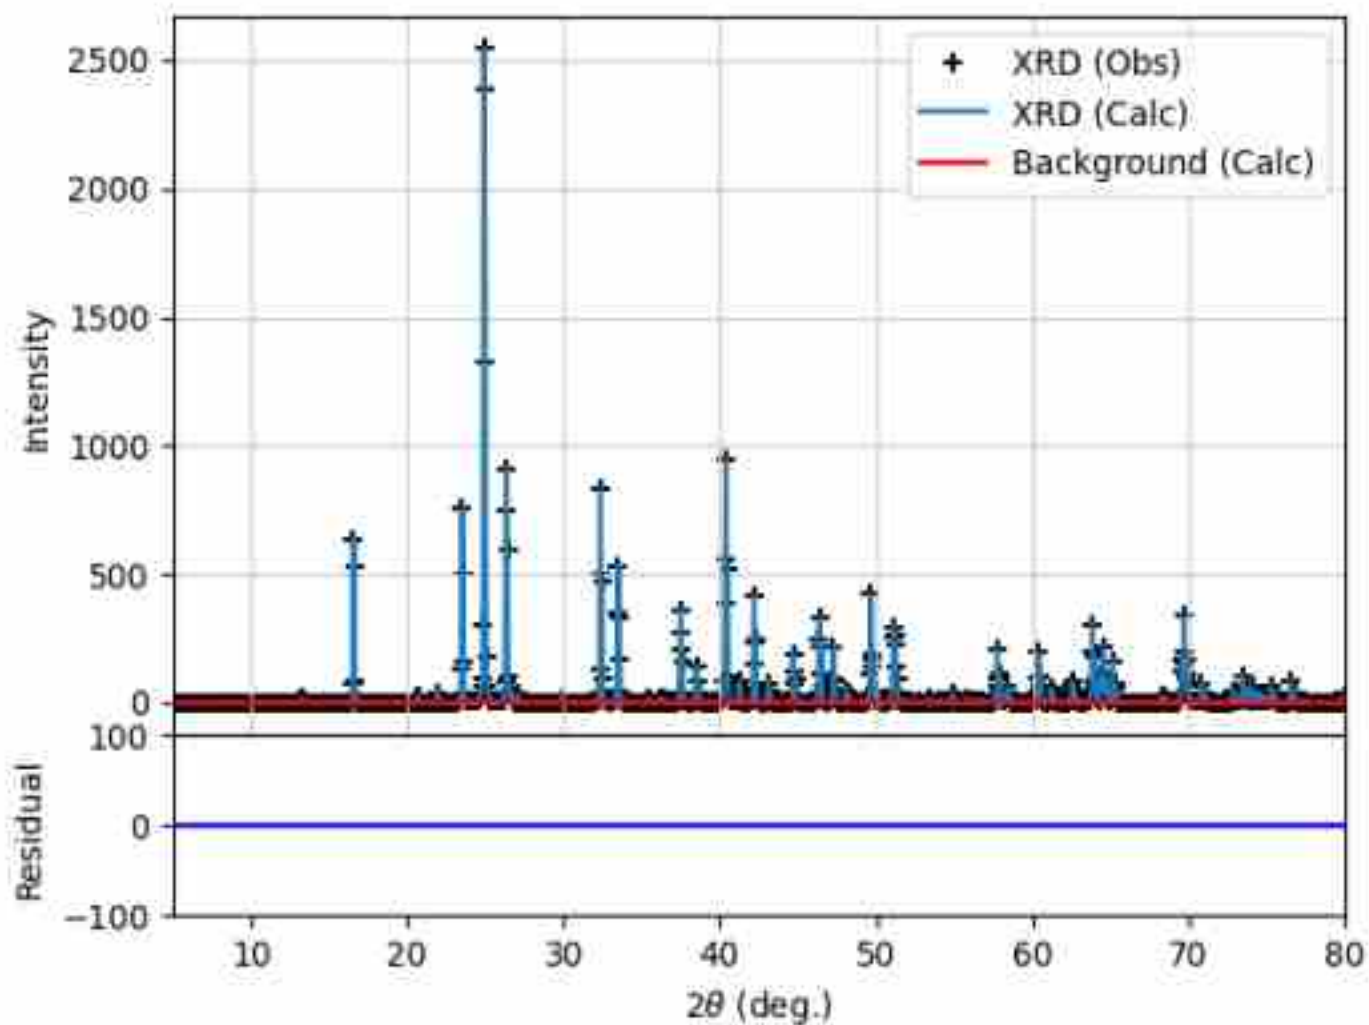

| RMSE before RR | Rwp     | RMSE after RR |
|----------------|---------|---------------|
| 0.023          | 0.00502 | 0.00047       |

# Sr<sub>2</sub>La<sub>2</sub>Mn<sub>2</sub>Mo<sub>2</sub>O<sub>12</sub>

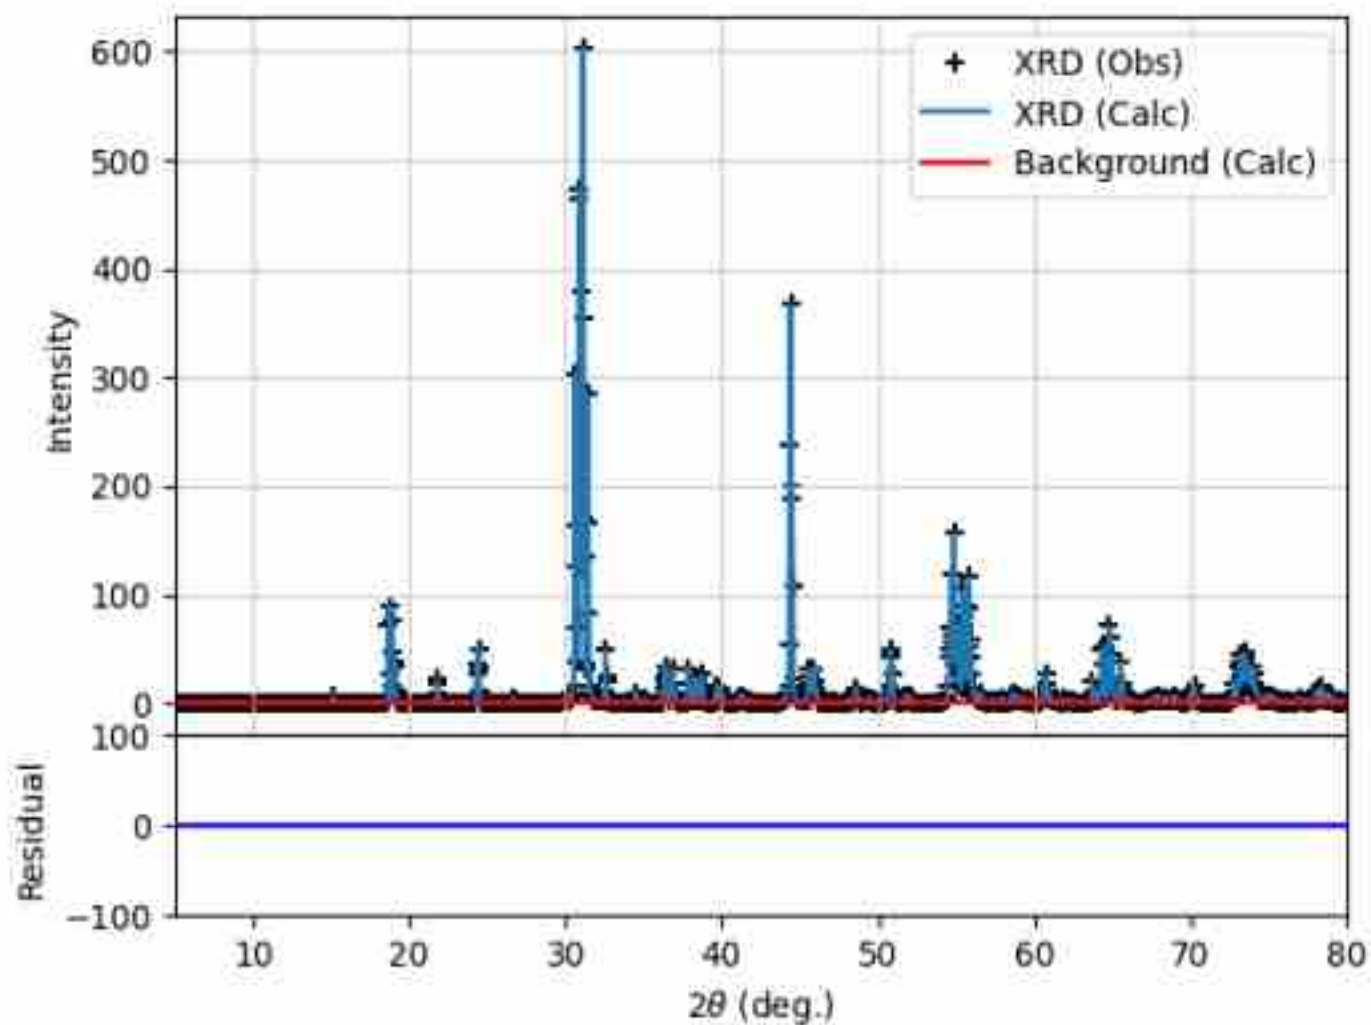

| RMSE before RR | Rwp     | RMSE after RR |
|----------------|---------|---------------|
| 0.023          | 0.00304 | 0.00061       |

# Sr<sub>2</sub>Mg<sub>4</sub>Pd<sub>2</sub>

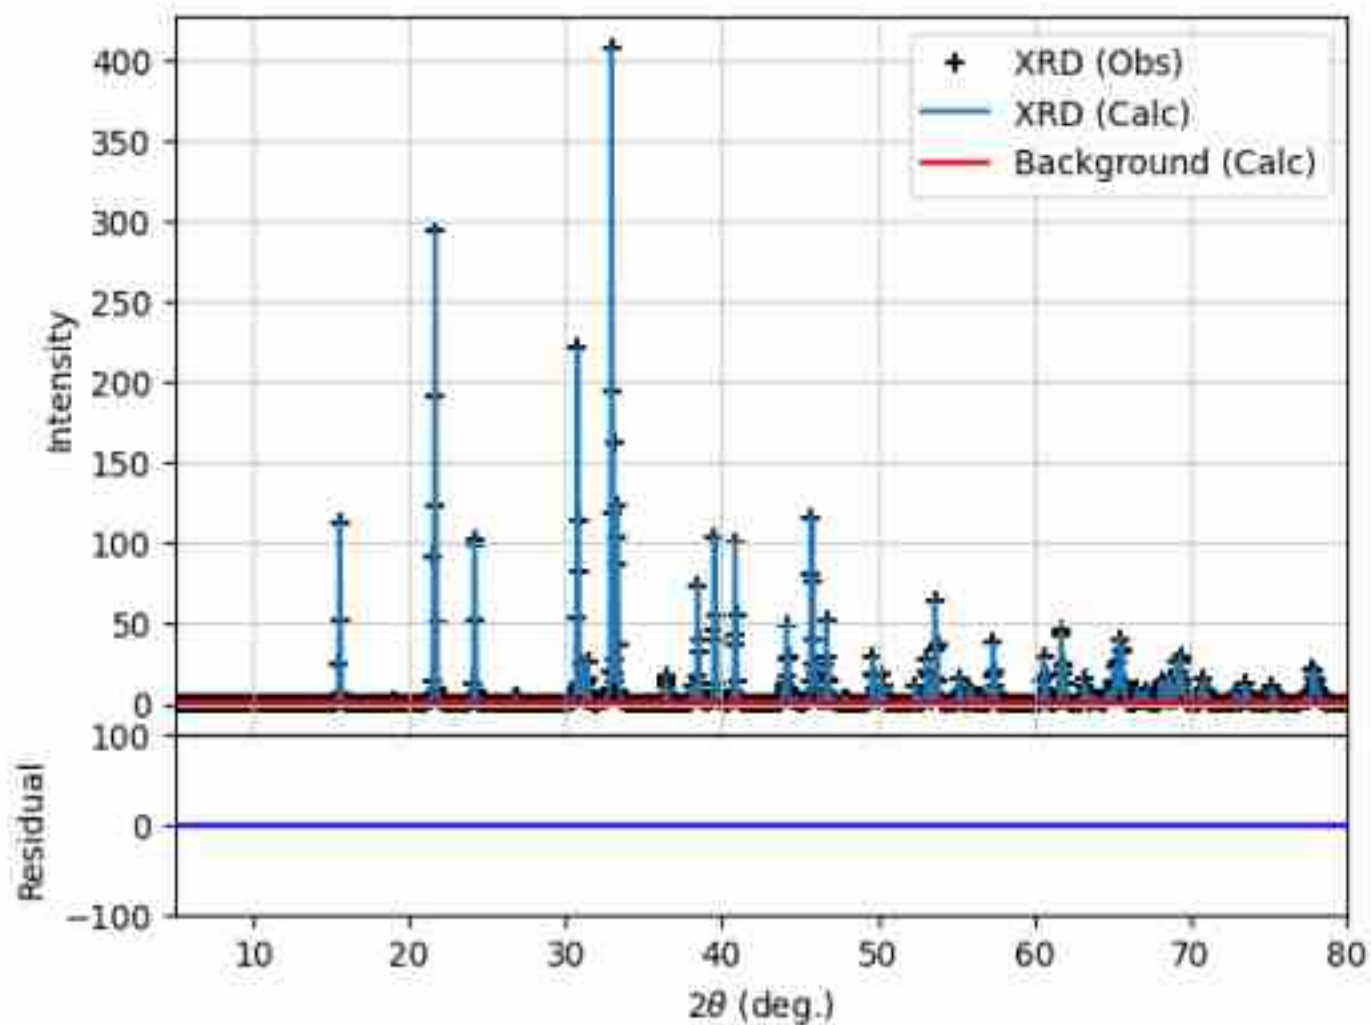

| RMSE before RR | Rwp    | RMSE after RR |
|----------------|--------|---------------|
| 0.023          | 0.0037 | 0.00053       |

# Sr<sub>2</sub>Nd<sub>4</sub>O<sub>8</sub>

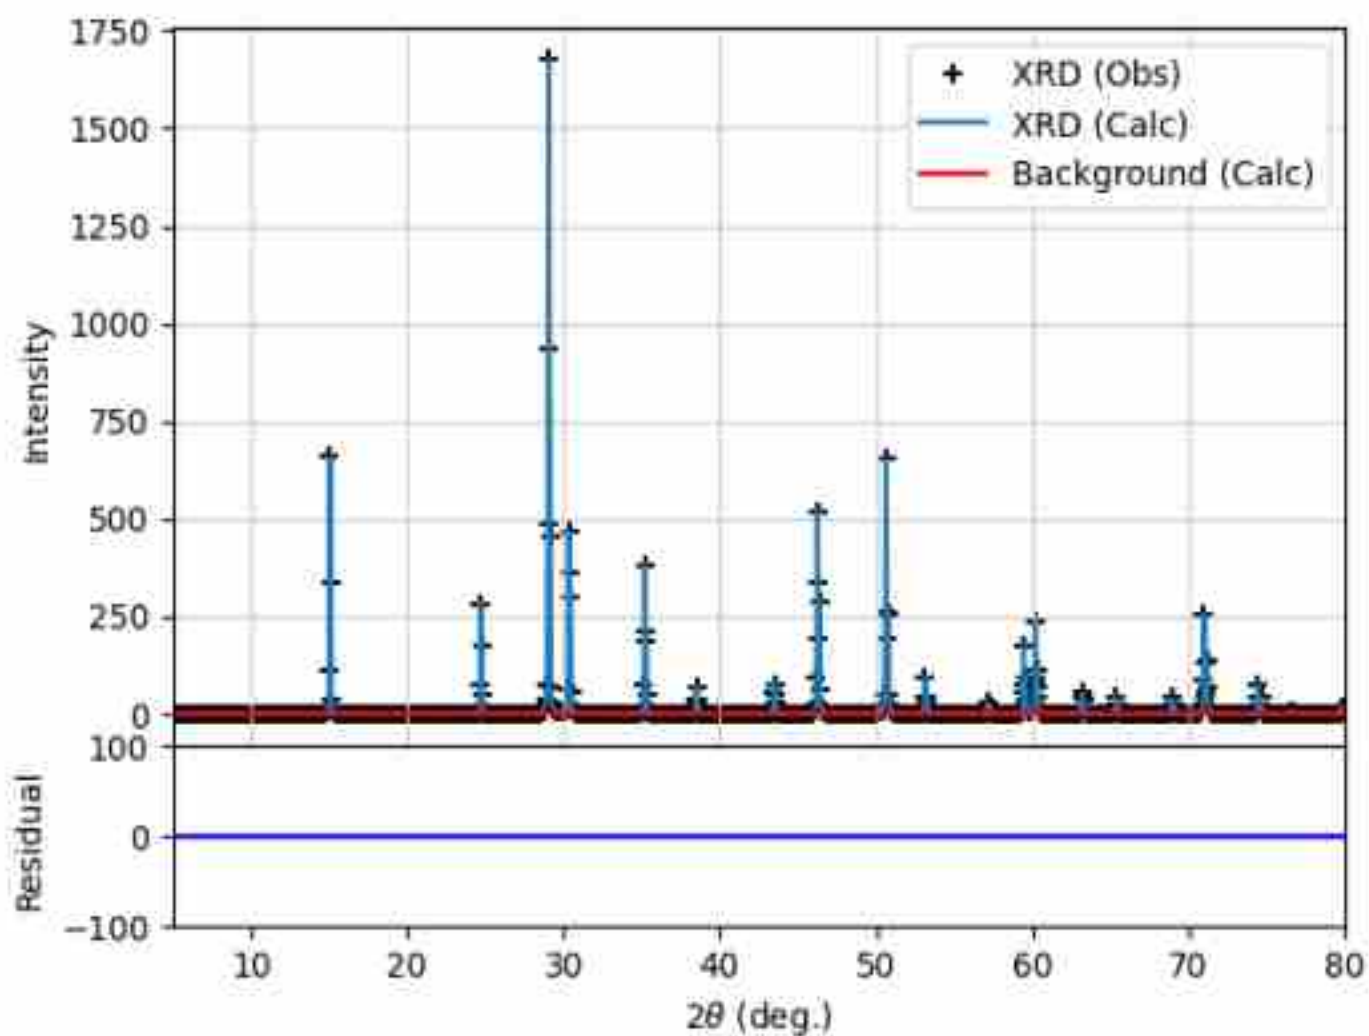

| RMSE before RR | Rwp     | RMSE after RR |
|----------------|---------|---------------|
| 0.023          | 0.01194 | 0.00414       |

# Sr<sub>2</sub>Pr<sub>2</sub>Sc<sub>2</sub>O<sub>8</sub>

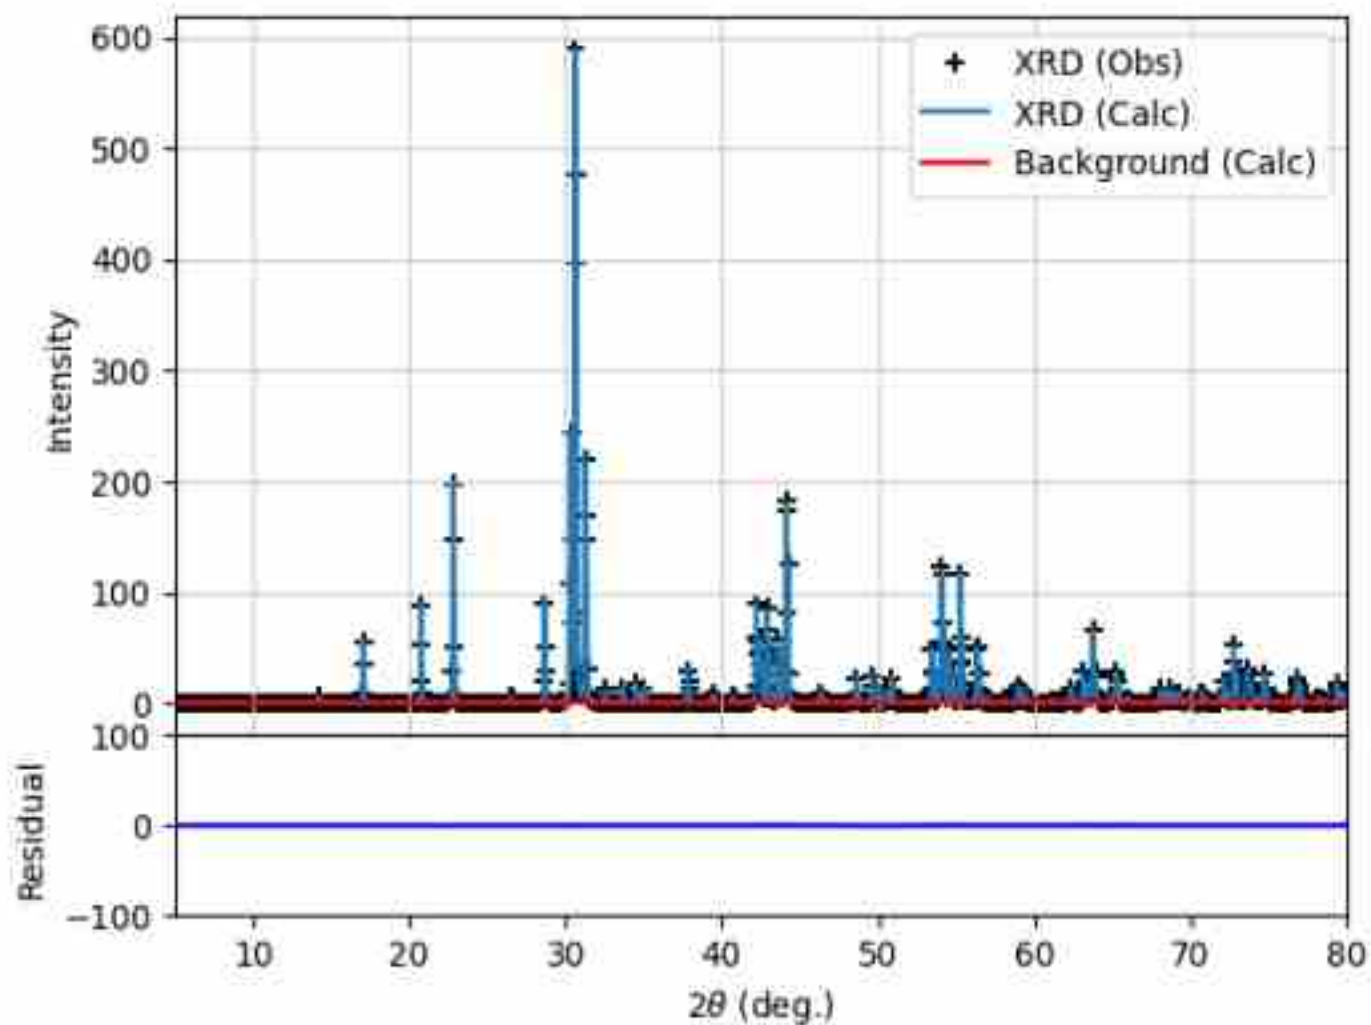

| RMSE before RR | Rwp     | RMSE after RR |
|----------------|---------|---------------|
| 0.023          | 1.03404 | 0.0319        |

# Sr<sub>2</sub>Zn<sub>2</sub>Bi<sub>4</sub>

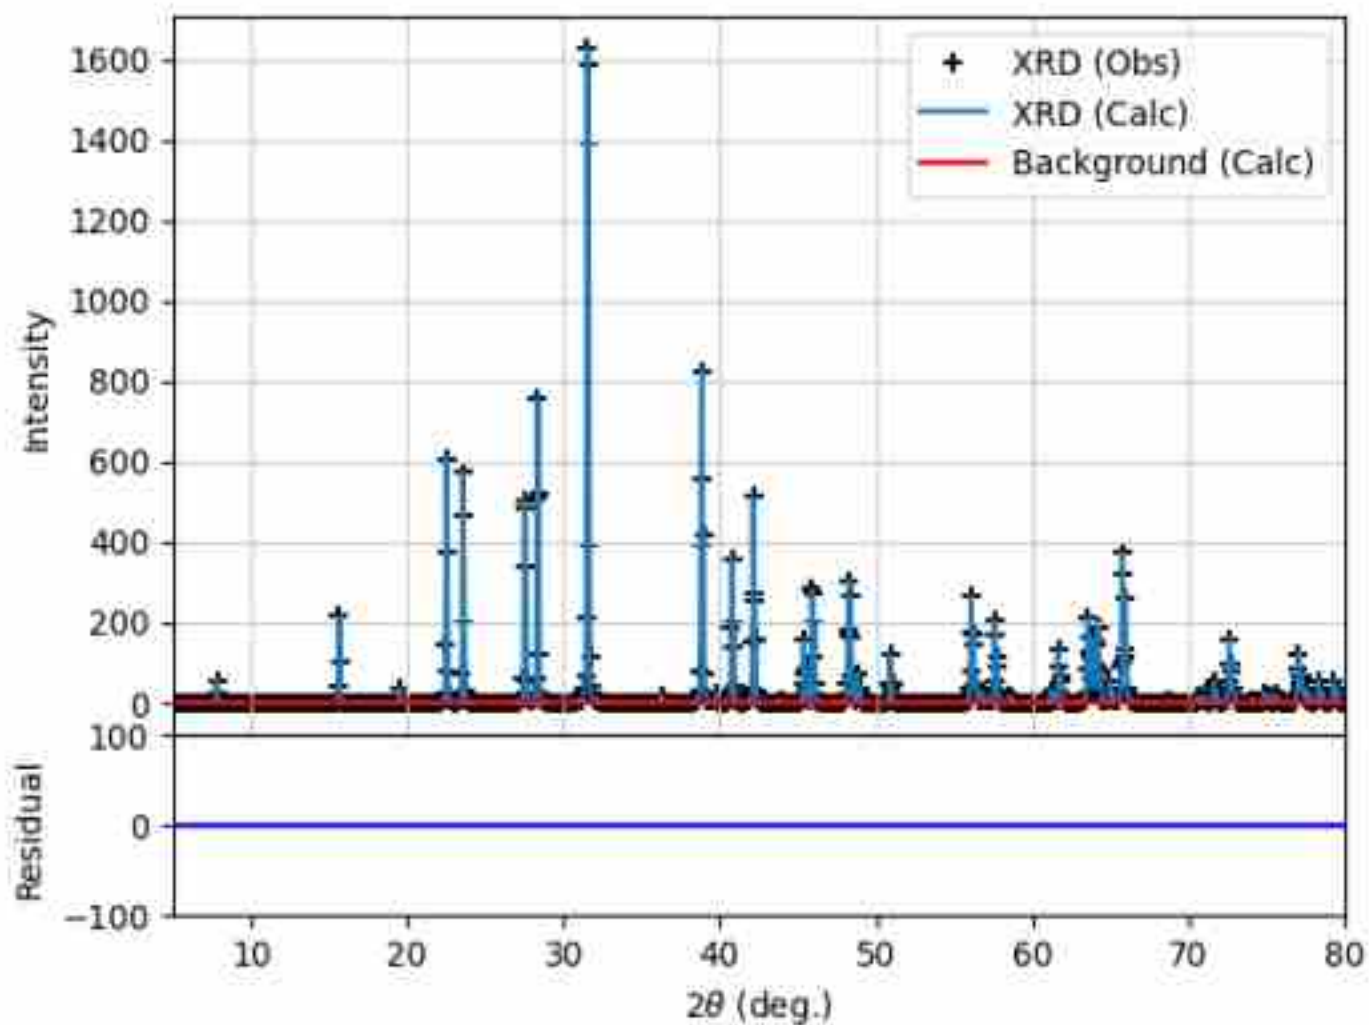

| RMSE before RR | Rwp     | RMSE after RR |
|----------------|---------|---------------|
| 0.023          | 0.00356 | 0.00046       |



# Sr<sub>2</sub>Zr<sub>2</sub>F<sub>12</sub>

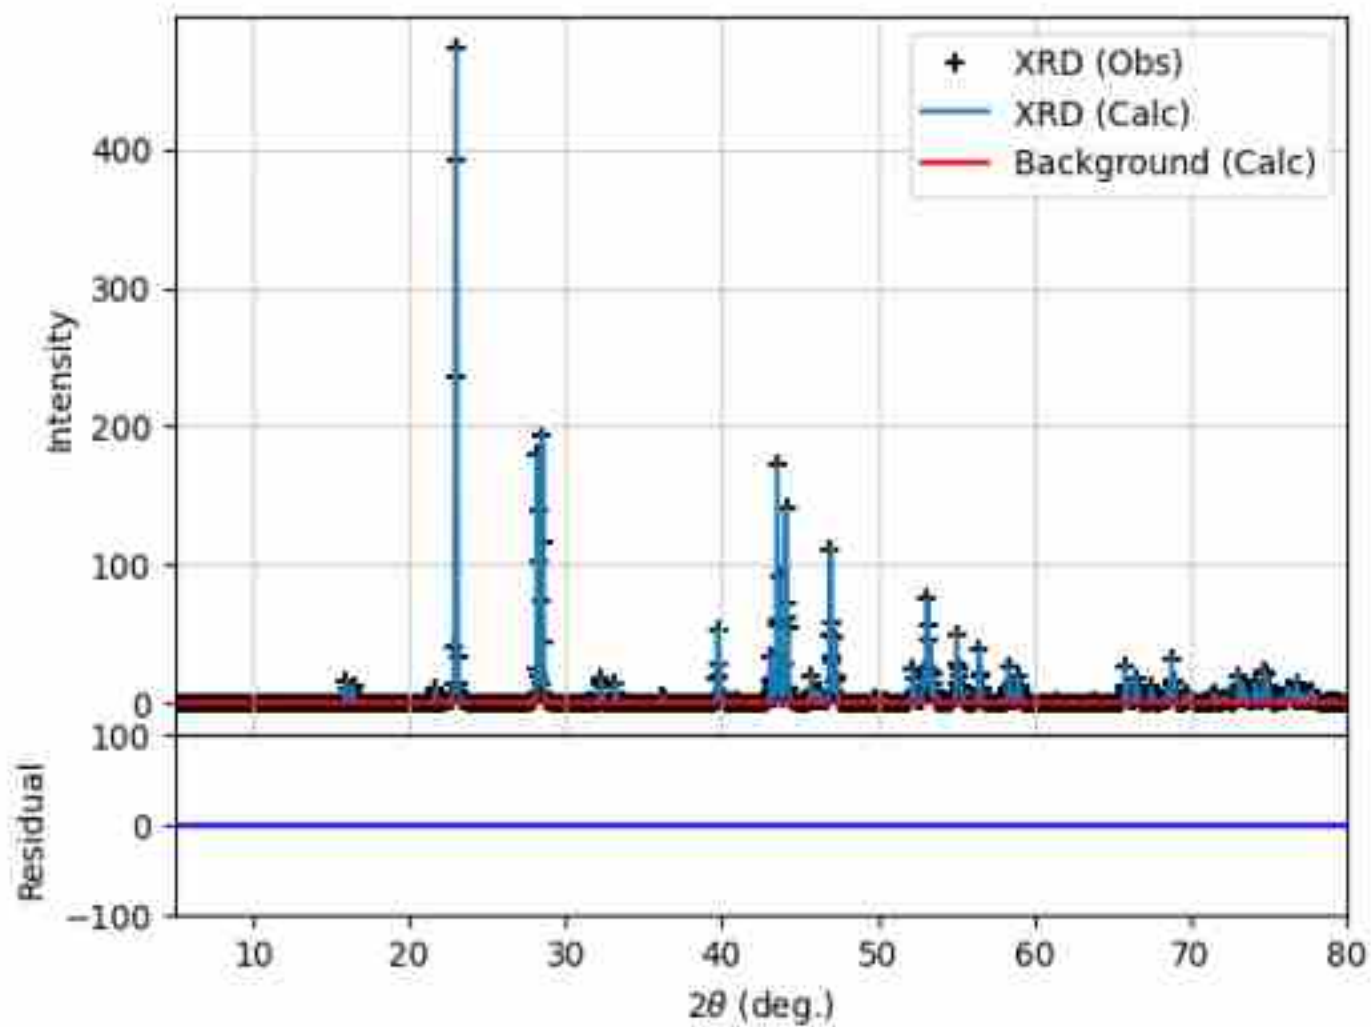

| RMSE before RR | Rwp     | RMSE after RR |
|----------------|---------|---------------|
| 0.023          | 0.00385 | 0.00062       |

# Sr<sub>3</sub>Nb<sub>1</sub>Co<sub>1</sub>O<sub>7</sub>

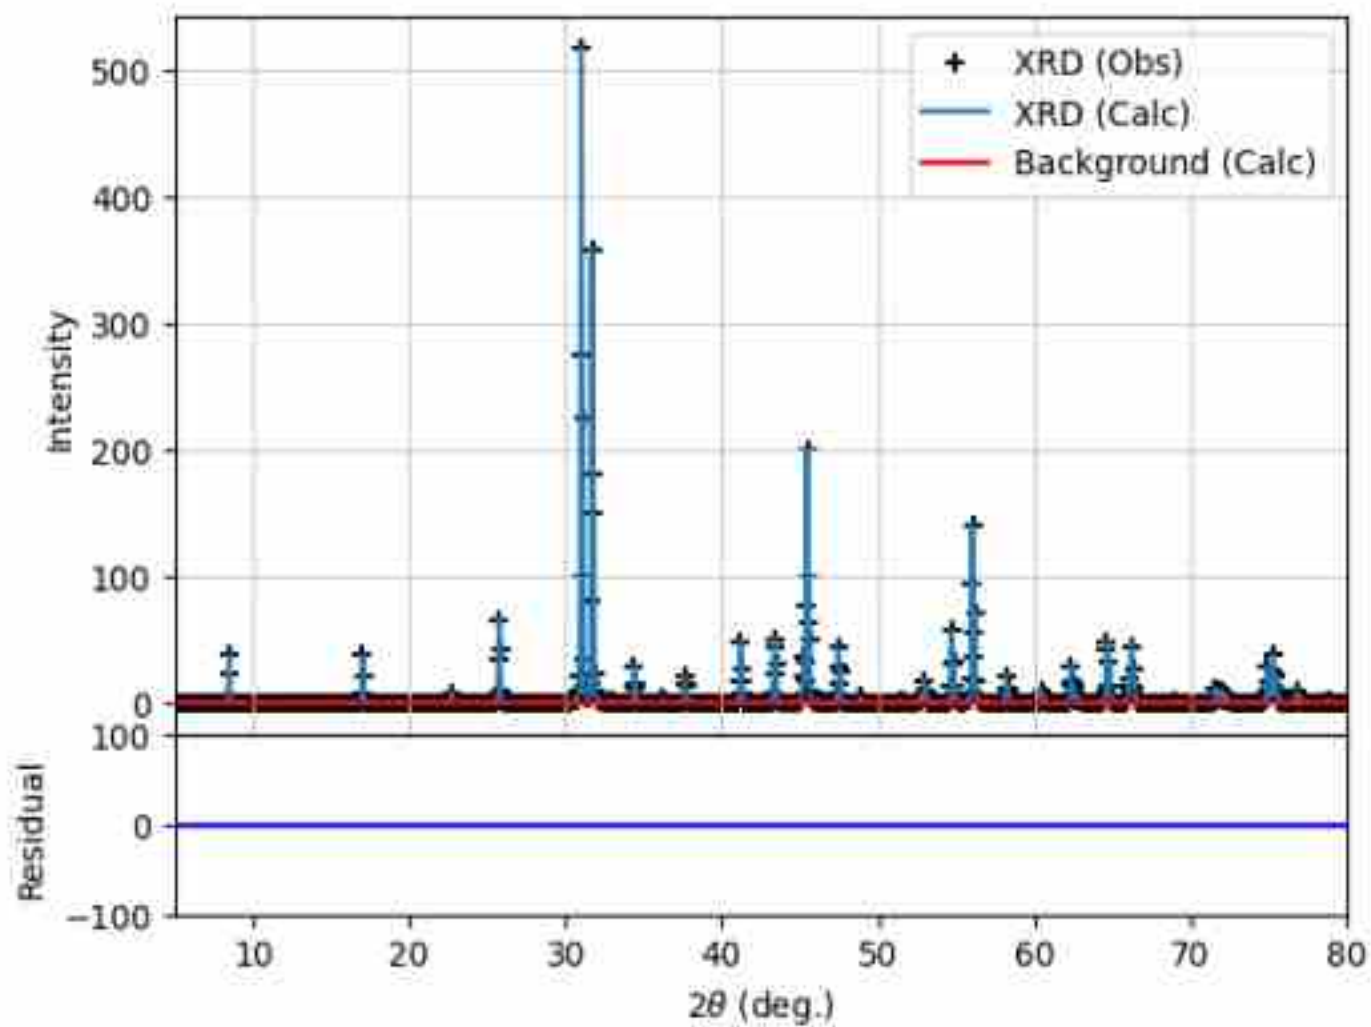

| RMSE before RR | Rwp     | RMSE after RR |
|----------------|---------|---------------|
| 0.023          | 0.00366 | 0.00081       |

# Sr4I8

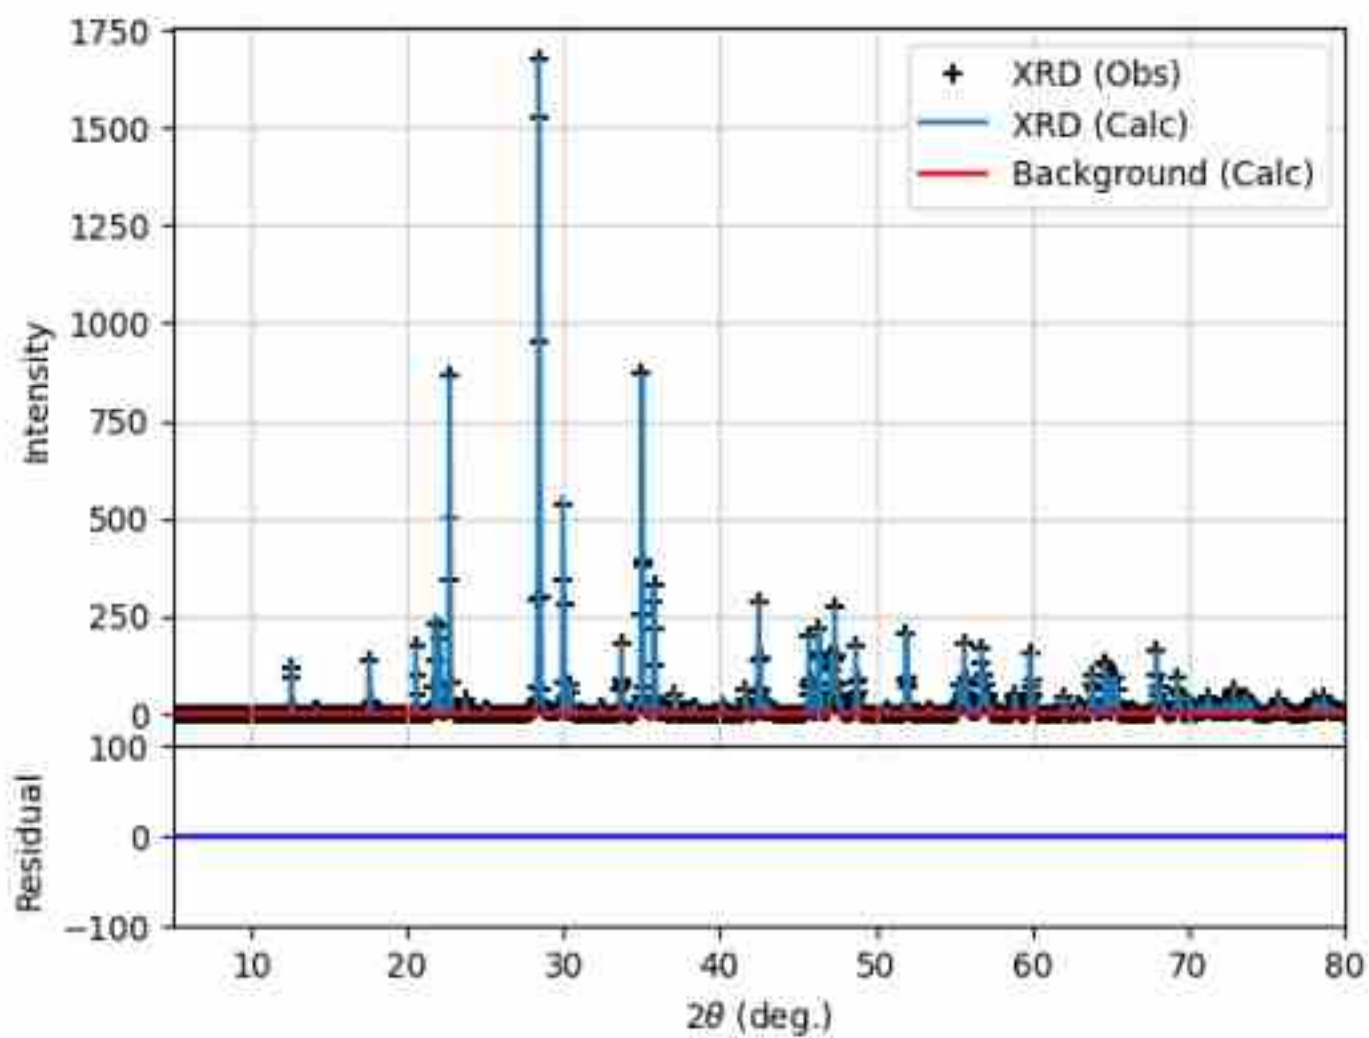

| RMSE before RR | Rwp     | RMSE after RR |
|----------------|---------|---------------|
| 0.023          | 0.00439 | 0.00032       |

# Sr<sub>4</sub>Sc<sub>2</sub>Ga<sub>2</sub>O<sub>10</sub>

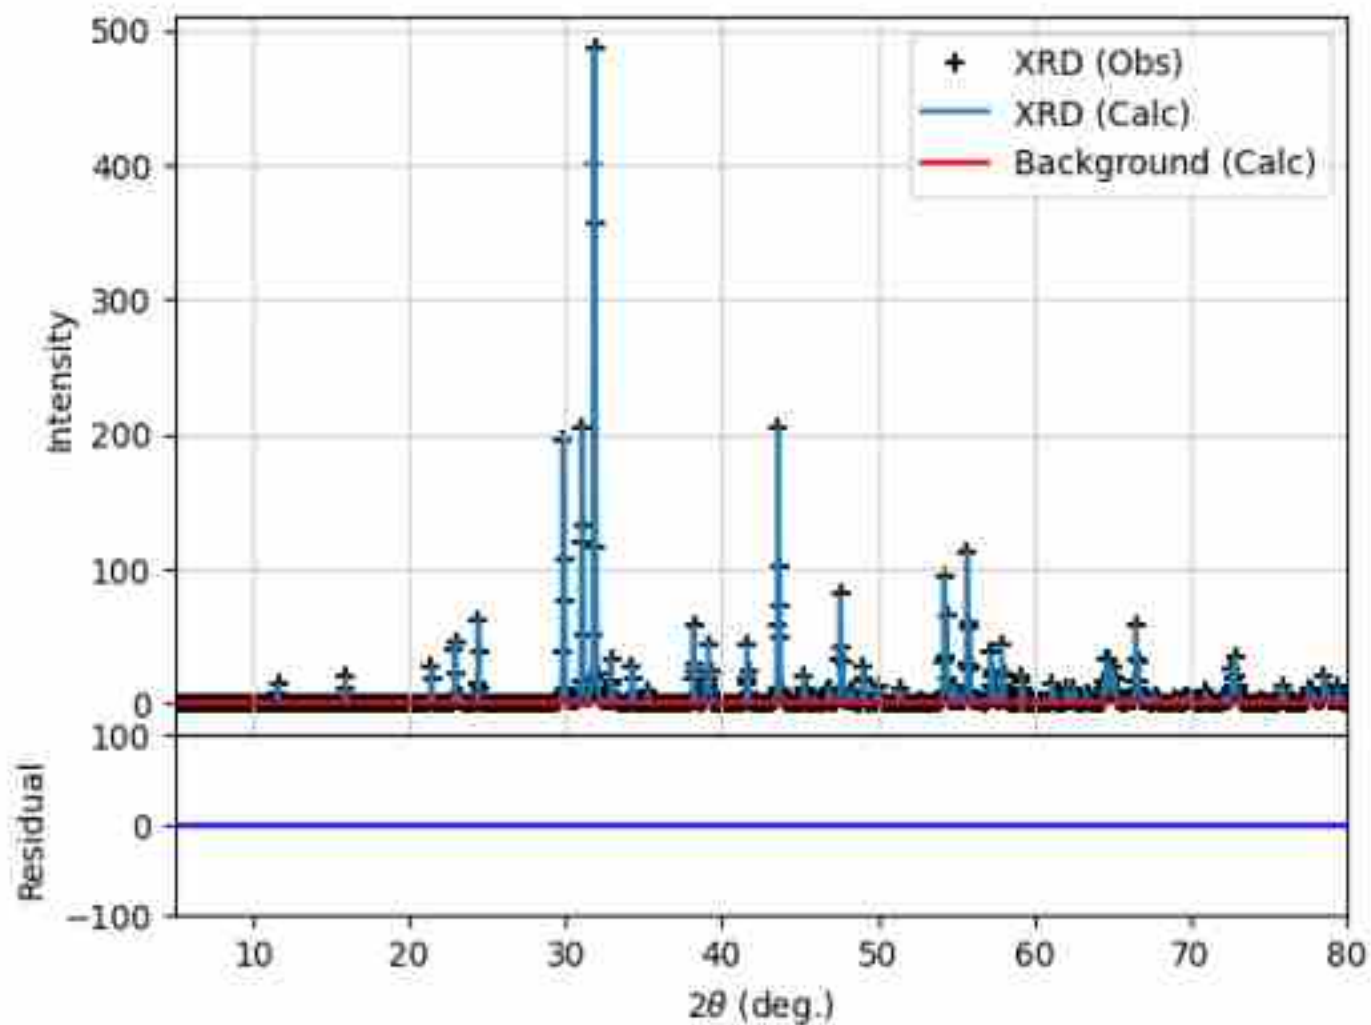

| RMSE before RR | Rwp     | RMSE after RR |
|----------------|---------|---------------|
| 0.023          | 0.00265 | 0.0005        |

# Sr<sub>4</sub>ZrTi<sub>3</sub>O<sub>12</sub>

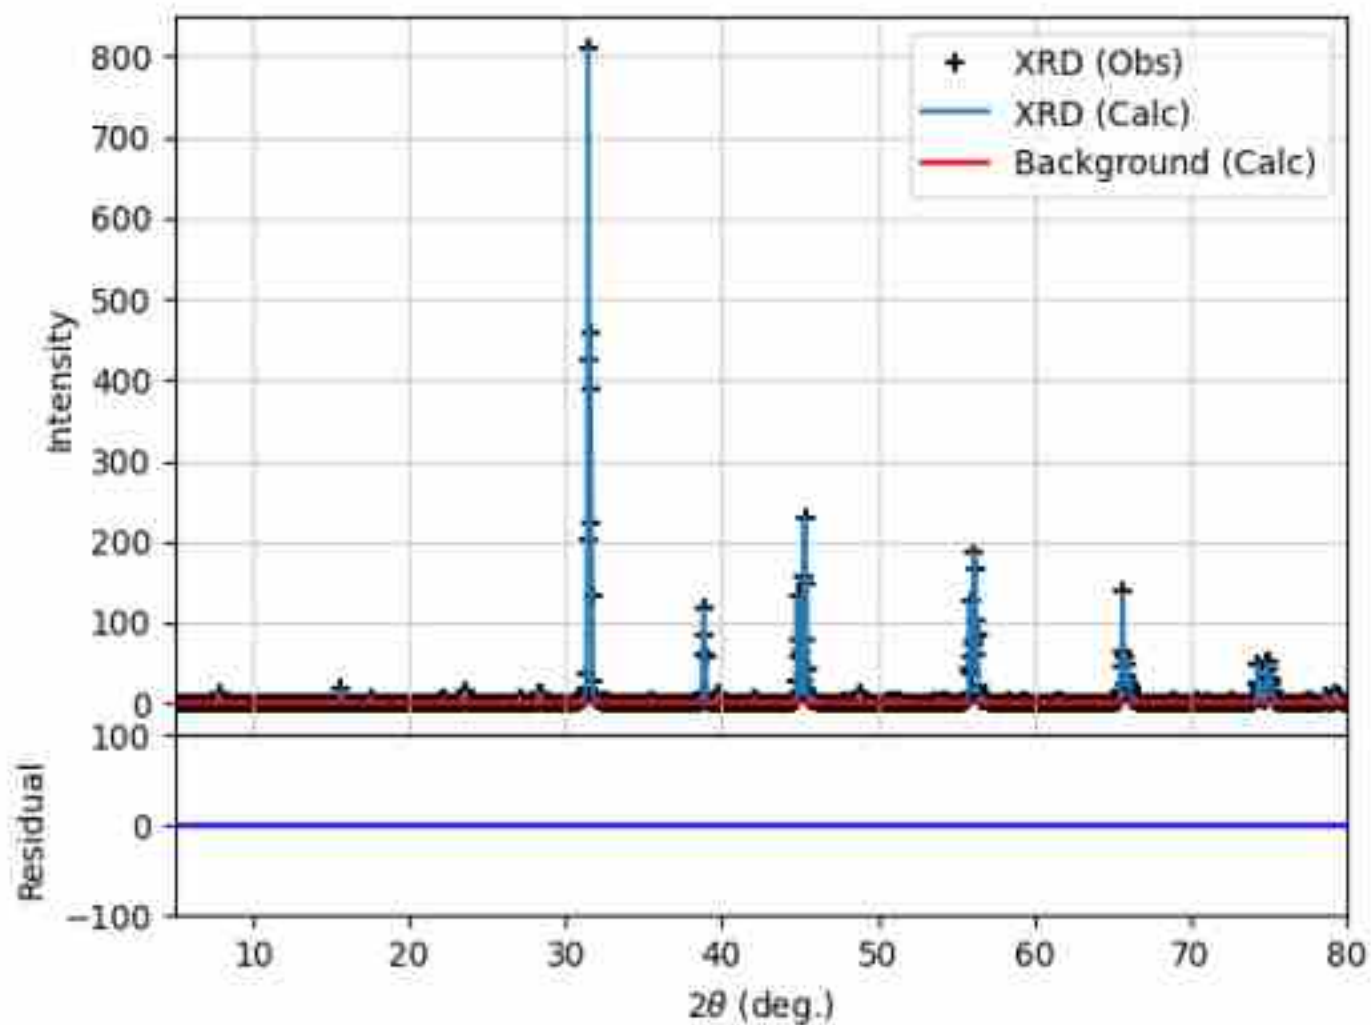

| RMSE before RR | Rwp     | RMSE after RR |
|----------------|---------|---------------|
| 0.023          | 0.00406 | 0.0012        |

# Ta1Nb1Cu6Te8

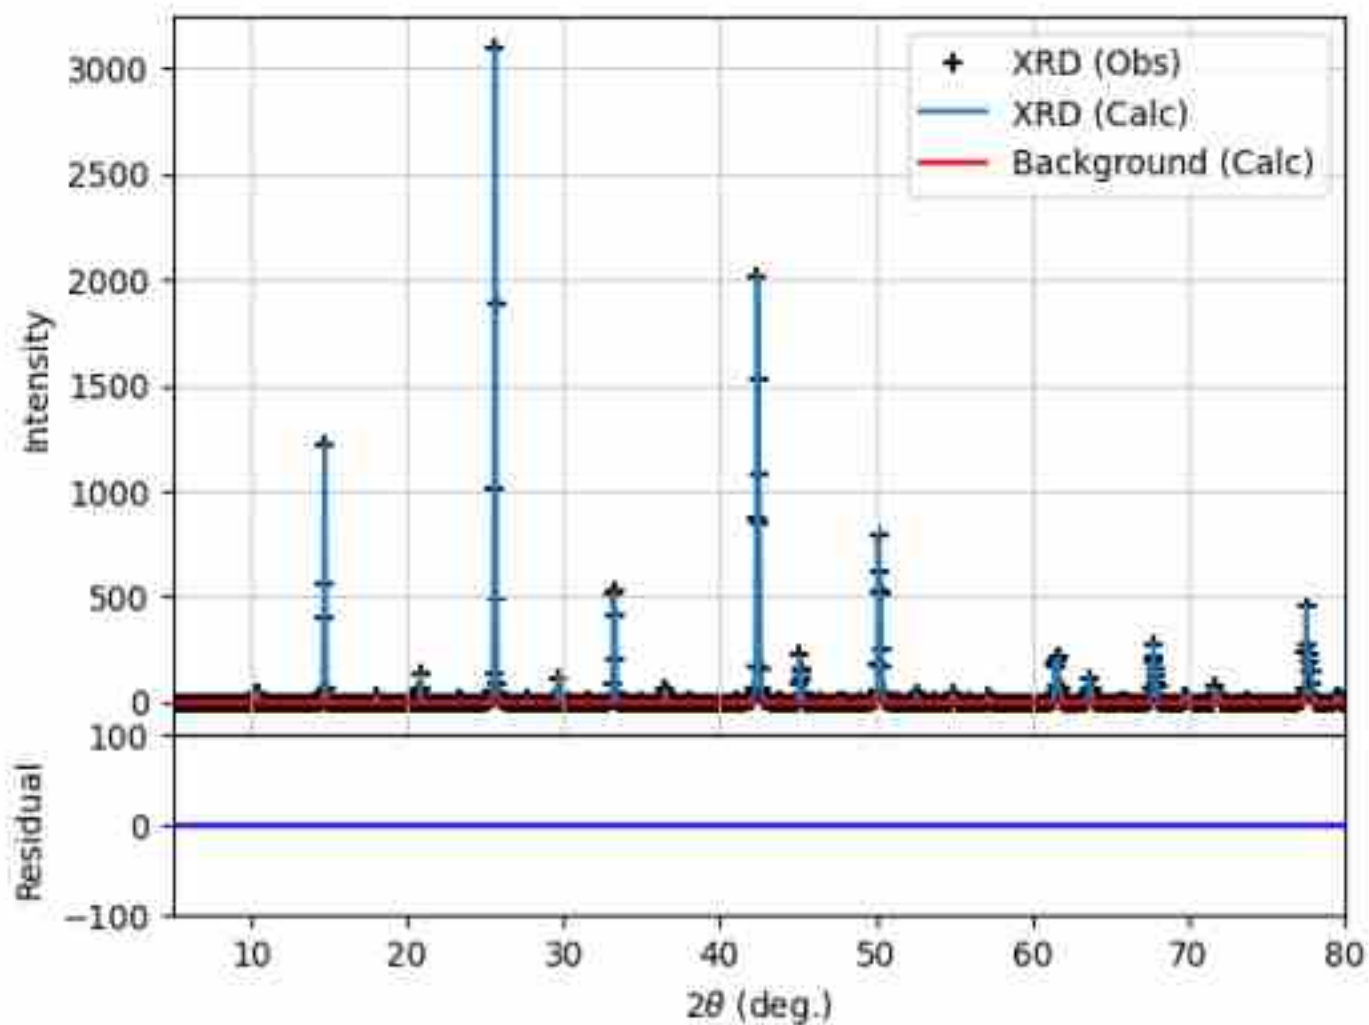

| RMSE before RR | Rwp     | RMSE after RR |
|----------------|---------|---------------|
| 0.023          | 0.00407 | 0.00058       |

# Ta<sub>2</sub>Pd<sub>1</sub>Se<sub>6</sub>

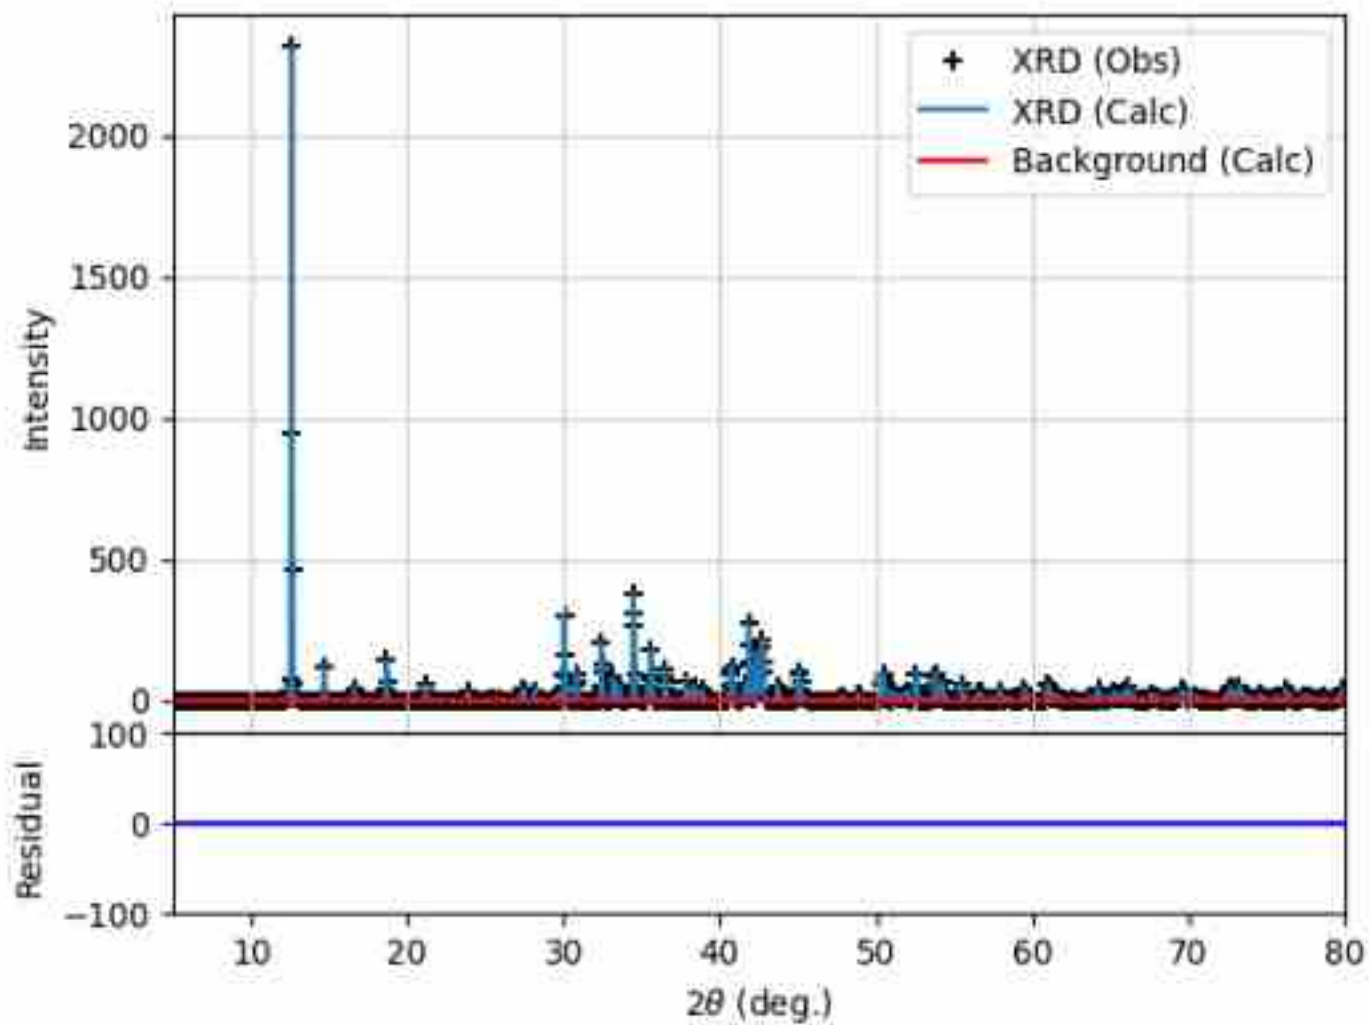

| RMSE before RR | Rwp    | RMSE after RR |
|----------------|--------|---------------|
| 0.023          | 0.0026 | 0.00019       |

# Ta4Co8

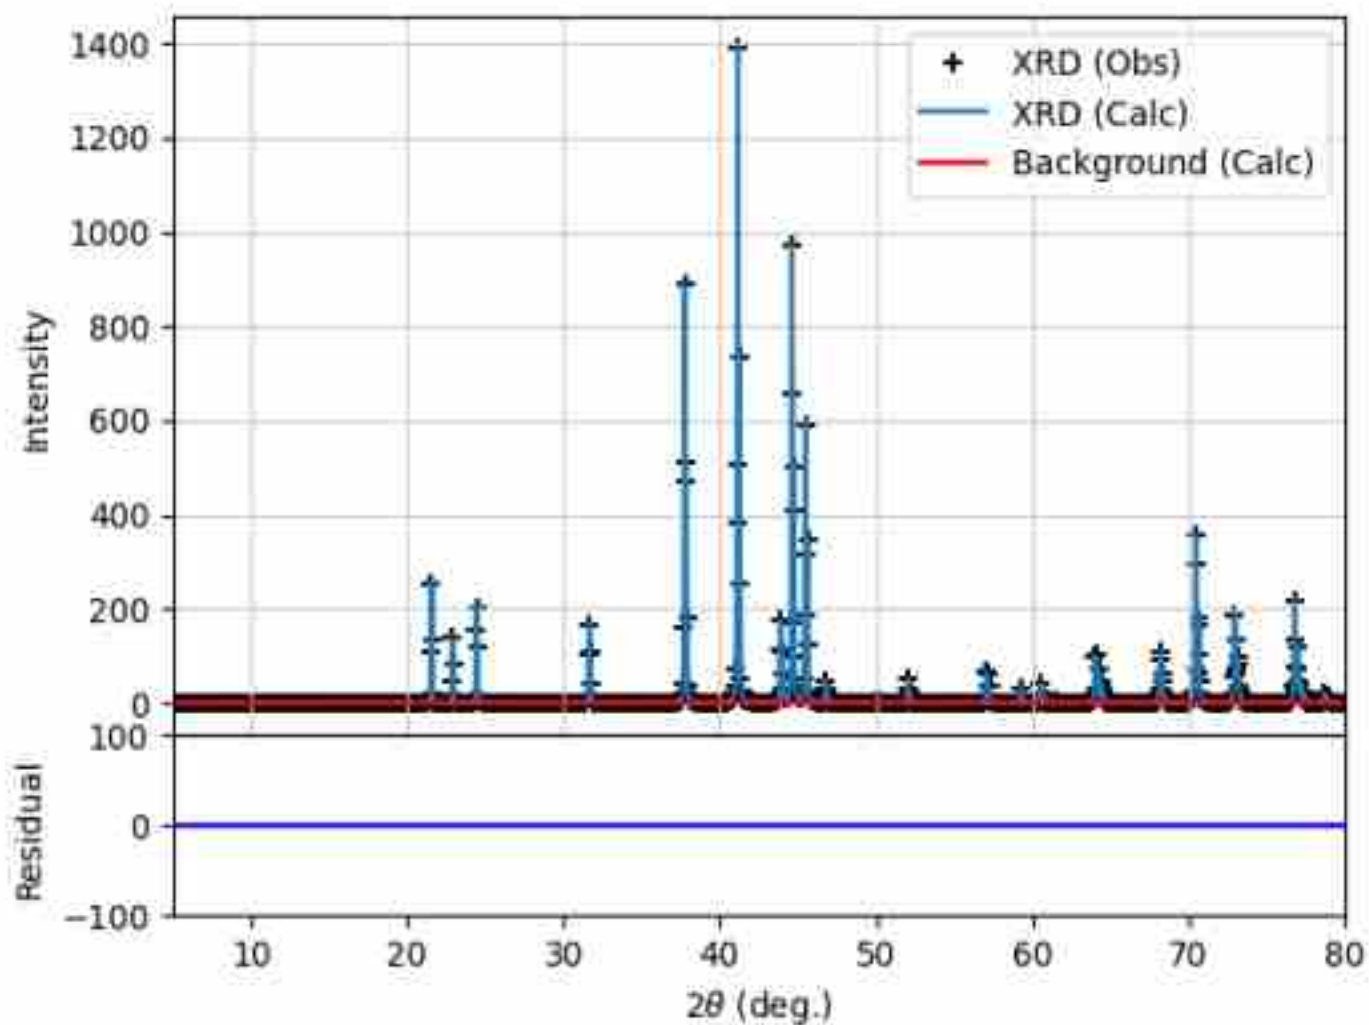

| RMSE before RR | Rwp     | RMSE after RR |
|----------------|---------|---------------|
| 0.023          | 0.03086 | 0.00179       |



# Ta<sub>4</sub>Mn<sub>4</sub>P<sub>4</sub>

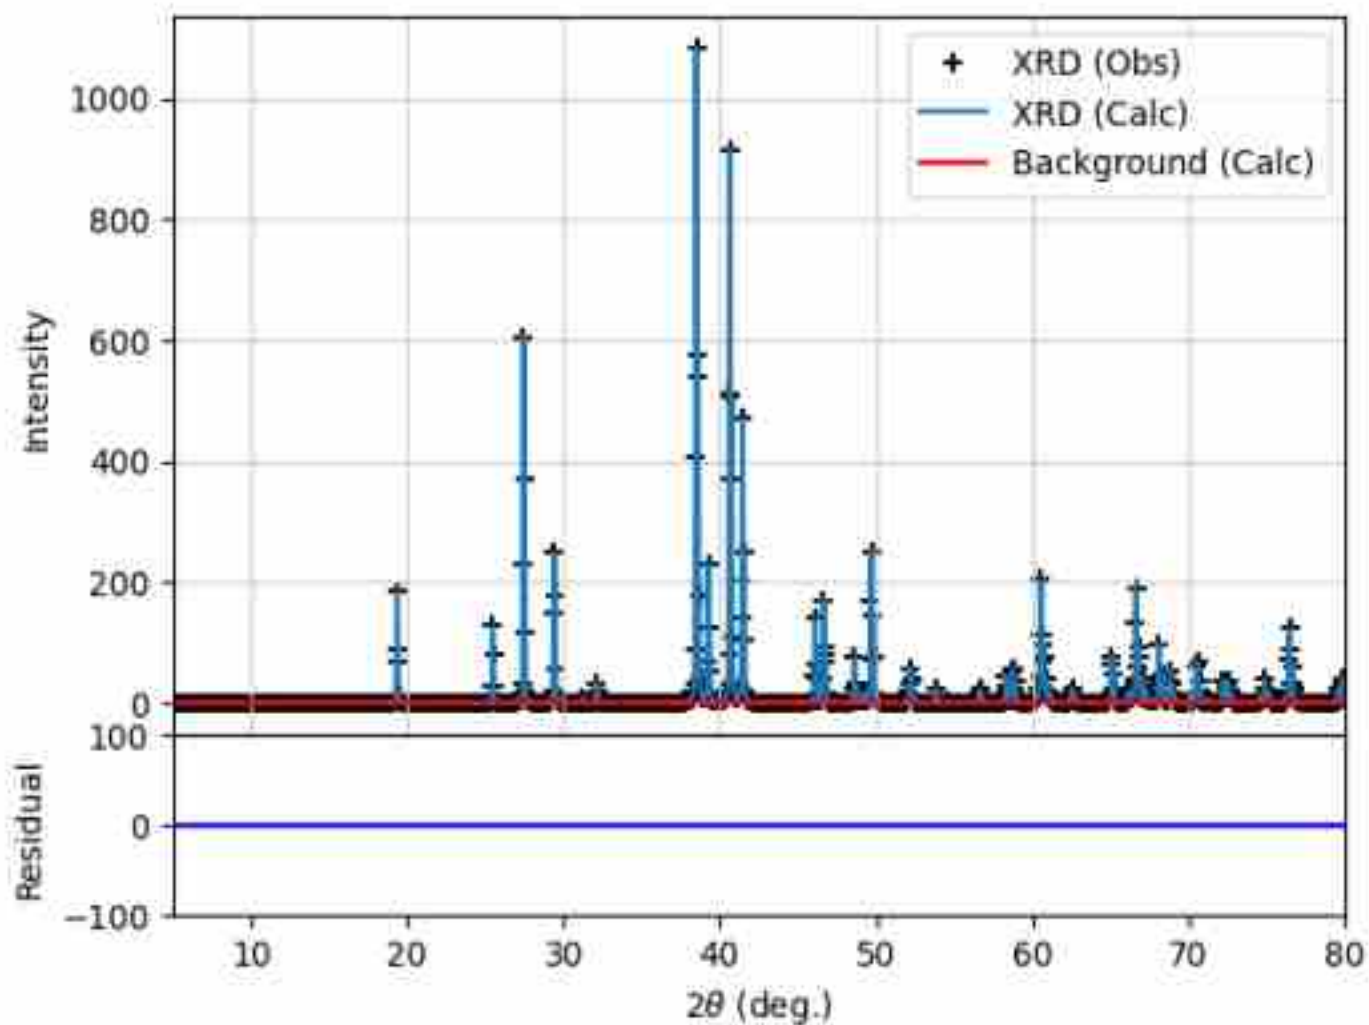

| RMSE before RR | Rwp     | RMSE after RR |
|----------------|---------|---------------|
| 0.023          | 0.00292 | 0.00037       |

# Tb14Rh6

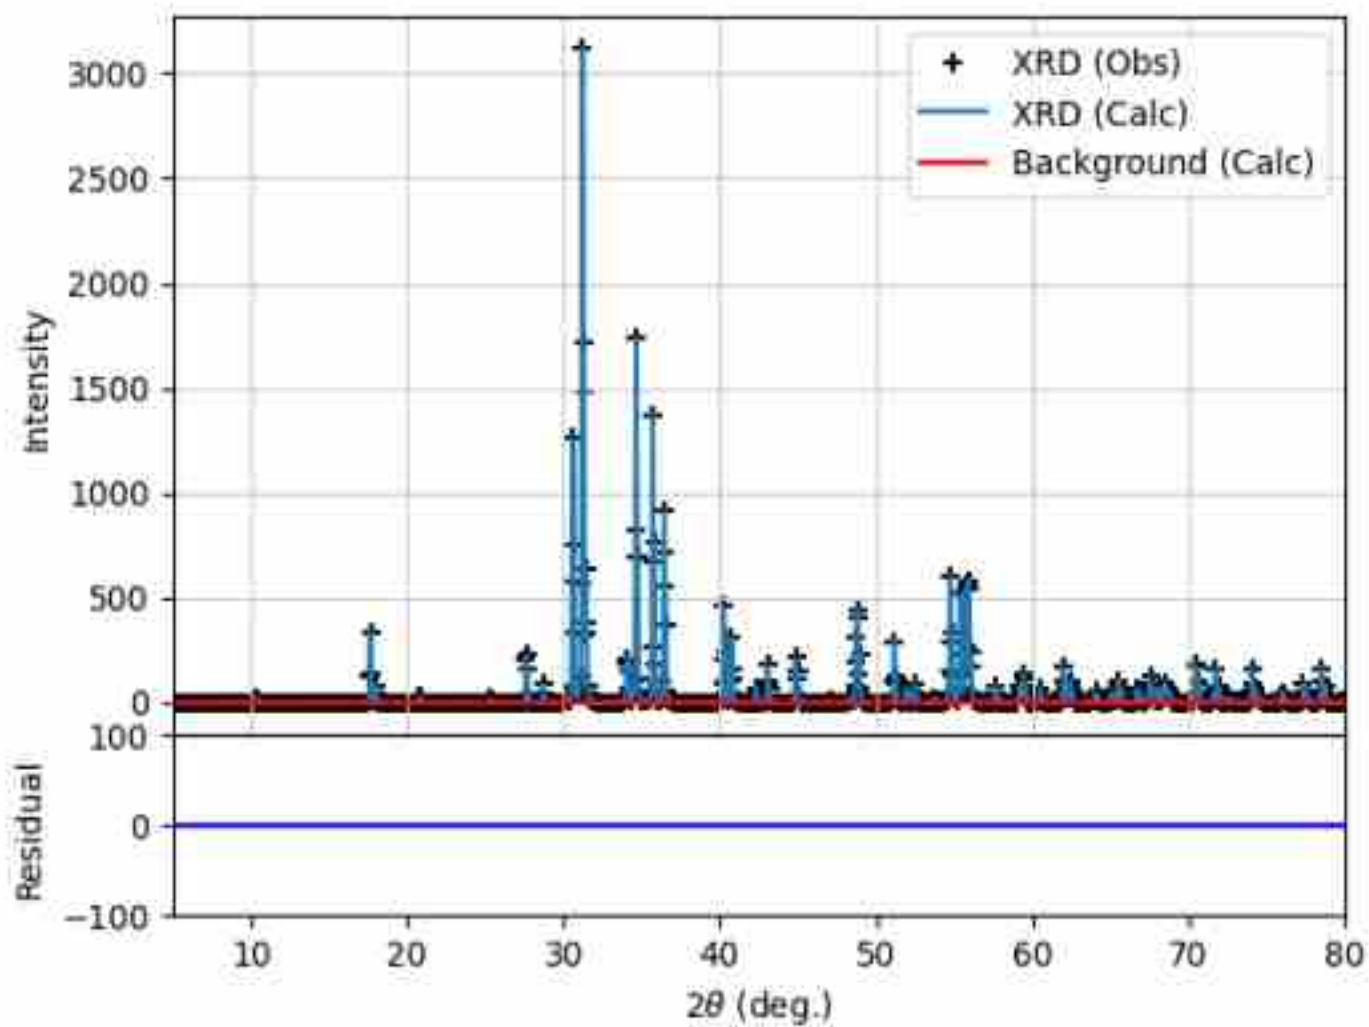

| RMSE before RR | Rwp     | RMSE after RR |
|----------------|---------|---------------|
| 0.023          | 0.00337 | 0.00031       |

# Th1Mn4Al8

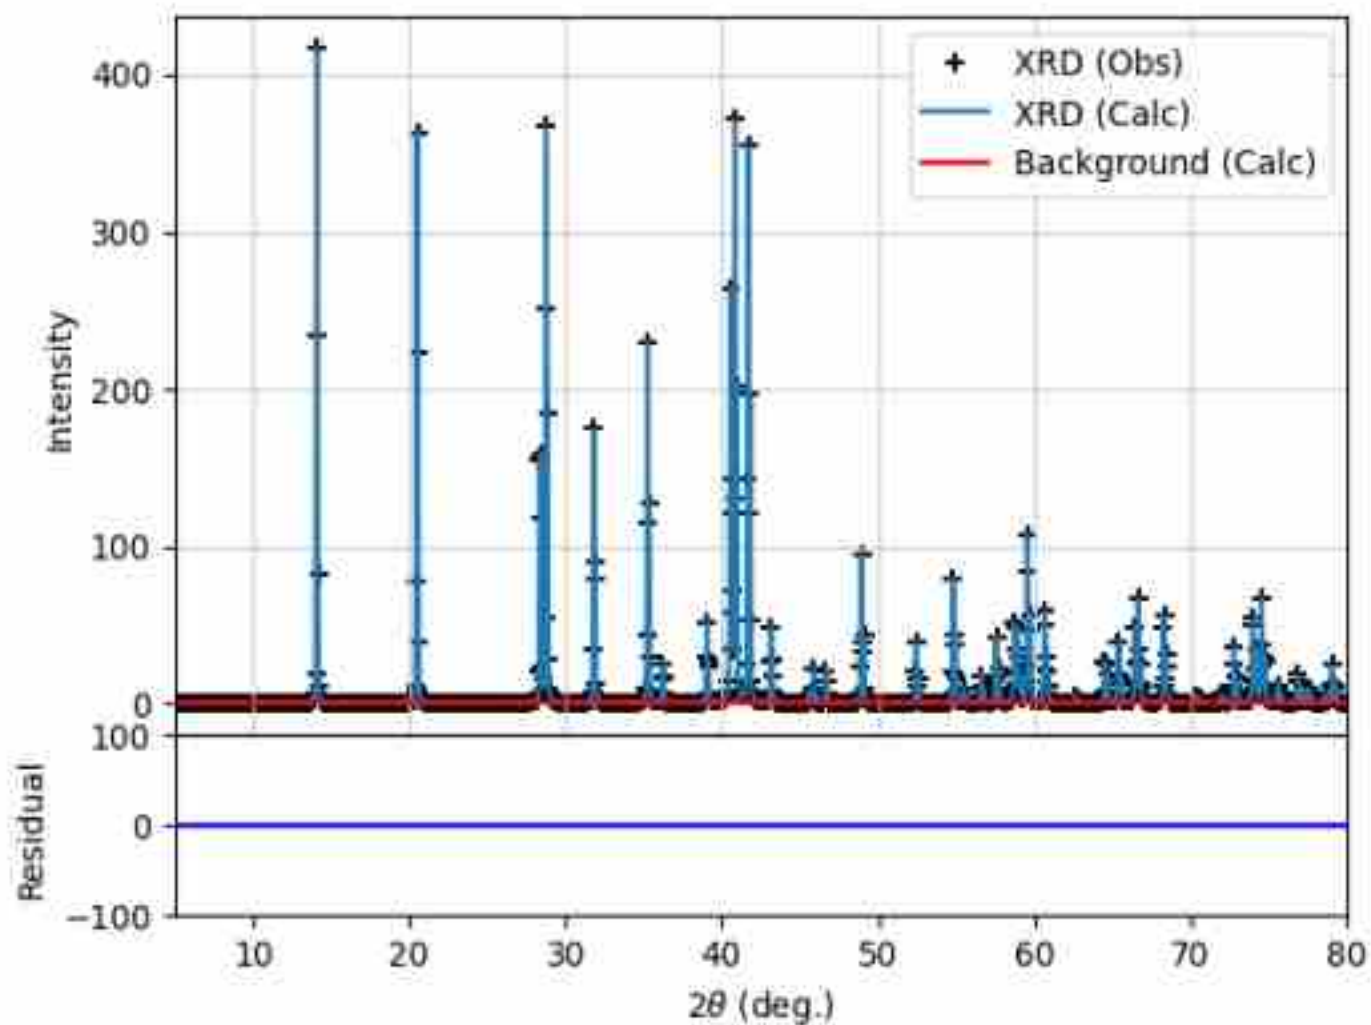

| RMSE before RR | Rwp     | RMSE after RR |
|----------------|---------|---------------|
| 0.023          | 0.00279 | 0.00072       |

# Th<sub>2</sub>Sb<sub>1</sub>N<sub>1</sub>O<sub>1</sub>

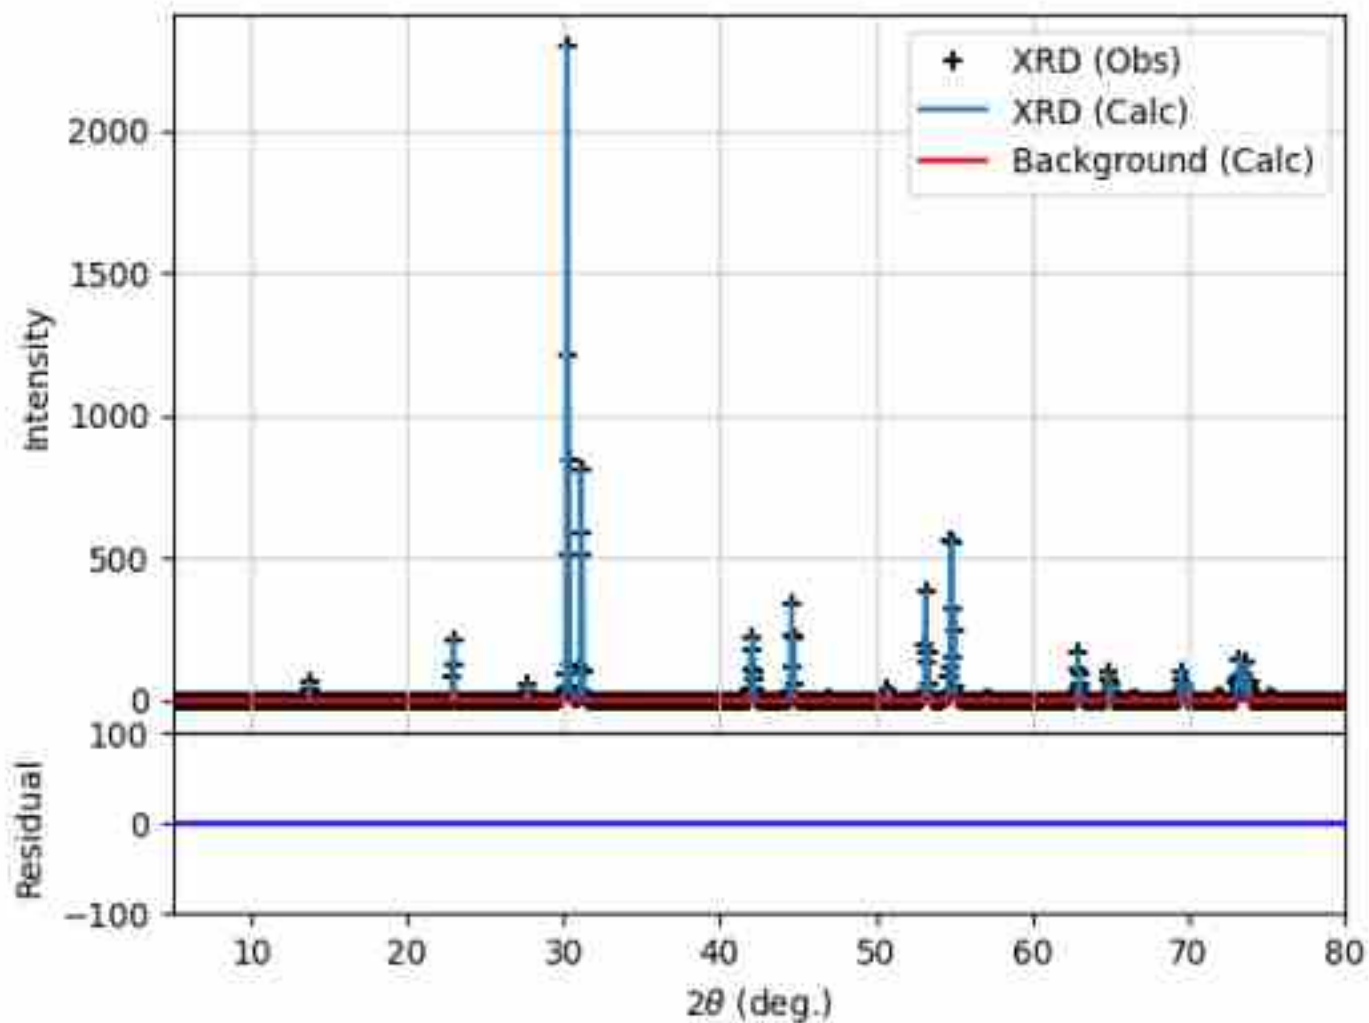

| RMSE before RR | Rwp     | RMSE after RR |
|----------------|---------|---------------|
| 0.023          | 0.01102 | 0.00168       |

# Th4S8

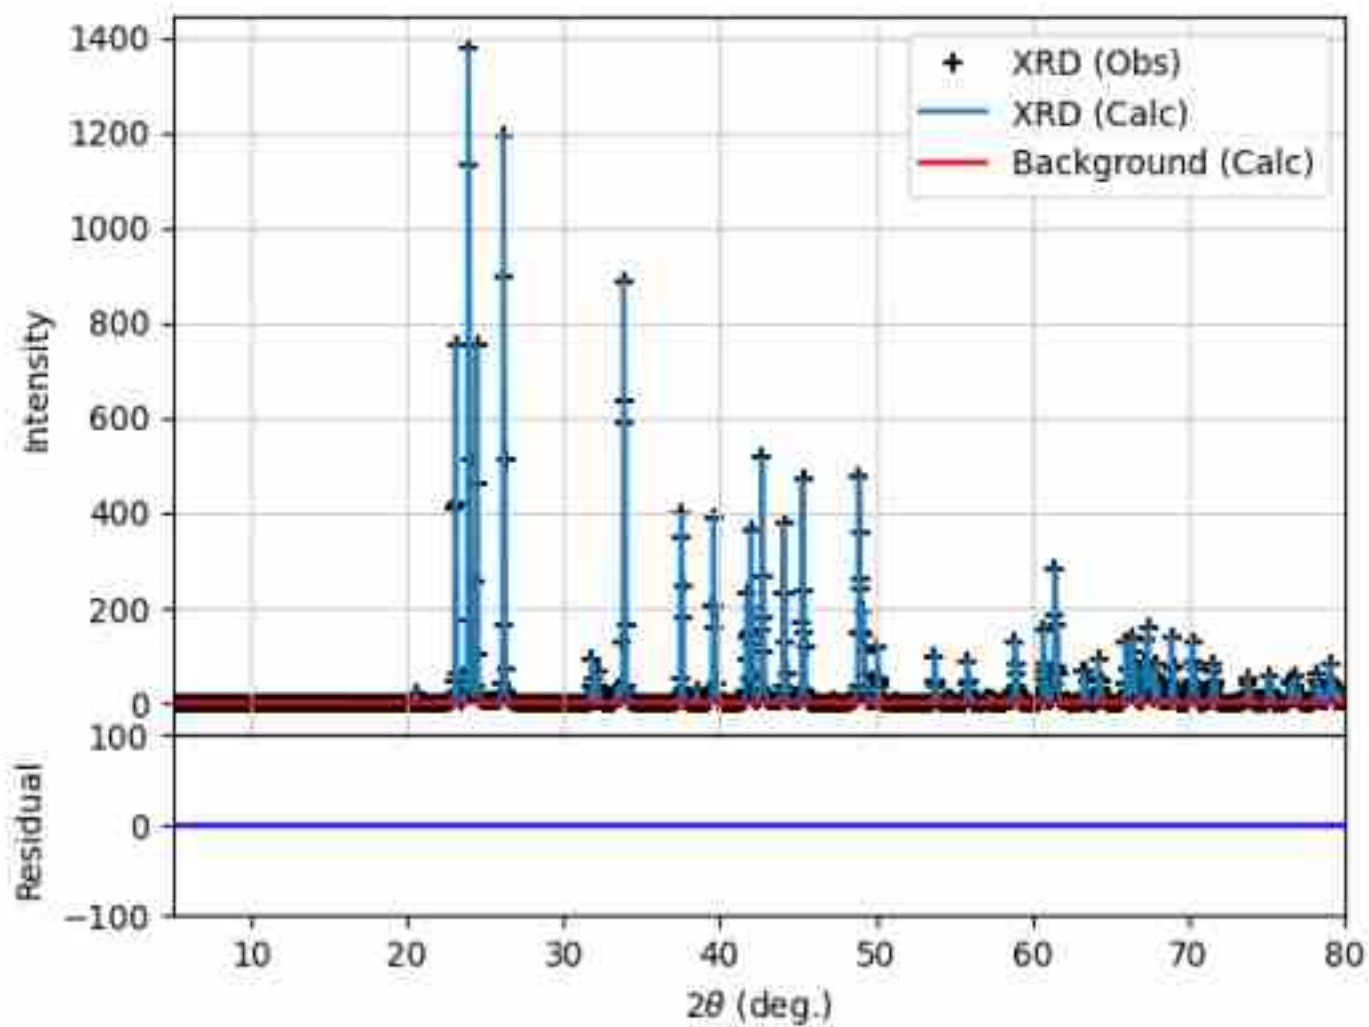

| RMSE before RR | Rwp     | RMSE after RR |
|----------------|---------|---------------|
| 0.023          | 0.00408 | 0.00111       |

# Th10Tl6

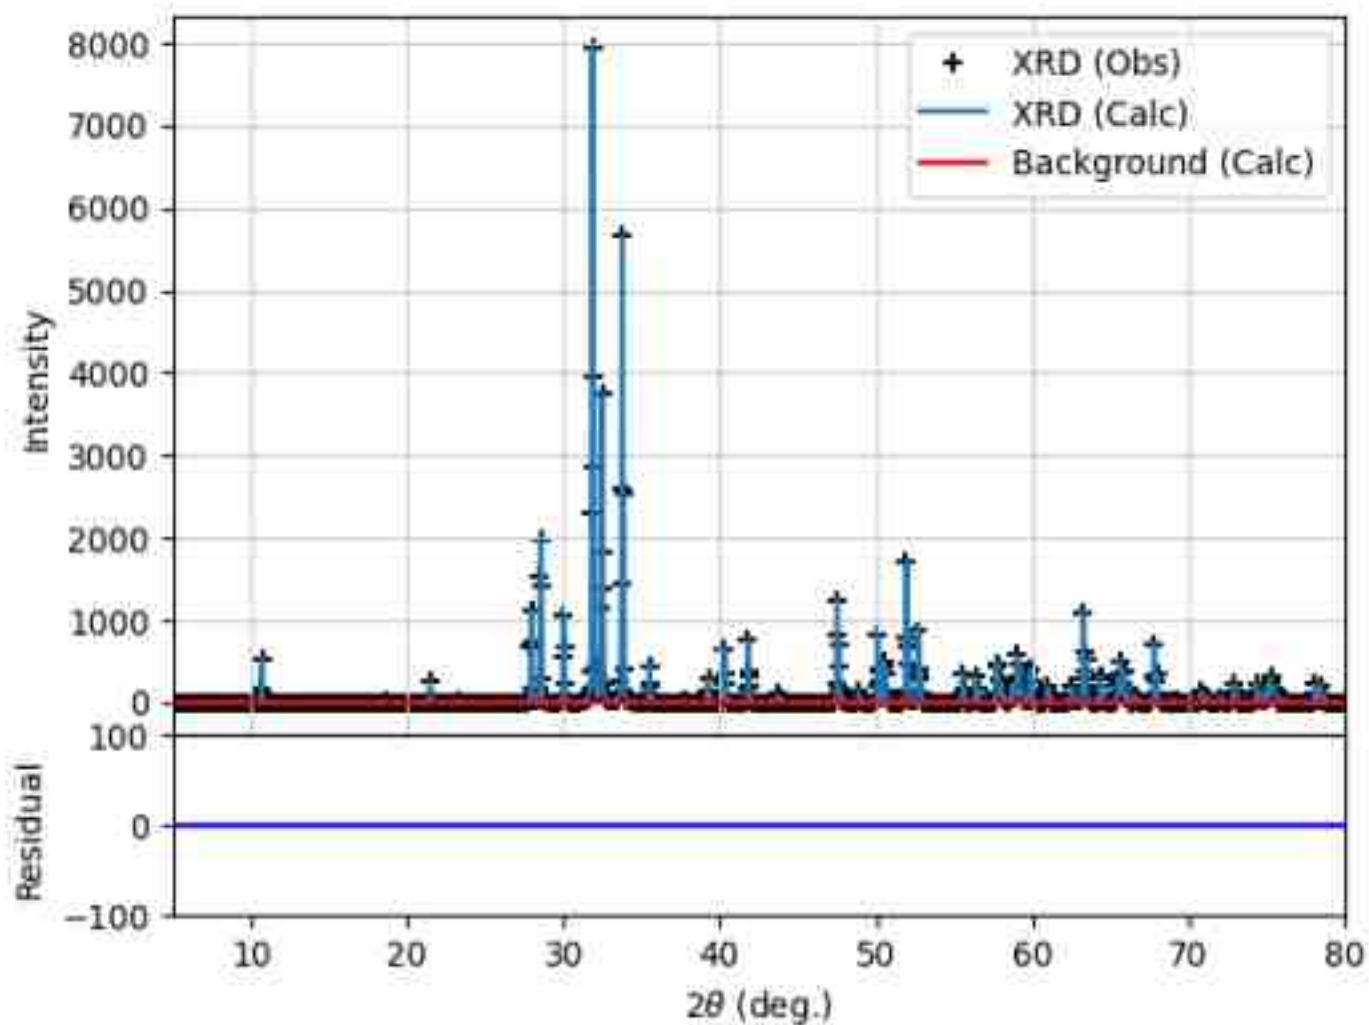

| RMSE before RR | Rwp     | RMSE after RR |
|----------------|---------|---------------|
| 0.023          | 0.01224 | 0.00073       |

# Ti2V2O6

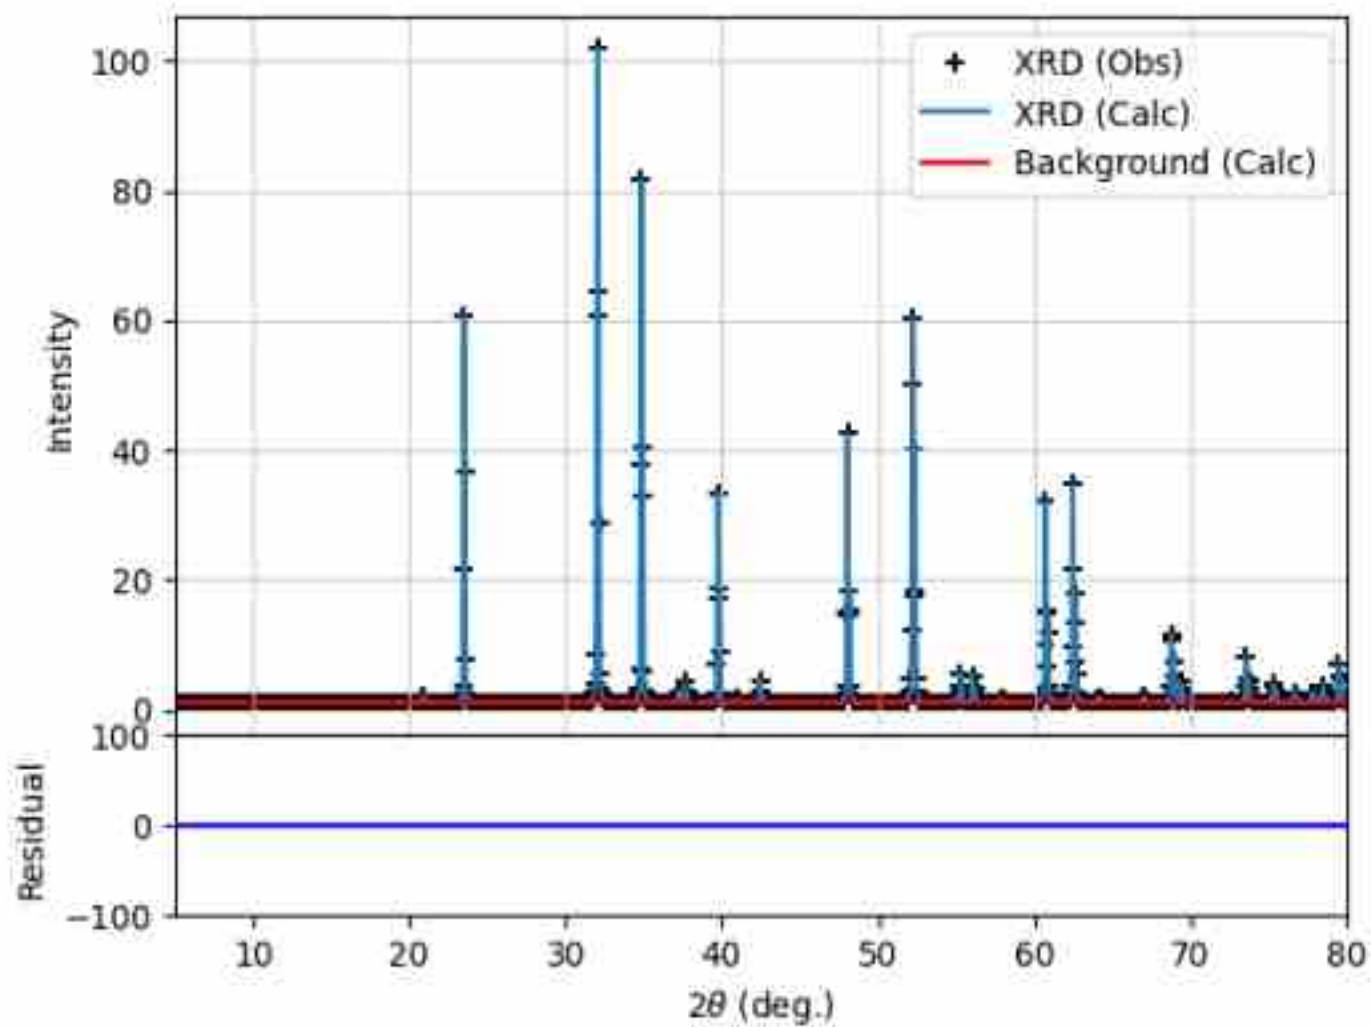

| RMSE before RR | Rwp     | RMSE after RR |
|----------------|---------|---------------|
| 0.023          | 0.00227 | 0.00063       |

# Ti<sub>4</sub>FeSe<sub>8</sub>

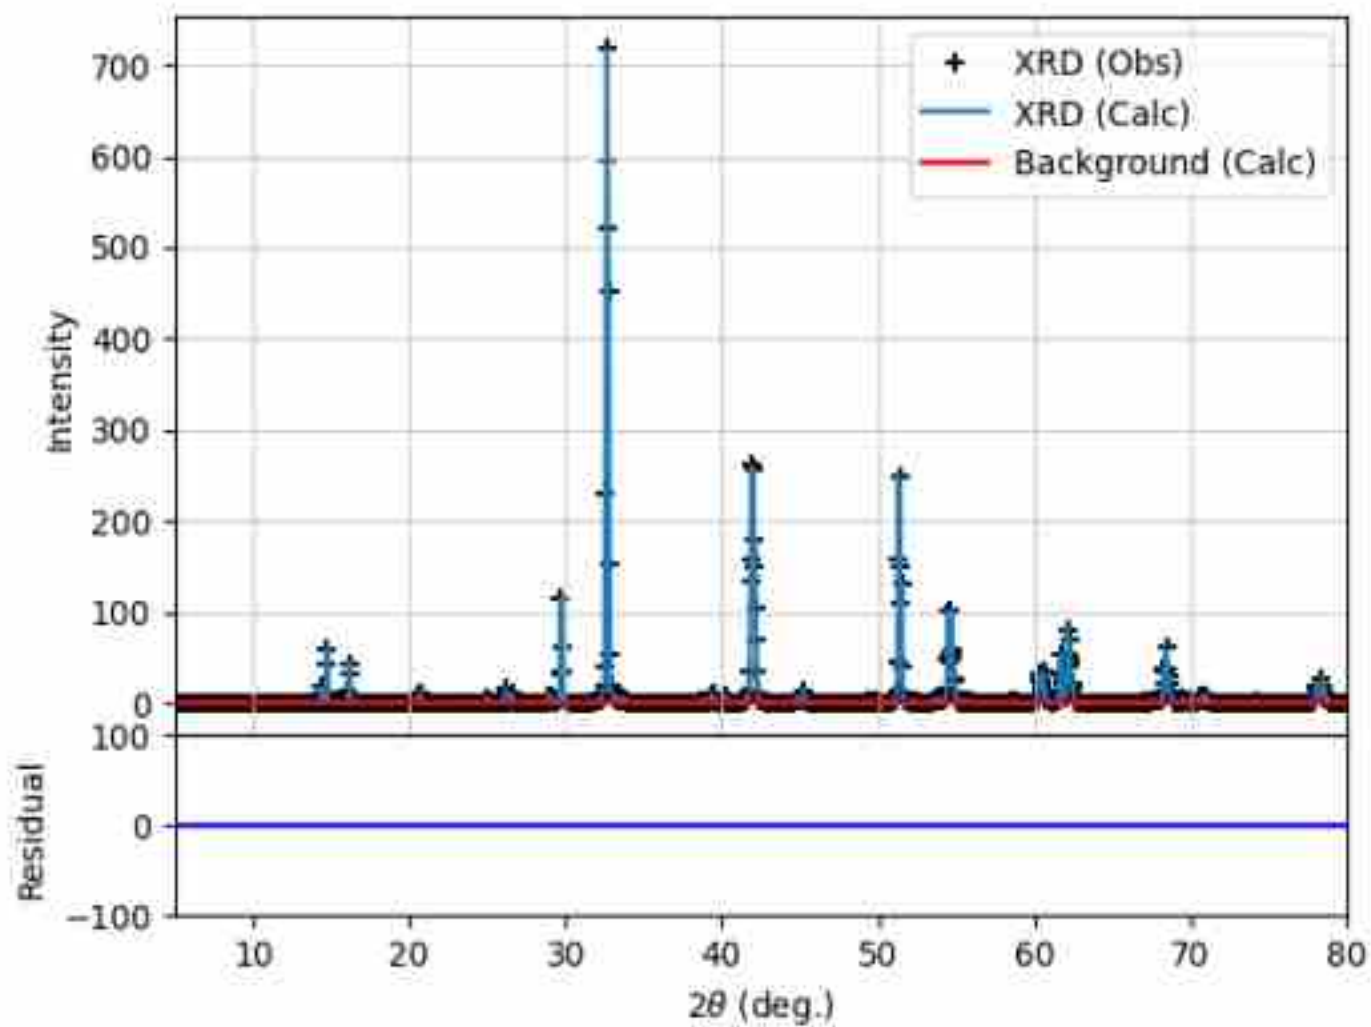

| RMSE before RR | Rwp     | RMSE after RR |
|----------------|---------|---------------|
| 0.023          | 0.00226 | 0.00037       |



# Ti<sub>8</sub>Ni<sub>2</sub>Bi<sub>4</sub>

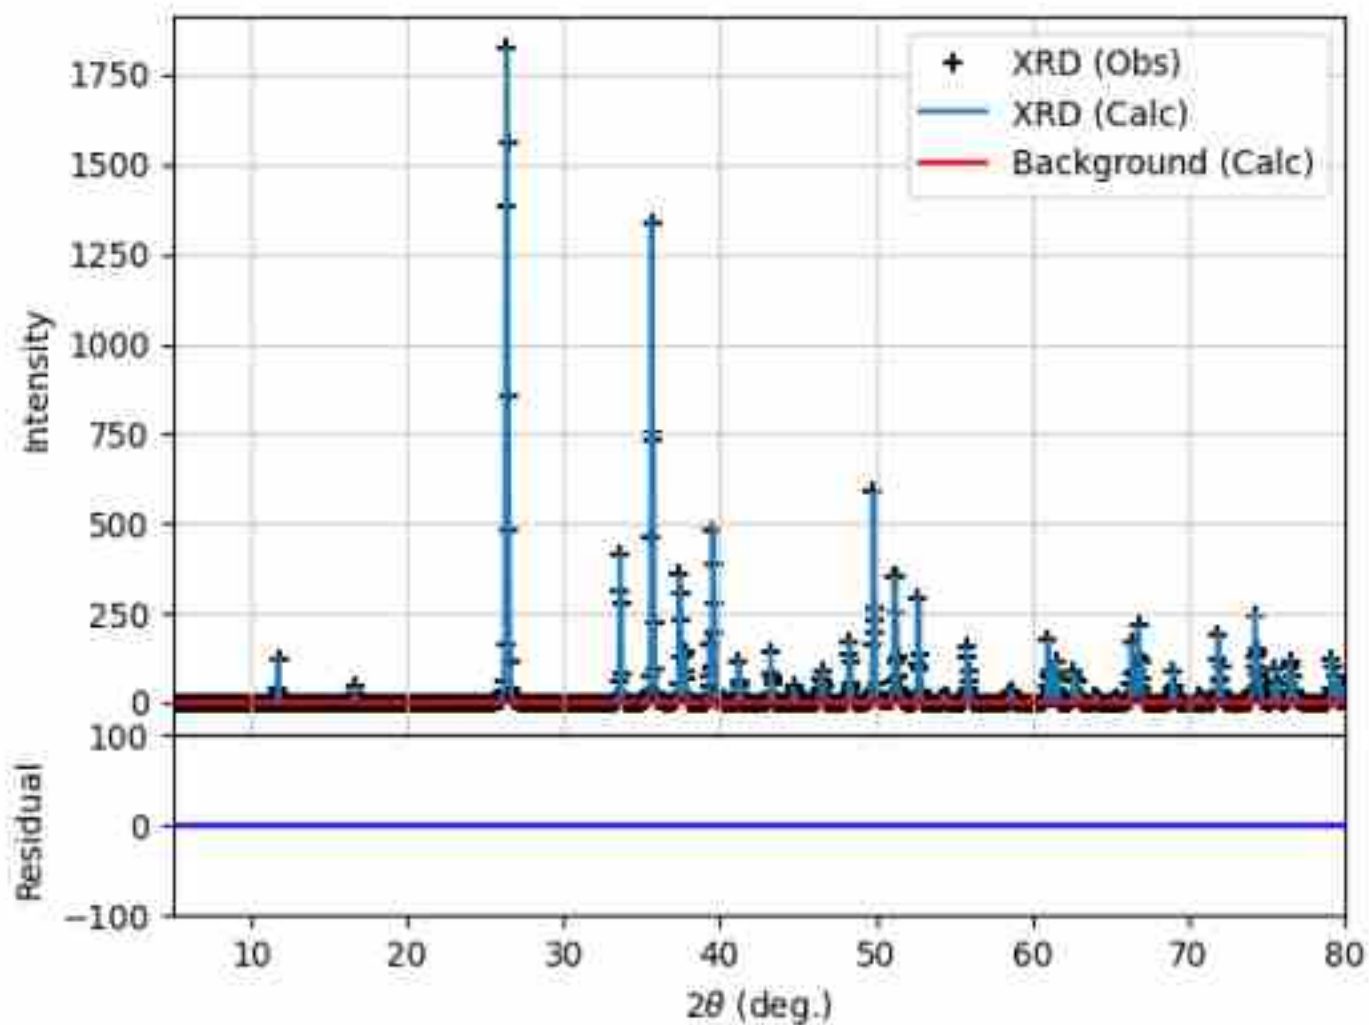

| RMSE before RR | Rwp     | RMSE after RR |
|----------------|---------|---------------|
| 0.023          | 0.00496 | 0.00096       |

# Tm1Mn6Al6

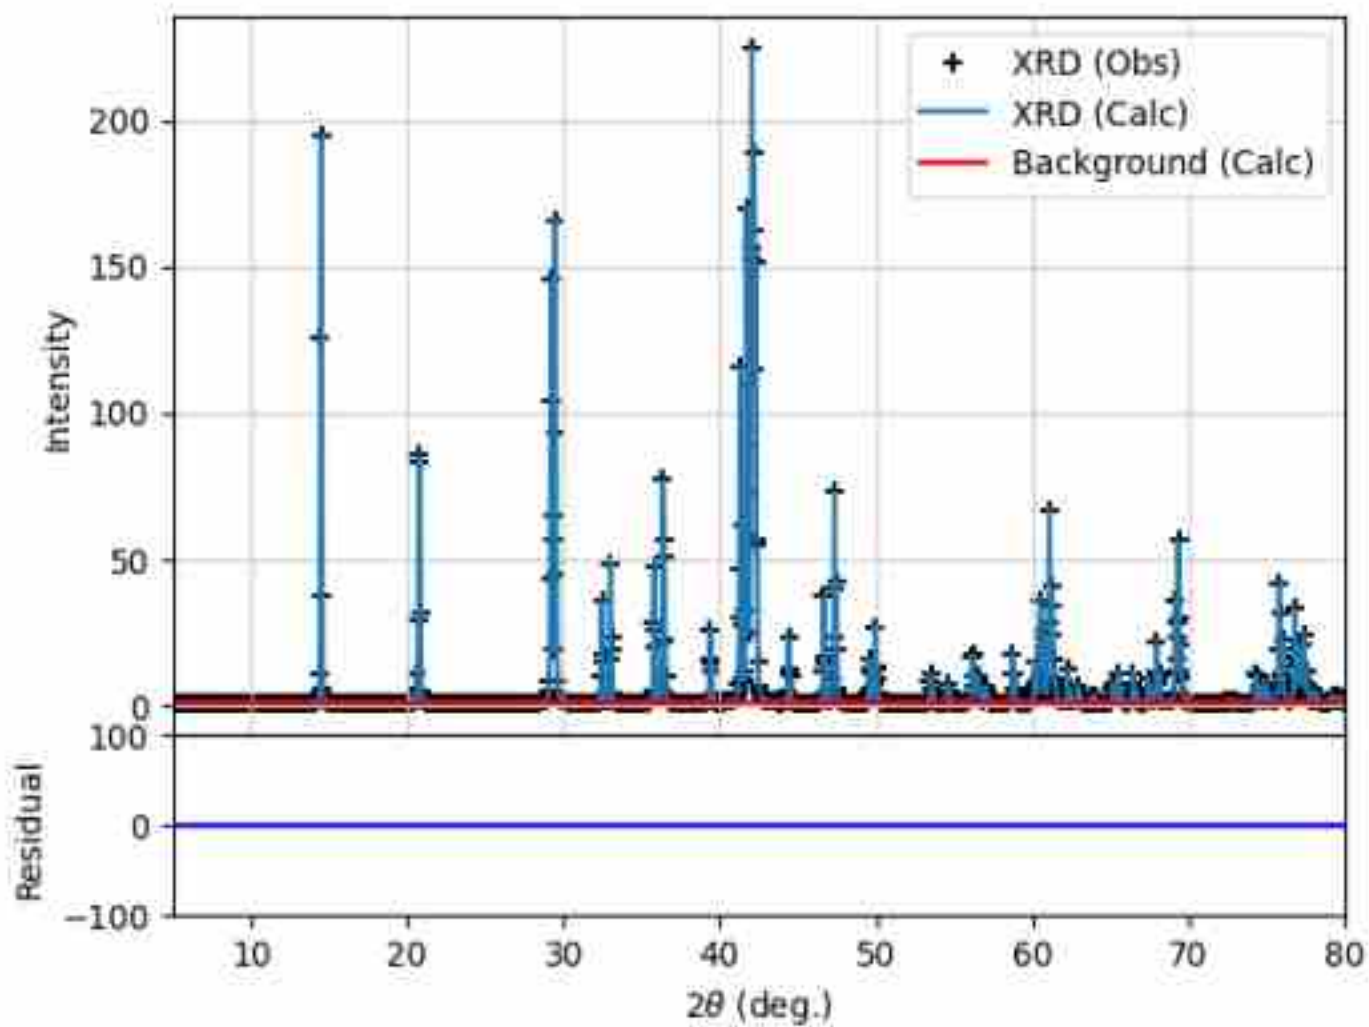

| RMSE before RR | Rwp     | RMSE after RR |
|----------------|---------|---------------|
| 0.023          | 0.00348 | 0.00054       |

# Tm<sub>2</sub>Cu<sub>1</sub>Ge<sub>4</sub>O<sub>12</sub>

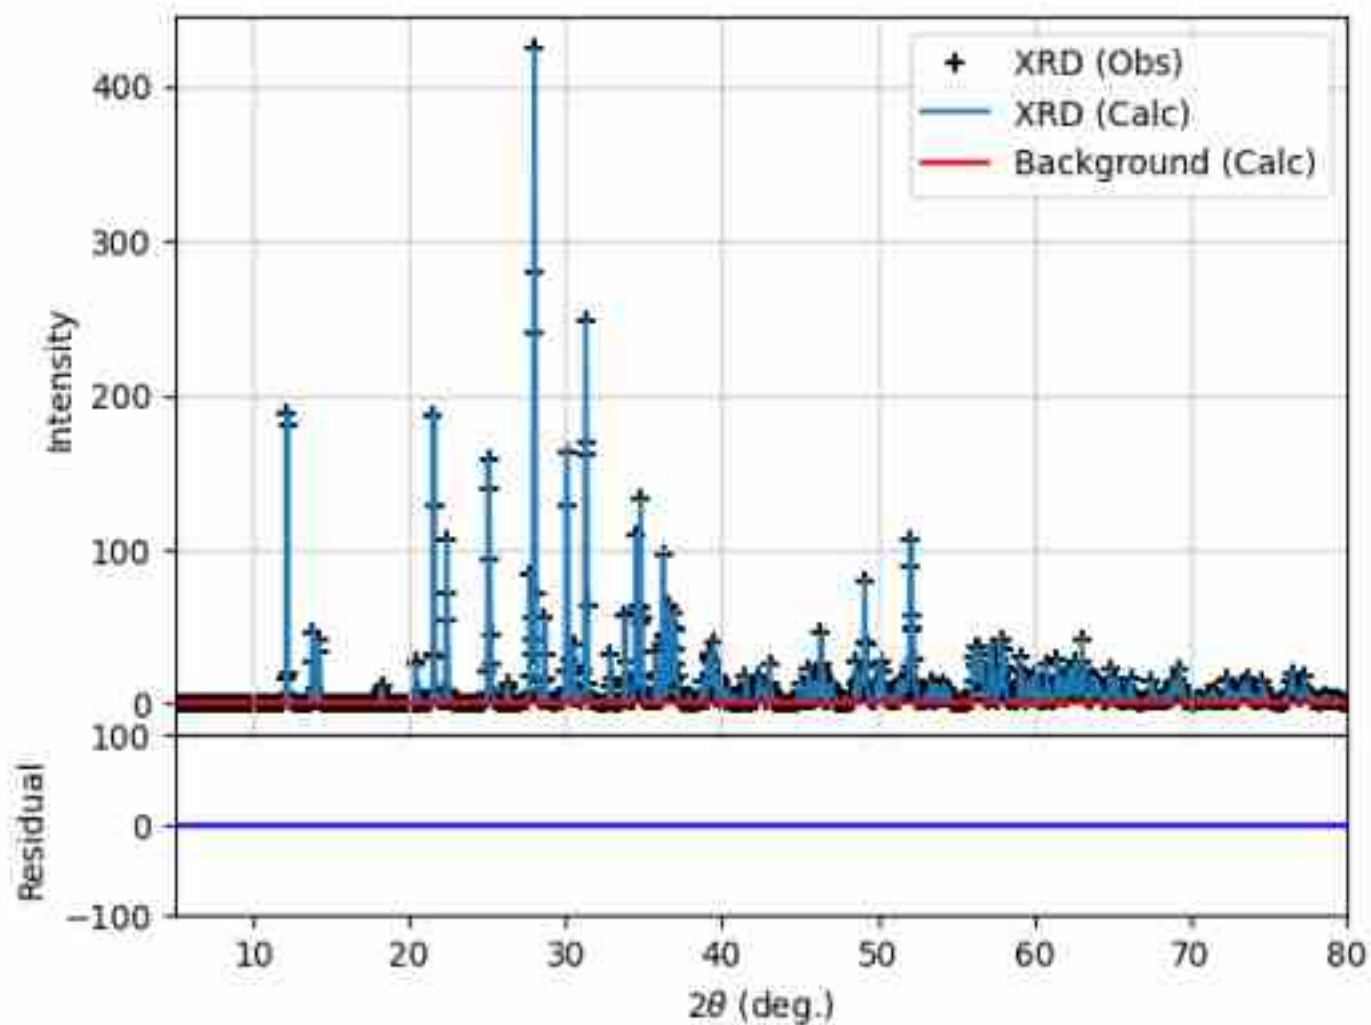

| RMSE before RR | Rwp     | RMSE after RR |
|----------------|---------|---------------|
| 0.023          | 0.00022 | 0.00038       |

# U<sub>2</sub>Re<sub>2</sub>C<sub>3</sub>

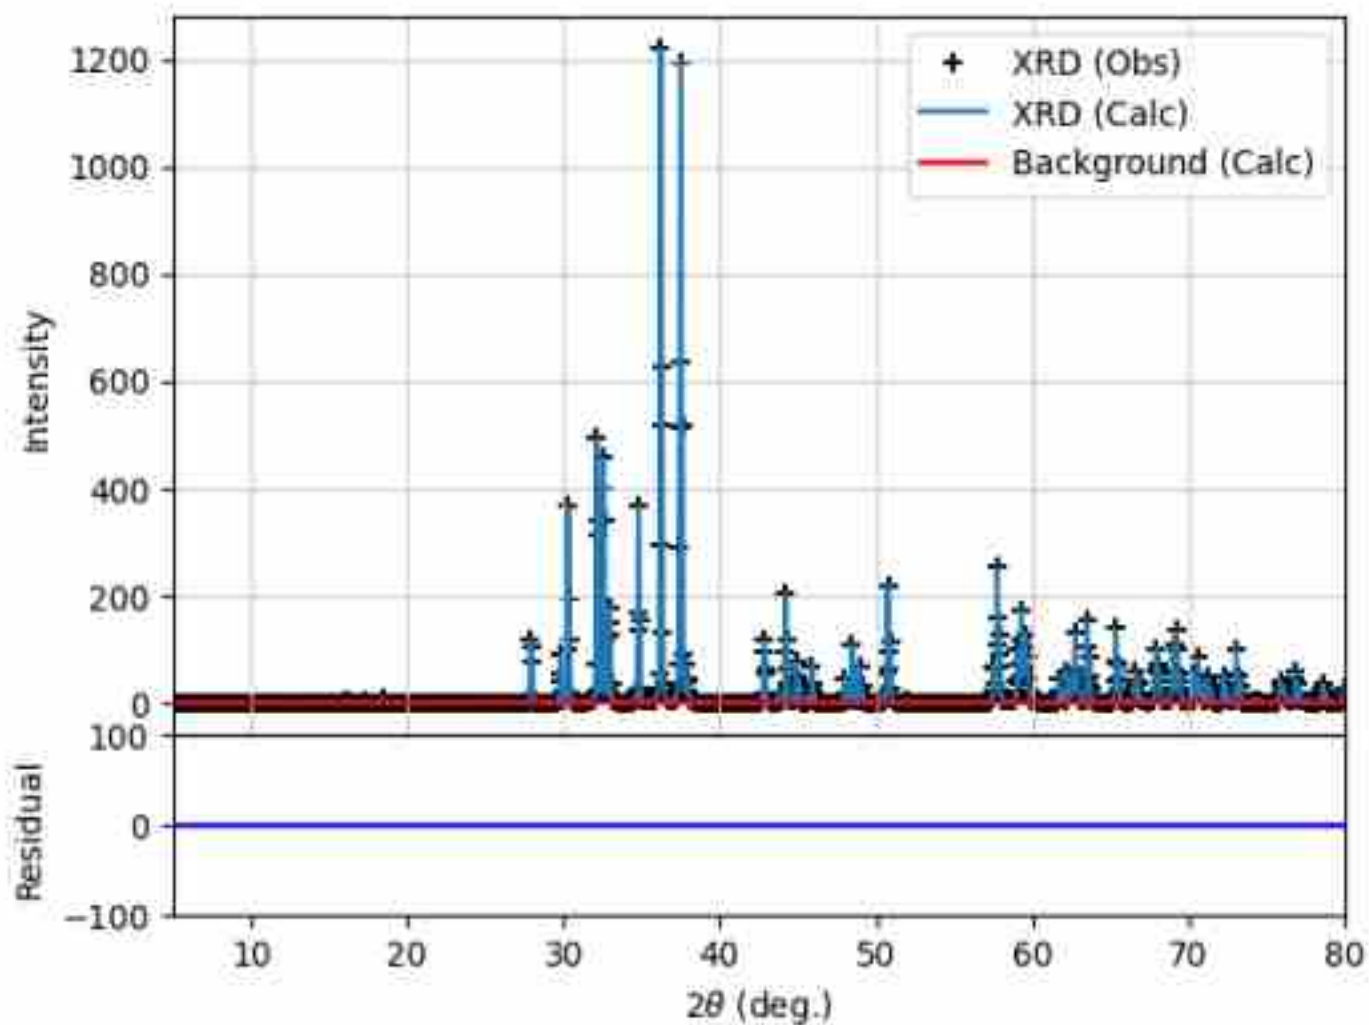

| RMSE before RR | Rwp     | RMSE after RR |
|----------------|---------|---------------|
| 0.023          | 0.00385 | 0.0012        |

# U<sub>2</sub>Si<sub>2</sub>Au<sub>2</sub>

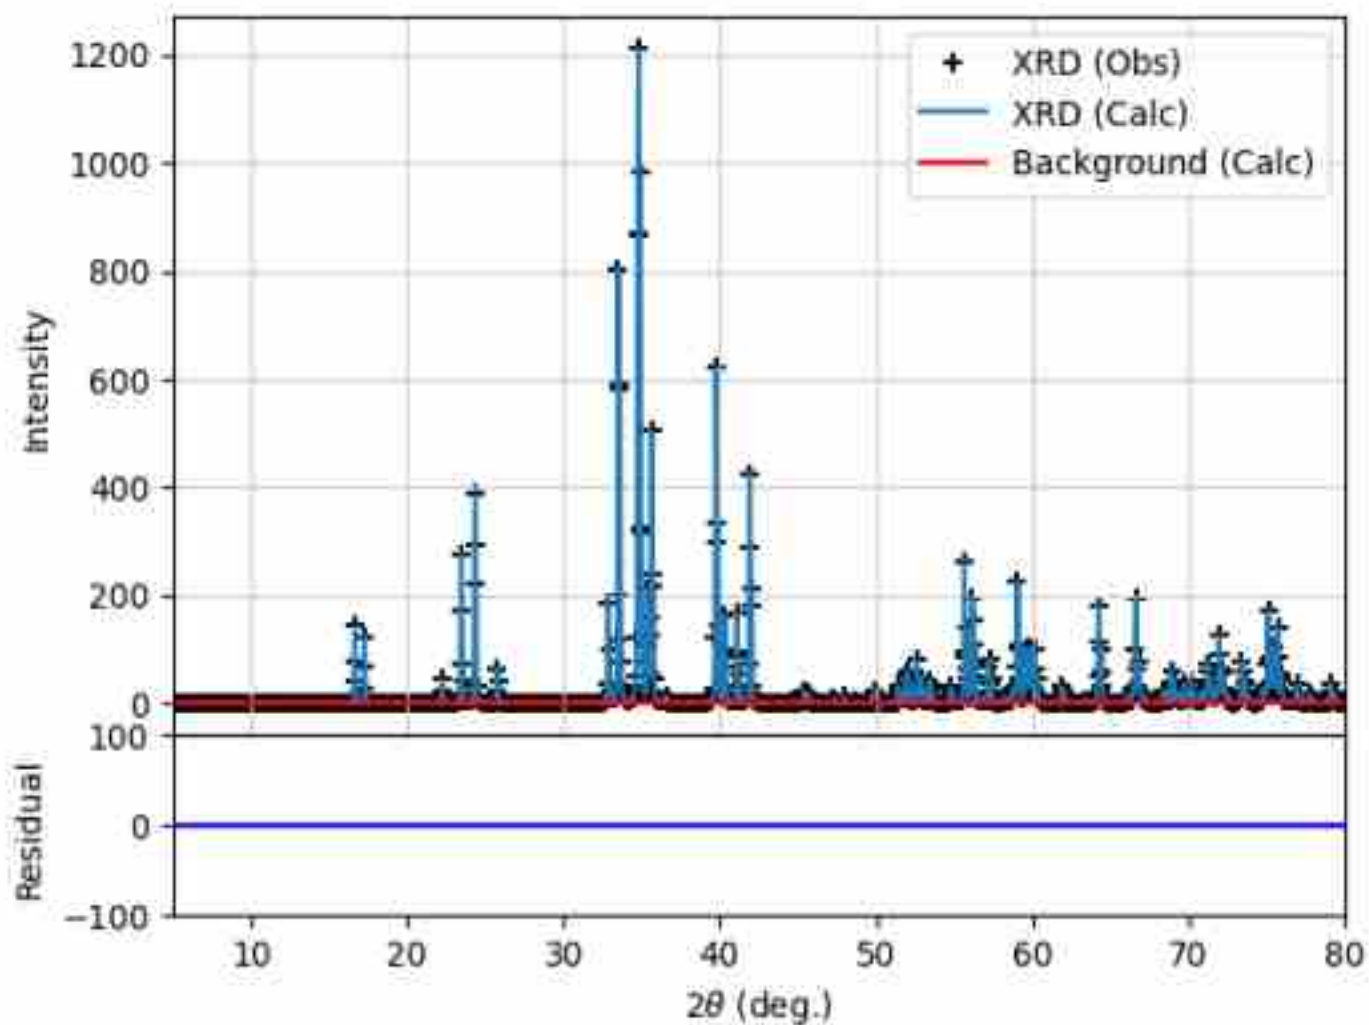

| RMSE before RR | Rwp     | RMSE after RR |
|----------------|---------|---------------|
| 0.023          | 0.00484 | 0.00042       |

# U<sub>2</sub>Te<sub>2</sub>O<sub>2</sub>

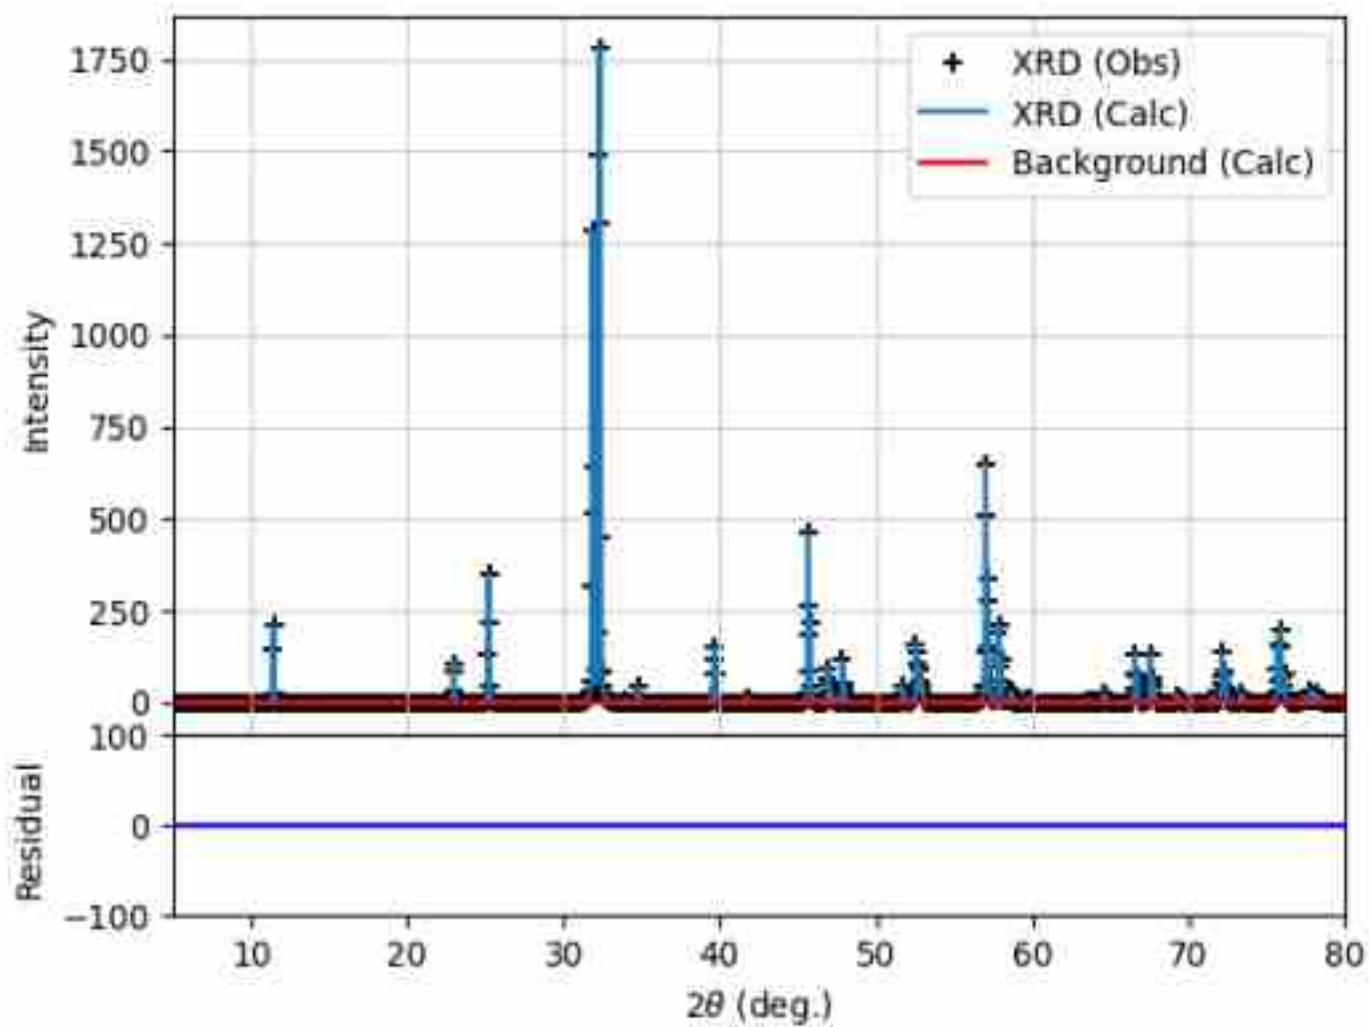

| RMSE before RR | Rwp     | RMSE after RR |
|----------------|---------|---------------|
| 0.023          | 0.00495 | 0.00111       |

# U6Ta2Sb10

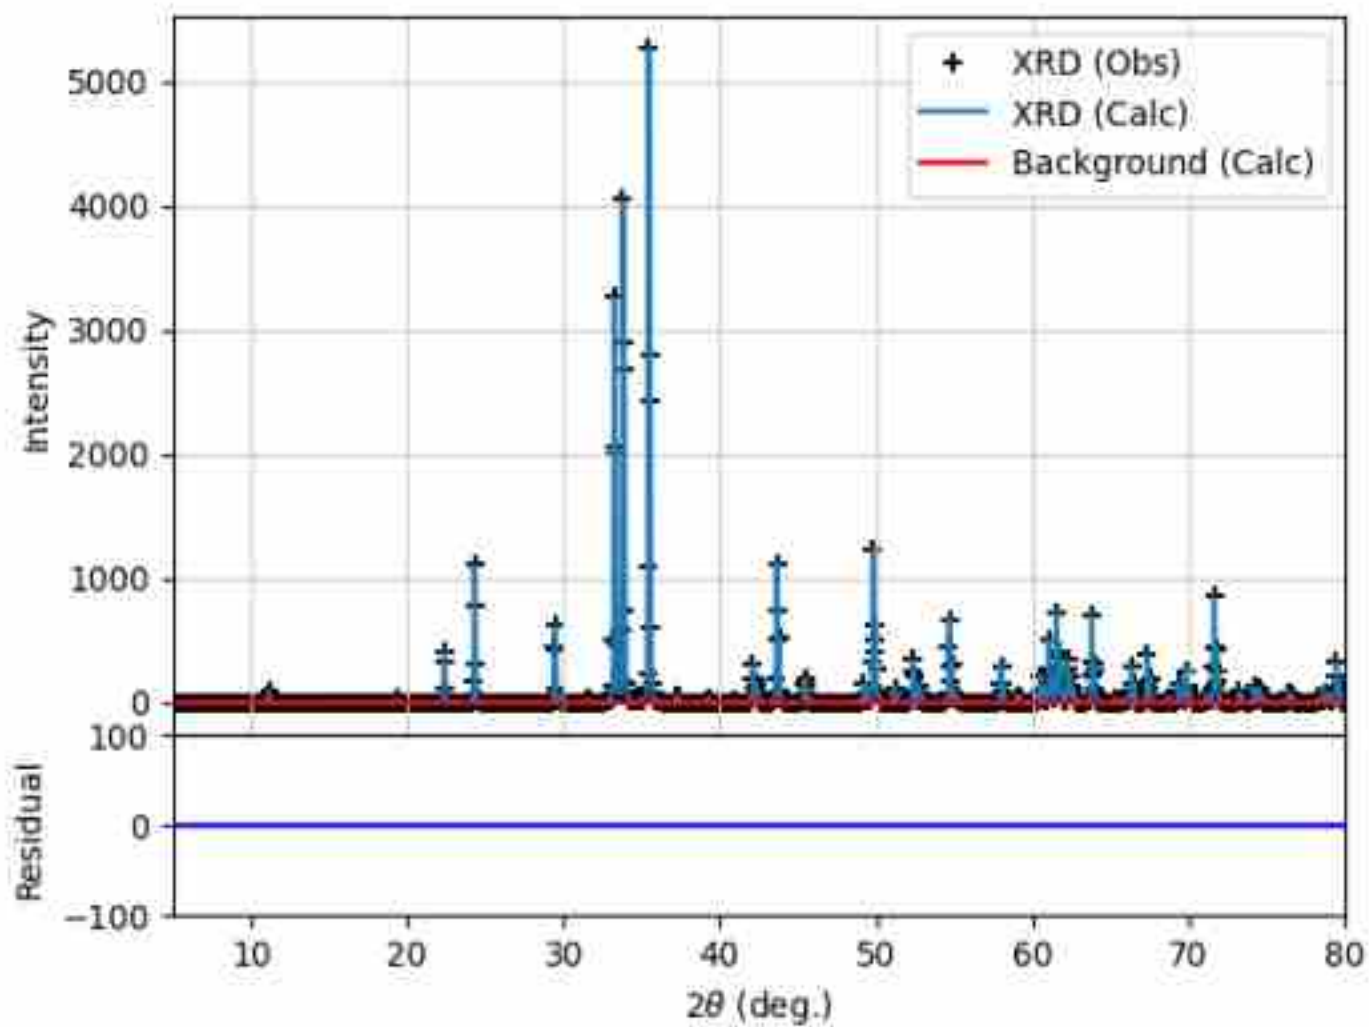

| RMSE before RR | Rwp    | RMSE after RR |
|----------------|--------|---------------|
| 0.023          | 0.0048 | 0.00044       |

# Y1Fe5Co5Mo2

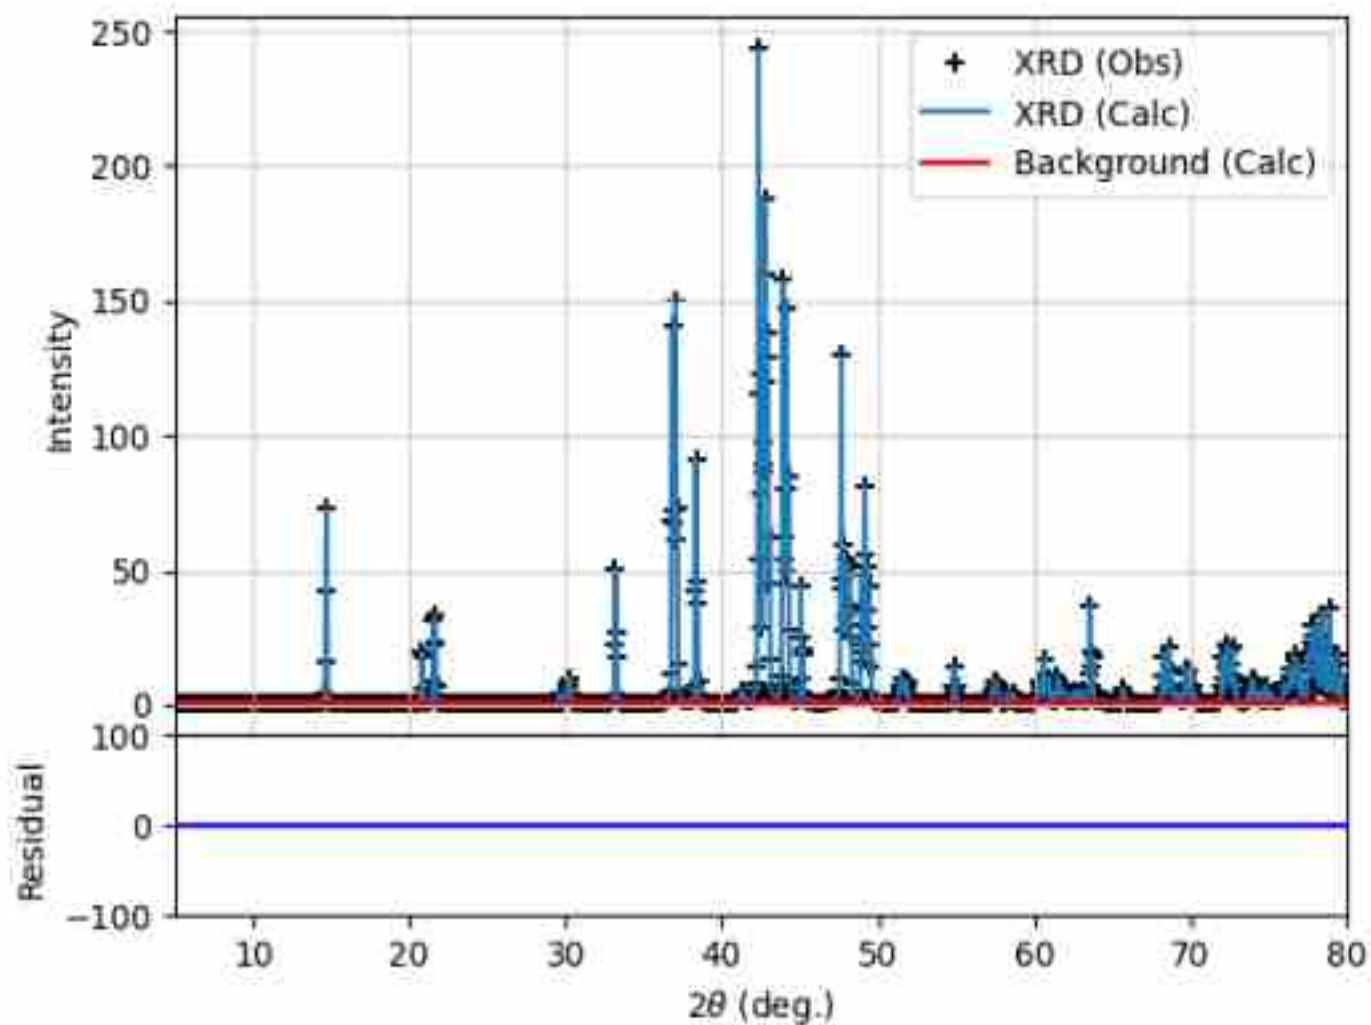

| RMSE before RR | Rwp     | RMSE after RR |
|----------------|---------|---------------|
| 0.023          | 0.25903 | 0.00891       |



# Y3P3O12

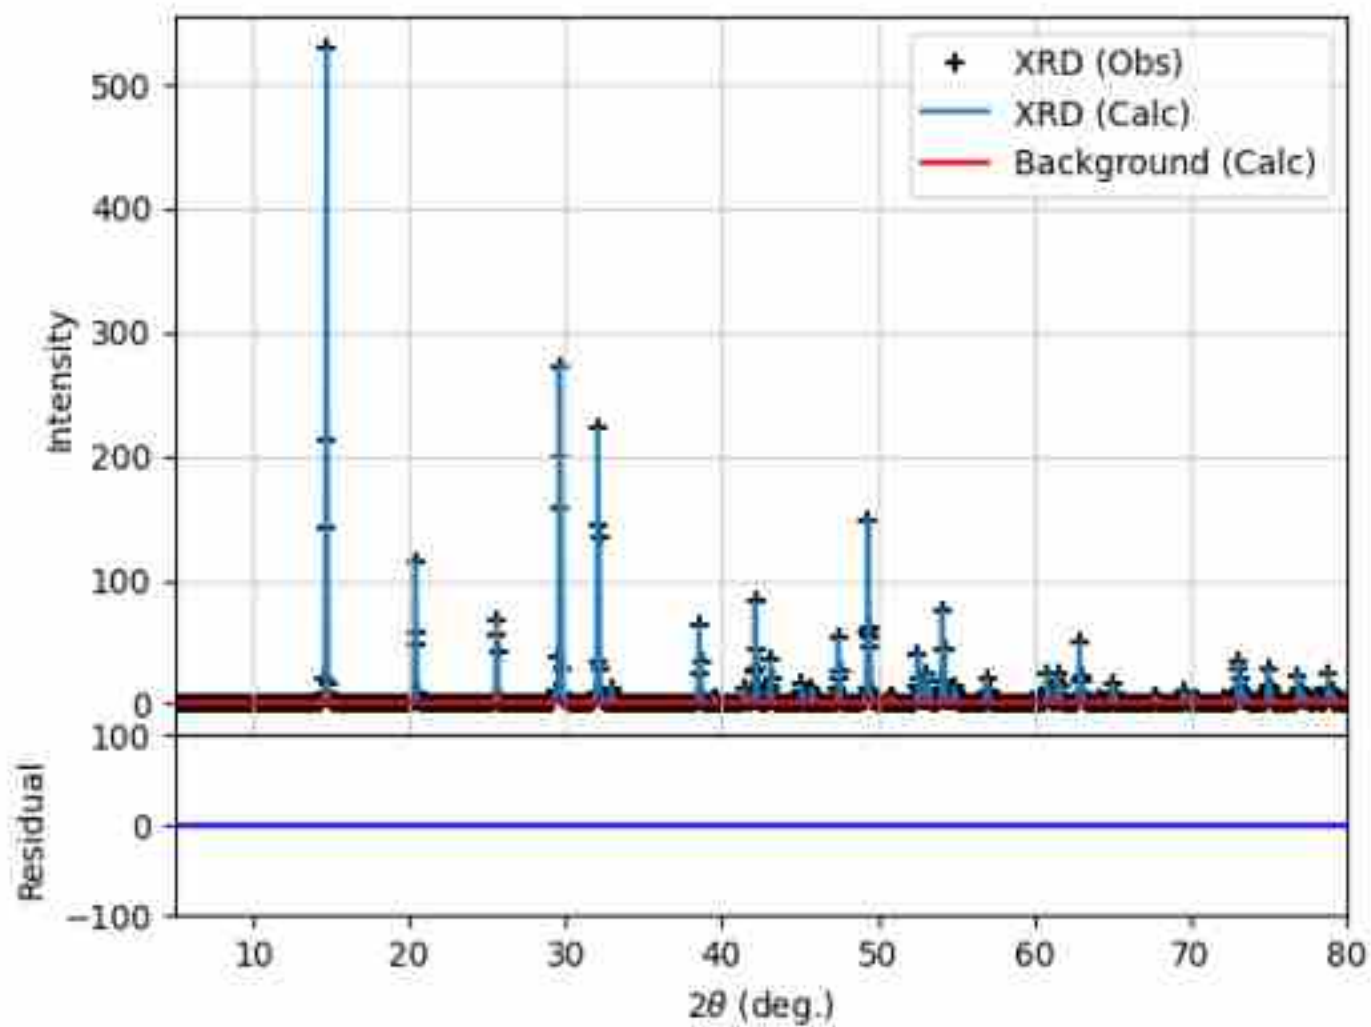

| RMSE before RR | Rwp     | RMSE after RR |
|----------------|---------|---------------|
| 0.023          | 0.00746 | 0.0031        |

# Y<sub>4</sub>Mn<sub>3</sub>Ni<sub>1</sub>O<sub>12</sub>

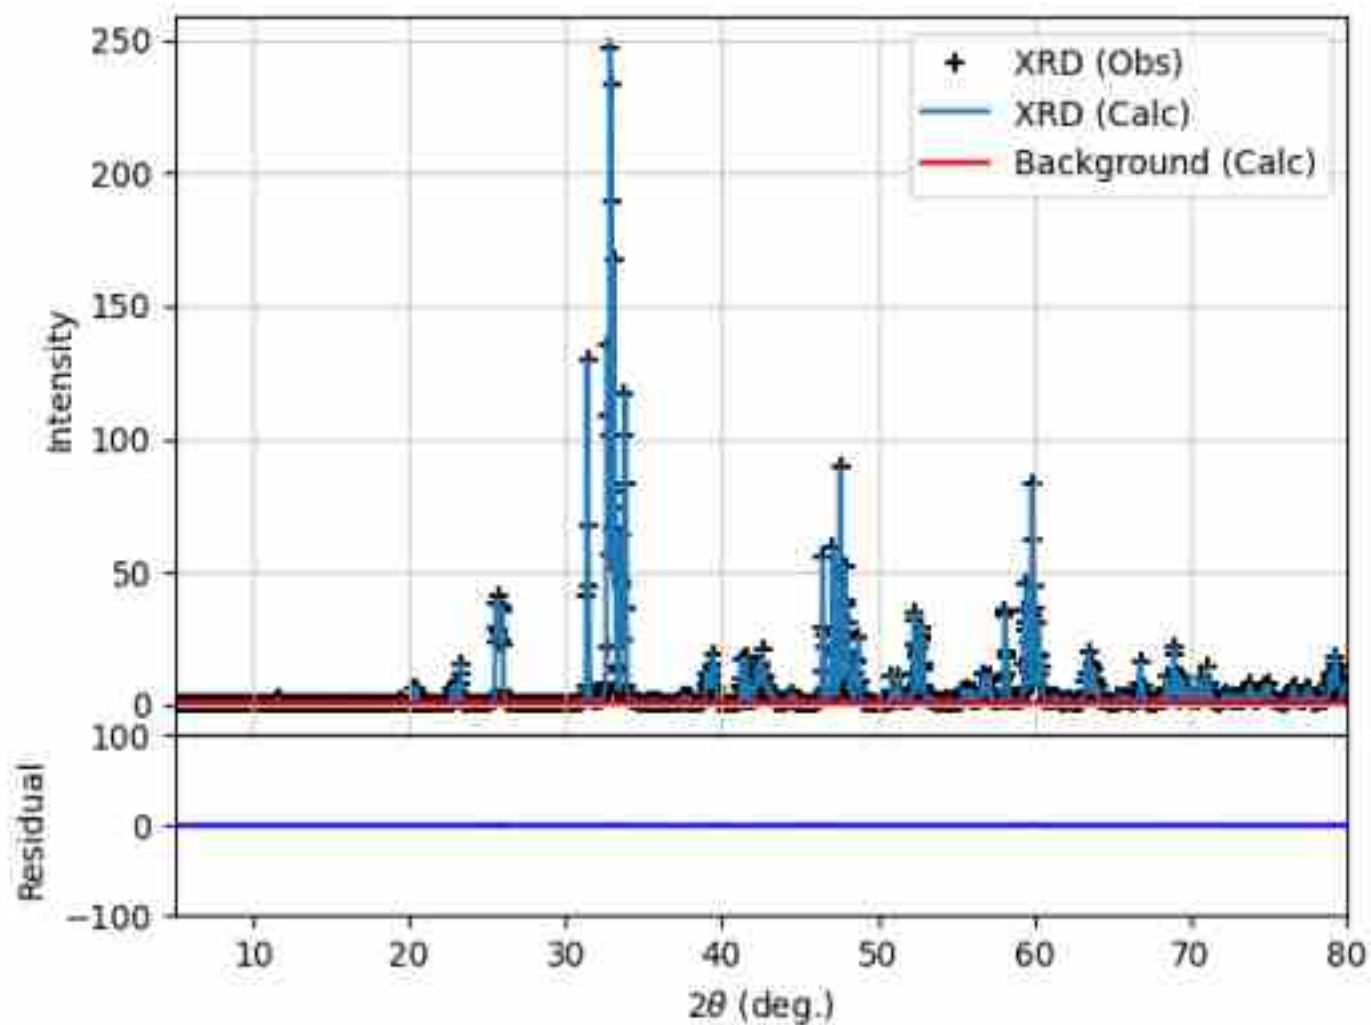

| RMSE before RR | Rwp     | RMSE after RR |
|----------------|---------|---------------|
| 0.023          | 1.00518 | 0.04289       |

# Y10Ge6

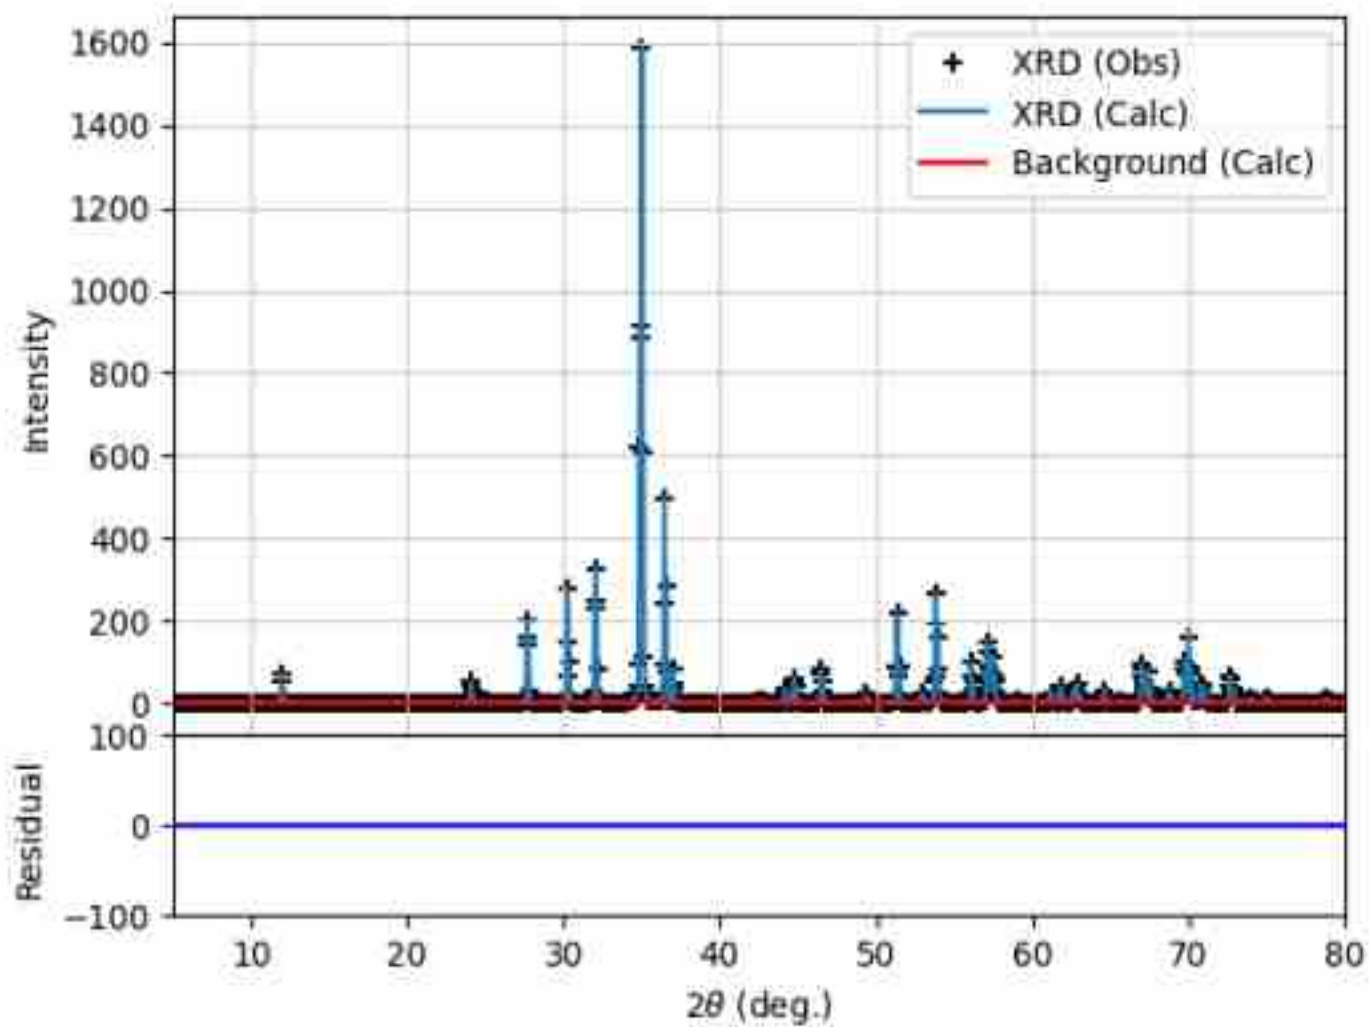

| RMSE before RR | Rwp     | RMSE after RR |
|----------------|---------|---------------|
| 0.023          | 0.00434 | 0.00037       |

# Yb4Pd4

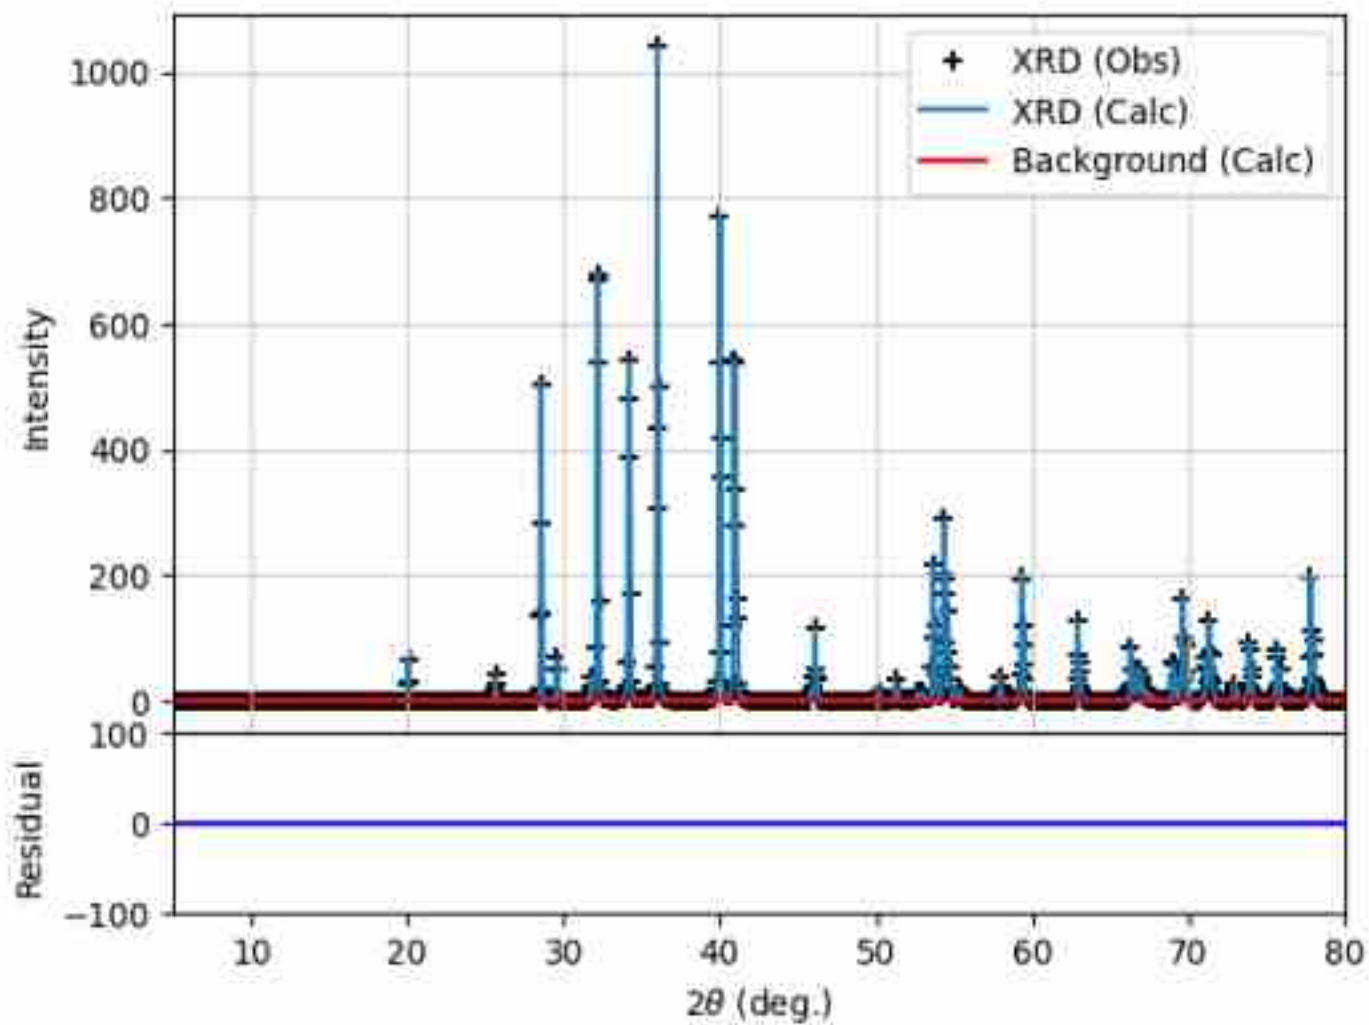

| RMSE before RR | Rwp     | RMSE after RR |
|----------------|---------|---------------|
| 0.023          | 0.00525 | 0.00025       |

# Yb6Dy2Sb6

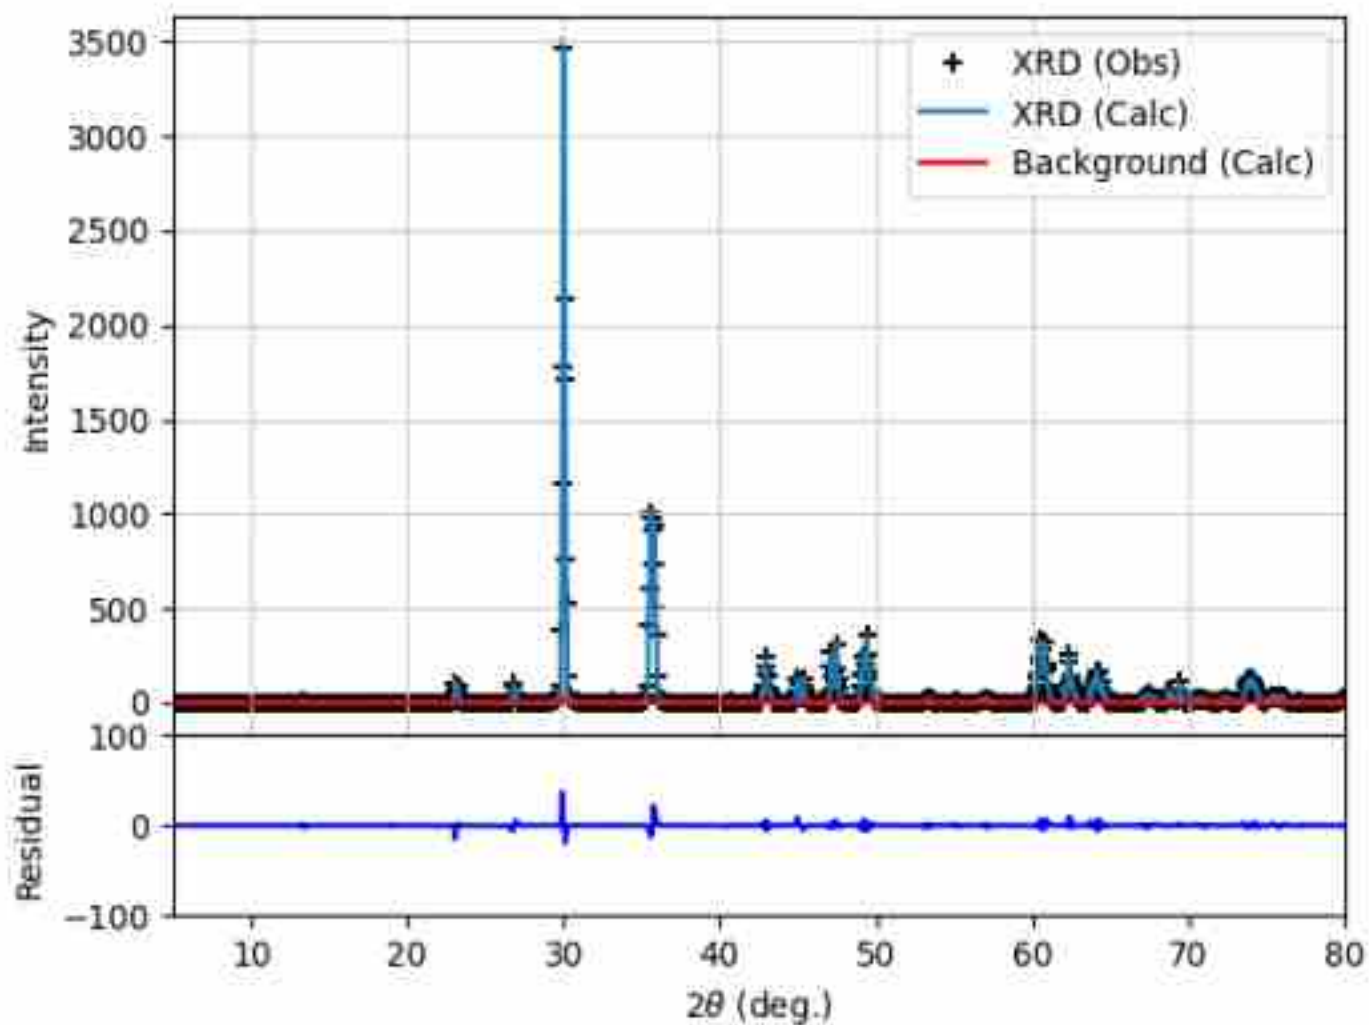

| RMSE before RR | Rwp     | RMSE after RR |
|----------------|---------|---------------|
| 0.023          | 2.84061 | 0.0232        |

# Yb10Ag6

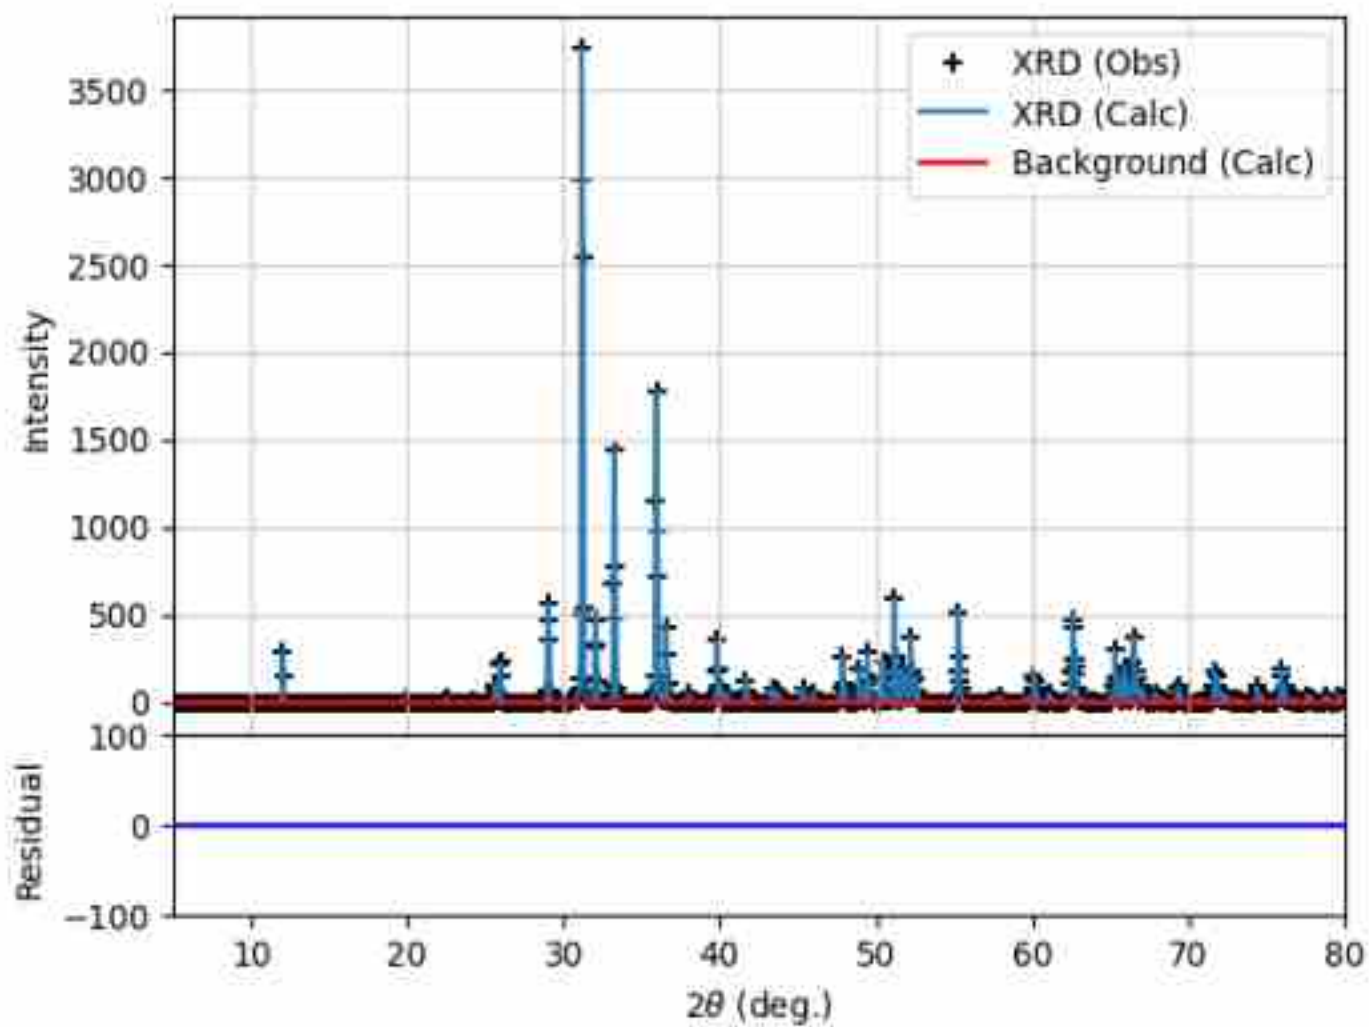

| RMSE before RR | Rwp    | RMSE after RR |
|----------------|--------|---------------|
| 0.023          | 0.0035 | 0.00031       |

# Zn<sub>1</sub>In<sub>2</sub>S<sub>4</sub>

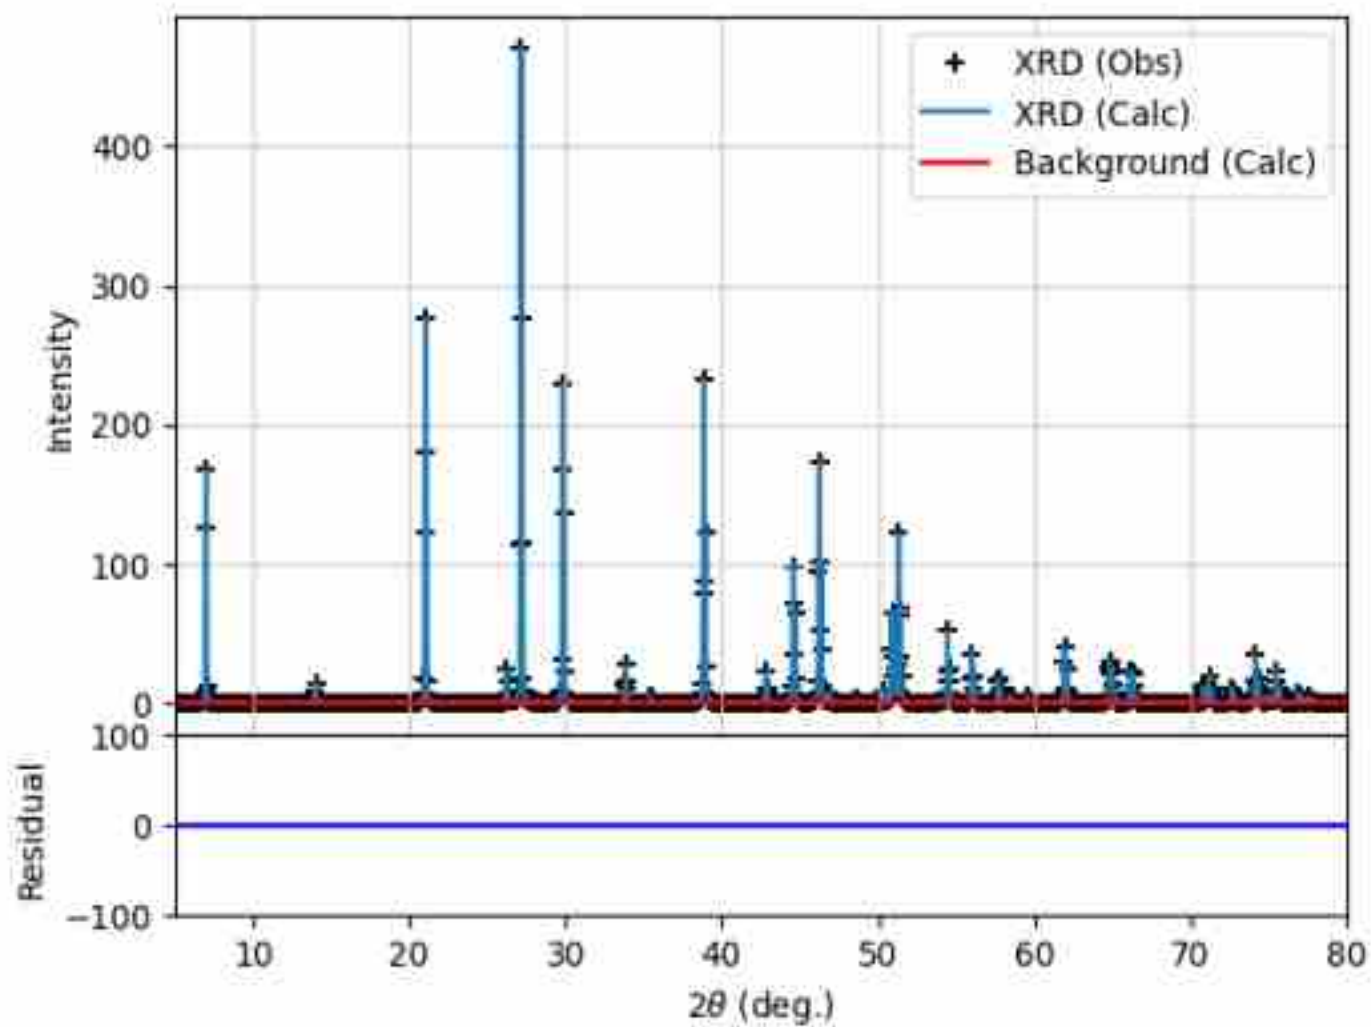

| RMSE before RR | Rwp     | RMSE after RR |
|----------------|---------|---------------|
| 0.023          | 0.00293 | 0.00089       |

# Zn1Ni1F6

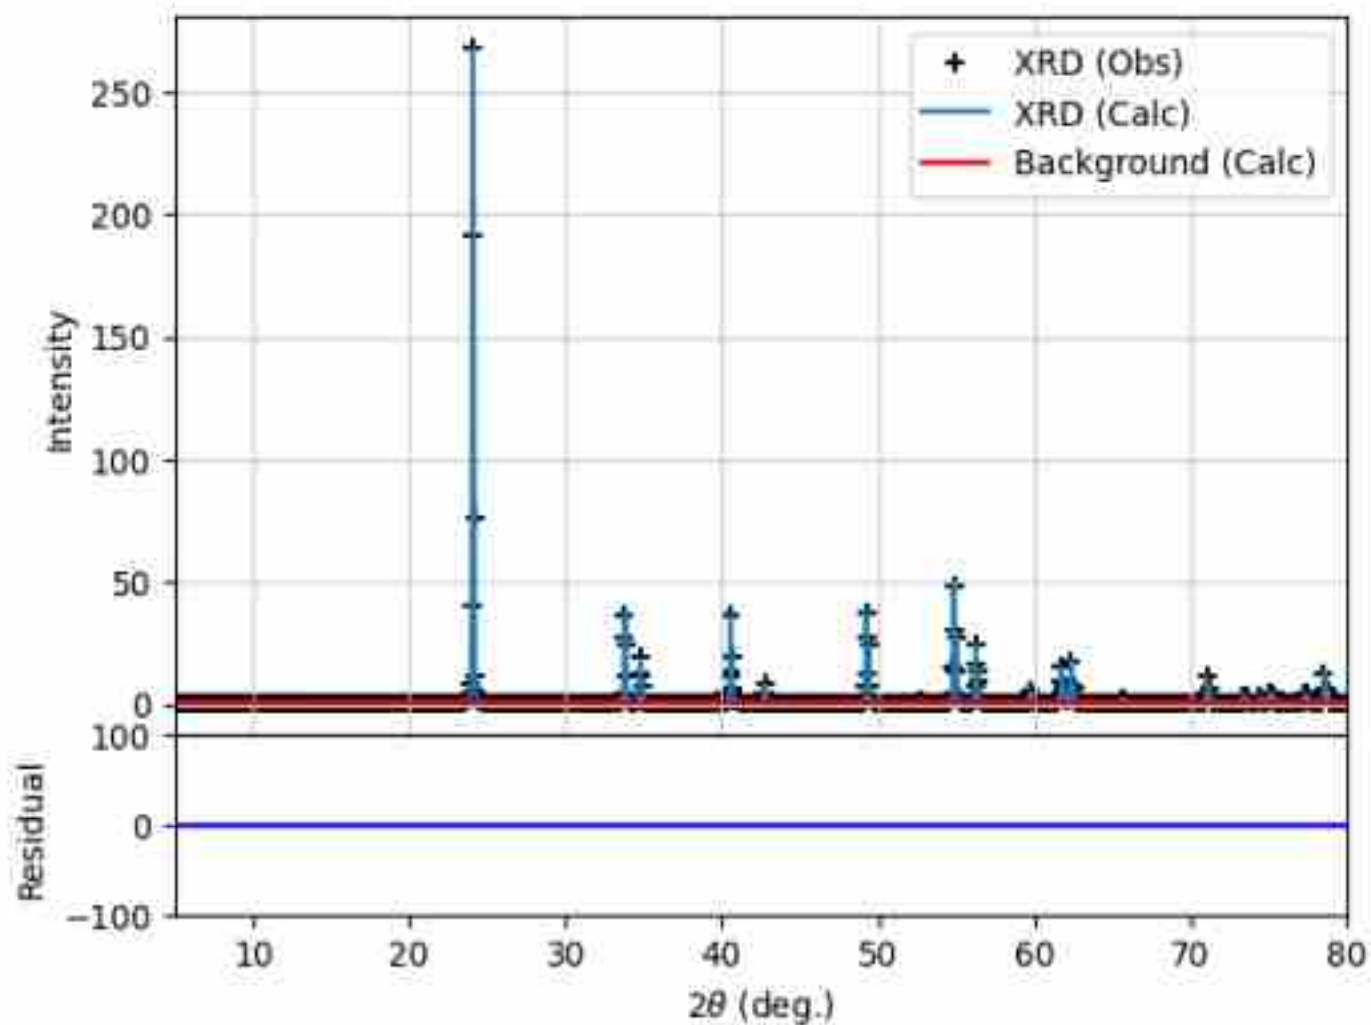

| RMSE before RR | Rwp     | RMSE after RR |
|----------------|---------|---------------|
| 0.023          | 0.00213 | 0.00055       |



# Zr<sub>3</sub>Al<sub>4</sub>C<sub>6</sub>

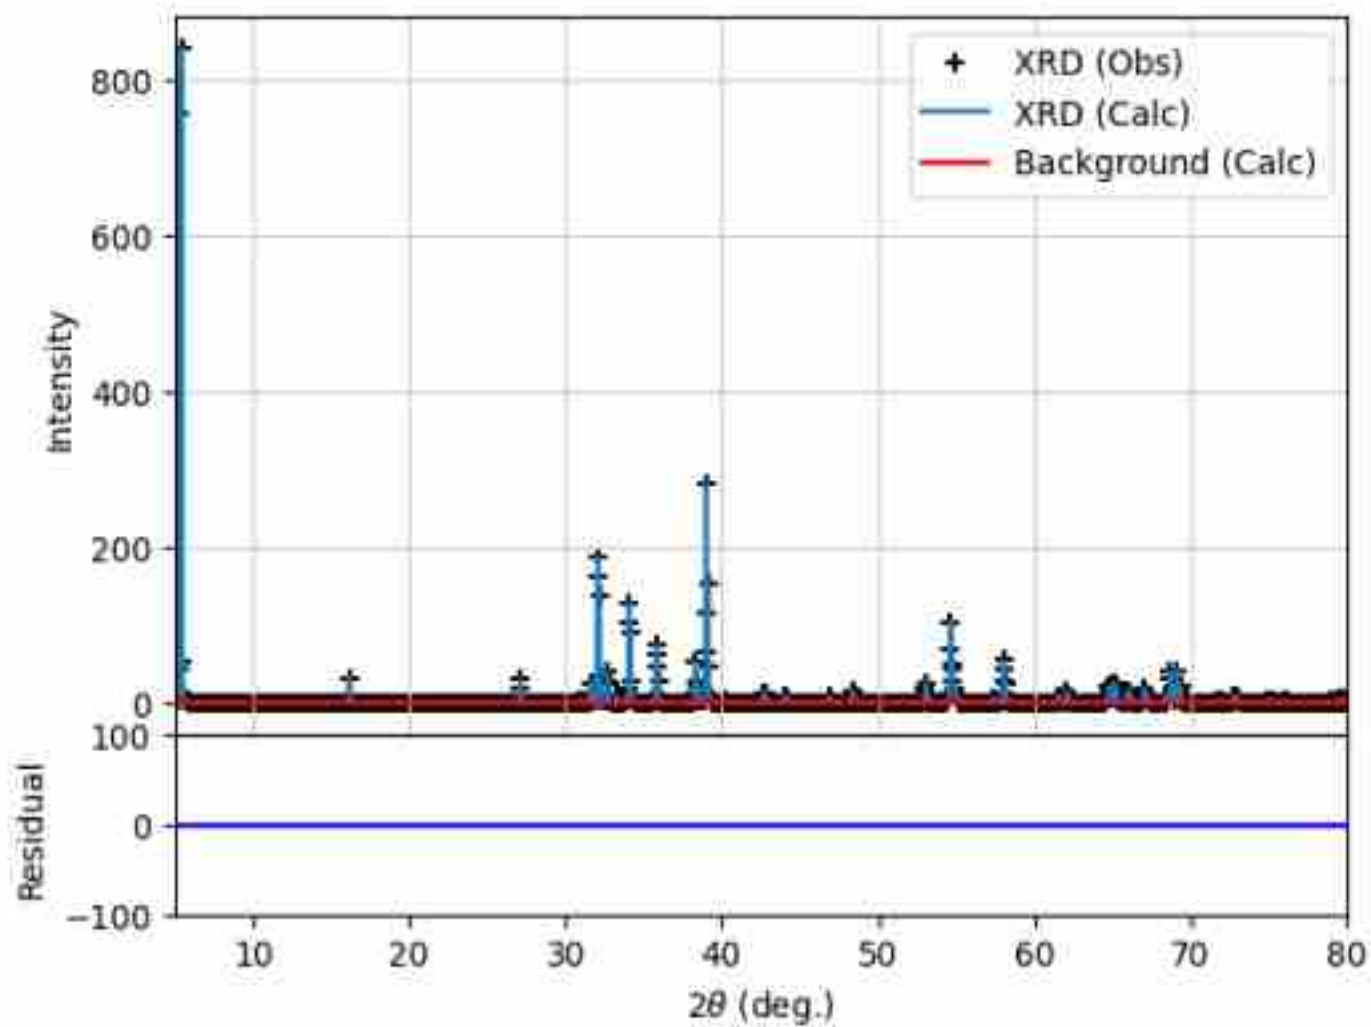

| RMSE before RR | Rwp     | RMSE after RR |
|----------------|---------|---------------|
| 0.023          | 0.00263 | 0.00108       |

# Zr<sub>4</sub>Fe<sub>4</sub>P<sub>4</sub>

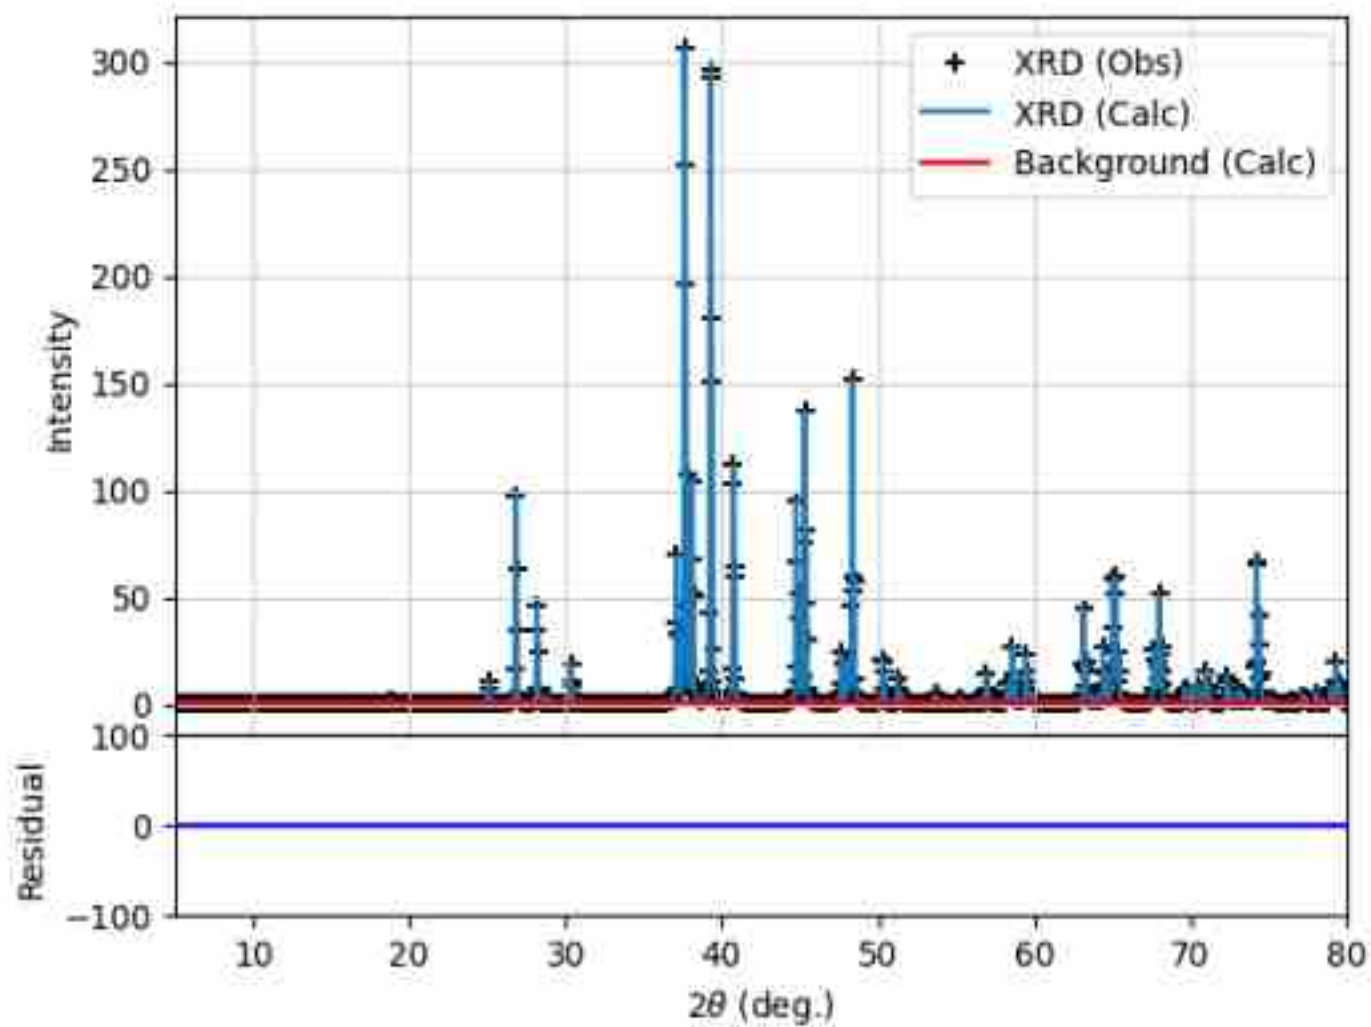

| RMSE before RR | Rwp    | RMSE after RR |
|----------------|--------|---------------|
| 0.023          | 0.0049 | 0.00053       |

# Zr4I12

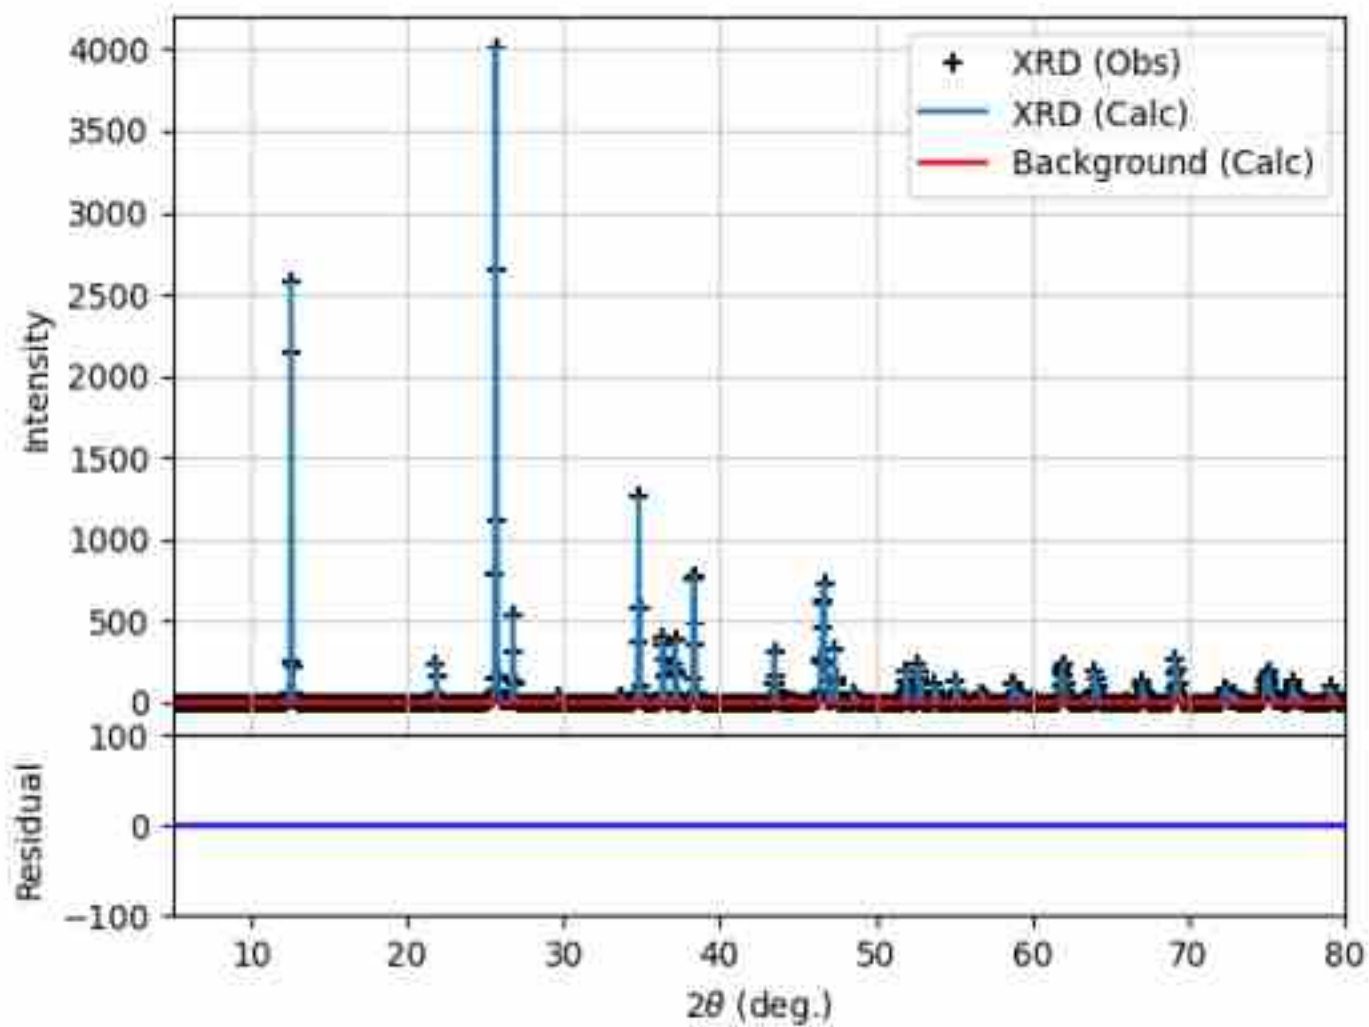

| RMSE before RR | Rwp     | RMSE after RR |
|----------------|---------|---------------|
| 0.023          | 0.00333 | 0.00019       |

# $\text{Al}_2\text{H}_2\text{O}_4$

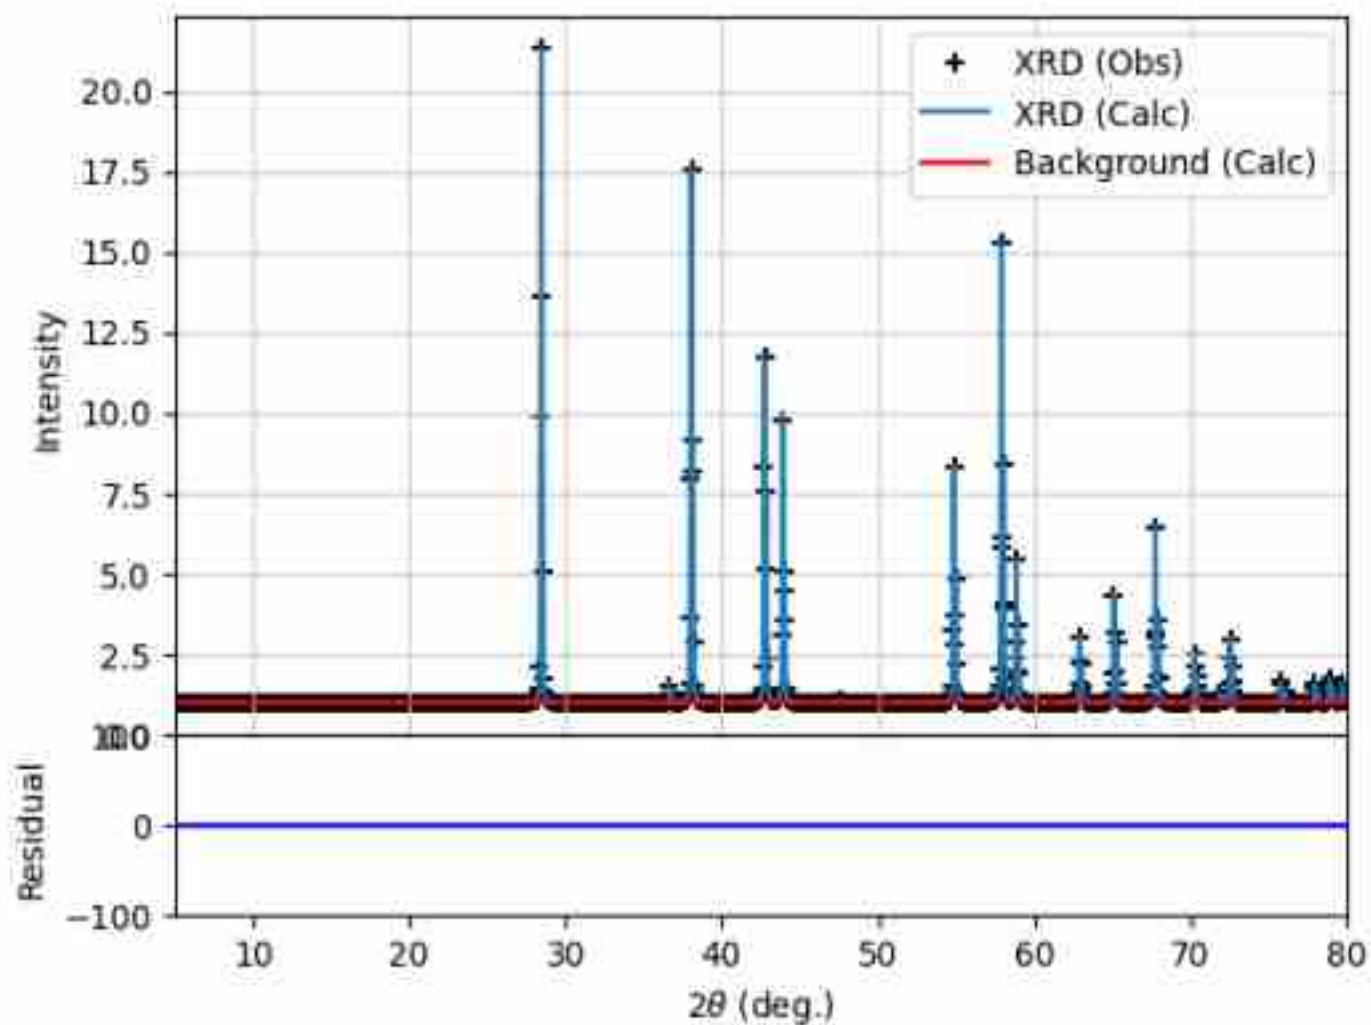

| RMSE before RR | Rwp     | RMSE after RR |
|----------------|---------|---------------|
| 0.024          | 0.00176 | 0.00244       |

# Al<sub>2</sub>Ni<sub>4</sub>O<sub>8</sub>

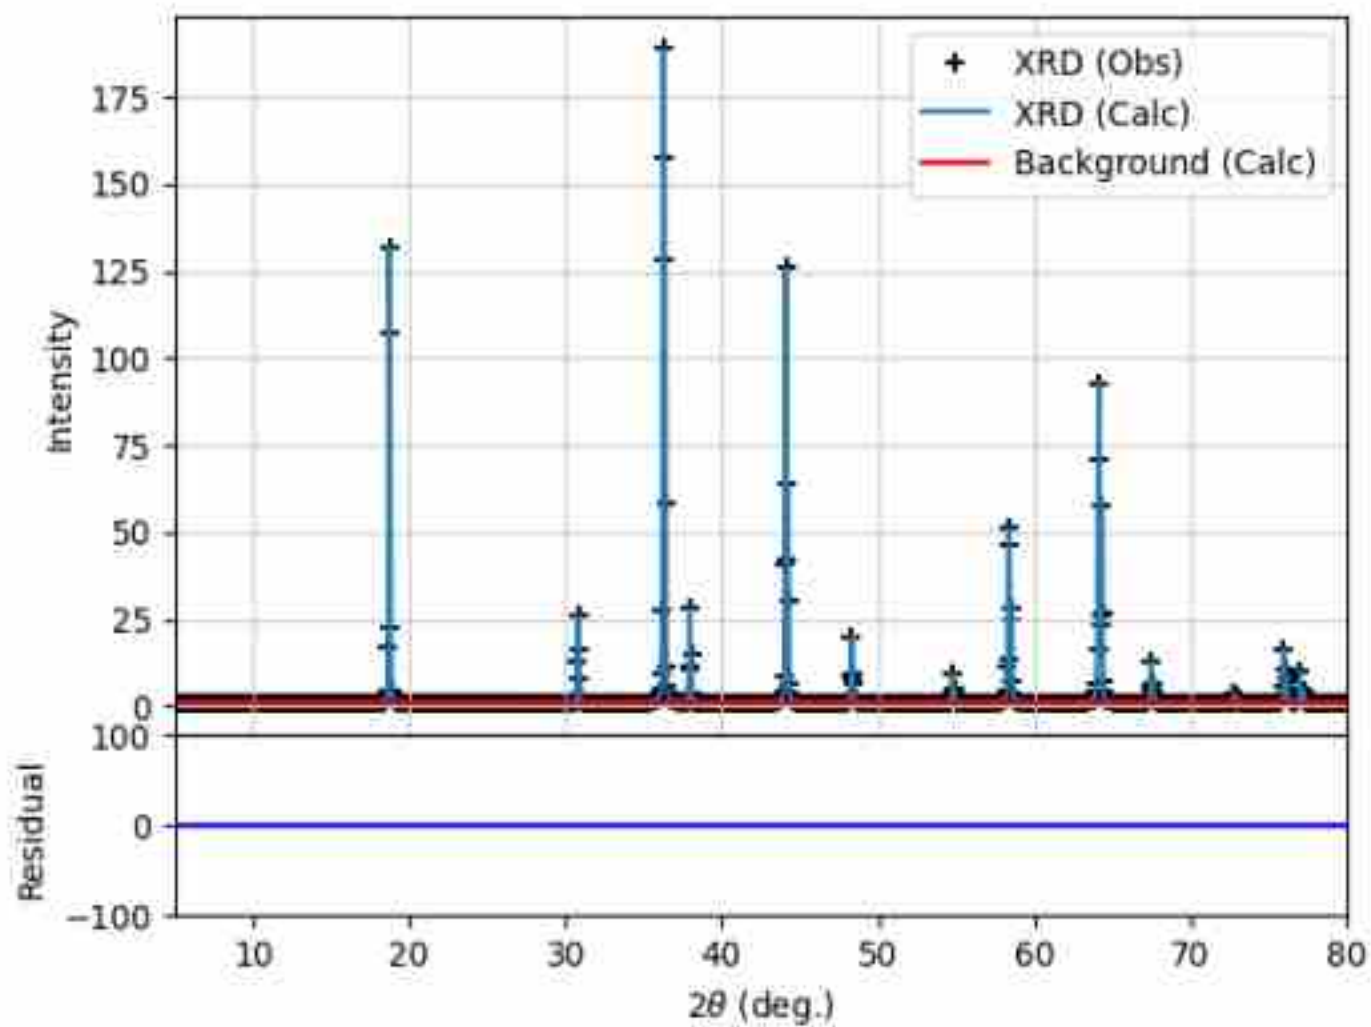

| RMSE before RR | Rwp     | RMSE after RR |
|----------------|---------|---------------|
| 0.024          | 0.01039 | 0.00311       |

# Al<sub>2</sub>Si<sub>4</sub>Mo<sub>3</sub>

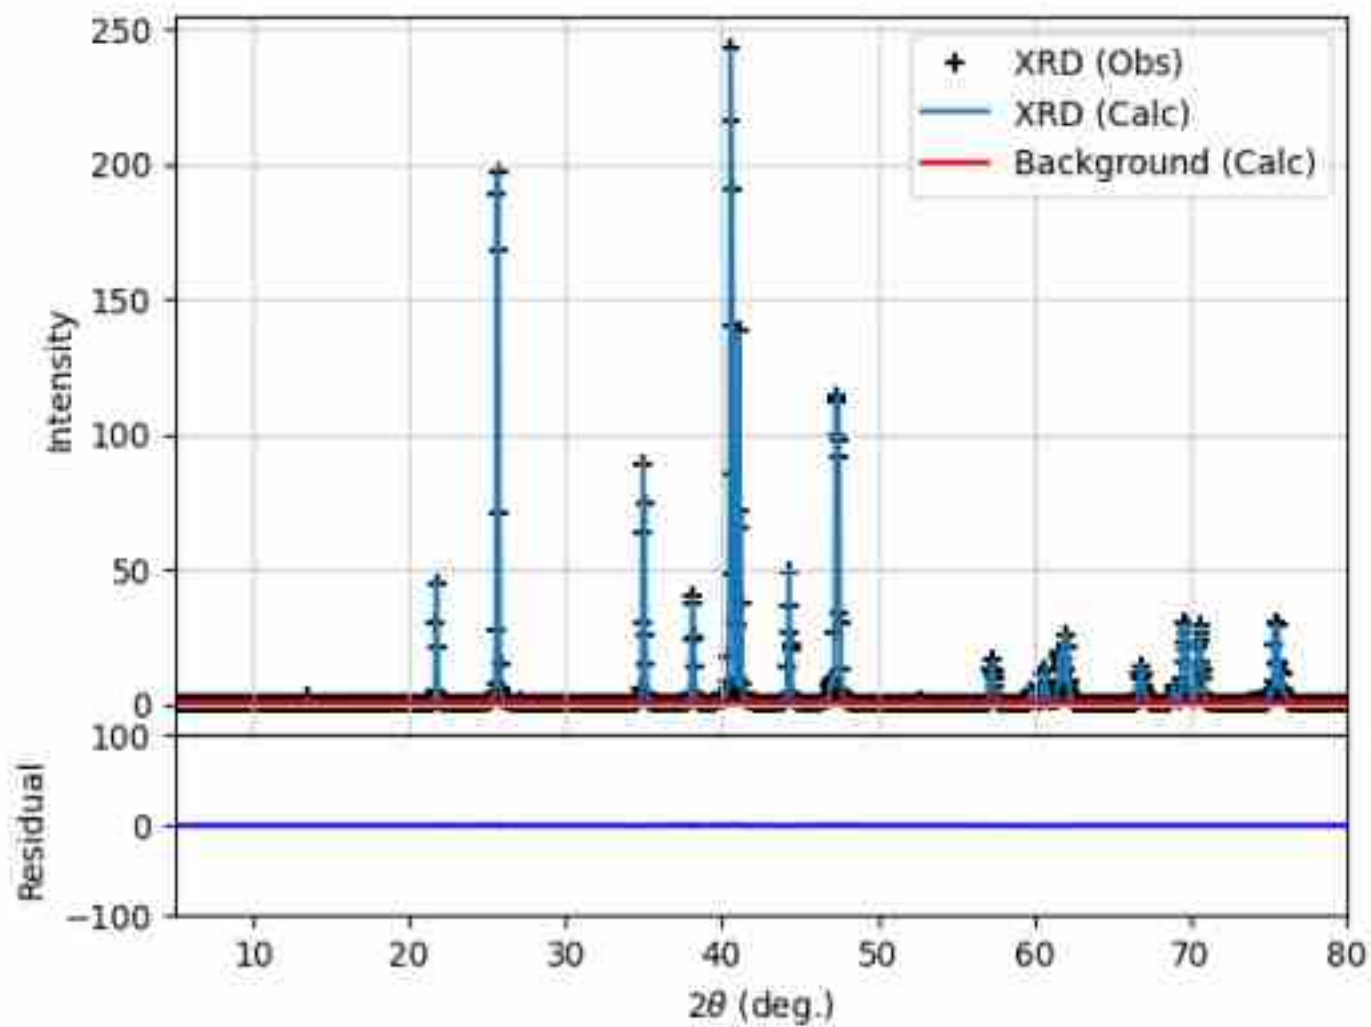

| RMSE before RR | Rwp     | RMSE after RR |
|----------------|---------|---------------|
| 0.024          | 1.06482 | 0.03314       |

# A12V4O8

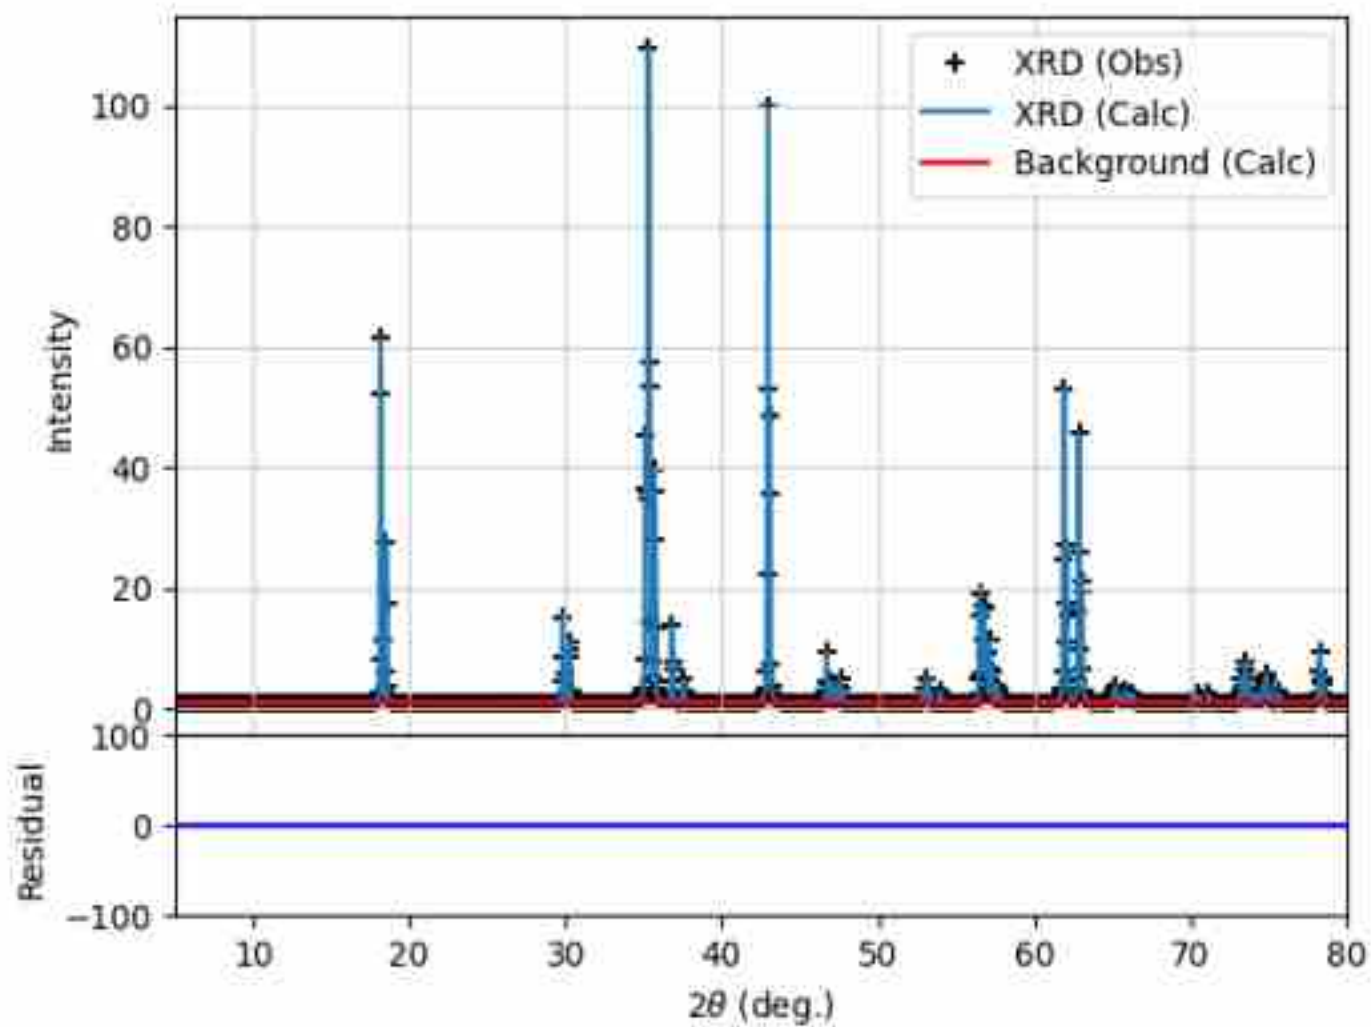

| RMSE before RR | Rwp     | RMSE after RR |
|----------------|---------|---------------|
| 0.024          | 0.00129 | 0.0004        |

# Ba<sub>1</sub>Sr<sub>3</sub>Zr<sub>4</sub>O<sub>12</sub>

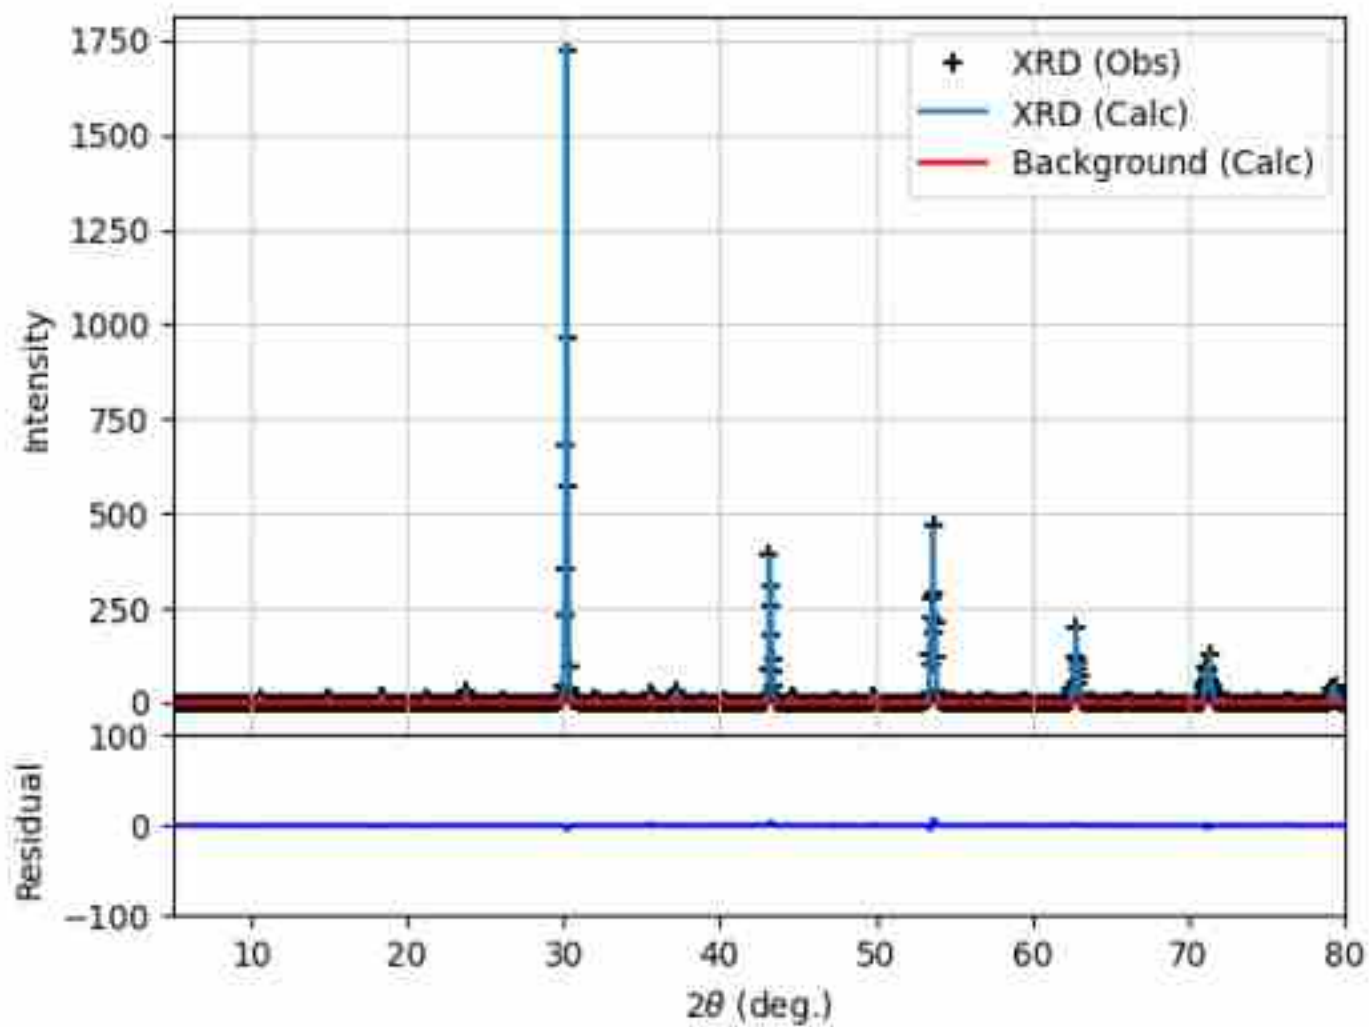

| RMSE before RR | Rwp     | RMSE after RR |
|----------------|---------|---------------|
| 0.024          | 2.00409 | 0.13601       |



# Ba<sub>2</sub>Dy<sub>4</sub>Pd<sub>2</sub>O<sub>10</sub>

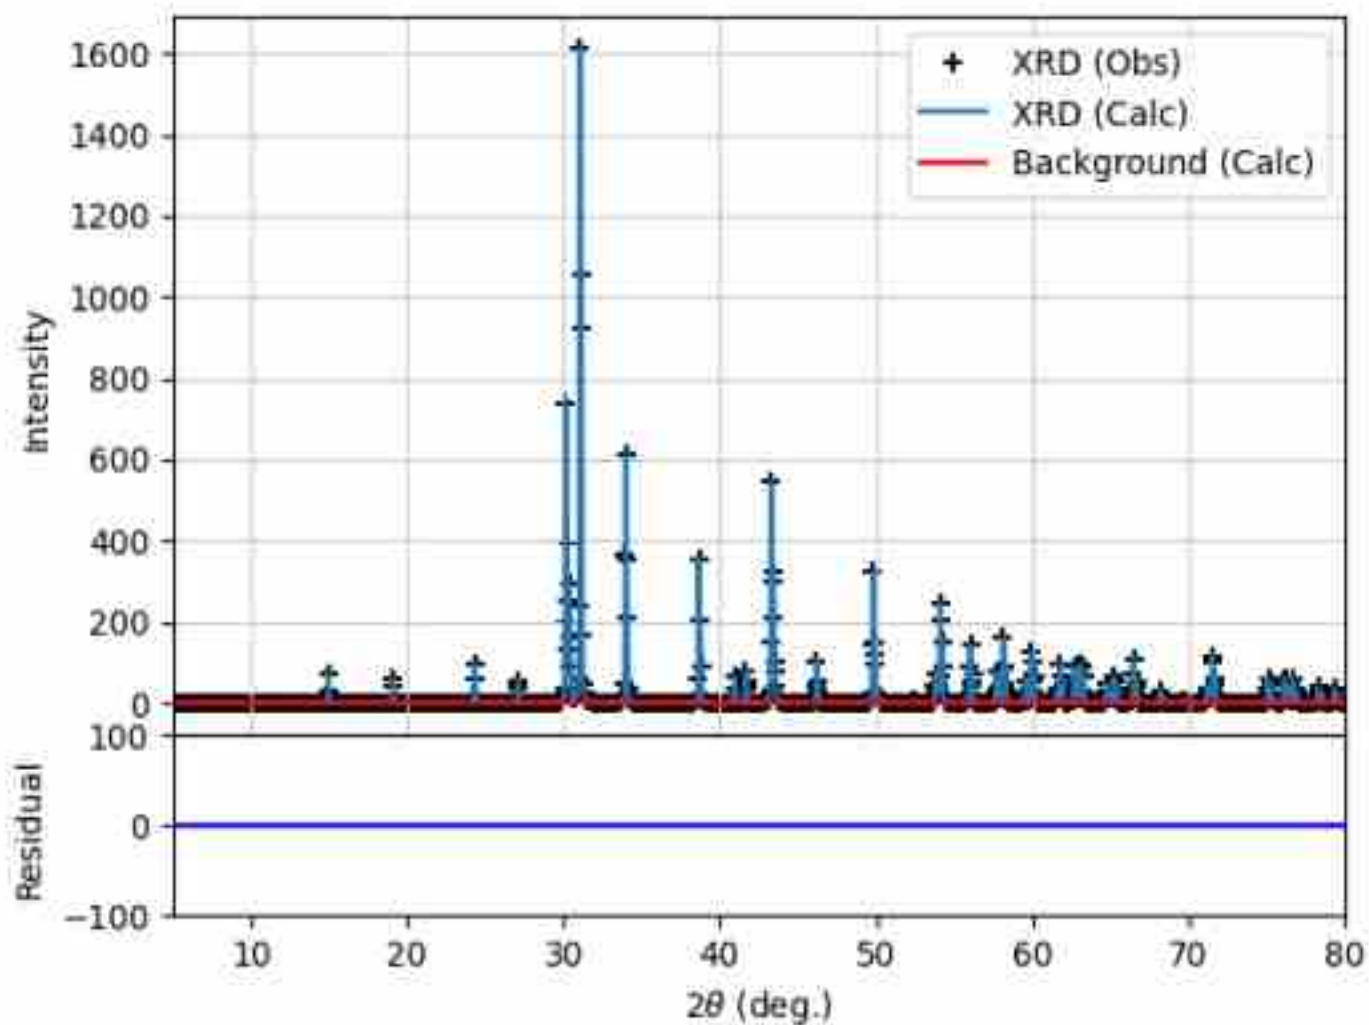

| RMSE before RR | Rwp     | RMSE after RR |
|----------------|---------|---------------|
| 0.024          | 0.00635 | 0.00217       |

# Ba<sub>2</sub>Nd<sub>4</sub>Cu<sub>2</sub>O<sub>10</sub>

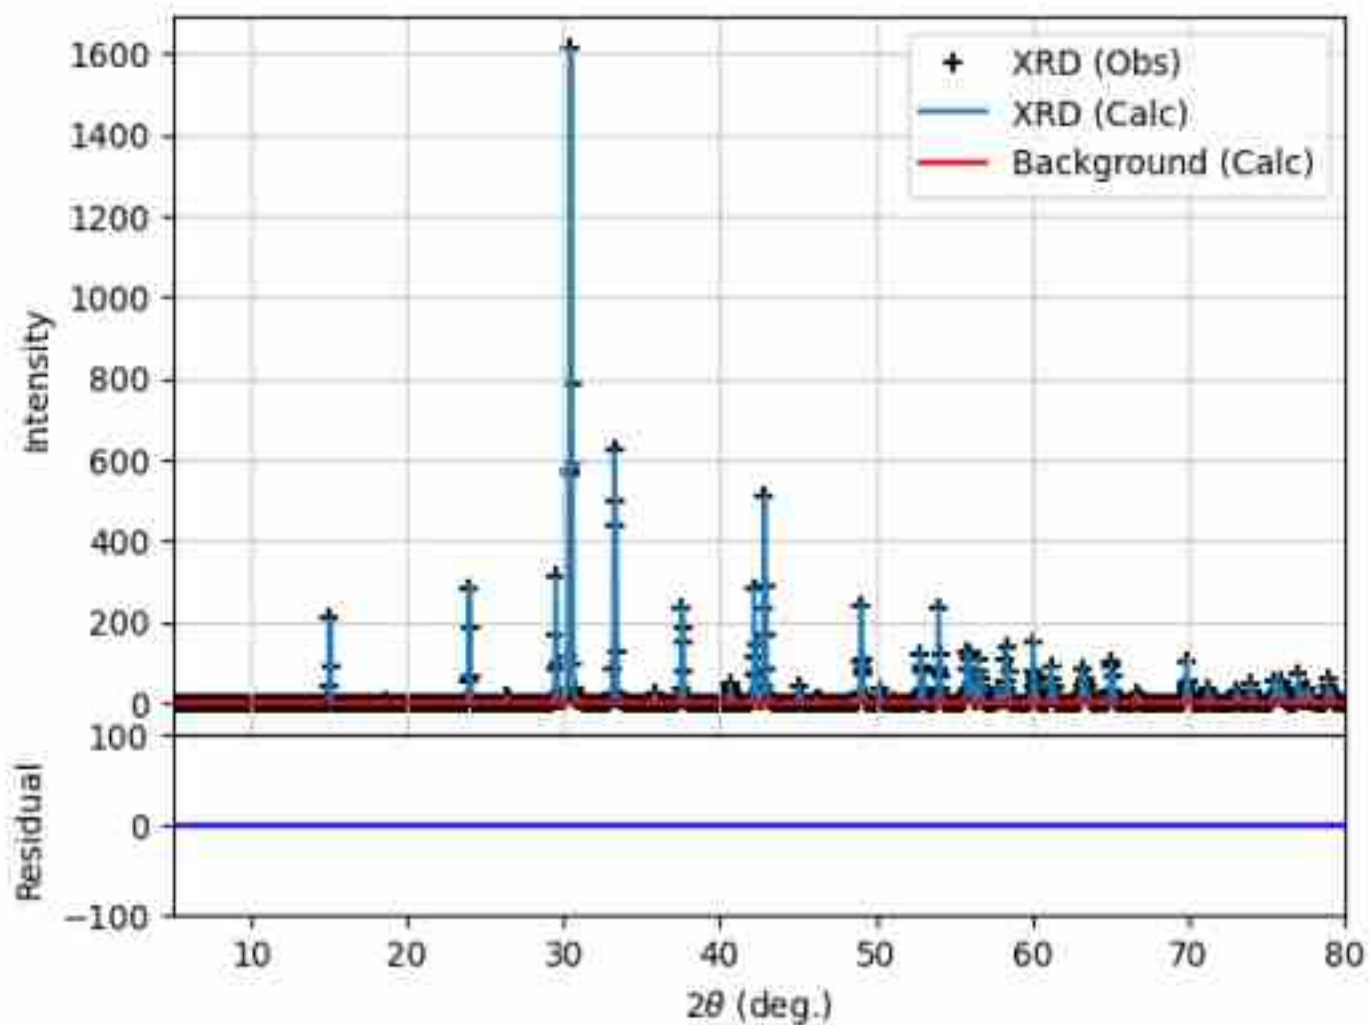

| RMSE before RR | Rwp     | RMSE after RR |
|----------------|---------|---------------|
| 0.024          | 0.00491 | 0.00194       |

# Ba<sub>3</sub>In<sub>2</sub>O<sub>5</sub>F<sub>2</sub>

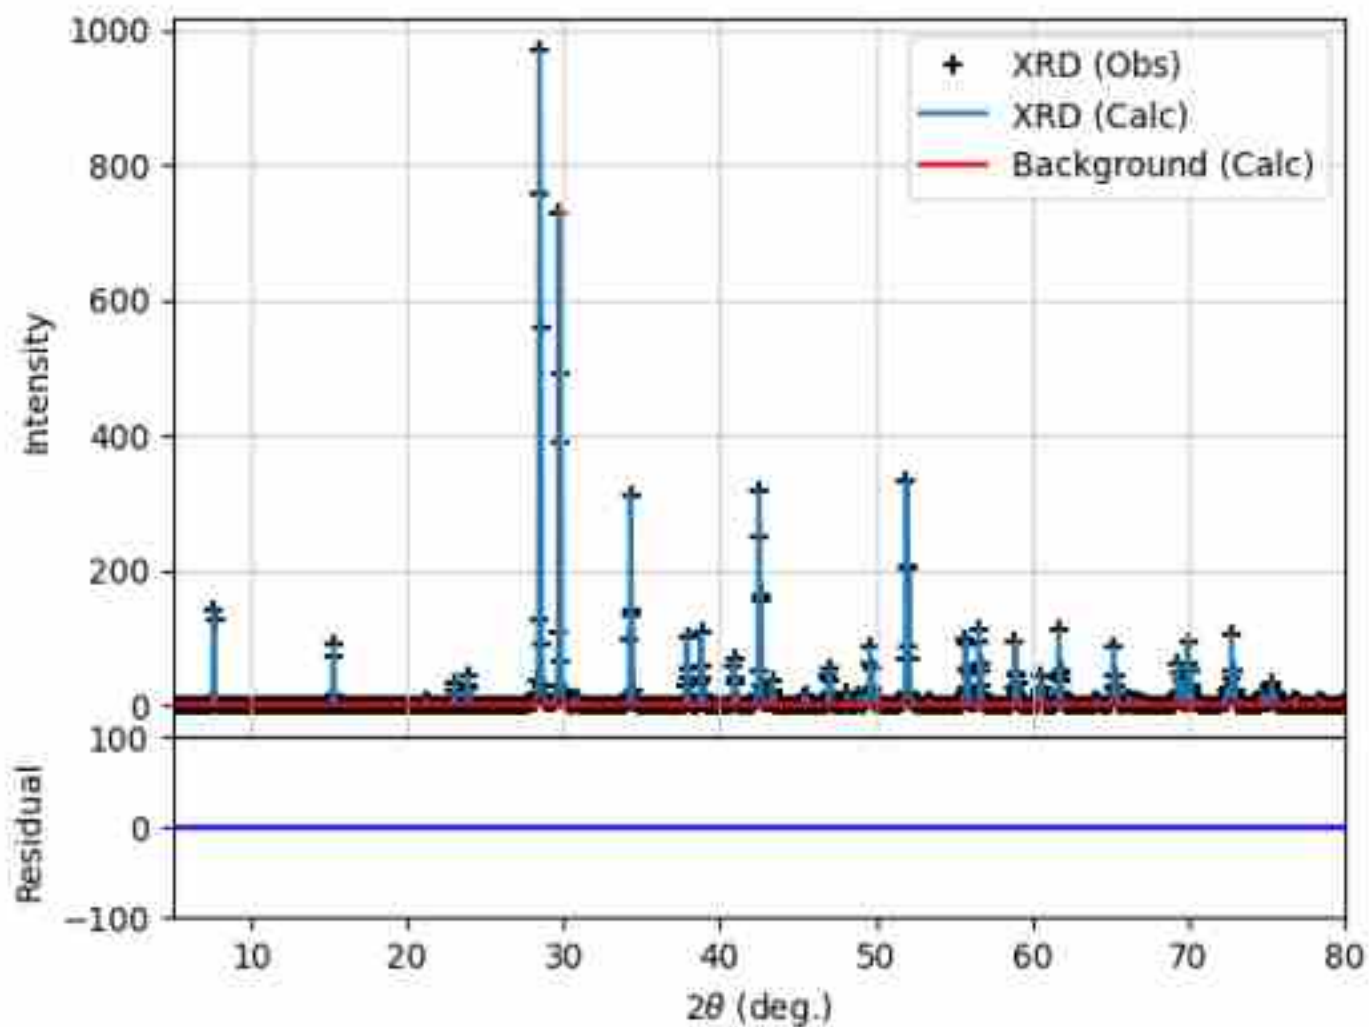

| RMSE before RR | Rwp     | RMSE after RR |
|----------------|---------|---------------|
| 0.024          | 0.00386 | 0.00089       |

# Ba<sub>3</sub>Li<sub>4</sub>Sb<sub>4</sub>

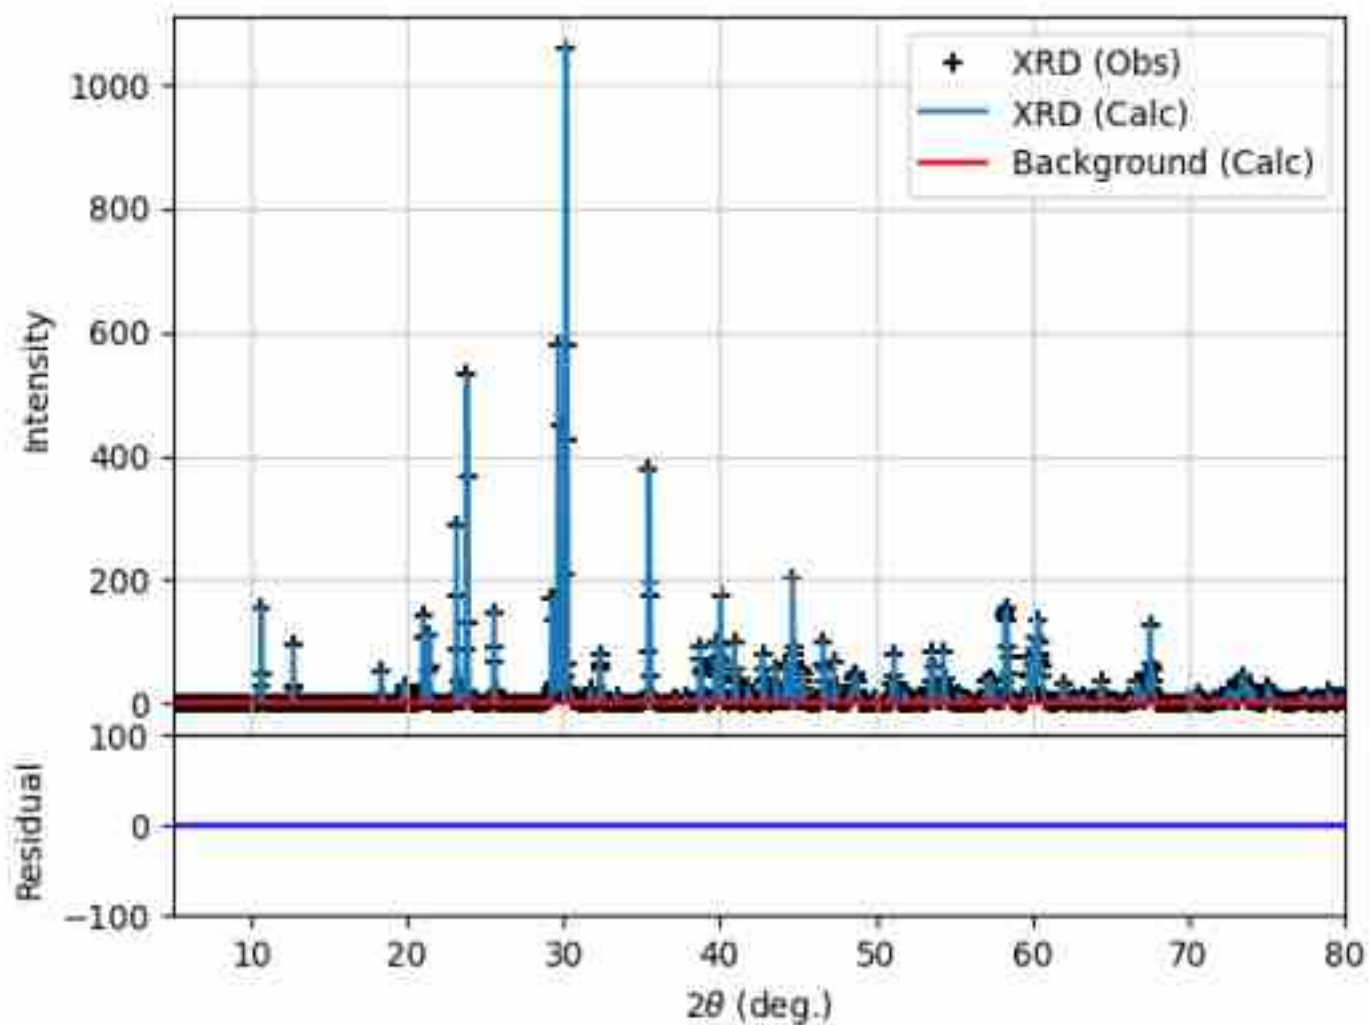

| RMSE before RR | Rwp     | RMSE after RR |
|----------------|---------|---------------|
| 0.024          | 0.00366 | 0.0028        |

# Ba<sub>4</sub>Fe<sub>2</sub>Br<sub>2</sub>O<sub>6</sub>

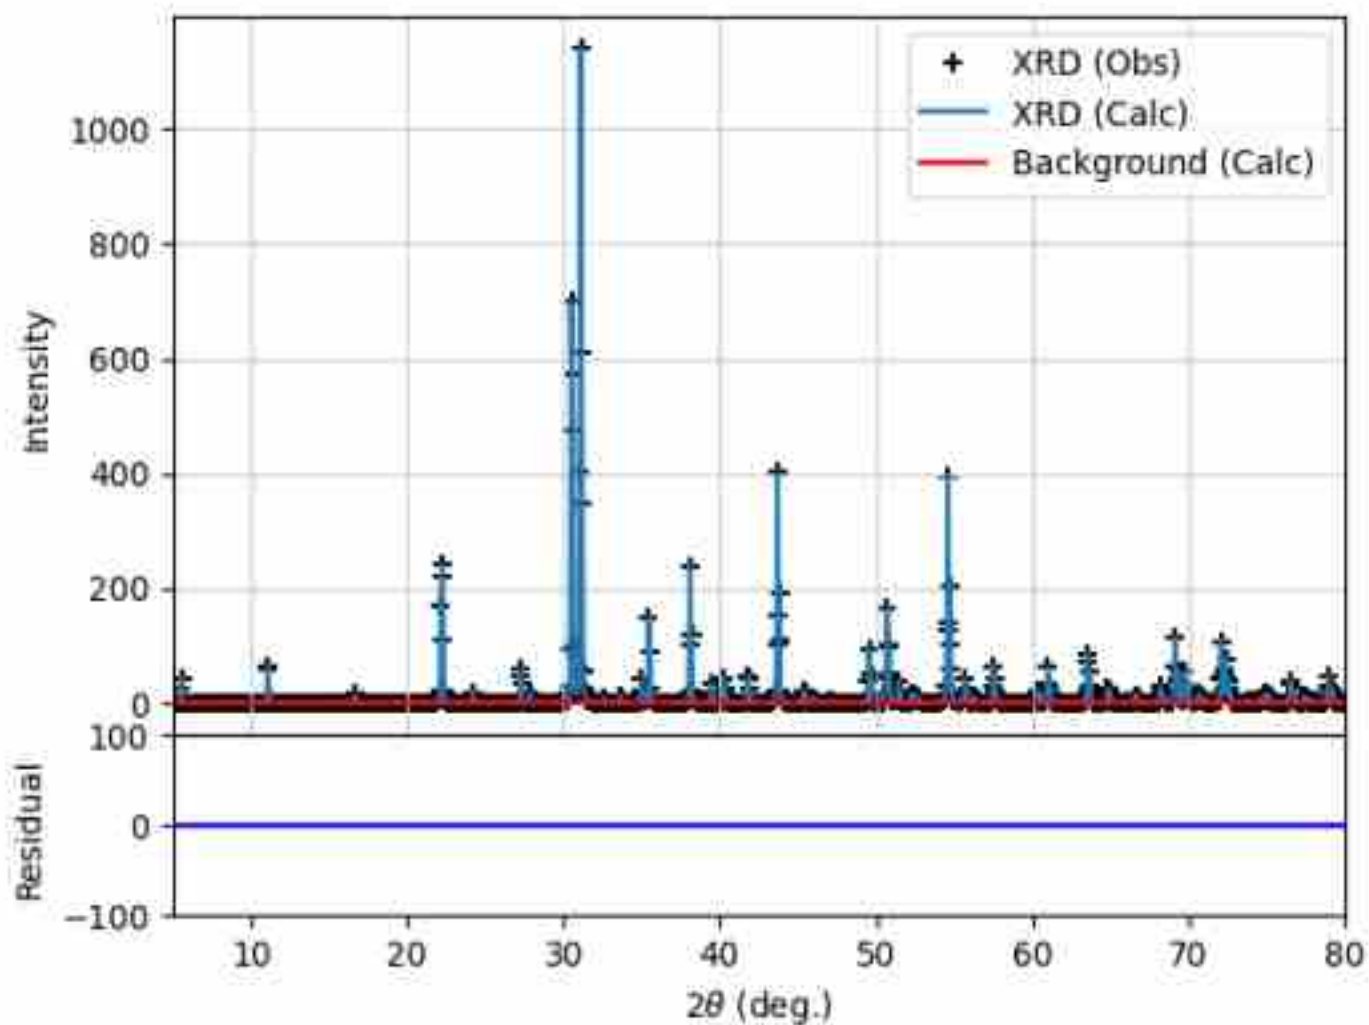

| RMSE before RR | Rwp    | RMSE after RR |
|----------------|--------|---------------|
| 0.024          | 0.0048 | 0.00188       |

# Ba<sub>4</sub>Ta<sub>2</sub>Ti<sub>1</sub>Zn<sub>1</sub>O<sub>12</sub>

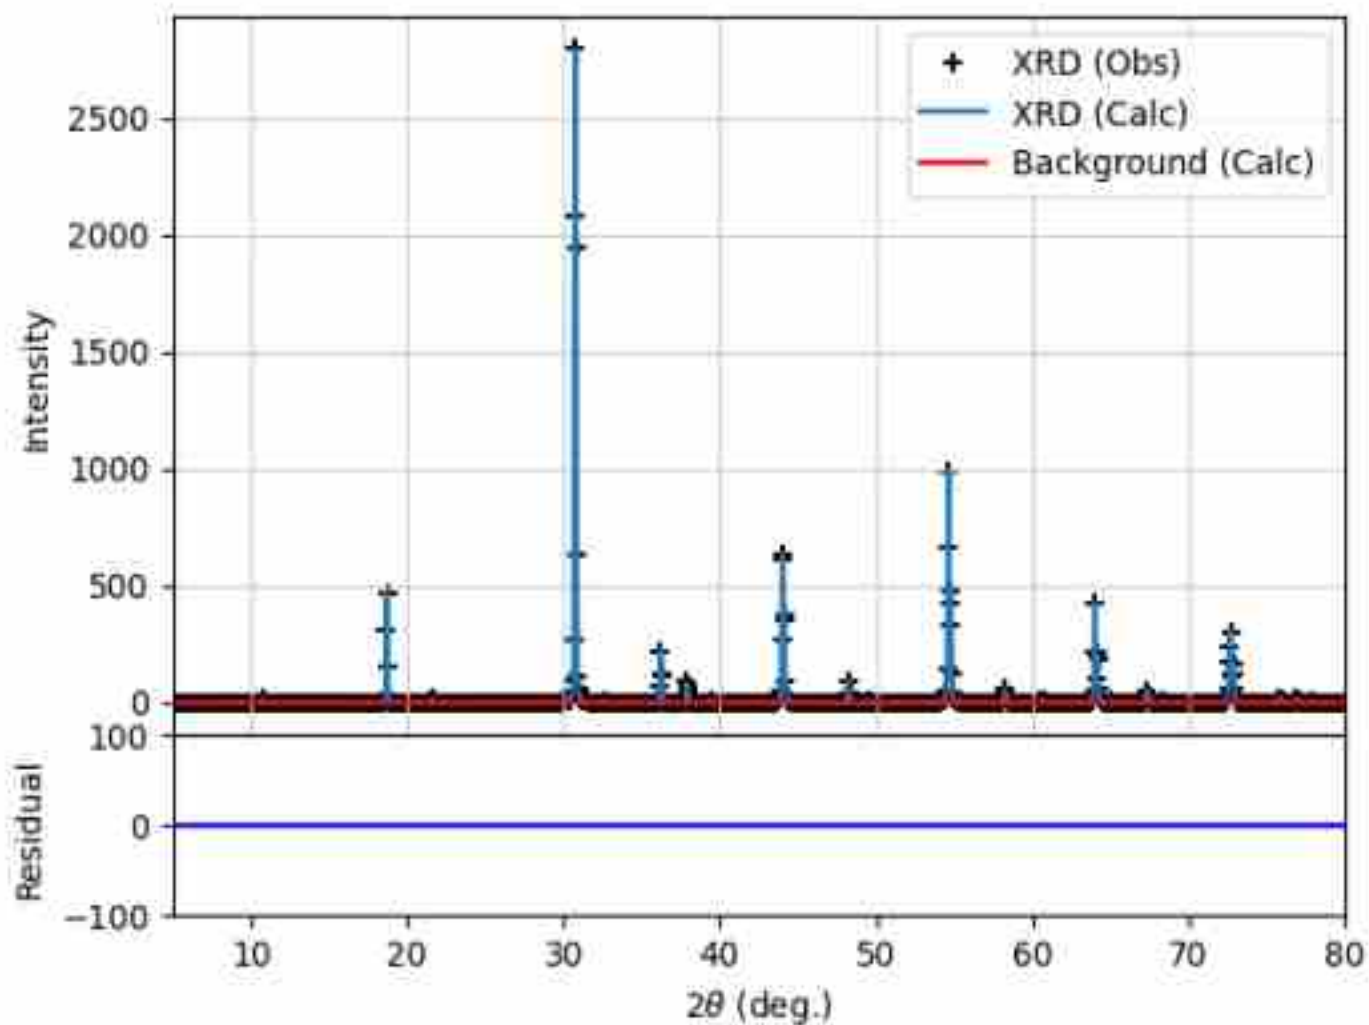

| RMSE before RR | Rwp     | RMSE after RR |
|----------------|---------|---------------|
| 0.024          | 0.00883 | 0.00195       |

# Ba6Fe2N6

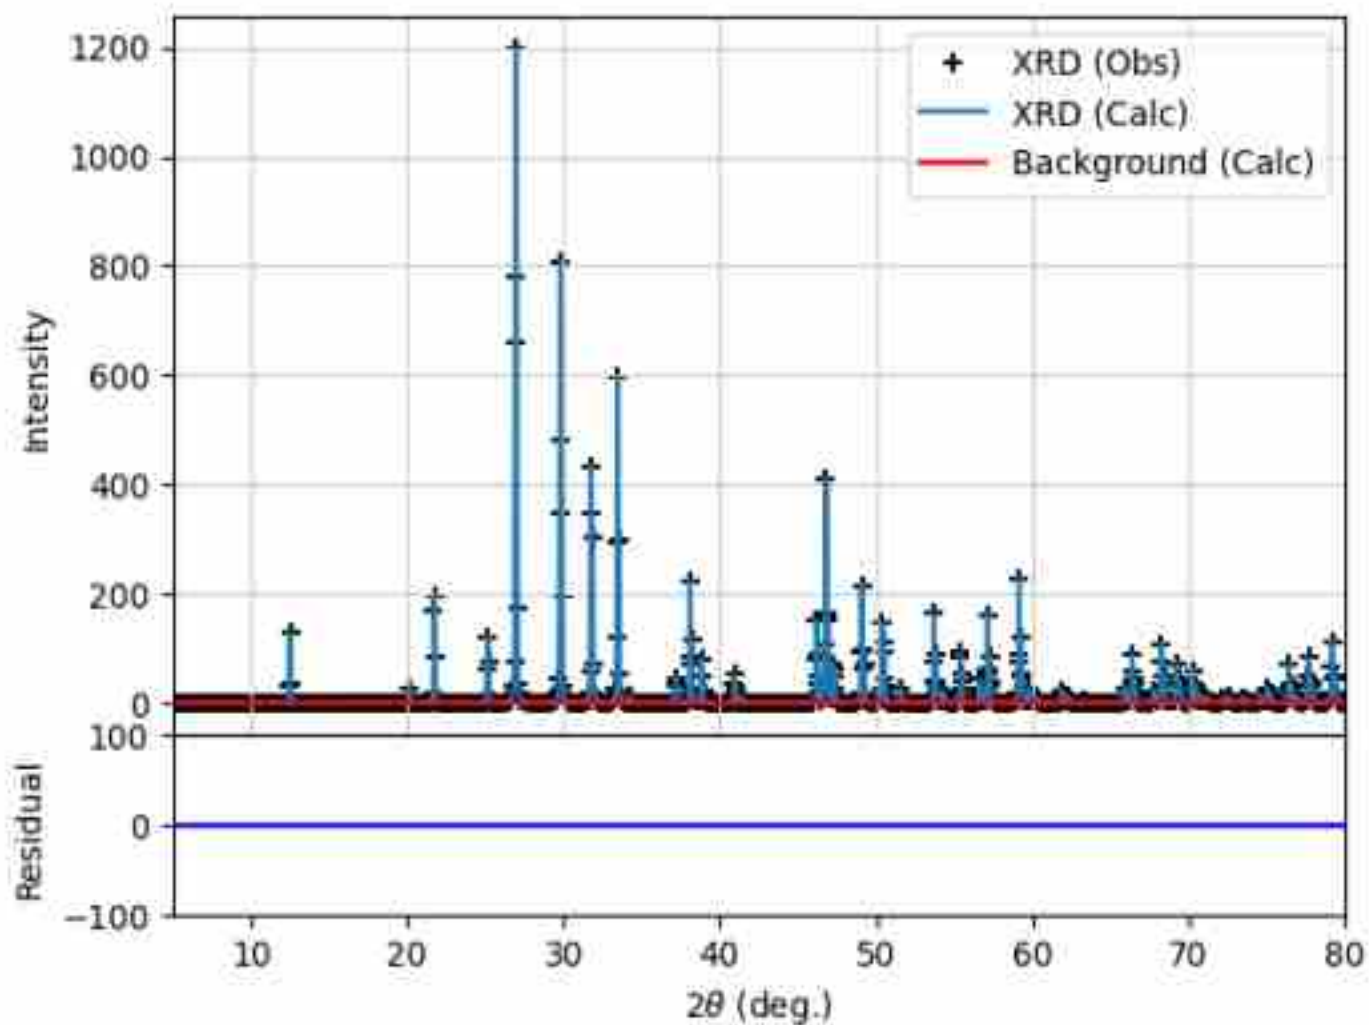

| RMSE before RR | Rwp     | RMSE after RR |
|----------------|---------|---------------|
| 0.024          | 0.00377 | 0.00081       |

# Ca1Cu2F8

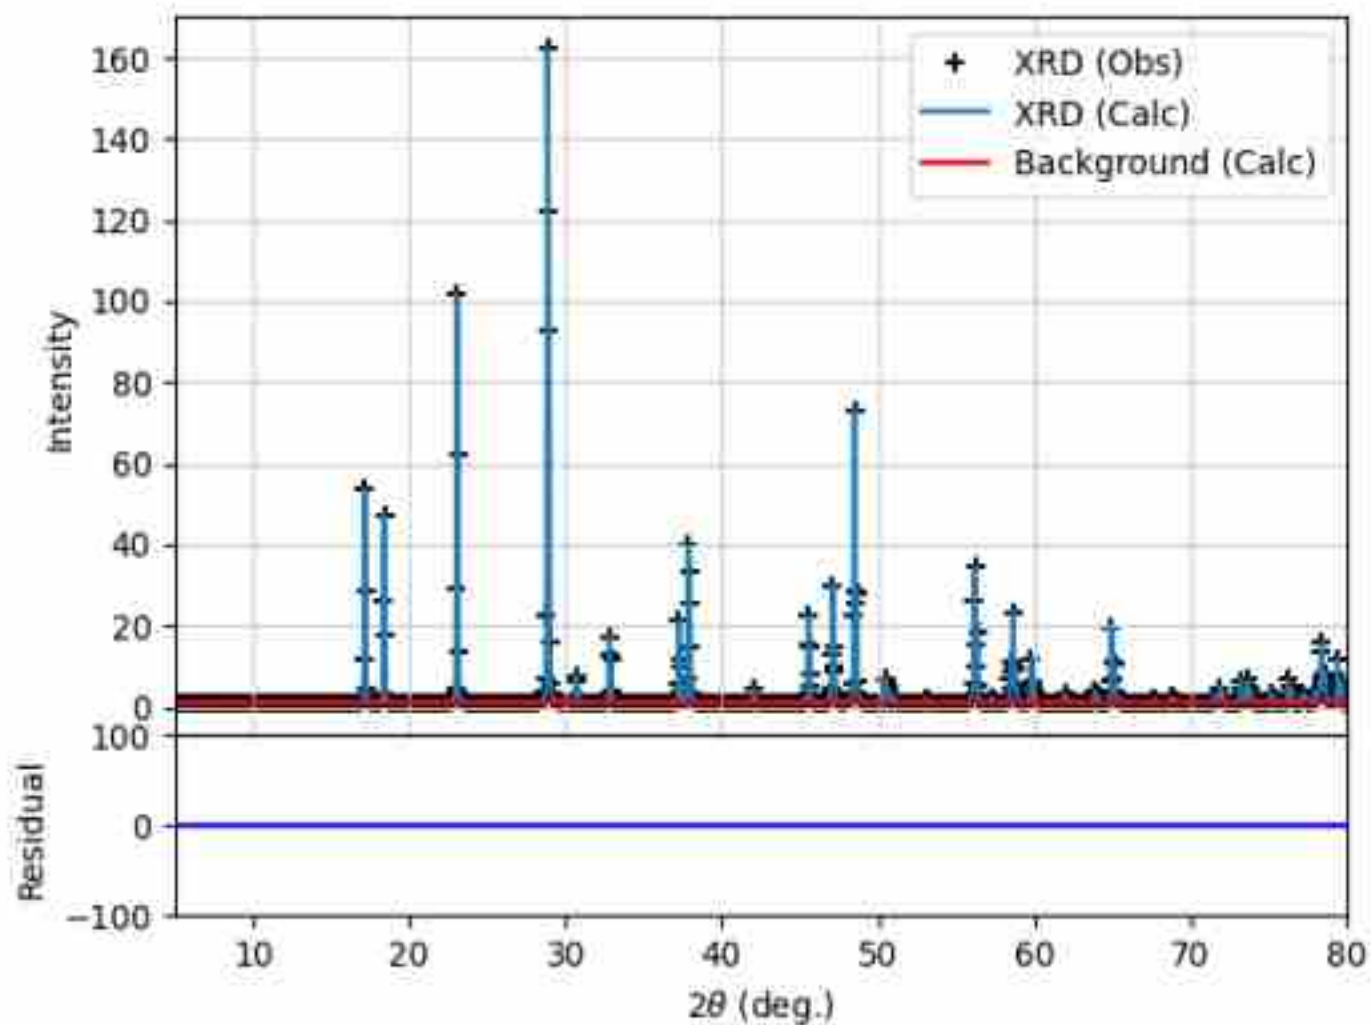

| RMSE before RR | Rwp     | RMSE after RR |
|----------------|---------|---------------|
| 0.024          | 0.00315 | 0.00143       |



# Ca1Mn1Cu3Ru3O12

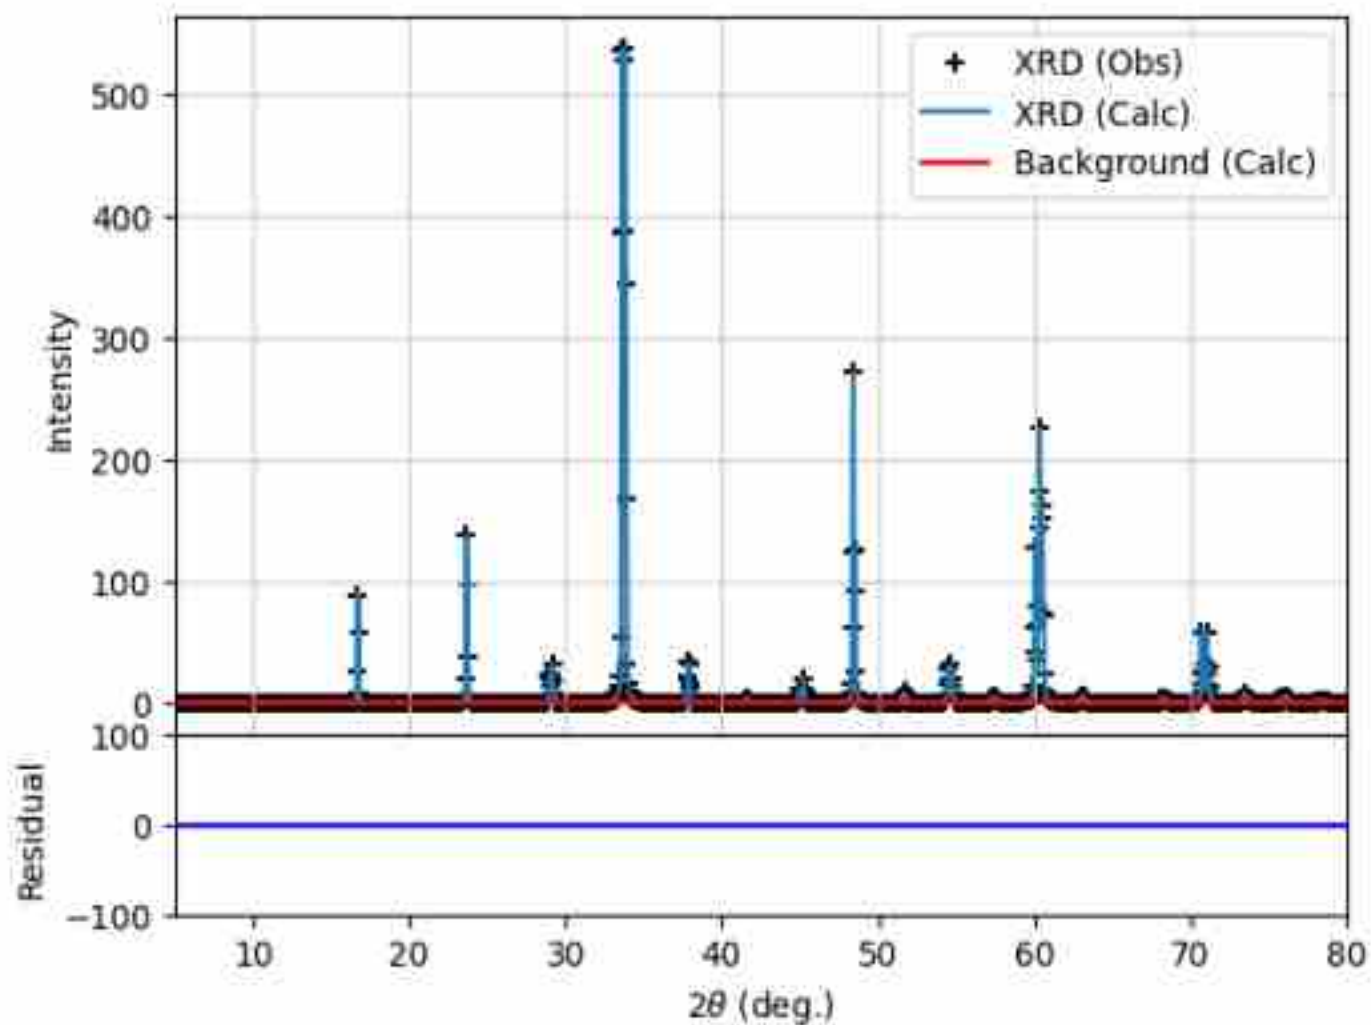

| RMSE before RR | Rwp   | RMSE after RR |
|----------------|-------|---------------|
| 0.024          | 0.004 | 0.00182       |

# Ca<sub>1</sub>V<sub>4</sub>Cu<sub>3</sub>O<sub>12</sub>

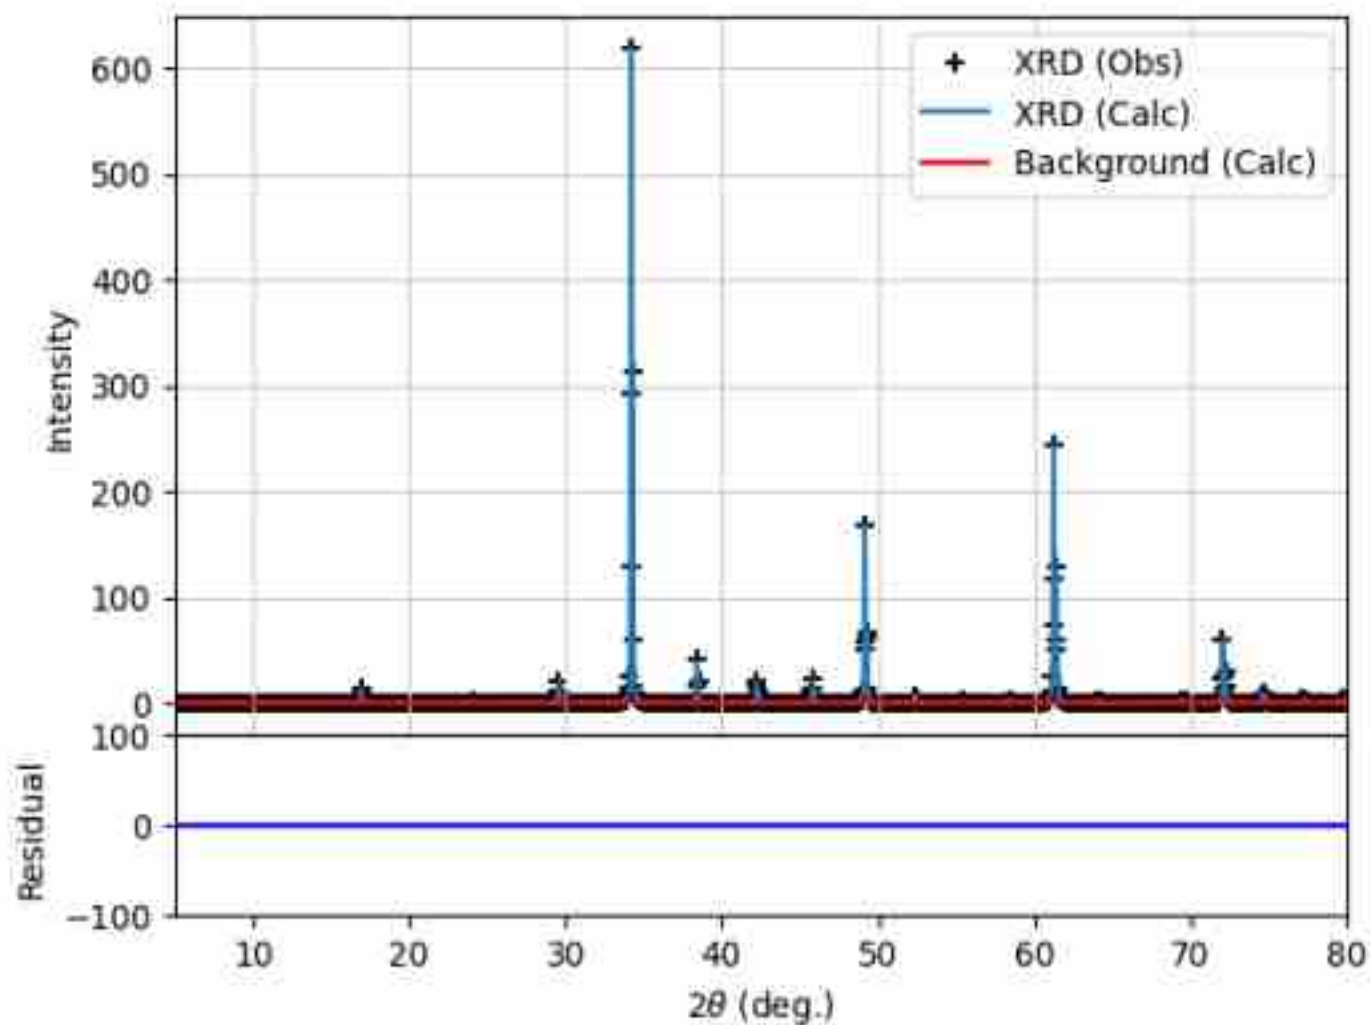

| RMSE before RR | Rwp     | RMSE after RR |
|----------------|---------|---------------|
| 0.024          | 0.00533 | 0.00314       |

# Ca<sub>3</sub>Cu<sub>2</sub>Br<sub>2</sub>O<sub>4</sub>

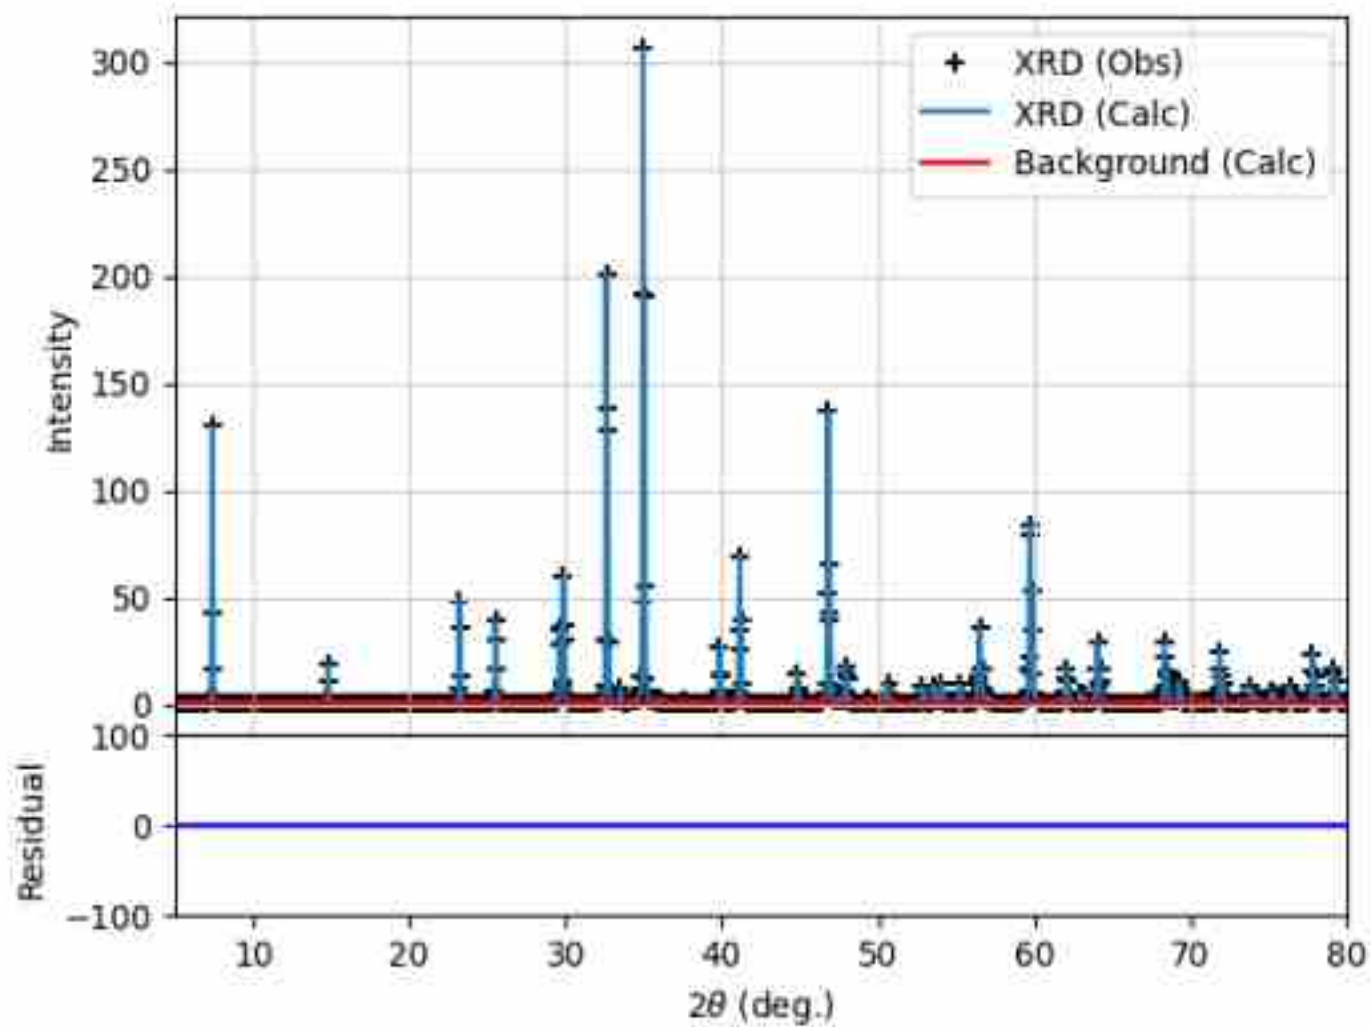

| RMSE before RR | Rwp     | RMSE after RR |
|----------------|---------|---------------|
| 0.024          | 0.01052 | 0.00078       |

# Ca<sub>3</sub>Fe<sub>2</sub>Mo<sub>2</sub>O<sub>12</sub>

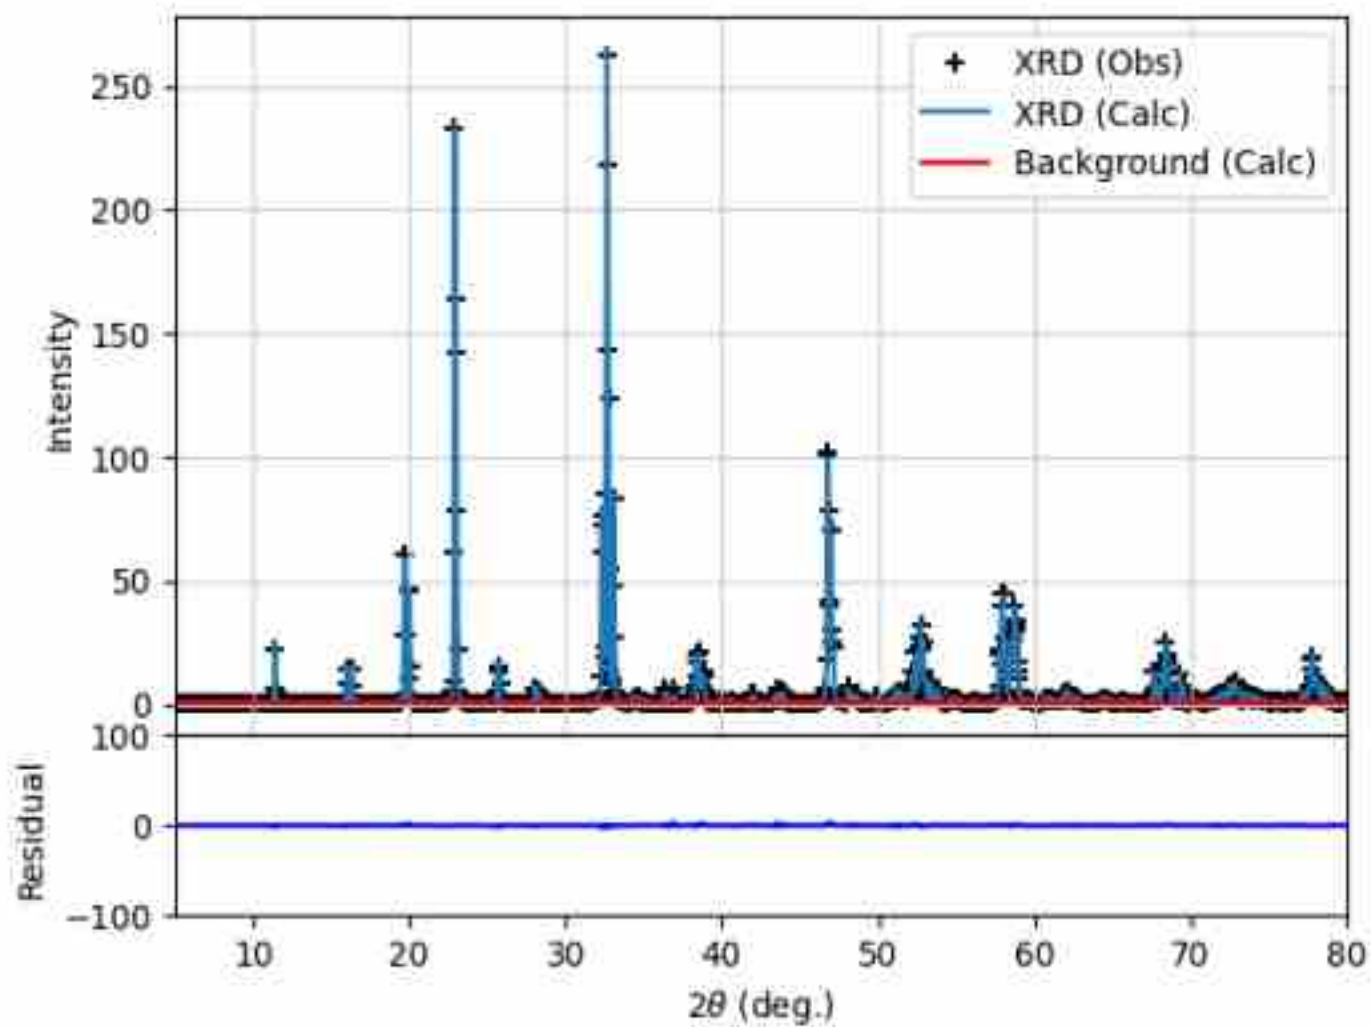

| RMSE before RR | Rwp     | RMSE after RR |
|----------------|---------|---------------|
| 0.024          | 6.66076 | 0.12927       |

# Ca<sub>4</sub>Mo<sub>4</sub>O<sub>12</sub>

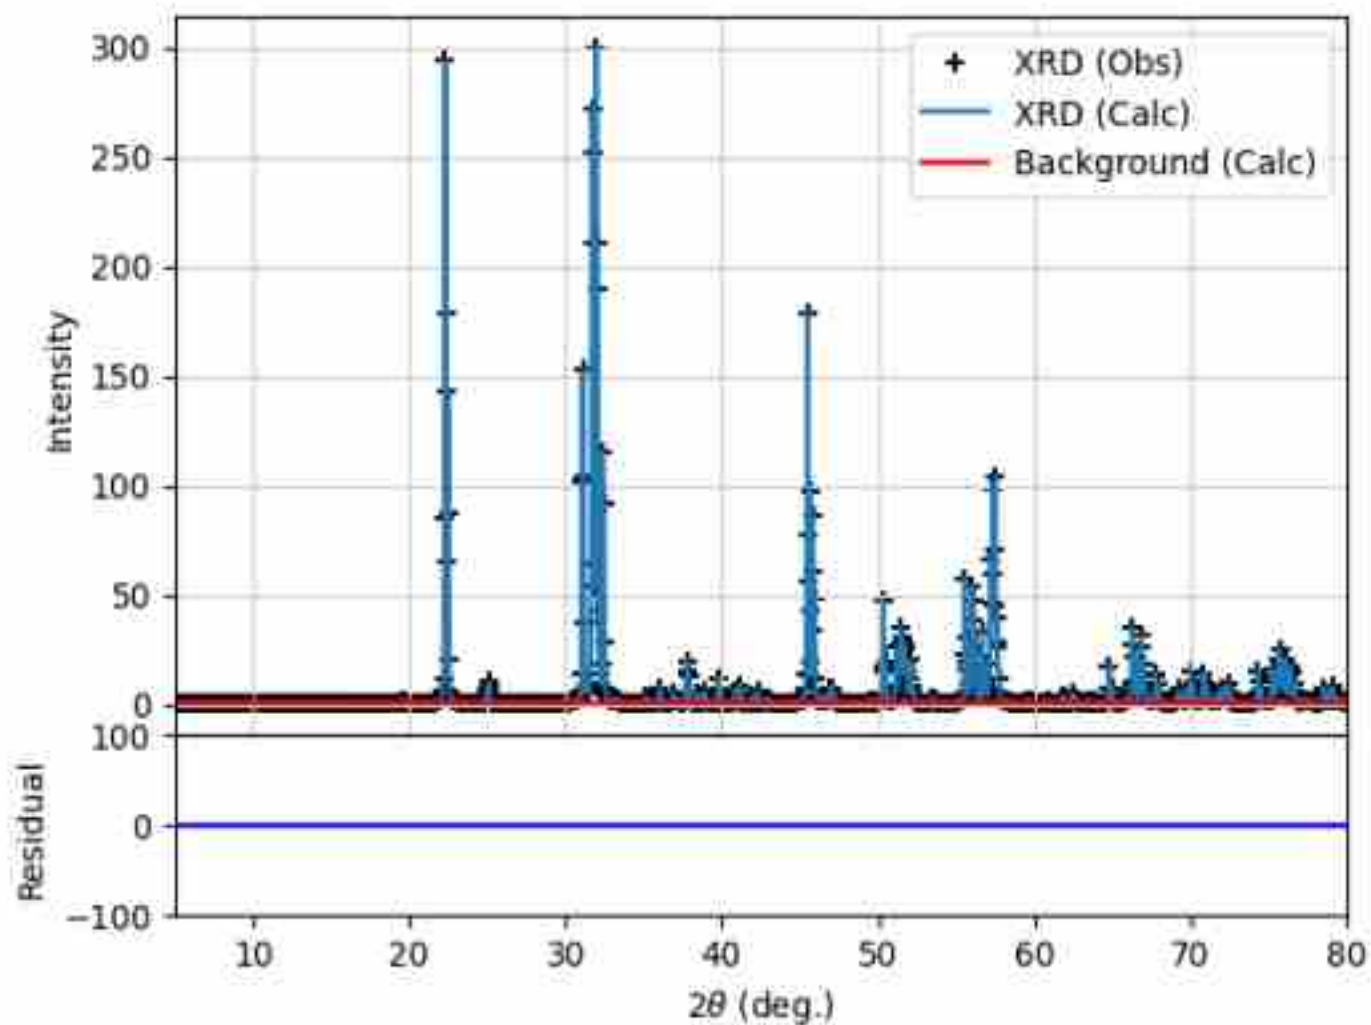

| RMSE before RR | Rwp     | RMSE after RR |
|----------------|---------|---------------|
| 0.024          | 0.00457 | 0.00088       |

# Ca<sub>6</sub>V<sub>2</sub>N<sub>6</sub>

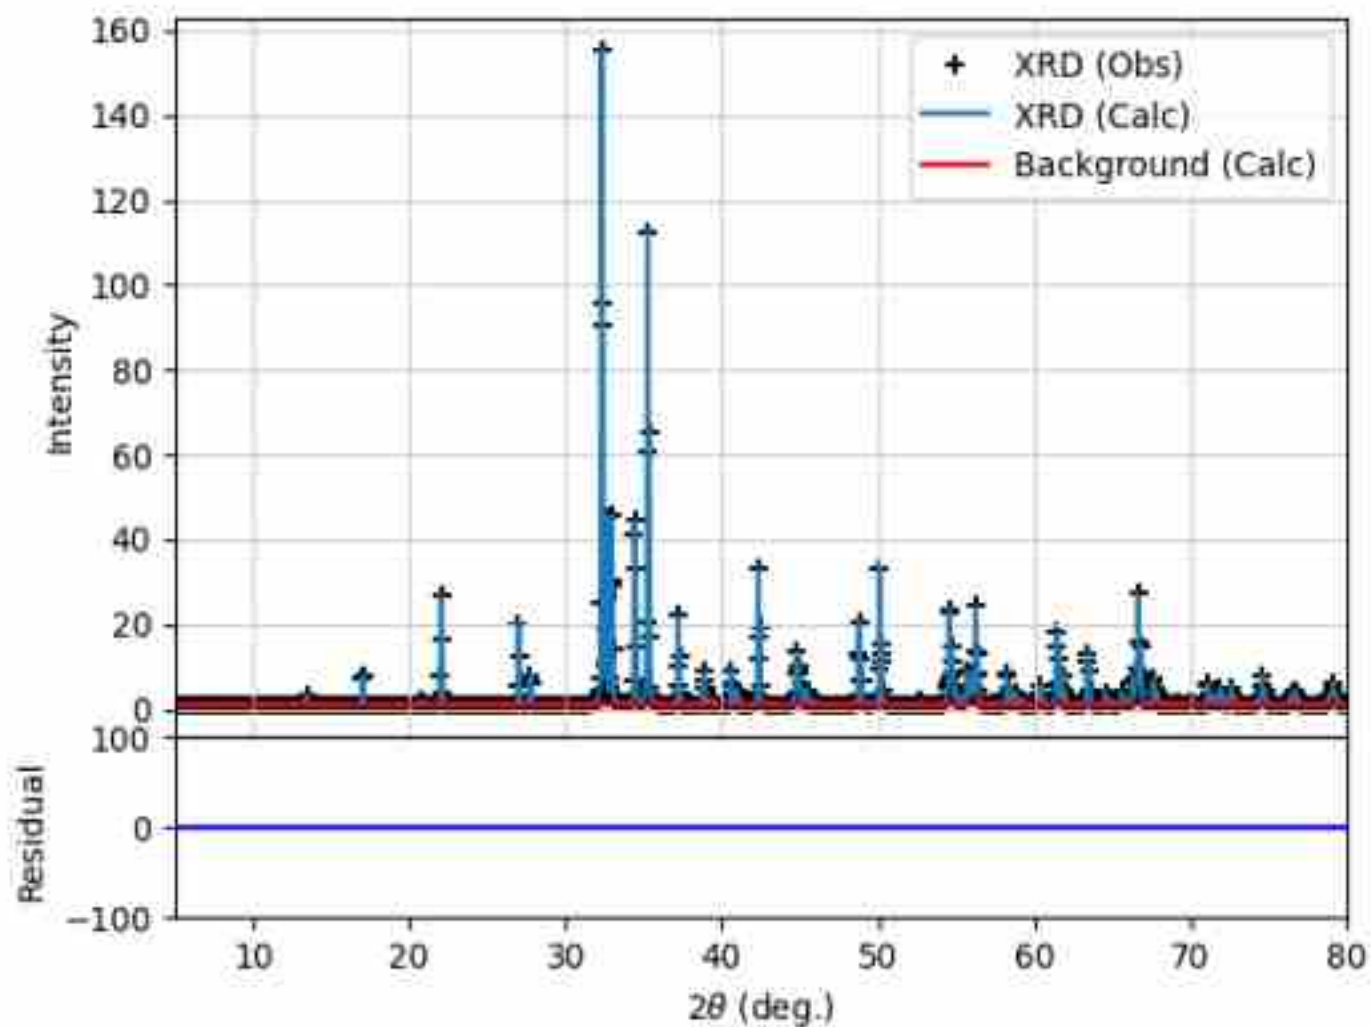

| RMSE before RR | Rwp     | RMSE after RR |
|----------------|---------|---------------|
| 0.024          | 0.00299 | 0.00076       |

# Cd<sub>2</sub>Ga<sub>1</sub>Cu<sub>1</sub>S<sub>4</sub>

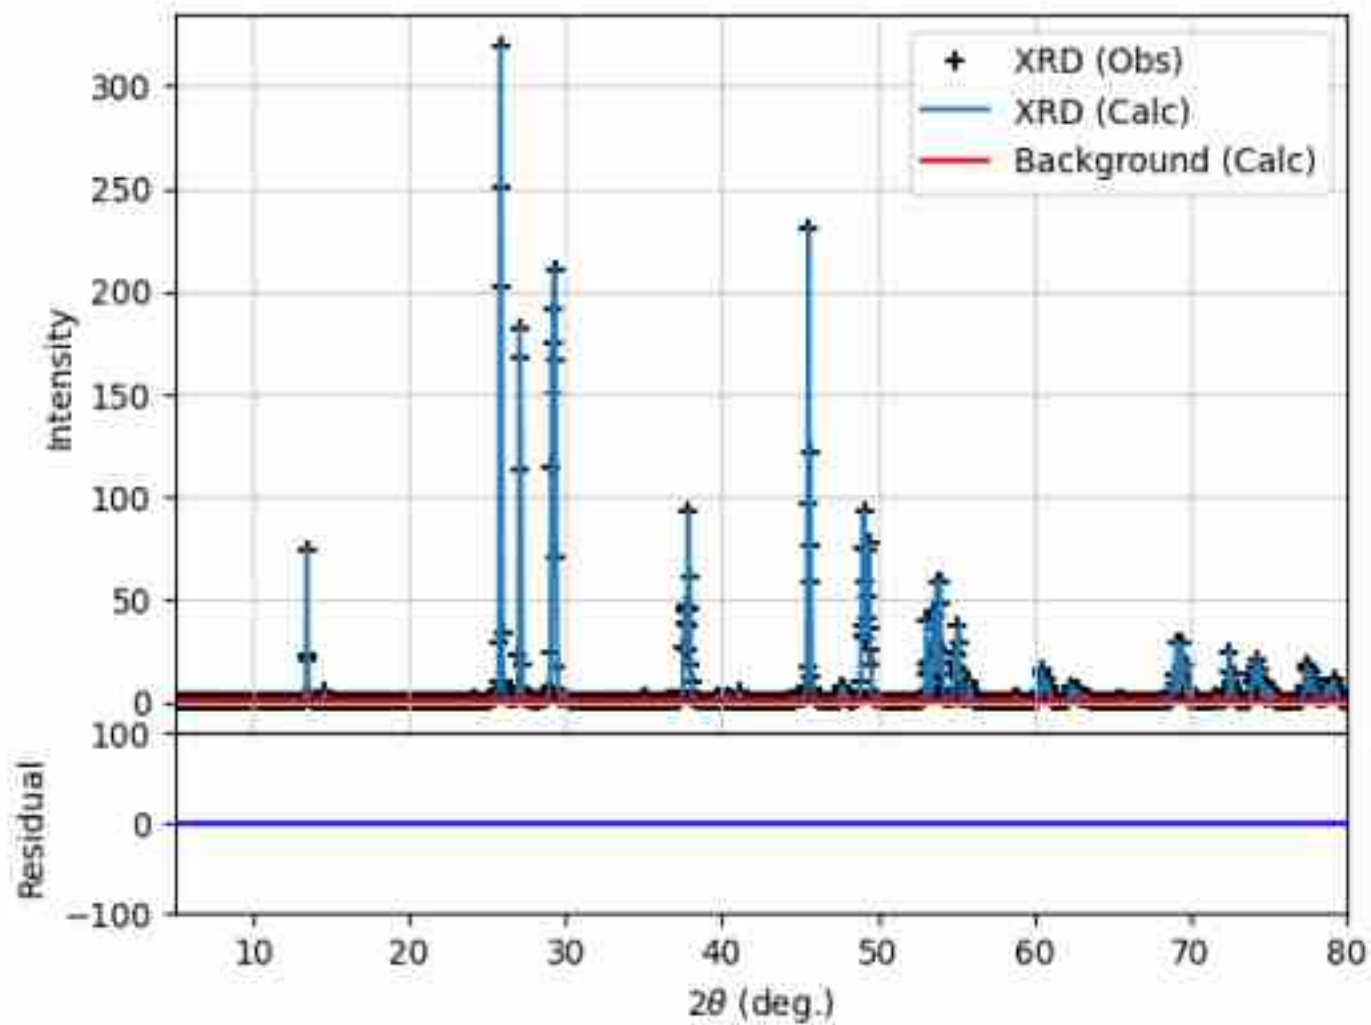

| RMSE before RR | Rwp     | RMSE after RR |
|----------------|---------|---------------|
| 0.024          | 0.00311 | 0.00025       |

# Ce1Pr4O10

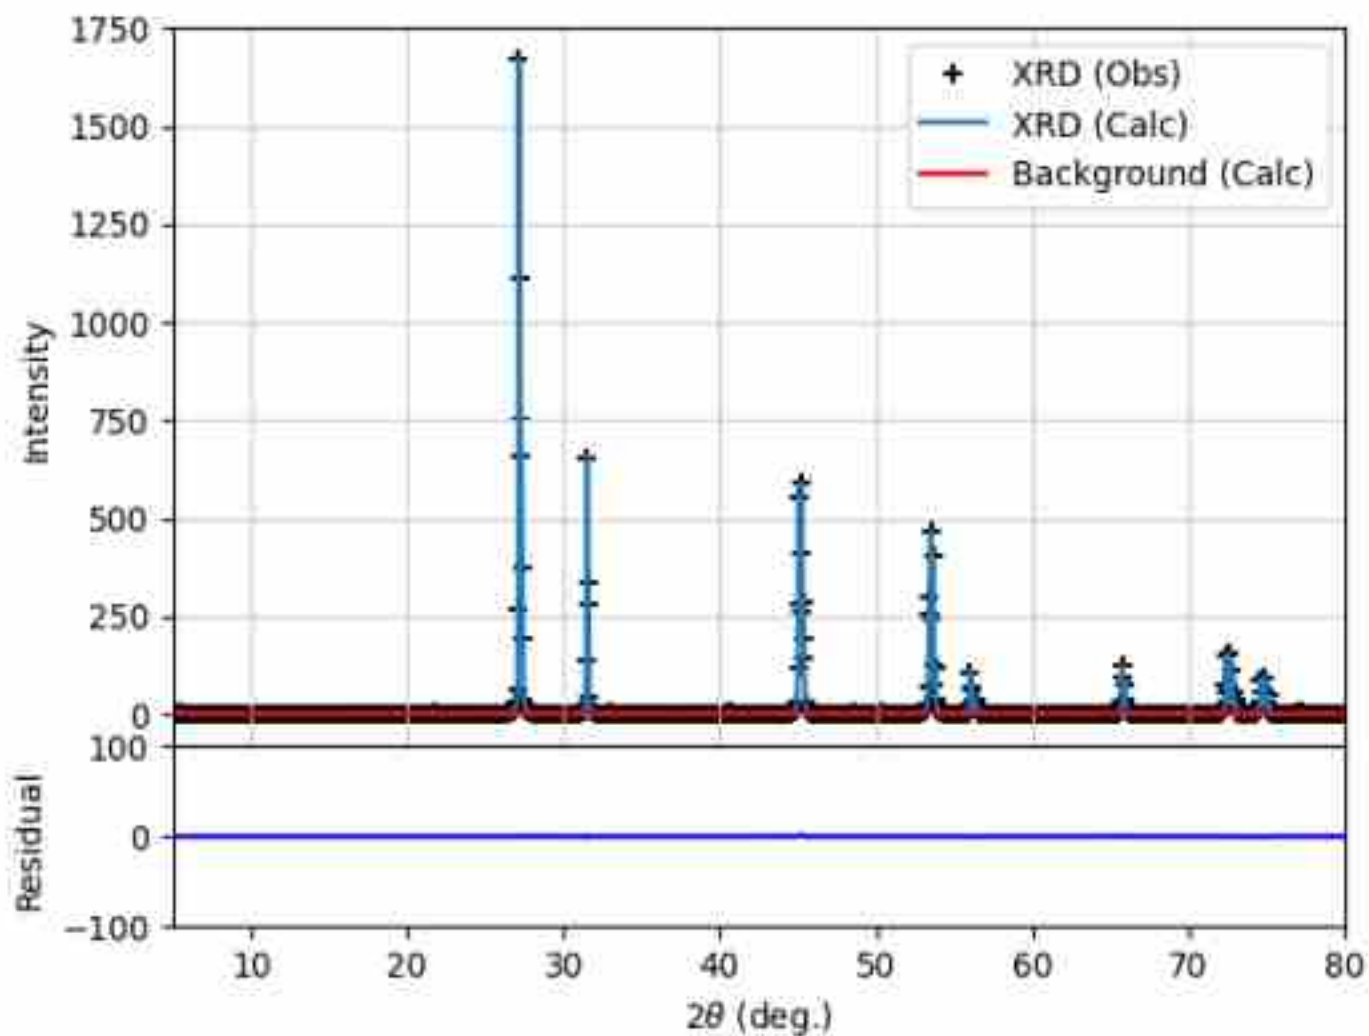

| RMSE before RR | Rwp    | RMSE after RR |
|----------------|--------|---------------|
| 0.024          | 0.4822 | 0.02217       |



# Ce<sub>2</sub>Fe<sub>2</sub>Si<sub>4</sub>

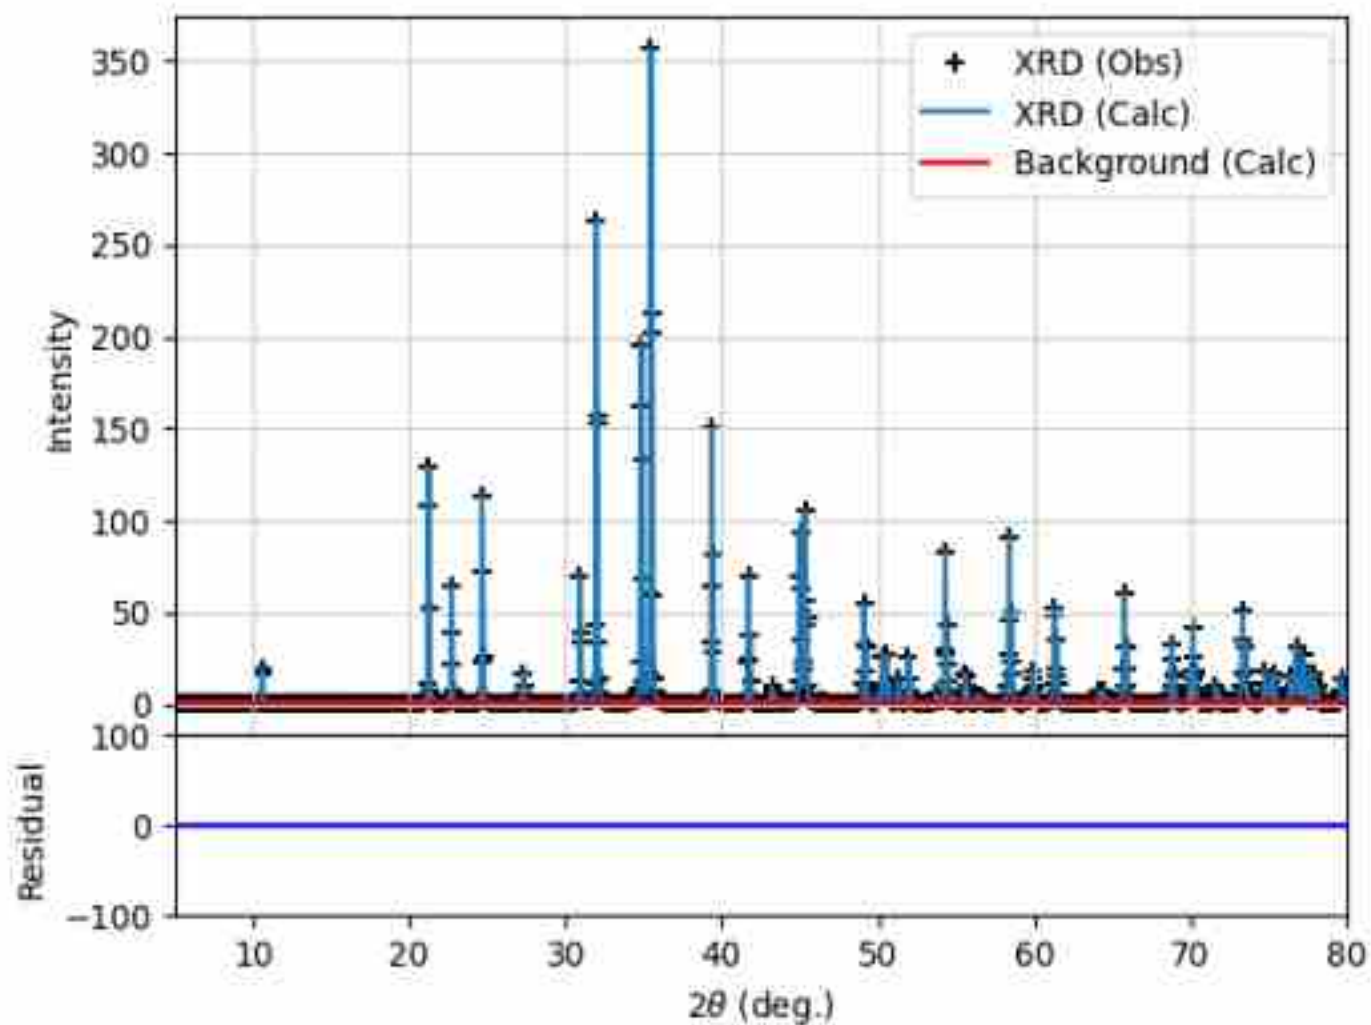

| RMSE before RR | Rwp     | RMSE after RR |
|----------------|---------|---------------|
| 0.024          | 0.00449 | 0.00055       |

# Ce<sub>2</sub>Si<sub>2</sub>O<sub>8</sub>

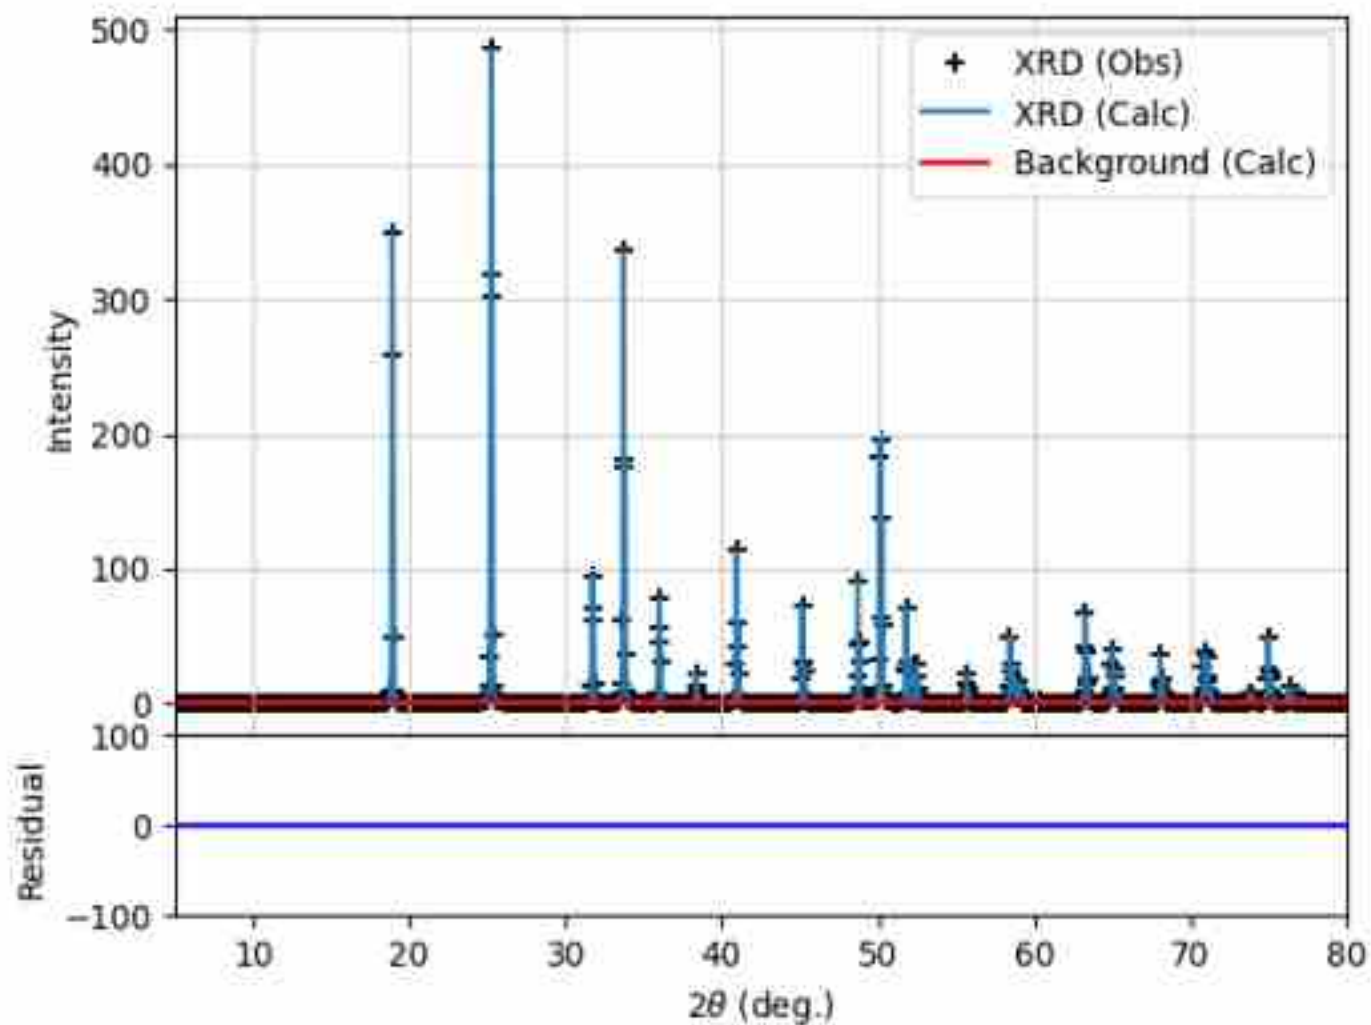

| RMSE before RR | Rwp     | RMSE after RR |
|----------------|---------|---------------|
| 0.024          | 0.00322 | 0.00137       |

# Ce<sub>4</sub>Al<sub>4</sub>Pd<sub>8</sub>

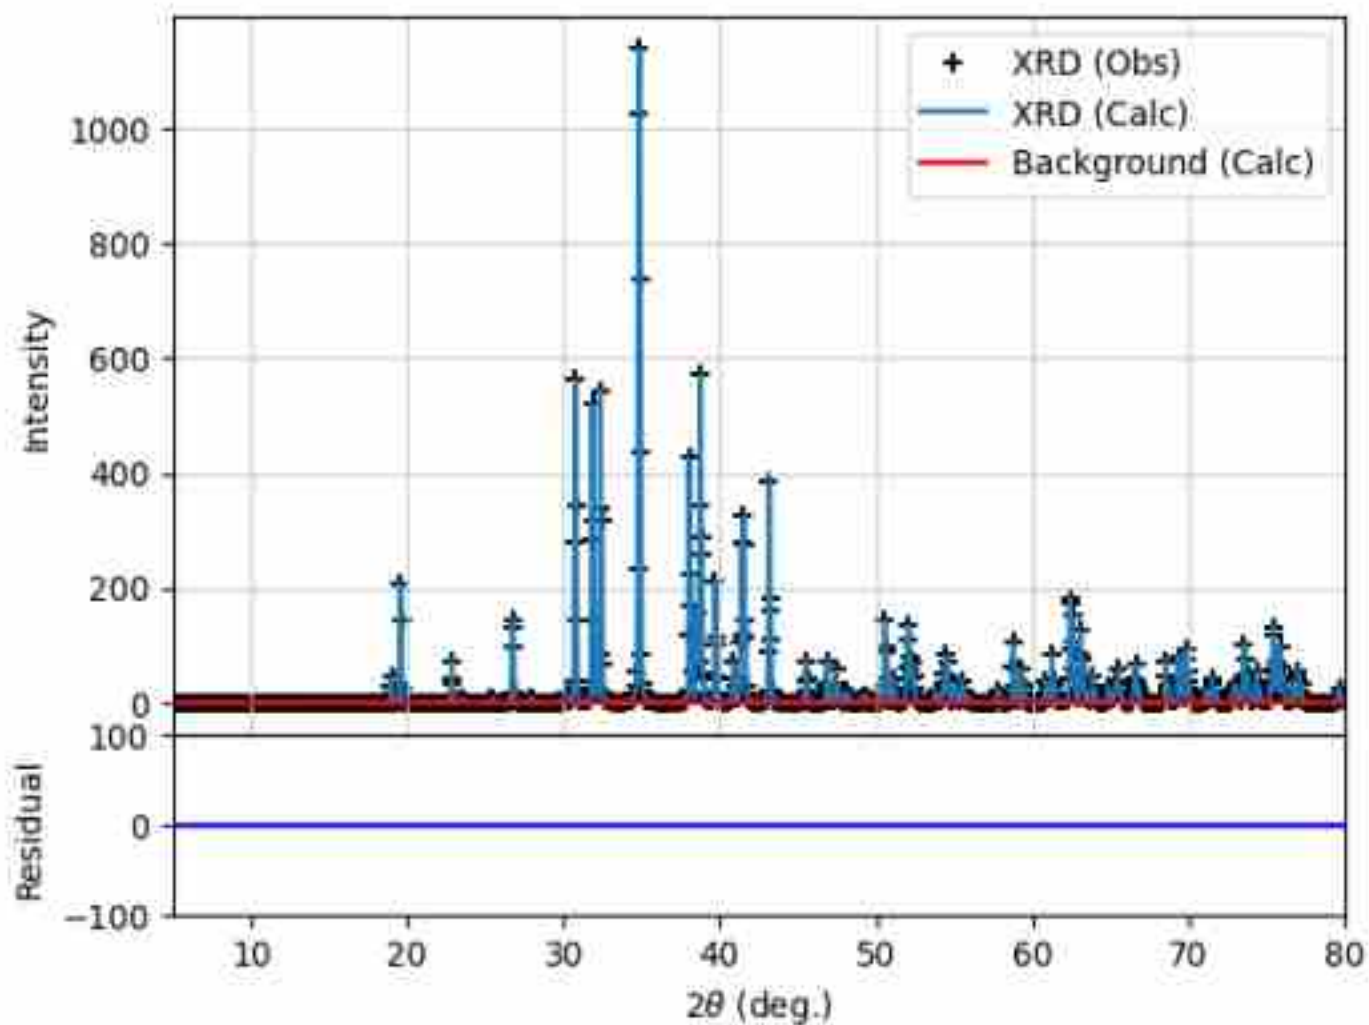

| RMSE before RR | Rwp     | RMSE after RR |
|----------------|---------|---------------|
| 0.024          | 0.00486 | 0.00078       |

# Ce<sub>4</sub>Al<sub>6</sub>Ge<sub>8</sub>

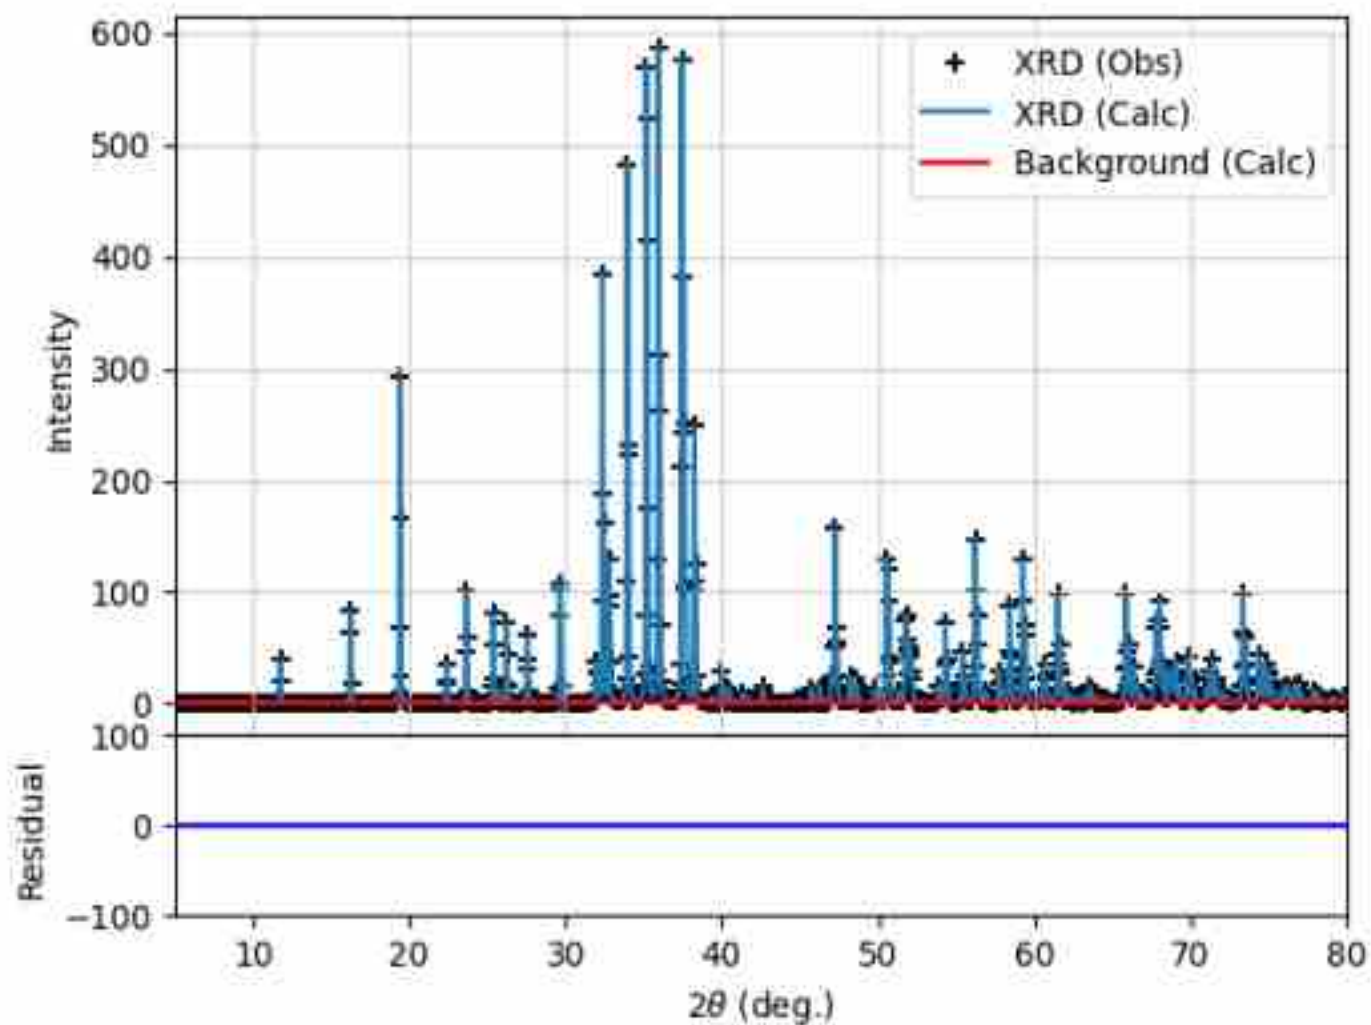

| RMSE before RR | Rwp    | RMSE after RR |
|----------------|--------|---------------|
| 0.024          | 0.0043 | 0.00052       |

# Ce6Ge10

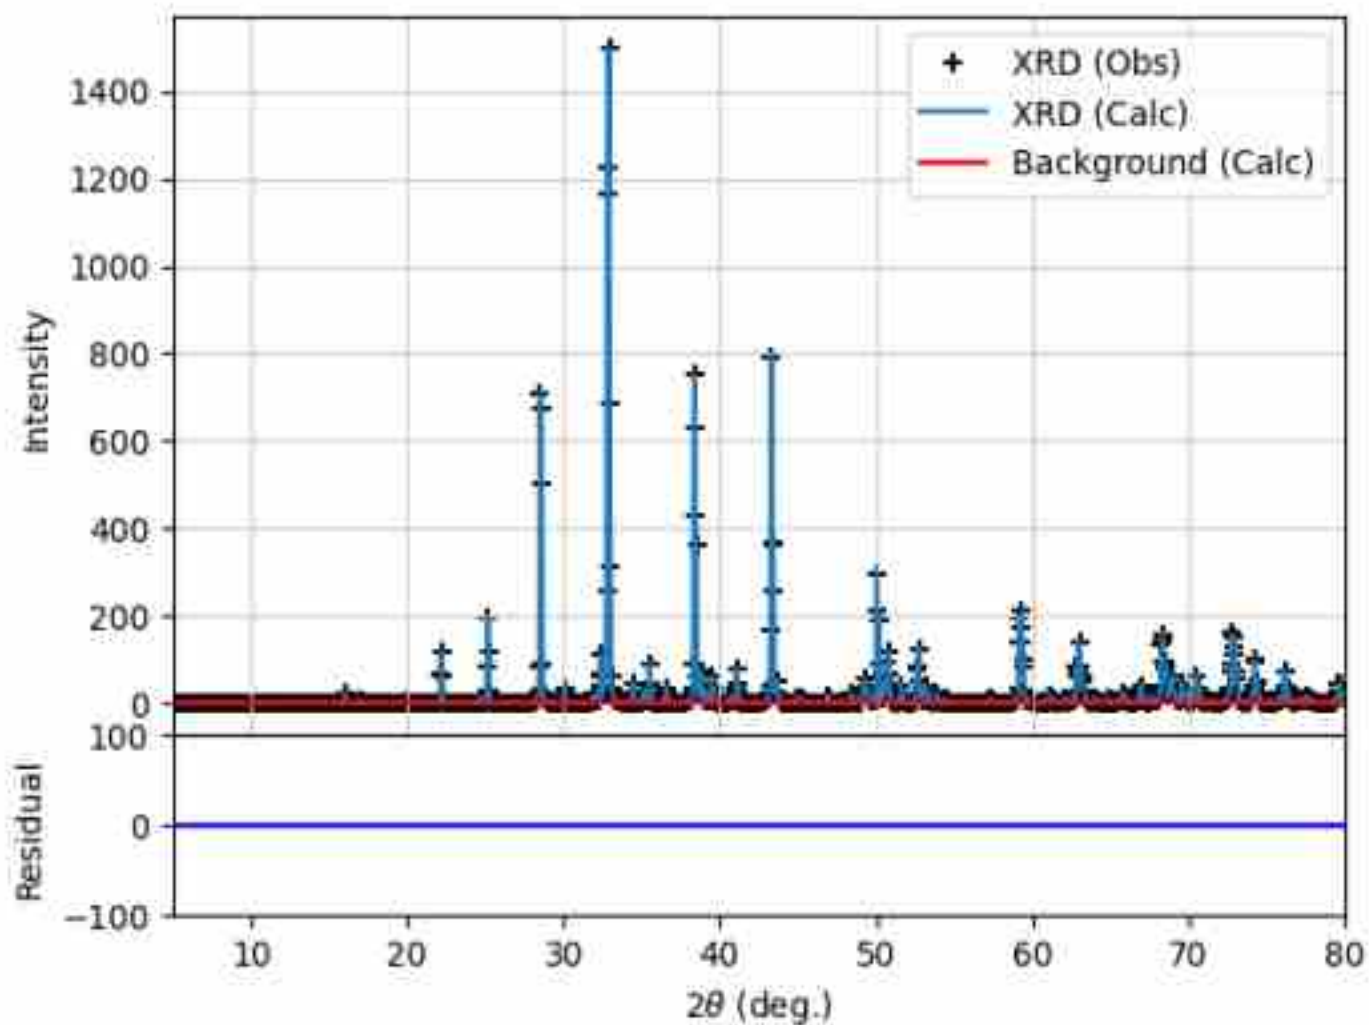

| RMSE before RR | Rwp     | RMSE after RR |
|----------------|---------|---------------|
| 0.024          | 0.00284 | 0.00029       |

# Co<sub>2</sub>Au<sub>2</sub>O<sub>4</sub>

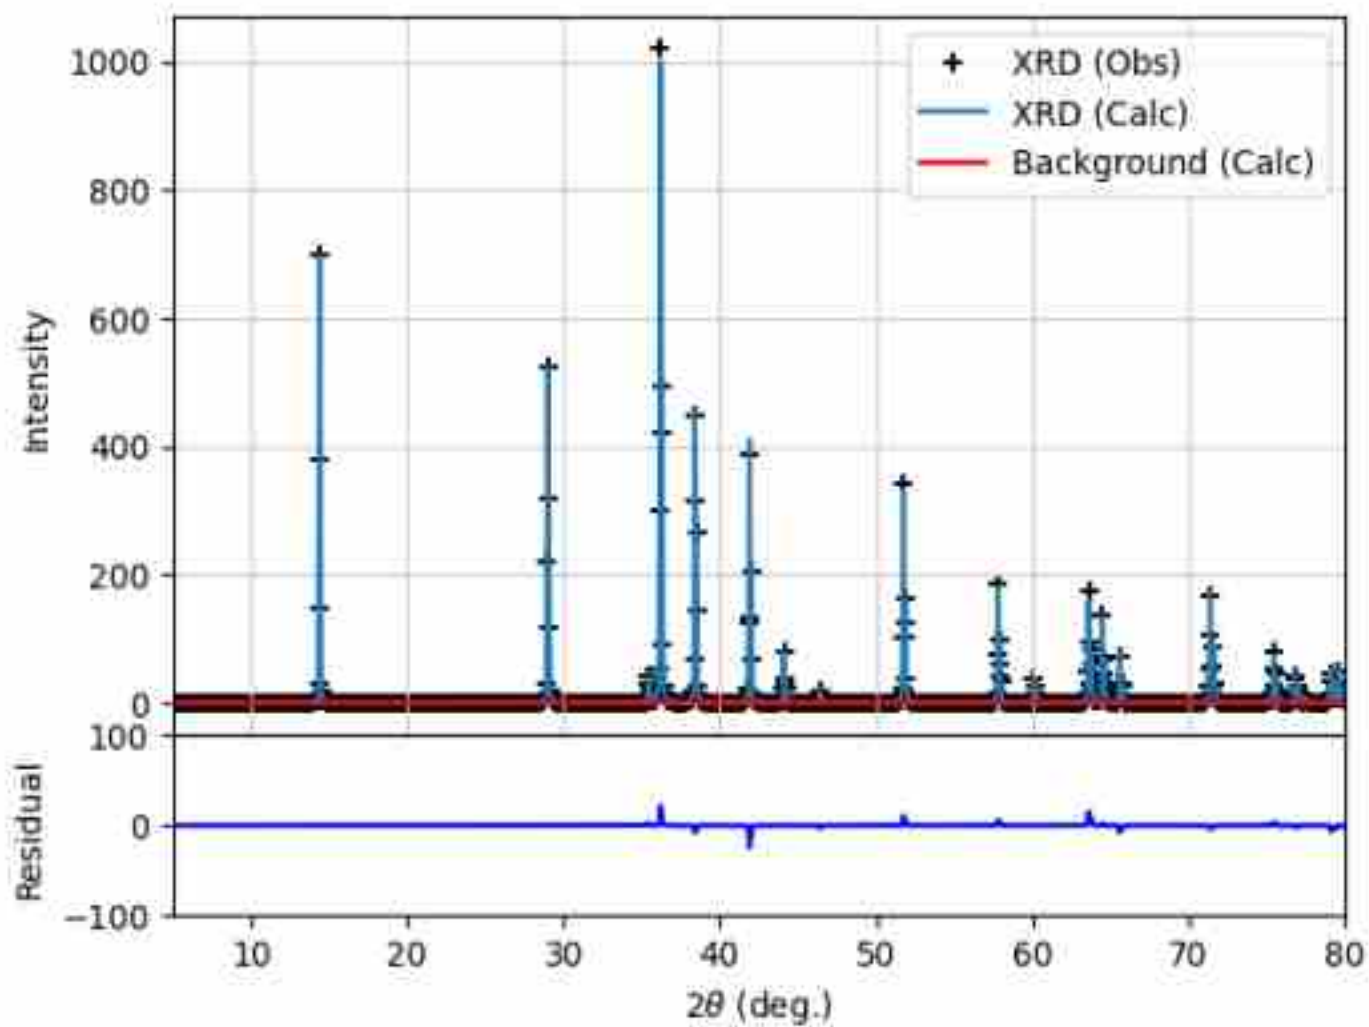

| RMSE before RR | Rwp     | RMSE after RR |
|----------------|---------|---------------|
| 0.024          | 4.00543 | 0.10165       |

# Cs1Li2Br3

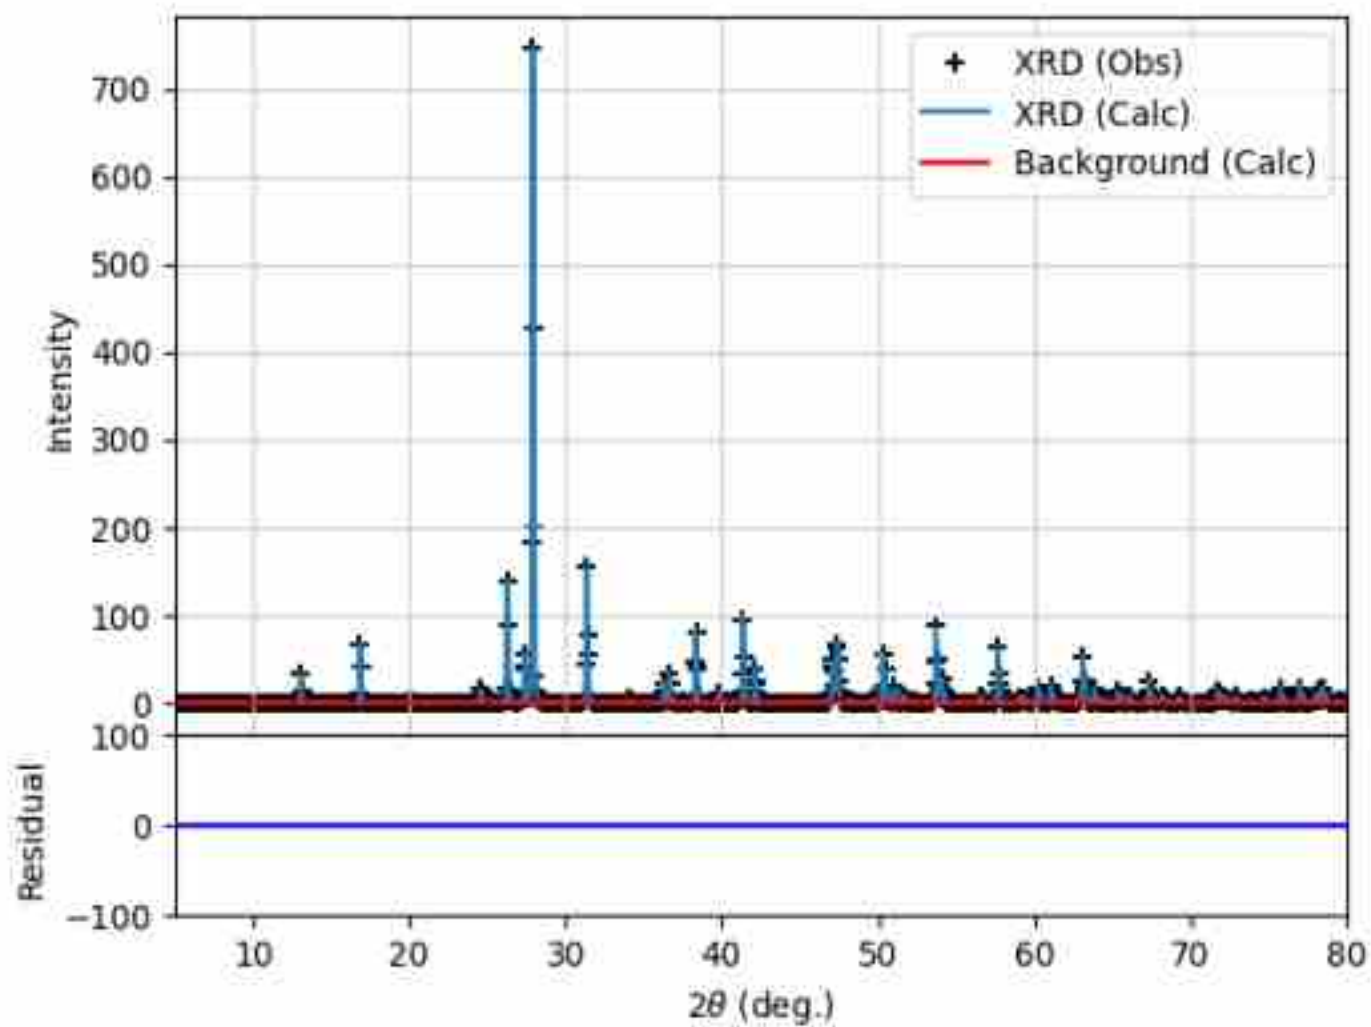

| RMSE before RR | Rwp     | RMSE after RR |
|----------------|---------|---------------|
| 0.024          | 0.00521 | 0.00326       |

# Cs<sub>2</sub>AlInH<sub>6</sub>

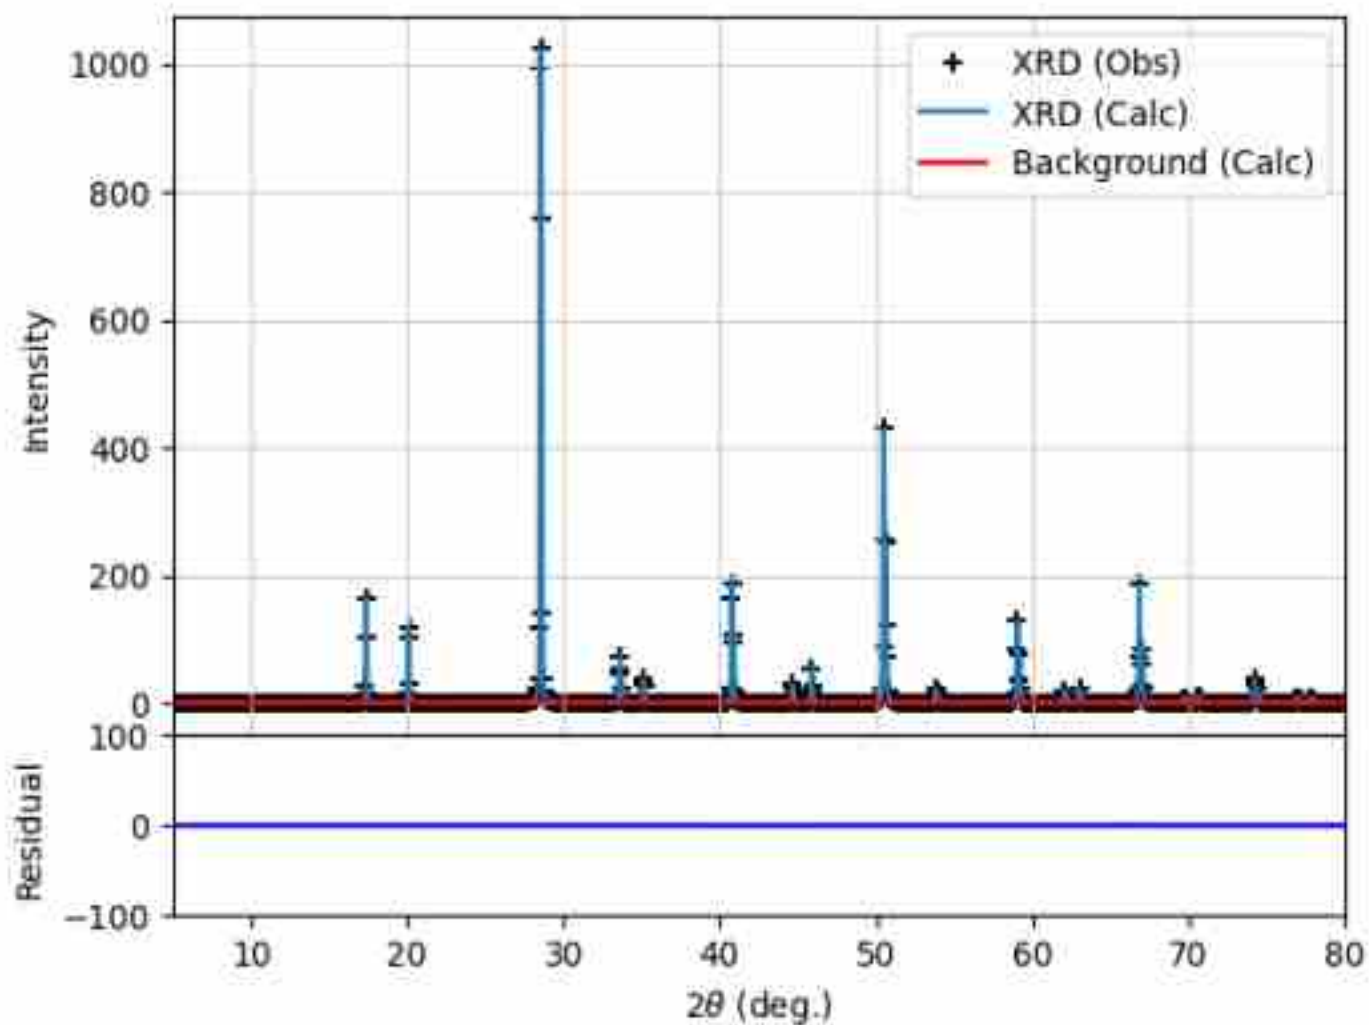

| RMSE before RR | Rwp     | RMSE after RR |
|----------------|---------|---------------|
| 0.024          | 0.20428 | 0.04163       |



# Cs<sub>2</sub>Ca<sub>1</sub>Sn<sub>1</sub>Cl<sub>6</sub>

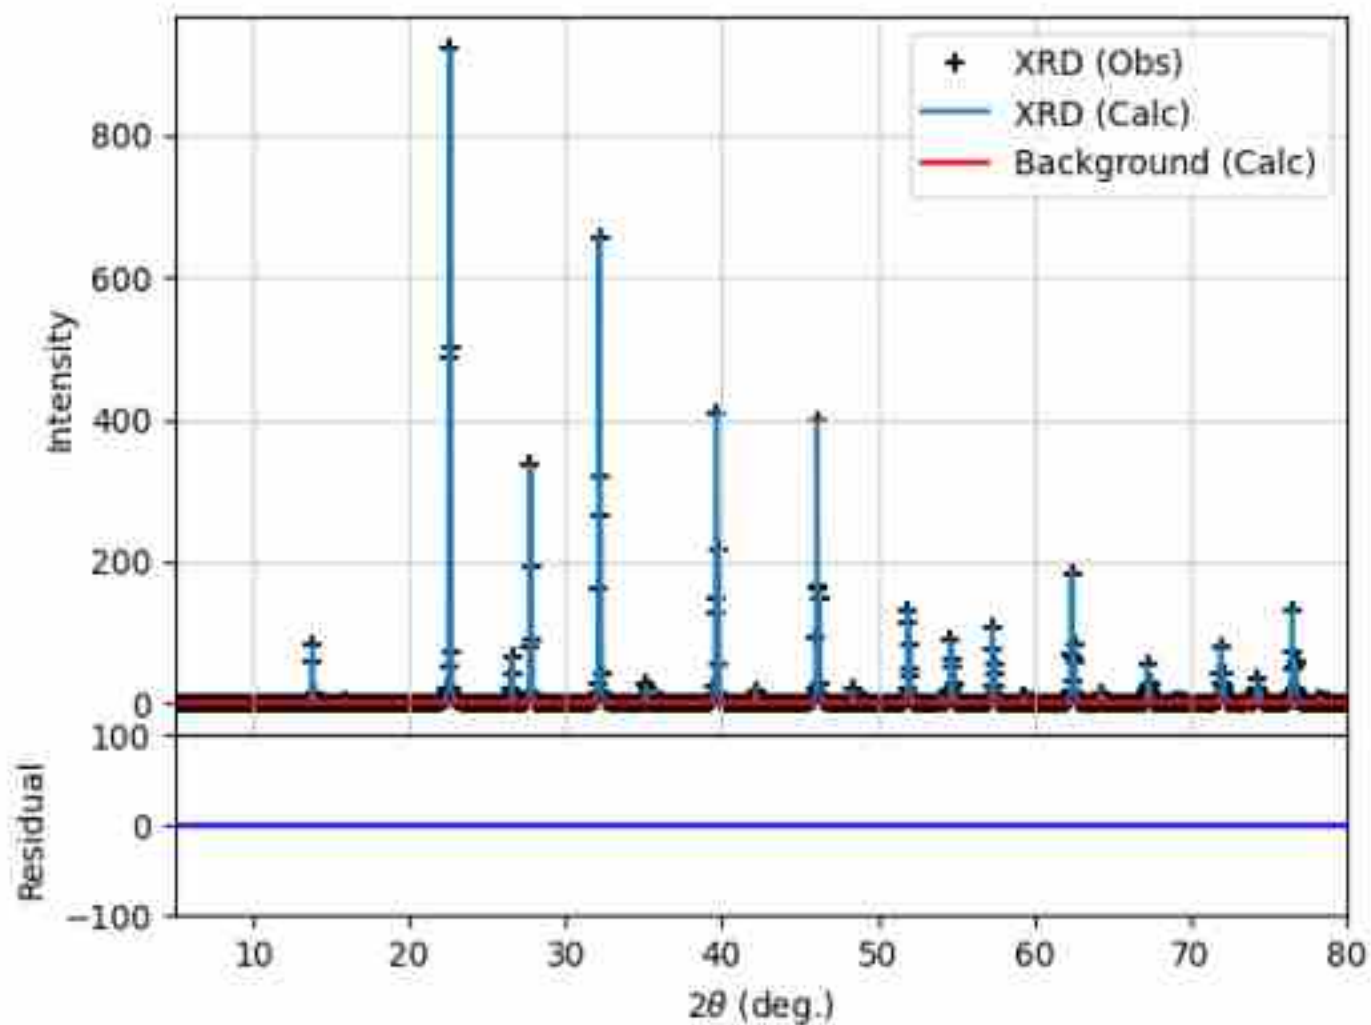

| RMSE before RR | Rwp     | RMSE after RR |
|----------------|---------|---------------|
| 0.024          | 0.01884 | 0.00174       |

# Cs<sub>2</sub>La<sub>2</sub>Cd<sub>2</sub>Te<sub>6</sub>

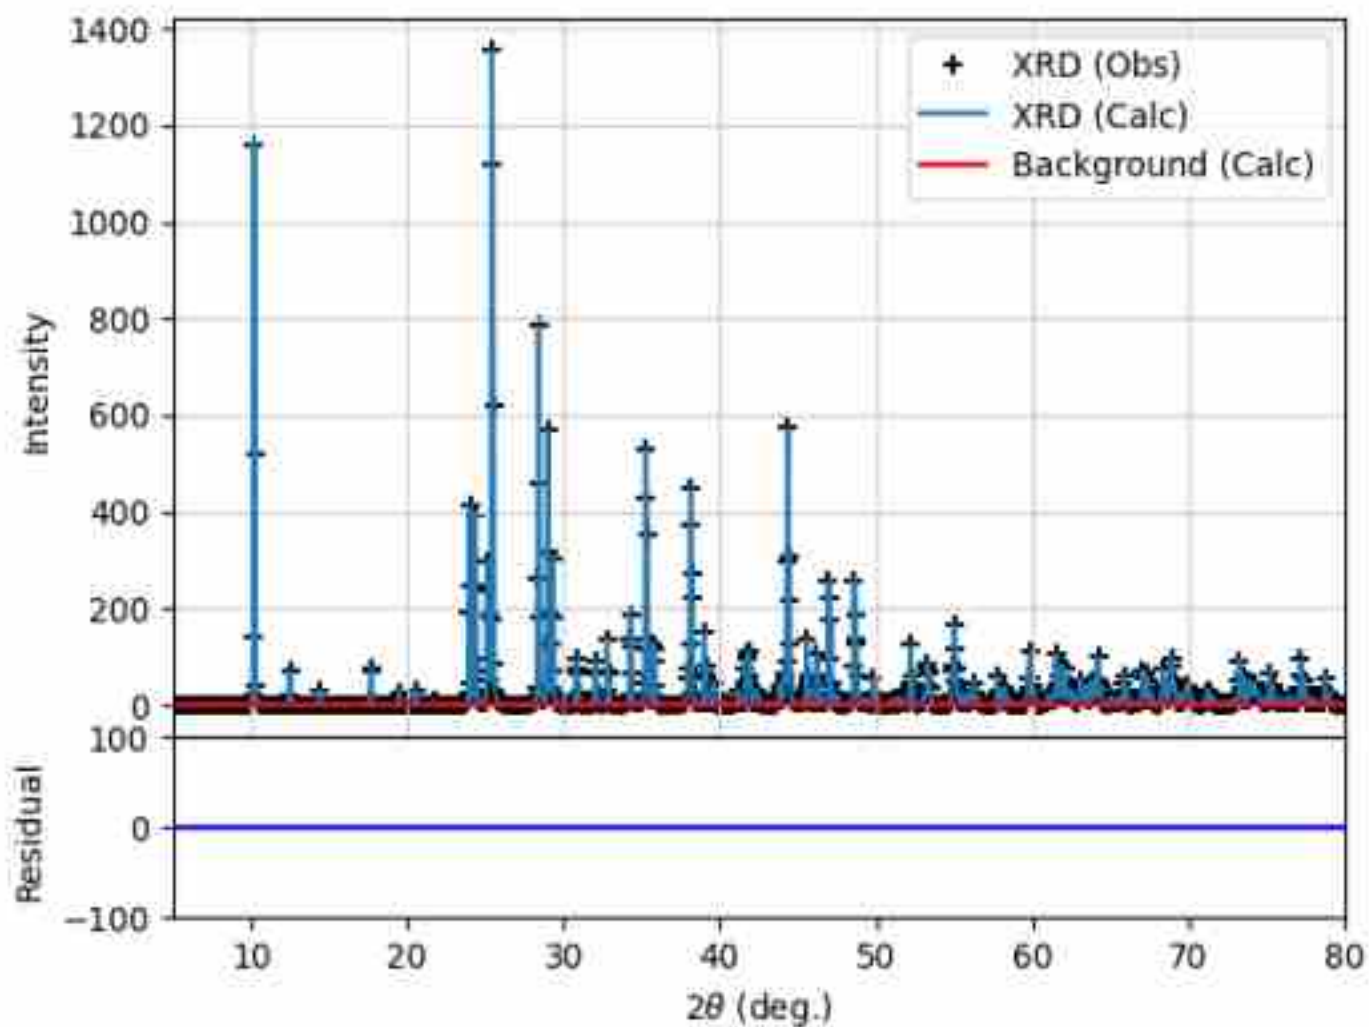

| RMSE before RR | Rwp     | RMSE after RR |
|----------------|---------|---------------|
| 0.024          | 0.00365 | 0.00029       |

# Cs<sub>2</sub>La<sub>4</sub>Cu<sub>2</sub>Se<sub>8</sub>

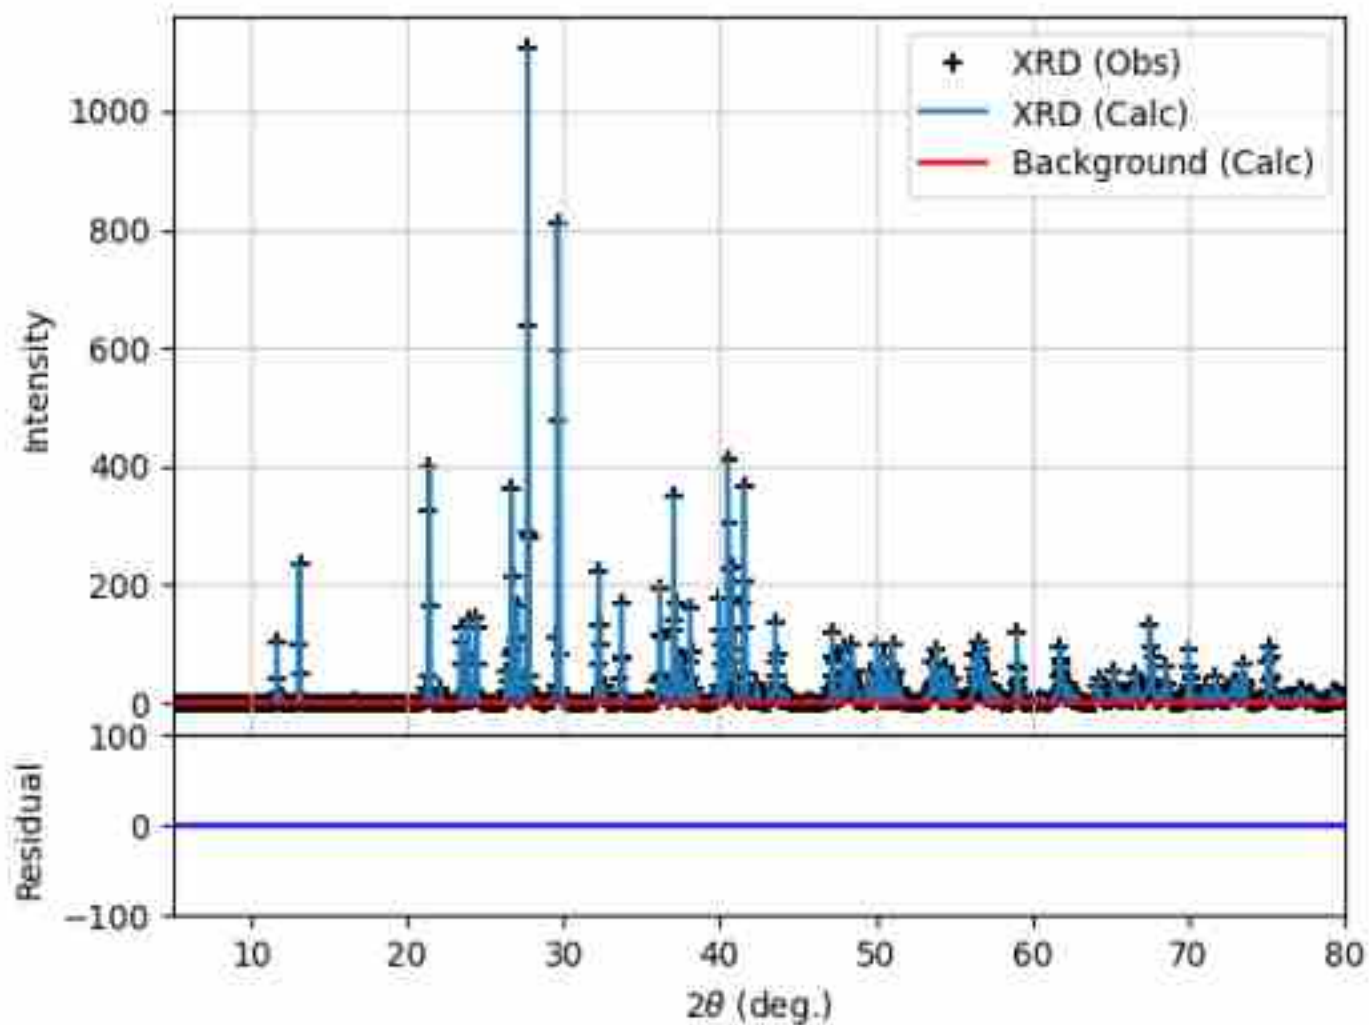

| RMSE before RR | Rwp     | RMSE after RR |
|----------------|---------|---------------|
| 0.024          | 0.00377 | 0.00043       |

# Cs<sub>2</sub>Pr<sub>2</sub>Cd<sub>2</sub>Se<sub>6</sub>

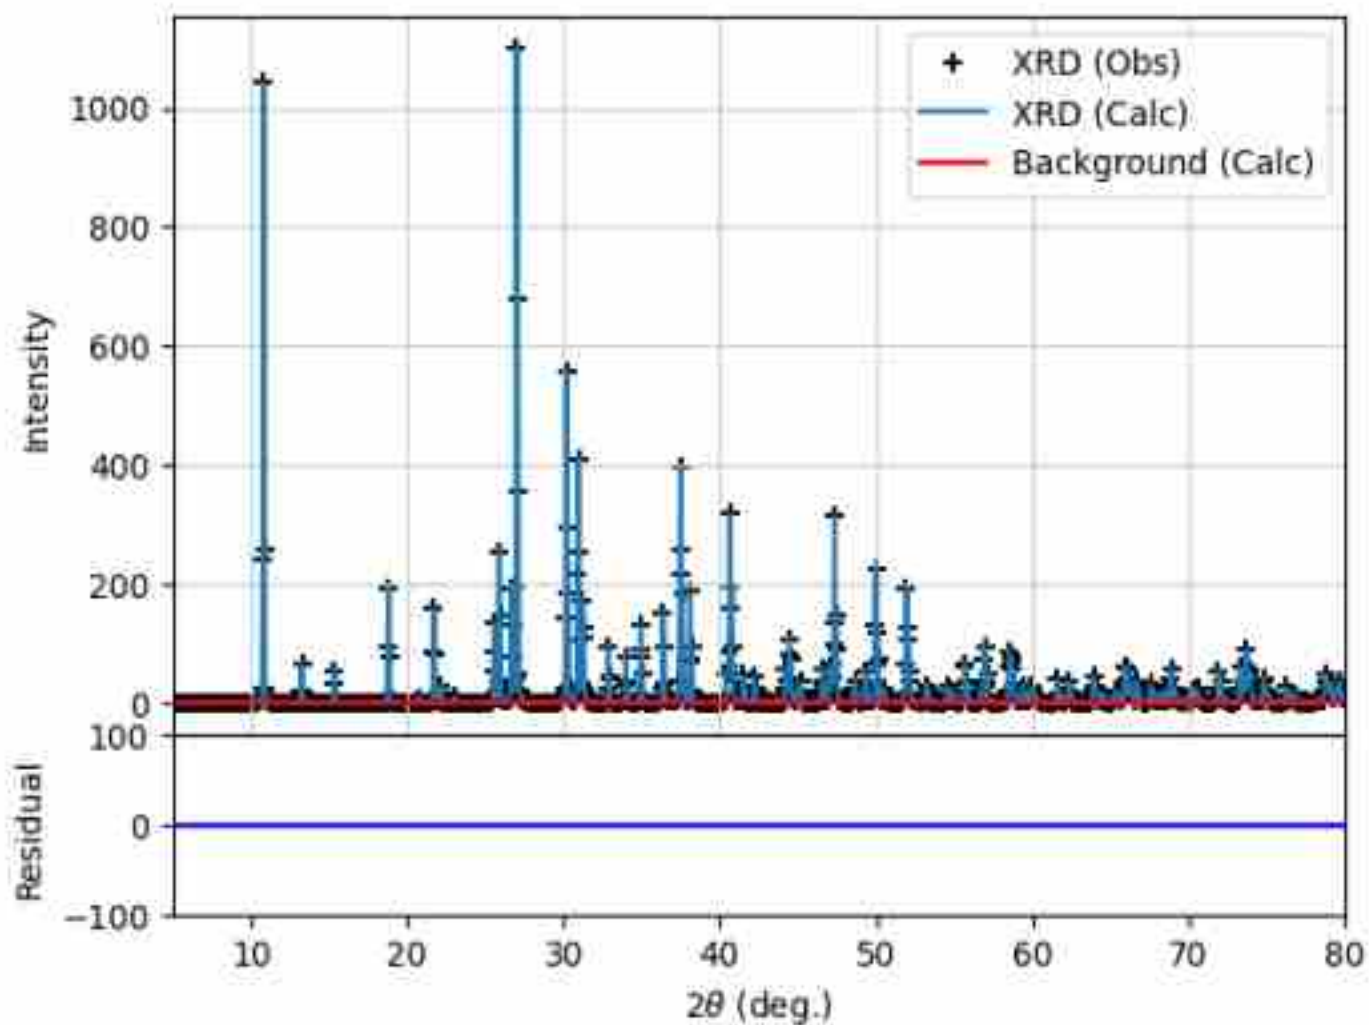

| RMSE before RR | Rwp     | RMSE after RR |
|----------------|---------|---------------|
| 0.024          | 0.00365 | 0.00029       |

# Cs<sub>2</sub>Sb<sub>2</sub>W<sub>2</sub>O<sub>12</sub>

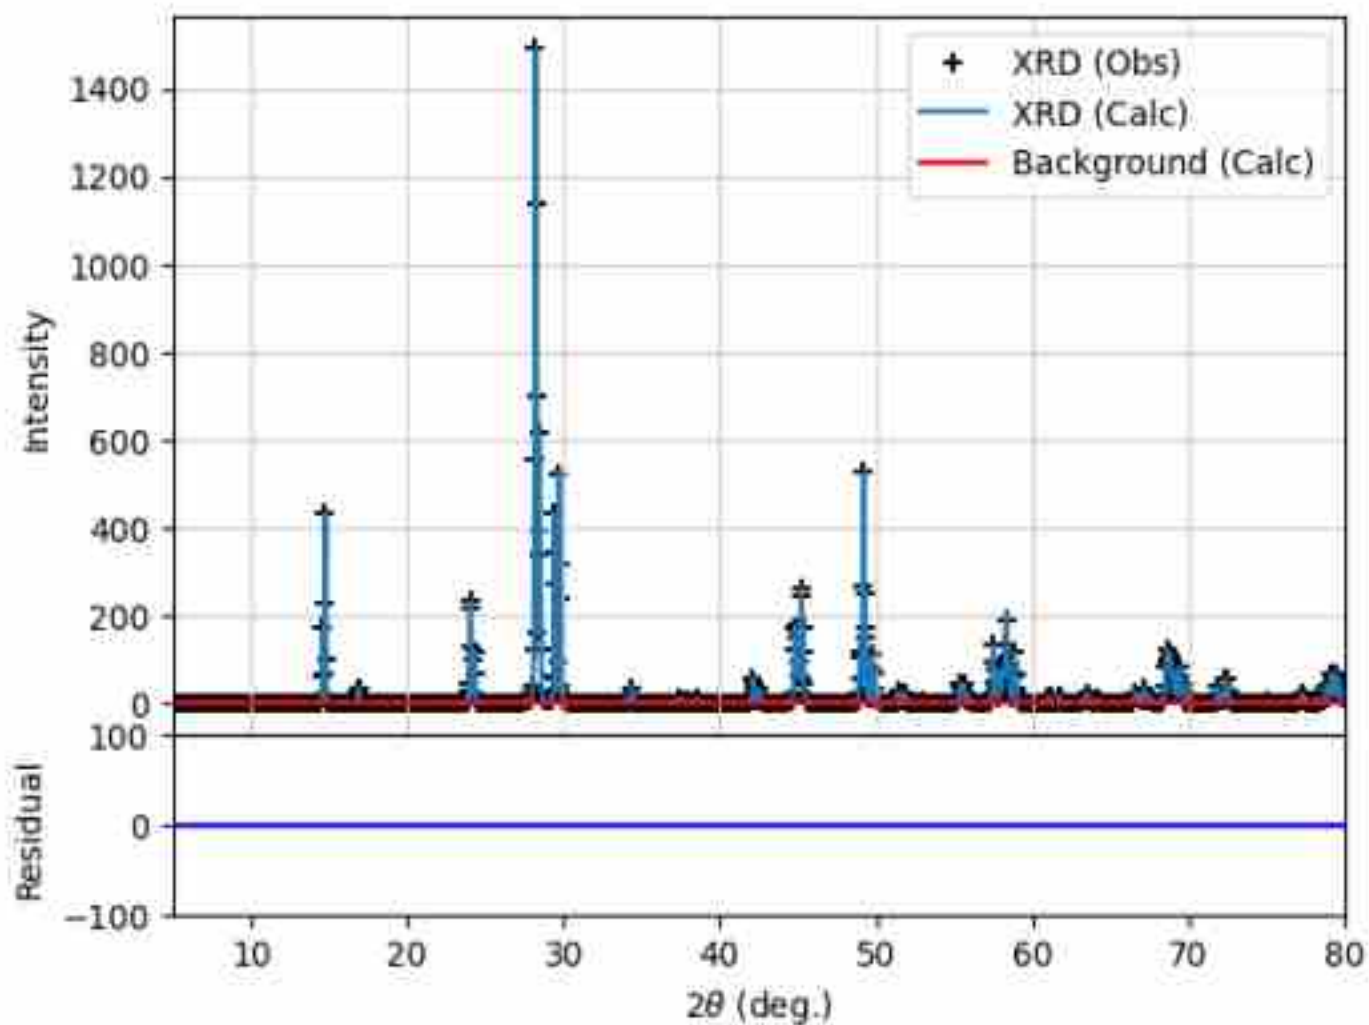

| RMSE before RR | Rwp     | RMSE after RR |
|----------------|---------|---------------|
| 0.024          | 0.00295 | 0.00161       |

# Cs<sub>2</sub>V<sub>2</sub>Ni<sub>2</sub>F<sub>12</sub>

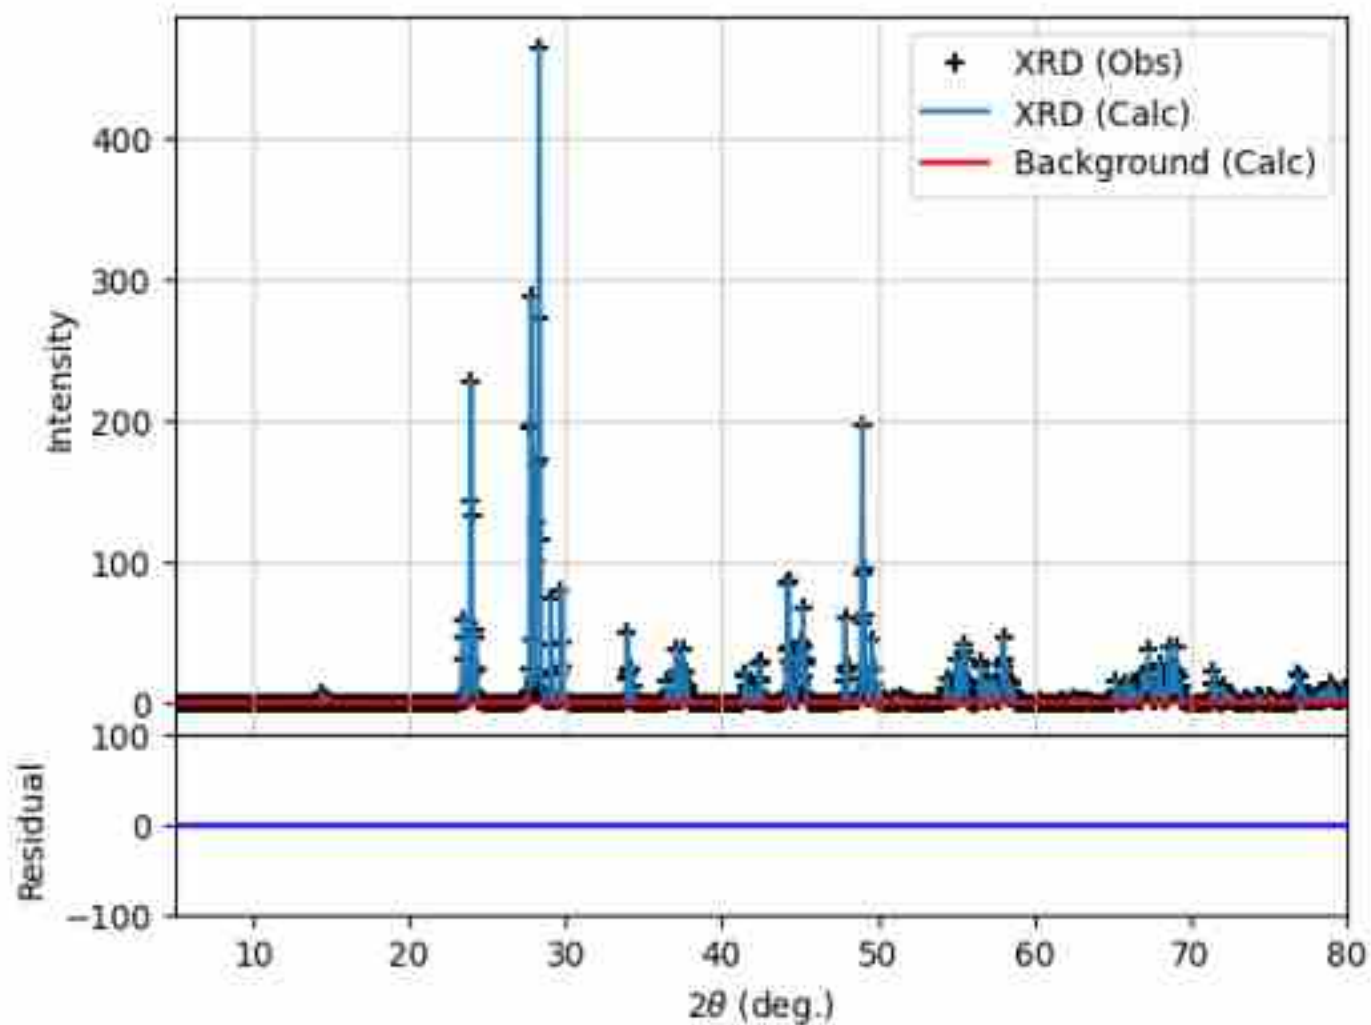

| RMSE before RR | Rwp     | RMSE after RR |
|----------------|---------|---------------|
| 0.024          | 0.00314 | 0.0007        |

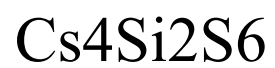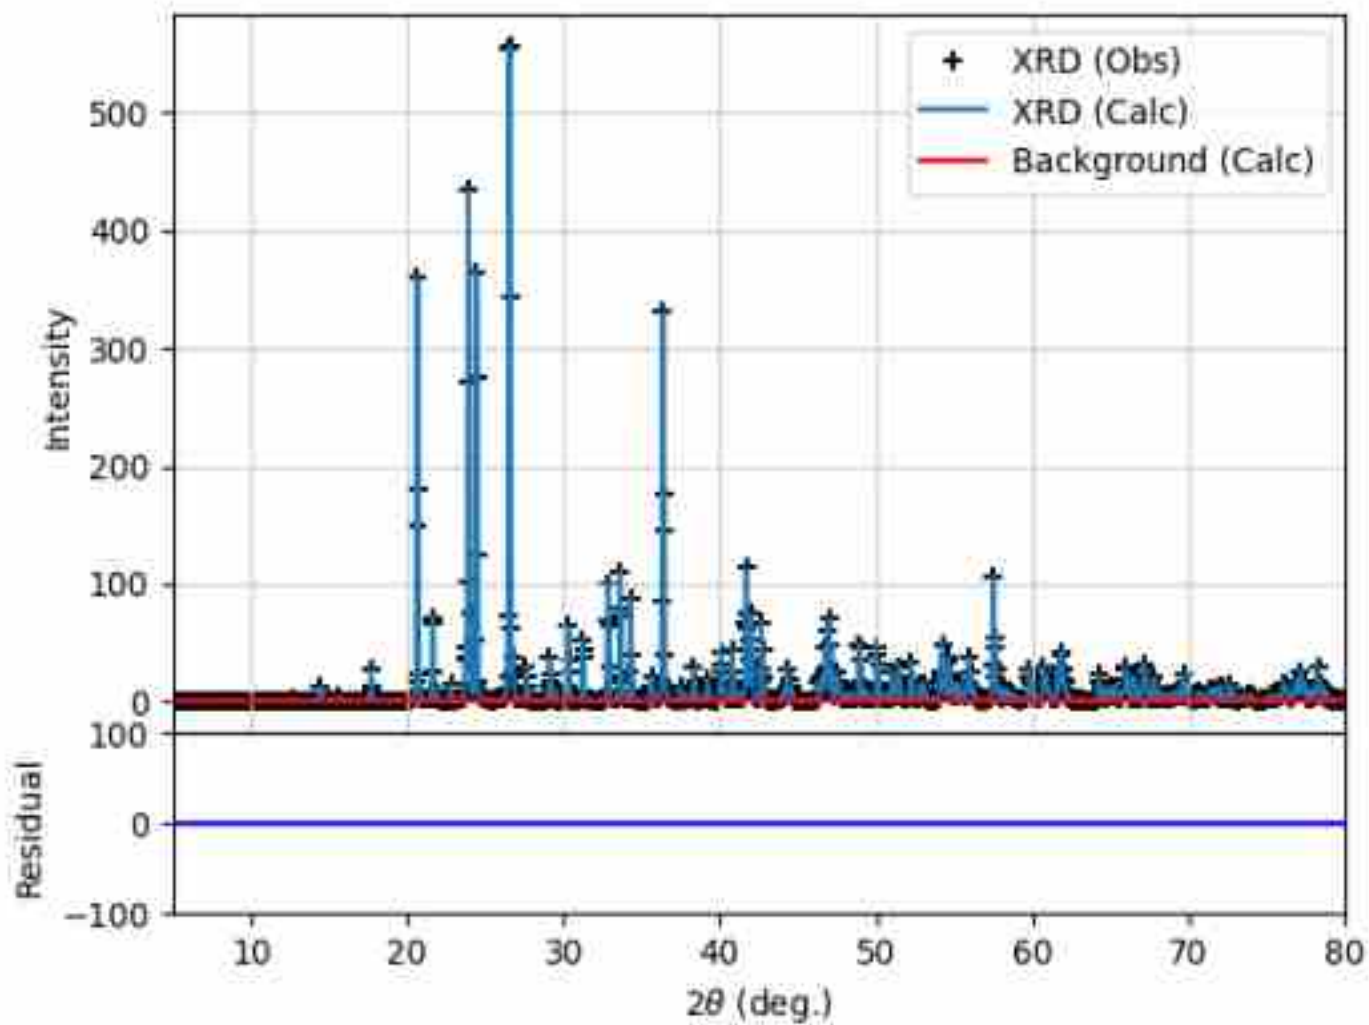

| RMSE before RR | Rwp     | RMSE after RR |
|----------------|---------|---------------|
| 0.024          | 0.00297 | 0.00024       |

# Cs<sub>4</sub>Tl<sub>1</sub>Sb<sub>1</sub>Cl<sub>12</sub>

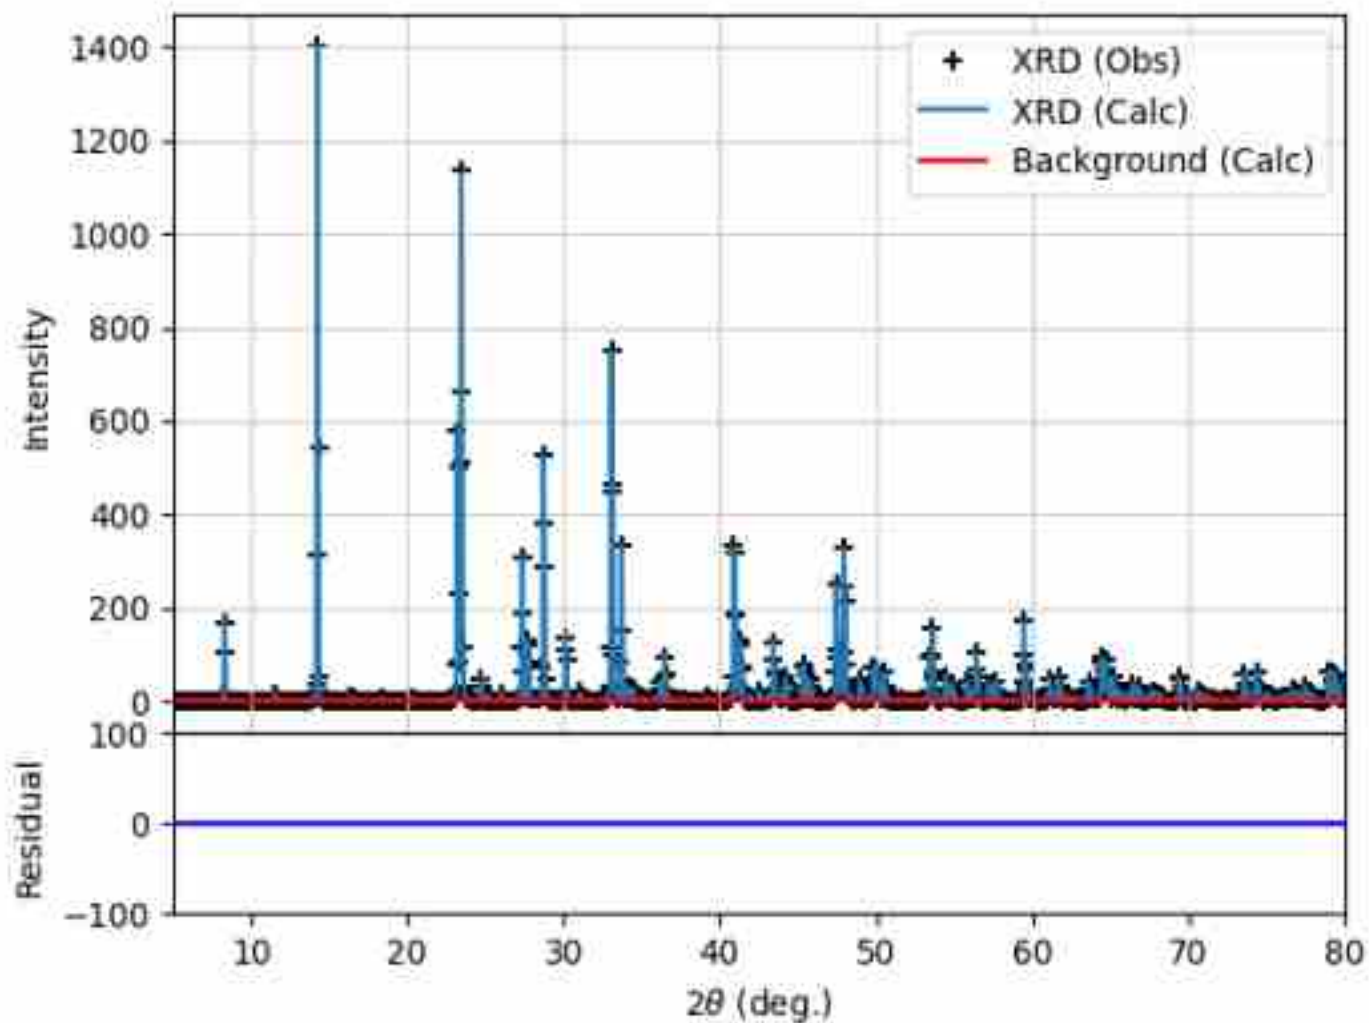

| RMSE before RR | Rwp     | RMSE after RR |
|----------------|---------|---------------|
| 0.024          | 0.00442 | 0.00069       |



# Cs5Tl11Cd2

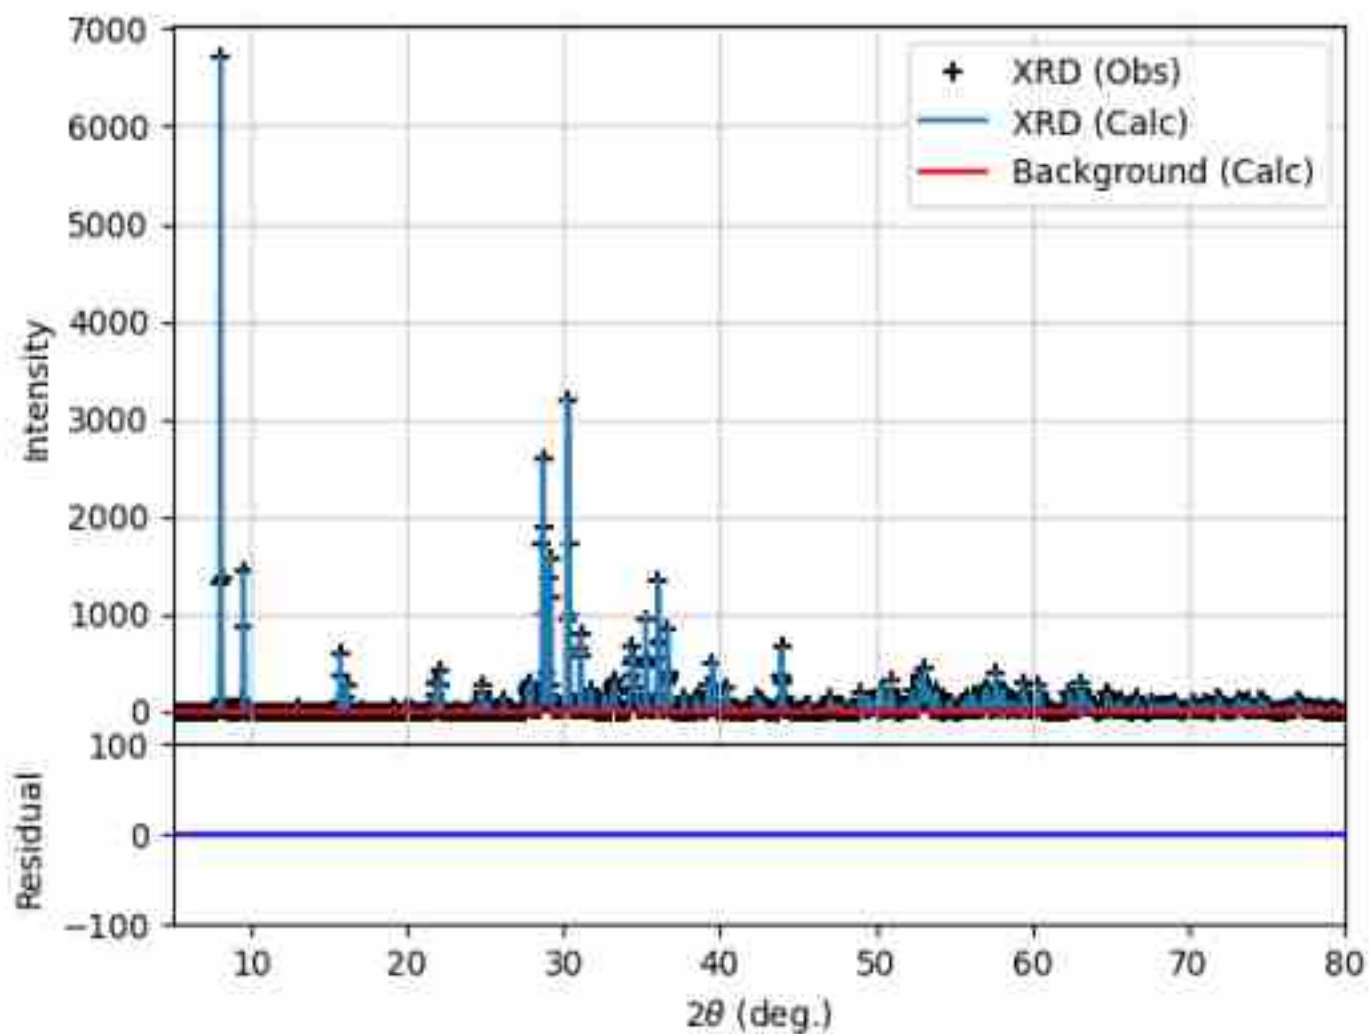

| RMSE before RR | Rwp     | RMSE after RR |
|----------------|---------|---------------|
| 0.024          | 0.00351 | 0.00031       |

# Cs6Sc2O6

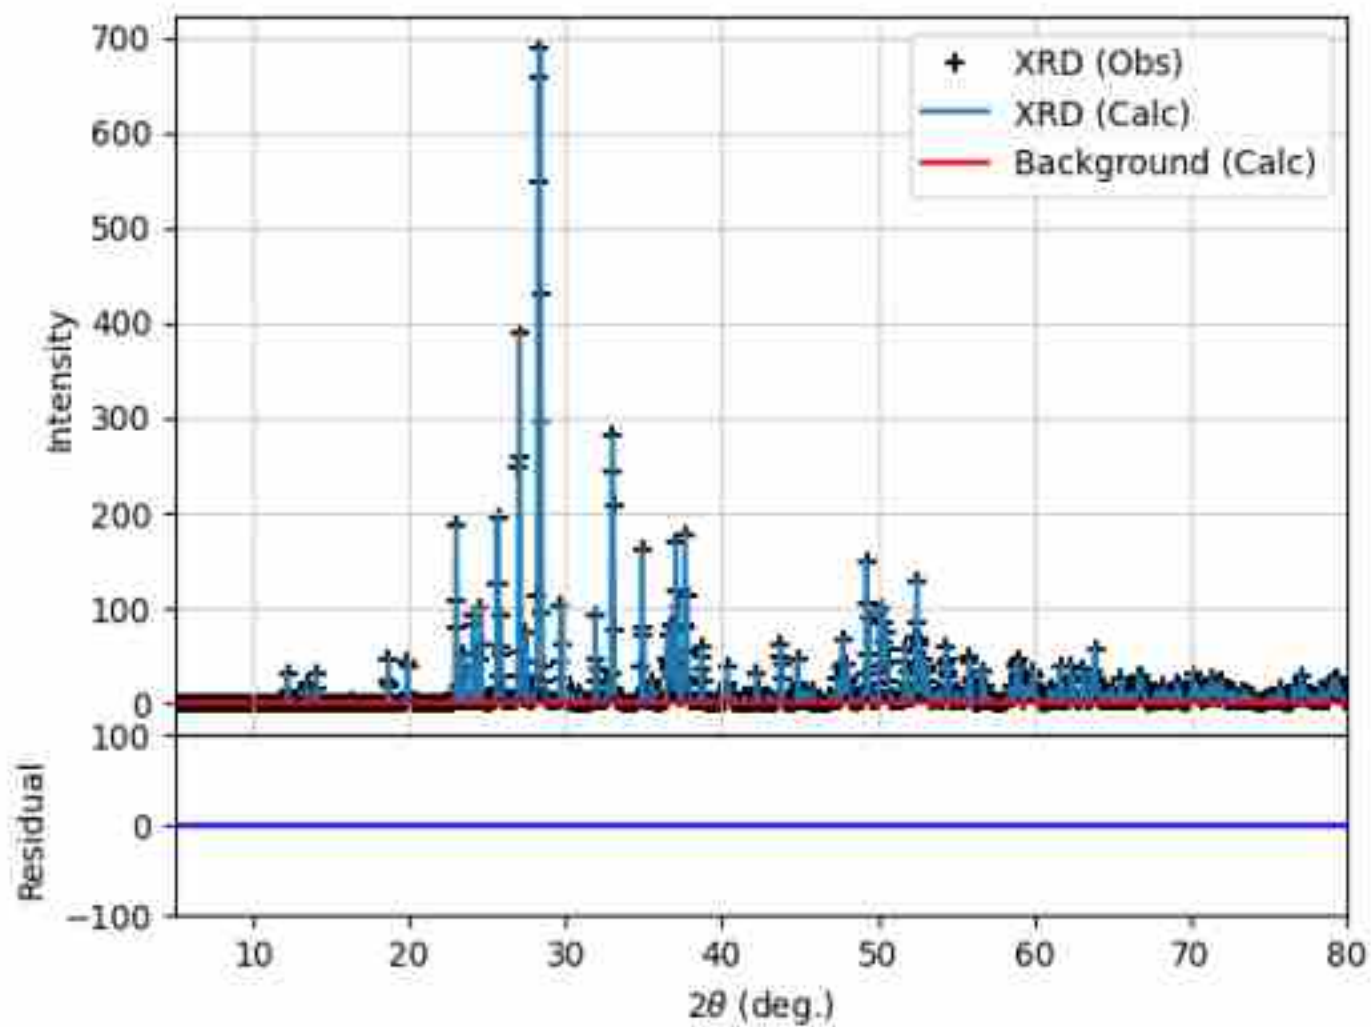

| RMSE before RR | Rwp     | RMSE after RR |
|----------------|---------|---------------|
| 0.024          | 0.00358 | 0.00058       |

# Cs<sub>6</sub>Y<sub>2</sub>O<sub>6</sub>

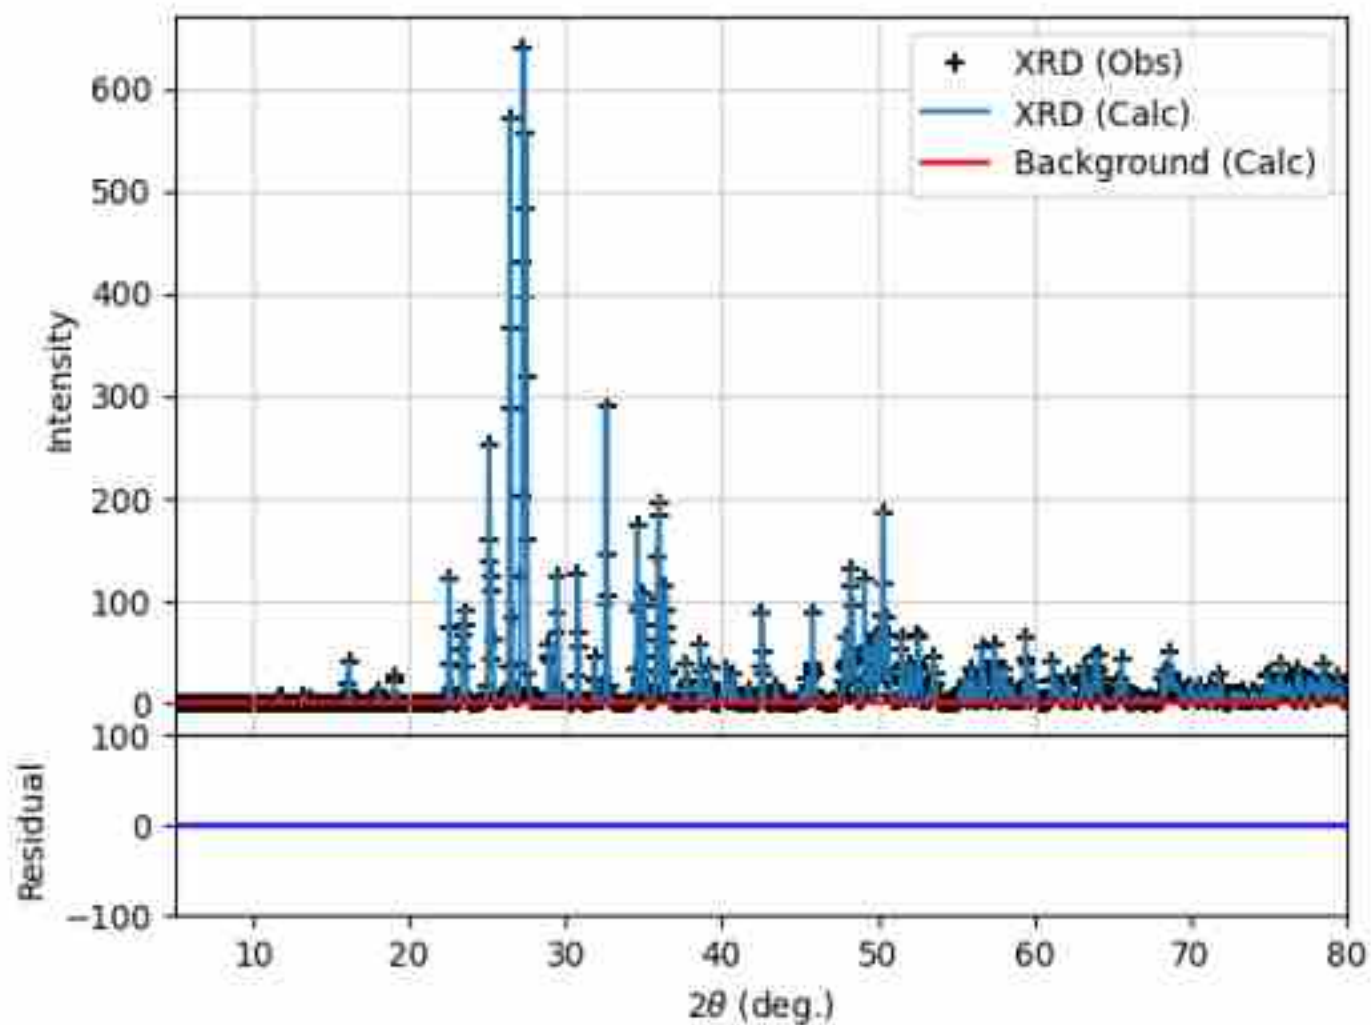

| RMSE before RR | Rwp     | RMSE after RR |
|----------------|---------|---------------|
| 0.024          | 0.00335 | 0.00067       |

# Cu<sub>1</sub>Au<sub>1</sub>O<sub>2</sub>

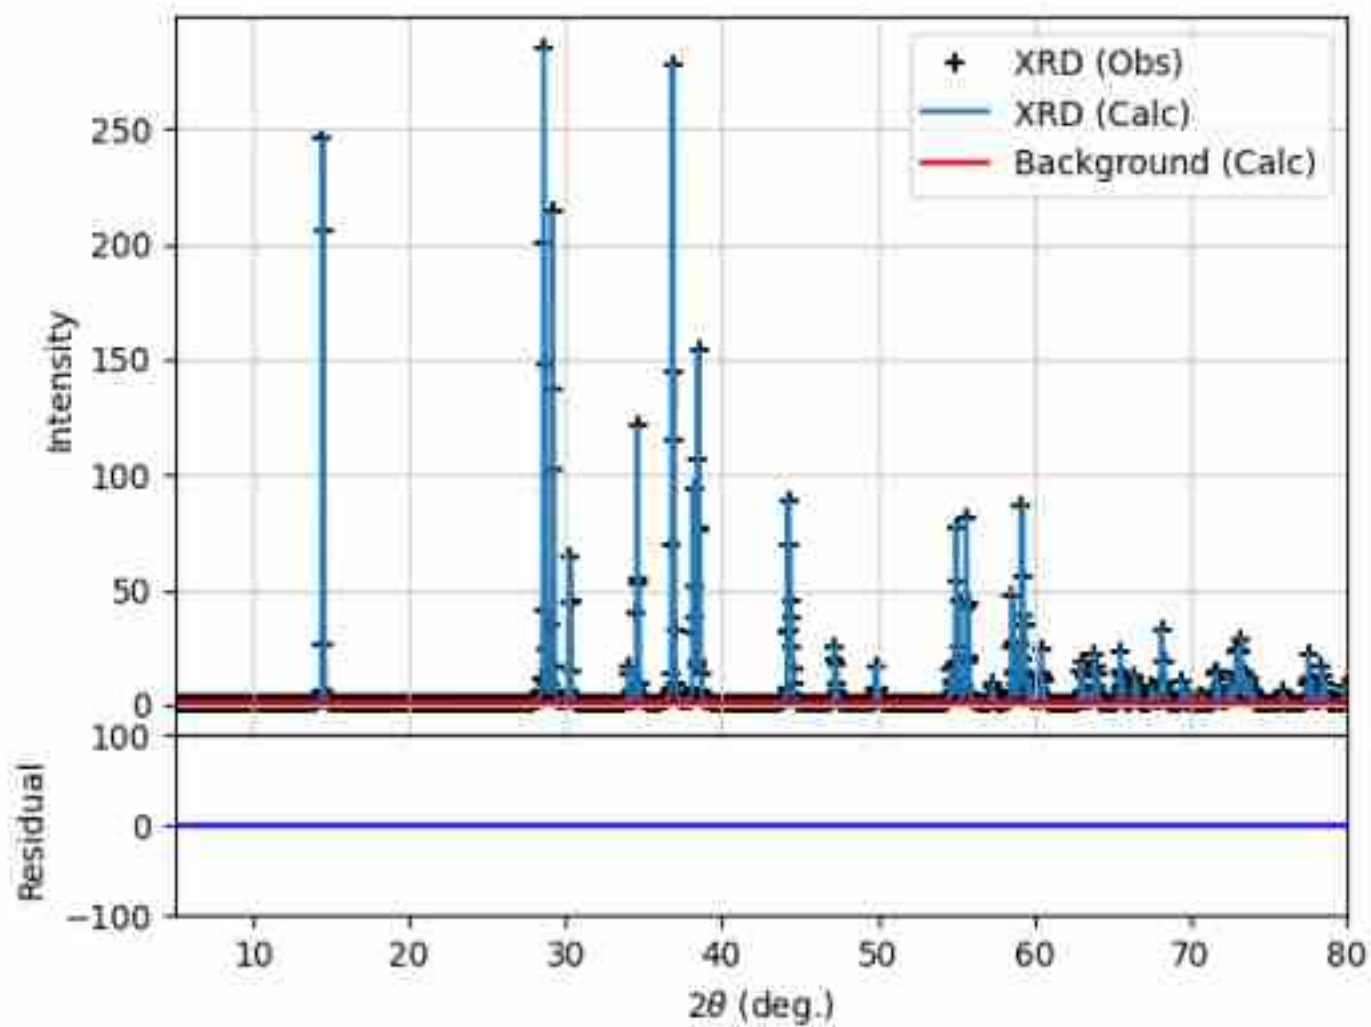

| RMSE before RR | Rwp     | RMSE after RR |
|----------------|---------|---------------|
| 0.024          | 0.00271 | 0.00095       |

# Cu<sub>2</sub>S<sub>4</sub>

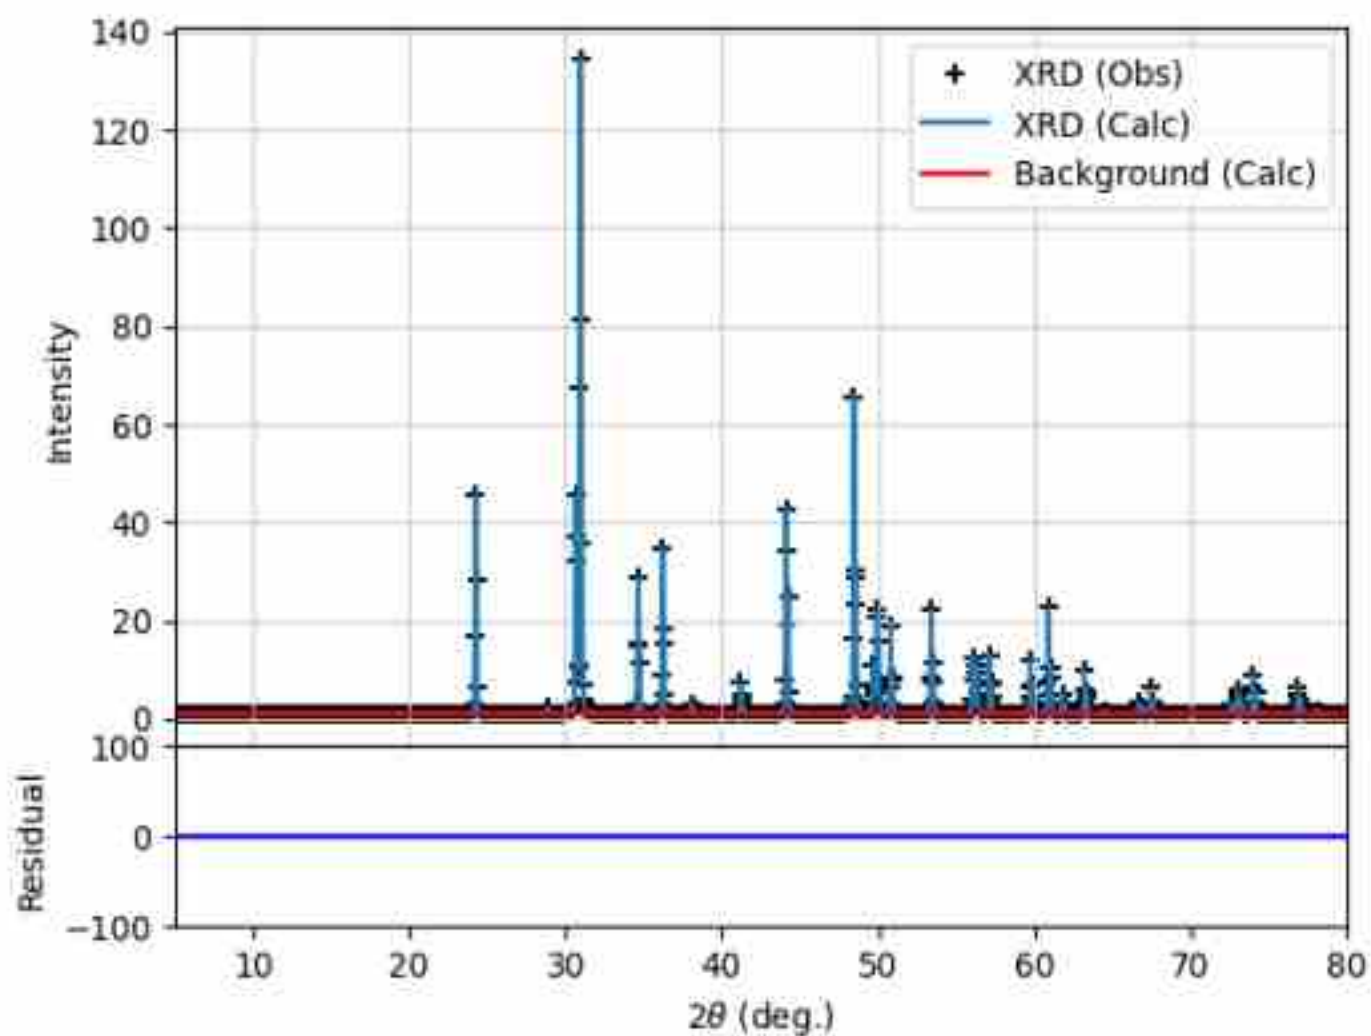

| RMSE before RR | Rwp     | RMSE after RR |
|----------------|---------|---------------|
| 0.024          | 0.00313 | 0.00049       |

# Dy12Ni6Pb1

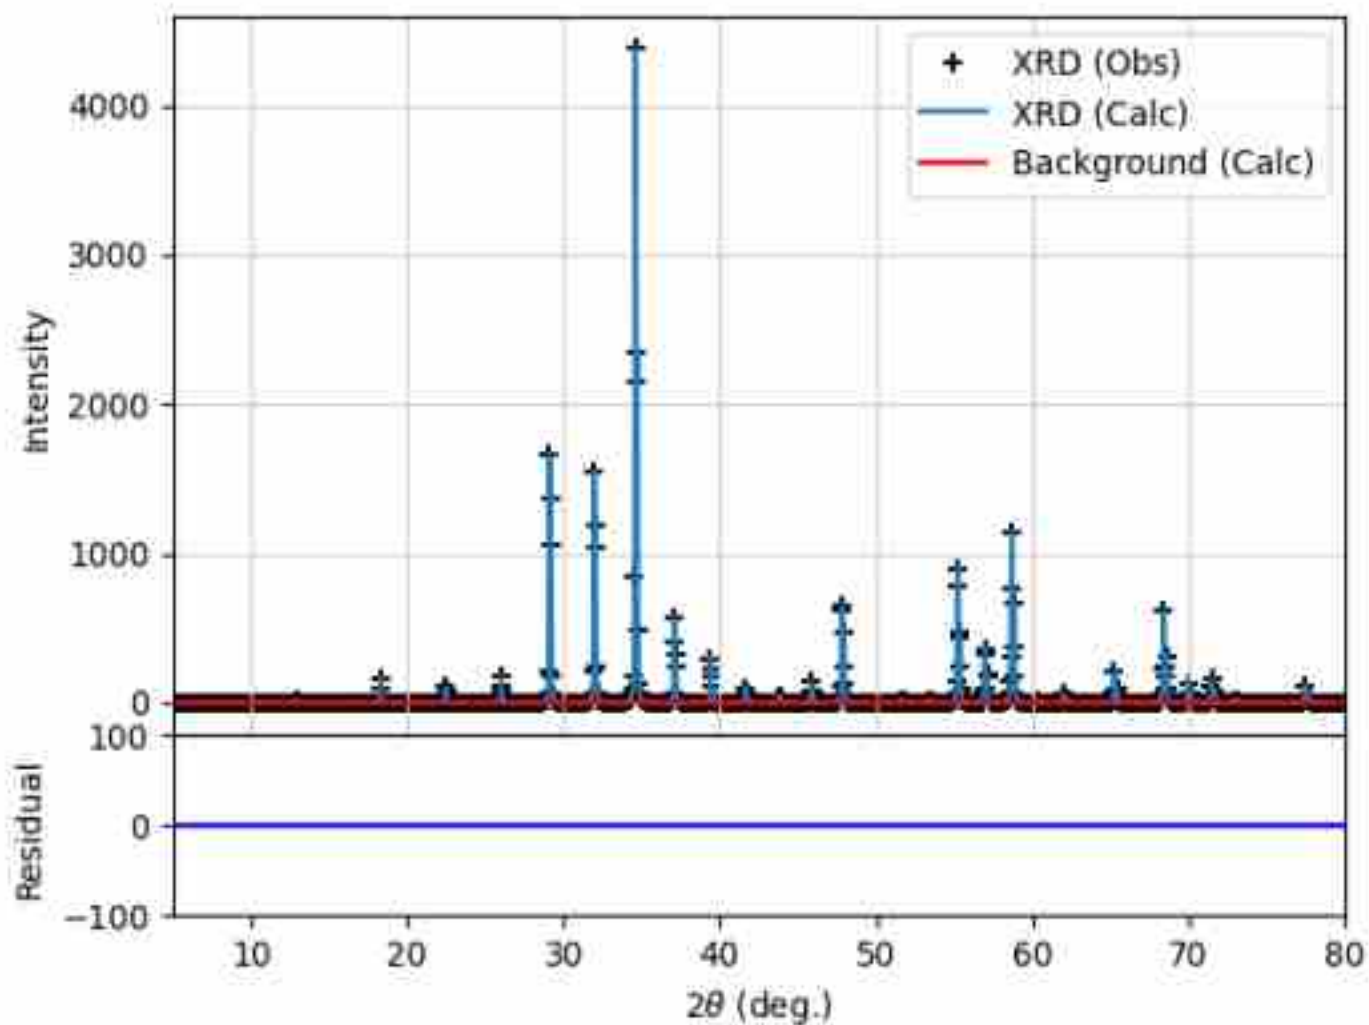

| RMSE before RR | Rwp     | RMSE after RR |
|----------------|---------|---------------|
| 0.024          | 0.00318 | 0.00063       |

# Er<sub>6</sub>Fe<sub>4</sub>Si<sub>6</sub>

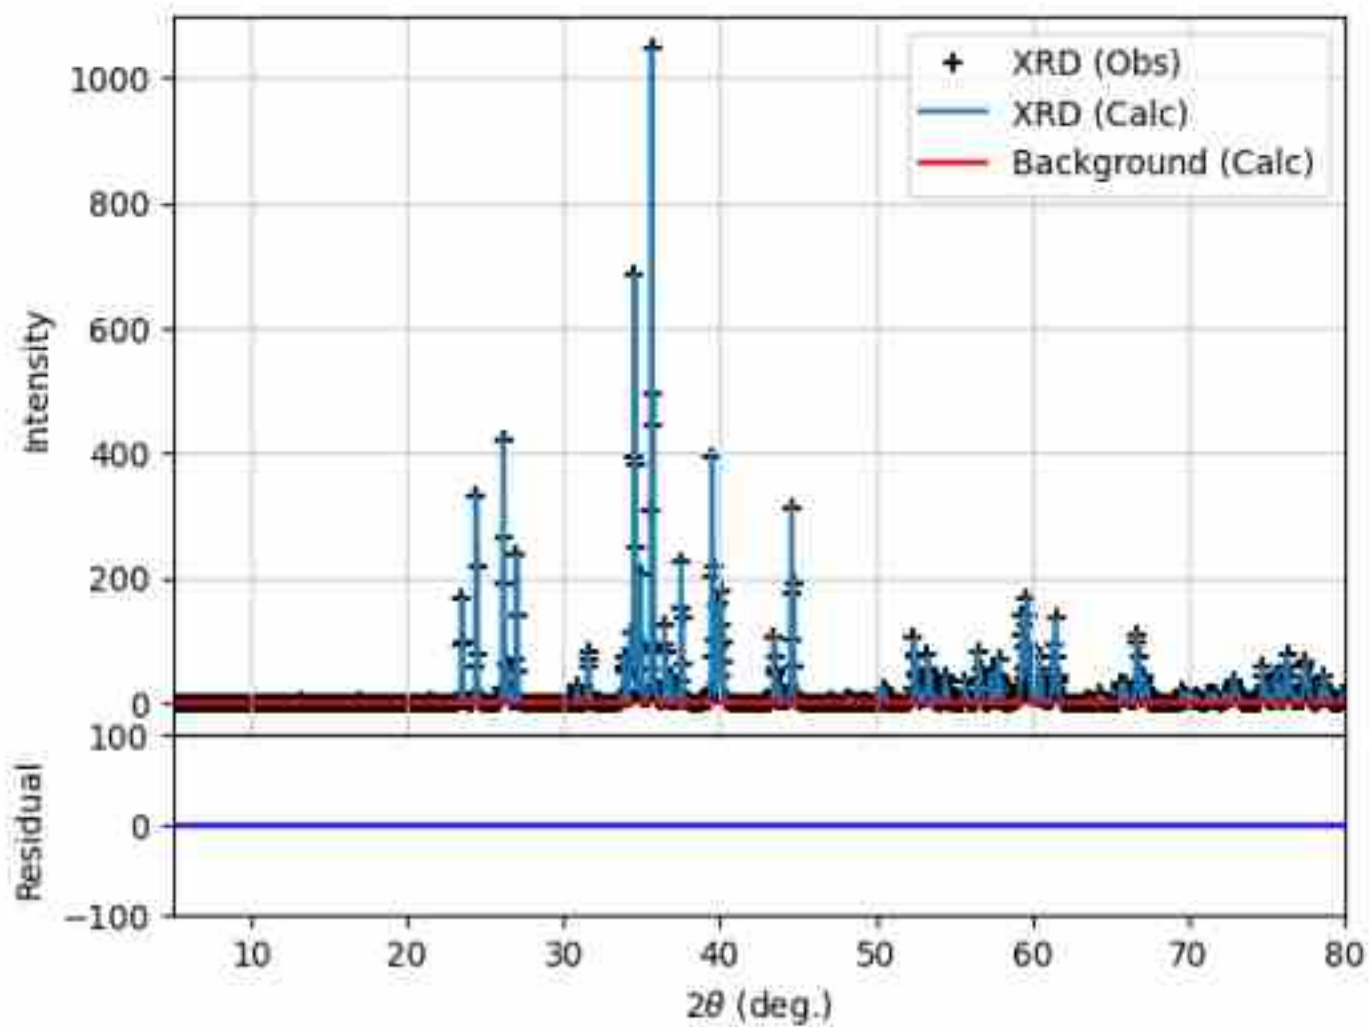

| RMSE before RR | Rwp     | RMSE after RR |
|----------------|---------|---------------|
| 0.024          | 0.00381 | 0.00053       |

# Eu6Tl2

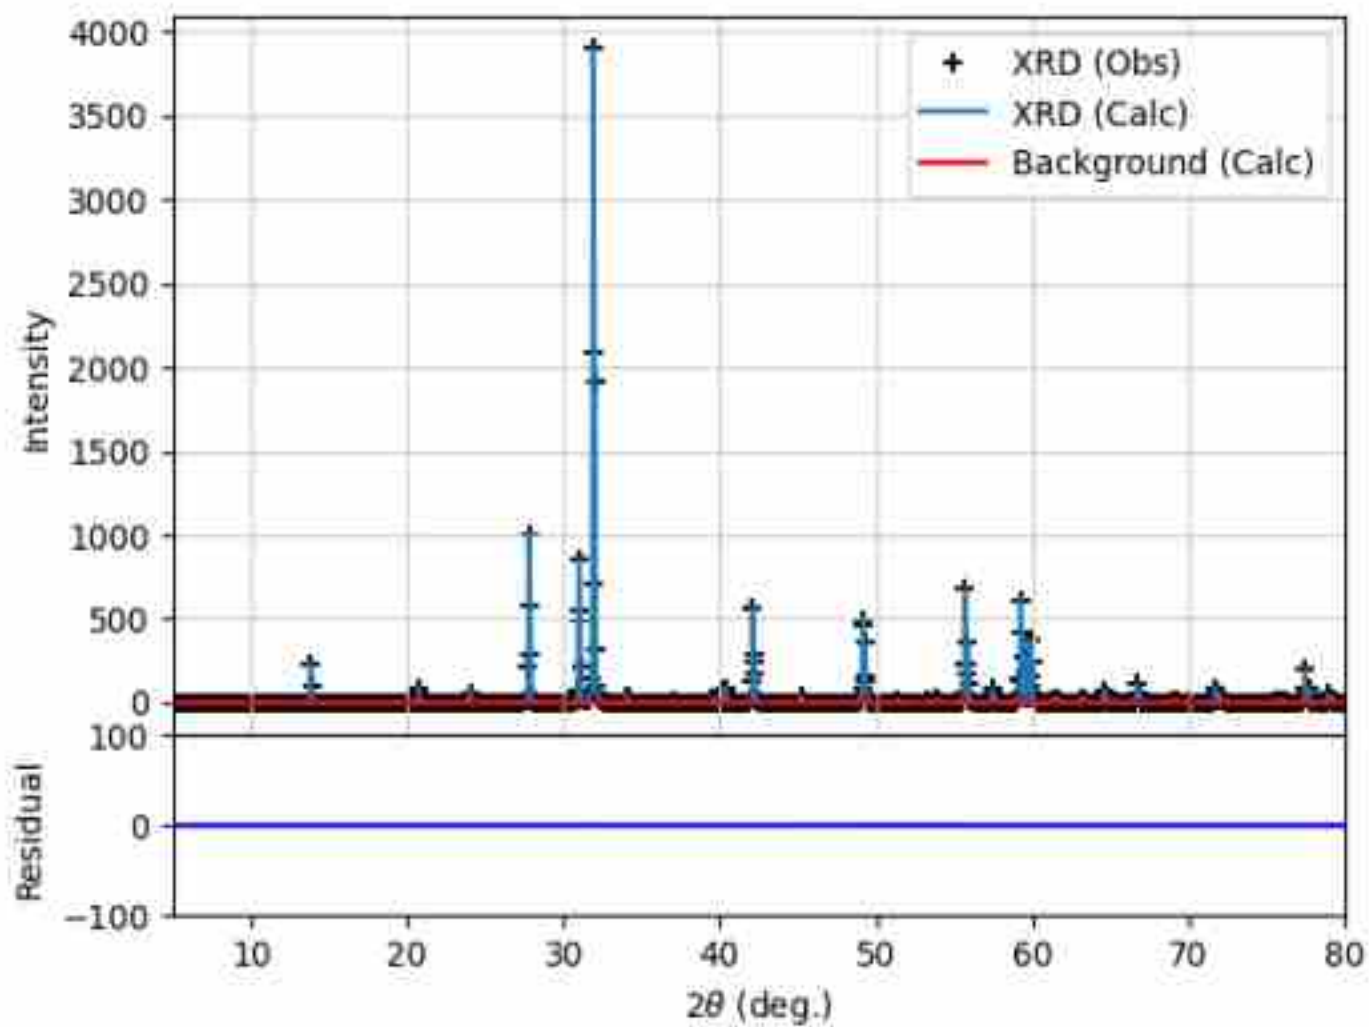

| RMSE before RR | Rwp     | RMSE after RR |
|----------------|---------|---------------|
| 0.024          | 0.14281 | 0.00191       |



# Fe1Mo3As4

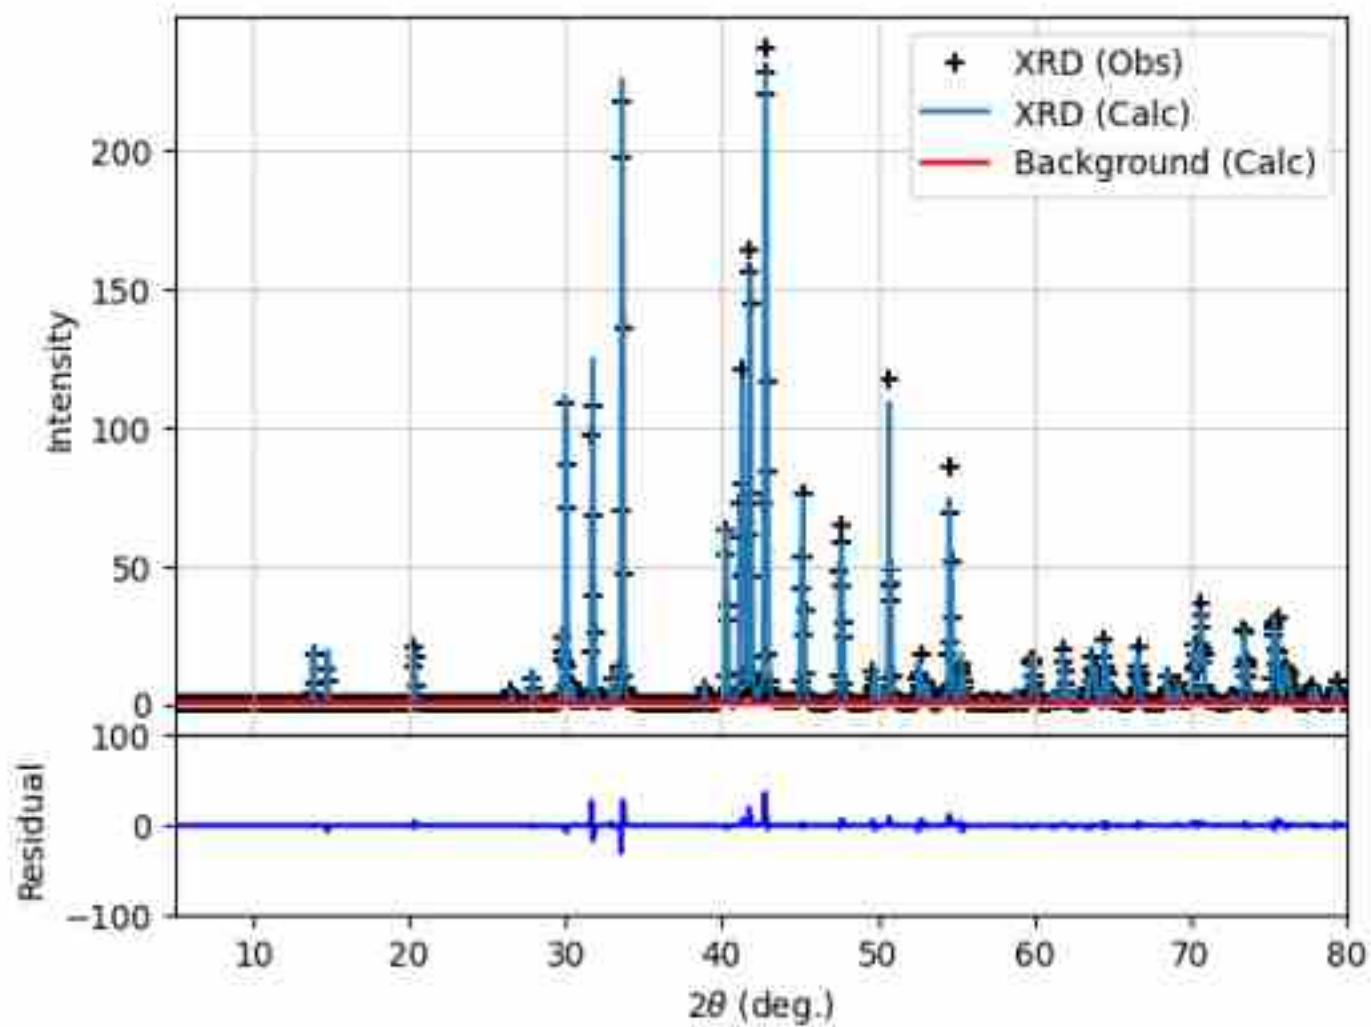

| RMSE before RR | Rwp      | RMSE after RR |
|----------------|----------|---------------|
| 0.024          | 14.33252 | 0.03617       |

# Fe6O1F11

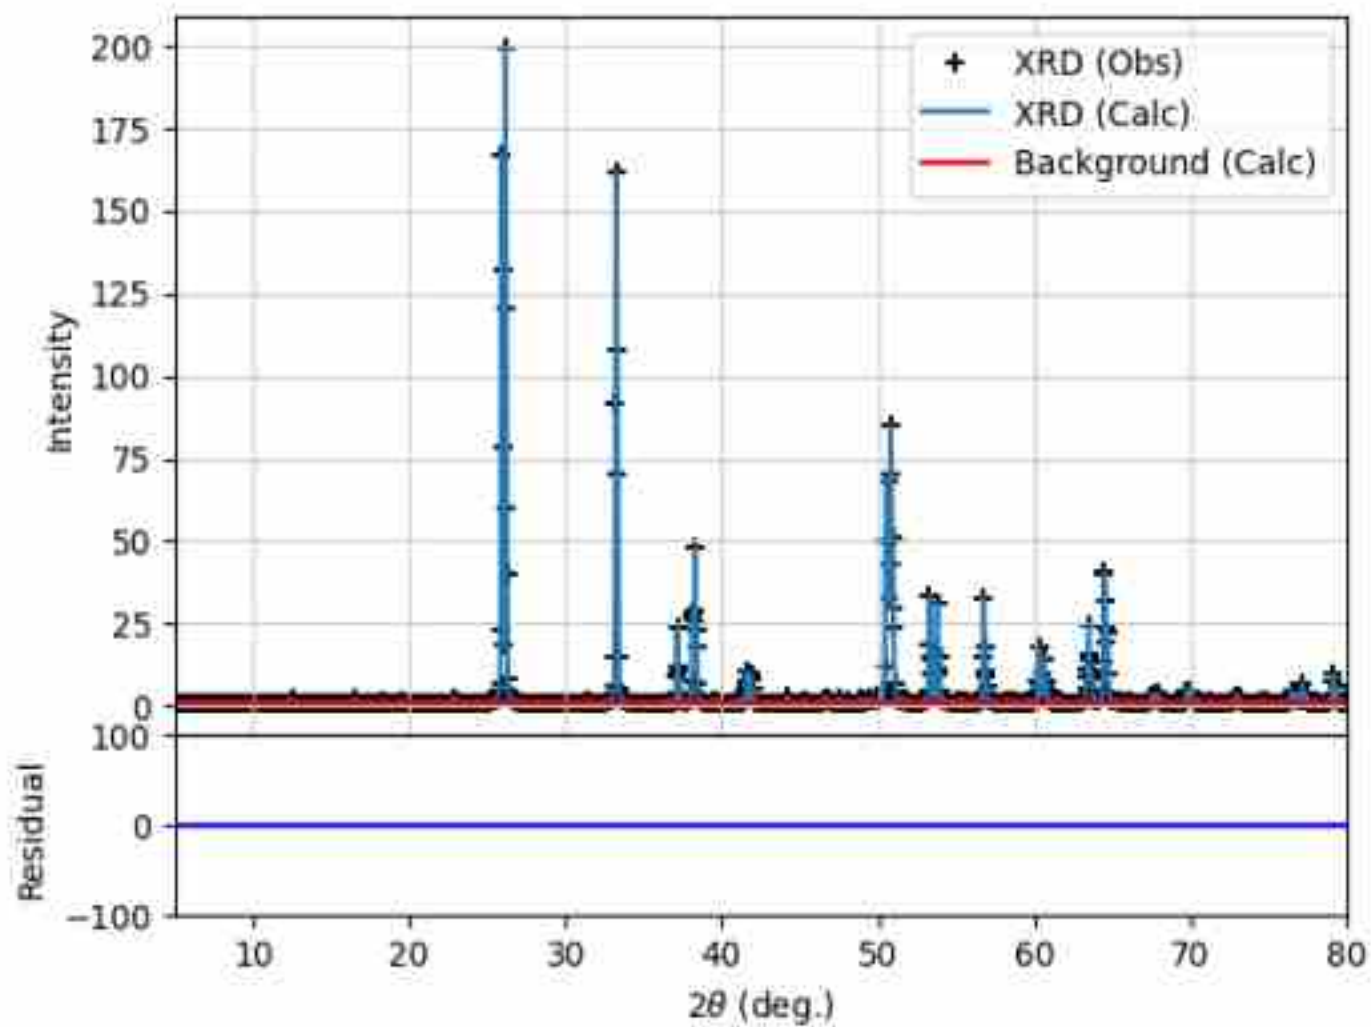

| RMSE before RR | Rwp    | RMSE after RR |
|----------------|--------|---------------|
| 0.024          | 0.0592 | 0.00077       |

# Fe<sub>6</sub>O<sub>2</sub>F<sub>10</sub>

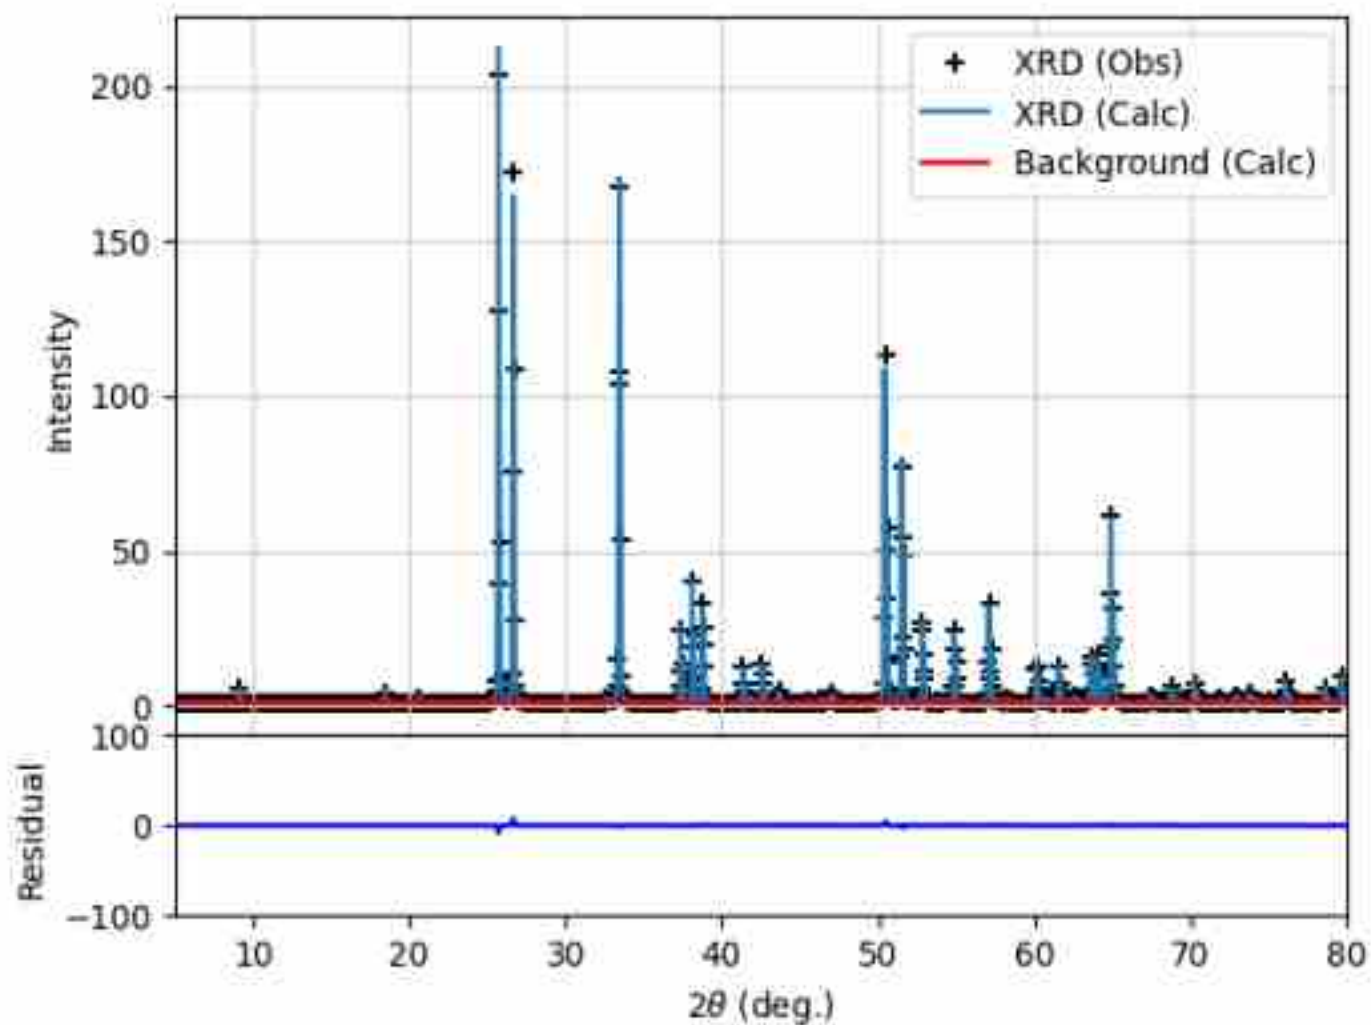

| RMSE before RR | Rwp    | RMSE after RR |
|----------------|--------|---------------|
| 0.024          | 3.0966 | 0.06235       |

# Gd<sub>2</sub>Cu<sub>4</sub>O<sub>8</sub>

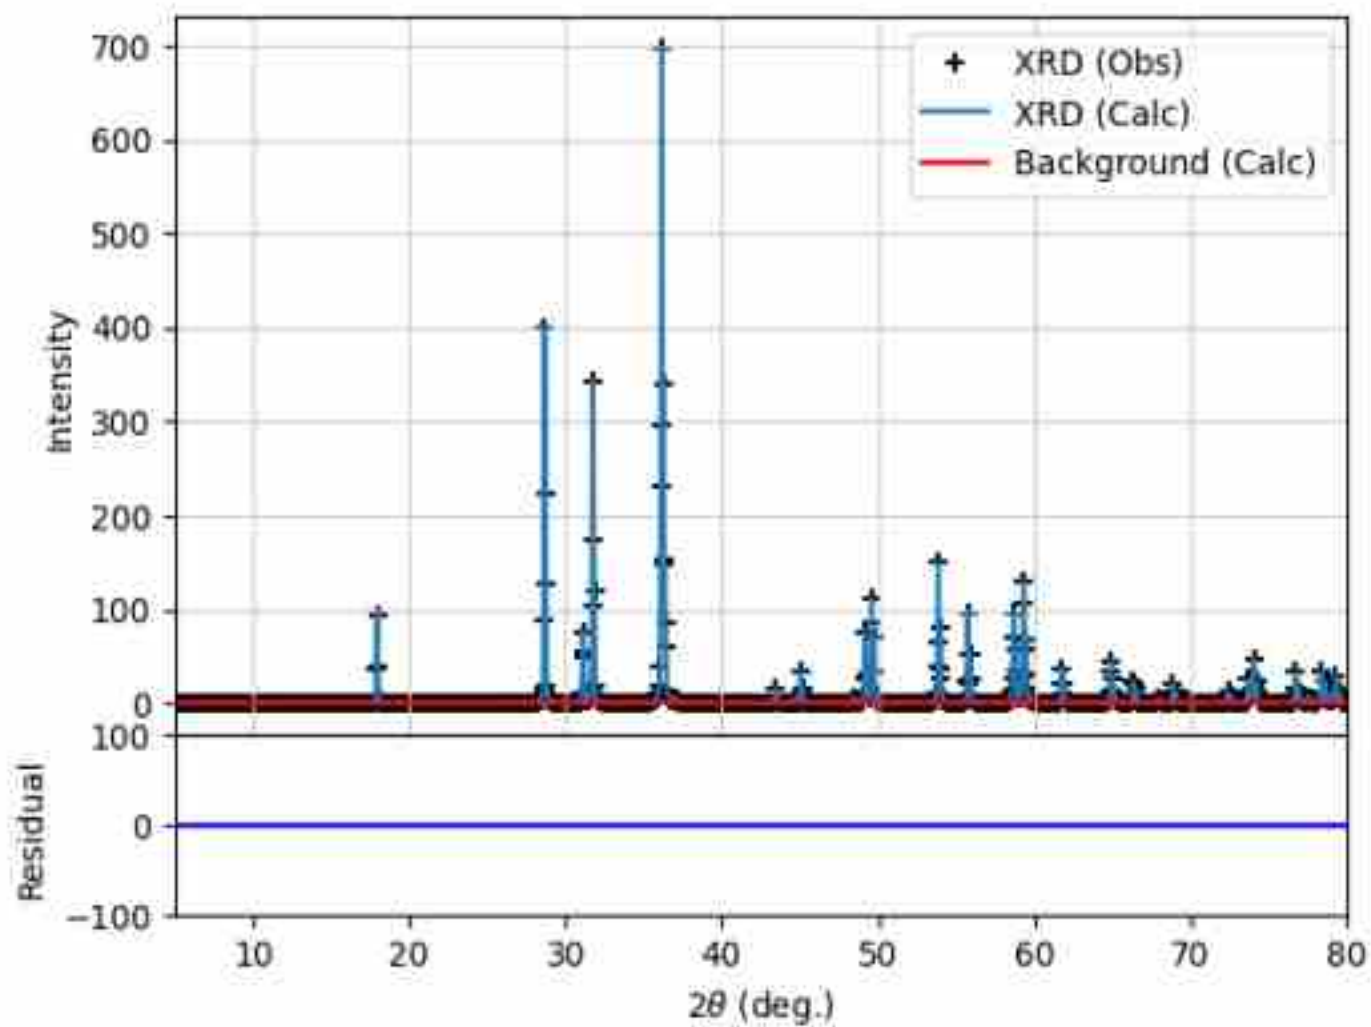

| RMSE before RR | Rwp     | RMSE after RR |
|----------------|---------|---------------|
| 0.024          | 0.00445 | 0.00224       |

# Gd<sub>4</sub>Ni<sub>14</sub>

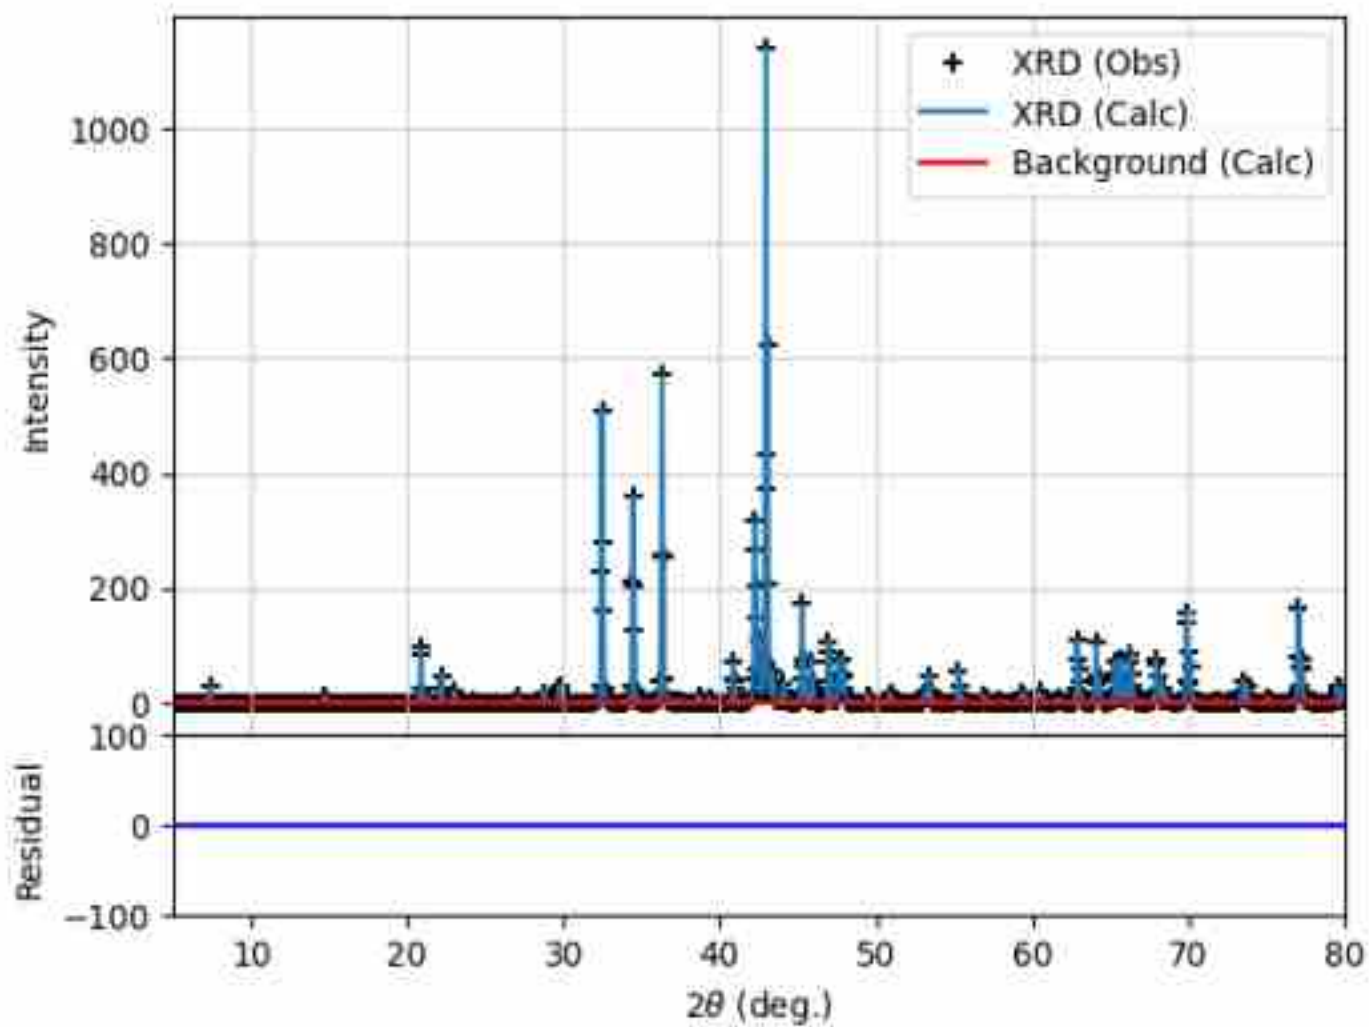

| RMSE before RR | Rwp     | RMSE after RR |
|----------------|---------|---------------|
| 0.024          | 0.00319 | 0.0004        |

# Hf2I6

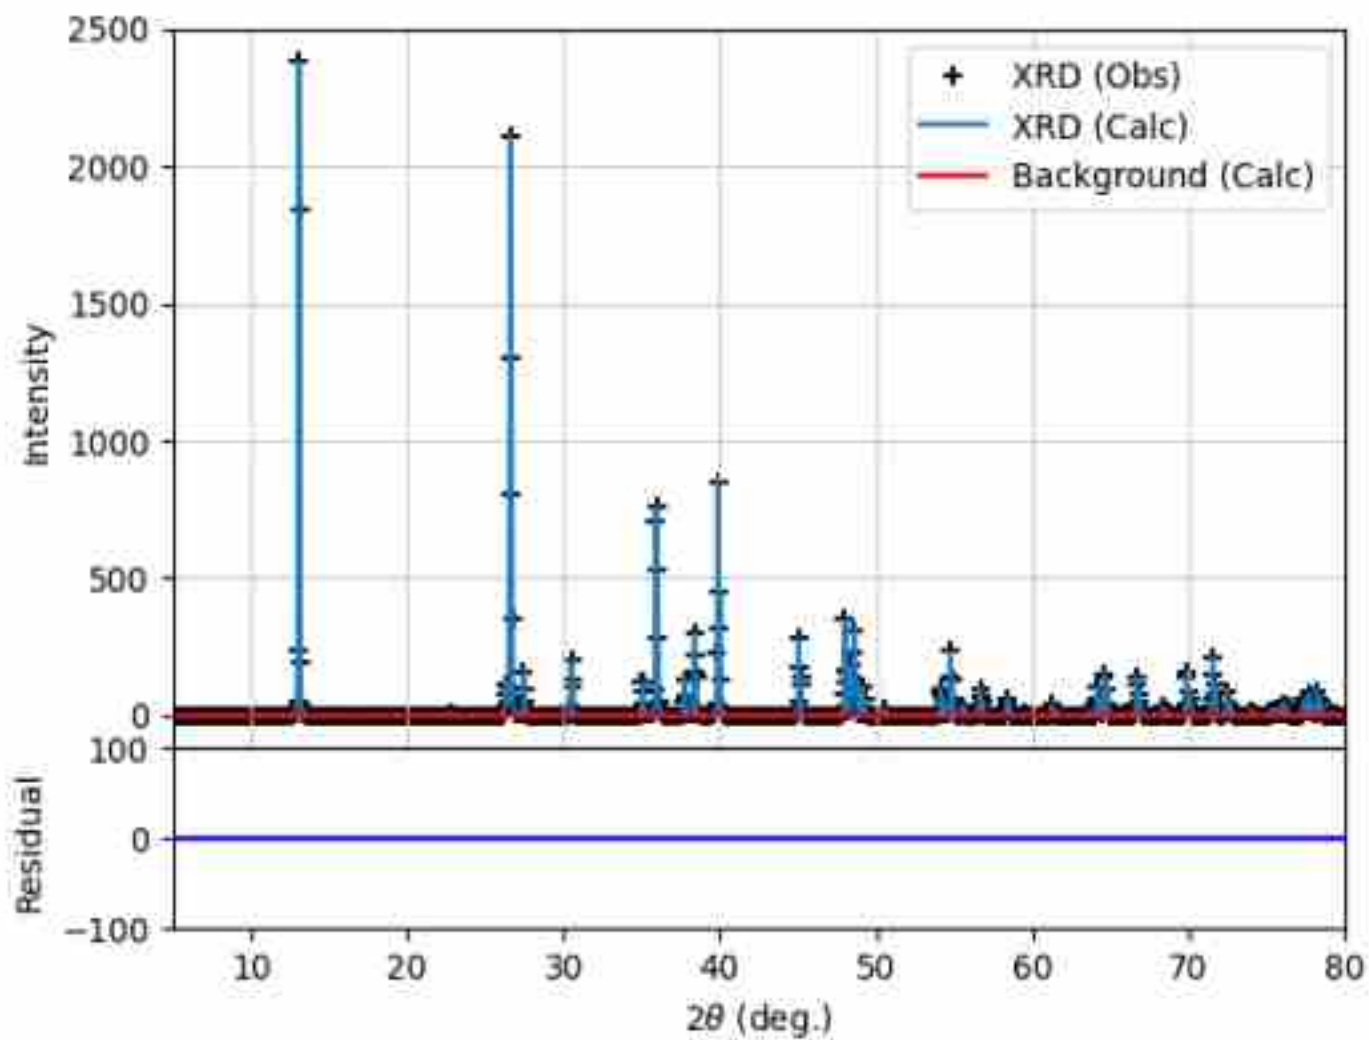

| RMSE before RR | Rwp     | RMSE after RR |
|----------------|---------|---------------|
| 0.024          | 0.00409 | 0.0003        |

# Ho<sub>3</sub>Ga<sub>6</sub>Co<sub>9</sub>

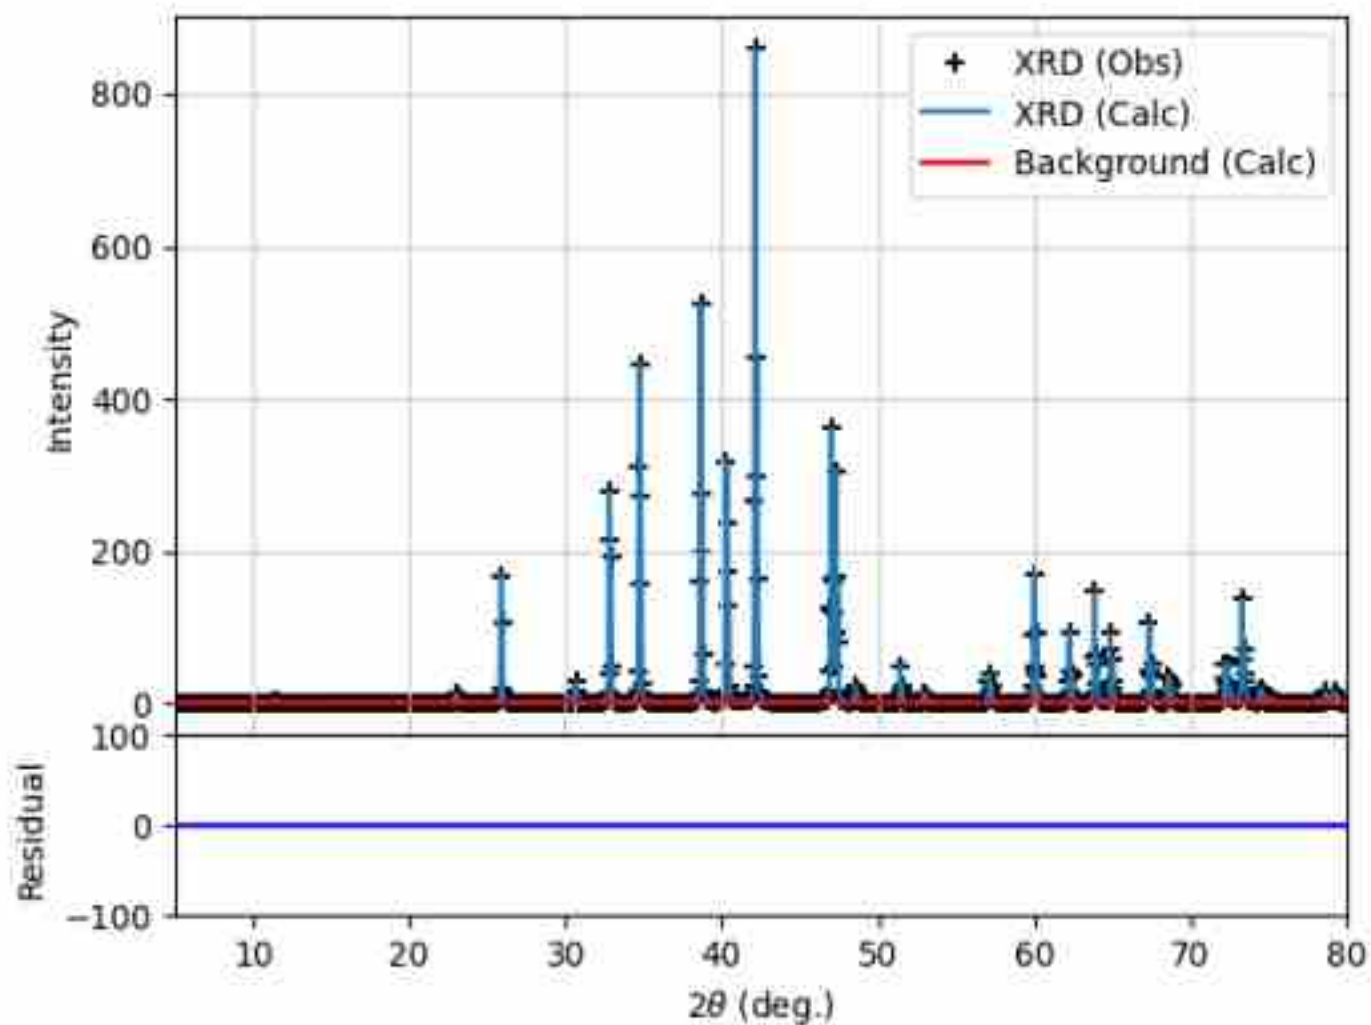

| RMSE before RR | Rwp     | RMSE after RR |
|----------------|---------|---------------|
| 0.024          | 0.00589 | 0.00068       |

# Ho4Co14

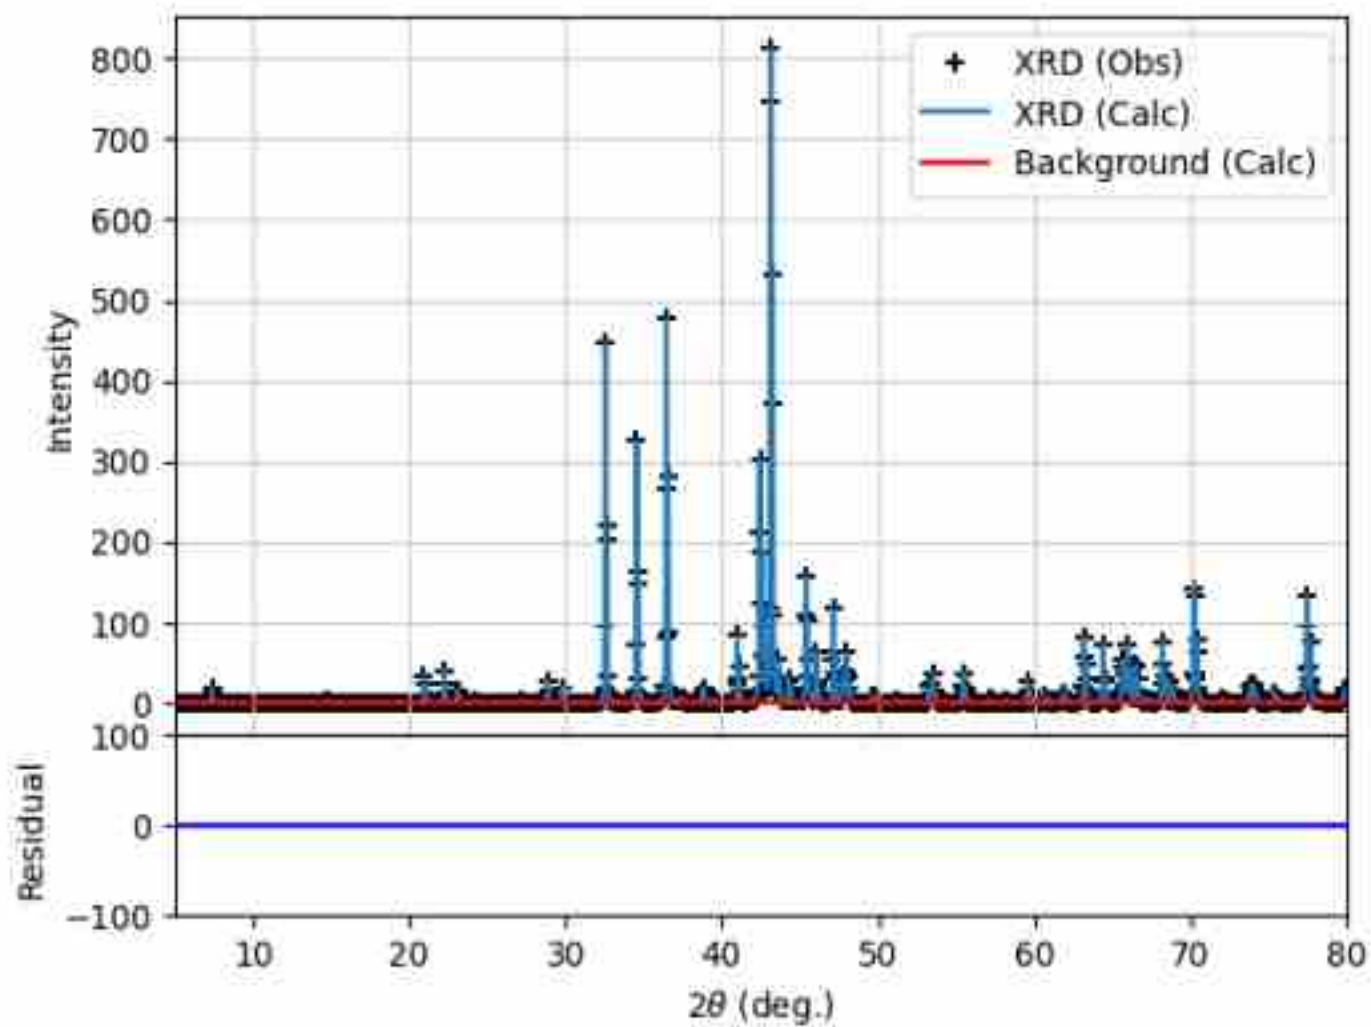

| RMSE before RR | Rwp     | RMSE after RR |
|----------------|---------|---------------|
| 0.024          | 0.00334 | 0.00044       |



# Ho<sub>4</sub>Hf<sub>1</sub>Al<sub>15</sub>

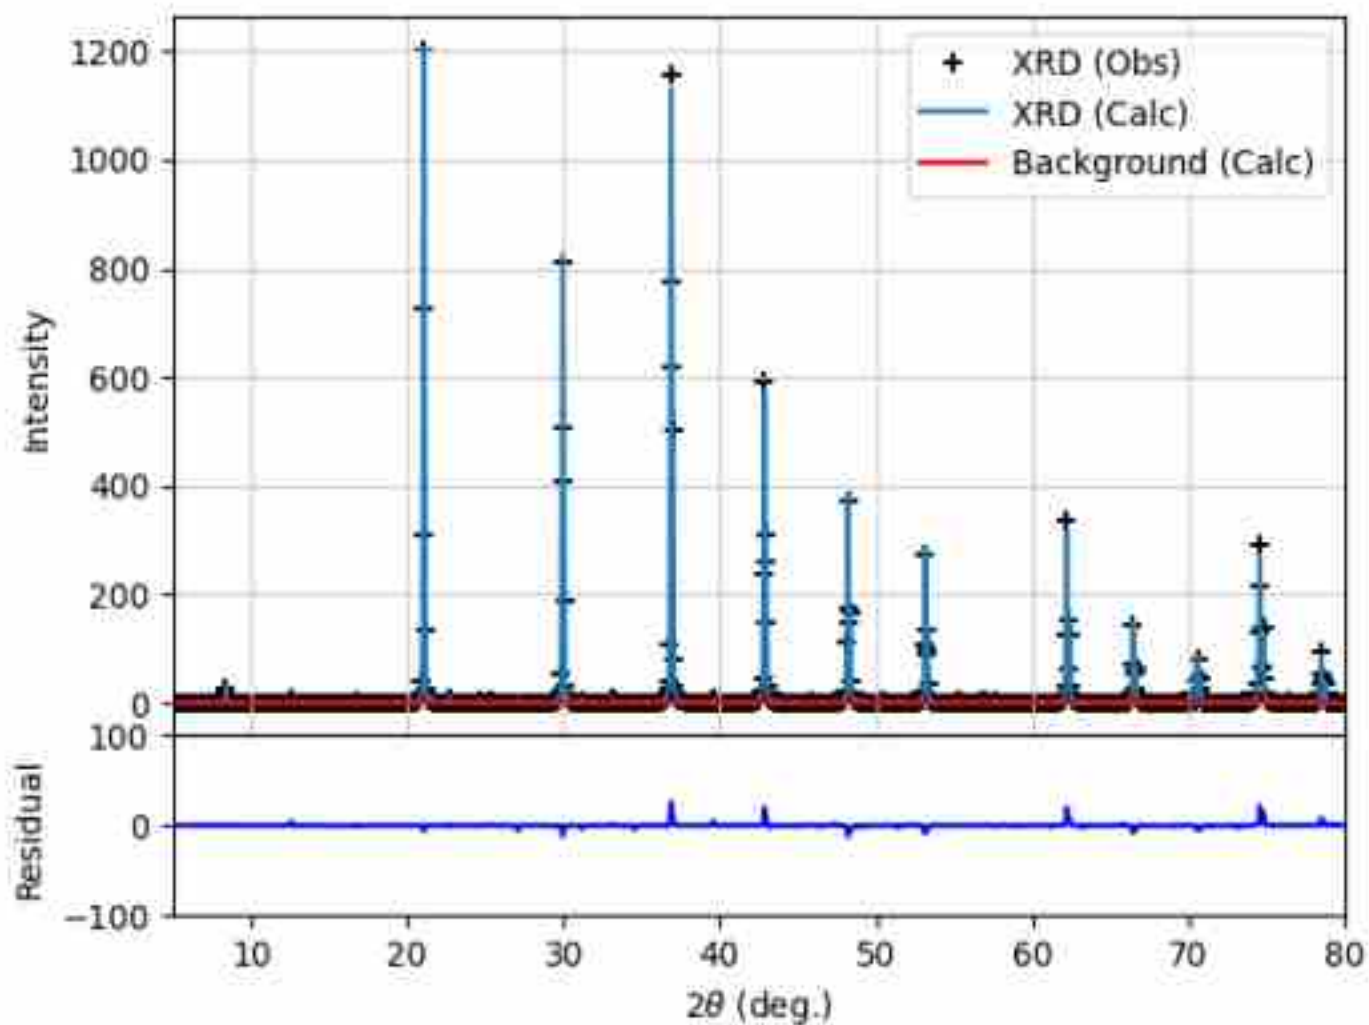

| RMSE before RR | Rwp     | RMSE after RR |
|----------------|---------|---------------|
| 0.024          | 9.22197 | None          |

# In2Cu6

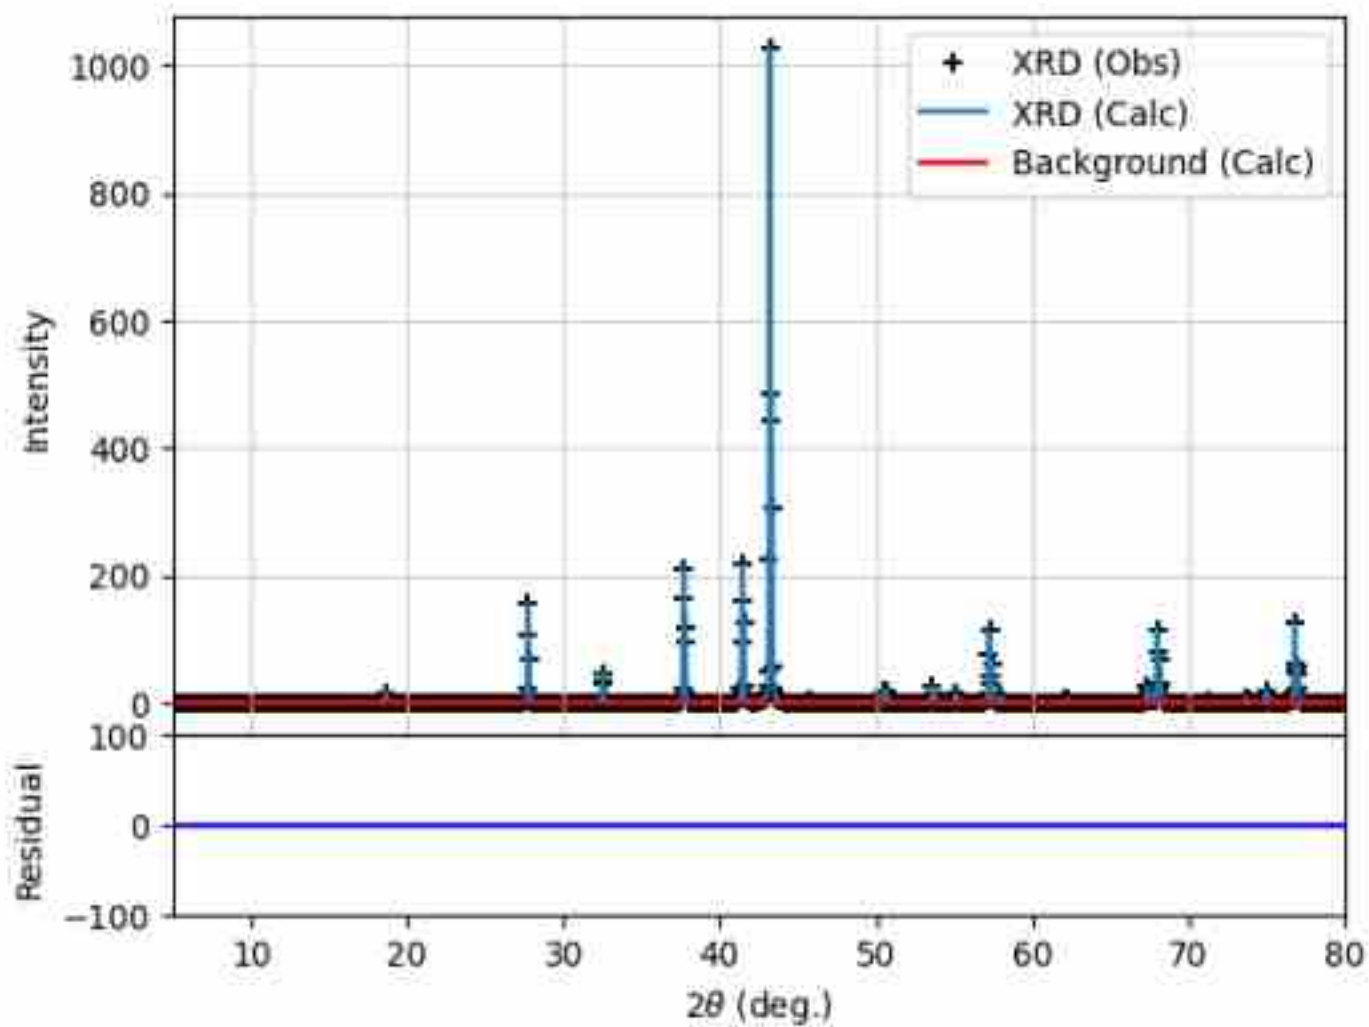

| RMSE before RR | Rwp    | RMSE after RR |
|----------------|--------|---------------|
| 0.024          | 0.0049 | 0.00076       |

# In<sub>2</sub>Si<sub>2</sub>Te<sub>6</sub>

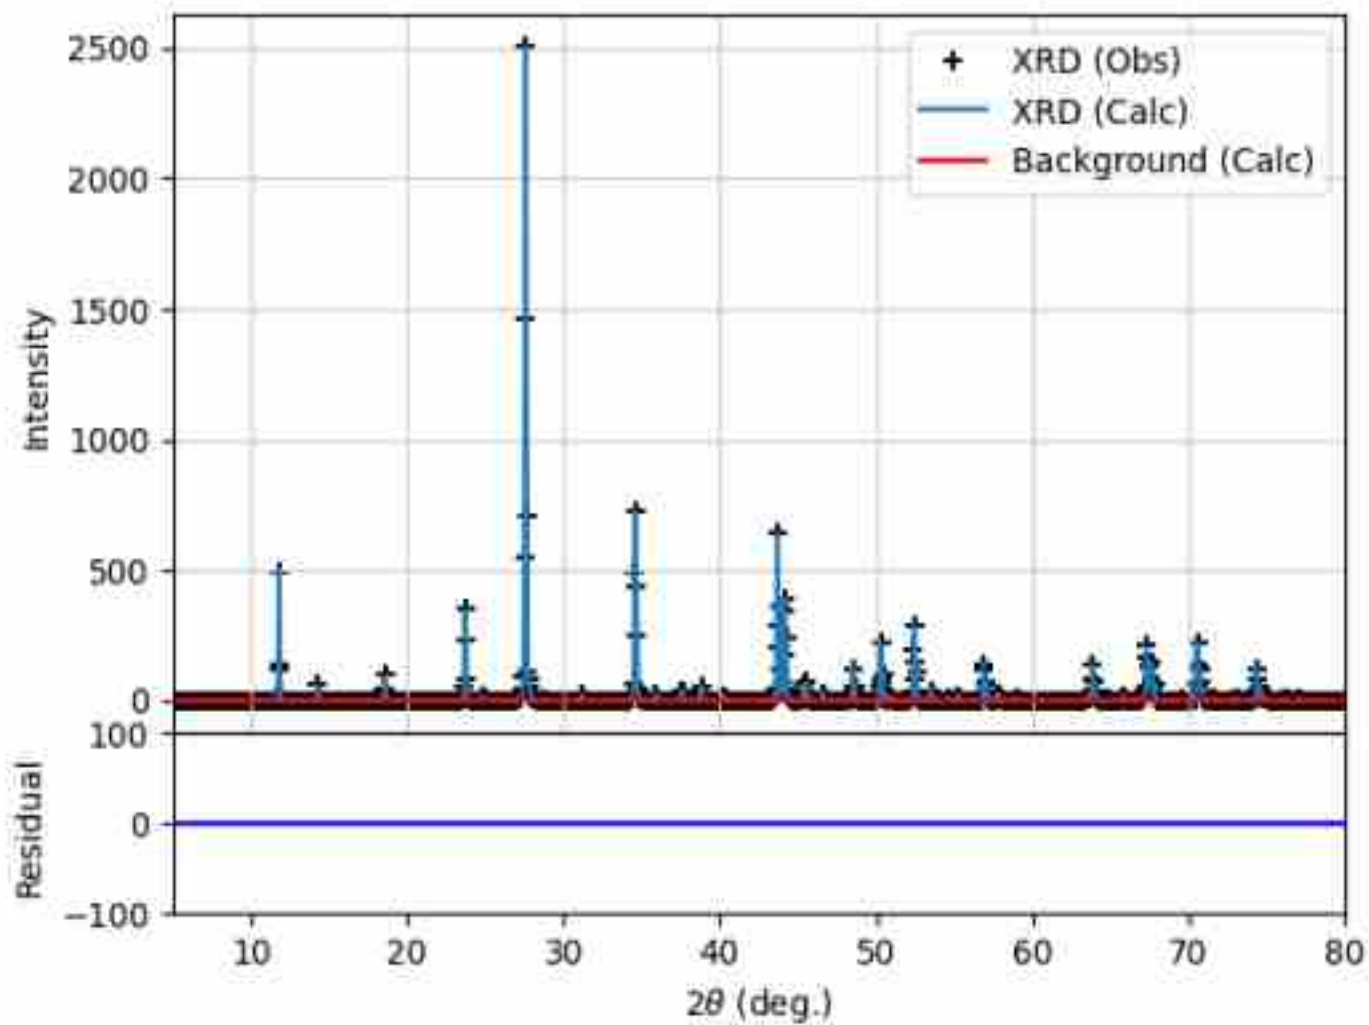

| RMSE before RR | Rwp     | RMSE after RR |
|----------------|---------|---------------|
| 0.024          | 0.00426 | 0.00056       |

# K1Al1S2O8

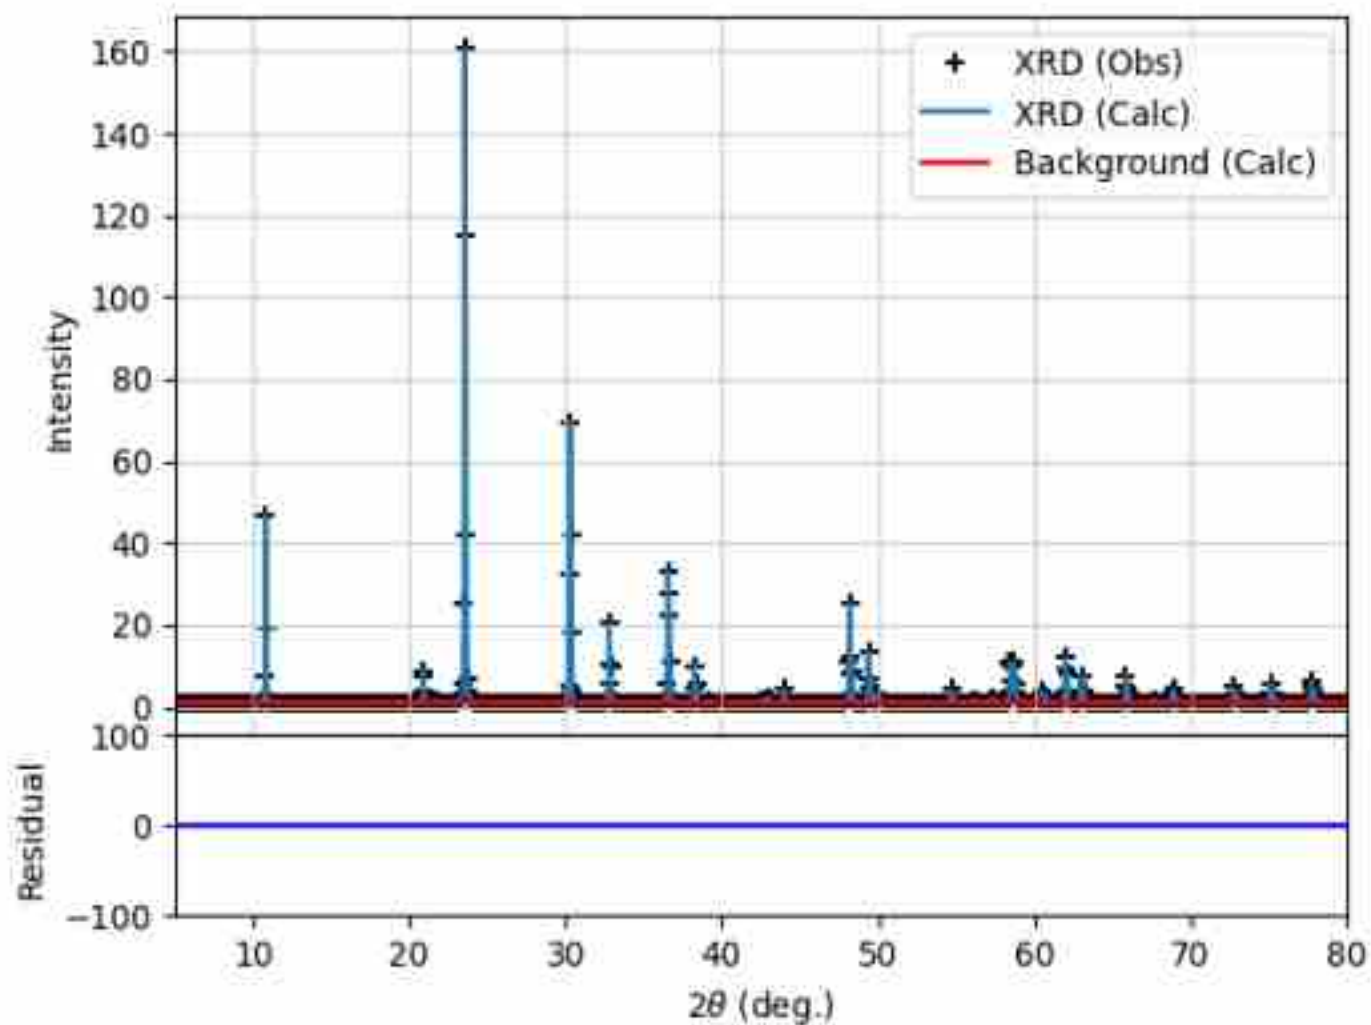

| RMSE before RR | Rwp     | RMSE after RR |
|----------------|---------|---------------|
| 0.024          | 0.00192 | 0.00115       |

# K<sub>2</sub>Eu<sub>2</sub>C<sub>4</sub>O<sub>12</sub>

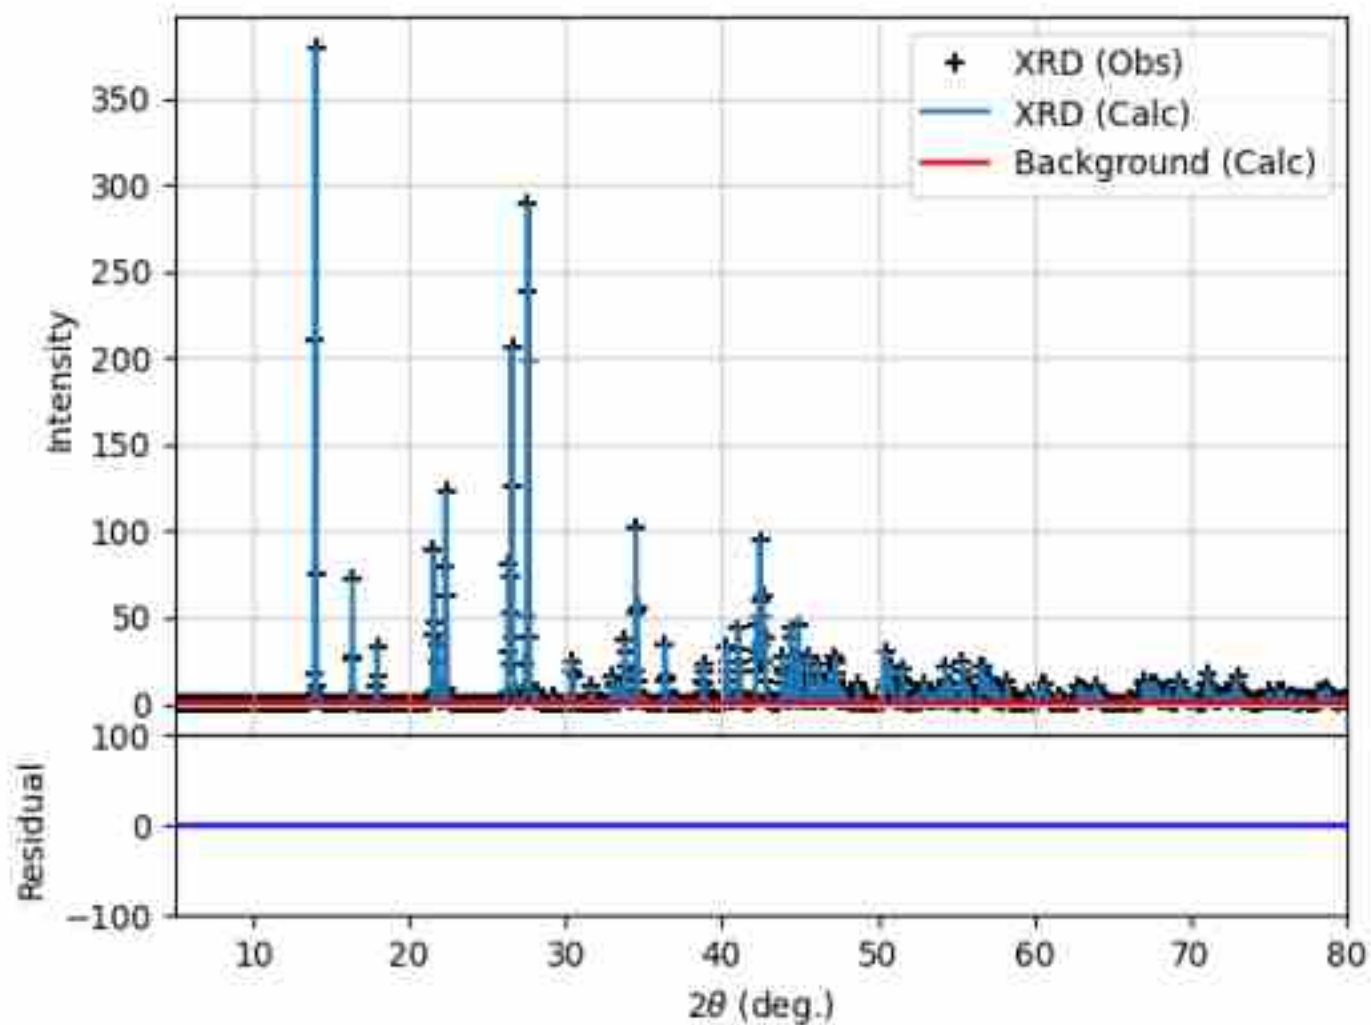

| RMSE before RR | Rwp     | RMSE after RR |
|----------------|---------|---------------|
| 0.024          | 0.00372 | 0.00061       |

# K<sub>2</sub>Y<sub>2</sub>C<sub>4</sub>O<sub>12</sub>

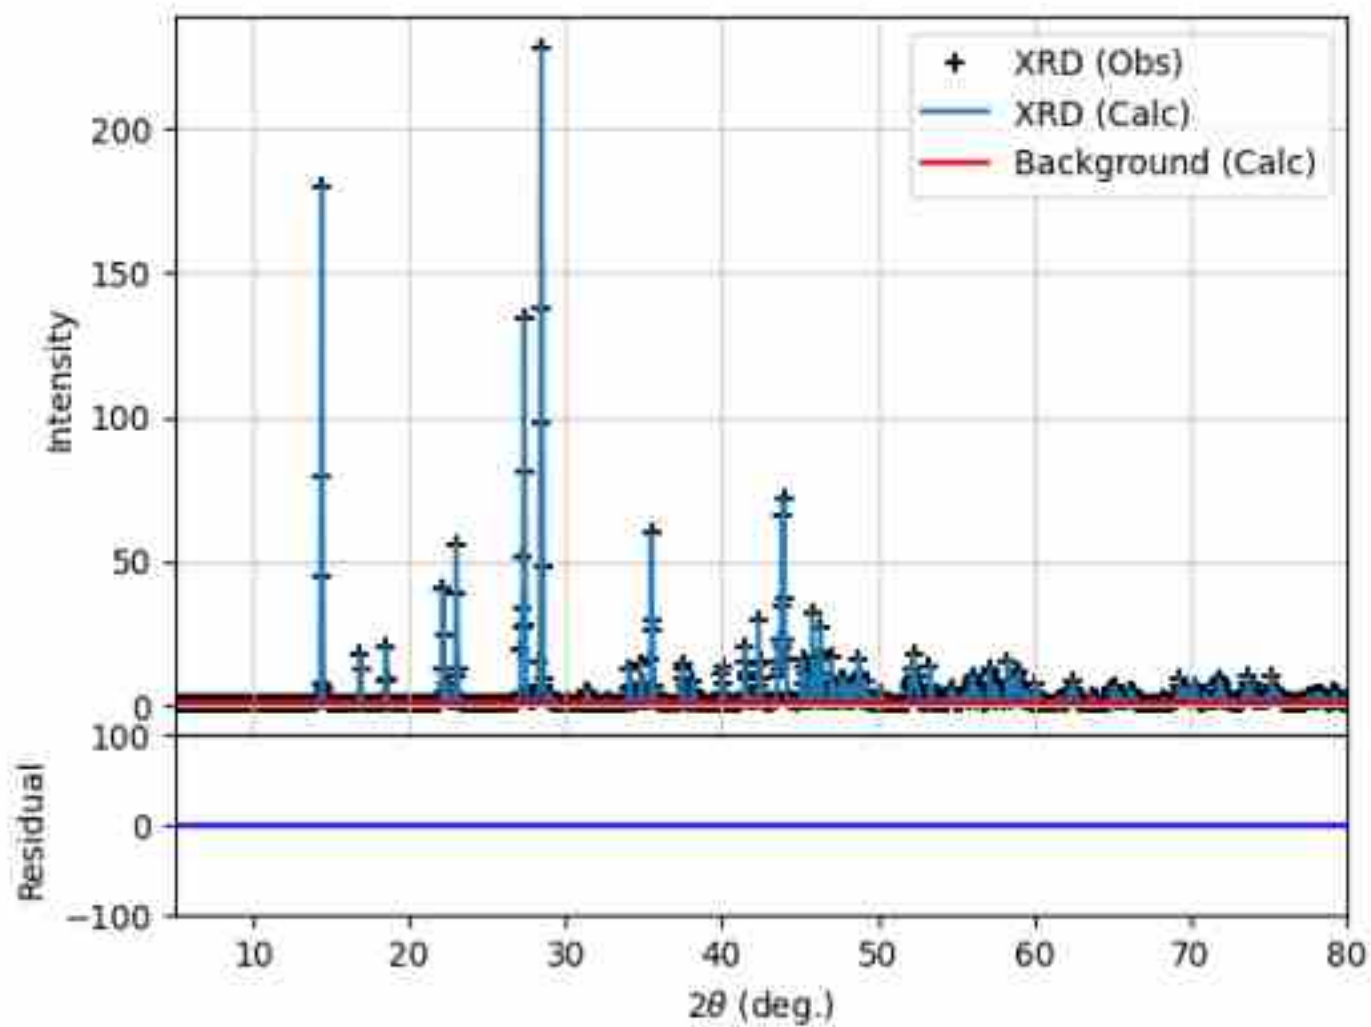

| RMSE before RR | Rwp     | RMSE after RR |
|----------------|---------|---------------|
| 0.024          | 0.00273 | 0.00141       |

# K3Re1Mo1O8

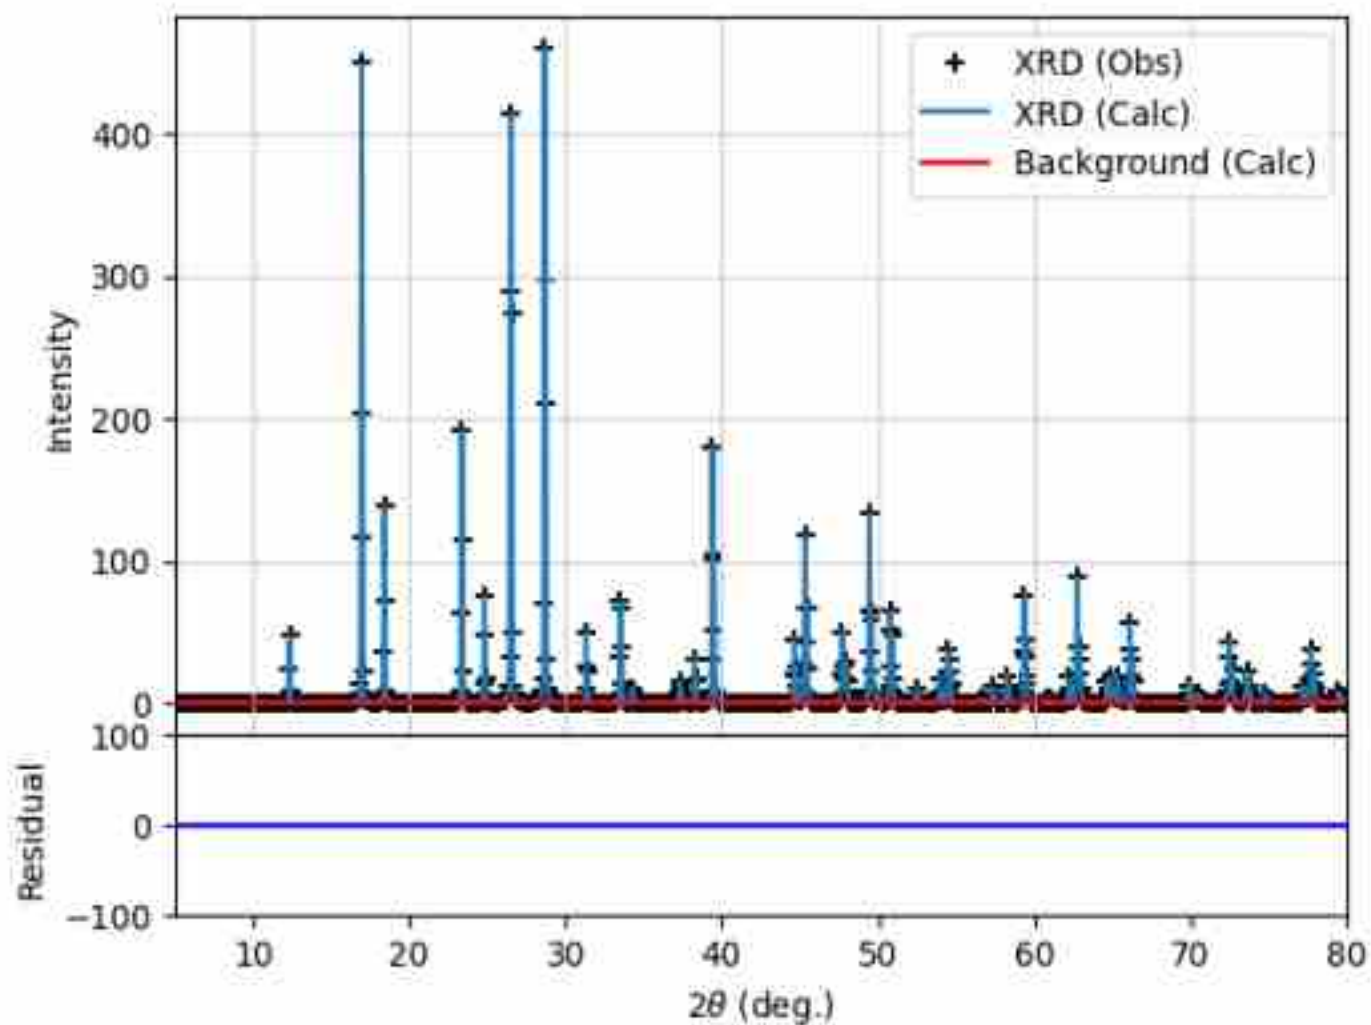

| RMSE before RR | Rwp     | RMSE after RR |
|----------------|---------|---------------|
| 0.024          | 0.00423 | 0.00184       |

# K4Nb2Cu2S8

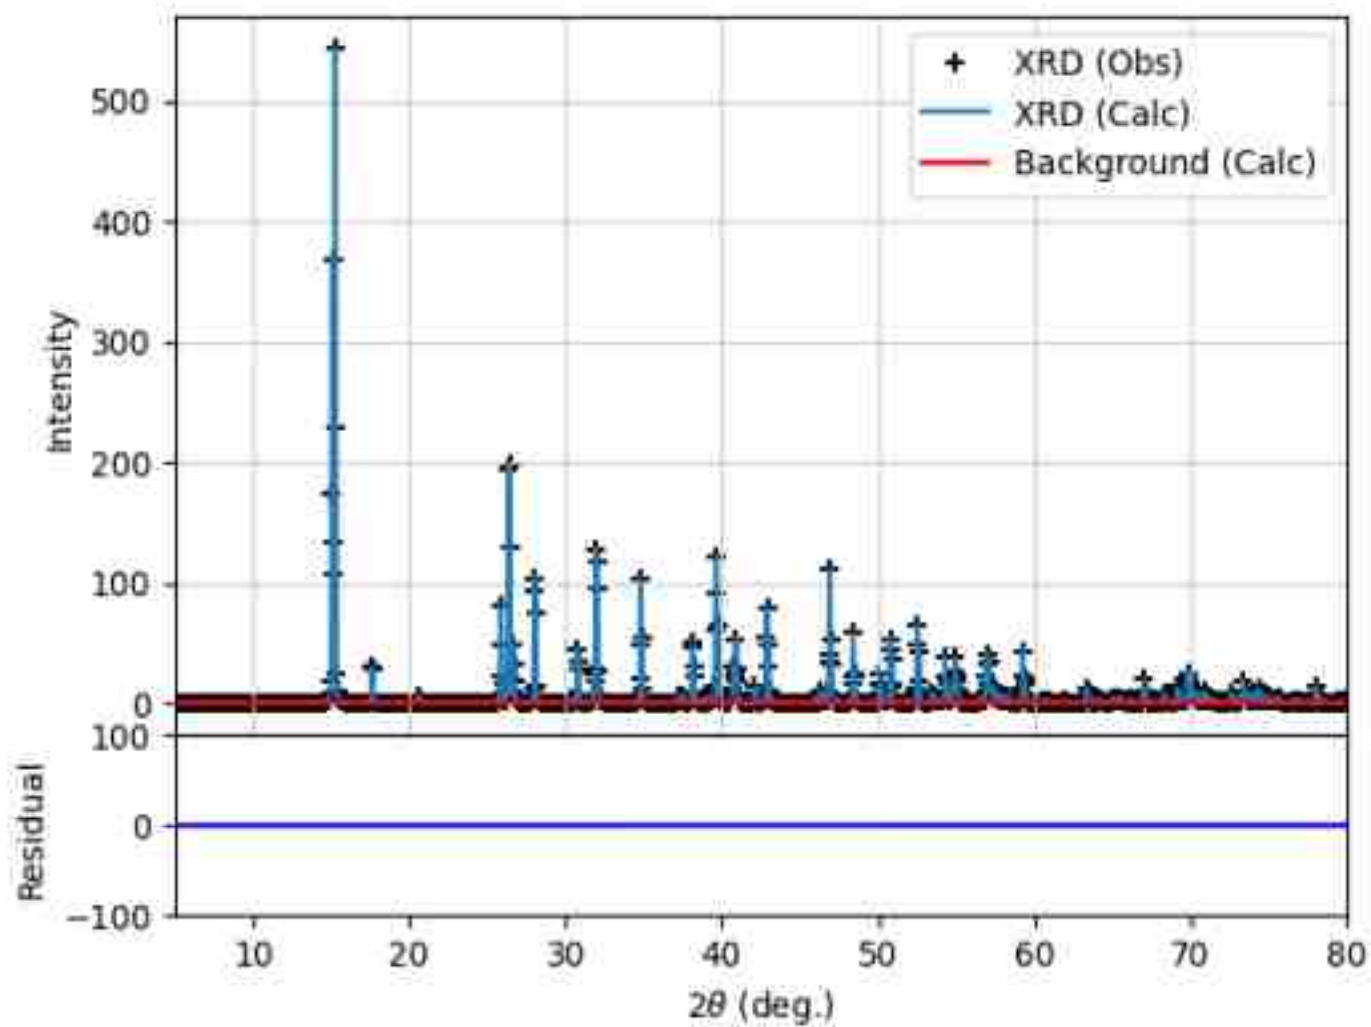

| RMSE before RR | Rwp     | RMSE after RR |
|----------------|---------|---------------|
| 0.024          | 0.98784 | 0.01053       |



# K4Ru2C110O1

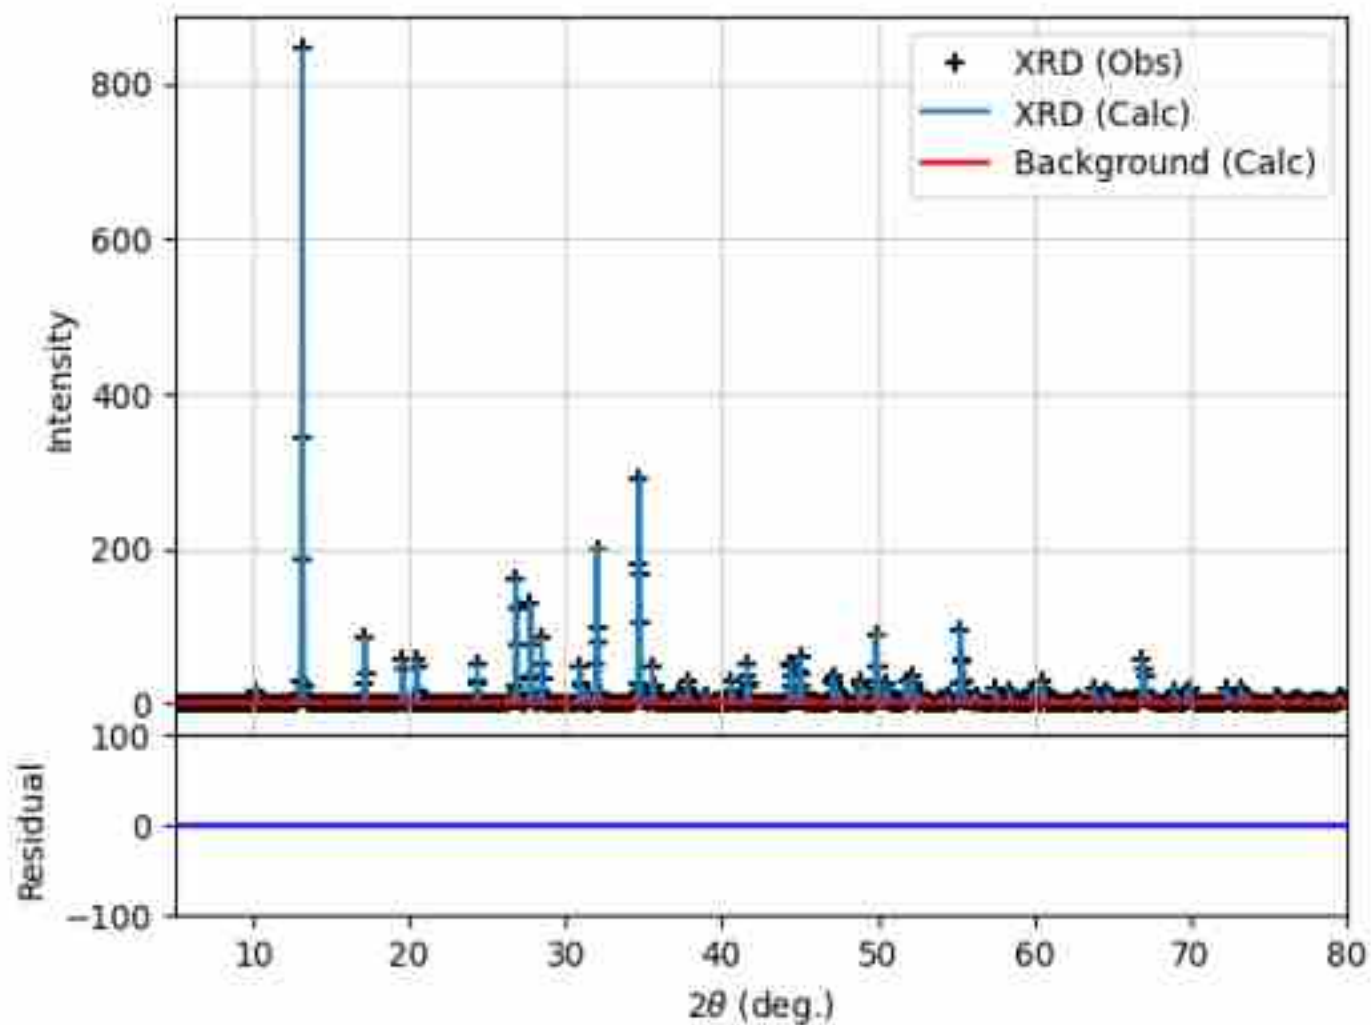

| RMSE before RR | Rwp     | RMSE after RR |
|----------------|---------|---------------|
| 0.024          | 0.00344 | 0.00034       |

# K6Be2F10

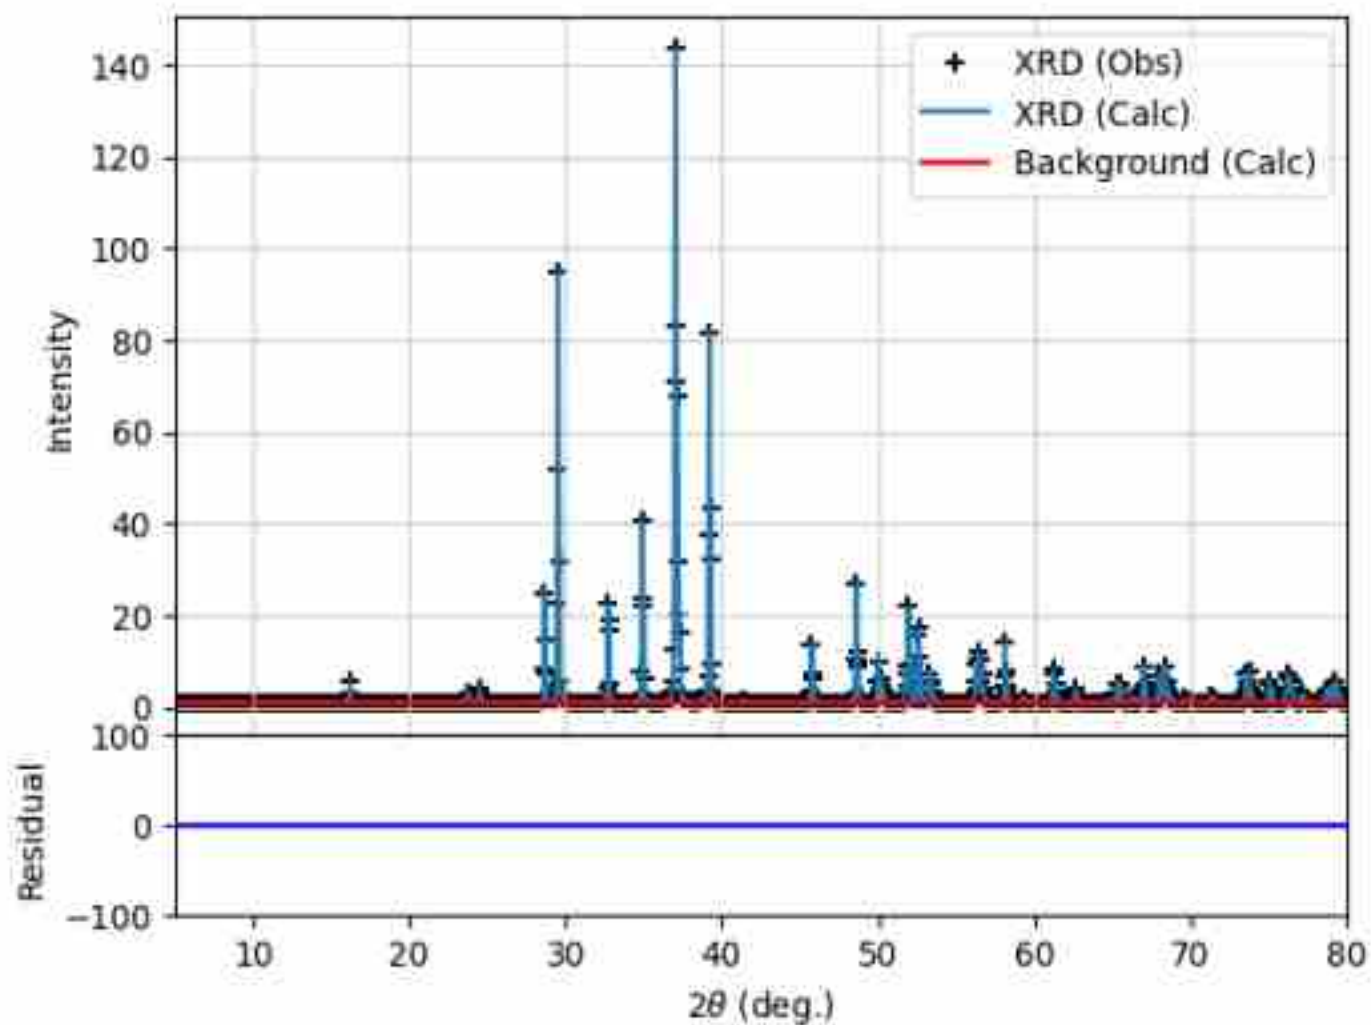

| RMSE before RR | Rwp     | RMSE after RR |
|----------------|---------|---------------|
| 0.024          | 0.00303 | 0.00091       |

# La1Ce1Ru4

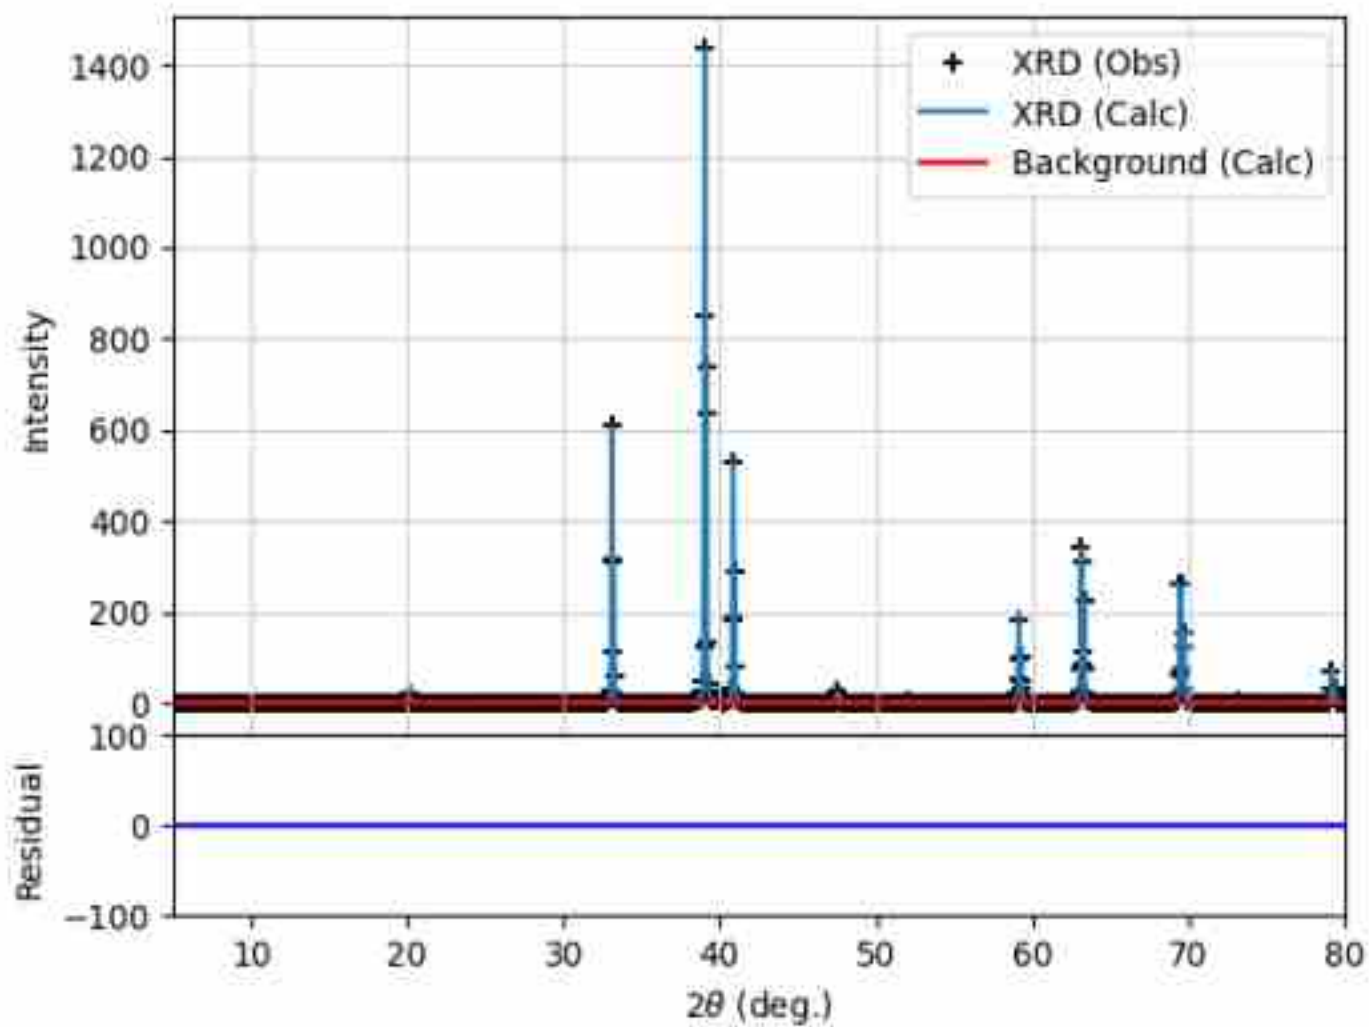

| RMSE before RR | Rwp     | RMSE after RR |
|----------------|---------|---------------|
| 0.024          | 0.01675 | 0.00077       |

# La<sub>2</sub>Fe<sub>2</sub>O<sub>6</sub>

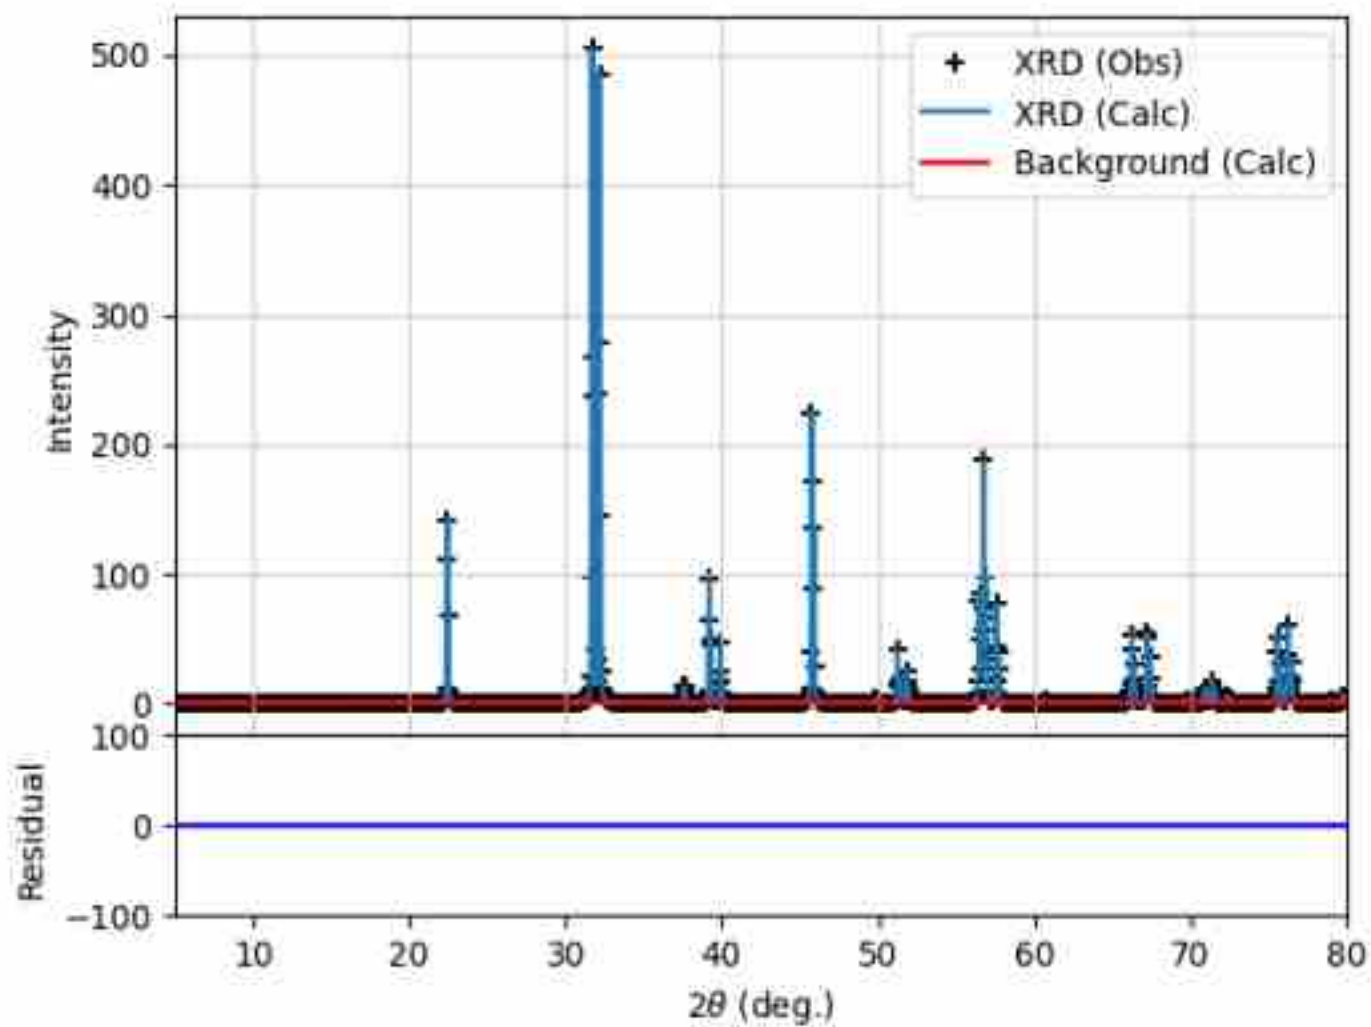

| RMSE before RR | Rwp     | RMSE after RR |
|----------------|---------|---------------|
| 0.024          | 0.00308 | 0.00164       |

# La<sub>2</sub>ZnNiO<sub>6</sub>

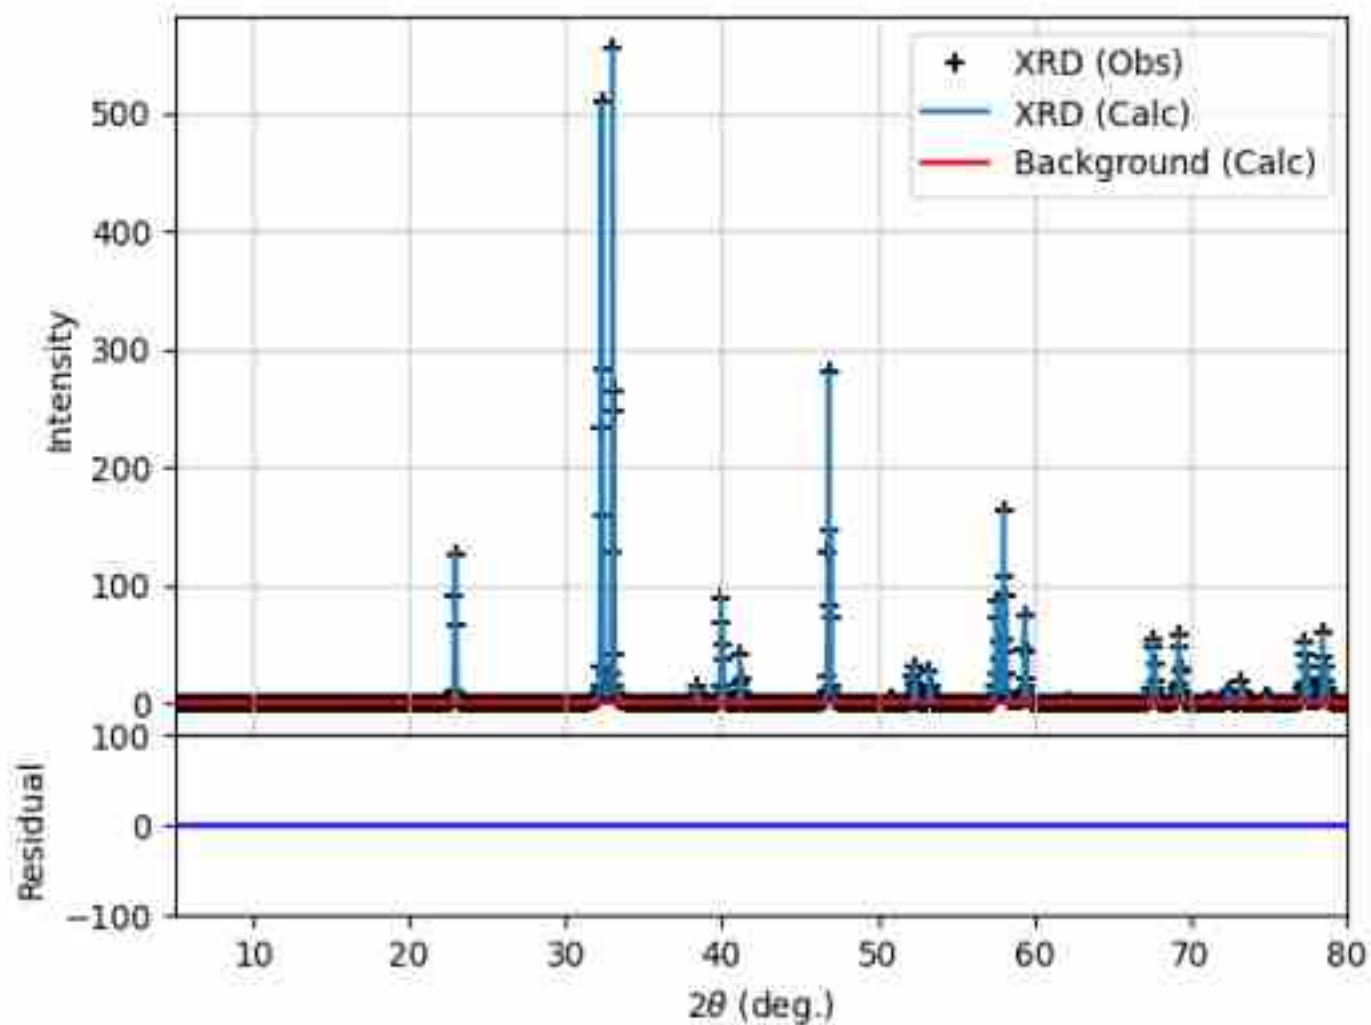

| RMSE before RR | Rwp     | RMSE after RR |
|----------------|---------|---------------|
| 0.024          | 0.00357 | 0.0016        |

# La<sub>3</sub>Cu<sub>4</sub>P<sub>4</sub>O<sub>2</sub>

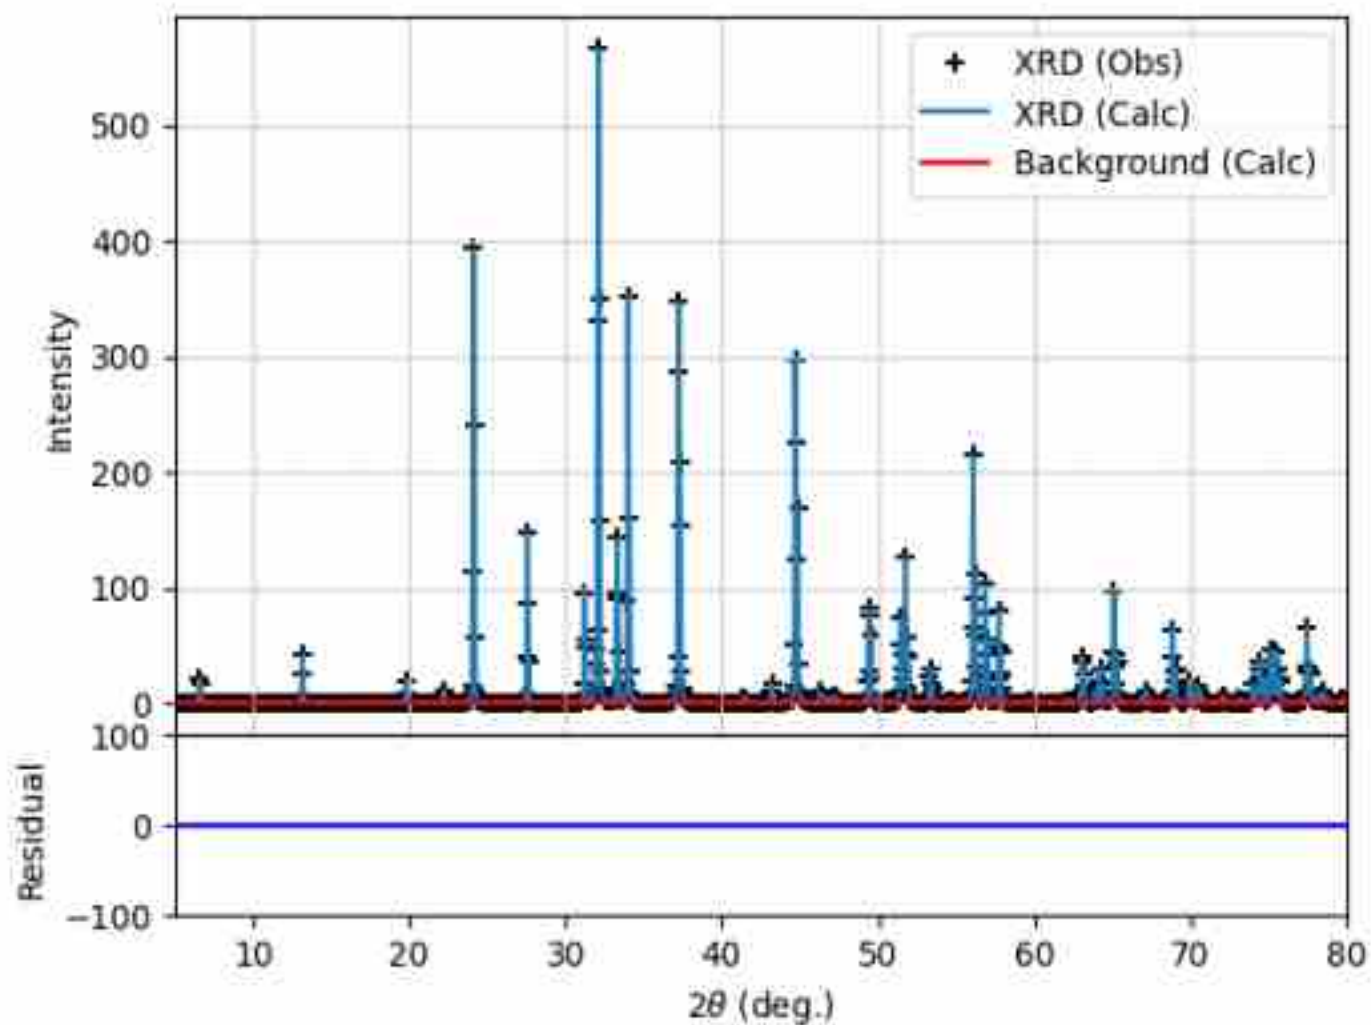

| RMSE before RR | Rwp     | RMSE after RR |
|----------------|---------|---------------|
| 0.024          | 0.00615 | 0.00219       |

# La10Tl6

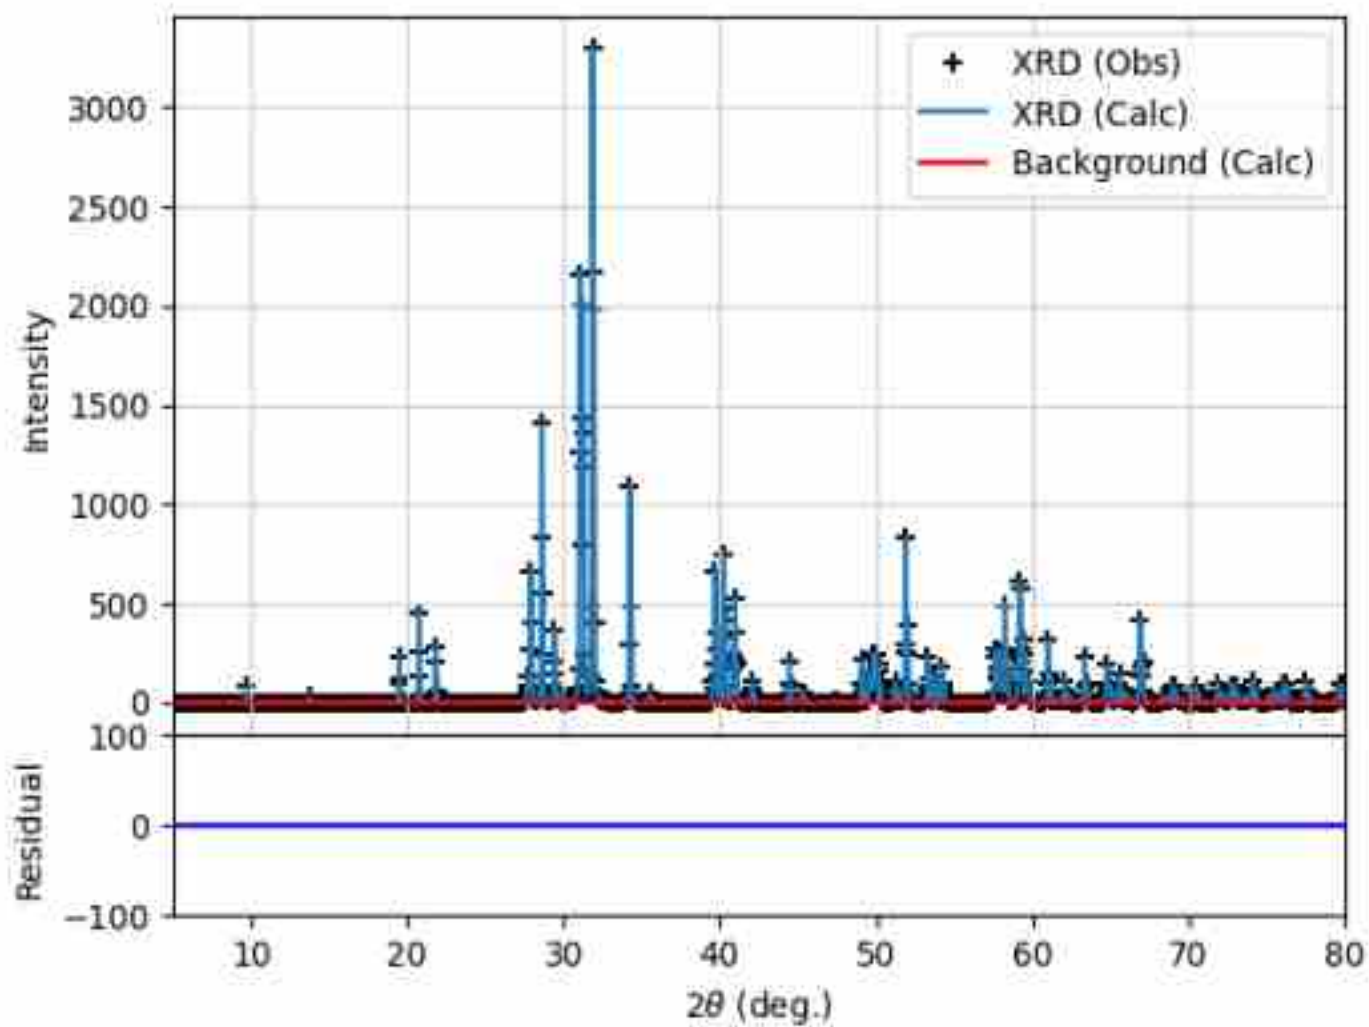

| RMSE before RR | Rwp     | RMSE after RR |
|----------------|---------|---------------|
| 0.024          | 0.00398 | 0.0004        |

# Li1Fe5O5F1

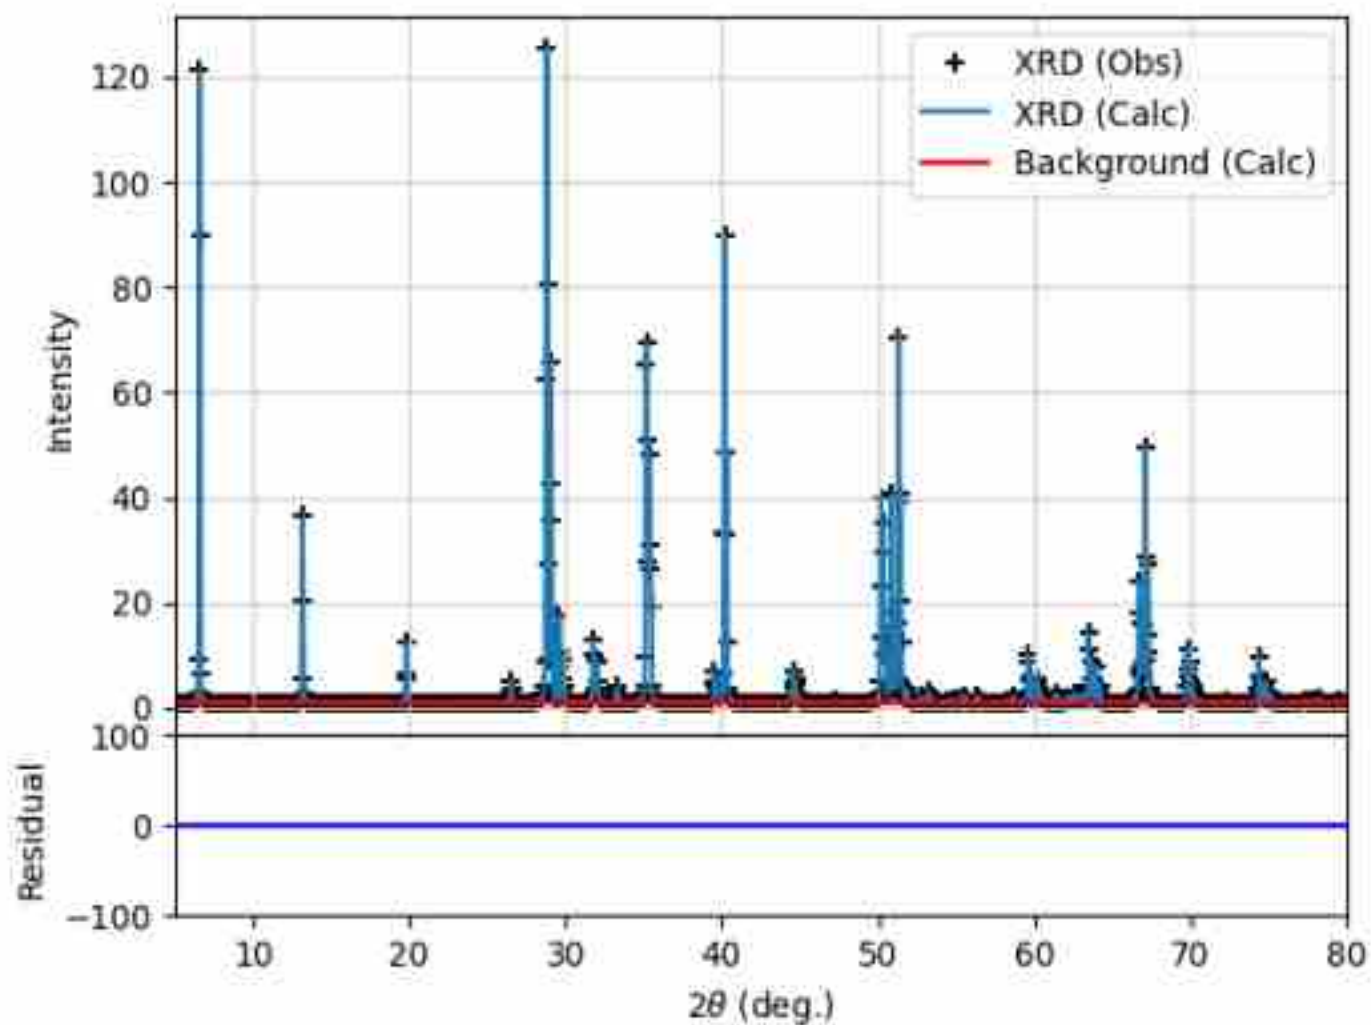

| RMSE before RR | Rwp     | RMSE after RR |
|----------------|---------|---------------|
| 0.024          | 0.00281 | 0.00104       |



# Li1Mn2Co1O6

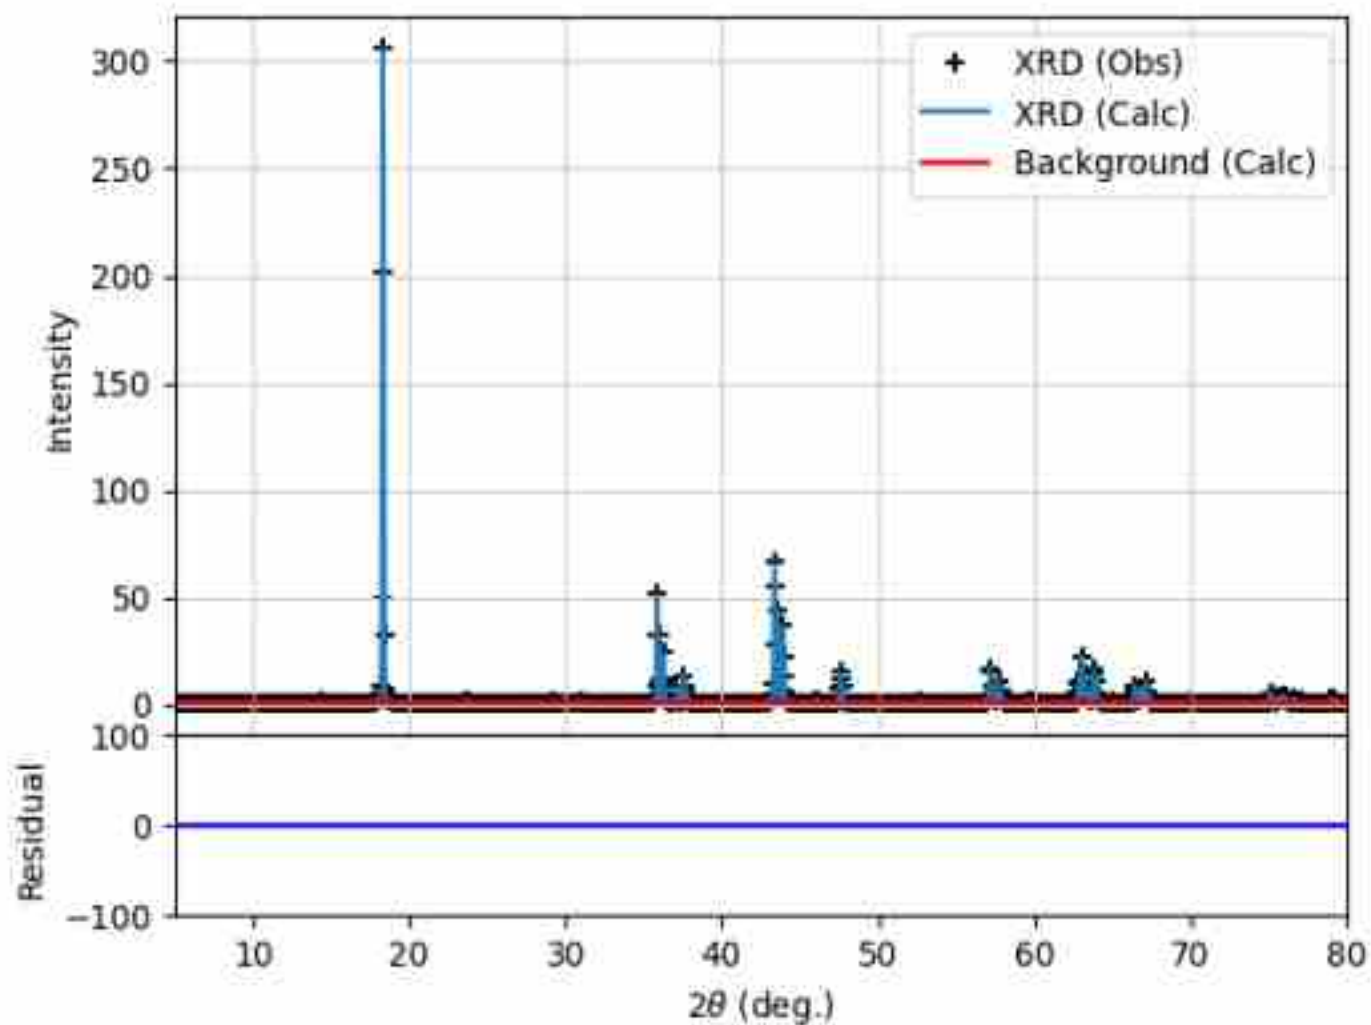

| RMSE before RR | Rwp     | RMSE after RR |
|----------------|---------|---------------|
| 0.024          | 0.00147 | 0.00047       |

# Li1V3Zn2O8

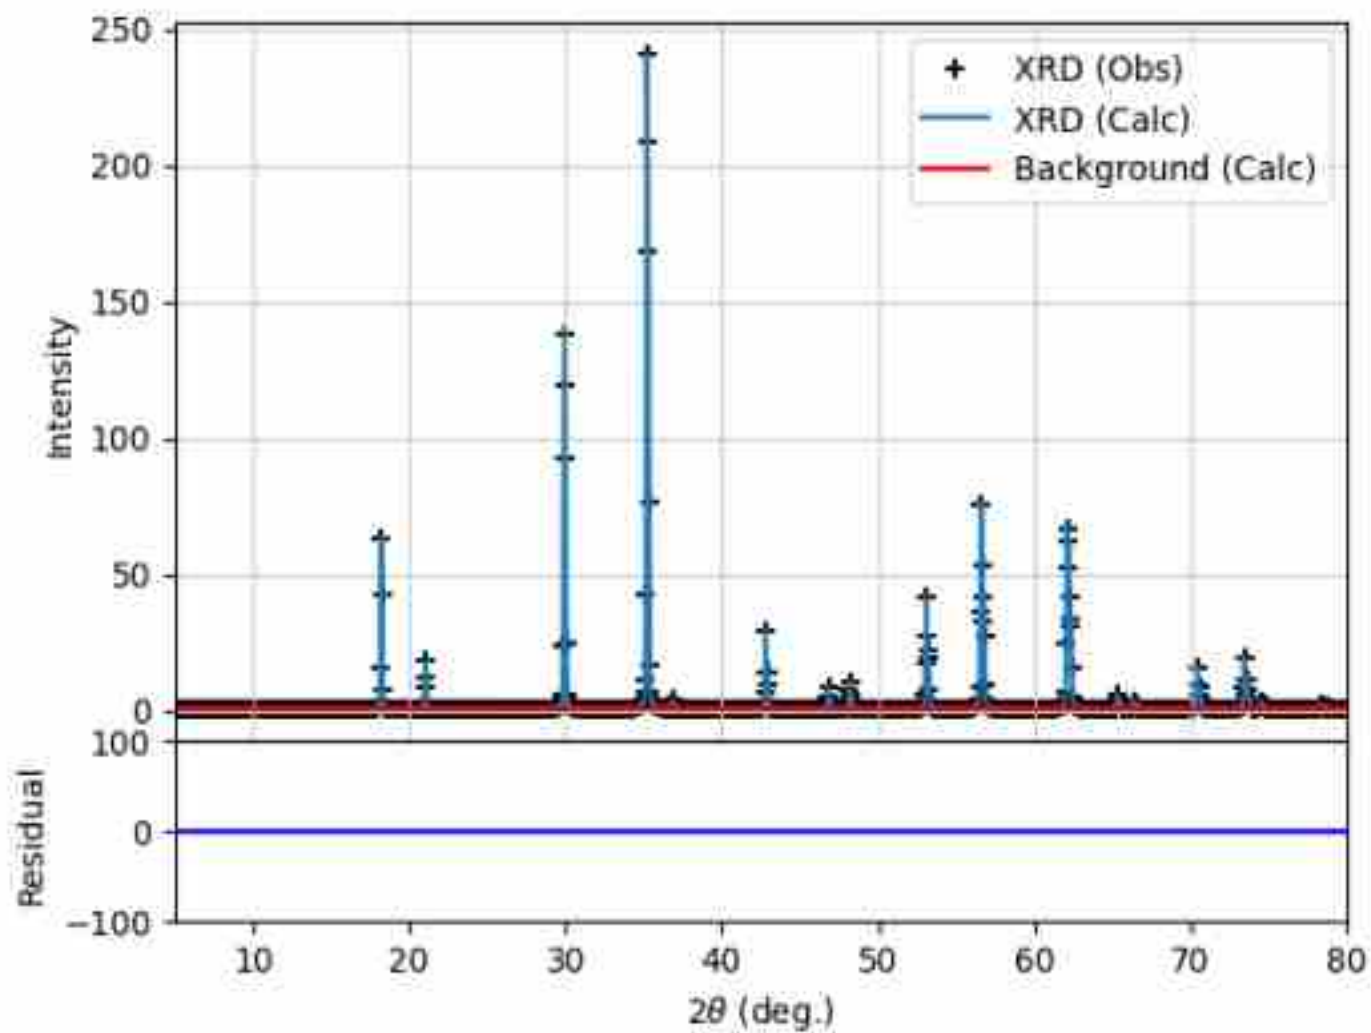

| RMSE before RR | Rwp     | RMSE after RR |
|----------------|---------|---------------|
| 0.024          | 0.00352 | 0.00184       |

# Li<sub>2</sub>Al<sub>2</sub>Pd<sub>2</sub>F<sub>12</sub>

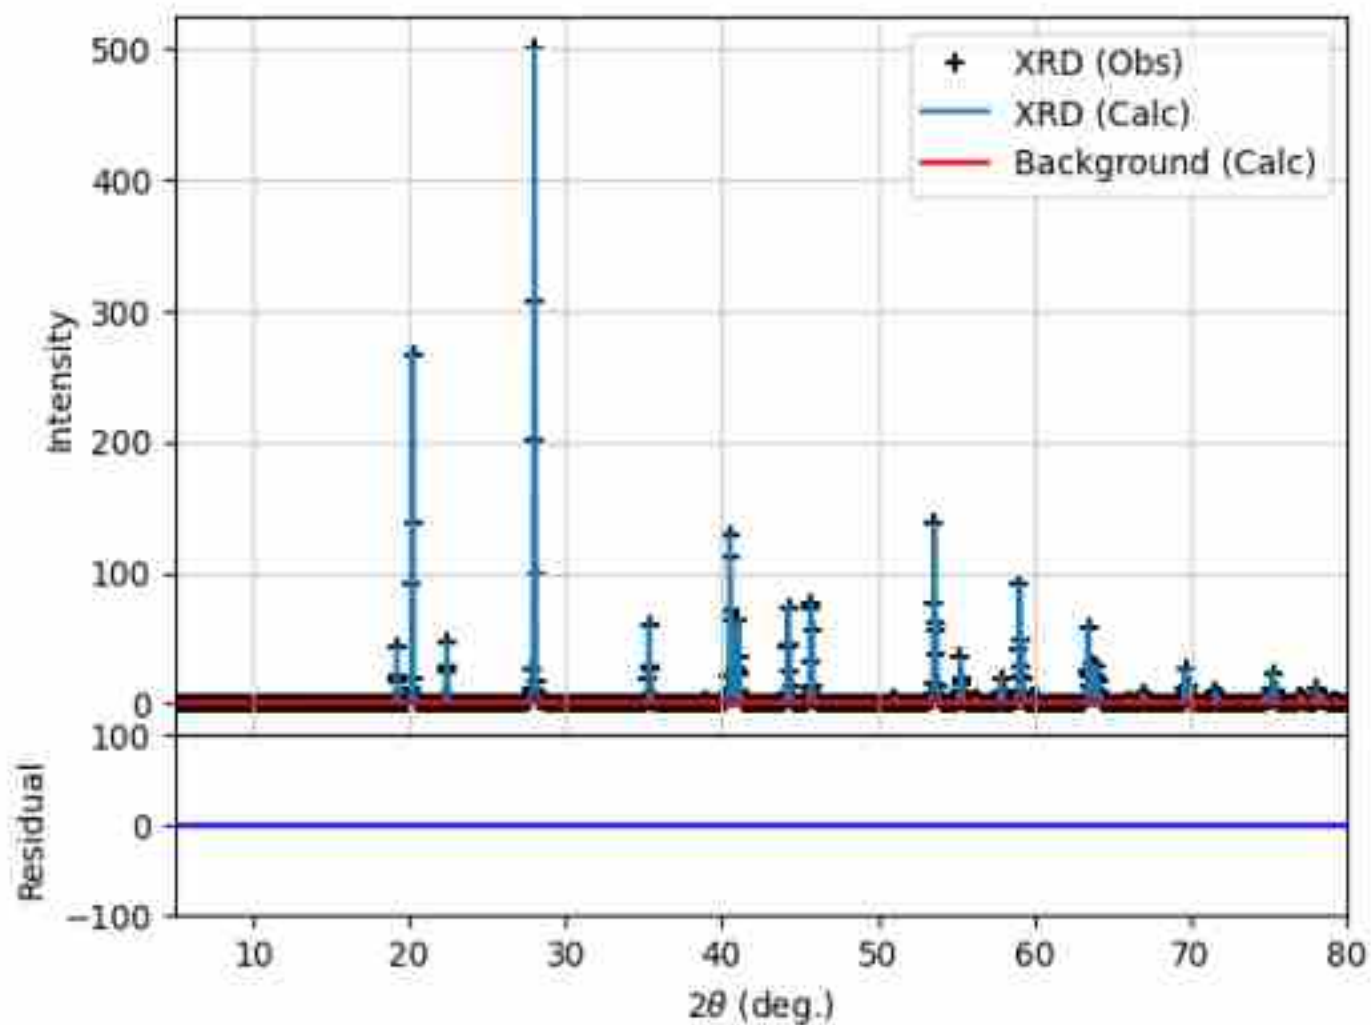

| RMSE before RR | Rwp     | RMSE after RR |
|----------------|---------|---------------|
| 0.024          | 0.01406 | 0.00414       |

# Li<sub>2</sub>La<sub>2</sub>Ti<sub>2</sub>O<sub>8</sub>

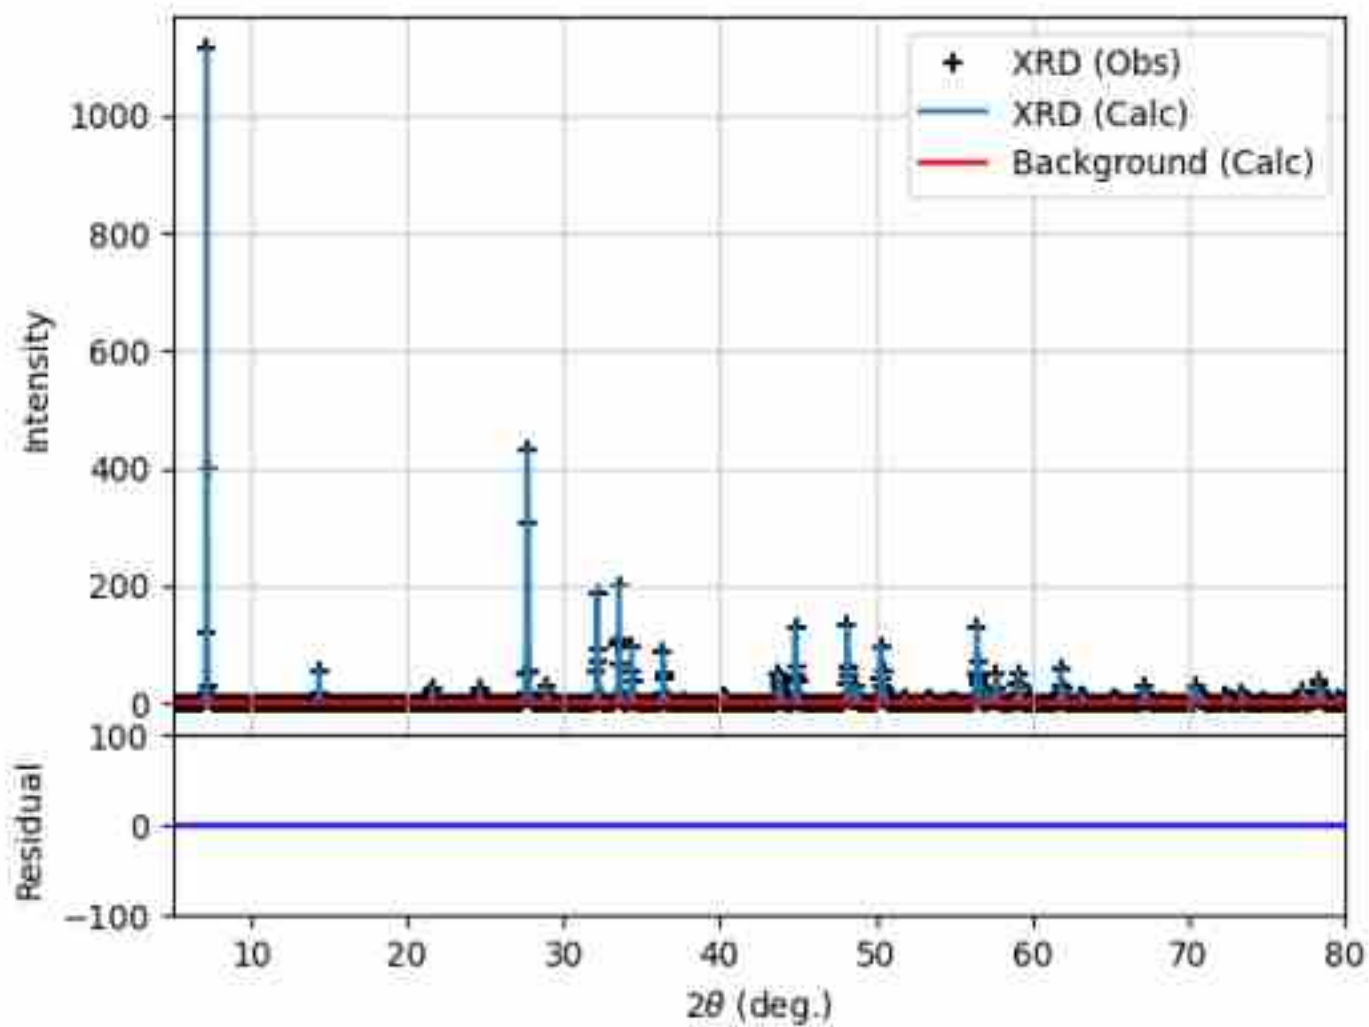

| RMSE before RR | Rwp     | RMSE after RR |
|----------------|---------|---------------|
| 0.024          | 0.00547 | 0.00383       |

# Li<sub>2</sub>U<sub>2</sub>O<sub>6</sub>

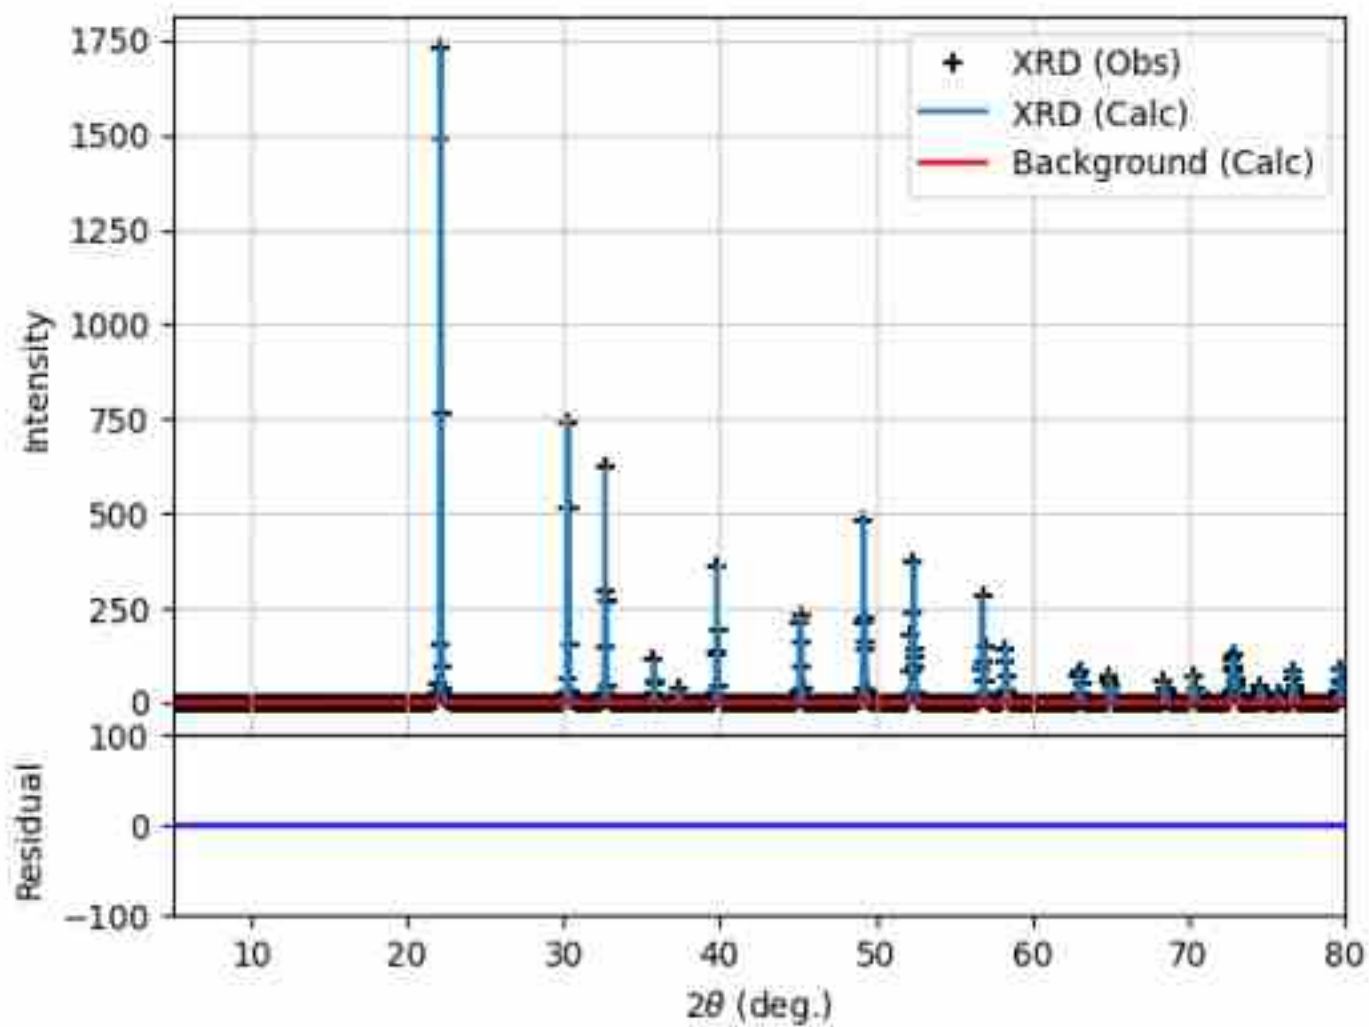

| RMSE before RR | Rwp     | RMSE after RR |
|----------------|---------|---------------|
| 0.024          | 0.00371 | 0.00276       |

# Li<sub>2</sub>V<sub>2</sub>Fe<sub>2</sub>O<sub>8</sub>

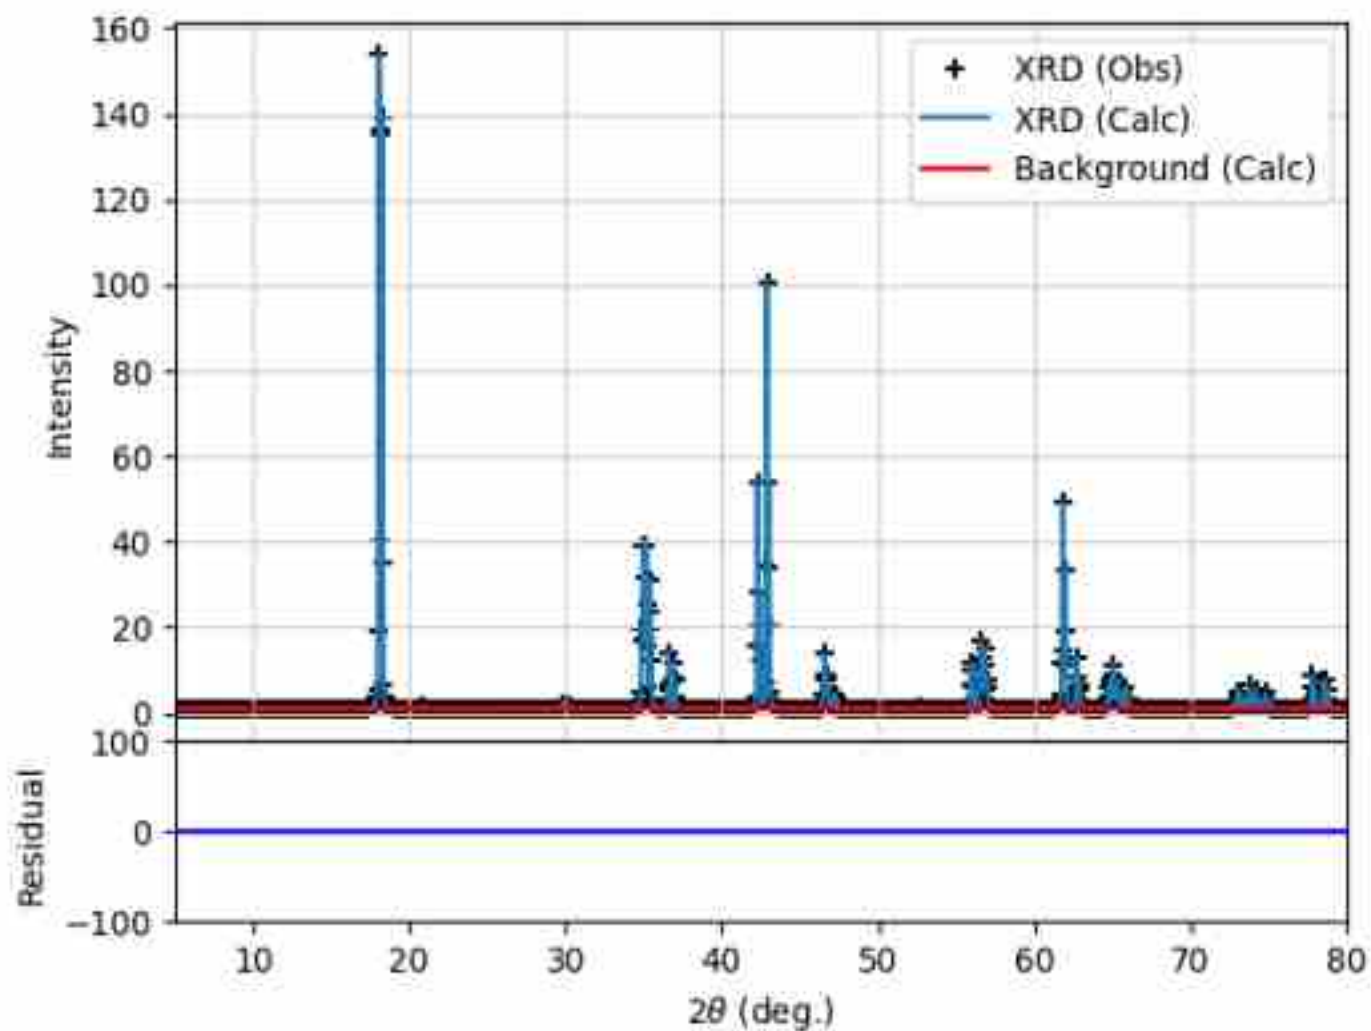

| RMSE before RR | Rwp     | RMSE after RR |
|----------------|---------|---------------|
| 0.024          | 0.00347 | 0.00135       |

# Li<sub>3</sub>V<sub>1</sub>P<sub>2</sub>O<sub>8</sub>

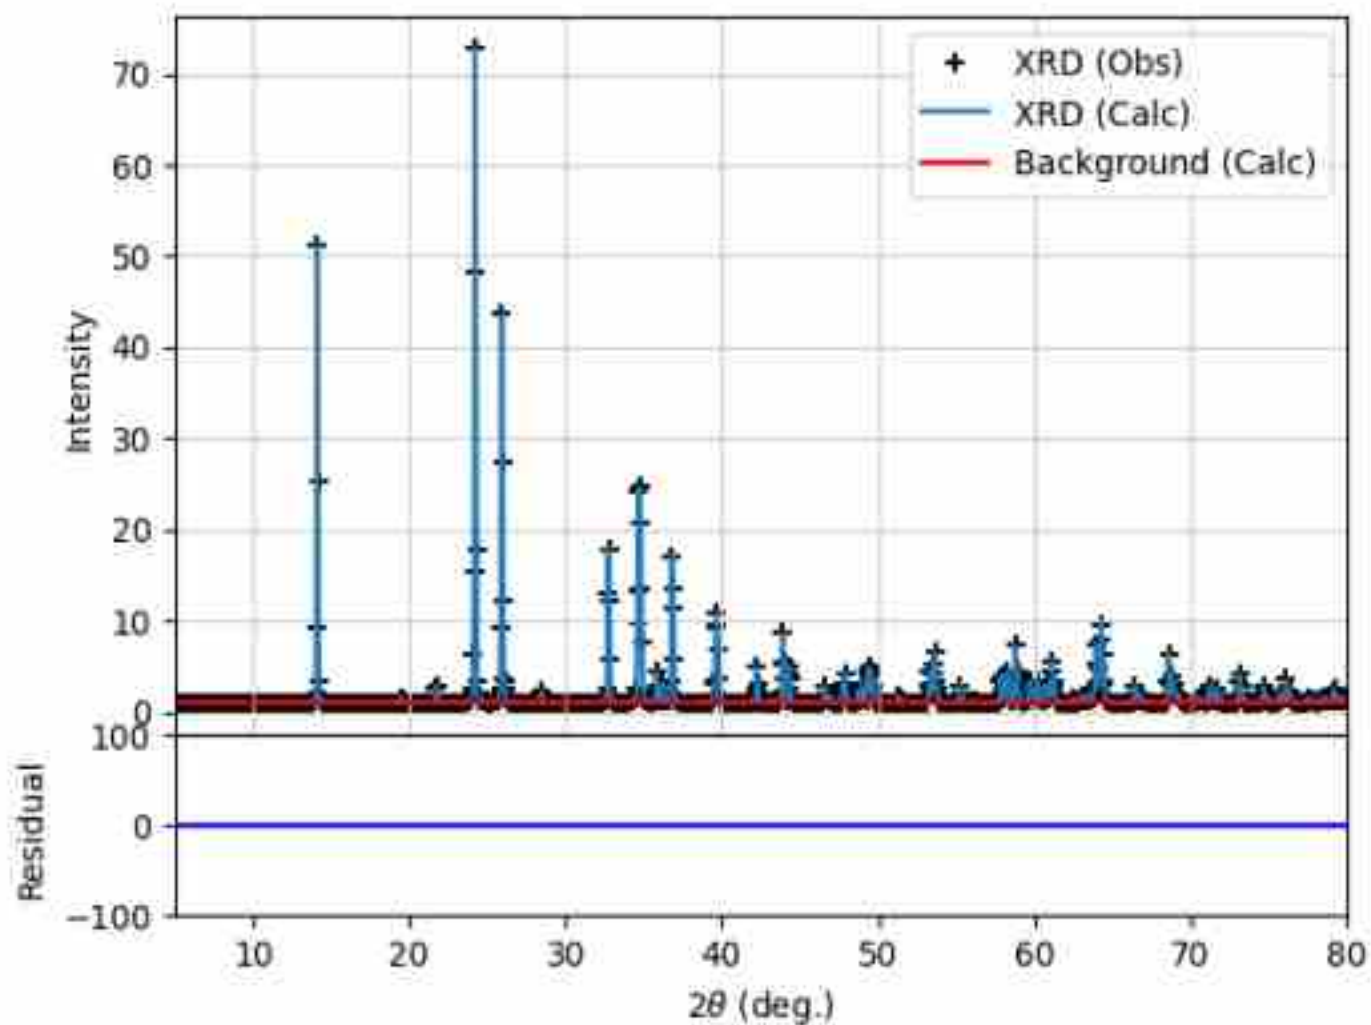

| RMSE before RR | Rwp     | RMSE after RR |
|----------------|---------|---------------|
| 0.024          | 0.00205 | 0.00095       |

# Li<sub>4</sub>Cu<sub>2</sub>P<sub>2</sub>

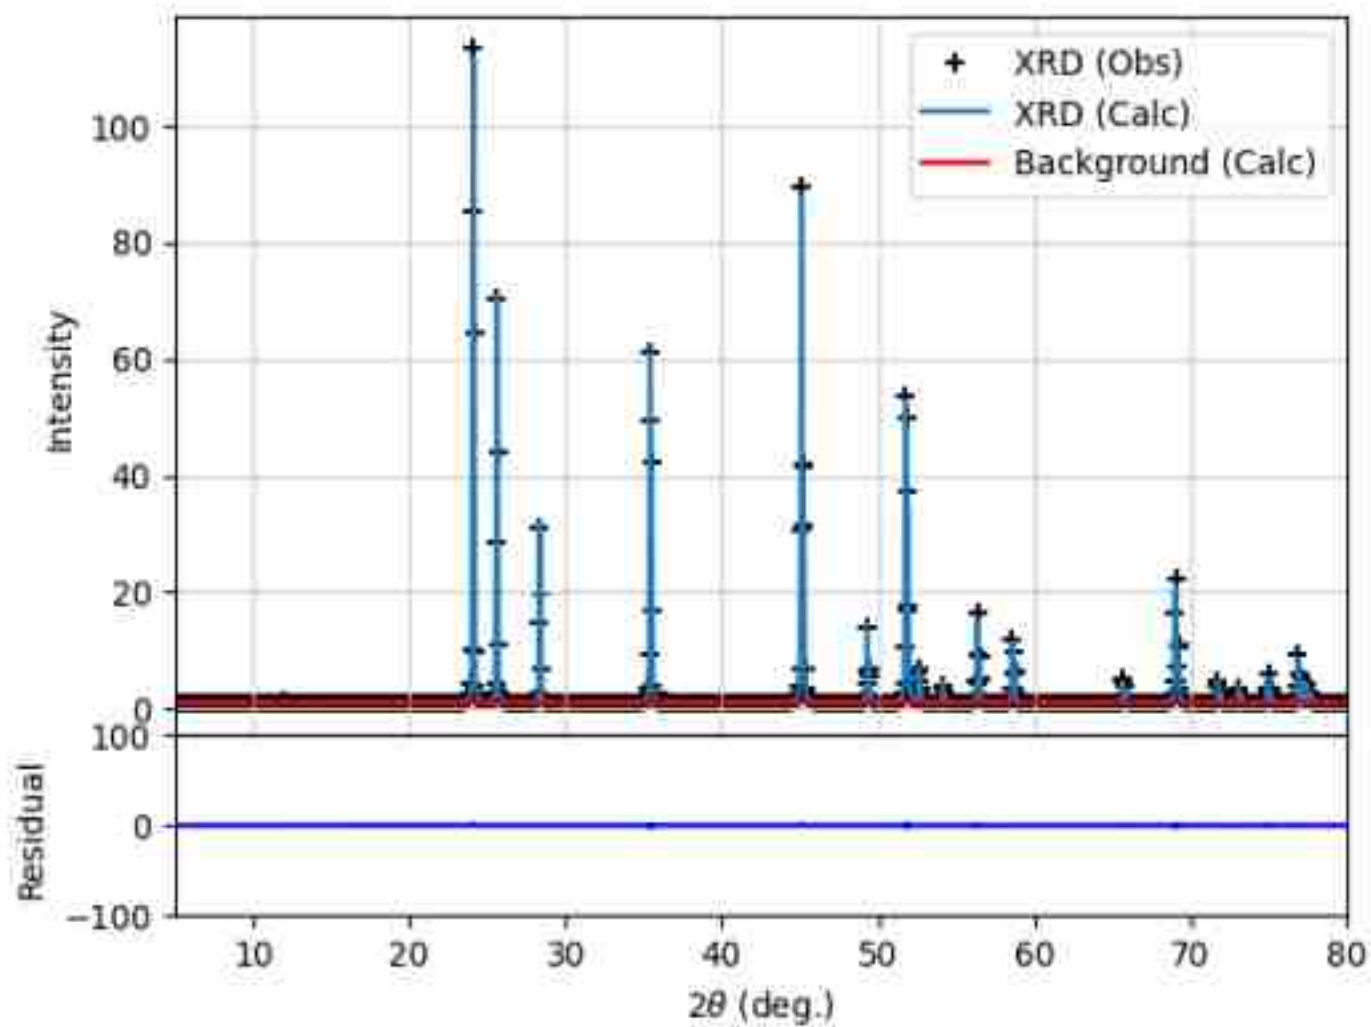

| RMSE before RR | Rwp     | RMSE after RR |
|----------------|---------|---------------|
| 0.024          | 3.28978 | 0.12475       |



# Li<sub>4</sub>Nd<sub>3</sub>Ge<sub>4</sub>

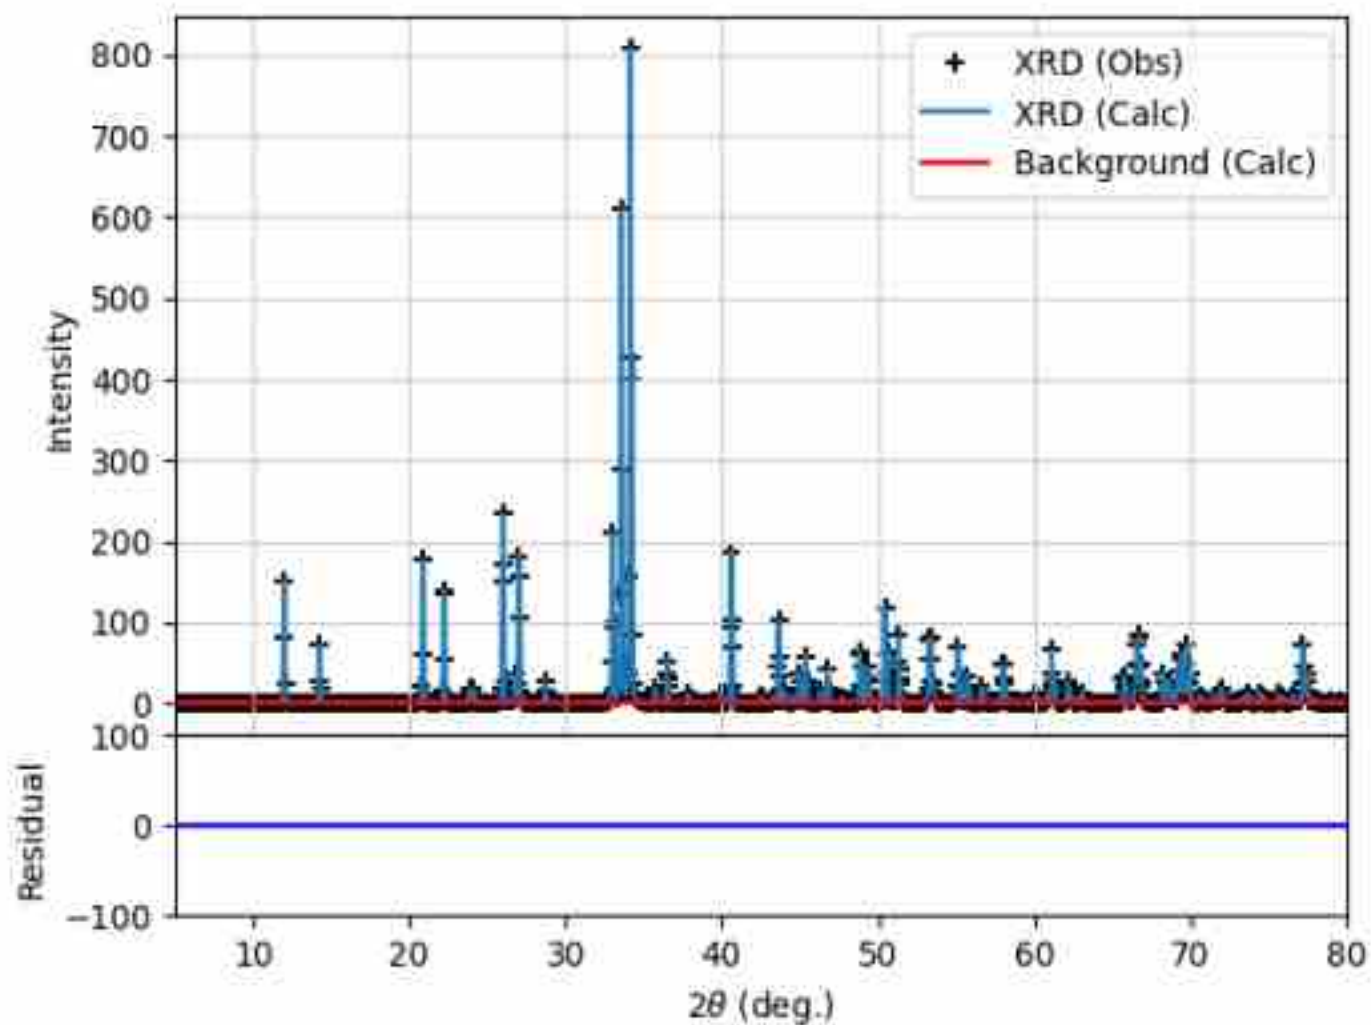

| RMSE before RR | Rwp     | RMSE after RR |
|----------------|---------|---------------|
| 0.024          | 0.00339 | 0.00167       |

# Lu<sub>2</sub>Nb<sub>2</sub>O<sub>8</sub>

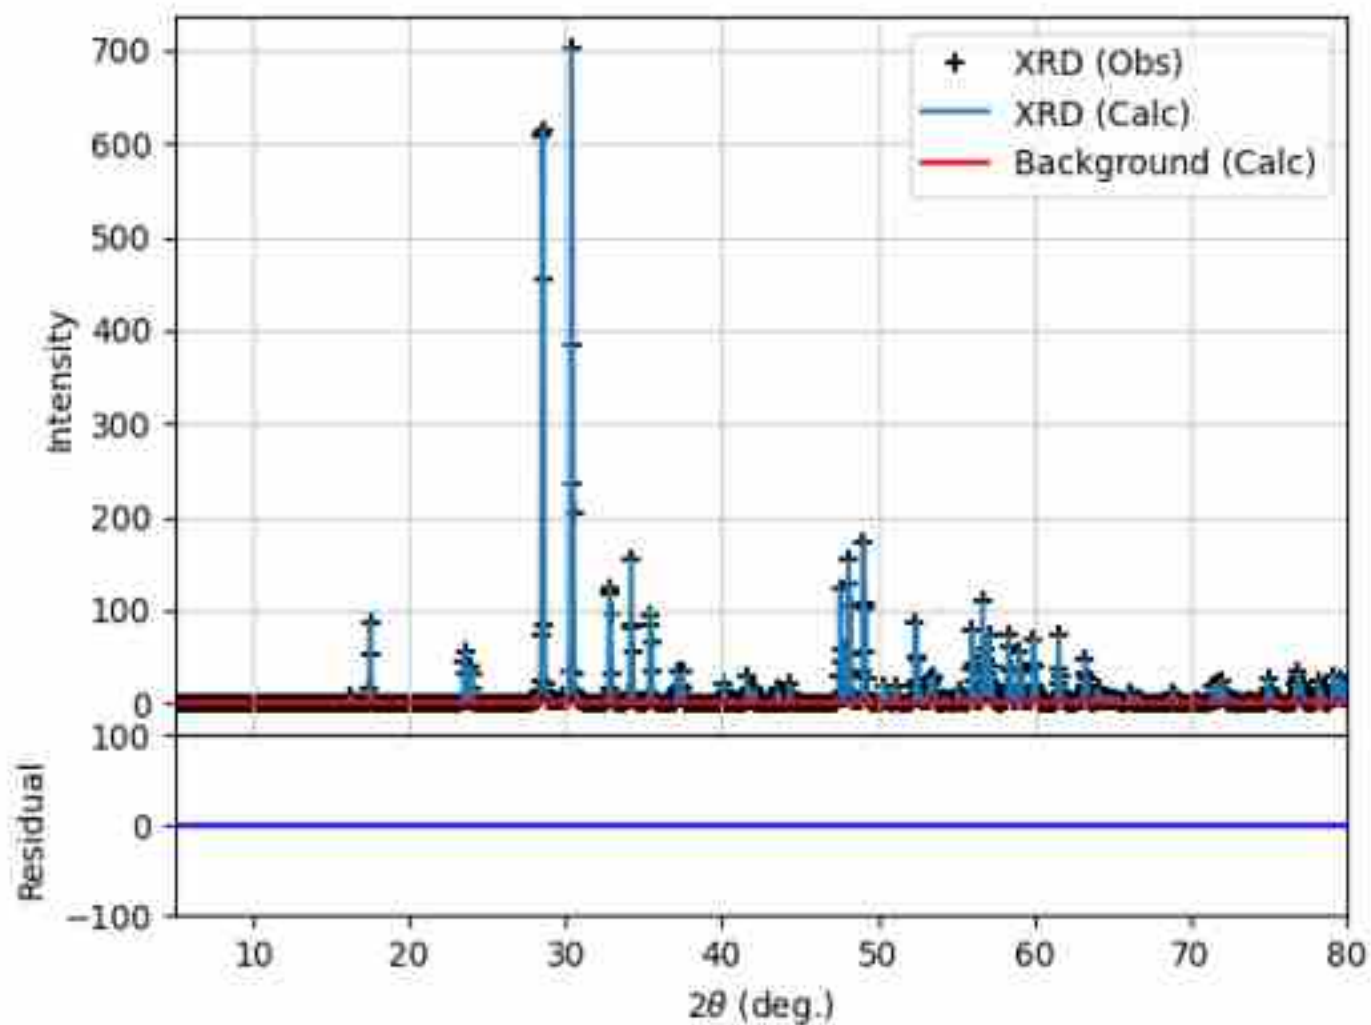

| RMSE before RR | Rwp     | RMSE after RR |
|----------------|---------|---------------|
| 0.024          | 0.00372 | 0.00151       |

# Lu<sub>3</sub>Ga<sub>10</sub>Ni<sub>1</sub>

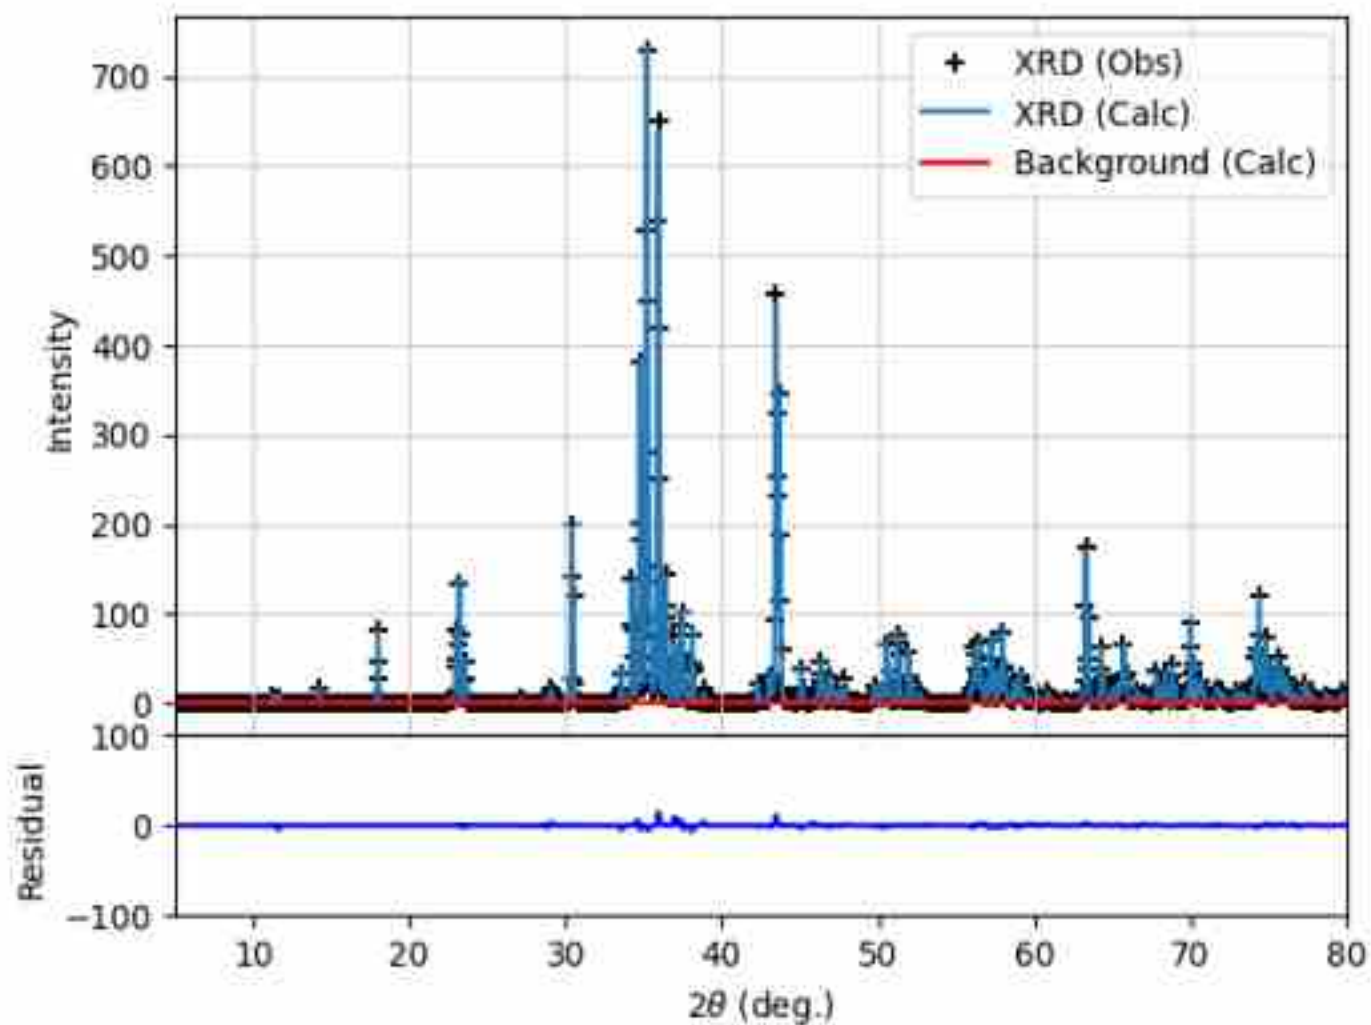

| RMSE before RR | Rwp     | RMSE after RR |
|----------------|---------|---------------|
| 0.024          | 5.14689 | 0.05314       |

# Lu6Ge6Ir4

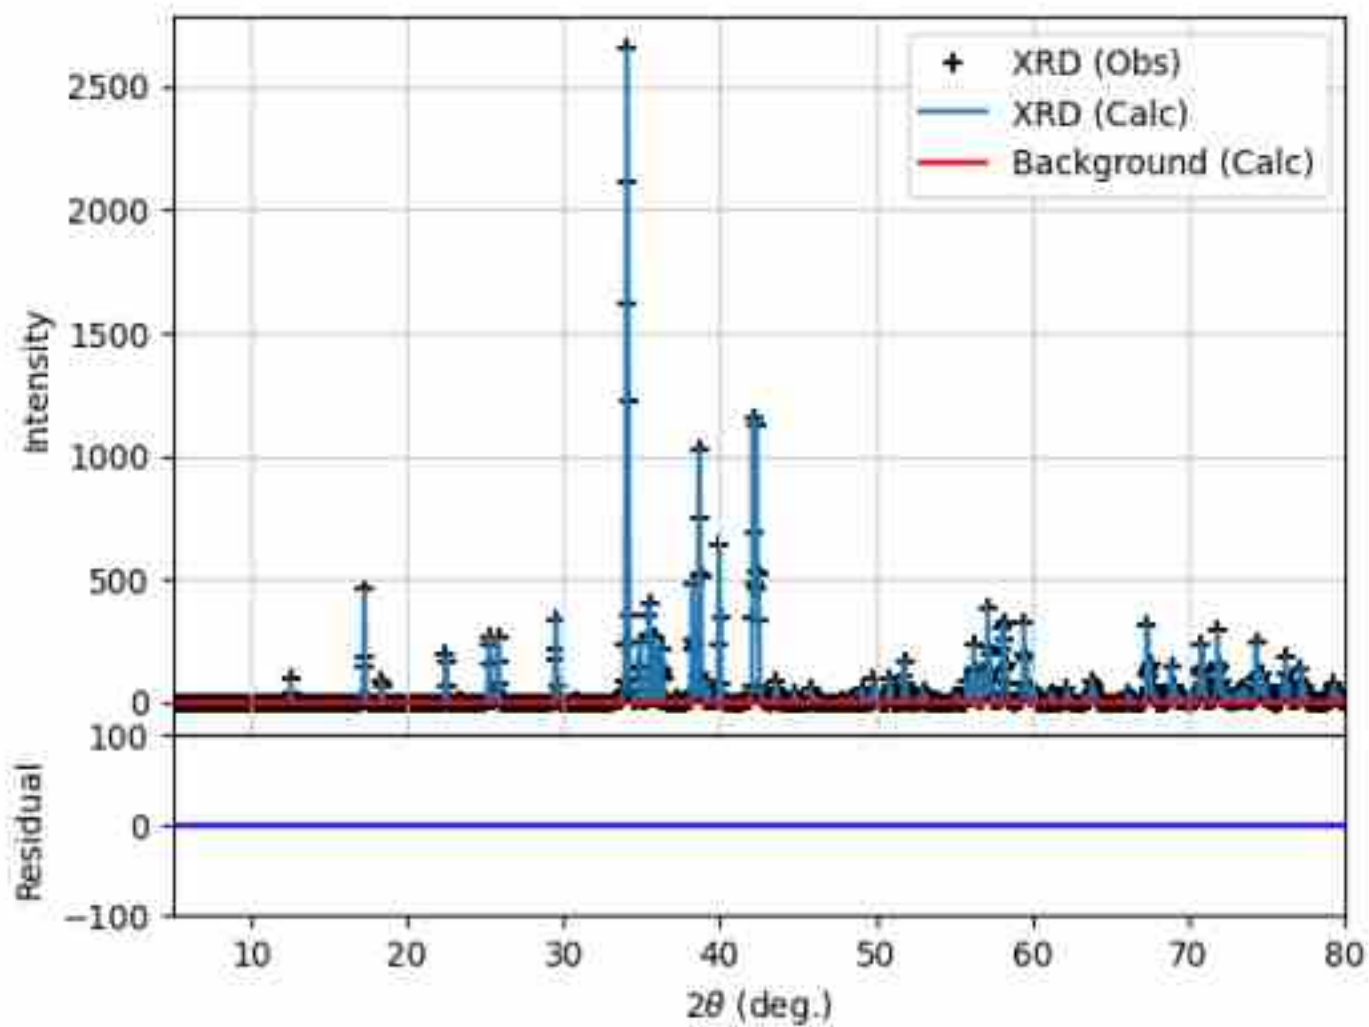

| RMSE before RR | Rwp     | RMSE after RR |
|----------------|---------|---------------|
| 0.024          | 0.00354 | 0.0003        |

# Lu10Ni4Bi2

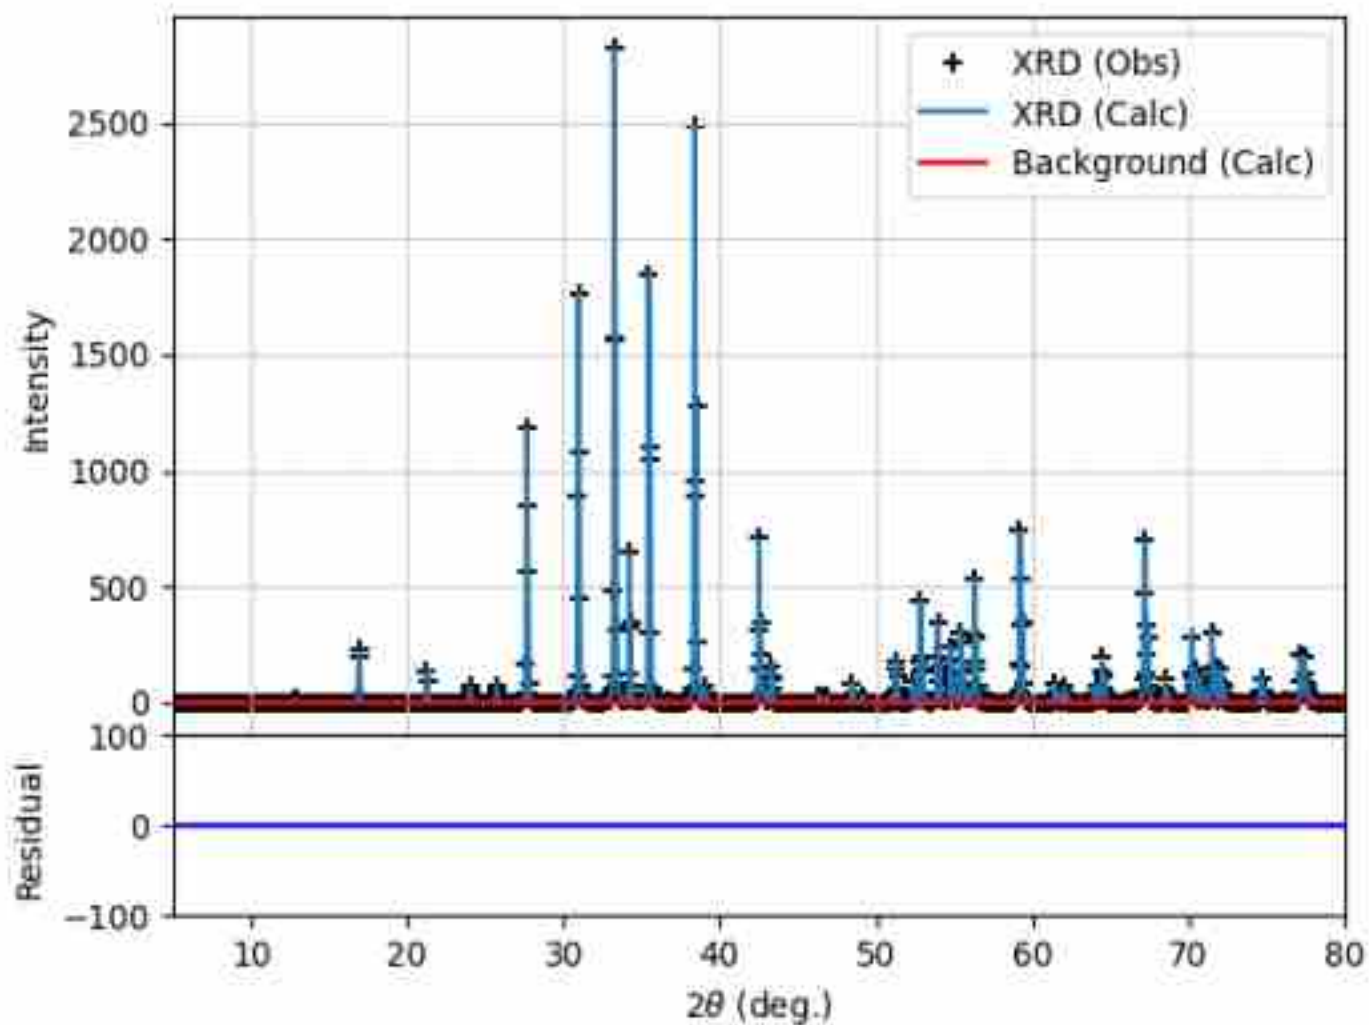

| RMSE before RR | Rwp     | RMSE after RR |
|----------------|---------|---------------|
| 0.024          | 0.00445 | 0.00049       |

# Mg<sub>2</sub>Sn<sub>4</sub>O<sub>10</sub>

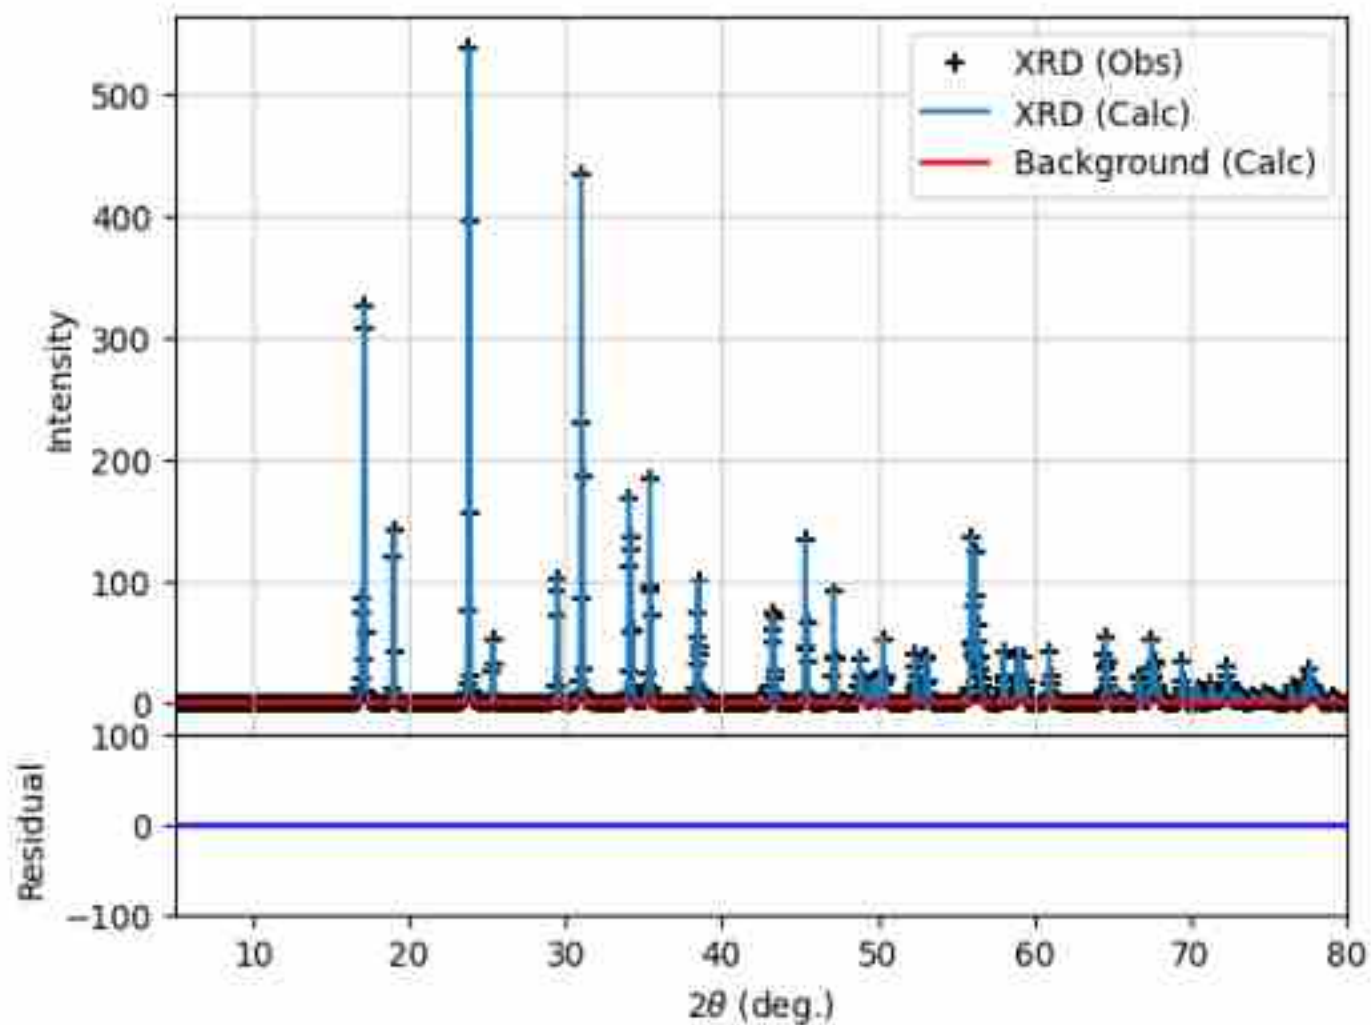

| RMSE before RR | Rwp     | RMSE after RR |
|----------------|---------|---------------|
| 0.024          | 0.00418 | 0.00157       |

# Mg<sub>2</sub>Ti<sub>4</sub>O<sub>8</sub>

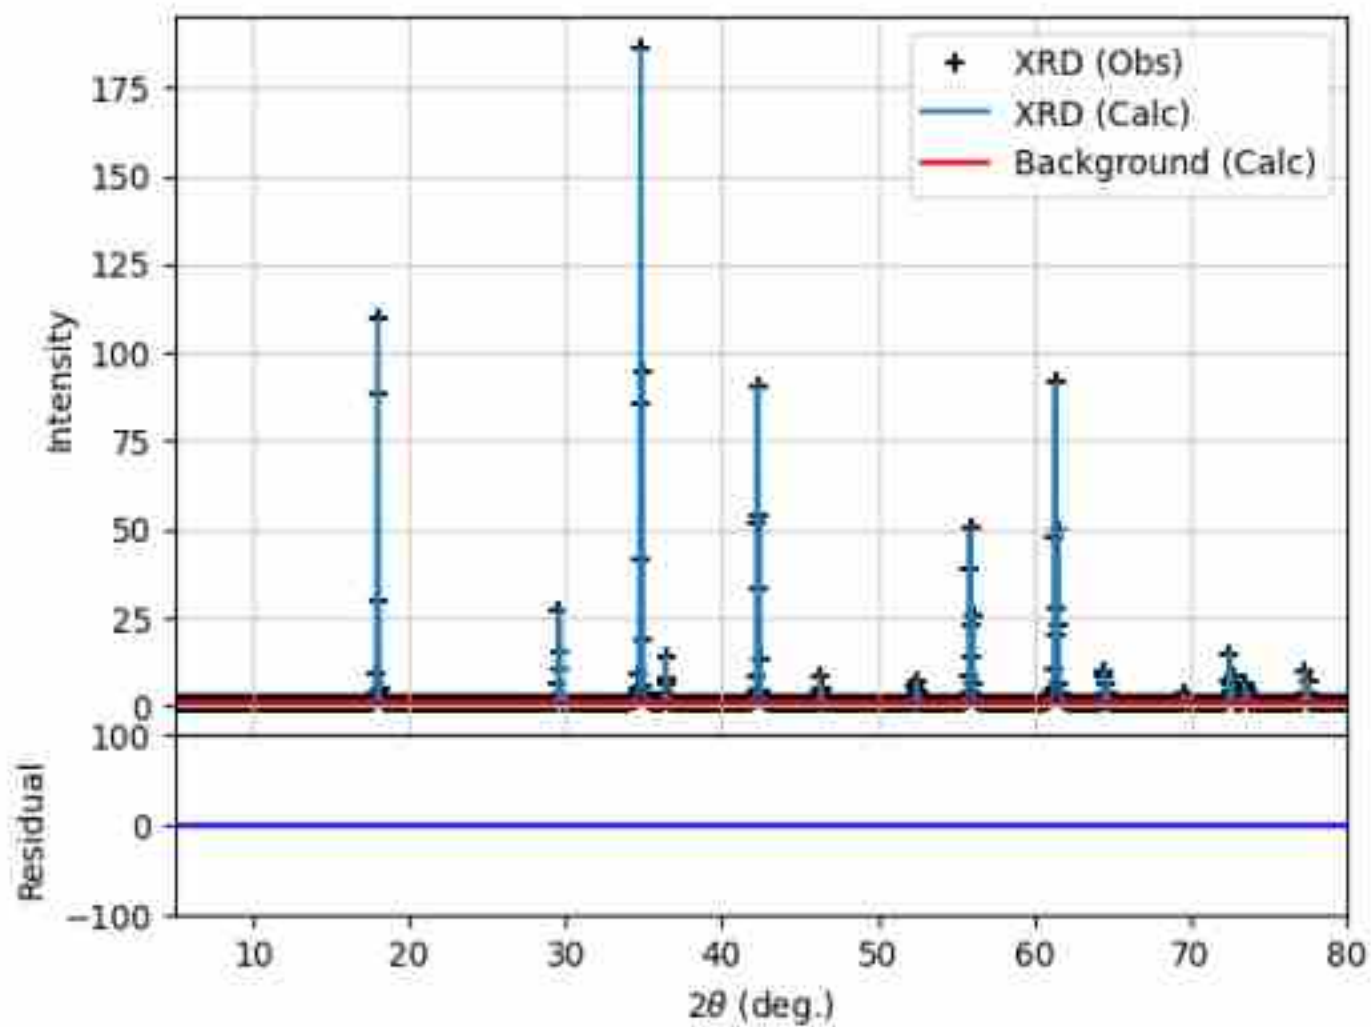

| RMSE before RR | Rwp     | RMSE after RR |
|----------------|---------|---------------|
| 0.024          | 0.07426 | 0.00752       |

# Mn<sub>1</sub>Cu<sub>2</sub>Sn<sub>3</sub>S<sub>8</sub>

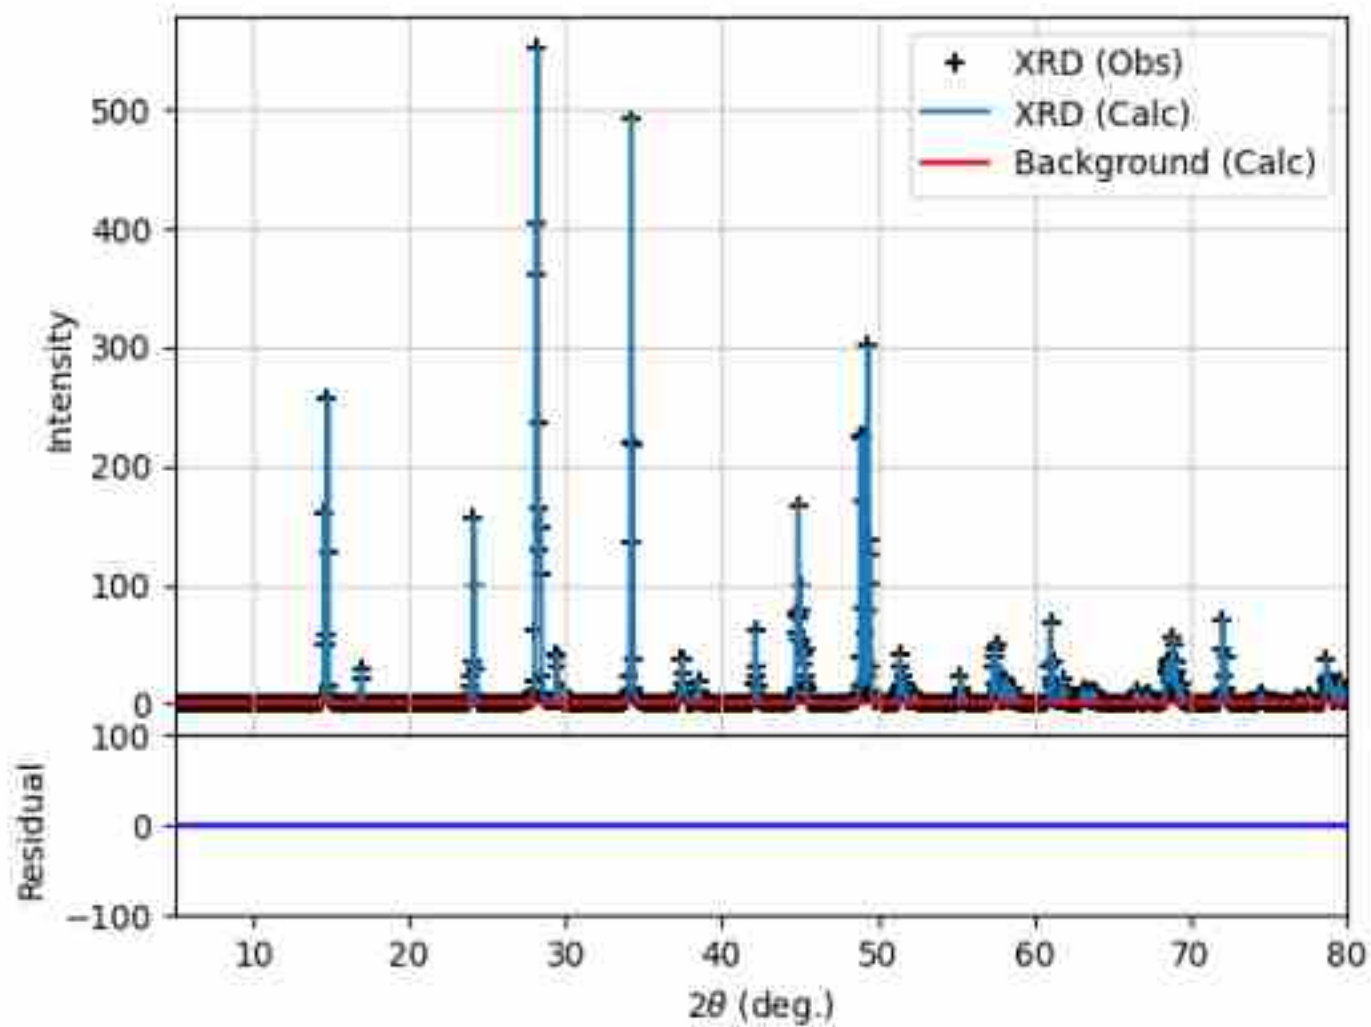

| RMSE before RR | Rwp    | RMSE after RR |
|----------------|--------|---------------|
| 0.024          | 0.0029 | 0.00037       |



# Mn1H4Cl2O2

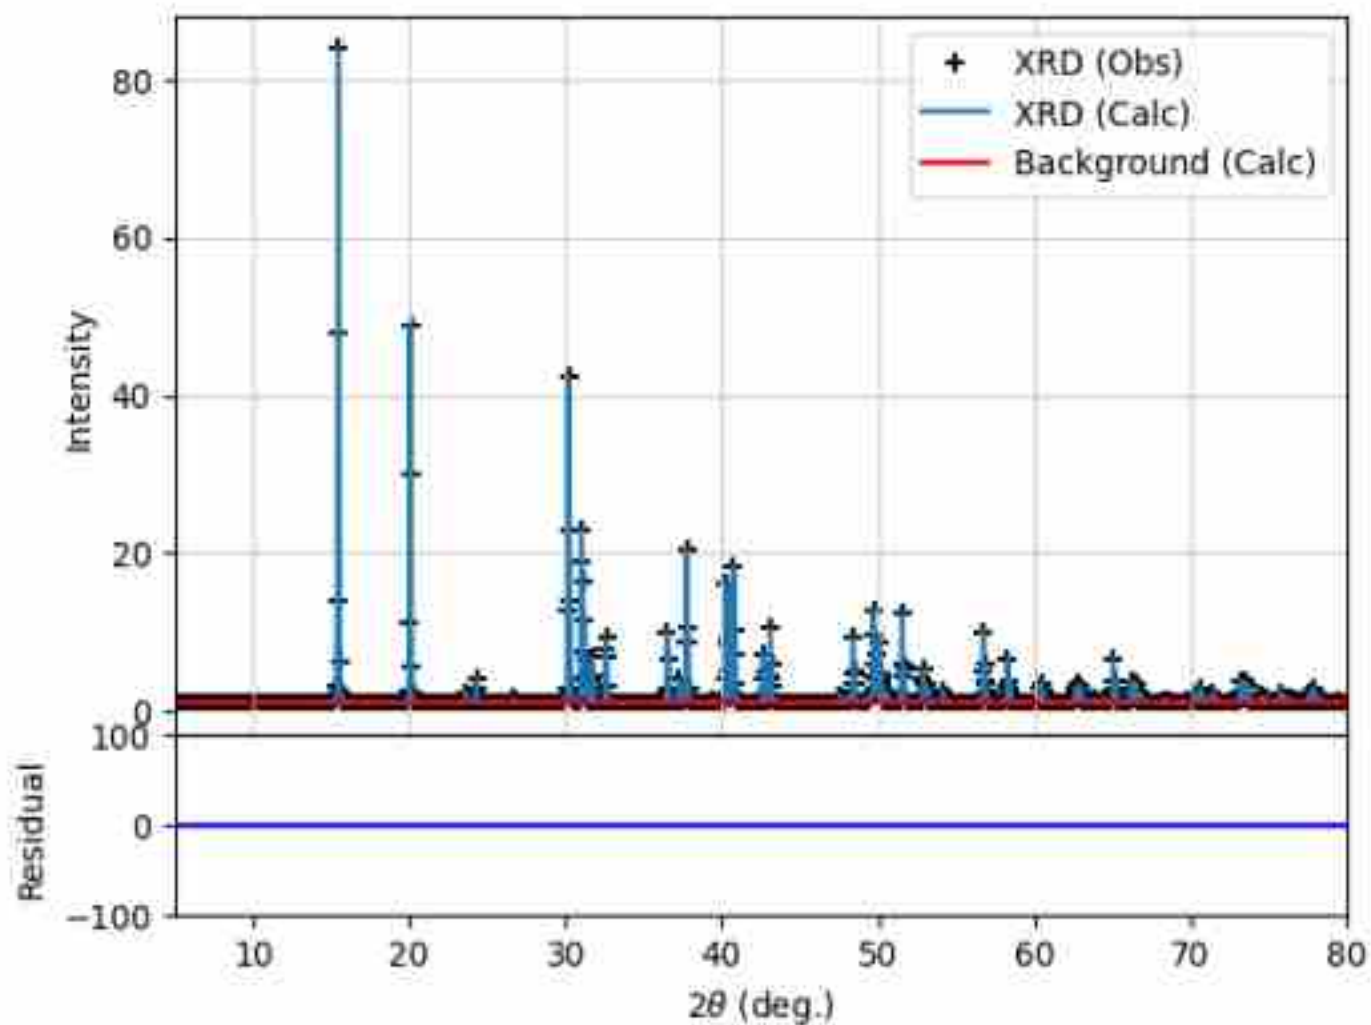

| RMSE before RR | Rwp     | RMSE after RR |
|----------------|---------|---------------|
| 0.024          | 0.04018 | 0.19647       |

# Mn<sub>1</sub>Hg<sub>3</sub>S<sub>4</sub>

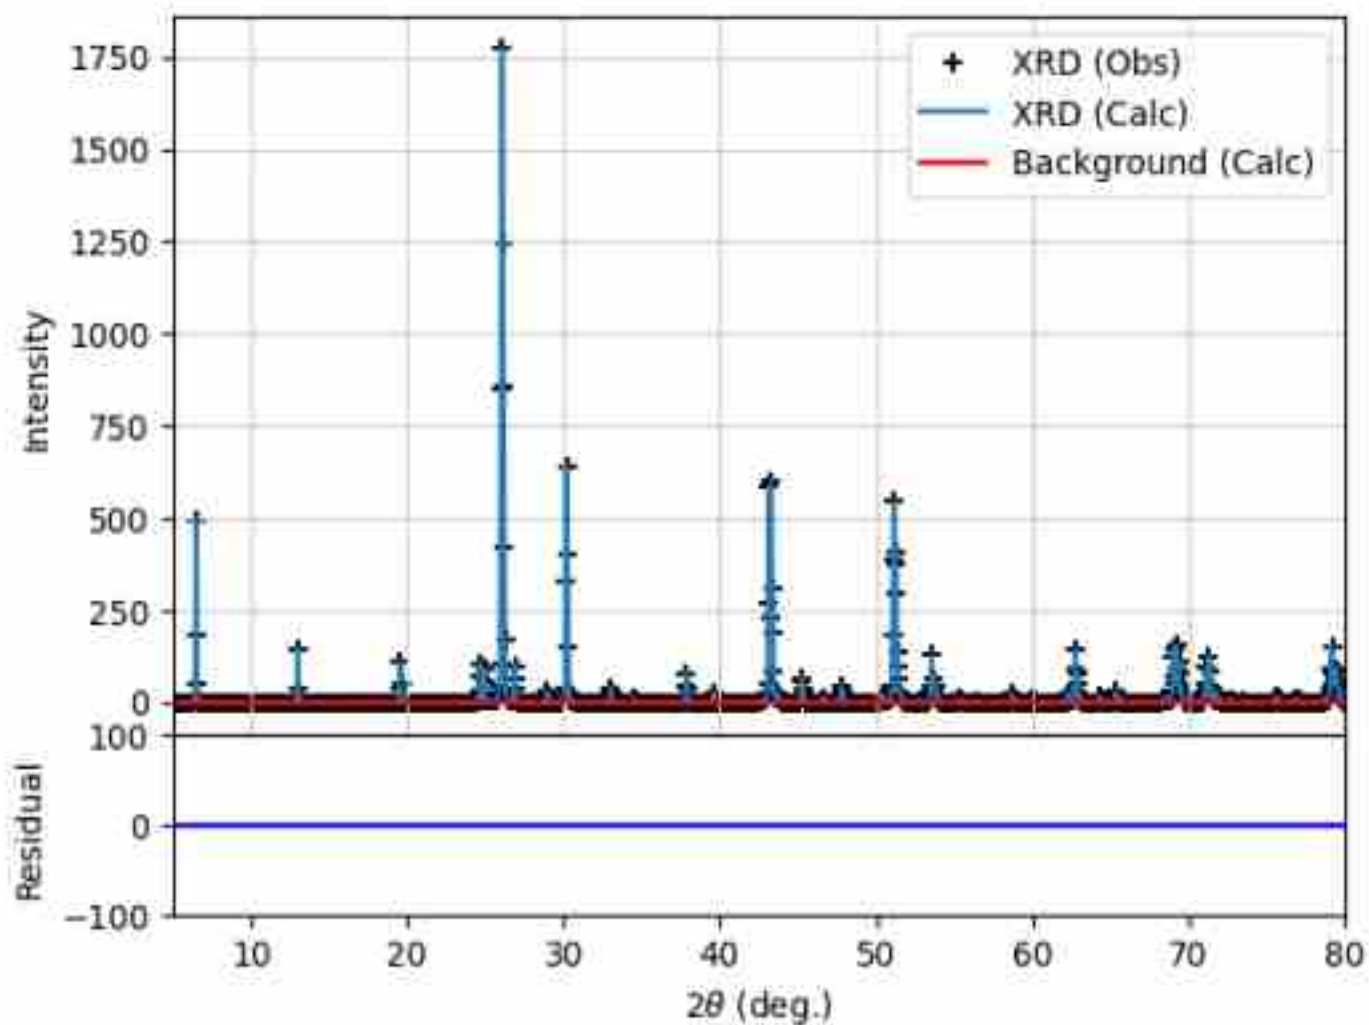

| RMSE before RR | Rwp    | RMSE after RR |
|----------------|--------|---------------|
| 0.024          | 0.0029 | 0.00029       |

# Mn<sub>4</sub>Cu<sub>2</sub>O<sub>8</sub>

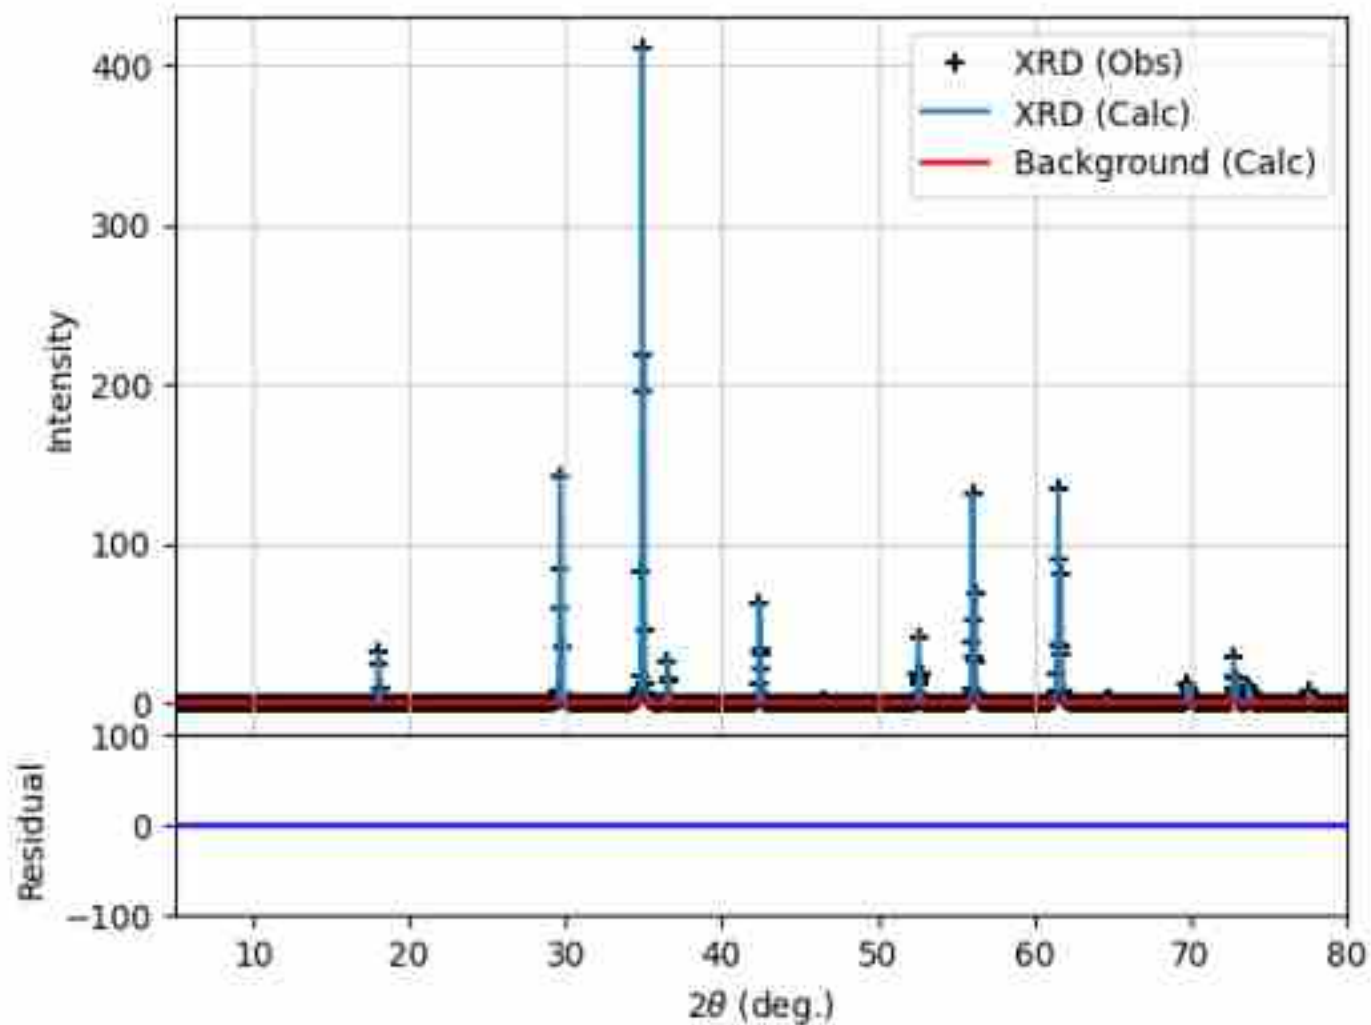

| RMSE before RR | Rwp     | RMSE after RR |
|----------------|---------|---------------|
| 0.024          | 0.05667 | 0.0073        |

# Mn<sub>4</sub>Hg<sub>2</sub>O<sub>8</sub>

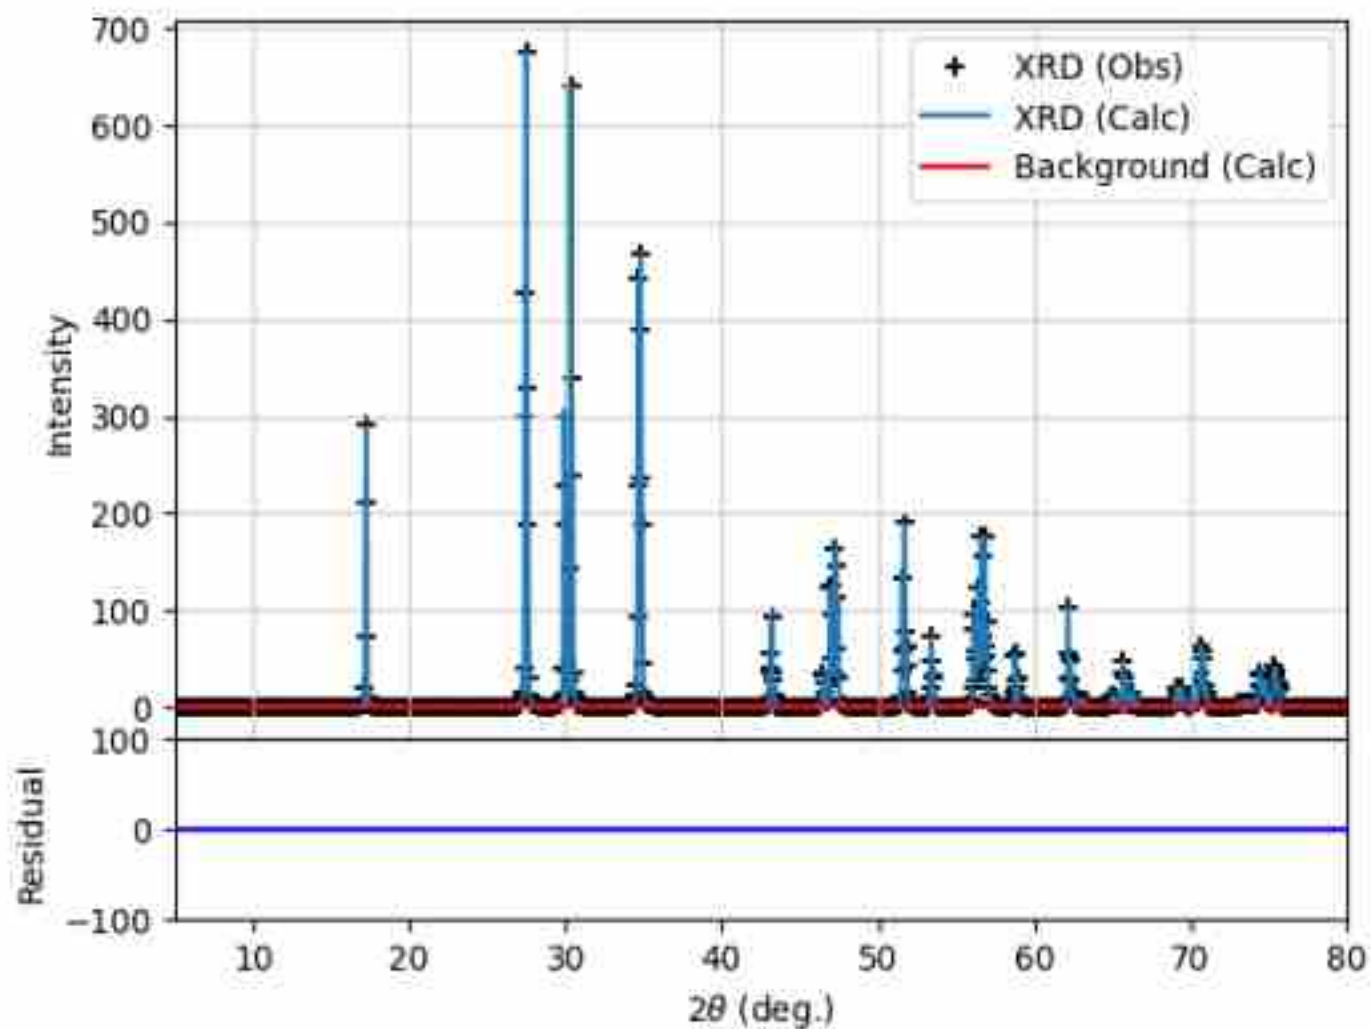

| RMSE before RR | Rwp     | RMSE after RR |
|----------------|---------|---------------|
| 0.024          | 0.00306 | 0.0014        |

# Na<sub>1</sub>Ti<sub>3</sub>Nb<sub>1</sub>Cu<sub>3</sub>O<sub>12</sub>

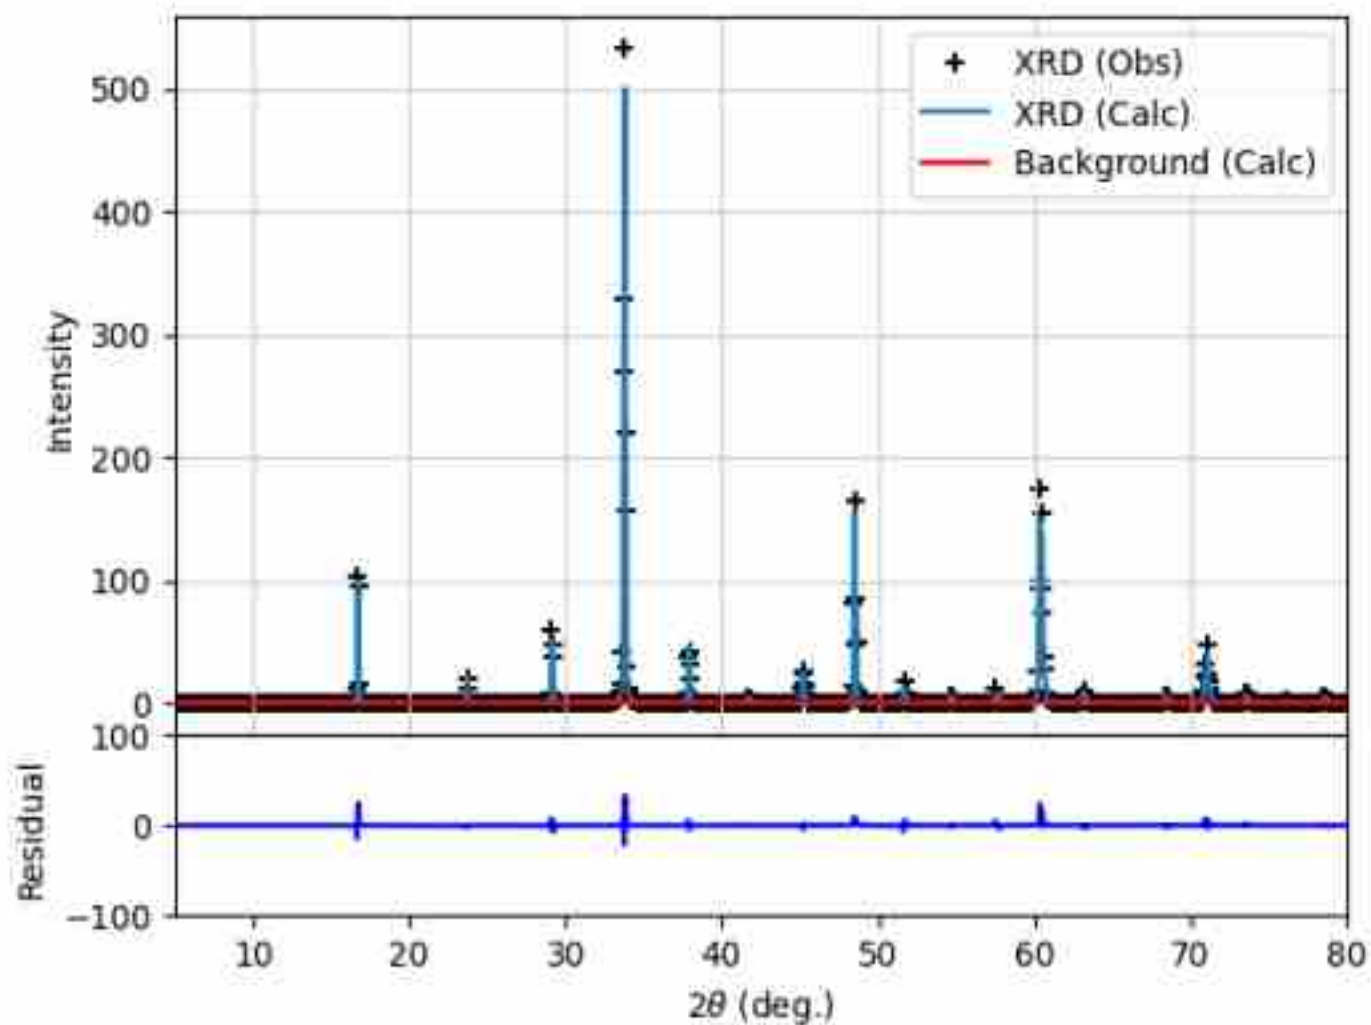

| RMSE before RR | Rwp      | RMSE after RR |
|----------------|----------|---------------|
| 0.024          | 12.63537 | 0.07906       |

# Na<sub>2</sub>Ge<sub>2</sub>Sb<sub>2</sub>O<sub>10</sub>

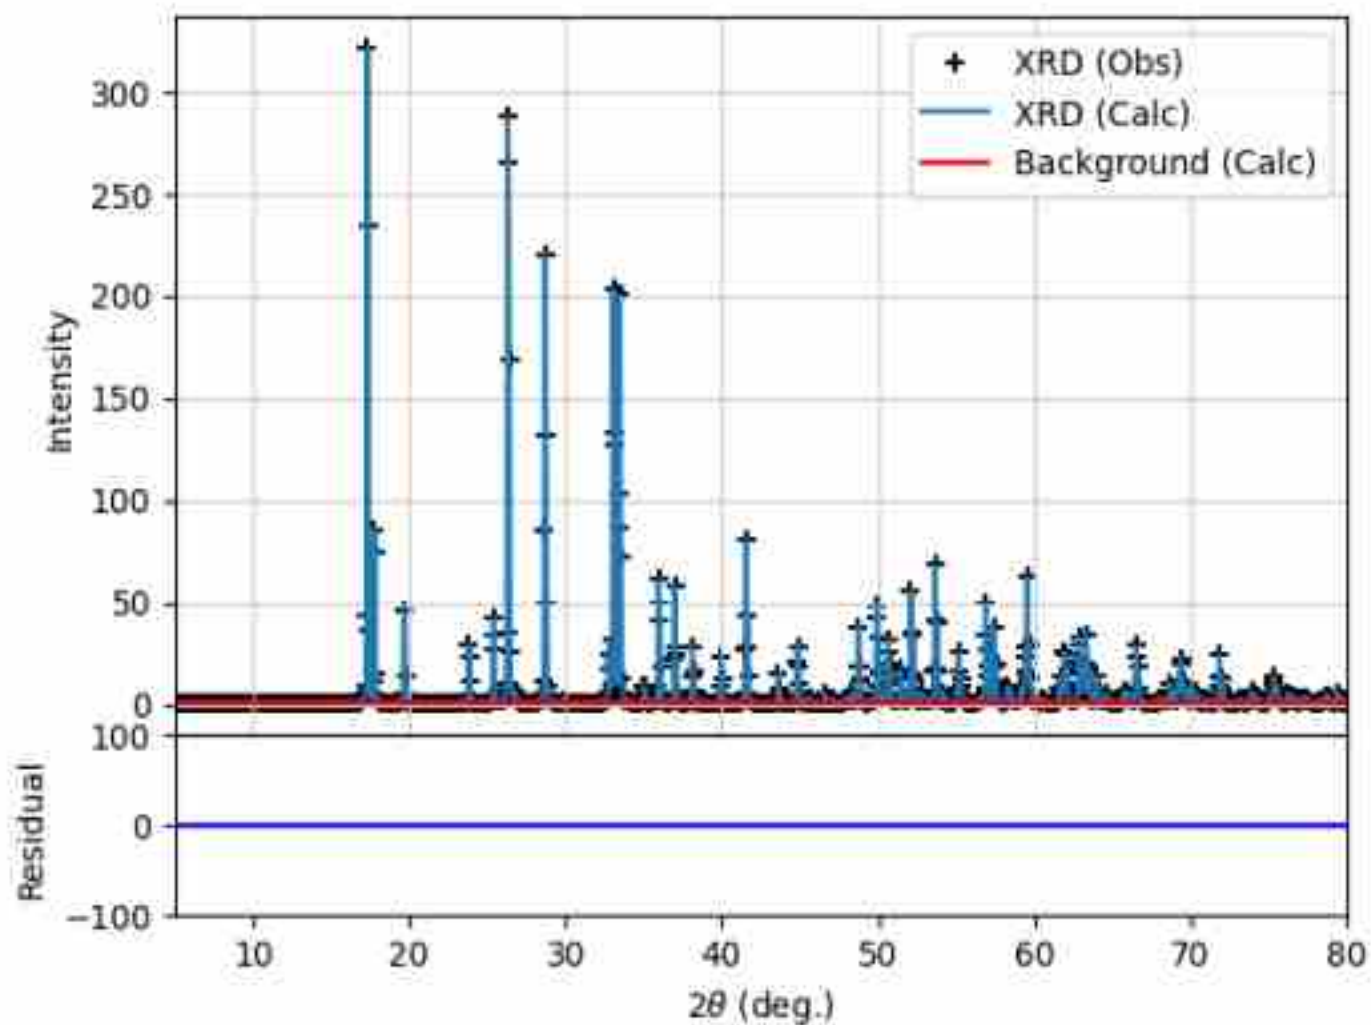

| RMSE before RR | Rwp     | RMSE after RR |
|----------------|---------|---------------|
| 0.024          | 0.00313 | 0.00083       |

# Na<sub>2</sub>Sb<sub>2</sub>S<sub>4</sub>

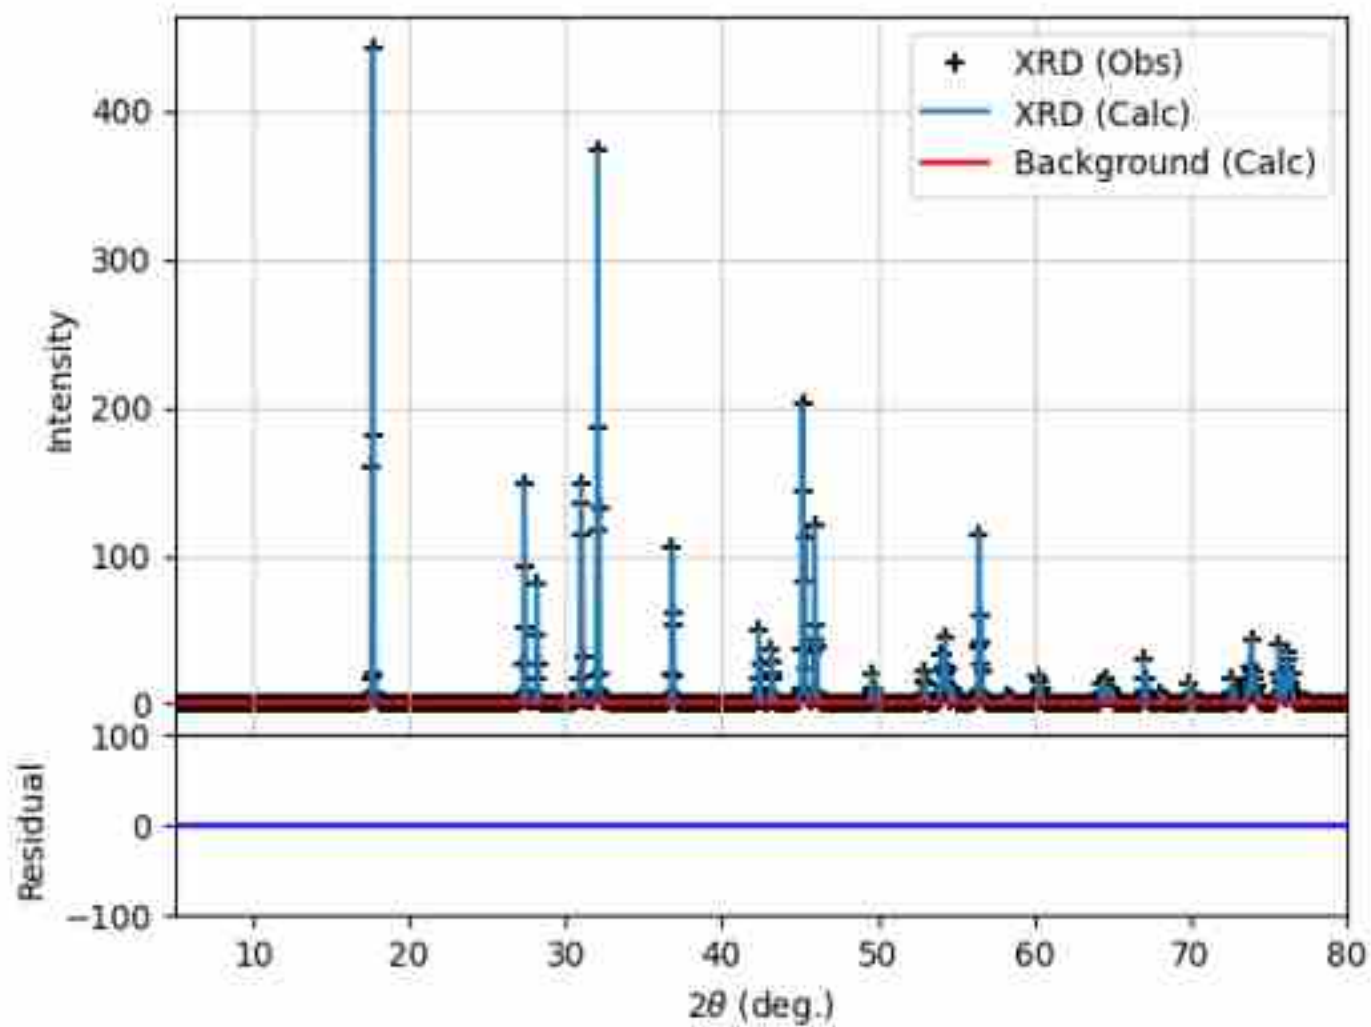

| RMSE before RR | Rwp     | RMSE after RR |
|----------------|---------|---------------|
| 0.024          | 0.00303 | 0.00065       |

# Na<sub>2</sub>ThF<sub>6</sub>

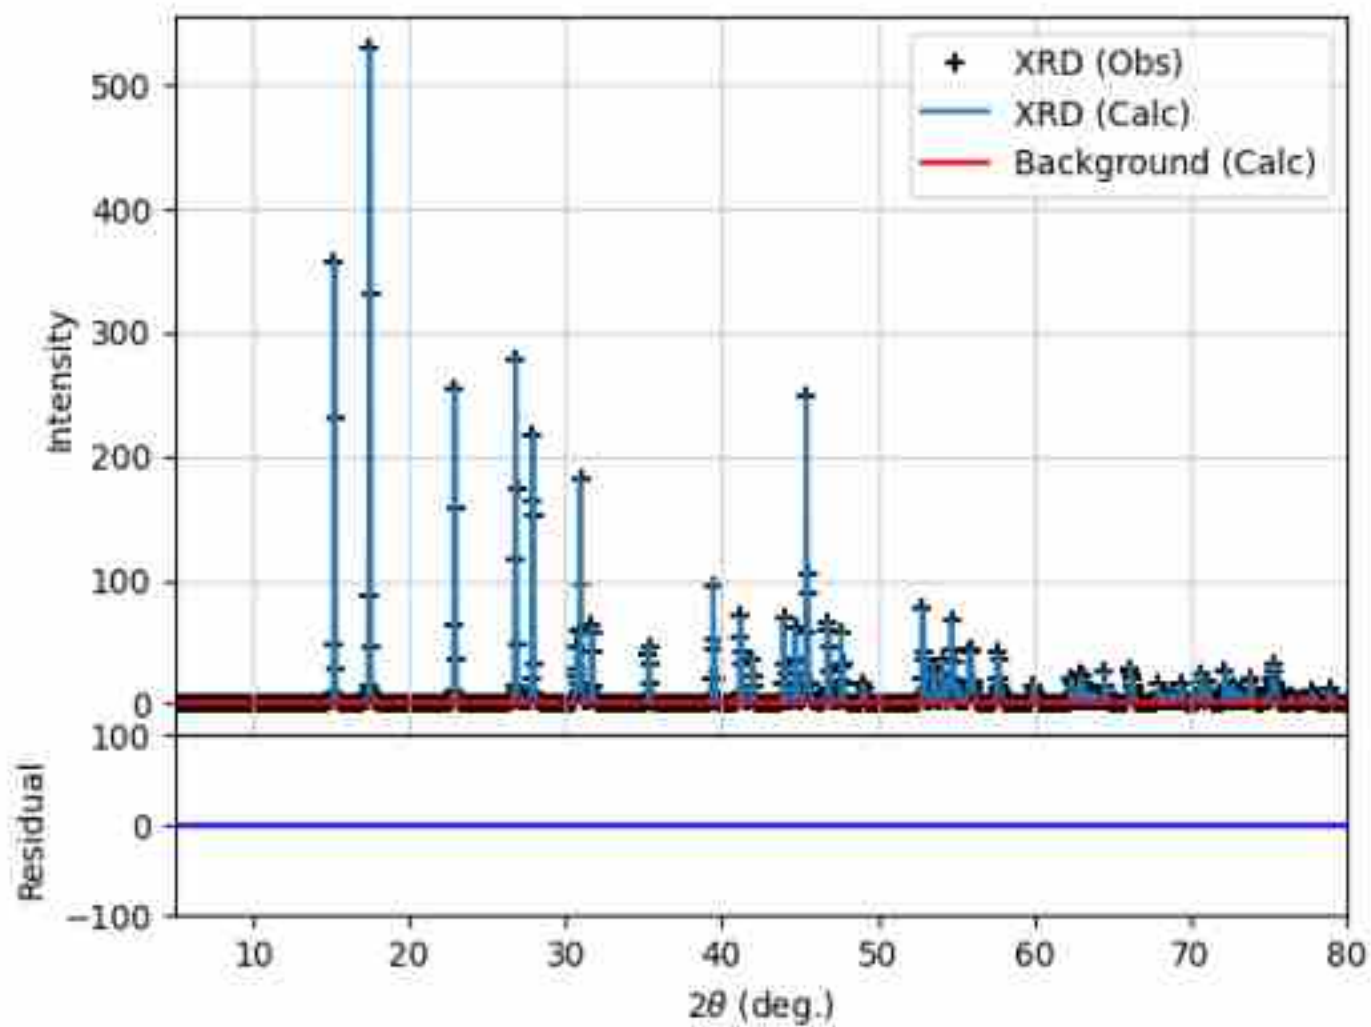

| RMSE before RR | Rwp    | RMSE after RR |
|----------------|--------|---------------|
| 0.024          | 0.0044 | 0.0013        |



# Na<sub>2</sub>Y<sub>2</sub>P<sub>2</sub>O<sub>8</sub>F<sub>2</sub>

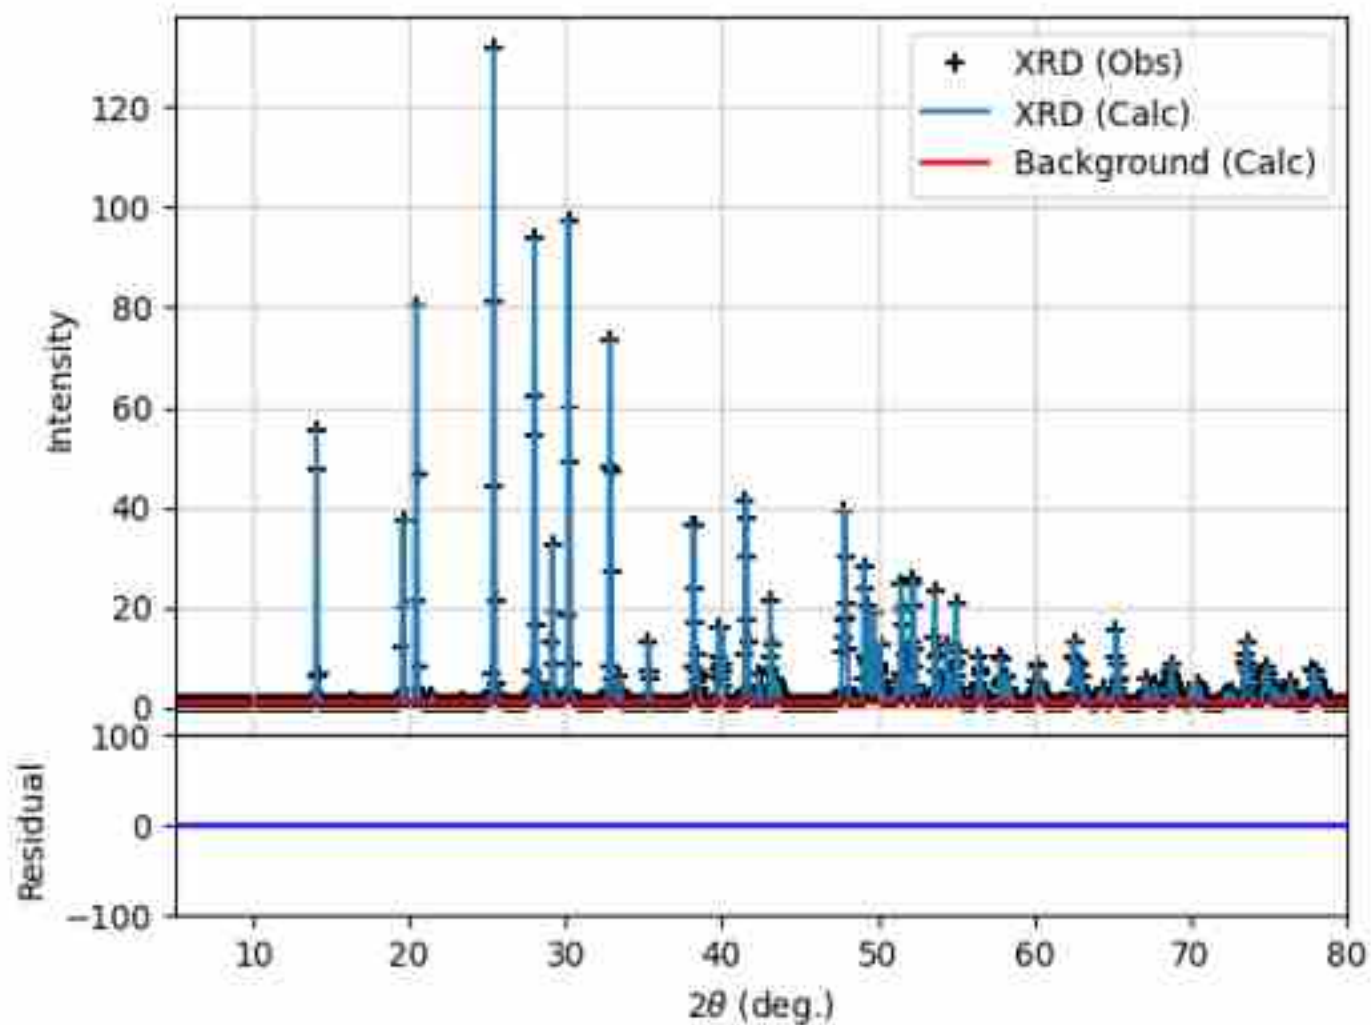

| RMSE before RR | Rwp     | RMSE after RR |
|----------------|---------|---------------|
| 0.024          | 0.00348 | 0.00157       |

# Na<sub>3</sub>Dy<sub>1</sub>Ti<sub>2</sub>Nb<sub>2</sub>O<sub>12</sub>

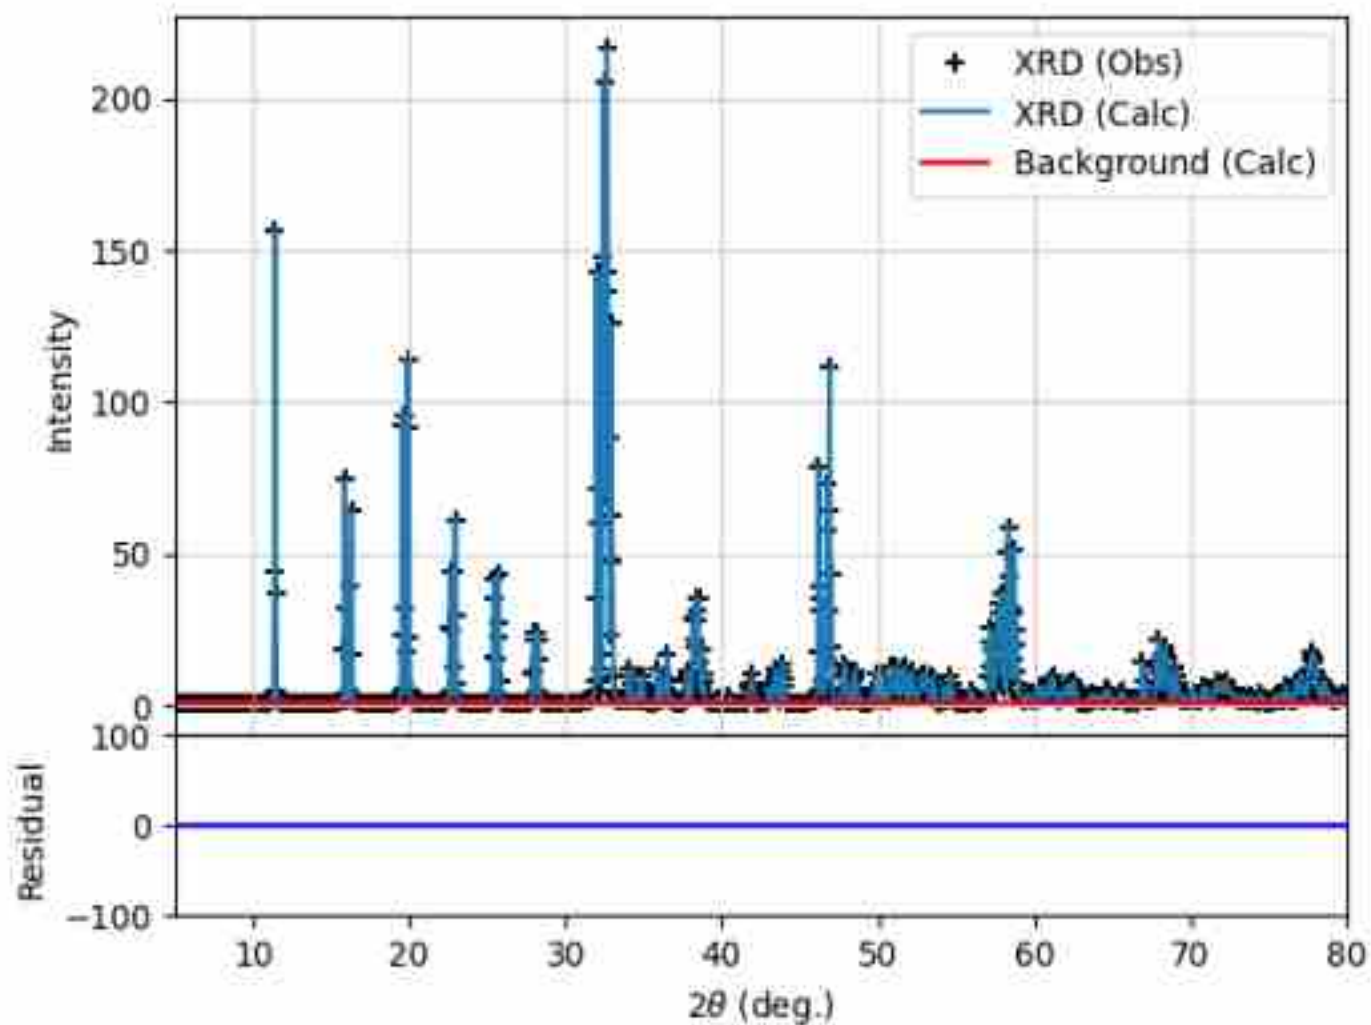

| RMSE before RR | Rwp   | RMSE after RR |
|----------------|-------|---------------|
| 0.024          | 9e-05 | 0.0           |

# Na<sub>4</sub>Se<sub>2</sub>O<sub>8</sub>

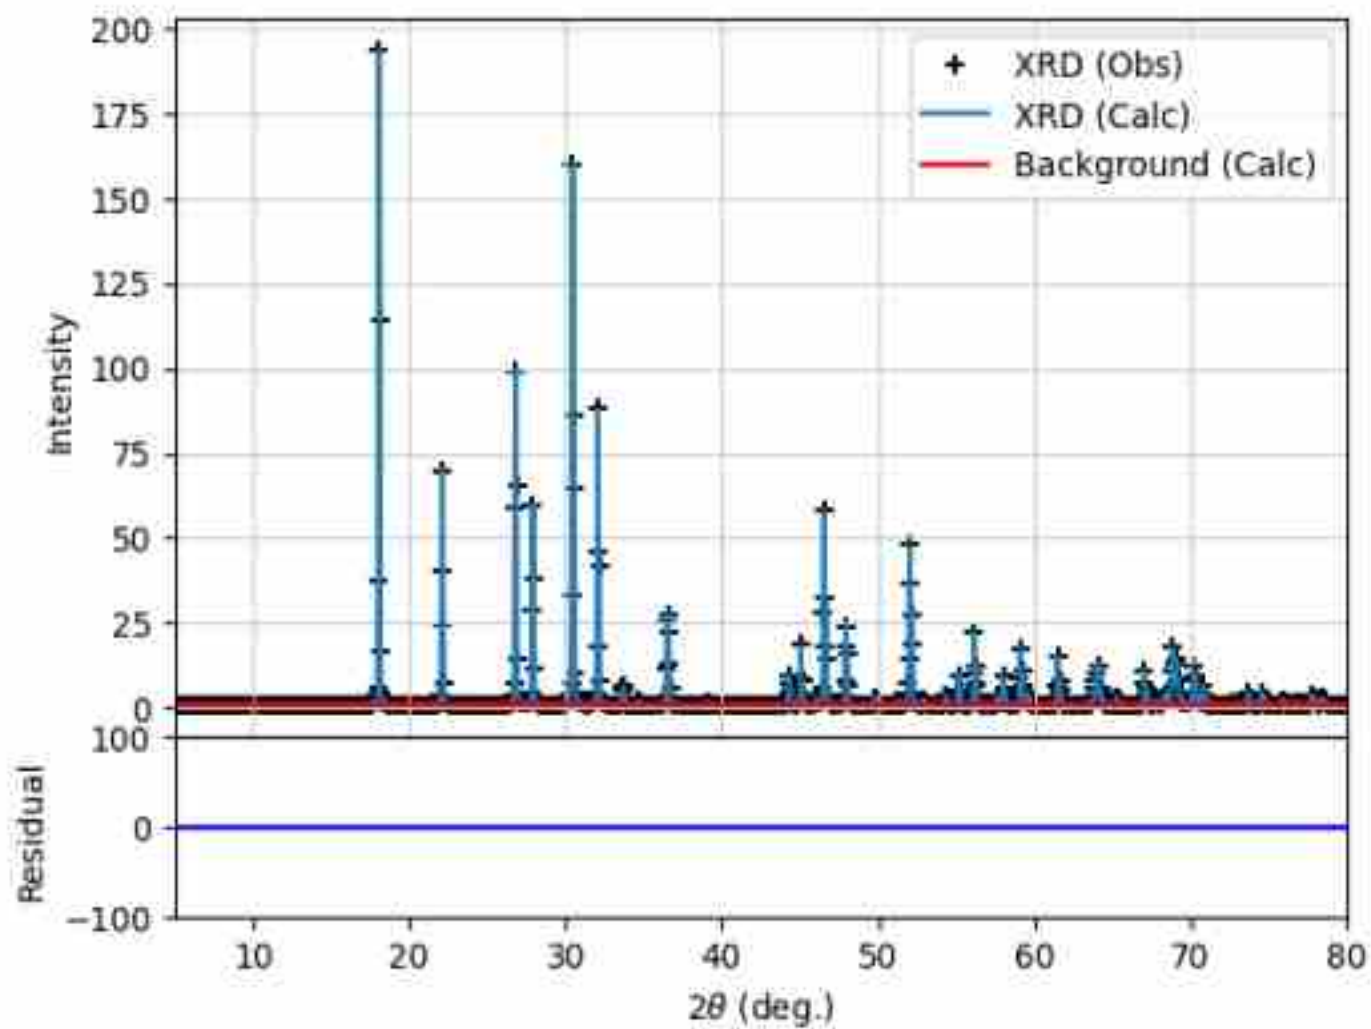

| RMSE before RR | Rwp    | RMSE after RR |
|----------------|--------|---------------|
| 0.024          | 0.0027 | 0.00099       |

# Na<sub>5</sub>Hf<sub>2</sub>F<sub>13</sub>

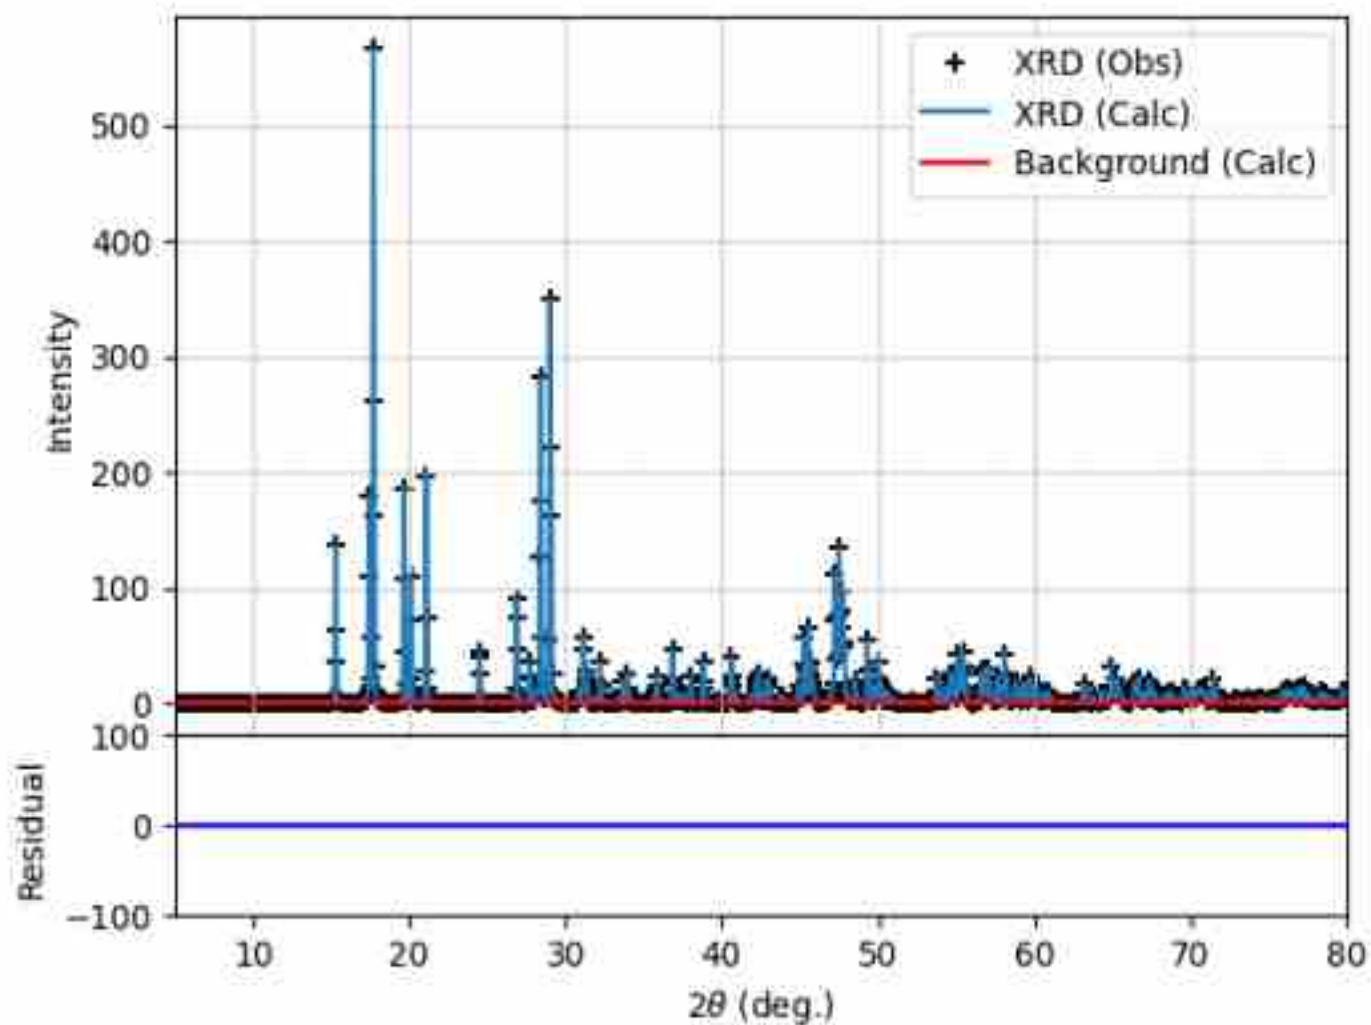

| RMSE before RR | Rwp     | RMSE after RR |
|----------------|---------|---------------|
| 0.024          | 0.00328 | 0.00102       |

# Na<sub>6</sub>As<sub>2</sub>O<sub>8</sub>

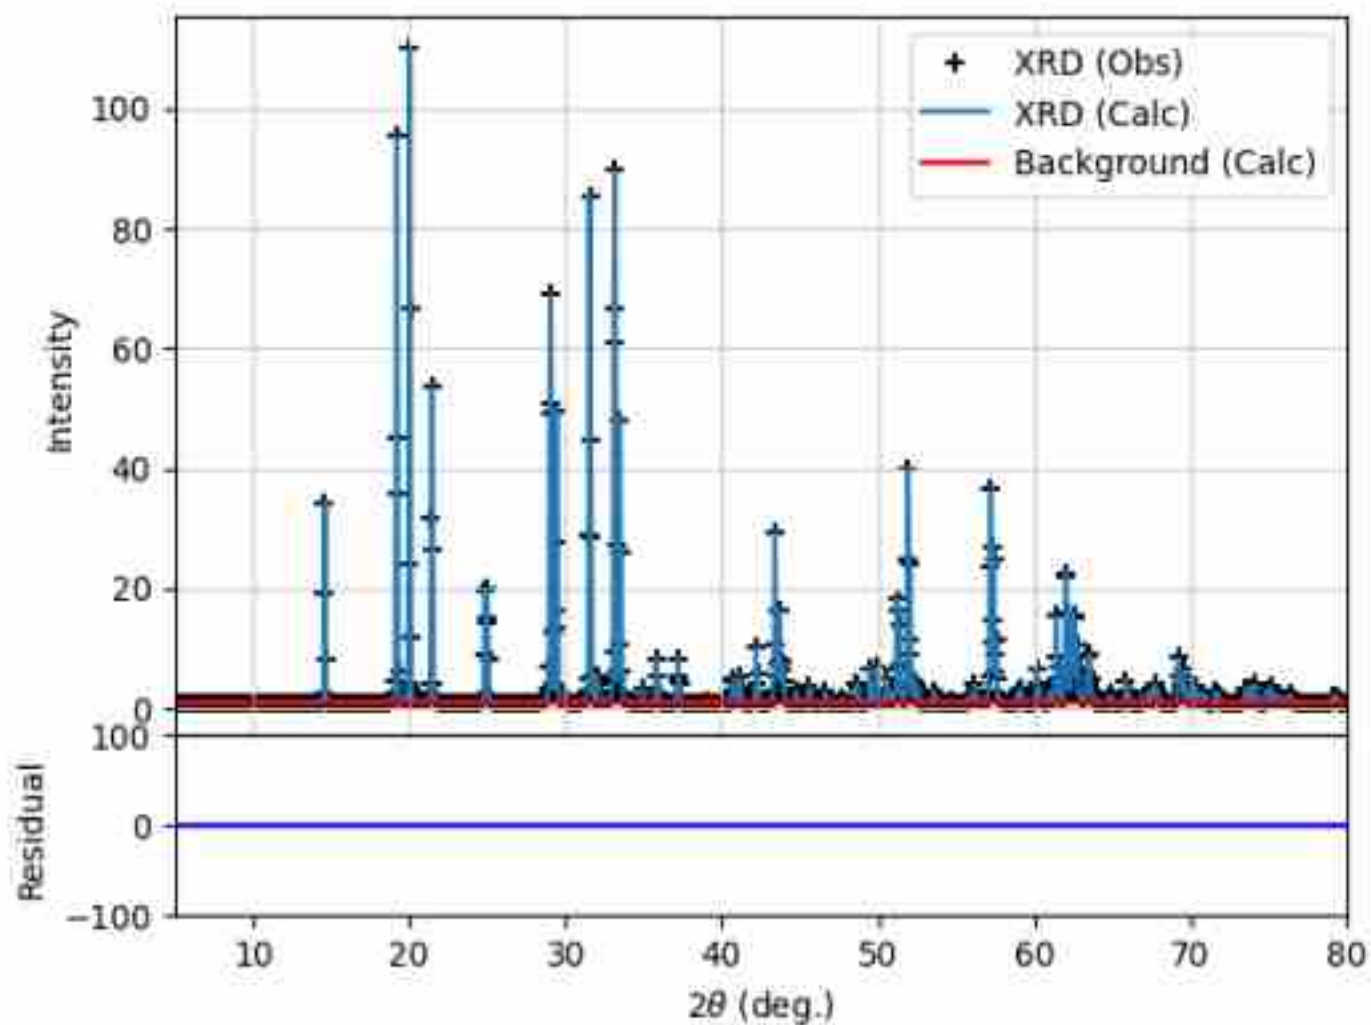

| RMSE before RR | Rwp     | RMSE after RR |
|----------------|---------|---------------|
| 0.024          | 0.00367 | 0.00128       |

# Na<sub>8</sub>Sn<sub>2</sub>O<sub>8</sub>

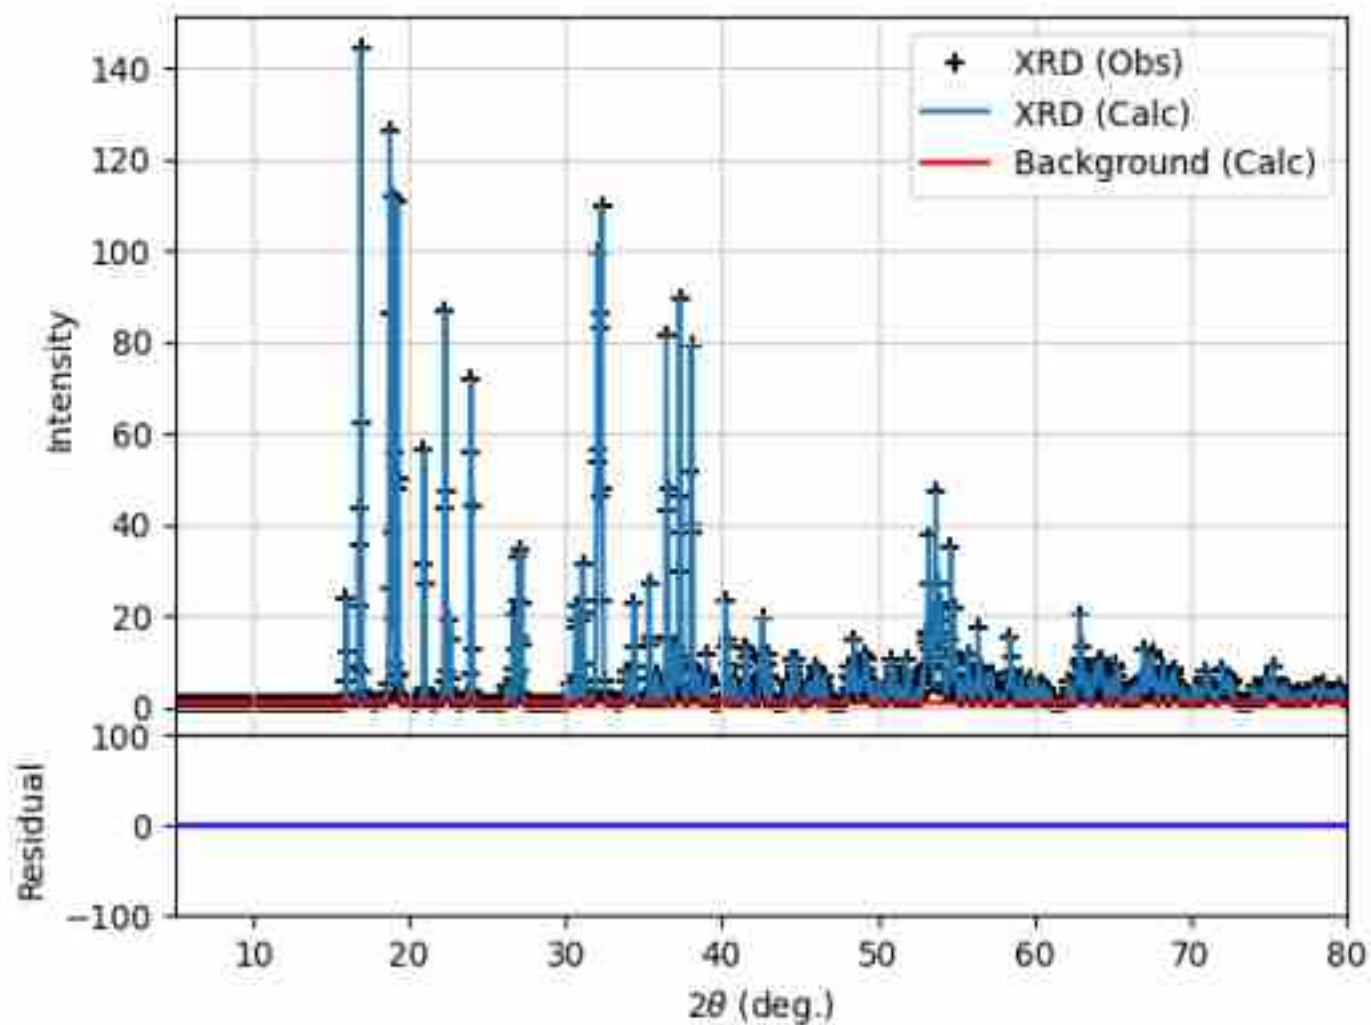

| RMSE before RR | Rwp     | RMSE after RR |
|----------------|---------|---------------|
| 0.024          | 0.00042 | 0.00026       |

# Na<sub>8</sub>Sn<sub>2</sub>Se<sub>8</sub>

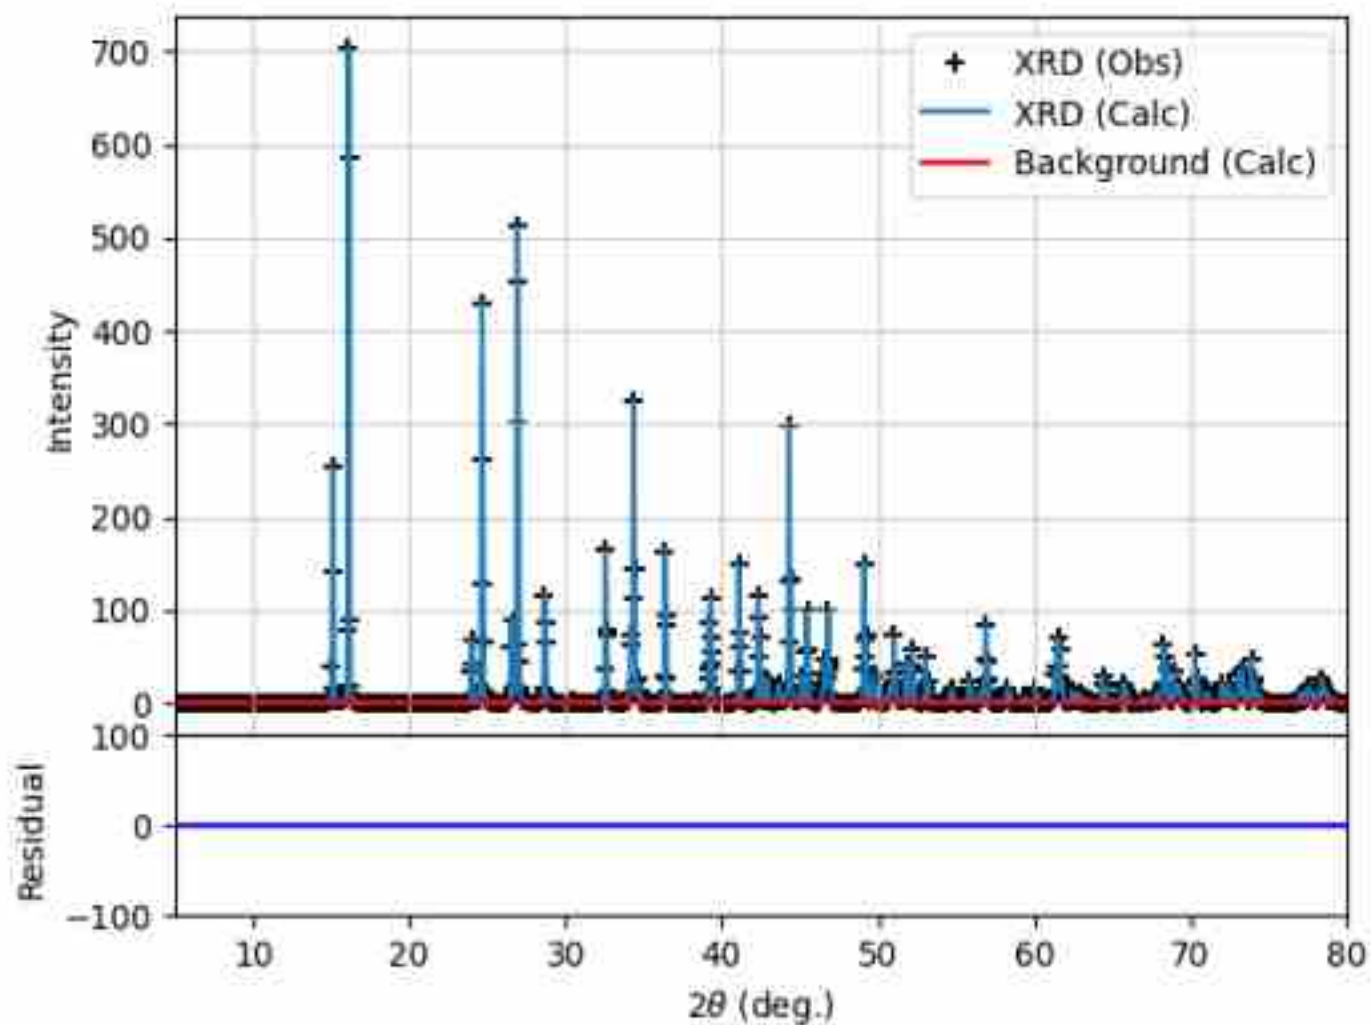

| RMSE before RR | Rwp   | RMSE after RR |
|----------------|-------|---------------|
| 0.024          | 0.004 | 0.00083       |

# Na<sub>8</sub>V<sub>2</sub>O<sub>8</sub>

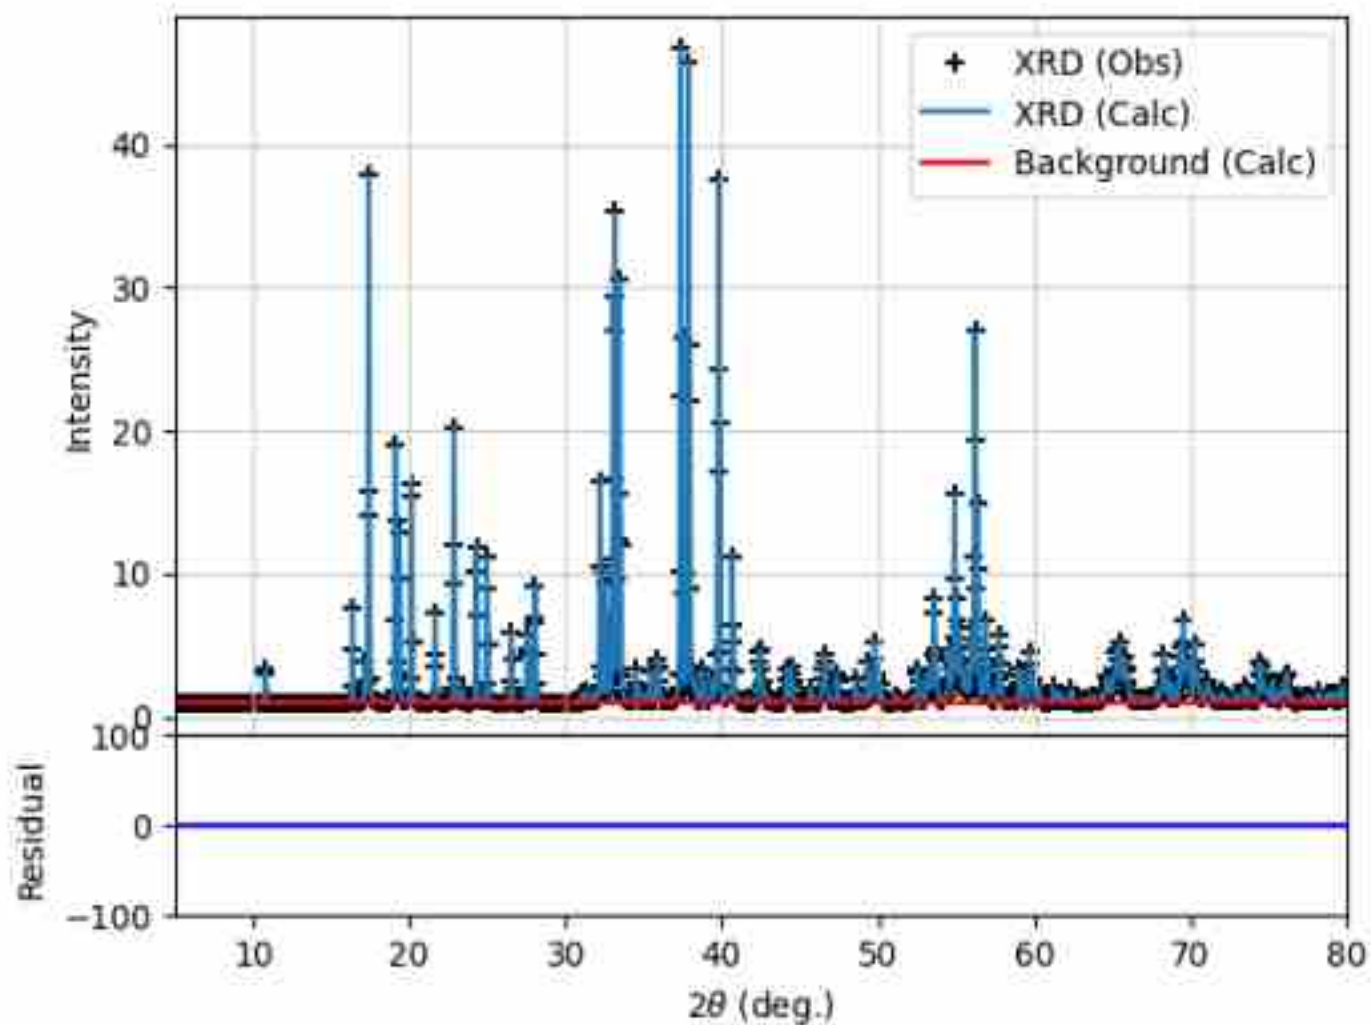

| RMSE before RR | Rwp     | RMSE after RR |
|----------------|---------|---------------|
| 0.024          | 0.00019 | 0.00017       |



# Nb2P2S2

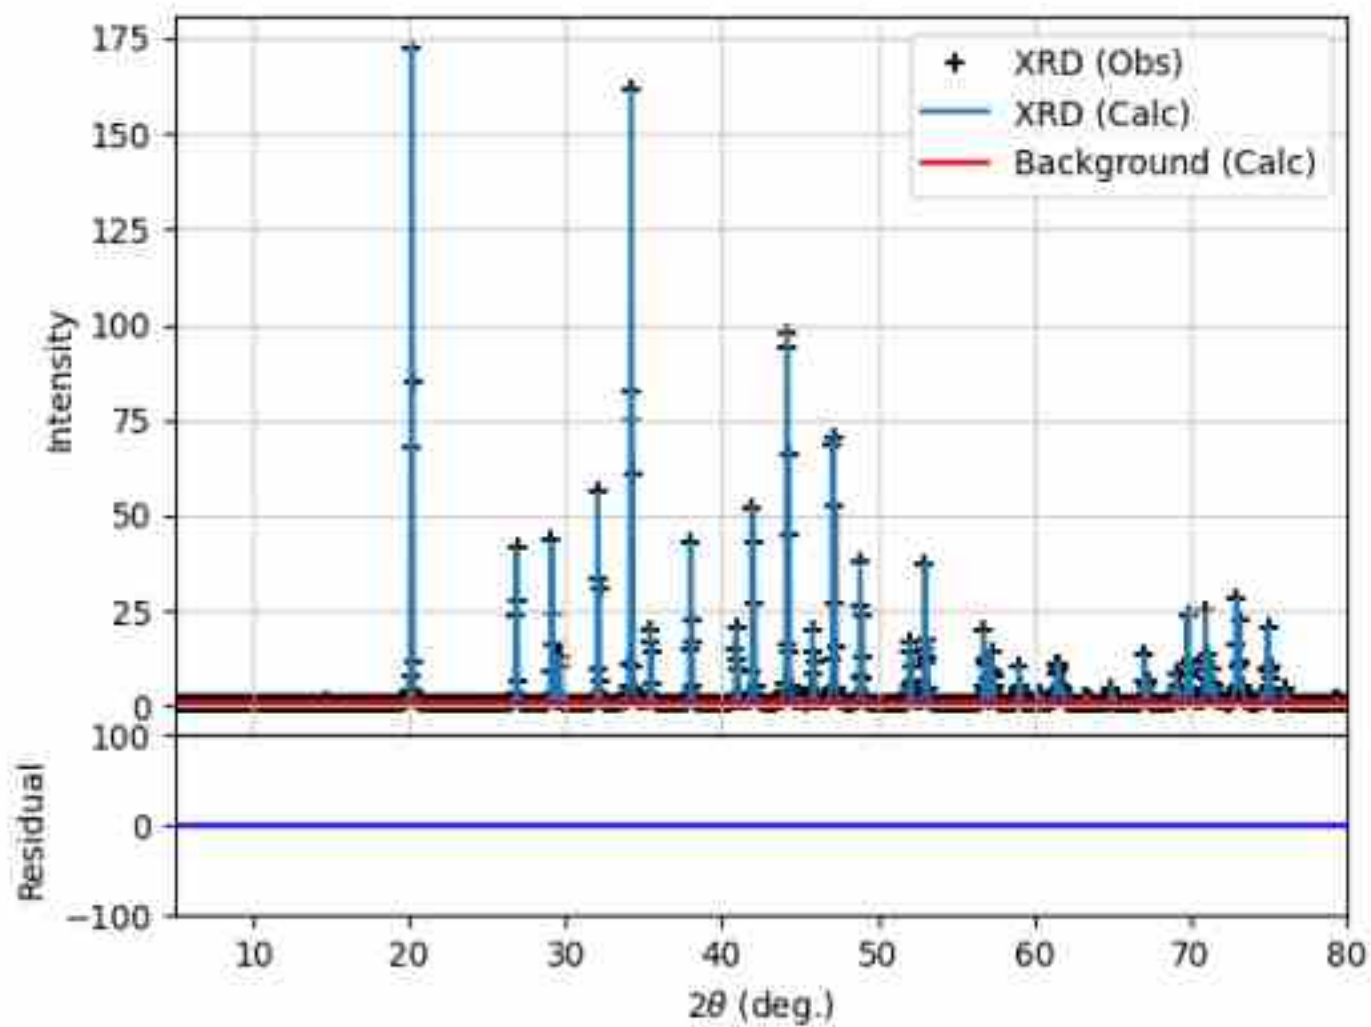

| RMSE before RR | Rwp     | RMSE after RR |
|----------------|---------|---------------|
| 0.024          | 0.00255 | 0.00045       |

# Nb<sub>2</sub>S<sub>4</sub>

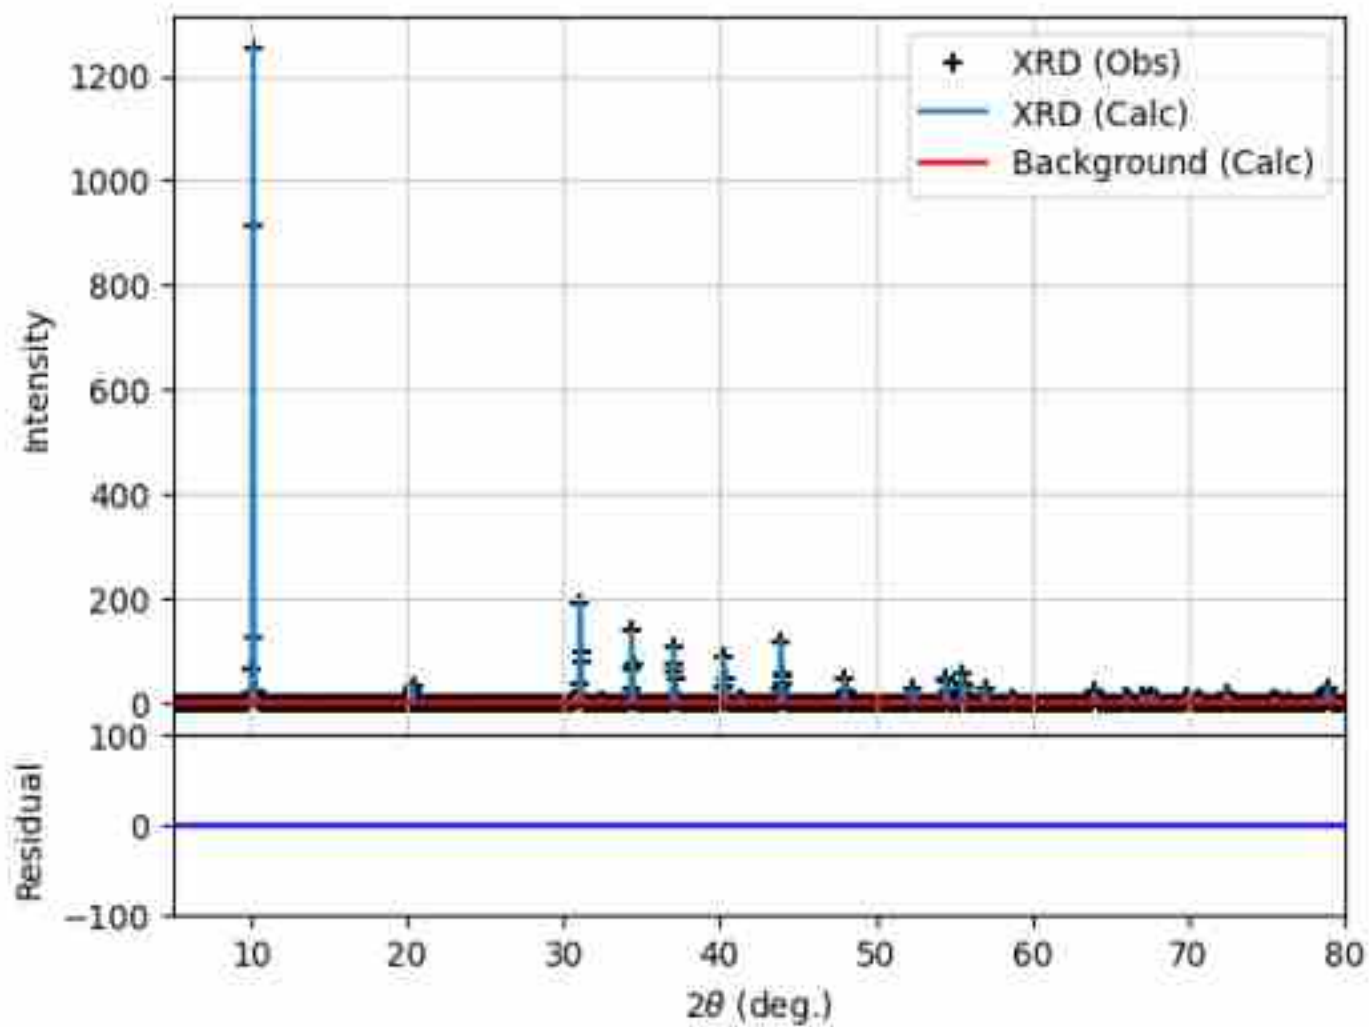

| RMSE before RR | Rwp     | RMSE after RR |
|----------------|---------|---------------|
| 0.024          | 0.00381 | 0.00035       |

# Nd<sub>2</sub>Ag<sub>2</sub>Pb<sub>2</sub>

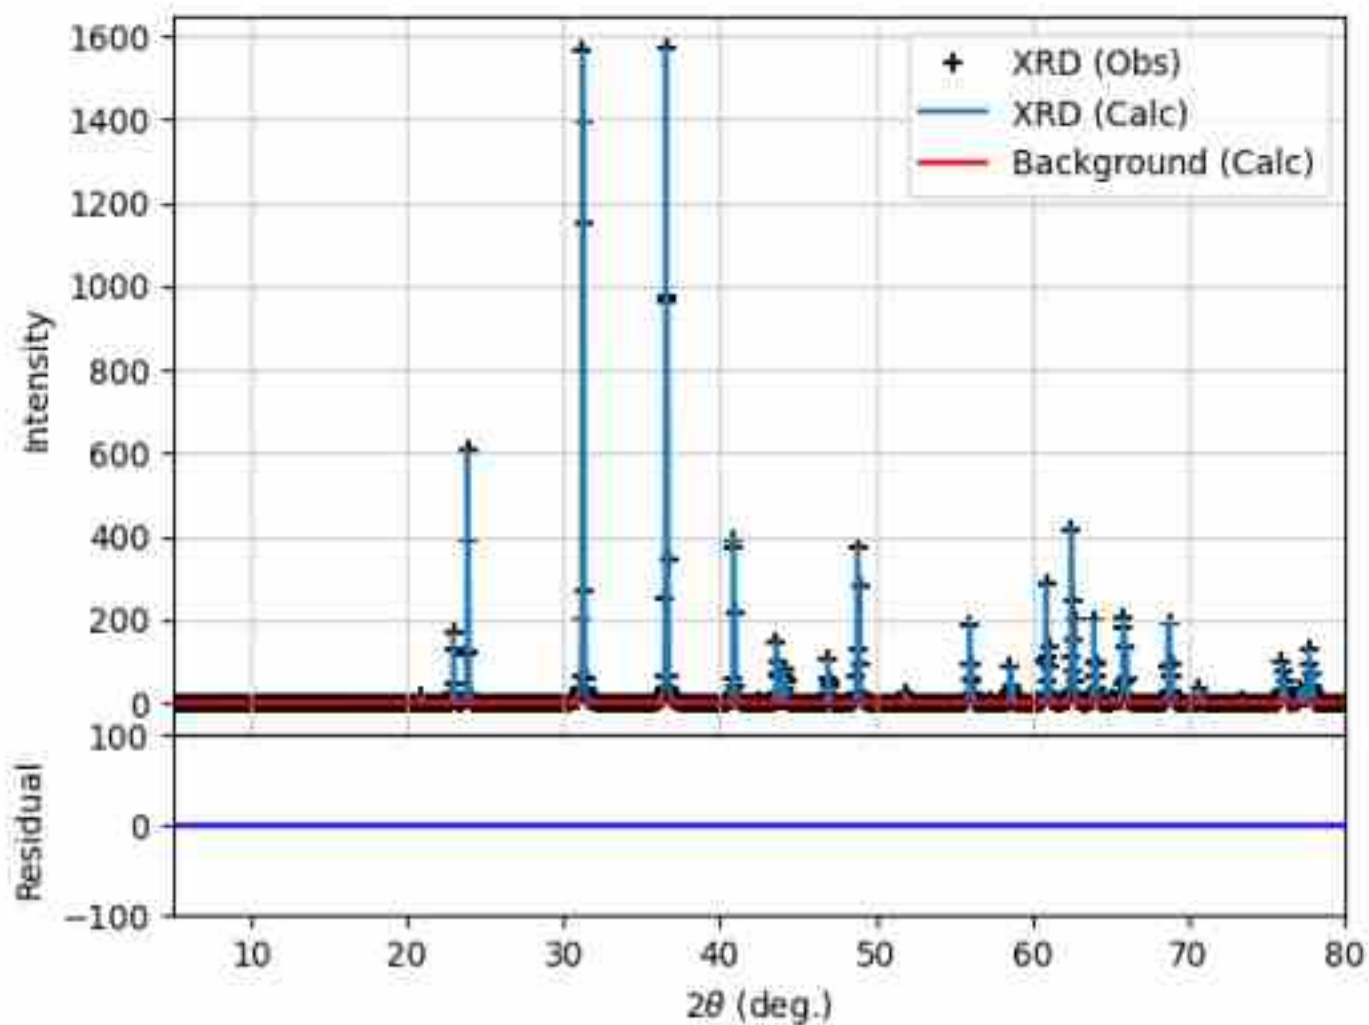

| RMSE before RR | Rwp     | RMSE after RR |
|----------------|---------|---------------|
| 0.024          | 0.00446 | 0.00028       |

# Nd<sub>3</sub>Ga<sub>6</sub>Co<sub>9</sub>

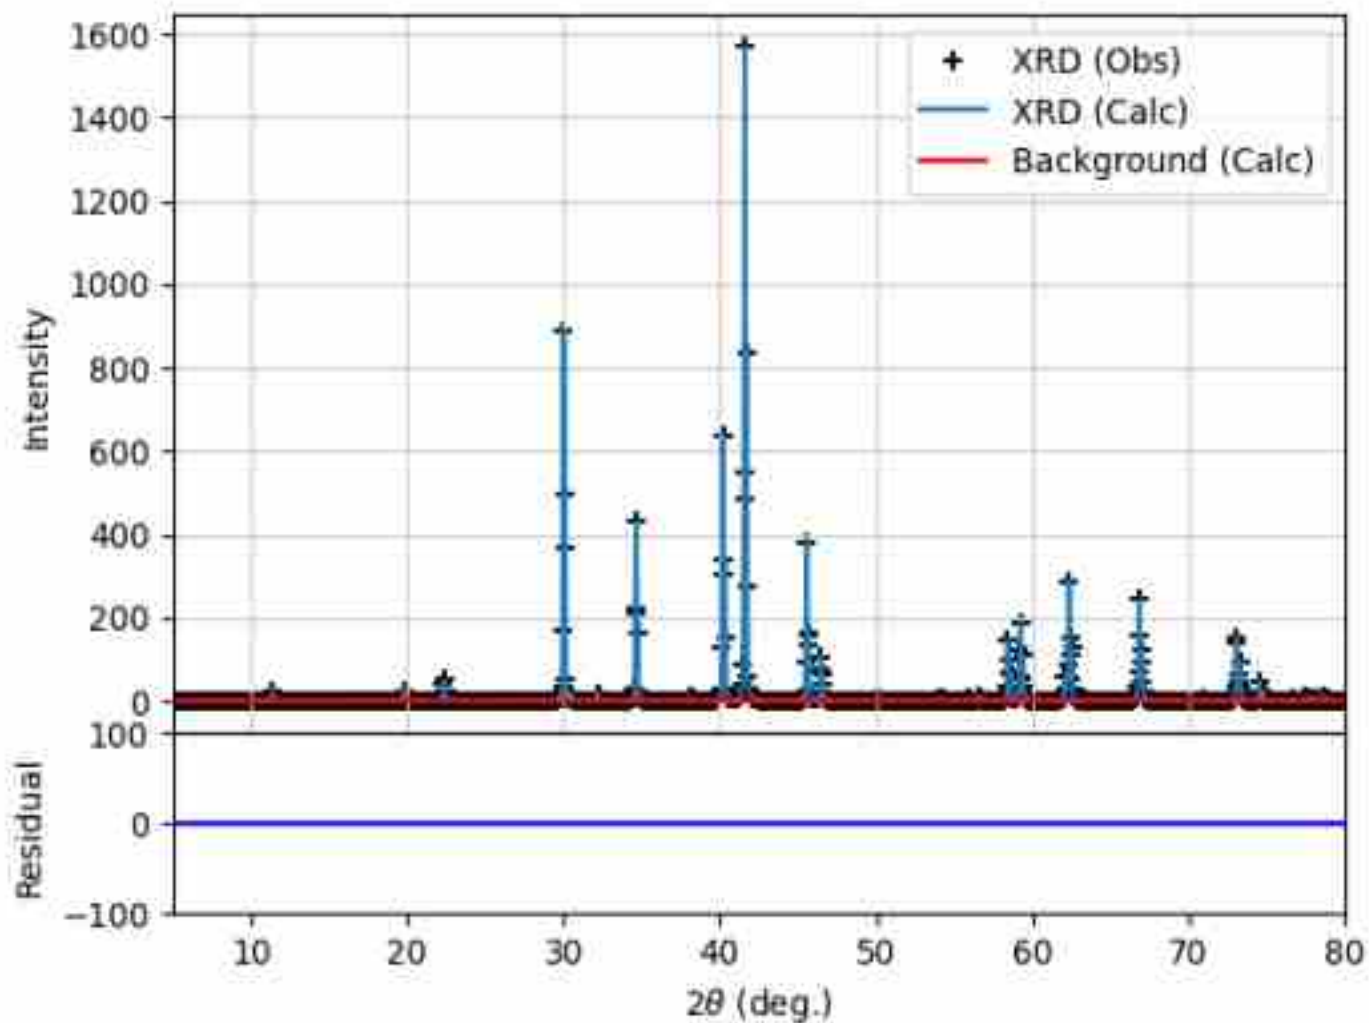

| RMSE before RR | Rwp     | RMSE after RR |
|----------------|---------|---------------|
| 0.024          | 0.00512 | 0.00085       |

# Nd<sub>4</sub>Zr<sub>4</sub>N<sub>4</sub>O<sub>8</sub>

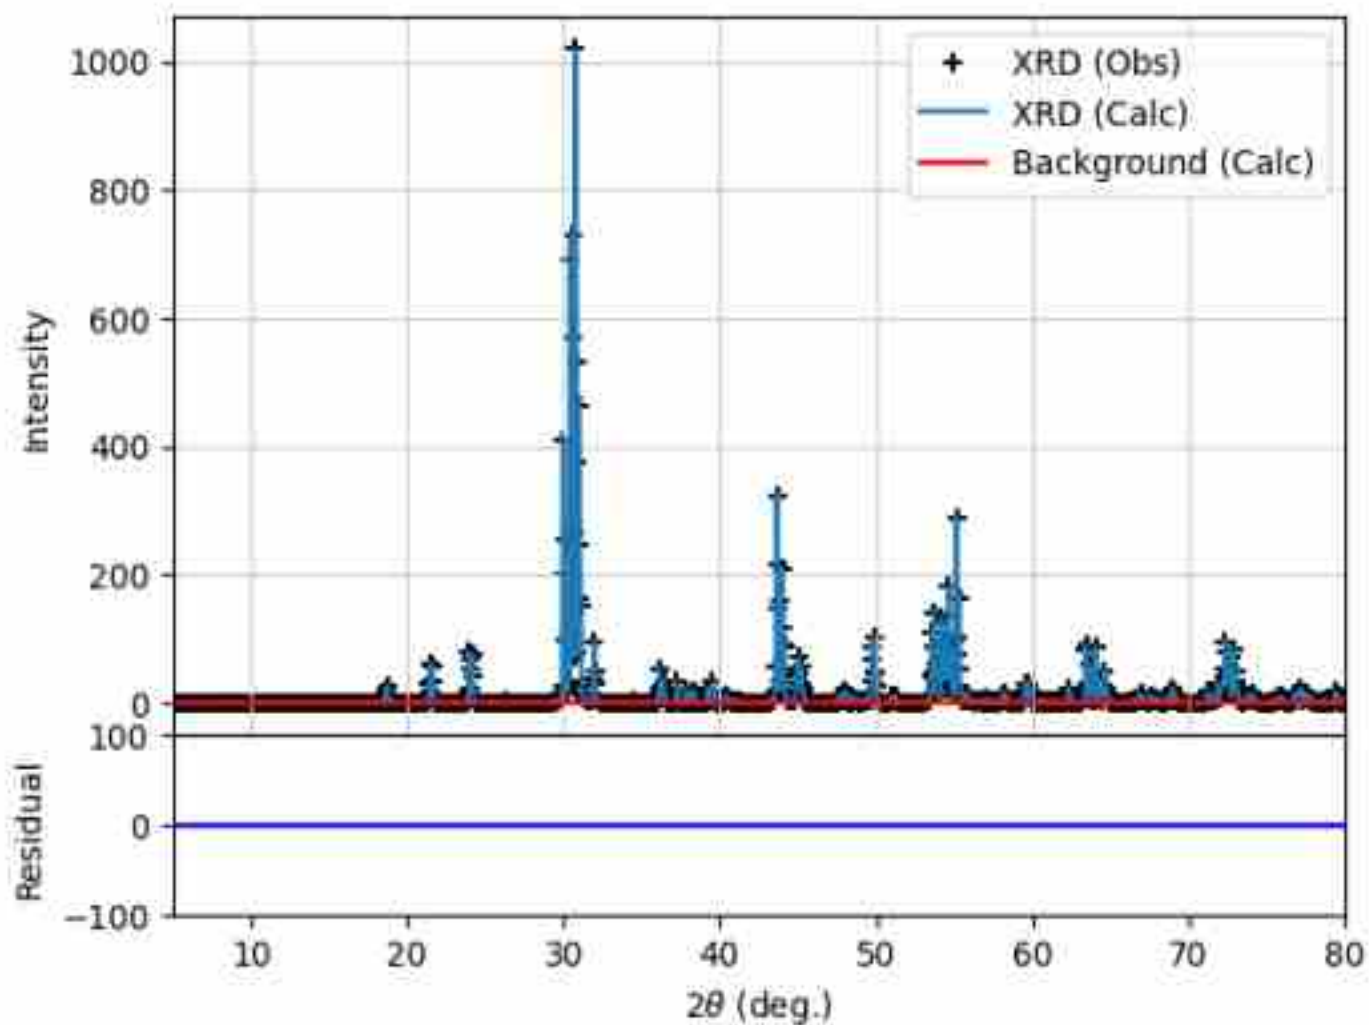

| RMSE before RR | Rwp     | RMSE after RR |
|----------------|---------|---------------|
| 0.024          | 0.00434 | 0.00095       |

# Nd6Au8

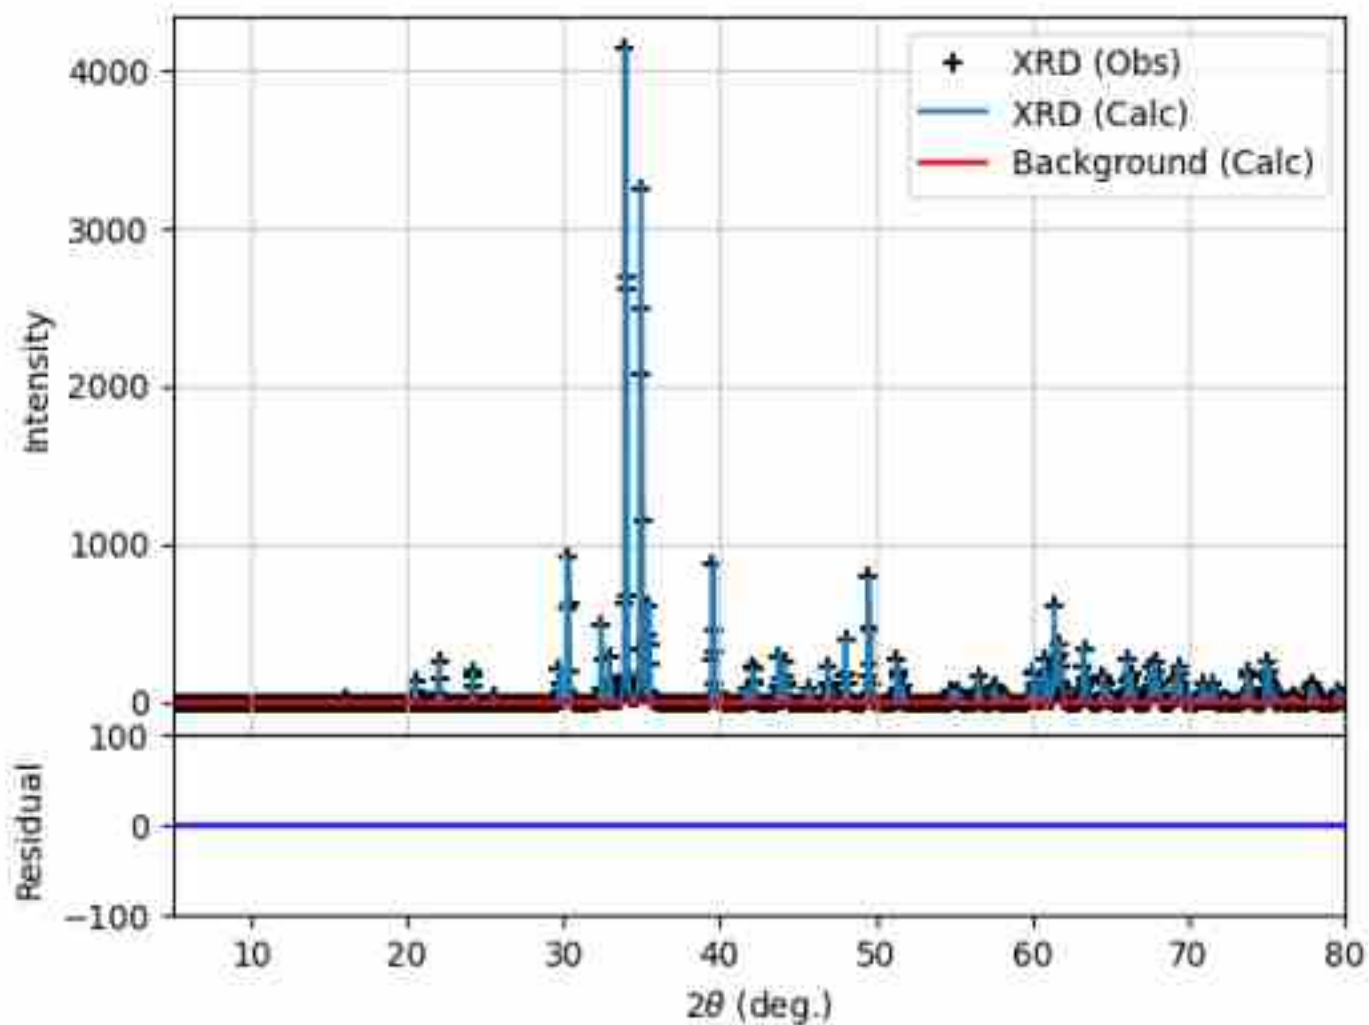

| RMSE before RR | Rwp    | RMSE after RR |
|----------------|--------|---------------|
| 0.024          | 0.0045 | 0.00042       |

# Nd8C12

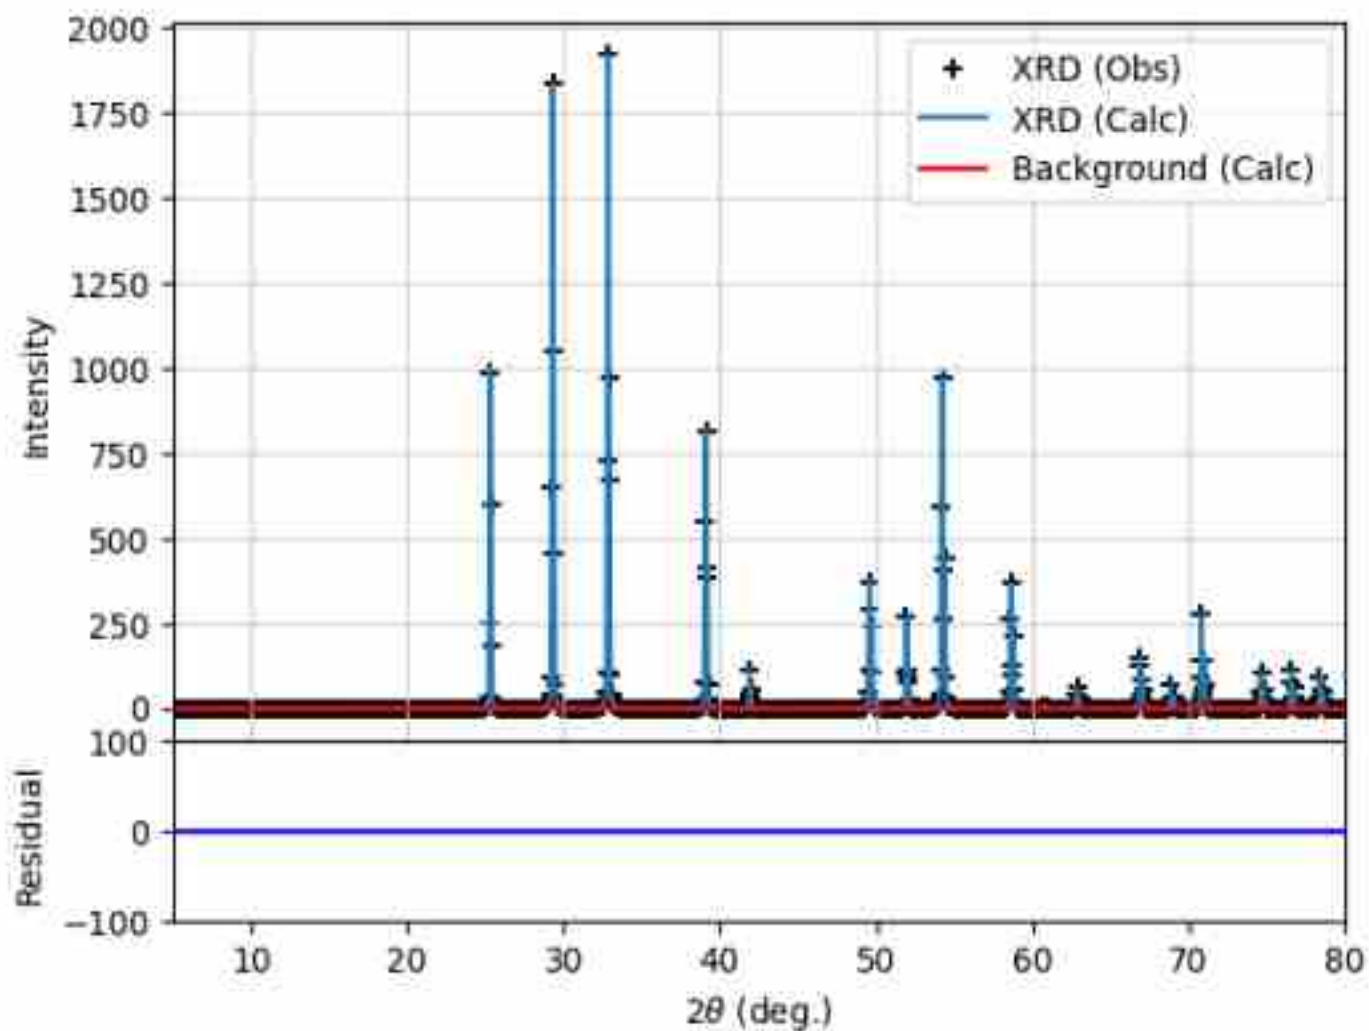

| RMSE before RR | Rwp     | RMSE after RR |
|----------------|---------|---------------|
| 0.024          | 0.00285 | 0.0011        |

# Nd14Pd6

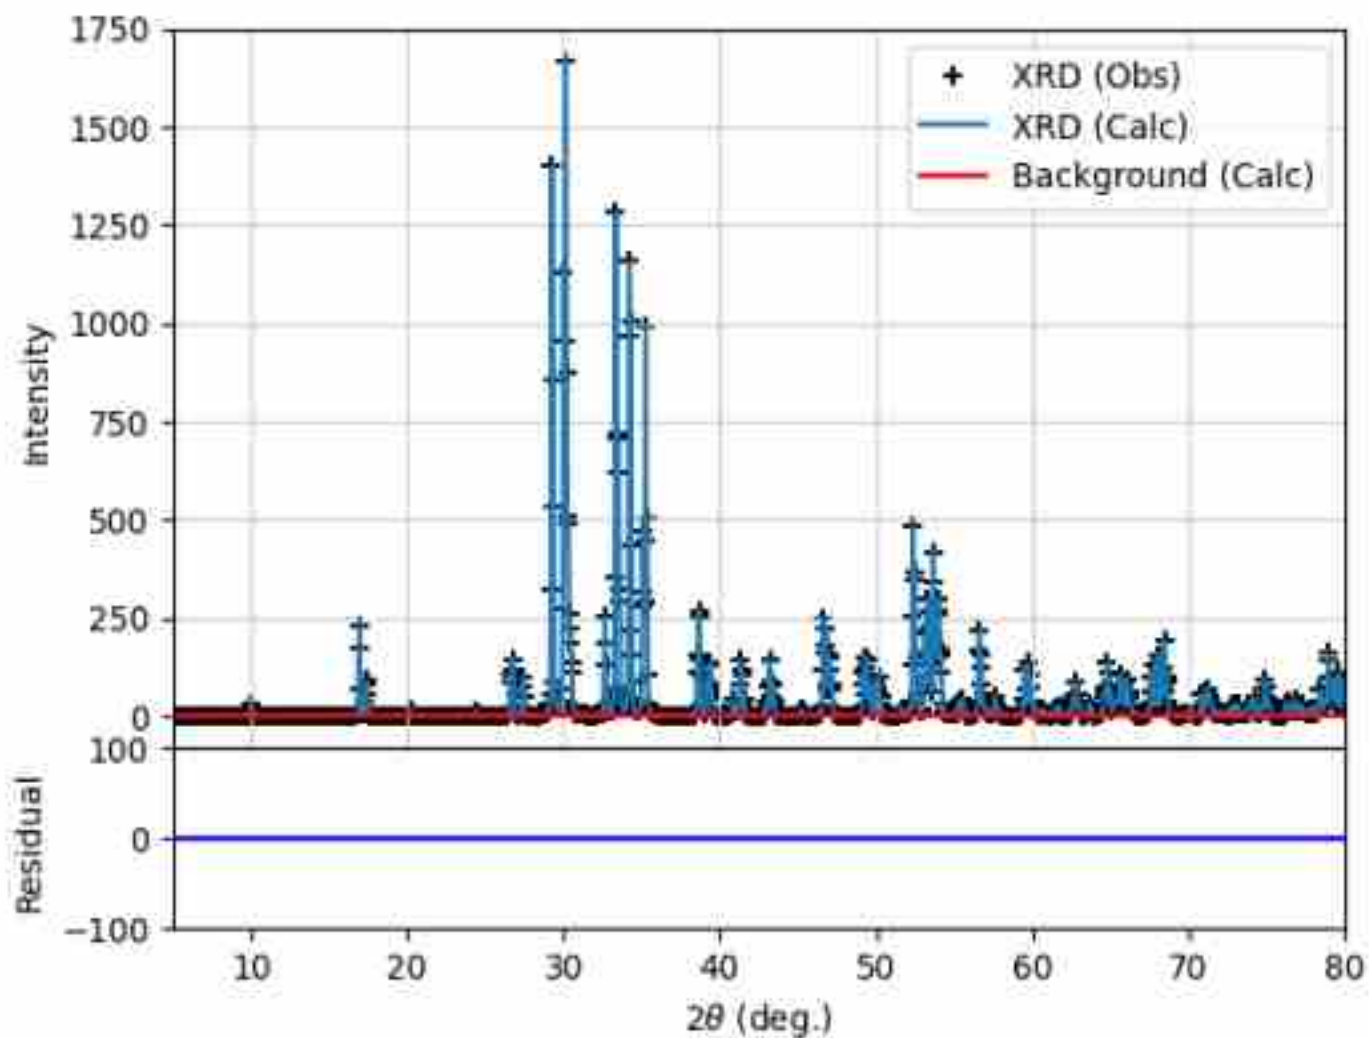

| RMSE before RR | Rwp     | RMSE after RR |
|----------------|---------|---------------|
| 0.024          | 0.00304 | 0.00034       |



# Ni<sub>2</sub>Ge<sub>2</sub>Pd<sub>2</sub>

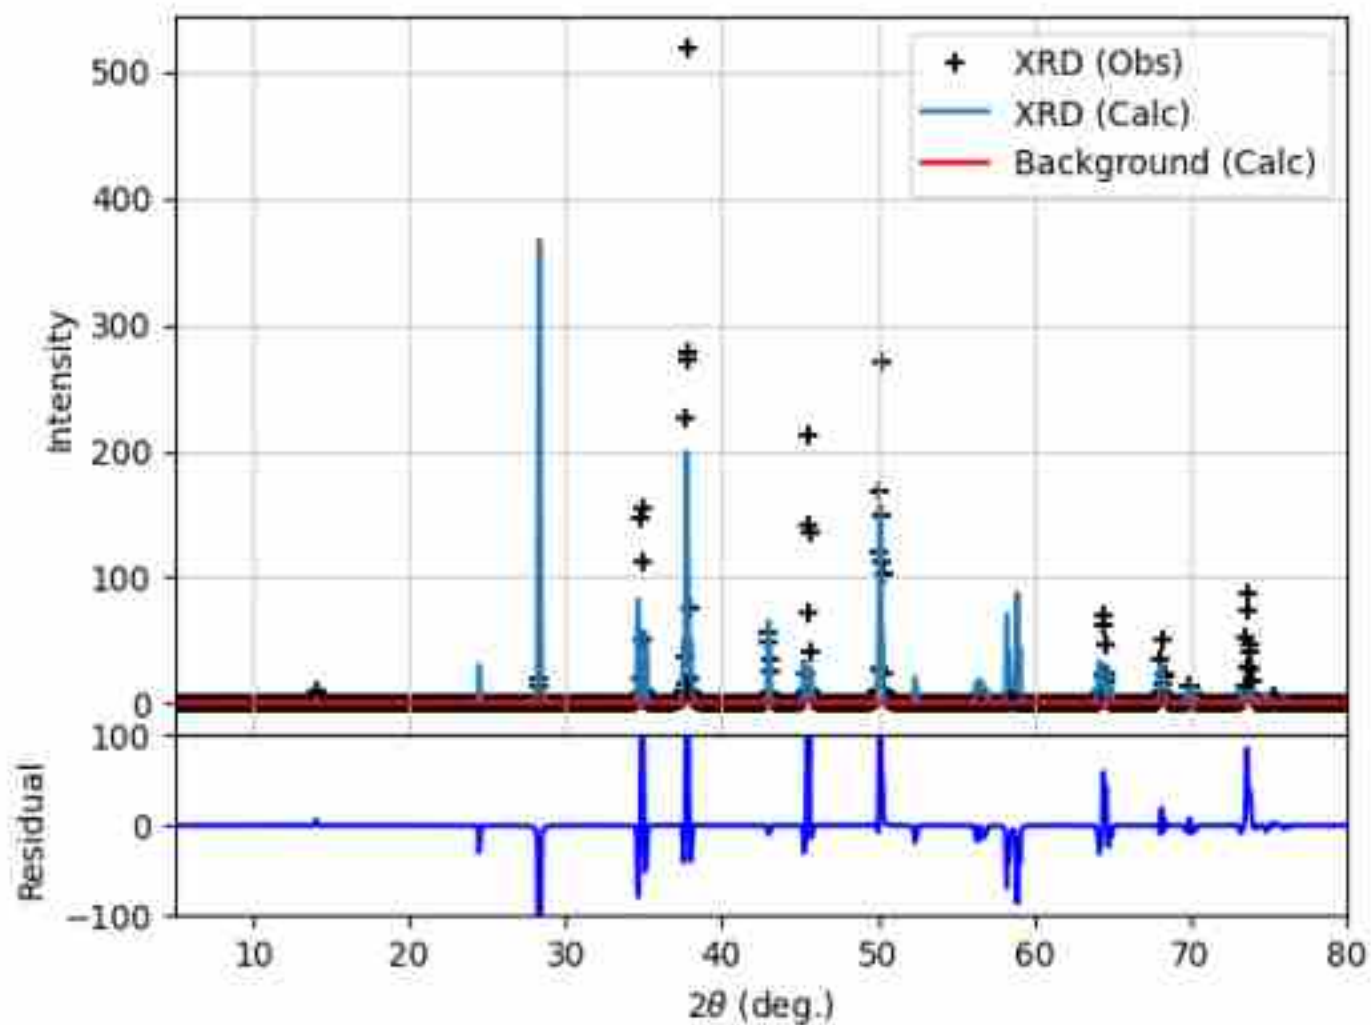

| RMSE before RR | Rwp   | RMSE after RR |
|----------------|-------|---------------|
| 0.024          | 100.0 | 0.30886       |

# Np<sub>2</sub>Si<sub>4</sub>

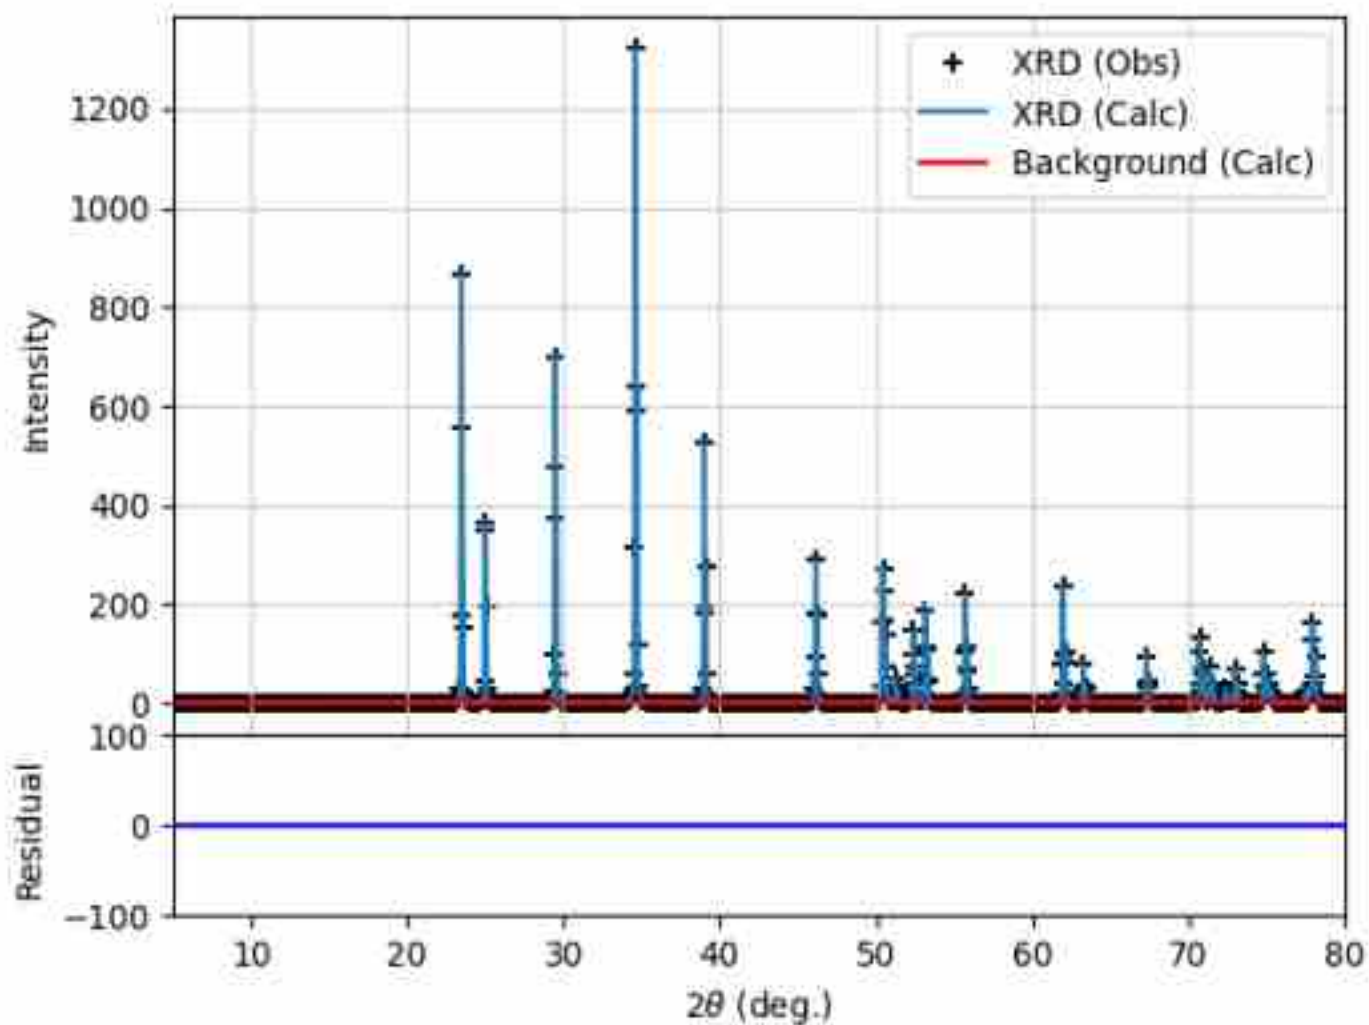

| RMSE before RR | Rwp     | RMSE after RR |
|----------------|---------|---------------|
| 0.024          | 0.00512 | 0.00178       |

# P4Pb4Se12

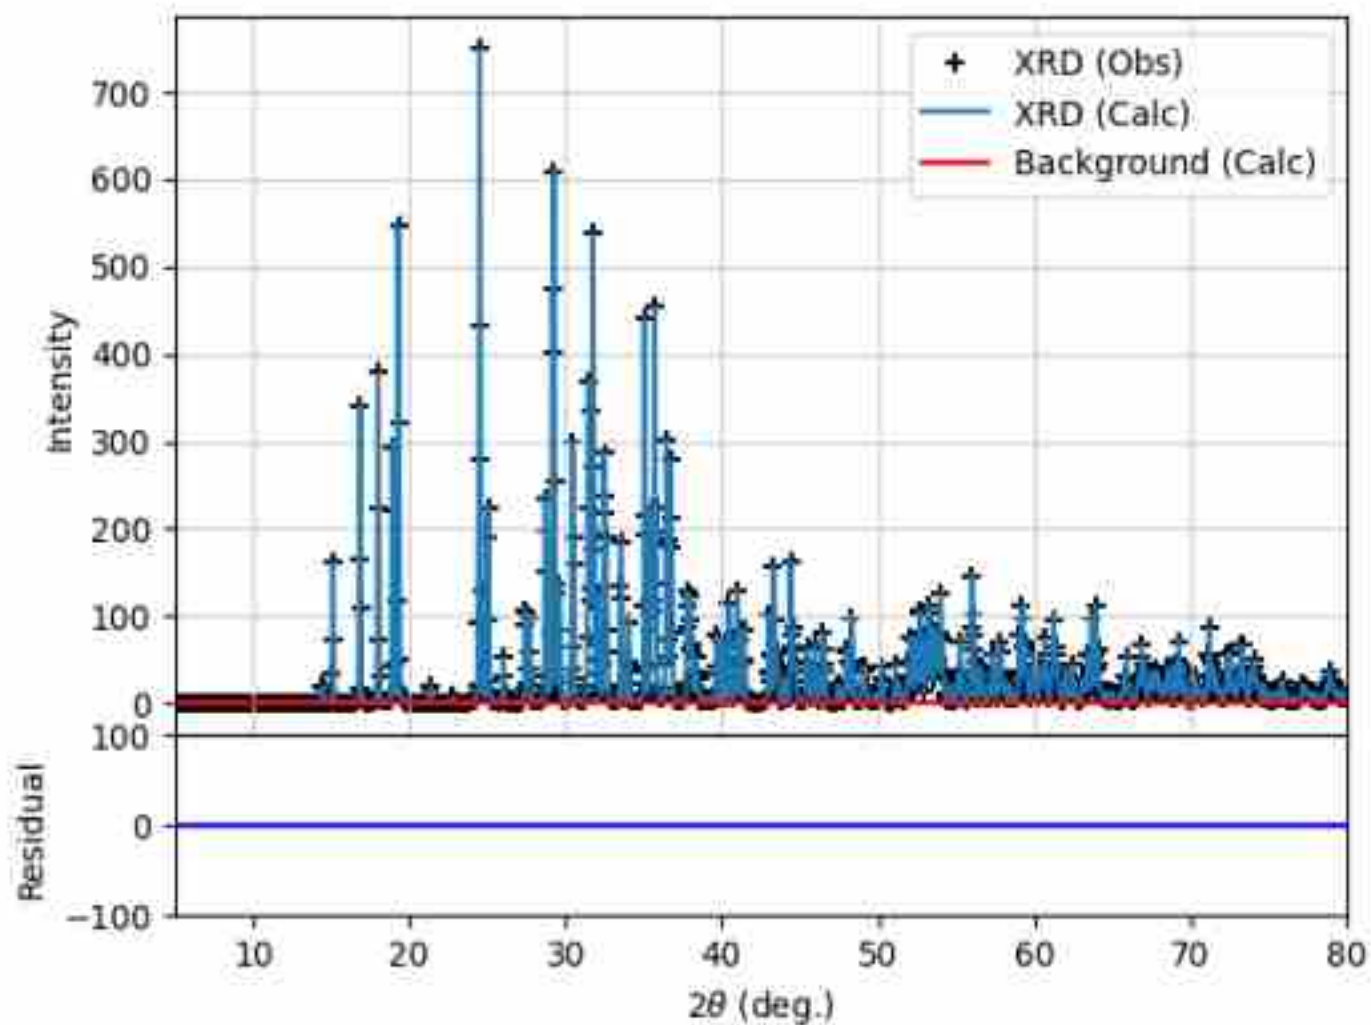

| RMSE before RR | Rwp     | RMSE after RR |
|----------------|---------|---------------|
| 0.024          | 0.00397 | 0.00054       |

# Pr<sub>2</sub>Ga<sub>12</sub>

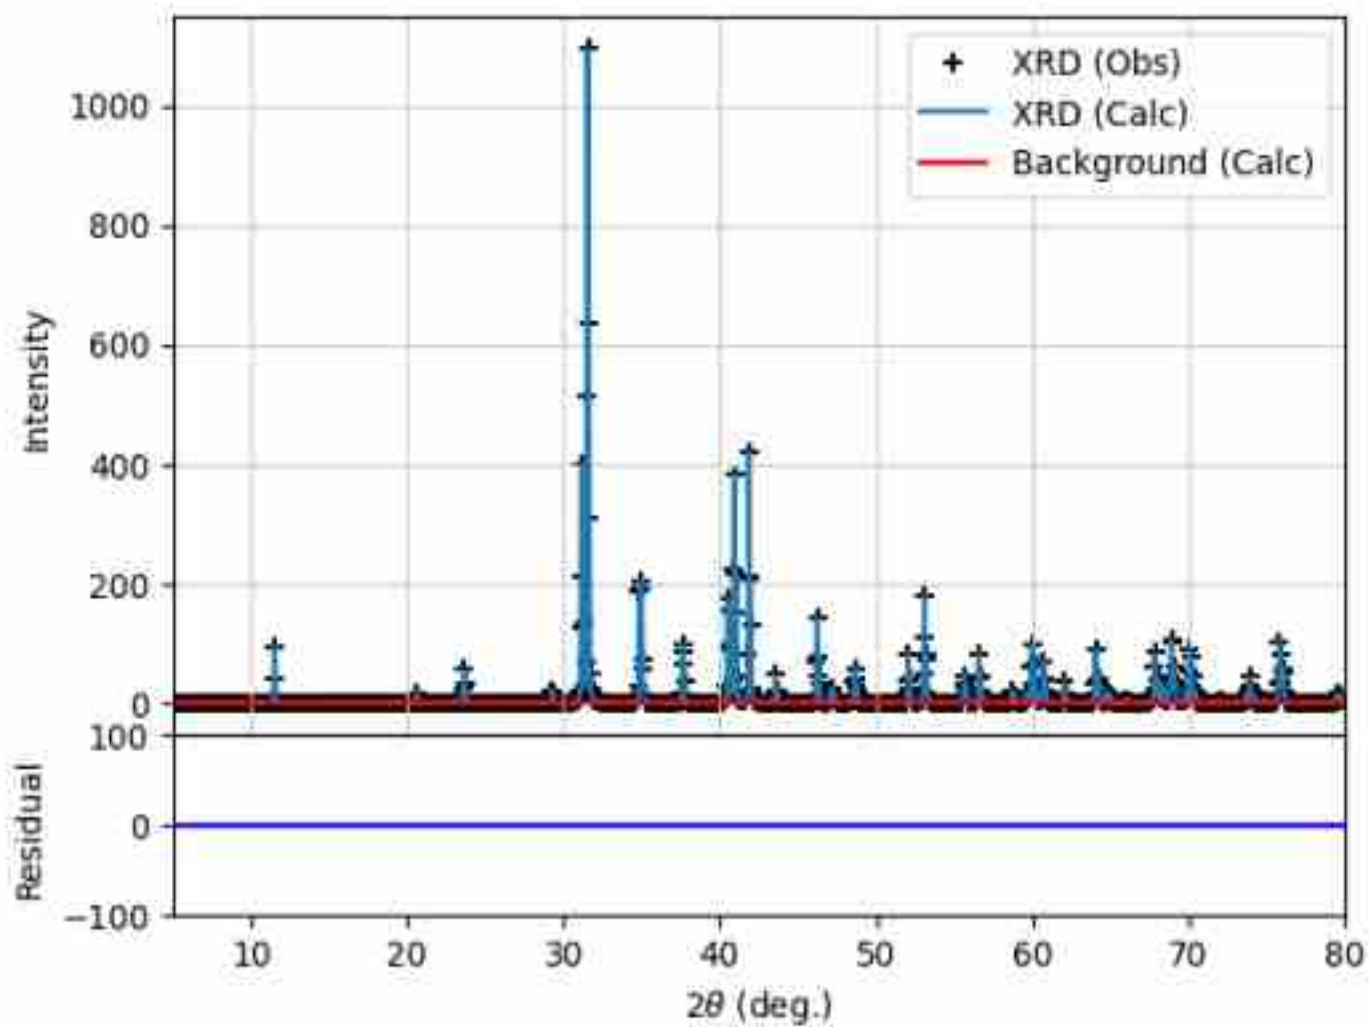

| RMSE before RR | Rwp     | RMSE after RR |
|----------------|---------|---------------|
| 0.024          | 0.00525 | 0.00045       |

# Pr10Sn6

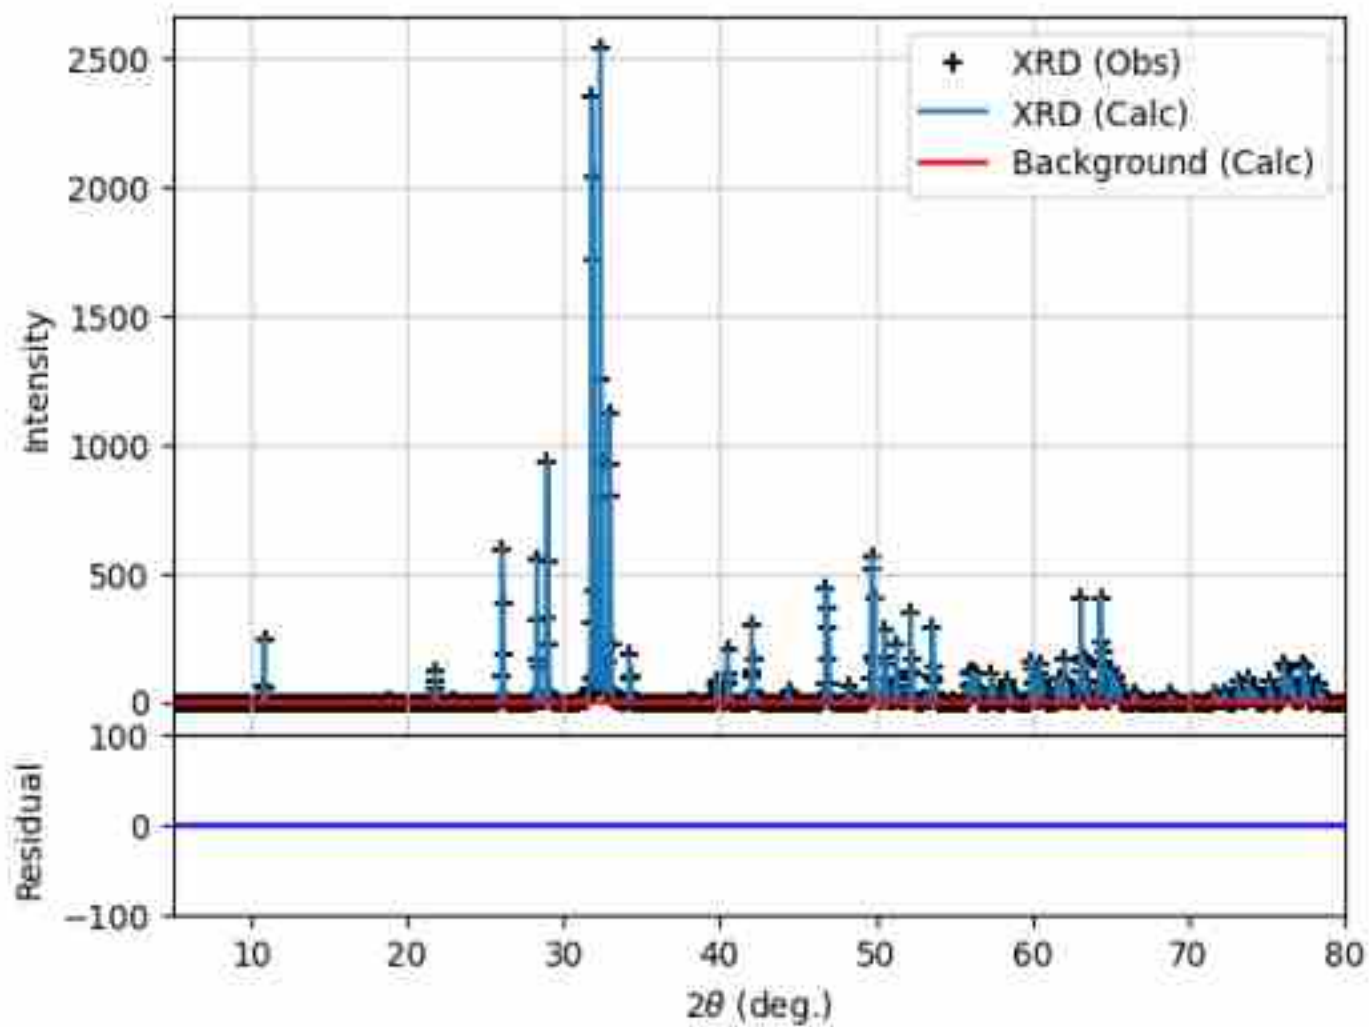

| RMSE before RR | Rwp   | RMSE after RR |
|----------------|-------|---------------|
| 0.024          | 0.006 | 0.00058       |

# Pu2Al6

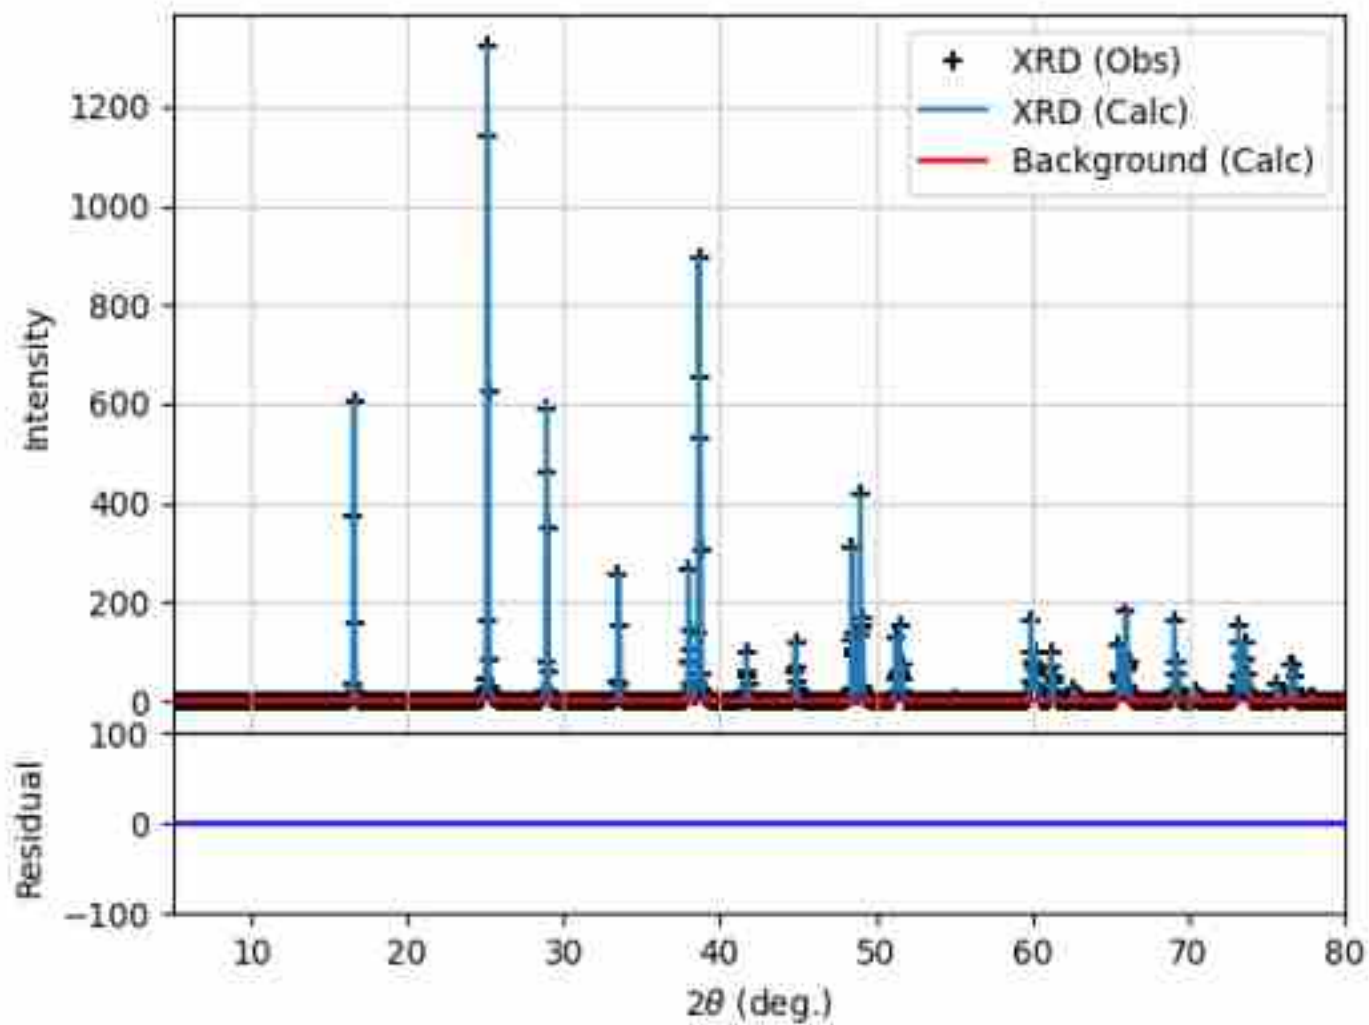

| RMSE before RR | Rwp     | RMSE after RR |
|----------------|---------|---------------|
| 0.024          | 0.00746 | 0.00387       |

# Rb<sub>4</sub>Fe<sub>2</sub>I<sub>8</sub>

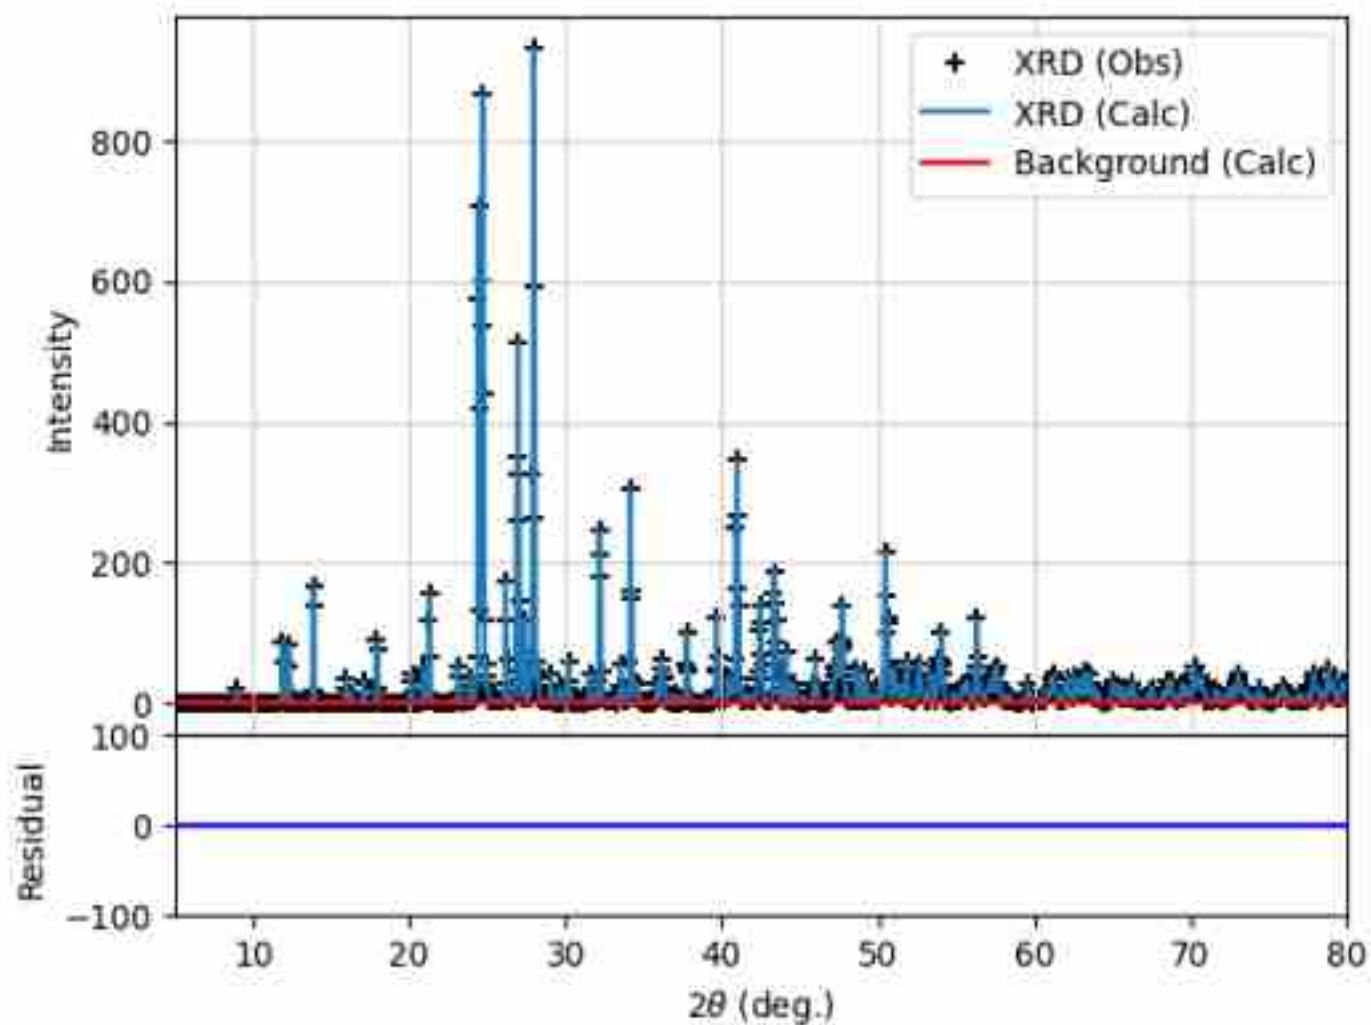

| RMSE before RR | Rwp     | RMSE after RR |
|----------------|---------|---------------|
| 0.024          | 0.00285 | 0.0002        |

# Rb6Ga2O6

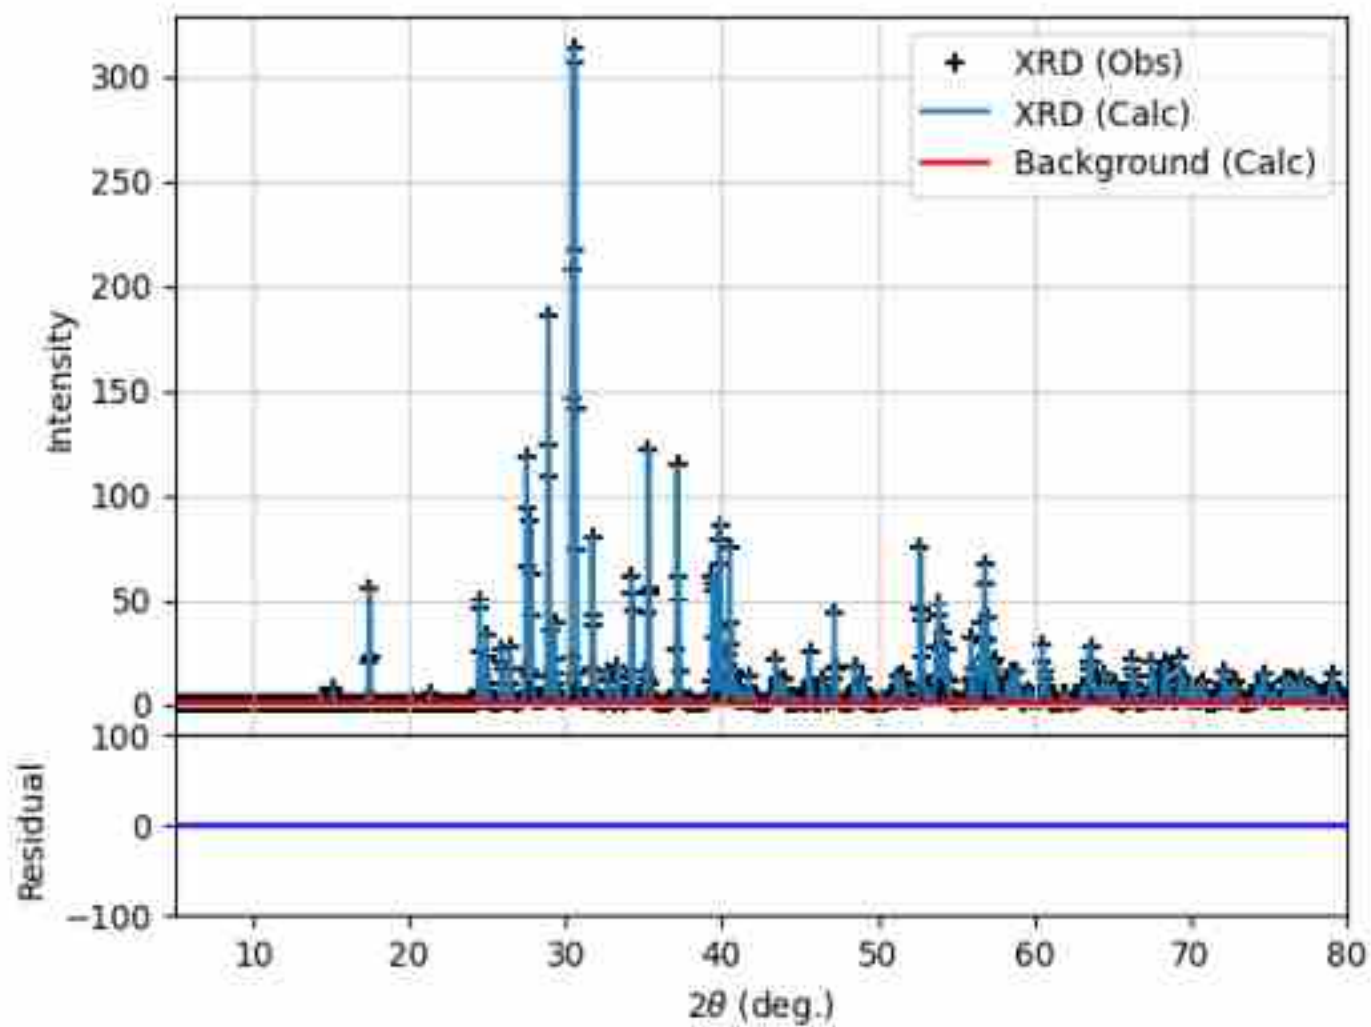

| RMSE before RR | Rwp     | RMSE after RR |
|----------------|---------|---------------|
| 0.024          | 0.00324 | 0.00062       |



# Rb6In2O6

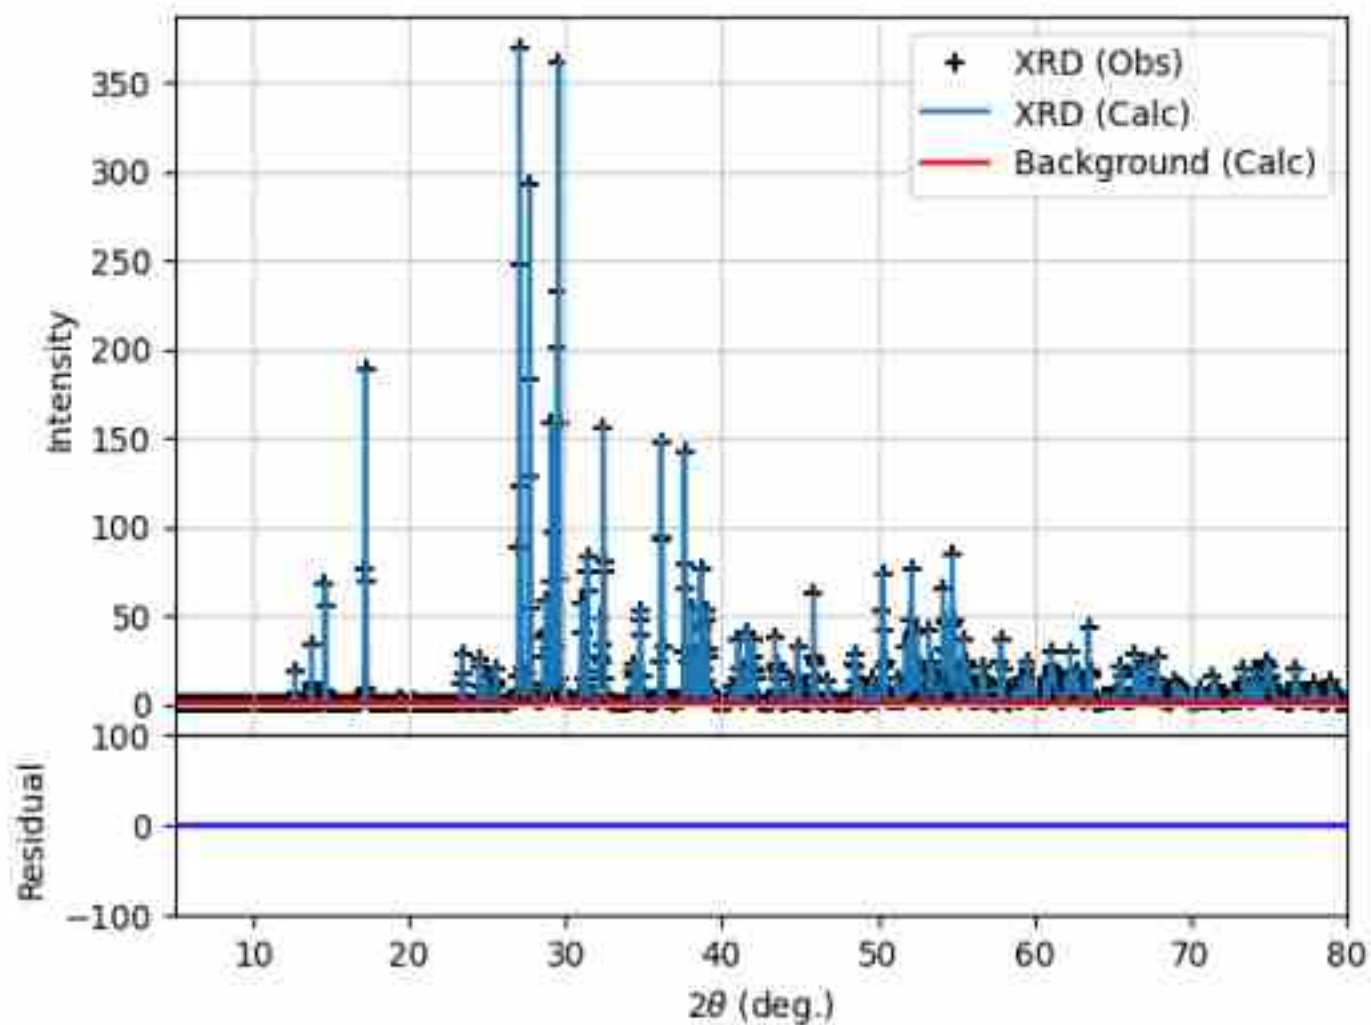

| RMSE before RR | Rwp     | RMSE after RR |
|----------------|---------|---------------|
| 0.024          | 0.00329 | 0.00052       |

# Sb1Pb1Br1O2

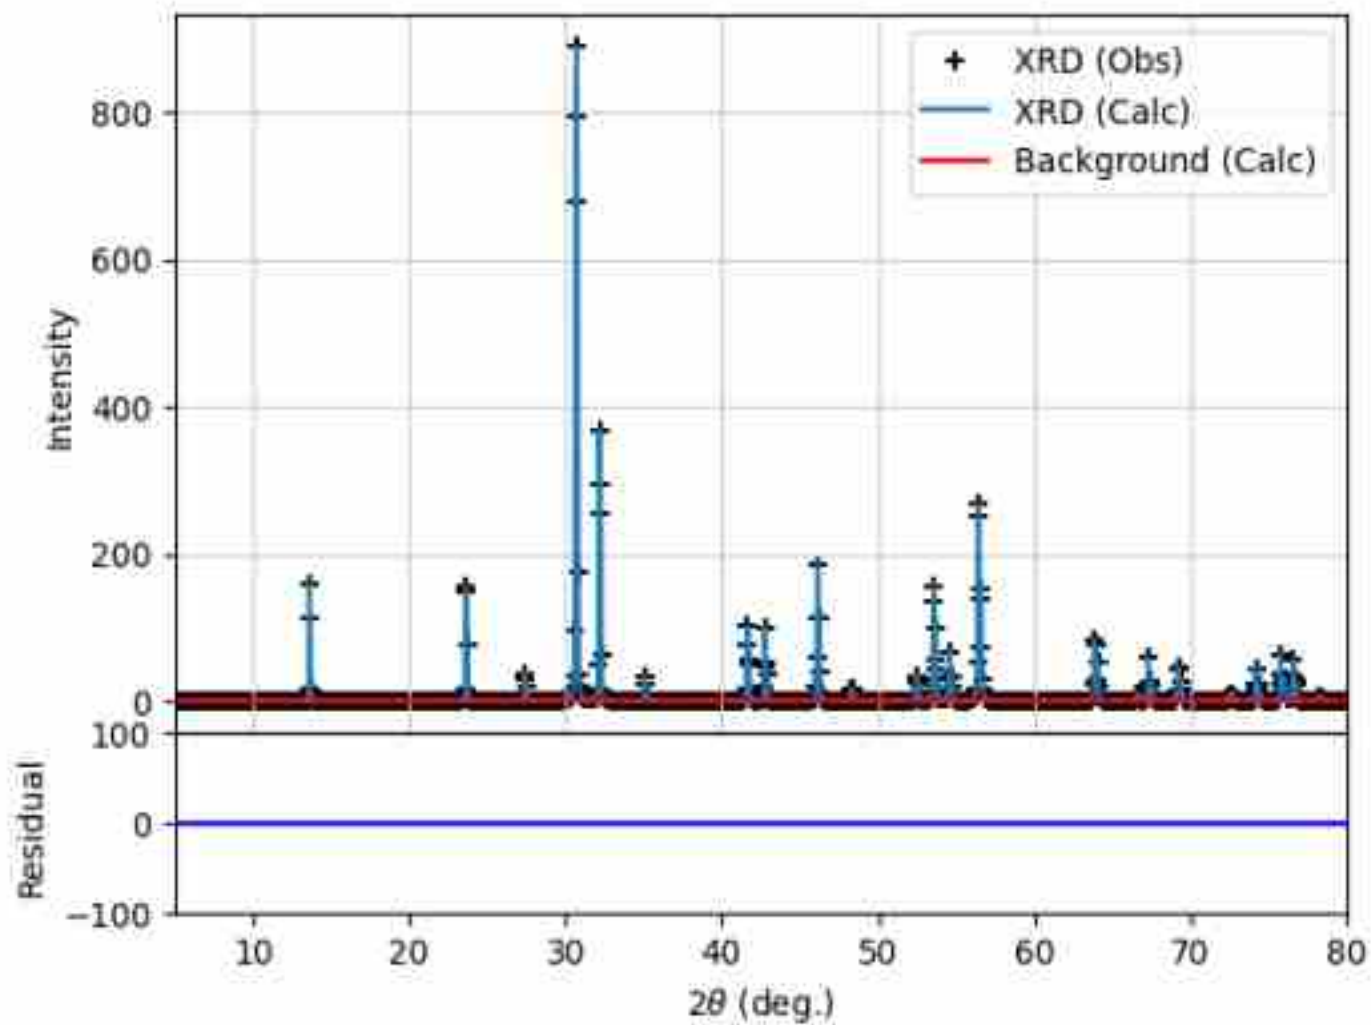

| RMSE before RR | Rwp    | RMSE after RR |
|----------------|--------|---------------|
| 0.024          | 0.0041 | 0.00088       |

# Sc4Re8

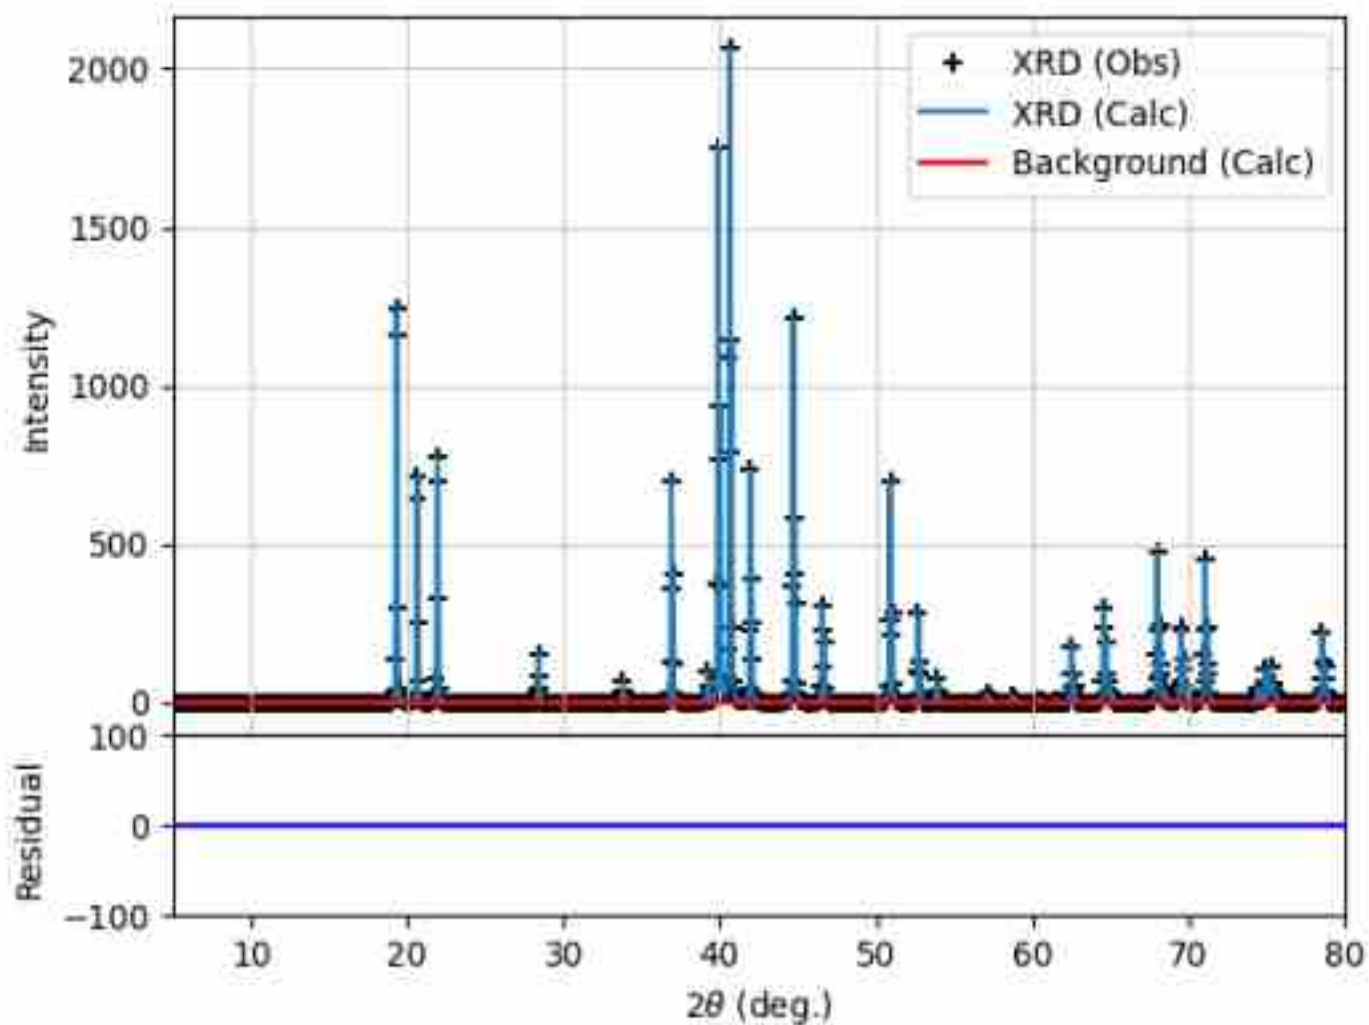

| RMSE before RR | Rwp     | RMSE after RR |
|----------------|---------|---------------|
| 0.024          | 0.00388 | 0.00079       |

# Sm1Ge12Pt4

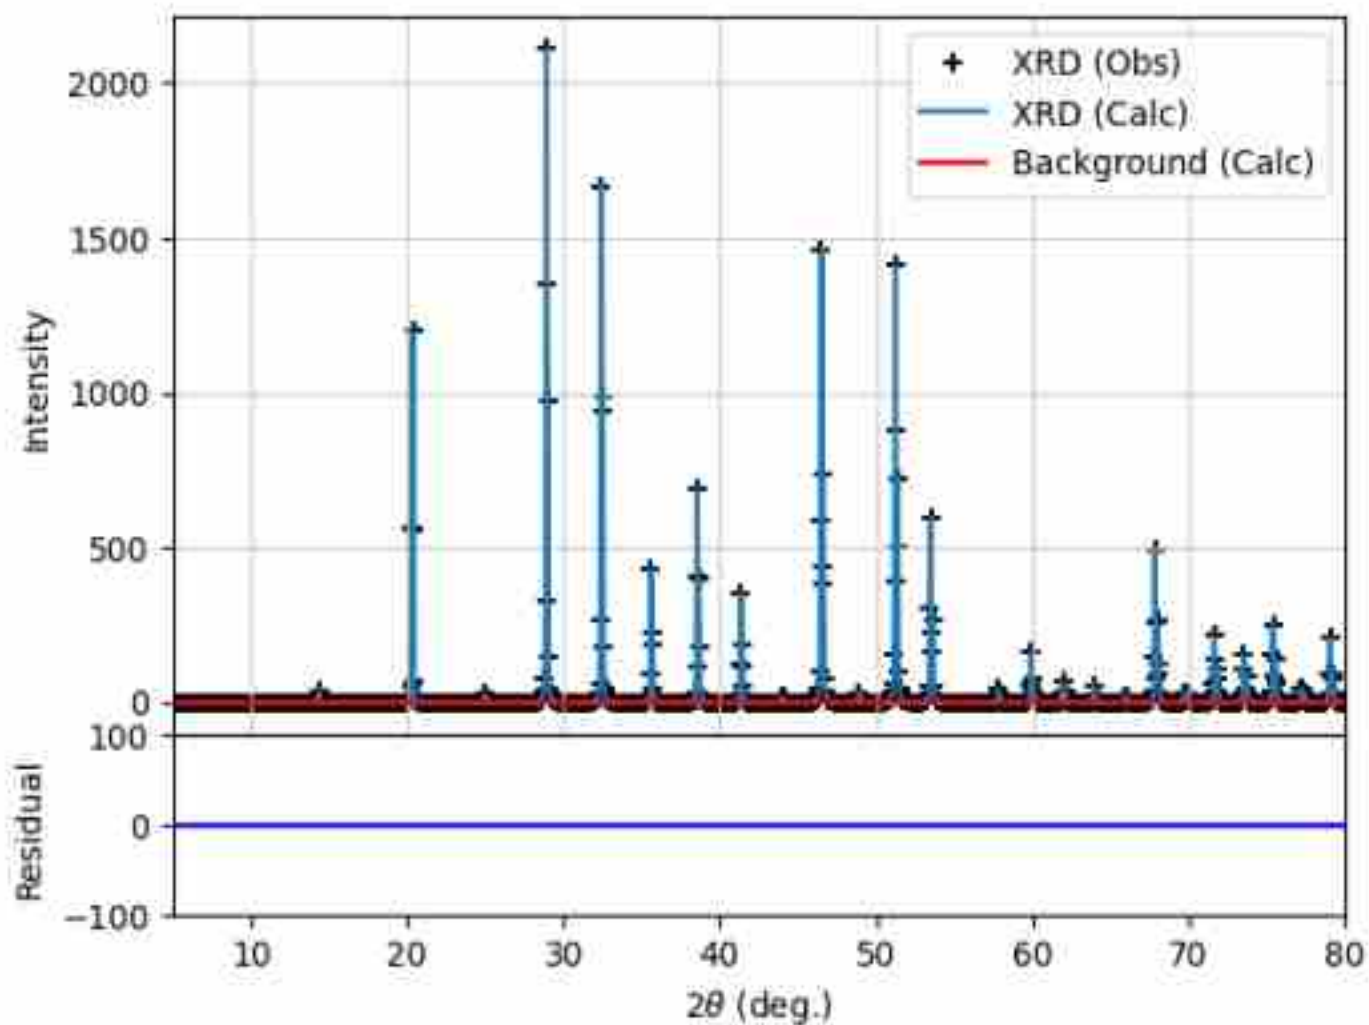

| RMSE before RR | Rwp     | RMSE after RR |
|----------------|---------|---------------|
| 0.024          | 0.00678 | 0.00149       |

# Sm<sub>2</sub>H<sub>2</sub>O<sub>4</sub>

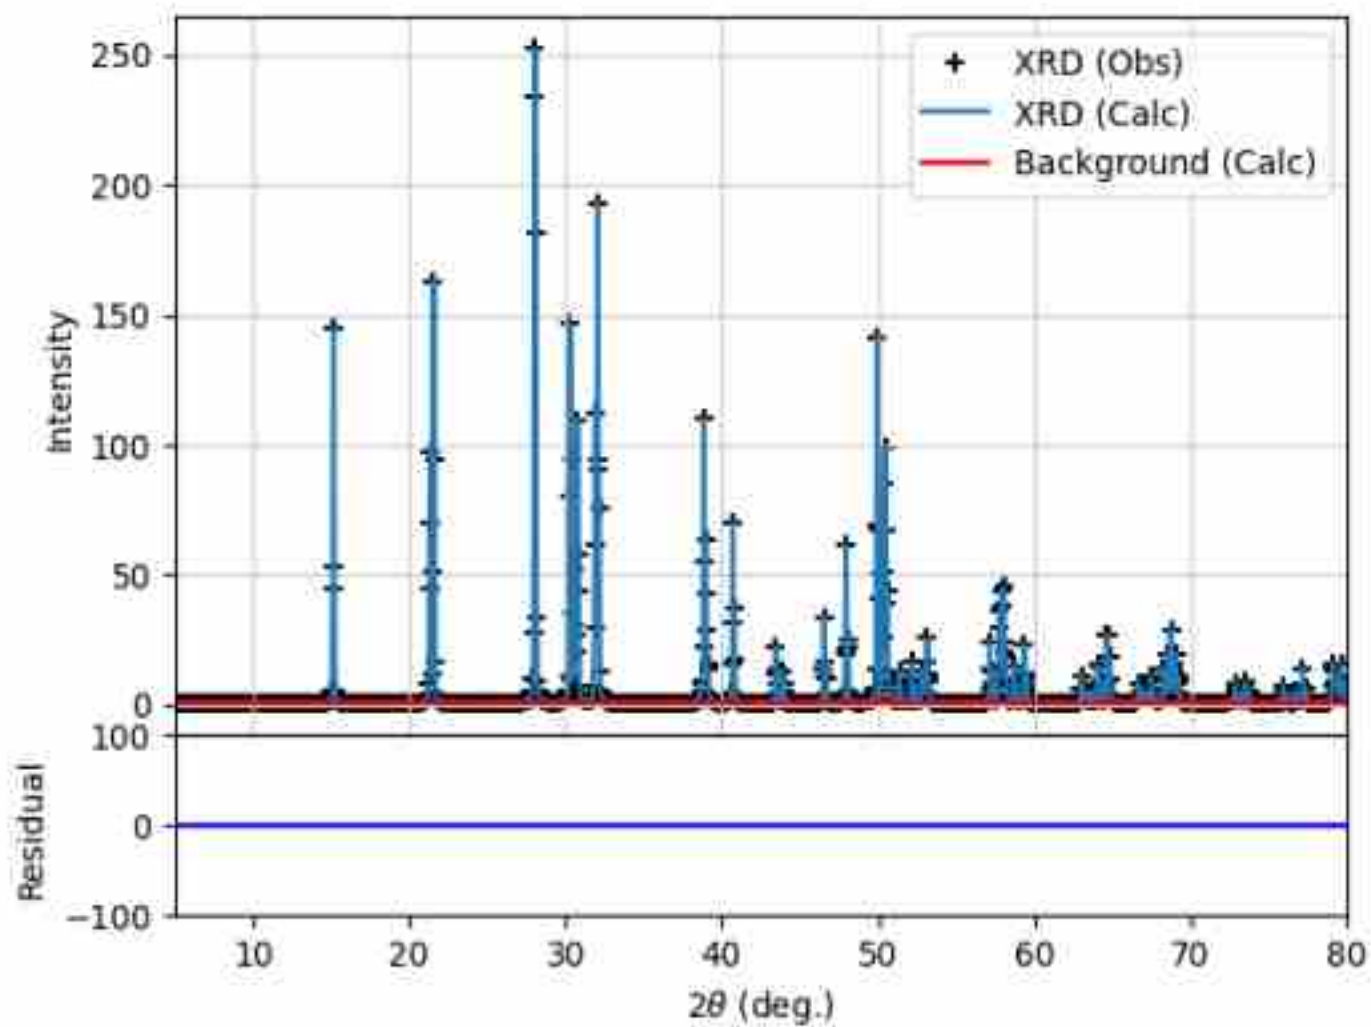

| RMSE before RR | Rwp     | RMSE after RR |
|----------------|---------|---------------|
| 0.024          | 0.11337 | 0.3205        |

# Sm4S8

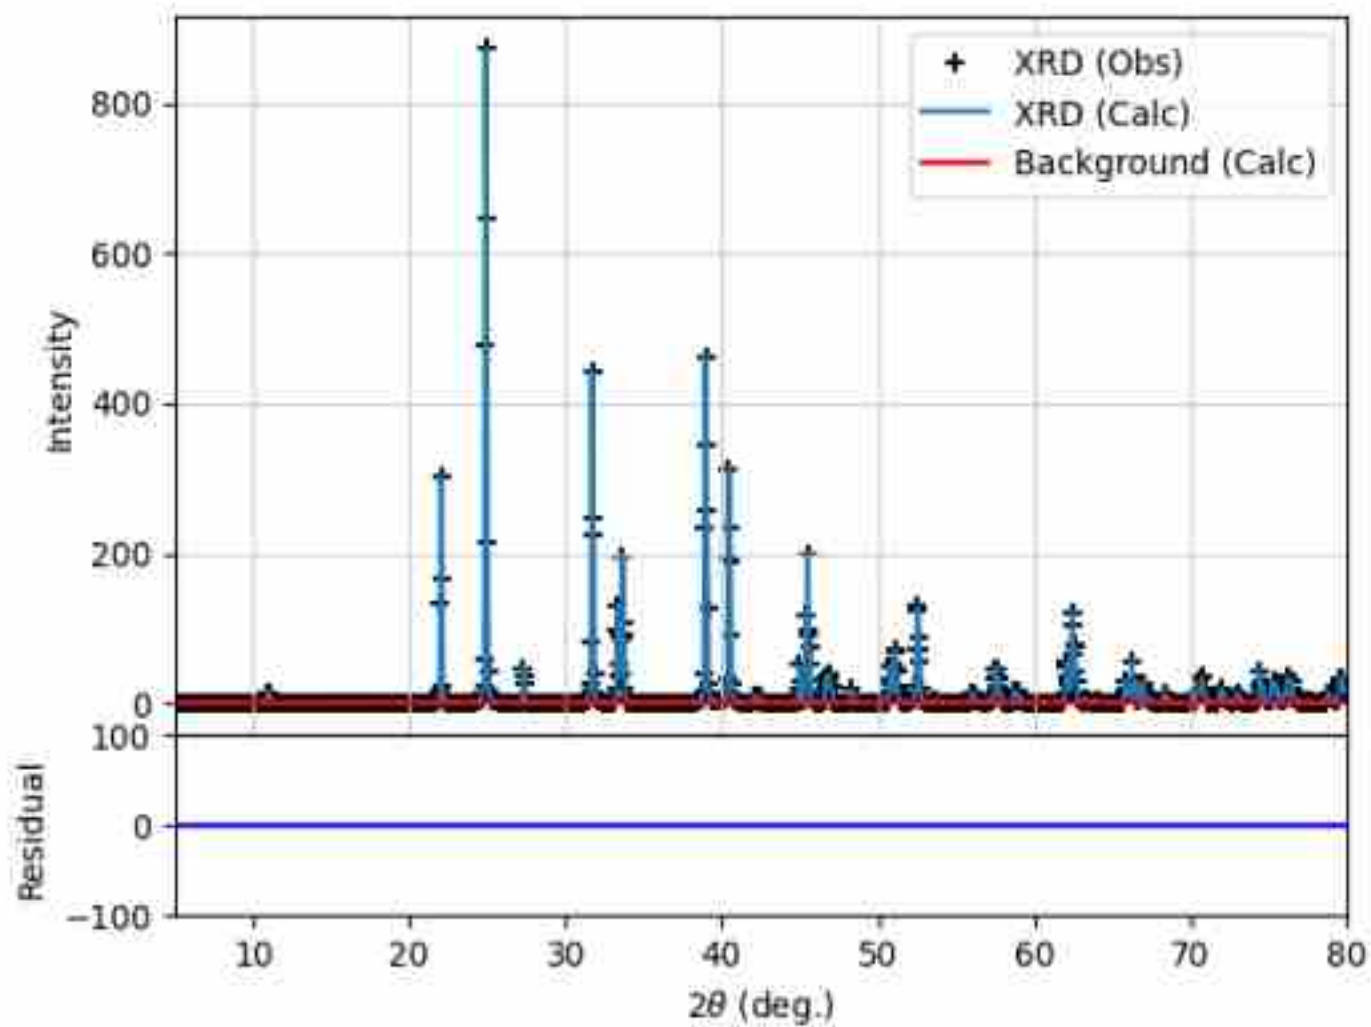

| RMSE before RR | Rwp     | RMSE after RR |
|----------------|---------|---------------|
| 0.024          | 0.00293 | 0.00065       |

# Sm6Ga2Co6

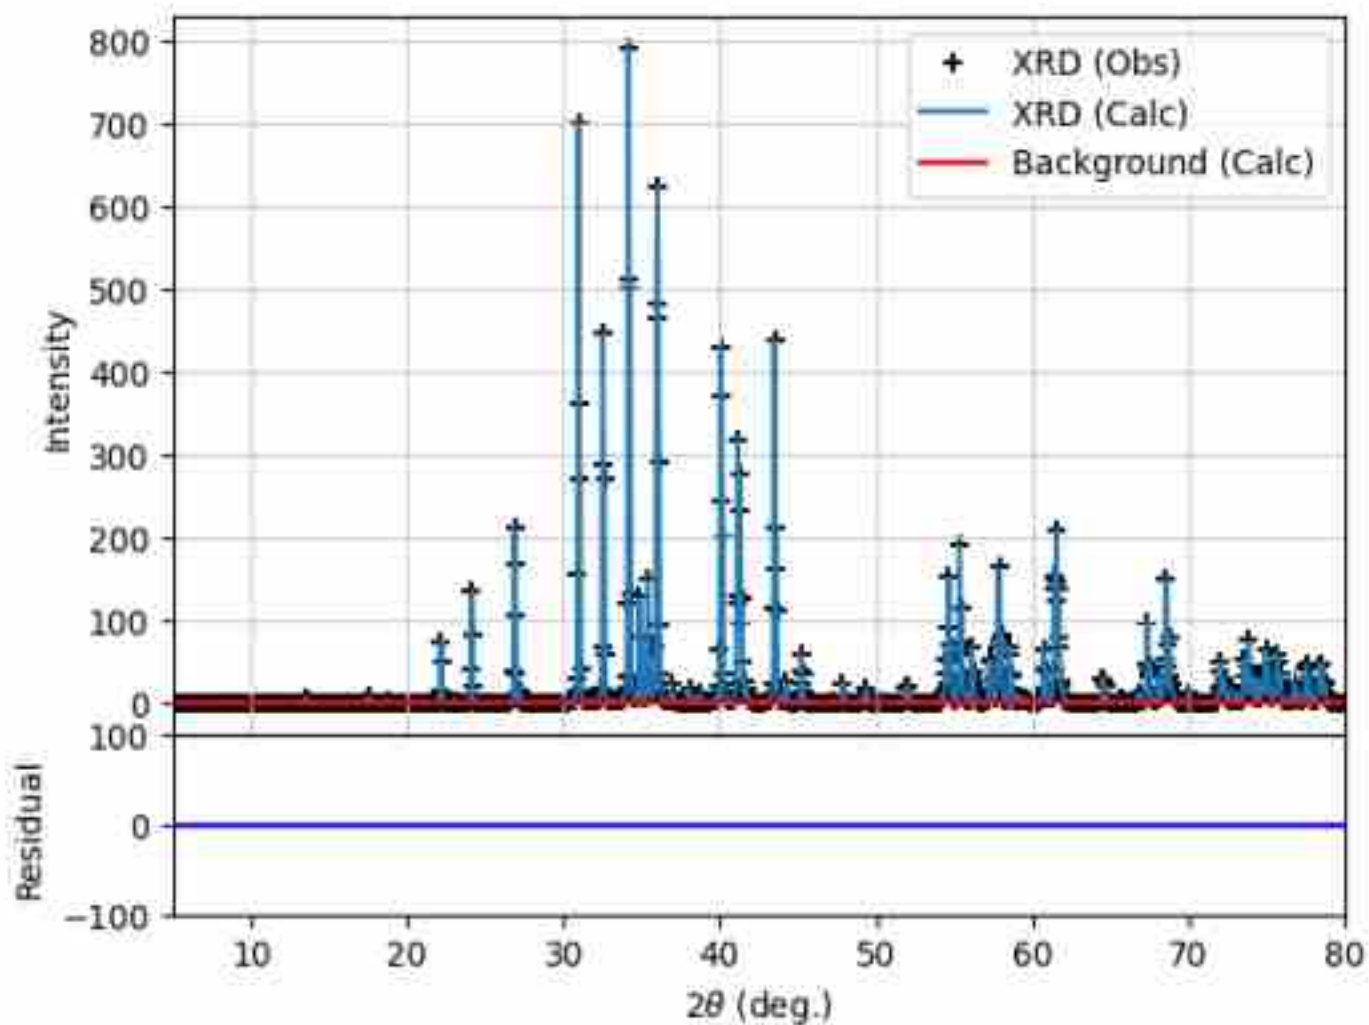

| RMSE before RR | Rwp     | RMSE after RR |
|----------------|---------|---------------|
| 0.024          | 0.00349 | 0.00049       |

# Sm10Bi6

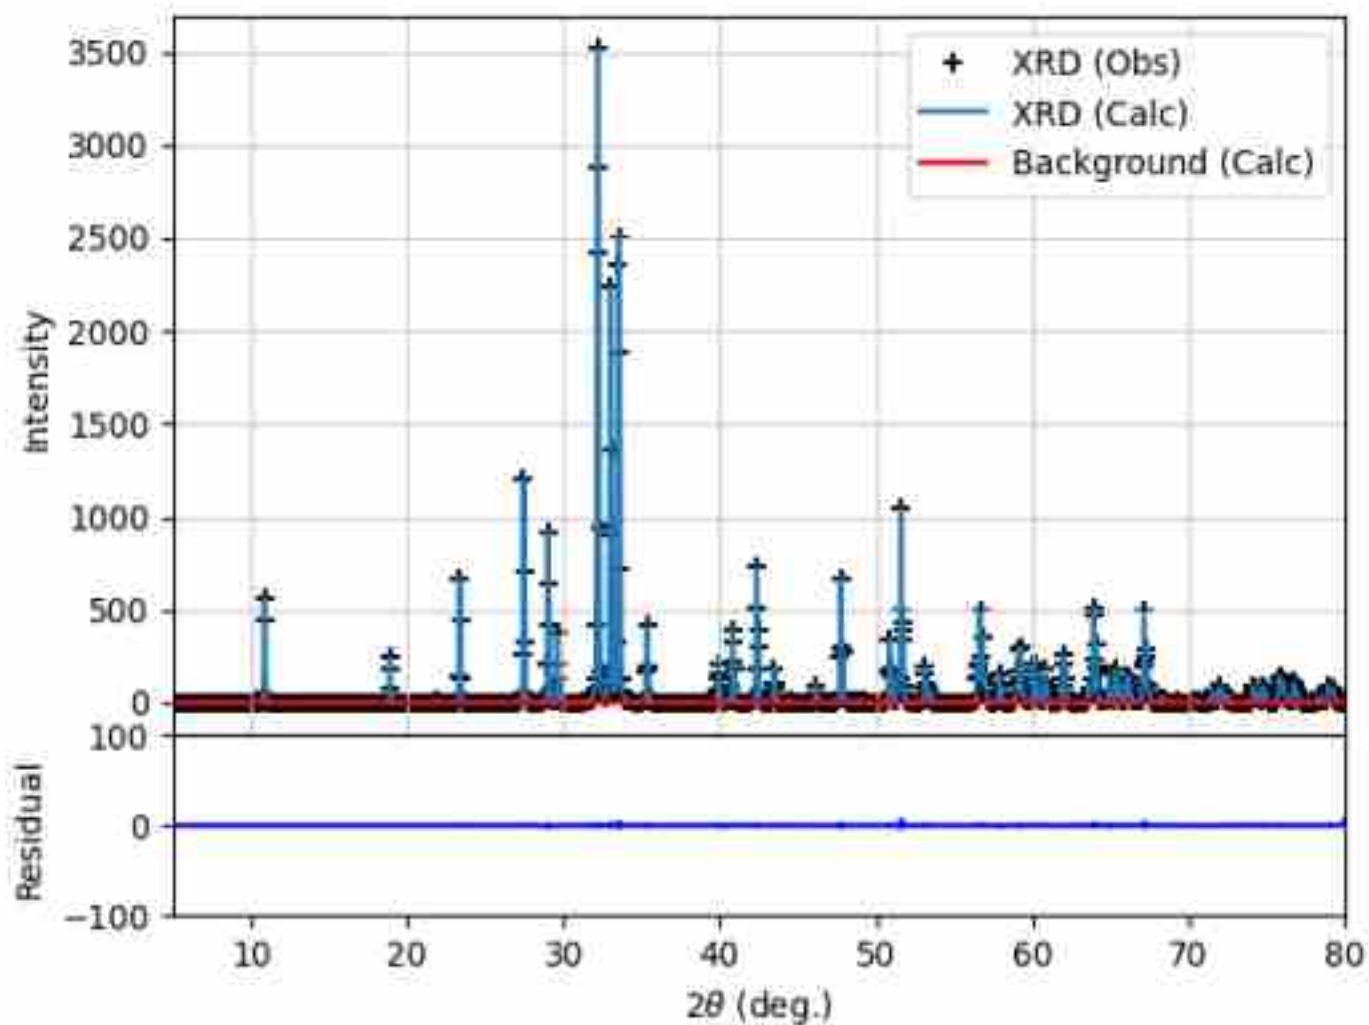

| RMSE before RR | Rwp    | RMSE after RR |
|----------------|--------|---------------|
| 0.024          | 1.0518 | 0.0058        |



# Sn4Pd4

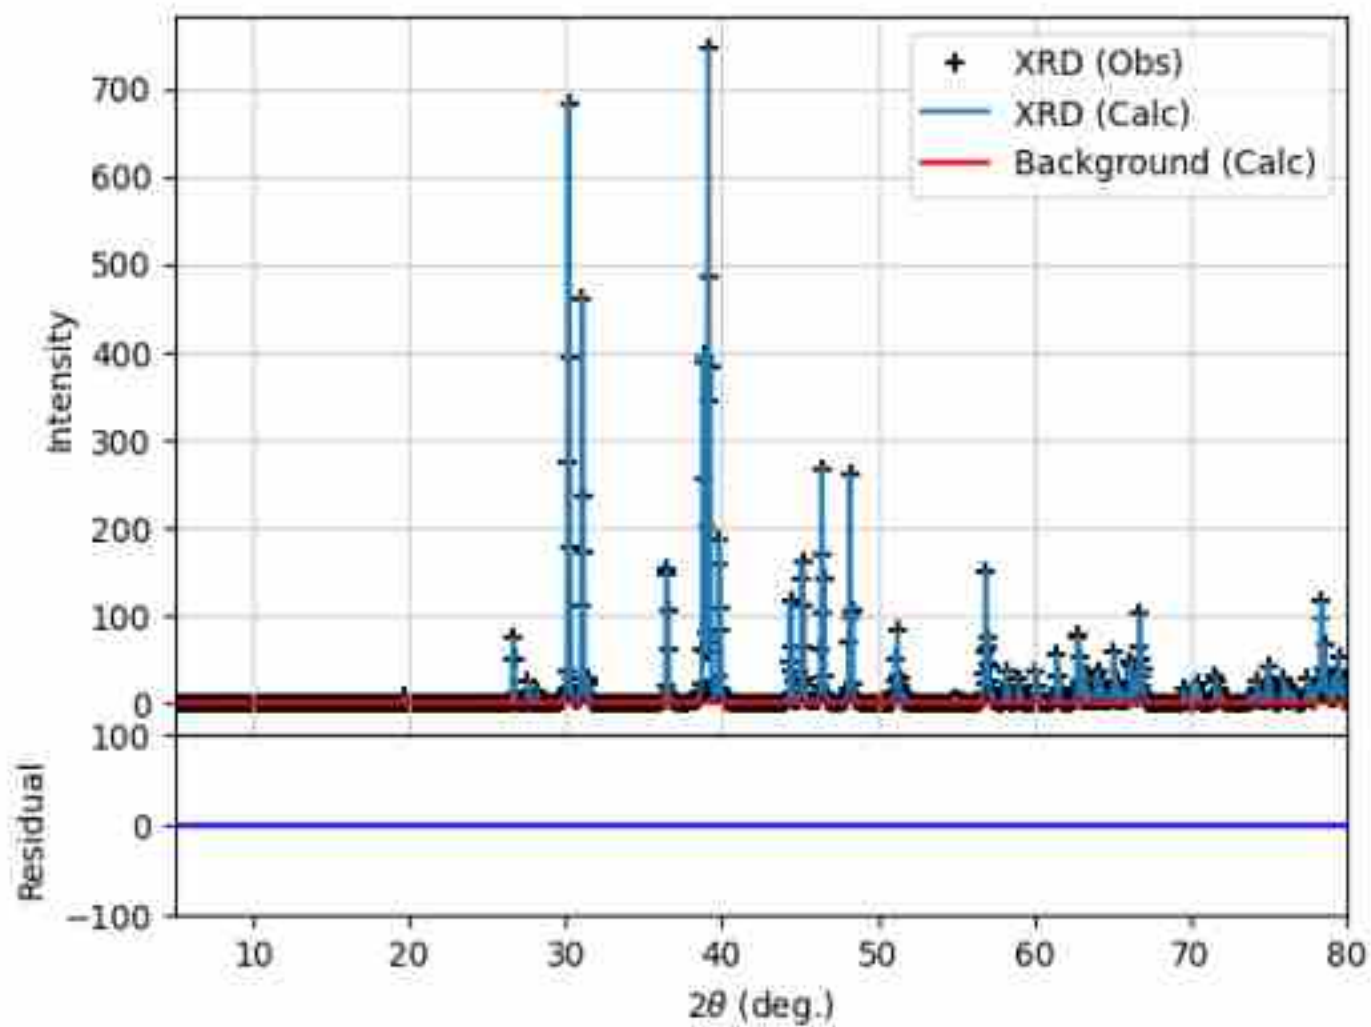

| RMSE before RR | Rwp     | RMSE after RR |
|----------------|---------|---------------|
| 0.024          | 0.00438 | 0.00024       |

# Sn8Au2

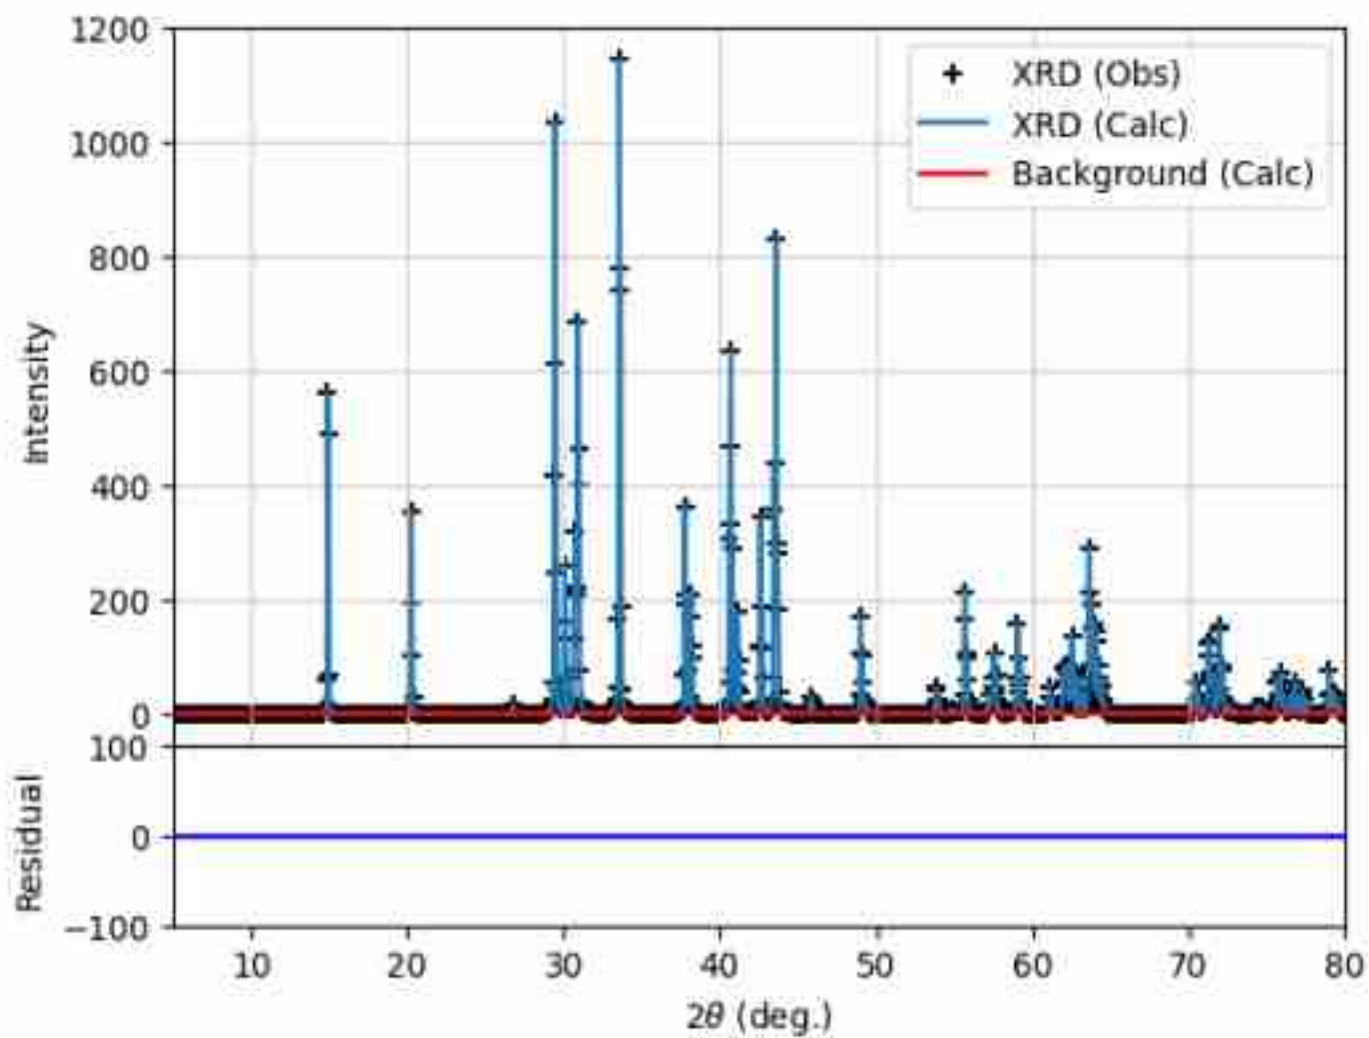

| RMSE before RR | Rwp    | RMSE after RR |
|----------------|--------|---------------|
| 0.024          | 0.0042 | 0.0002        |

# Sr<sub>2</sub>La<sub>2</sub>Fe<sub>2</sub>Co<sub>2</sub>O<sub>12</sub>

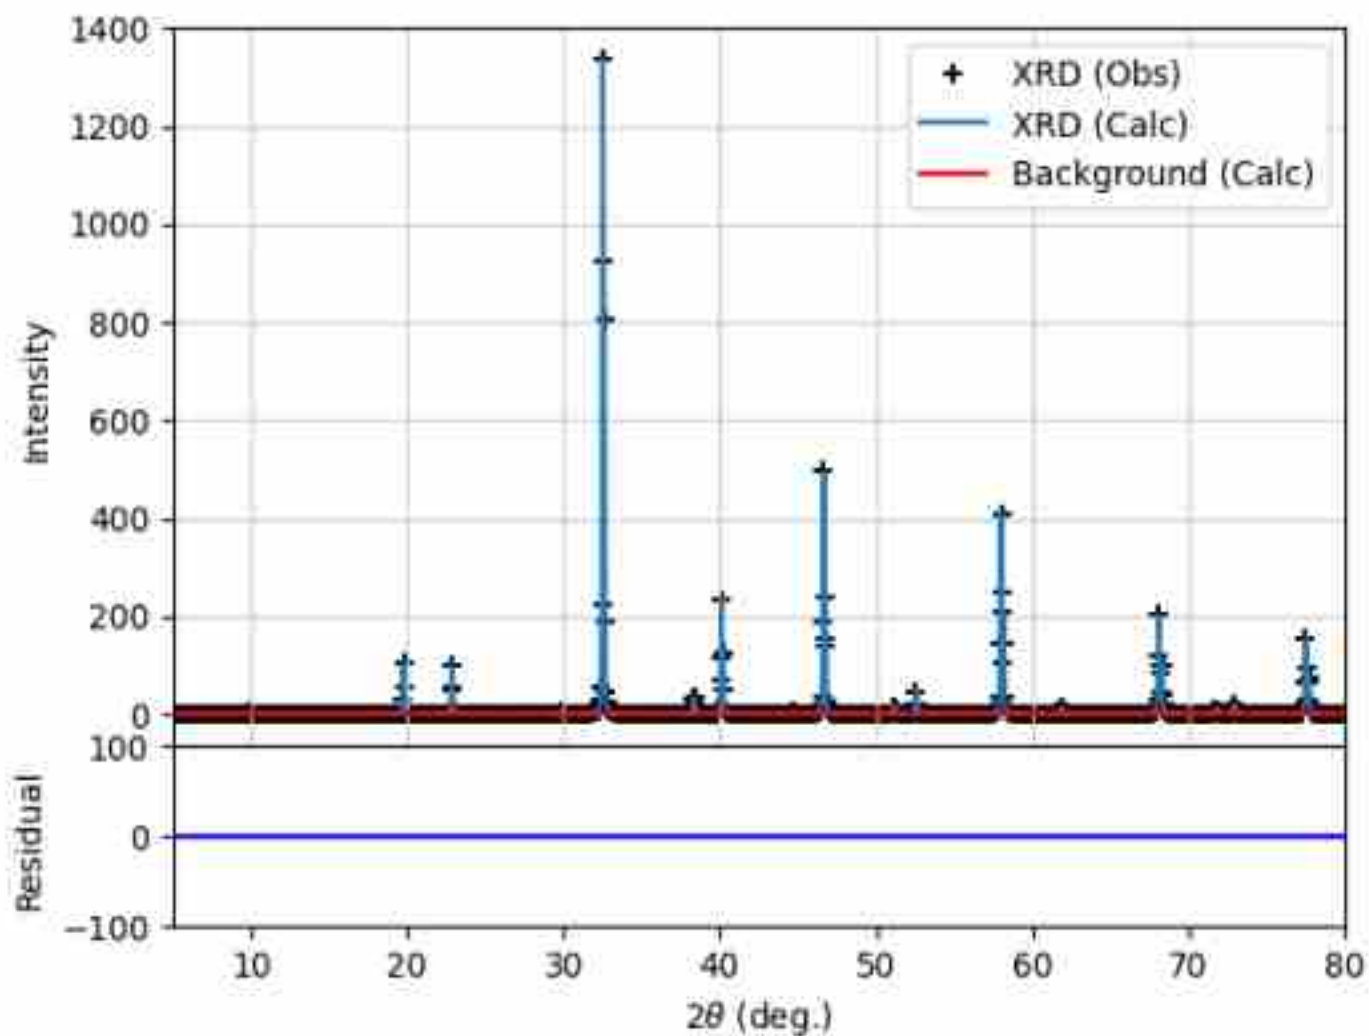

| RMSE before RR | Rwp     | RMSE after RR |
|----------------|---------|---------------|
| 0.024          | 0.02772 | 0.00447       |

# Sr<sub>2</sub>Li<sub>2</sub>Ga<sub>2</sub>F<sub>12</sub>

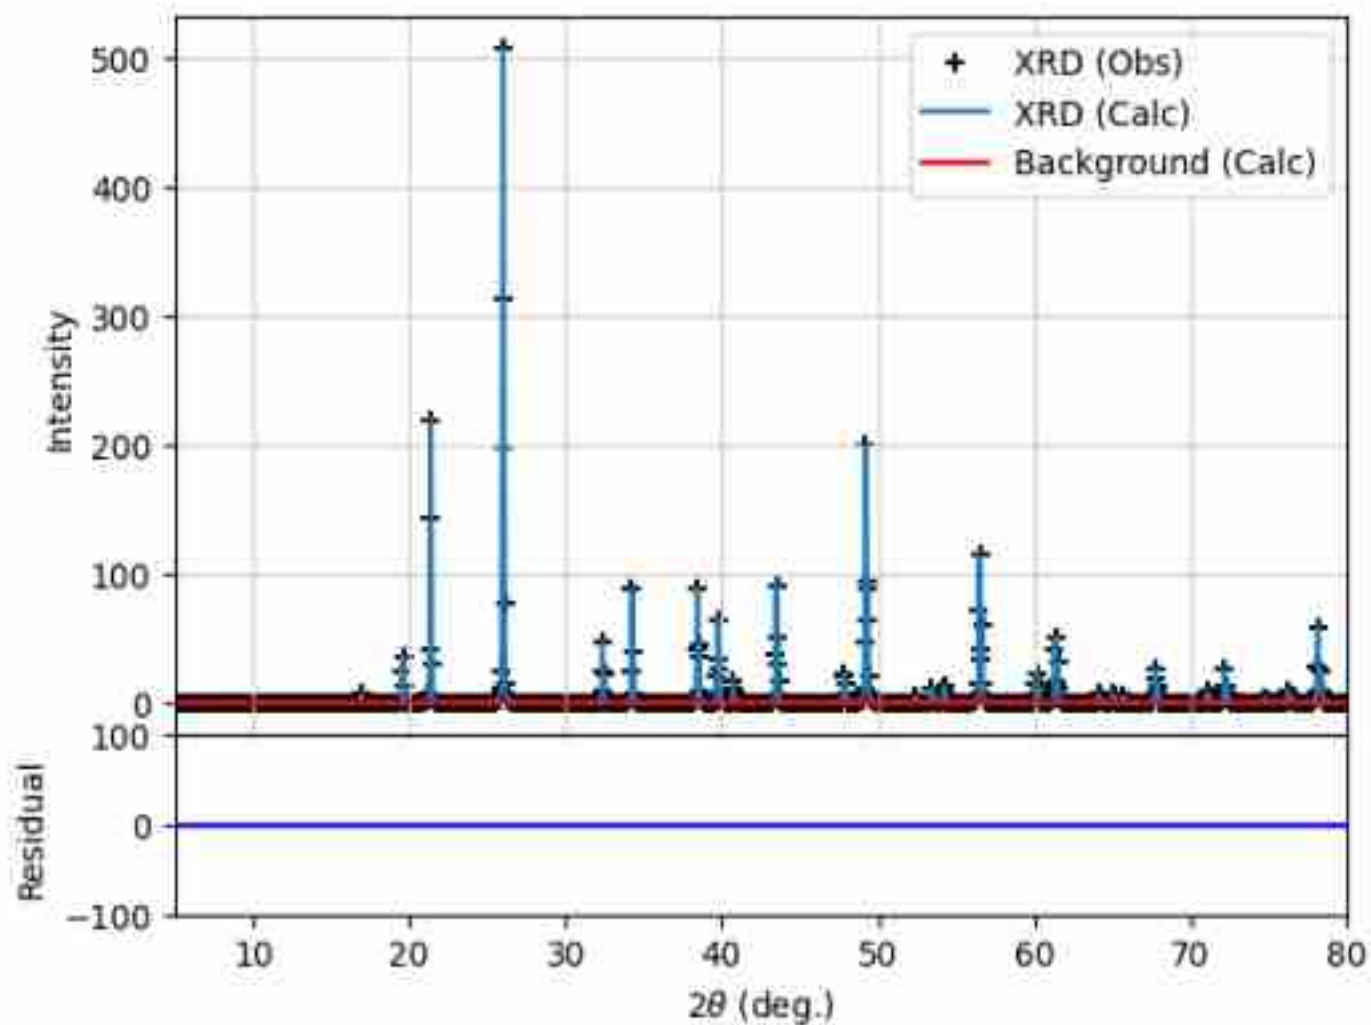

| RMSE before RR | Rwp     | RMSE after RR |
|----------------|---------|---------------|
| 0.024          | 0.00344 | 0.00181       |

# Sr<sub>4</sub>Fe<sub>4</sub>O<sub>10</sub>

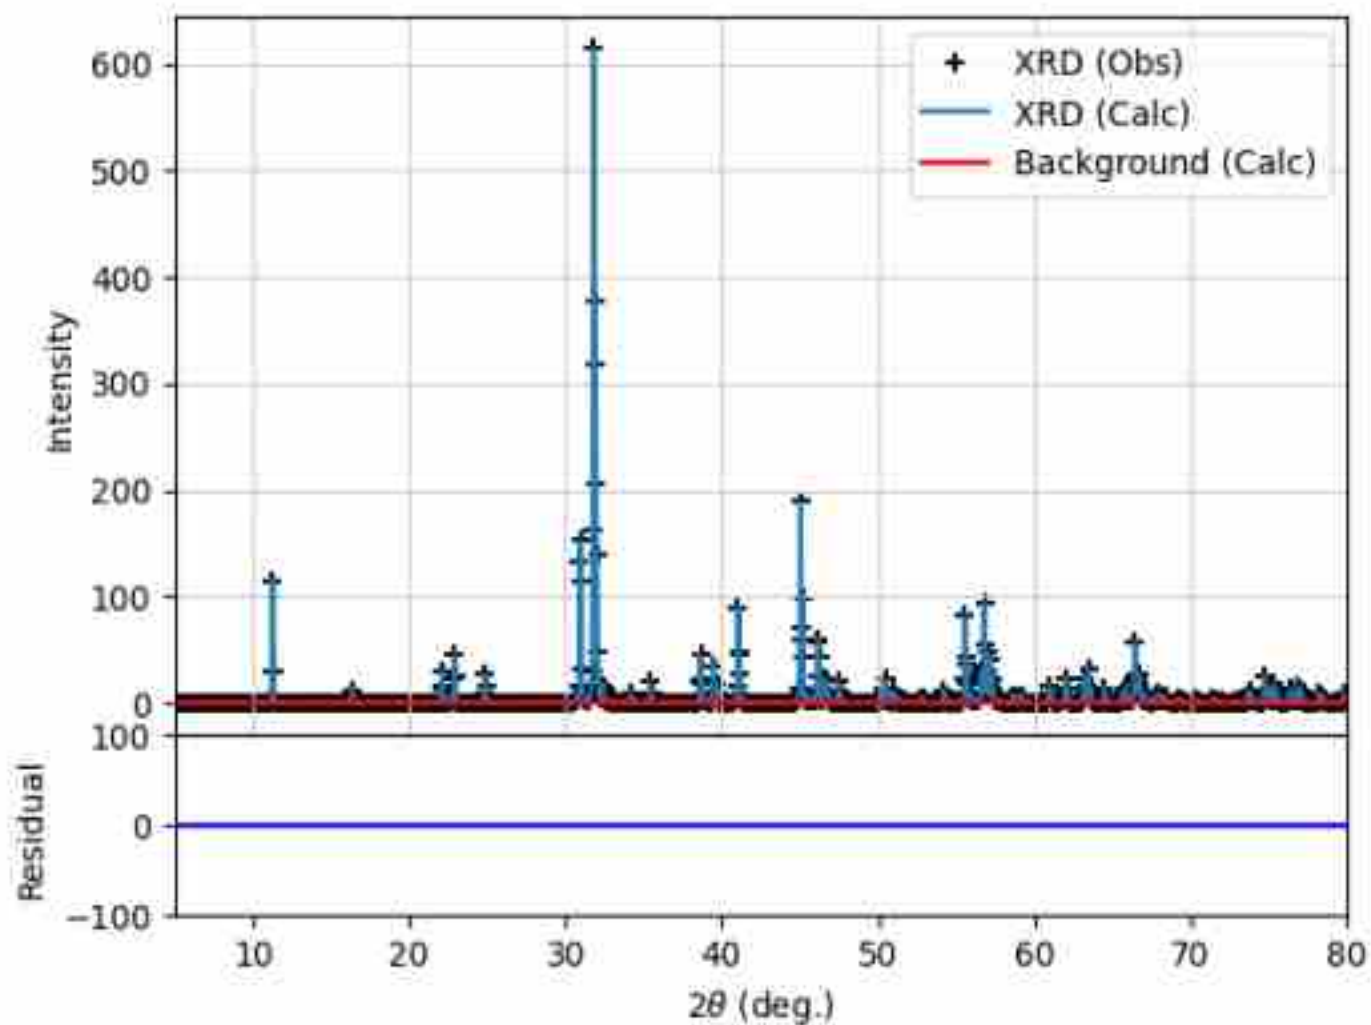

| RMSE before RR | Rwp     | RMSE after RR |
|----------------|---------|---------------|
| 0.024          | 0.00301 | 0.00069       |

# Sr<sub>4</sub>In<sub>4</sub>O<sub>10</sub>

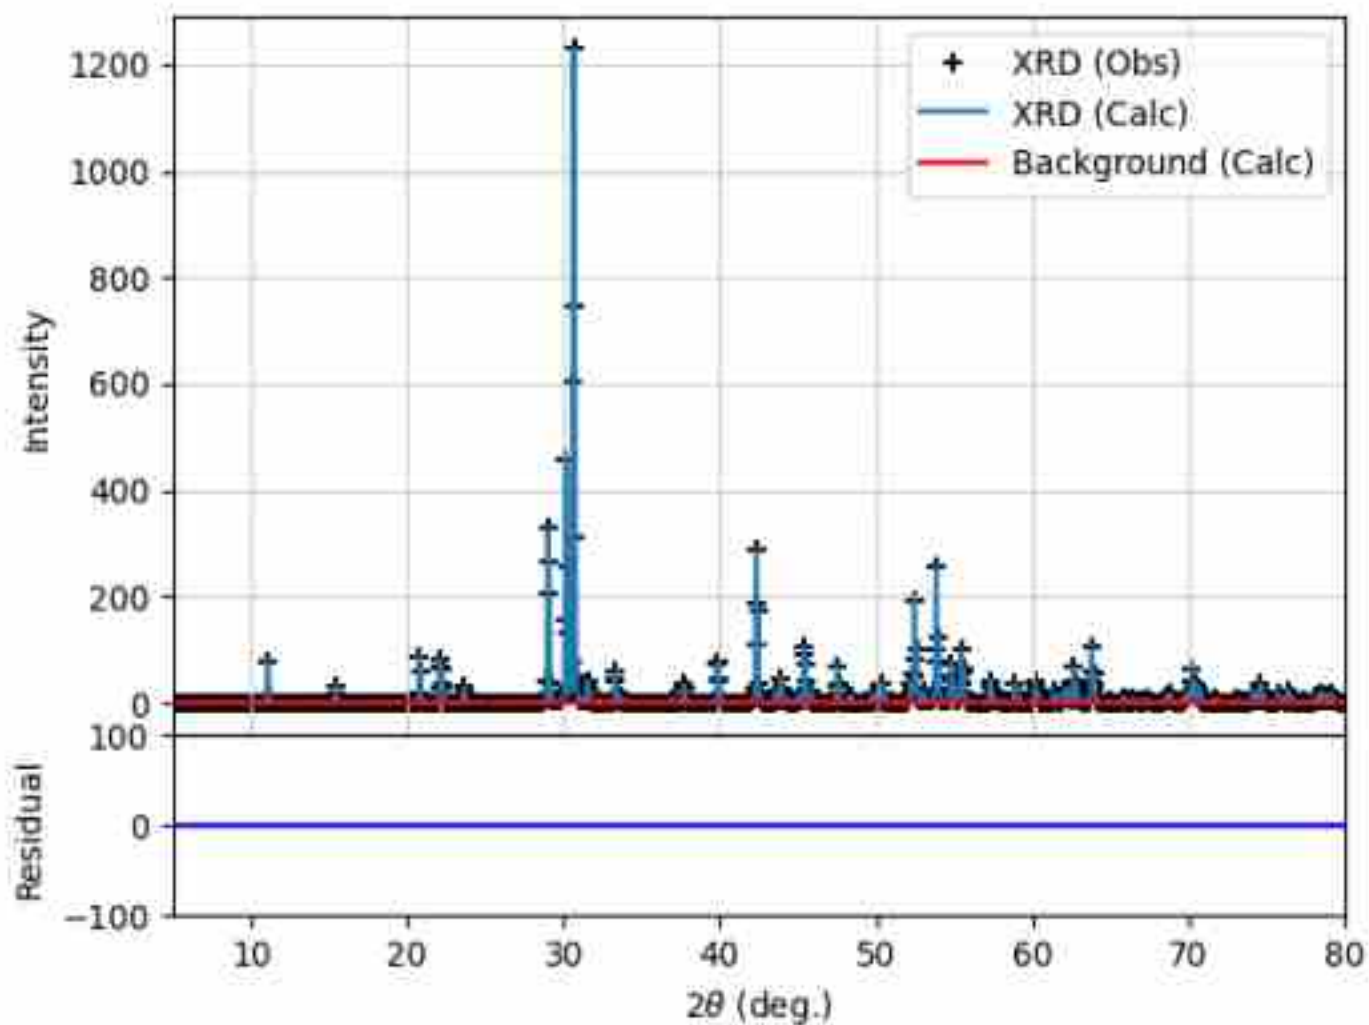

| RMSE before RR | Rwp     | RMSE after RR |
|----------------|---------|---------------|
| 0.024          | 0.00299 | 0.00114       |

# Sr<sub>4</sub>Mn<sub>1</sub>Ru<sub>1</sub>O<sub>8</sub>

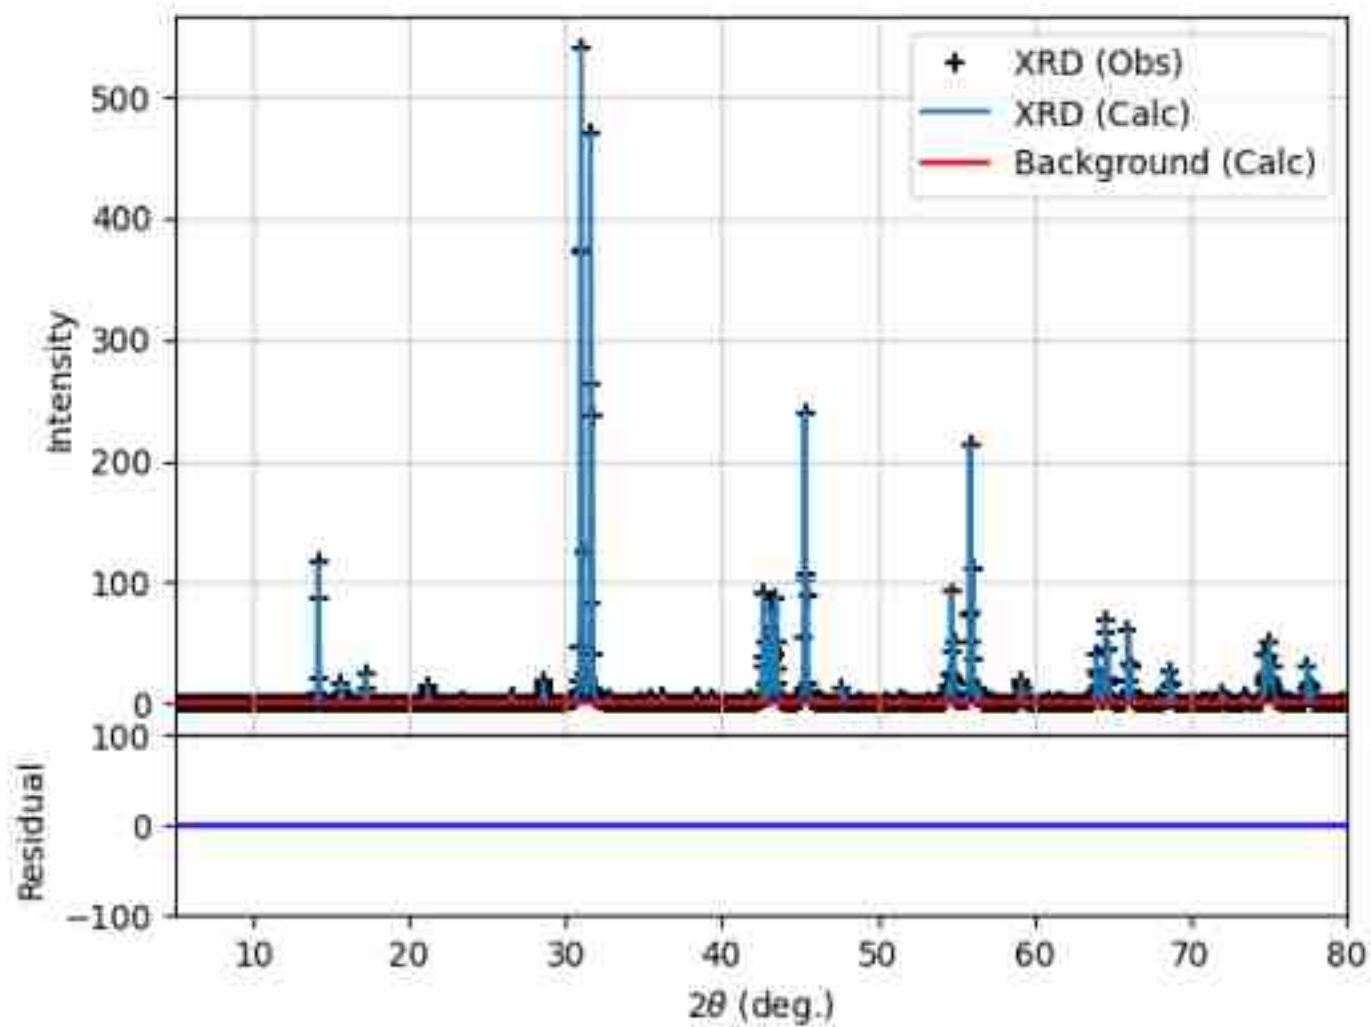

| RMSE before RR | Rwp     | RMSE after RR |
|----------------|---------|---------------|
| 0.024          | 0.00336 | 0.00081       |

# Ta<sub>2</sub>Zn<sub>4</sub>N<sub>6</sub>

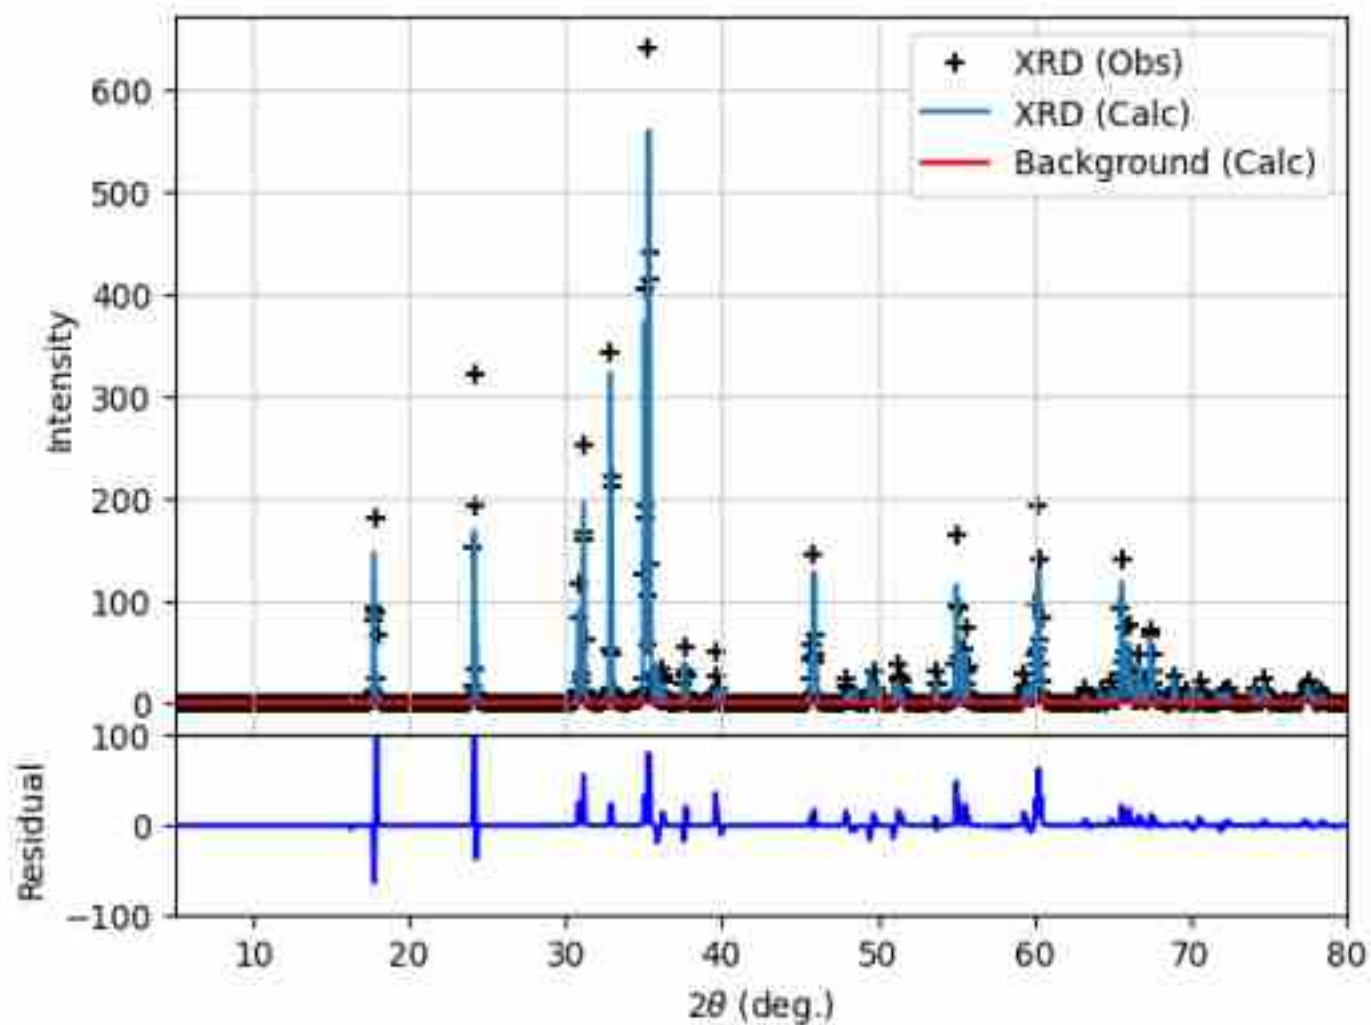

| RMSE before RR | Rwp      | RMSE after RR |
|----------------|----------|---------------|
| 0.024          | 37.12382 | None          |



# Tb1Mn12

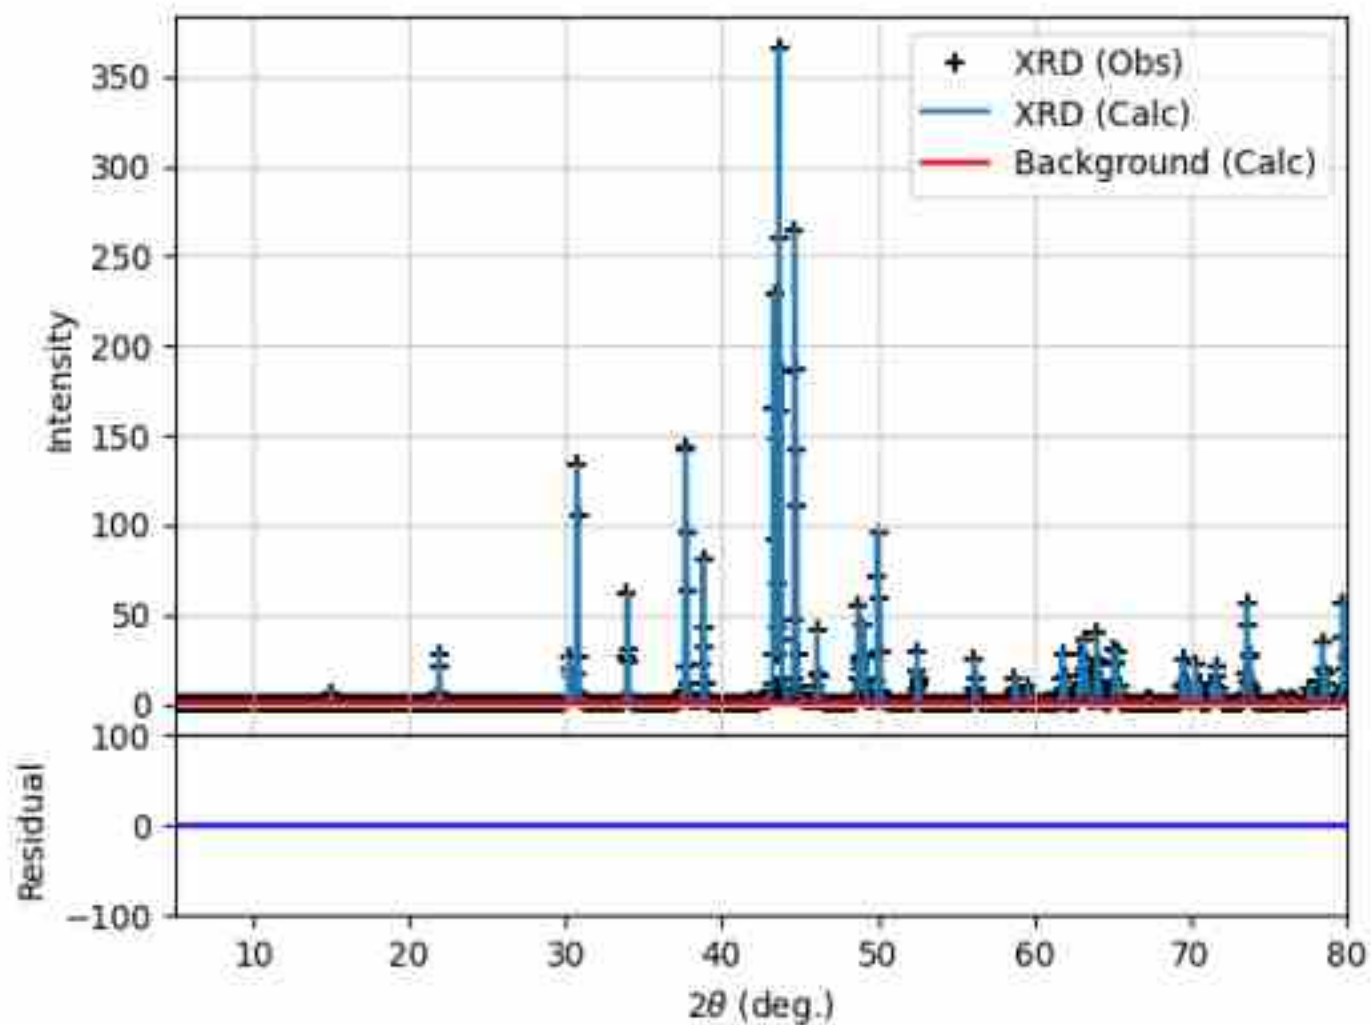

| RMSE before RR | Rwp     | RMSE after RR |
|----------------|---------|---------------|
| 0.024          | 0.01101 | 0.00183       |

# Tb12Co5Bi1

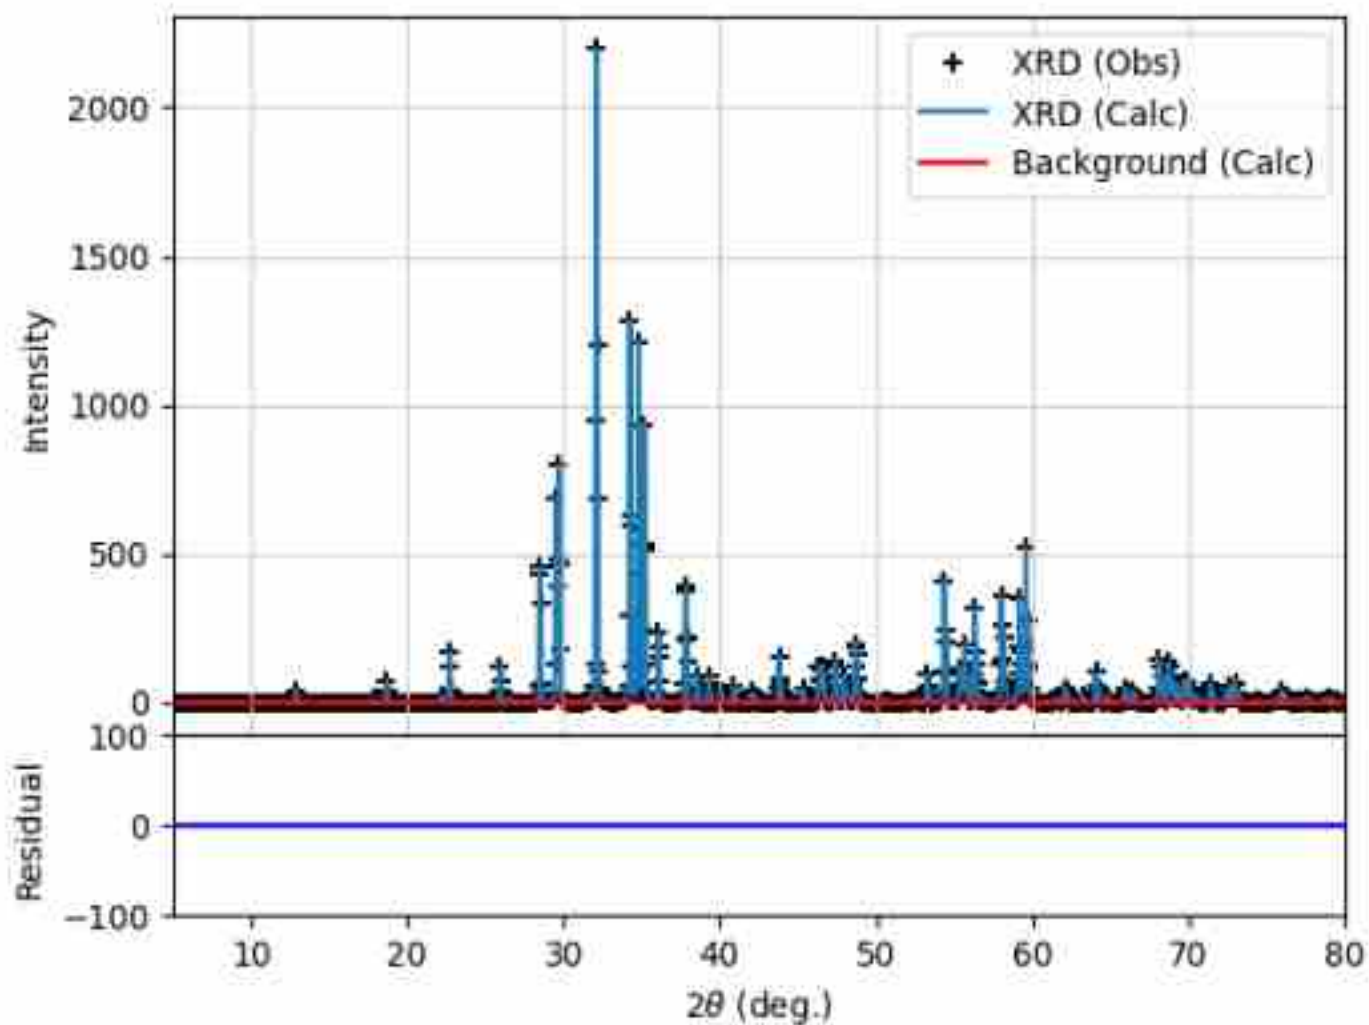

| RMSE before RR | Rwp     | RMSE after RR |
|----------------|---------|---------------|
| 0.024          | 0.00329 | 0.00046       |

# Th<sub>3</sub>U<sub>3</sub>P<sub>8</sub>

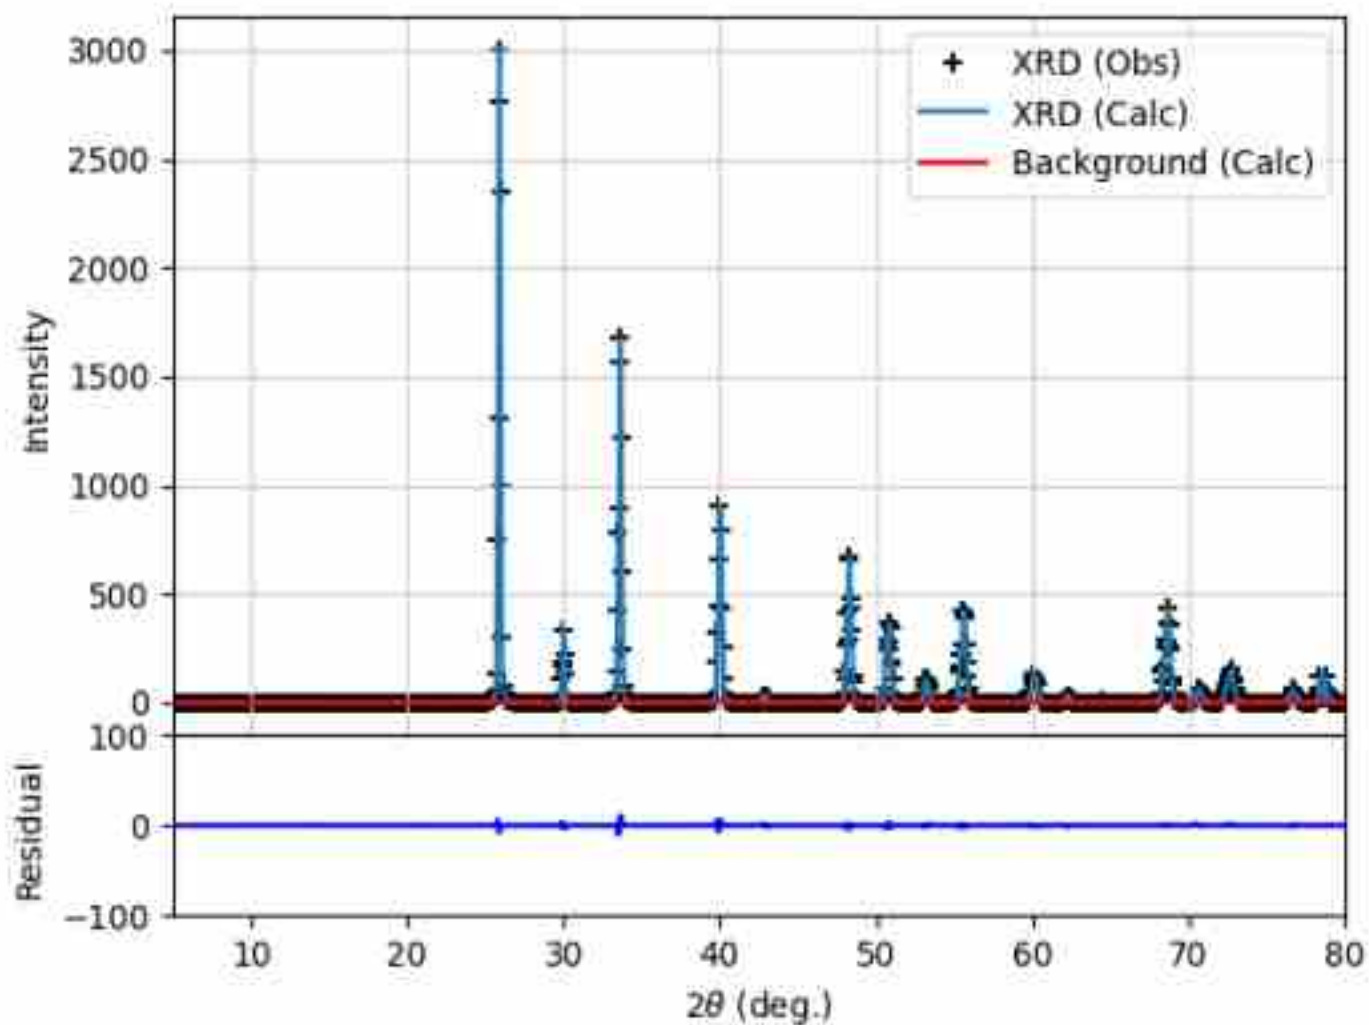

| RMSE before RR | Rwp     | RMSE after RR |
|----------------|---------|---------------|
| 0.024          | 0.90259 | 0.04185       |

# Th8S12

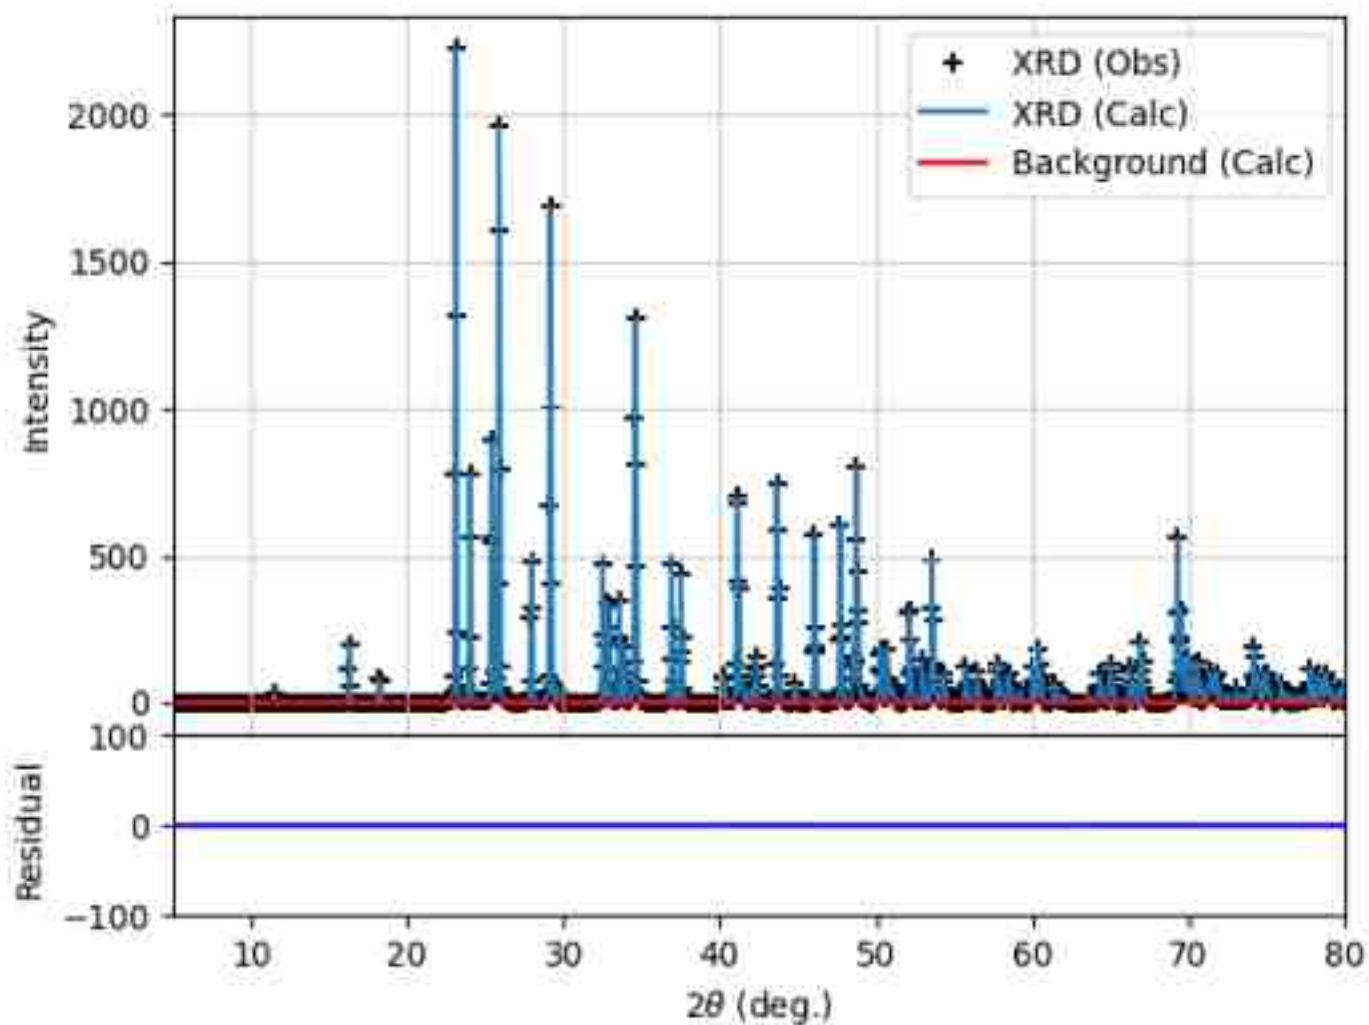

| RMSE before RR | Rwp     | RMSE after RR |
|----------------|---------|---------------|
| 0.024          | 0.11259 | 0.00791       |

# Ti1Cu1F6

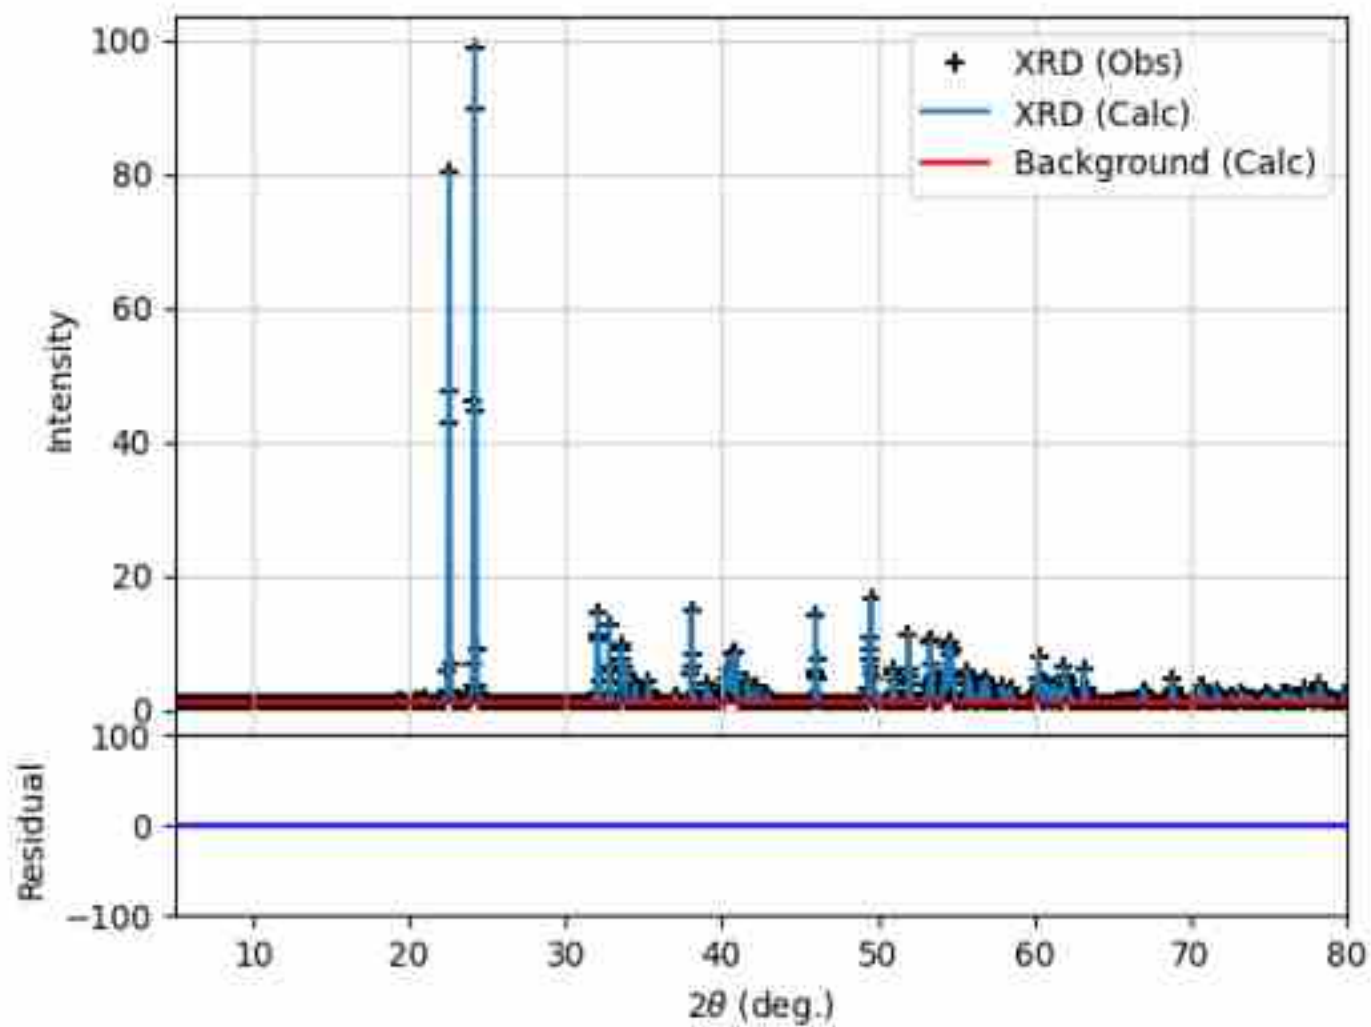

| RMSE before RR | Rwp     | RMSE after RR |
|----------------|---------|---------------|
| 0.024          | 0.00113 | 0.00017       |

# Ti1Cu4S4

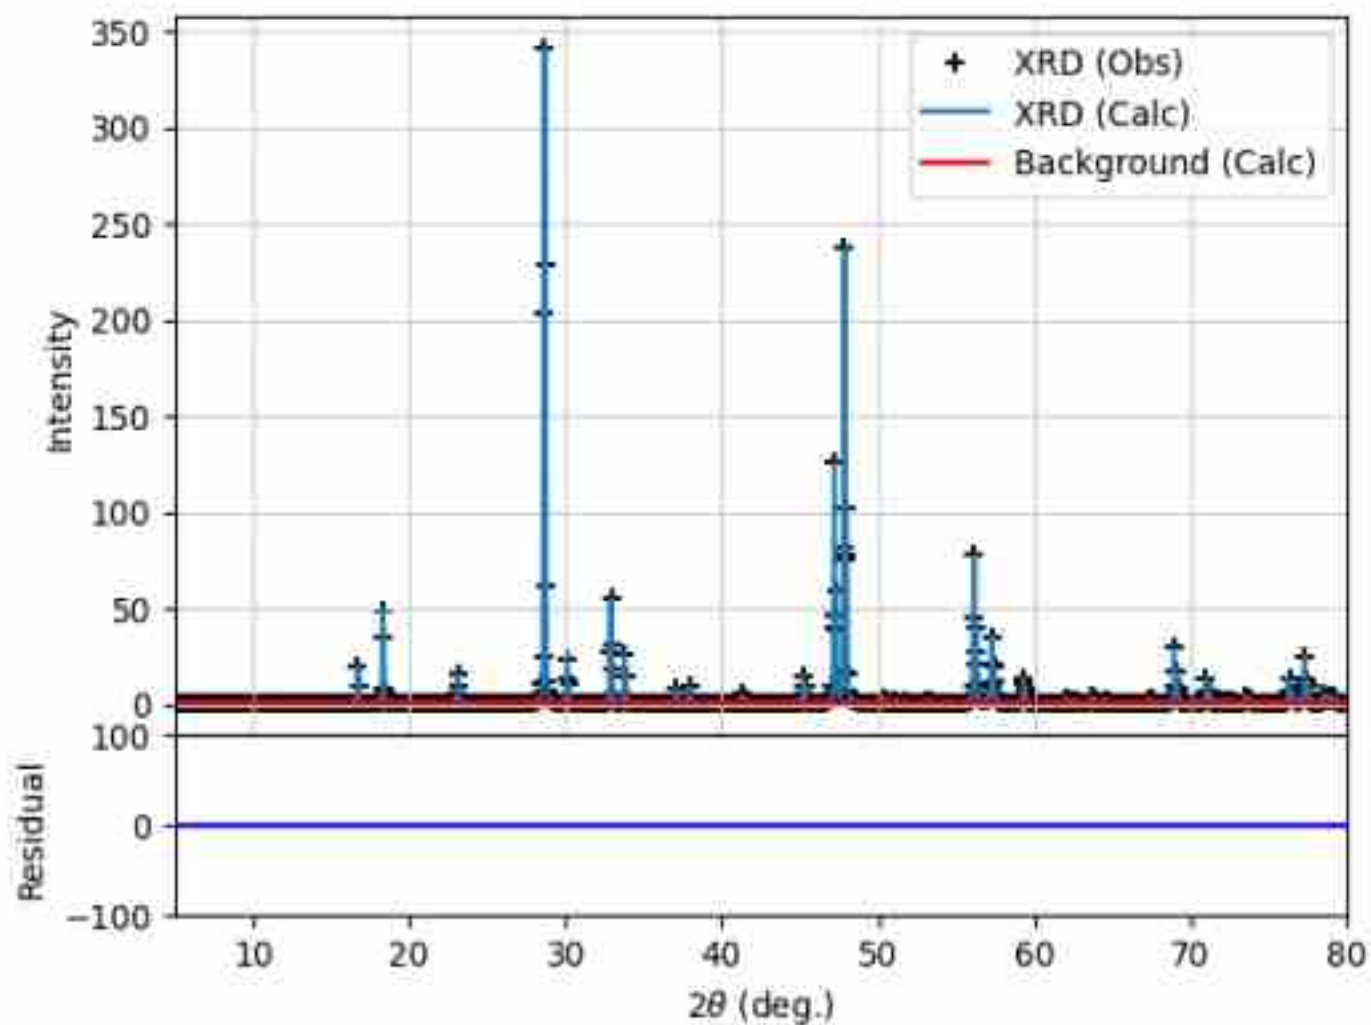

| RMSE before RR | Rwp     | RMSE after RR |
|----------------|---------|---------------|
| 0.024          | 0.00305 | 0.00065       |

# Ti<sub>3</sub>O<sub>6</sub>

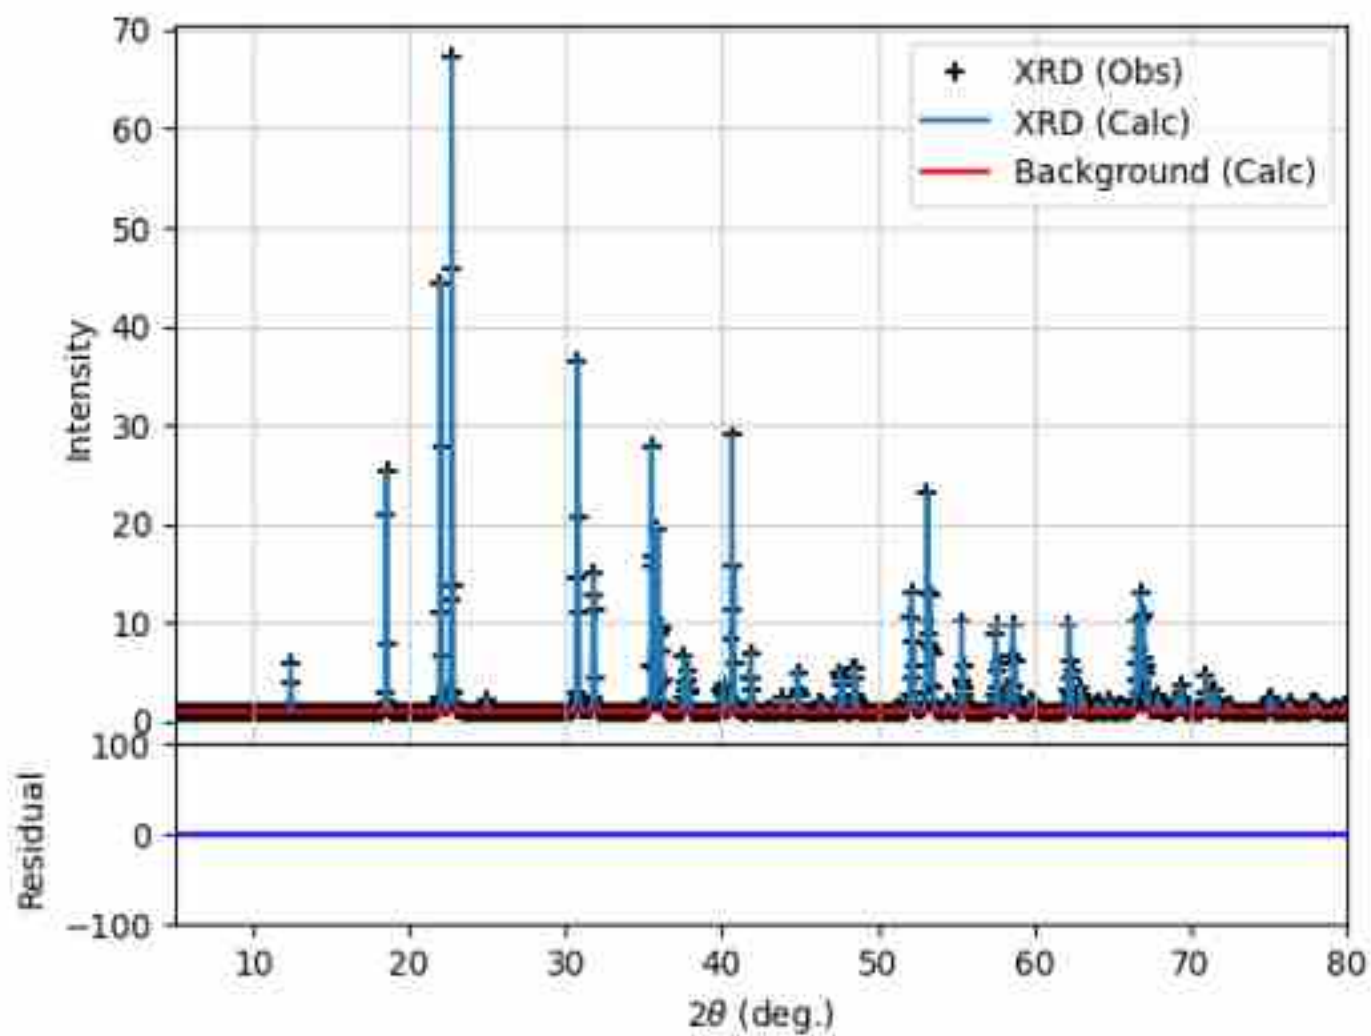

| RMSE before RR | Rwp    | RMSE after RR |
|----------------|--------|---------------|
| 0.024          | 0.0018 | 0.00045       |

# Ti4Ga6

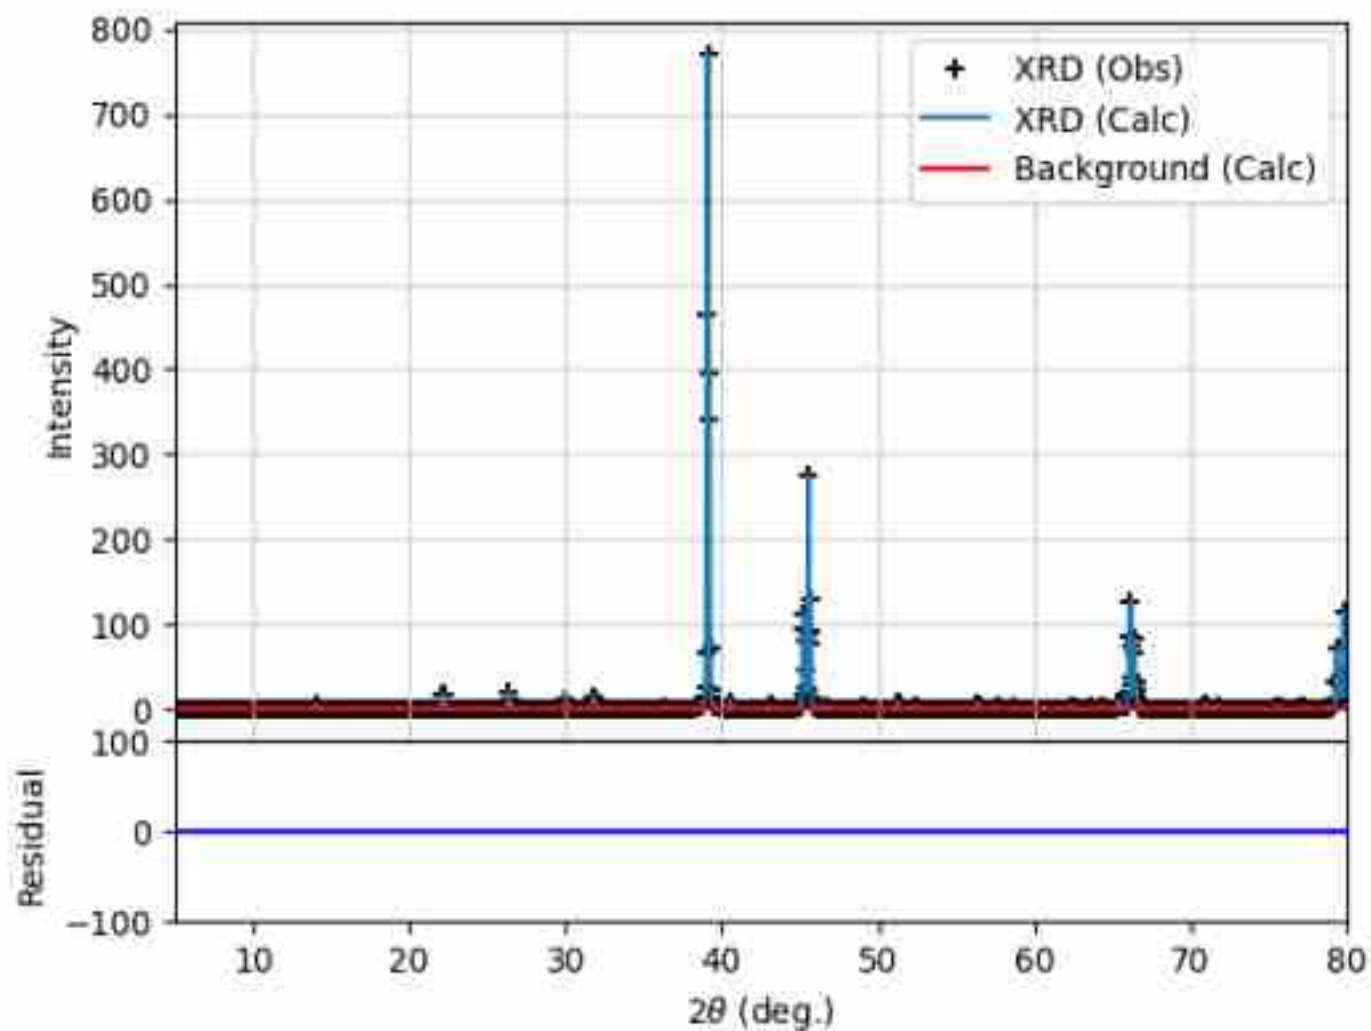

| RMSE before RR | Rwp     | RMSE after RR |
|----------------|---------|---------------|
| 0.024          | 0.00365 | 0.00043       |



# Ti10Cu1Sn6

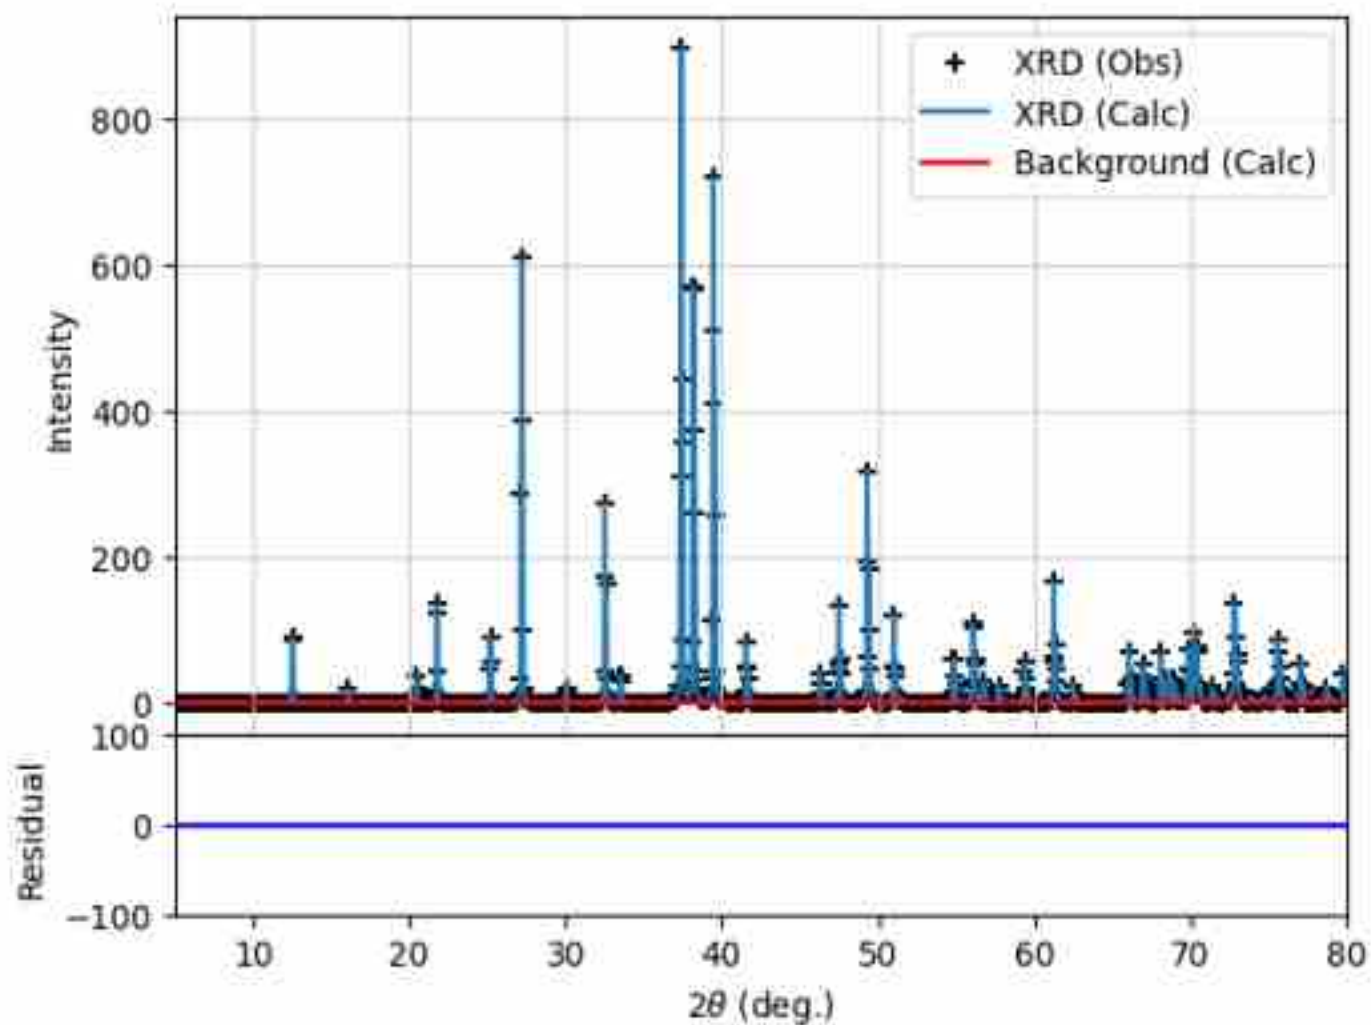

| RMSE before RR | Rwp     | RMSE after RR |
|----------------|---------|---------------|
| 0.024          | 0.00346 | 0.00057       |

# Tm10Sb2Pd4

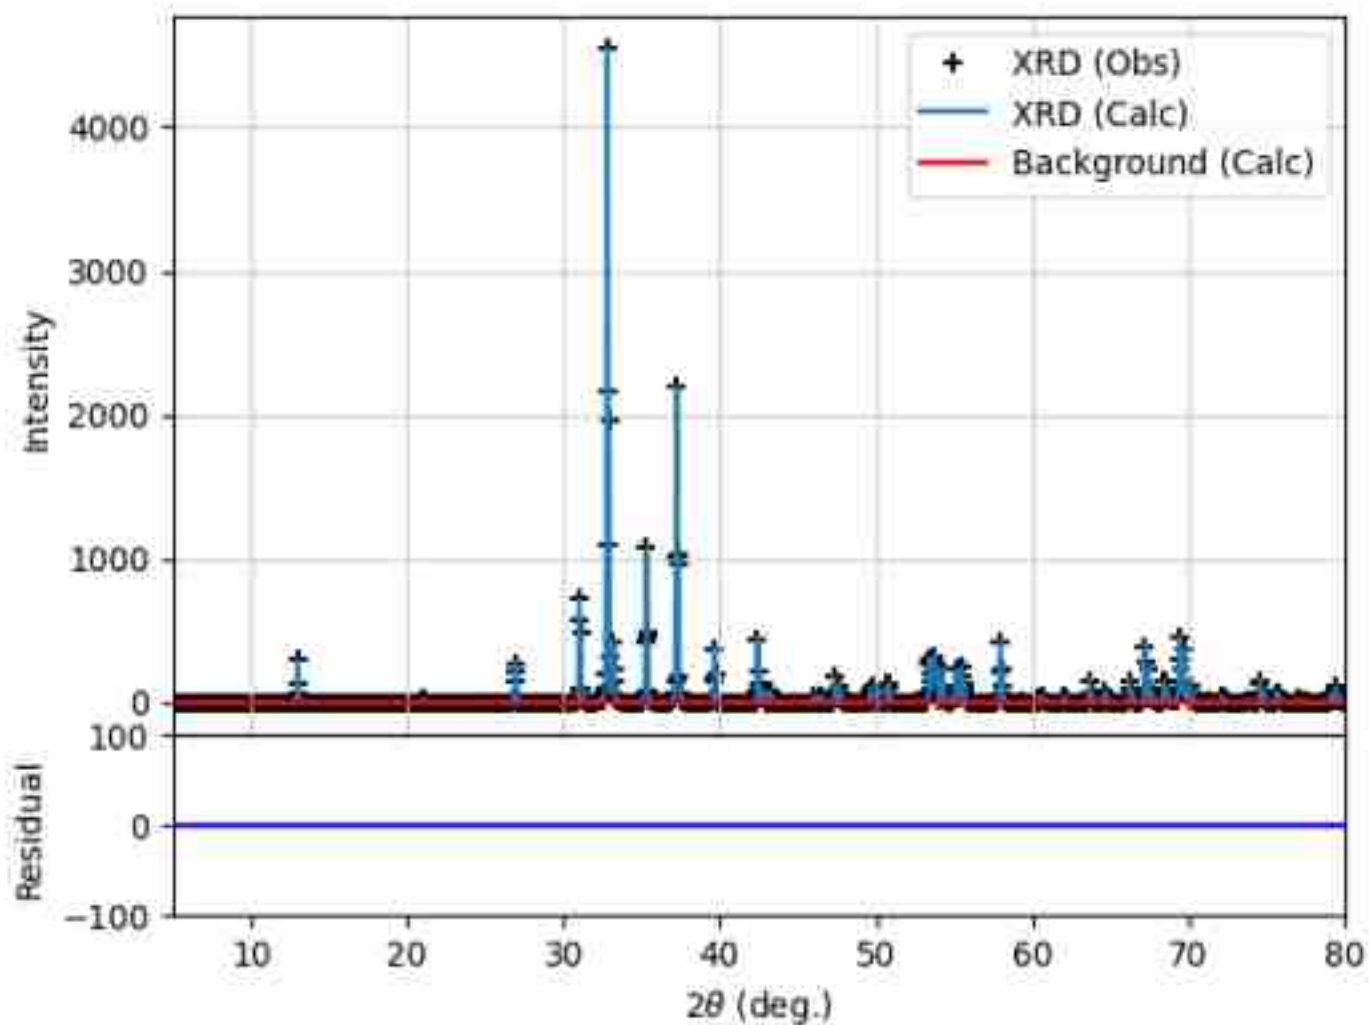

| RMSE before RR | Rwp     | RMSE after RR |
|----------------|---------|---------------|
| 0.024          | 0.00397 | 0.00026       |

# Tm<sub>12</sub>Co<sub>5</sub>Bi<sub>1</sub>

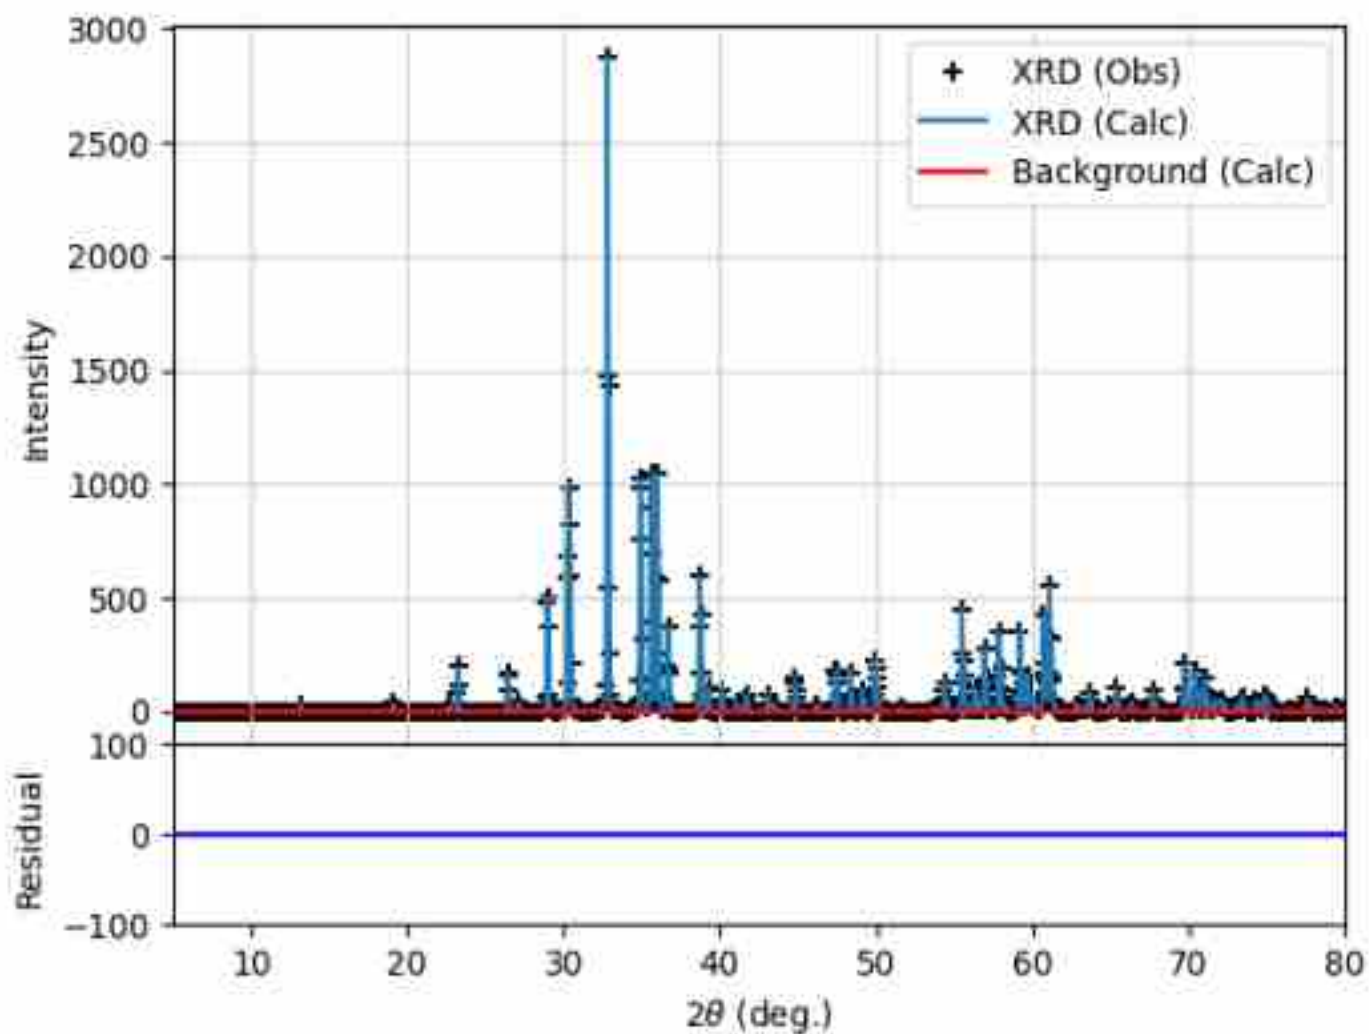

| RMSE before RR | Rwp    | RMSE after RR |
|----------------|--------|---------------|
| 0.024          | 0.0036 | 0.00067       |

# U1Co4Sn1

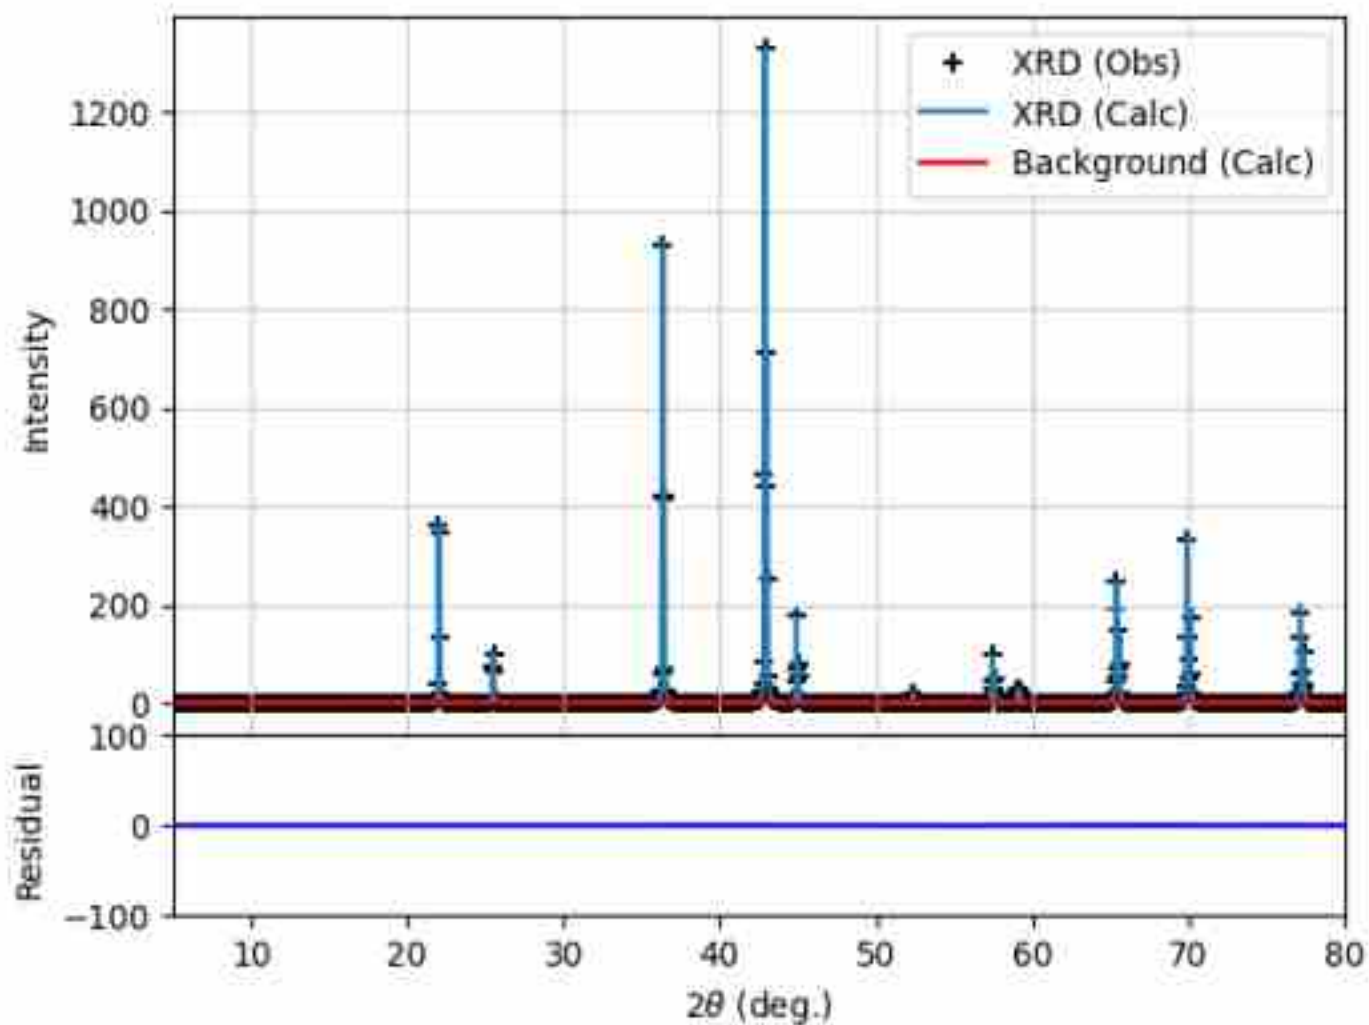

| RMSE before RR | Rwp     | RMSE after RR |
|----------------|---------|---------------|
| 0.024          | 0.14421 | 0.00891       |

# U<sub>2</sub>Sn<sub>4</sub>

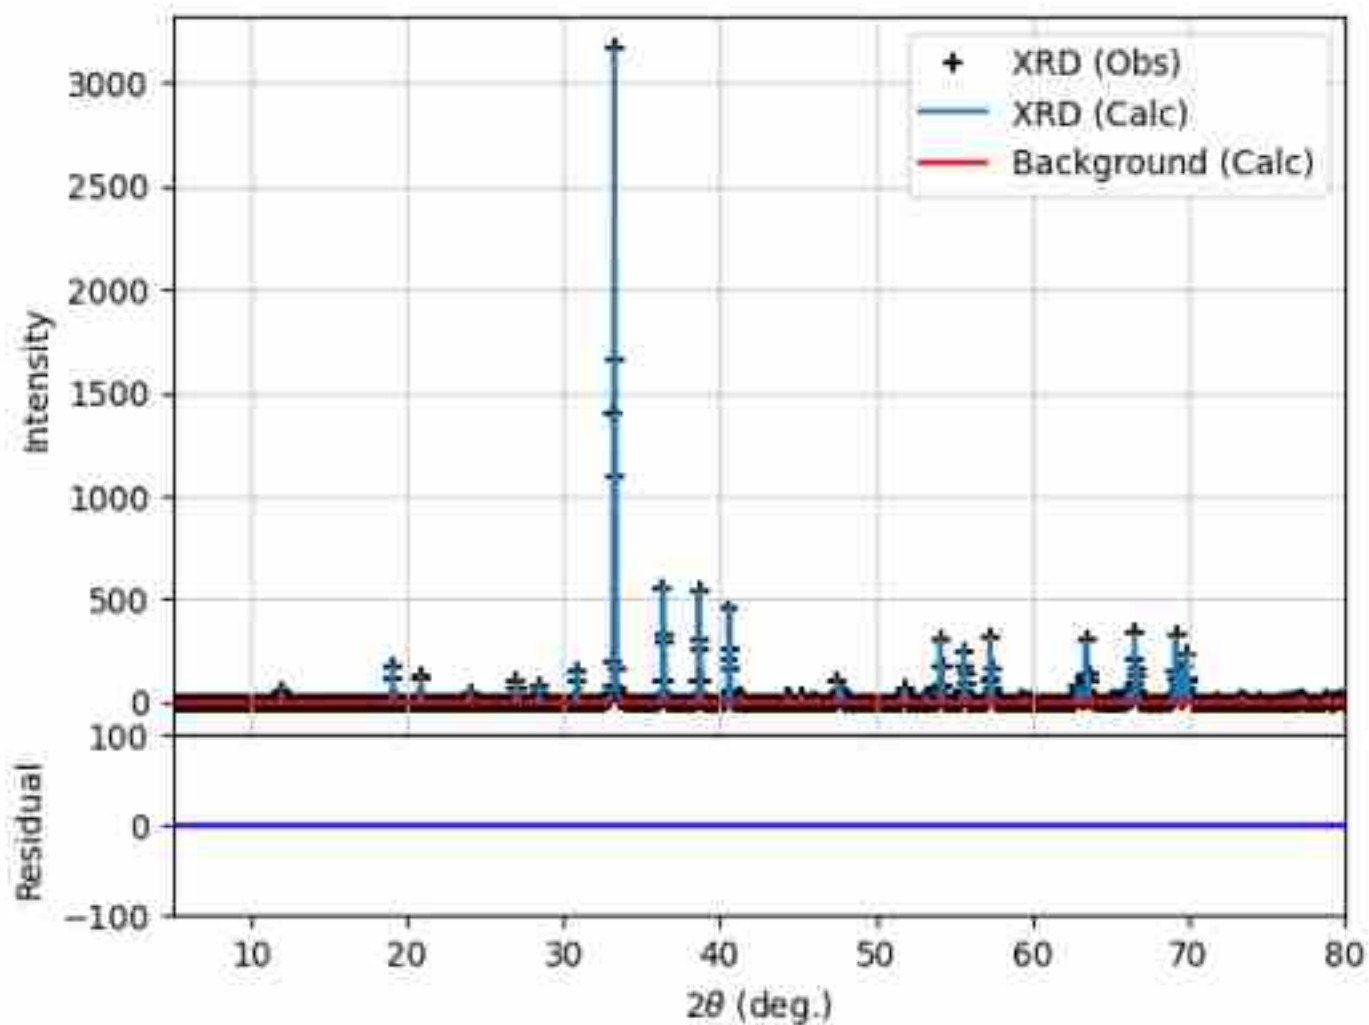

| RMSE before RR | Rwp     | RMSE after RR |
|----------------|---------|---------------|
| 0.024          | 0.00547 | 0.00052       |

# U<sub>4</sub>Fe<sub>6</sub>Ge<sub>2</sub>

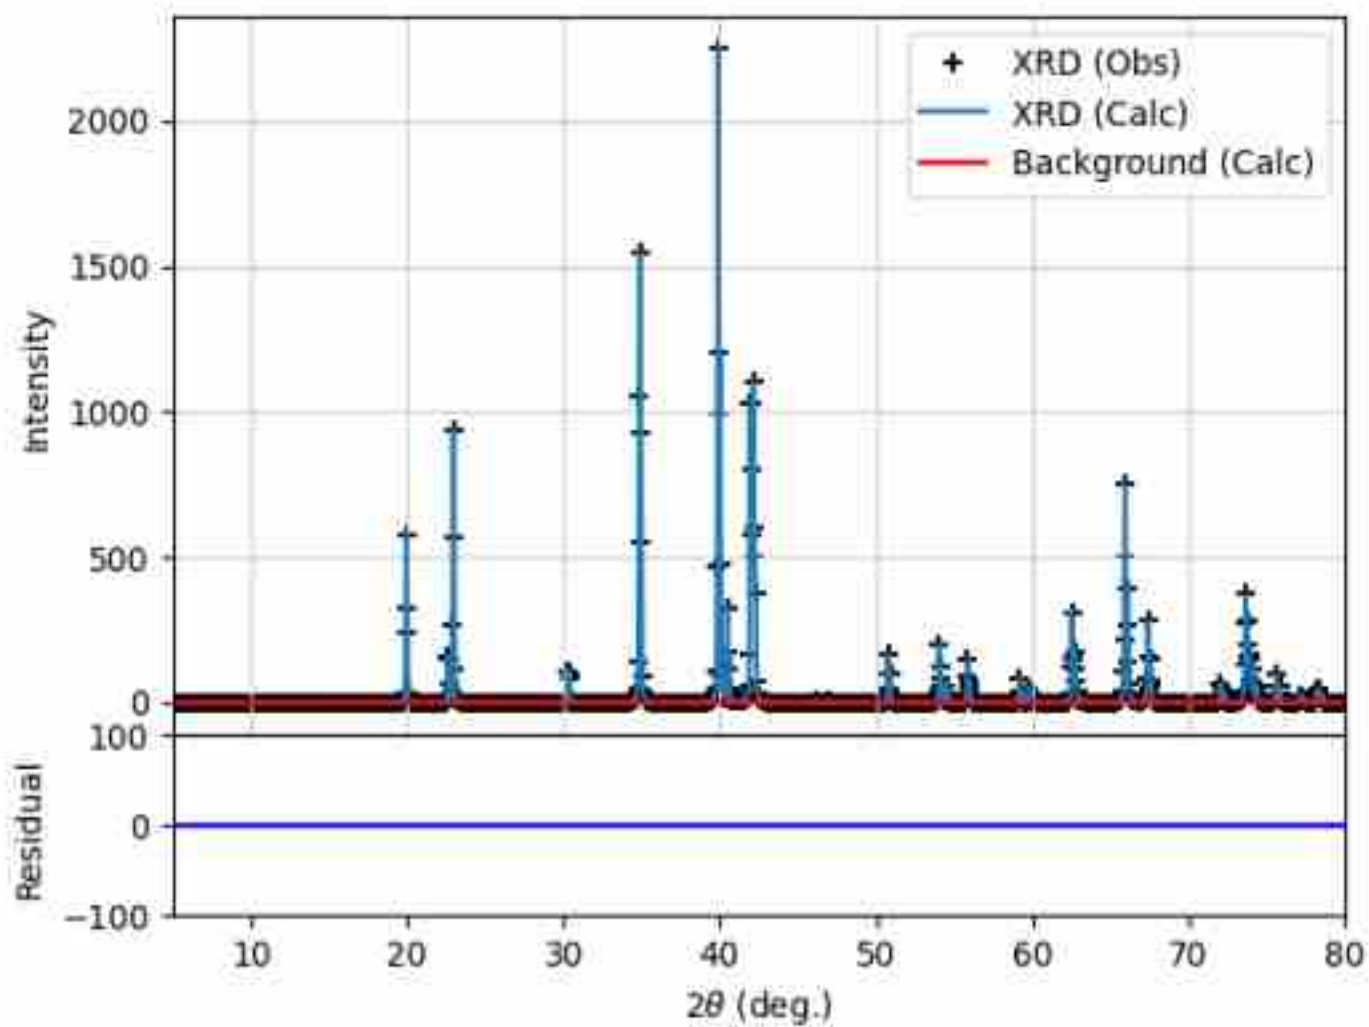

| RMSE before RR | Rwp     | RMSE after RR |
|----------------|---------|---------------|
| 0.024          | 0.00479 | 0.0011        |

# U4Rh4S12

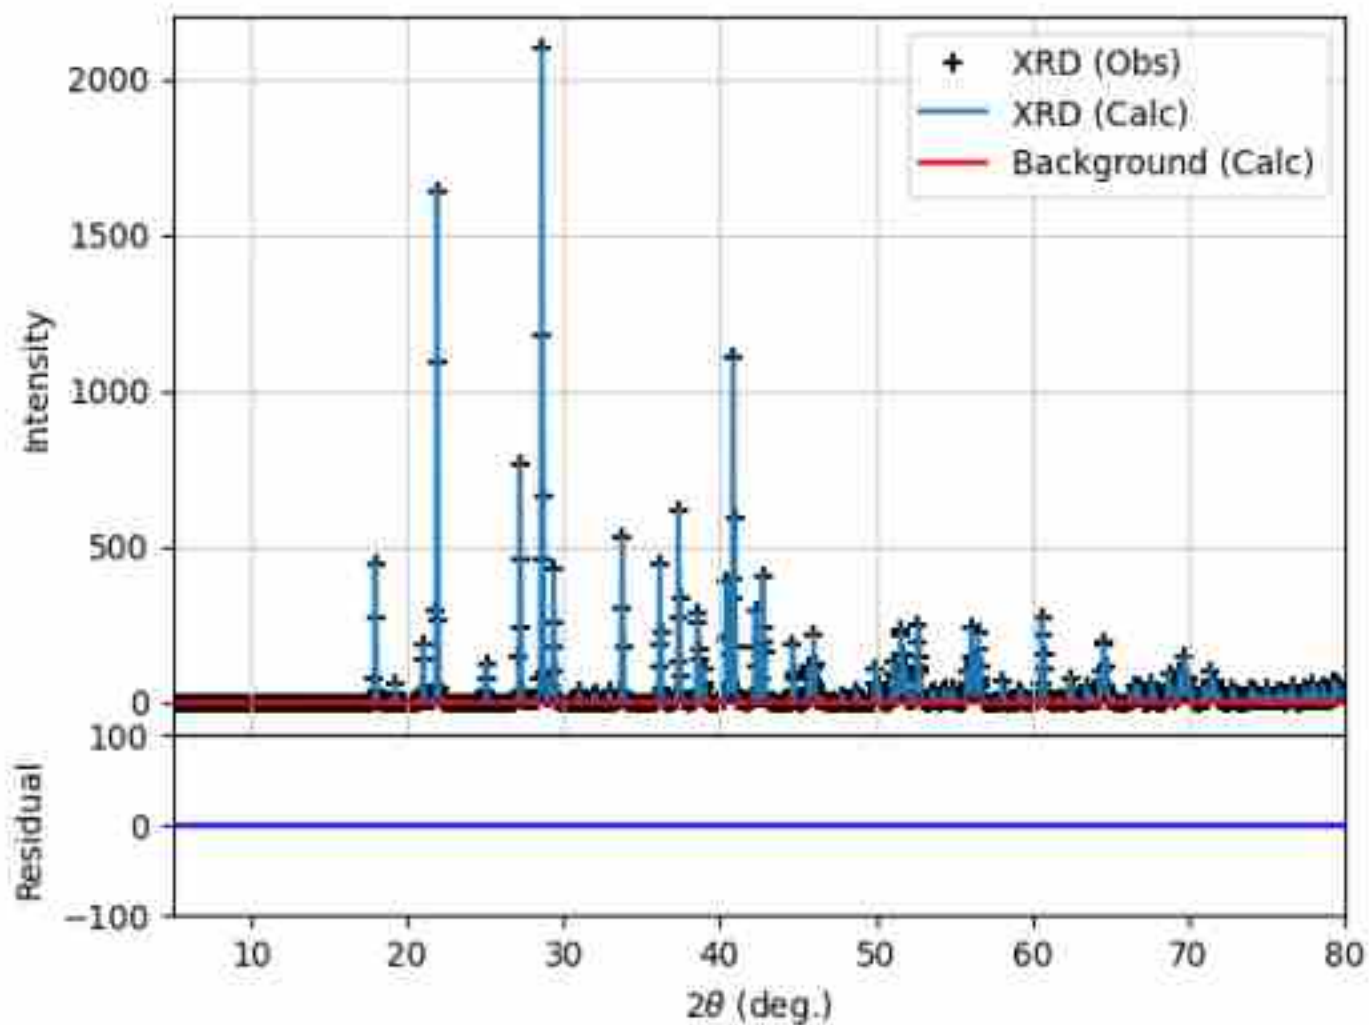

| RMSE before RR | Rwp     | RMSE after RR |
|----------------|---------|---------------|
| 0.024          | 0.00469 | 0.00085       |

# U6Sb8

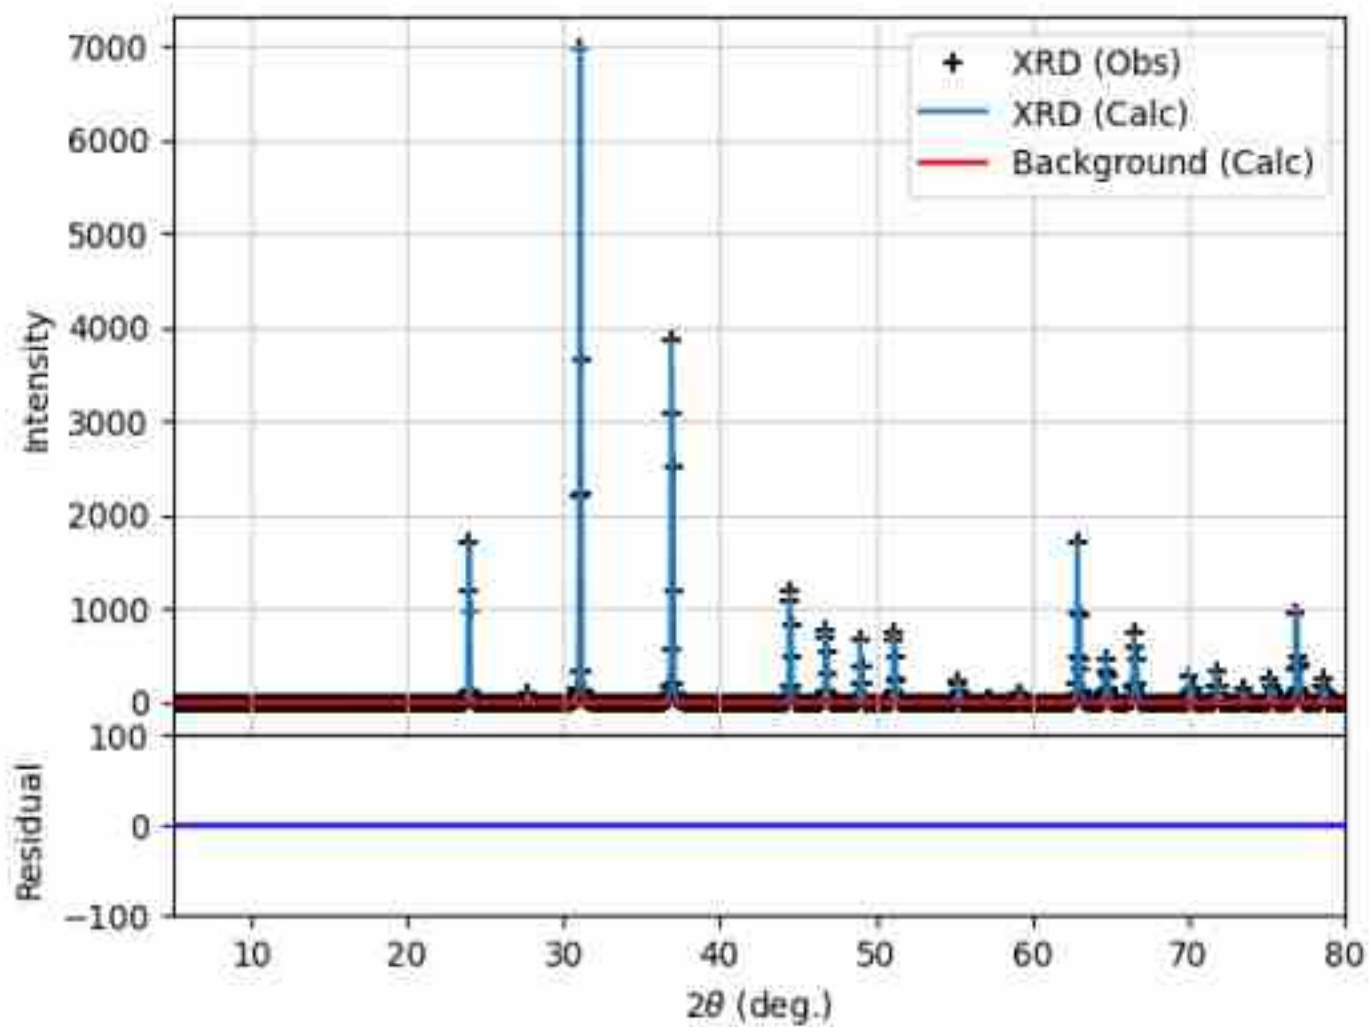

| RMSE before RR | Rwp     | RMSE after RR |
|----------------|---------|---------------|
| 0.024          | 0.00686 | 0.0006        |



# V2F8

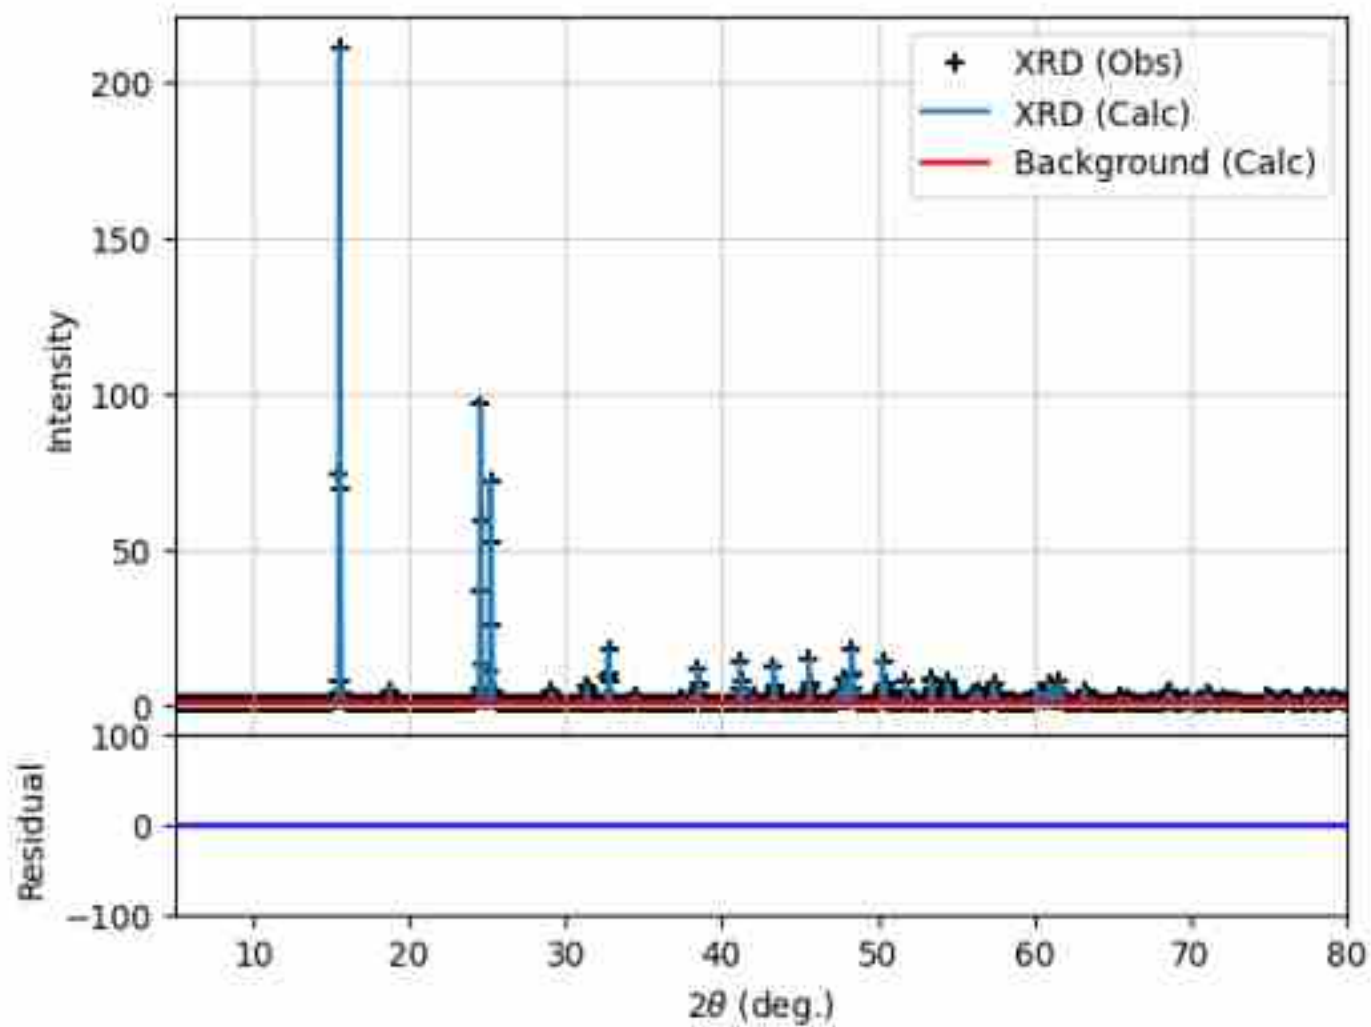

| RMSE before RR | Rwp     | RMSE after RR |
|----------------|---------|---------------|
| 0.024          | 0.00287 | 0.00038       |

# V6O6F6

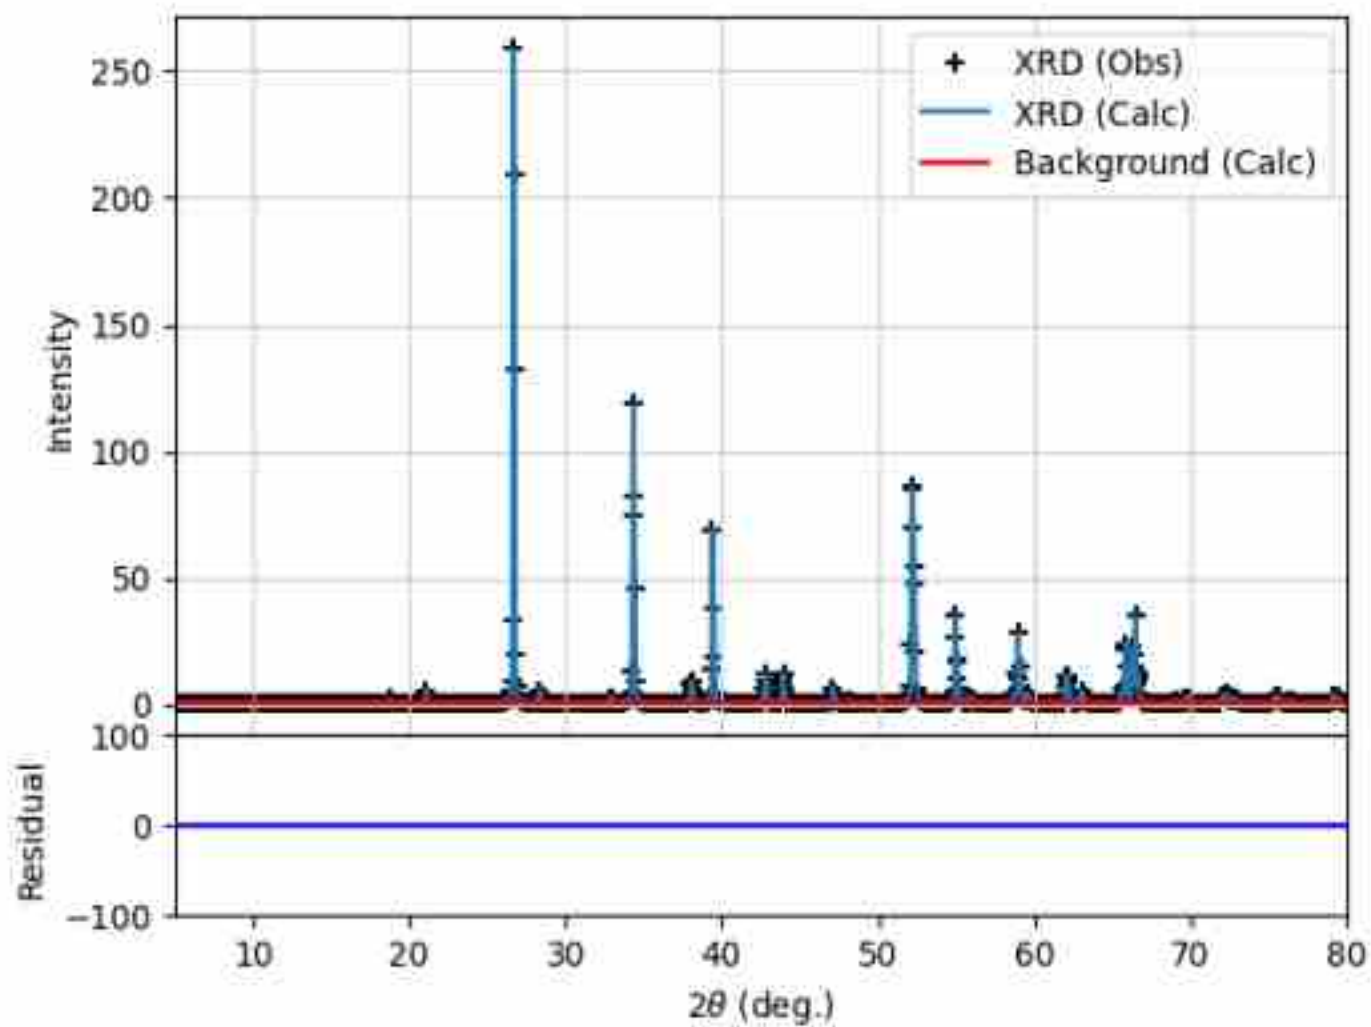

| RMSE before RR | Rwp     | RMSE after RR |
|----------------|---------|---------------|
| 0.024          | 0.00353 | 0.00093       |

# Y<sub>3</sub>Ag<sub>4</sub>Sn<sub>4</sub>

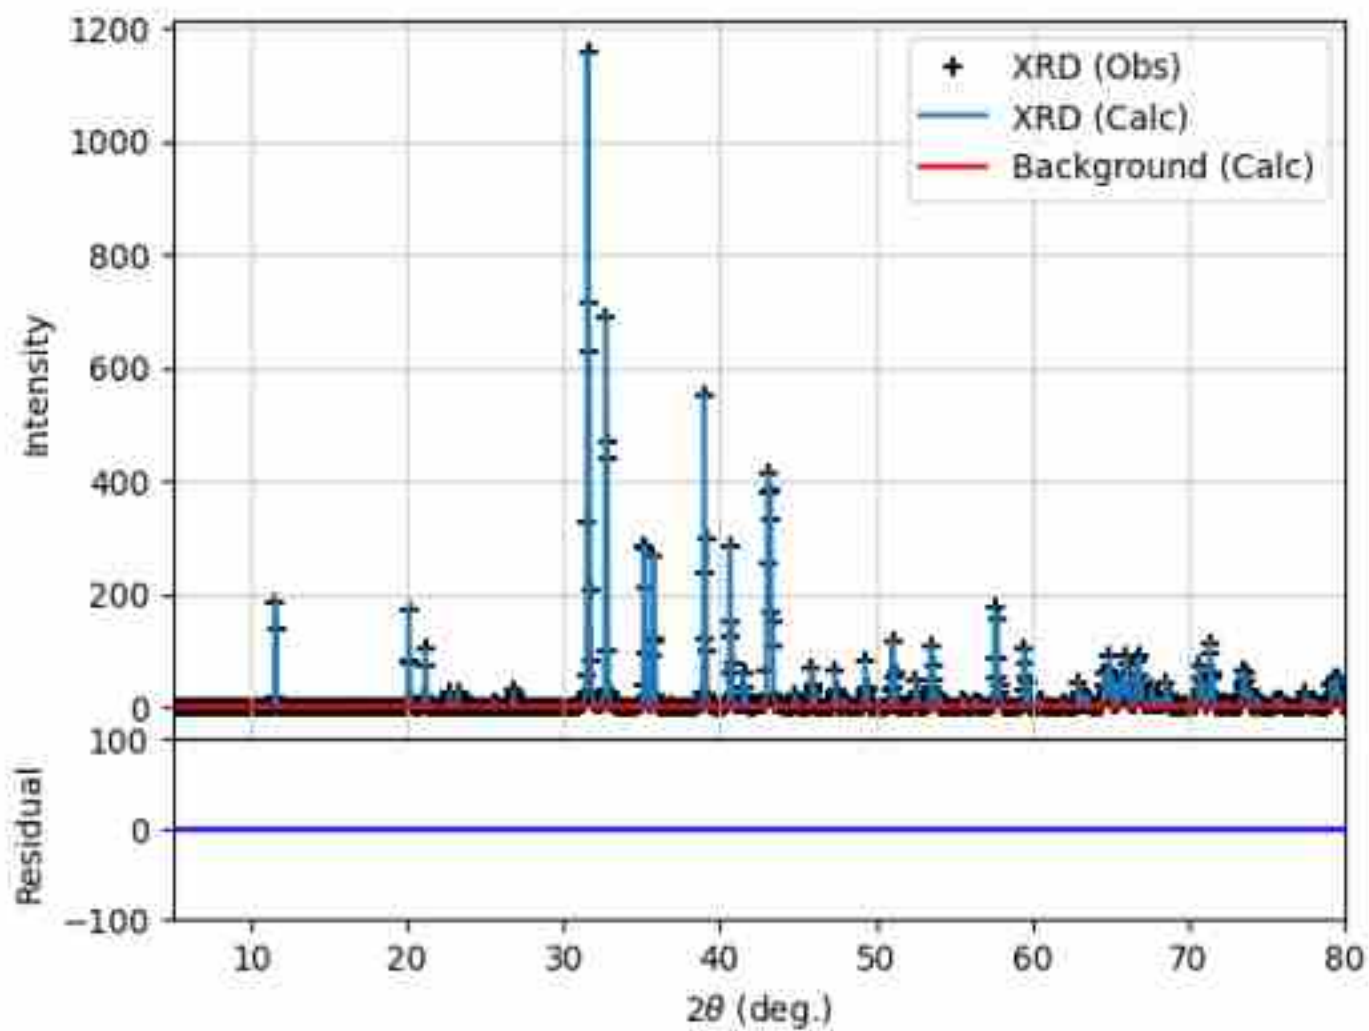

| RMSE before RR | Rwp     | RMSE after RR |
|----------------|---------|---------------|
| 0.024          | 0.00314 | 0.00023       |

# Y3Al9Ni6

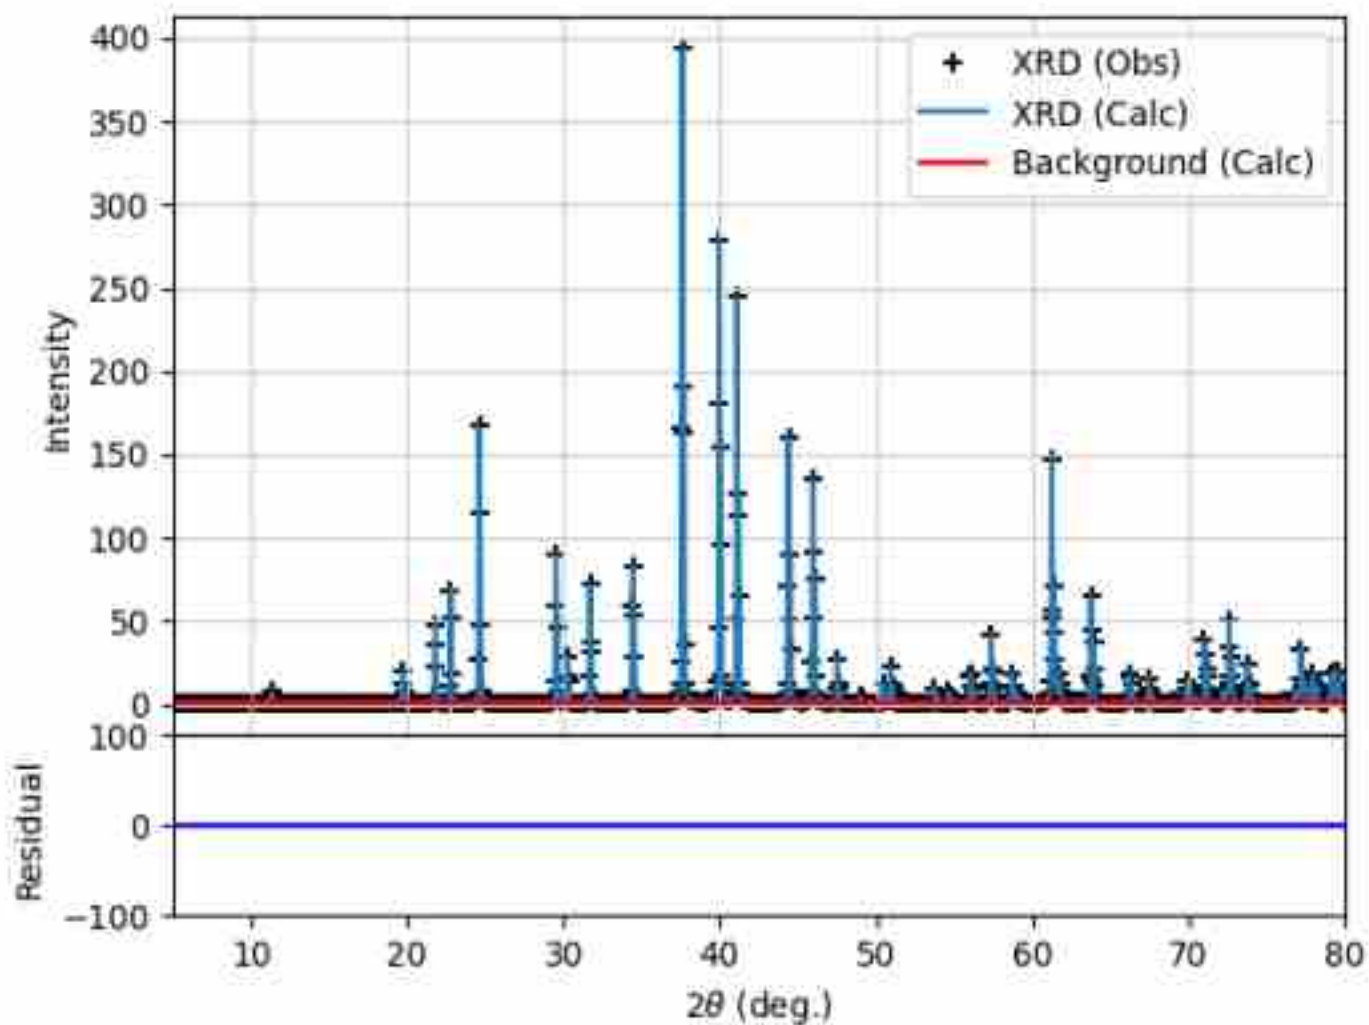

| RMSE before RR | Rwp     | RMSE after RR |
|----------------|---------|---------------|
| 0.024          | 0.00879 | 0.00152       |

# Y4Mg2

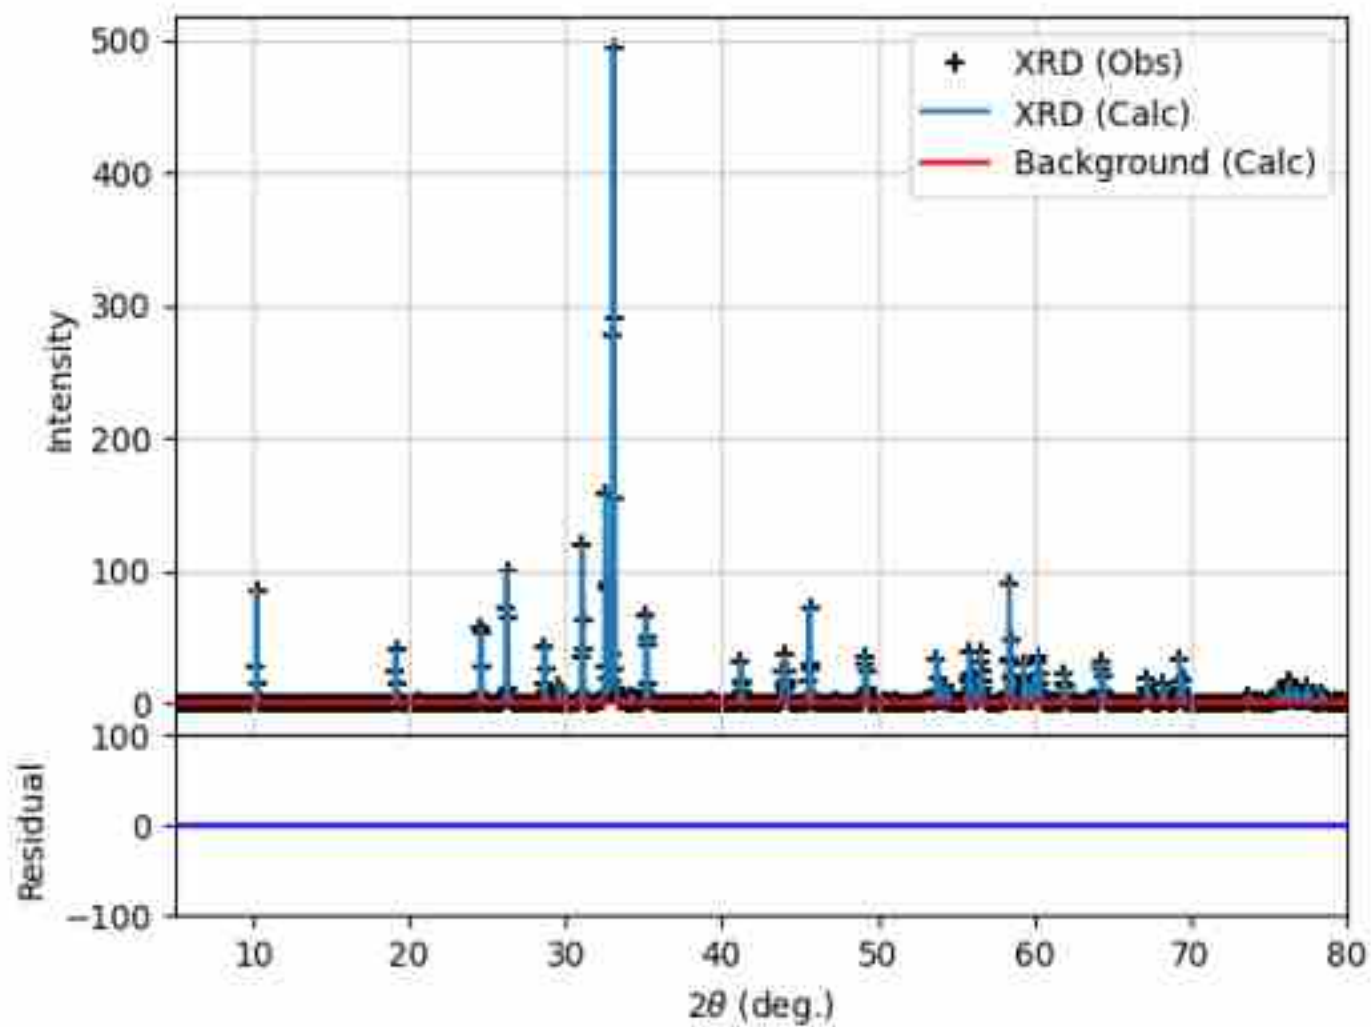

| RMSE before RR | Rwp     | RMSE after RR |
|----------------|---------|---------------|
| 0.024          | 0.00372 | 0.00043       |

# Y10Bi2Pd4

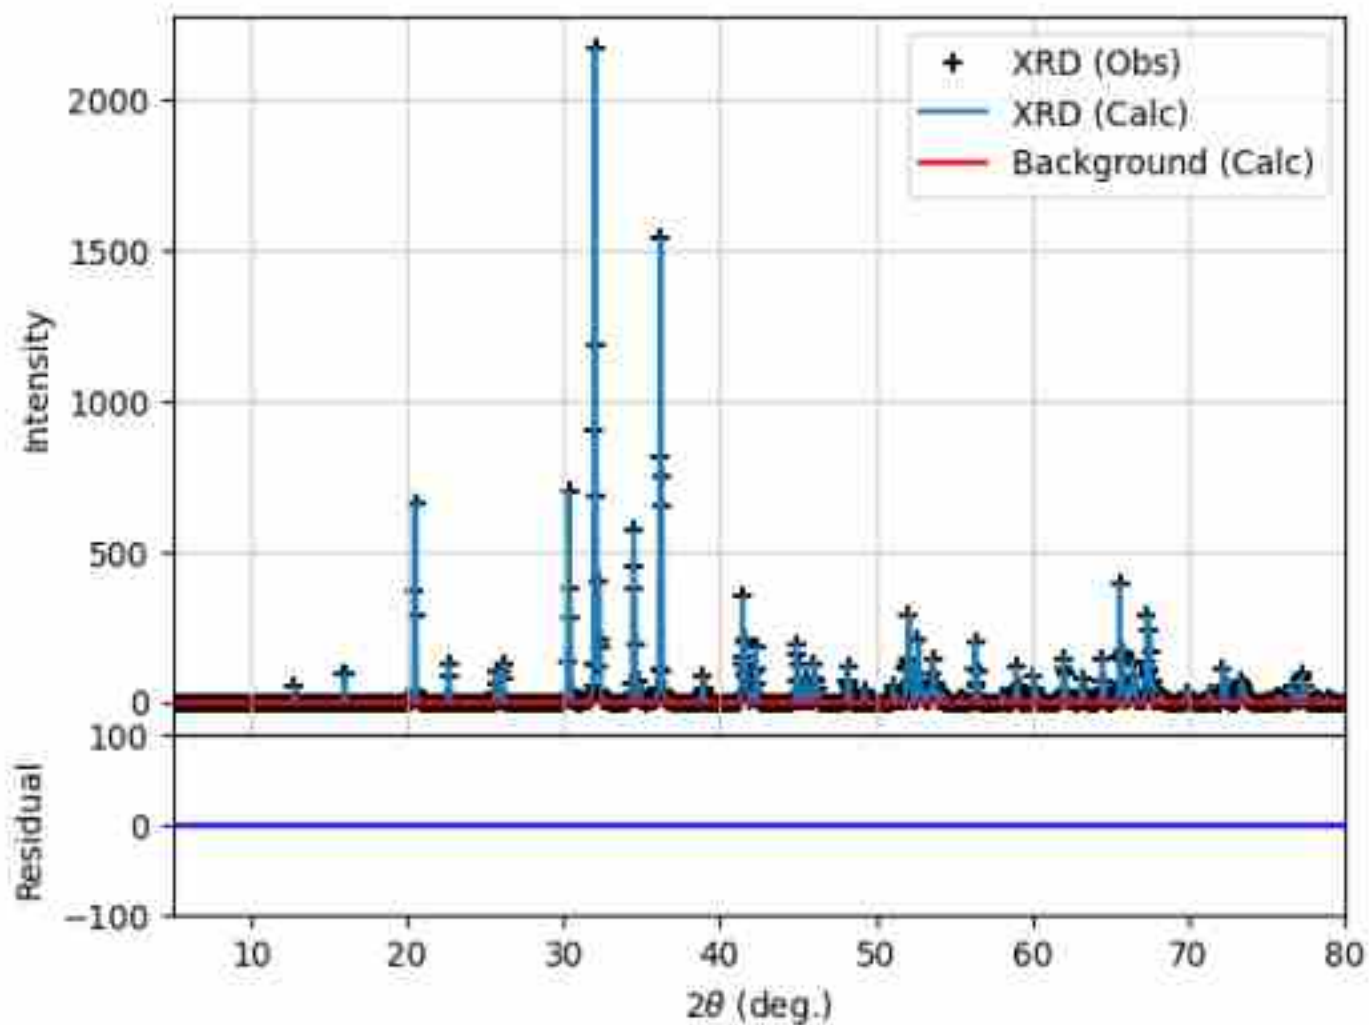

| RMSE before RR | Rwp     | RMSE after RR |
|----------------|---------|---------------|
| 0.024          | 0.00367 | 0.00039       |

# Y10Pb6

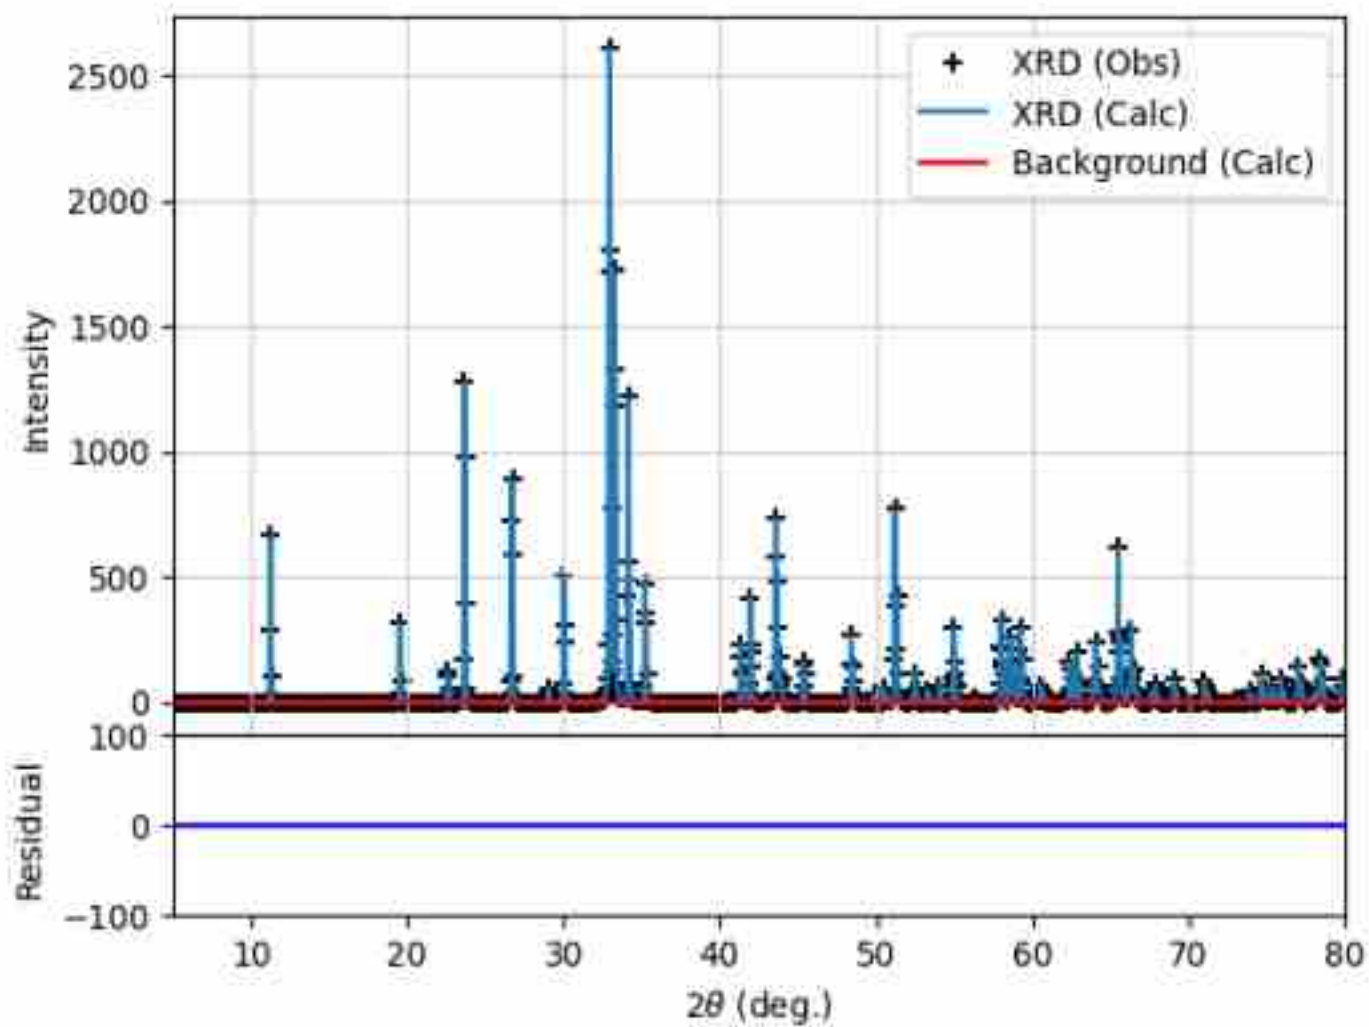

| RMSE before RR | Rwp    | RMSE after RR |
|----------------|--------|---------------|
| 0.024          | 0.0028 | 0.00032       |

# Y12Ga2Co4

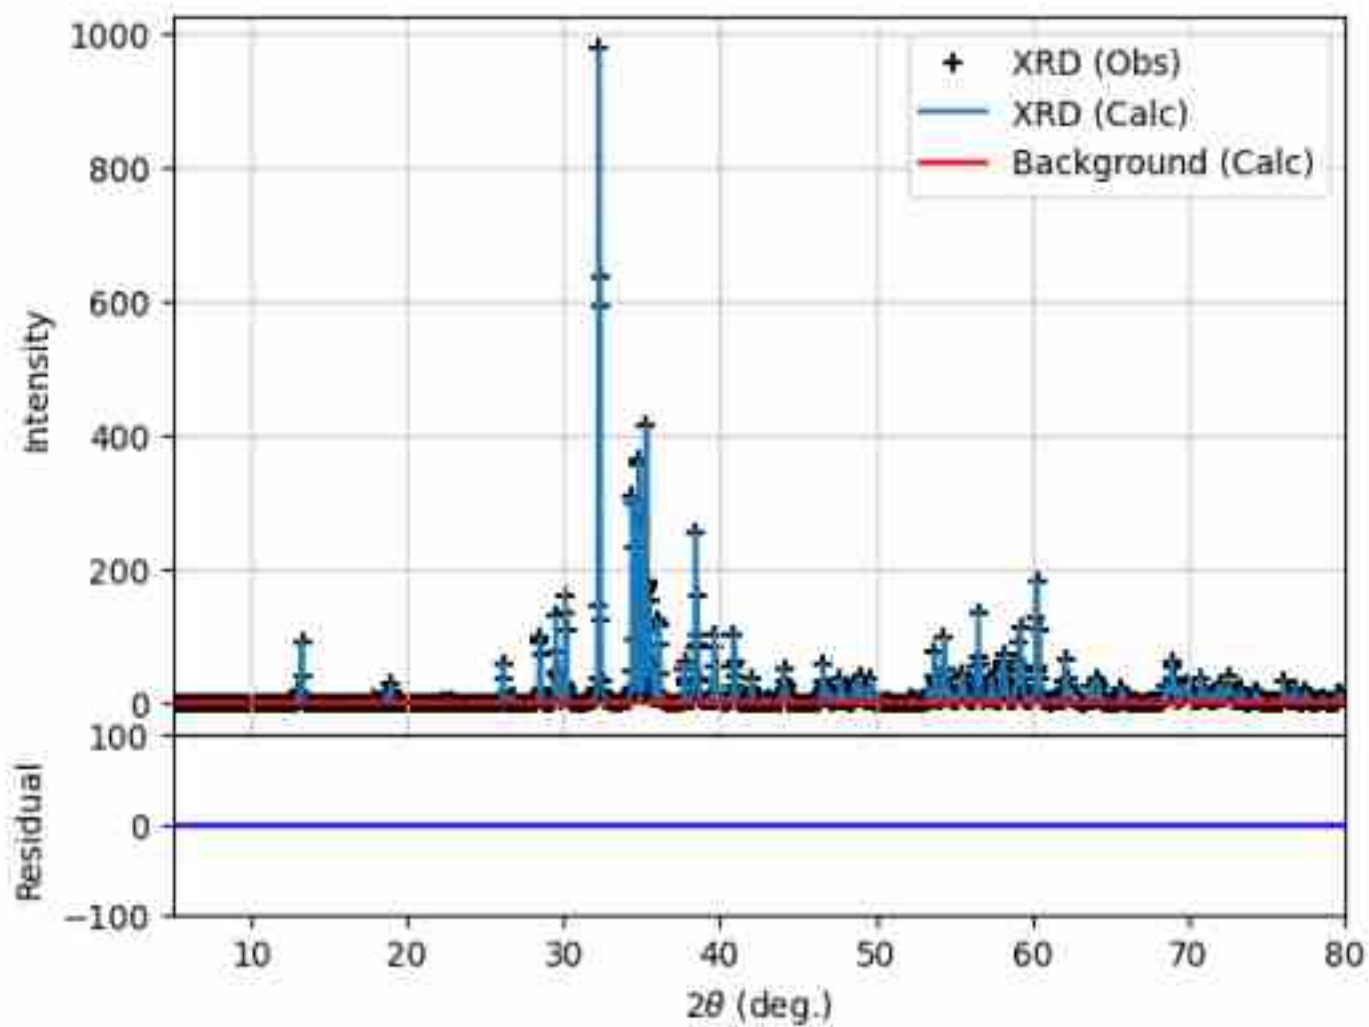

| RMSE before RR | Rwp    | RMSE after RR |
|----------------|--------|---------------|
| 0.024          | 0.0031 | 0.00023       |



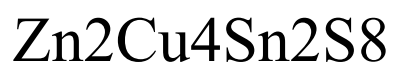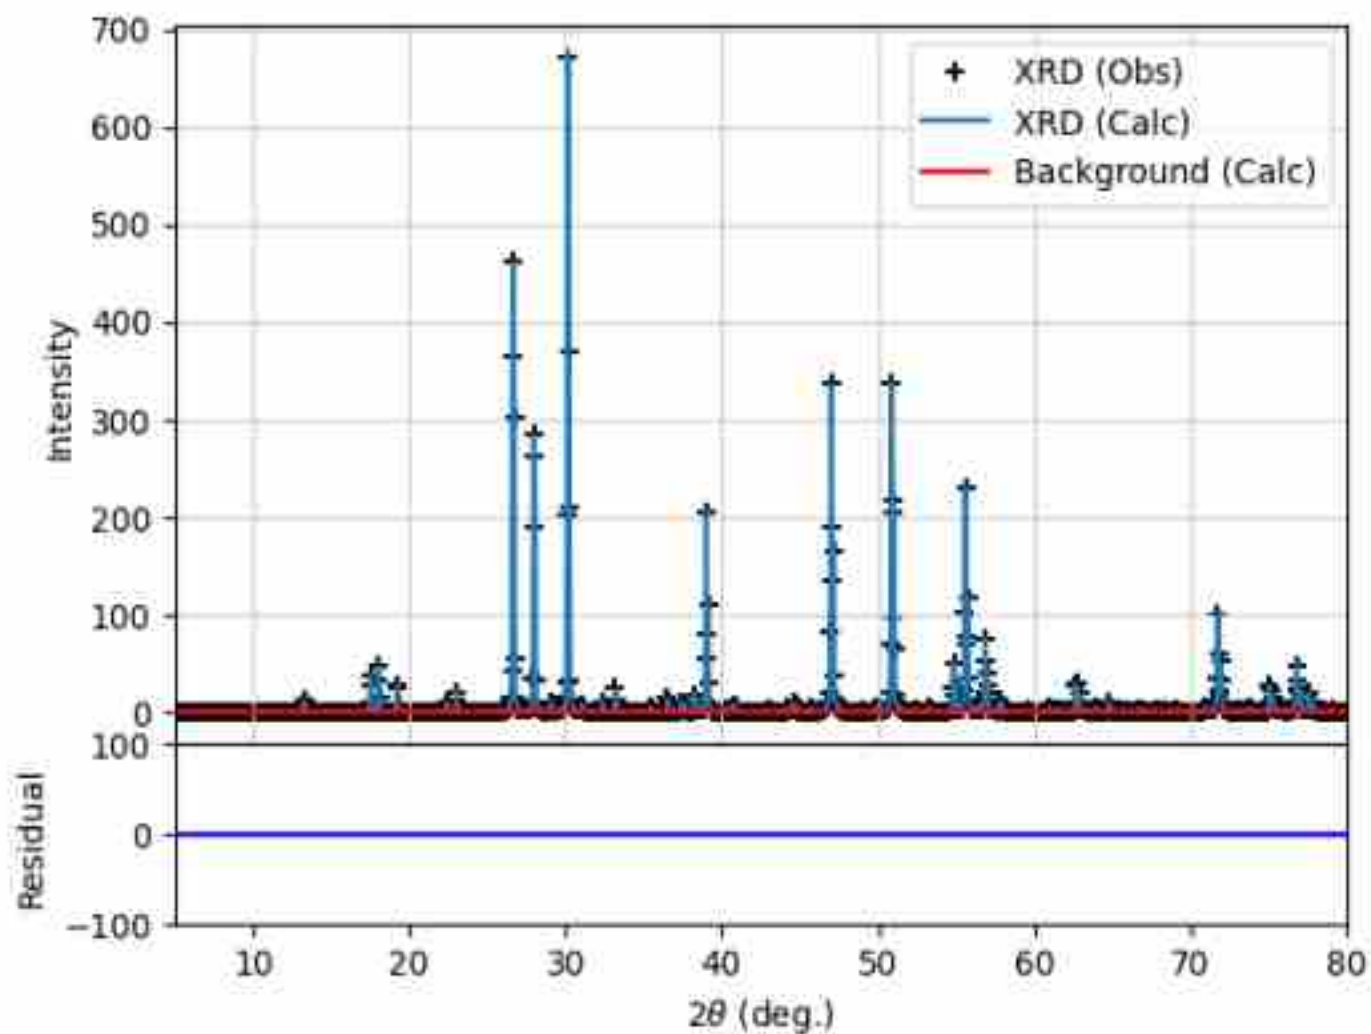

| RMSE before RR | Rwp     | RMSE after RR |
|----------------|---------|---------------|
| 0.024          | 0.00357 | 0.00054       |

# Zn<sub>2</sub>Ge<sub>2</sub>P<sub>4</sub>

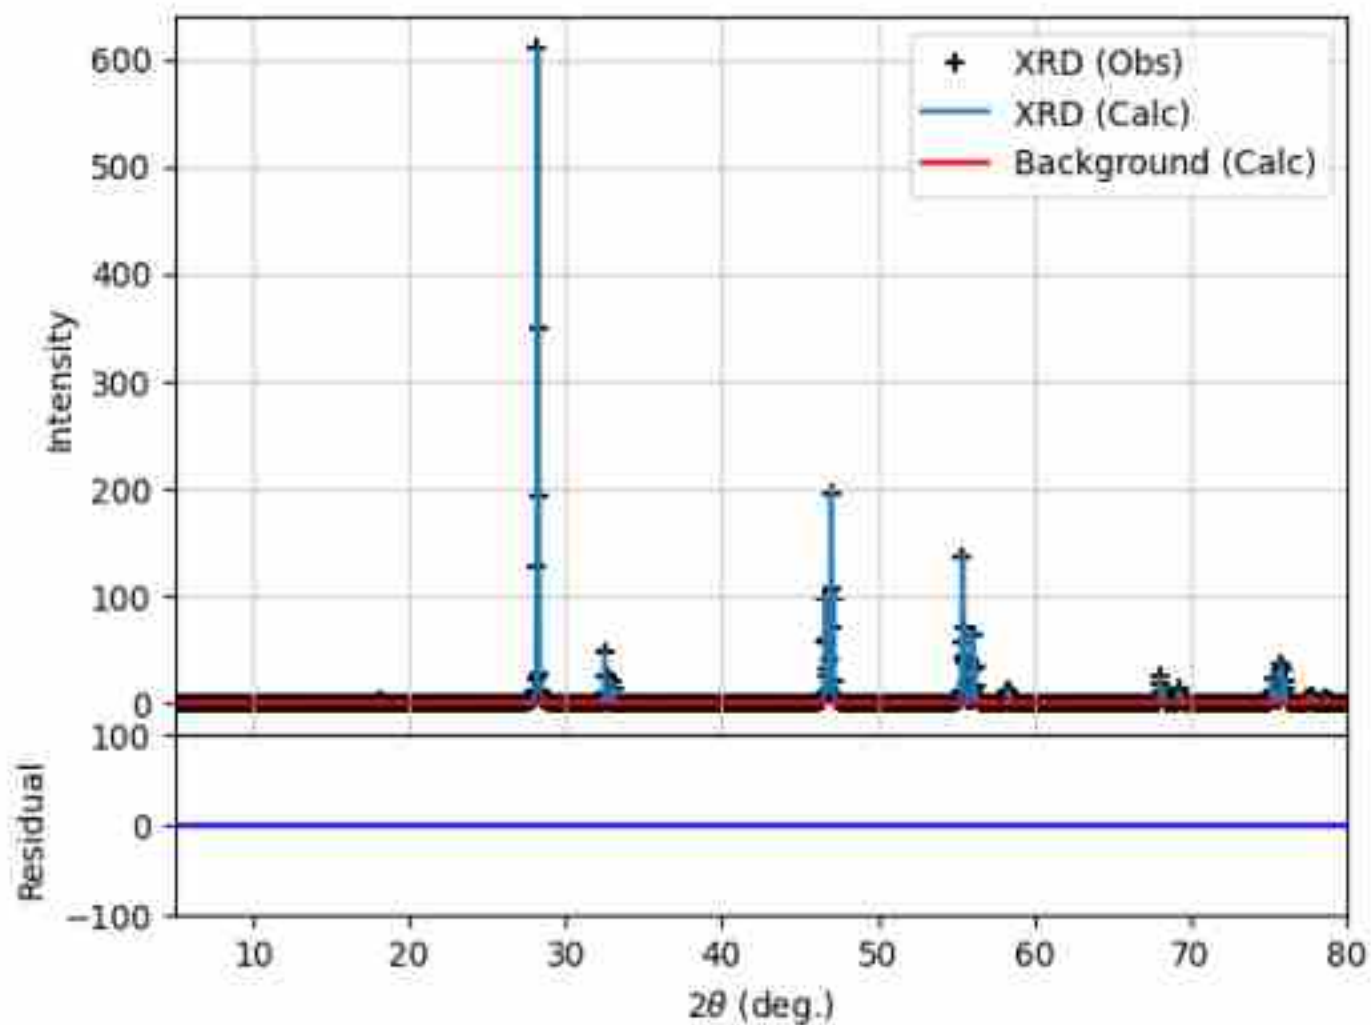

| RMSE before RR | Rwp     | RMSE after RR |
|----------------|---------|---------------|
| 0.024          | 0.00403 | 0.00075       |

# Zn<sub>4</sub>P<sub>2</sub>N<sub>6</sub>

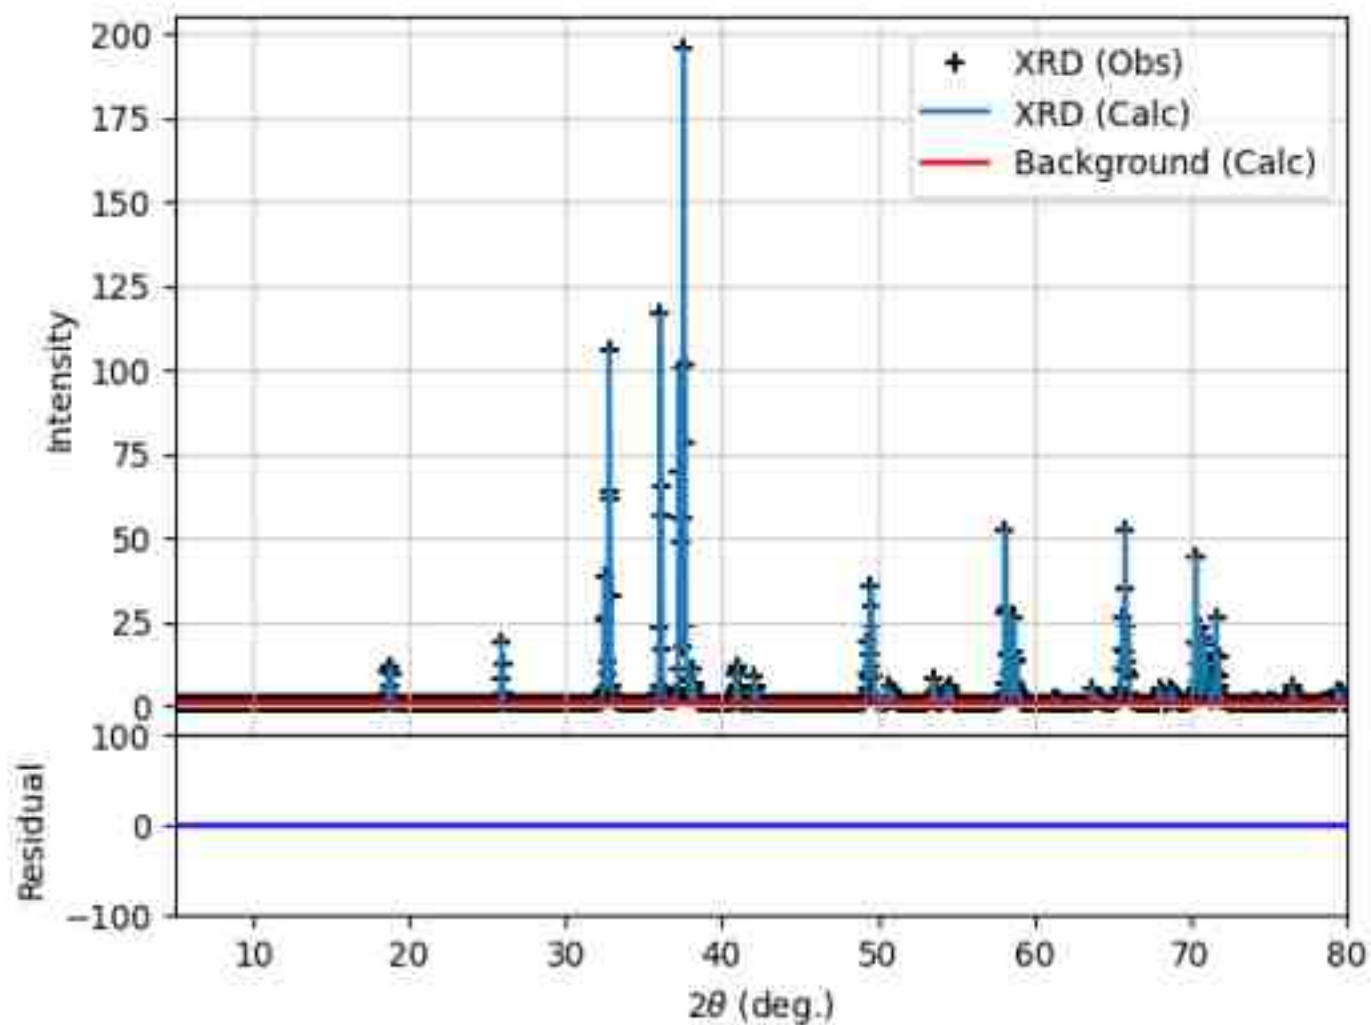

| RMSE before RR | Rwp     | RMSE after RR |
|----------------|---------|---------------|
| 0.024          | 0.00333 | 0.00113       |

# Zn<sub>4</sub>Sb<sub>2</sub>N<sub>6</sub>

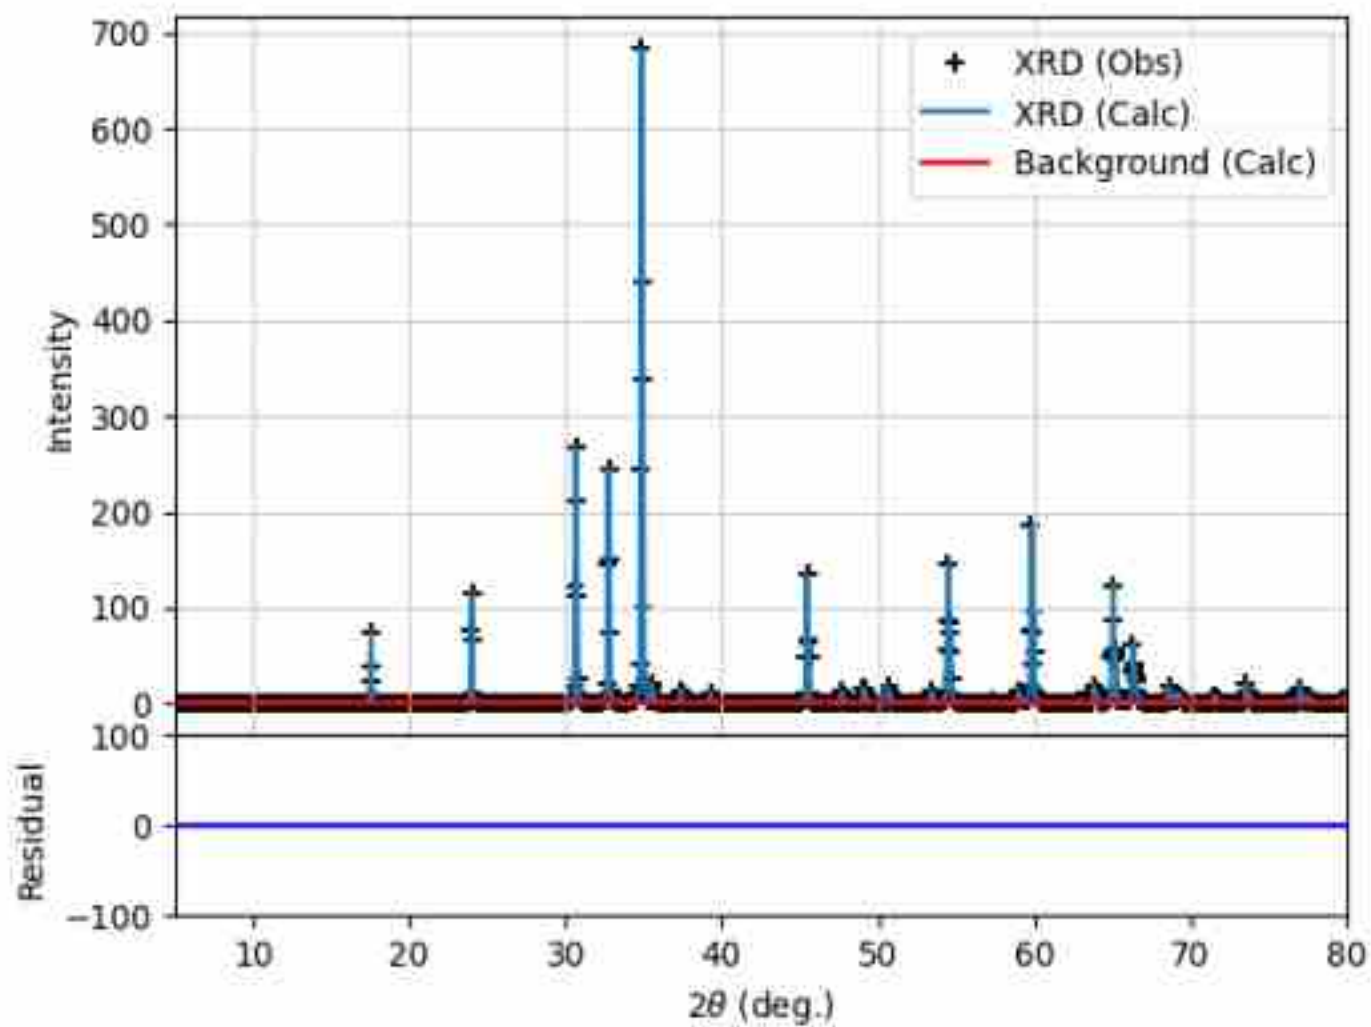

| RMSE before RR | Rwp     | RMSE after RR |
|----------------|---------|---------------|
| 0.024          | 0.00353 | 0.00097       |

# Zr<sub>2</sub>Cu<sub>4</sub>Te<sub>6</sub>

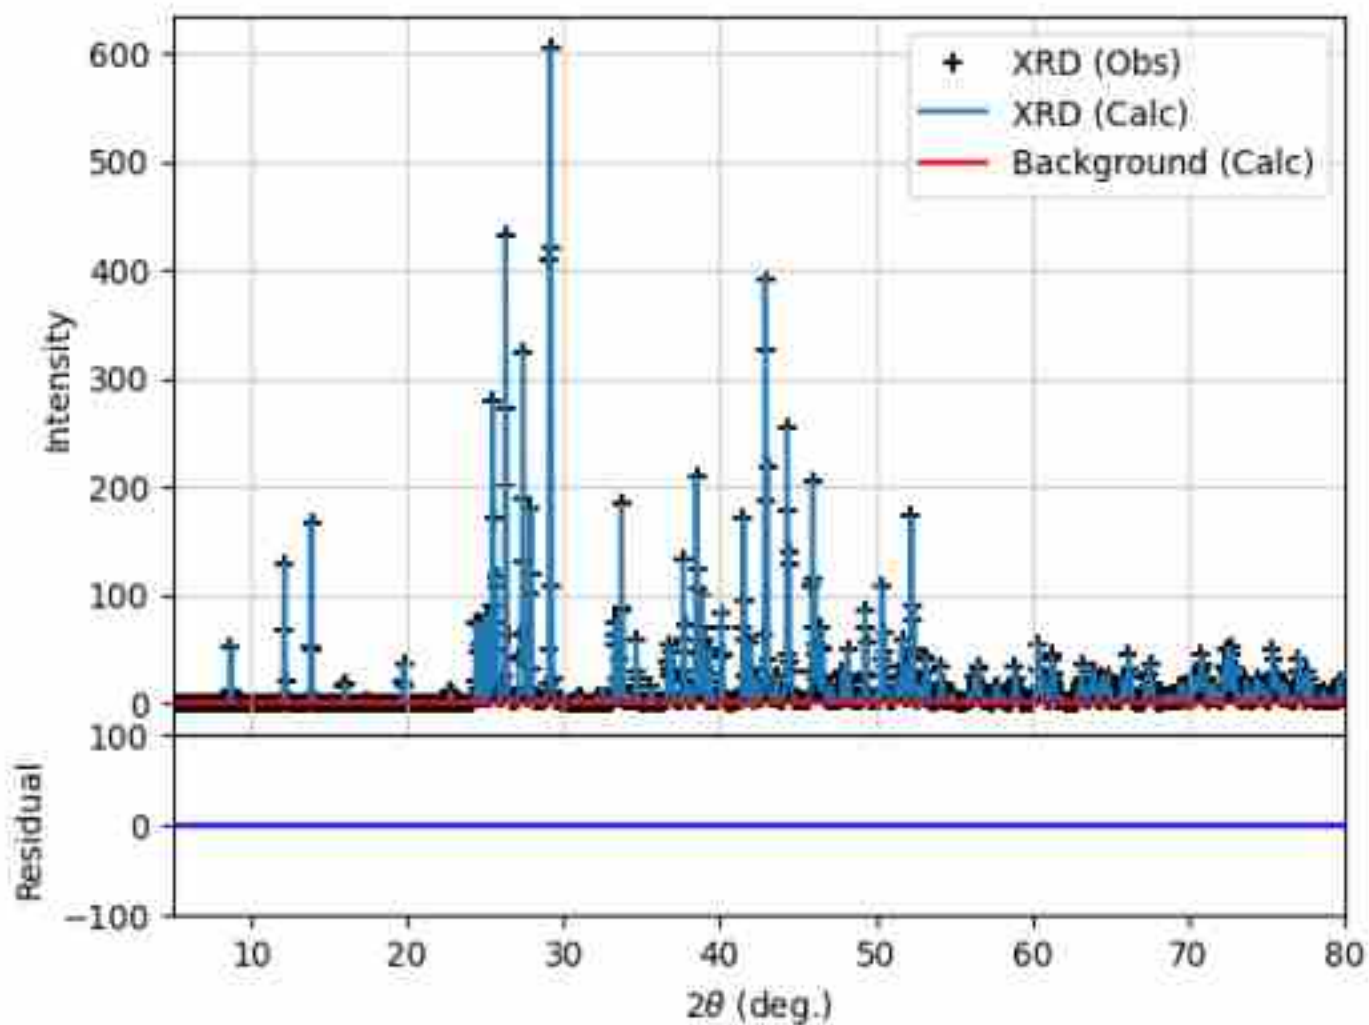

| RMSE before RR | Rwp     | RMSE after RR |
|----------------|---------|---------------|
| 0.024          | 0.00321 | 0.00021       |

# Zr<sub>2</sub>Ga<sub>4</sub>

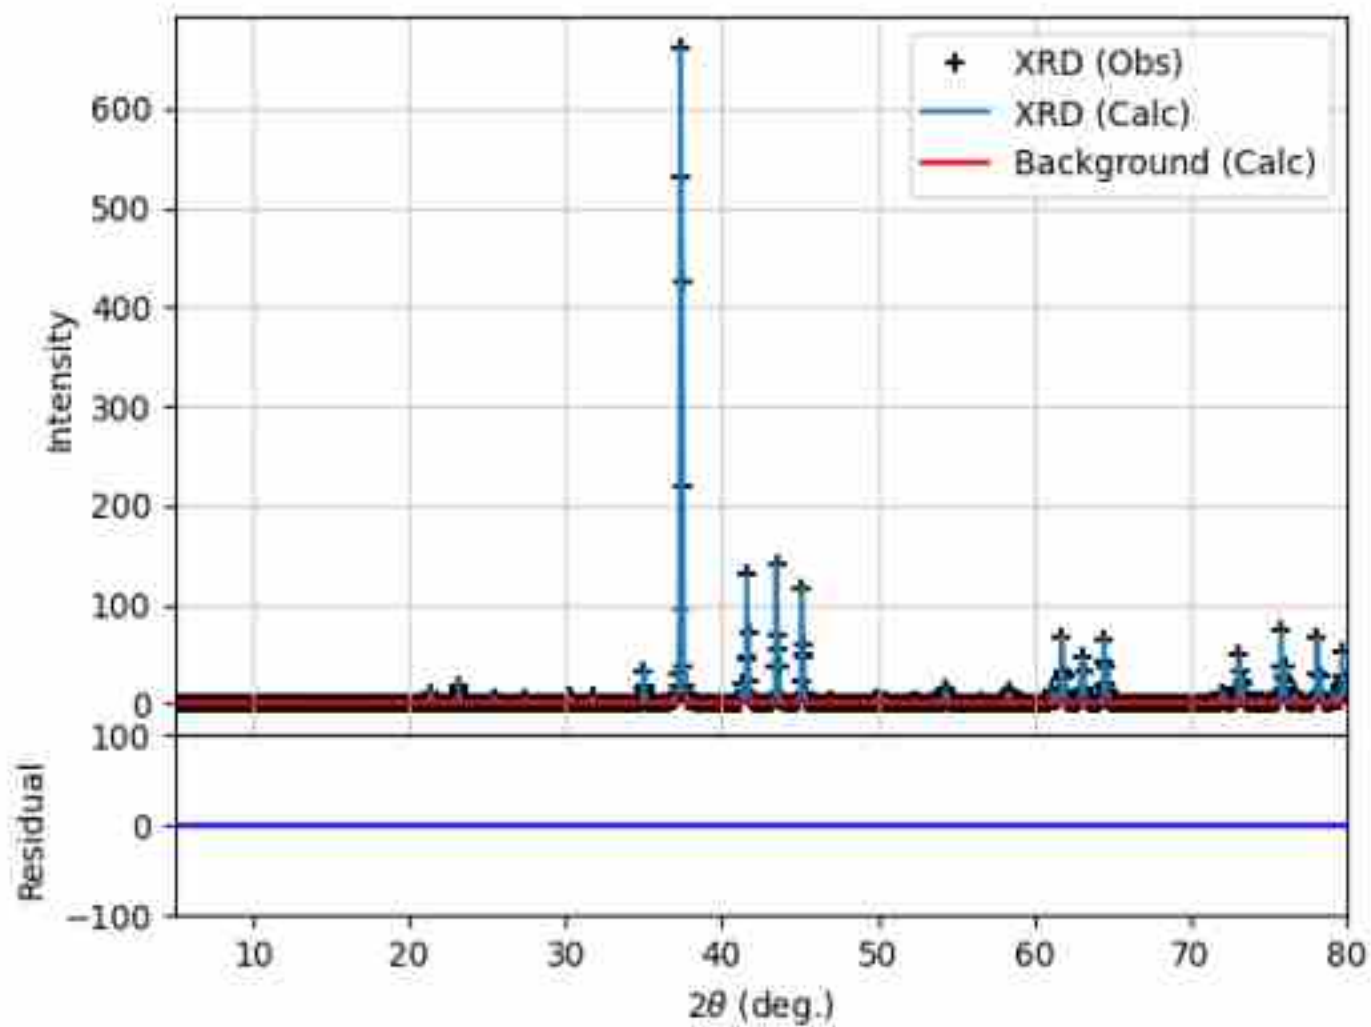

| RMSE before RR | Rwp     | RMSE after RR |
|----------------|---------|---------------|
| 0.024          | 0.00436 | 0.00029       |

# Zr<sub>2</sub>Sc<sub>4</sub>

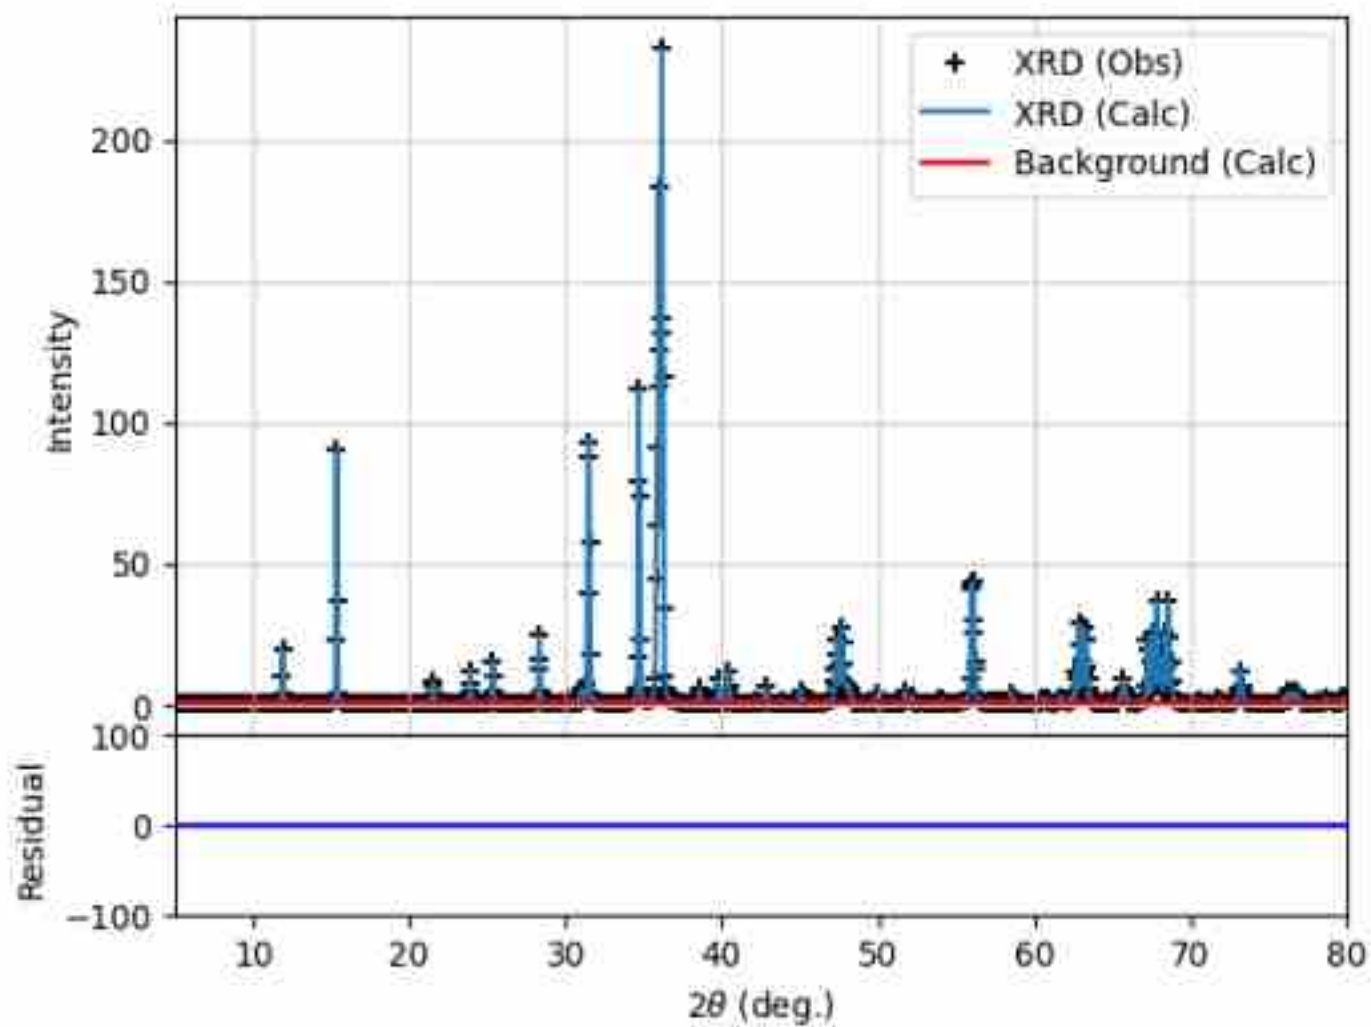

| RMSE before RR | Rwp     | RMSE after RR |
|----------------|---------|---------------|
| 0.024          | 0.00248 | 0.0004        |

# Zr<sub>4</sub>Cr<sub>4</sub>Si<sub>4</sub>

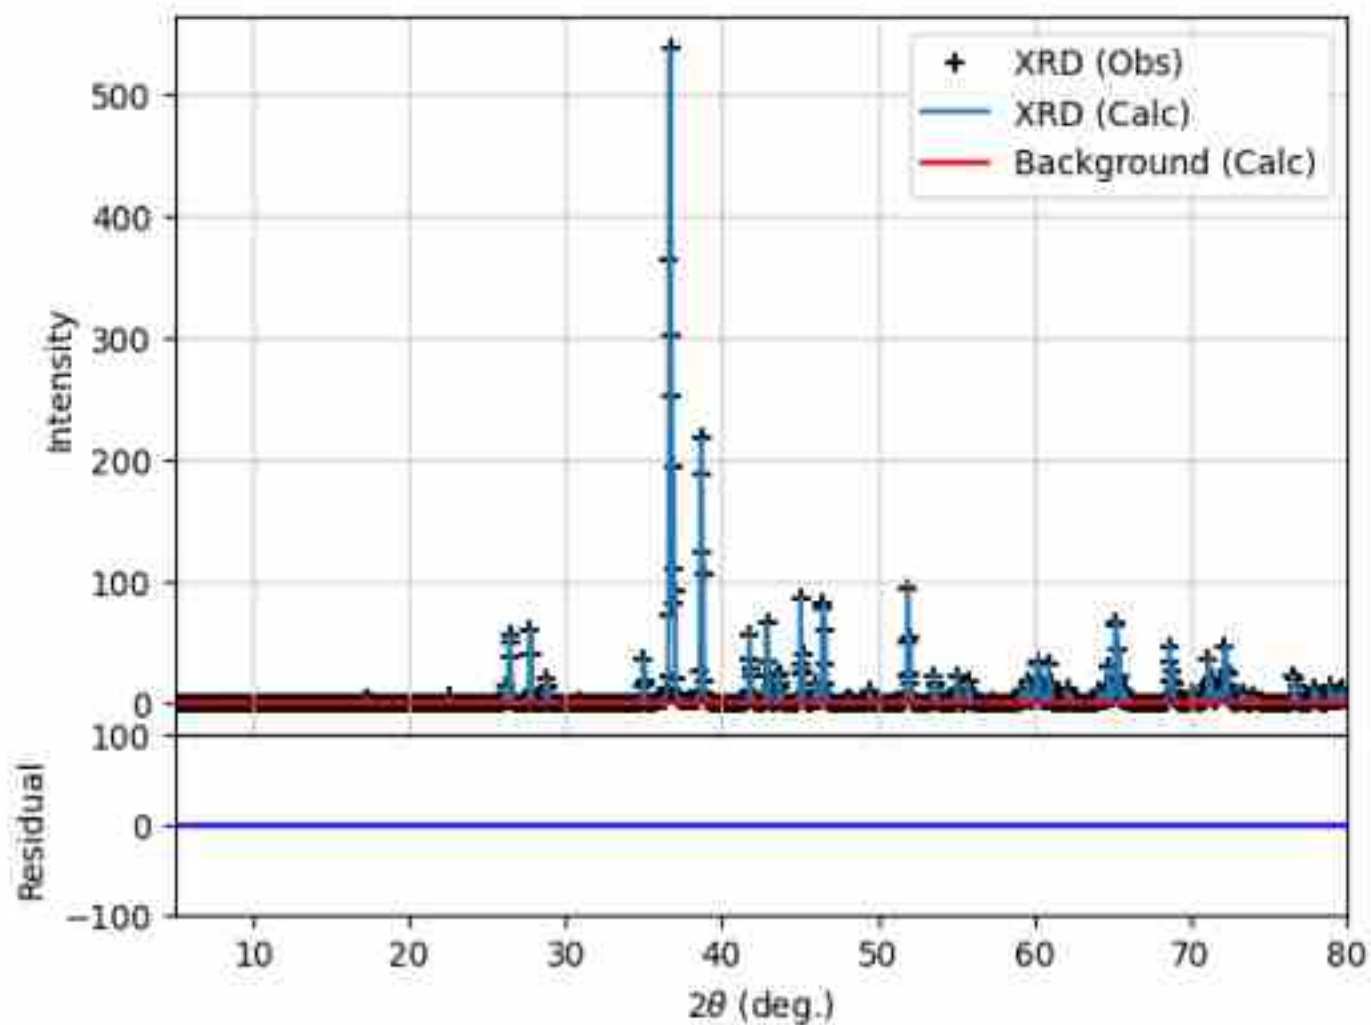

| RMSE before RR | Rwp     | RMSE after RR |
|----------------|---------|---------------|
| 0.024          | 0.00462 | 0.00052       |



# Al1Cr4Ag1S8

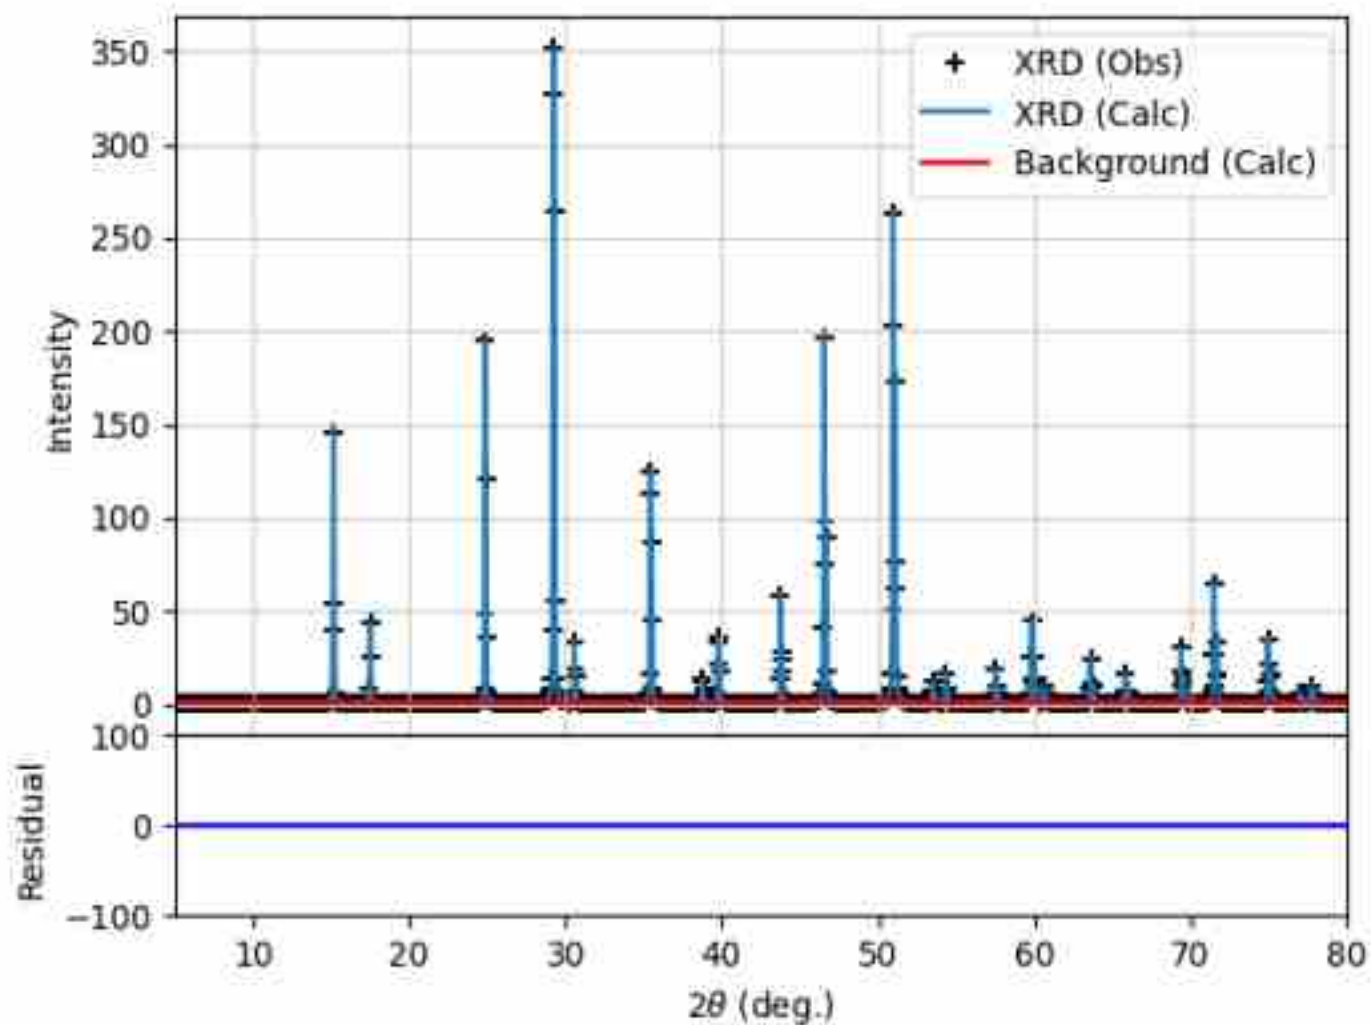

| RMSE before RR | Rwp     | RMSE after RR |
|----------------|---------|---------------|
| 0.025          | 0.04833 | 0.0037        |

# Al4O6

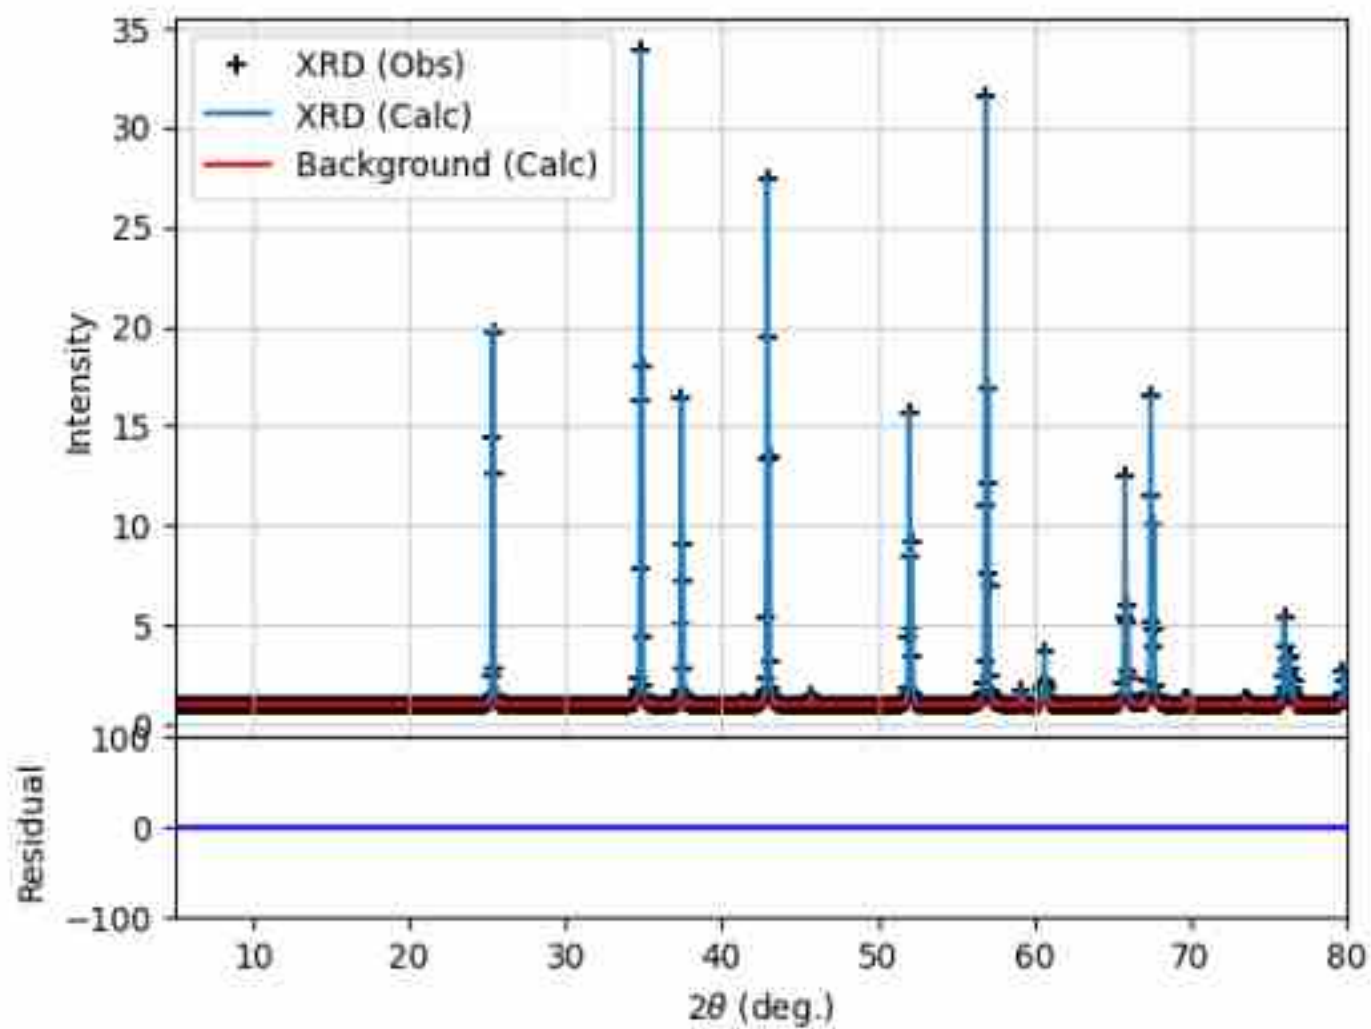

| RMSE before RR | Rwp     | RMSE after RR |
|----------------|---------|---------------|
| 0.025          | 0.00198 | 0.00115       |

# As4Rh4

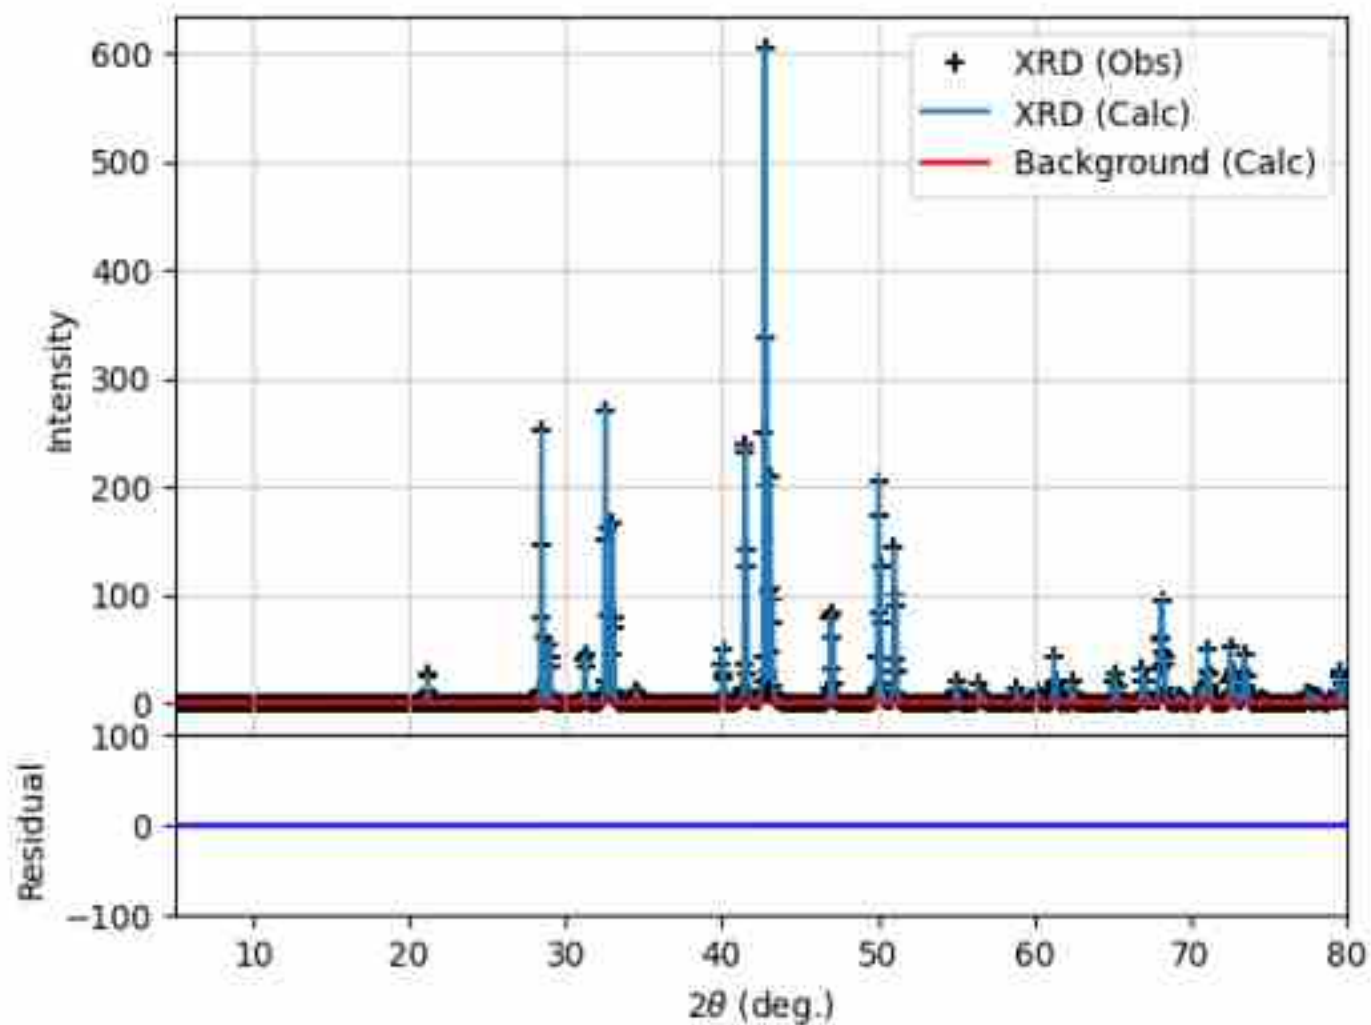

| RMSE before RR | Rwp     | RMSE after RR |
|----------------|---------|---------------|
| 0.025          | 1.16714 | 0.00198       |

# Ba<sub>2</sub>Nd<sub>1</sub>Tl<sub>1</sub>Cu<sub>2</sub>O<sub>7</sub>

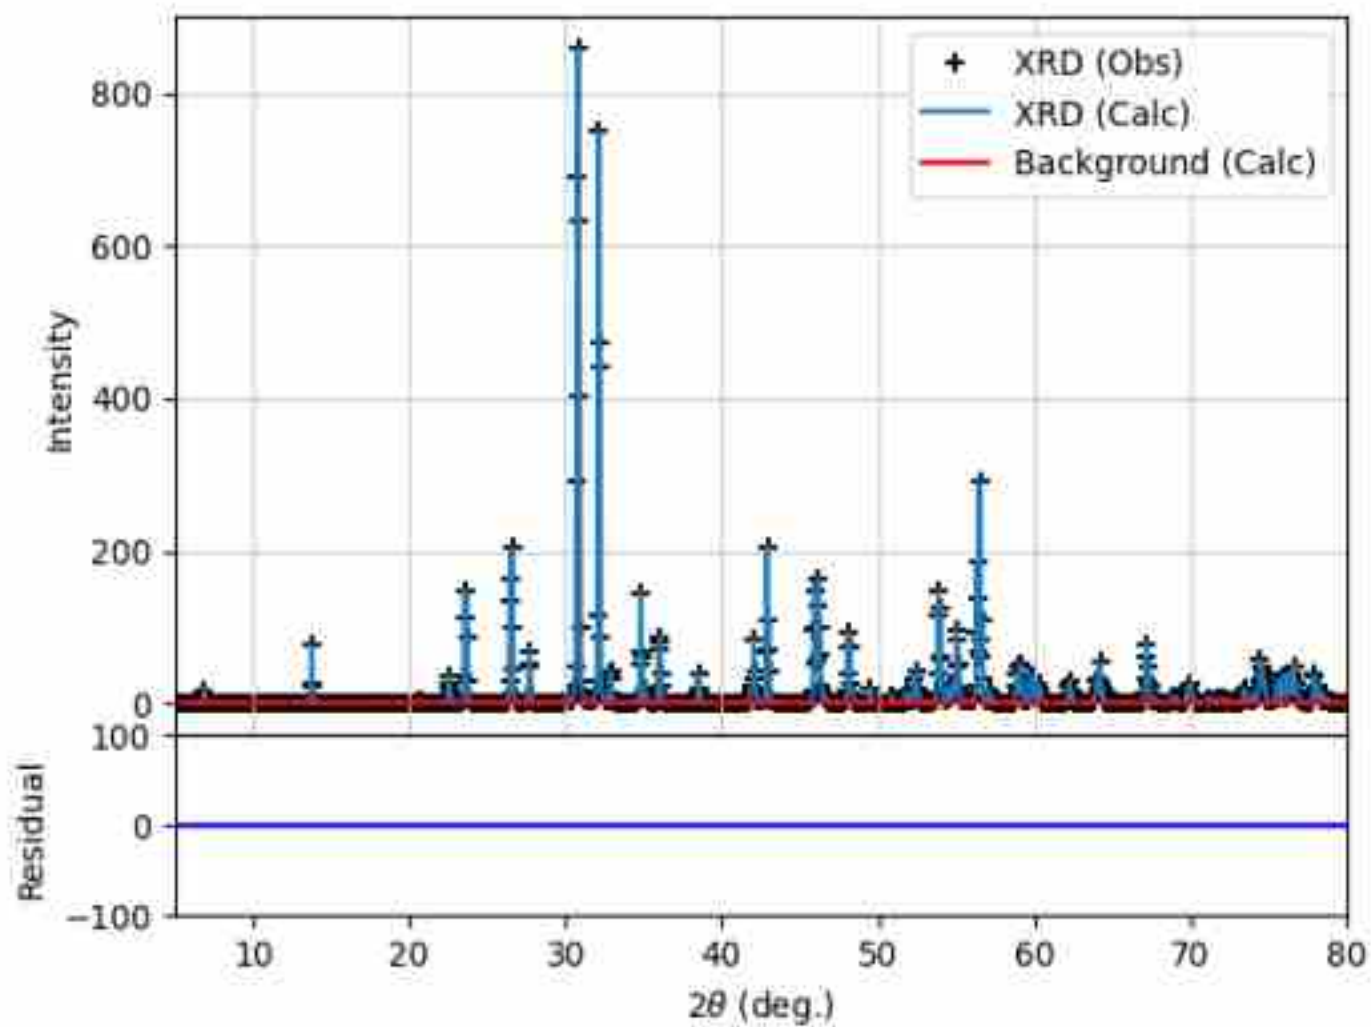

| RMSE before RR | Rwp     | RMSE after RR |
|----------------|---------|---------------|
| 0.025          | 0.00425 | 0.00137       |

# Ba<sub>2</sub>Nd<sub>4</sub>Fe<sub>2</sub>S<sub>10</sub>

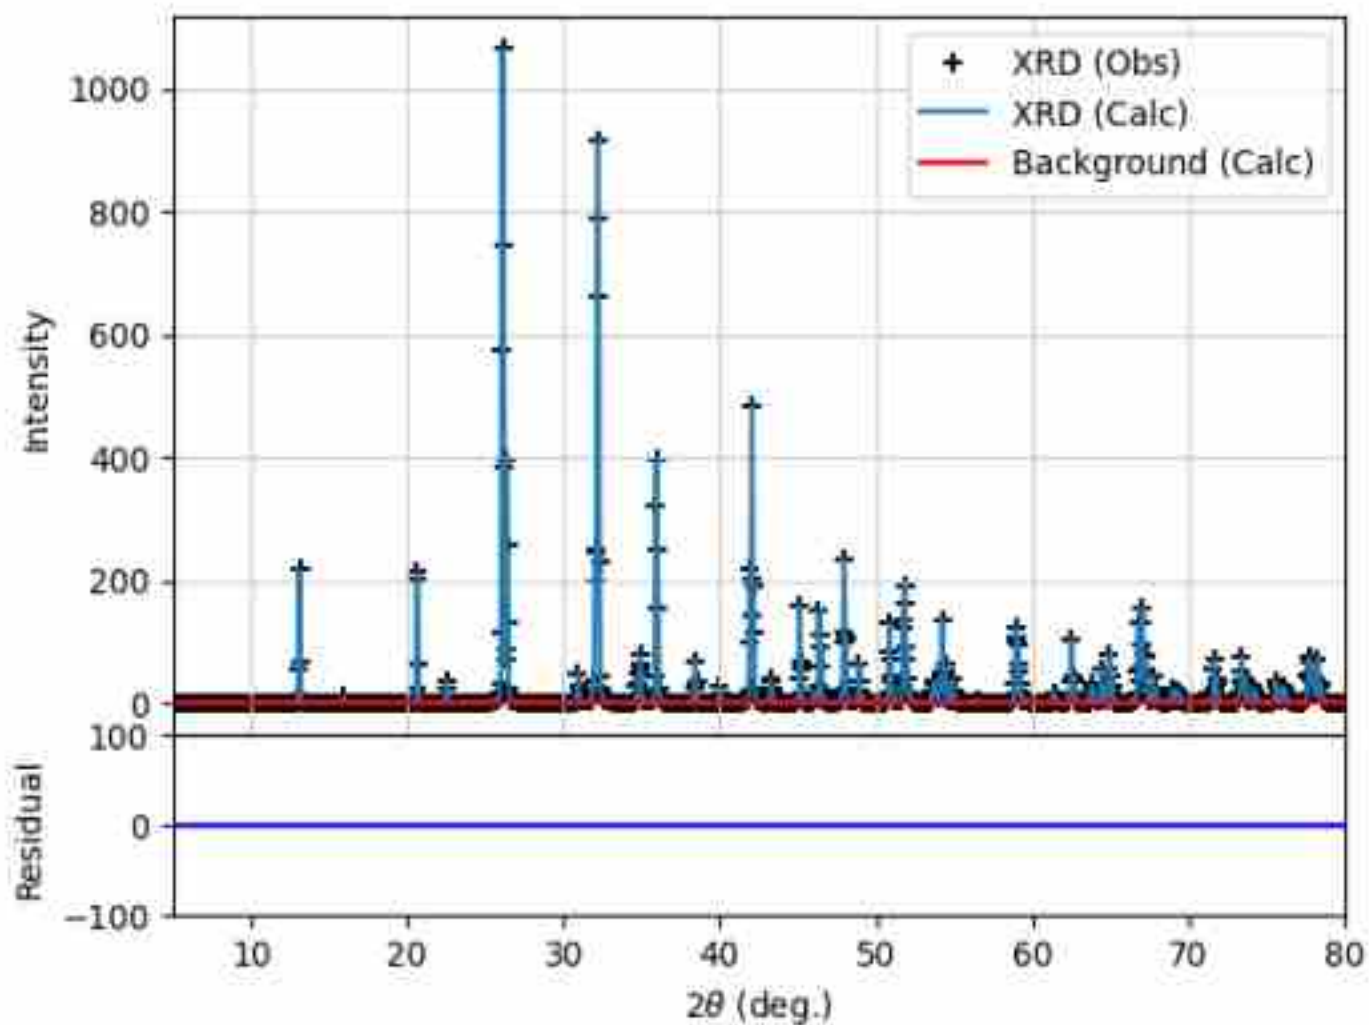

| RMSE before RR | Rwp     | RMSE after RR |
|----------------|---------|---------------|
| 0.025          | 0.00313 | 0.0006        |

# Ba<sub>2</sub>Sr<sub>2</sub>Y<sub>2</sub>Nb<sub>2</sub>O<sub>12</sub>

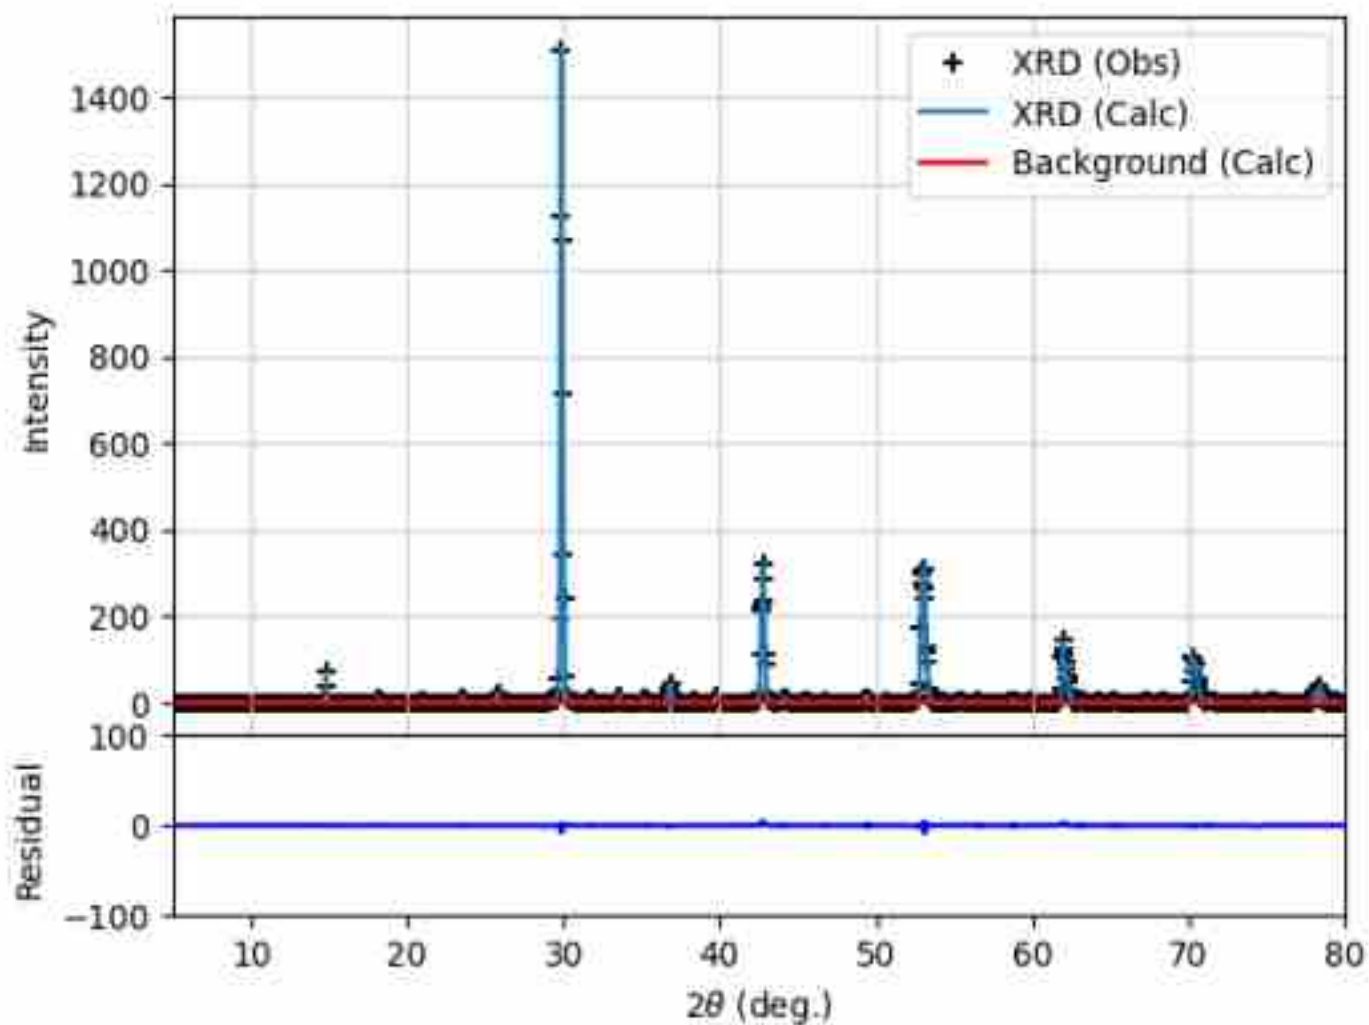

| RMSE before RR | Rwp     | RMSE after RR |
|----------------|---------|---------------|
| 0.025          | 2.92869 | 0.0543        |

# Ba<sub>2</sub>Y<sub>2</sub>Br<sub>10</sub>

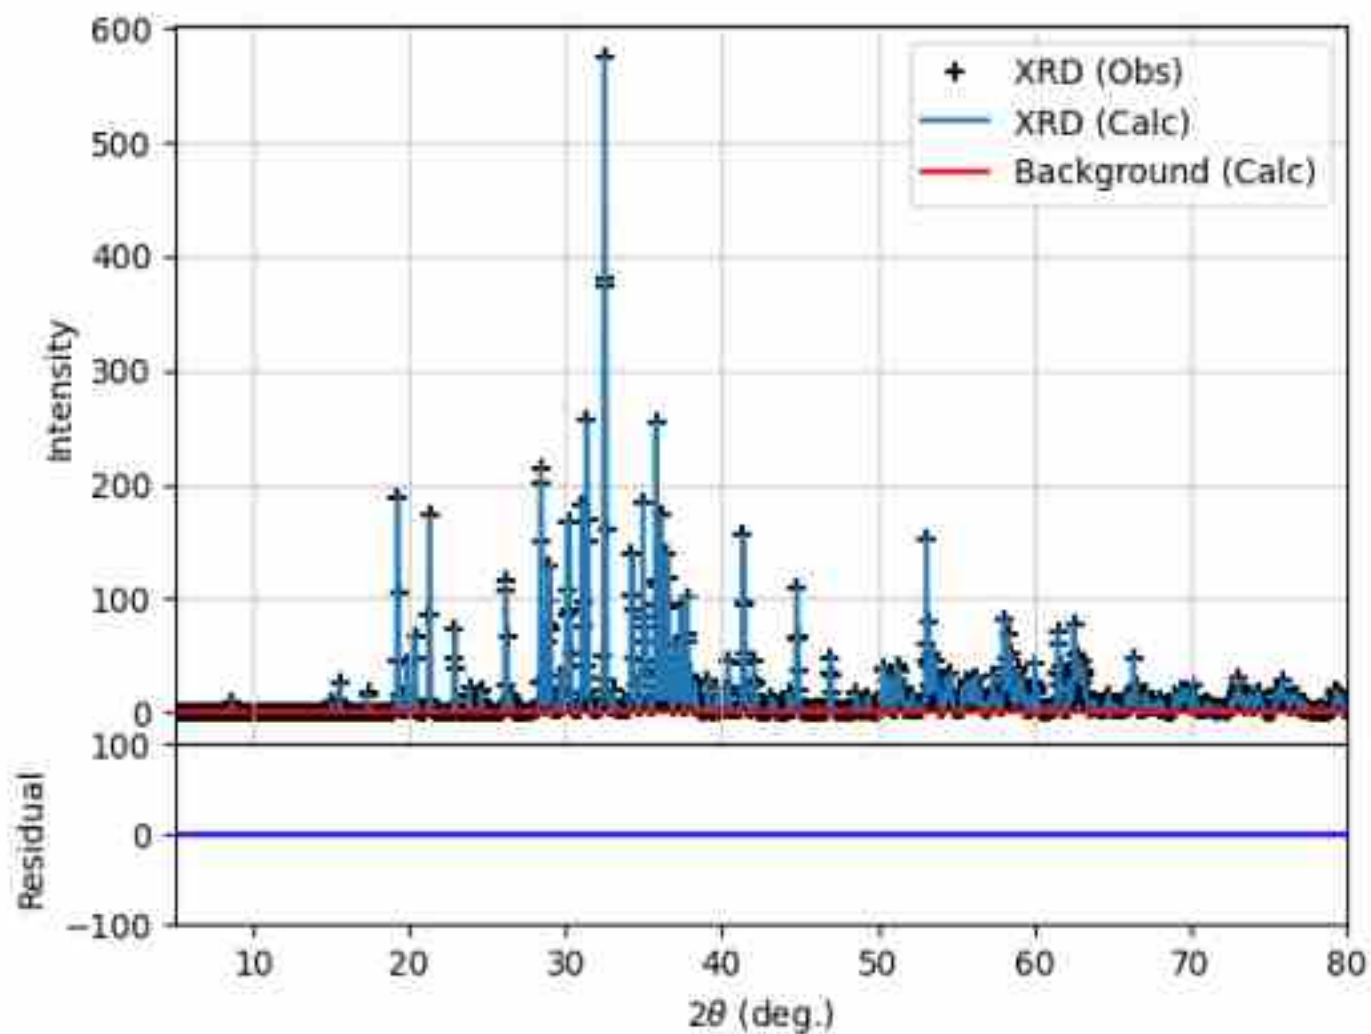

| RMSE before RR | Rwp     | RMSE after RR |
|----------------|---------|---------------|
| 0.025          | 0.00336 | 0.00026       |

# Ba6Ge2O10

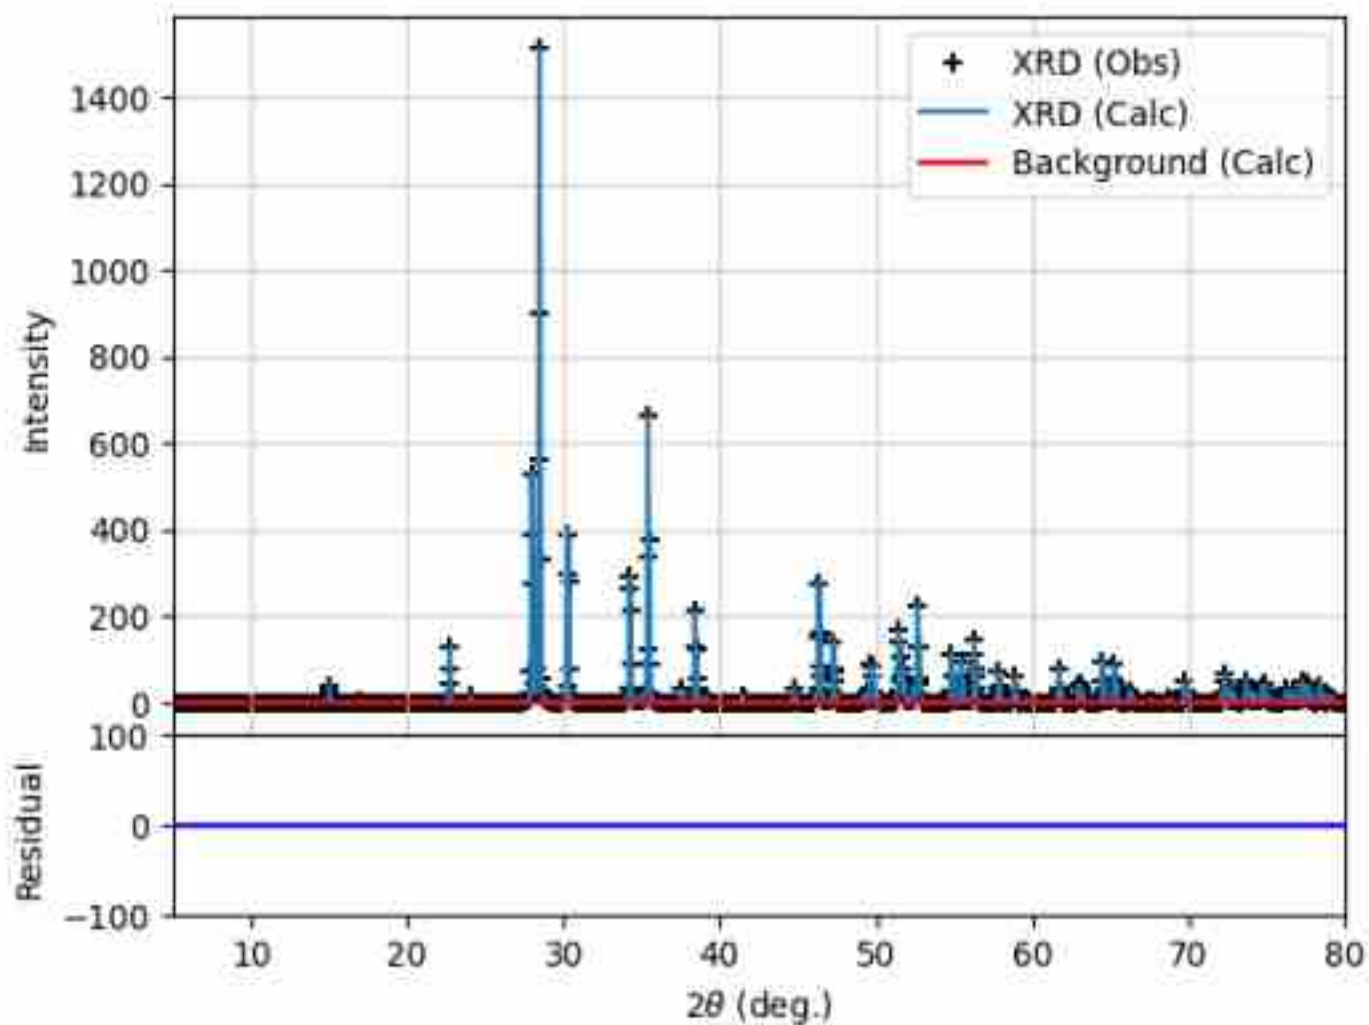

| RMSE before RR | Rwp     | RMSE after RR |
|----------------|---------|---------------|
| 0.025          | 0.00381 | 0.00081       |



# Be<sub>2</sub>Ge<sub>2</sub>As<sub>4</sub>

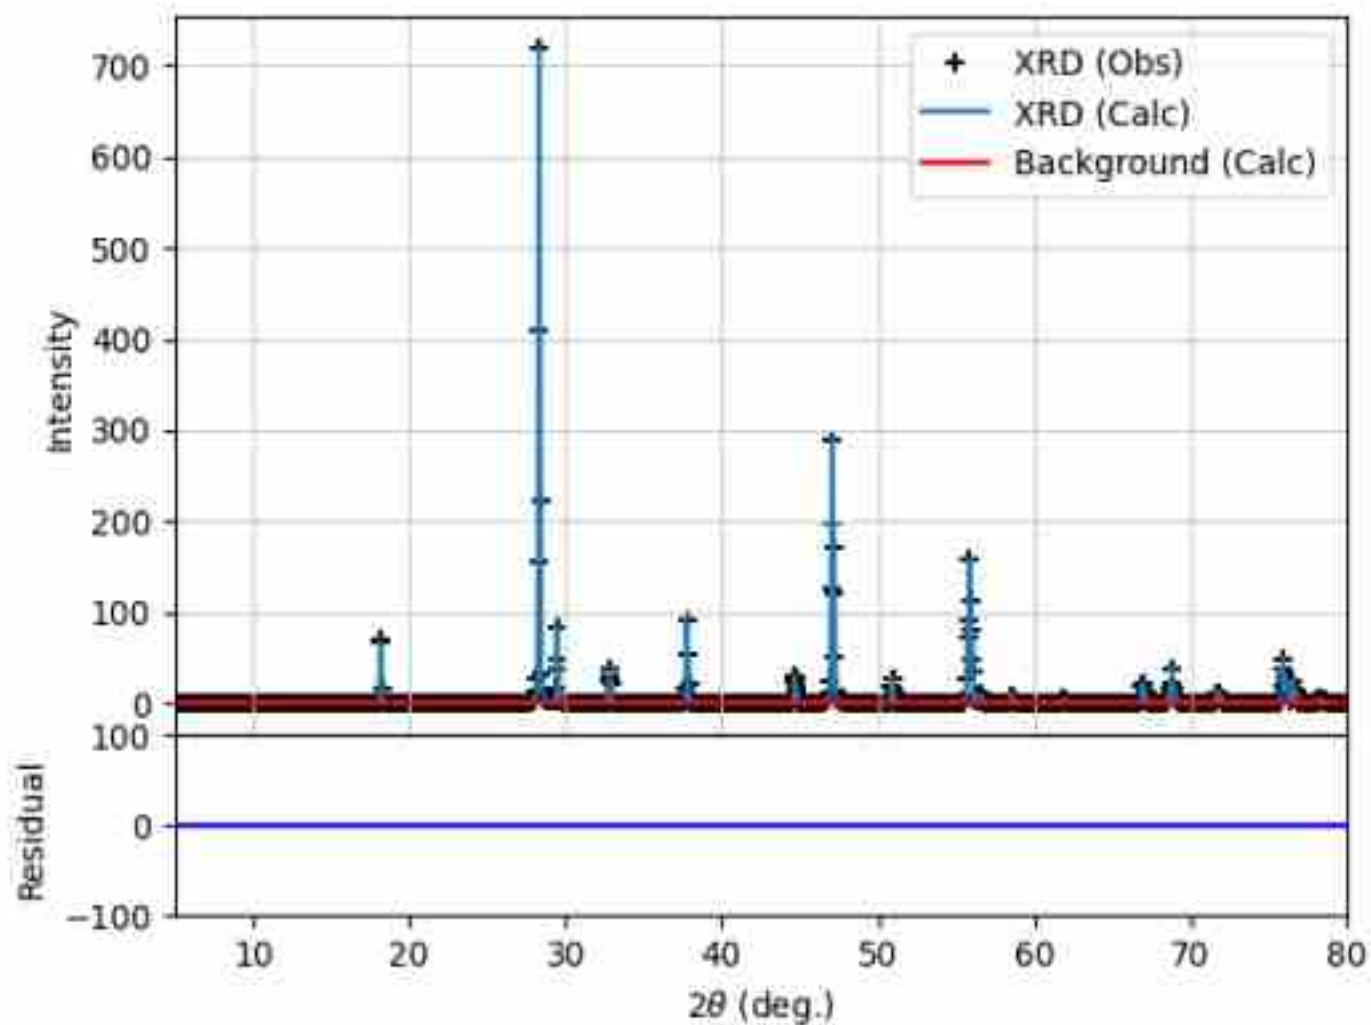

| RMSE before RR | Rwp     | RMSE after RR |
|----------------|---------|---------------|
| 0.025          | 0.00312 | 0.00085       |

# Be<sub>2</sub>Si<sub>2</sub>N<sub>4</sub>

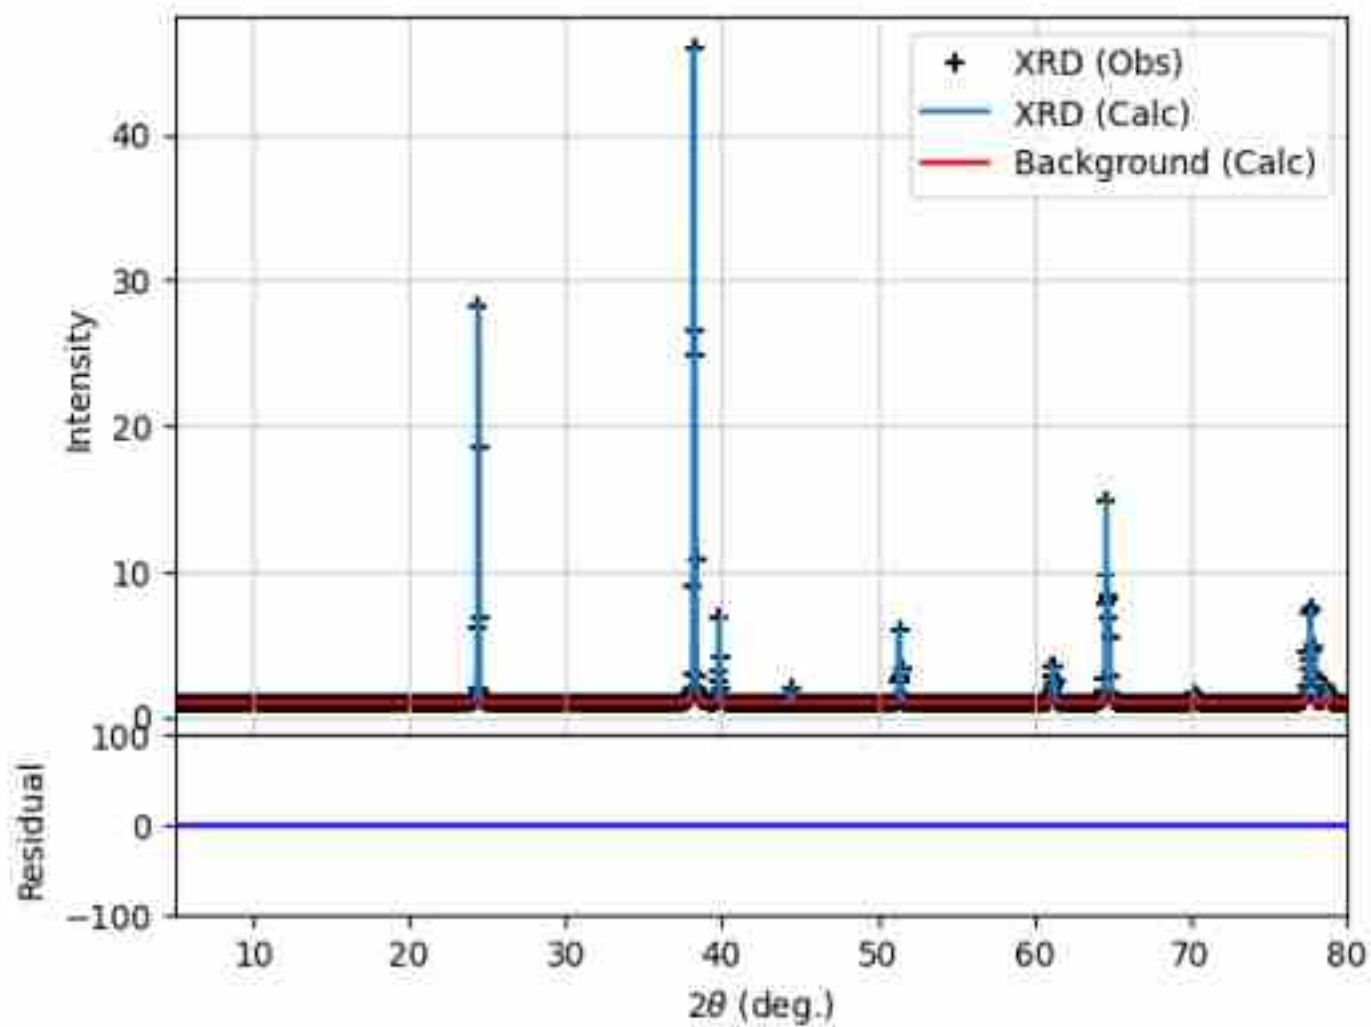

| RMSE before RR | Rwp   | RMSE after RR |
|----------------|-------|---------------|
| 0.025          | 0.002 | 0.00116       |

# Be<sub>4</sub>B<sub>2</sub>O<sub>6</sub>F<sub>2</sub>

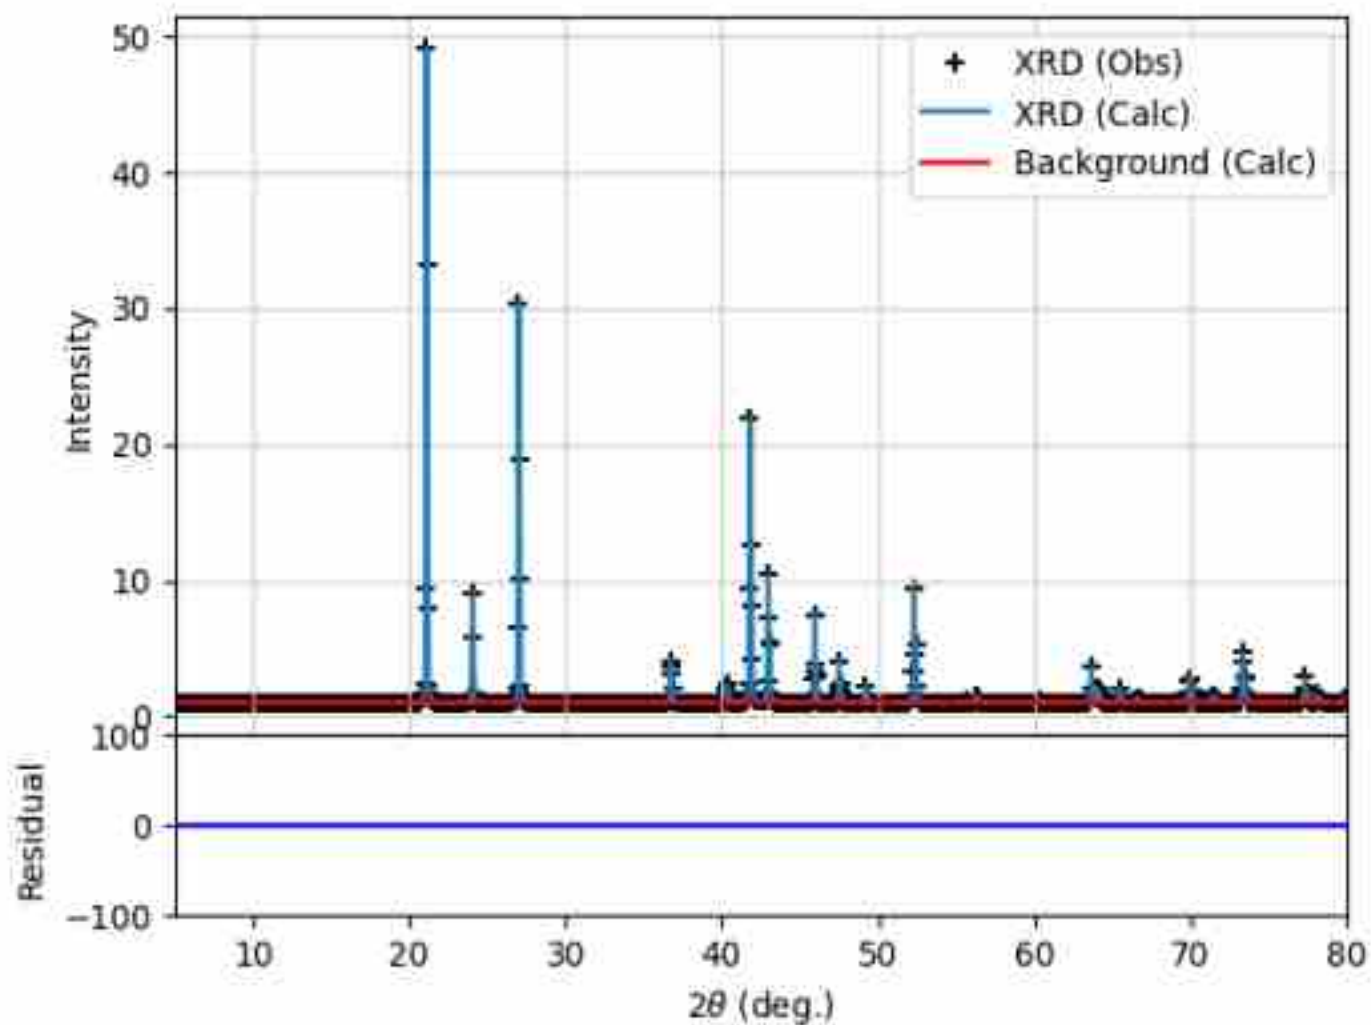

| RMSE before RR | Rwp    | RMSE after RR |
|----------------|--------|---------------|
| 0.025          | 0.0012 | 0.00099       |

# Ca<sub>2</sub>Be<sub>6</sub>O<sub>8</sub>

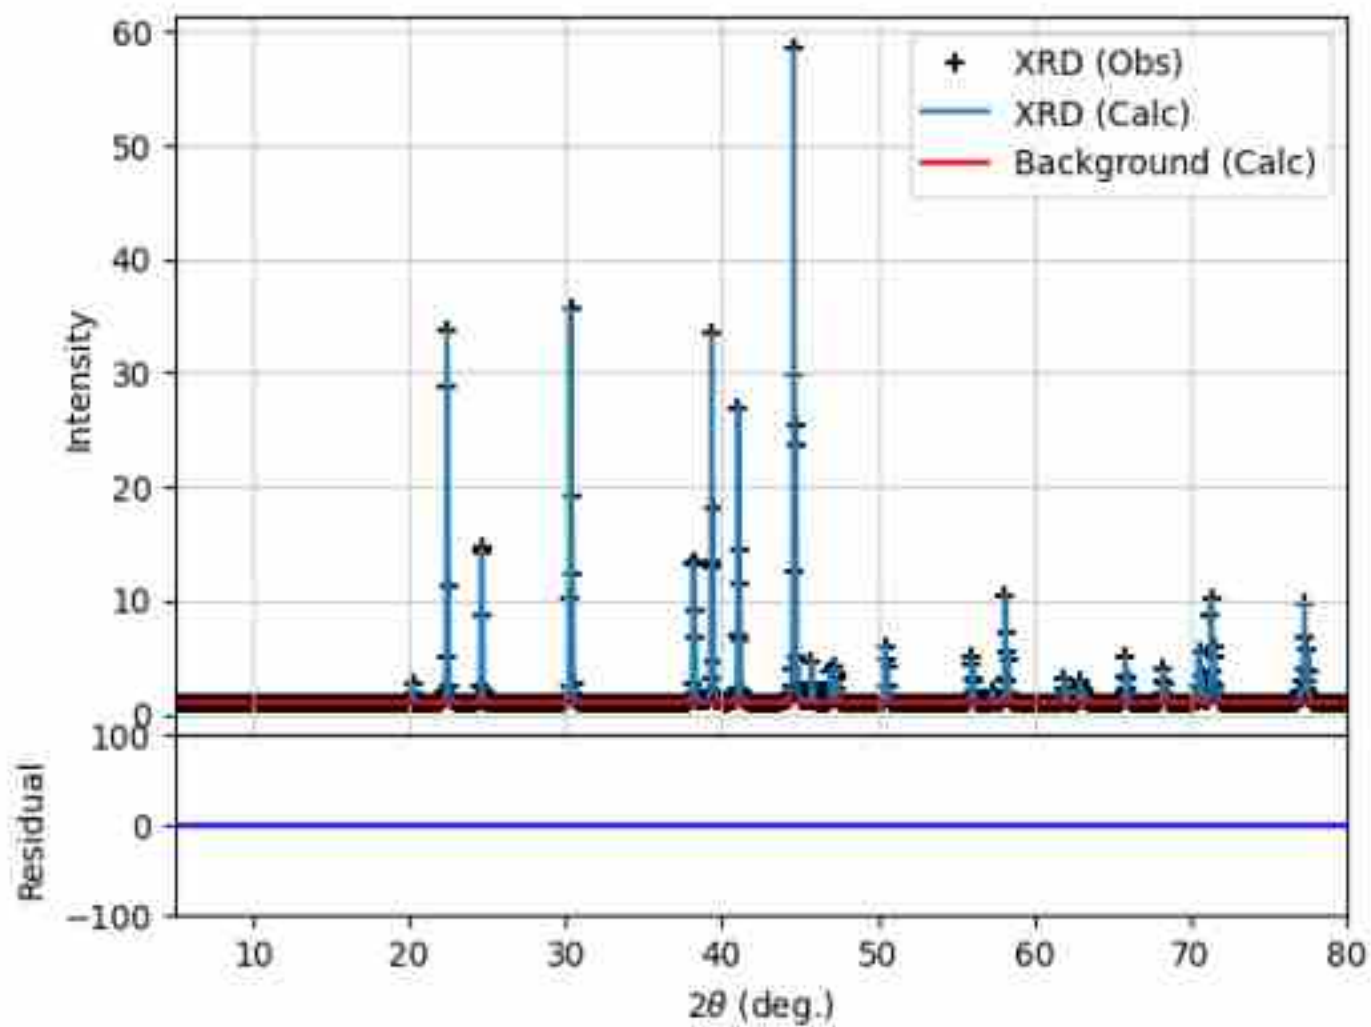

| RMSE before RR | Rwp     | RMSE after RR |
|----------------|---------|---------------|
| 0.025          | 0.00517 | 0.00242       |

# Ca<sub>2</sub>Bi<sub>2</sub>F<sub>10</sub>

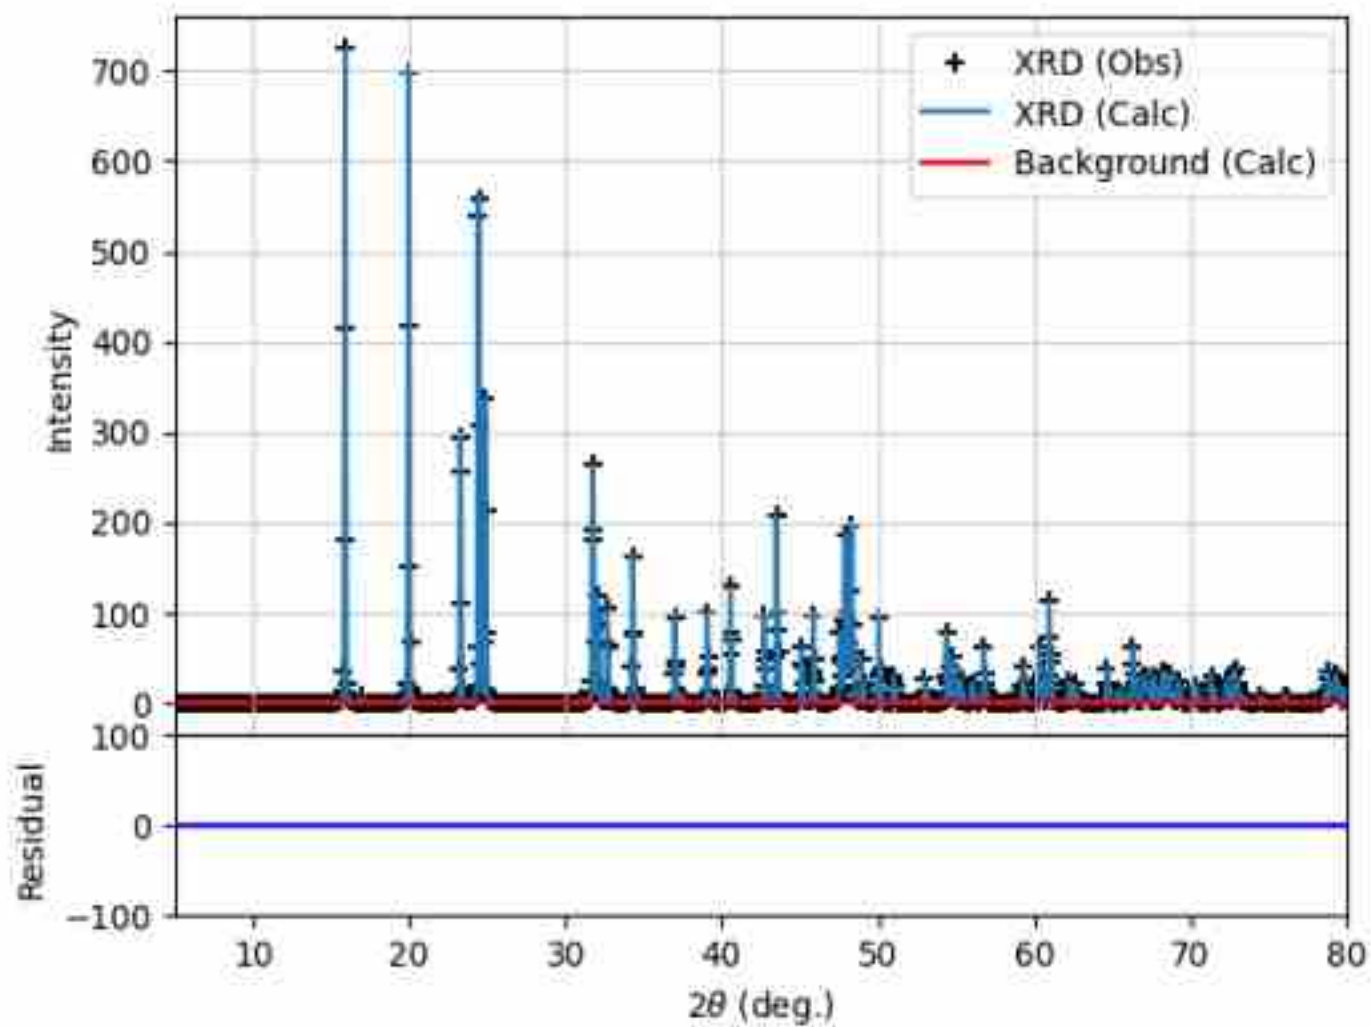

| RMSE before RR | Rwp     | RMSE after RR |
|----------------|---------|---------------|
| 0.025          | 0.00274 | 0.0008        |

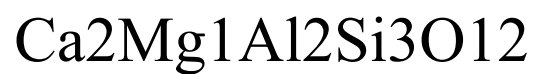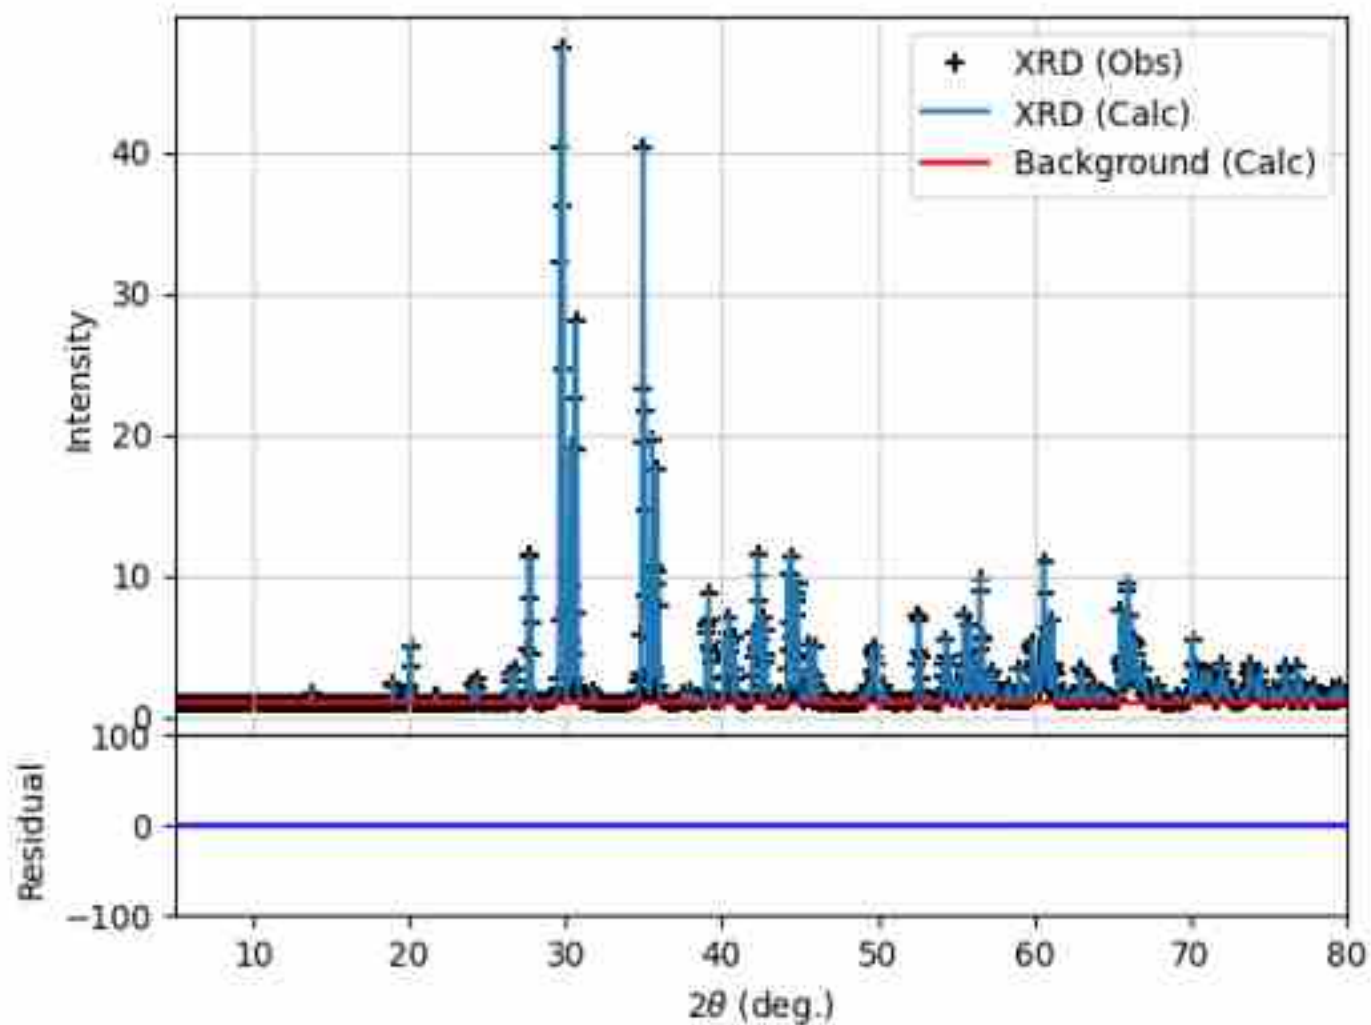

| RMSE before RR | Rwp    | RMSE after RR |
|----------------|--------|---------------|
| 0.025          | 0.1975 | 0.00053       |

# Ca<sub>2</sub>Mg<sub>6</sub>

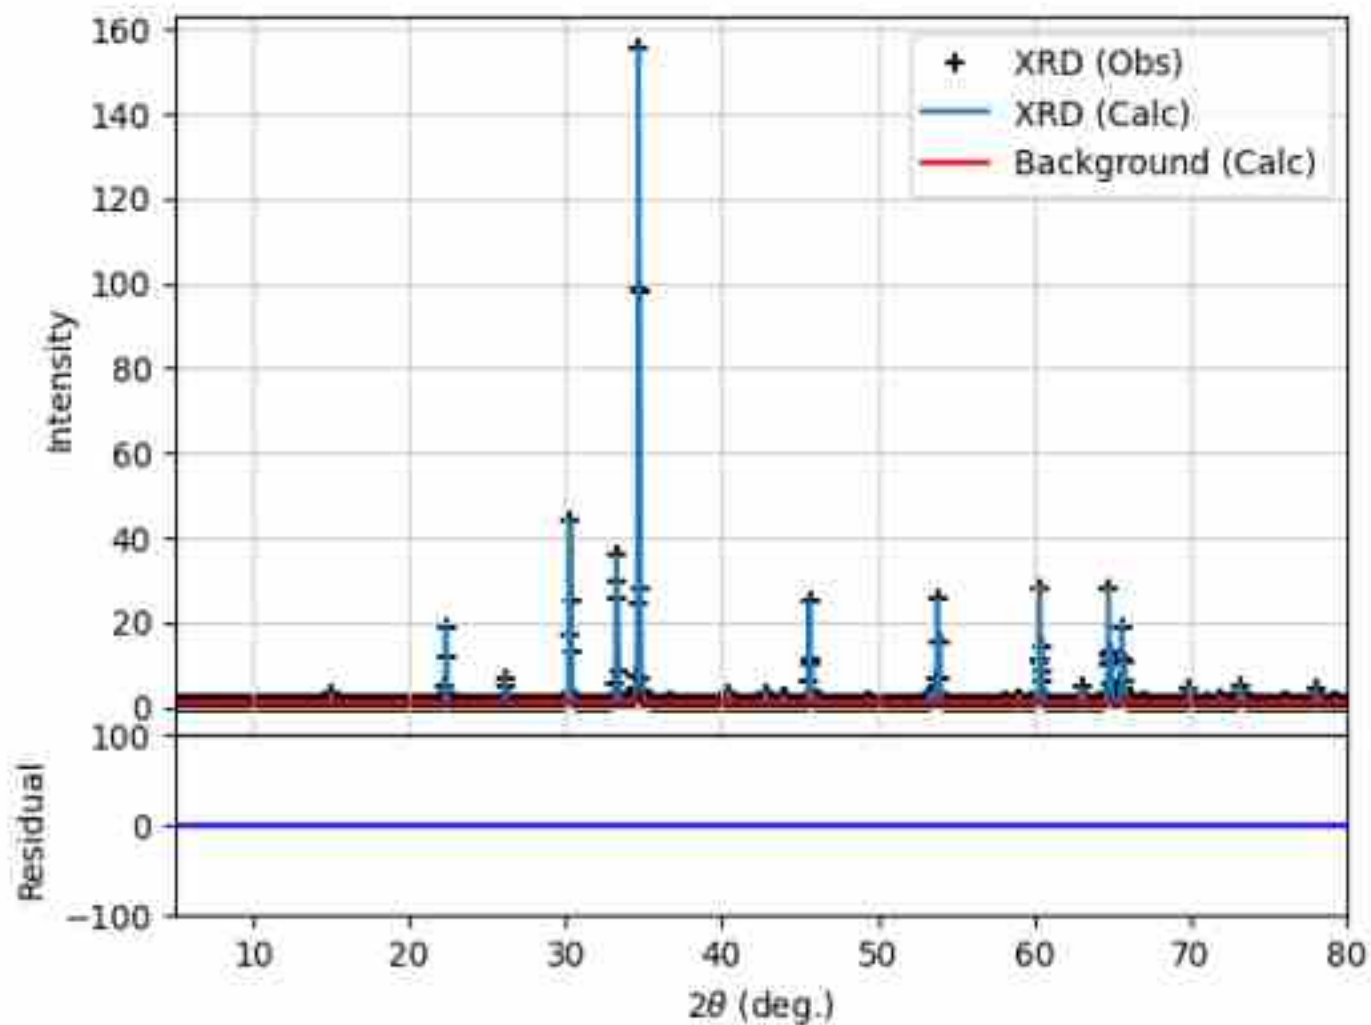

| RMSE before RR | Rwp     | RMSE after RR |
|----------------|---------|---------------|
| 0.025          | 0.02493 | 0.002         |

# Ca<sub>2</sub>Ti<sub>4</sub>O<sub>10</sub>

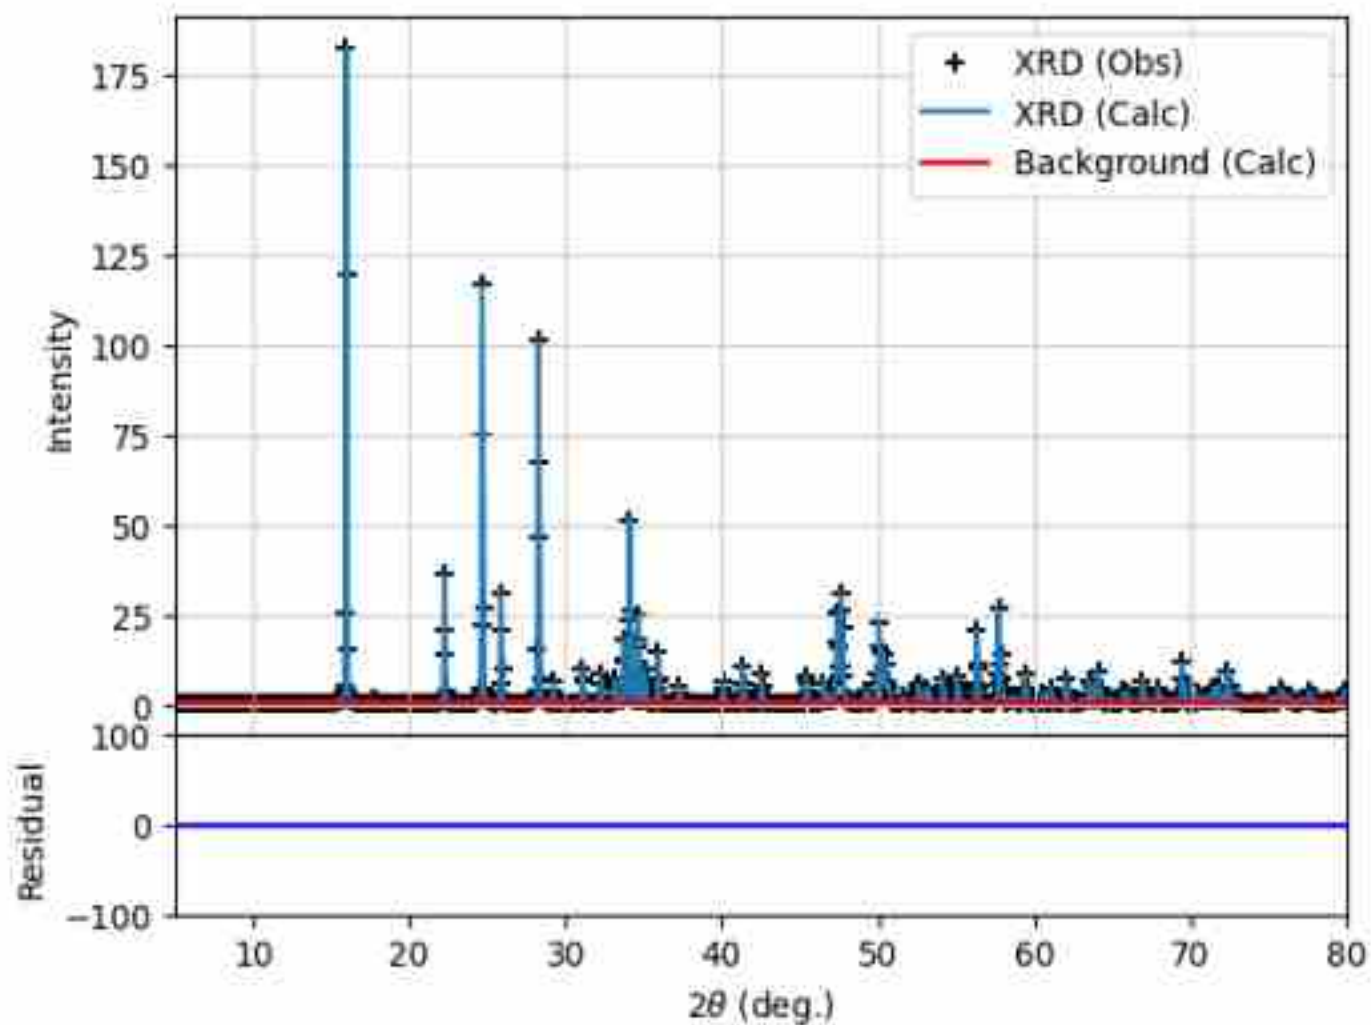

| RMSE before RR | Rwp     | RMSE after RR |
|----------------|---------|---------------|
| 0.025          | 0.00282 | 0.00081       |



# Ca<sub>4</sub>Al<sub>2</sub>Co<sub>2</sub>O<sub>10</sub>

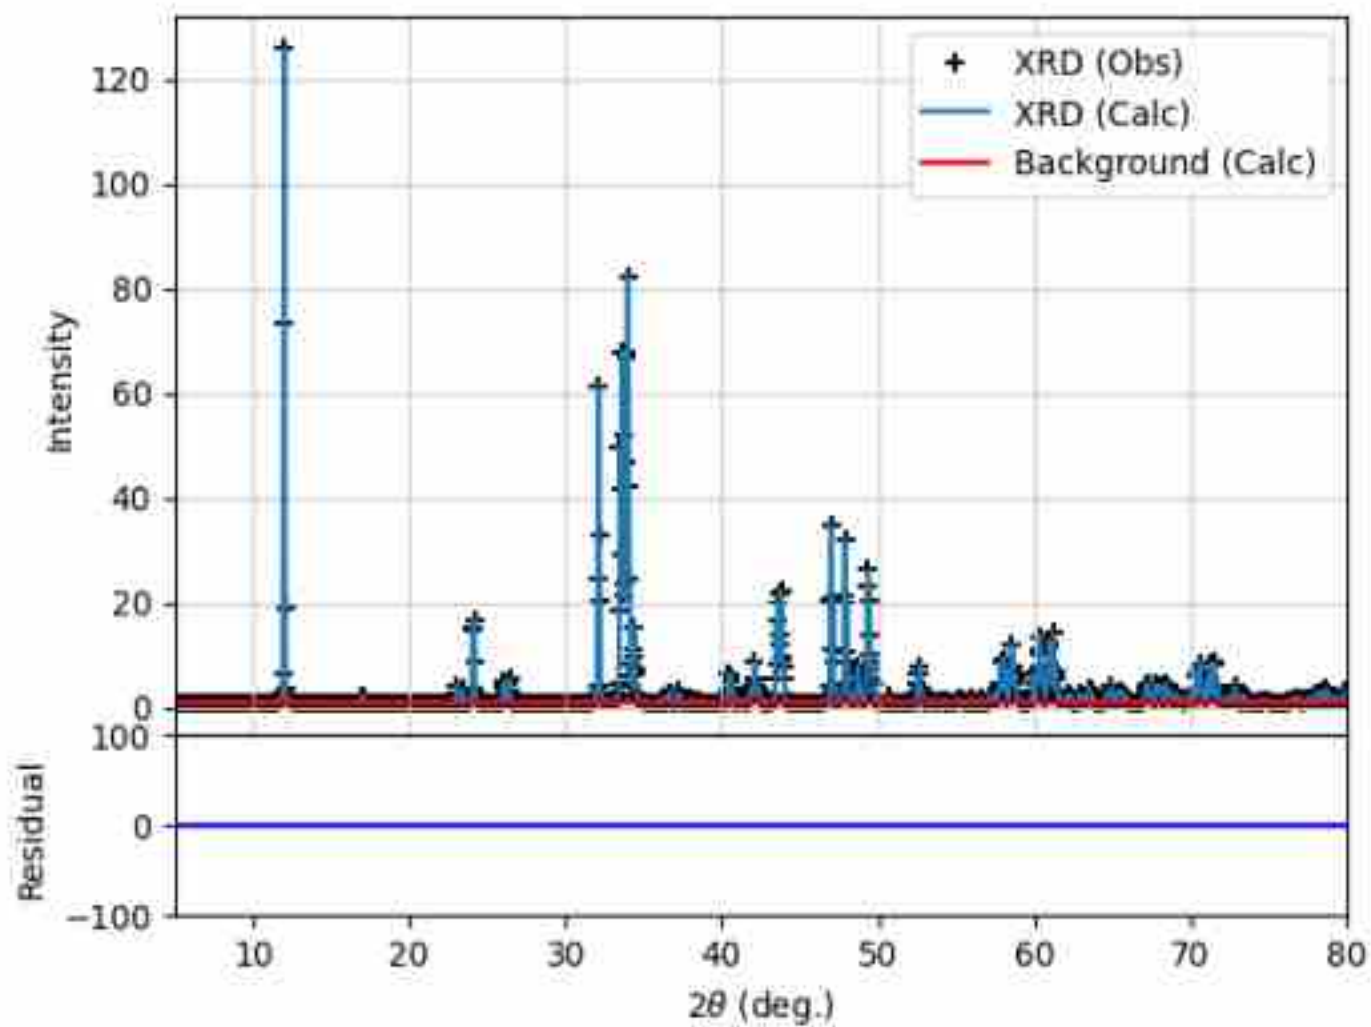

| RMSE before RR | Rwp     | RMSE after RR |
|----------------|---------|---------------|
| 0.025          | 0.00029 | 0.0           |

# Ca<sub>4</sub>Fe<sub>2</sub>O<sub>s</sub>2O<sub>12</sub>

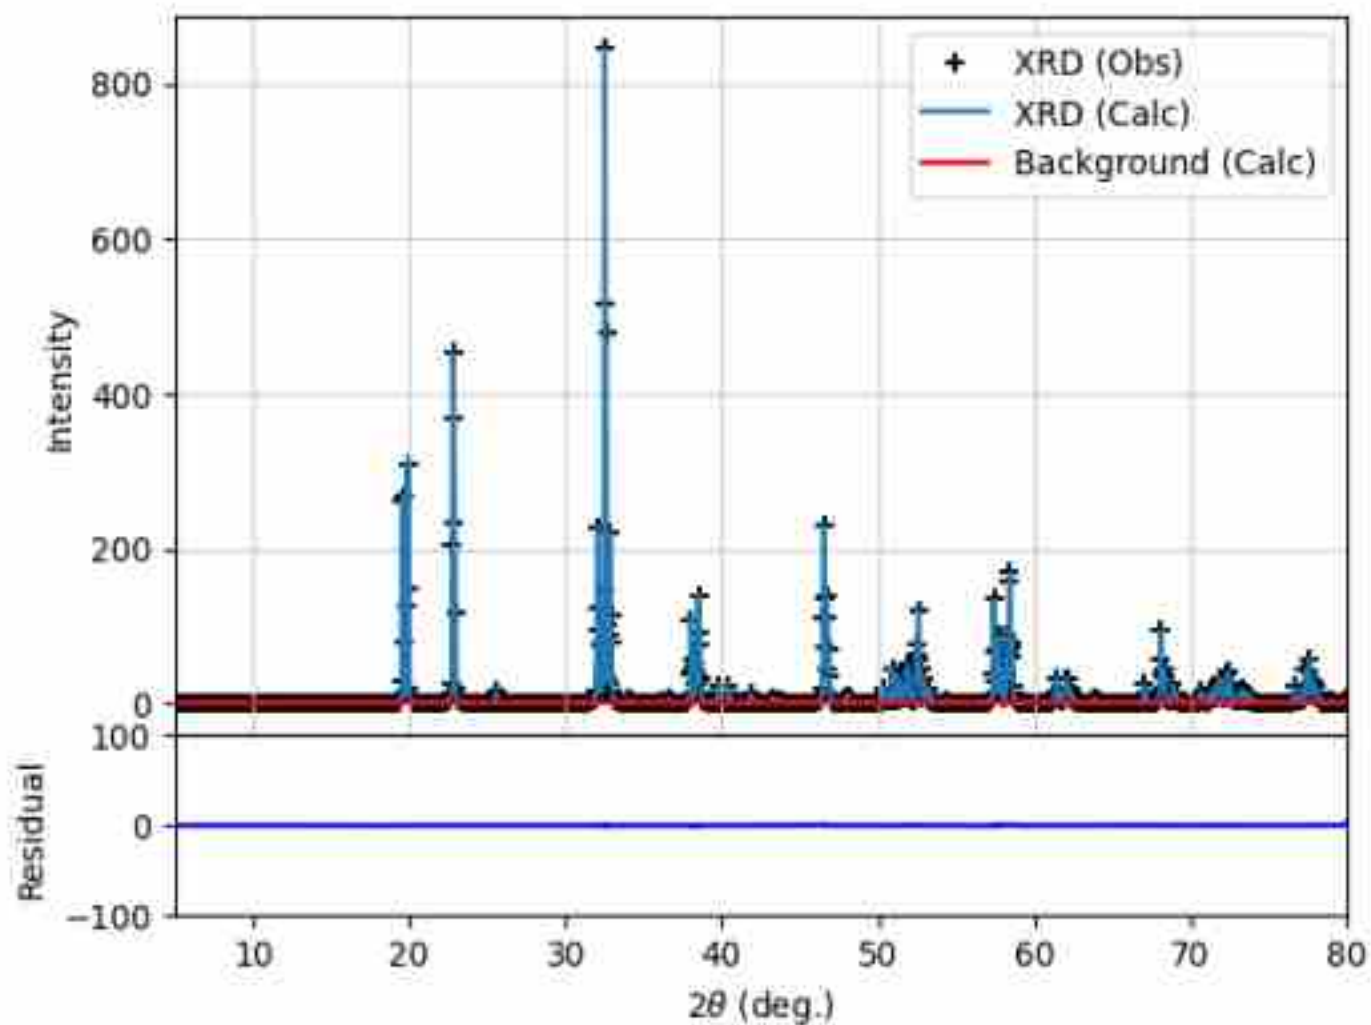

| RMSE before RR | Rwp     | RMSE after RR |
|----------------|---------|---------------|
| 0.025          | 1.87437 | 0.03465       |

# Ca<sub>4</sub>Mn<sub>4</sub>O<sub>10</sub>

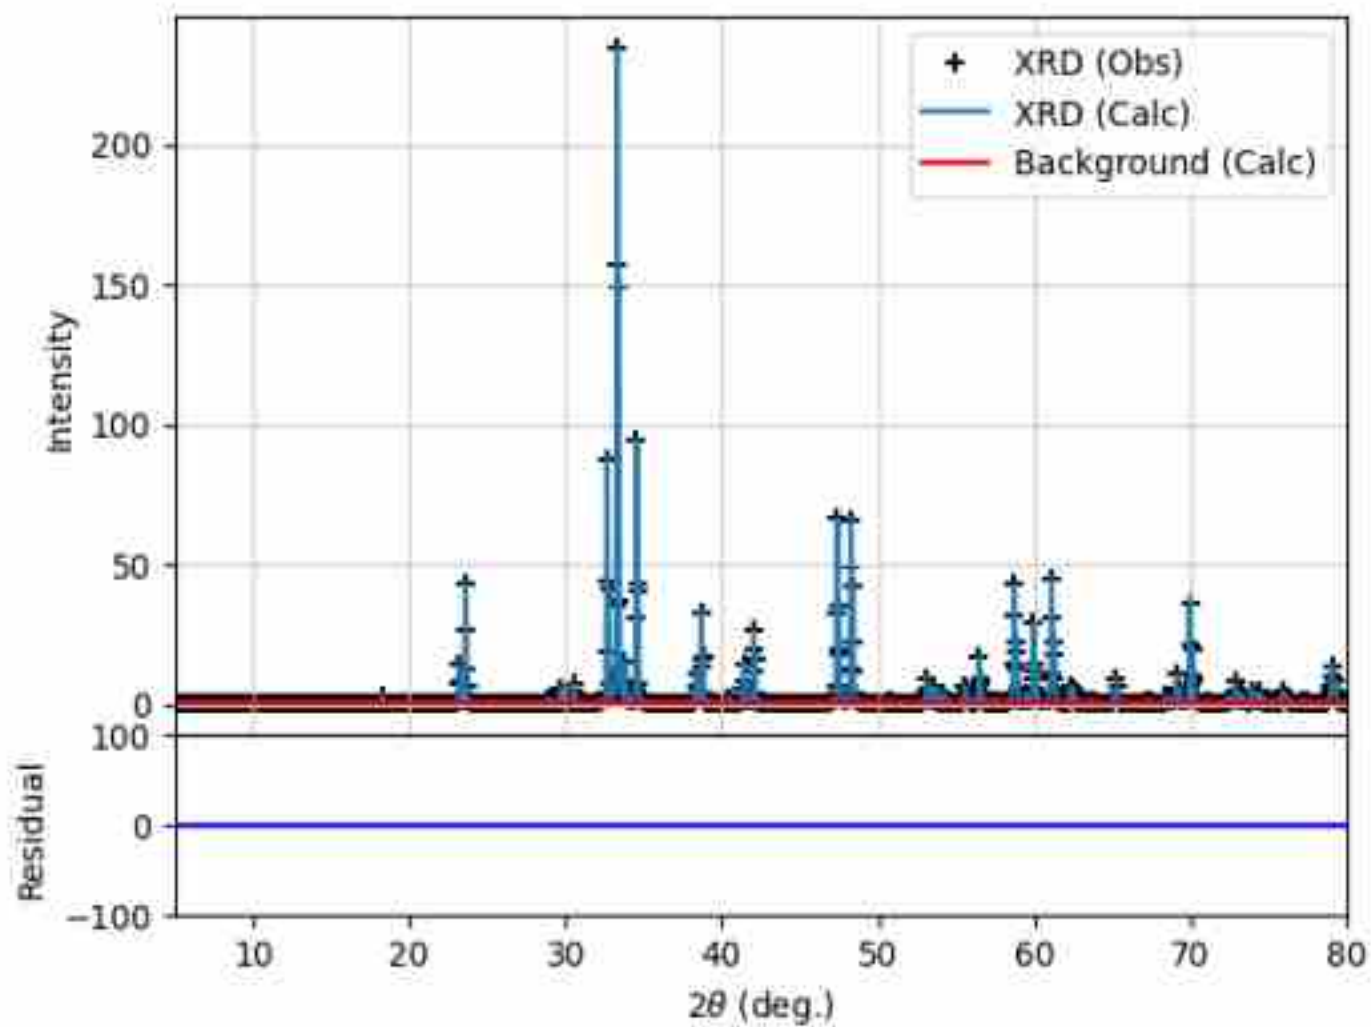

| RMSE before RR | Rwp     | RMSE after RR |
|----------------|---------|---------------|
| 0.025          | 0.00443 | 0.00075       |

# Ca6Al4As8

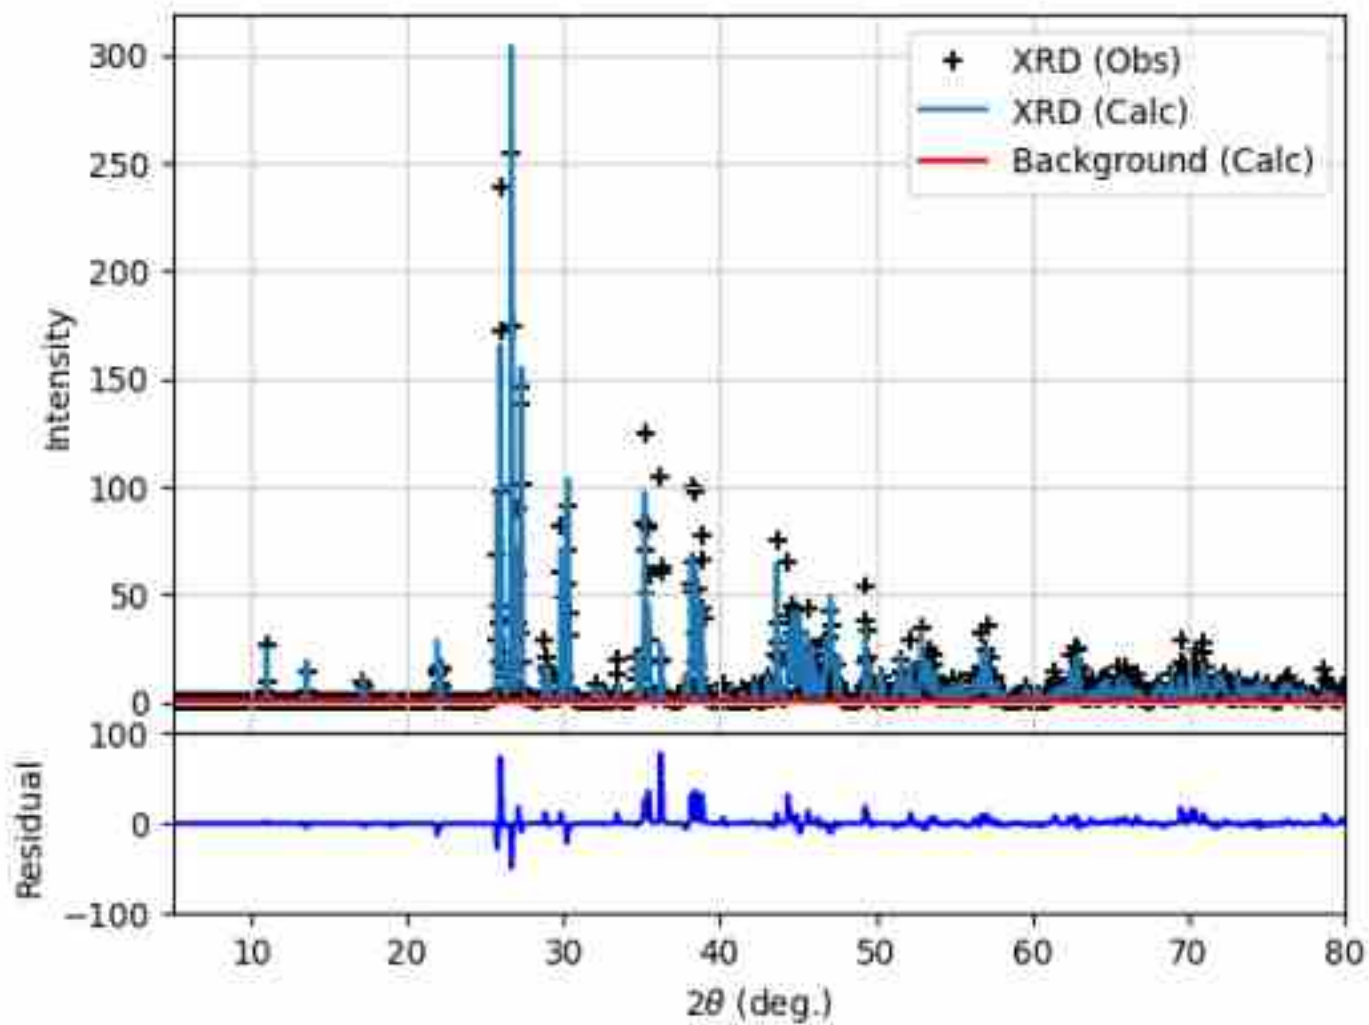

| RMSE before RR | Rwp      | RMSE after RR |
|----------------|----------|---------------|
| 0.025          | 32.96542 | 0.37596       |

Ca8Cu4

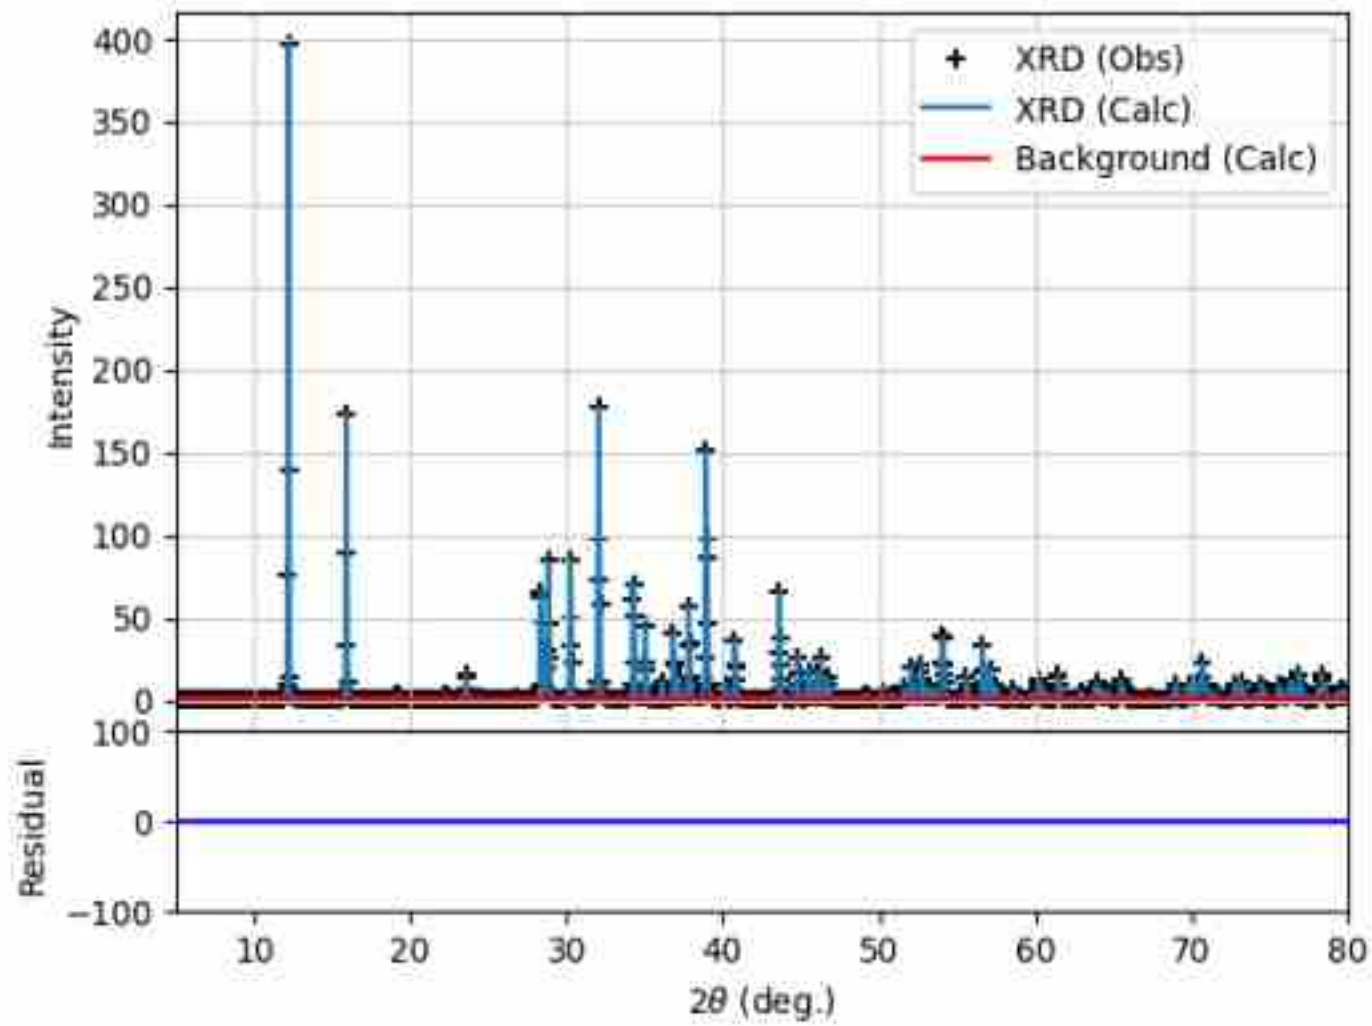

| RMSE before RR | Rwp    | RMSE after RR |
|----------------|--------|---------------|
| 0.025          | 0.0044 | 0.00043       |

# Ca<sub>8</sub>Mg<sub>2</sub>Sn<sub>6</sub>

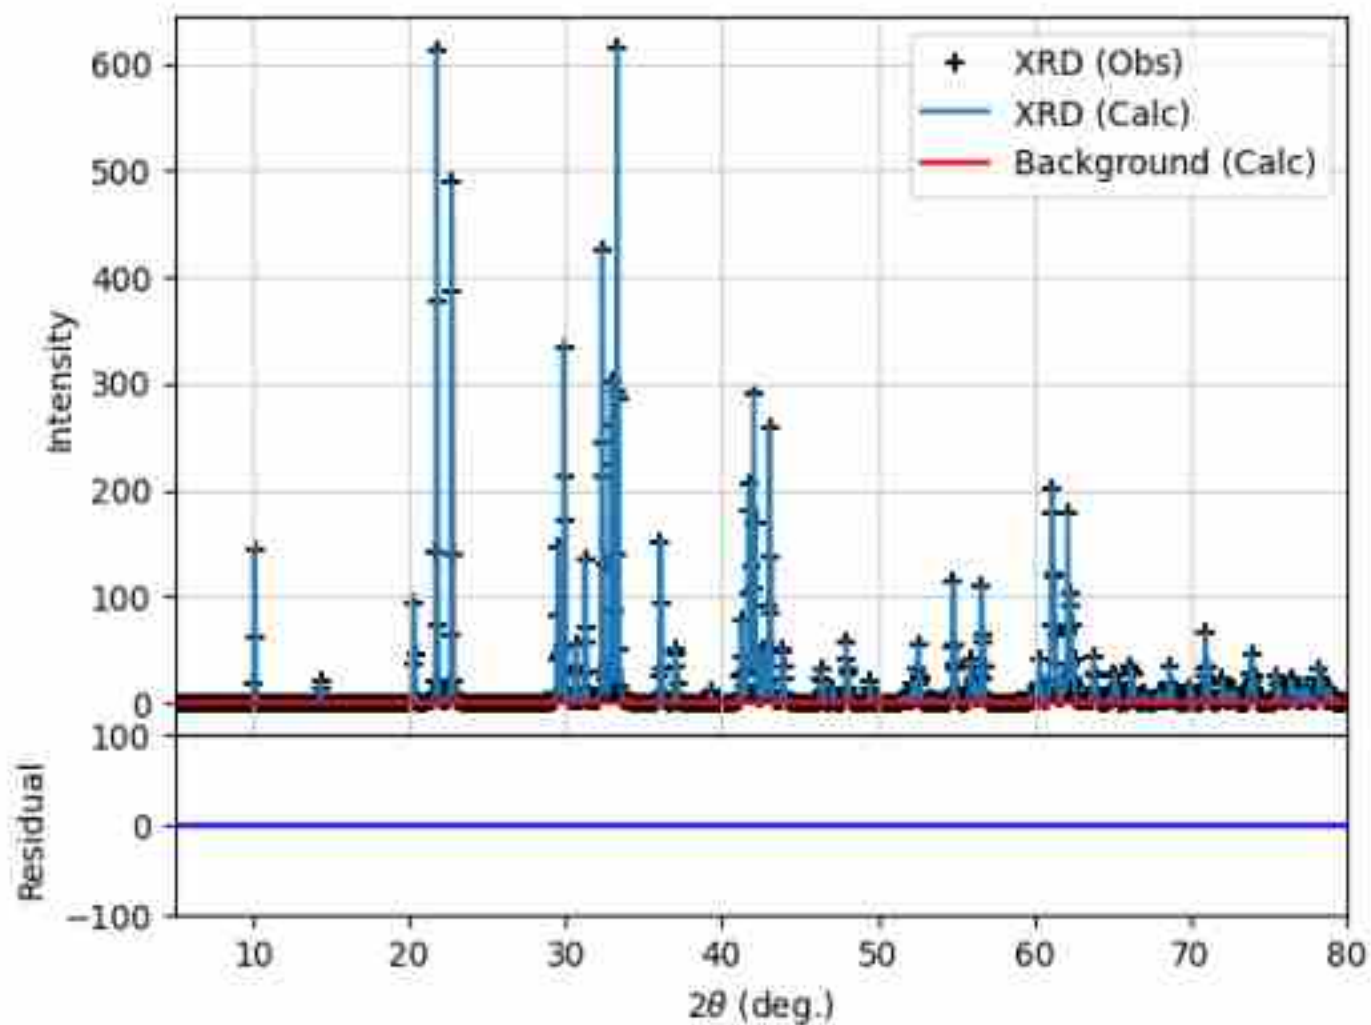

| RMSE before RR | Rwp     | RMSE after RR |
|----------------|---------|---------------|
| 0.025          | 0.00367 | 0.00079       |

# Cd<sub>3</sub>As<sub>4</sub>I<sub>3</sub>

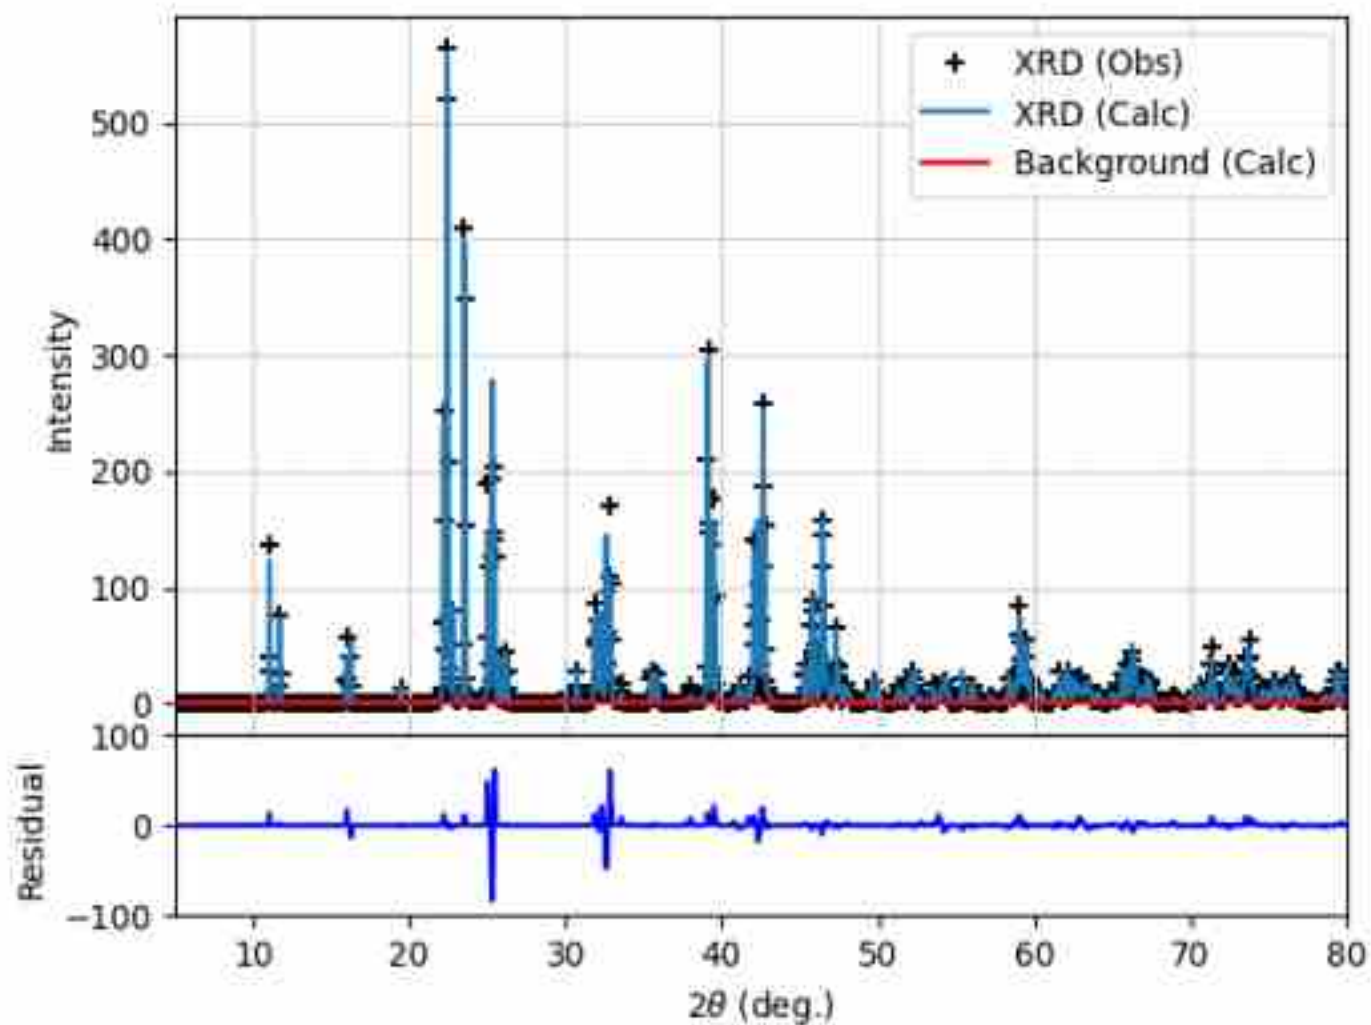

| RMSE before RR | Rwp      | RMSE after RR |
|----------------|----------|---------------|
| 0.025          | 16.59111 | 0.06985       |

# Cd6Cl4O4

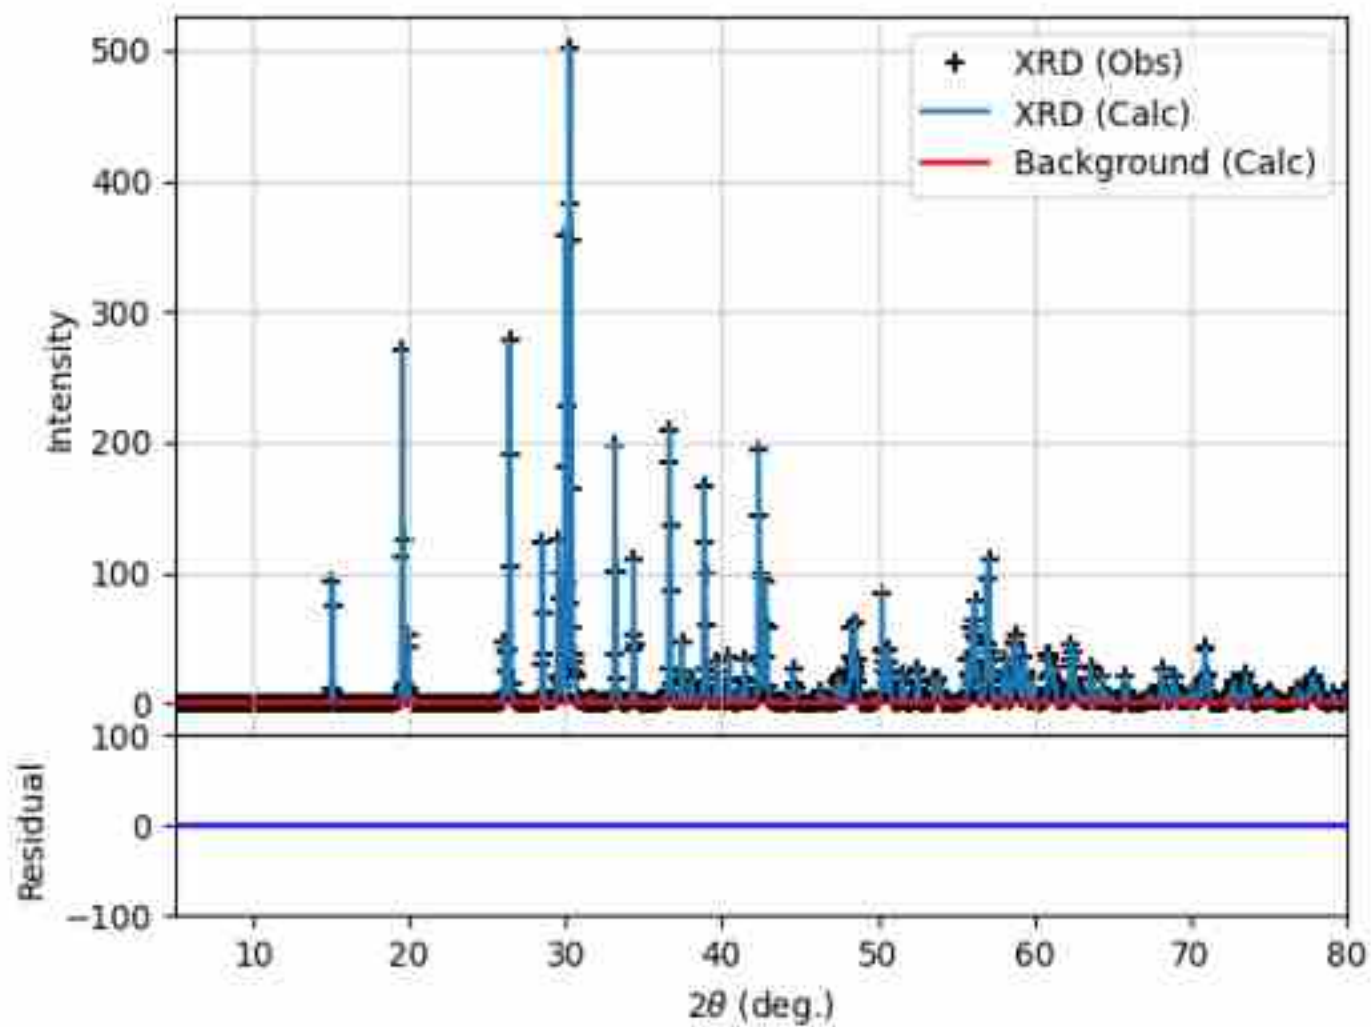

| RMSE before RR | Rwp     | RMSE after RR |
|----------------|---------|---------------|
| 0.025          | 0.00402 | 0.00058       |



# Ce<sub>2</sub>As<sub>2</sub>S<sub>2</sub>

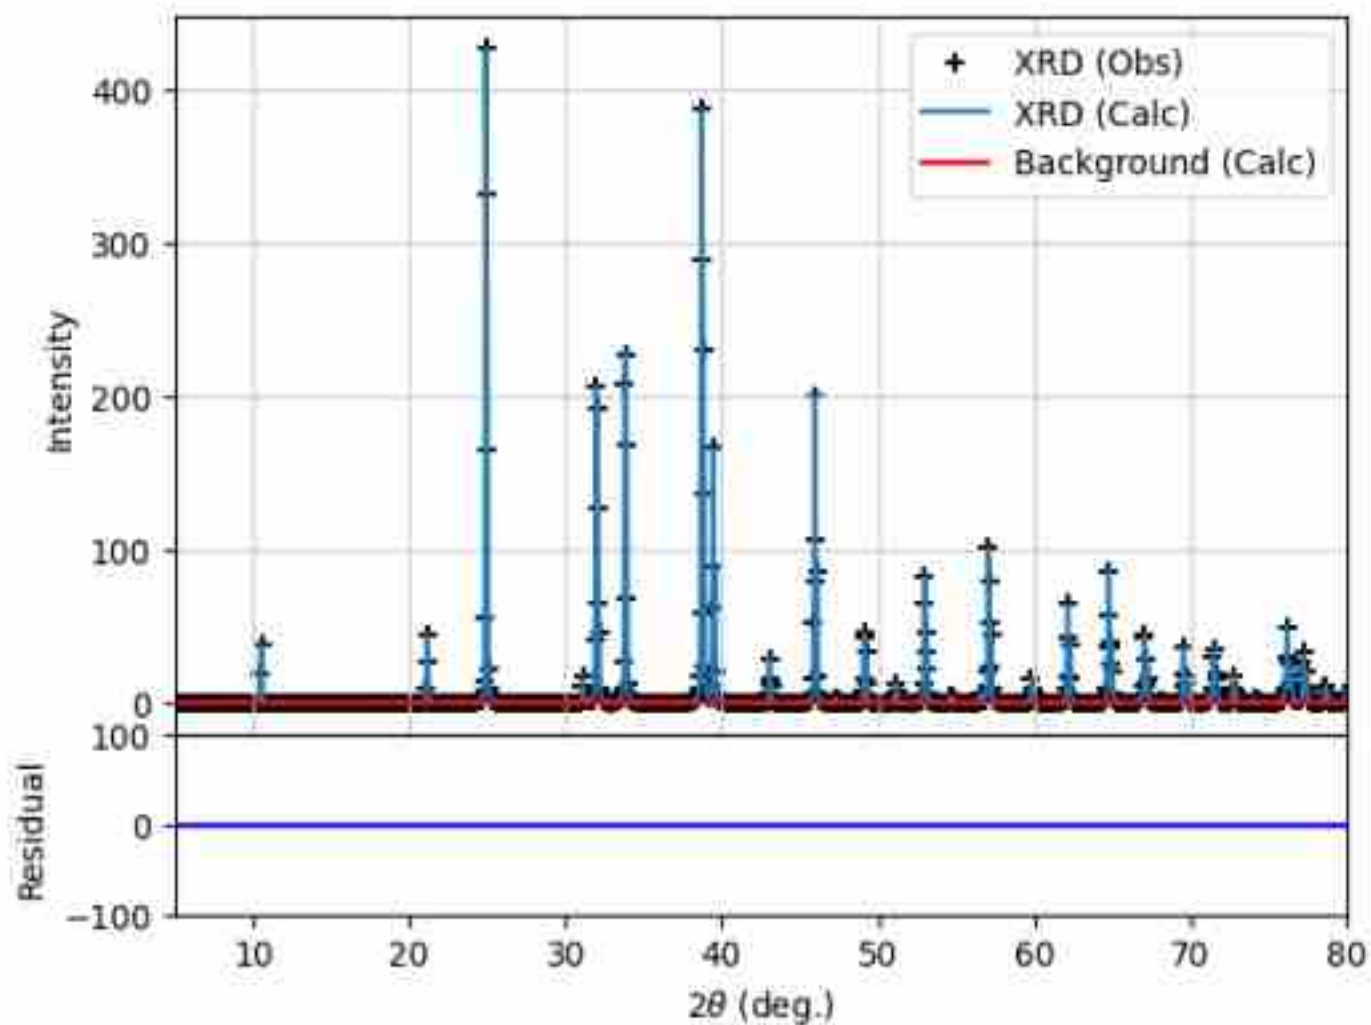

| RMSE before RR | Rwp     | RMSE after RR |
|----------------|---------|---------------|
| 0.025          | 0.00389 | 0.00041       |

# Ce<sub>2</sub>Hf<sub>2</sub>O<sub>8</sub>

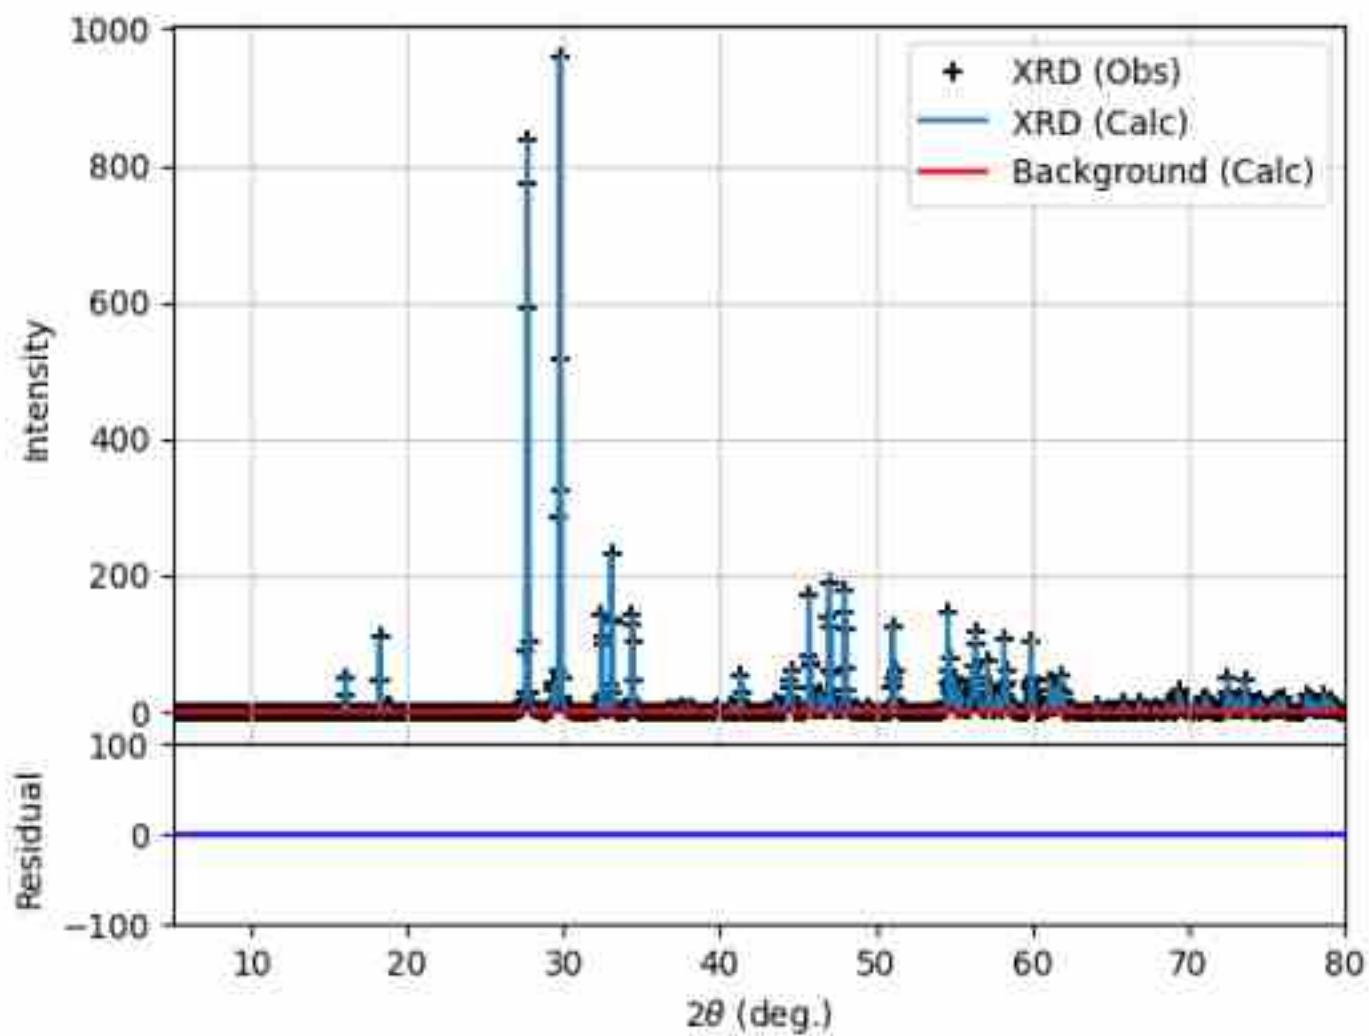

| RMSE before RR | Rwp     | RMSE after RR |
|----------------|---------|---------------|
| 0.025          | 0.00388 | 0.00111       |

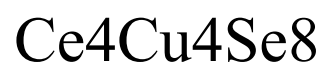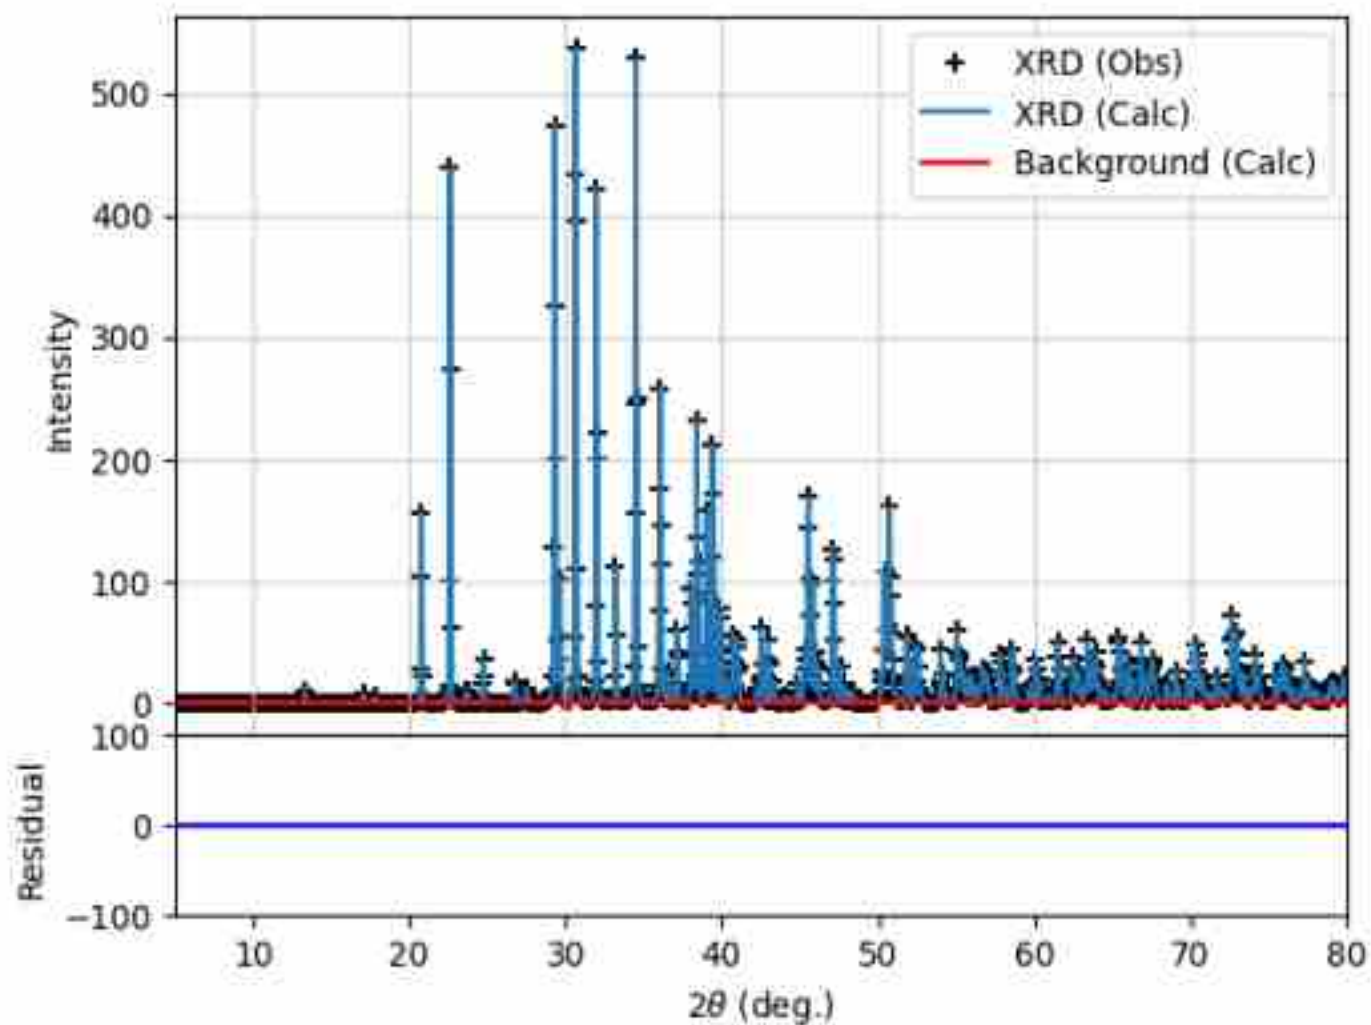

| RMSE before RR | Rwp     | RMSE after RR |
|----------------|---------|---------------|
| 0.025          | 0.00363 | 0.00028       |

# Ce4Se8

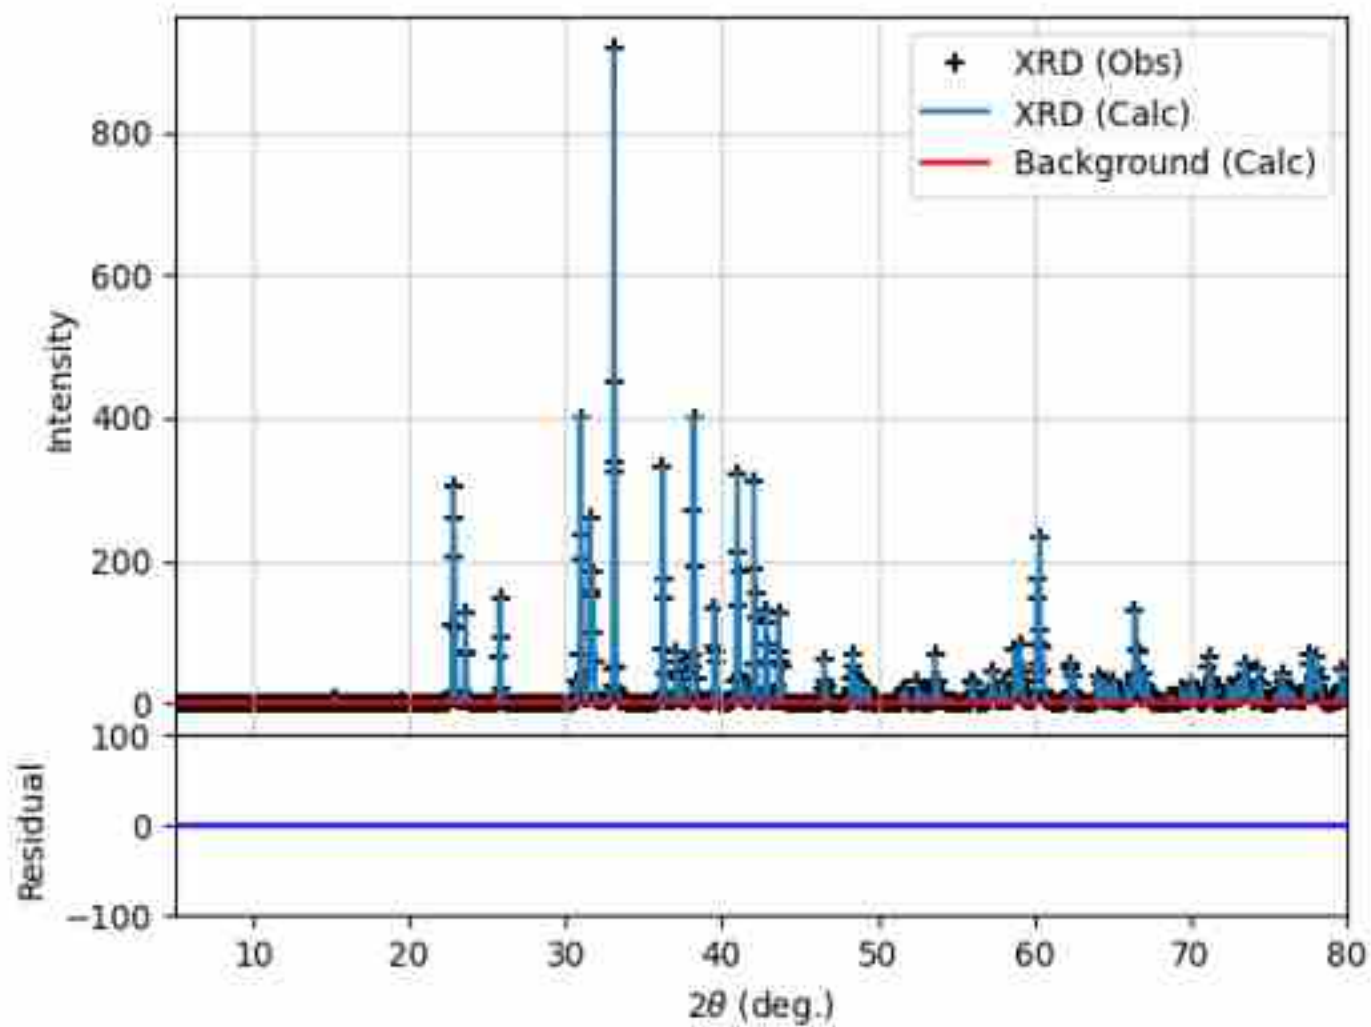

| RMSE before RR | Rwp     | RMSE after RR |
|----------------|---------|---------------|
| 0.025          | 0.00465 | 0.00054       |

# Cr<sub>2</sub>Ag<sub>1</sub>Bi<sub>1</sub>O<sub>8</sub>

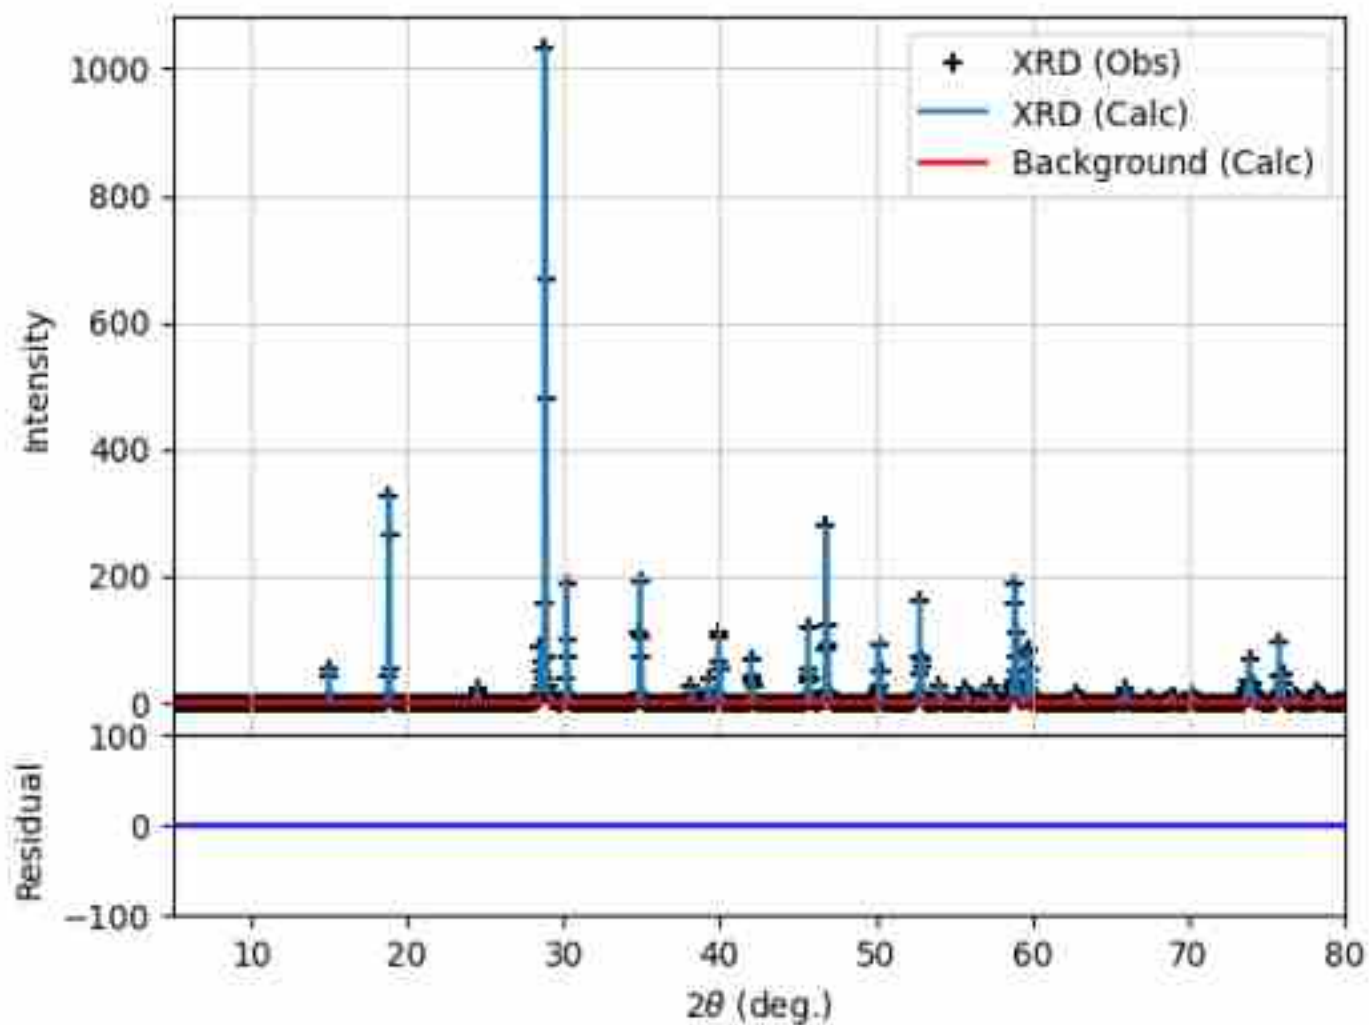

| RMSE before RR | Rwp     | RMSE after RR |
|----------------|---------|---------------|
| 0.025          | 0.00298 | 0.00142       |

# Cr2F10

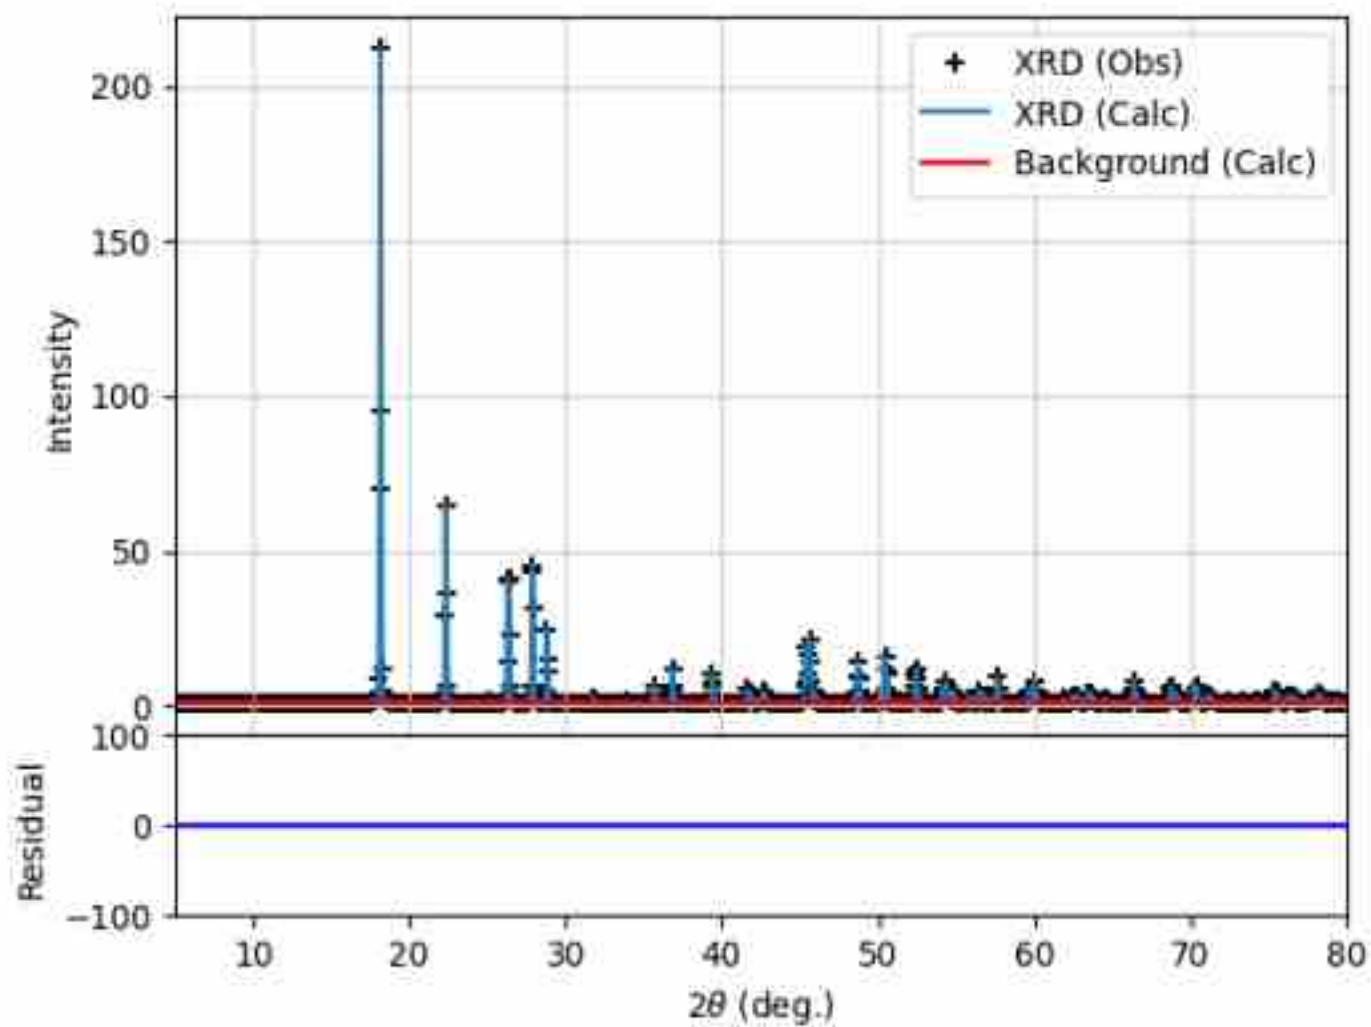

| RMSE before RR | Rwp     | RMSE after RR |
|----------------|---------|---------------|
| 0.025          | 0.00249 | 0.00052       |

# Cr<sub>4</sub>Cu<sub>3</sub>Te<sub>8</sub>

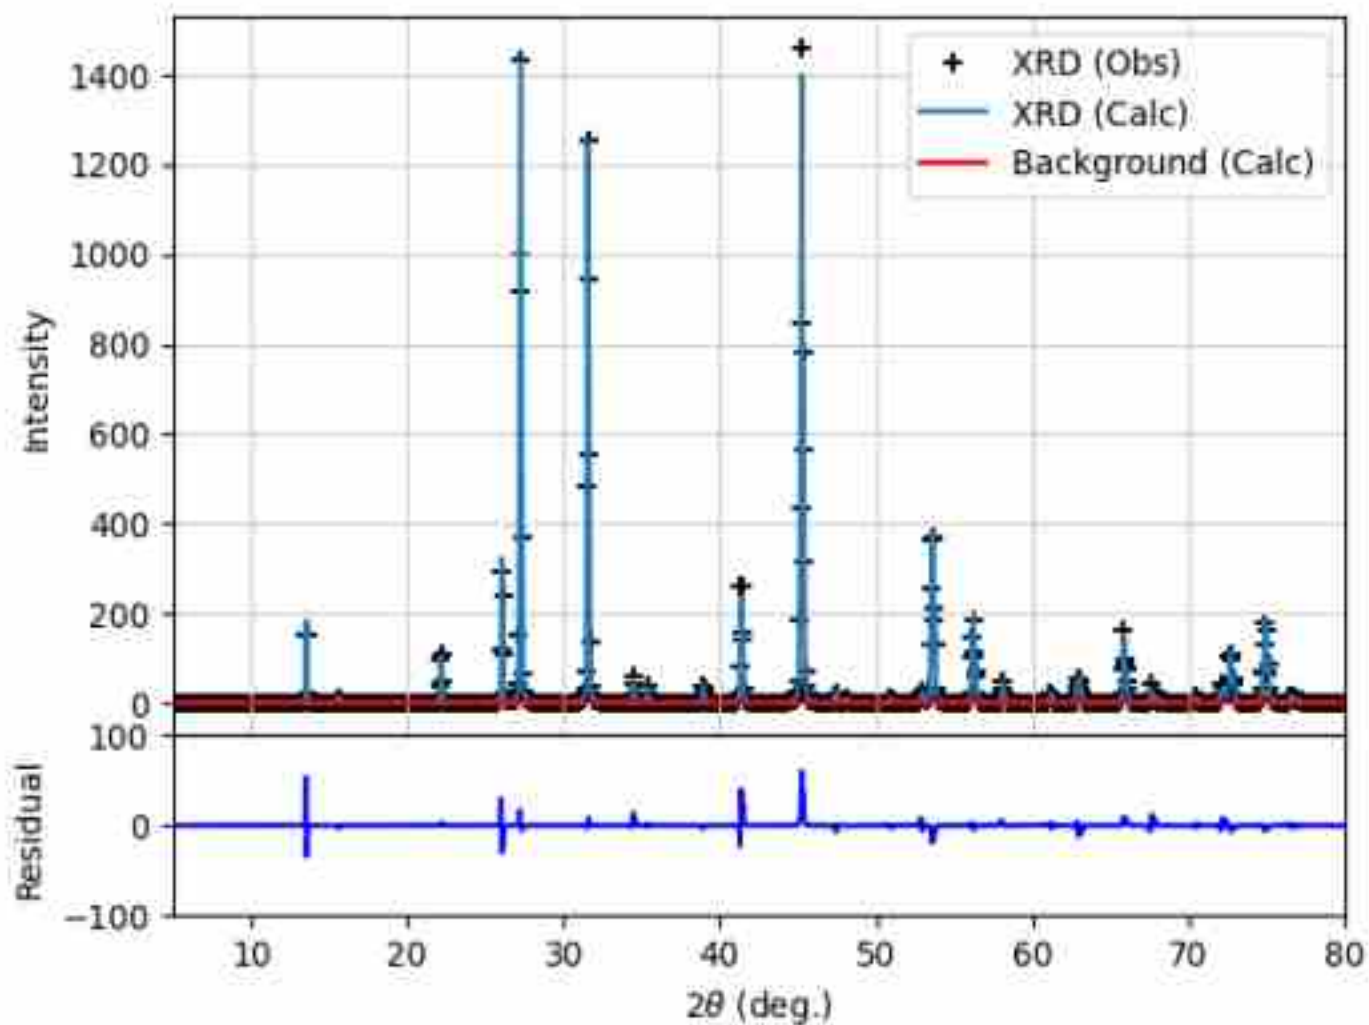

| RMSE before RR | Rwp     | RMSE after RR |
|----------------|---------|---------------|
| 0.025          | 8.35746 | 0.04601       |

Cr4O1F11

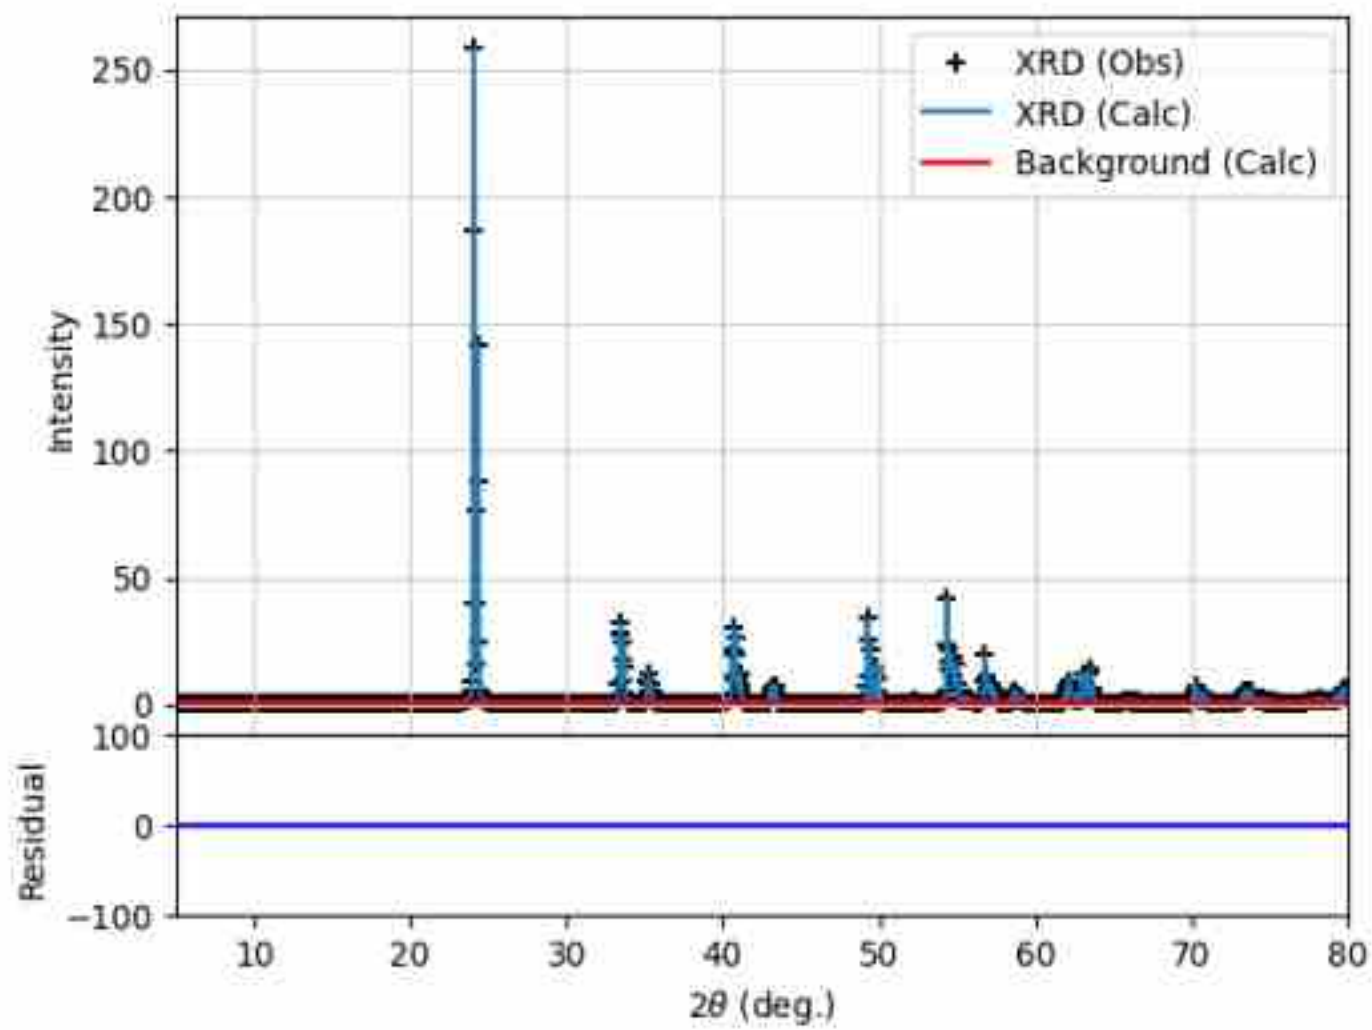

| RMSE before RR | Rwp   | RMSE after RR |
|----------------|-------|---------------|
| 0.025          | 8e-05 | 0.0           |



# Cs<sub>2</sub>Rb<sub>4</sub>Pd<sub>2</sub>F<sub>10</sub>

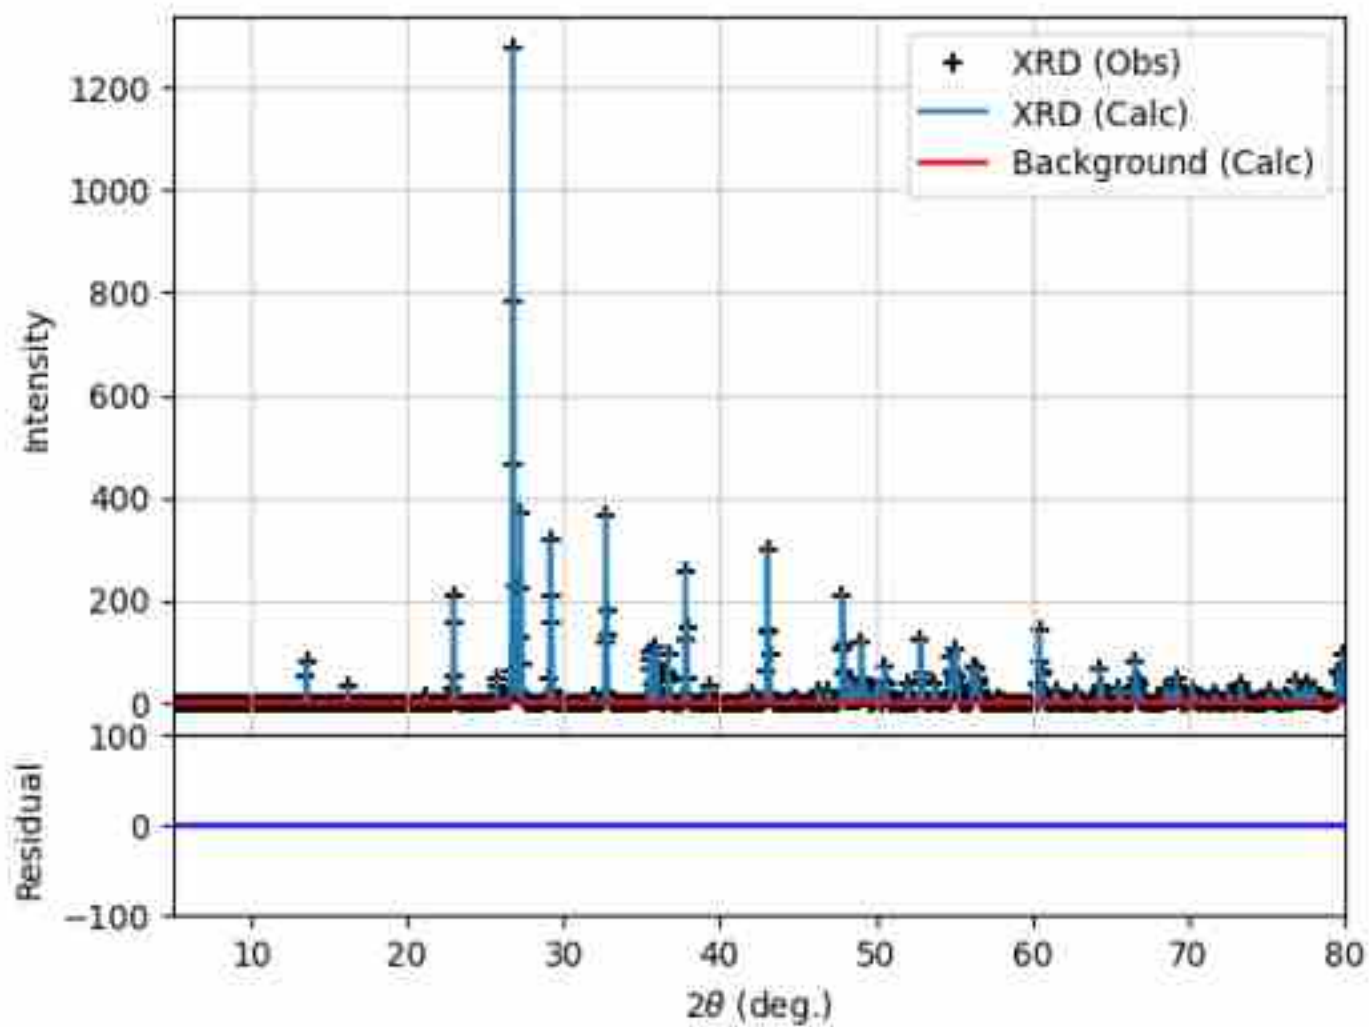

| RMSE before RR | Rwp     | RMSE after RR |
|----------------|---------|---------------|
| 0.025          | 0.00413 | 0.00113       |

# Cs<sub>3</sub>Ni<sub>3</sub>F<sub>9</sub>

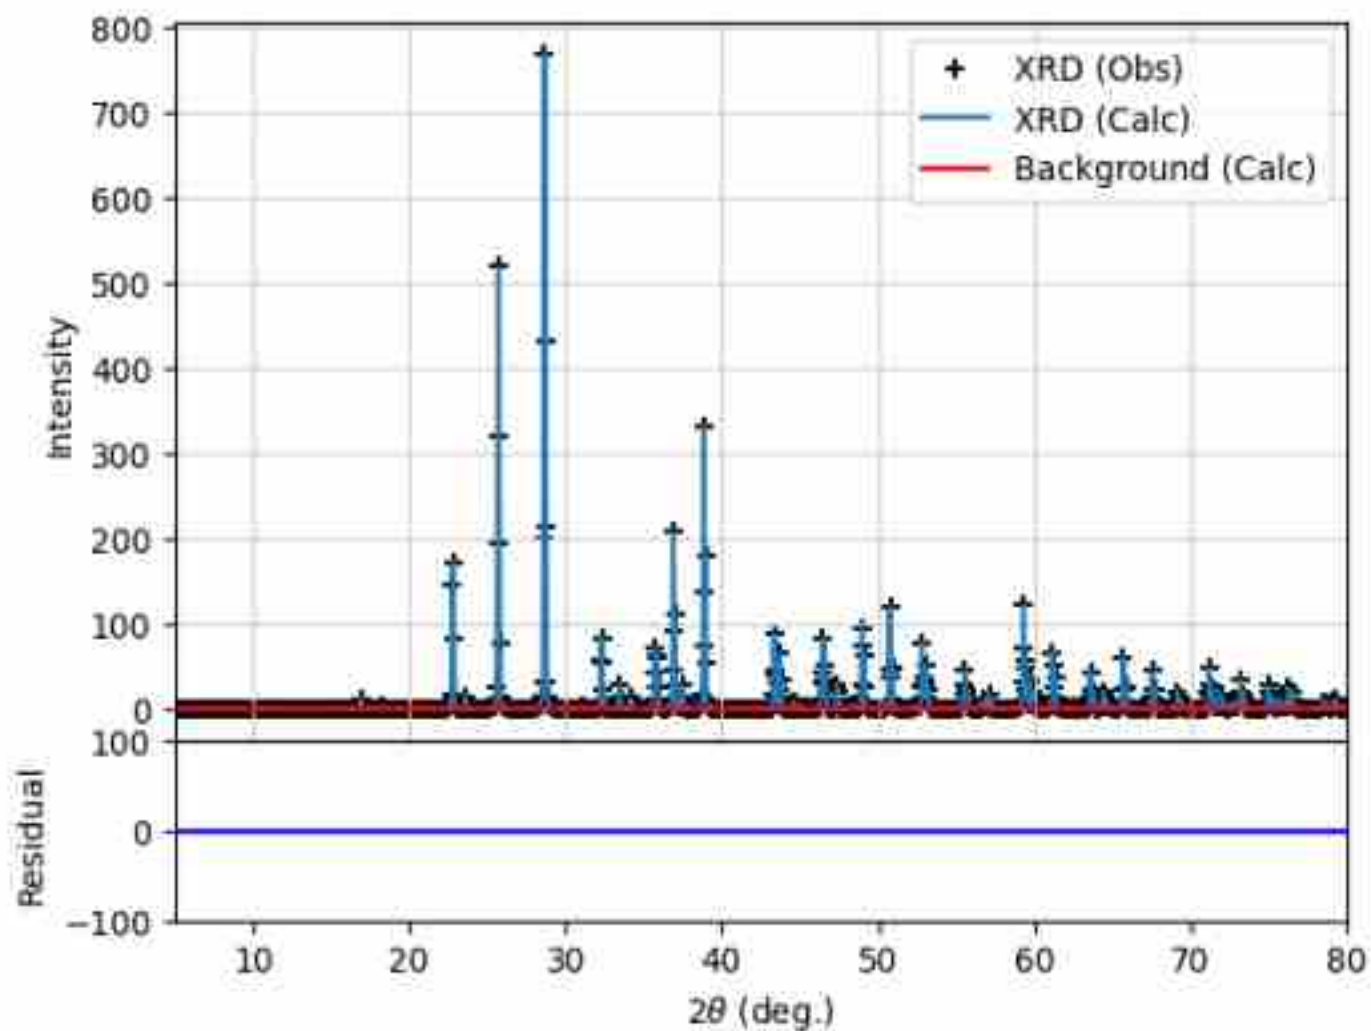

| RMSE before RR | Rwp     | RMSE after RR |
|----------------|---------|---------------|
| 0.025          | 0.00347 | 0.00093       |

# Cs<sub>3</sub>Sb<sub>2</sub>Br<sub>9</sub>

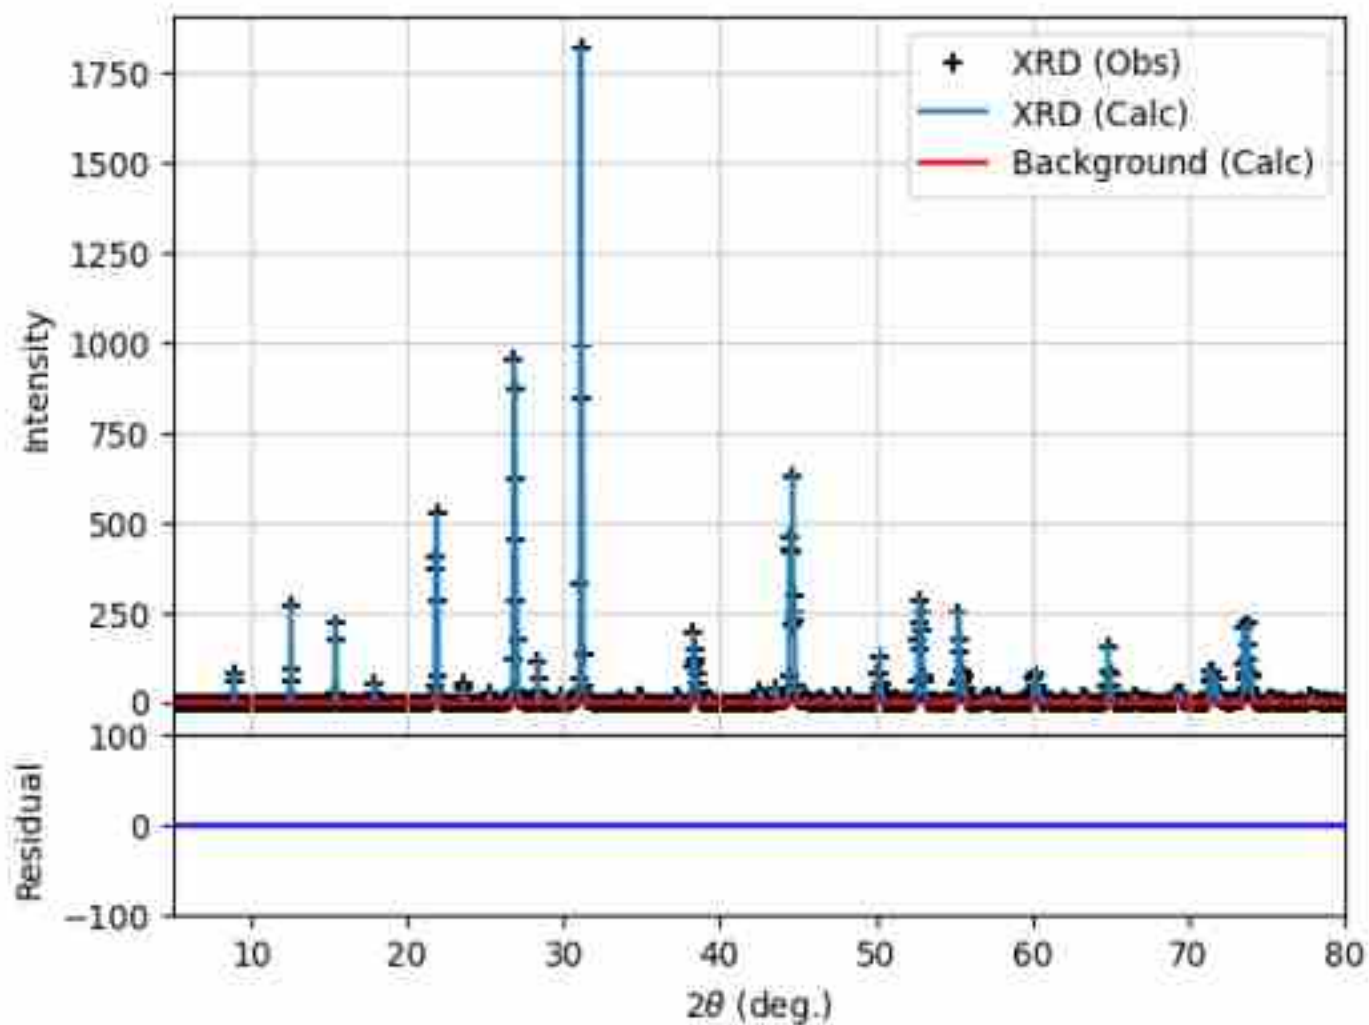

| RMSE before RR | Rwp     | RMSE after RR |
|----------------|---------|---------------|
| 0.025          | 0.00358 | 0.00053       |

# Cs<sub>4</sub>Ta<sub>2</sub>Ag<sub>2</sub>S<sub>8</sub>

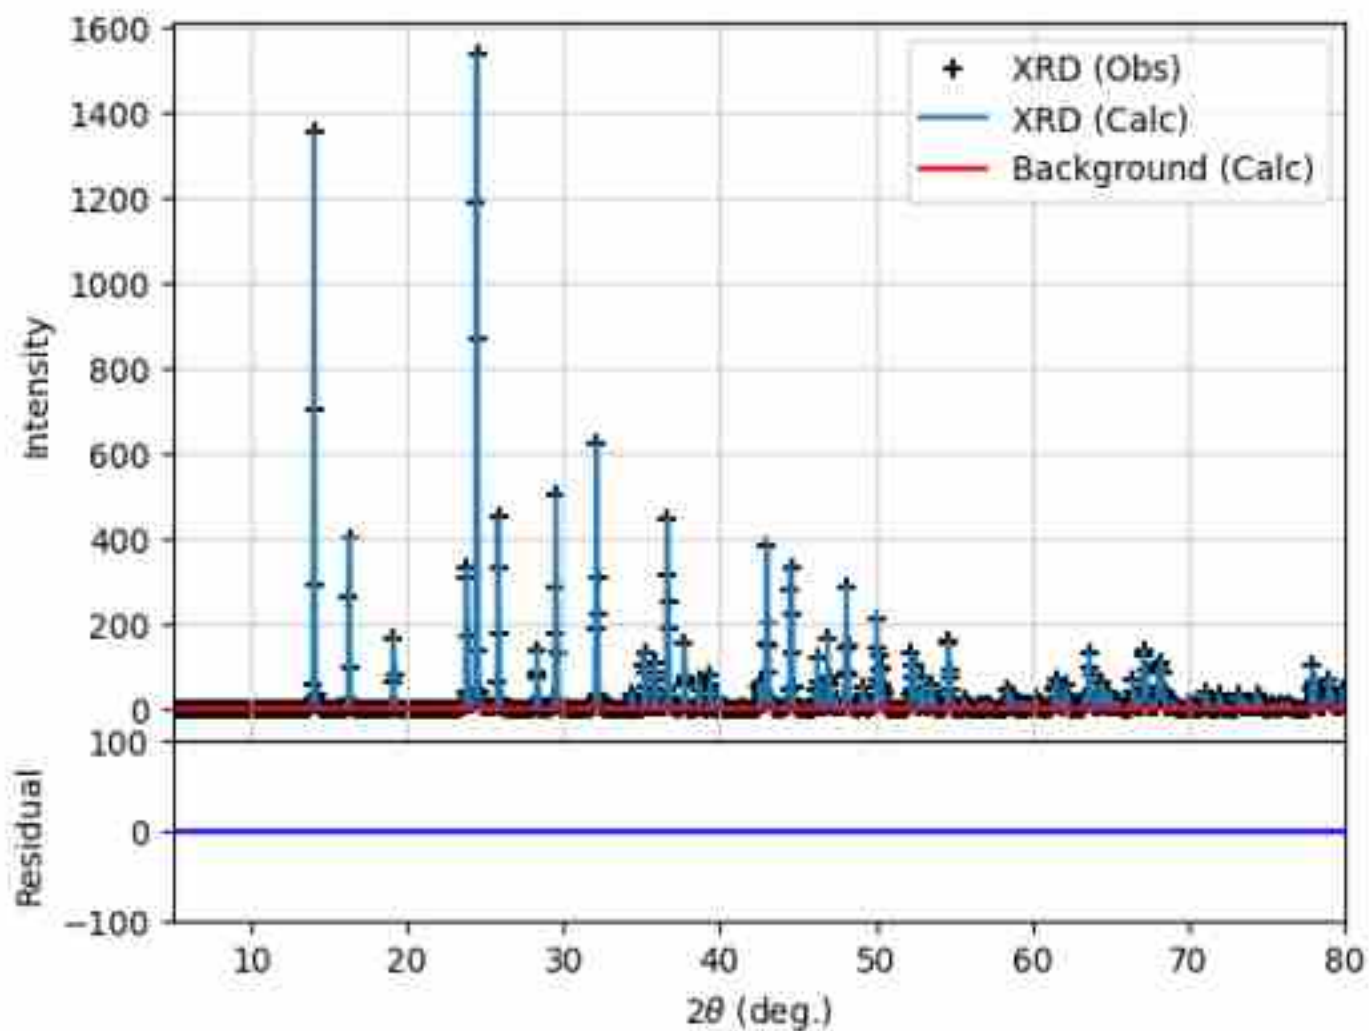

| RMSE before RR | Rwp     | RMSE after RR |
|----------------|---------|---------------|
| 0.025          | 0.00273 | 0.00051       |

# Cs6Dy2O6

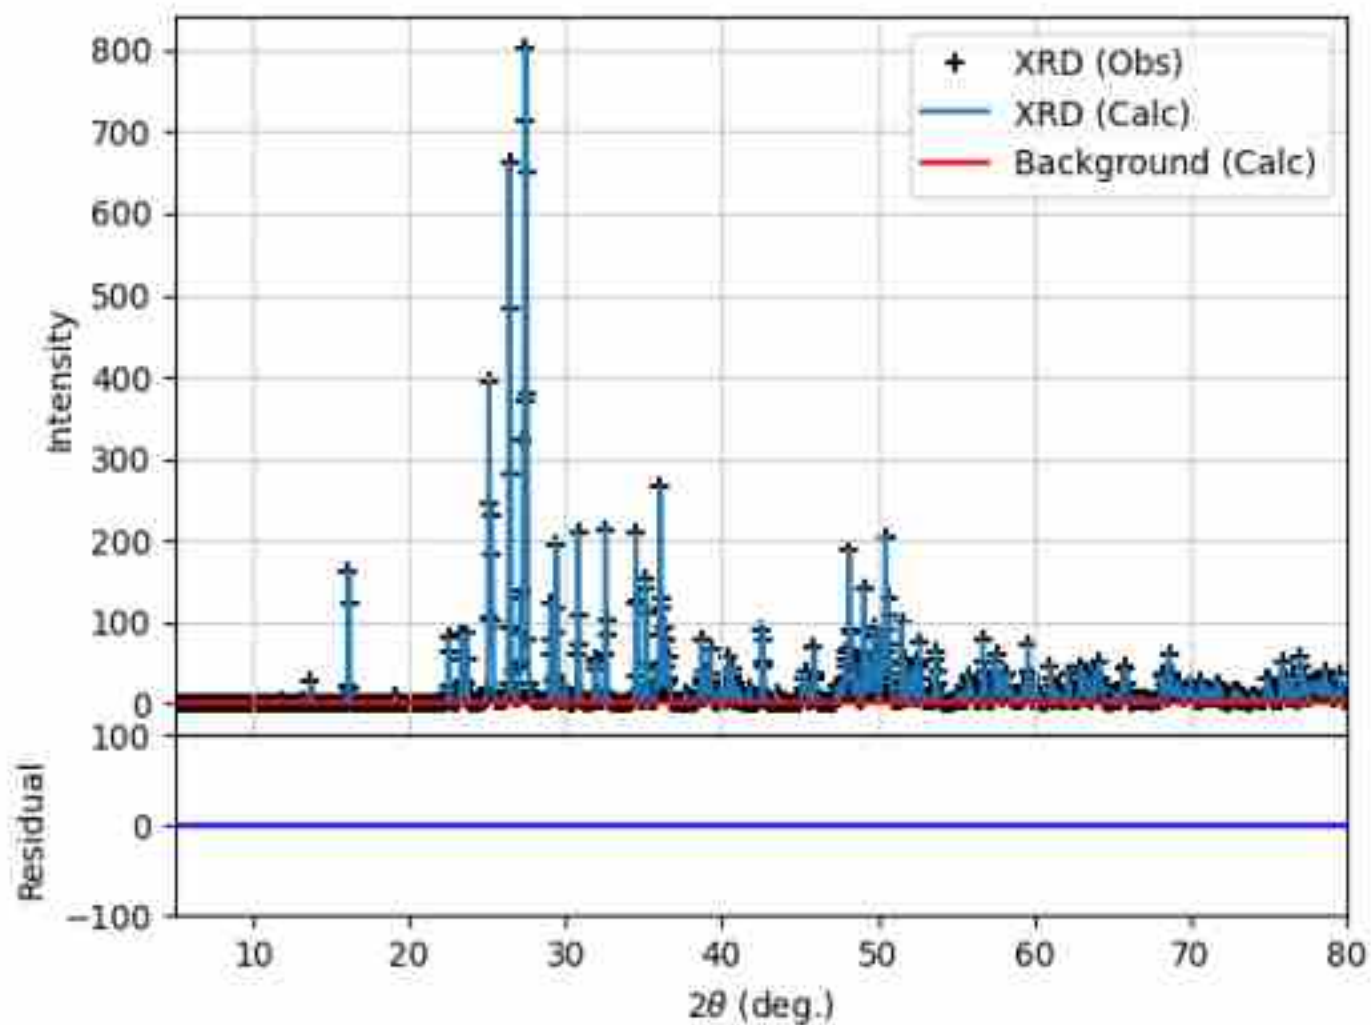

| RMSE before RR | Rwp     | RMSE after RR |
|----------------|---------|---------------|
| 0.025          | 0.00341 | 0.00103       |

# Dy<sub>2</sub>Ga<sub>12</sub>

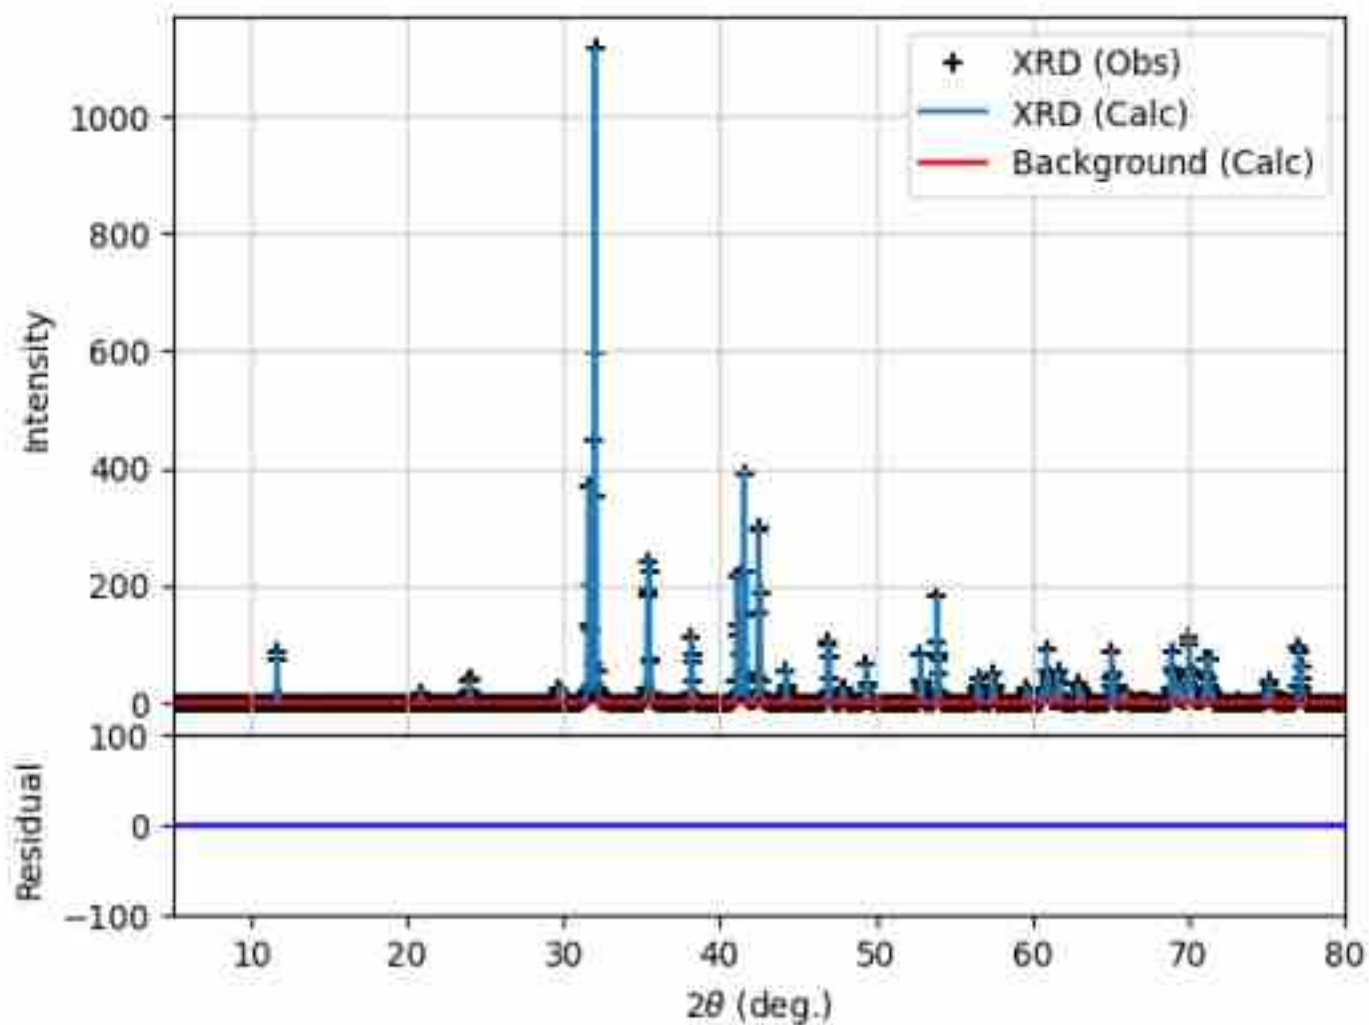

| RMSE before RR | Rwp     | RMSE after RR |
|----------------|---------|---------------|
| 0.025          | 0.00509 | 0.0005        |

# Dy<sub>2</sub>Mn<sub>4</sub>Si<sub>2</sub>C<sub>2</sub>

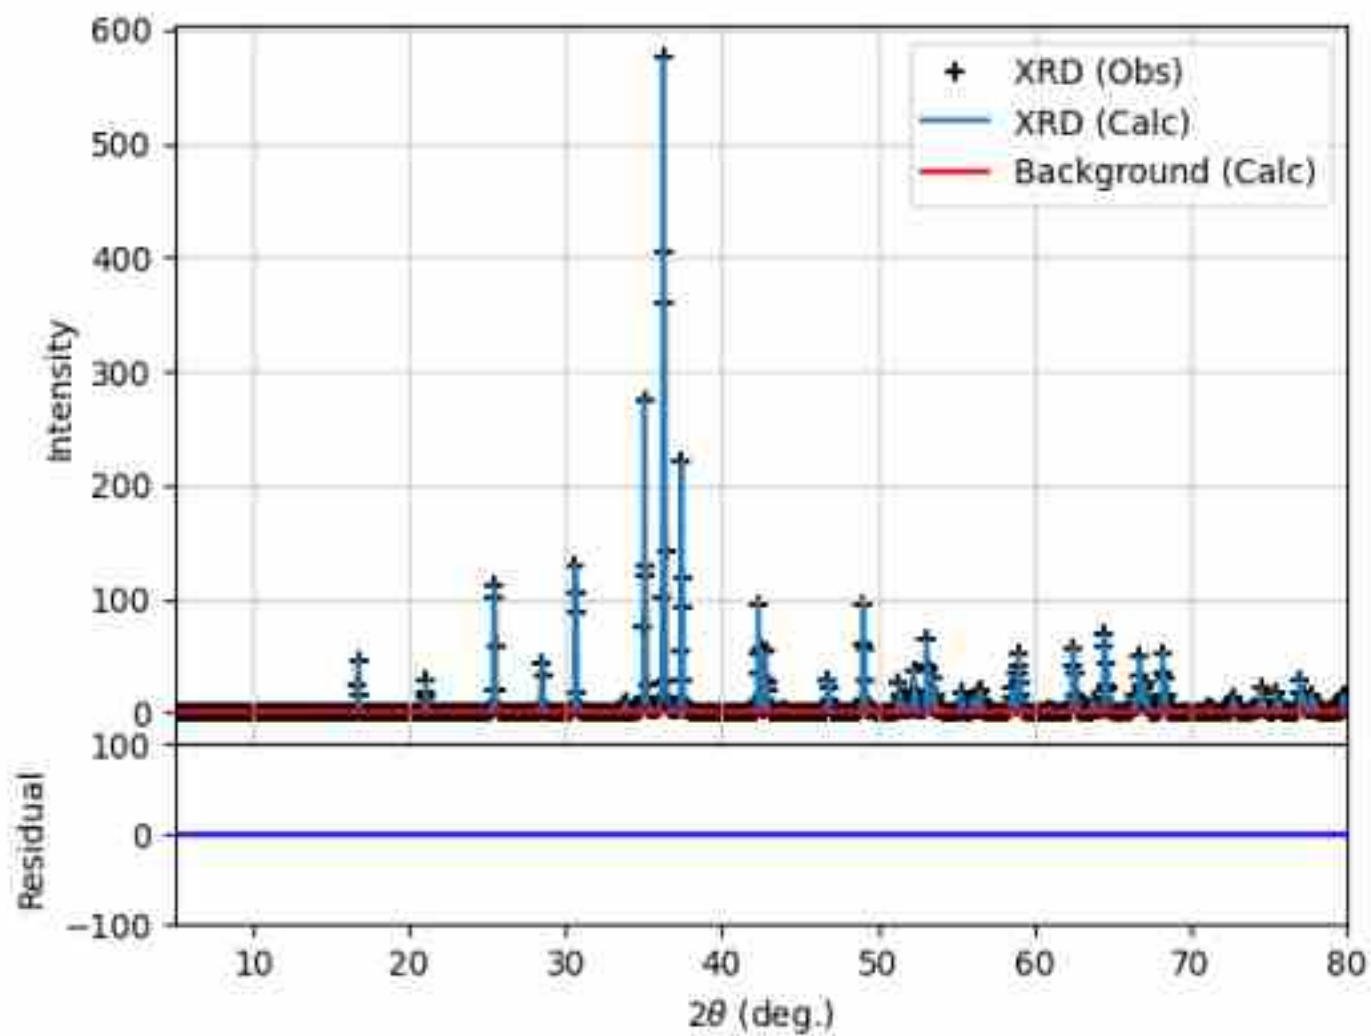

| RMSE before RR | Rwp     | RMSE after RR |
|----------------|---------|---------------|
| 0.025          | 0.00421 | 0.00094       |

# Dy<sub>3</sub>Ni<sub>9</sub>

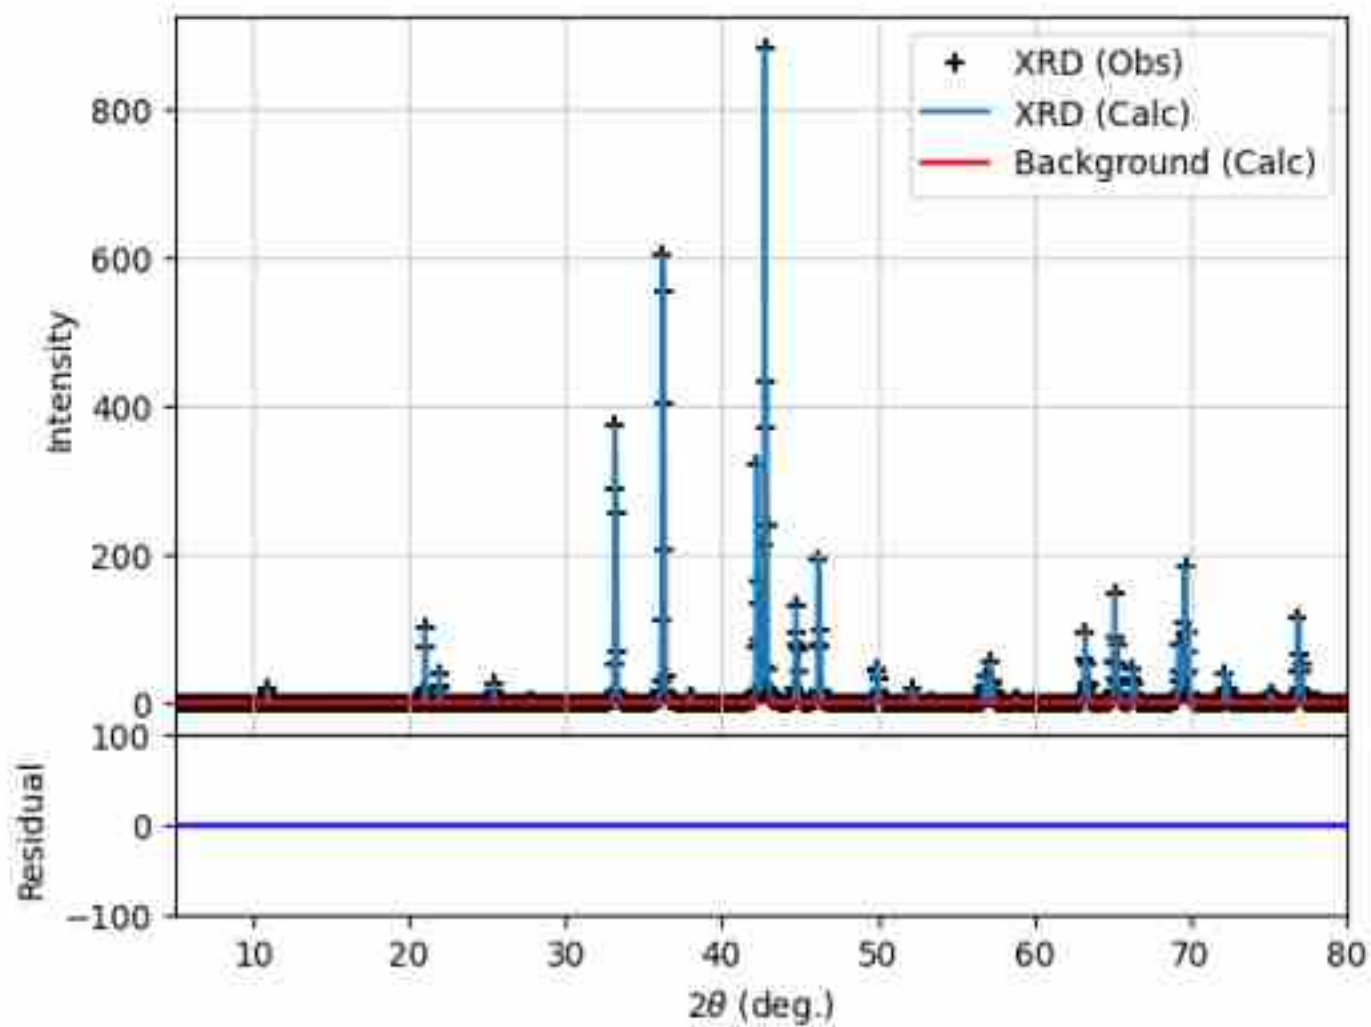

| RMSE before RR | Rwp     | RMSE after RR |
|----------------|---------|---------------|
| 0.025          | 0.00301 | 0.00033       |



# Dy<sub>4</sub>Cr<sub>4</sub>Se<sub>12</sub>

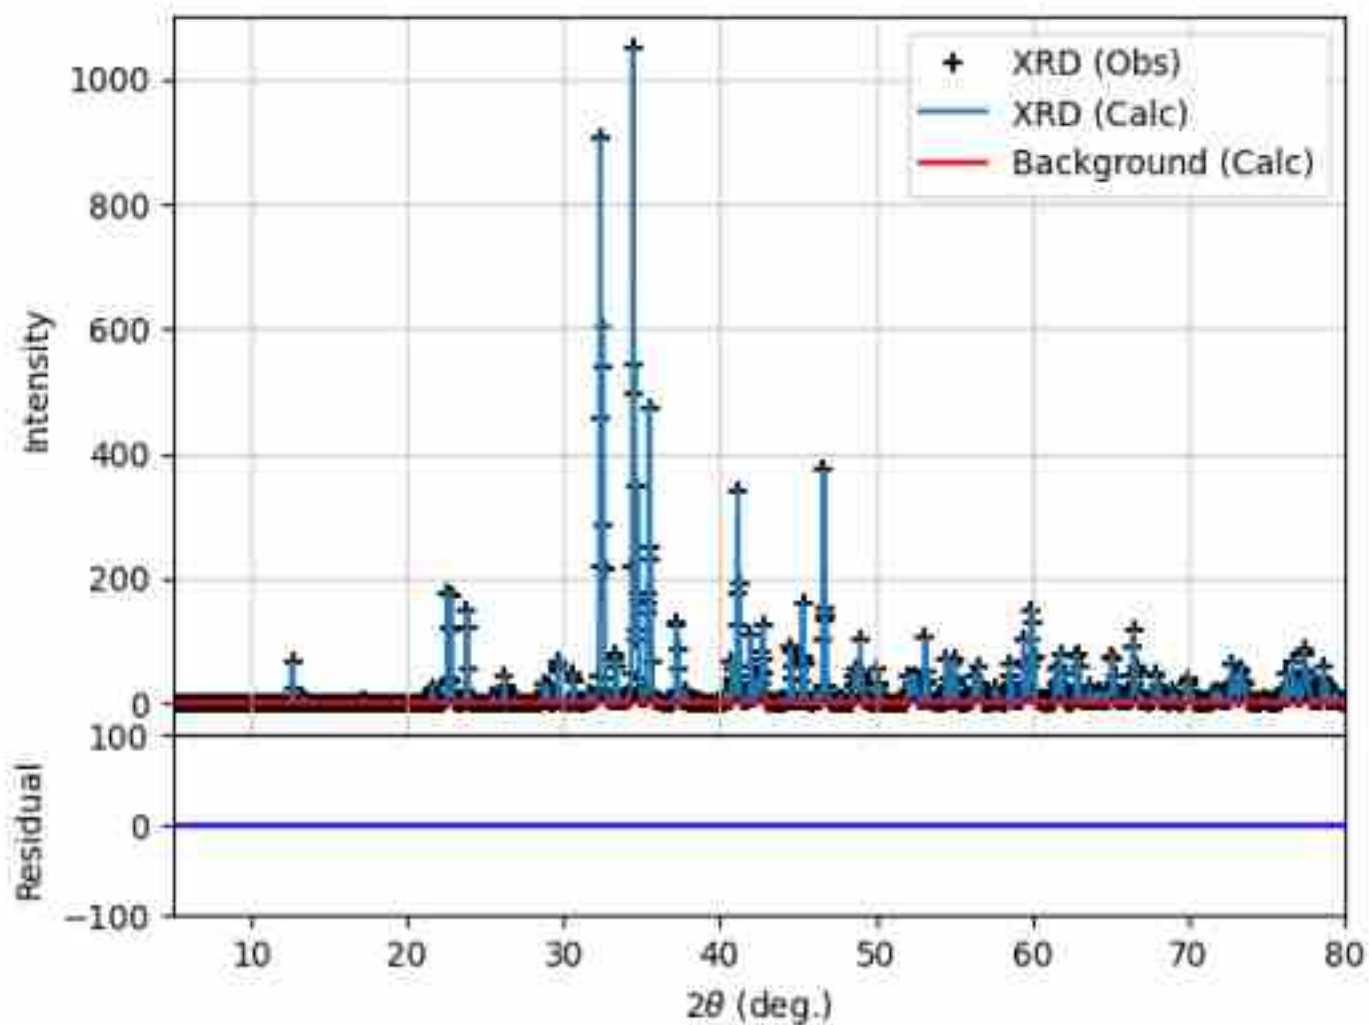

| RMSE before RR | Rwp     | RMSE after RR |
|----------------|---------|---------------|
| 0.025          | 0.00422 | 0.00047       |

# Dy<sub>4</sub>Te<sub>2</sub>O<sub>12</sub>

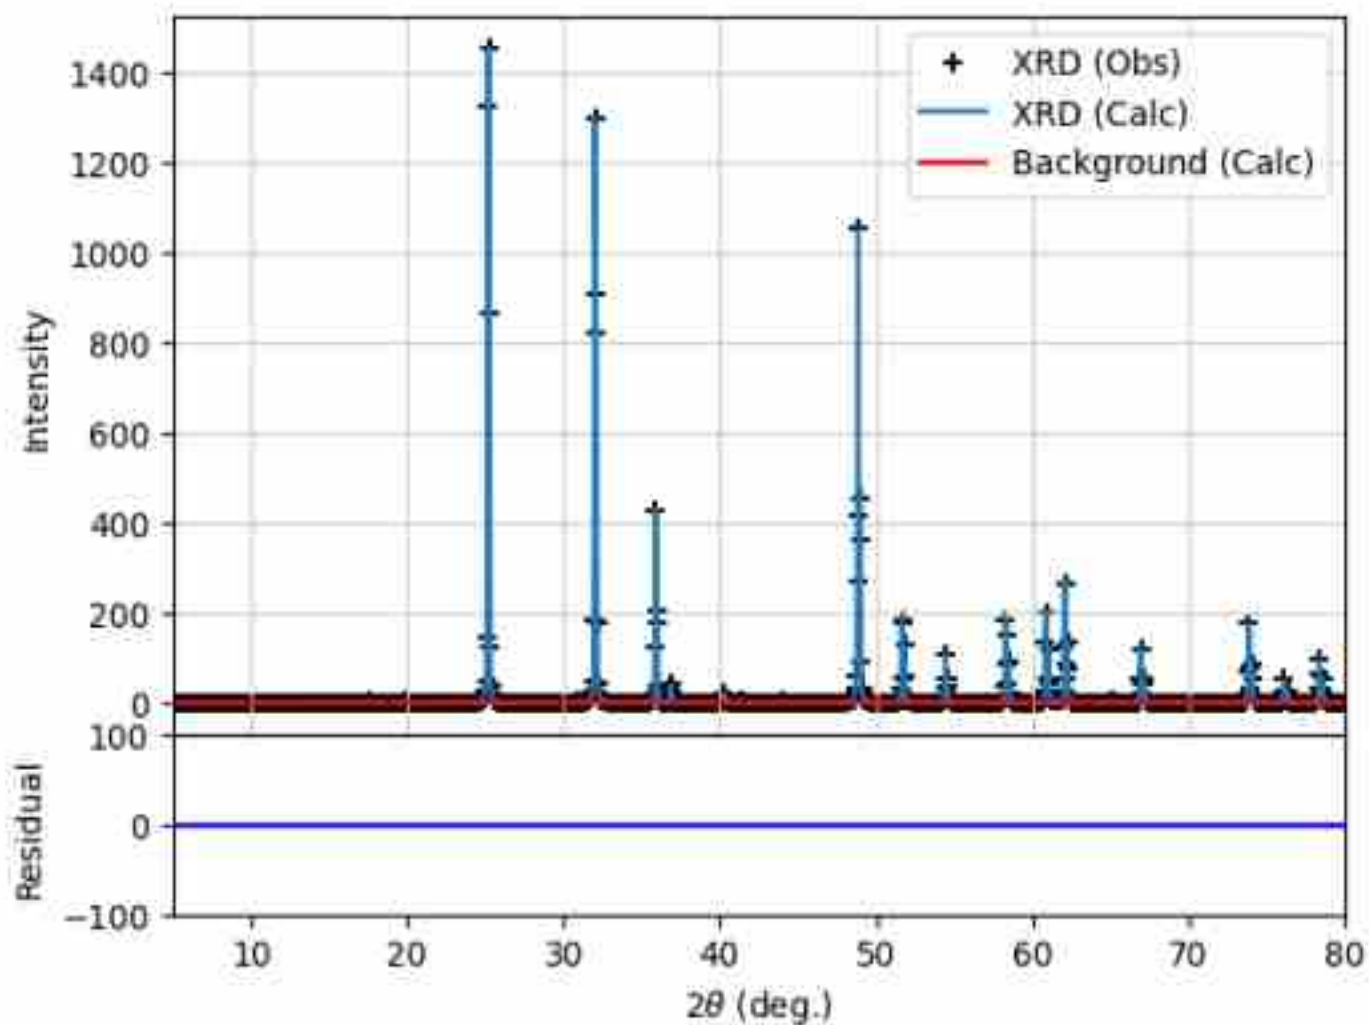

| RMSE before RR | Rwp     | RMSE after RR |
|----------------|---------|---------------|
| 0.025          | 0.00563 | 0.00253       |

# Er<sub>4</sub>Ni<sub>4</sub>Sn<sub>4</sub>

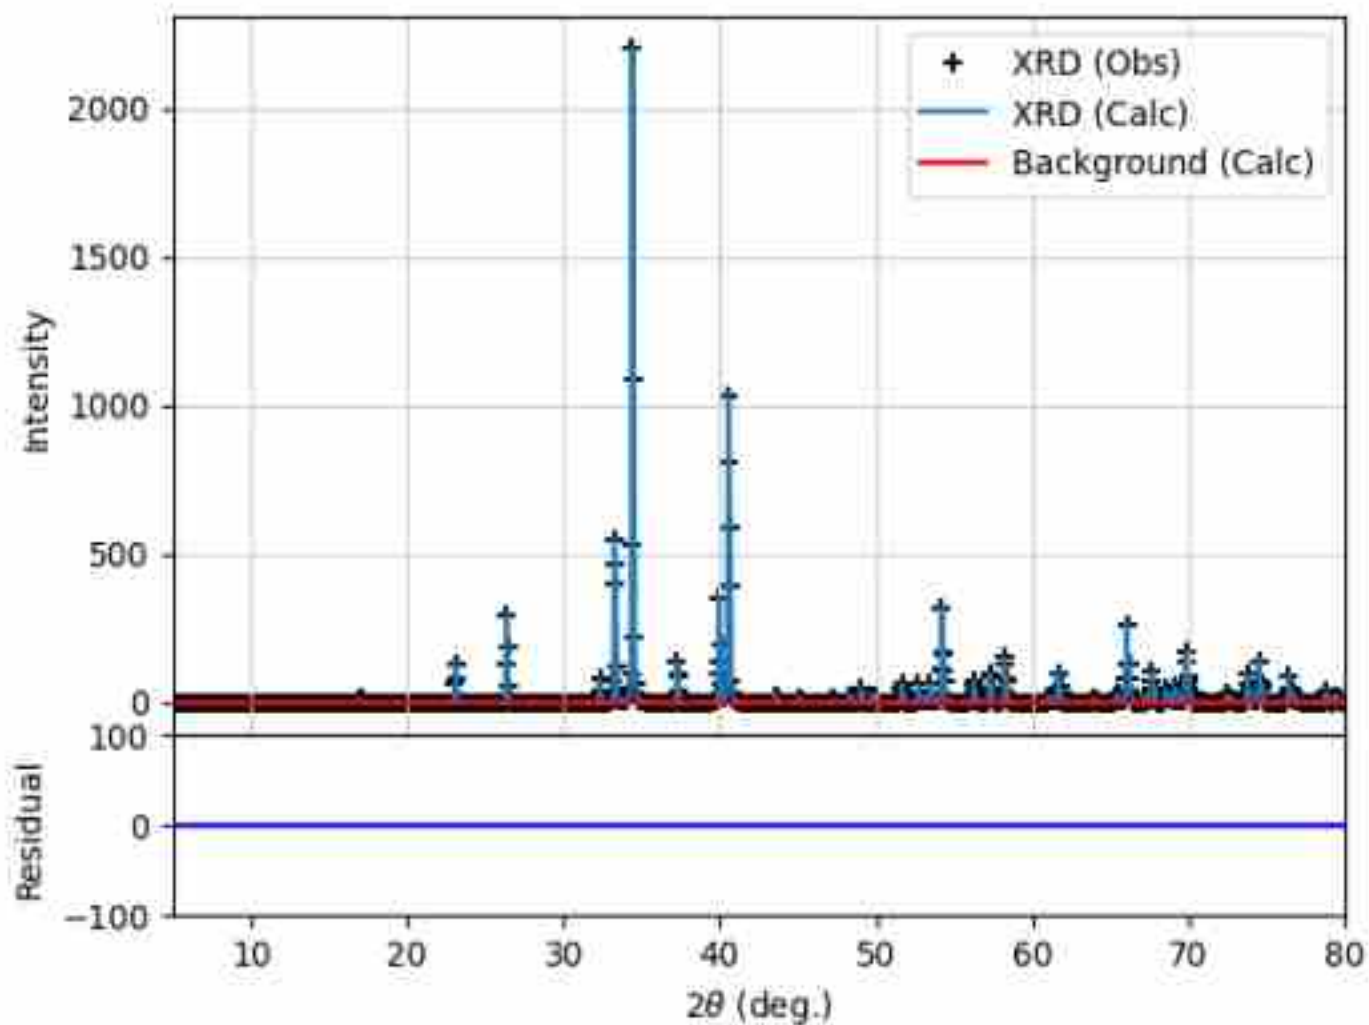

| RMSE before RR | Rwp     | RMSE after RR |
|----------------|---------|---------------|
| 0.025          | 0.00465 | 0.00034       |

# Er<sub>6</sub>Co<sub>2</sub>Si<sub>6</sub>

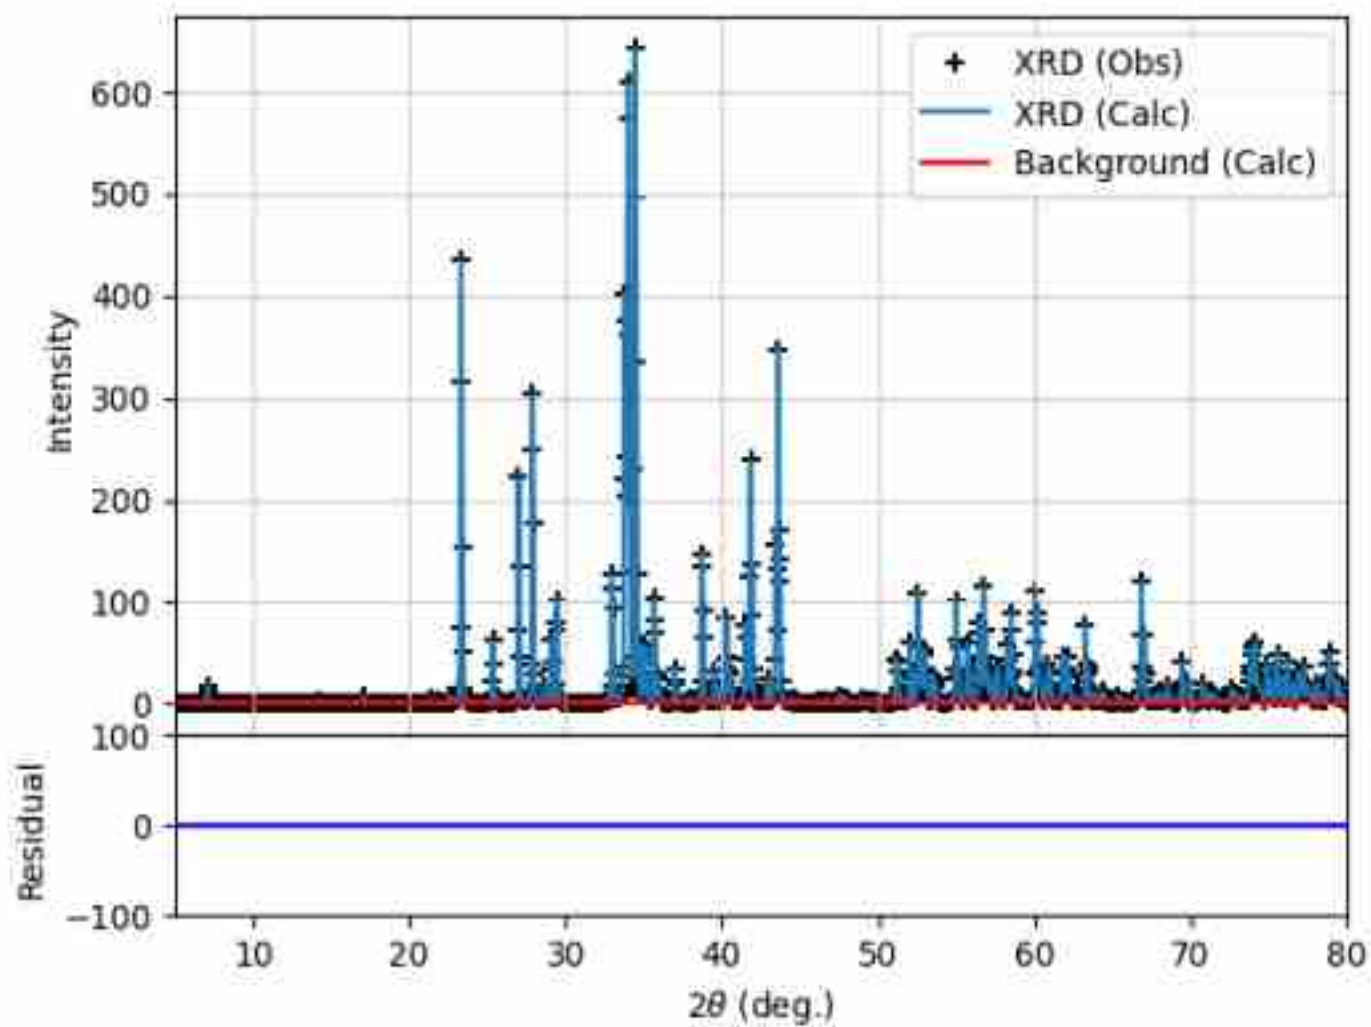

| RMSE before RR | Rwp     | RMSE after RR |
|----------------|---------|---------------|
| 0.025          | 0.00247 | 0.00056       |

# Er8Sb6

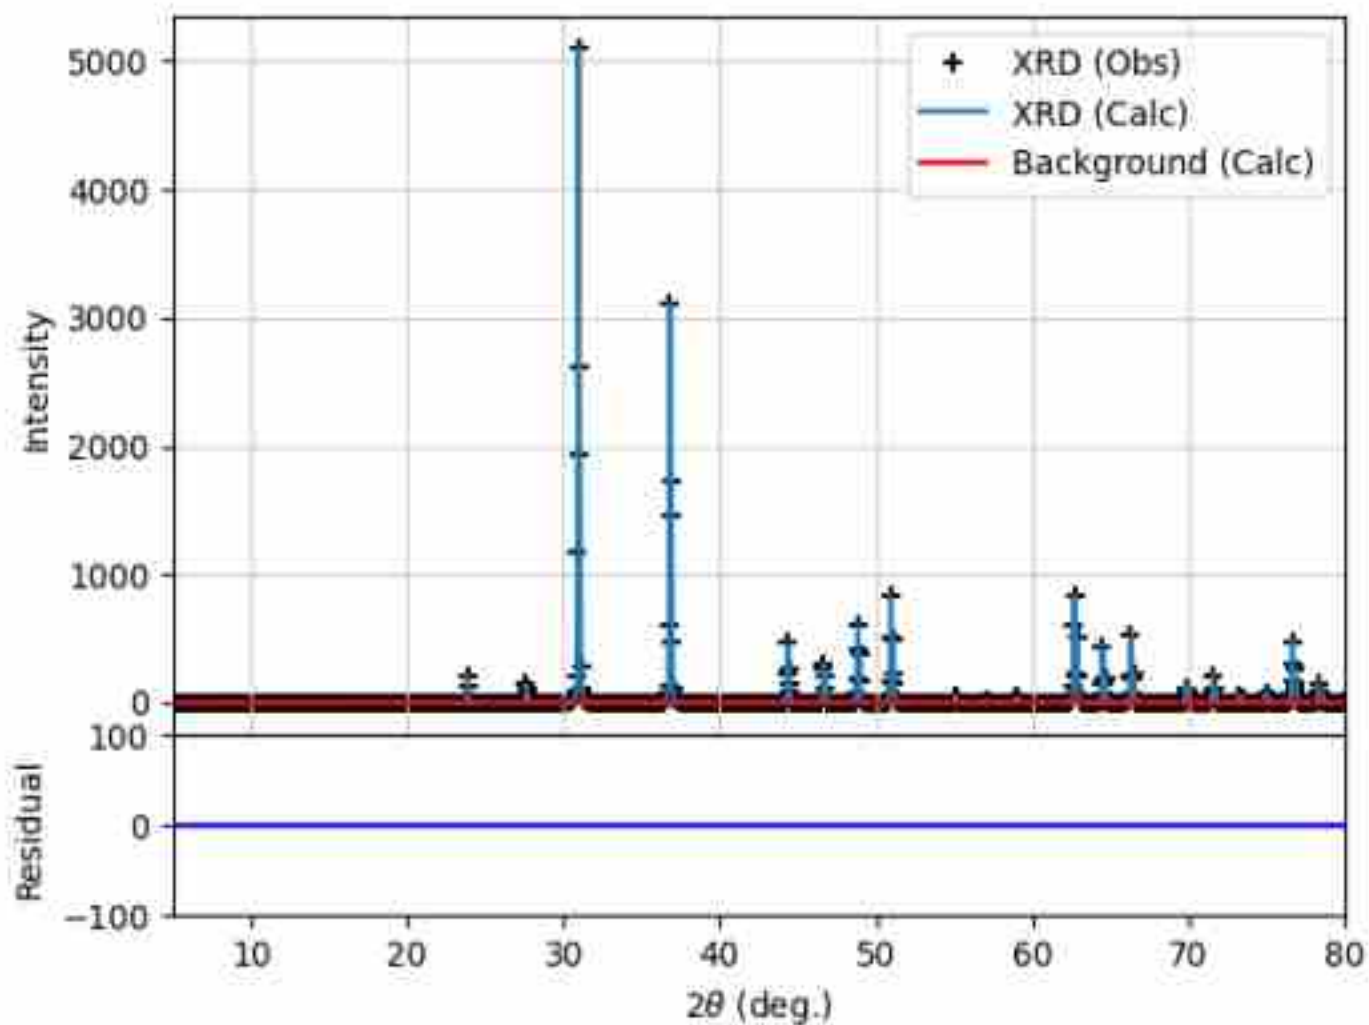

| RMSE before RR | Rwp     | RMSE after RR |
|----------------|---------|---------------|
| 0.025          | 0.02714 | 0.00111       |

# Eu<sub>2</sub>C<sub>1</sub>N<sub>2</sub>C<sub>12</sub>

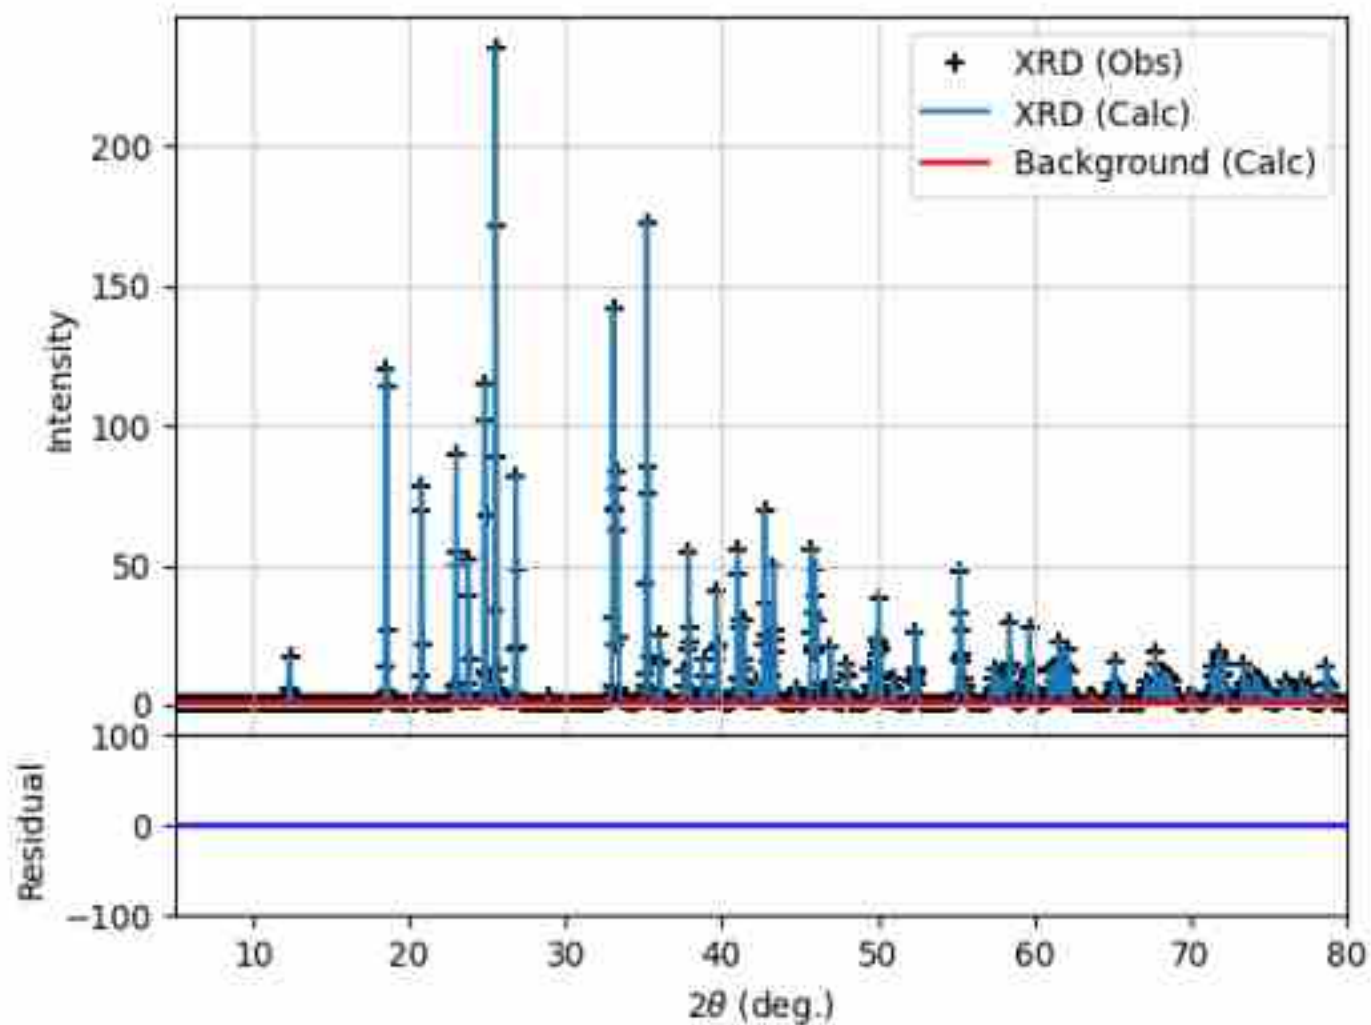

| RMSE before RR | Rwp     | RMSE after RR |
|----------------|---------|---------------|
| 0.025          | 0.00281 | 0.00067       |

# Eu2Pd6S8

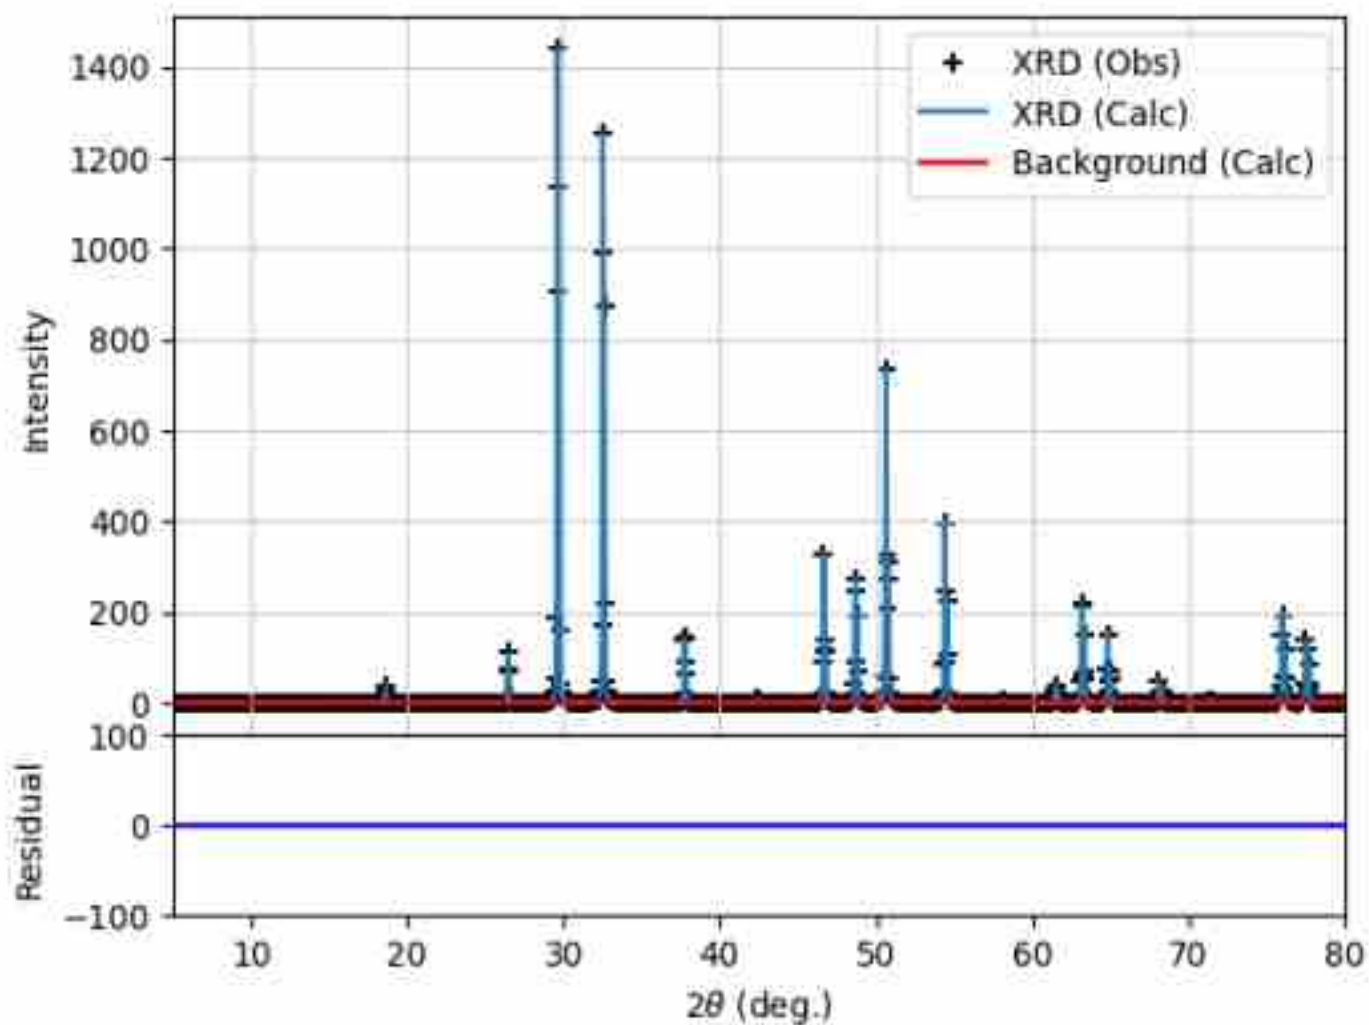

| RMSE before RR | Rwp     | RMSE after RR |
|----------------|---------|---------------|
| 0.025          | 0.00457 | 0.00067       |

# Eu10Sb6

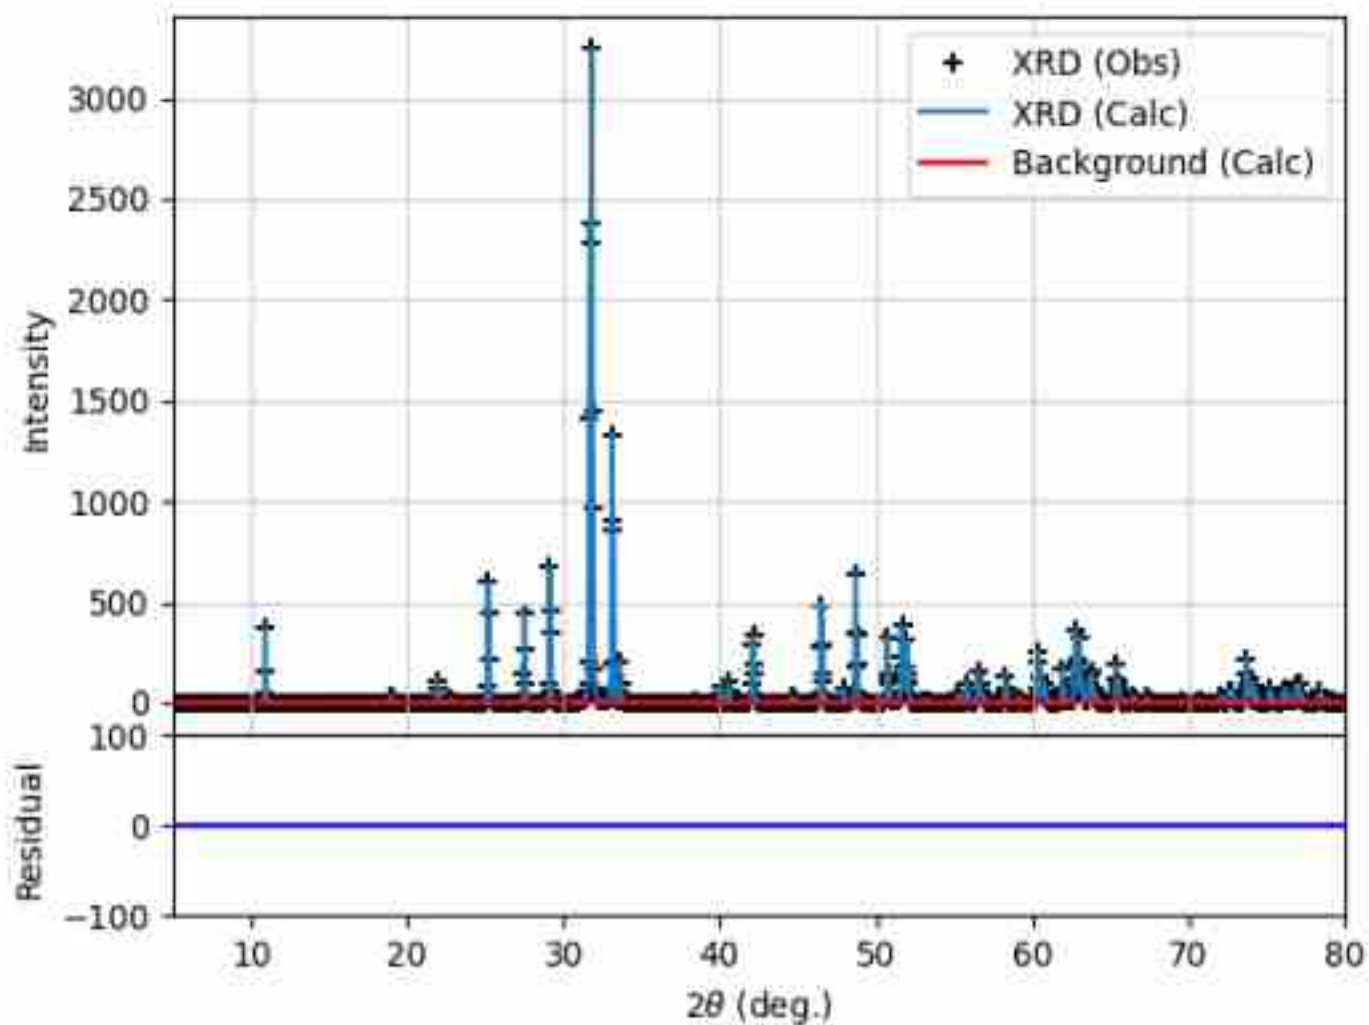

| RMSE before RR | Rwp     | RMSE after RR |
|----------------|---------|---------------|
| 0.025          | 0.00555 | 0.00057       |



# Ga<sub>2</sub>Cu<sub>2</sub>O<sub>4</sub>

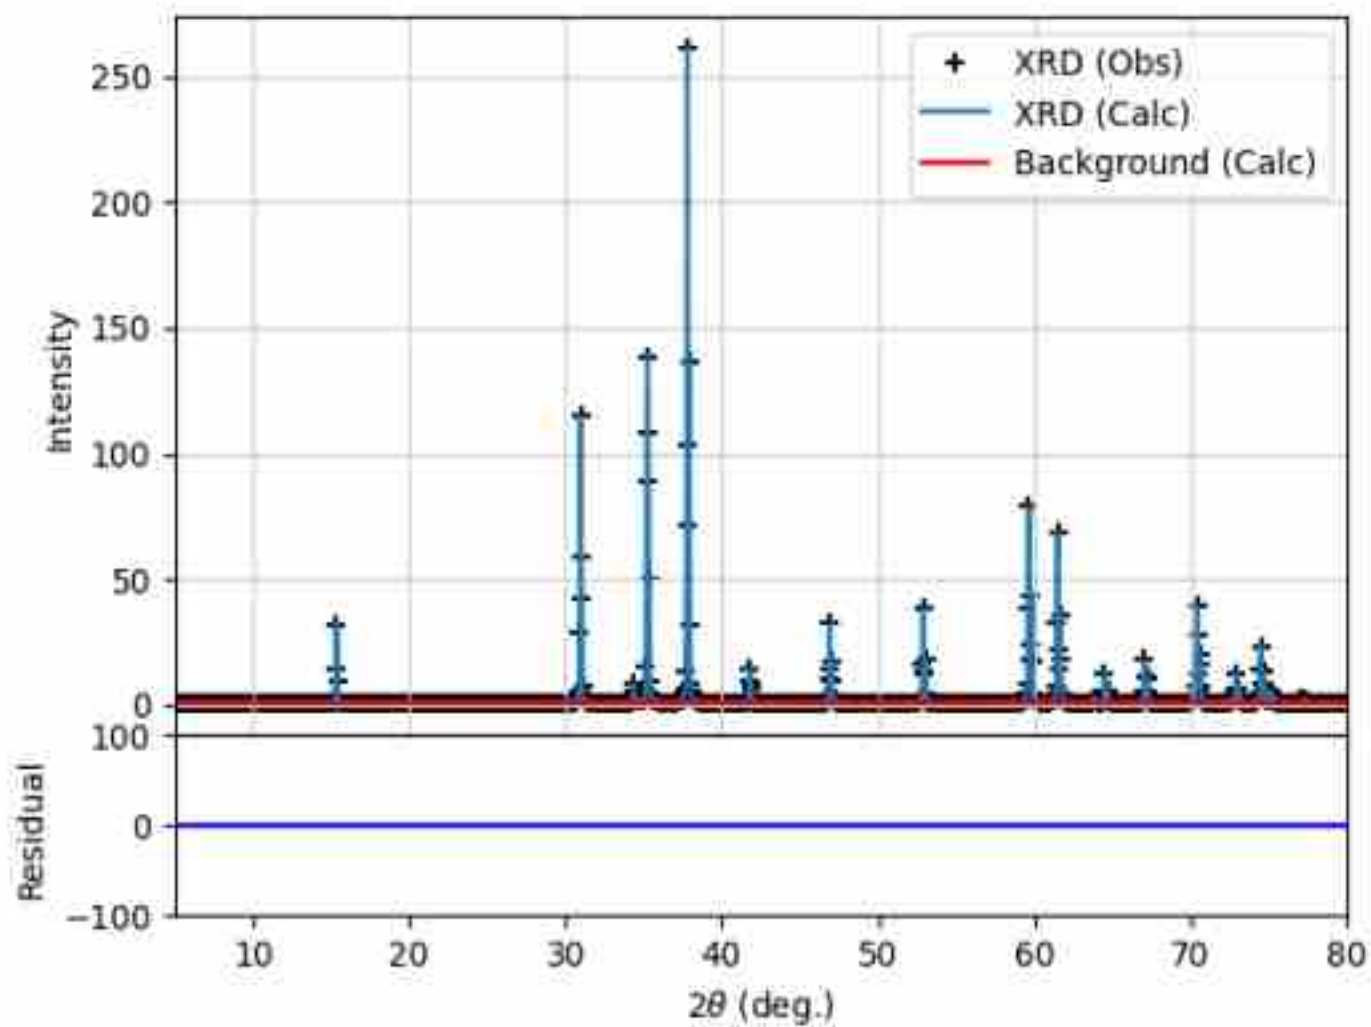

| RMSE before RR | Rwp     | RMSE after RR |
|----------------|---------|---------------|
| 0.025          | 0.00291 | 0.00102       |

# Gd<sub>2</sub>As<sub>2</sub>O<sub>8</sub>

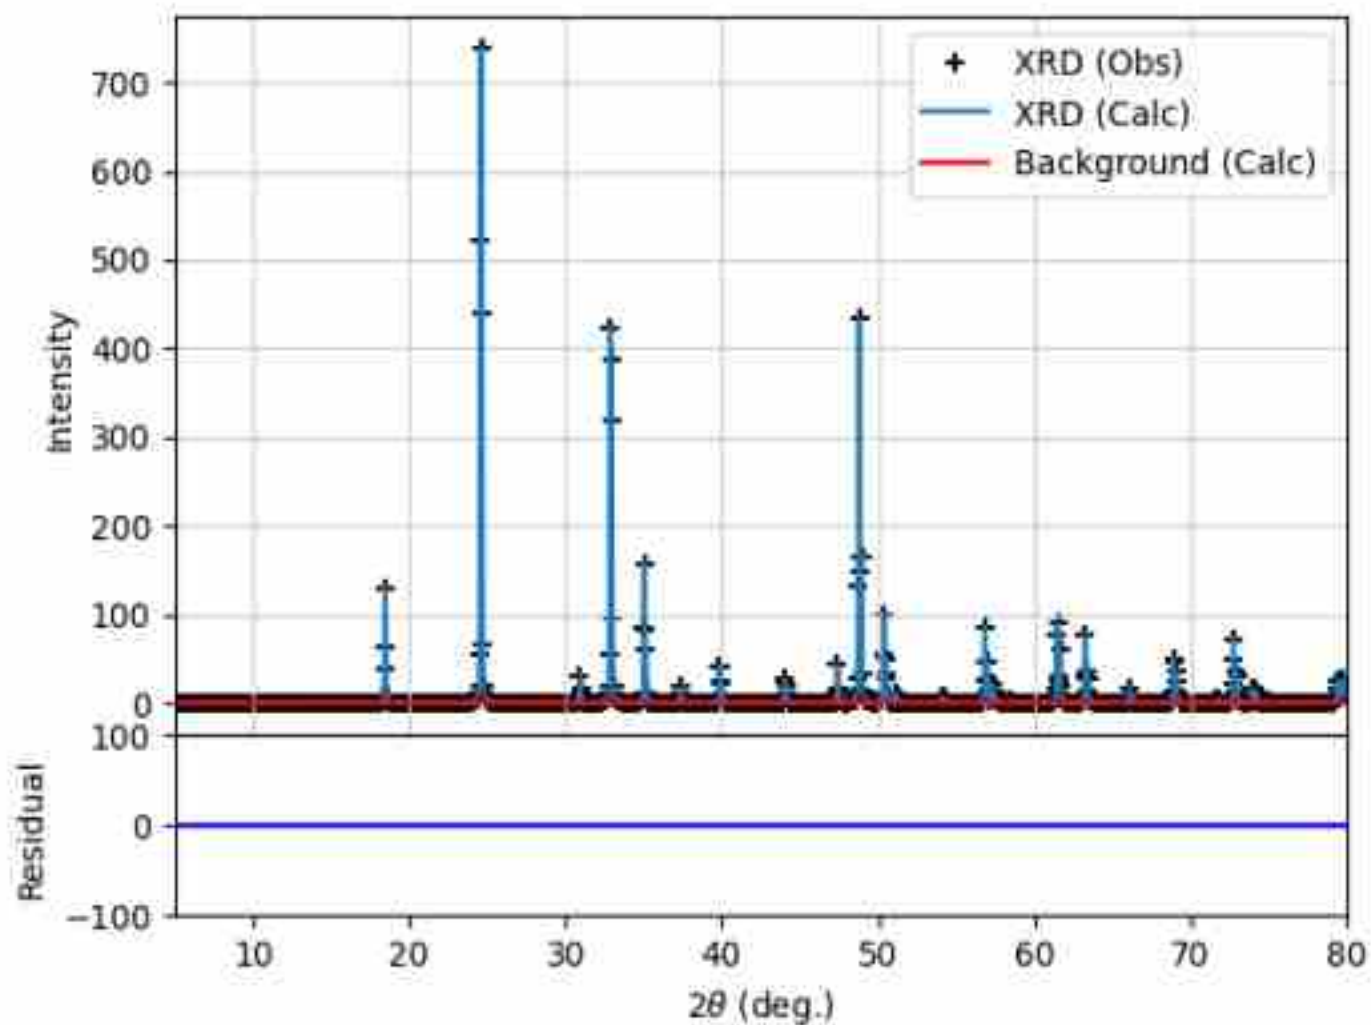

| RMSE before RR | Rwp     | RMSE after RR |
|----------------|---------|---------------|
| 0.025          | 0.00353 | 0.00103       |

# Gd<sub>4</sub>Mg<sub>2</sub>Se<sub>8</sub>

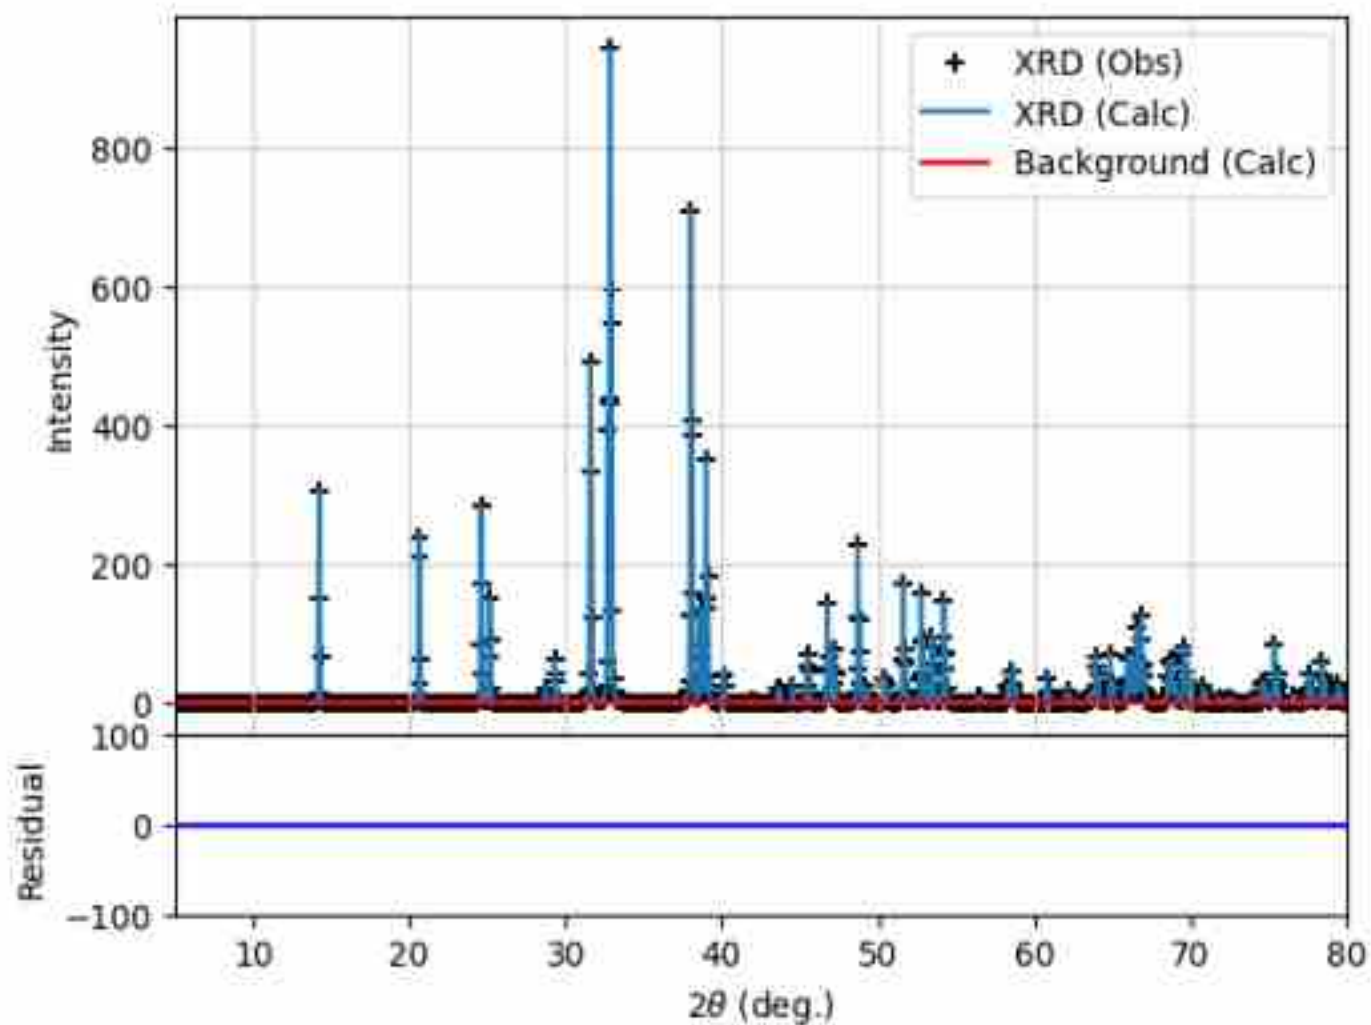

| RMSE before RR | Rwp     | RMSE after RR |
|----------------|---------|---------------|
| 0.025          | 0.00396 | 0.00046       |

# Hf2Ir2

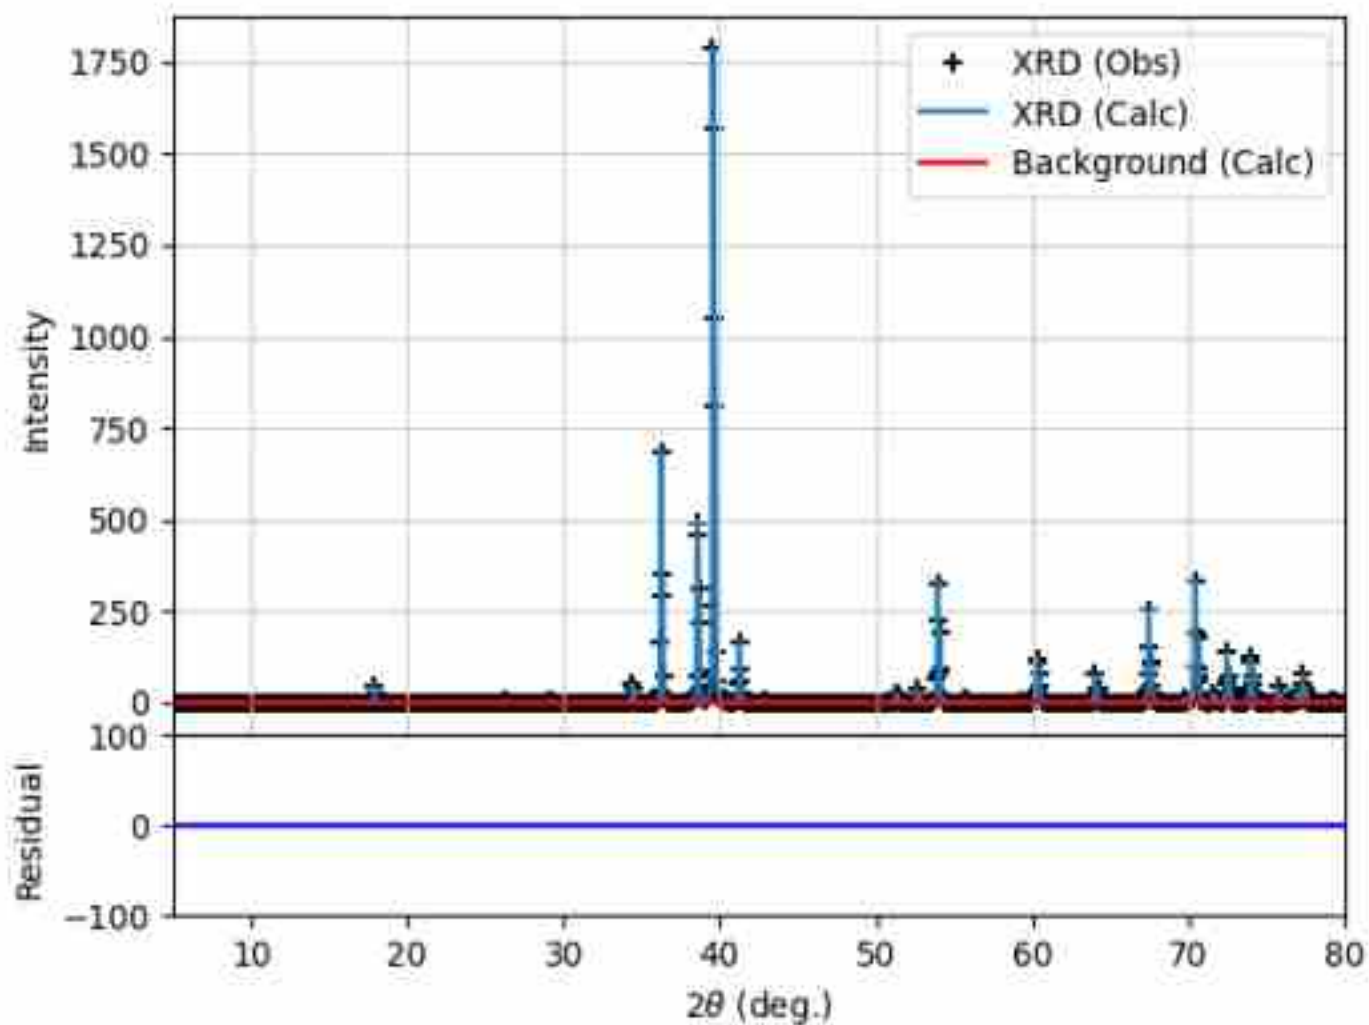

| RMSE before RR | Rwp     | RMSE after RR |
|----------------|---------|---------------|
| 0.025          | 0.00466 | 0.00022       |

# K<sub>2</sub>Nd<sub>4</sub>Nb<sub>2</sub>O<sub>12</sub>

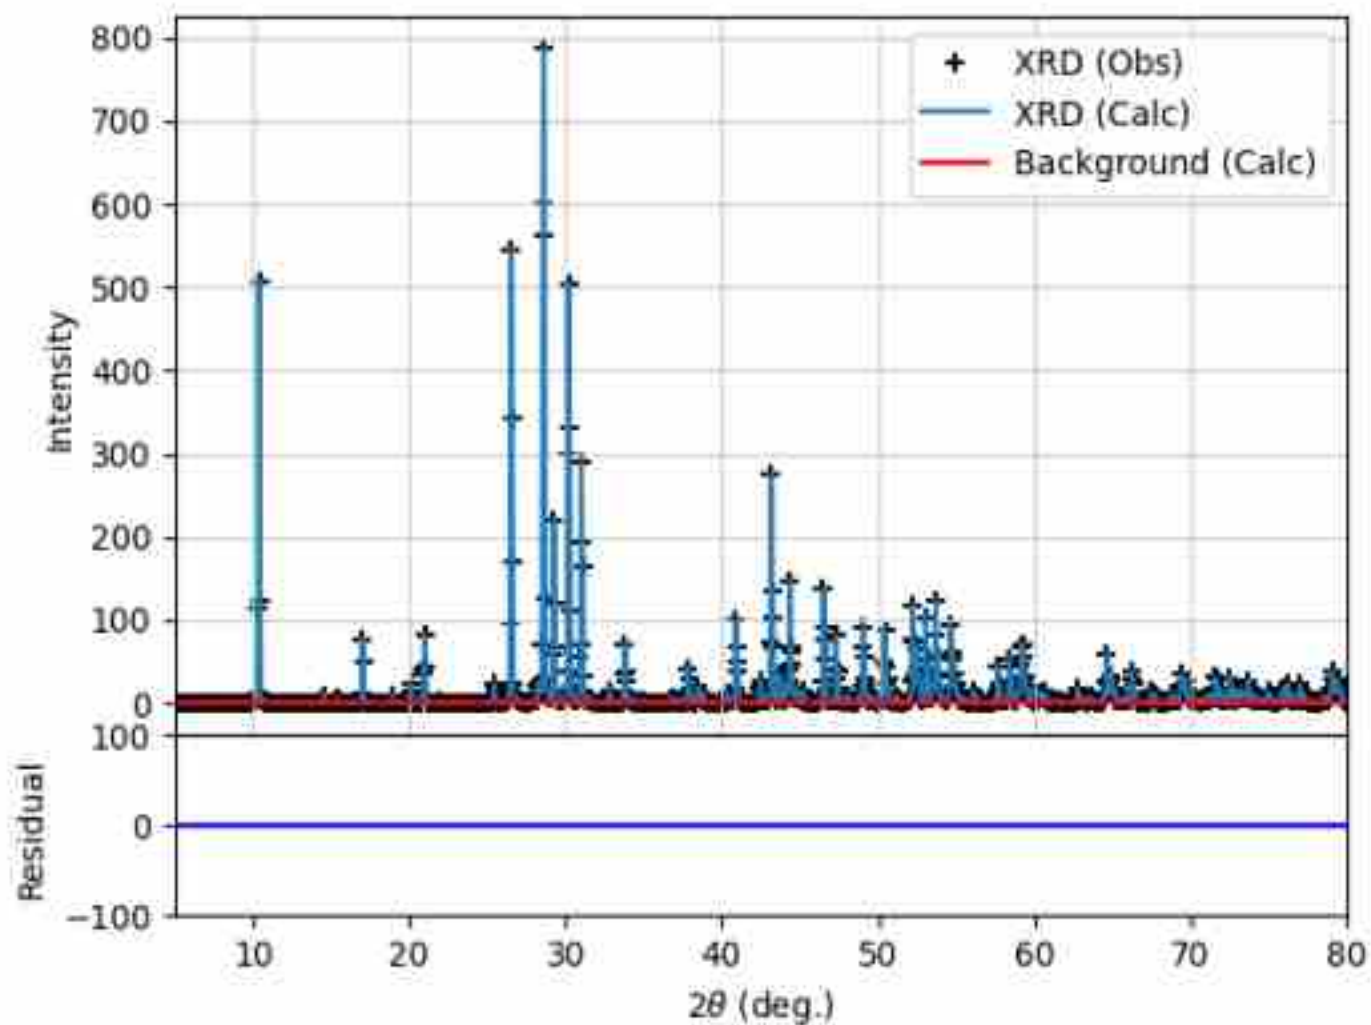

| RMSE before RR | Rwp     | RMSE after RR |
|----------------|---------|---------------|
| 0.025          | 0.00326 | 0.00096       |

# K4Na4Se4

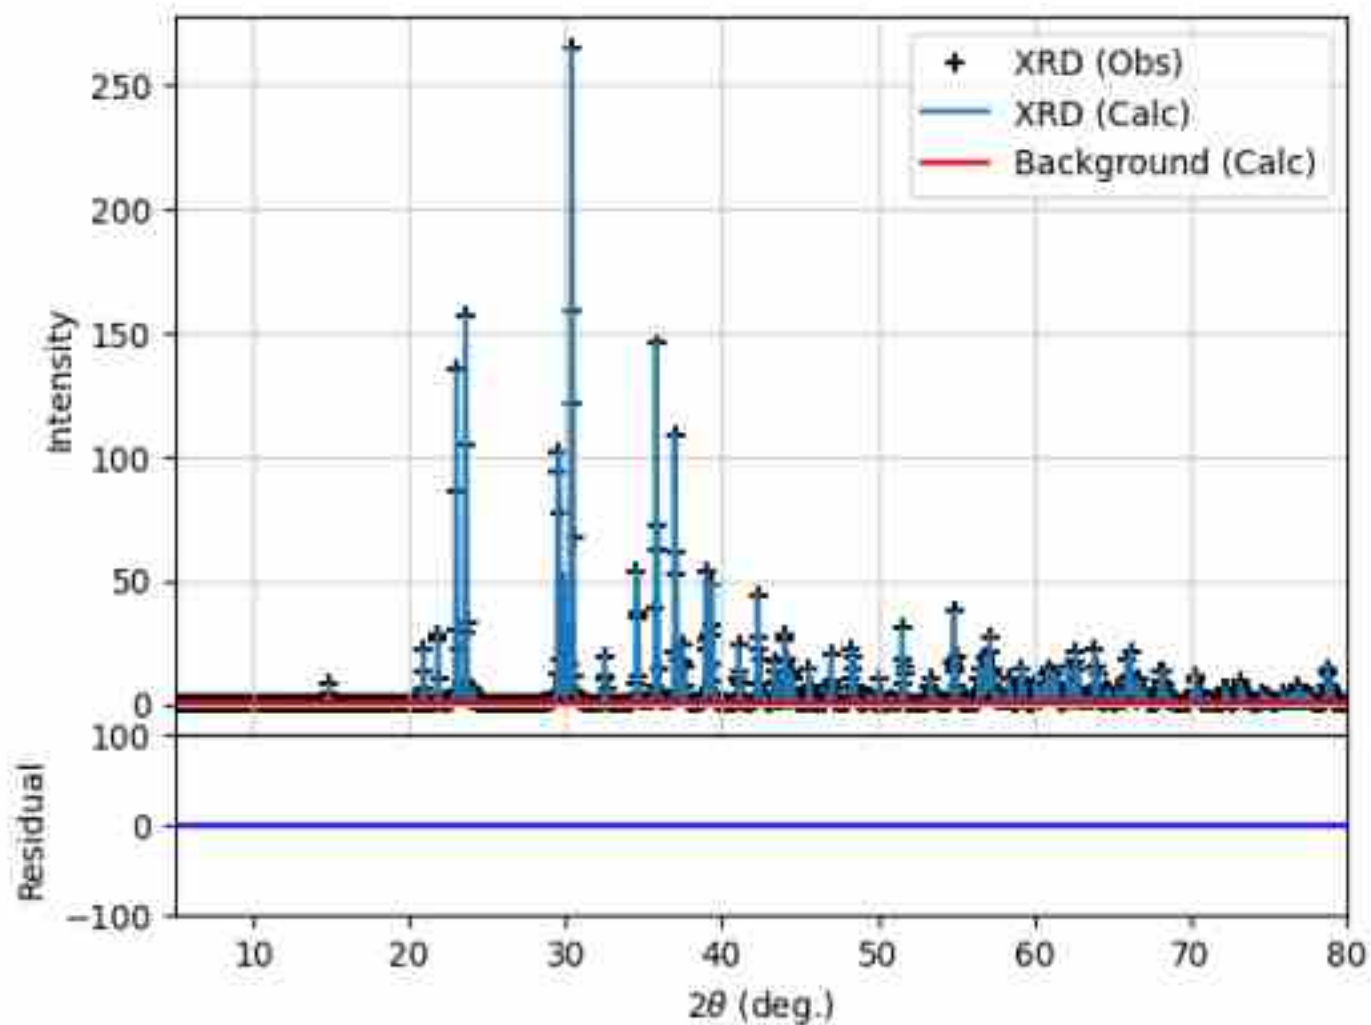

| RMSE before RR | Rwp     | RMSE after RR |
|----------------|---------|---------------|
| 0.025          | 0.00321 | 0.00041       |

# K6Ho2F12

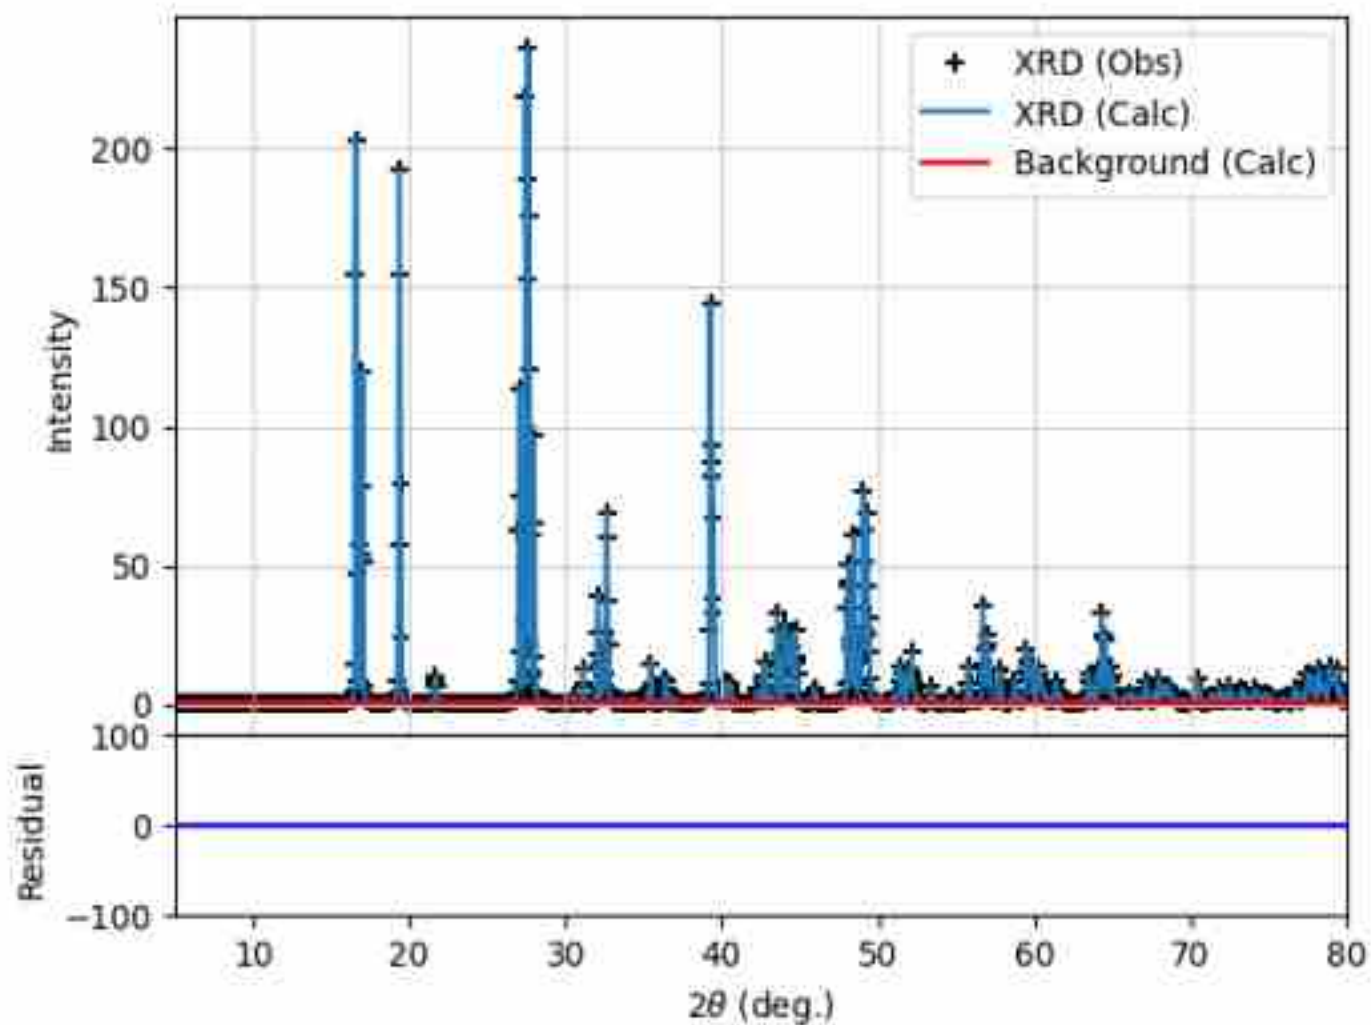

| RMSE before RR | Rwp     | RMSE after RR |
|----------------|---------|---------------|
| 0.025          | 0.00309 | 0.00084       |

# La1U1N2

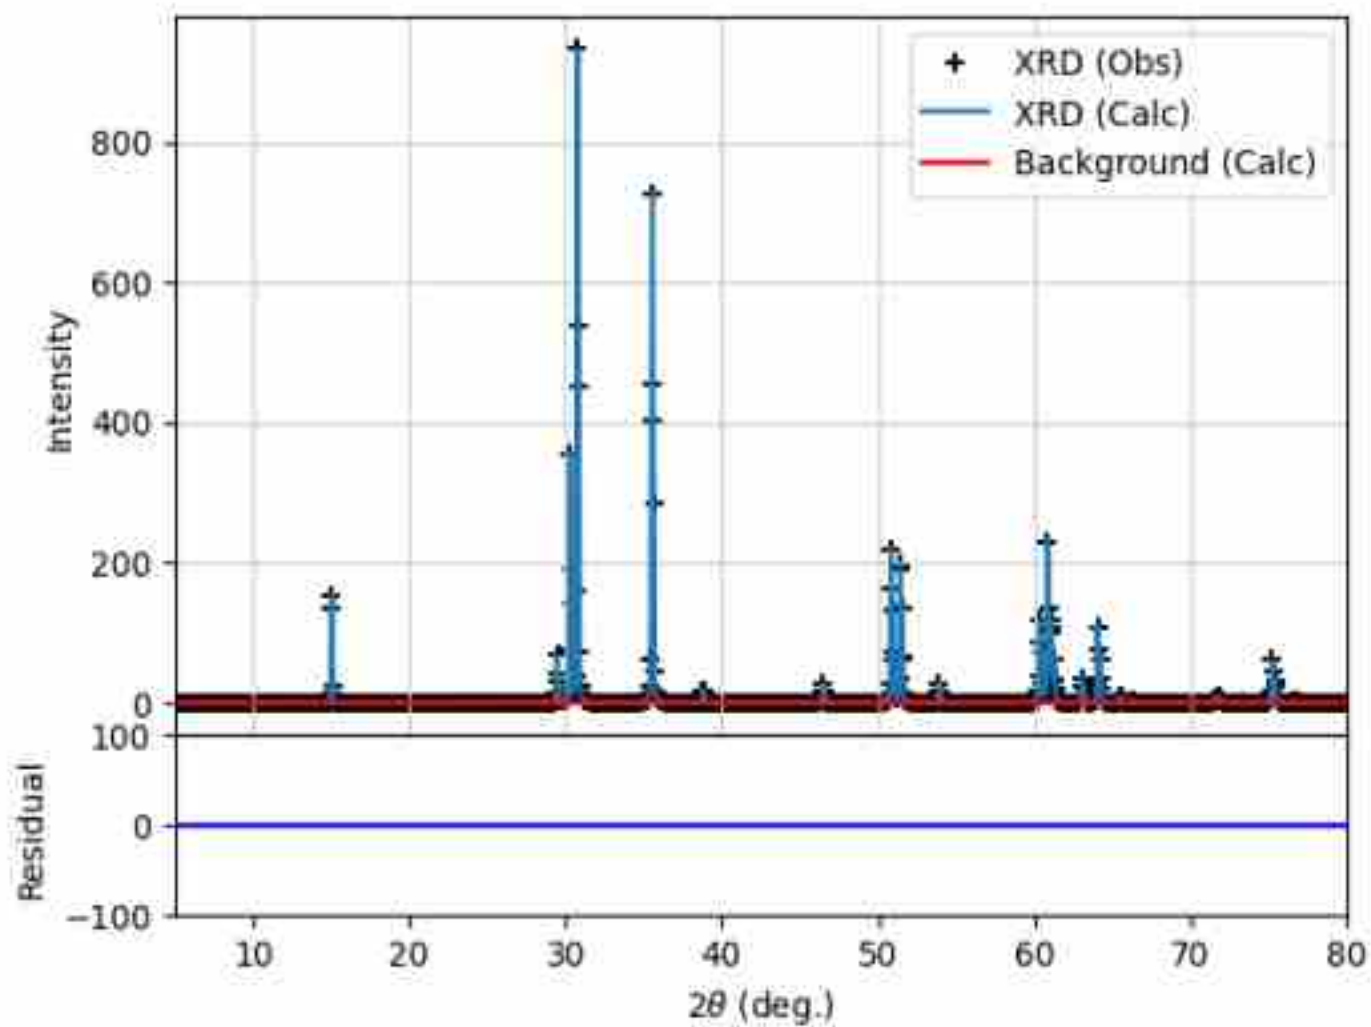

| RMSE before RR | Rwp     | RMSE after RR |
|----------------|---------|---------------|
| 0.025          | 0.00616 | 0.00412       |



# La2Ga12

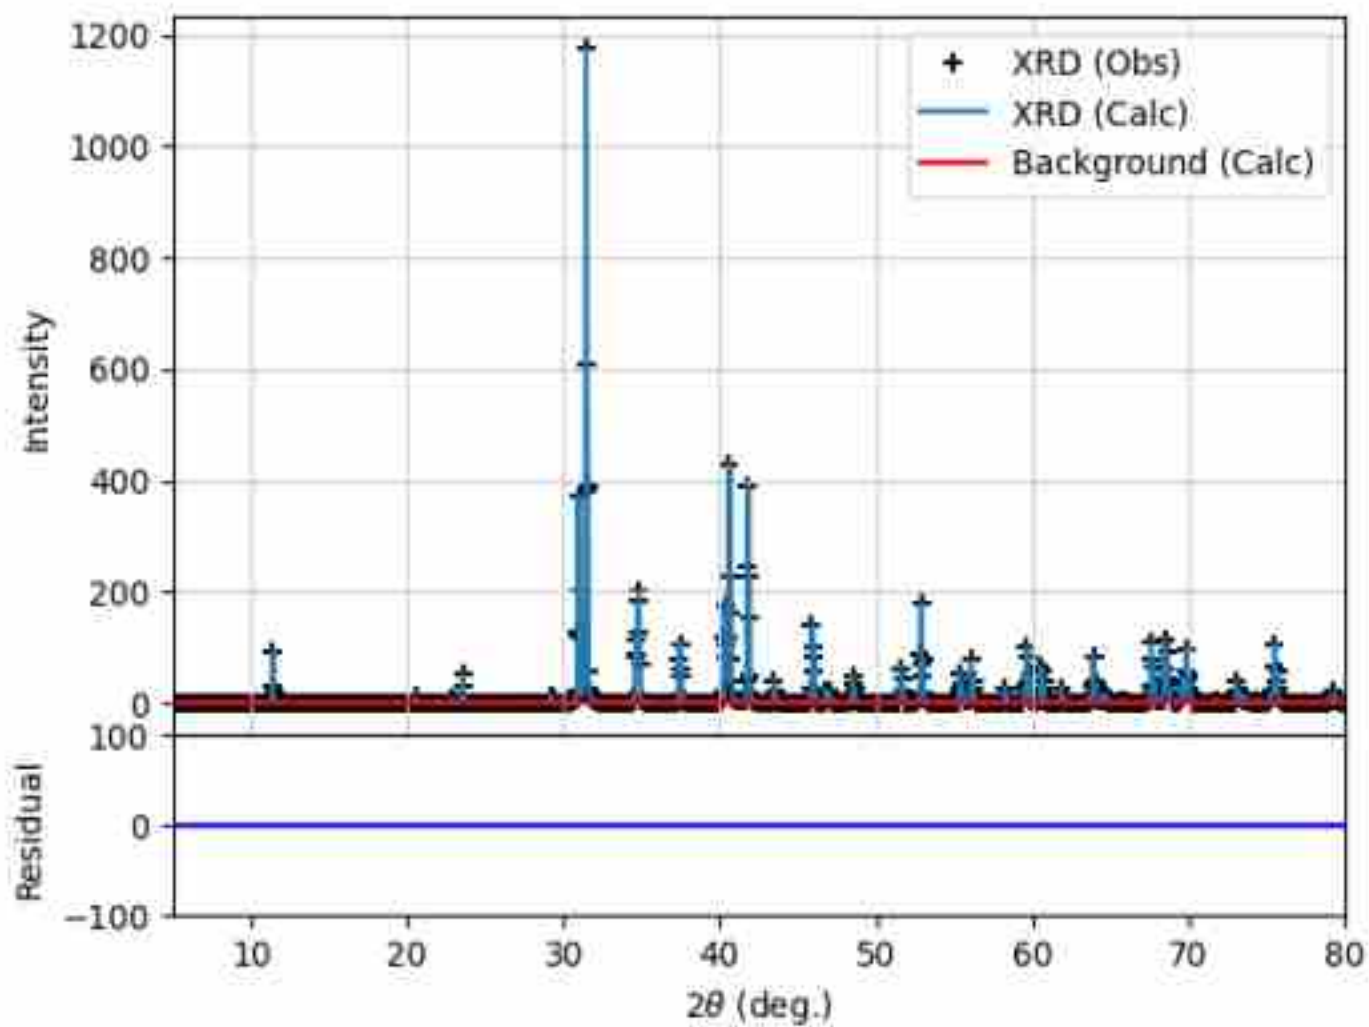

| RMSE before RR | Rwp     | RMSE after RR |
|----------------|---------|---------------|
| 0.025          | 0.00555 | 0.0007        |

# La<sub>4</sub>Co<sub>14</sub>

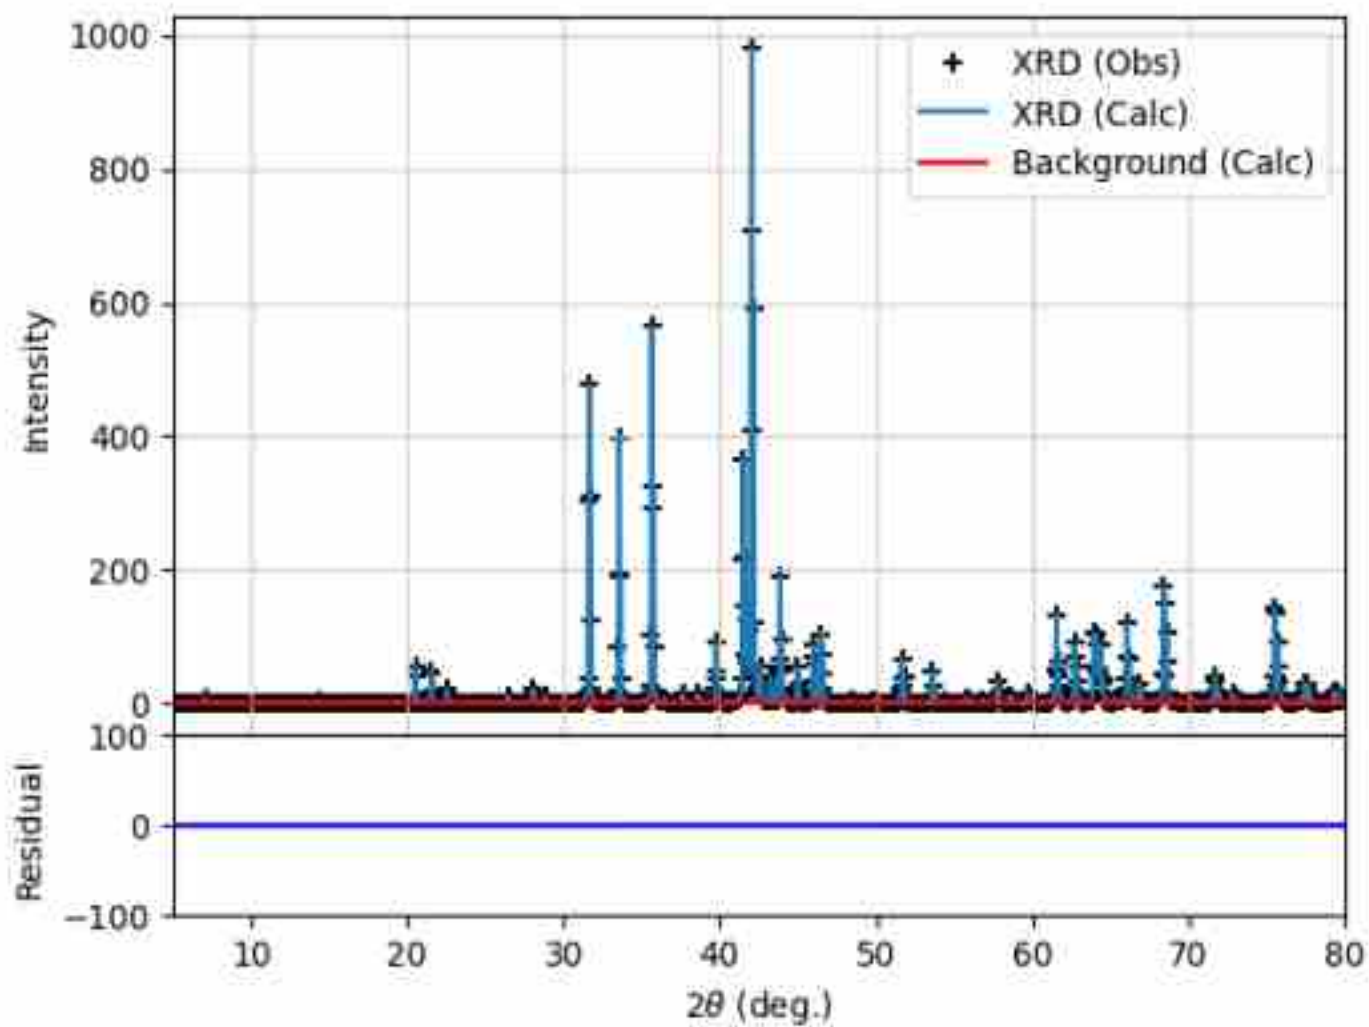

| RMSE before RR | Rwp     | RMSE after RR |
|----------------|---------|---------------|
| 0.025          | 0.49814 | 0.0056        |

# La<sub>4</sub>Cu<sub>5</sub>Sb<sub>8</sub>

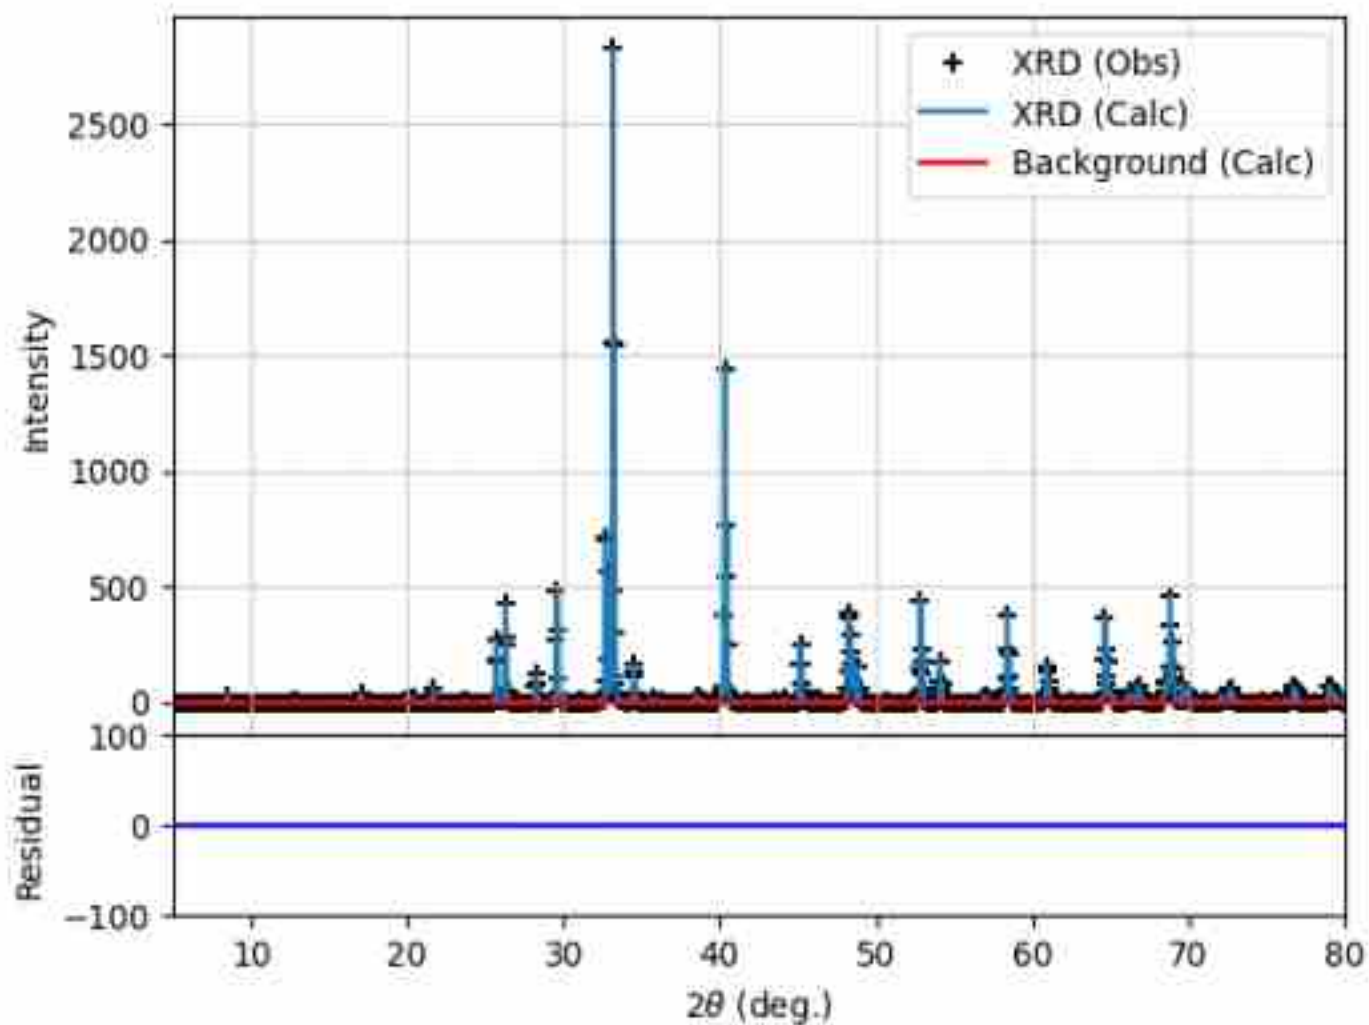

| RMSE before RR | Rwp     | RMSE after RR |
|----------------|---------|---------------|
| 0.025          | 0.01202 | 0.00038       |

# La<sub>4</sub>Dy<sub>1</sub>C<sub>10</sub>

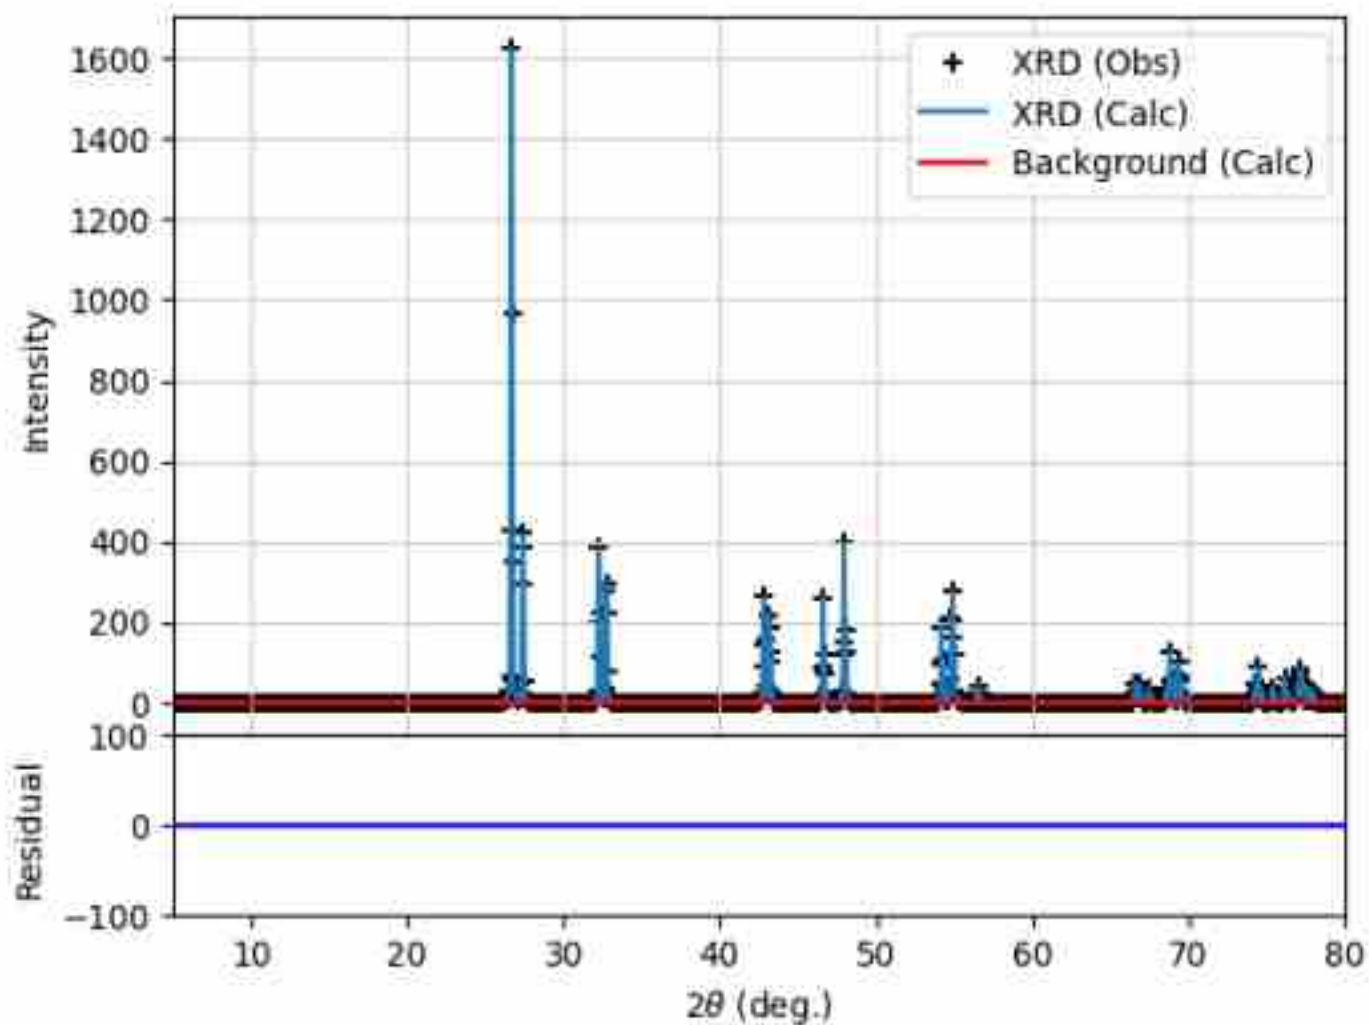

| RMSE before RR | Rwp     | RMSE after RR |
|----------------|---------|---------------|
| 0.025          | 0.00424 | 0.00154       |

# La4Sb8

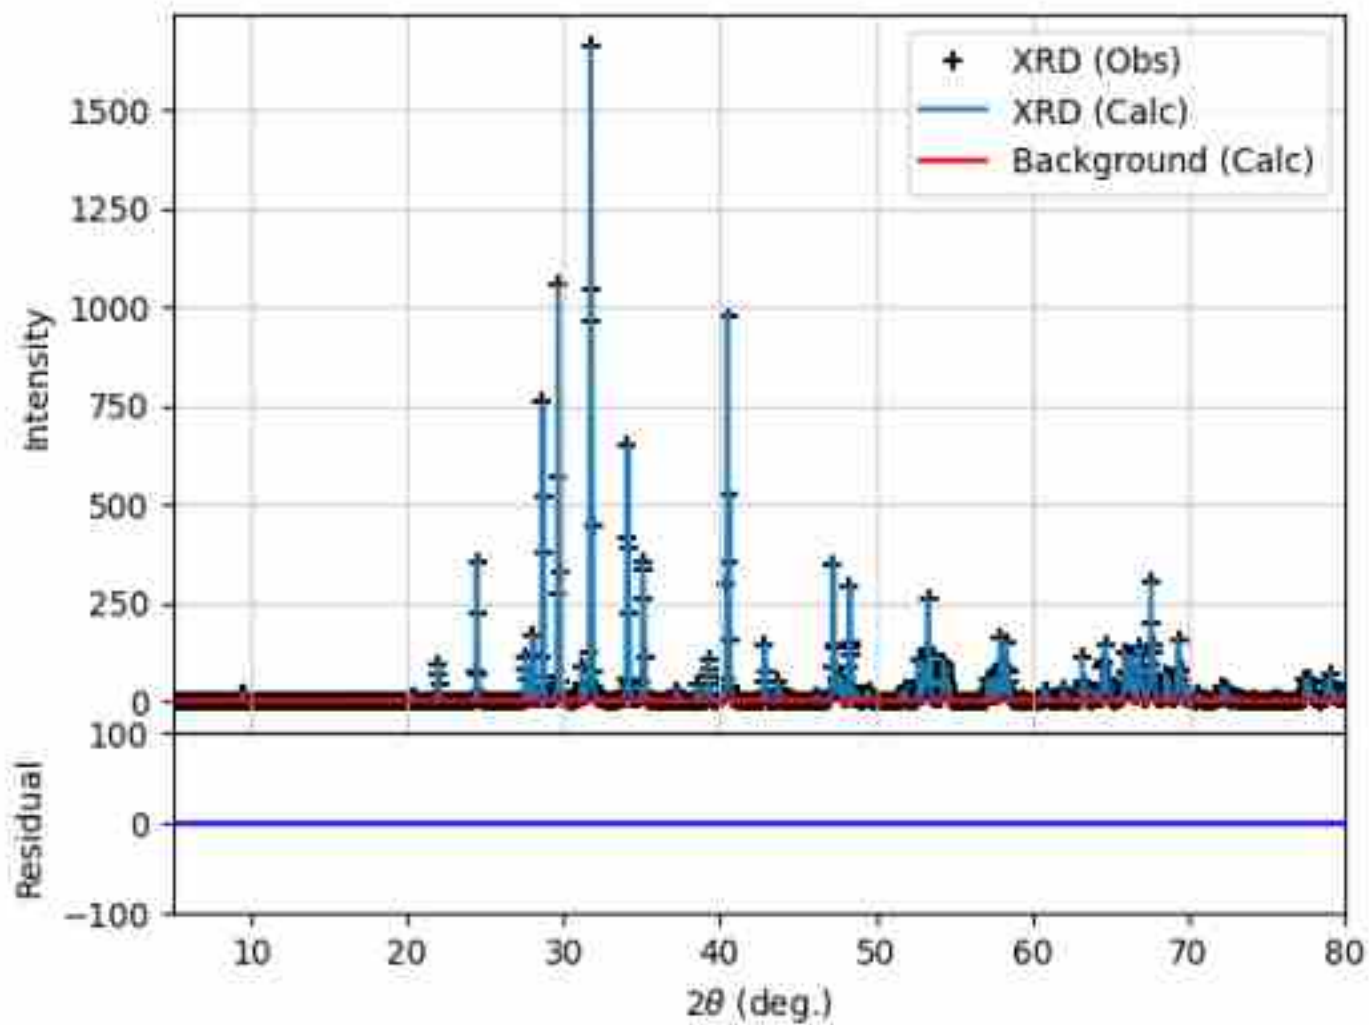

| RMSE before RR | Rwp     | RMSE after RR |
|----------------|---------|---------------|
| 0.025          | 0.00496 | 0.00034       |

# Li1Cr4Ga1S8

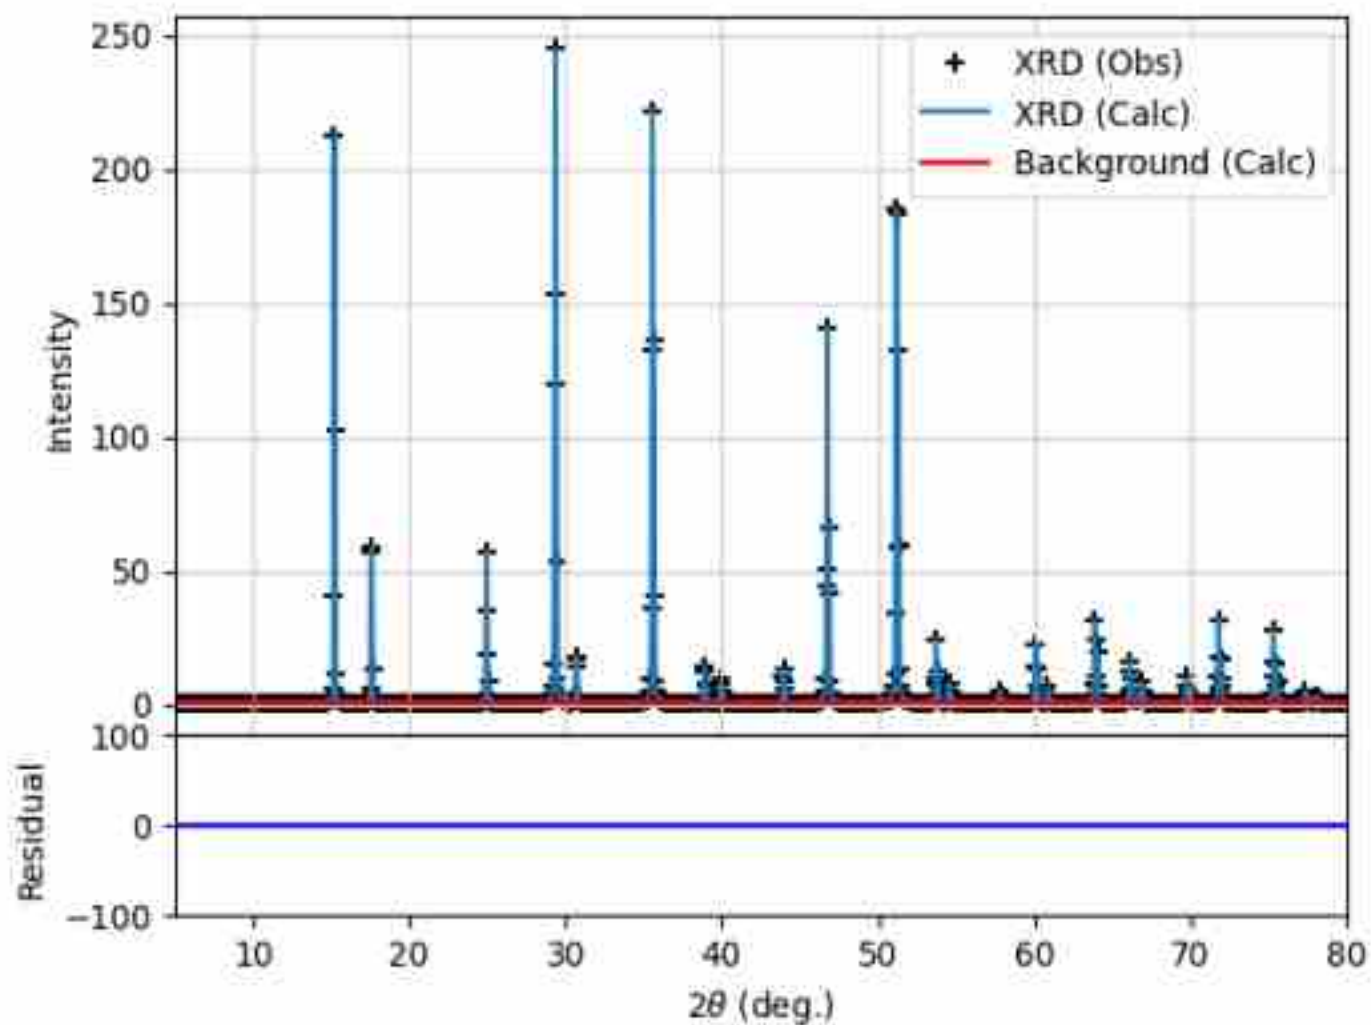

| RMSE before RR | Rwp     | RMSE after RR |
|----------------|---------|---------------|
| 0.025          | 0.09454 | 0.00652       |

# Li<sub>2</sub>CeAs<sub>2</sub>

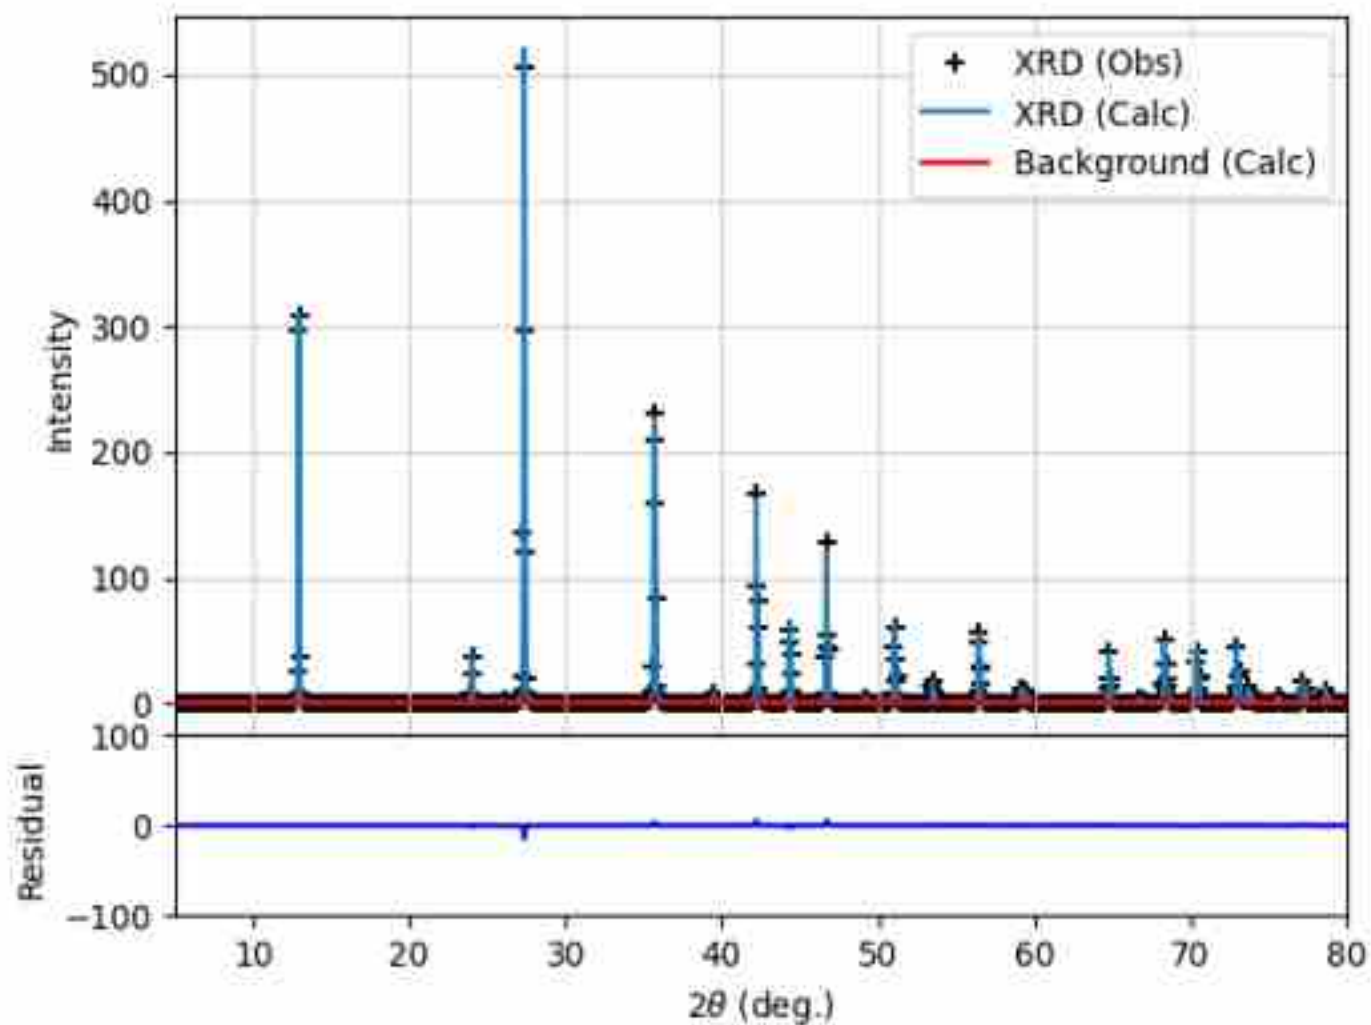

| RMSE before RR | Rwp    | RMSE after RR |
|----------------|--------|---------------|
| 0.025          | 2.3434 | 0.28323       |

# Li<sub>2</sub>Fe<sub>3</sub>Co<sub>10</sub>O<sub>8</sub>

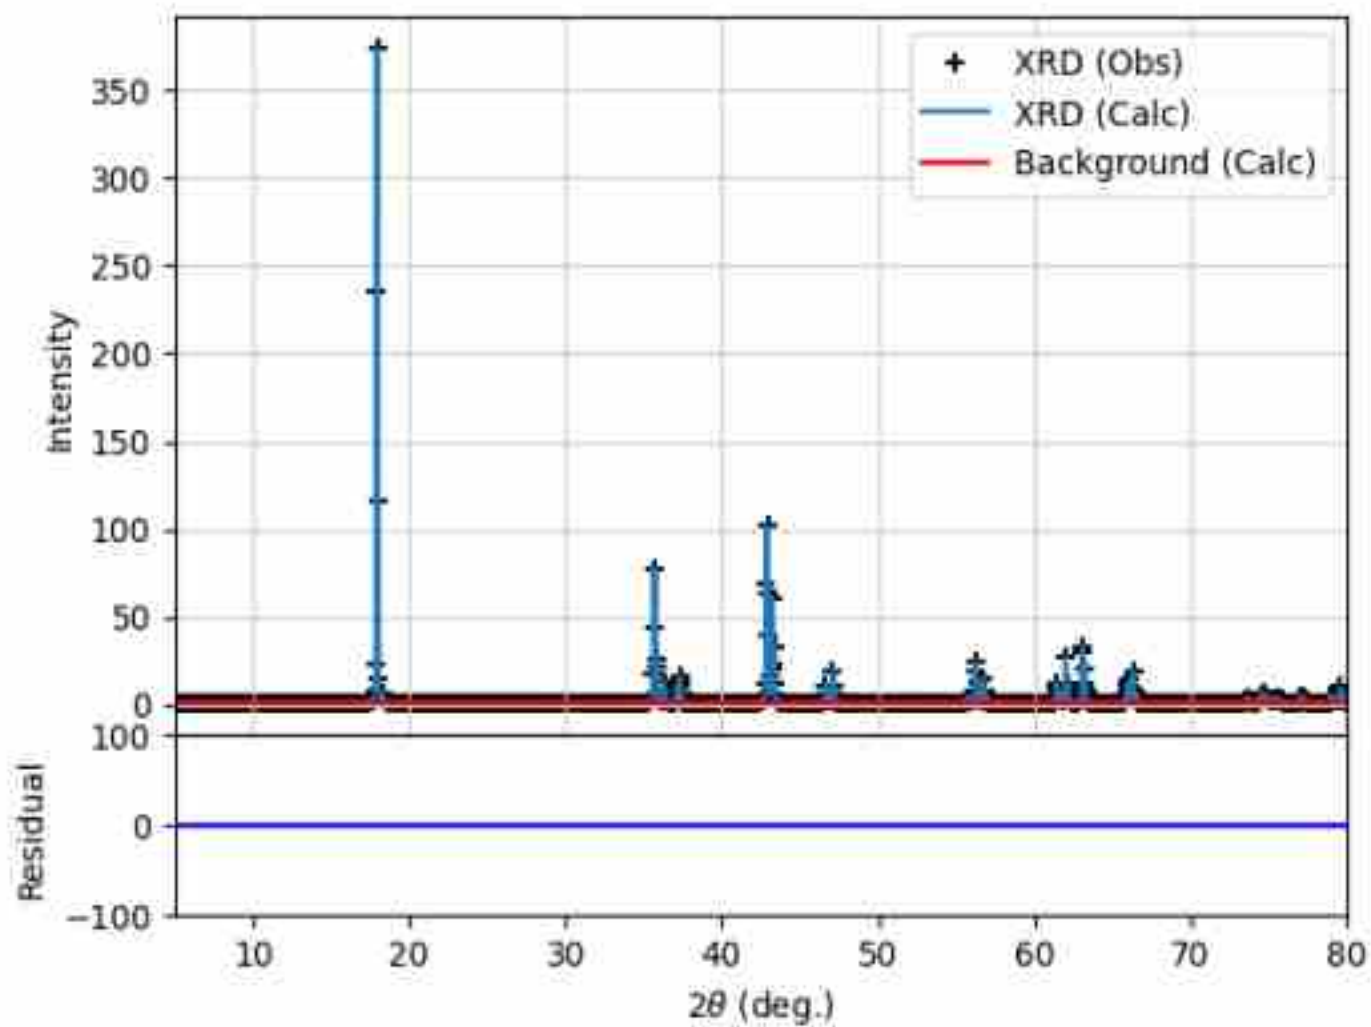

| RMSE before RR | Rwp     | RMSE after RR |
|----------------|---------|---------------|
| 0.025          | 0.00185 | 0.00092       |



# Li<sub>2</sub>Ti<sub>2</sub>Rh<sub>2</sub>O<sub>8</sub>

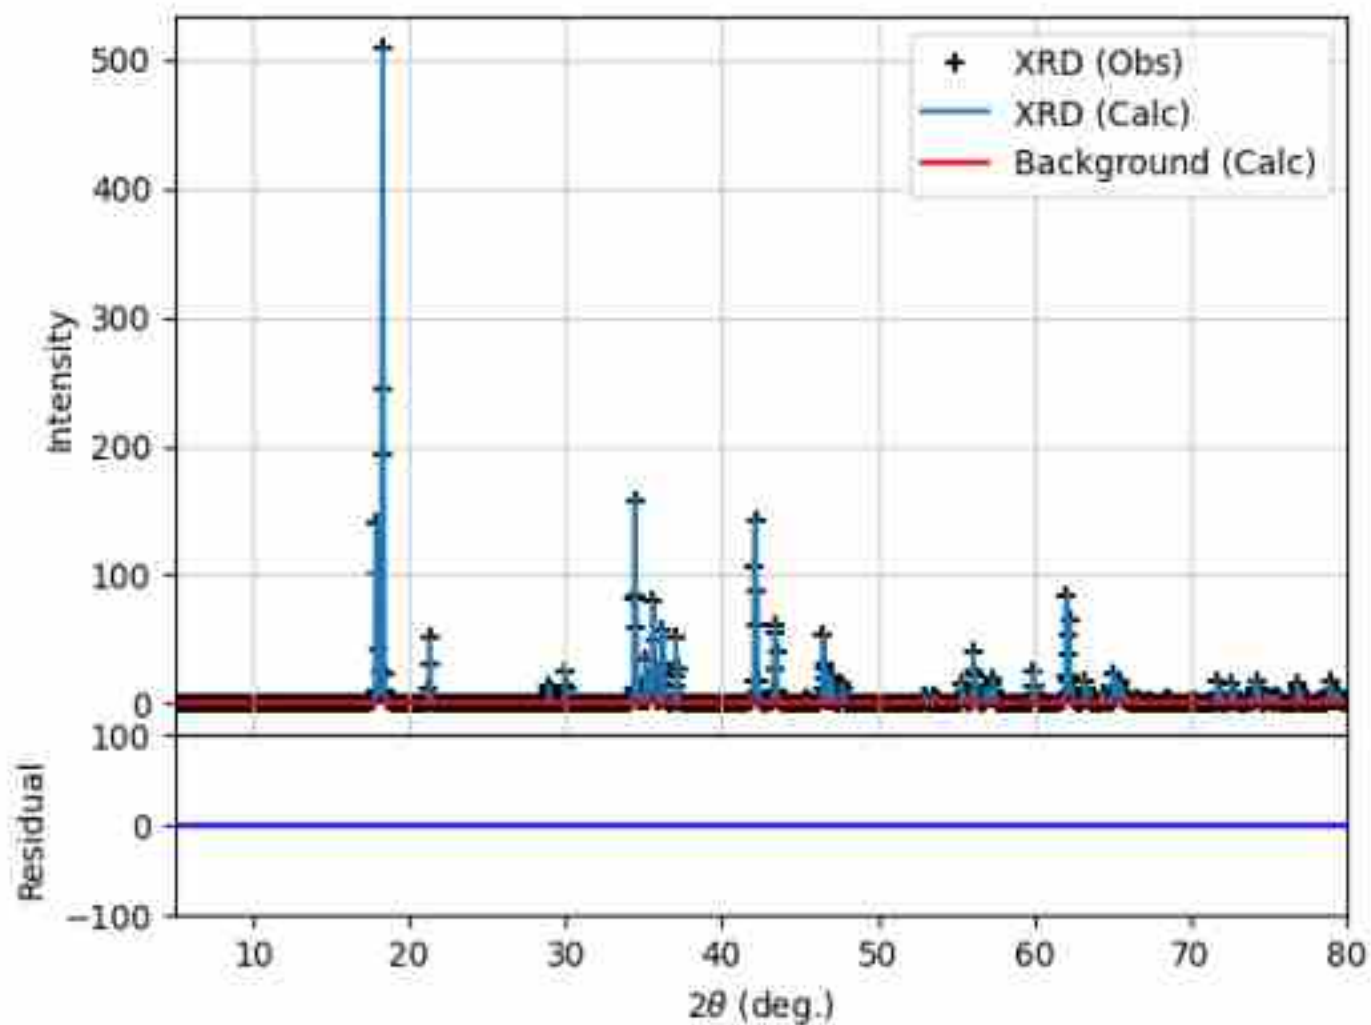

| RMSE before RR | Rwp     | RMSE after RR |
|----------------|---------|---------------|
| 0.025          | 0.00366 | 0.00147       |

# Li<sub>2</sub>Yb<sub>2</sub>Al<sub>2</sub>F<sub>12</sub>

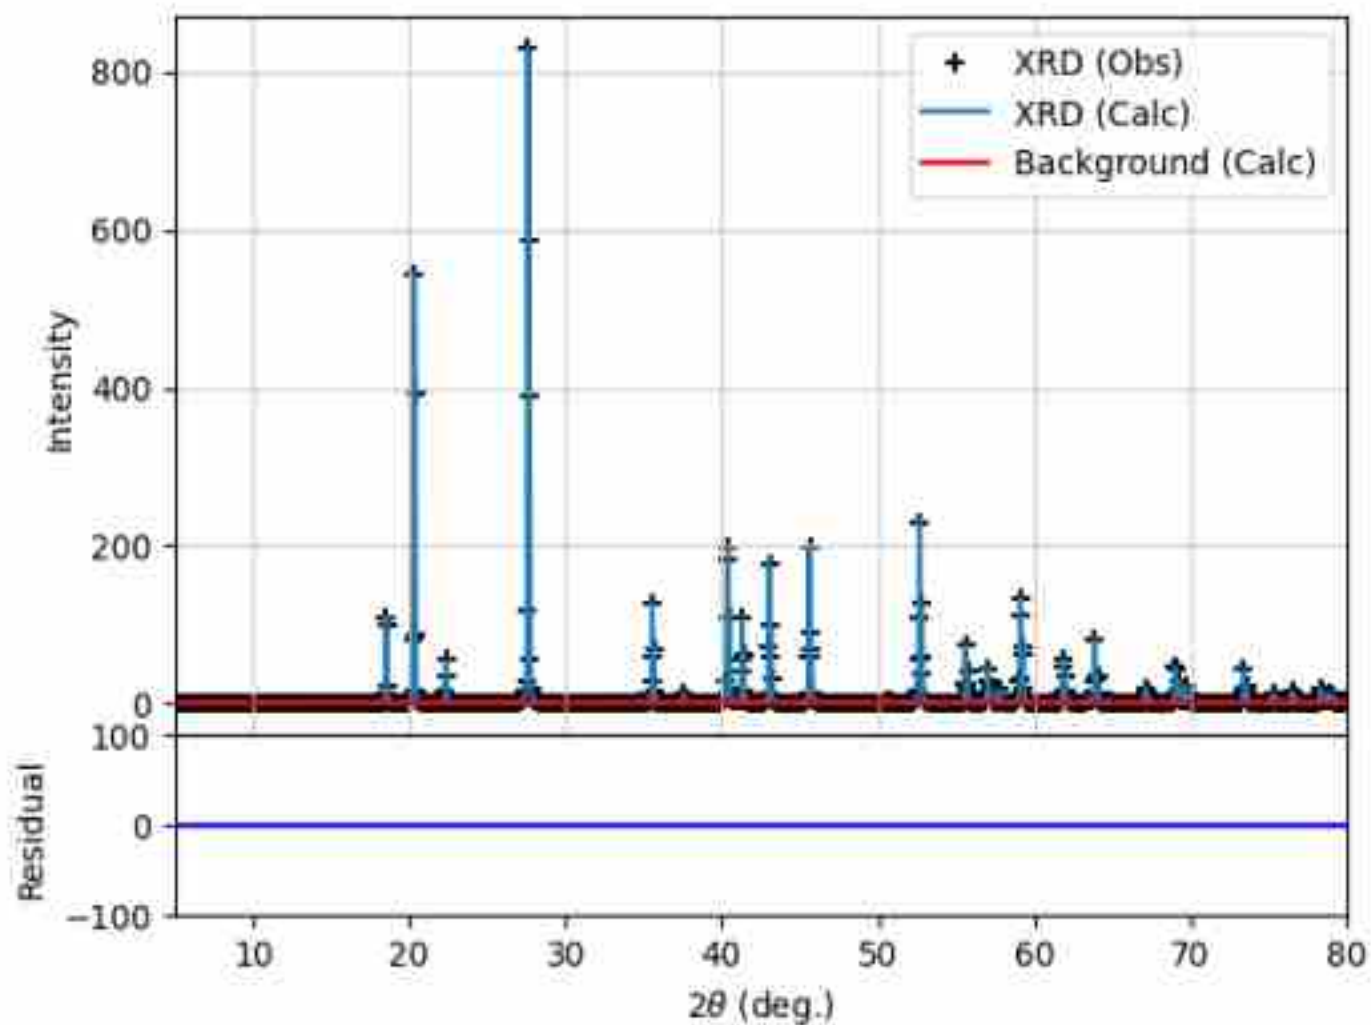

| RMSE before RR | Rwp     | RMSE after RR |
|----------------|---------|---------------|
| 0.025          | 0.00682 | 0.00298       |

# Li<sub>3</sub>V<sub>2</sub>Ni<sub>1</sub>O<sub>6</sub>

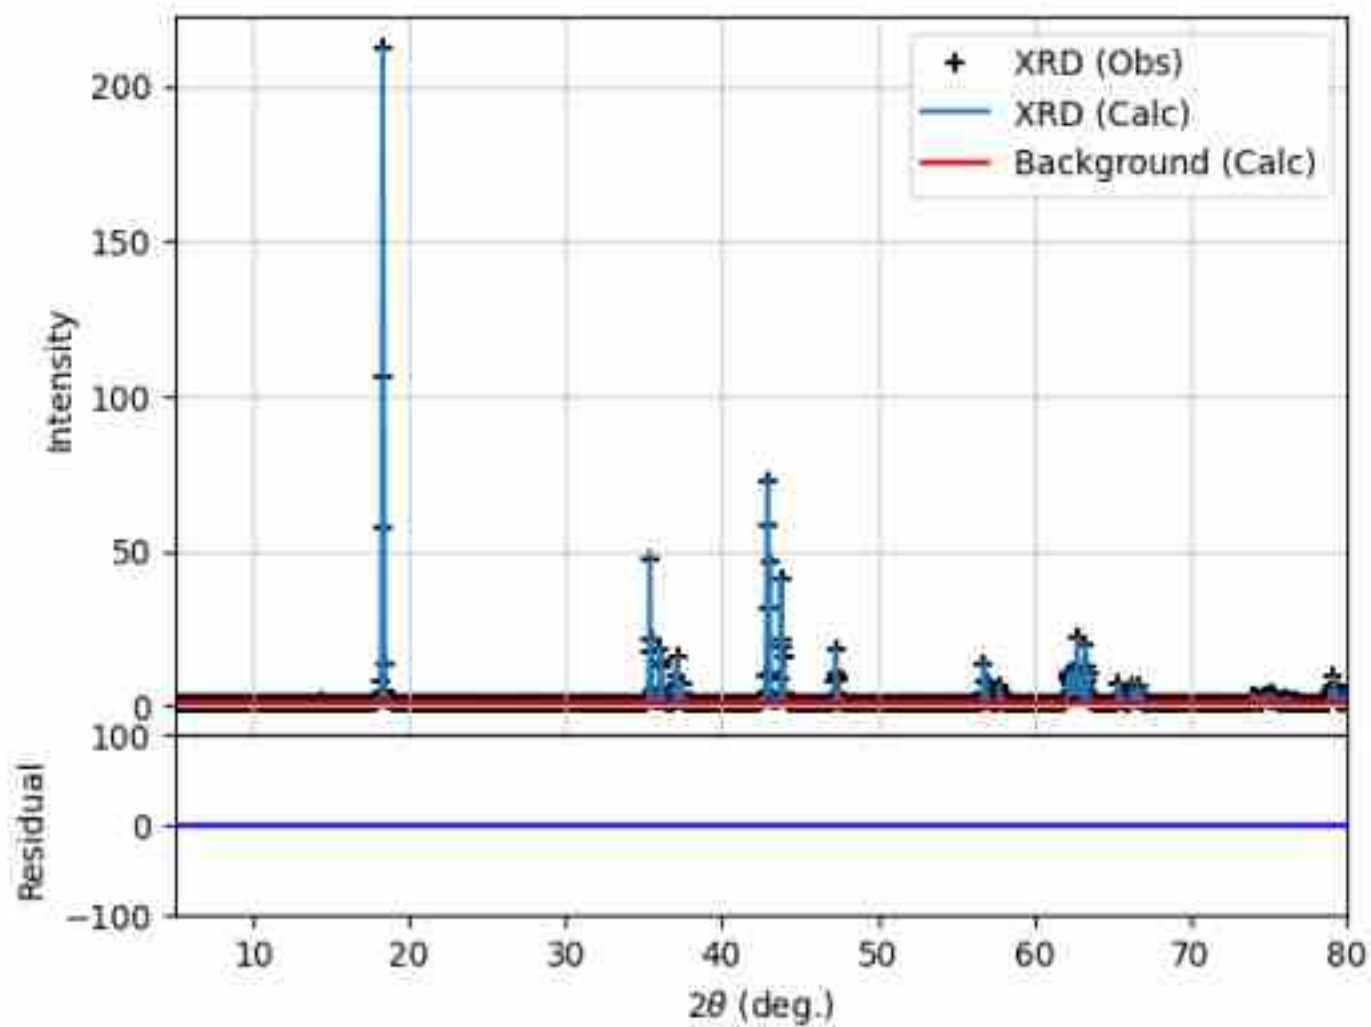

| RMSE before RR | Rwp     | RMSE after RR |
|----------------|---------|---------------|
| 0.025          | 0.00196 | 0.00085       |

# Li<sub>4</sub>Fe<sub>4</sub>F<sub>12</sub>

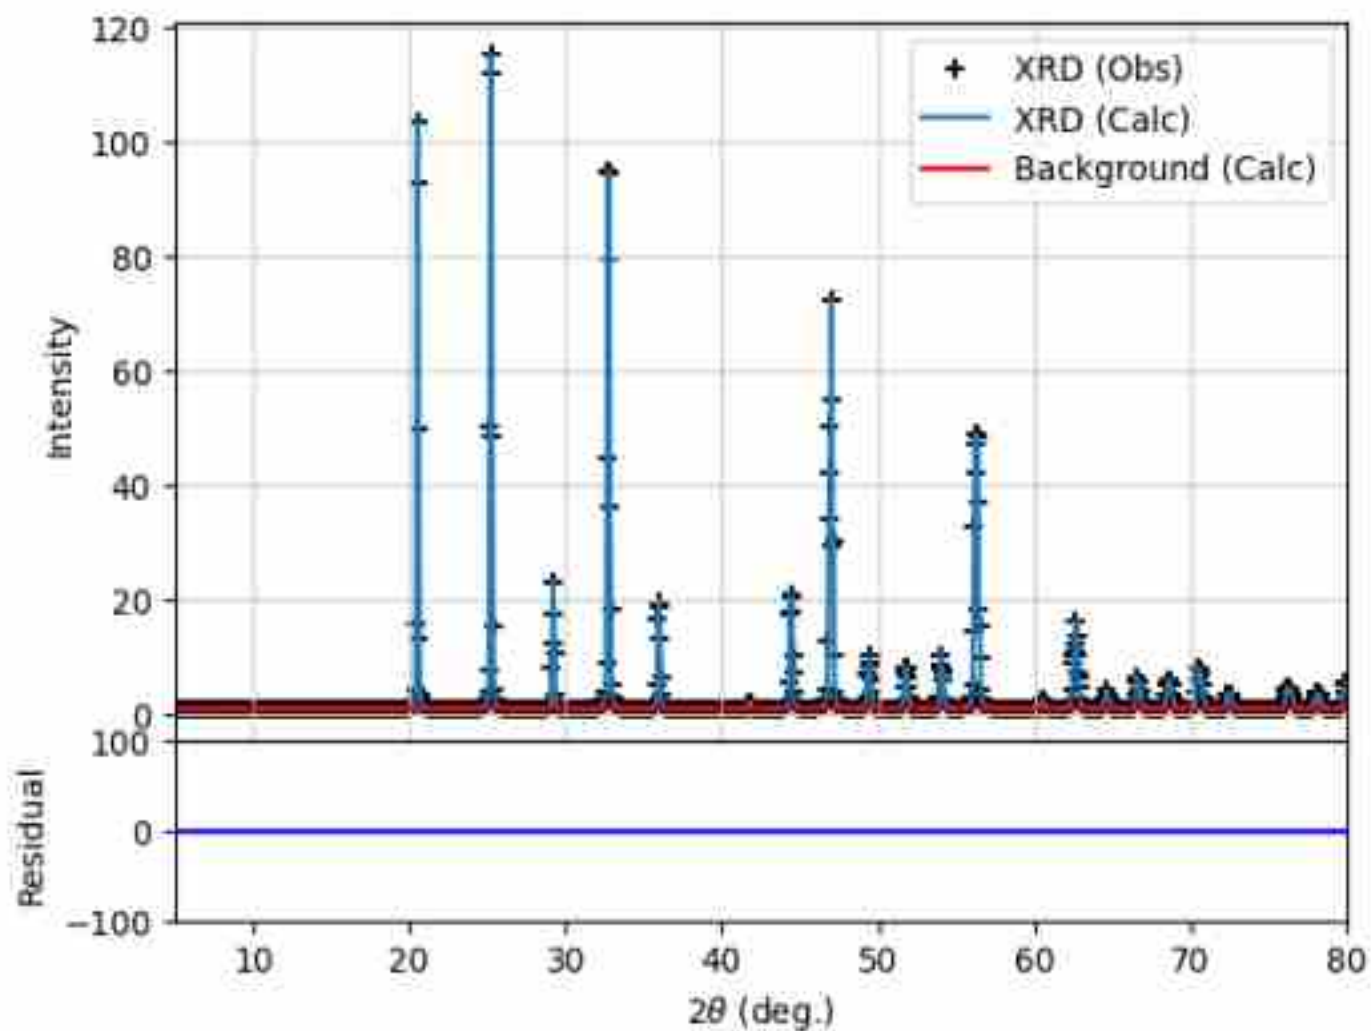

| RMSE before RR | Rwp     | RMSE after RR |
|----------------|---------|---------------|
| 0.025          | 0.00062 | 2e-05         |

# Li<sub>4</sub>La<sub>4</sub>Ge<sub>8</sub>

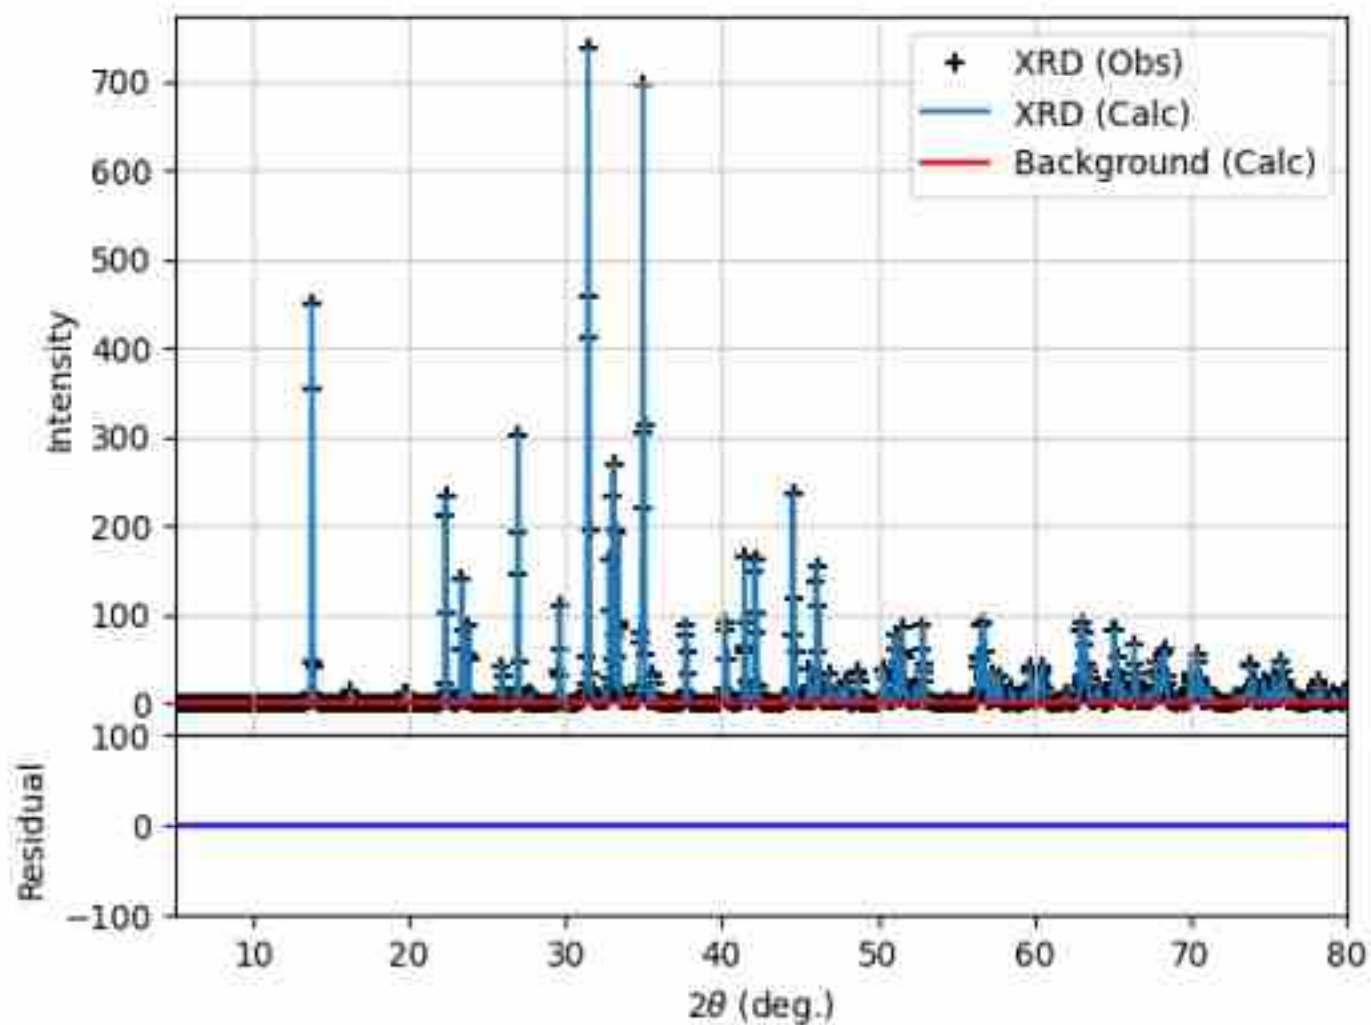

| RMSE before RR | Rwp     | RMSE after RR |
|----------------|---------|---------------|
| 0.025          | 0.00444 | 0.00126       |

# Li<sub>4</sub>Pd<sub>2</sub>O<sub>6</sub>

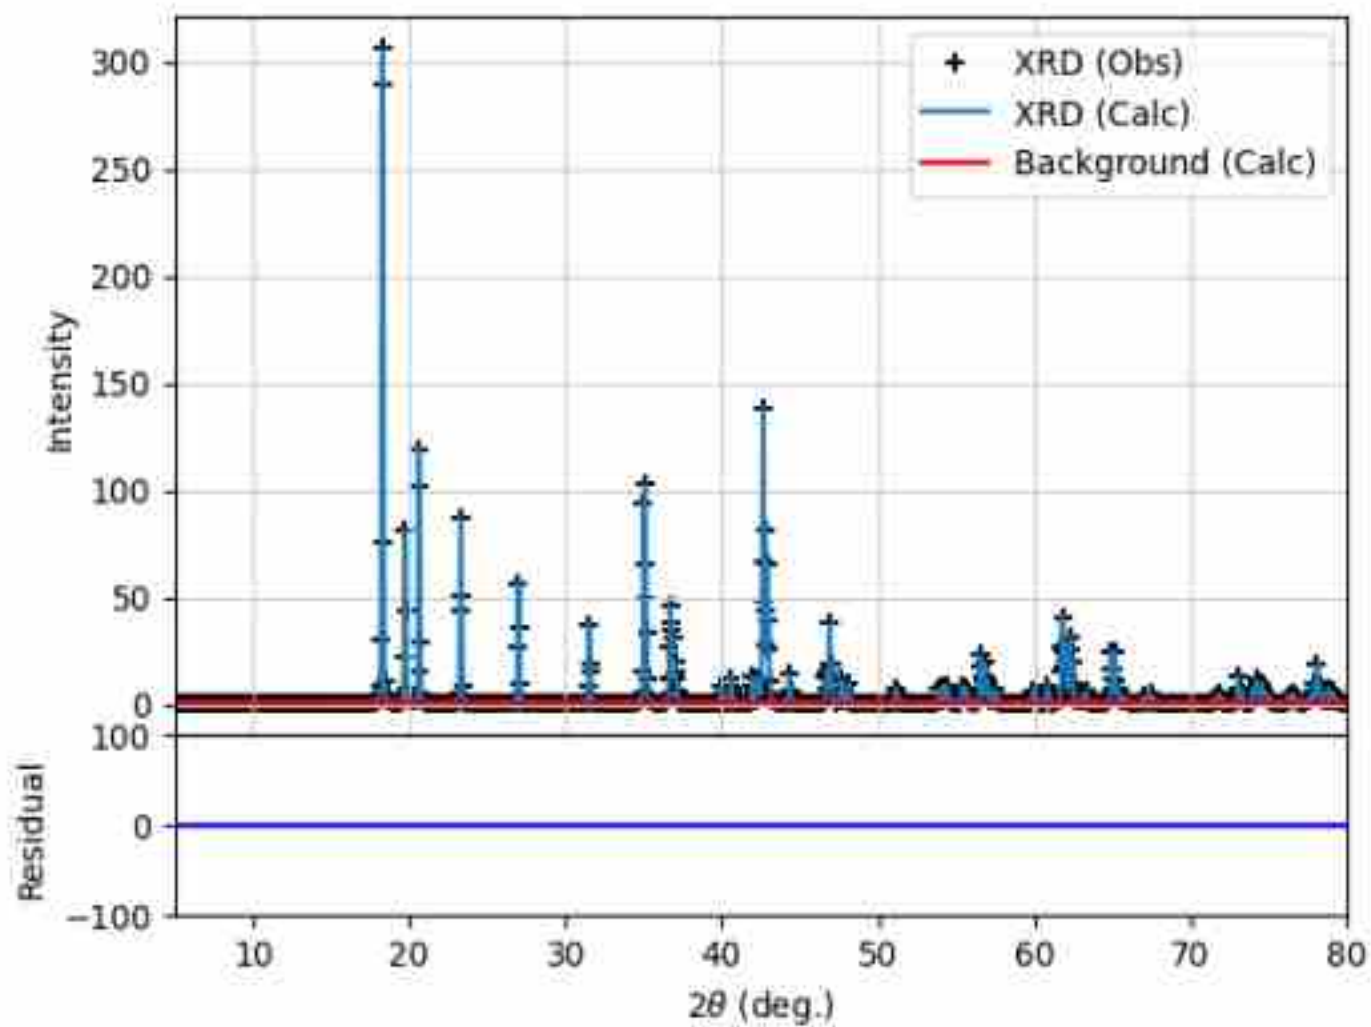

| RMSE before RR | Rwp    | RMSE after RR |
|----------------|--------|---------------|
| 0.025          | 0.0029 | 0.00194       |

# Li<sub>4</sub>V<sub>2</sub>Cr<sub>2</sub>O<sub>8</sub>

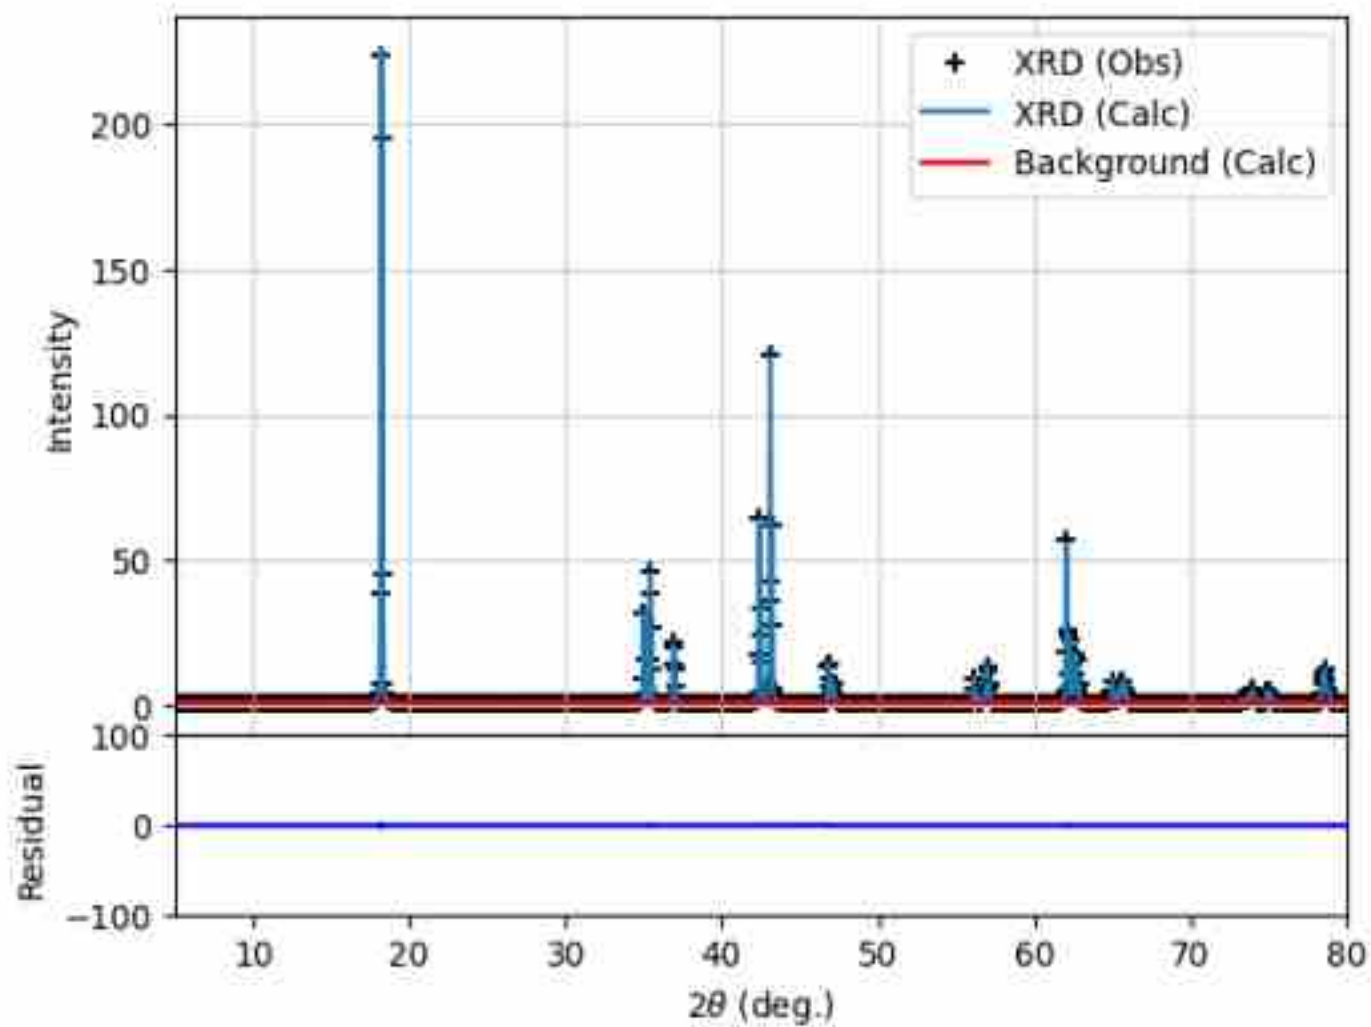

| RMSE before RR | Rwp     | RMSE after RR |
|----------------|---------|---------------|
| 0.025          | 1.08952 | 0.02401       |

# Li<sub>4</sub>V<sub>3</sub>Cr<sub>10</sub>O<sub>8</sub>

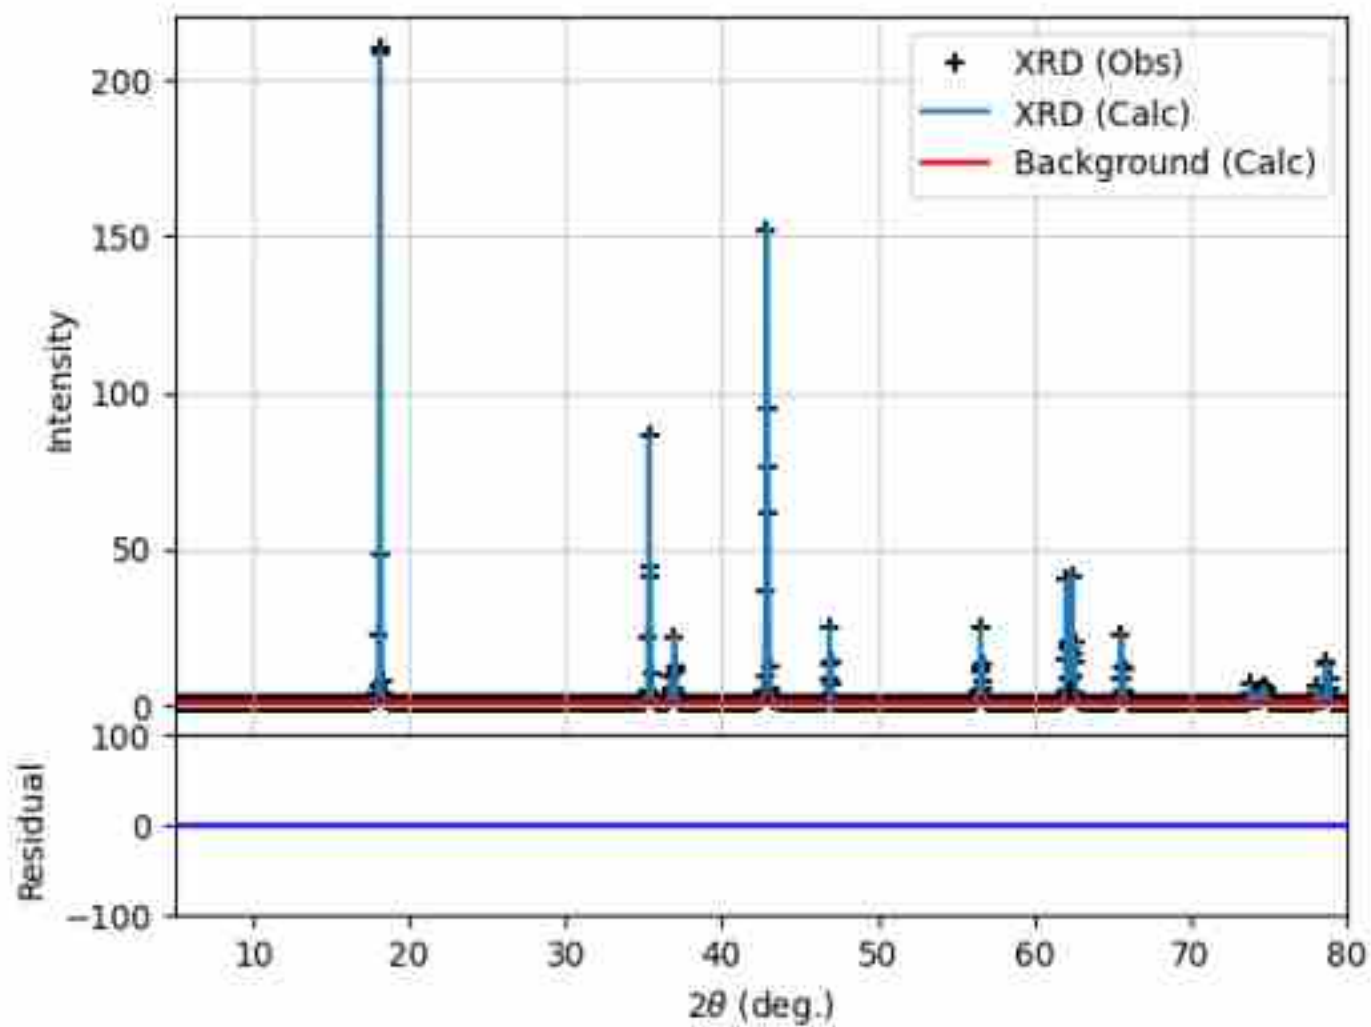

| RMSE before RR | Rwp     | RMSE after RR |
|----------------|---------|---------------|
| 0.025          | 0.00307 | 0.00376       |



# Li5Co3O8

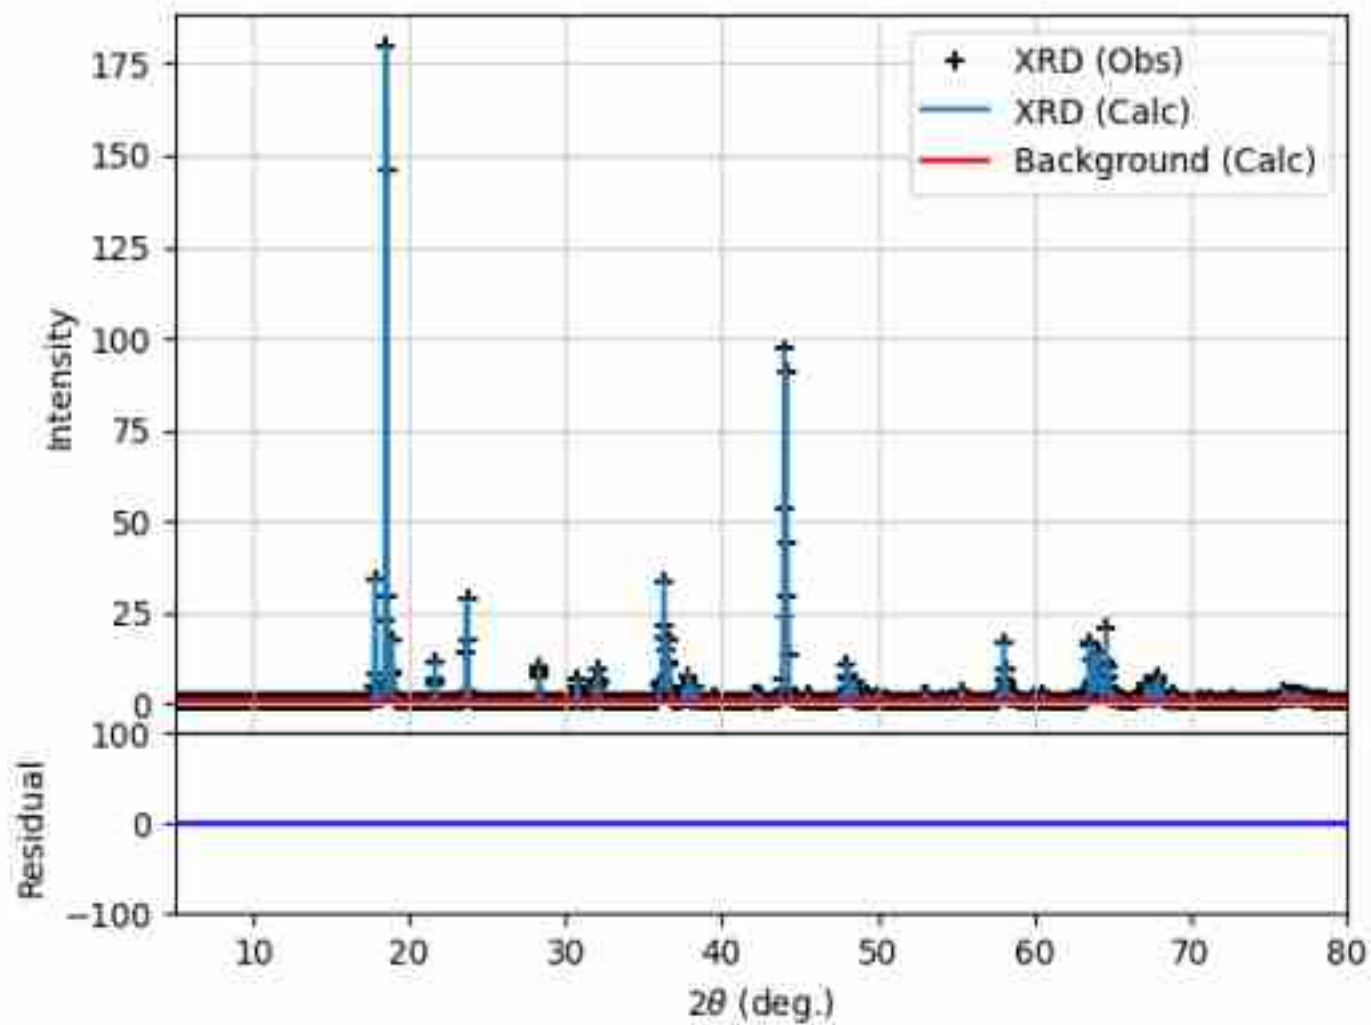

| RMSE before RR | Rwp     | RMSE after RR |
|----------------|---------|---------------|
| 0.025          | 0.00196 | 0.00095       |

# Lu<sub>4</sub>Co<sub>4</sub>O<sub>12</sub>

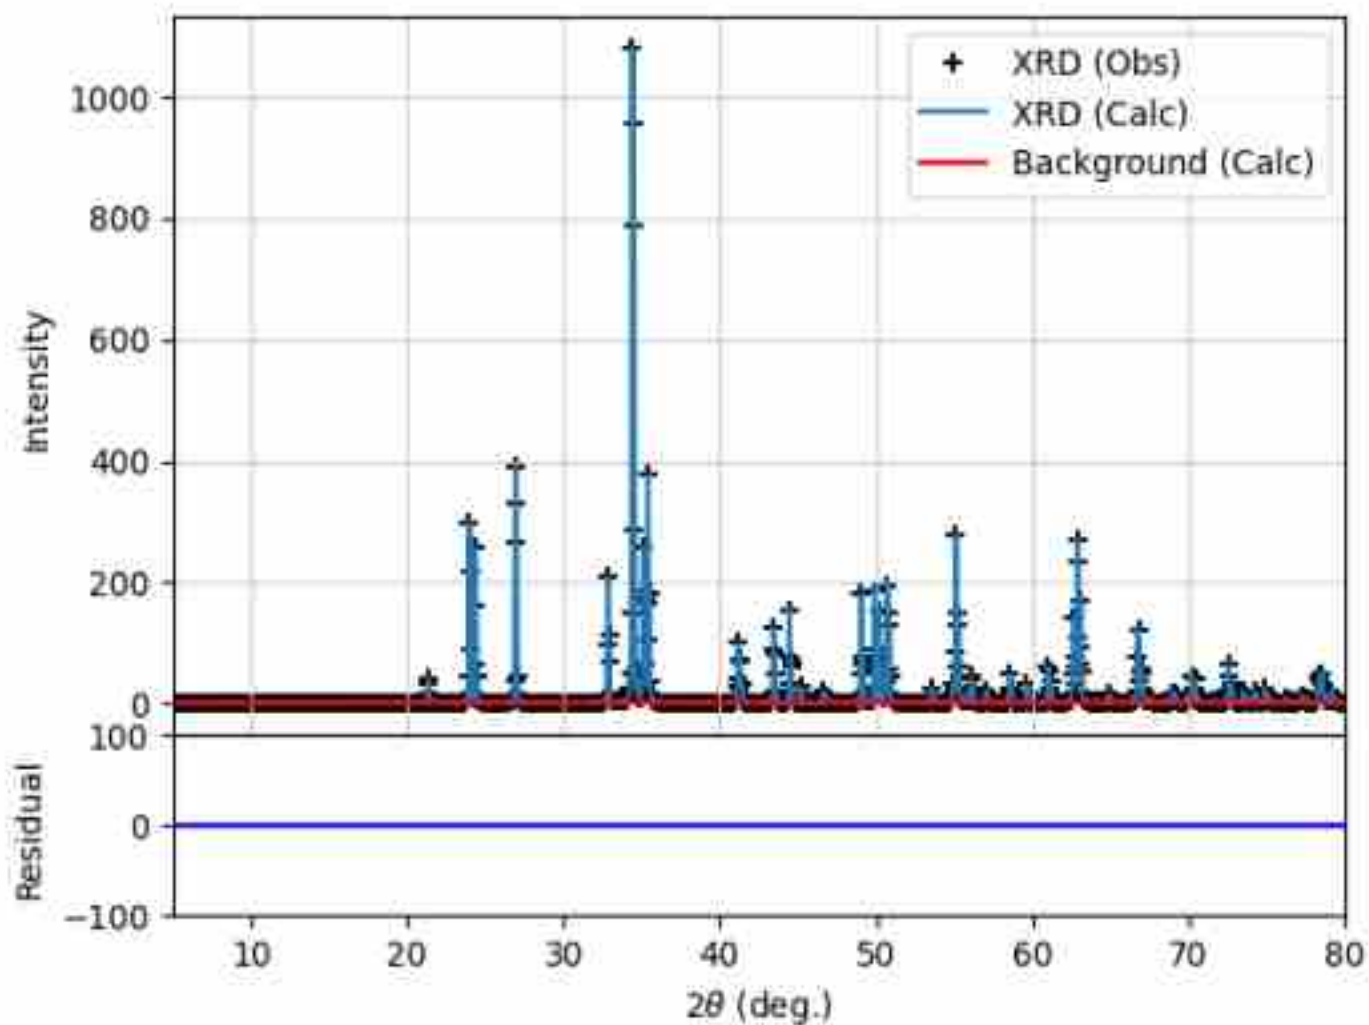

| RMSE before RR | Rwp    | RMSE after RR |
|----------------|--------|---------------|
| 0.025          | 0.0039 | 0.00154       |

# Mg<sub>4</sub>Mn<sub>2</sub>N<sub>6</sub>

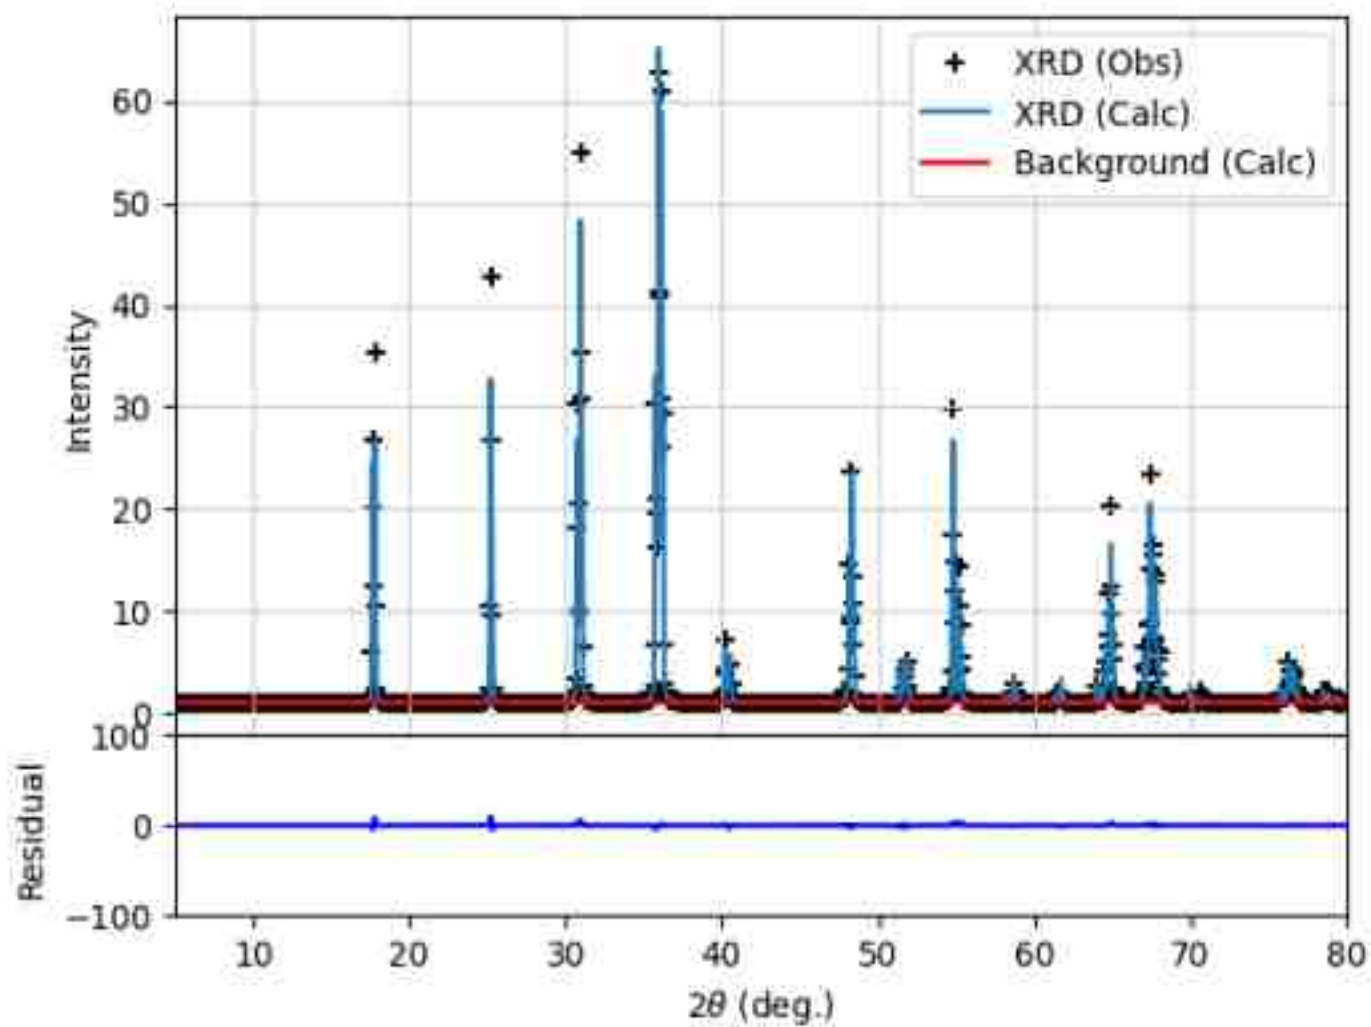

| RMSE before RR | Rwp      | RMSE after RR |
|----------------|----------|---------------|
| 0.025          | 14.12973 | 0.15237       |

# Mn<sub>2</sub>In<sub>2</sub>O<sub>6</sub>

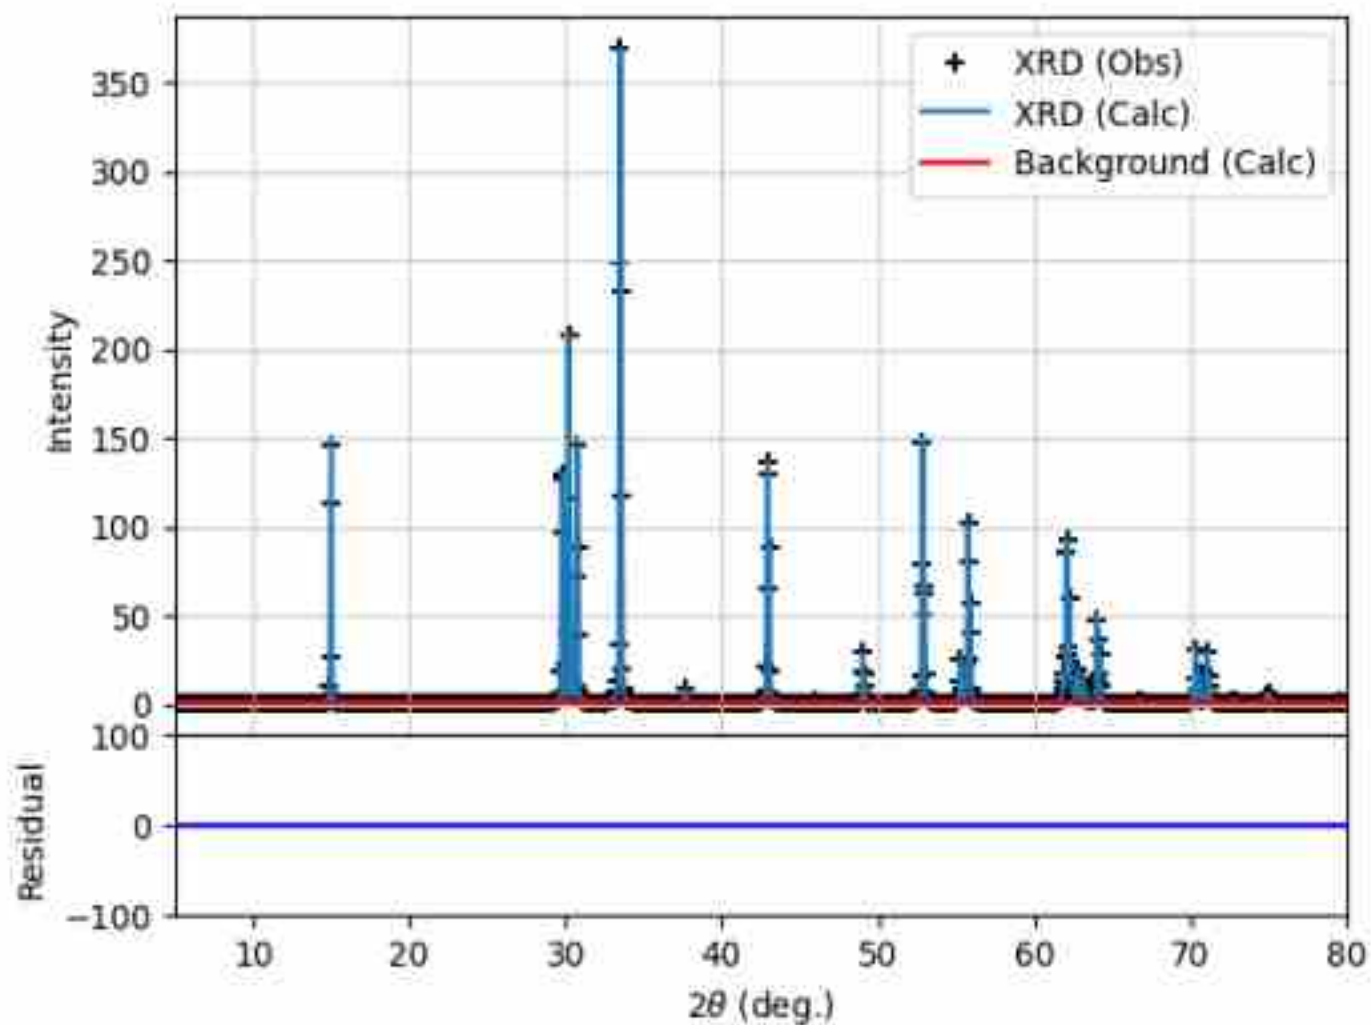

| RMSE before RR | Rwp     | RMSE after RR |
|----------------|---------|---------------|
| 0.025          | 0.00231 | 0.00165       |

# Mn<sub>2</sub>Sb<sub>2</sub>S<sub>4</sub>Br<sub>2</sub>

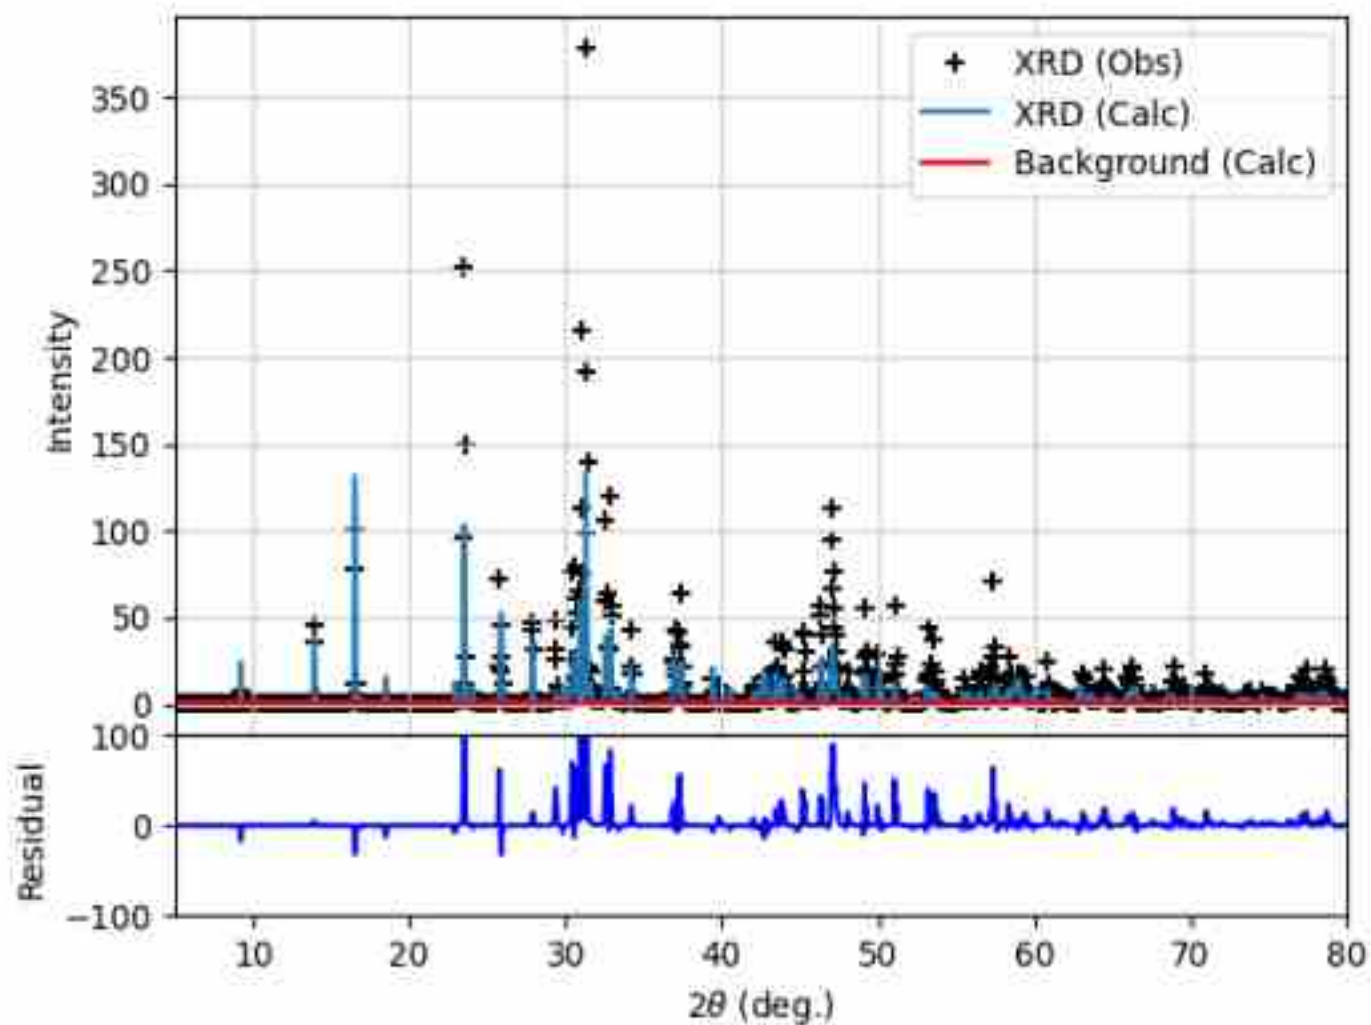

| RMSE before RR | Rwp      | RMSE after RR |
|----------------|----------|---------------|
| 0.025          | 63.75319 | None          |

# Mn<sub>6</sub>O<sub>7</sub>F<sub>5</sub>

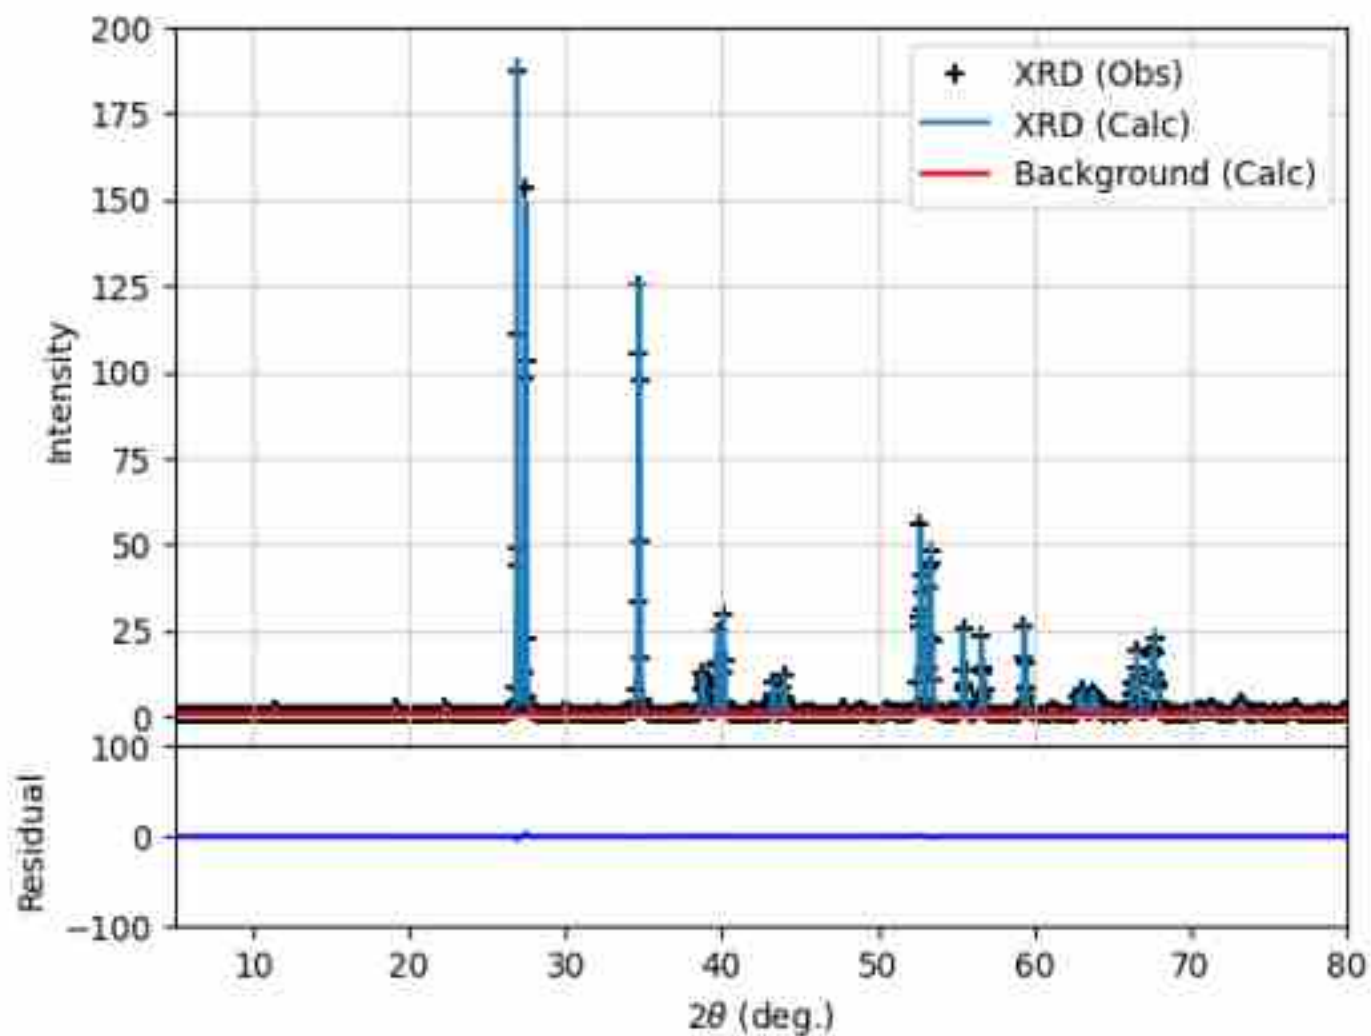

| RMSE before RR | Rwp     | RMSE after RR |
|----------------|---------|---------------|
| 0.025          | 1.66859 | 0.04855       |

# Na<sub>6</sub>Lu<sub>2</sub>Br<sub>12</sub>

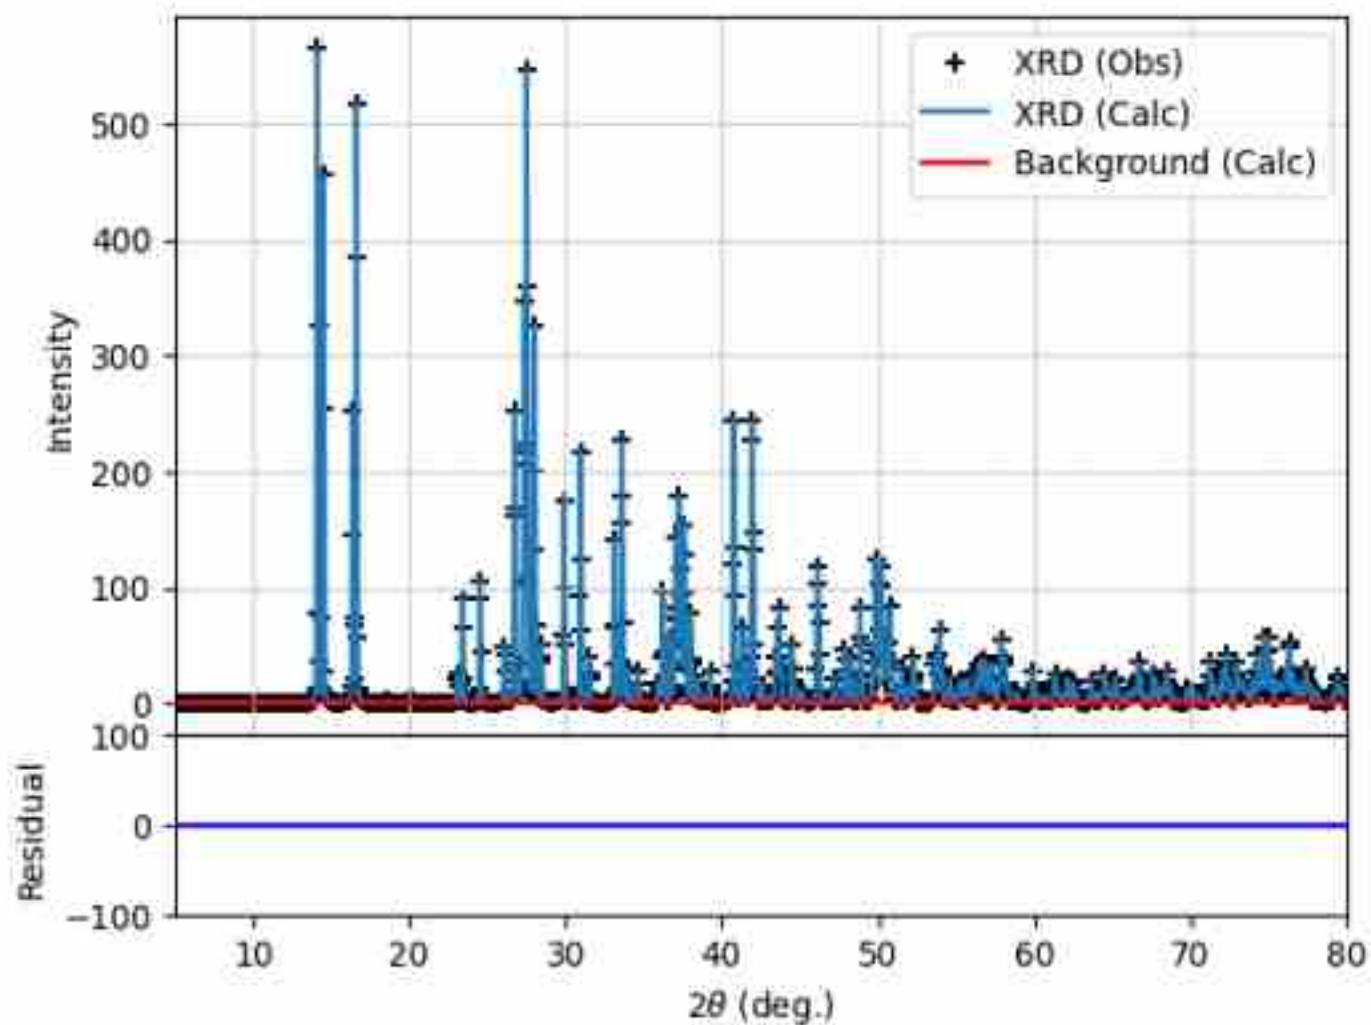

| RMSE before RR | Rwp     | RMSE after RR |
|----------------|---------|---------------|
| 0.025          | 0.00323 | 0.0005        |

# Nb<sub>4</sub>Cu<sub>1</sub>Se<sub>8</sub>

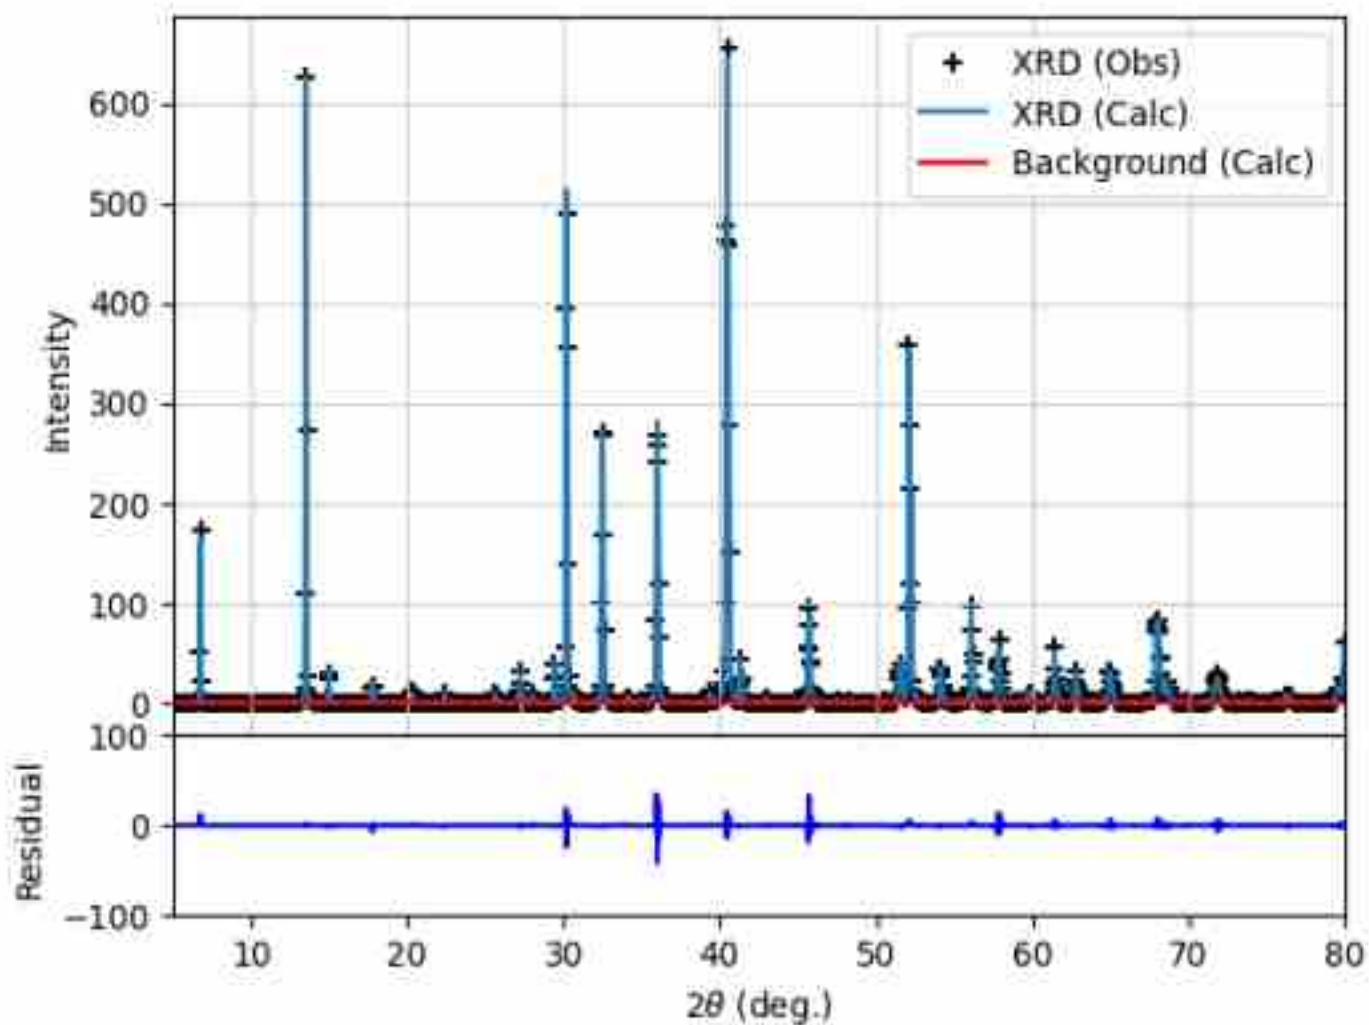

| RMSE before RR | Rwp     | RMSE after RR |
|----------------|---------|---------------|
| 0.025          | 7.84014 | 0.03184       |



# Nb<sub>6</sub>Zn<sub>1</sub>S<sub>8</sub>

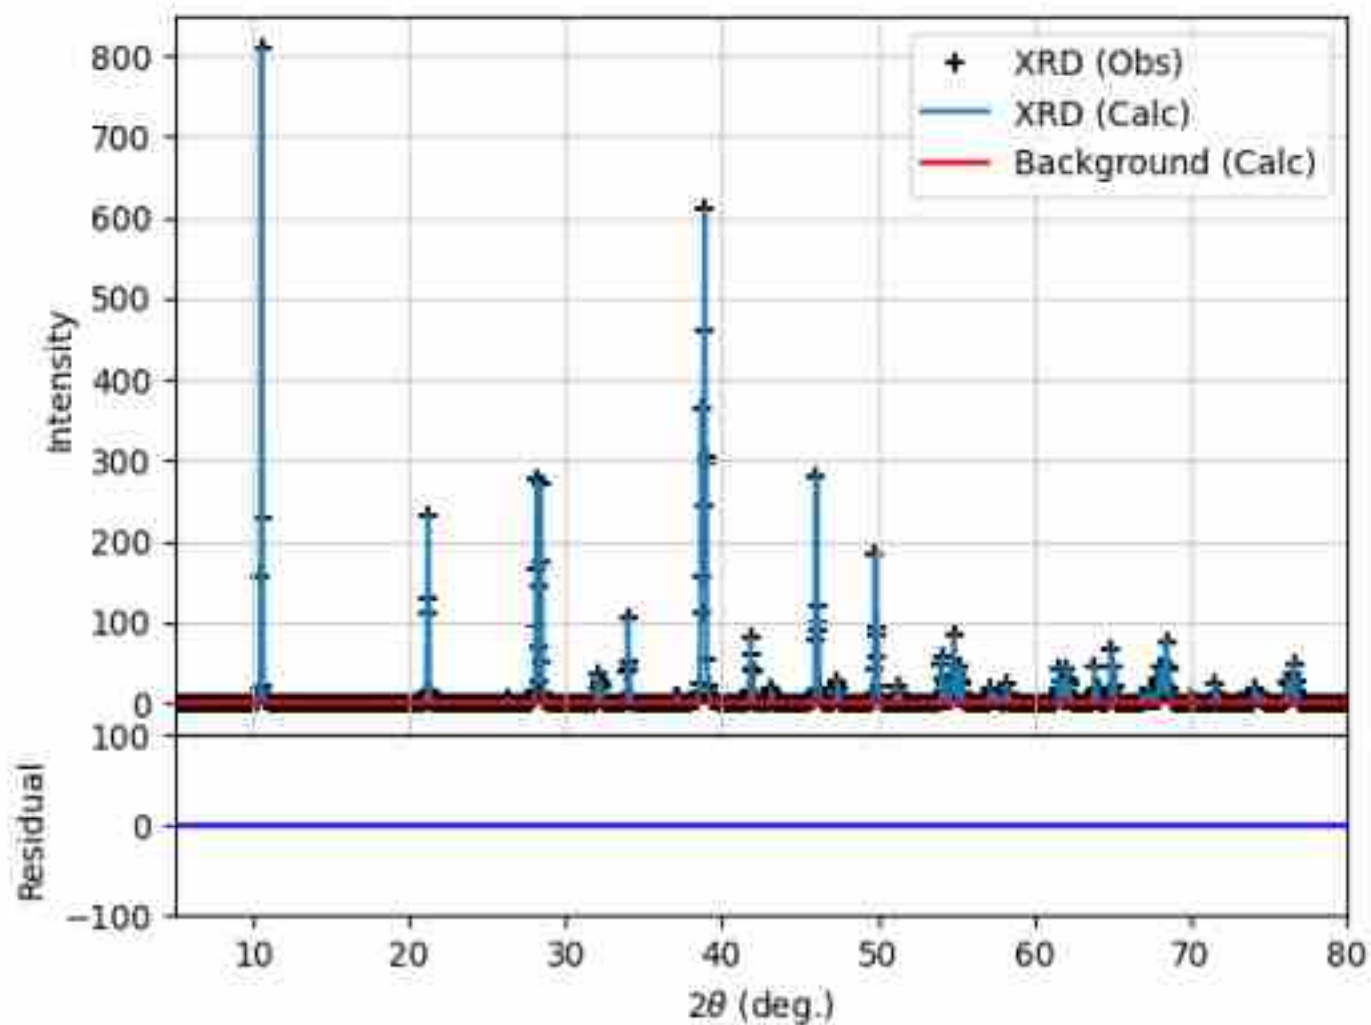

| RMSE before RR | Rwp     | RMSE after RR |
|----------------|---------|---------------|
| 0.025          | 0.00391 | 0.00094       |

# Ni<sub>2</sub>F<sub>6</sub>

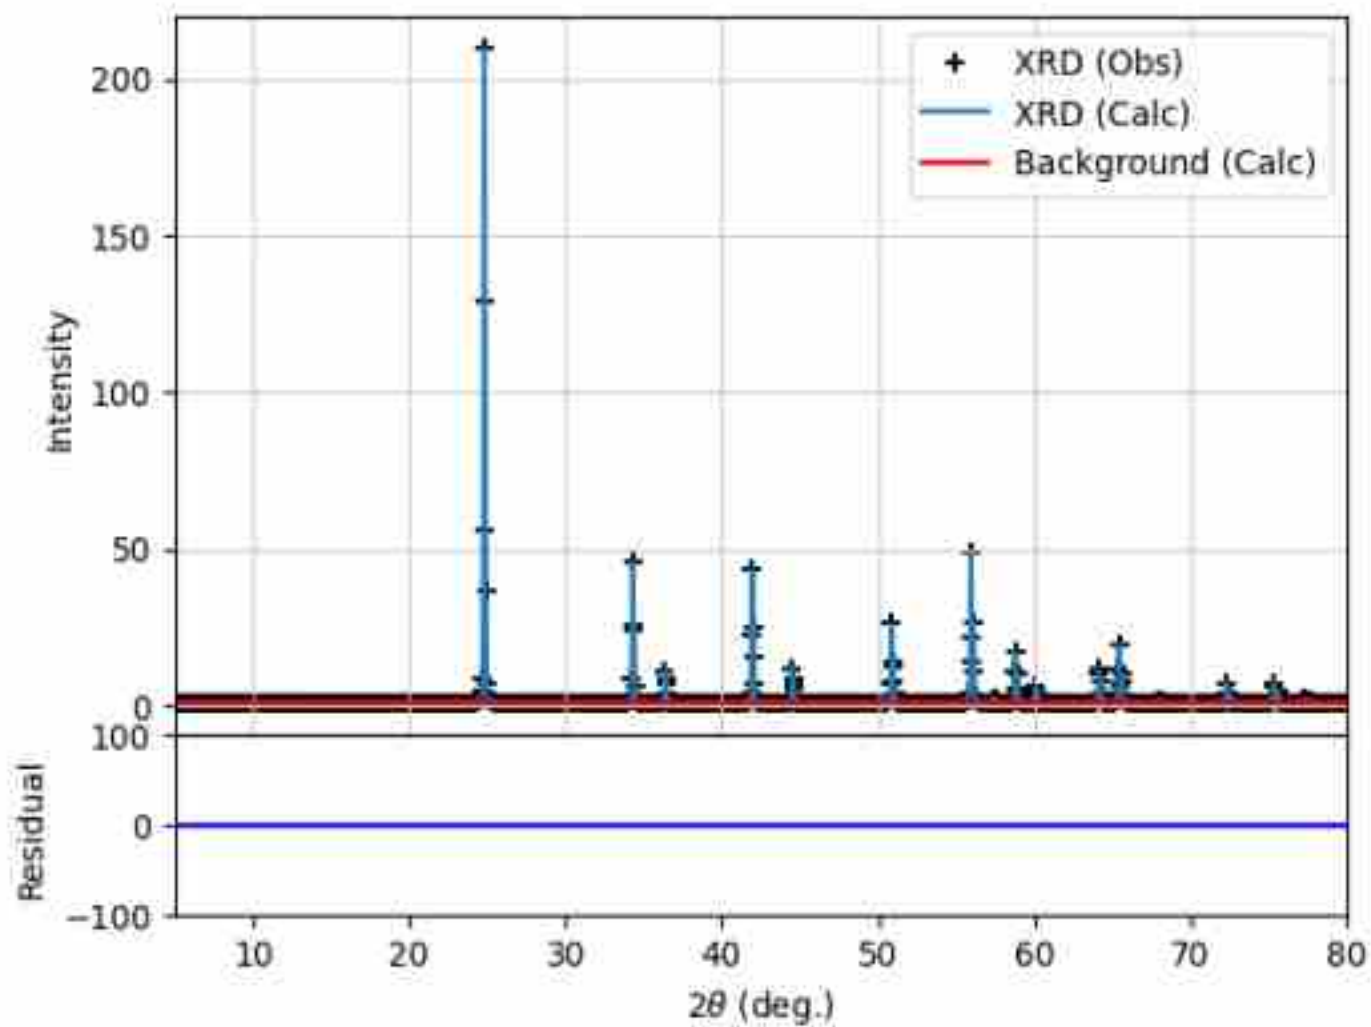

| RMSE before RR | Rwp     | RMSE after RR |
|----------------|---------|---------------|
| 0.025          | 0.00441 | 0.001         |

# Np4Se10

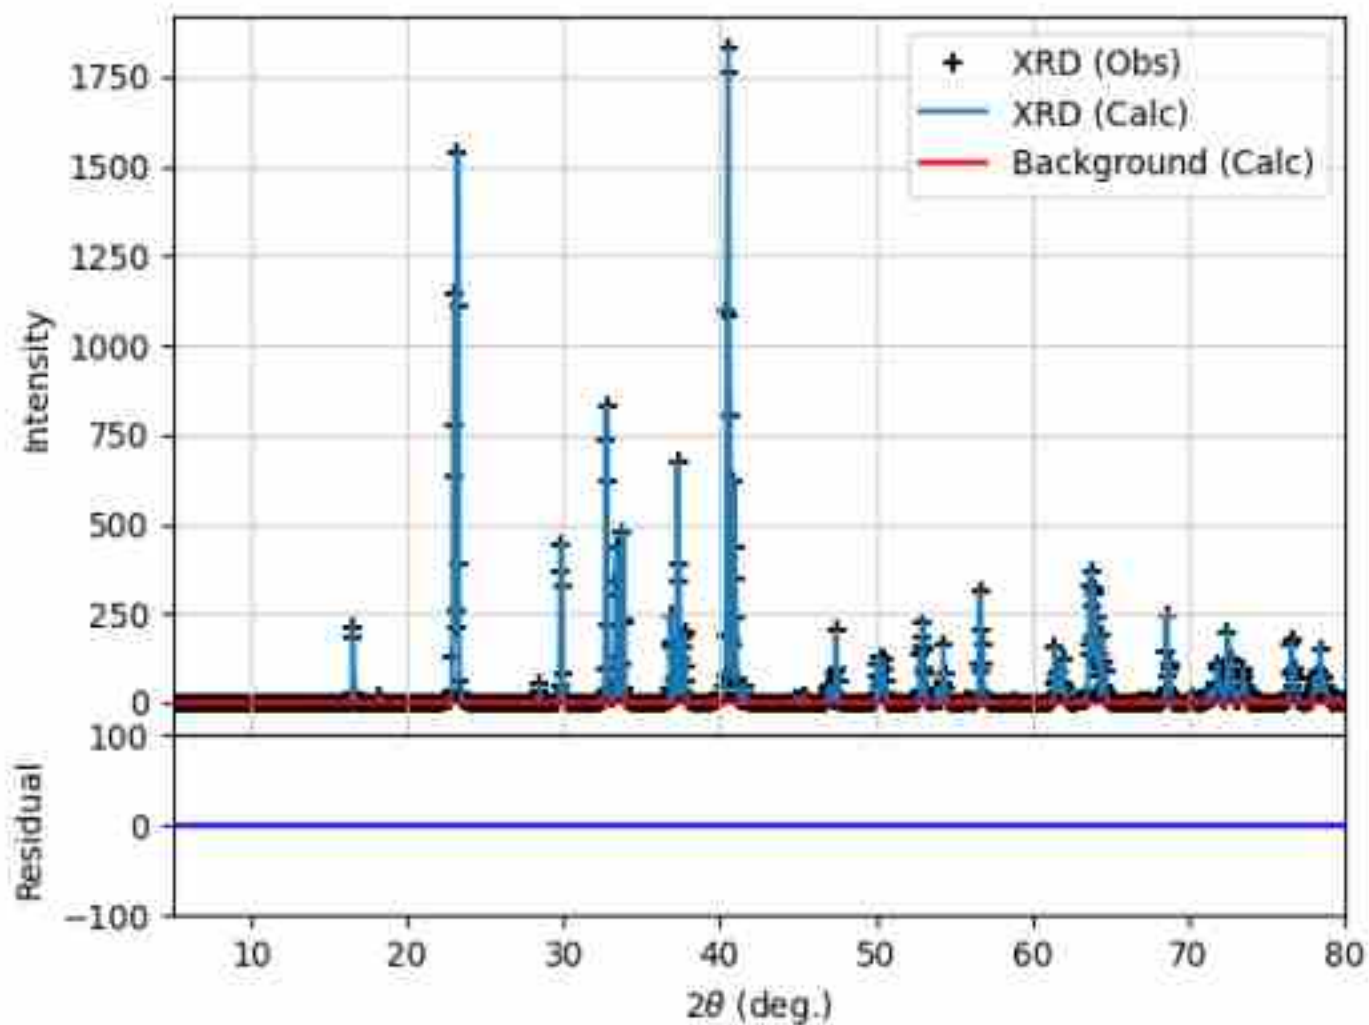

| RMSE before RR | Rwp    | RMSE after RR |
|----------------|--------|---------------|
| 0.025          | 0.0037 | 0.00031       |

# P8Pt4

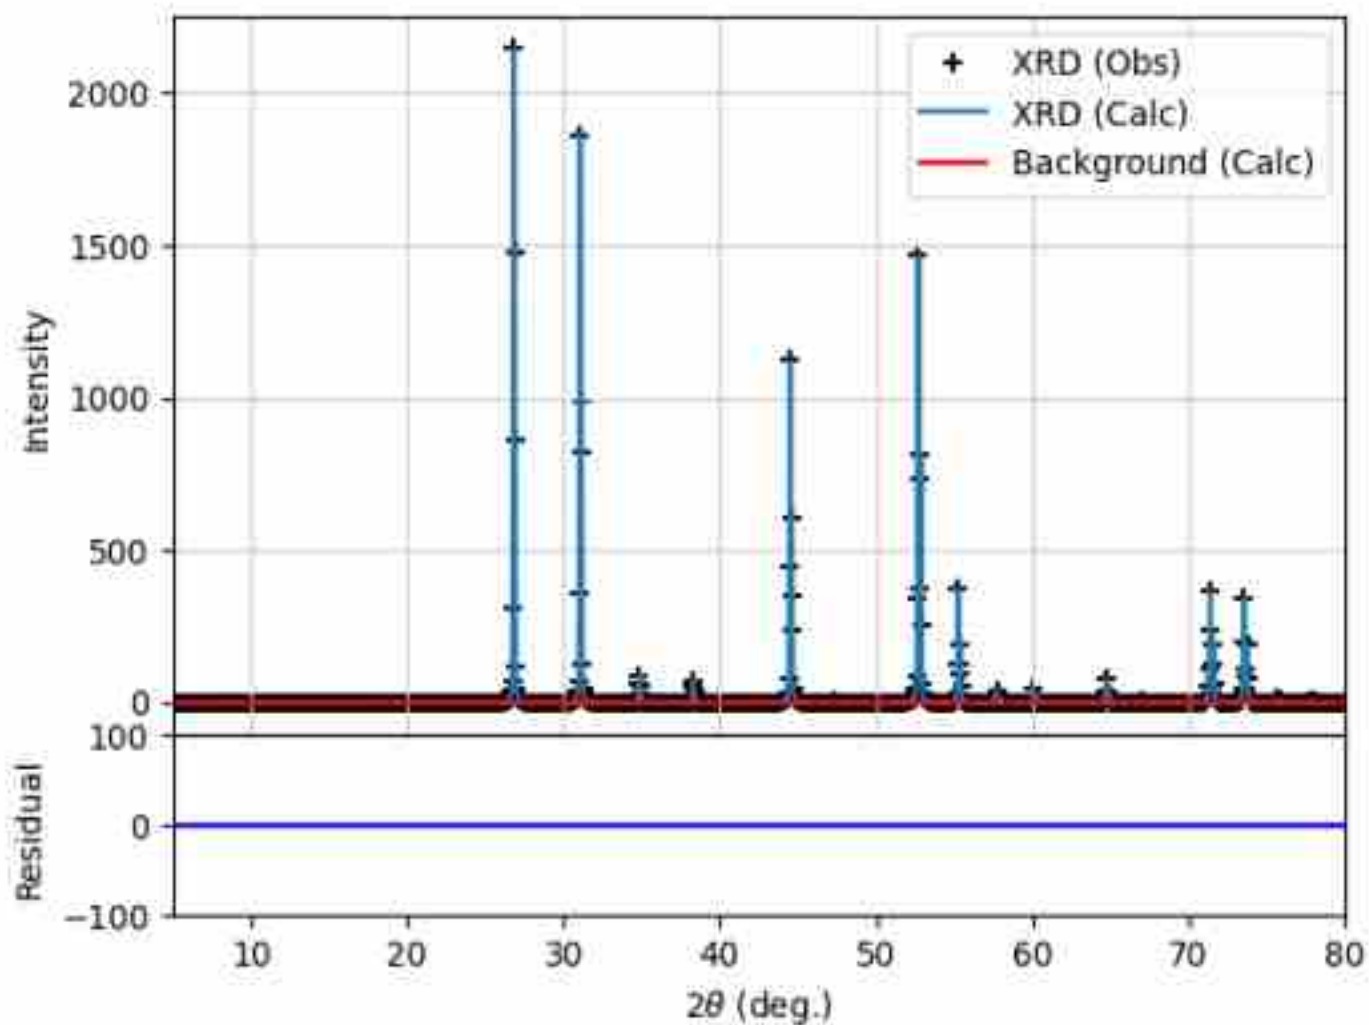

| RMSE before RR | Rwp    | RMSE after RR |
|----------------|--------|---------------|
| 0.025          | 0.1093 | 0.00279       |

# Pb4C18

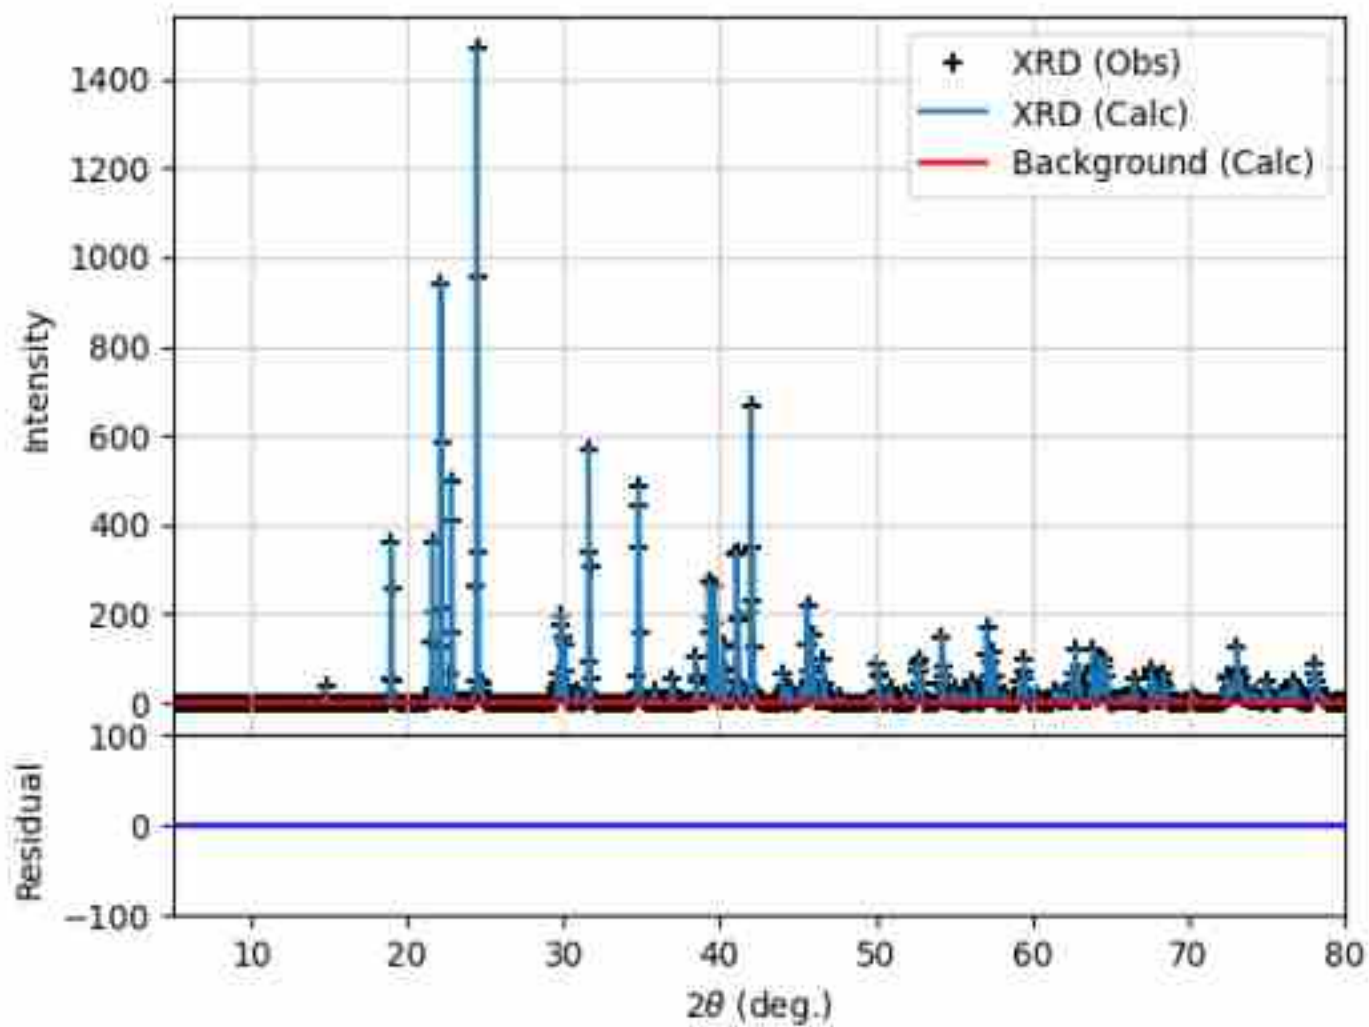

| RMSE before RR | Rwp     | RMSE after RR |
|----------------|---------|---------------|
| 0.025          | 0.00433 | 0.00057       |

# Pb<sub>4</sub>I<sub>2</sub>O<sub>2</sub>F<sub>2</sub>

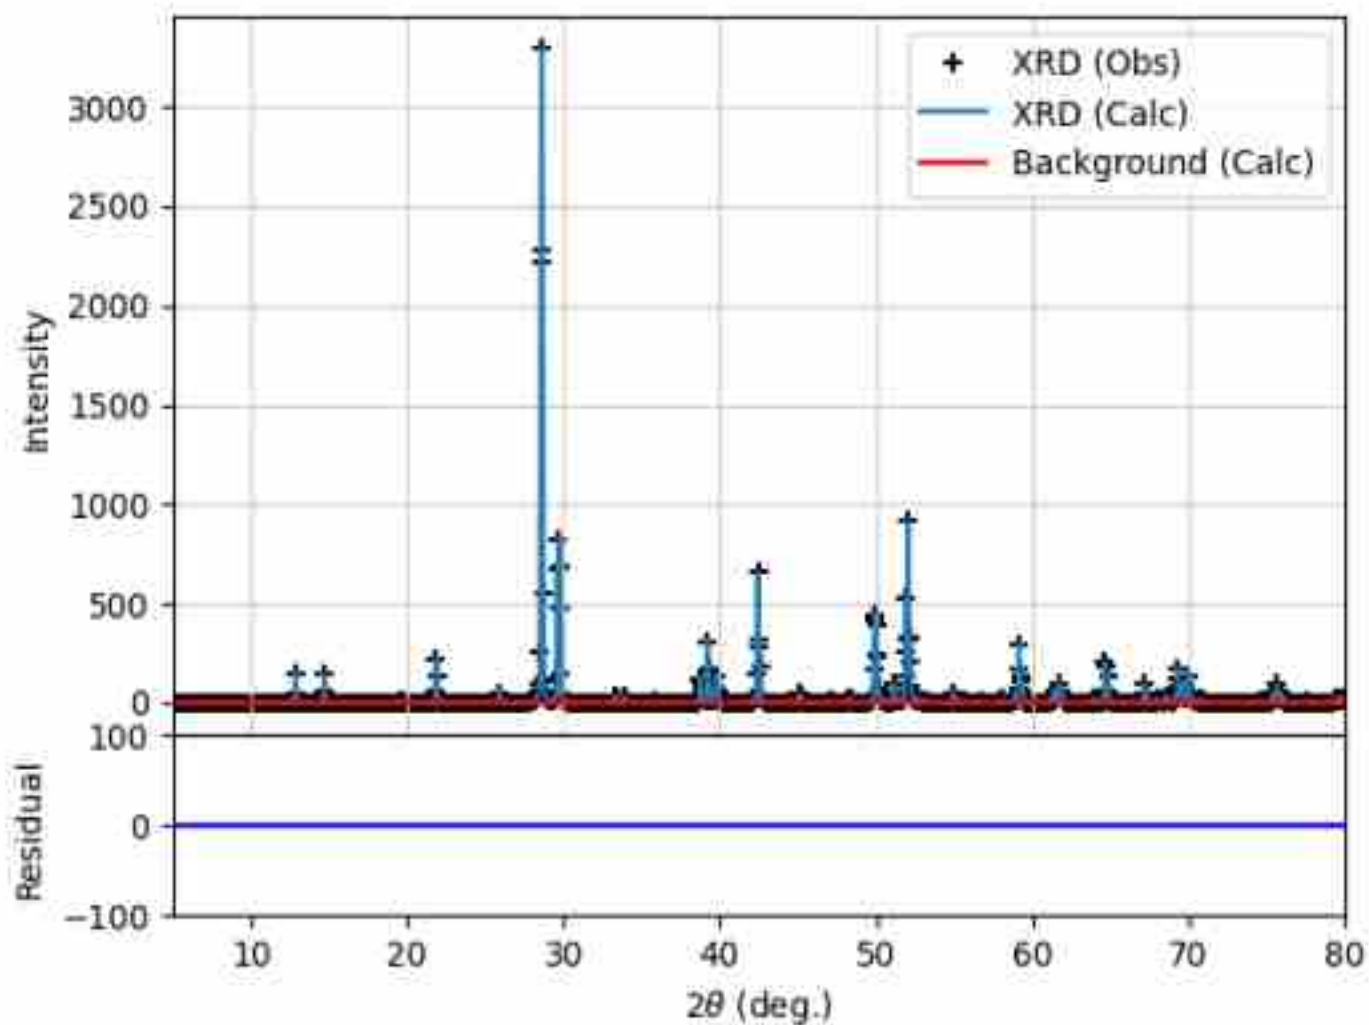

| RMSE before RR | Rwp     | RMSE after RR |
|----------------|---------|---------------|
| 0.025          | 0.00376 | 0.00137       |

# Pd2Pb4F12

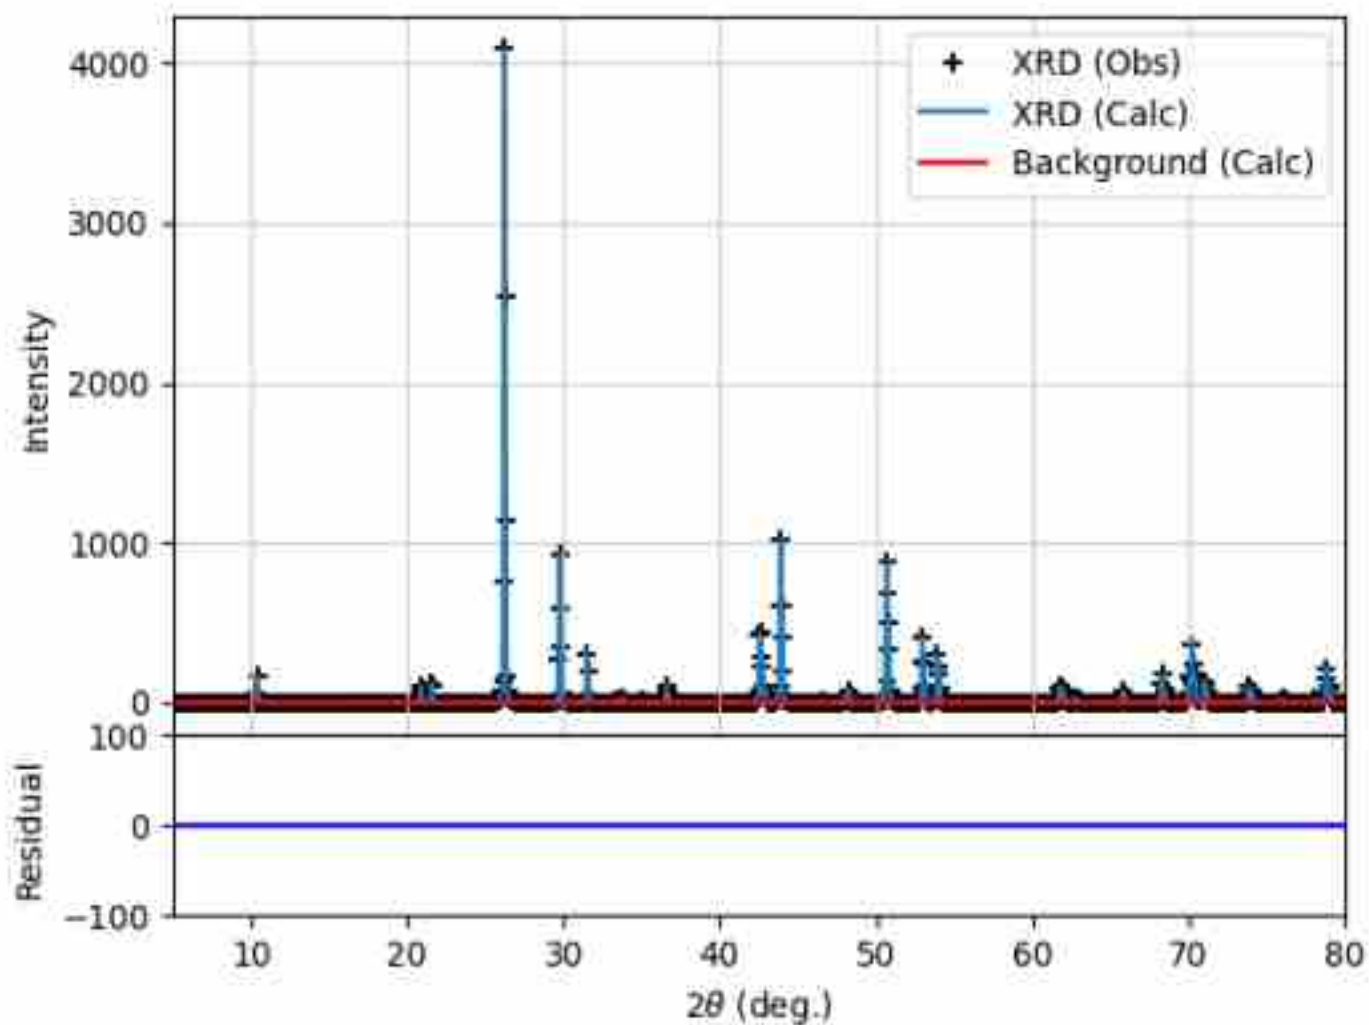

| RMSE before RR | Rwp     | RMSE after RR |
|----------------|---------|---------------|
| 0.025          | 0.00618 | 0.00171       |

# Pr<sub>1</sub>Mn<sub>7</sub>O<sub>12</sub>

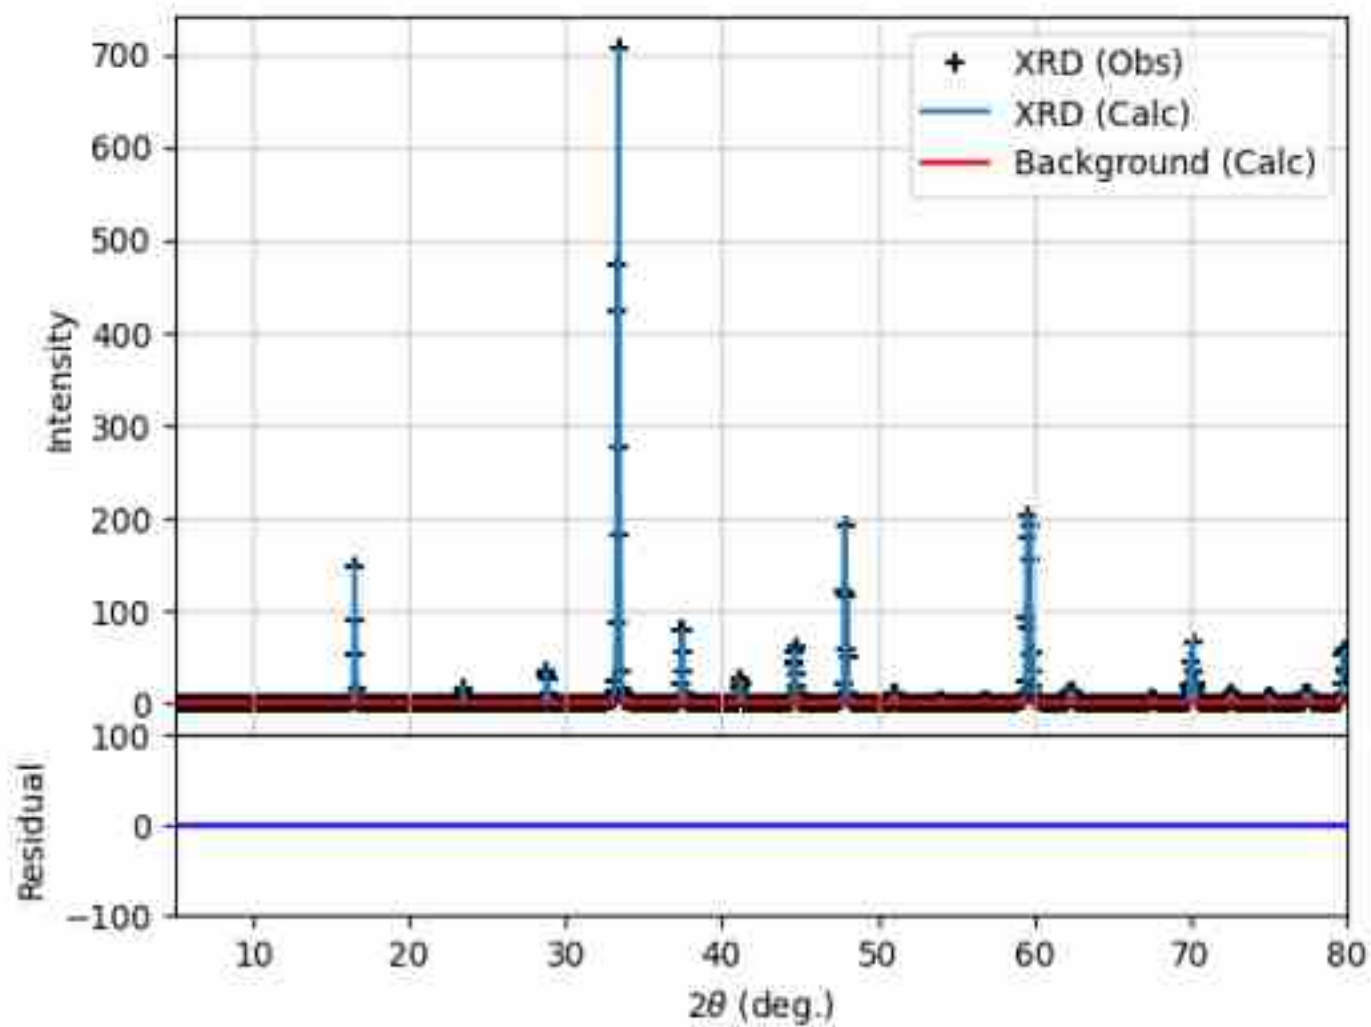

| RMSE before RR | Rwp     | RMSE after RR |
|----------------|---------|---------------|
| 0.025          | 0.00407 | 0.00209       |



# Pr<sub>6</sub>Ti<sub>2</sub>Sb<sub>10</sub>

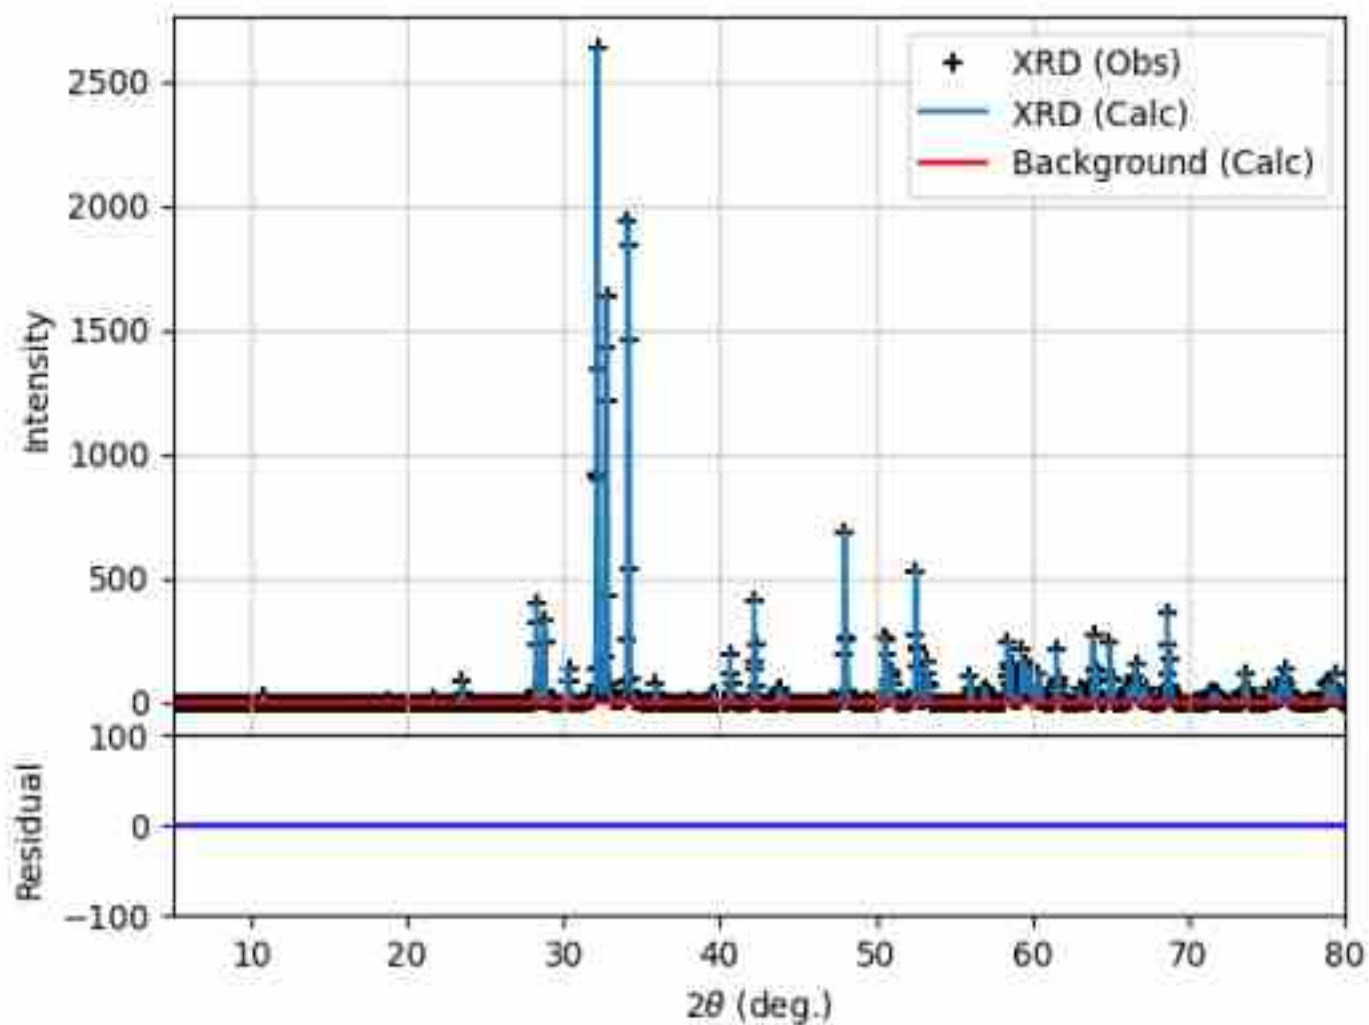

| RMSE before RR | Rwp     | RMSE after RR |
|----------------|---------|---------------|
| 0.025          | 0.00416 | 0.00032       |

# Rb<sub>2</sub>CrCl<sub>4</sub>

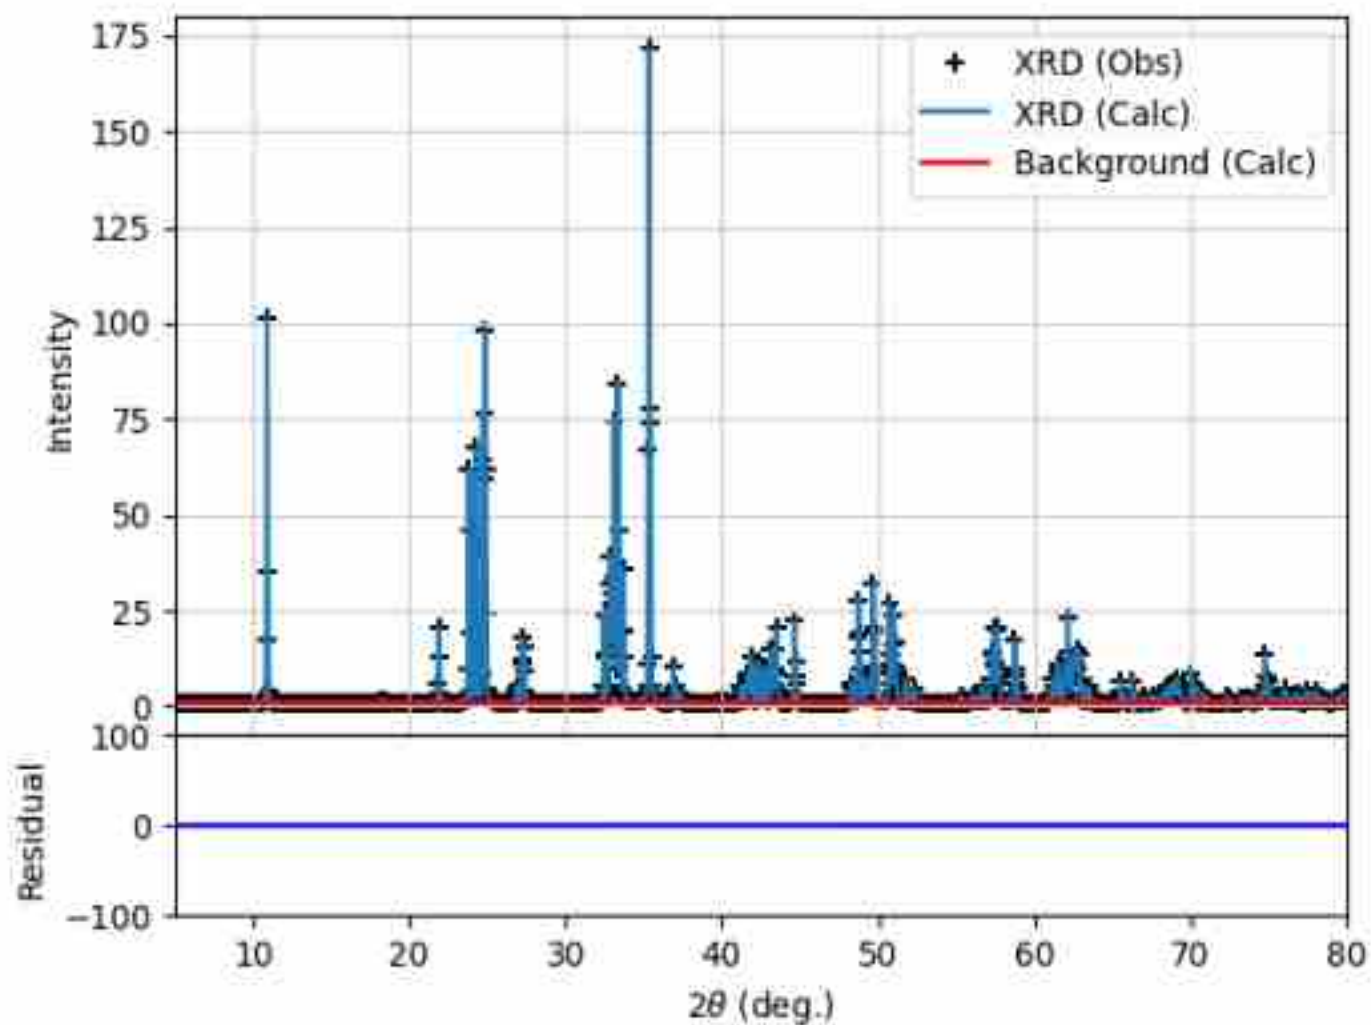

| RMSE before RR | Rwp     | RMSE after RR |
|----------------|---------|---------------|
| 0.025          | 0.21806 | 0.00365       |

# Rb<sub>2</sub>Cu<sub>1</sub>F<sub>6</sub>

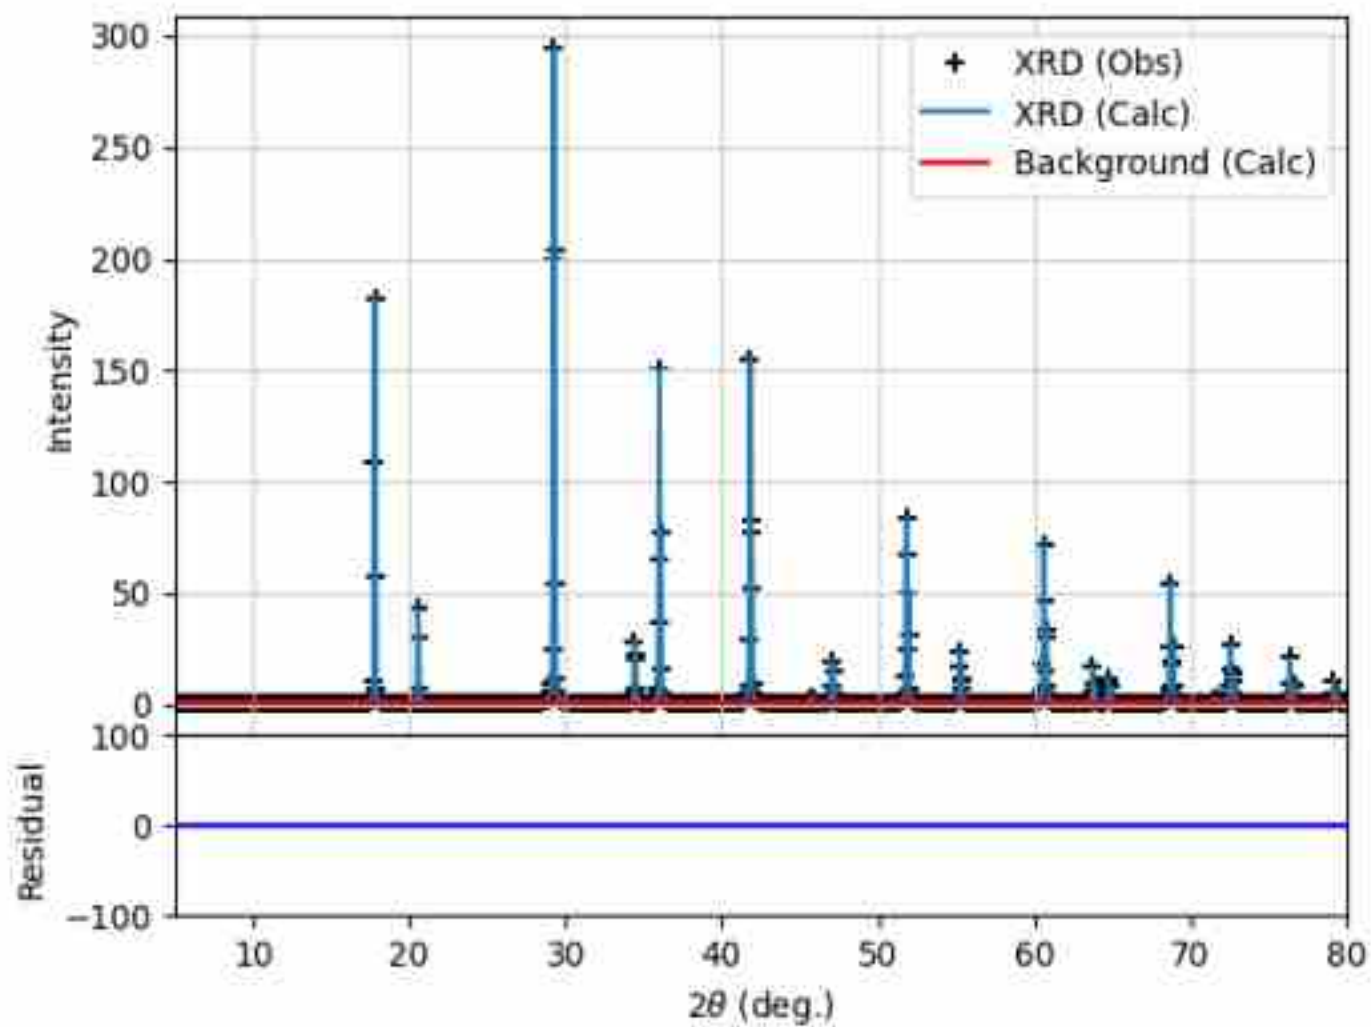

| RMSE before RR | Rwp   | RMSE after RR |
|----------------|-------|---------------|
| 0.025          | 0.043 | 0.00611       |

# Rb<sub>2</sub>U<sub>2</sub>Te<sub>6</sub>Au<sub>2</sub>

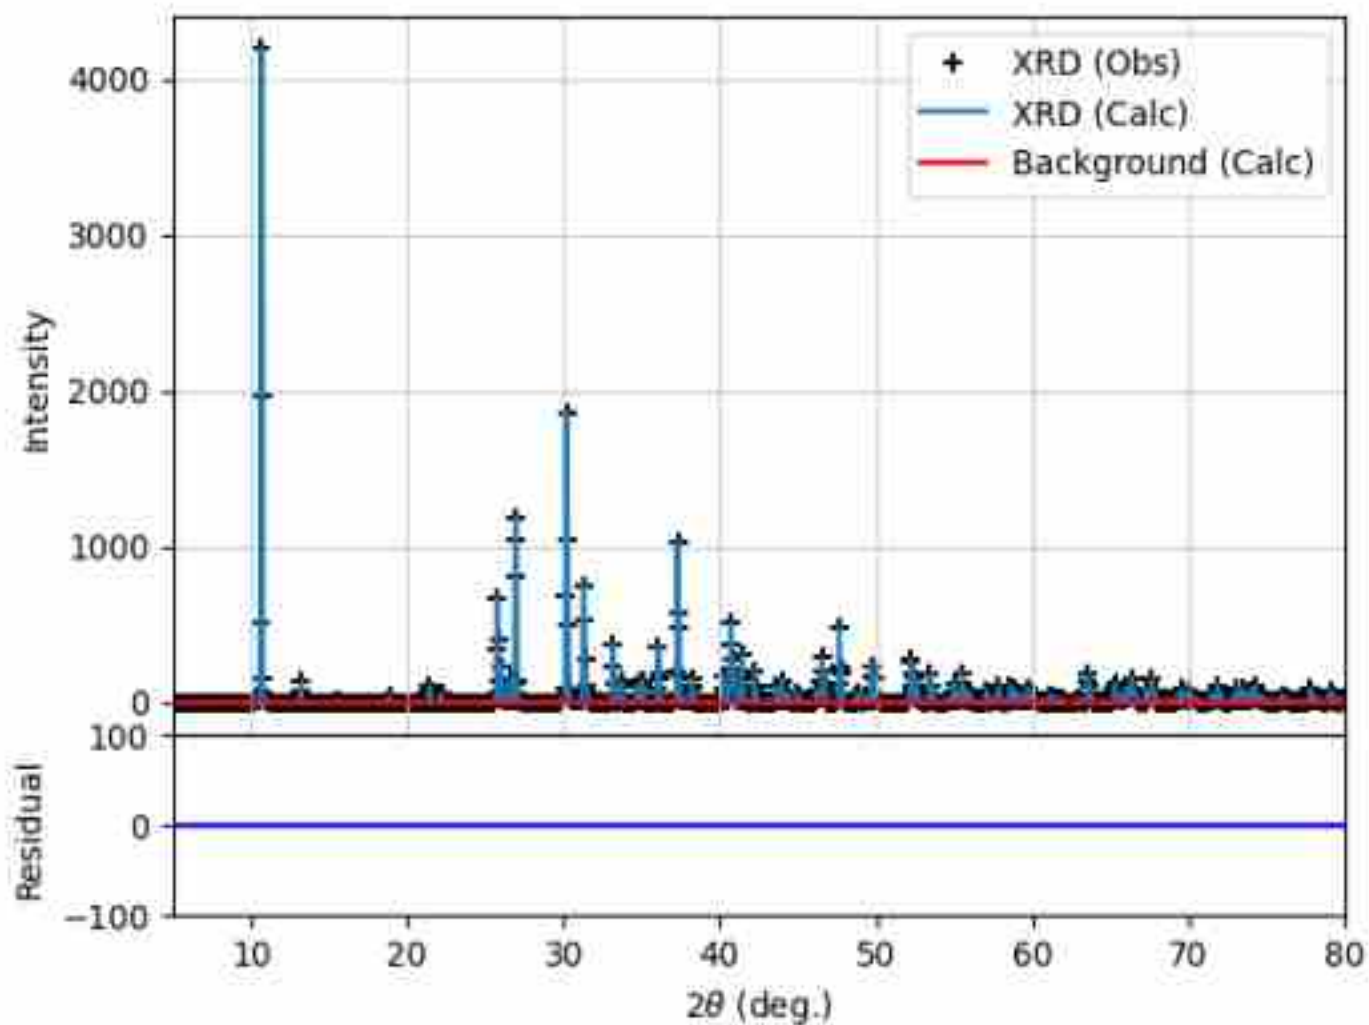

| RMSE before RR | Rwp     | RMSE after RR |
|----------------|---------|---------------|
| 0.025          | 0.00414 | 0.00026       |

# Rb<sub>3</sub>Ho<sub>1</sub>F<sub>6</sub>

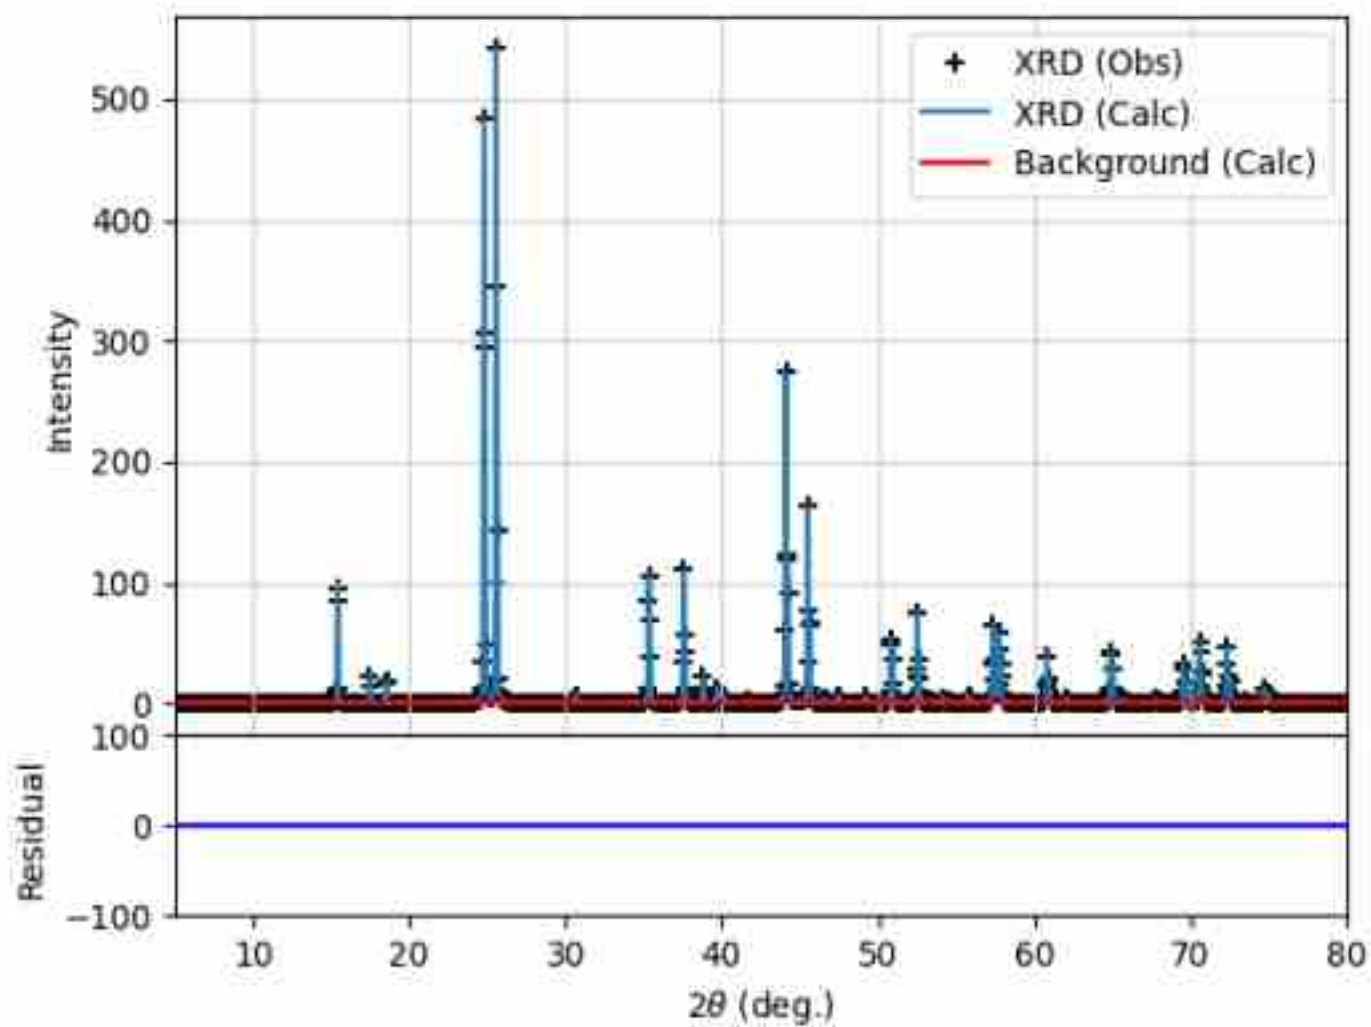

| RMSE before RR | Rwp     | RMSE after RR |
|----------------|---------|---------------|
| 0.025          | 0.00364 | 0.00076       |

# Rb3Na1Mo2O8

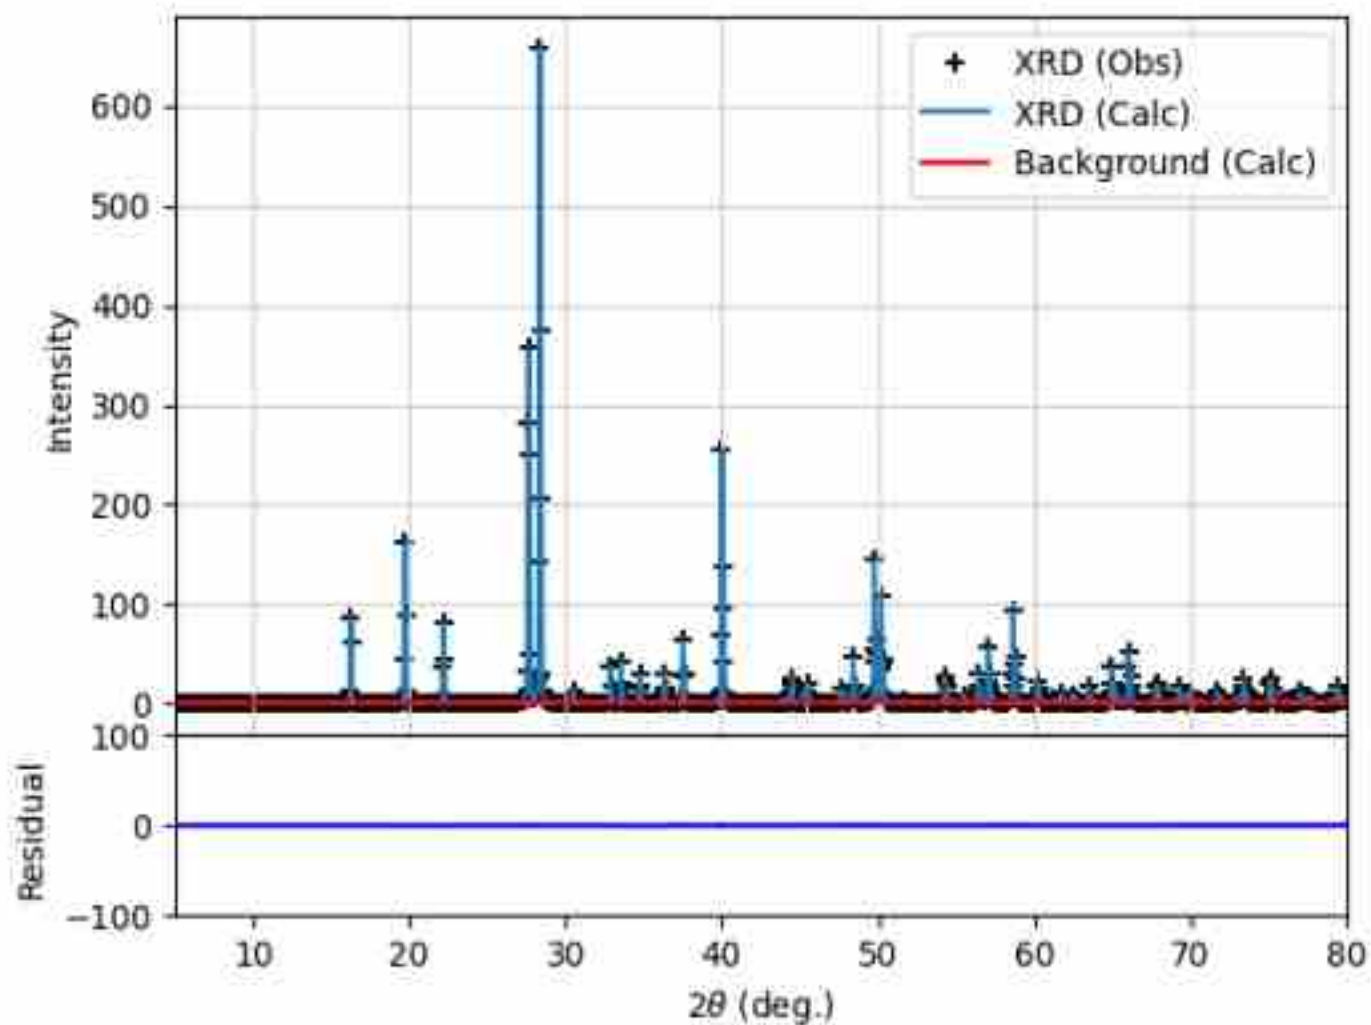

| RMSE before RR | Rwp     | RMSE after RR |
|----------------|---------|---------------|
| 0.025          | 1.33555 | 0.01833       |

# Rb<sub>3</sub>Y<sub>1</sub>F<sub>6</sub>

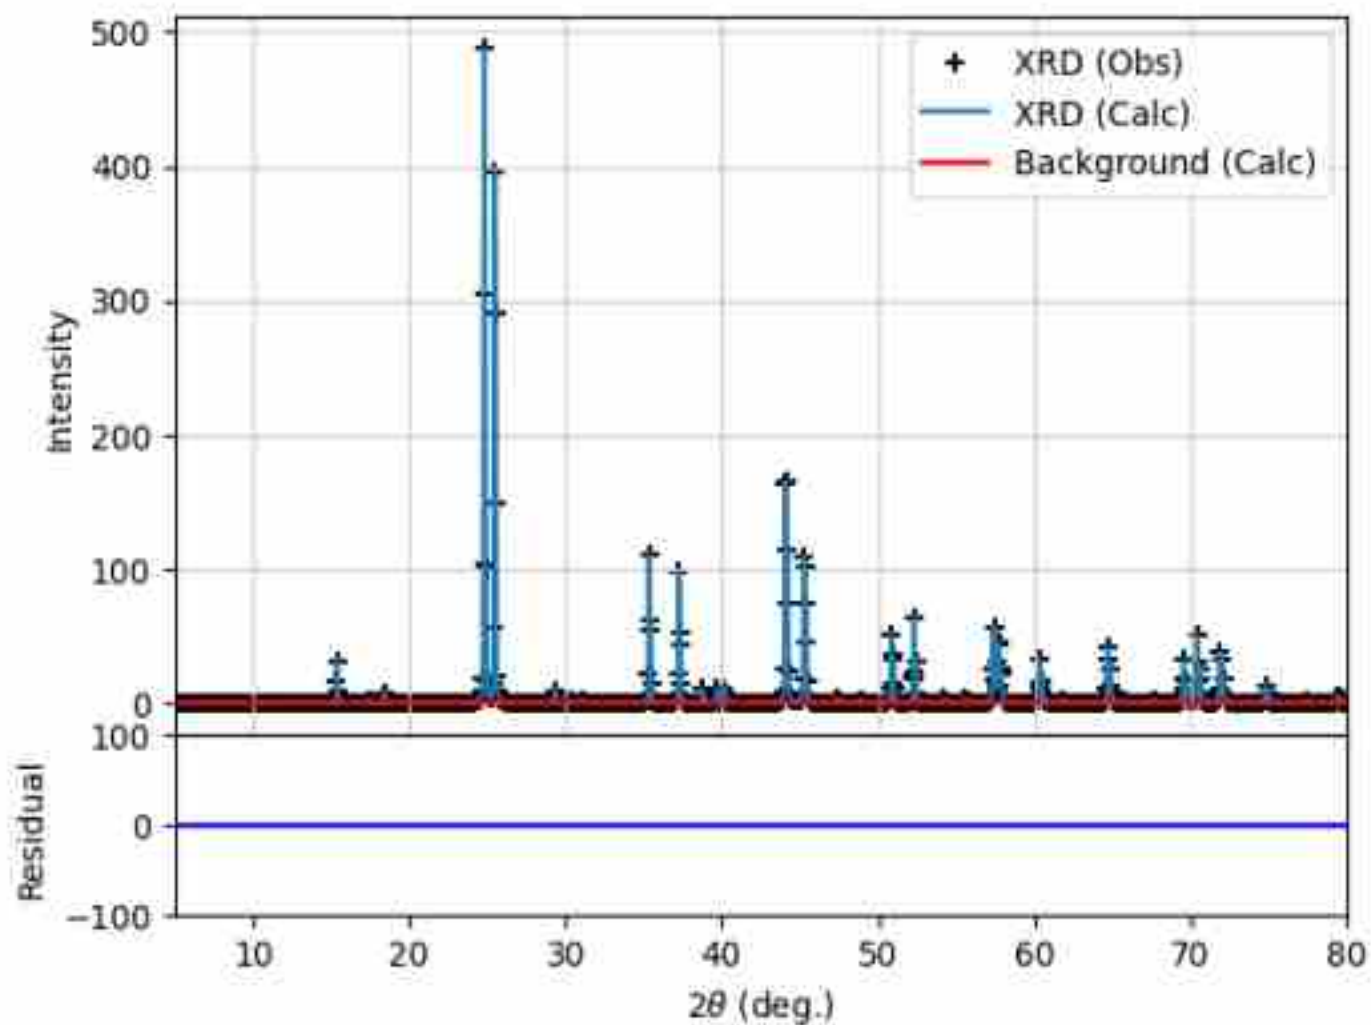

| RMSE before RR | Rwp     | RMSE after RR |
|----------------|---------|---------------|
| 0.025          | 0.00365 | 0.00078       |

# Rb<sub>4</sub>Li<sub>2</sub>V<sub>2</sub>S<sub>8</sub>

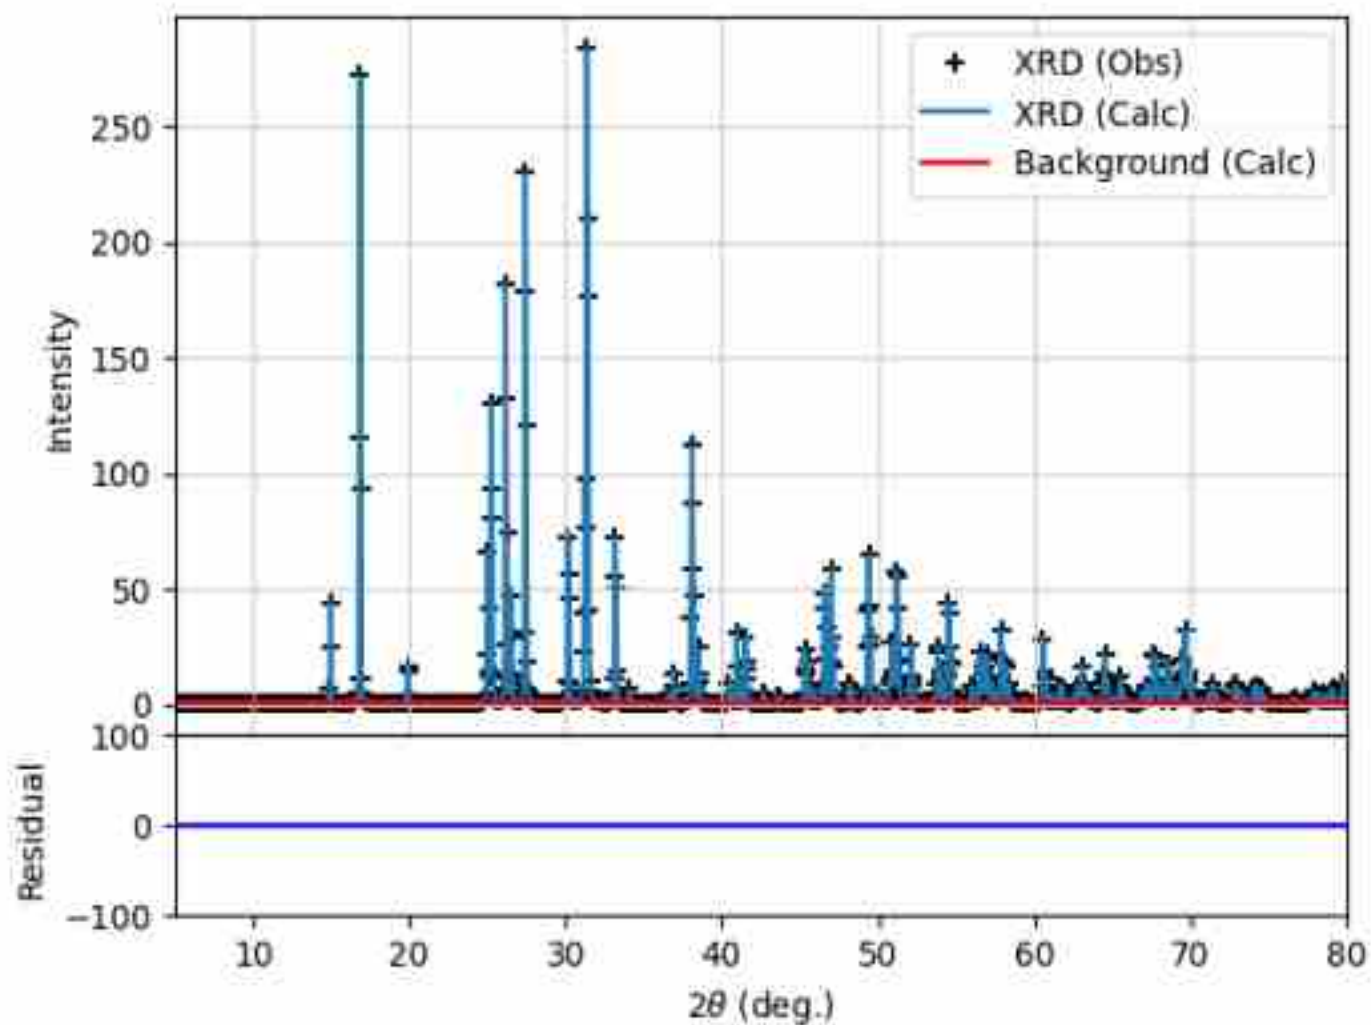

| RMSE before RR | Rwp     | RMSE after RR |
|----------------|---------|---------------|
| 0.025          | 0.00295 | 0.00068       |



# Rb<sub>4</sub>Mn<sub>6</sub>Se<sub>8</sub>

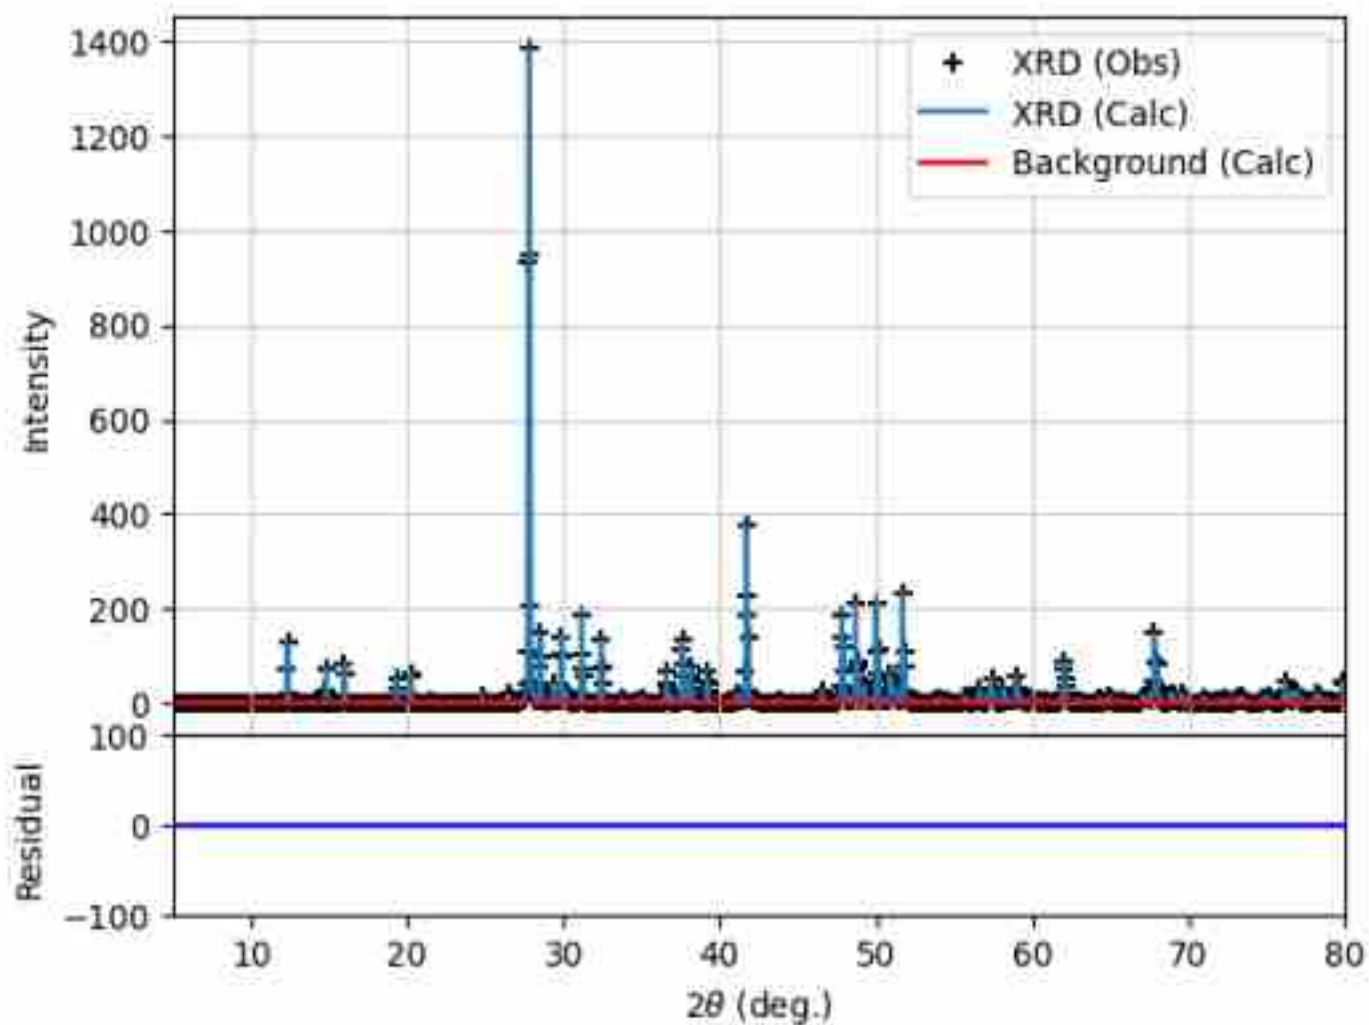

| RMSE before RR | Rwp     | RMSE after RR |
|----------------|---------|---------------|
| 0.025          | 0.00331 | 0.00029       |

# Rb<sub>4</sub>Ta<sub>2</sub>Cu<sub>2</sub>Se<sub>8</sub>

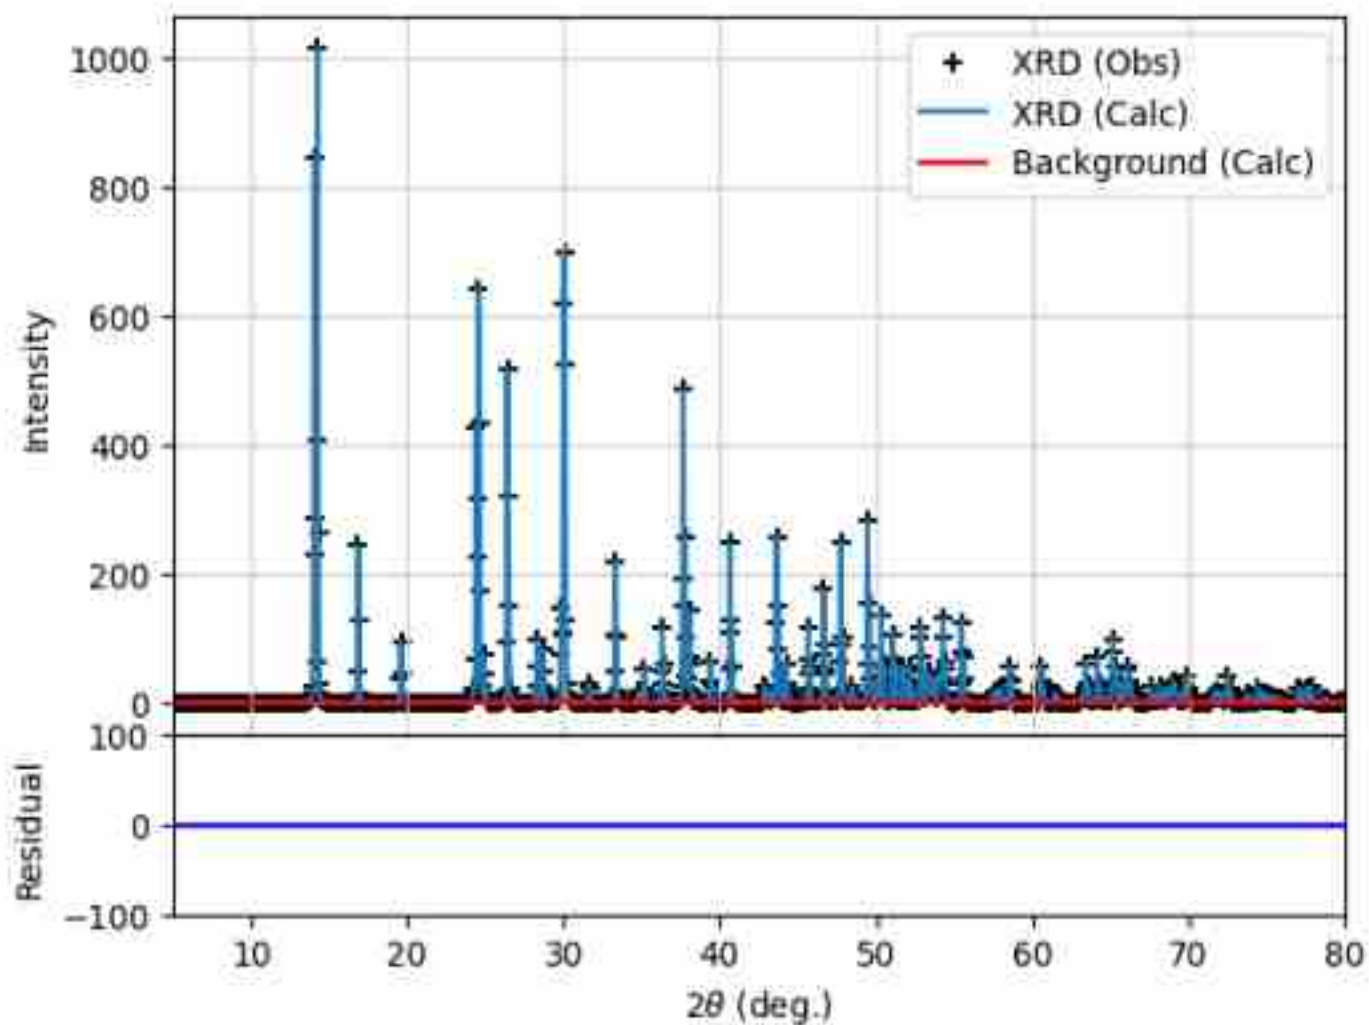

| RMSE before RR | Rwp     | RMSE after RR |
|----------------|---------|---------------|
| 0.025          | 0.00286 | 0.00021       |

# Rb6Tm2O6

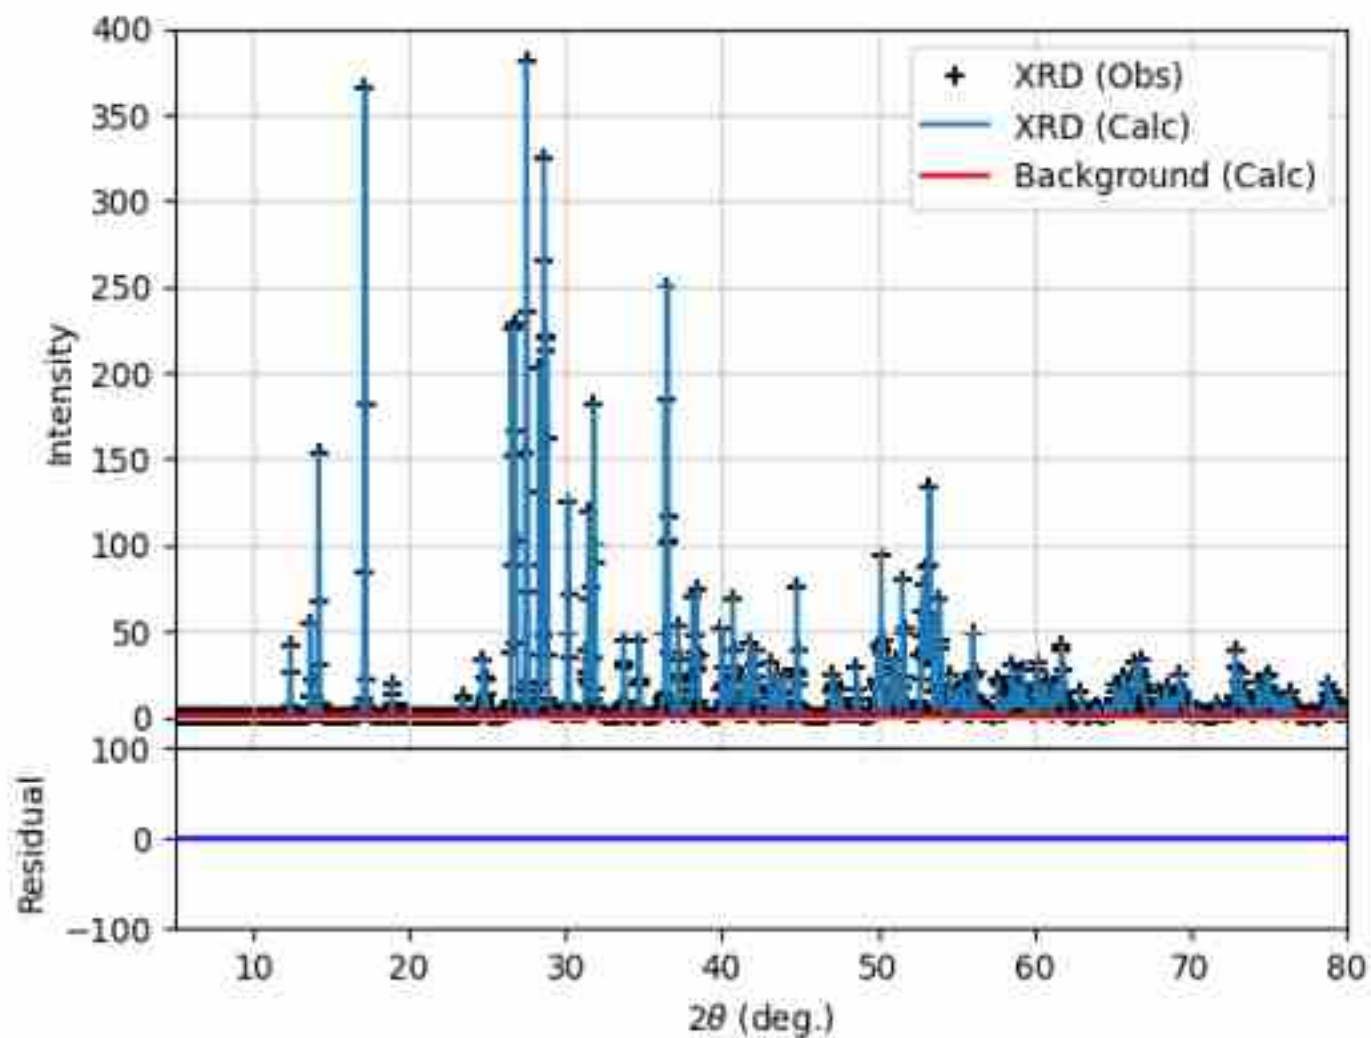

| RMSE before RR | Rwp     | RMSE after RR |
|----------------|---------|---------------|
| 0.025          | 0.00378 | 0.00069       |

# Rb8Te4

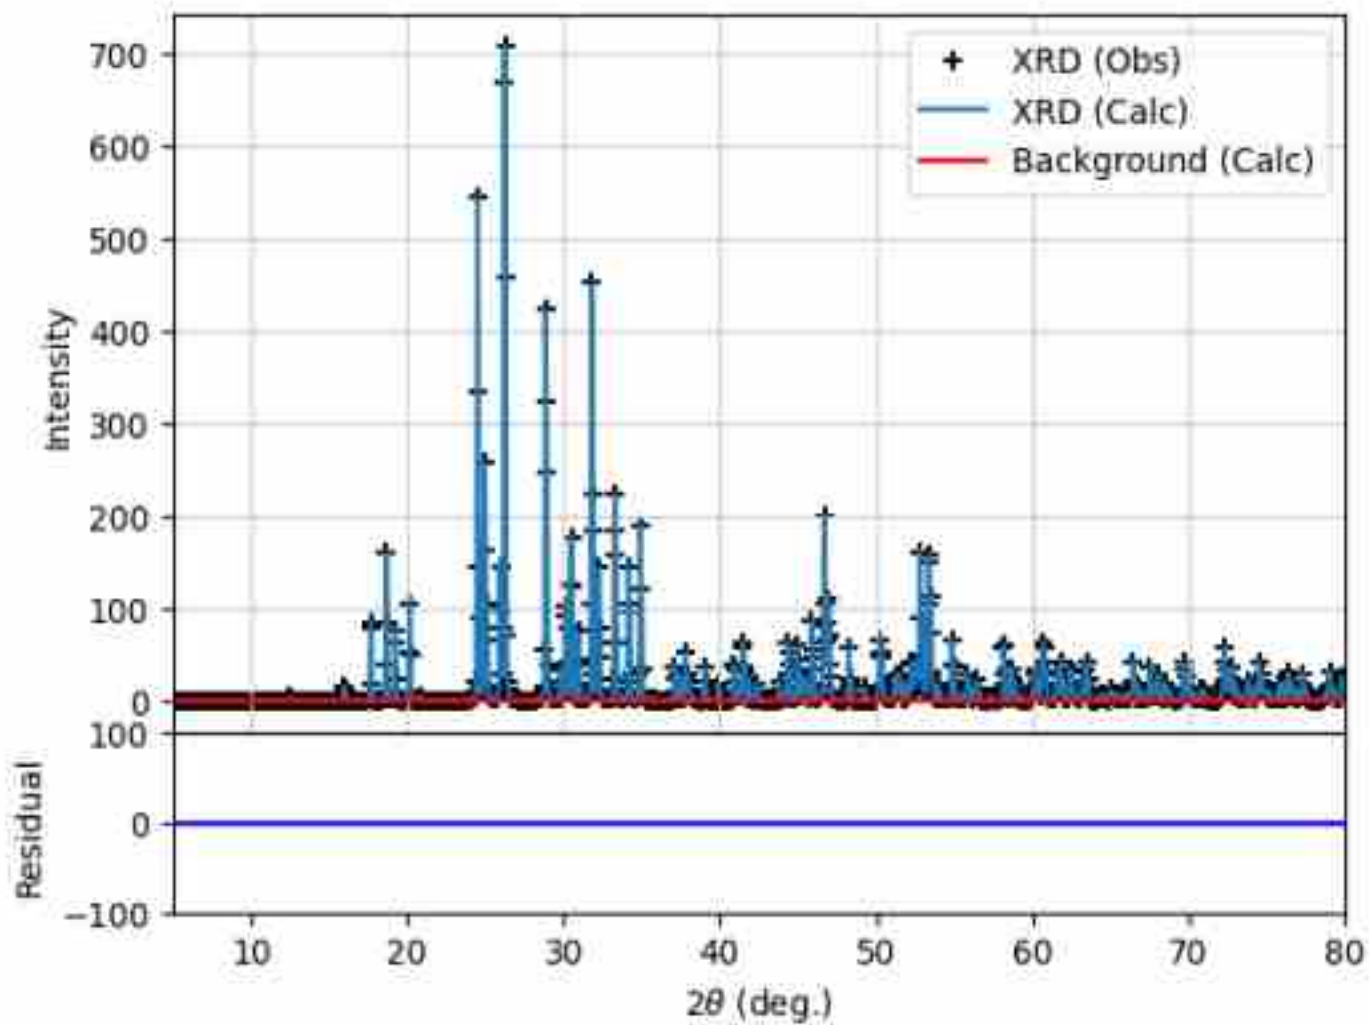

| RMSE before RR | Rwp     | RMSE after RR |
|----------------|---------|---------------|
| 0.025          | 0.00357 | 0.00024       |

# Sm4Al6Ge8

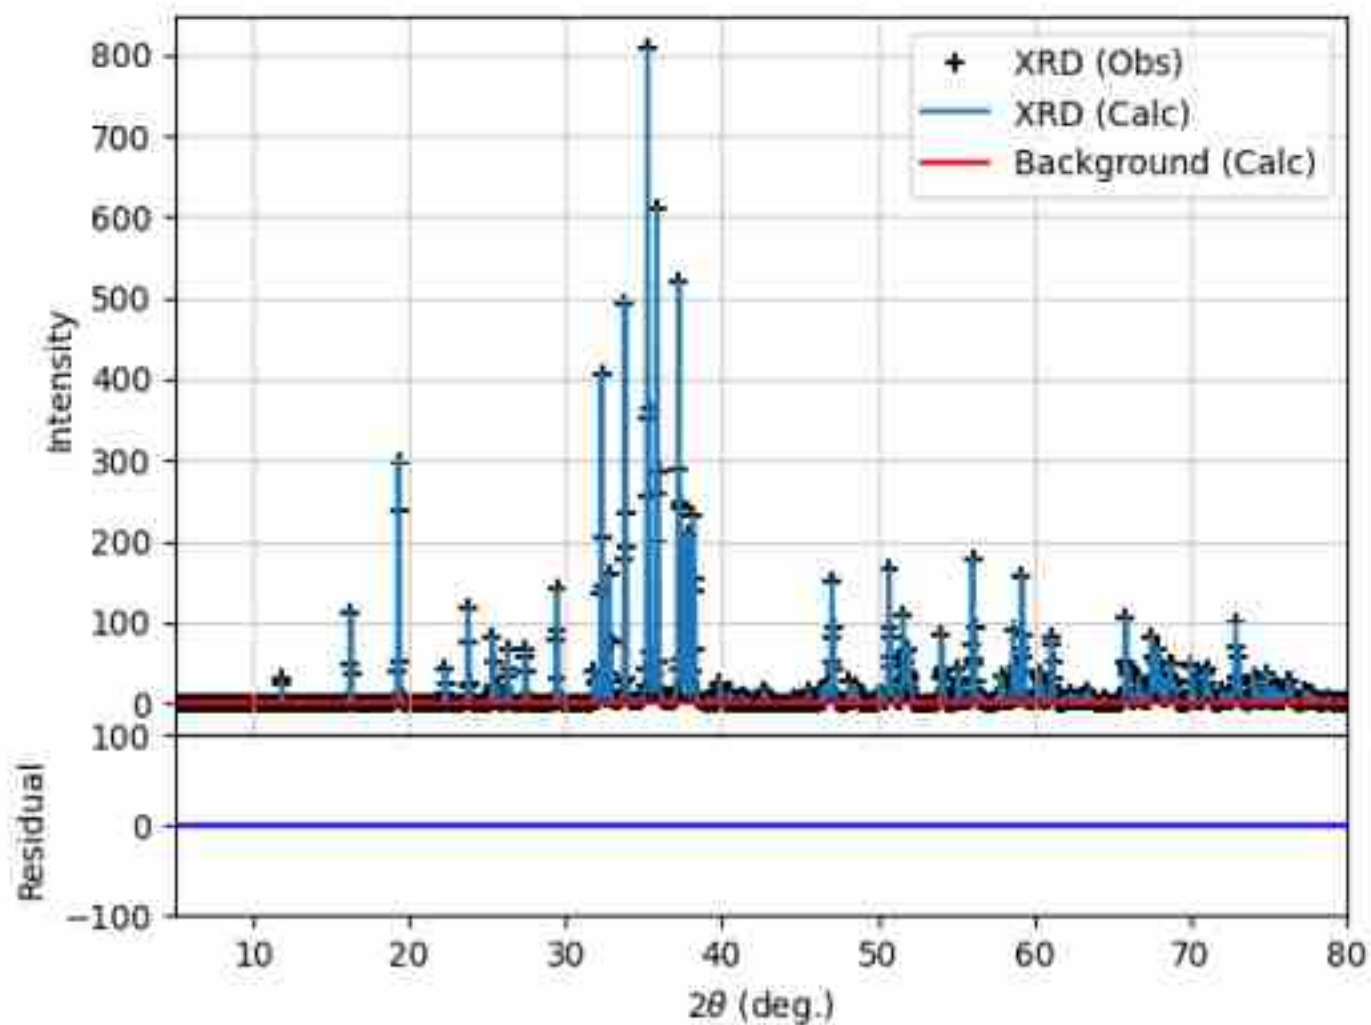

| RMSE before RR | Rwp     | RMSE after RR |
|----------------|---------|---------------|
| 0.025          | 0.00406 | 0.00079       |

# Sm4S2C18

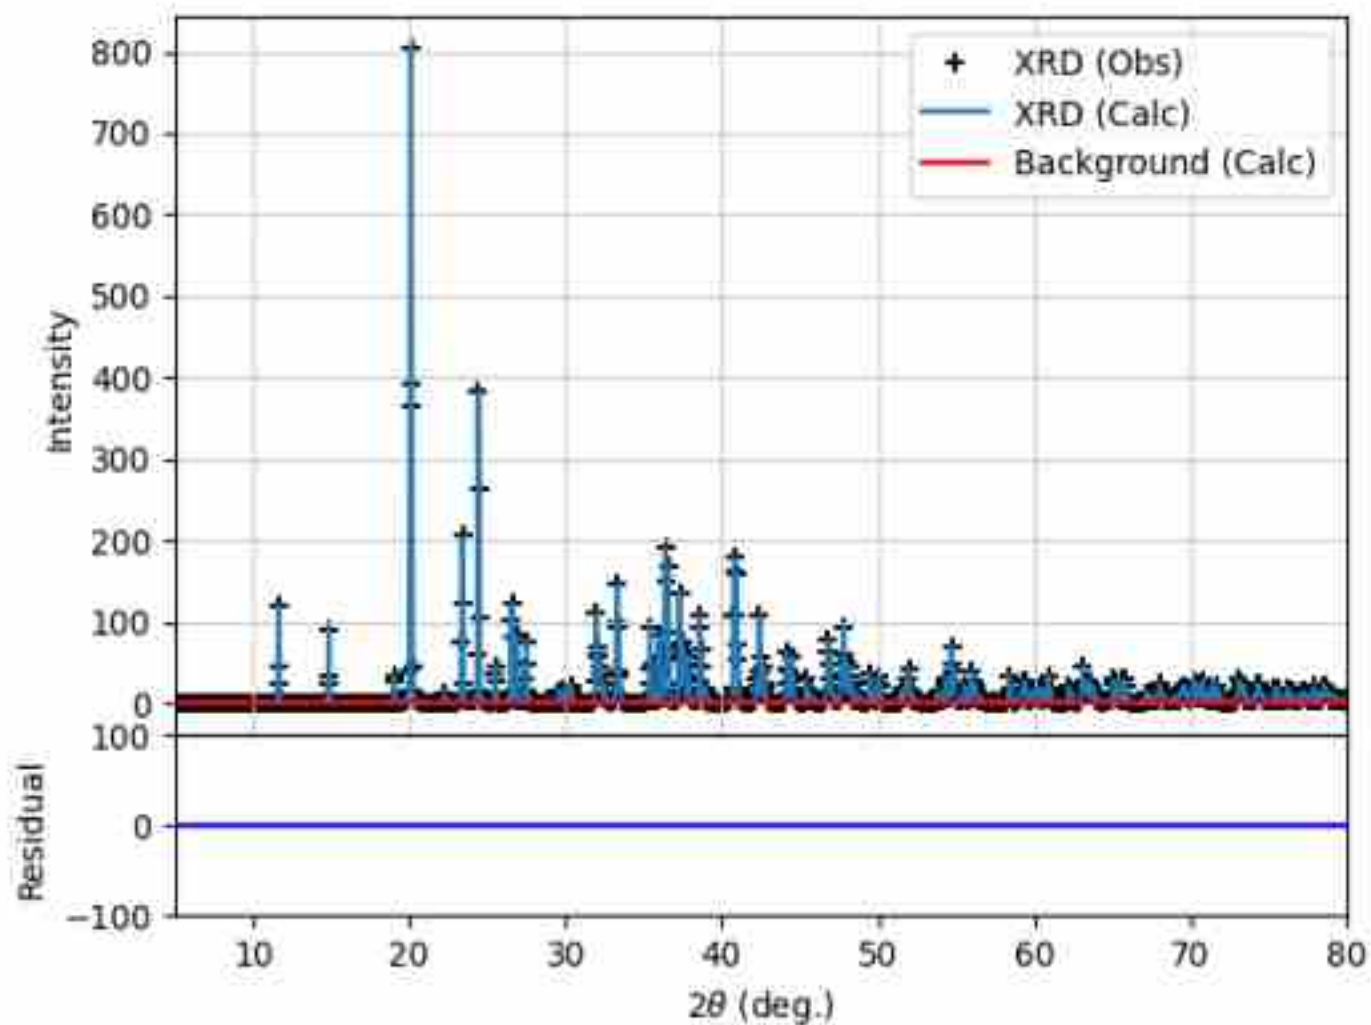

| RMSE before RR | Rwp     | RMSE after RR |
|----------------|---------|---------------|
| 0.025          | 0.00366 | 0.00036       |

# Sm6Cu6Sb8

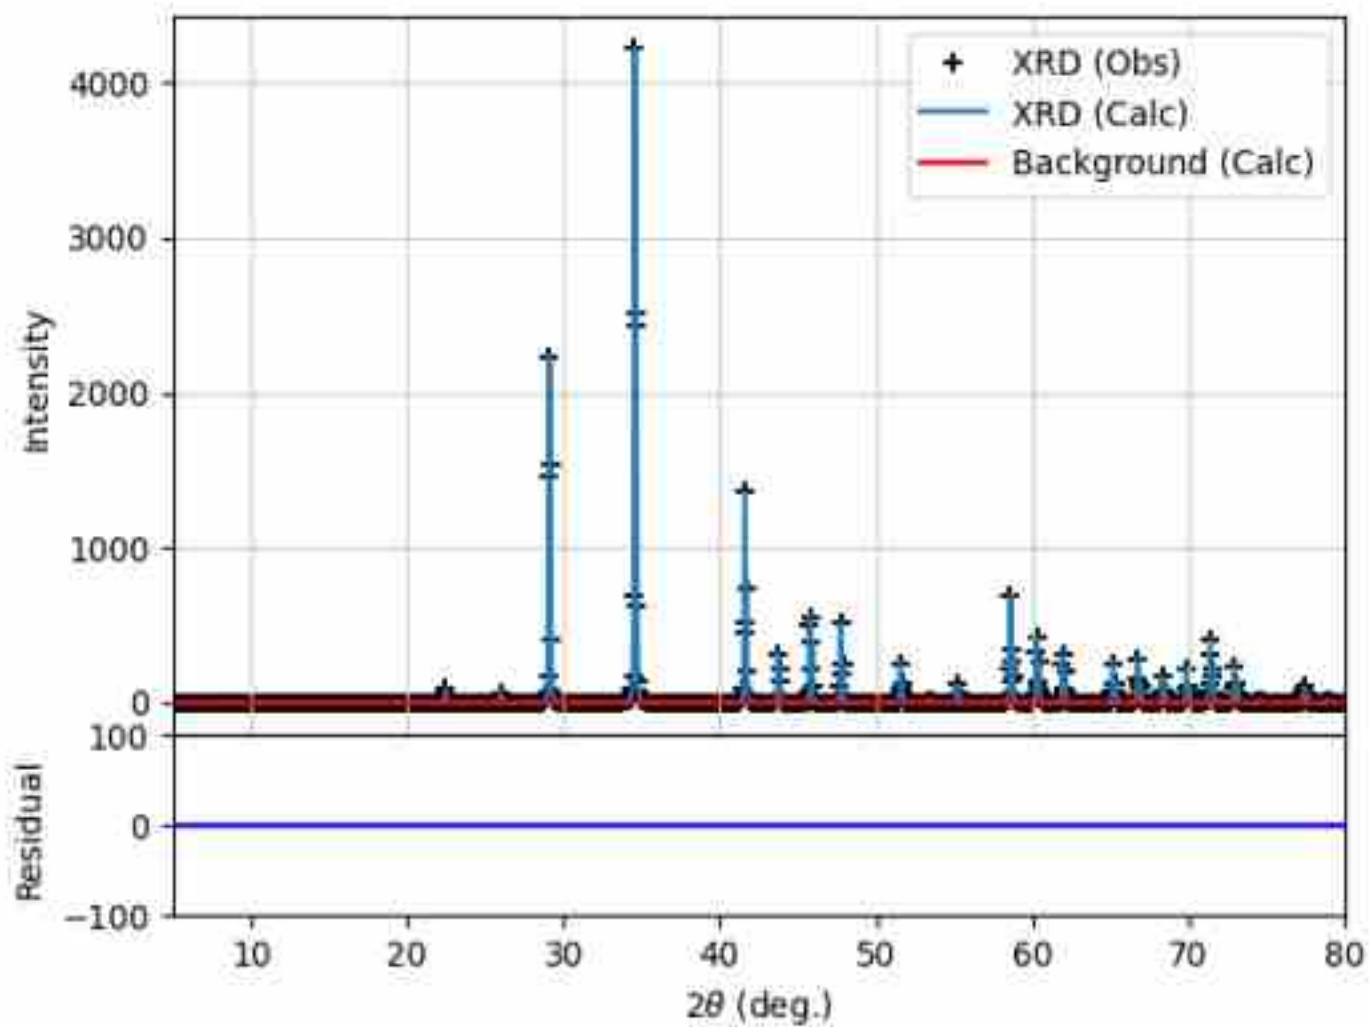

| RMSE before RR | Rwp     | RMSE after RR |
|----------------|---------|---------------|
| 0.025          | 0.02171 | 0.00143       |

# Sr1La3Ni2O8

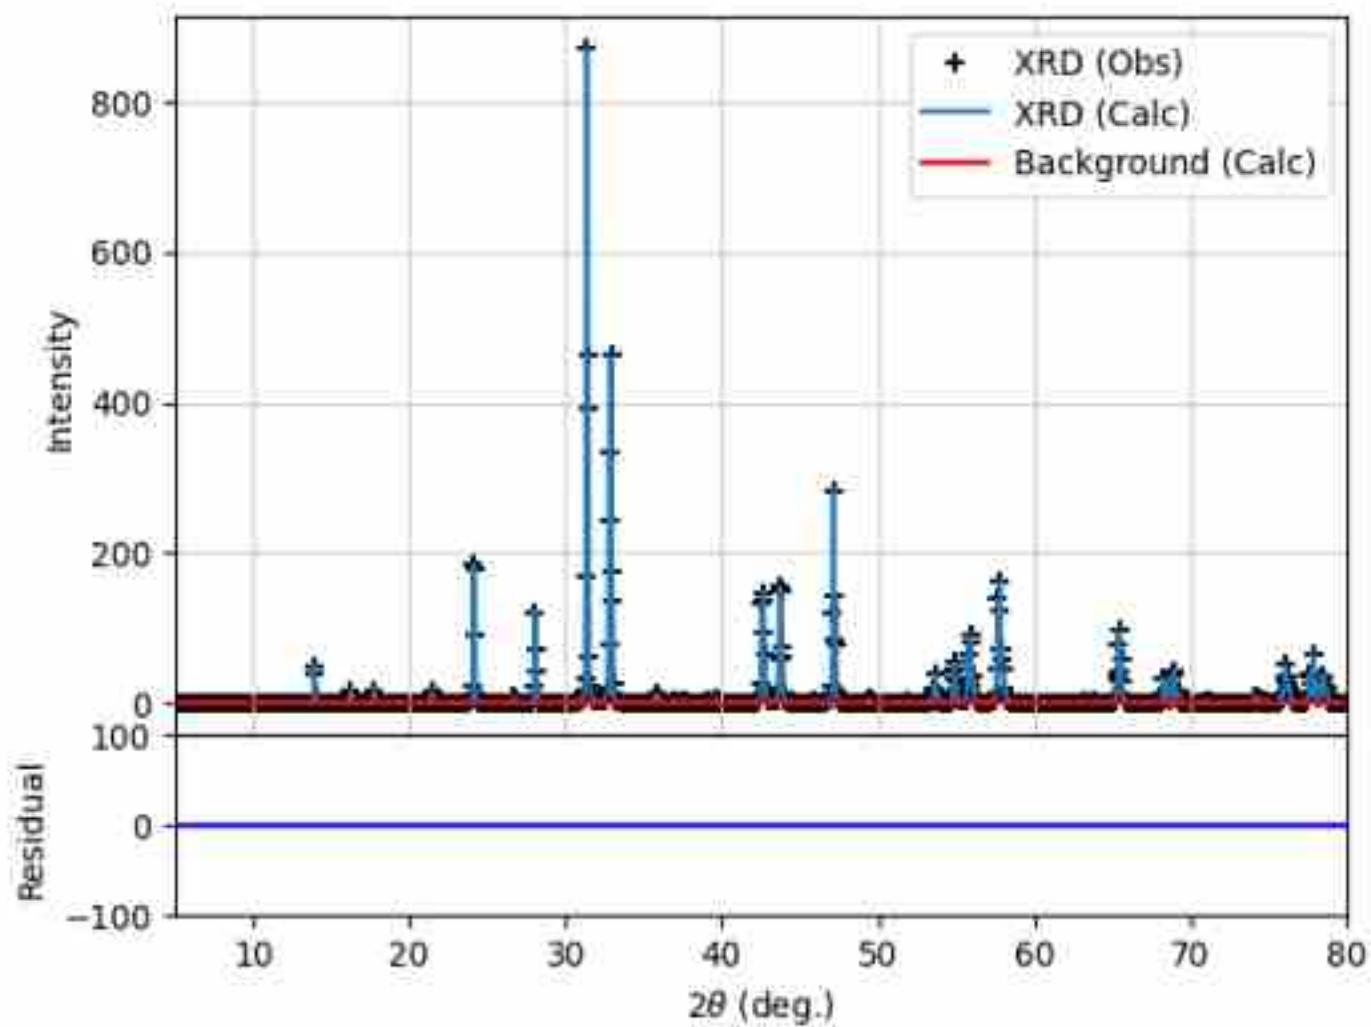

| RMSE before RR | Rwp     | RMSE after RR |
|----------------|---------|---------------|
| 0.025          | 0.00284 | 0.00058       |



# Sr<sub>2</sub>Cu<sub>3</sub>Br<sub>2</sub>O<sub>4</sub>

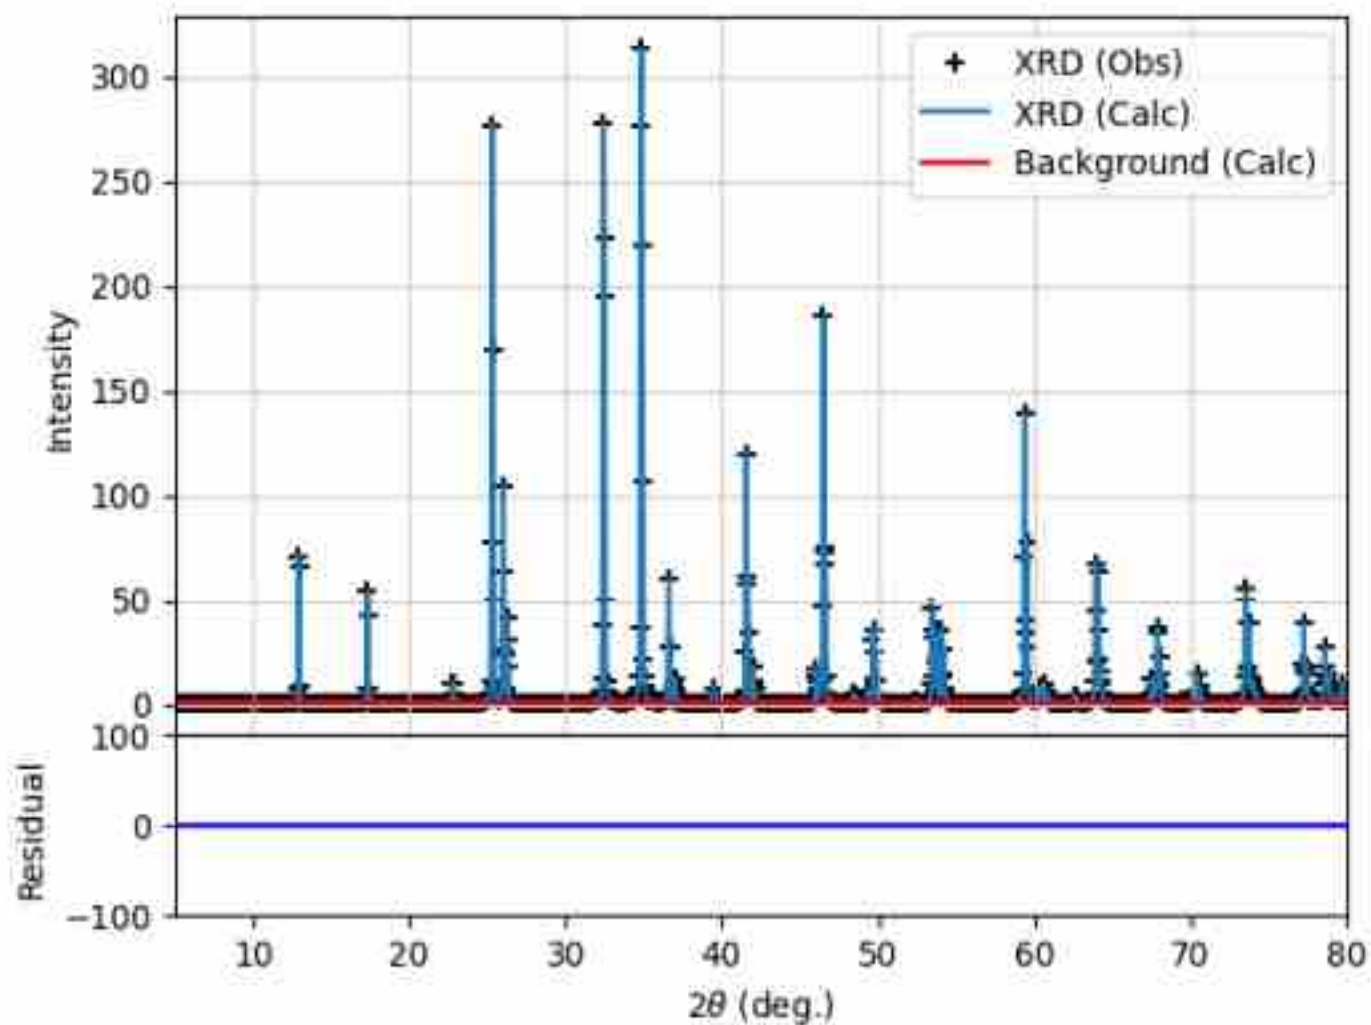

| RMSE before RR | Rwp     | RMSE after RR |
|----------------|---------|---------------|
| 0.025          | 0.00521 | 0.00204       |

# Sr<sub>2</sub>Li<sub>2</sub>Ni<sub>2</sub>F<sub>12</sub>

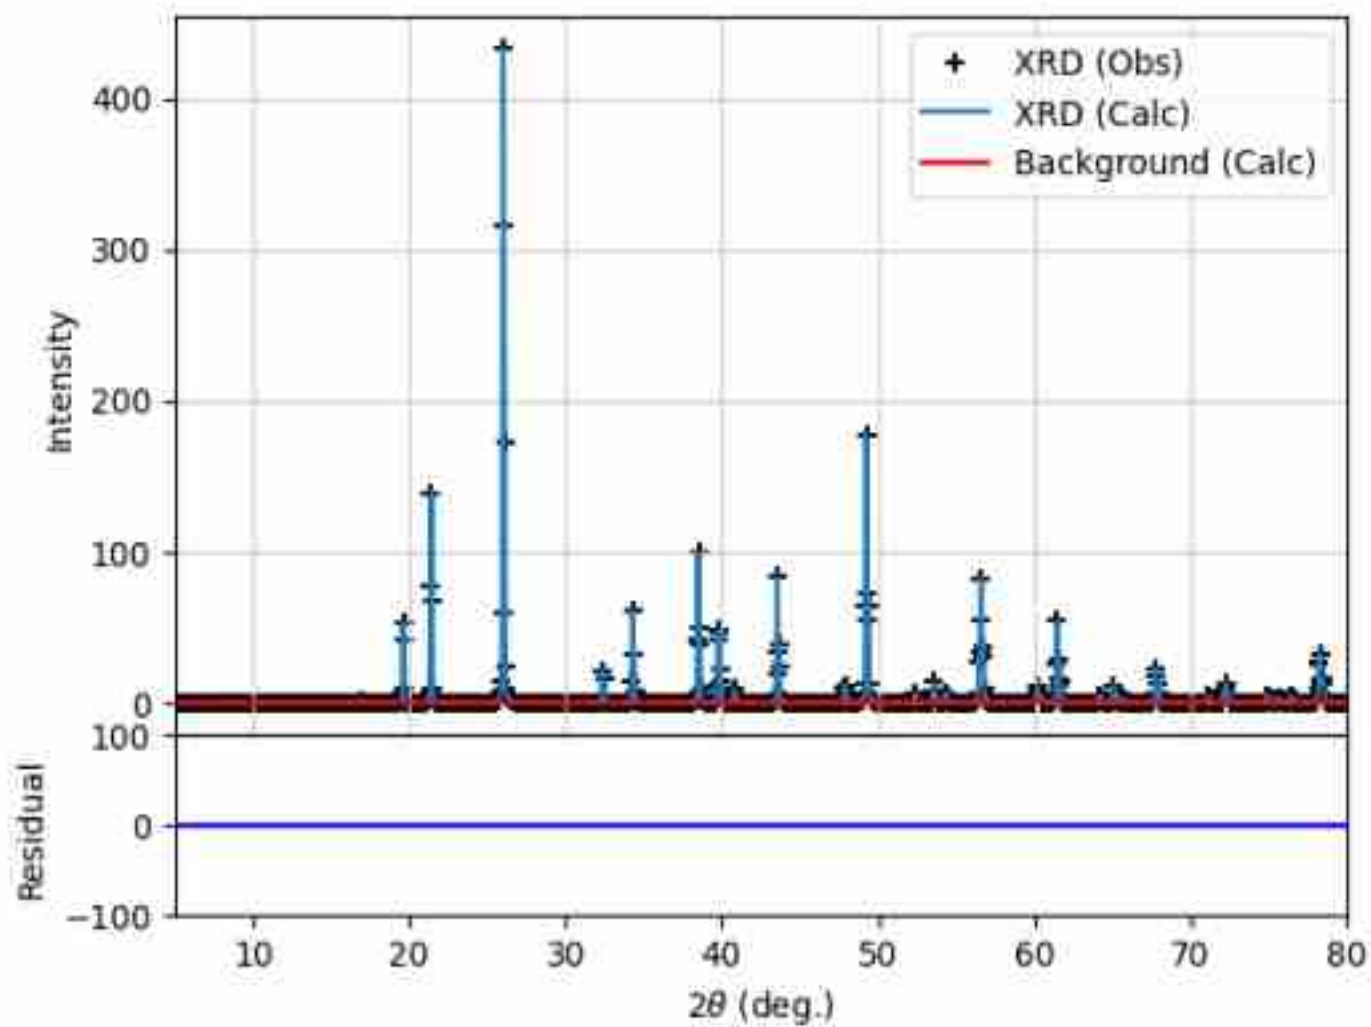

| RMSE before RR | Rwp     | RMSE after RR |
|----------------|---------|---------------|
| 0.025          | 0.00608 | 0.00262       |

# Sr<sub>3</sub>Fe<sub>2</sub>Cu<sub>2</sub>Se<sub>2</sub>O<sub>5</sub>

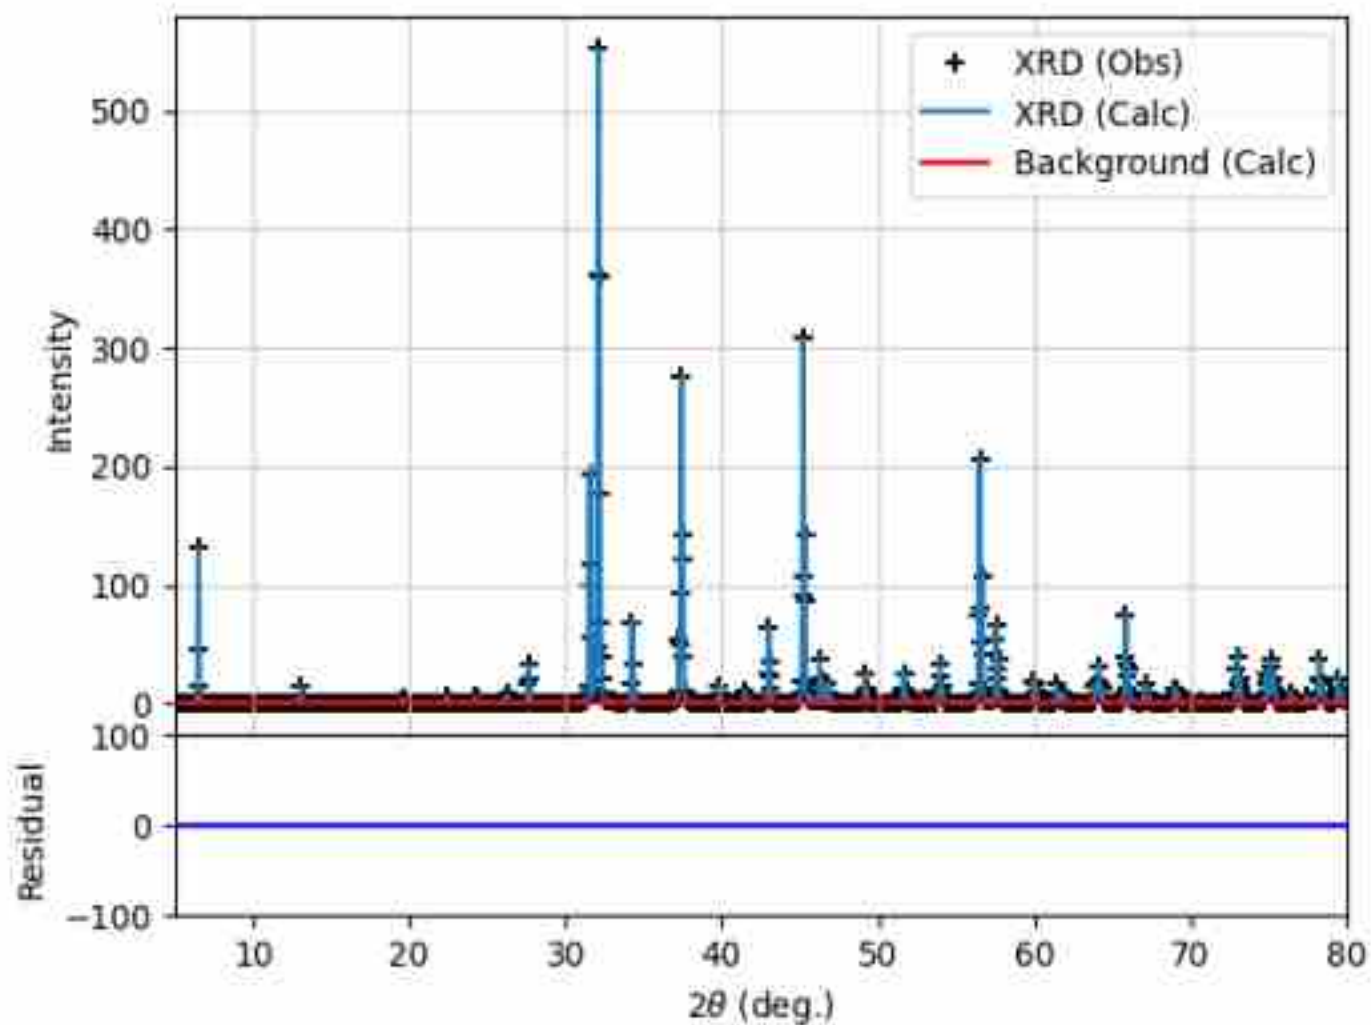

| RMSE before RR | Rwp     | RMSE after RR |
|----------------|---------|---------------|
| 0.025          | 0.00196 | 0.00051       |

# Sr<sub>3</sub>LaTaAl<sub>3</sub>O<sub>12</sub>

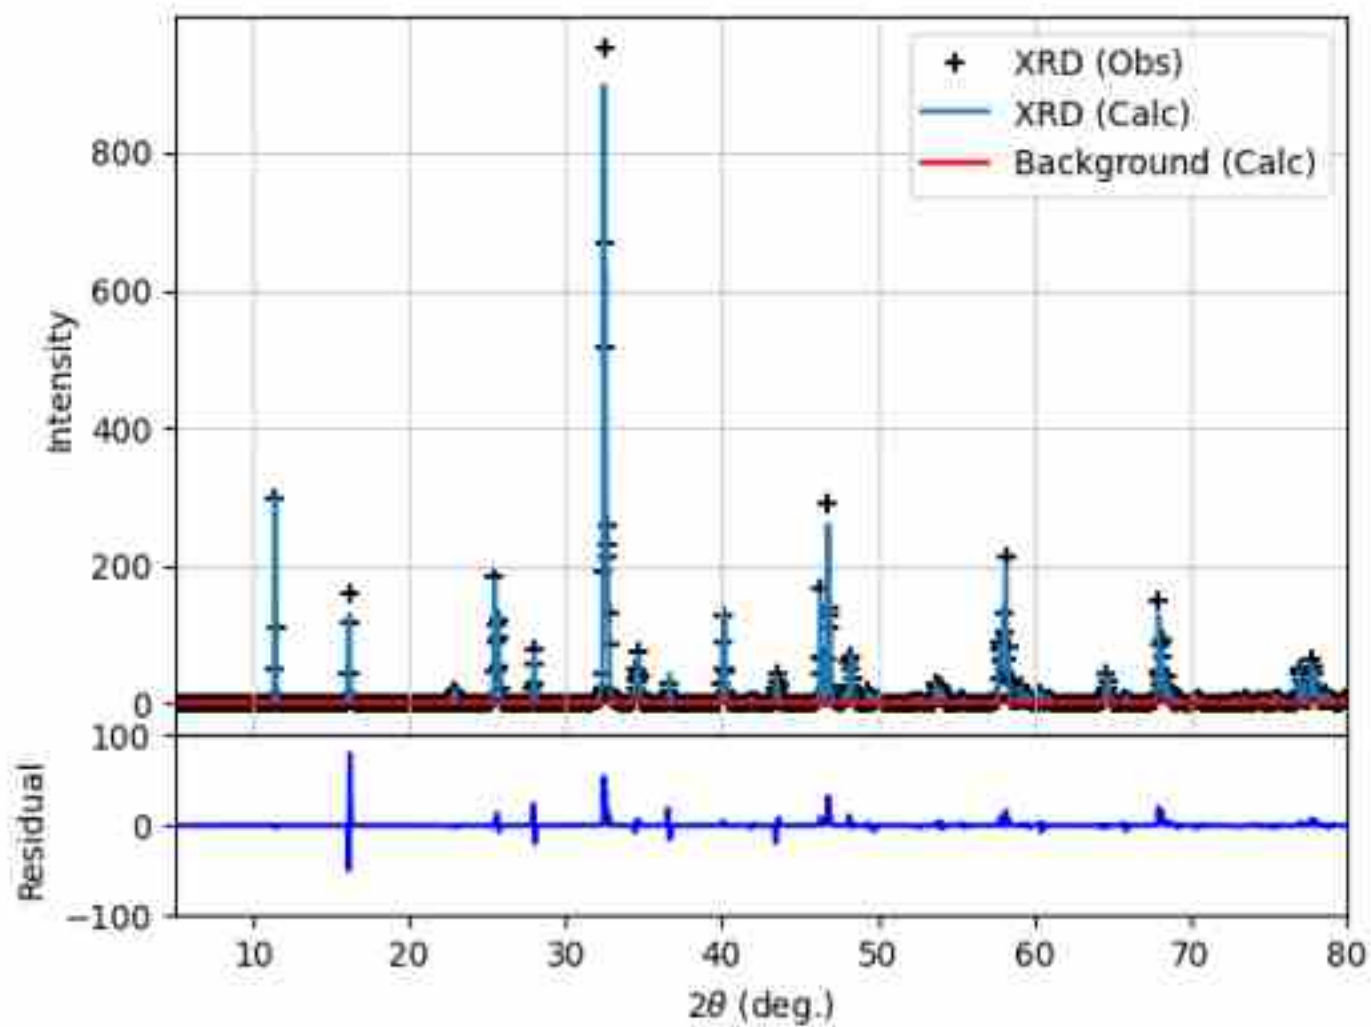

| RMSE before RR | Rwp      | RMSE after RR |
|----------------|----------|---------------|
| 0.025          | 17.06927 | 0.07582       |

# Sr<sub>4</sub>Ge<sub>2</sub>Se<sub>8</sub>

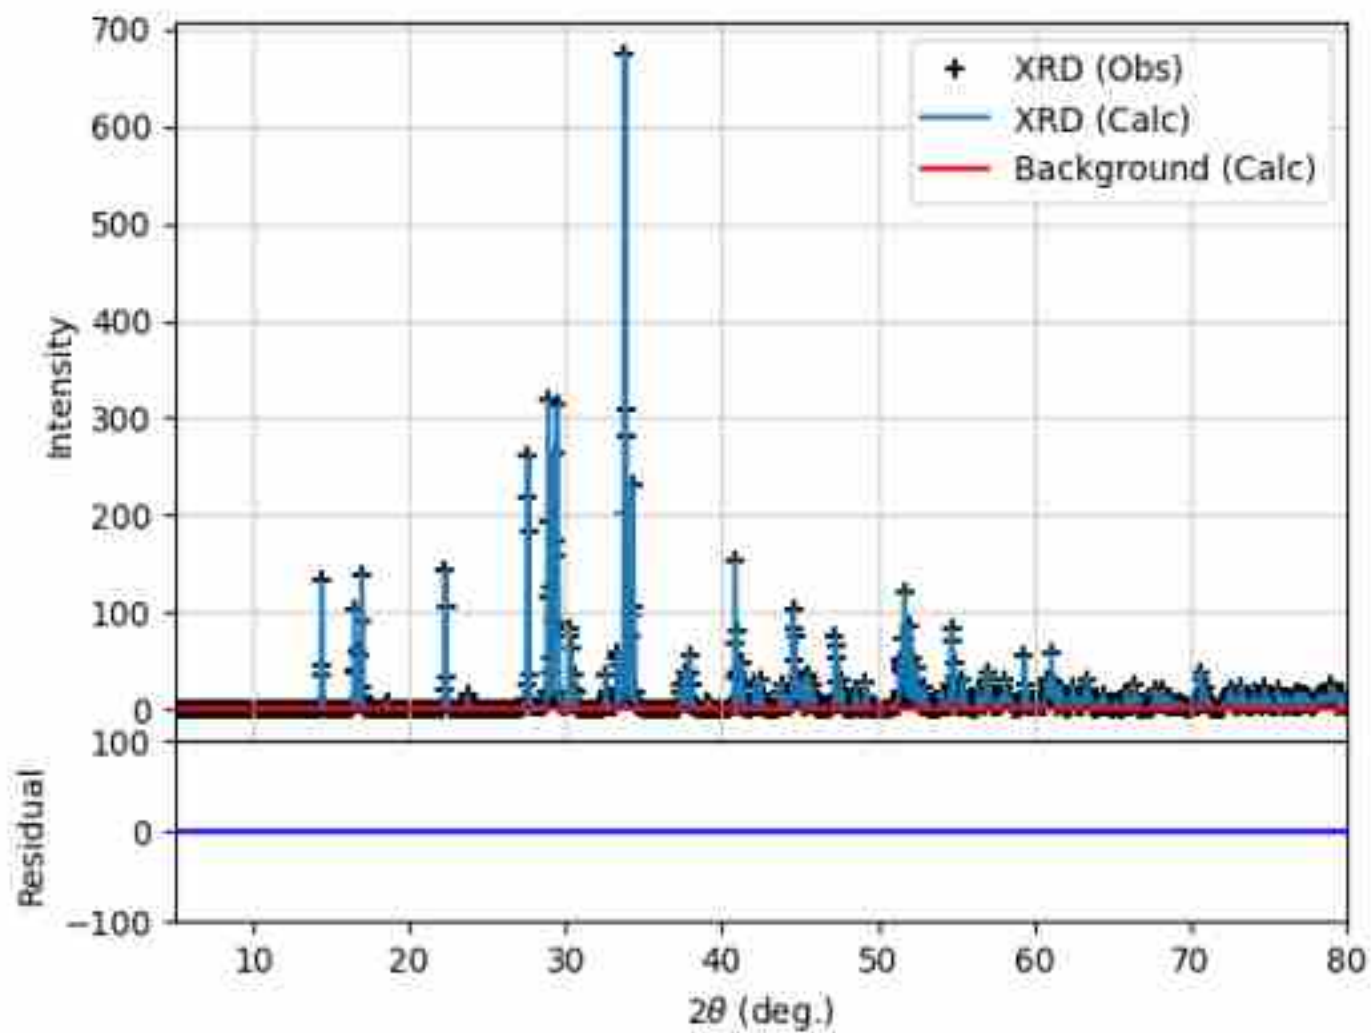

| RMSE before RR | Rwp     | RMSE after RR |
|----------------|---------|---------------|
| 0.025          | 0.00328 | 0.00026       |

# Sr4Pb2O8

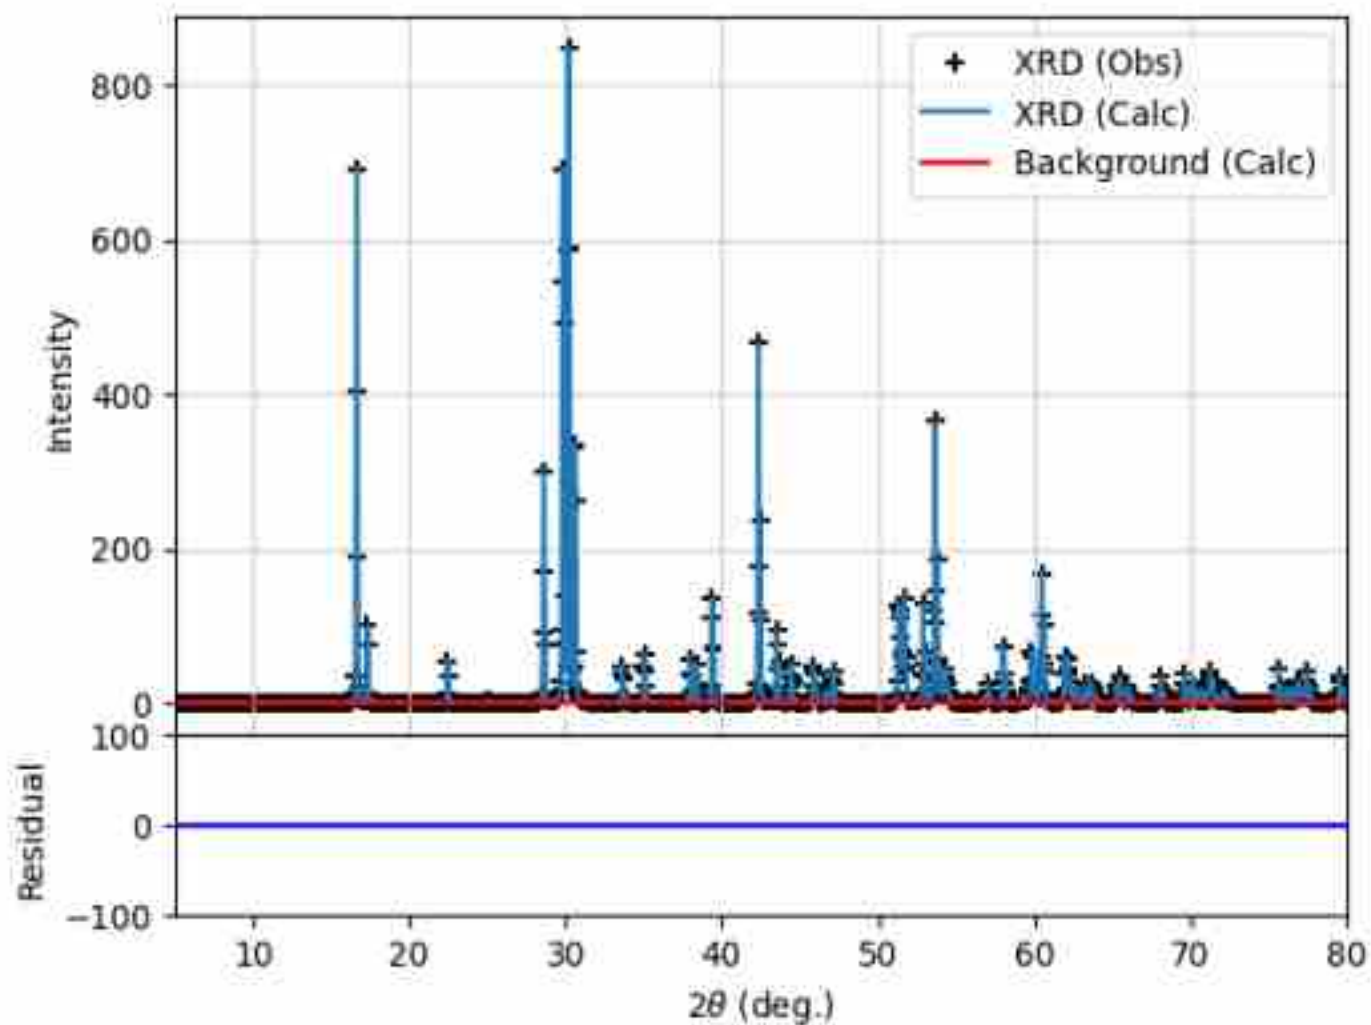

| RMSE before RR | Rwp     | RMSE after RR |
|----------------|---------|---------------|
| 0.025          | 0.00427 | 0.00161       |

# Sr4Ru4O12

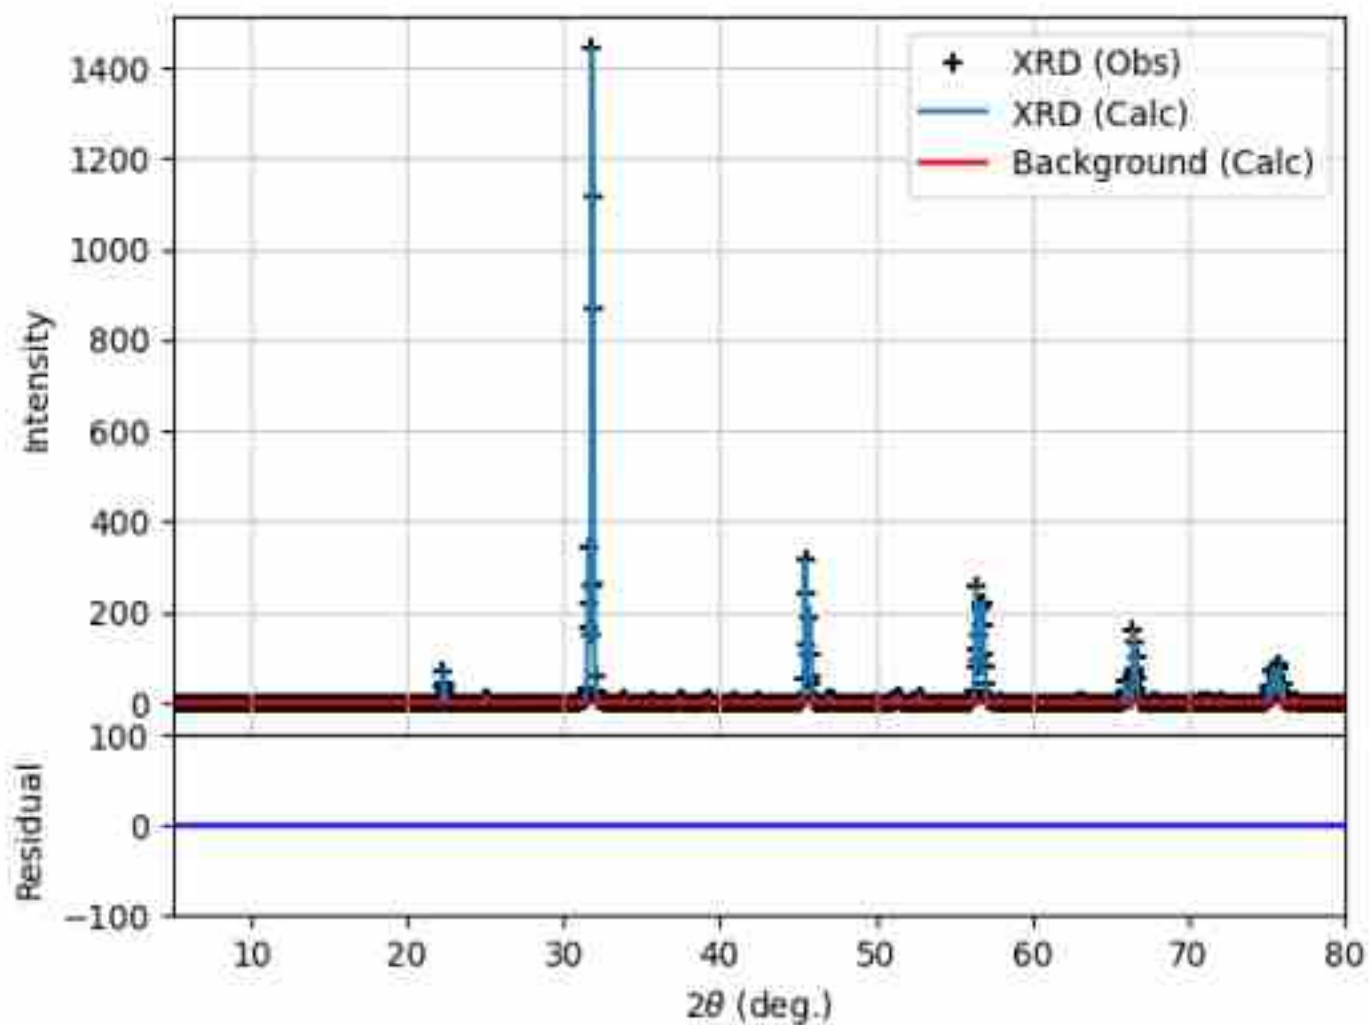

| RMSE before RR | Rwp     | RMSE after RR |
|----------------|---------|---------------|
| 0.025          | 0.00297 | 0.00102       |

# Sr10As6H2

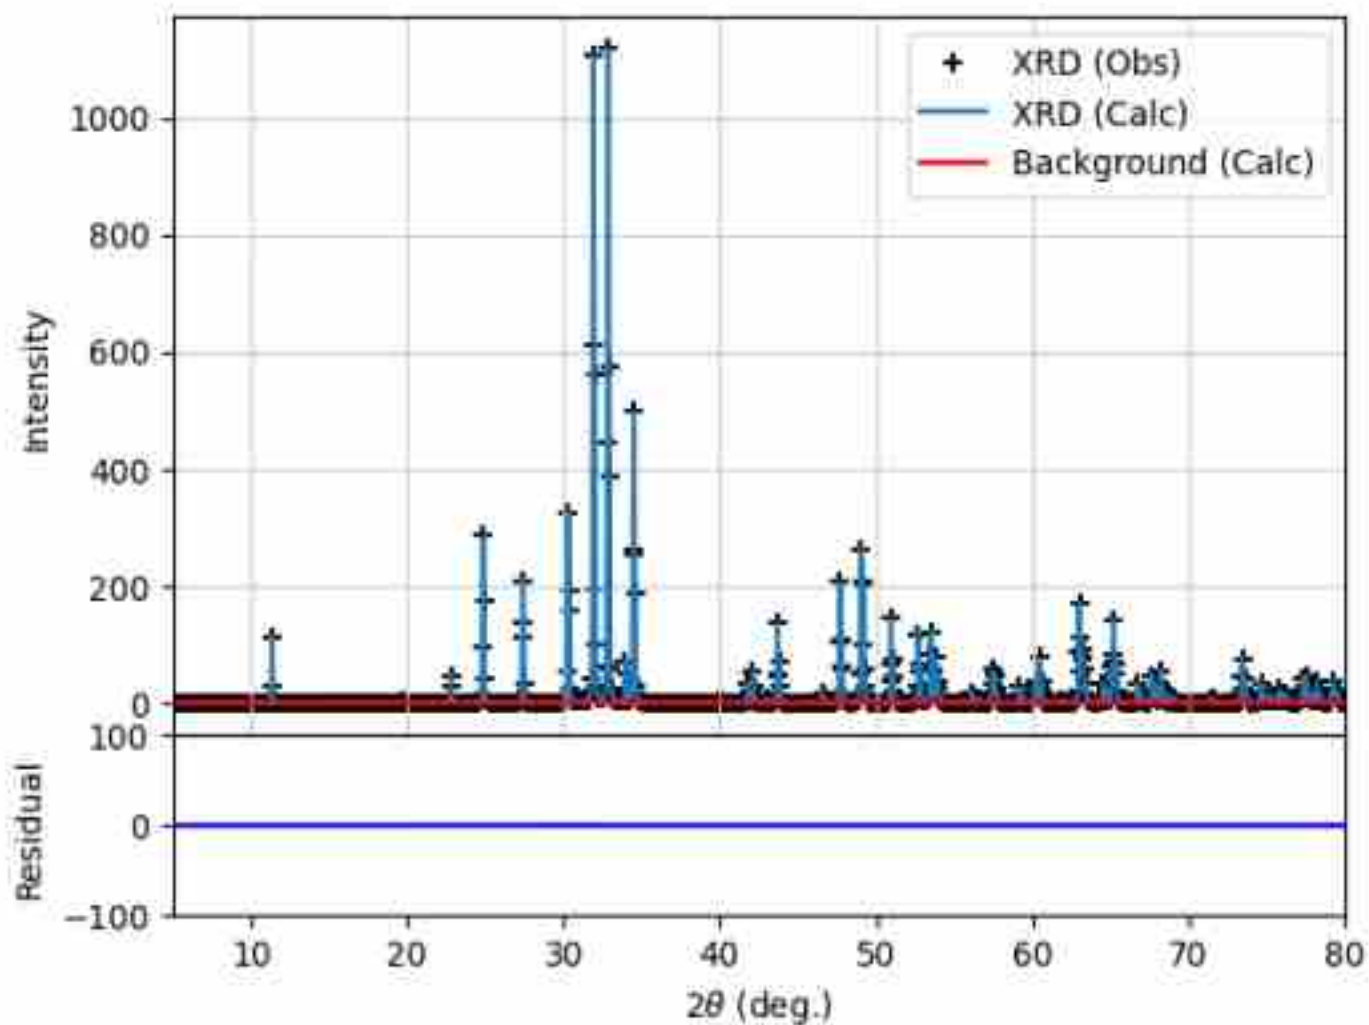

| RMSE before RR | Rwp     | RMSE after RR |
|----------------|---------|---------------|
| 0.025          | 0.06907 | 0.02343       |



# Tb<sub>4</sub>Ga<sub>12</sub>Ag<sub>1</sub>

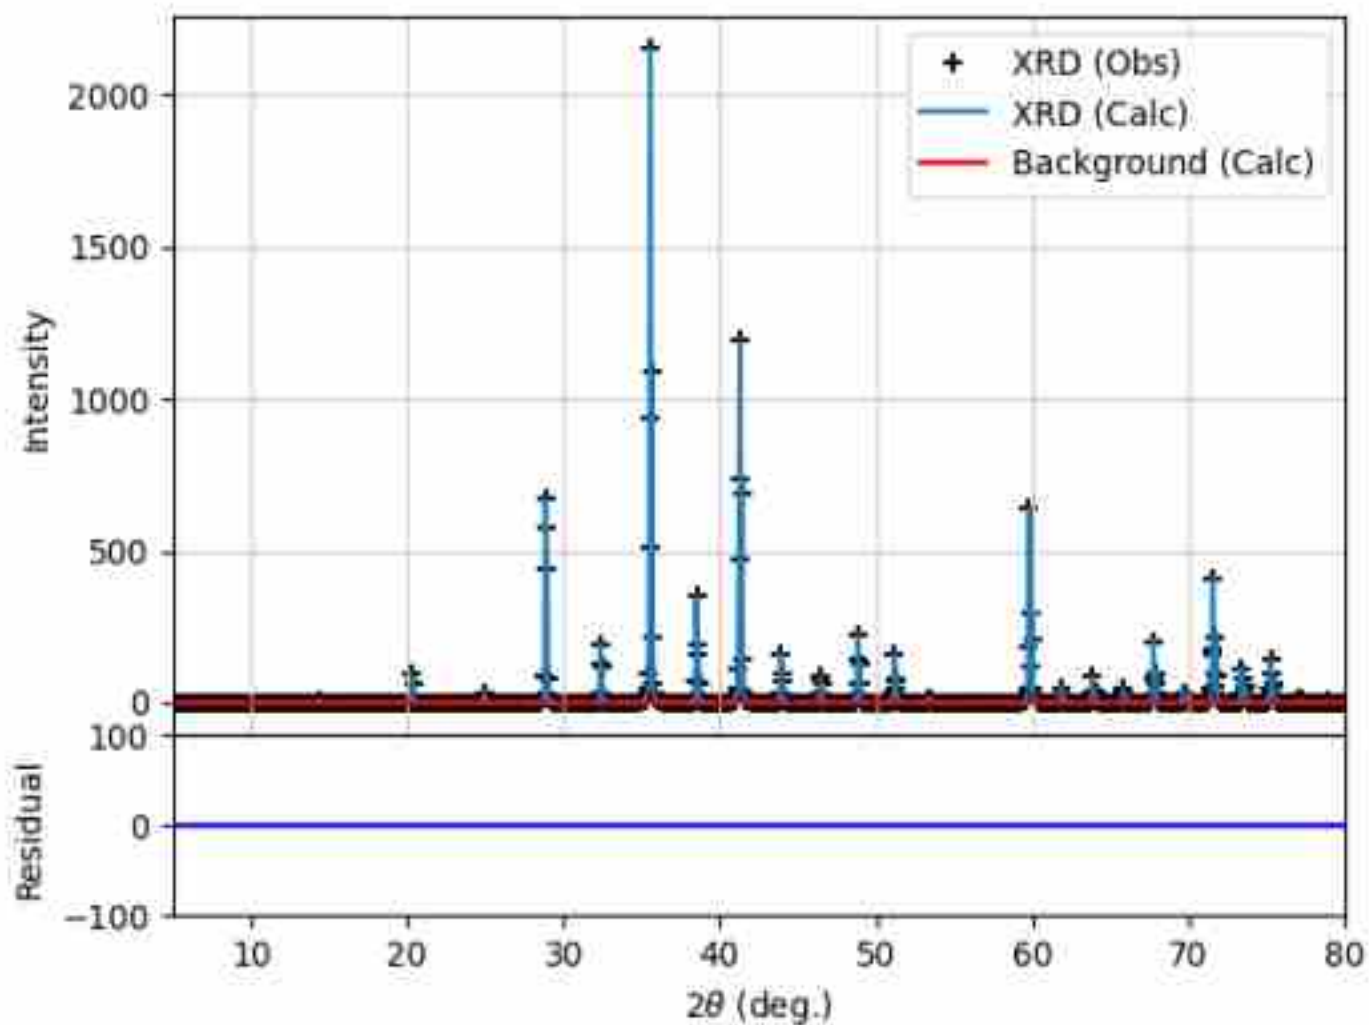

| RMSE before RR | Rwp     | RMSE after RR |
|----------------|---------|---------------|
| 0.025          | 0.00798 | 0.00135       |

# Tb<sub>4</sub>Ge<sub>4</sub>Pt<sub>4</sub>

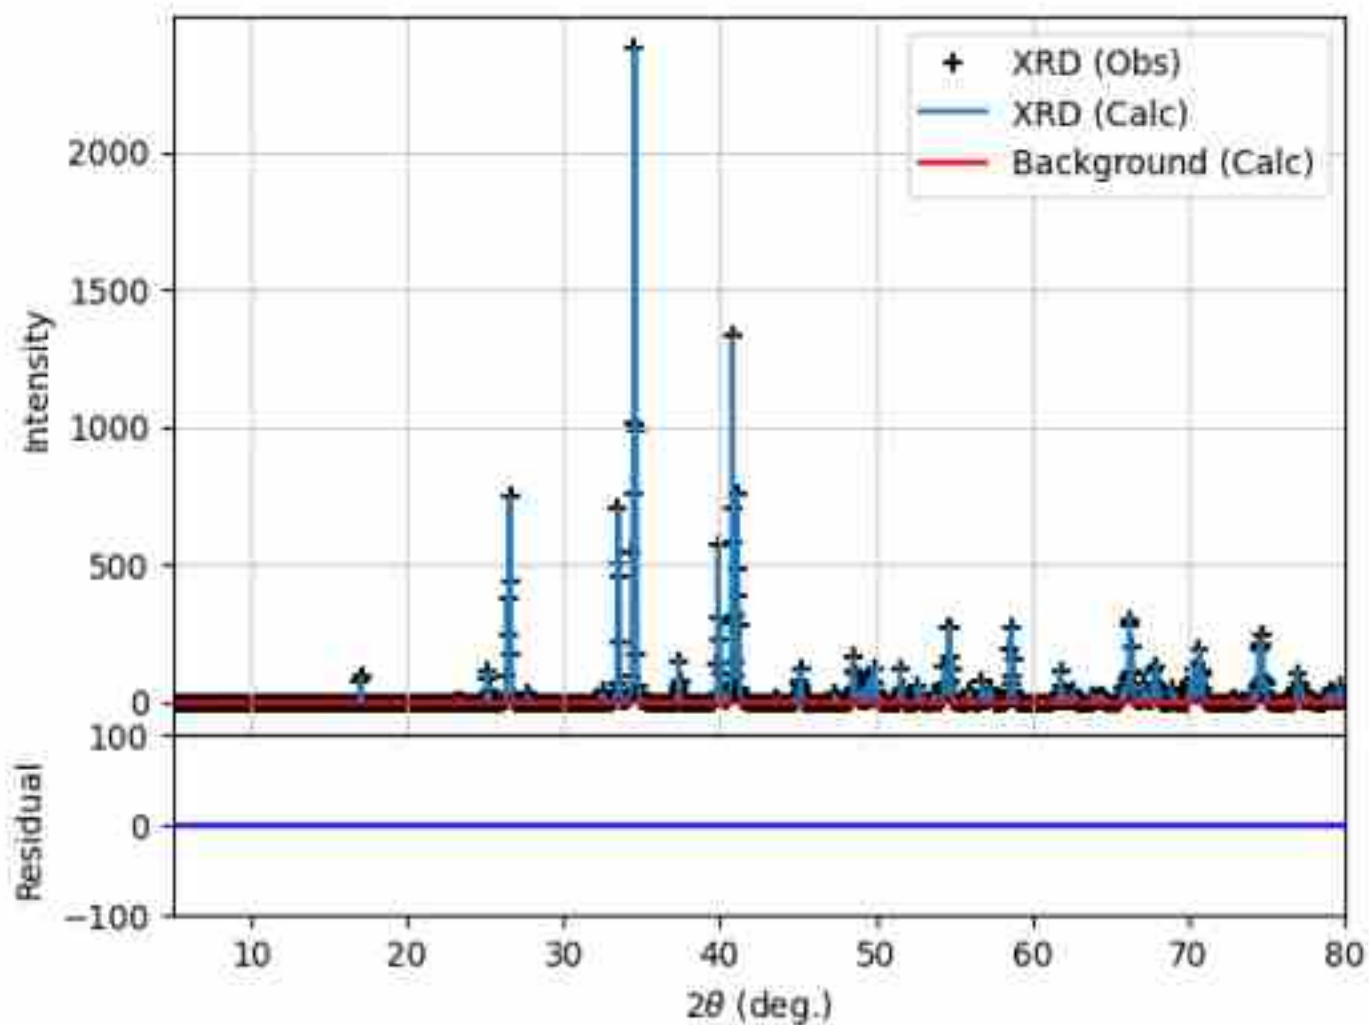

| RMSE before RR | Rwp     | RMSE after RR |
|----------------|---------|---------------|
| 0.025          | 0.00425 | 0.00028       |

# Tb<sub>4</sub>Tm<sub>4</sub>O<sub>12</sub>

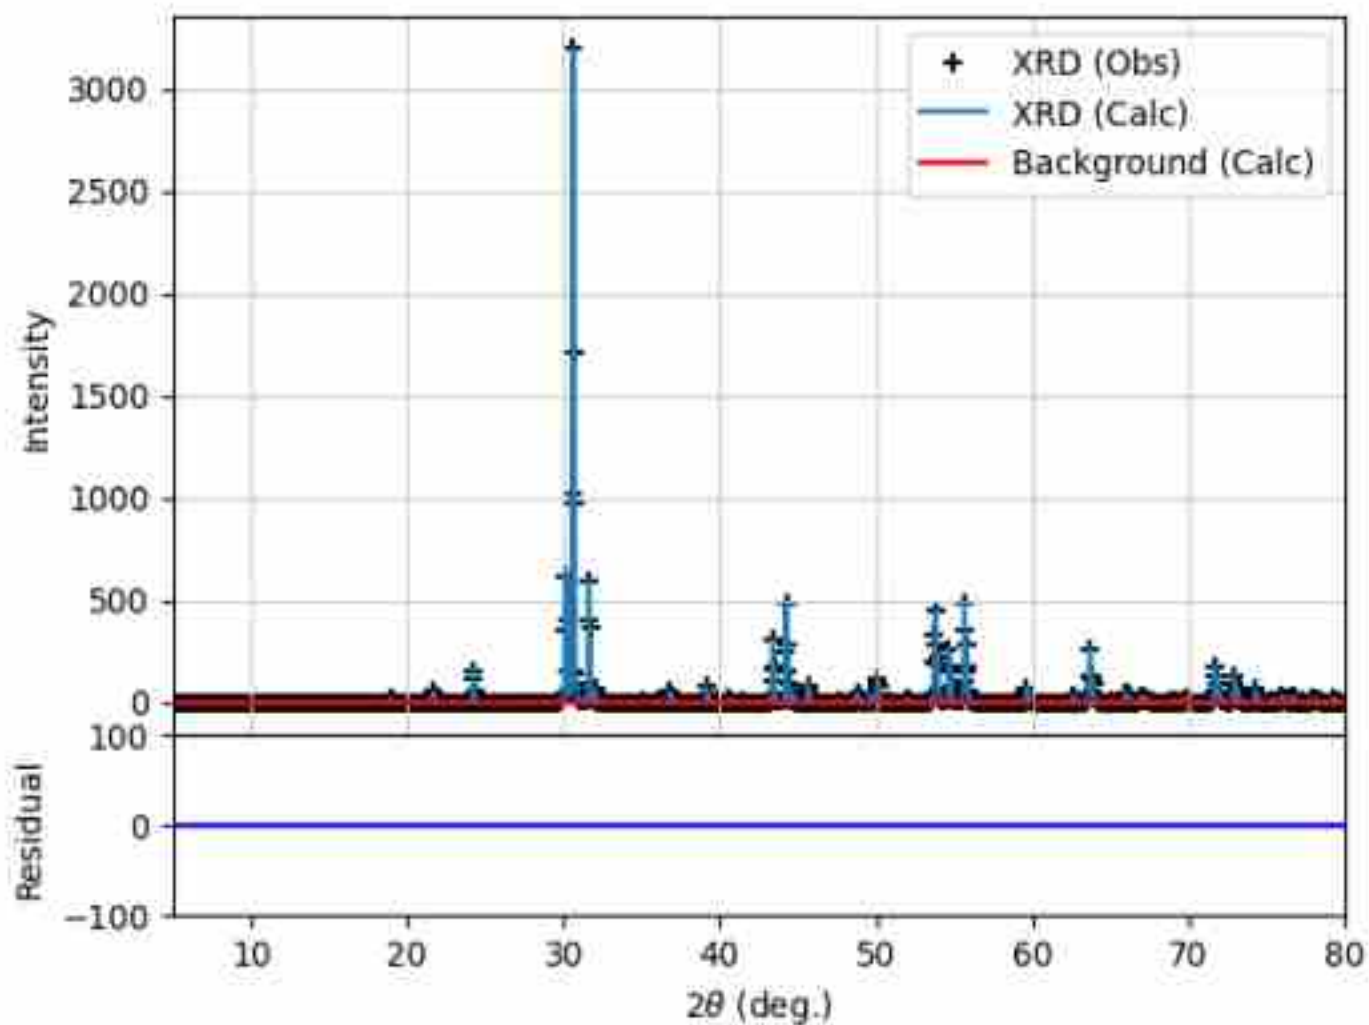

| RMSE before RR | Rwp     | RMSE after RR |
|----------------|---------|---------------|
| 0.025          | 0.00399 | 0.00111       |

# Th<sub>2</sub>Co<sub>4</sub>As<sub>4</sub>

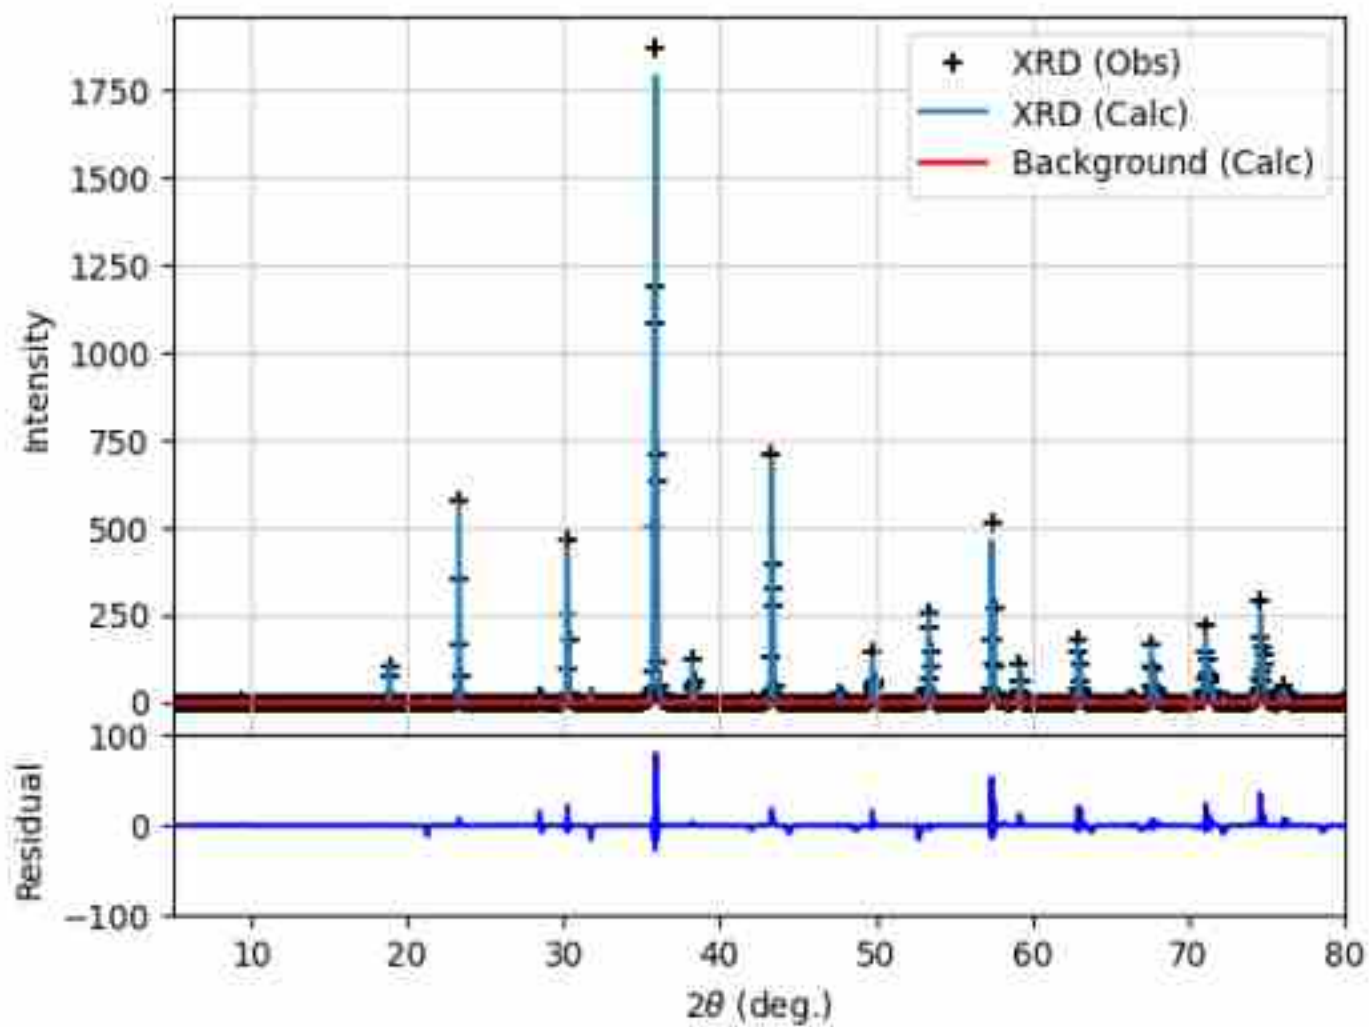

| RMSE before RR | Rwp      | RMSE after RR |
|----------------|----------|---------------|
| 0.025          | 20.78338 | 0.15281       |

# Th<sub>3</sub>N<sub>4</sub>

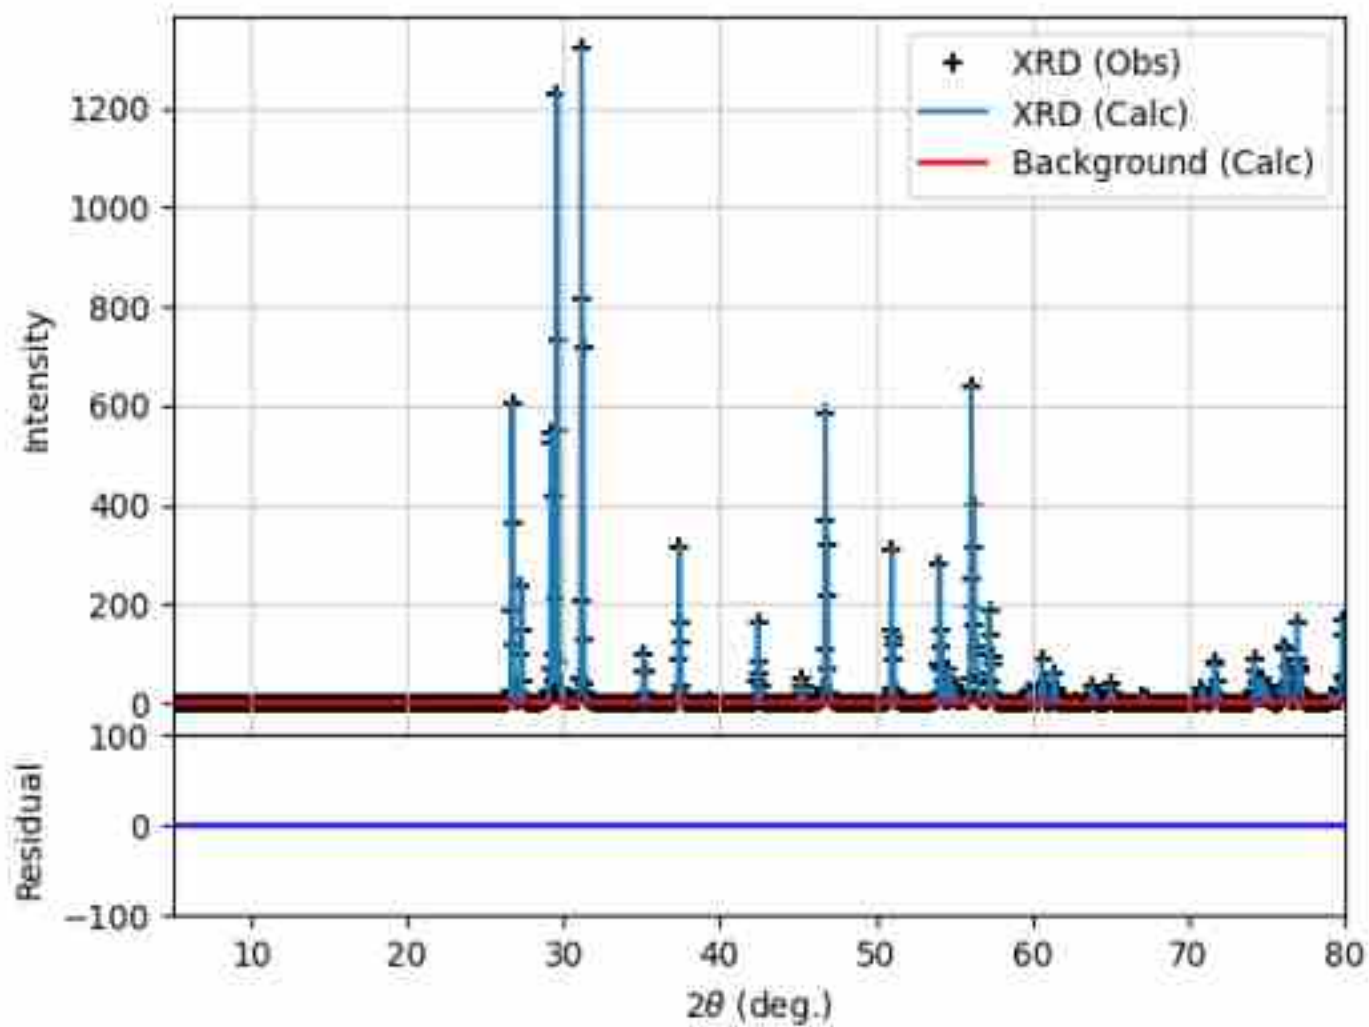

| RMSE before RR | Rwp     | RMSE after RR |
|----------------|---------|---------------|
| 0.025          | 0.00602 | 0.0016        |

# Th<sub>4</sub>Mn<sub>8</sub>

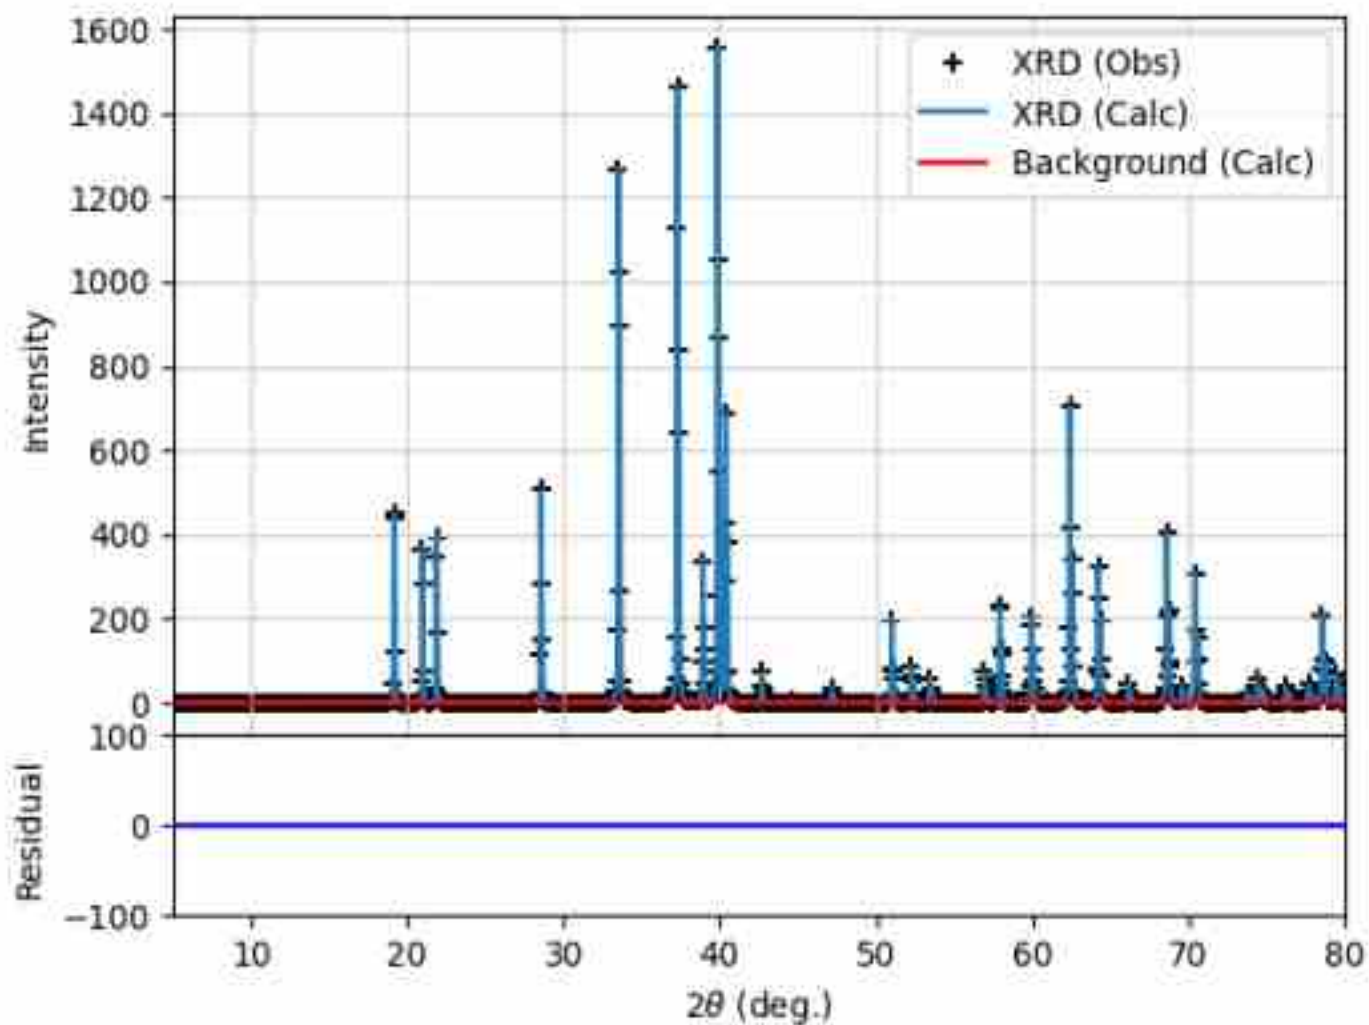

| RMSE before RR | Rwp     | RMSE after RR |
|----------------|---------|---------------|
| 0.025          | 0.00443 | 0.00082       |

# Ti<sub>2</sub>Fe<sub>2</sub>O<sub>6</sub>

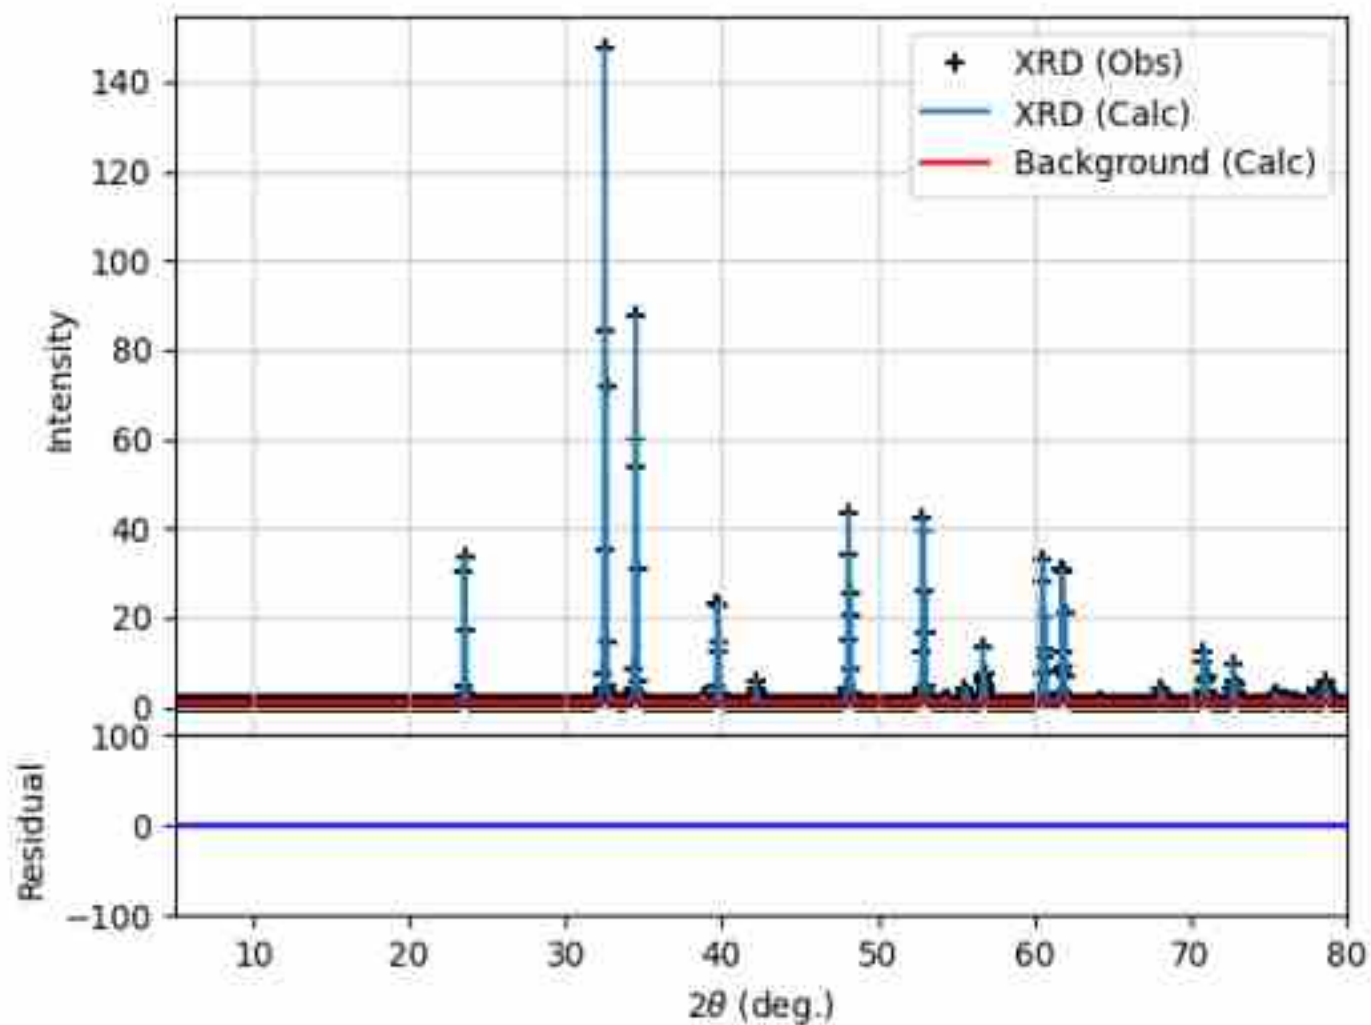

| RMSE before RR | Rwp    | RMSE after RR |
|----------------|--------|---------------|
| 0.025          | 0.0016 | 0.00018       |

# Ti10Cu2Sb4

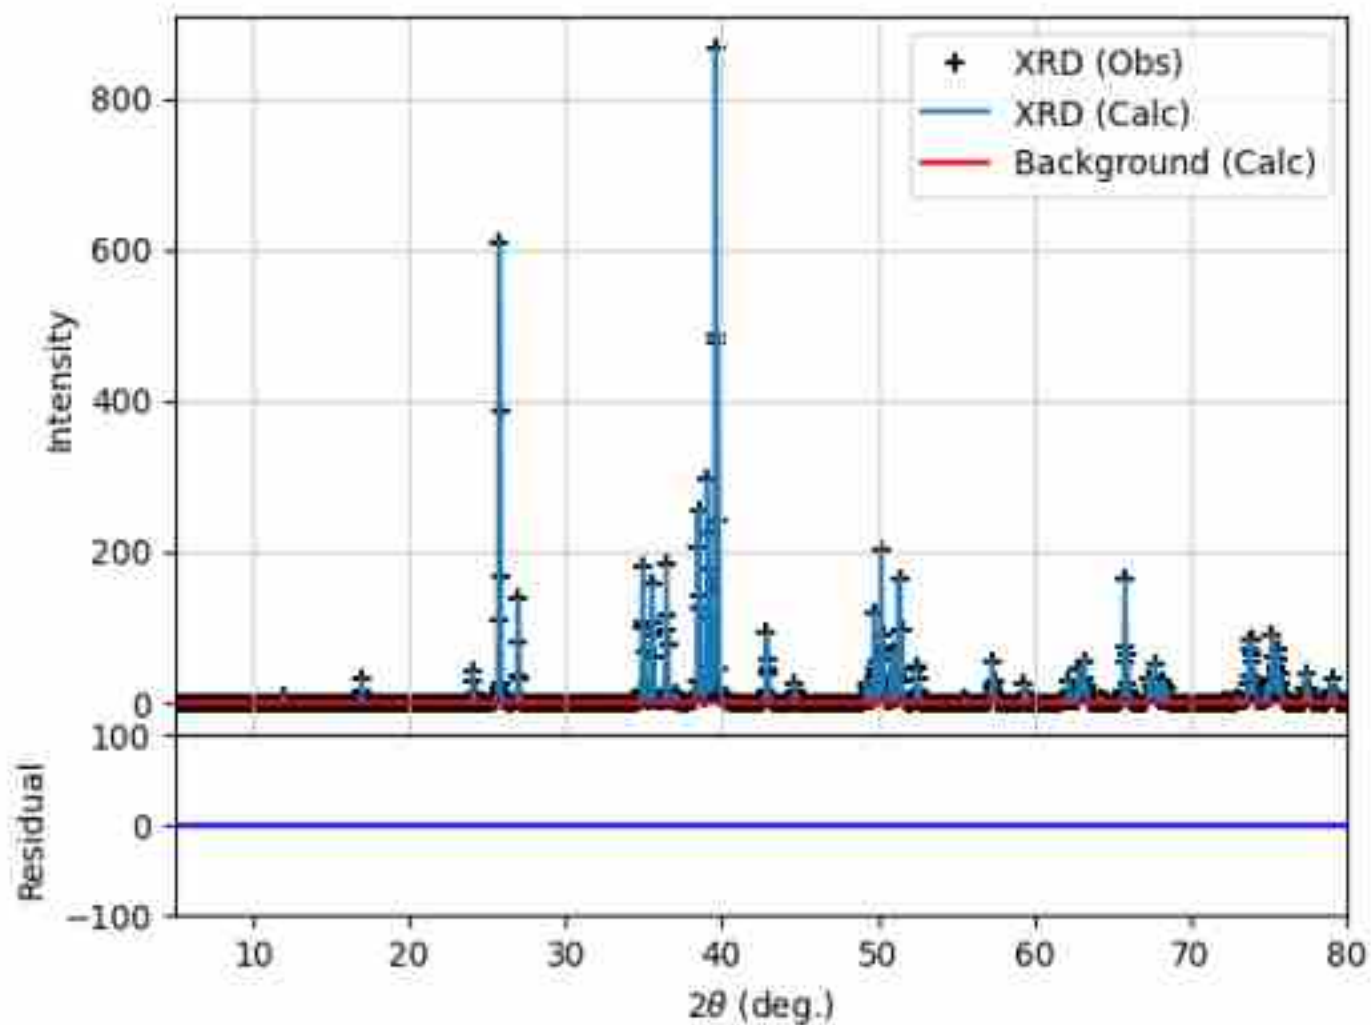

| RMSE before RR | Rwp     | RMSE after RR |
|----------------|---------|---------------|
| 0.025          | 0.00386 | 0.00056       |



# Tm<sub>2</sub>Se<sub>1</sub>O<sub>2</sub>

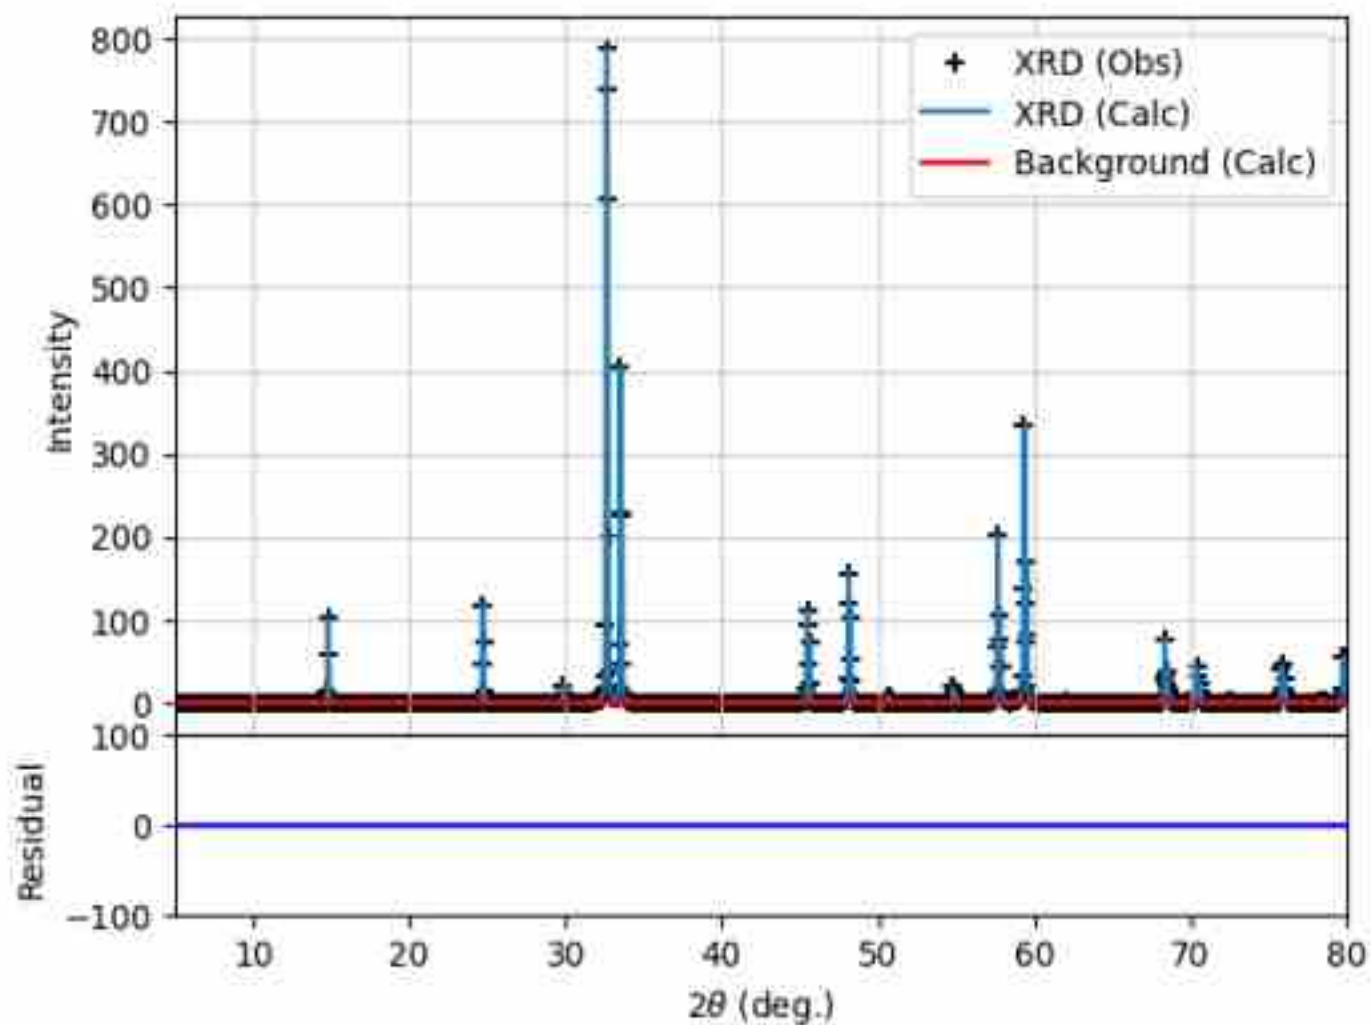

| RMSE before RR | Rwp     | RMSE after RR |
|----------------|---------|---------------|
| 0.025          | 0.00338 | 0.00121       |

# Tm<sub>4</sub>Cu<sub>4</sub>S<sub>8</sub>

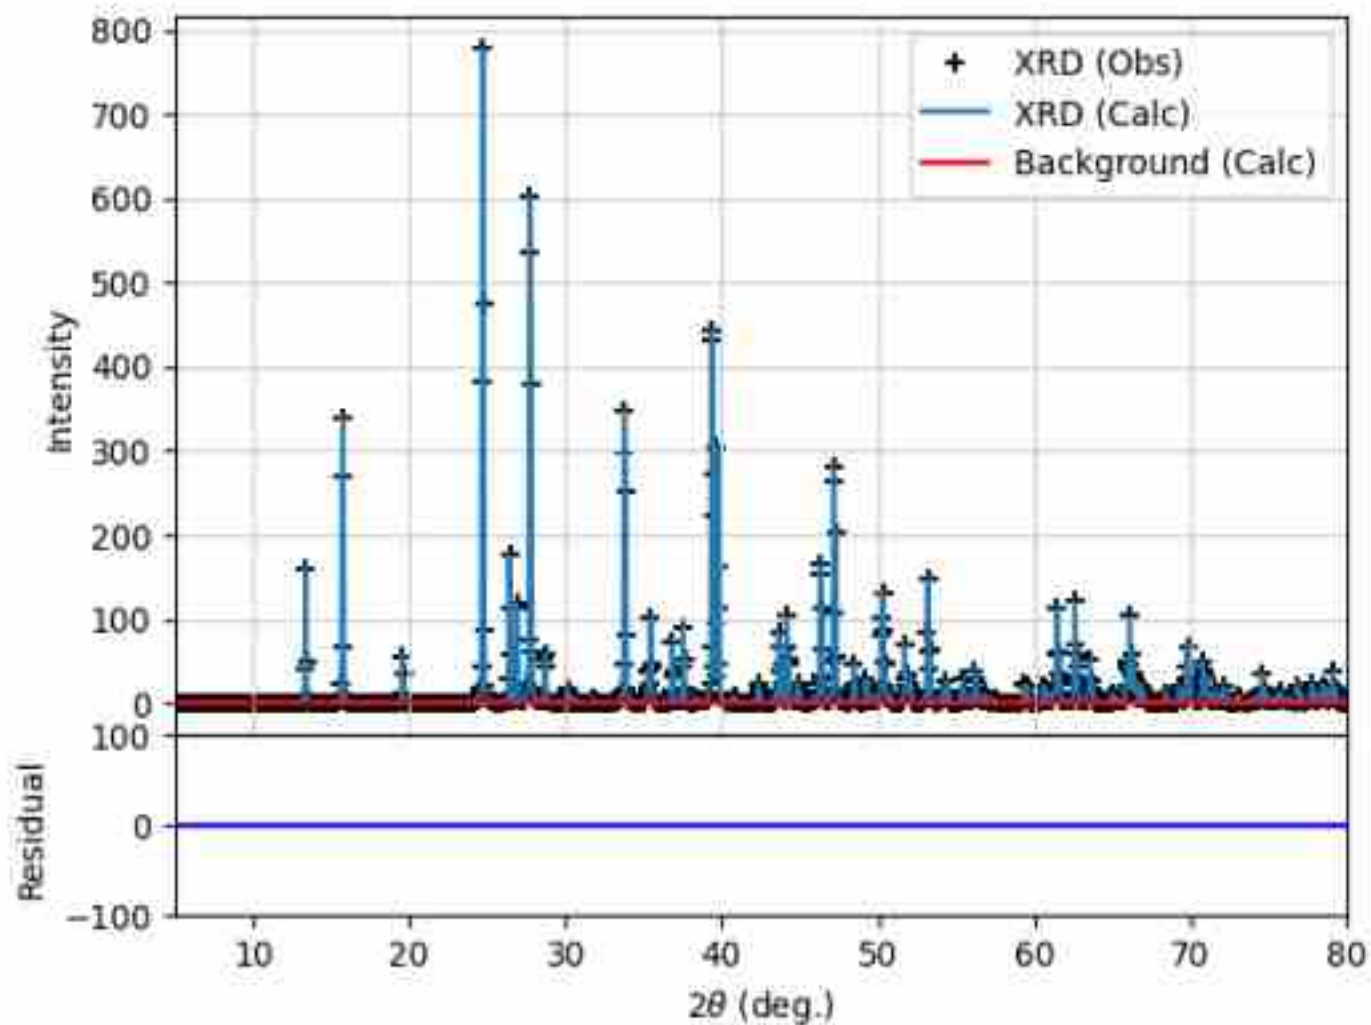

| RMSE before RR | Rwp     | RMSE after RR |
|----------------|---------|---------------|
| 0.025          | 0.00432 | 0.00062       |

# U1Pt4Au1

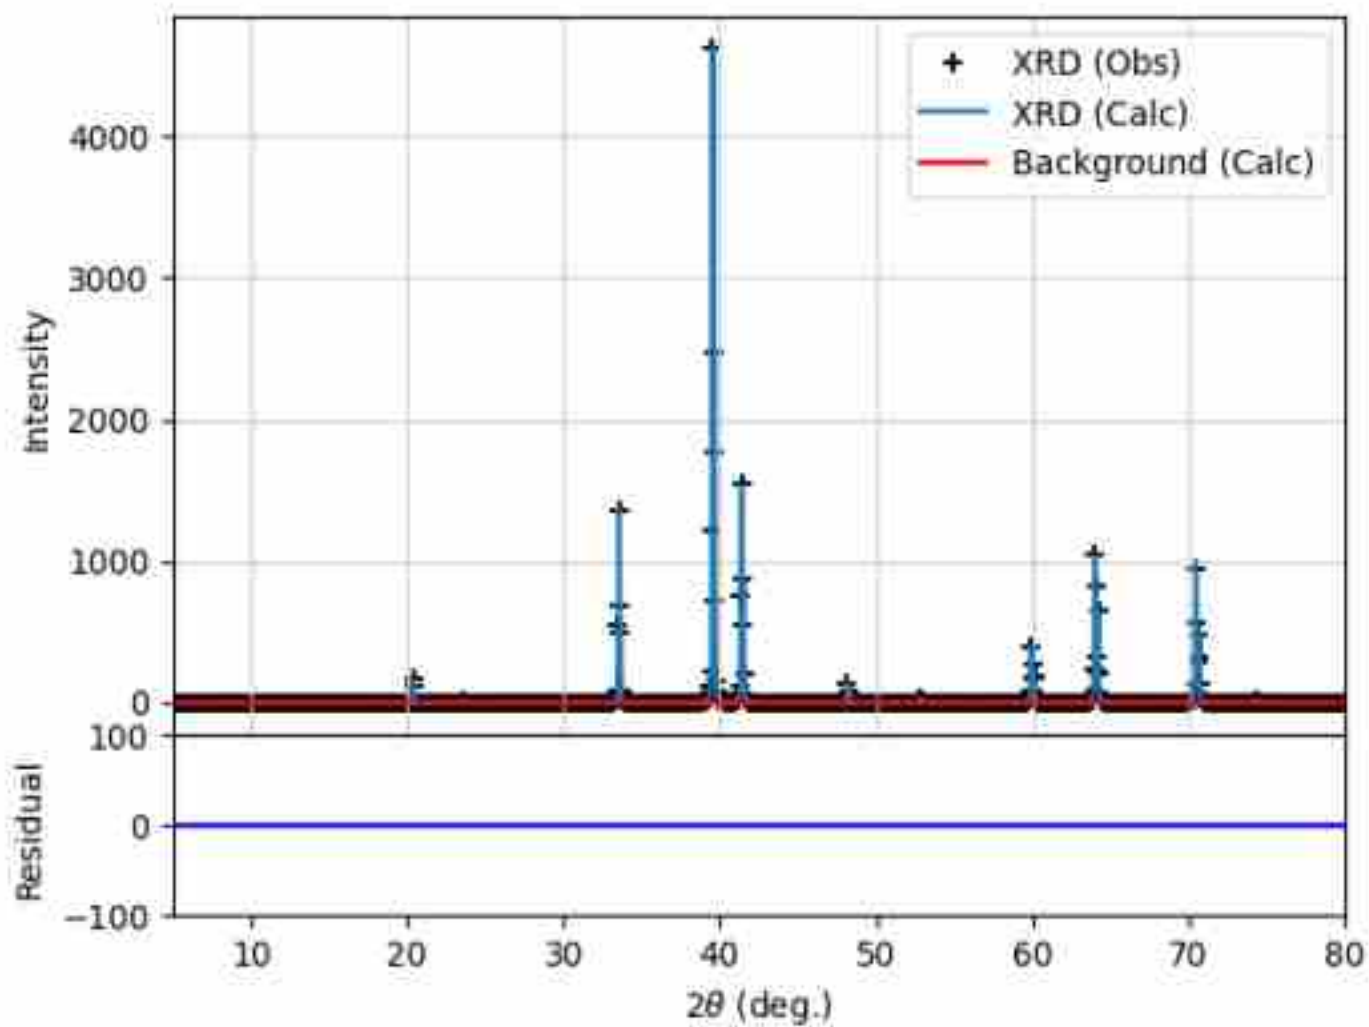

| RMSE before RR | Rwp     | RMSE after RR |
|----------------|---------|---------------|
| 0.025          | 0.03308 | 0.00101       |

# U<sub>2</sub>Ga<sub>2</sub>Au<sub>2</sub>

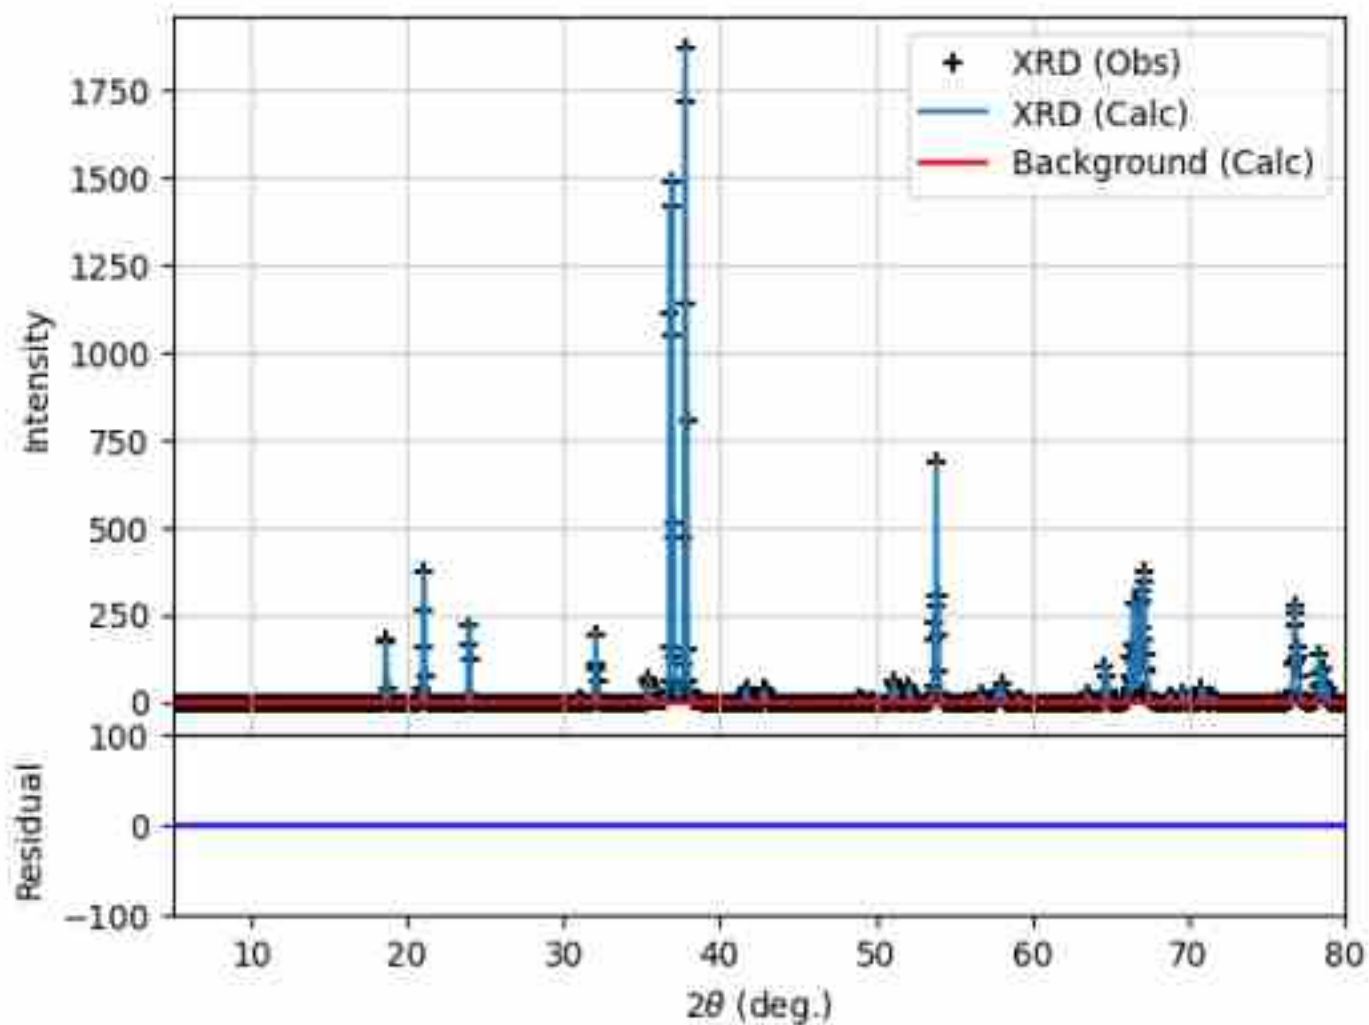

| RMSE before RR | Rwp     | RMSE after RR |
|----------------|---------|---------------|
| 0.025          | 0.00292 | 0.00024       |

# V4C116

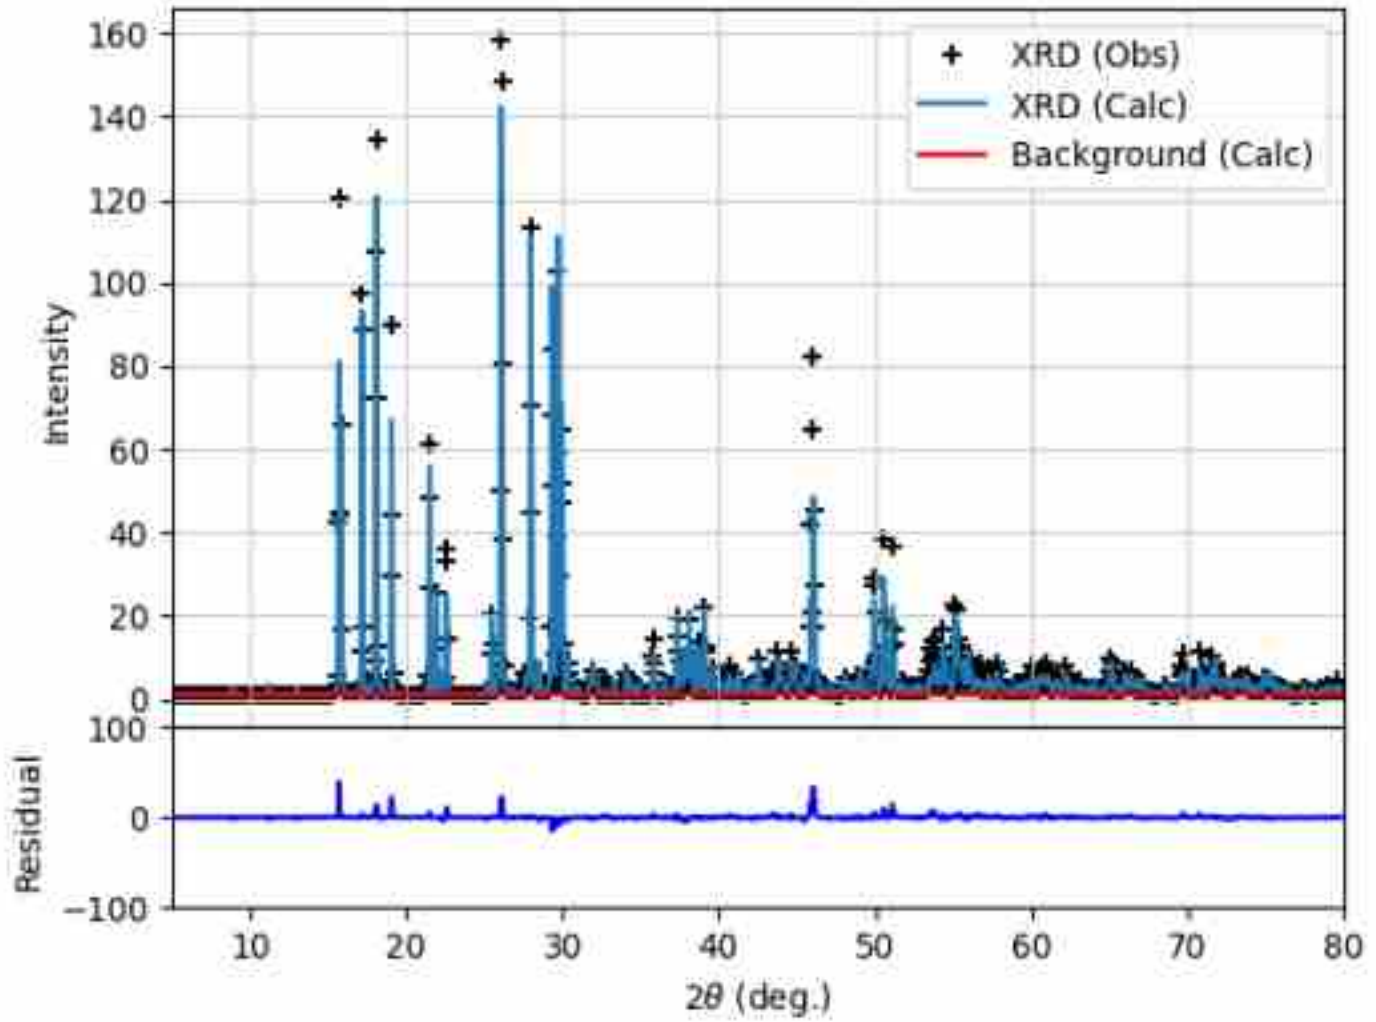

| RMSE before RR | Rwp      | RMSE after RR |
|----------------|----------|---------------|
| 0.025          | 25.02693 | 0.29886       |

# V4O3F5

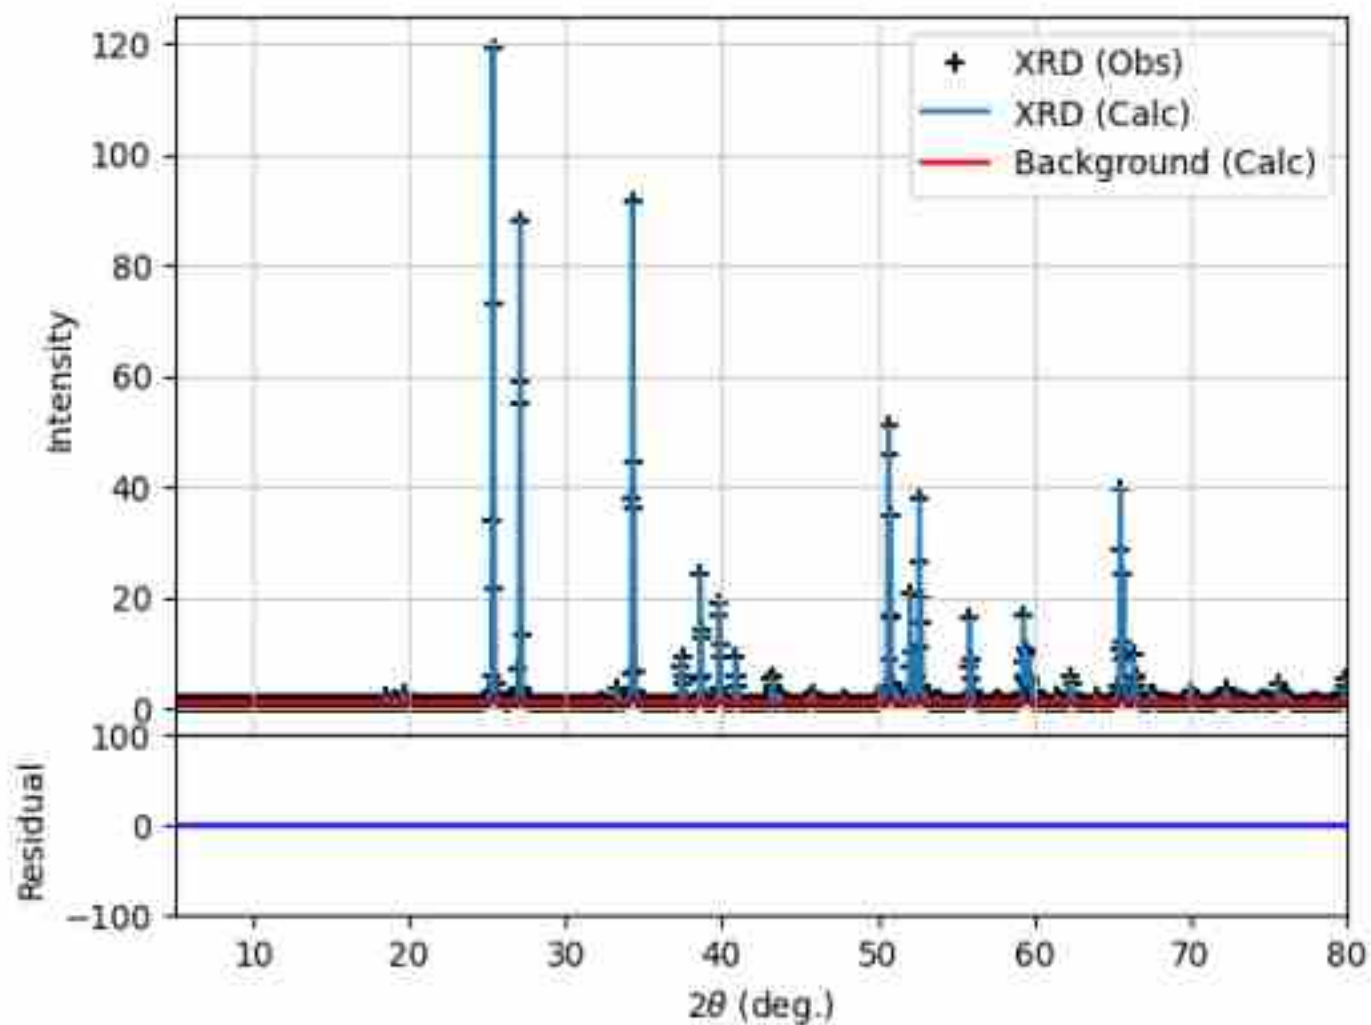

| RMSE before RR | Rwp     | RMSE after RR |
|----------------|---------|---------------|
| 0.025          | 0.00185 | 0.00044       |

# V4Sn8

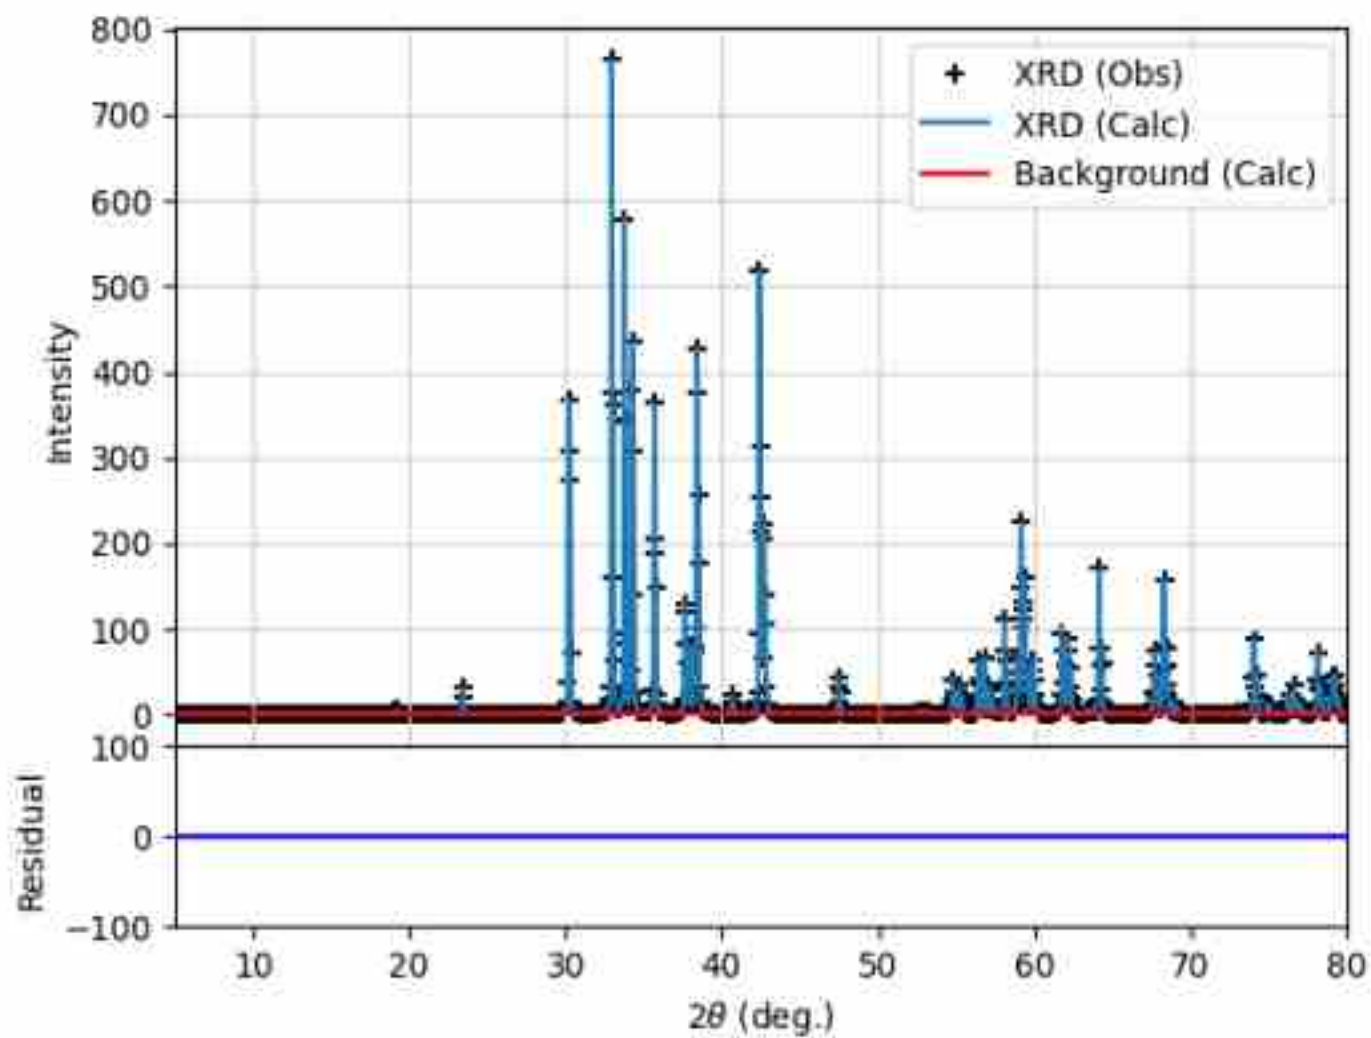

| RMSE before RR | Rwp     | RMSE after RR |
|----------------|---------|---------------|
| 0.025          | 0.00399 | 0.00031       |

# V5Fe1O12

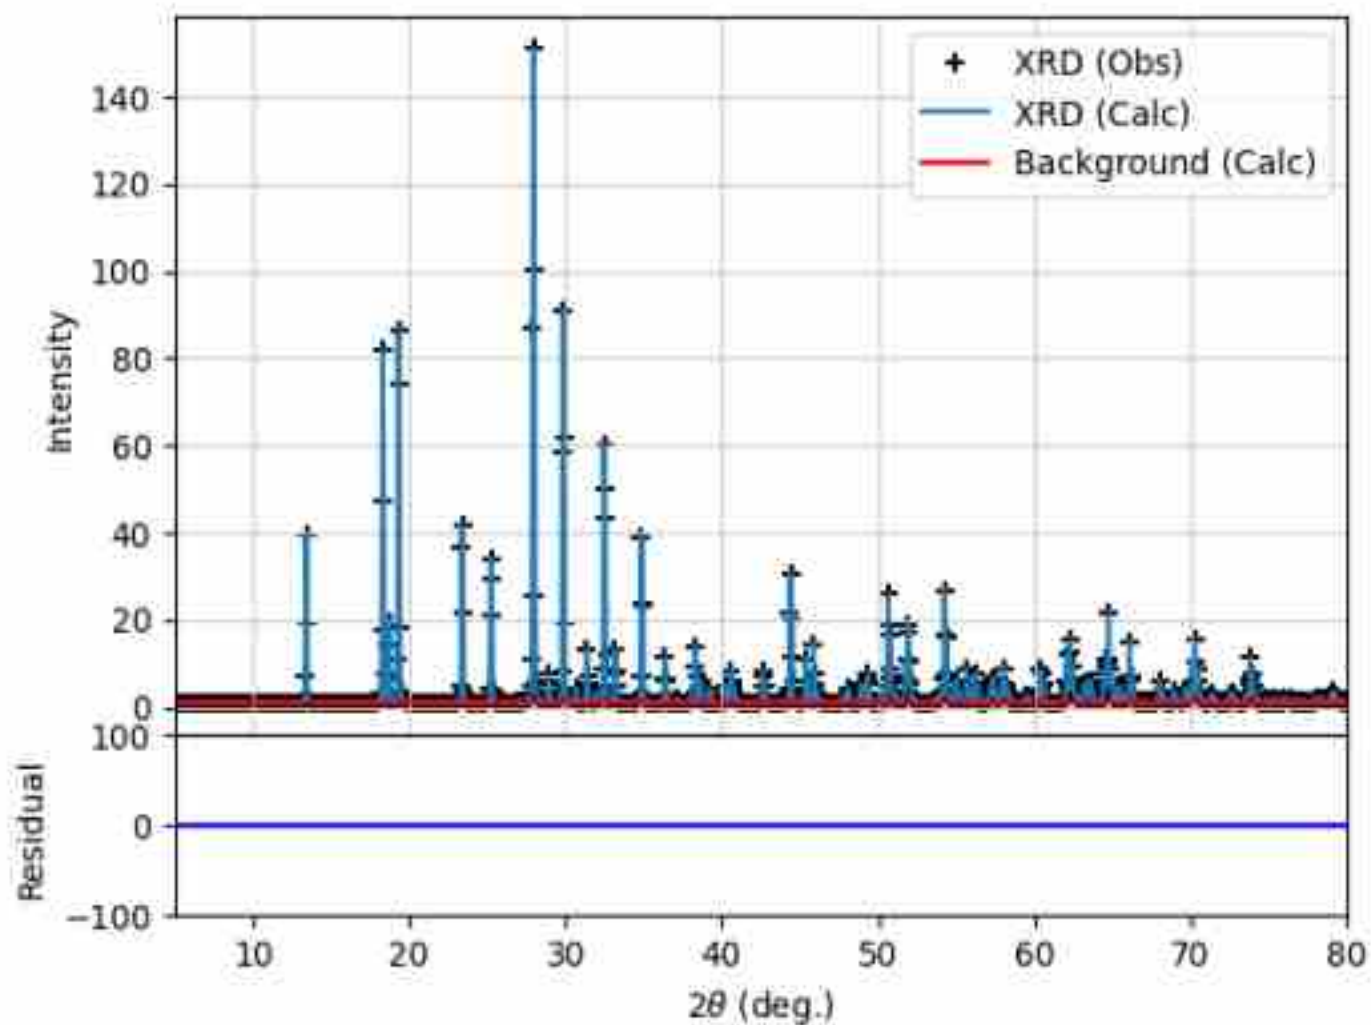

| RMSE before RR | Rwp     | RMSE after RR |
|----------------|---------|---------------|
| 0.025          | 0.00274 | 0.0005        |



# Y1Fe3B4O12

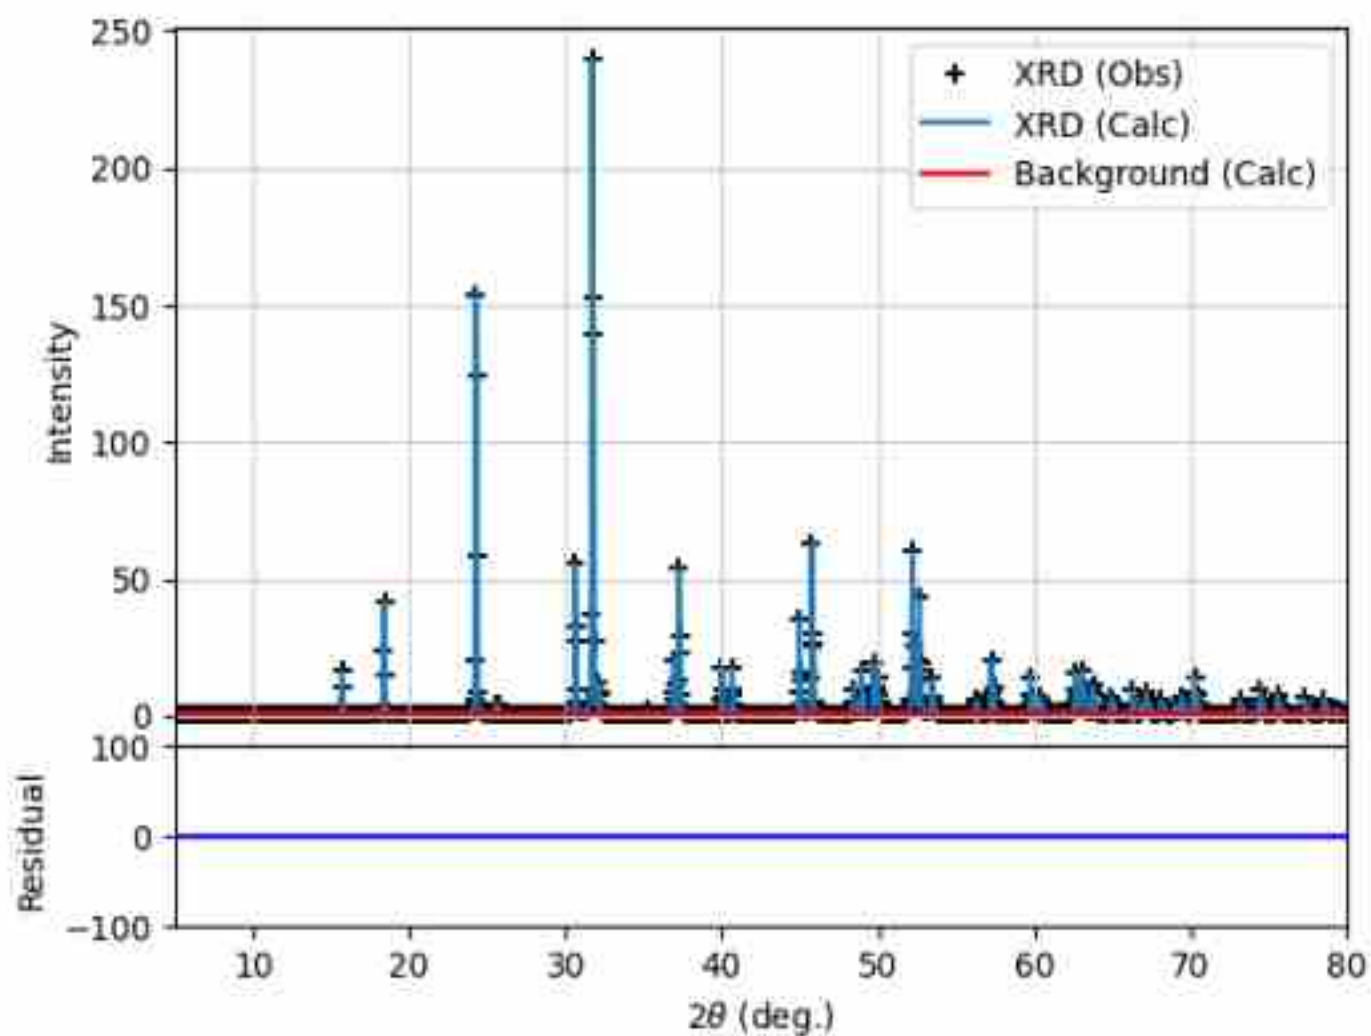

| RMSE before RR | Rwp     | RMSE after RR |
|----------------|---------|---------------|
| 0.025          | 0.00326 | 0.00154       |

# Y2Co1Ru3

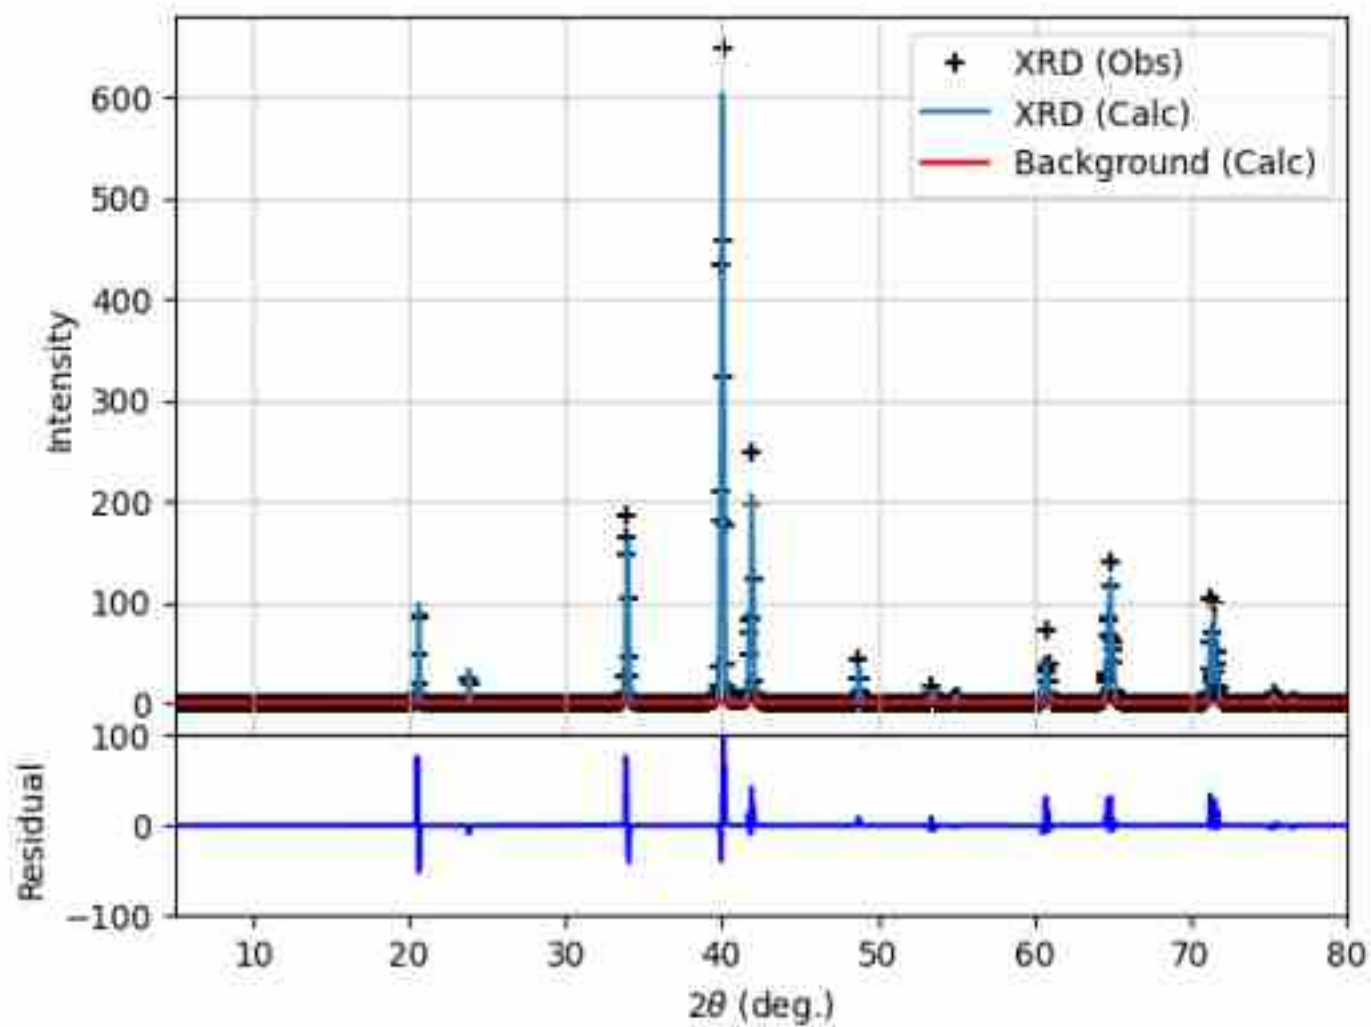

| RMSE before RR | Rwp      | RMSE after RR |
|----------------|----------|---------------|
| 0.025          | 27.33092 | 0.0308        |

# Y6Cu6Sb8

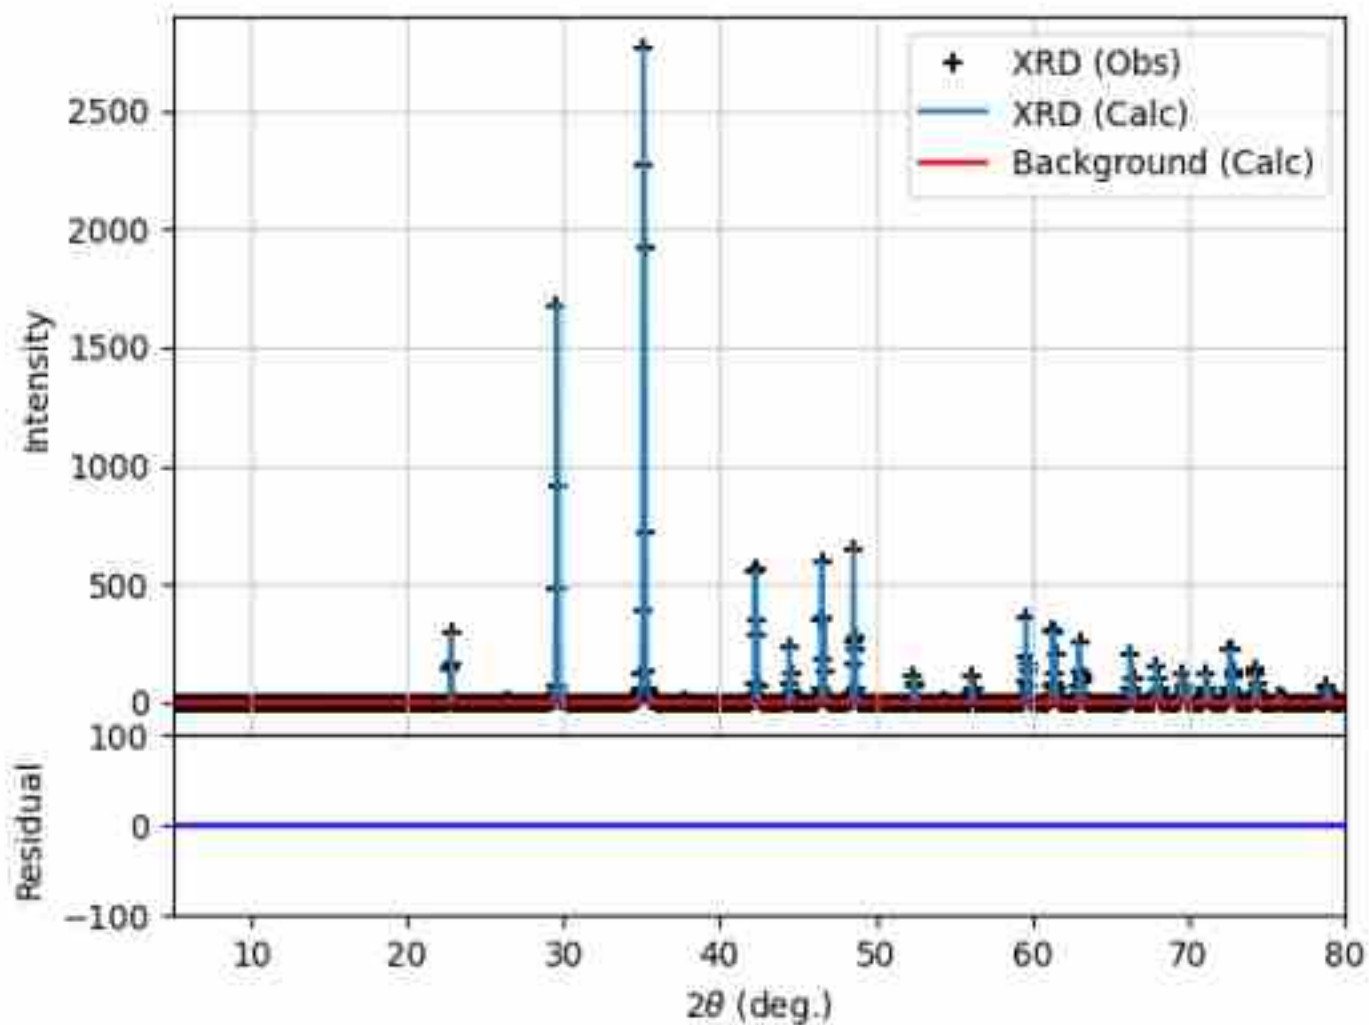

| RMSE before RR | Rwp     | RMSE after RR |
|----------------|---------|---------------|
| 0.025          | 0.01414 | 0.00122       |

# Yb<sub>2</sub>Nb<sub>2</sub>O<sub>8</sub>

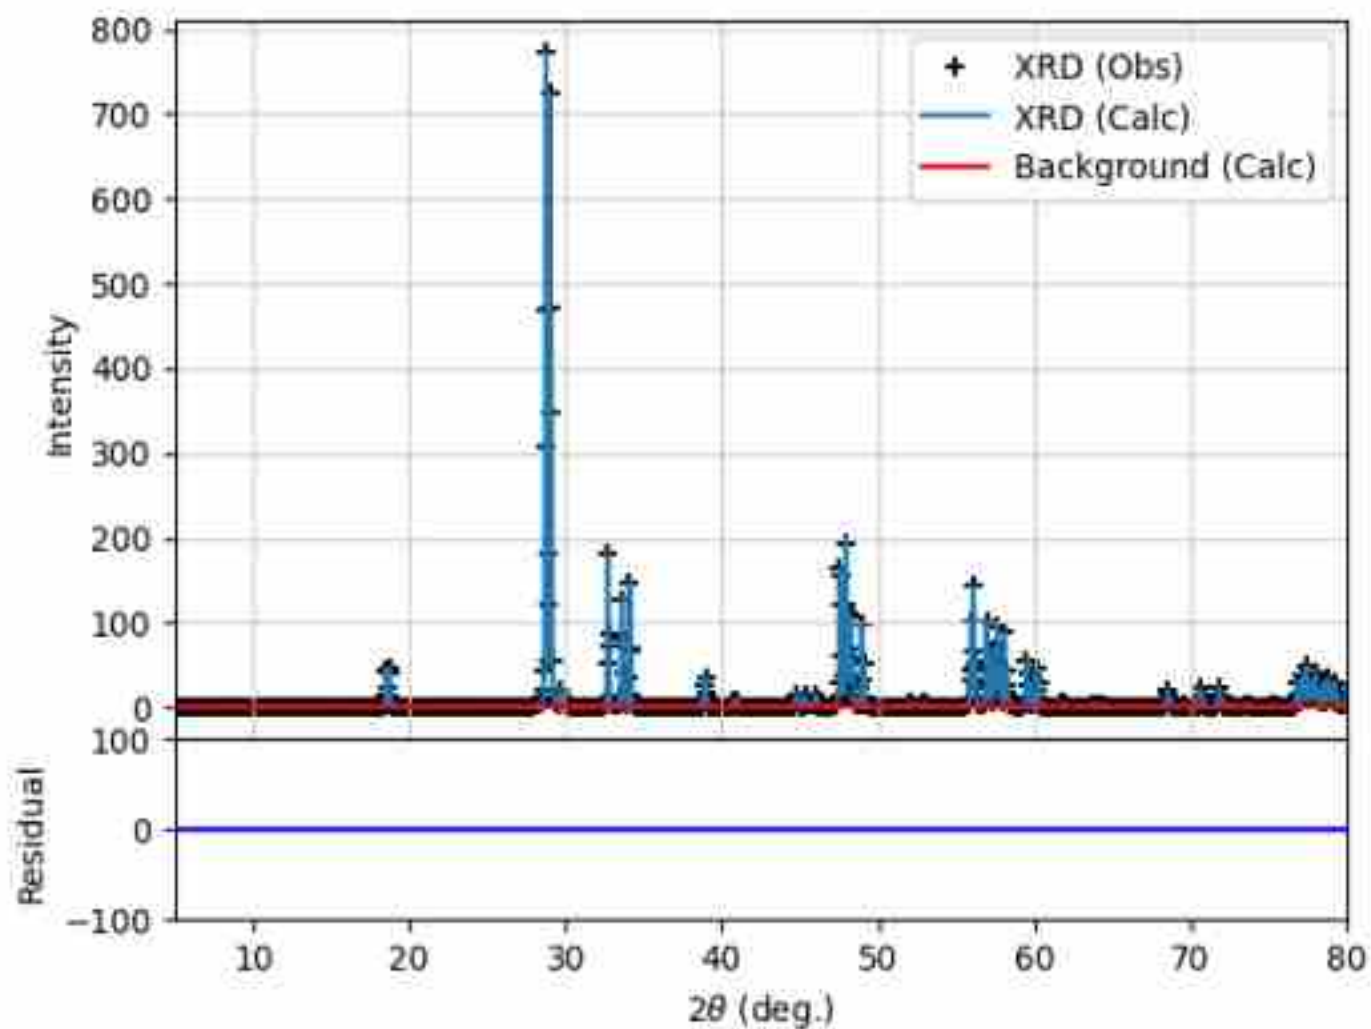

| RMSE before RR | Rwp     | RMSE after RR |
|----------------|---------|---------------|
| 0.025          | 0.00379 | 0.0013        |

# Yb10Pt6

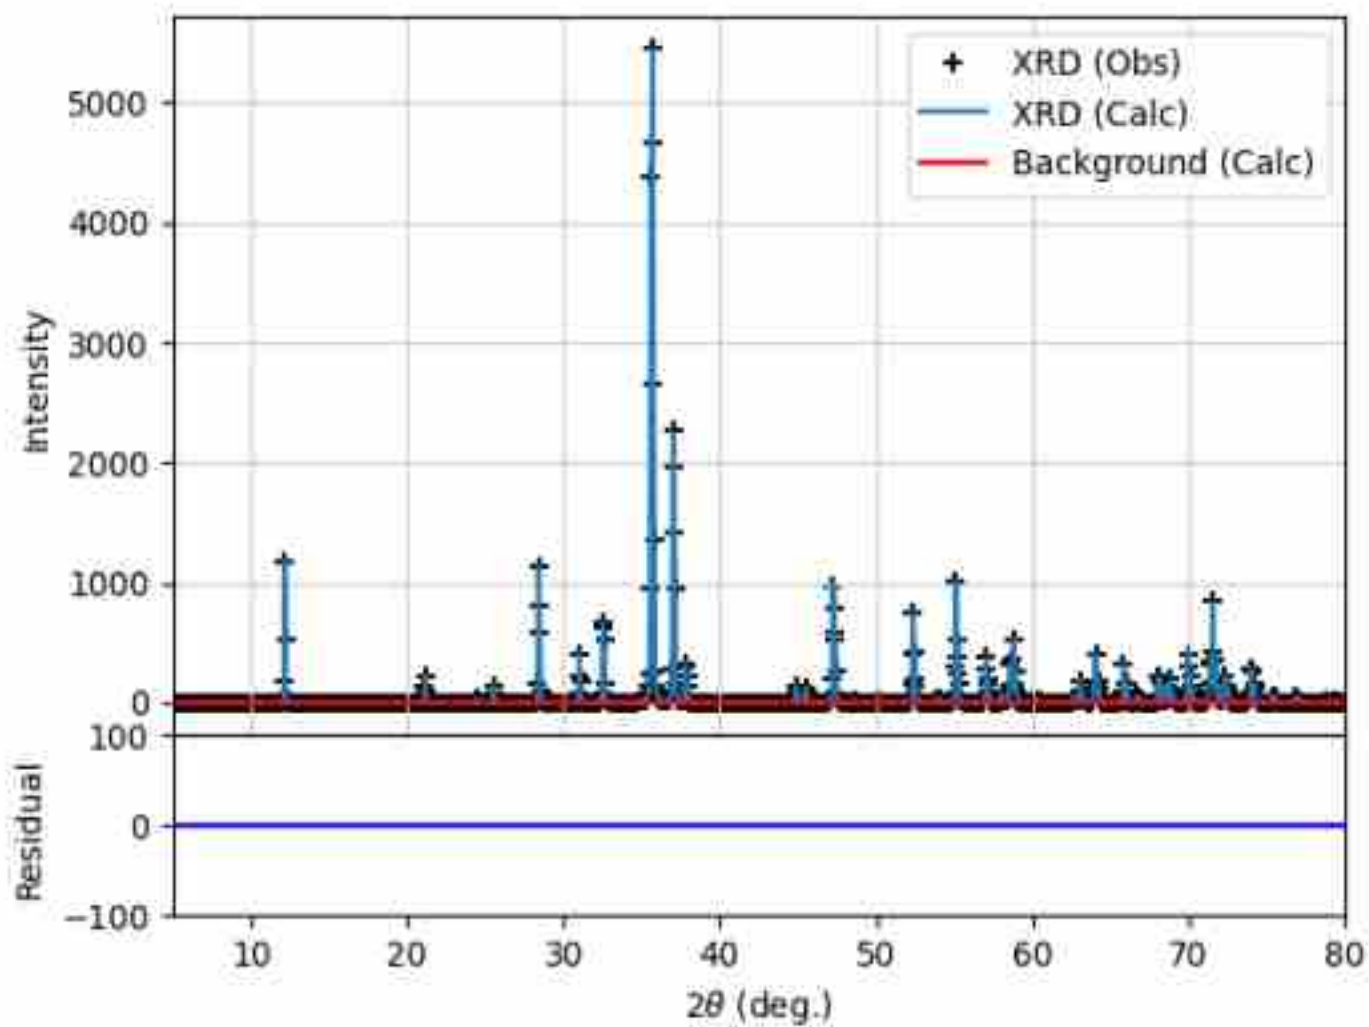

| RMSE before RR | Rwp     | RMSE after RR |
|----------------|---------|---------------|
| 0.025          | 0.00467 | 0.00043       |

# Zn<sub>2</sub>Cu<sub>4</sub>O<sub>8</sub>

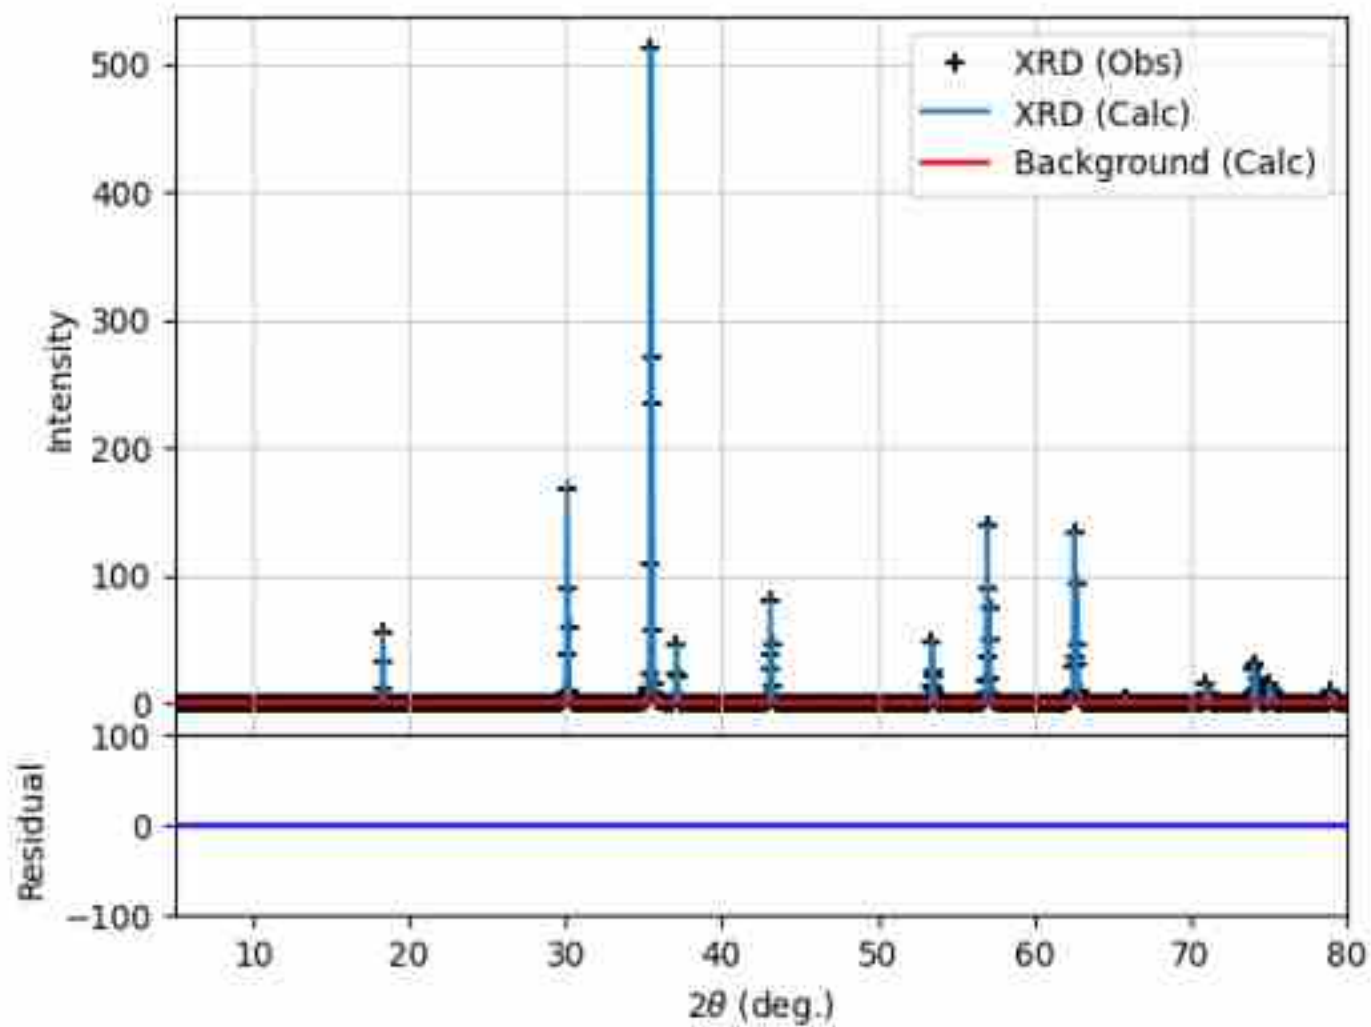

| RMSE before RR | Rwp     | RMSE after RR |
|----------------|---------|---------------|
| 0.025          | 0.02355 | 0.00513       |

# Zn<sub>2</sub>Mo<sub>4</sub>O<sub>8</sub>

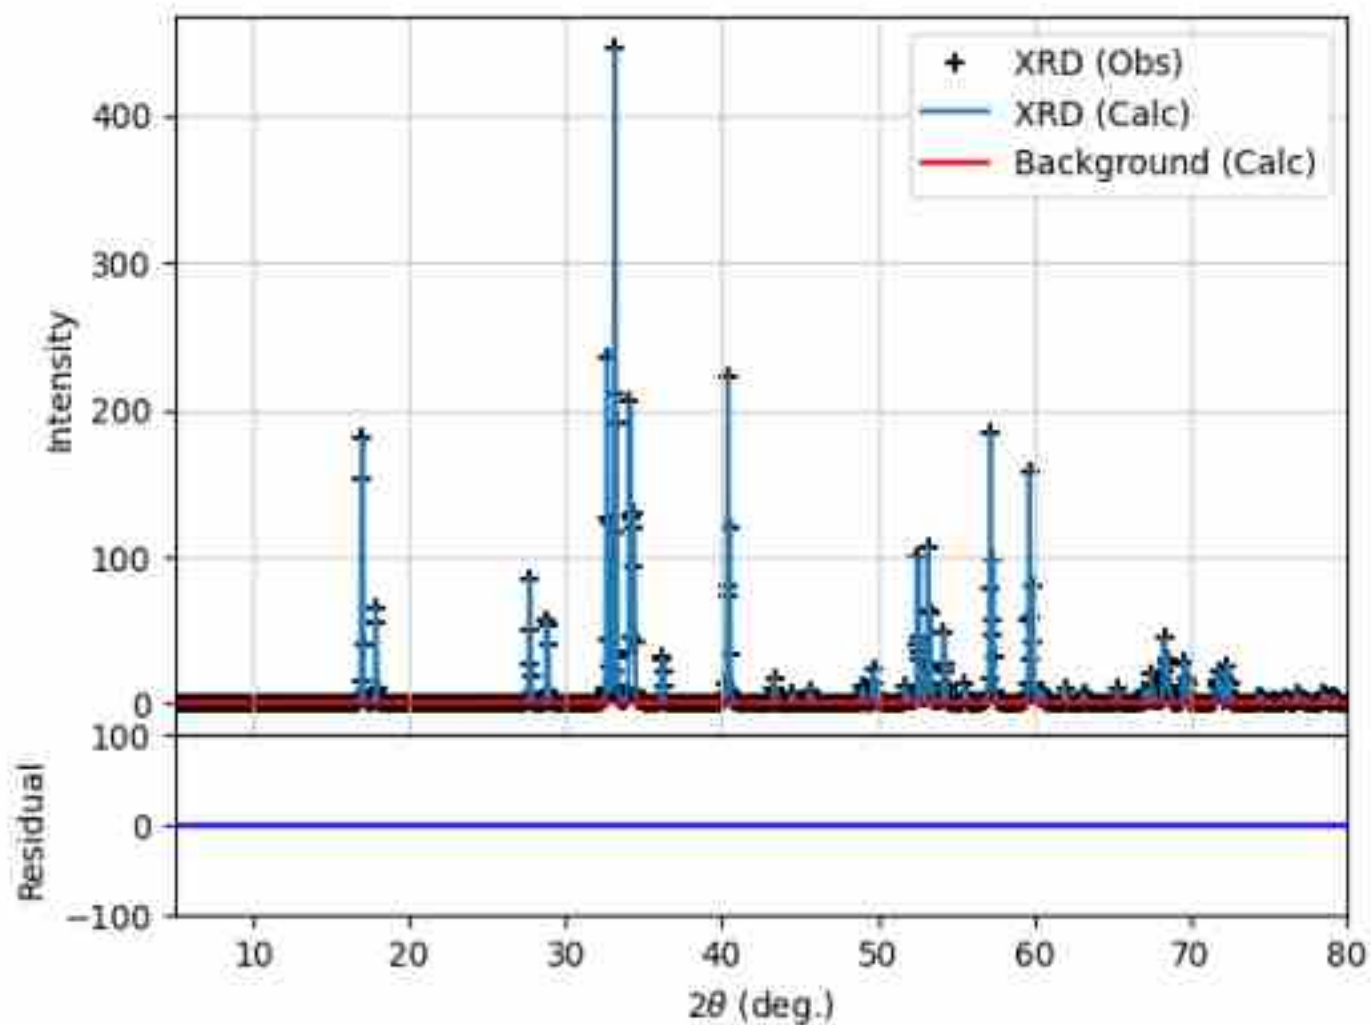

| RMSE before RR | Rwp     | RMSE after RR |
|----------------|---------|---------------|
| 0.025          | 0.00252 | 0.00097       |

# Zn<sub>2</sub>Si<sub>2</sub>As<sub>4</sub>

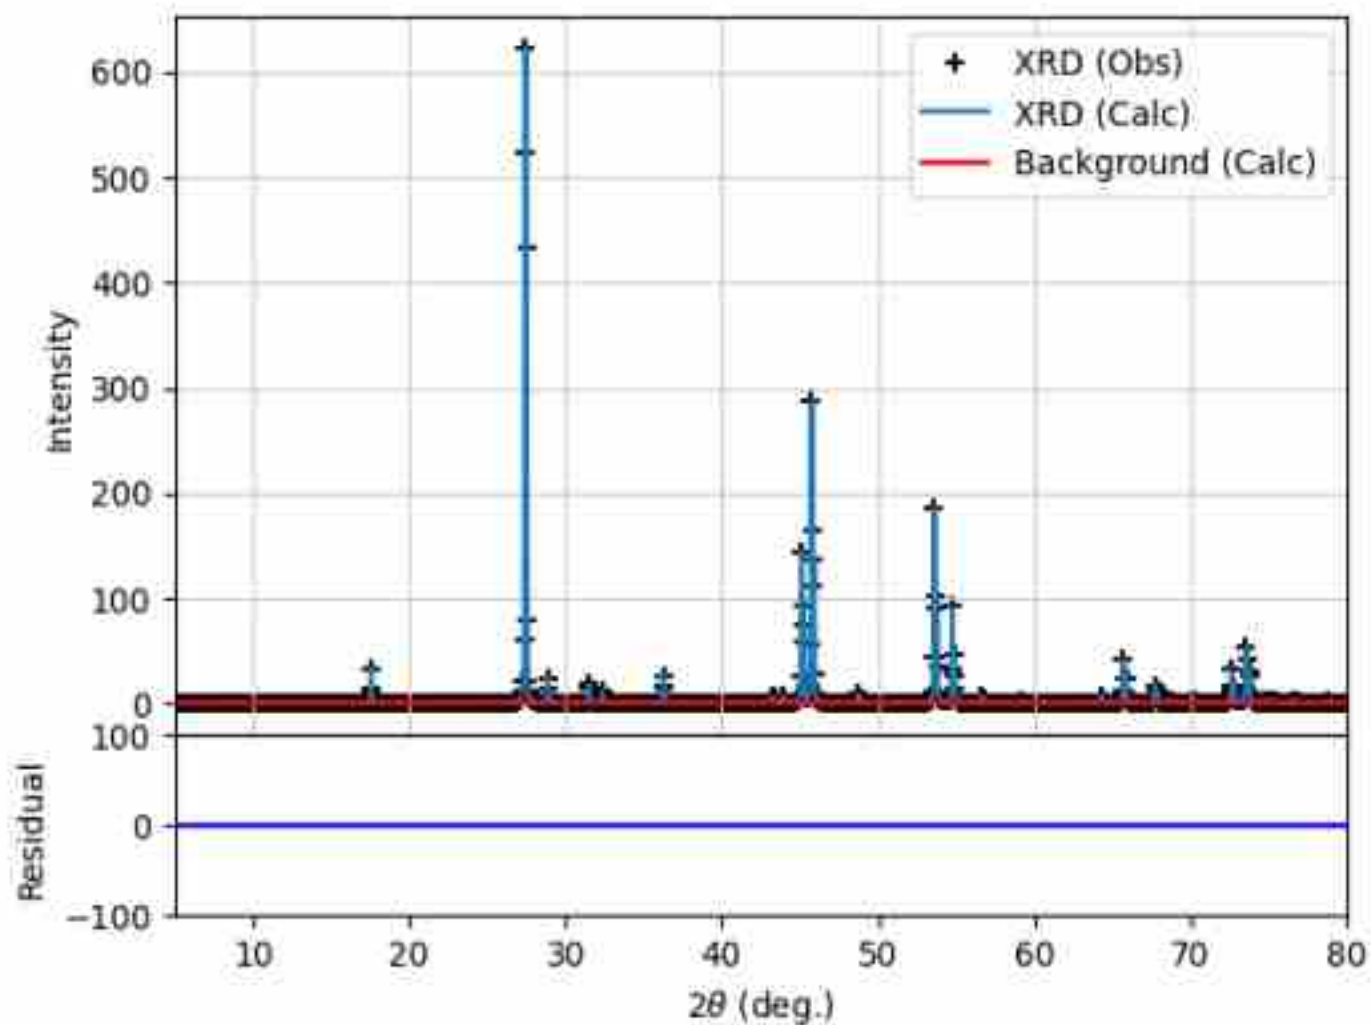

| RMSE before RR | Rwp     | RMSE after RR |
|----------------|---------|---------------|
| 0.025          | 0.00519 | 0.00068       |



# Zn<sub>4</sub>Cu<sub>2</sub>Ir<sub>2</sub>O<sub>12</sub>

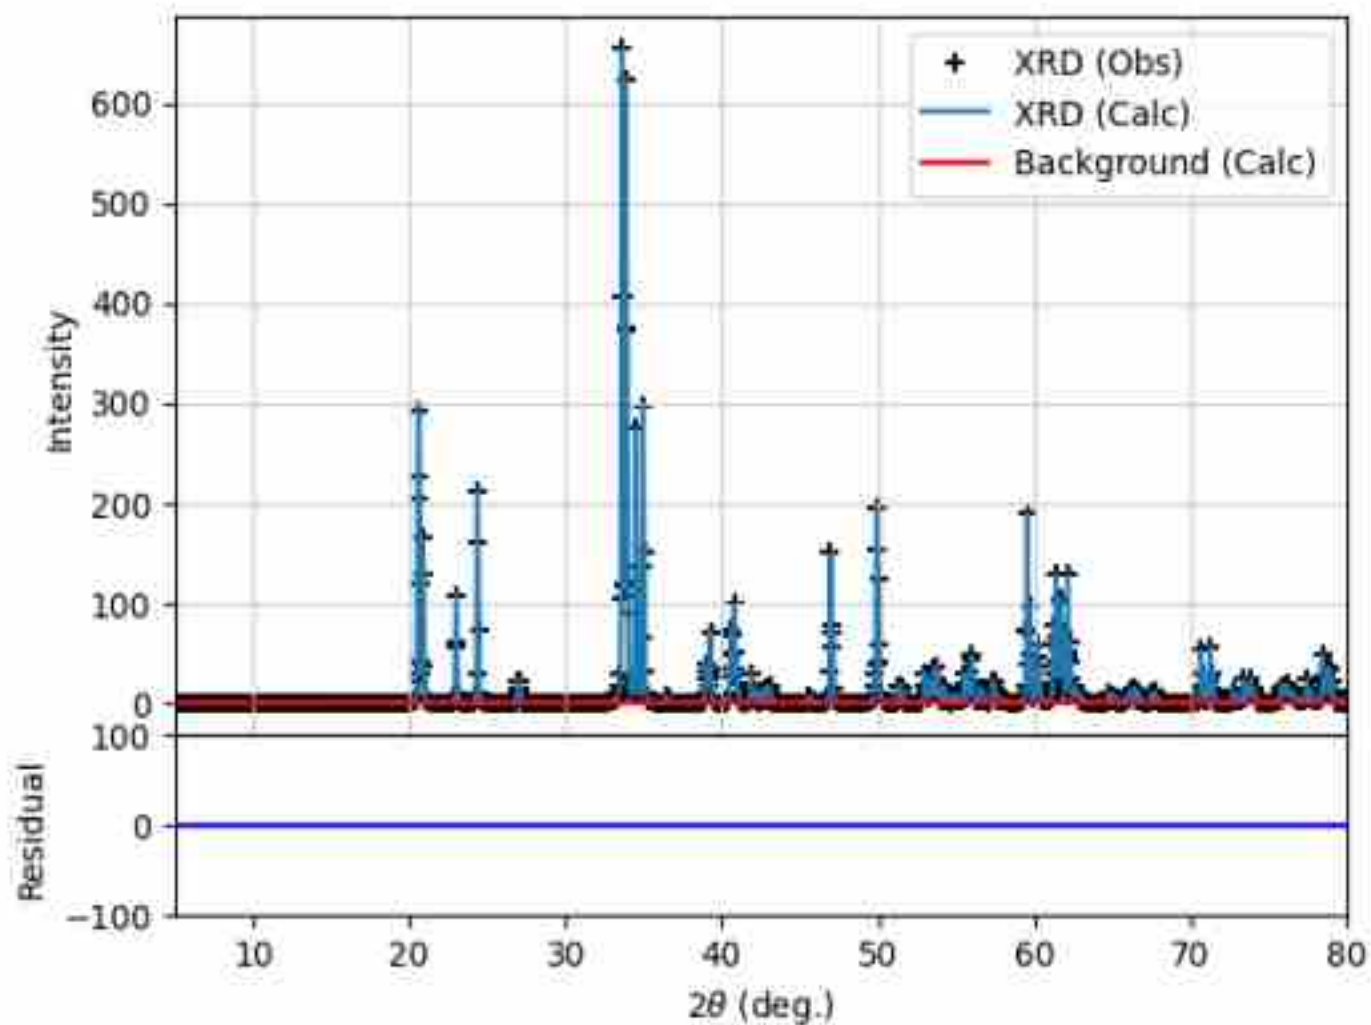

| RMSE before RR | Rwp     | RMSE after RR |
|----------------|---------|---------------|
| 0.025          | 0.00413 | 0.00134       |

# Zn4S8

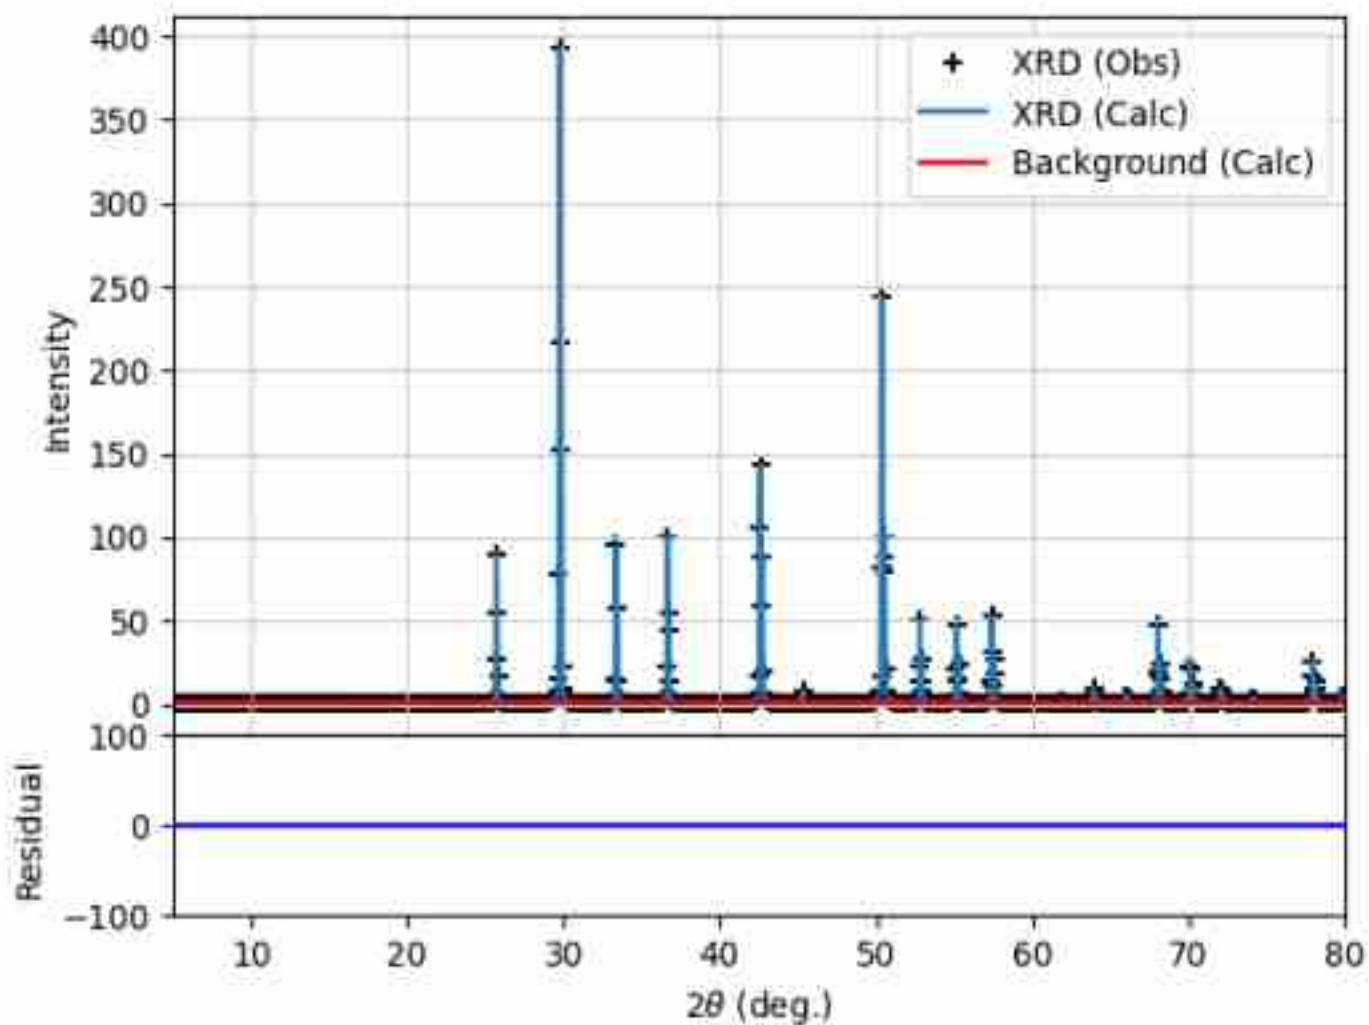

| RMSE before RR | Rwp     | RMSE after RR |
|----------------|---------|---------------|
| 0.025          | 0.00357 | 0.00078       |

# Zr1Ti1F6

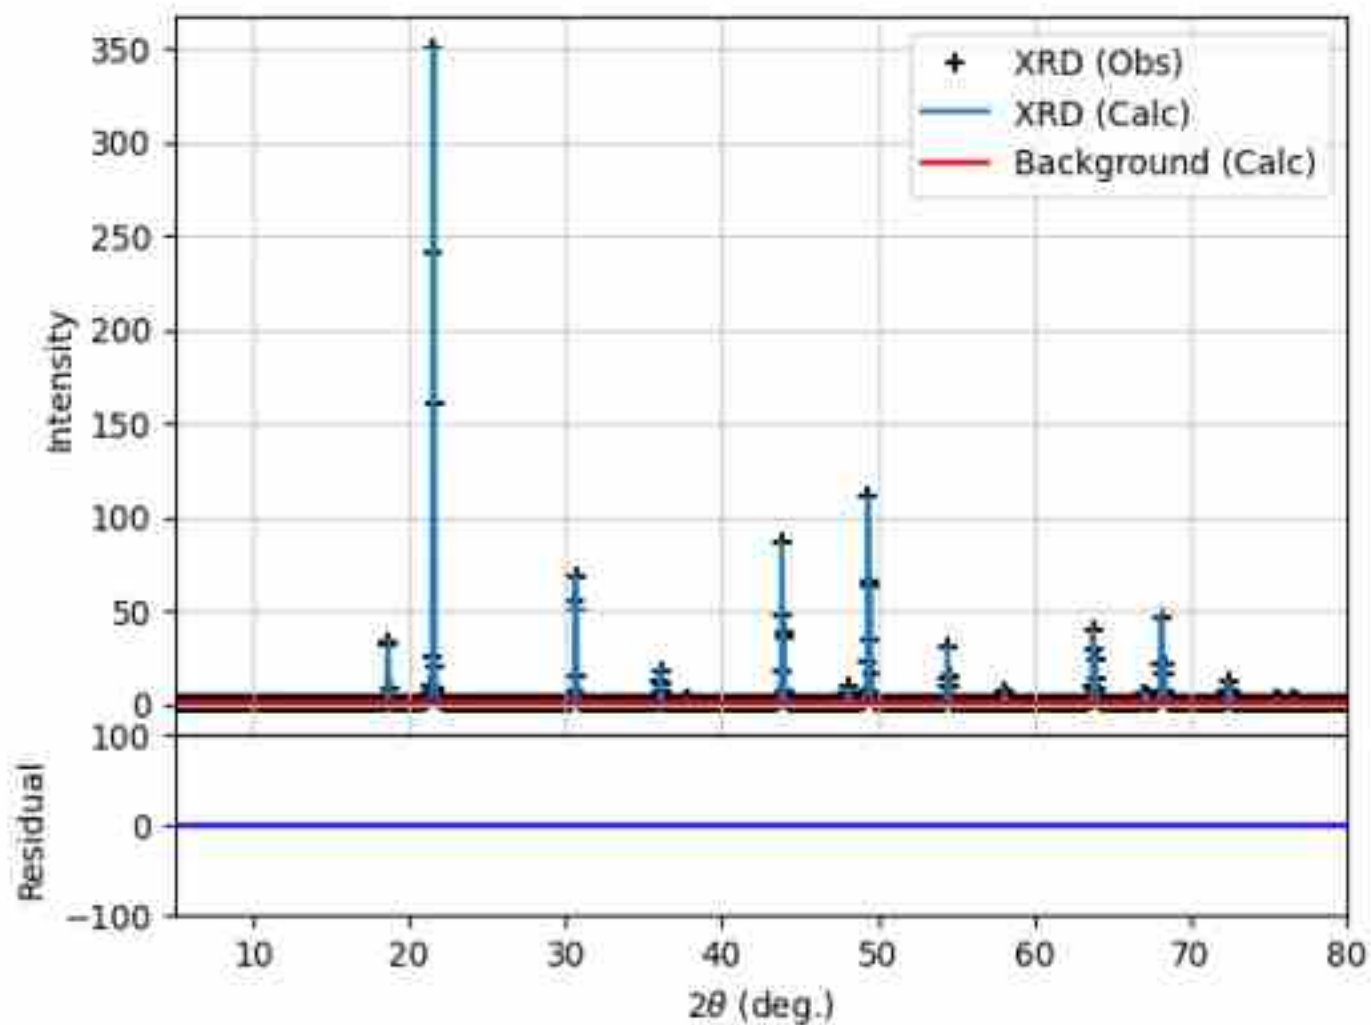

| RMSE before RR | Rwp     | RMSE after RR |
|----------------|---------|---------------|
| 0.025          | 0.01013 | 0.00314       |

# Zr<sub>2</sub>Be<sub>17</sub>

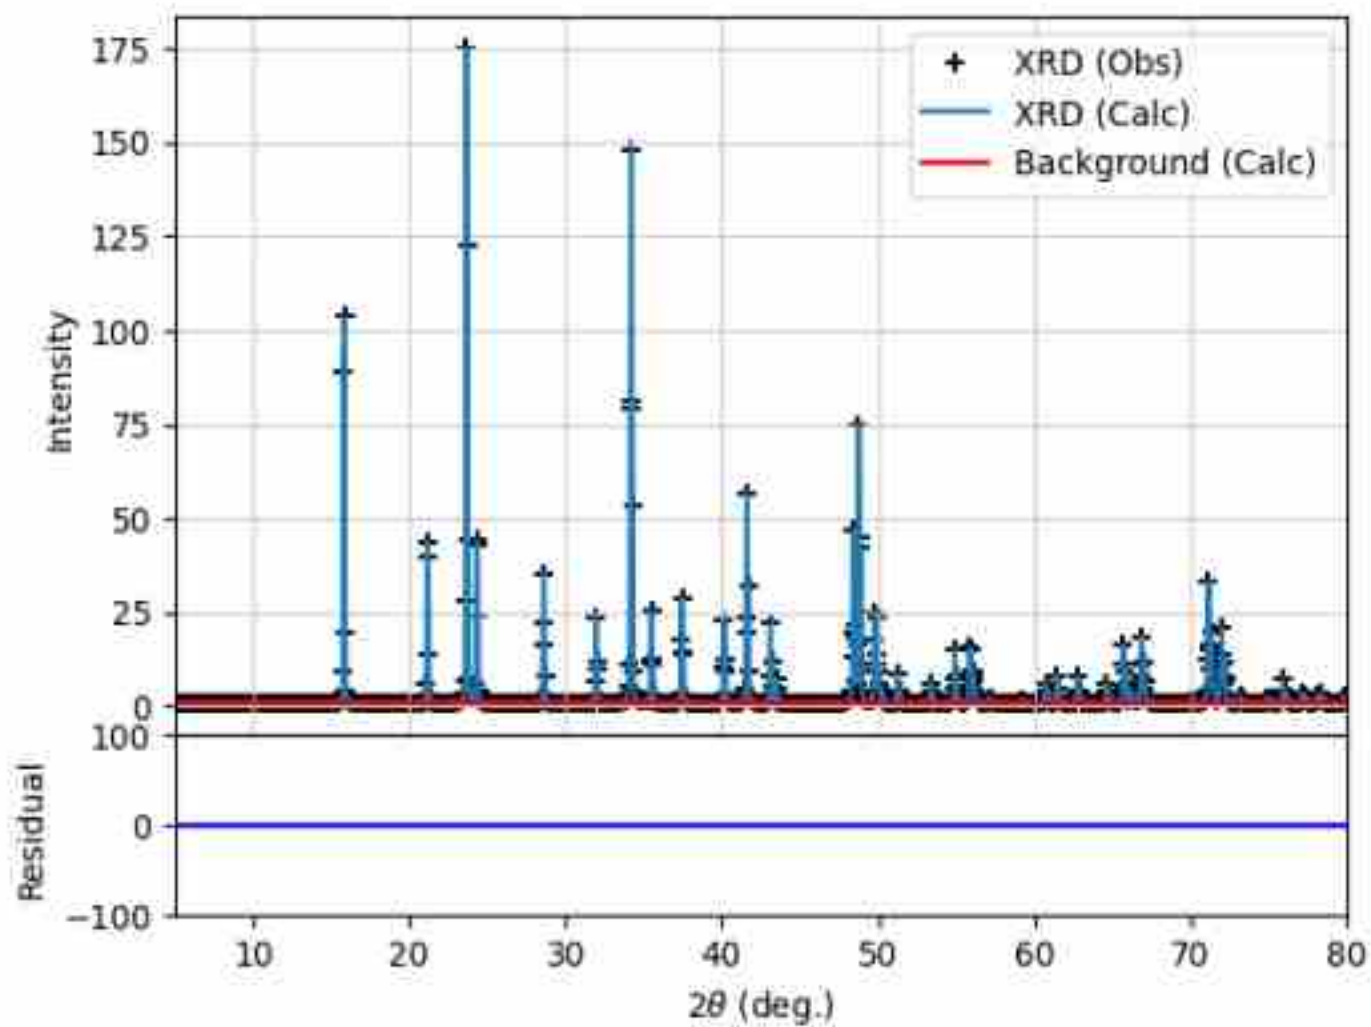

| RMSE before RR | Rwp     | RMSE after RR |
|----------------|---------|---------------|
| 0.025          | 0.00414 | 0.00175       |

# Zr4Ge4

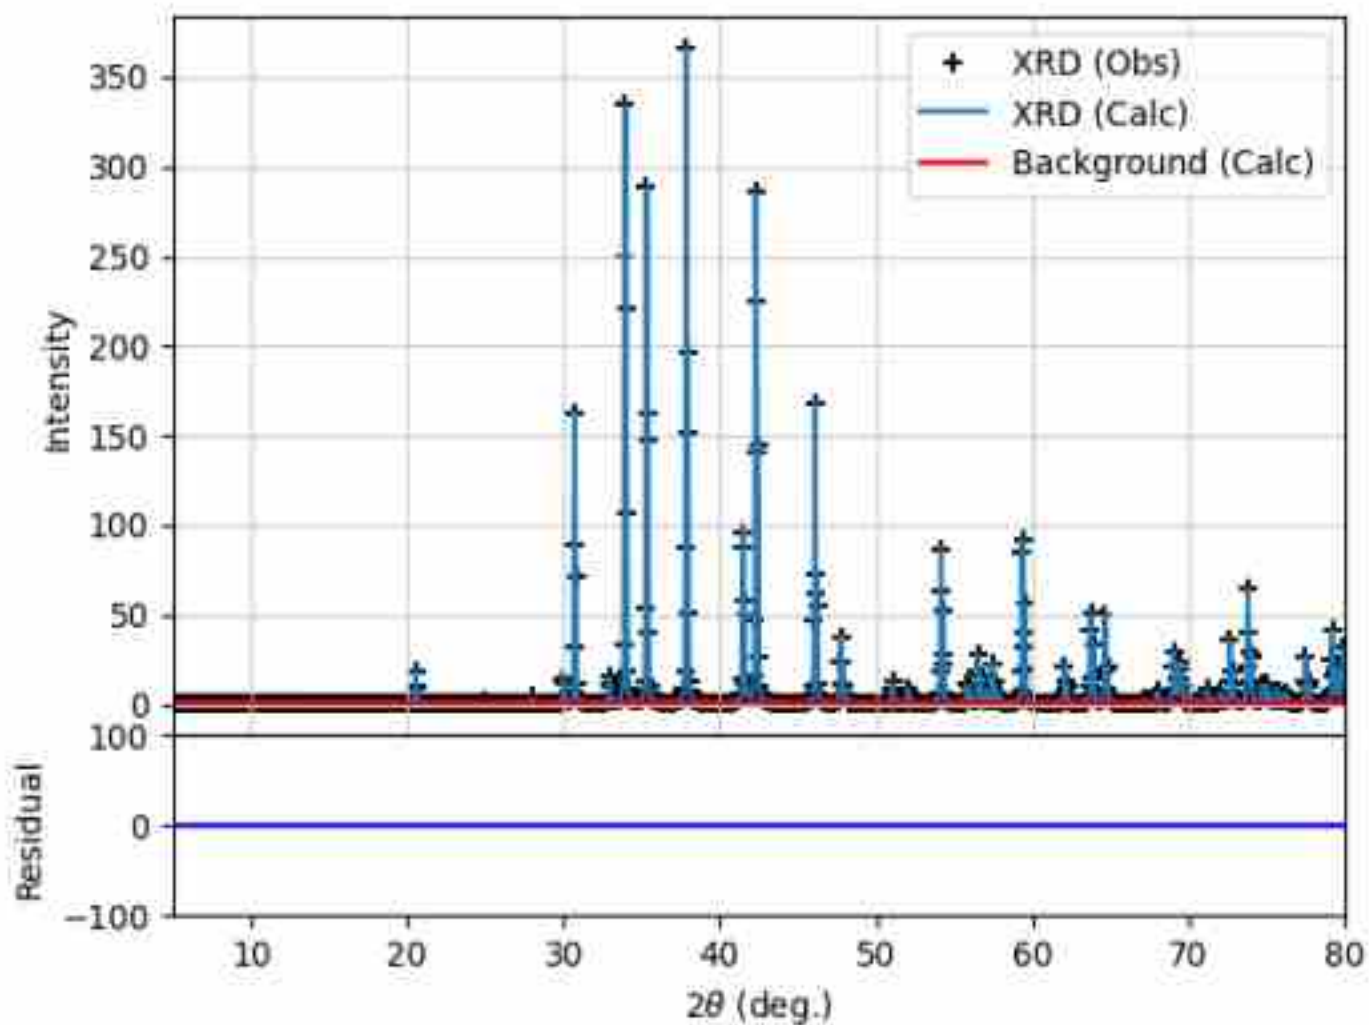

| RMSE before RR | Rwp     | RMSE after RR |
|----------------|---------|---------------|
| 0.025          | 0.00421 | 0.00024       |

# Zr10Sn8

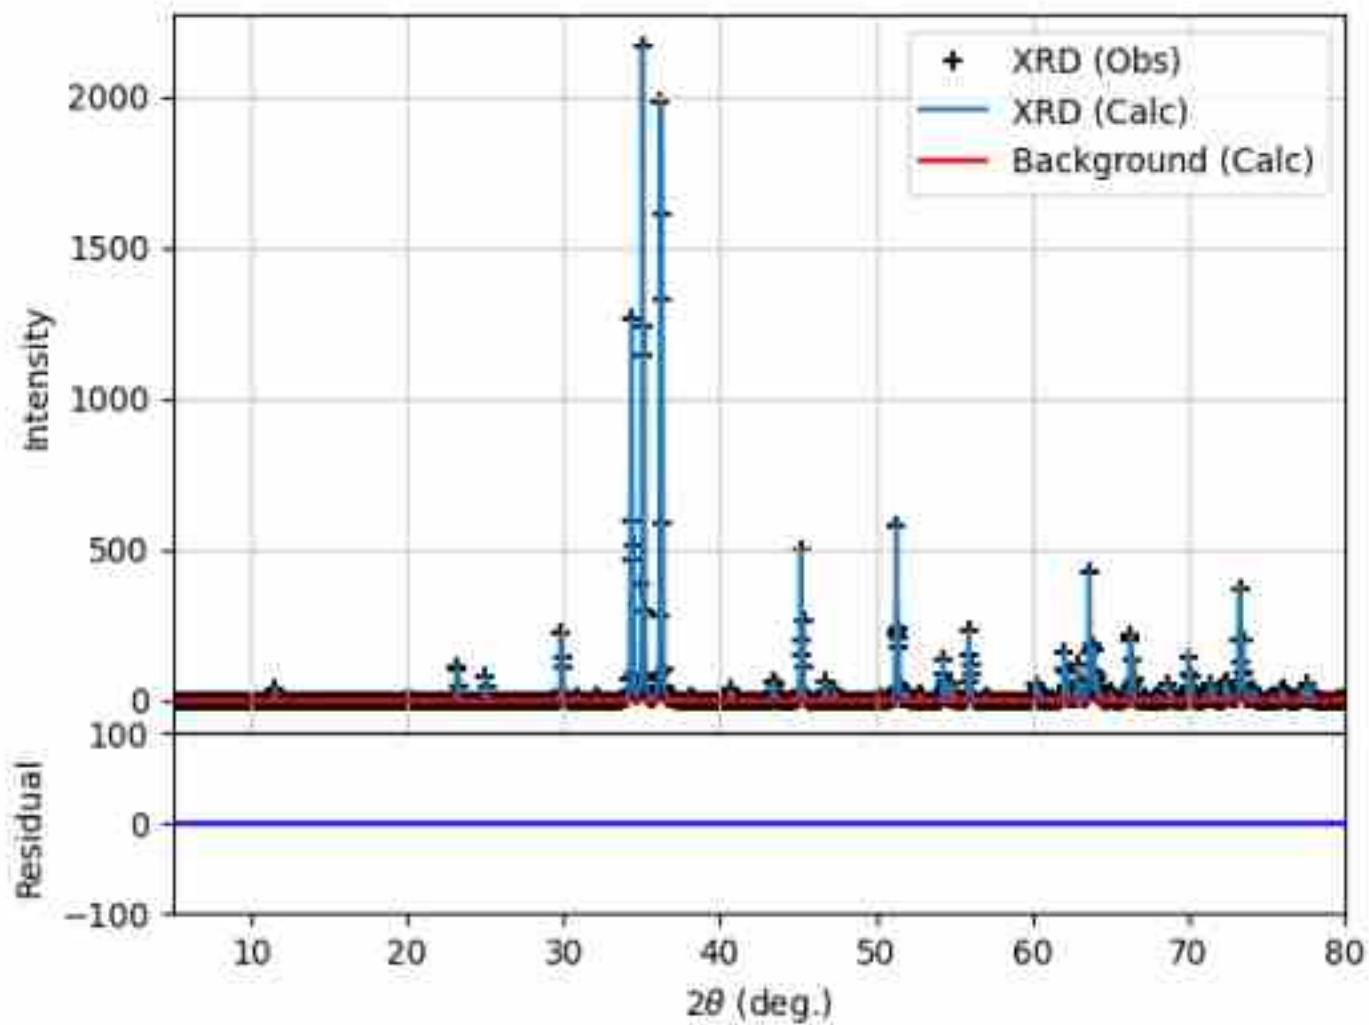

| RMSE before RR | Rwp     | RMSE after RR |
|----------------|---------|---------------|
| 0.025          | 0.00412 | 0.0005        |

# Zr<sub>10</sub>Zn<sub>2</sub>Sn<sub>6</sub>

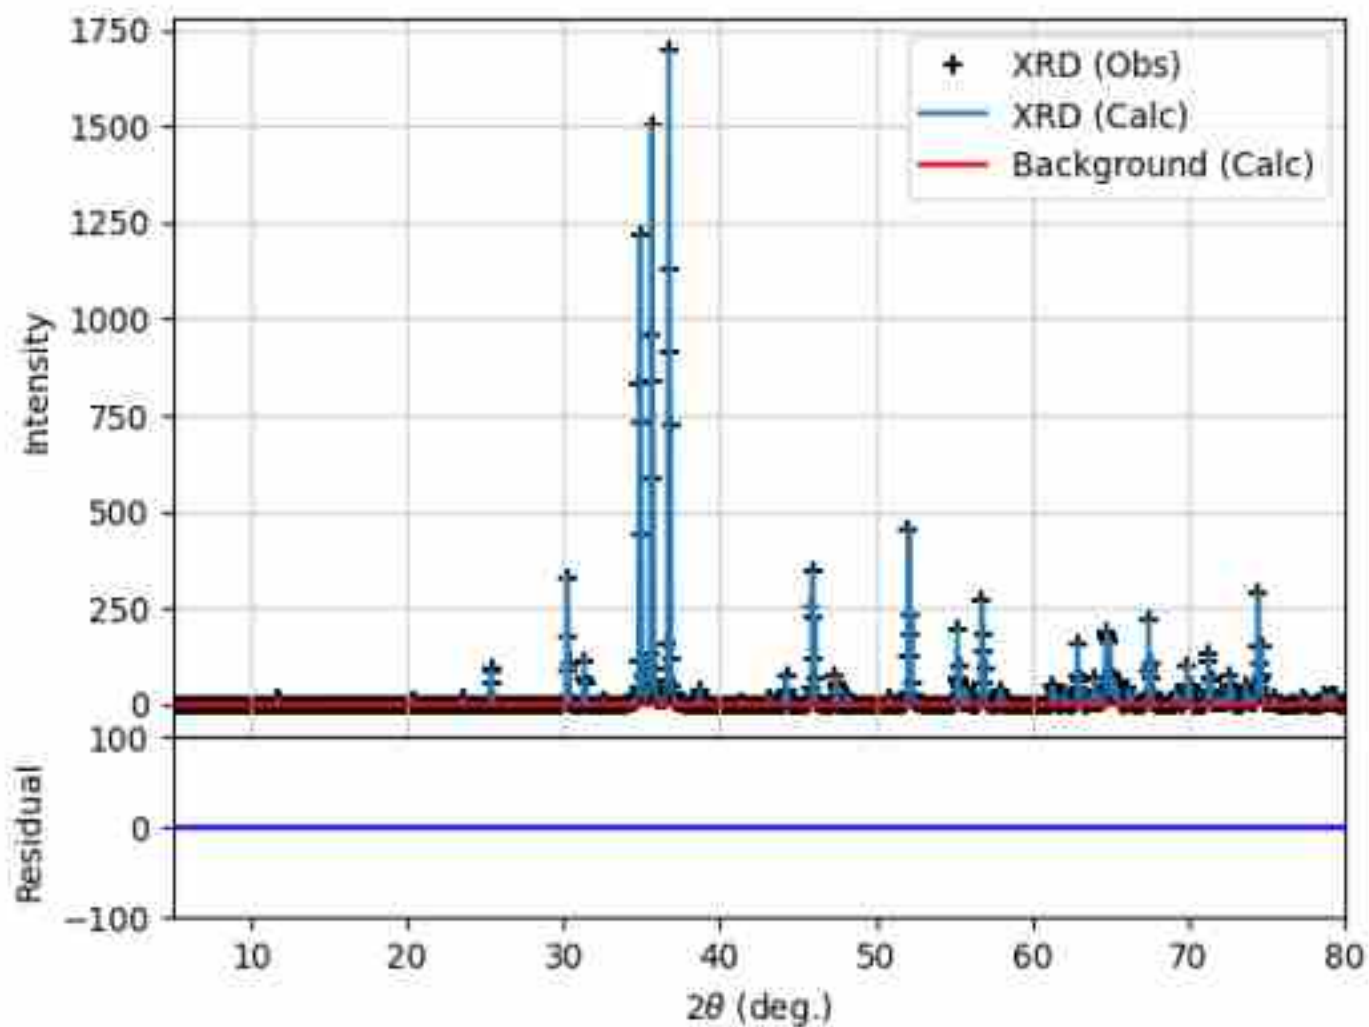

| RMSE before RR | Rwp     | RMSE after RR |
|----------------|---------|---------------|
| 0.025          | 0.00764 | 0.00073       |

# Ag<sub>4</sub>Mo<sub>2</sub>O<sub>8</sub>

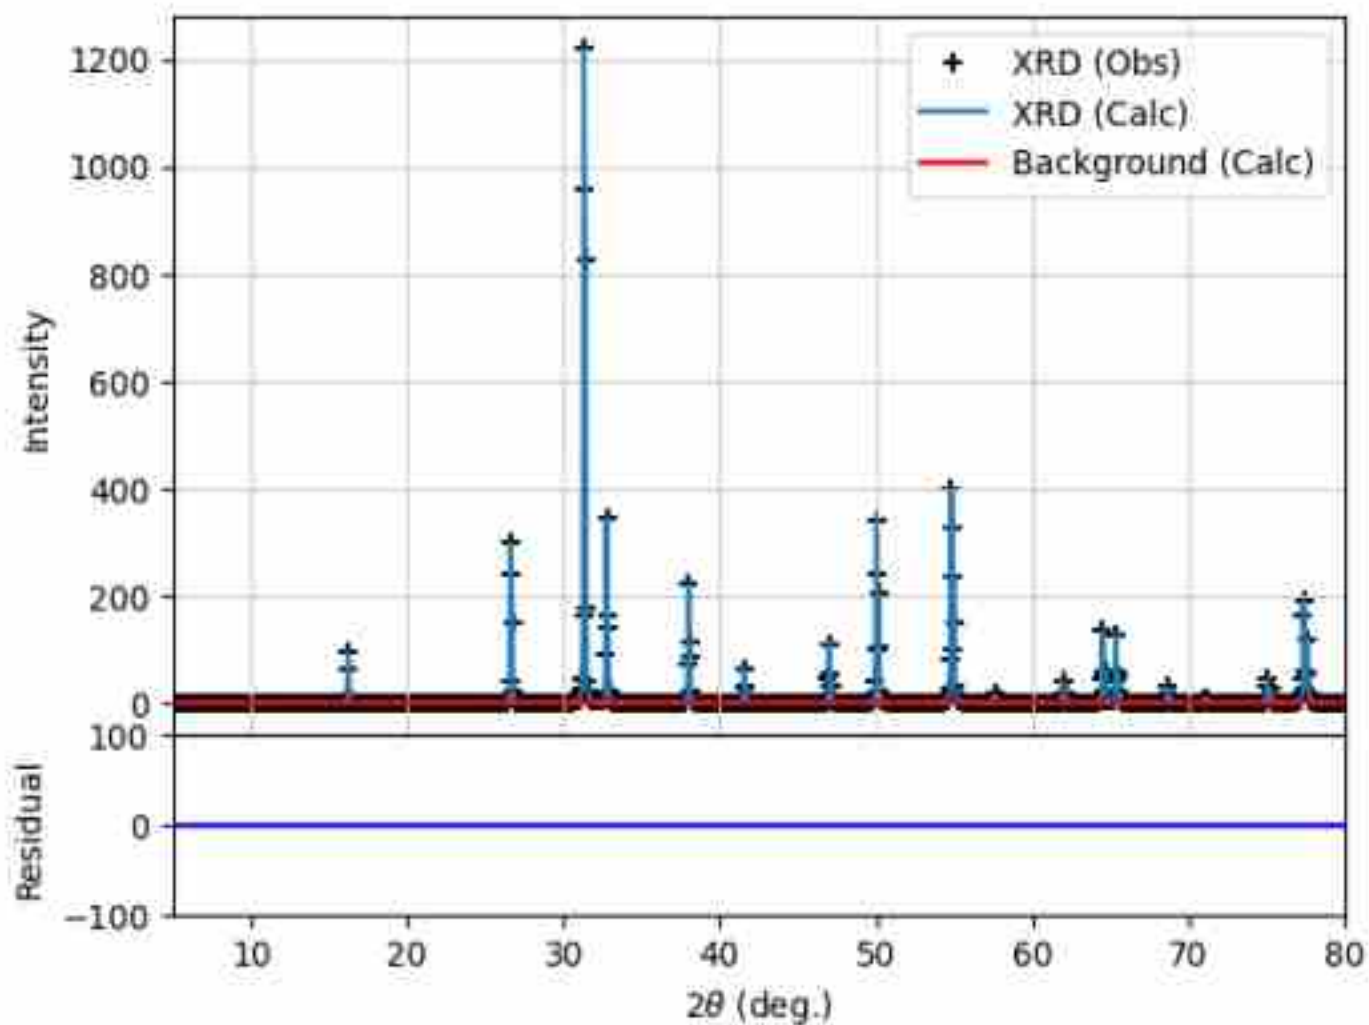

| RMSE before RR | Rwp    | RMSE after RR |
|----------------|--------|---------------|
| 0.026          | 0.0115 | 0.00373       |



# Ba1La1Mg1Ru1O6

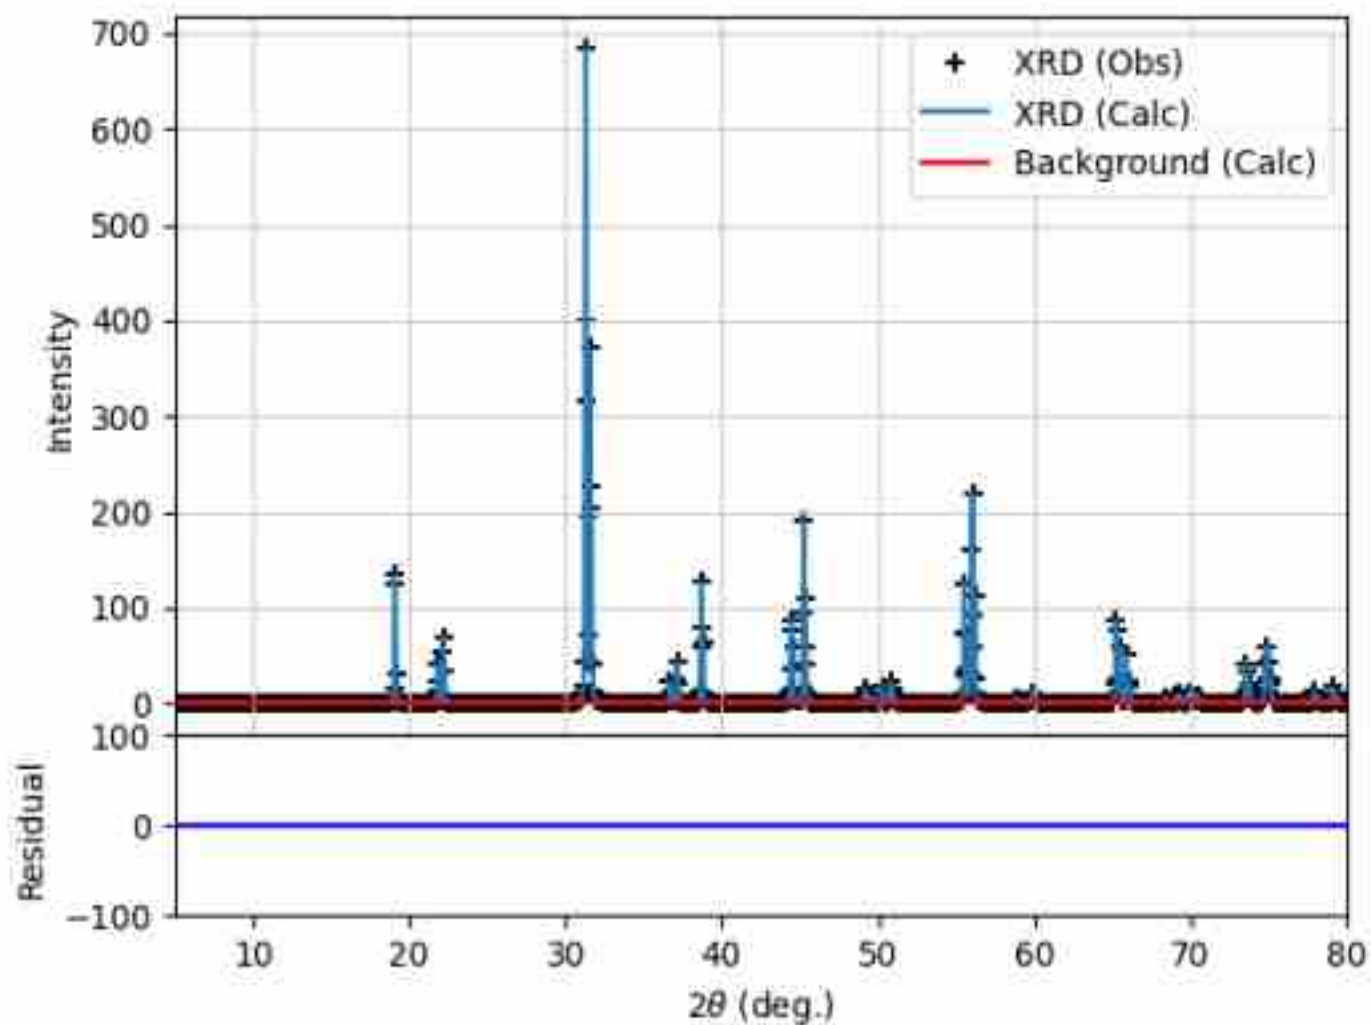

| RMSE before RR | Rwp     | RMSE after RR |
|----------------|---------|---------------|
| 0.026          | 0.00313 | 0.00082       |

# Ba1Ni2P2O8

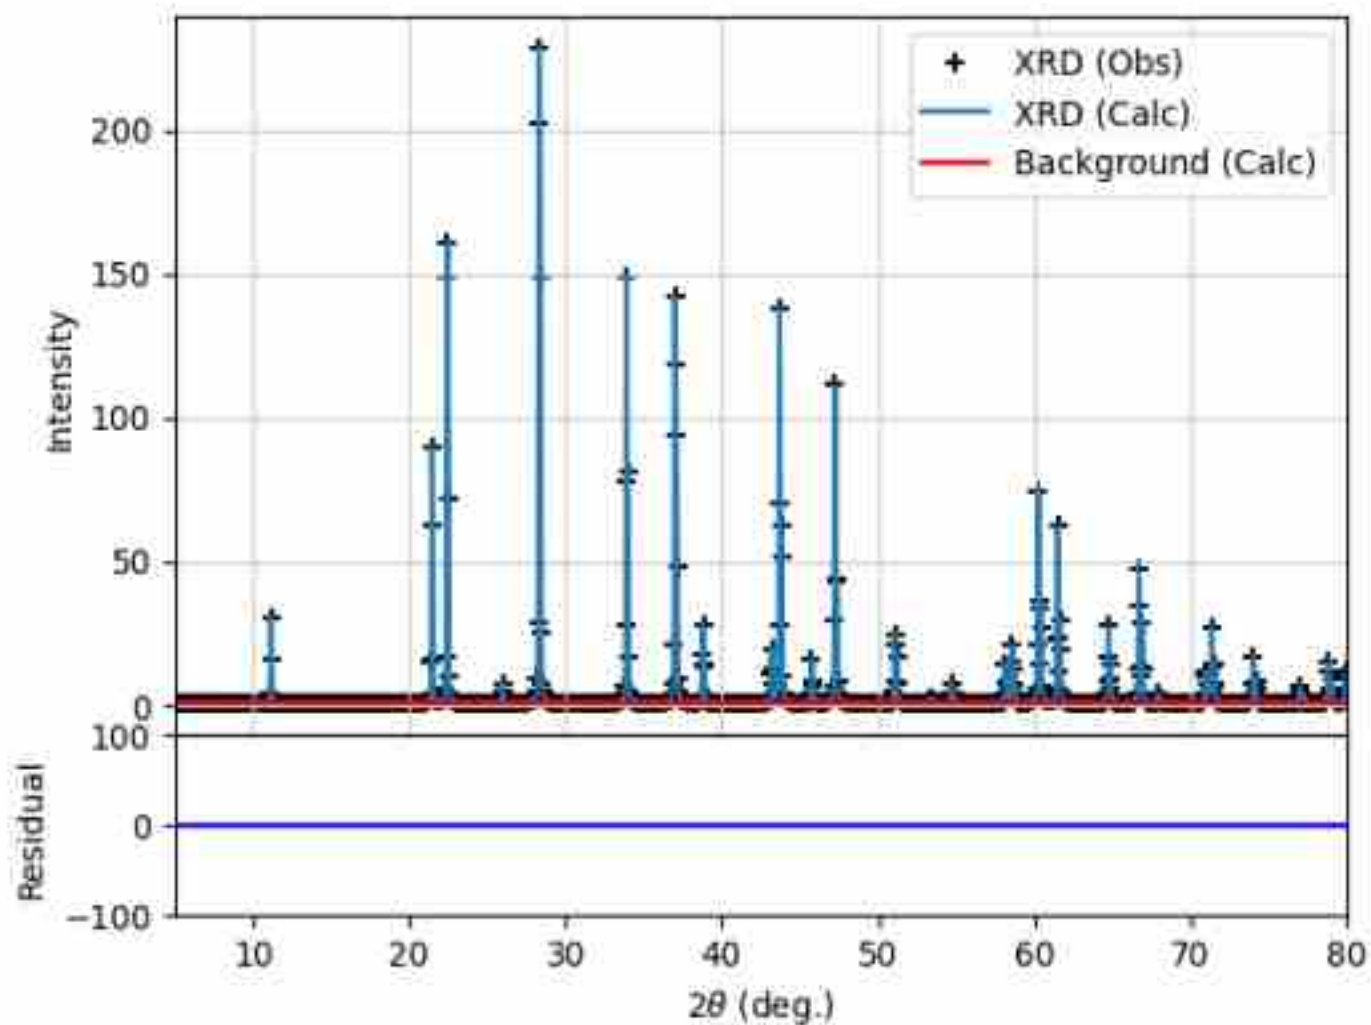

| RMSE before RR | Rwp     | RMSE after RR |
|----------------|---------|---------------|
| 0.026          | 0.00303 | 0.00181       |

# Ba<sub>2</sub>CaW<sub>6</sub>O<sub>26</sub>

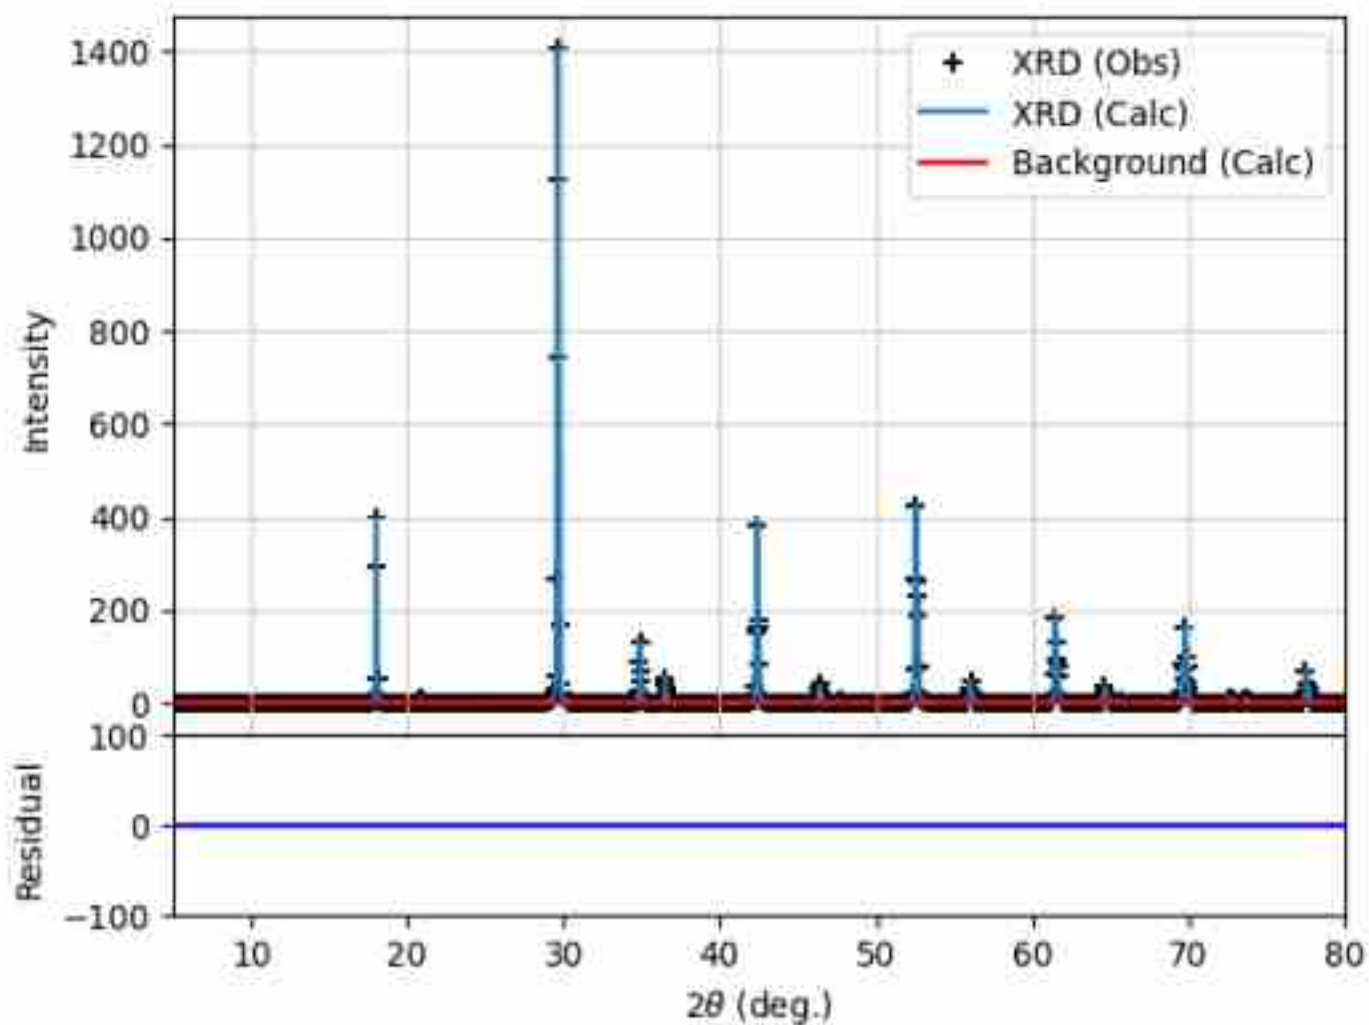

| RMSE before RR | Rwp     | RMSE after RR |
|----------------|---------|---------------|
| 0.026          | 0.00329 | 0.00268       |

# Ba<sub>2</sub>Ce<sub>2</sub>N<sub>4</sub>

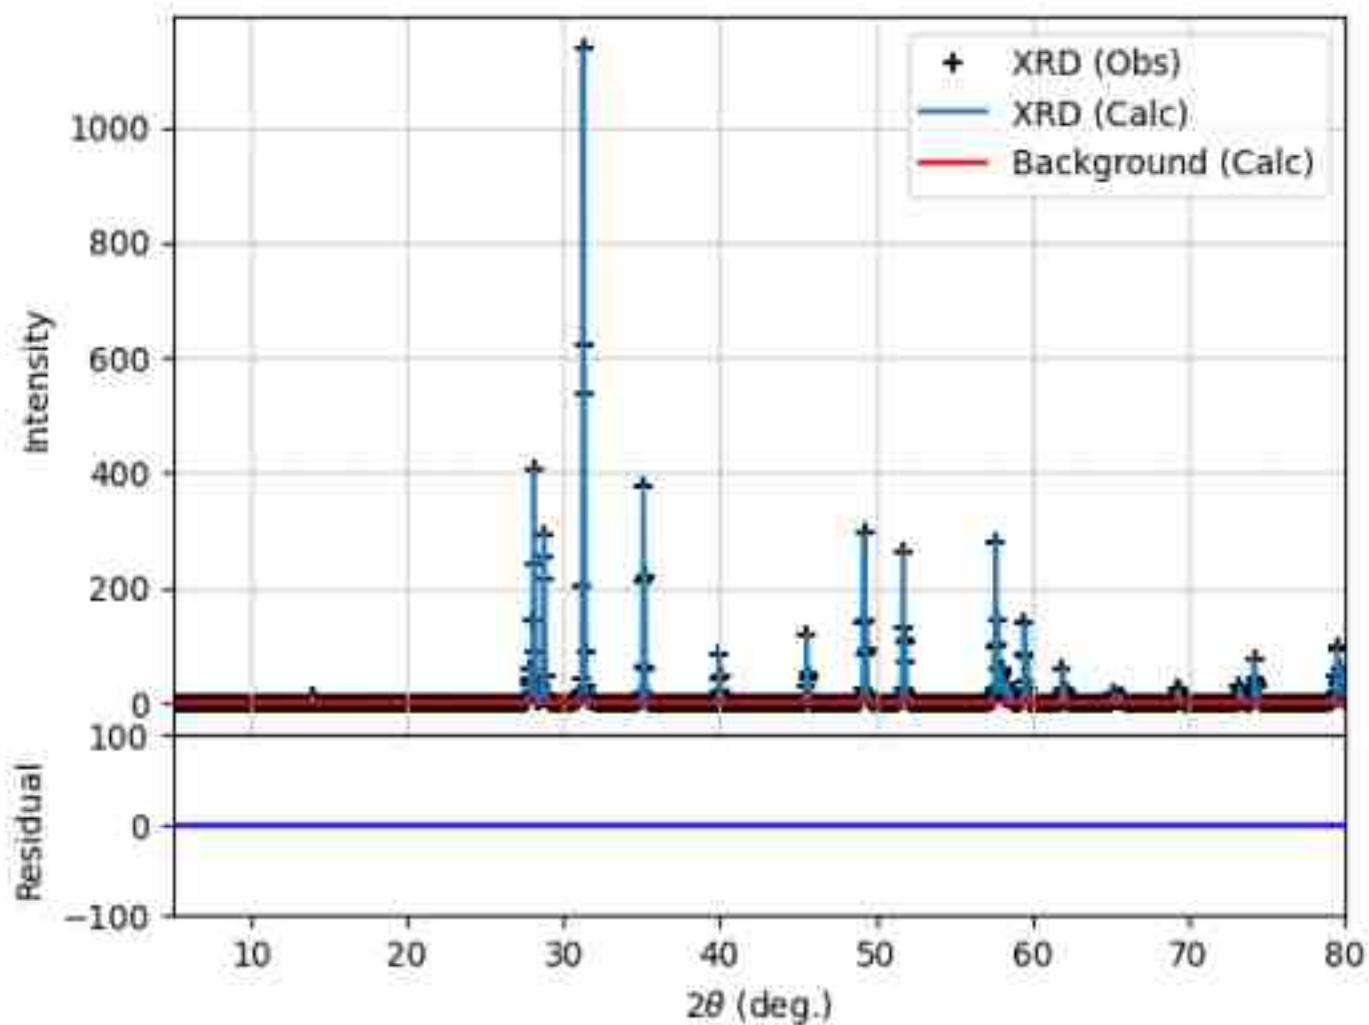

| RMSE before RR | Rwp     | RMSE after RR |
|----------------|---------|---------------|
| 0.026          | 0.00368 | 0.00181       |

# Ba2Cu2S4

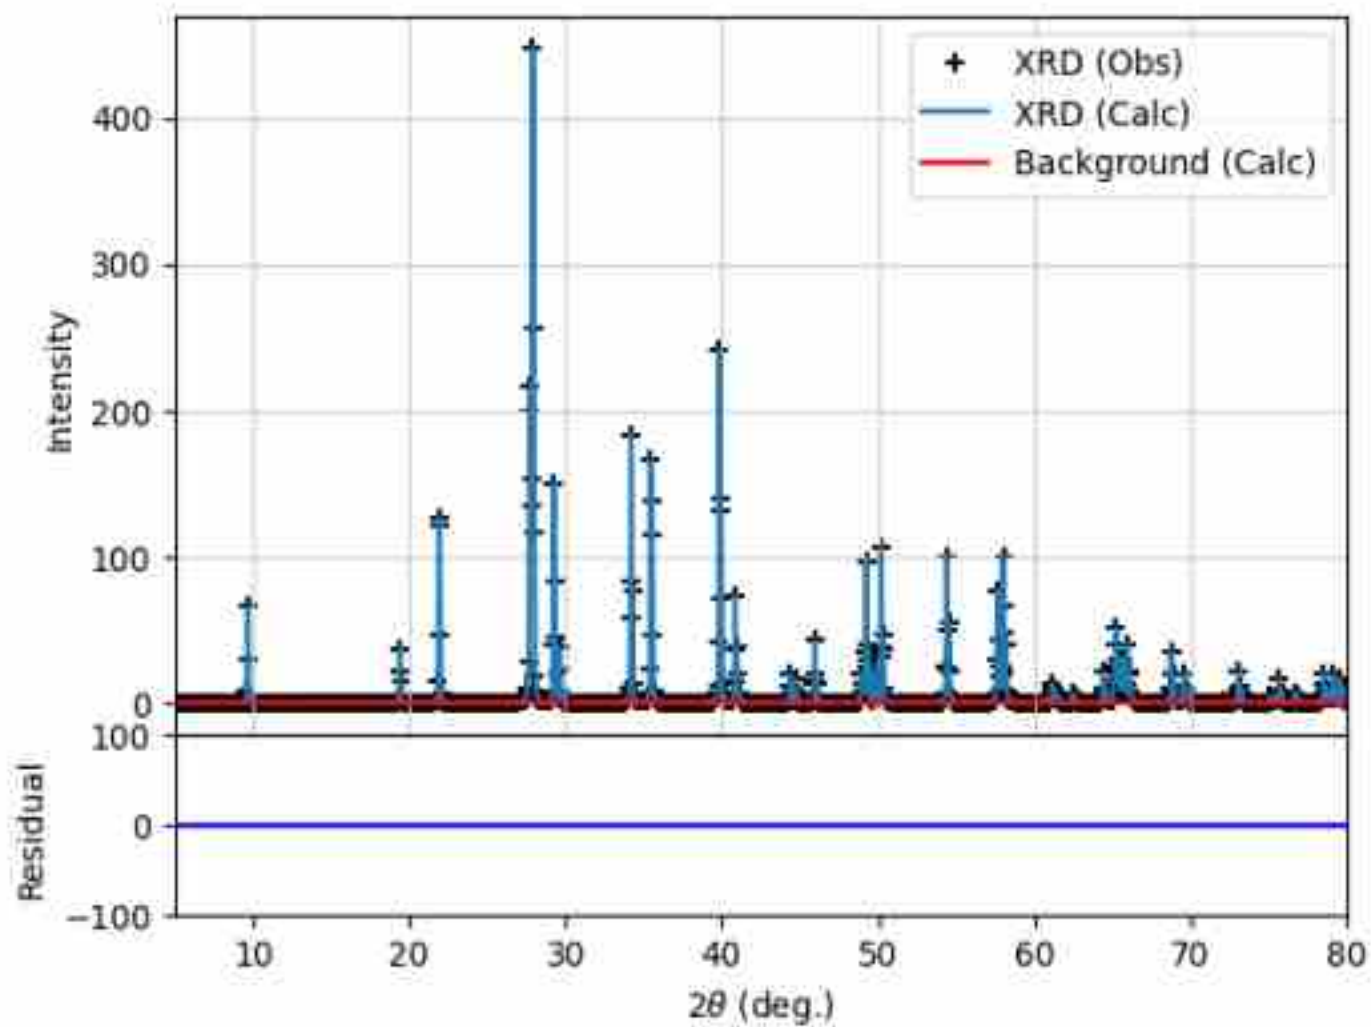

| RMSE before RR | Rwp     | RMSE after RR |
|----------------|---------|---------------|
| 0.026          | 0.00388 | 0.0008        |

# Ba<sub>2</sub>Pr<sub>1</sub>Cu<sub>4</sub>O<sub>8</sub>

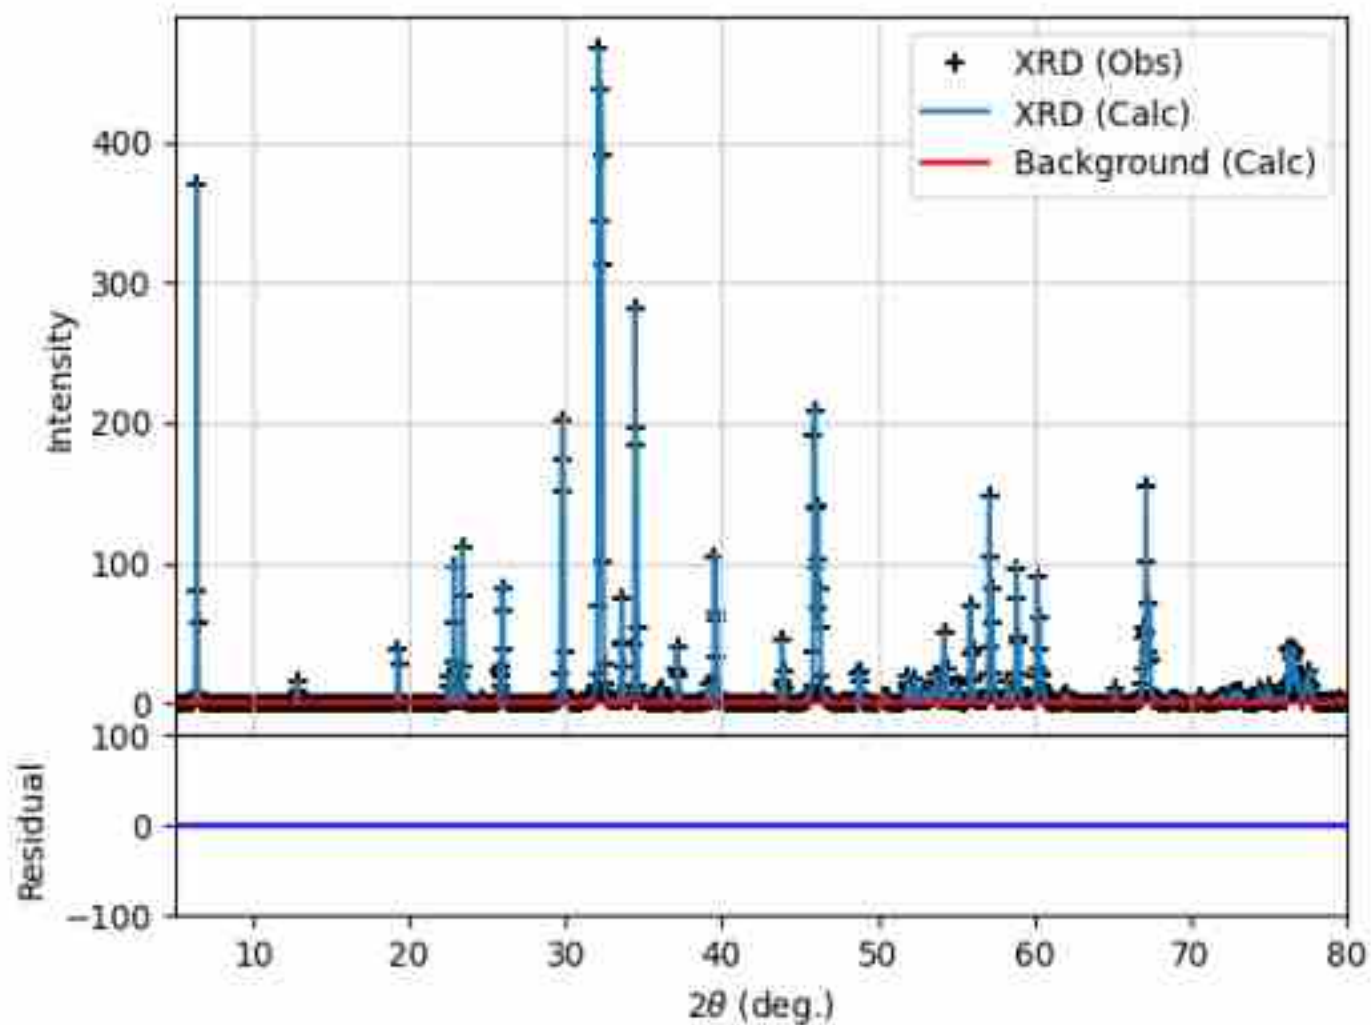

| RMSE before RR | Rwp     | RMSE after RR |
|----------------|---------|---------------|
| 0.026          | 0.00508 | 0.0016        |

# Ba<sub>2</sub>Sr<sub>2</sub>Ce<sub>2</sub>W<sub>2</sub>O<sub>12</sub>

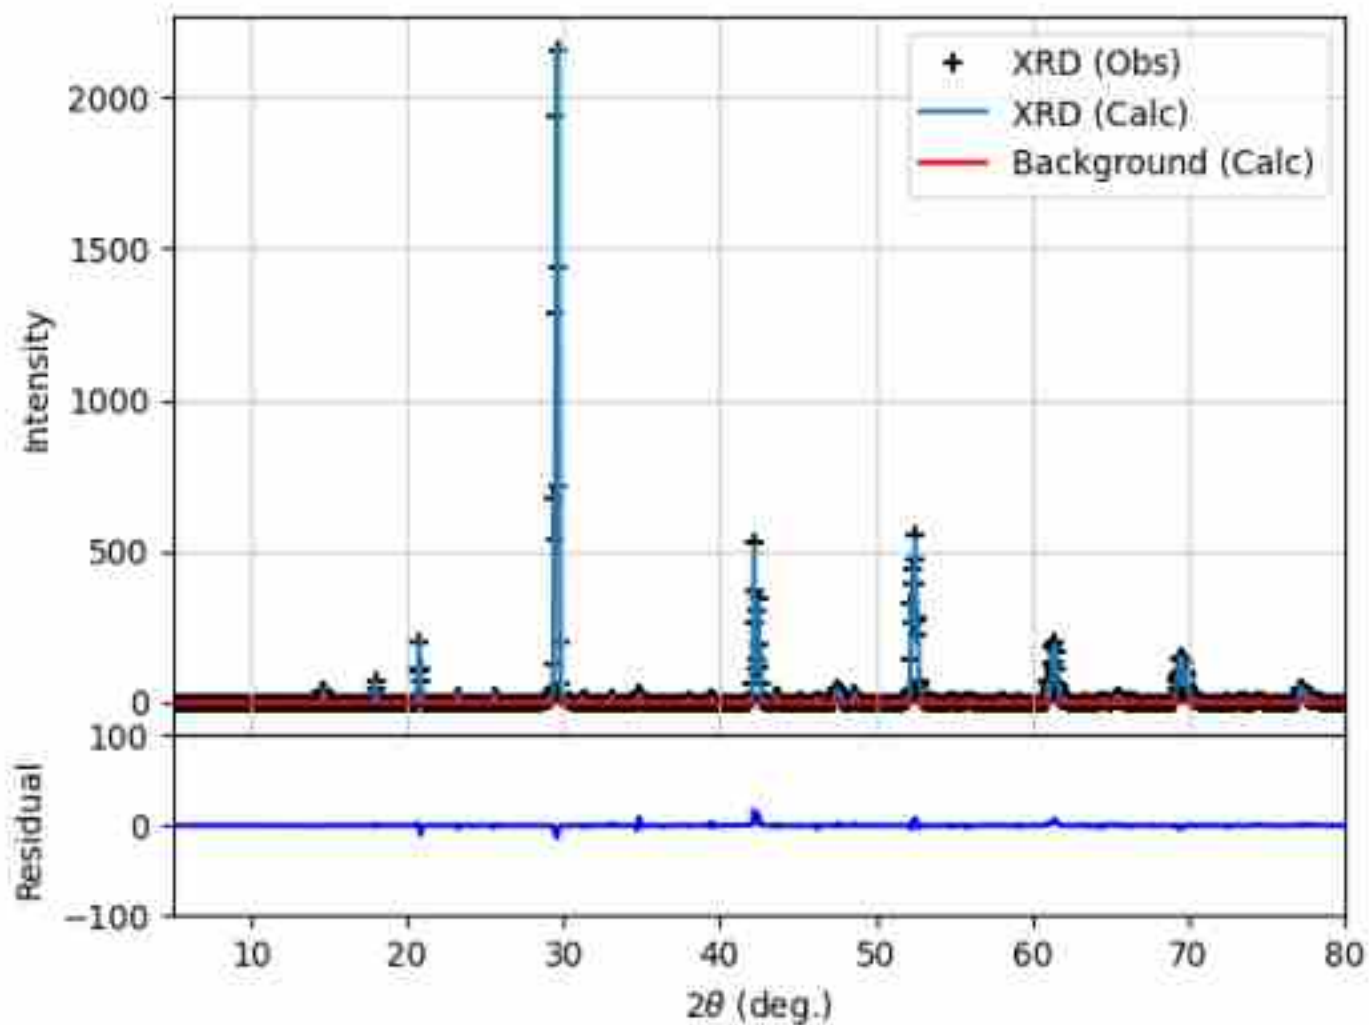

| RMSE before RR | Rwp     | RMSE after RR |
|----------------|---------|---------------|
| 0.026          | 4.84297 | 0.16964       |

# Ba<sub>2</sub>Sr<sub>2</sub>Eu<sub>2</sub>Sb<sub>2</sub>O<sub>12</sub>

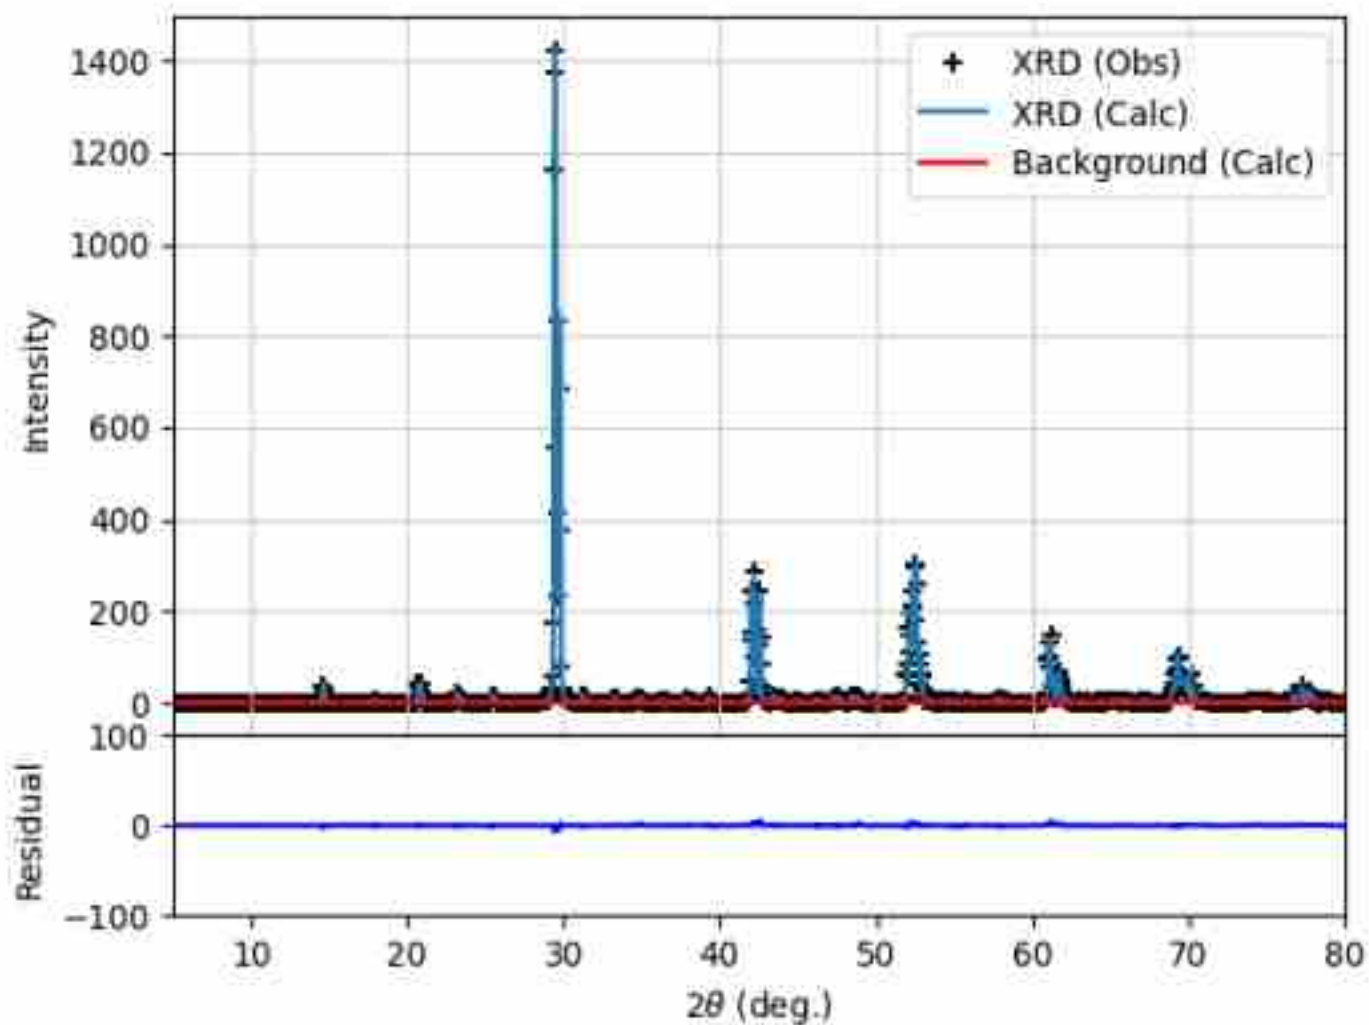

| RMSE before RR | Rwp     | RMSE after RR |
|----------------|---------|---------------|
| 0.026          | 4.30038 | 0.15633       |



# Ba<sub>4</sub>Ga<sub>2</sub>Ge<sub>2</sub>N<sub>2</sub>

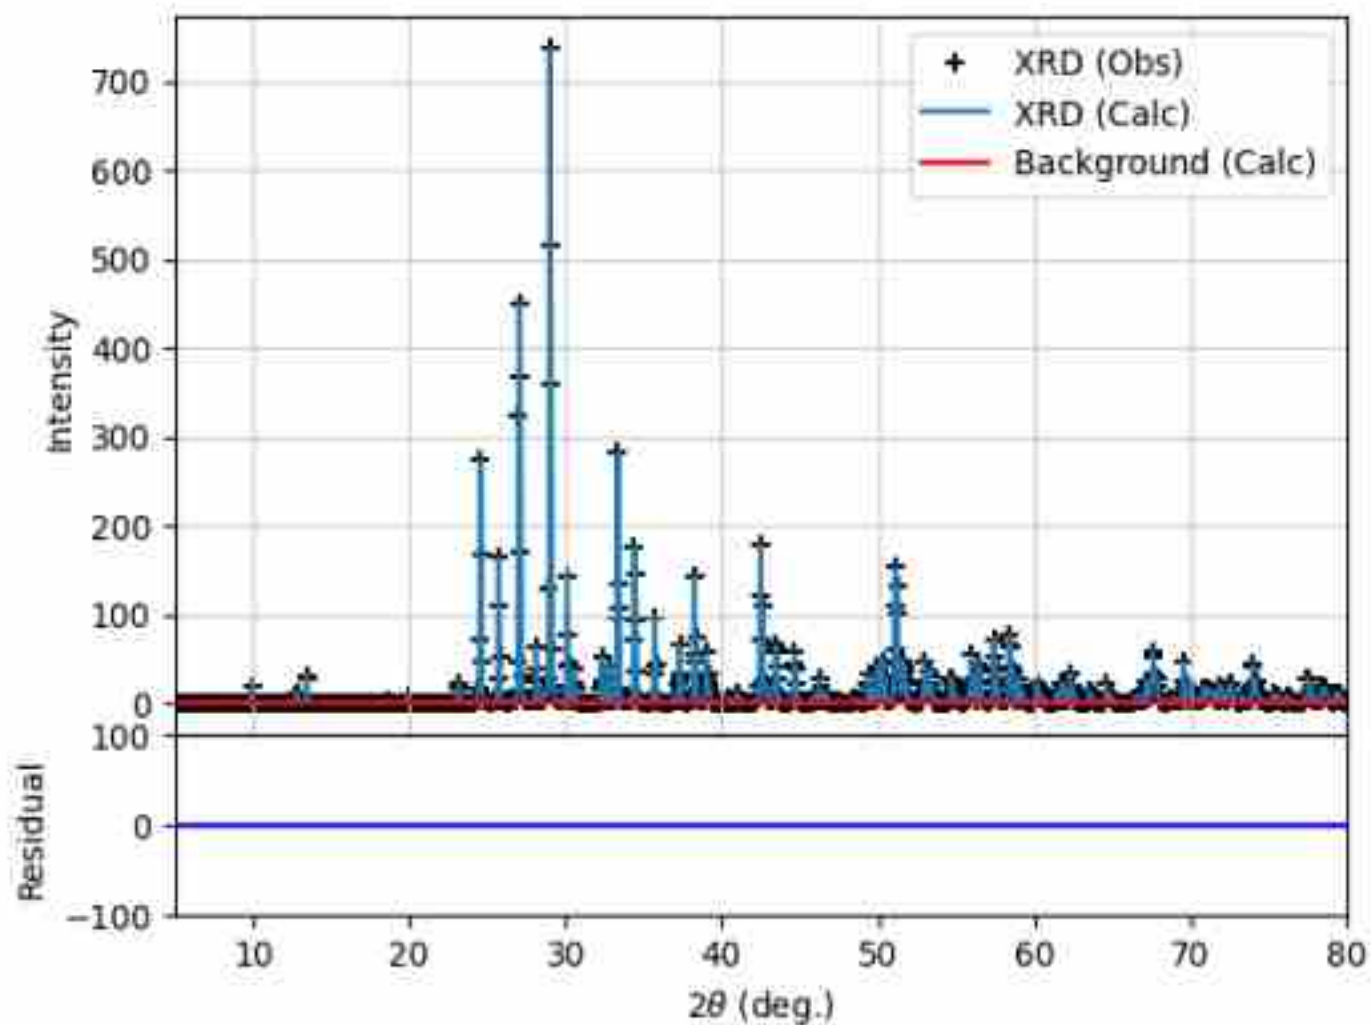

| RMSE before RR | Rwp     | RMSE after RR |
|----------------|---------|---------------|
| 0.026          | 0.00343 | 0.00044       |

# Ba<sub>4</sub>N<sub>2</sub>F<sub>2</sub>

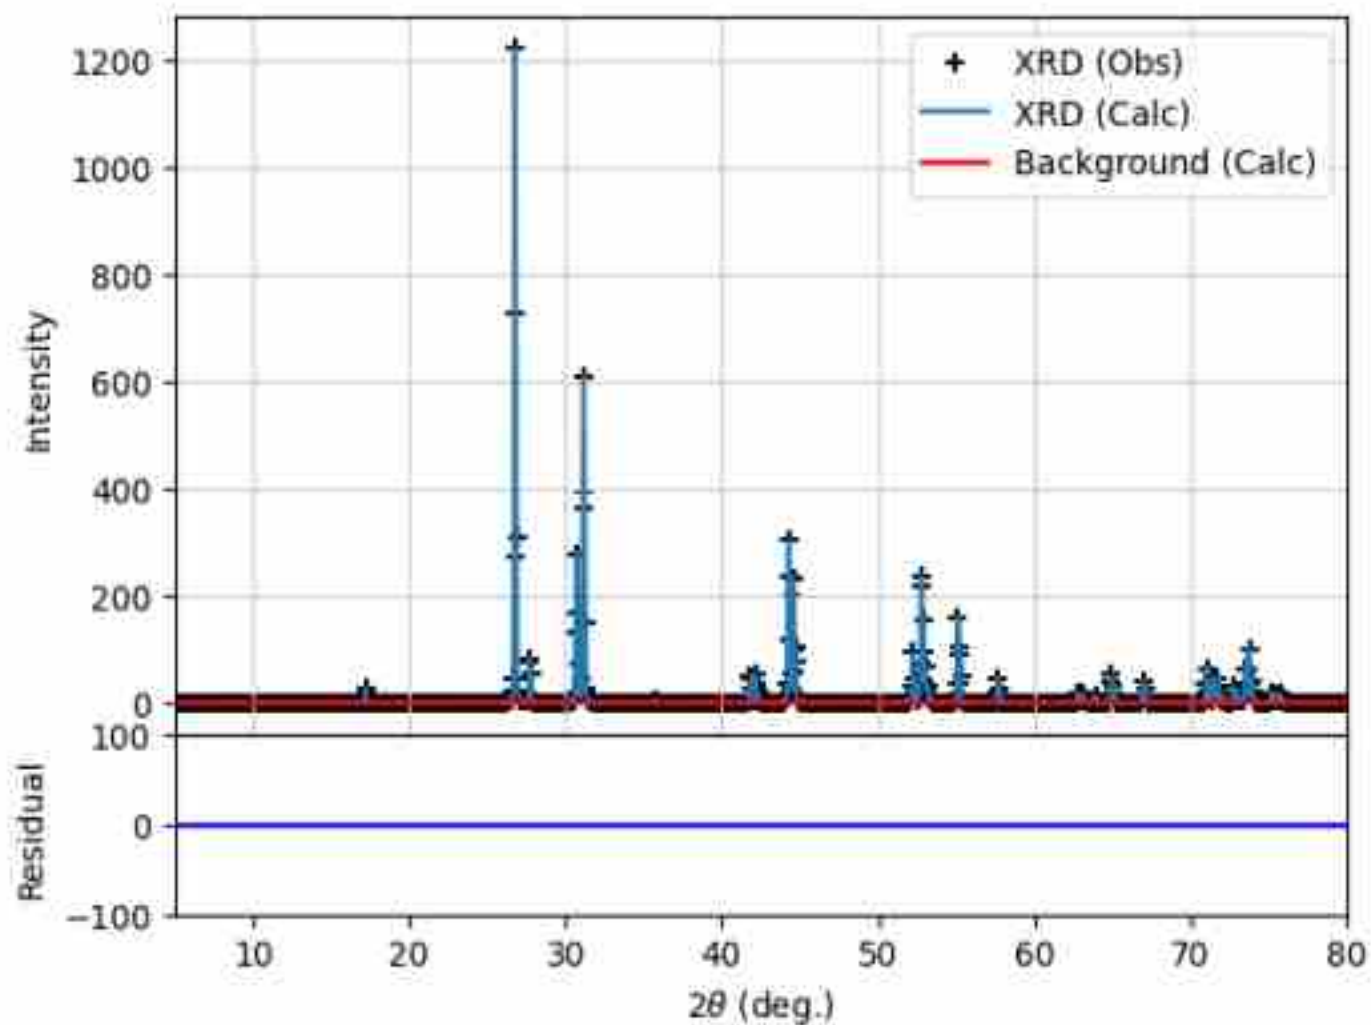

| RMSE before RR | Rwp     | RMSE after RR |
|----------------|---------|---------------|
| 0.026          | 0.00663 | 0.00104       |

# Ba<sub>4</sub>Ni<sub>2</sub>Mo<sub>2</sub>O<sub>12</sub>

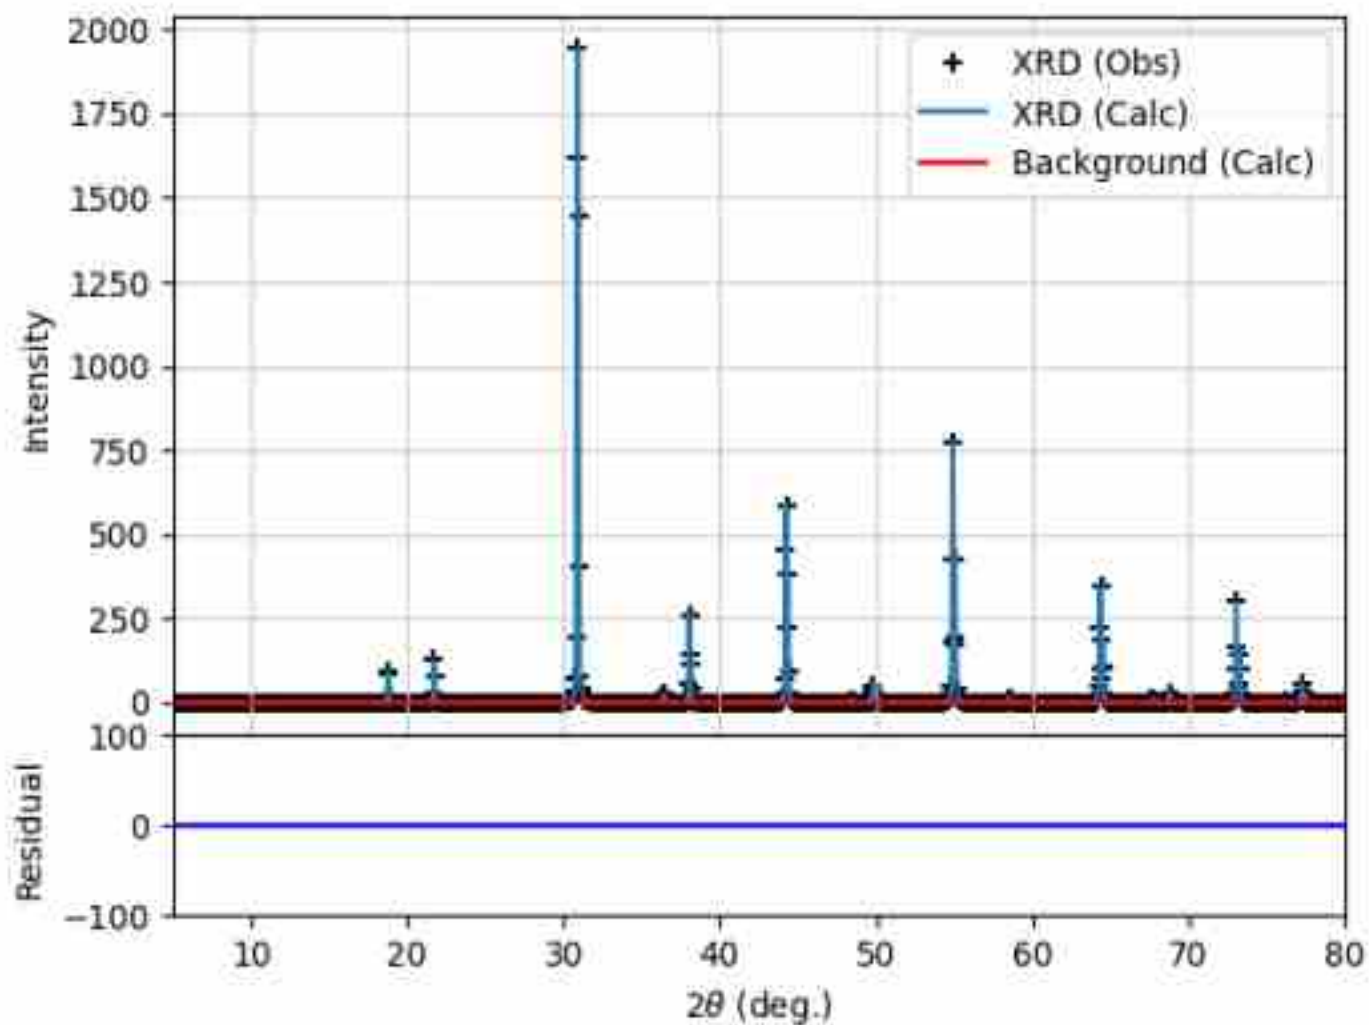

| RMSE before RR | Rwp     | RMSE after RR |
|----------------|---------|---------------|
| 0.026          | 0.05271 | 0.00689       |

# Ba6Pb10

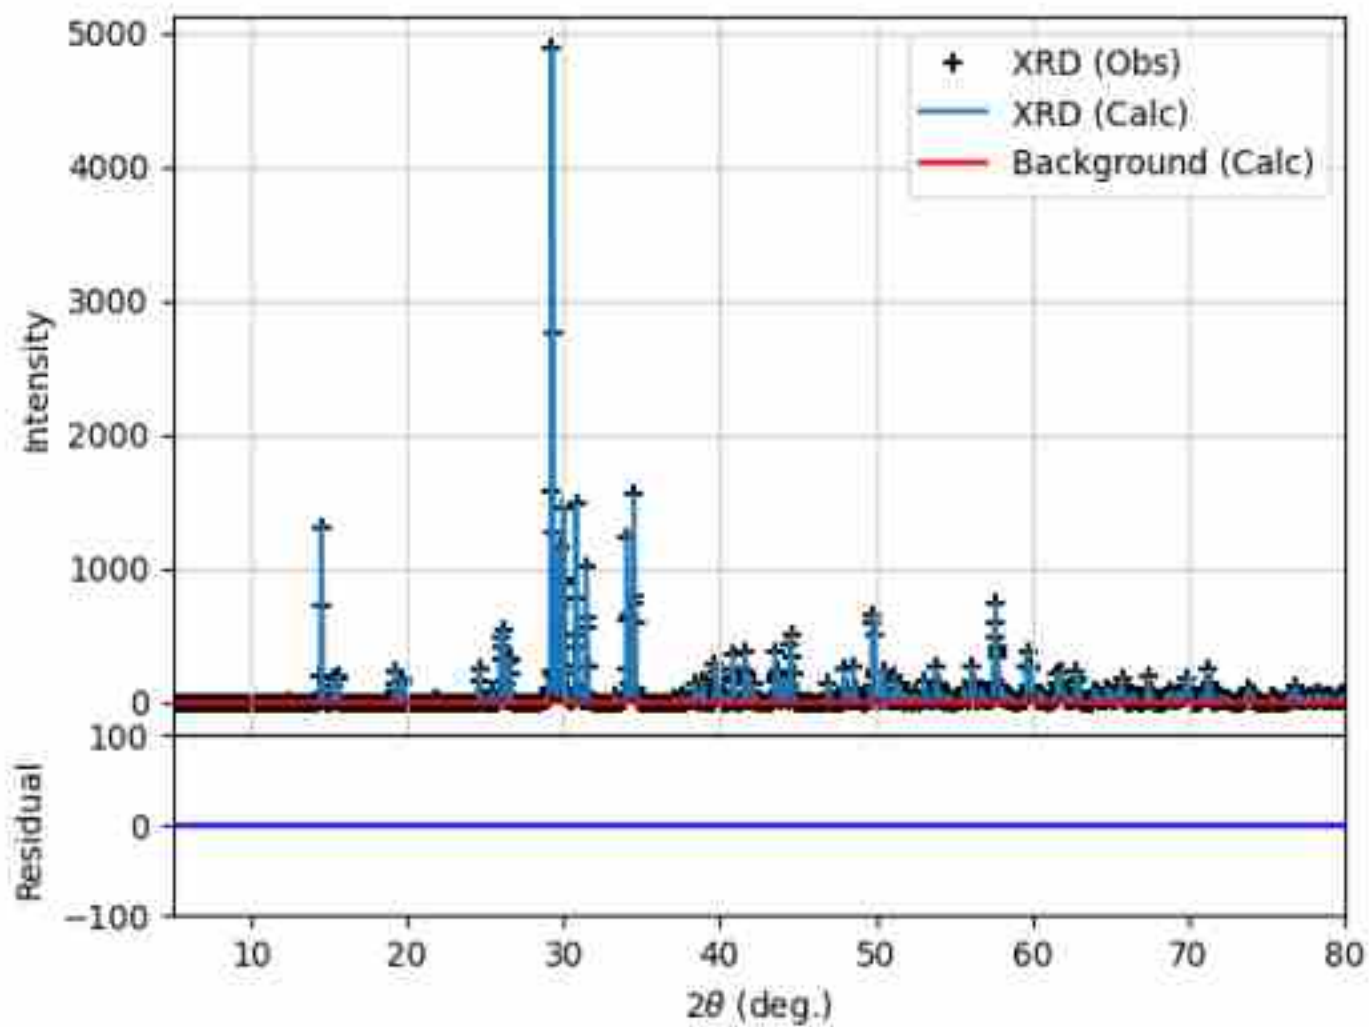

| RMSE before RR | Rwp     | RMSE after RR |
|----------------|---------|---------------|
| 0.026          | 0.00355 | 0.00035       |

# Be<sub>4</sub>Ge<sub>4</sub>N<sub>8</sub>

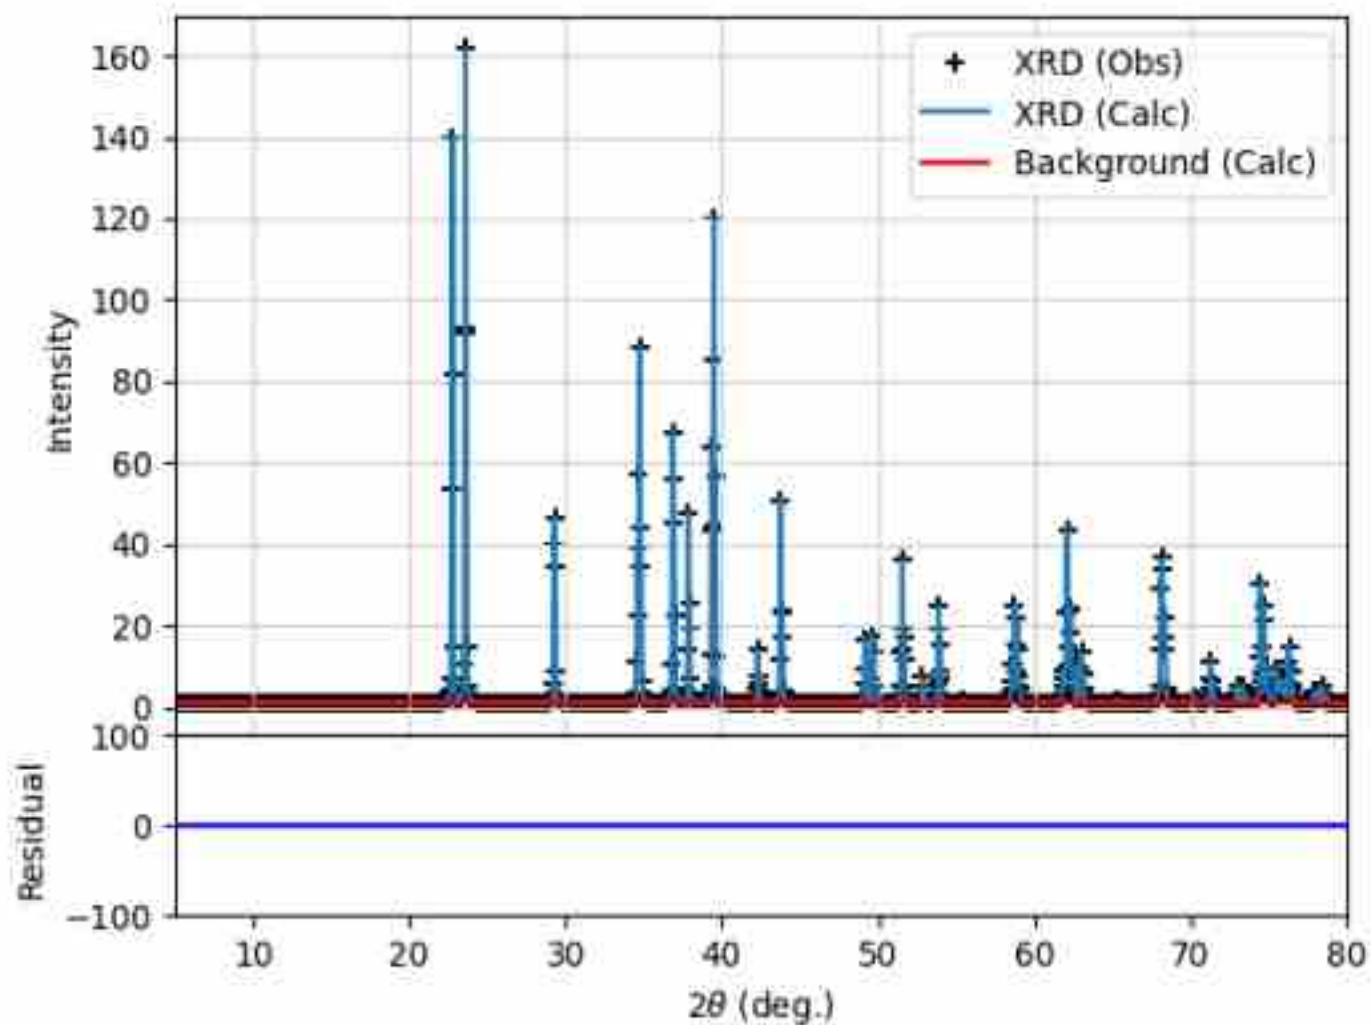

| RMSE before RR | Rwp     | RMSE after RR |
|----------------|---------|---------------|
| 0.026          | 0.00362 | 0.00143       |

# Ca1C2

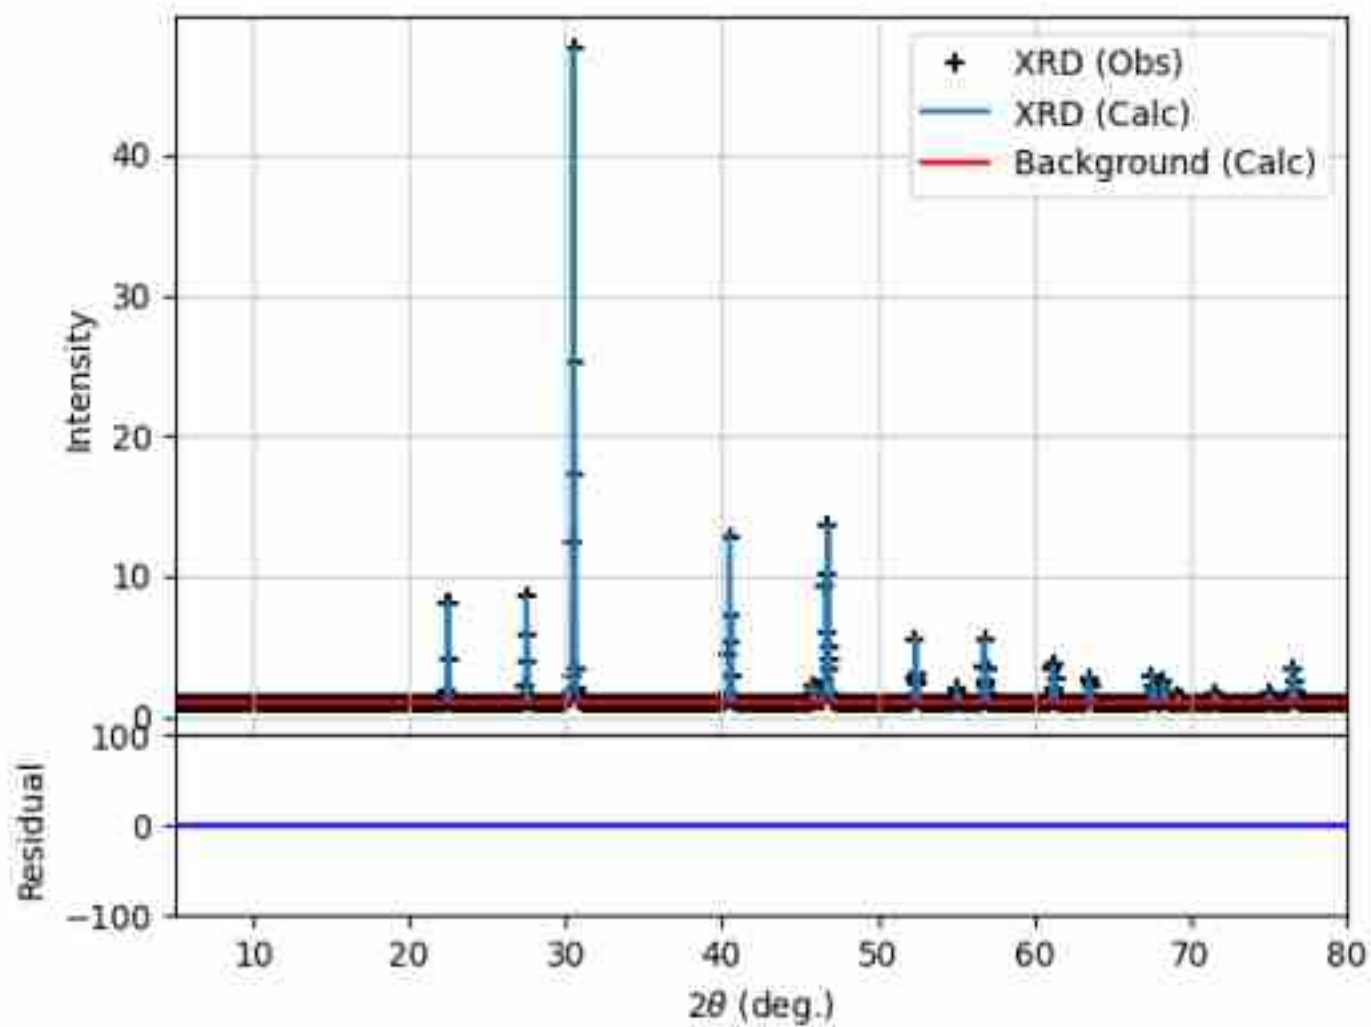

| RMSE before RR | Rwp     | RMSE after RR |
|----------------|---------|---------------|
| 0.026          | 0.00116 | 0.00076       |

# Ca<sub>2</sub>Y<sub>4</sub>O<sub>8</sub>

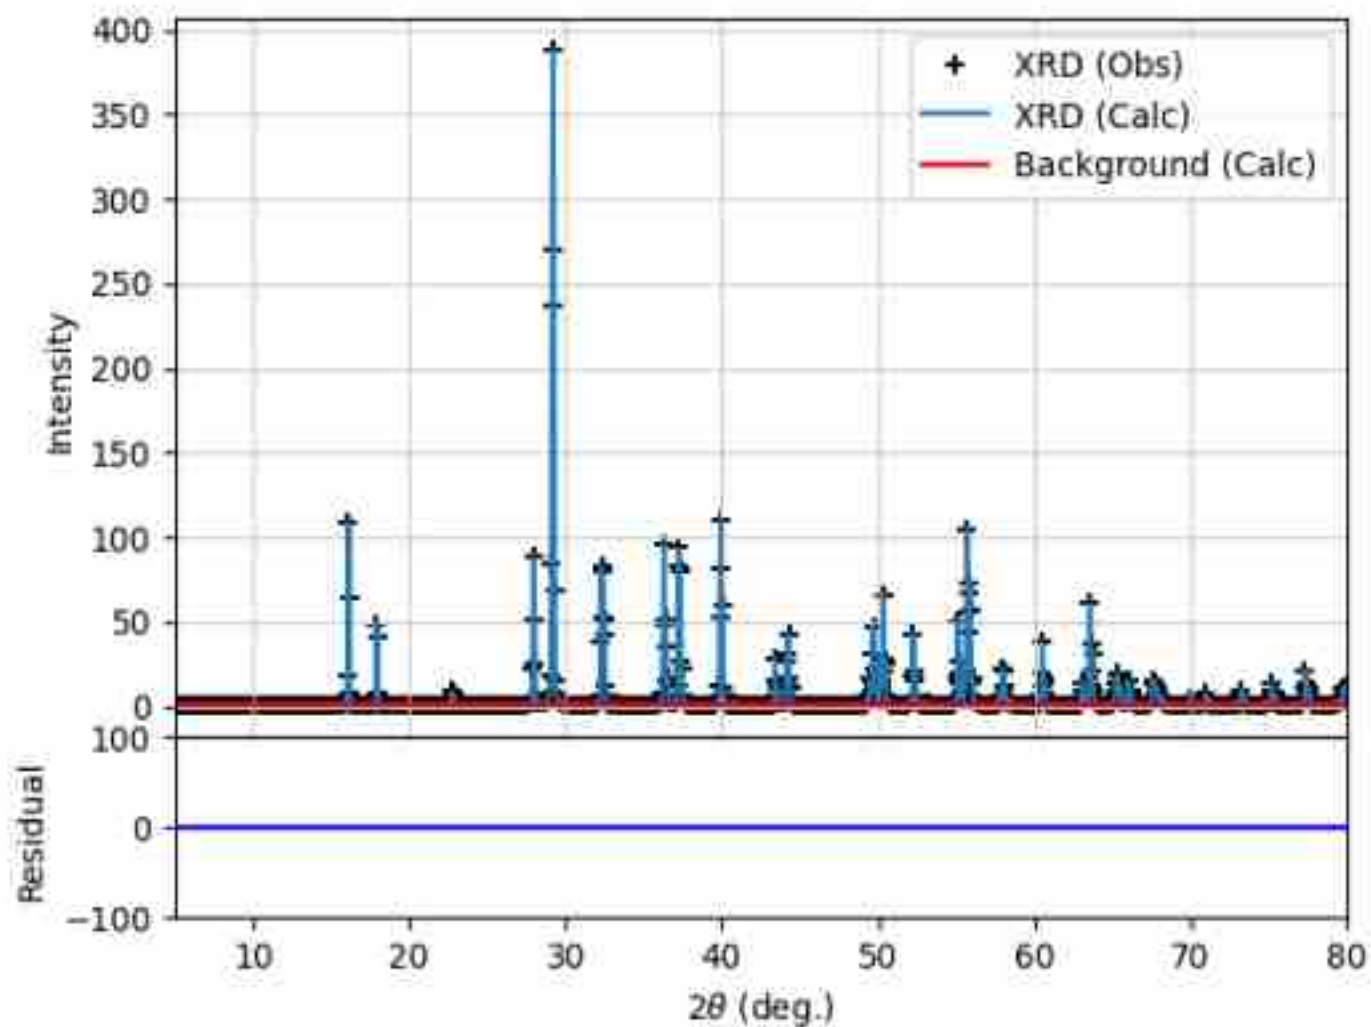

| RMSE before RR | Rwp     | RMSE after RR |
|----------------|---------|---------------|
| 0.026          | 0.00386 | 0.00116       |

# Ce<sub>2</sub>Se<sub>1</sub>F<sub>4</sub>

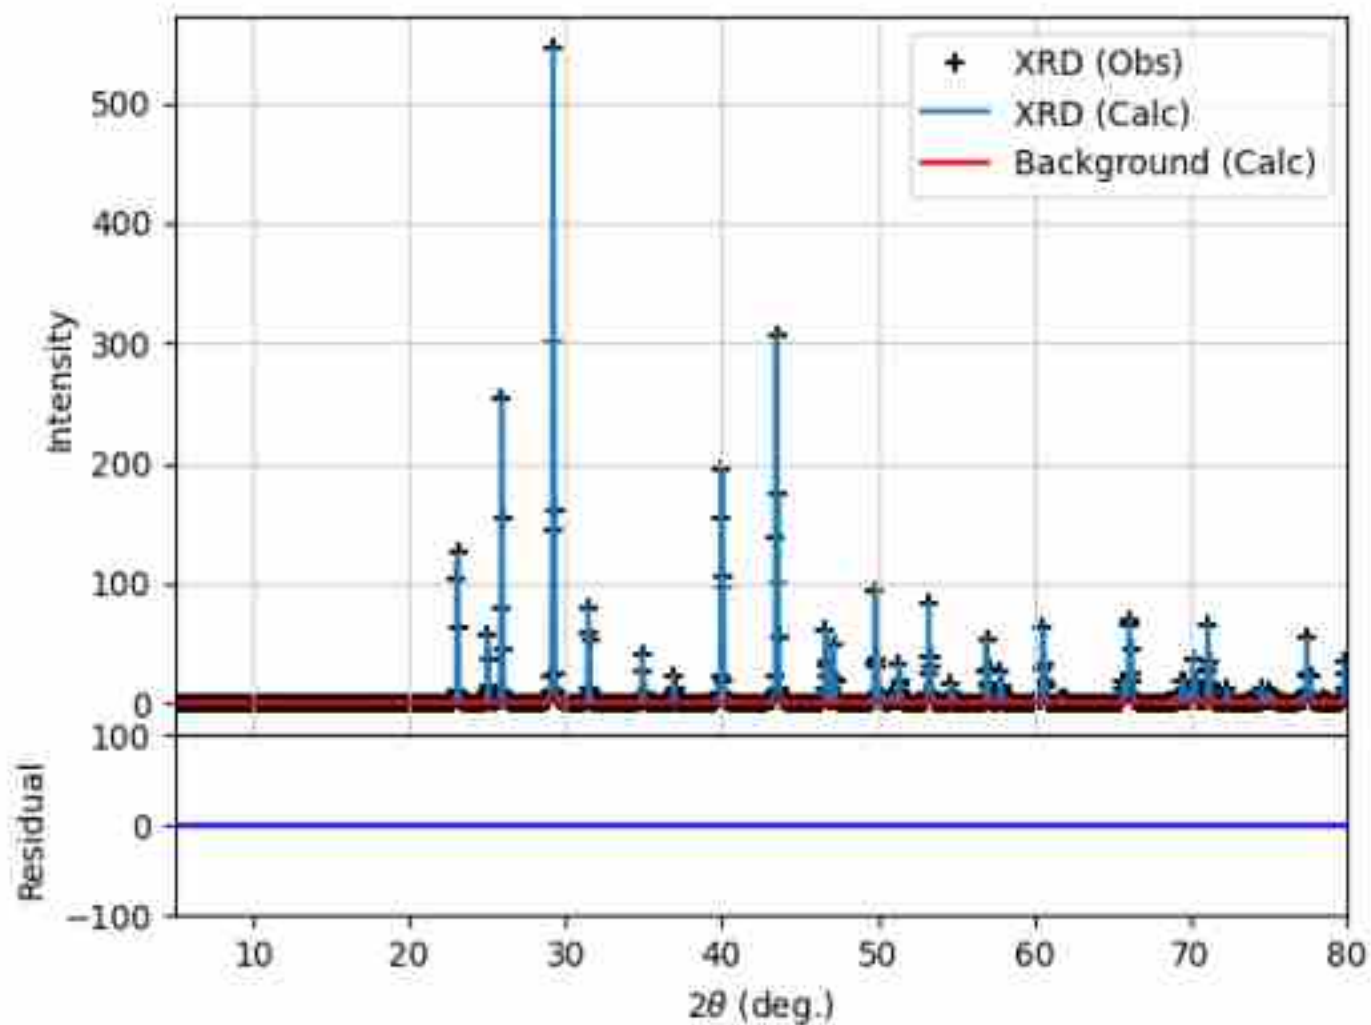

| RMSE before RR | Rwp     | RMSE after RR |
|----------------|---------|---------------|
| 0.026          | 0.00279 | 0.00311       |



# Ce6Sb8Pt6

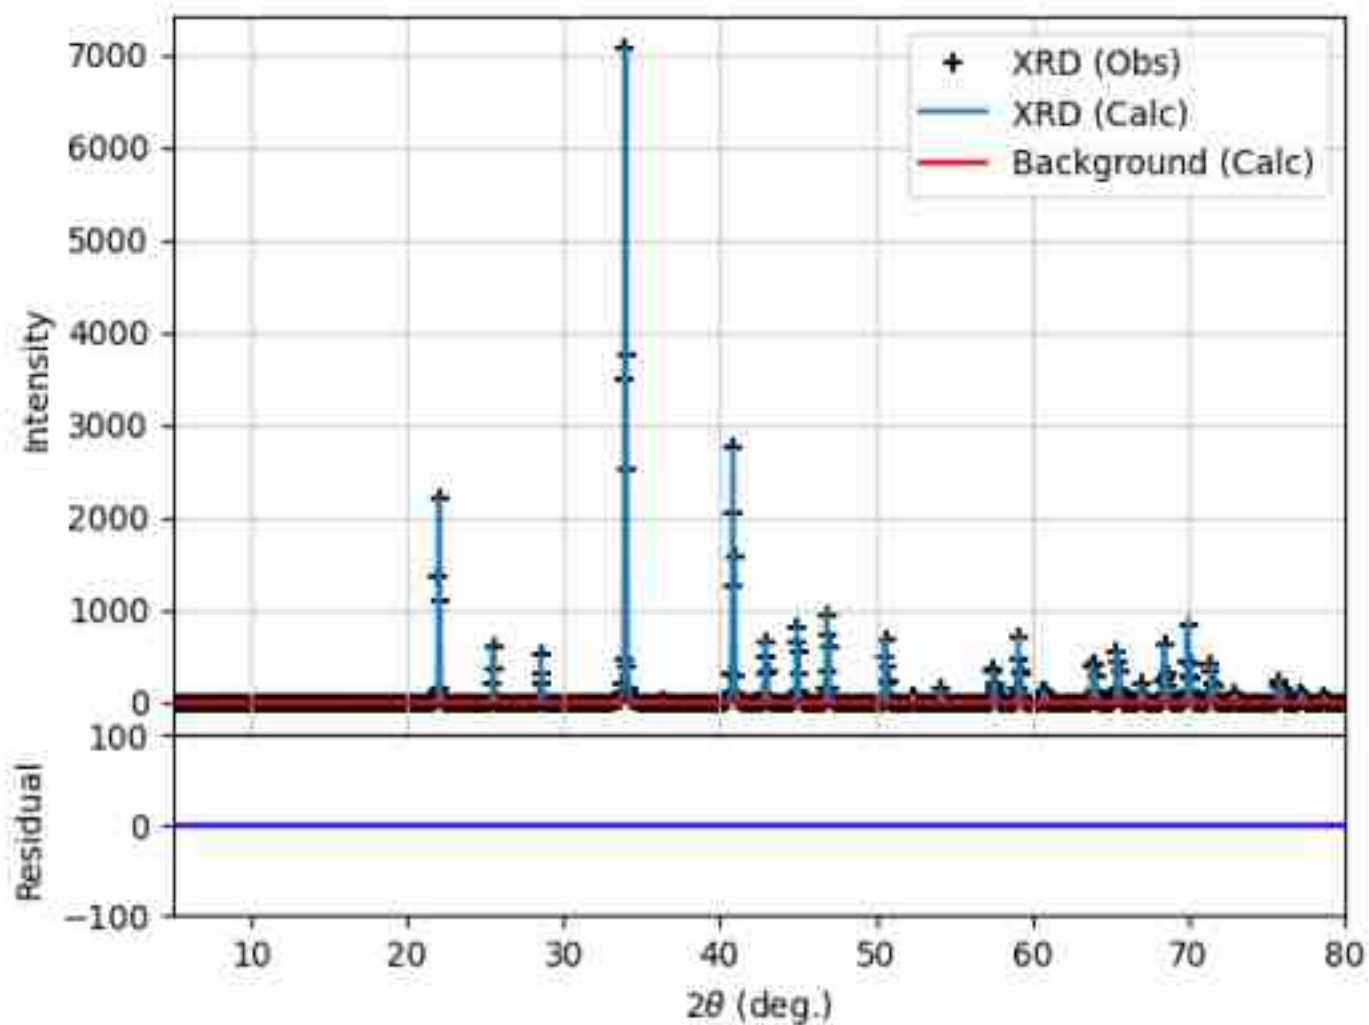

| RMSE before RR | Rwp     | RMSE after RR |
|----------------|---------|---------------|
| 0.026          | 0.01482 | 0.00098       |

# Co<sub>5</sub>Sb<sub>1</sub>O<sub>12</sub>

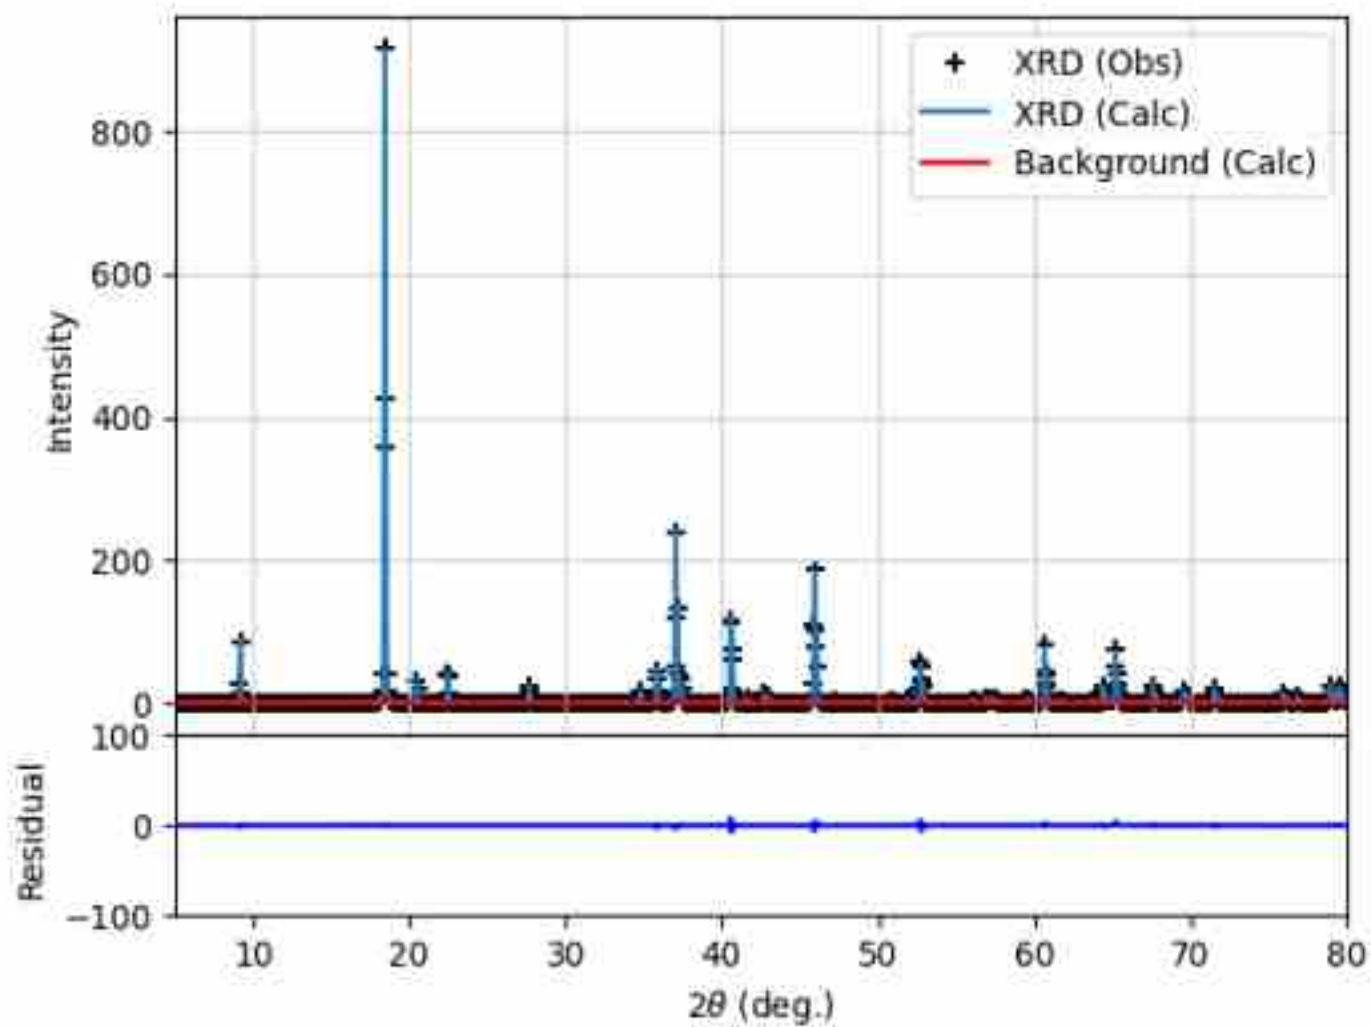

| RMSE before RR | Rwp     | RMSE after RR |
|----------------|---------|---------------|
| 0.026          | 2.76141 | 0.05756       |

# Co12P4

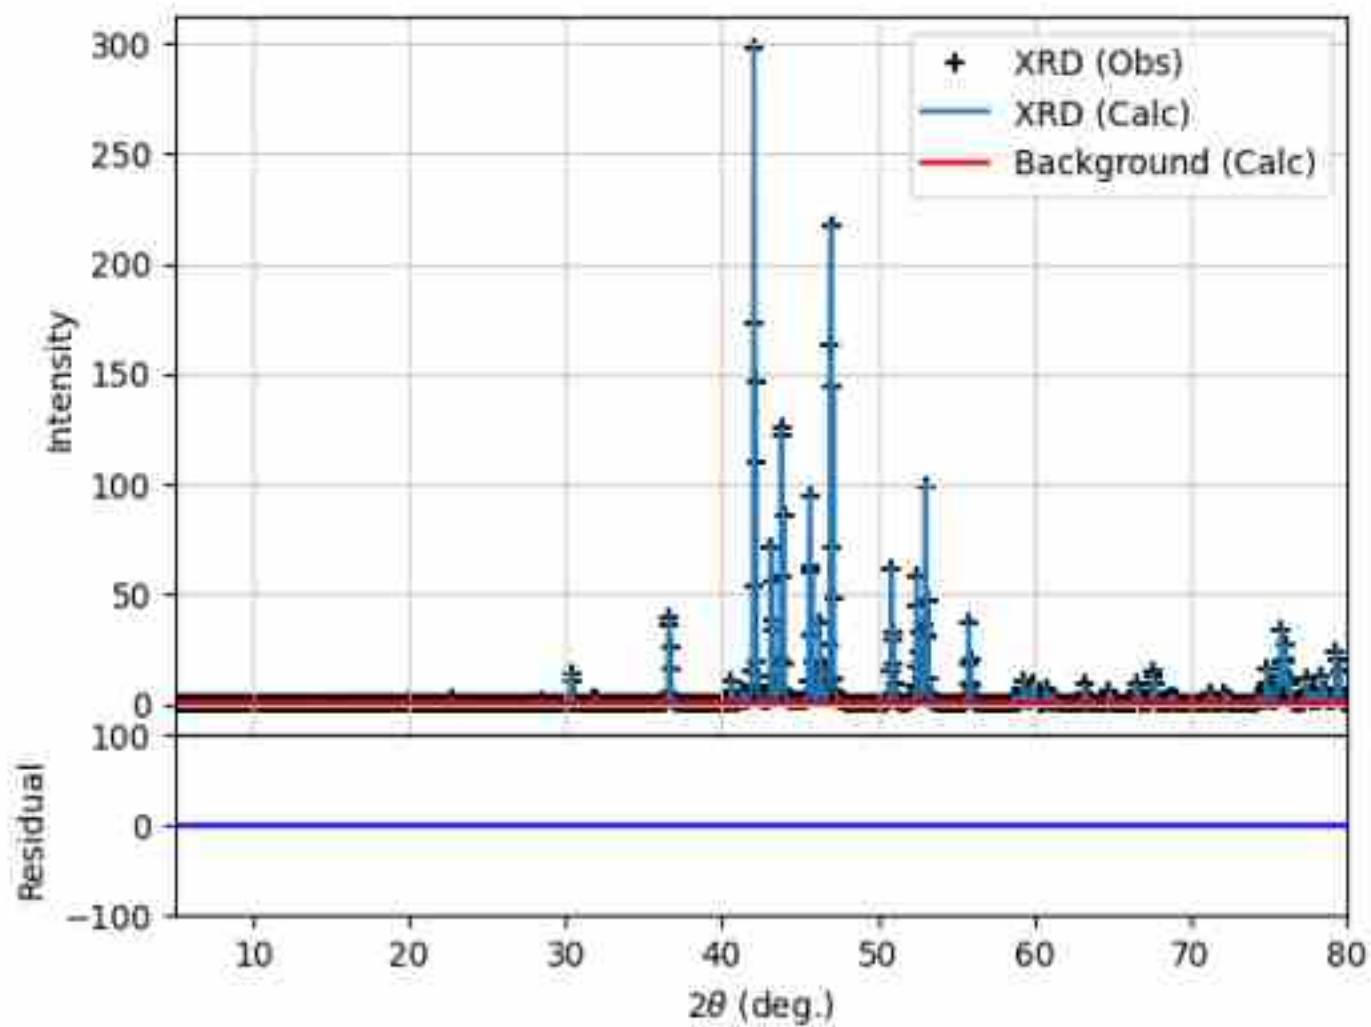

| RMSE before RR | Rwp     | RMSE after RR |
|----------------|---------|---------------|
| 0.026          | 0.00279 | 0.00077       |

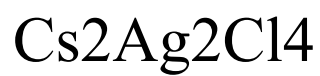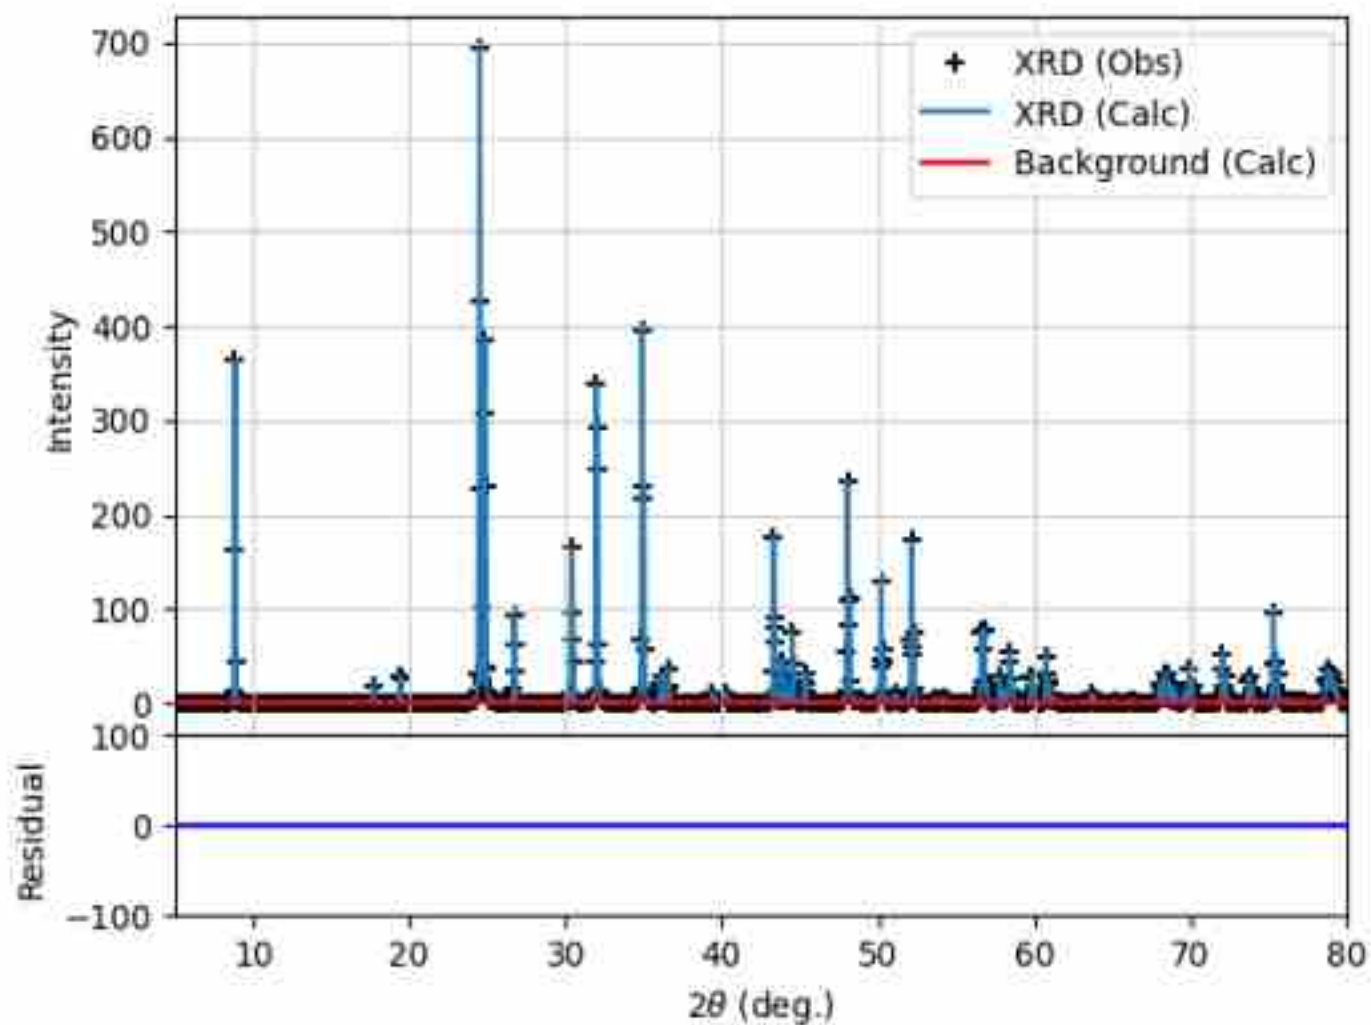

| RMSE before RR | Rwp     | RMSE after RR |
|----------------|---------|---------------|
| 0.026          | 0.03561 | 0.00062       |

# Cs<sub>2</sub>Co<sub>2</sub>O<sub>4</sub>

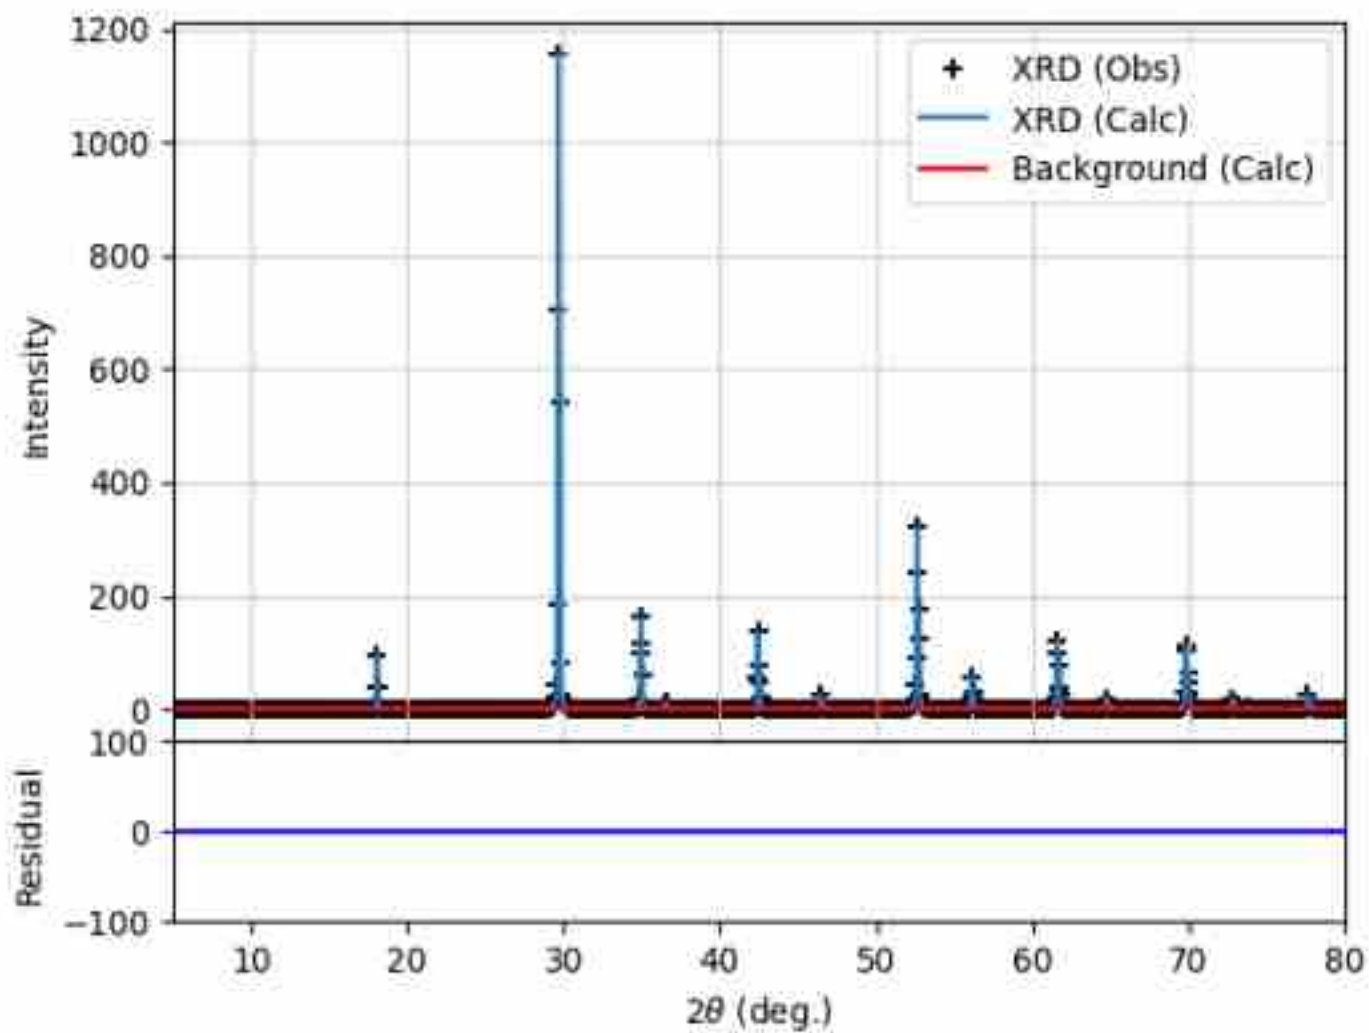

| RMSE before RR | Rwp     | RMSE after RR |
|----------------|---------|---------------|
| 0.026          | 0.01145 | 0.00372       |

# Cs<sub>3</sub>As<sub>2</sub>Cl<sub>9</sub>

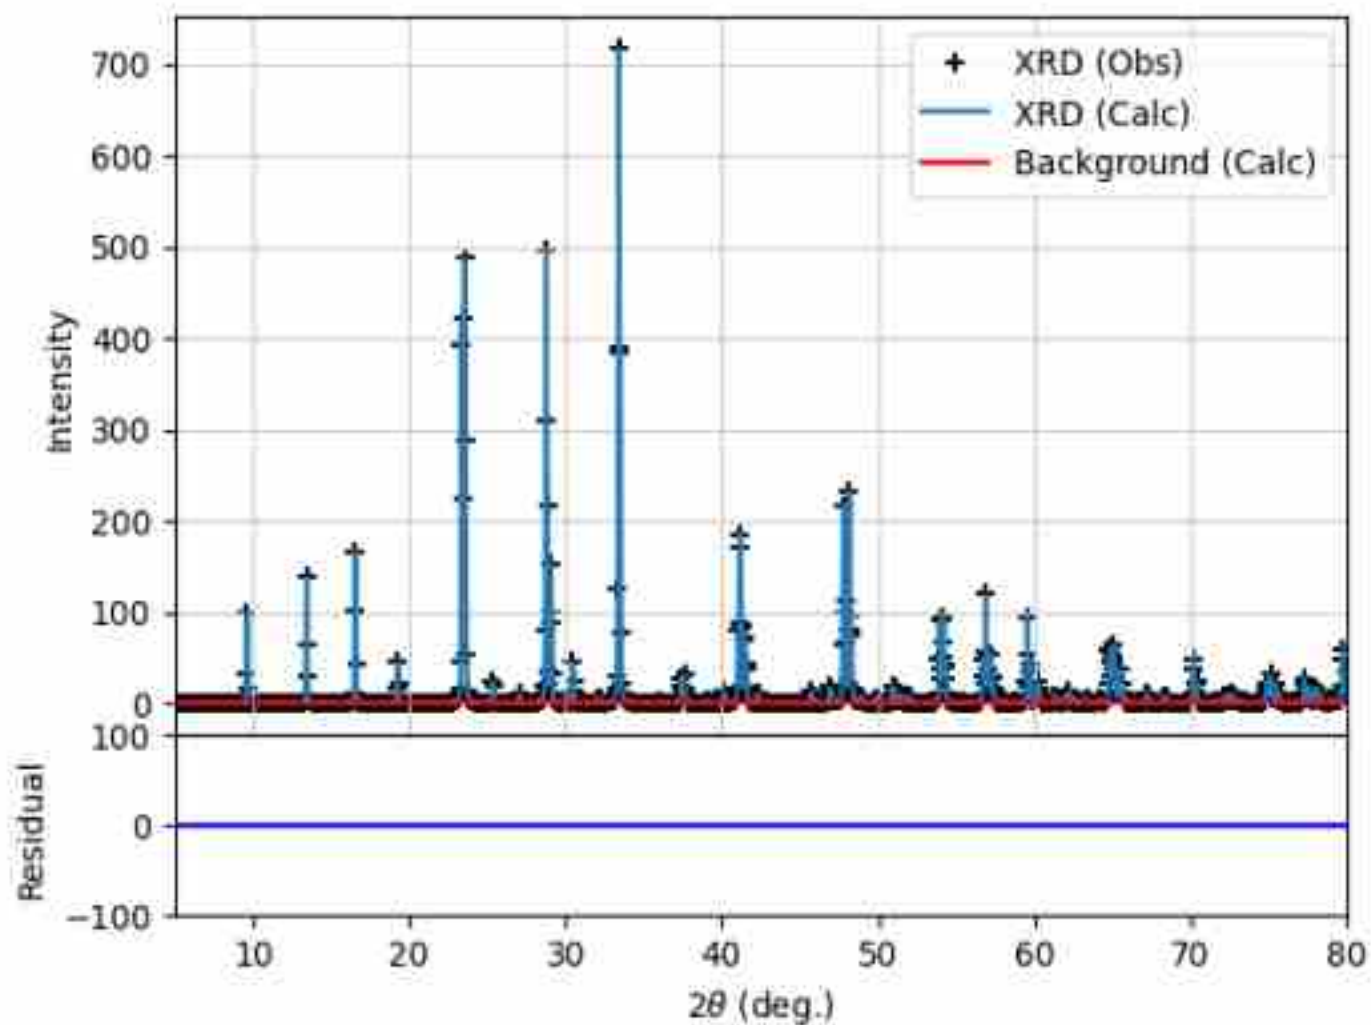

| RMSE before RR | Rwp     | RMSE after RR |
|----------------|---------|---------------|
| 0.026          | 0.00329 | 0.00091       |

# Cs<sub>3</sub>FeF<sub>6</sub>

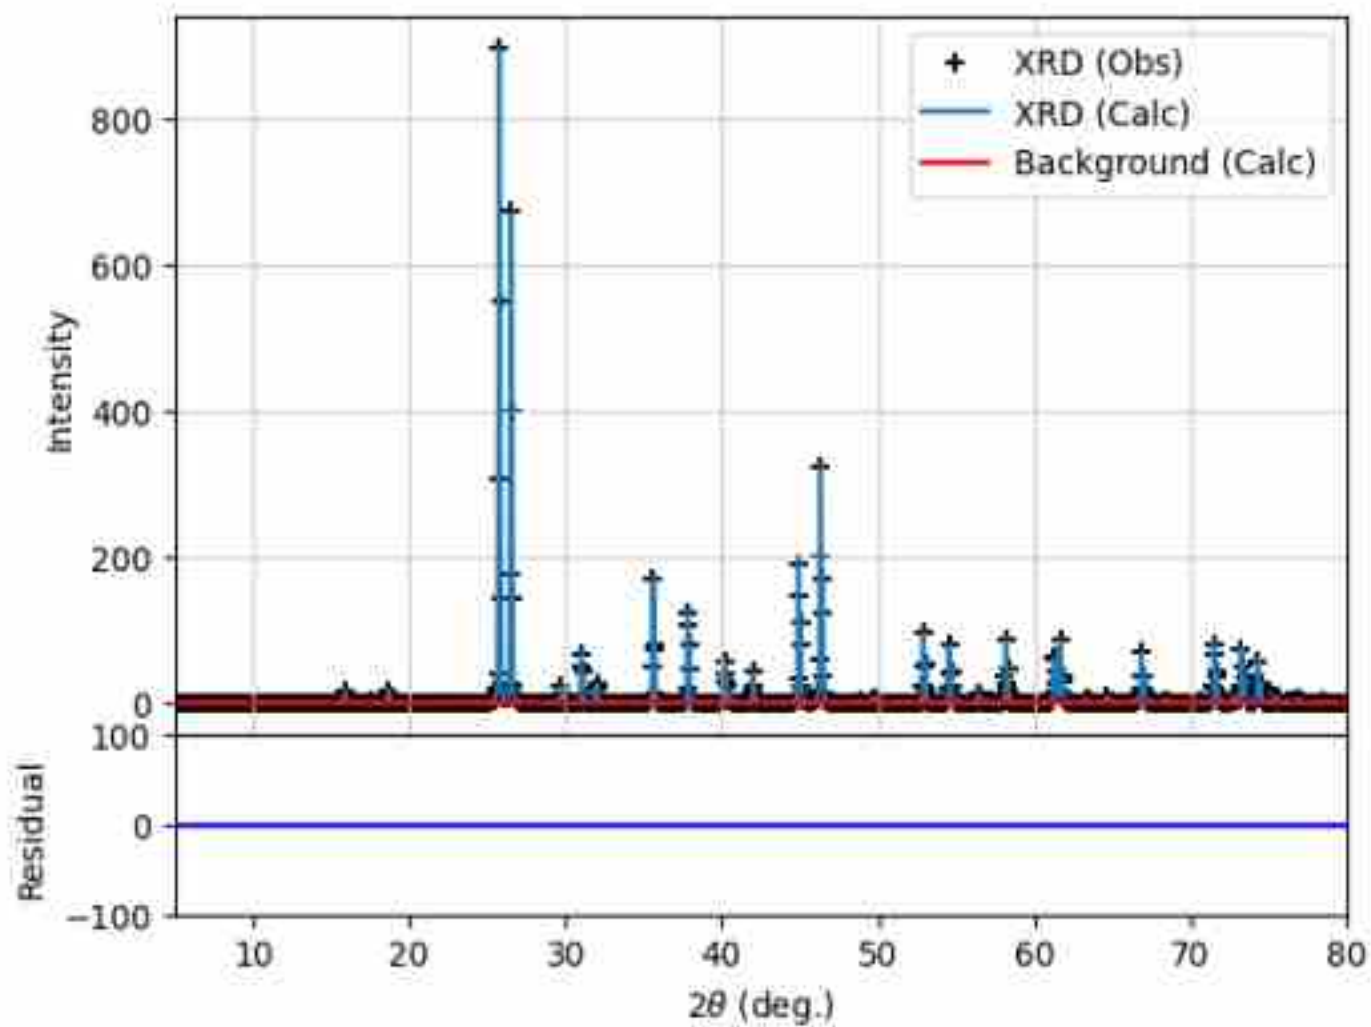

| RMSE before RR | Rwp     | RMSE after RR |
|----------------|---------|---------------|
| 0.026          | 0.00379 | 0.00077       |

# Cs<sub>4</sub>Ni<sub>2</sub>As<sub>4</sub>

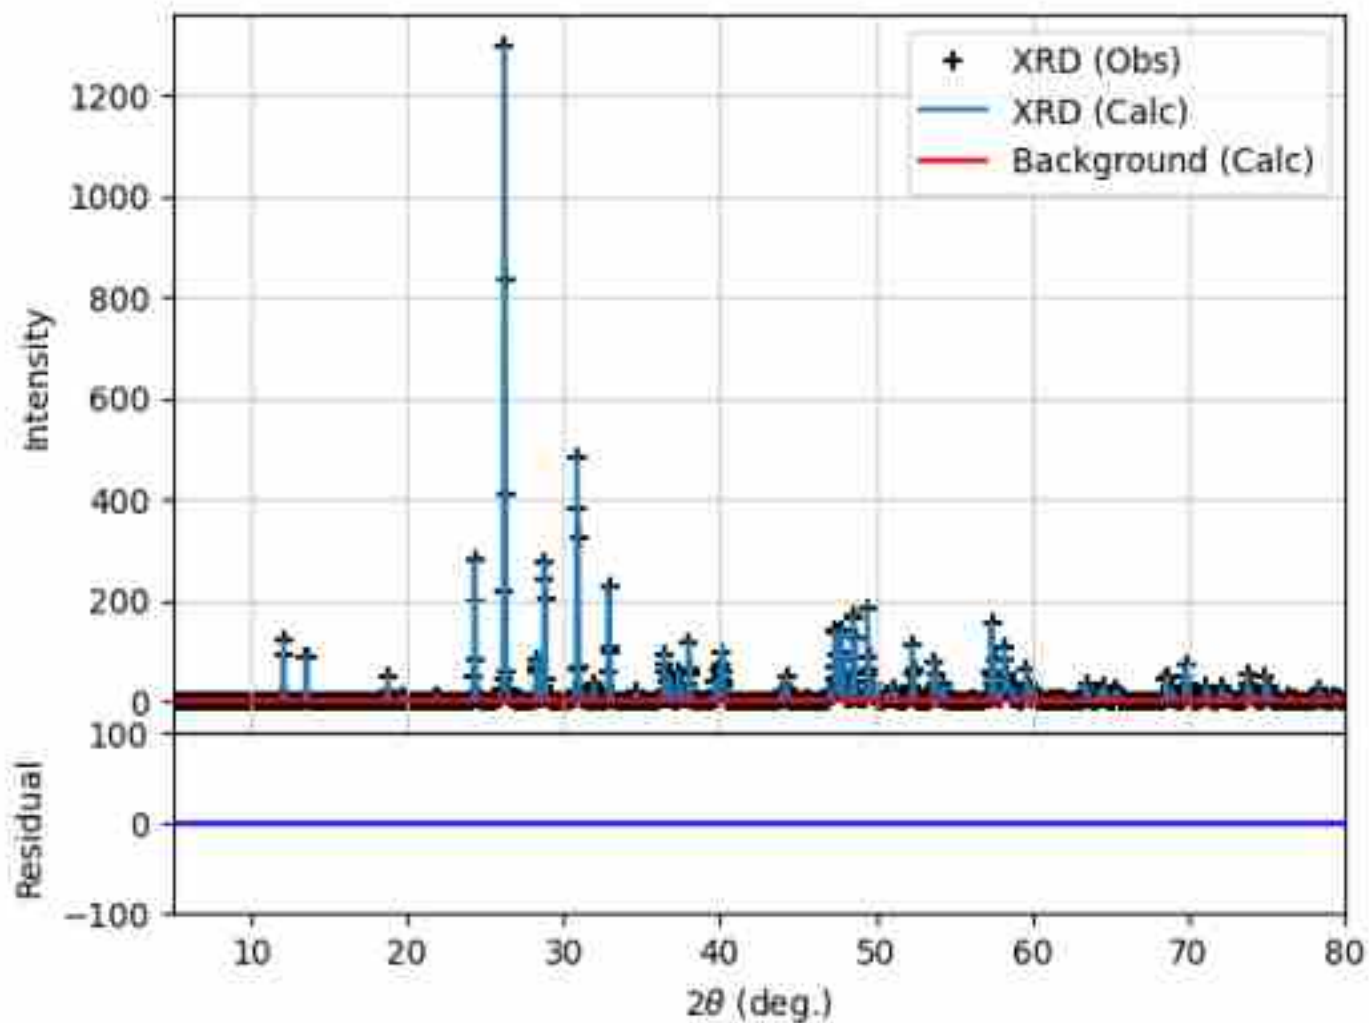

| RMSE before RR | Rwp     | RMSE after RR |
|----------------|---------|---------------|
| 0.026          | 0.00356 | 0.00037       |



# Cs<sub>4</sub>Pb<sub>4</sub>I<sub>12</sub>

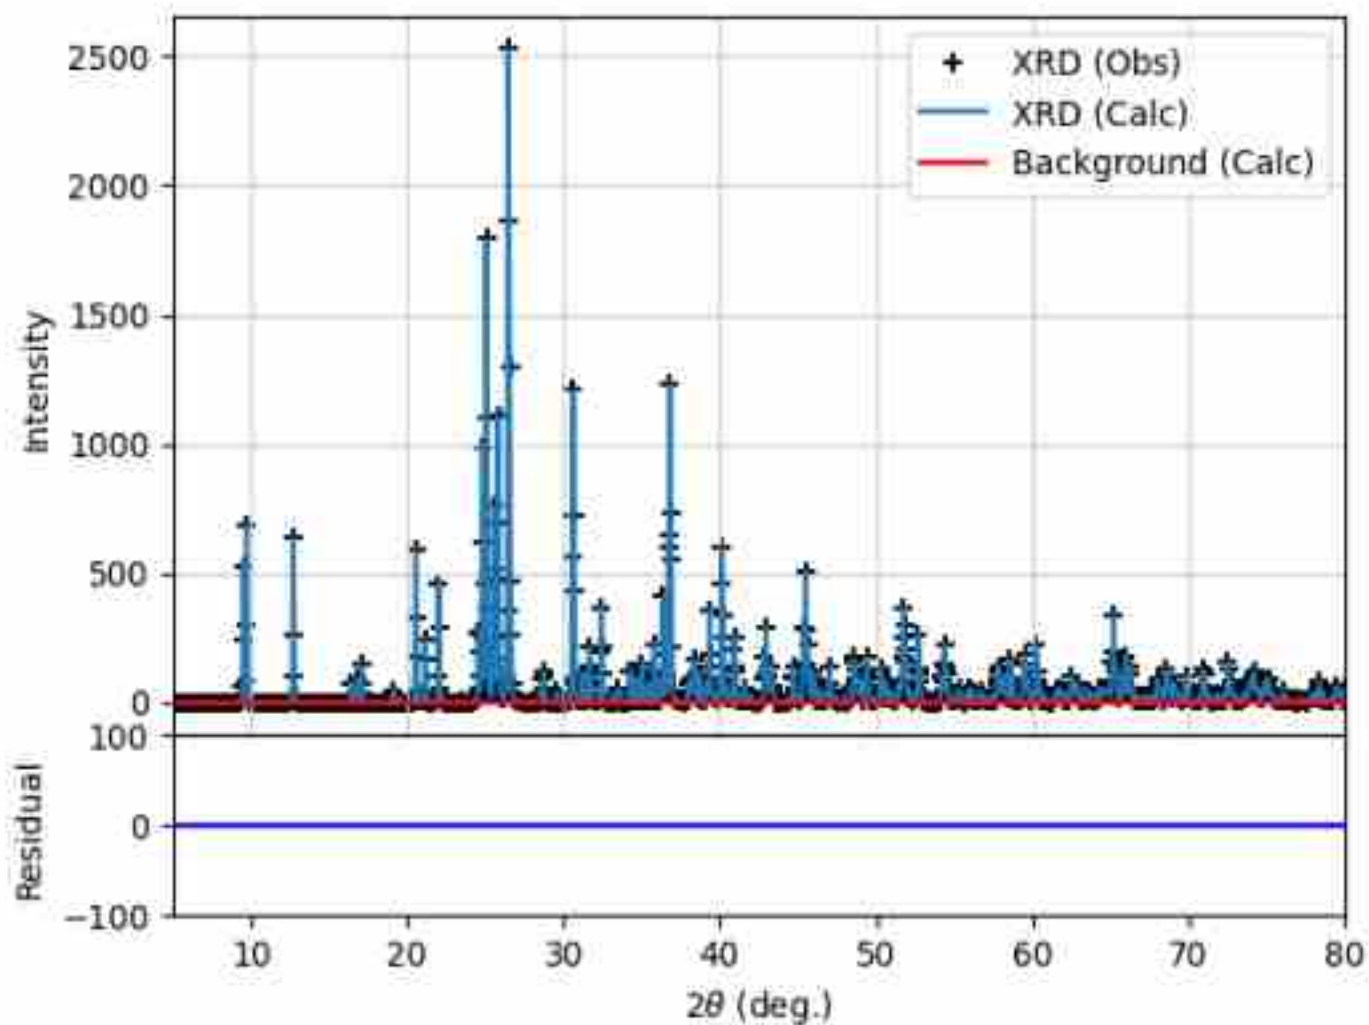

| RMSE before RR | Rwp     | RMSE after RR |
|----------------|---------|---------------|
| 0.026          | 0.00413 | 0.0003        |

# Cu<sub>2</sub>Sb<sub>4</sub>O<sub>12</sub>

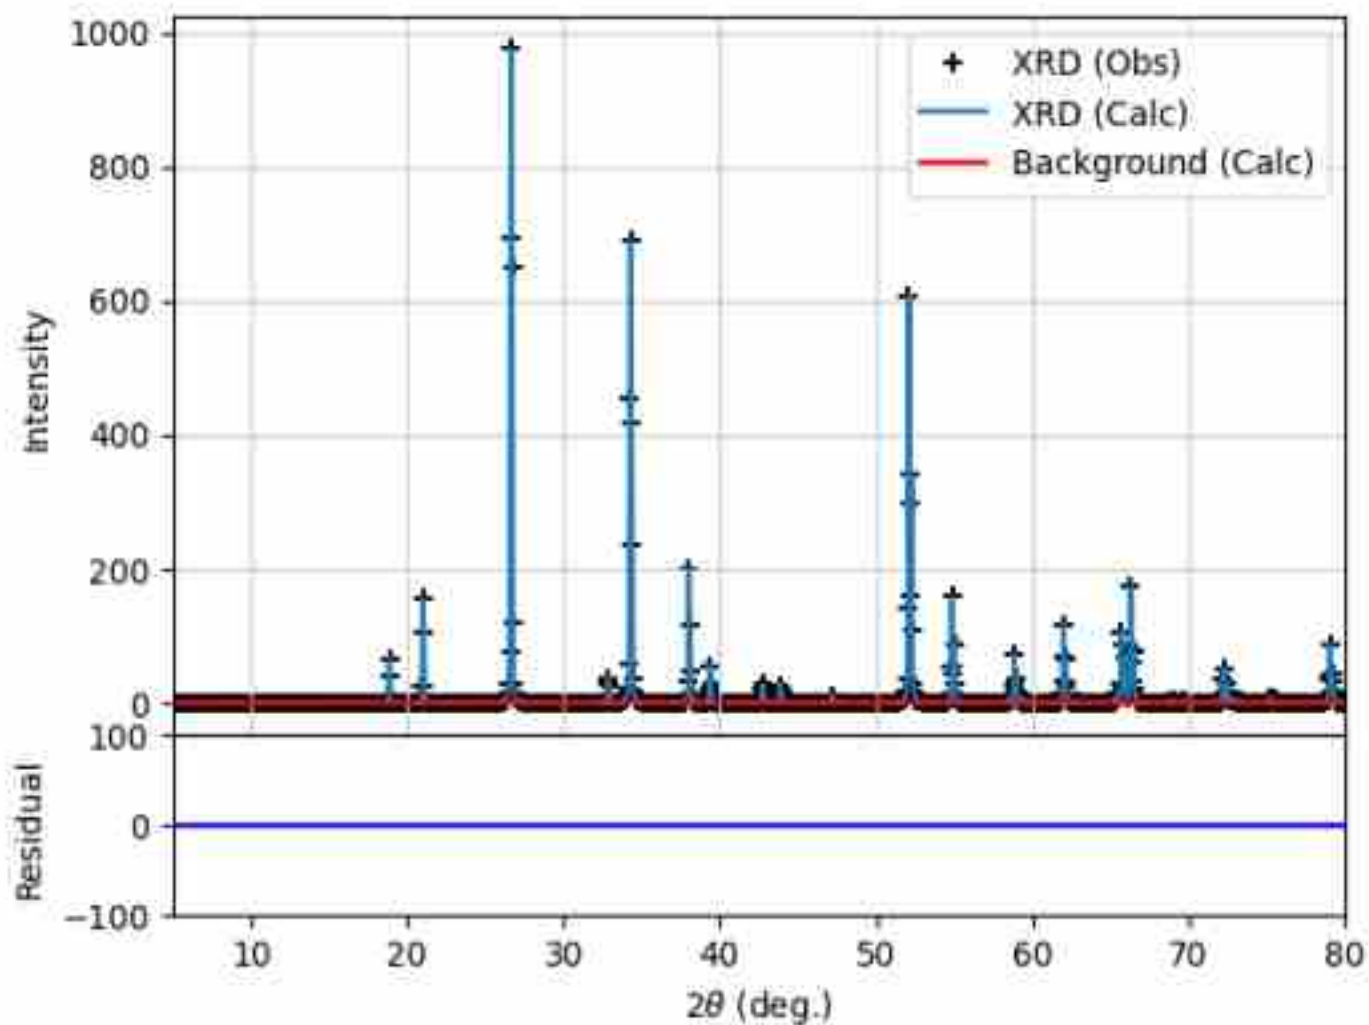

| RMSE before RR | Rwp     | RMSE after RR |
|----------------|---------|---------------|
| 0.026          | 0.00424 | 0.00133       |

# Cu<sub>4</sub>Ge<sub>2</sub>S<sub>6</sub>

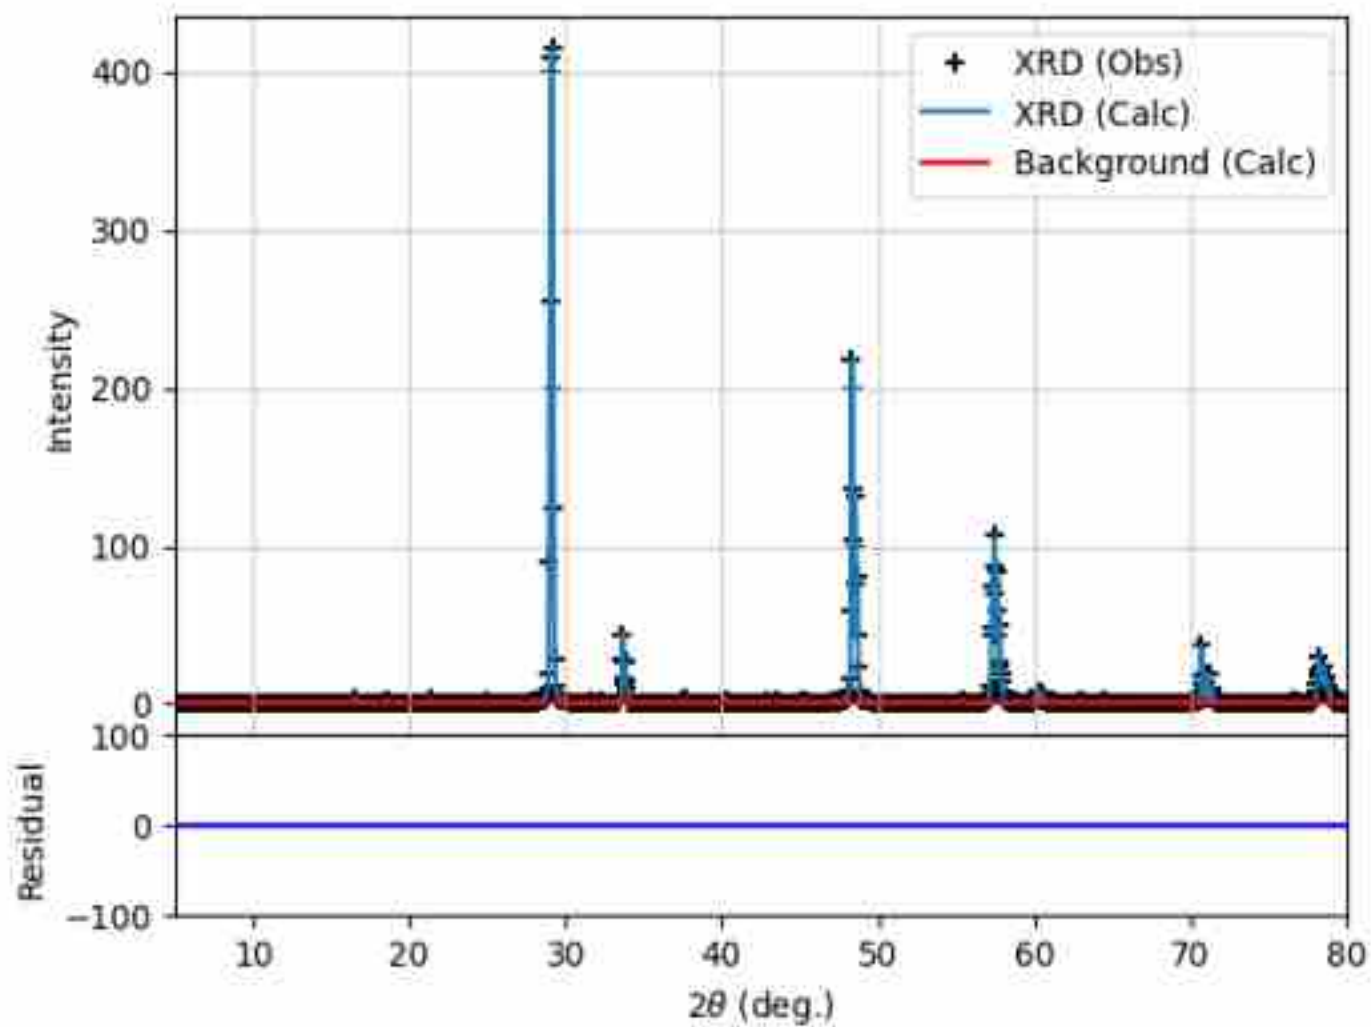

| RMSE before RR | Rwp     | RMSE after RR |
|----------------|---------|---------------|
| 0.026          | 0.00424 | 0.00223       |

# Dy<sub>2</sub>Ga<sub>3</sub>Cu<sub>1</sub>

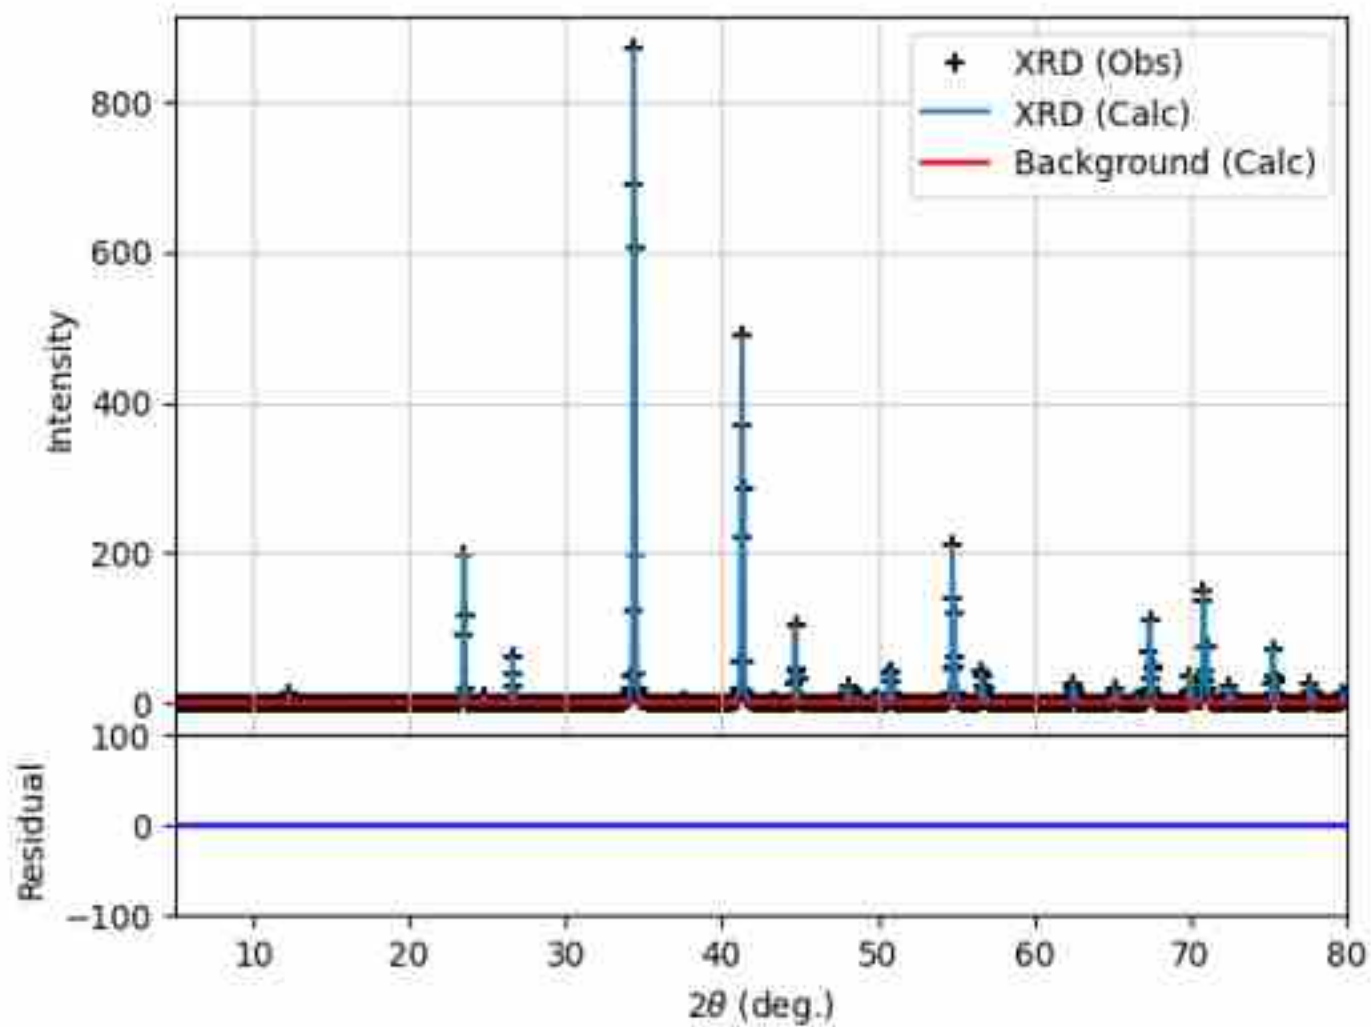

| RMSE before RR | Rwp     | RMSE after RR |
|----------------|---------|---------------|
| 0.026          | 0.00277 | 0.0003        |

# Dy<sub>2</sub>H<sub>2</sub>O<sub>4</sub>

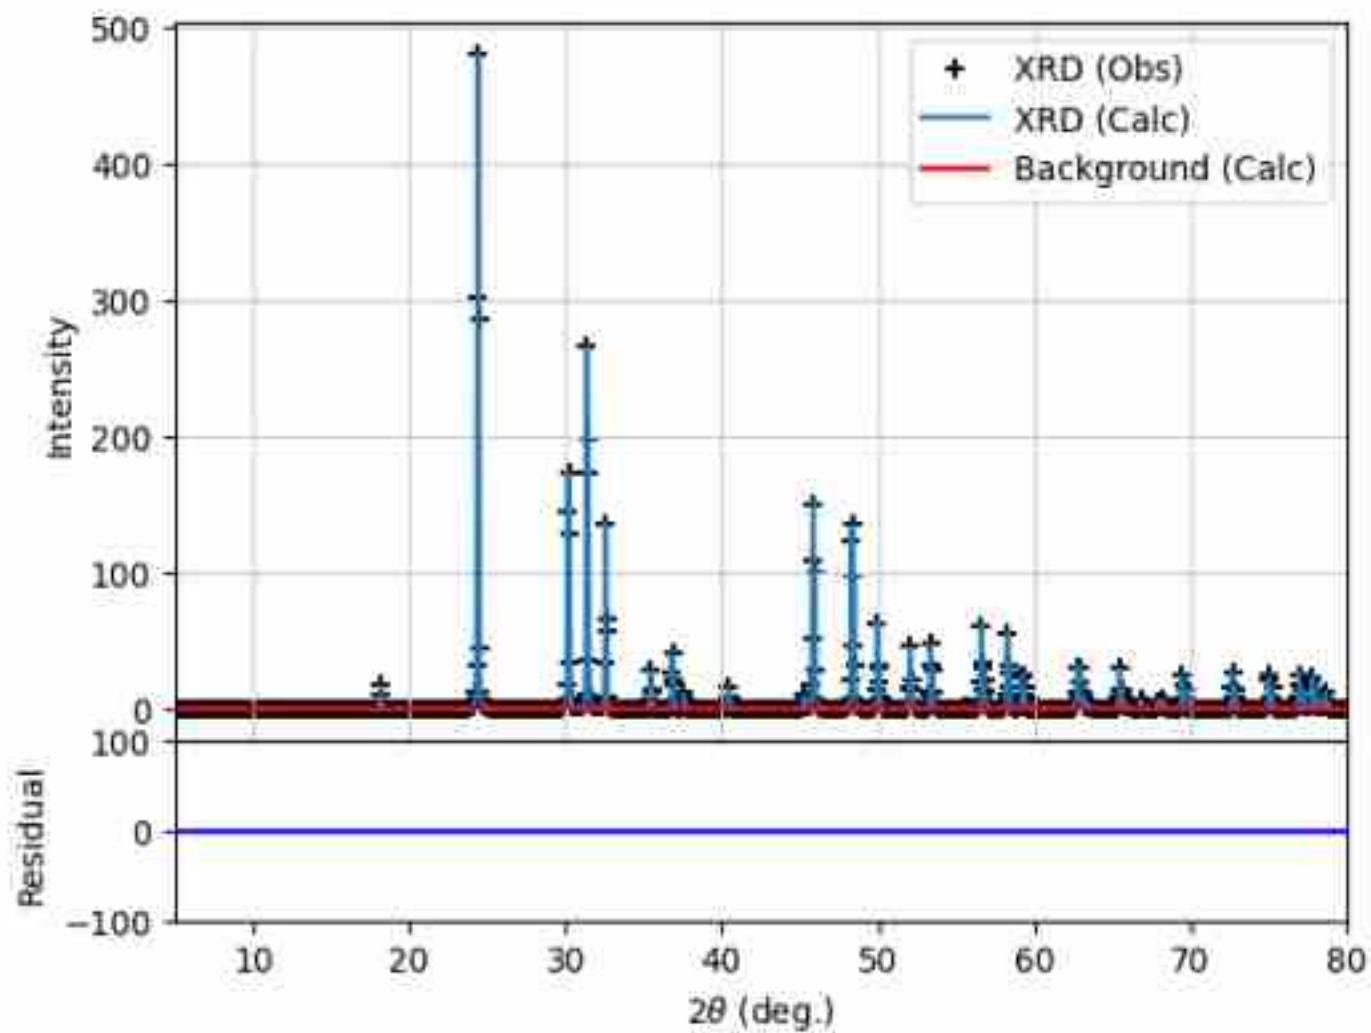

| RMSE before RR | Rwp     | RMSE after RR |
|----------------|---------|---------------|
| 0.026          | 0.00372 | 0.00462       |

# Dy<sub>4</sub>Co<sub>2</sub>Ge<sub>4</sub>

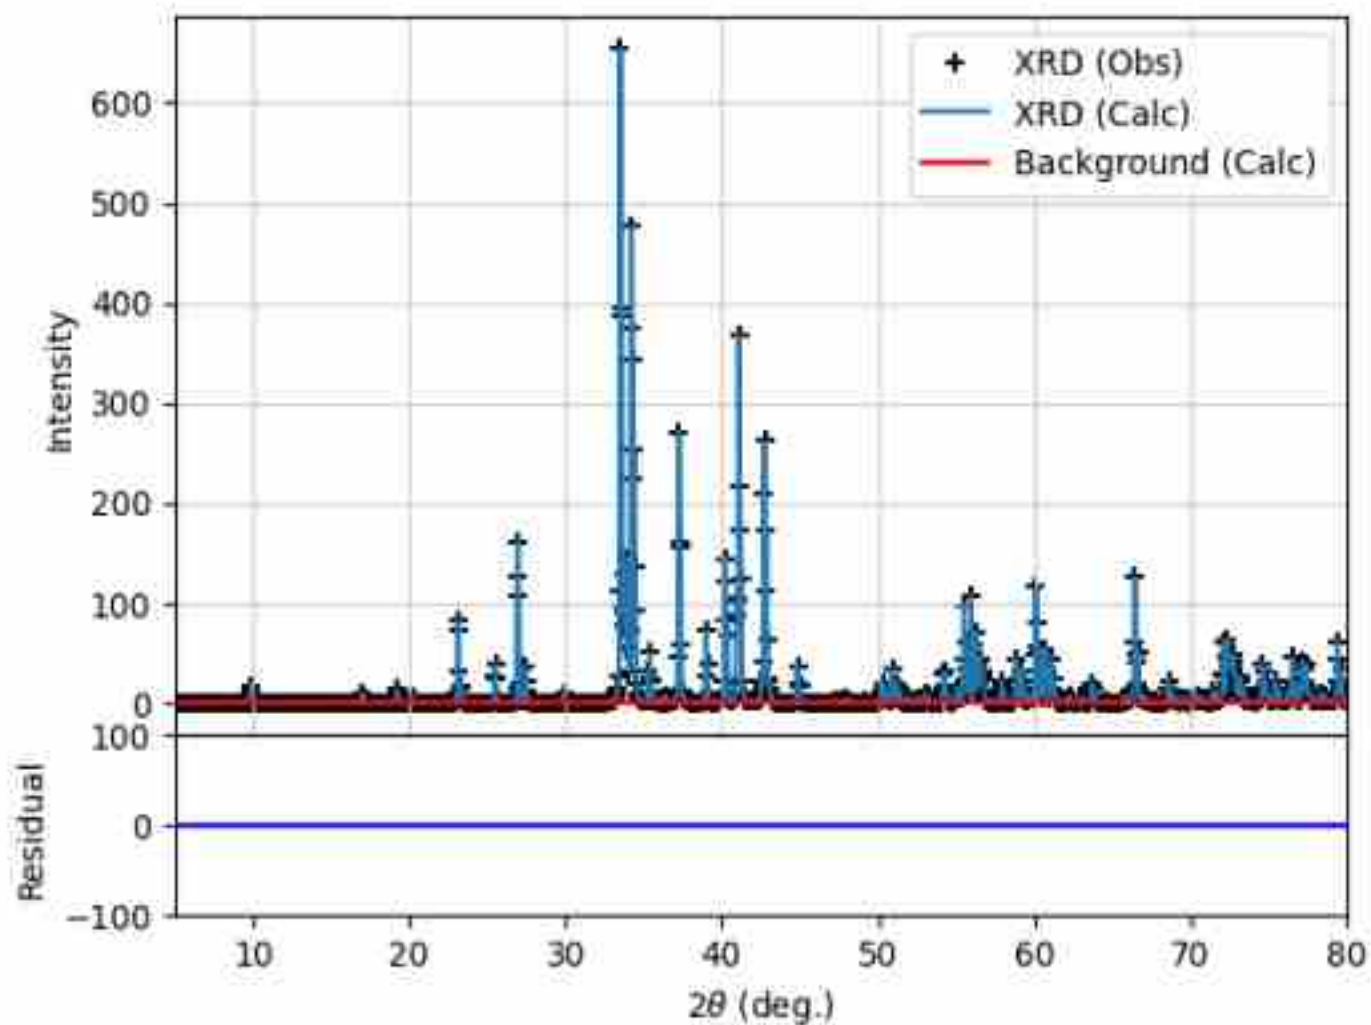

| RMSE before RR | Rwp     | RMSE after RR |
|----------------|---------|---------------|
| 0.026          | 0.00271 | 0.00037       |

# Dy<sub>4</sub>Ga<sub>12</sub>Pt<sub>1</sub>

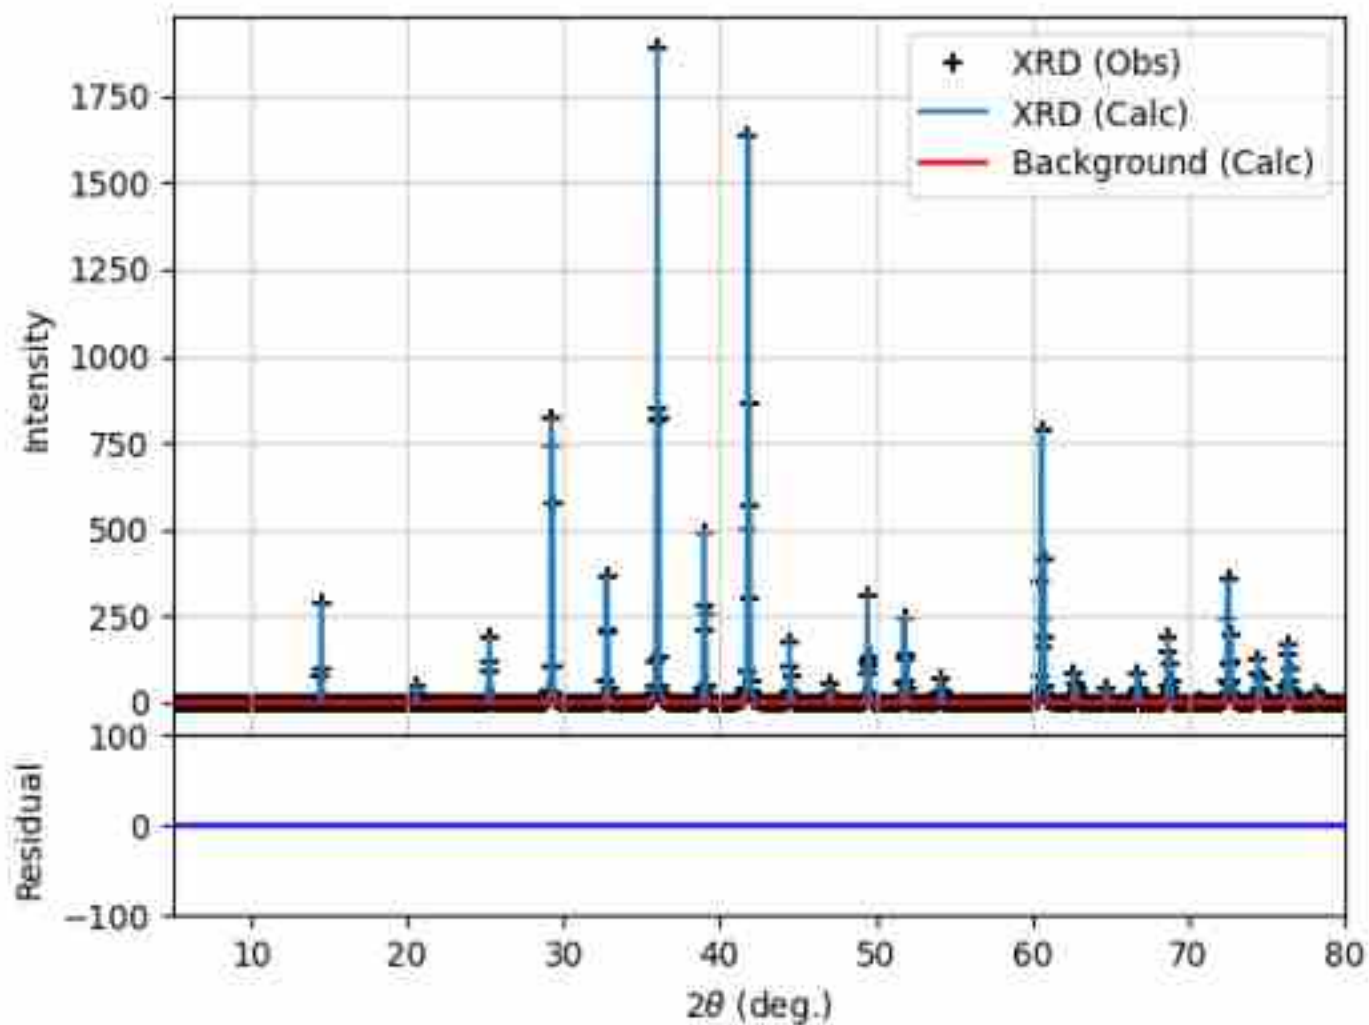

| RMSE before RR | Rwp     | RMSE after RR |
|----------------|---------|---------------|
| 0.026          | 0.01224 | 0.00158       |

# Er<sub>4</sub>Ge<sub>10</sub>Ru<sub>6</sub>

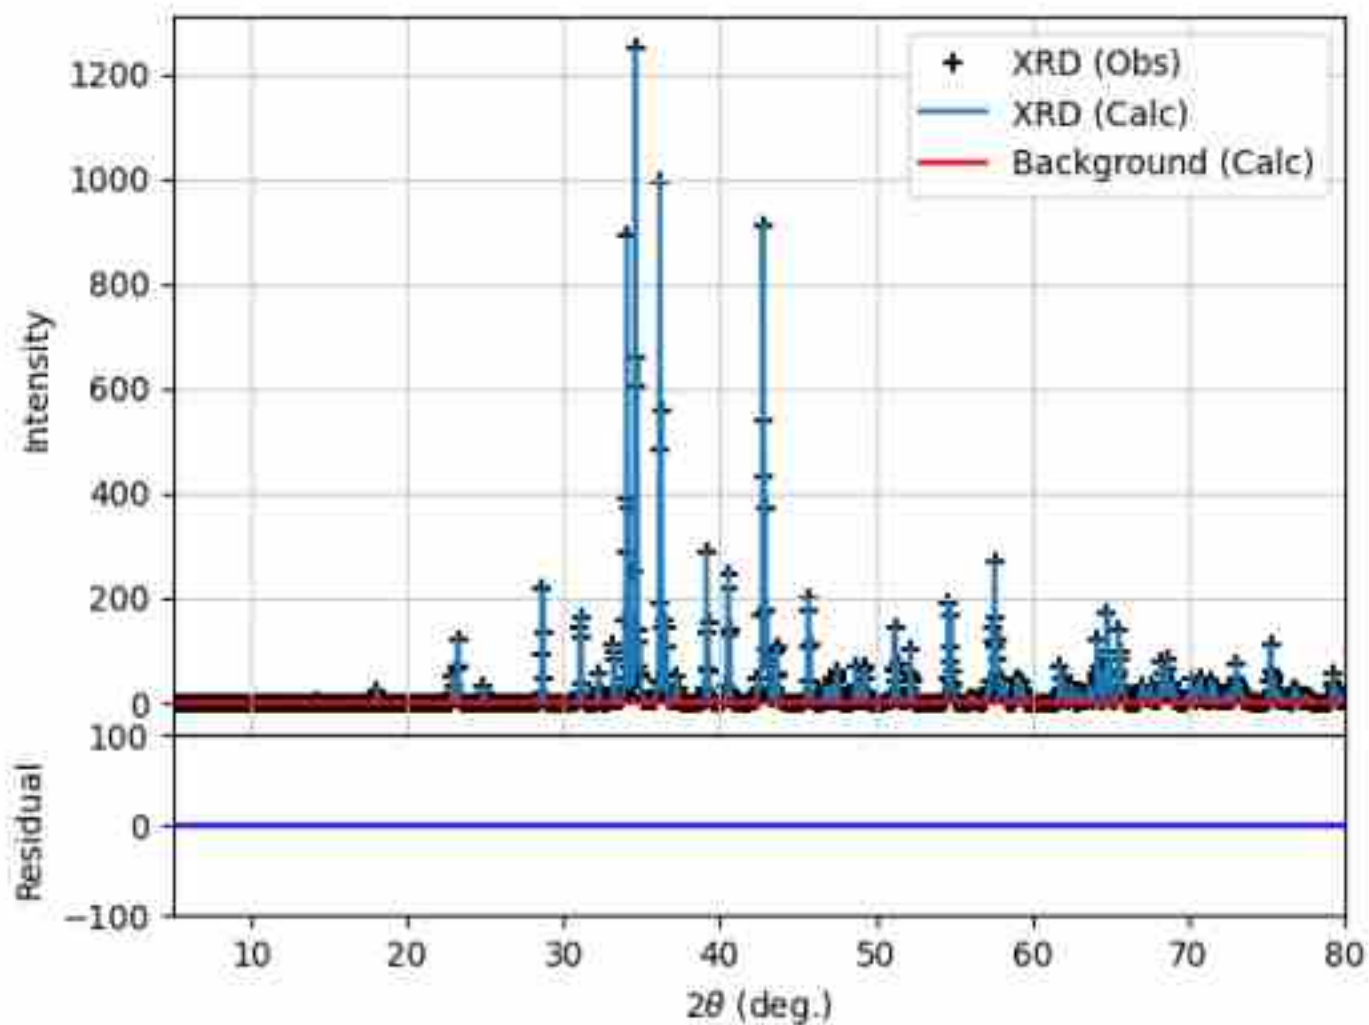

| RMSE before RR | Rwp    | RMSE after RR |
|----------------|--------|---------------|
| 0.026          | 0.0039 | 0.00036       |



# Er<sub>4</sub>Zn<sub>12</sub>

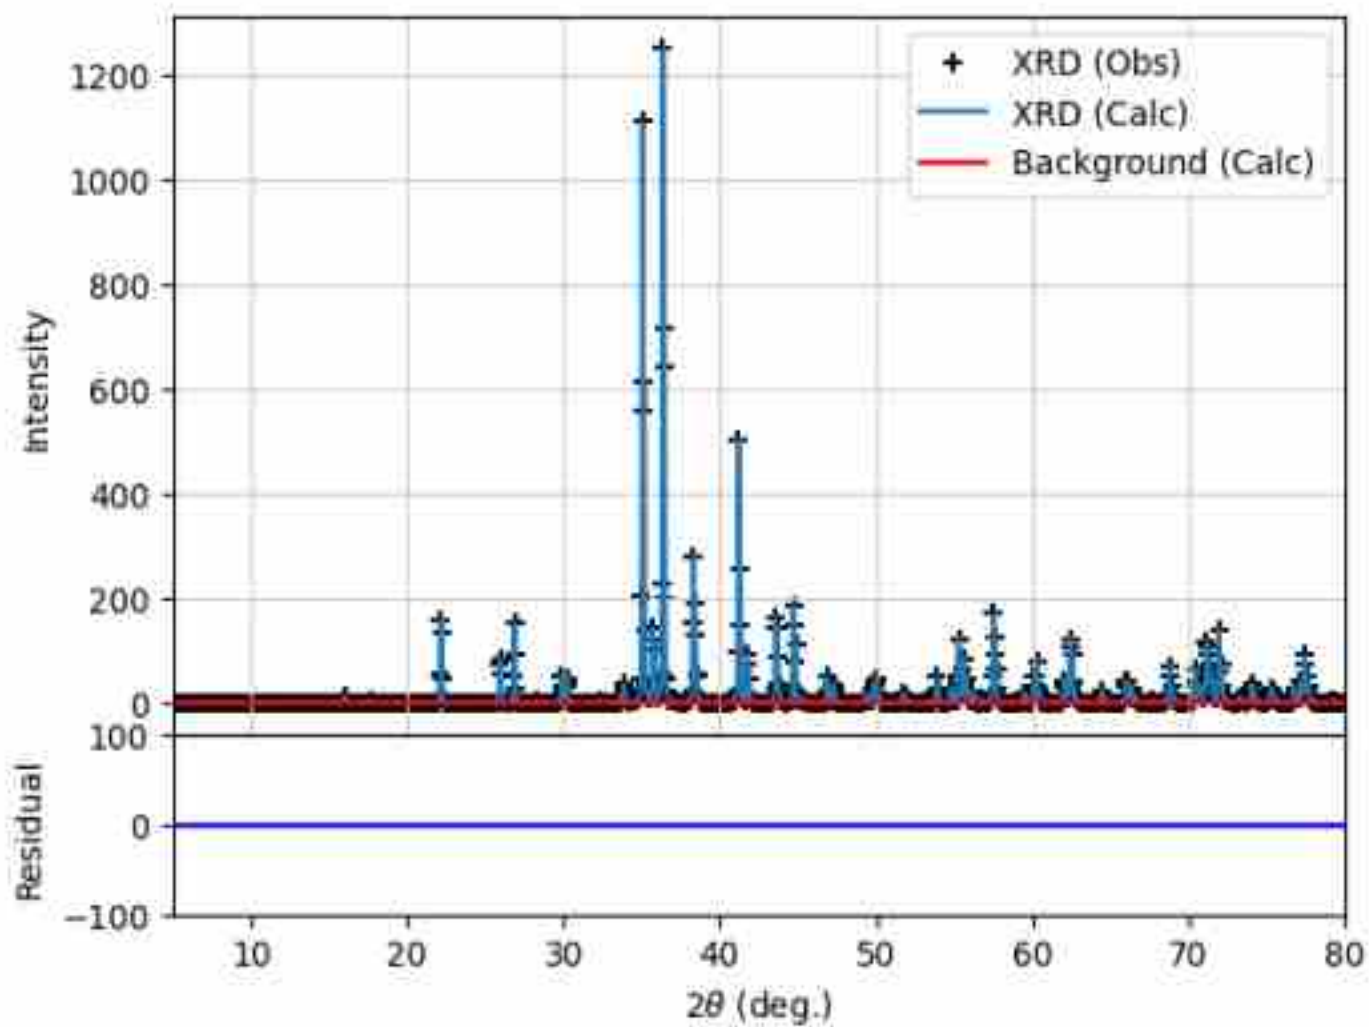

| RMSE before RR | Rwp     | RMSE after RR |
|----------------|---------|---------------|
| 0.026          | 0.00408 | 0.00048       |

# Er<sub>8</sub>Te<sub>12</sub>

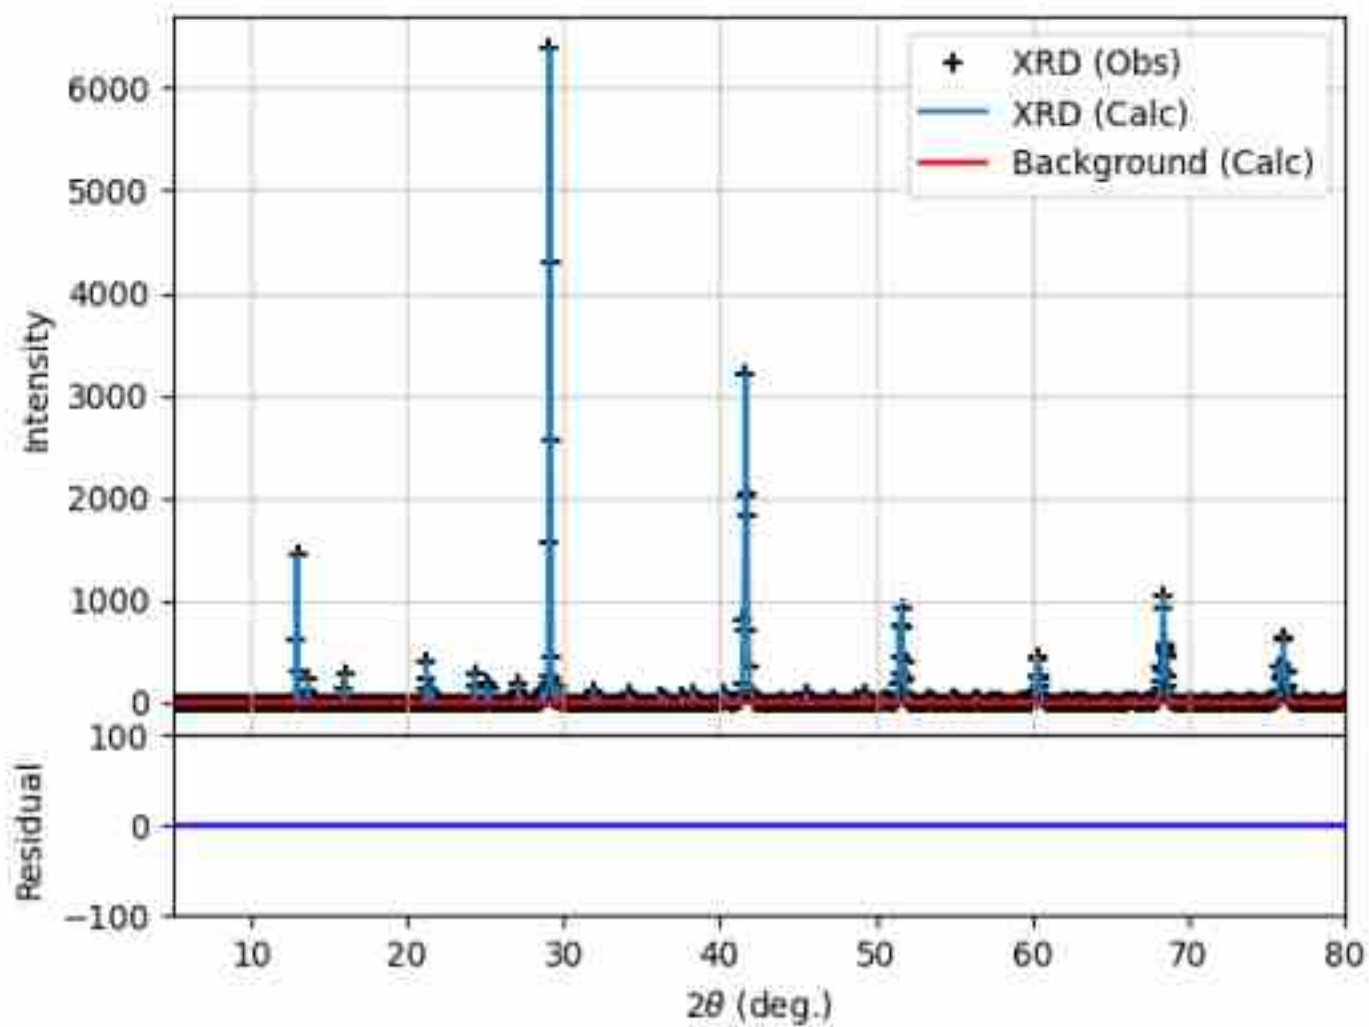

| RMSE before RR | Rwp     | RMSE after RR |
|----------------|---------|---------------|
| 0.026          | 0.00435 | 0.00072       |

# Eu<sub>2</sub>Lu<sub>2</sub>Cu<sub>2</sub>S<sub>6</sub>

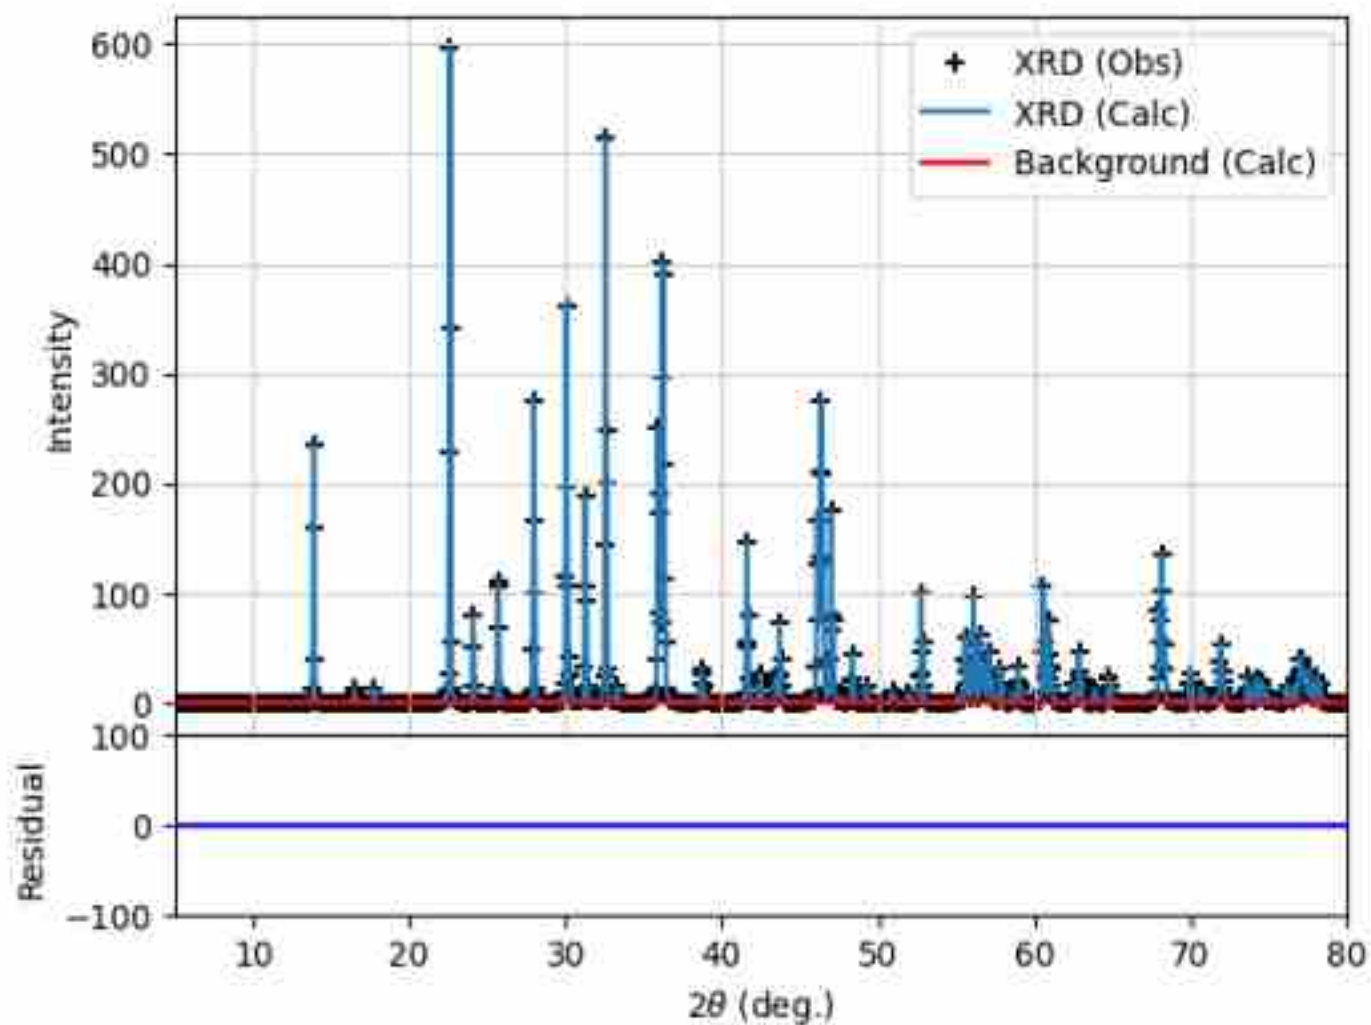

| RMSE before RR | Rwp    | RMSE after RR |
|----------------|--------|---------------|
| 0.026          | 0.0033 | 0.00055       |

# Eu<sub>2</sub>MgH<sub>6</sub>

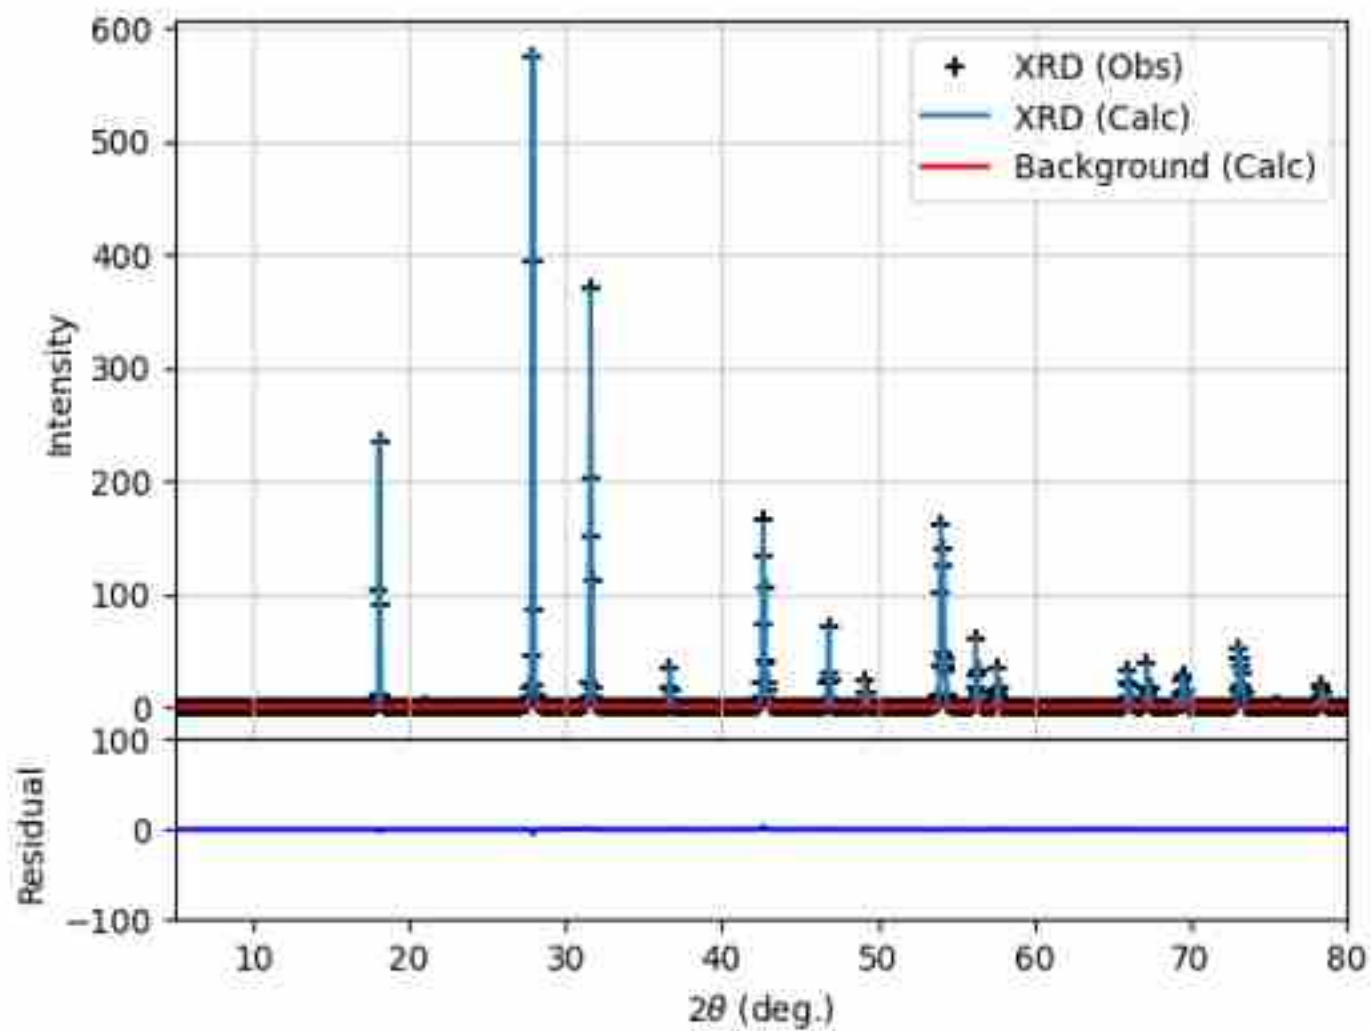

| RMSE before RR | Rwp     | RMSE after RR |
|----------------|---------|---------------|
| 0.026          | 0.91382 | 0.49312       |

# Eu6Ga4

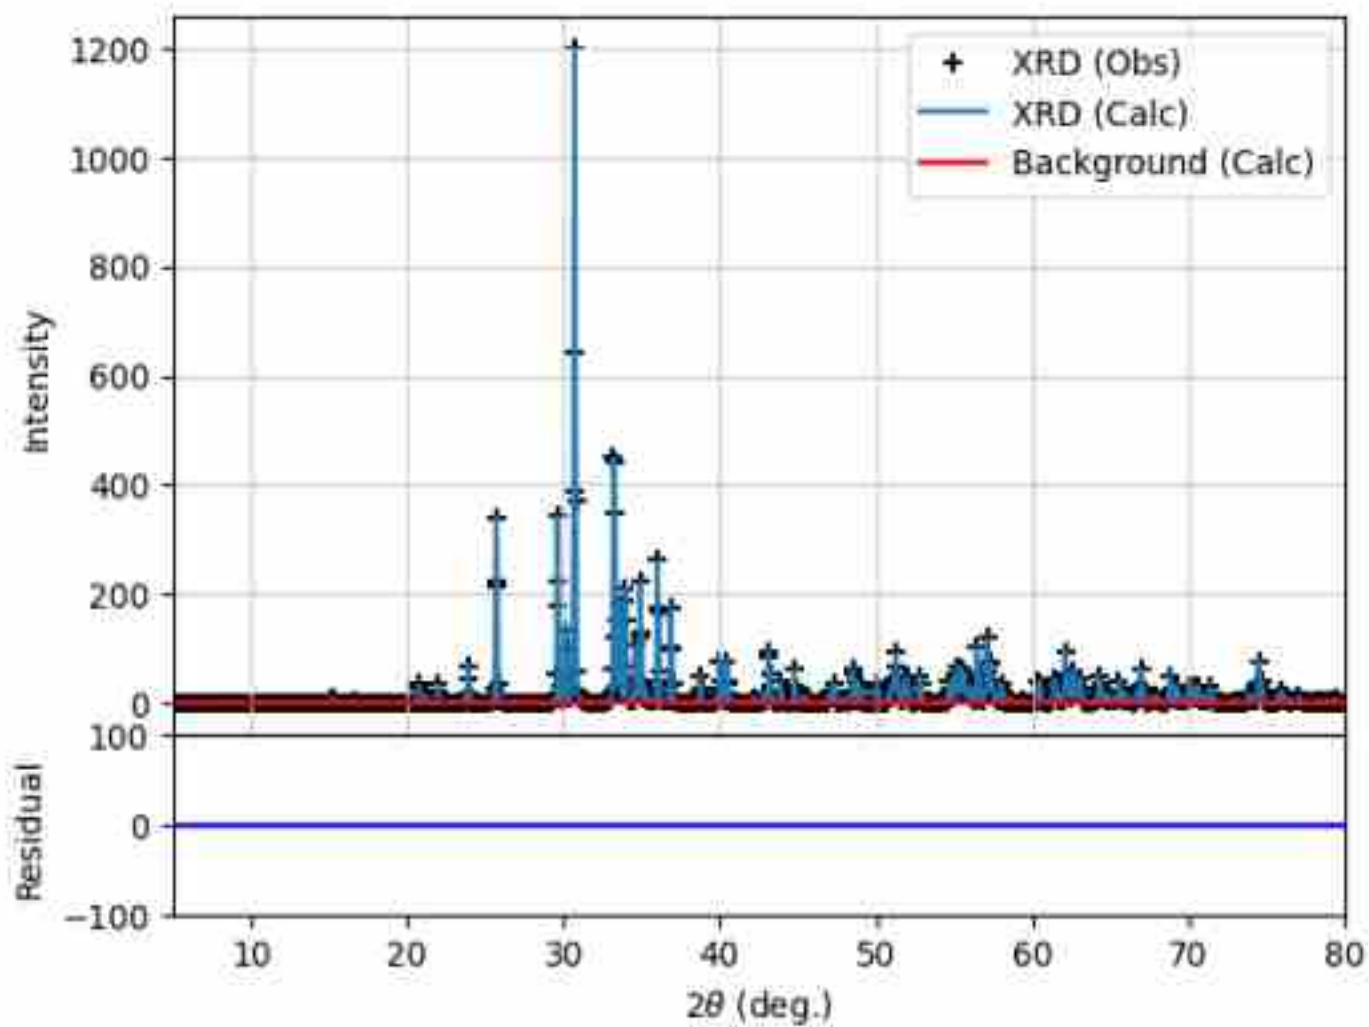

| RMSE before RR | Rwp    | RMSE after RR |
|----------------|--------|---------------|
| 0.026          | 0.0037 | 0.00022       |

# Ga4Pt4

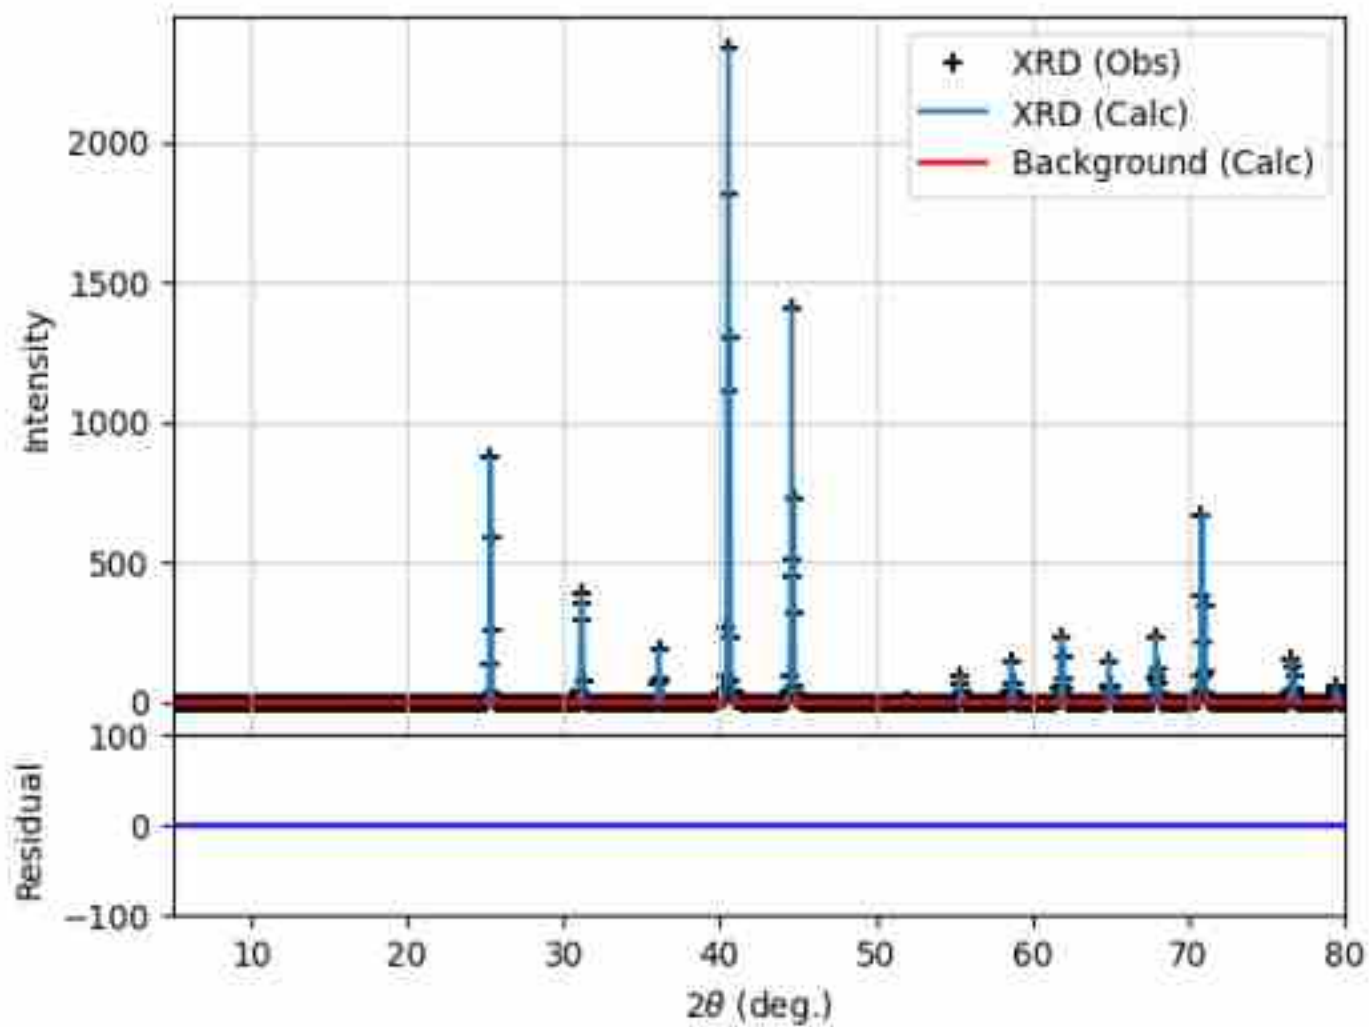

| RMSE before RR | Rwp     | RMSE after RR |
|----------------|---------|---------------|
| 0.026          | 0.00863 | 0.0008        |

# Hf<sub>2</sub>Cr<sub>2</sub>Ag<sub>2</sub>S<sub>8</sub>

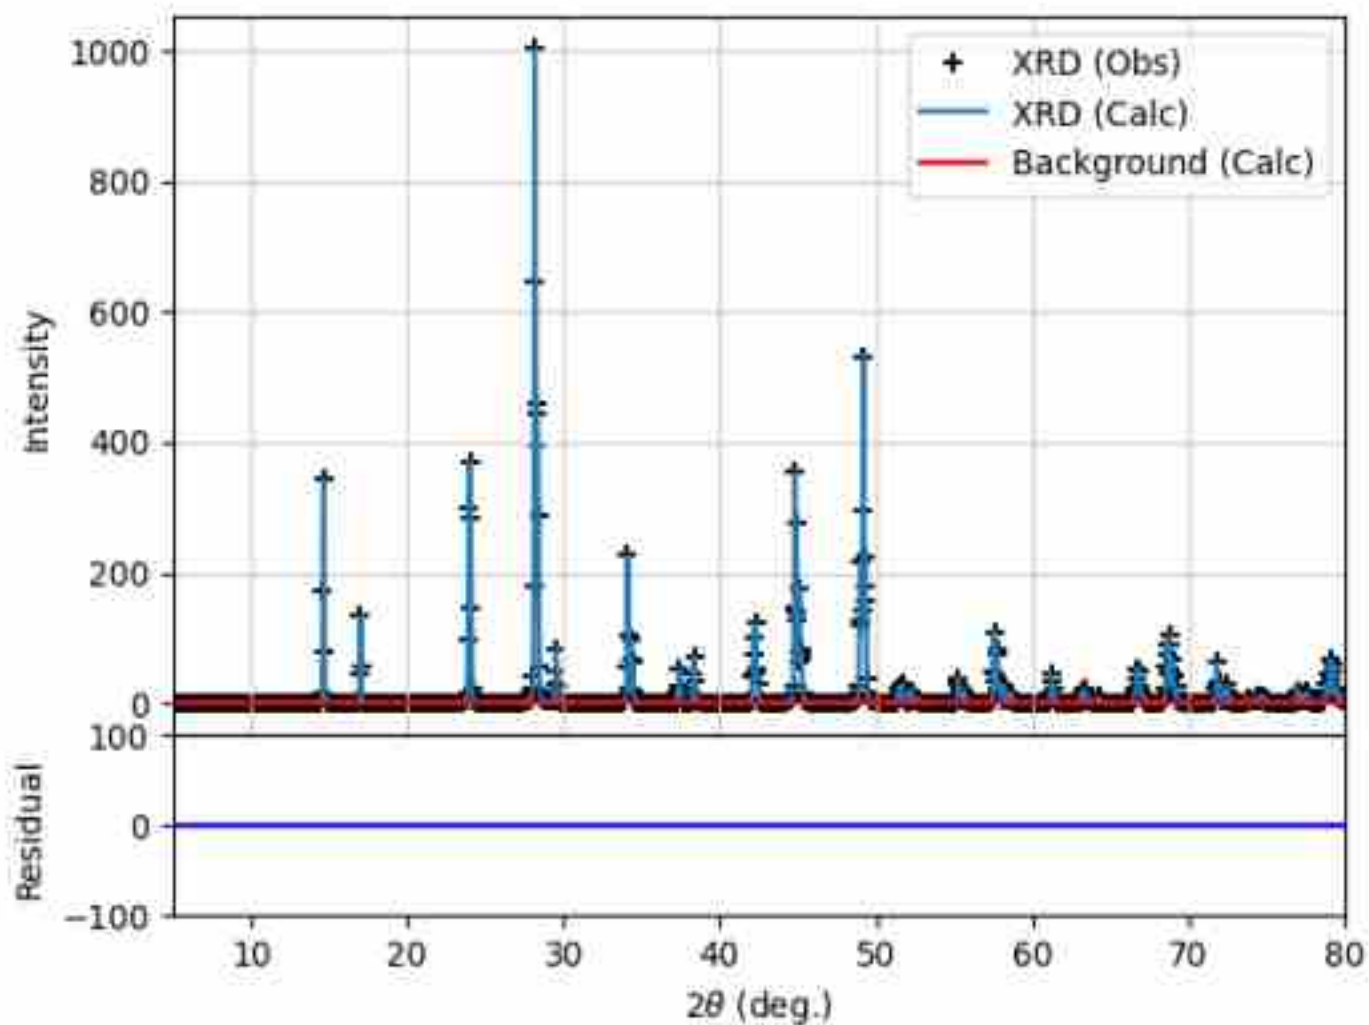

| RMSE before RR | Rwp     | RMSE after RR |
|----------------|---------|---------------|
| 0.026          | 0.00234 | 0.0006        |

# Hf10Ir6

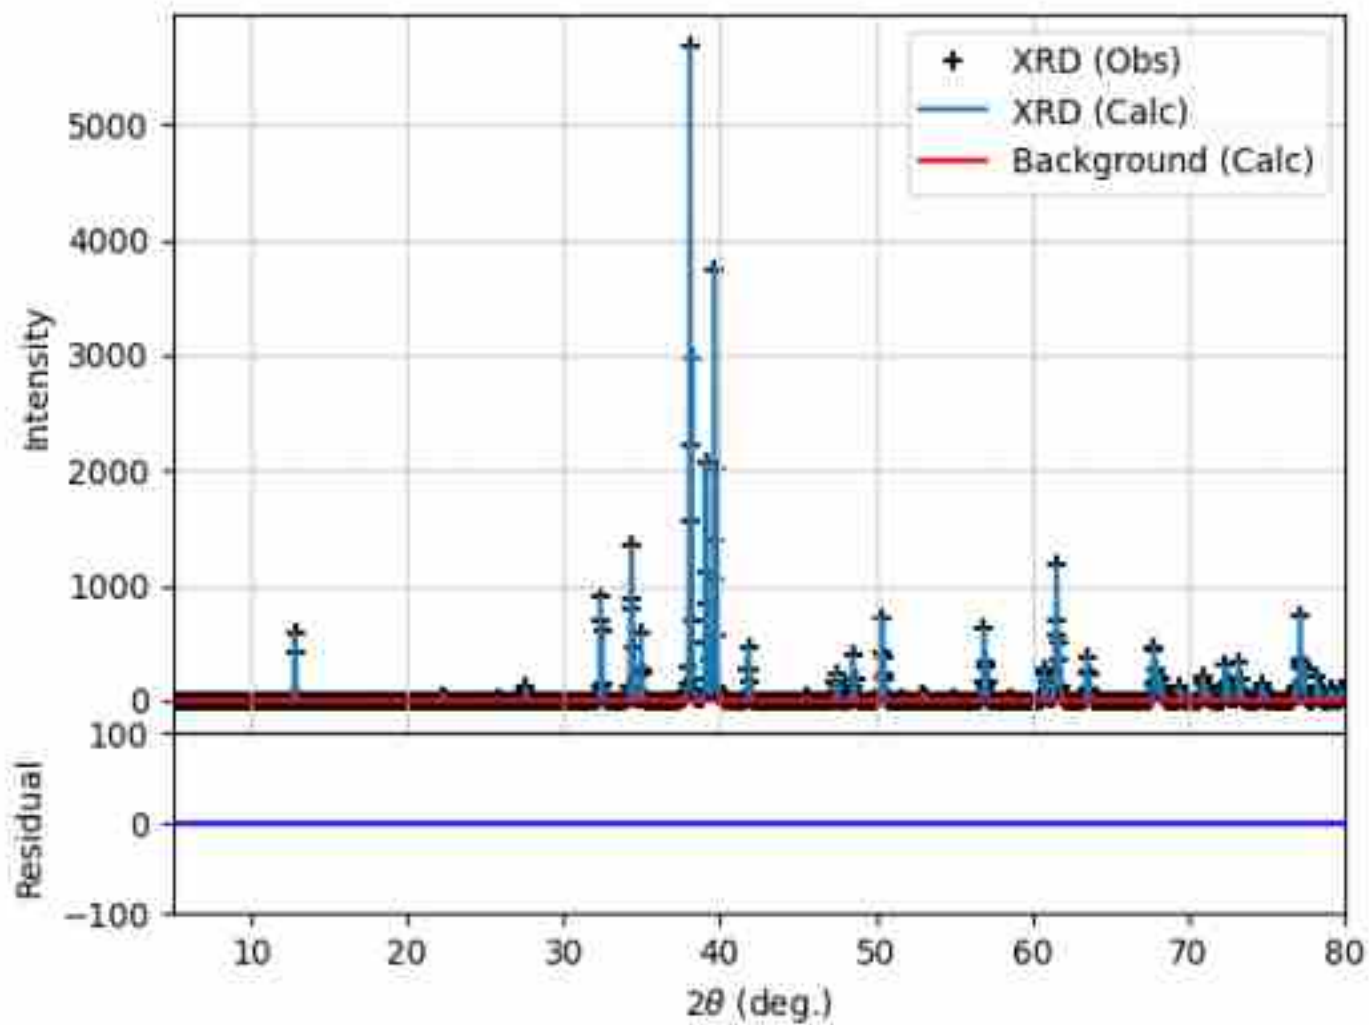

| RMSE before RR | Rwp     | RMSE after RR |
|----------------|---------|---------------|
| 0.026          | 0.00709 | 0.00055       |



# Ho1Ni4Au1

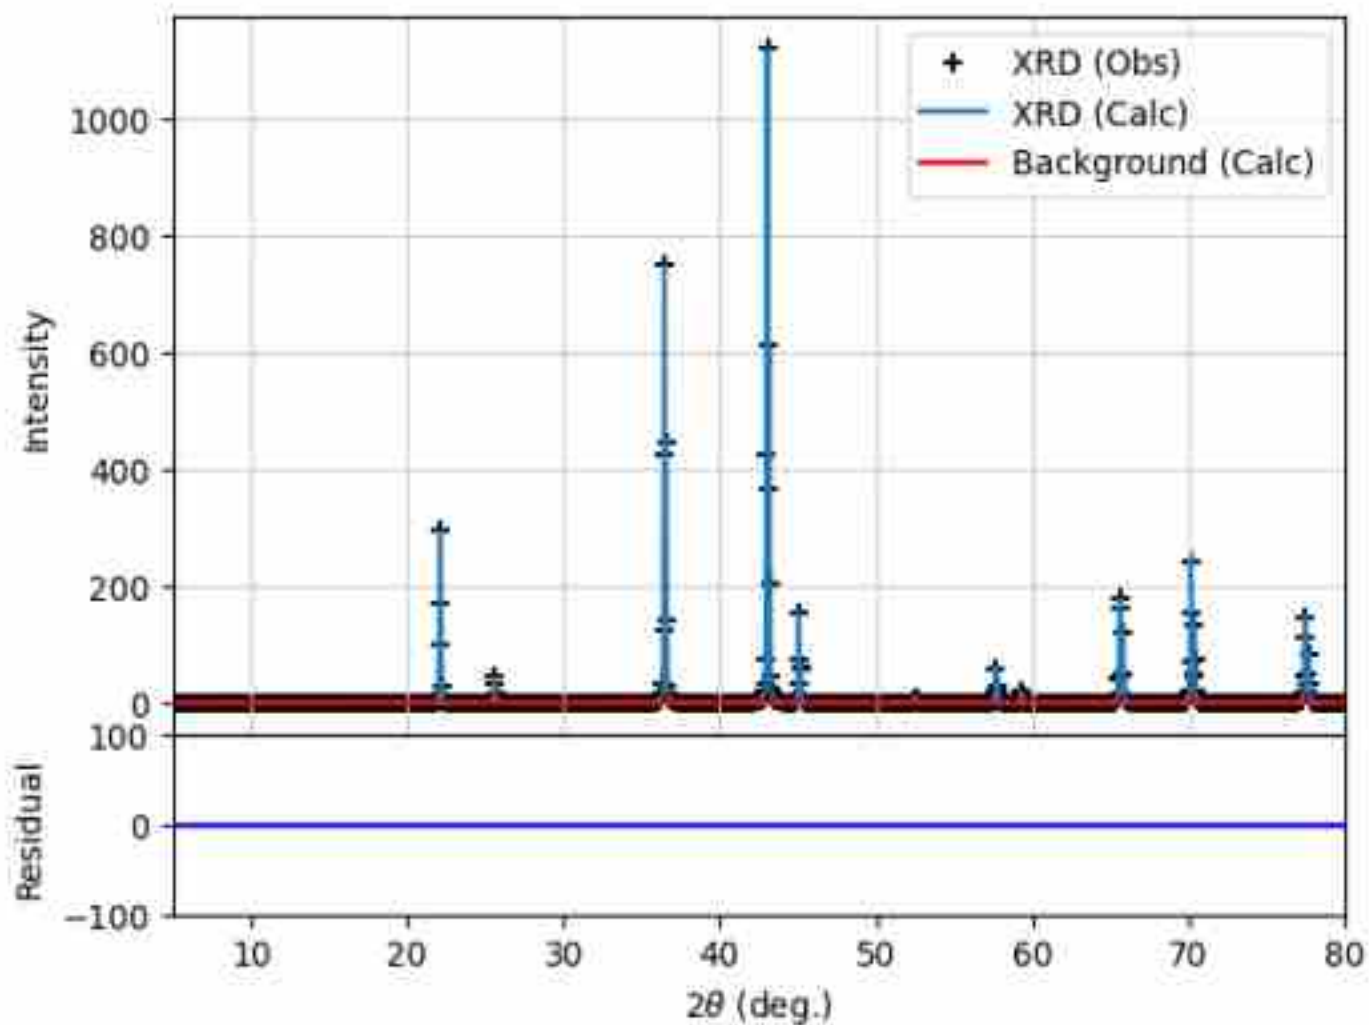

| RMSE before RR | Rwp     | RMSE after RR |
|----------------|---------|---------------|
| 0.026          | 0.02073 | 0.00306       |

# Ho<sub>2</sub>Ni<sub>2</sub>Sn<sub>8</sub>

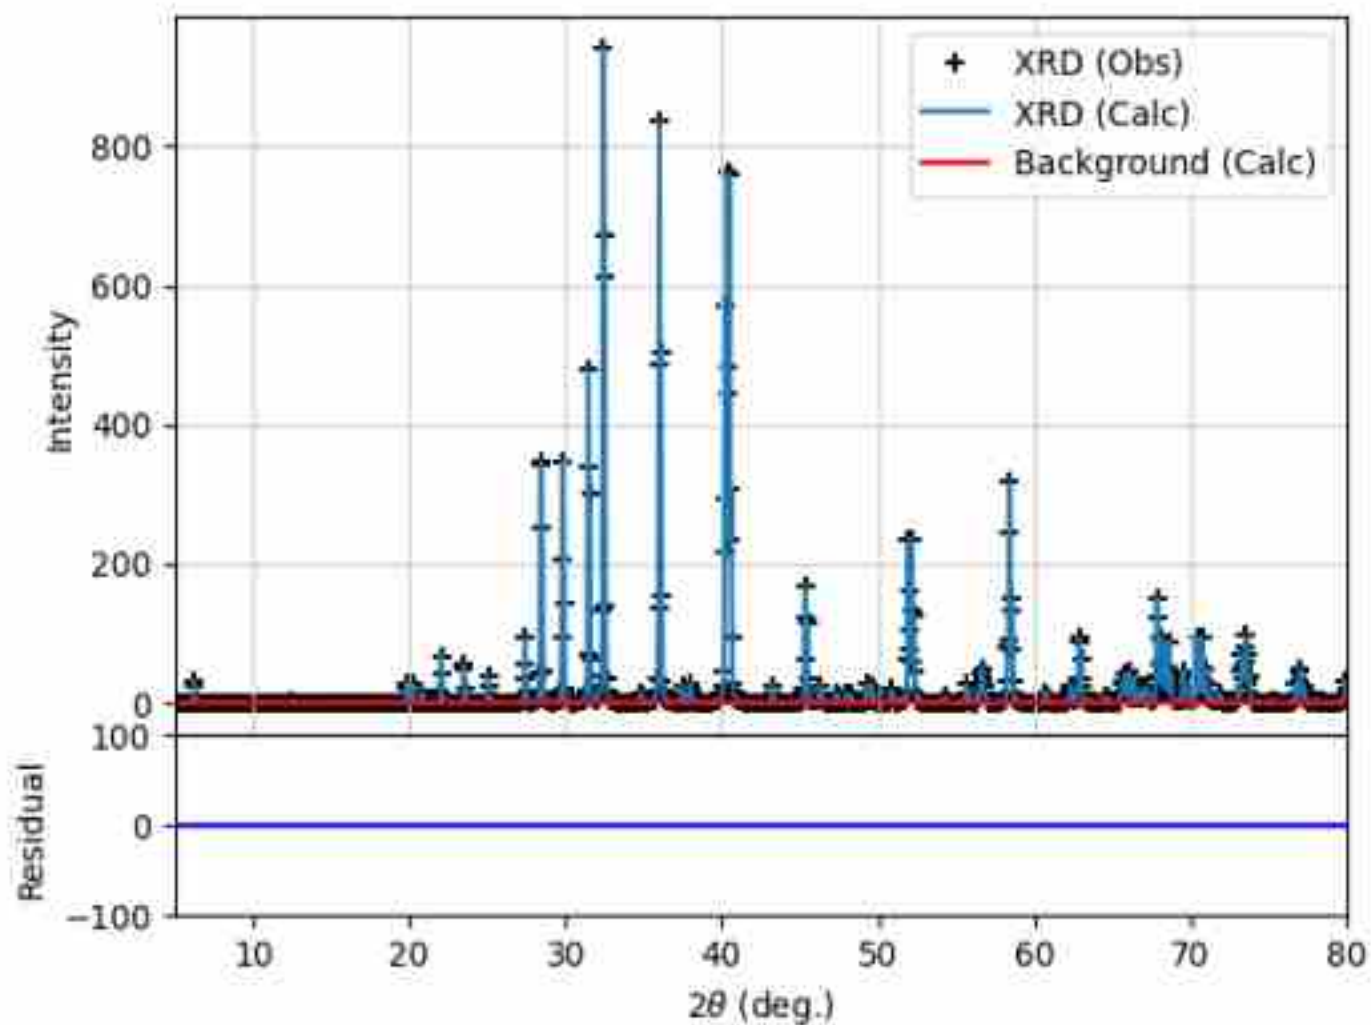

| RMSE before RR | Rwp     | RMSE after RR |
|----------------|---------|---------------|
| 0.026          | 0.00415 | 0.00041       |

# Ho<sub>4</sub>Ge<sub>8</sub>Pt<sub>4</sub>

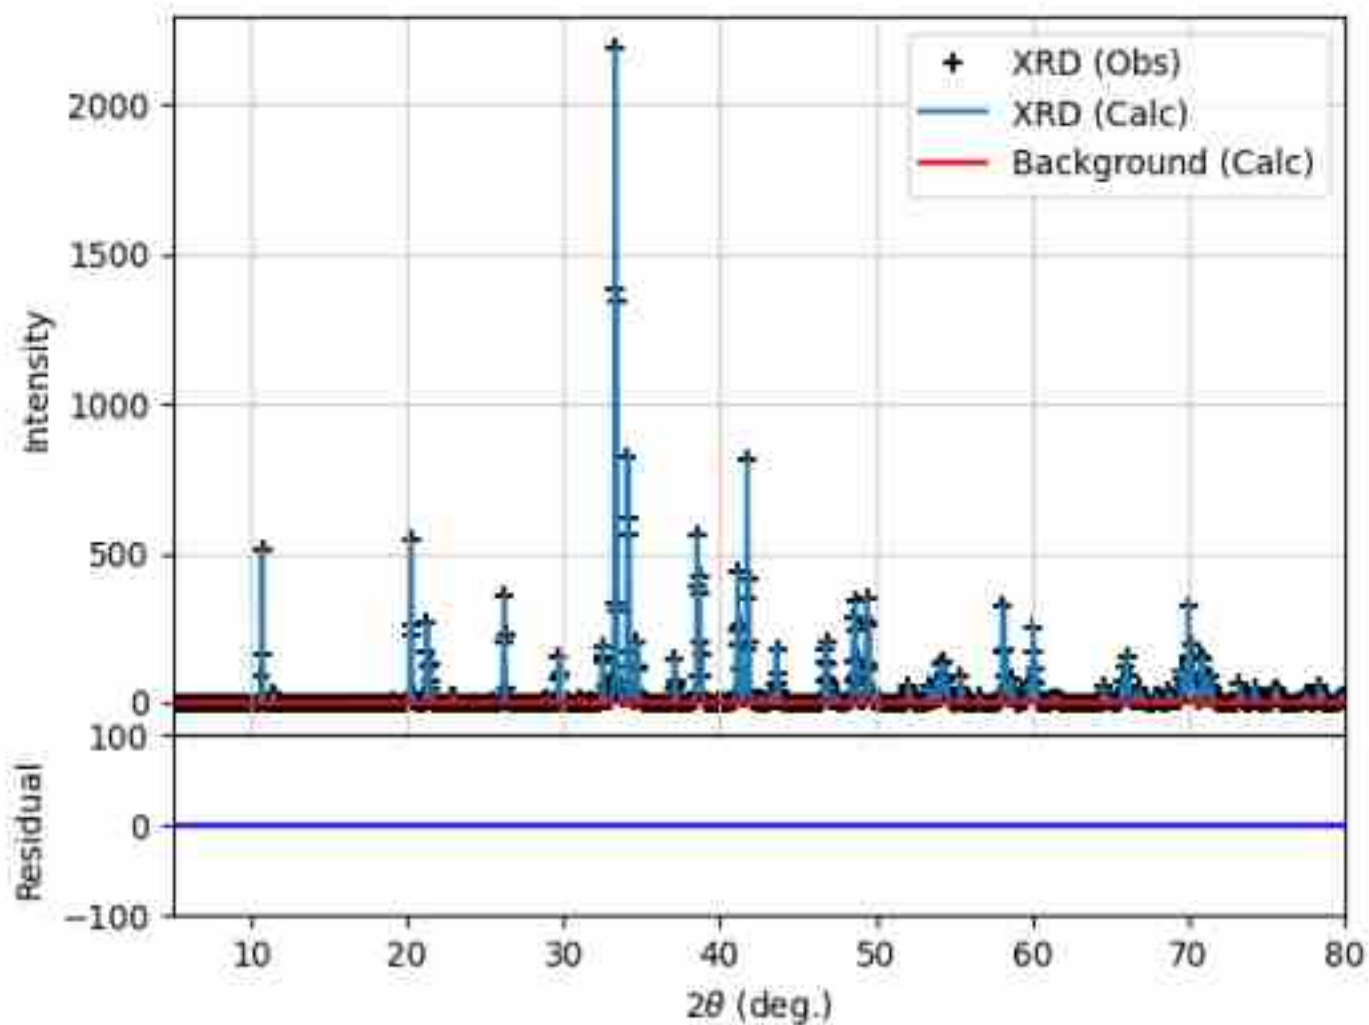

| RMSE before RR | Rwp     | RMSE after RR |
|----------------|---------|---------------|
| 0.026          | 0.00361 | 0.00046       |

# Ho<sub>4</sub>Zn<sub>12</sub>

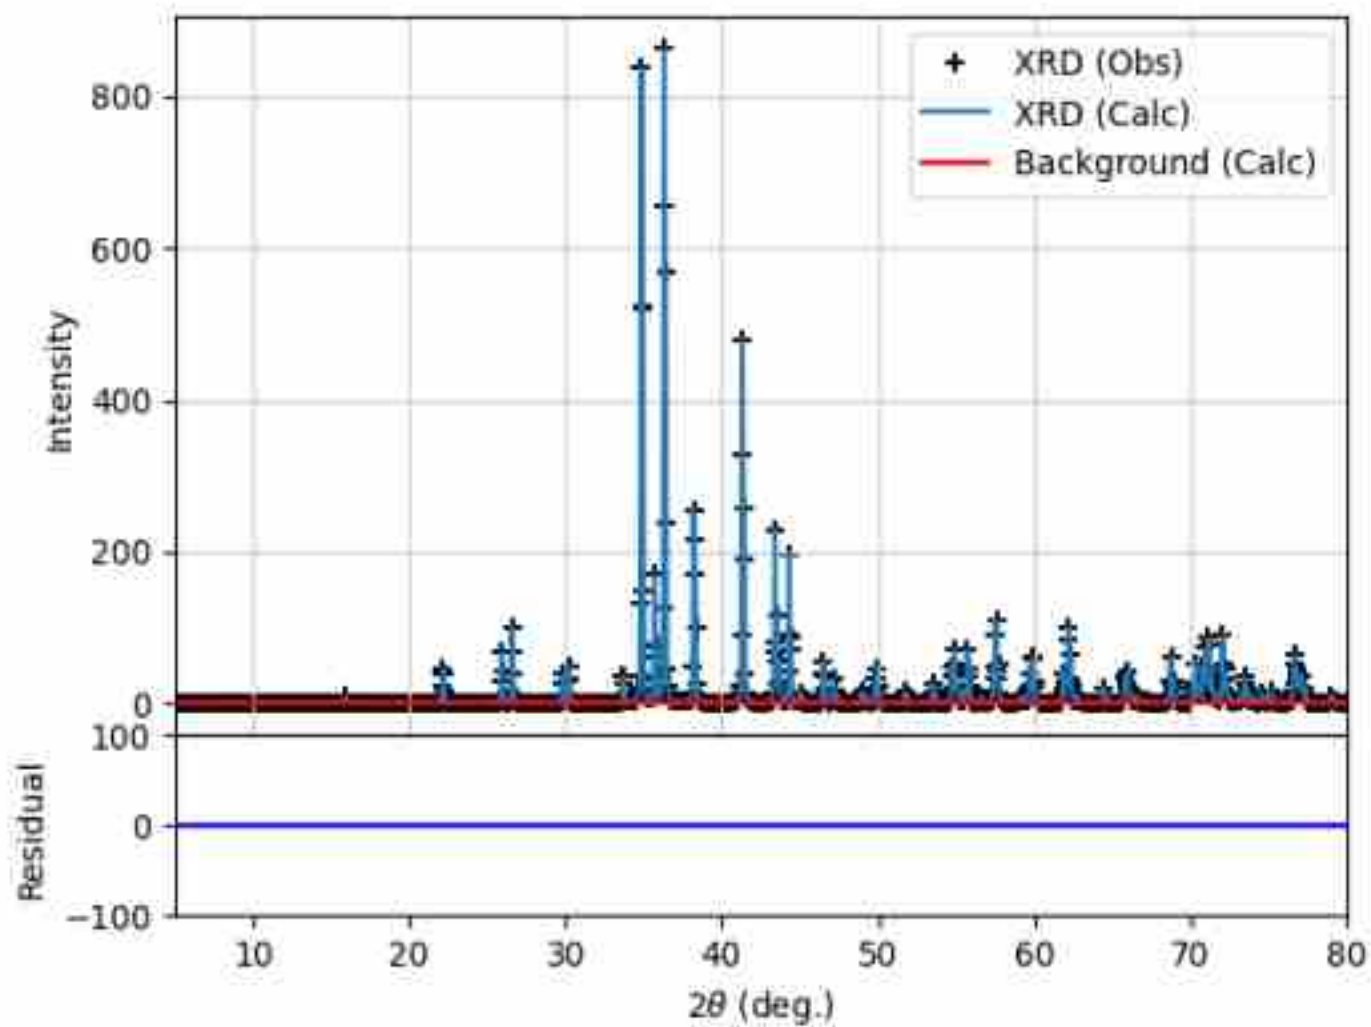

| RMSE before RR | Rwp     | RMSE after RR |
|----------------|---------|---------------|
| 0.026          | 0.00451 | 0.00047       |

# Ho10Bi2Au4

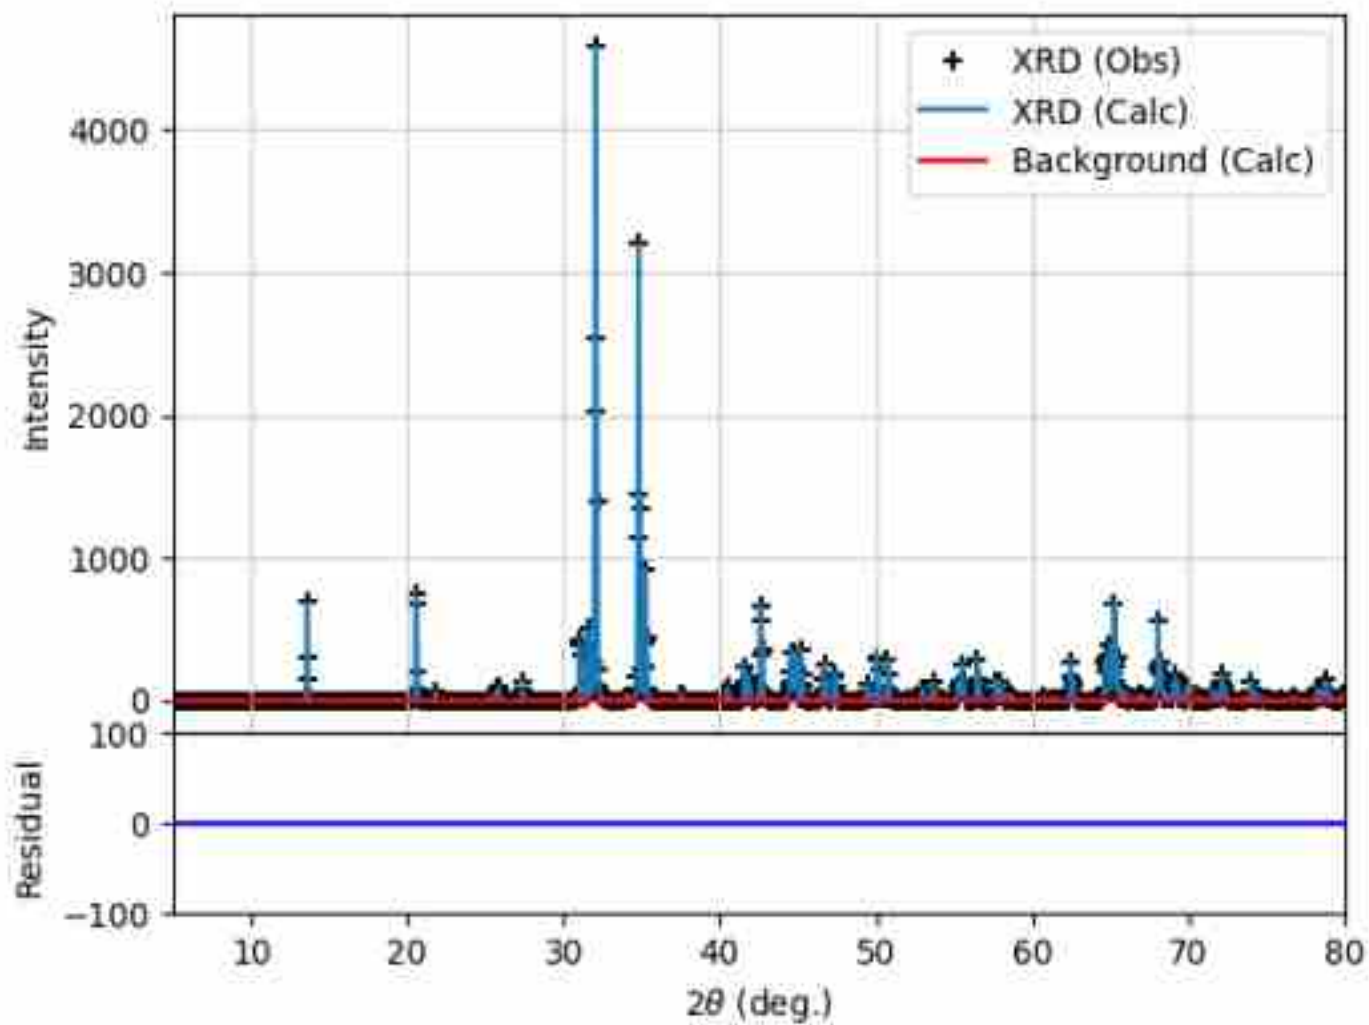

| RMSE before RR | Rwp     | RMSE after RR |
|----------------|---------|---------------|
| 0.026          | 0.00447 | 0.0003        |

# Ho<sub>12</sub>Ga<sub>2</sub>Co<sub>4</sub>

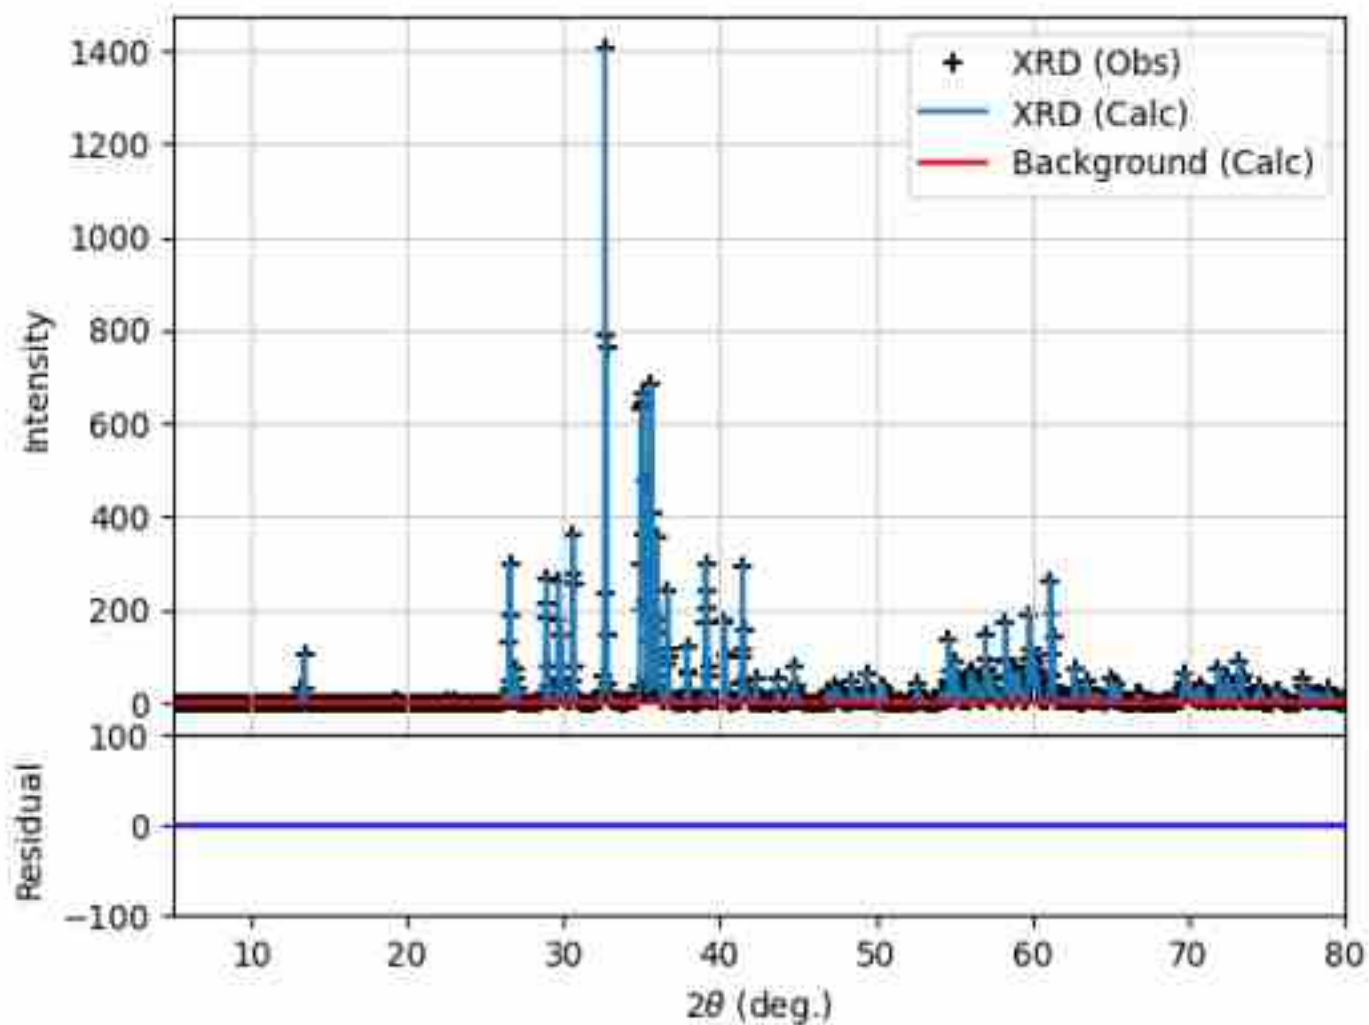

| RMSE before RR | Rwp     | RMSE after RR |
|----------------|---------|---------------|
| 0.026          | 0.00382 | 0.00036       |

# K<sub>2</sub>Be<sub>2</sub>Pb<sub>1</sub>F<sub>8</sub>

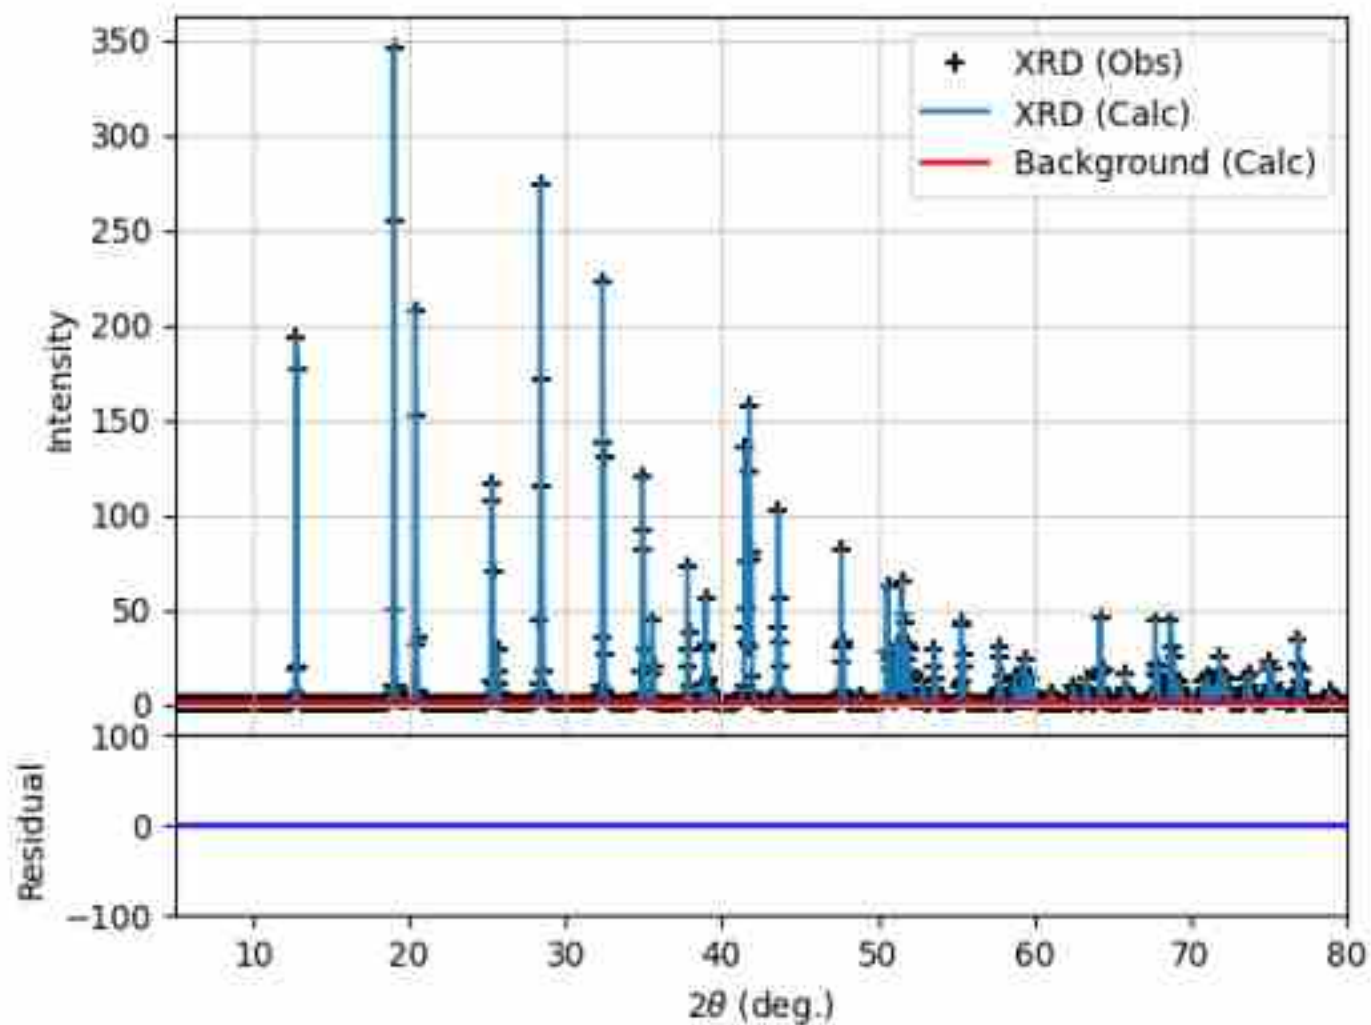

| RMSE before RR | Rwp     | RMSE after RR |
|----------------|---------|---------------|
| 0.026          | 0.00564 | 0.0027        |

# K<sub>2</sub>Bi<sub>2</sub>F<sub>12</sub>

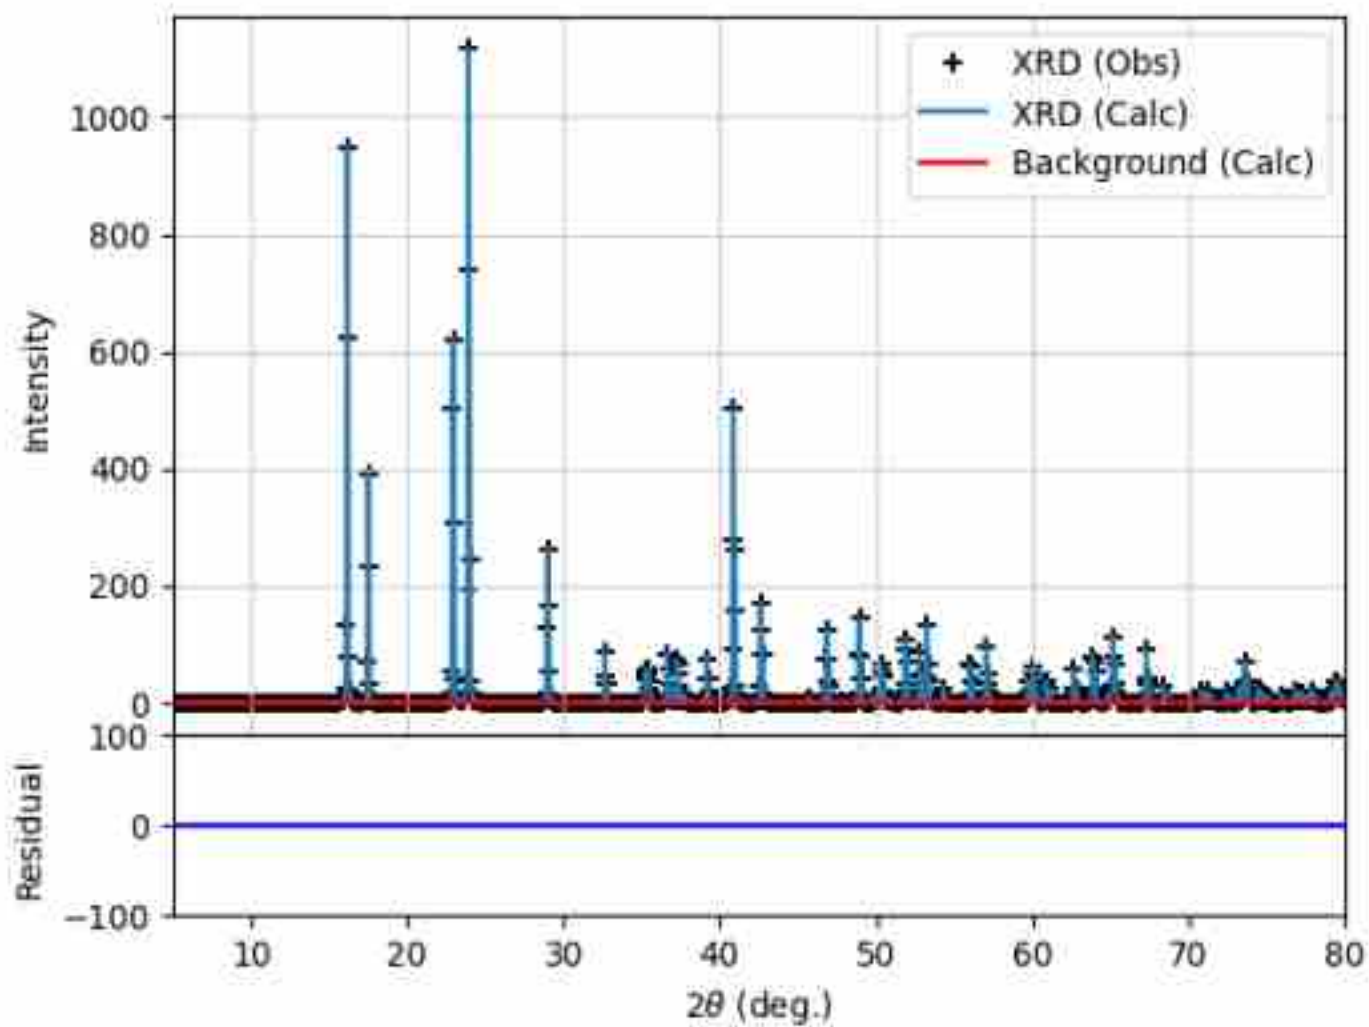

| RMSE before RR | Rwp     | RMSE after RR |
|----------------|---------|---------------|
| 0.026          | 0.00412 | 0.00117       |



# K<sub>2</sub>HfF<sub>6</sub>

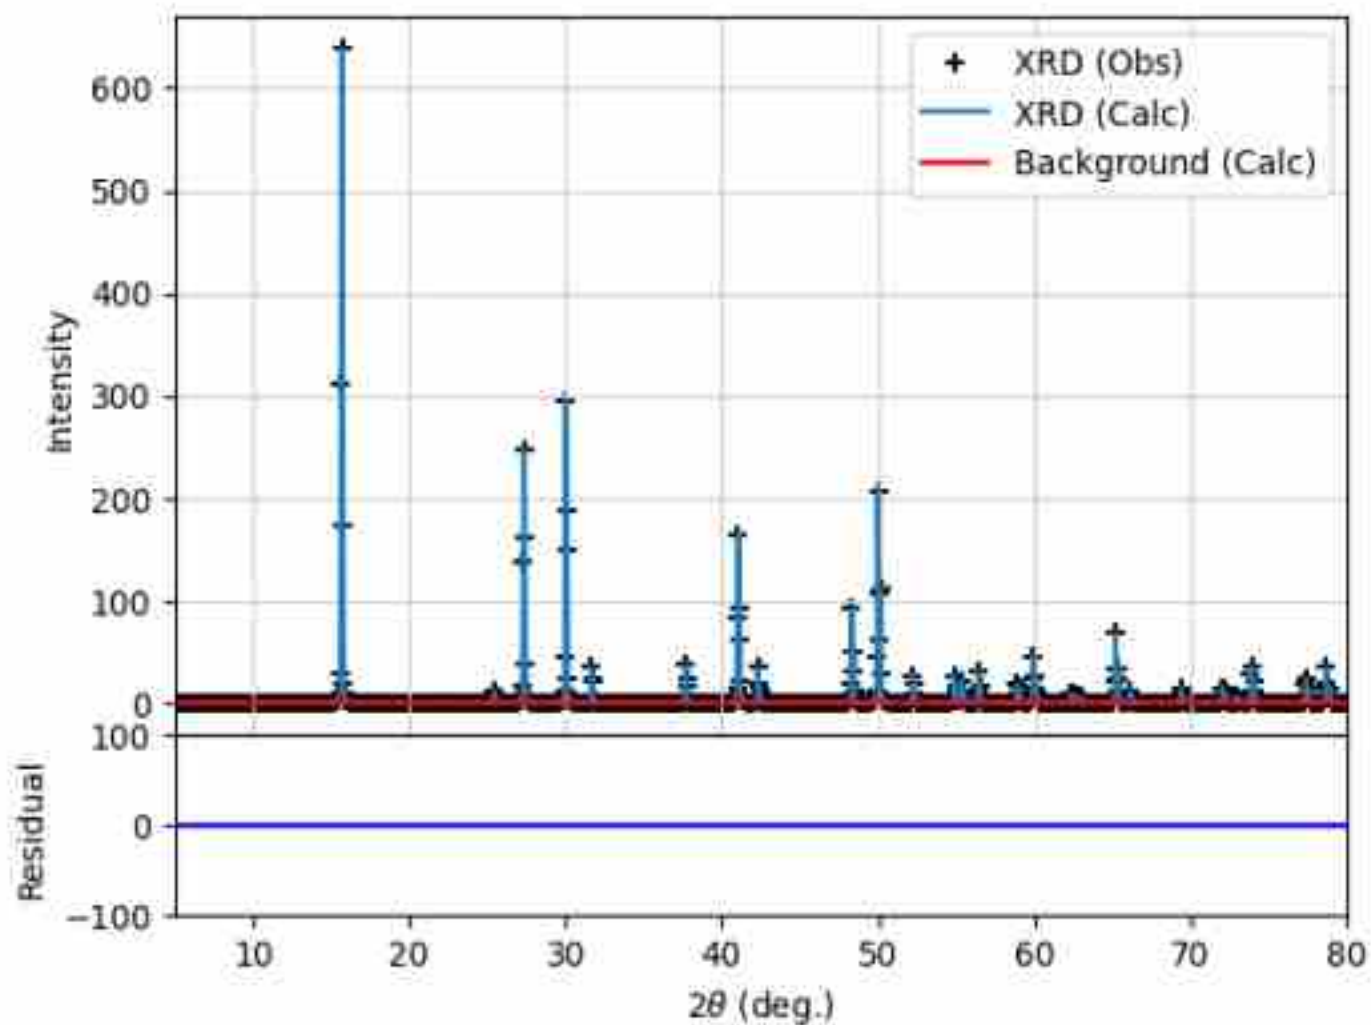

| RMSE before RR | Rwp     | RMSE after RR |
|----------------|---------|---------------|
| 0.026          | 0.00845 | 0.00373       |

# K<sub>2</sub>Na<sub>2</sub>Mo<sub>2</sub>O<sub>4</sub>F<sub>8</sub>

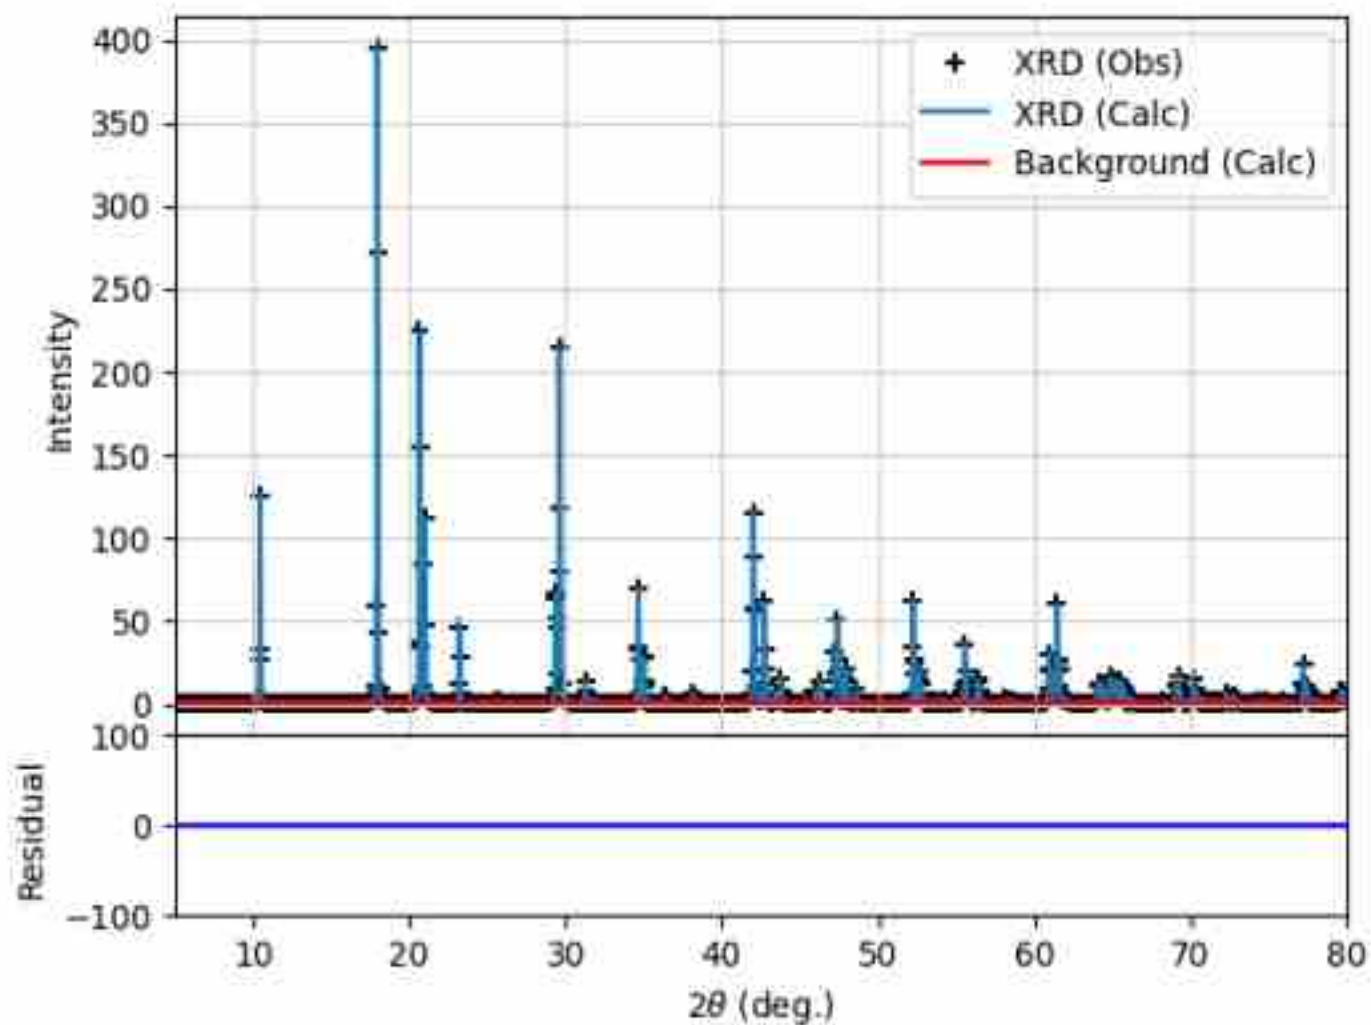

| RMSE before RR | Rwp     | RMSE after RR |
|----------------|---------|---------------|
| 0.026          | 0.00398 | 0.00088       |

# K2Tl1Co1F6

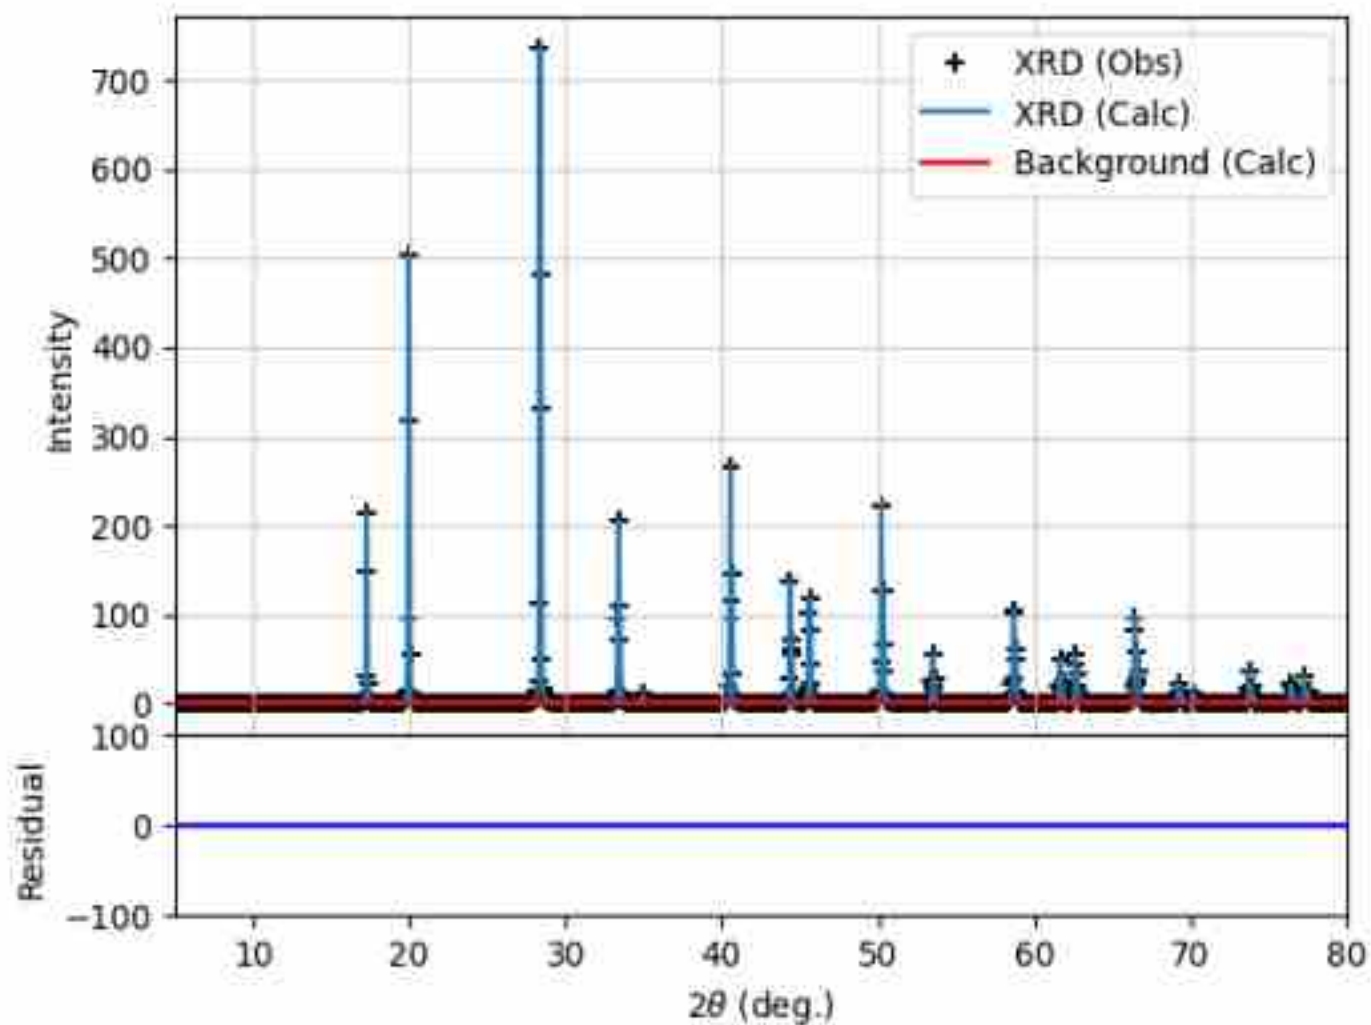

| RMSE before RR | Rwp     | RMSE after RR |
|----------------|---------|---------------|
| 0.026          | 0.02615 | 0.00455       |

# K<sub>2</sub>V<sub>4</sub>Ag<sub>2</sub>O<sub>12</sub>

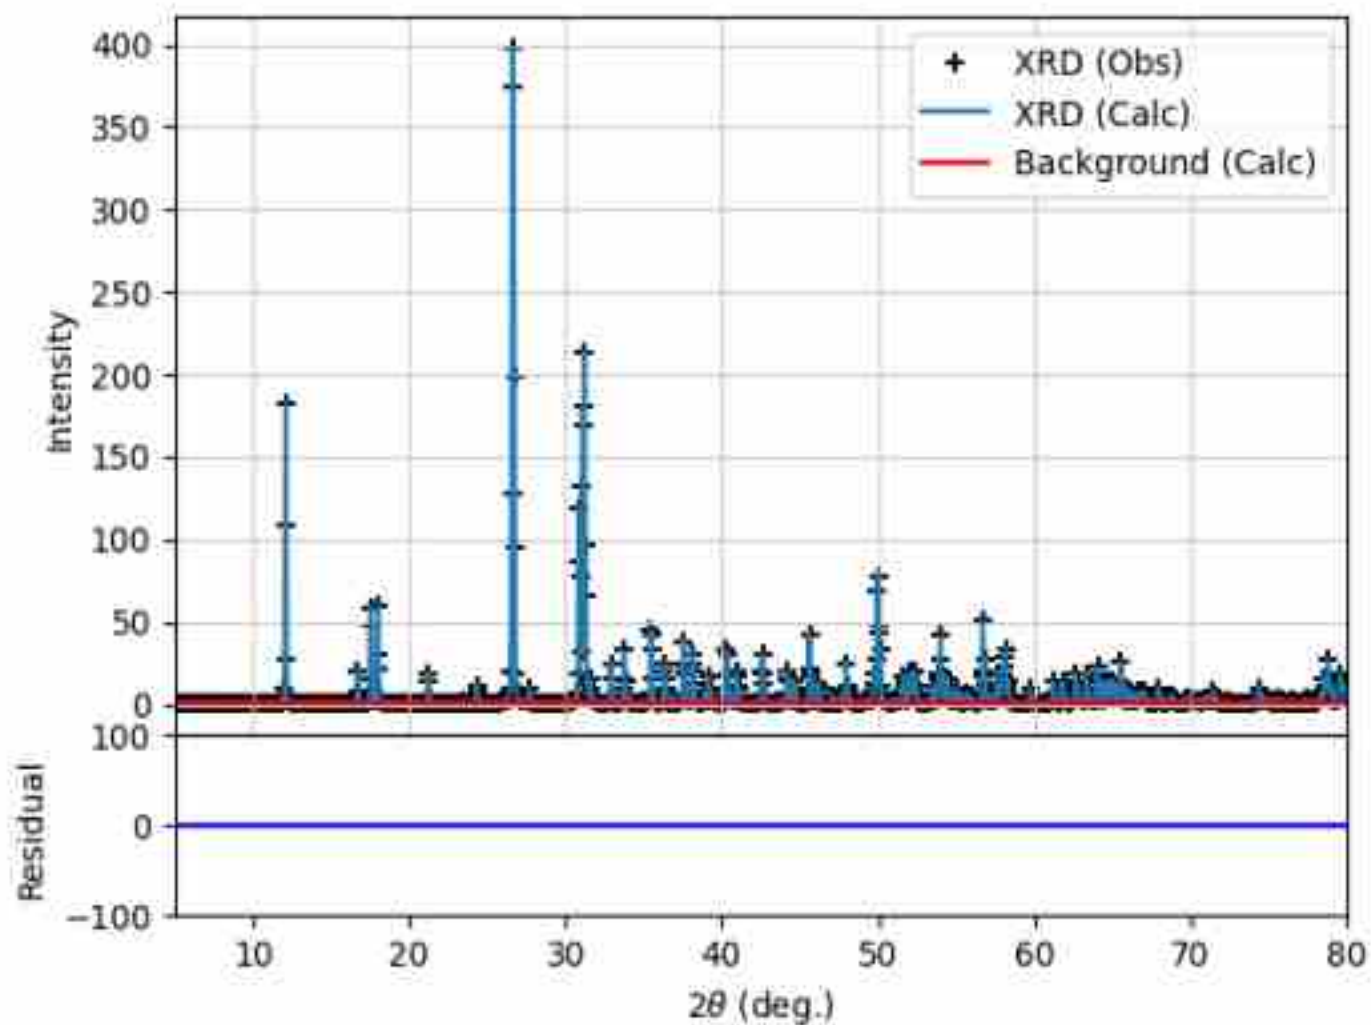

| RMSE before RR | Rwp     | RMSE after RR |
|----------------|---------|---------------|
| 0.026          | 0.00385 | 0.00125       |

# K4Mn4C112

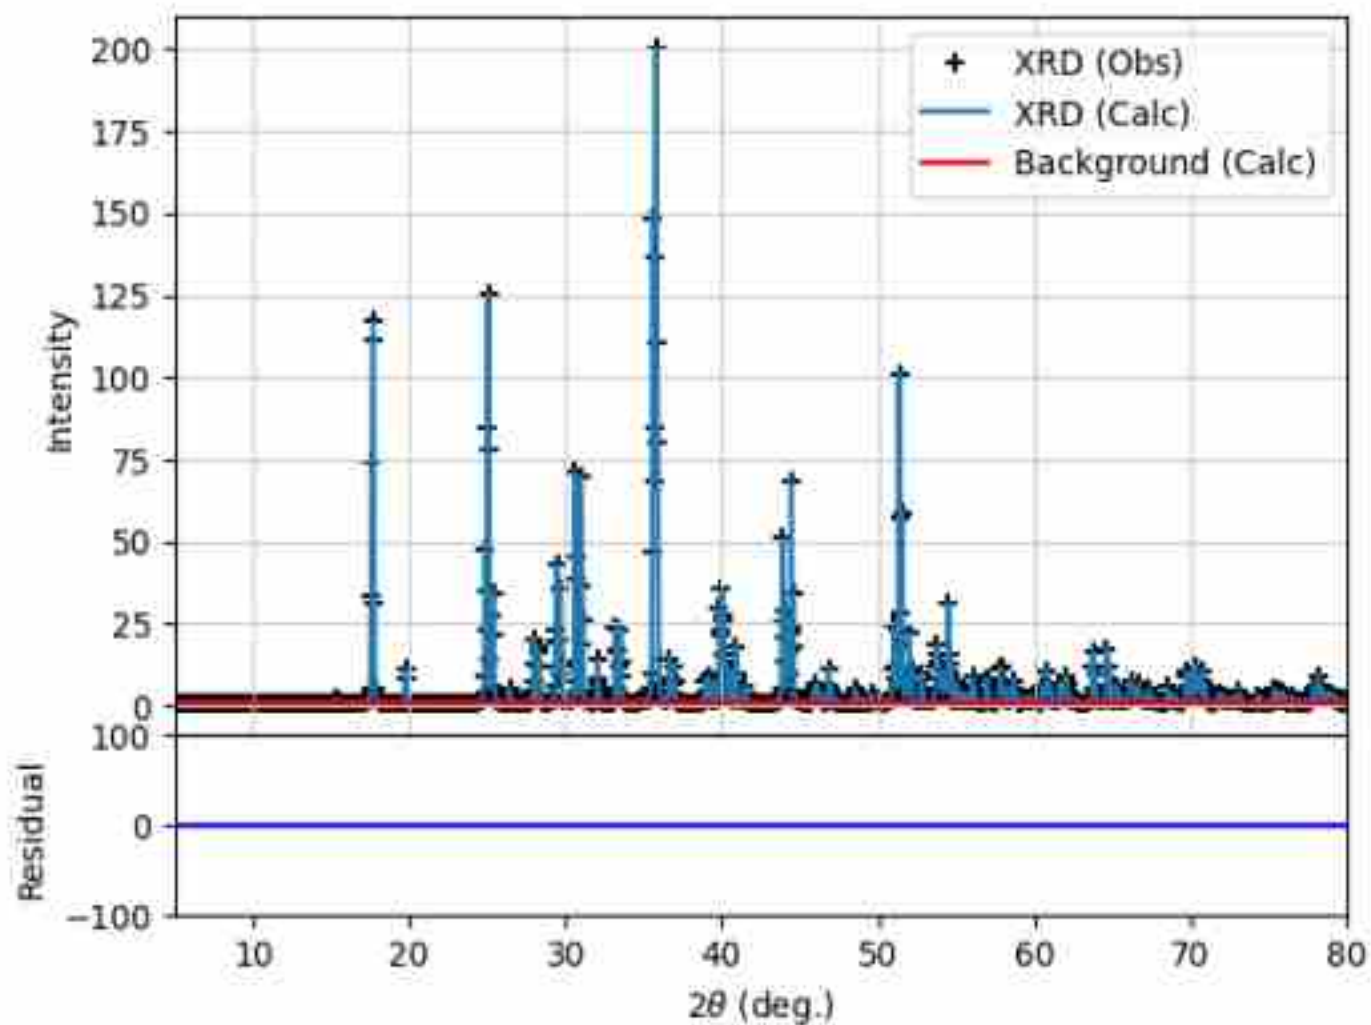

| RMSE before RR | Rwp     | RMSE after RR |
|----------------|---------|---------------|
| 0.026          | 0.00304 | 0.0004        |

# K4Pb2O6

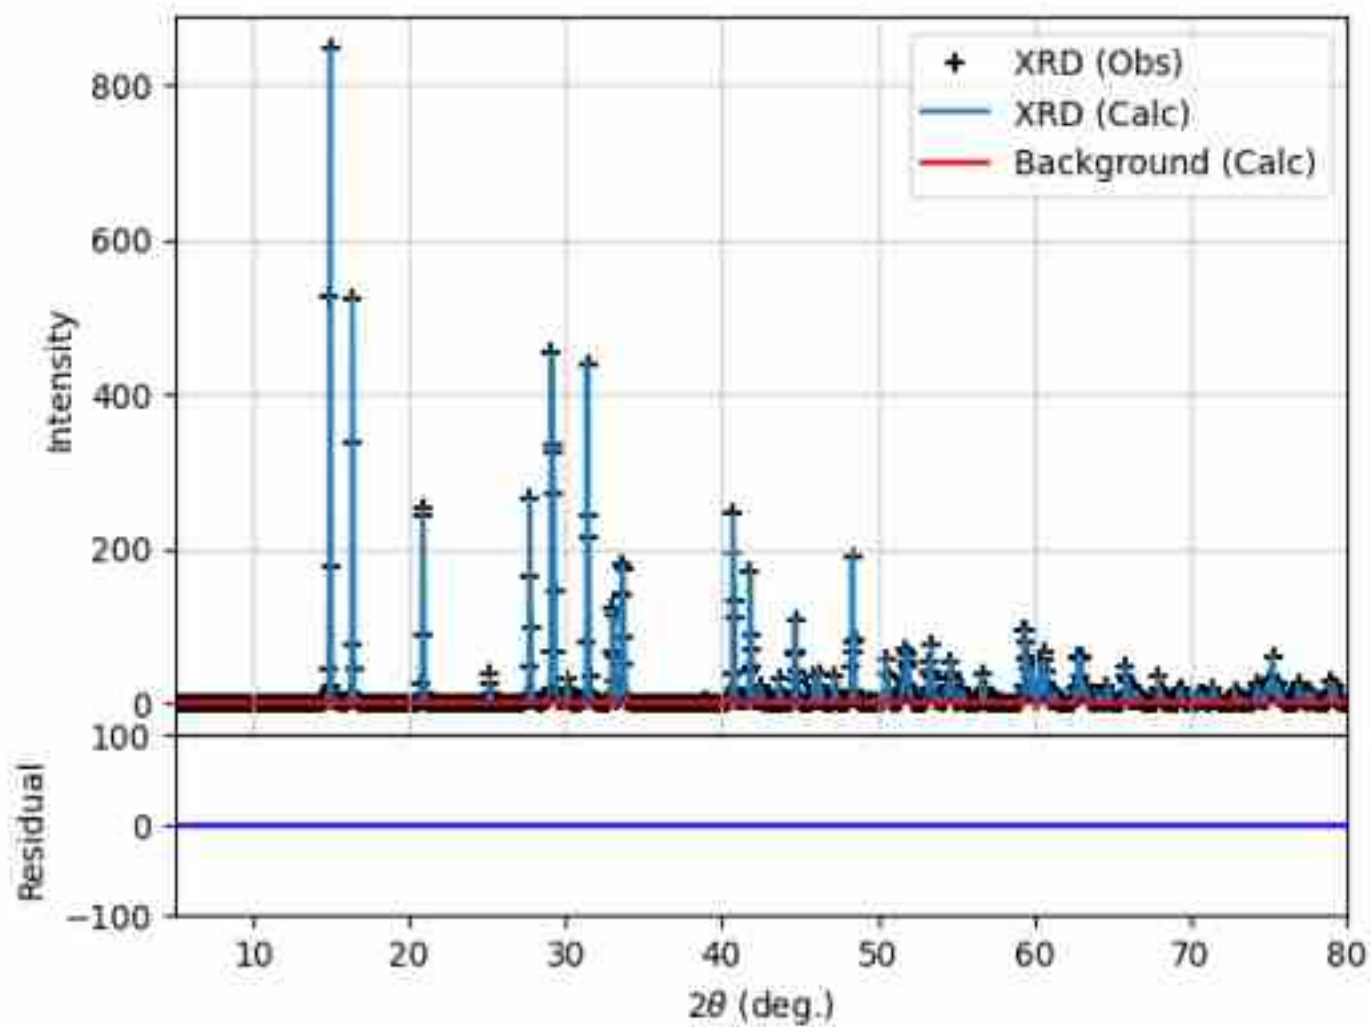

| RMSE before RR | Rwp     | RMSE after RR |
|----------------|---------|---------------|
| 0.026          | 0.00403 | 0.00131       |

# K4Sr1U3O12

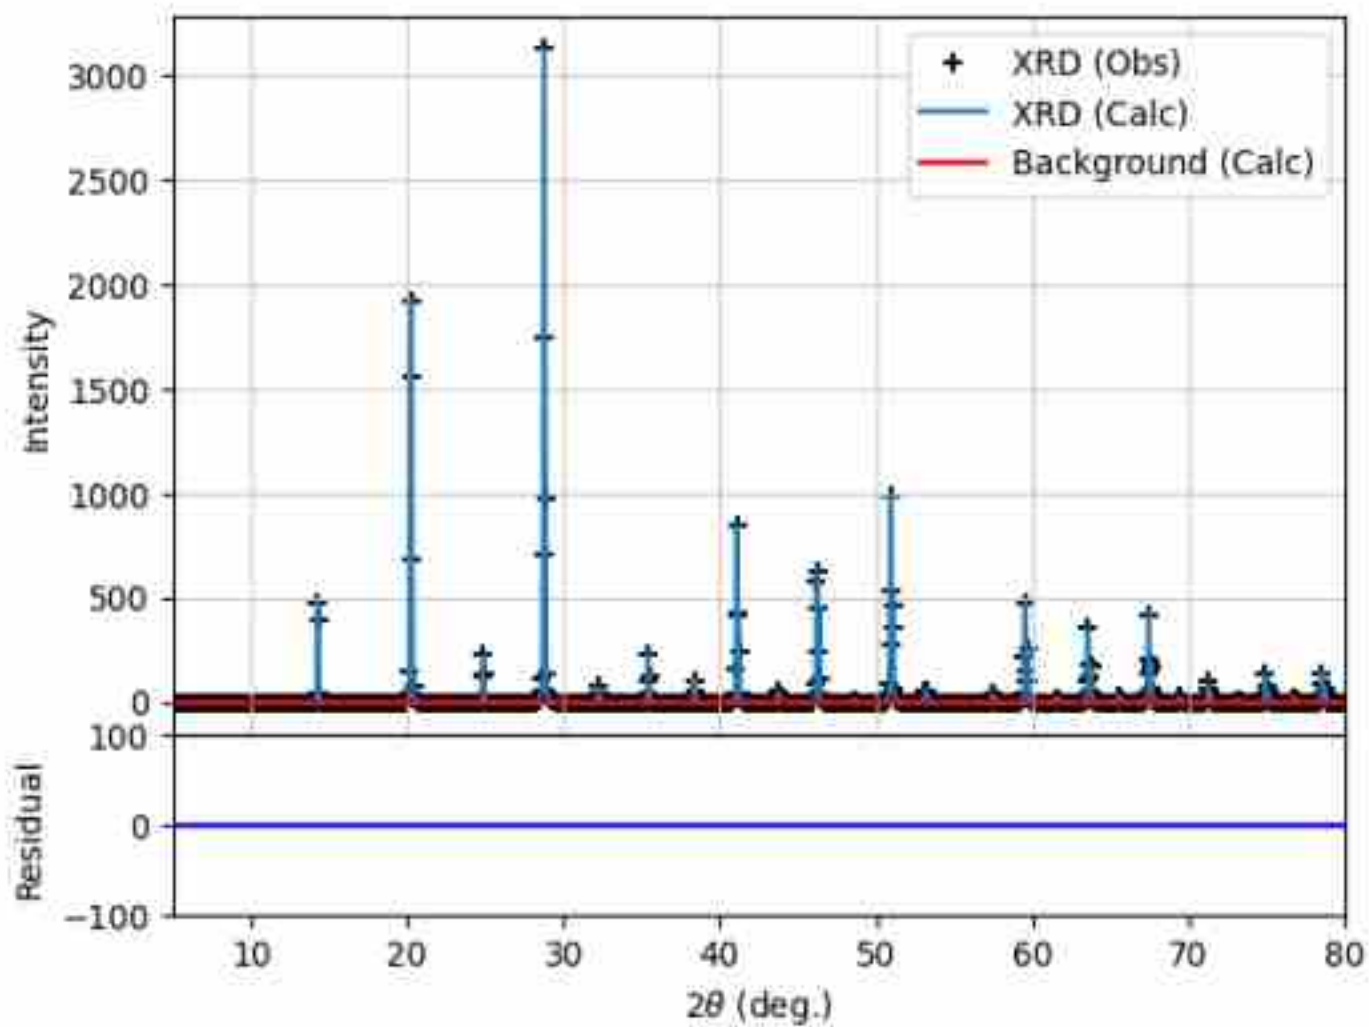

| RMSE before RR | Rwp     | RMSE after RR |
|----------------|---------|---------------|
| 0.026          | 0.00991 | 0.00486       |

# K<sub>4</sub>V<sub>2</sub>Cu<sub>2</sub>S<sub>8</sub>

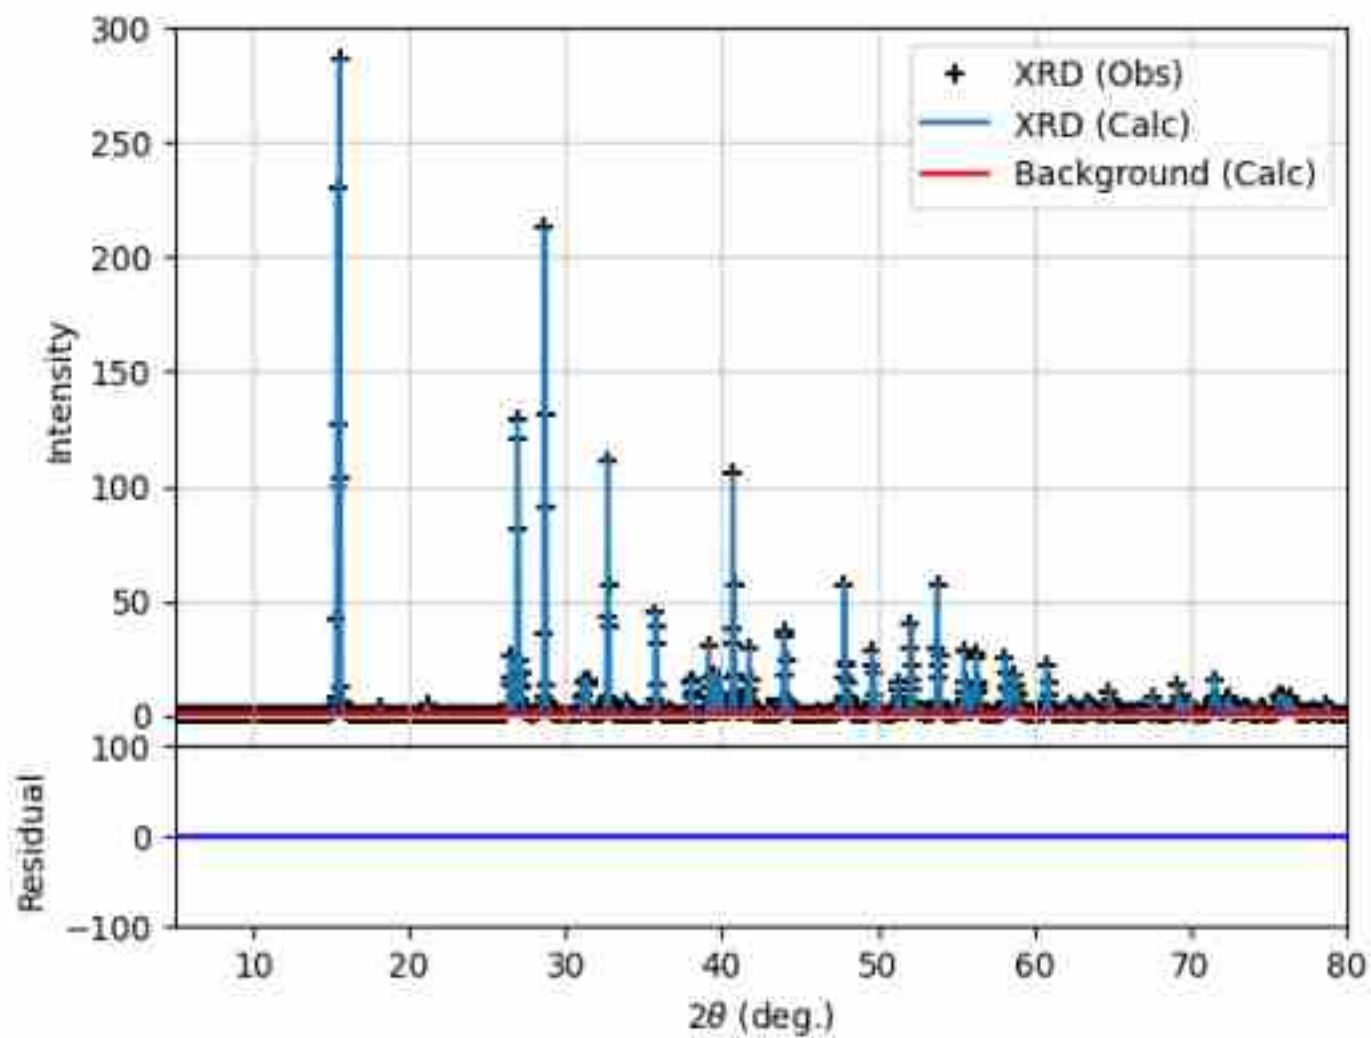

| RMSE before RR | Rwp     | RMSE after RR |
|----------------|---------|---------------|
| 0.026          | 0.00251 | 0.00034       |



# La<sub>2</sub>Al<sub>11</sub>Ni<sub>9</sub>

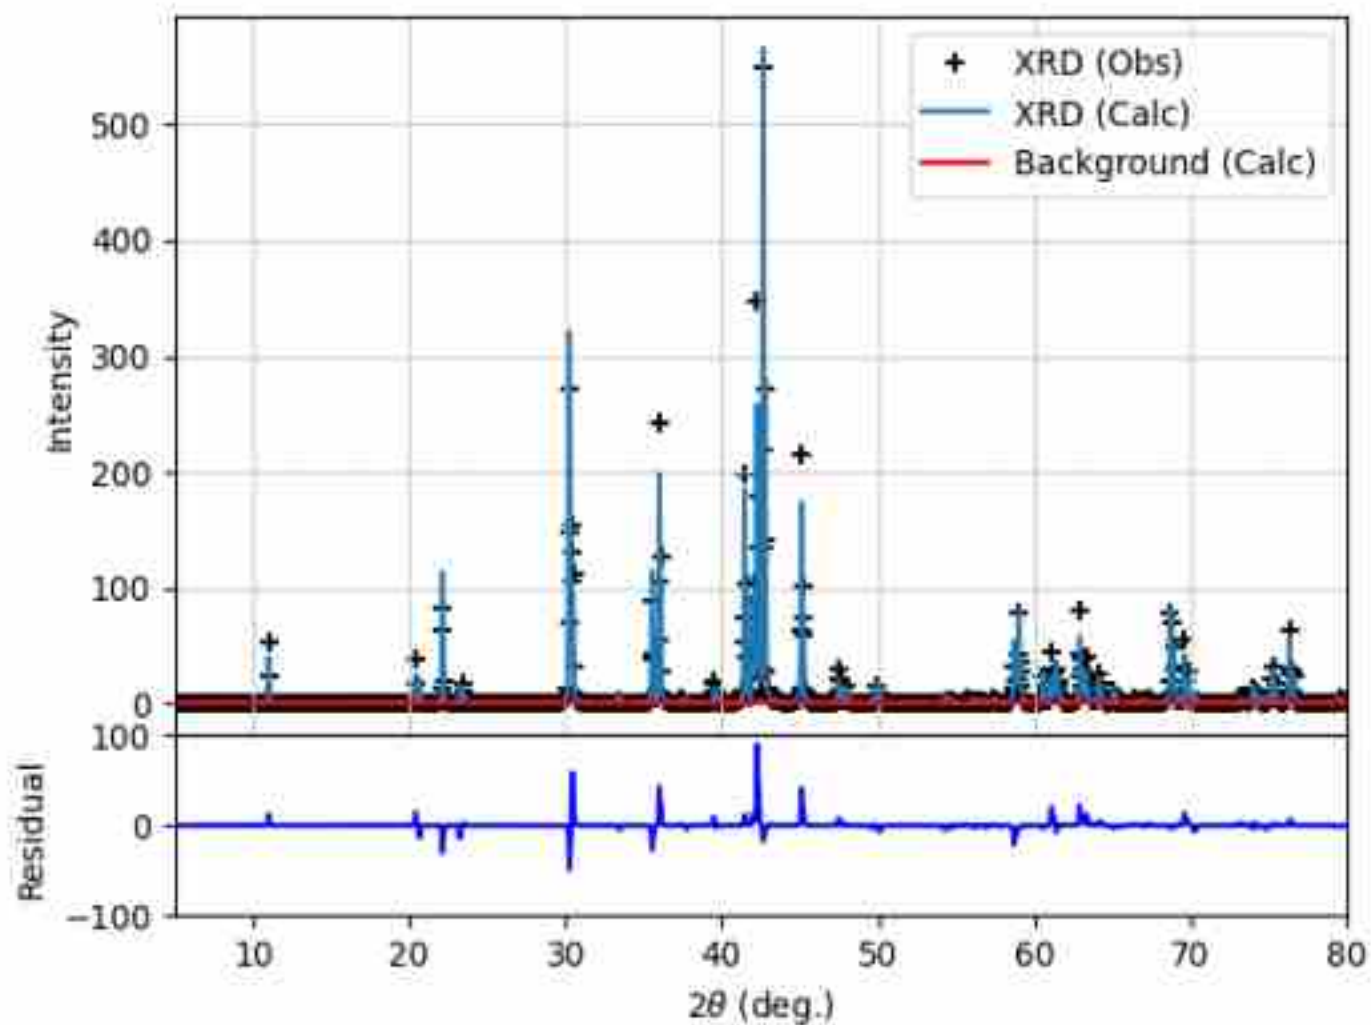

| RMSE before RR | Rwp      | RMSE after RR |
|----------------|----------|---------------|
| 0.026          | 30.68183 | 0.02654       |

# La<sub>3</sub>Ge<sub>4</sub>Rh<sub>4</sub>

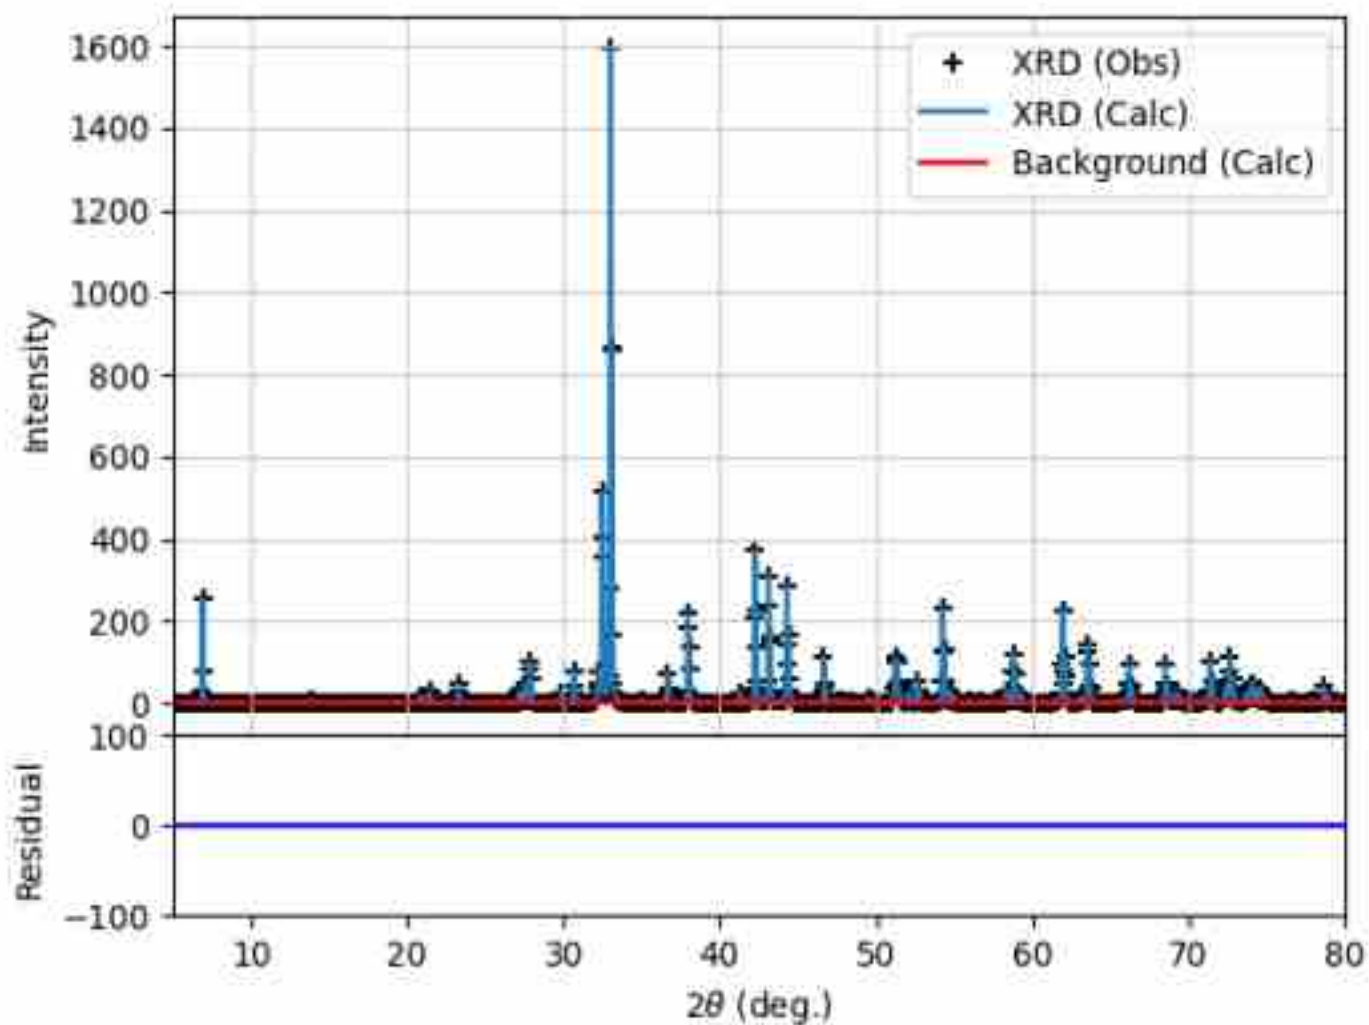

| RMSE before RR | Rwp     | RMSE after RR |
|----------------|---------|---------------|
| 0.026          | 0.00384 | 0.00035       |

# Li1Ag1O2

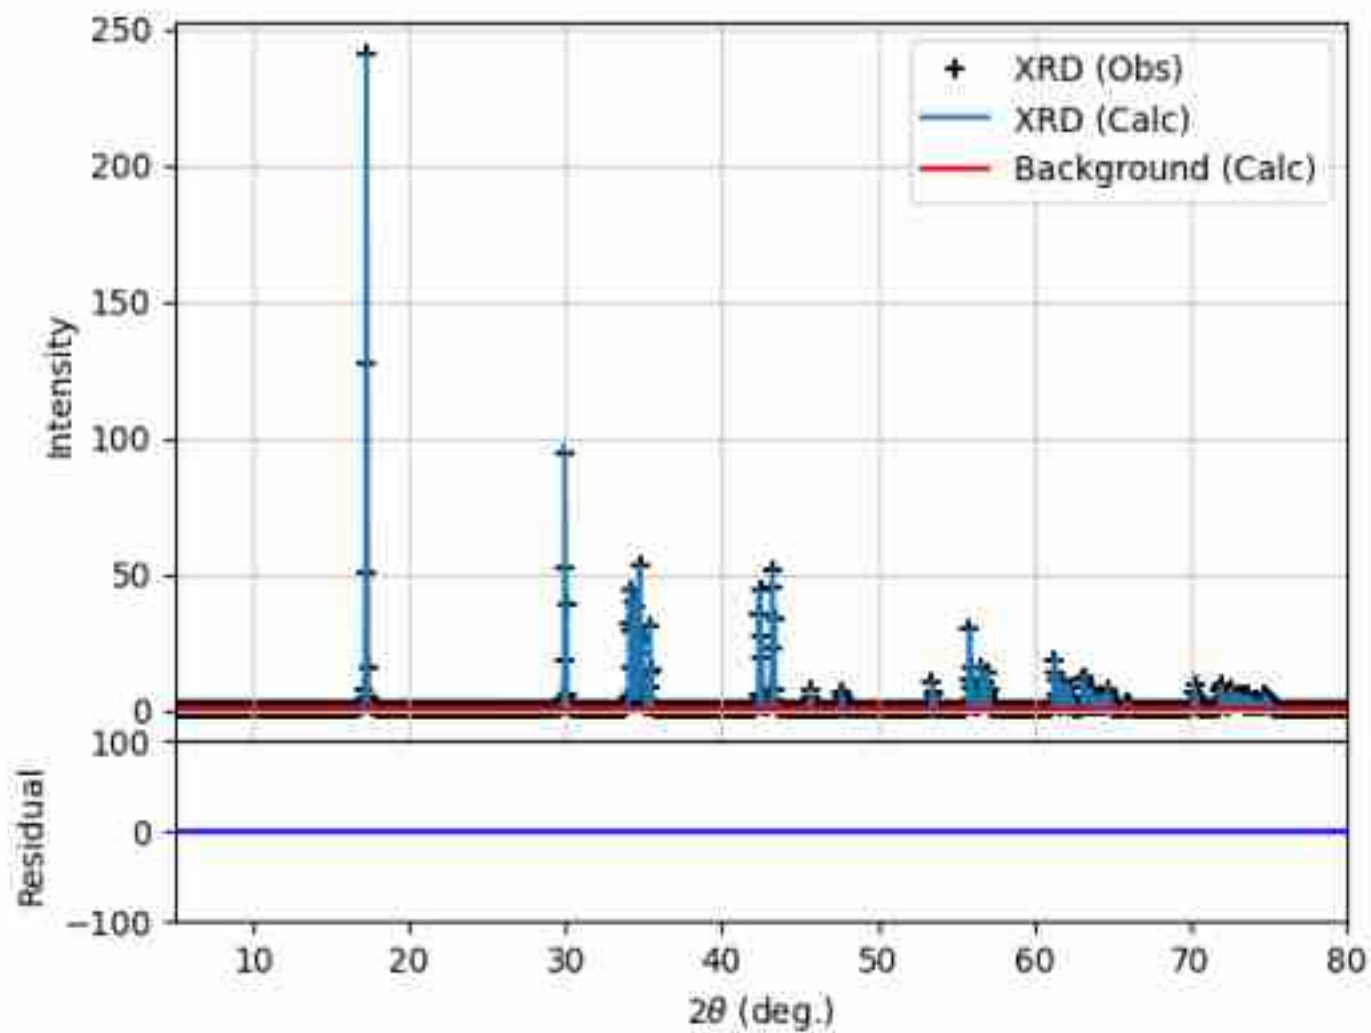

| RMSE before RR | Rwp     | RMSE after RR |
|----------------|---------|---------------|
| 0.026          | 0.00219 | 0.00095       |

# Li1Bi1B2O6

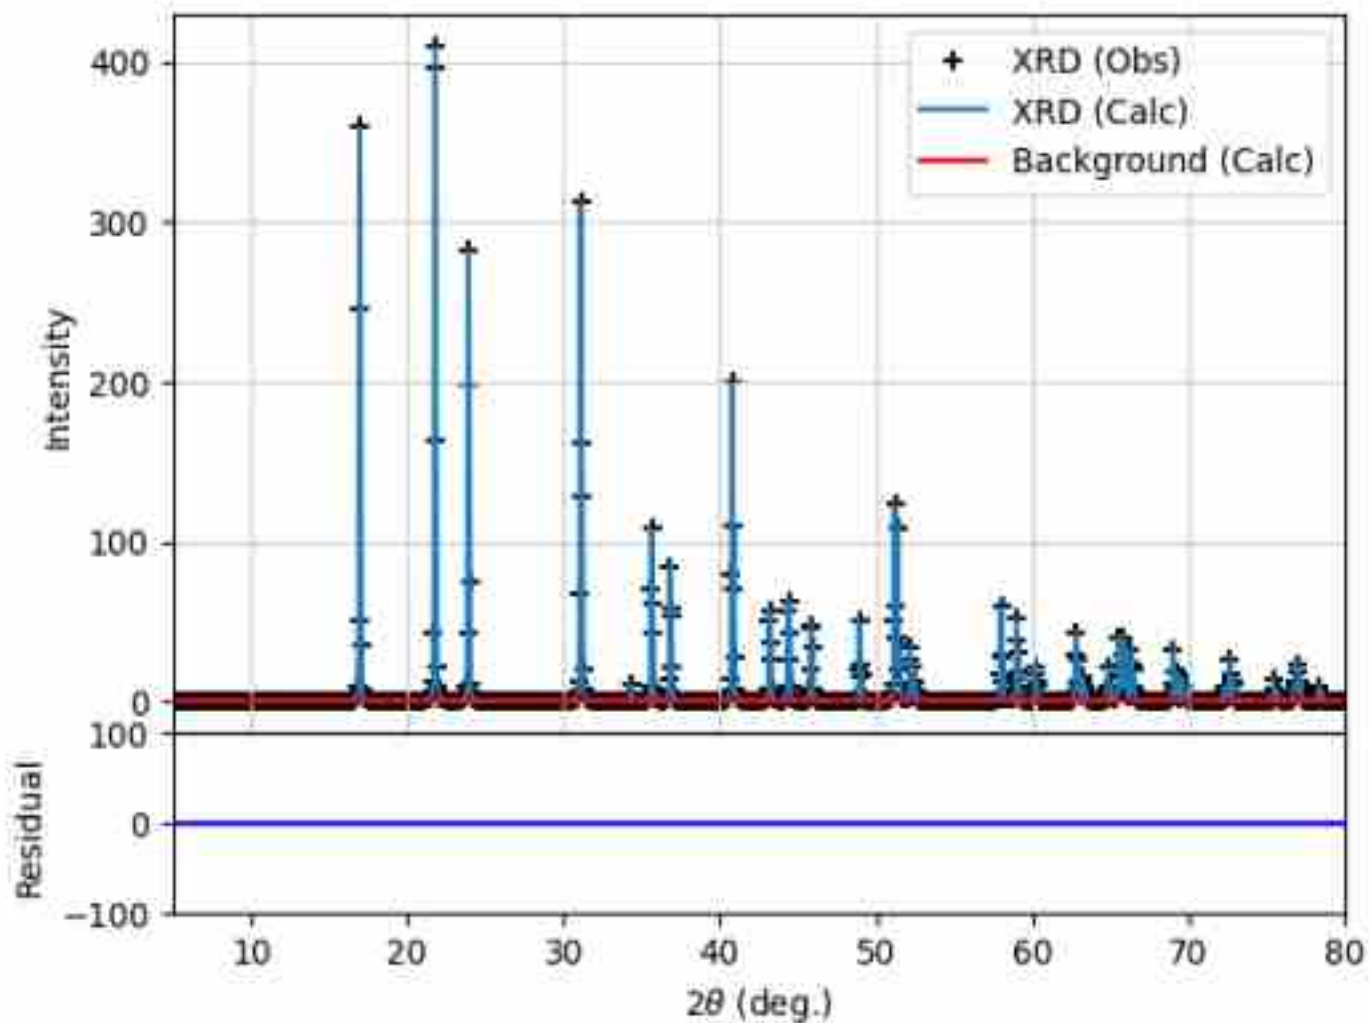

| RMSE before RR | Rwp    | RMSE after RR |
|----------------|--------|---------------|
| 0.026          | 0.0095 | 0.00657       |

# Li<sub>2</sub>Al<sub>1</sub>Co<sub>1</sub>O<sub>4</sub>

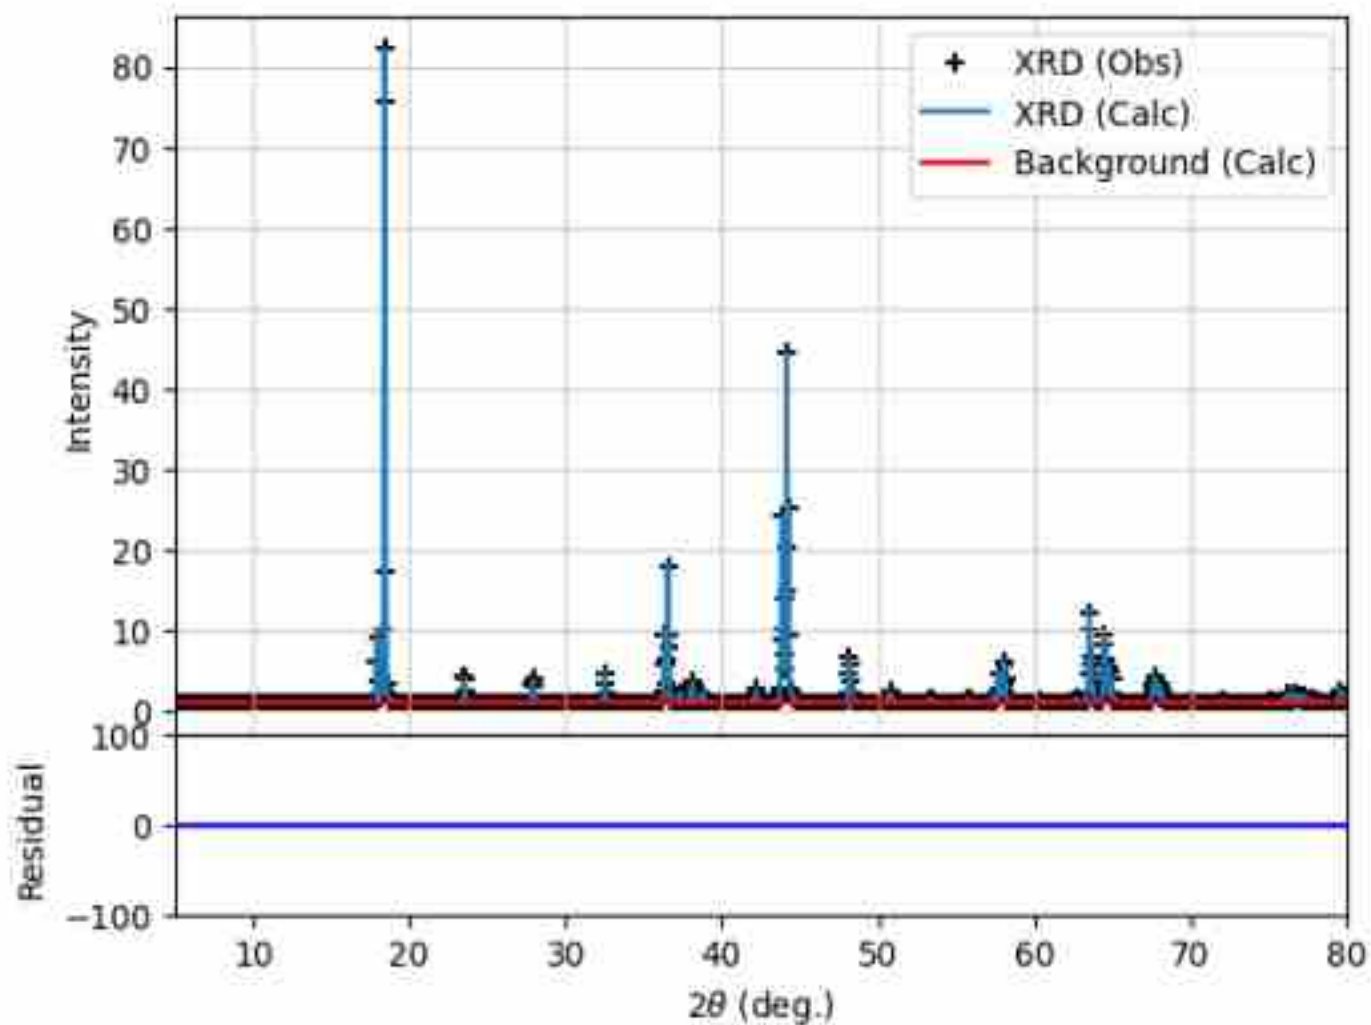

| RMSE before RR | Rwp     | RMSE after RR |
|----------------|---------|---------------|
| 0.026          | 0.00142 | 0.00103       |

# Li<sub>2</sub>Mg<sub>1</sub>Ni<sub>3</sub>O<sub>8</sub>

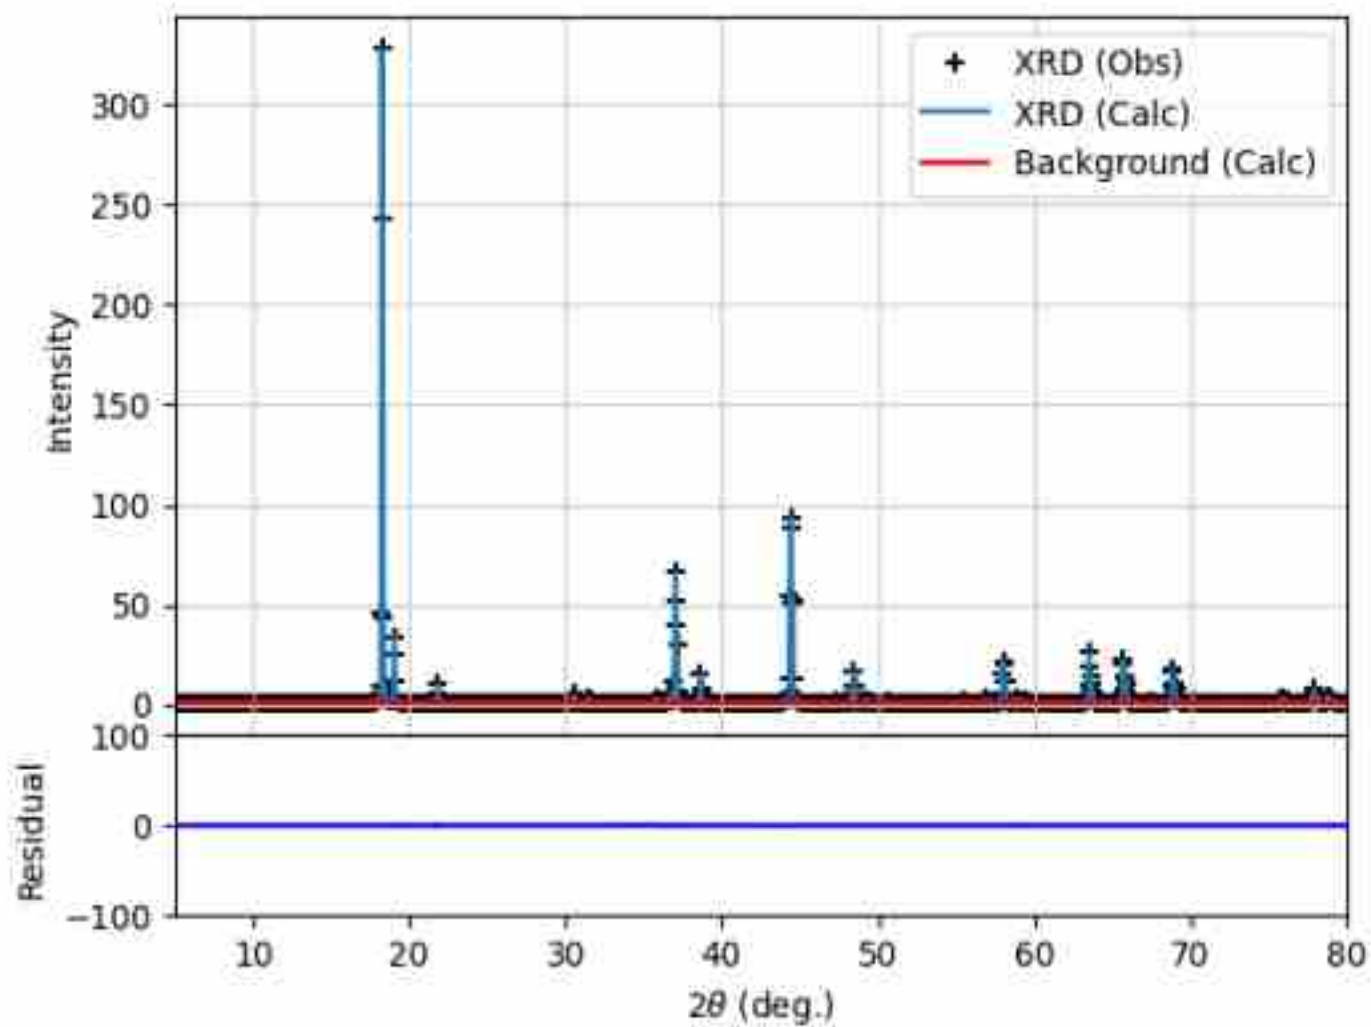

| RMSE before RR | Rwp     | RMSE after RR |
|----------------|---------|---------------|
| 0.026          | 1.46352 | 0.02938       |

# Li<sub>2</sub>Mn<sub>2</sub>F<sub>6</sub>

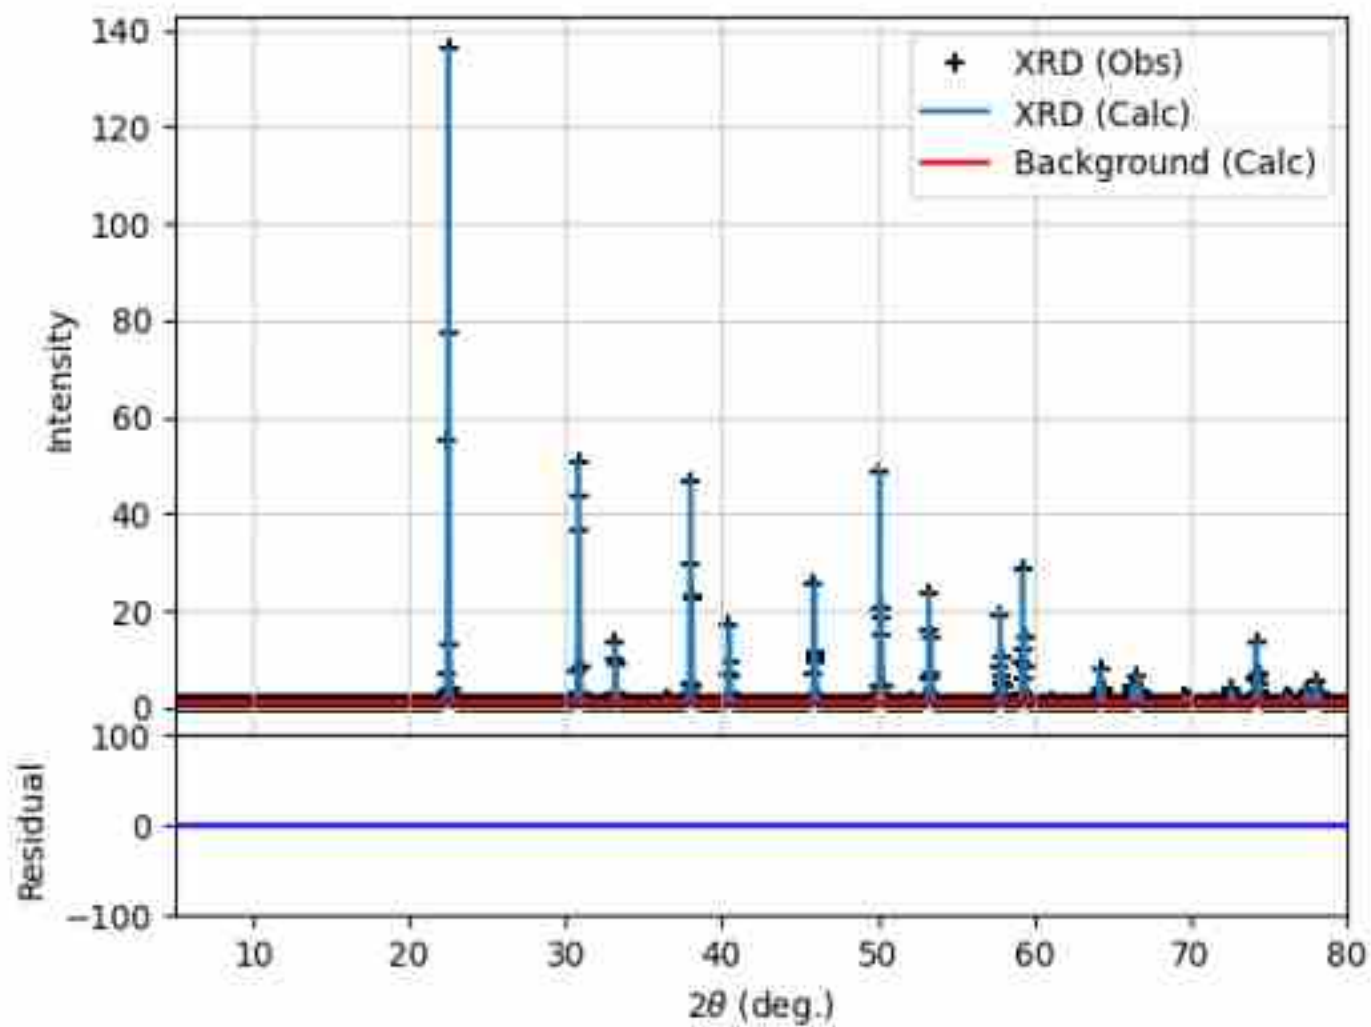

| RMSE before RR | Rwp     | RMSE after RR |
|----------------|---------|---------------|
| 0.026          | 0.00252 | 0.00135       |

# Li<sub>2</sub>P<sub>2</sub>W<sub>10</sub>O<sub>8</sub>

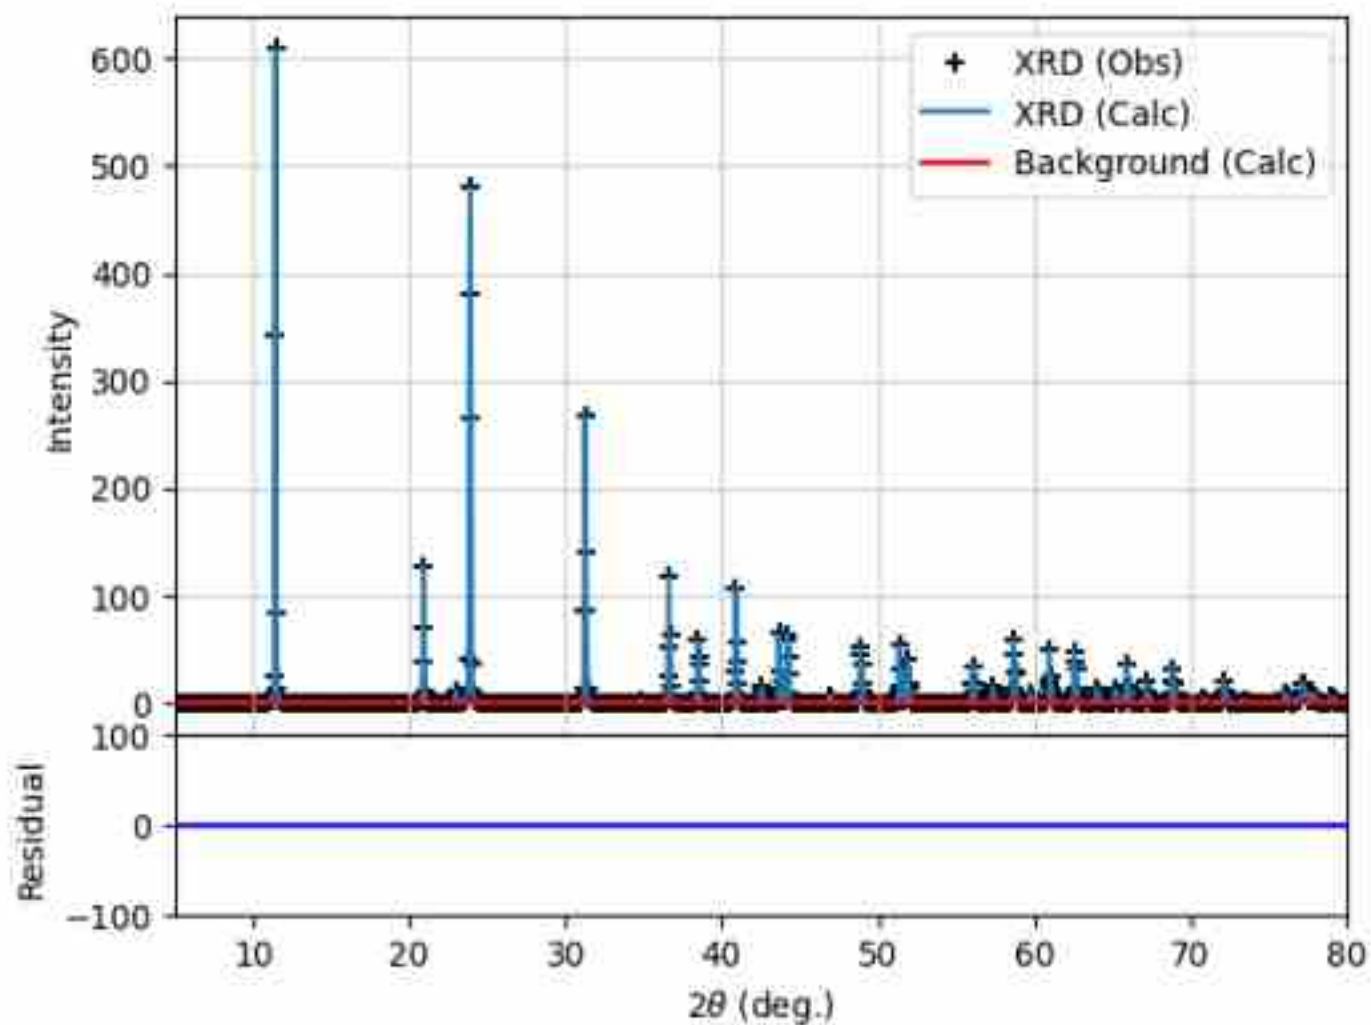

| RMSE before RR | Rwp    | RMSE after RR |
|----------------|--------|---------------|
| 0.026          | 0.0031 | 0.00175       |



# Li<sub>2</sub>Ti<sub>2</sub>O<sub>4</sub>

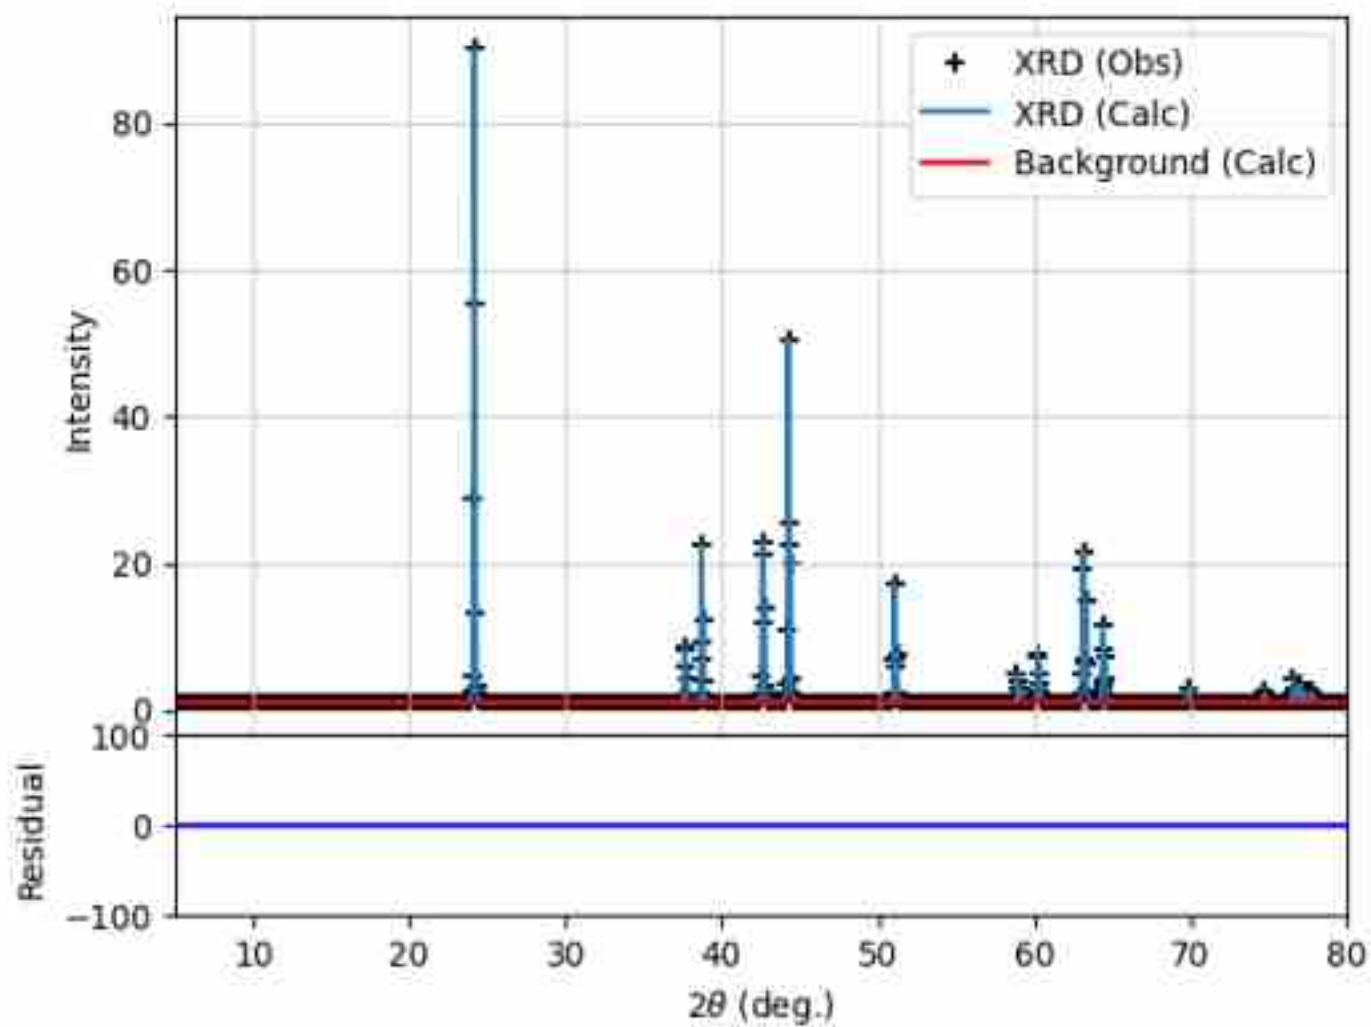

| RMSE before RR | Rwp     | RMSE after RR |
|----------------|---------|---------------|
| 0.026          | 0.01095 | 0.00355       |

# Li<sub>3</sub>Al<sub>1</sub>Co<sub>2</sub>O<sub>6</sub>

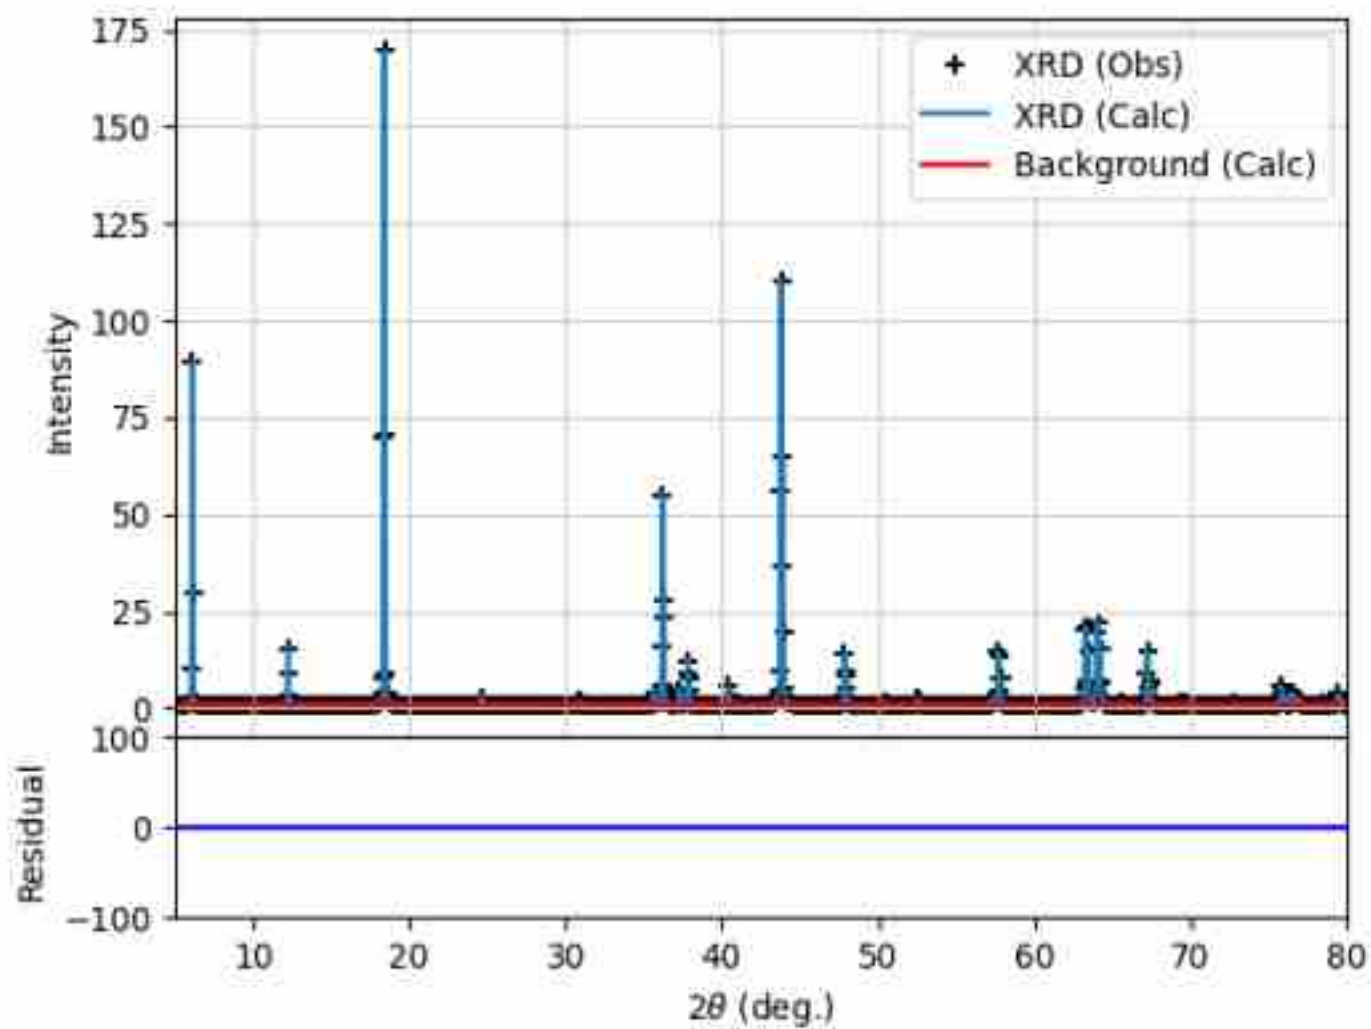

| RMSE before RR | Rwp     | RMSE after RR |
|----------------|---------|---------------|
| 0.026          | 0.00225 | 0.00148       |

Li3Fe4Co1O8

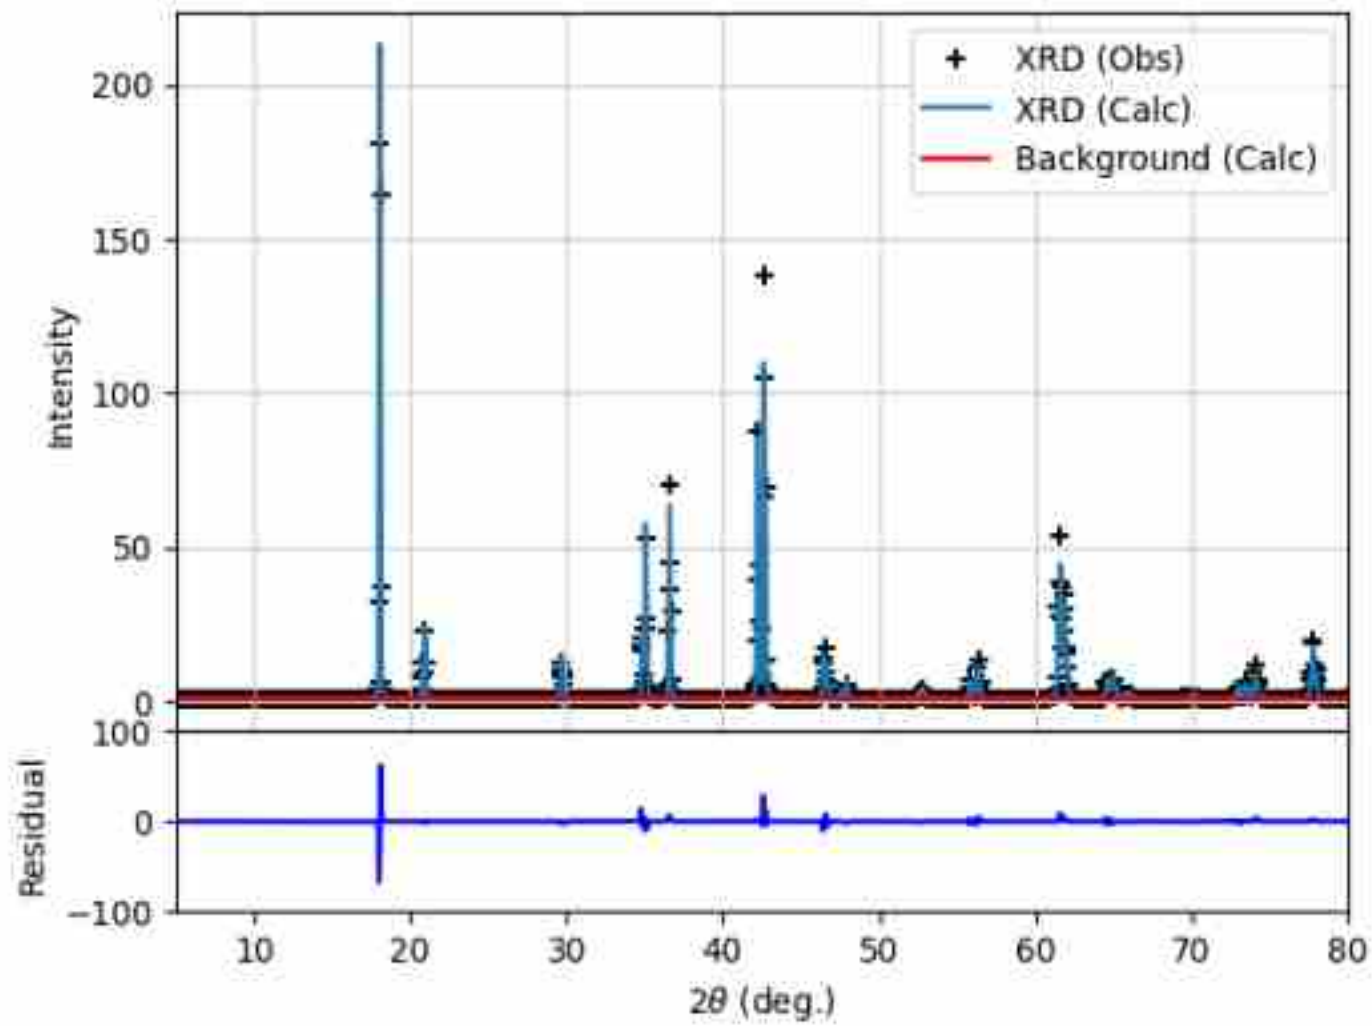

| RMSE before RR | Rwp      | RMSE after RR |
|----------------|----------|---------------|
| 0.026          | 29.35492 | 0.07629       |

# Li<sub>3</sub>MnNi<sub>3</sub>O<sub>8</sub>

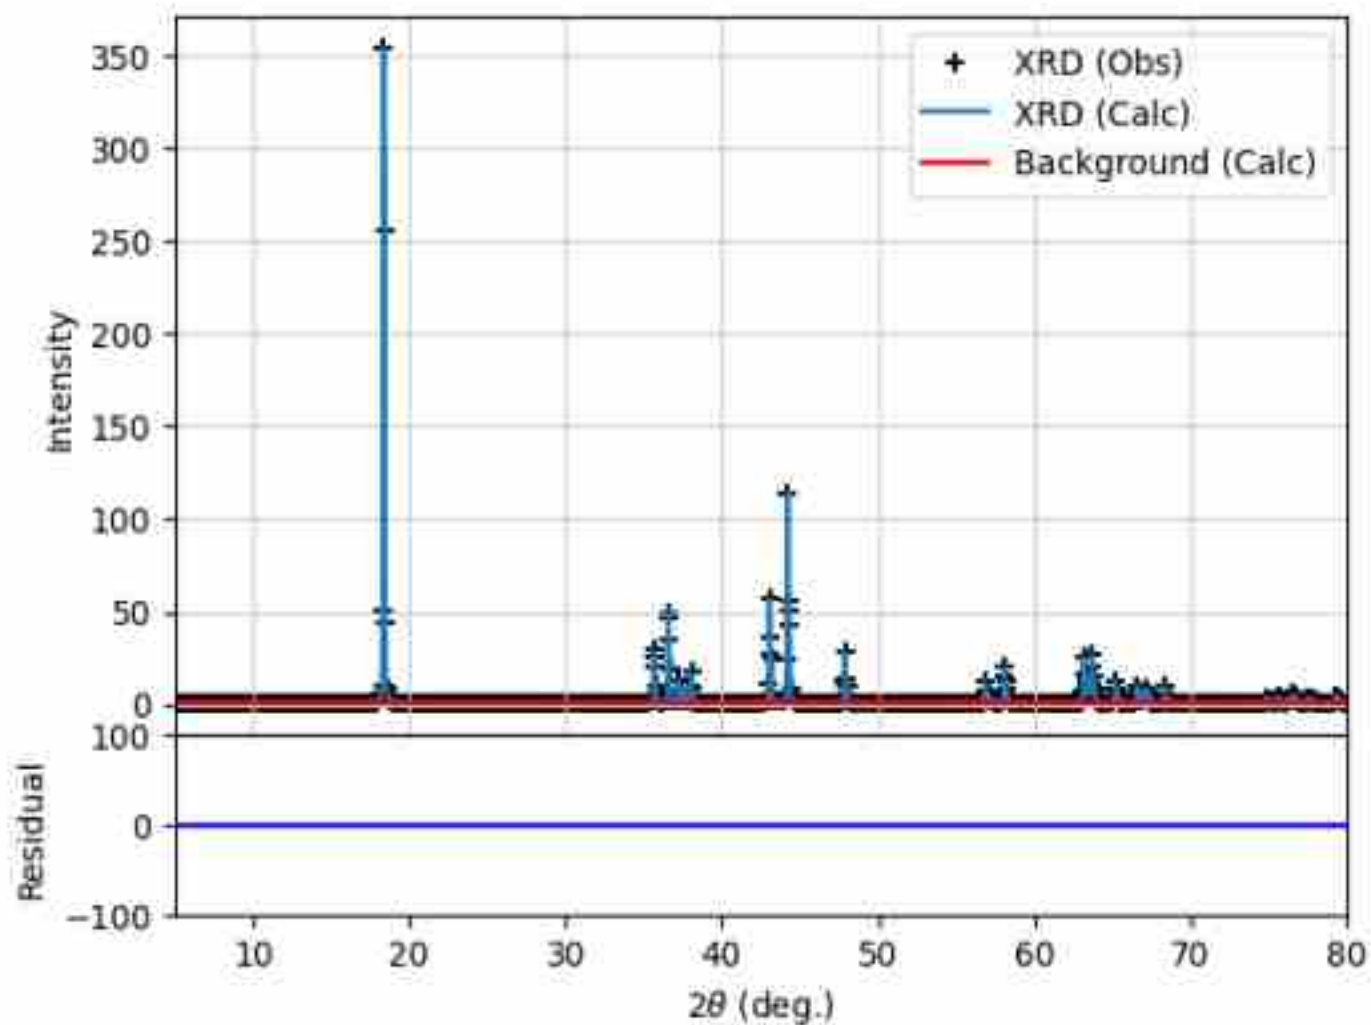

| RMSE before RR | Rwp     | RMSE after RR |
|----------------|---------|---------------|
| 0.026          | 0.00258 | 0.00151       |

# Li<sub>4</sub>Cr<sub>1</sub>Sb<sub>1</sub>Te<sub>2</sub>O<sub>12</sub>

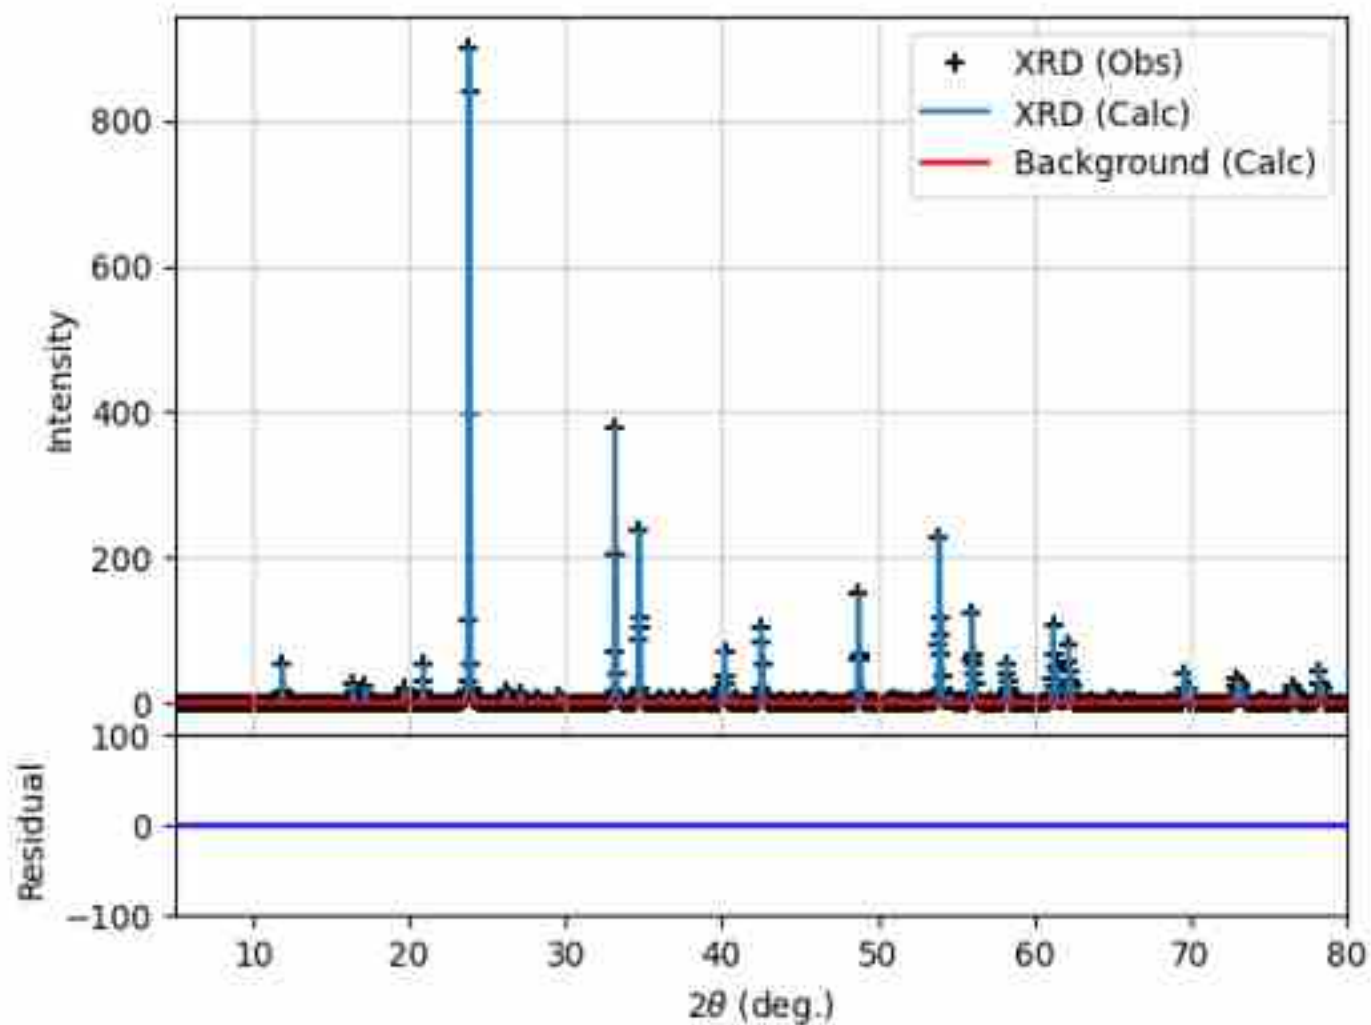

| RMSE before RR | Rwp     | RMSE after RR |
|----------------|---------|---------------|
| 0.026          | 0.07979 | 0.00957       |

# Li4Ga2

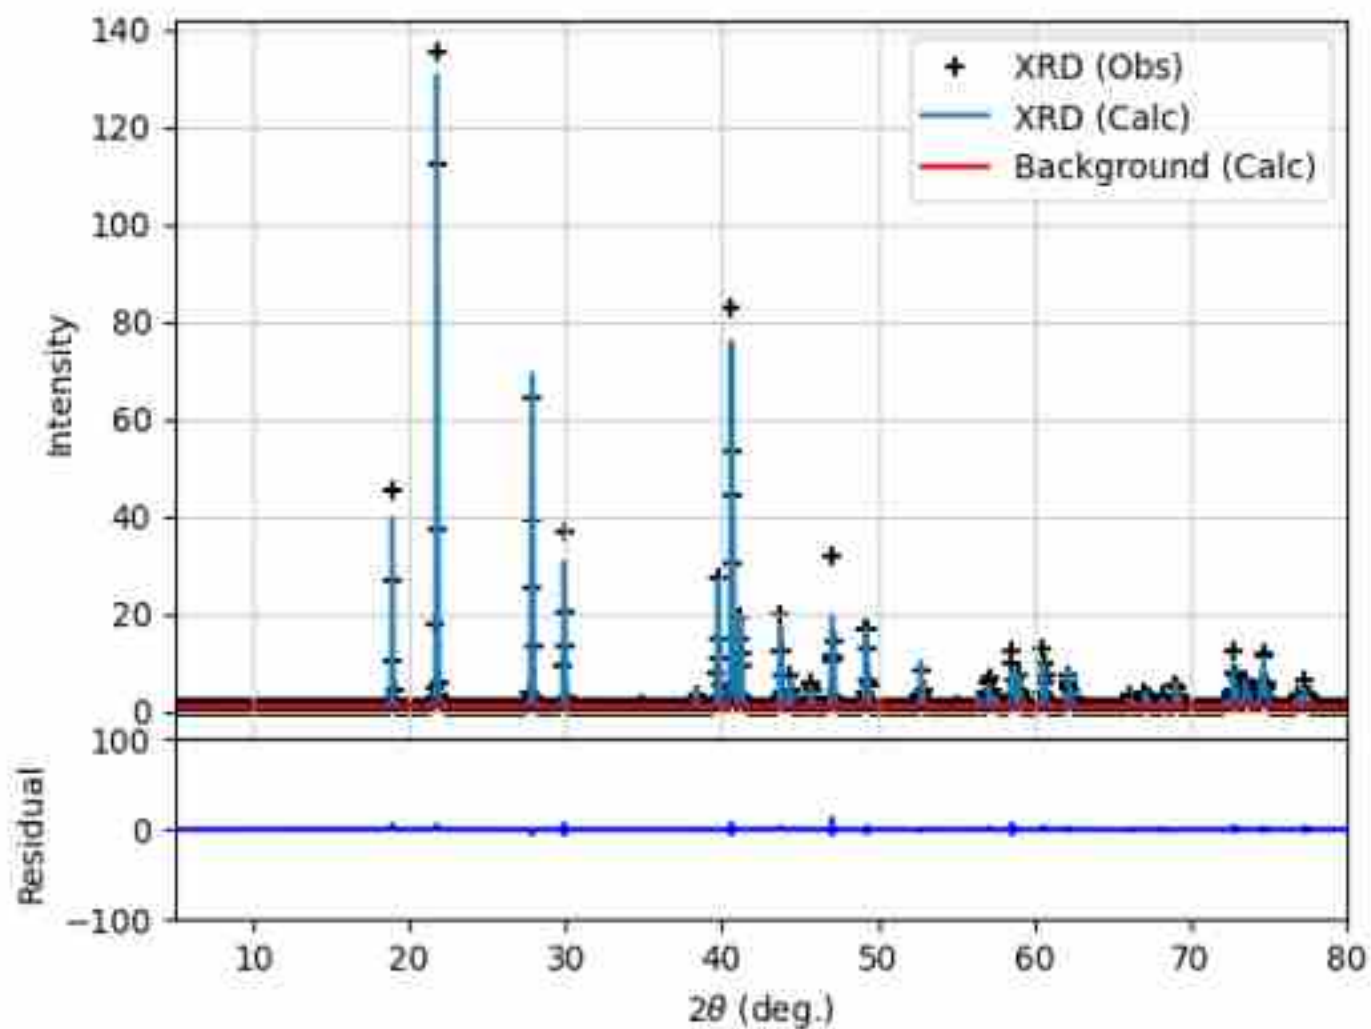

| RMSE before RR | Rwp      | RMSE after RR |
|----------------|----------|---------------|
| 0.026          | 13.71517 | 0.36434       |

# Li<sub>4</sub>Ge<sub>2</sub>F<sub>12</sub>

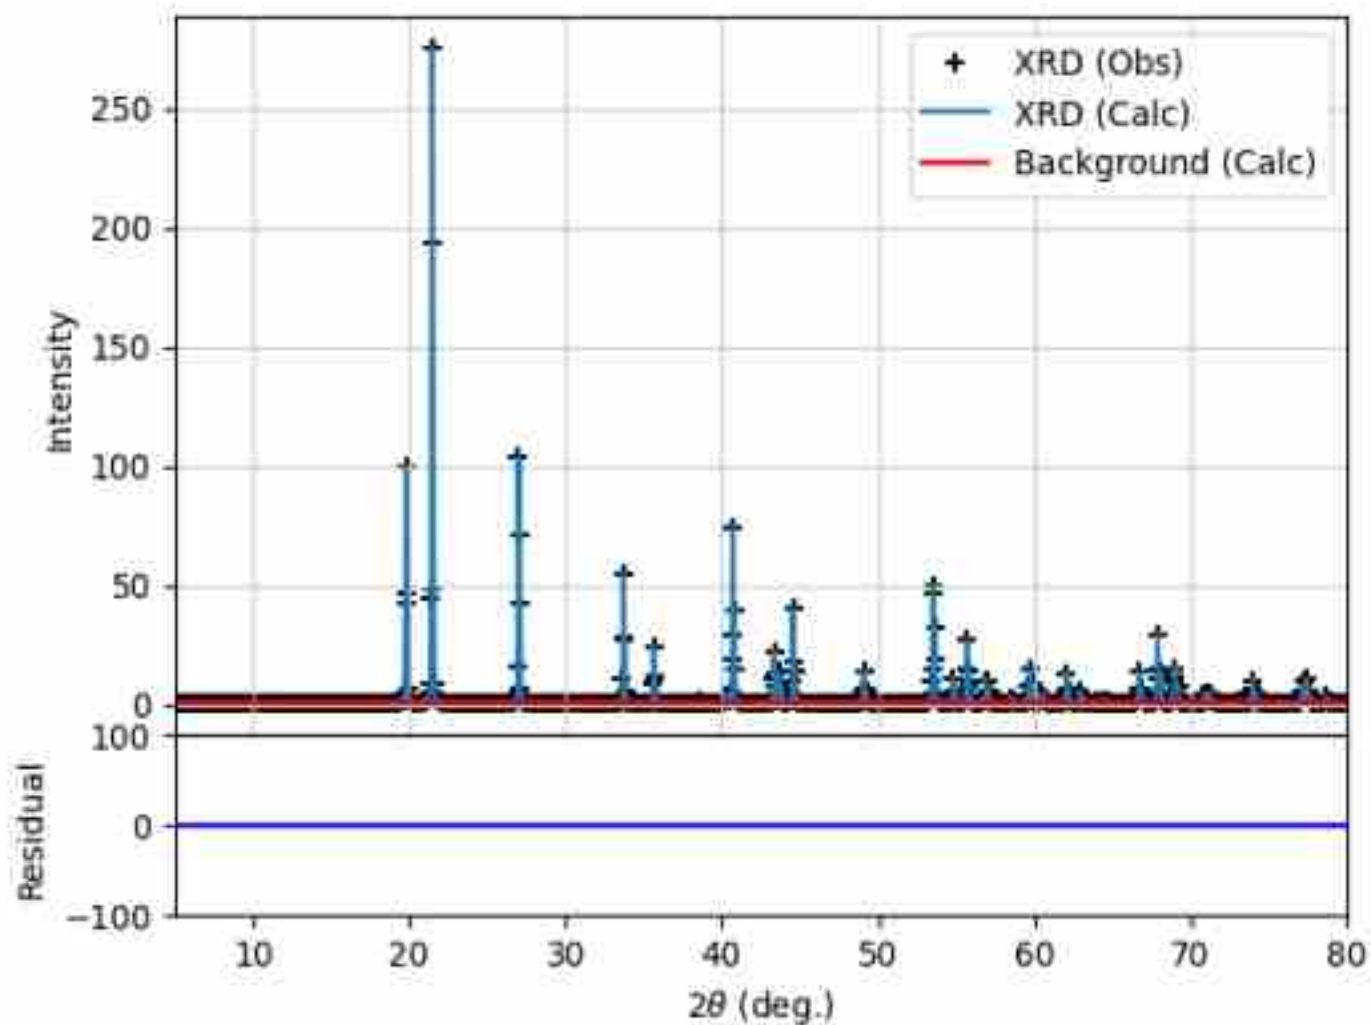

| RMSE before RR | Rwp     | RMSE after RR |
|----------------|---------|---------------|
| 0.026          | 0.00296 | 0.00112       |

# Li<sub>4</sub>In<sub>4</sub>S<sub>8</sub>

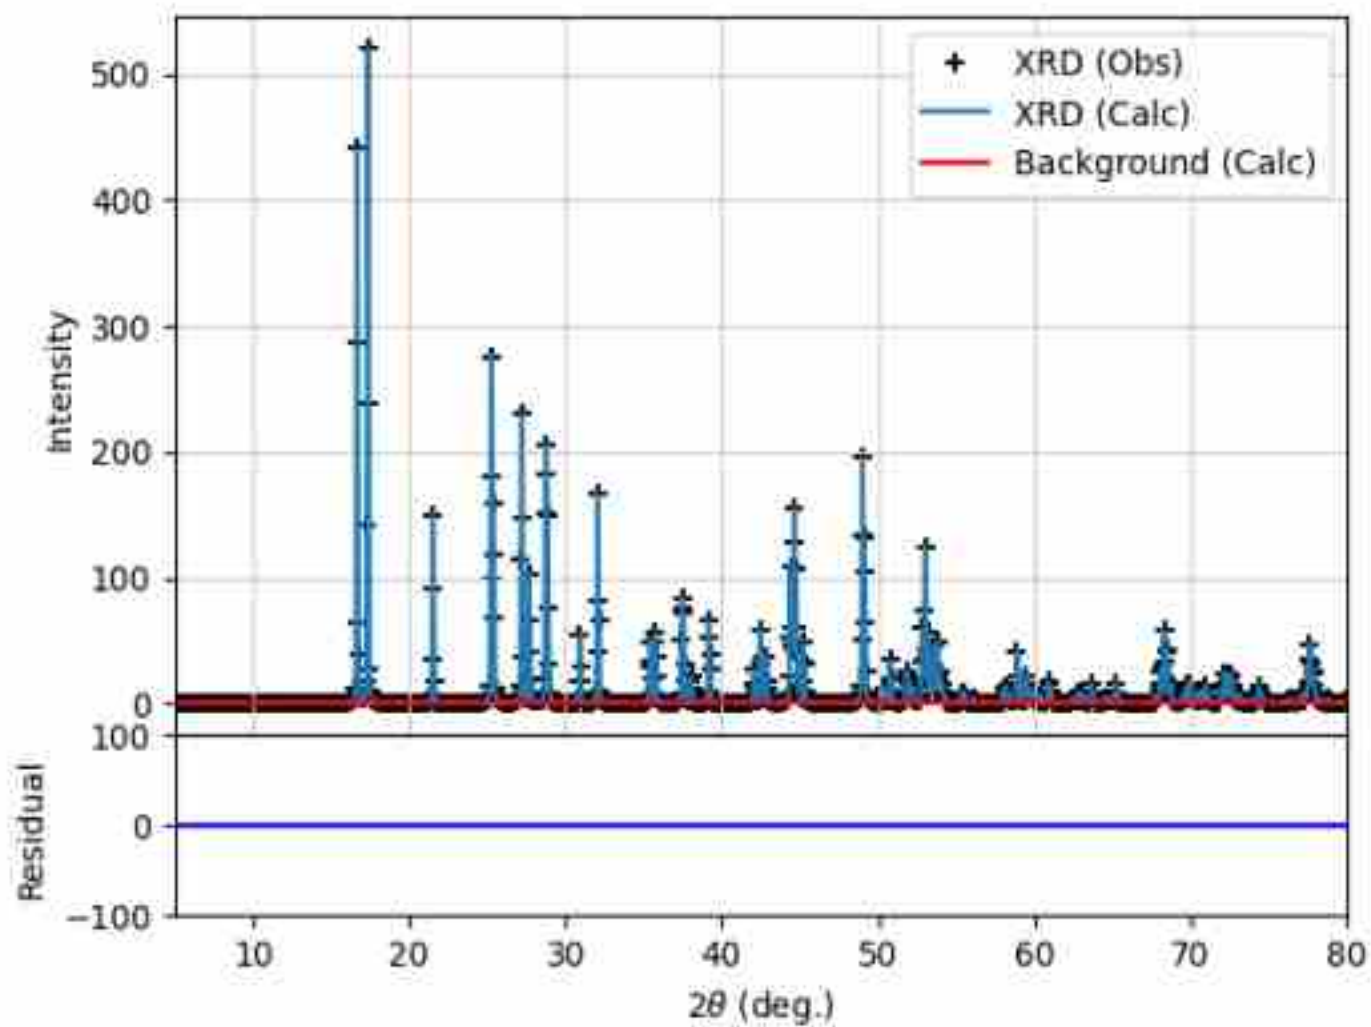

| RMSE before RR | Rwp    | RMSE after RR |
|----------------|--------|---------------|
| 0.026          | 0.0037 | 0.00098       |



# Li4Pr4O8

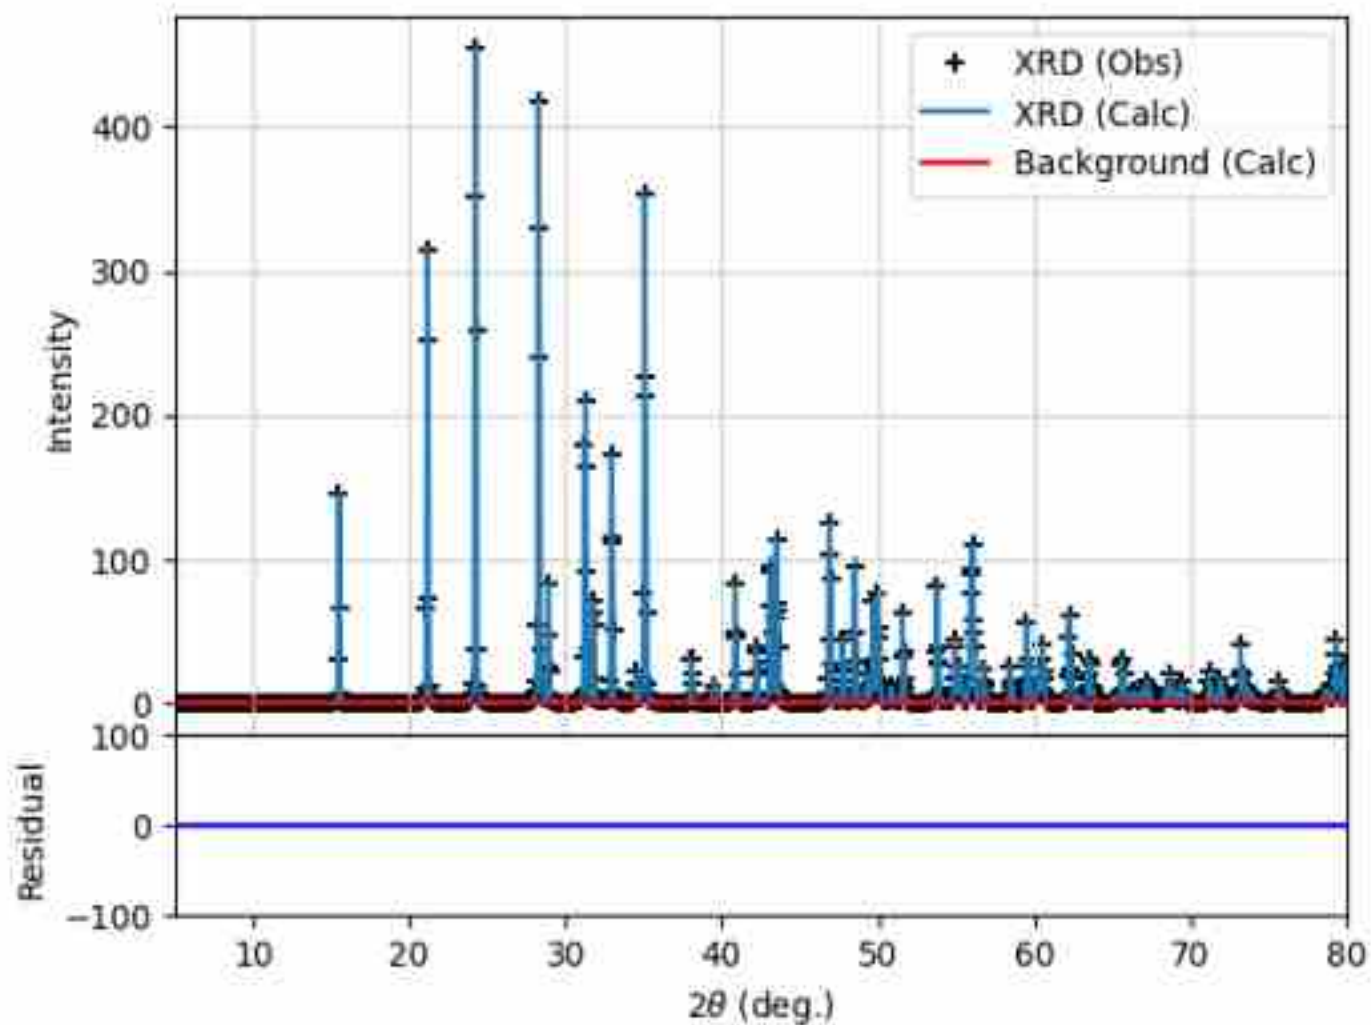

| RMSE before RR | Rwp     | RMSE after RR |
|----------------|---------|---------------|
| 0.026          | 0.00378 | 0.0015        |

# Li<sub>4</sub>TiV<sub>3</sub>O<sub>8</sub>

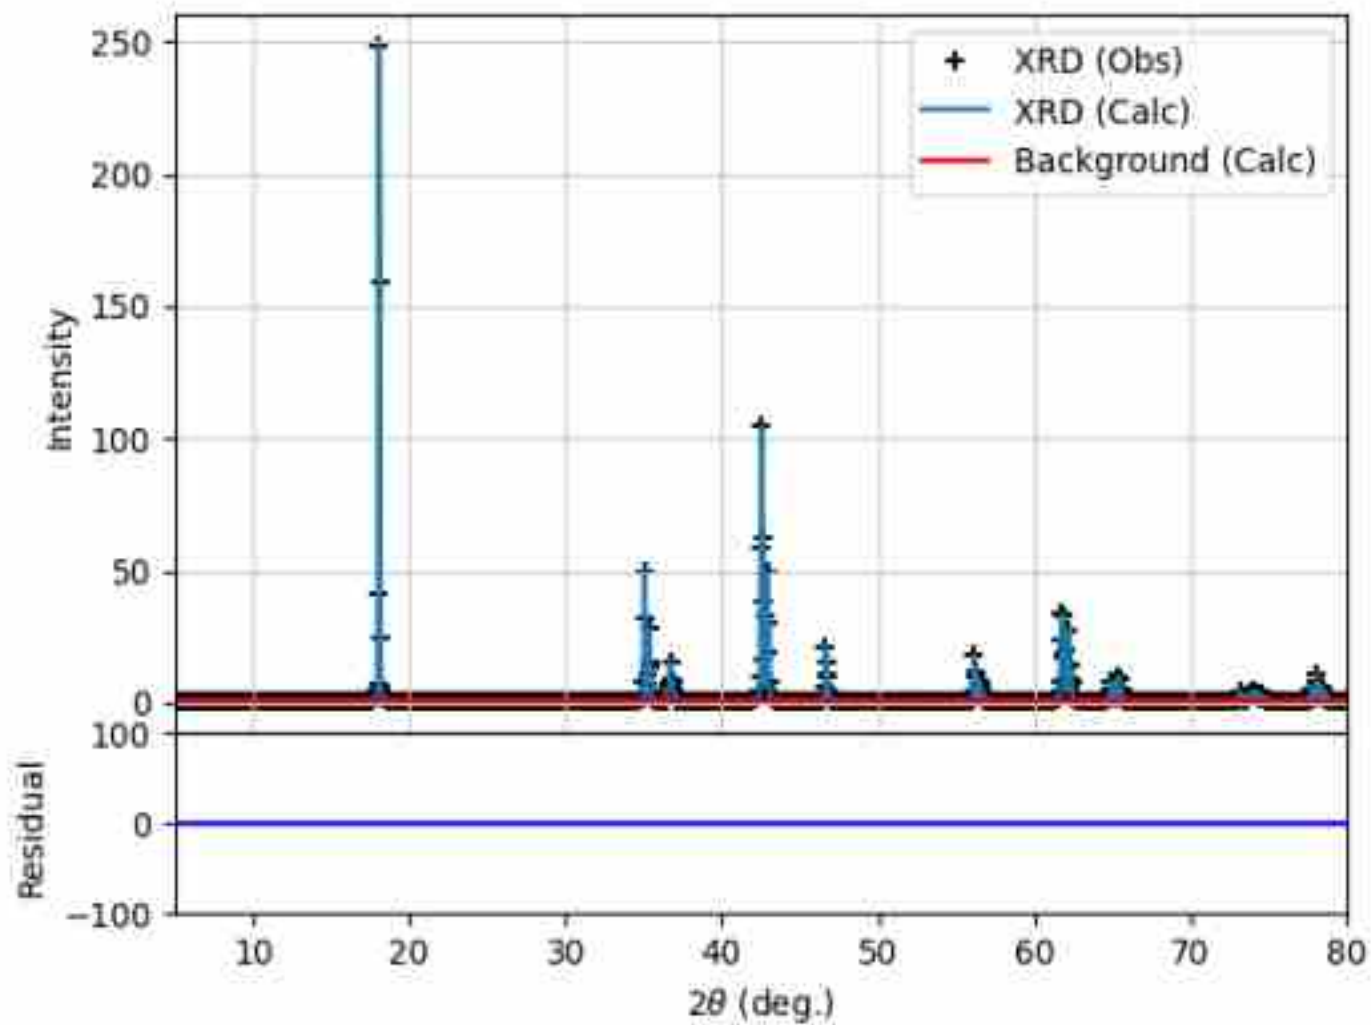

| RMSE before RR | Rwp     | RMSE after RR |
|----------------|---------|---------------|
| 0.026          | 0.00193 | 0.00142       |

# Li<sub>4</sub>V<sub>4</sub>O<sub>8</sub>

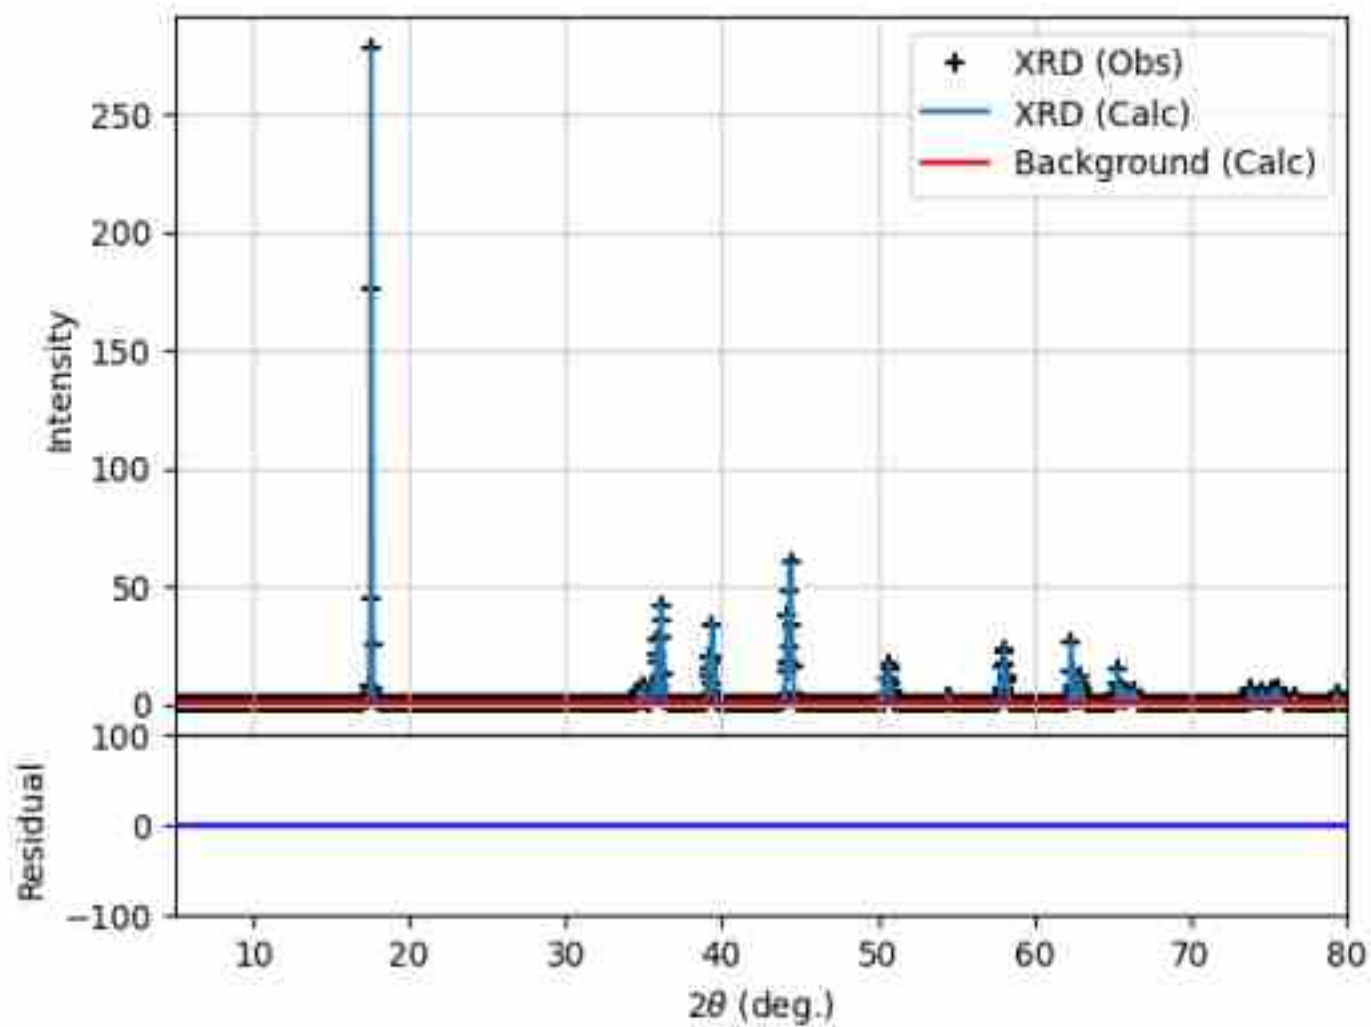

| RMSE before RR | Rwp     | RMSE after RR |
|----------------|---------|---------------|
| 0.026          | 0.00603 | 0.00108       |

# Li<sub>6</sub>Au<sub>2</sub>S<sub>4</sub>

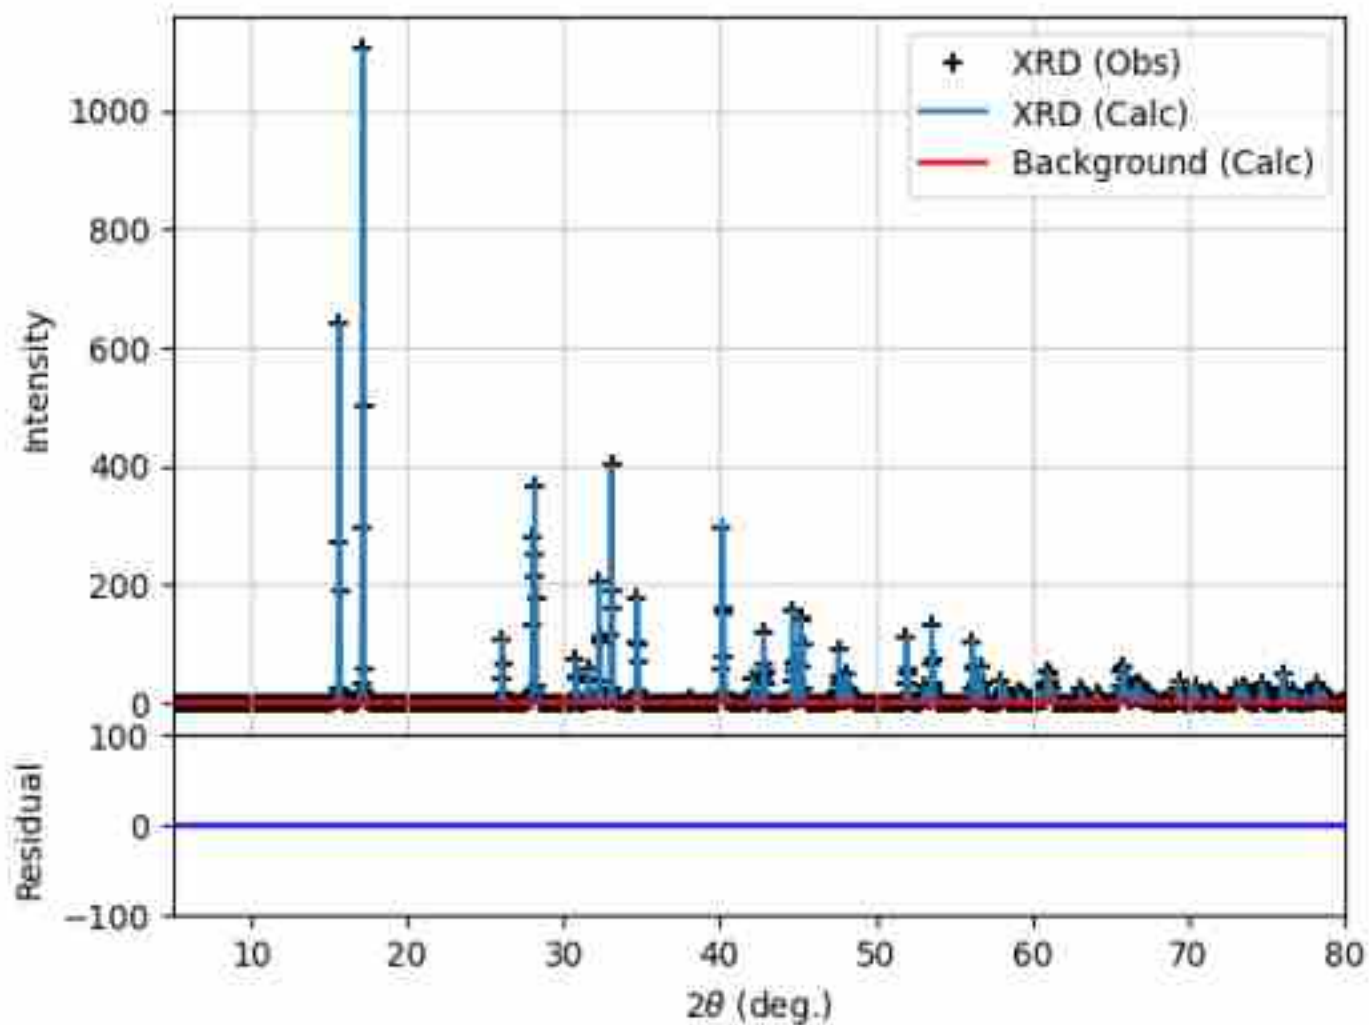

| RMSE before RR | Rwp     | RMSE after RR |
|----------------|---------|---------------|
| 0.026          | 0.00404 | 0.00252       |

# Li6V2F12

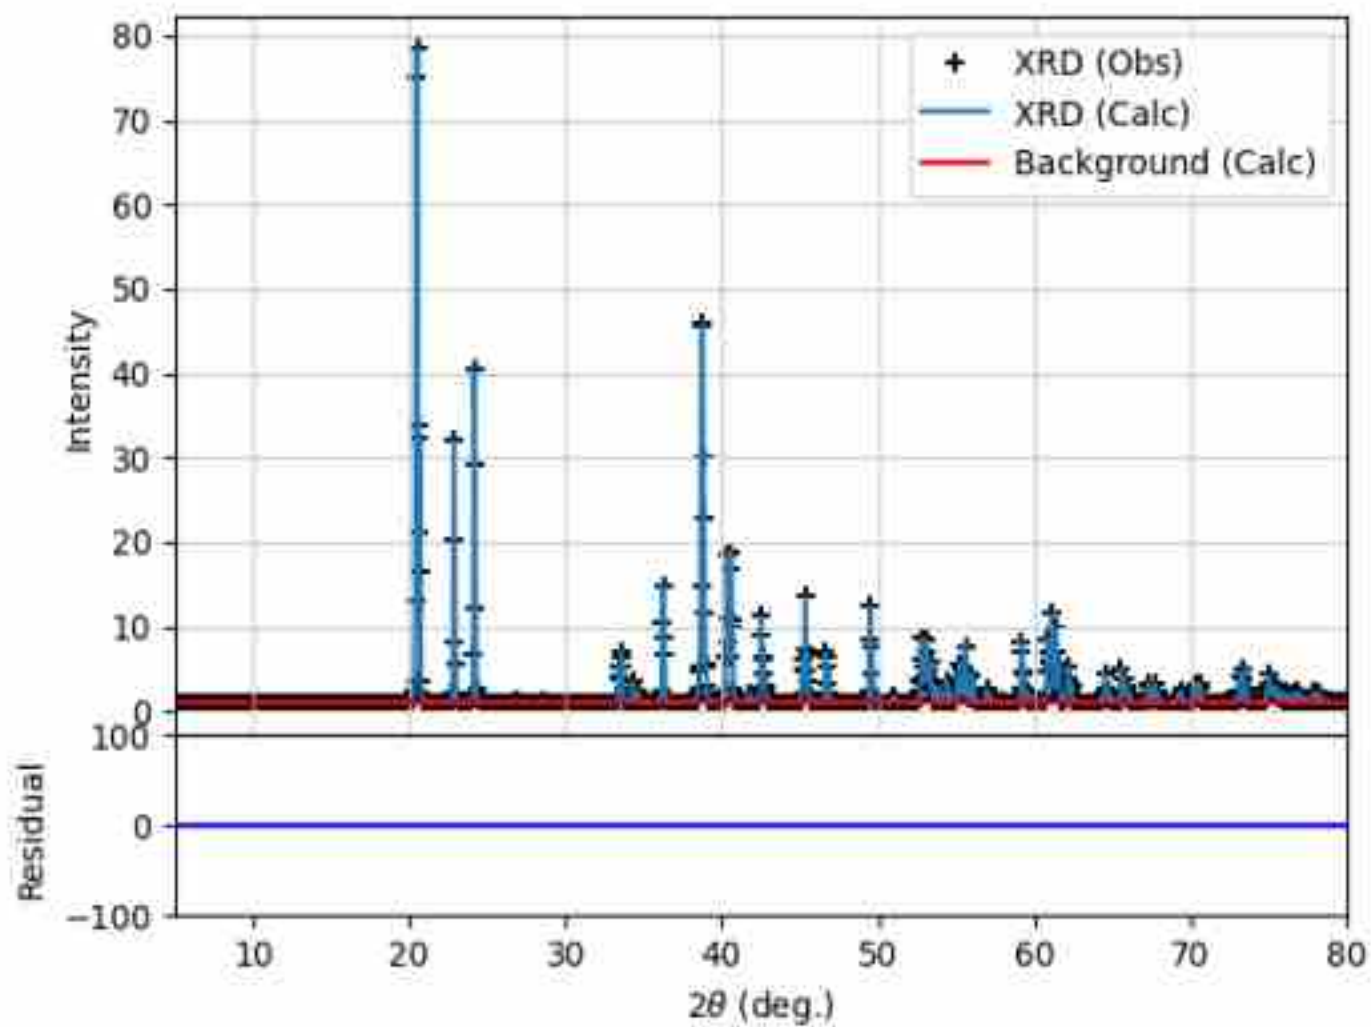

| RMSE before RR | Rwp     | RMSE after RR |
|----------------|---------|---------------|
| 0.026          | 0.00226 | 0.001         |

# Lu<sub>4</sub>Ge<sub>6</sub>Os<sub>7</sub>

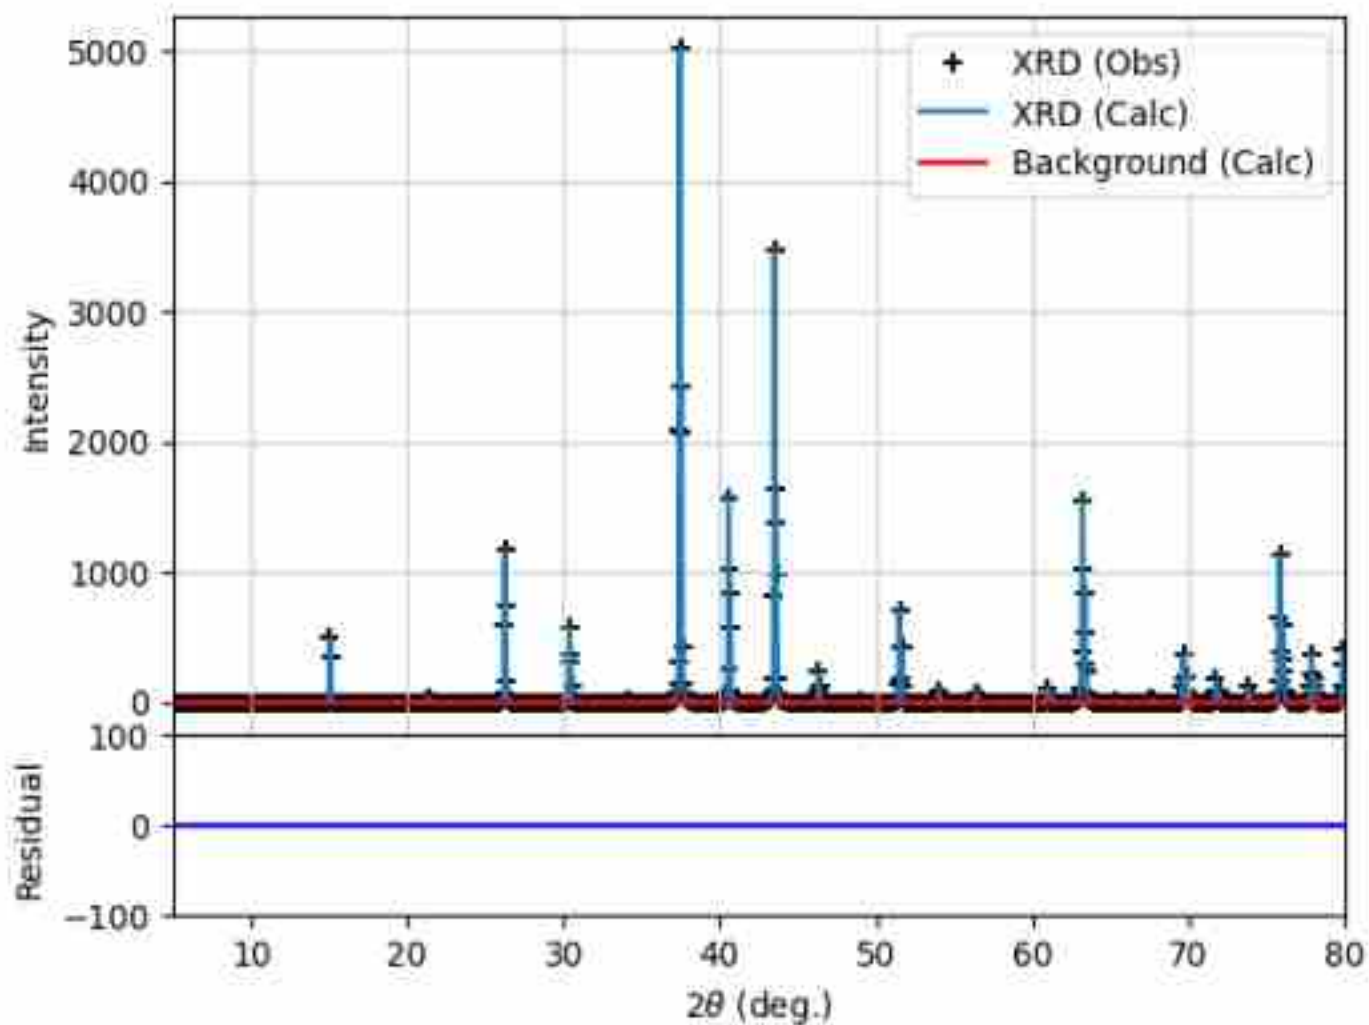

| RMSE before RR | Rwp     | RMSE after RR |
|----------------|---------|---------------|
| 0.026          | 0.00613 | 0.00134       |

# Lu4Zn12

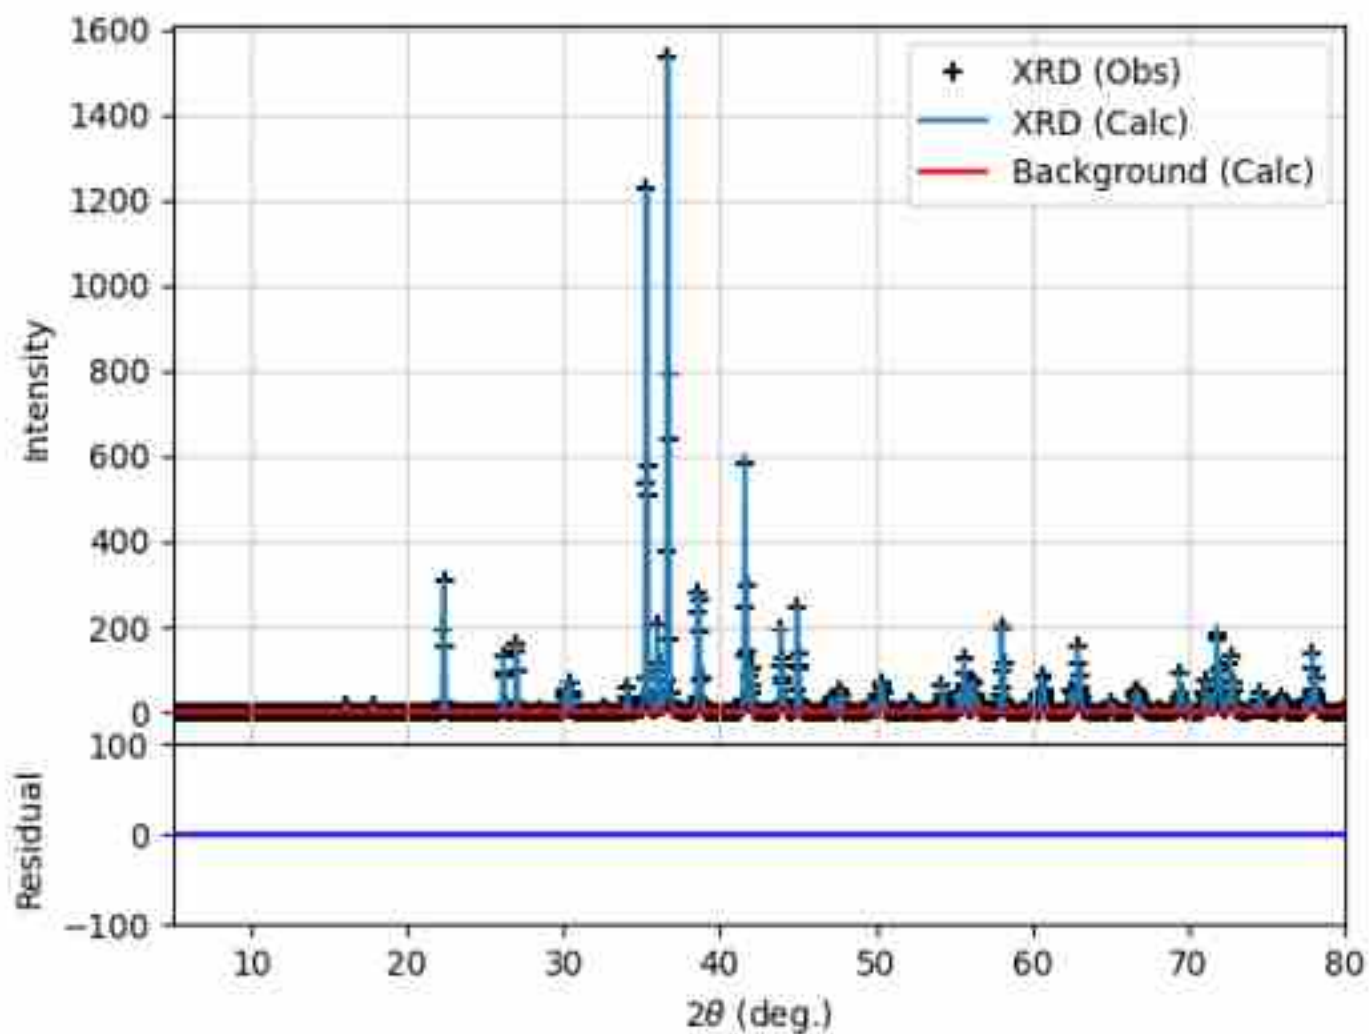

| RMSE before RR | Rwp     | RMSE after RR |
|----------------|---------|---------------|
| 0.026          | 0.00492 | 0.00054       |

# Mg<sub>2</sub>Au<sub>4</sub>

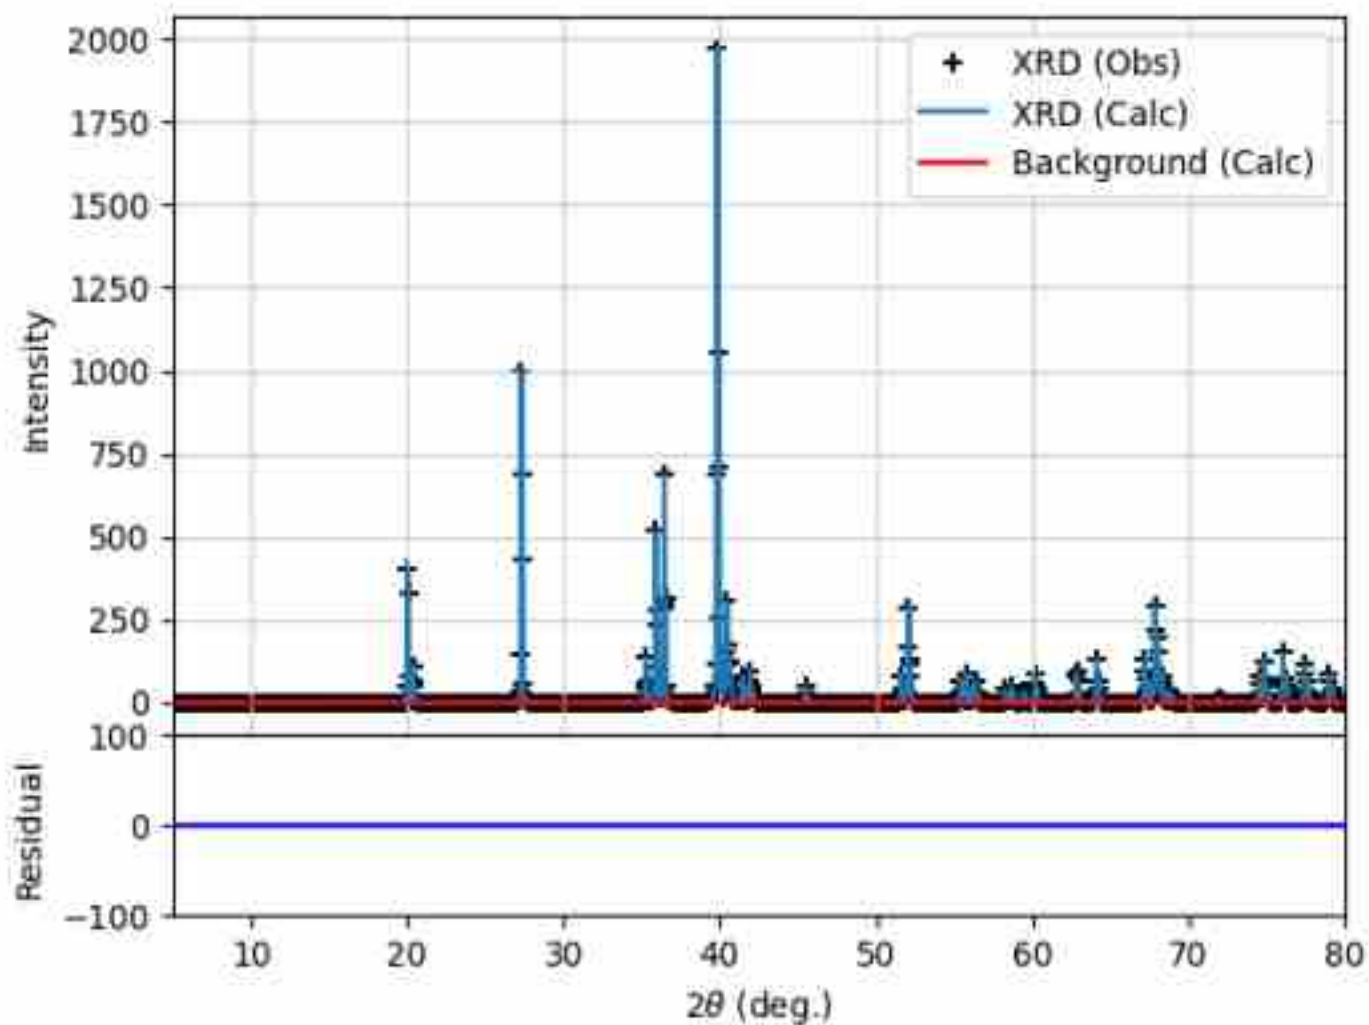

| RMSE before RR | Rwp     | RMSE after RR |
|----------------|---------|---------------|
| 0.026          | 0.00488 | 0.00067       |



# Mg<sub>2</sub>Hg<sub>4</sub>

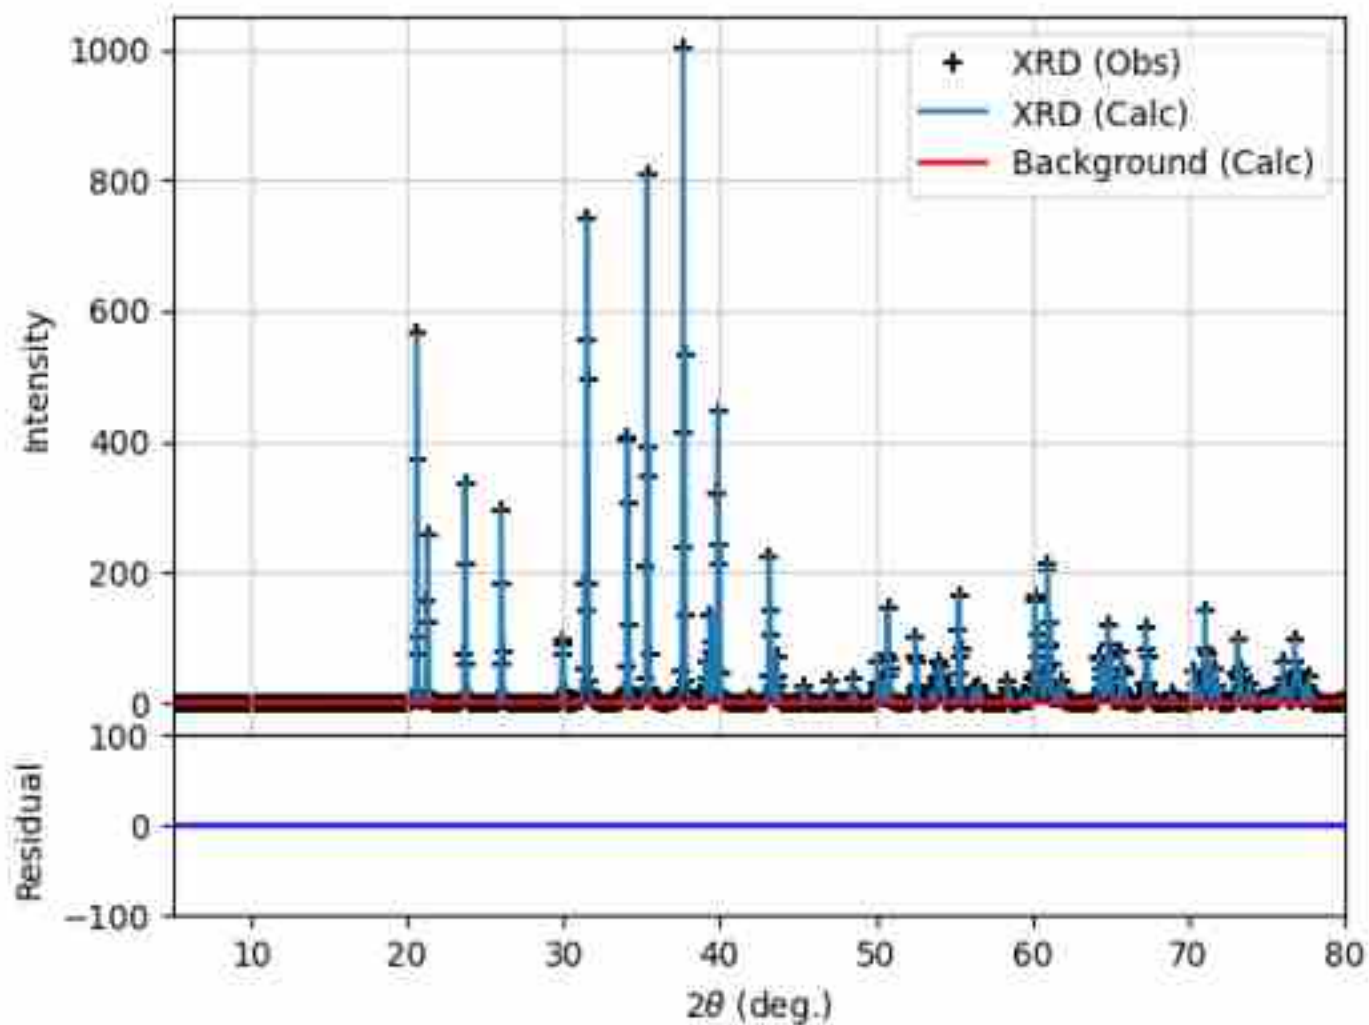

| RMSE before RR | Rwp    | RMSE after RR |
|----------------|--------|---------------|
| 0.026          | 0.0039 | 0.00043       |

# Mg<sub>2</sub>In<sub>4</sub>Se<sub>8</sub>

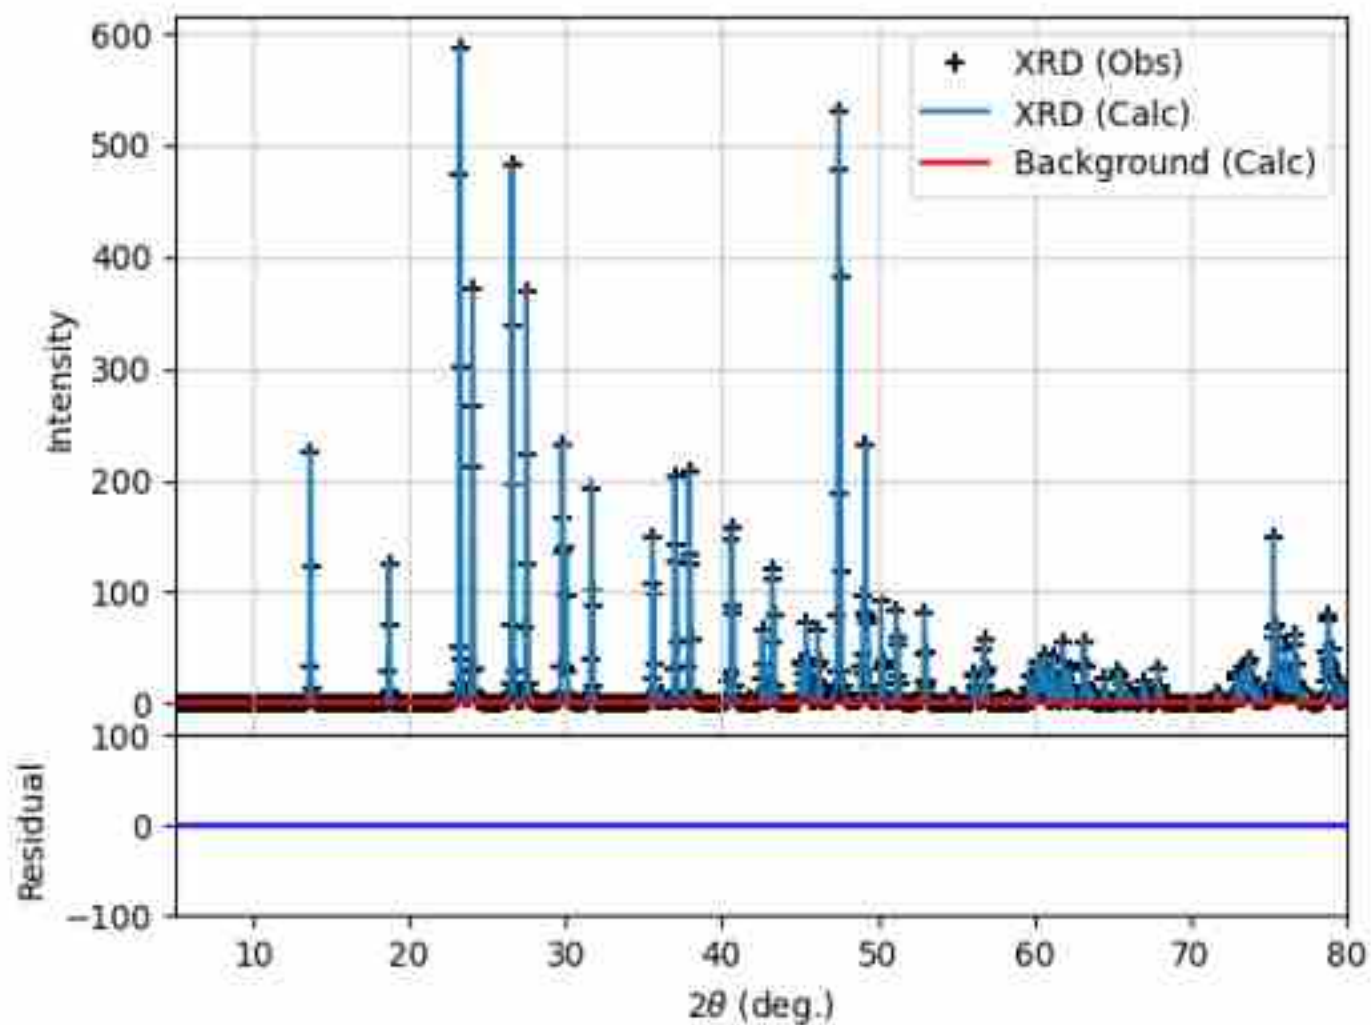

| RMSE before RR | Rwp     | RMSE after RR |
|----------------|---------|---------------|
| 0.026          | 0.00367 | 0.00046       |

# Mg<sub>2</sub>Mn<sub>3</sub>O<sub>8</sub>

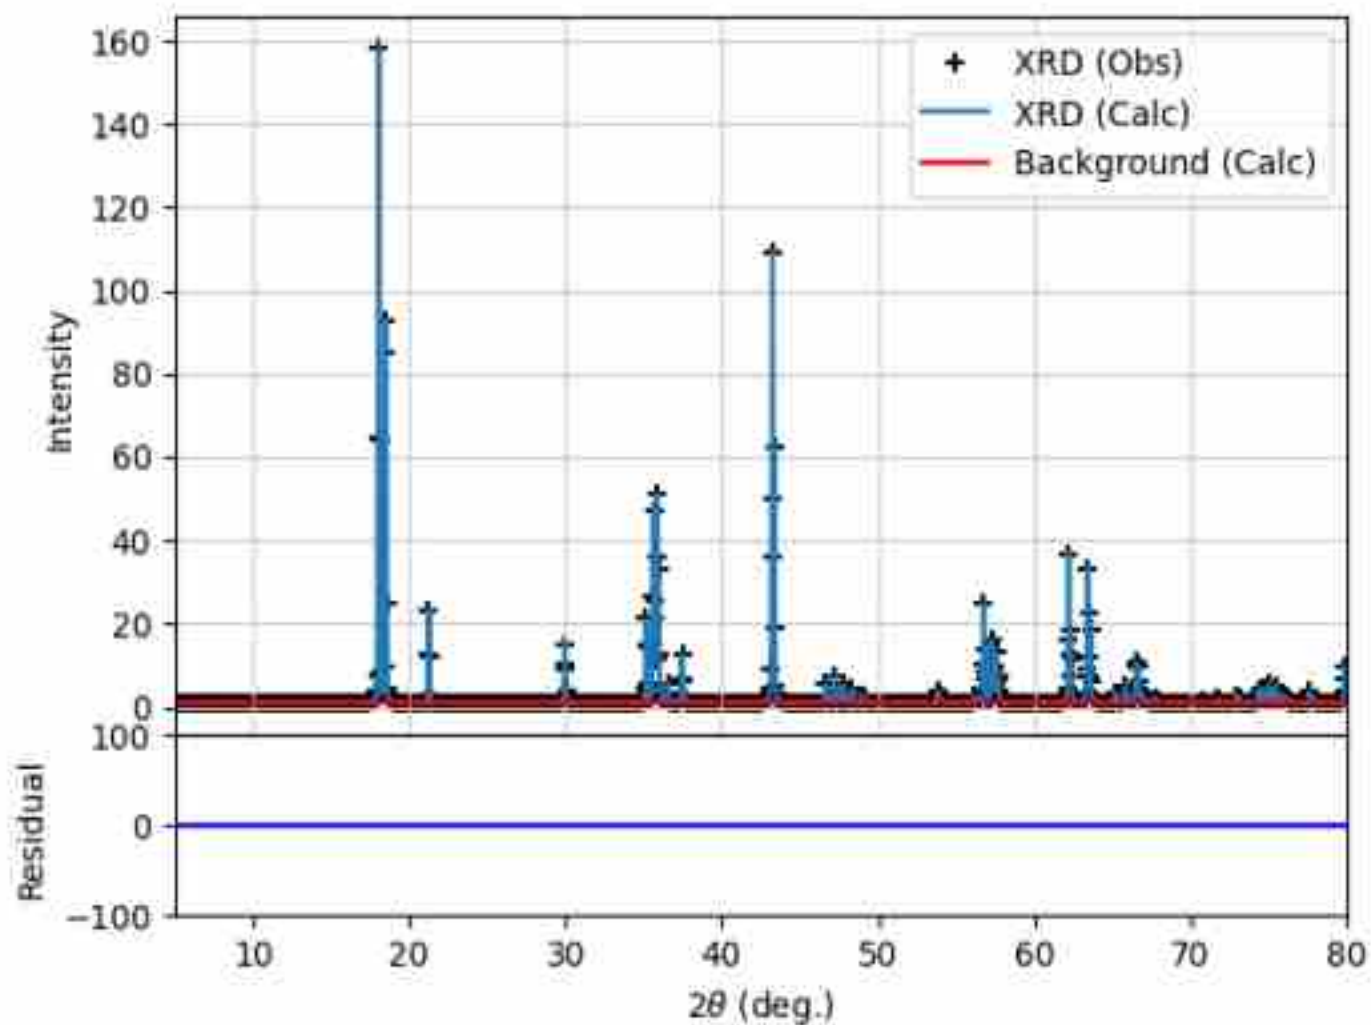

| RMSE before RR | Rwp     | RMSE after RR |
|----------------|---------|---------------|
| 0.026          | 0.00277 | 0.0009        |

# Mn<sub>2</sub>Bi<sub>2</sub>S<sub>4</sub>Br<sub>2</sub>

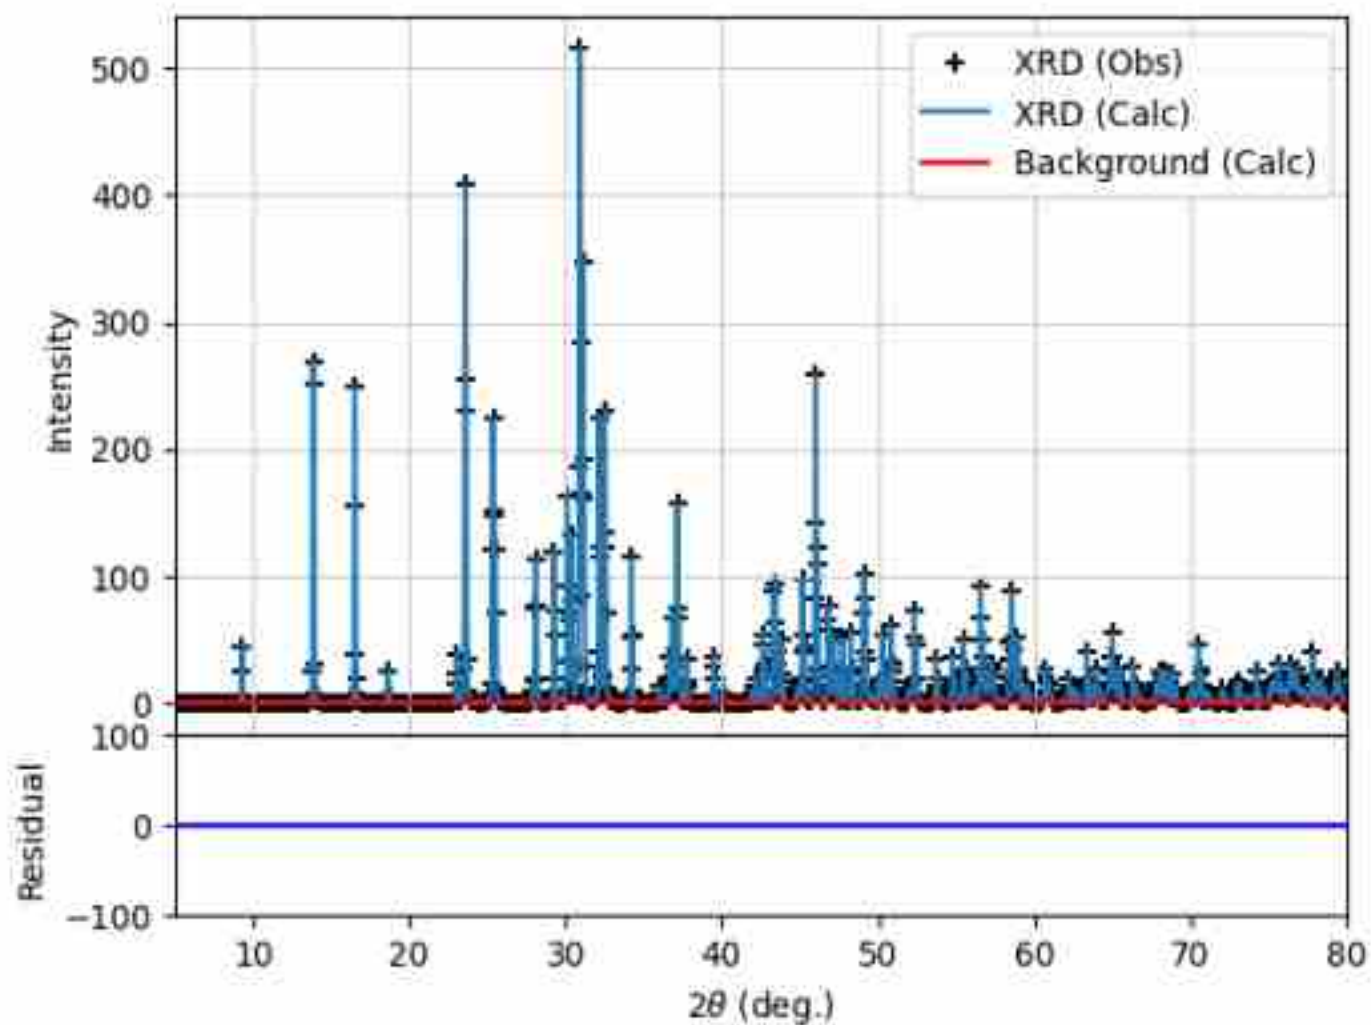

| RMSE before RR | Rwp     | RMSE after RR |
|----------------|---------|---------------|
| 0.026          | 0.00314 | 0.00061       |

# Mn<sub>2</sub>Co<sub>4</sub>Te<sub>2</sub>O<sub>12</sub>

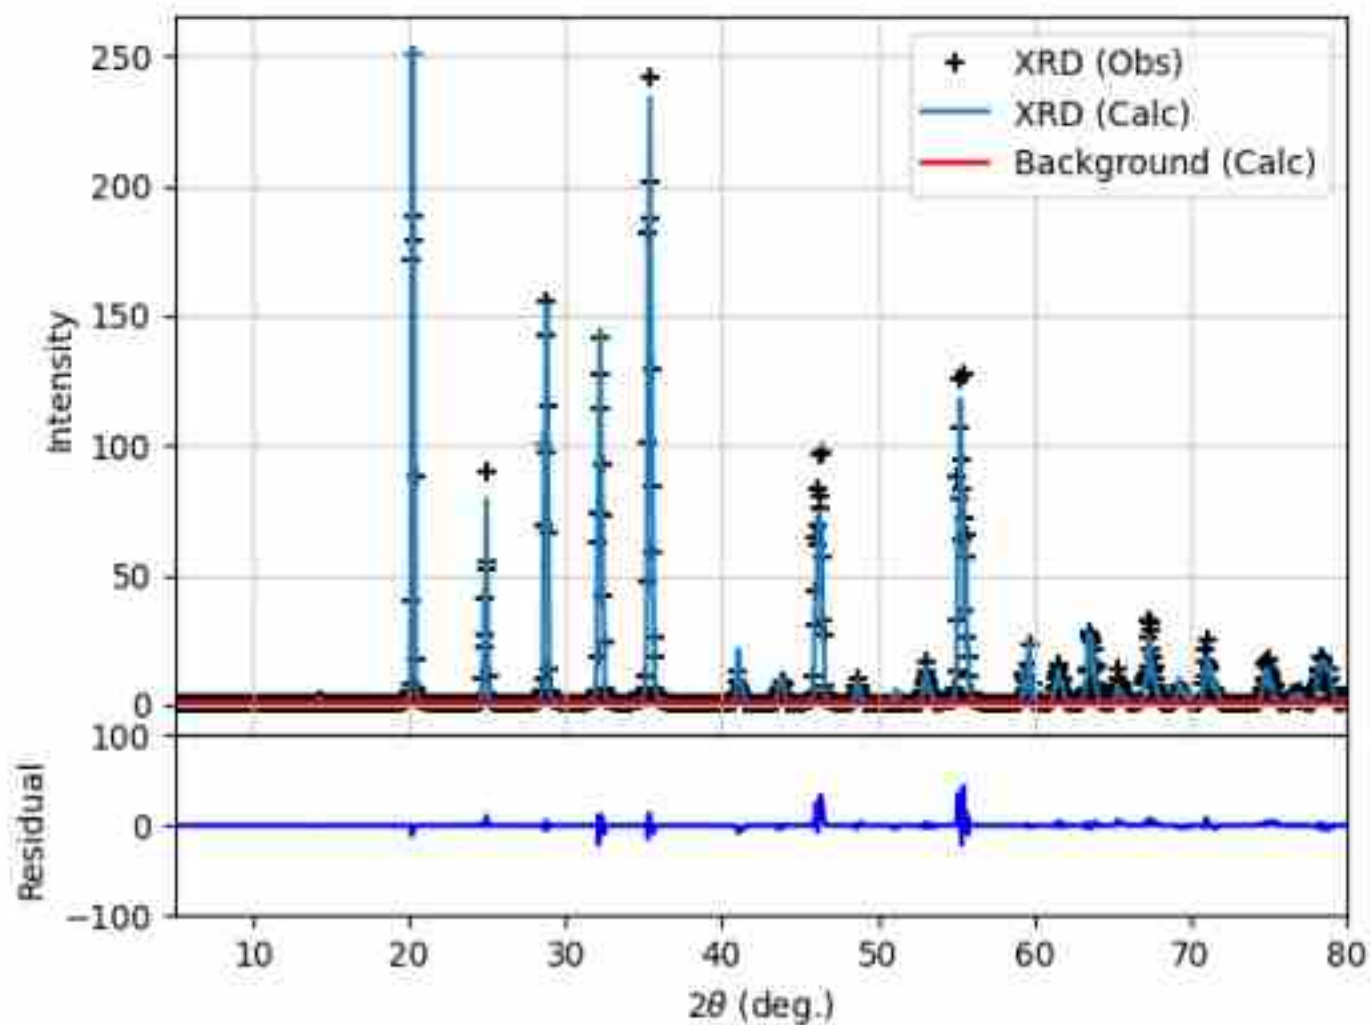

| RMSE before RR | Rwp      | RMSE after RR |
|----------------|----------|---------------|
| 0.026          | 18.17747 | 0.25504       |

# Mn<sub>5</sub>Co<sub>10</sub>O<sub>12</sub>

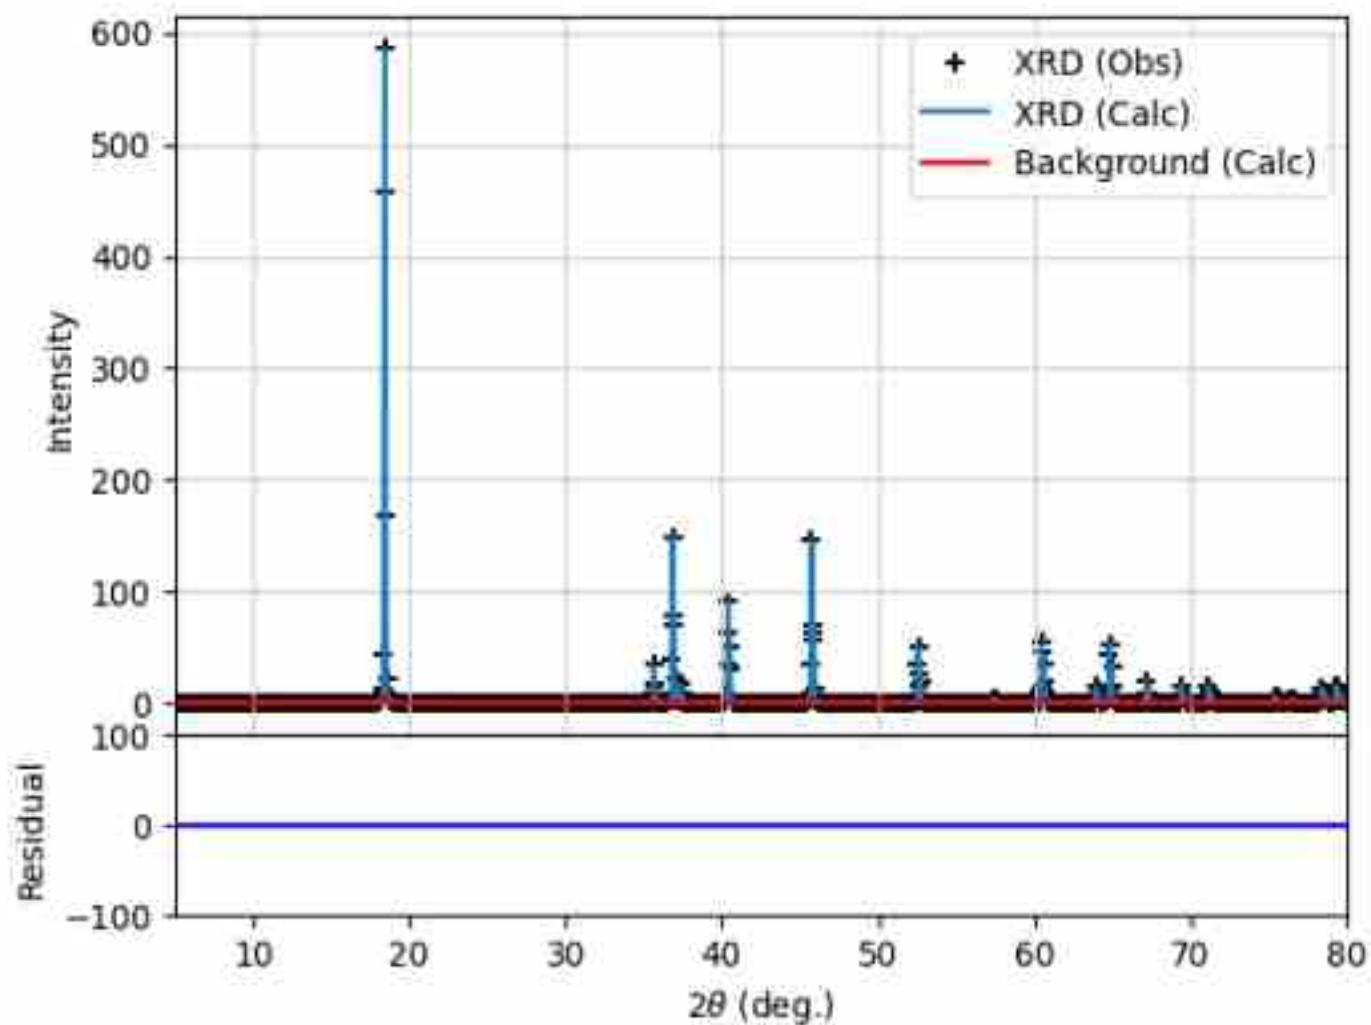

| RMSE before RR | Rwp     | RMSE after RR |
|----------------|---------|---------------|
| 0.026          | 0.00984 | 0.00784       |

# Mn<sub>6</sub>Ga<sub>2</sub>C<sub>2</sub>

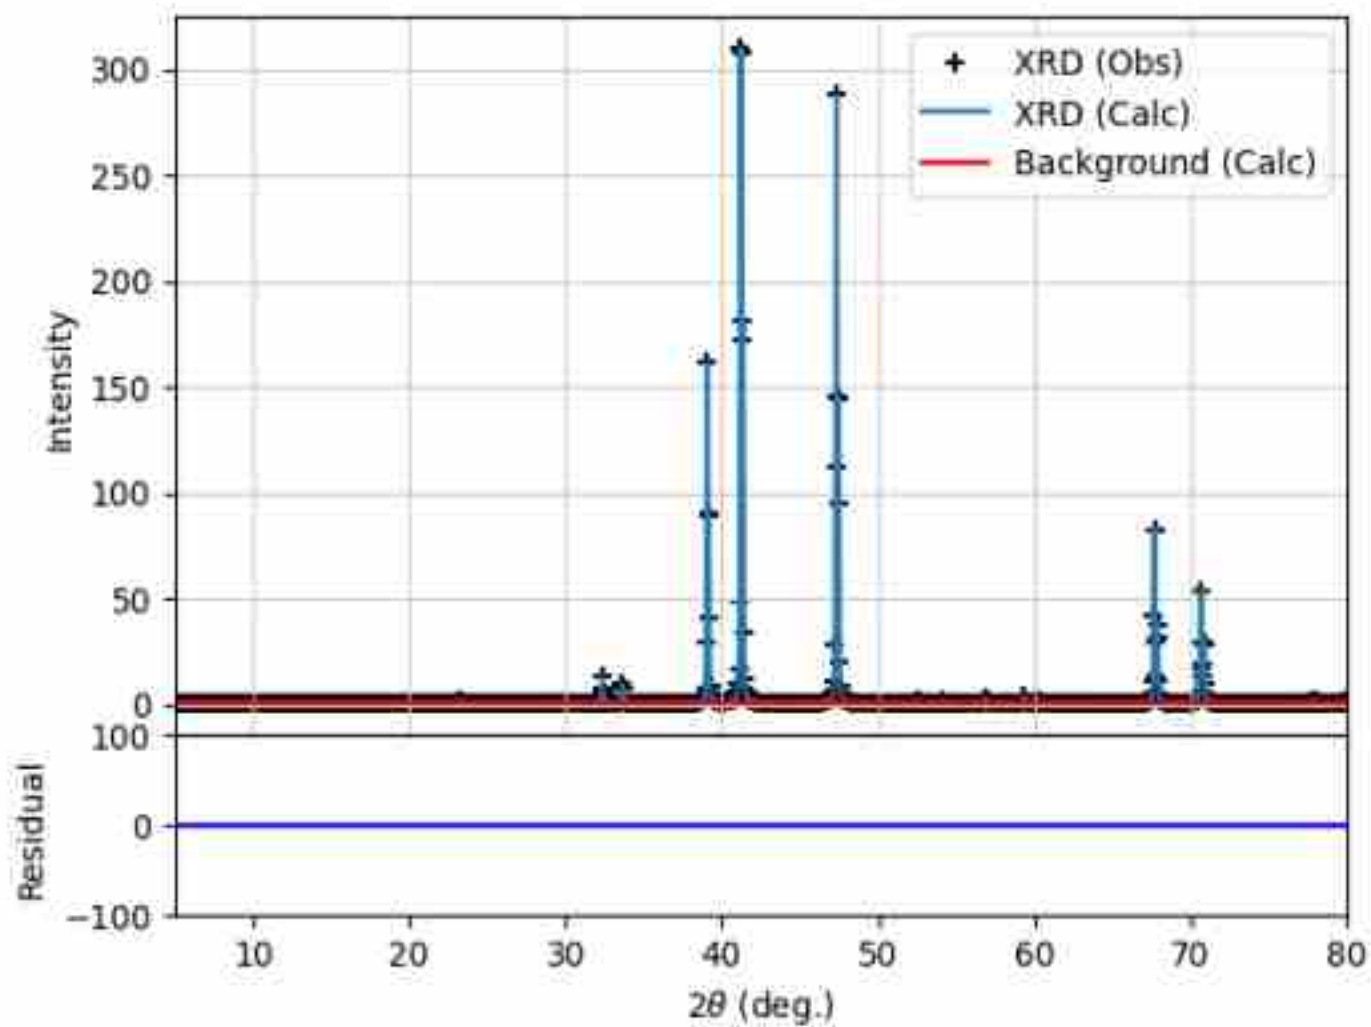

| RMSE before RR | Rwp     | RMSE after RR |
|----------------|---------|---------------|
| 0.026          | 0.00058 | 0.00011       |

# Mn<sub>6</sub>W<sub>2</sub>O<sub>12</sub>

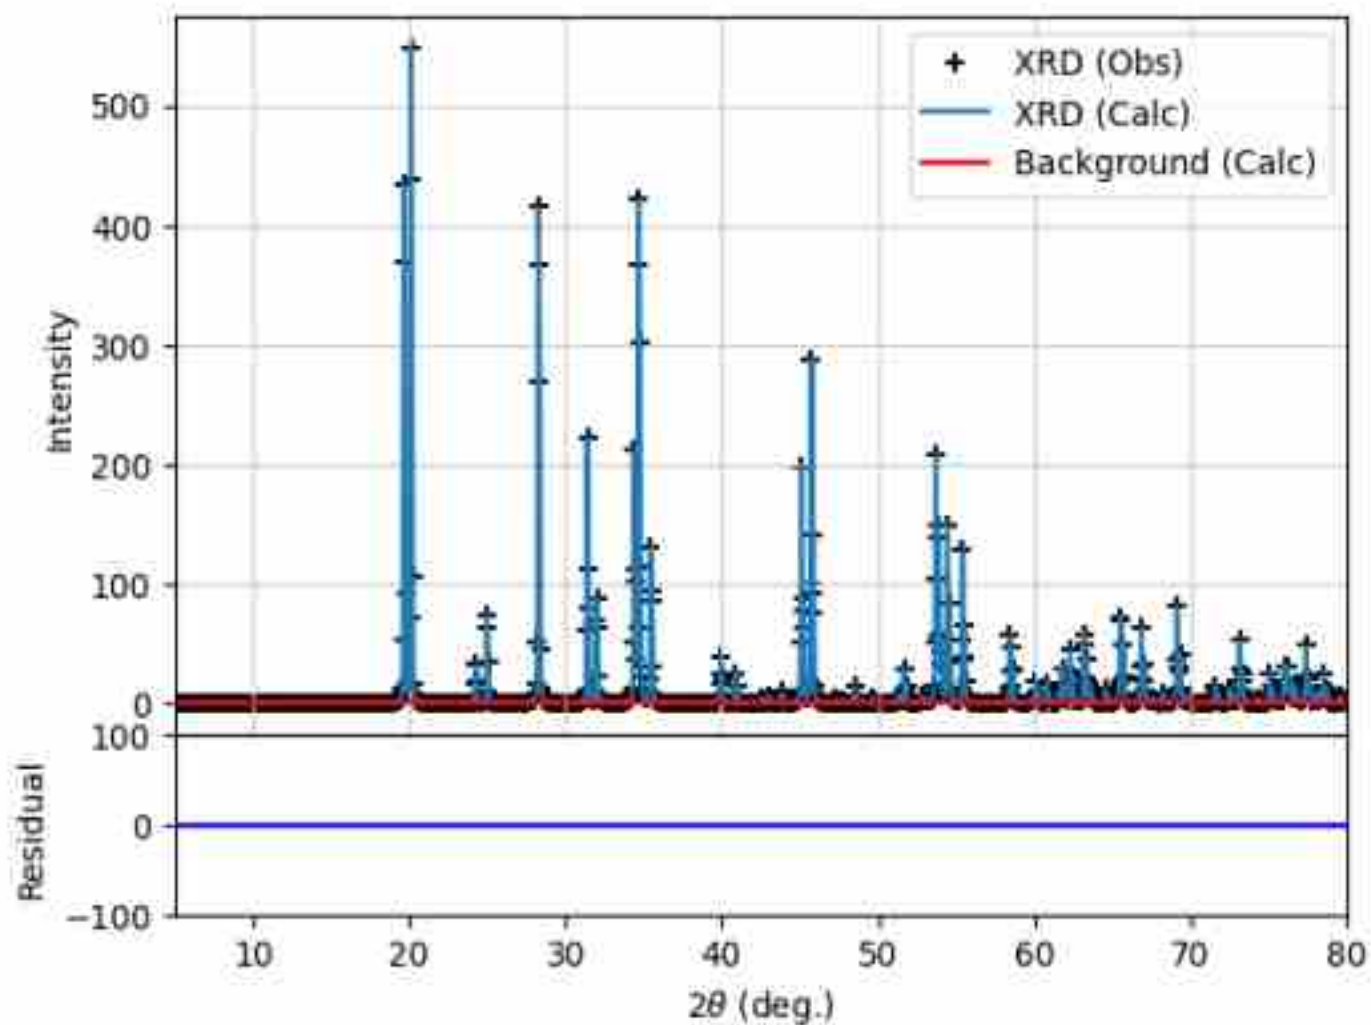

| RMSE before RR | Rwp     | RMSE after RR |
|----------------|---------|---------------|
| 0.026          | 0.00365 | 0.00178       |



# Na1Fe4Sb12

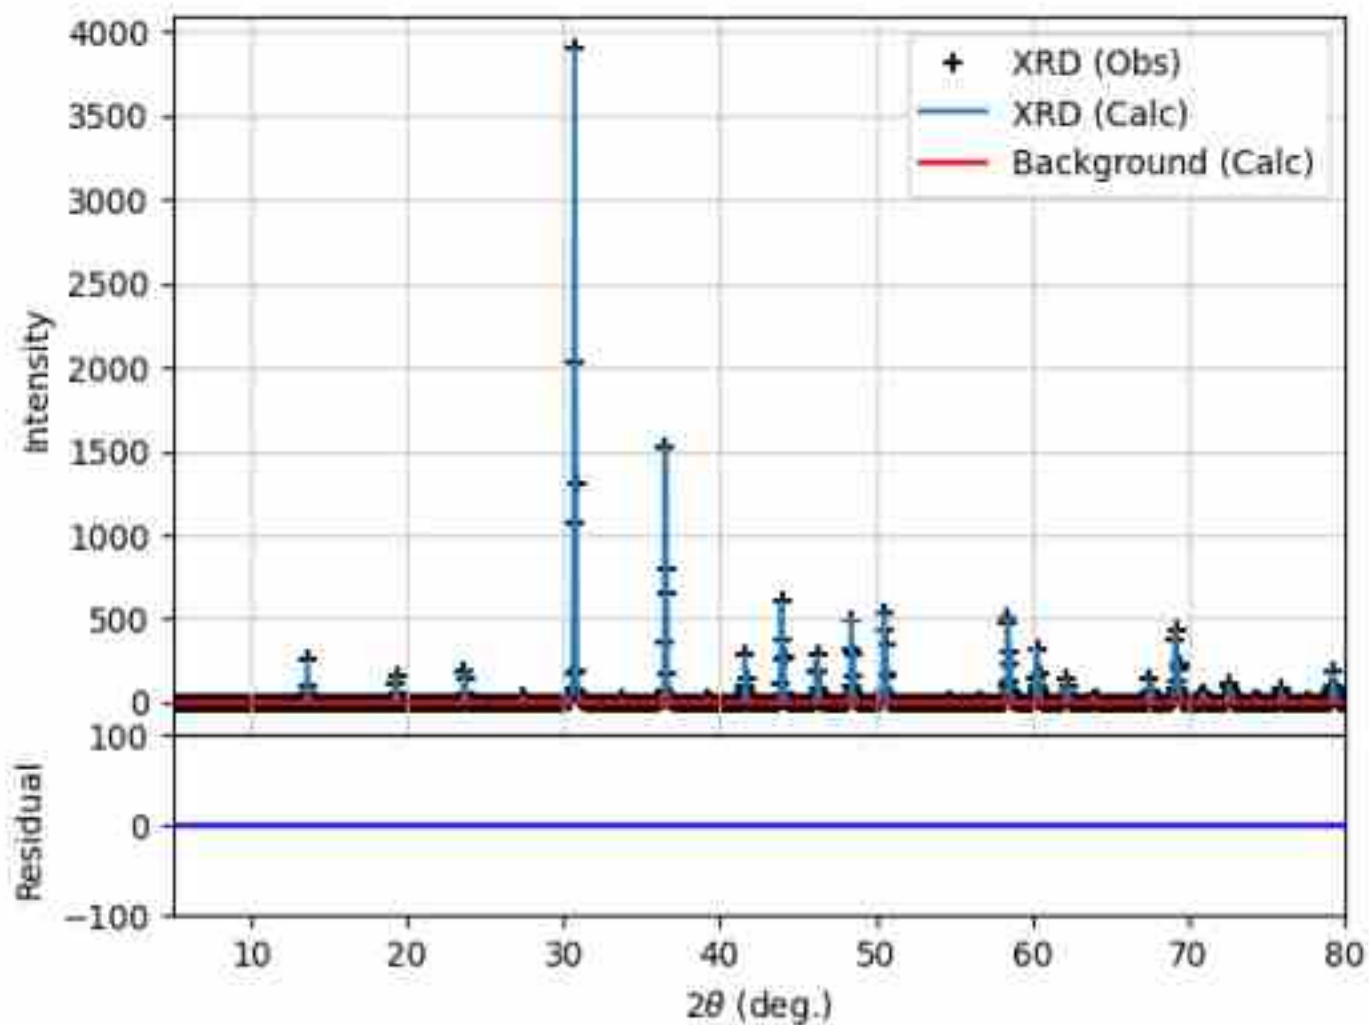

| RMSE before RR | Rwp    | RMSE after RR |
|----------------|--------|---------------|
| 0.026          | 0.0183 | 0.00209       |

# Na<sub>2</sub>Cd<sub>6</sub>

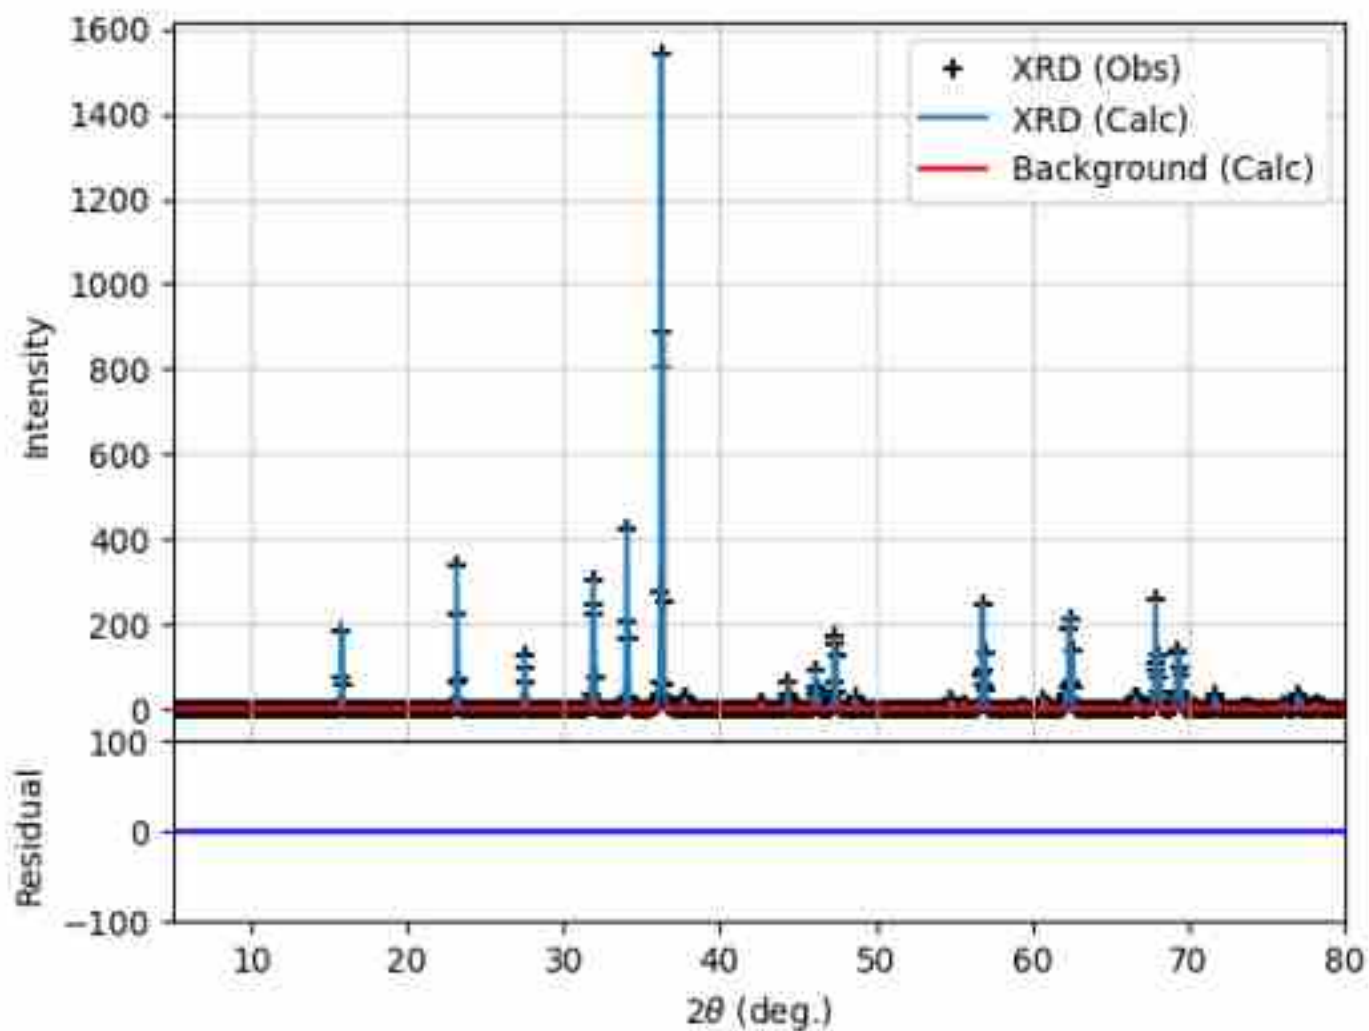

| RMSE before RR | Rwp     | RMSE after RR |
|----------------|---------|---------------|
| 0.026          | 0.00757 | 0.00103       |

# Na<sub>2</sub>Co<sub>2</sub>F<sub>6</sub>

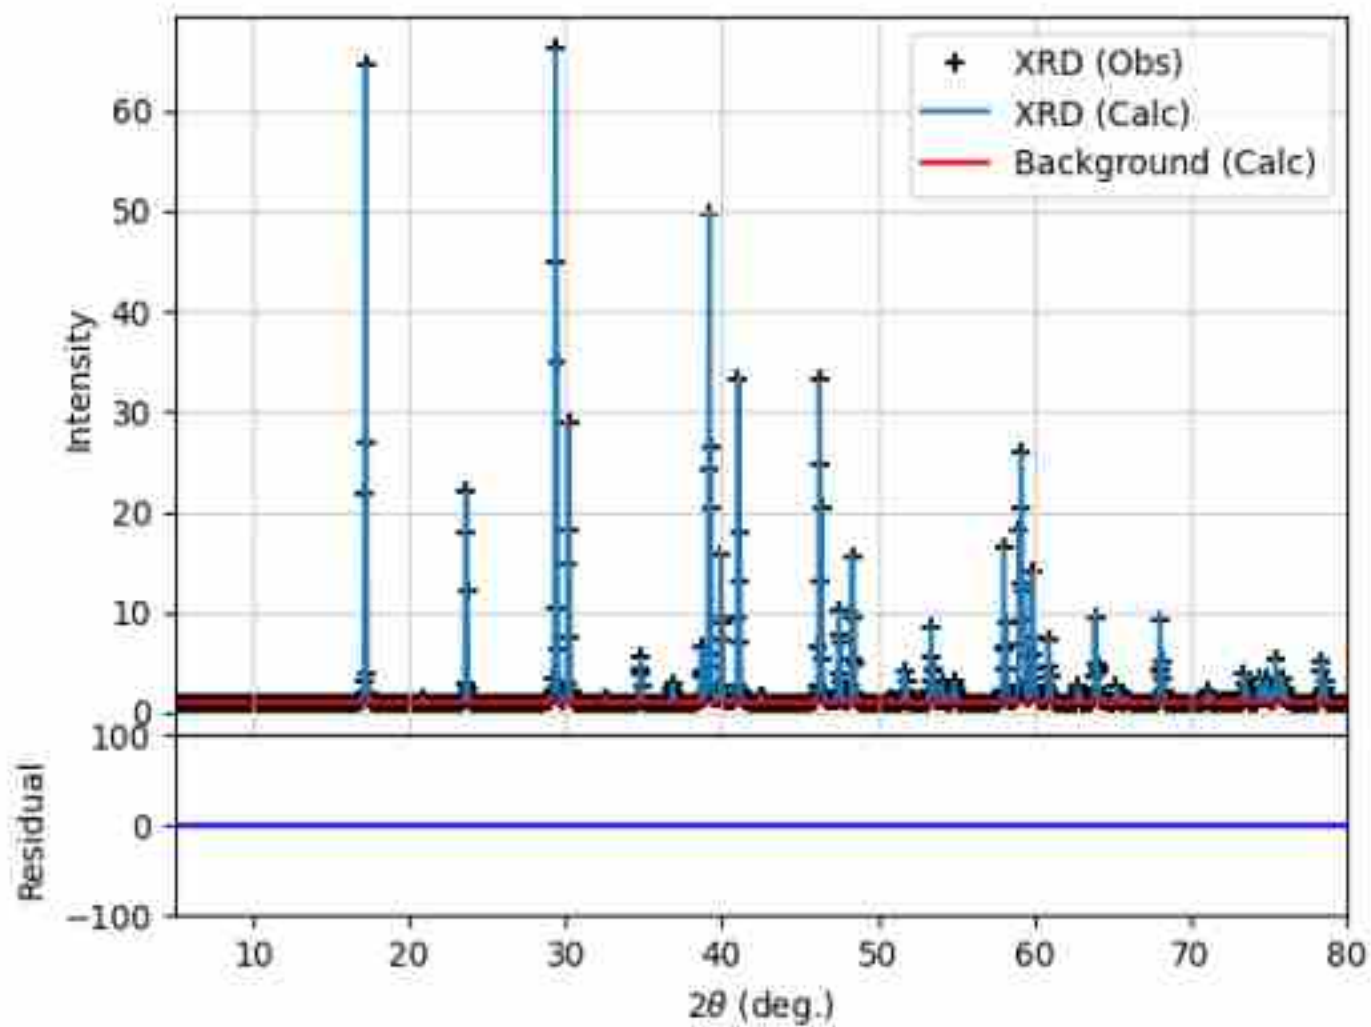

| RMSE before RR | Rwp     | RMSE after RR |
|----------------|---------|---------------|
| 0.026          | 0.00239 | 0.00062       |

# Na<sub>2</sub>Tl<sub>6</sub>

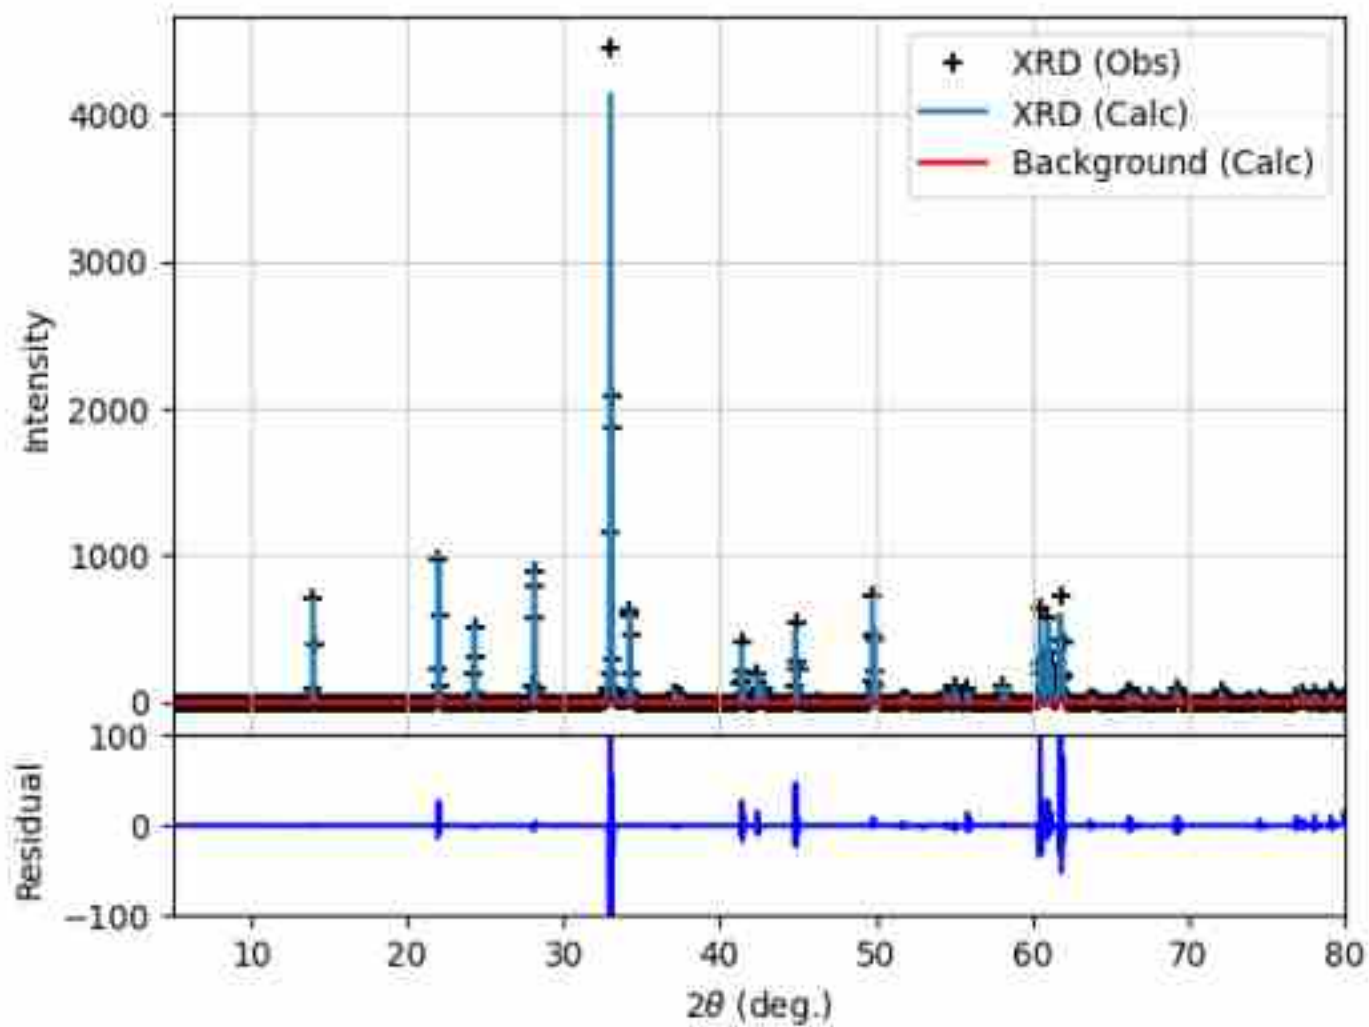

| RMSE before RR | Rwp     | RMSE after RR |
|----------------|---------|---------------|
| 0.026          | 7.88209 | 0.01765       |

# Na<sub>3</sub>Cd<sub>2</sub>Ir<sub>1</sub>O<sub>6</sub>

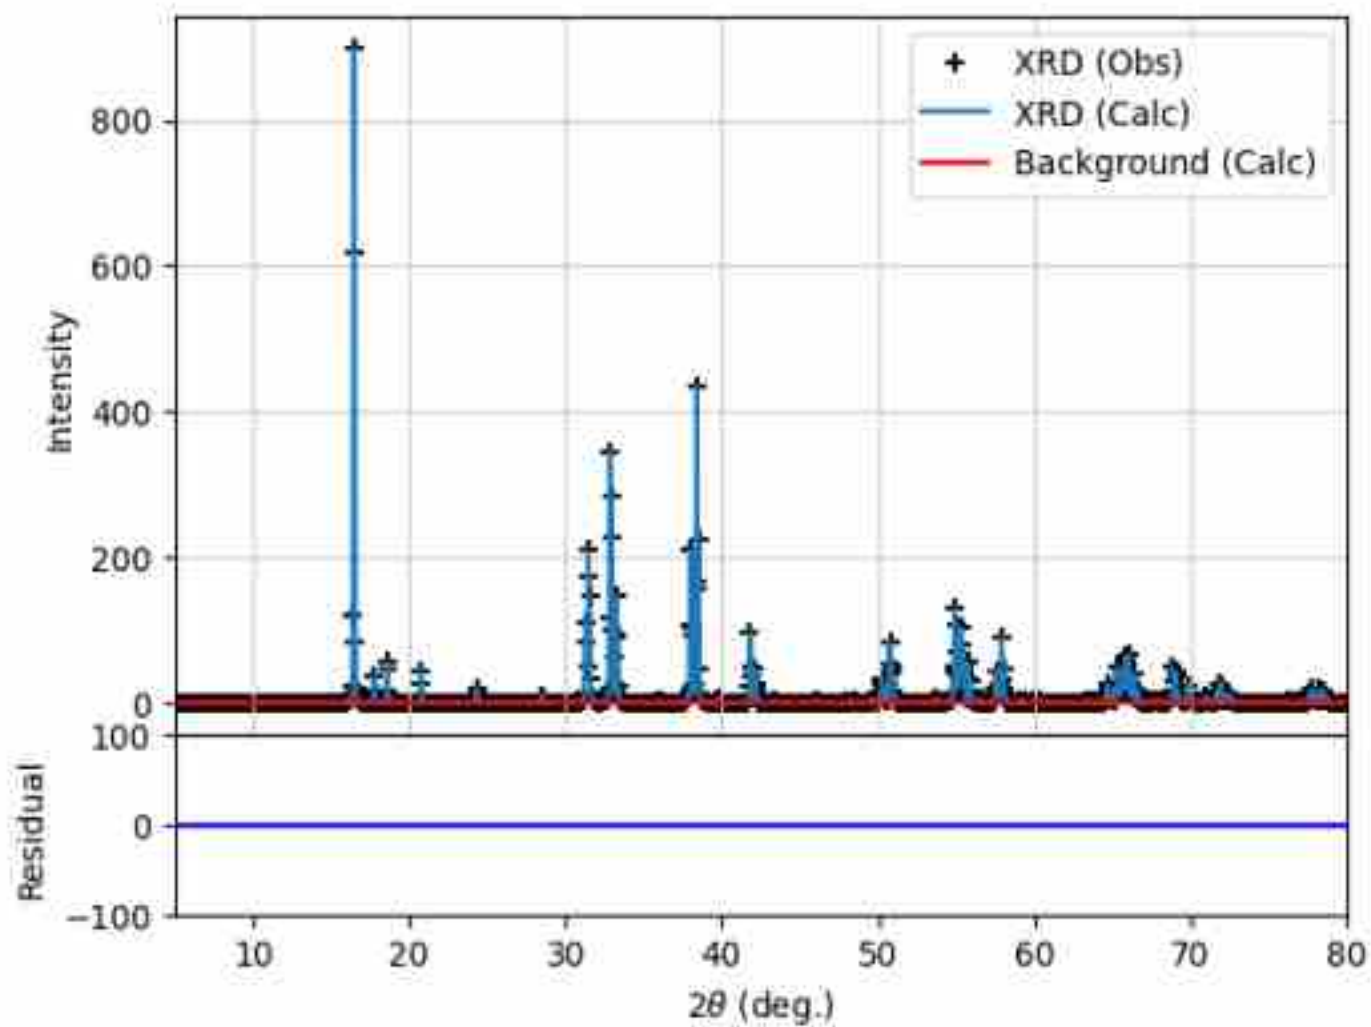

| RMSE before RR | Rwp     | RMSE after RR |
|----------------|---------|---------------|
| 0.026          | 0.00317 | 0.00112       |

# Na<sub>4</sub>Fe<sub>4</sub>F<sub>12</sub>

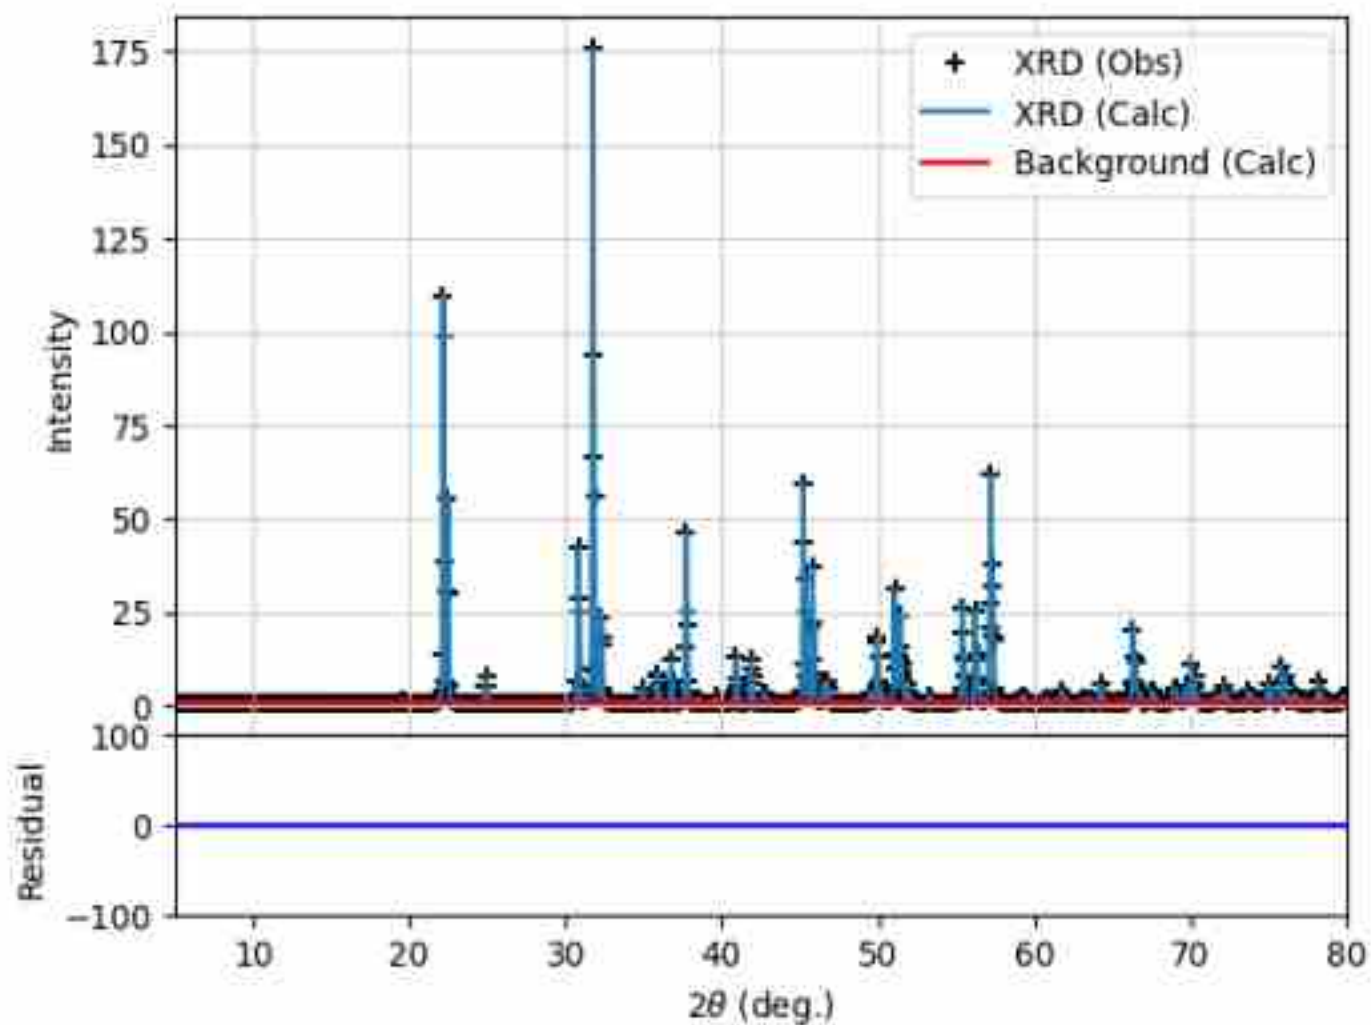

| RMSE before RR | Rwp     | RMSE after RR |
|----------------|---------|---------------|
| 0.026          | 0.00324 | 0.00065       |

# Na<sub>4</sub>Fe<sub>4</sub>O<sub>8</sub>

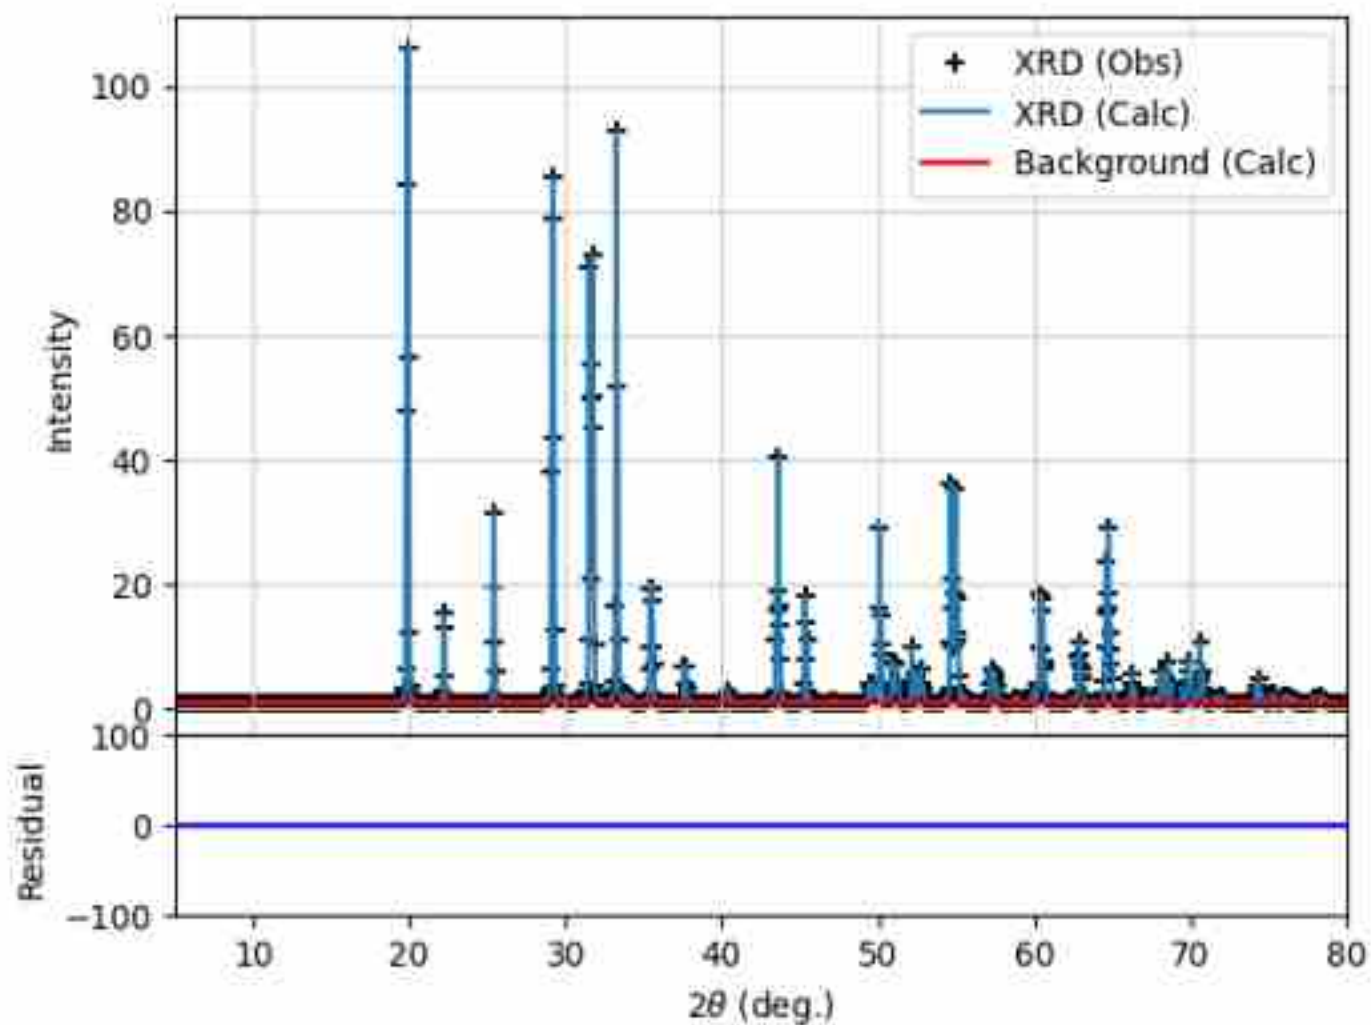

| RMSE before RR | Rwp     | RMSE after RR |
|----------------|---------|---------------|
| 0.026          | 0.00199 | 0.00072       |

# Na<sub>4</sub>V<sub>4</sub>O<sub>12</sub>

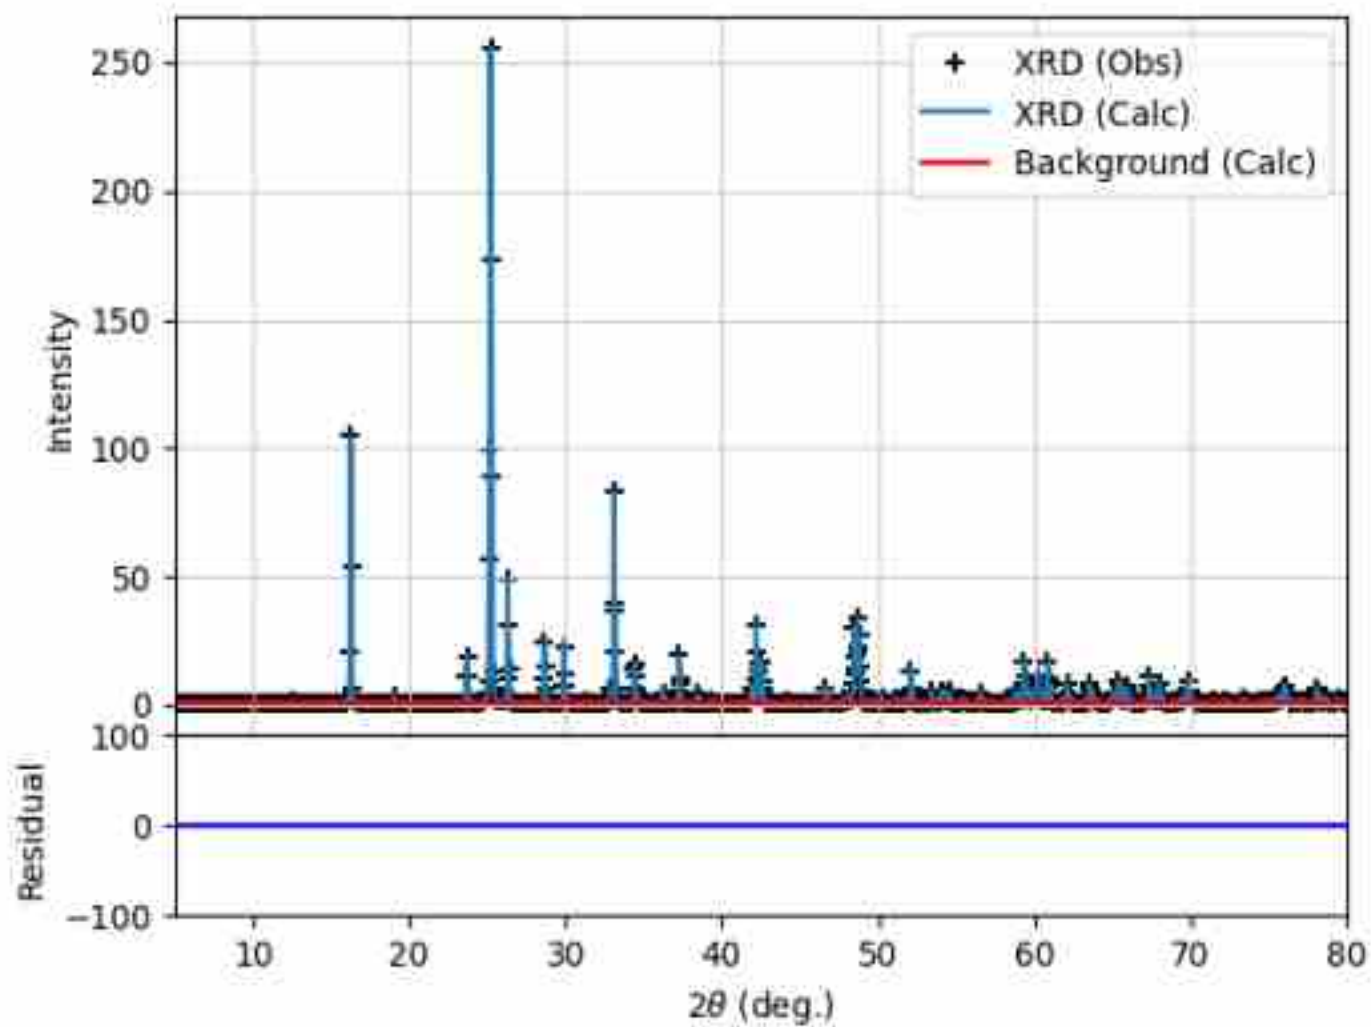

| RMSE before RR | Rwp     | RMSE after RR |
|----------------|---------|---------------|
| 0.026          | 0.00274 | 0.00082       |



# Na<sub>8</sub>Pb<sub>2</sub>O<sub>8</sub>

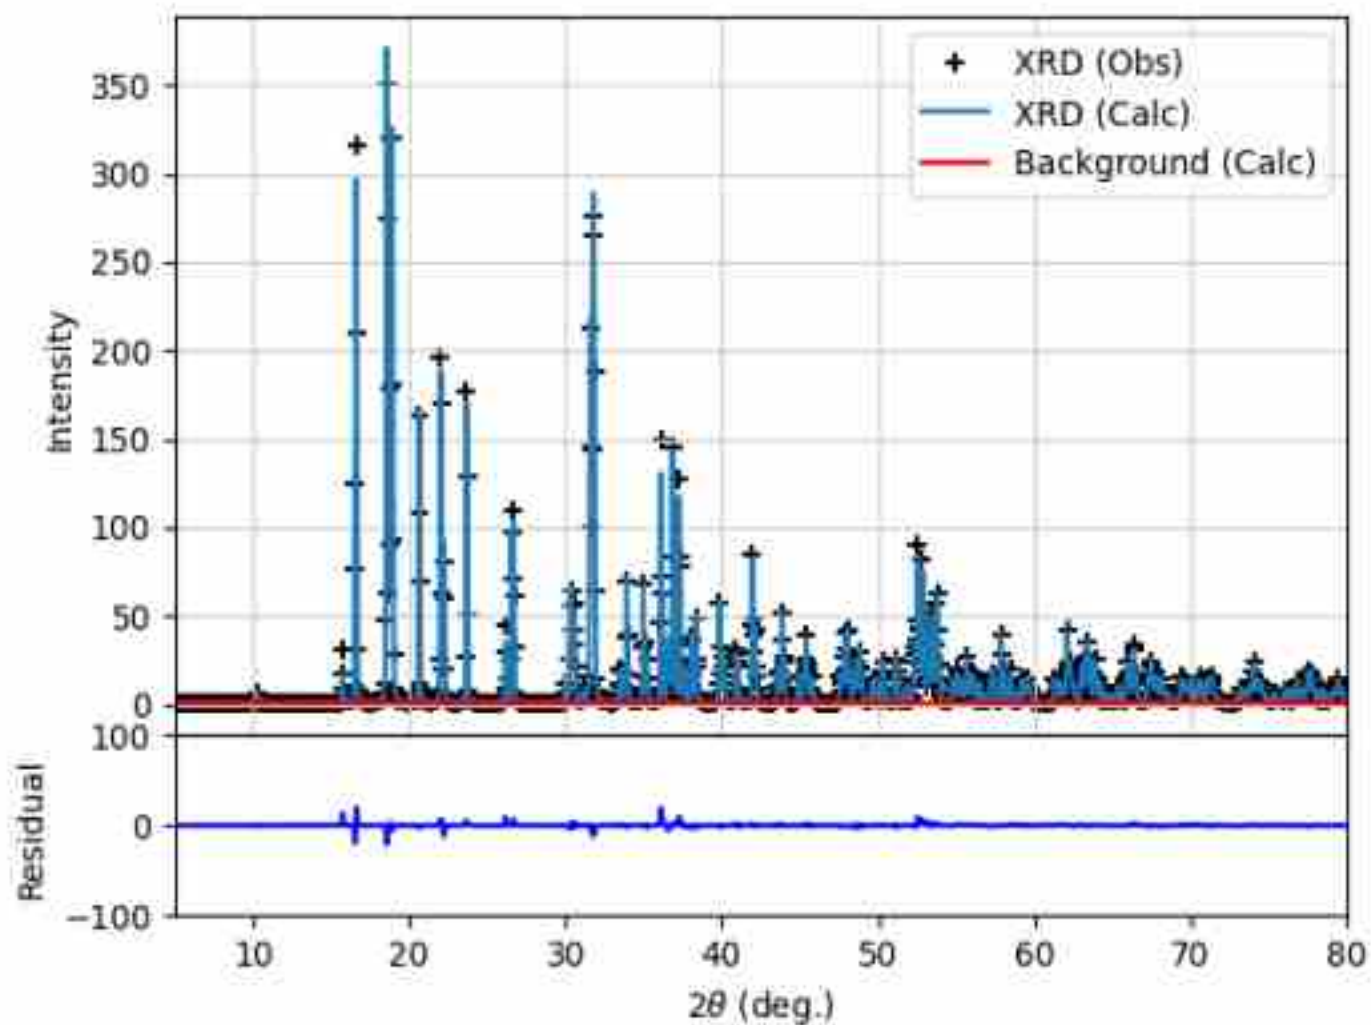

| RMSE before RR | Rwp     | RMSE after RR |
|----------------|---------|---------------|
| 0.026          | 6.55069 | 0.34195       |

# Nb<sub>2</sub>Al<sub>2</sub>V<sub>2</sub>C<sub>2</sub>

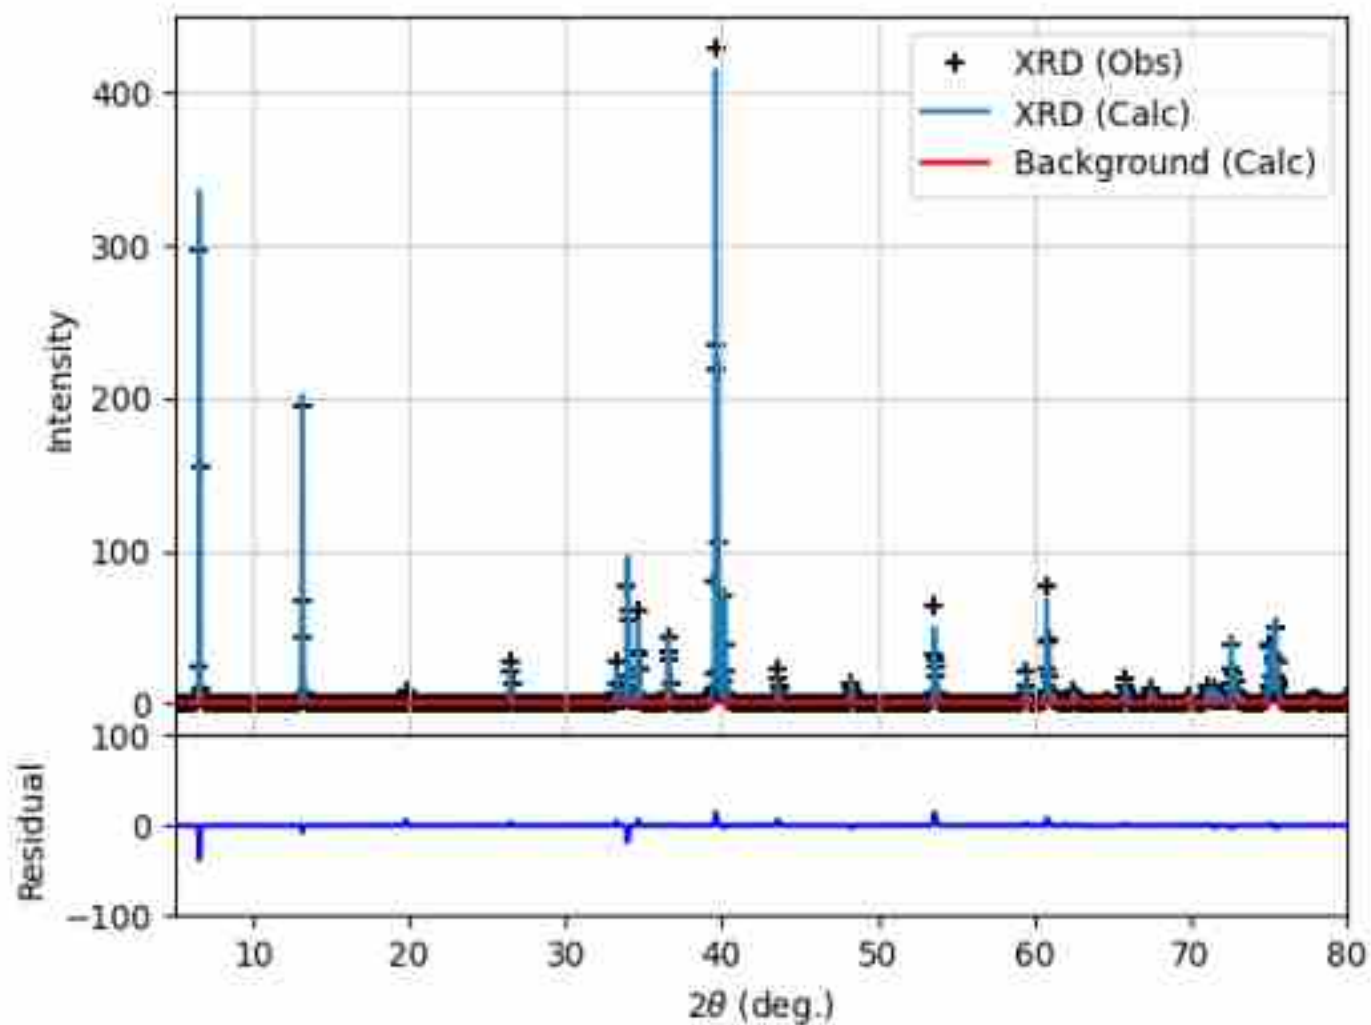

| RMSE before RR | Rwp      | RMSE after RR |
|----------------|----------|---------------|
| 0.026          | 10.54783 | 0.03613       |

# Nd8Te12

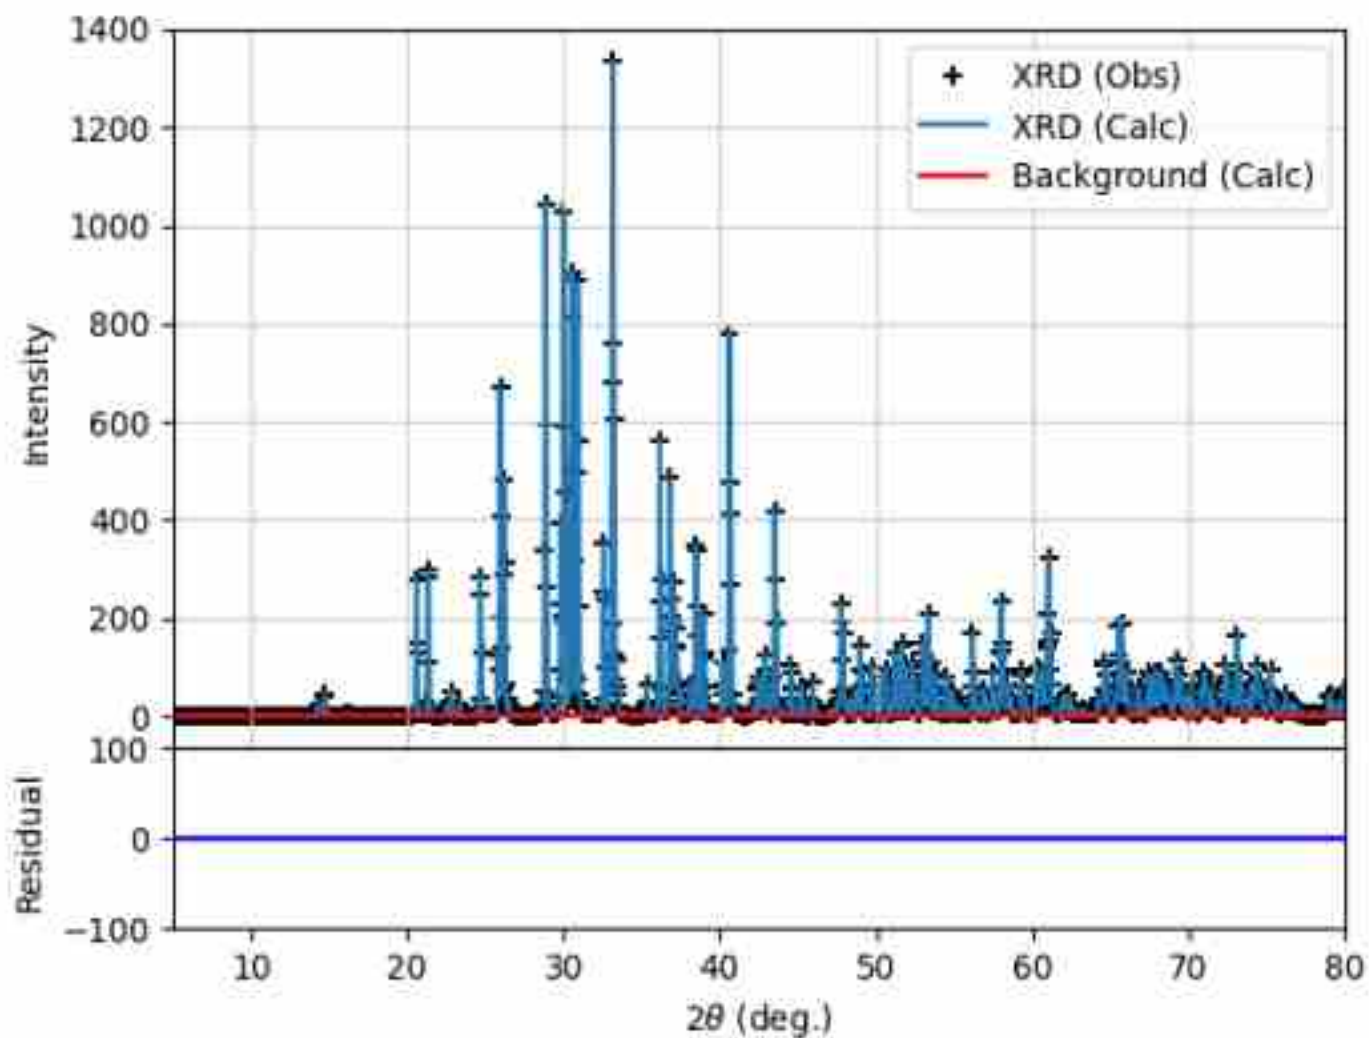

| RMSE before RR | Rwp     | RMSE after RR |
|----------------|---------|---------------|
| 0.026          | 0.00385 | 0.00036       |

# Ni<sub>4</sub>Sb<sub>4</sub>S<sub>4</sub>

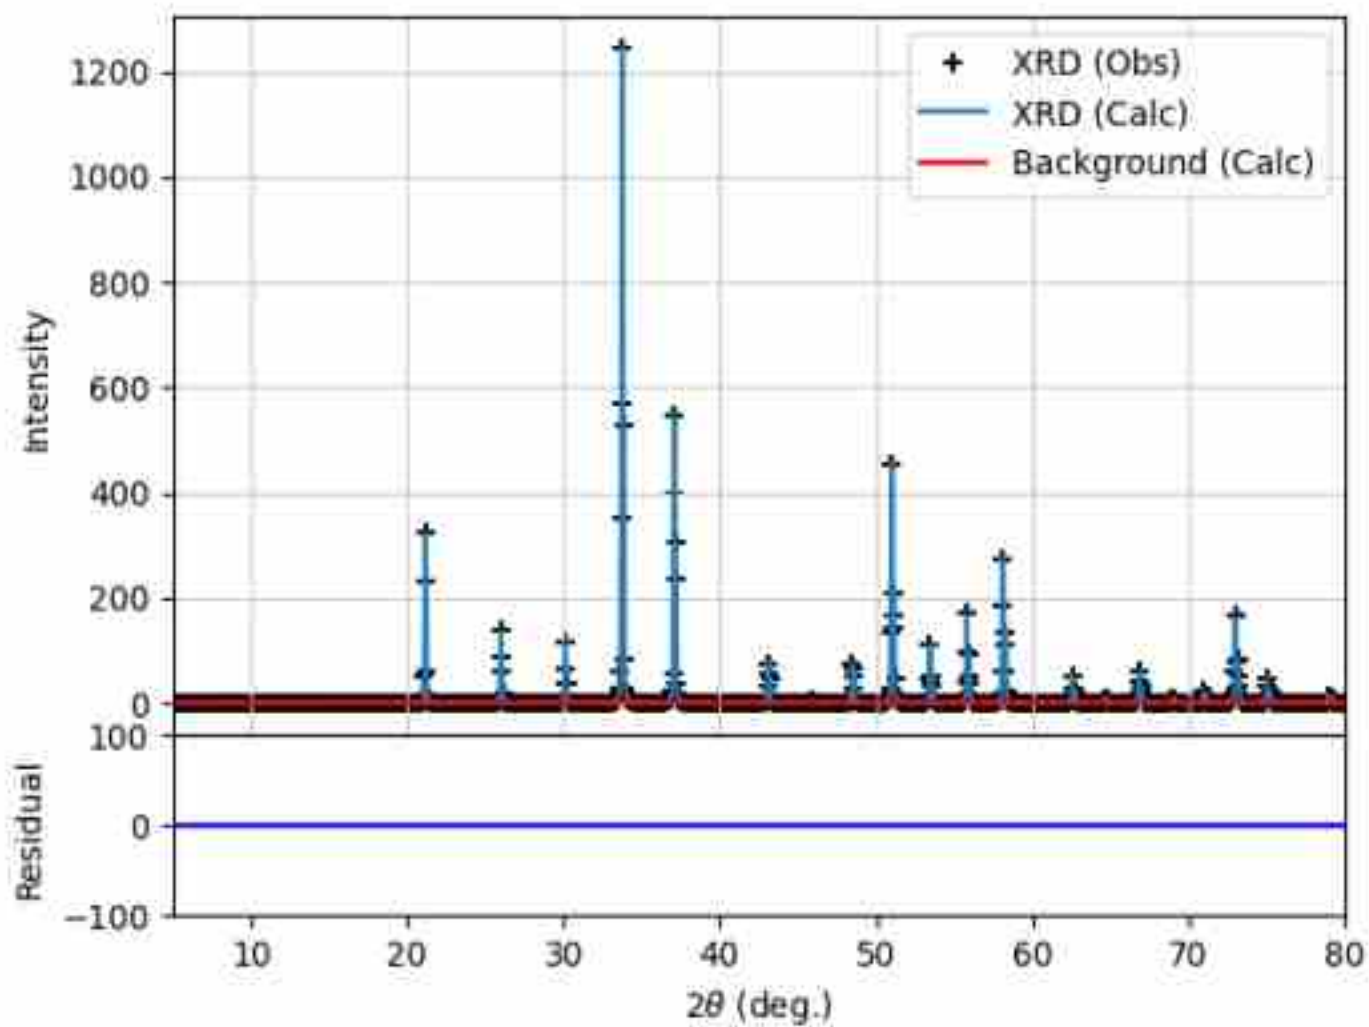

| RMSE before RR | Rwp     | RMSE after RR |
|----------------|---------|---------------|
| 0.026          | 0.00405 | 0.00071       |

# Pr<sub>1</sub>Mn<sub>7</sub>O<sub>12</sub>

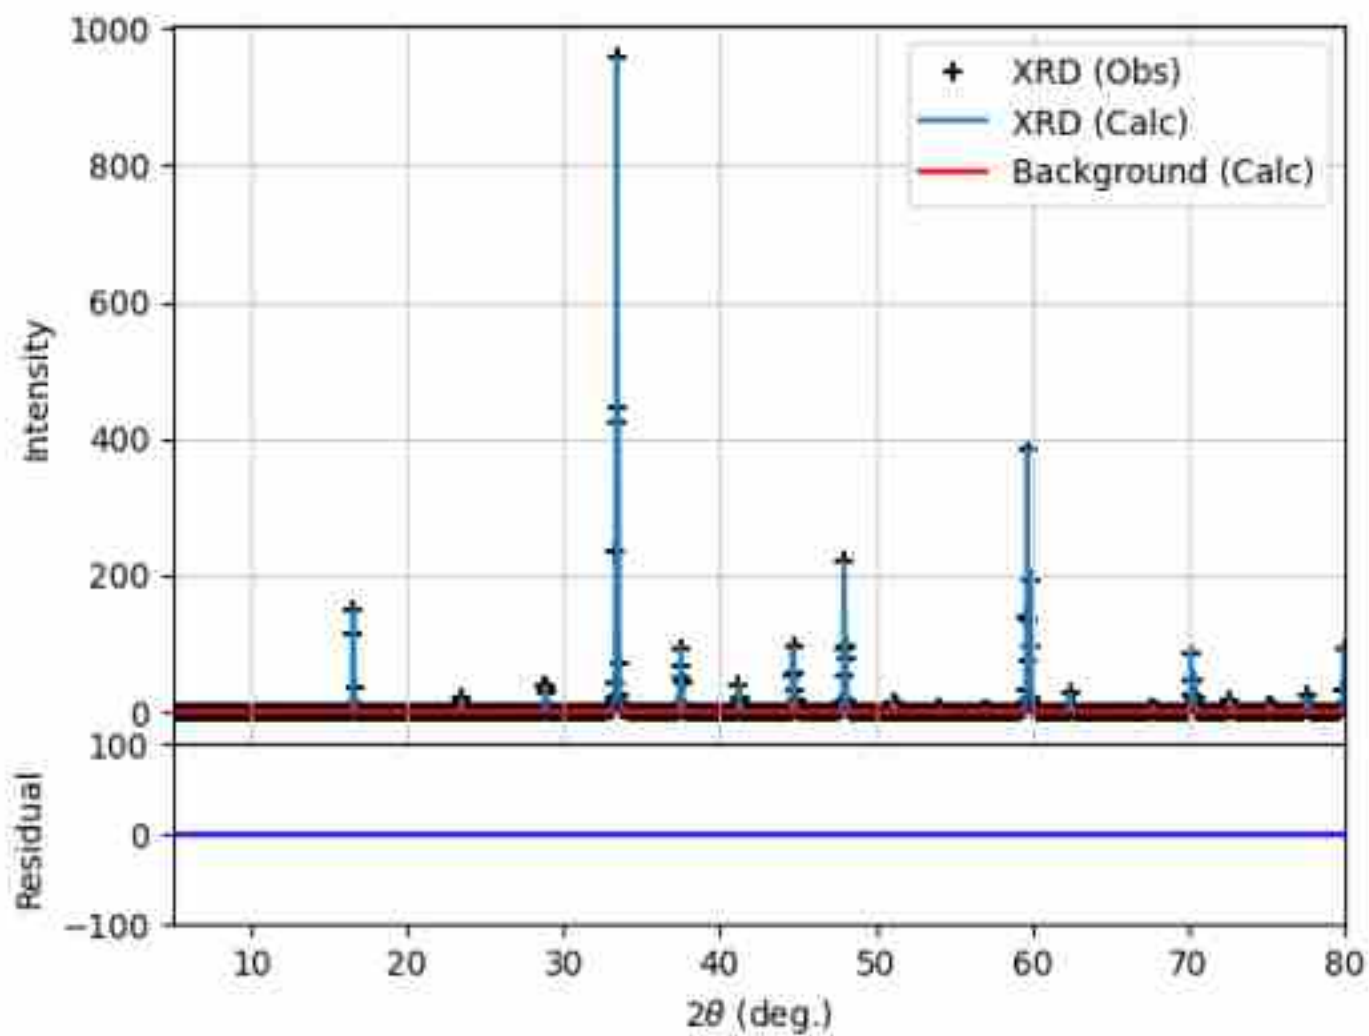

| RMSE before RR | Rwp     | RMSE after RR |
|----------------|---------|---------------|
| 0.026          | 0.00889 | 0.00417       |

# Rb1Na1Cd3O4

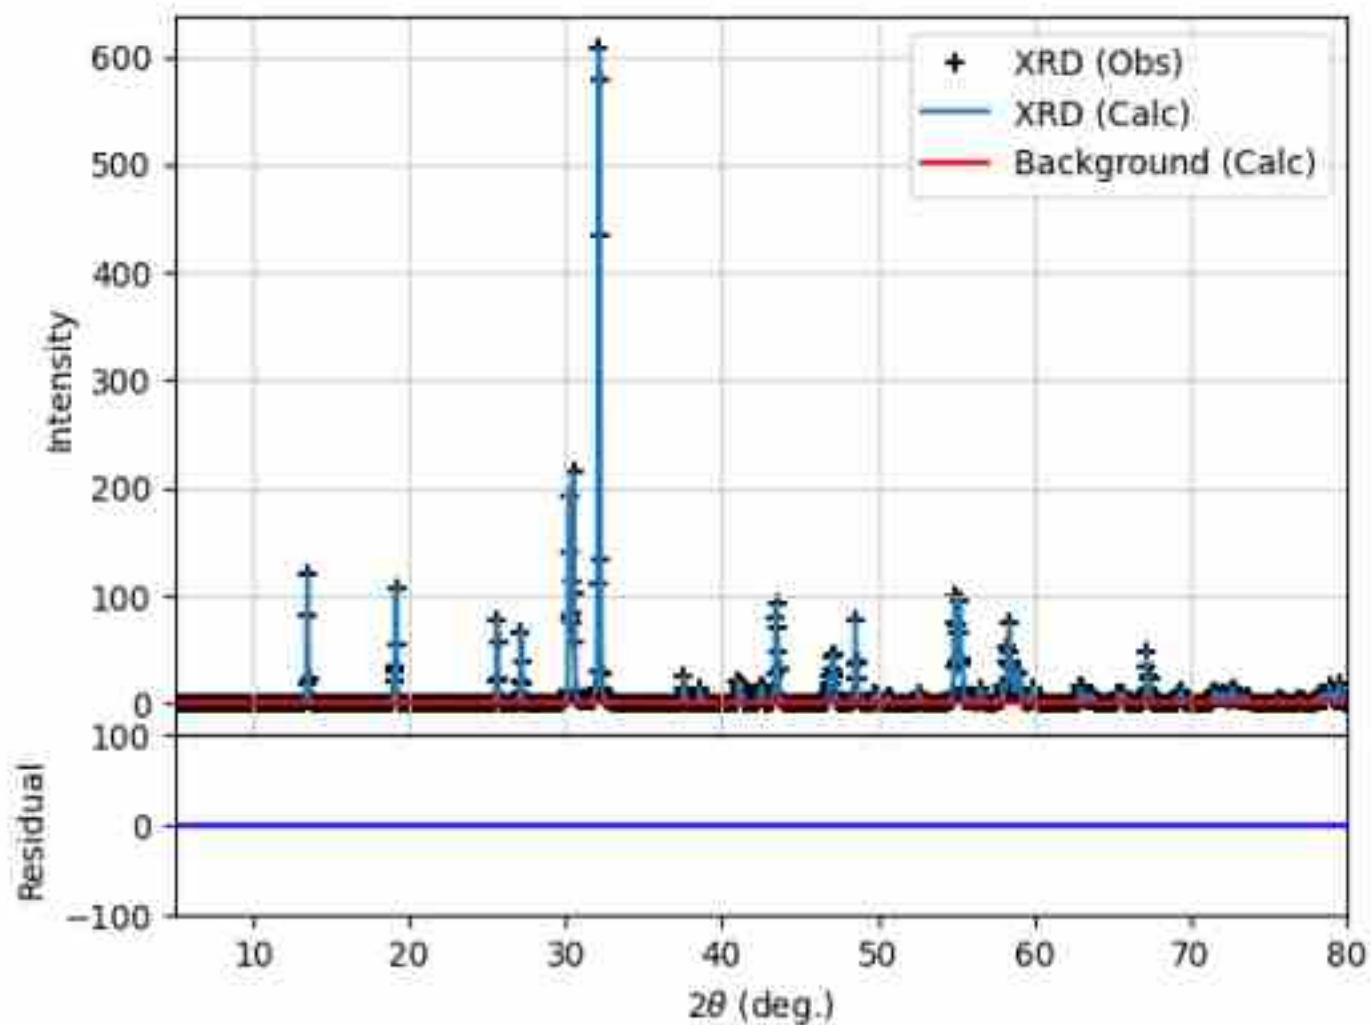

| RMSE before RR | Rwp     | RMSE after RR |
|----------------|---------|---------------|
| 0.026          | 0.00241 | 0.0004        |

# Rb2Co1F6

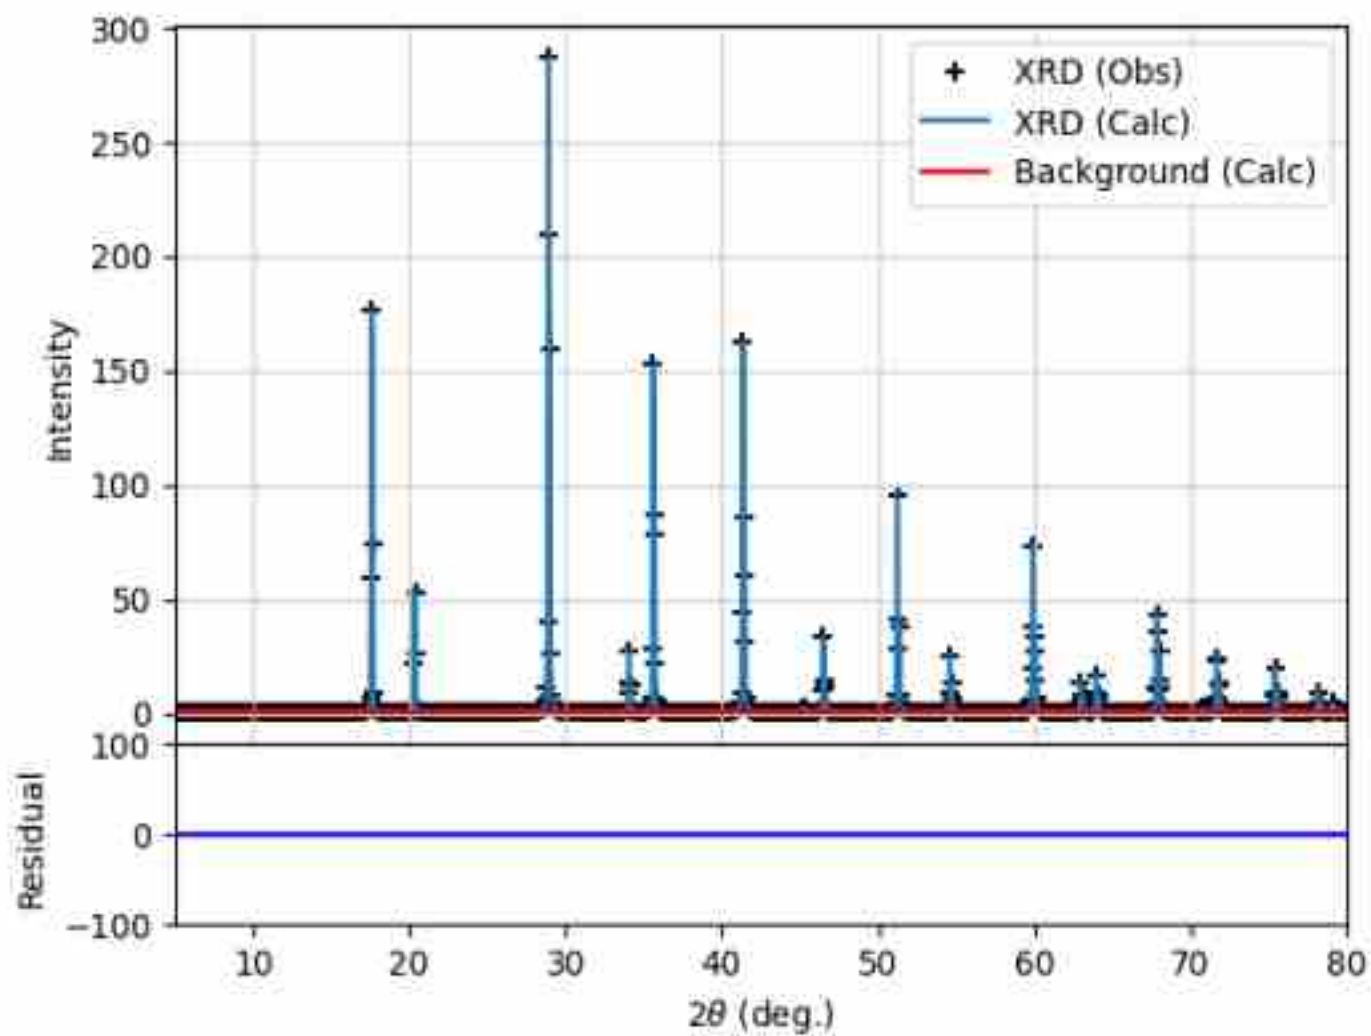

| RMSE before RR | Rwp     | RMSE after RR |
|----------------|---------|---------------|
| 0.026          | 0.09217 | 0.00732       |

# Rb<sub>2</sub>Hf<sub>2</sub>O<sub>5</sub>

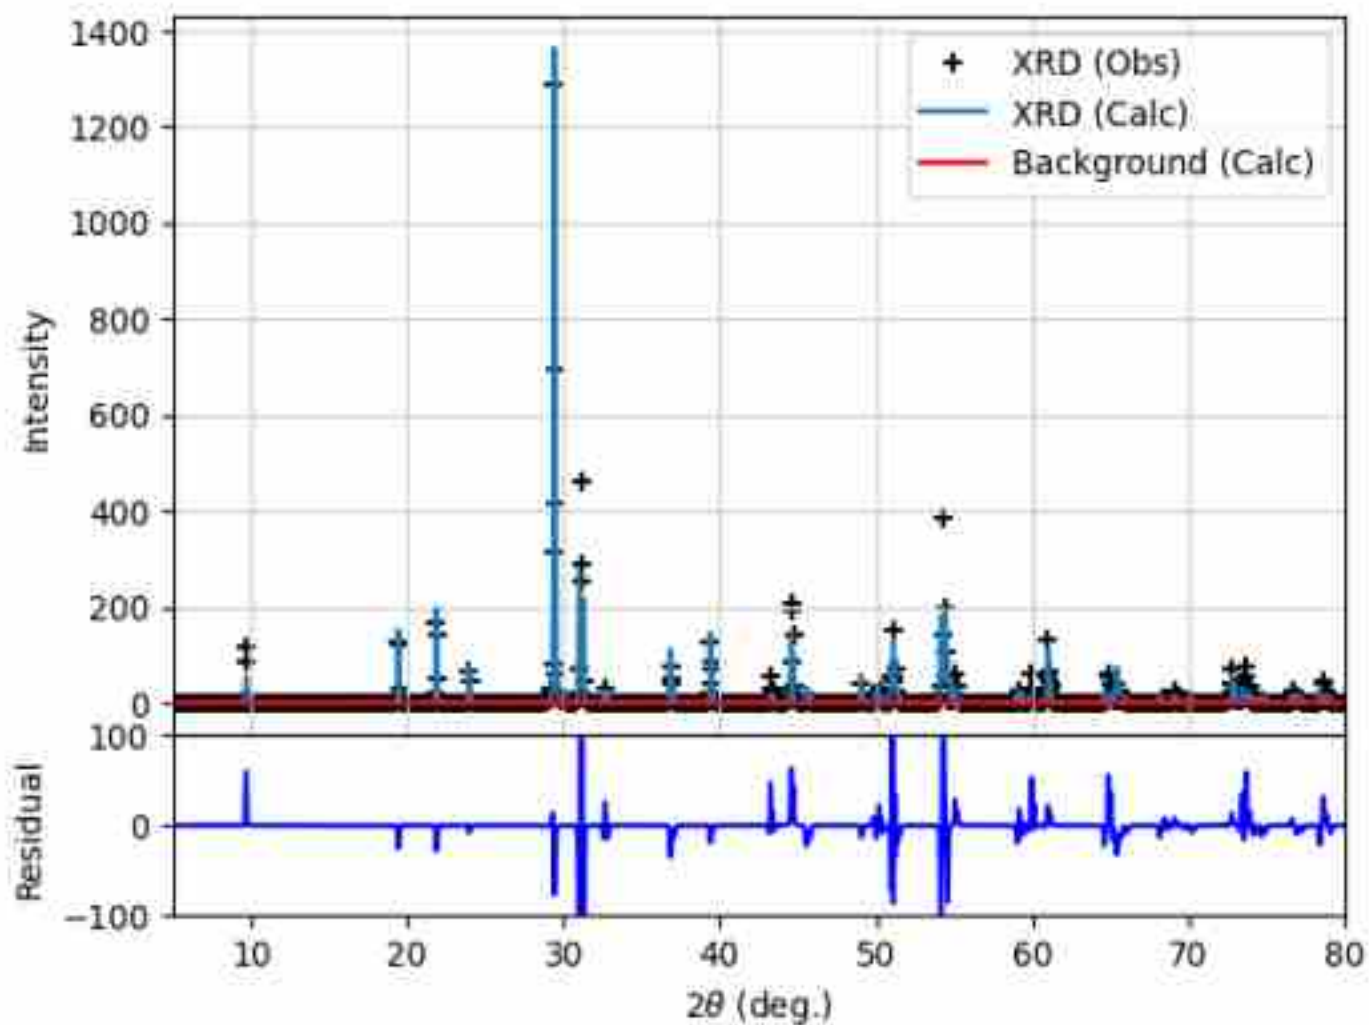

| RMSE before RR | Rwp   | RMSE after RR |
|----------------|-------|---------------|
| 0.026          | 100.0 | 0.33914       |



# Rb<sub>2</sub>Sm<sub>2</sub>I<sub>6</sub>

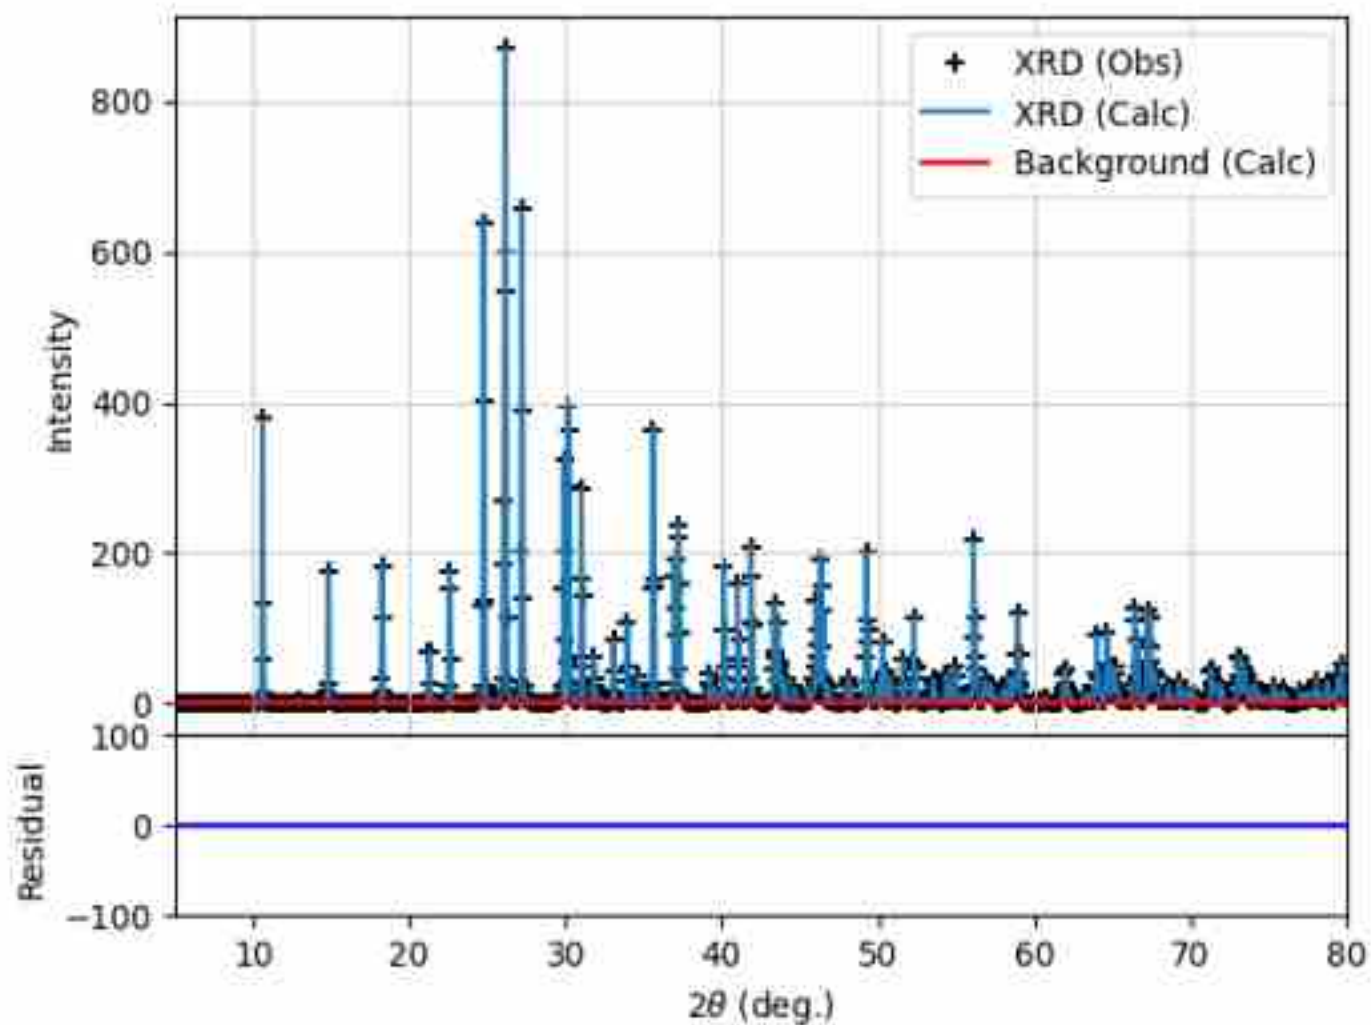

| RMSE before RR | Rwp     | RMSE after RR |
|----------------|---------|---------------|
| 0.026          | 0.00379 | 0.00023       |

# Rb3Al1Cl6

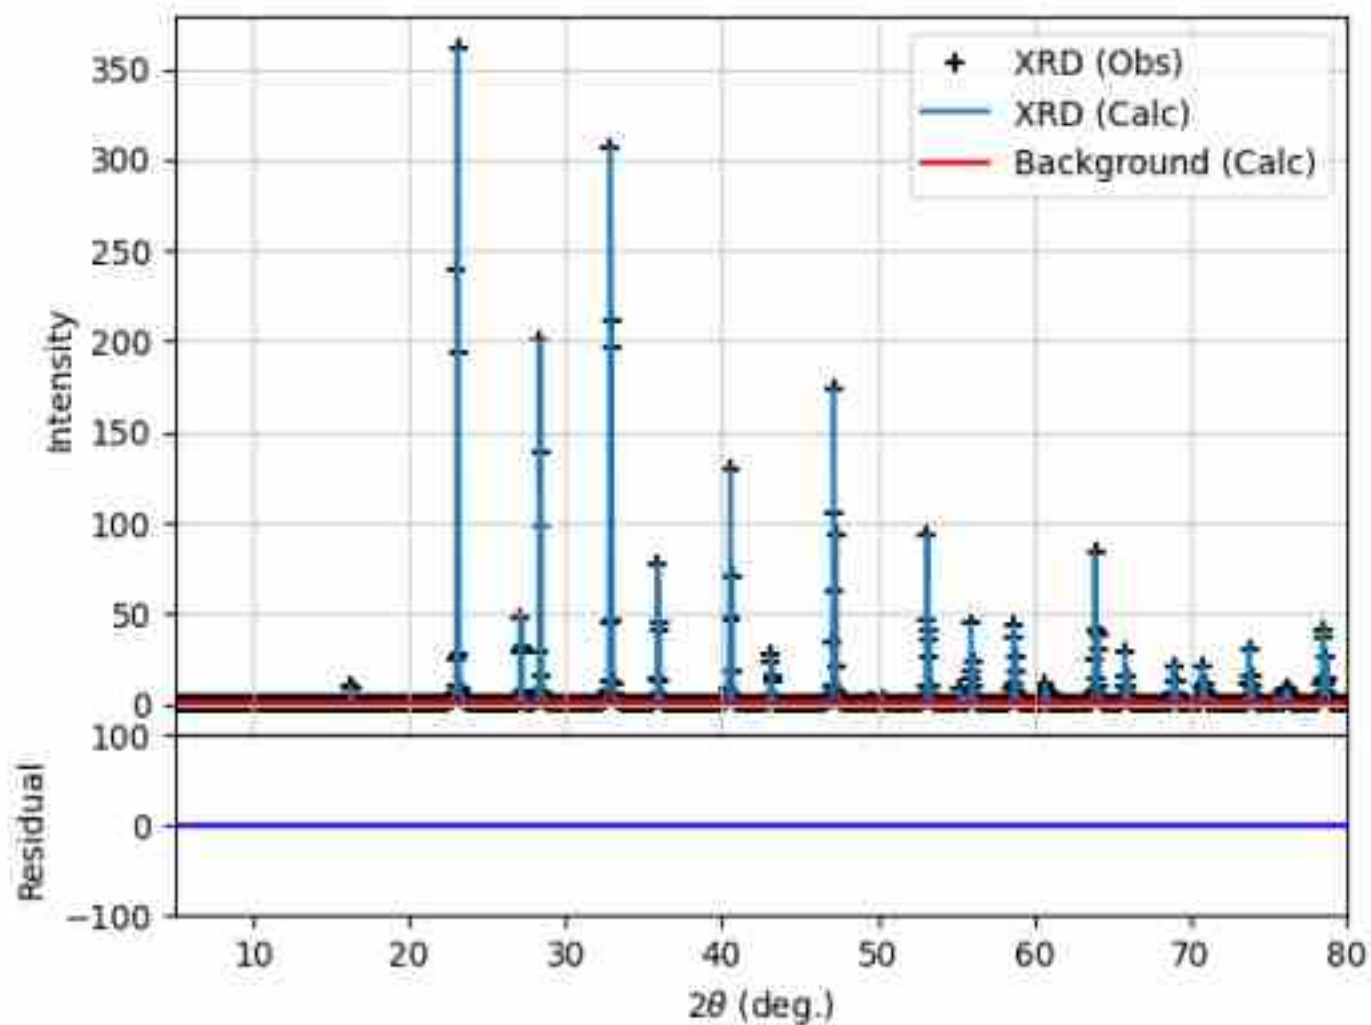

| RMSE before RR | Rwp     | RMSE after RR |
|----------------|---------|---------------|
| 0.026          | 0.04058 | 0.00311       |

# Rb3Sc1V2O8

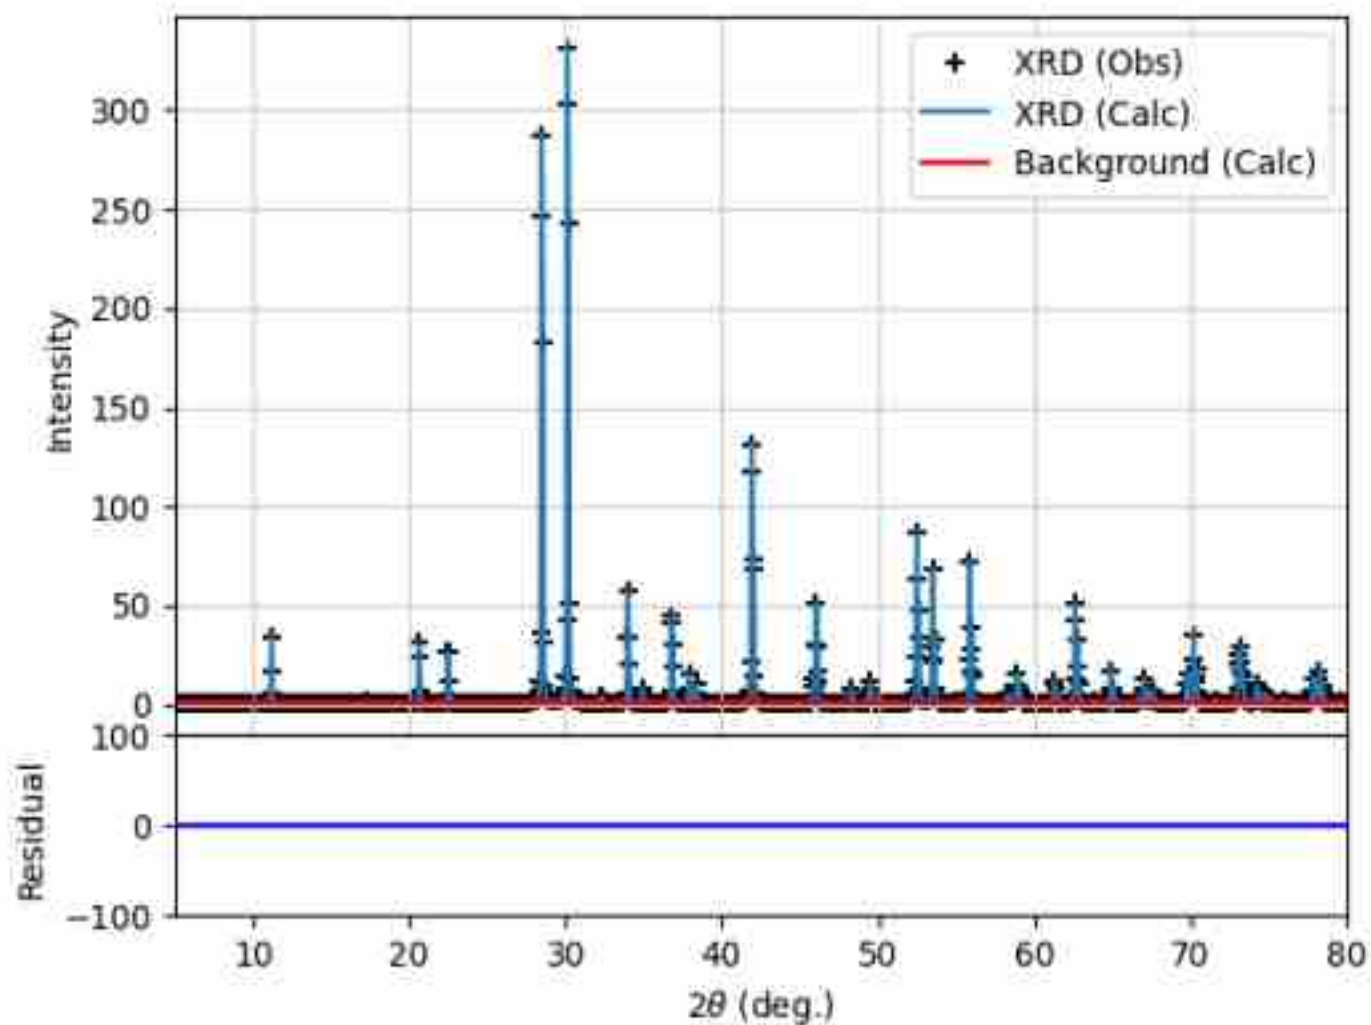

| RMSE before RR | Rwp    | RMSE after RR |
|----------------|--------|---------------|
| 0.026          | 0.0037 | 0.00084       |

# Rb4In6

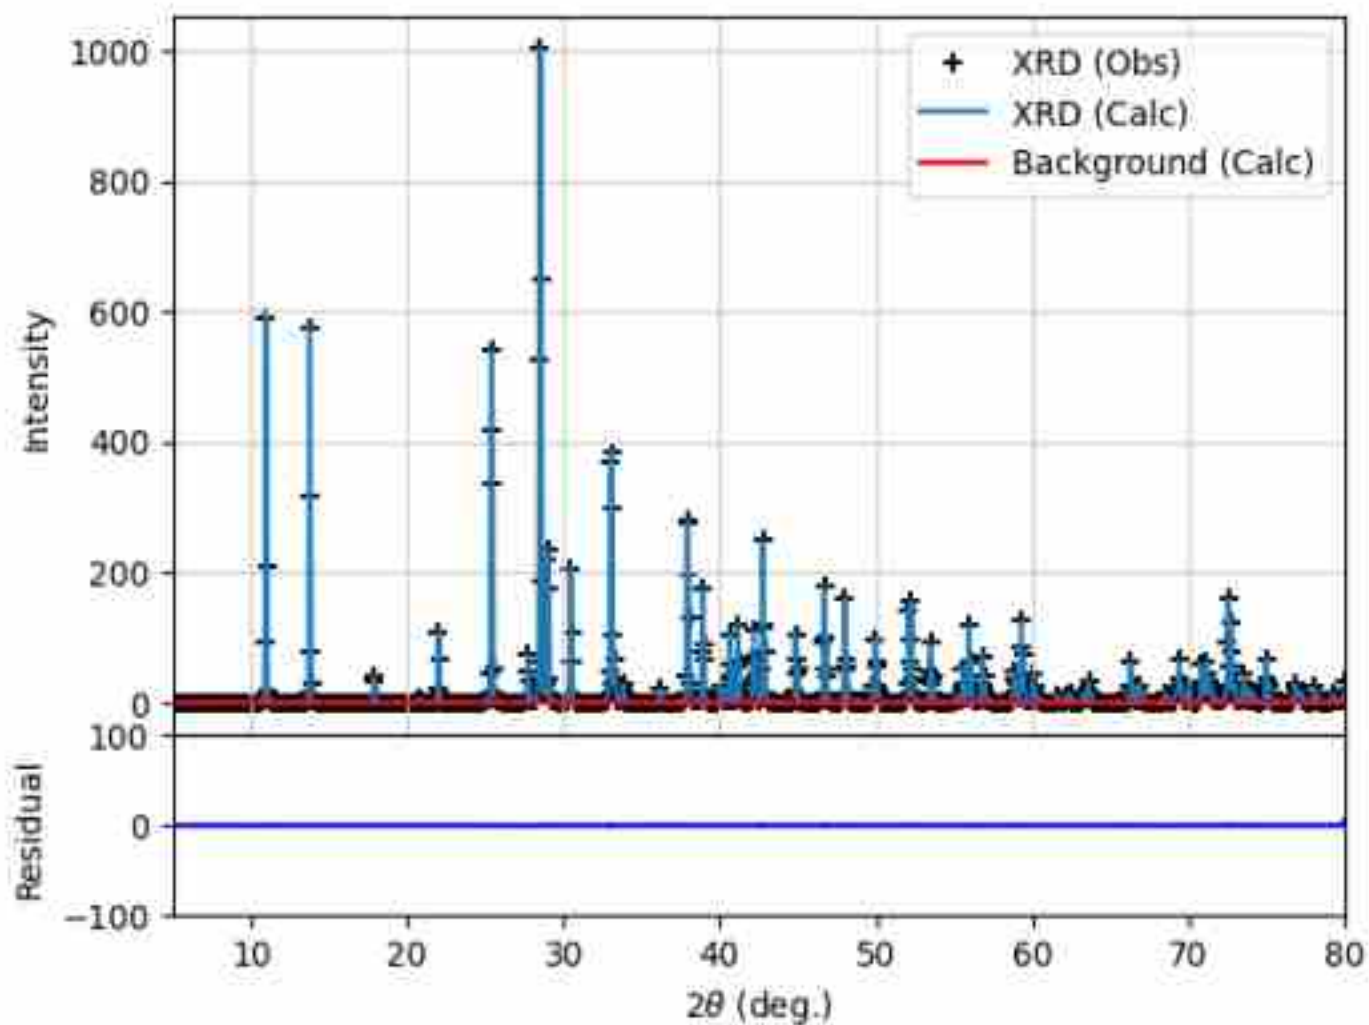

| RMSE before RR | Rwp     | RMSE after RR |
|----------------|---------|---------------|
| 0.026          | 1.05637 | 0.00714       |

# Rb<sub>4</sub>Mn<sub>6</sub>S<sub>8</sub>

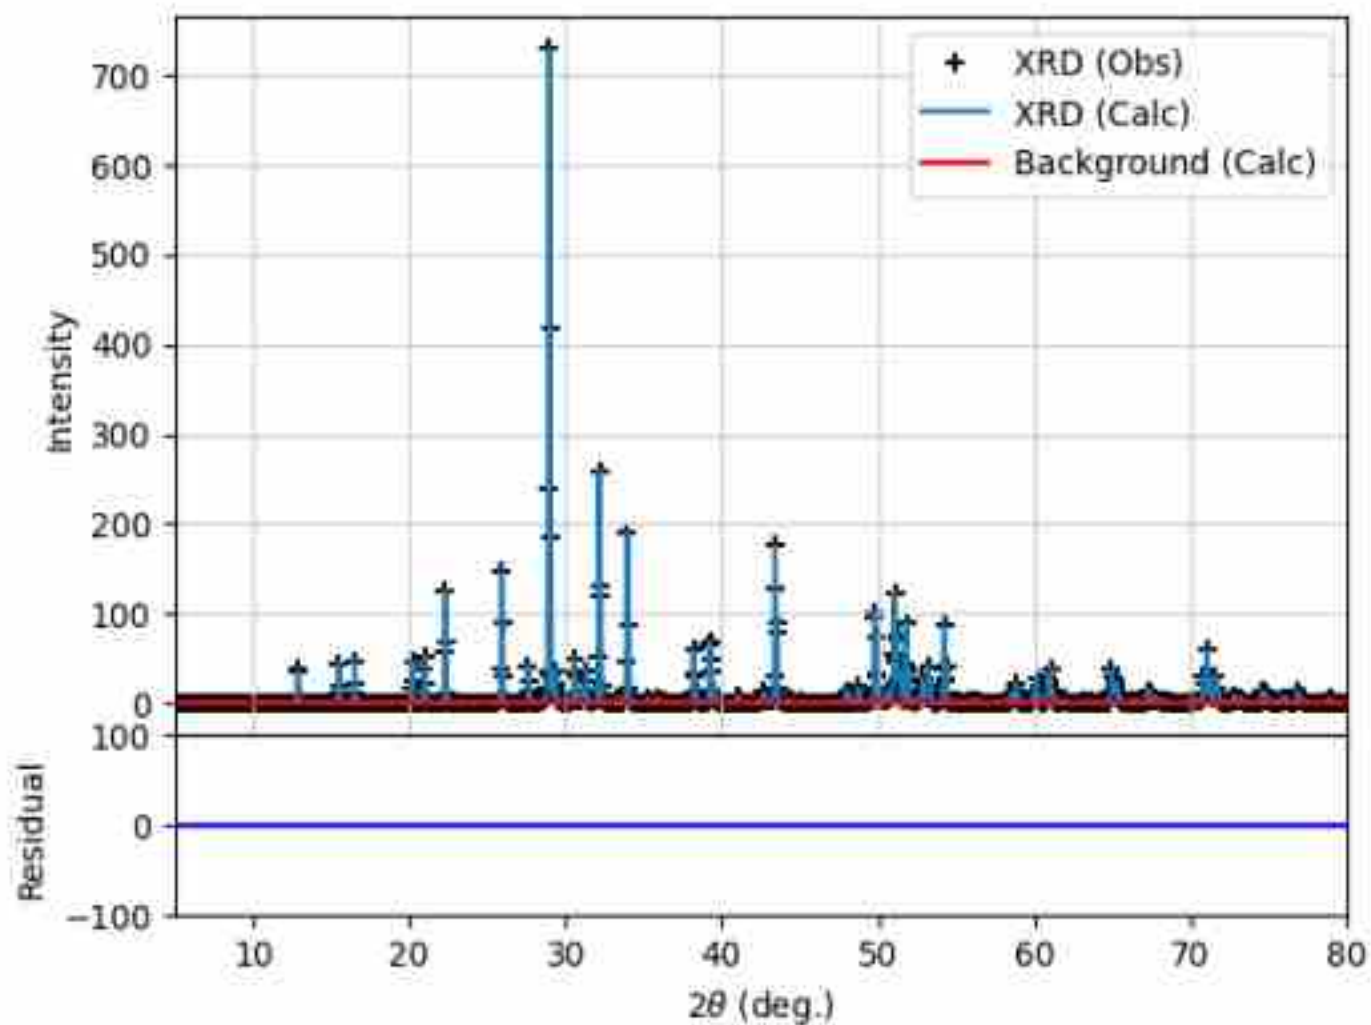

| RMSE before RR | Rwp     | RMSE after RR |
|----------------|---------|---------------|
| 0.026          | 0.00359 | 0.00035       |

# Rb4U2F12

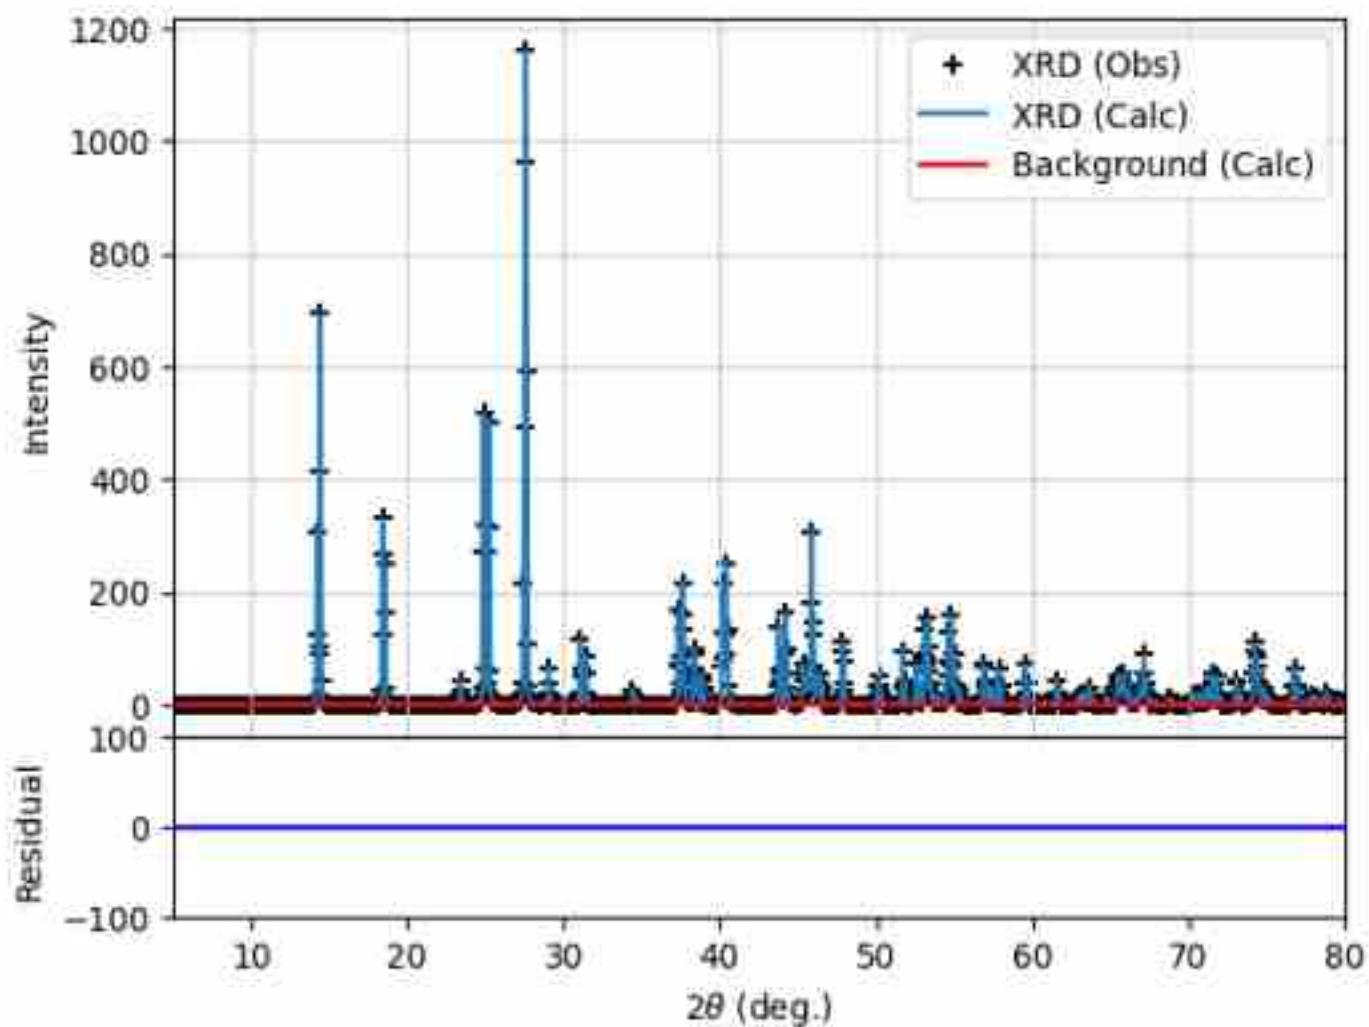

| RMSE before RR | Rwp     | RMSE after RR |
|----------------|---------|---------------|
| 0.026          | 0.00363 | 0.00142       |

# Sc1Mn4Al8

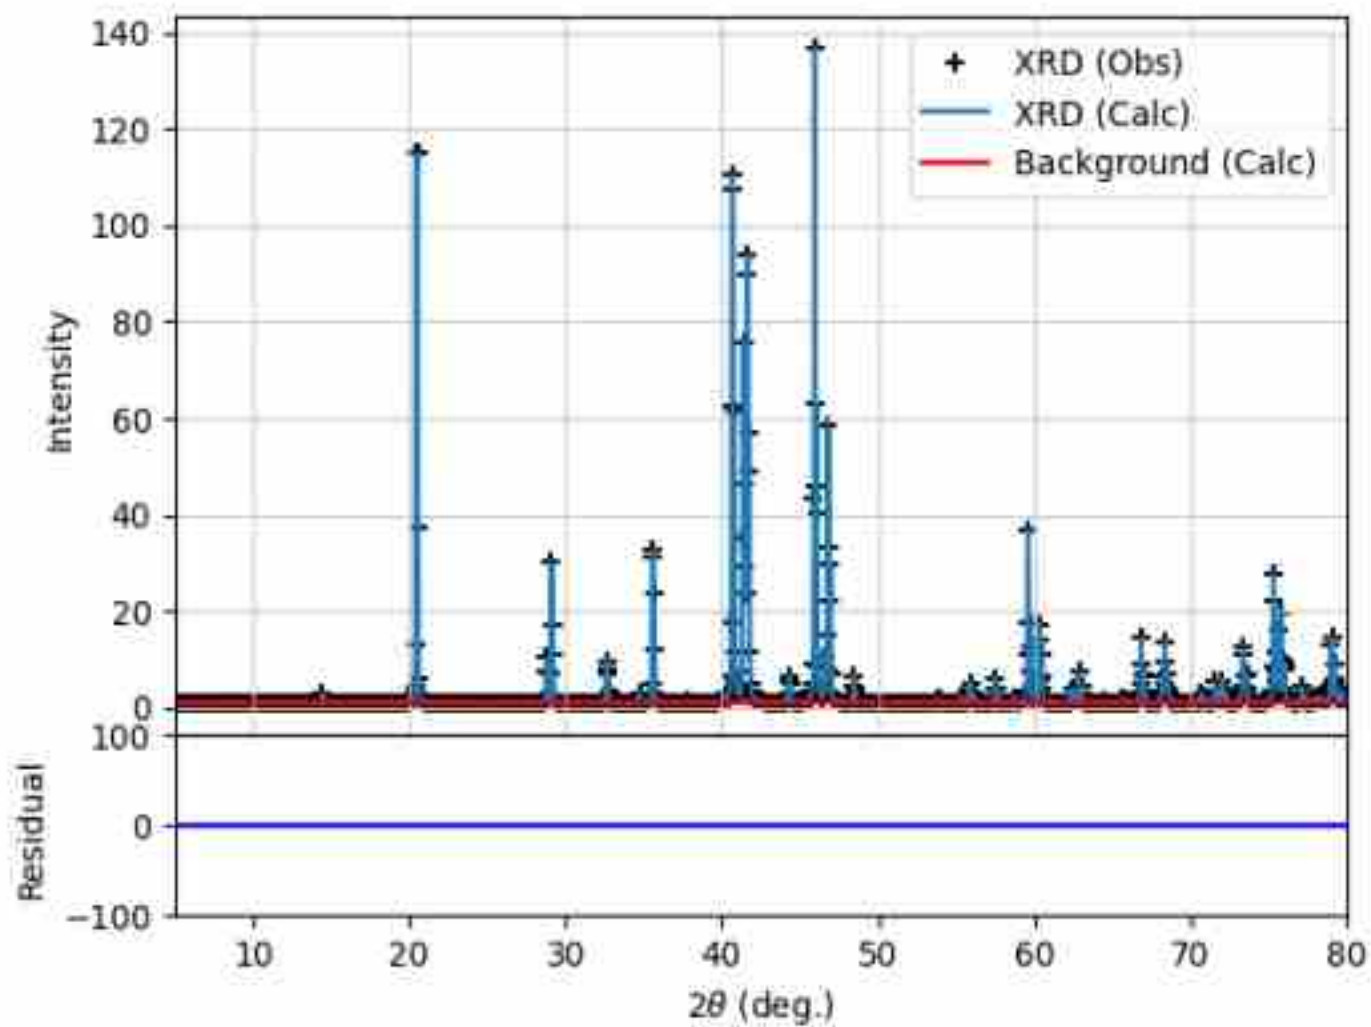

| RMSE before RR | Rwp     | RMSE after RR |
|----------------|---------|---------------|
| 0.026          | 0.00306 | 0.00069       |

# Sc<sub>4</sub>Ge<sub>6</sub>Rh<sub>7</sub>

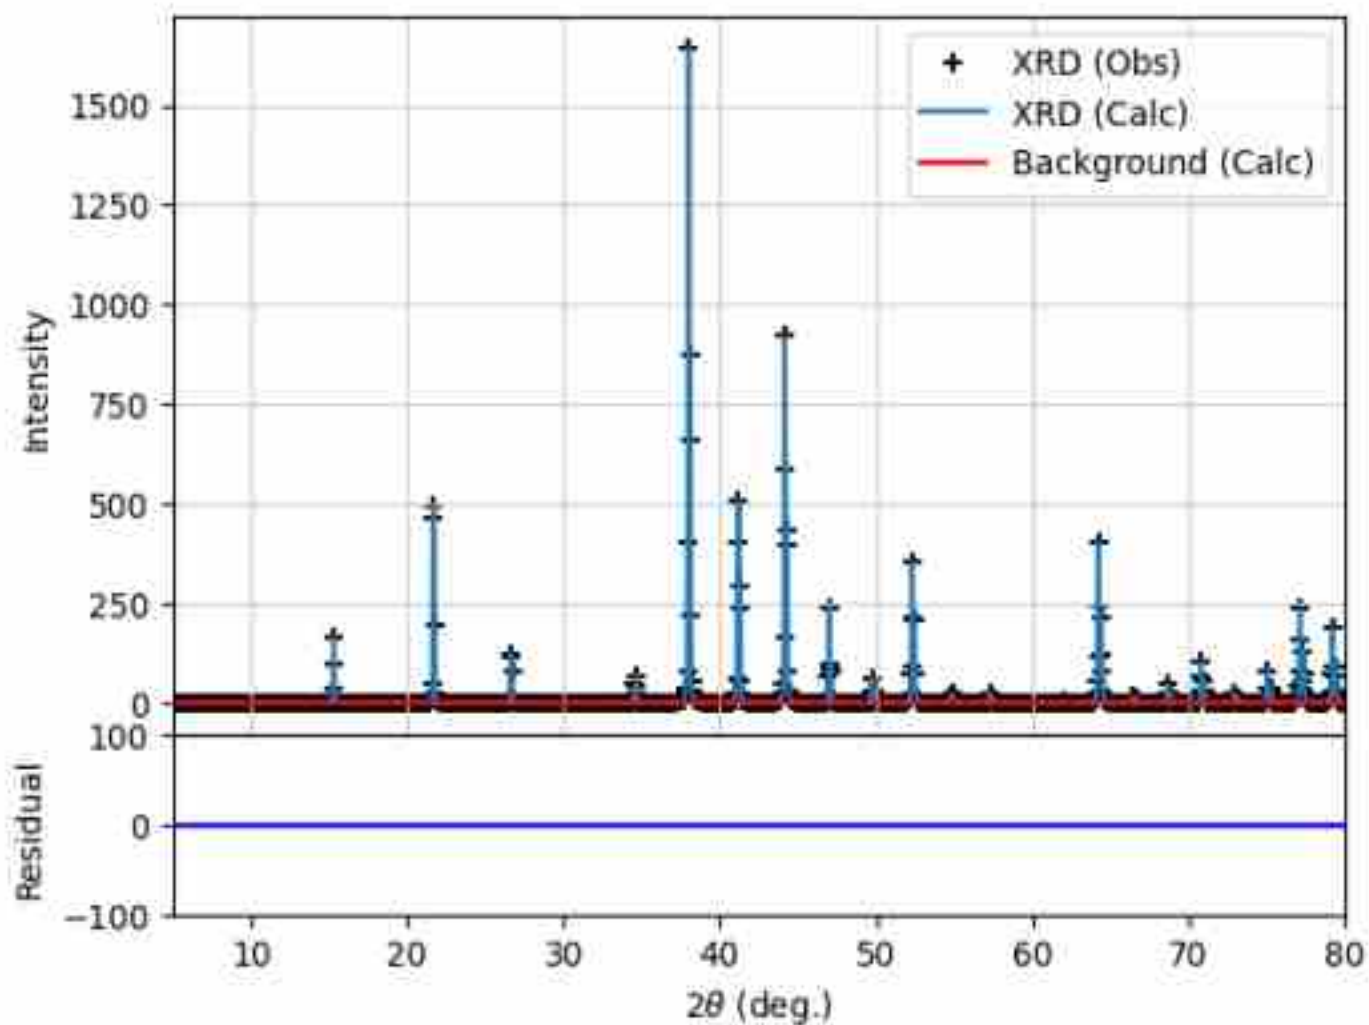

| RMSE before RR | Rwp     | RMSE after RR |
|----------------|---------|---------------|
| 0.026          | 0.01157 | 0.00166       |



# Sc6Os2C8

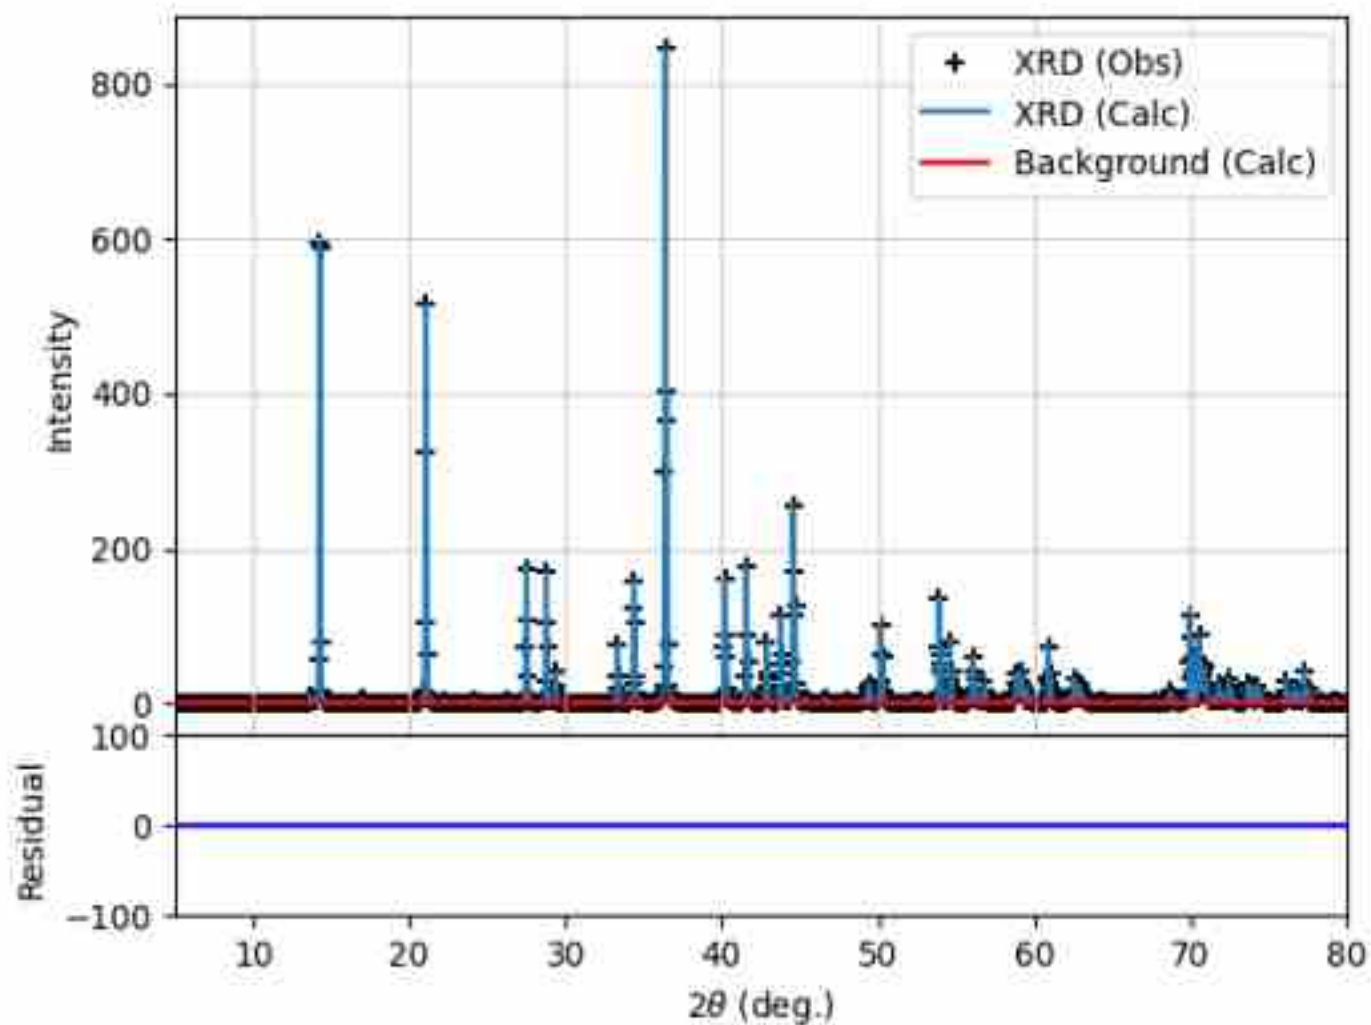

| RMSE before RR | Rwp     | RMSE after RR |
|----------------|---------|---------------|
| 0.026          | 0.00309 | 0.00078       |

# Sm4B4O12

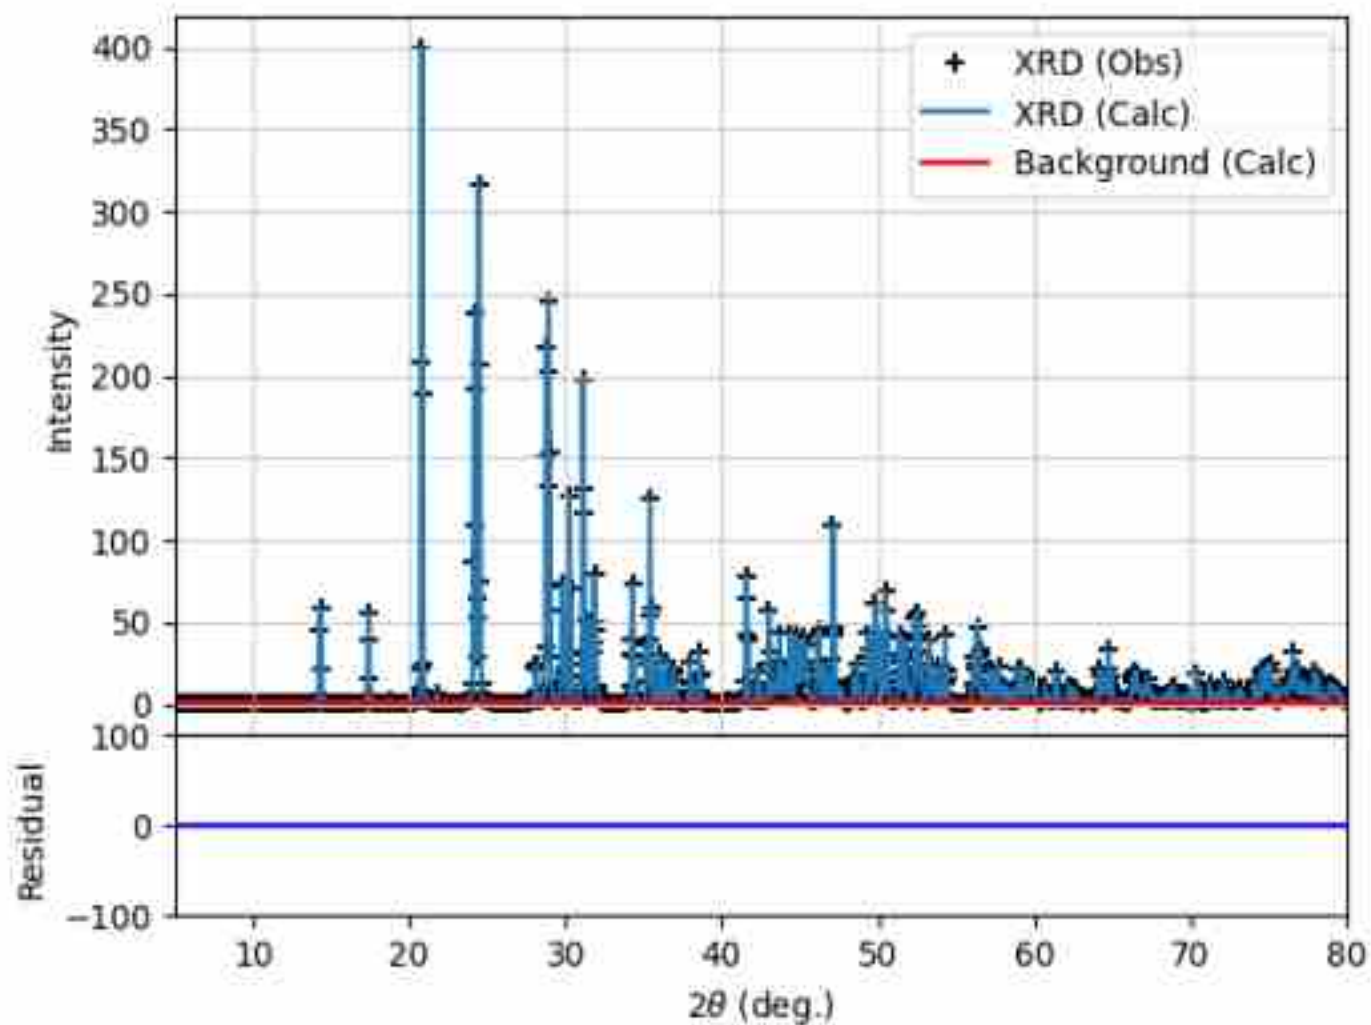

| RMSE before RR | Rwp     | RMSE after RR |
|----------------|---------|---------------|
| 0.026          | 0.00161 | 0.00069       |

# Sm8Te12

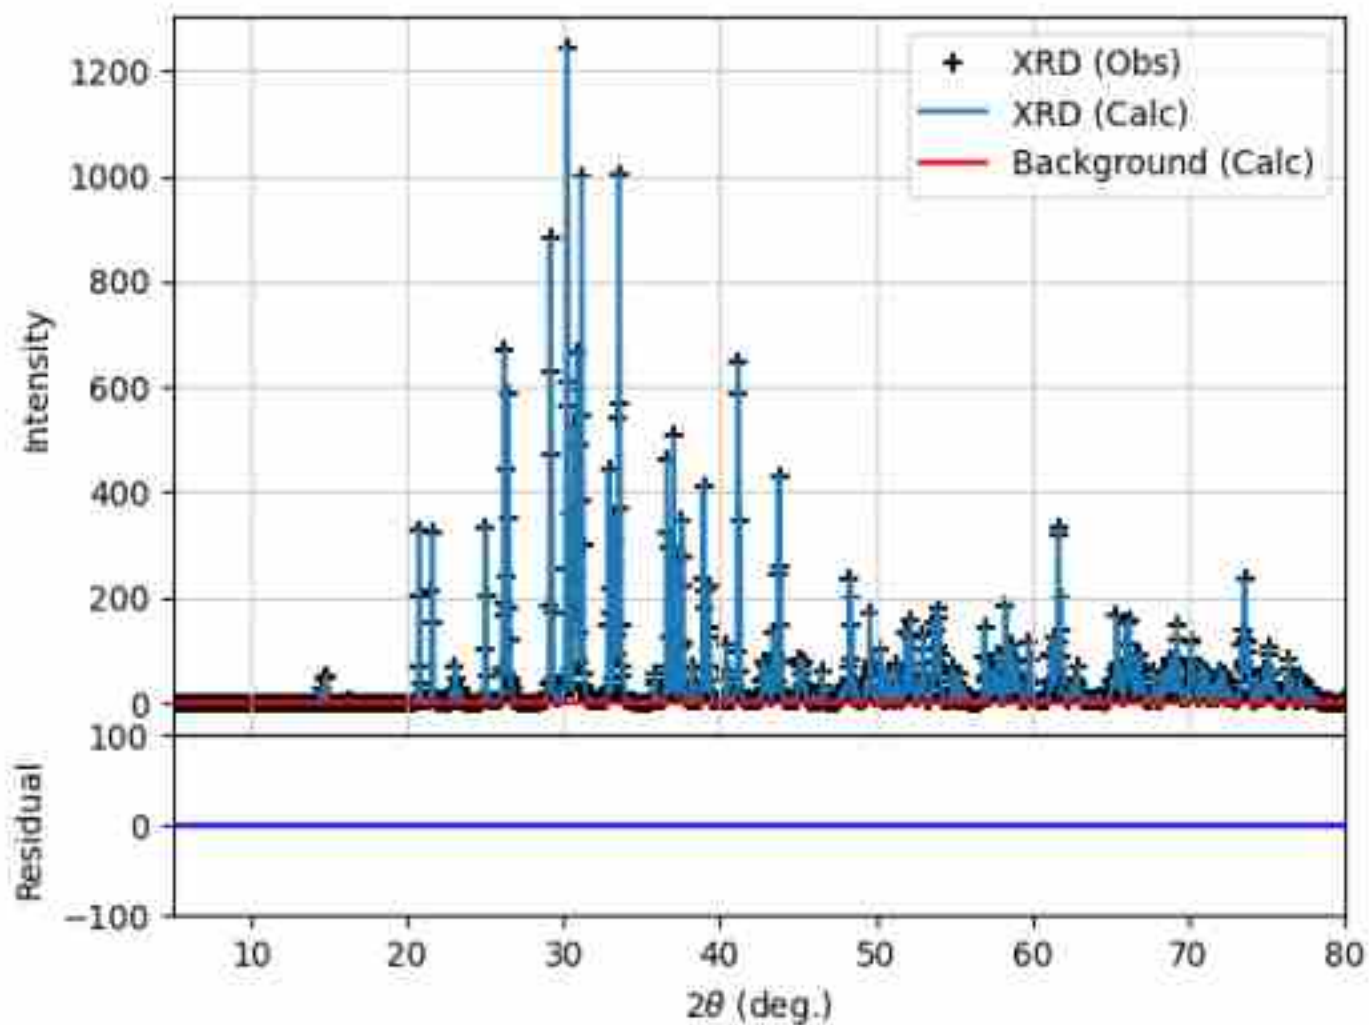

| RMSE before RR | Rwp     | RMSE after RR |
|----------------|---------|---------------|
| 0.026          | 0.00393 | 0.00033       |

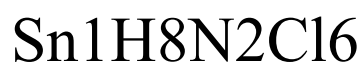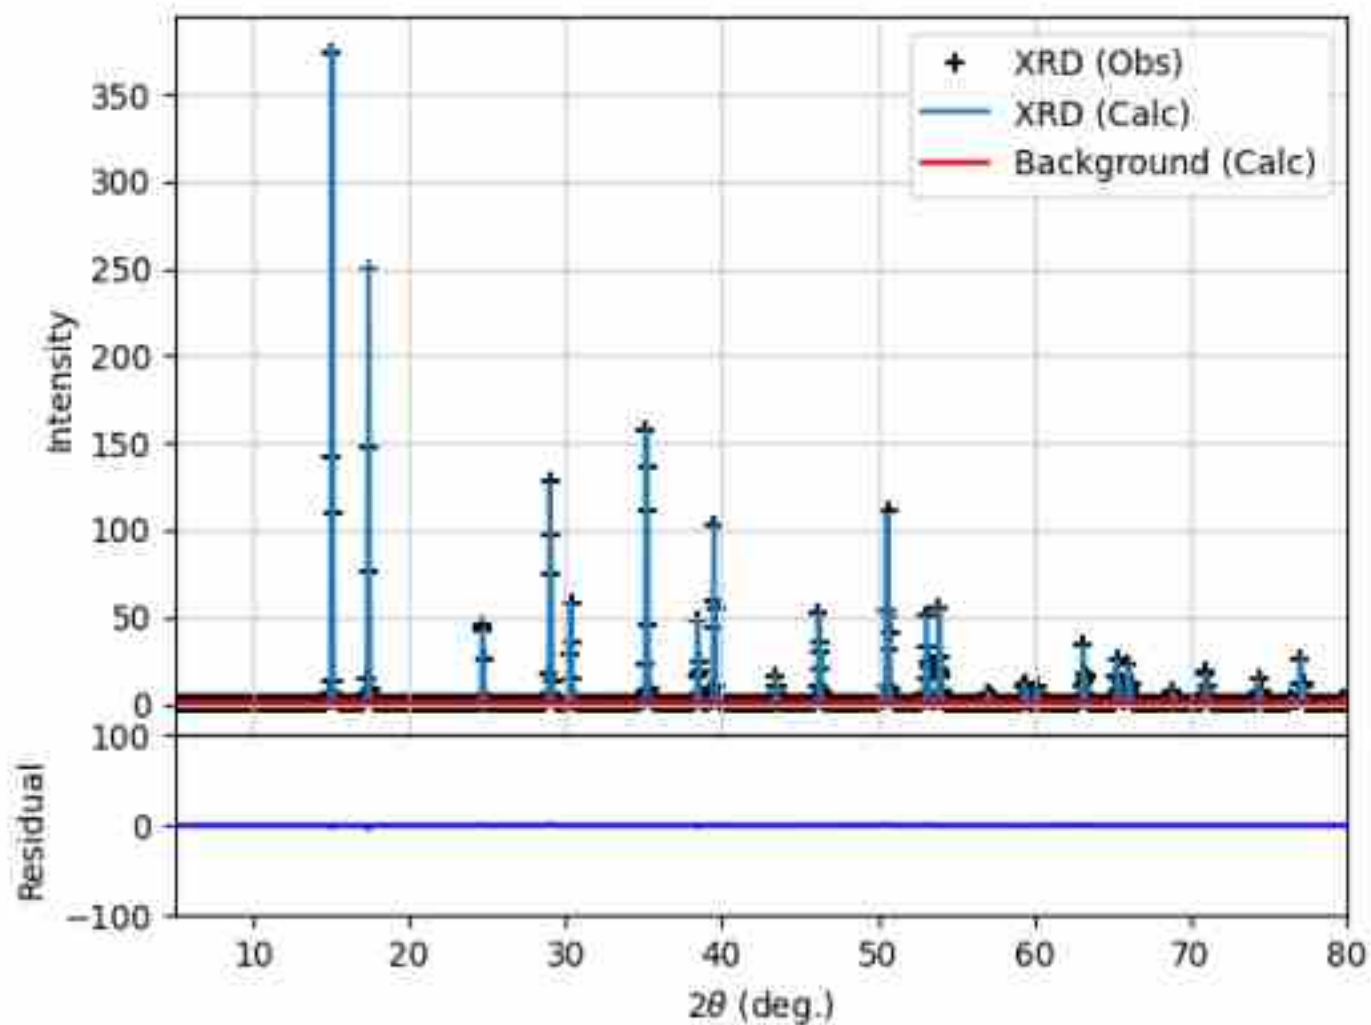

| RMSE before RR | Rwp     | RMSE after RR |
|----------------|---------|---------------|
| 0.026          | 1.17138 | 0.35918       |

# Sn4I2F6

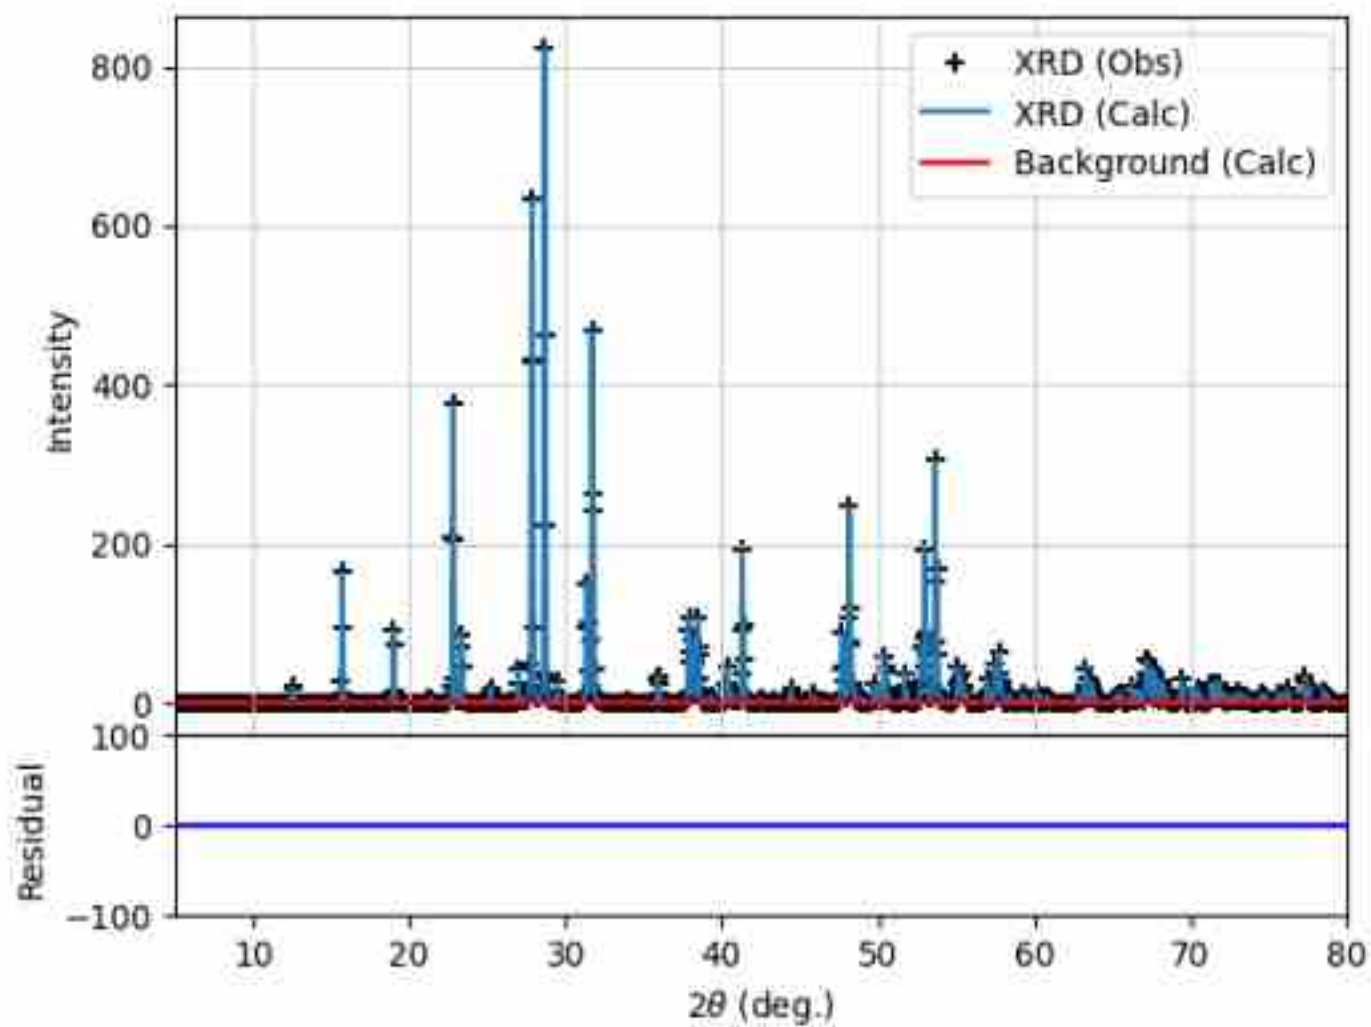

| RMSE before RR | Rwp     | RMSE after RR |
|----------------|---------|---------------|
| 0.026          | 0.00348 | 0.00101       |

# Sr1Pu1O4

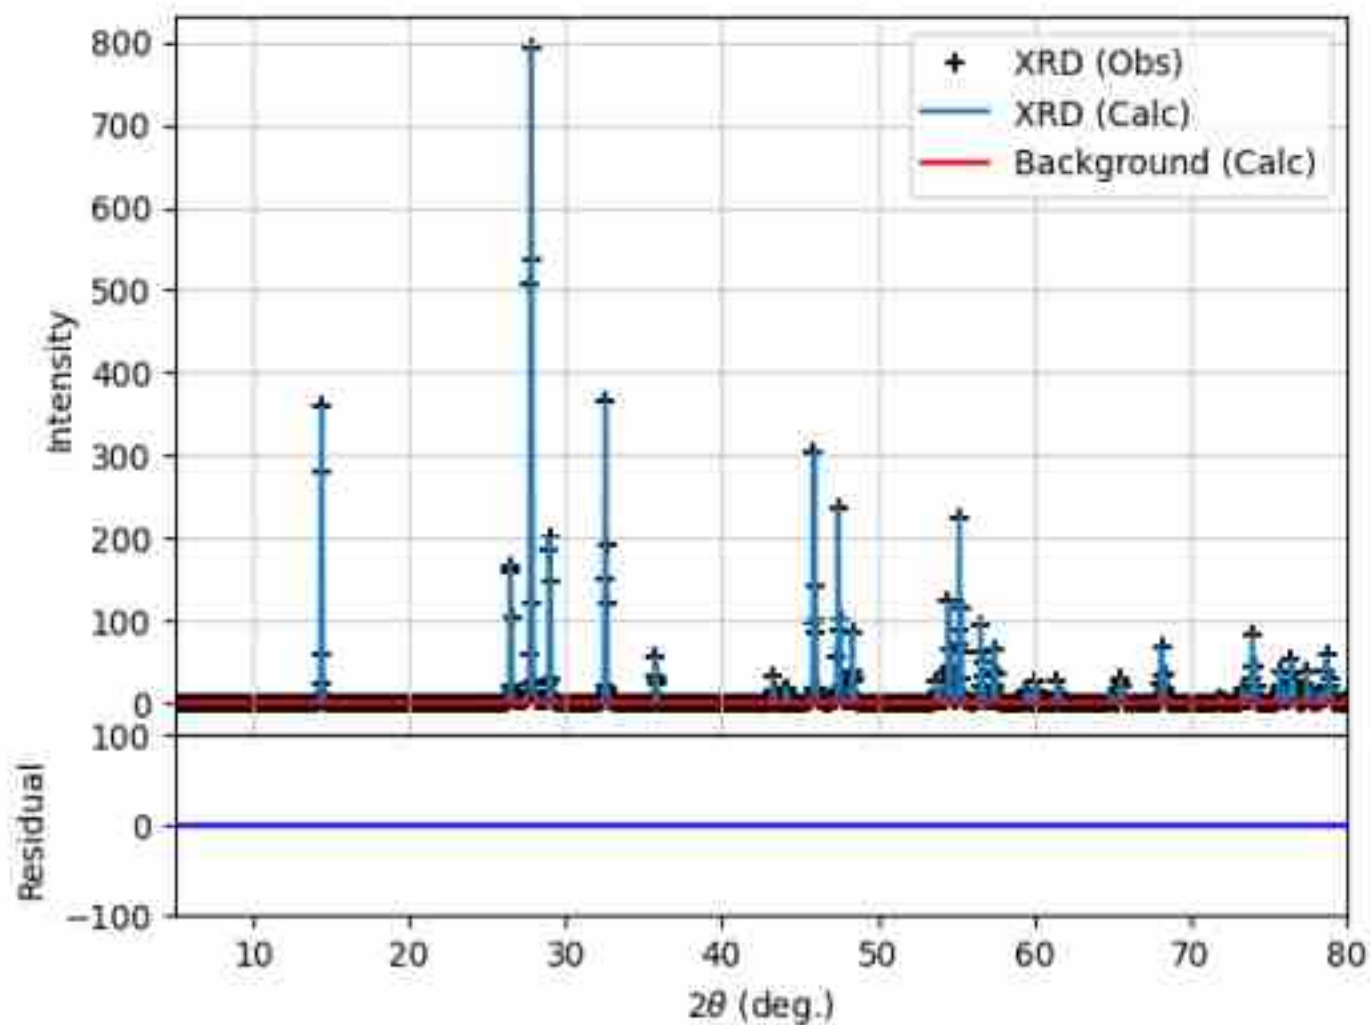

| RMSE before RR | Rwp     | RMSE after RR |
|----------------|---------|---------------|
| 0.026          | 0.00361 | 0.00133       |

# Sr<sub>2</sub>CeNi<sub>10</sub>O<sub>6</sub>

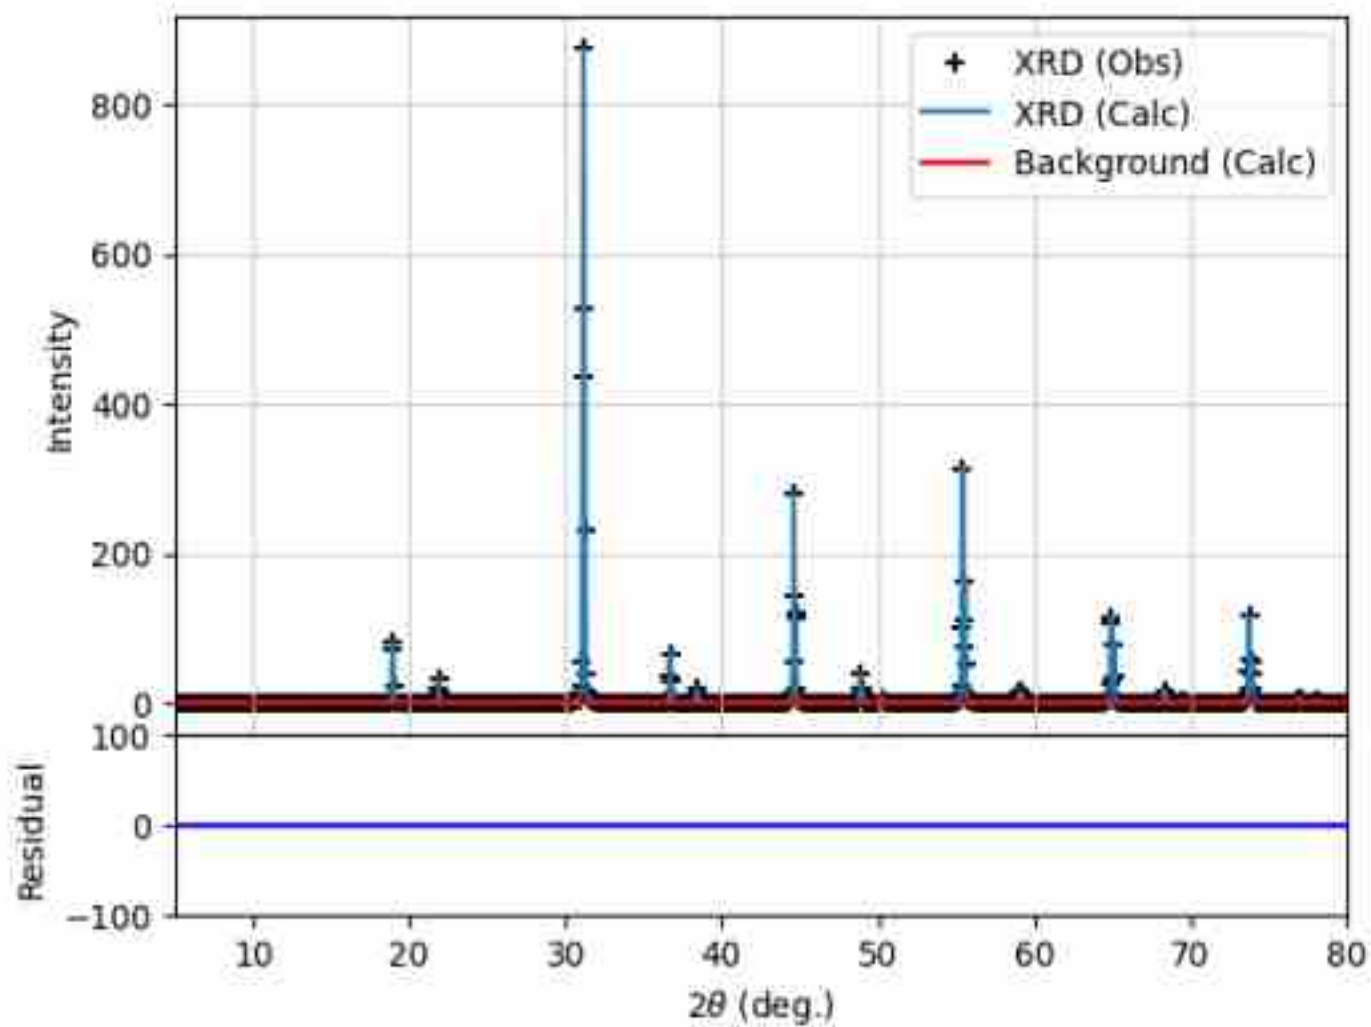

| RMSE before RR | Rwp     | RMSE after RR |
|----------------|---------|---------------|
| 0.026          | 0.03121 | 0.0069        |

# Sr<sub>2</sub>Li<sub>2</sub>Pr<sub>2</sub>Te<sub>2</sub>O<sub>12</sub>

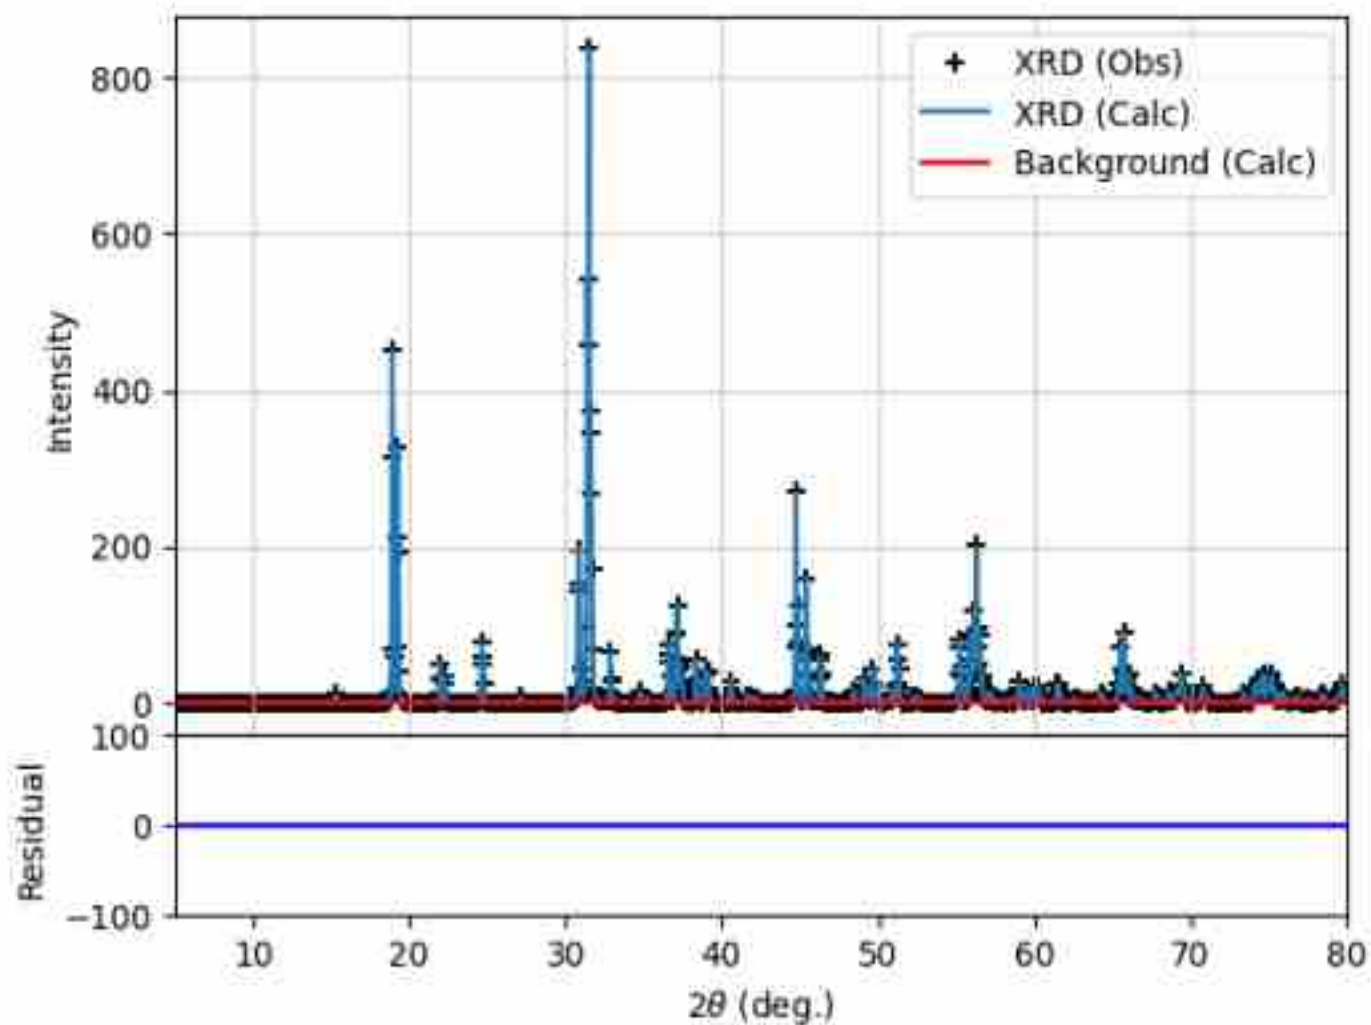

| RMSE before RR | Rwp     | RMSE after RR |
|----------------|---------|---------------|
| 0.026          | 0.00318 | 0.00093       |



Sr3Pr1Mn4O12

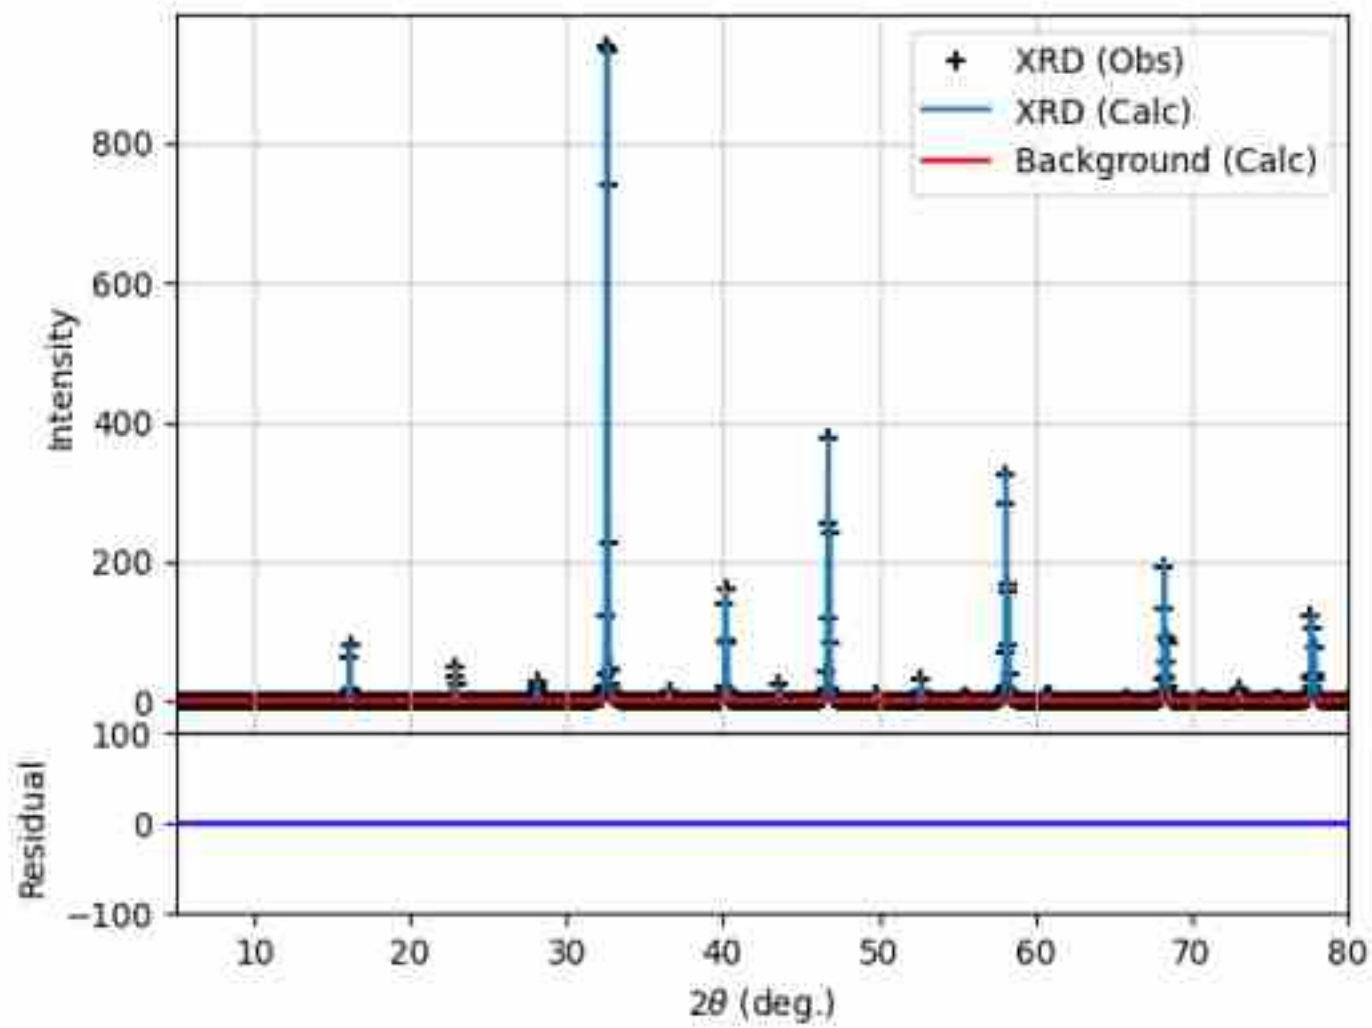

| RMSE before RR | Rwp     | RMSE after RR |
|----------------|---------|---------------|
| 0.026          | 0.05314 | 0.00848       |

# Sr<sub>4</sub>Cr<sub>2</sub>W<sub>2</sub>O<sub>12</sub>

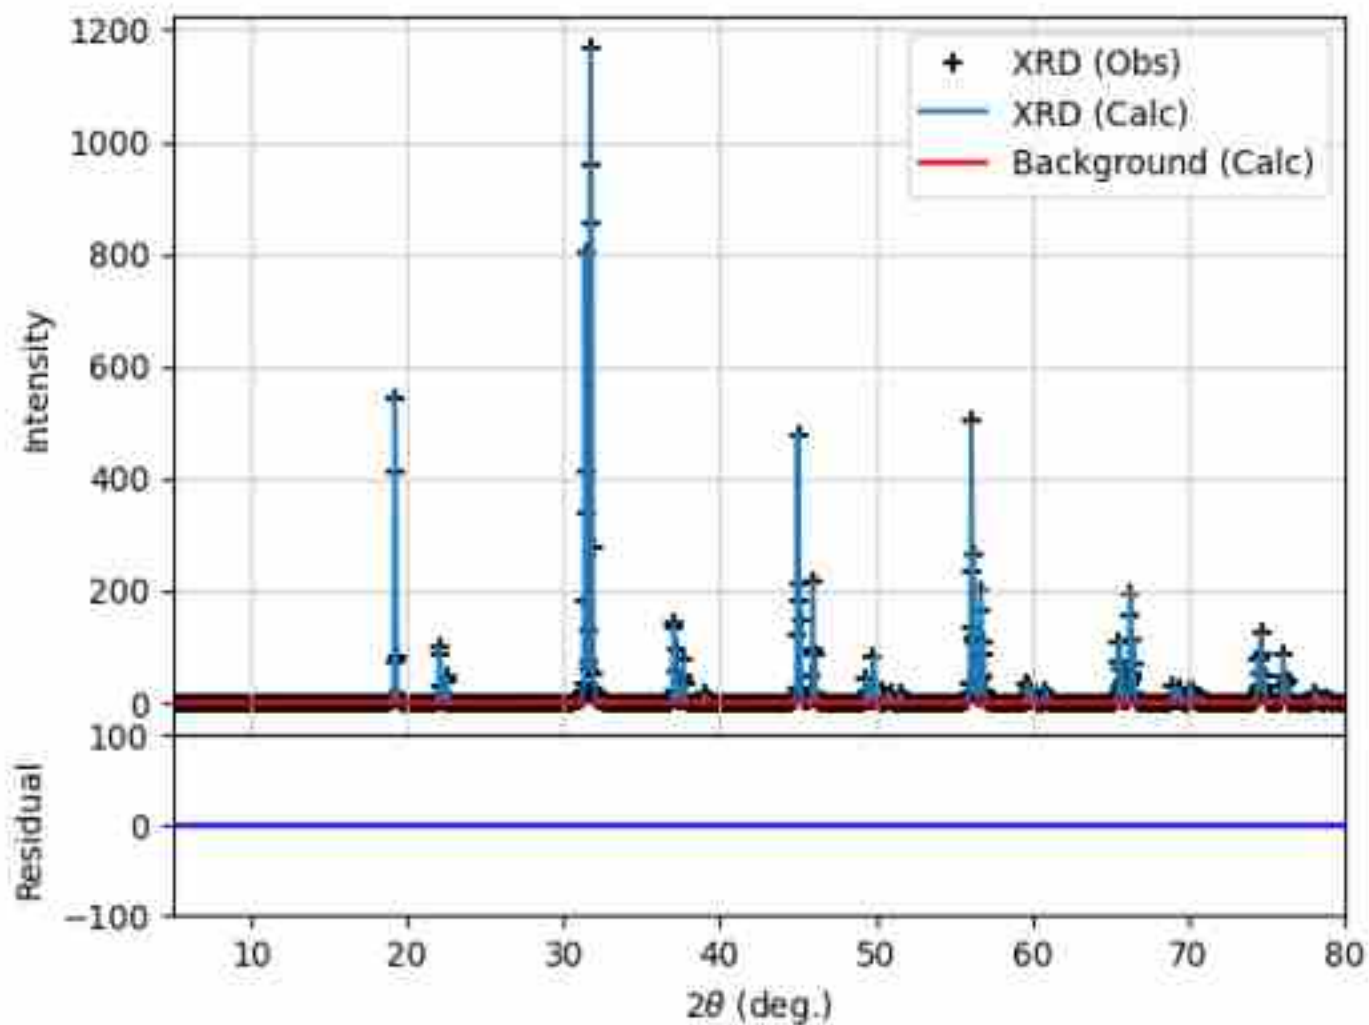

| RMSE before RR | Rwp     | RMSE after RR |
|----------------|---------|---------------|
| 0.026          | 0.00273 | 0.00076       |

# Ta<sub>2</sub>C1S<sub>2</sub>

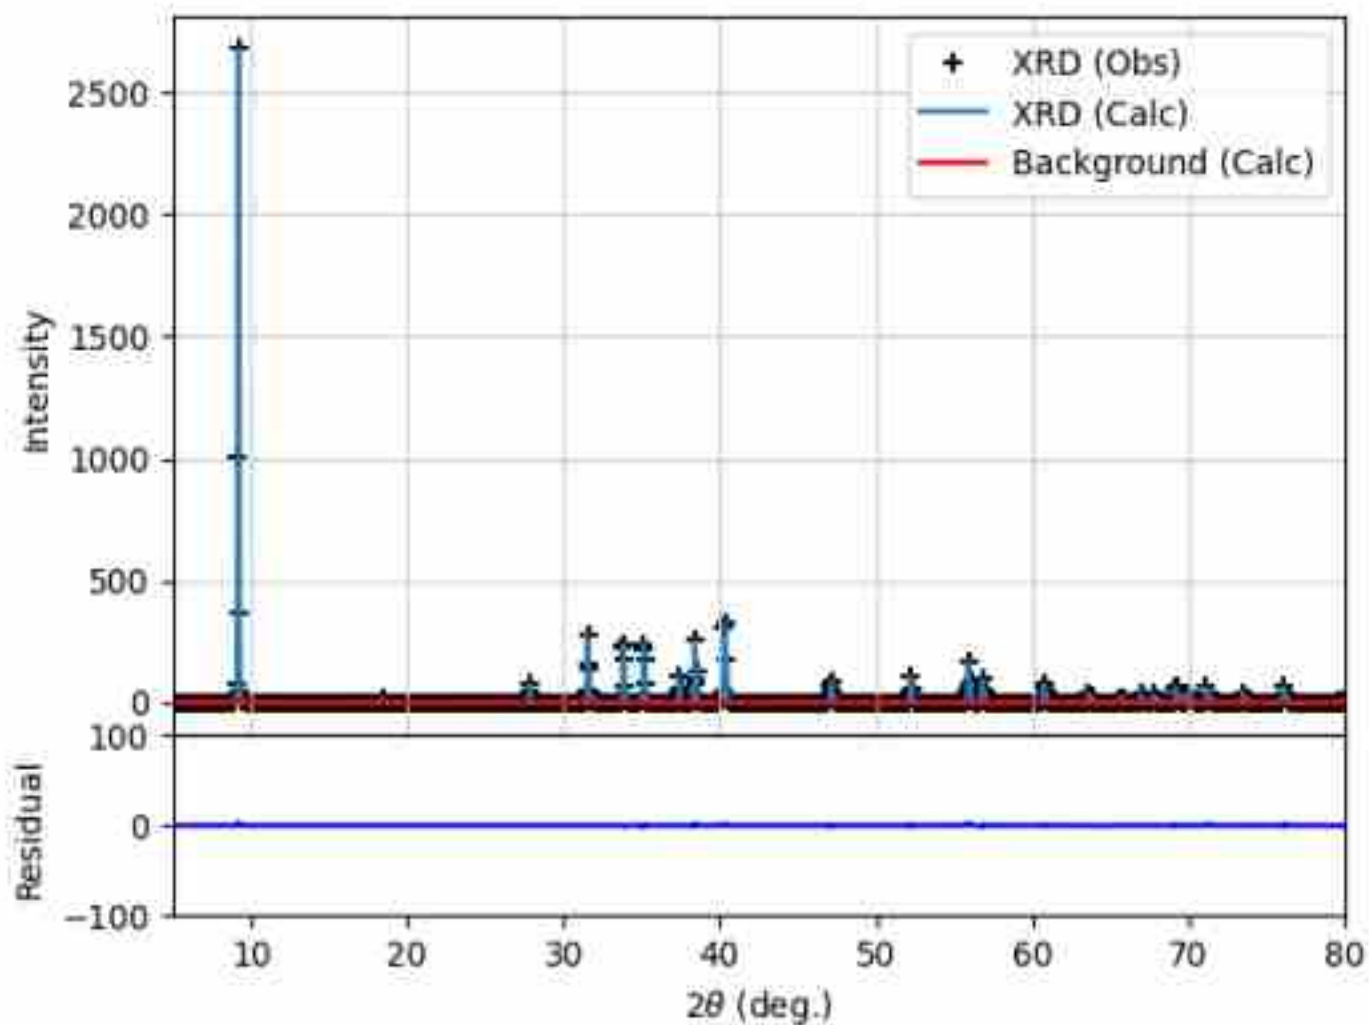

| RMSE before RR | Rwp     | RMSE after RR |
|----------------|---------|---------------|
| 0.026          | 2.03289 | 0.02798       |

# Tb1Fe4P12

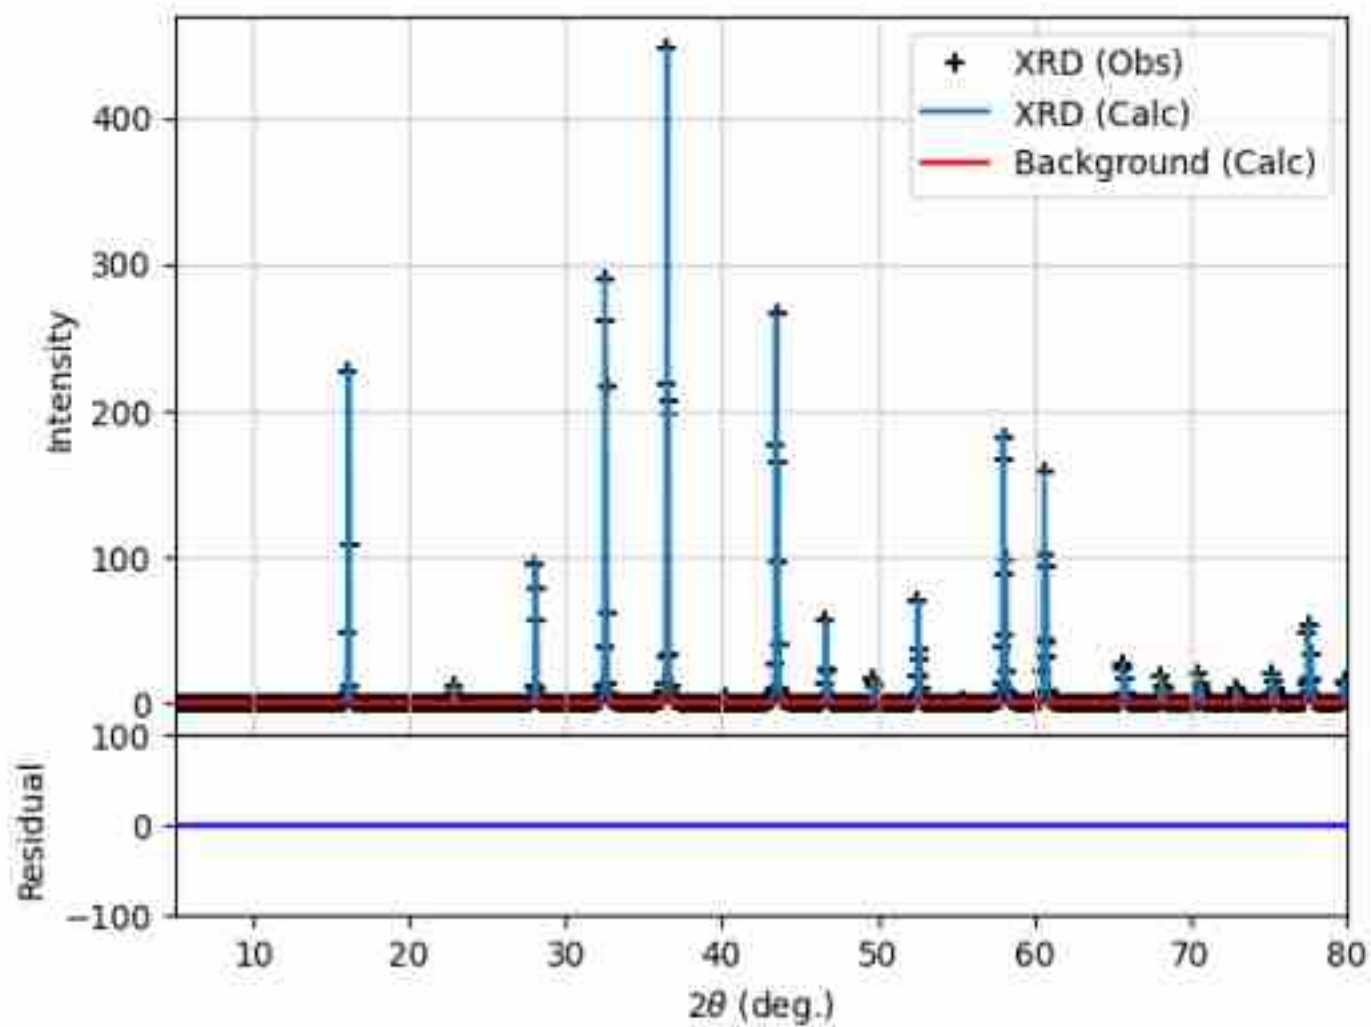

| RMSE before RR | Rwp     | RMSE after RR |
|----------------|---------|---------------|
| 0.026          | 0.00854 | 0.00242       |

# Tb<sub>3</sub>Ni<sub>9</sub>Sn<sub>6</sub>

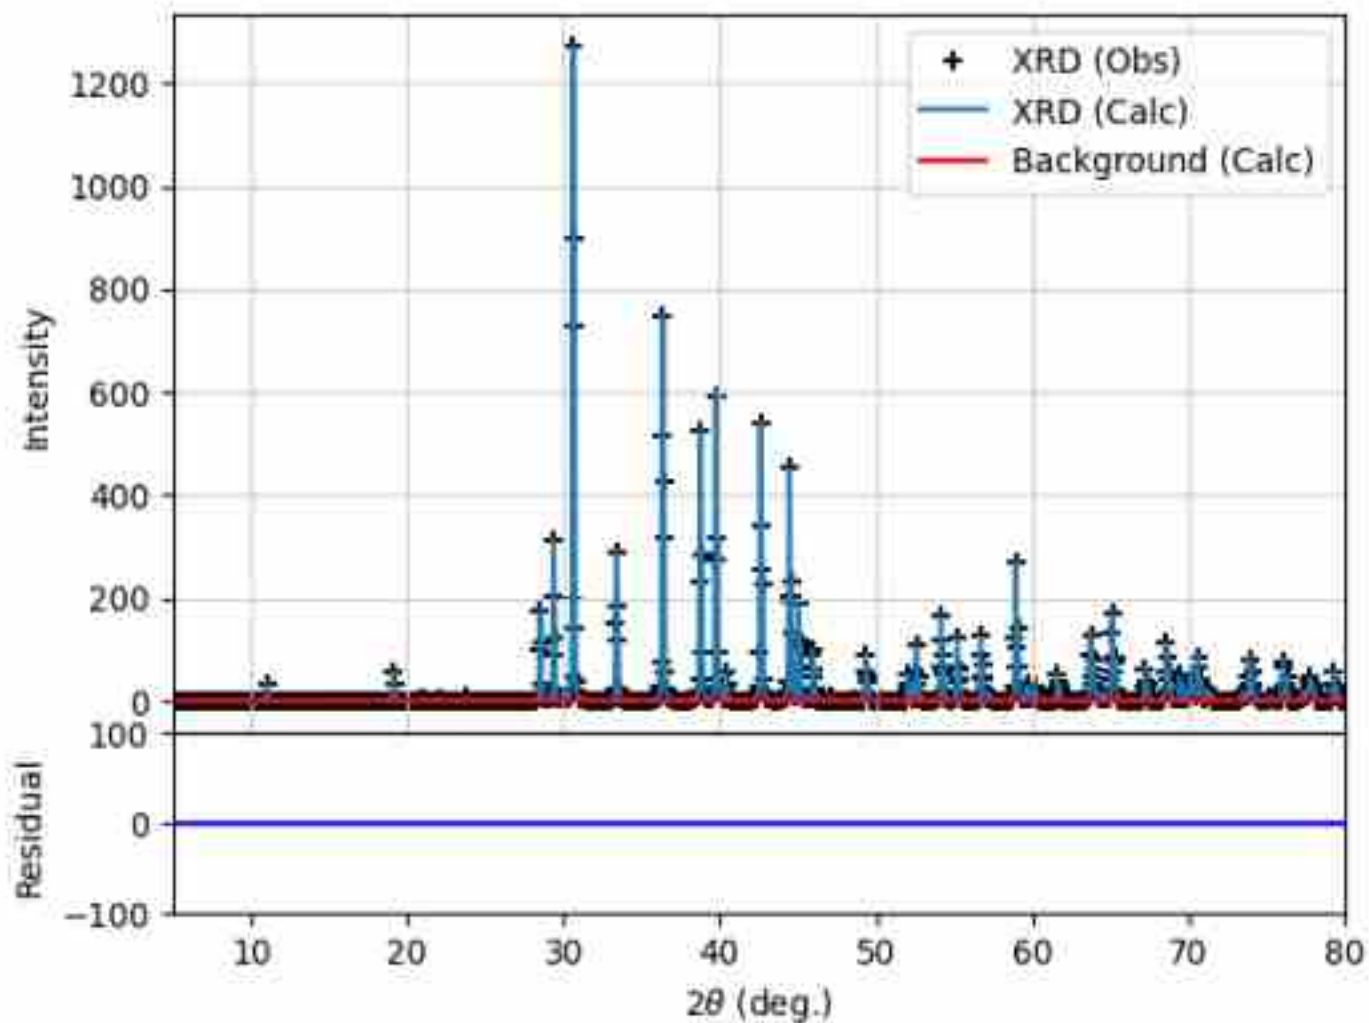

| RMSE before RR | Rwp     | RMSE after RR |
|----------------|---------|---------------|
| 0.026          | 0.00345 | 0.00054       |

# Tb<sub>4</sub>Ga<sub>12</sub>Pt<sub>1</sub>

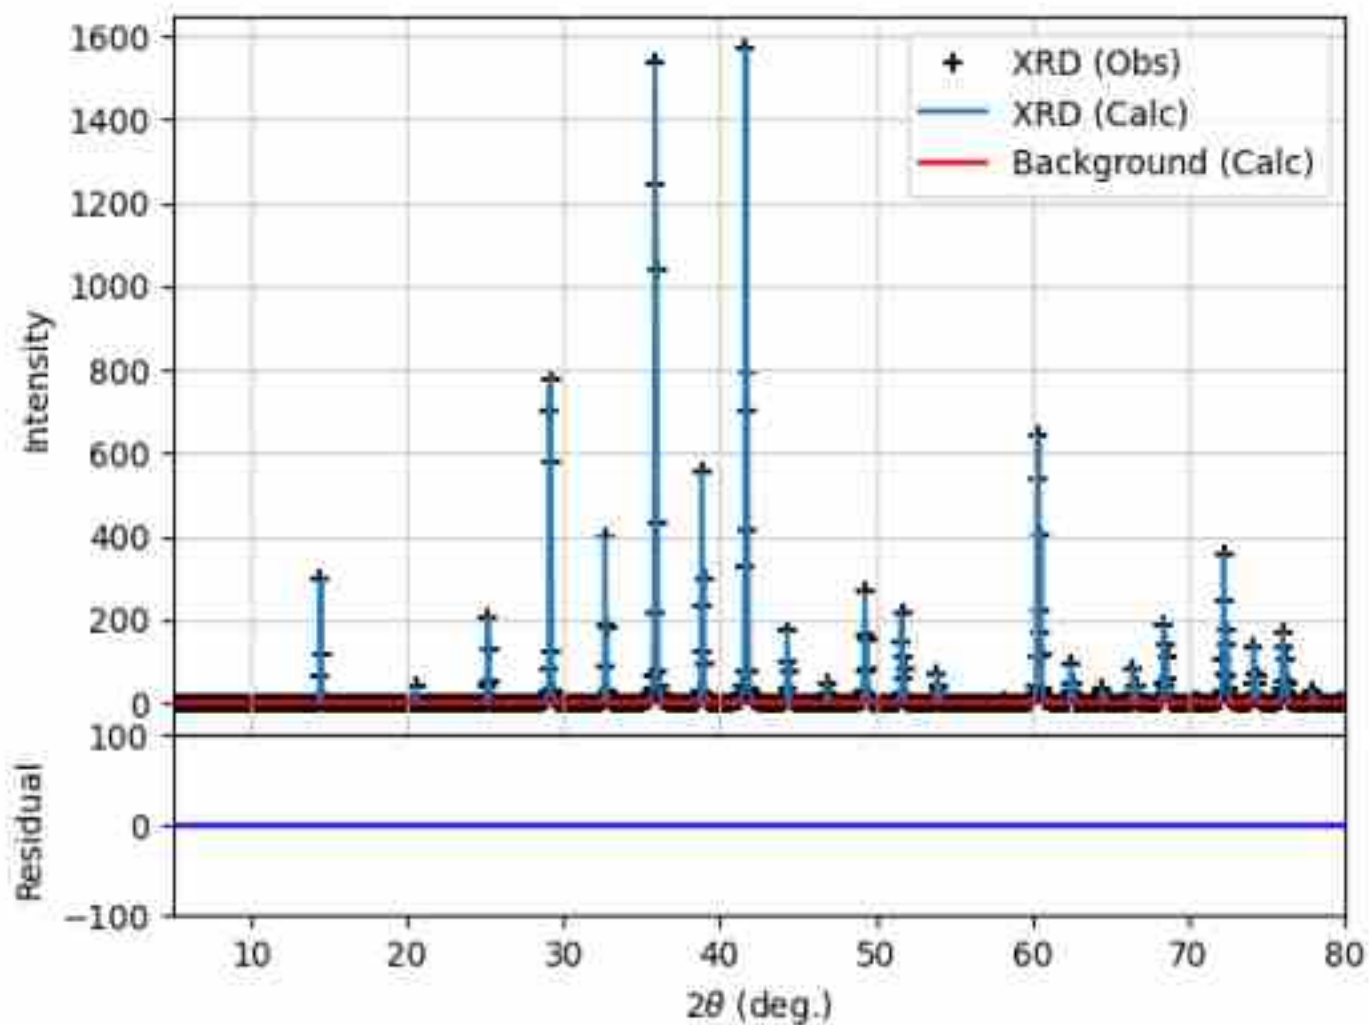

| RMSE before RR | Rwp     | RMSE after RR |
|----------------|---------|---------------|
| 0.026          | 0.01542 | 0.00147       |

# Te1Pb3Cl2O4

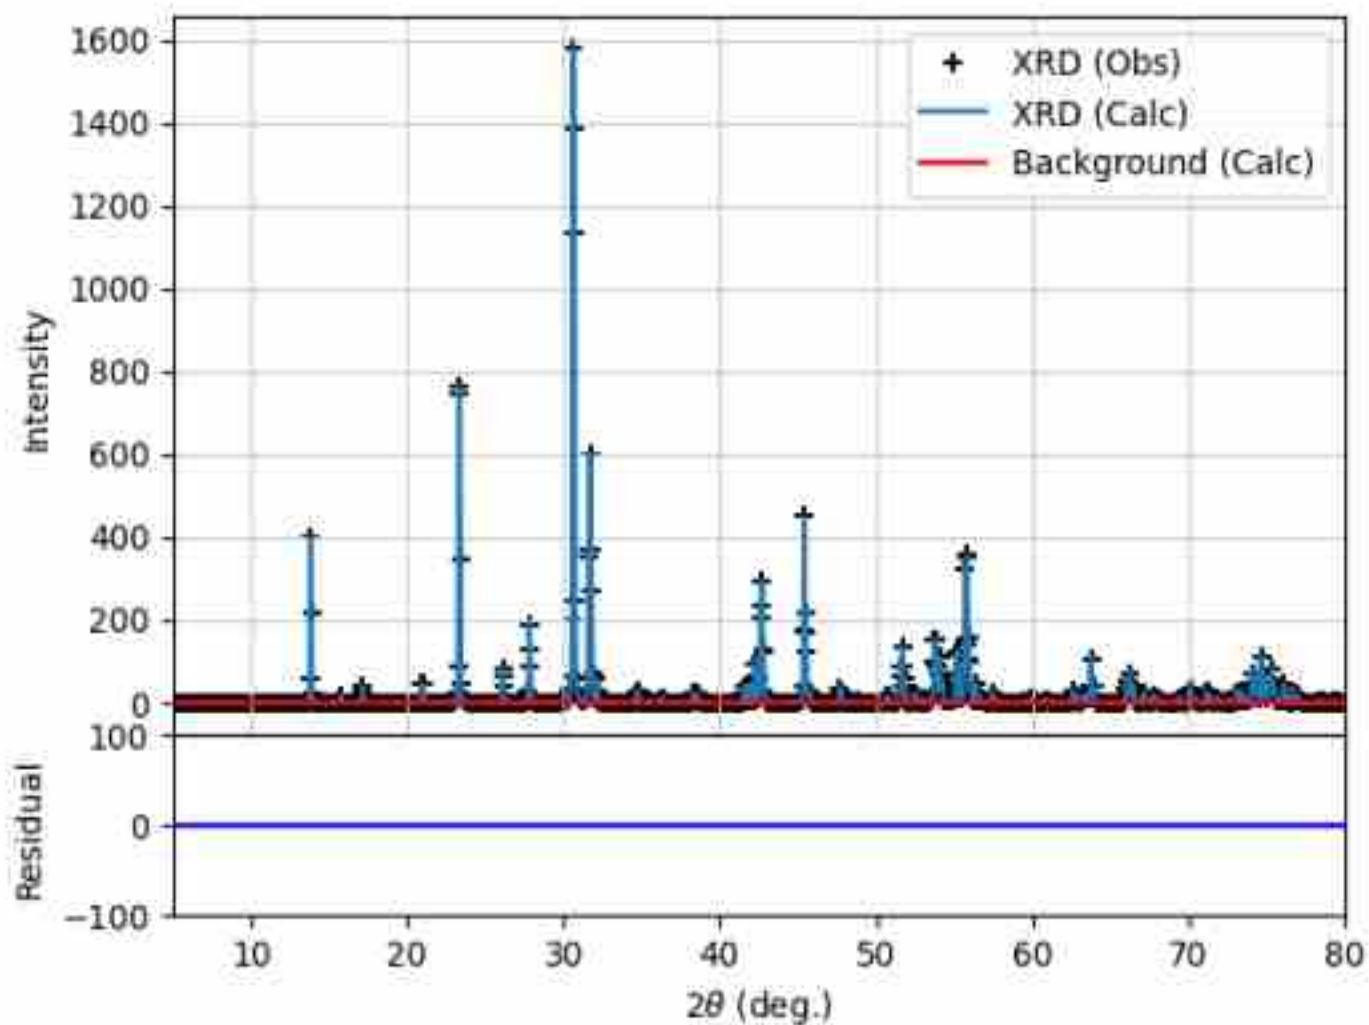

| RMSE before RR | Rwp     | RMSE after RR |
|----------------|---------|---------------|
| 0.026          | 0.00345 | 0.00088       |

# Te1W1O6

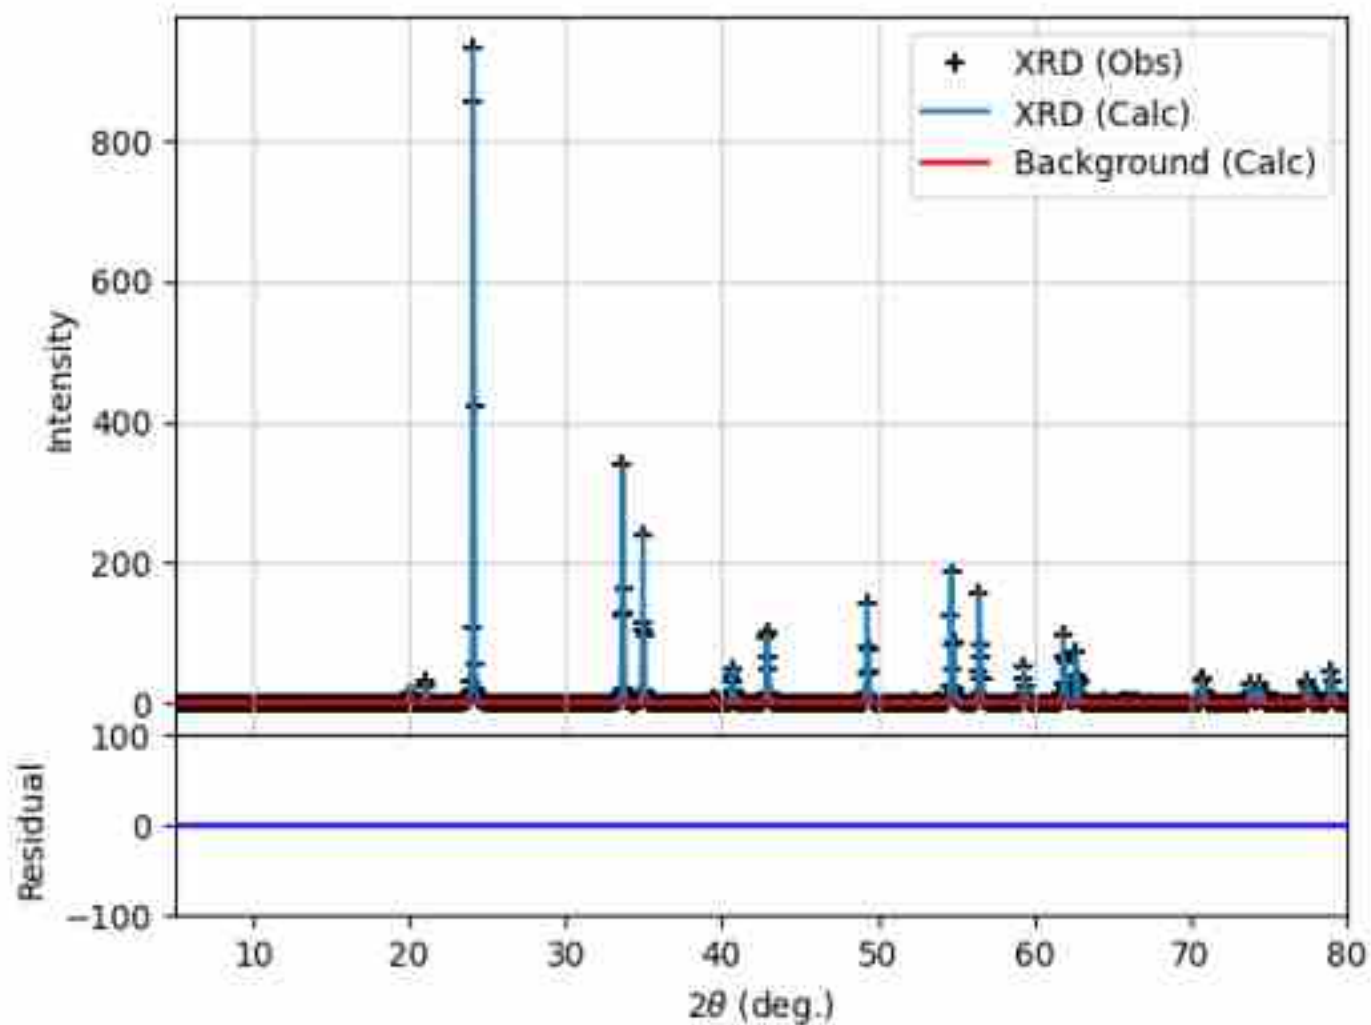

| RMSE before RR | Rwp     | RMSE after RR |
|----------------|---------|---------------|
| 0.026          | 0.00334 | 0.00188       |



# Ti<sub>4</sub>In<sub>2</sub>C<sub>2</sub>

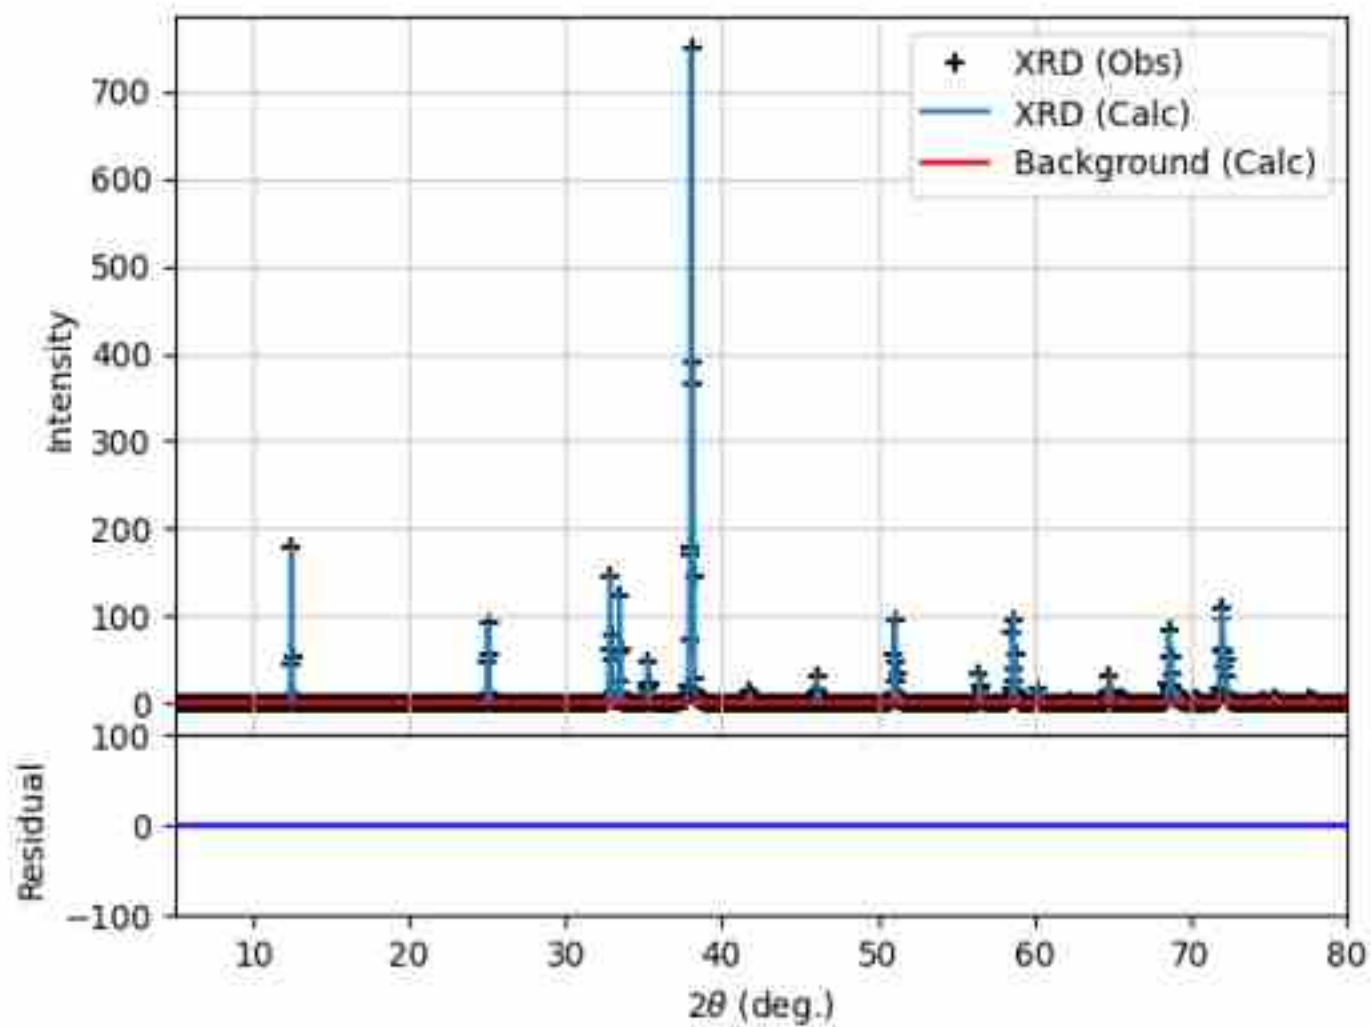

| RMSE before RR | Rwp    | RMSE after RR |
|----------------|--------|---------------|
| 0.026          | 0.0307 | 0.00107       |

# Ti4Pb2C2

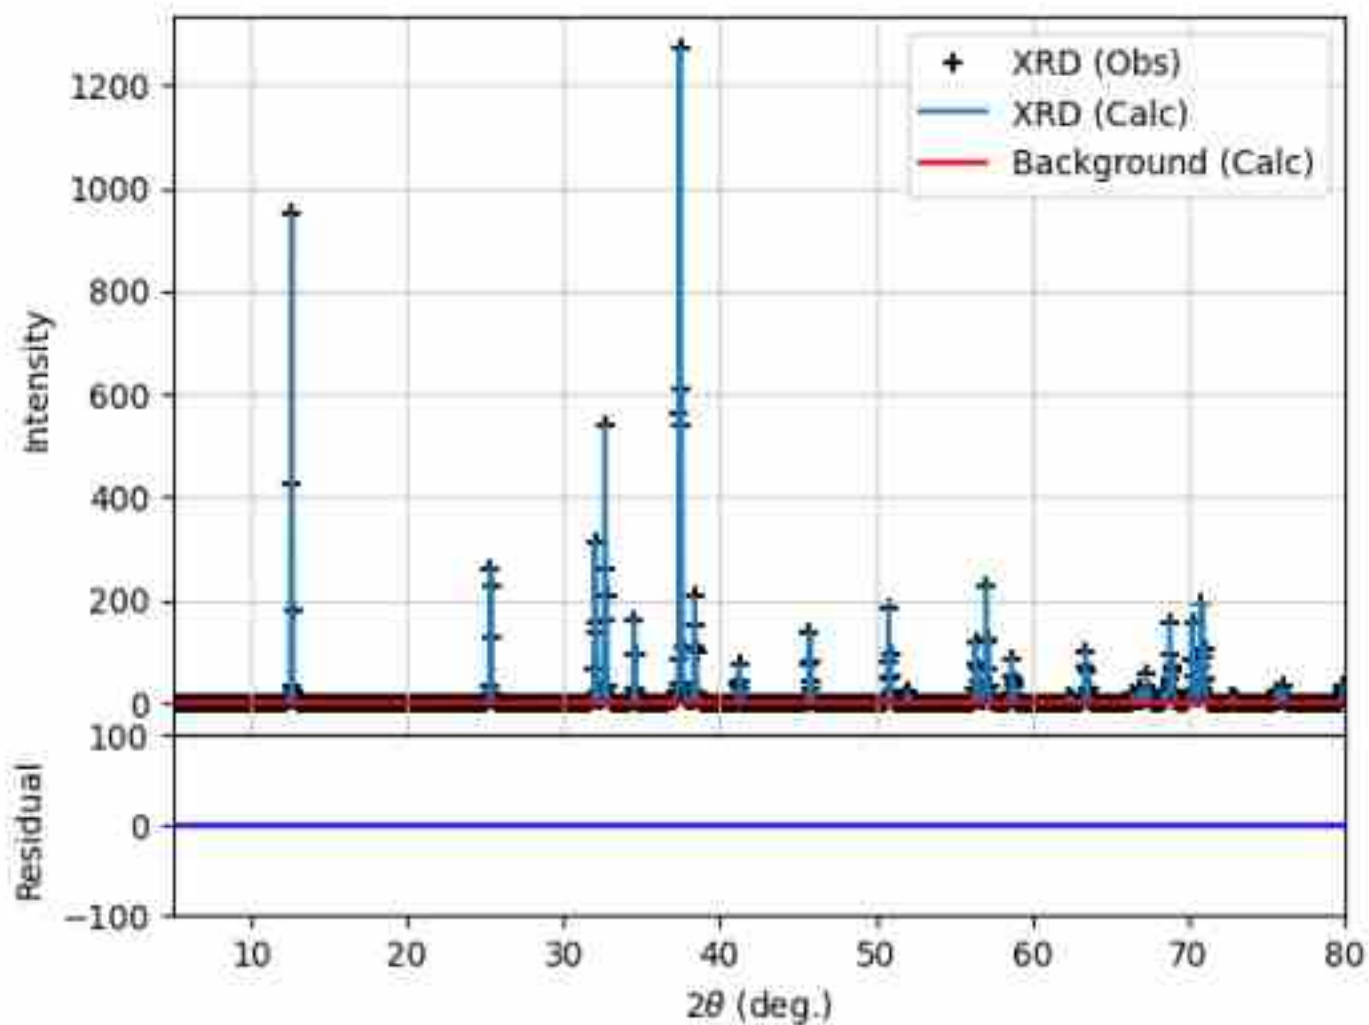

| RMSE before RR | Rwp     | RMSE after RR |
|----------------|---------|---------------|
| 0.026          | 0.00346 | 0.0013        |

# Ti<sub>4</sub>Si<sub>4</sub>Ru<sub>4</sub>

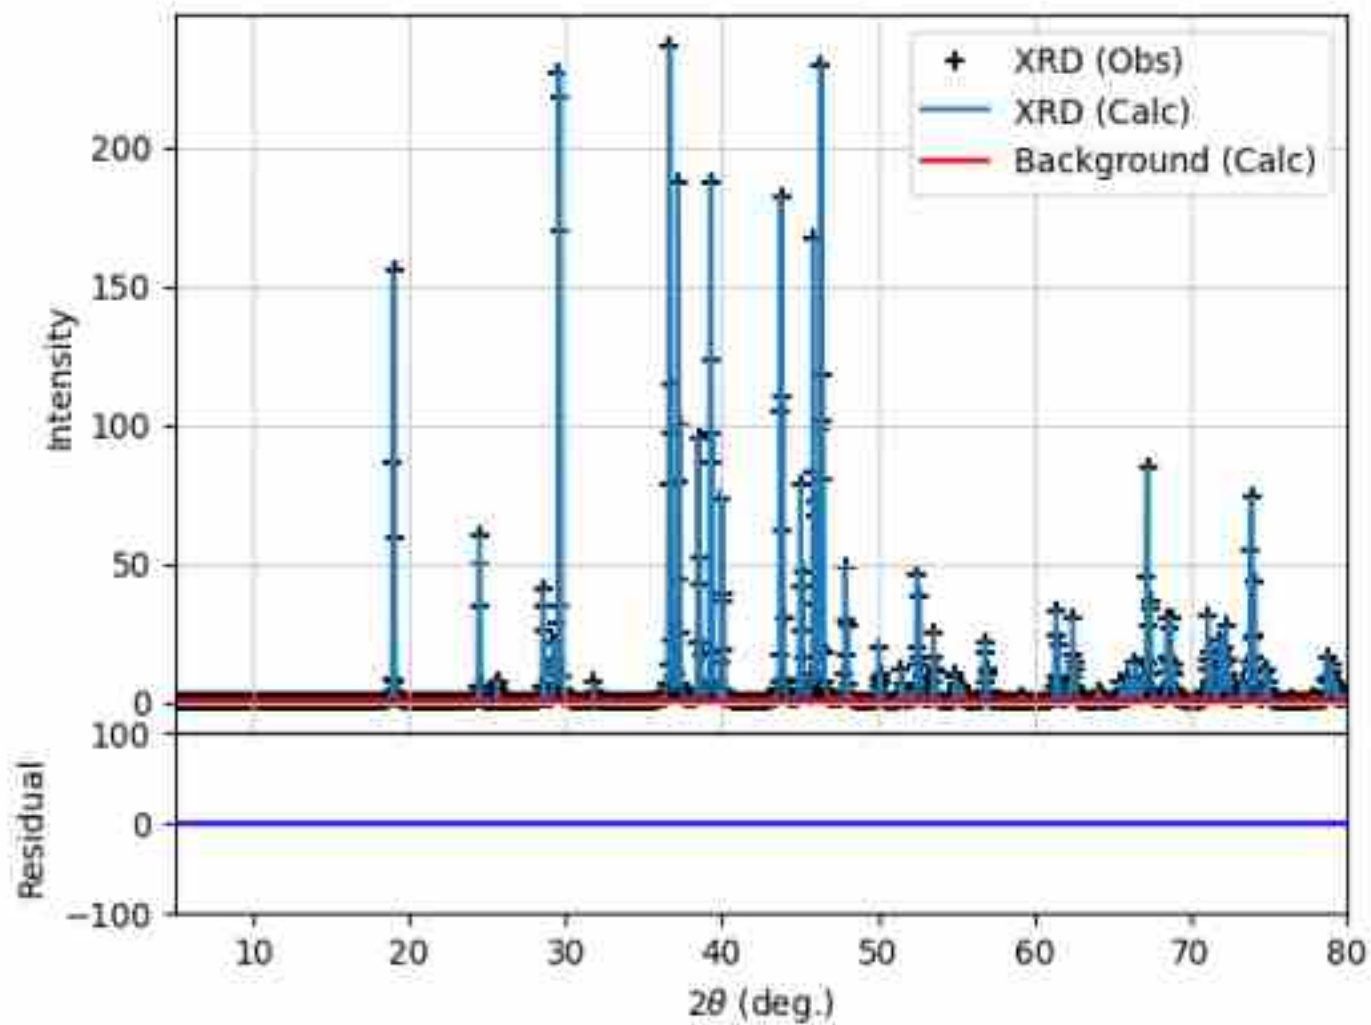

| RMSE before RR | Rwp     | RMSE after RR |
|----------------|---------|---------------|
| 0.026          | 0.00389 | 0.00045       |

# Ti10Ni2Sn6

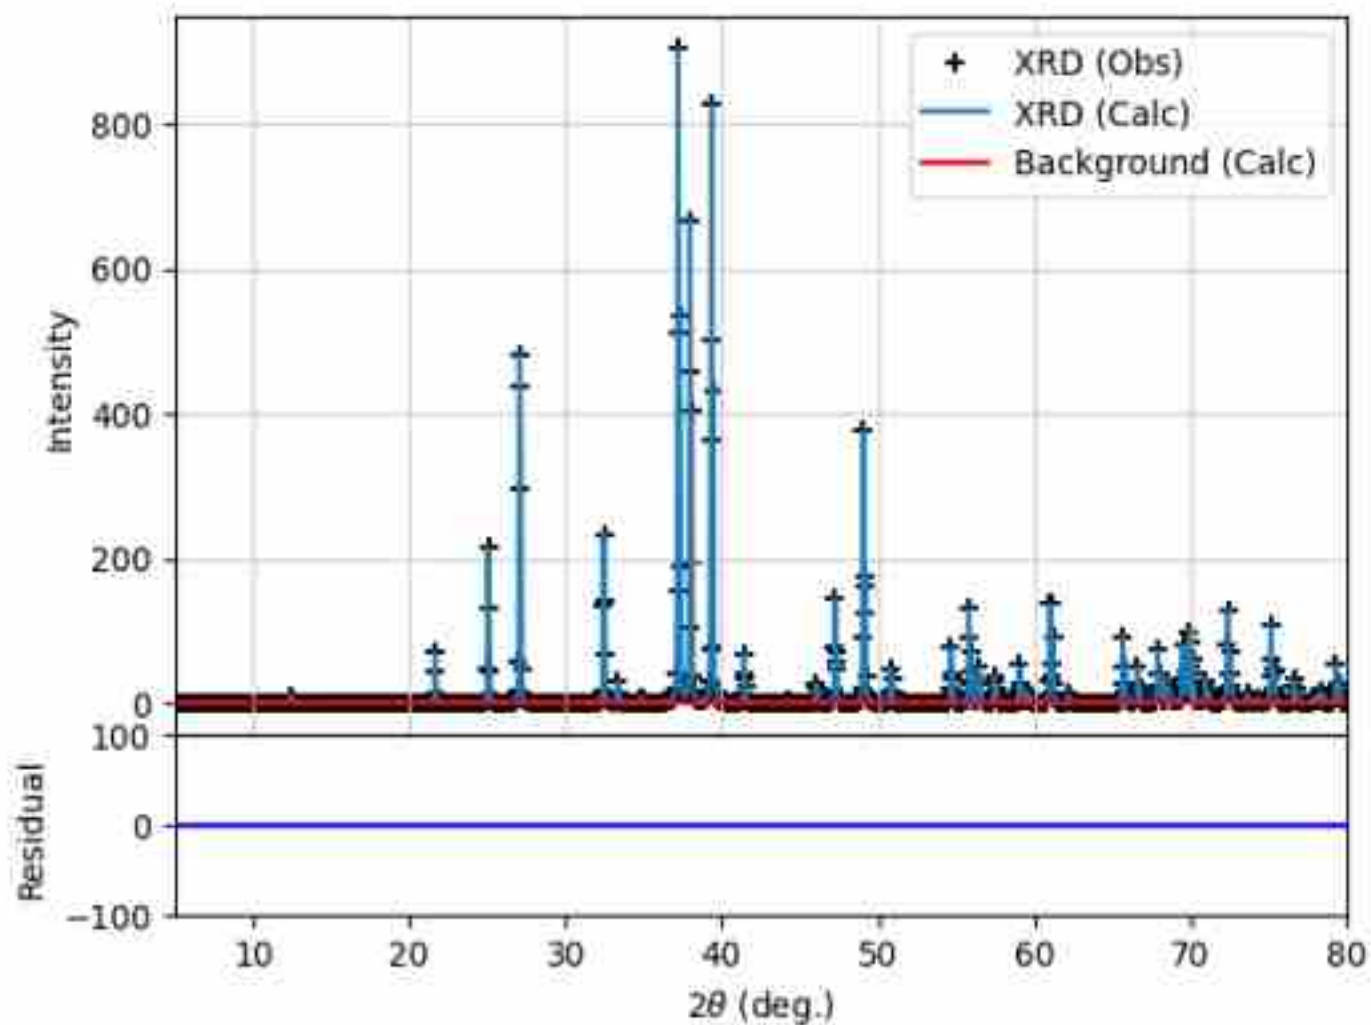

| RMSE before RR | Rwp     | RMSE after RR |
|----------------|---------|---------------|
| 0.026          | 0.01401 | 0.00153       |

# Tm<sub>3</sub>Mn<sub>3</sub>Ge<sub>3</sub>

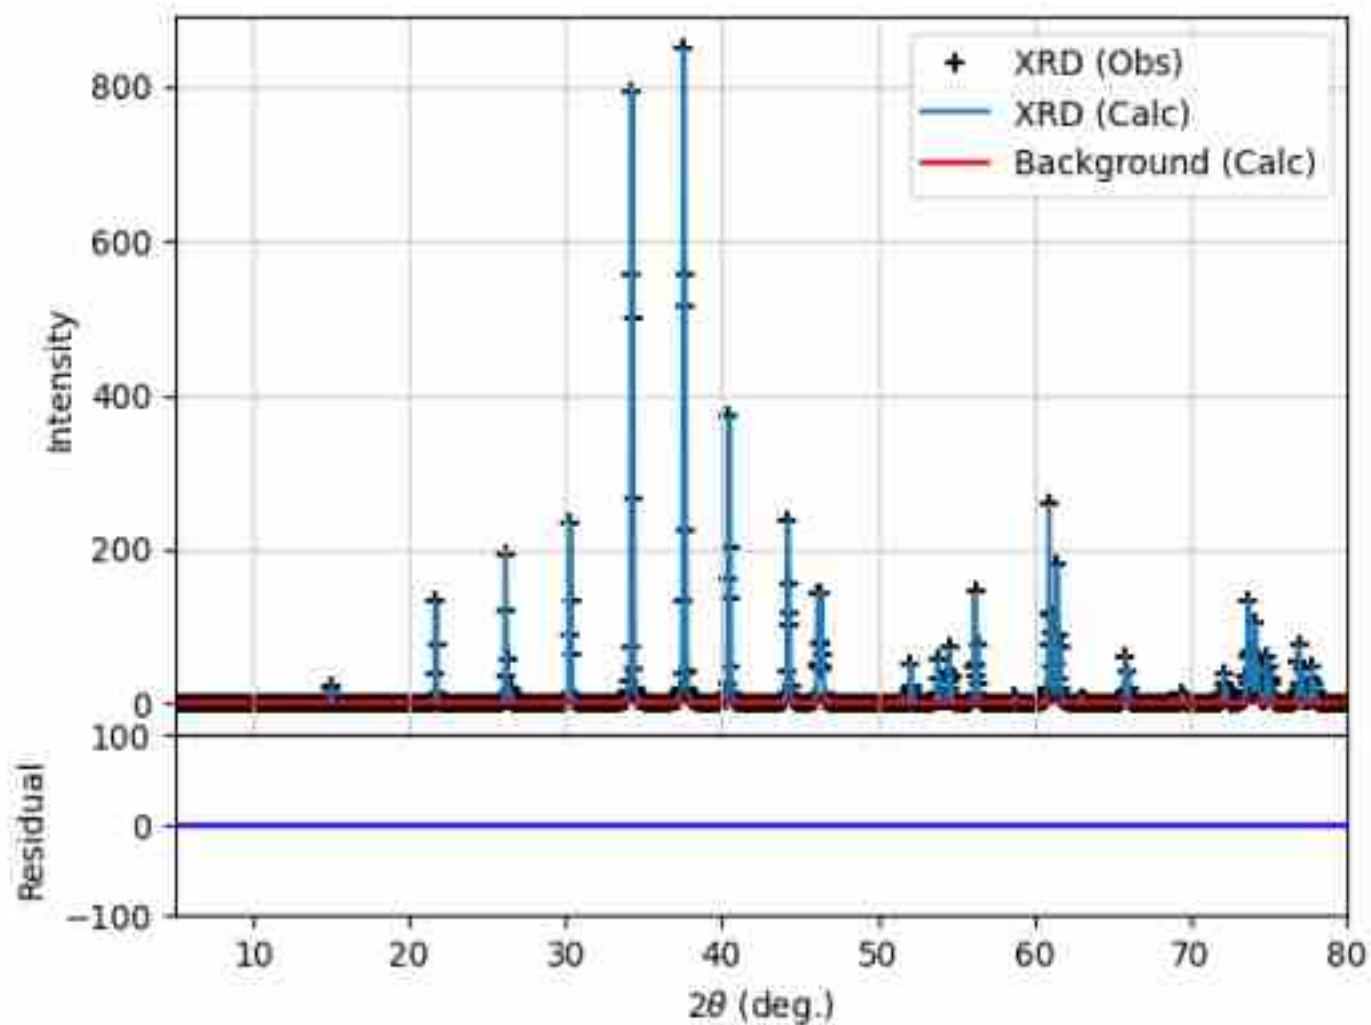

| RMSE before RR | Rwp     | RMSE after RR |
|----------------|---------|---------------|
| 0.026          | 0.00554 | 0.00132       |

# U<sub>2</sub>Co<sub>2</sub>C<sub>4</sub>

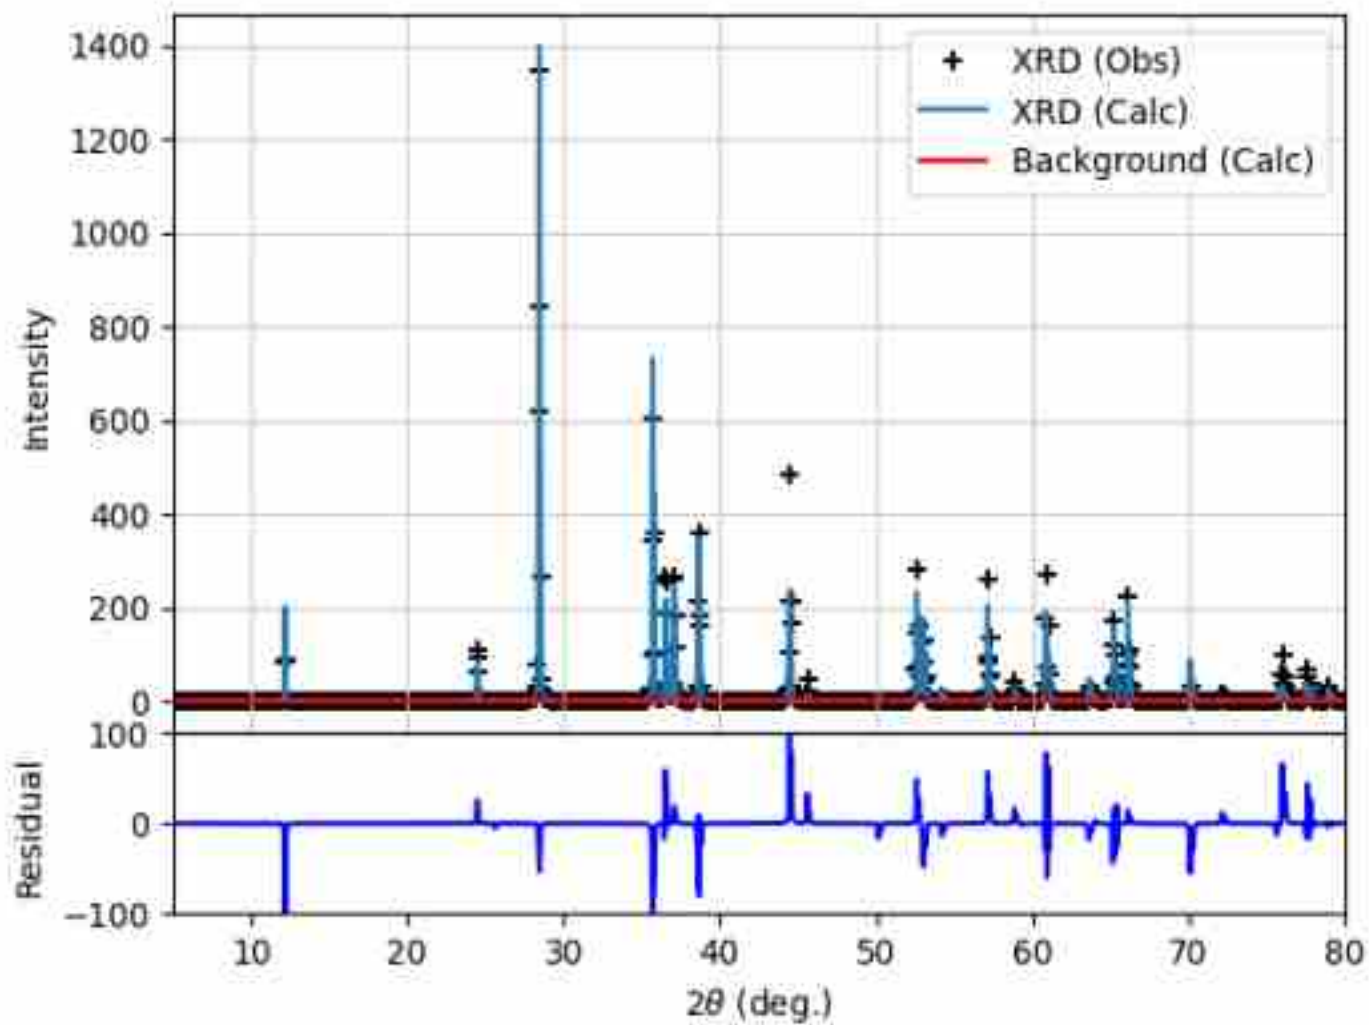

| RMSE before RR | Rwp      | RMSE after RR |
|----------------|----------|---------------|
| 0.026          | 38.58198 | None          |

# U2Pt2

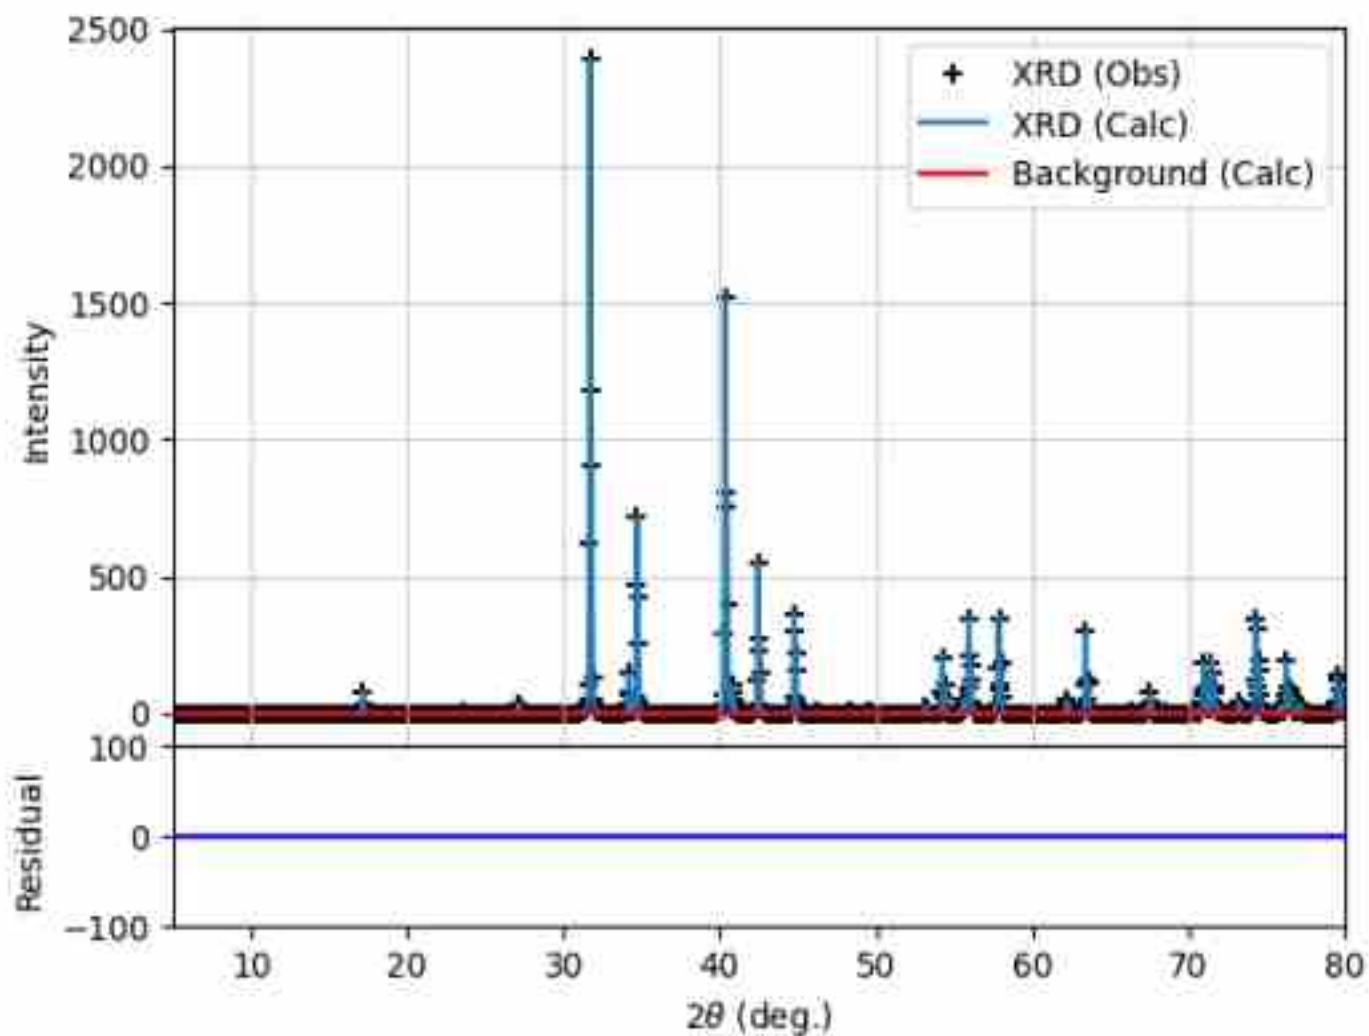

| RMSE before RR | Rwp     | RMSE after RR |
|----------------|---------|---------------|
| 0.026          | 0.00443 | 0.00019       |

# U<sub>4</sub>Fe<sub>2</sub>S<sub>10</sub>

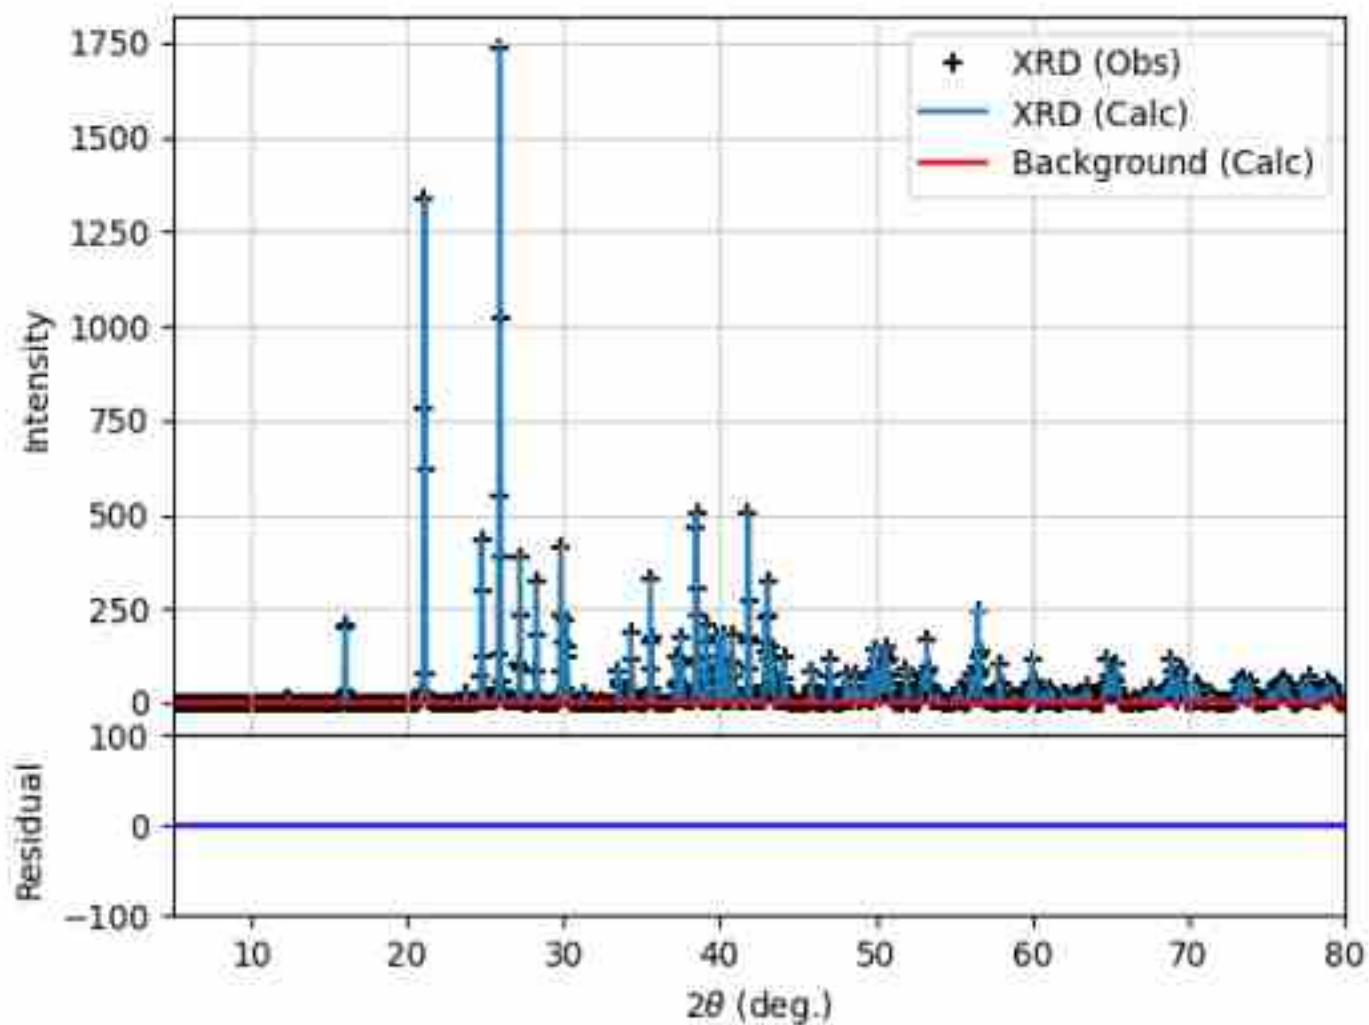

| RMSE before RR | Rwp     | RMSE after RR |
|----------------|---------|---------------|
| 0.026          | 0.00319 | 0.00079       |



# V6O8F4

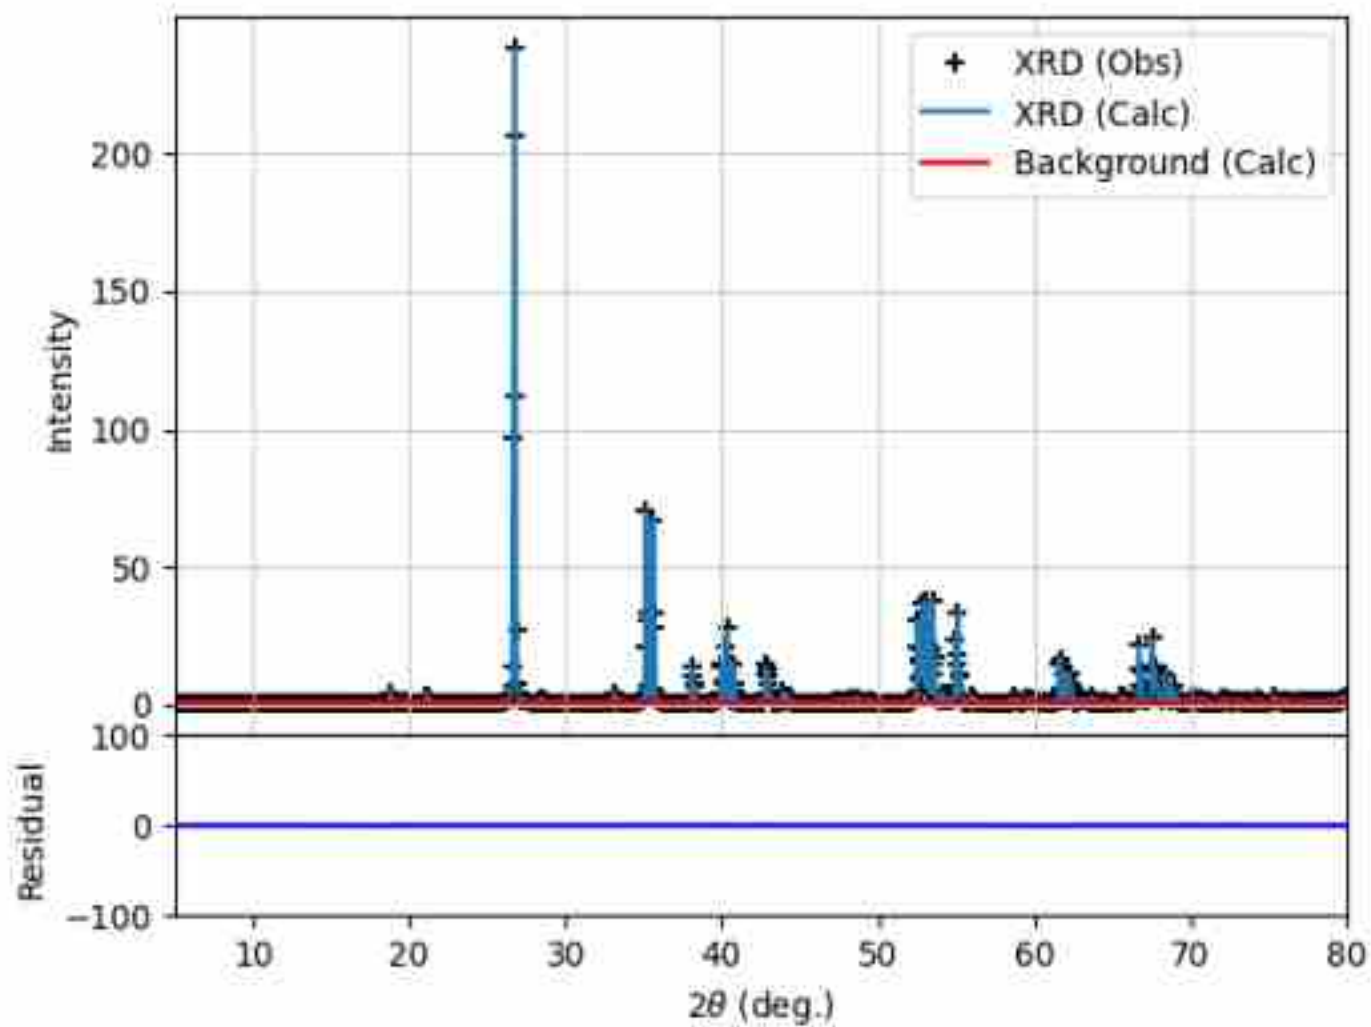

| RMSE before RR | Rwp     | RMSE after RR |
|----------------|---------|---------------|
| 0.026          | 2.02796 | 0.05421       |

# Yb<sub>2</sub>Cu<sub>2</sub>As<sub>4</sub>

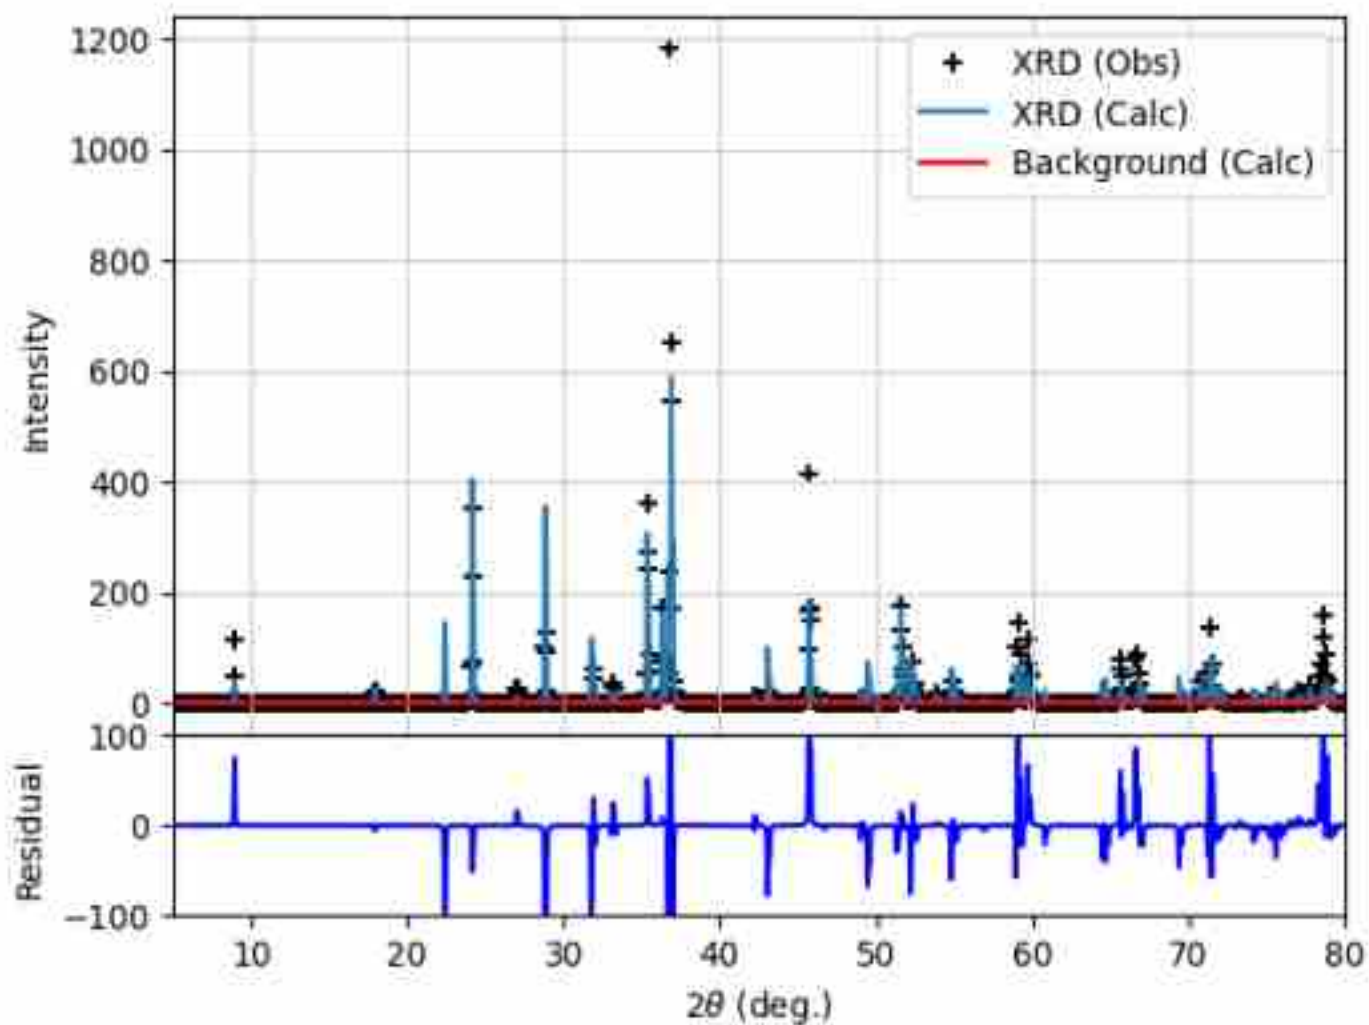

| RMSE before RR | Rwp   | RMSE after RR |
|----------------|-------|---------------|
| 0.026          | 100.0 | 0.4478        |

# Yb<sub>2</sub>Ga<sub>8</sub>Ni<sub>2</sub>

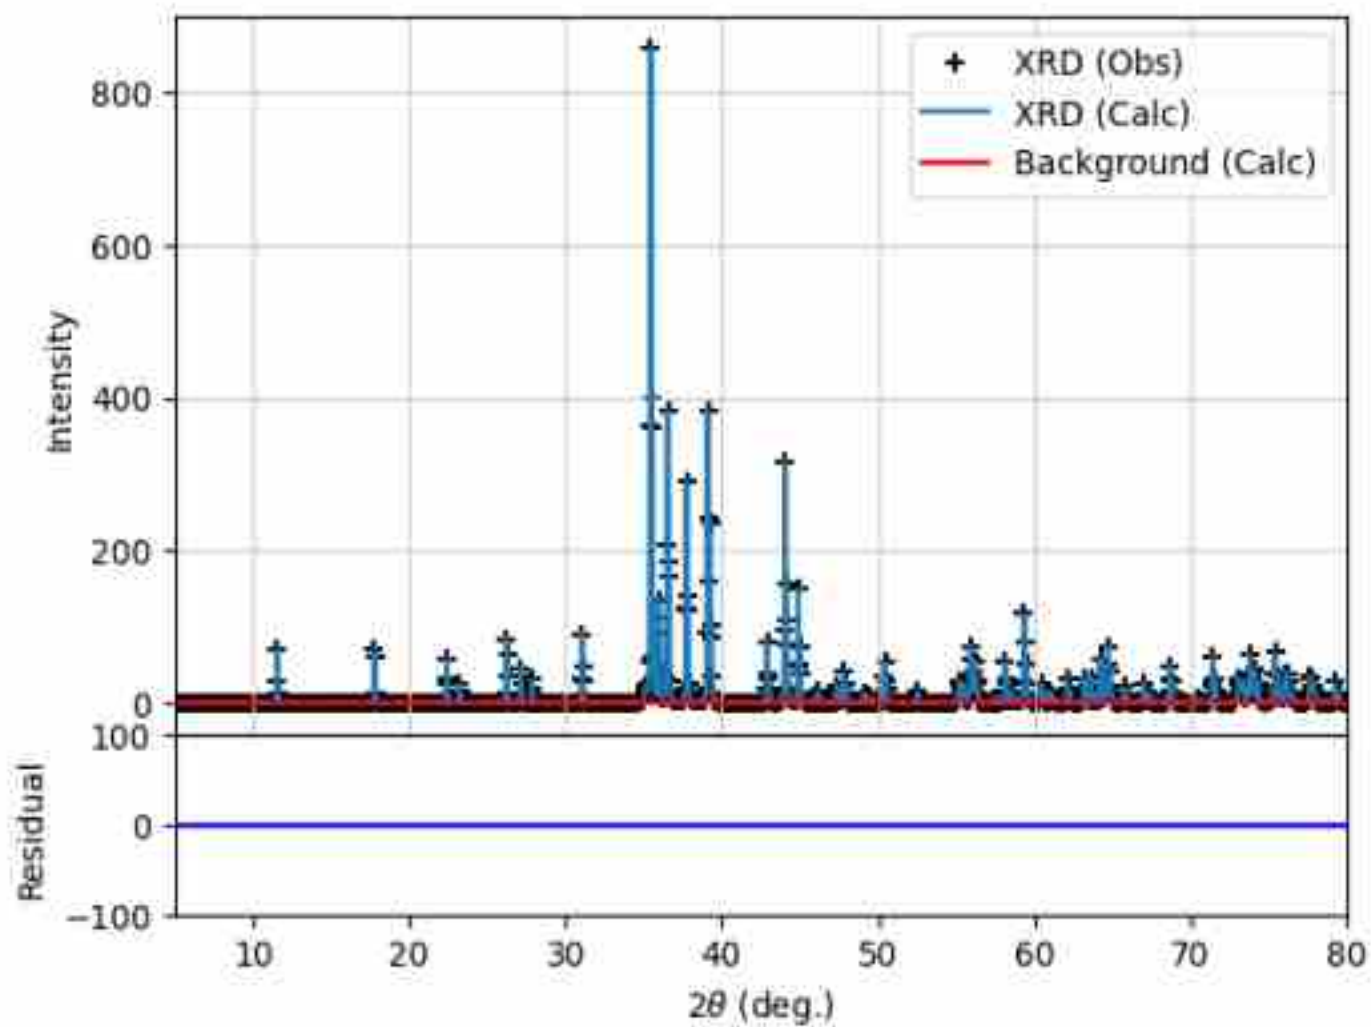

| RMSE before RR | Rwp     | RMSE after RR |
|----------------|---------|---------------|
| 0.026          | 0.00406 | 0.00053       |

# Yb<sub>2</sub>In<sub>8</sub>Pt<sub>2</sub>

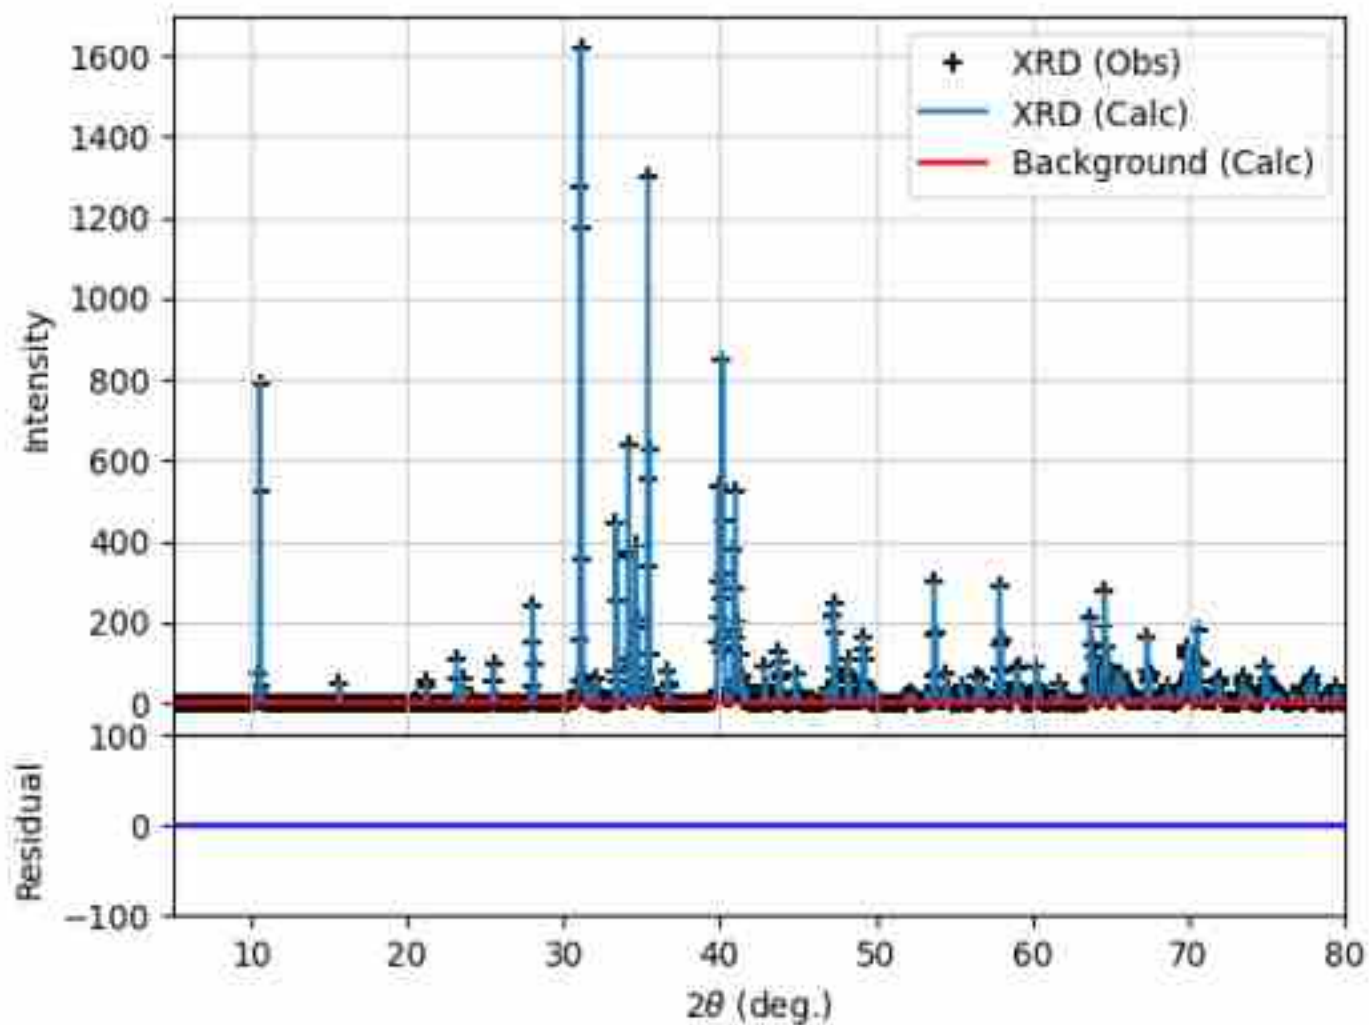

| RMSE before RR | Rwp    | RMSE after RR |
|----------------|--------|---------------|
| 0.026          | 0.0037 | 0.00037       |

# Yb<sub>2</sub>Si<sub>2</sub>O<sub>7</sub>

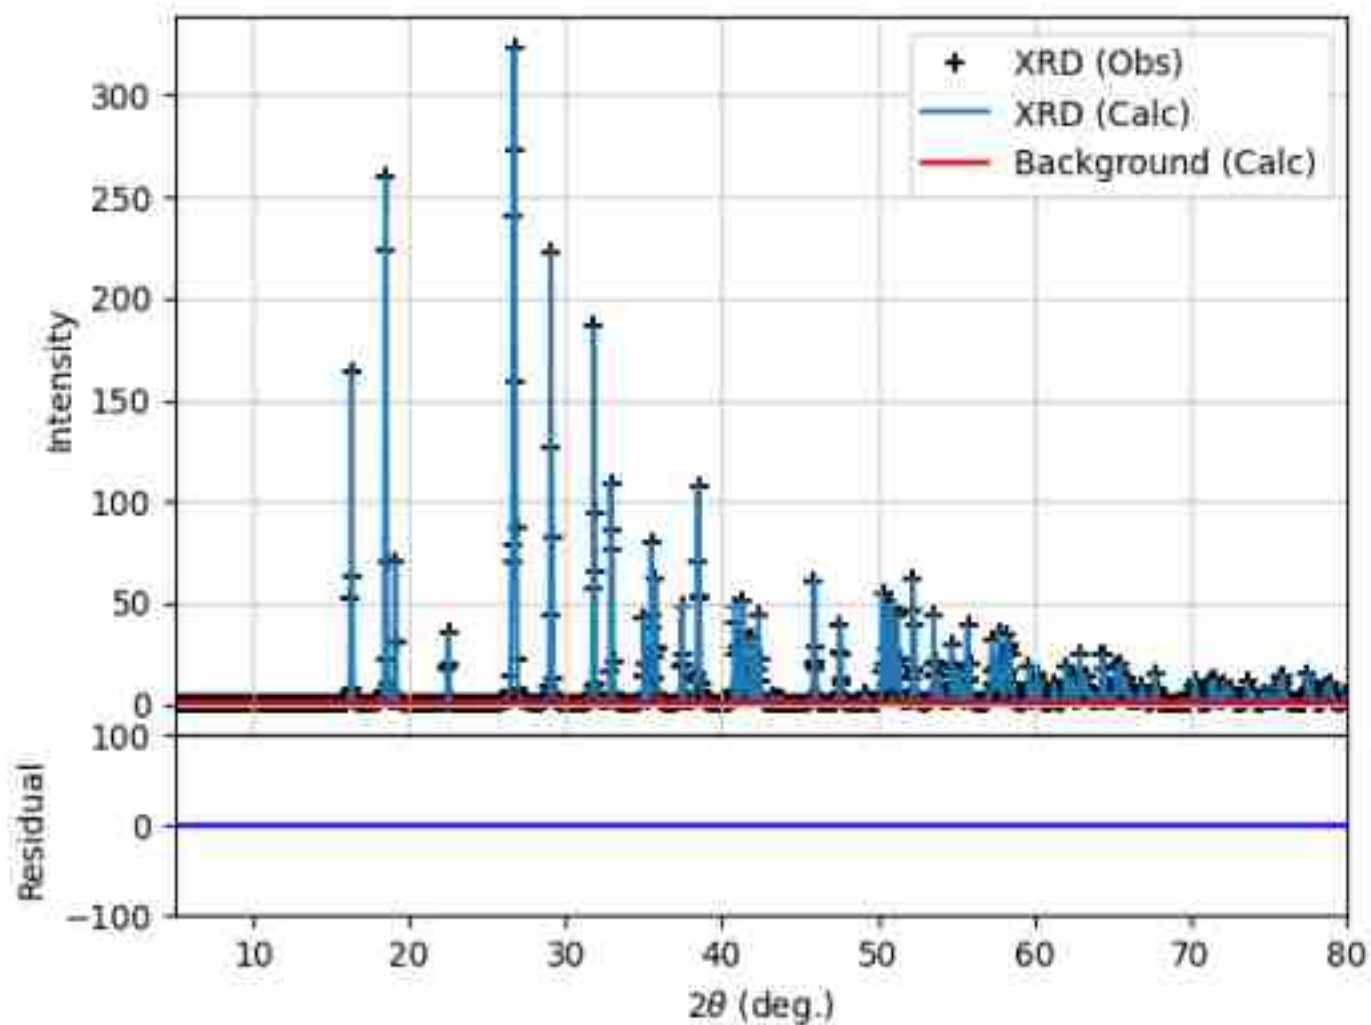

| RMSE before RR | Rwp     | RMSE after RR |
|----------------|---------|---------------|
| 0.026          | 0.00341 | 0.00103       |

# Zn4S4

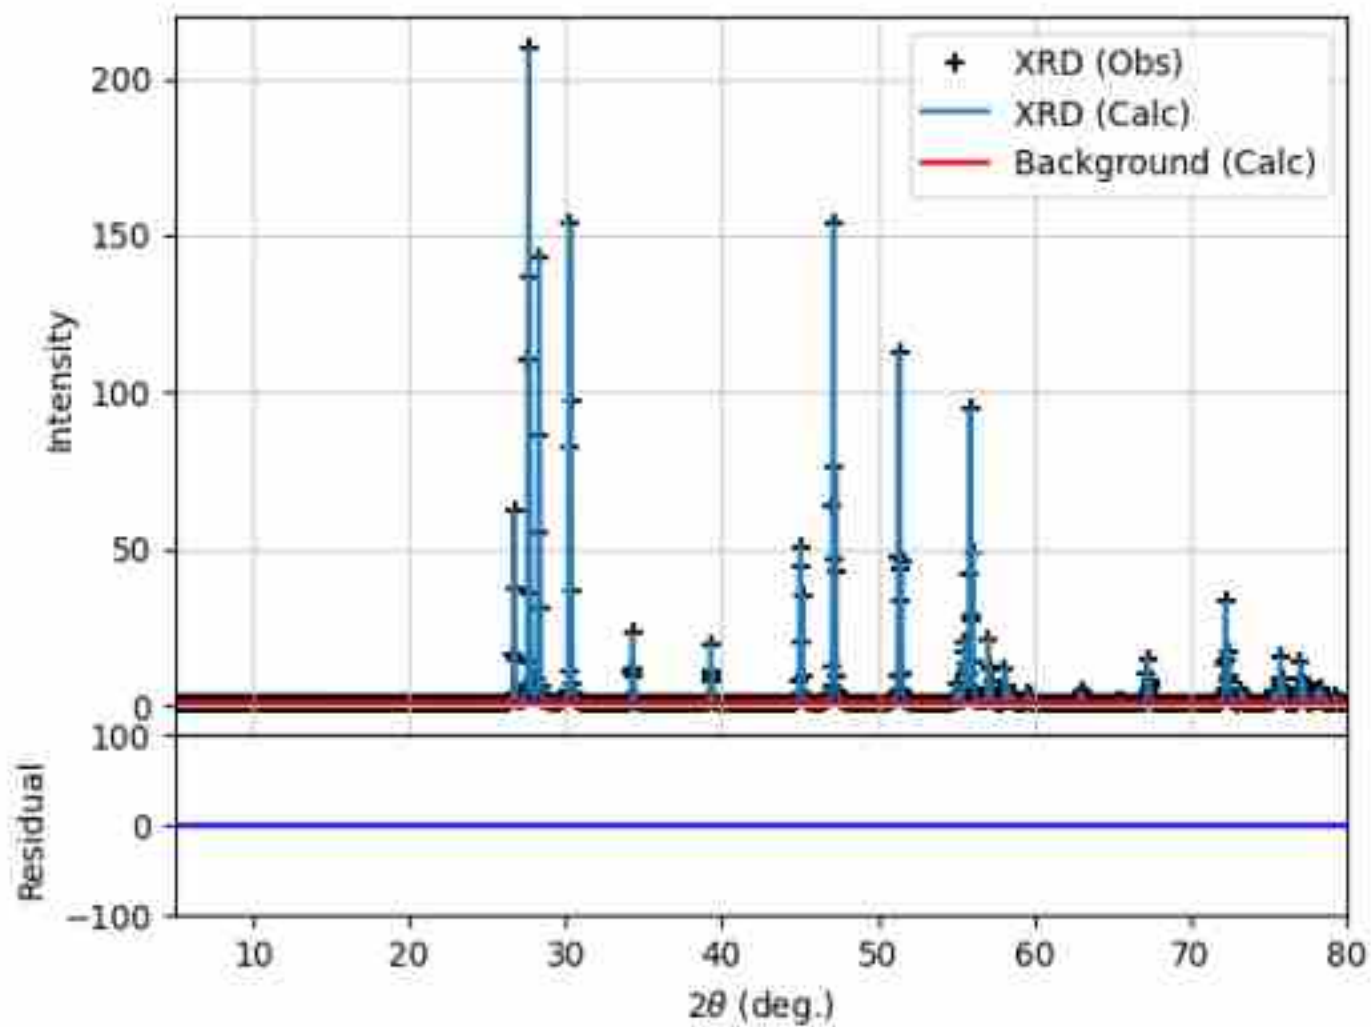

| RMSE before RR | Rwp     | RMSE after RR |
|----------------|---------|---------------|
| 0.026          | 0.00224 | 0.00044       |

# Zr1Ti1Ni2H6

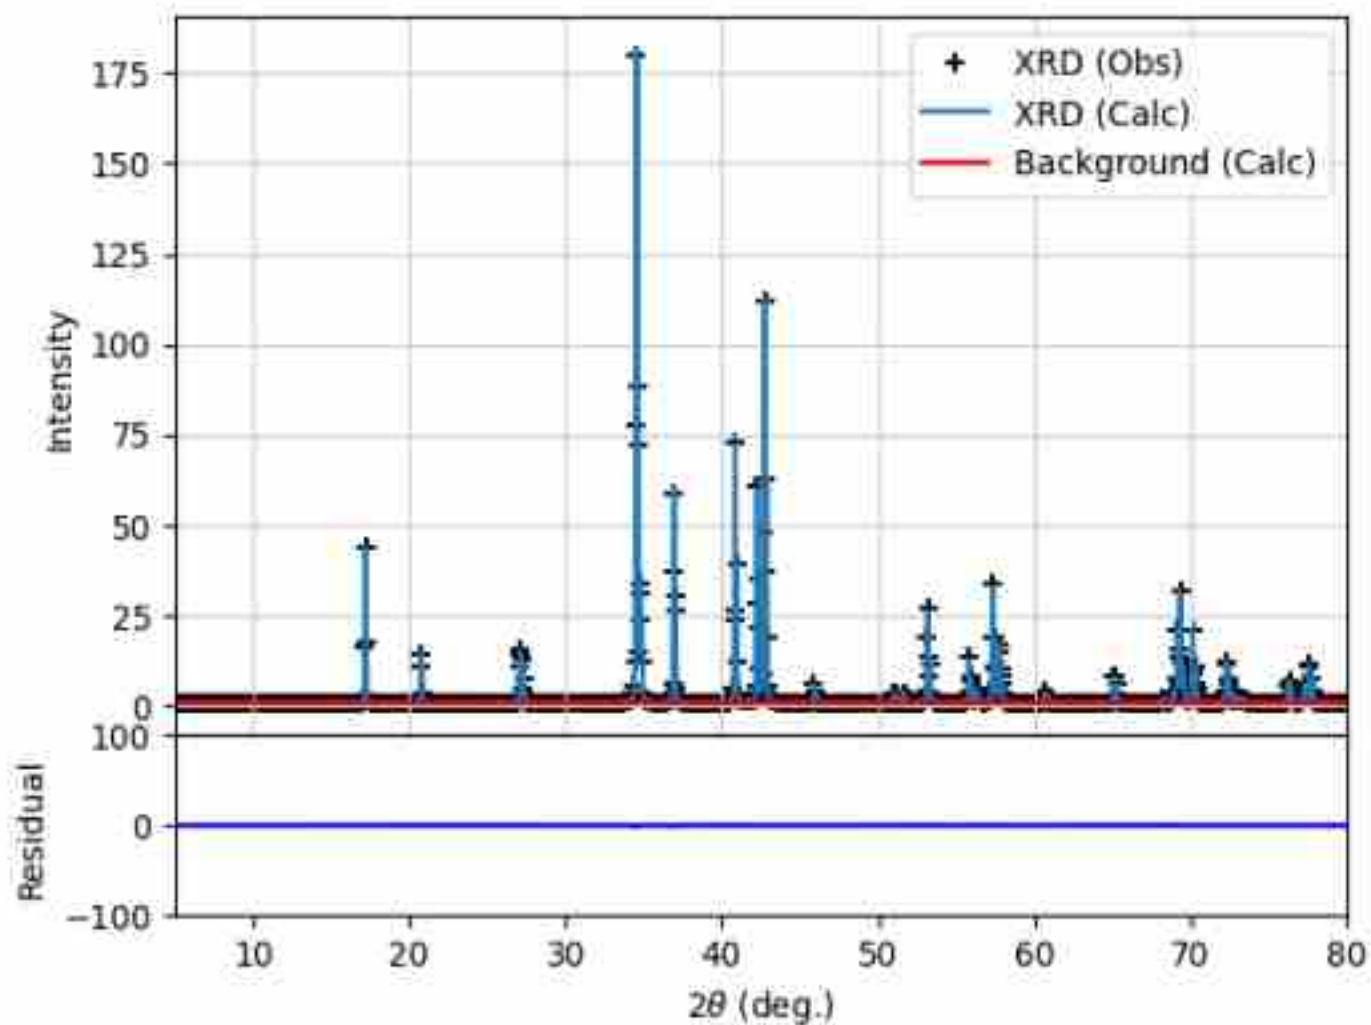

| RMSE before RR | Rwp     | RMSE after RR |
|----------------|---------|---------------|
| 0.026          | 1.05201 | None          |

# Zr<sub>4</sub>Ti<sub>4</sub>Rh<sub>4</sub>

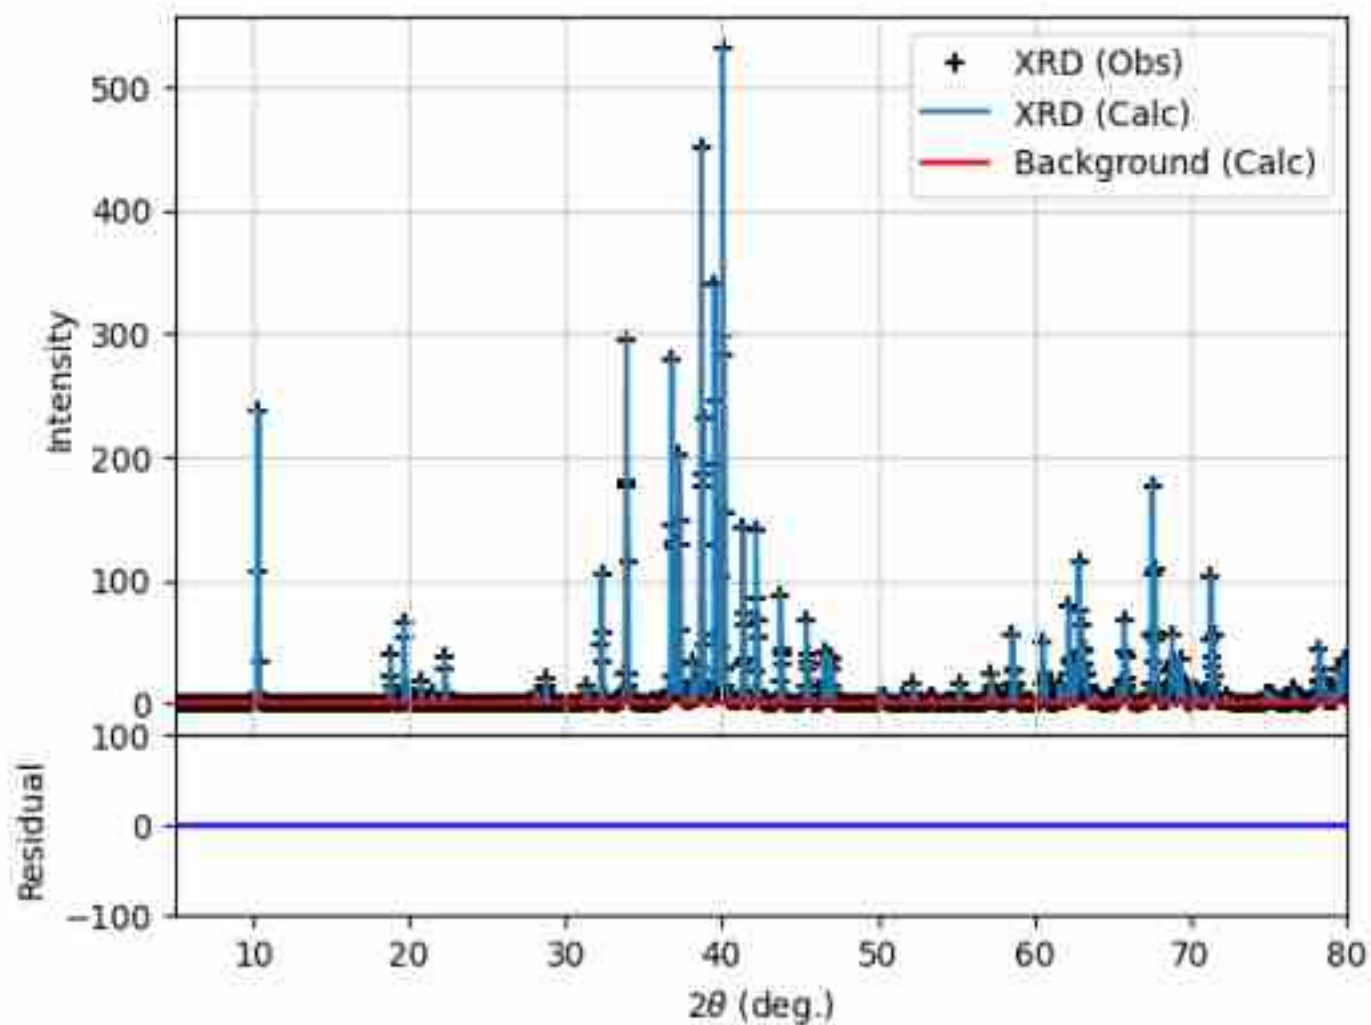

| RMSE before RR | Rwp     | RMSE after RR |
|----------------|---------|---------------|
| 0.026          | 0.00377 | 0.00029       |



# Zr4Ti12C2

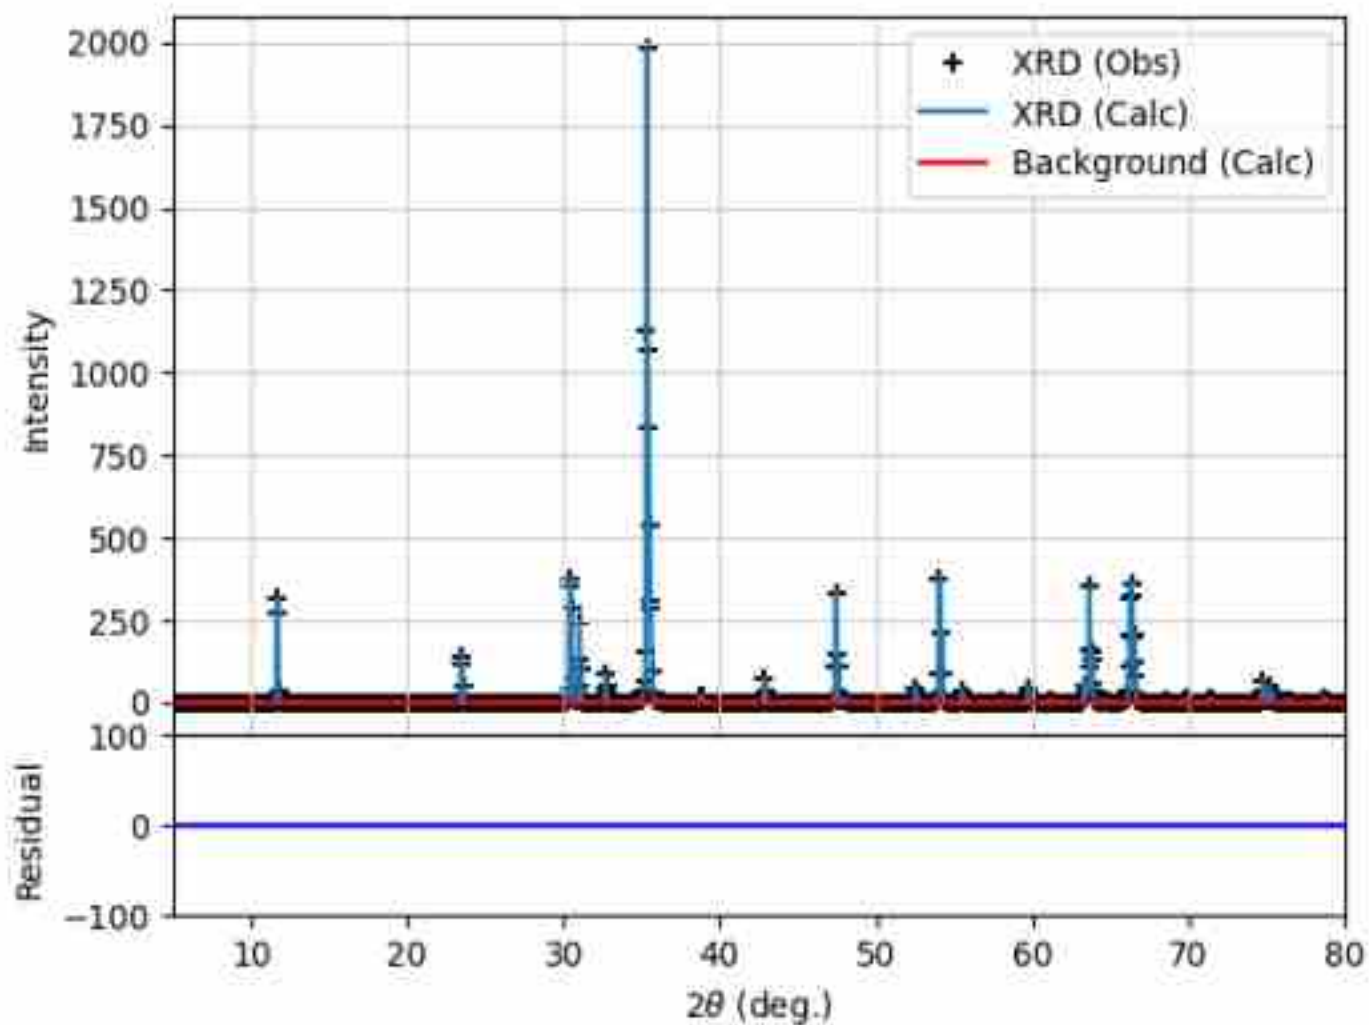

| RMSE before RR | Rwp     | RMSE after RR |
|----------------|---------|---------------|
| 0.026          | 0.00267 | 0.00076       |

# Zr10Ga8

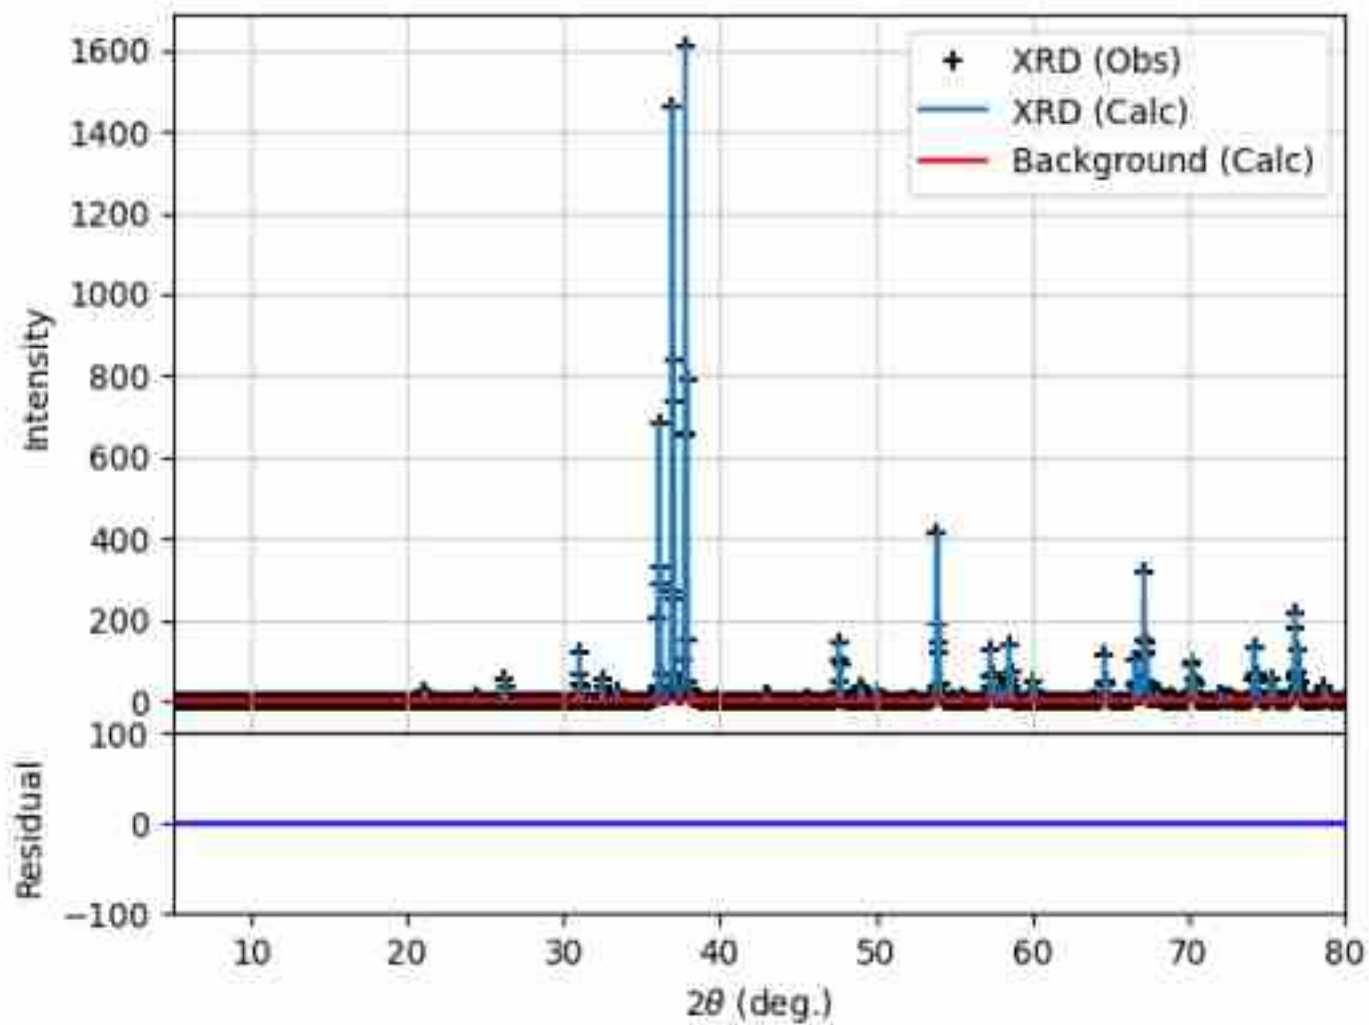

| RMSE before RR | Rwp     | RMSE after RR |
|----------------|---------|---------------|
| 0.026          | 0.01117 | 0.00072       |

# Zr<sub>10</sub>Ir<sub>4</sub>Os<sub>2</sub>

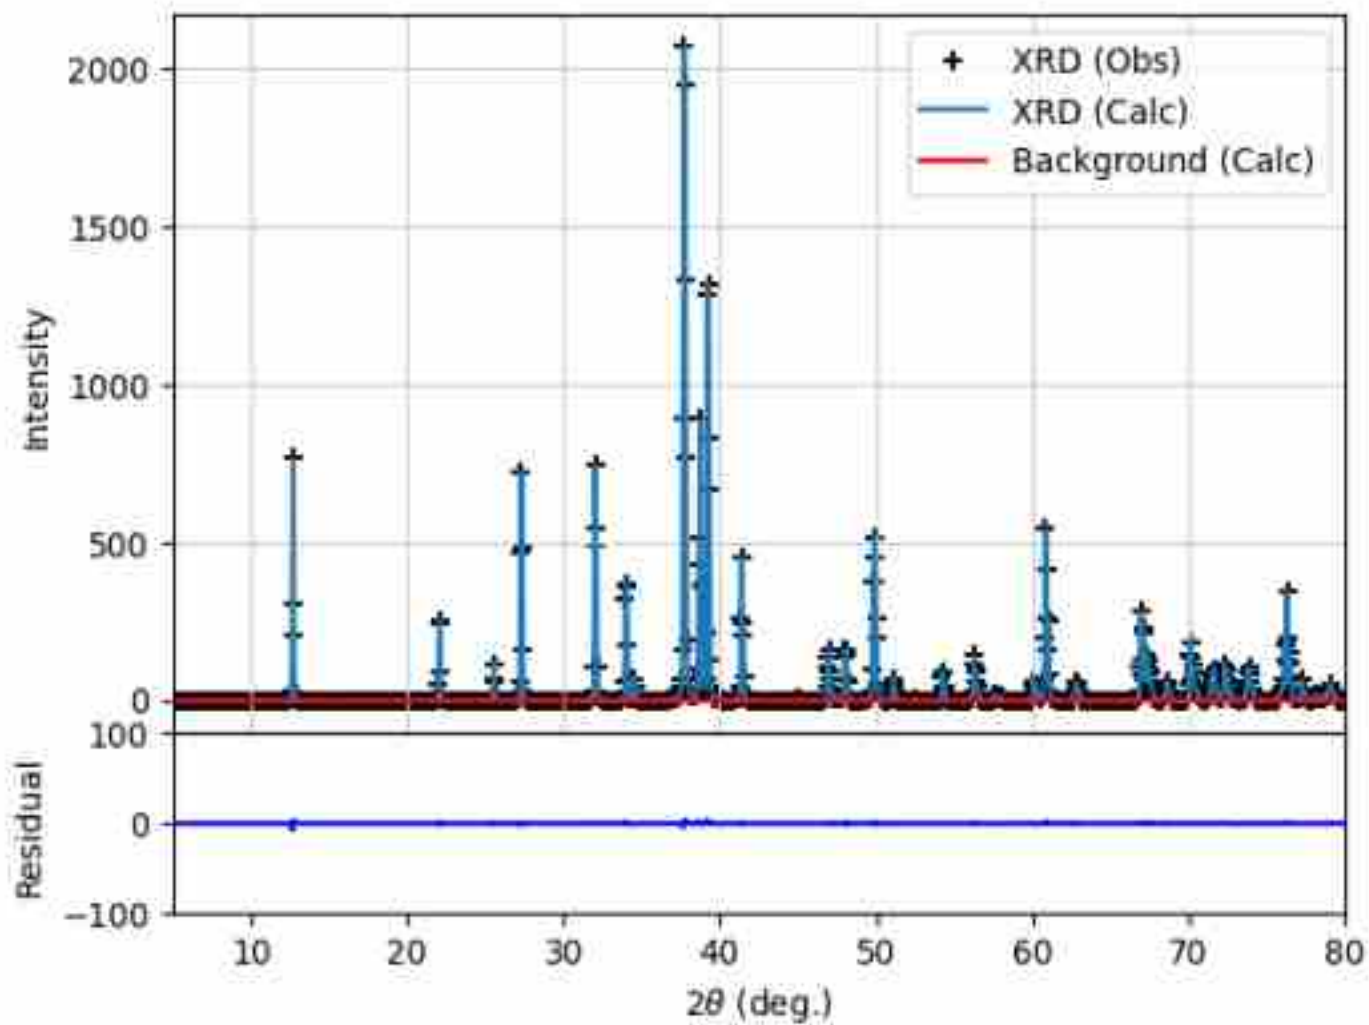

| RMSE before RR | Rwp     | RMSE after RR |
|----------------|---------|---------------|
| 0.026          | 0.73401 | 0.01155       |

# Zr<sub>10</sub>Ni<sub>1</sub>Sn<sub>1</sub>Sb<sub>4</sub>

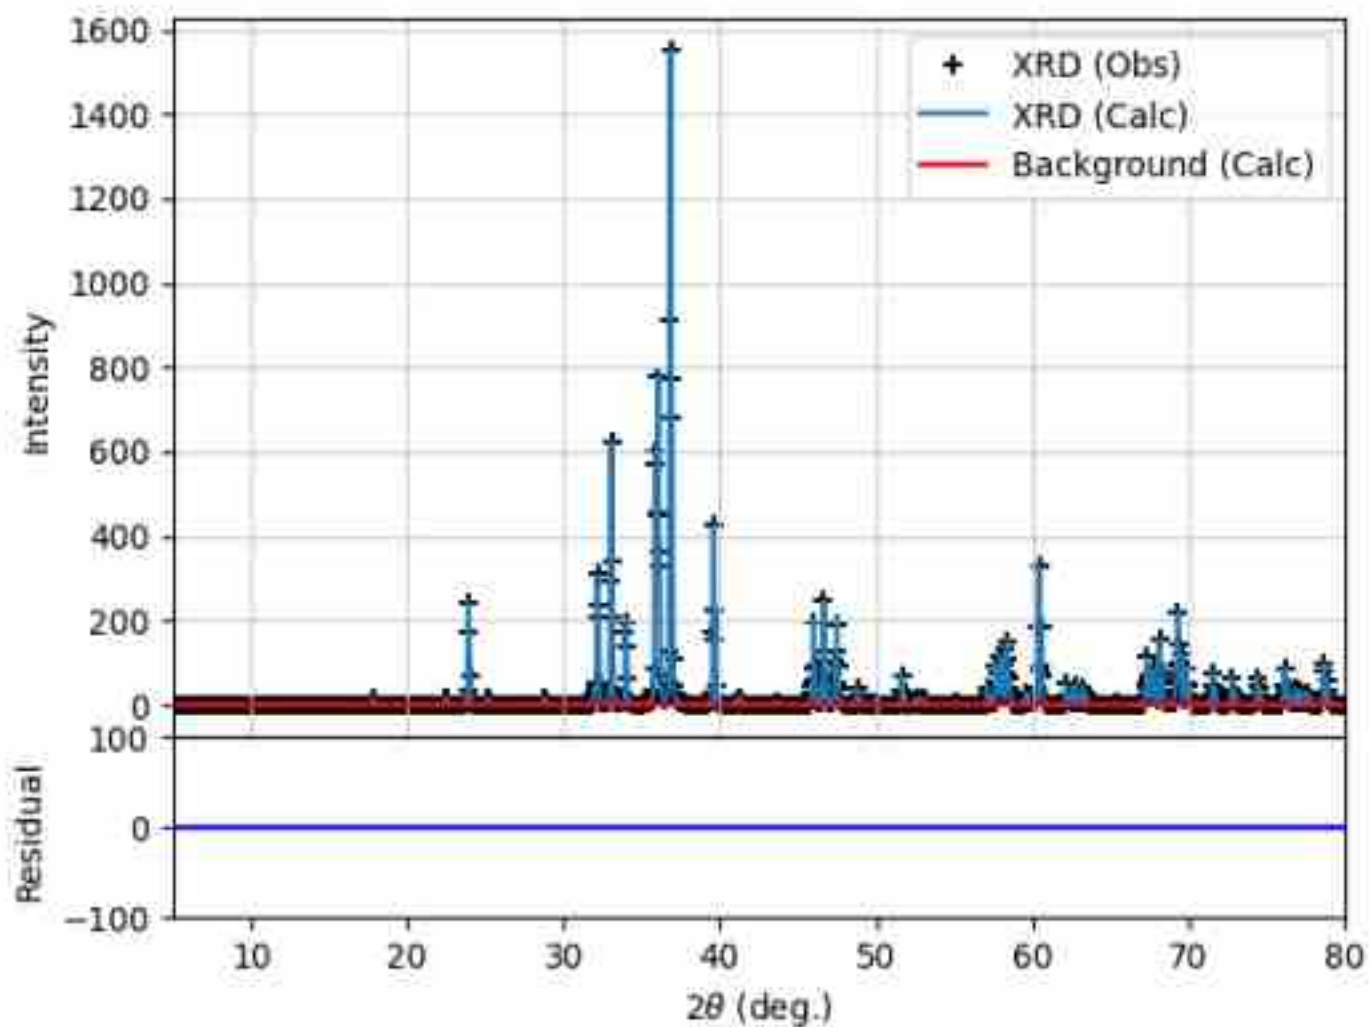

| RMSE before RR | Rwp     | RMSE after RR |
|----------------|---------|---------------|
| 0.026          | 0.00304 | 0.00032       |

# Al1V1Ni2

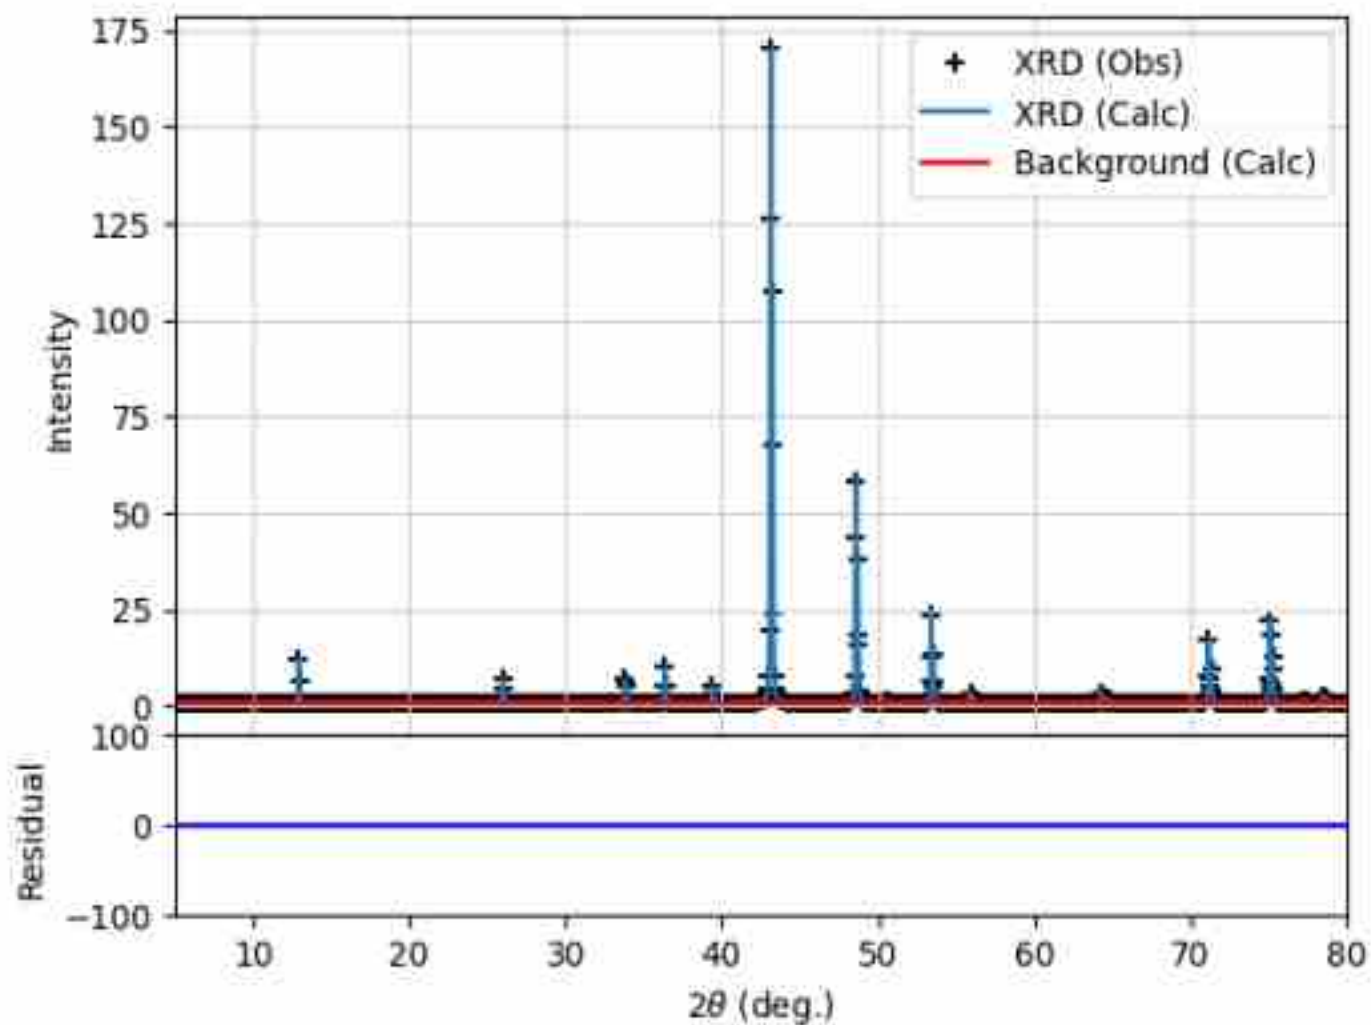

| RMSE before RR | Rwp     | RMSE after RR |
|----------------|---------|---------------|
| 0.027          | 0.00373 | 0.00042       |

# Ba1Ge1As2O8

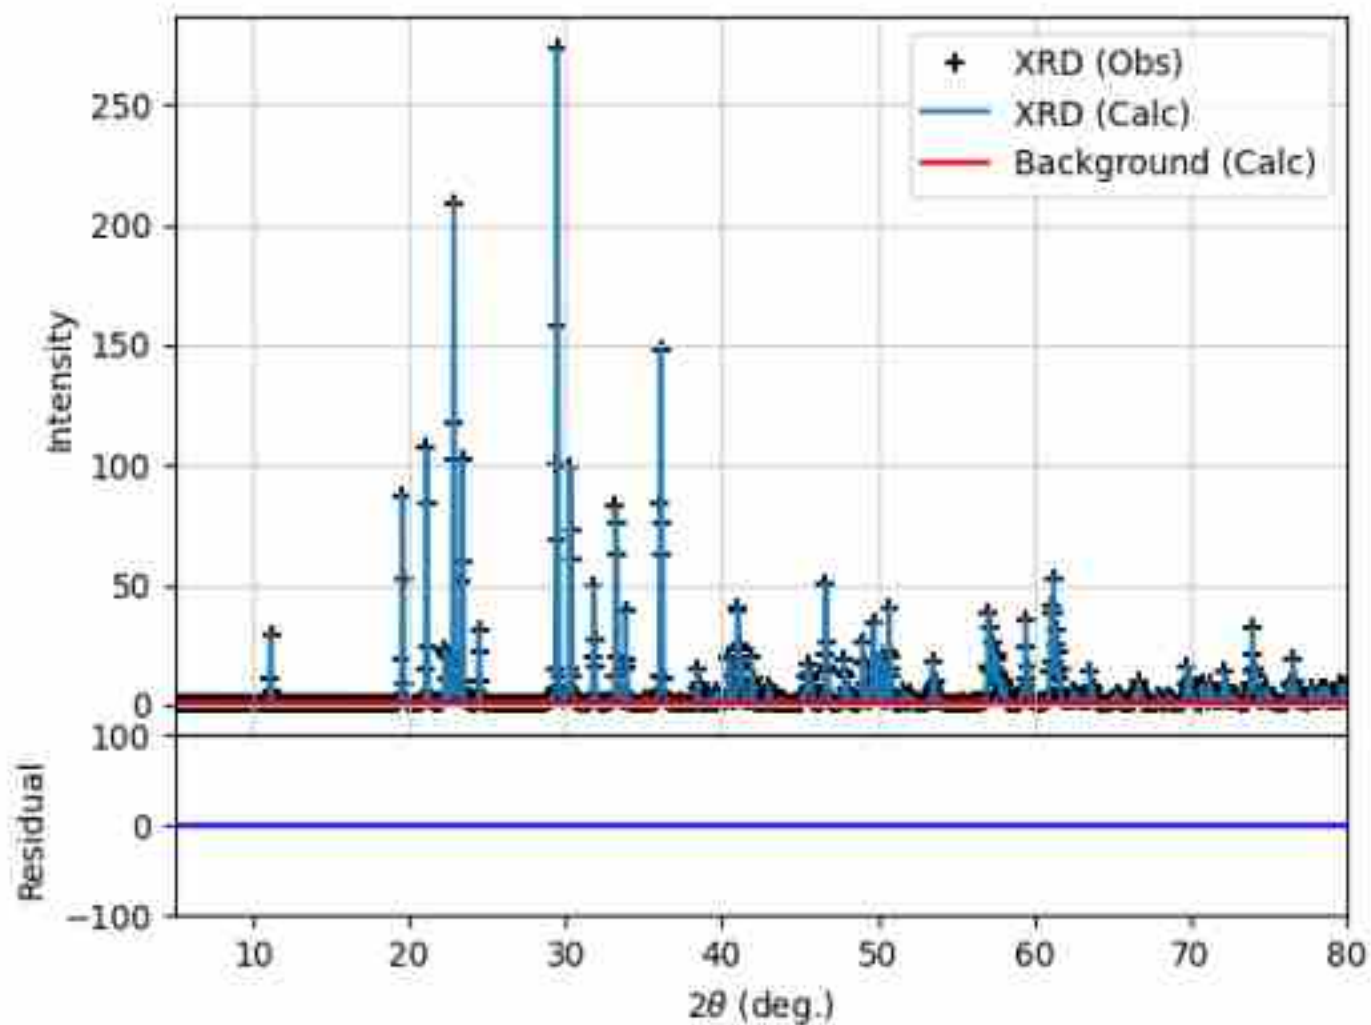

| RMSE before RR | Rwp     | RMSE after RR |
|----------------|---------|---------------|
| 0.027          | 0.00333 | 0.00092       |

# Ba<sub>2</sub>Al<sub>2</sub>B<sub>2</sub>O<sub>6</sub>F<sub>4</sub>

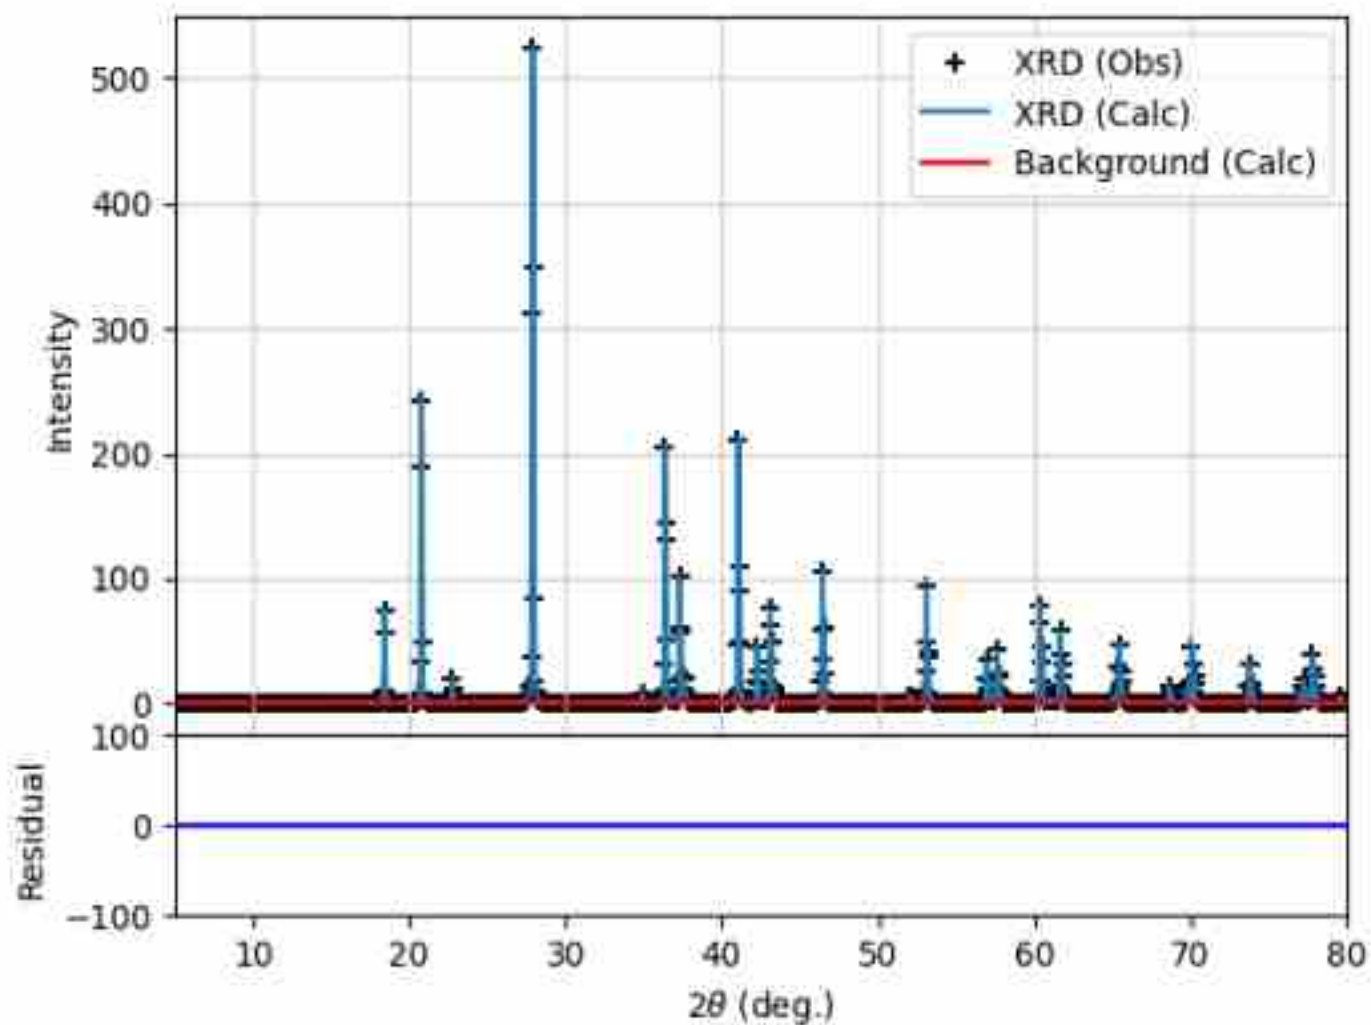

| RMSE before RR | Rwp     | RMSE after RR |
|----------------|---------|---------------|
| 0.027          | 0.00371 | 0.00202       |

# Ba<sub>2</sub>Al<sub>4</sub>Se<sub>8</sub>

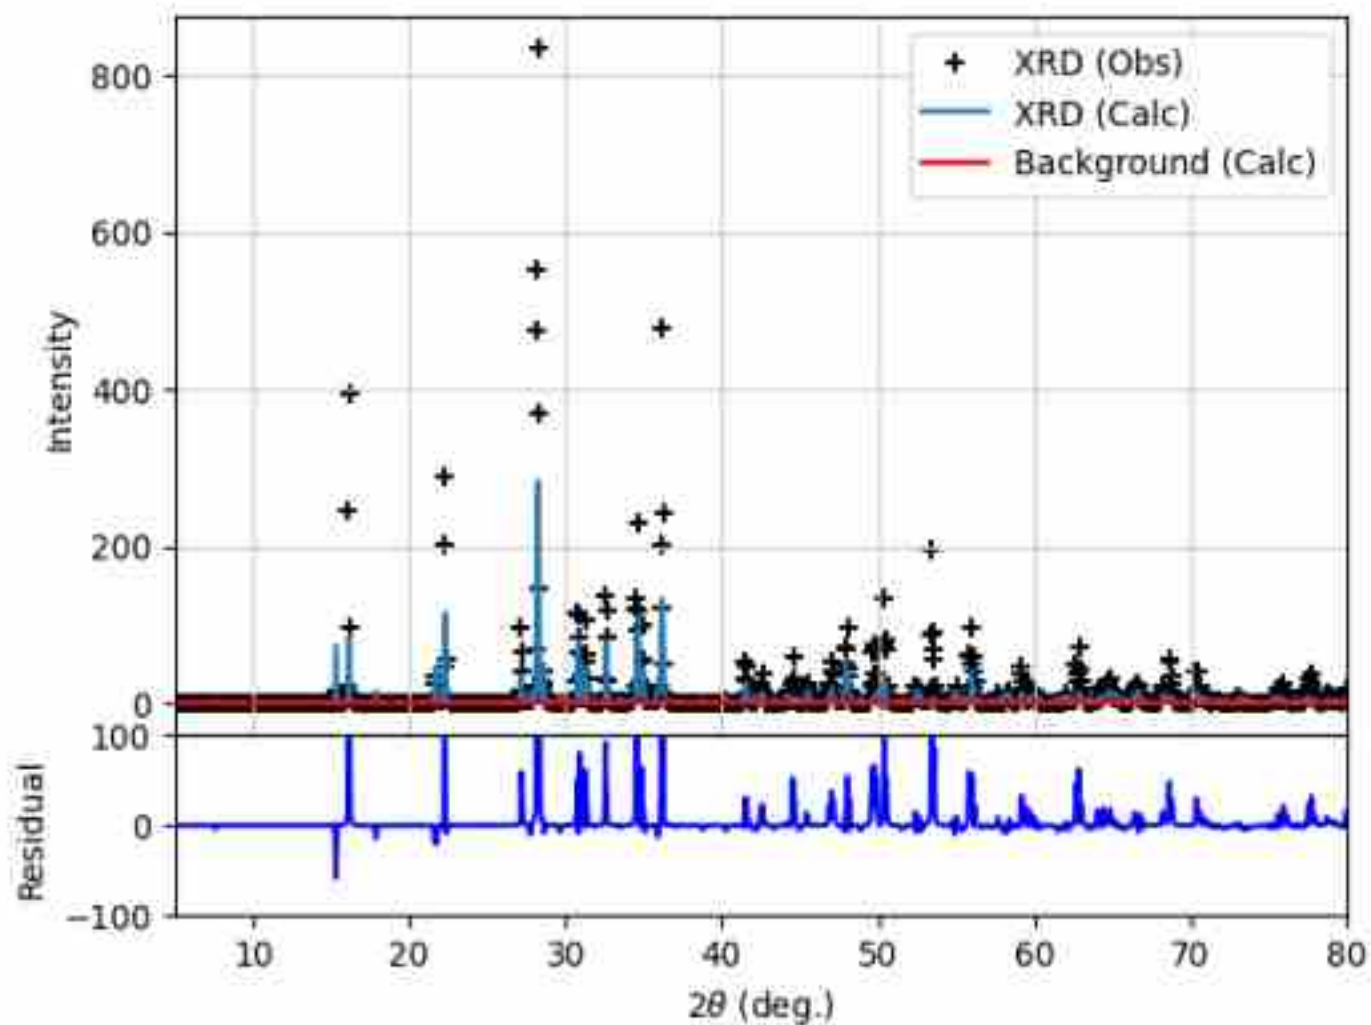

| RMSE before RR | Rwp      | RMSE after RR |
|----------------|----------|---------------|
| 0.027          | 68.23902 | 0.24354       |



# Ba2Ce4S8

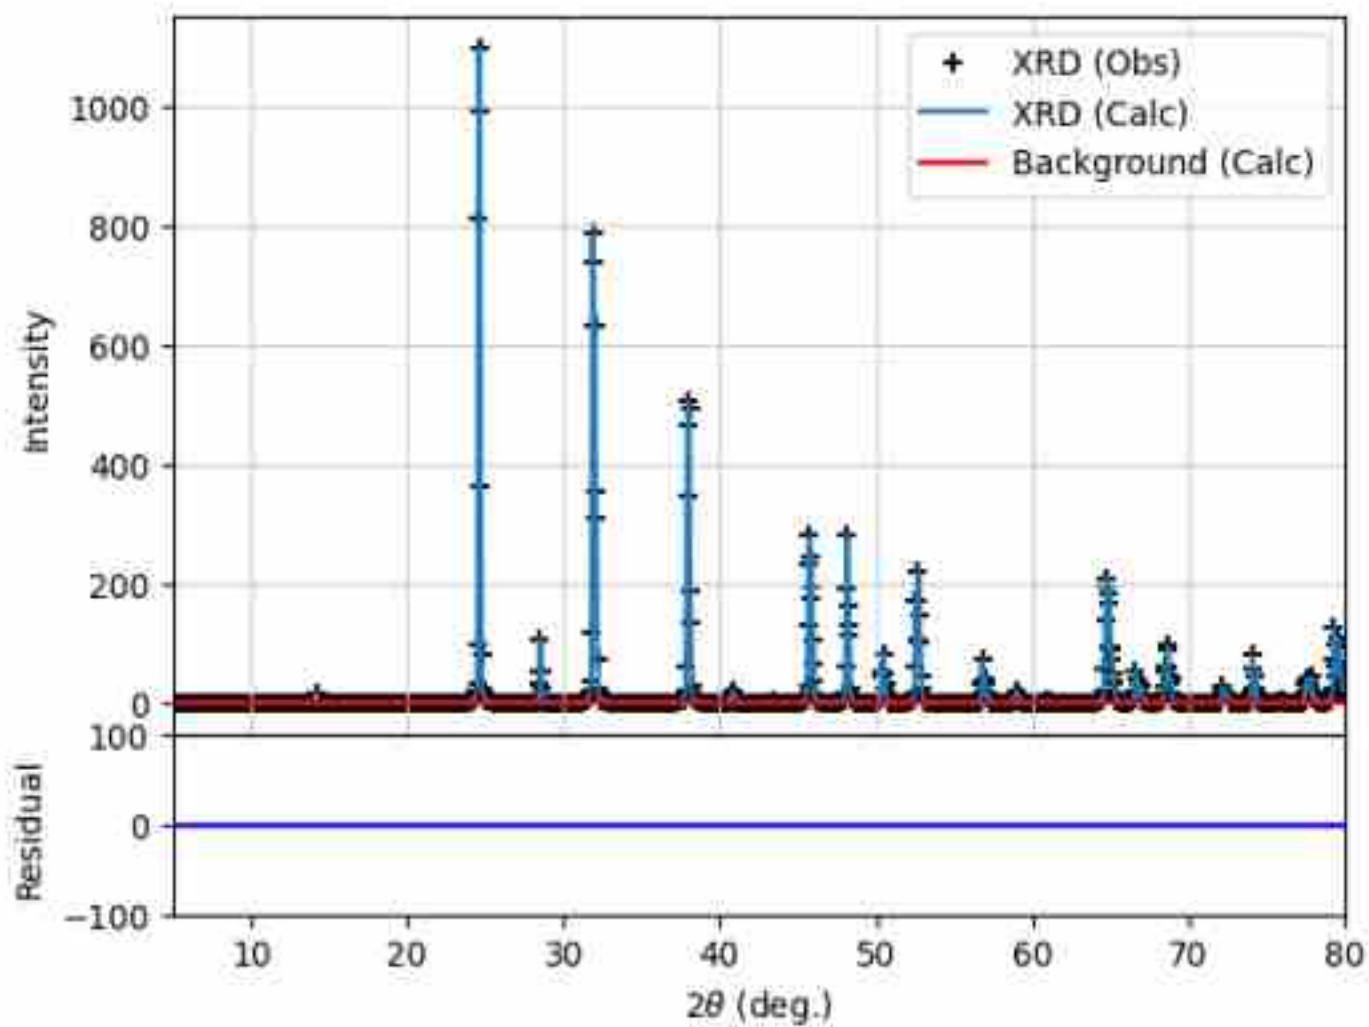

| RMSE before RR | Rwp     | RMSE after RR |
|----------------|---------|---------------|
| 0.027          | 0.00295 | 0.00058       |

# Ba<sub>2</sub>Cu<sub>1</sub>Te<sub>1</sub>O<sub>6</sub>

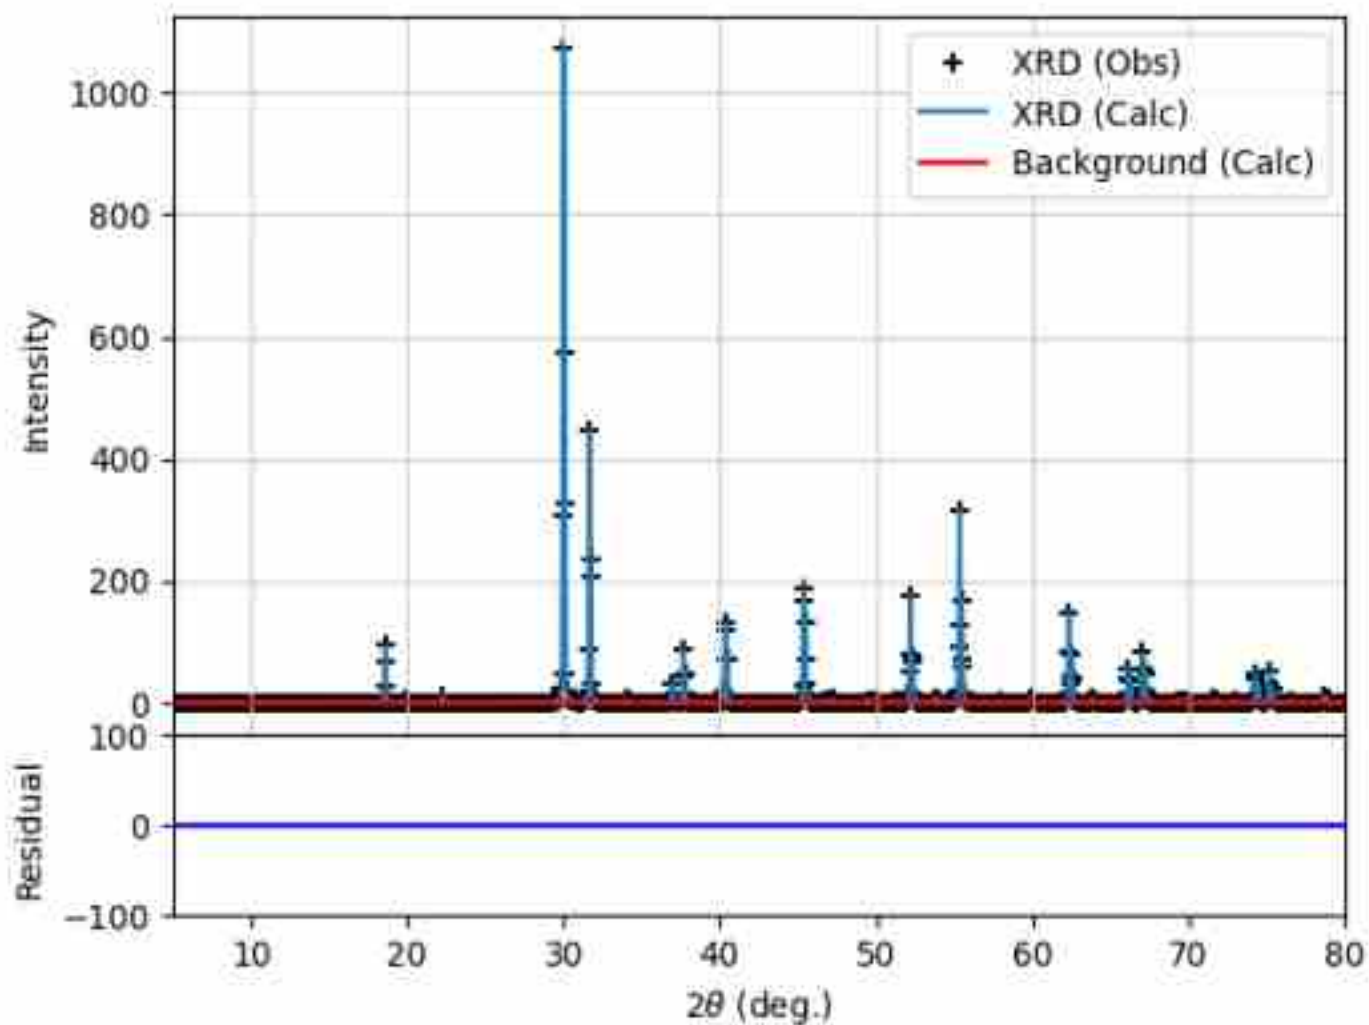

| RMSE before RR | Rwp     | RMSE after RR |
|----------------|---------|---------------|
| 0.027          | 0.00331 | 0.00152       |

# Ba<sub>2</sub>S<sub>2</sub>O<sub>6</sub>

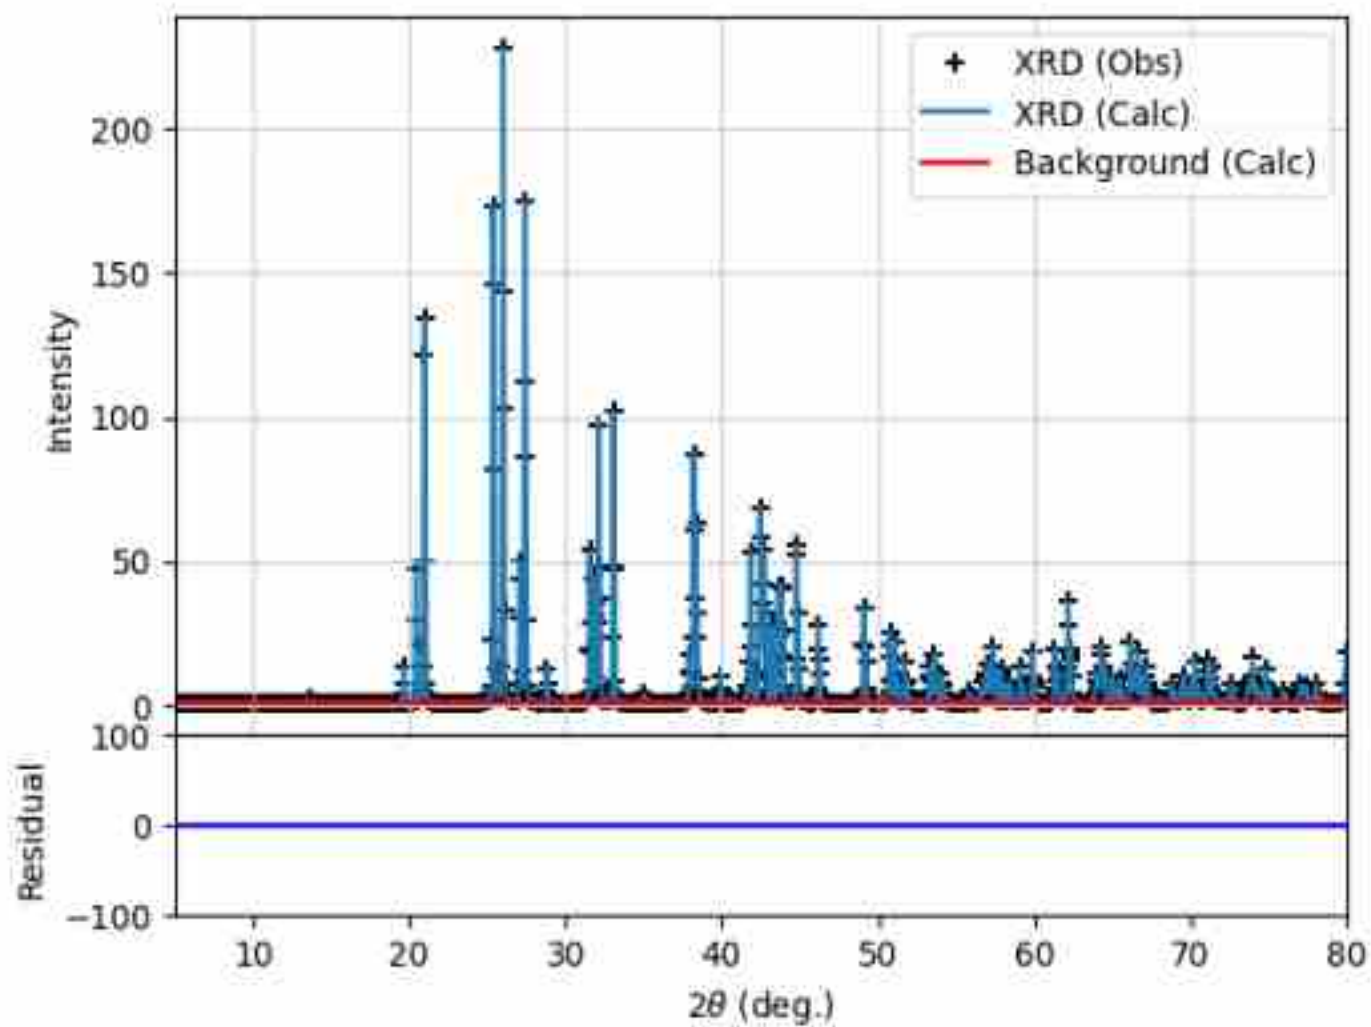

| RMSE before RR | Rwp    | RMSE after RR |
|----------------|--------|---------------|
| 0.027          | 0.0035 | 0.00061       |

# Ba<sub>3</sub>In<sub>2</sub>Br<sub>2</sub>O<sub>5</sub>

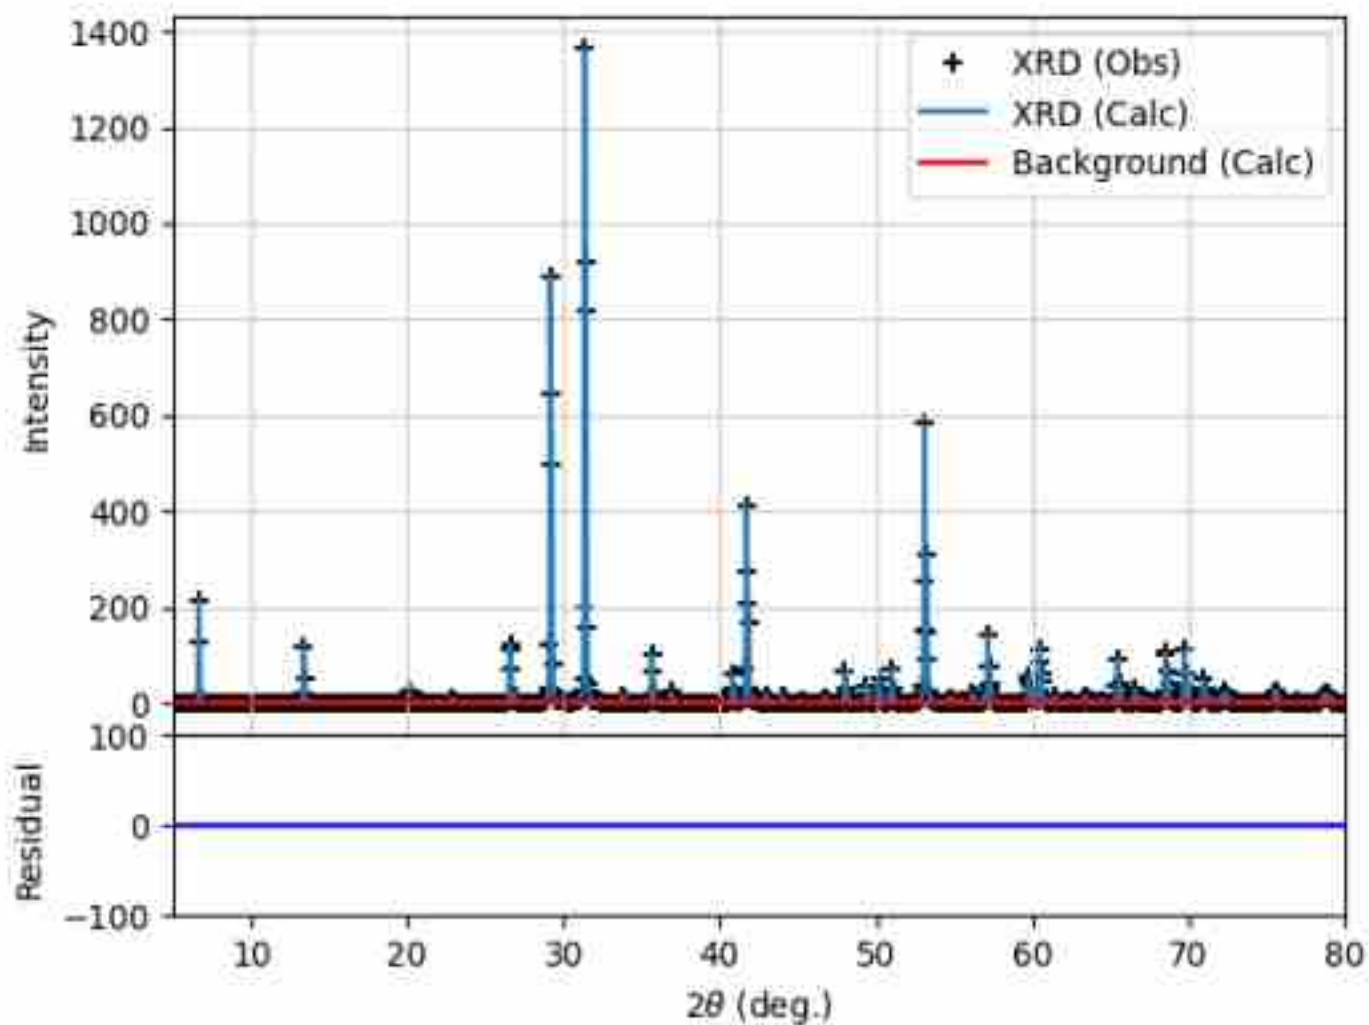

| RMSE before RR | Rwp     | RMSE after RR |
|----------------|---------|---------------|
| 0.027          | 0.00439 | 0.00169       |

# Ba<sub>3</sub>Sr<sub>1</sub>Yb<sub>2</sub>Re<sub>2</sub>O<sub>12</sub>

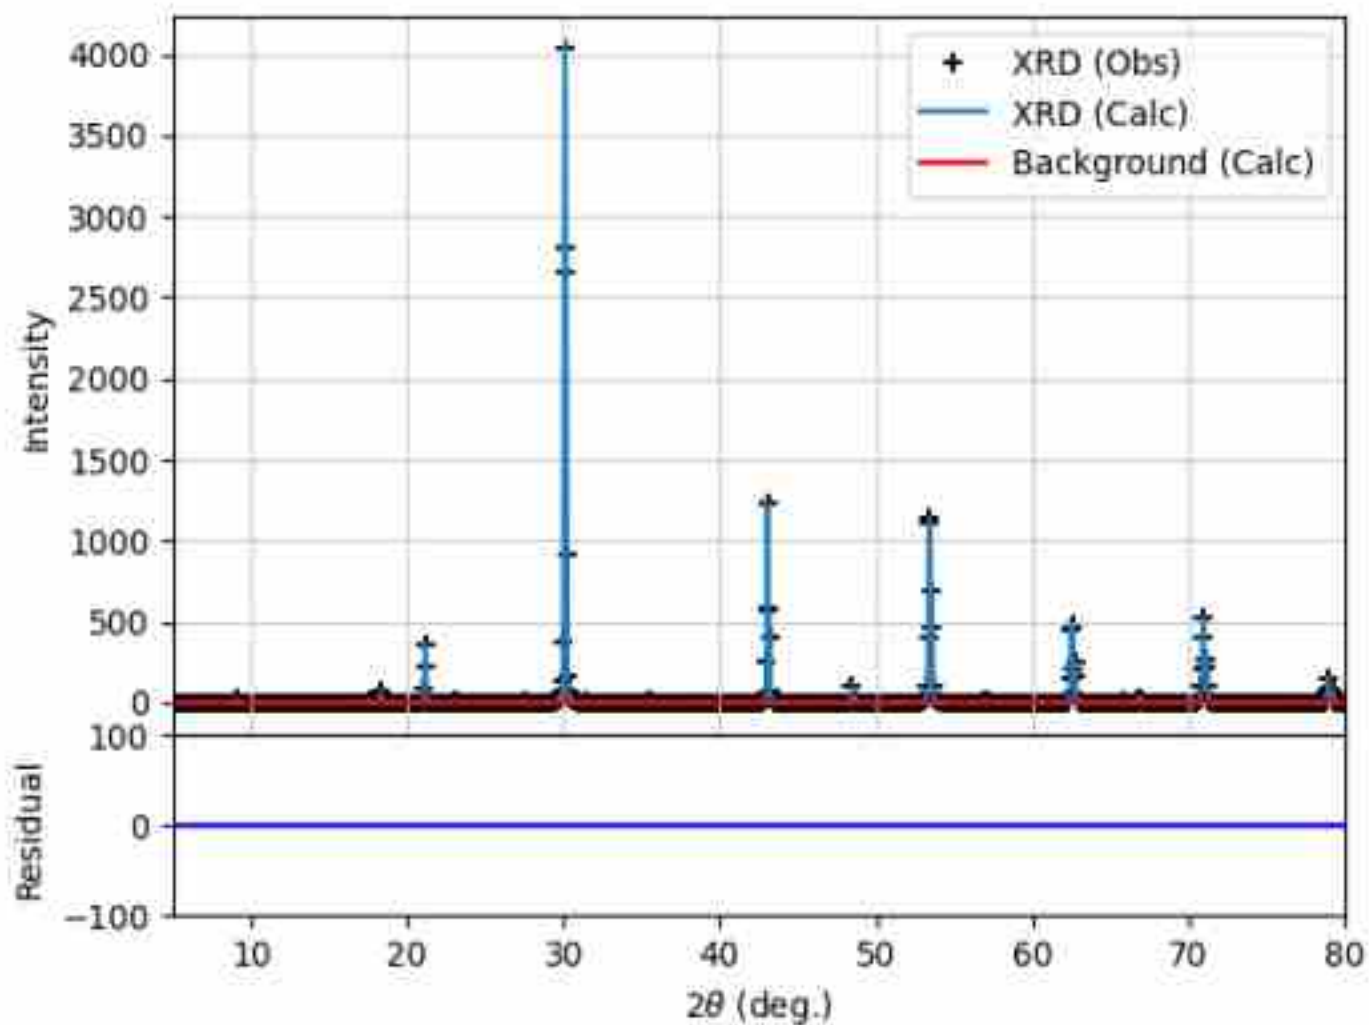

| RMSE before RR | Rwp     | RMSE after RR |
|----------------|---------|---------------|
| 0.027          | 0.01975 | 0.00513       |

# Ba<sub>4</sub>Dy<sub>2</sub>In<sub>2</sub>Se<sub>10</sub>

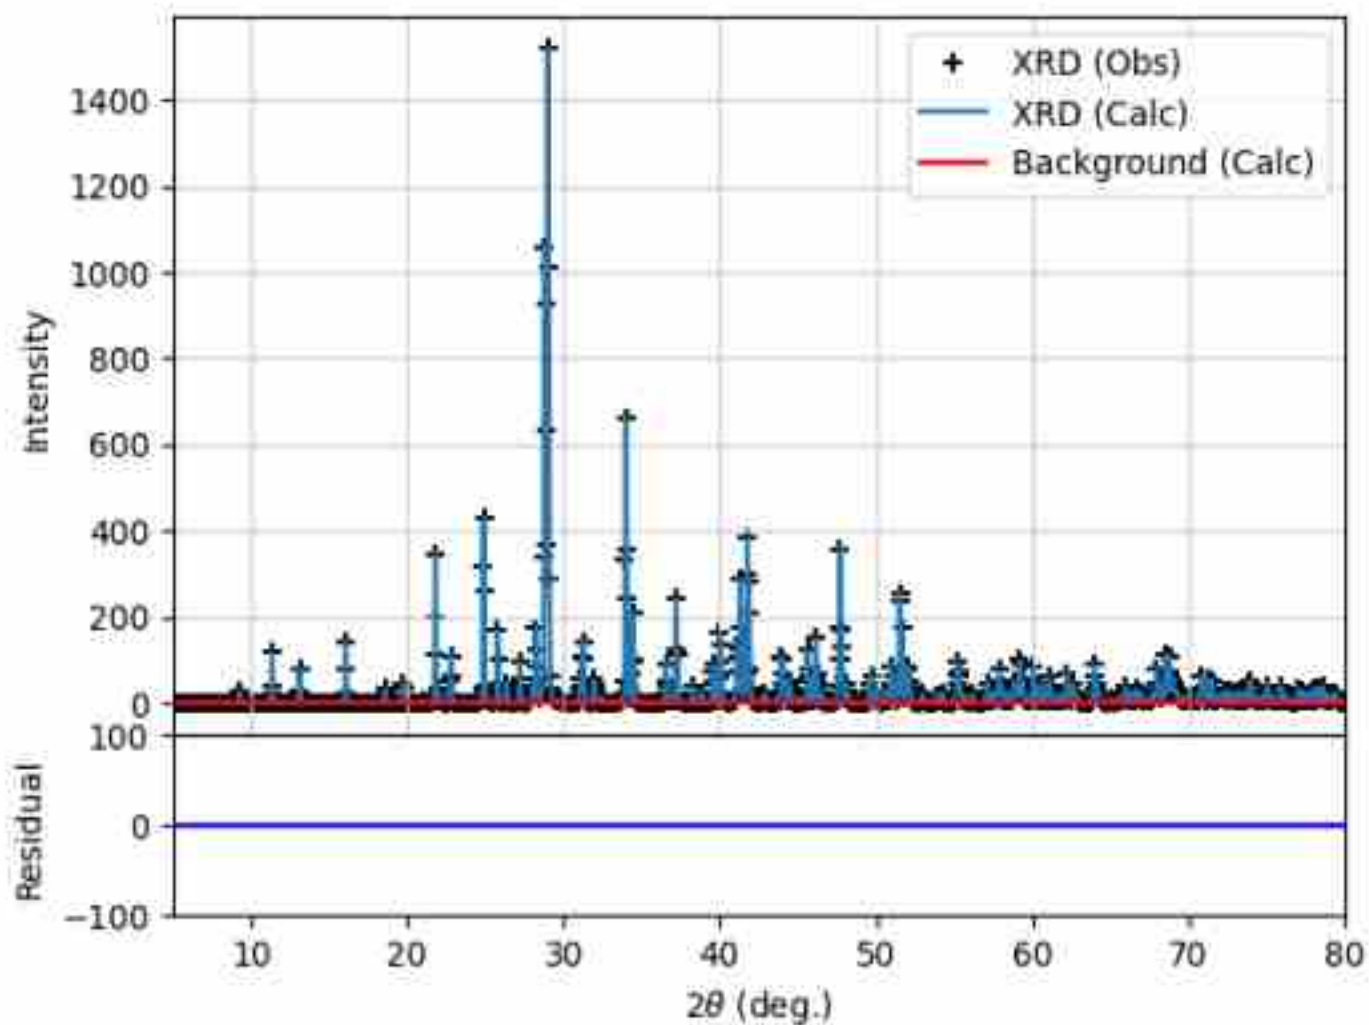

| RMSE before RR | Rwp     | RMSE after RR |
|----------------|---------|---------------|
| 0.027          | 0.00305 | 0.00029       |

# Ba6Cr2N6

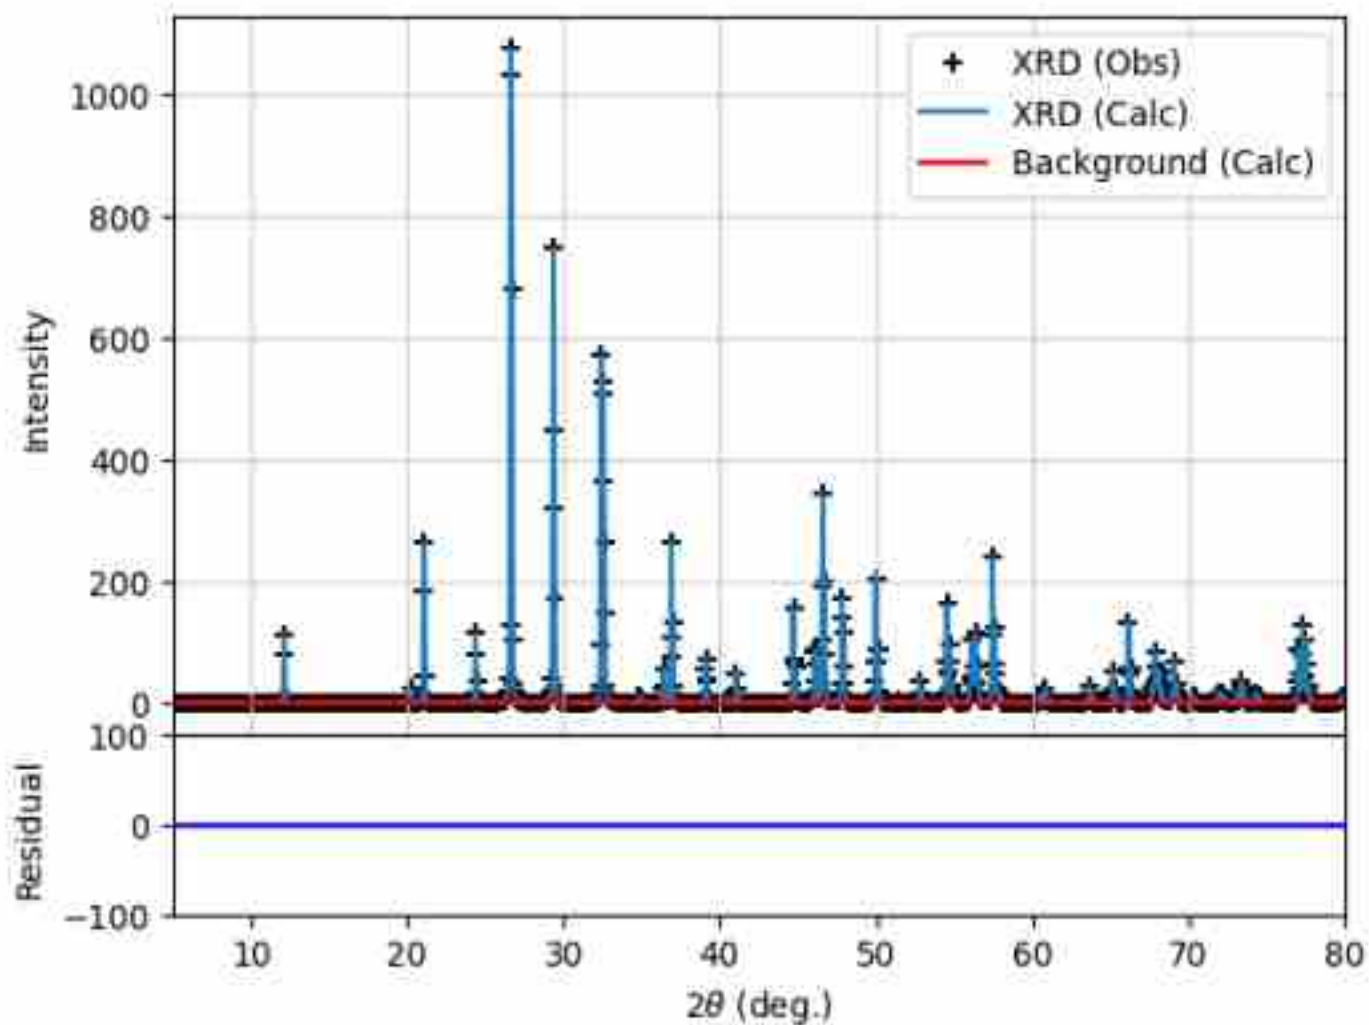

| RMSE before RR | Rwp     | RMSE after RR |
|----------------|---------|---------------|
| 0.027          | 0.00445 | 0.0013        |

# Ba6Hf1O8

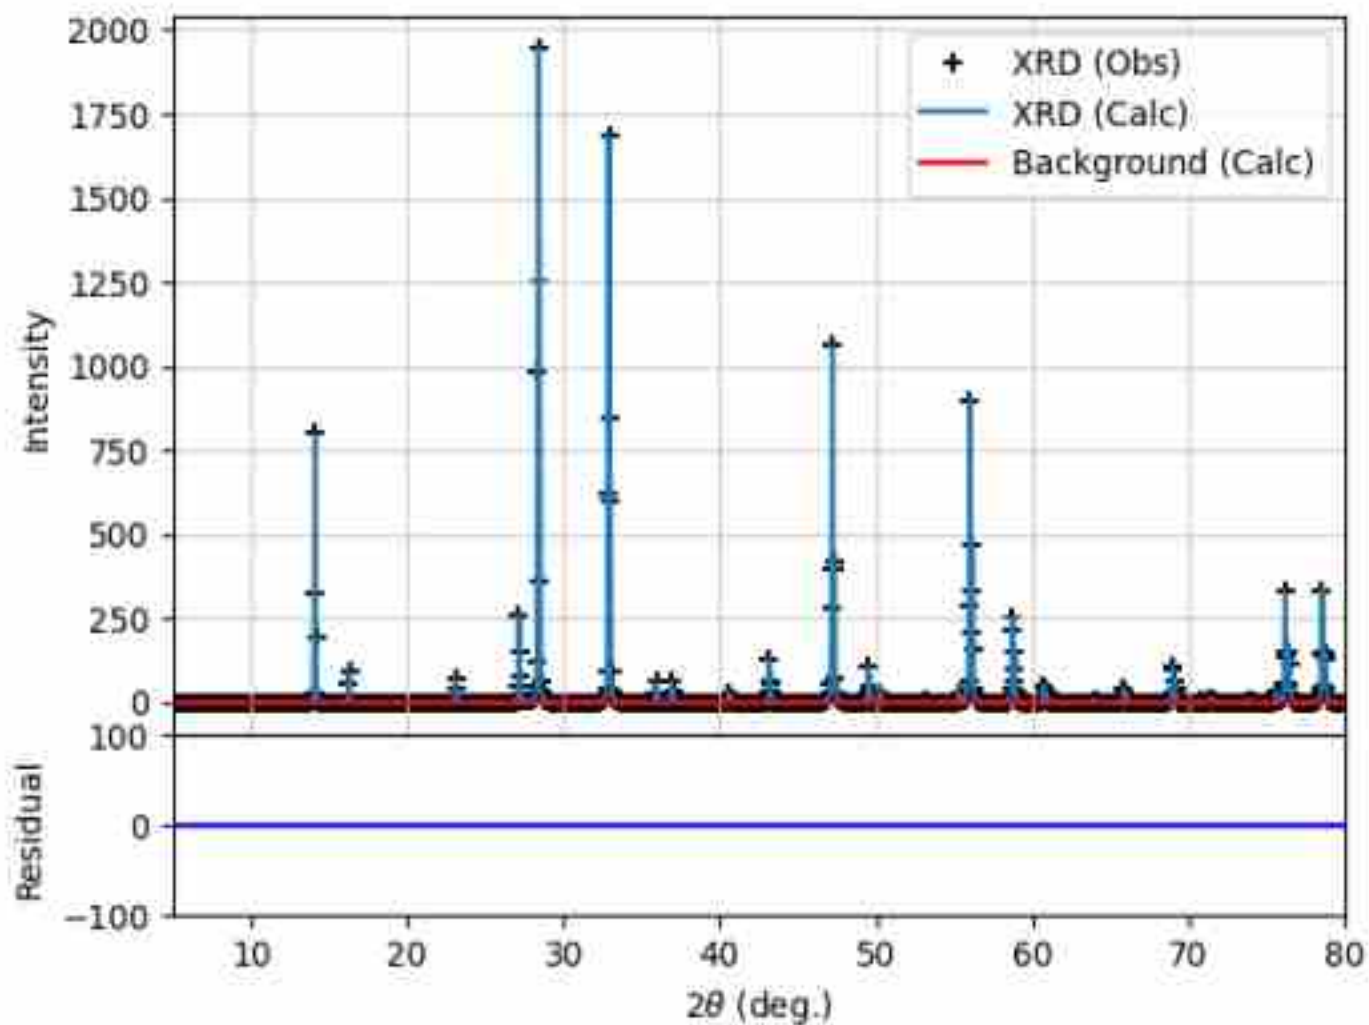

| RMSE before RR | Rwp     | RMSE after RR |
|----------------|---------|---------------|
| 0.027          | 0.03169 | 0.00819       |



# Bi<sub>4</sub>Ir<sub>4</sub>S<sub>4</sub>

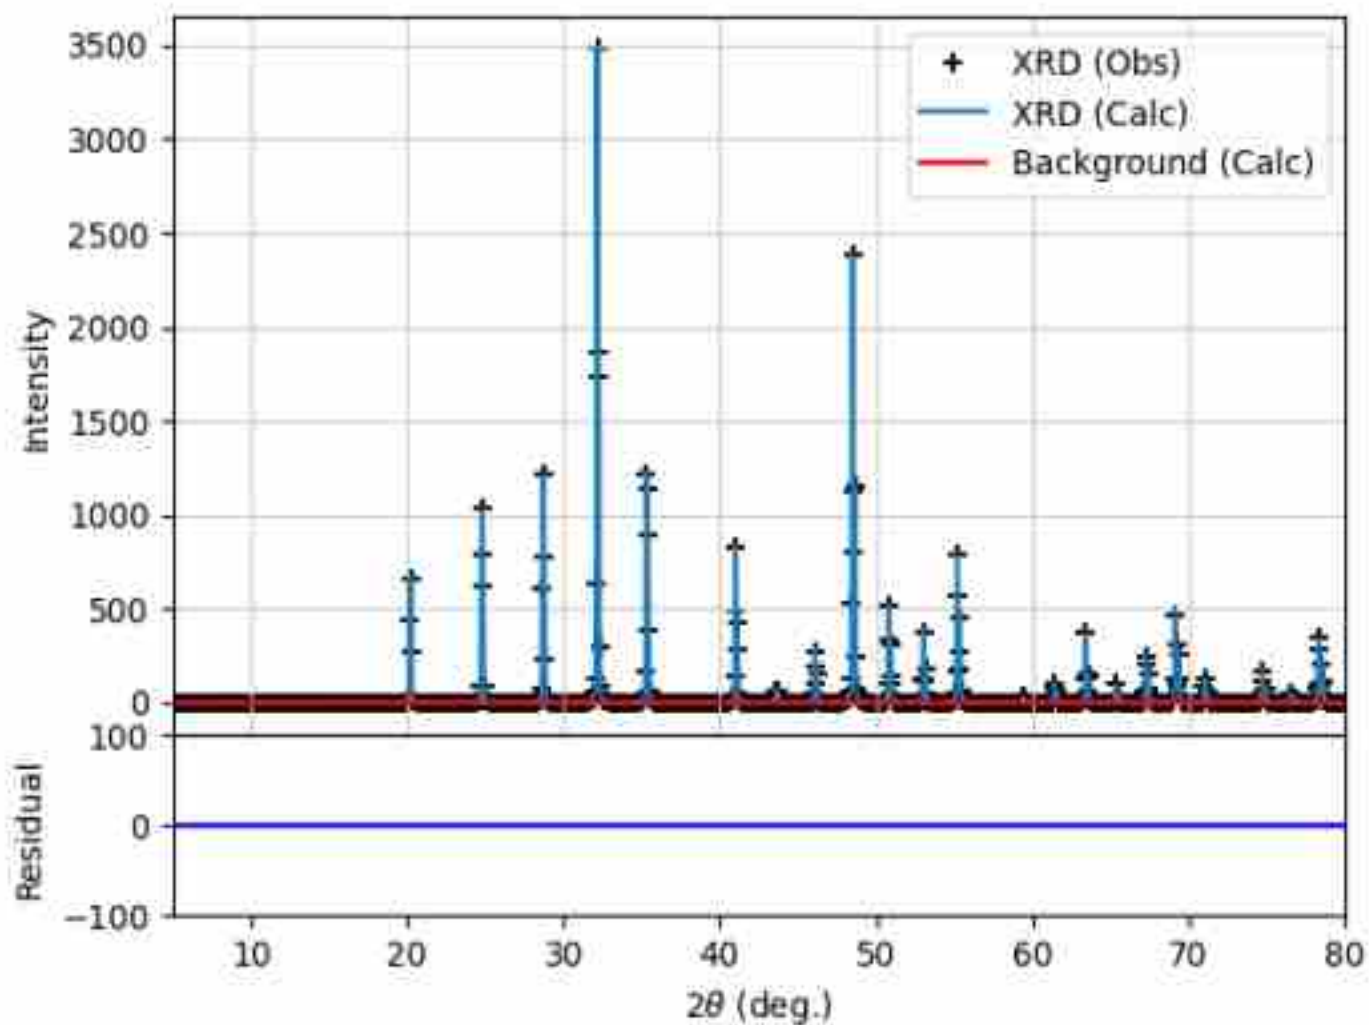

| RMSE before RR | Rwp     | RMSE after RR |
|----------------|---------|---------------|
| 0.027          | 0.00643 | 0.0014        |

# Ca<sub>1</sub>La<sub>2</sub>Ti<sub>1</sub>O<sub>6</sub>

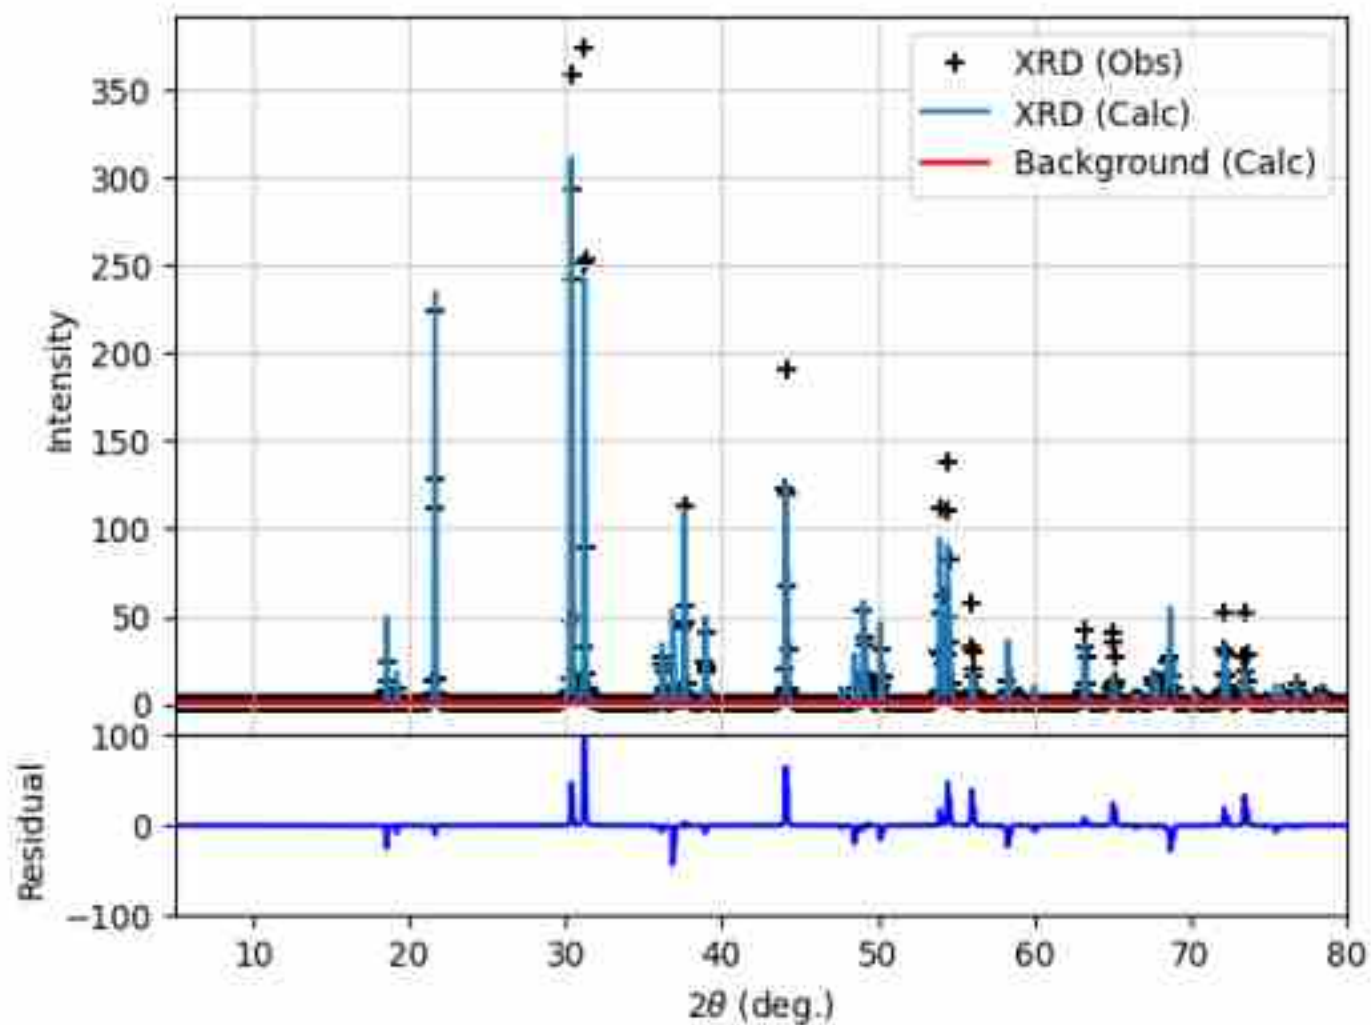

| RMSE before RR | Rwp      | RMSE after RR |
|----------------|----------|---------------|
| 0.027          | 44.84741 | 0.0293        |

# Ca<sub>2</sub>Ta<sub>2</sub>Al<sub>2</sub>O<sub>10</sub>

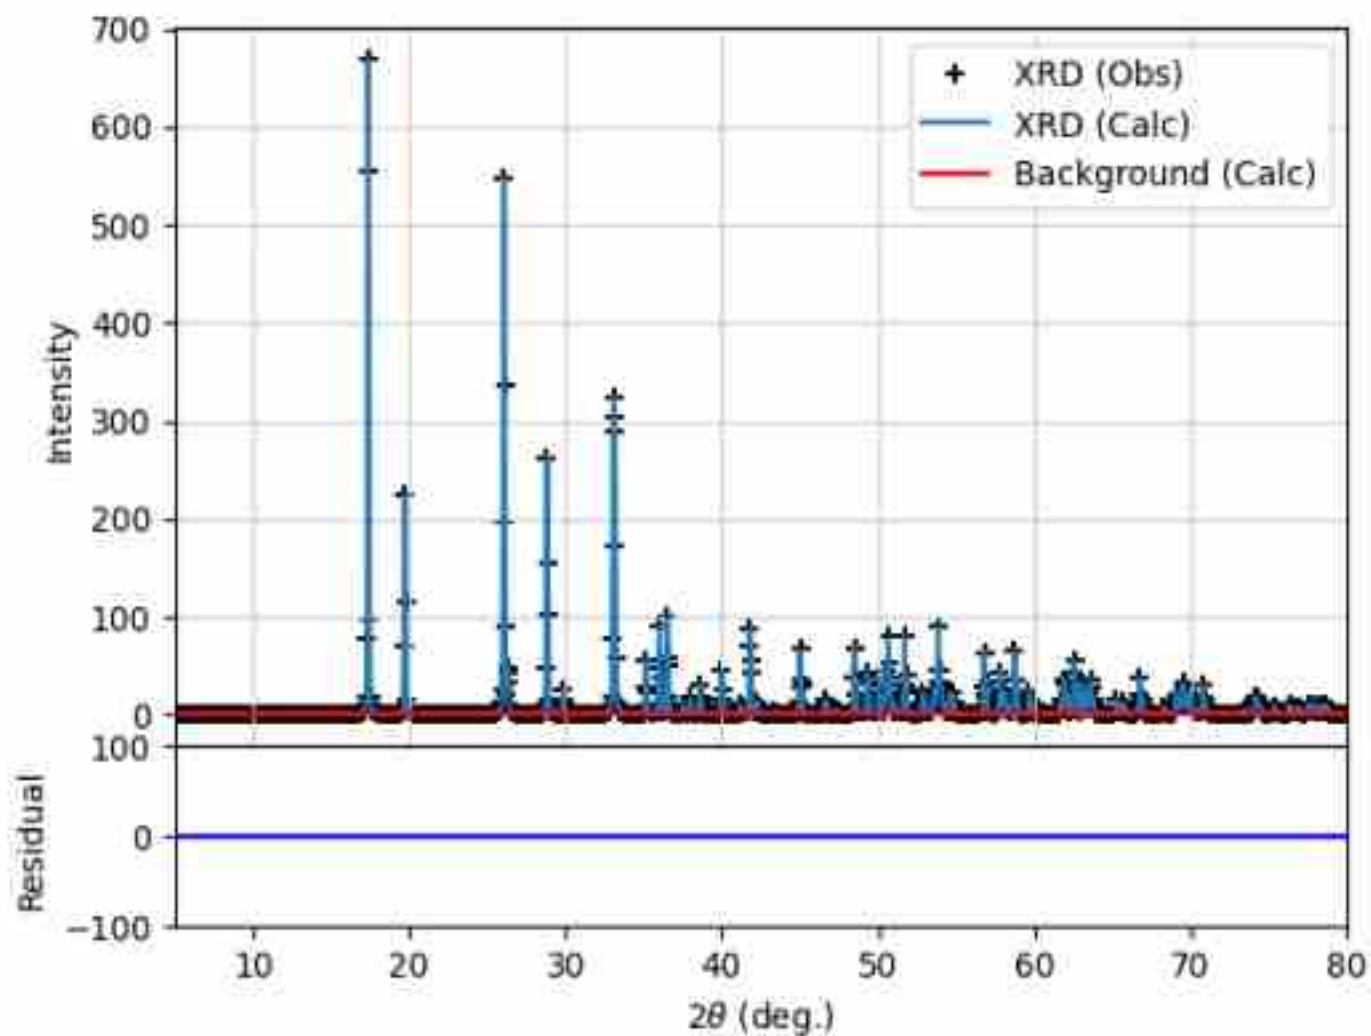

| RMSE before RR | Rwp     | RMSE after RR |
|----------------|---------|---------------|
| 0.027          | 0.00426 | 0.00145       |

# Ca6Re2N6

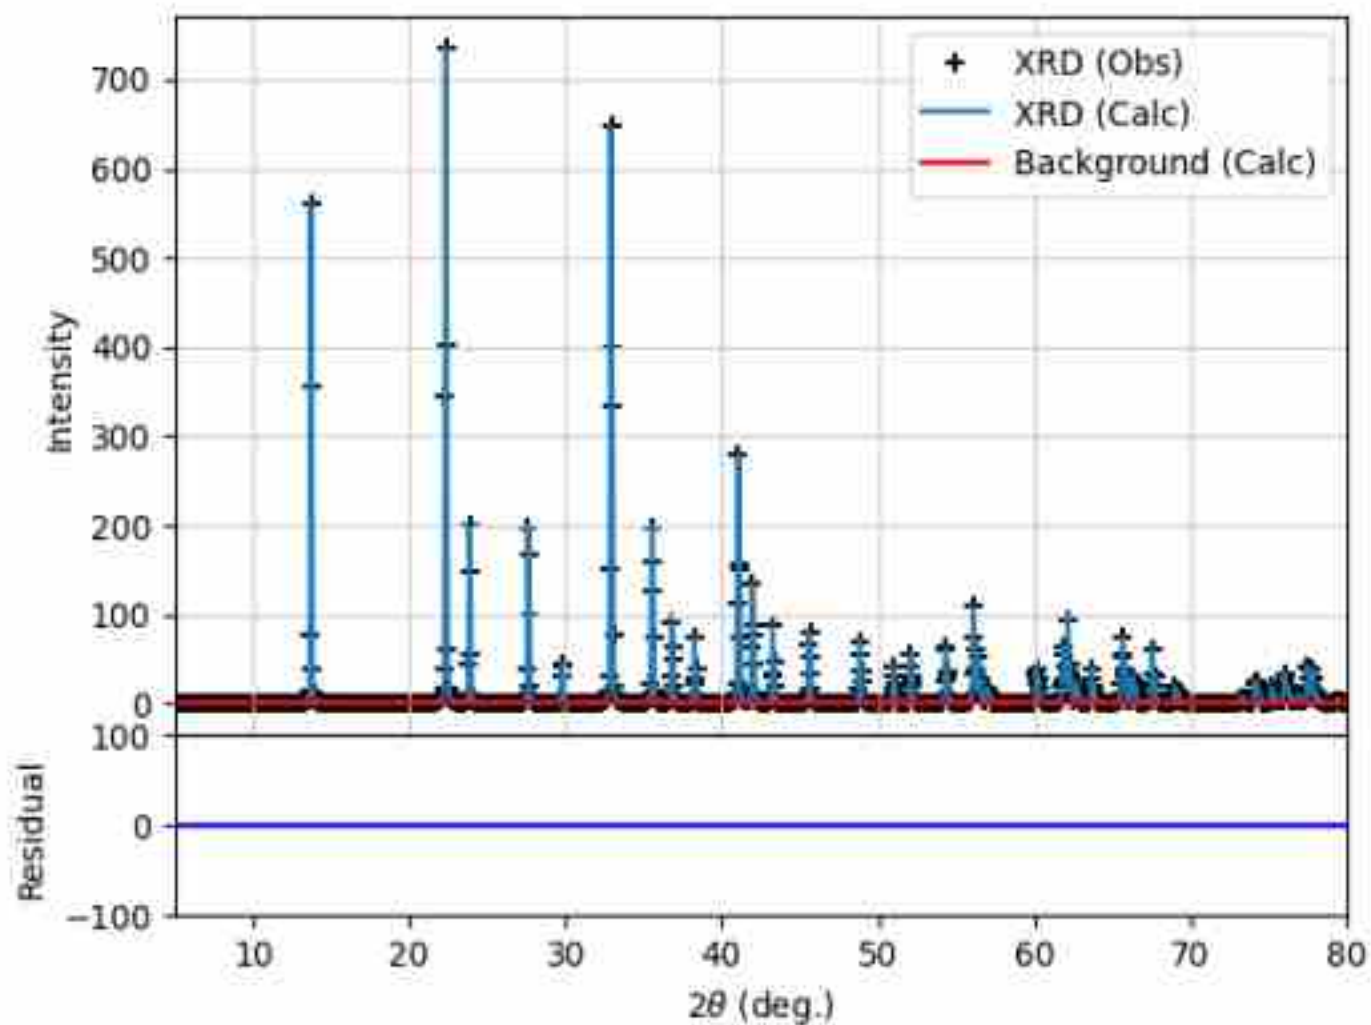

| RMSE before RR | Rwp     | RMSE after RR |
|----------------|---------|---------------|
| 0.027          | 0.00273 | 0.00186       |

# Cd1Fe4Ni1O8

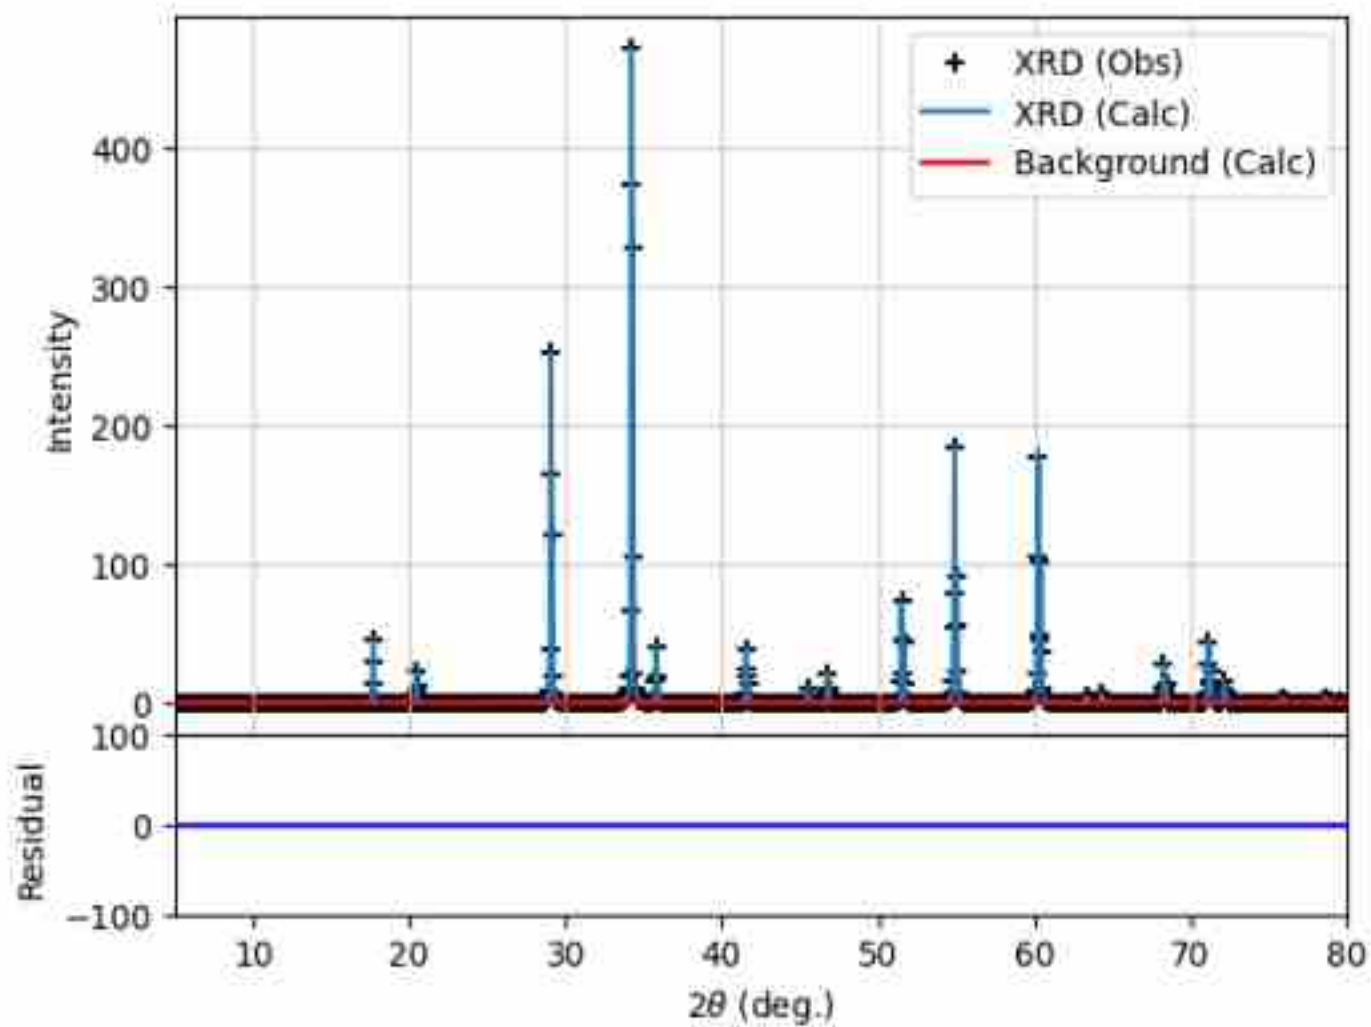

| RMSE before RR | Rwp     | RMSE after RR |
|----------------|---------|---------------|
| 0.027          | 0.00427 | 0.00277       |

# Ce2S4

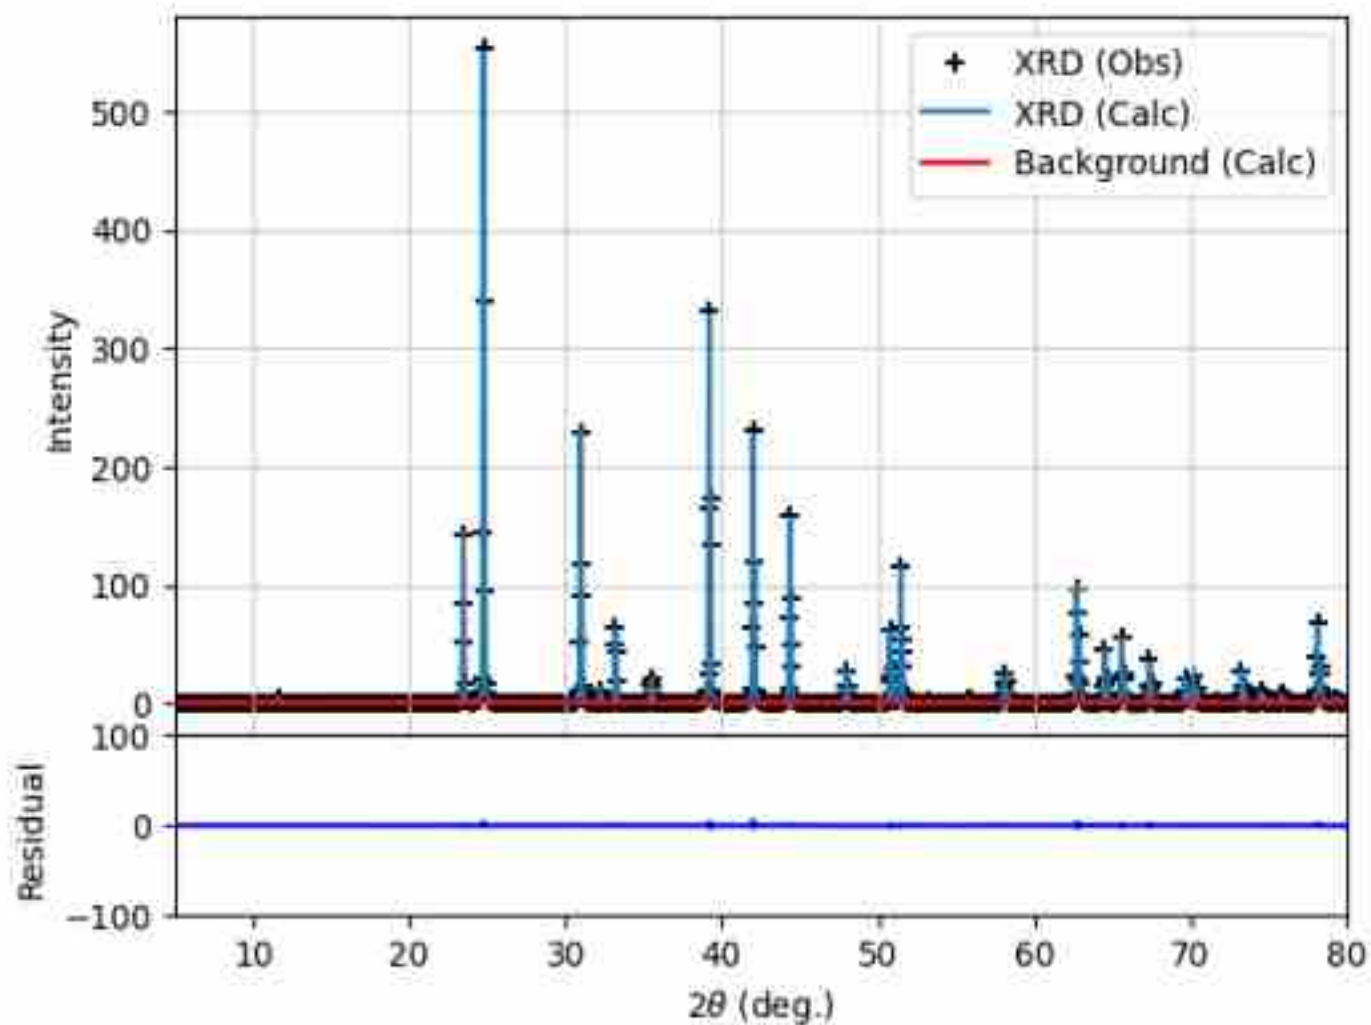

| RMSE before RR | Rwp     | RMSE after RR |
|----------------|---------|---------------|
| 0.027          | 3.04524 | 0.02364       |

# Ce<sub>4</sub>Cd<sub>2</sub>Cu<sub>4</sub>

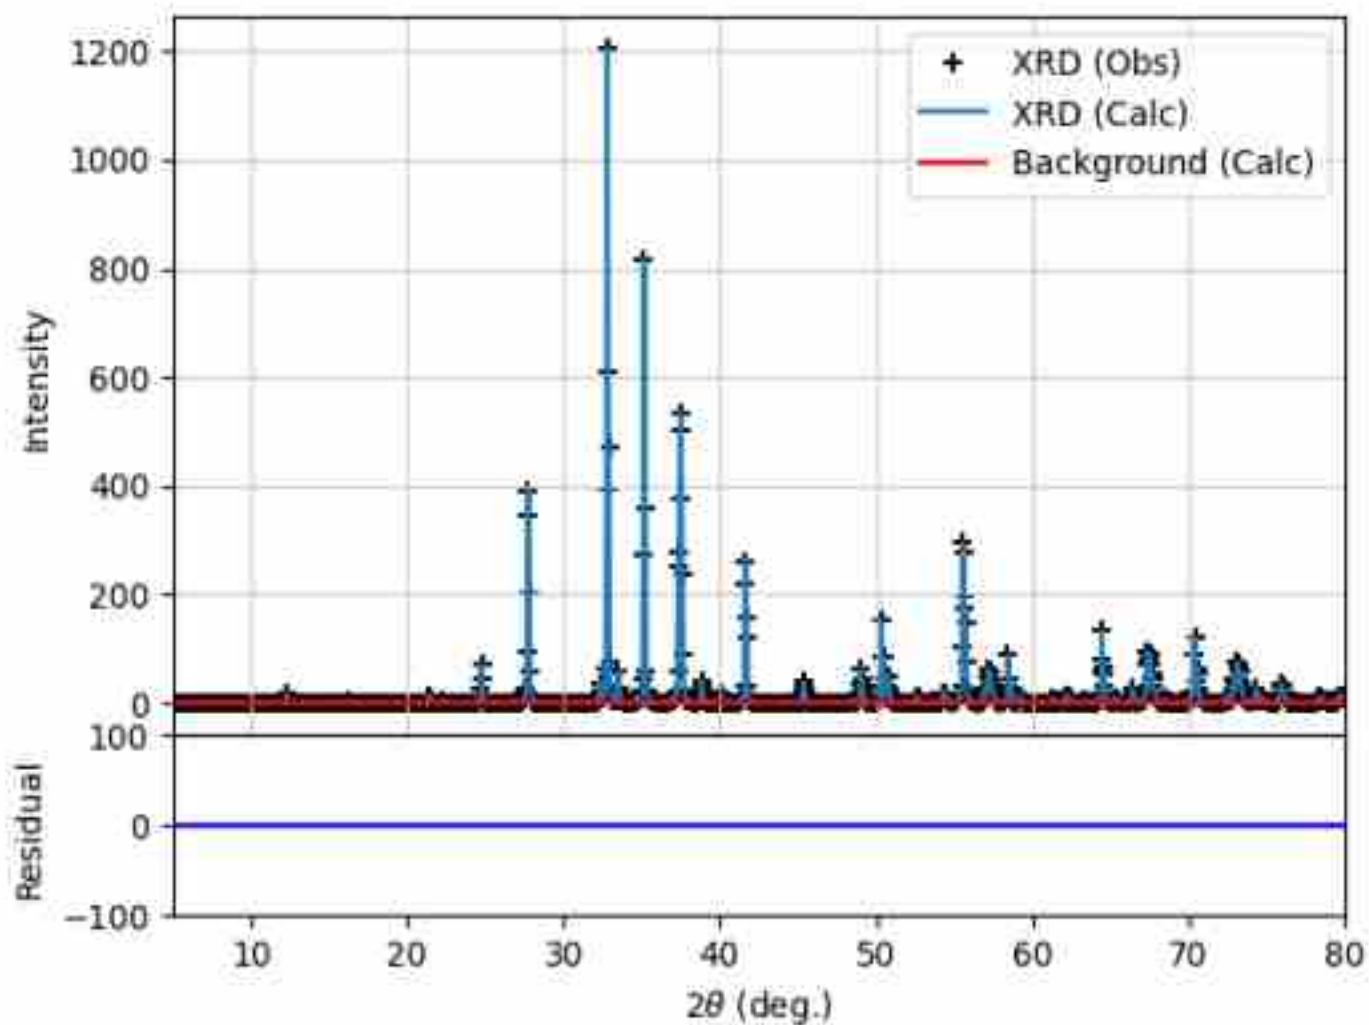

| RMSE before RR | Rwp     | RMSE after RR |
|----------------|---------|---------------|
| 0.027          | 0.00385 | 0.00032       |

# Ce6Mn2Bi10

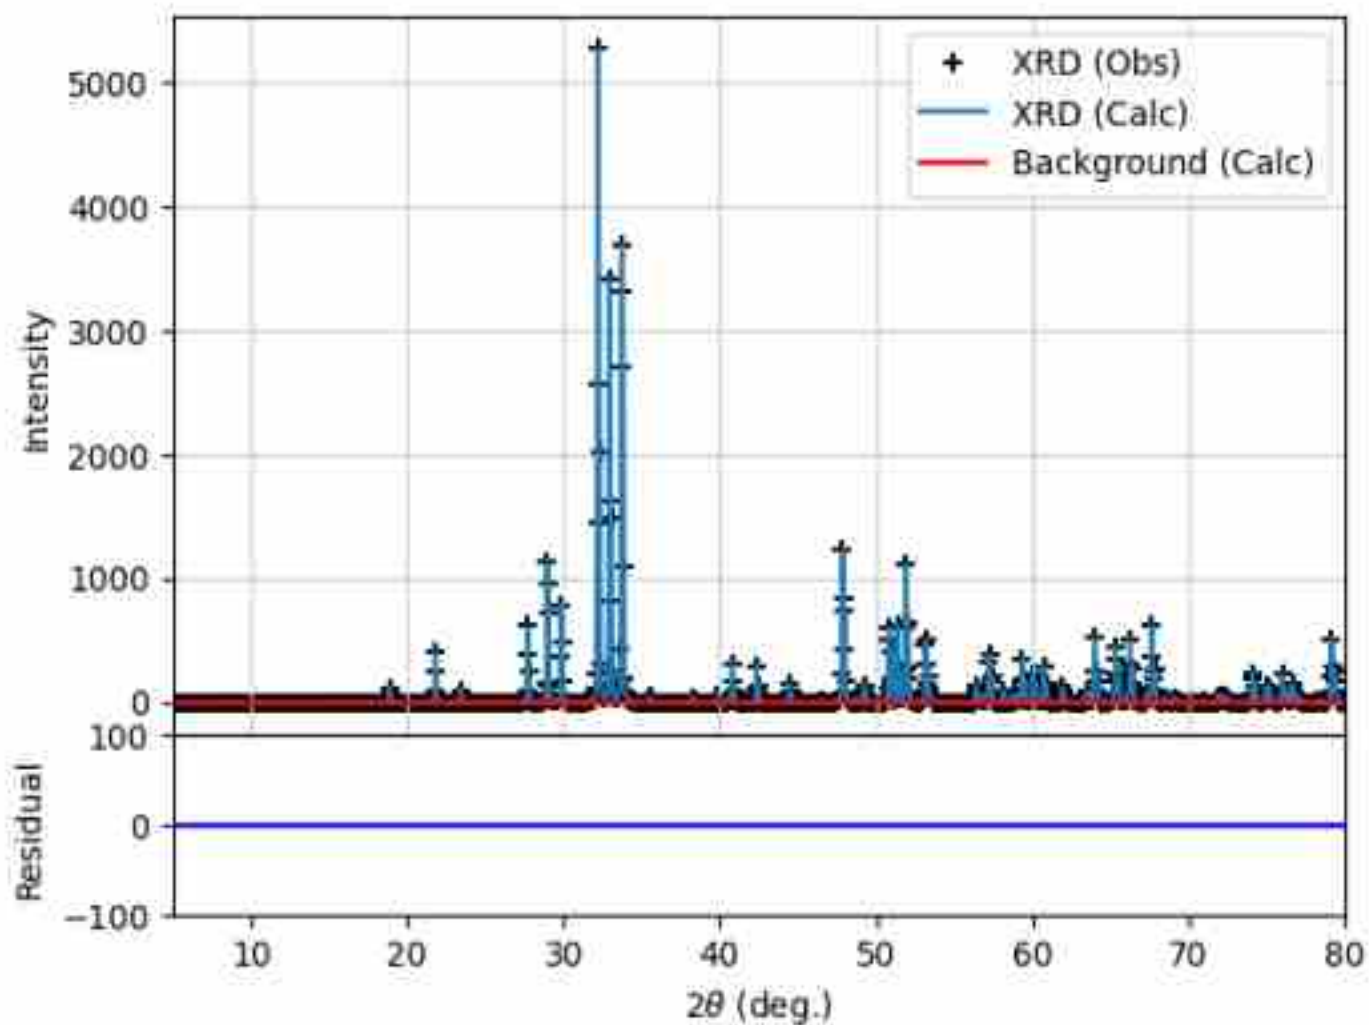

| RMSE before RR | Rwp     | RMSE after RR |
|----------------|---------|---------------|
| 0.027          | 0.00591 | 0.00056       |



# Co<sub>4</sub>As<sub>4</sub>Rh<sub>4</sub>

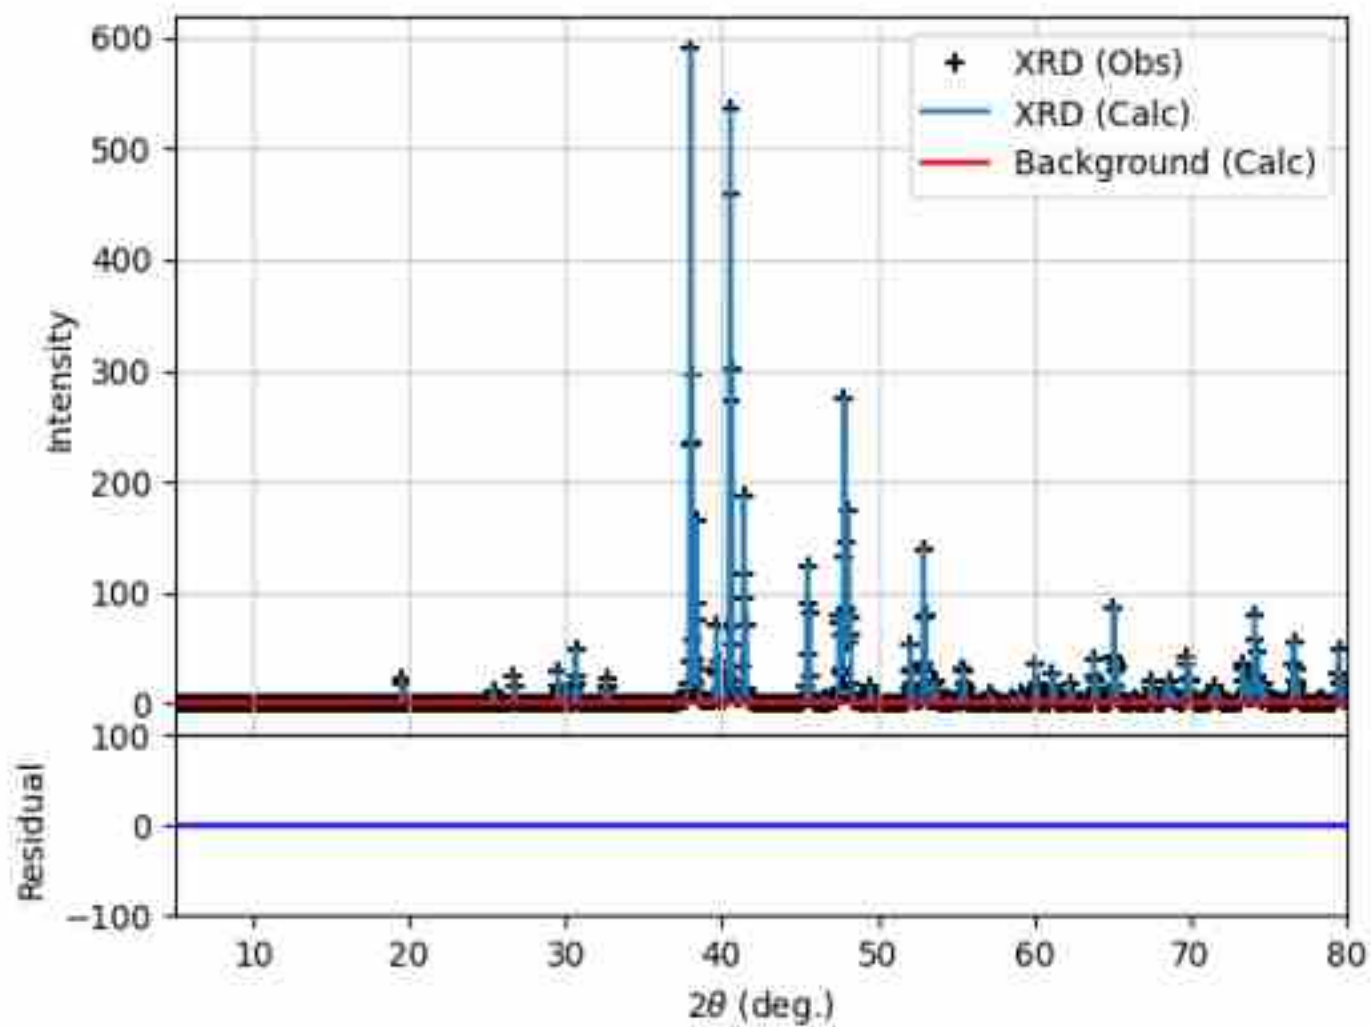

| RMSE before RR | Rwp     | RMSE after RR |
|----------------|---------|---------------|
| 0.027          | 0.00436 | 0.00033       |

# Co4P12

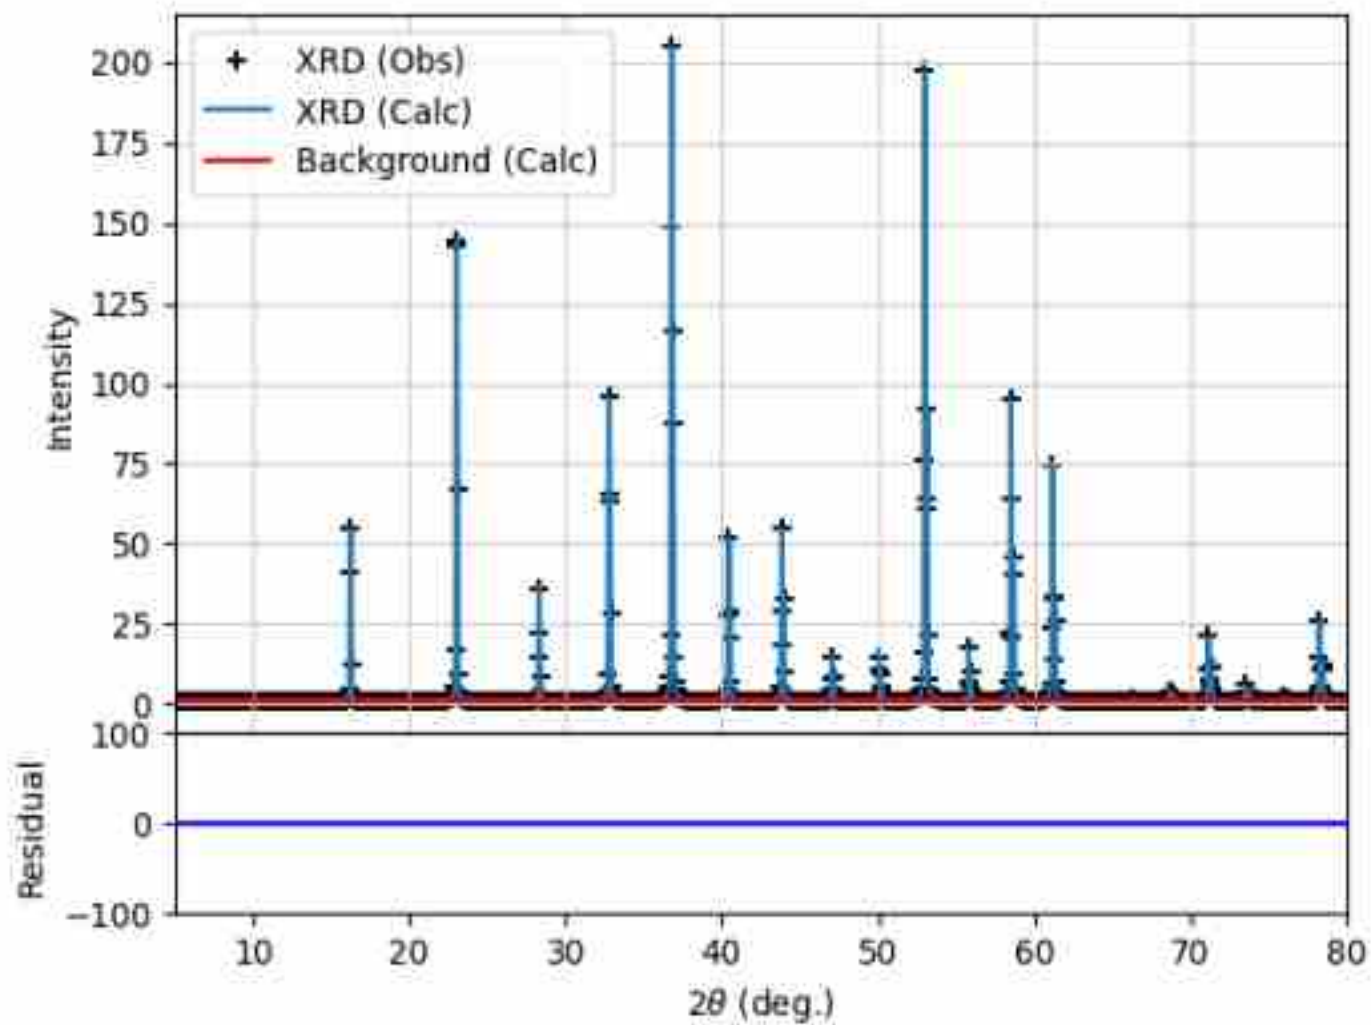

| RMSE before RR | Rwp     | RMSE after RR |
|----------------|---------|---------------|
| 0.027          | 0.05126 | 0.0039        |

# Cr<sub>4</sub>Fe<sub>2</sub>O<sub>8</sub>

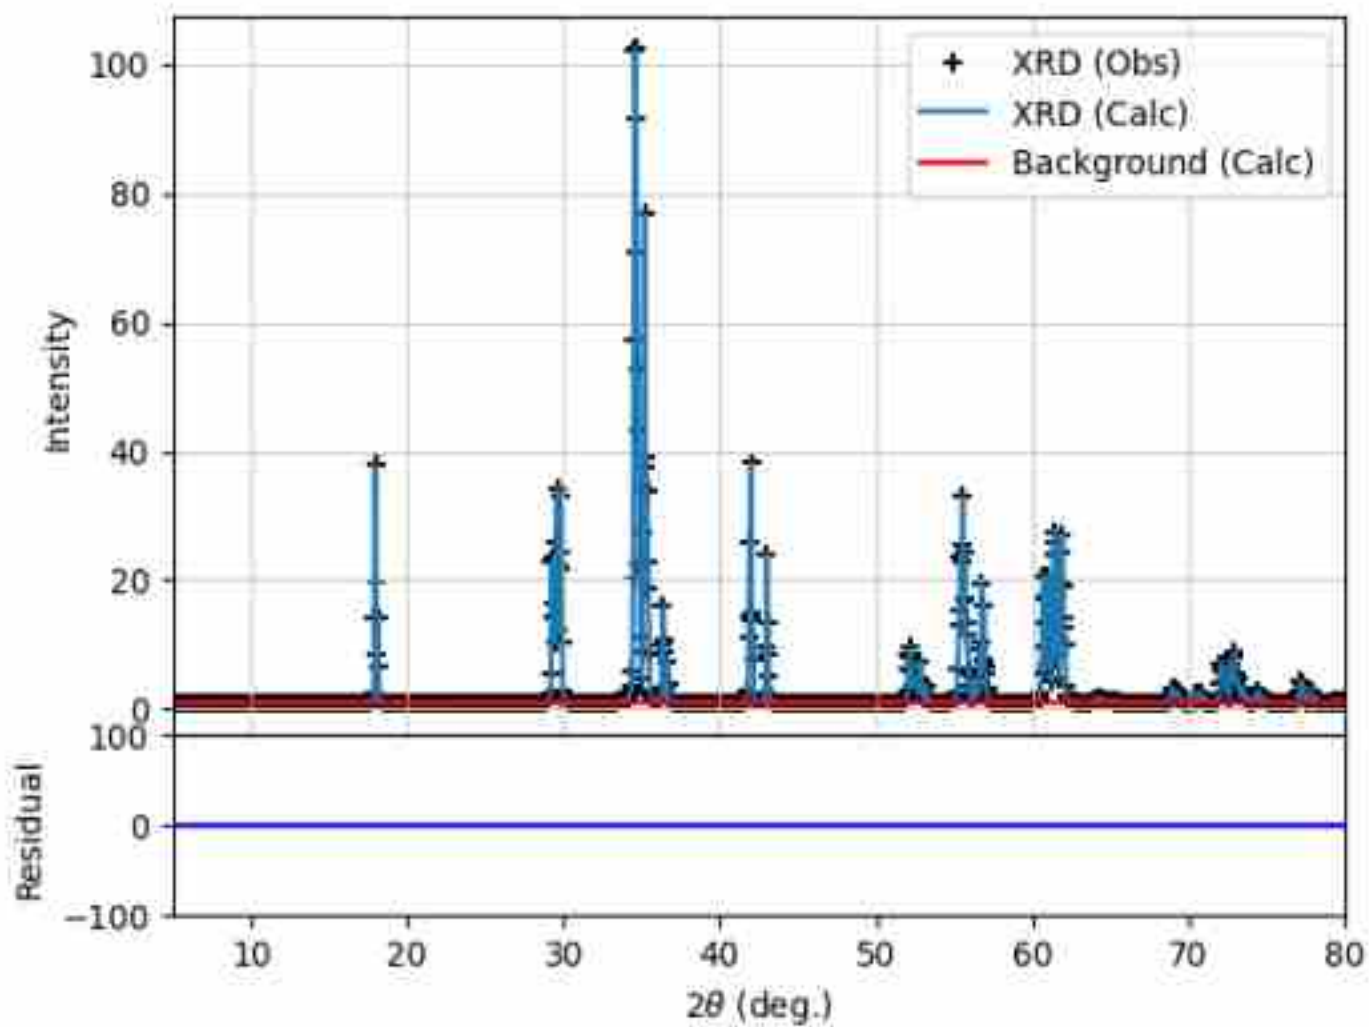

| RMSE before RR | Rwp     | RMSE after RR |
|----------------|---------|---------------|
| 0.027          | 0.00022 | 0.00022       |

# Cr4O8

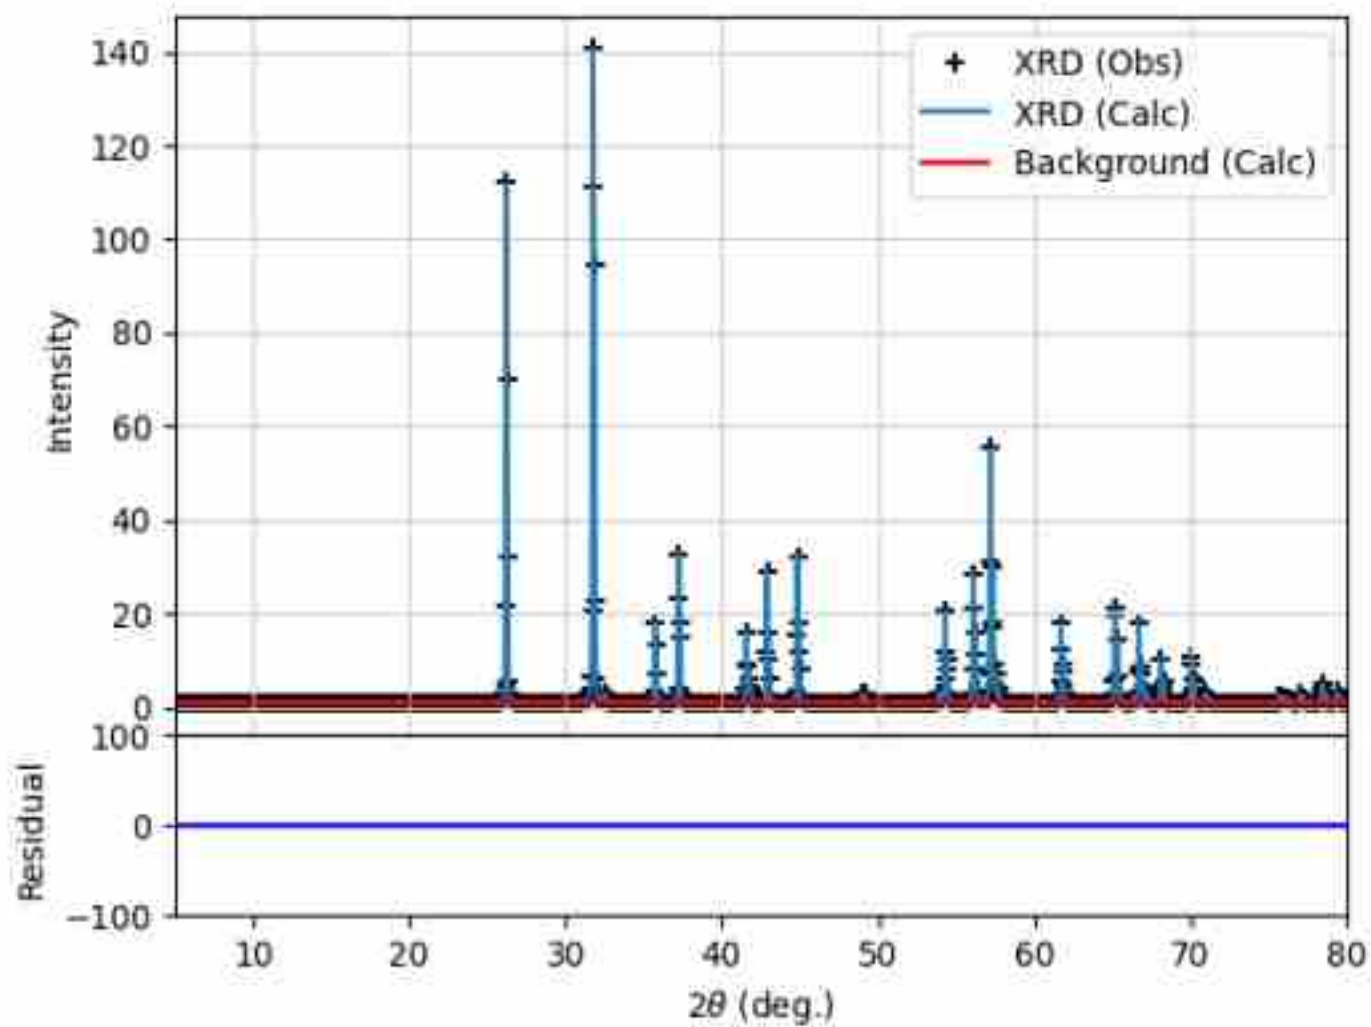

| RMSE before RR | Rwp   | RMSE after RR |
|----------------|-------|---------------|
| 0.027          | 0.002 | 0.00052       |

# Cr<sub>4</sub>Si<sub>4</sub>

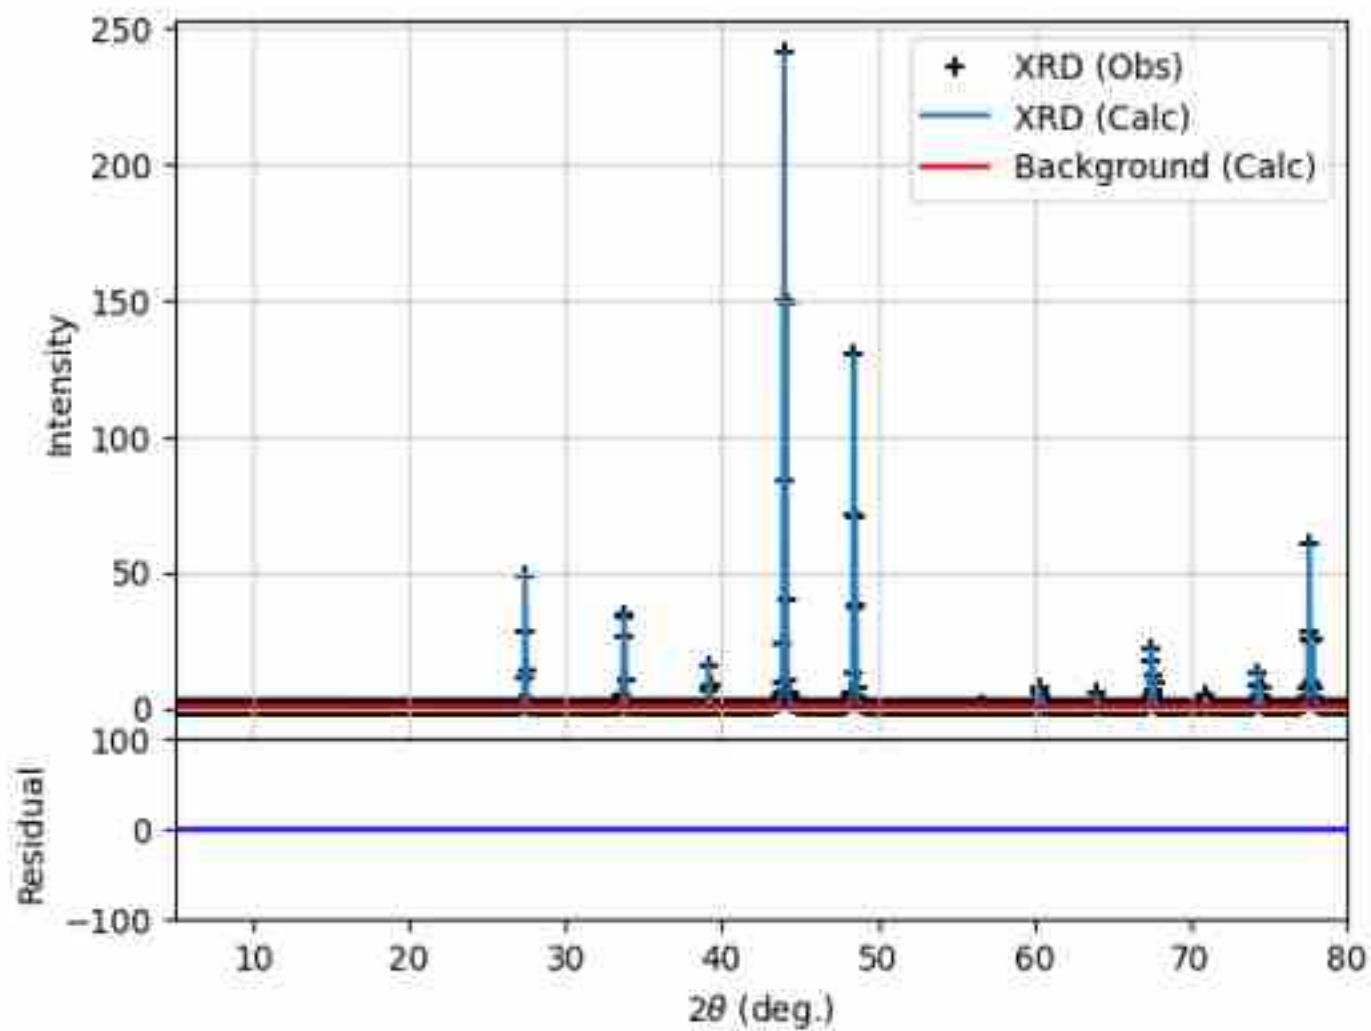

| RMSE before RR | Rwp     | RMSE after RR |
|----------------|---------|---------------|
| 0.027          | 0.00399 | 0.00048       |

# Cr8S12

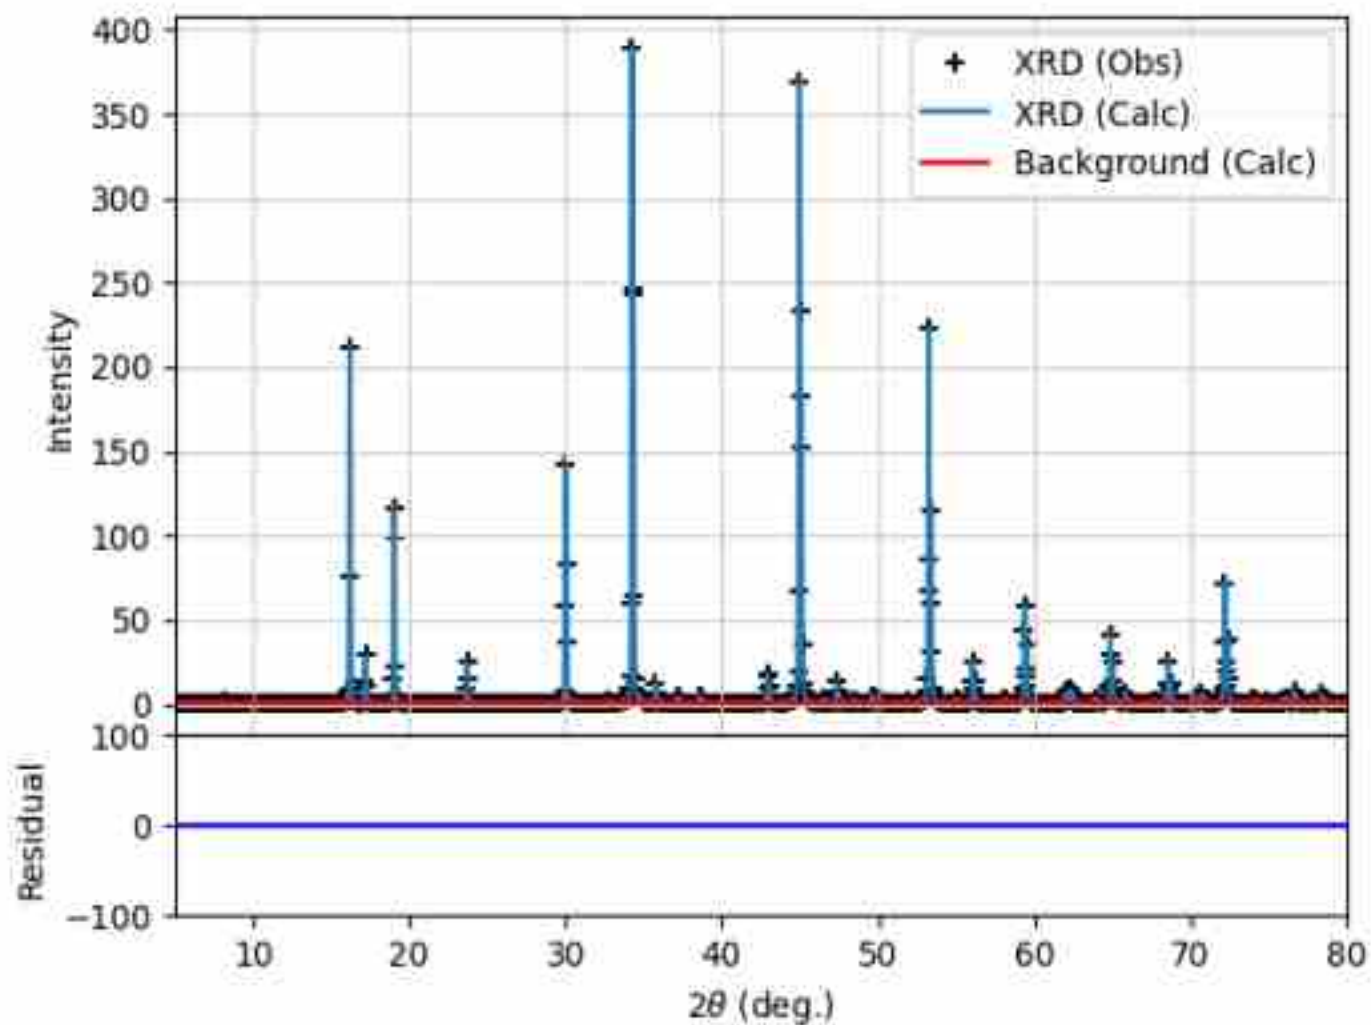

| RMSE before RR | Rwp     | RMSE after RR |
|----------------|---------|---------------|
| 0.027          | 0.00303 | 0.00066       |

# $\text{Cs}_2\text{Co}_2\text{Cu}_2\text{F}_{12}$

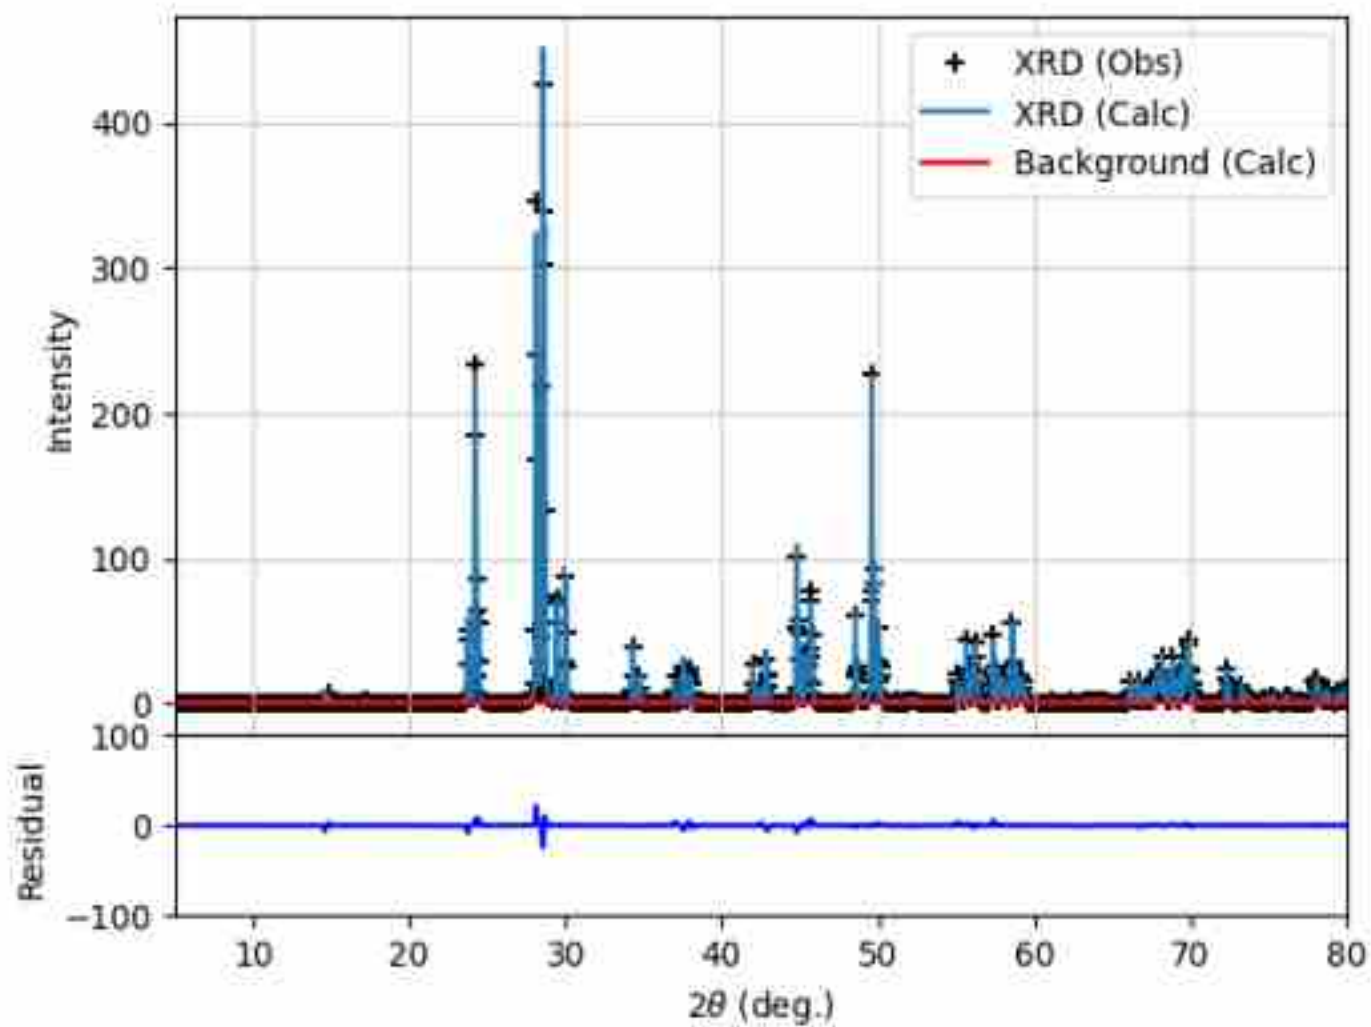

| RMSE before RR | Rwp     | RMSE after RR |
|----------------|---------|---------------|
| 0.027          | 8.32204 | 0.0407        |

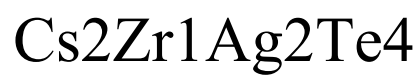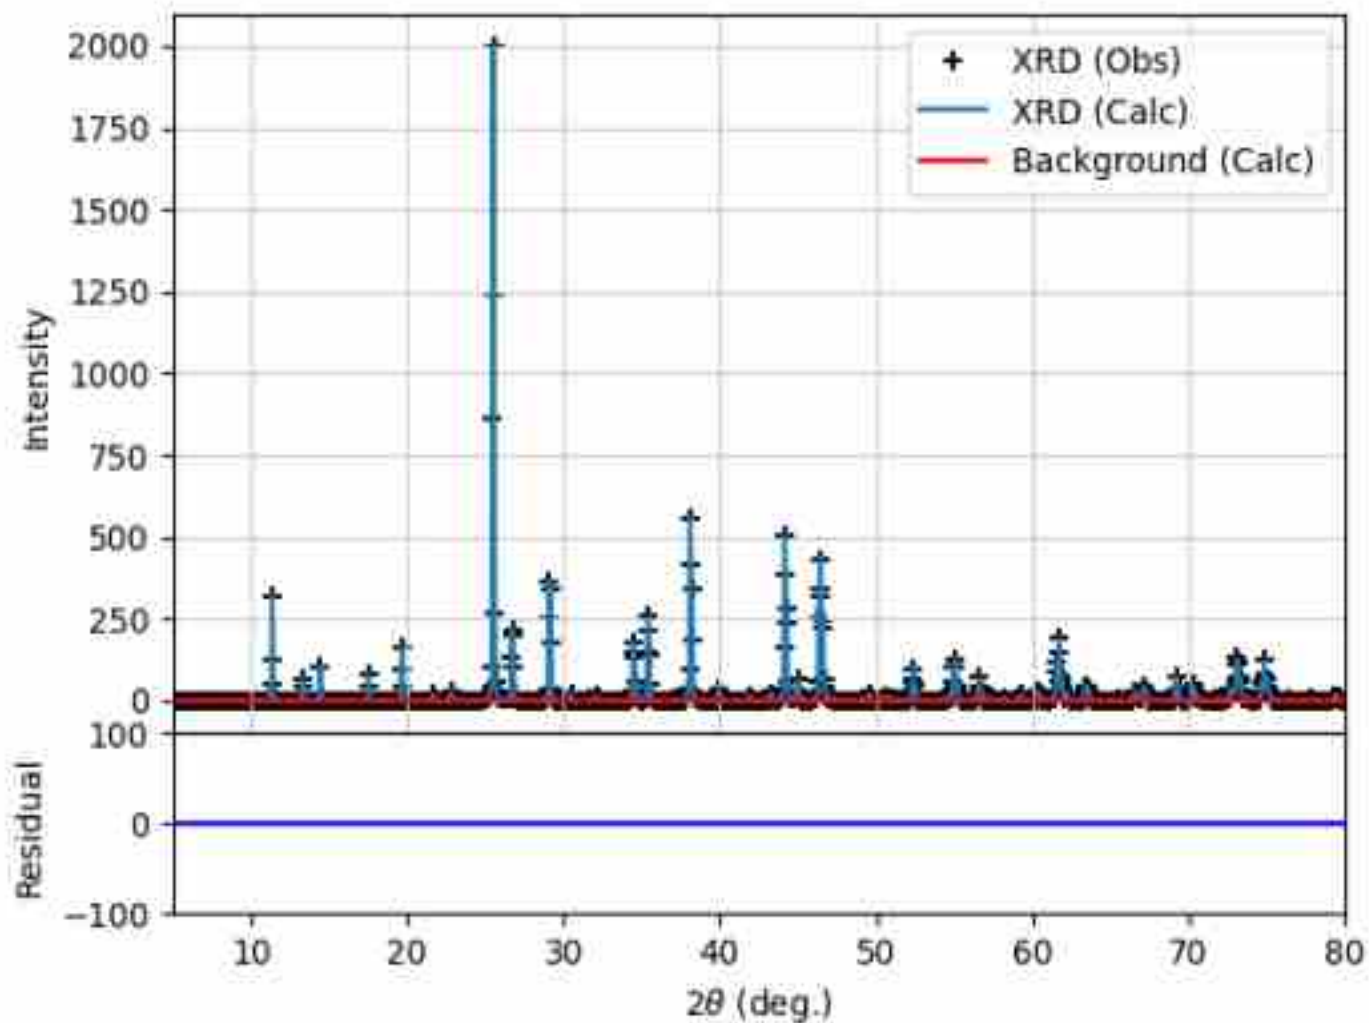

| RMSE before RR | Rwp    | RMSE after RR |
|----------------|--------|---------------|
| 0.027          | 0.0035 | 0.00027       |



# Cs<sub>4</sub>Na<sub>2</sub>Fe<sub>2</sub>F<sub>12</sub>

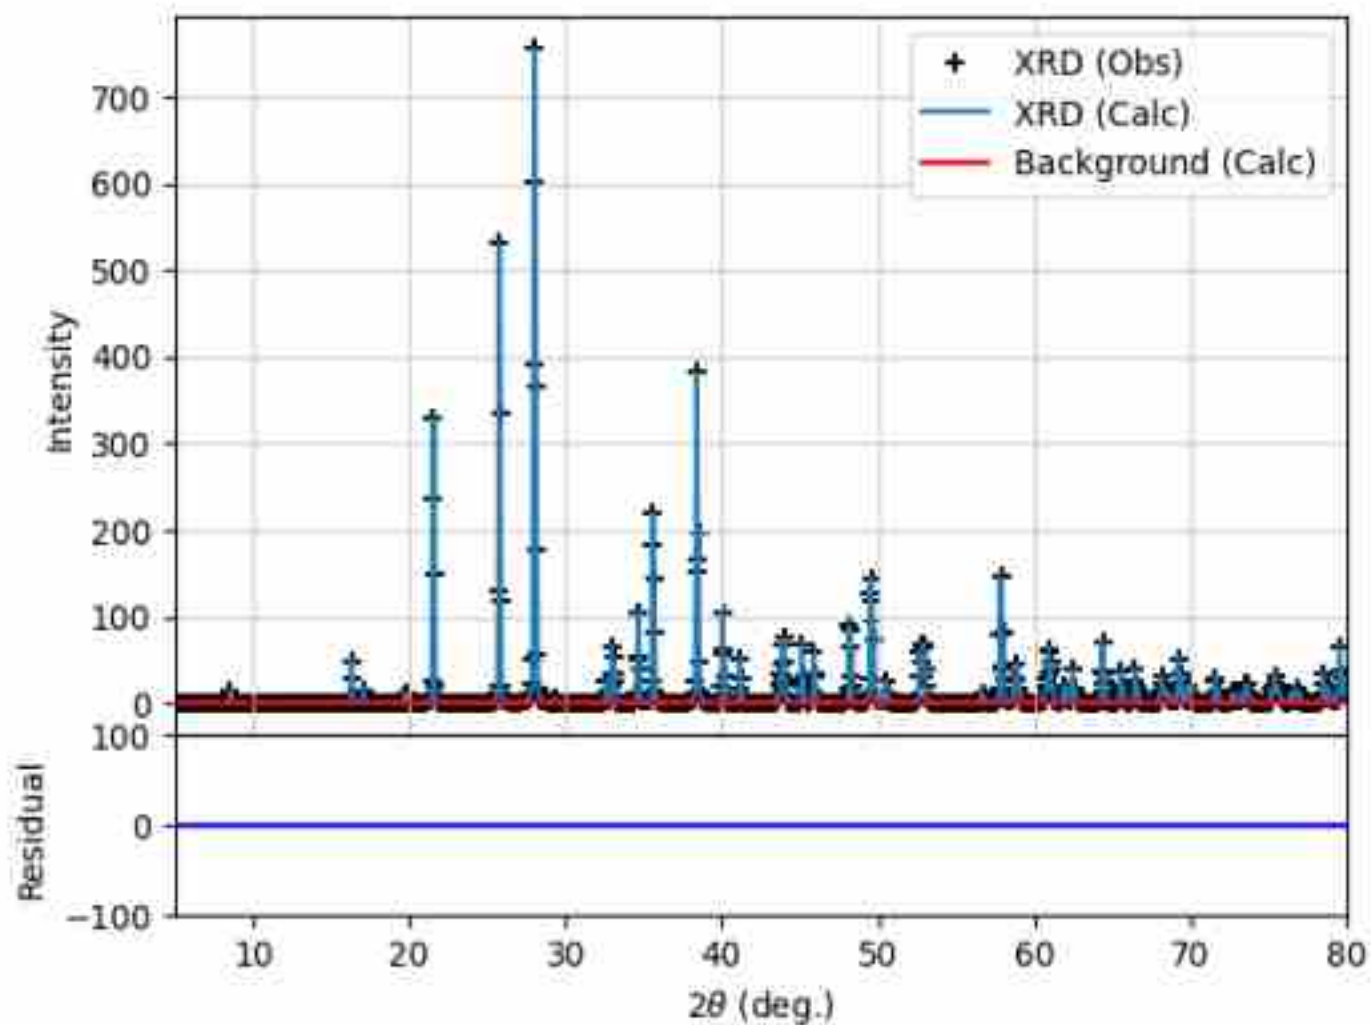

| RMSE before RR | Rwp     | RMSE after RR |
|----------------|---------|---------------|
| 0.027          | 0.00385 | 0.00137       |

# Cs<sub>4</sub>Na<sub>2</sub>Sc<sub>1</sub>Ga<sub>1</sub>F<sub>12</sub>

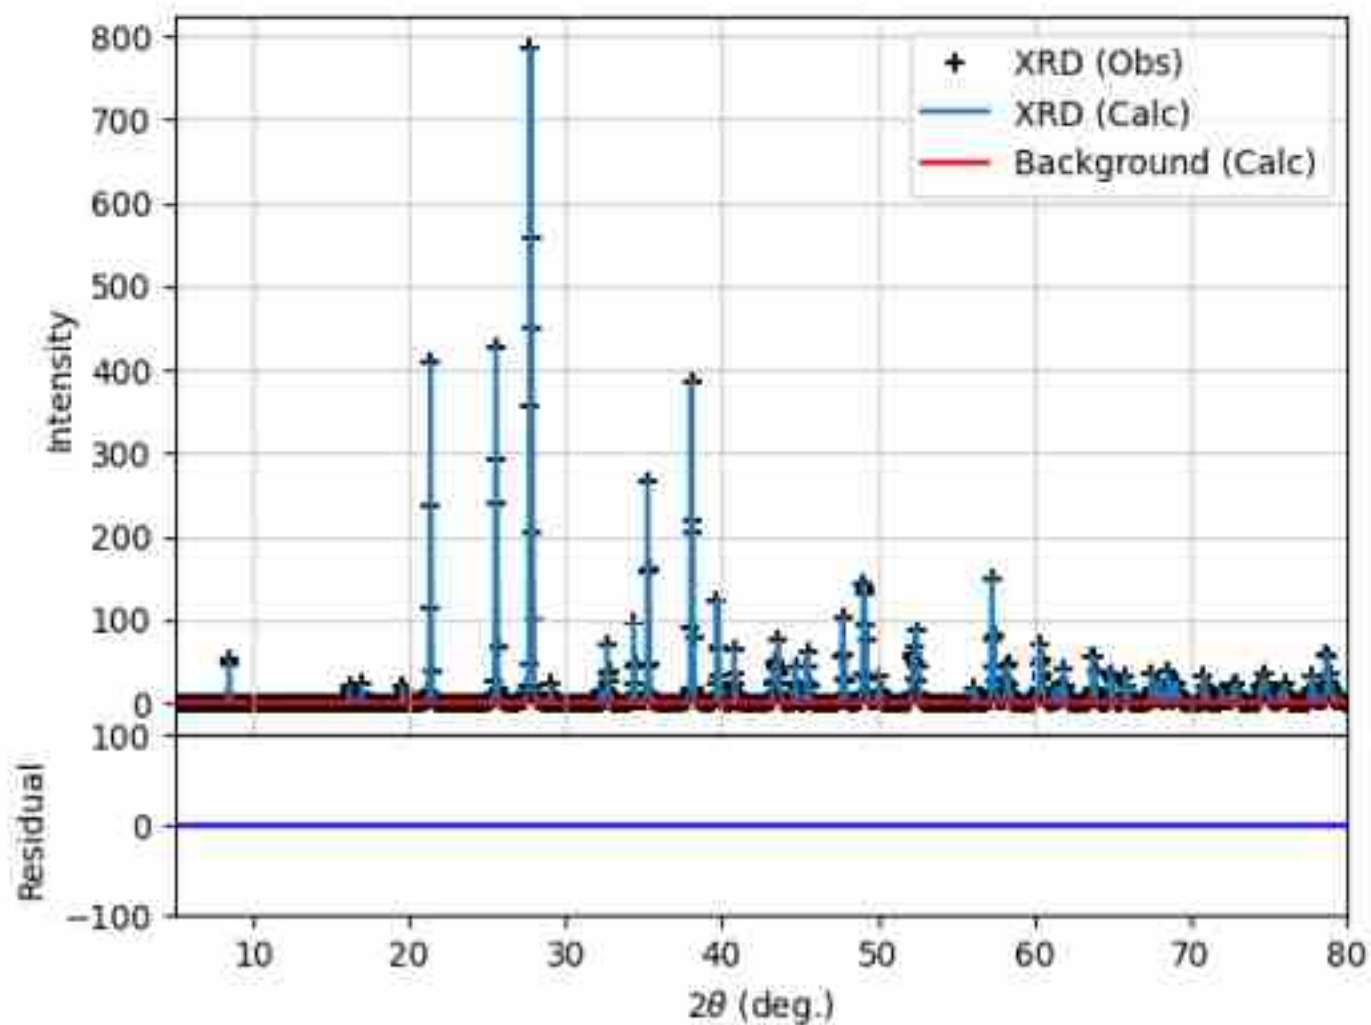

| RMSE before RR | Rwp     | RMSE after RR |
|----------------|---------|---------------|
| 0.027          | 0.00518 | 0.00204       |

# Cs<sub>6</sub>Cd<sub>2</sub>Br<sub>10</sub>

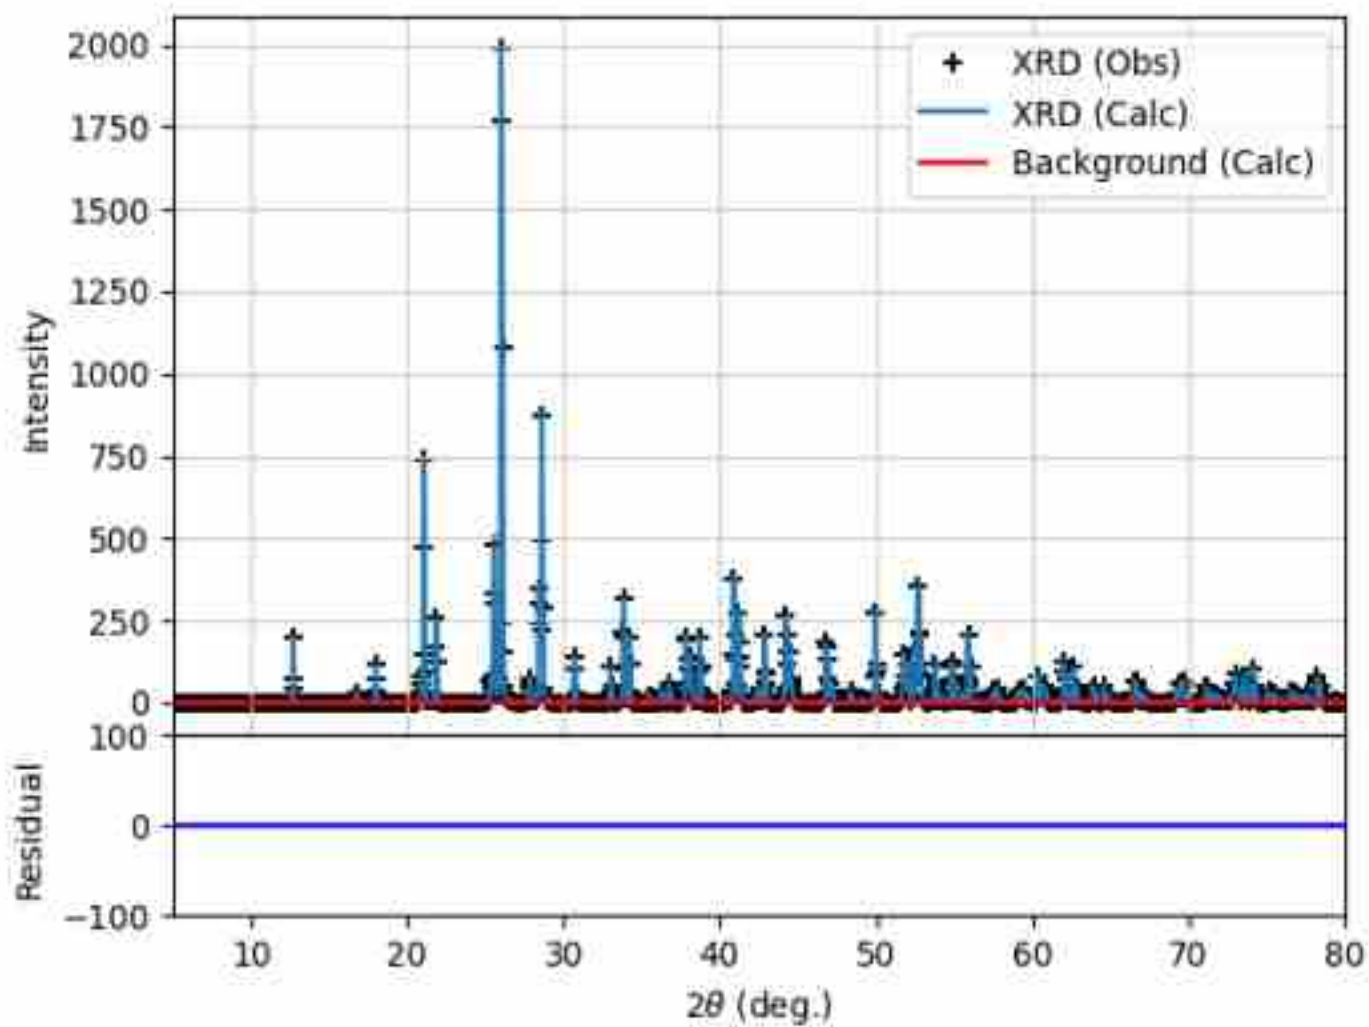

| RMSE before RR | Rwp     | RMSE after RR |
|----------------|---------|---------------|
| 0.027          | 0.00373 | 0.00025       |

# Cu<sub>6</sub>P<sub>2</sub>S<sub>8</sub>

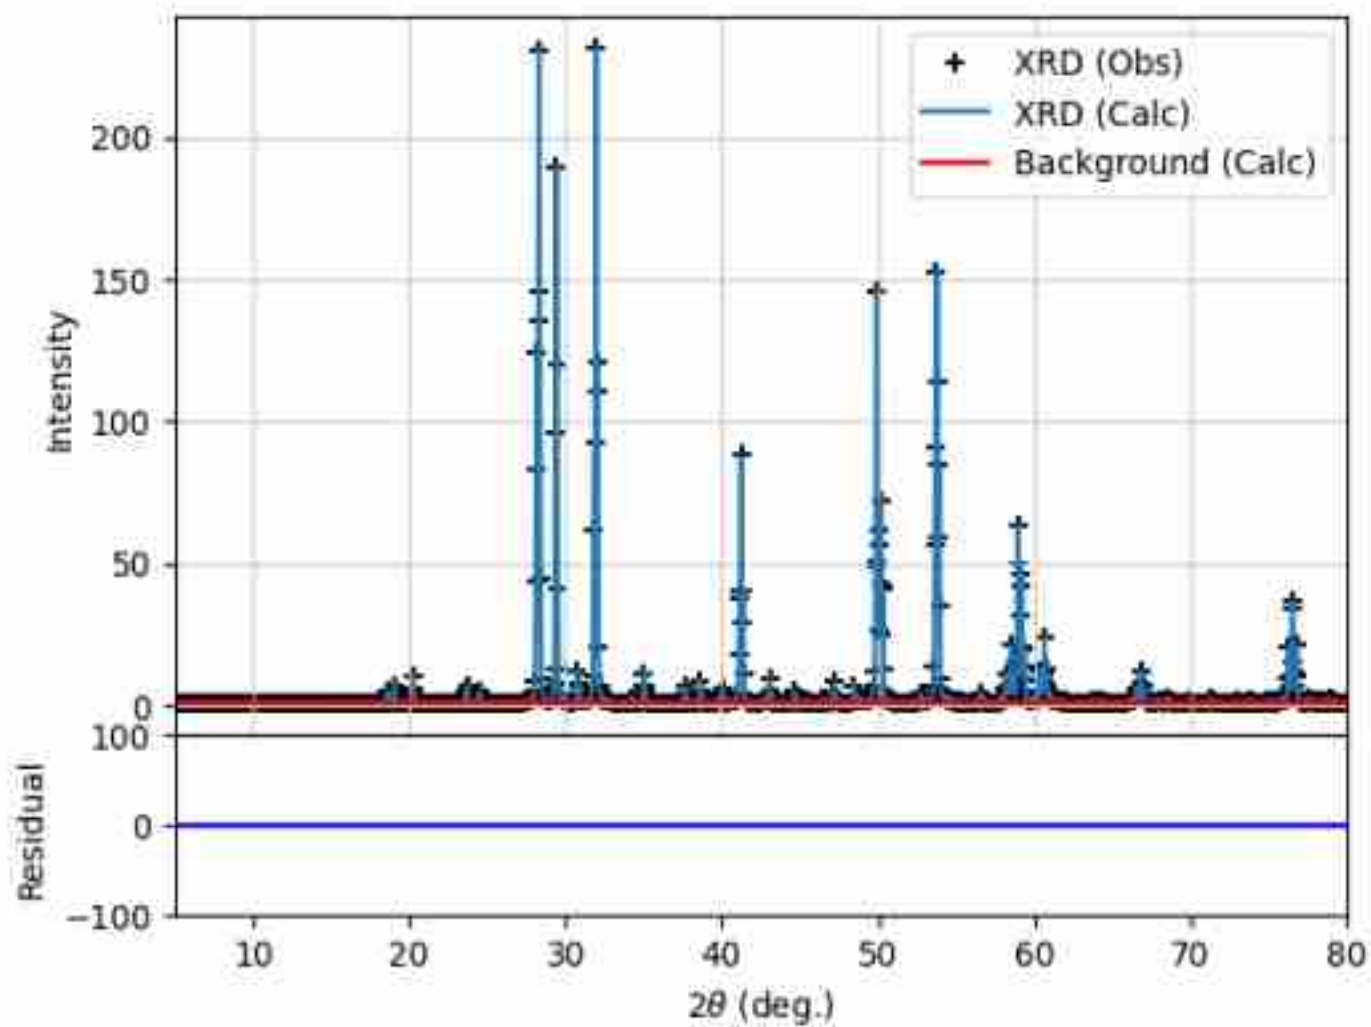

| RMSE before RR | Rwp     | RMSE after RR |
|----------------|---------|---------------|
| 0.027          | 0.00311 | 0.00027       |

# Dy<sub>3</sub>Ag<sub>4</sub>Sn<sub>4</sub>

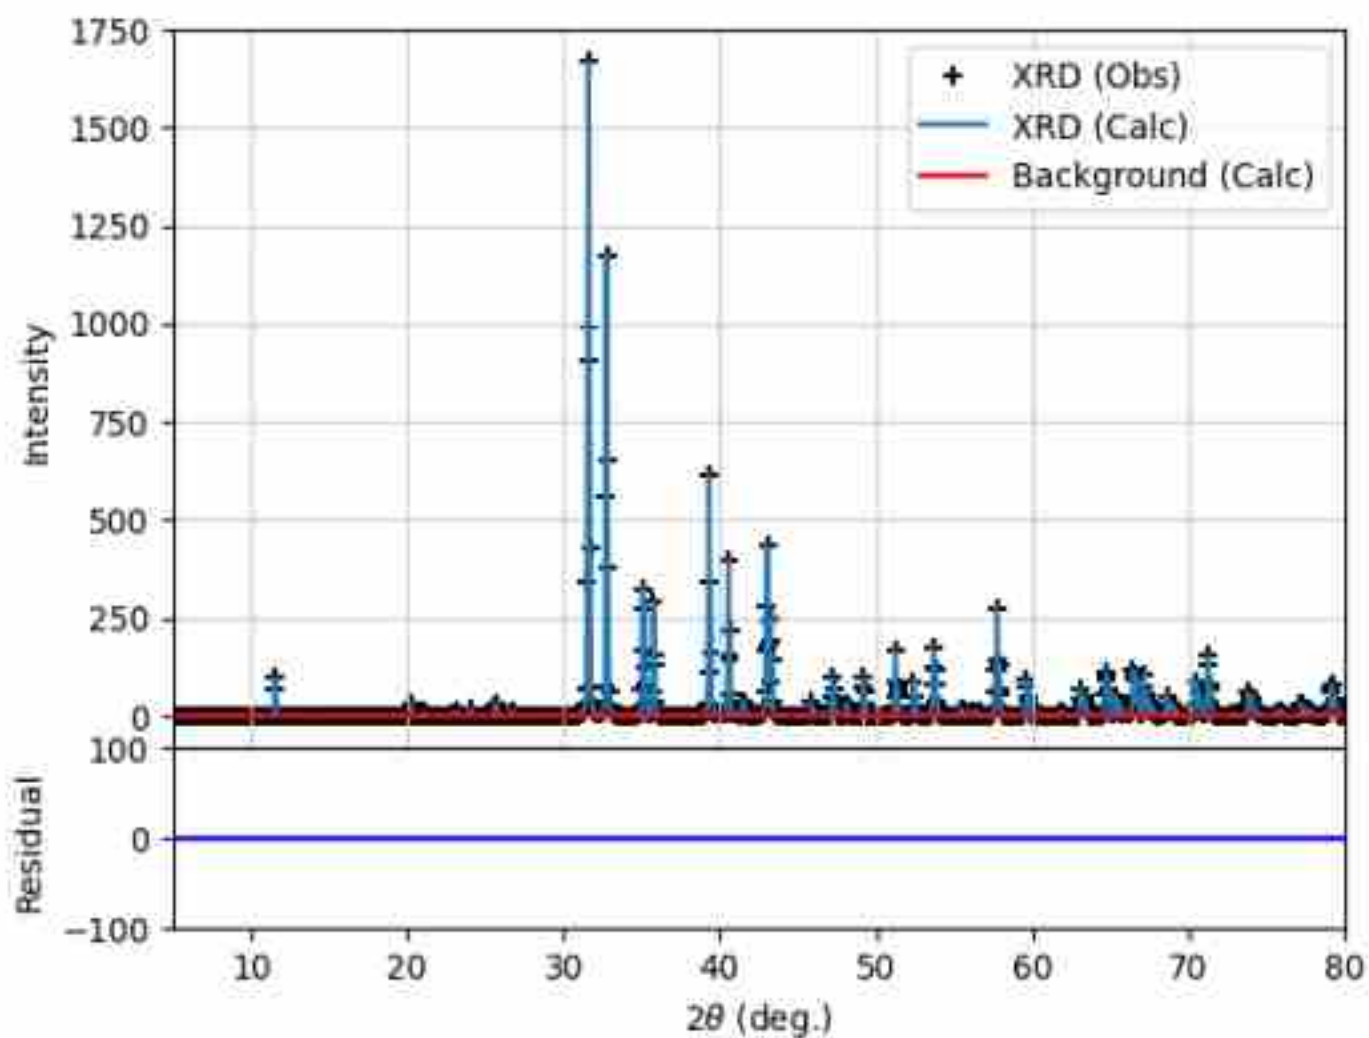

| RMSE before RR | Rwp     | RMSE after RR |
|----------------|---------|---------------|
| 0.027          | 0.00374 | 0.00032       |

# Dy<sub>4</sub>Ge<sub>6</sub>Rh<sub>7</sub>

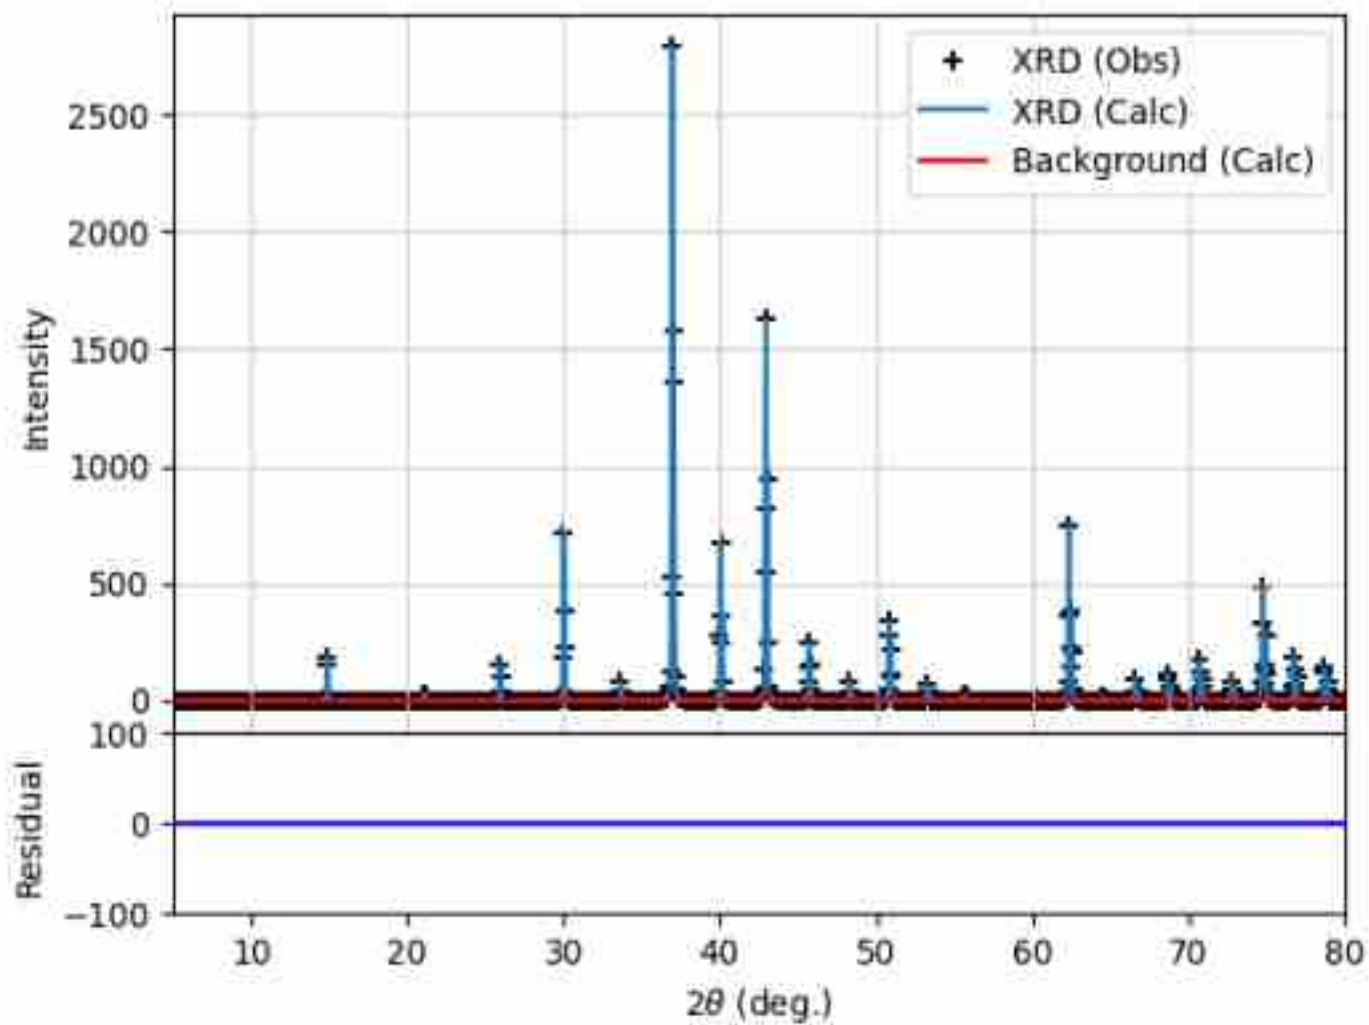

| RMSE before RR | Rwp     | RMSE after RR |
|----------------|---------|---------------|
| 0.027          | 0.03508 | 0.00305       |

# Dy6Ge6Pd6

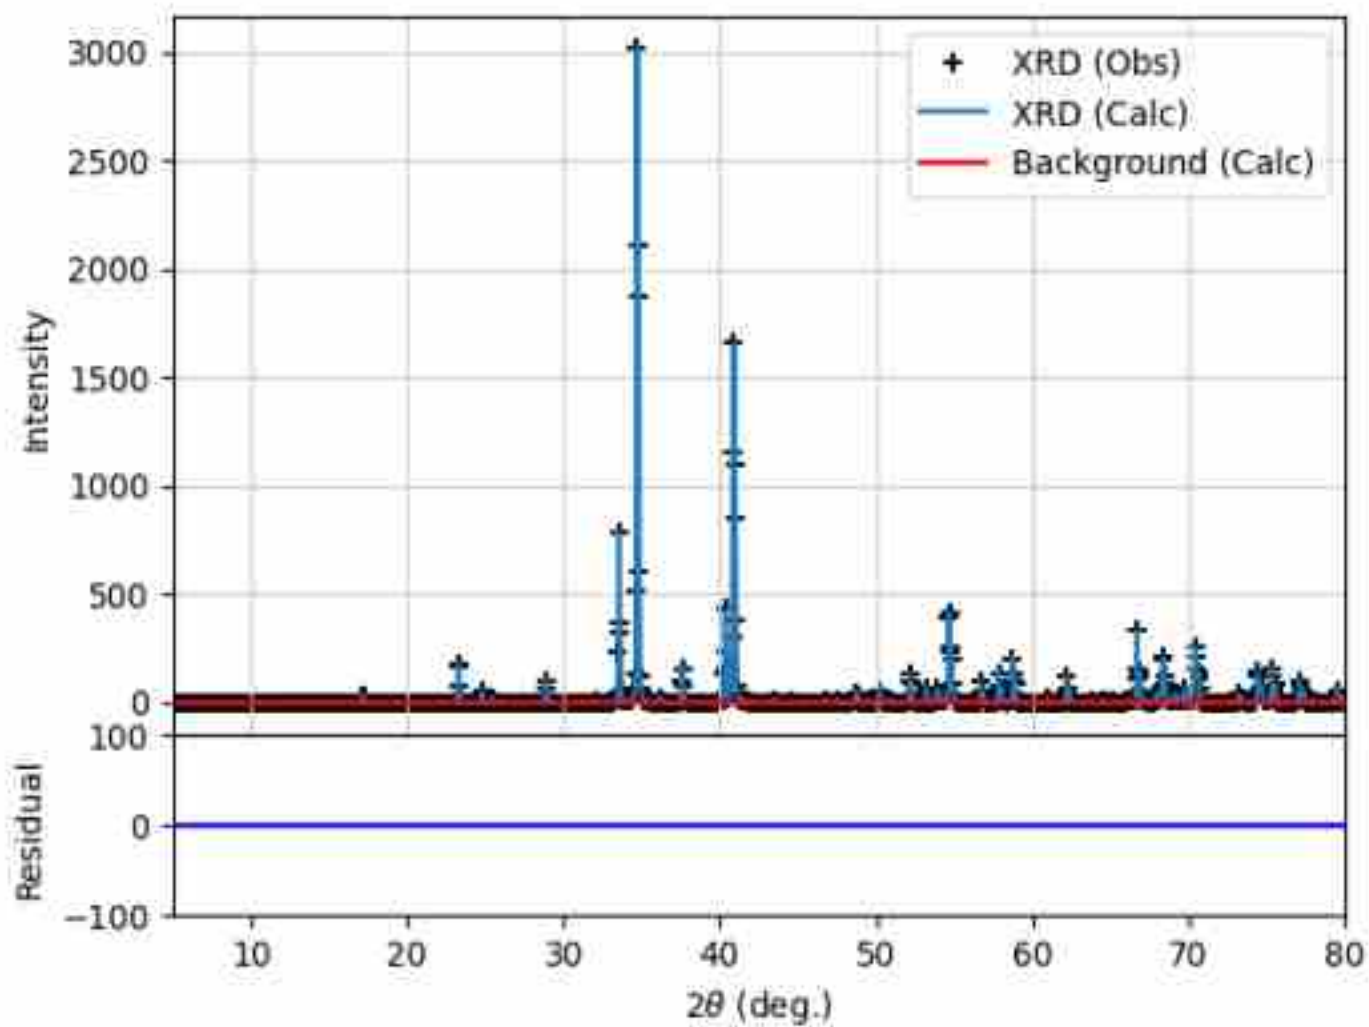

| RMSE before RR | Rwp     | RMSE after RR |
|----------------|---------|---------------|
| 0.027          | 0.00356 | 0.00036       |

# Eu<sub>2</sub>Ag<sub>2</sub>O<sub>4</sub>

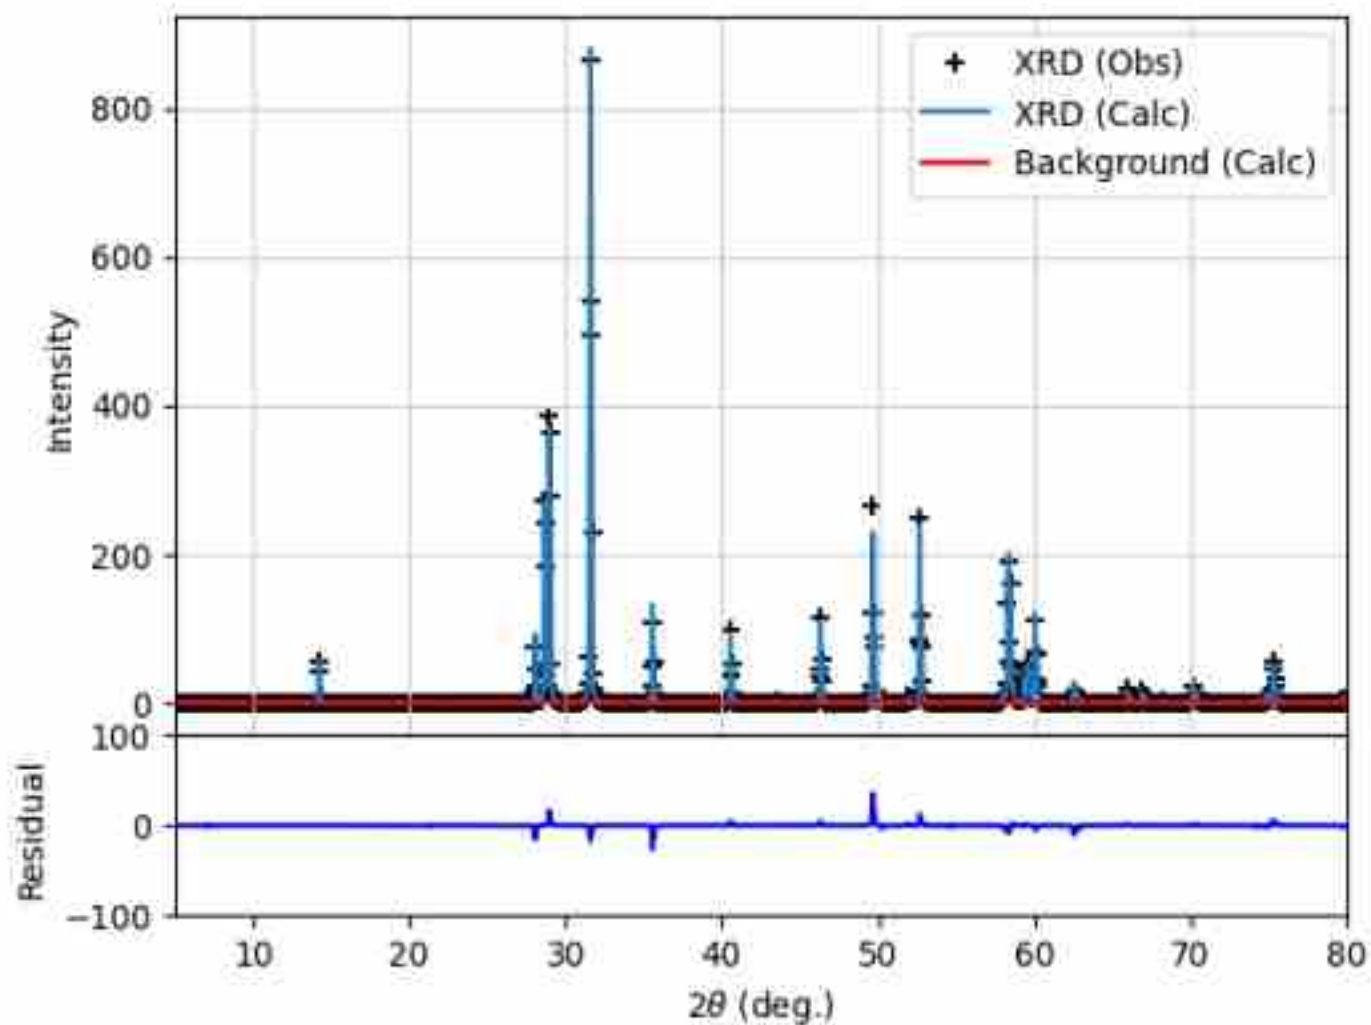

| RMSE before RR | Rwp      | RMSE after RR |
|----------------|----------|---------------|
| 0.027          | 10.18646 | 0.11669       |



# Fe<sub>4</sub>H<sub>4</sub>O<sub>8</sub>

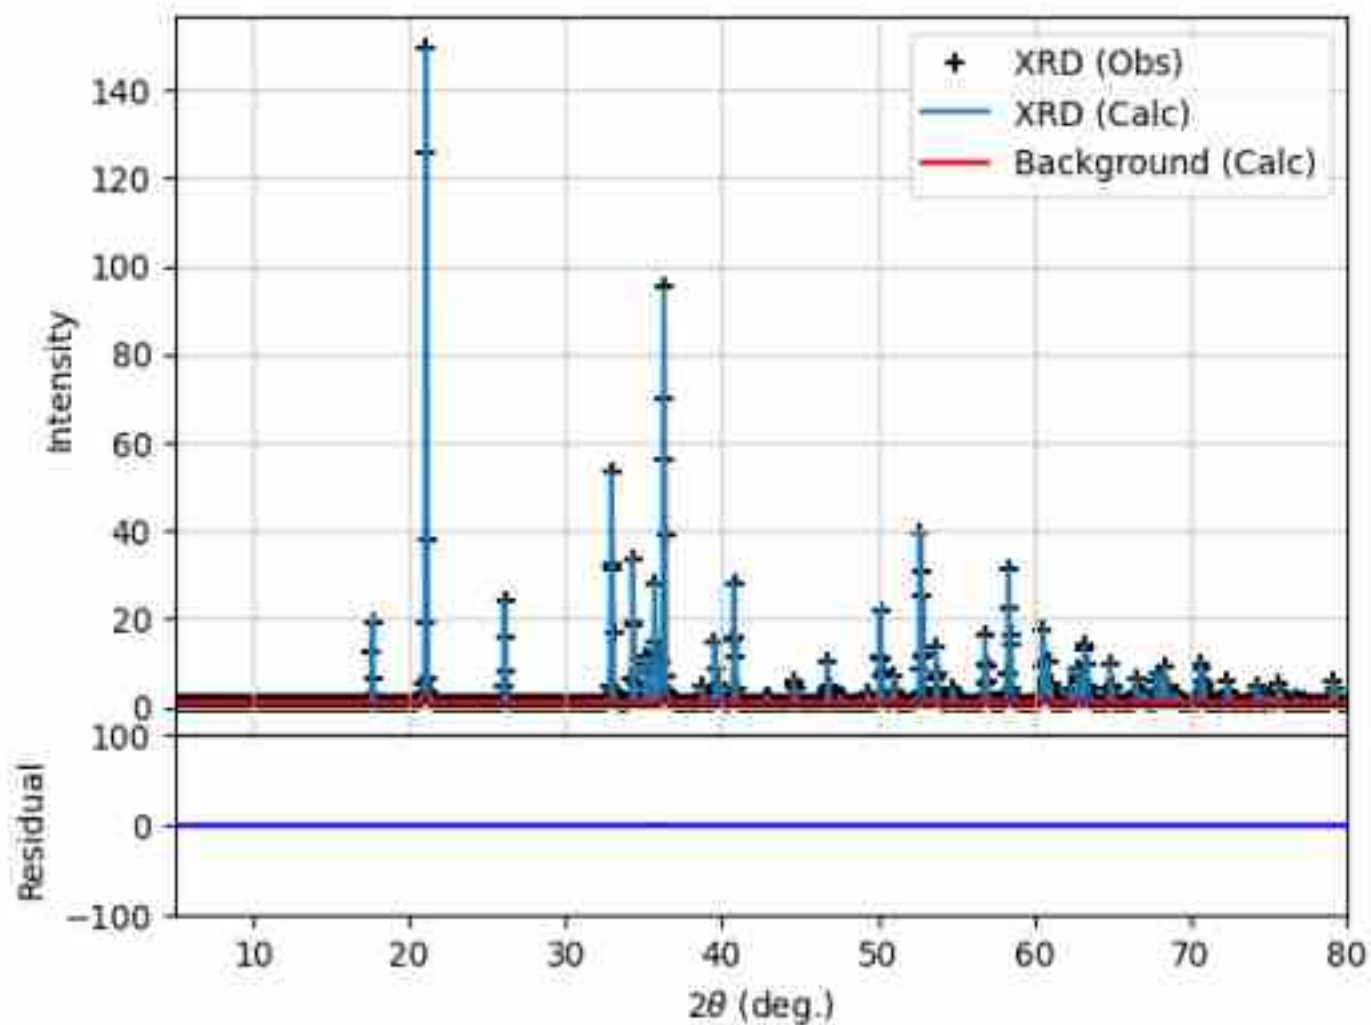

| RMSE before RR | Rwp    | RMSE after RR |
|----------------|--------|---------------|
| 0.027          | 0.4523 | None          |

# Gd1Er4Al15

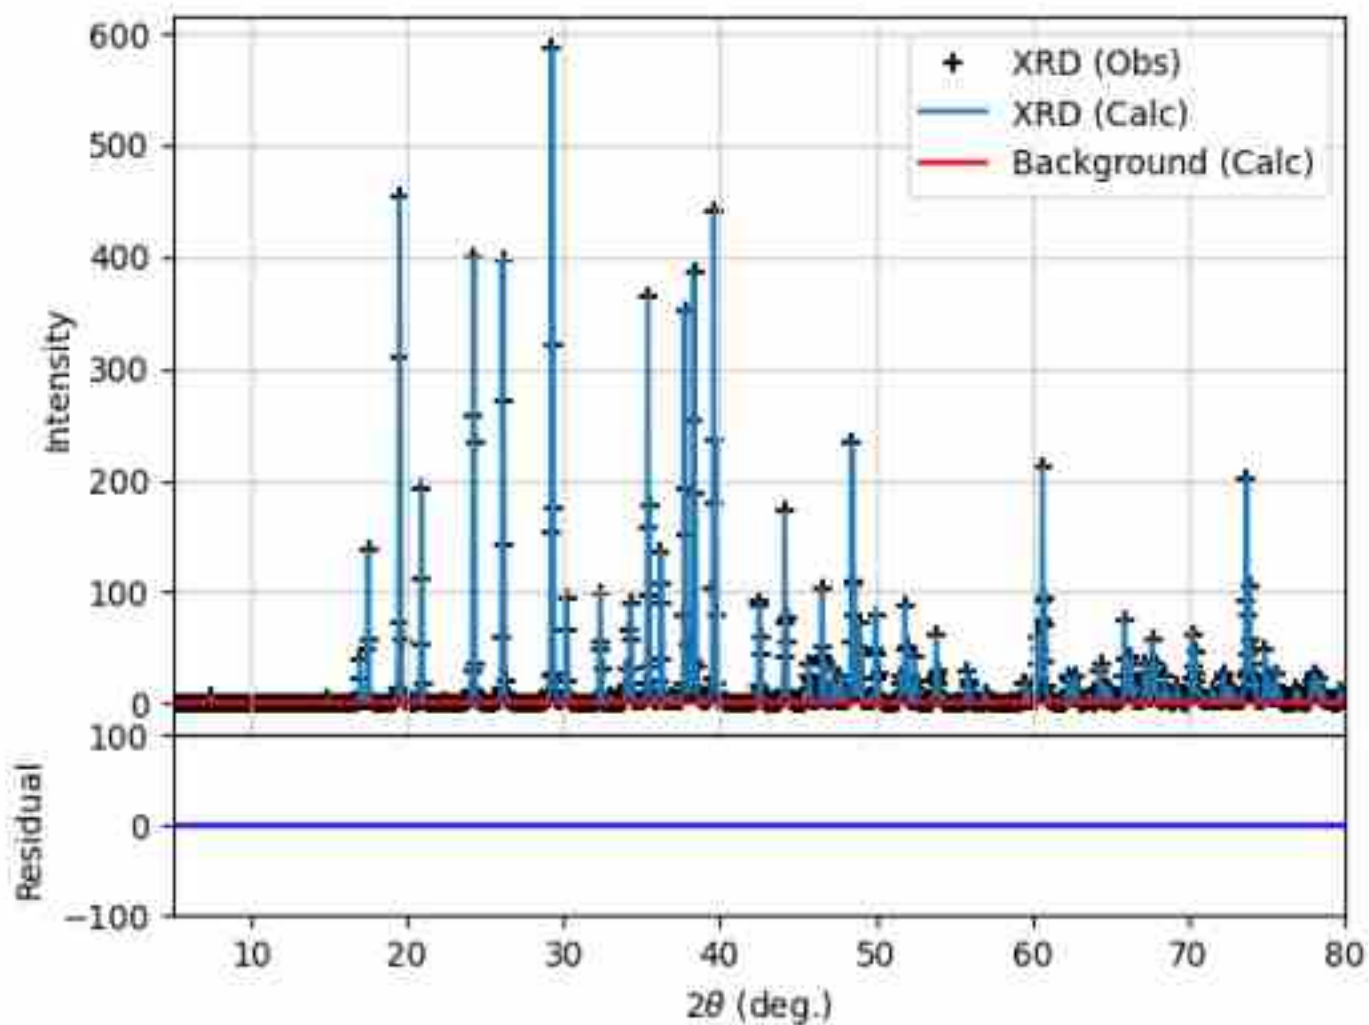

| RMSE before RR | Rwp     | RMSE after RR |
|----------------|---------|---------------|
| 0.027          | 0.00471 | 0.00133       |

# Gd1In1Pt4

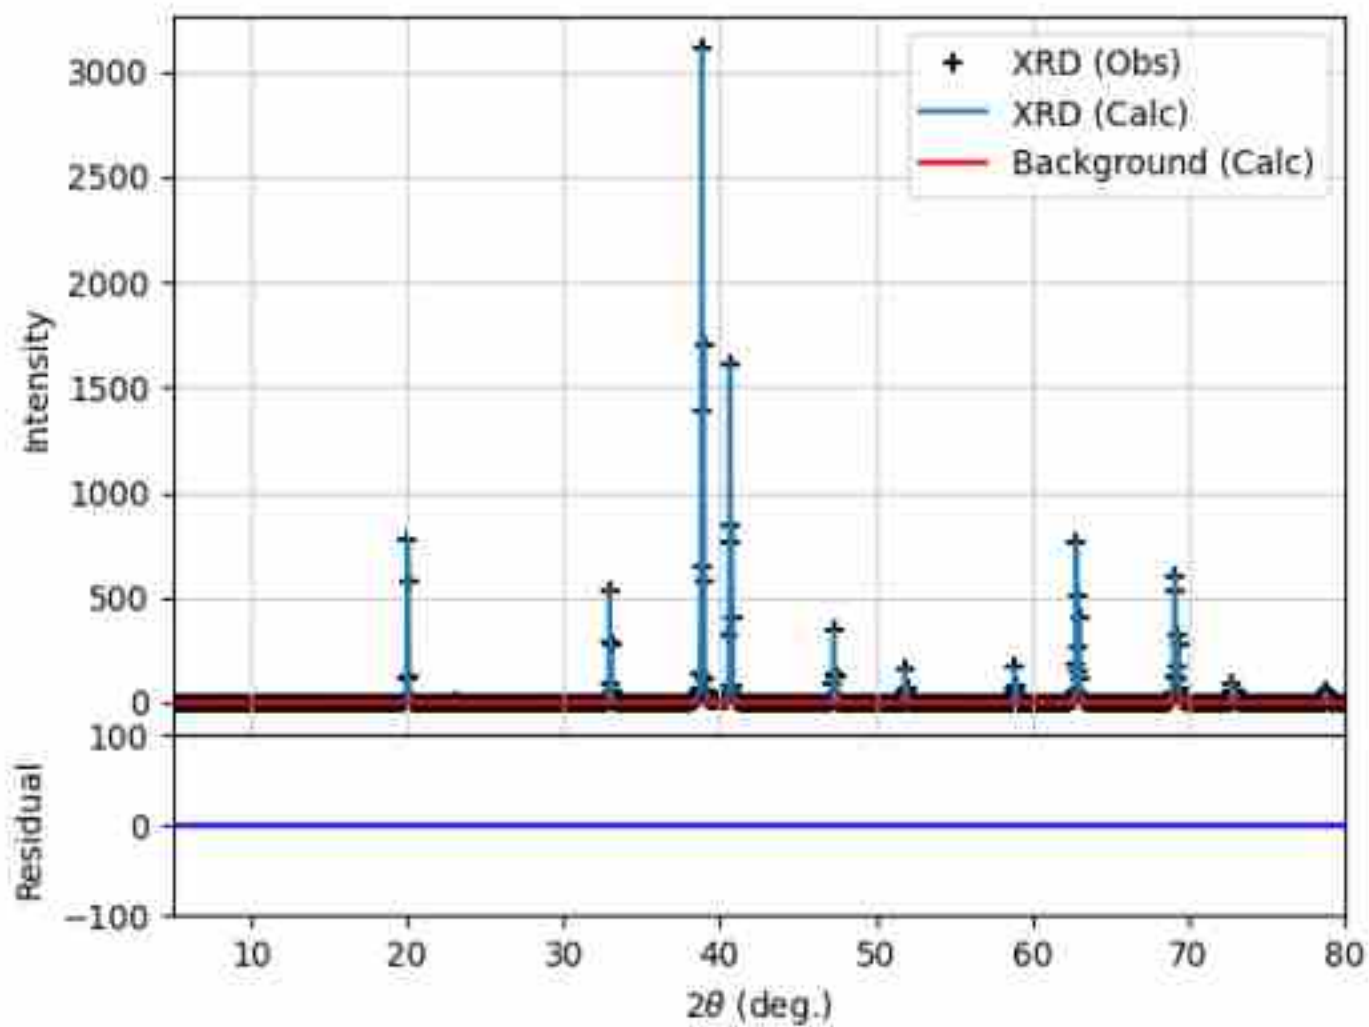

| RMSE before RR | Rwp     | RMSE after RR |
|----------------|---------|---------------|
| 0.027          | 0.03127 | 0.00119       |

# Hf9Ni11

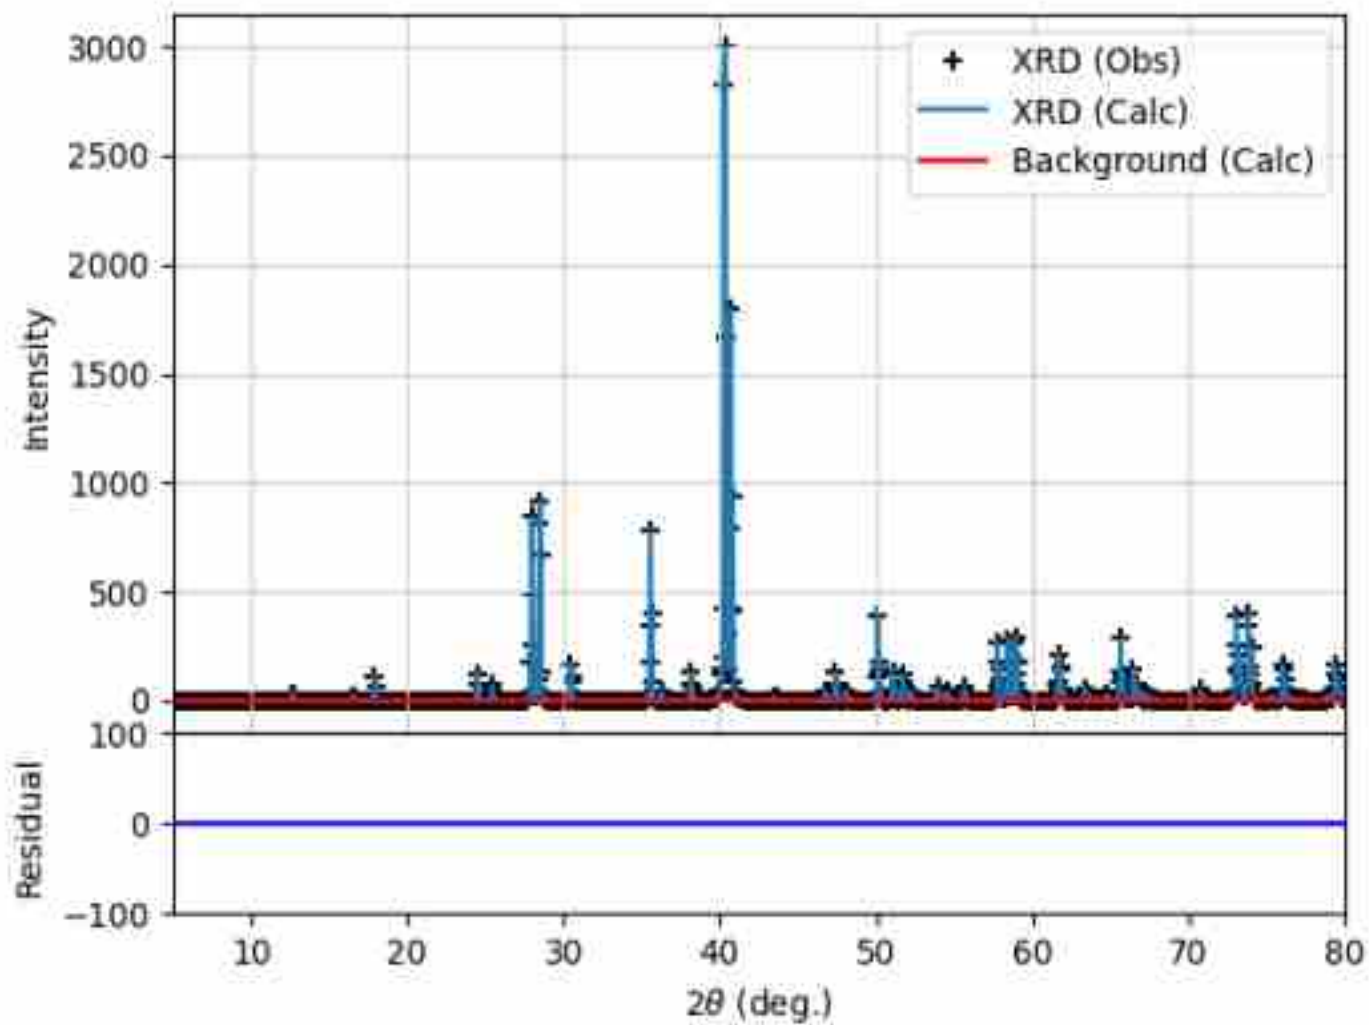

| RMSE before RR | Rwp     | RMSE after RR |
|----------------|---------|---------------|
| 0.027          | 0.00416 | 0.00078       |

# In<sub>4</sub>Ag<sub>4</sub>Se<sub>8</sub>

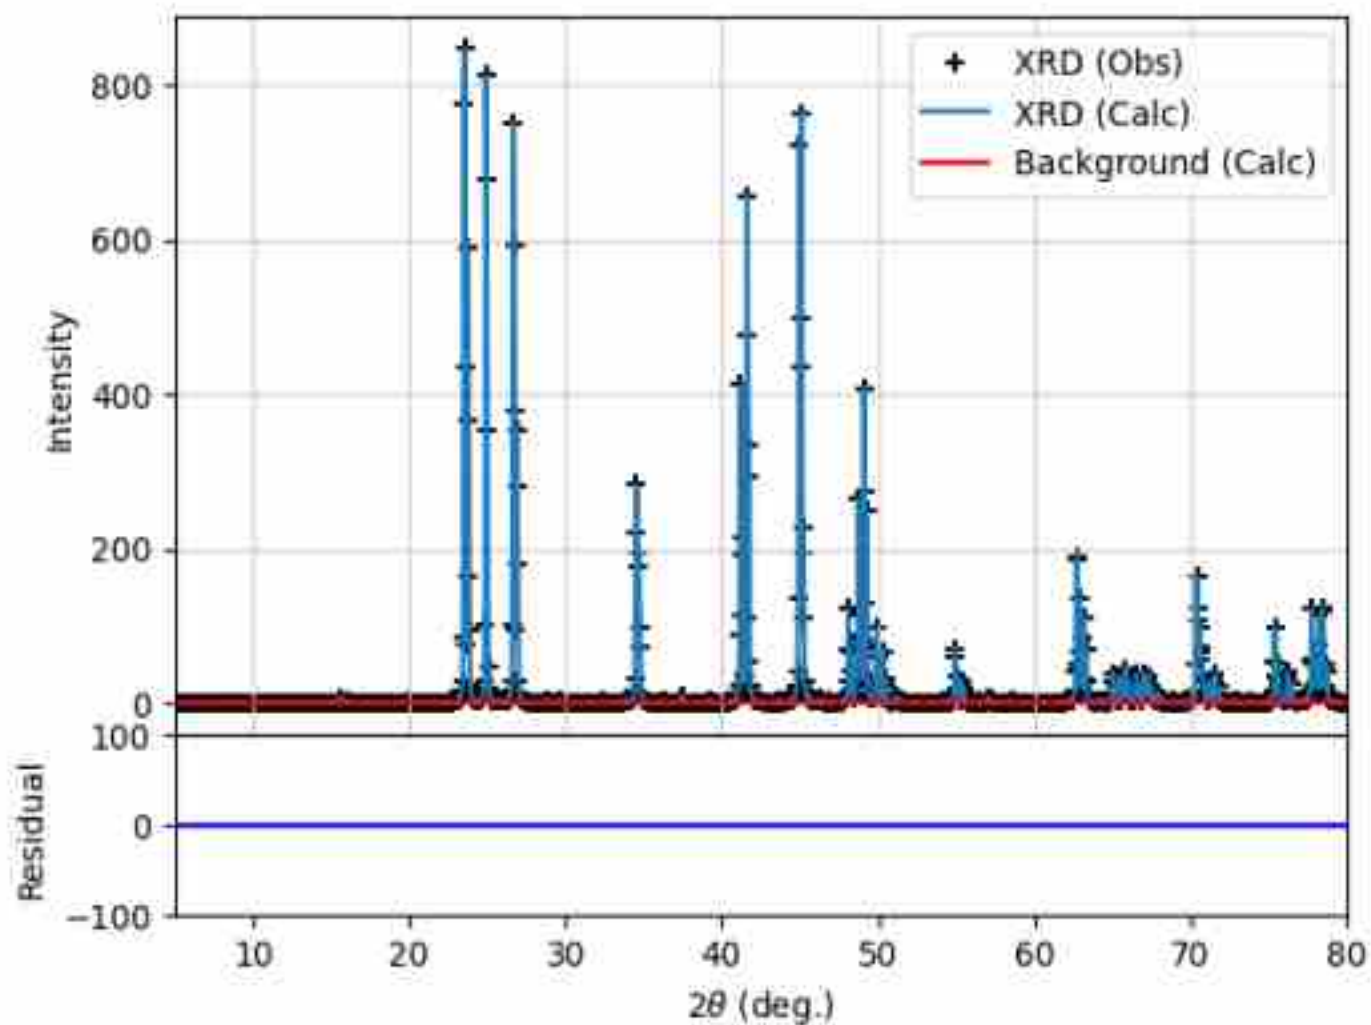

| RMSE before RR | Rwp     | RMSE after RR |
|----------------|---------|---------------|
| 0.027          | 0.00397 | 0.00033       |

# In4Rh4O12

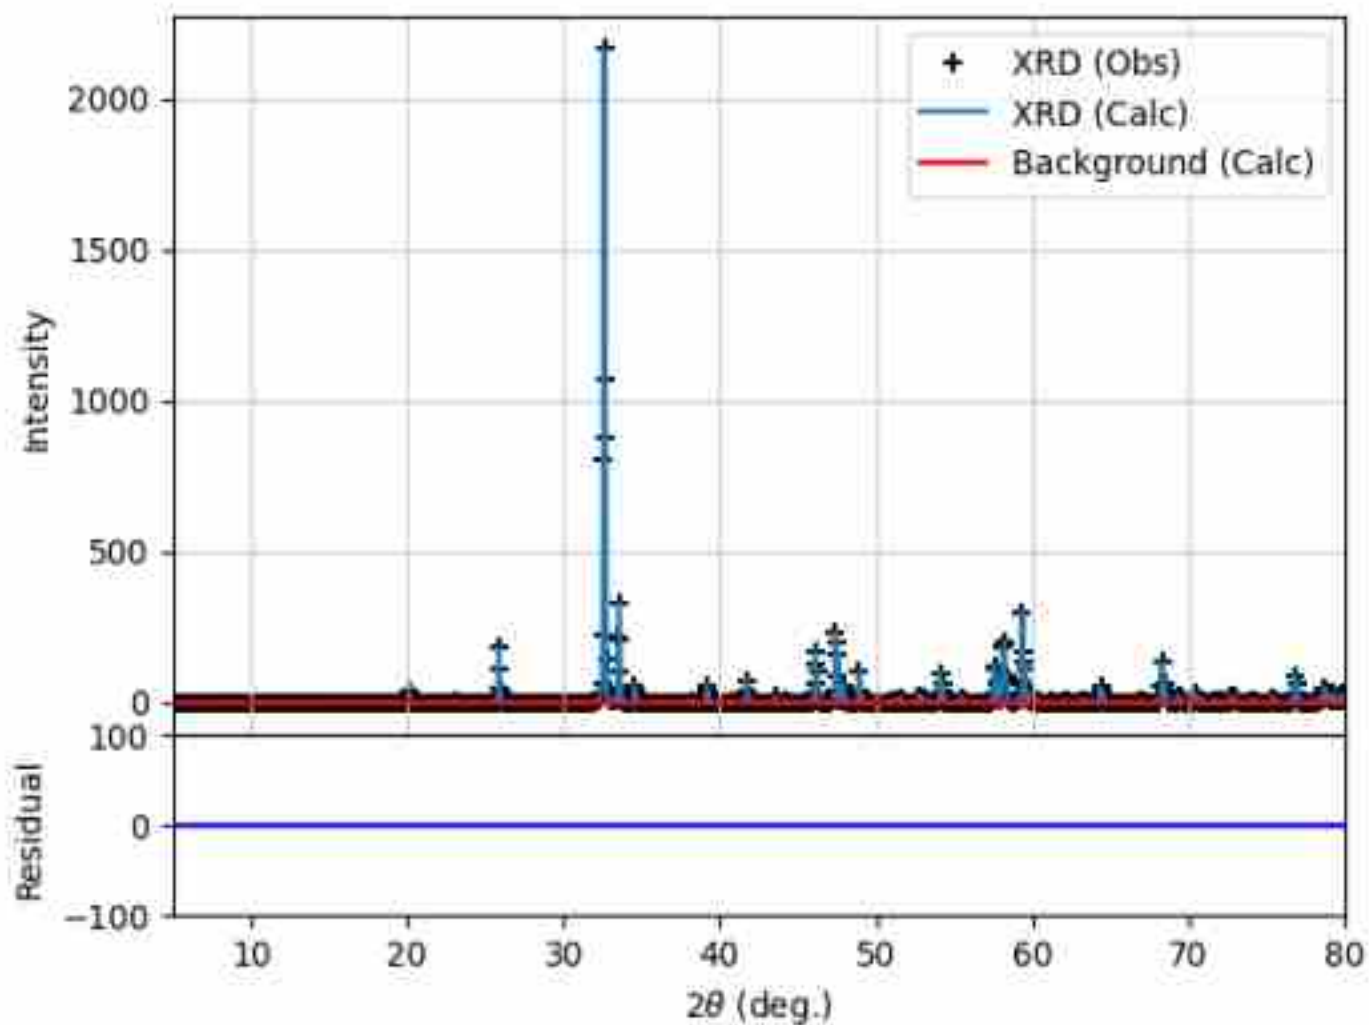

| RMSE before RR | Rwp    | RMSE after RR |
|----------------|--------|---------------|
| 0.027          | 0.0052 | 0.0014        |

# In12Ir4

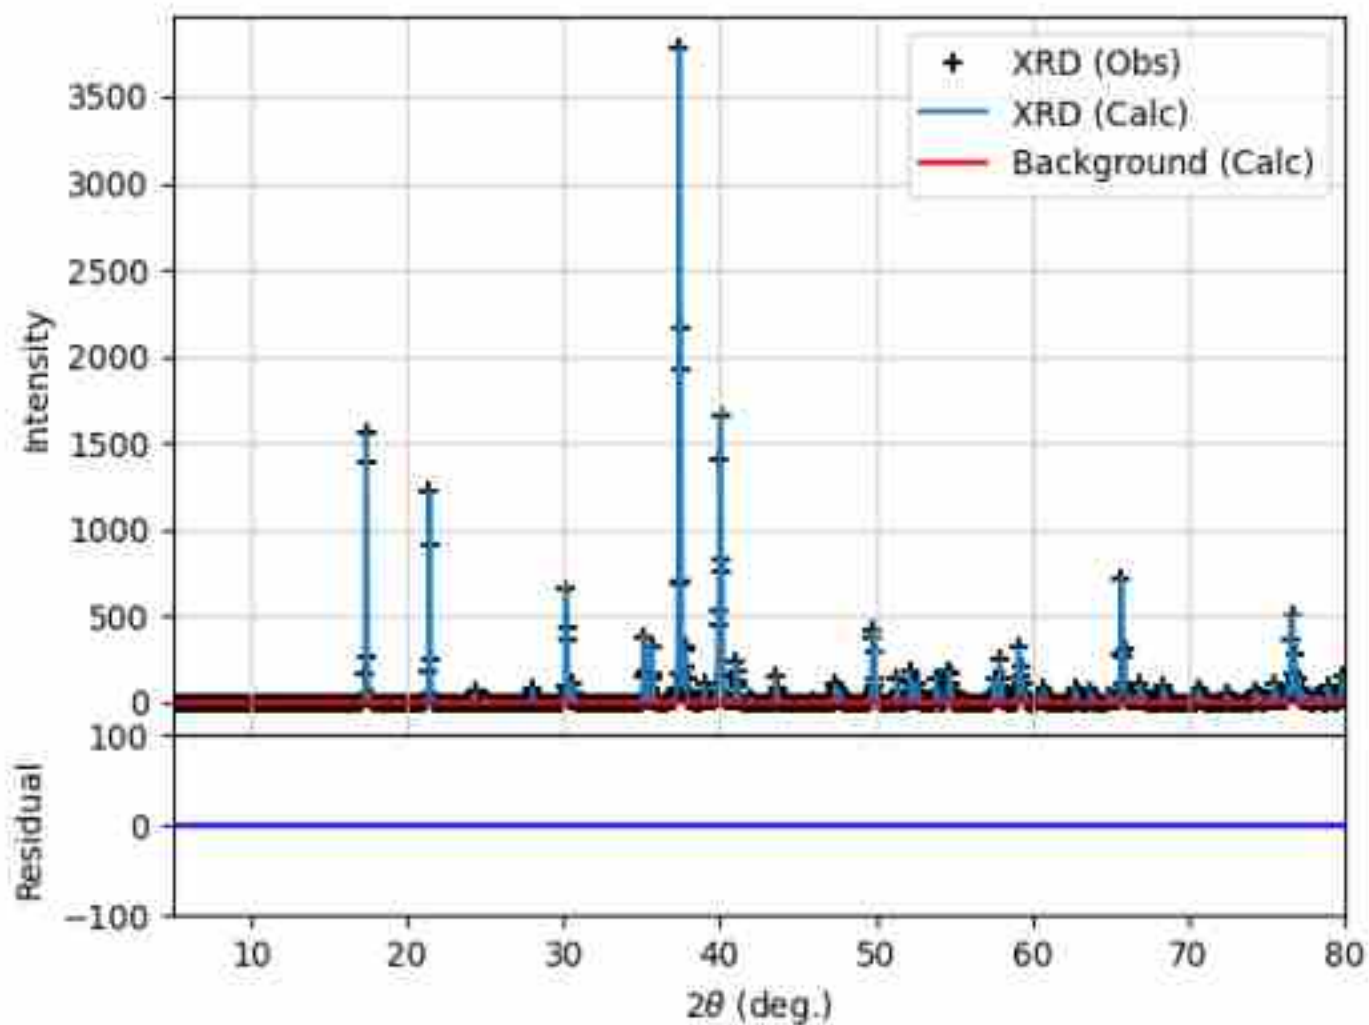

| RMSE before RR | Rwp     | RMSE after RR |
|----------------|---------|---------------|
| 0.027          | 0.00547 | 0.00032       |

# K1Ba2I1O6

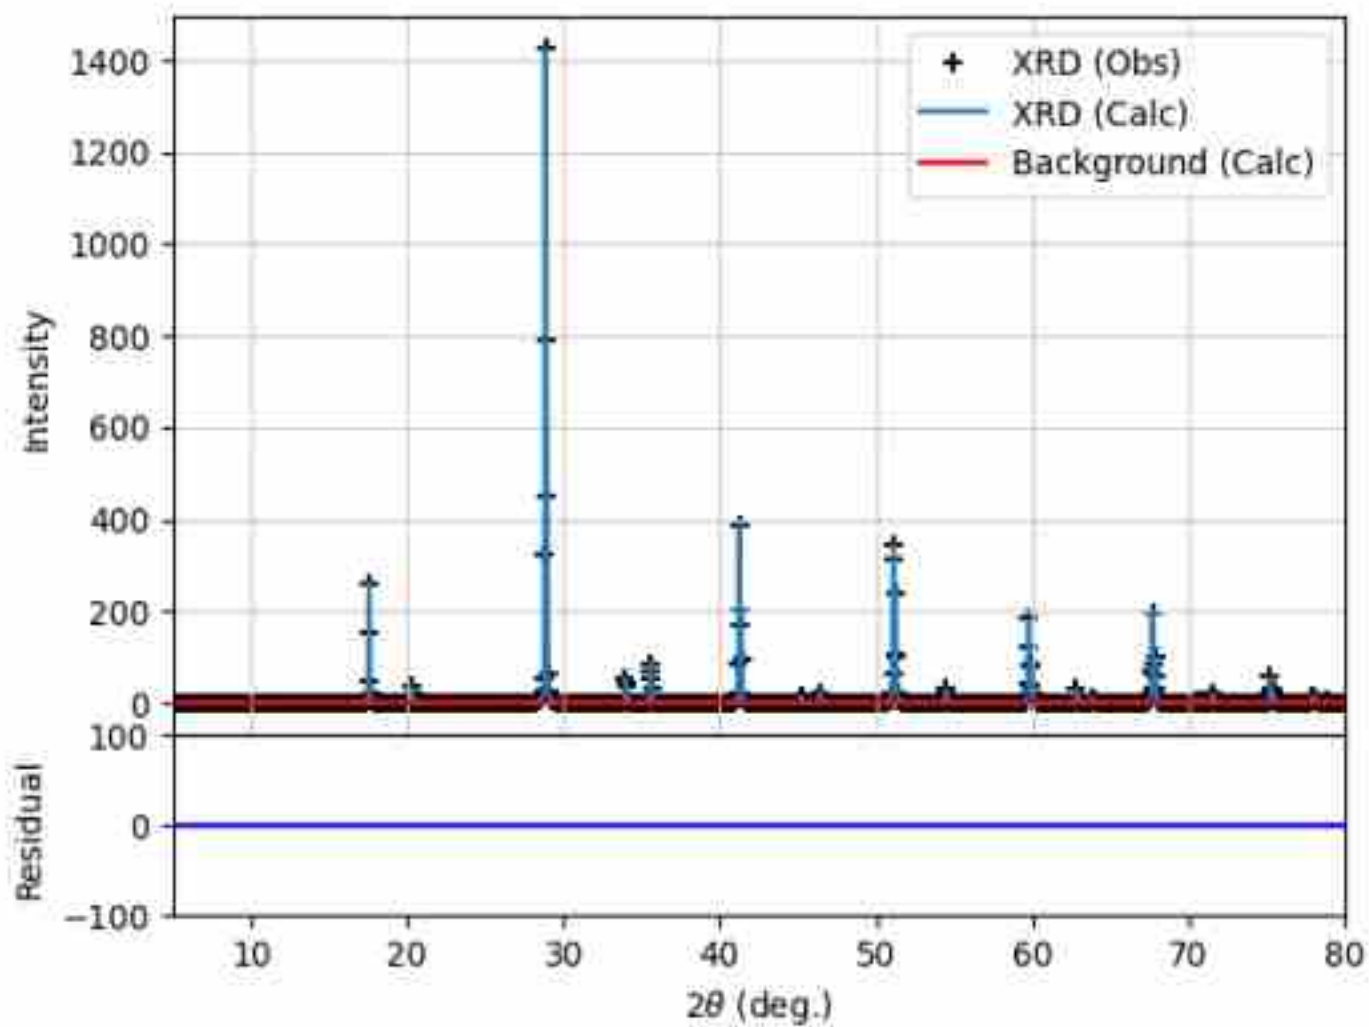

| RMSE before RR | Rwp    | RMSE after RR |
|----------------|--------|---------------|
| 0.027          | 0.0534 | 0.0082        |



# K1Ni1I1O6

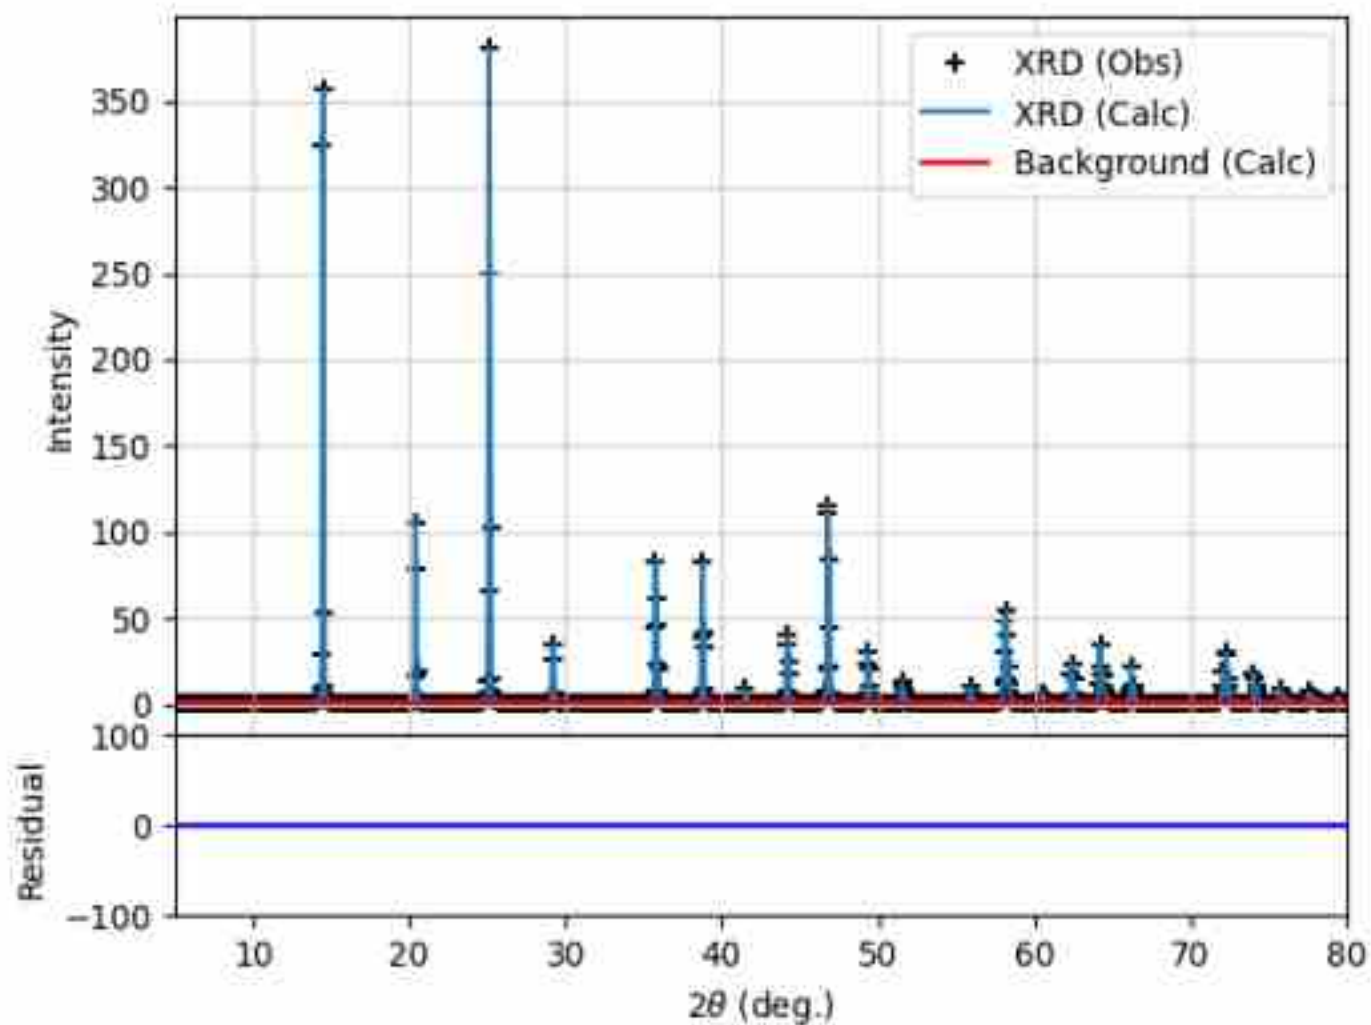

| RMSE before RR | Rwp     | RMSE after RR |
|----------------|---------|---------------|
| 0.027          | 0.00441 | 0.00295       |

# K<sub>2</sub>Bi<sub>4</sub>

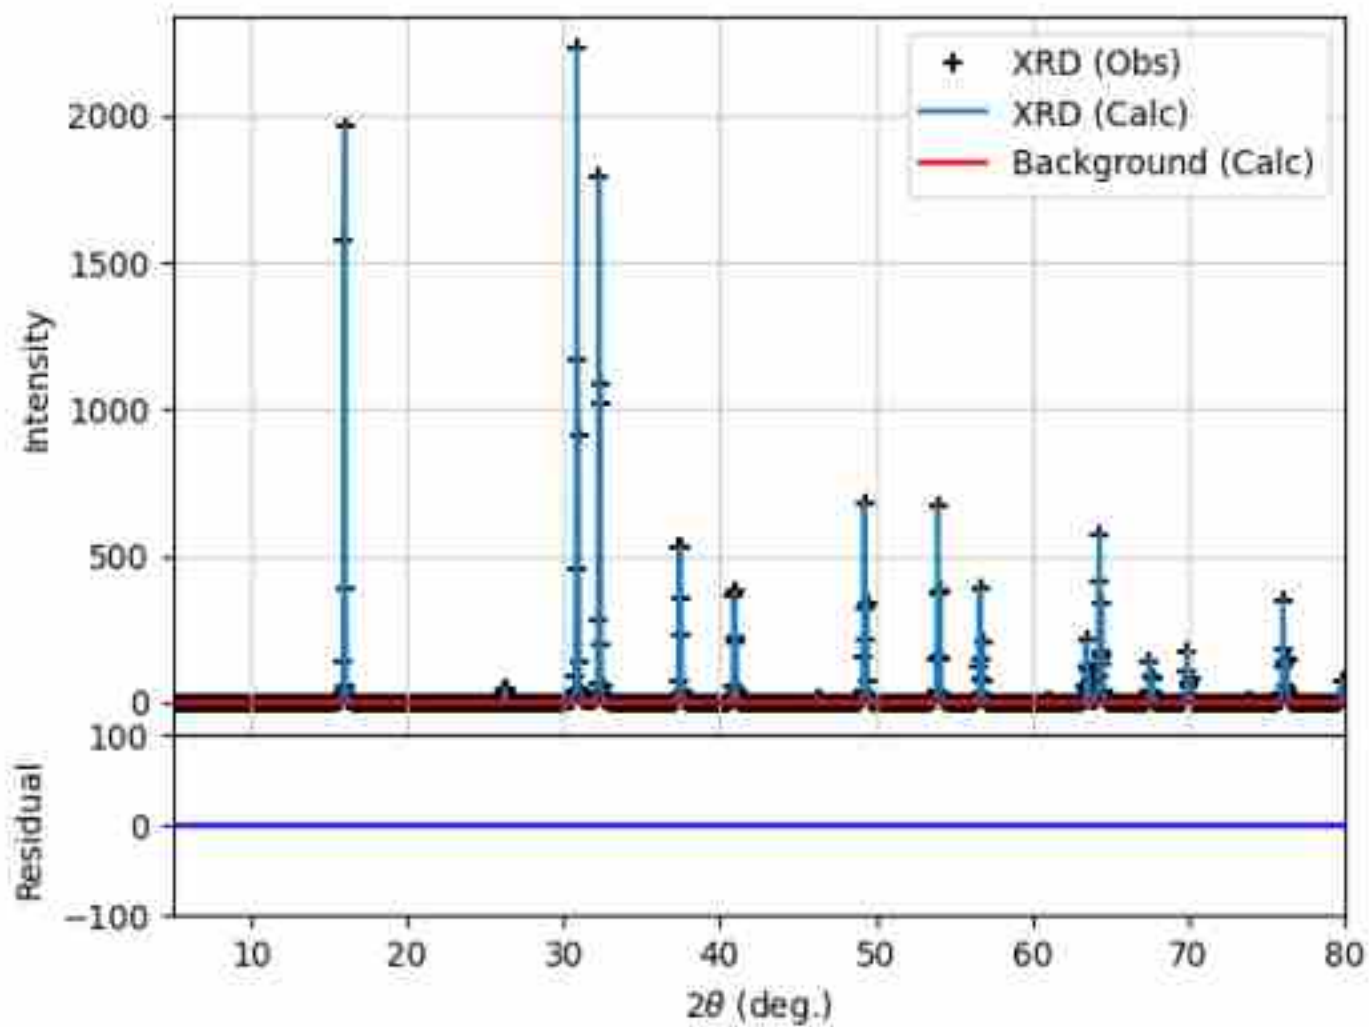

| RMSE before RR | Rwp     | RMSE after RR |
|----------------|---------|---------------|
| 0.027          | 0.00615 | 0.00119       |

# K3Na1Se2O8

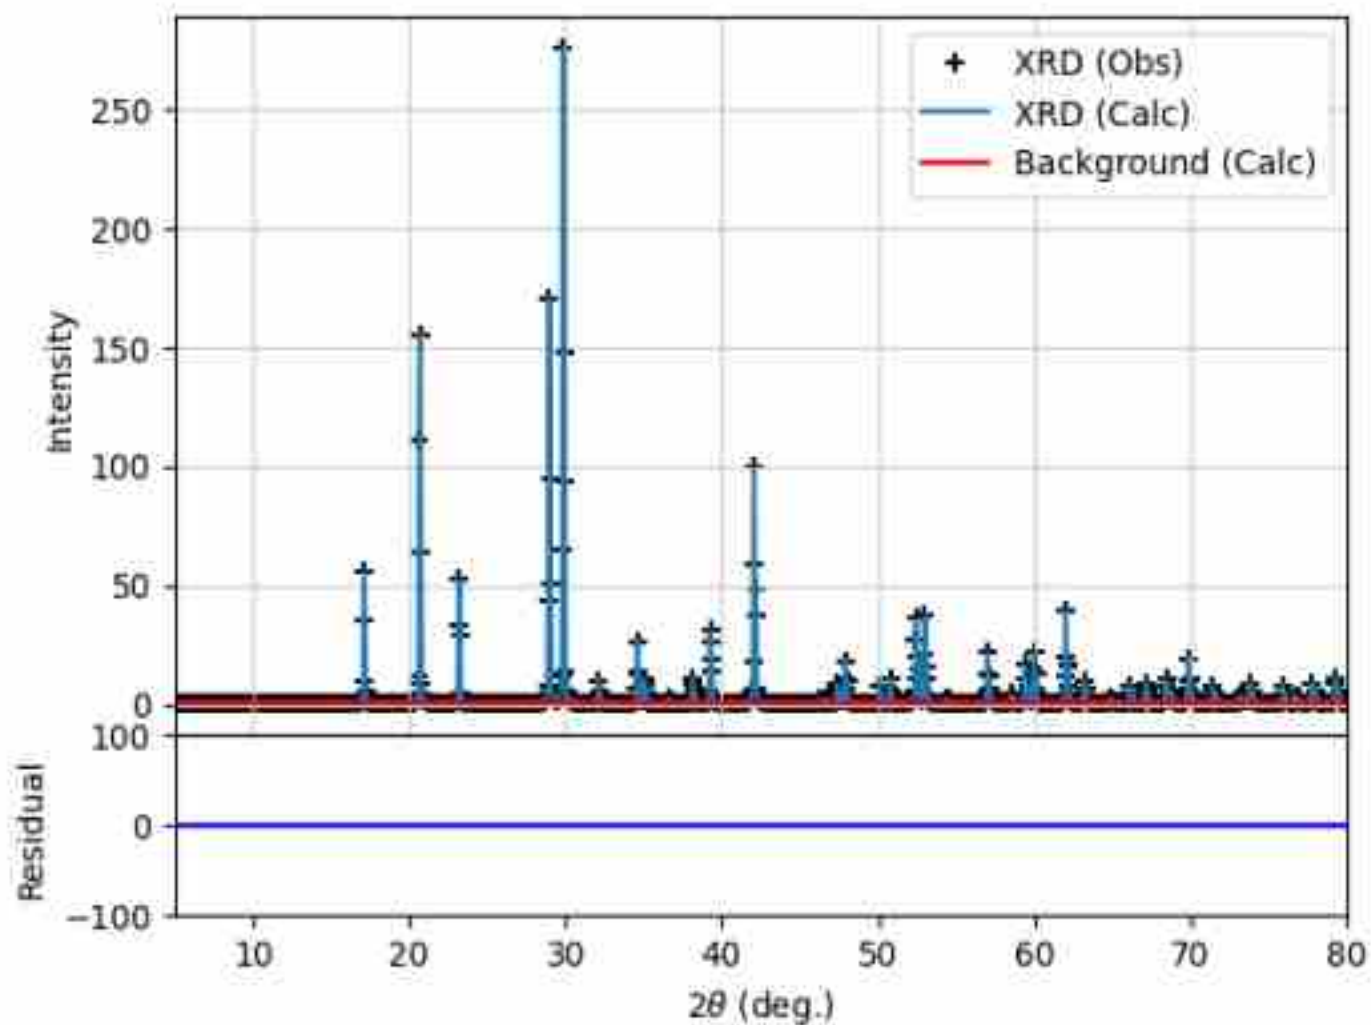

| RMSE before RR | Rwp     | RMSE after RR |
|----------------|---------|---------------|
| 0.027          | 0.00238 | 0.00085       |

# K<sub>4</sub>Na<sub>4</sub>Te<sub>4</sub>

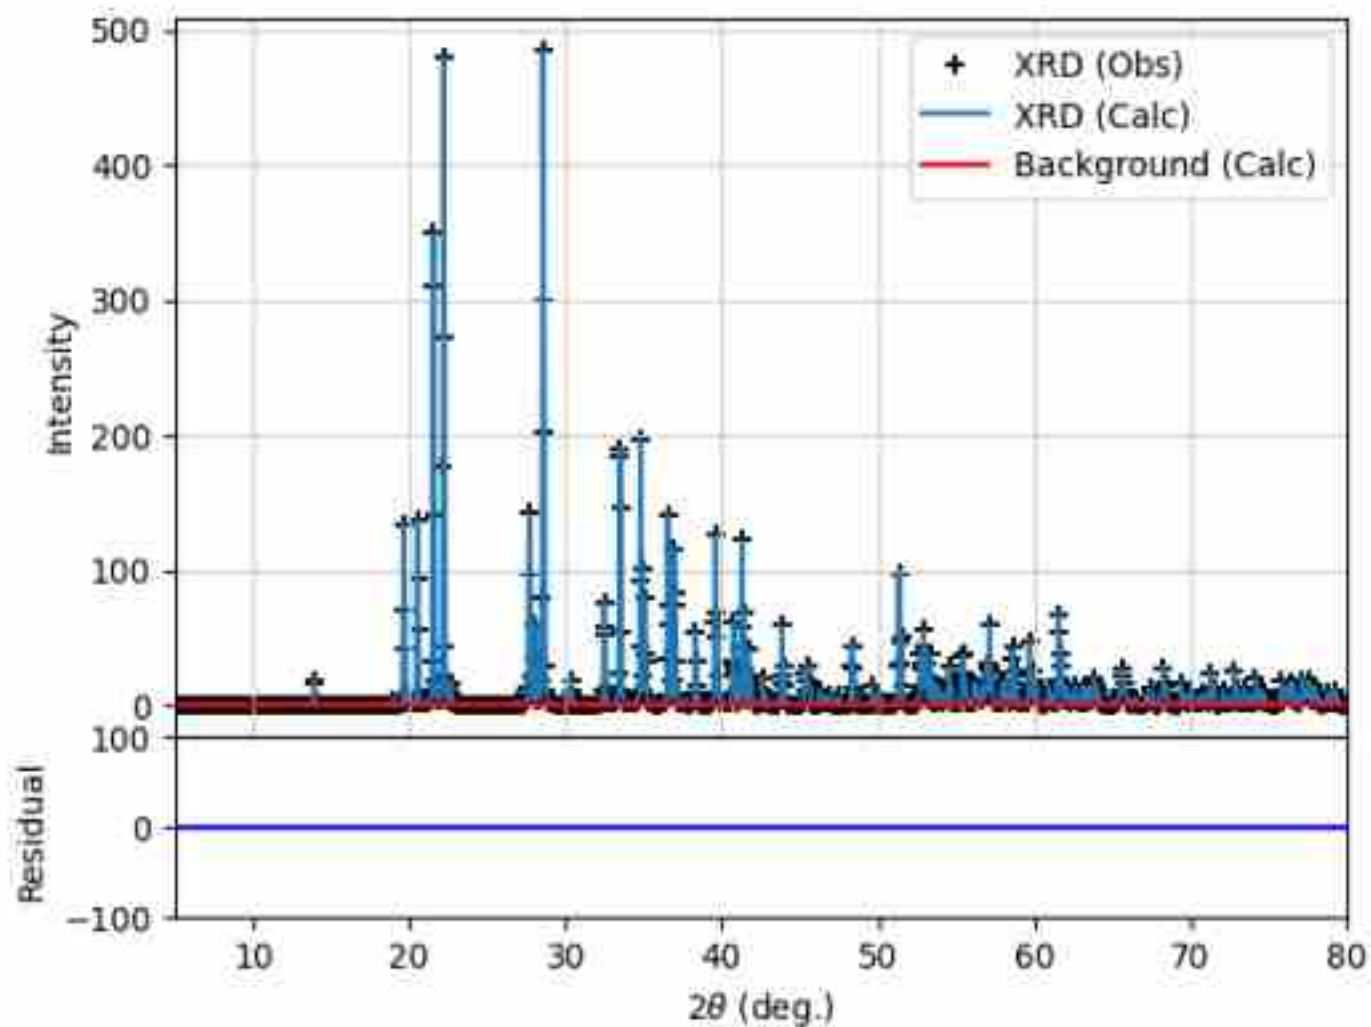

| RMSE before RR | Rwp     | RMSE after RR |
|----------------|---------|---------------|
| 0.027          | 0.00379 | 0.00041       |

# La<sub>4</sub>Cu<sub>1</sub>O<sub>8</sub>

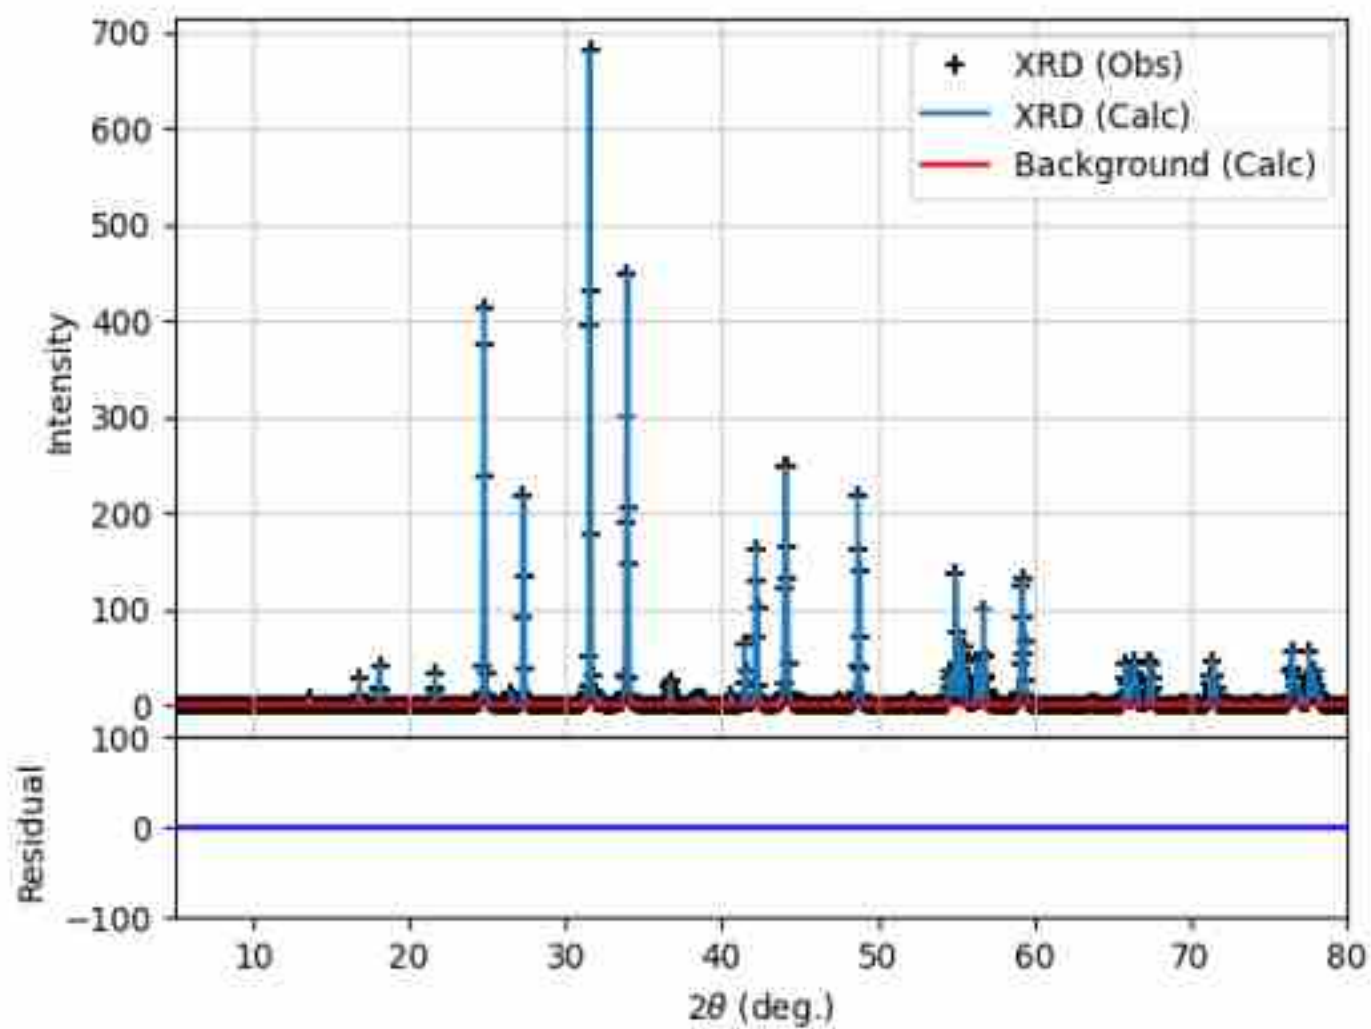

| RMSE before RR | Rwp     | RMSE after RR |
|----------------|---------|---------------|
| 0.027          | 0.00413 | 0.00189       |

# La<sub>4</sub>Mg<sub>2</sub>Nb<sub>2</sub>O<sub>12</sub>

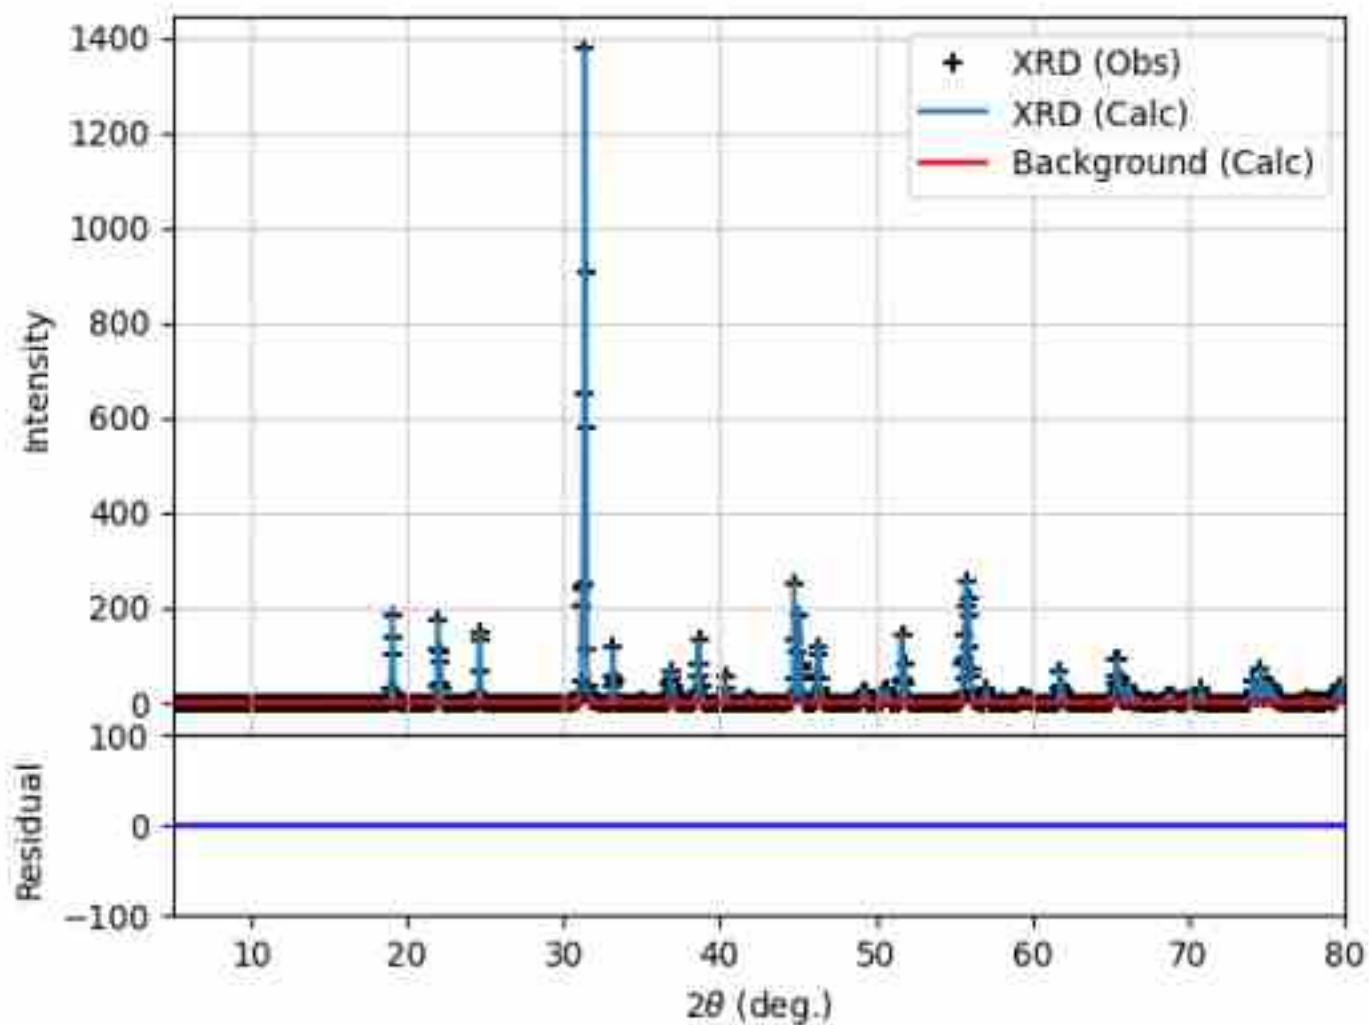

| RMSE before RR | Rwp     | RMSE after RR |
|----------------|---------|---------------|
| 0.027          | 0.00443 | 0.00119       |

# La<sub>4</sub>Ni<sub>2</sub>O<sub>8</sub>

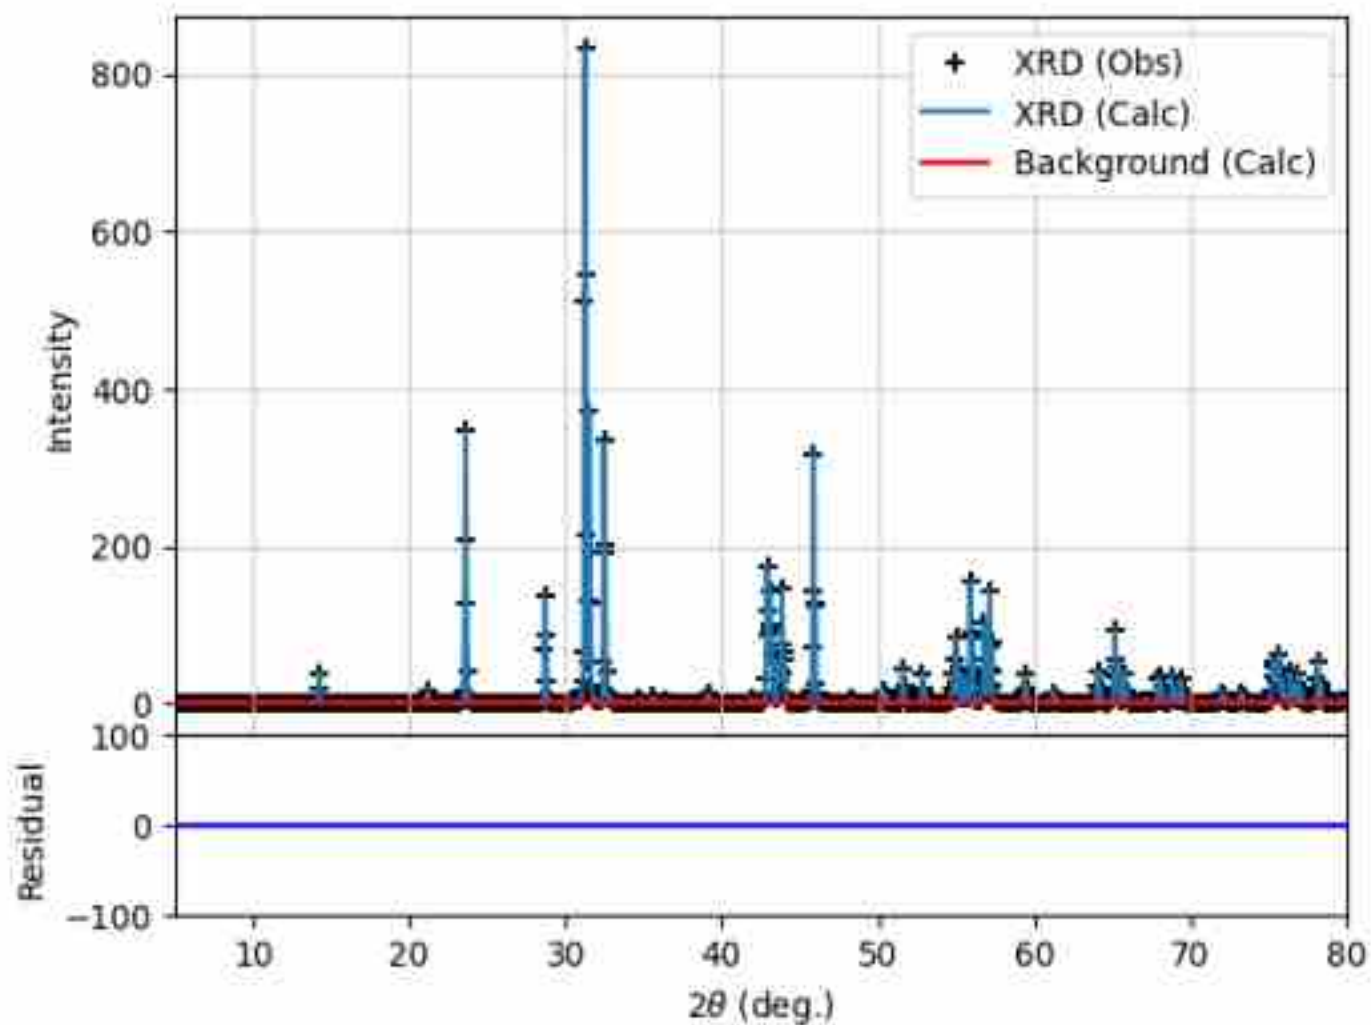

| RMSE before RR | Rwp     | RMSE after RR |
|----------------|---------|---------------|
| 0.027          | 0.00236 | 0.00066       |

# Li1Al1O2

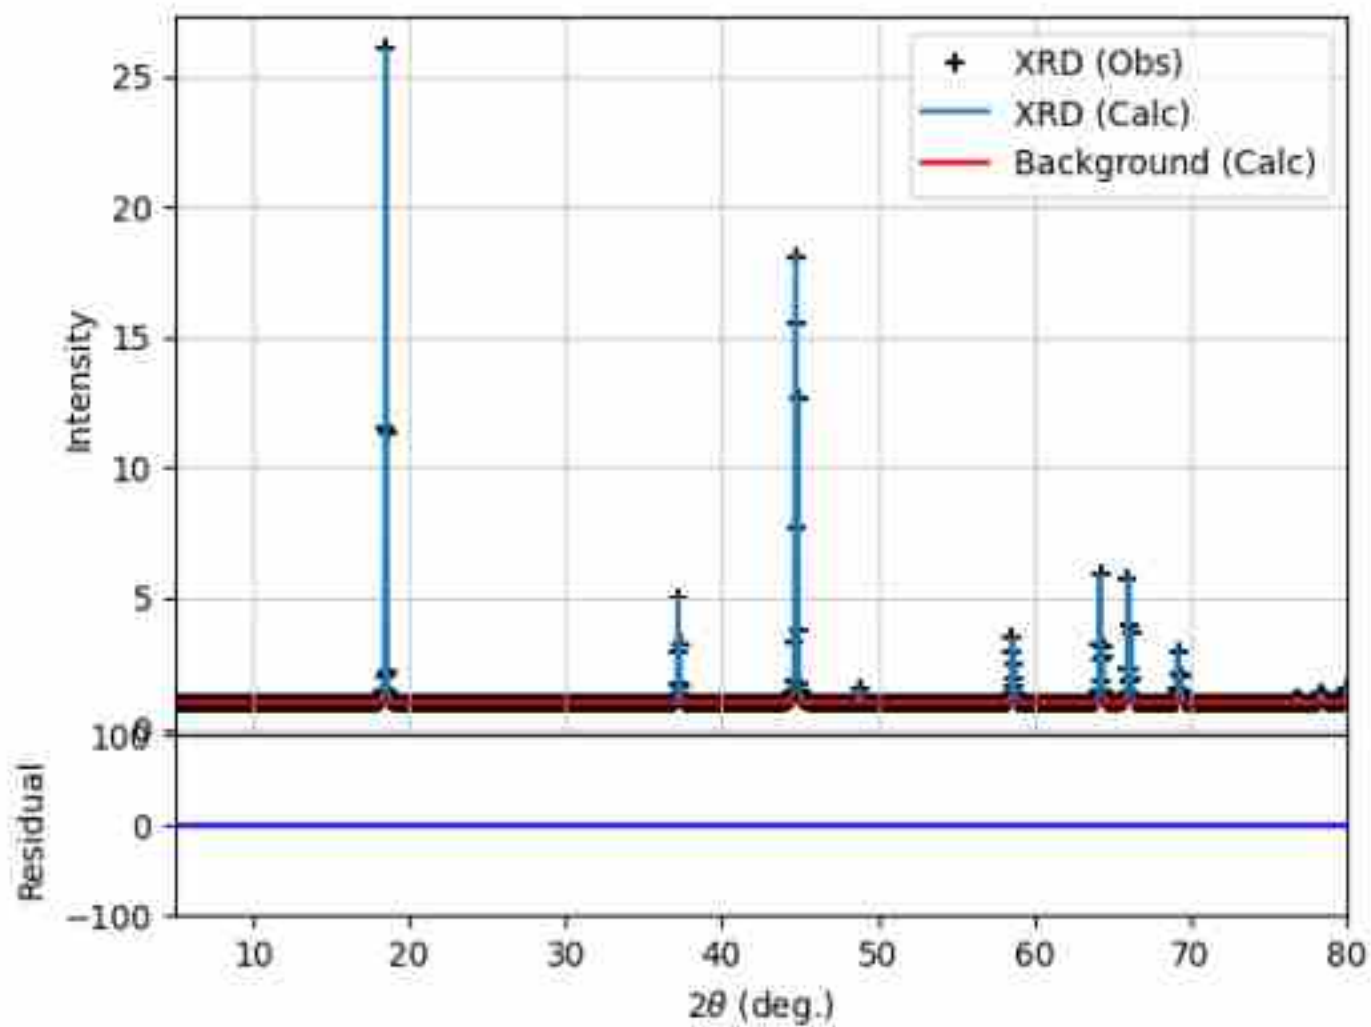

| RMSE before RR | Rwp     | RMSE after RR |
|----------------|---------|---------------|
| 0.027          | 0.00182 | 0.00138       |



# Li<sub>2</sub>Fe<sub>4</sub>O<sub>6</sub>

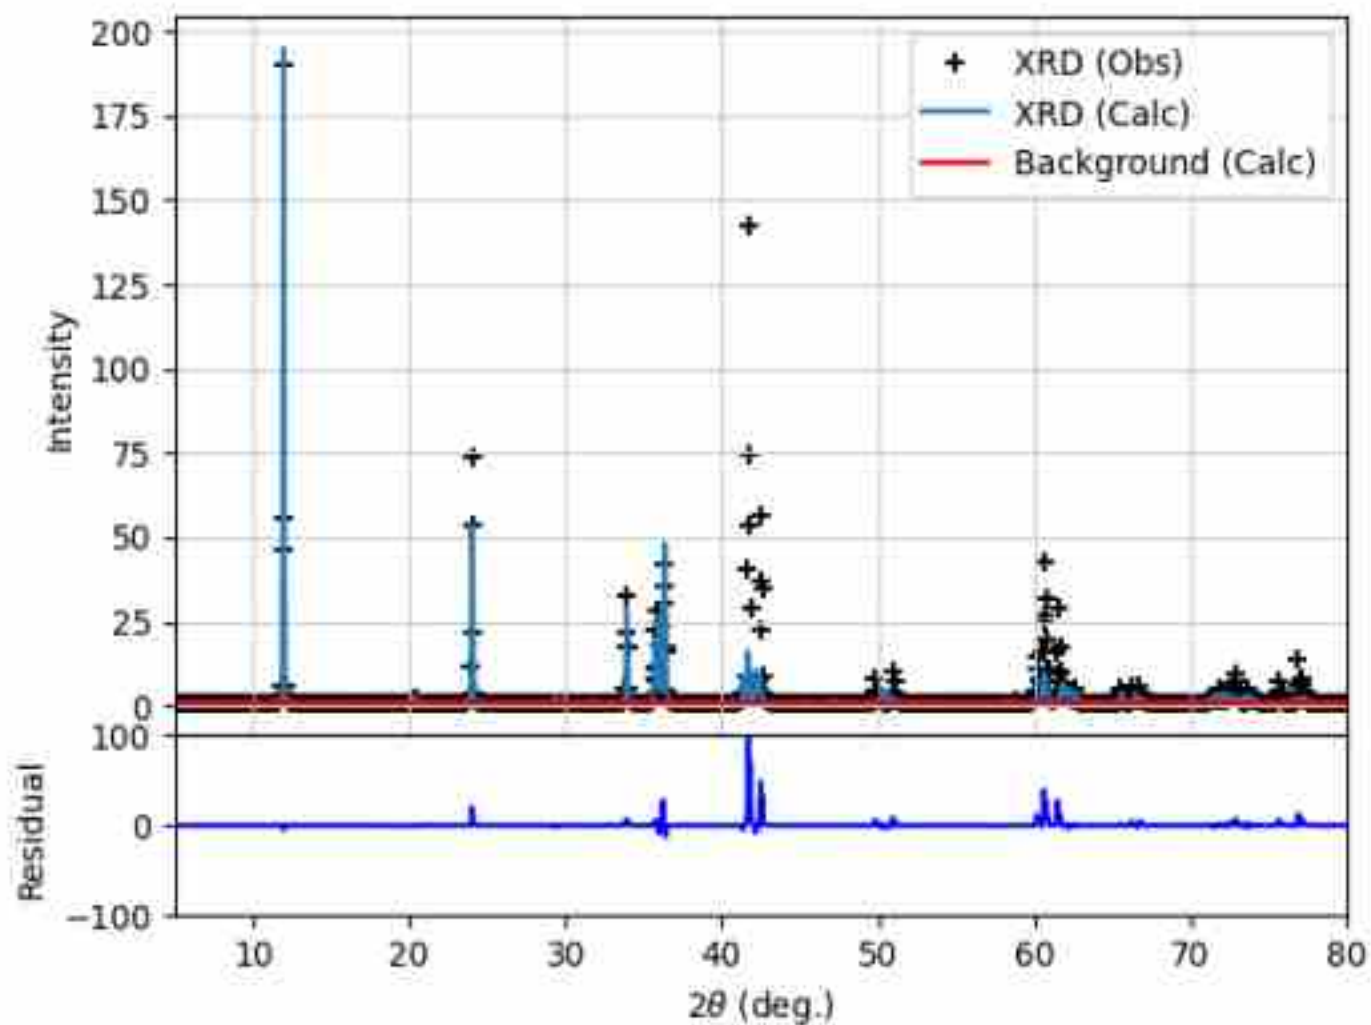

| RMSE before RR | Rwp      | RMSE after RR |
|----------------|----------|---------------|
| 0.027          | 49.43171 | None          |

# Li<sub>4</sub>Cr<sub>1</sub>Te<sub>3</sub>O<sub>12</sub>

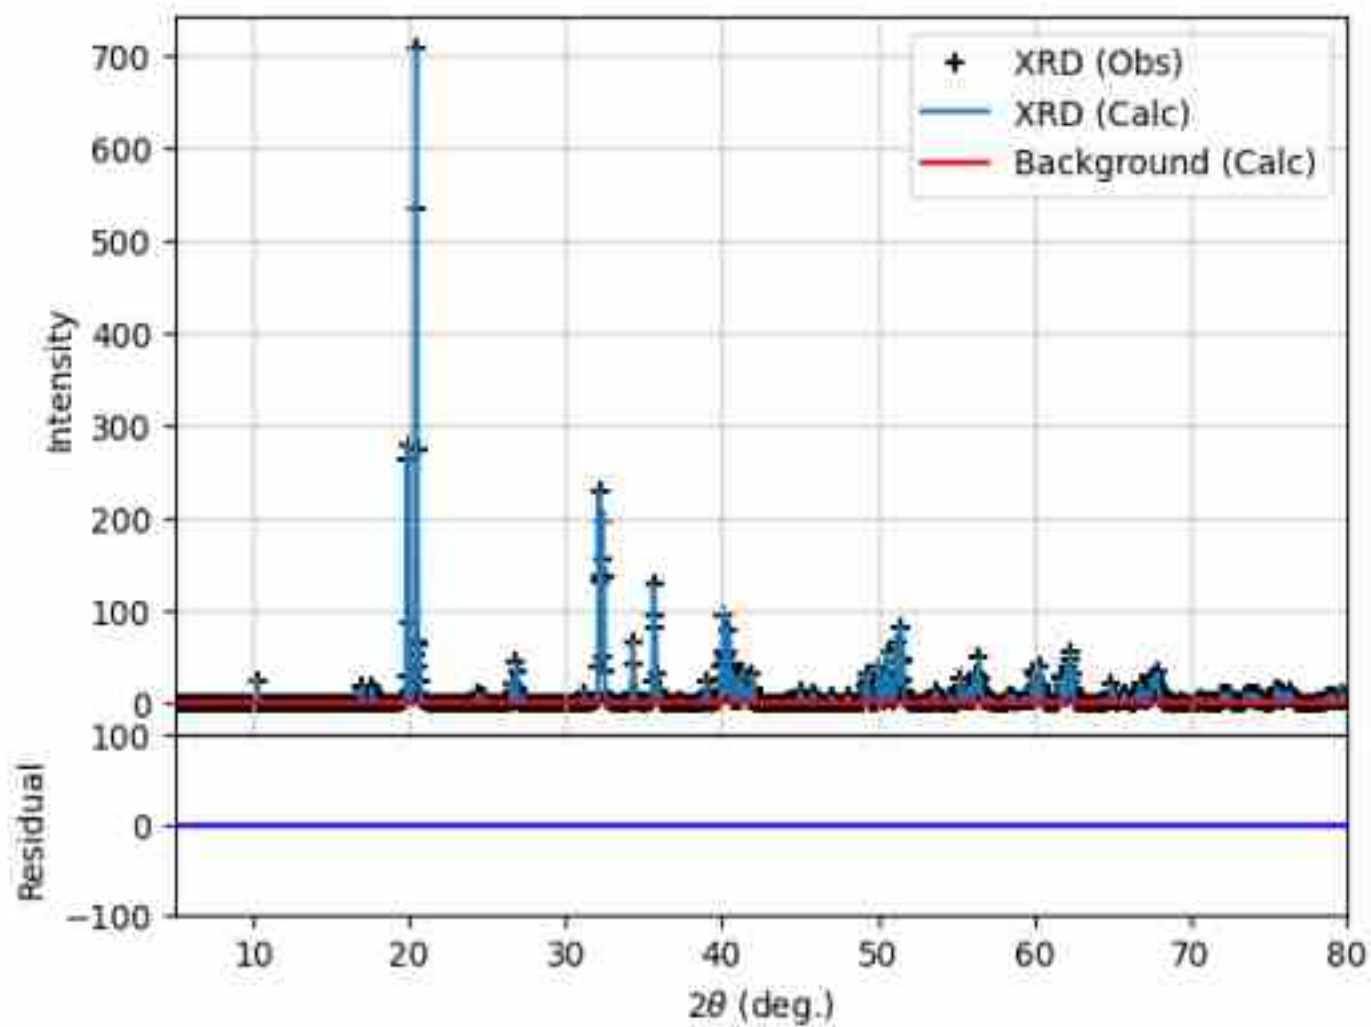

| RMSE before RR | Rwp   | RMSE after RR |
|----------------|-------|---------------|
| 0.027          | 0.004 | 0.00129       |

# Li<sub>4</sub>Mn<sub>2</sub>Sn<sub>2</sub>O<sub>8</sub>

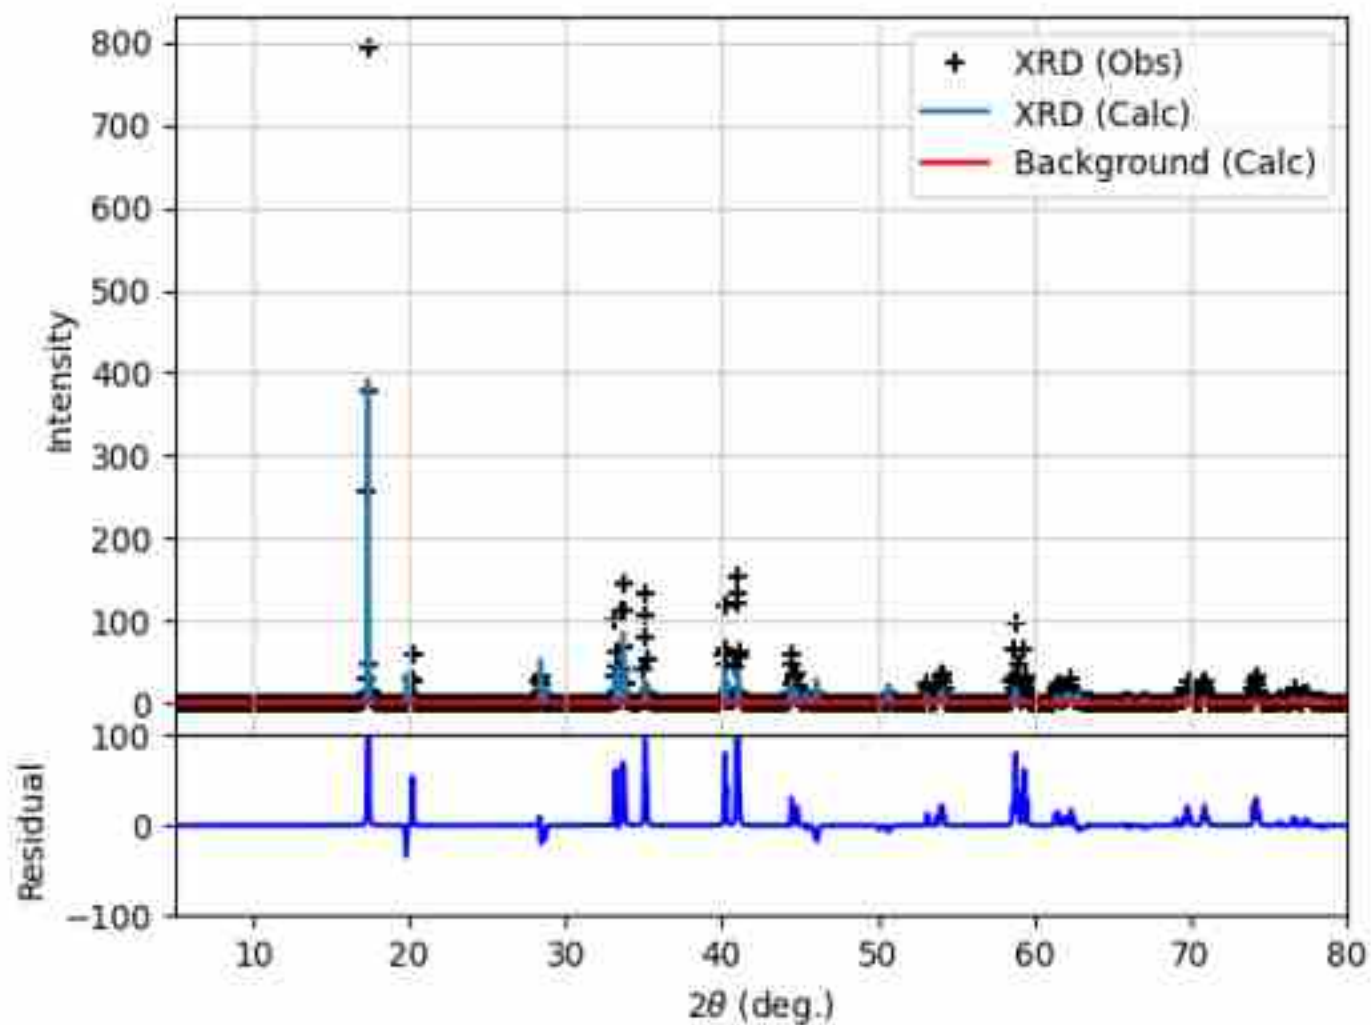

| RMSE before RR | Rwp      | RMSE after RR |
|----------------|----------|---------------|
| 0.027          | 77.21989 | 0.13177       |

# Li<sub>4</sub>Ti<sub>1</sub>S<sub>4</sub>

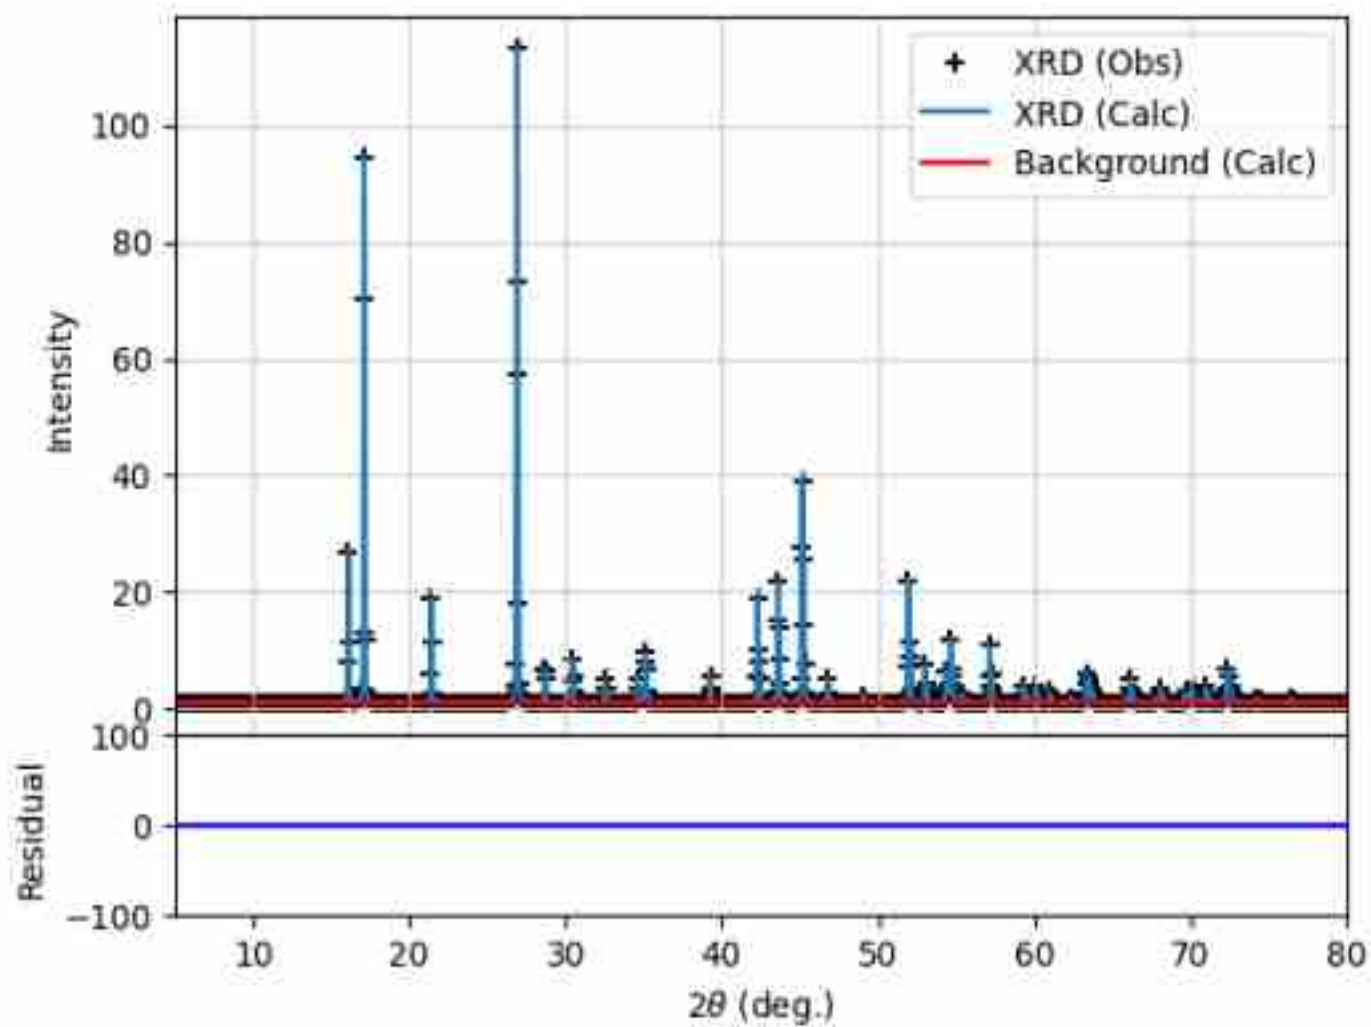

| RMSE before RR | Rwp     | RMSE after RR |
|----------------|---------|---------------|
| 0.027          | 0.00184 | 0.00075       |

# Li<sub>6</sub>Al<sub>2</sub>H<sub>12</sub>

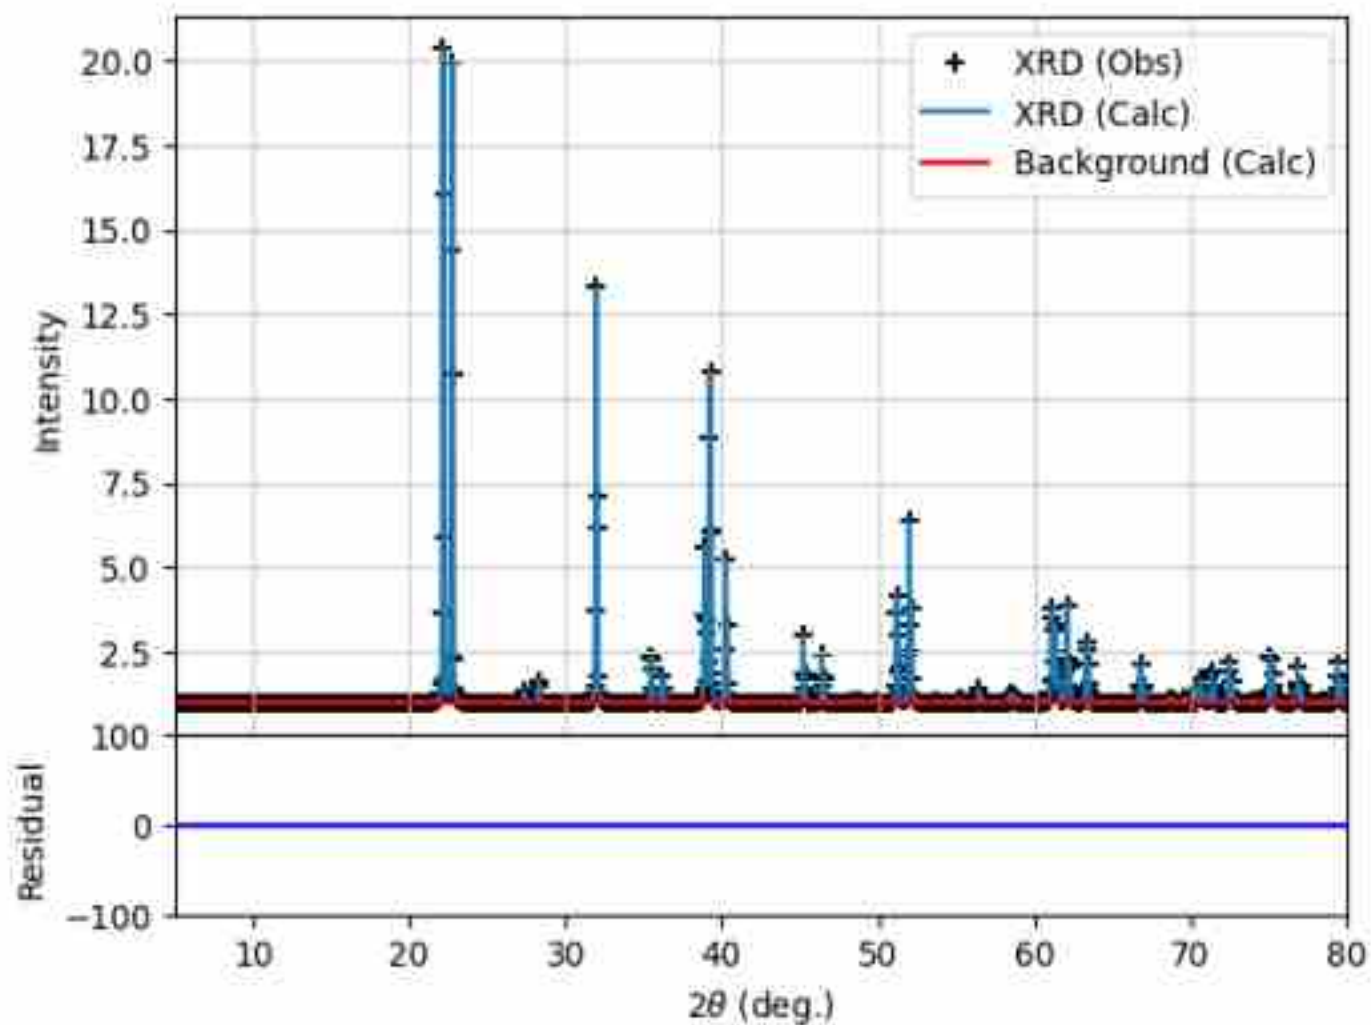

| RMSE before RR | Rwp     | RMSE after RR |
|----------------|---------|---------------|
| 0.027          | 0.00161 | 0.0043        |

# Lu<sub>8</sub>In<sub>4</sub>Au<sub>8</sub>

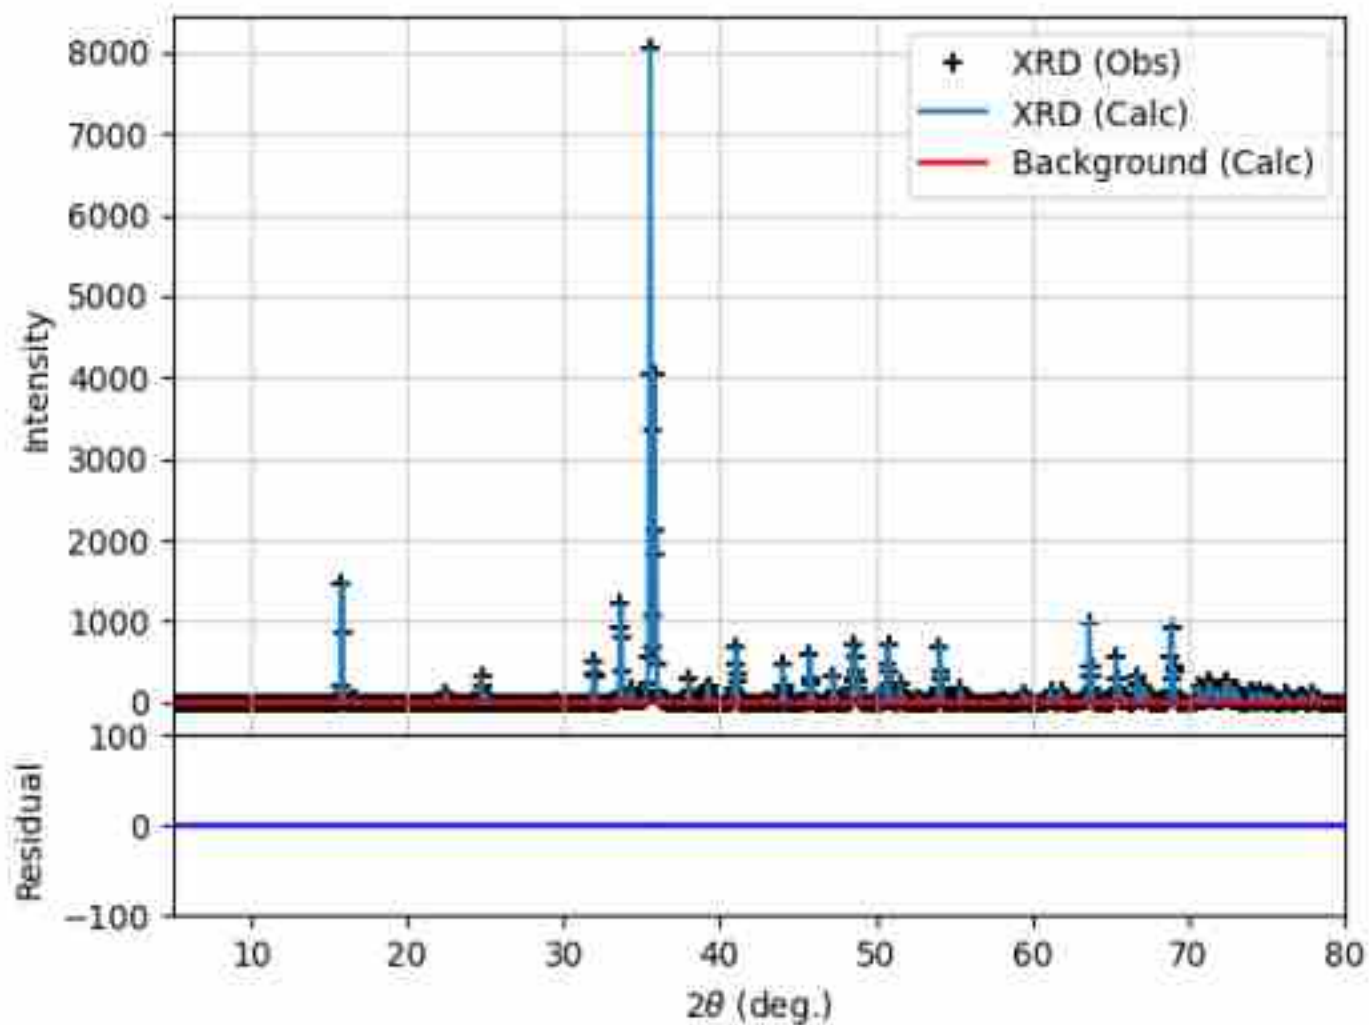

| RMSE before RR | Rwp     | RMSE after RR |
|----------------|---------|---------------|
| 0.027          | 0.00727 | 0.00059       |

# Mg<sub>1</sub>In<sub>2</sub>Ga<sub>2</sub>Cu<sub>1</sub>O<sub>8</sub>

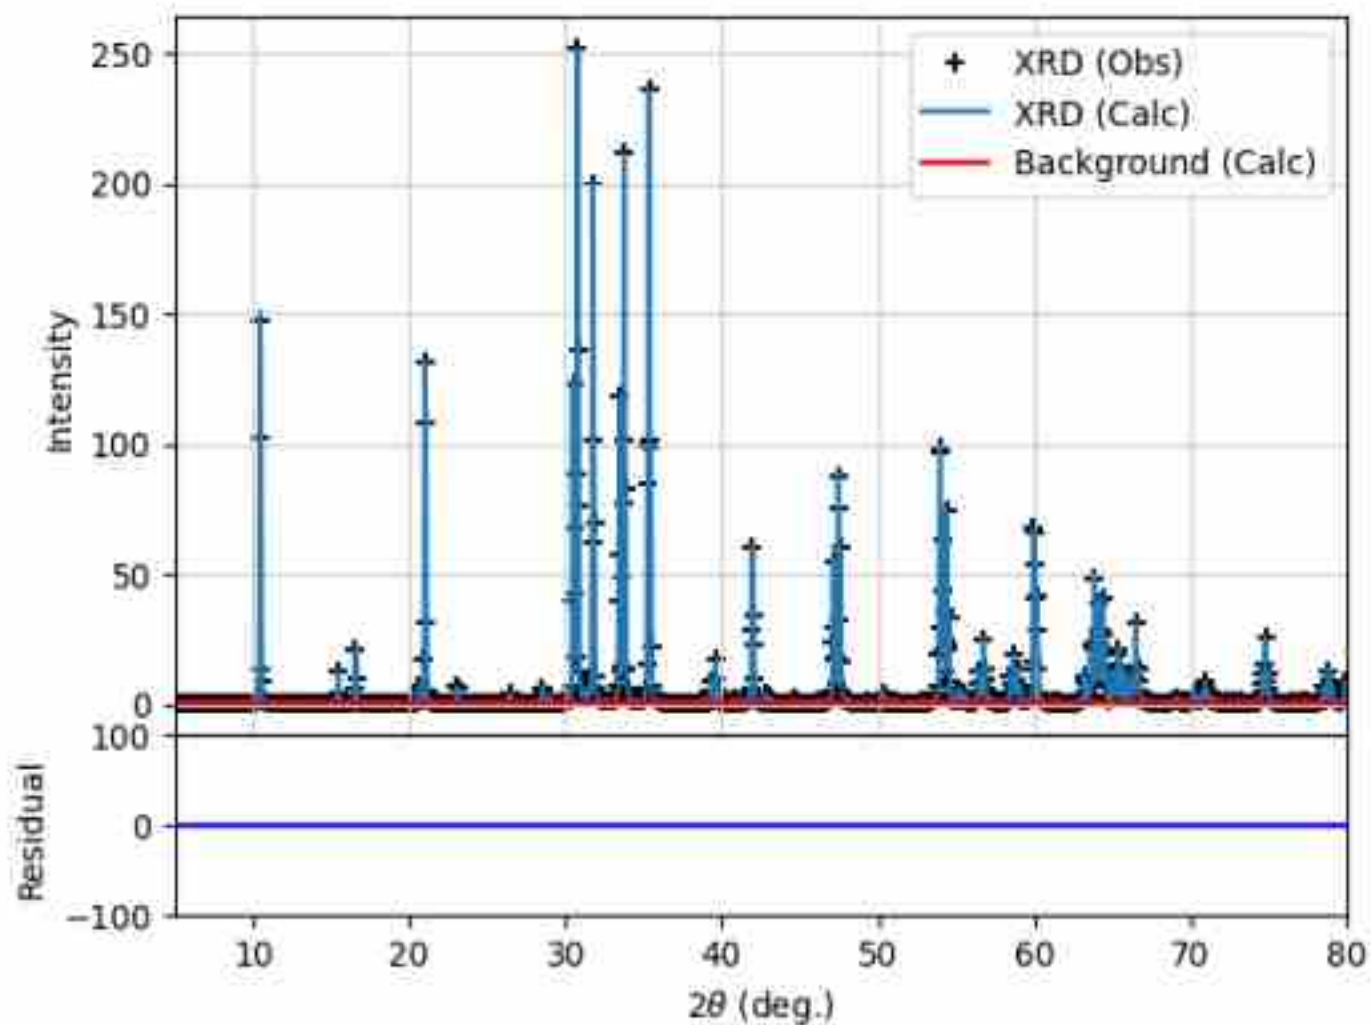

| RMSE before RR | Rwp     | RMSE after RR |
|----------------|---------|---------------|
| 0.027          | 0.00395 | 0.00061       |

# Mg<sub>2</sub>Ti<sub>4</sub>Mn<sub>2</sub>O<sub>12</sub>

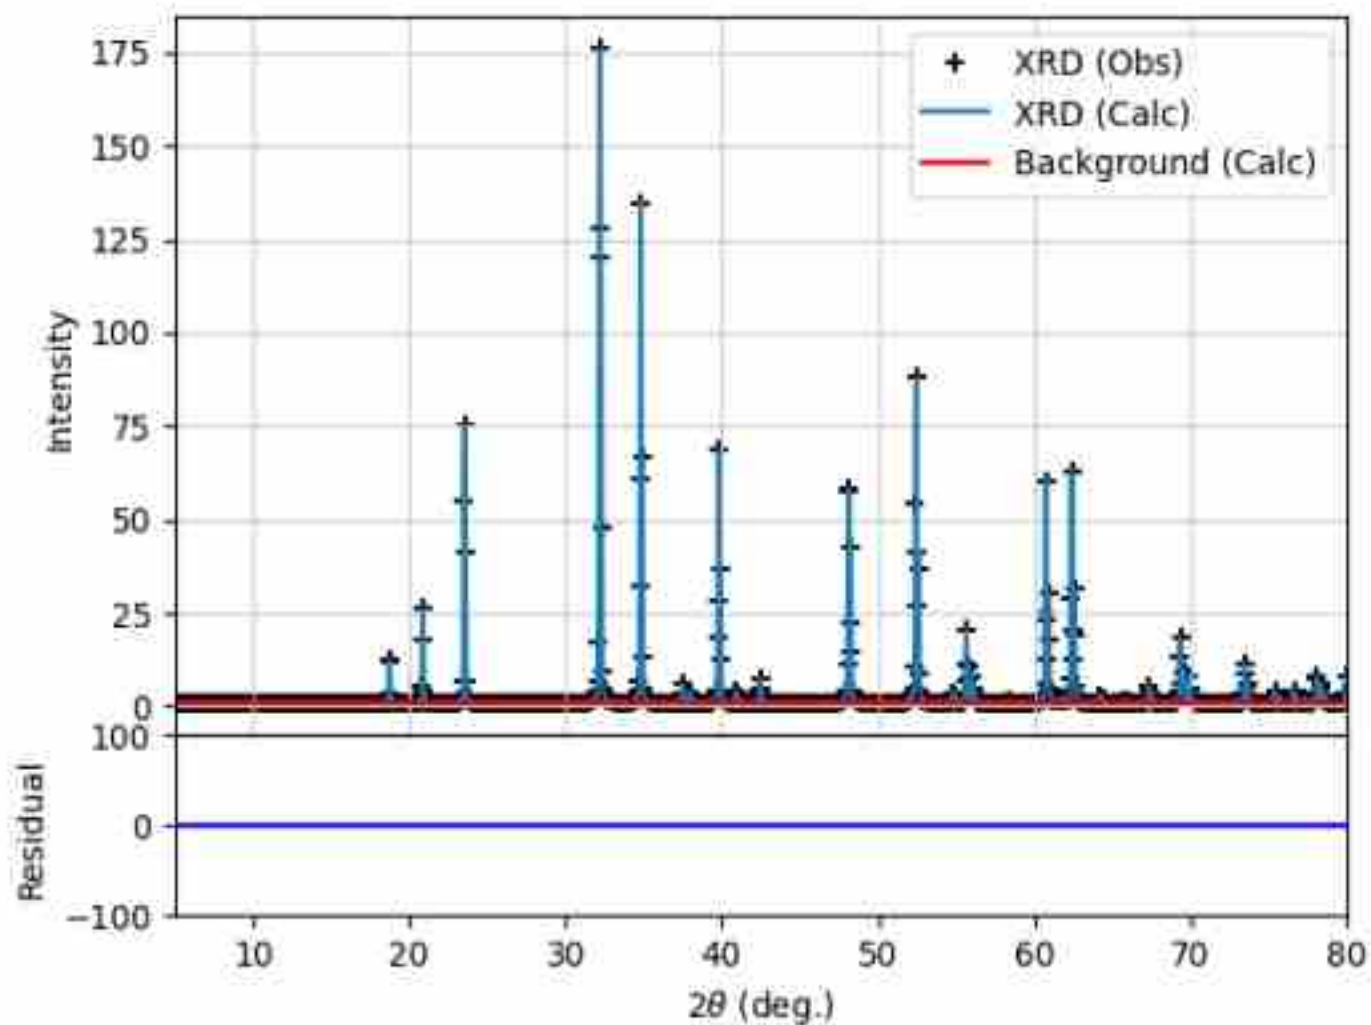

| RMSE before RR | Rwp     | RMSE after RR |
|----------------|---------|---------------|
| 0.027          | 0.00209 | 0.00011       |



# Mg<sub>4</sub>Mn<sub>2</sub>W<sub>2</sub>O<sub>12</sub>

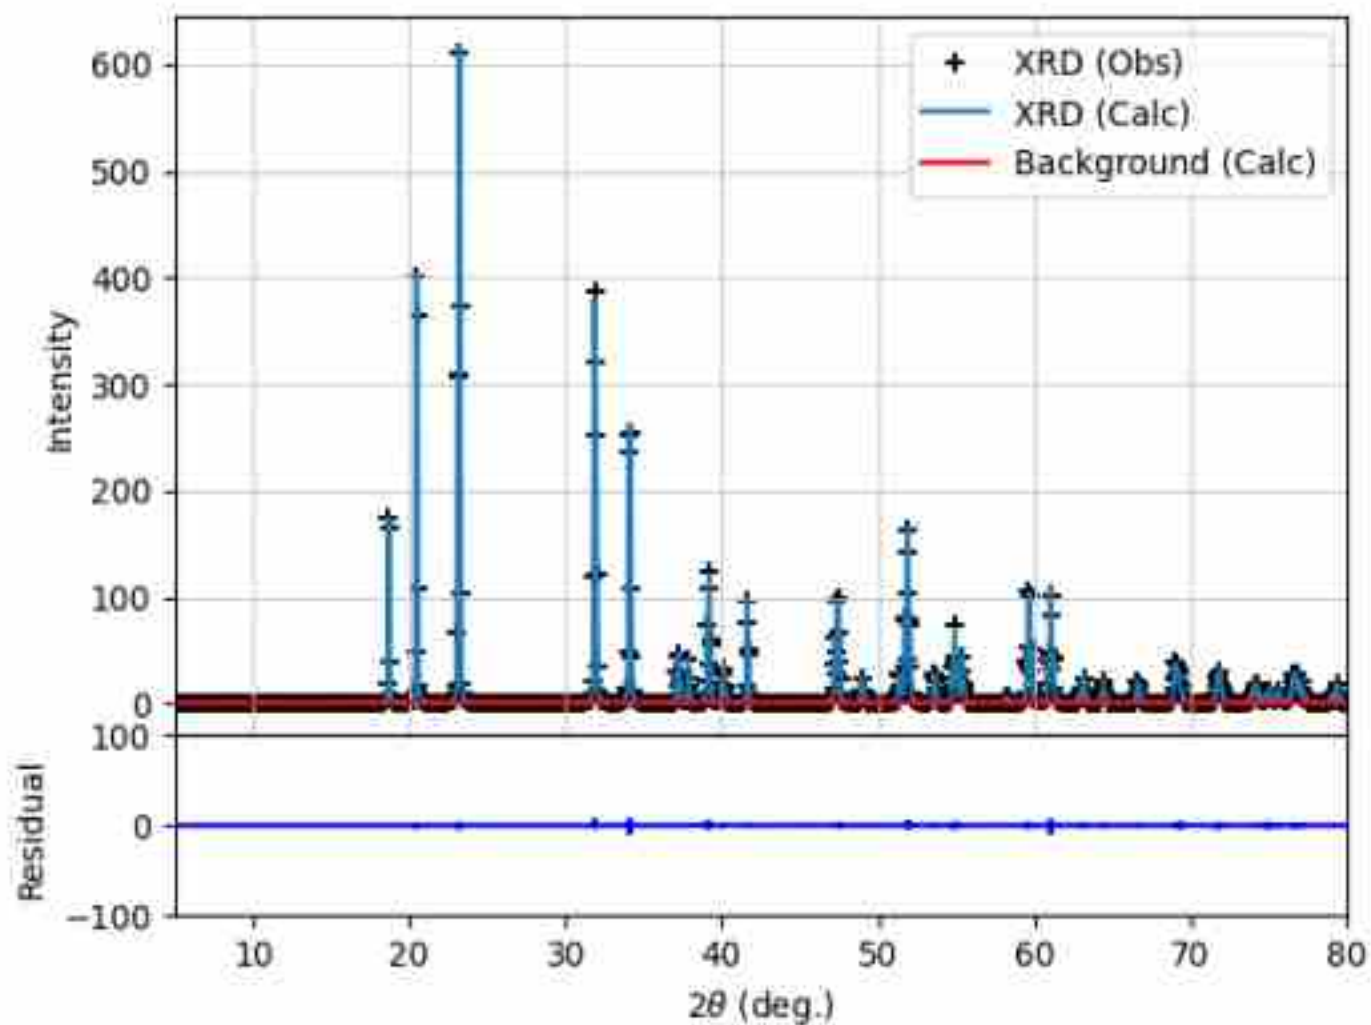

| RMSE before RR | Rwp     | RMSE after RR |
|----------------|---------|---------------|
| 0.027          | 3.18514 | None          |

# Mg<sub>10</sub>In<sub>4</sub>

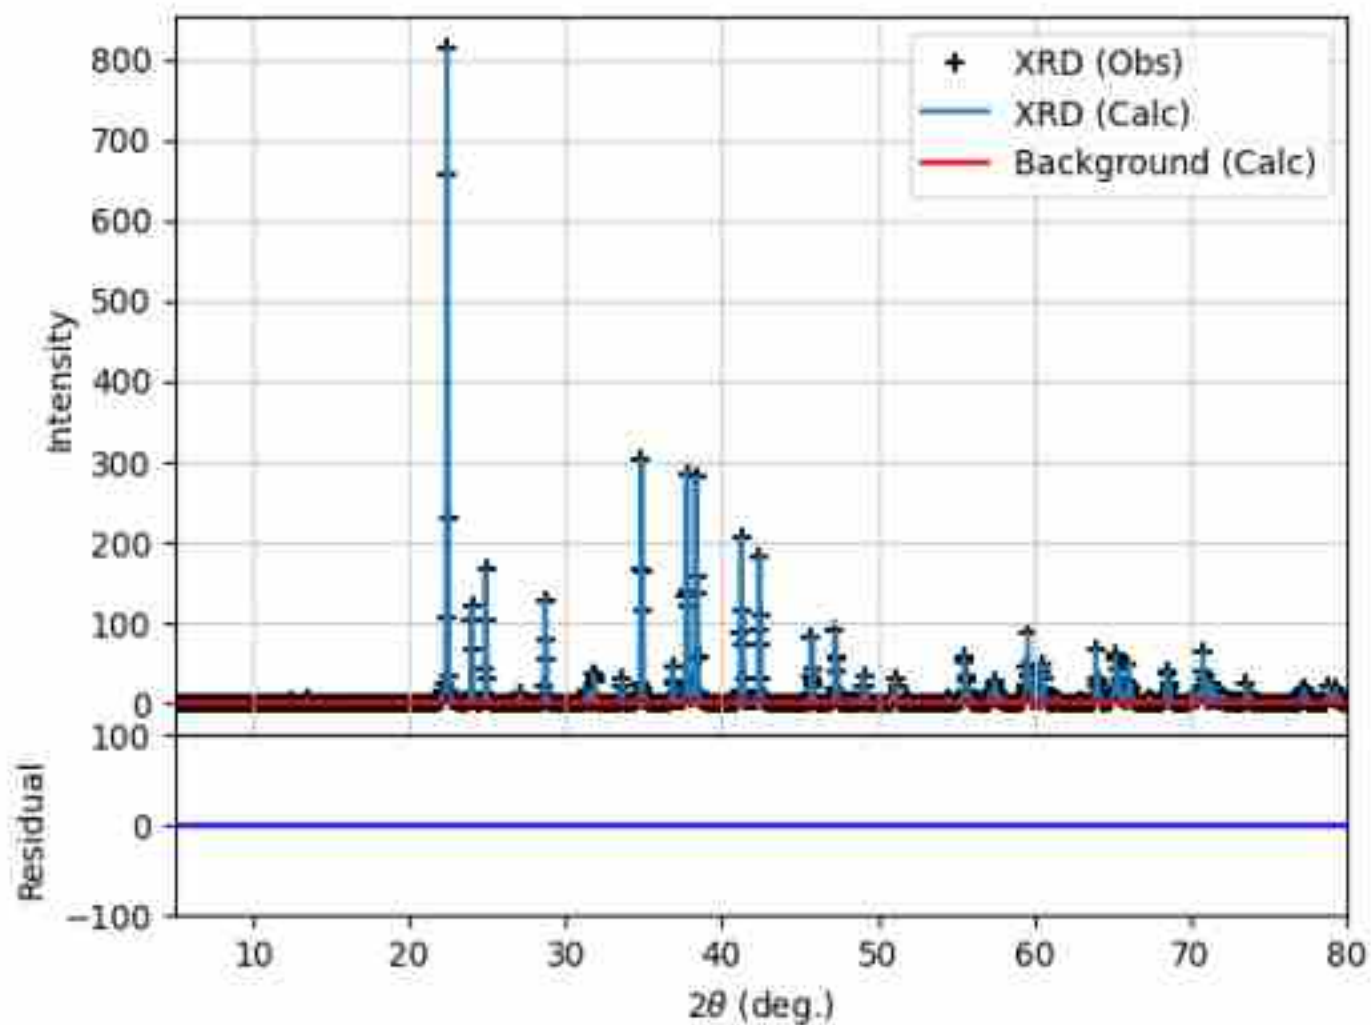

| RMSE before RR | Rwp     | RMSE after RR |
|----------------|---------|---------------|
| 0.027          | 0.00357 | 0.00055       |

# Mn<sub>2</sub>Fe<sub>4</sub>O<sub>6</sub>

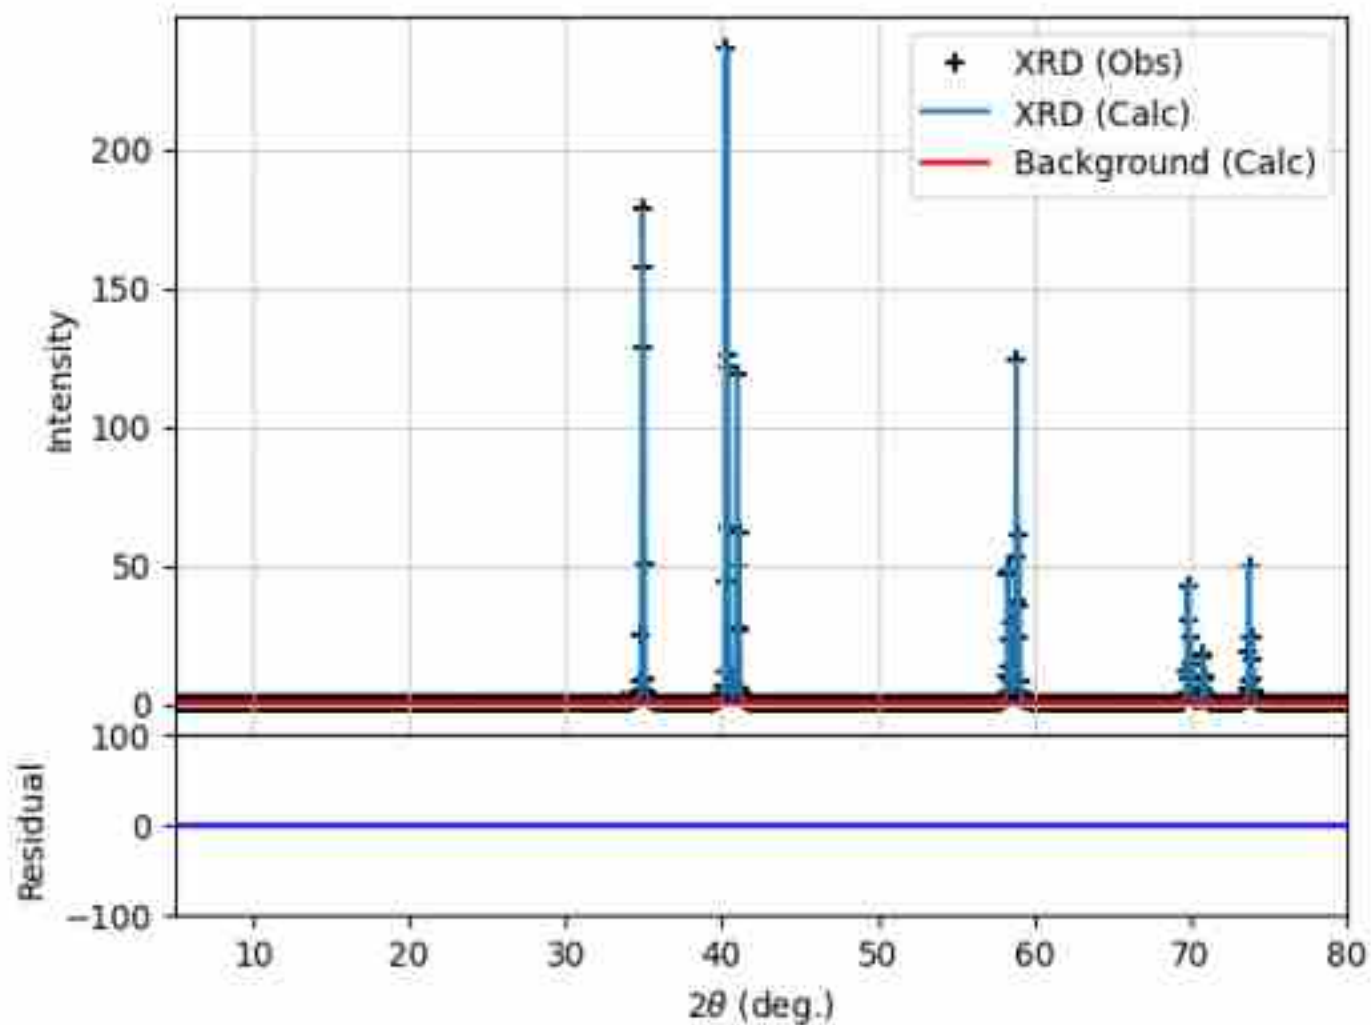

| RMSE before RR | Rwp     | RMSE after RR |
|----------------|---------|---------------|
| 0.027          | 0.00375 | 0.00064       |

# Na1La1Nb4O12

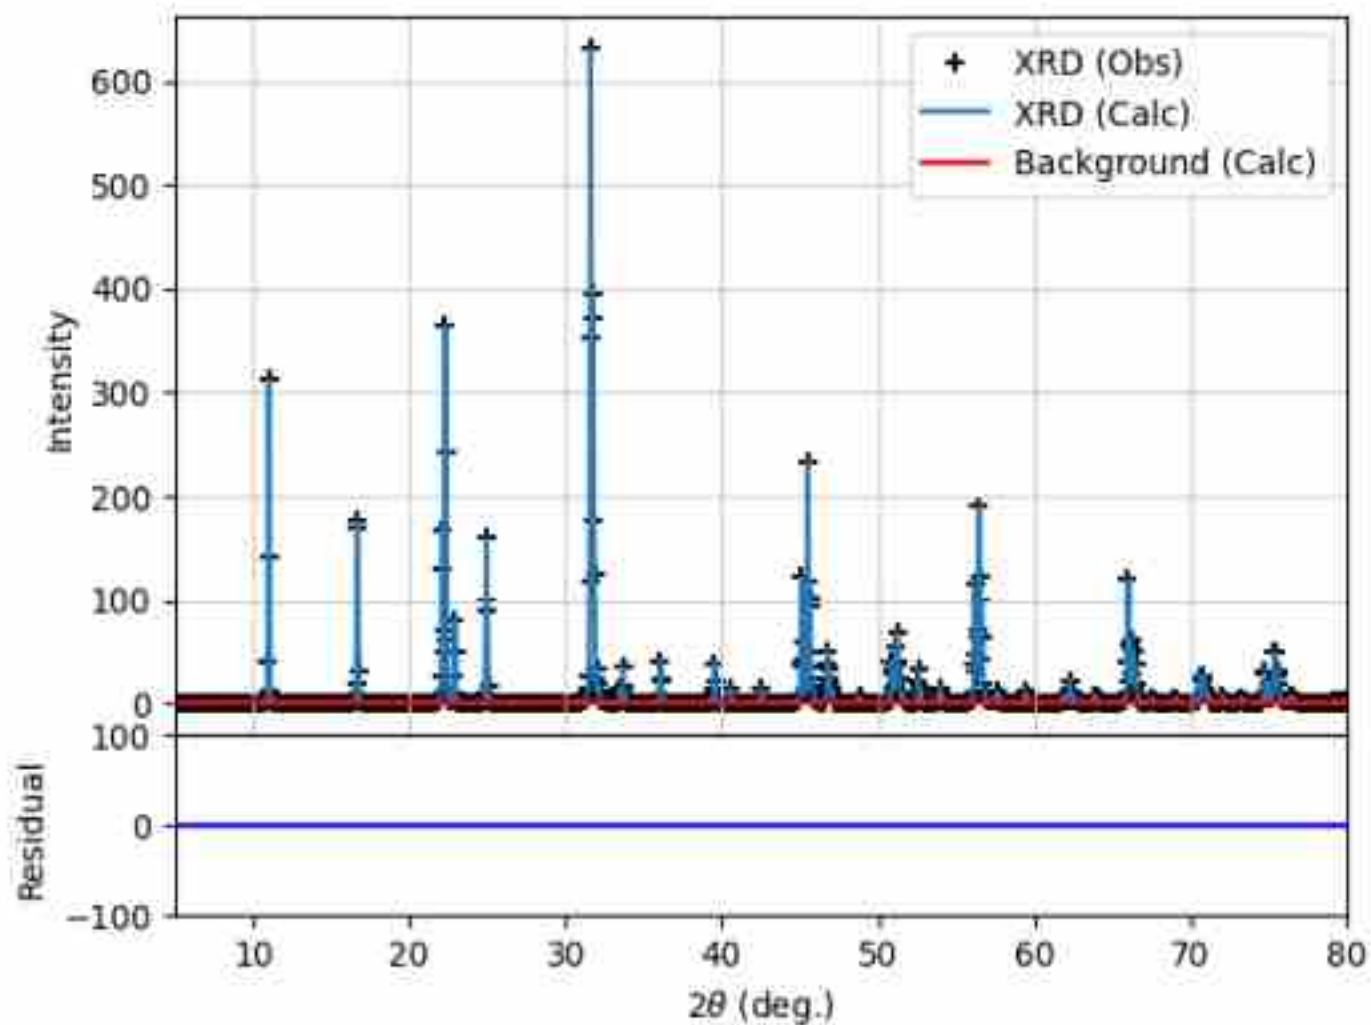

| RMSE before RR | Rwp     | RMSE after RR |
|----------------|---------|---------------|
| 0.027          | 0.00538 | 0.0023        |

# Na<sub>2</sub>Gd<sub>2</sub>Ti<sub>3</sub>O<sub>10</sub>

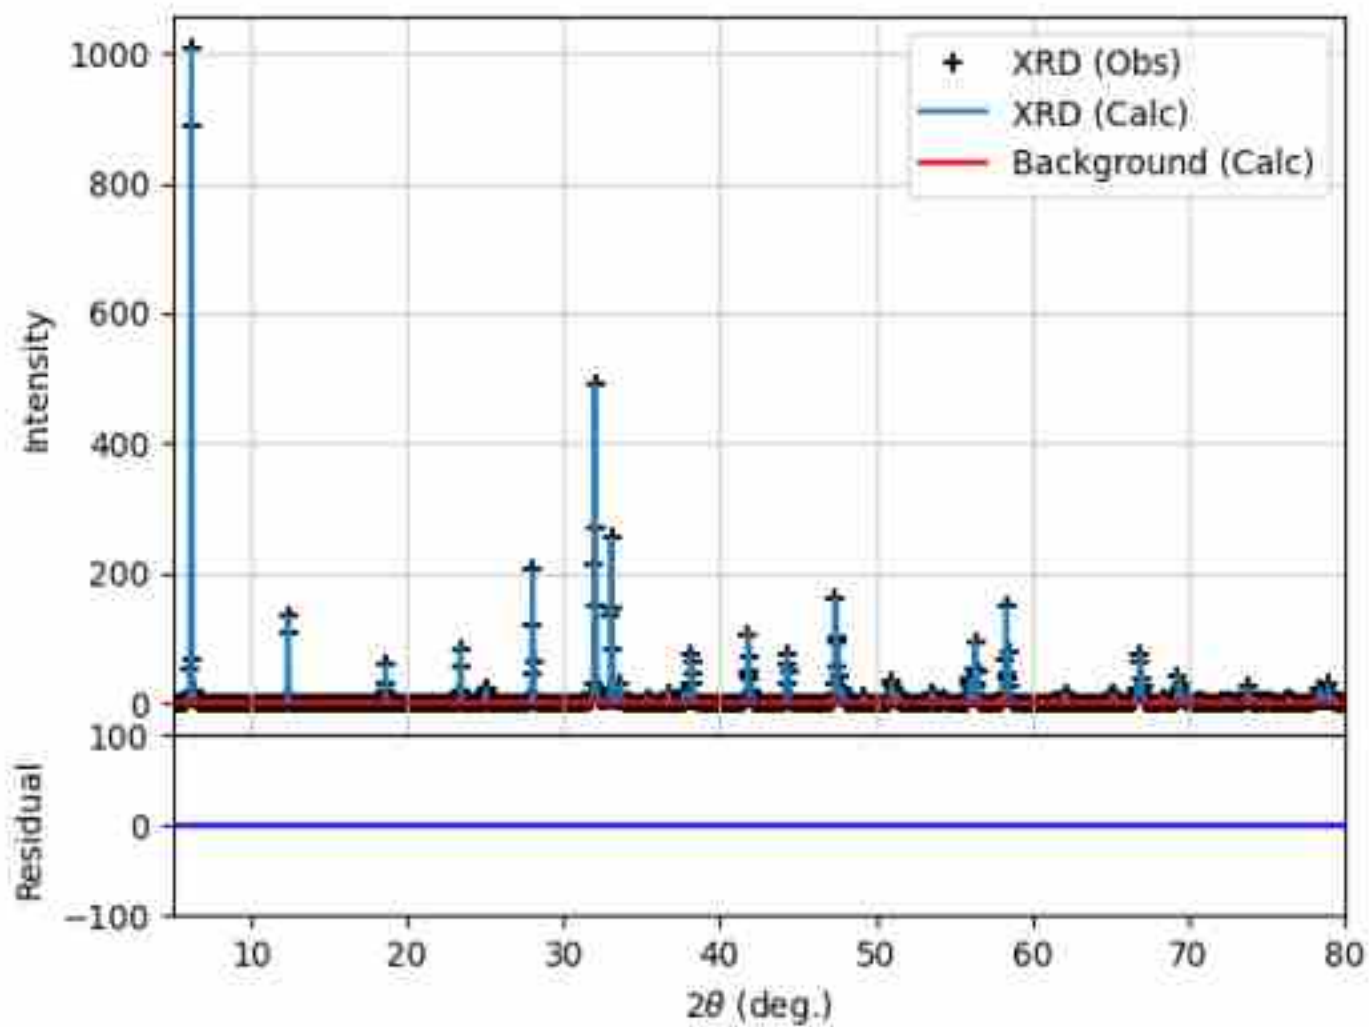

| RMSE before RR | Rwp     | RMSE after RR |
|----------------|---------|---------------|
| 0.027          | 0.00346 | 0.00146       |

# Na<sub>2</sub>Ta<sub>2</sub>W<sub>2</sub>O<sub>12</sub>

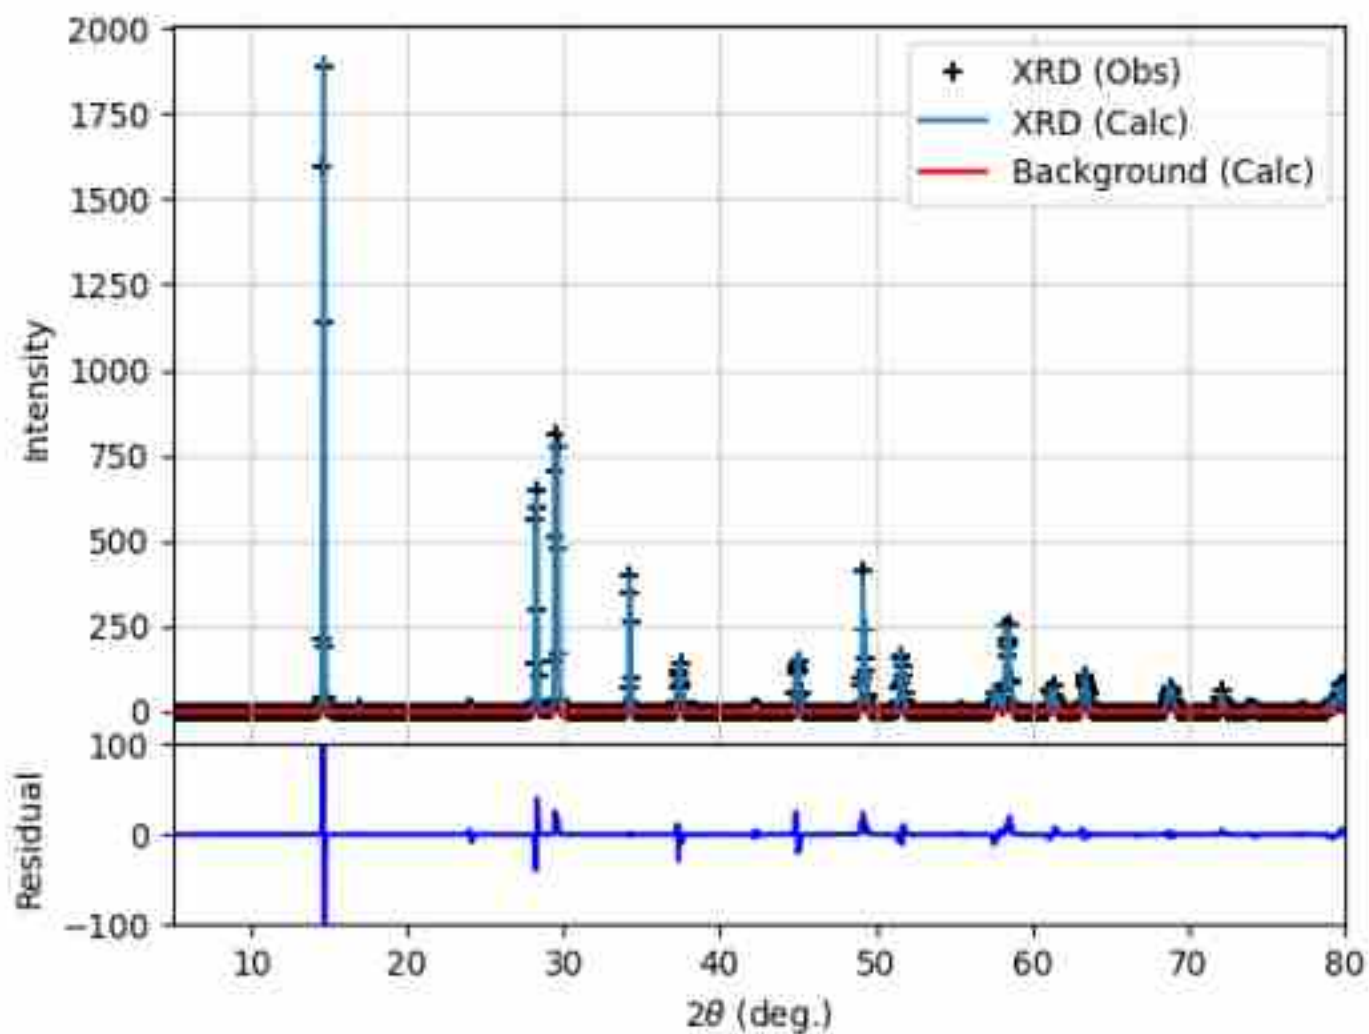

| RMSE before RR | Rwp     | RMSE after RR |
|----------------|---------|---------------|
| 0.027          | 9.89776 | 0.06863       |

# Na<sub>6</sub>Ti<sub>2</sub>C112

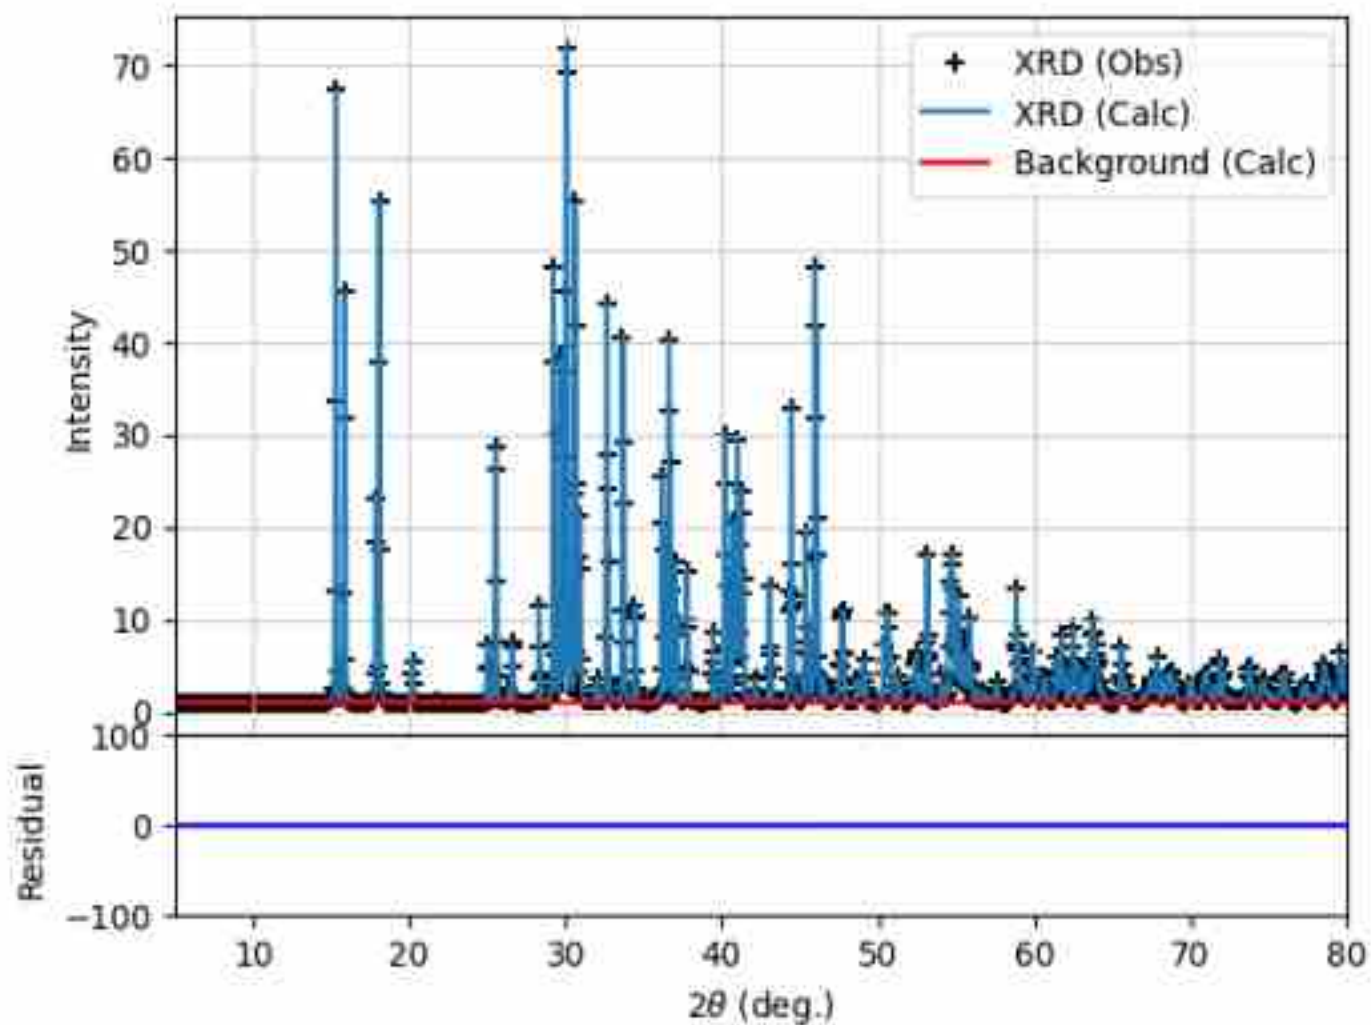

| RMSE before RR | Rwp     | RMSE after RR |
|----------------|---------|---------------|
| 0.027          | 0.15803 | 0.00571       |

# Nb<sub>2</sub>Ag<sub>2</sub>O<sub>6</sub>

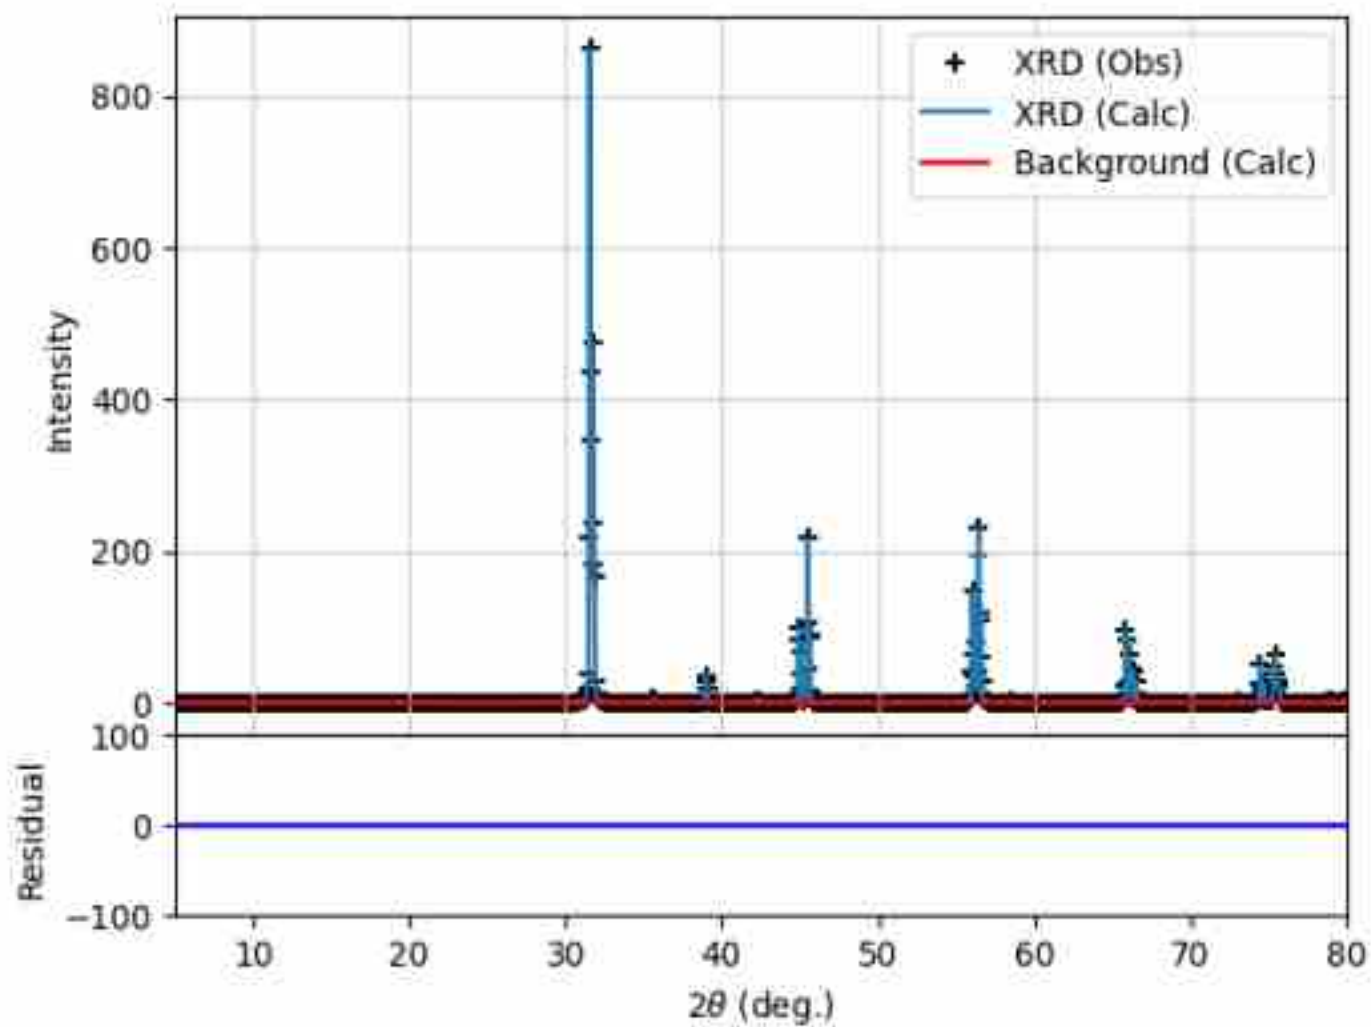

| RMSE before RR | Rwp     | RMSE after RR |
|----------------|---------|---------------|
| 0.027          | 0.00414 | 0.002         |



# Nb<sub>2</sub>Fe<sub>2</sub>O<sub>8</sub>

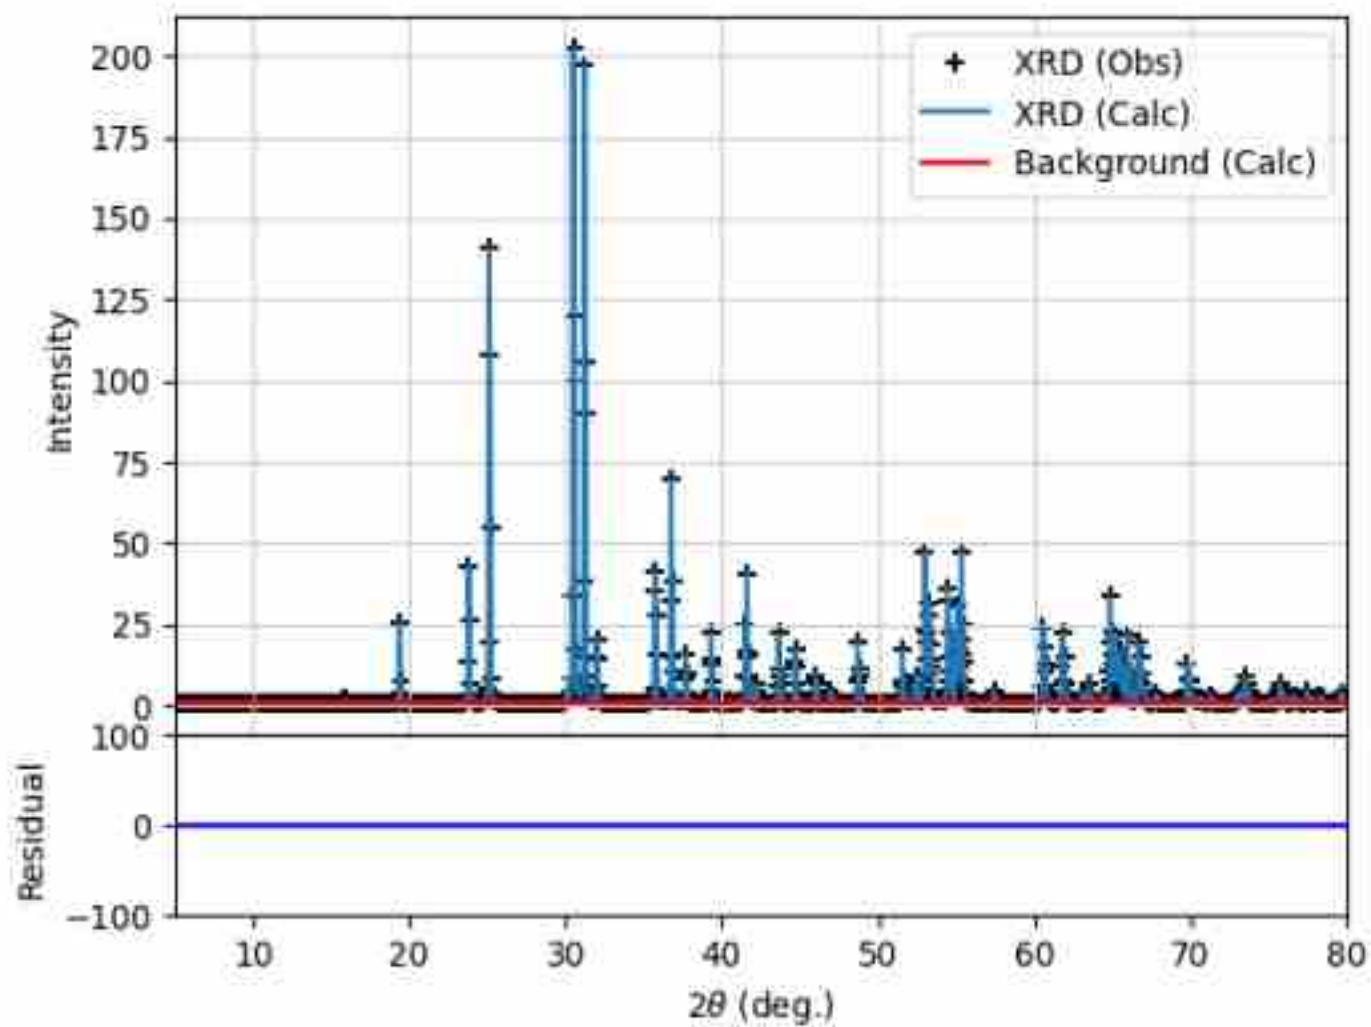

| RMSE before RR | Rwp   | RMSE after RR |
|----------------|-------|---------------|
| 0.027          | 0.003 | 0.0007        |

# Nb<sub>2</sub>Se<sub>2</sub>S<sub>2</sub>

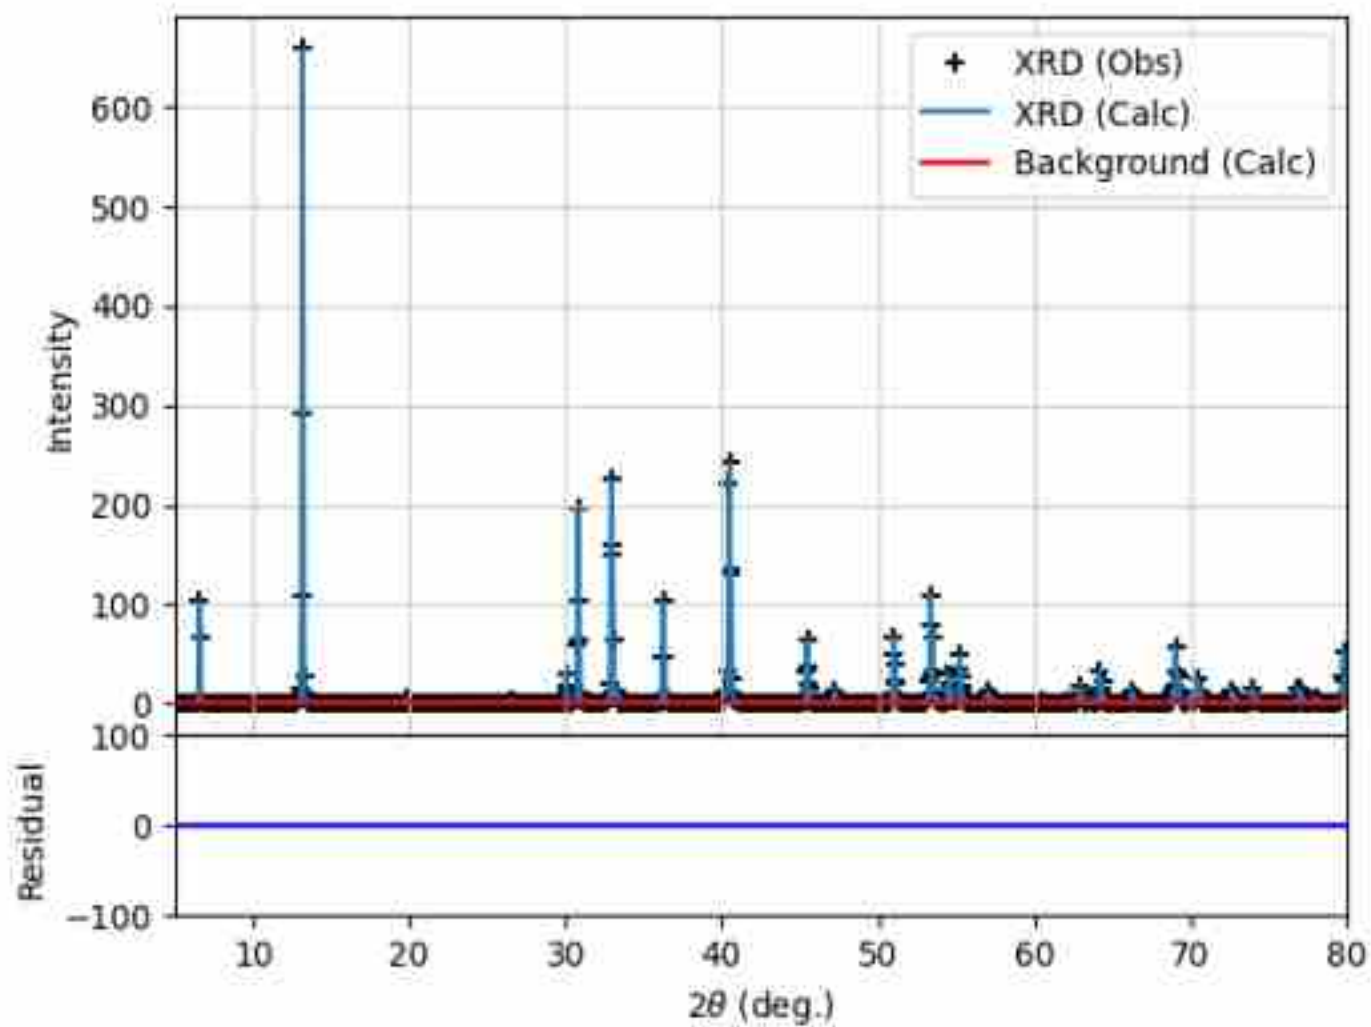

| RMSE before RR | Rwp     | RMSE after RR |
|----------------|---------|---------------|
| 0.027          | 0.00403 | 0.00056       |

# Nb<sub>6</sub>V<sub>2</sub>C<sub>3</sub>S<sub>6</sub>

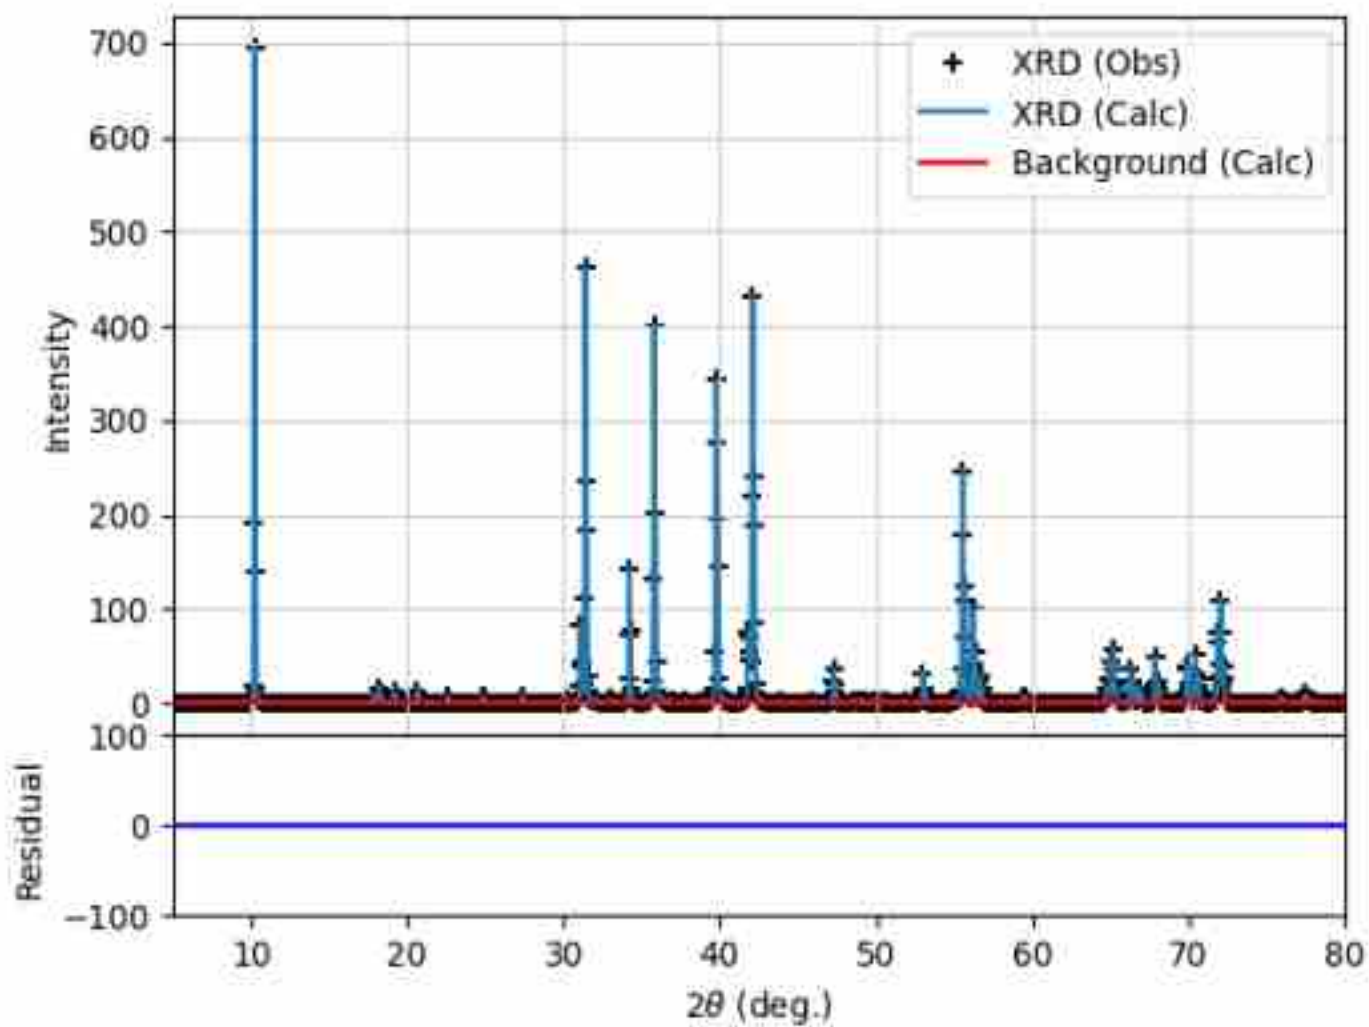

| RMSE before RR | Rwp     | RMSE after RR |
|----------------|---------|---------------|
| 0.027          | 0.00376 | 0.00184       |

# Nd5Ag1S8

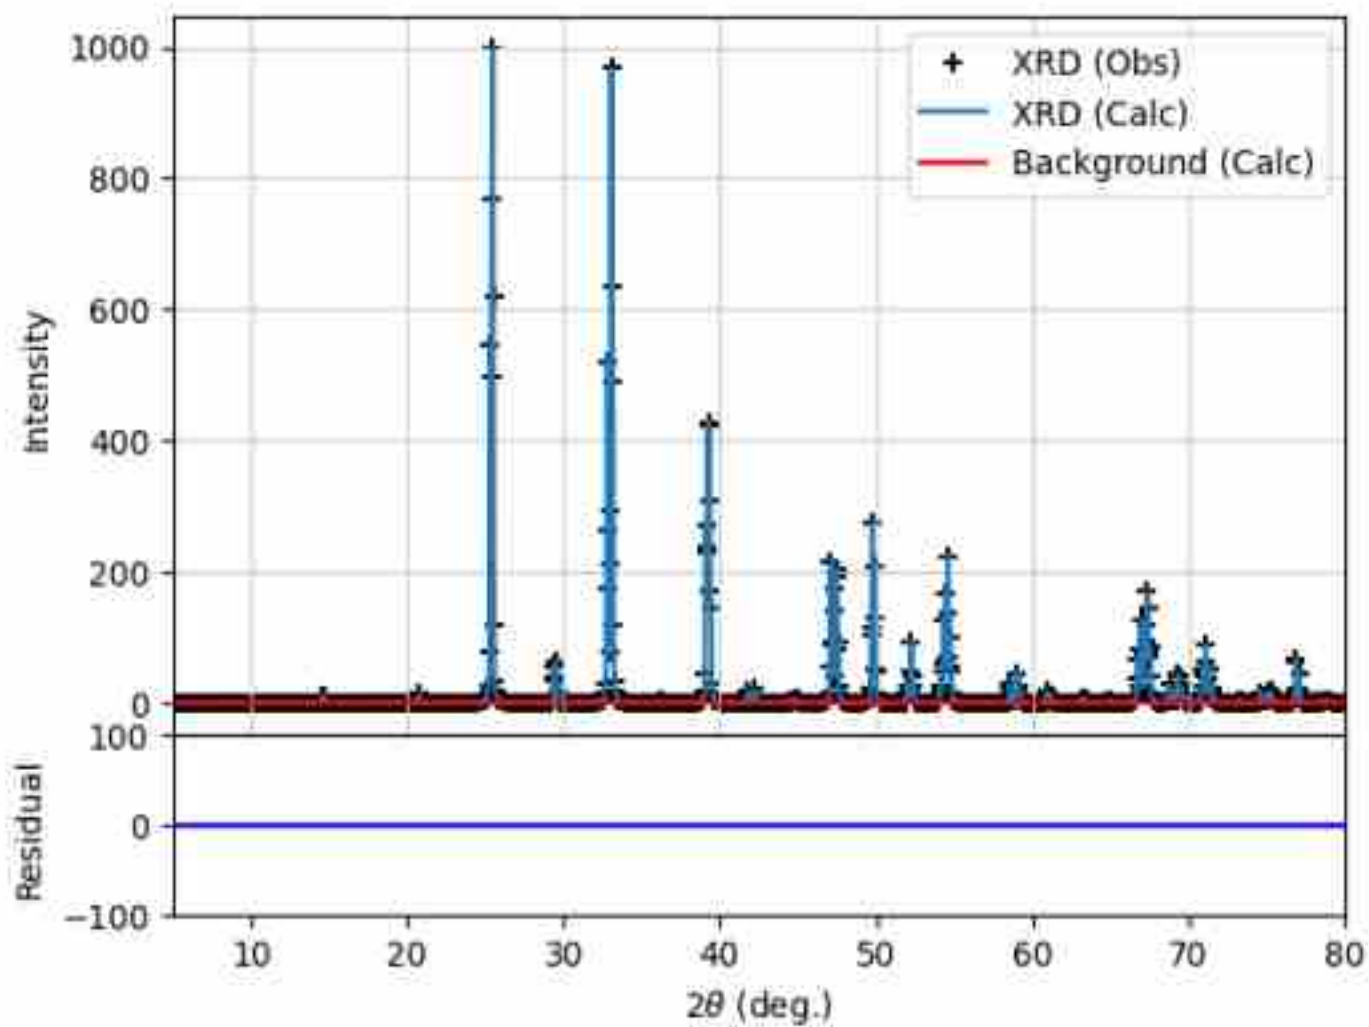

| RMSE before RR | Rwp     | RMSE after RR |
|----------------|---------|---------------|
| 0.027          | 0.00285 | 0.00079       |

# Np<sub>1</sub>Fe<sub>4</sub>P<sub>12</sub>

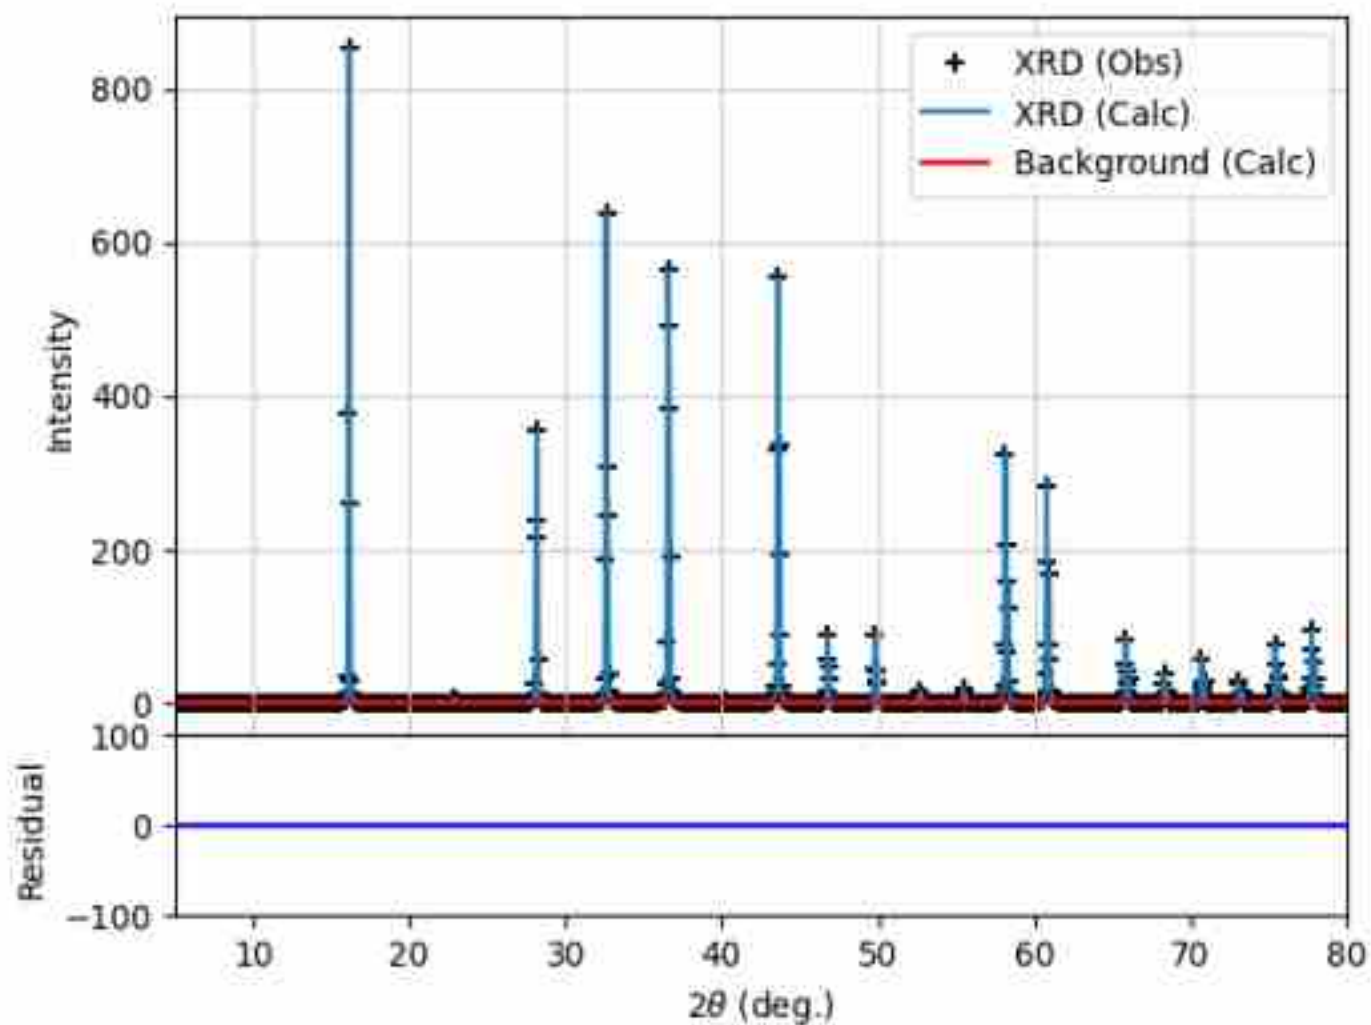

| RMSE before RR | Rwp     | RMSE after RR |
|----------------|---------|---------------|
| 0.027          | 0.00796 | 0.00313       |

# Pu2Co4

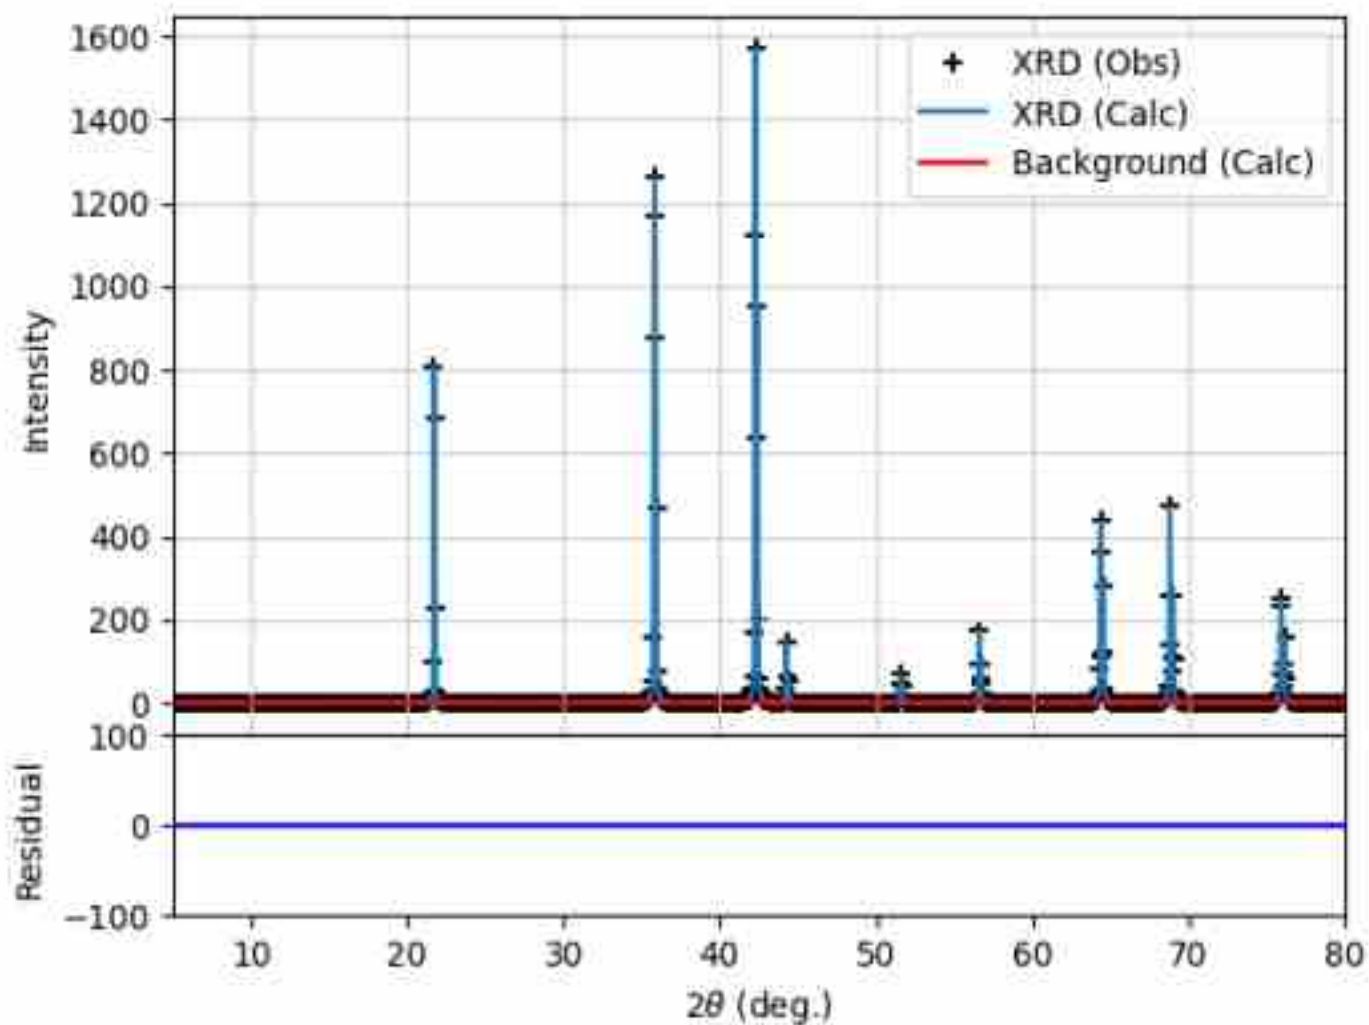

| RMSE before RR | Rwp     | RMSE after RR |
|----------------|---------|---------------|
| 0.027          | 0.00662 | 0.00036       |

# Rb<sub>2</sub>Nb<sub>2</sub>Te<sub>2</sub>O<sub>12</sub>

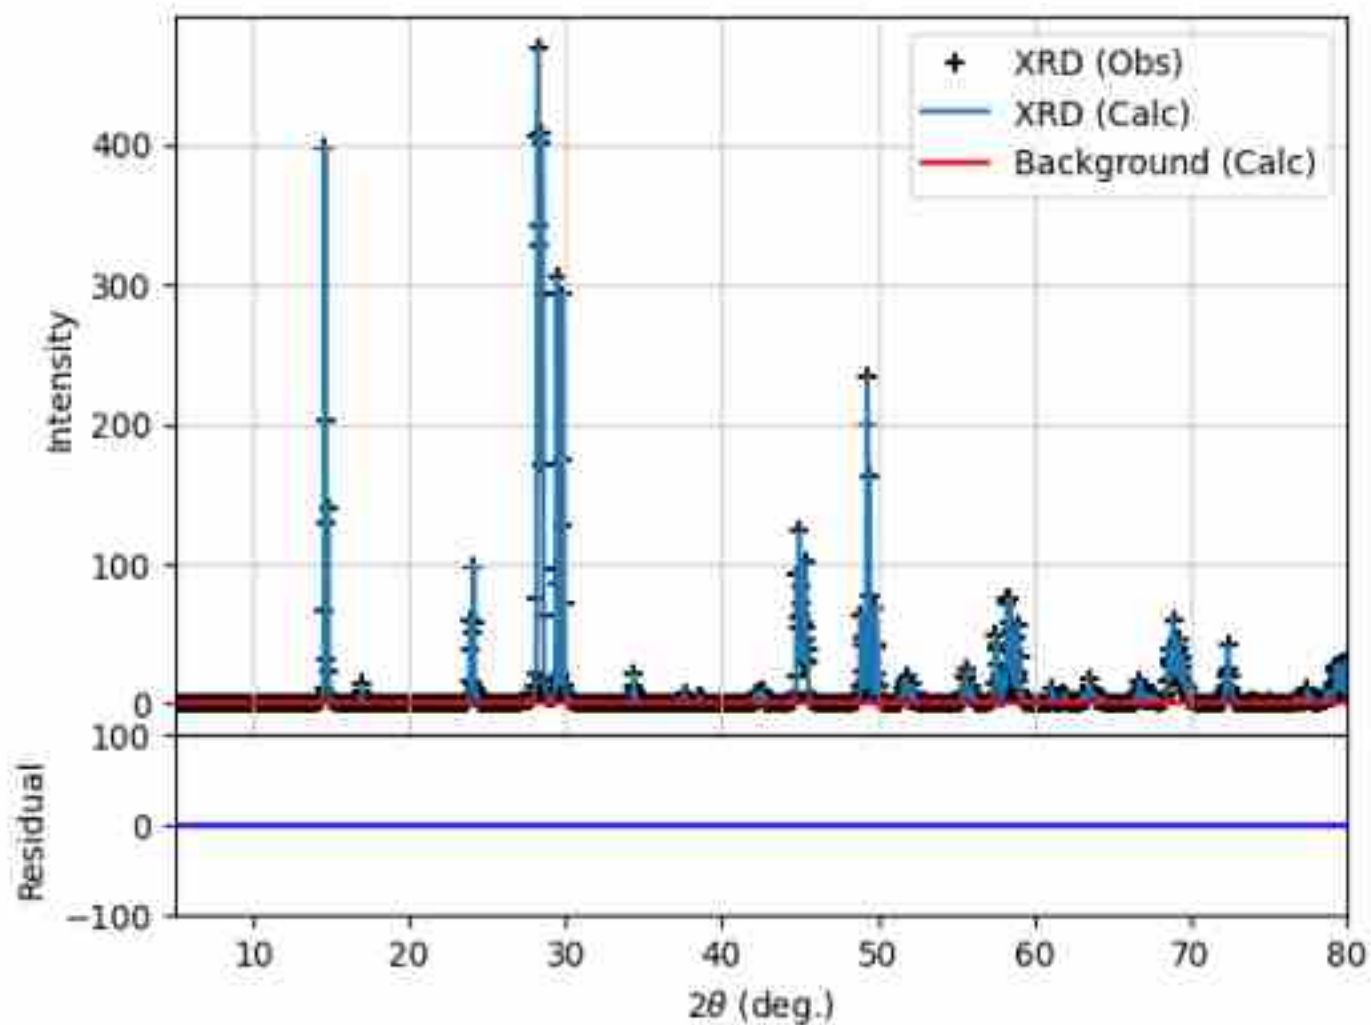

| RMSE before RR | Rwp     | RMSE after RR |
|----------------|---------|---------------|
| 0.027          | 0.00295 | 0.00102       |

# Sb6Pb2

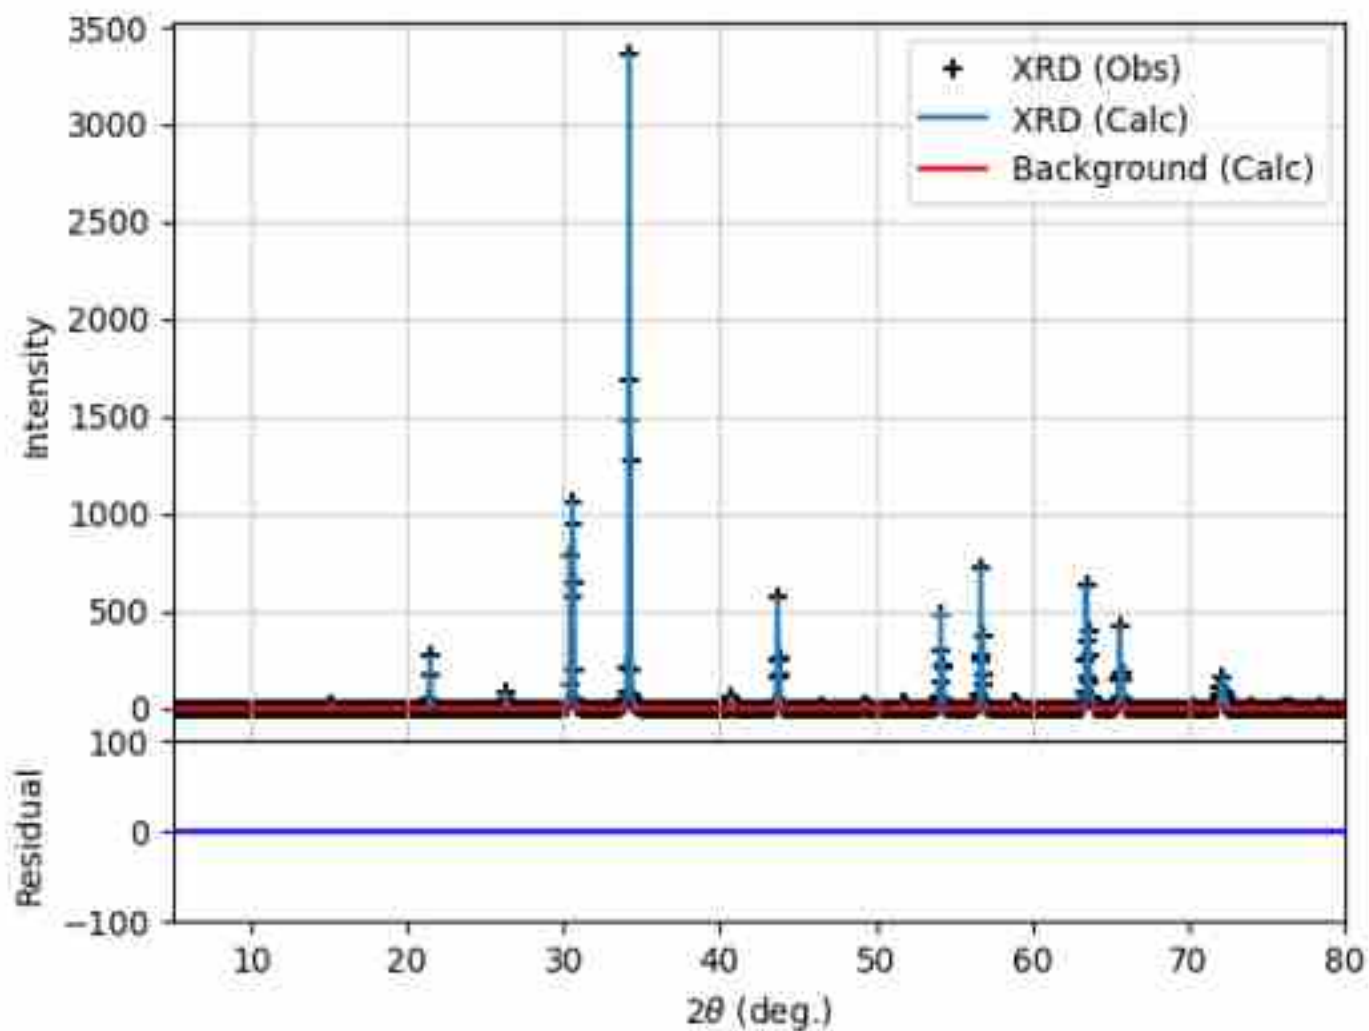

| RMSE before RR | Rwp     | RMSE after RR |
|----------------|---------|---------------|
| 0.027          | 0.00878 | 0.00074       |



# Si<sub>4</sub>Ir<sub>4</sub>

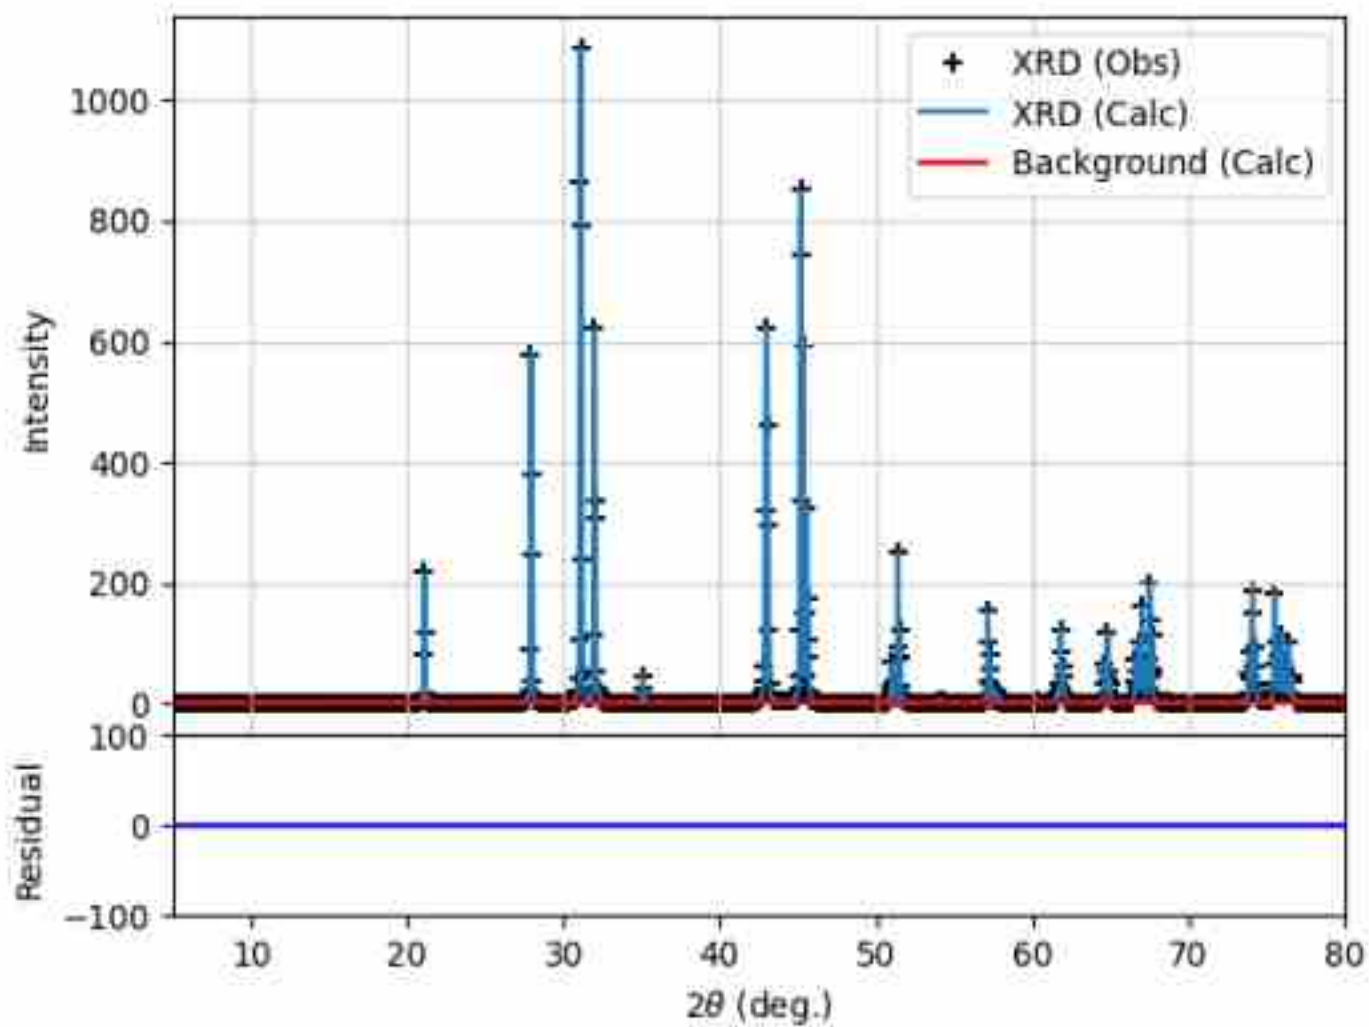

| RMSE before RR | Rwp     | RMSE after RR |
|----------------|---------|---------------|
| 0.027          | 0.00527 | 0.00079       |

# Sm<sub>2</sub>H<sub>6</sub>O<sub>6</sub>

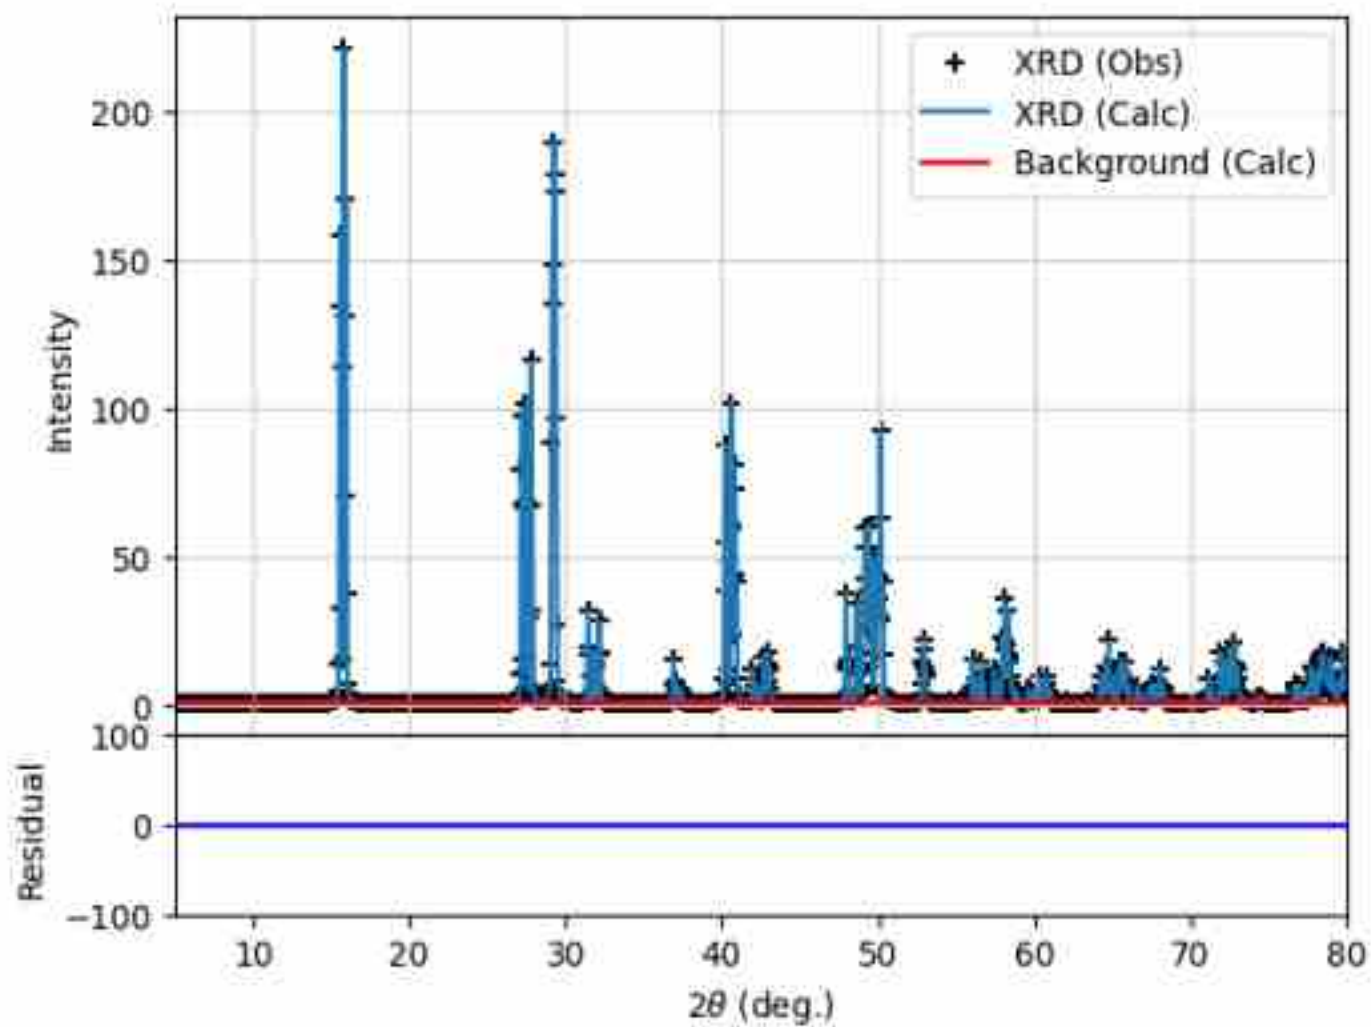

| RMSE before RR | Rwp     | RMSE after RR |
|----------------|---------|---------------|
| 0.027          | 0.00911 | 0.01198       |

# Sm2Rh4

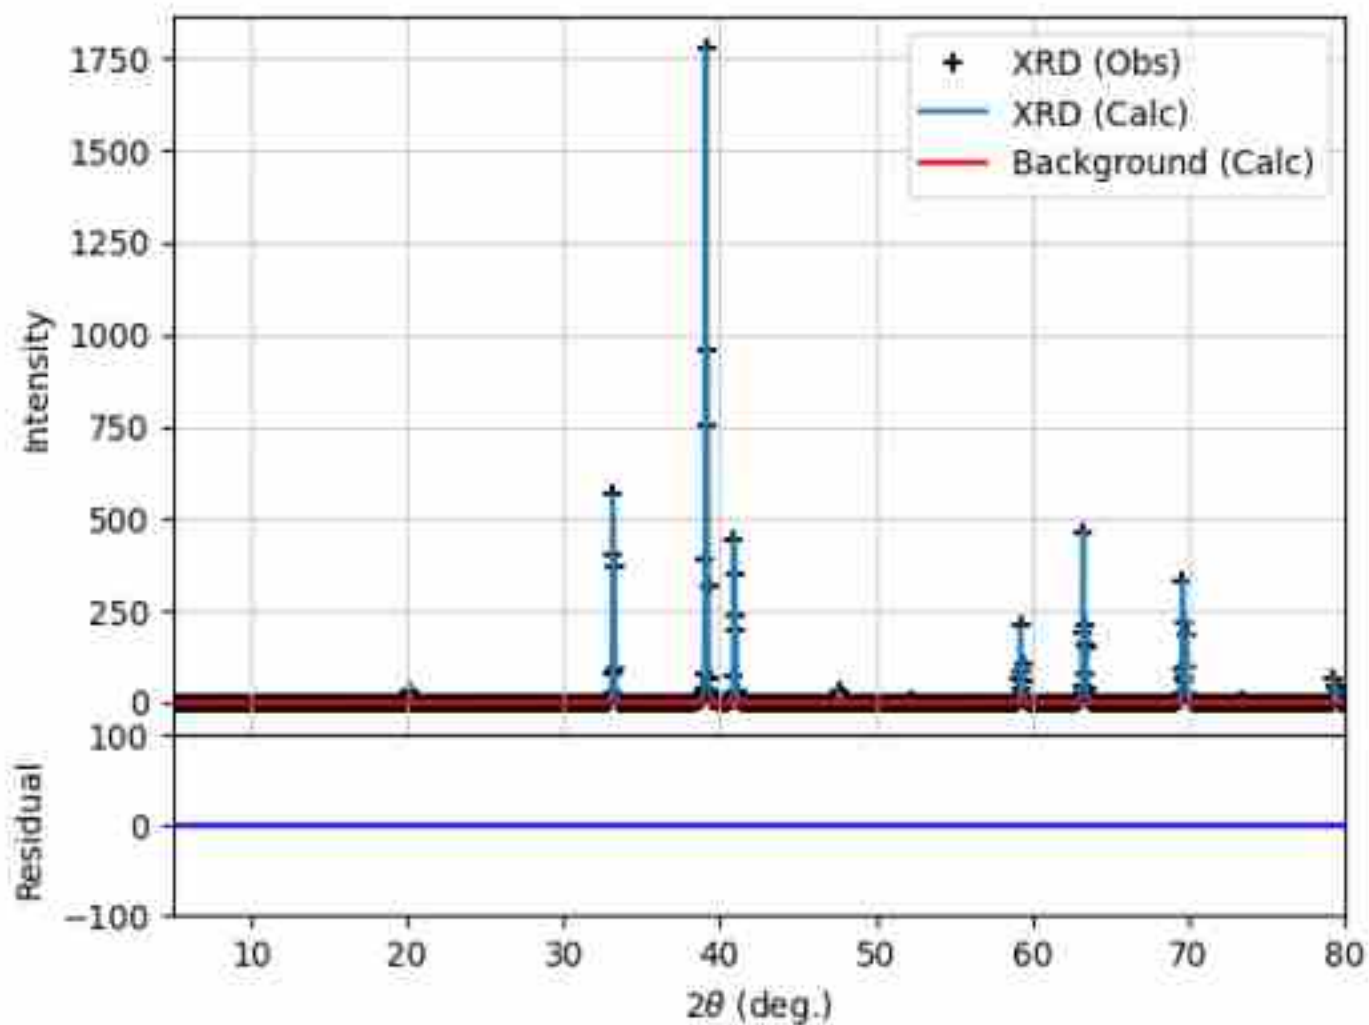

| RMSE before RR | Rwp     | RMSE after RR |
|----------------|---------|---------------|
| 0.027          | 0.00595 | 0.0005        |

# Sn1Bi2Te4

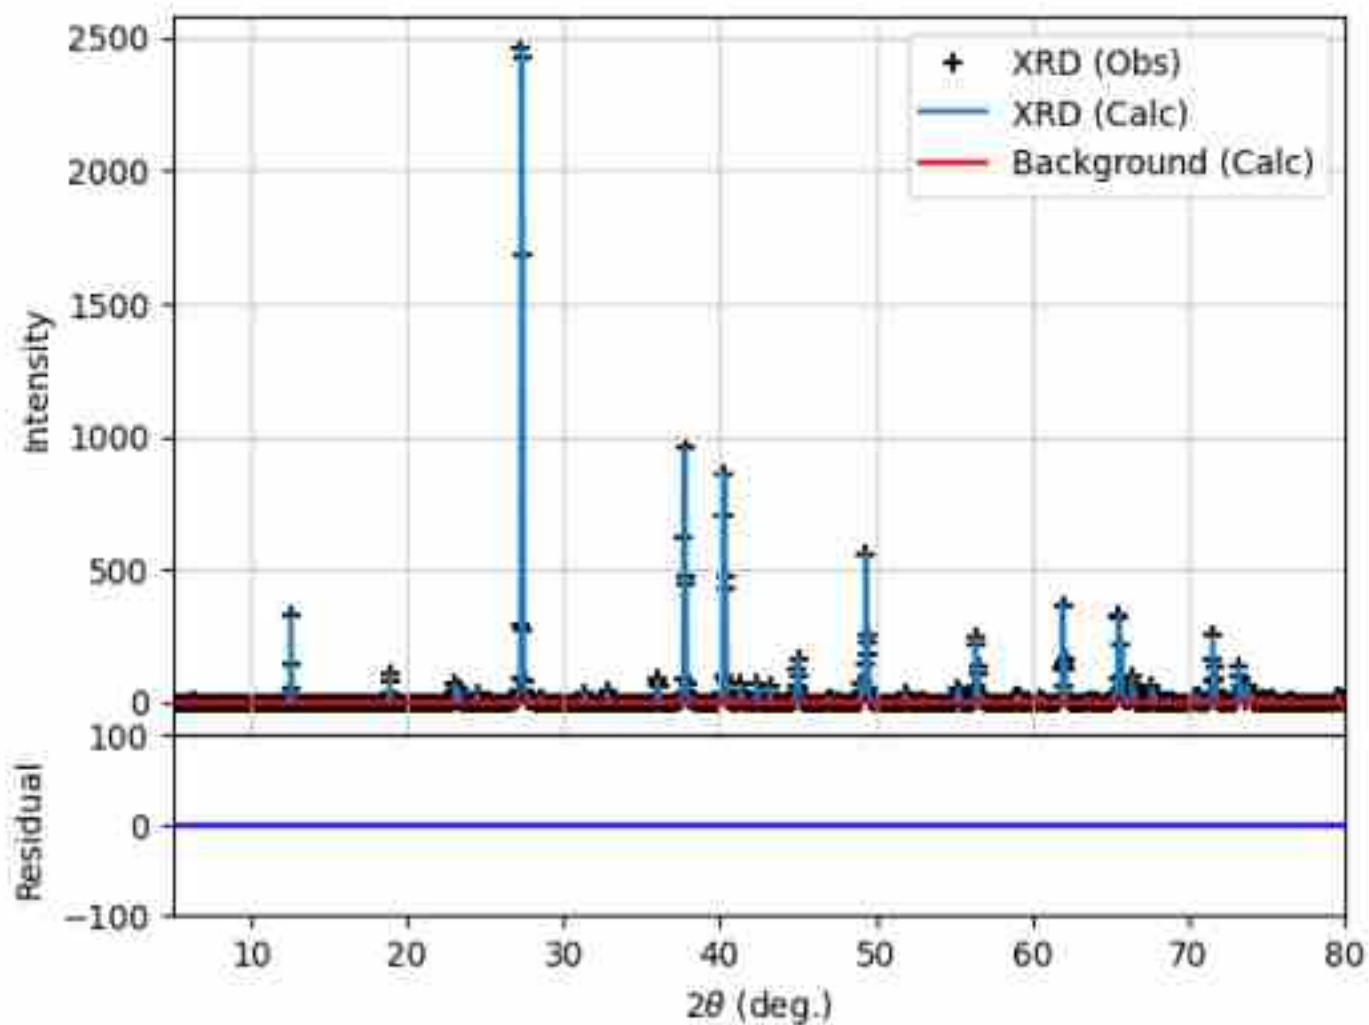

| RMSE before RR | Rwp     | RMSE after RR |
|----------------|---------|---------------|
| 0.027          | 0.00345 | 0.00015       |

# Sn14Ir4Os2

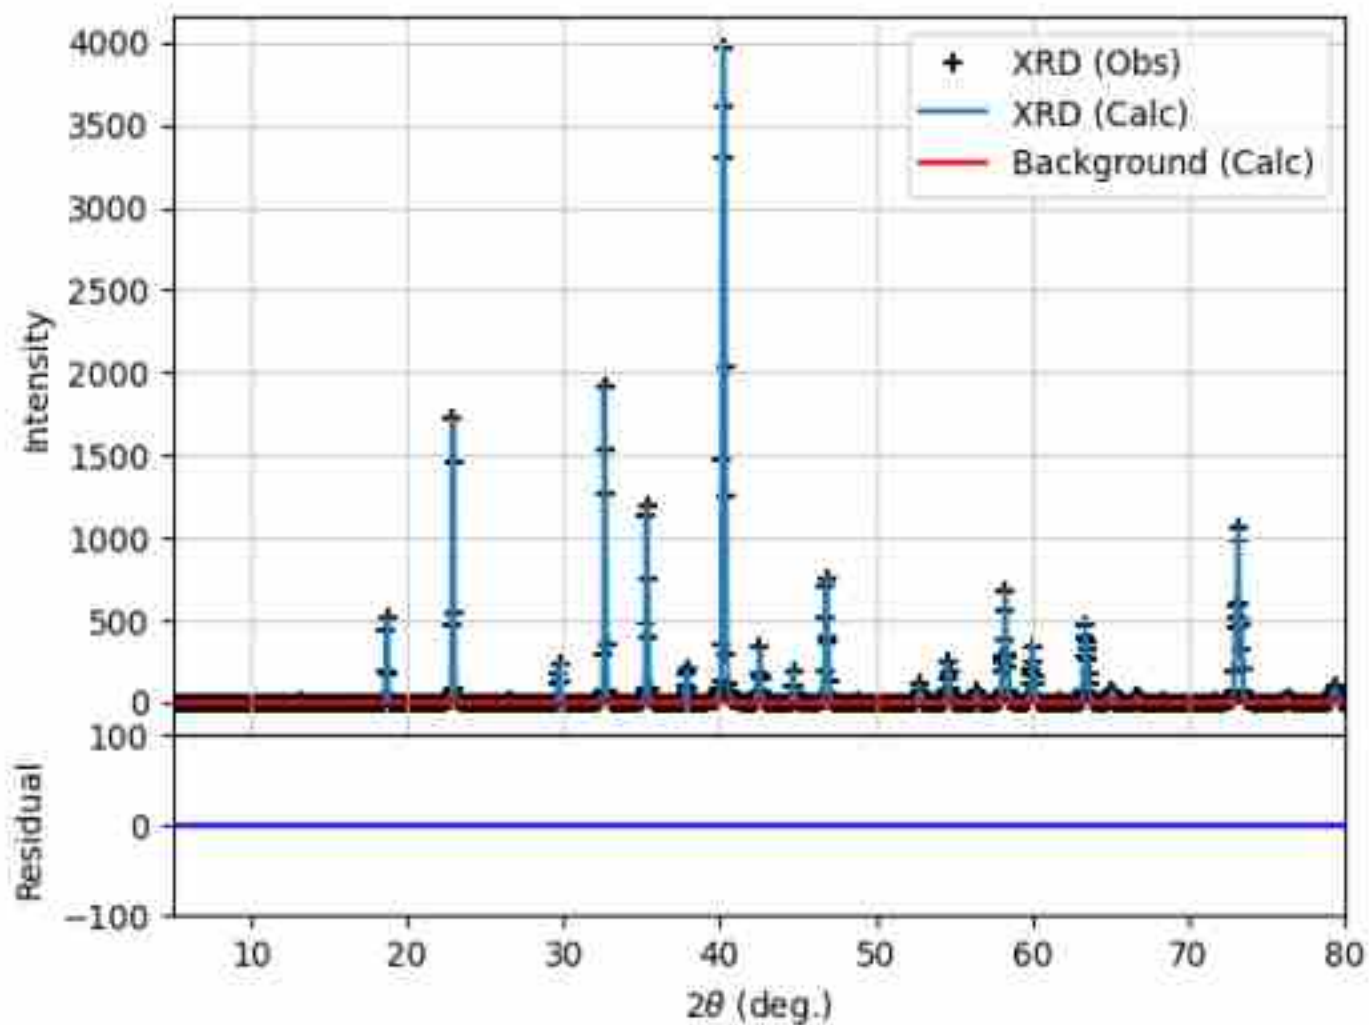

| RMSE before RR | Rwp     | RMSE after RR |
|----------------|---------|---------------|
| 0.027          | 0.00354 | 0.00051       |

# Sr1Li1Al1Sb2

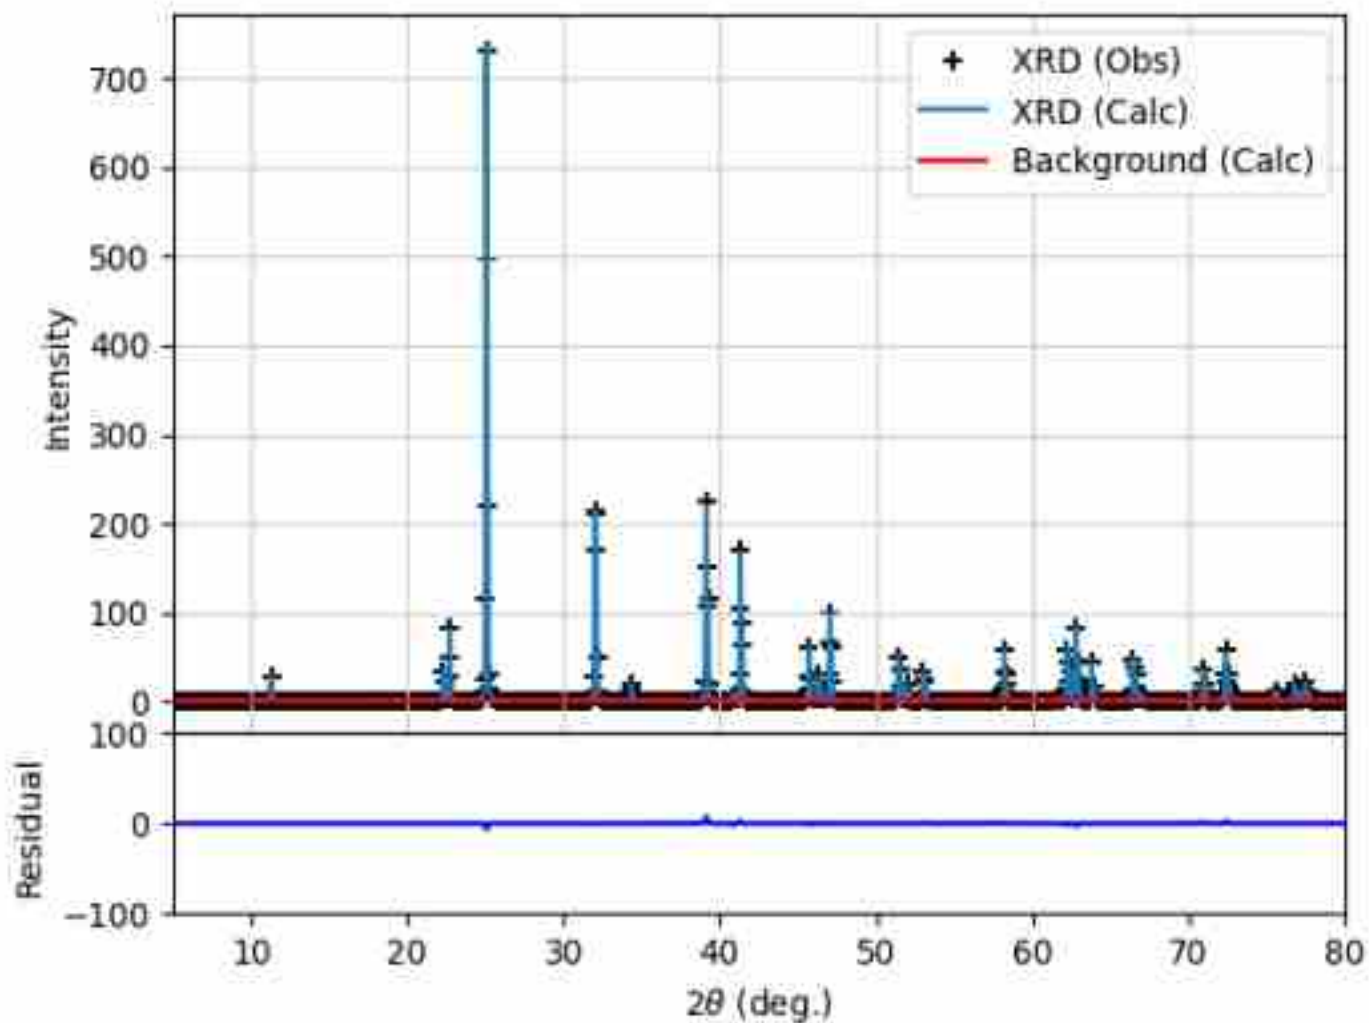

| RMSE before RR | Rwp     | RMSE after RR |
|----------------|---------|---------------|
| 0.027          | 2.02961 | 0.13368       |

# Sr<sub>2</sub>HoCu<sub>2</sub>RuO<sub>8</sub>

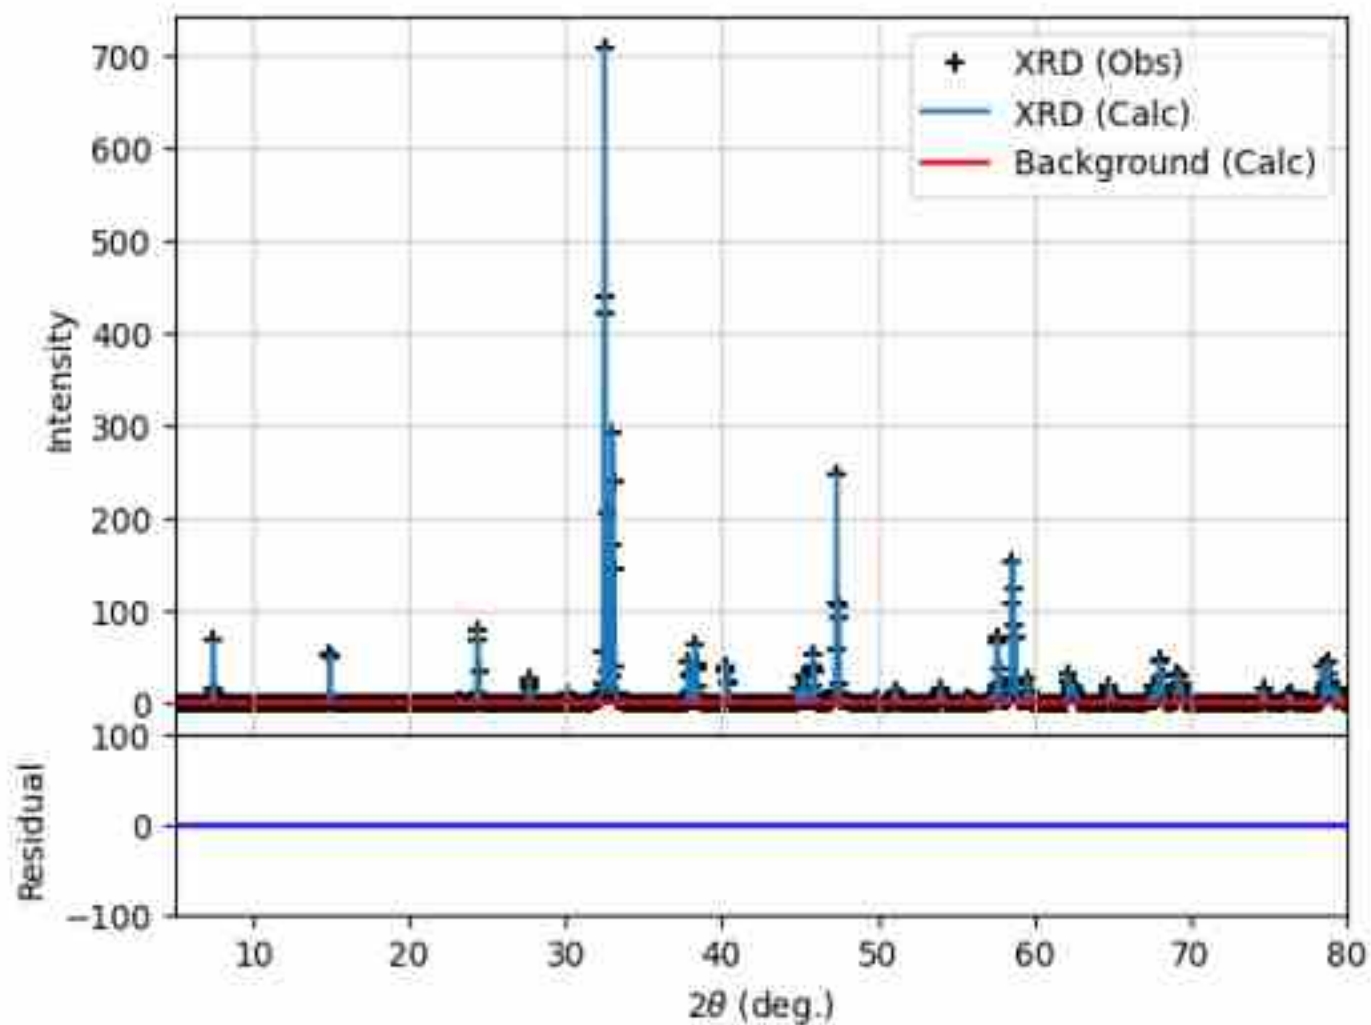

| RMSE before RR | Rwp     | RMSE after RR |
|----------------|---------|---------------|
| 0.027          | 0.00434 | 0.00074       |

# Sr<sub>2</sub>La<sub>2</sub>Ga<sub>2</sub>Cu<sub>2</sub>O<sub>10</sub>

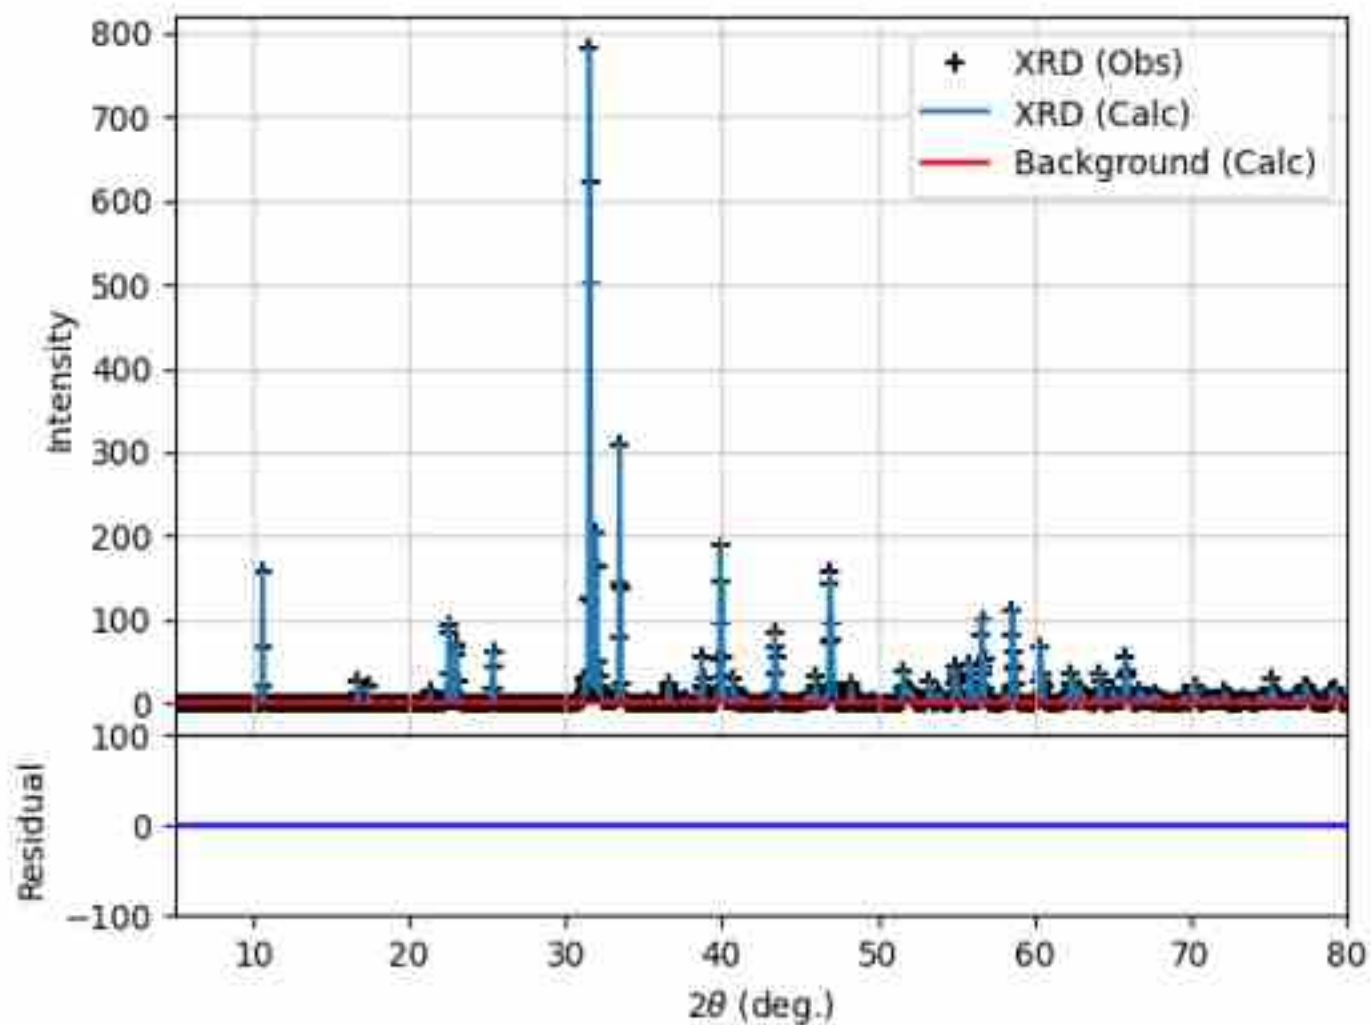

| RMSE before RR | Rwp     | RMSE after RR |
|----------------|---------|---------------|
| 0.027          | 0.00227 | 0.00082       |



# Sr<sub>4</sub>Fe<sub>3</sub>Mo<sub>1</sub>O<sub>12</sub>

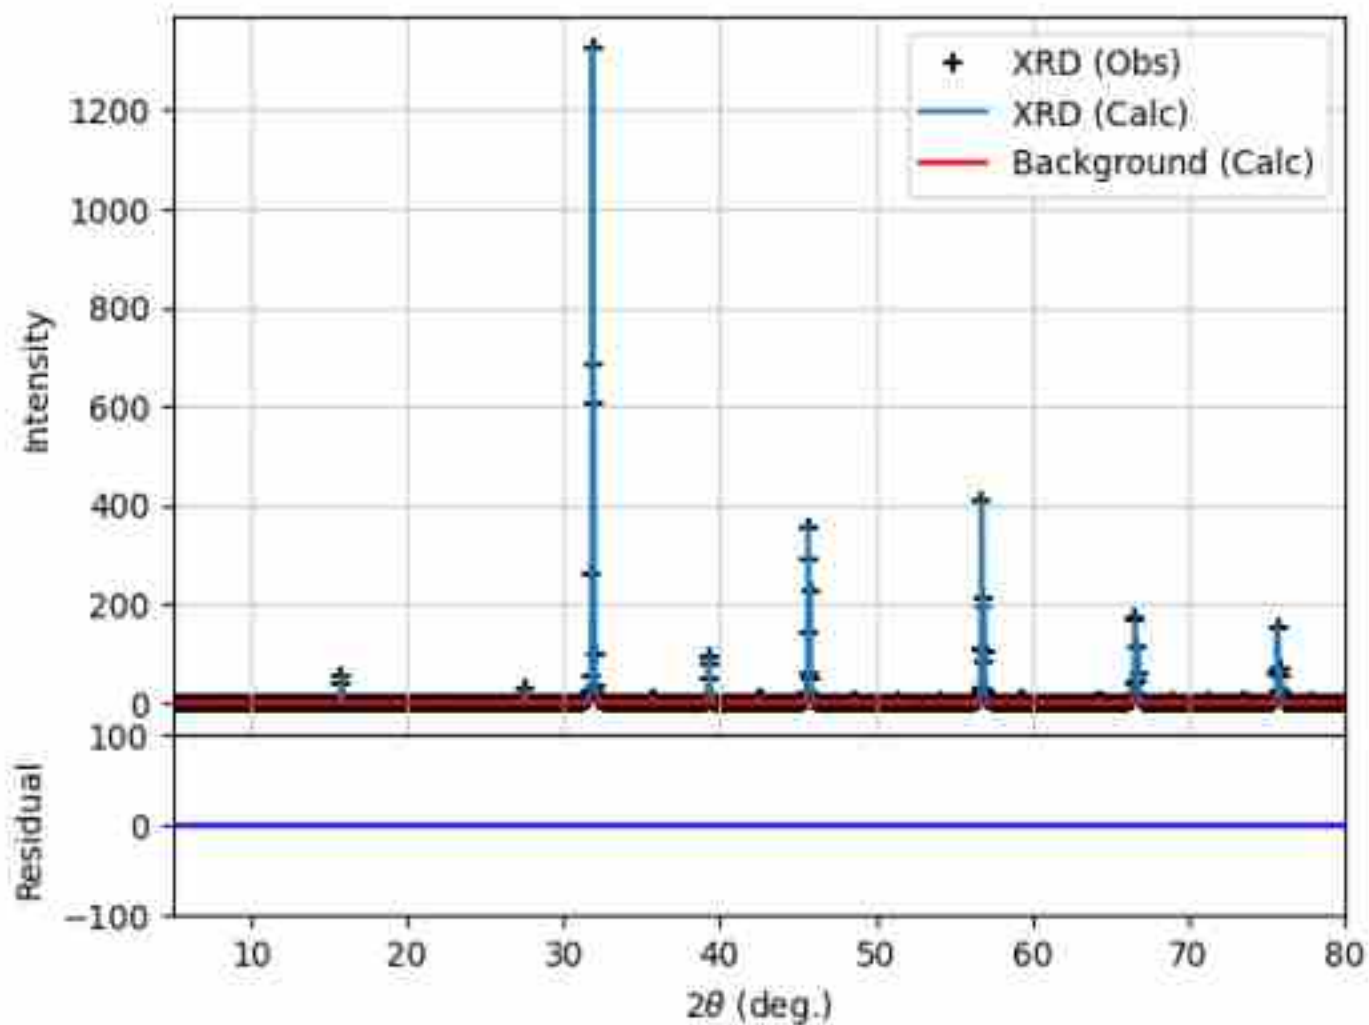

| RMSE before RR | Rwp     | RMSE after RR |
|----------------|---------|---------------|
| 0.027          | 0.02975 | 0.00551       |

# Sr<sub>4</sub>Hf<sub>2</sub>Fe<sub>2</sub>O<sub>12</sub>

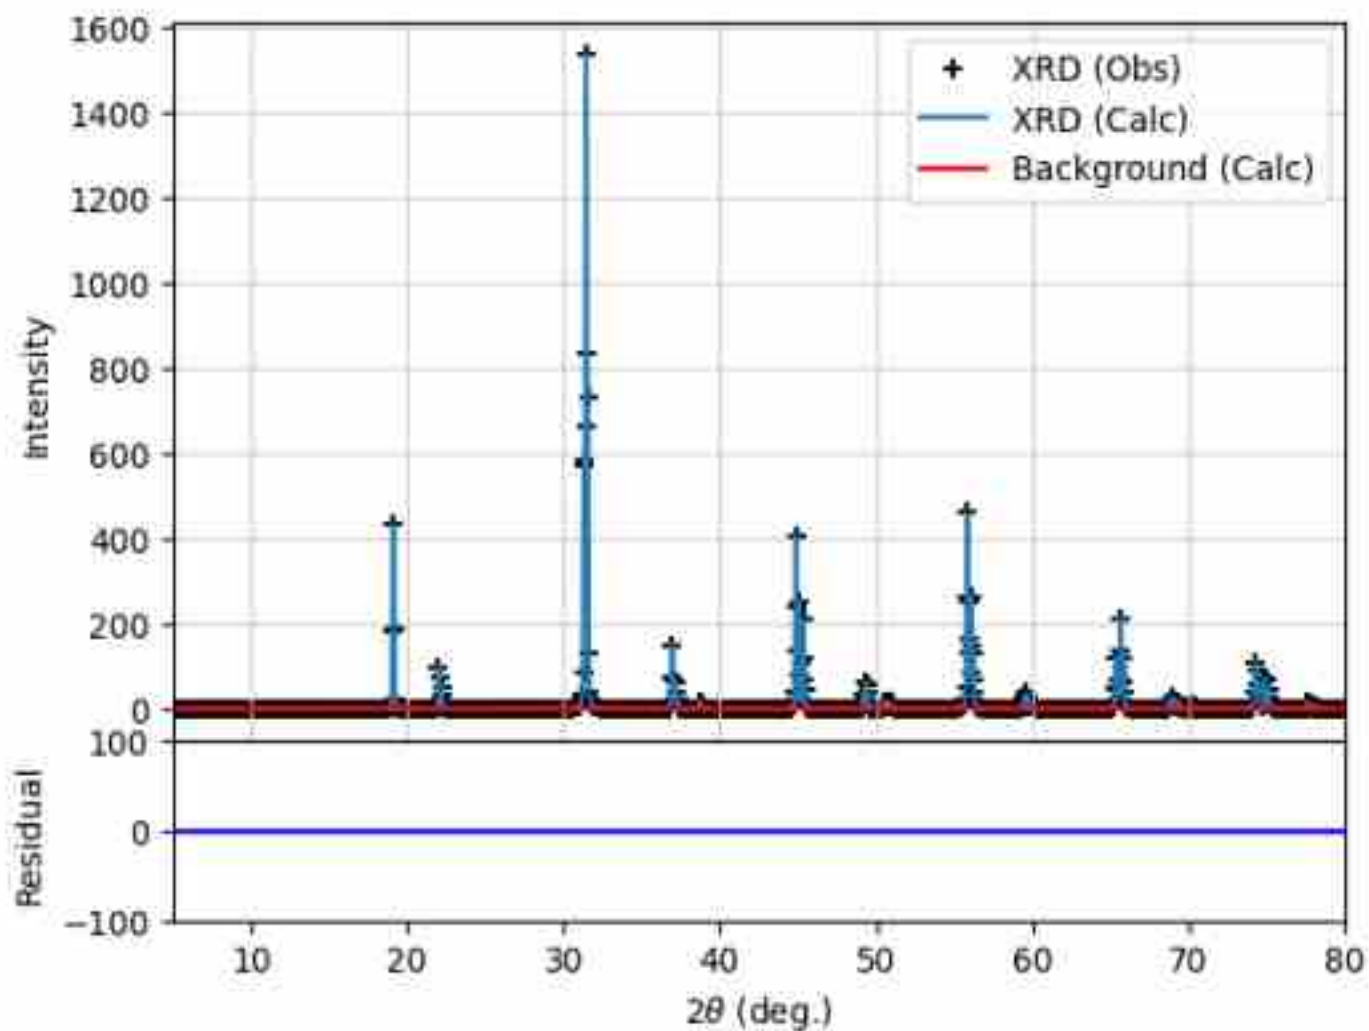

| RMSE before RR | Rwp     | RMSE after RR |
|----------------|---------|---------------|
| 0.027          | 0.00487 | 0.00169       |

# Sr8Si4

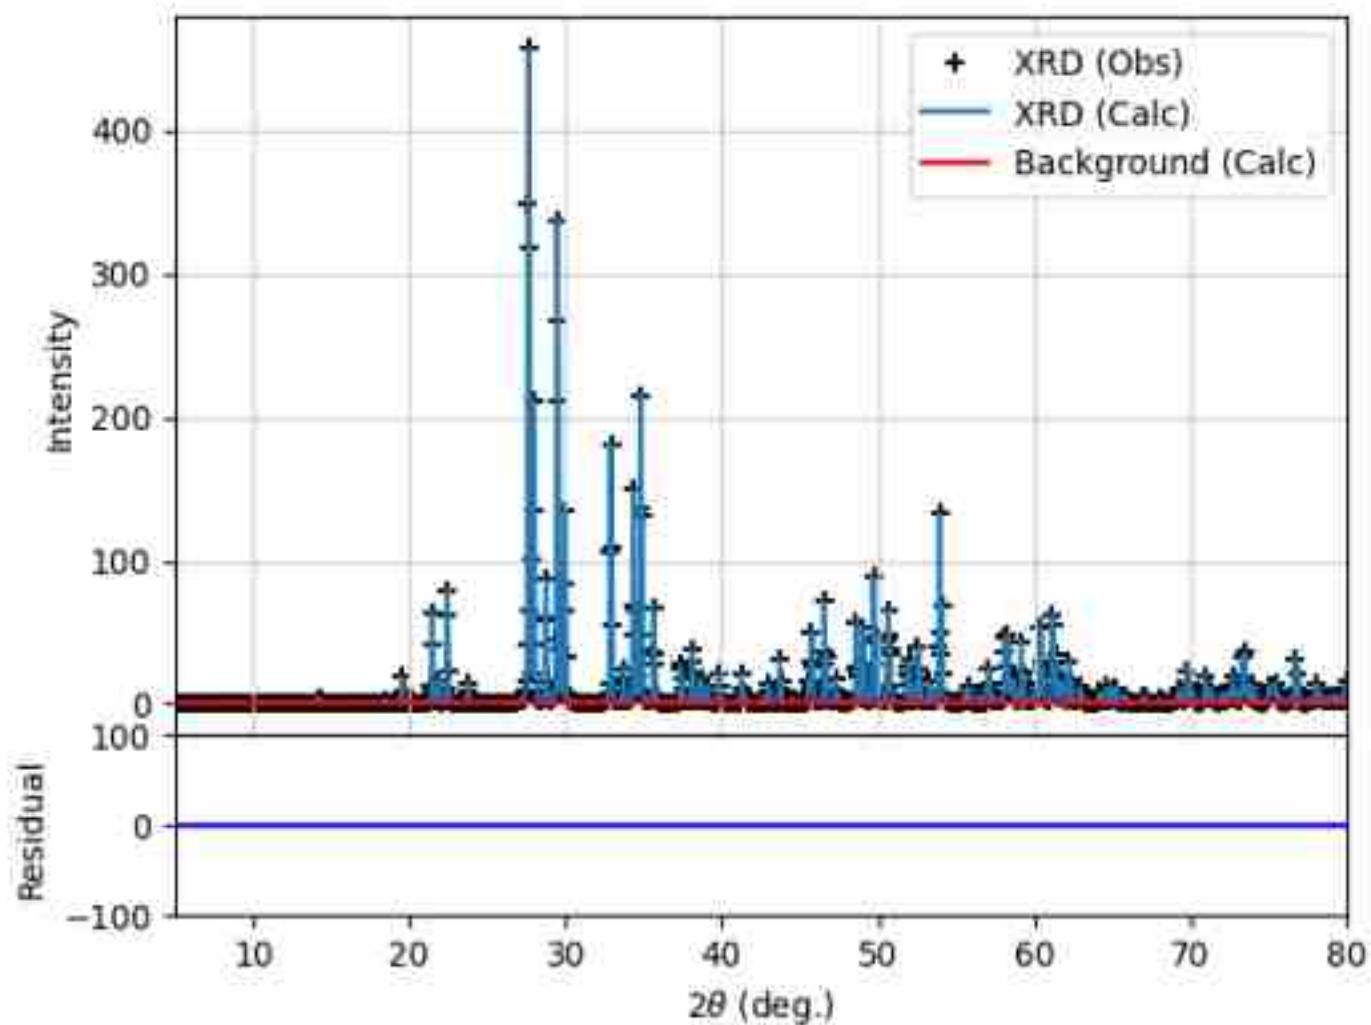

| RMSE before RR | Rwp     | RMSE after RR |
|----------------|---------|---------------|
| 0.027          | 0.00364 | 0.0004        |

# Tb<sub>2</sub>Al<sub>6</sub>Si<sub>4</sub>Pt<sub>1</sub>

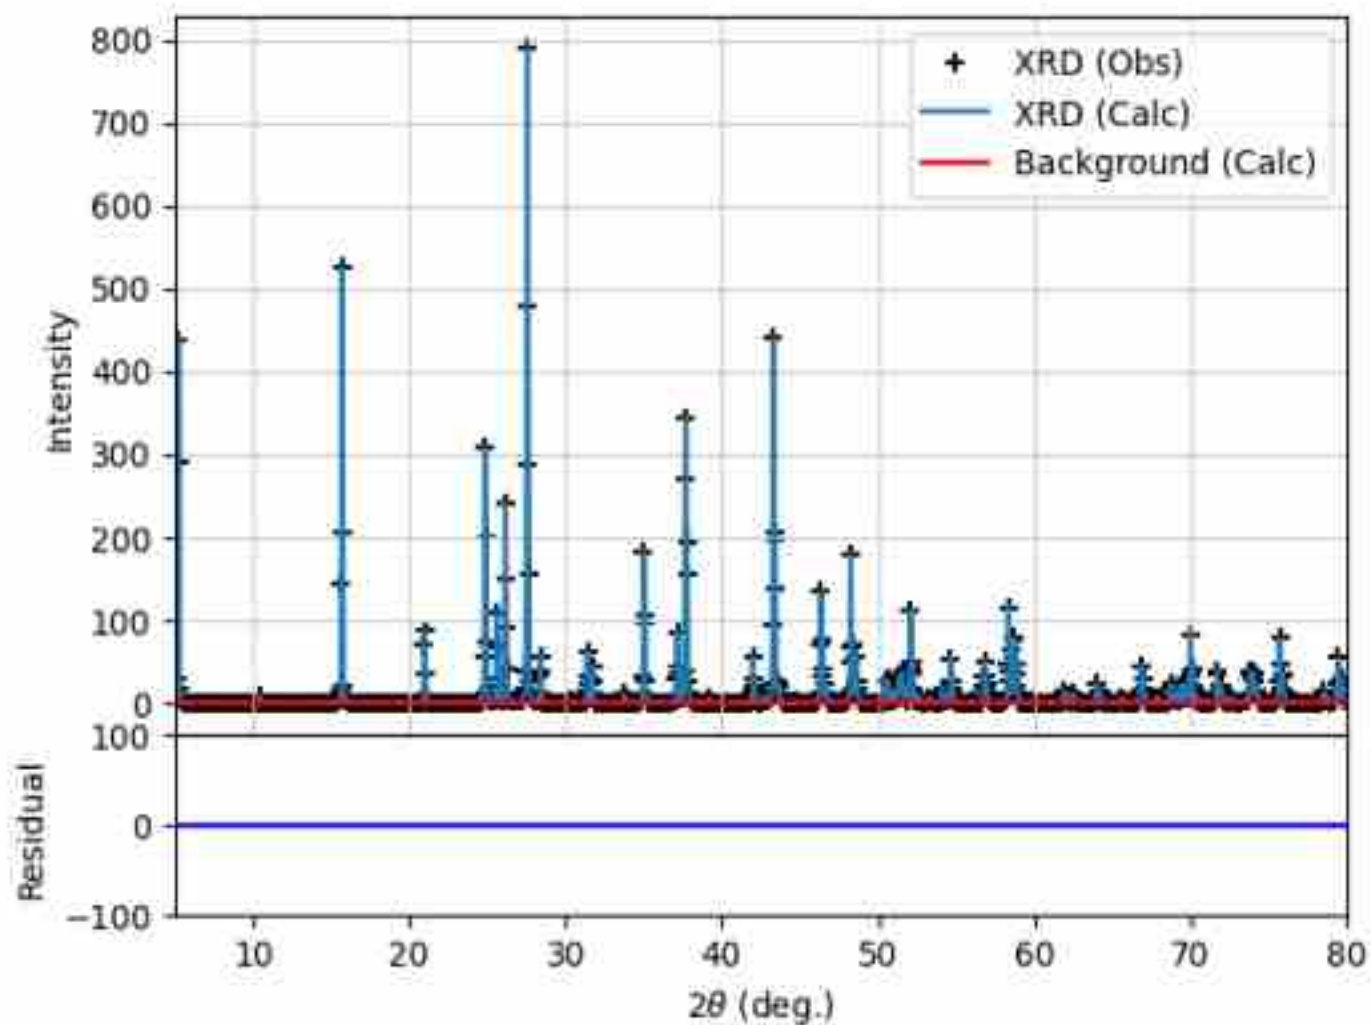

| RMSE before RR | Rwp     | RMSE after RR |
|----------------|---------|---------------|
| 0.027          | 0.00332 | 0.00052       |

# Tb<sub>4</sub>Cr<sub>4</sub>Se<sub>12</sub>

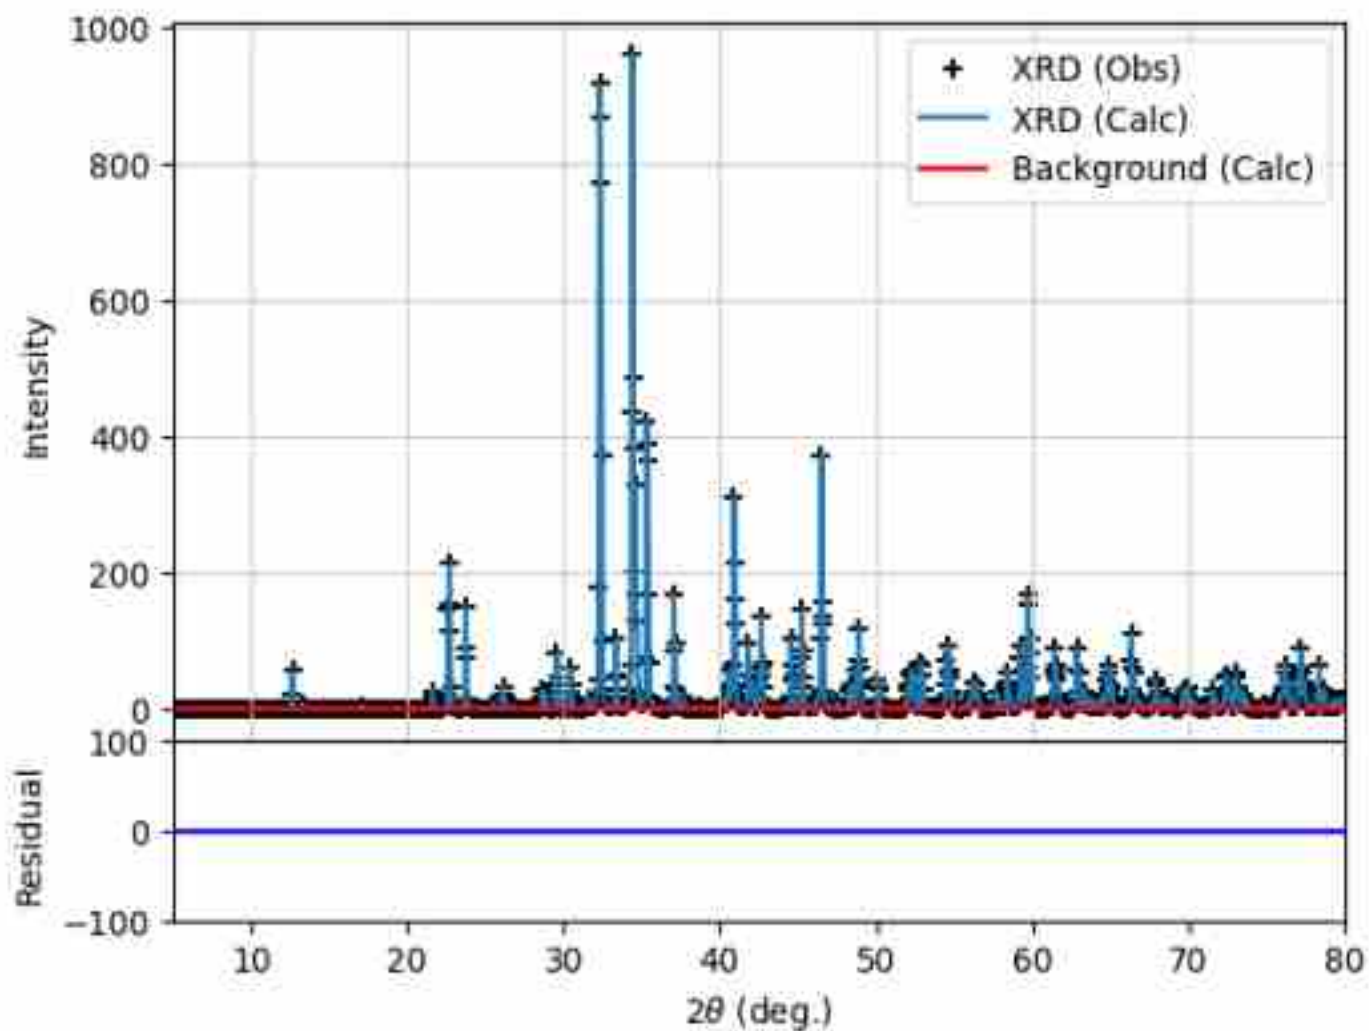

| RMSE before RR | Rwp     | RMSE after RR |
|----------------|---------|---------------|
| 0.027          | 0.00424 | 0.0005        |

# Th<sub>2</sub>Cu<sub>2</sub>P<sub>2</sub>O<sub>2</sub>

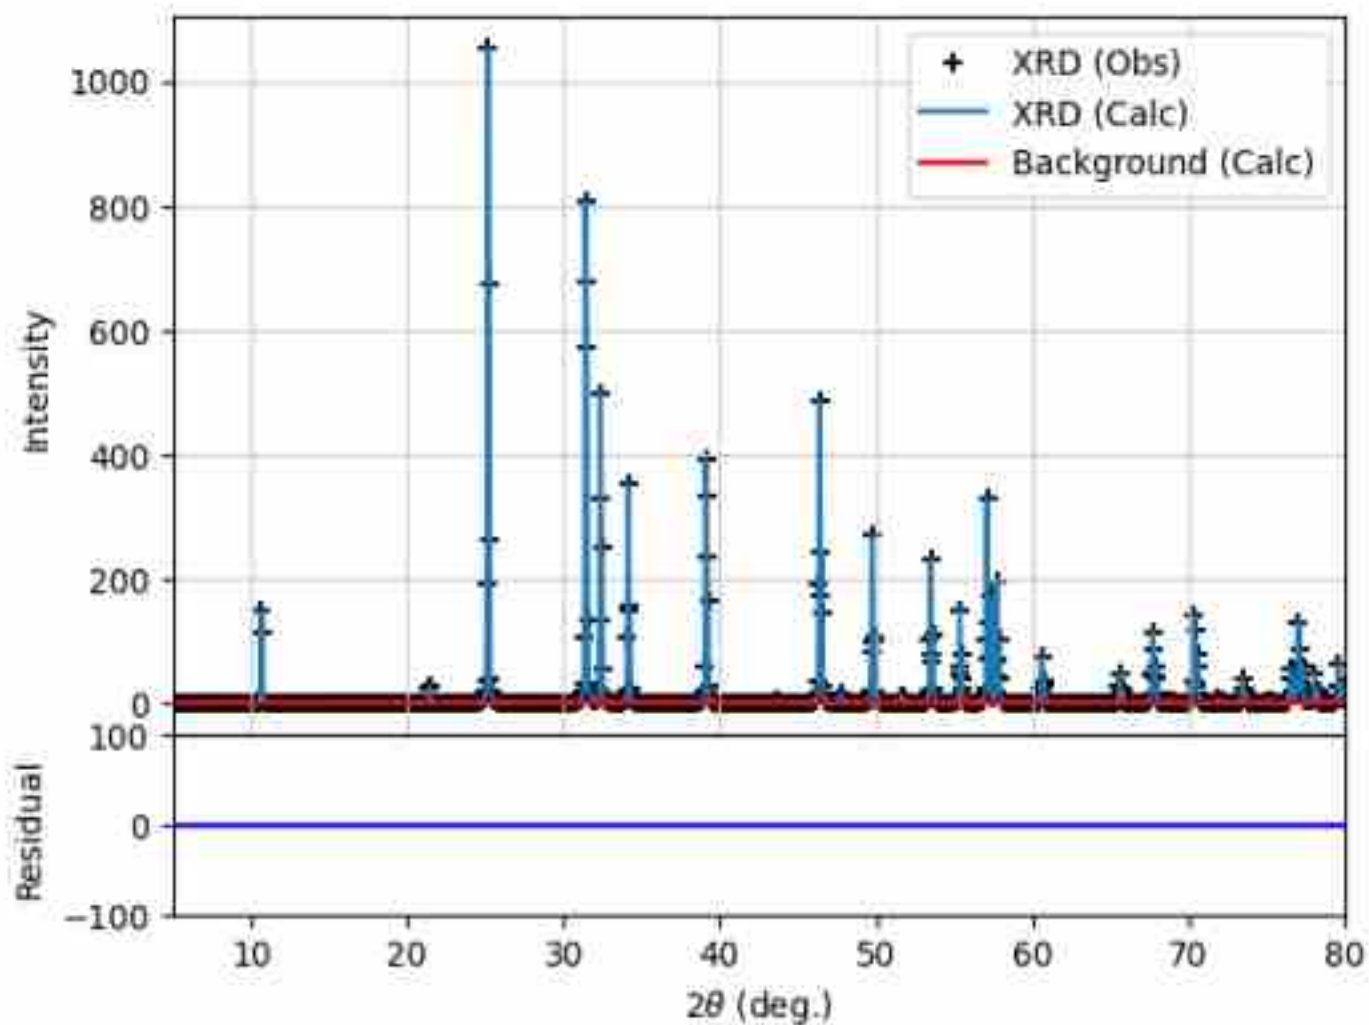

| RMSE before RR | Rwp     | RMSE after RR |
|----------------|---------|---------------|
| 0.027          | 0.00554 | 0.00101       |

# Th<sub>4</sub>Cr<sub>4</sub>S<sub>12</sub>

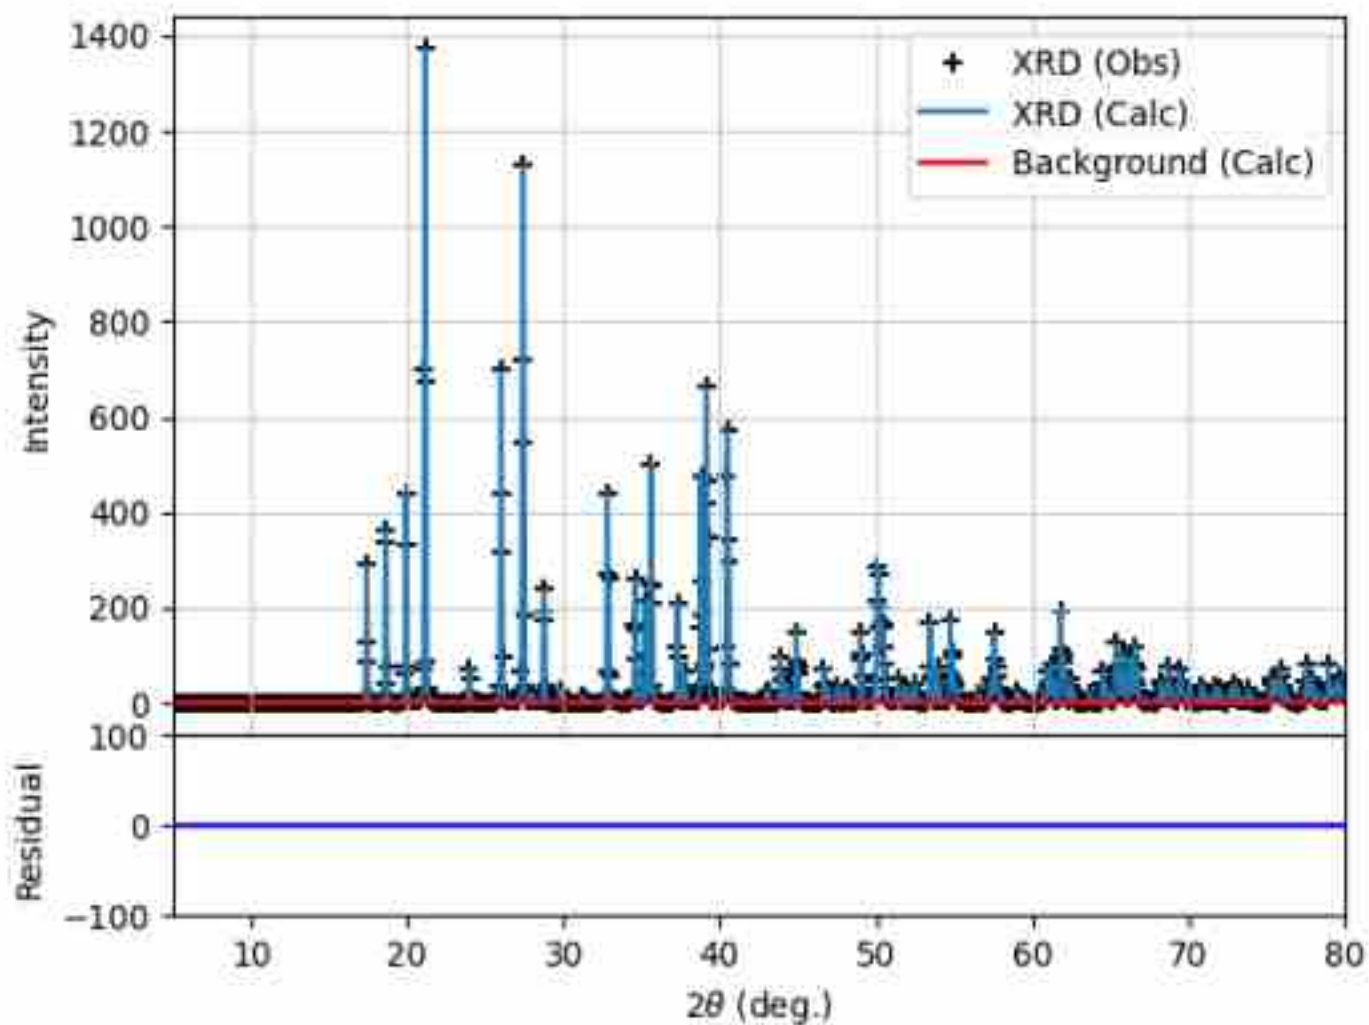

| RMSE before RR | Rwp     | RMSE after RR |
|----------------|---------|---------------|
| 0.027          | 0.00391 | 0.00068       |

# Ti<sub>2</sub>Al<sub>4</sub>O<sub>10</sub>

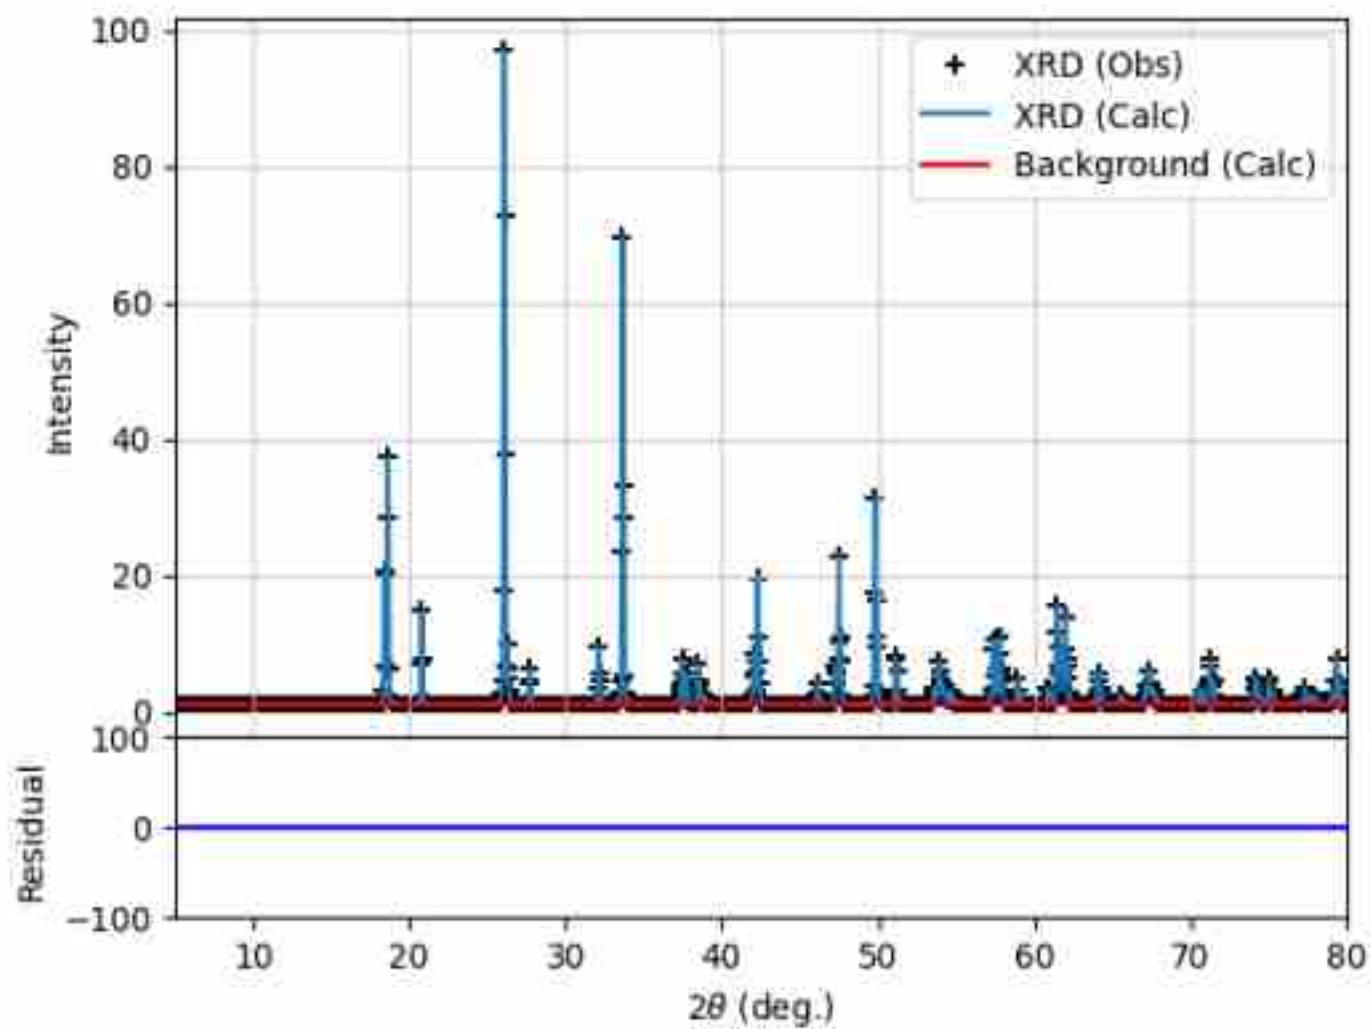

| RMSE before RR | Rwp     | RMSE after RR |
|----------------|---------|---------------|
| 0.027          | 0.00217 | 0.00057       |



# Ti<sub>3</sub>Nb<sub>10</sub>O<sub>8</sub>

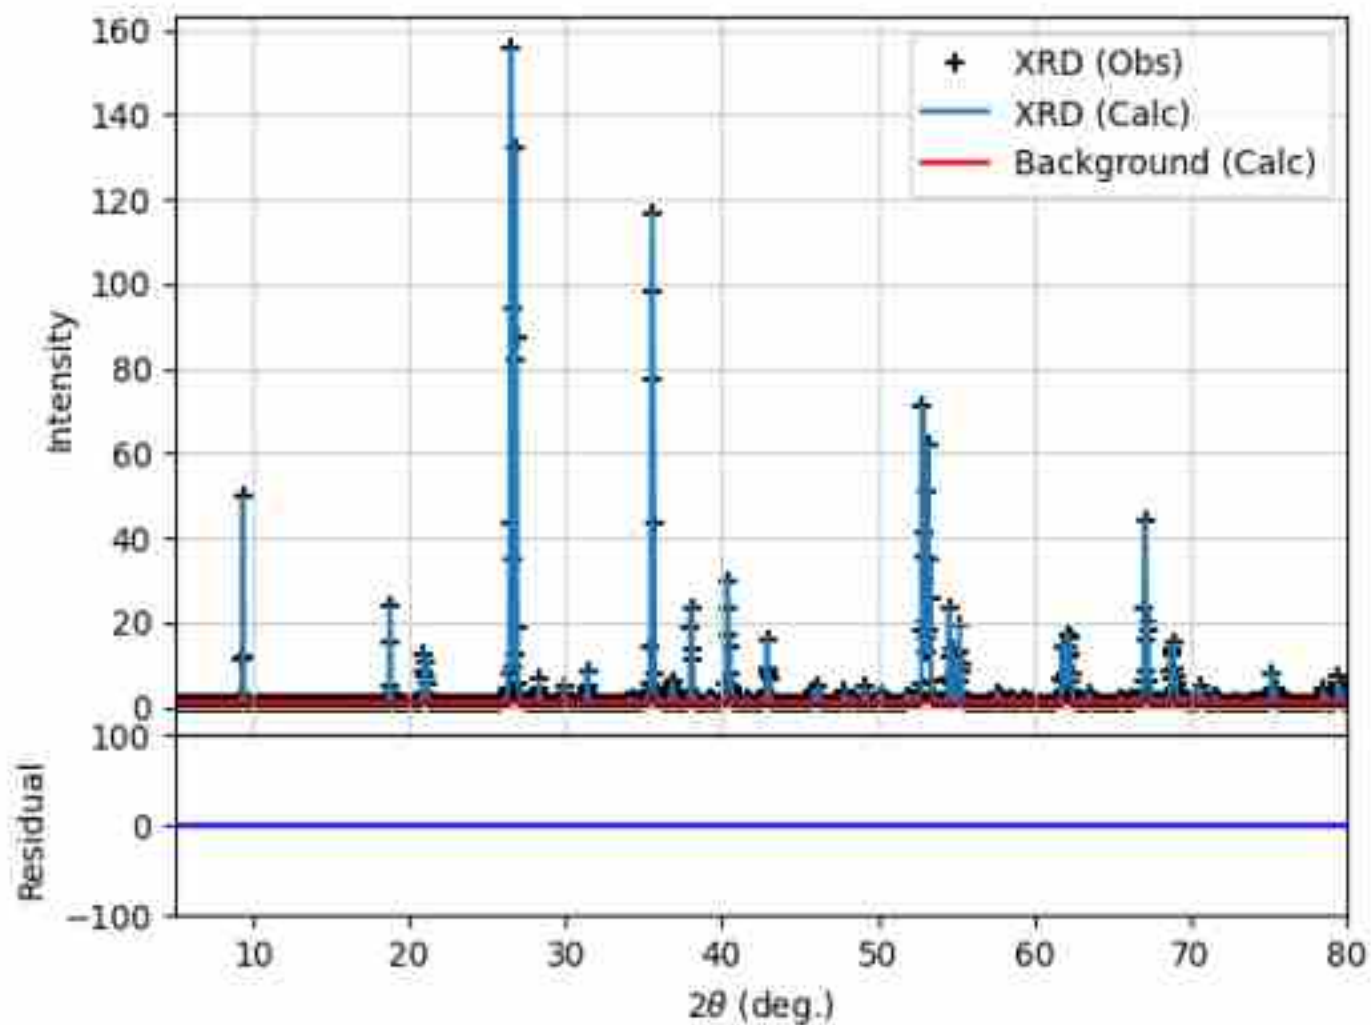

| RMSE before RR | Rwp     | RMSE after RR |
|----------------|---------|---------------|
| 0.027          | 0.00234 | 0.00059       |

# Ti10Ga6

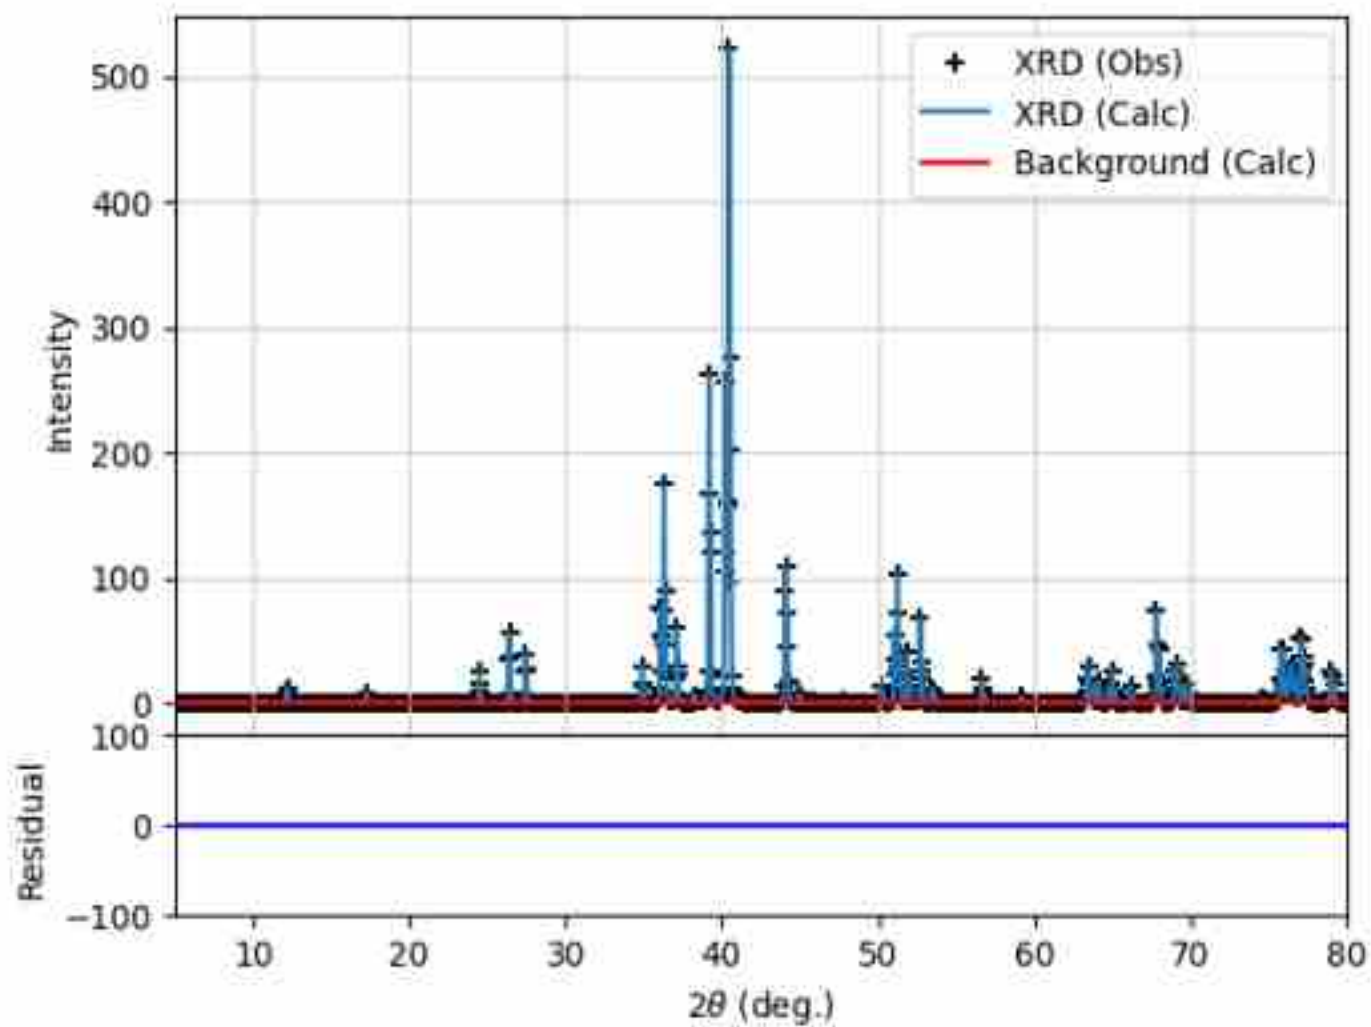

| RMSE before RR | Rwp     | RMSE after RR |
|----------------|---------|---------------|
| 0.027          | 0.00401 | 0.00032       |

# Tl<sub>2</sub>Pb<sub>2</sub>I<sub>6</sub>

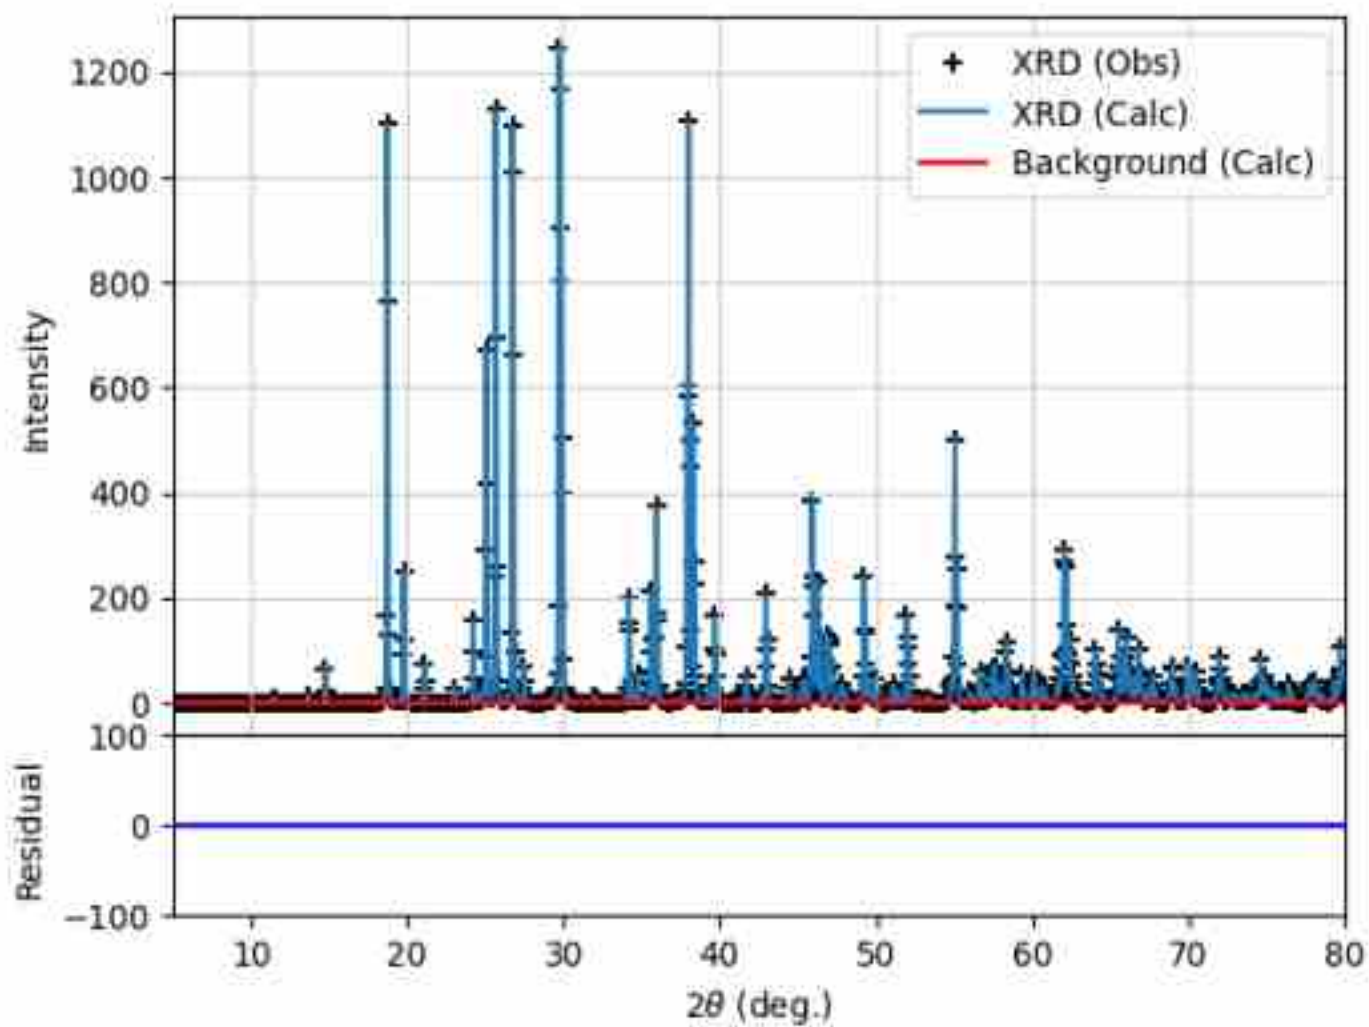

| RMSE before RR | Rwp     | RMSE after RR |
|----------------|---------|---------------|
| 0.027          | 0.00386 | 0.00022       |

# Tm4Te2O12

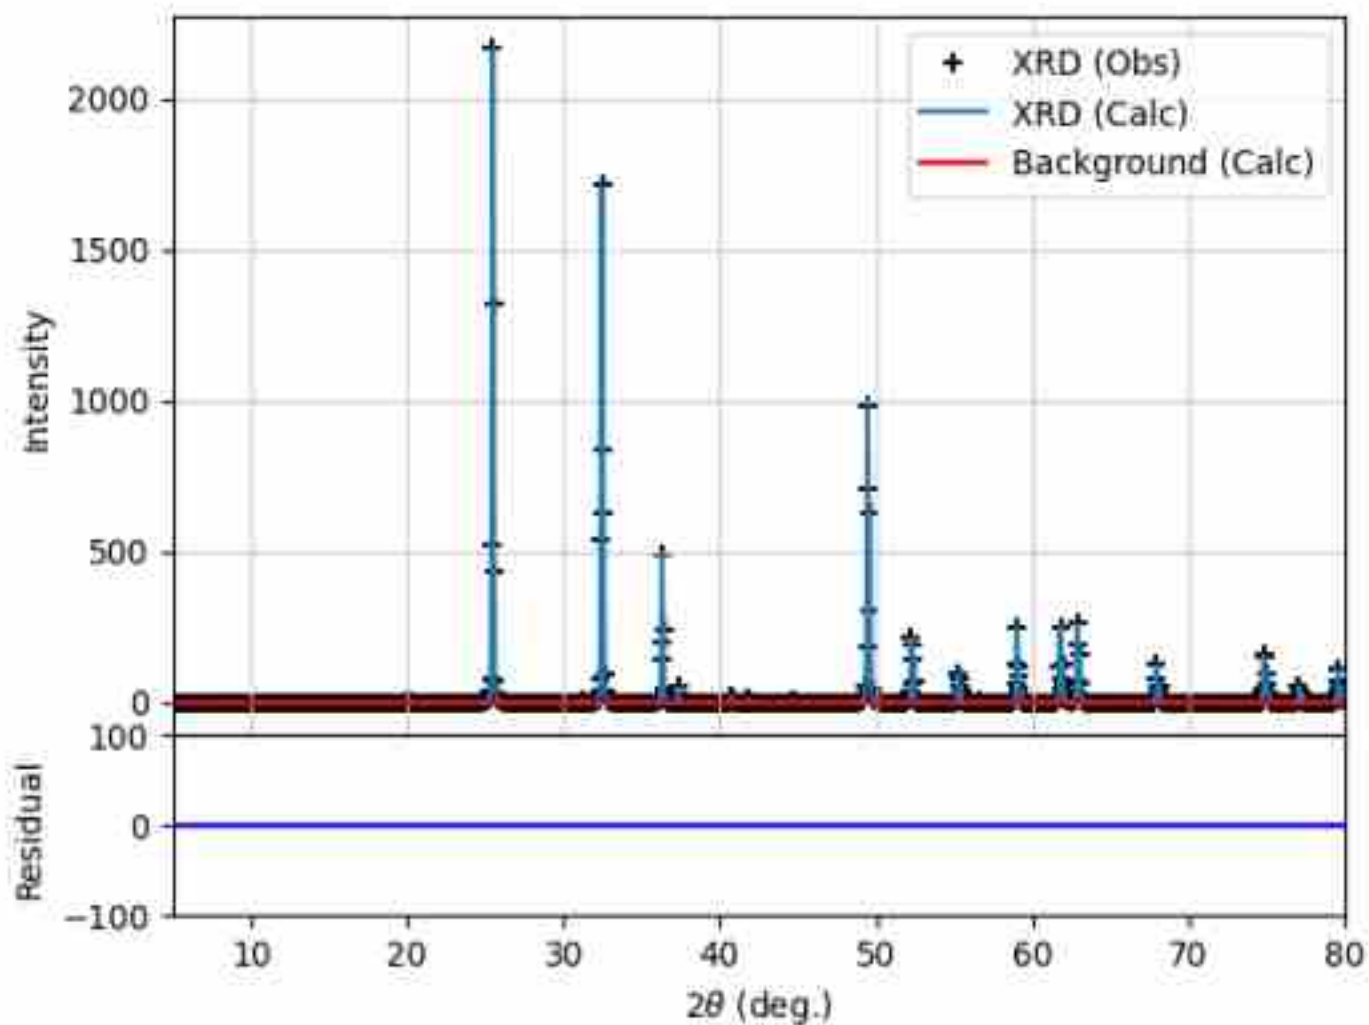

| RMSE before RR | Rwp     | RMSE after RR |
|----------------|---------|---------------|
| 0.027          | 0.00419 | 0.00107       |

# U1Ge12Pt4

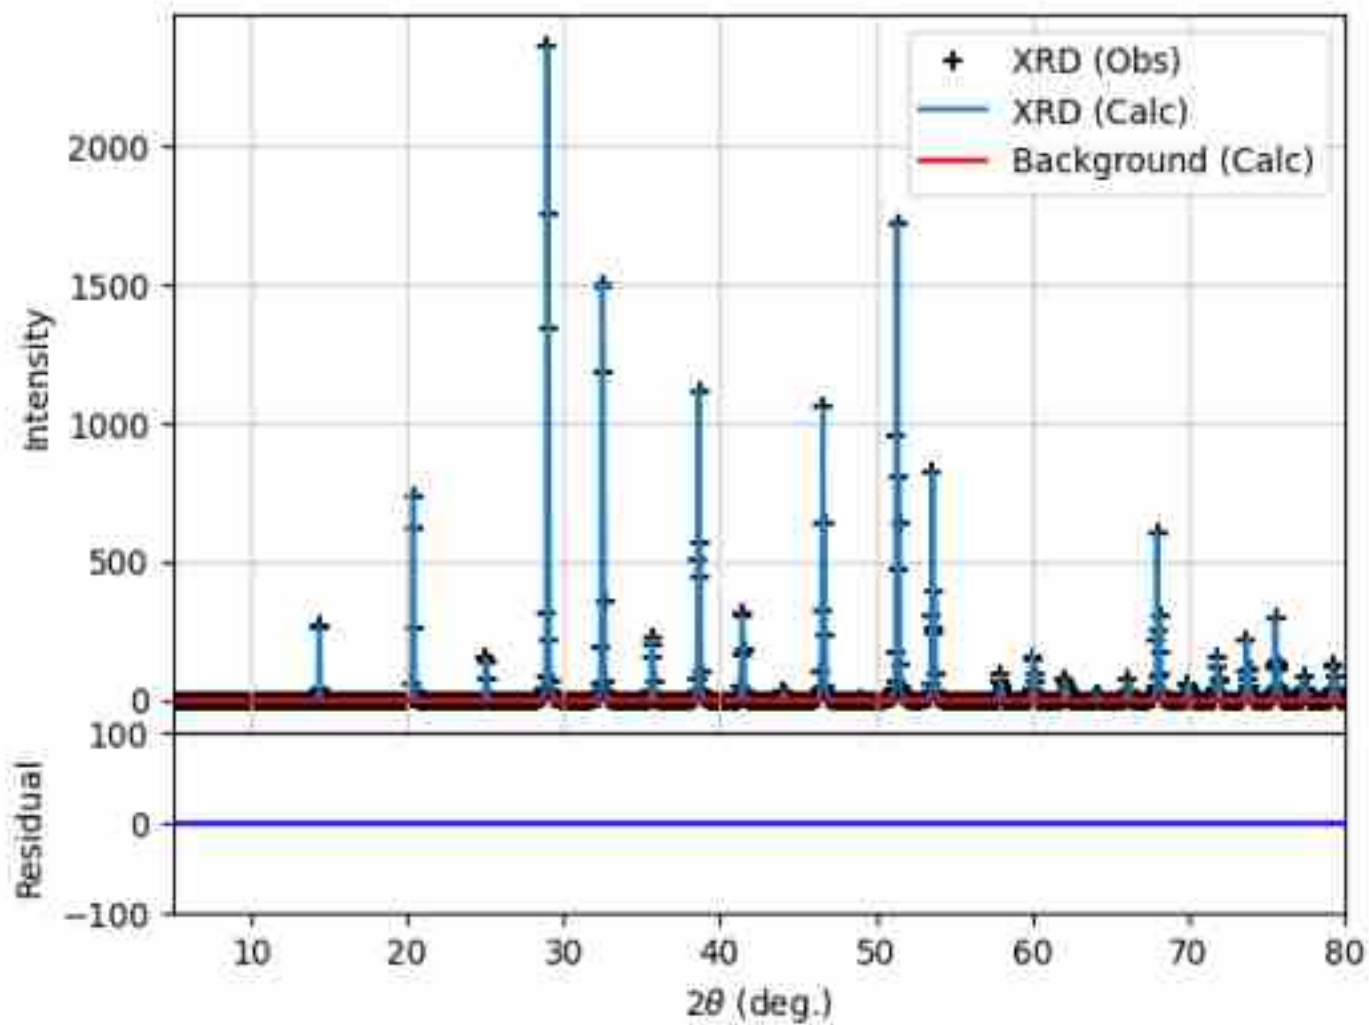

| RMSE before RR | Rwp     | RMSE after RR |
|----------------|---------|---------------|
| 0.027          | 0.00647 | 0.00131       |

# U<sub>2</sub>Si<sub>2</sub>O<sub>8</sub>

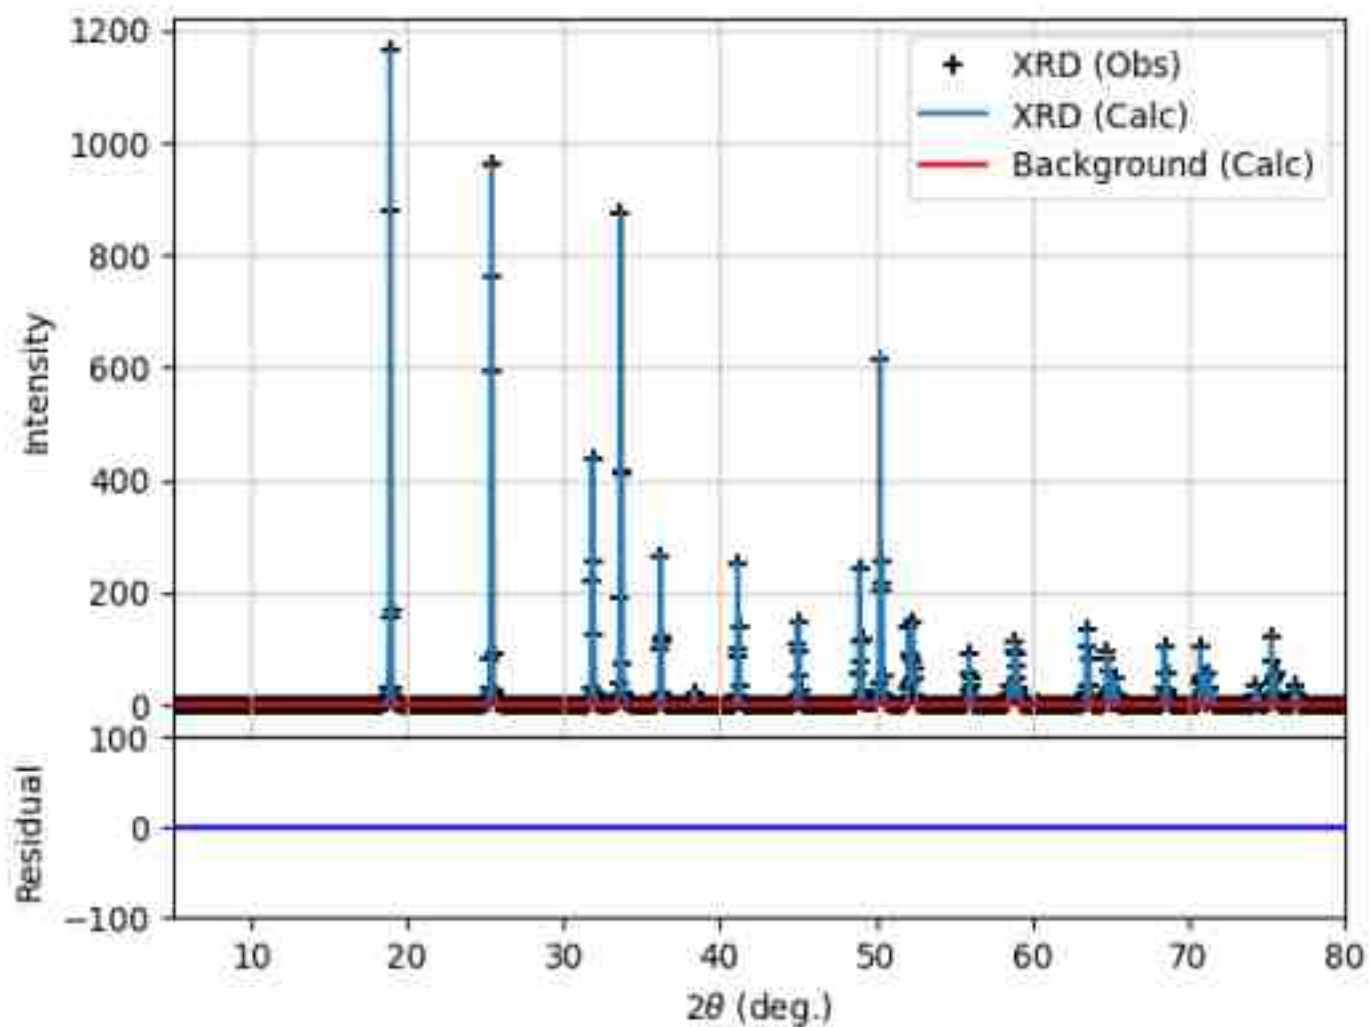

| RMSE before RR | Rwp     | RMSE after RR |
|----------------|---------|---------------|
| 0.027          | 0.00279 | 0.00179       |

# U4Ga12Fe1

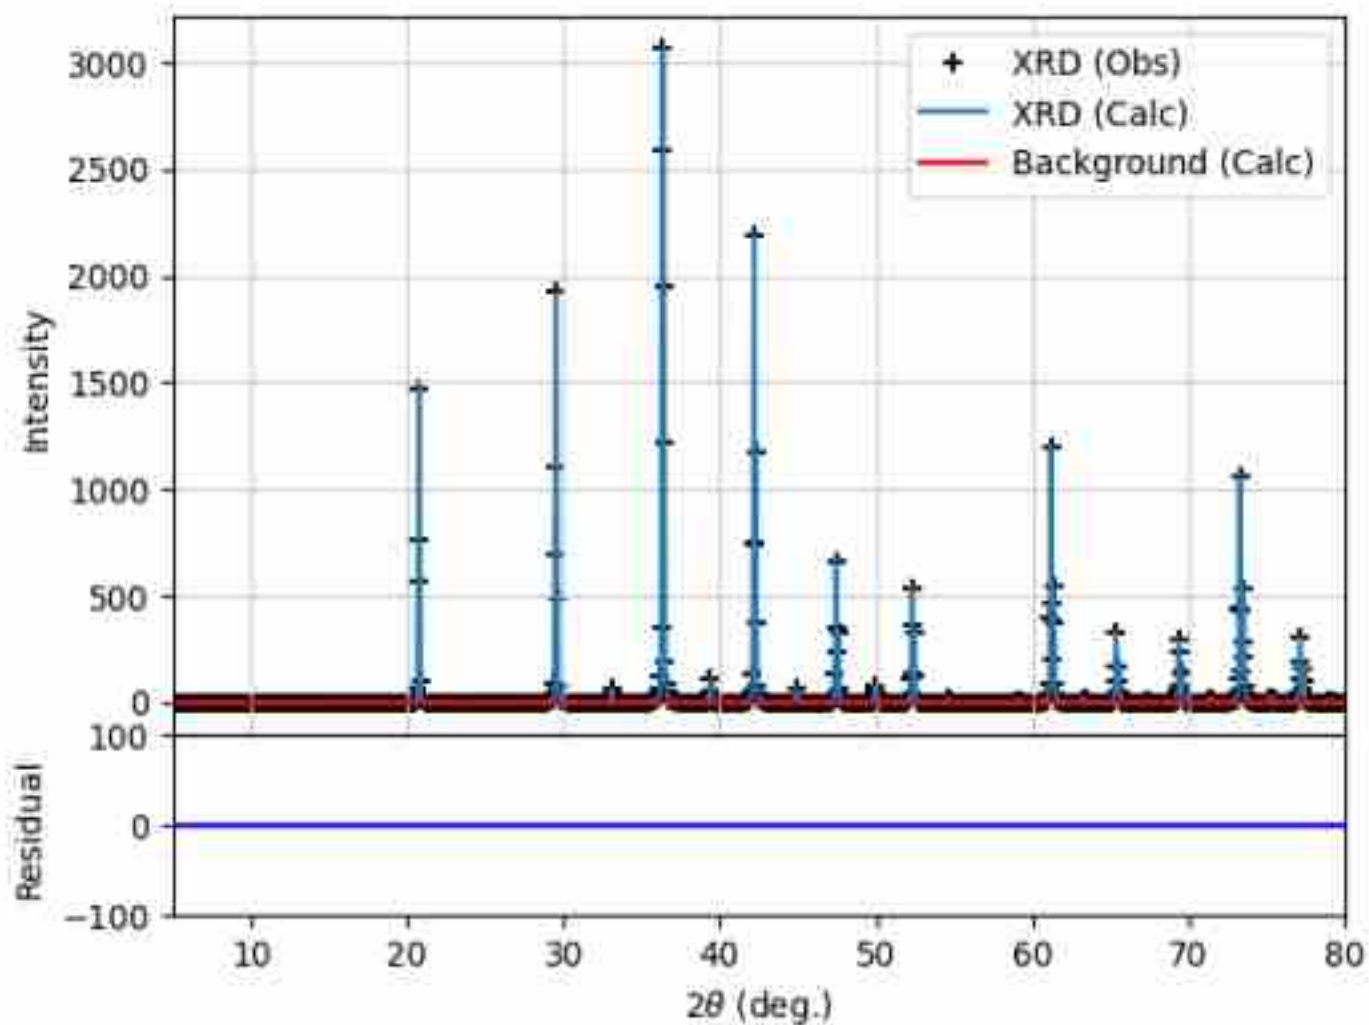

| RMSE before RR | Rwp     | RMSE after RR |
|----------------|---------|---------------|
| 0.027          | 0.01511 | 0.0015        |

# U8Te12

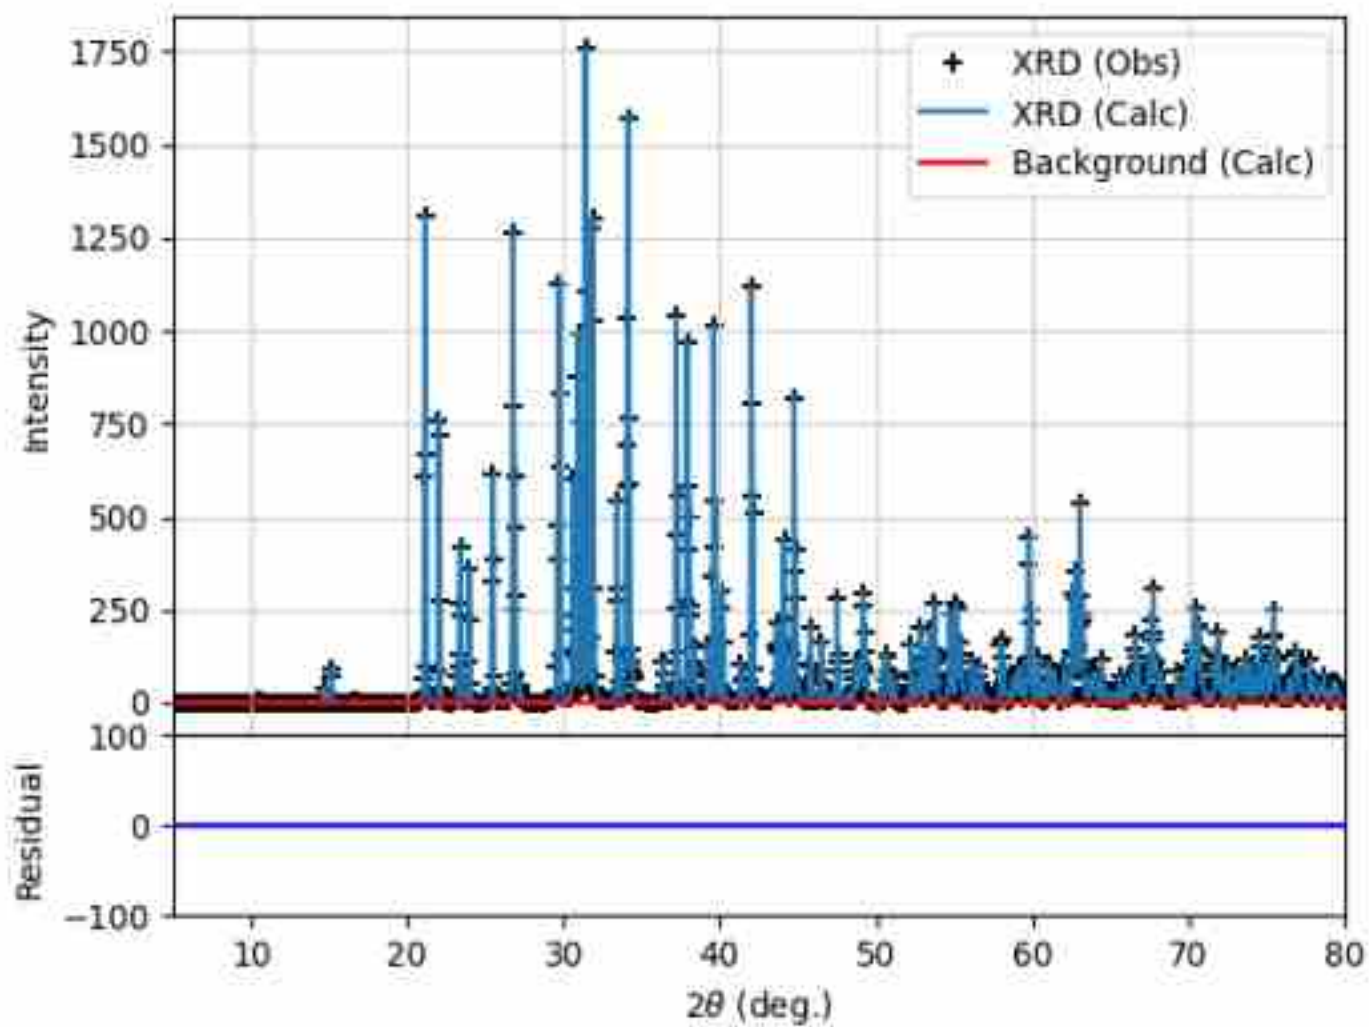

| RMSE before RR | Rwp    | RMSE after RR |
|----------------|--------|---------------|
| 0.027          | 0.0024 | 0.00016       |



# V4Ge1S8

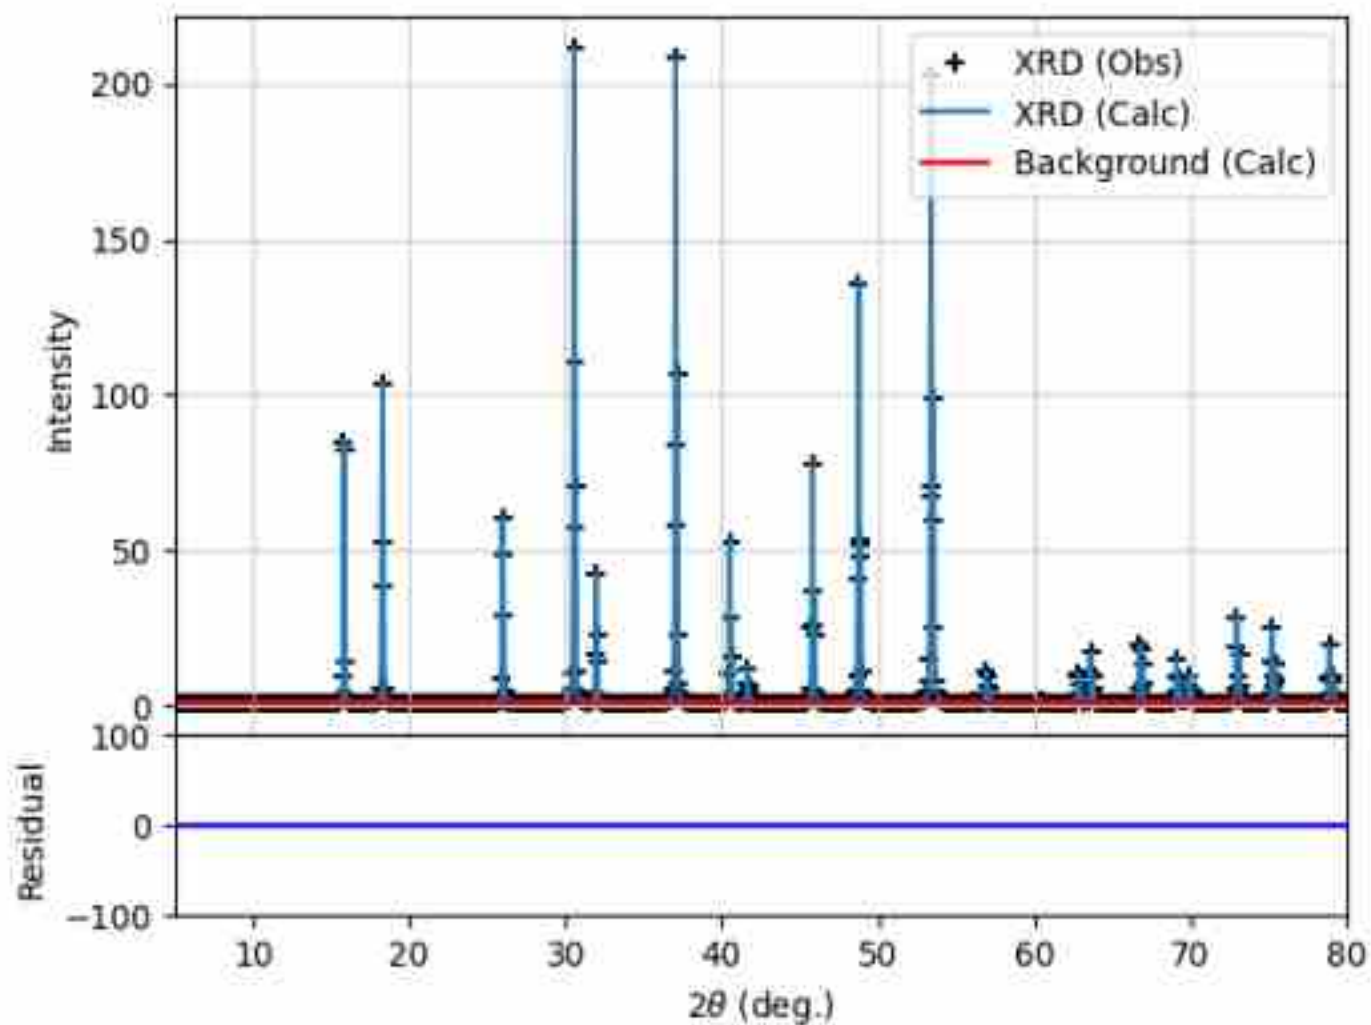

| RMSE before RR | Rwp     | RMSE after RR |
|----------------|---------|---------------|
| 0.027          | 0.03053 | 0.00303       |

# V6O7F5

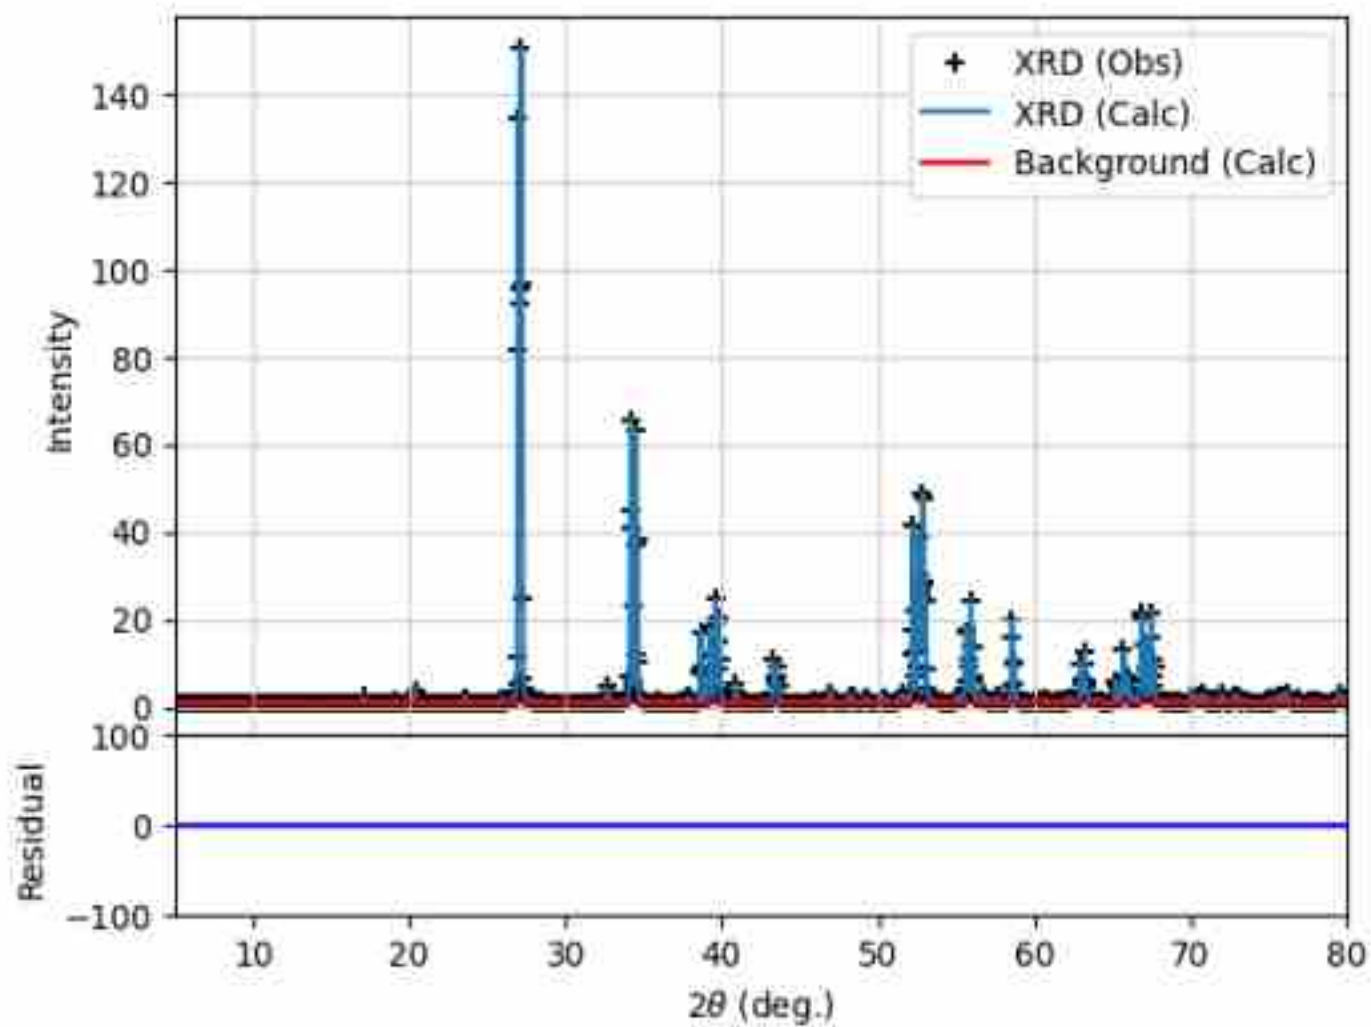

| RMSE before RR | Rwp     | RMSE after RR |
|----------------|---------|---------------|
| 0.027          | 0.00215 | 0.00027       |

# V10Si6N2

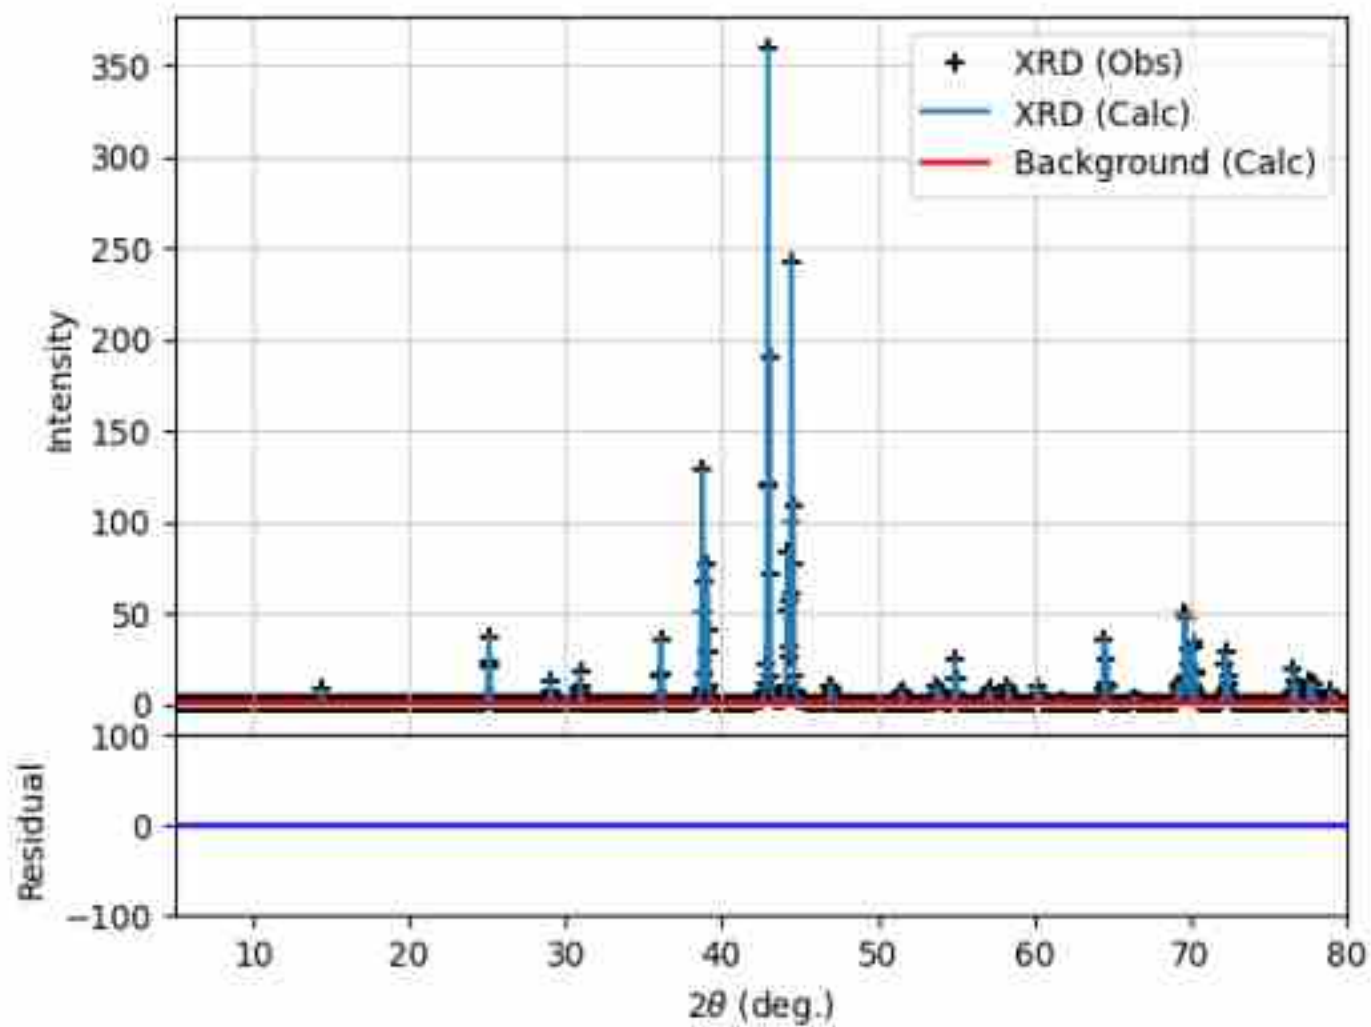

| RMSE before RR | Rwp     | RMSE after RR |
|----------------|---------|---------------|
| 0.027          | 0.04165 | 0.00295       |

# Y2Mg4

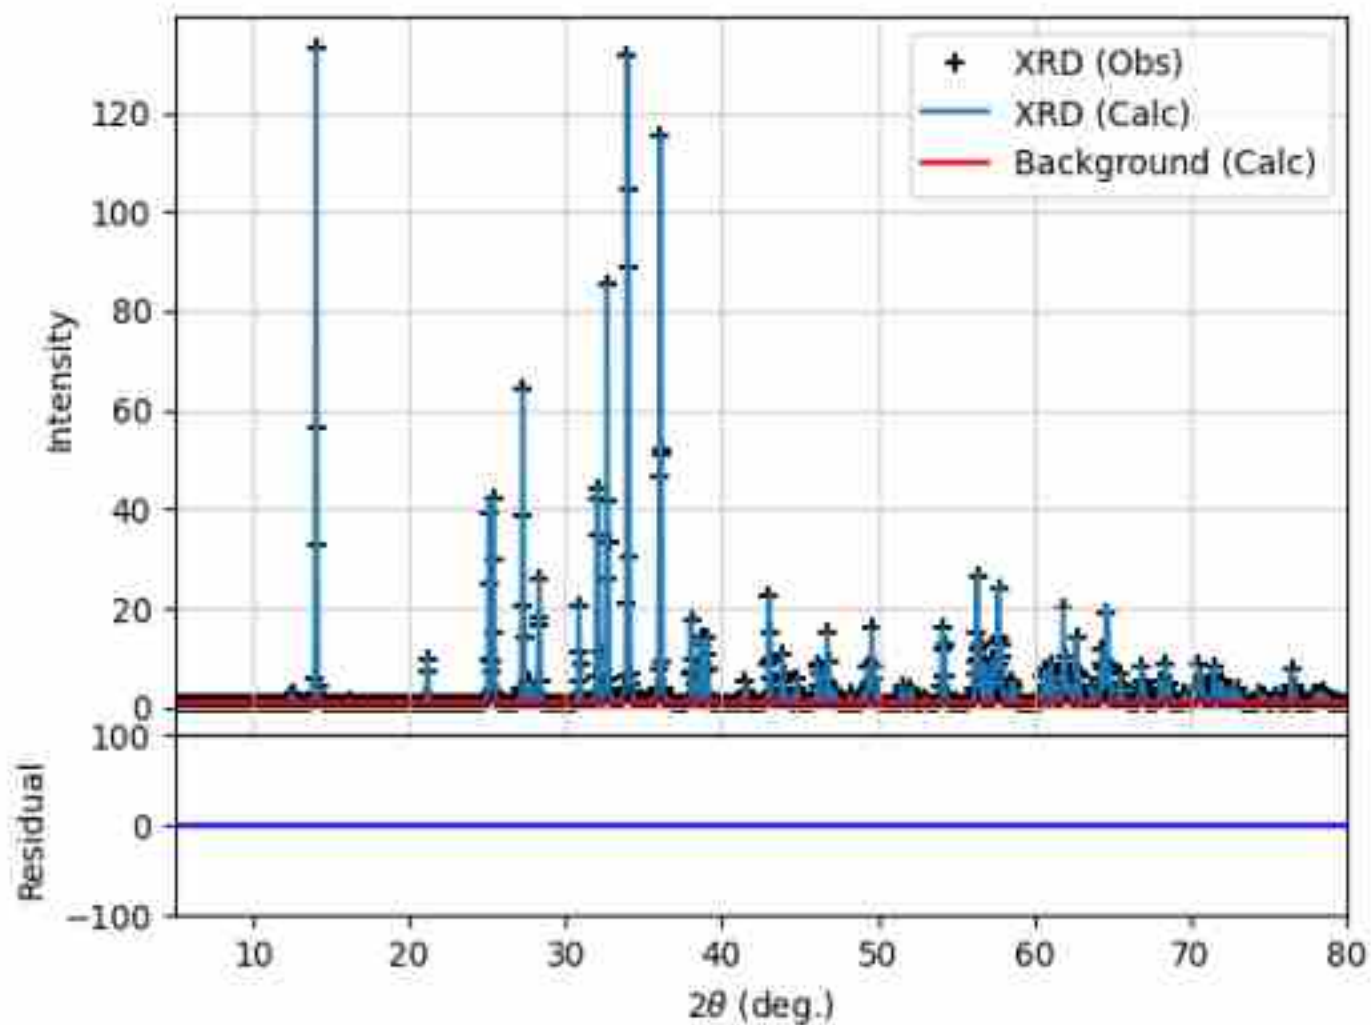

| RMSE before RR | Rwp     | RMSE after RR |
|----------------|---------|---------------|
| 0.027          | 0.00255 | 0.00038       |

# Yb2Pr6

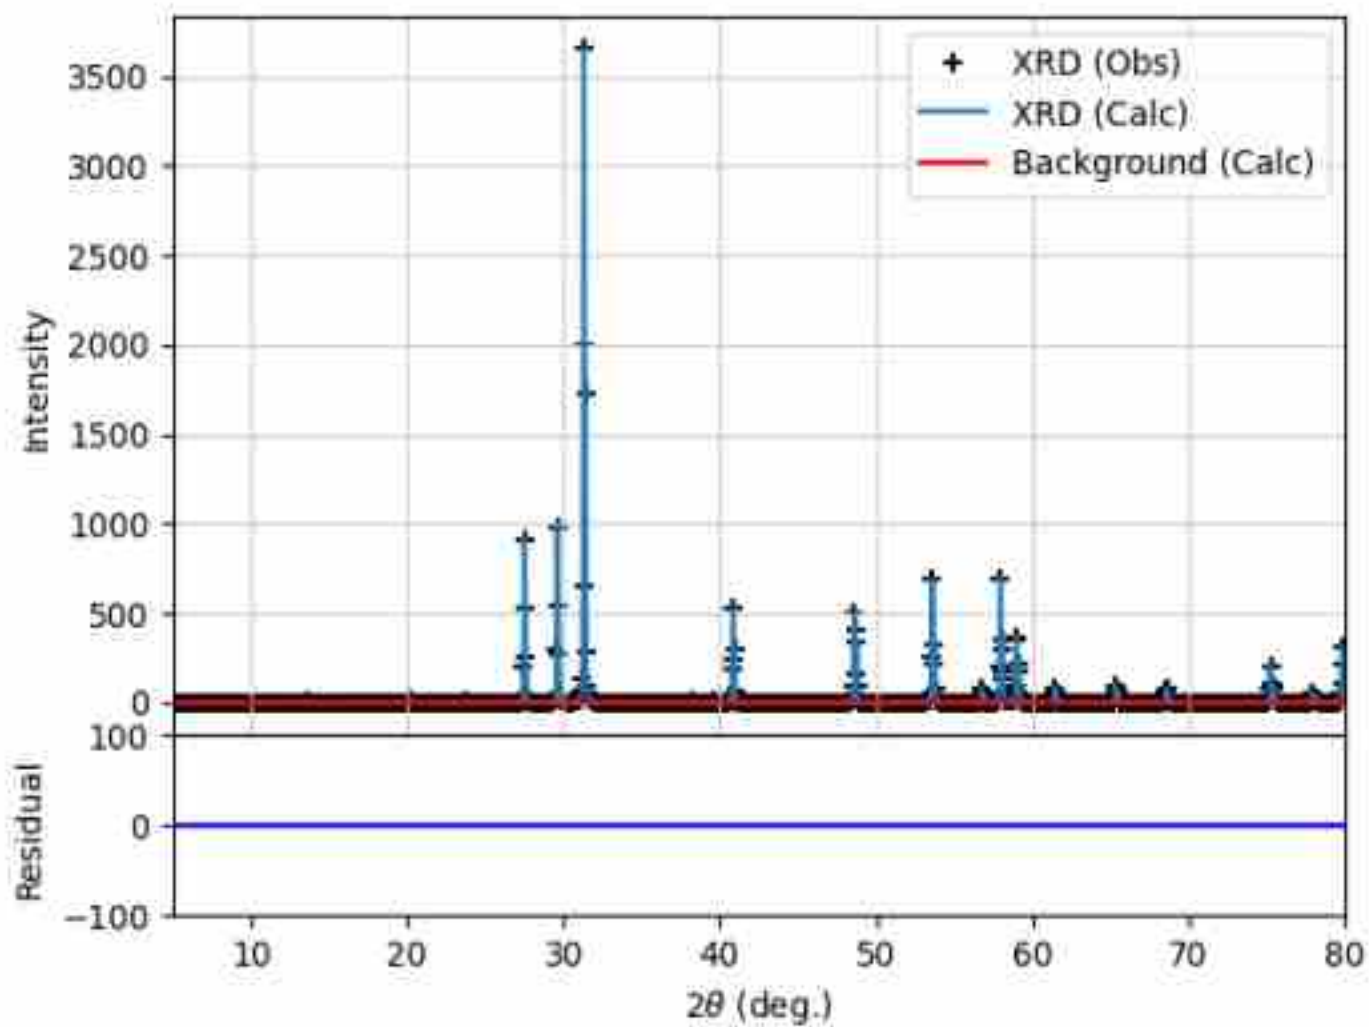

| RMSE before RR | Rwp     | RMSE after RR |
|----------------|---------|---------------|
| 0.027          | 0.00383 | 0.00033       |

# Yb<sub>3</sub>Ga<sub>9</sub>Pd<sub>2</sub>

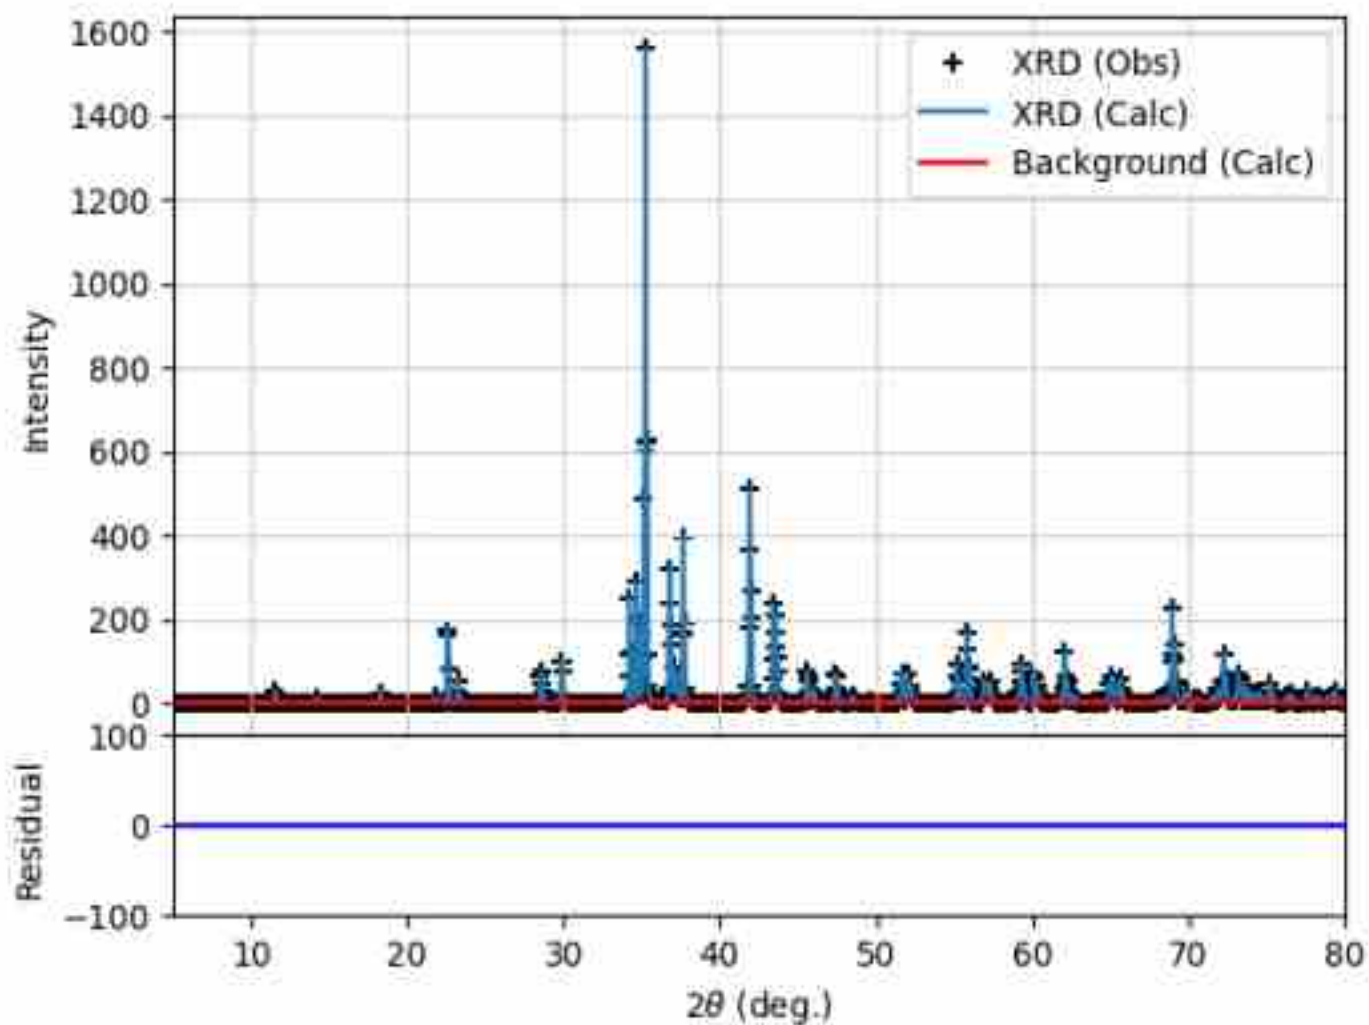

| RMSE before RR | Rwp     | RMSE after RR |
|----------------|---------|---------------|
| 0.027          | 0.00709 | 0.00085       |

# Yb10Ir6

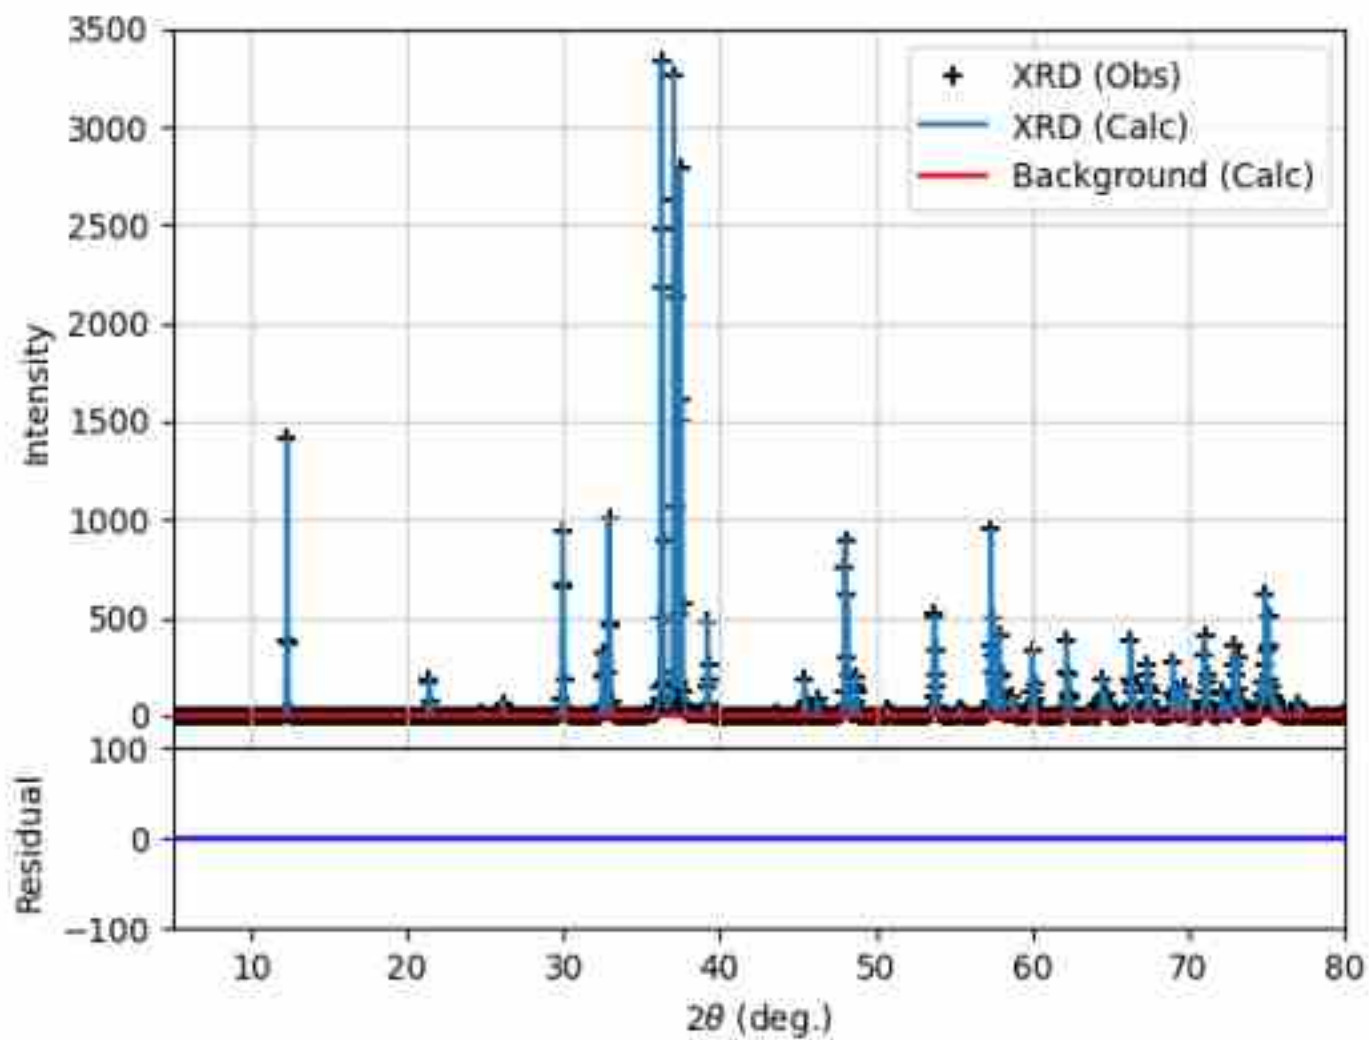

| RMSE before RR | Rwp     | RMSE after RR |
|----------------|---------|---------------|
| 0.027          | 0.00444 | 0.00044       |

# Zr<sub>4</sub>In<sub>2</sub>C<sub>2</sub>

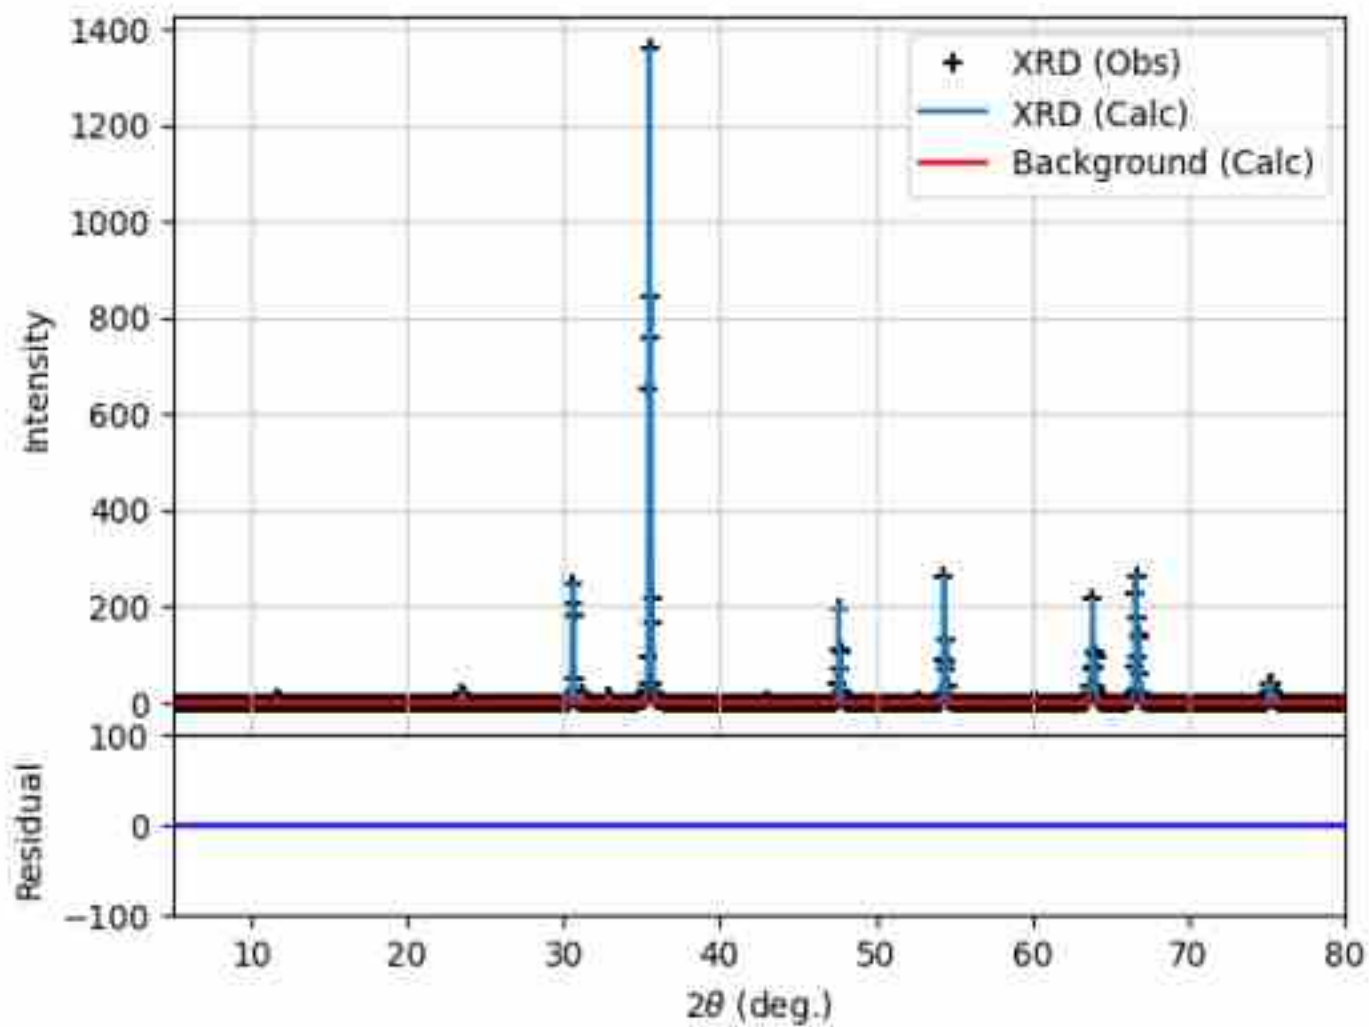

| RMSE before RR | Rwp     | RMSE after RR |
|----------------|---------|---------------|
| 0.027          | 0.00336 | 0.00062       |



# Al<sub>2</sub>Fe<sub>4</sub>O<sub>8</sub>

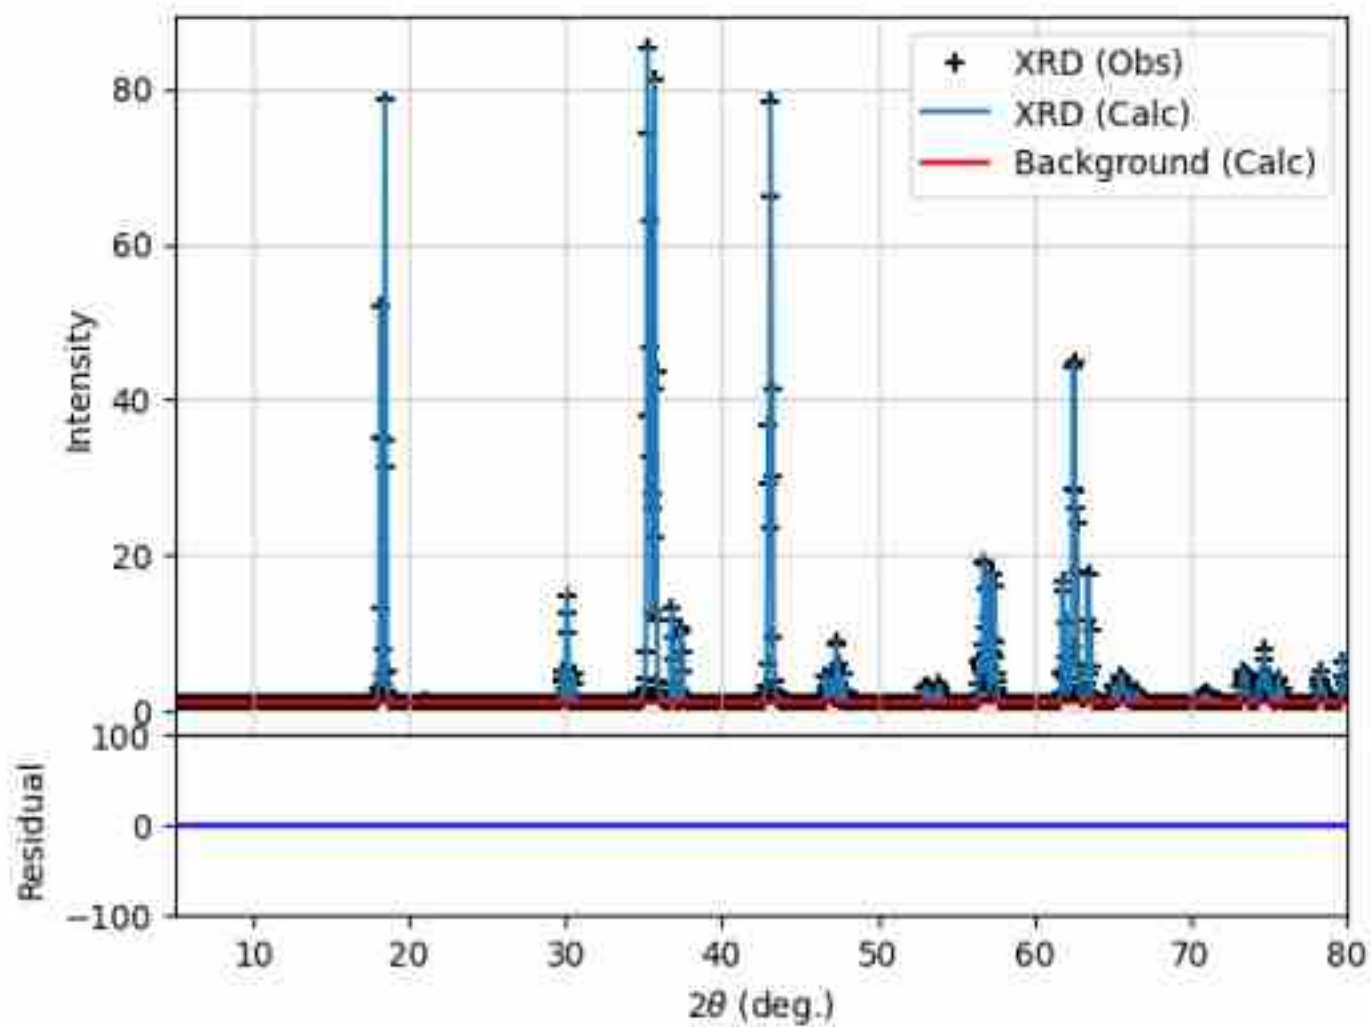

| RMSE before RR | Rwp    | RMSE after RR |
|----------------|--------|---------------|
| 0.028          | 0.0003 | 0.00019       |

# Ba<sub>1</sub>Sr<sub>2</sub>Y<sub>2</sub>Cu<sub>2</sub>Pt<sub>1</sub>O<sub>10</sub>

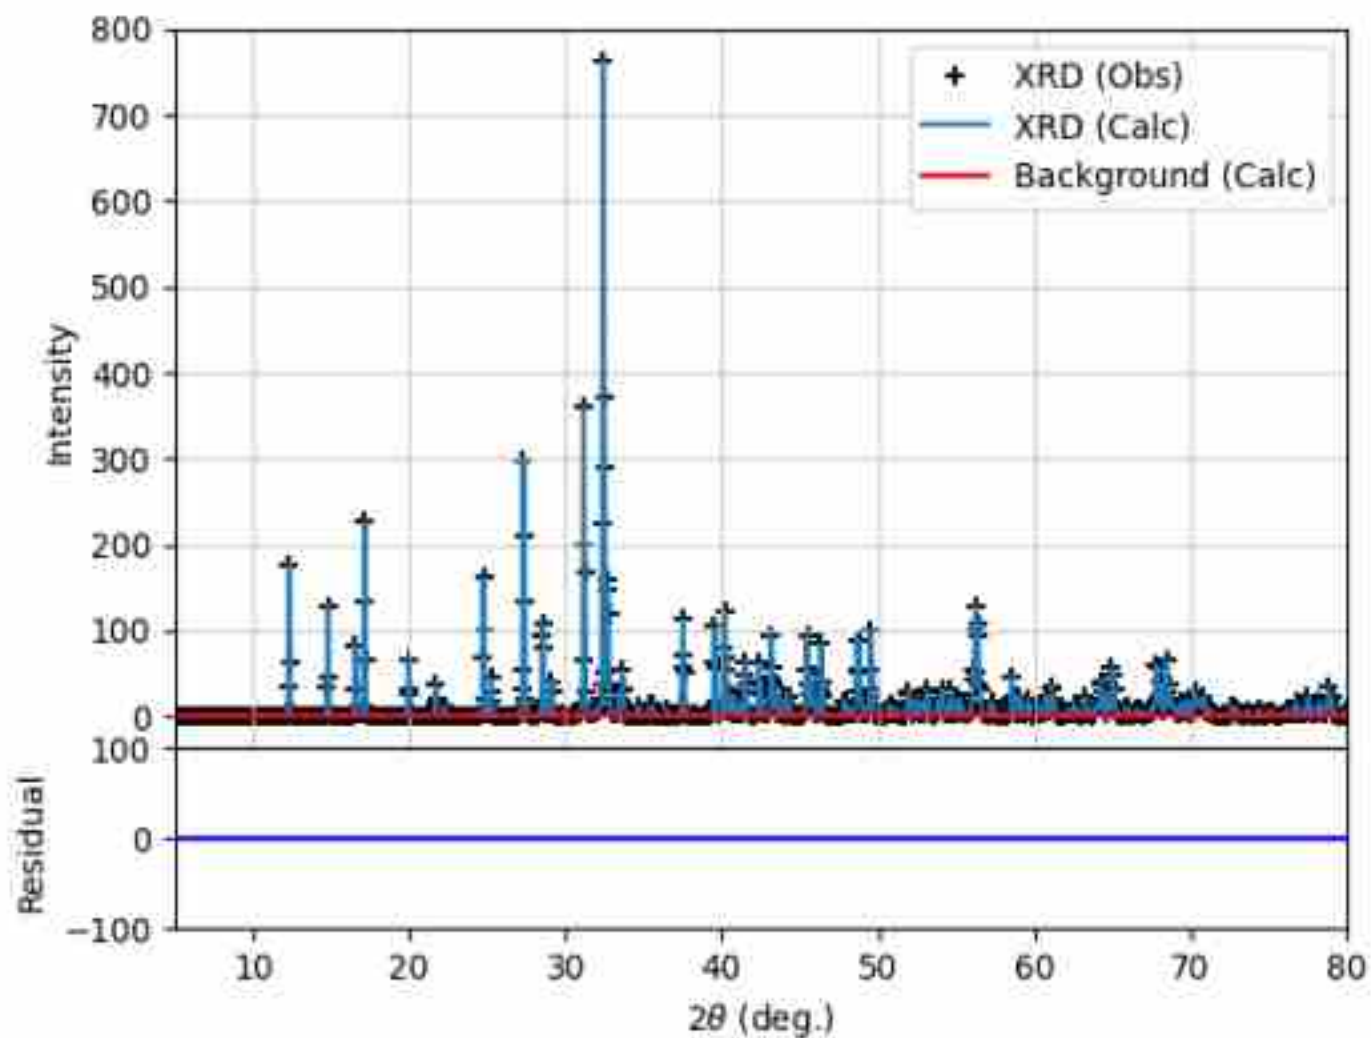

| RMSE before RR | Rwp     | RMSE after RR |
|----------------|---------|---------------|
| 0.028          | 0.00399 | 0.00092       |

# Ba1Ti1B2O6

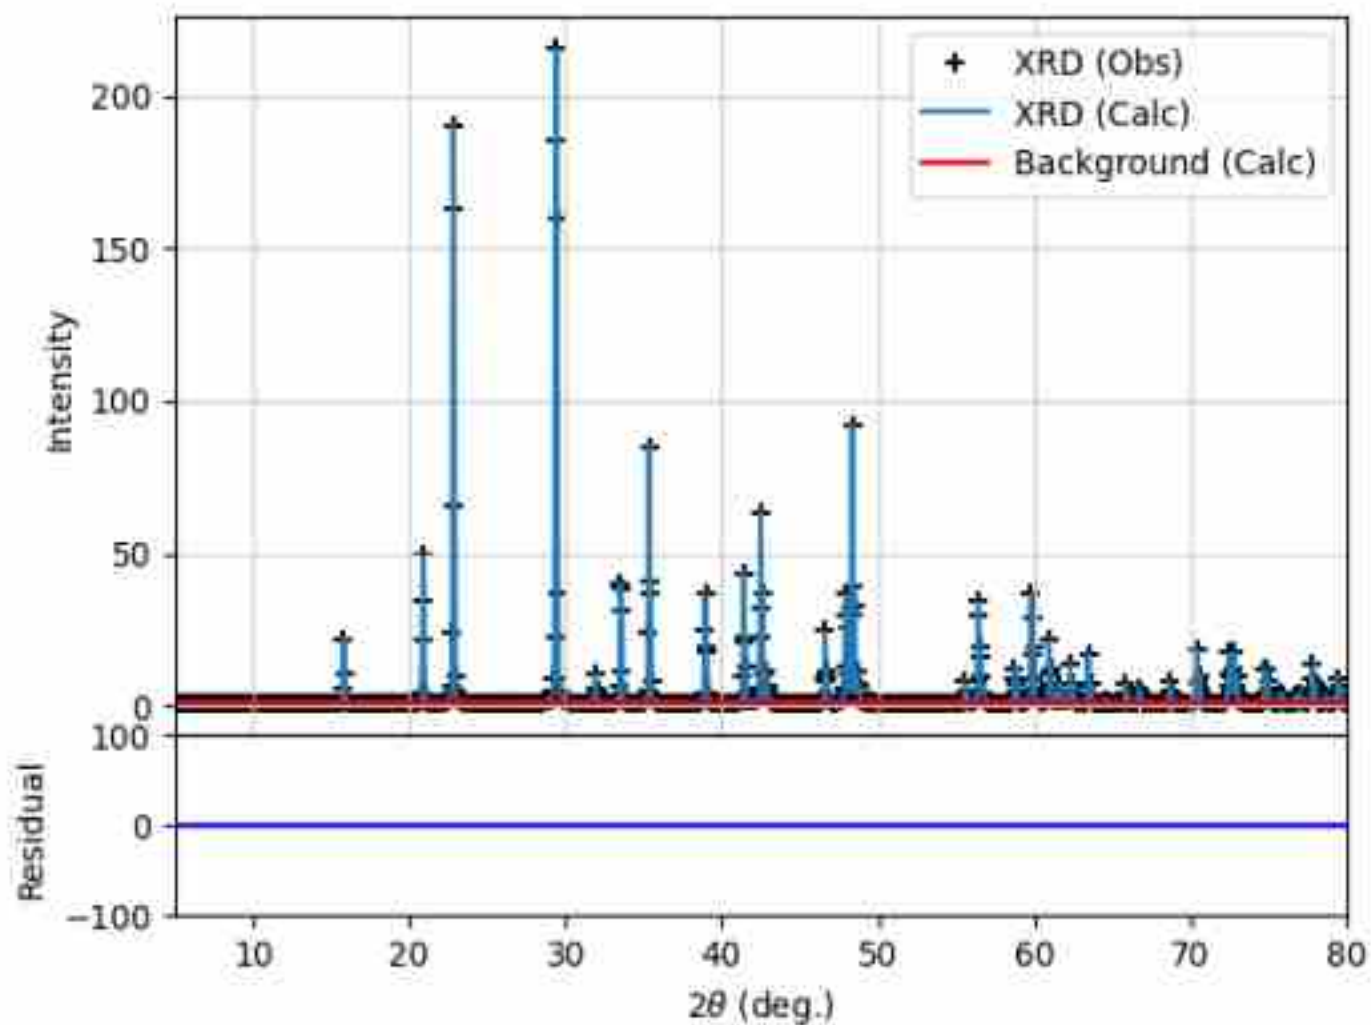

| RMSE before RR | Rwp     | RMSE after RR |
|----------------|---------|---------------|
| 0.028          | 0.00284 | 0.00116       |

# Ba<sub>2</sub>Cu<sub>1</sub>W<sub>1</sub>O<sub>6</sub>

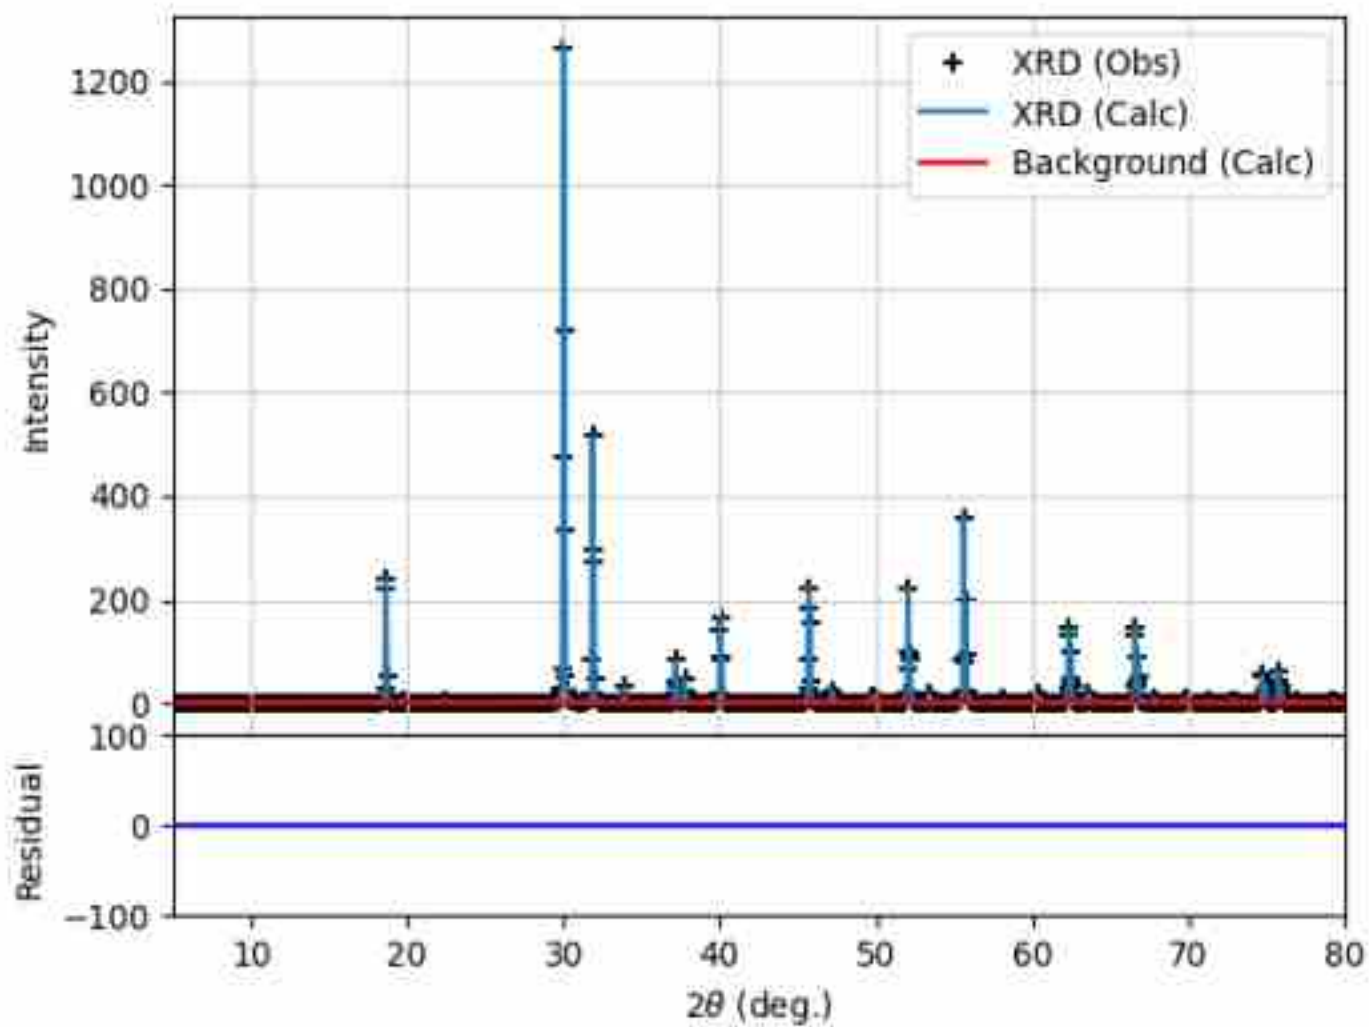

| RMSE before RR | Rwp     | RMSE after RR |
|----------------|---------|---------------|
| 0.028          | 0.00406 | 0.00193       |

# Ba4Nb2O9

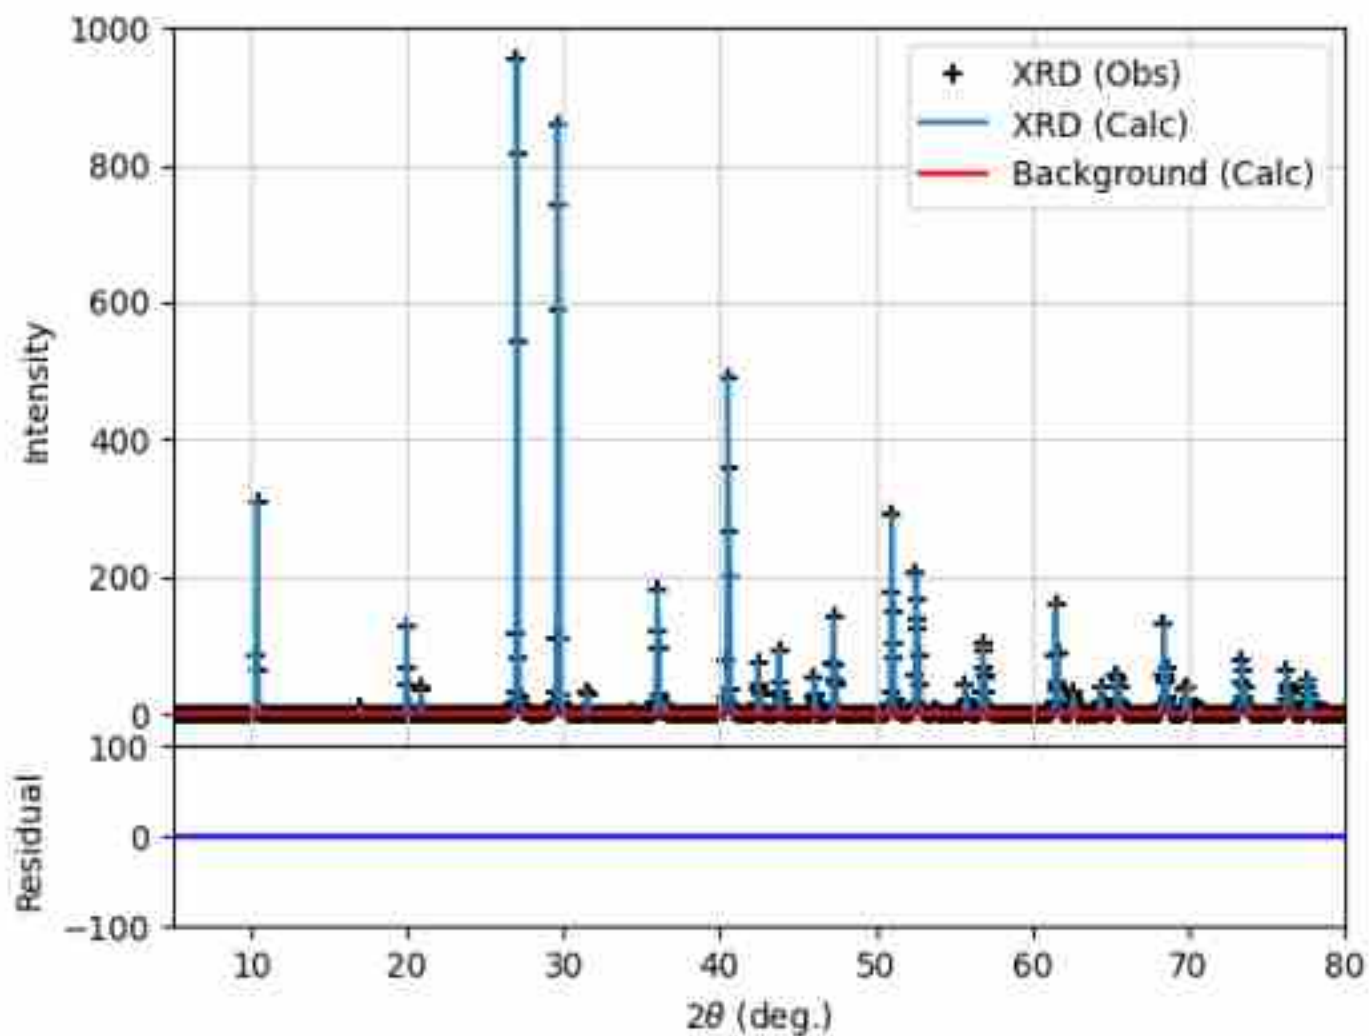

| RMSE before RR | Rwp     | RMSE after RR |
|----------------|---------|---------------|
| 0.028          | 0.00381 | 0.00208       |

# Bi<sub>8</sub>Se<sub>12</sub>

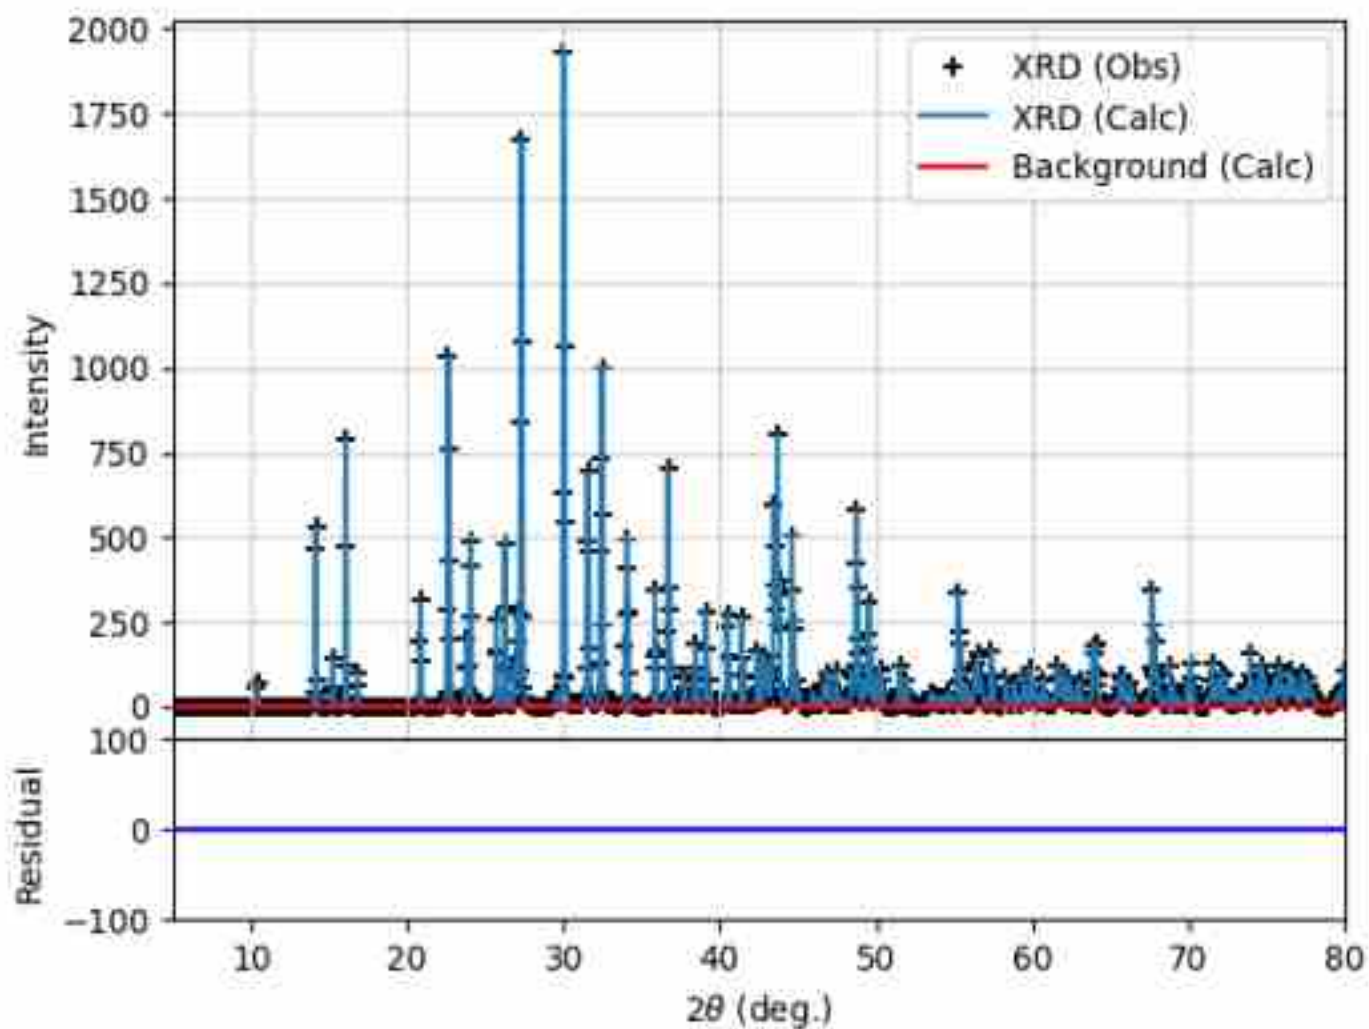

| RMSE before RR | Rwp     | RMSE after RR |
|----------------|---------|---------------|
| 0.028          | 0.00417 | 0.00045       |

# Ca<sub>2</sub>Bi<sub>4</sub>O<sub>12</sub>

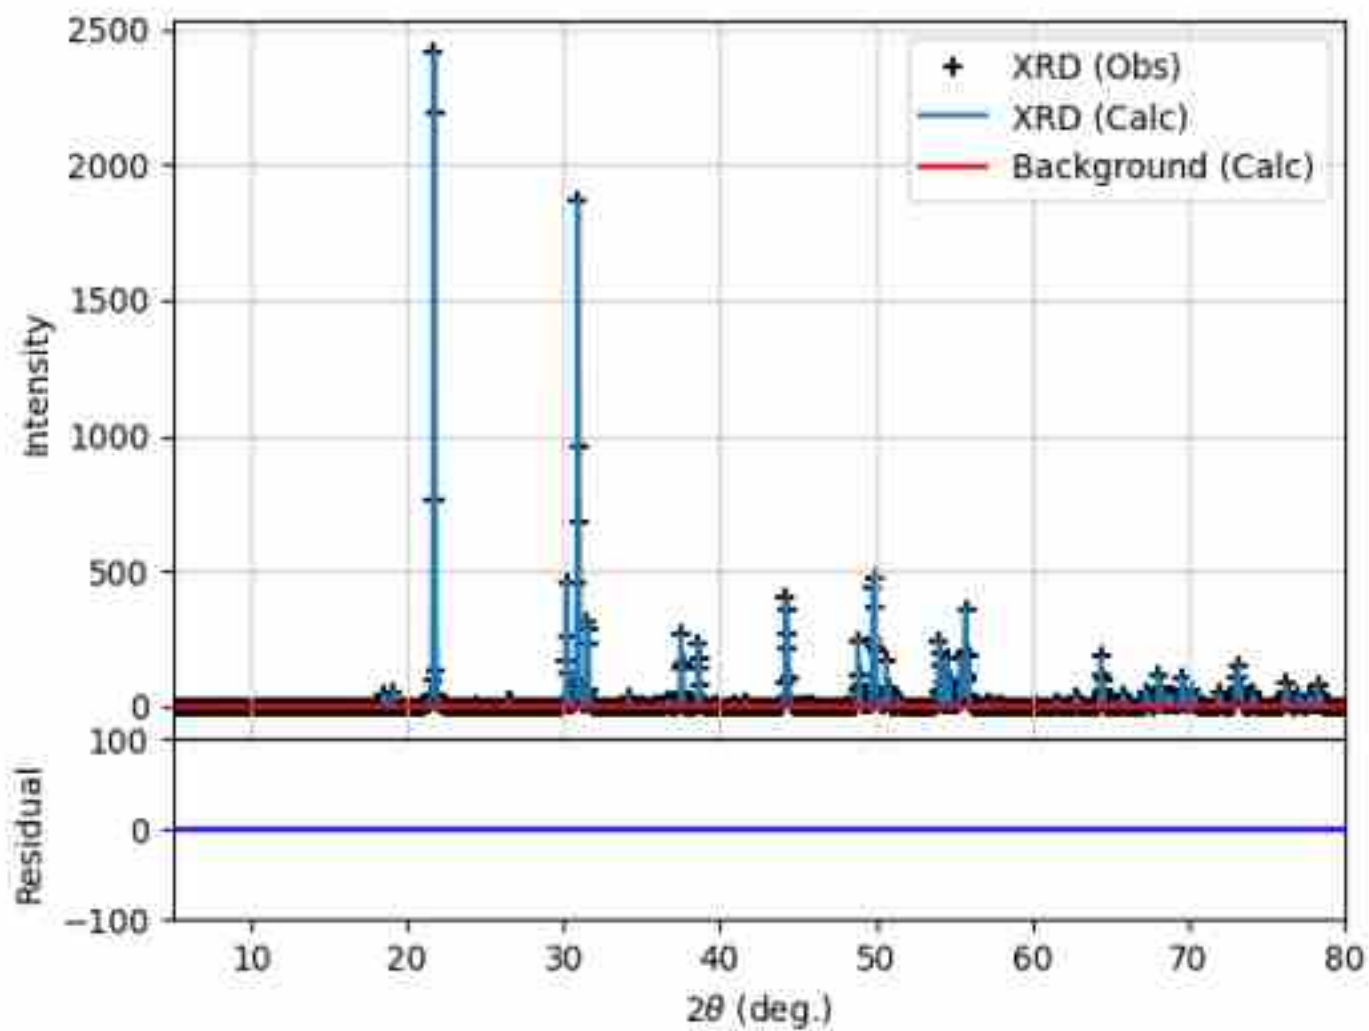

| RMSE before RR | Rwp     | RMSE after RR |
|----------------|---------|---------------|
| 0.028          | 0.00422 | 0.00191       |

# Ca<sub>2</sub>Cu<sub>4</sub>O<sub>8</sub>

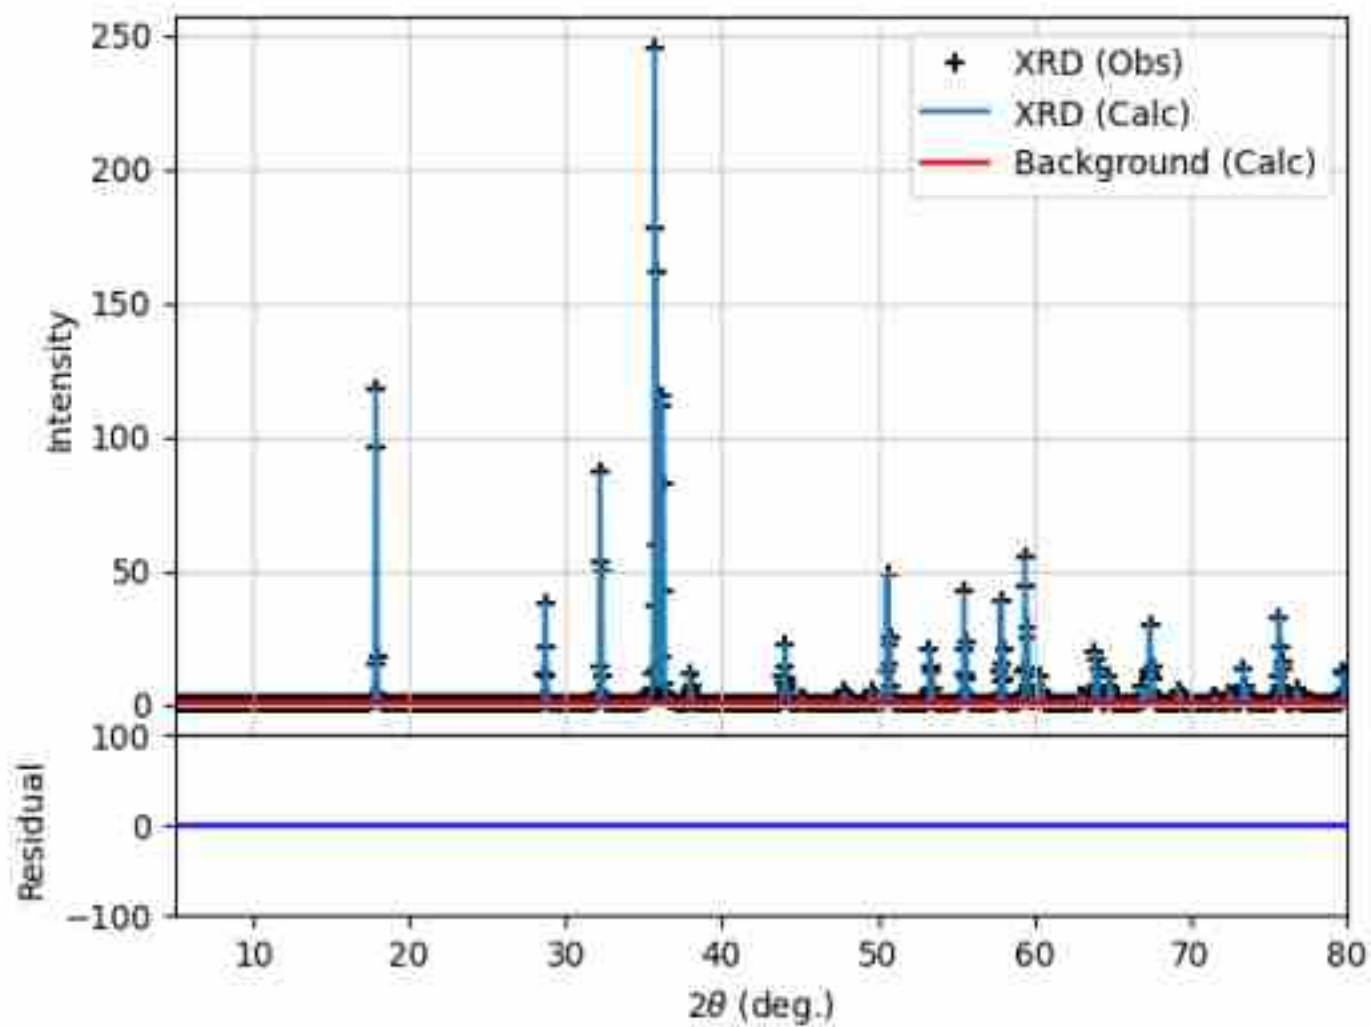

| RMSE before RR | Rwp     | RMSE after RR |
|----------------|---------|---------------|
| 0.028          | 0.00798 | 0.00251       |



# Ca<sub>2</sub>In<sub>4</sub>O<sub>8</sub>

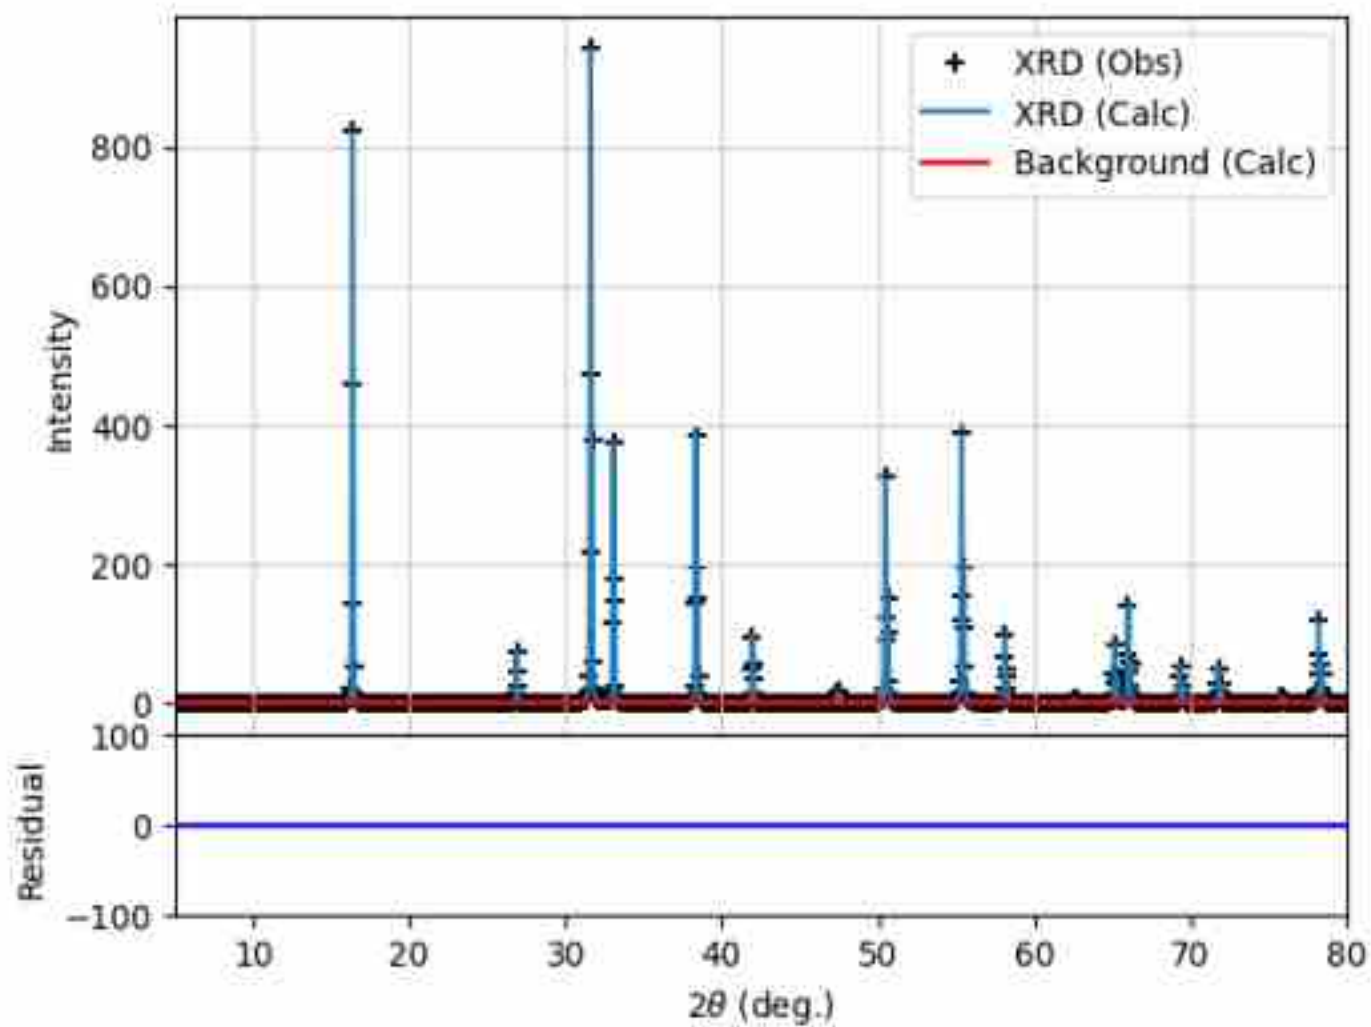

| RMSE before RR | Rwp     | RMSE after RR |
|----------------|---------|---------------|
| 0.028          | 0.01238 | 0.00395       |

# Ca<sub>4</sub>Ge<sub>8</sub>Pt<sub>4</sub>

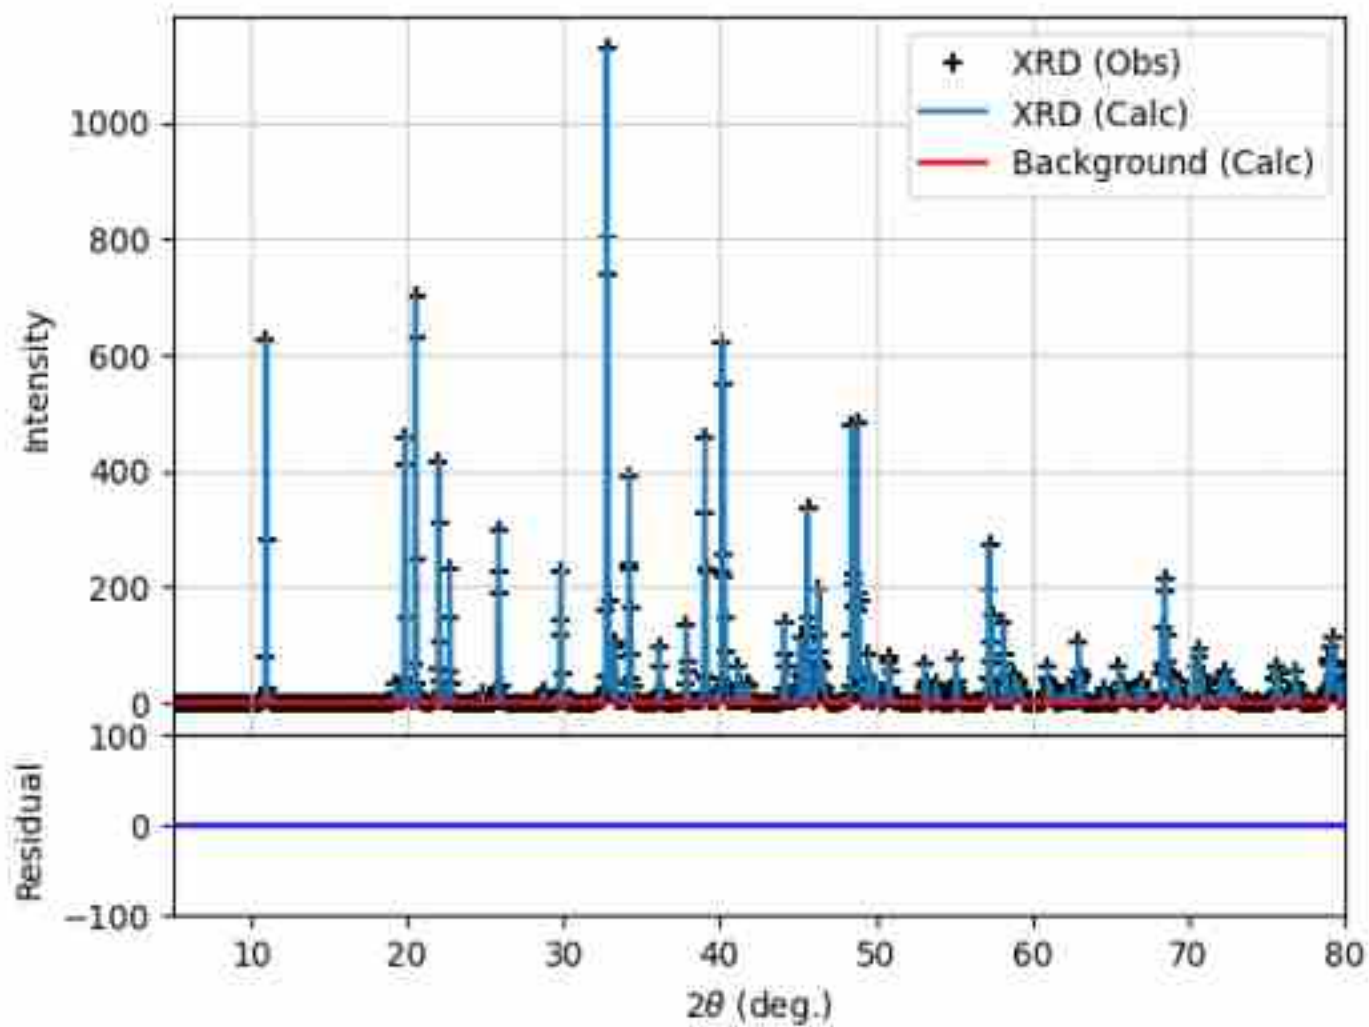

| RMSE before RR | Rwp     | RMSE after RR |
|----------------|---------|---------------|
| 0.028          | 0.00382 | 0.00035       |

# Ca4Mg2

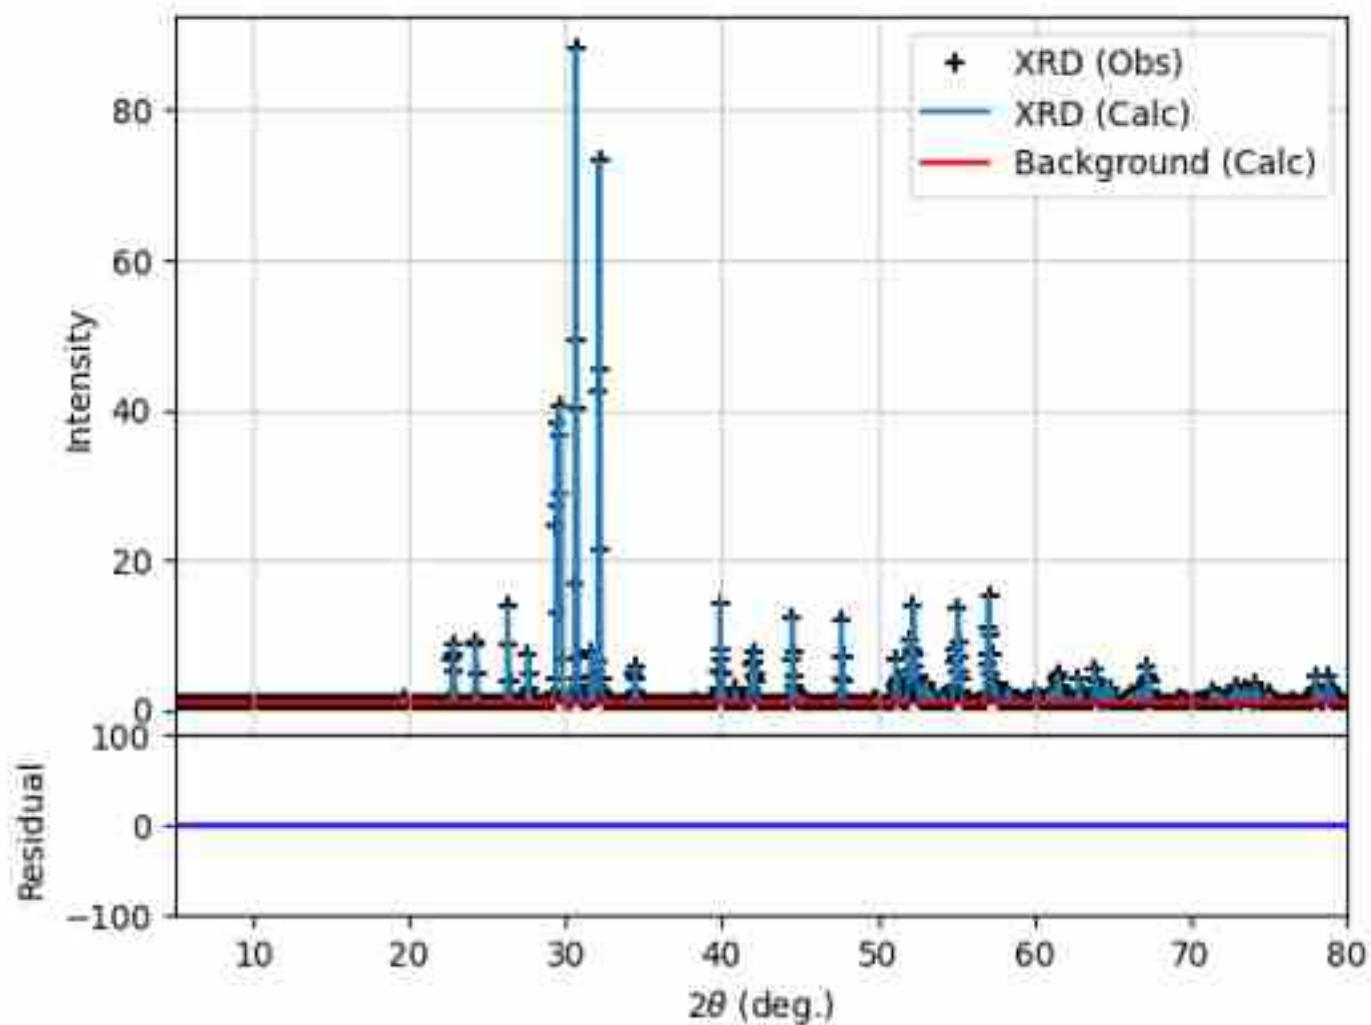

| RMSE before RR | Rwp     | RMSE after RR |
|----------------|---------|---------------|
| 0.028          | 0.00241 | 0.00023       |

# Cd1Bi1I1O2

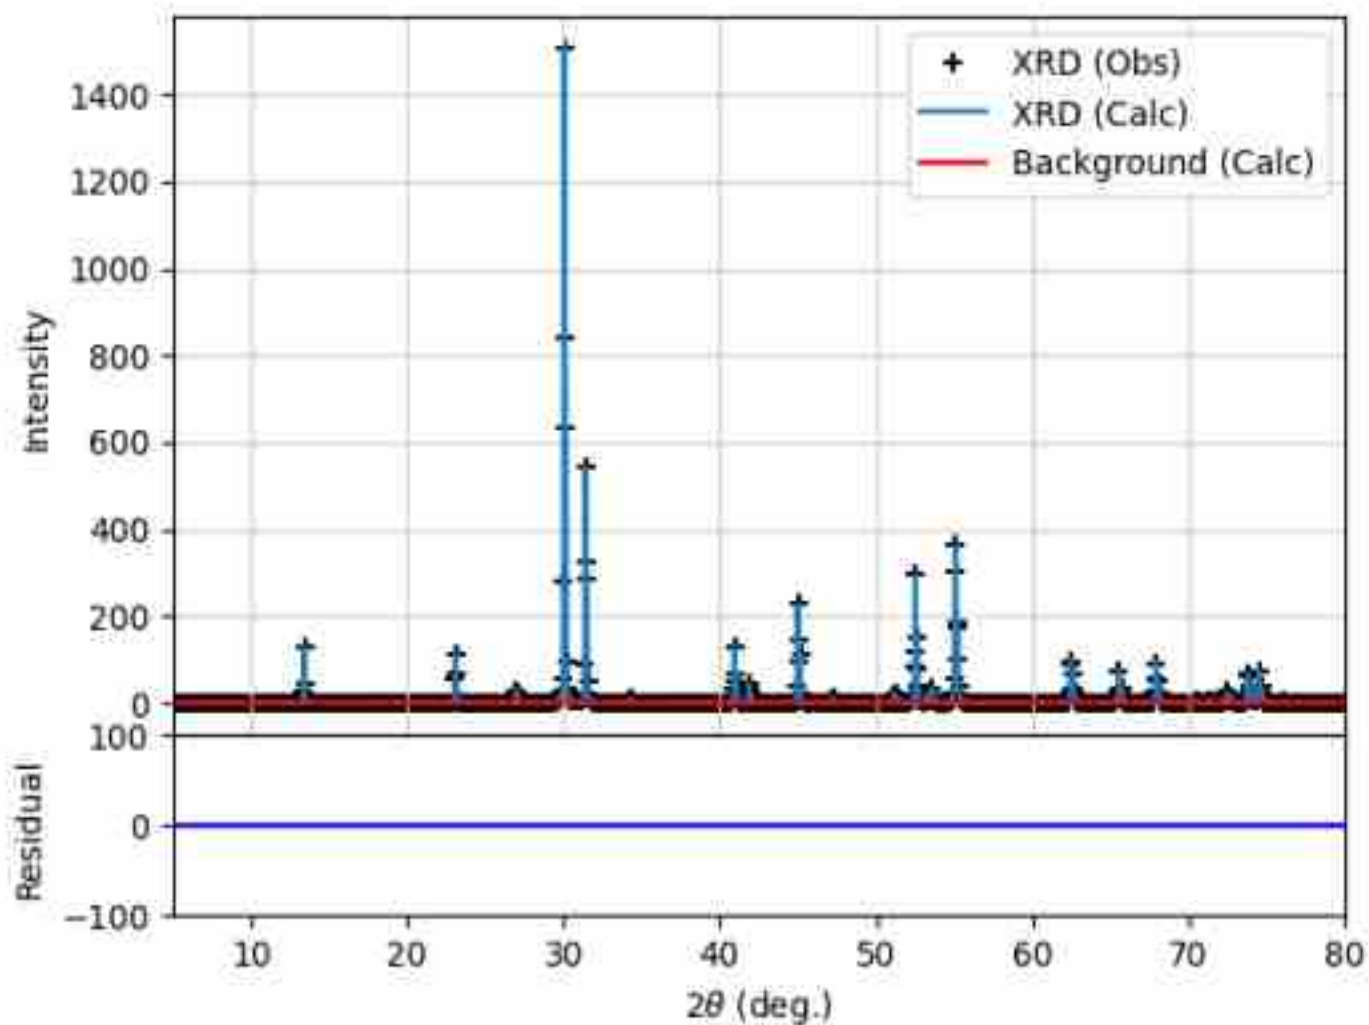

| RMSE before RR | Rwp     | RMSE after RR |
|----------------|---------|---------------|
| 0.028          | 0.00329 | 0.00073       |

# $\text{Cd}_2\text{Ga}_2\text{Ag}_4\text{Se}_8$

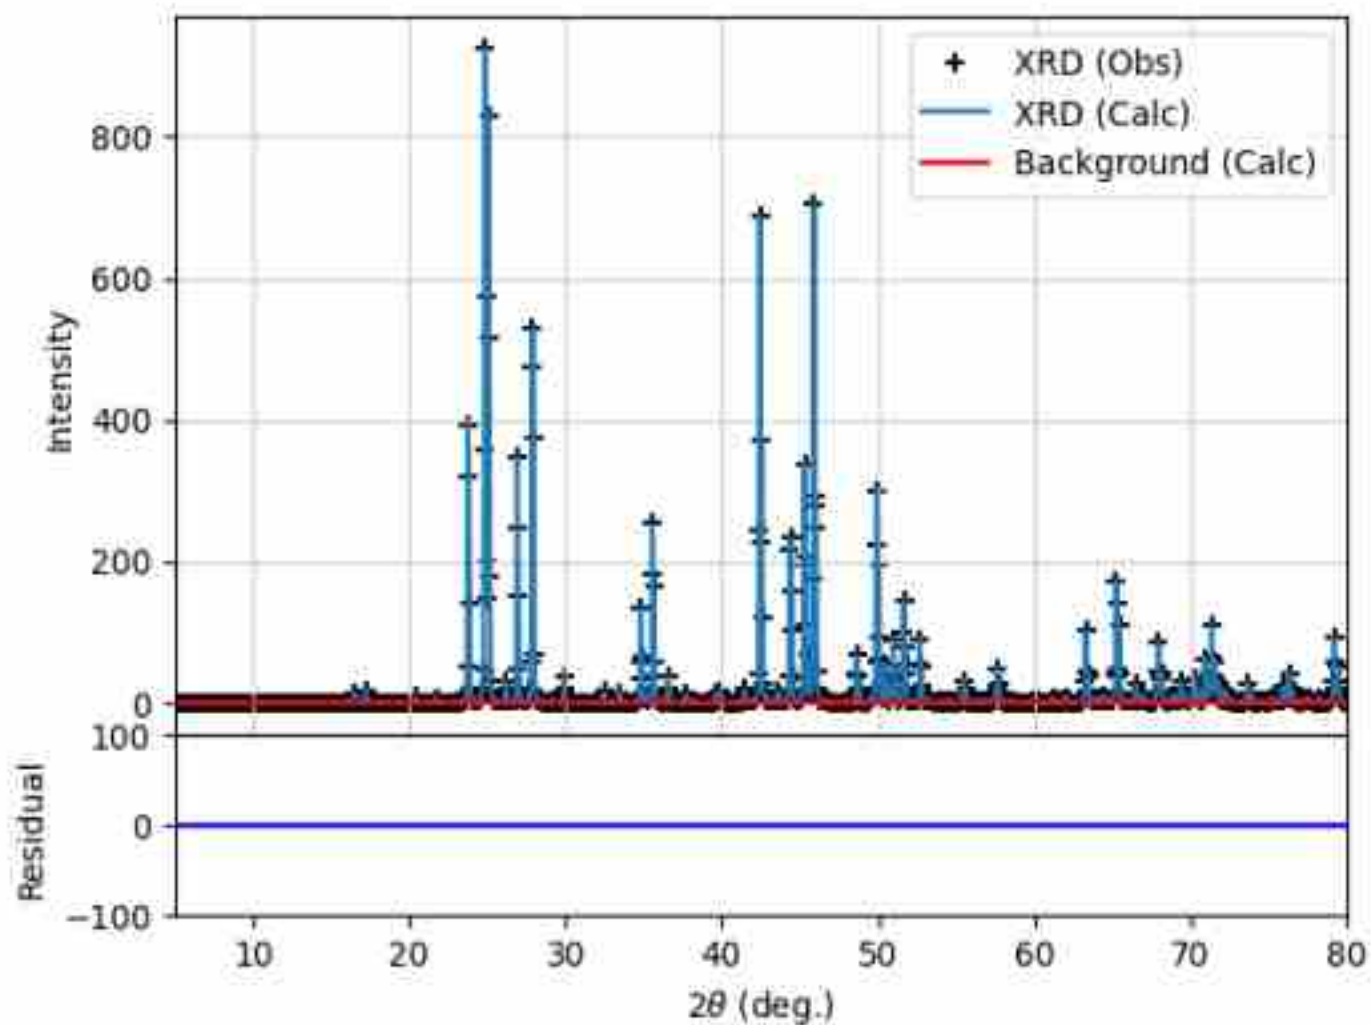

| RMSE before RR | Rwp     | RMSE after RR |
|----------------|---------|---------------|
| 0.028          | 0.00429 | 0.00045       |

# Ce3Mg3

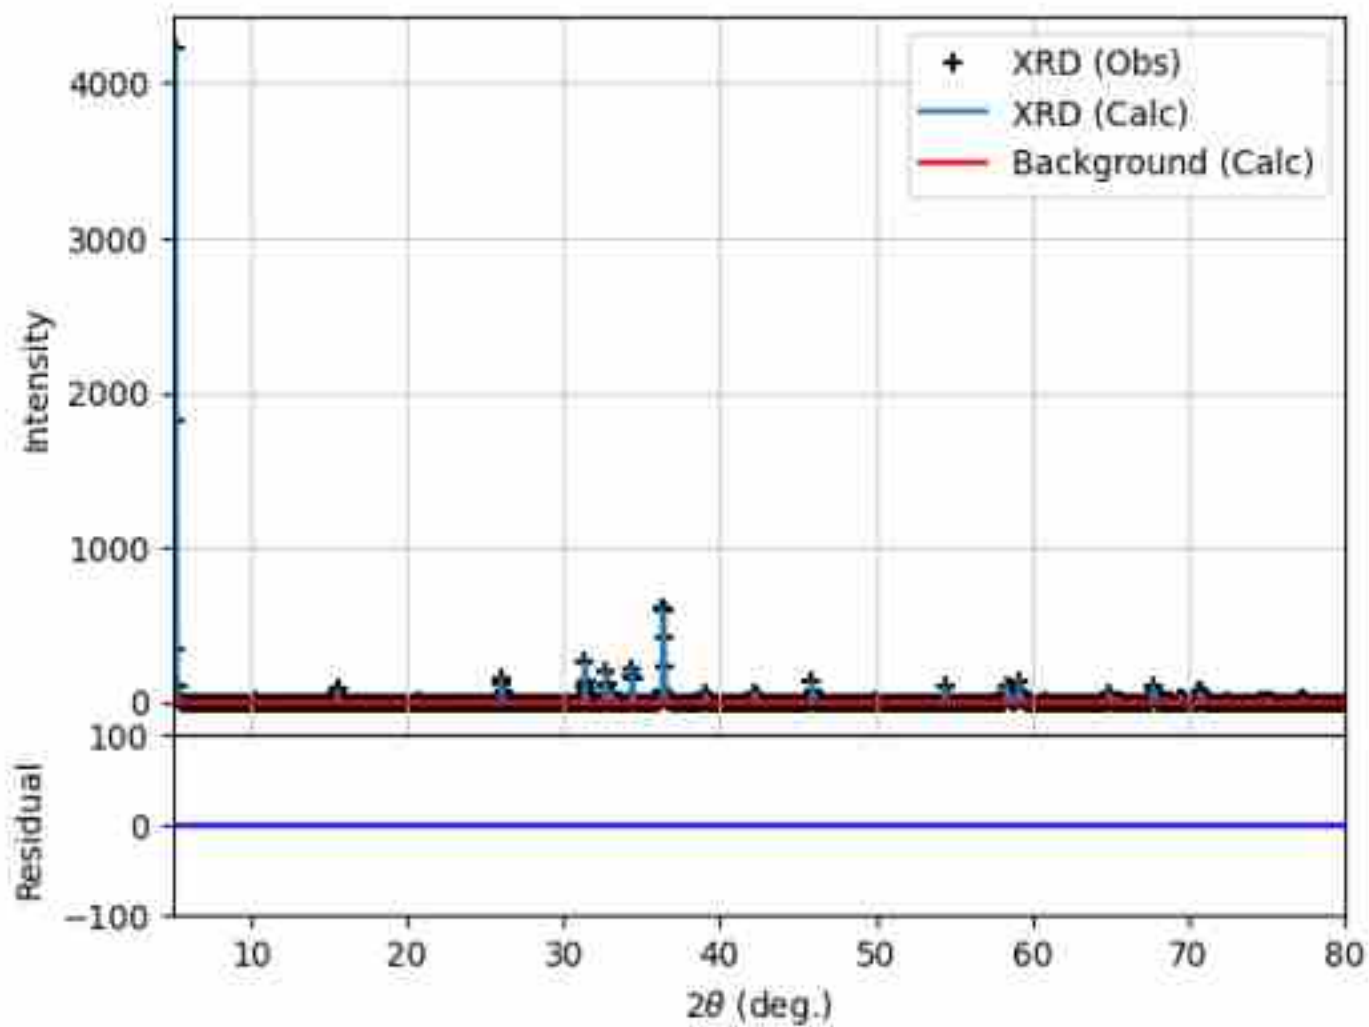

| RMSE before RR | Rwp     | RMSE after RR |
|----------------|---------|---------------|
| 0.028          | 0.01825 | 0.00354       |

# Ce4Sm1O9

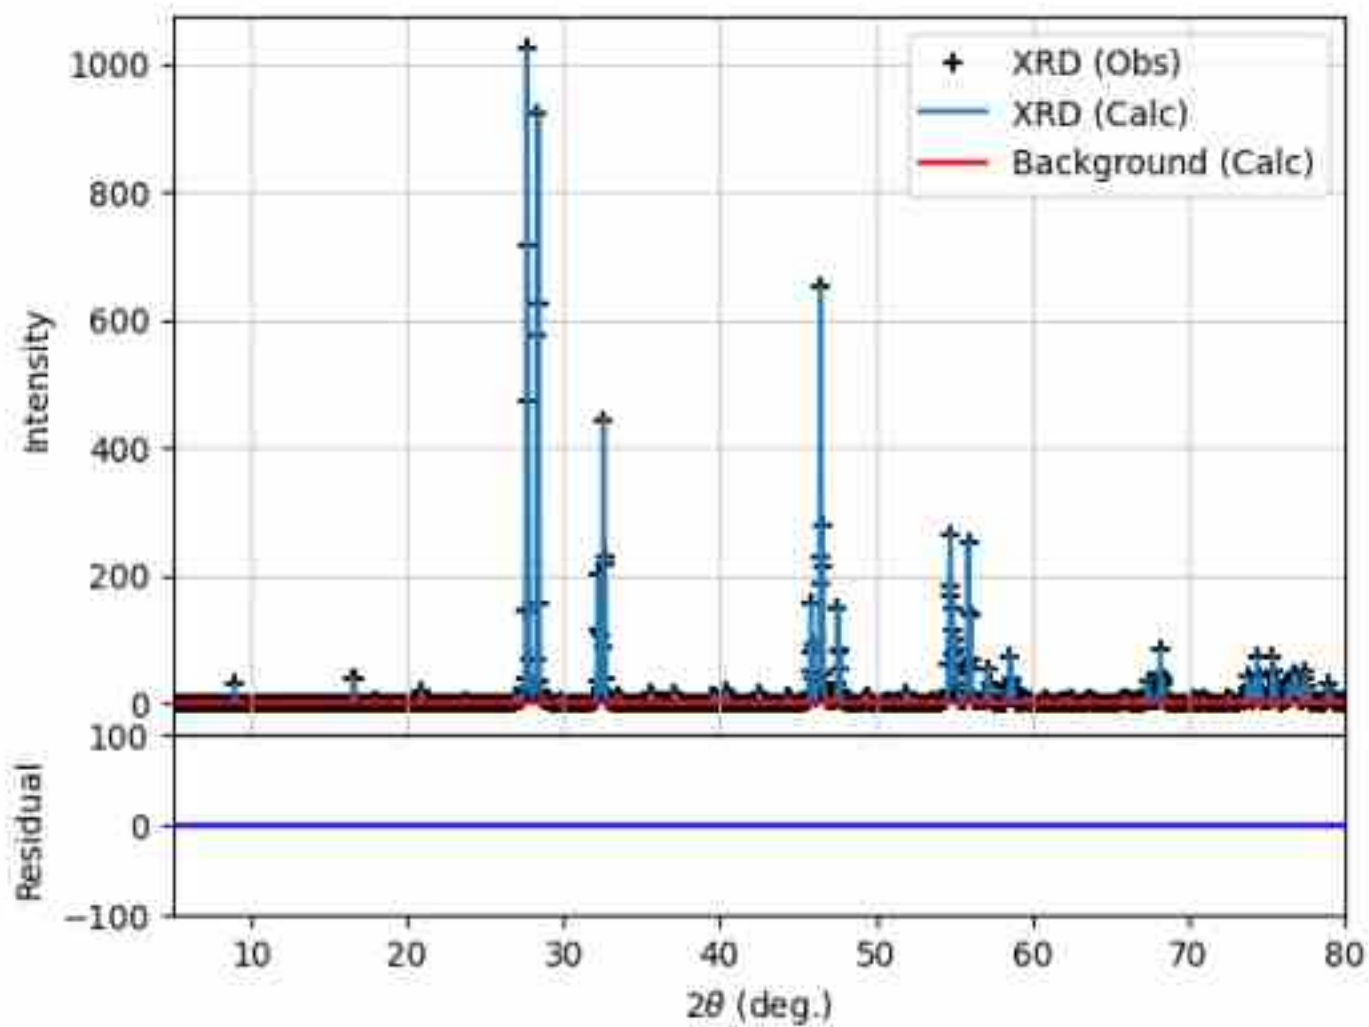

| RMSE before RR | Rwp     | RMSE after RR |
|----------------|---------|---------------|
| 0.028          | 0.00332 | 0.0011        |

# Ce<sub>4</sub>Zn<sub>4</sub>Ge<sub>4</sub>

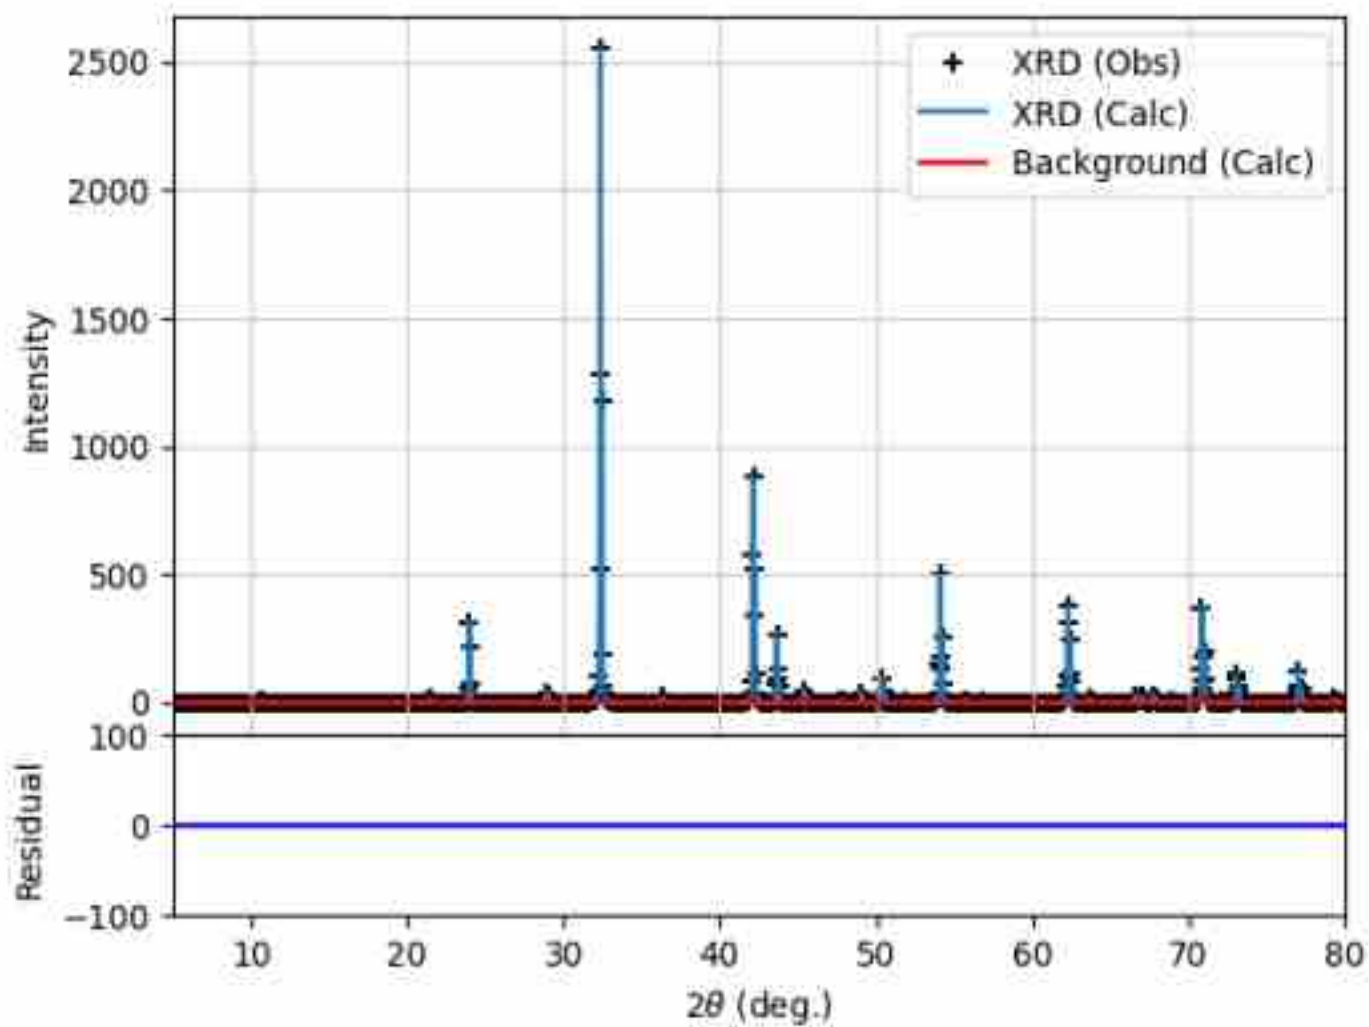

| RMSE before RR | Rwp    | RMSE after RR |
|----------------|--------|---------------|
| 0.028          | 0.0053 | 0.00039       |



# Cr<sub>4</sub>Cu<sub>3</sub>O<sub>12</sub>

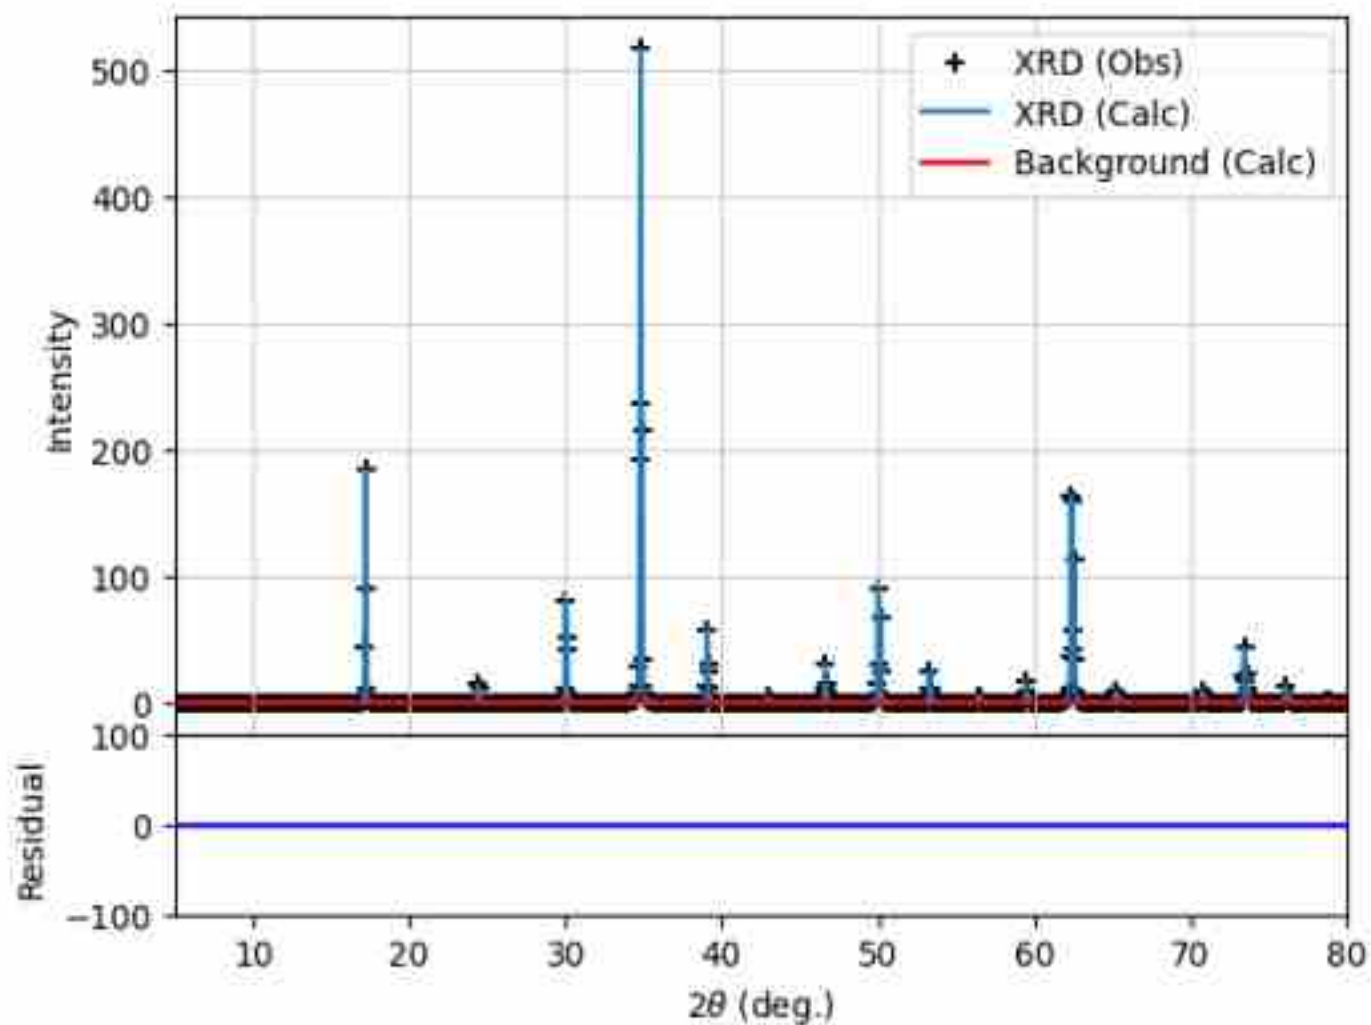

| RMSE before RR | Rwp     | RMSE after RR |
|----------------|---------|---------------|
| 0.028          | 0.00868 | 0.00498       |

# Cs<sub>2</sub>Cl<sub>2</sub>O<sub>8</sub>

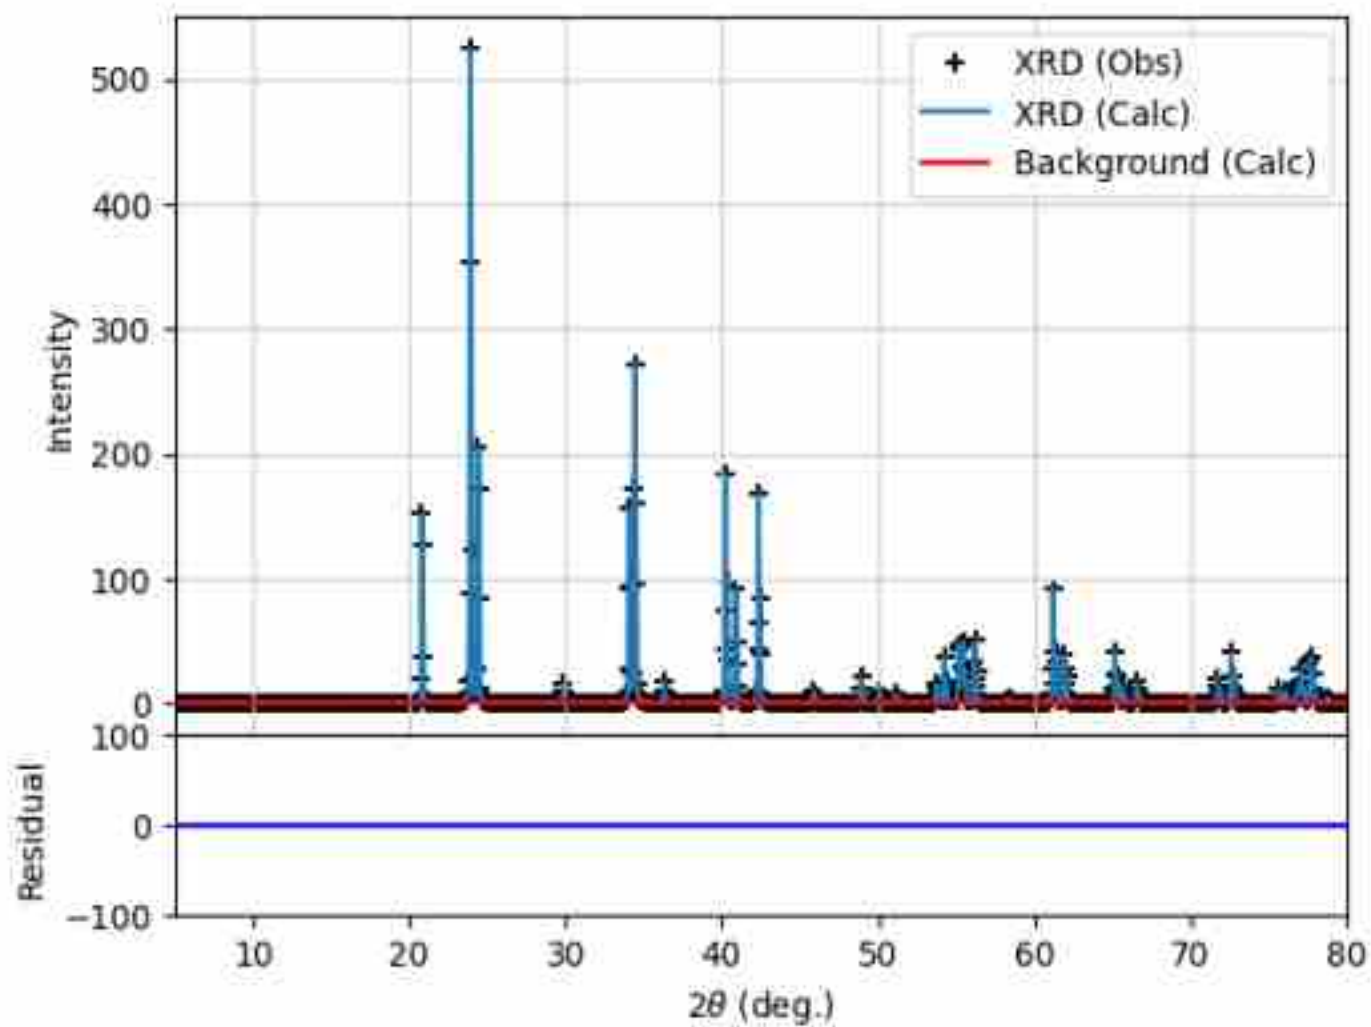

| RMSE before RR | Rwp     | RMSE after RR |
|----------------|---------|---------------|
| 0.028          | 0.00433 | 0.00137       |

# Cs<sub>2</sub>Fe<sub>4</sub>S<sub>6</sub>

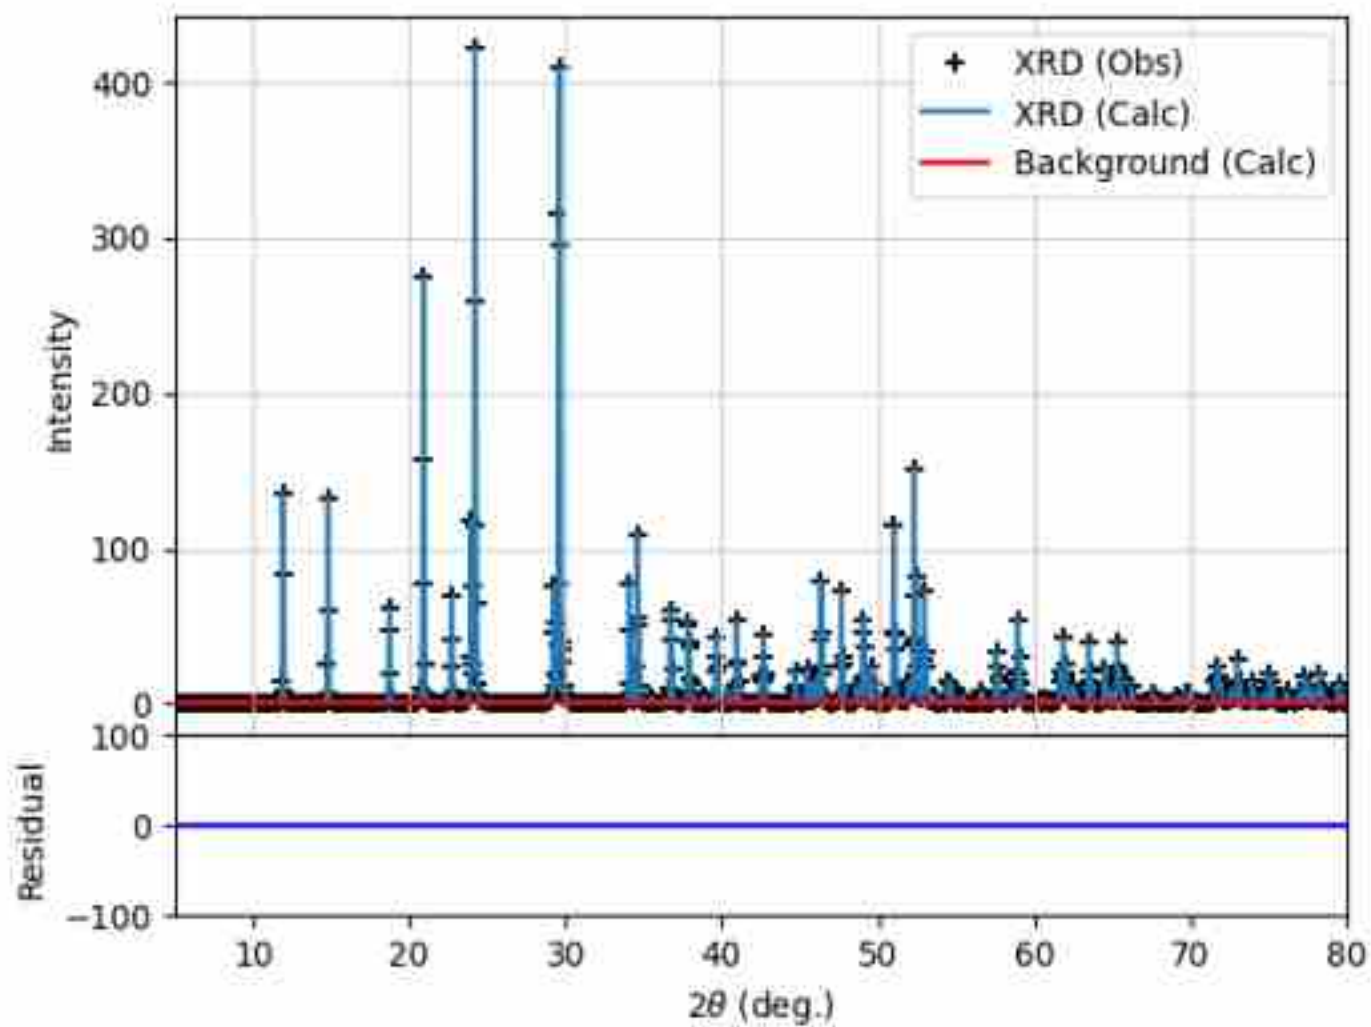

| RMSE before RR | Rwp     | RMSE after RR |
|----------------|---------|---------------|
| 0.028          | 0.00353 | 0.00052       |

# Cs<sub>2</sub>Ni<sub>2</sub>F<sub>6</sub>

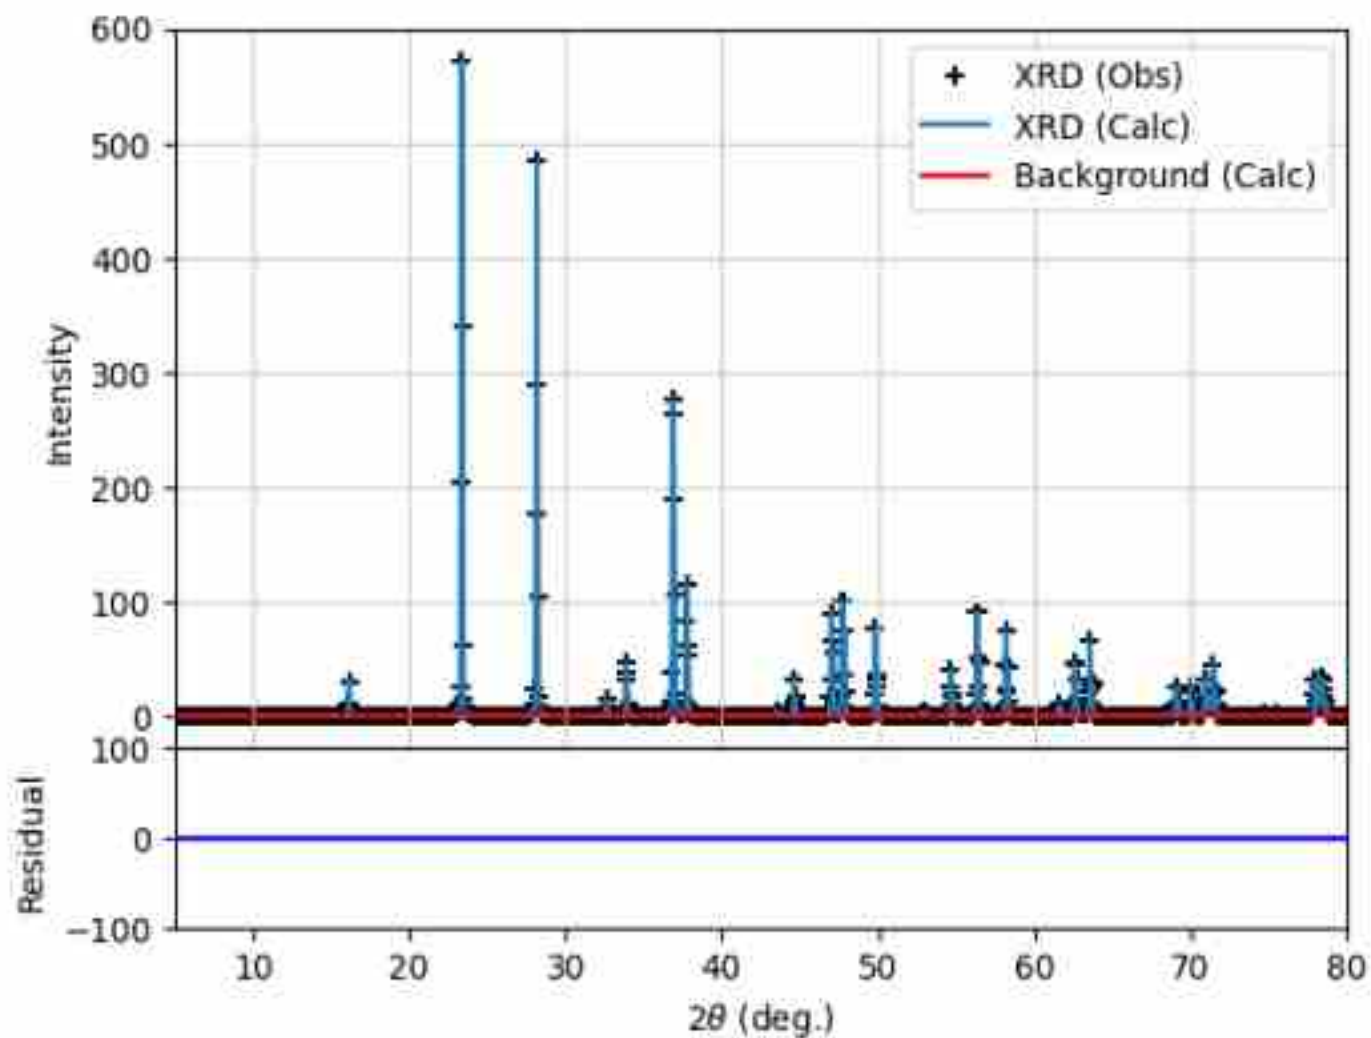

| RMSE before RR | Rwp     | RMSE after RR |
|----------------|---------|---------------|
| 0.028          | 0.01448 | 0.00479       |

# Cs<sub>2</sub>Pb<sub>4</sub>I<sub>10</sub>

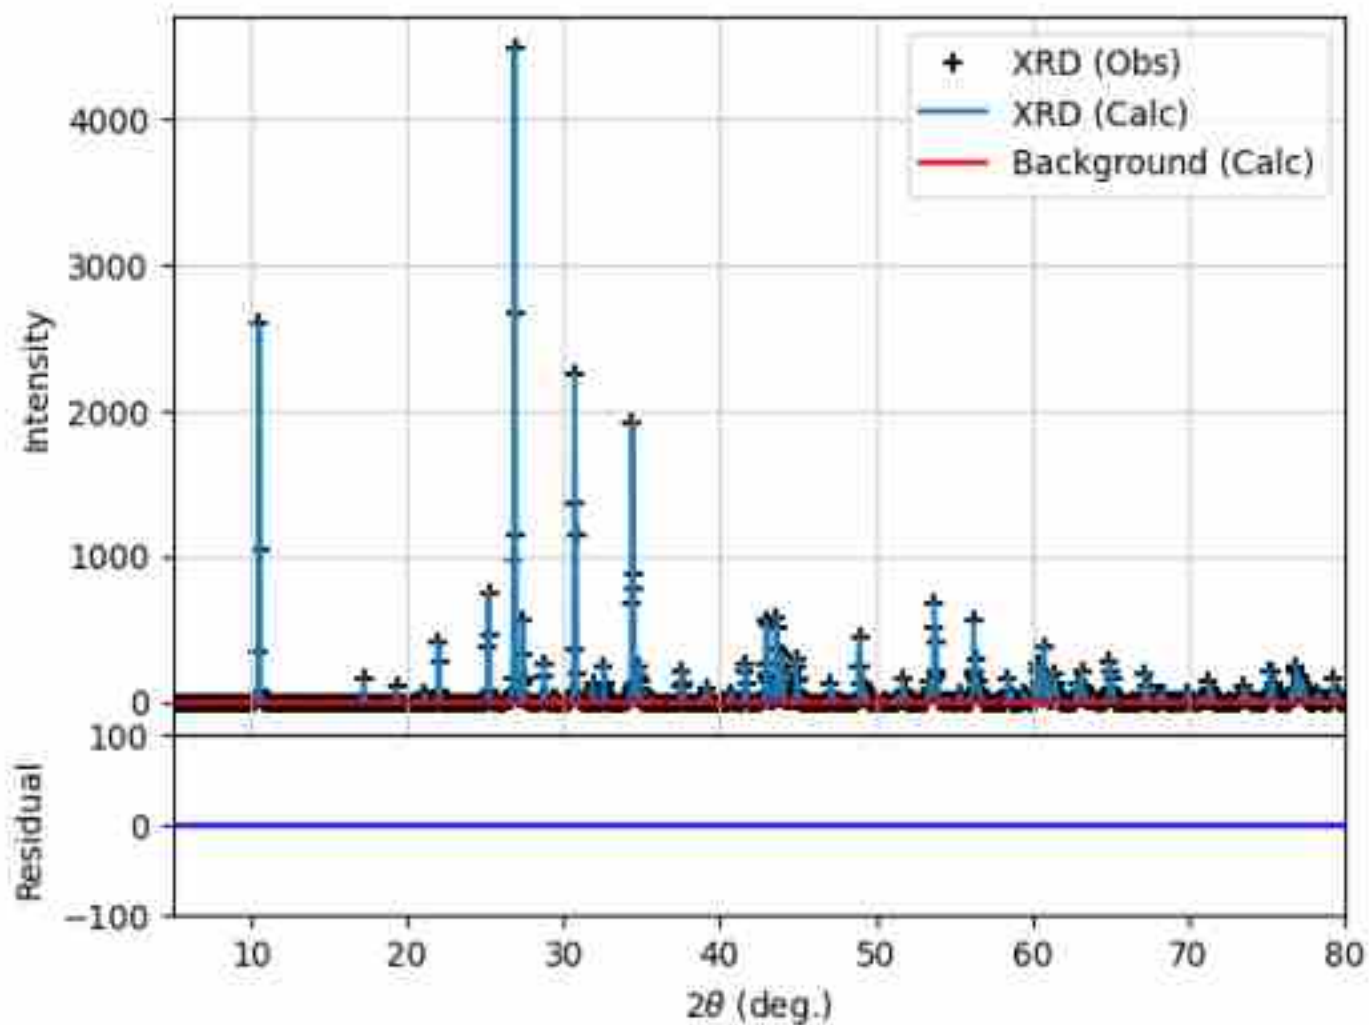

| RMSE before RR | Rwp     | RMSE after RR |
|----------------|---------|---------------|
| 0.028          | 0.00346 | 0.00033       |

# Cs<sub>3</sub>Fe<sub>2</sub>Cl<sub>9</sub>

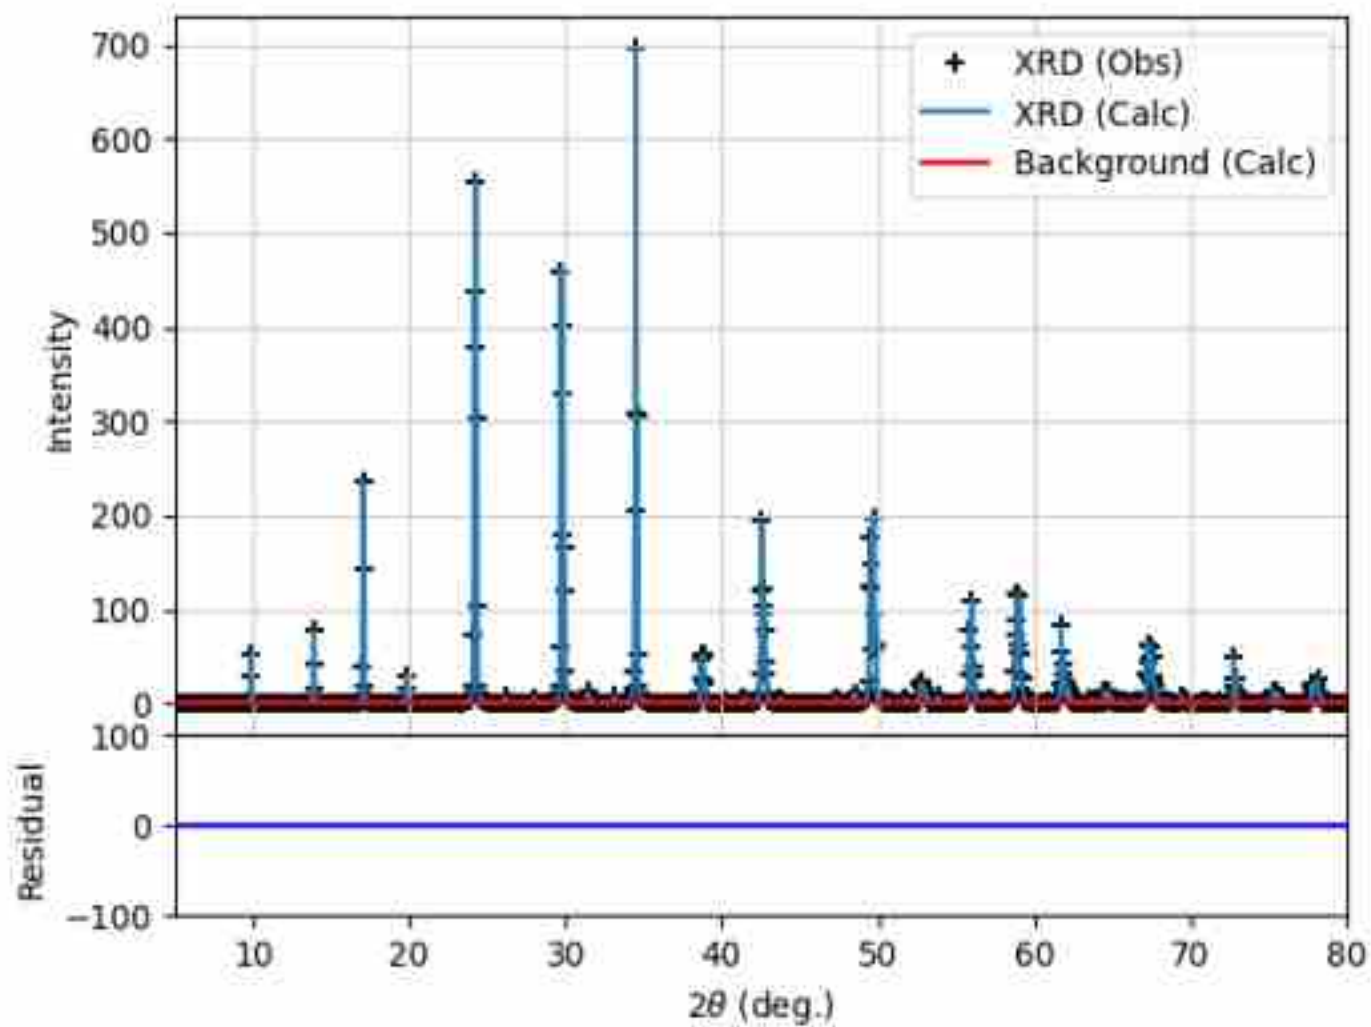

| RMSE before RR | Rwp     | RMSE after RR |
|----------------|---------|---------------|
| 0.028          | 0.00275 | 0.00077       |

# Cs<sub>4</sub>Na<sub>2</sub>Co<sub>2</sub>F<sub>12</sub>

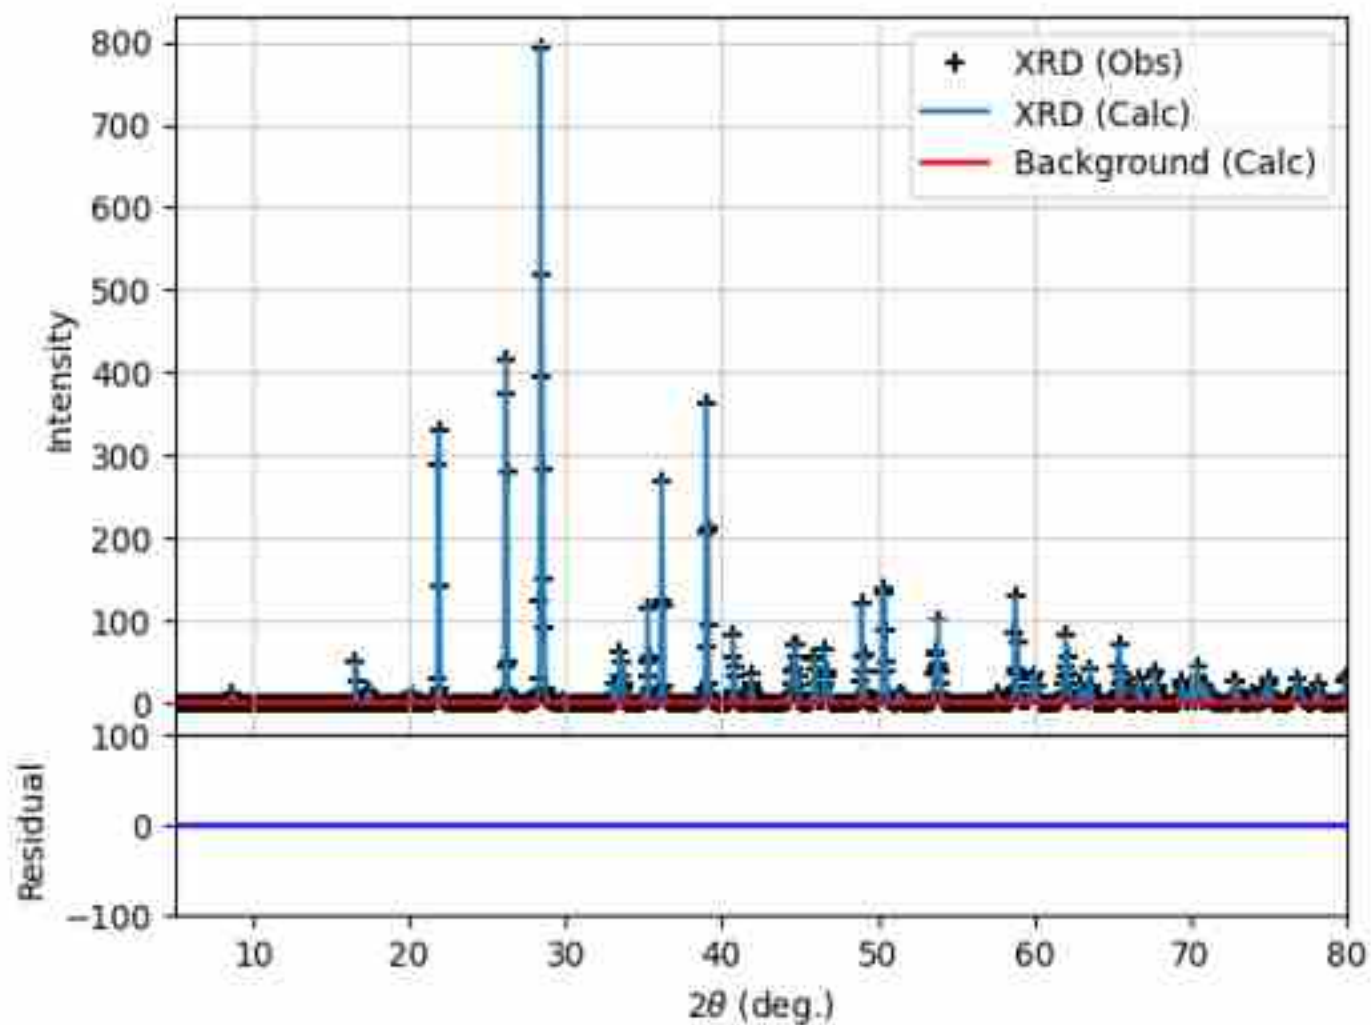

| RMSE before RR | Rwp     | RMSE after RR |
|----------------|---------|---------------|
| 0.028          | 0.00346 | 0.00119       |

# Cs6Pd2F10

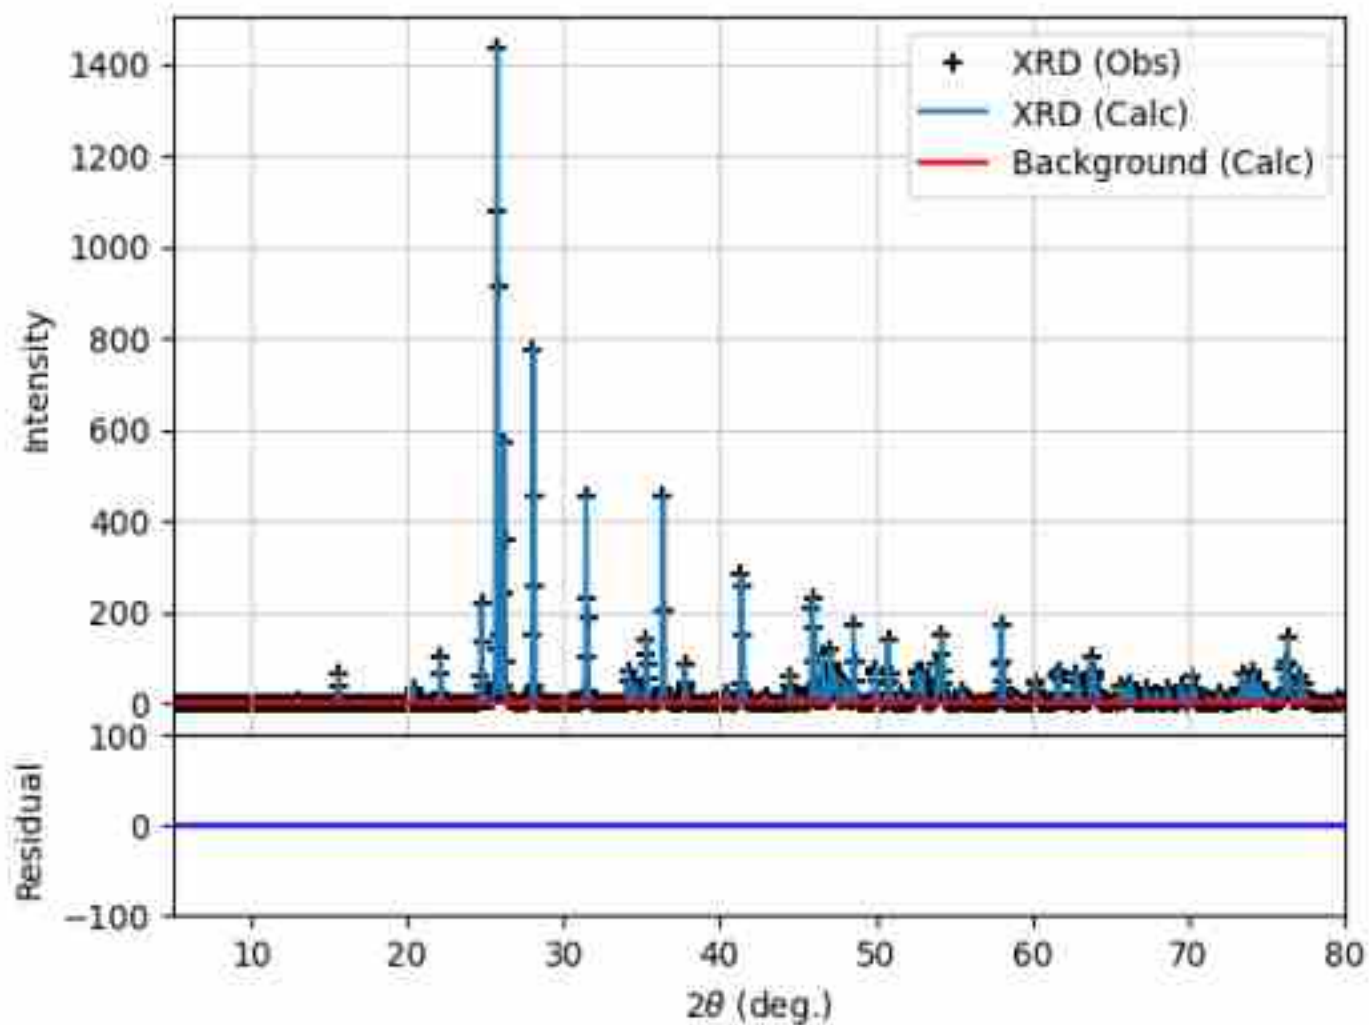

| RMSE before RR | Rwp     | RMSE after RR |
|----------------|---------|---------------|
| 0.028          | 0.00411 | 0.0009        |



# Er<sub>2</sub>Ni<sub>2</sub>Sn<sub>8</sub>

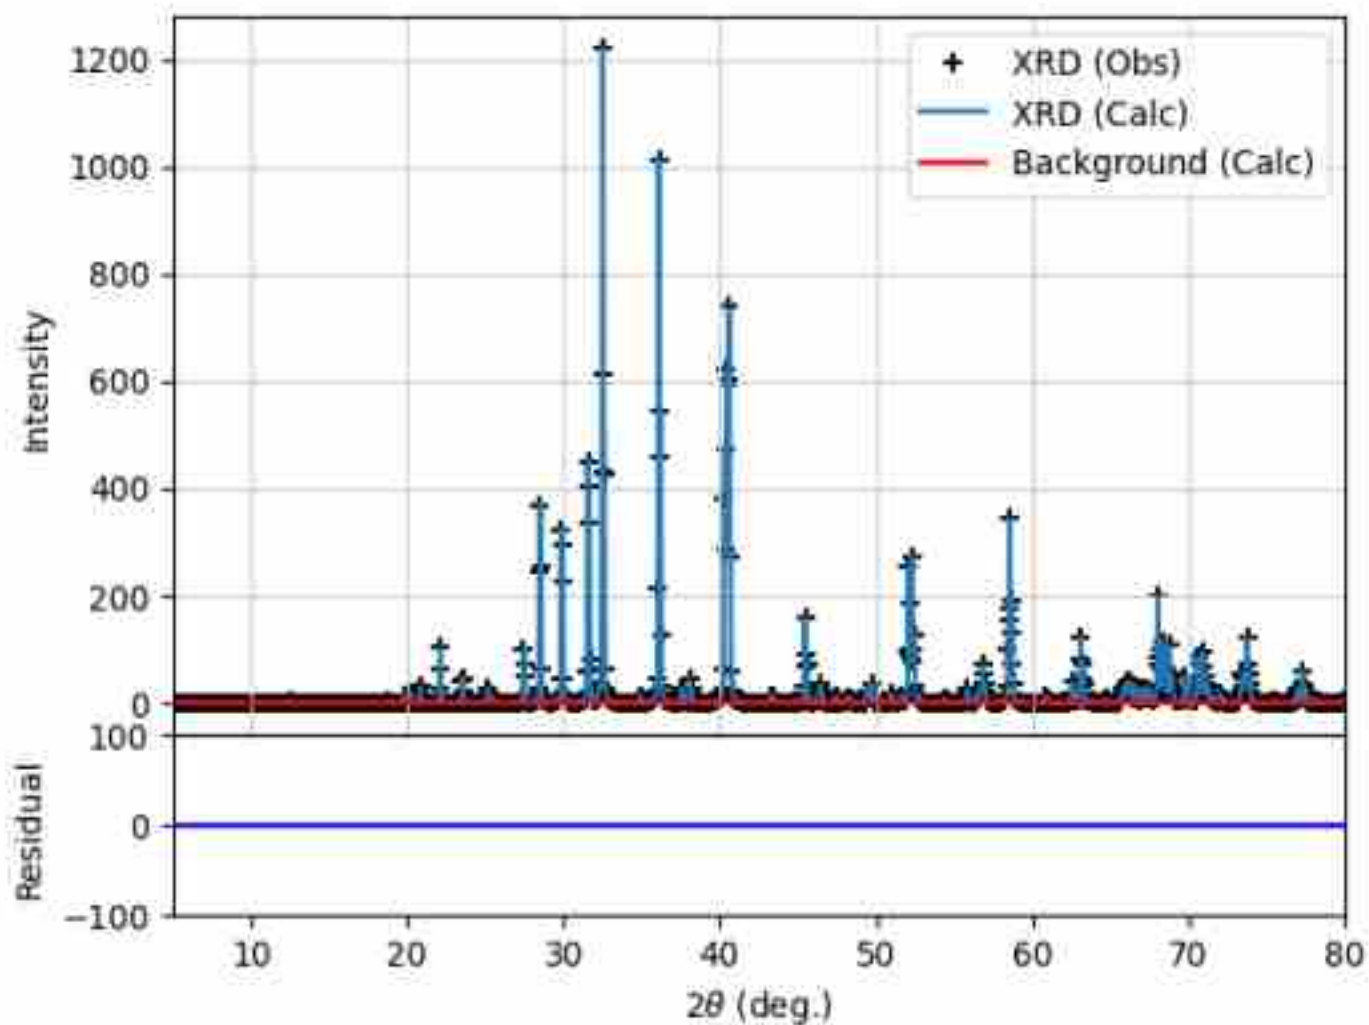

| RMSE before RR | Rwp     | RMSE after RR |
|----------------|---------|---------------|
| 0.028          | 0.00331 | 0.00039       |

# Er<sub>2</sub>Se<sub>3</sub>

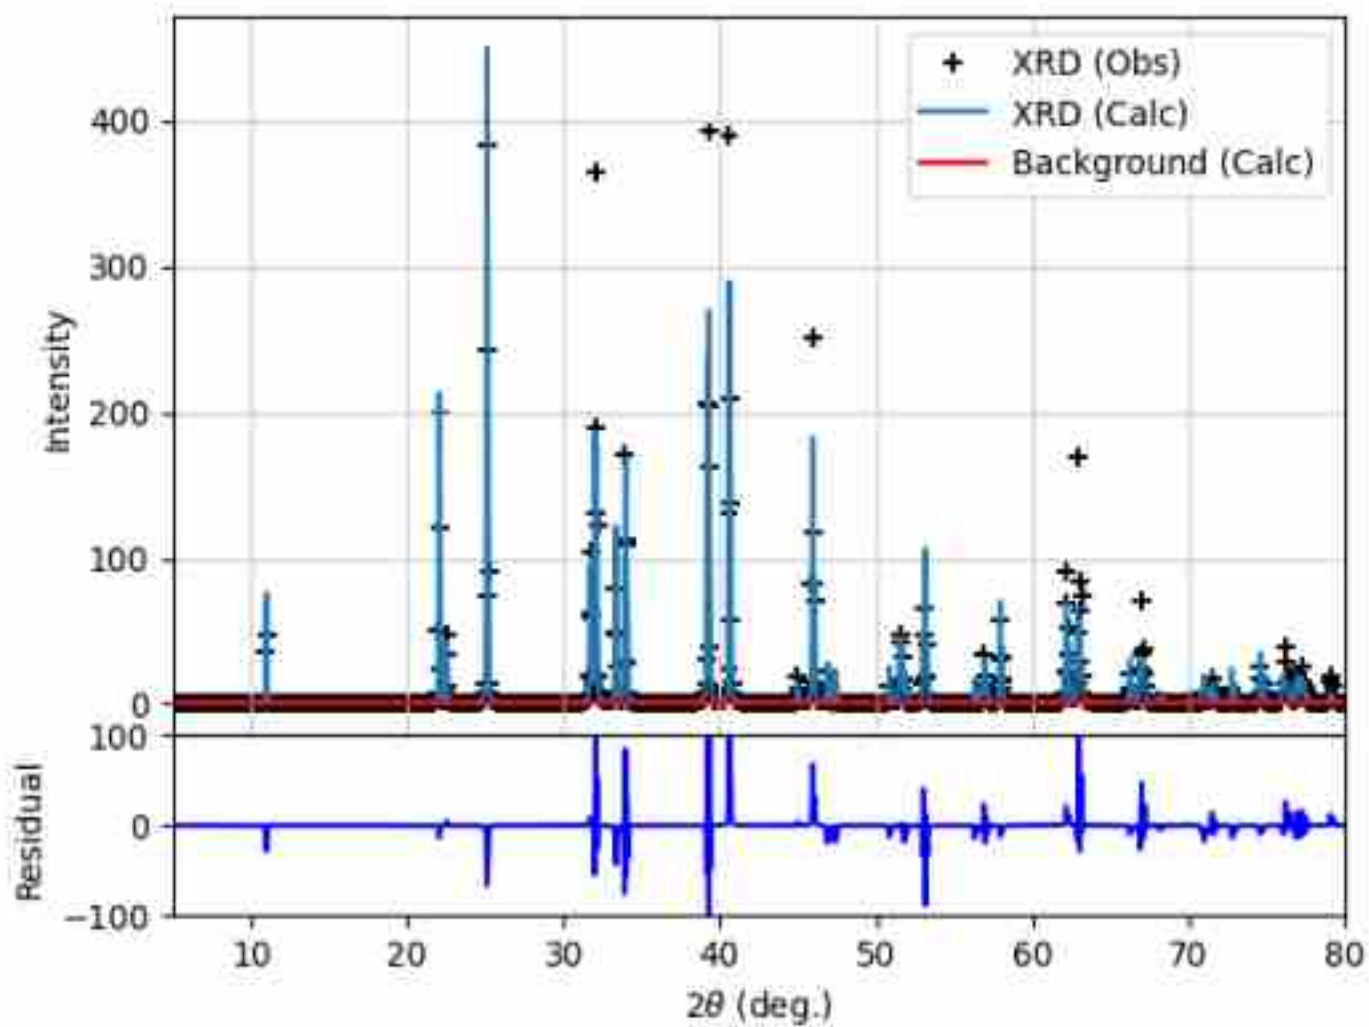

| RMSE before RR | Rwp      | RMSE after RR |
|----------------|----------|---------------|
| 0.028          | 63.98223 | 0.26373       |

# Er<sub>4</sub>Zn<sub>4</sub>Rh<sub>4</sub>

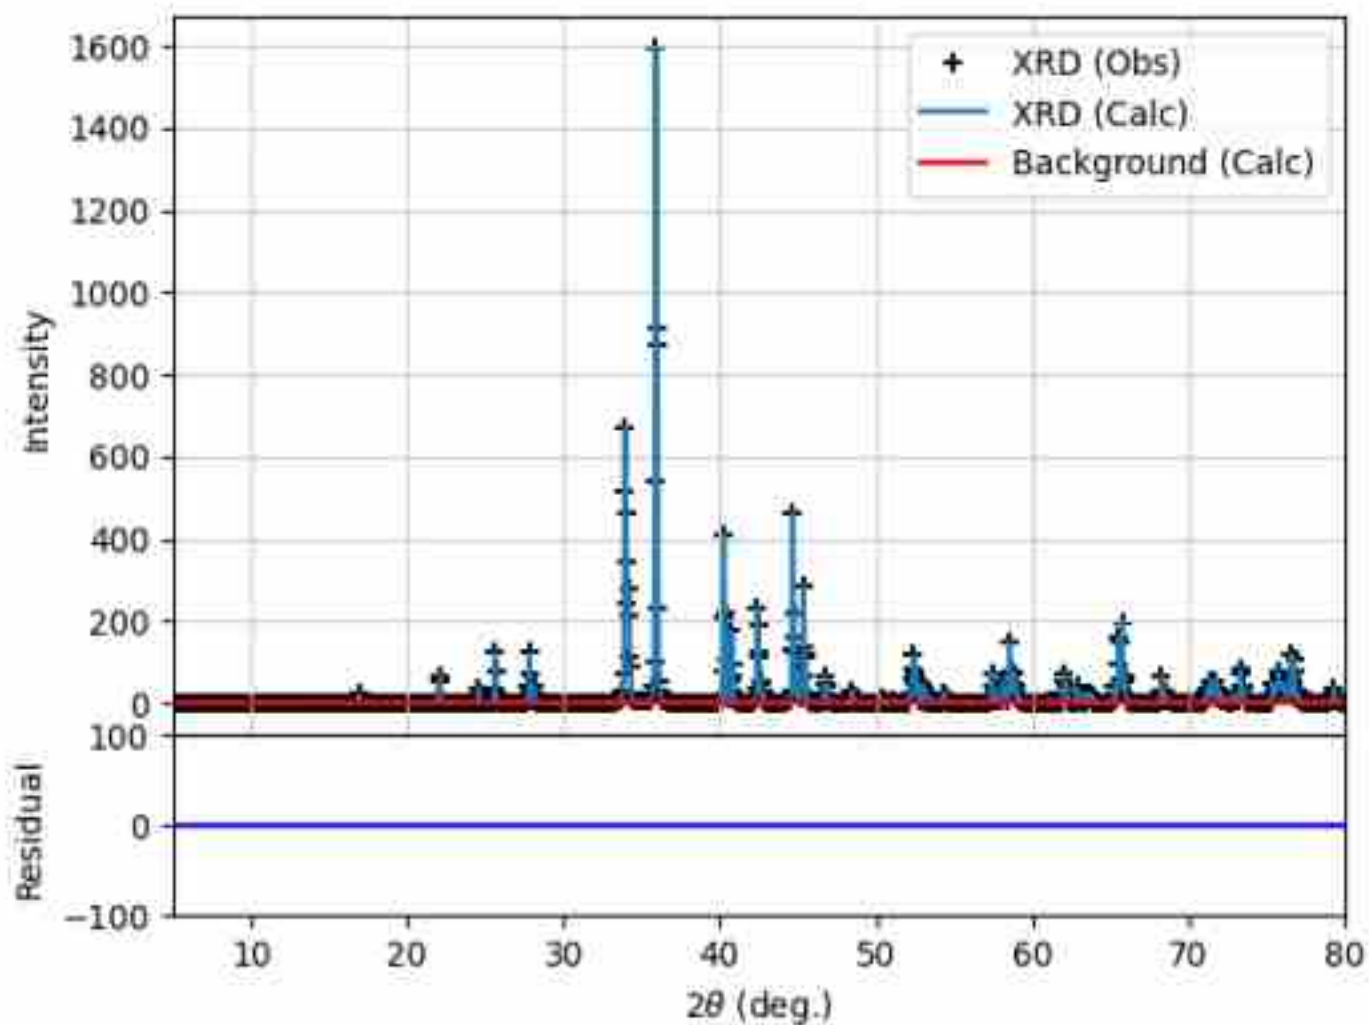

| RMSE before RR | Rwp     | RMSE after RR |
|----------------|---------|---------------|
| 0.028          | 0.00442 | 0.00023       |

# Eu<sub>4</sub>Mg<sub>4</sub>Tl<sub>4</sub>

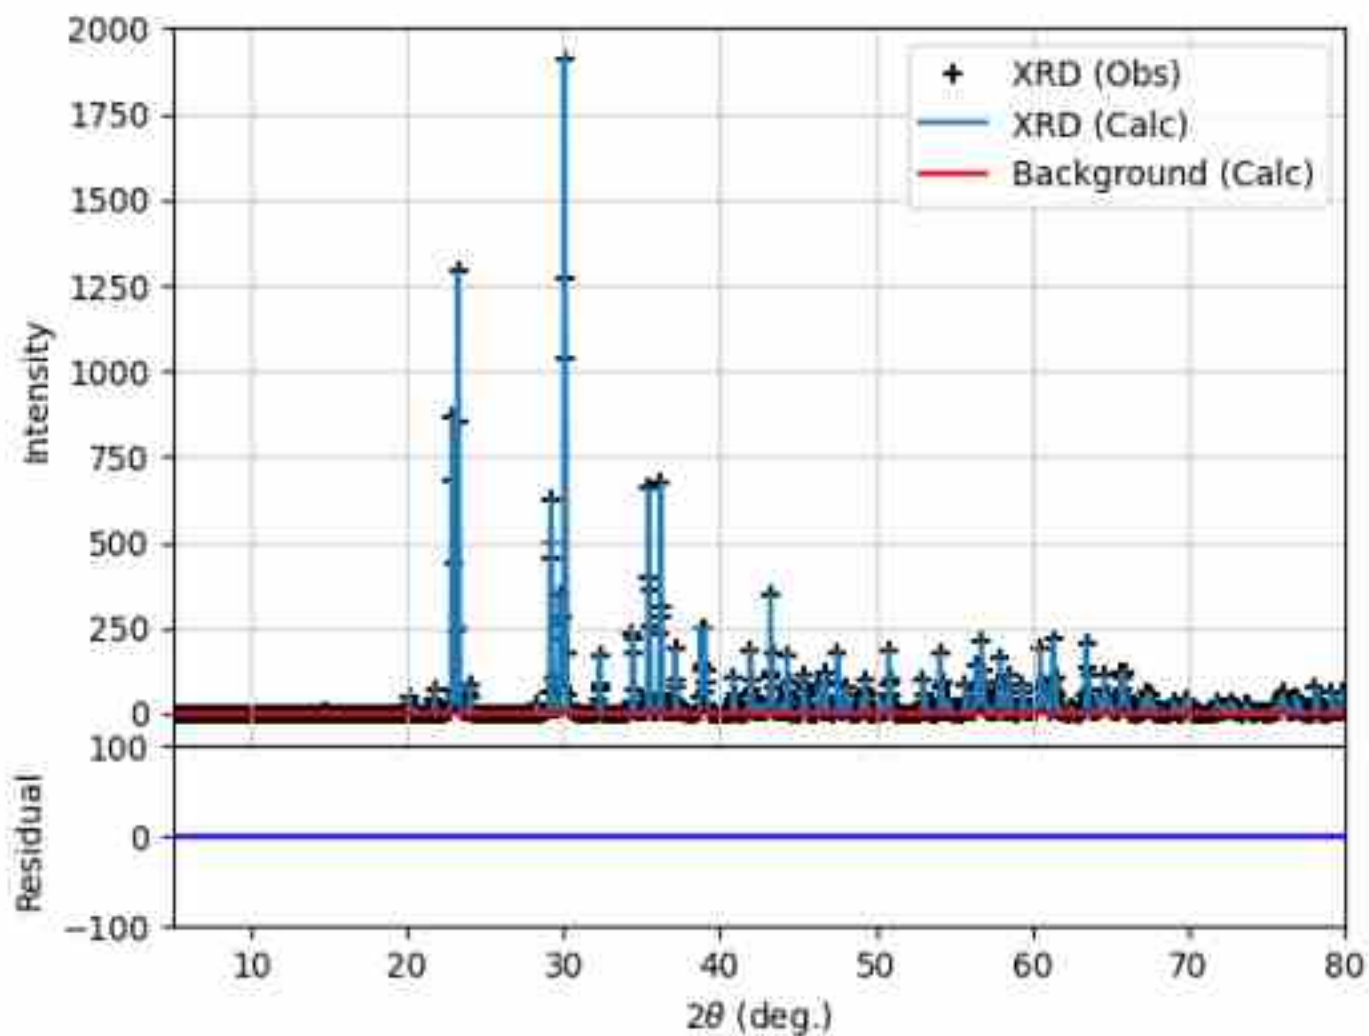

| RMSE before RR | Rwp     | RMSE after RR |
|----------------|---------|---------------|
| 0.028          | 0.00539 | 0.00156       |

# Ga<sub>4</sub>Pb<sub>2</sub>O<sub>8</sub>

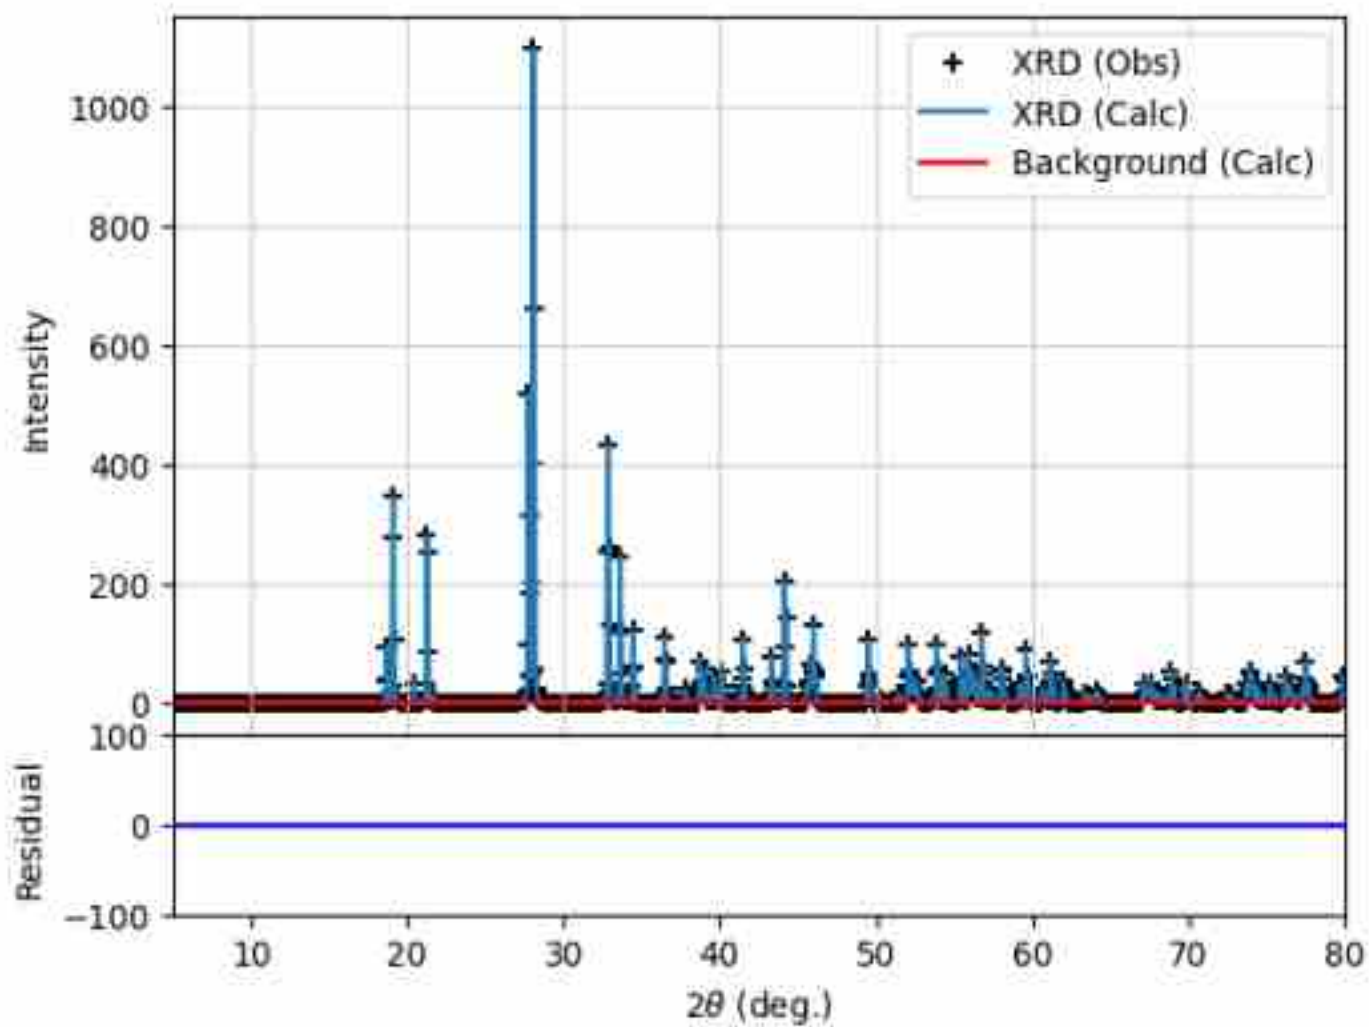

| RMSE before RR | Rwp     | RMSE after RR |
|----------------|---------|---------------|
| 0.028          | 0.00422 | 0.00151       |

# Ga10Ni2

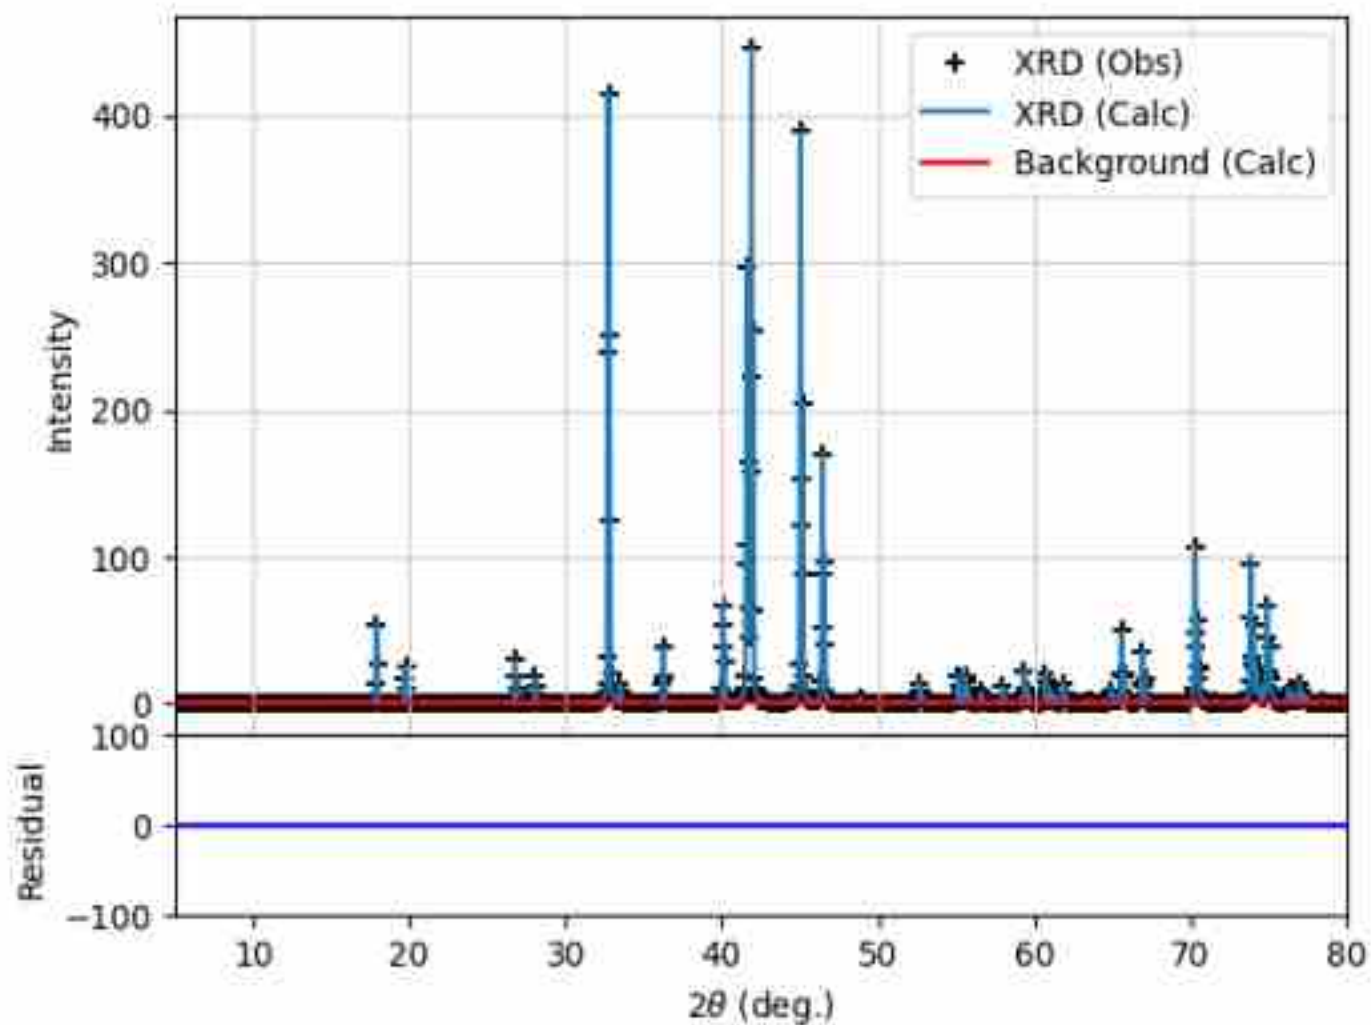

| RMSE before RR | Rwp     | RMSE after RR |
|----------------|---------|---------------|
| 0.028          | 0.00341 | 0.00041       |

# Gd<sub>4</sub>Al<sub>6</sub>Ge<sub>8</sub>

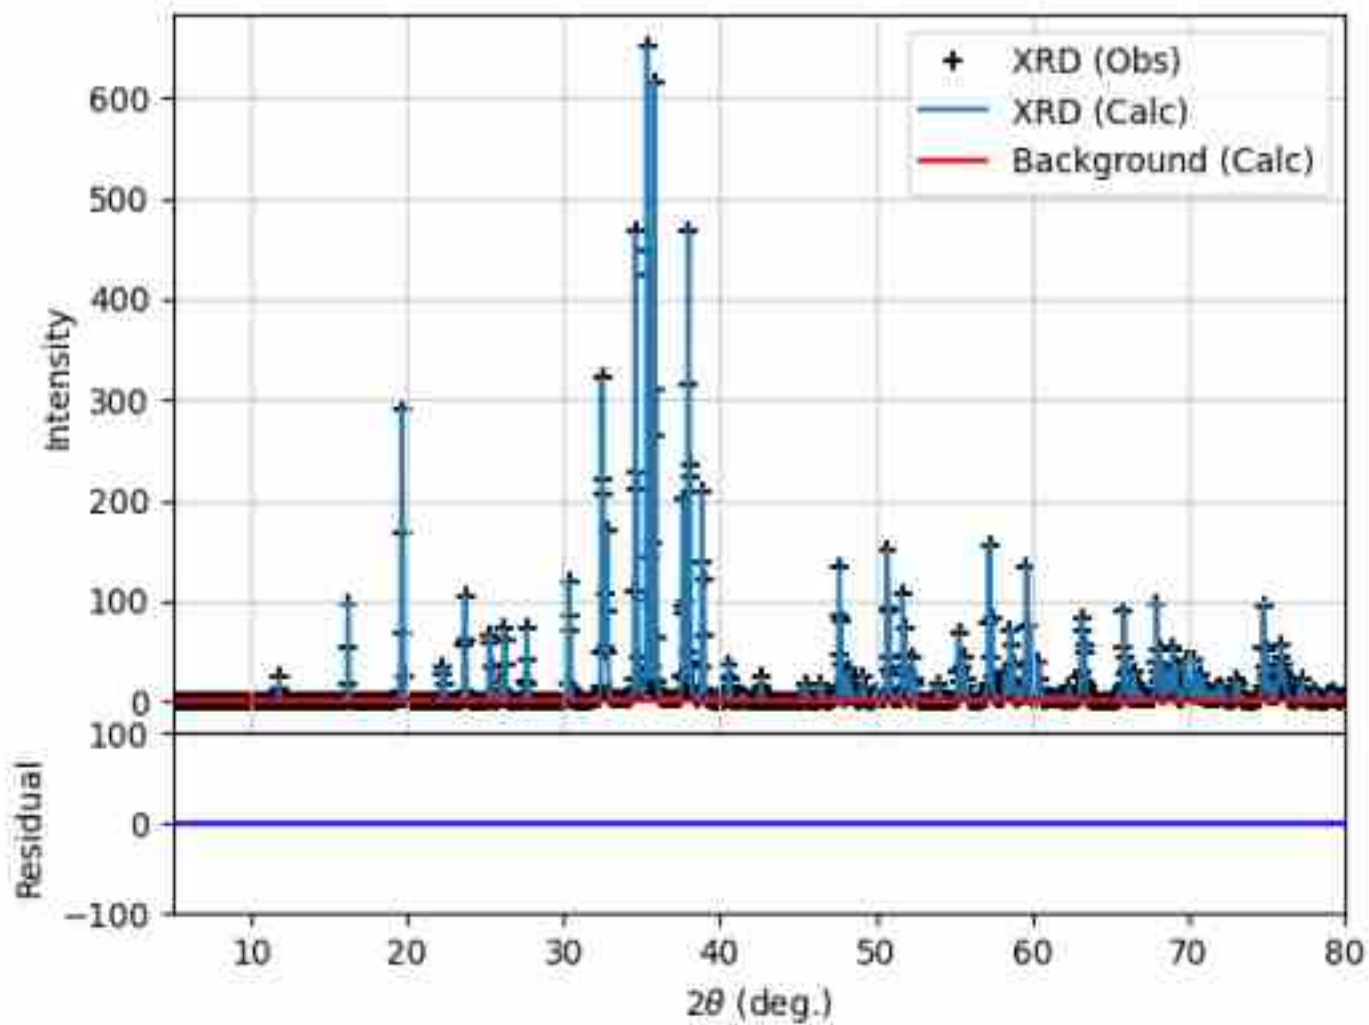

| RMSE before RR | Rwp     | RMSE after RR |
|----------------|---------|---------------|
| 0.028          | 0.00409 | 0.00061       |

# Hf4Cr4P4

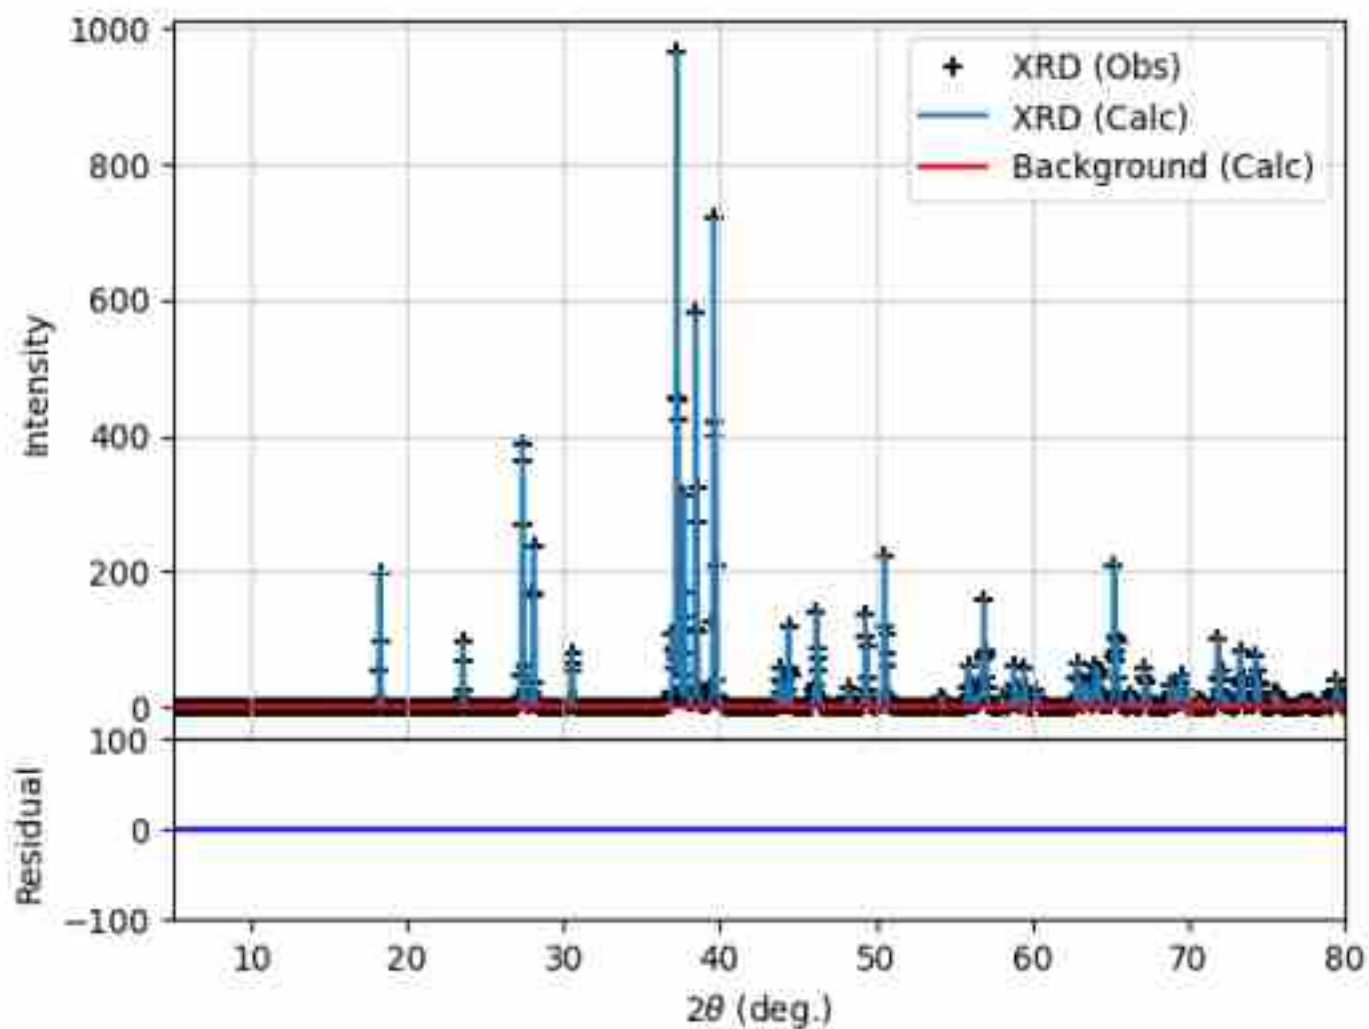

| RMSE before RR | Rwp     | RMSE after RR |
|----------------|---------|---------------|
| 0.028          | 0.00476 | 0.00091       |



# Hf4Ti2C2

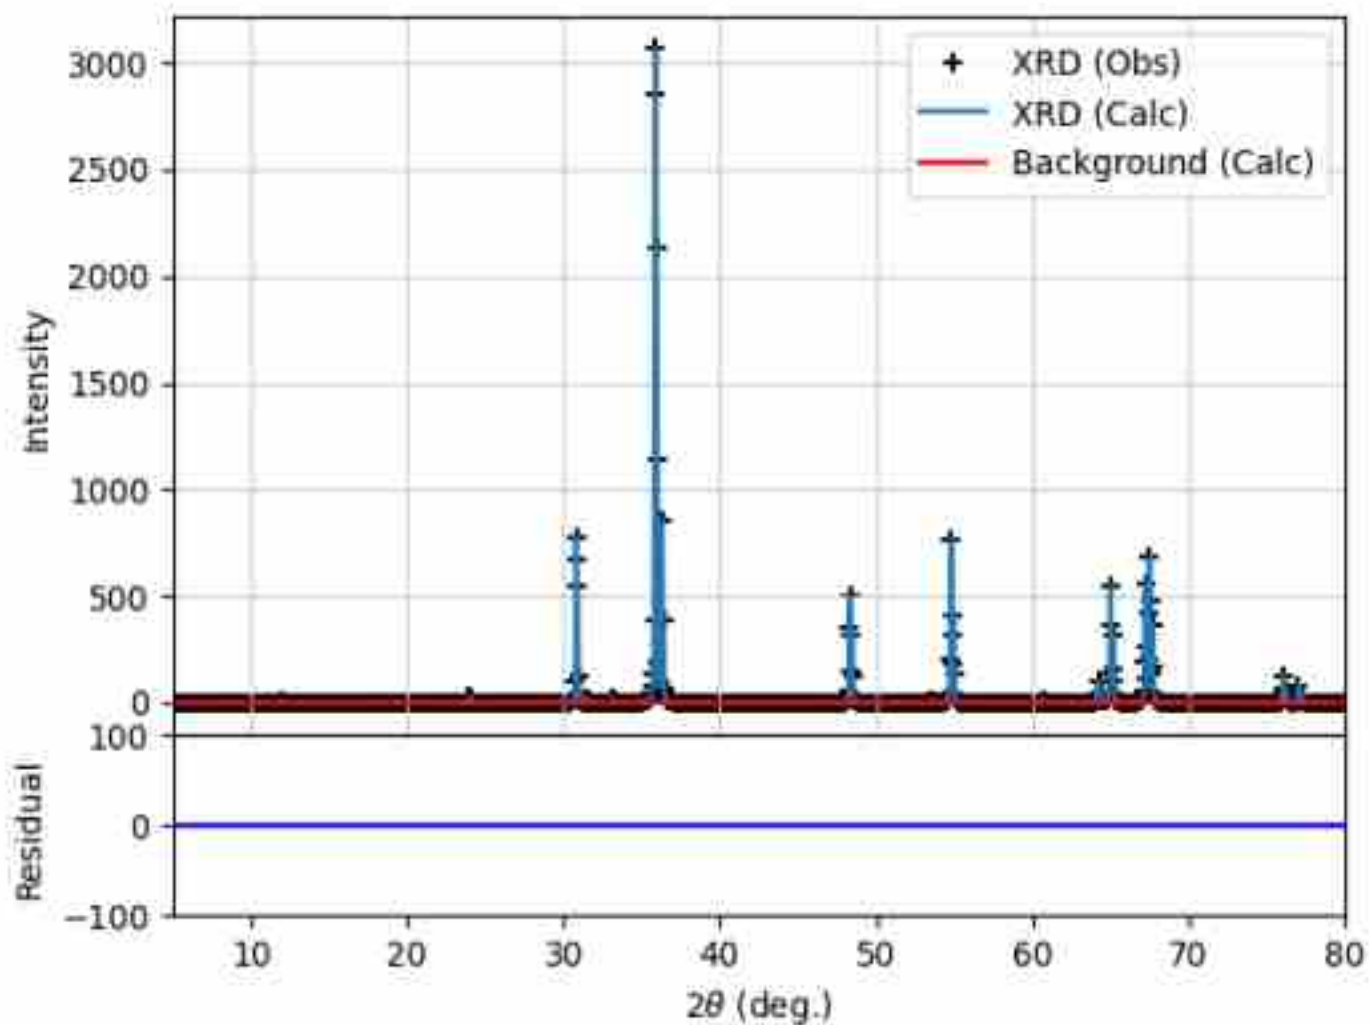

| RMSE before RR | Rwp     | RMSE after RR |
|----------------|---------|---------------|
| 0.028          | 0.00222 | 0.00079       |

# In8O12

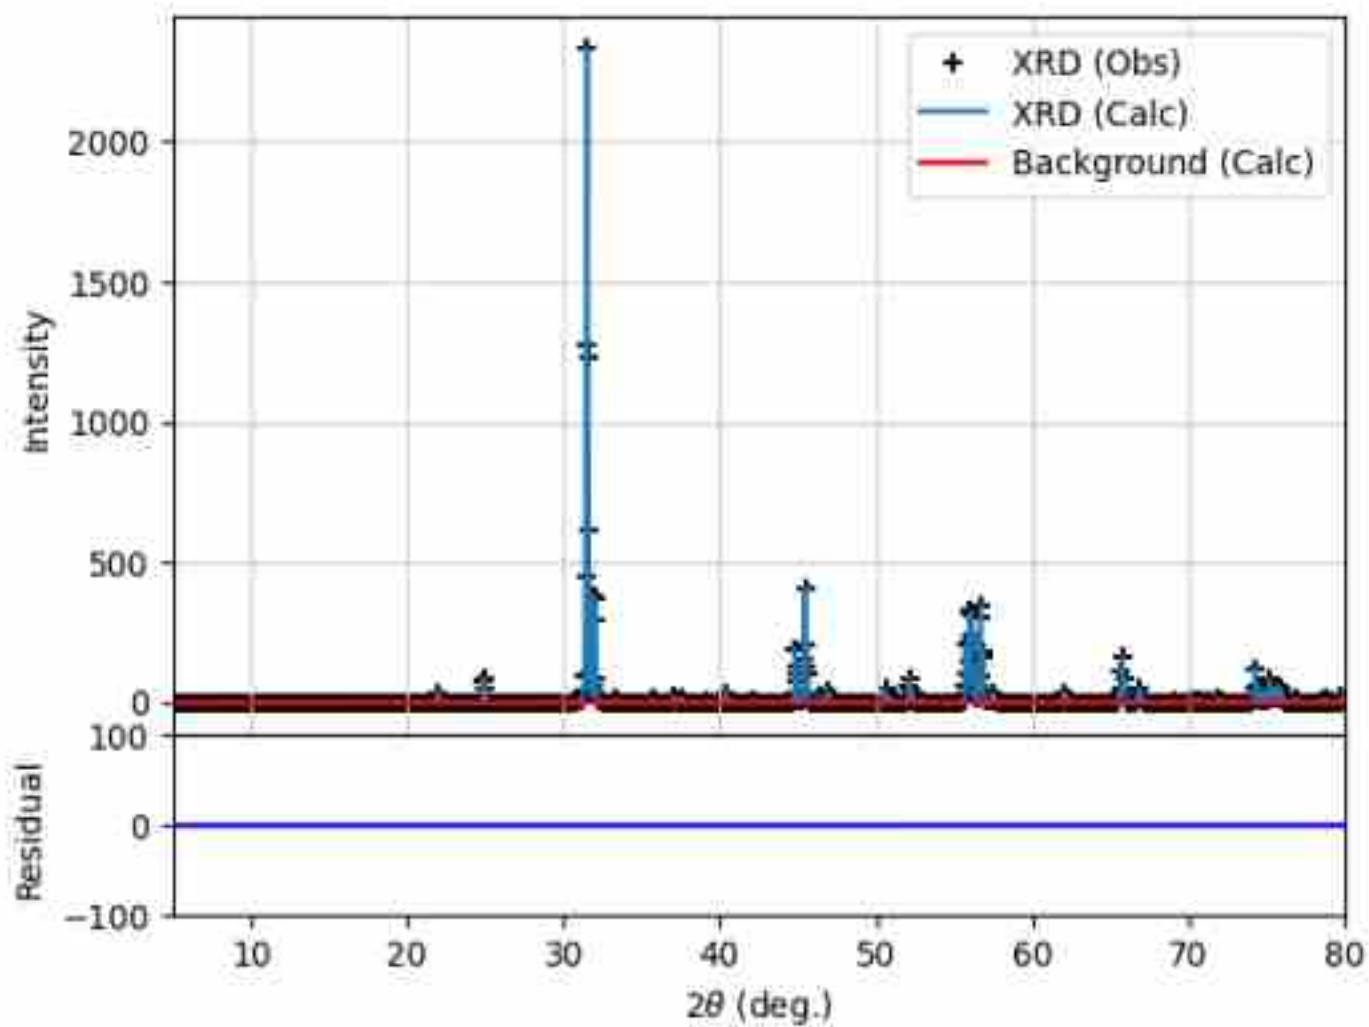

| RMSE before RR | Rwp     | RMSE after RR |
|----------------|---------|---------------|
| 0.028          | 0.11003 | 0.00691       |

# K1Fe4Sb12

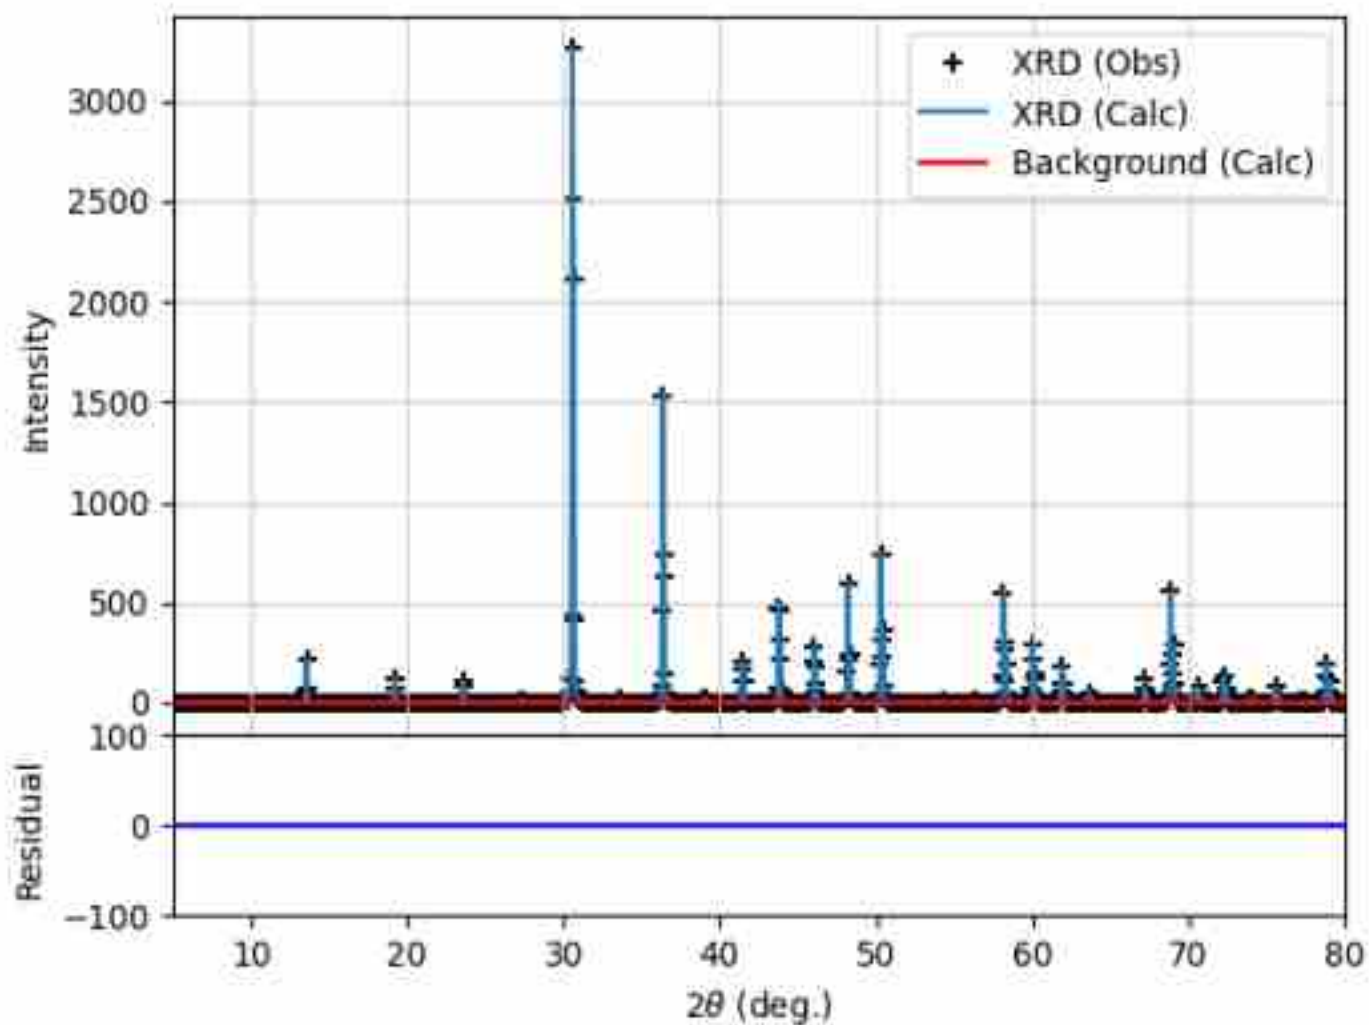

| RMSE before RR | Rwp     | RMSE after RR |
|----------------|---------|---------------|
| 0.028          | 0.00641 | 0.00108       |

# K1Rb2Zr1O1F5

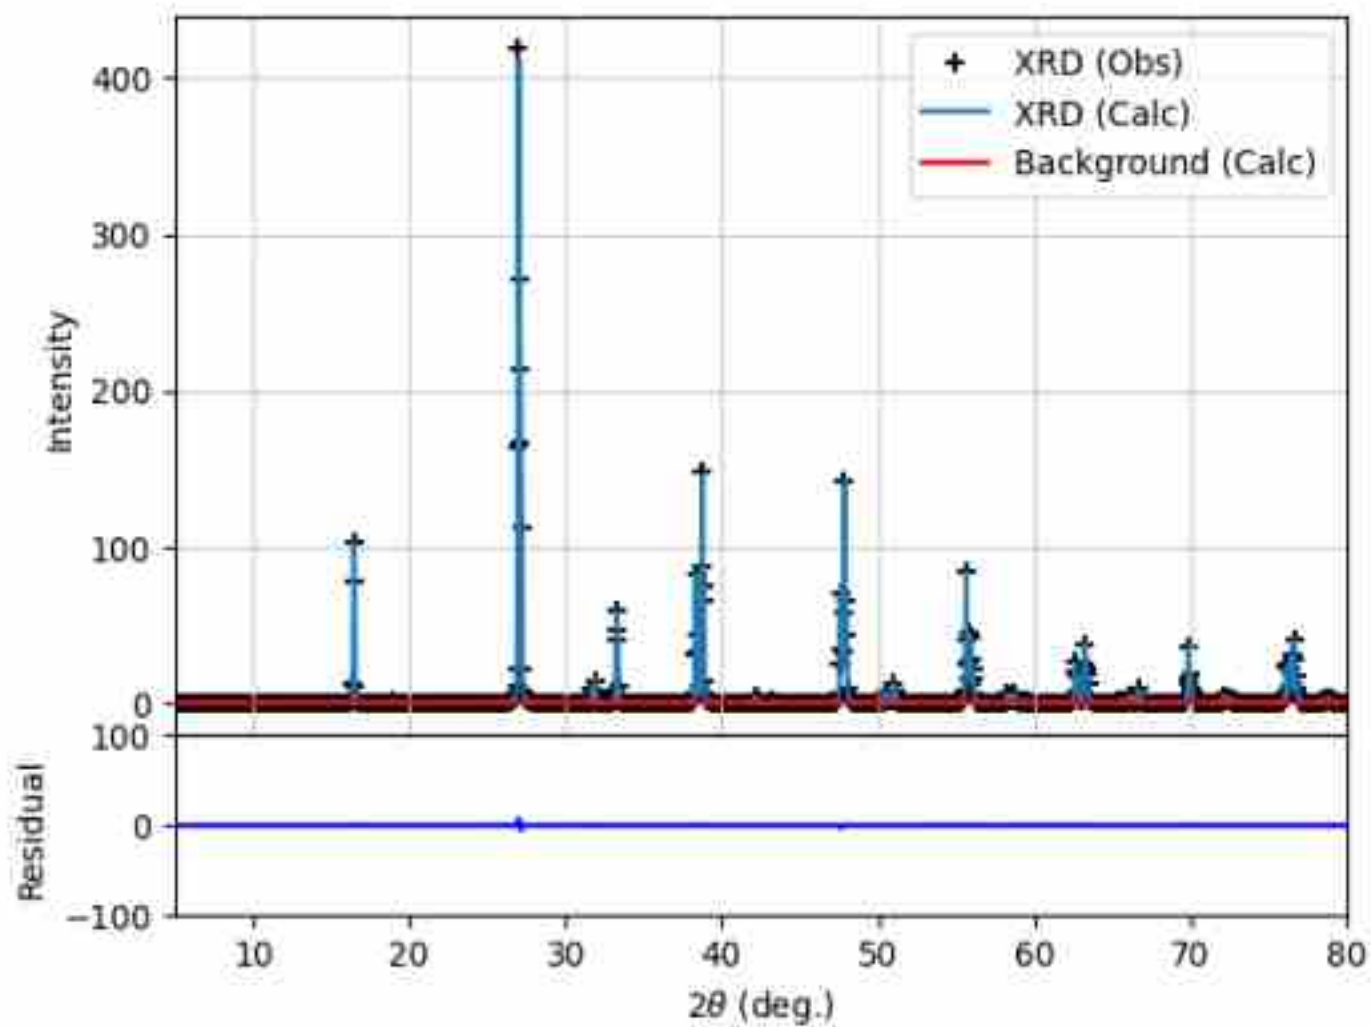

| RMSE before RR | Rwp     | RMSE after RR |
|----------------|---------|---------------|
| 0.028          | 1.71951 | 0.04323       |

# K4Rb2Pd2F10

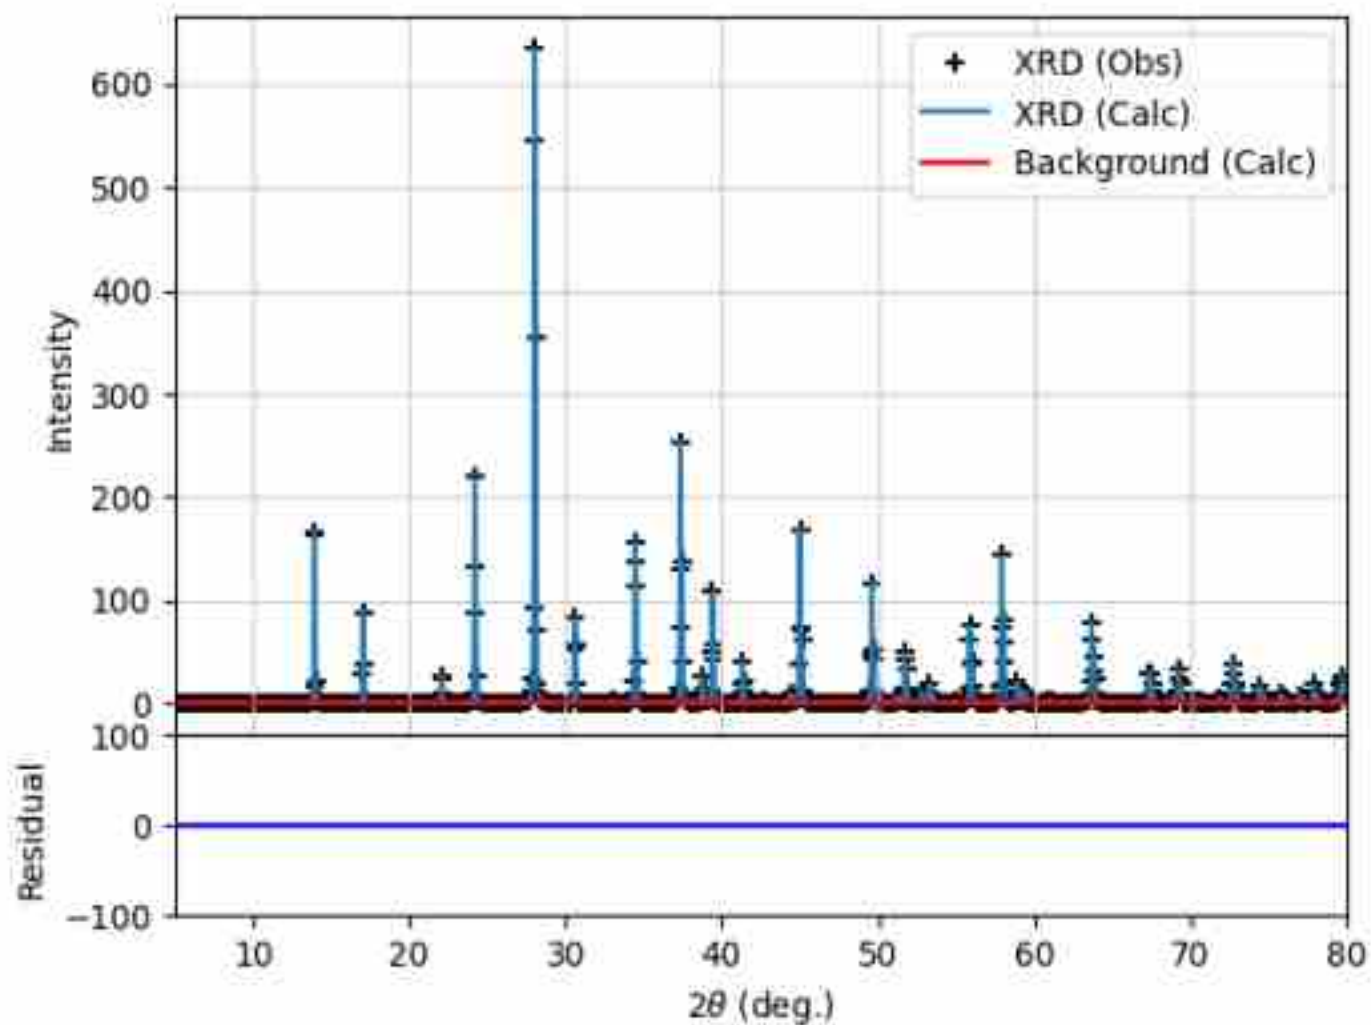

| RMSE before RR | Rwp     | RMSE after RR |
|----------------|---------|---------------|
| 0.028          | 0.00353 | 0.00123       |

# K6Yb2F12

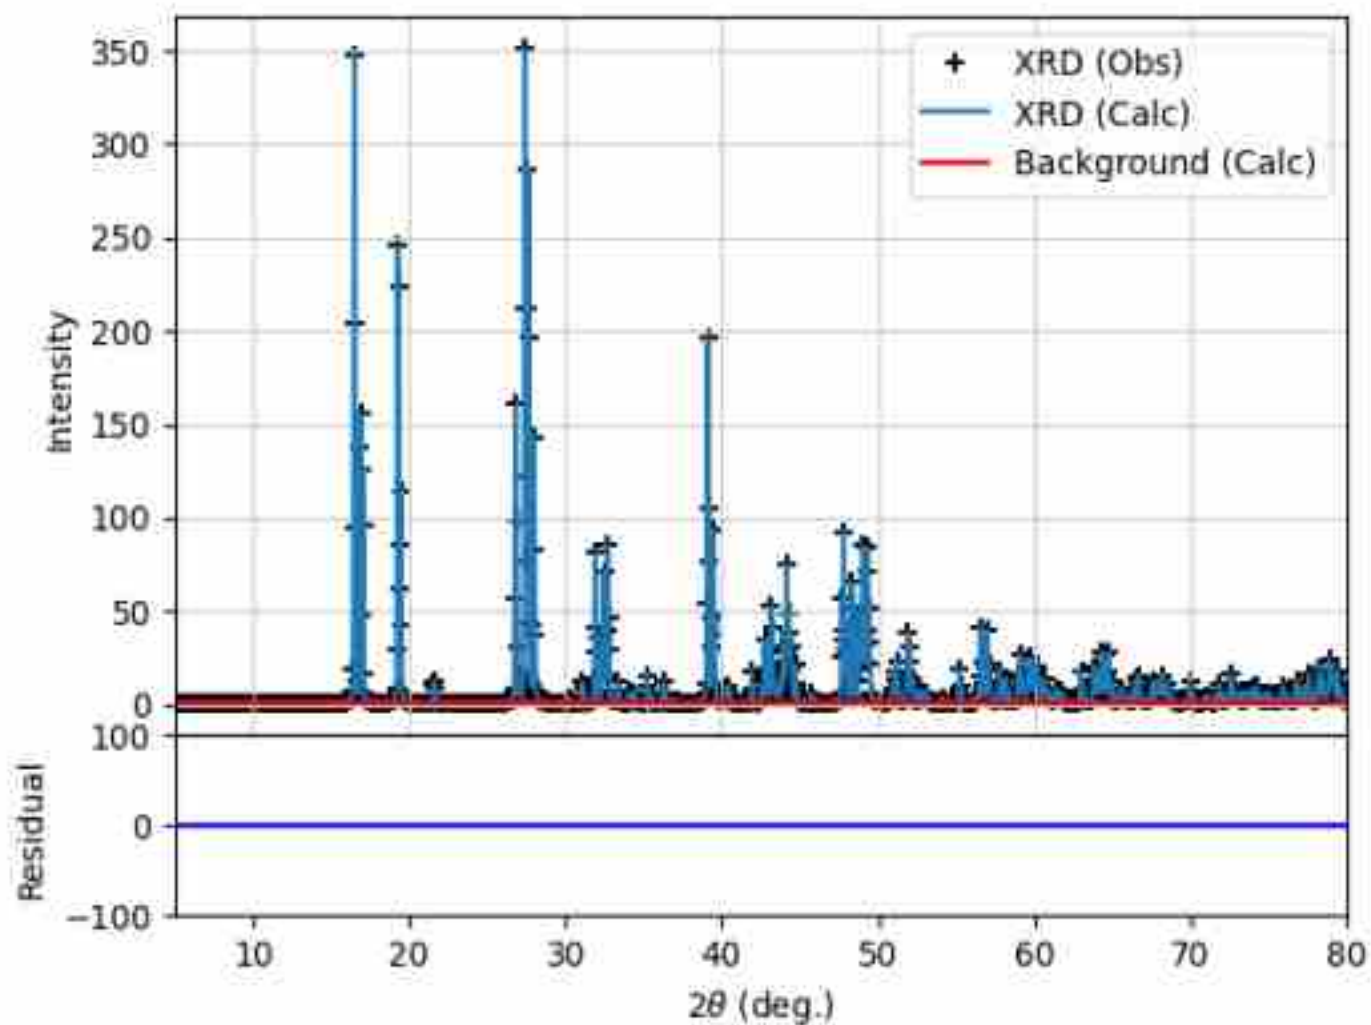

| RMSE before RR | Rwp     | RMSE after RR |
|----------------|---------|---------------|
| 0.028          | 0.00329 | 0.00074       |

# La<sub>2</sub>Bi<sub>2</sub>Se<sub>4</sub>O<sub>2</sub>

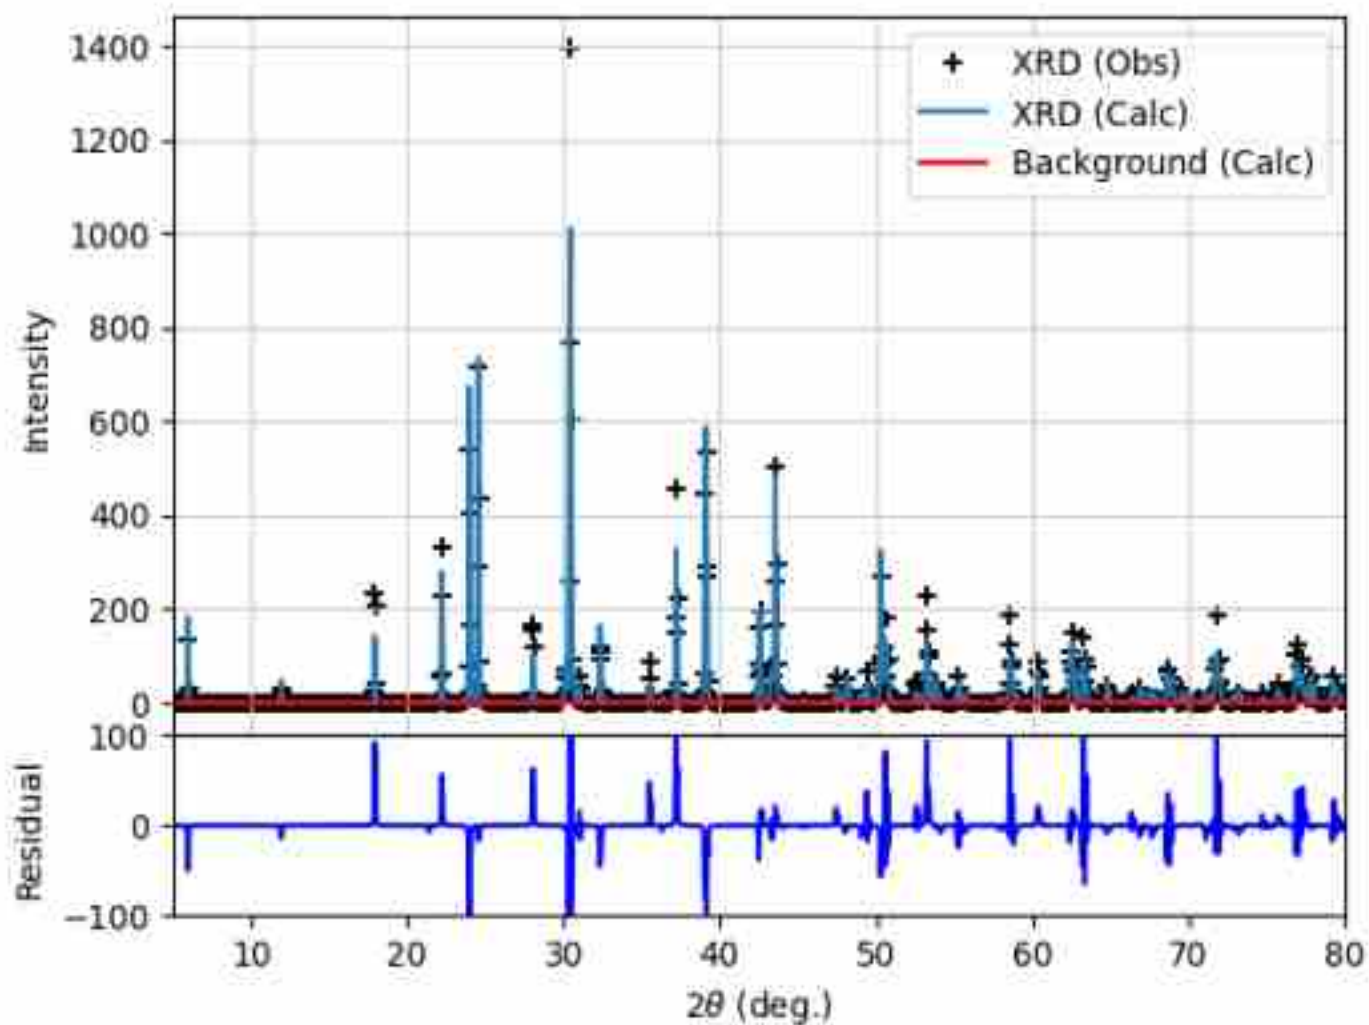

| RMSE before RR | Rwp      | RMSE after RR |
|----------------|----------|---------------|
| 0.028          | 36.12646 | 0.28876       |

# La<sub>2</sub>Tm<sub>2</sub>Ge<sub>8</sub>Ir<sub>4</sub>

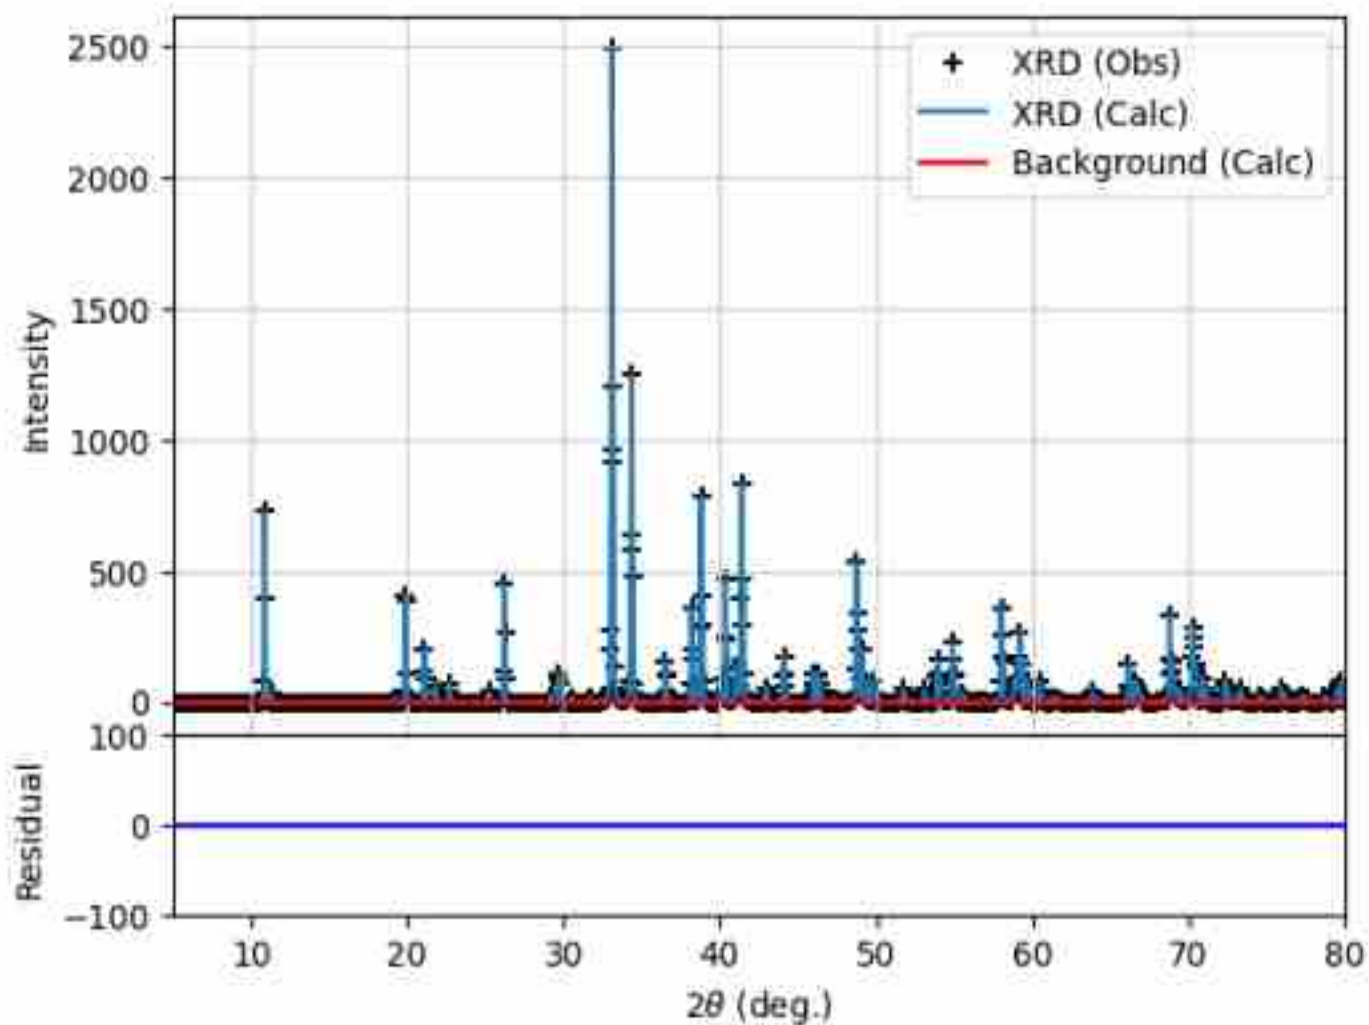

| RMSE before RR | Rwp     | RMSE after RR |
|----------------|---------|---------------|
| 0.028          | 0.00342 | 0.00033       |



# La<sub>4</sub>Cu<sub>4</sub>S<sub>8</sub>

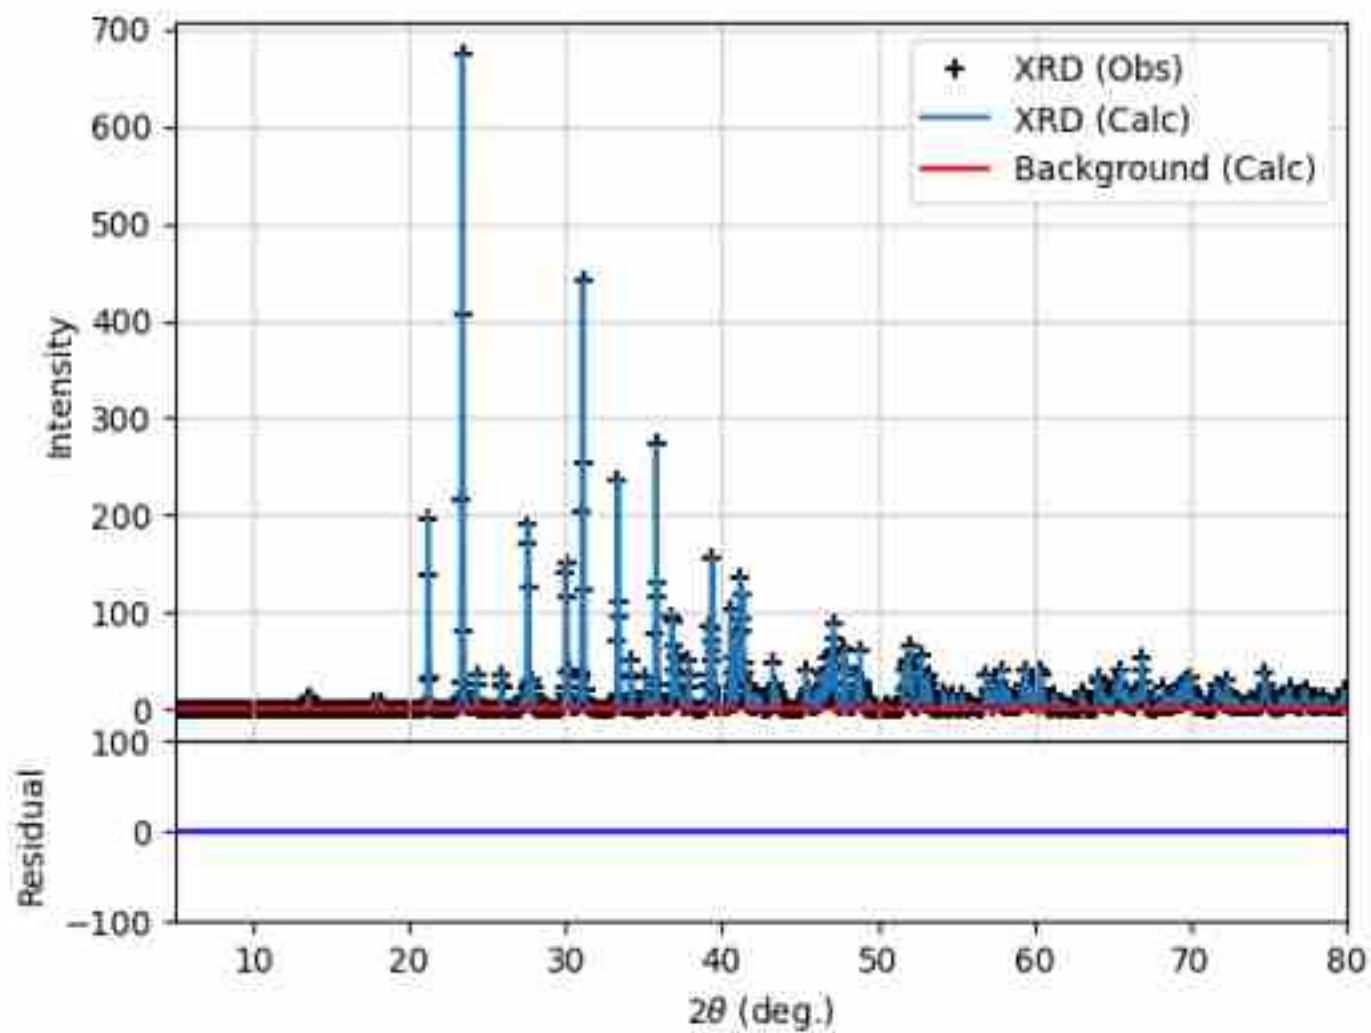

| RMSE before RR | Rwp     | RMSE after RR |
|----------------|---------|---------------|
| 0.028          | 0.00396 | 0.00047       |

# La<sub>4</sub>Tc<sub>4</sub>N<sub>12</sub>

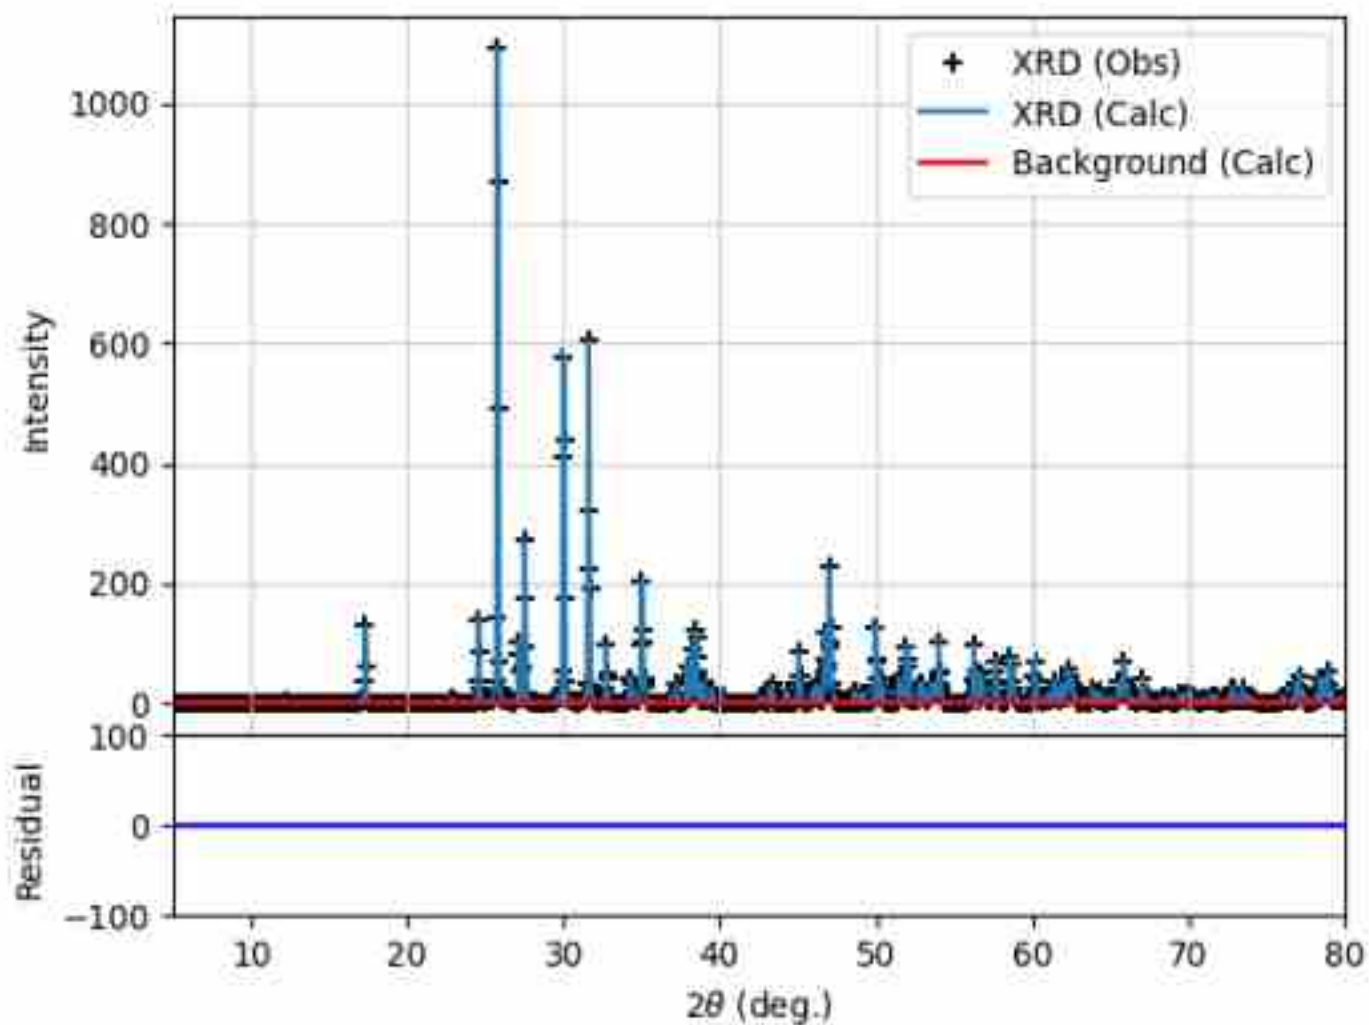

| RMSE before RR | Rwp     | RMSE after RR |
|----------------|---------|---------------|
| 0.028          | 0.00471 | 0.00126       |

# La6Ge10

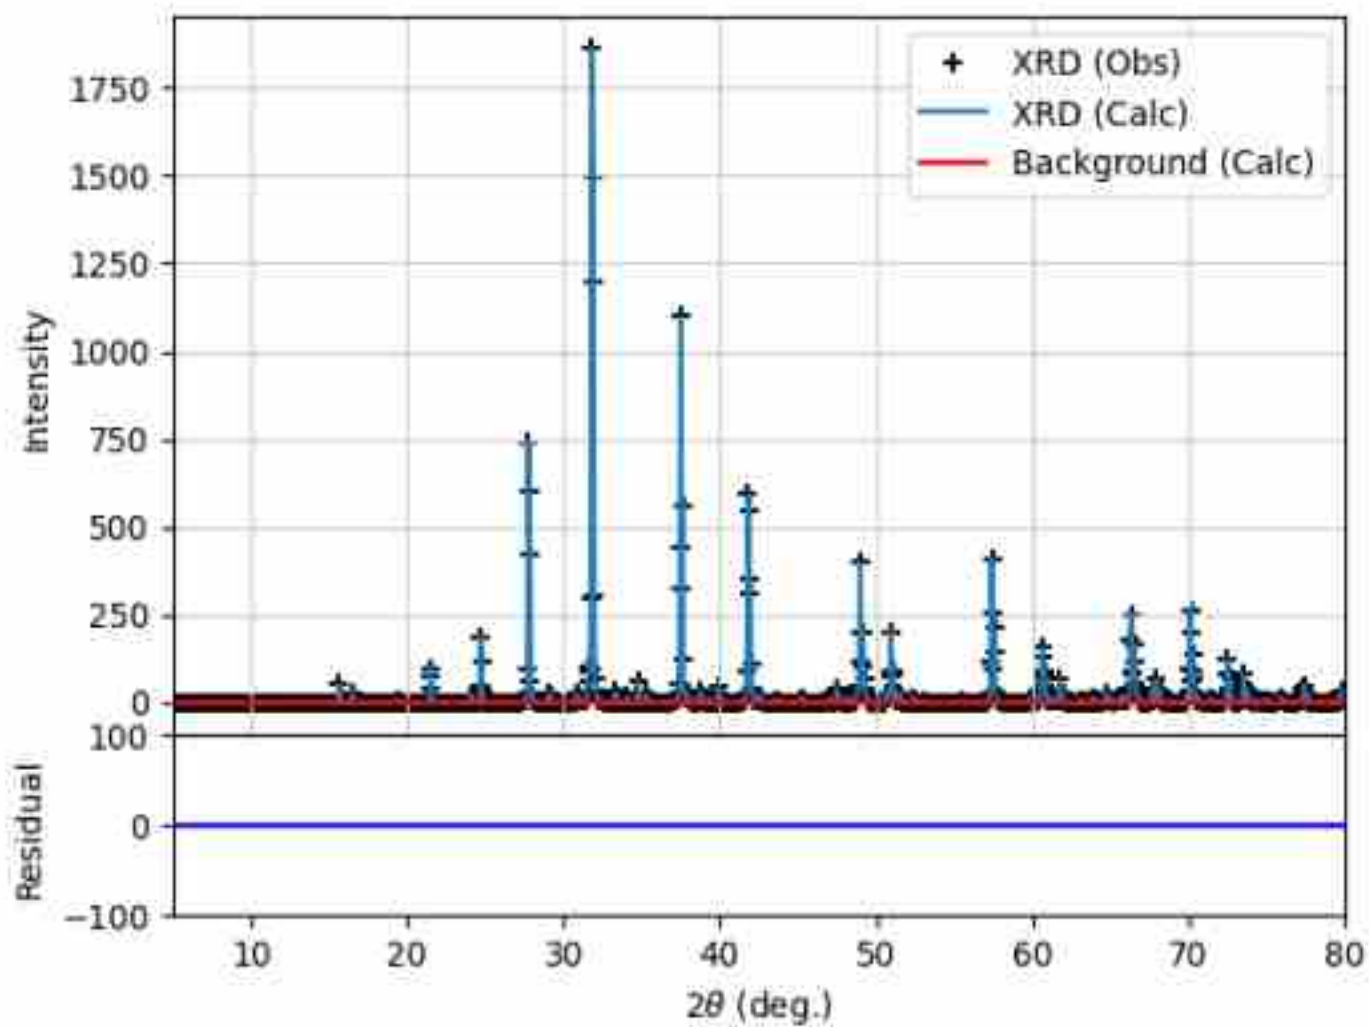

| RMSE before RR | Rwp     | RMSE after RR |
|----------------|---------|---------------|
| 0.028          | 0.00234 | 0.00025       |

# Li1Ni1Sn1O4

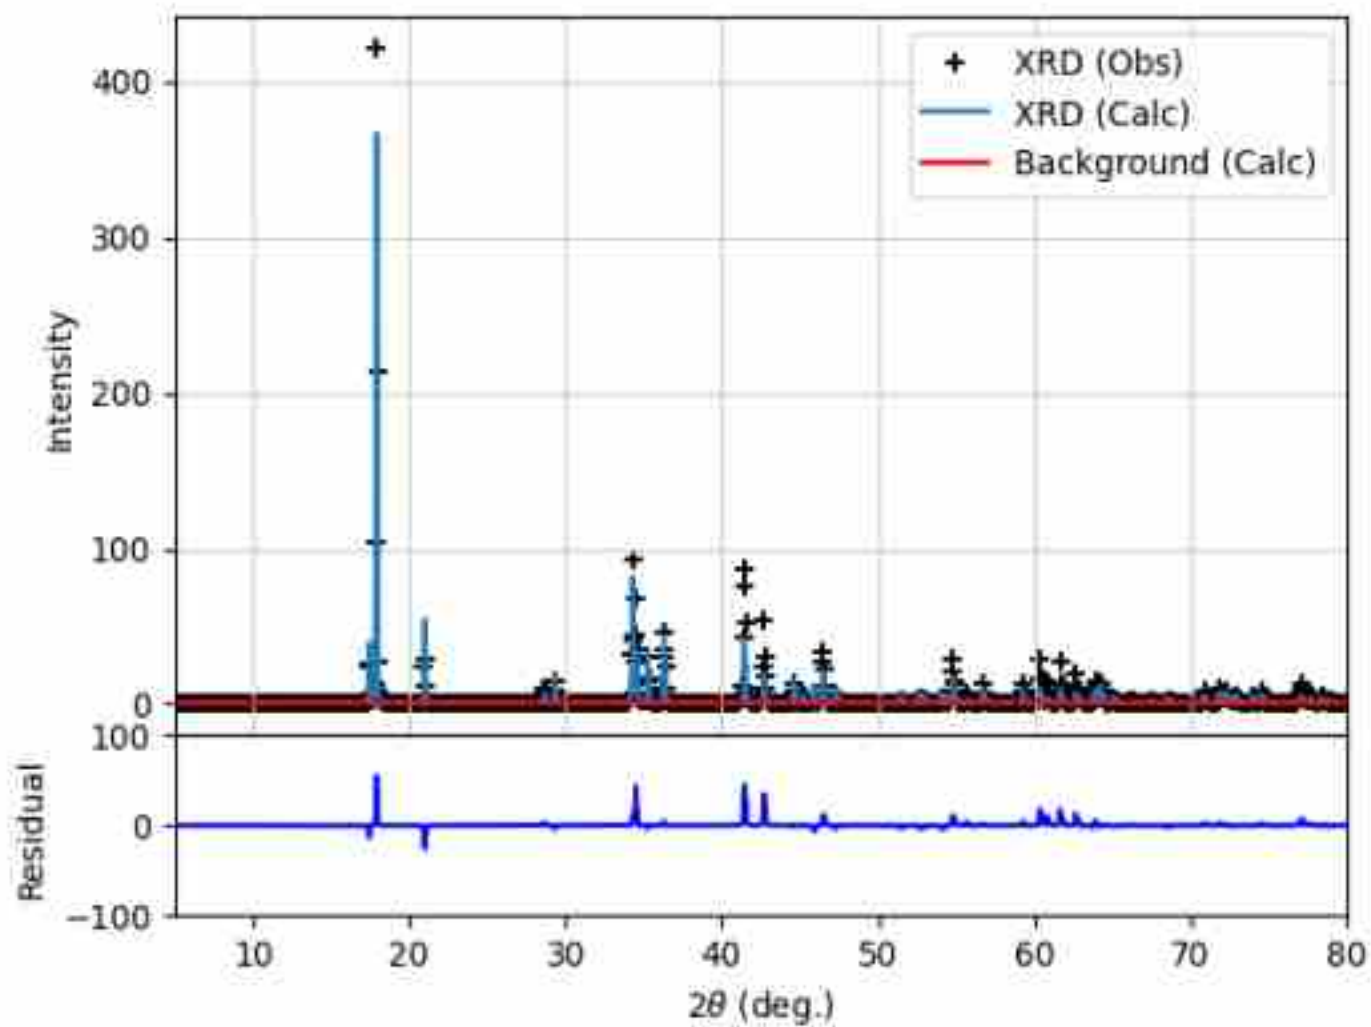

| RMSE before RR | Rwp      | RMSE after RR |
|----------------|----------|---------------|
| 0.028          | 33.19869 | None          |

# Li<sub>2</sub>Nb<sub>4</sub>Zn<sub>1</sub>O<sub>12</sub>

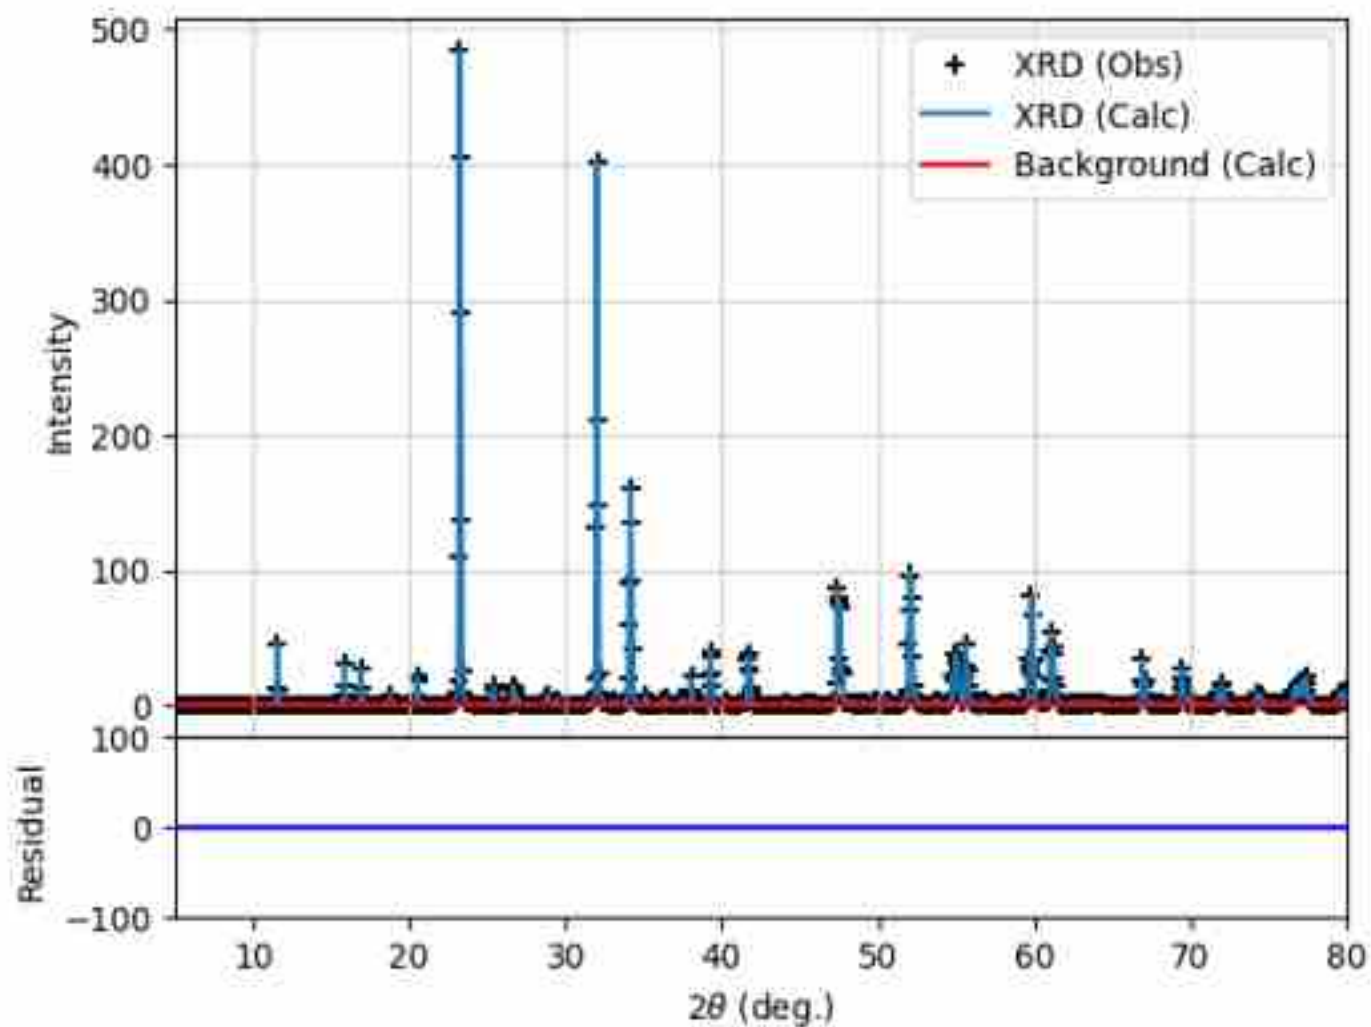

| RMSE before RR | Rwp     | RMSE after RR |
|----------------|---------|---------------|
| 0.028          | 0.00084 | 1e-05         |

# Li<sub>2</sub>Ni<sub>2</sub>O<sub>4</sub>

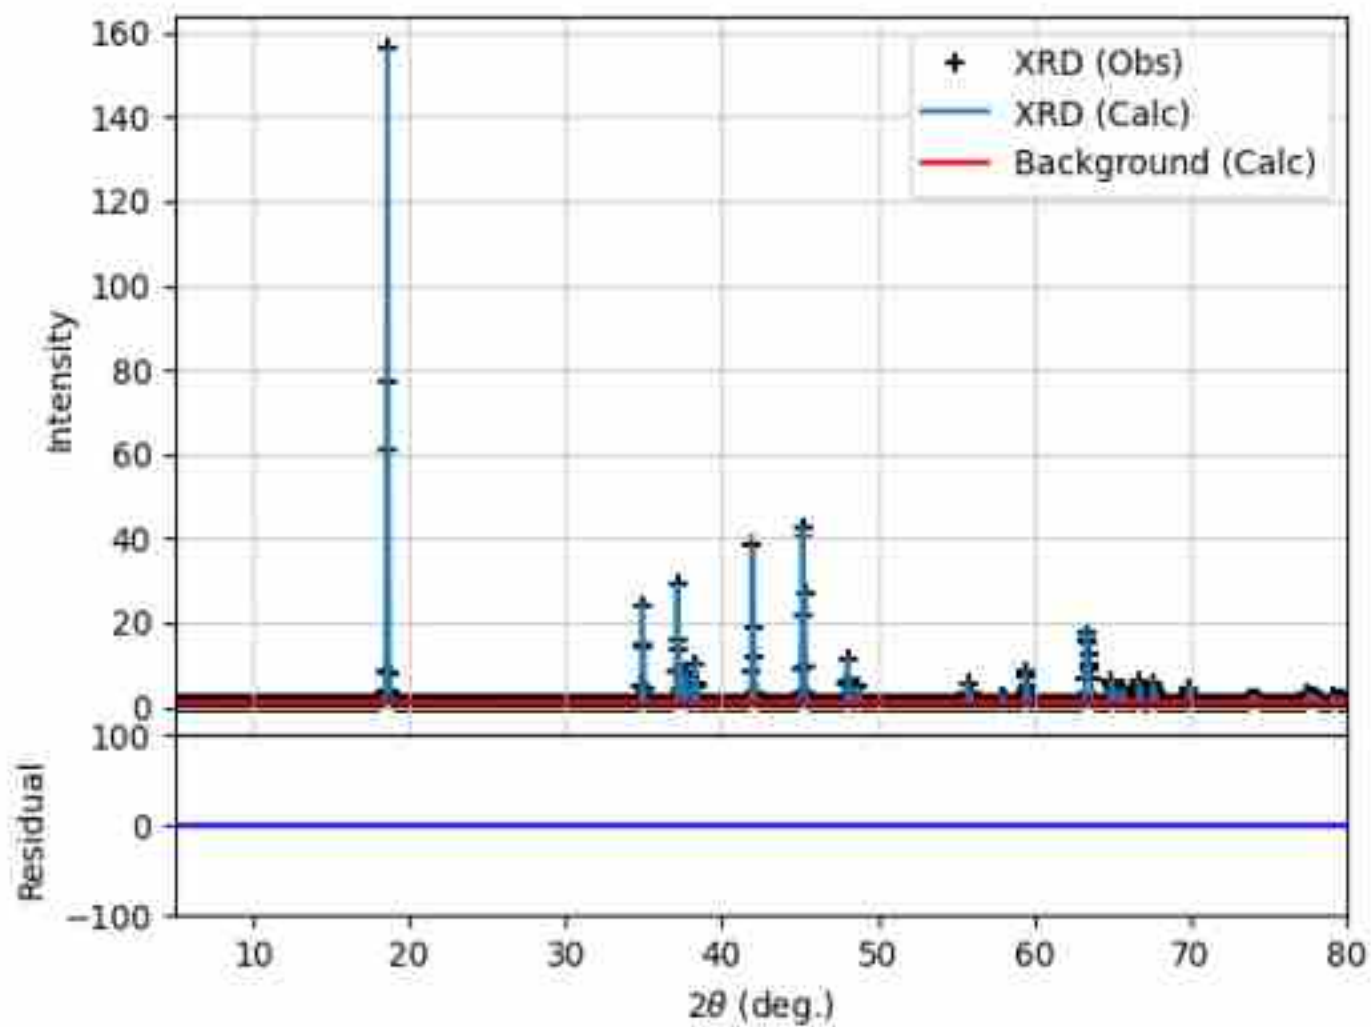

| RMSE before RR | Rwp     | RMSE after RR |
|----------------|---------|---------------|
| 0.028          | 0.00083 | 0.00069       |

# Li<sub>2</sub>O<sub>s</sub>2O<sub>6</sub>

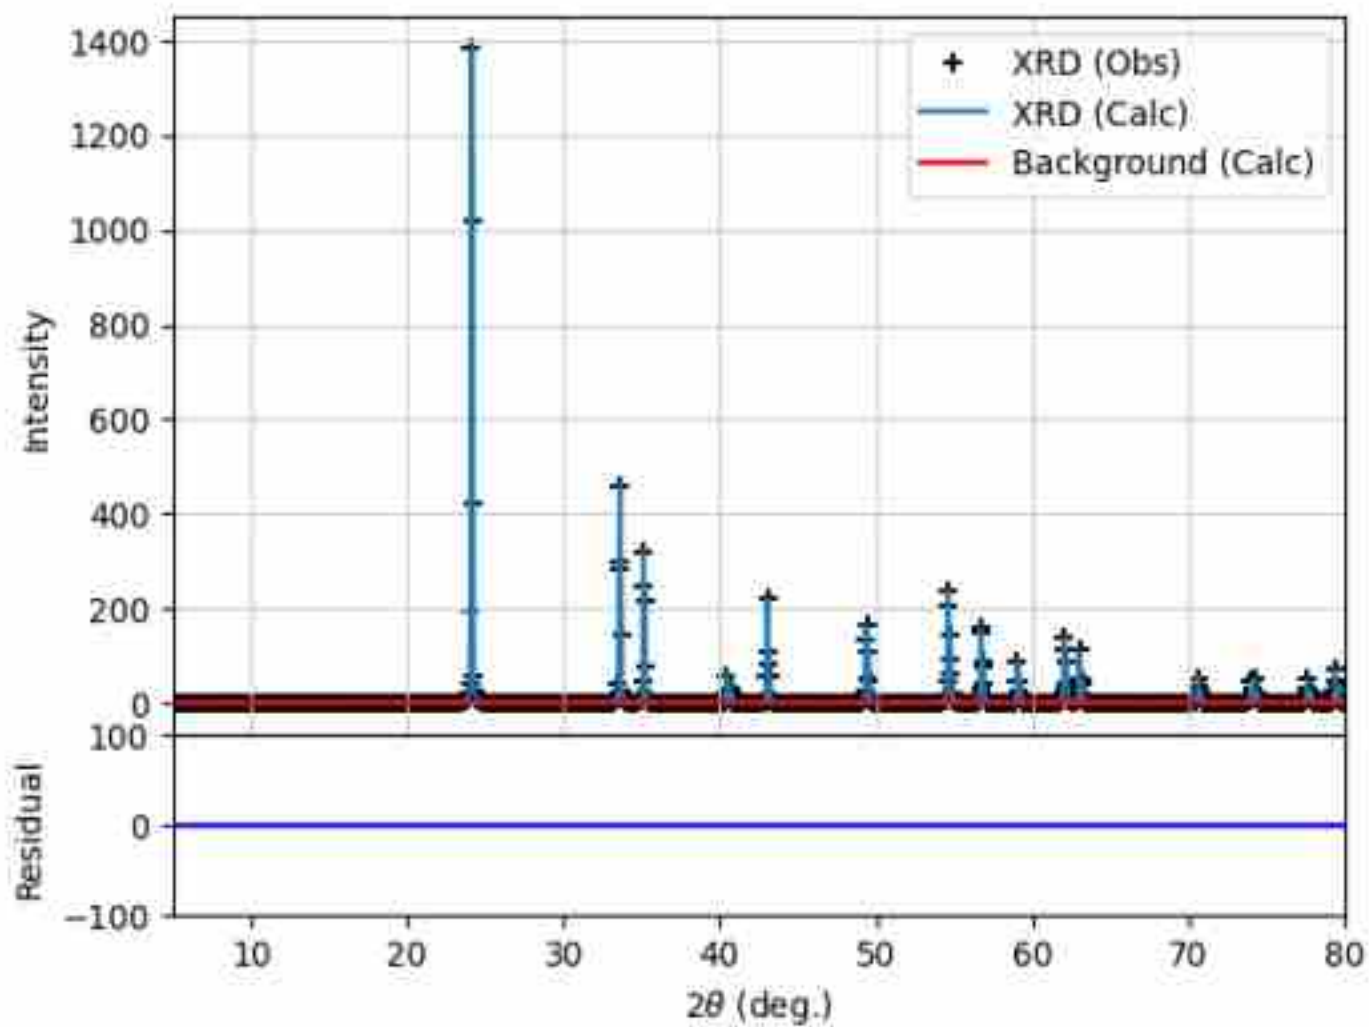

| RMSE before RR | Rwp     | RMSE after RR |
|----------------|---------|---------------|
| 0.028          | 0.00324 | 0.0026        |

# Li<sub>3</sub>TiCr<sub>2</sub>O<sub>6</sub>

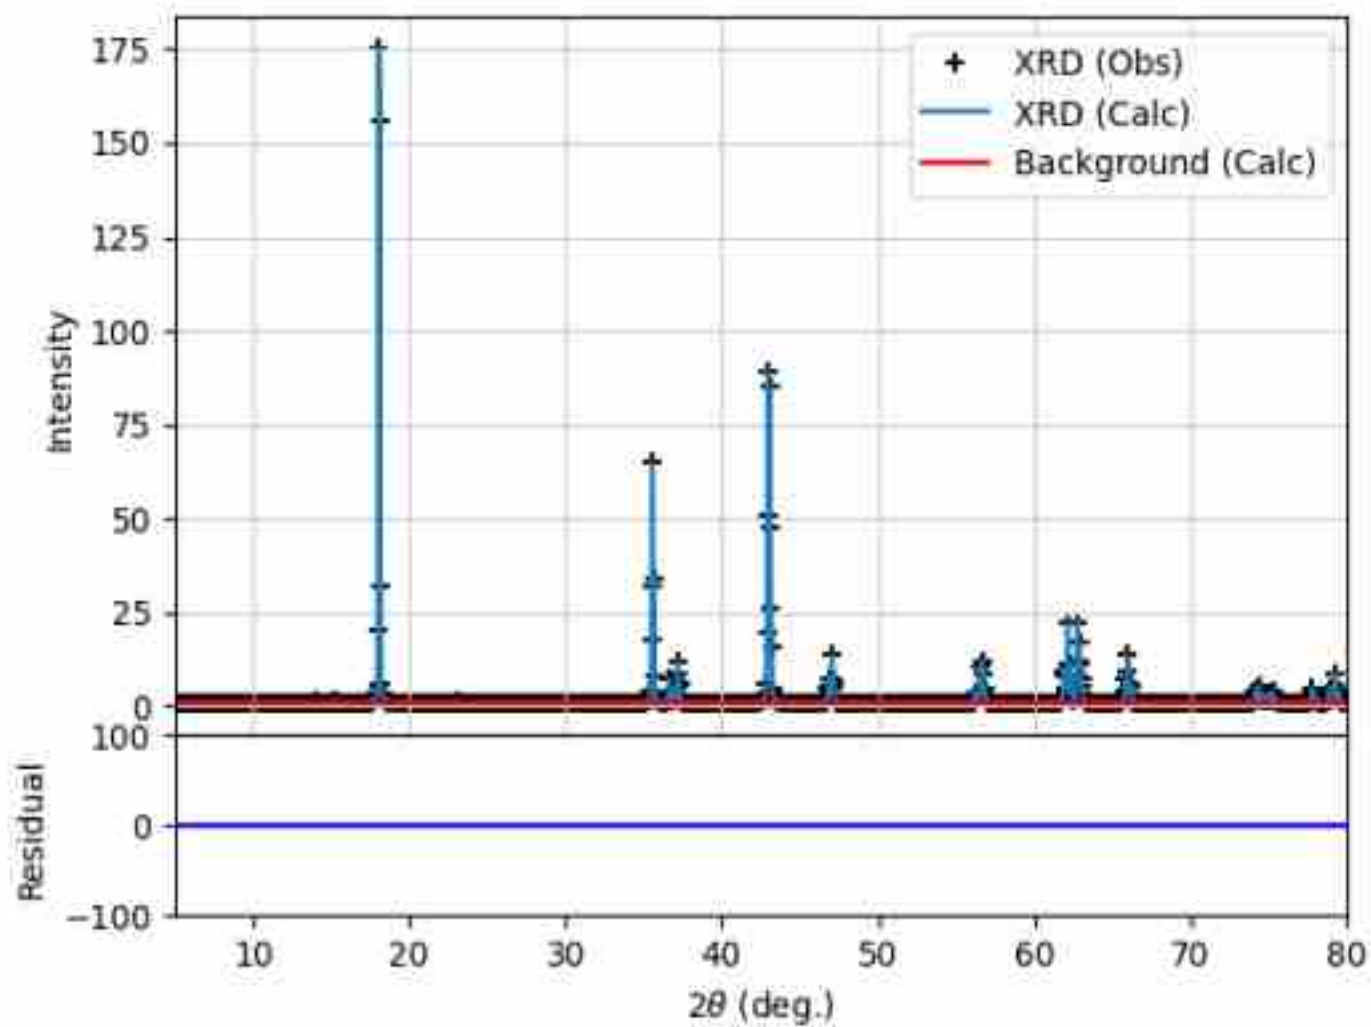

| RMSE before RR | Rwp     | RMSE after RR |
|----------------|---------|---------------|
| 0.028          | 0.00199 | 0.00089       |



# Li<sub>3</sub>Ti1Fe<sub>4</sub>O<sub>8</sub>

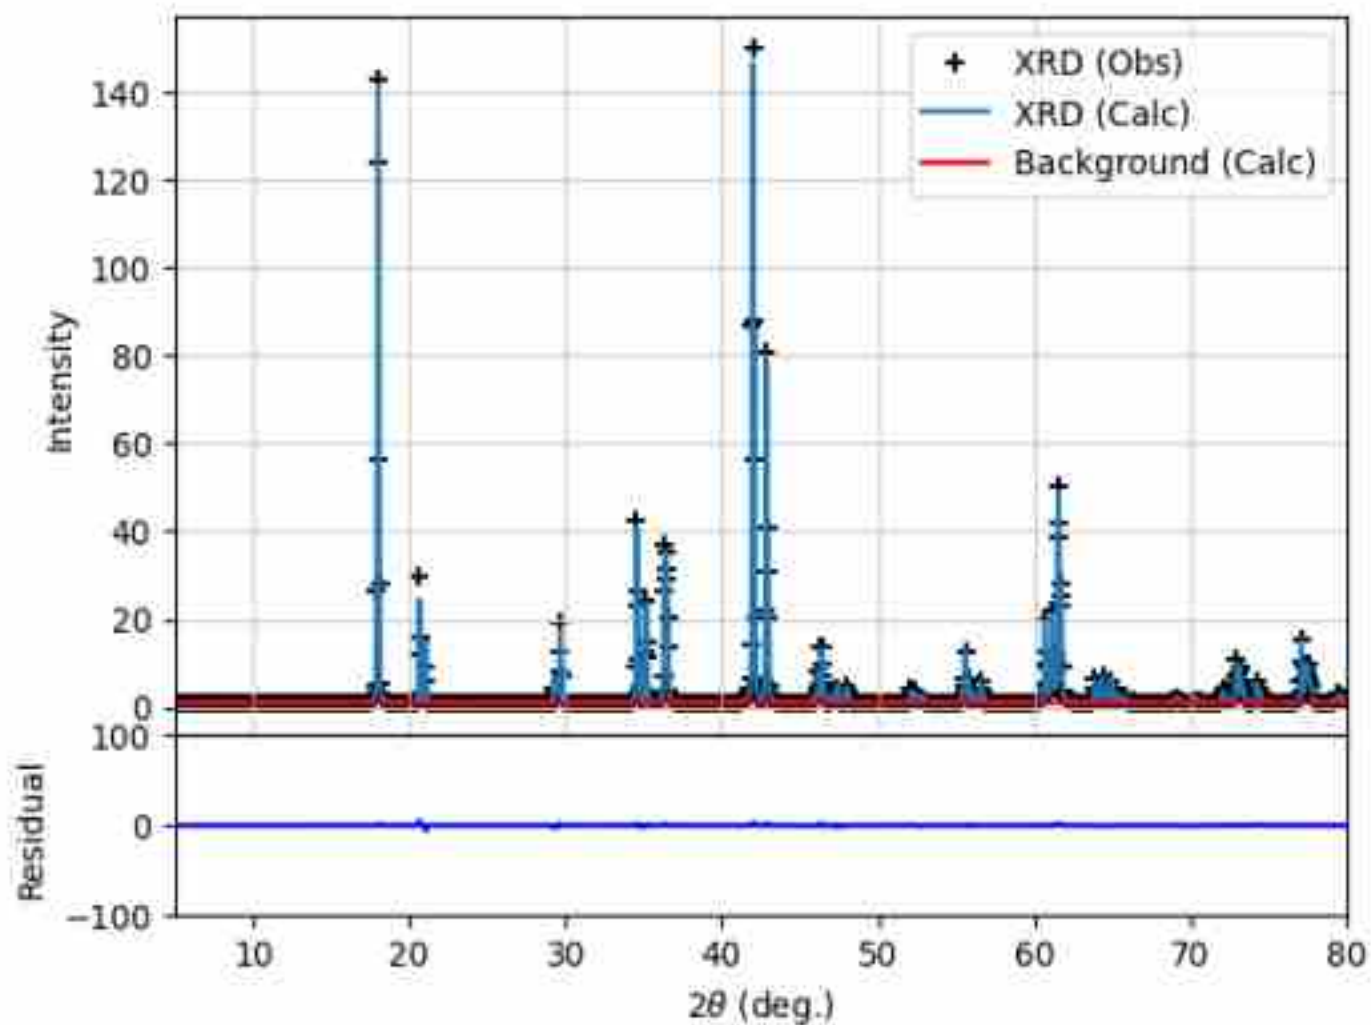

| RMSE before RR | Rwp     | RMSE after RR |
|----------------|---------|---------------|
| 0.028          | 8.13625 | 0.0543        |

# Li<sub>3</sub>U<sub>3</sub>Br<sub>12</sub>

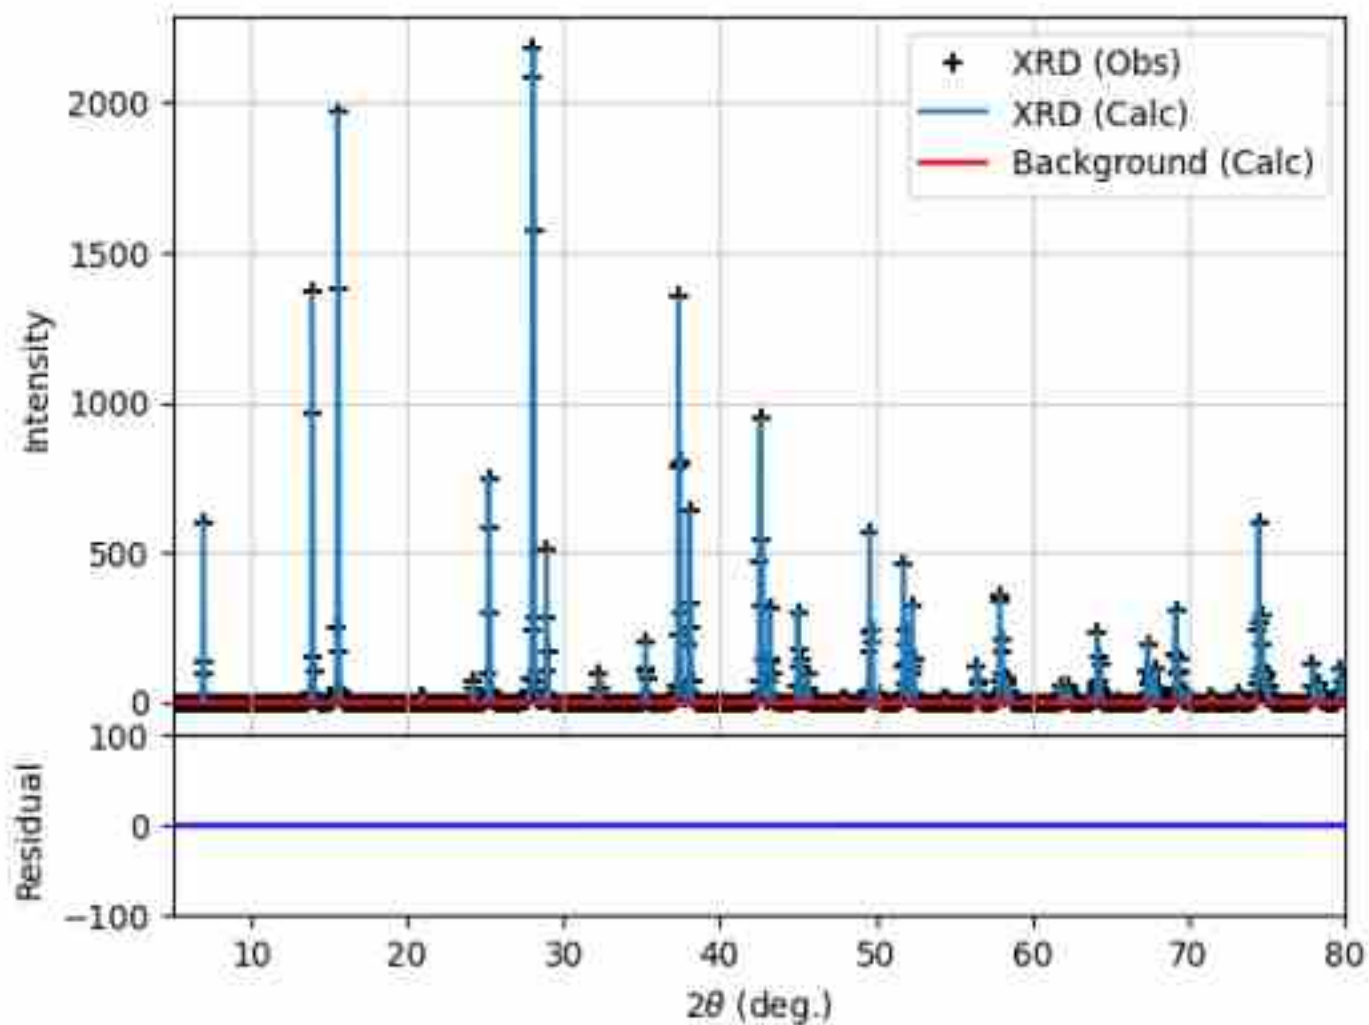

| RMSE before RR | Rwp     | RMSE after RR |
|----------------|---------|---------------|
| 0.028          | 0.03926 | 0.00815       |

# Li<sub>4</sub>Co<sub>2</sub>Sn<sub>2</sub>O<sub>8</sub>

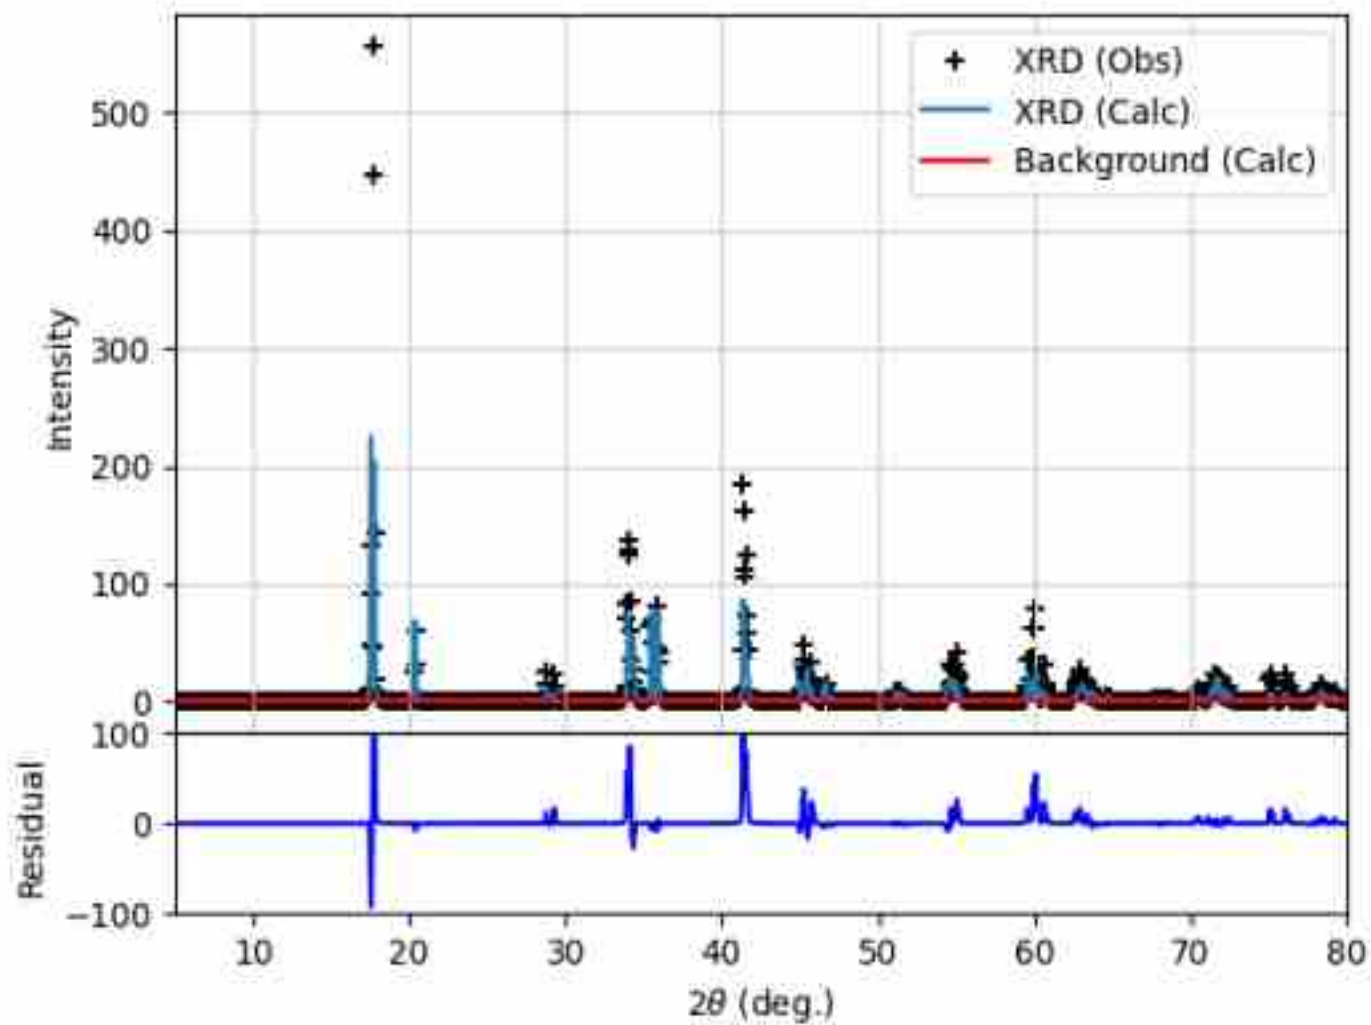

| RMSE before RR | Rwp      | RMSE after RR |
|----------------|----------|---------------|
| 0.028          | 51.13033 | None          |

# Li<sub>4</sub>Ni<sub>2</sub>F<sub>8</sub>

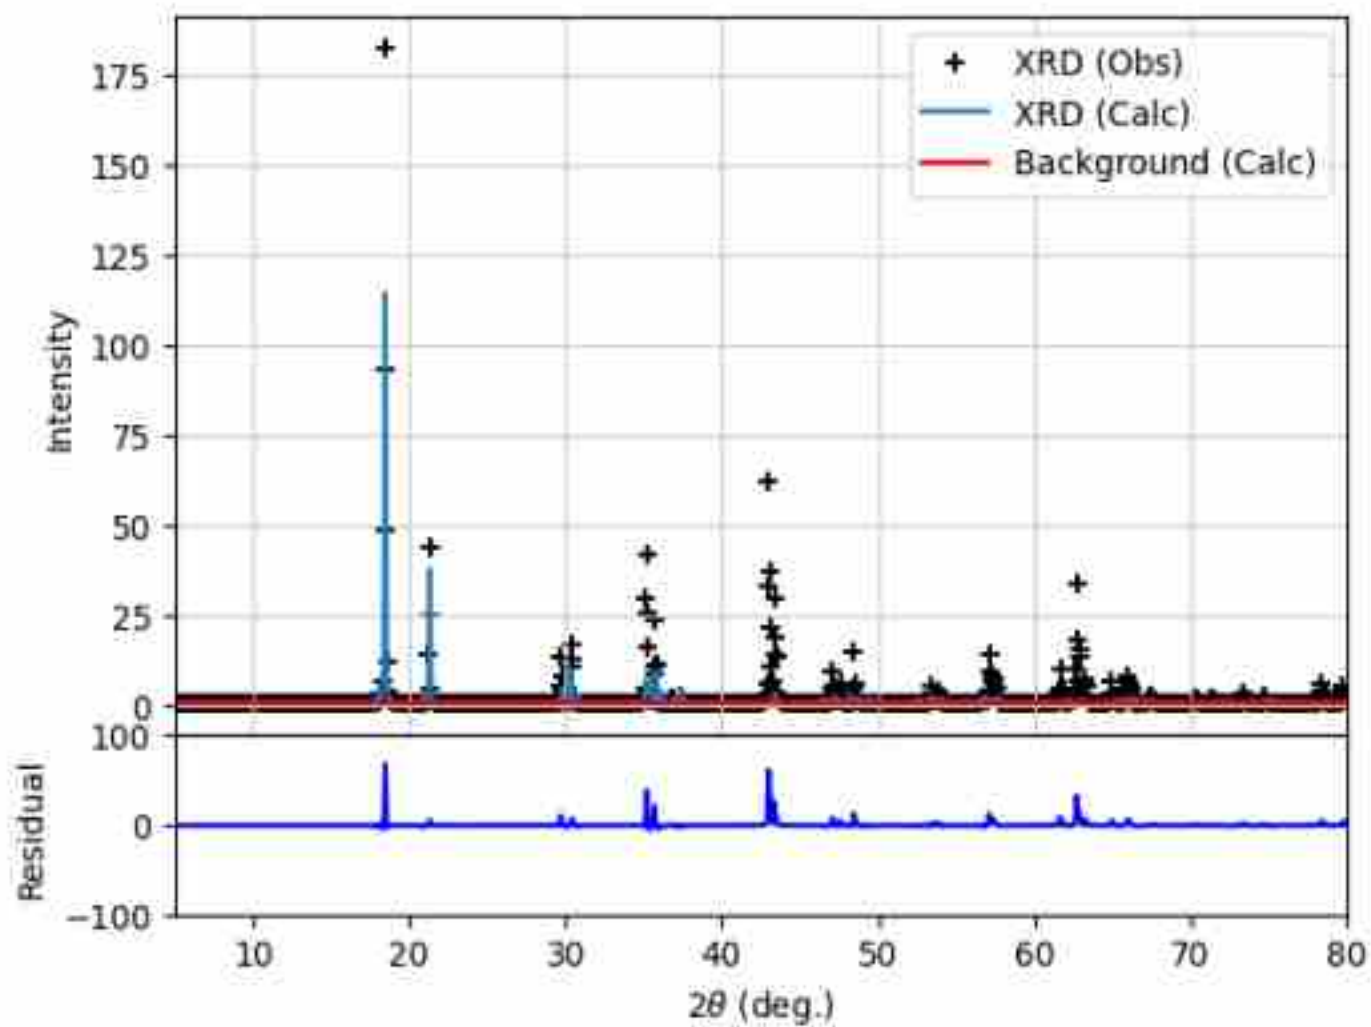

| RMSE before RR | Rwp      | RMSE after RR |
|----------------|----------|---------------|
| 0.028          | 52.71331 | None          |

# Li<sub>4</sub>Ti<sub>1</sub>Ni<sub>3</sub>O<sub>8</sub>

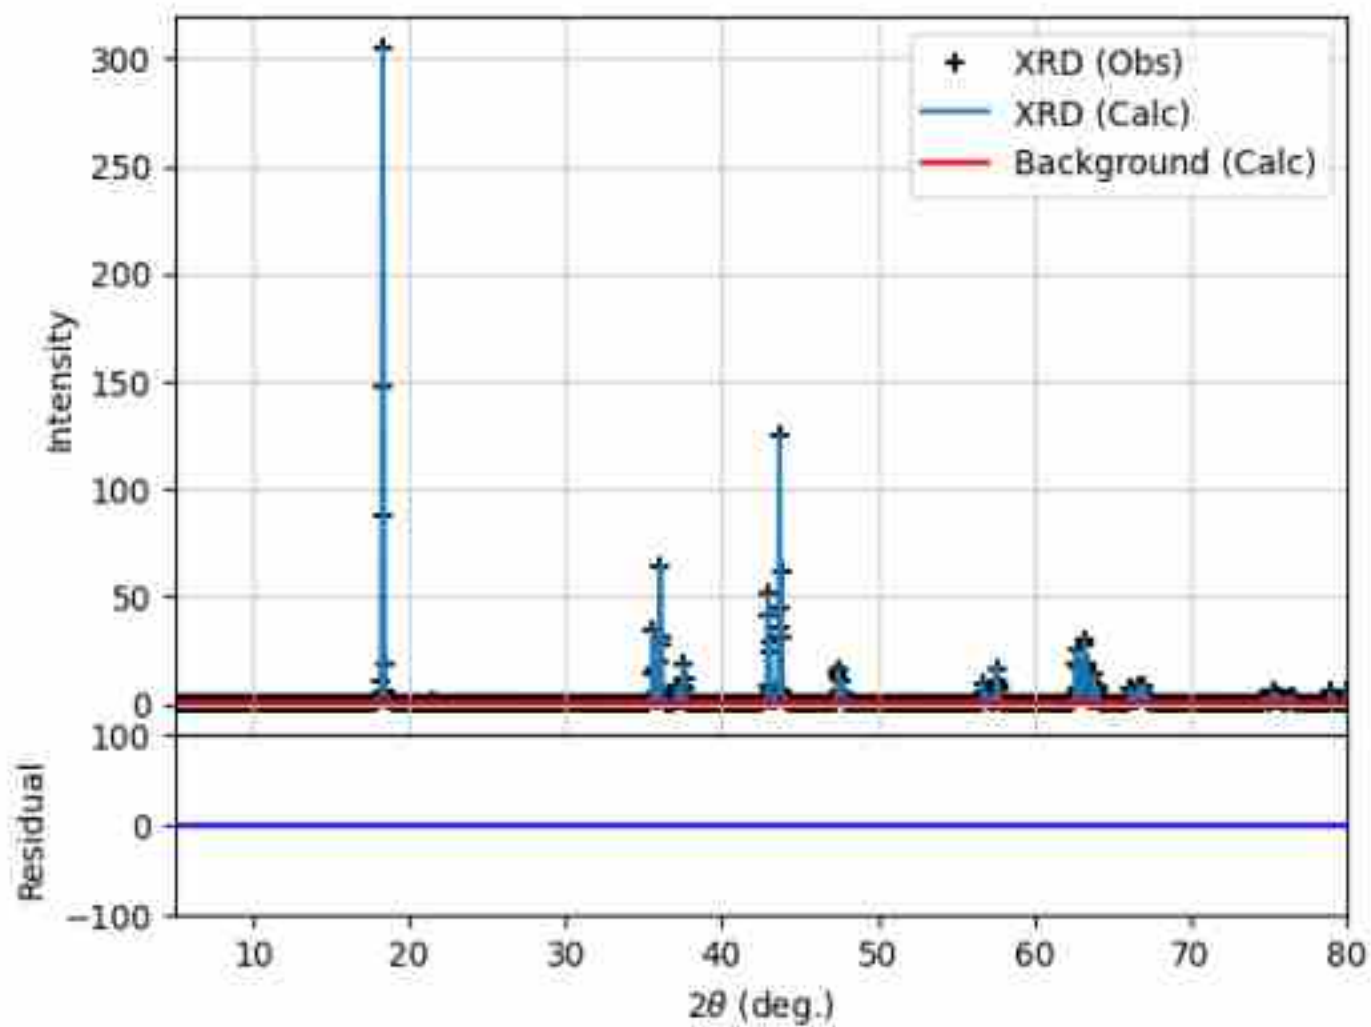

| RMSE before RR | Rwp     | RMSE after RR |
|----------------|---------|---------------|
| 0.028          | 0.00282 | 0.00142       |

# Li6Co4O10

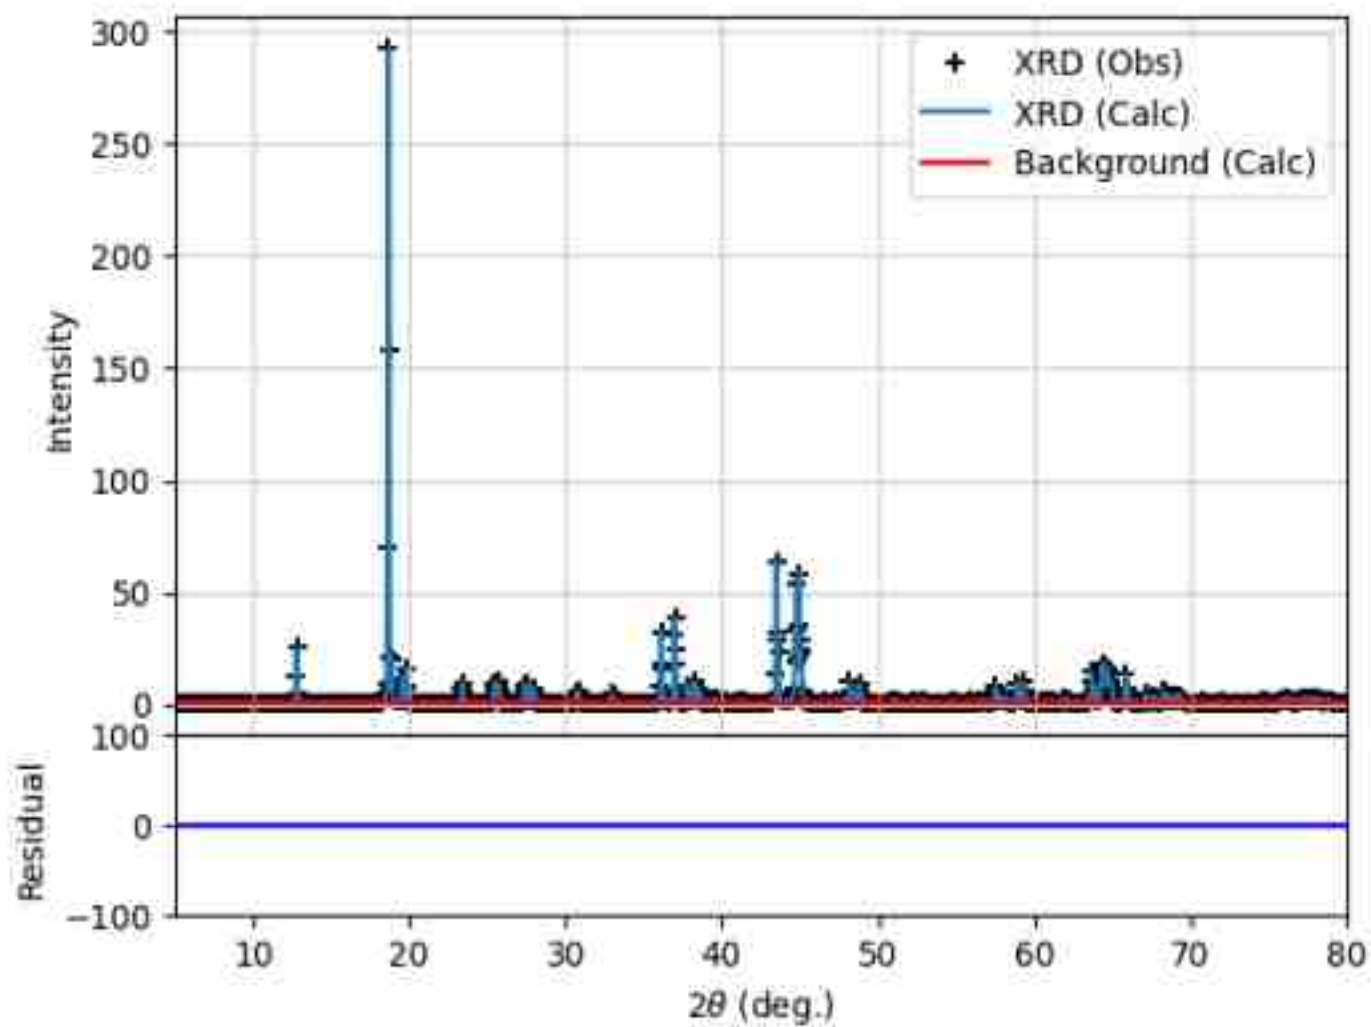

| RMSE before RR | Rwp    | RMSE after RR |
|----------------|--------|---------------|
| 0.028          | 0.0011 | 0.00064       |

# Lu<sub>4</sub>Te<sub>2</sub>O<sub>12</sub>

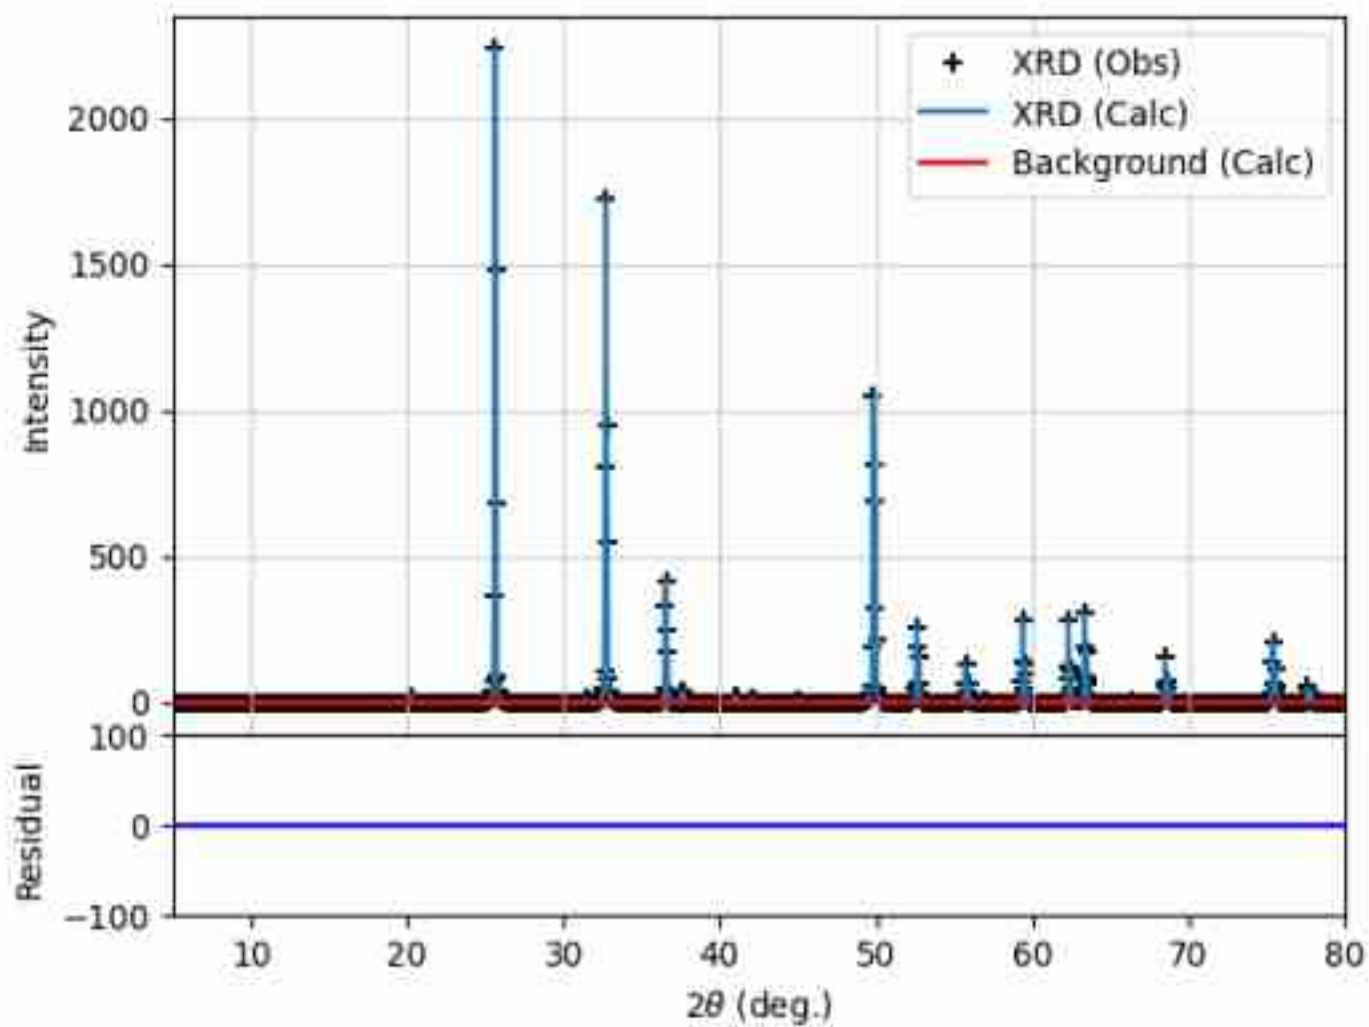

| RMSE before RR | Rwp     | RMSE after RR |
|----------------|---------|---------------|
| 0.028          | 0.00522 | 0.00169       |

# Lu12Al18

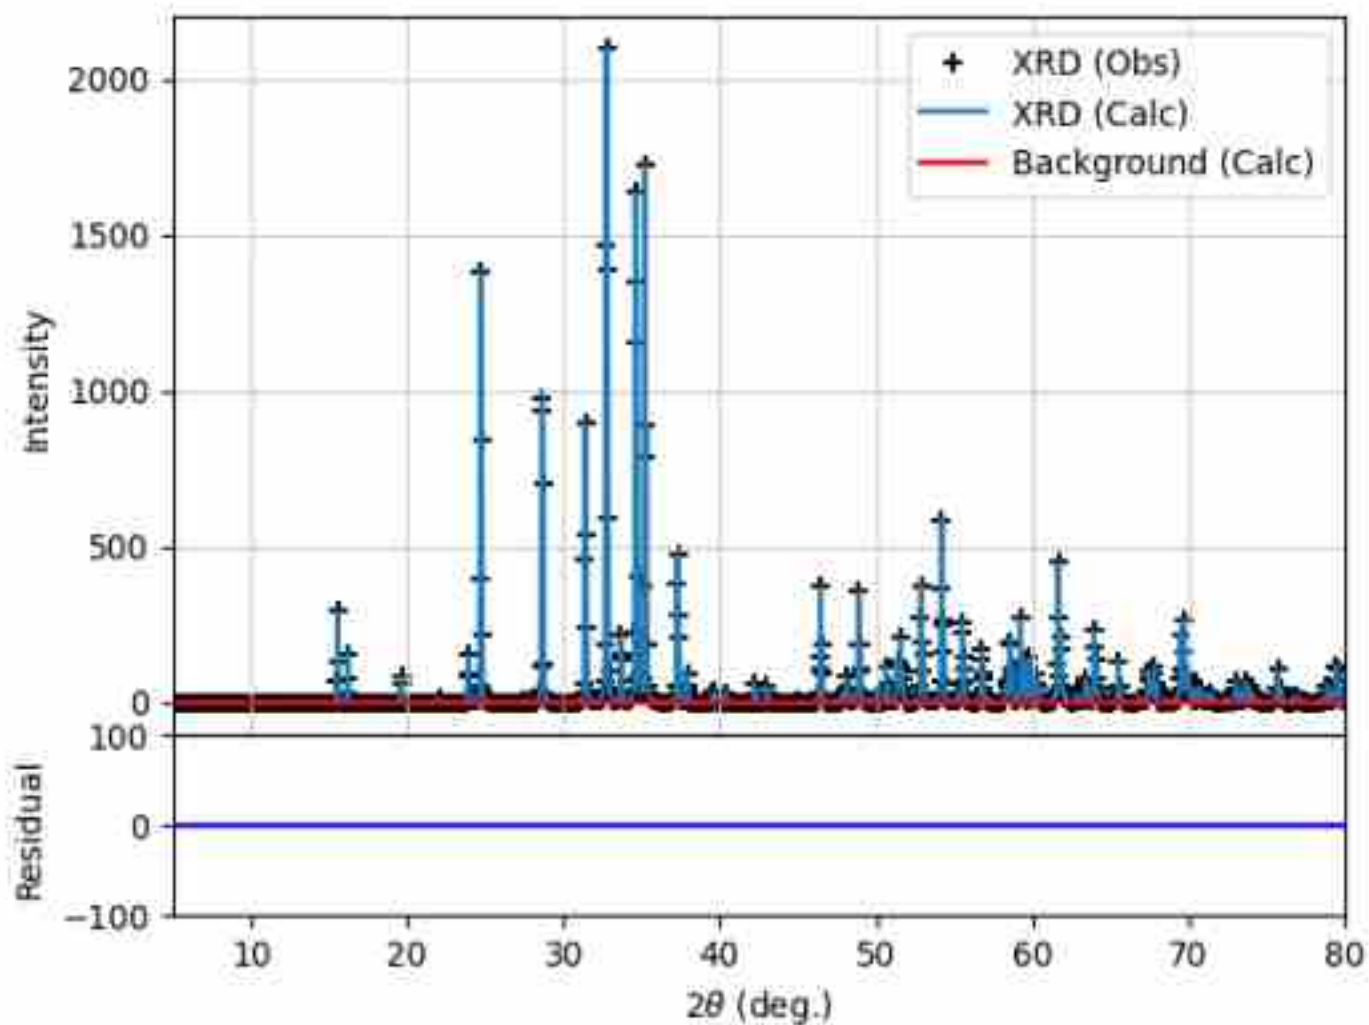

| RMSE before RR | Rwp     | RMSE after RR |
|----------------|---------|---------------|
| 0.028          | 0.00481 | 0.00083       |



# Mg<sub>1</sub>Cd<sub>1</sub>C<sub>2</sub>O<sub>6</sub>

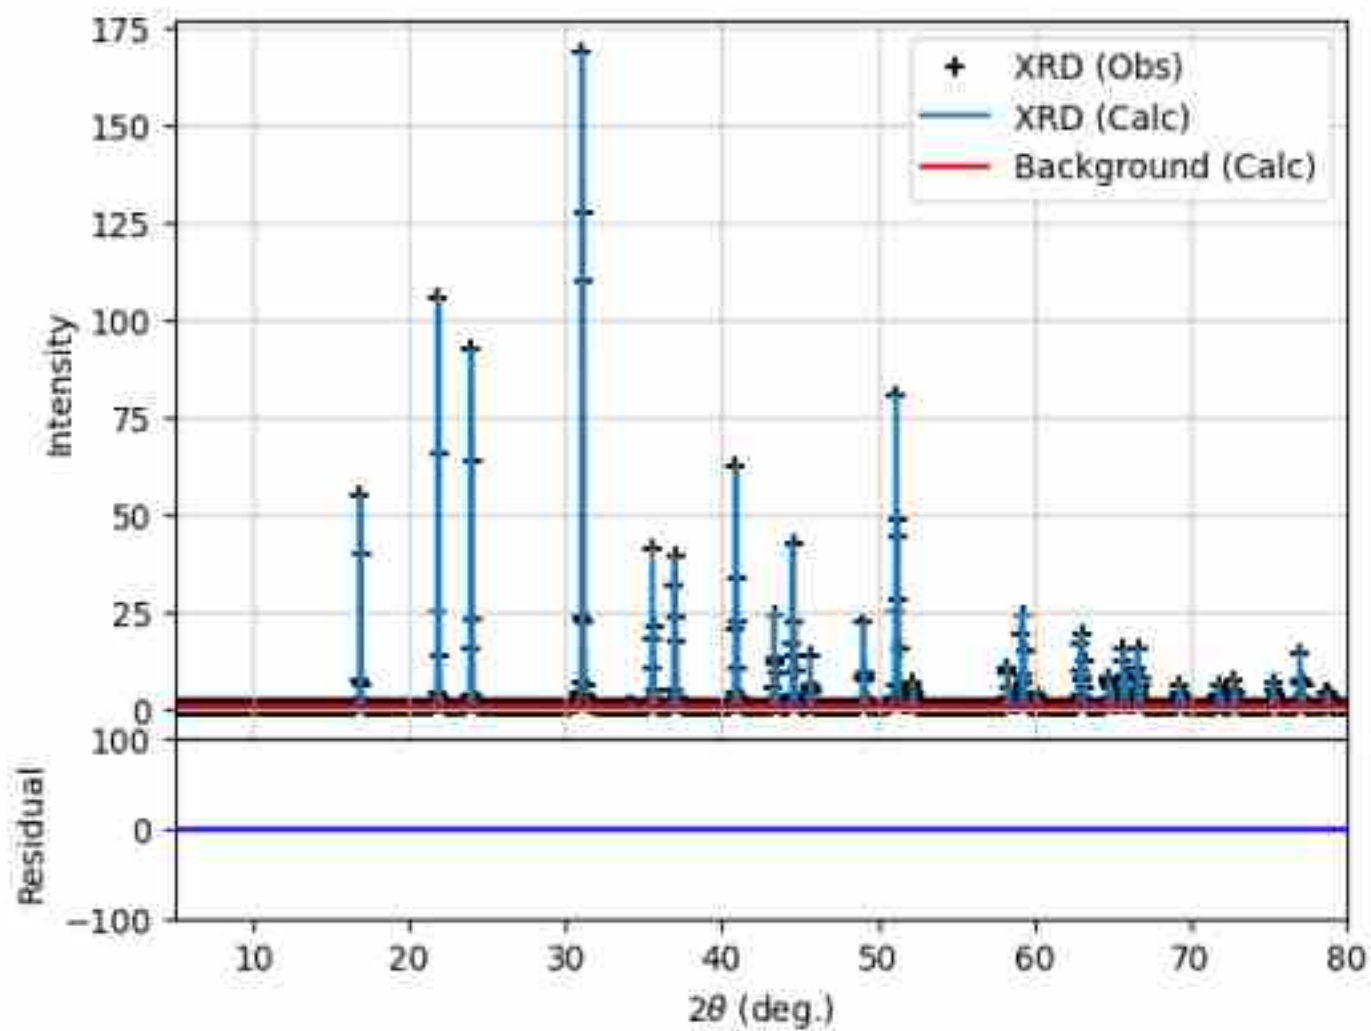

| RMSE before RR | Rwp    | RMSE after RR |
|----------------|--------|---------------|
| 0.028          | 0.0033 | 0.00253       |

# Mg<sub>2</sub>Mn<sub>2</sub>In<sub>2</sub>S<sub>8</sub>

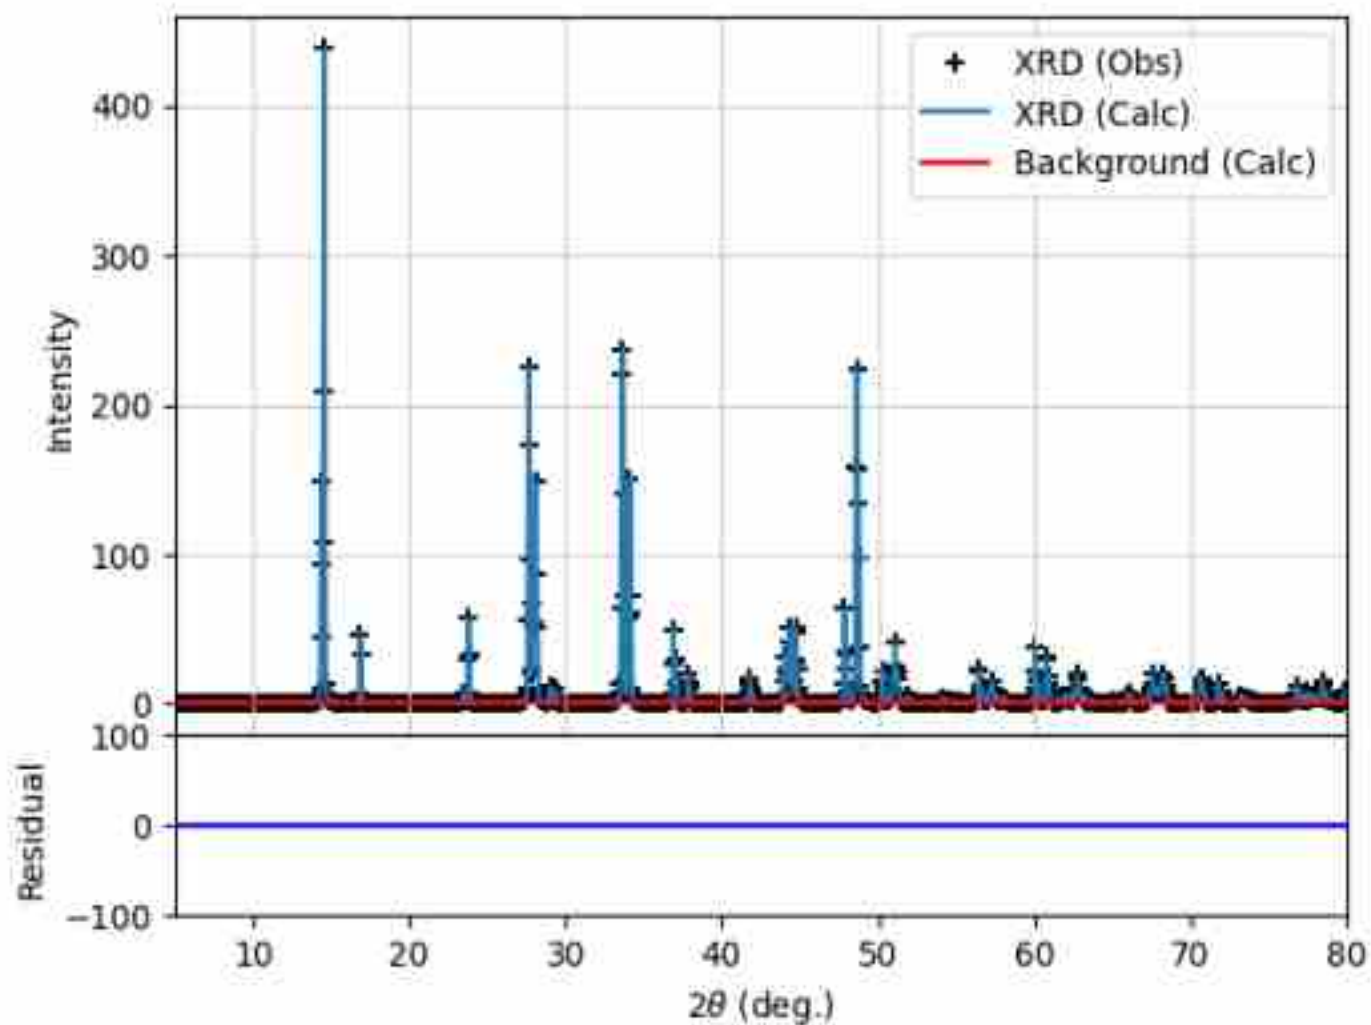

| RMSE before RR | Rwp     | RMSE after RR |
|----------------|---------|---------------|
| 0.028          | 0.00052 | 0.00021       |

# Mg<sub>3</sub>Fe<sub>4</sub>O<sub>7</sub>

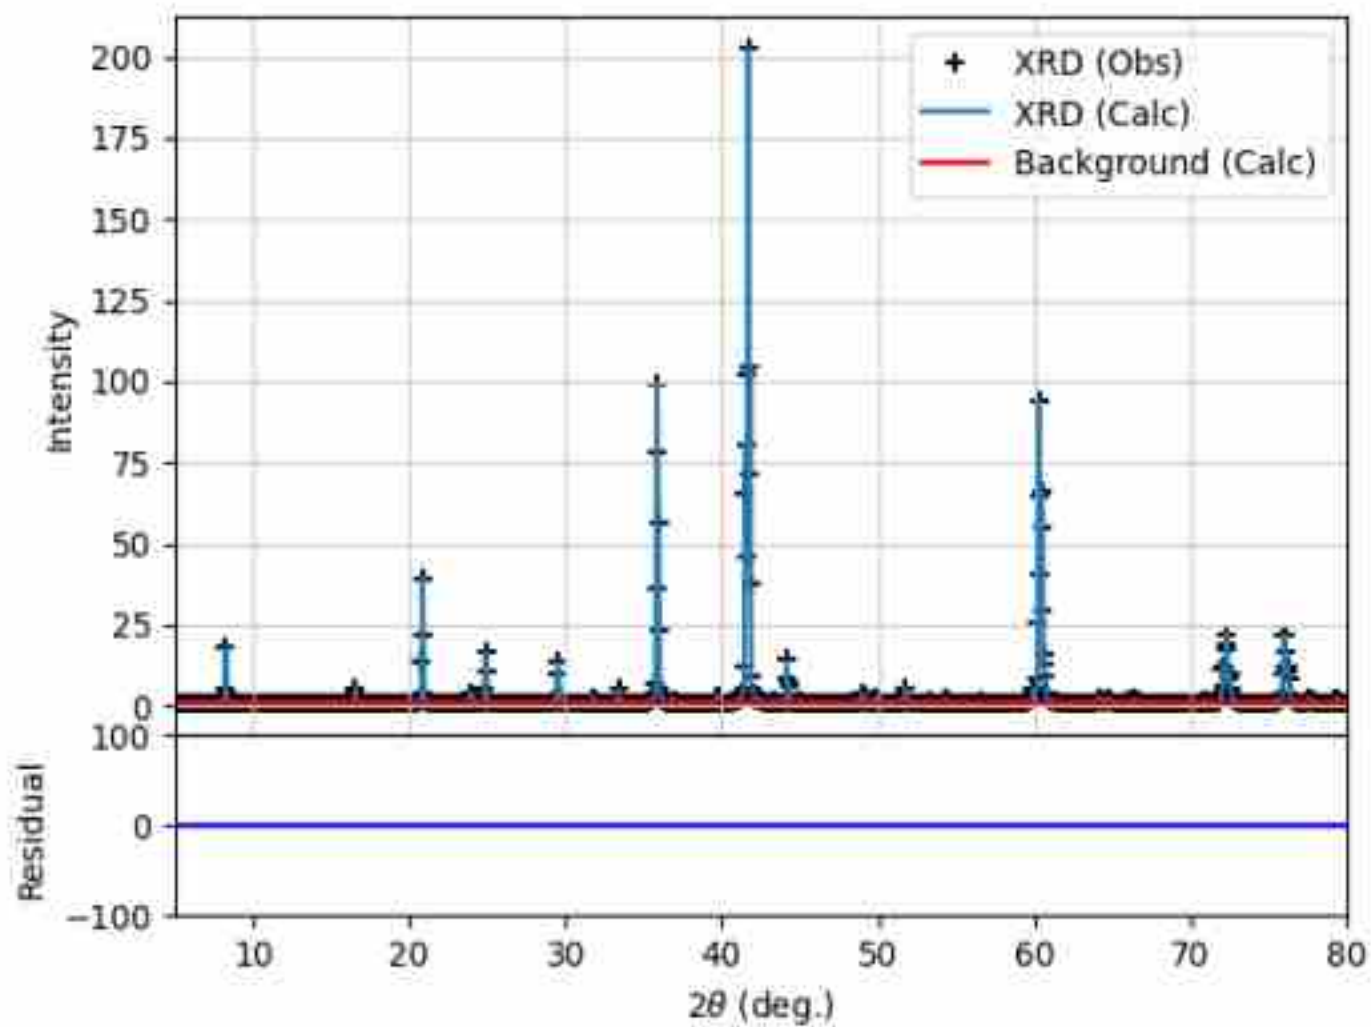

| RMSE before RR | Rwp     | RMSE after RR |
|----------------|---------|---------------|
| 0.028          | 0.00717 | 0.01045       |

# Mn<sub>2</sub>Cd<sub>2</sub>F<sub>10</sub>

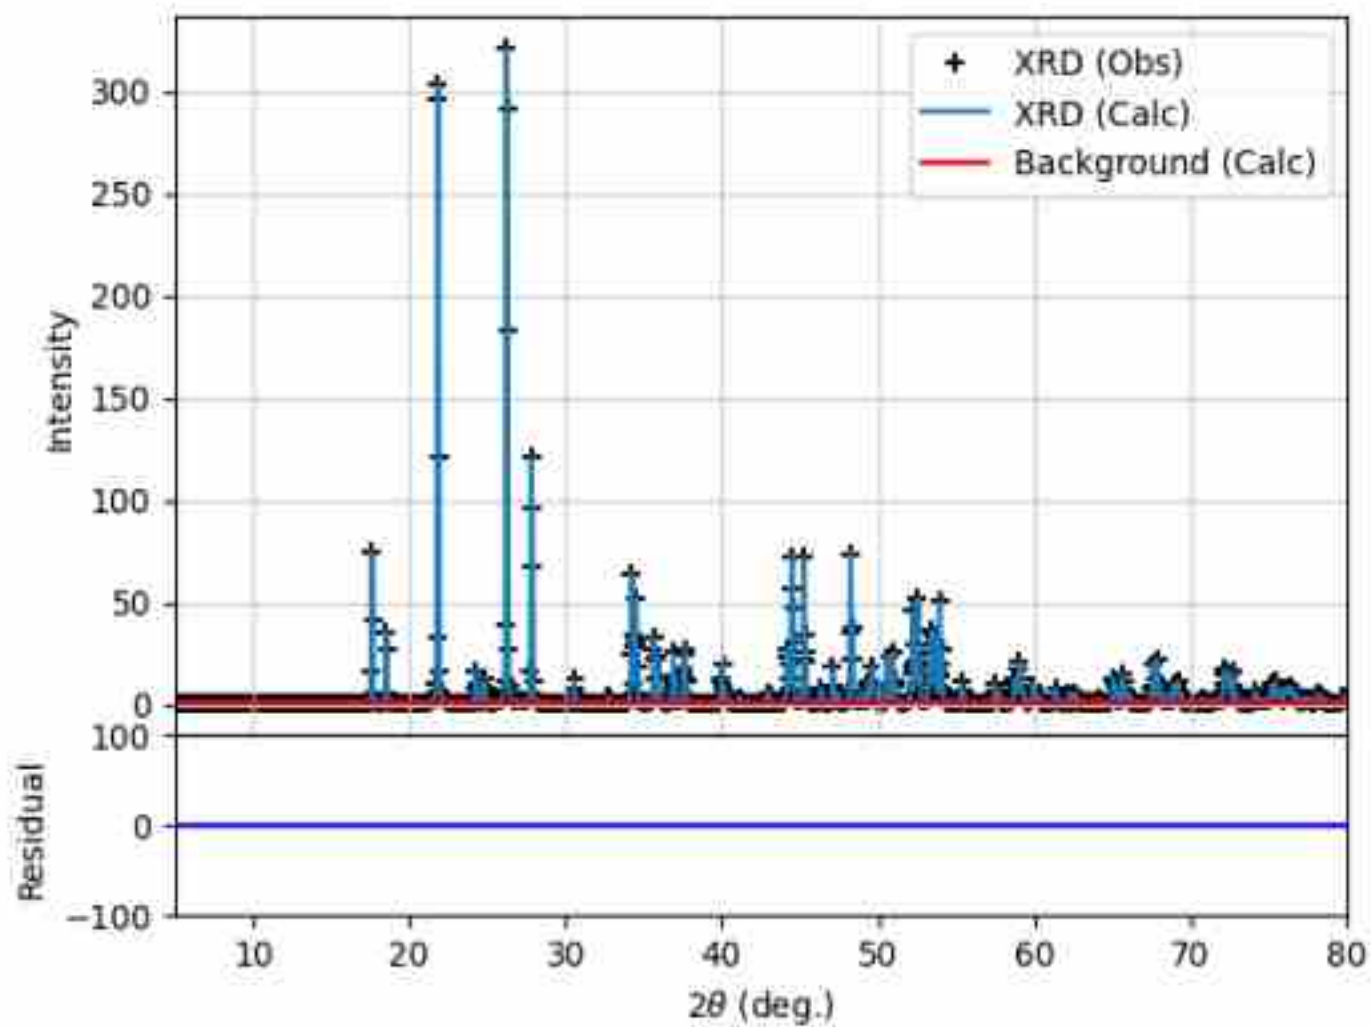

| RMSE before RR | Rwp    | RMSE after RR |
|----------------|--------|---------------|
| 0.028          | 0.0036 | 0.00056       |

# Mn<sub>4</sub>Ge<sub>2</sub>O<sub>8</sub>

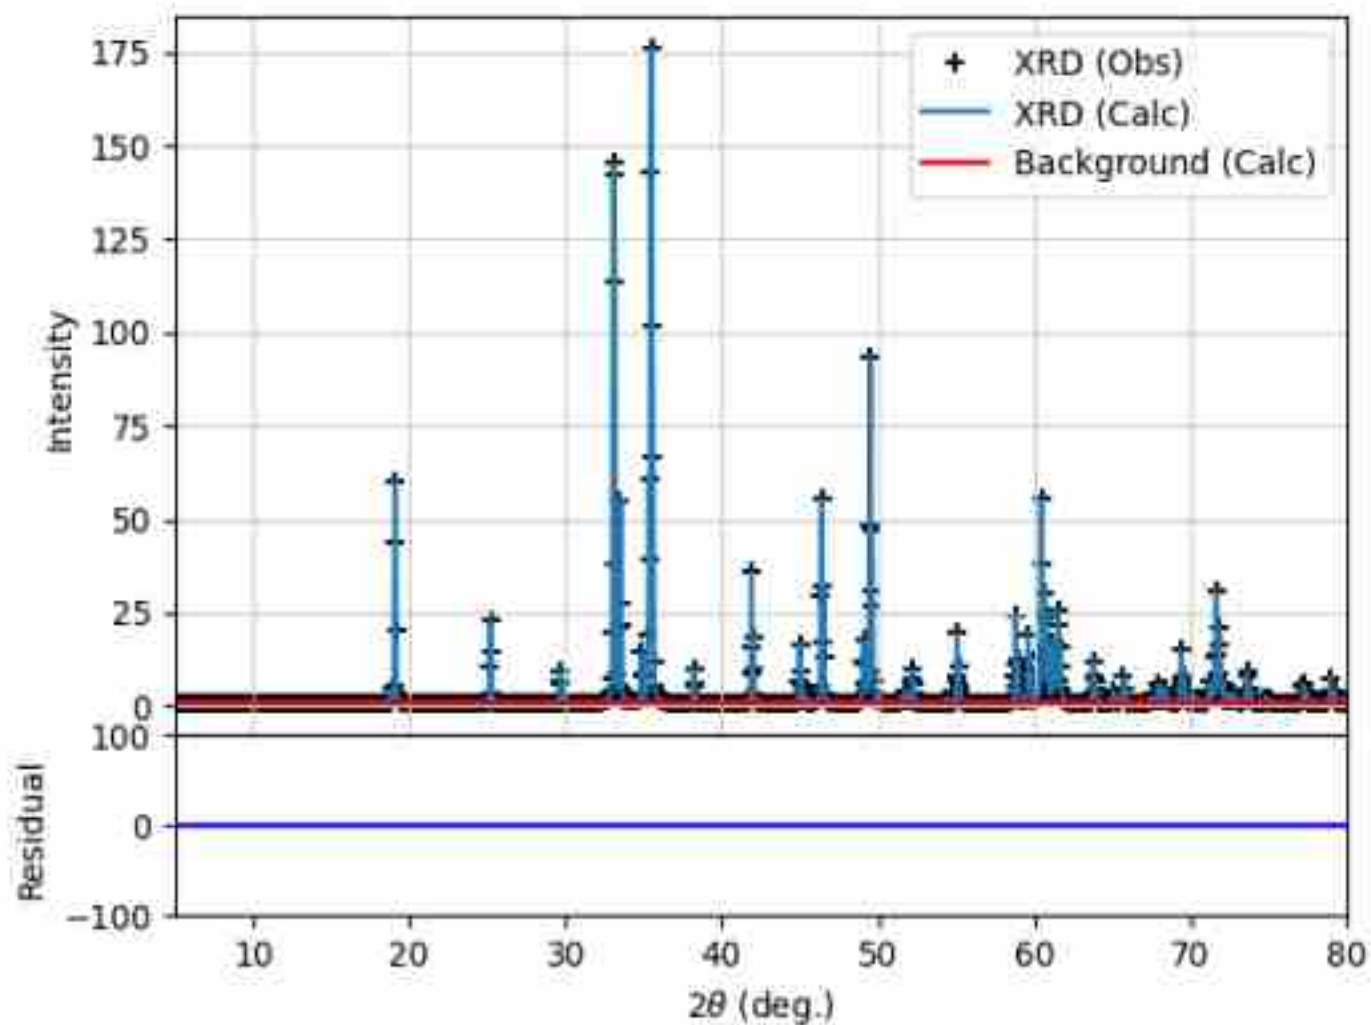

| RMSE before RR | Rwp     | RMSE after RR |
|----------------|---------|---------------|
| 0.028          | 0.00457 | 0.00097       |

# Mn6Pt2

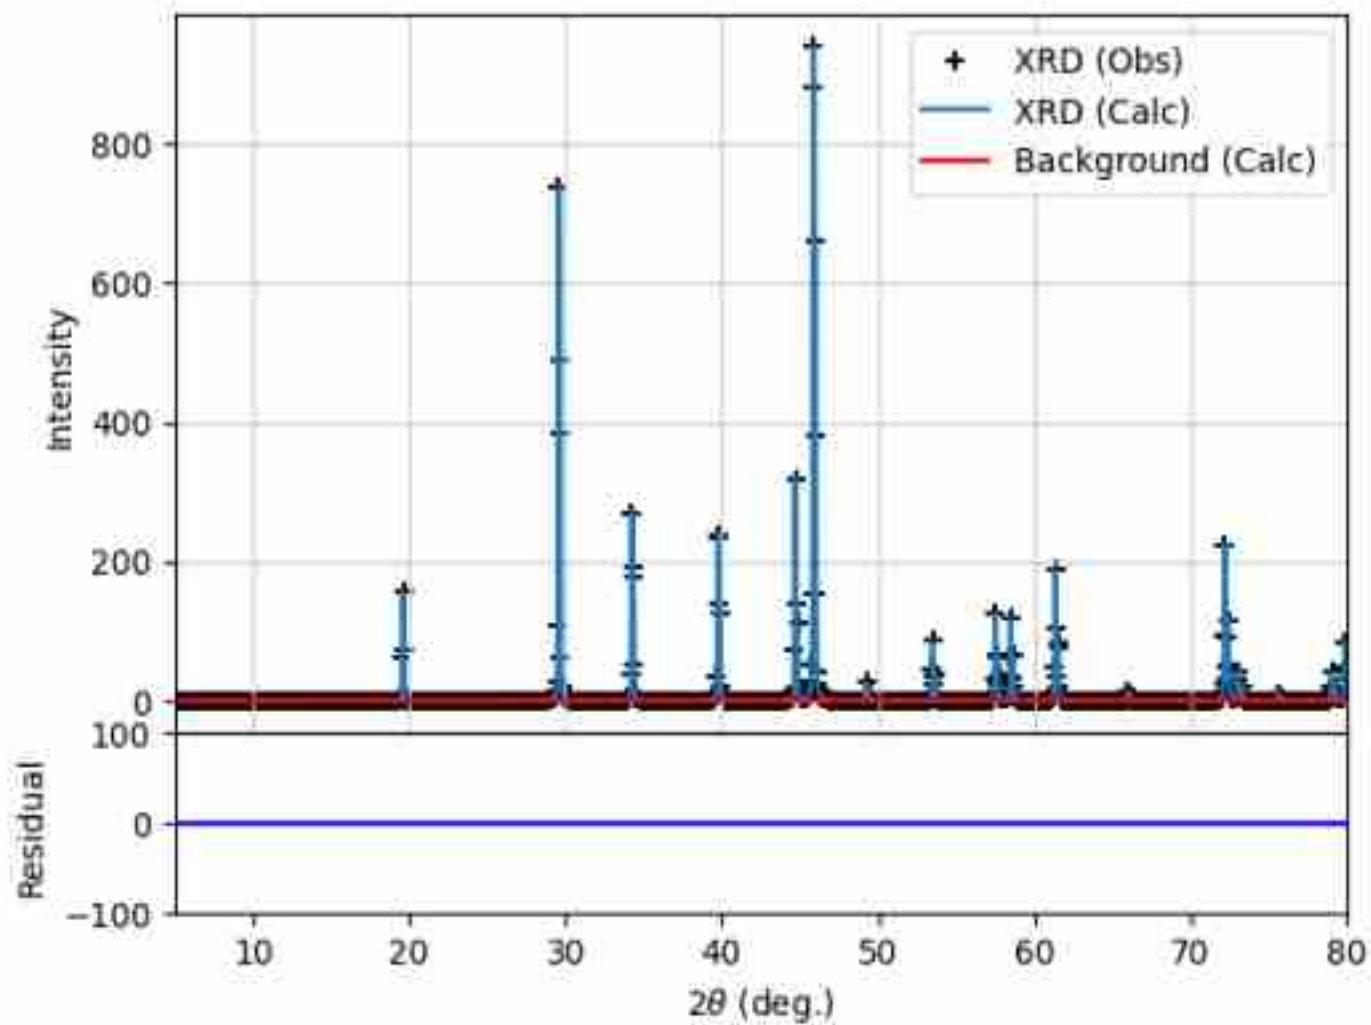

| RMSE before RR | Rwp     | RMSE after RR |
|----------------|---------|---------------|
| 0.028          | 0.01861 | 0.00185       |

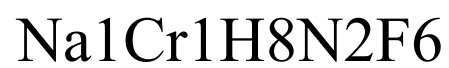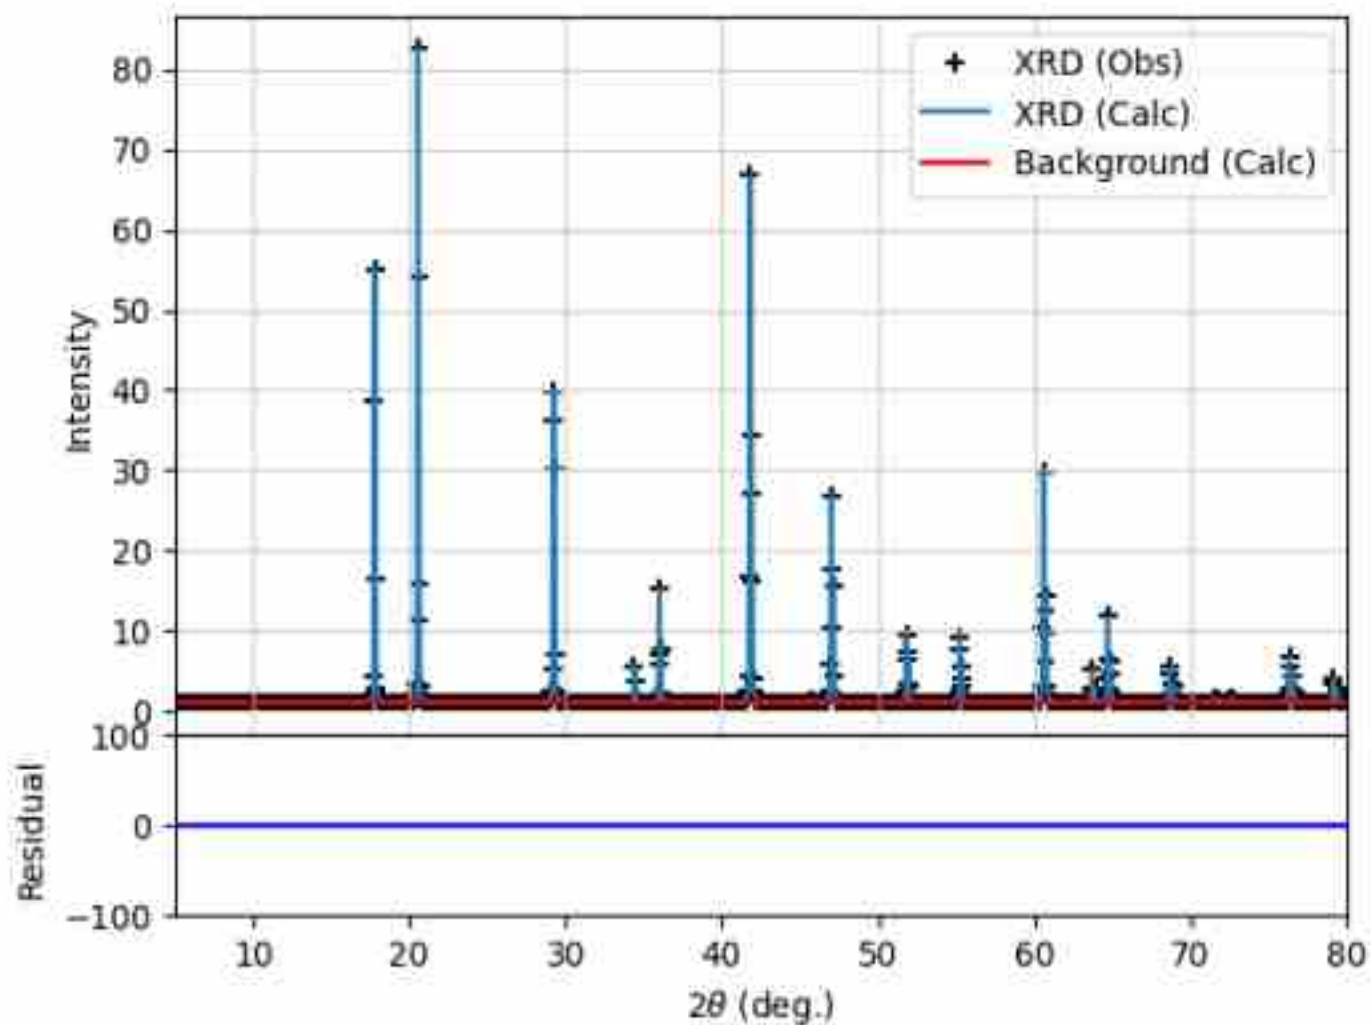

| RMSE before RR | Rwp    | RMSE after RR |
|----------------|--------|---------------|
| 0.028          | 0.0327 | 0.01384       |

# Na<sub>4</sub>Nb<sub>2</sub>F<sub>12</sub>

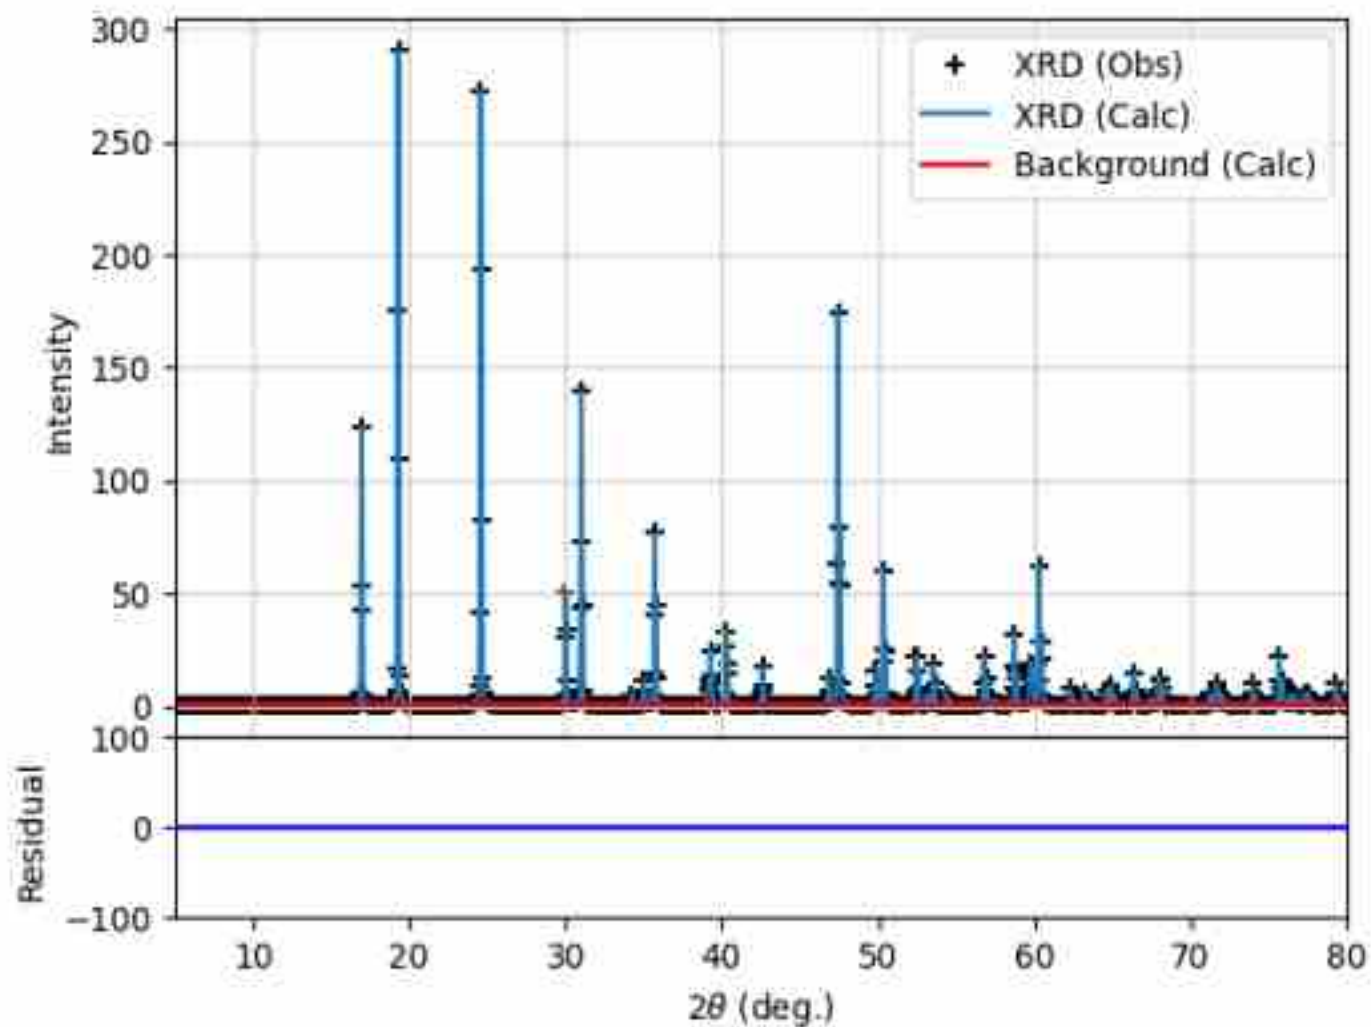

| RMSE before RR | Rwp     | RMSE after RR |
|----------------|---------|---------------|
| 0.028          | 0.00443 | 0.00101       |



# Na<sub>4</sub>Sn<sub>1</sub>Ge<sub>2</sub>S<sub>6</sub>

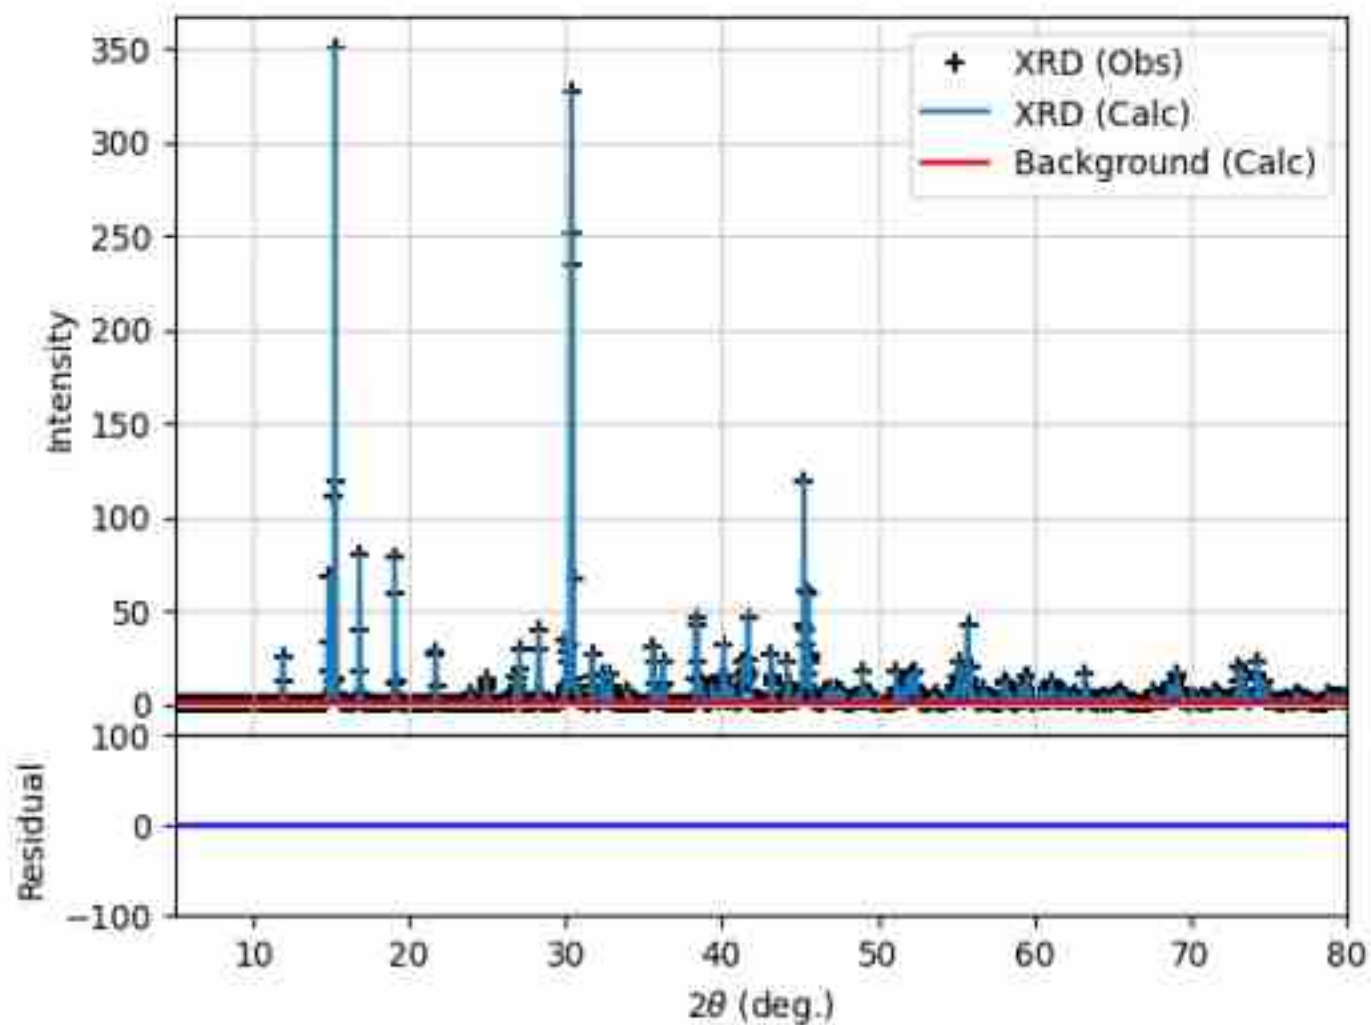

| RMSE before RR | Rwp     | RMSE after RR |
|----------------|---------|---------------|
| 0.028          | 0.00283 | 0.00028       |

# Na<sub>6</sub>P<sub>2</sub>O<sub>8</sub>

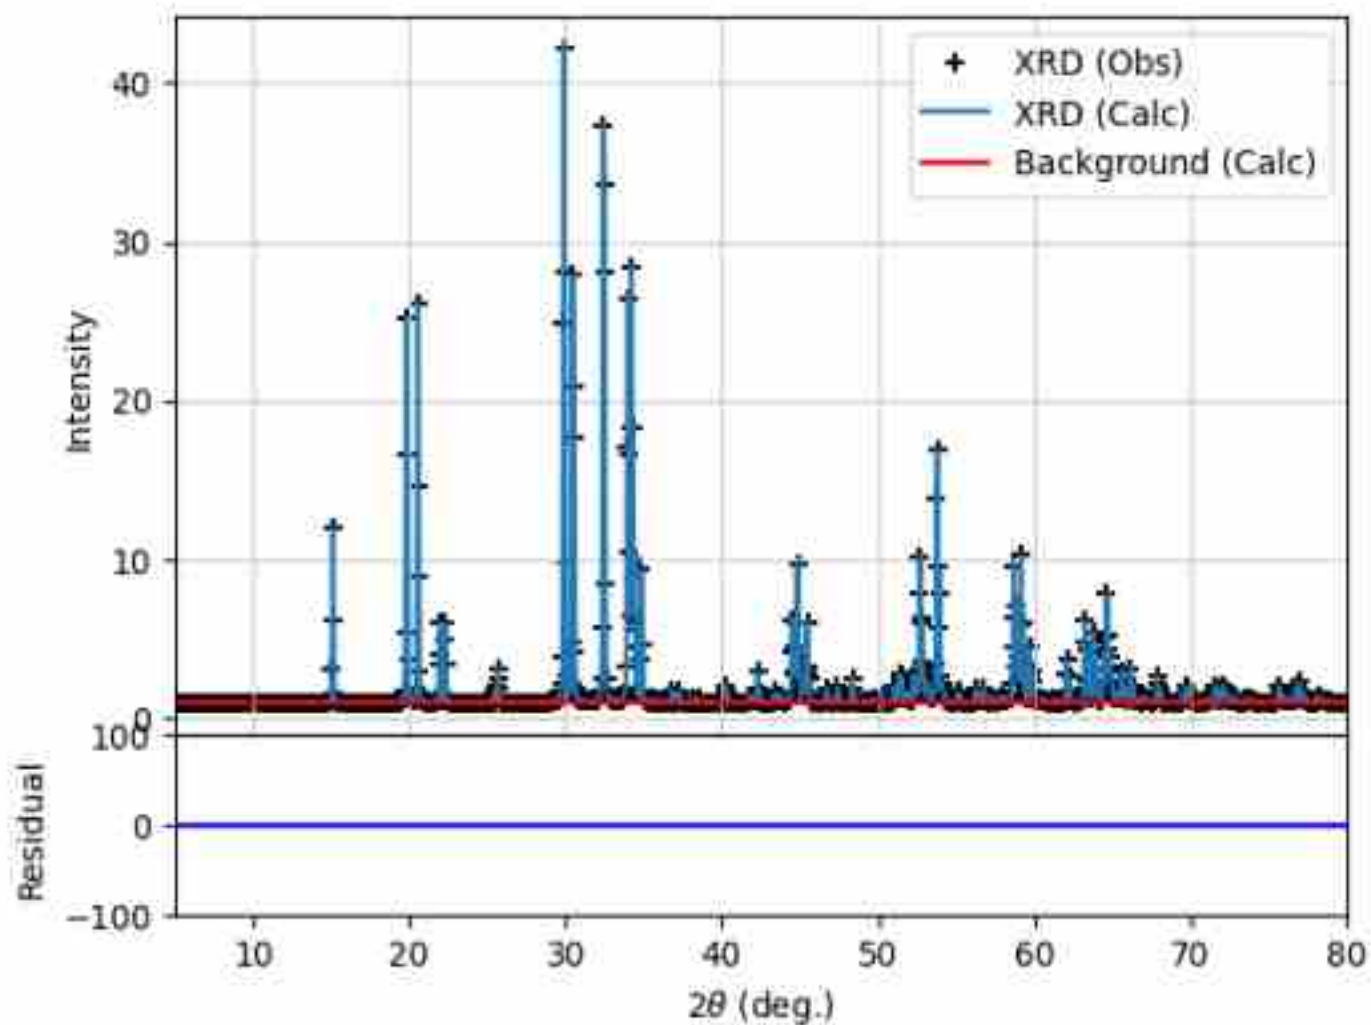

| RMSE before RR | Rwp     | RMSE after RR |
|----------------|---------|---------------|
| 0.028          | 0.00197 | 0.00052       |

# Na<sub>8</sub>Fe<sub>2</sub>O<sub>8</sub>

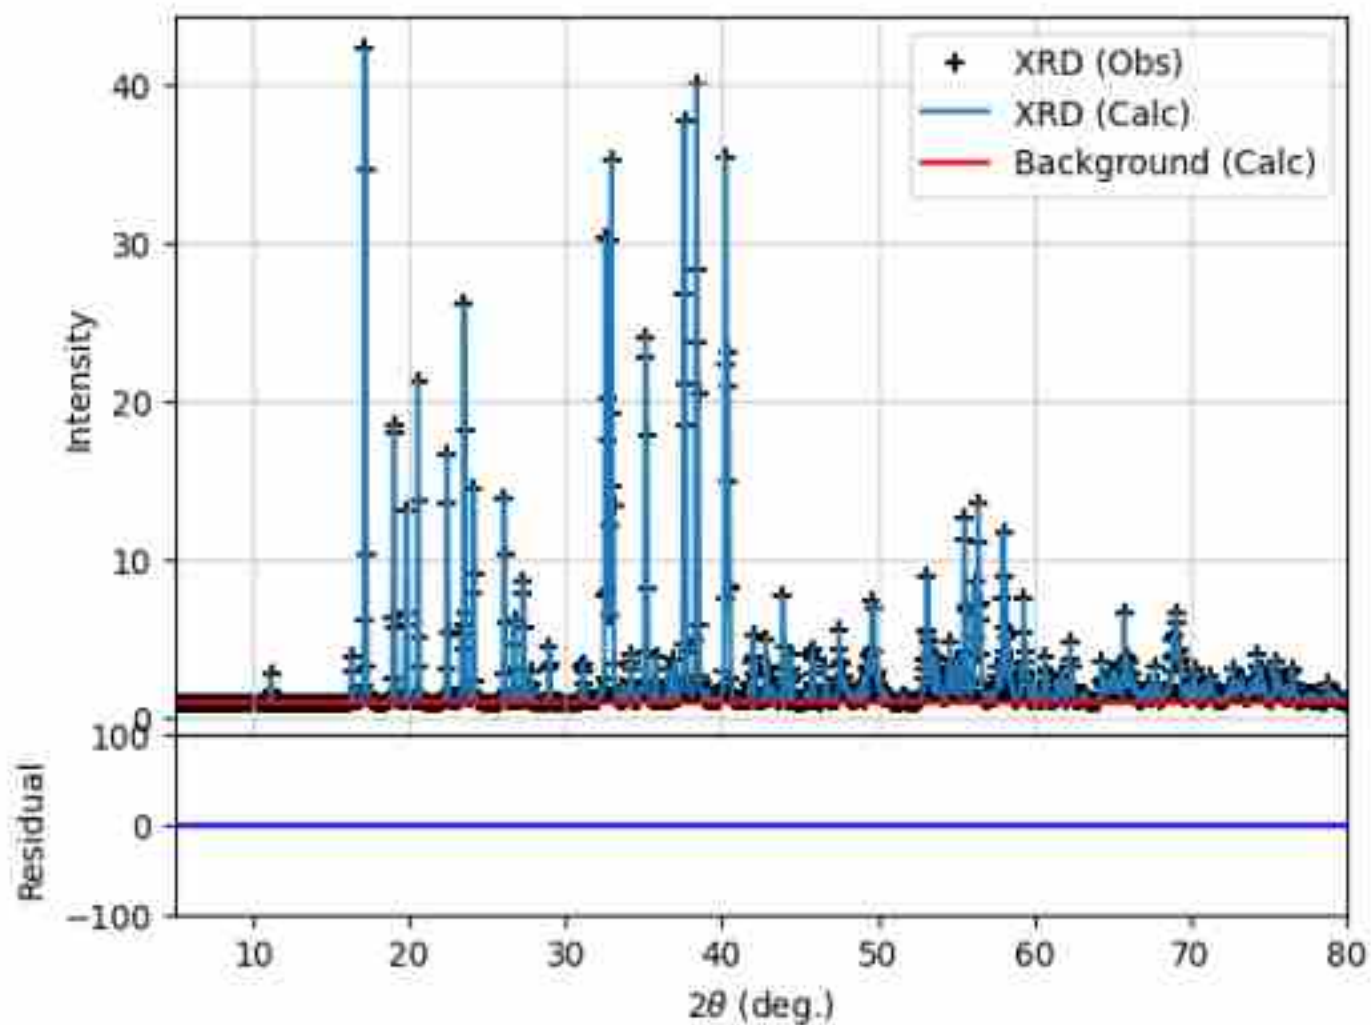

| RMSE before RR | Rwp     | RMSE after RR |
|----------------|---------|---------------|
| 0.028          | 0.00074 | 0.00042       |

# Nb<sub>4</sub>Ni<sub>4</sub>P<sub>4</sub>

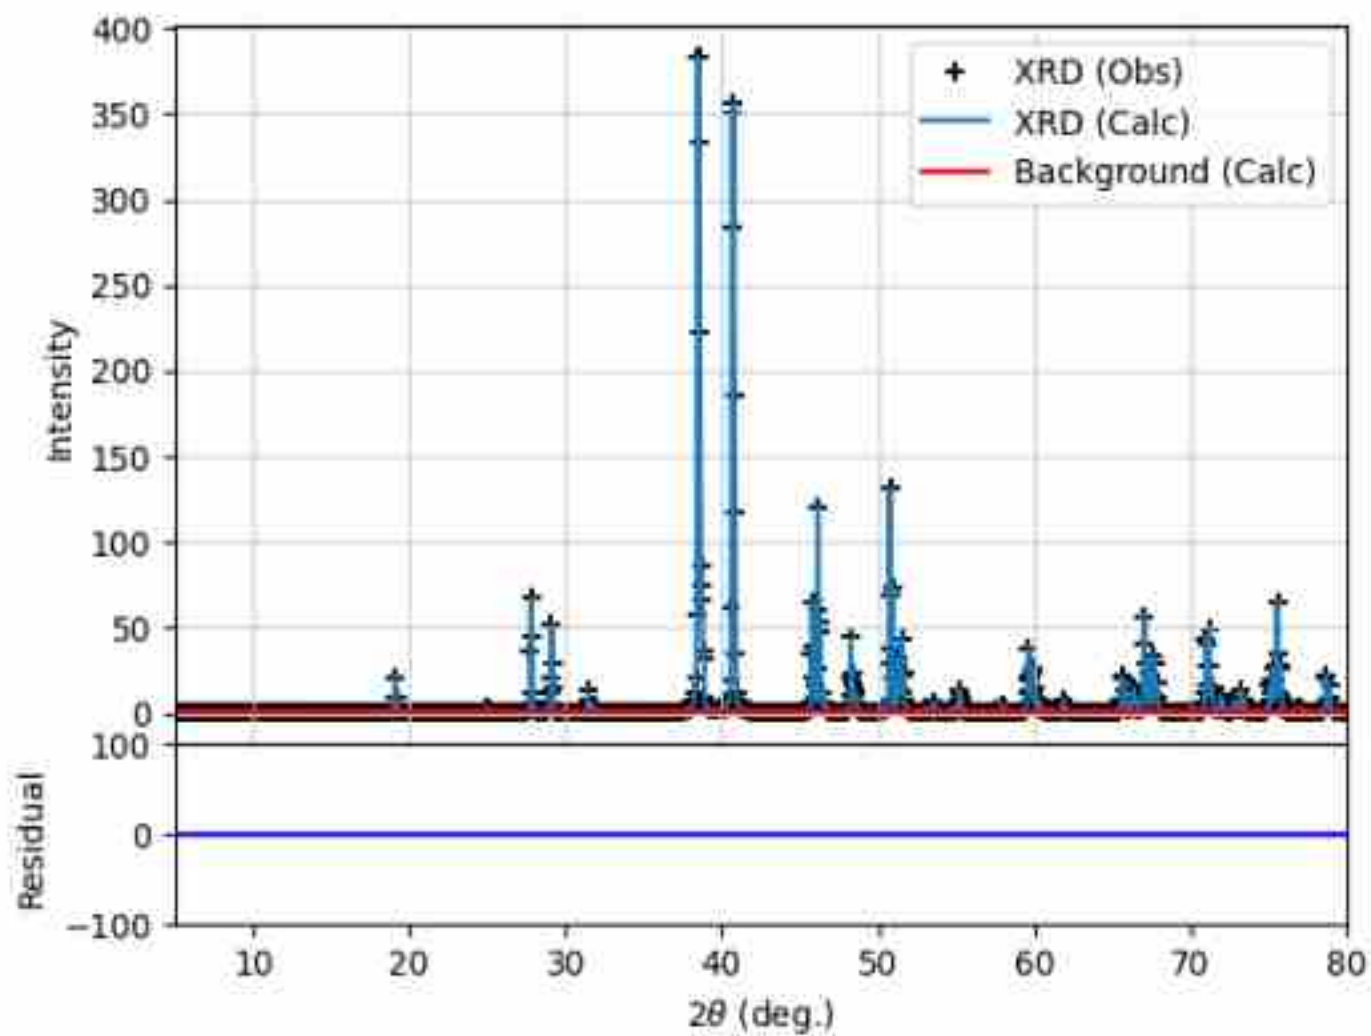

| RMSE before RR | Rwp     | RMSE after RR |
|----------------|---------|---------------|
| 0.028          | 0.00489 | 0.00059       |

# P2N2F4

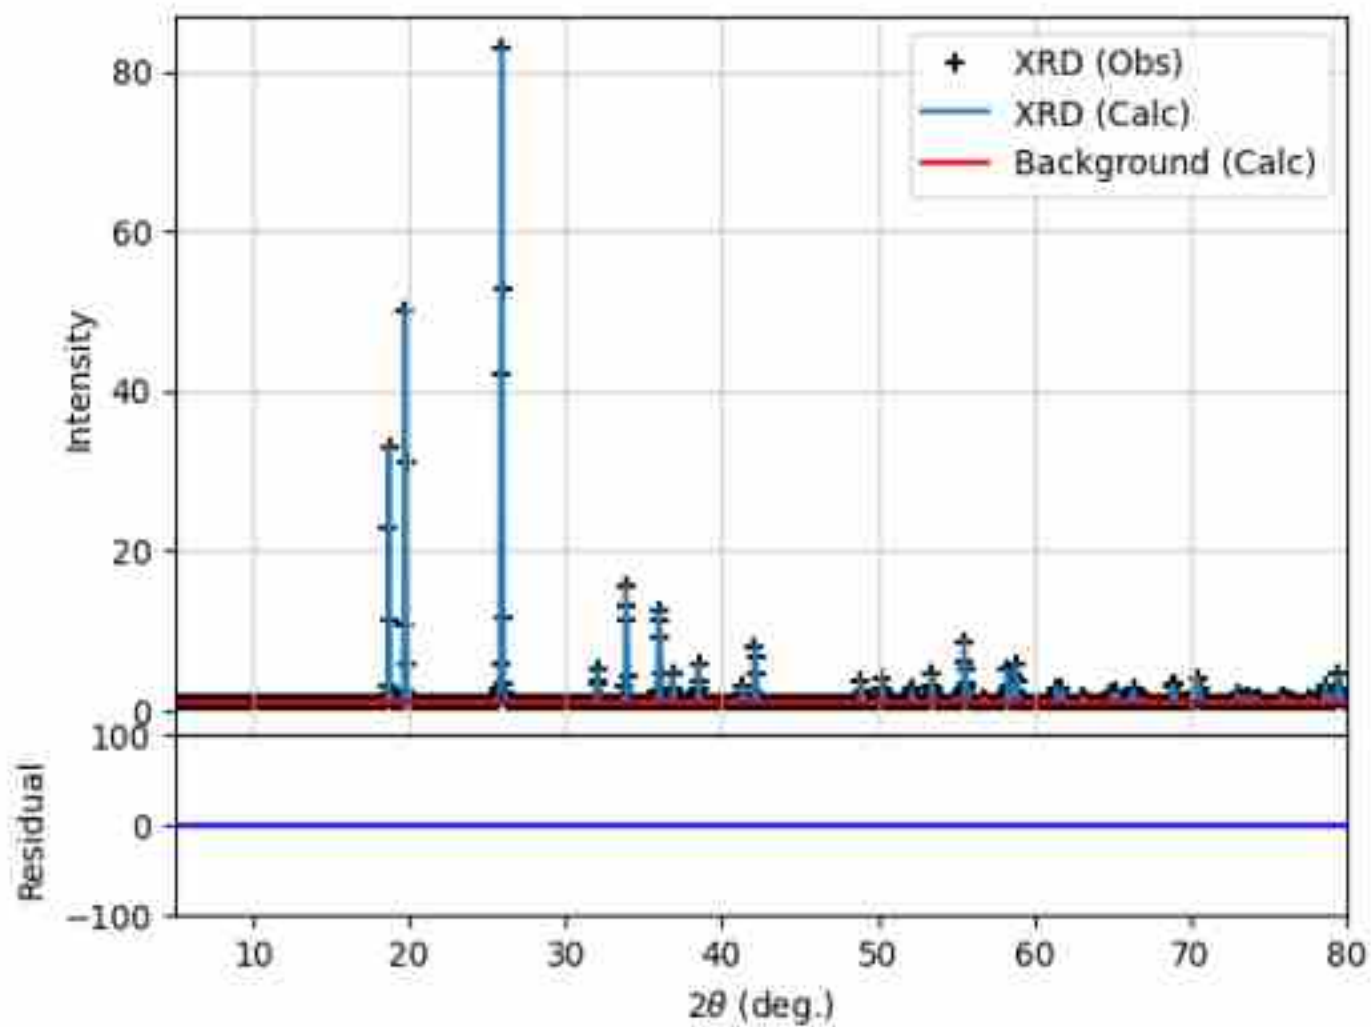

| RMSE before RR | Rwp     | RMSE after RR |
|----------------|---------|---------------|
| 0.028          | 0.00225 | 0.00075       |

# Pr6Sb8Pt6

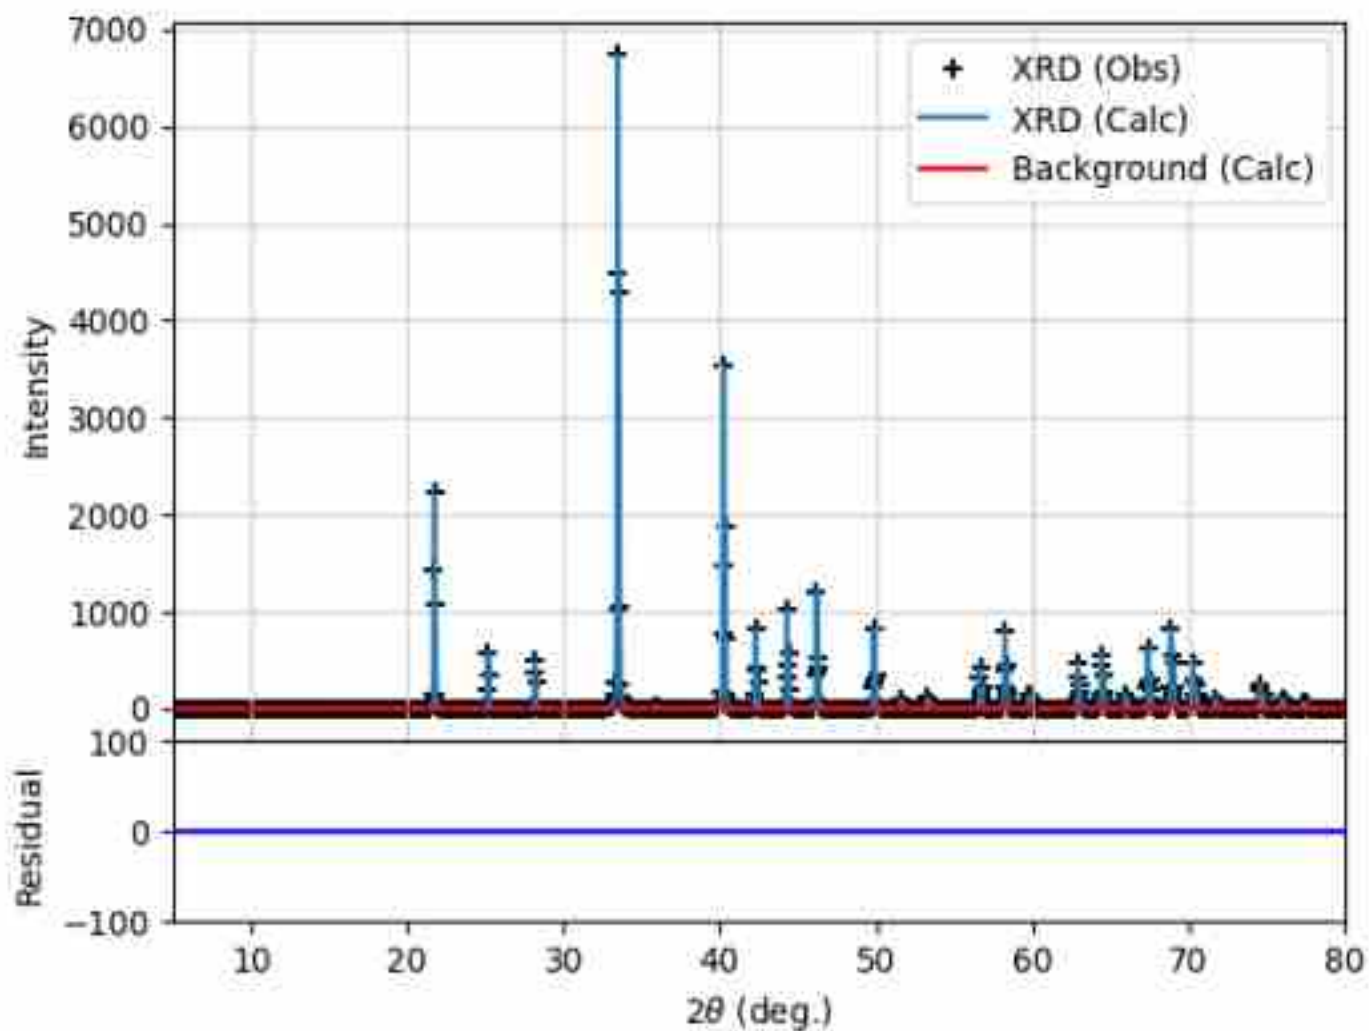

| RMSE before RR | Rwp     | RMSE after RR |
|----------------|---------|---------------|
| 0.028          | 0.01667 | 0.00108       |

# Pr10Pb6

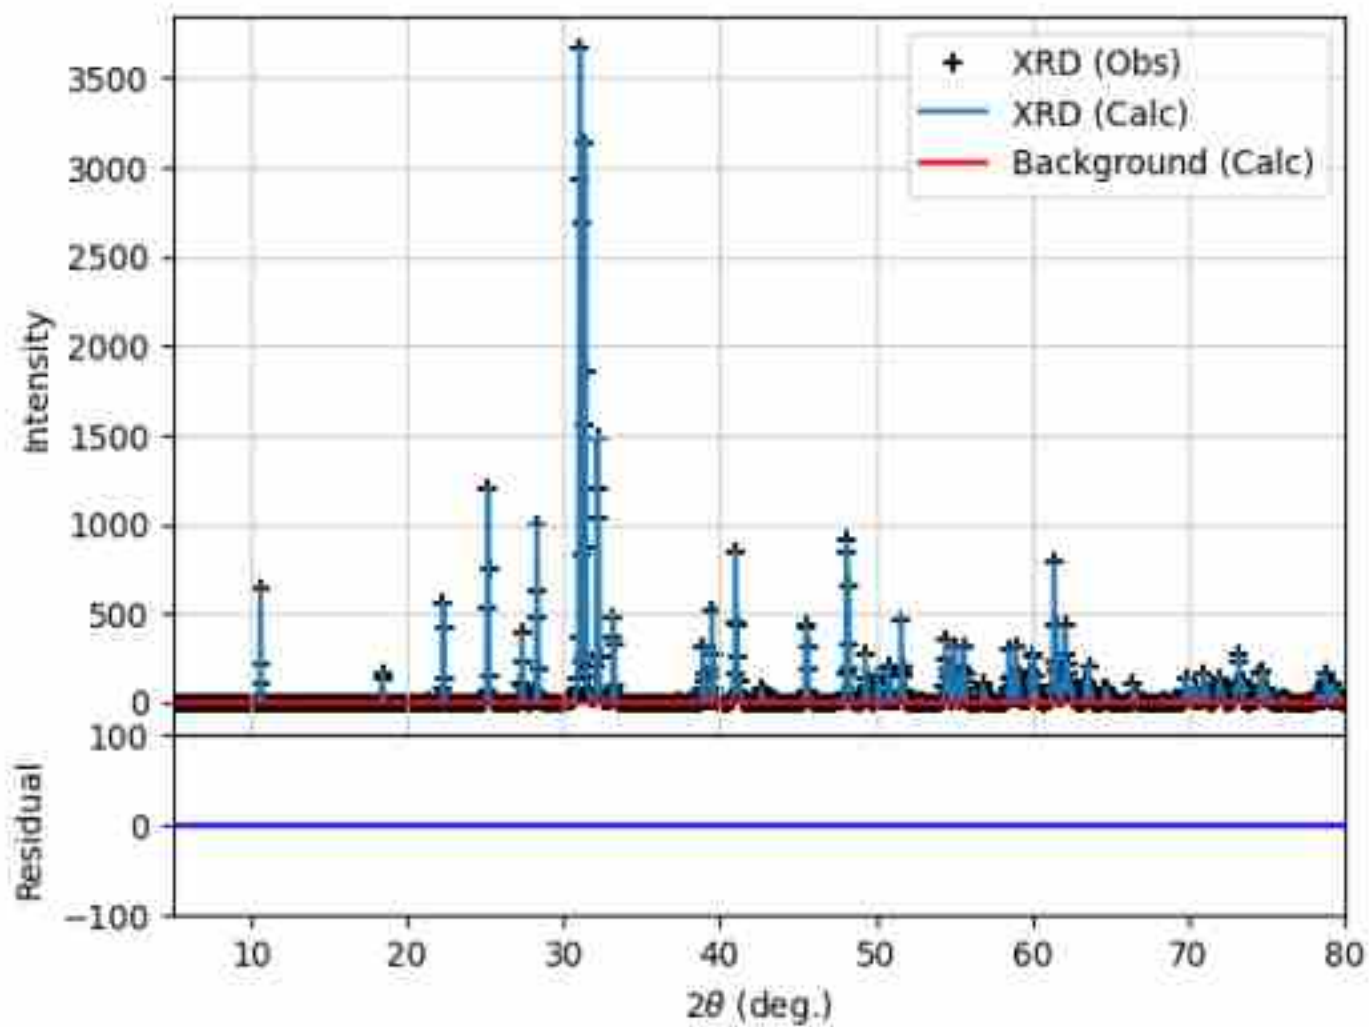

| RMSE before RR | Rwp     | RMSE after RR |
|----------------|---------|---------------|
| 0.028          | 0.00471 | 0.00028       |

# Pr<sub>10</sub>Sn<sub>6</sub>Au<sub>2</sub>

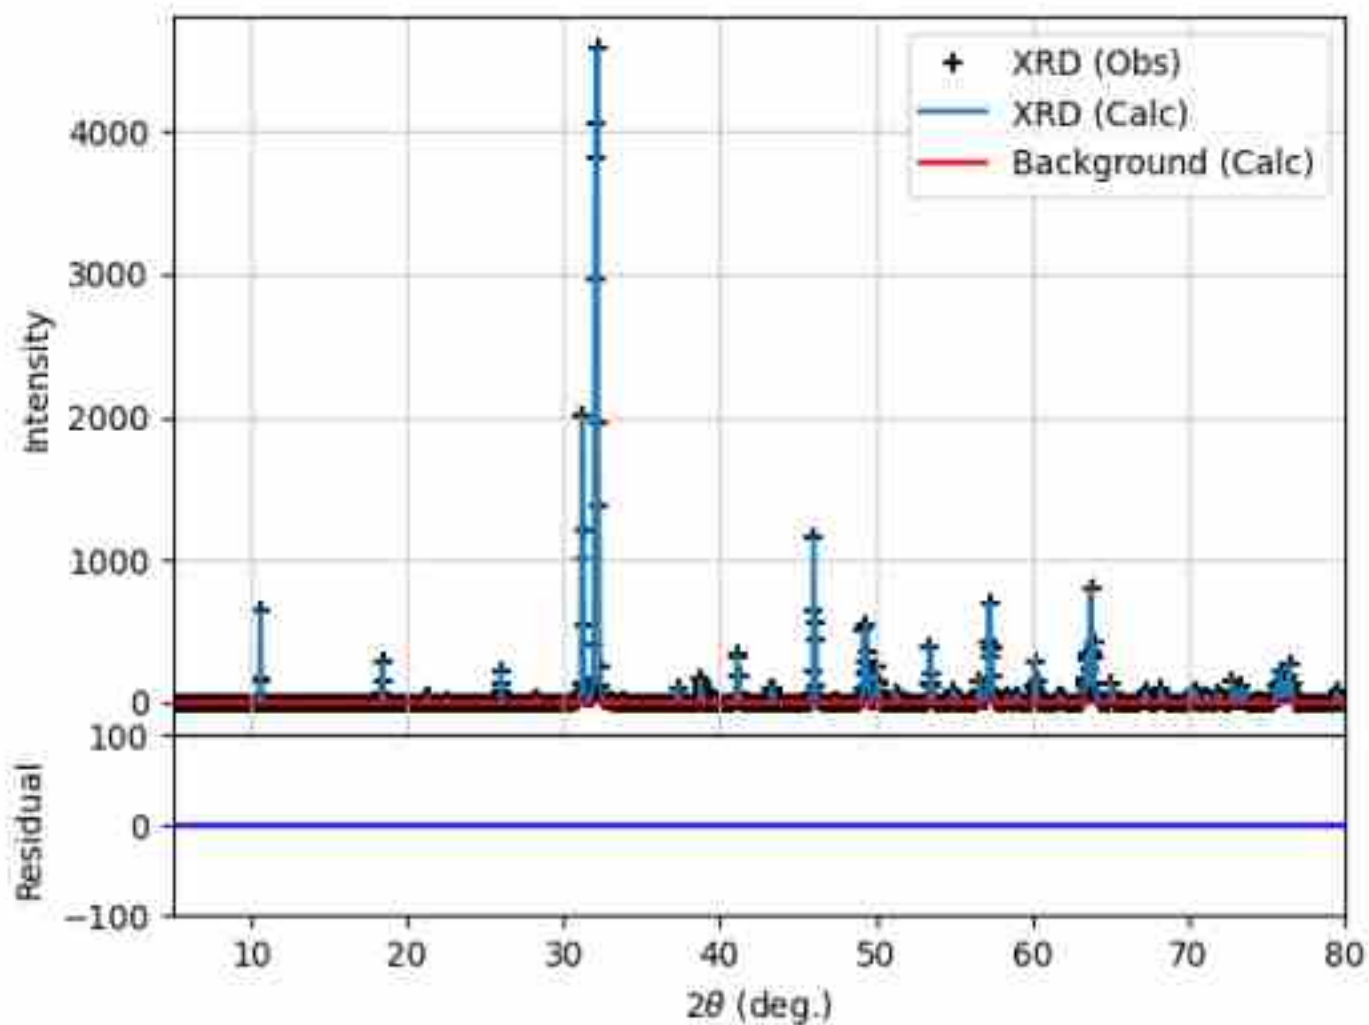

| RMSE before RR | Rwp     | RMSE after RR |
|----------------|---------|---------------|
| 0.028          | 0.00348 | 0.00034       |



# Sc1Ti4Ni5Sn5

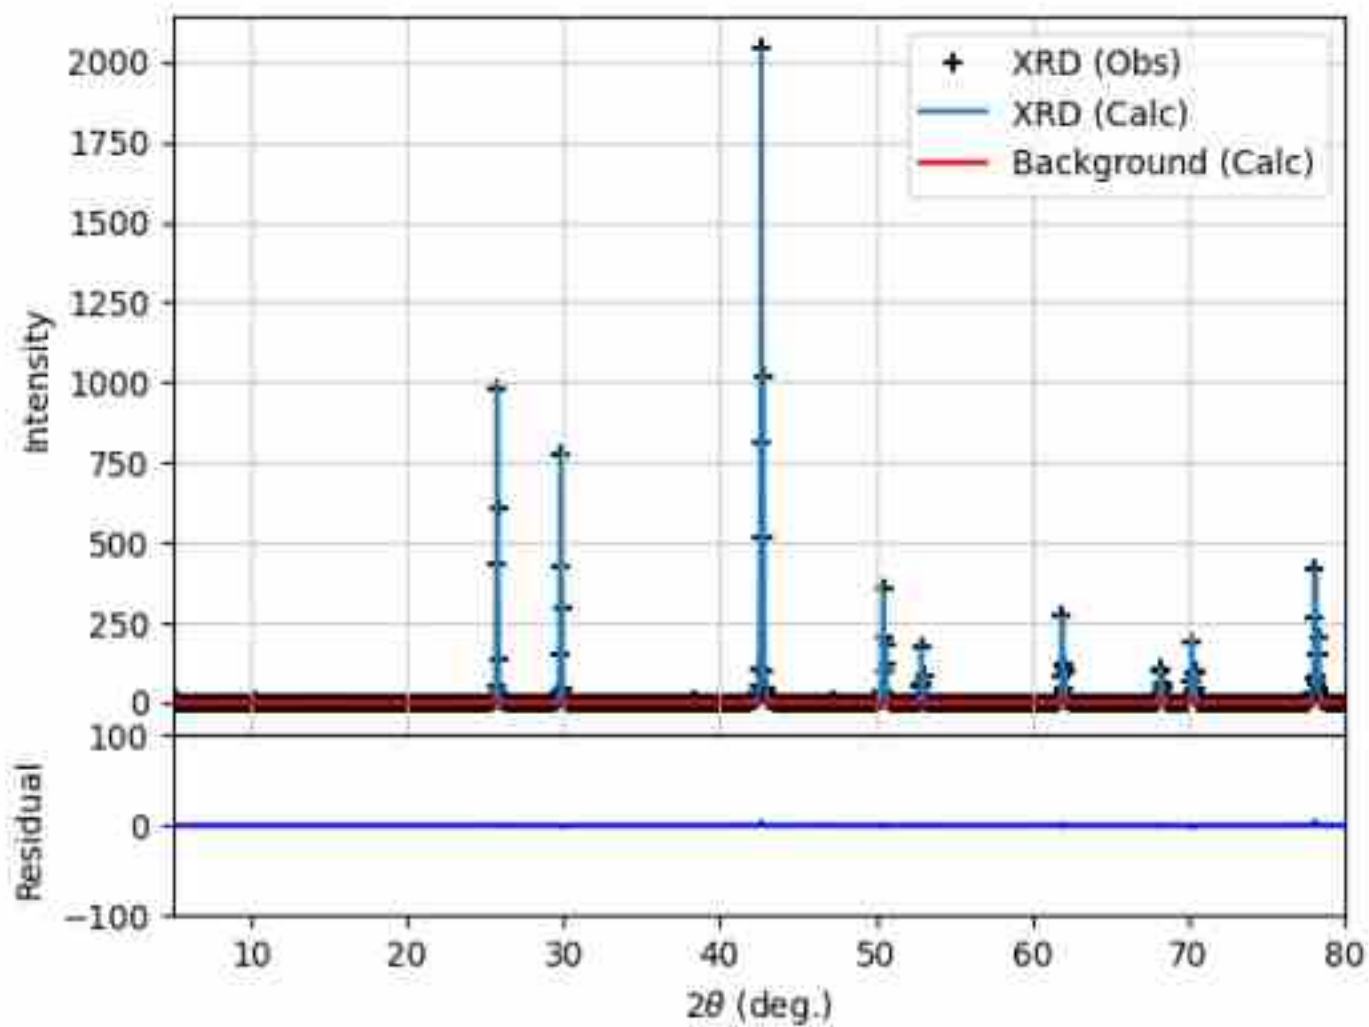

| RMSE before RR | Rwp     | RMSE after RR |
|----------------|---------|---------------|
| 0.028          | 0.67625 | 0.01309       |

# Sc4Ge6Ru7

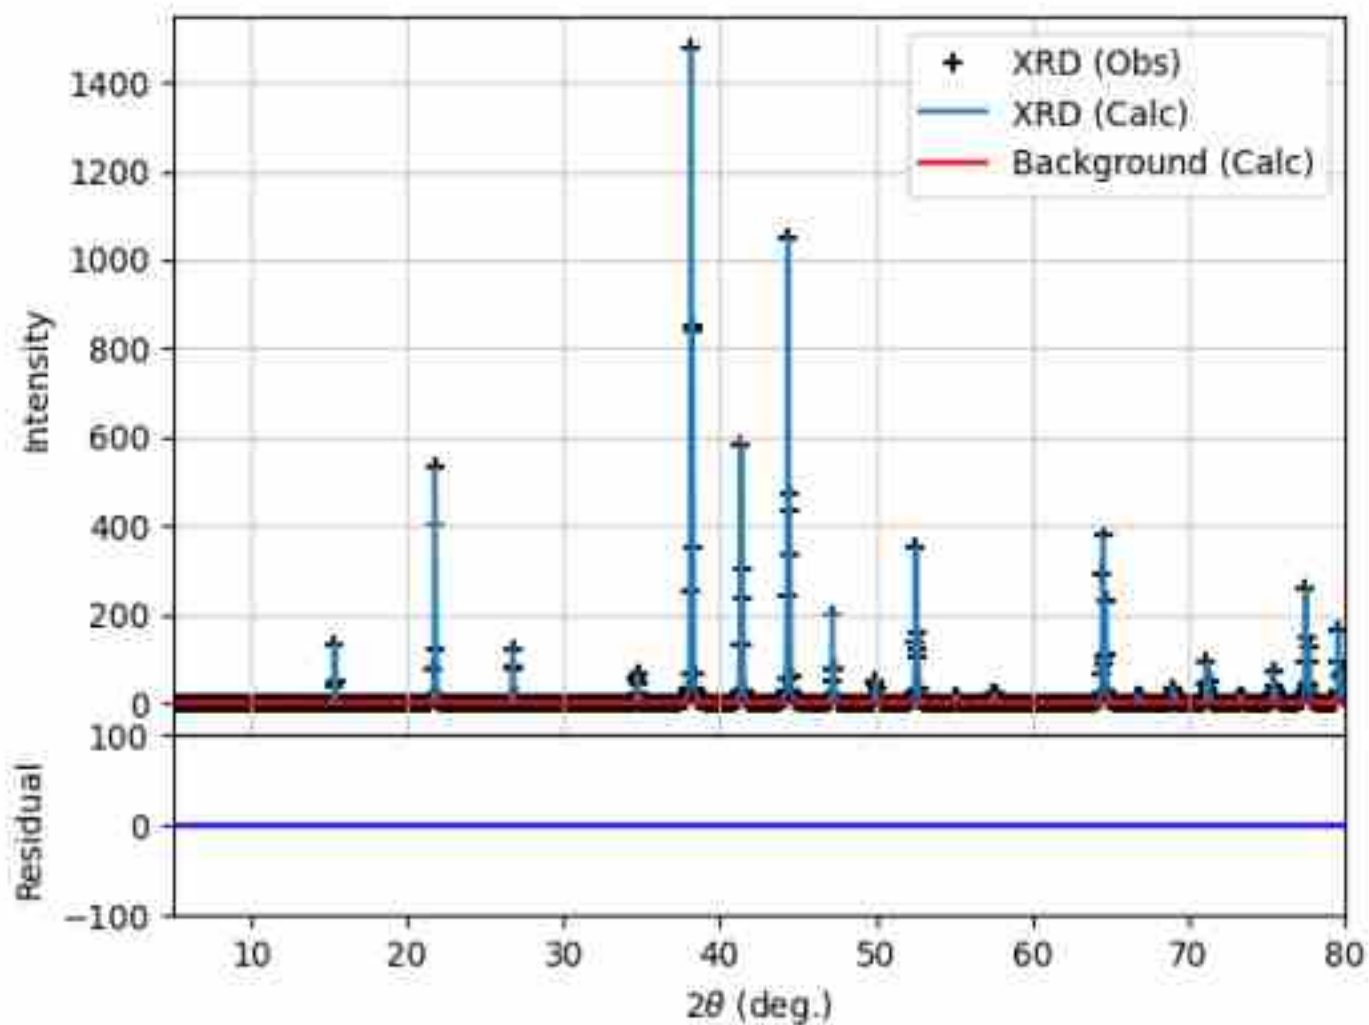

| RMSE before RR | Rwp     | RMSE after RR |
|----------------|---------|---------------|
| 0.028          | 0.01448 | 0.00187       |

# Sm4Cu4O12

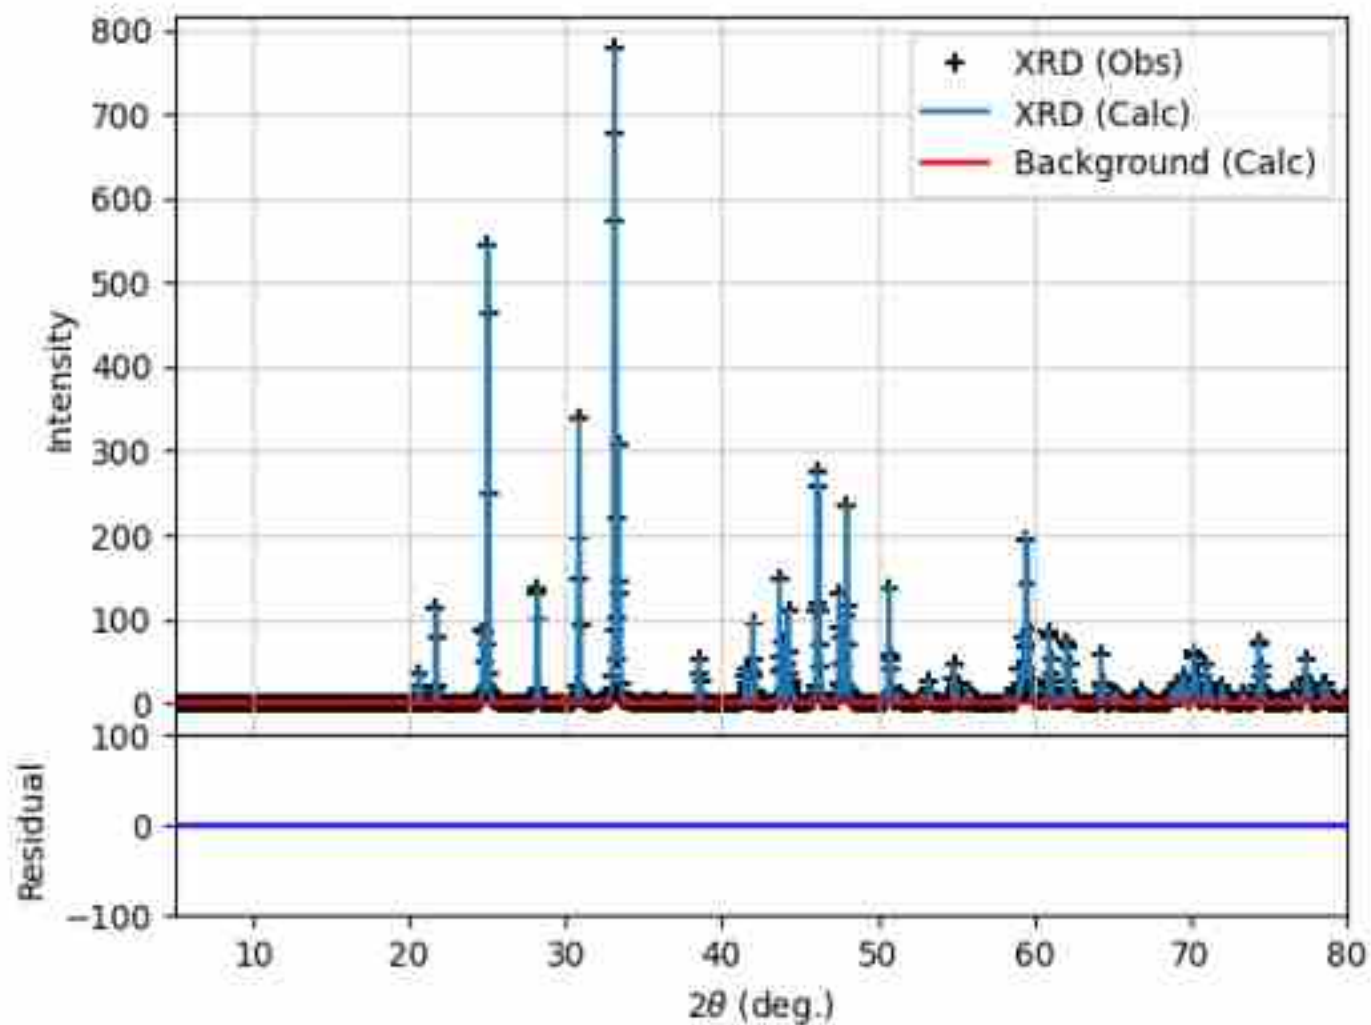

| RMSE before RR | Rwp    | RMSE after RR |
|----------------|--------|---------------|
| 0.028          | 0.0042 | 0.00146       |

# Sn4Br16

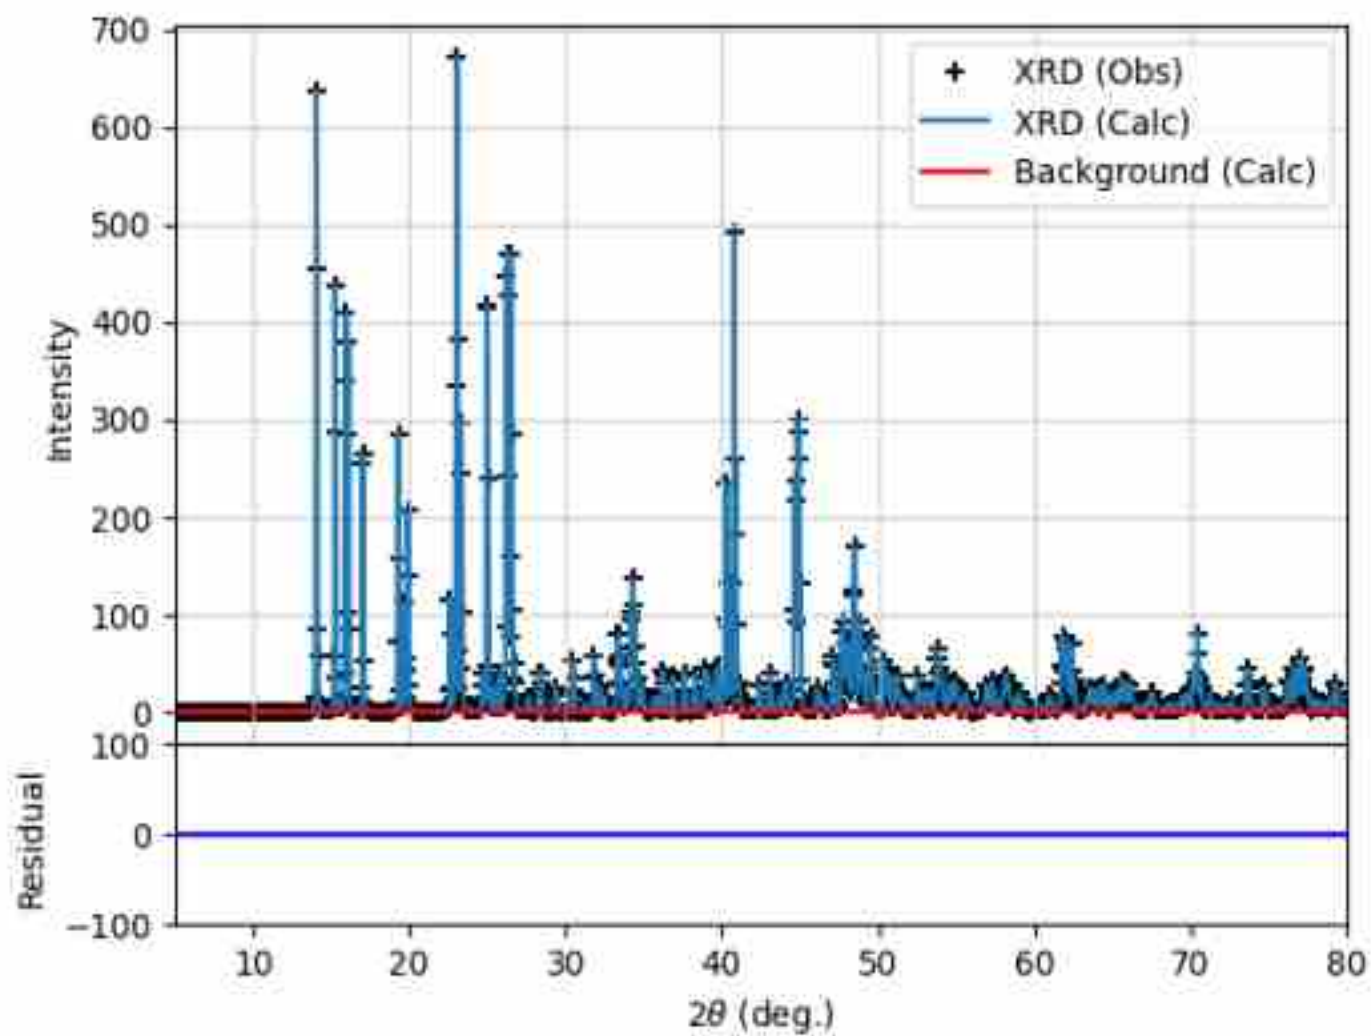

| RMSE before RR | Rwp     | RMSE after RR |
|----------------|---------|---------------|
| 0.028          | 0.00287 | 0.00027       |

# Sr4Co4O10

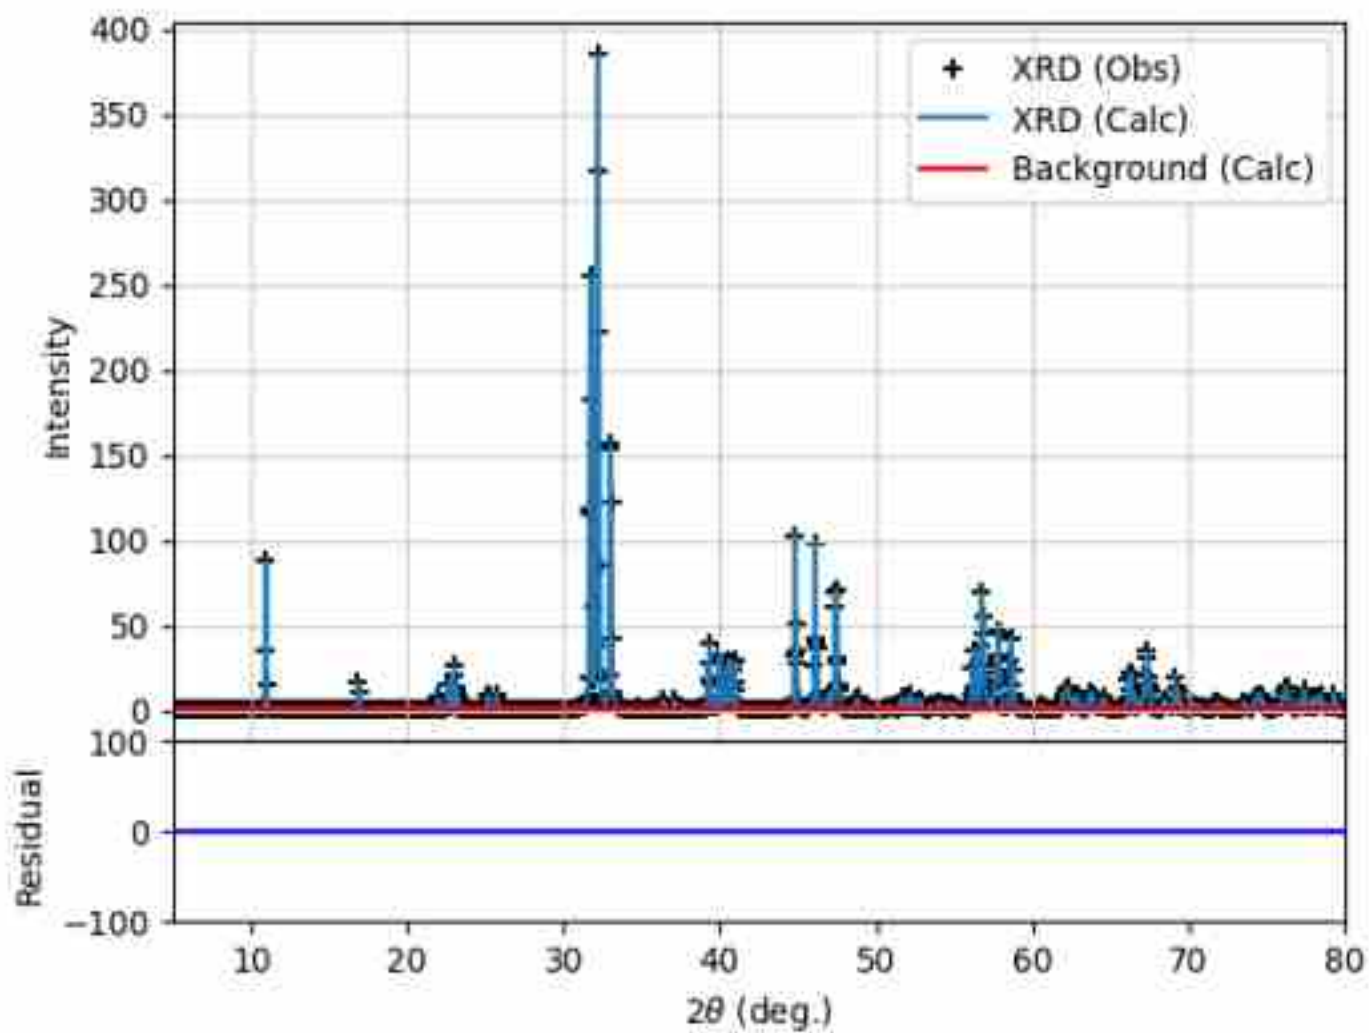

| RMSE before RR | Rwp     | RMSE after RR |
|----------------|---------|---------------|
| 0.028          | 0.00283 | 0.0           |

# Sr<sub>4</sub>V<sub>4</sub>N<sub>8</sub>

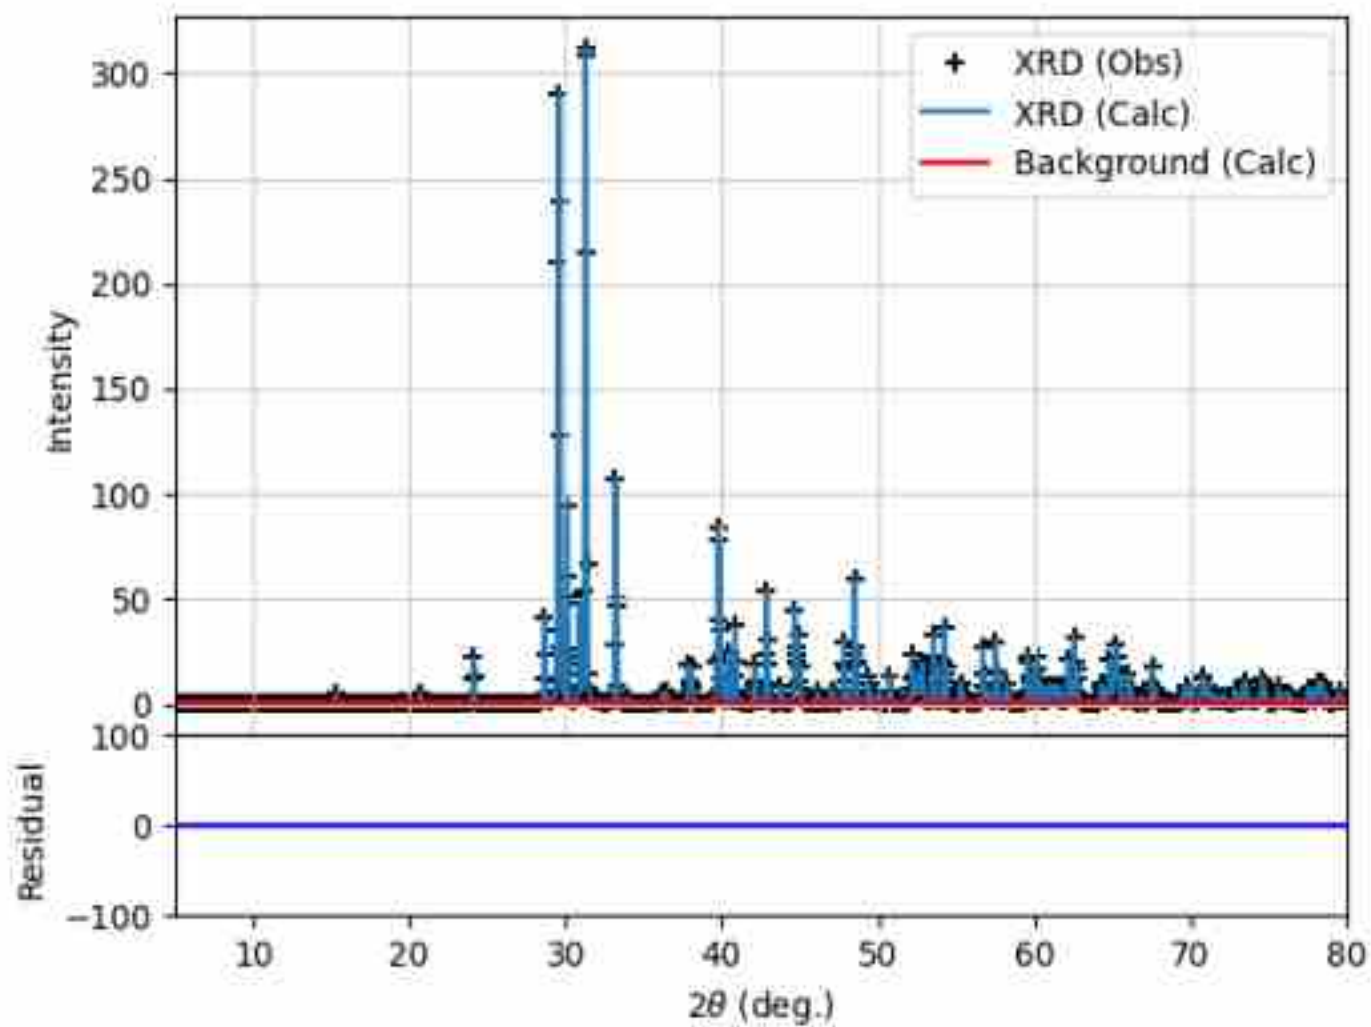

| RMSE before RR | Rwp     | RMSE after RR |
|----------------|---------|---------------|
| 0.028          | 0.00362 | 0.00104       |

# Sr6U2O12

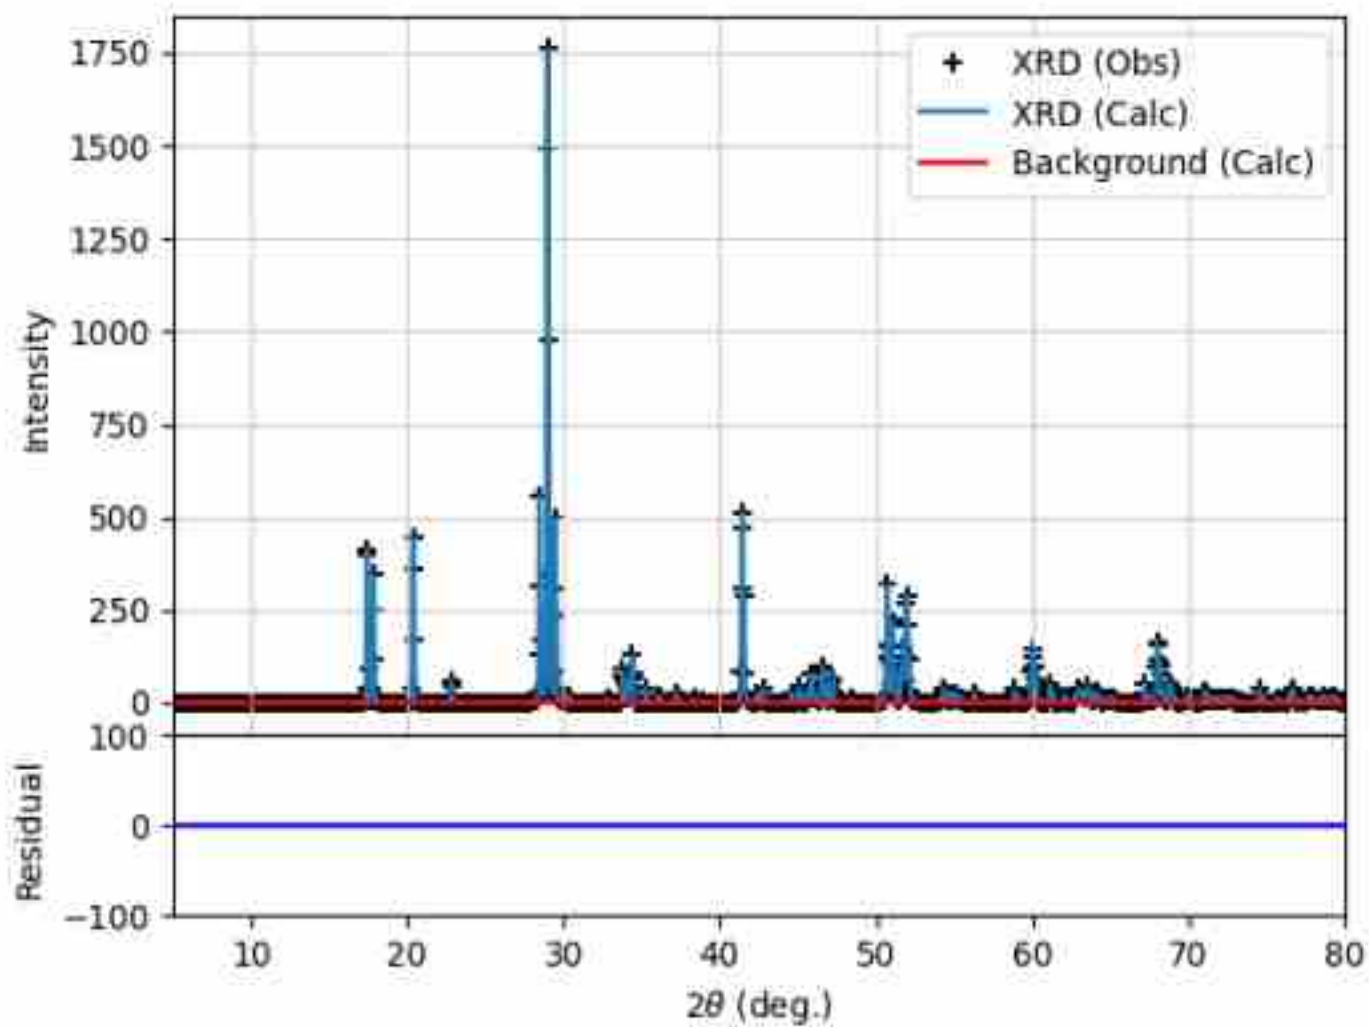

| RMSE before RR | Rwp     | RMSE after RR |
|----------------|---------|---------------|
| 0.028          | 0.00306 | 0.00068       |

# Ti<sub>2</sub>Zn<sub>2</sub>O<sub>6</sub>

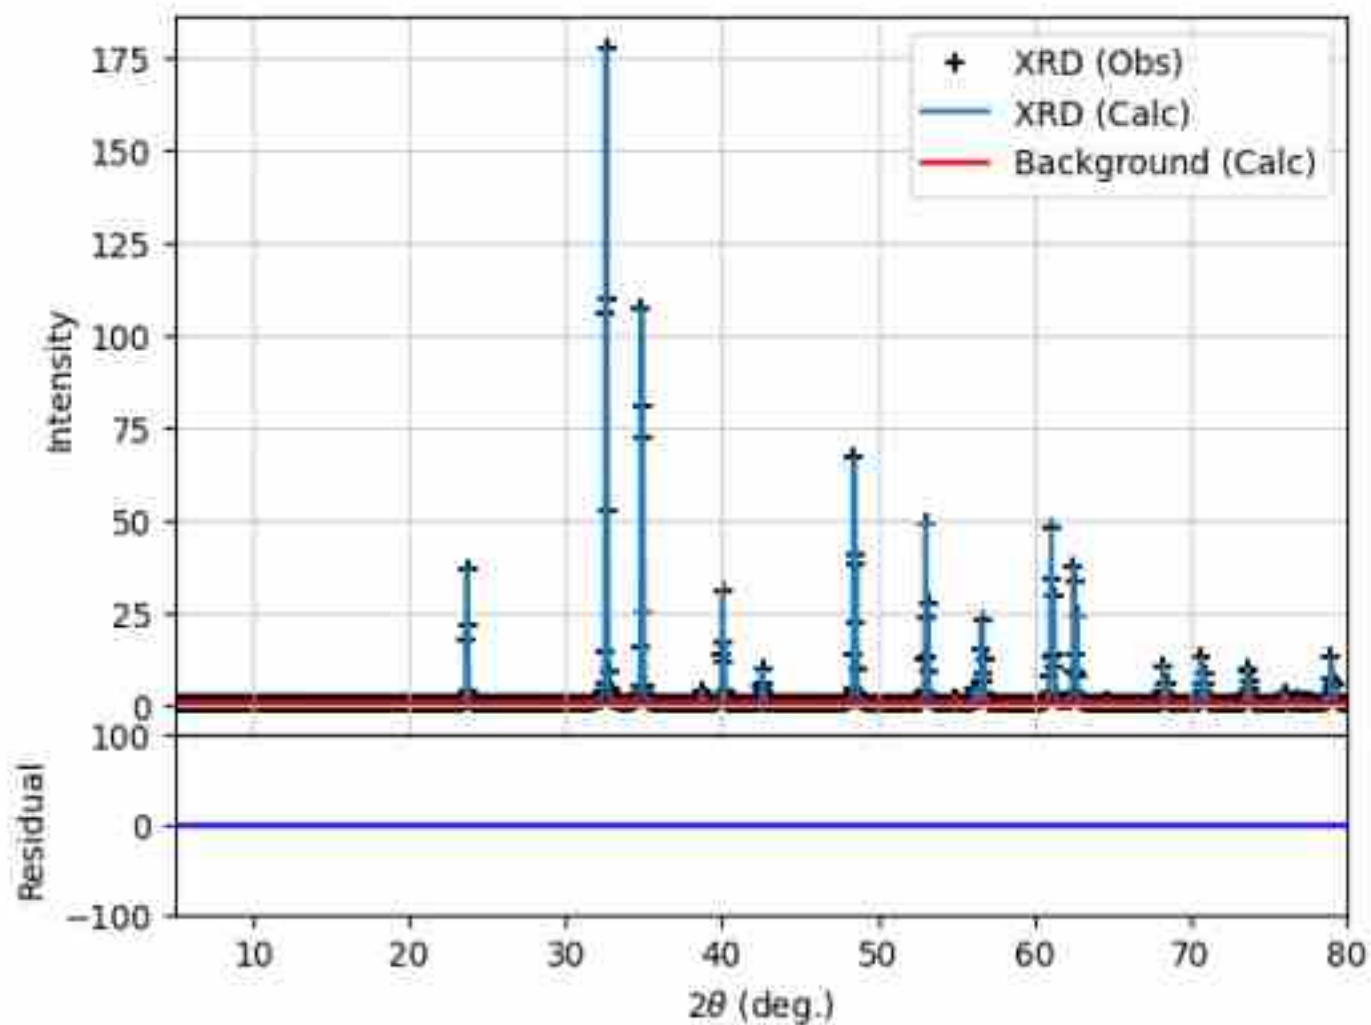

| RMSE before RR | Rwp     | RMSE after RR |
|----------------|---------|---------------|
| 0.028          | 0.00298 | 0.00118       |



# Ti<sub>2</sub>Zn<sub>4</sub>O<sub>8</sub>

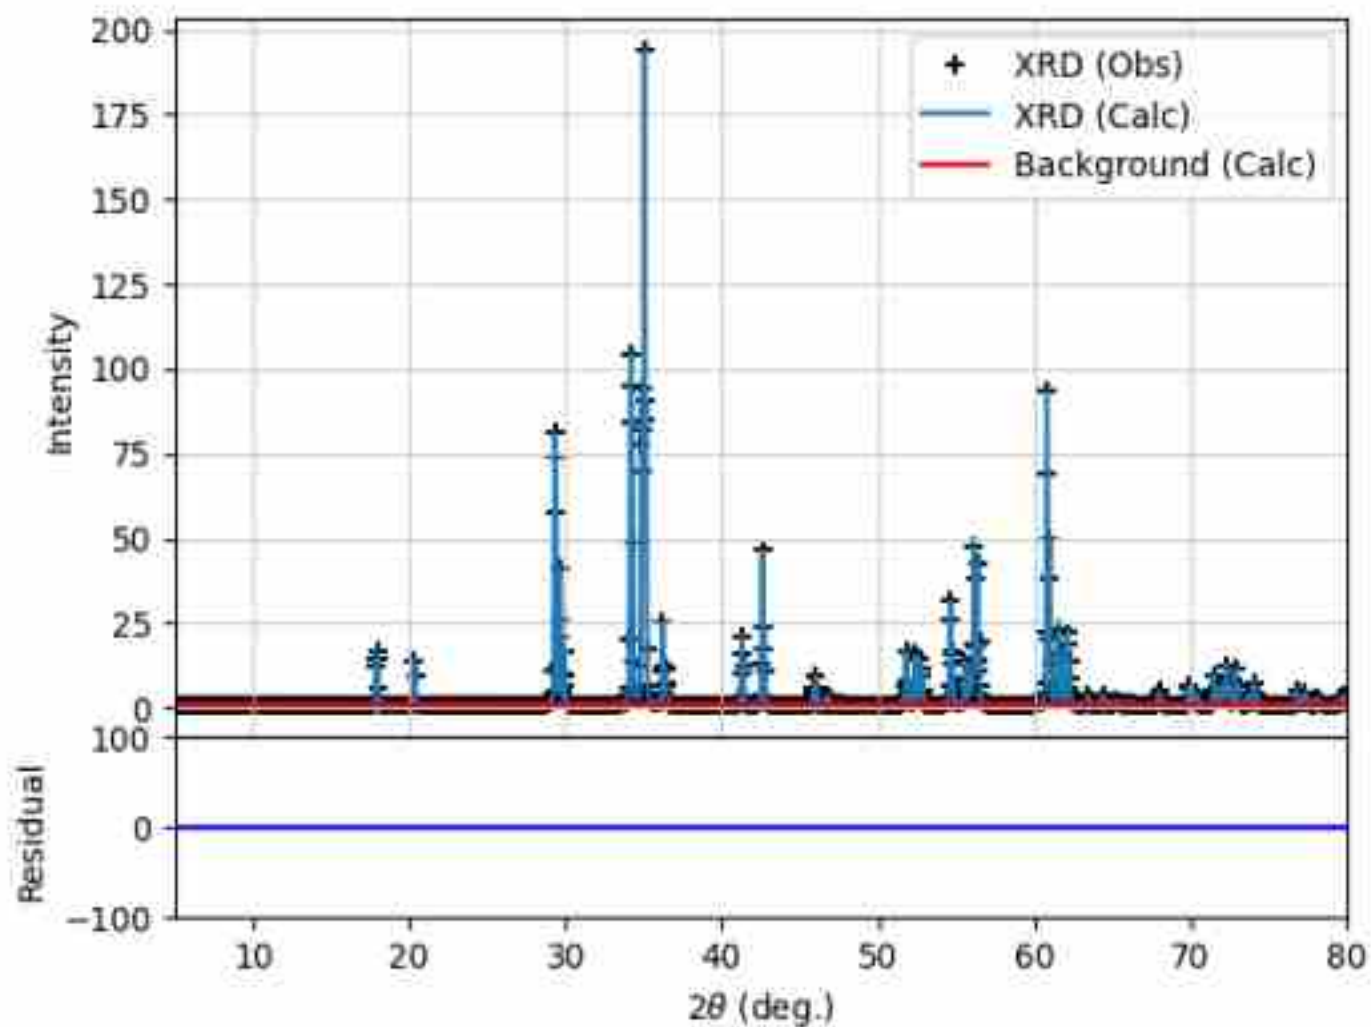

| RMSE before RR | Rwp     | RMSE after RR |
|----------------|---------|---------------|
| 0.028          | 0.00272 | 0.001         |

# Ti<sub>4</sub>Fe<sub>4</sub>O<sub>12</sub>

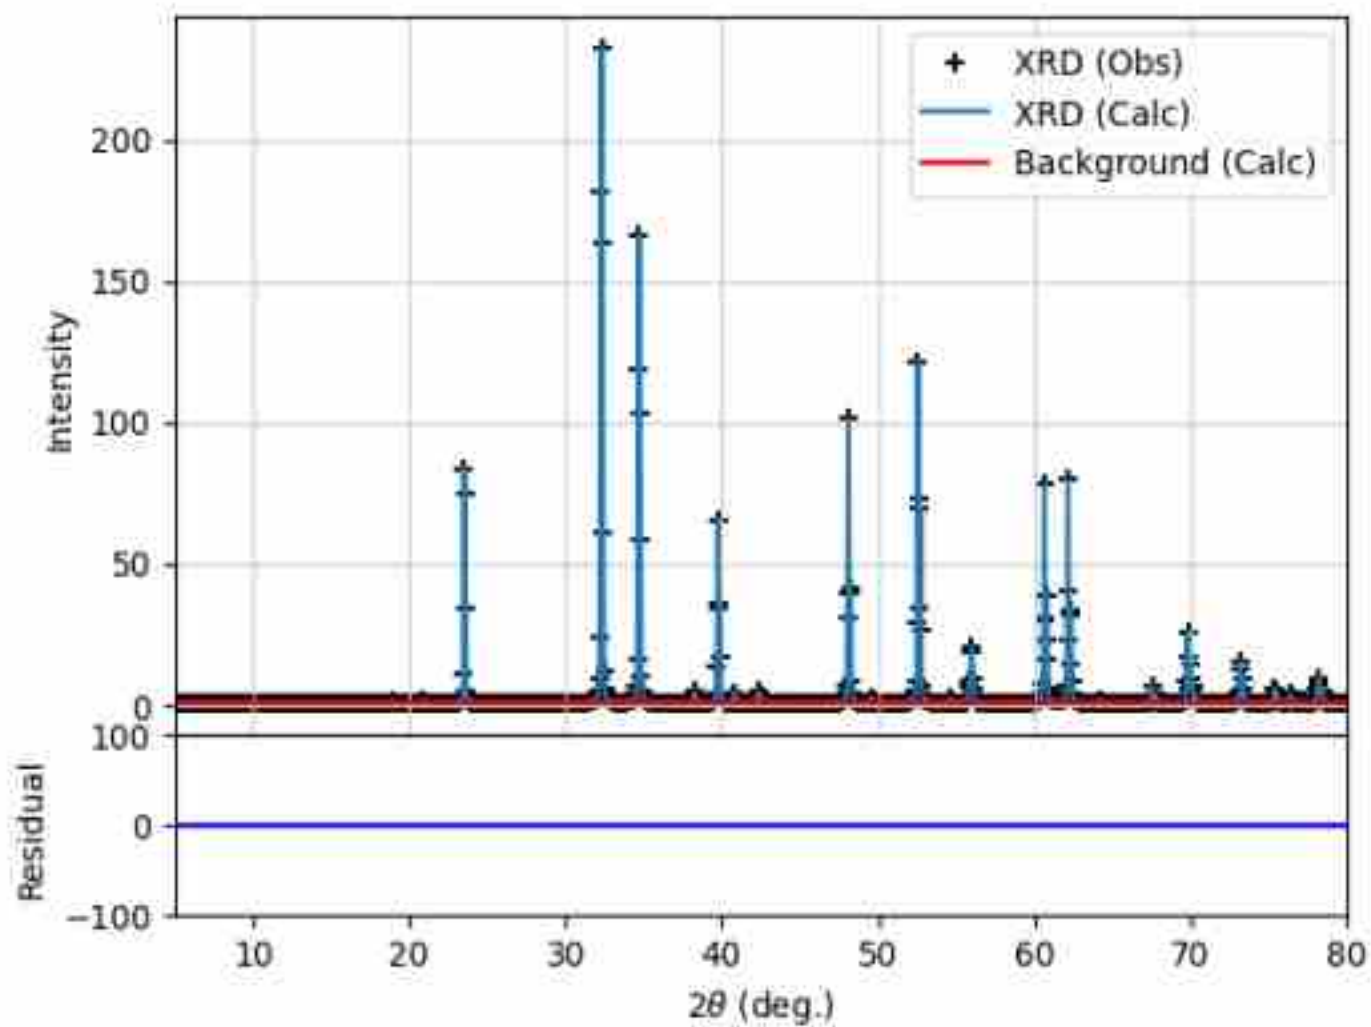

| RMSE before RR | Rwp     | RMSE after RR |
|----------------|---------|---------------|
| 0.028          | 0.00251 | 0.00035       |

# Tl1P1F6

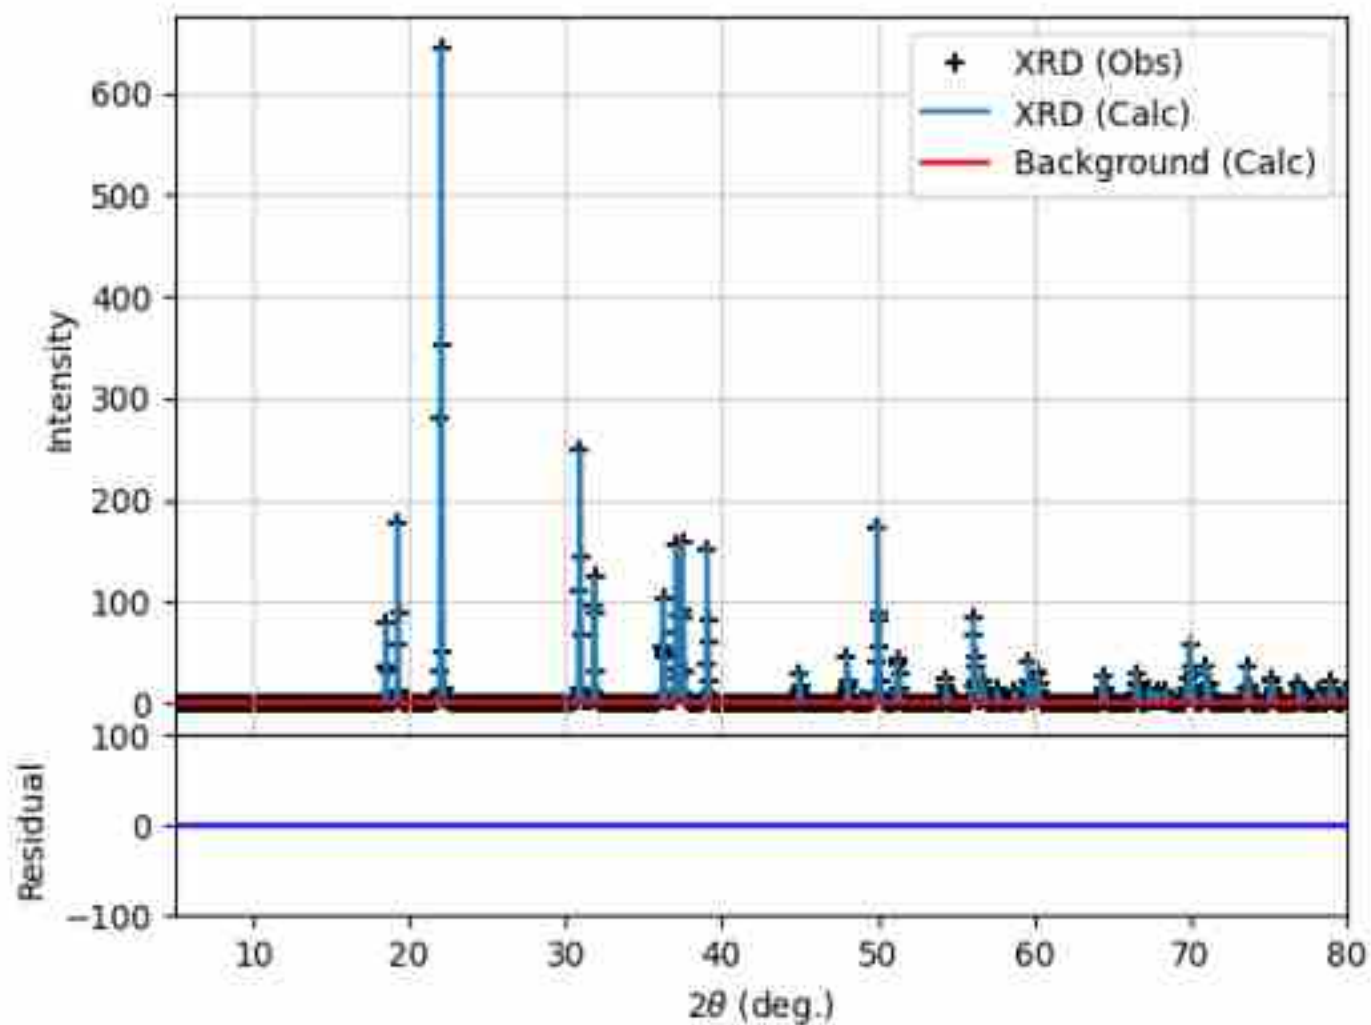

| RMSE before RR | Rwp     | RMSE after RR |
|----------------|---------|---------------|
| 0.028          | 0.00422 | 0.00172       |

# Tl6Fe2C110

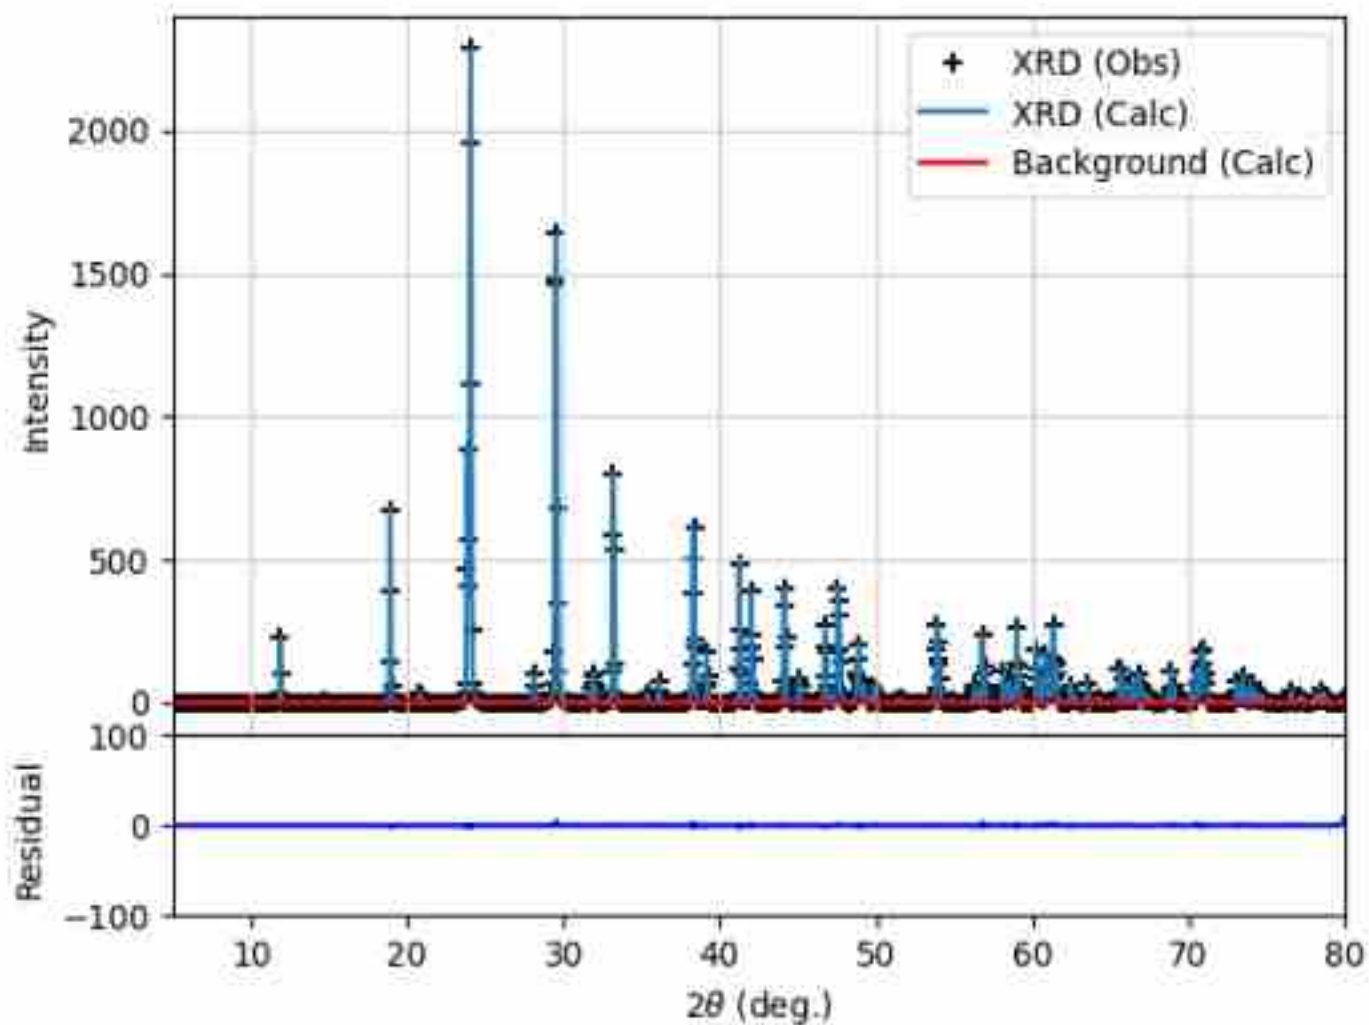

| RMSE before RR | Rwp     | RMSE after RR |
|----------------|---------|---------------|
| 0.028          | 1.41315 | 0.01629       |

# U<sub>2</sub>Fe<sub>8</sub>Ge<sub>4</sub>

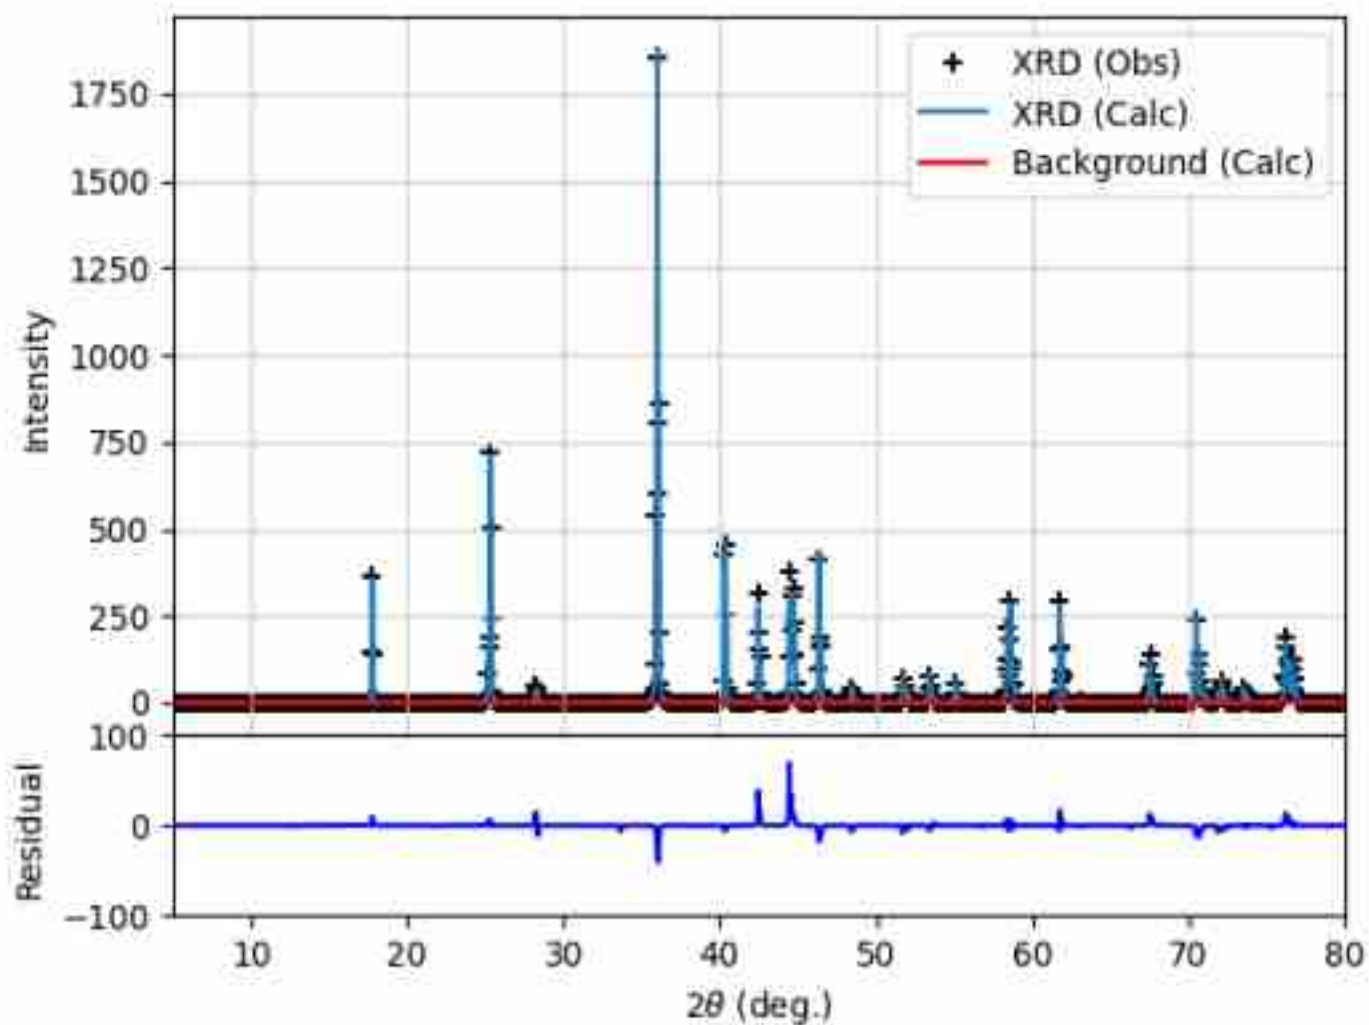

| RMSE before RR | Rwp      | RMSE after RR |
|----------------|----------|---------------|
| 0.028          | 10.06007 | 0.02739       |

# U<sub>6</sub>Cu<sub>6</sub>Sn<sub>8</sub>

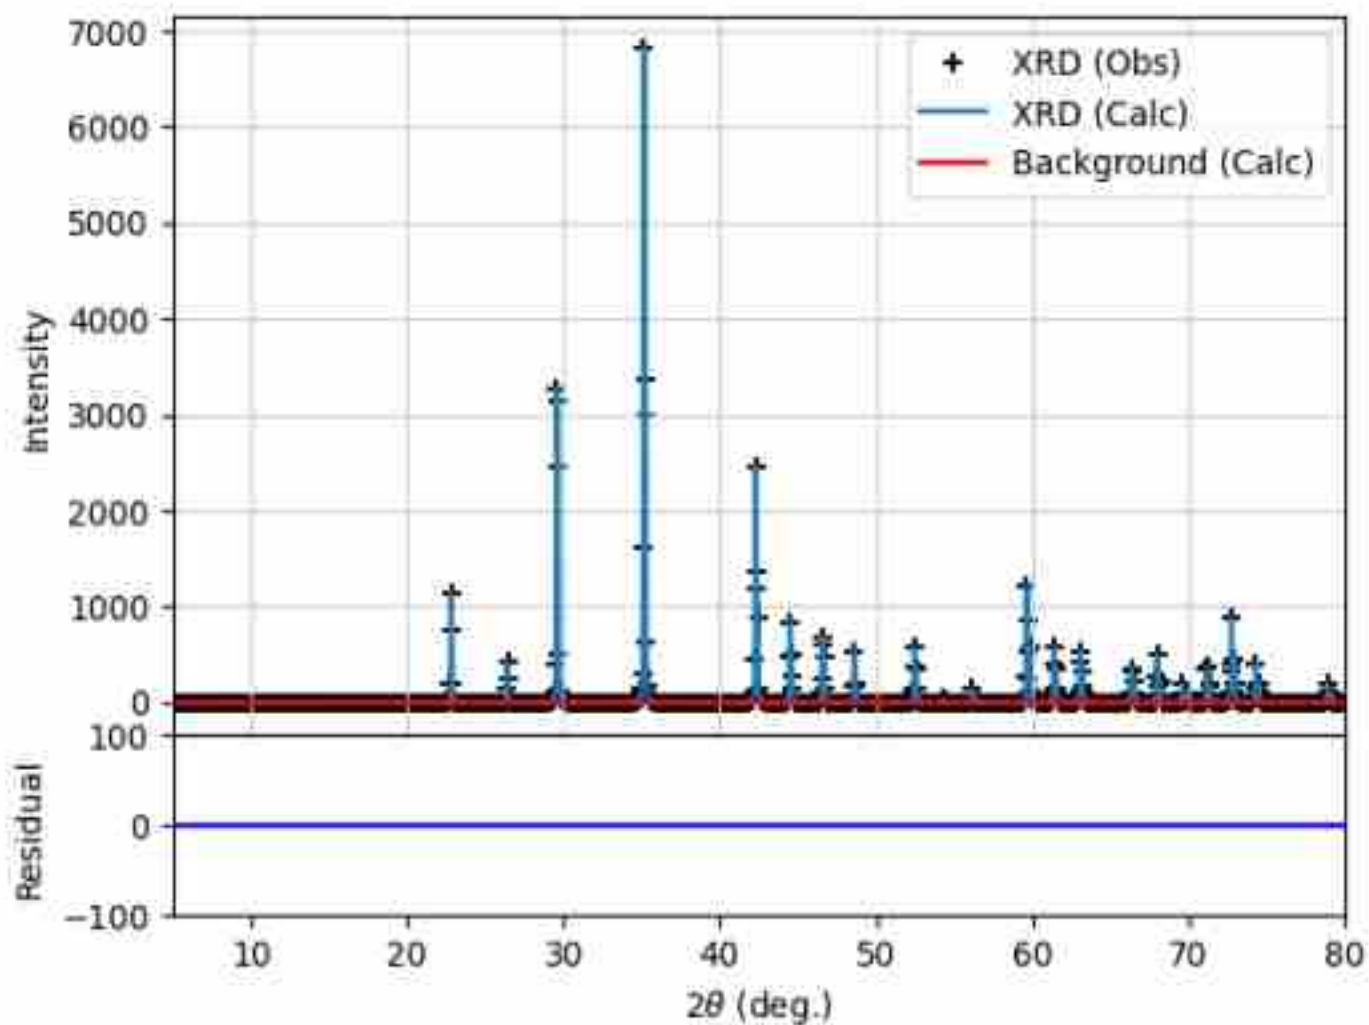

| RMSE before RR | Rwp     | RMSE after RR |
|----------------|---------|---------------|
| 0.028          | 0.01088 | 0.00115       |

# Y2Th5O13

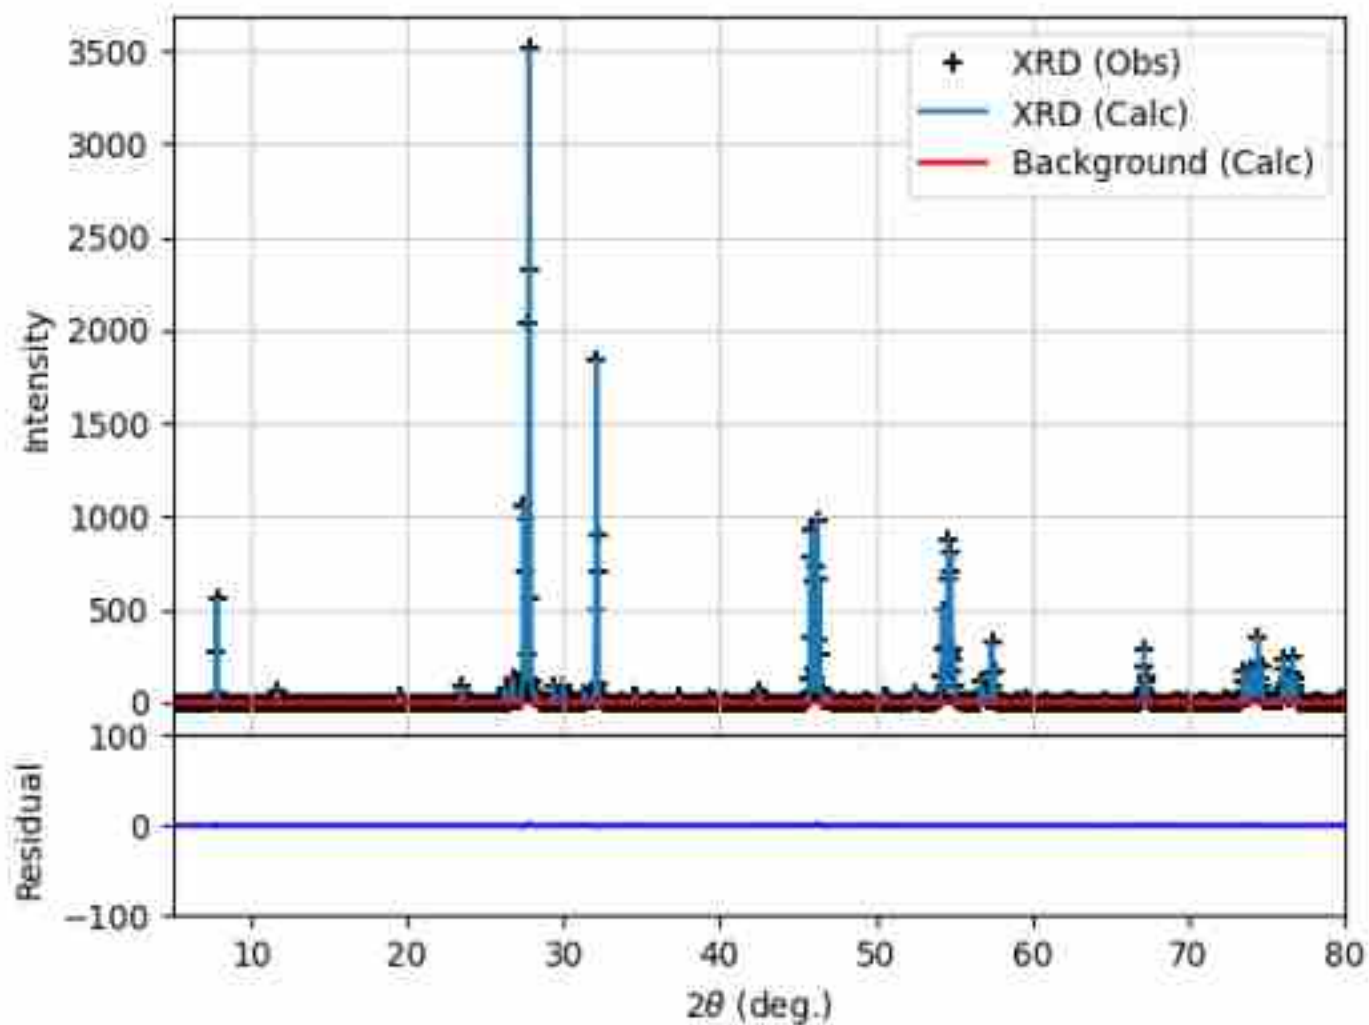

| RMSE before RR | Rwp     | RMSE after RR |
|----------------|---------|---------------|
| 0.028          | 0.37176 | 0.02694       |

# Yb<sub>2</sub>B<sub>2</sub>O<sub>6</sub>

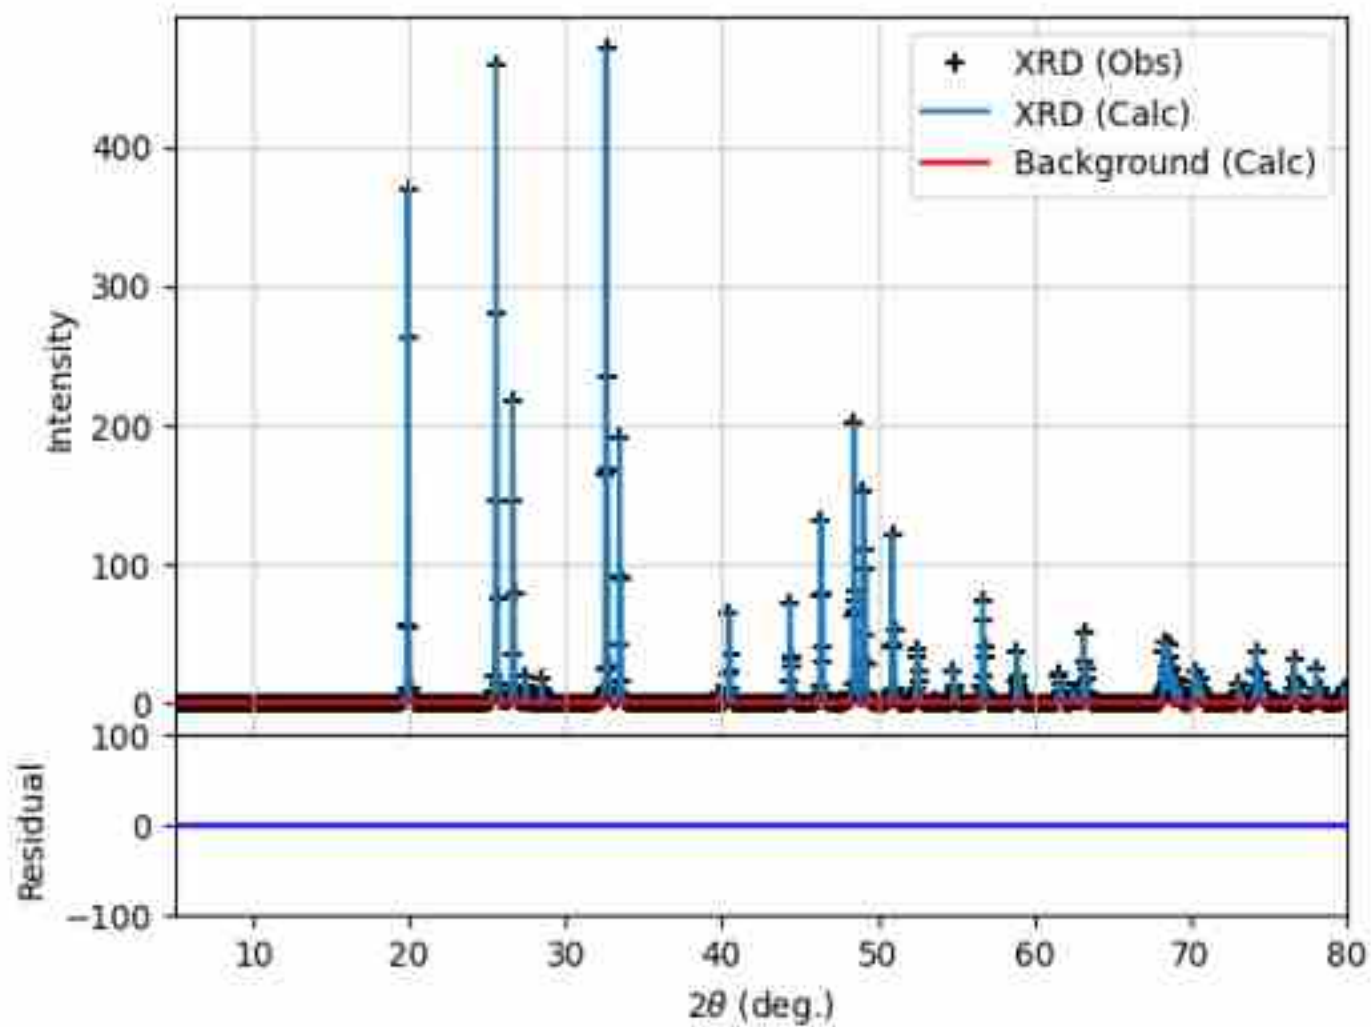

| RMSE before RR | Rwp     | RMSE after RR |
|----------------|---------|---------------|
| 0.028          | 0.00302 | 0.00136       |



# Zr<sub>4</sub>Si<sub>4</sub>As<sub>4</sub>

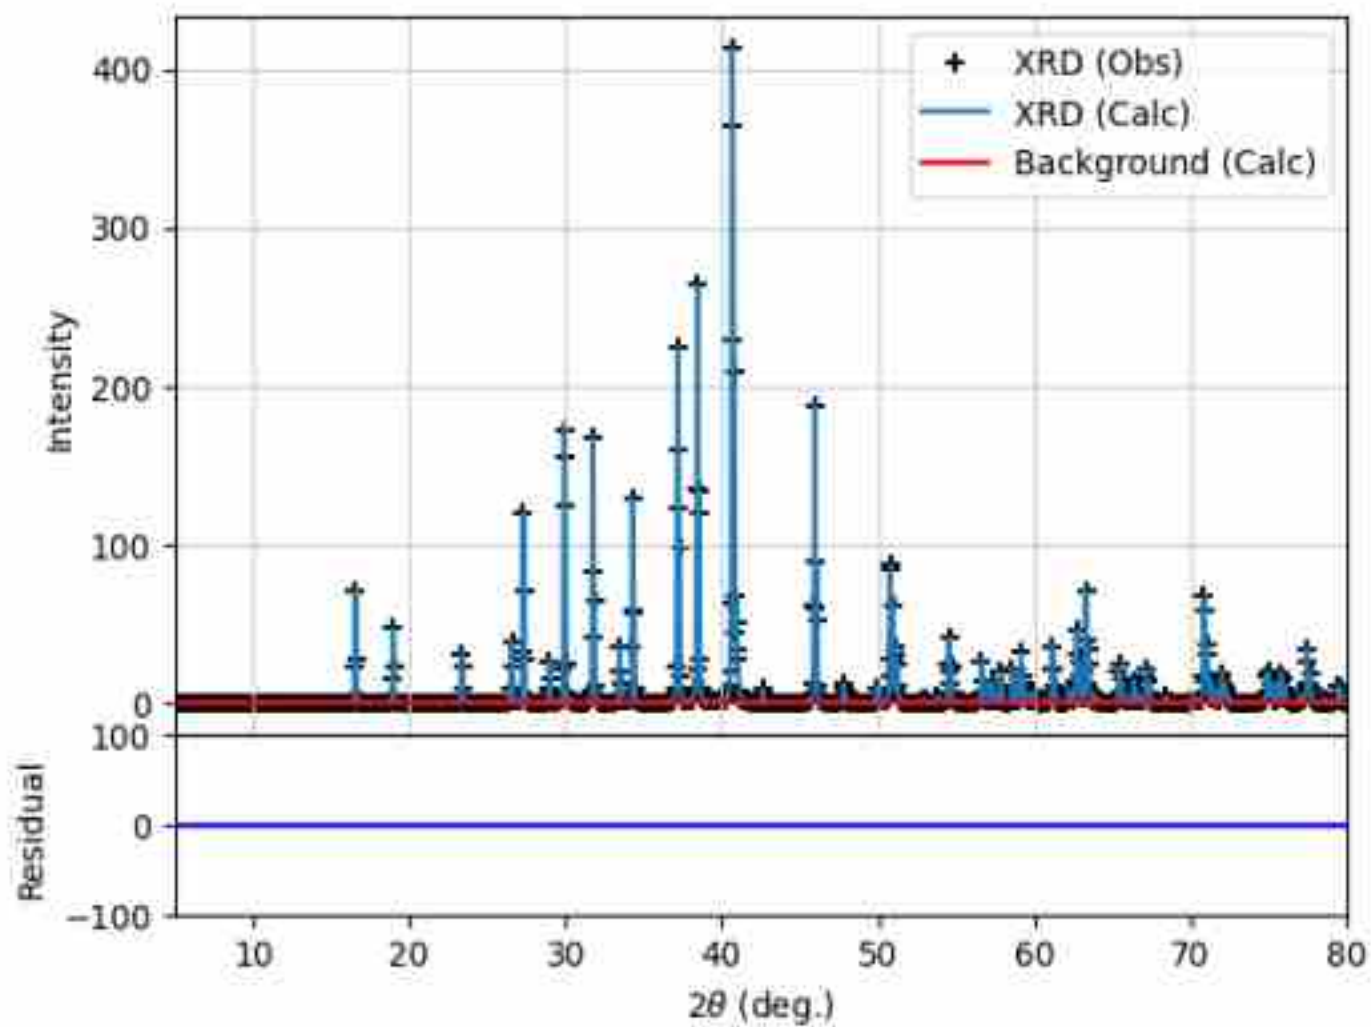

| RMSE before RR | Rwp     | RMSE after RR |
|----------------|---------|---------------|
| 0.028          | 0.00449 | 0.00041       |

# Al<sub>4</sub>In<sub>1</sub>Ag<sub>1</sub>Te<sub>8</sub>

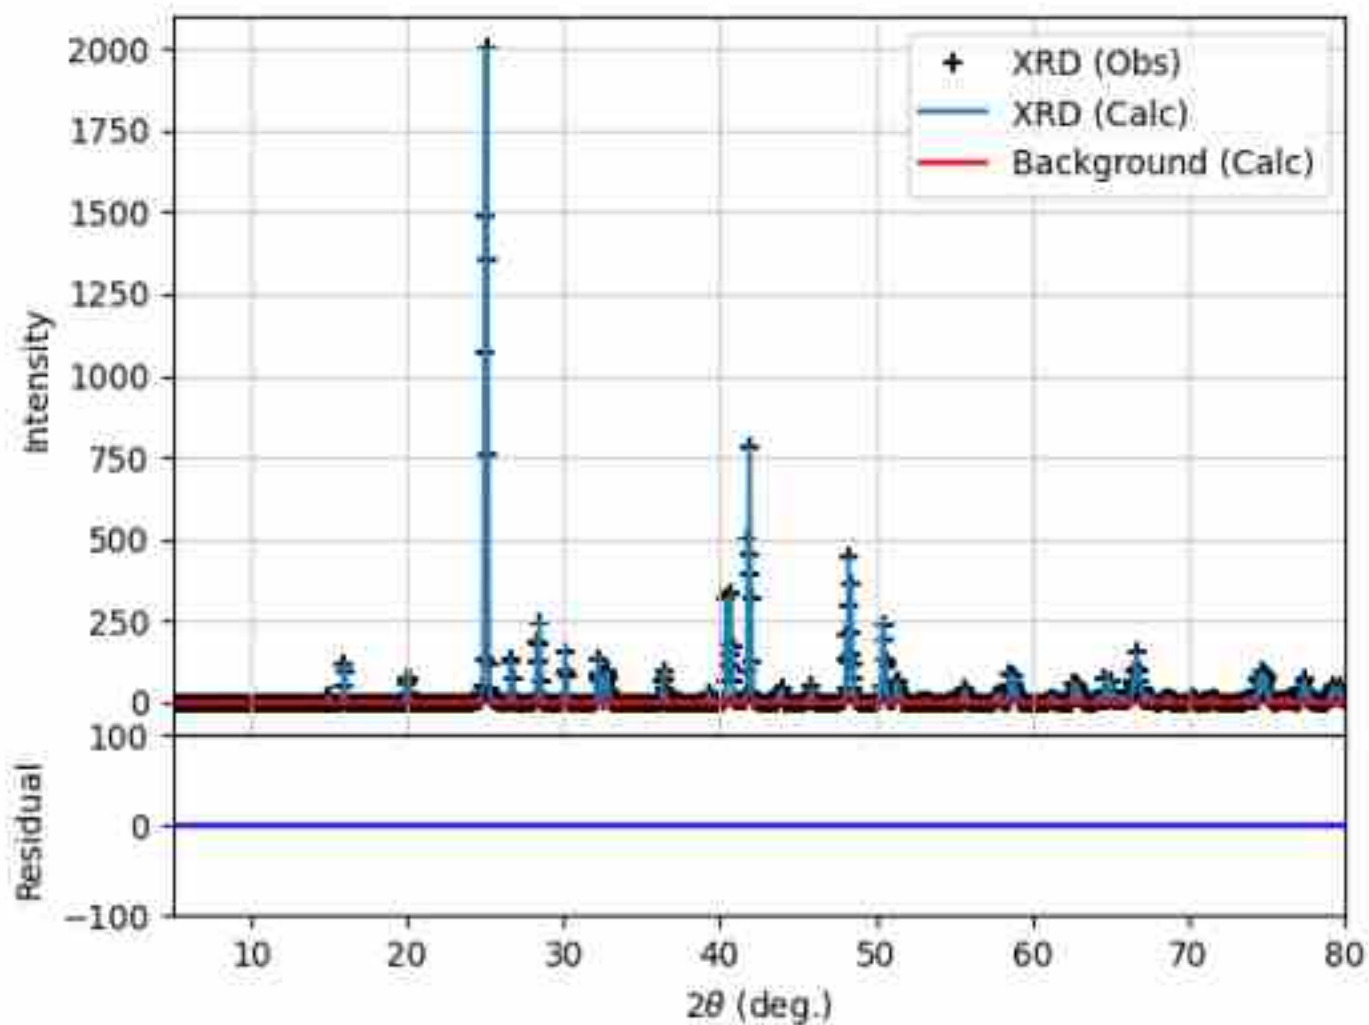

| RMSE before RR | Rwp     | RMSE after RR |
|----------------|---------|---------------|
| 0.029          | 0.00375 | 0.00035       |

# Al<sub>4</sub>In<sub>4</sub>O<sub>12</sub>

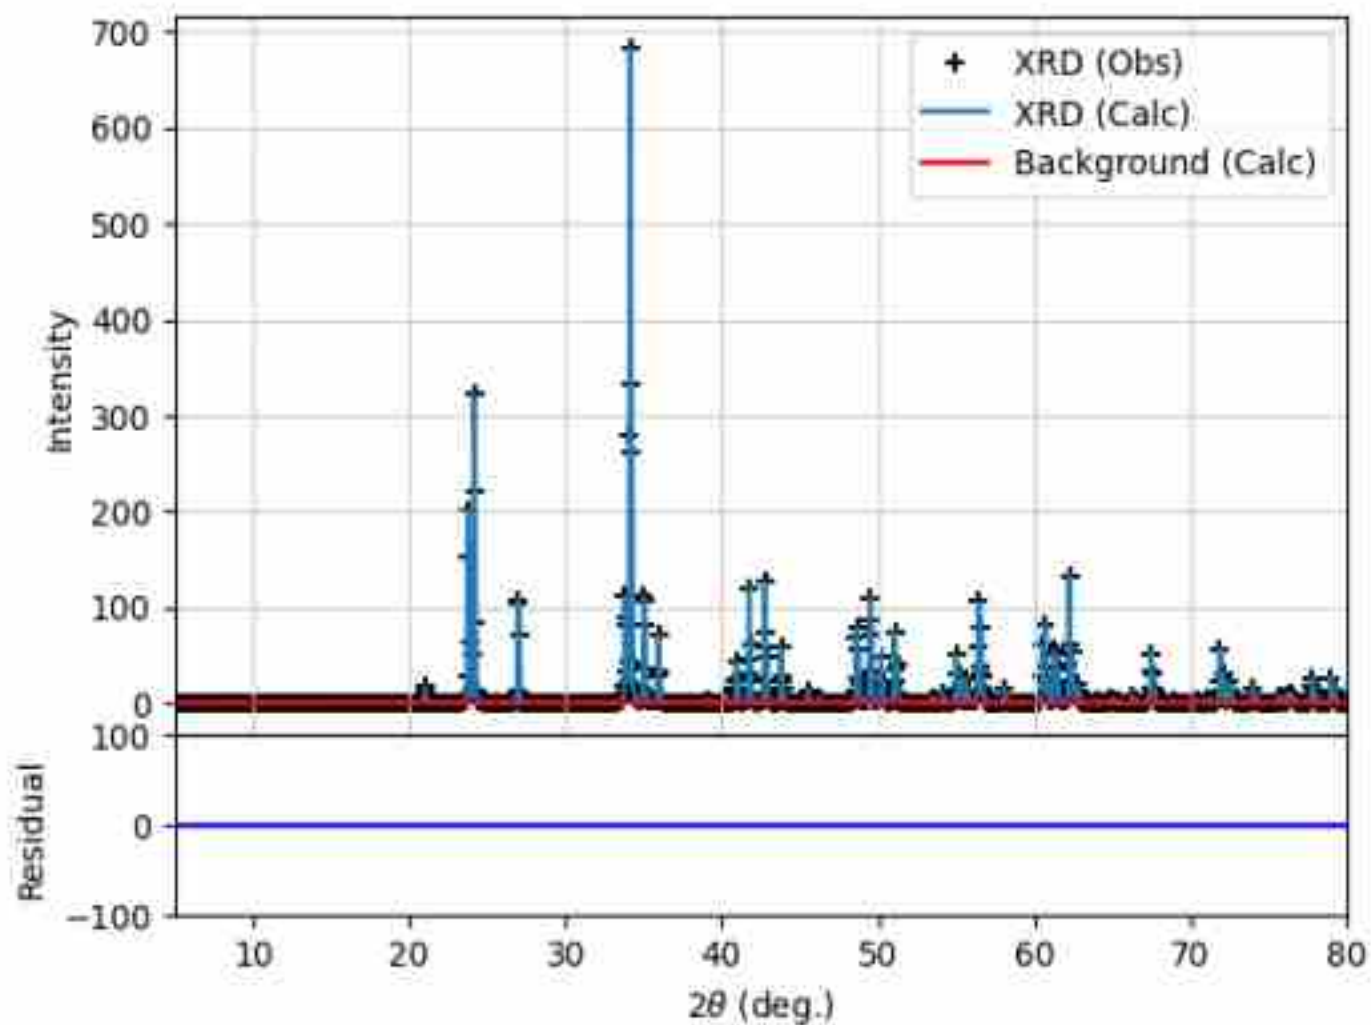

| RMSE before RR | Rwp     | RMSE after RR |
|----------------|---------|---------------|
| 0.029          | 0.00353 | 0.00119       |

# Ba<sub>2</sub>AlGa<sub>3</sub>

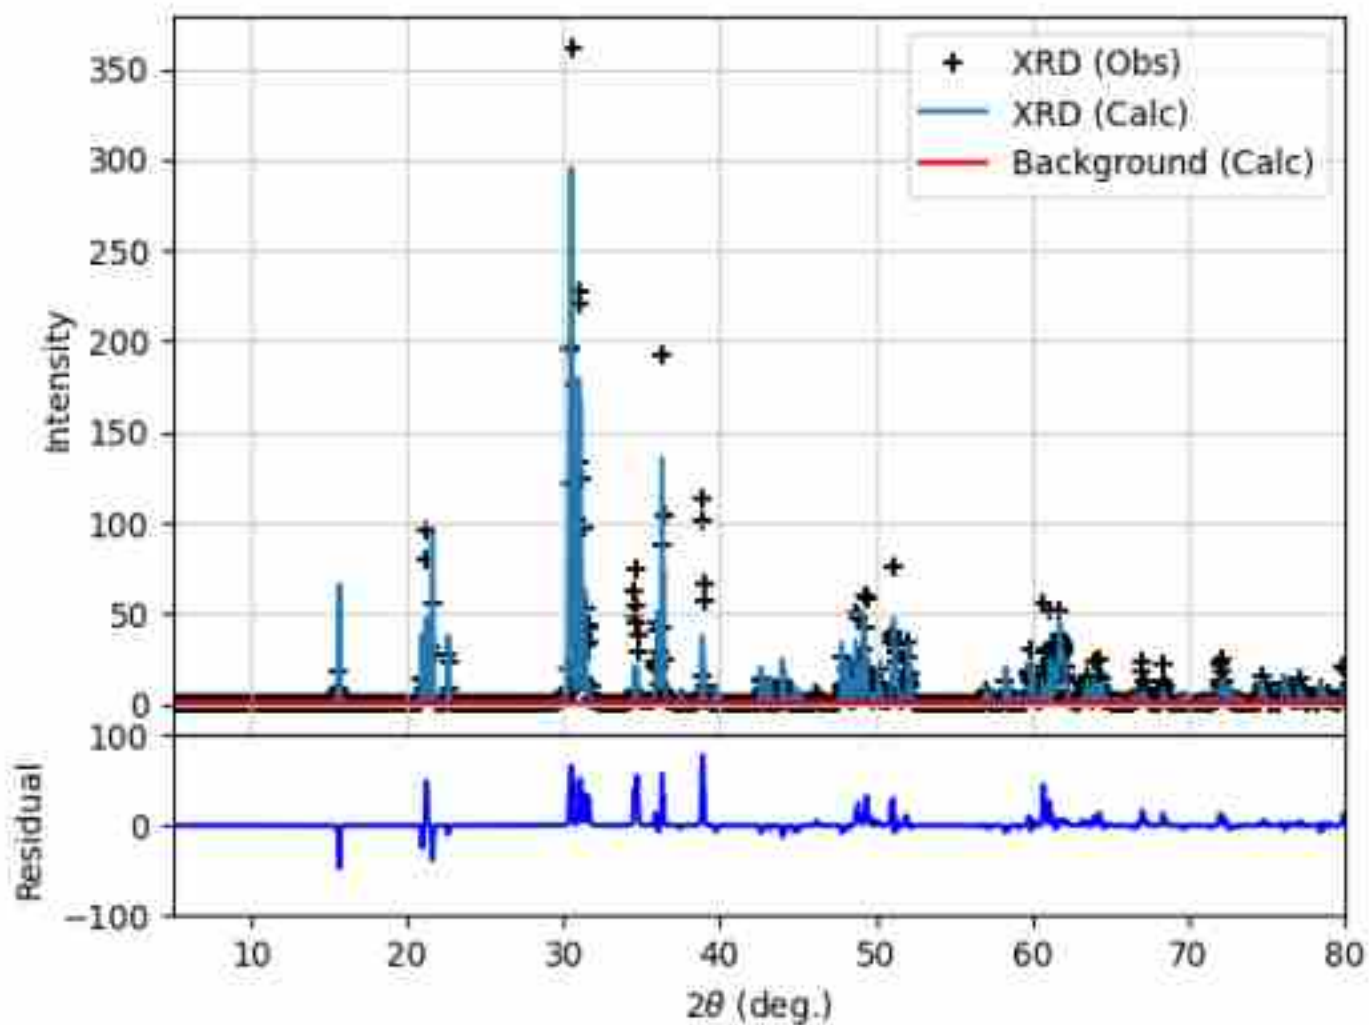

| RMSE before RR | Rwp     | RMSE after RR |
|----------------|---------|---------------|
| 0.029          | 44.8415 | 0.23686       |

# Ba<sub>2</sub>Th<sub>2</sub>N<sub>4</sub>

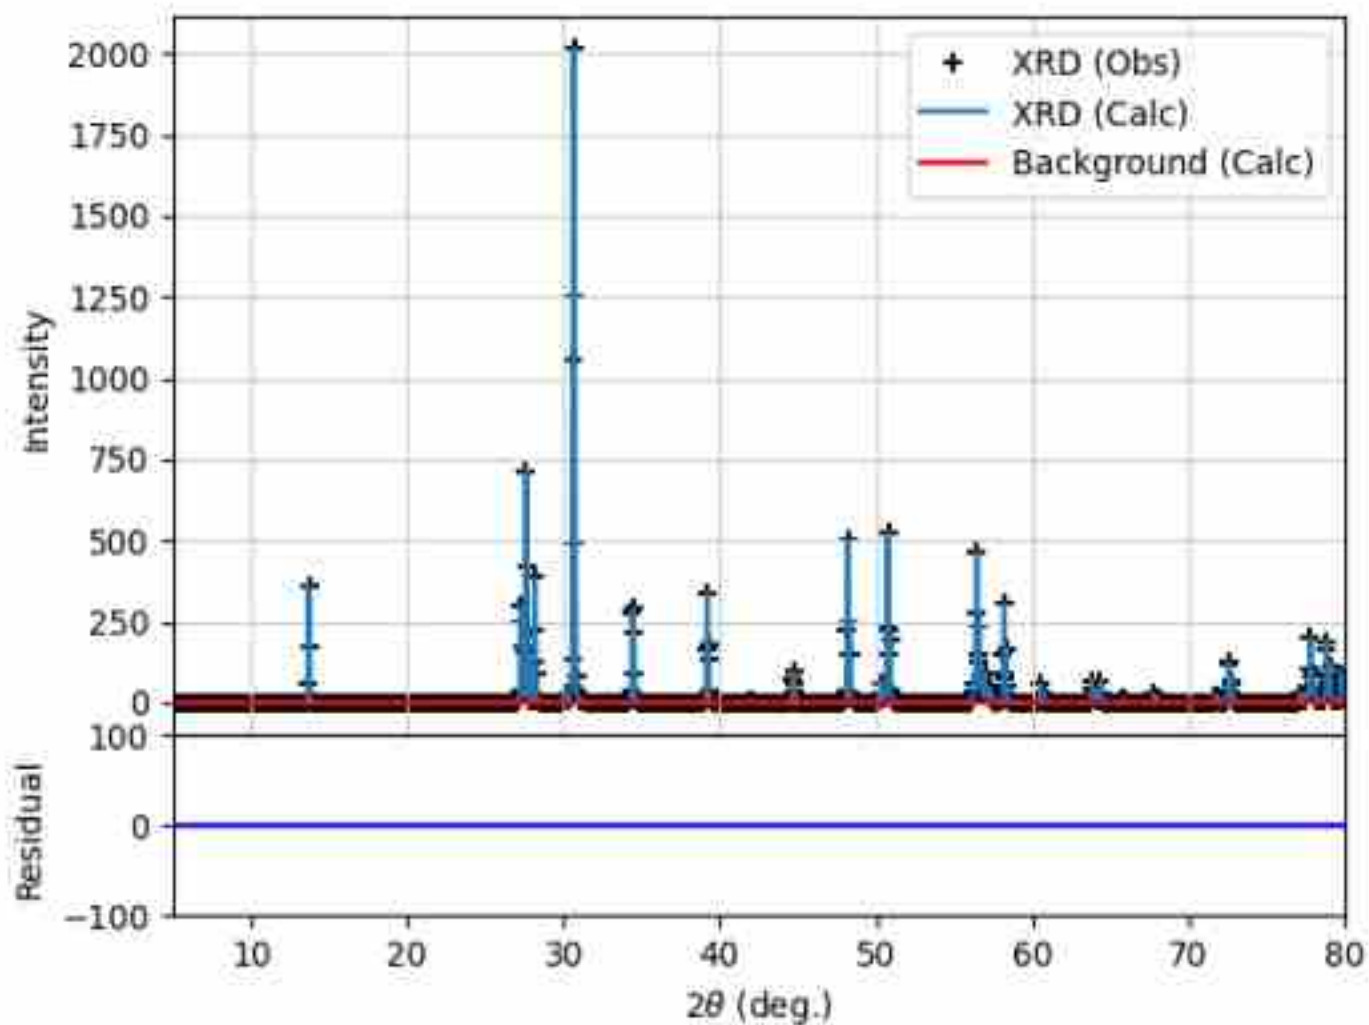

| RMSE before RR | Rwp     | RMSE after RR |
|----------------|---------|---------------|
| 0.029          | 0.00292 | 0.00189       |

# Ba<sub>4</sub>Ce<sub>1</sub>Mn<sub>3</sub>O<sub>12</sub>

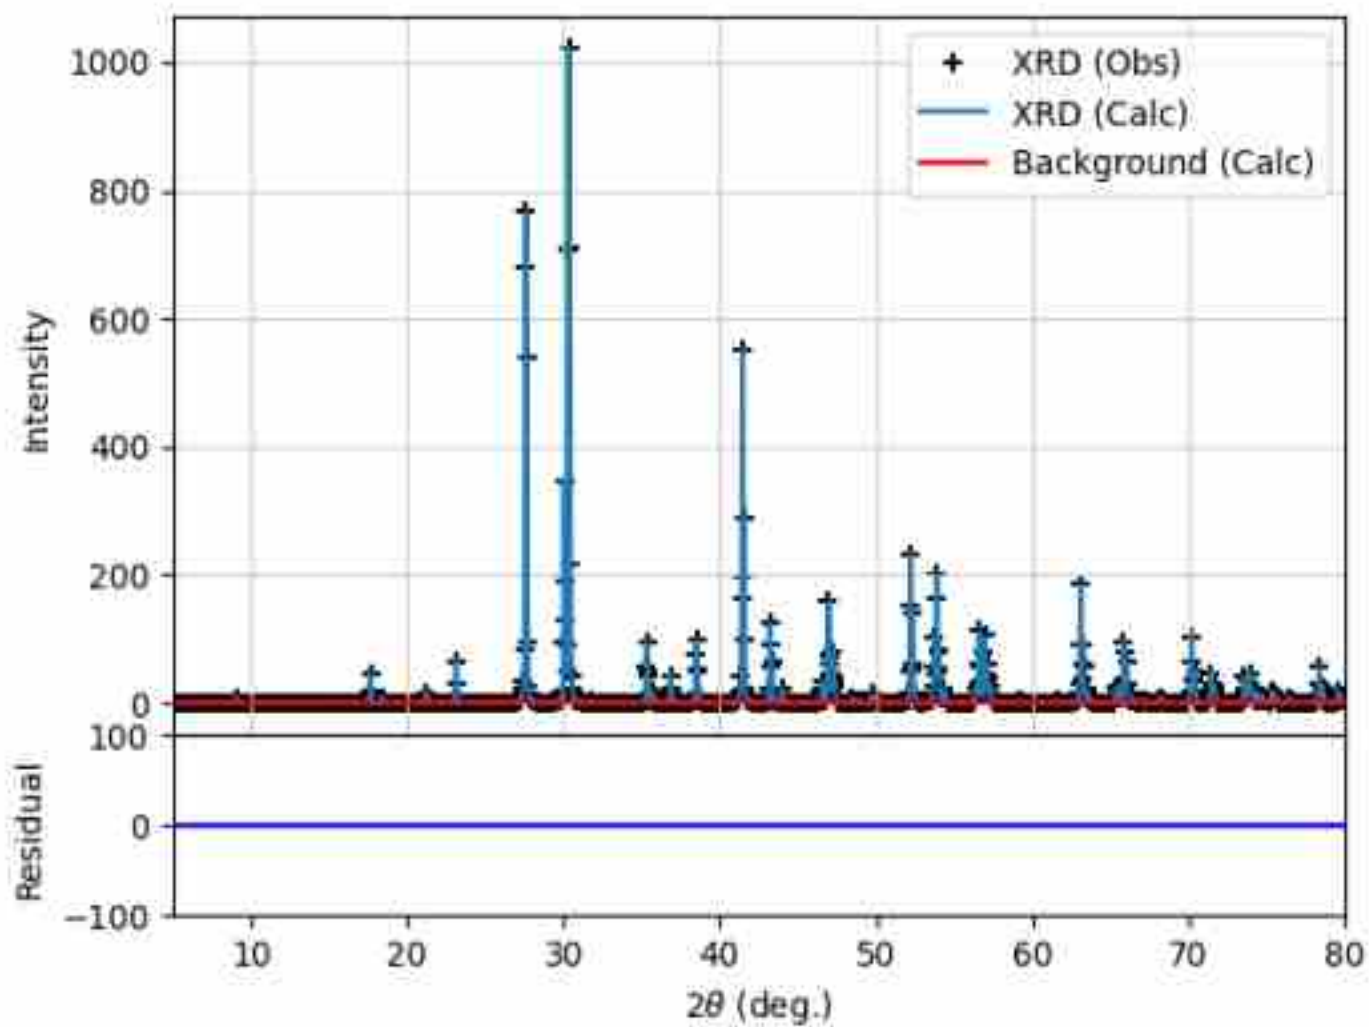

| RMSE before RR | Rwp     | RMSE after RR |
|----------------|---------|---------------|
| 0.029          | 0.00437 | 0.00199       |

# Ba4Sn4S12

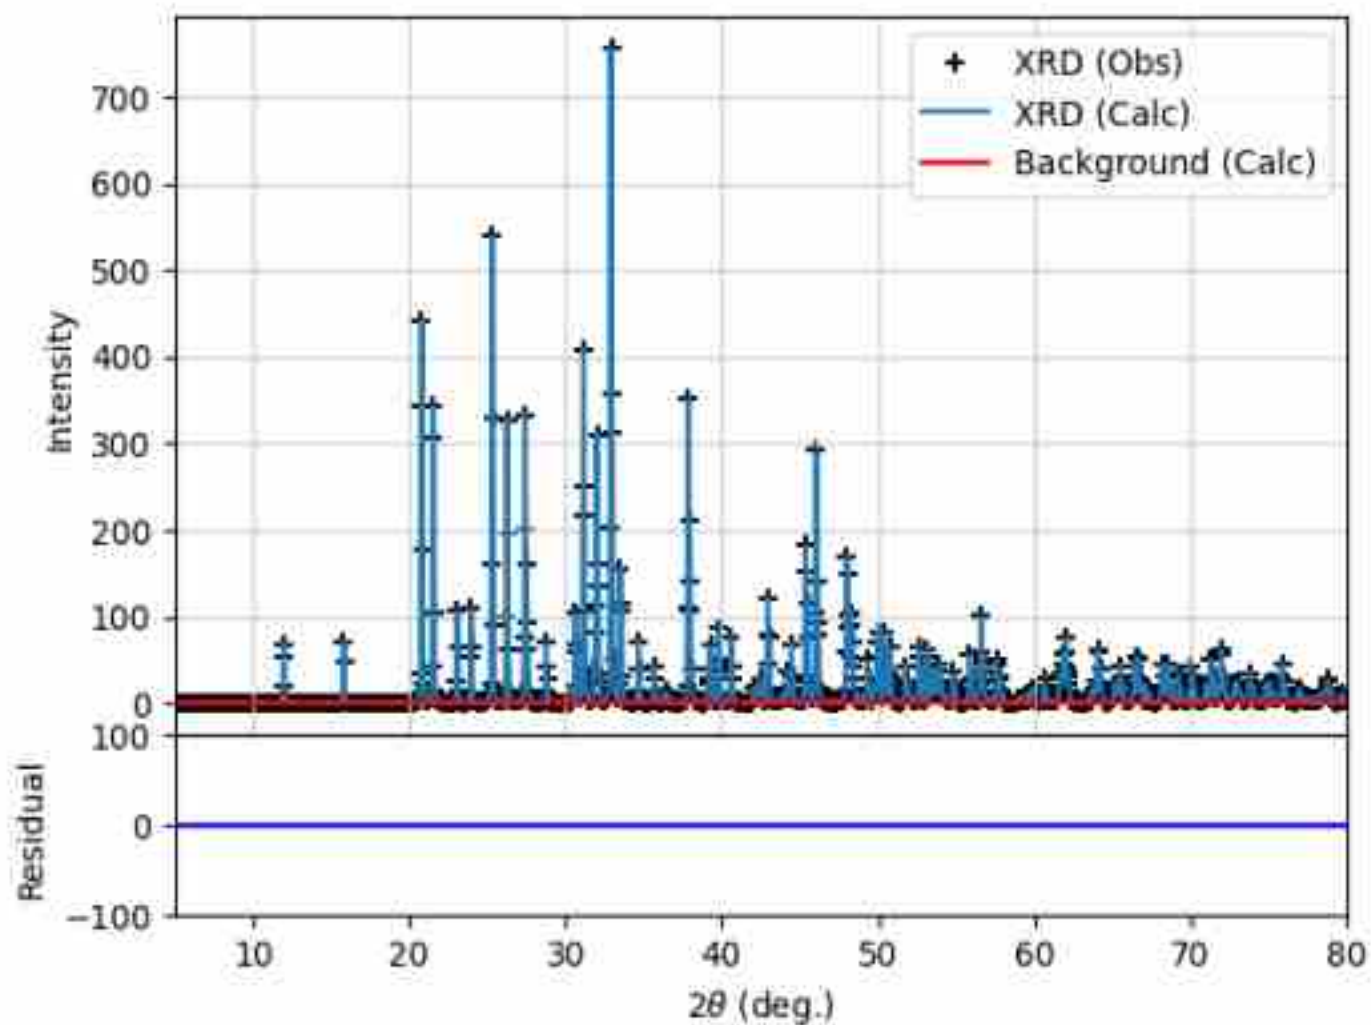

| RMSE before RR | Rwp     | RMSE after RR |
|----------------|---------|---------------|
| 0.029          | 0.00423 | 0.00076       |

# Ba6In4P8

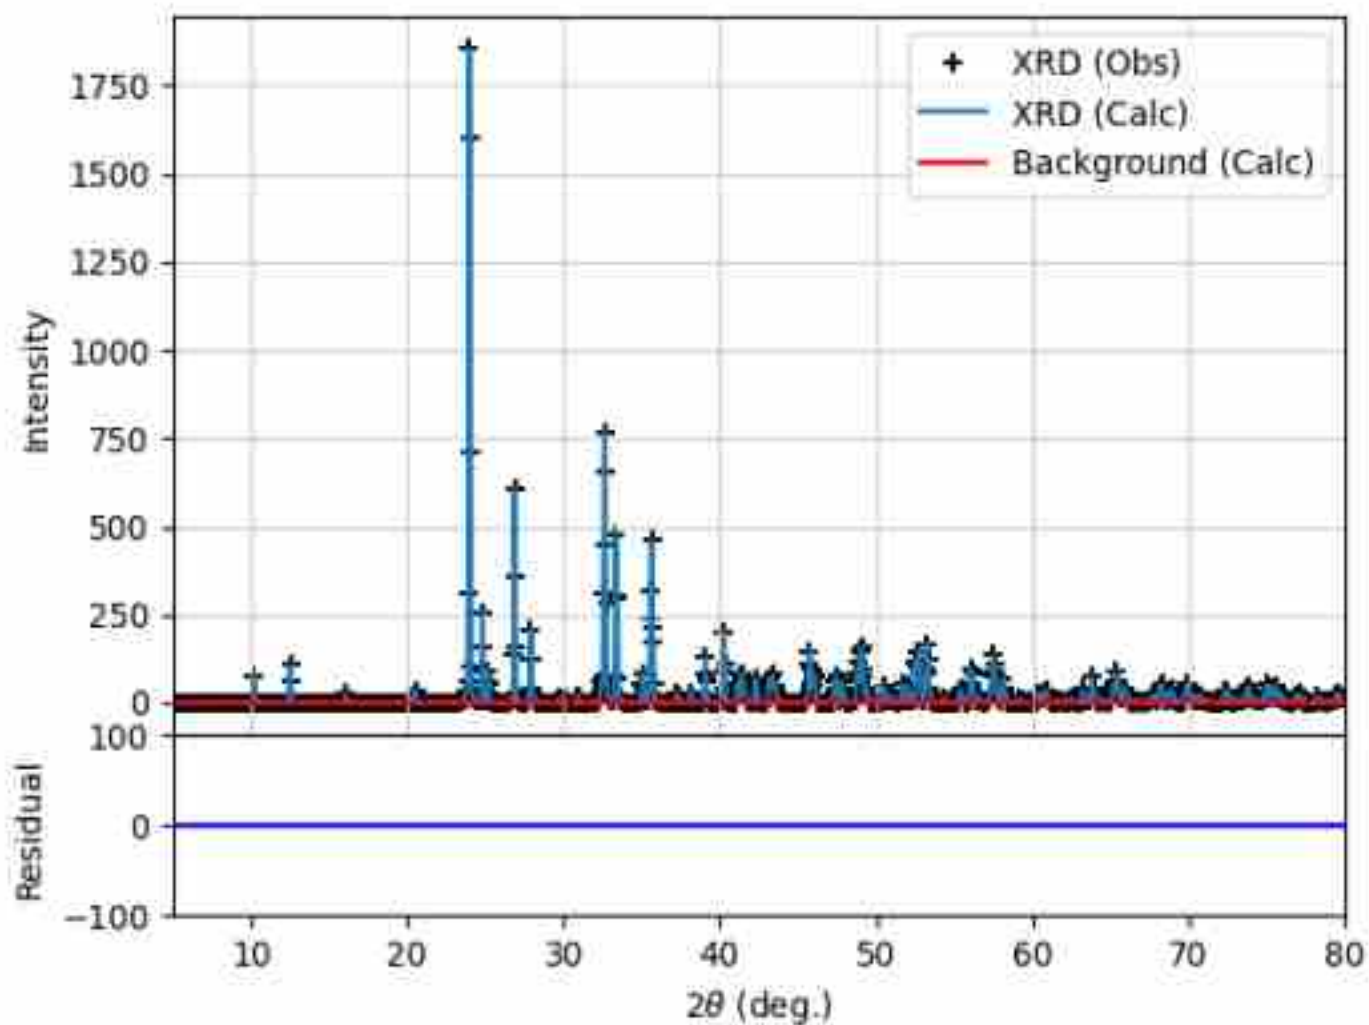

| RMSE before RR | Rwp    | RMSE after RR |
|----------------|--------|---------------|
| 0.029          | 0.0031 | 0.00063       |



# Ca<sub>1</sub>Mg<sub>1</sub>P<sub>2</sub>Se<sub>6</sub>

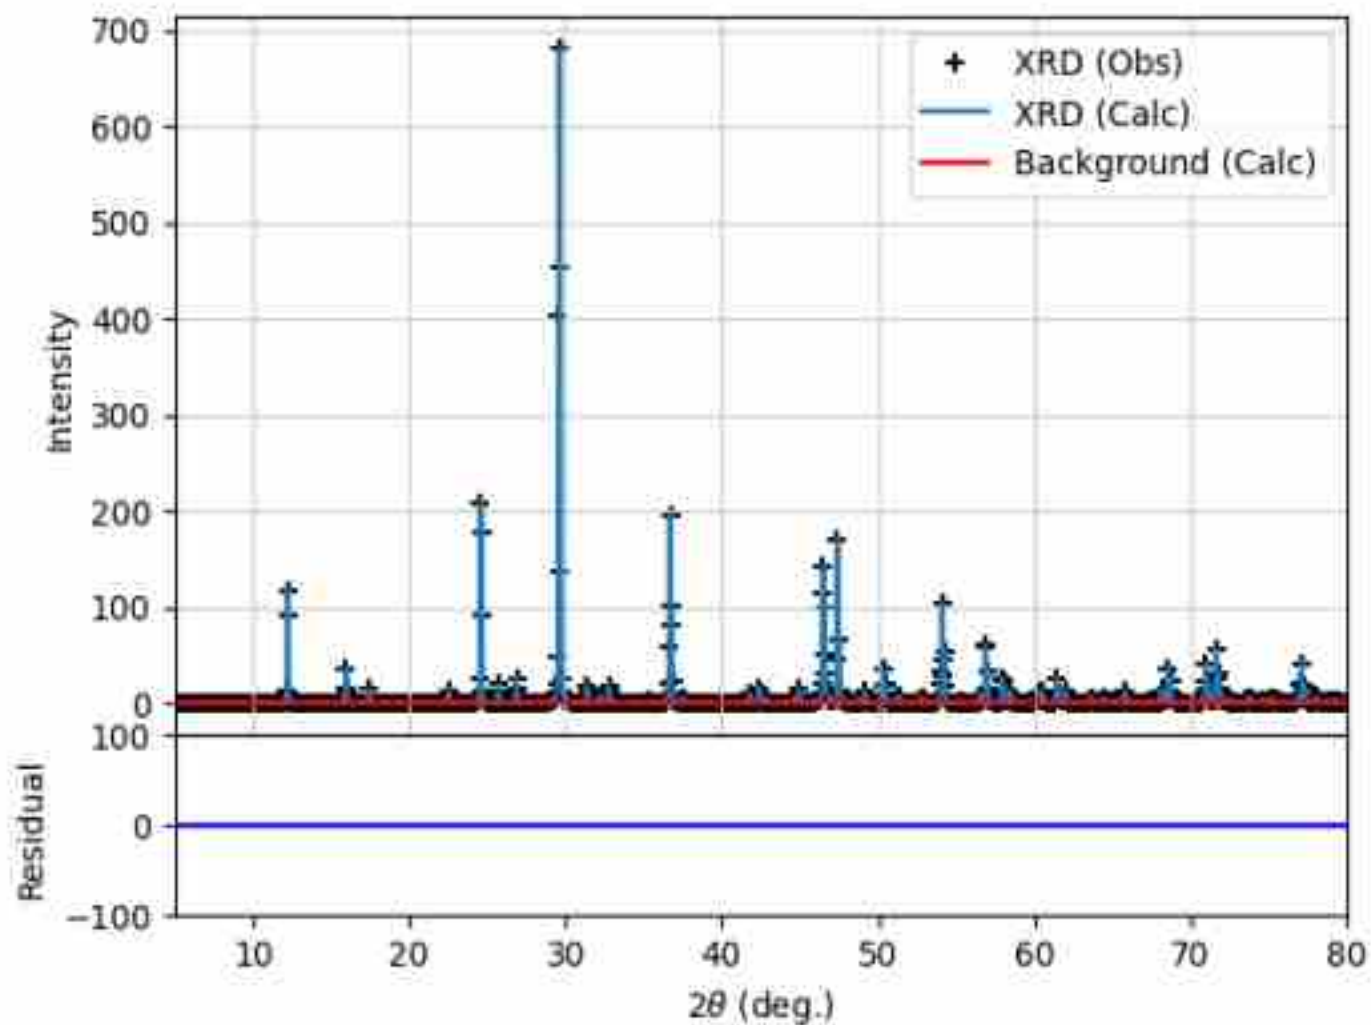

| RMSE before RR | Rwp    | RMSE after RR |
|----------------|--------|---------------|
| 0.029          | 0.0028 | 0.00036       |

# Ce1Mn4Cu3O12

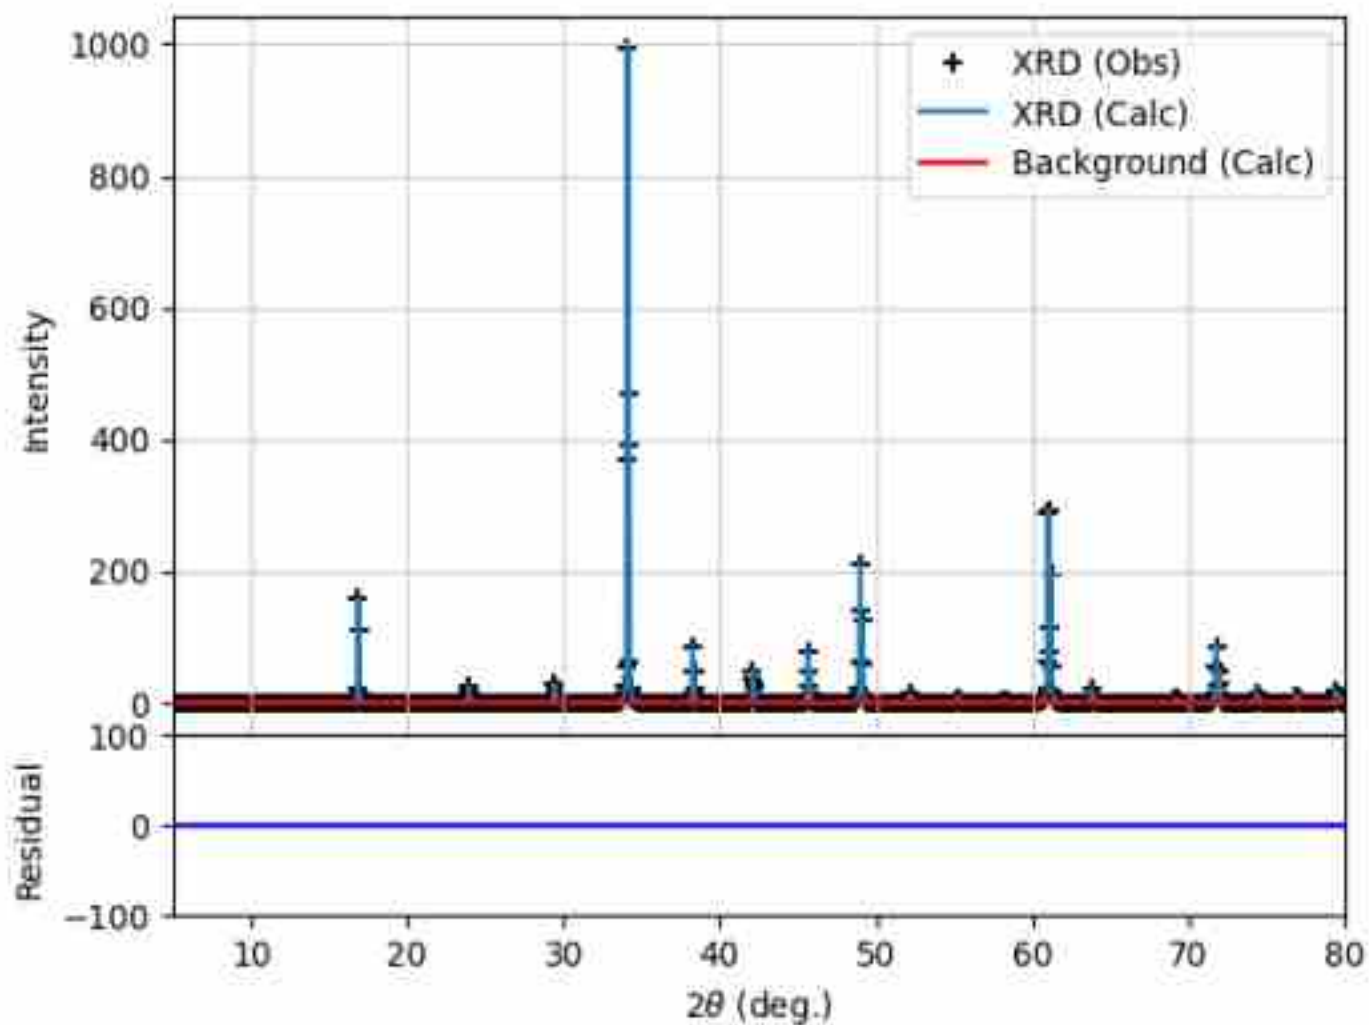

| RMSE before RR | Rwp     | RMSE after RR |
|----------------|---------|---------------|
| 0.029          | 0.00872 | 0.00437       |

# Ce<sub>2</sub>Bi<sub>2</sub>S<sub>4</sub>O<sub>2</sub>

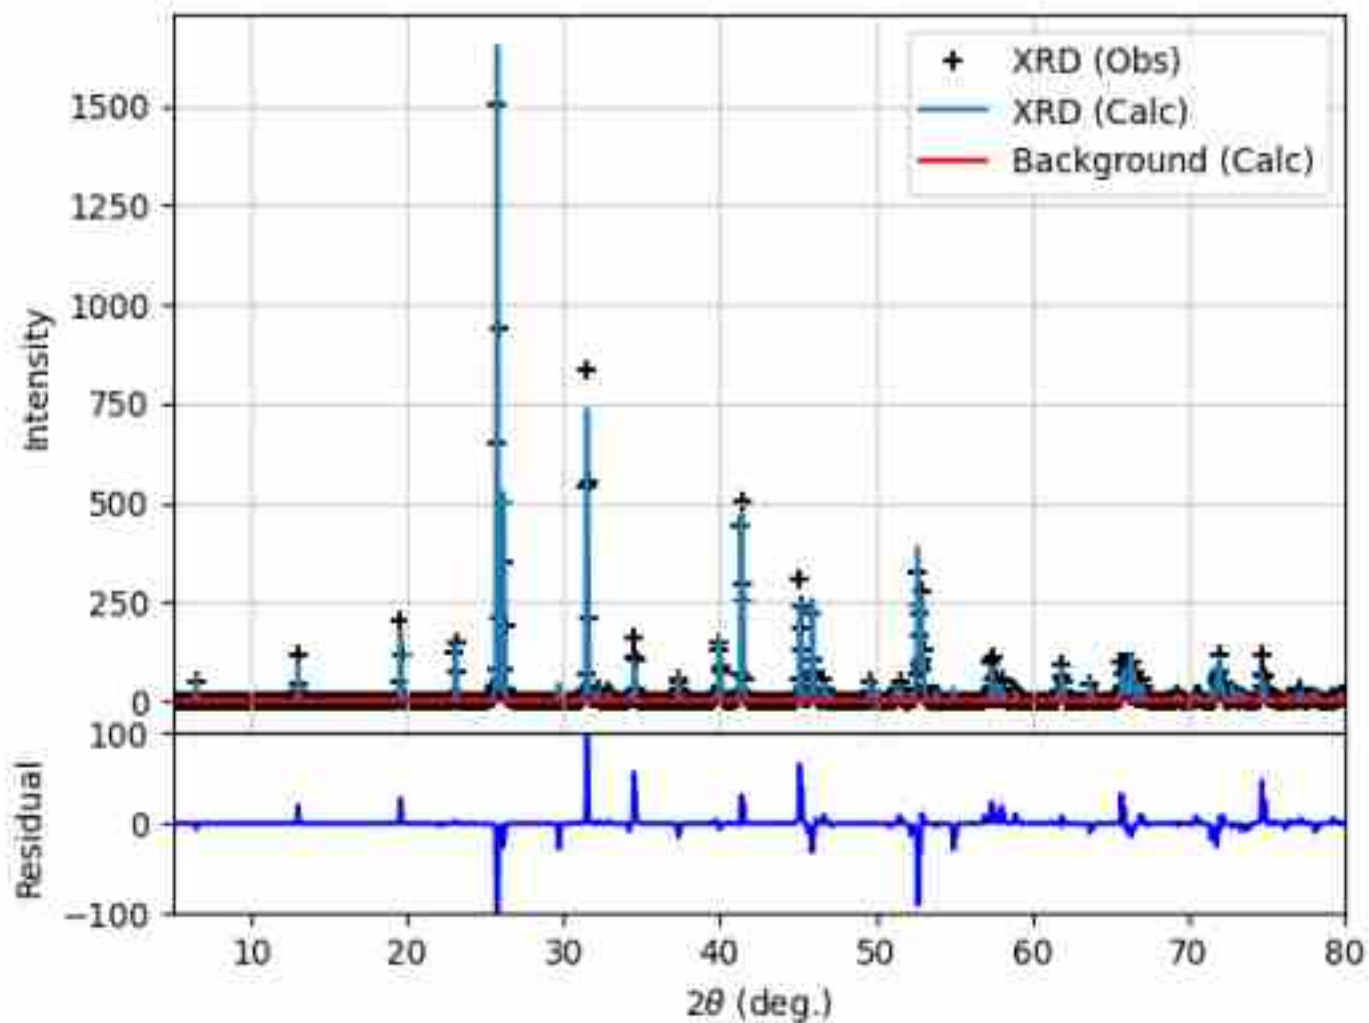

| RMSE before RR | Rwp      | RMSE after RR |
|----------------|----------|---------------|
| 0.029          | 27.72084 | 0.29526       |

# Ce<sub>2</sub>Zn<sub>6</sub>

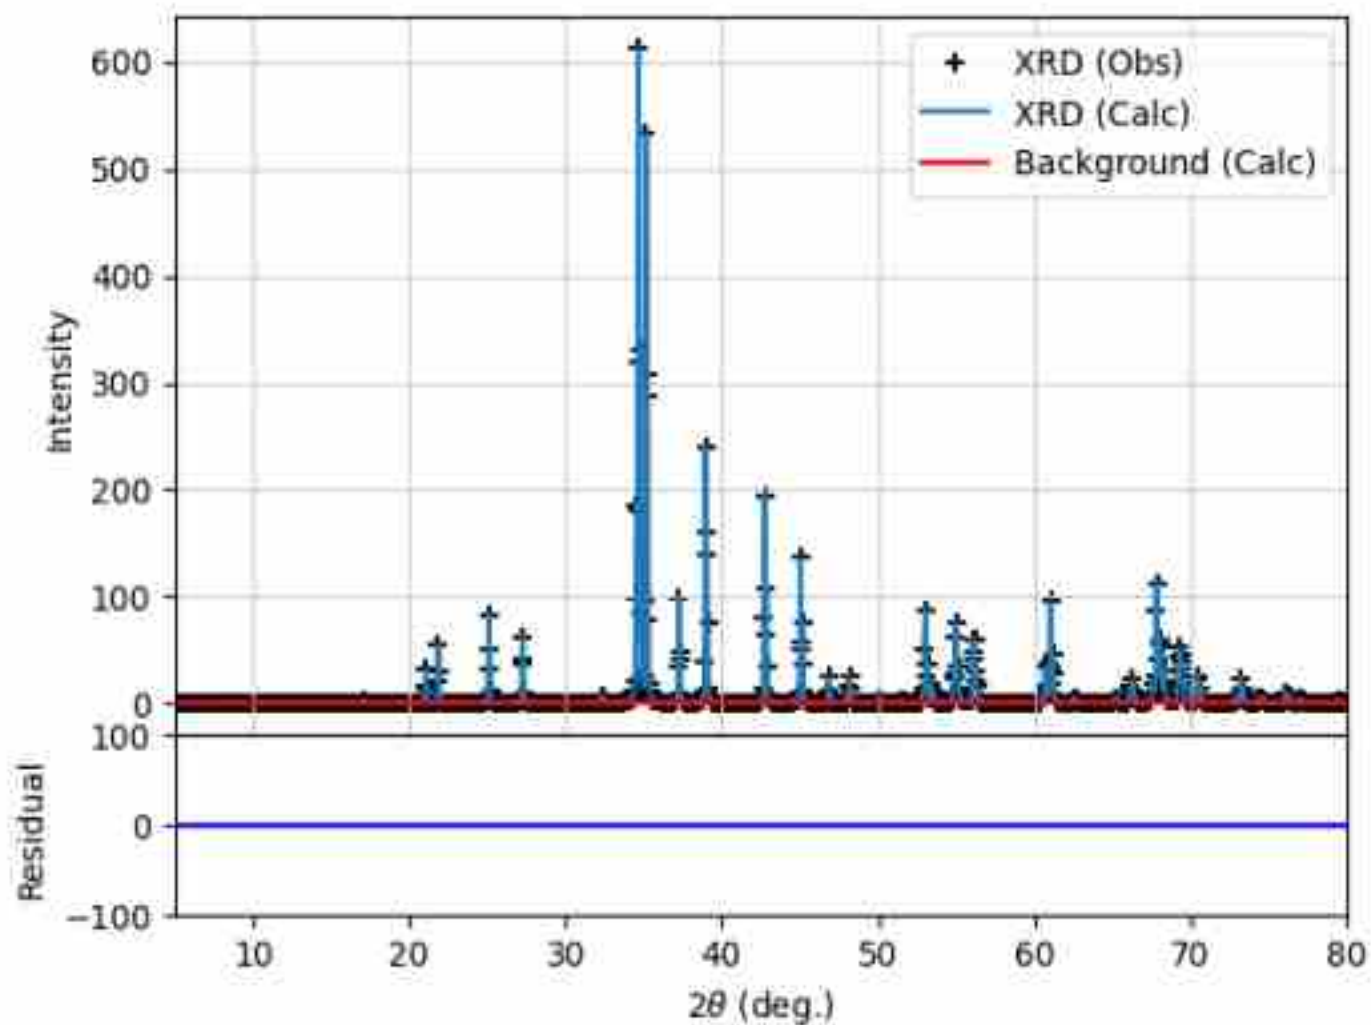

| RMSE before RR | Rwp     | RMSE after RR |
|----------------|---------|---------------|
| 0.029          | 0.00355 | 0.00028       |

# Ce10Ge6C2

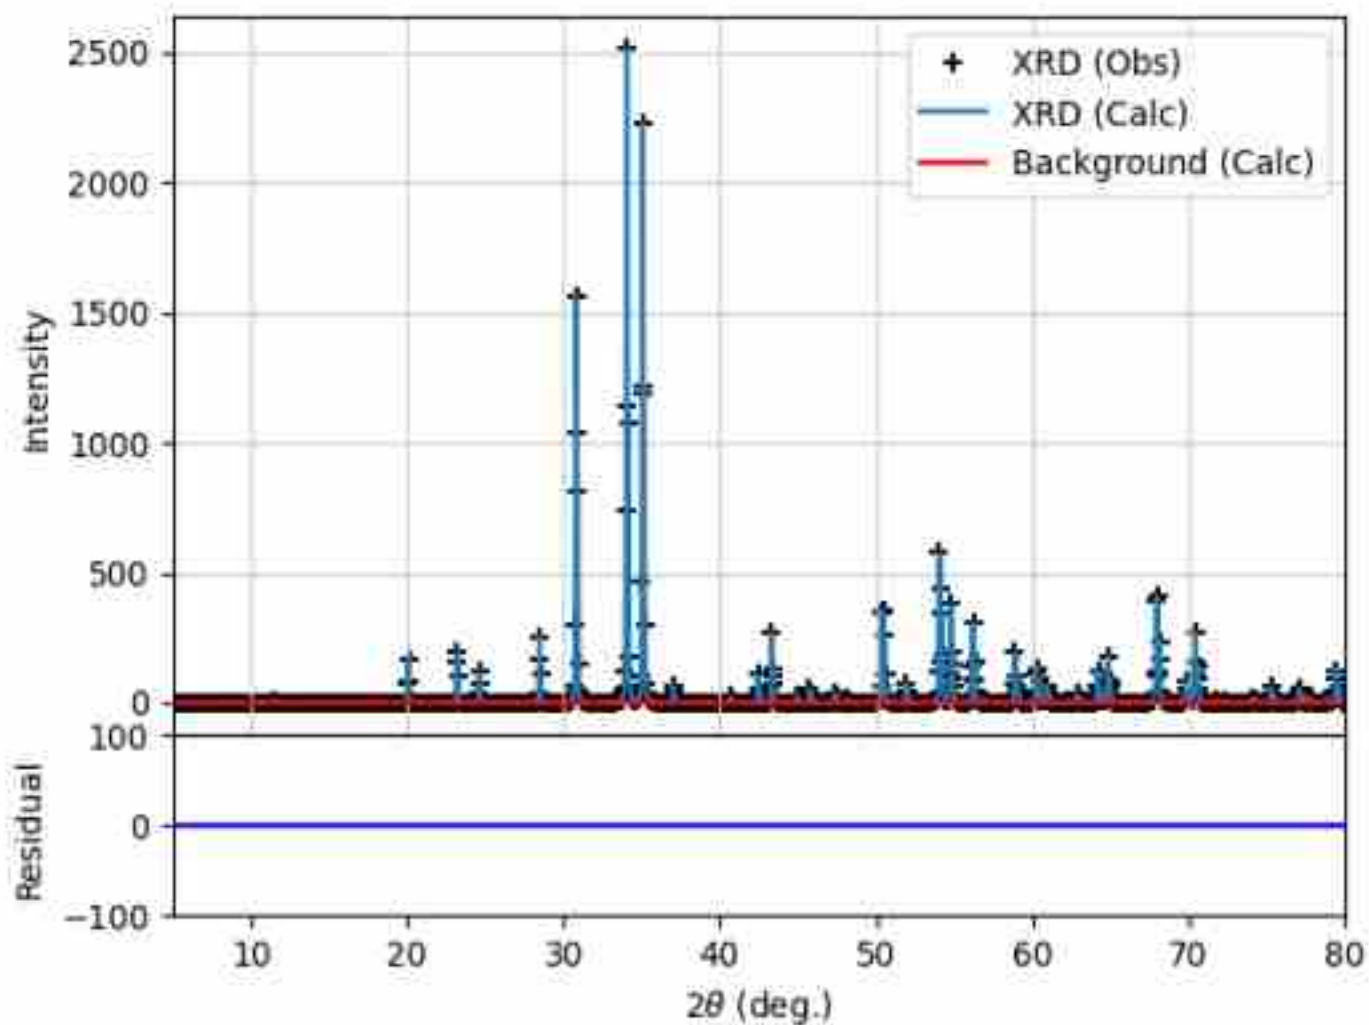

| RMSE before RR | Rwp     | RMSE after RR |
|----------------|---------|---------------|
| 0.029          | 0.01152 | 0.00208       |

# Cr<sub>2</sub>Mo<sub>2</sub>As<sub>4</sub>

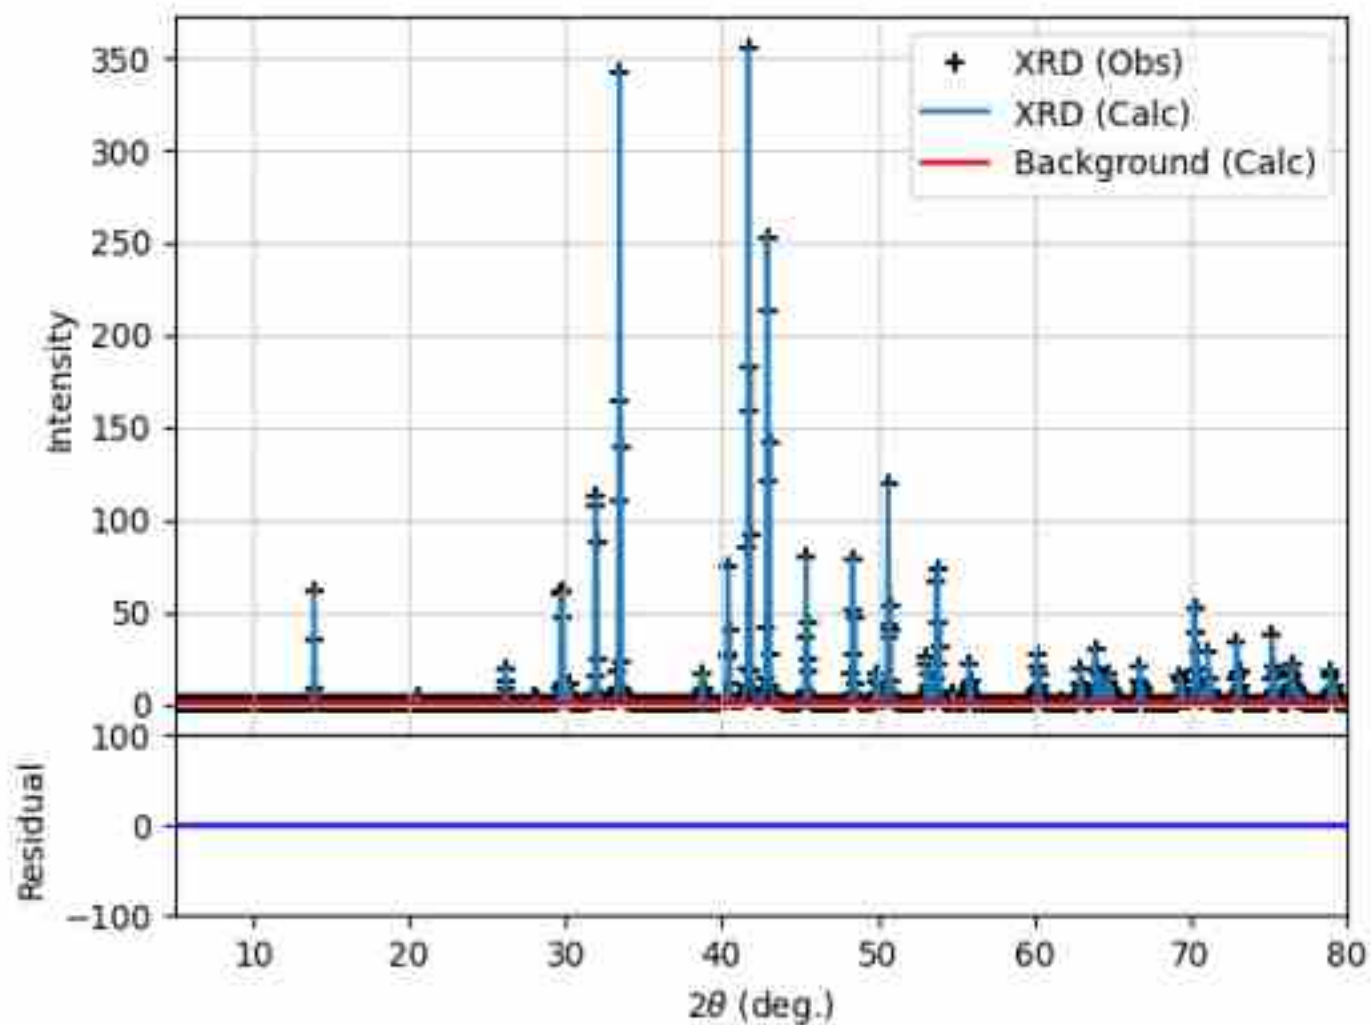

| RMSE before RR | Rwp     | RMSE after RR |
|----------------|---------|---------------|
| 0.029          | 0.00424 | 0.00033       |

# Cs1Re1F6

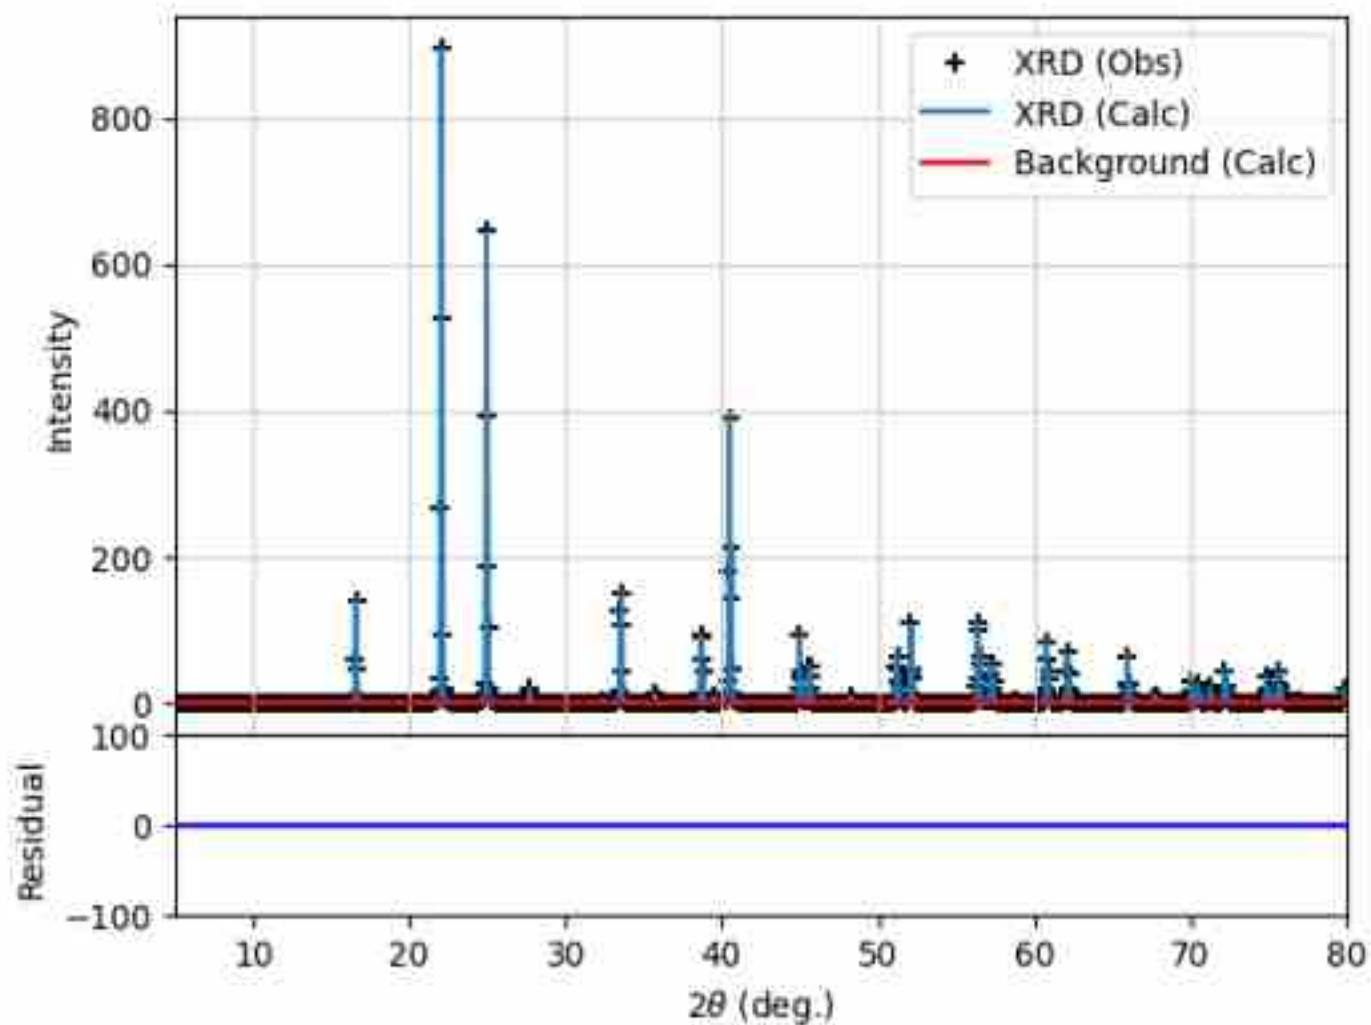

| RMSE before RR | Rwp     | RMSE after RR |
|----------------|---------|---------------|
| 0.029          | 0.00303 | 0.00091       |

# Cs<sub>2</sub>Ga<sub>2</sub>H<sub>8</sub>

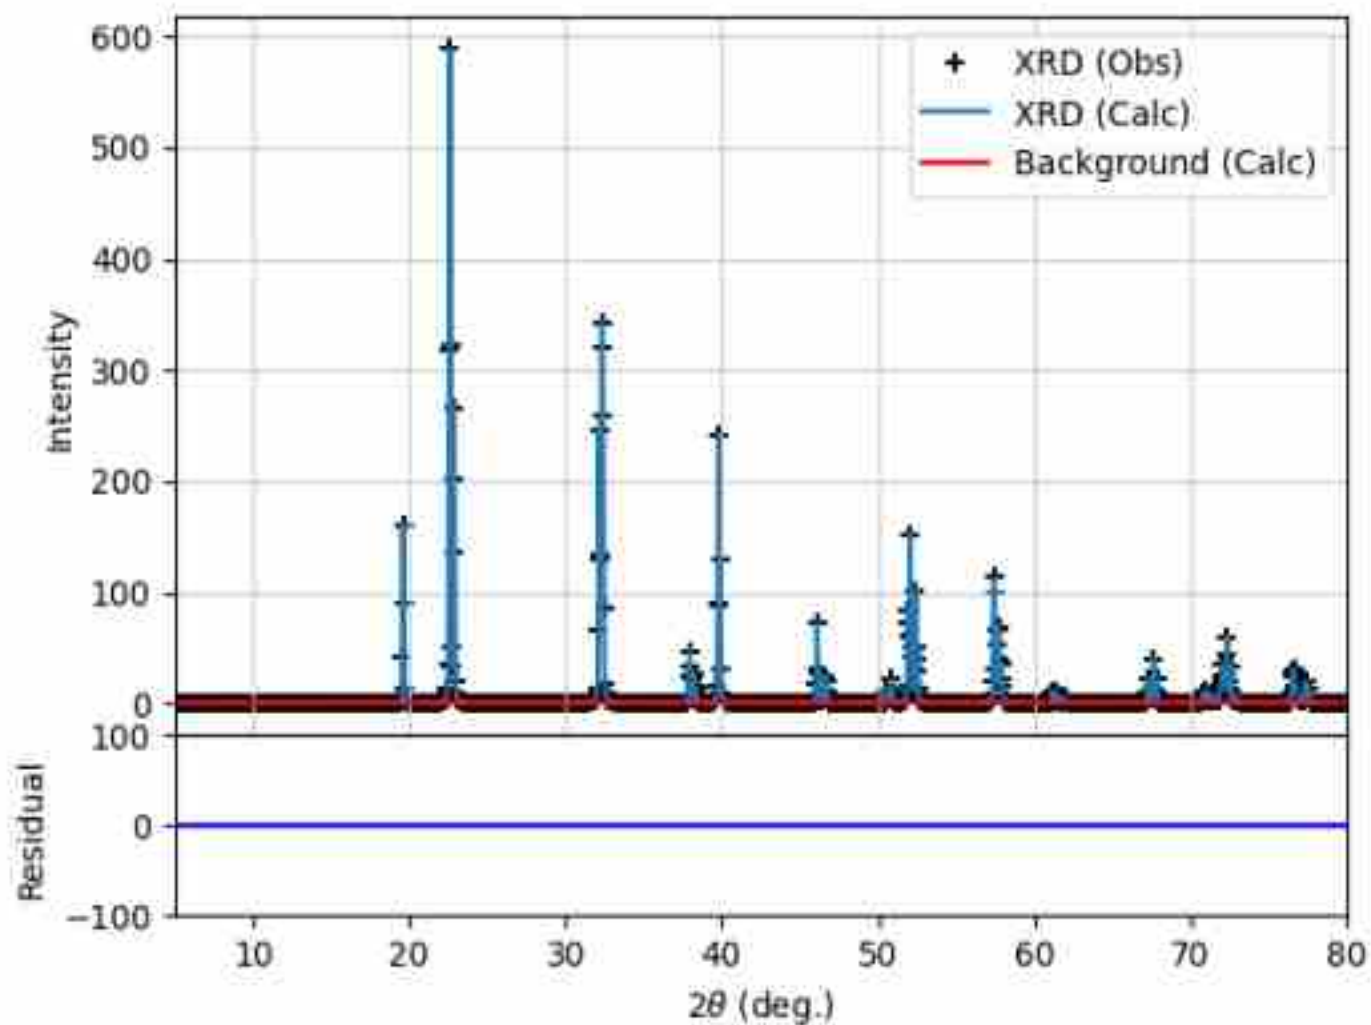

| RMSE before RR | Rwp     | RMSE after RR |
|----------------|---------|---------------|
| 0.029          | 0.00459 | 0.00607       |



# $\text{Cs}_2\text{Mg}_2\text{Co}_2\text{F}_{12}$

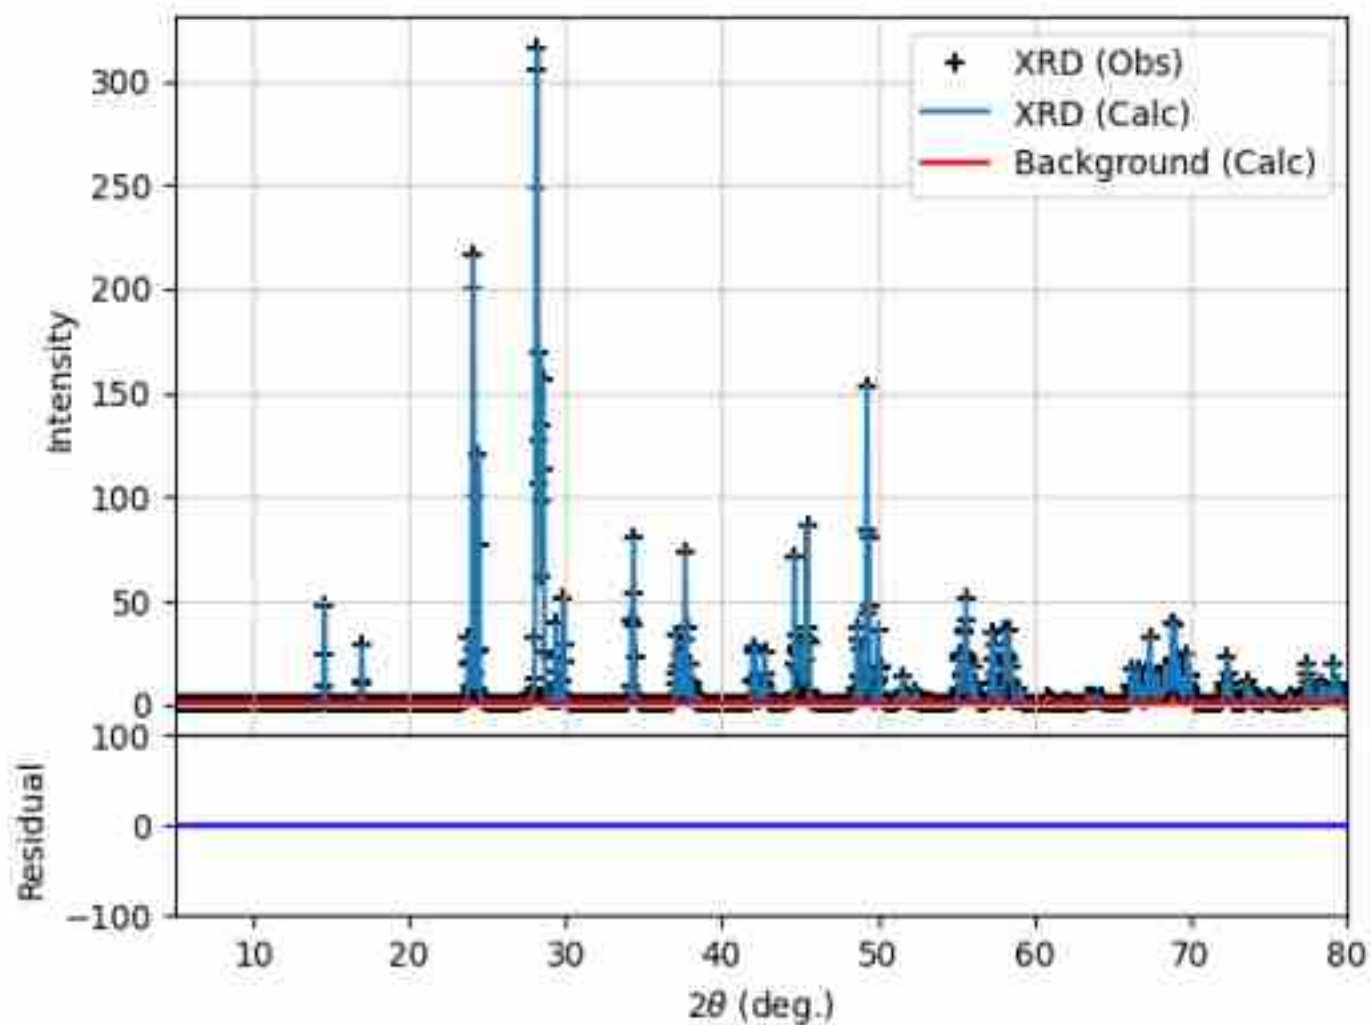

| RMSE before RR | Rwp     | RMSE after RR |
|----------------|---------|---------------|
| 0.029          | 0.00276 | 0.00066       |

# Cs6Co2C110

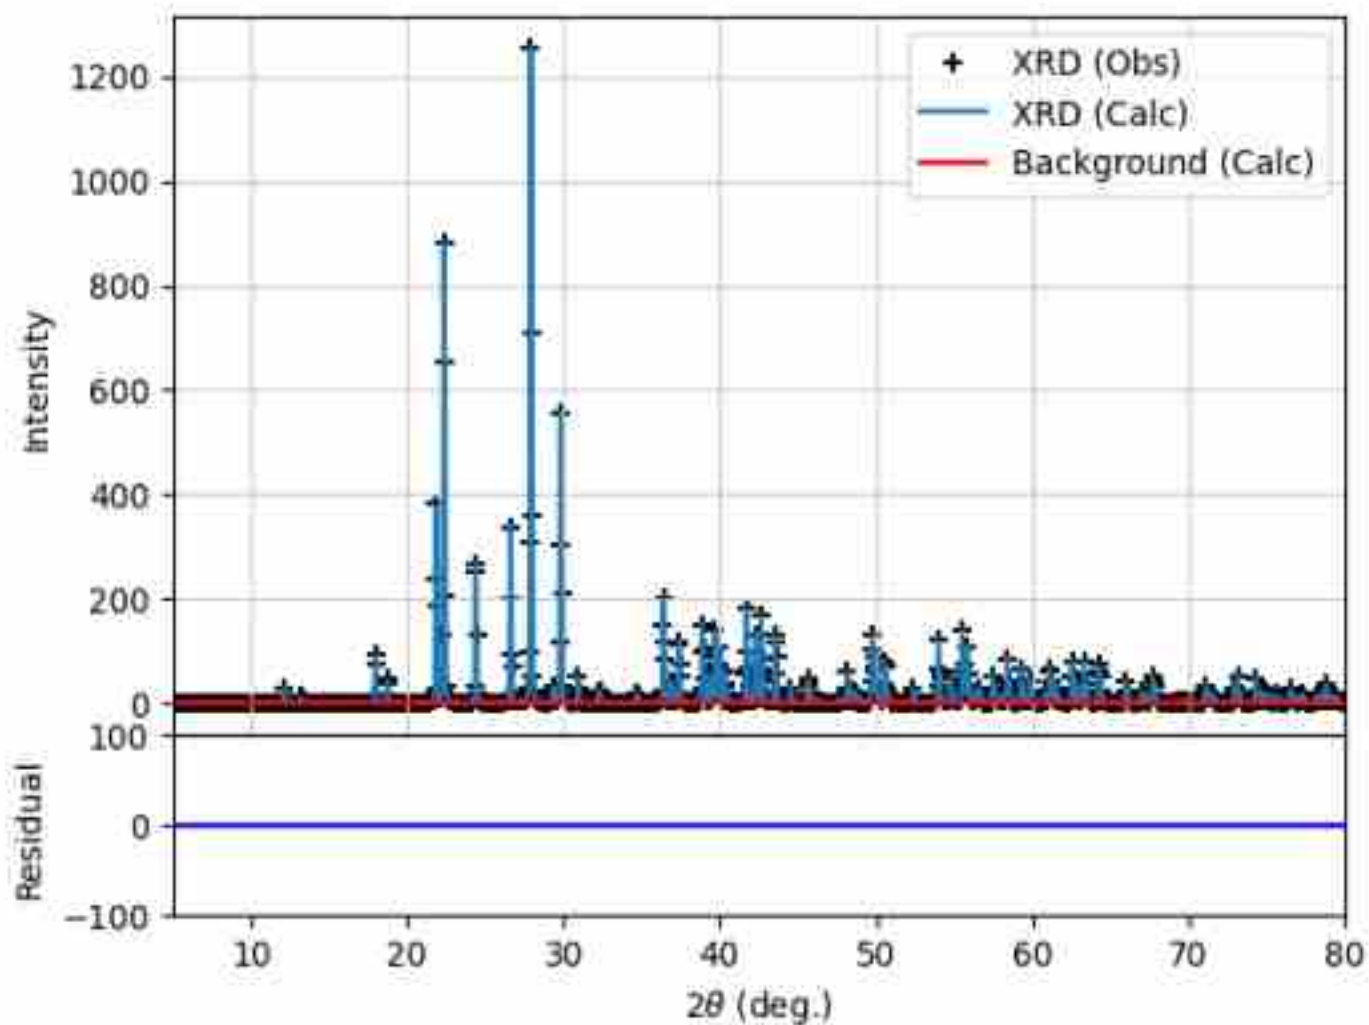

| RMSE before RR | Rwp     | RMSE after RR |
|----------------|---------|---------------|
| 0.029          | 0.00286 | 0.00041       |

# Cs20

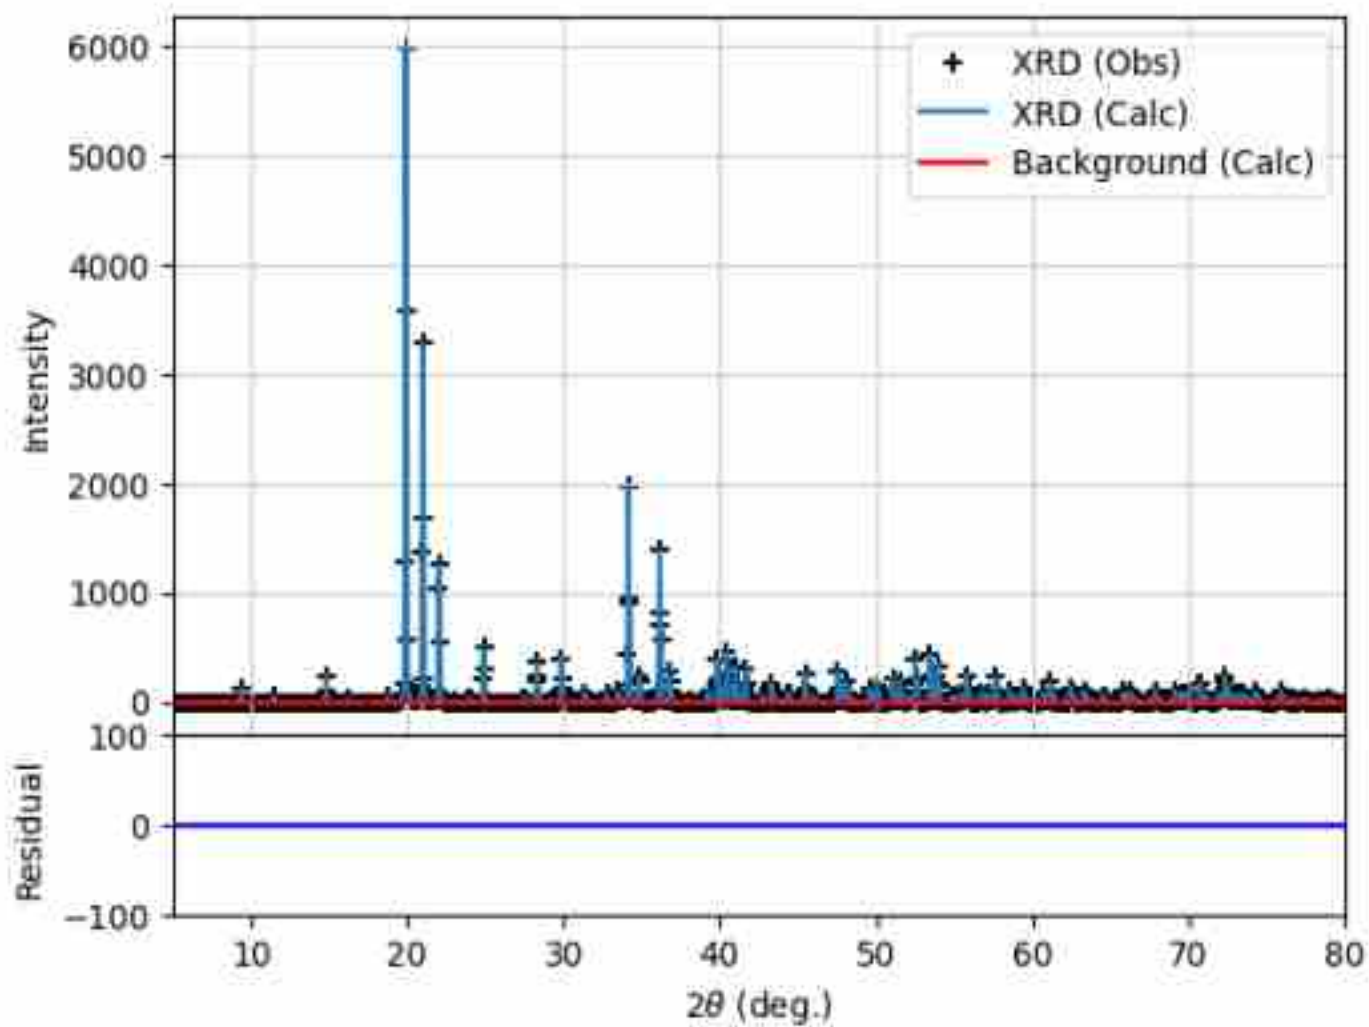

| RMSE before RR | Rwp     | RMSE after RR |
|----------------|---------|---------------|
| 0.029          | 0.00414 | 0.00025       |

# Cu<sub>2</sub>Ag<sub>2</sub>Se<sub>2</sub>

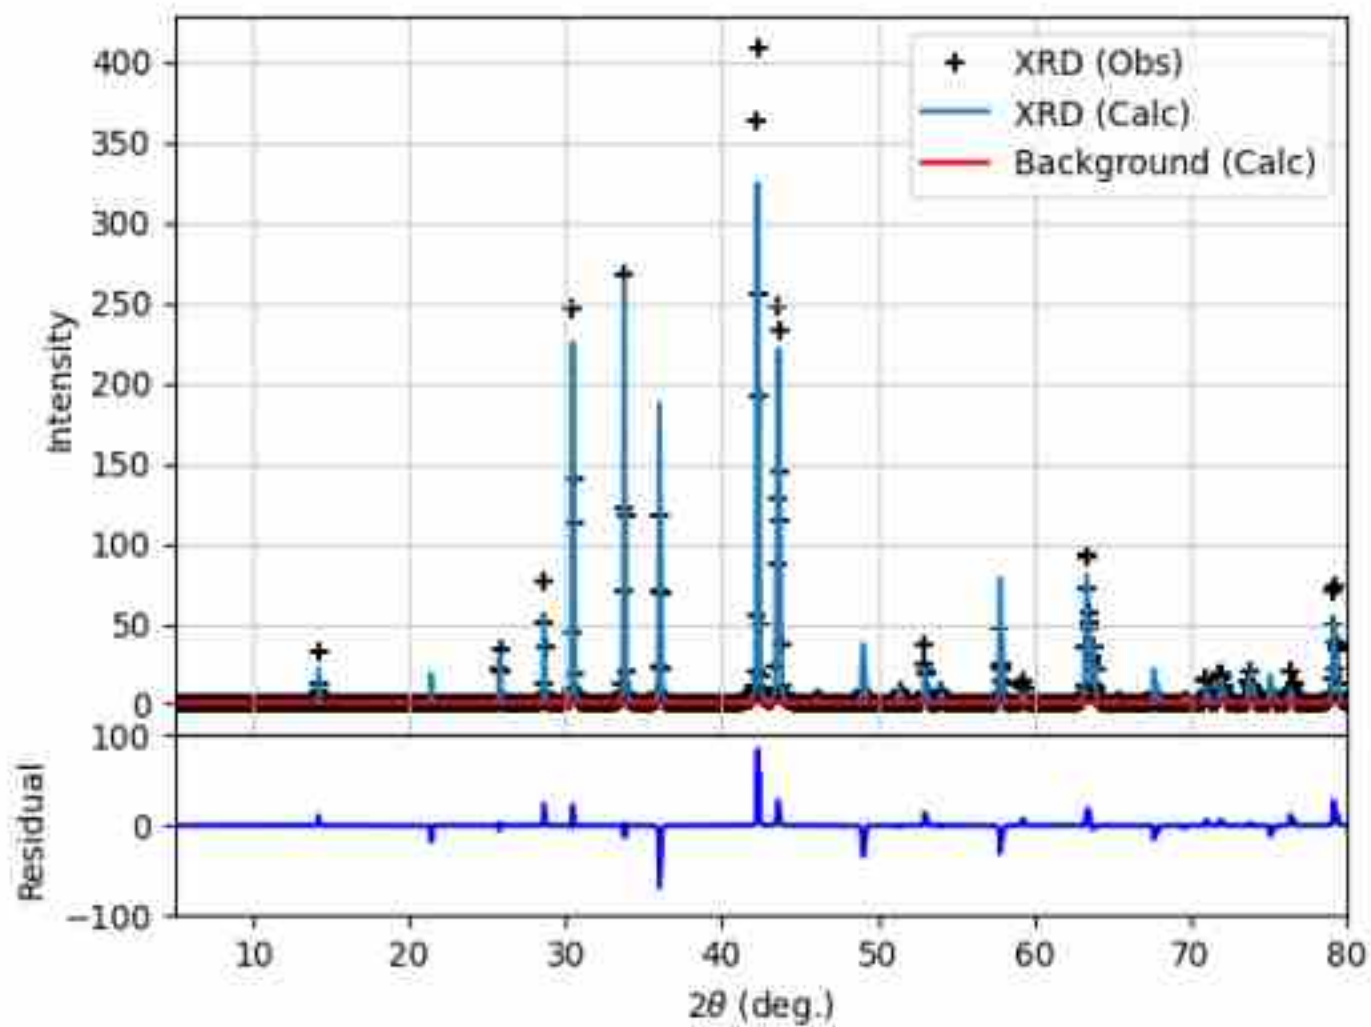

| RMSE before RR | Rwp      | RMSE after RR |
|----------------|----------|---------------|
| 0.029          | 48.94667 | 0.02971       |

# Dy<sub>4</sub>Zn<sub>12</sub>

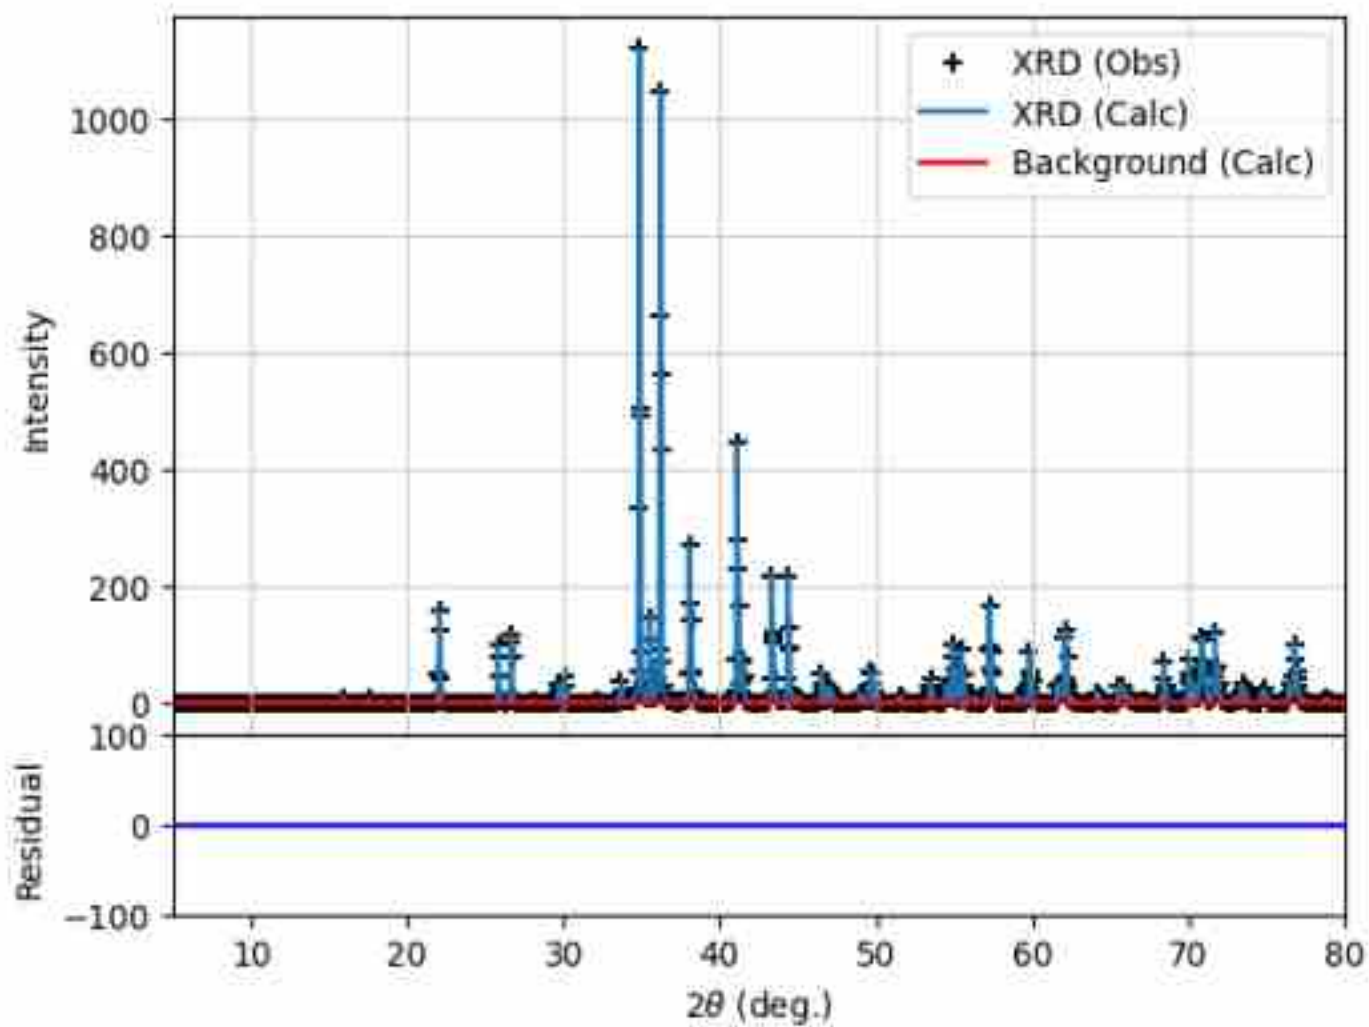

| RMSE before RR | Rwp    | RMSE after RR |
|----------------|--------|---------------|
| 0.029          | 0.0047 | 0.00044       |

# Er<sub>2</sub>Mg<sub>2</sub>Ru<sub>1</sub>

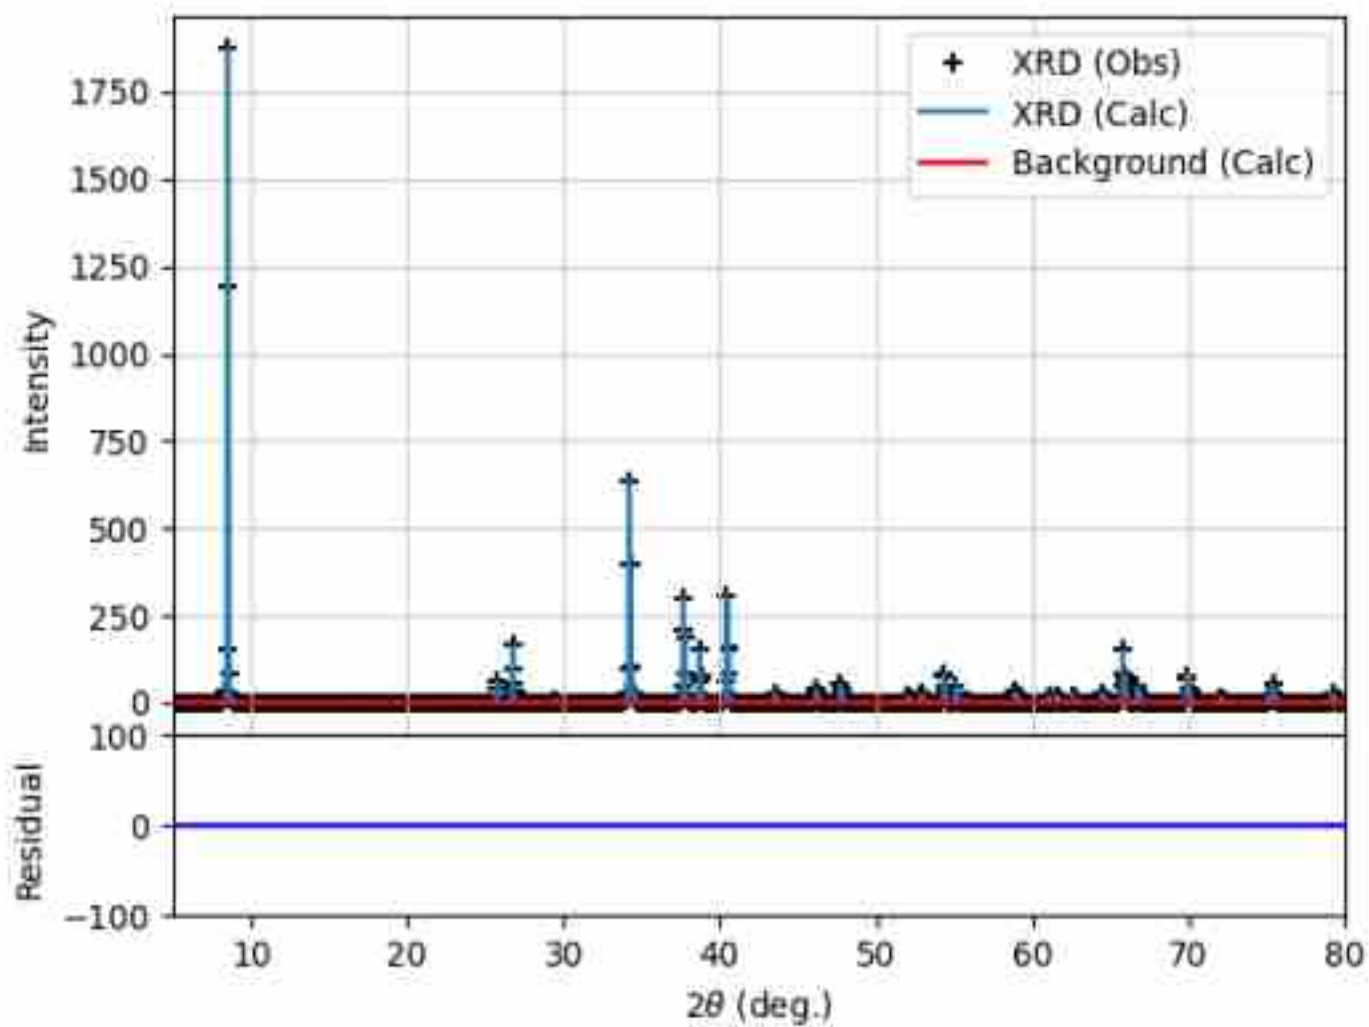

| RMSE before RR | Rwp    | RMSE after RR |
|----------------|--------|---------------|
| 0.029          | 0.0037 | 0.00097       |

# Fe5Sn1O8

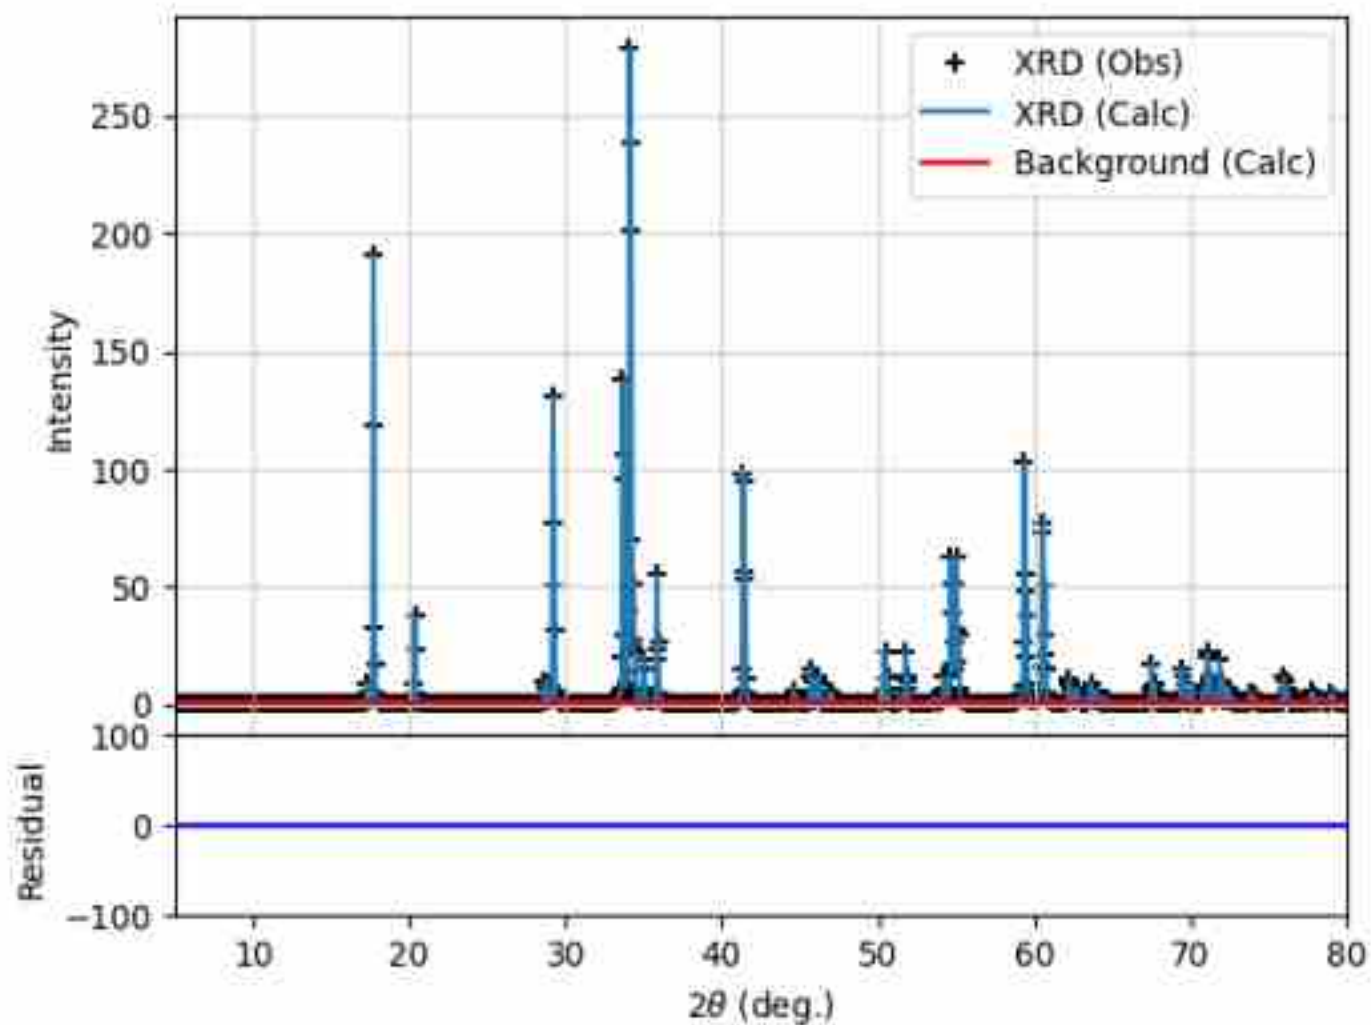

| RMSE before RR | Rwp     | RMSE after RR |
|----------------|---------|---------------|
| 0.029          | 0.00296 | 0.00103       |

# Ge4Se2S2

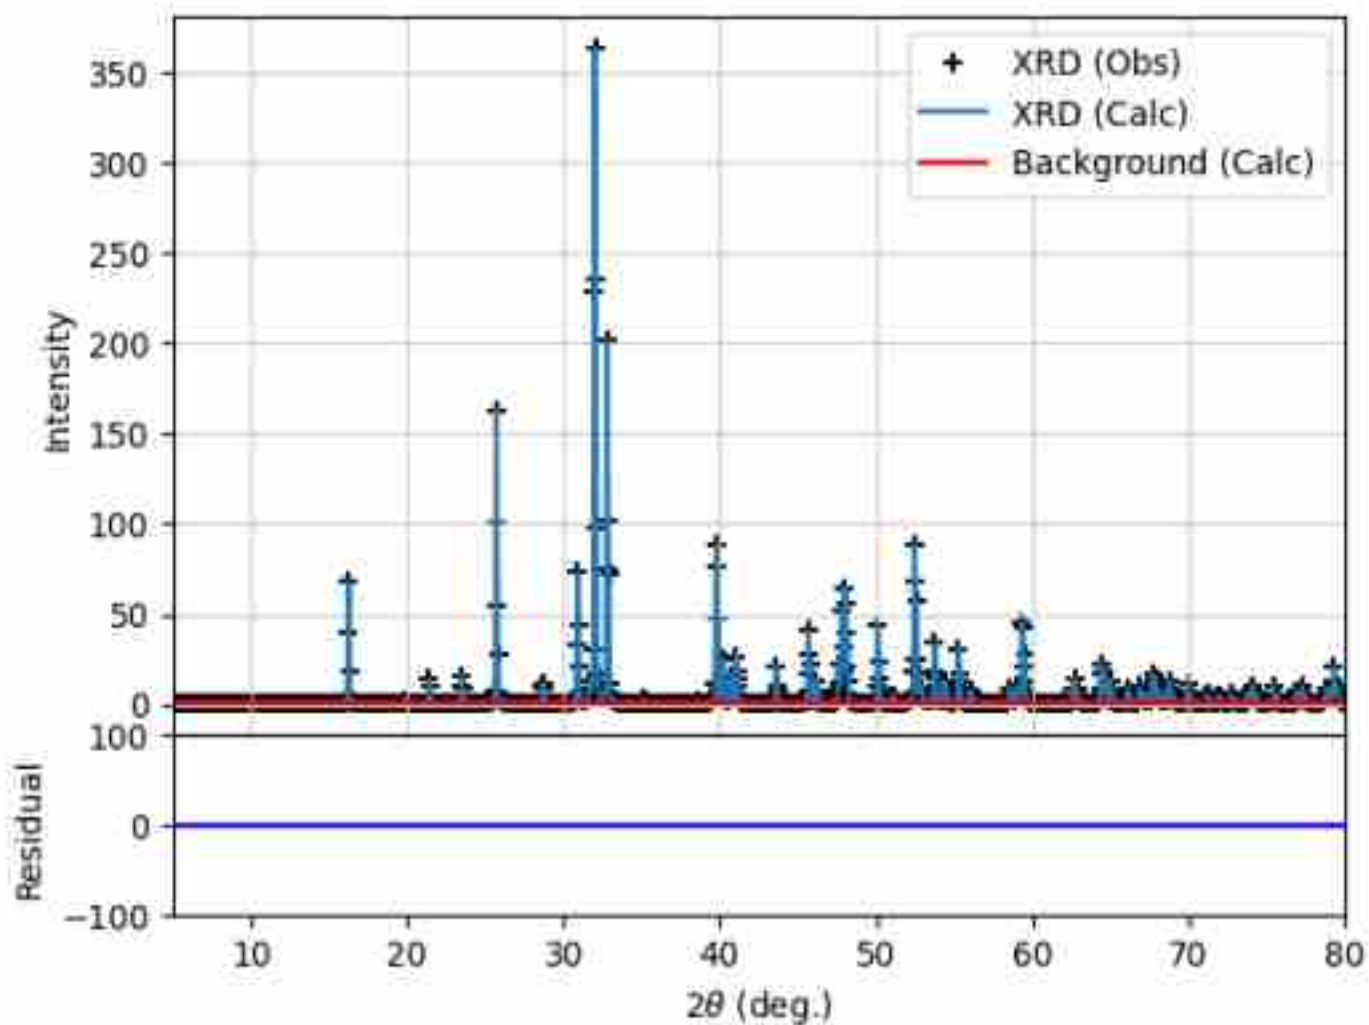

| RMSE before RR | Rwp     | RMSE after RR |
|----------------|---------|---------------|
| 0.029          | 0.00382 | 0.00036       |



# Hf<sub>2</sub>Ge<sub>2</sub>S<sub>2</sub>

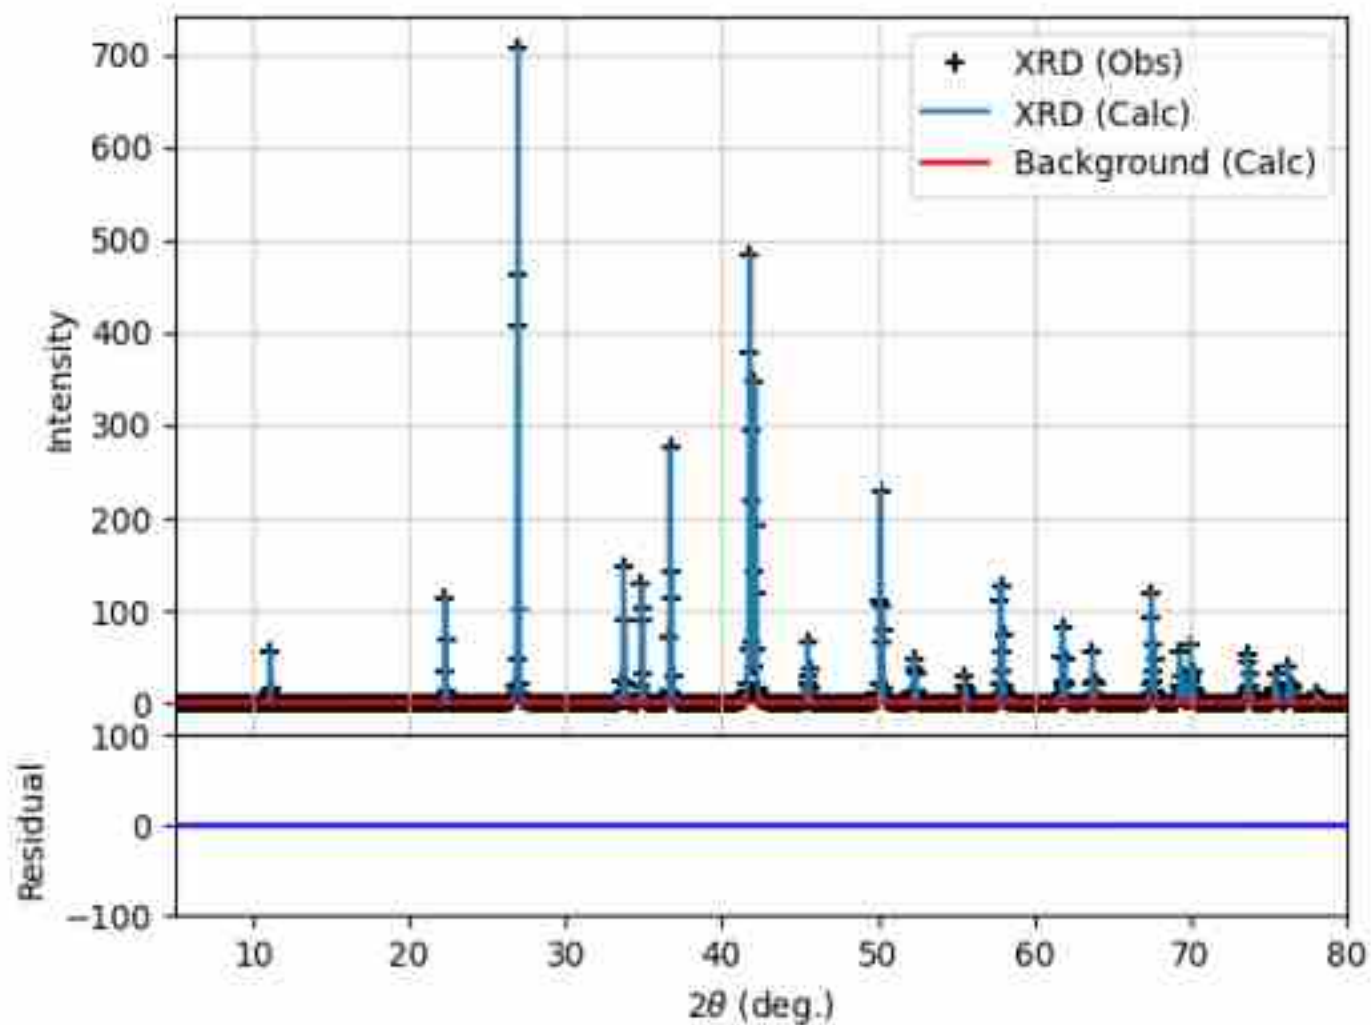

| RMSE before RR | Rwp     | RMSE after RR |
|----------------|---------|---------------|
| 0.029          | 0.15614 | 0.00358       |

# Ho<sub>2</sub>Mg<sub>2</sub>Mo<sub>4</sub>O<sub>12</sub>

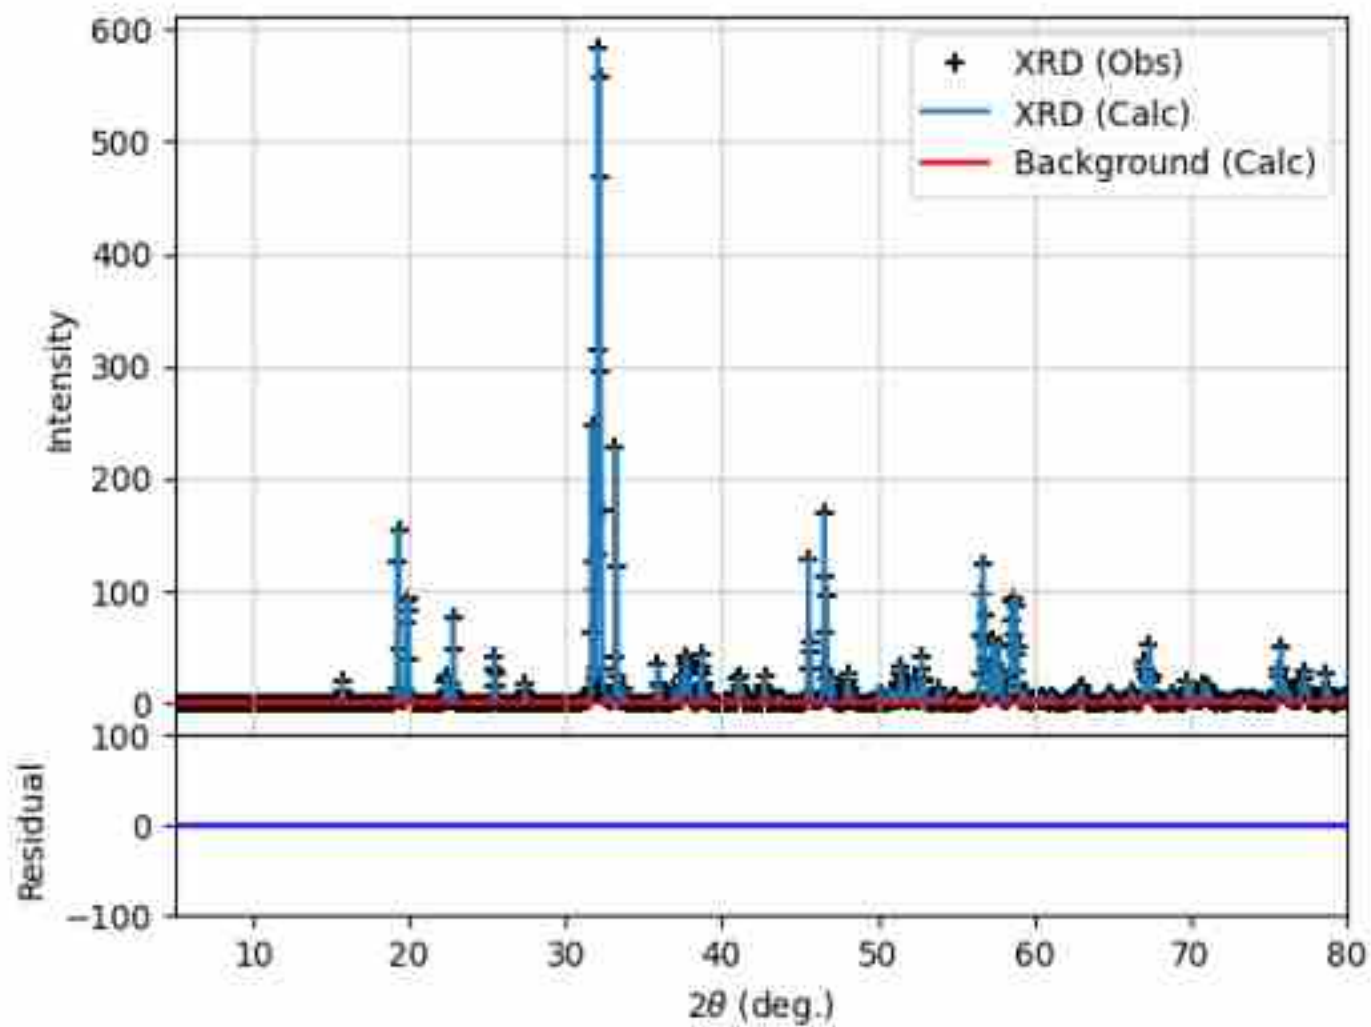

| RMSE before RR | Rwp    | RMSE after RR |
|----------------|--------|---------------|
| 0.029          | 0.0032 | 0.0009        |

# Ho<sub>4</sub>Co<sub>2</sub>Ge<sub>4</sub>

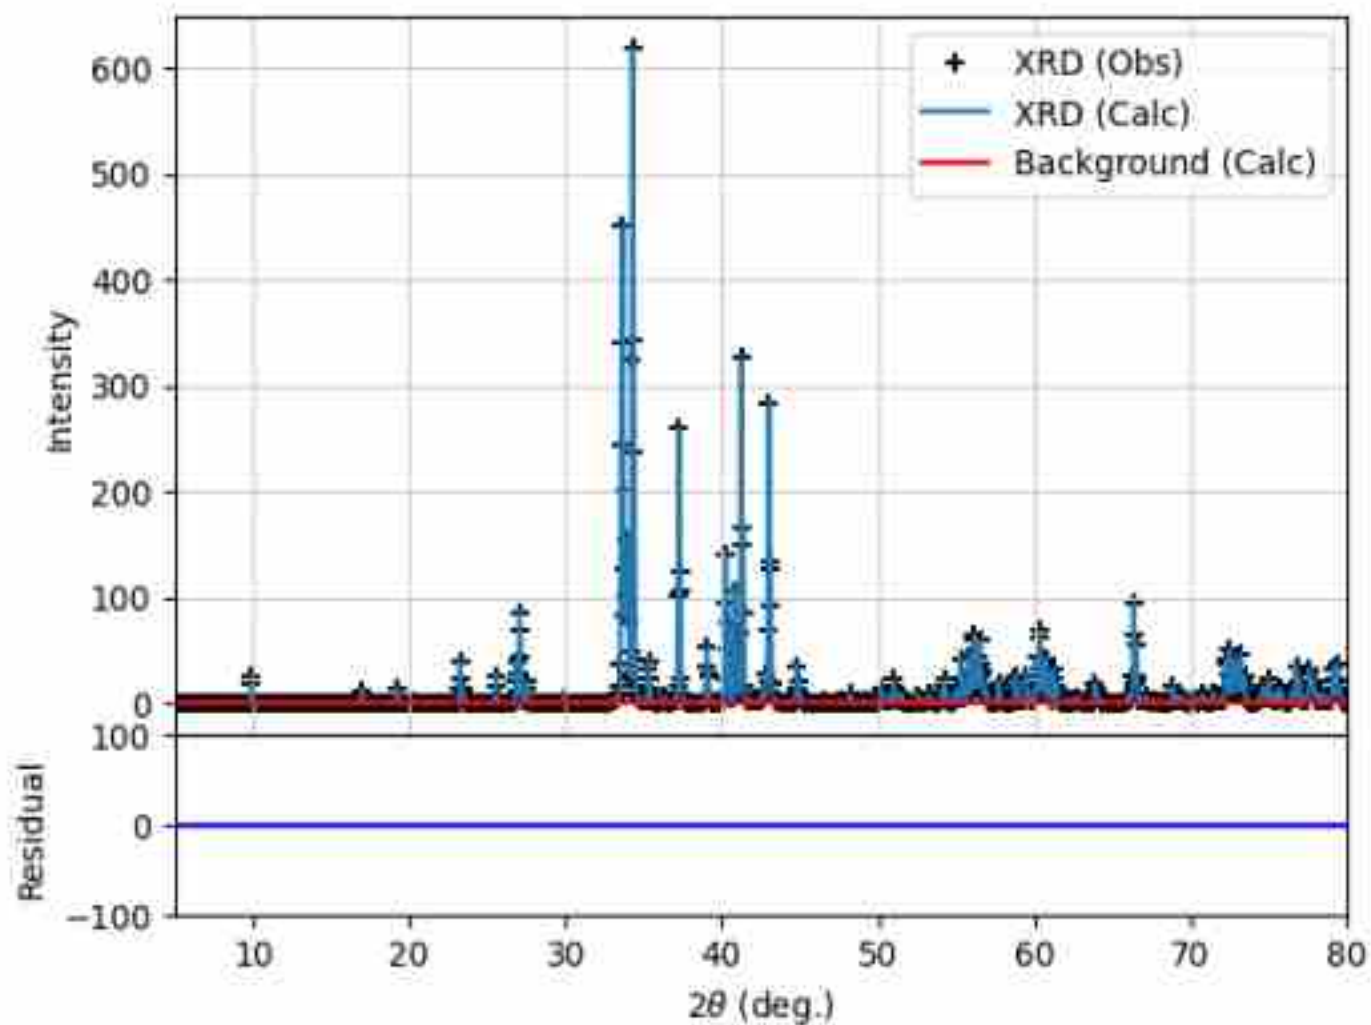

| RMSE before RR | Rwp     | RMSE after RR |
|----------------|---------|---------------|
| 0.029          | 0.00291 | 0.00023       |

# K1Li1Zn3O4

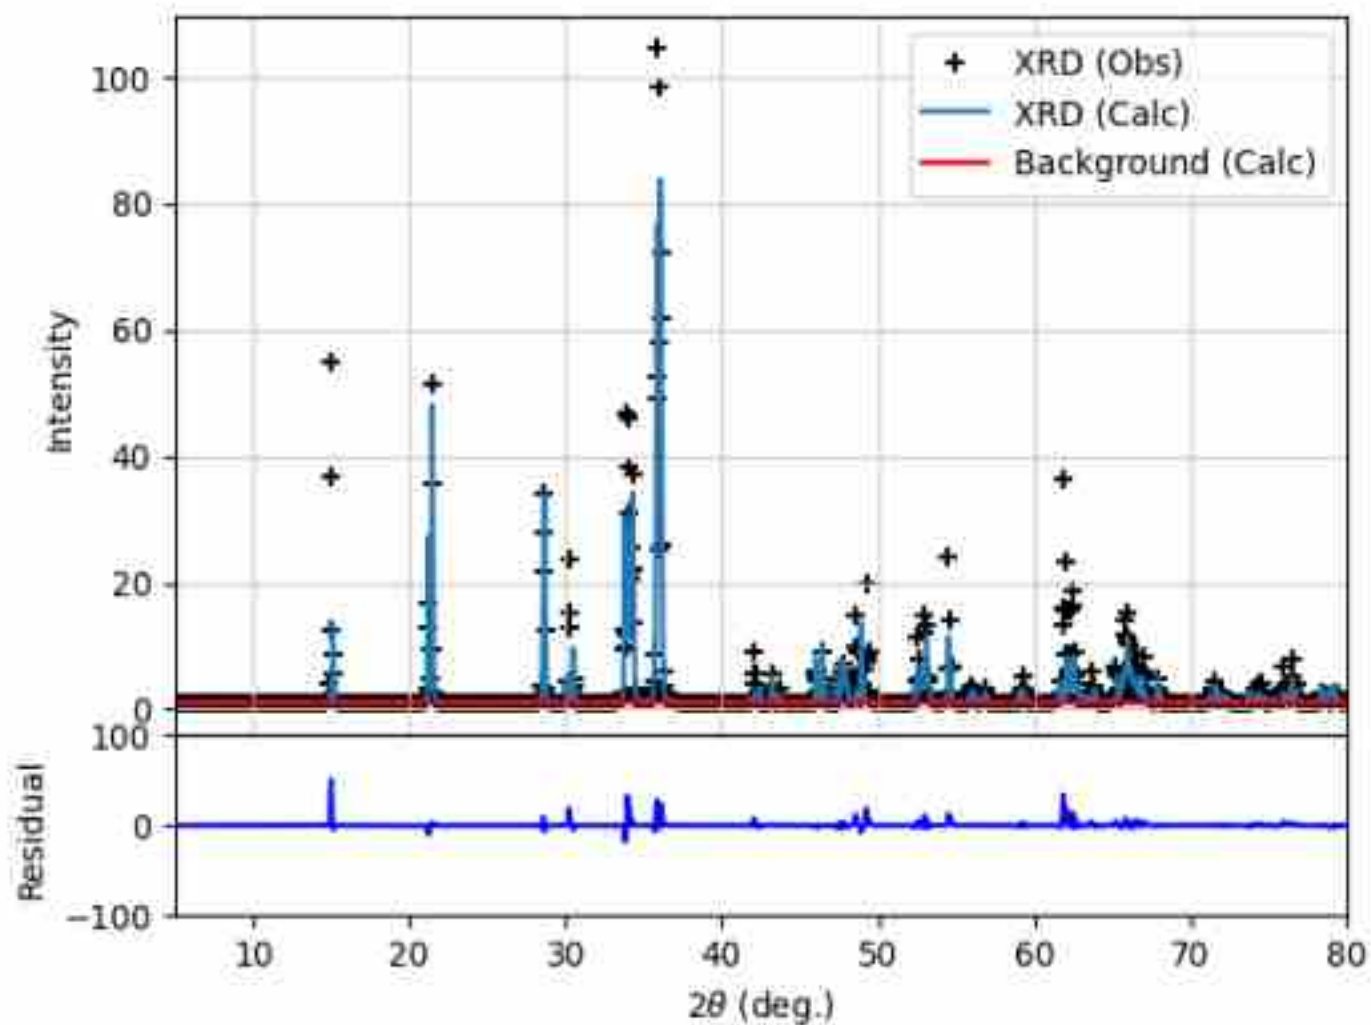

| RMSE before RR | Rwp      | RMSE after RR |
|----------------|----------|---------------|
| 0.029          | 44.23921 | 0.35376       |

# K<sub>2</sub>Nb<sub>2</sub>Ag<sub>4</sub>Se<sub>8</sub>

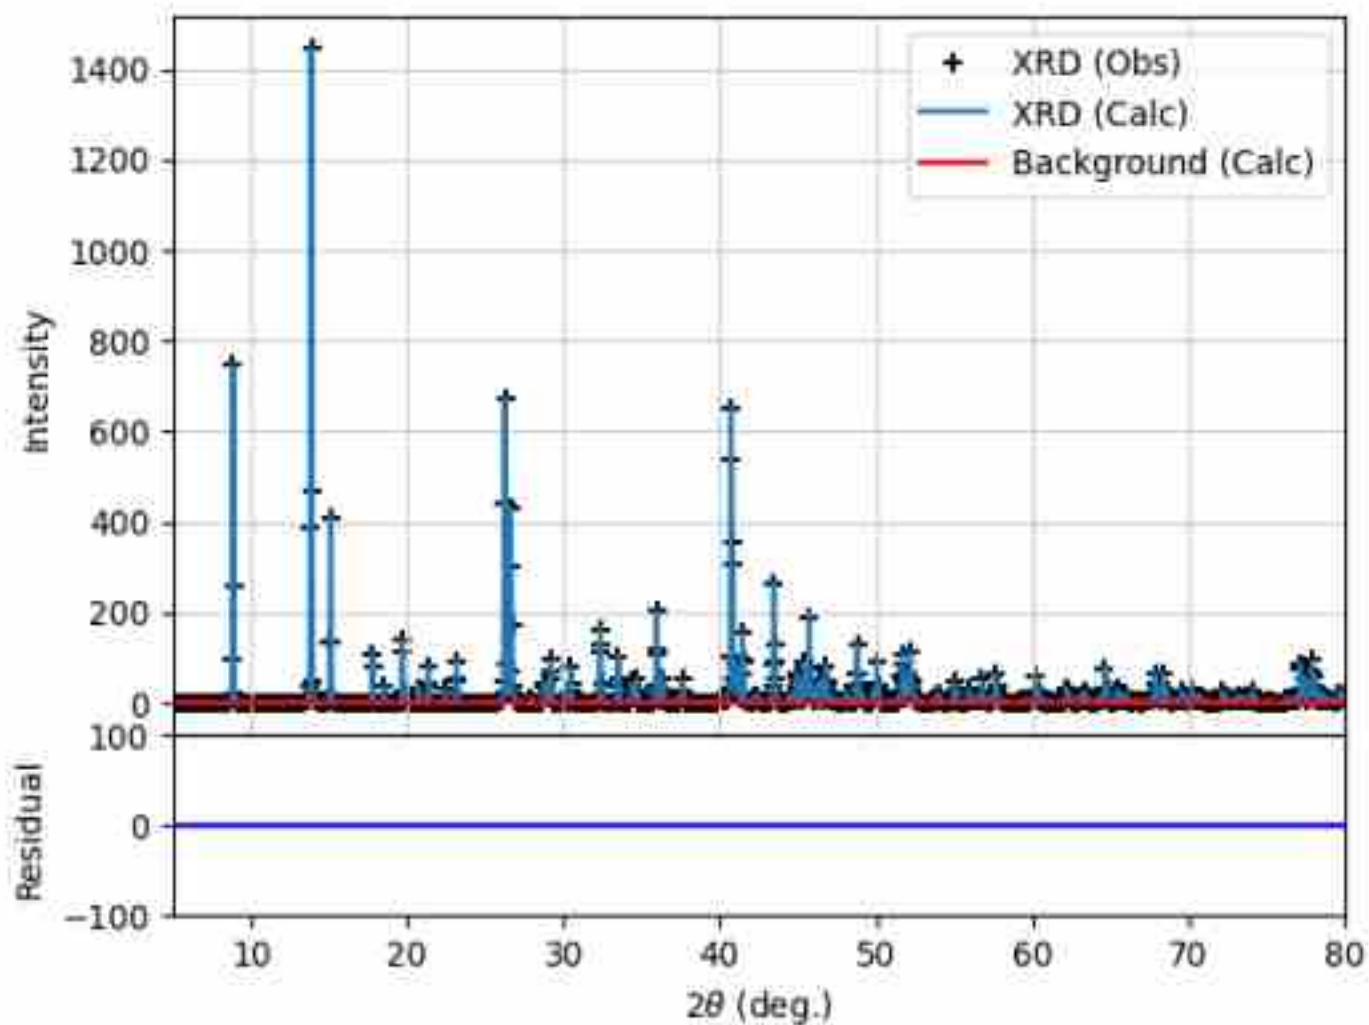

| RMSE before RR | Rwp     | RMSE after RR |
|----------------|---------|---------------|
| 0.029          | 0.00343 | 0.00059       |

# K4Li2Al2H12

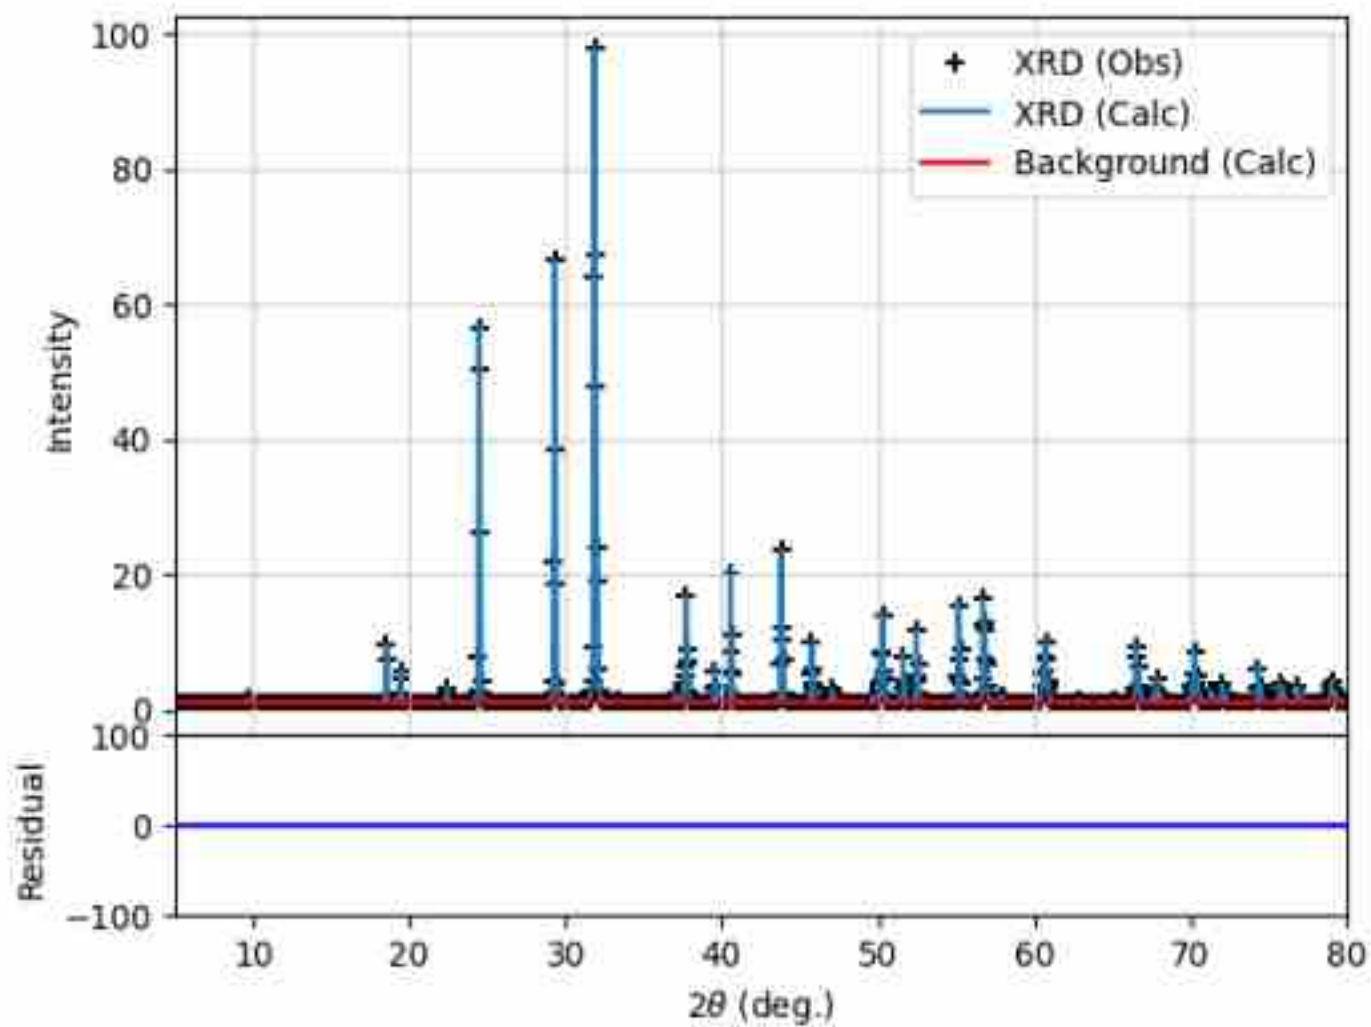

| RMSE before RR | Rwp     | RMSE after RR |
|----------------|---------|---------------|
| 0.029          | 0.12758 | 0.2175        |

# K6Tl2Au10

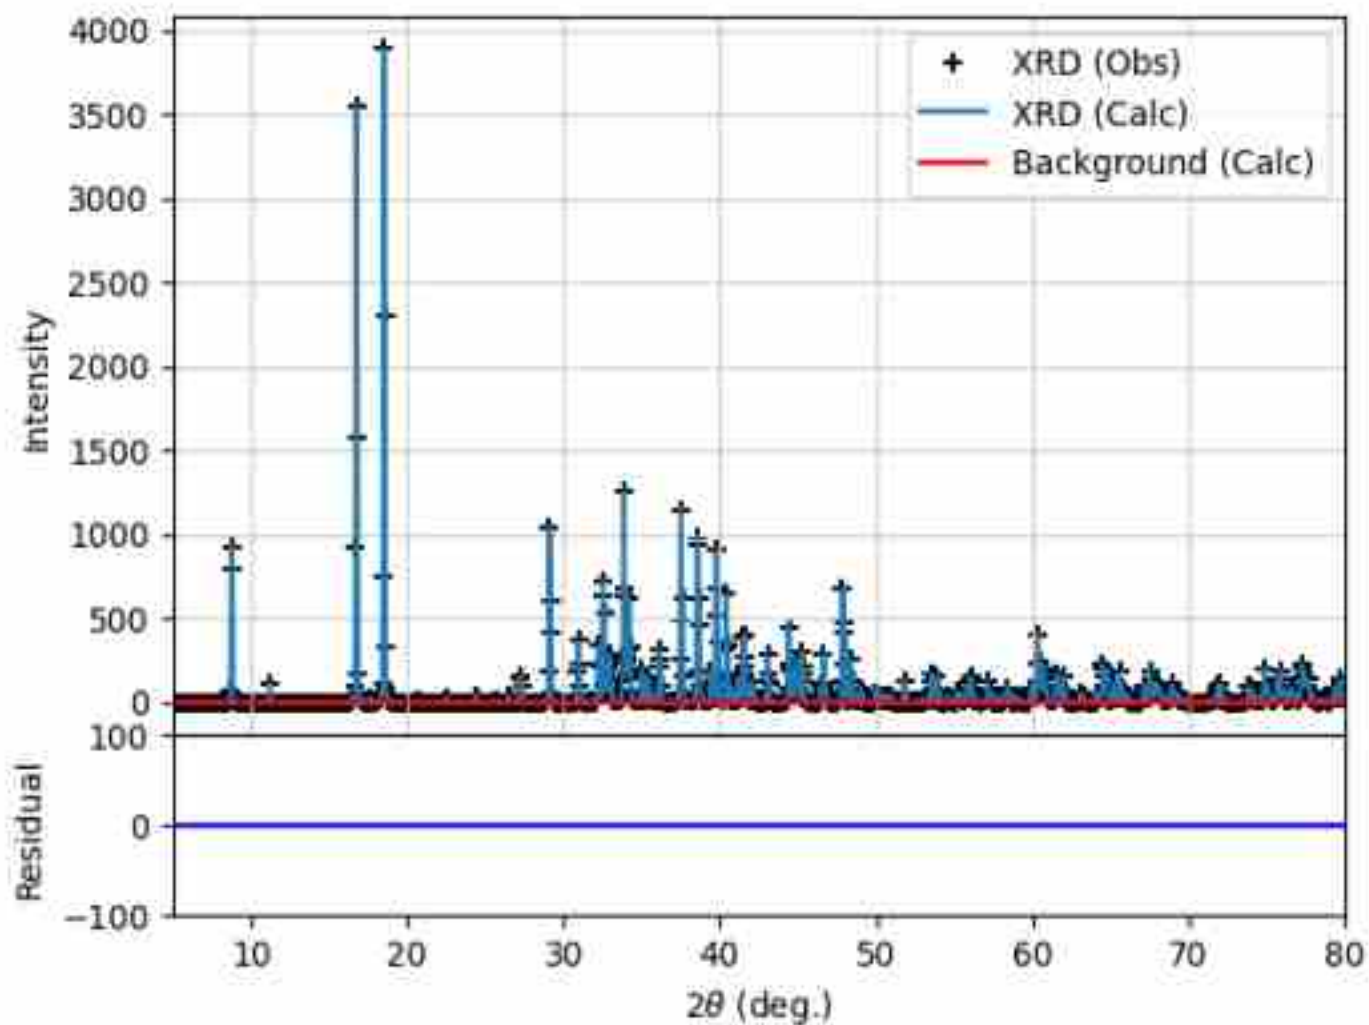

| RMSE before RR | Rwp     | RMSE after RR |
|----------------|---------|---------------|
| 0.029          | 0.00437 | 0.00058       |

# Li1Ge3Sb1Te5

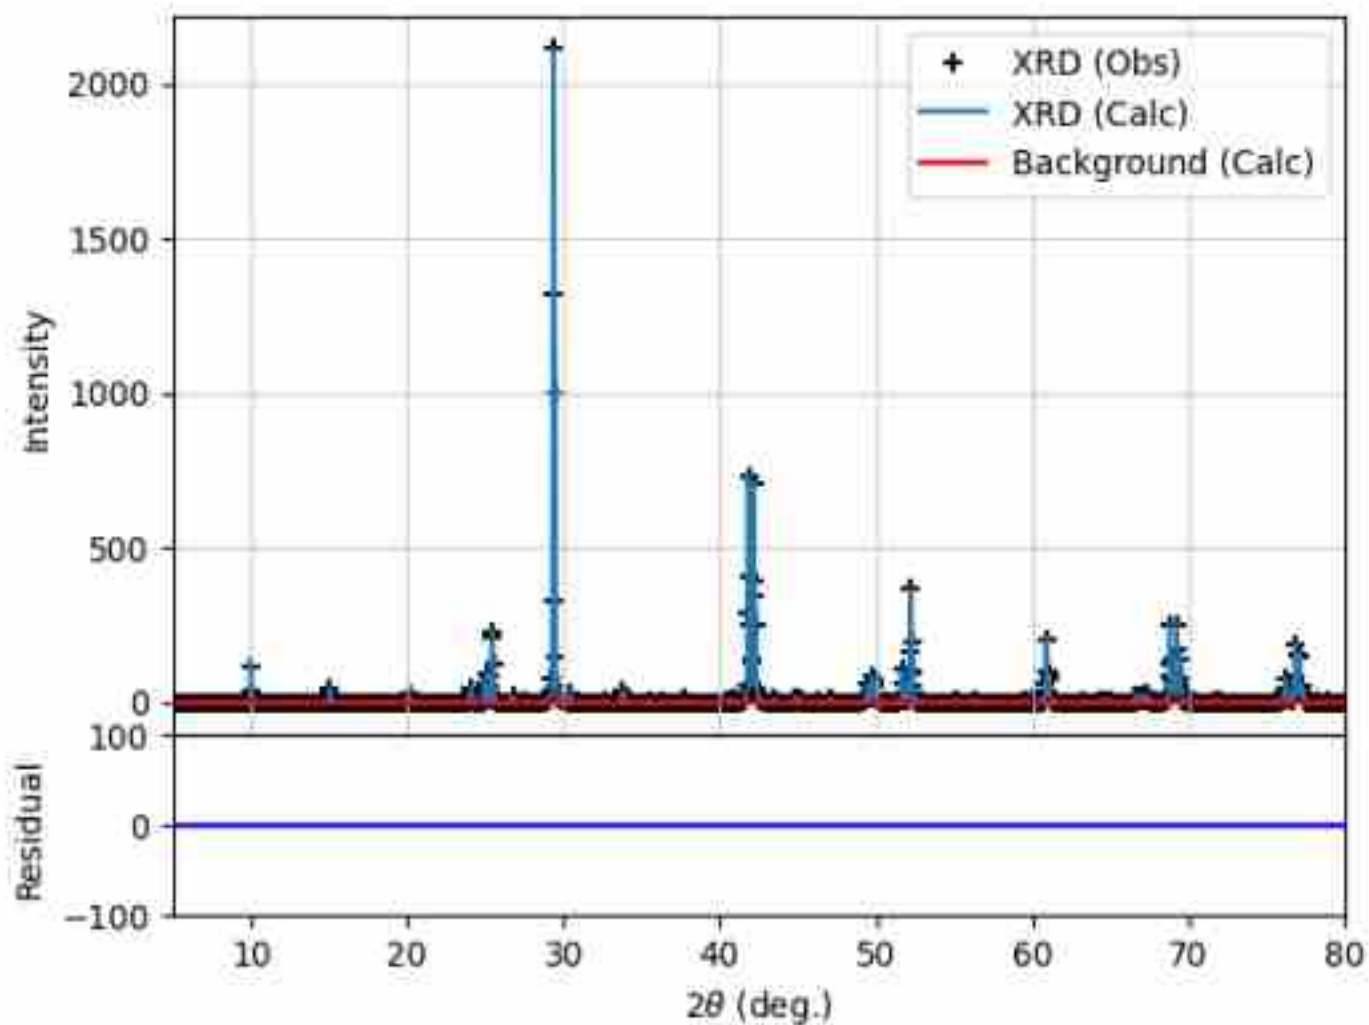

| RMSE before RR | Rwp     | RMSE after RR |
|----------------|---------|---------------|
| 0.029          | 0.00623 | 0.00275       |



# Li<sub>2</sub>Cu<sub>10</sub>O<sub>2</sub>

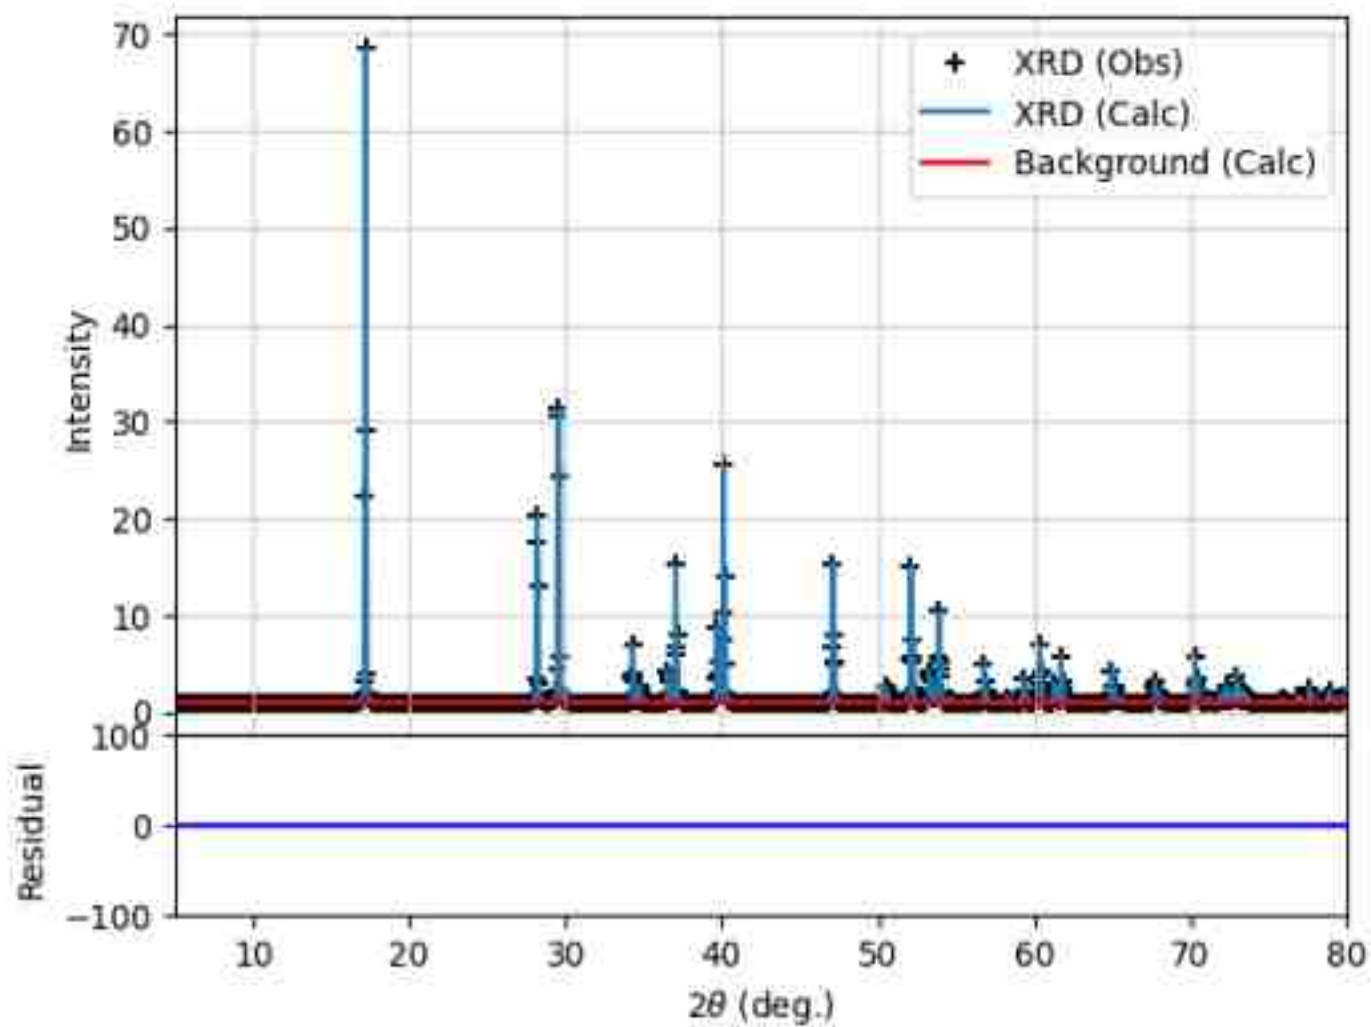

| RMSE before RR | Rwp     | RMSE after RR |
|----------------|---------|---------------|
| 0.029          | 0.00216 | 0.00103       |

# Li<sub>2</sub>Mg<sub>2</sub>

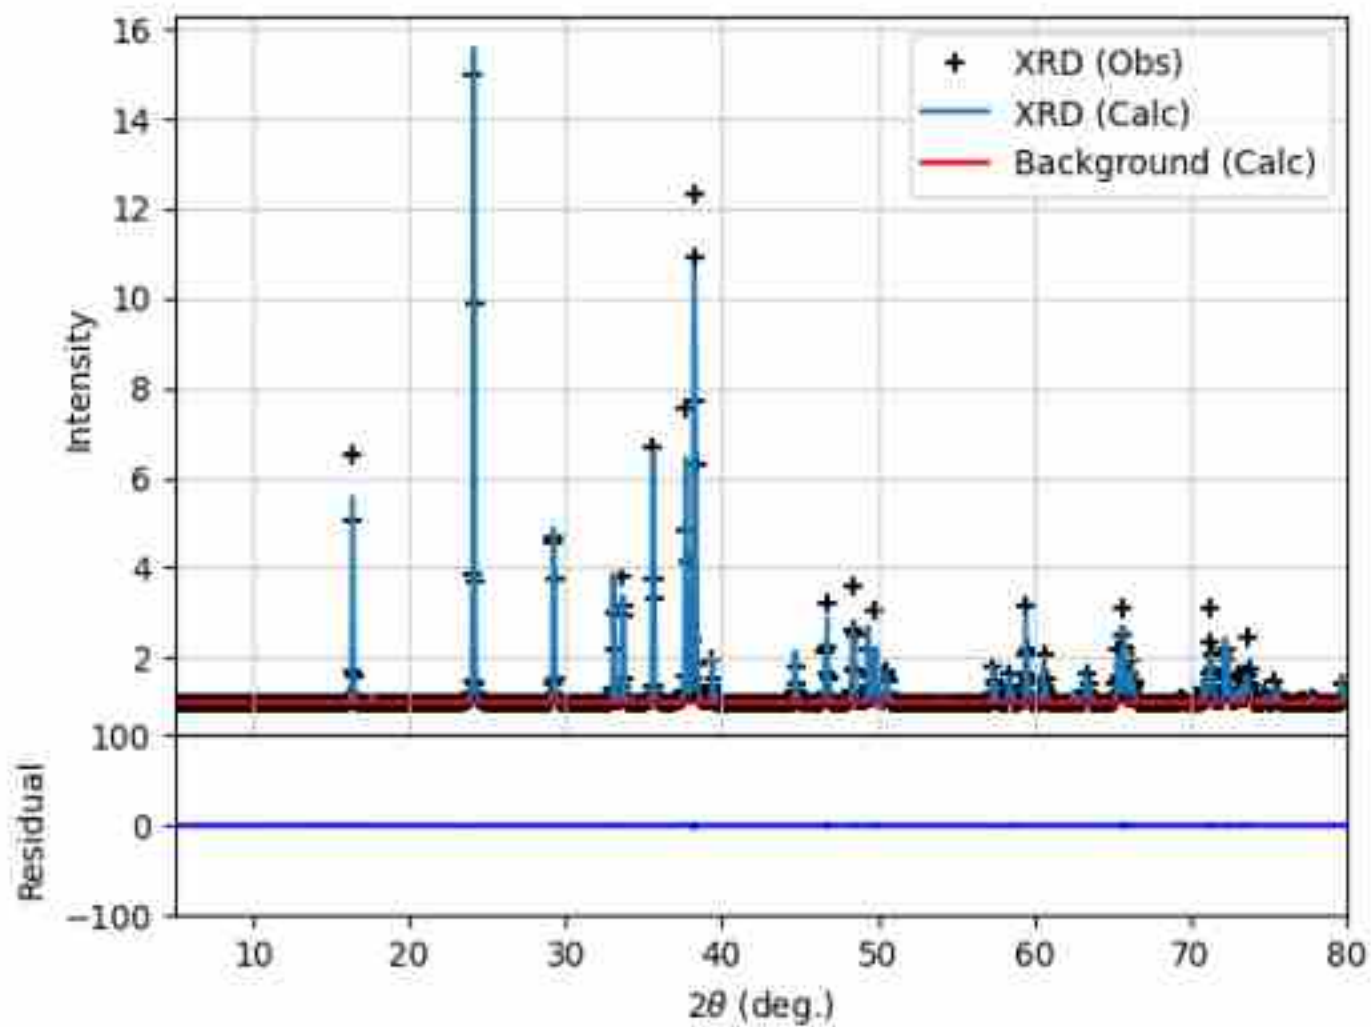

| RMSE before RR | Rwp      | RMSE after RR |
|----------------|----------|---------------|
| 0.029          | 11.11731 | 0.03039       |

# Li<sub>2</sub>V<sub>1</sub>Ni<sub>1</sub>O<sub>4</sub>

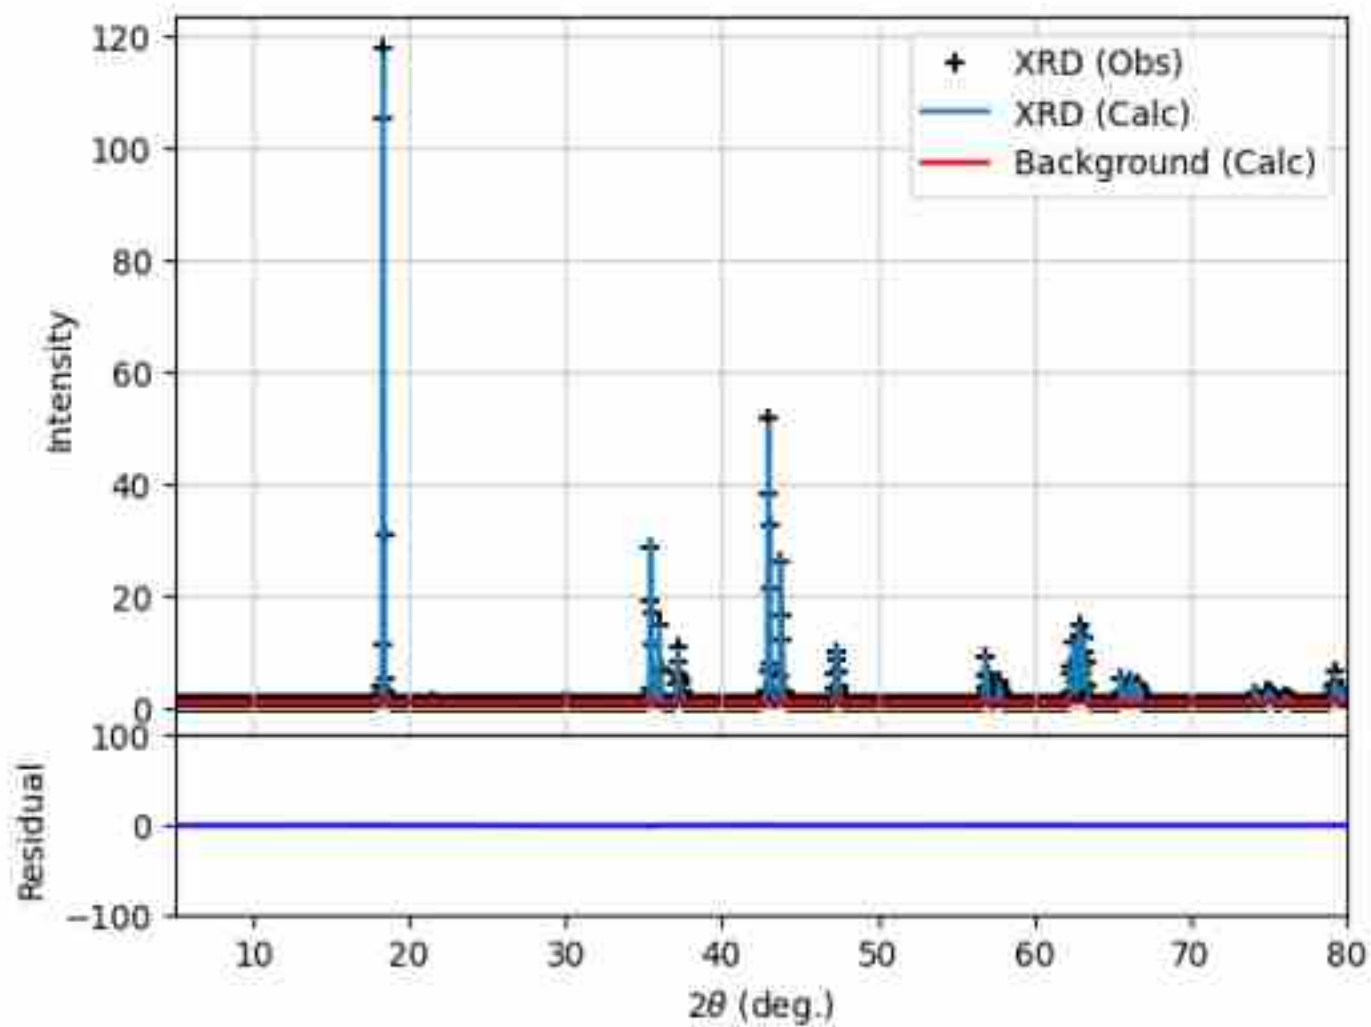

| RMSE before RR | Rwp     | RMSE after RR |
|----------------|---------|---------------|
| 0.029          | 2.48813 | 0.0288        |

# Li<sub>4</sub>Cr<sub>4</sub>O<sub>8</sub>

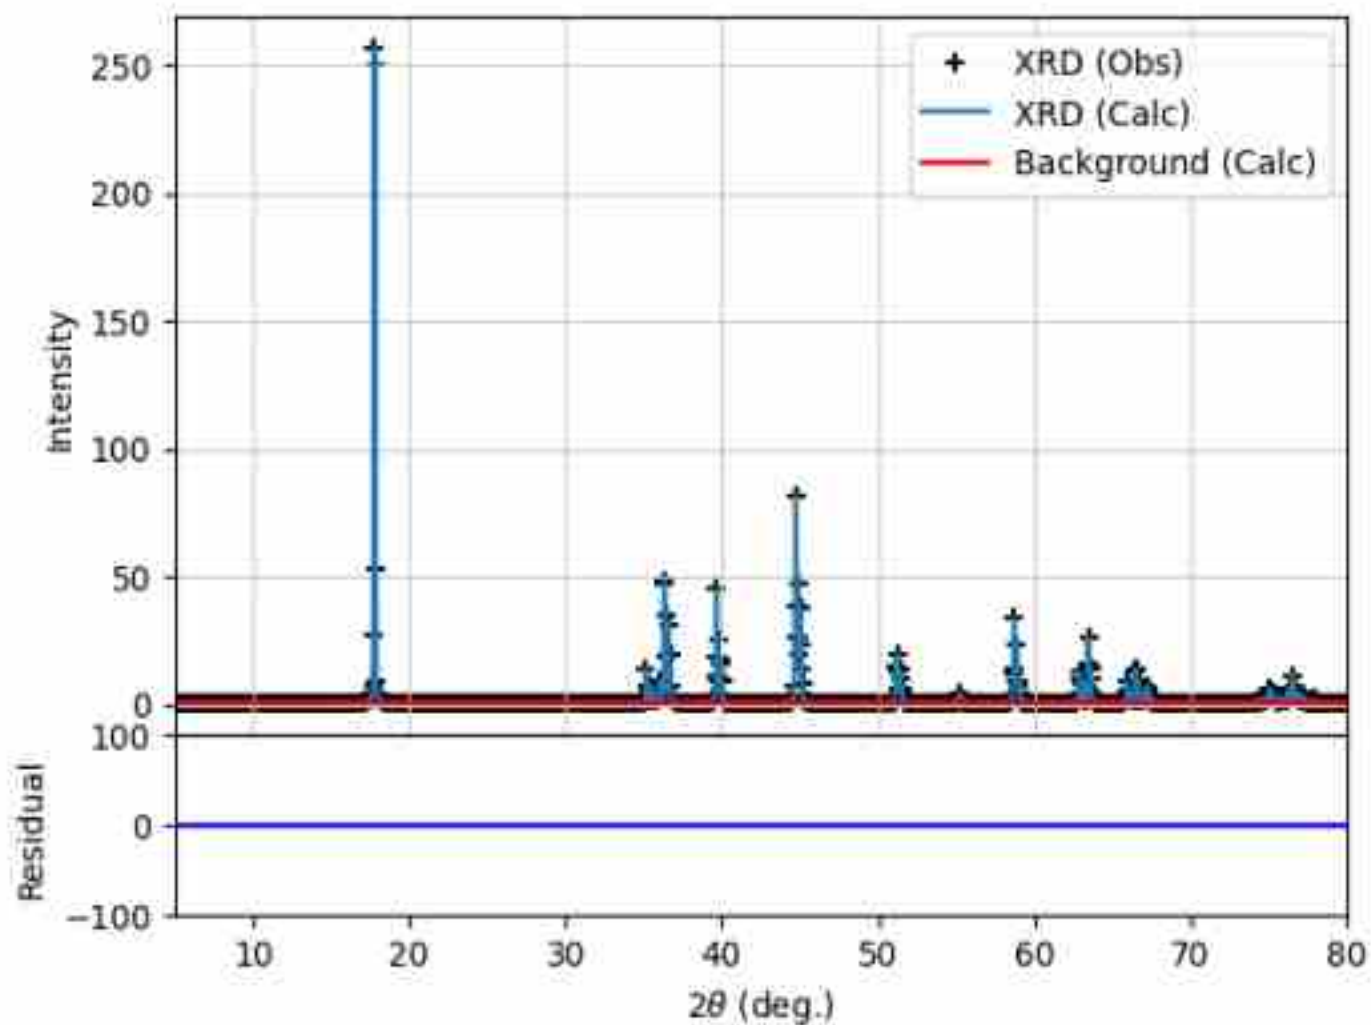

| RMSE before RR | Rwp     | RMSE after RR |
|----------------|---------|---------------|
| 0.029          | 0.00214 | 0.00106       |

# Li<sub>4</sub>Fe<sub>3</sub>Sb<sub>1</sub>O<sub>8</sub>

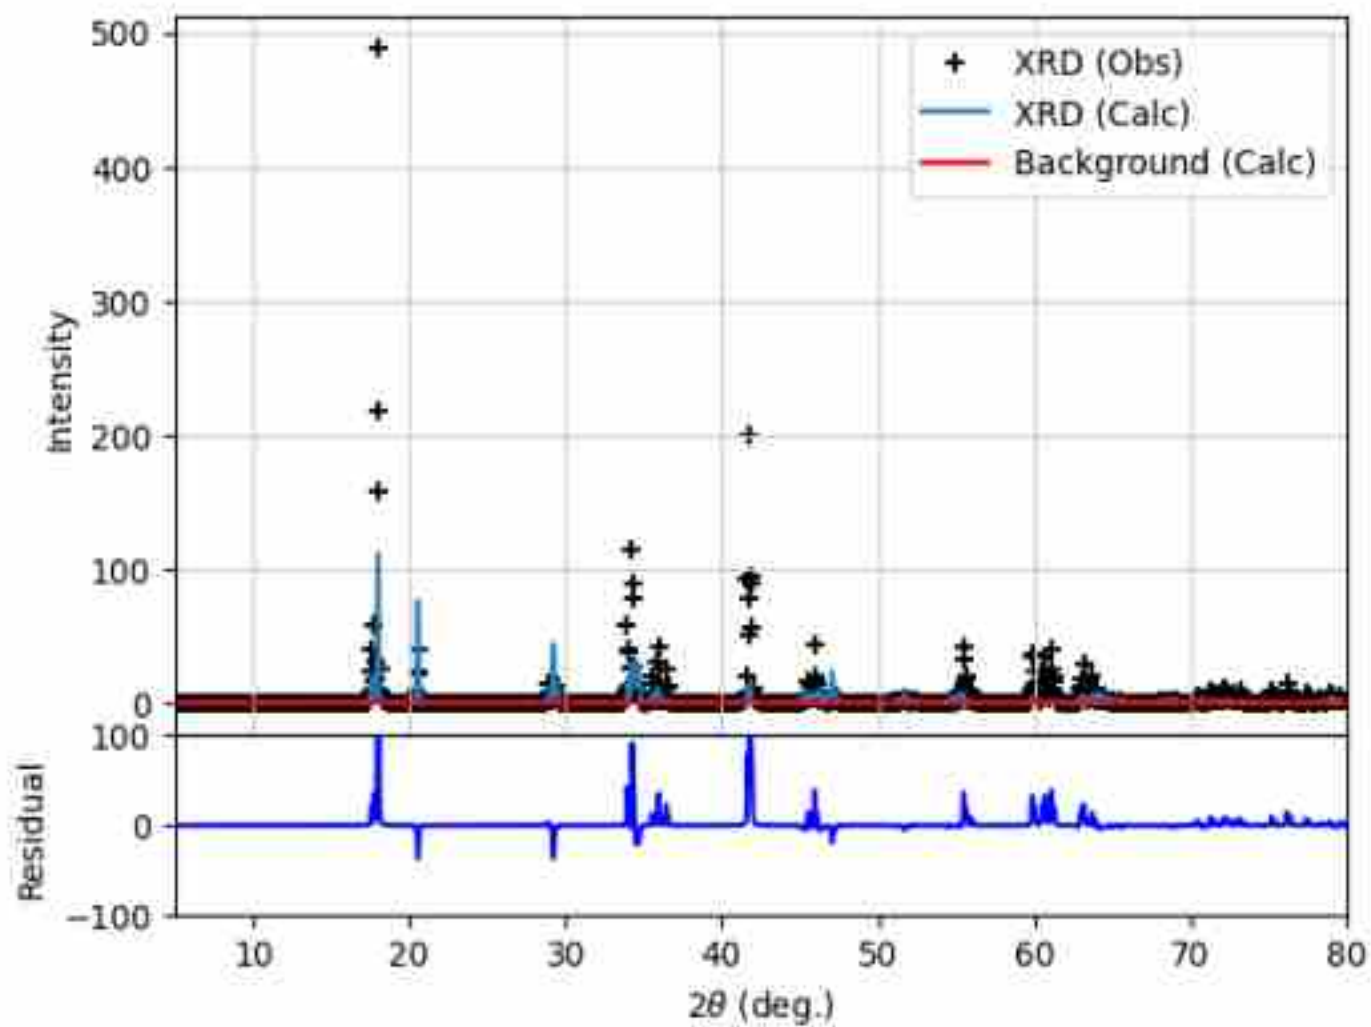

| RMSE before RR | Rwp      | RMSE after RR |
|----------------|----------|---------------|
| 0.029          | 74.23023 | None          |

# Li<sub>4</sub>Mn<sub>2</sub>Te<sub>1</sub>W<sub>1</sub>O<sub>12</sub>

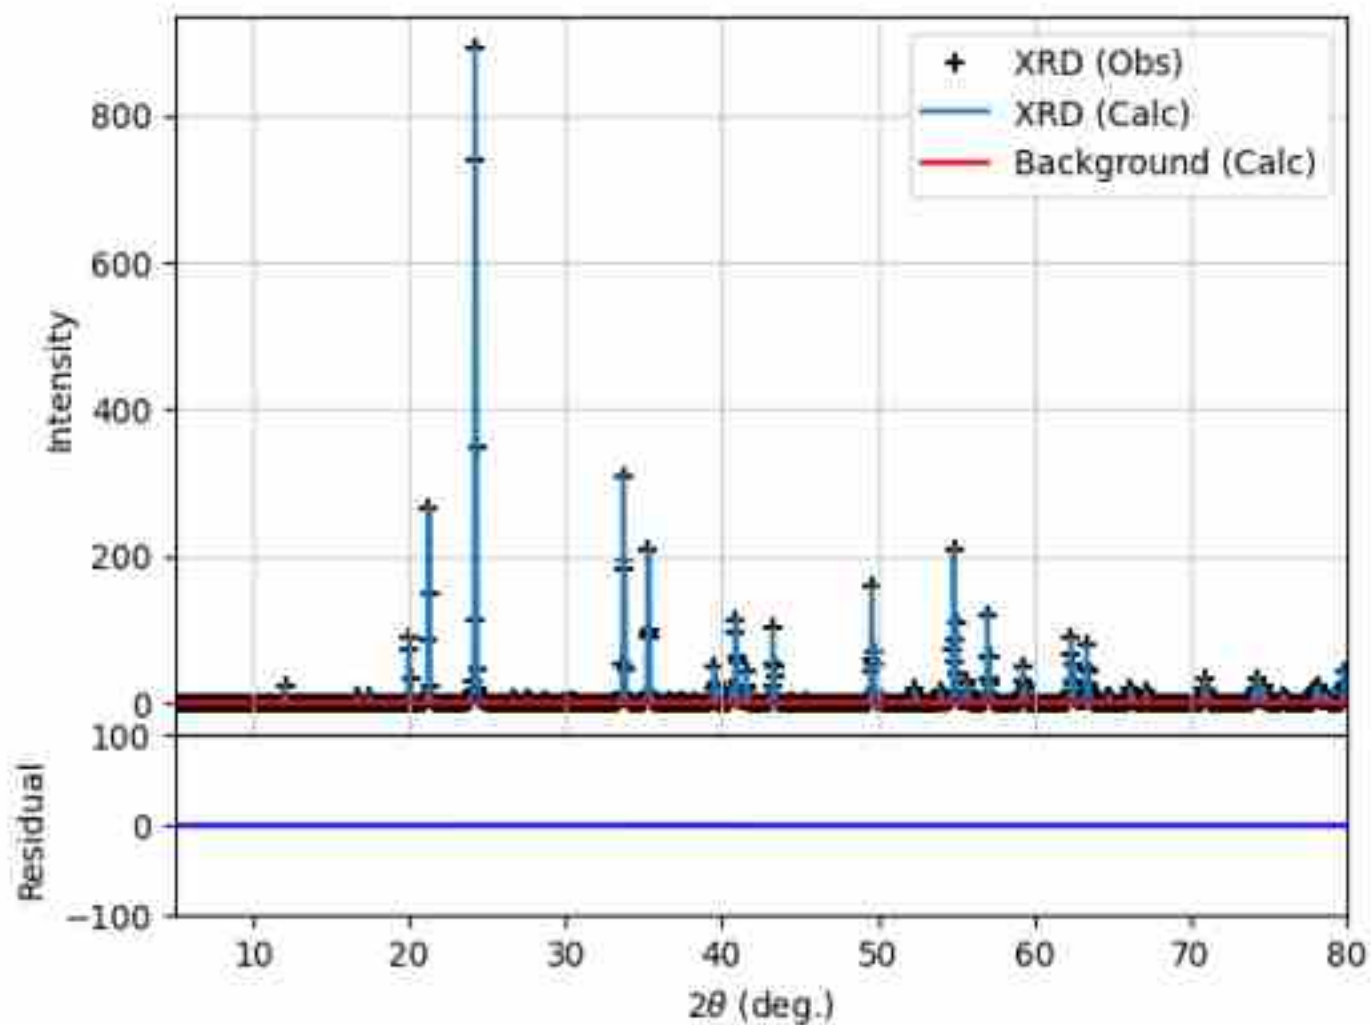

| RMSE before RR | Rwp     | RMSE after RR |
|----------------|---------|---------------|
| 0.029          | 0.24091 | 0.01635       |

# Li<sub>4</sub>V<sub>4</sub>F<sub>12</sub>

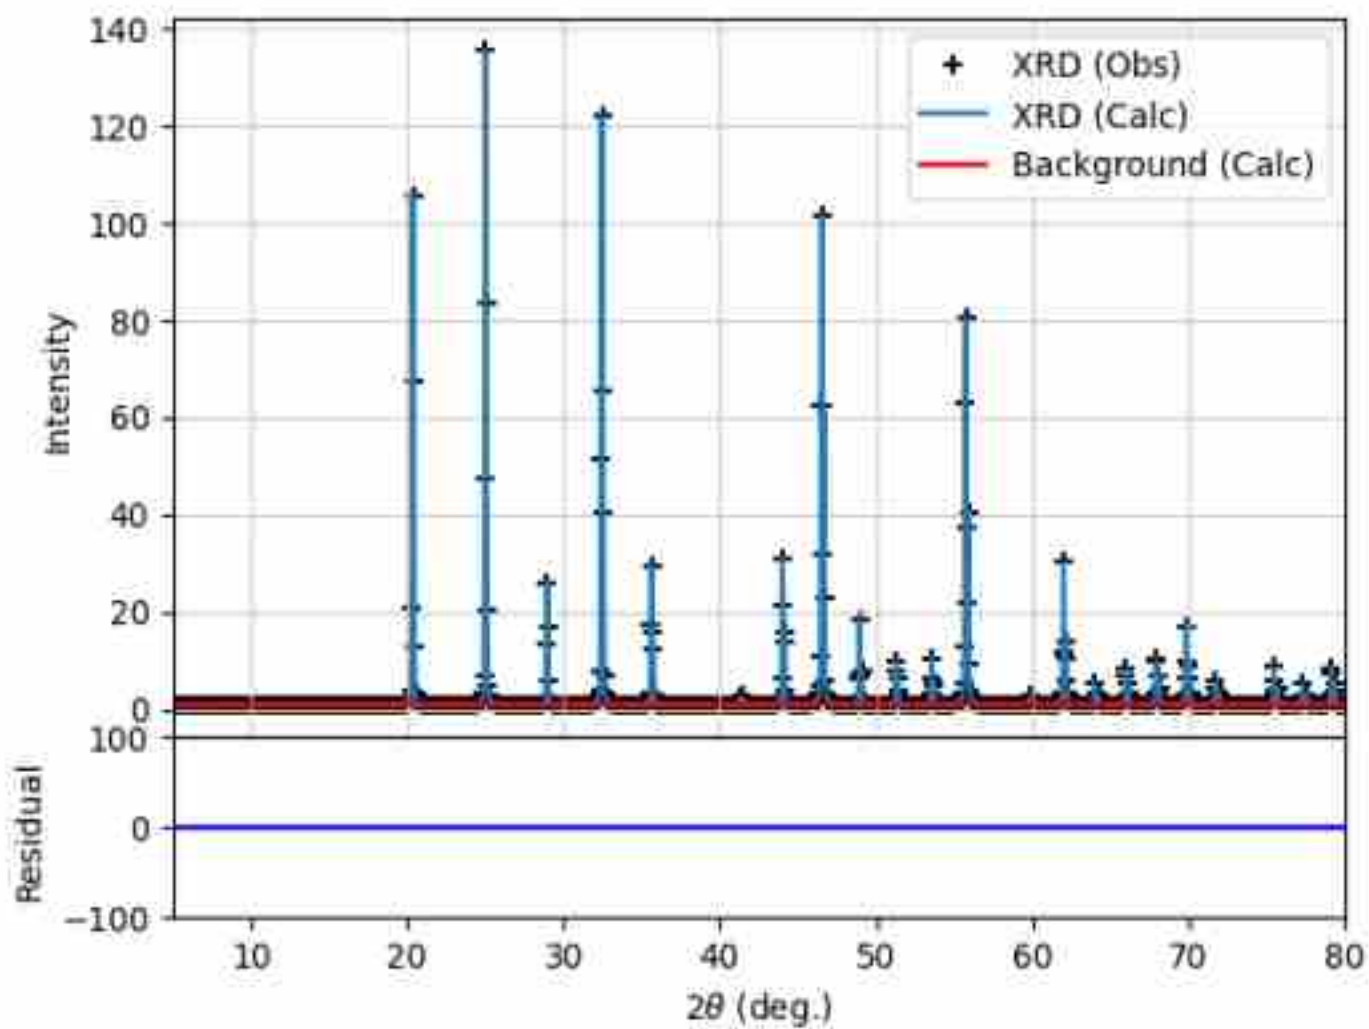

| RMSE before RR | Rwp     | RMSE after RR |
|----------------|---------|---------------|
| 0.029          | 0.00342 | 0.00134       |

# Mg<sub>3</sub>V<sub>2</sub>O<sub>8</sub>

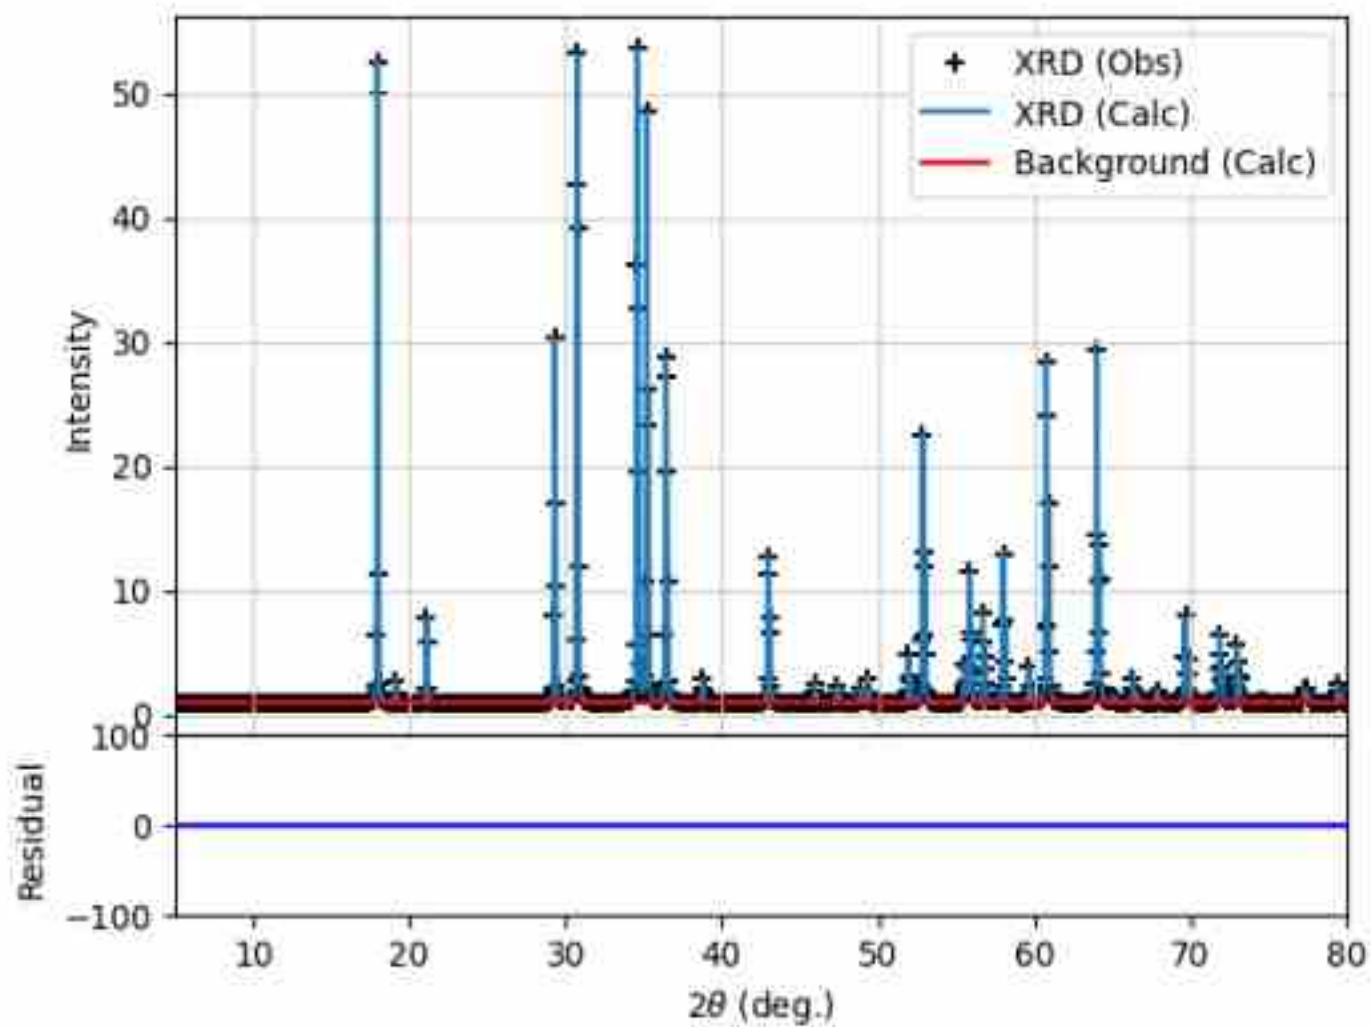

| RMSE before RR | Rwp     | RMSE after RR |
|----------------|---------|---------------|
| 0.029          | 0.00217 | 0.00045       |



# Mg<sub>4</sub>Cu<sub>4</sub>P<sub>4</sub>

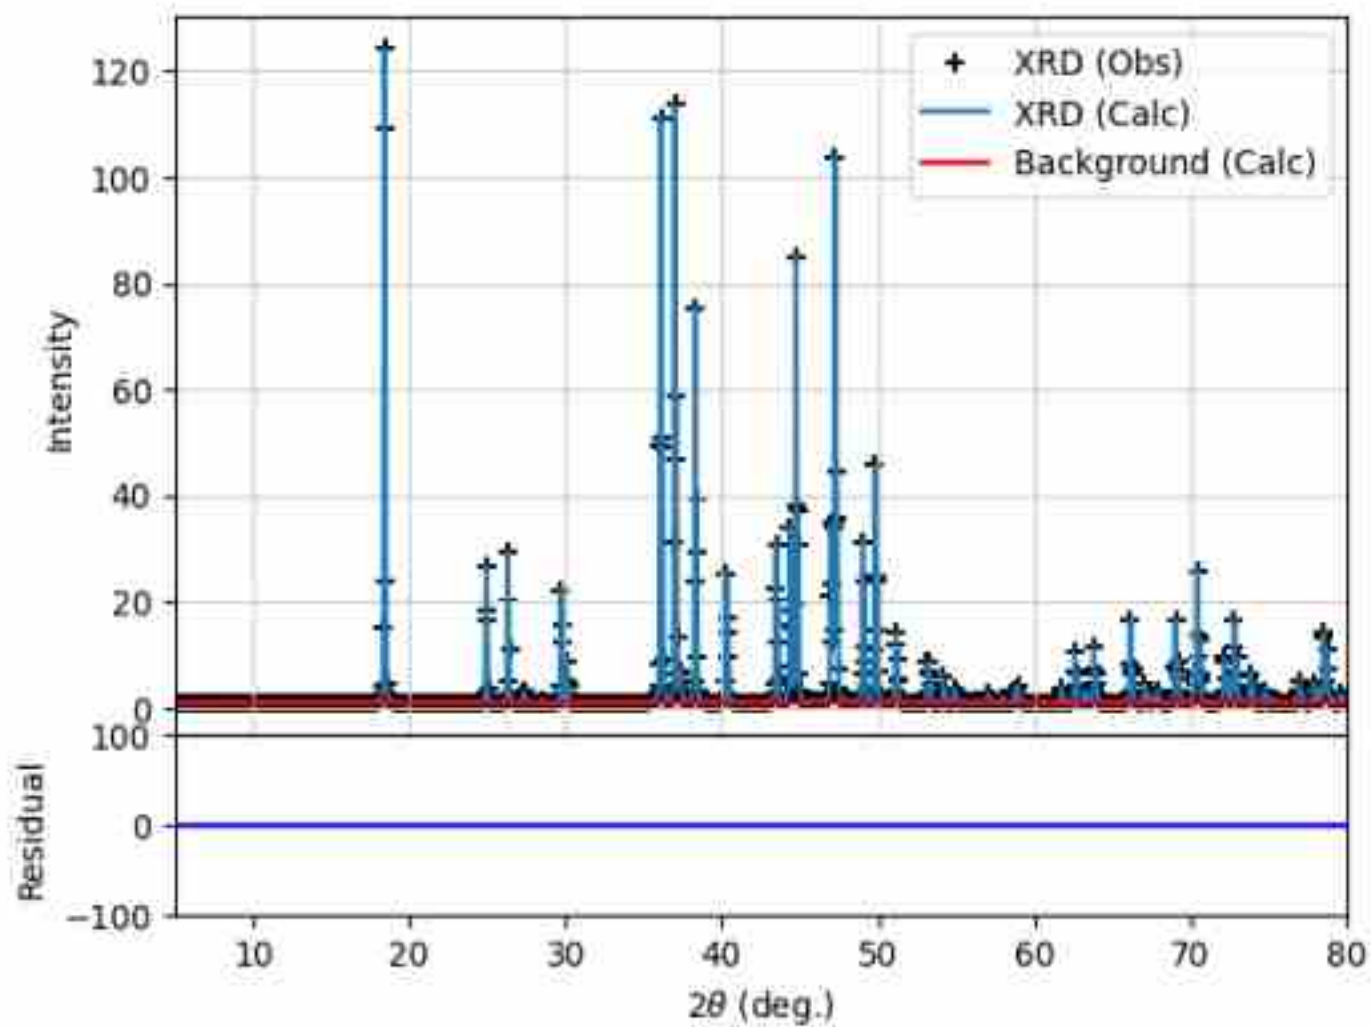

| RMSE before RR | Rwp     | RMSE after RR |
|----------------|---------|---------------|
| 0.029          | 0.00332 | 0.00055       |

# Mn1Cd1Cu4Sn2Se8

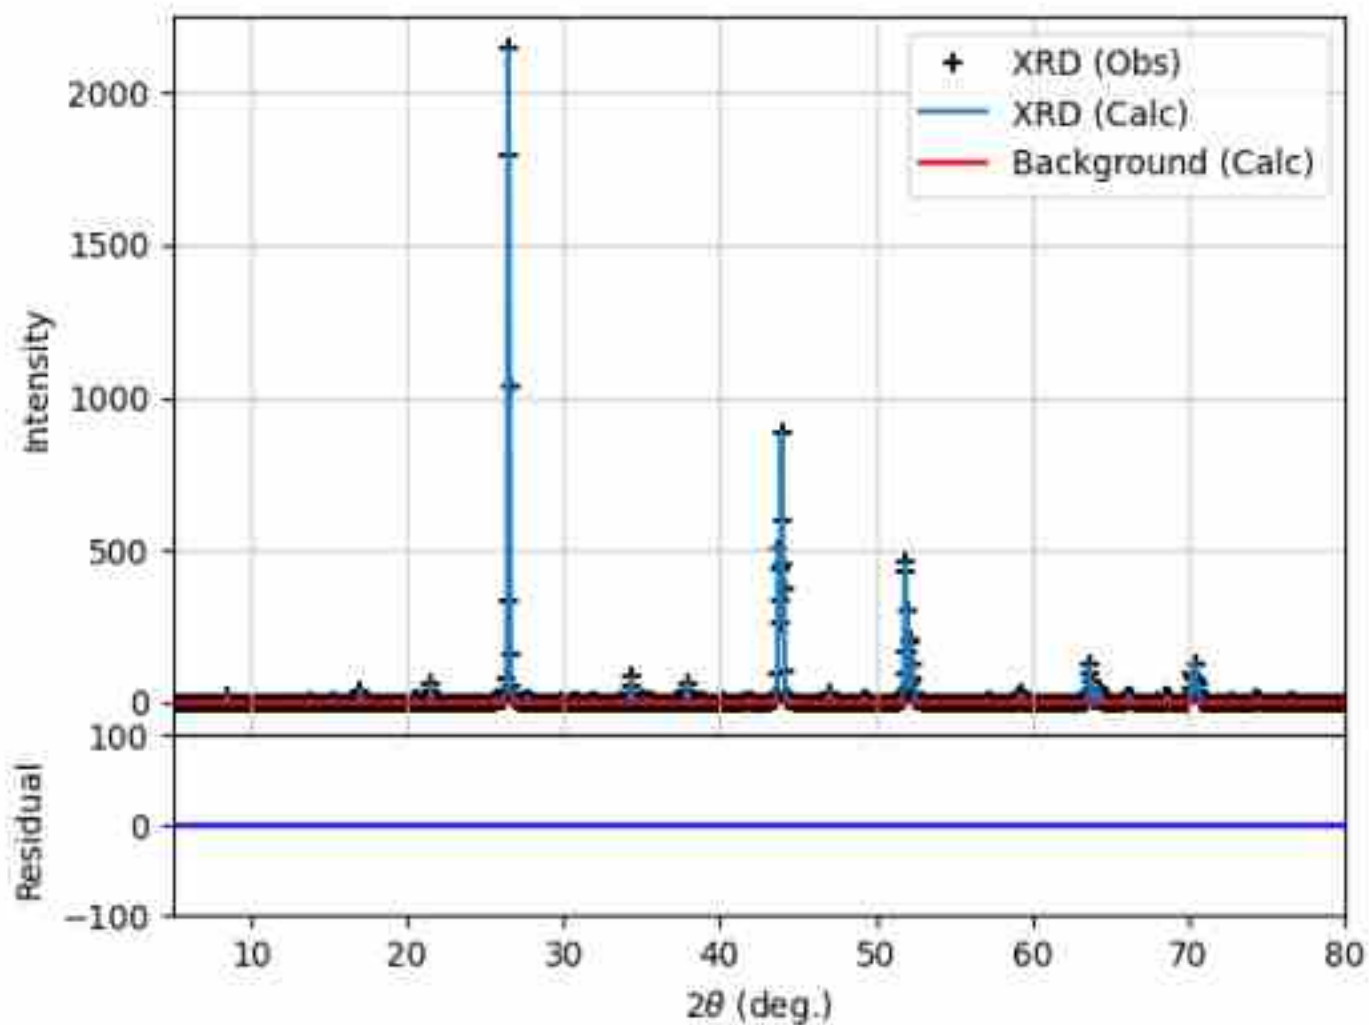

| RMSE before RR | Rwp     | RMSE after RR |
|----------------|---------|---------------|
| 0.029          | 0.00205 | 0.00019       |

# Mn1Tl1Rh2

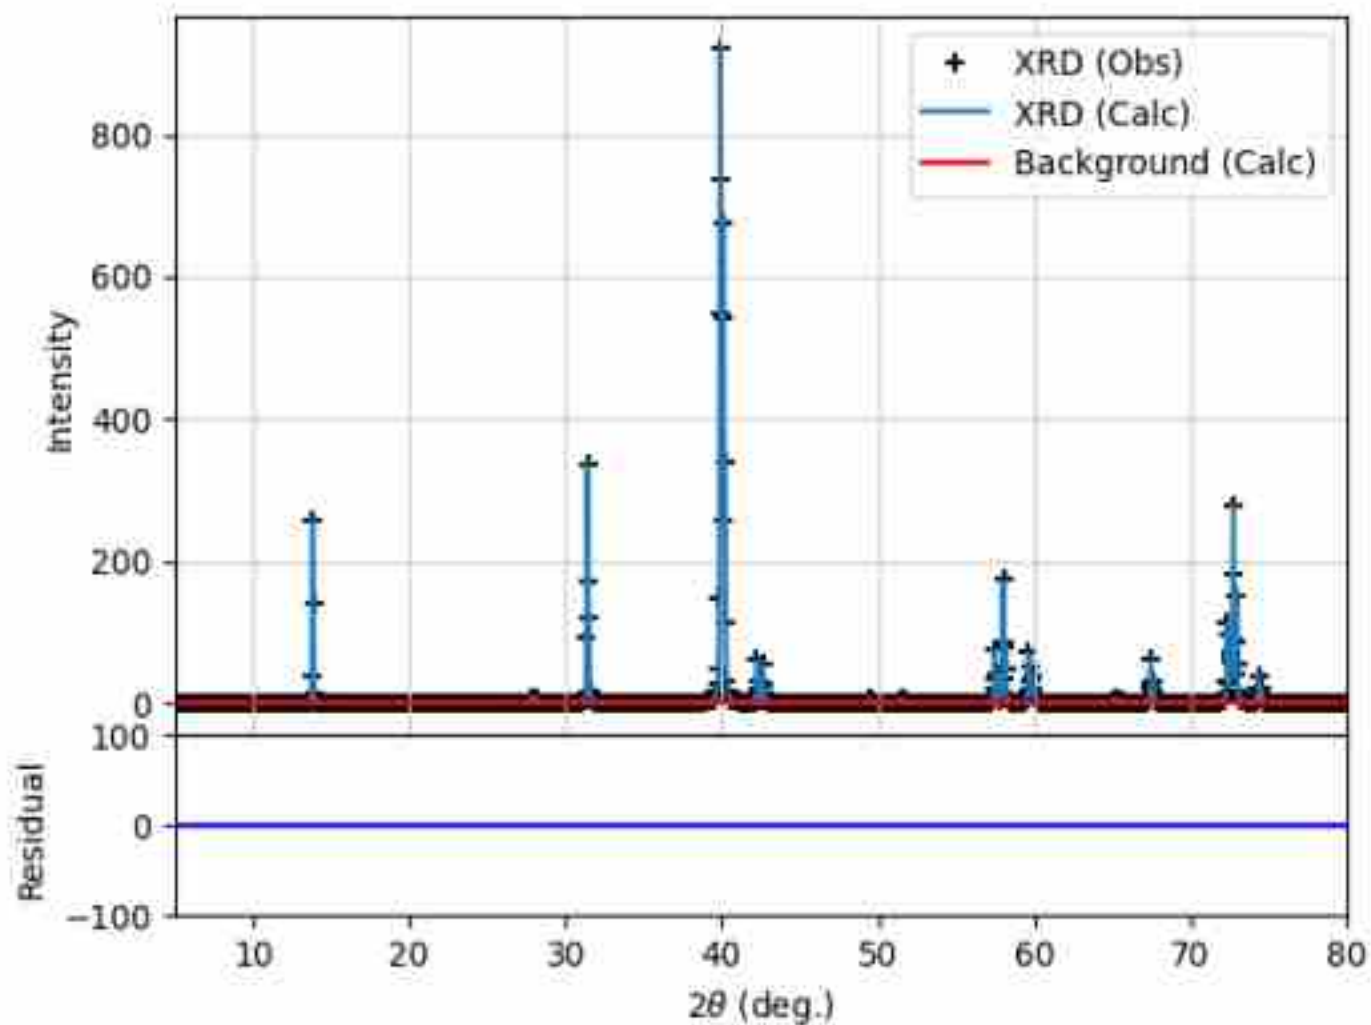

| RMSE before RR | Rwp     | RMSE after RR |
|----------------|---------|---------------|
| 0.029          | 0.01176 | 0.00081       |

# Mn<sub>2</sub>Fe<sub>2</sub>Ni<sub>2</sub>O<sub>8</sub>

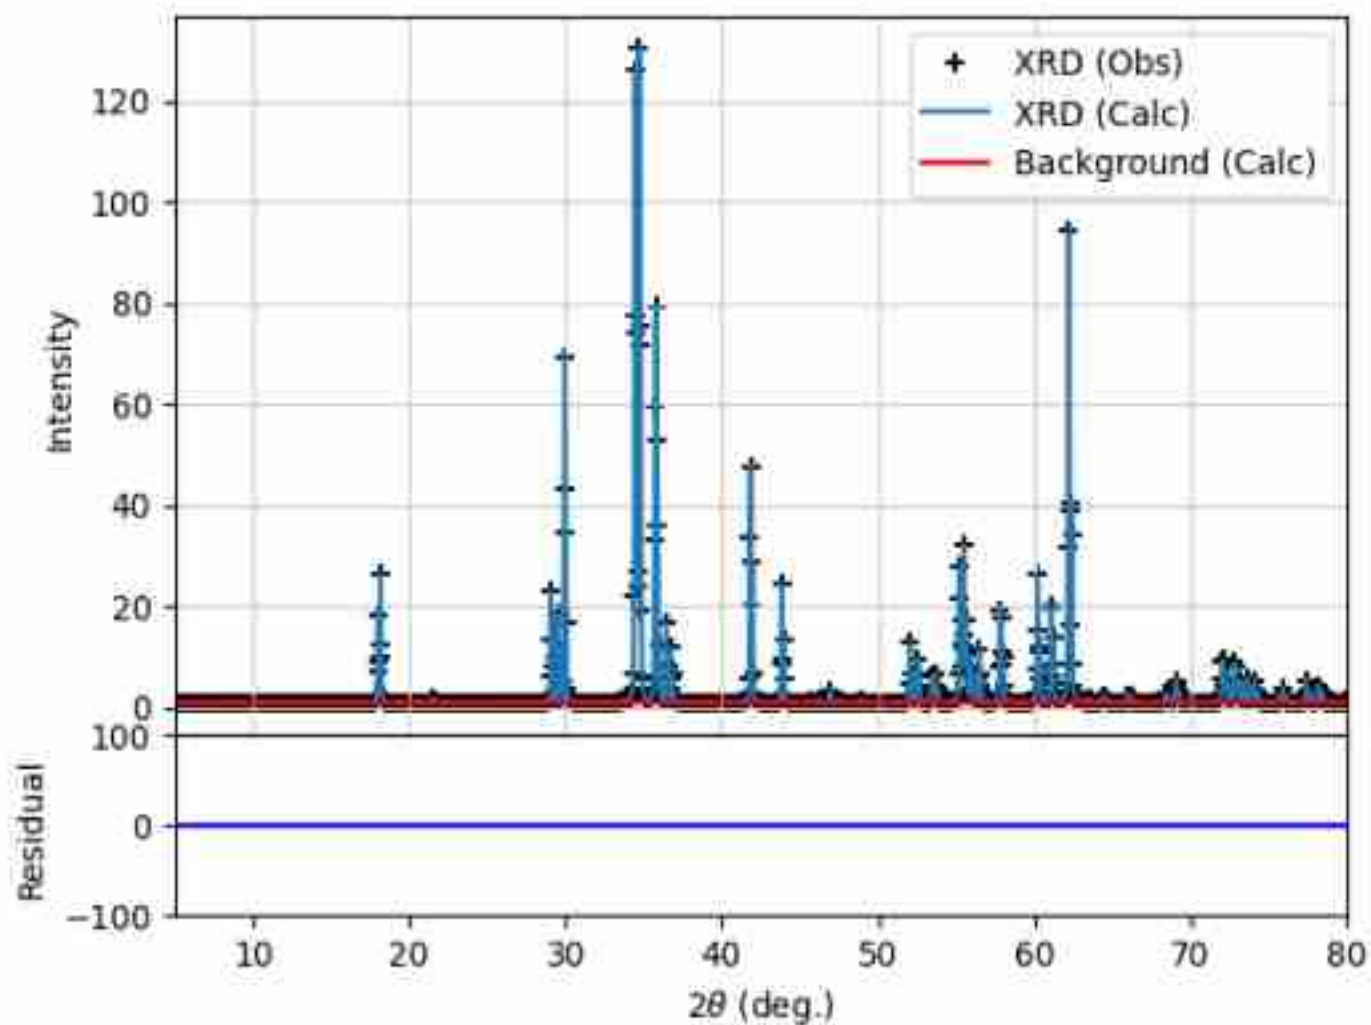

| RMSE before RR | Rwp     | RMSE after RR |
|----------------|---------|---------------|
| 0.029          | 0.00261 | 0.00063       |

# Mn5V1O12

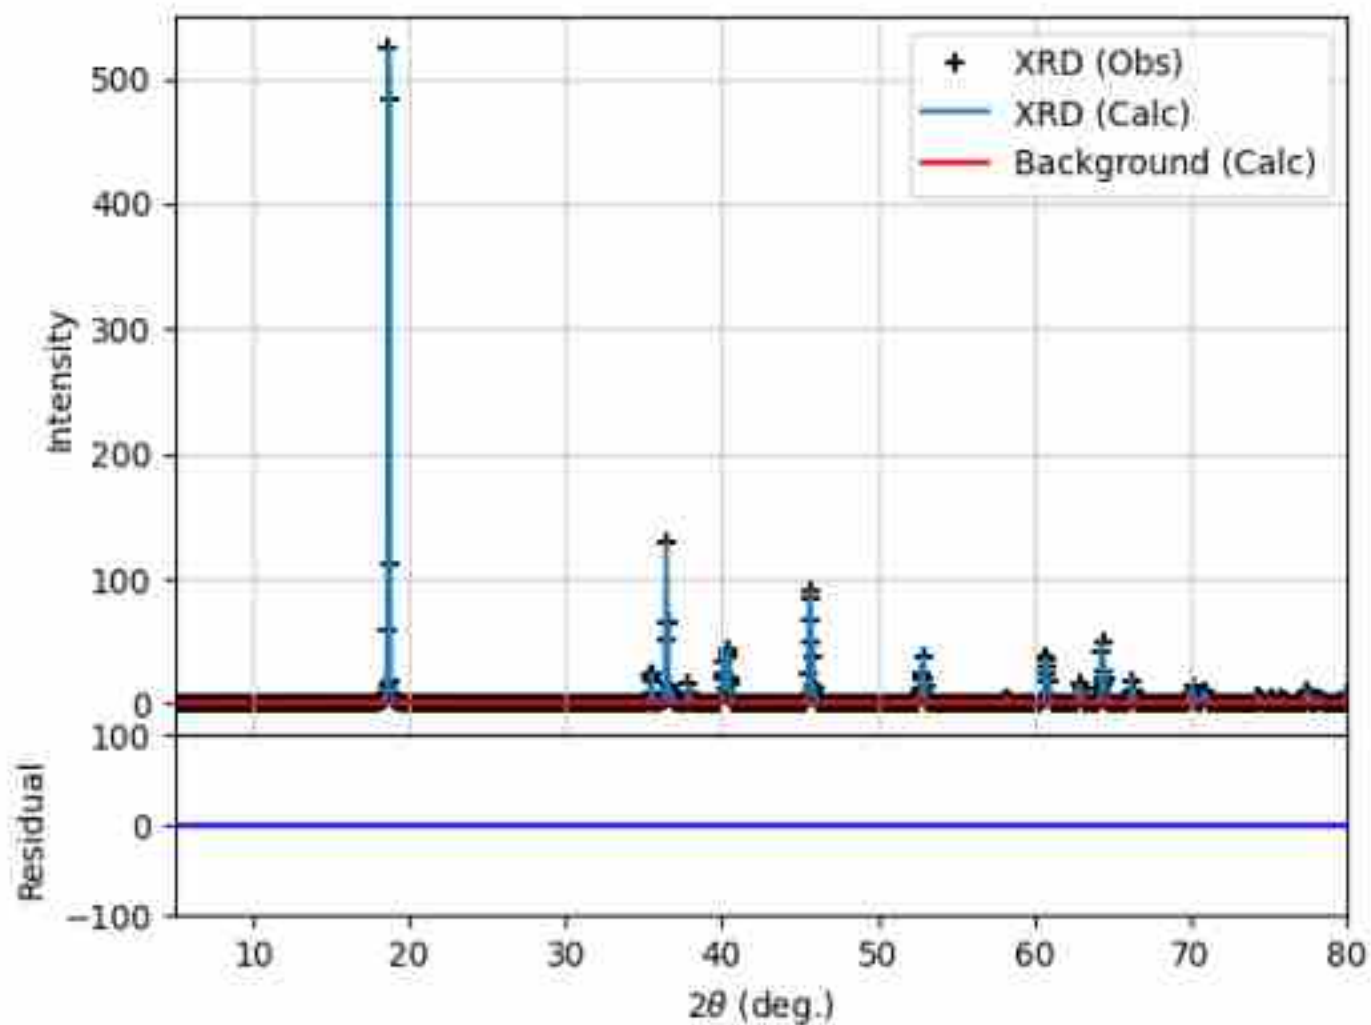

| RMSE before RR | Rwp     | RMSE after RR |
|----------------|---------|---------------|
| 0.029          | 0.00212 | 0.00073       |

# Na<sub>2</sub>Ca<sub>2</sub>H<sub>6</sub>

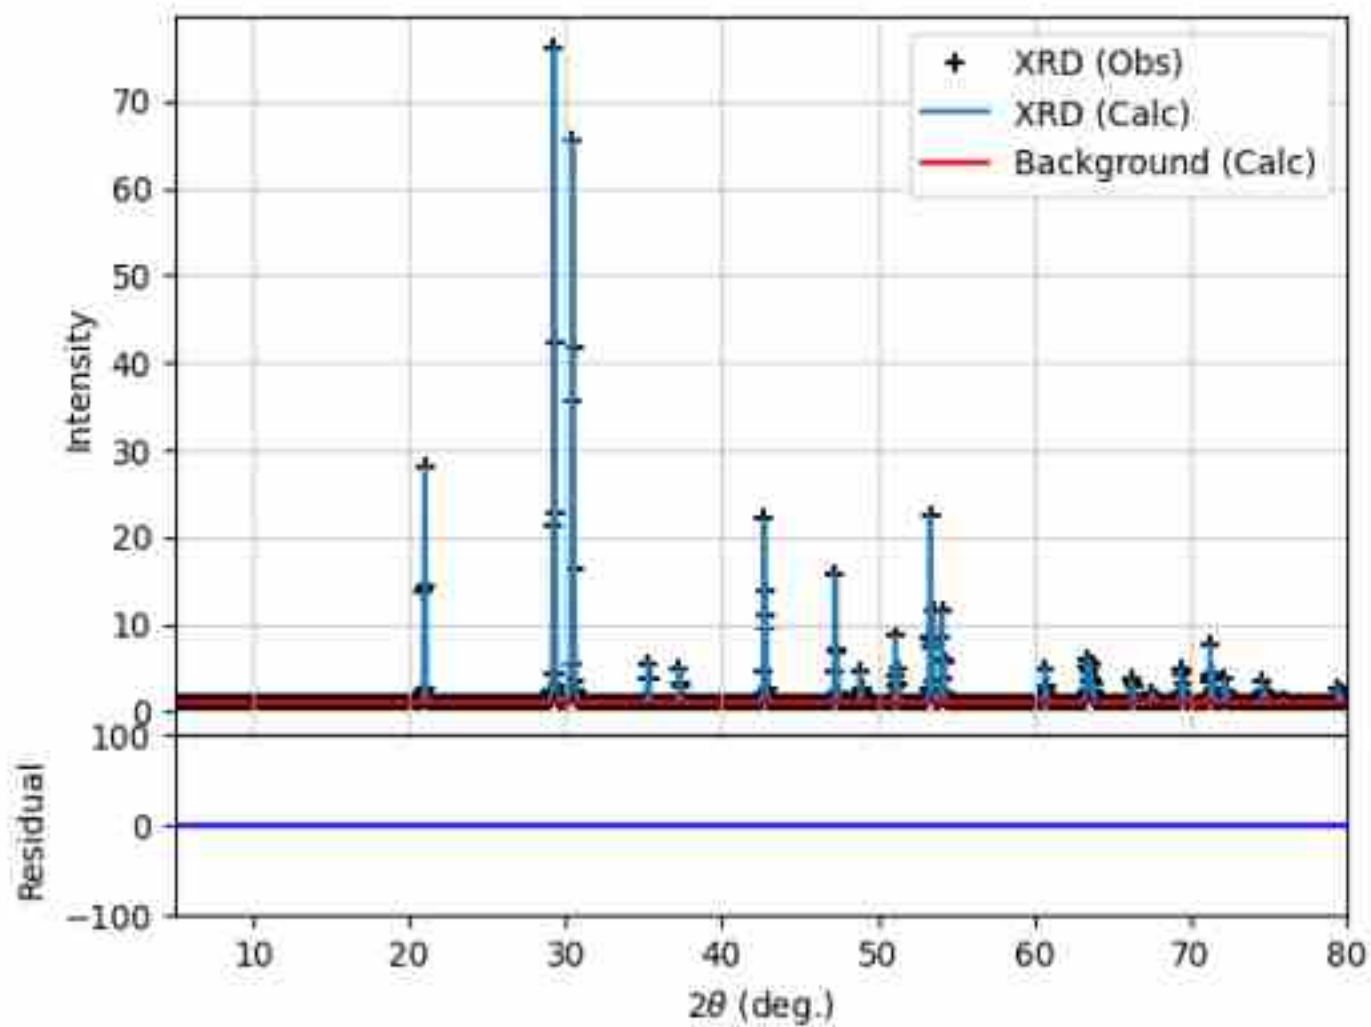

| RMSE before RR | Rwp     | RMSE after RR |
|----------------|---------|---------------|
| 0.029          | 0.27332 | 0.27891       |

# Na<sub>4</sub>Co<sub>4</sub>O<sub>8</sub>

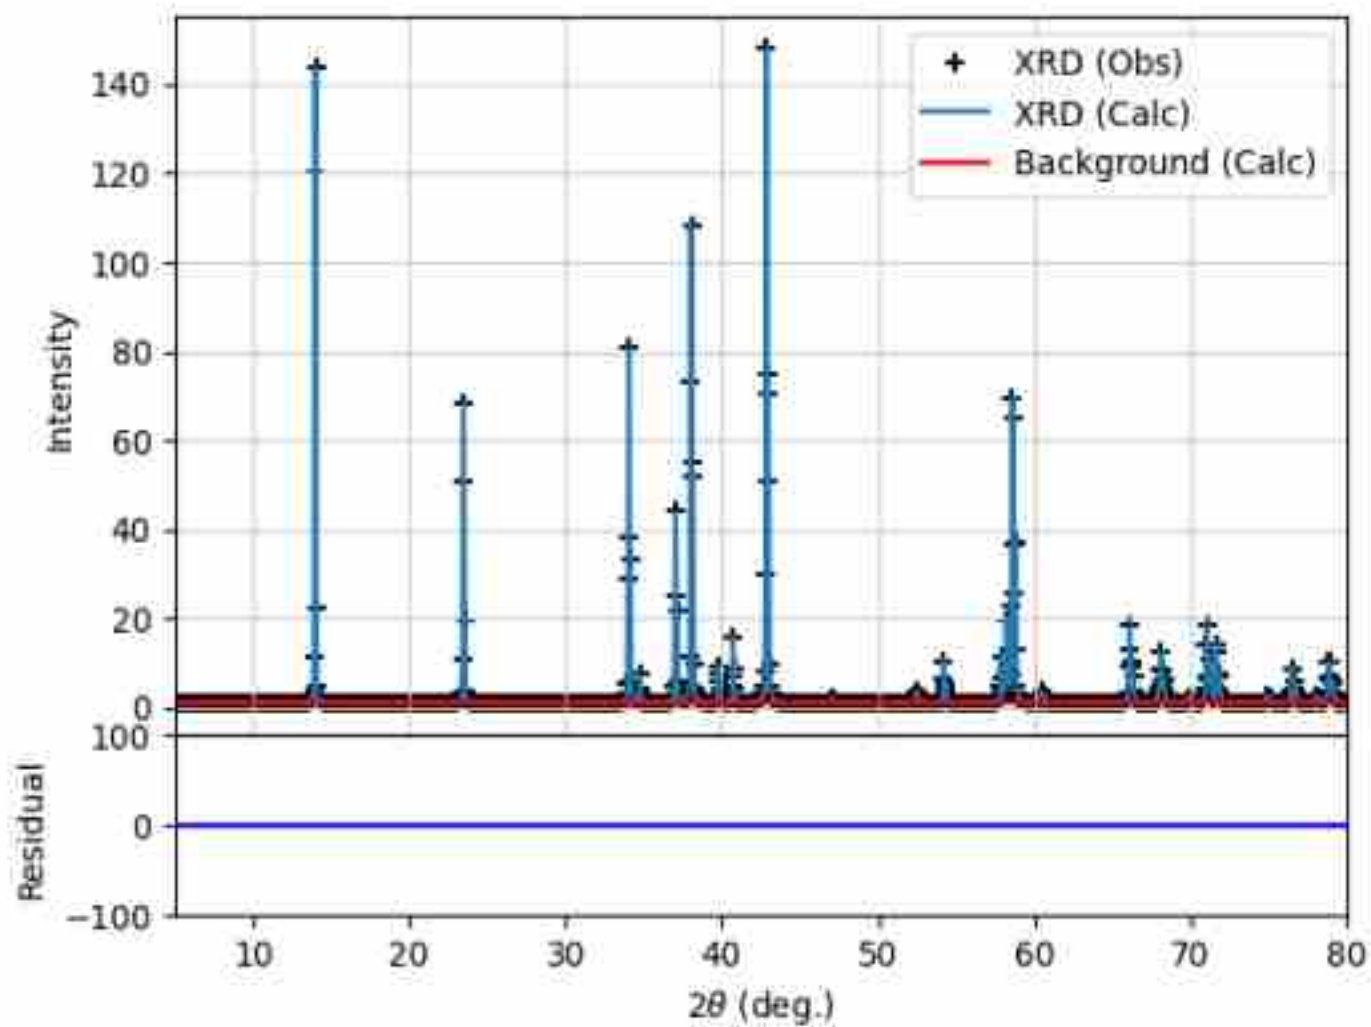

| RMSE before RR | Rwp    | RMSE after RR |
|----------------|--------|---------------|
| 0.029          | 0.0027 | 0.00054       |

# Nb1V1H4

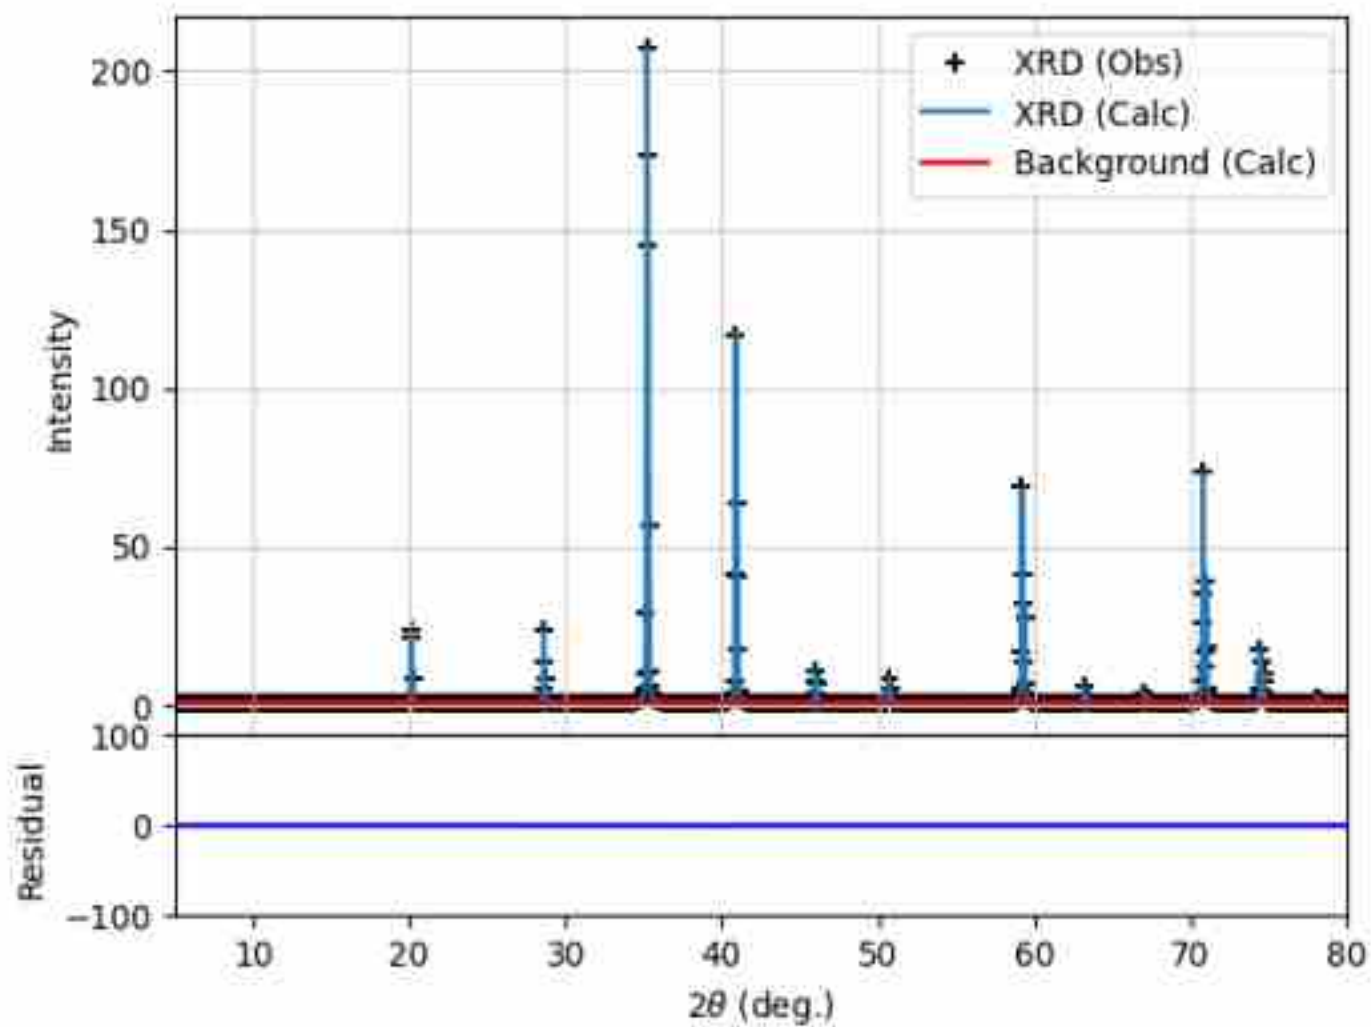

| RMSE before RR | Rwp     | RMSE after RR |
|----------------|---------|---------------|
| 0.029          | 0.19978 | 0.06075       |



# Ni6O2F10

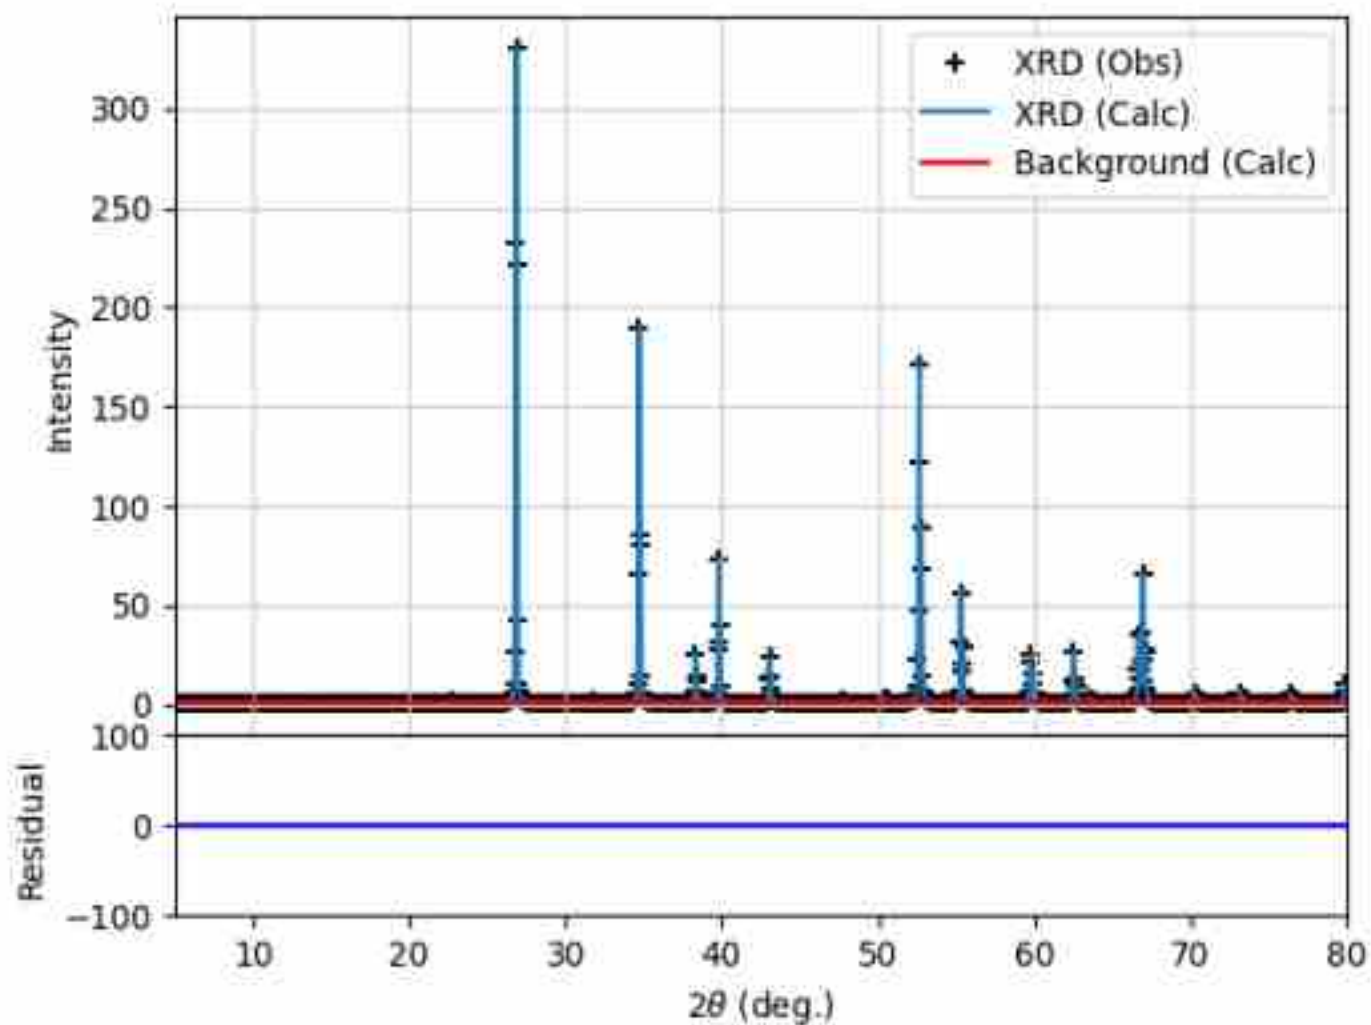

| RMSE before RR | Rwp     | RMSE after RR |
|----------------|---------|---------------|
| 0.029          | 0.00313 | 0.00071       |

# Pb2C18

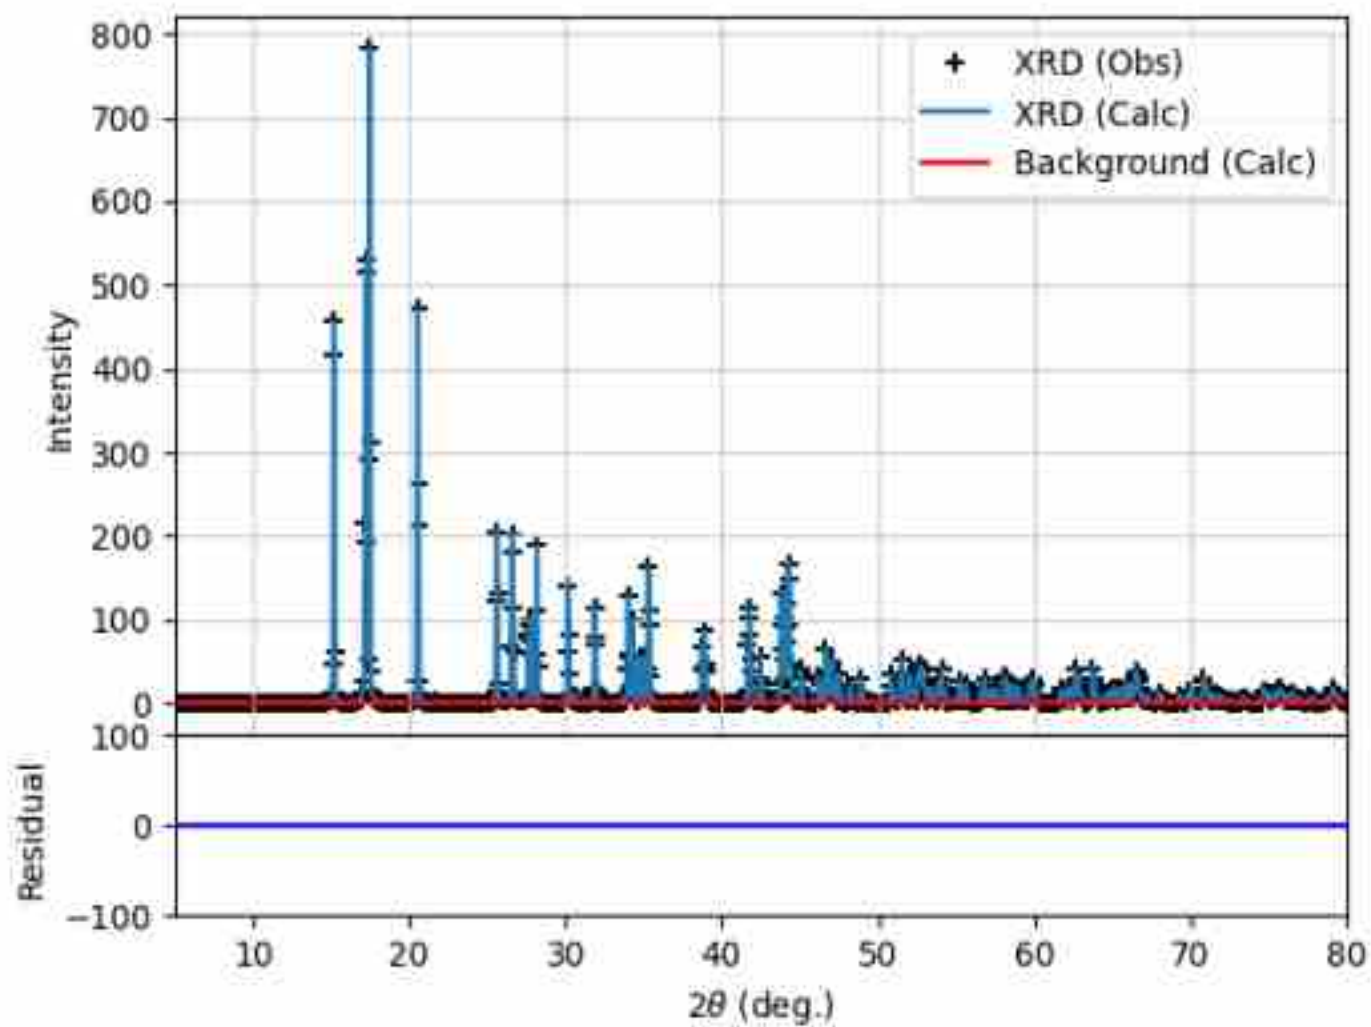

| RMSE before RR | Rwp     | RMSE after RR |
|----------------|---------|---------------|
| 0.029          | 0.00274 | 0.00039       |

# Rb<sub>4</sub>Mn<sub>2</sub>F<sub>12</sub>

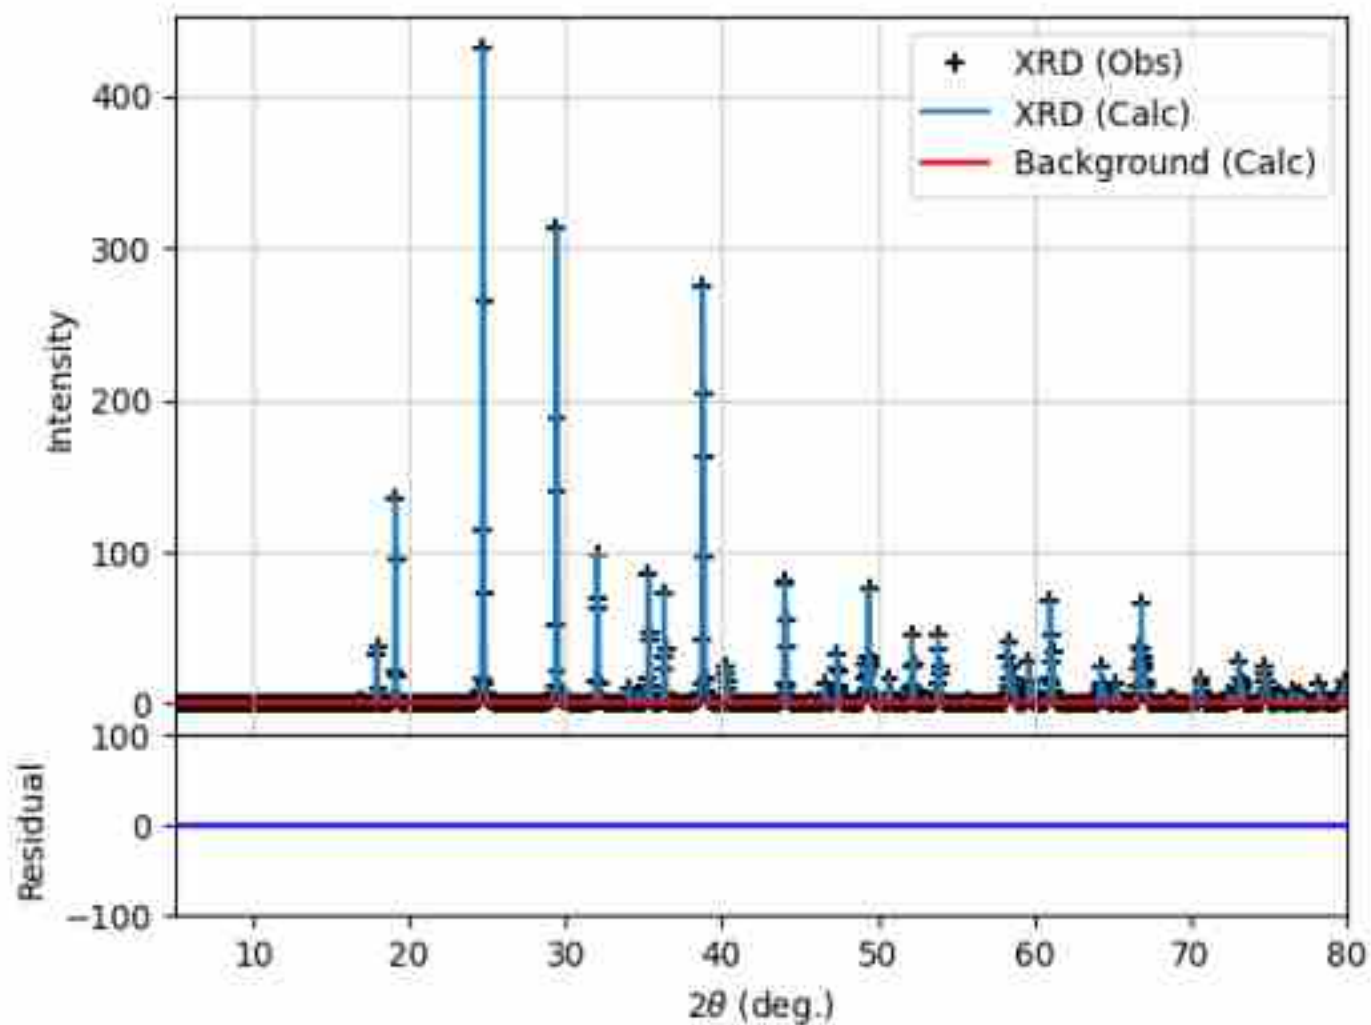

| RMSE before RR | Rwp     | RMSE after RR |
|----------------|---------|---------------|
| 0.029          | 0.00389 | 0.00136       |

# Si<sub>2</sub>B<sub>4</sub>Mo<sub>10</sub>

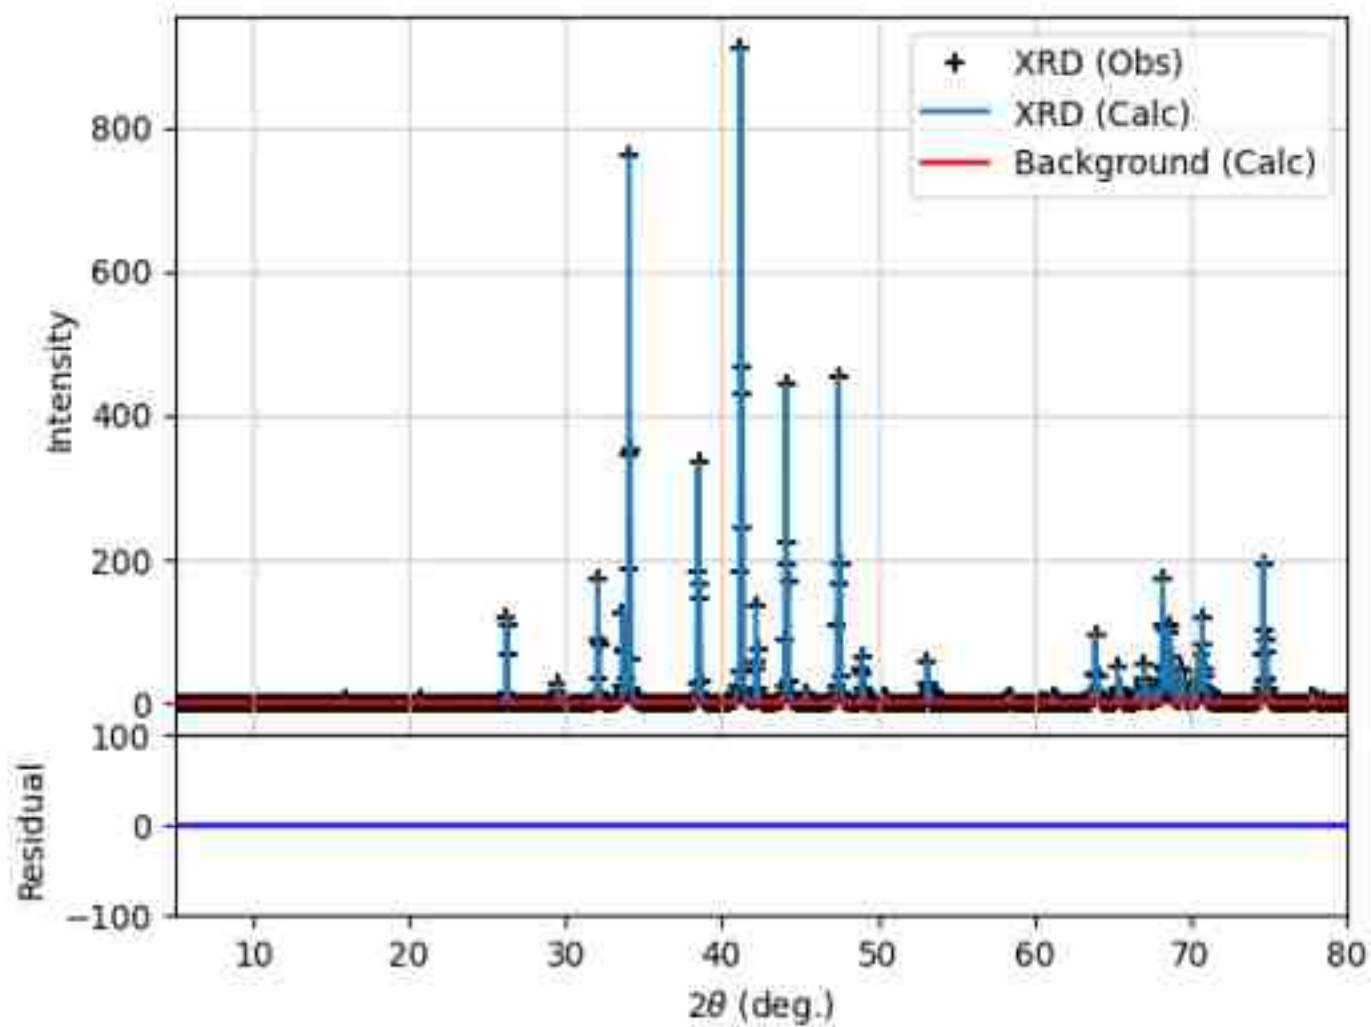

| RMSE before RR | Rwp    | RMSE after RR |
|----------------|--------|---------------|
| 0.029          | 0.0043 | 0.0014        |

# Si<sub>2</sub>Ir<sub>6</sub>

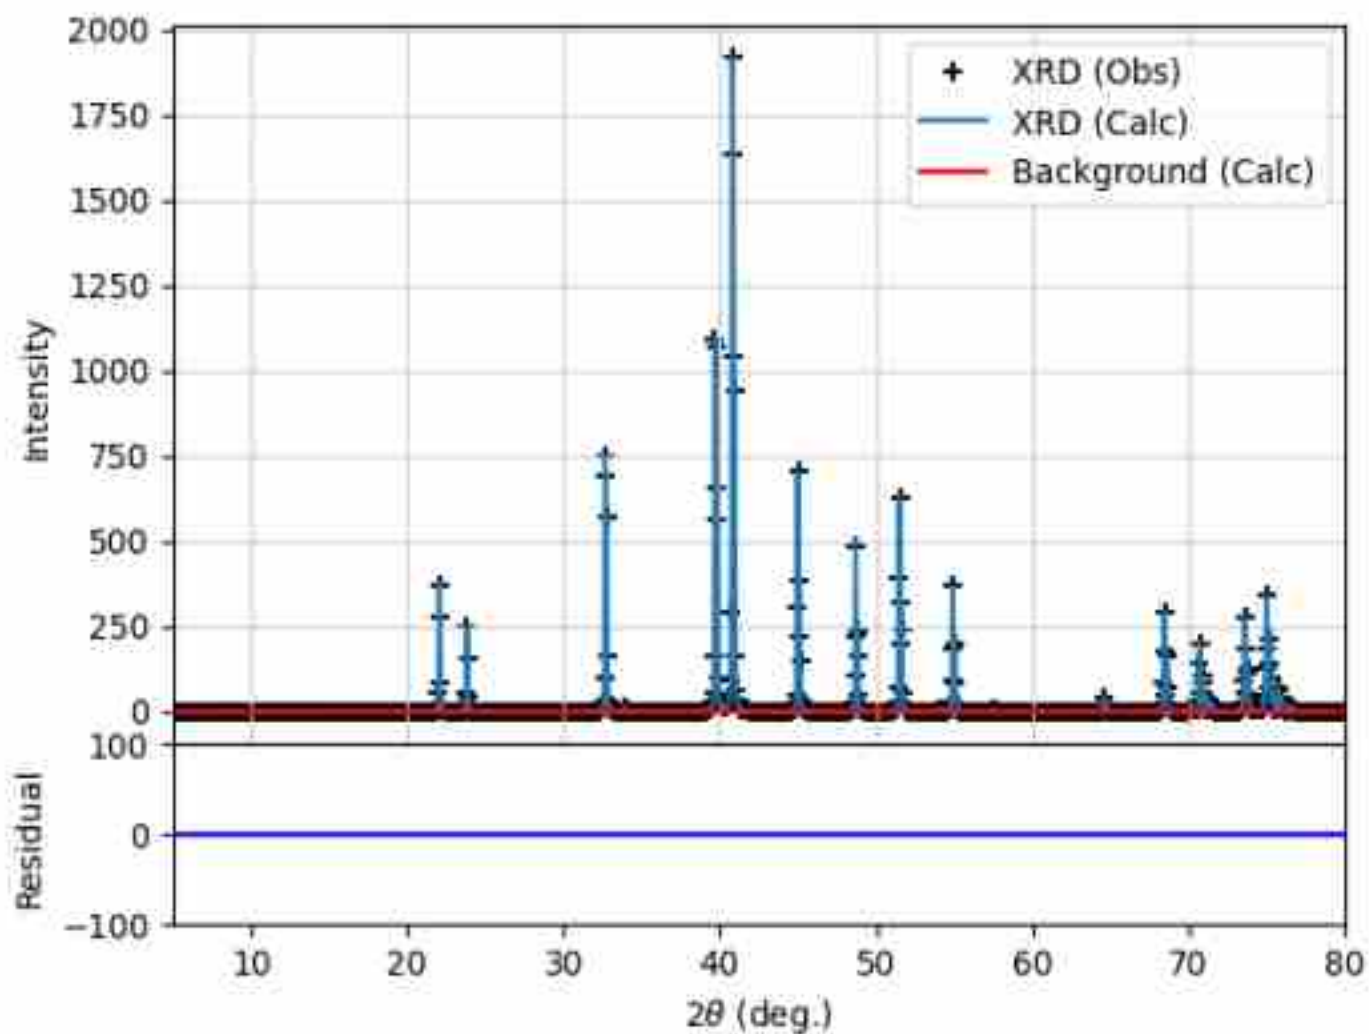

| RMSE before RR | Rwp     | RMSE after RR |
|----------------|---------|---------------|
| 0.029          | 0.00723 | 0.00138       |

# Sr1Ca3V4O12

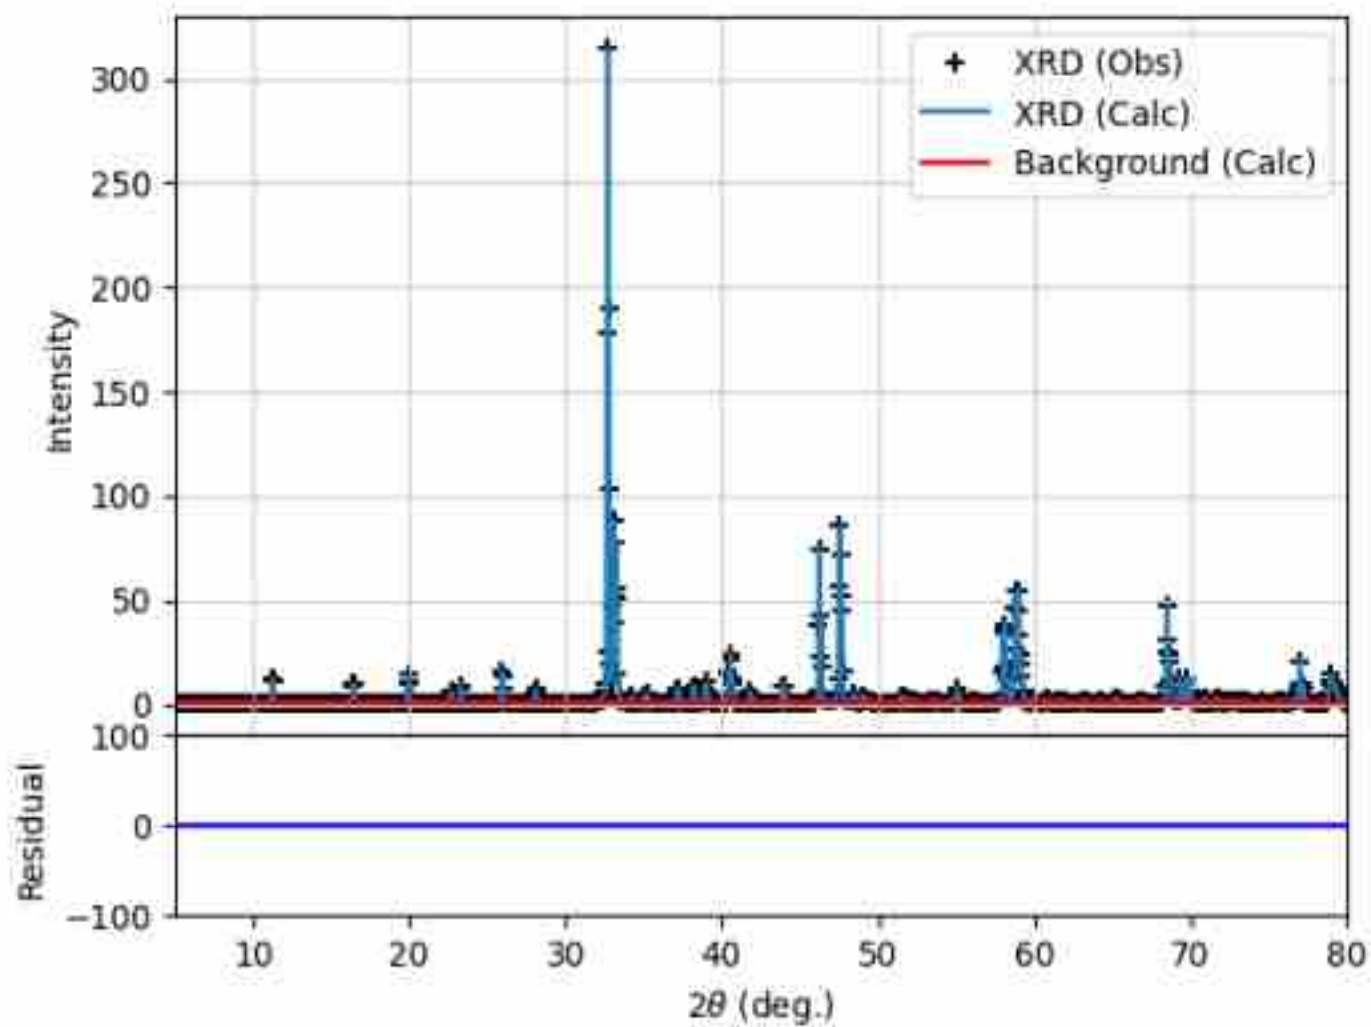

| RMSE before RR | Rwp     | RMSE after RR |
|----------------|---------|---------------|
| 0.029          | 0.00231 | 0.00047       |

# Sr<sub>2</sub>La<sub>2</sub>Mg<sub>1</sub>Ru<sub>3</sub>O<sub>12</sub>

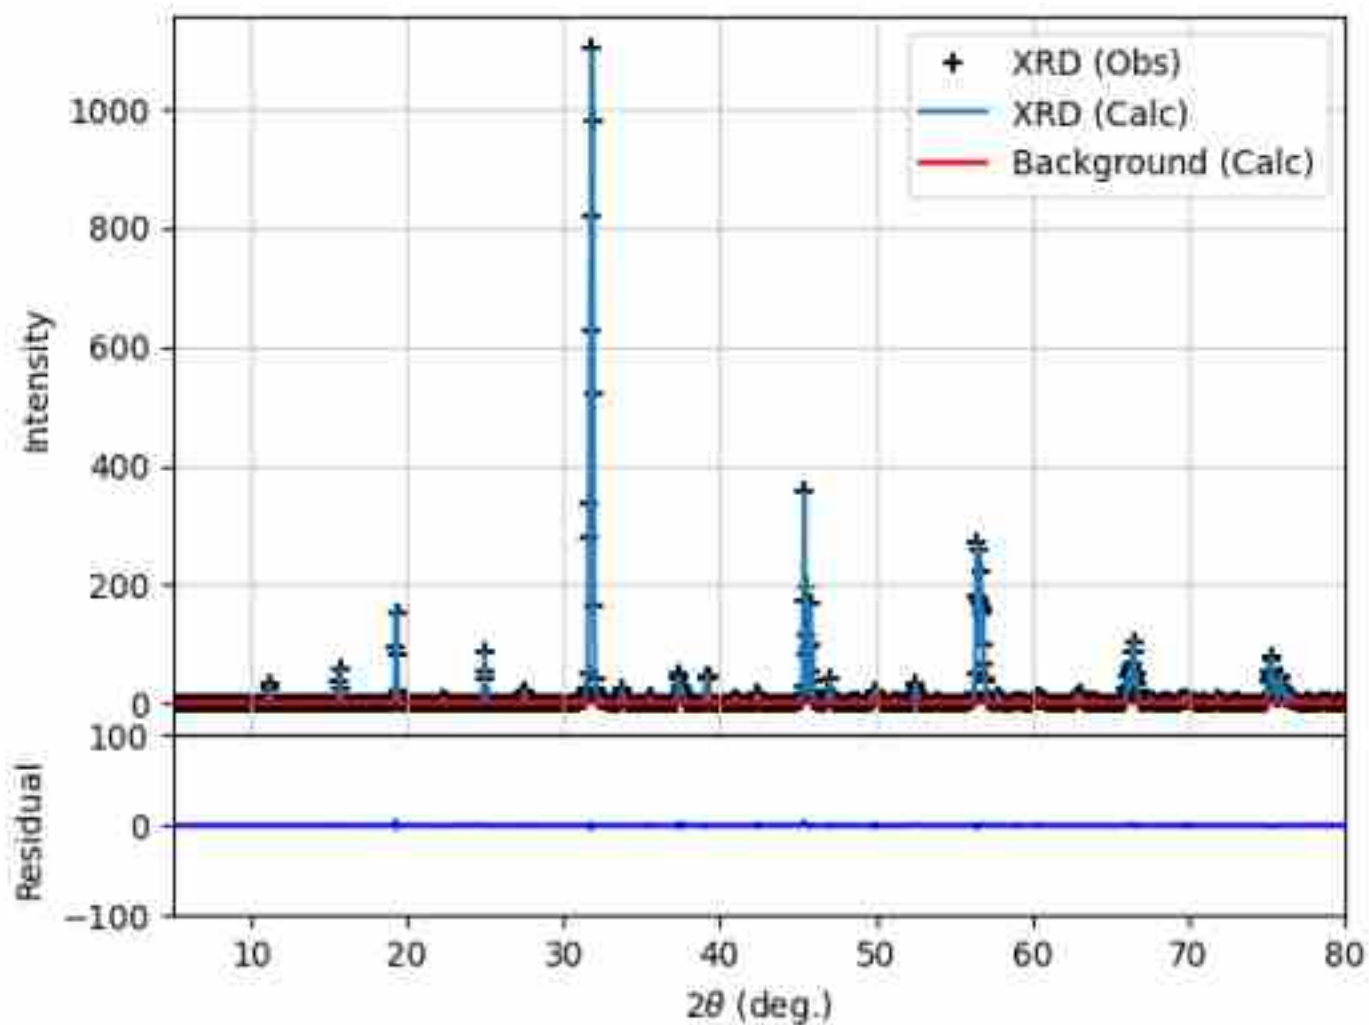

| RMSE before RR | Rwp     | RMSE after RR |
|----------------|---------|---------------|
| 0.029          | 1.97963 | 0.09043       |

# Sr<sub>4</sub>Eu<sub>2</sub>Ta<sub>2</sub>O<sub>12</sub>

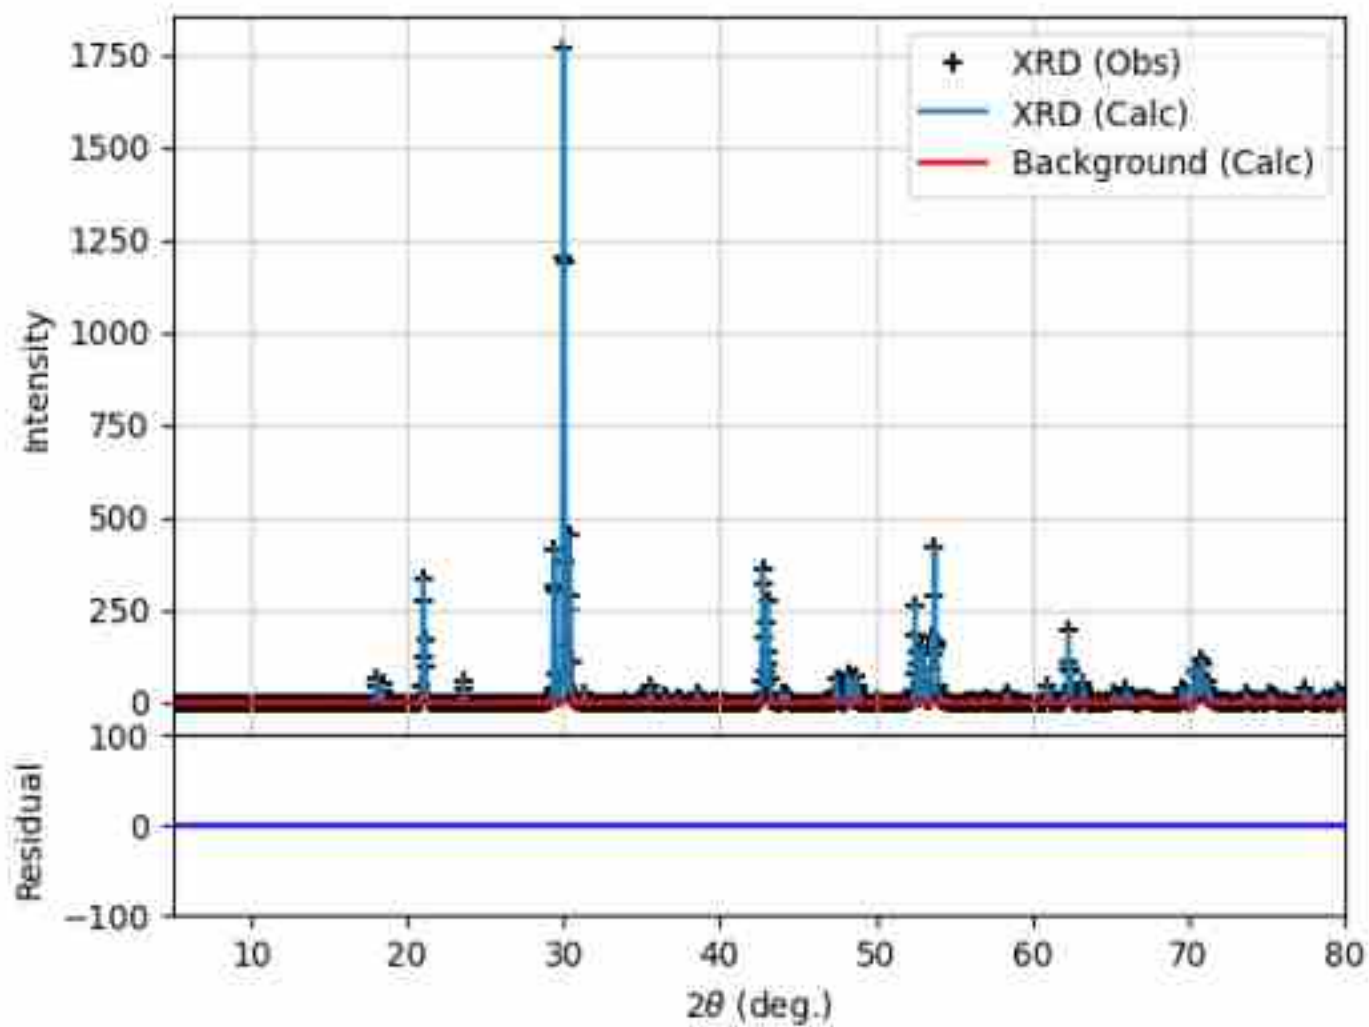

| RMSE before RR | Rwp     | RMSE after RR |
|----------------|---------|---------------|
| 0.029          | 0.00289 | 0.00109       |



# Sr<sub>4</sub>U<sub>2</sub>Fe<sub>2</sub>O<sub>12</sub>

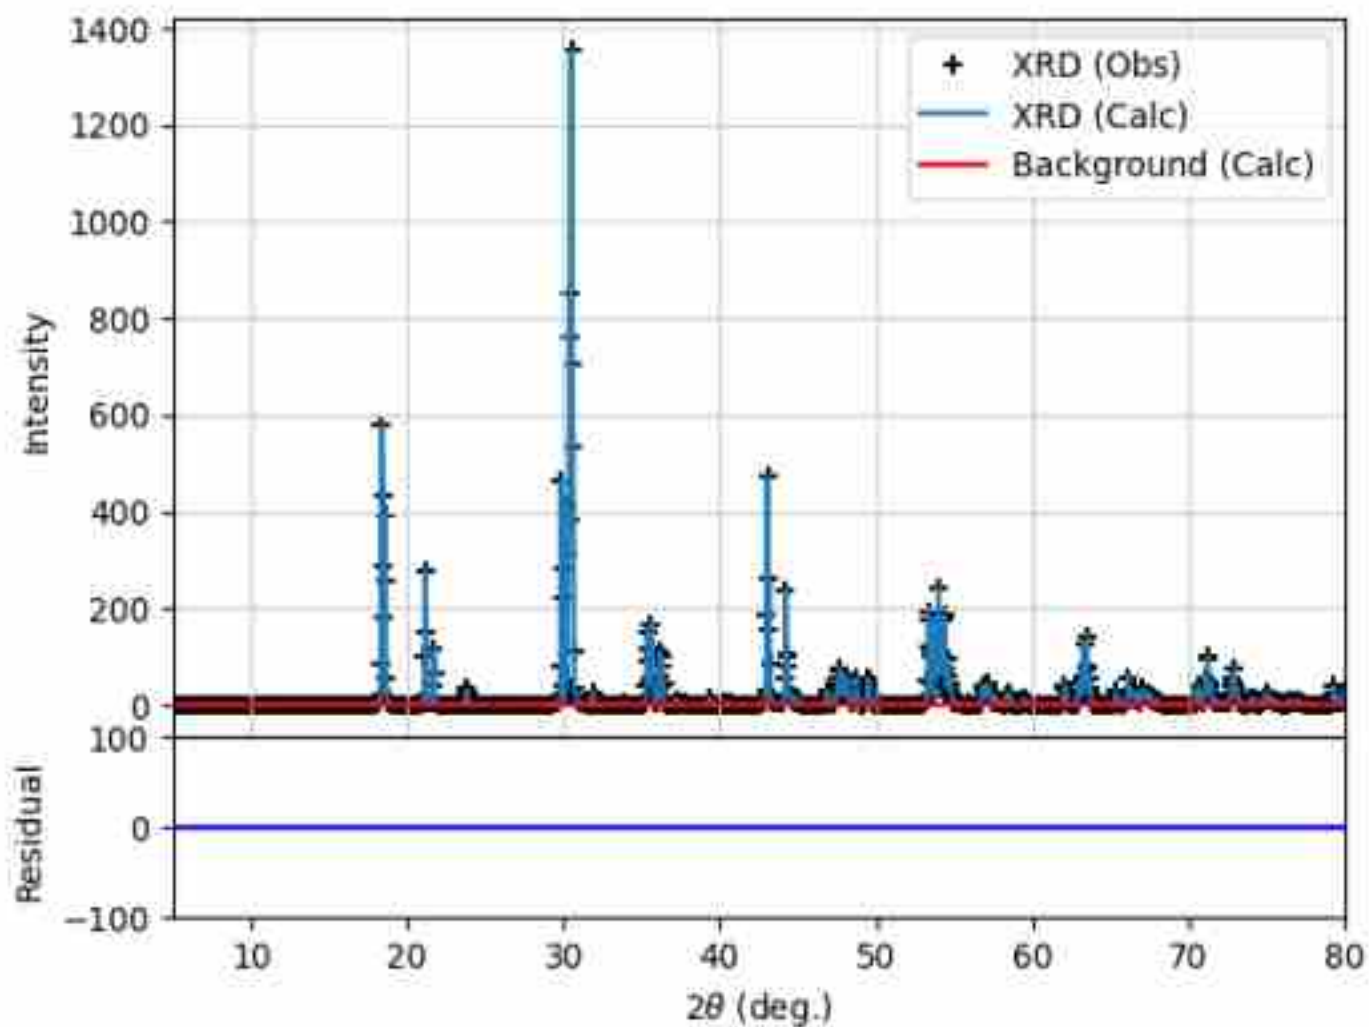

| RMSE before RR | Rwp     | RMSE after RR |
|----------------|---------|---------------|
| 0.029          | 0.00313 | 0.00118       |

# Ta<sub>2</sub>P<sub>2</sub>S<sub>2</sub>

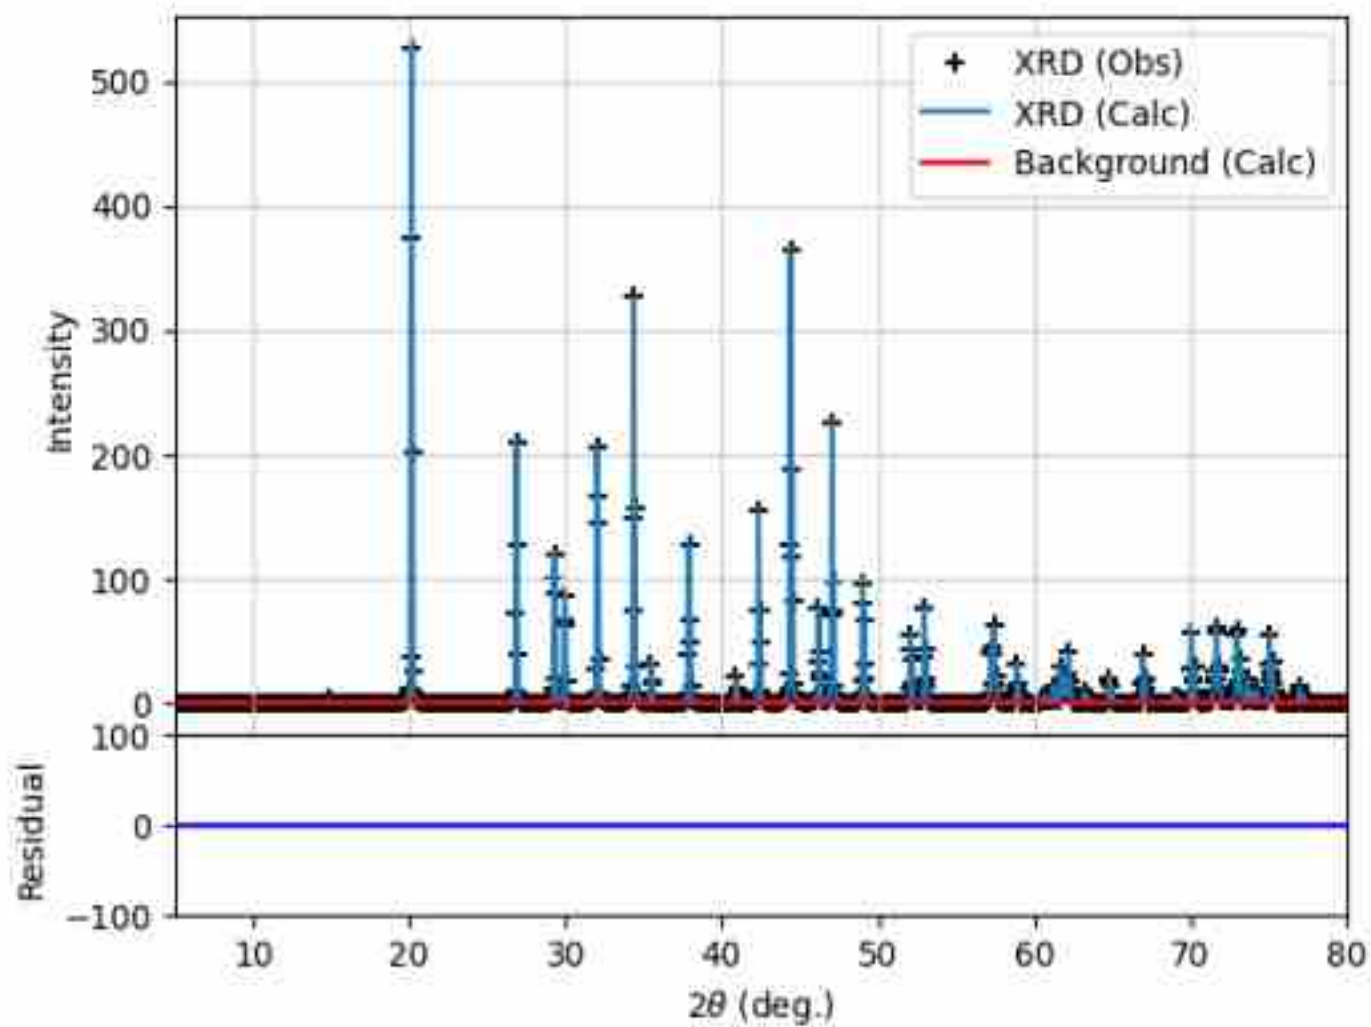

| RMSE before RR | Rwp     | RMSE after RR |
|----------------|---------|---------------|
| 0.029          | 0.00443 | 0.00055       |

# Tb<sub>4</sub>Zn<sub>4</sub>Ge<sub>4</sub>

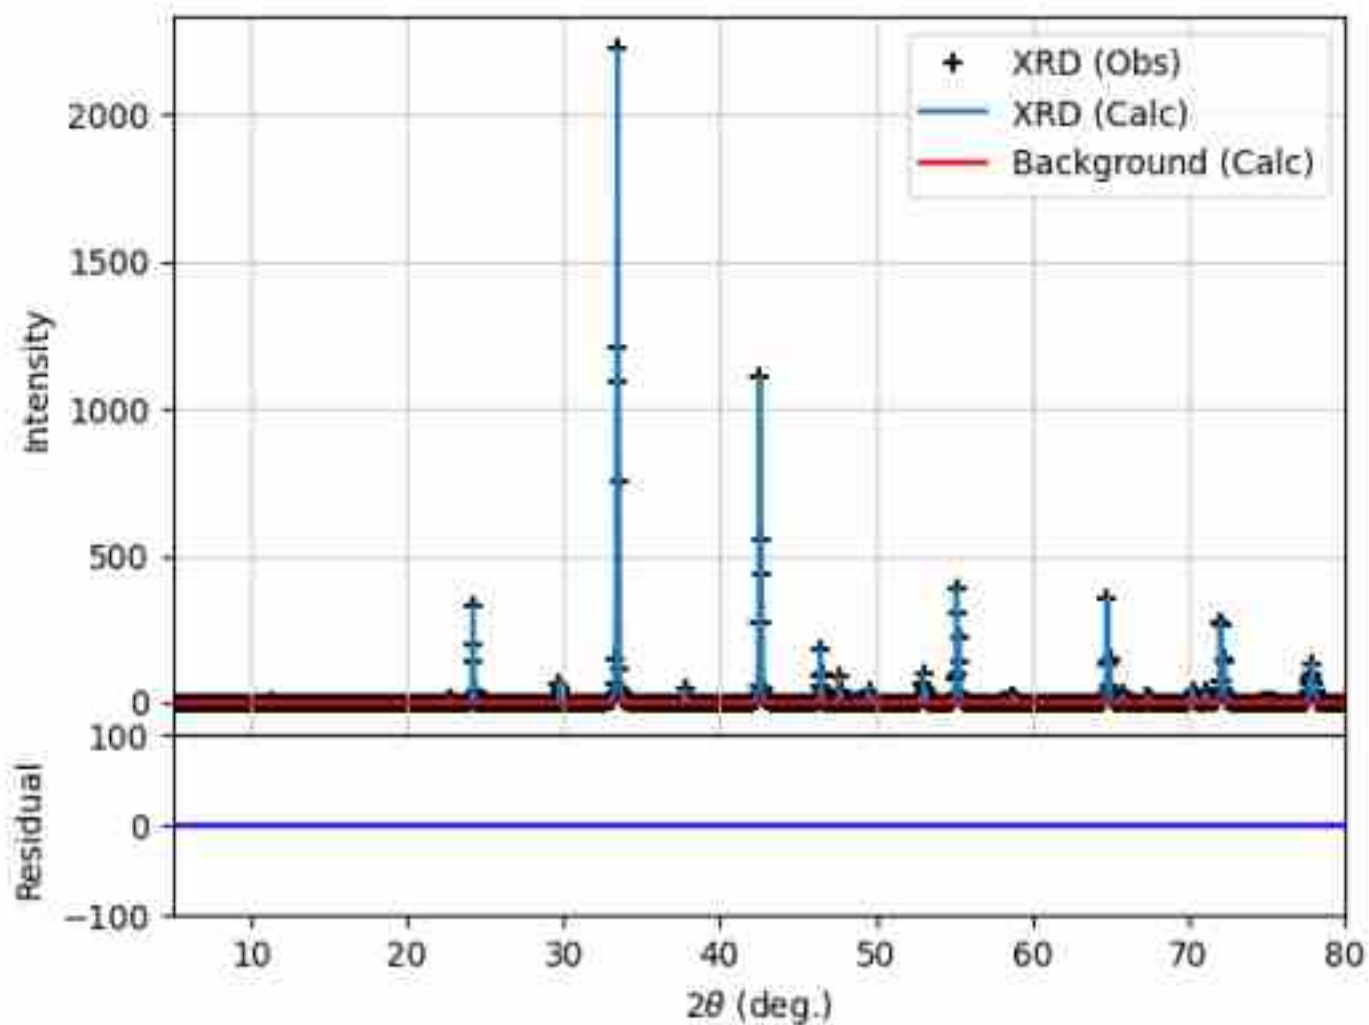

| RMSE before RR | Rwp     | RMSE after RR |
|----------------|---------|---------------|
| 0.029          | 0.00728 | 0.0005        |

# Tb10Bi2Pt4

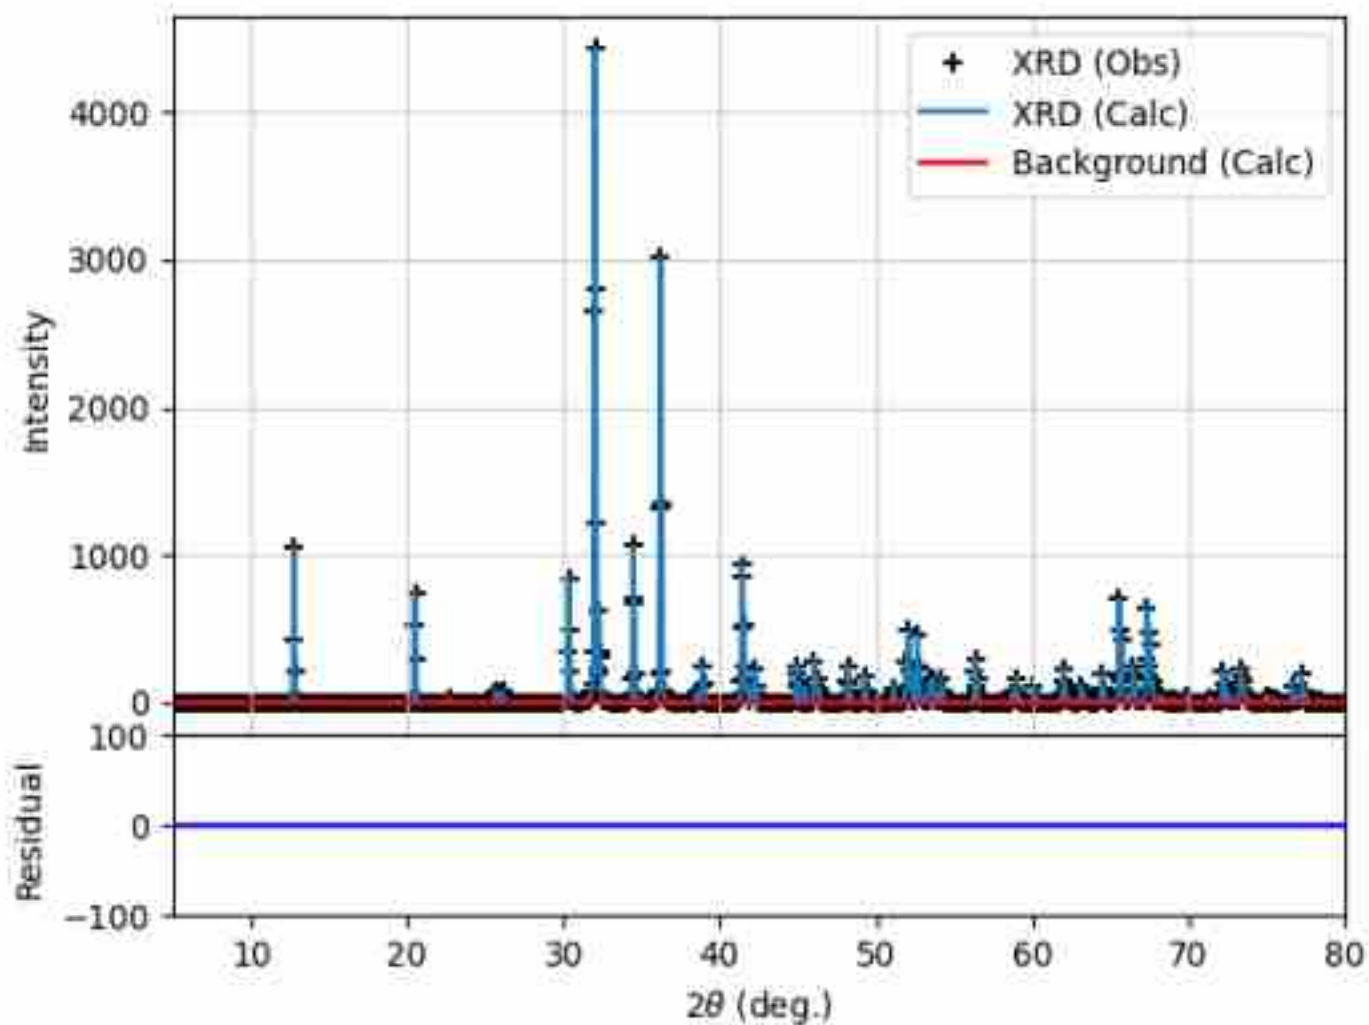

| RMSE before RR | Rwp     | RMSE after RR |
|----------------|---------|---------------|
| 0.029          | 0.00333 | 0.00026       |

# Tb<sub>12</sub>Ga<sub>2</sub>Ni<sub>4</sub>

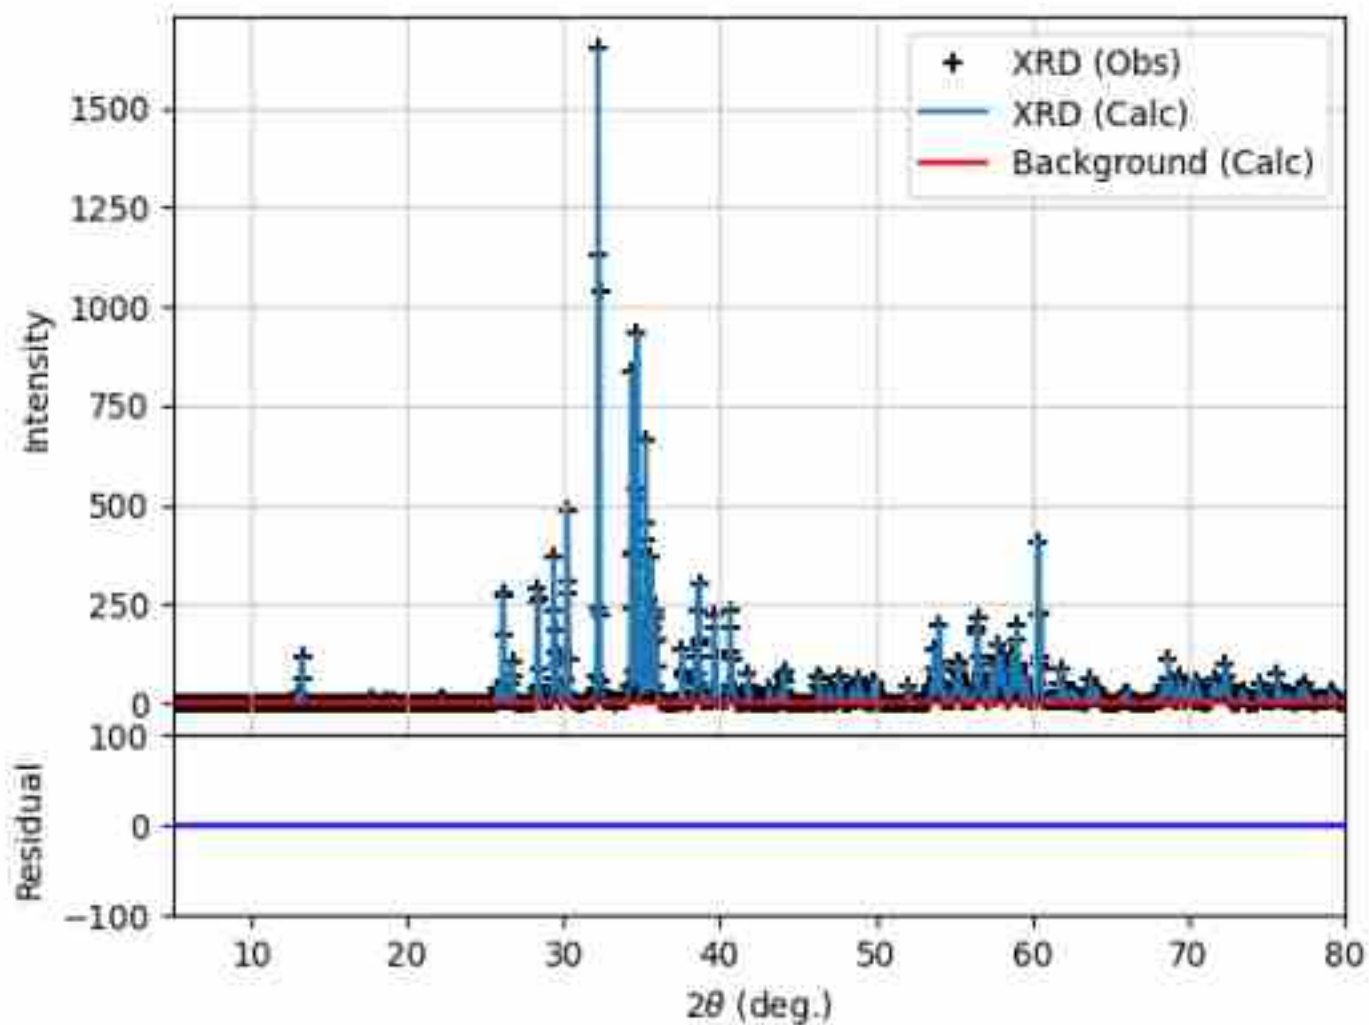

| RMSE before RR | Rwp     | RMSE after RR |
|----------------|---------|---------------|
| 0.029          | 0.00378 | 0.00054       |

# Tc<sub>2</sub>Ag<sub>2</sub>O<sub>8</sub>

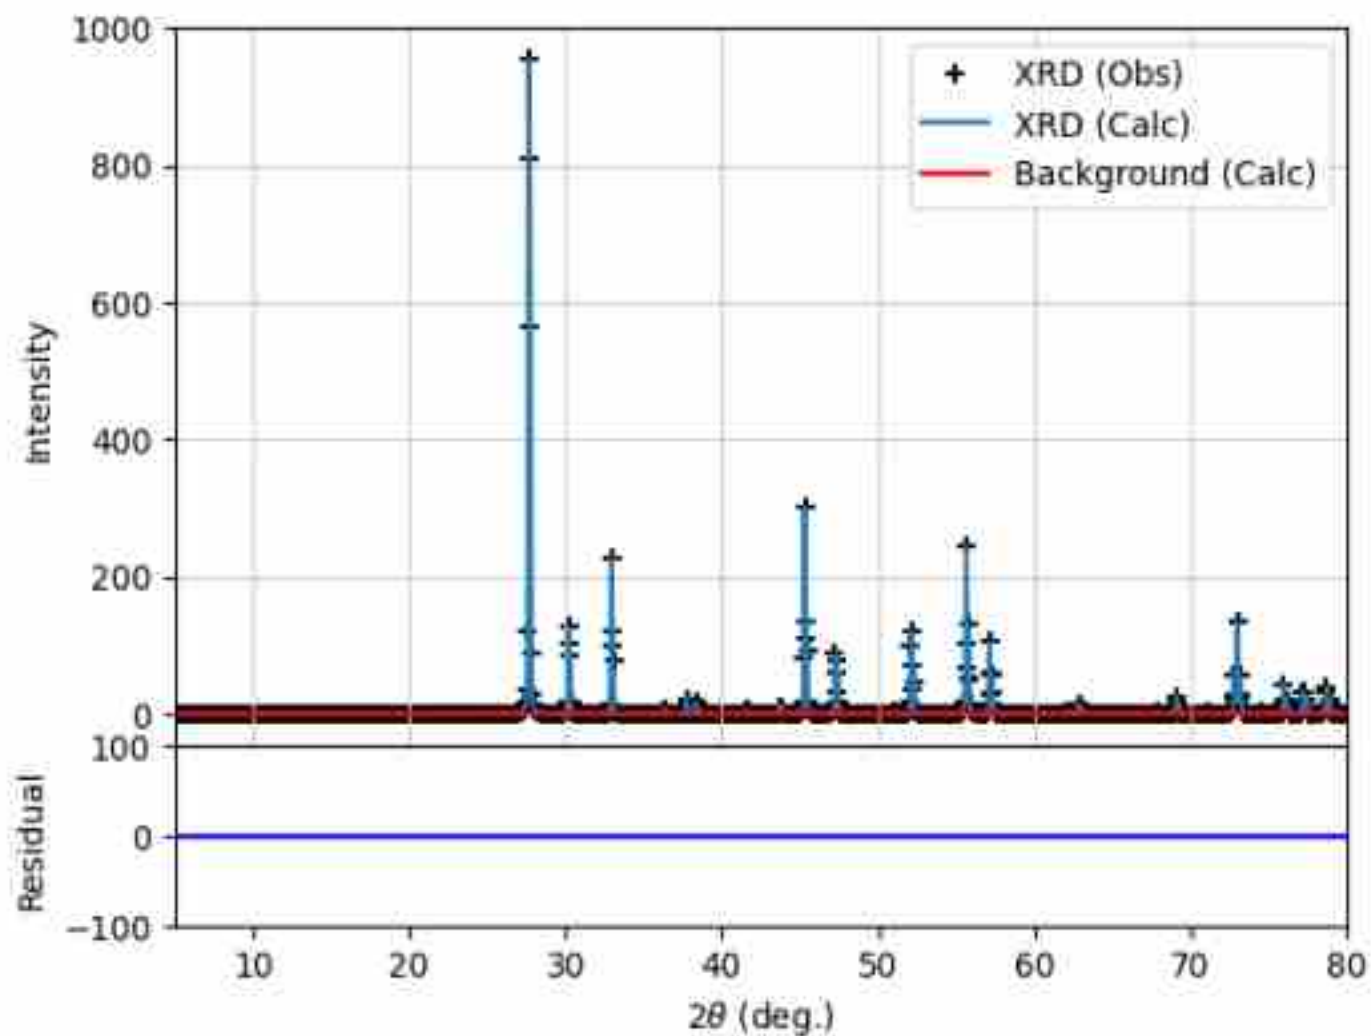

| RMSE before RR | Rwp     | RMSE after RR |
|----------------|---------|---------------|
| 0.029          | 0.00304 | 0.00105       |

# Te1Pb3Br2O4

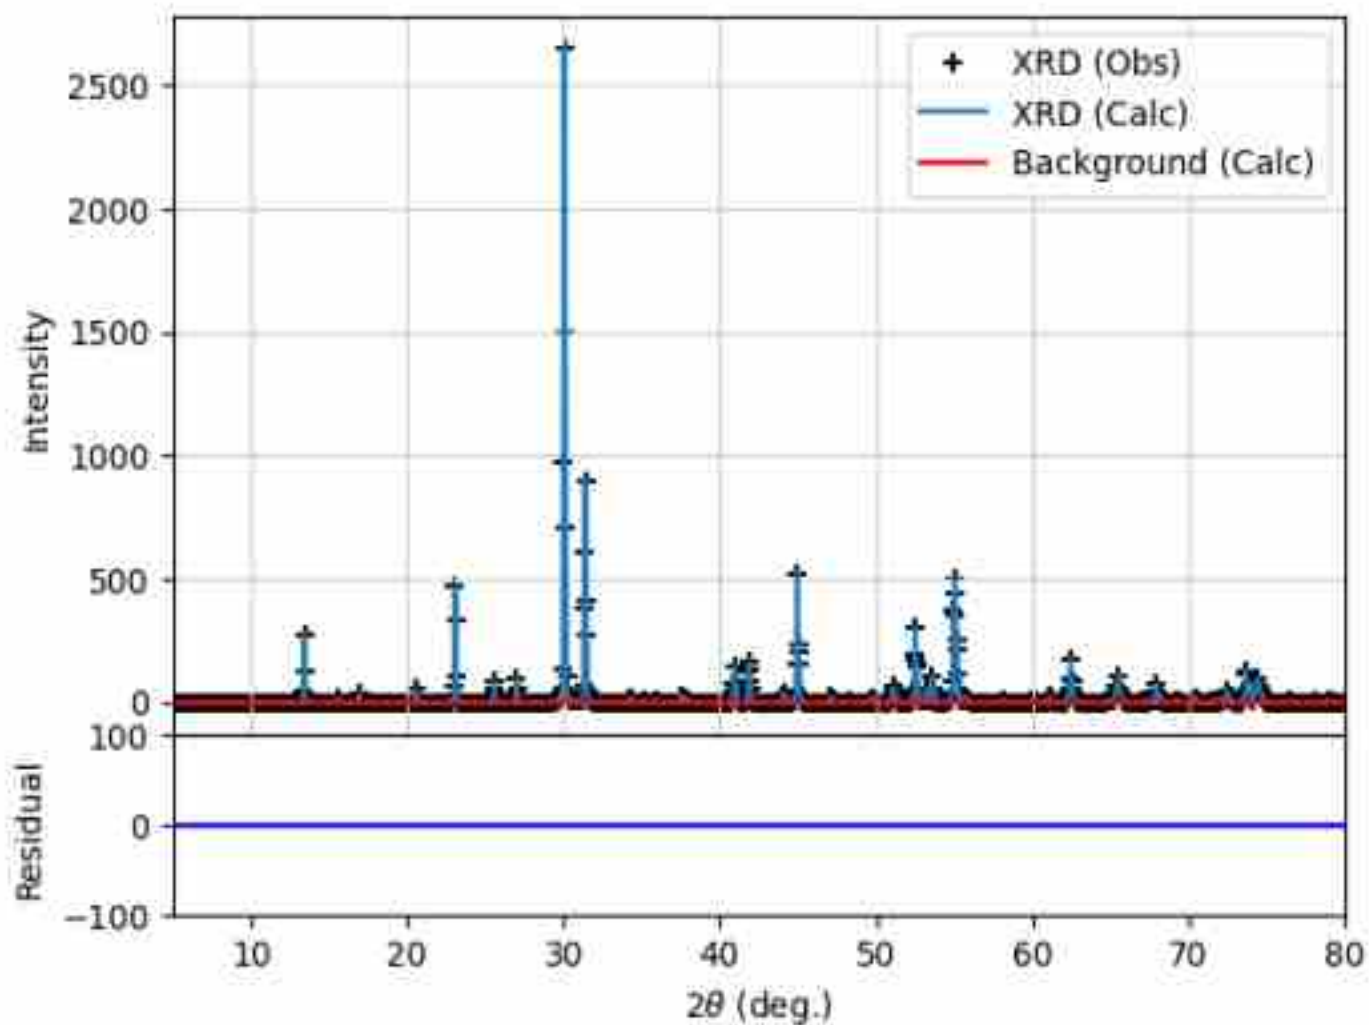

| RMSE before RR | Rwp     | RMSE after RR |
|----------------|---------|---------------|
| 0.029          | 0.00308 | 0.00126       |

# Ti<sub>2</sub>Nb<sub>2</sub>Sb<sub>2</sub>O<sub>12</sub>

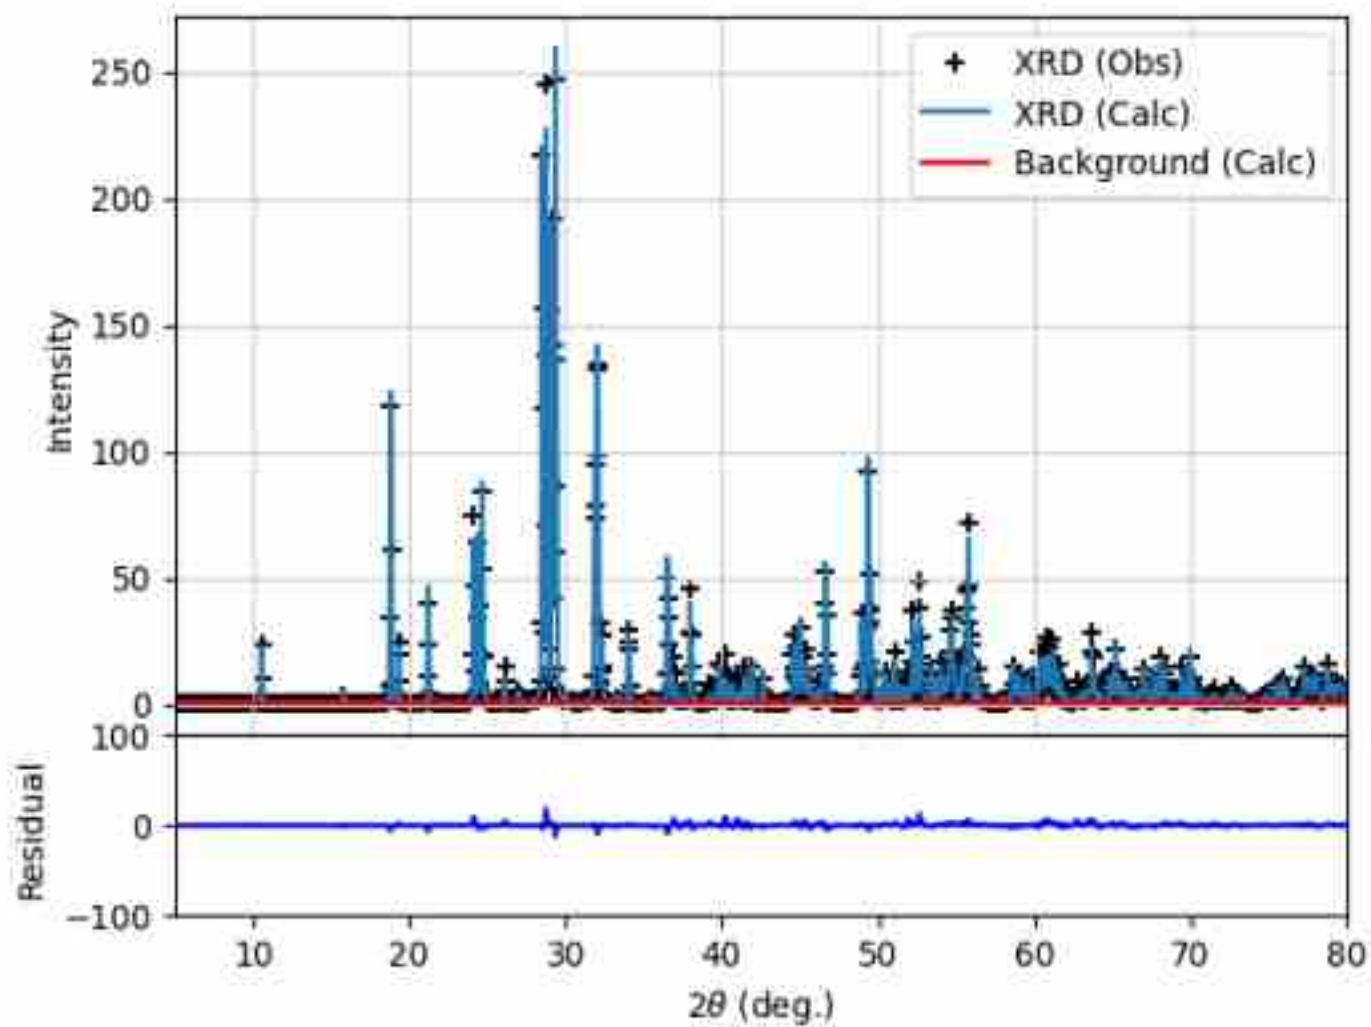

| RMSE before RR | Rwp      | RMSE after RR |
|----------------|----------|---------------|
| 0.029          | 16.38069 | 0.23673       |



# Ti4As4

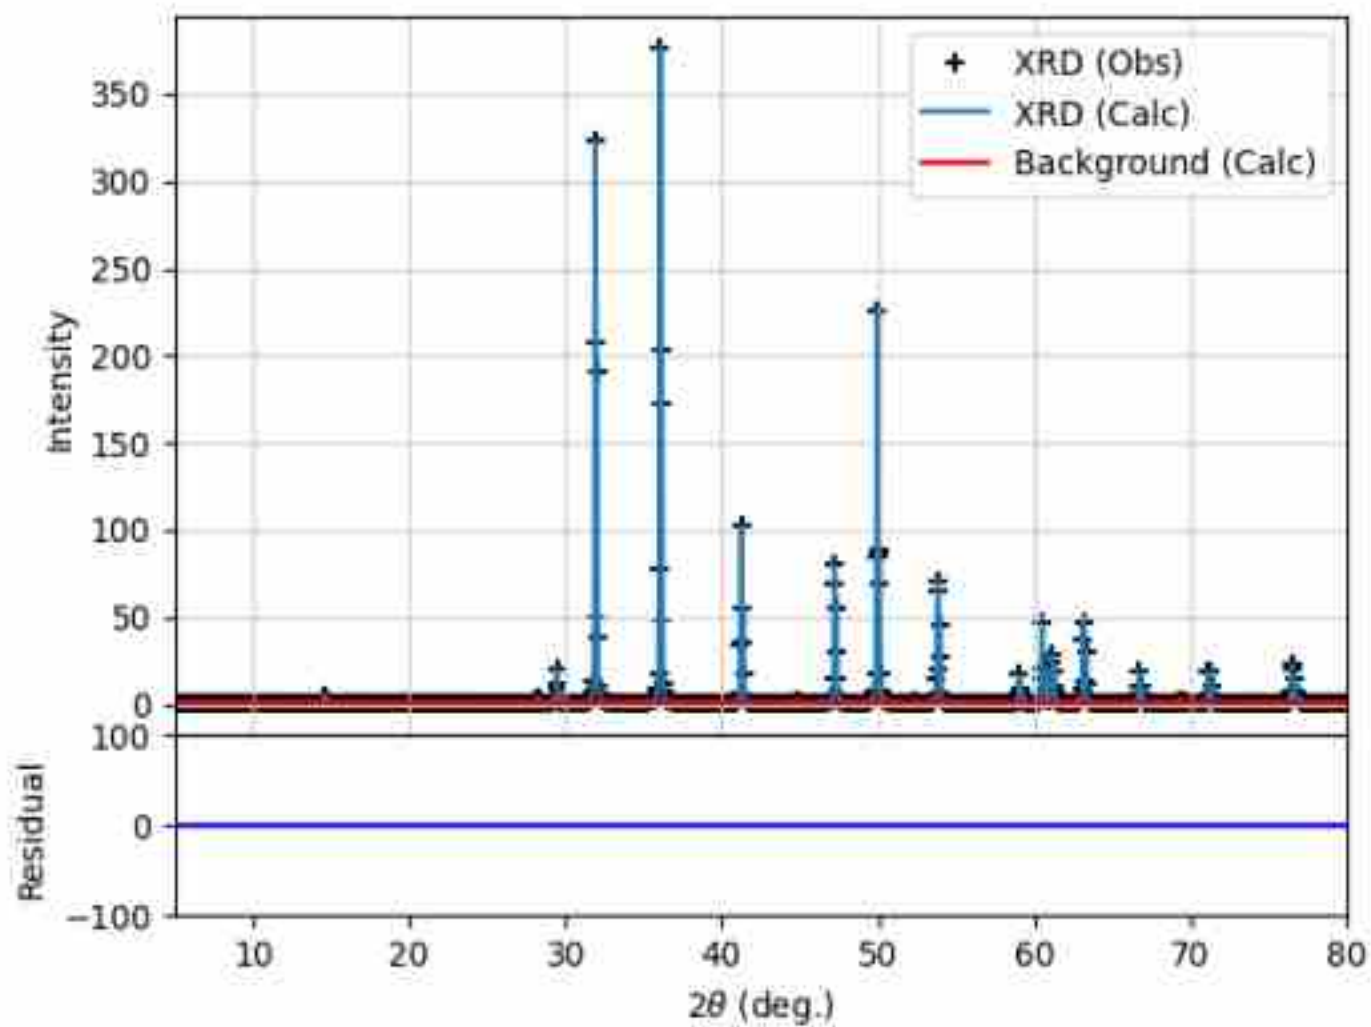

| RMSE before RR | Rwp     | RMSE after RR |
|----------------|---------|---------------|
| 0.029          | 0.00298 | 0.00039       |

# Ti<sub>4</sub>Mn<sub>2</sub>O<sub>8</sub>

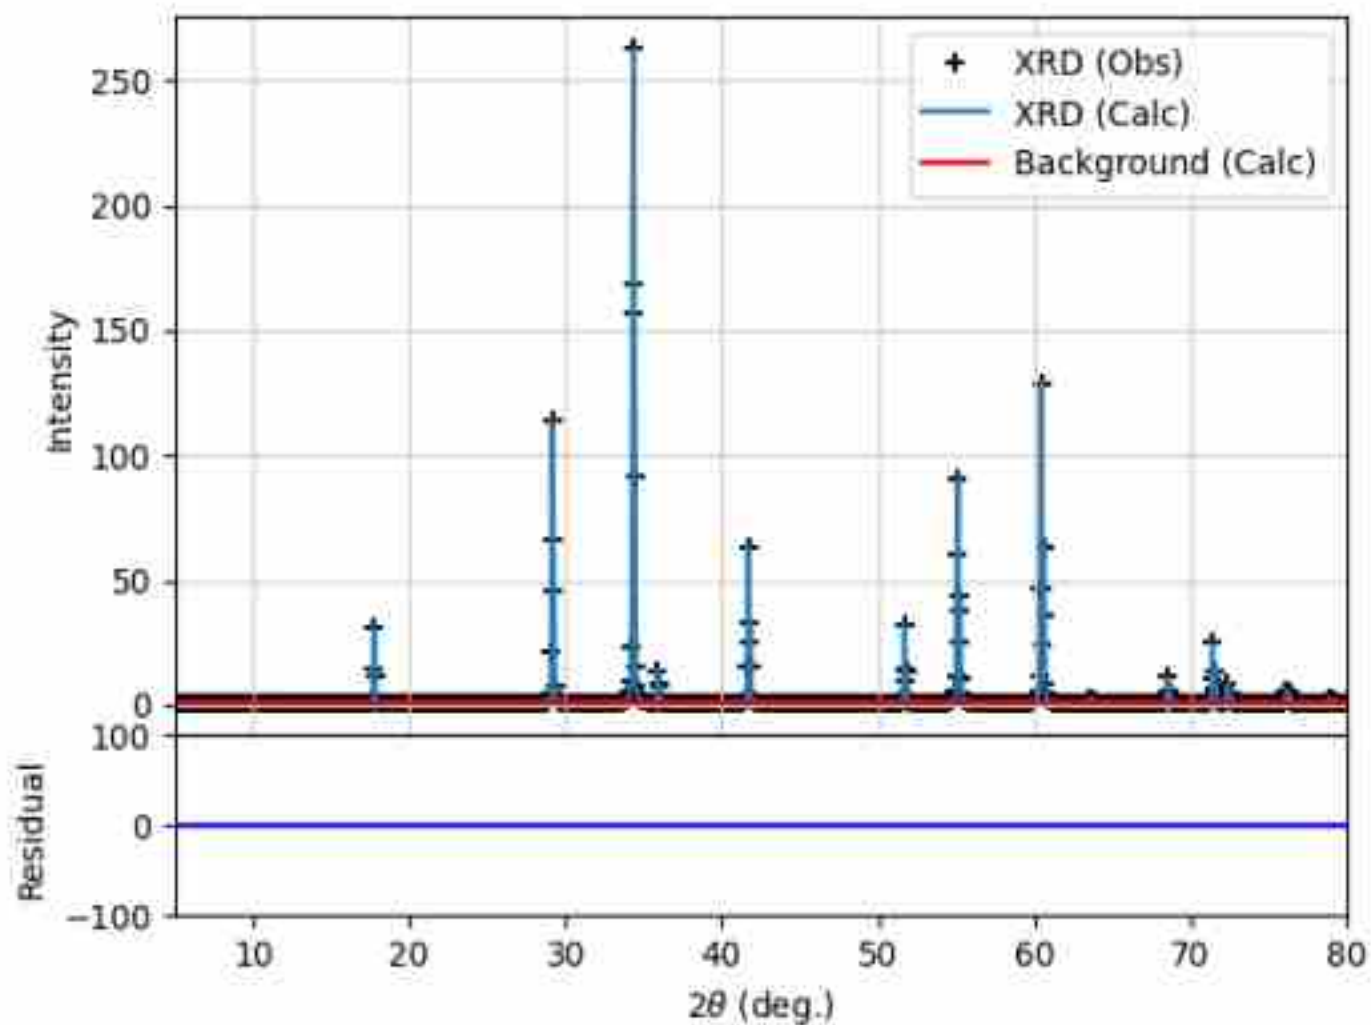

| RMSE before RR | Rwp     | RMSE after RR |
|----------------|---------|---------------|
| 0.029          | 0.03028 | 0.00488       |

# Ti6Co2S12

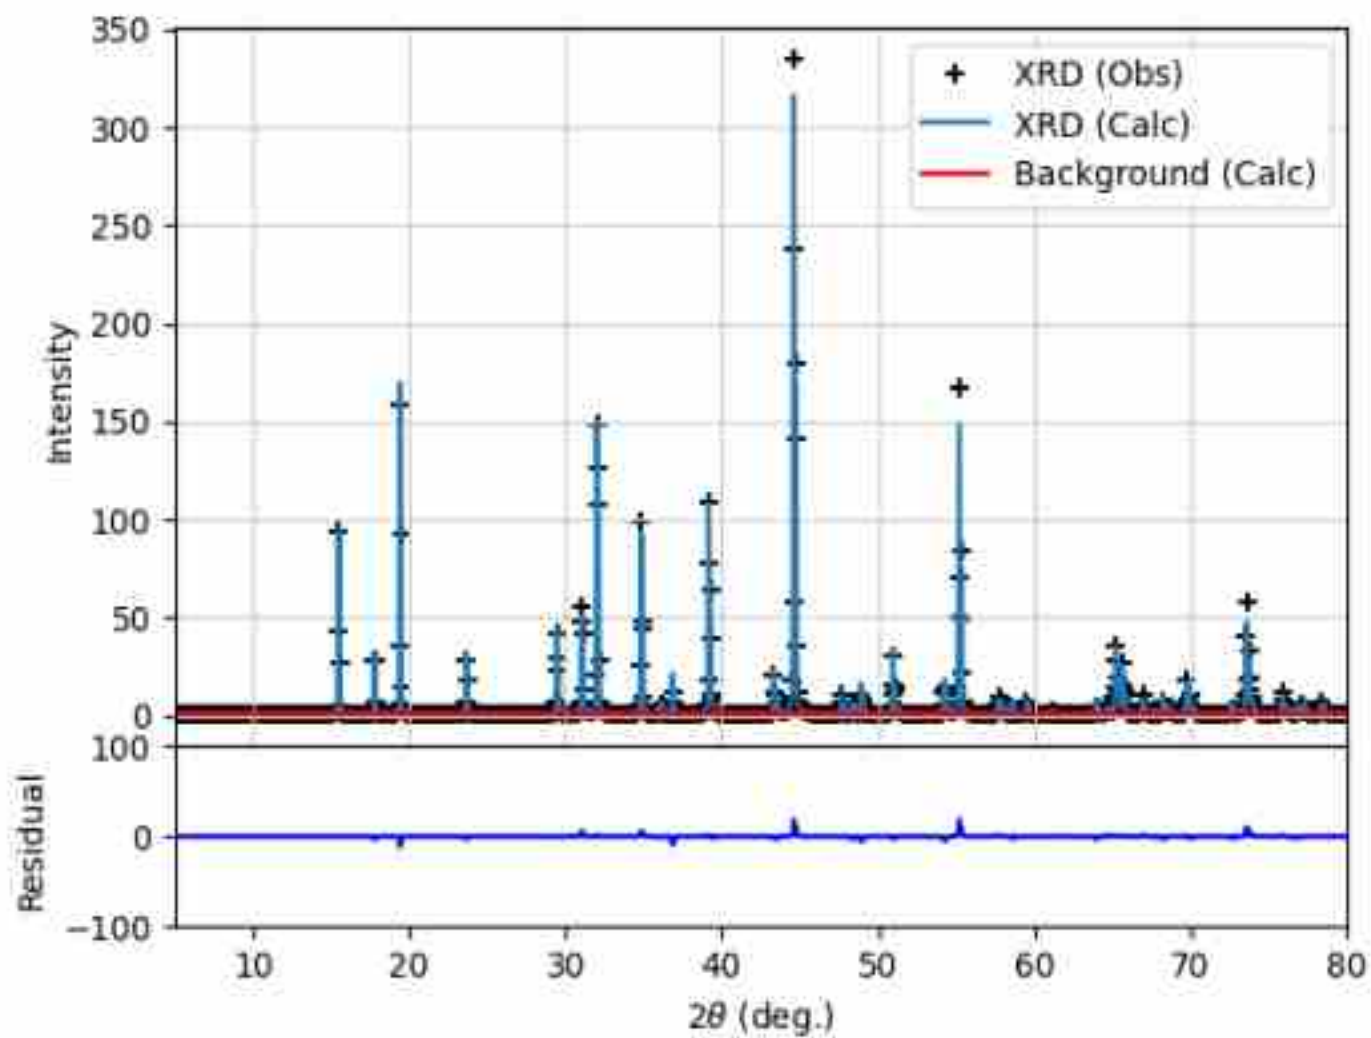

| RMSE before RR | Rwp      | RMSE after RR |
|----------------|----------|---------------|
| 0.029          | 12.80652 | 0.05303       |

# Tl2Pt4S6

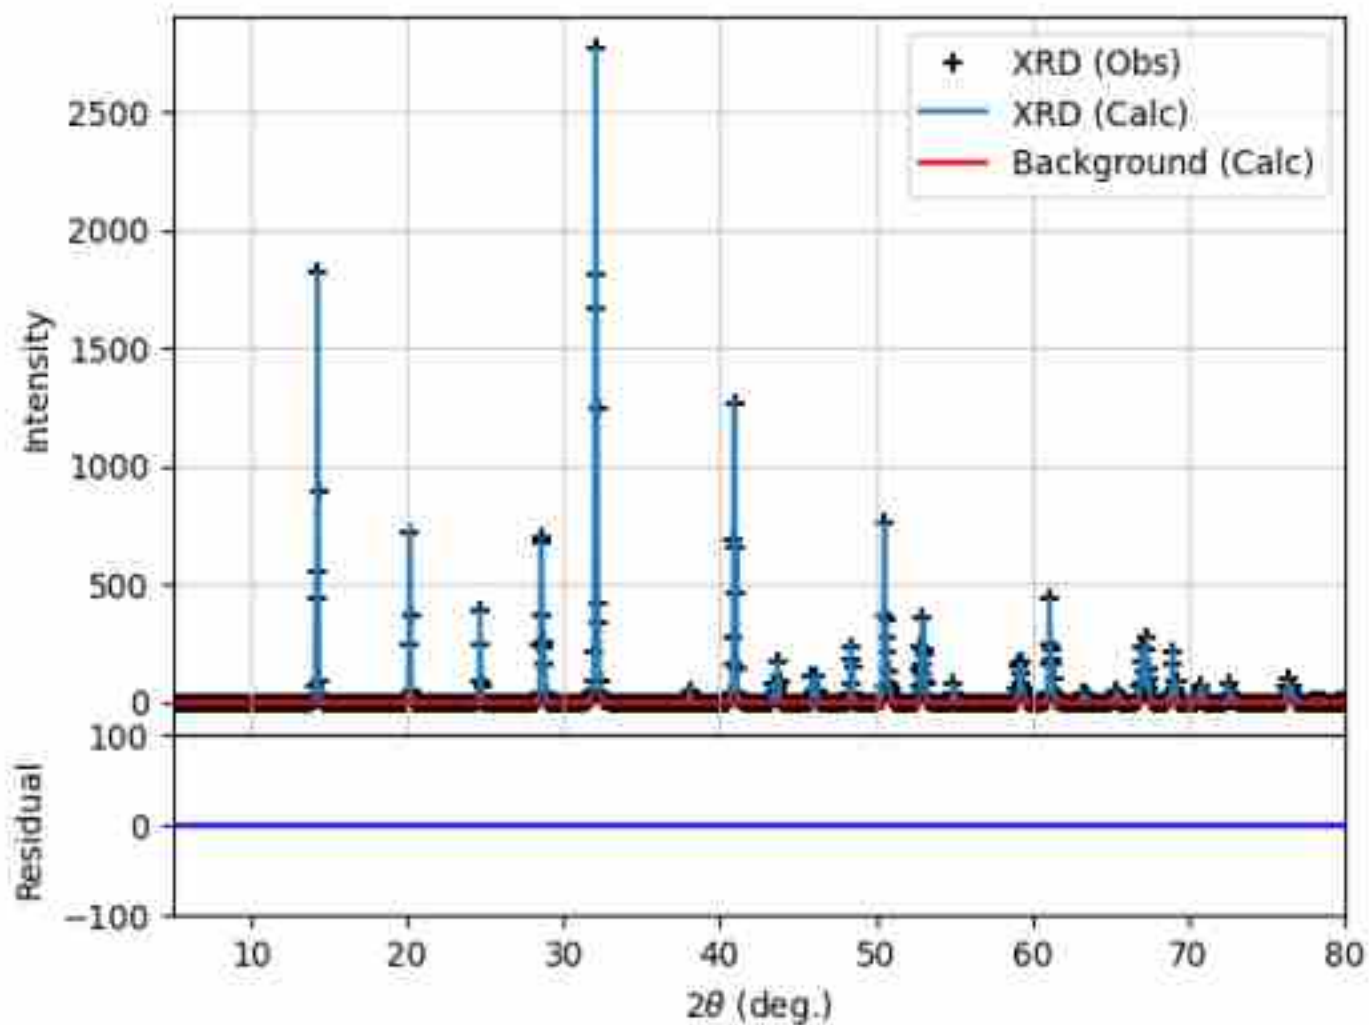

| RMSE before RR | Rwp     | RMSE after RR |
|----------------|---------|---------------|
| 0.029          | 0.00576 | 0.00184       |

# Tm<sub>4</sub>H<sub>4</sub>O<sub>8</sub>

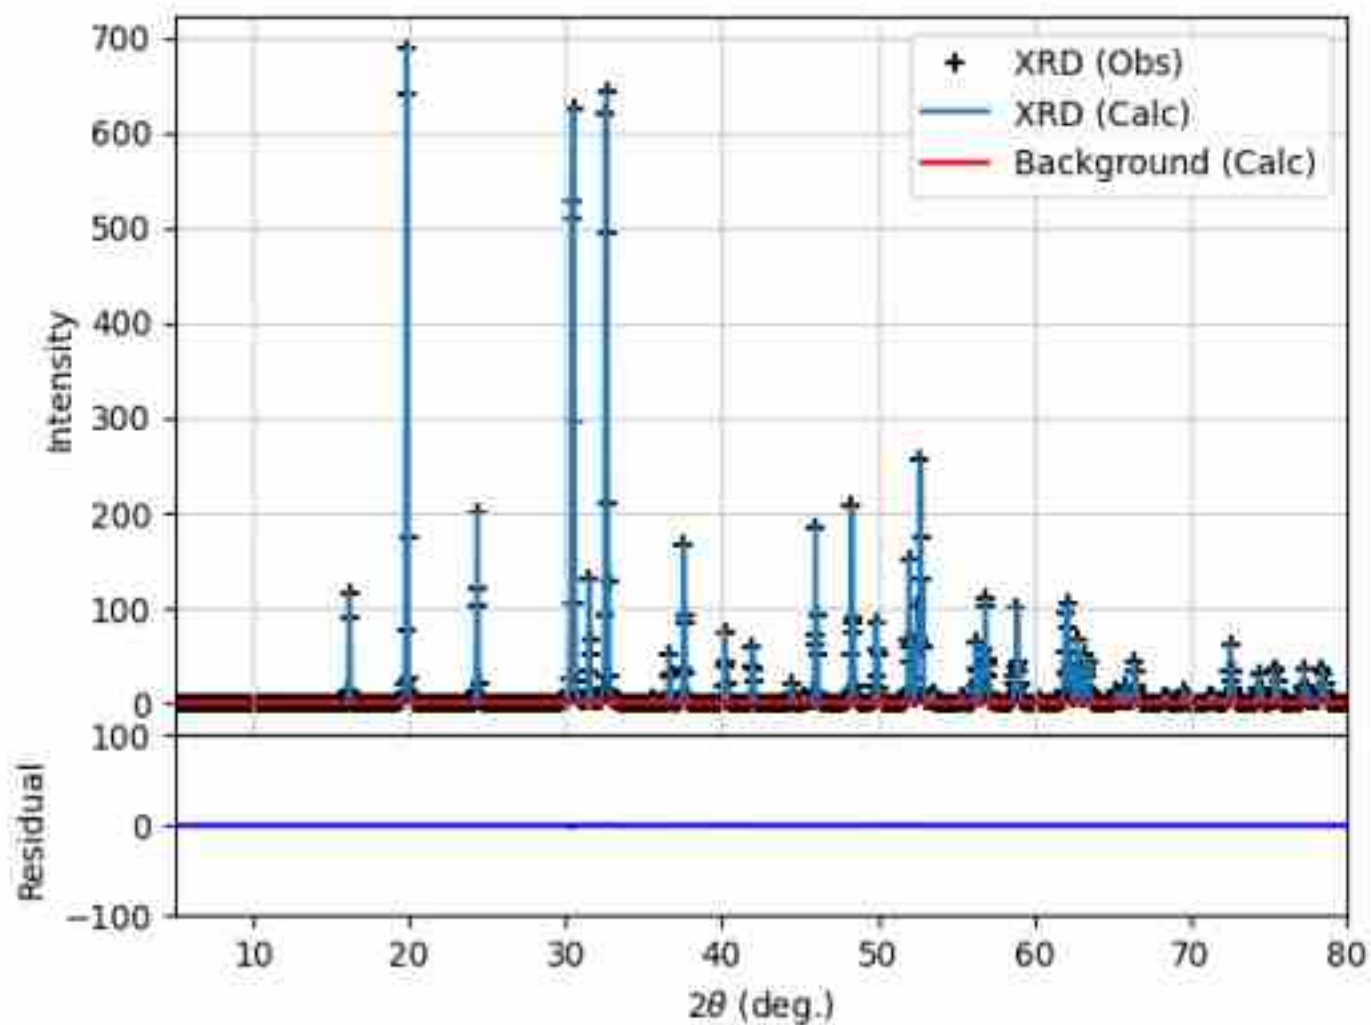

| RMSE before RR | Rwp     | RMSE after RR |
|----------------|---------|---------------|
| 0.029          | 0.22665 | 0.04929       |

# Tm<sub>8</sub>Te<sub>12</sub>

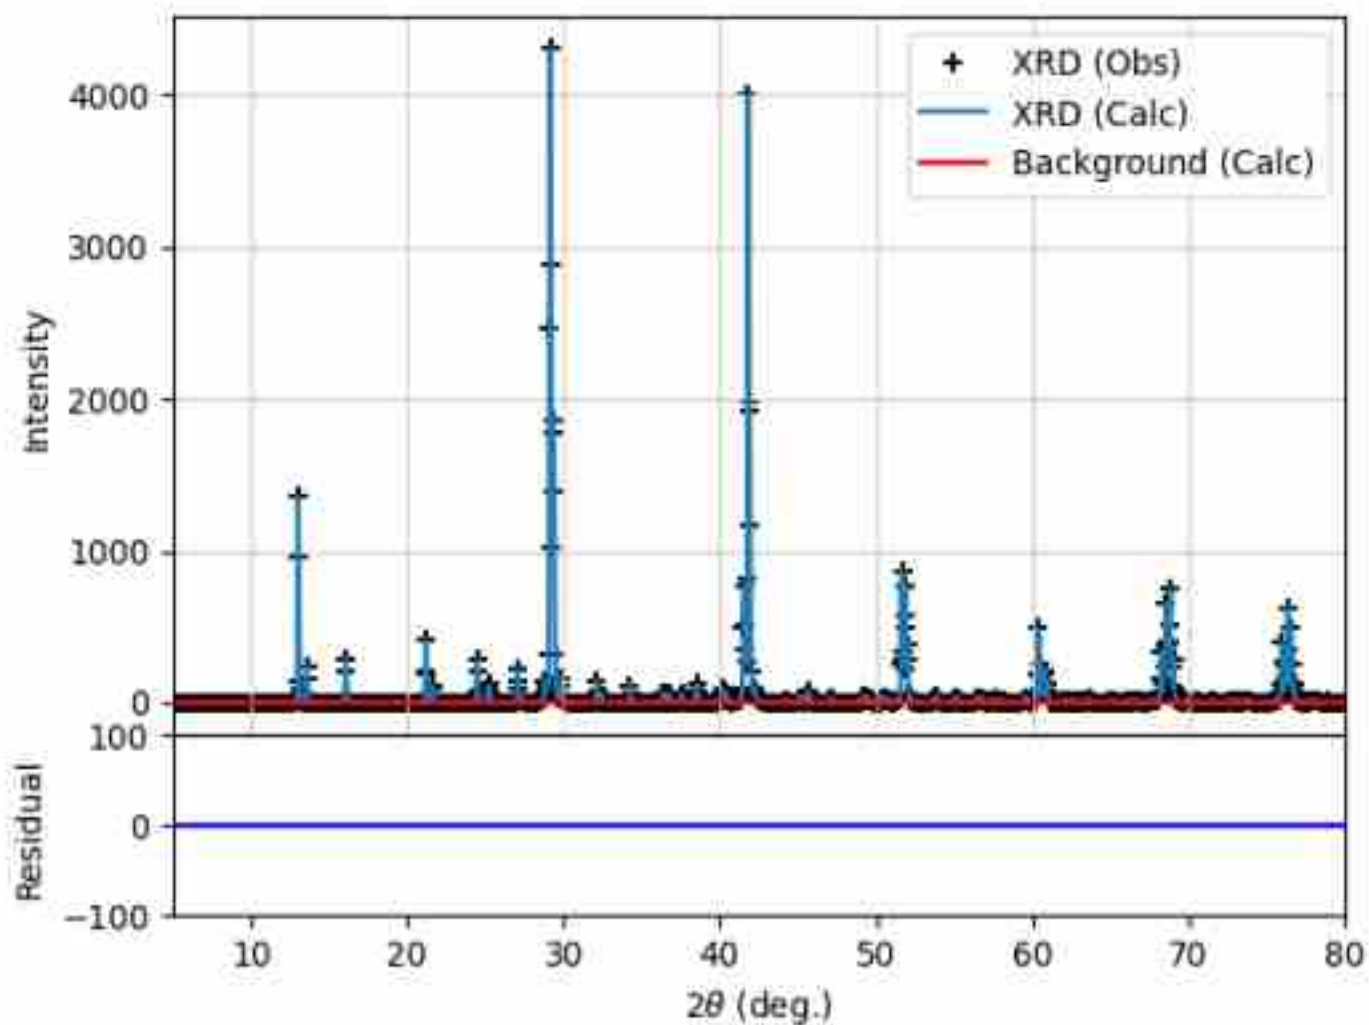

| RMSE before RR | Rwp     | RMSE after RR |
|----------------|---------|---------------|
| 0.029          | 0.00443 | 0.00035       |

# U<sub>2</sub>Si<sub>2</sub>S<sub>2</sub>

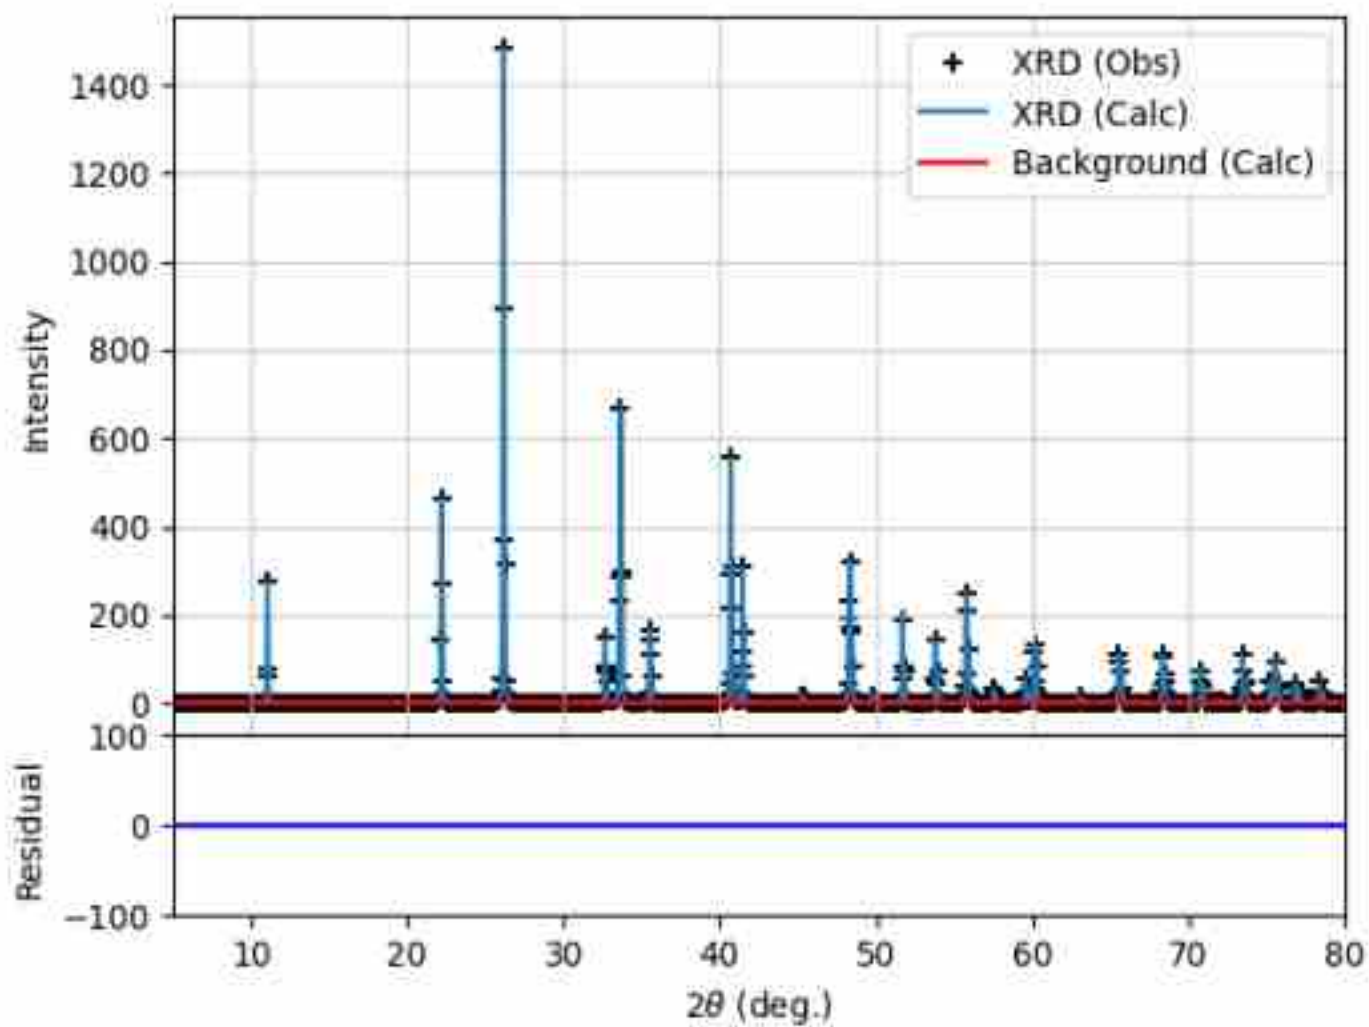

| RMSE before RR | Rwp     | RMSE after RR |
|----------------|---------|---------------|
| 0.029          | 0.02682 | 0.00466       |

# V1Ag1P2Se6

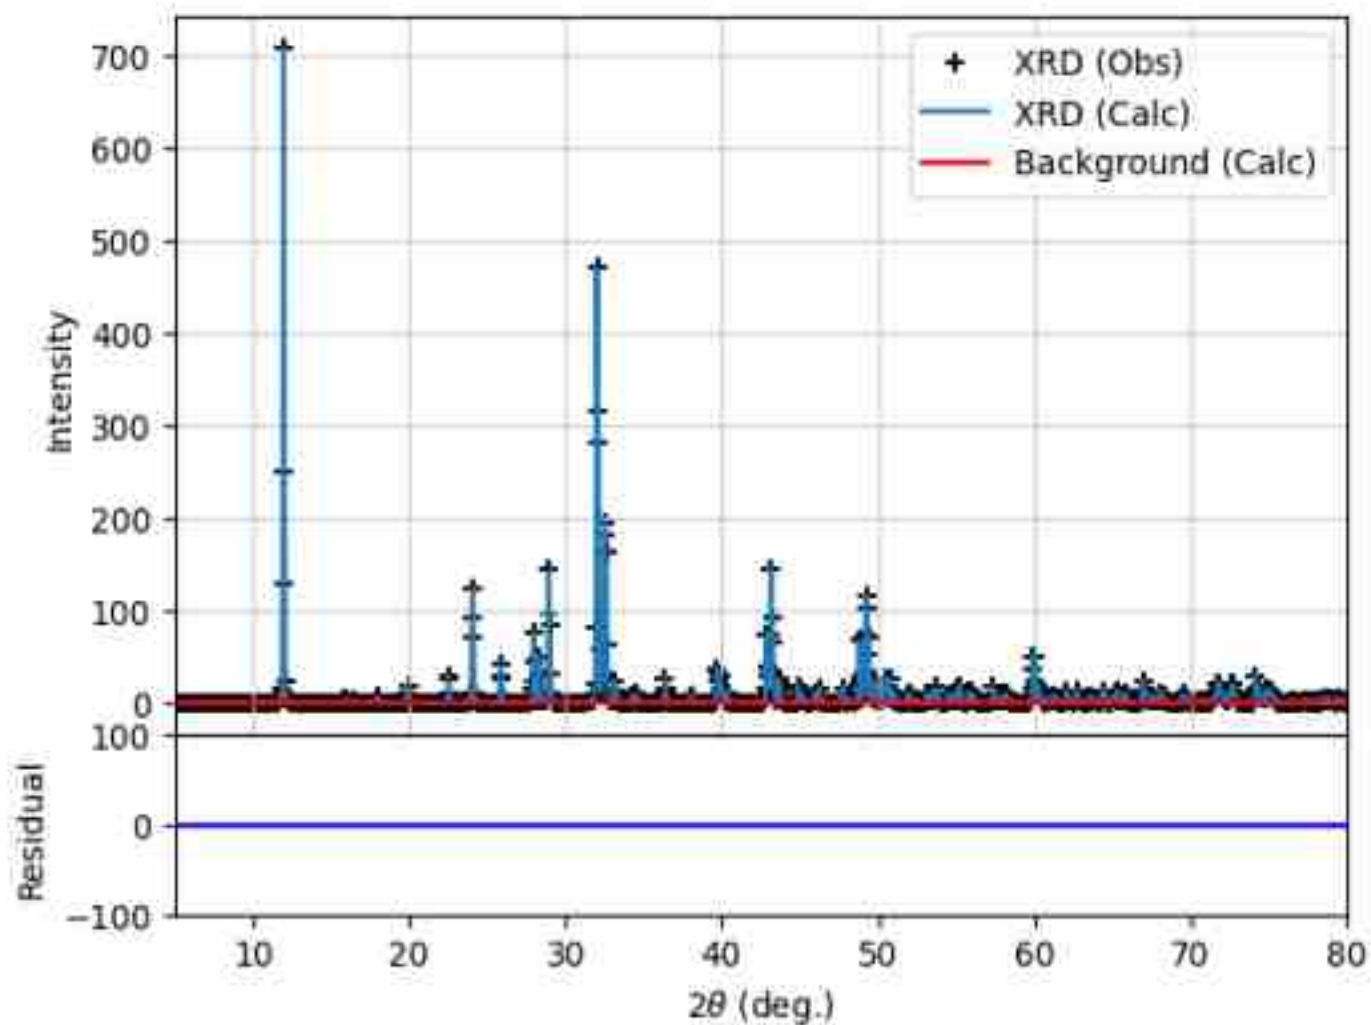

| RMSE before RR | Rwp     | RMSE after RR |
|----------------|---------|---------------|
| 0.029          | 0.00281 | 0.00033       |



# V2P2O10

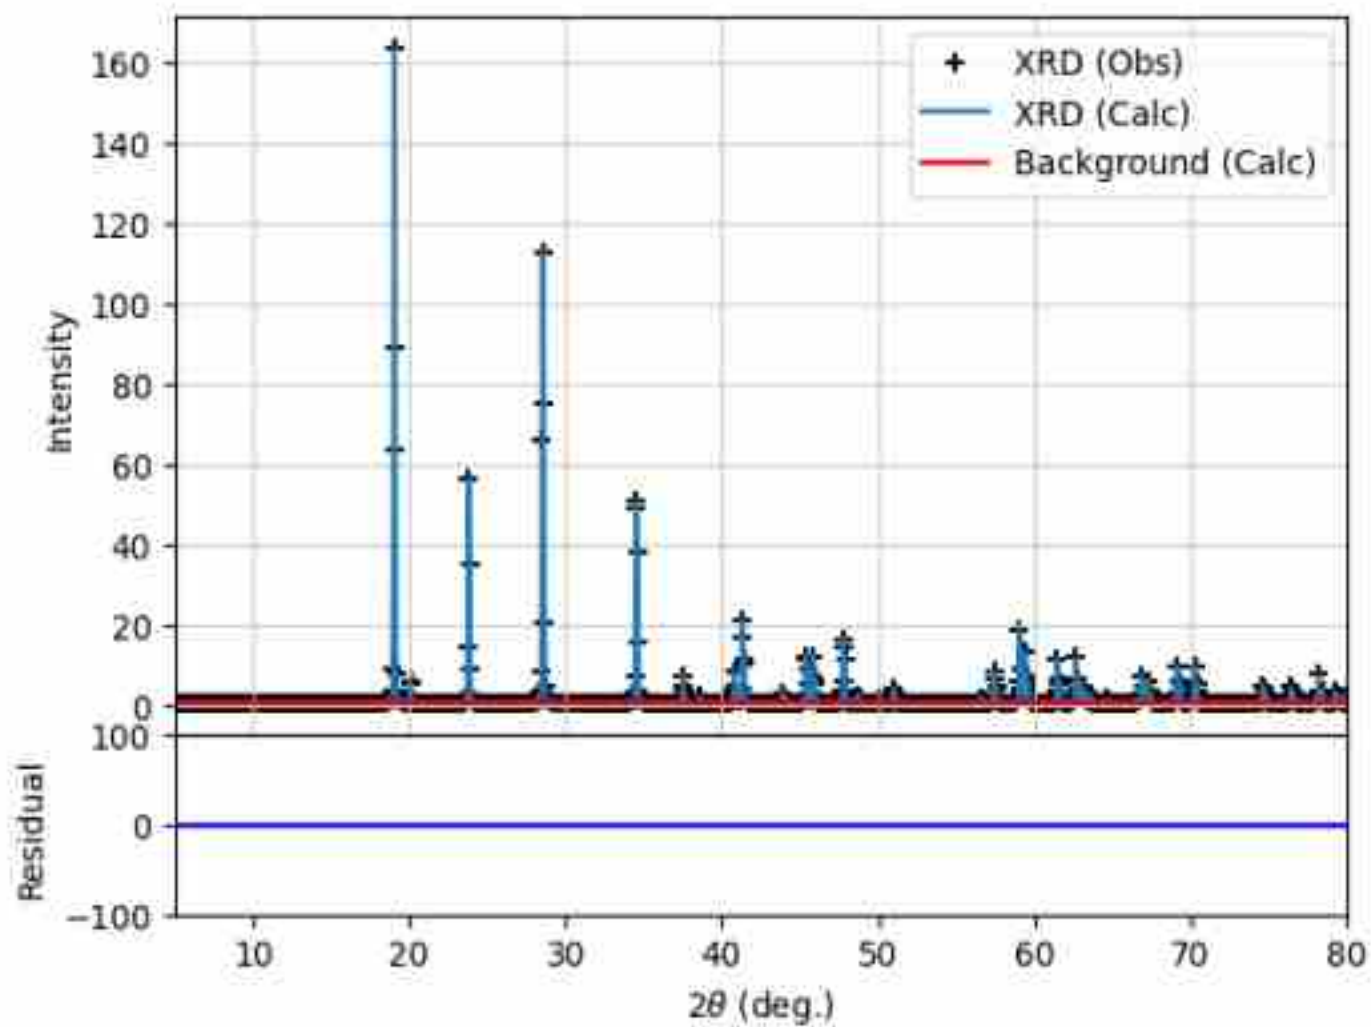

| RMSE before RR | Rwp     | RMSE after RR |
|----------------|---------|---------------|
| 0.029          | 0.00285 | 0.00084       |

# V<sub>3</sub>Co<sub>6</sub>Ni<sub>3</sub>

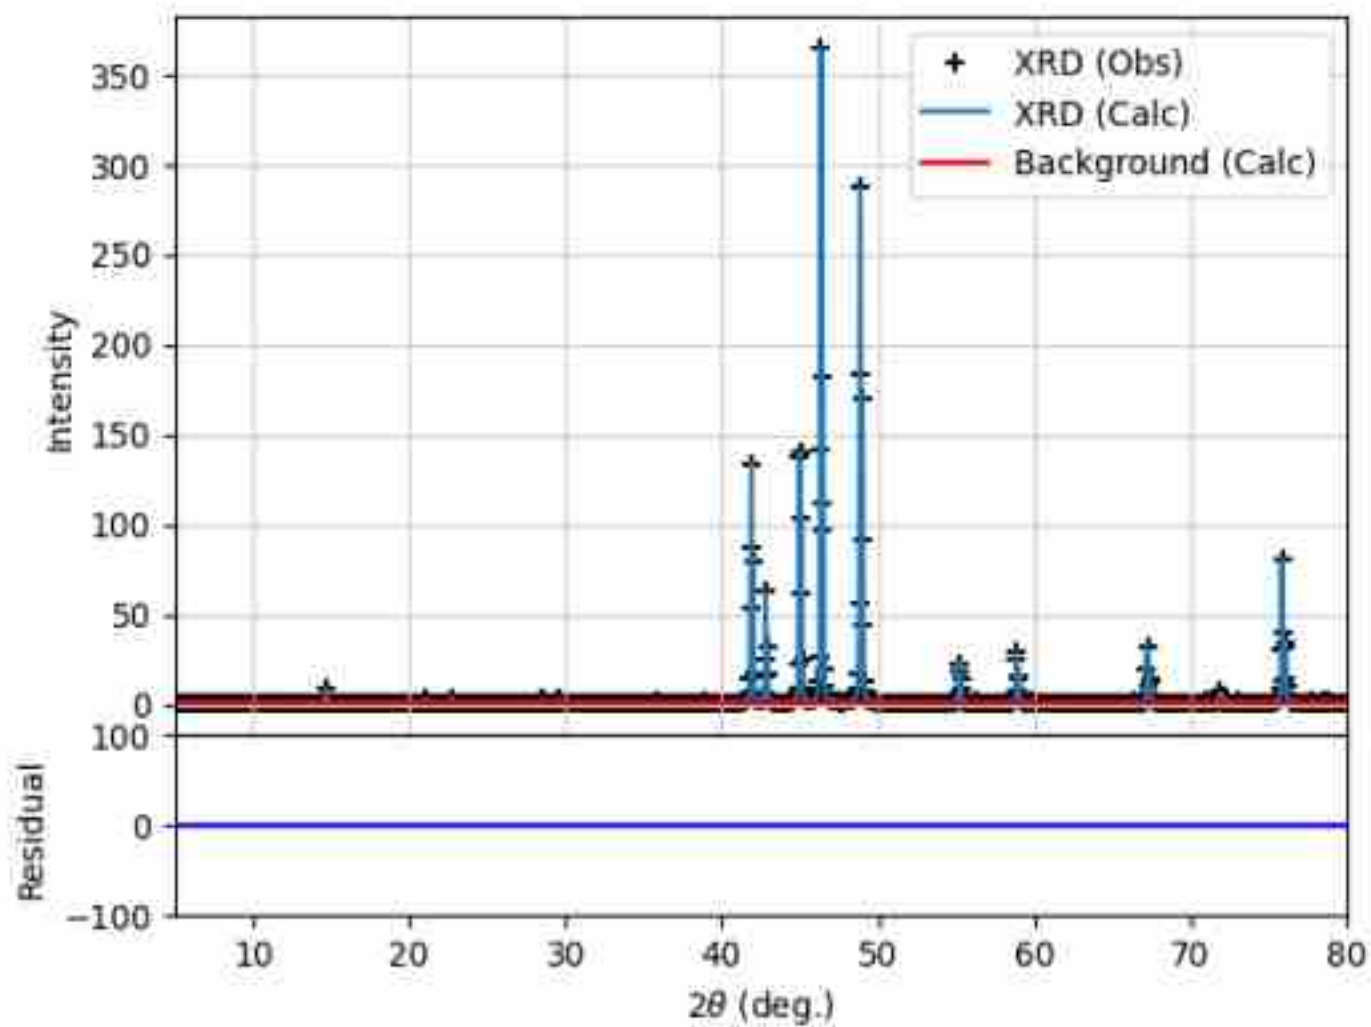

| RMSE before RR | Rwp     | RMSE after RR |
|----------------|---------|---------------|
| 0.029          | 0.00233 | 0.0004        |

# V6O7F5

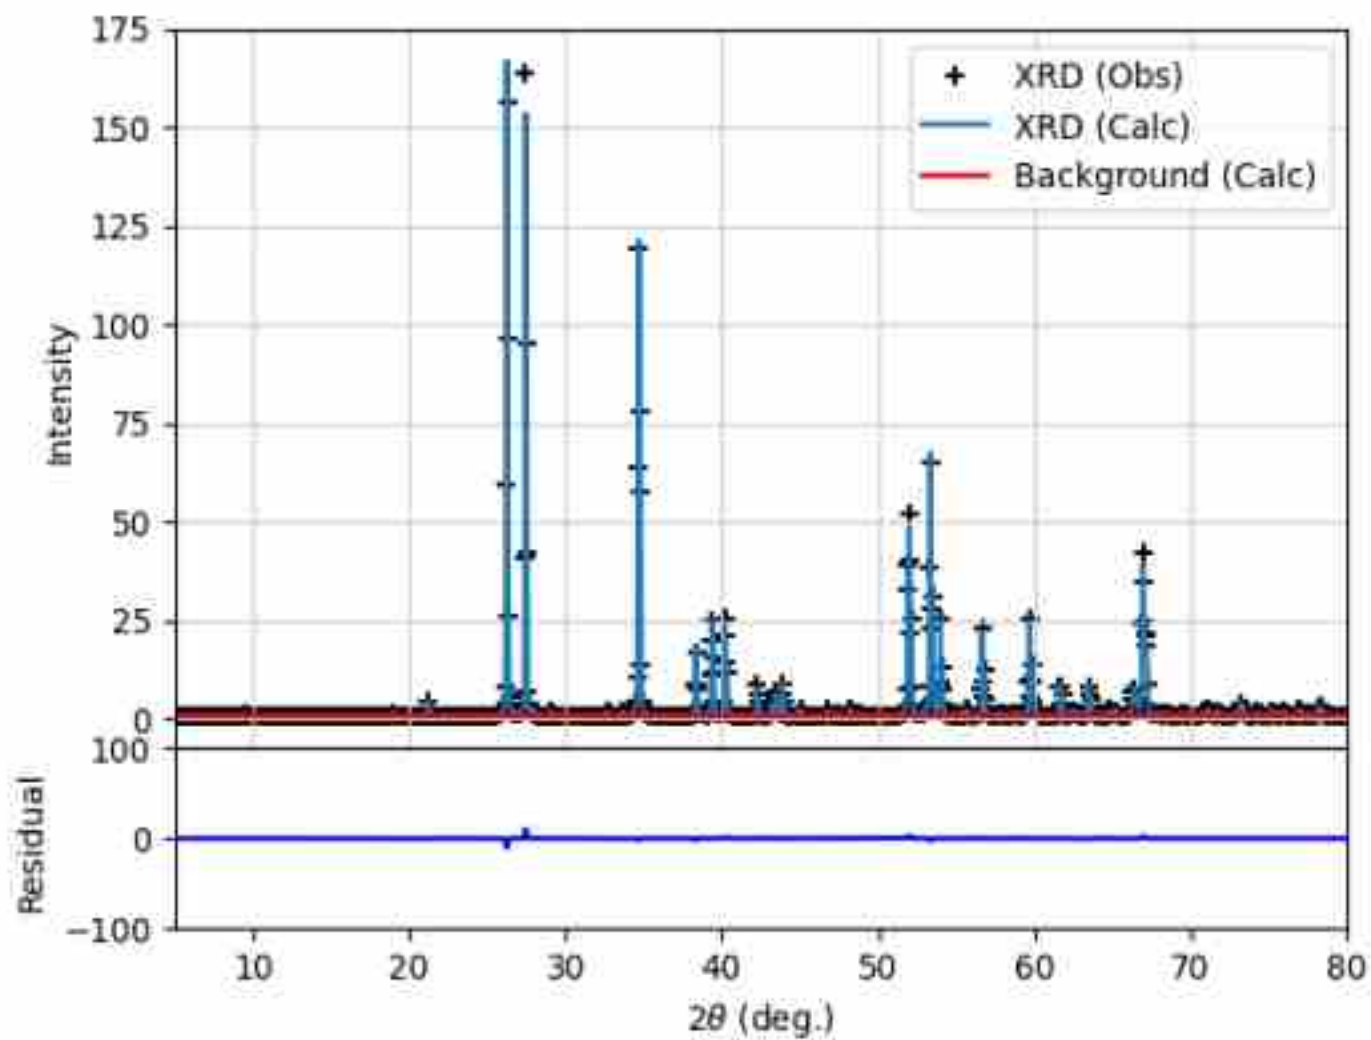

| RMSE before RR | Rwp     | RMSE after RR |
|----------------|---------|---------------|
| 0.029          | 4.47129 | 0.06557       |

# Y2Cr4S8

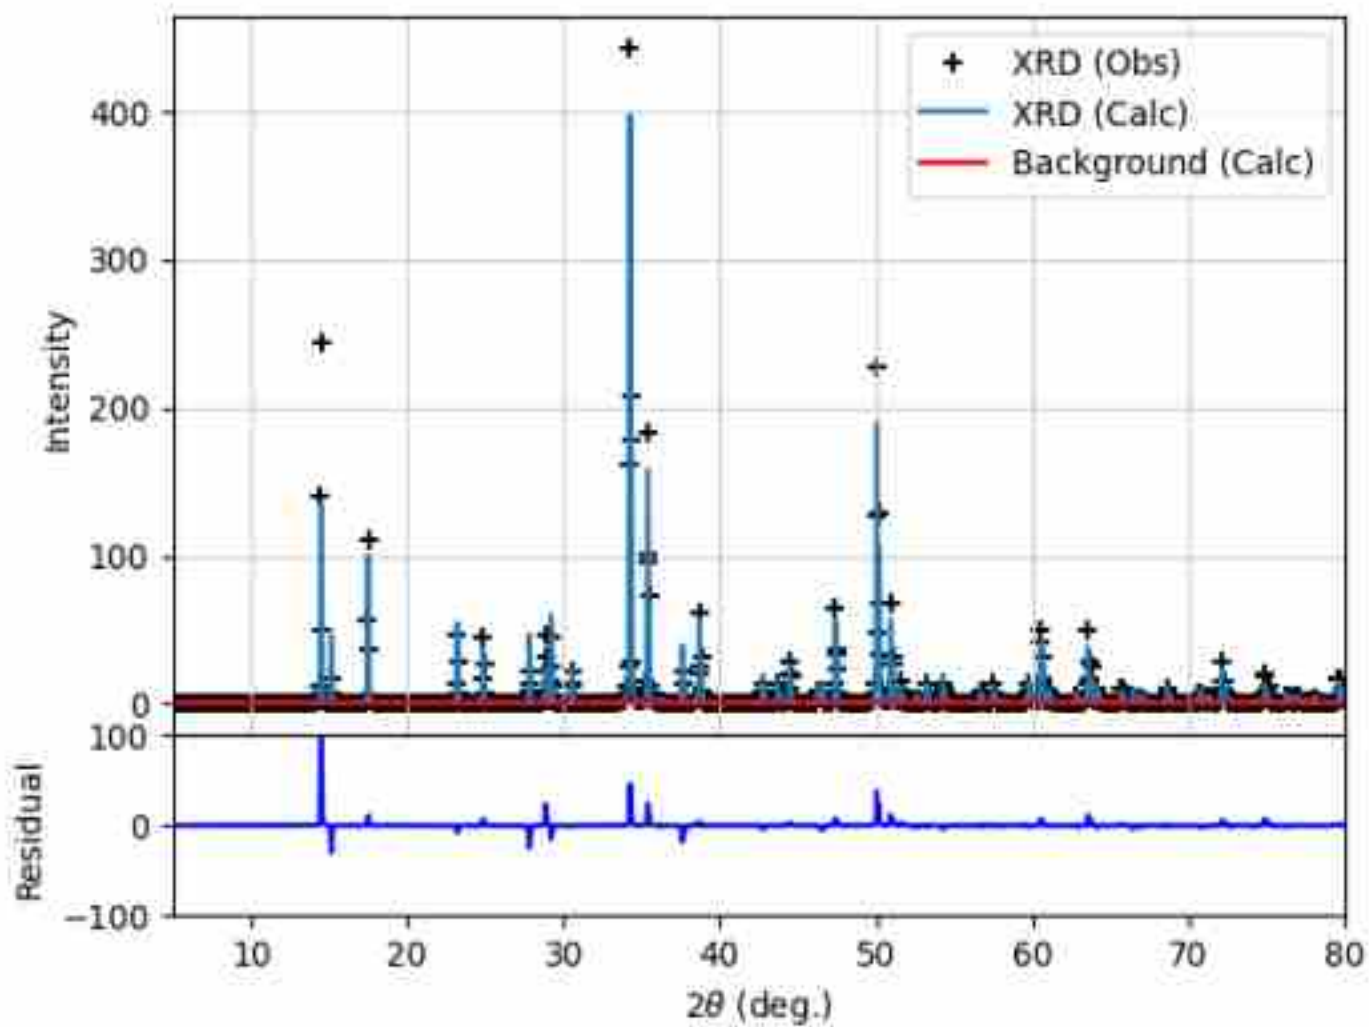

| RMSE before RR | Rwp      | RMSE after RR |
|----------------|----------|---------------|
| 0.029          | 25.61781 | 0.14634       |

# Y<sub>2</sub>Mg<sub>3</sub>Zn<sub>3</sub>

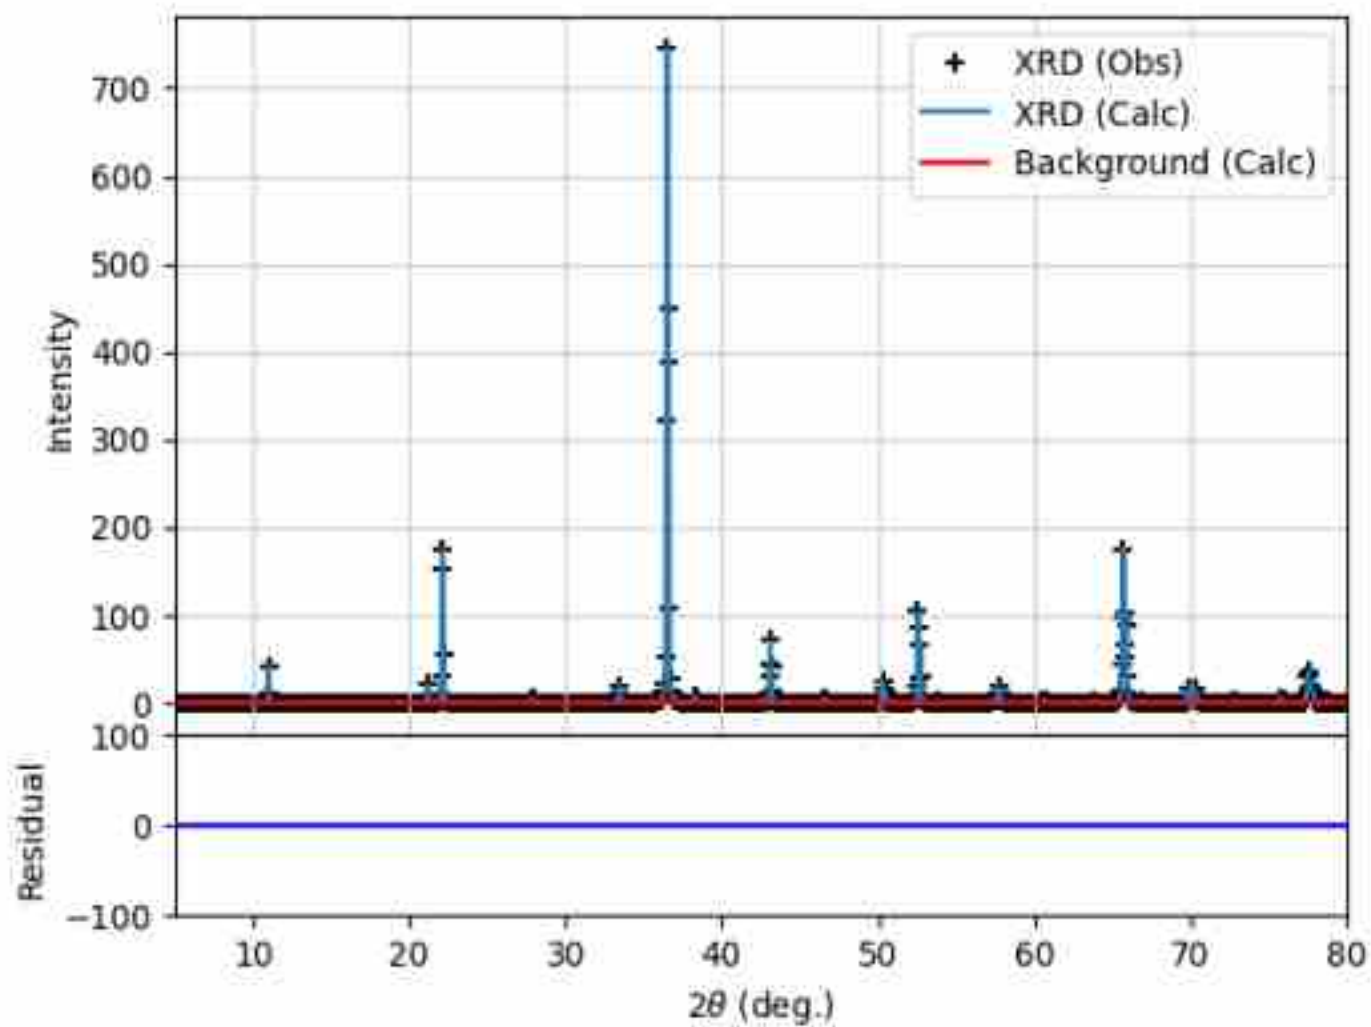

| RMSE before RR | Rwp     | RMSE after RR |
|----------------|---------|---------------|
| 0.029          | 0.00353 | 0.00039       |

# Y<sub>2</sub>Mn<sub>2</sub>O<sub>6</sub>

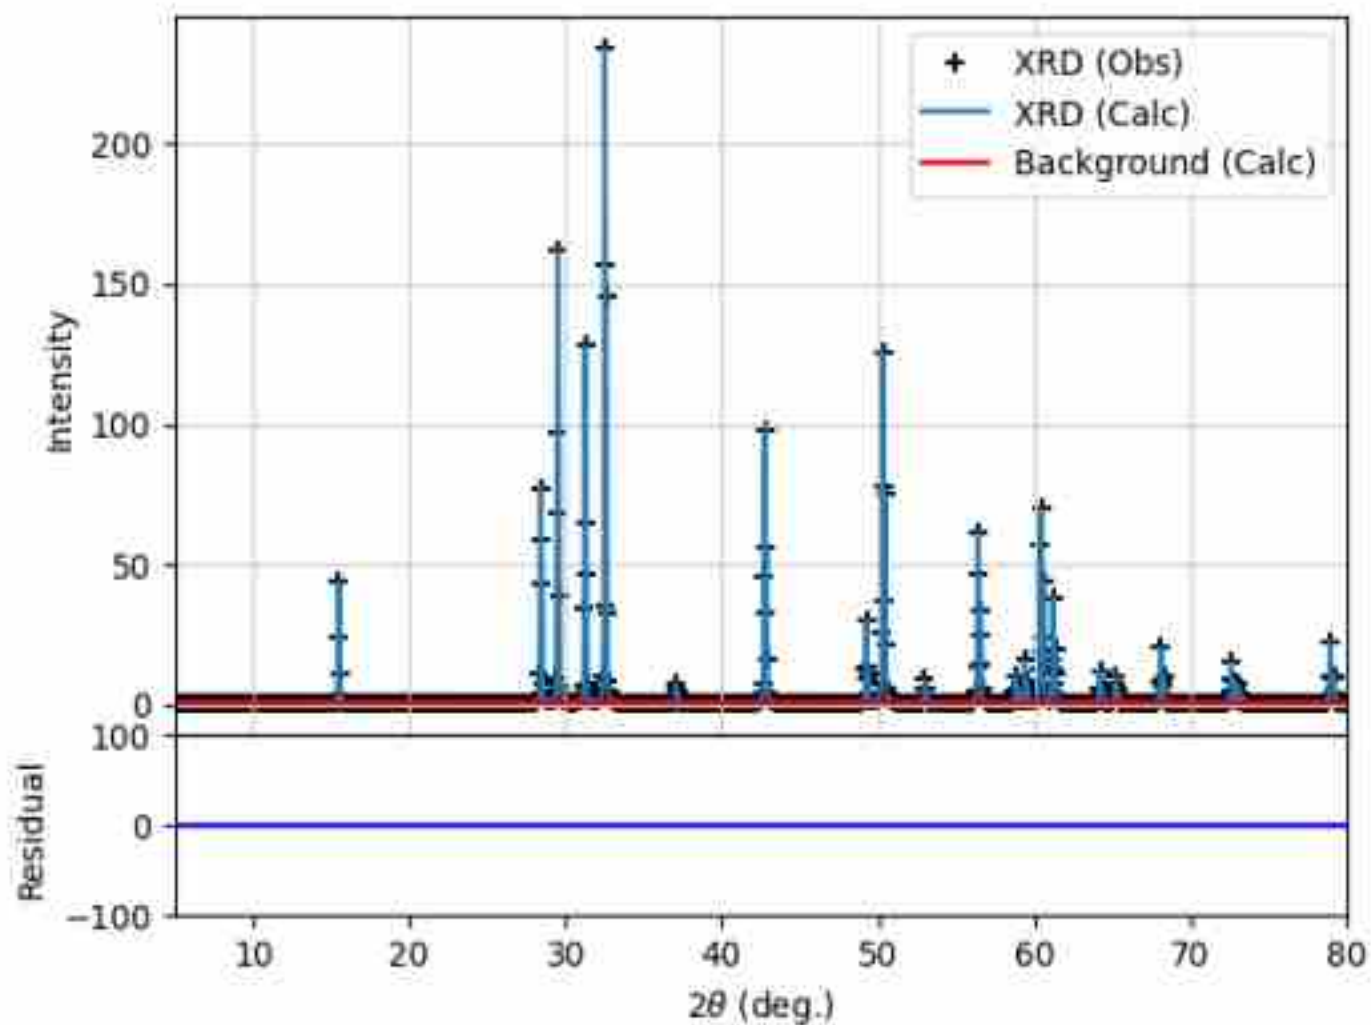

| RMSE before RR | Rwp    | RMSE after RR |
|----------------|--------|---------------|
| 0.029          | 0.0042 | 0.0011        |

# Y4Cu4S8

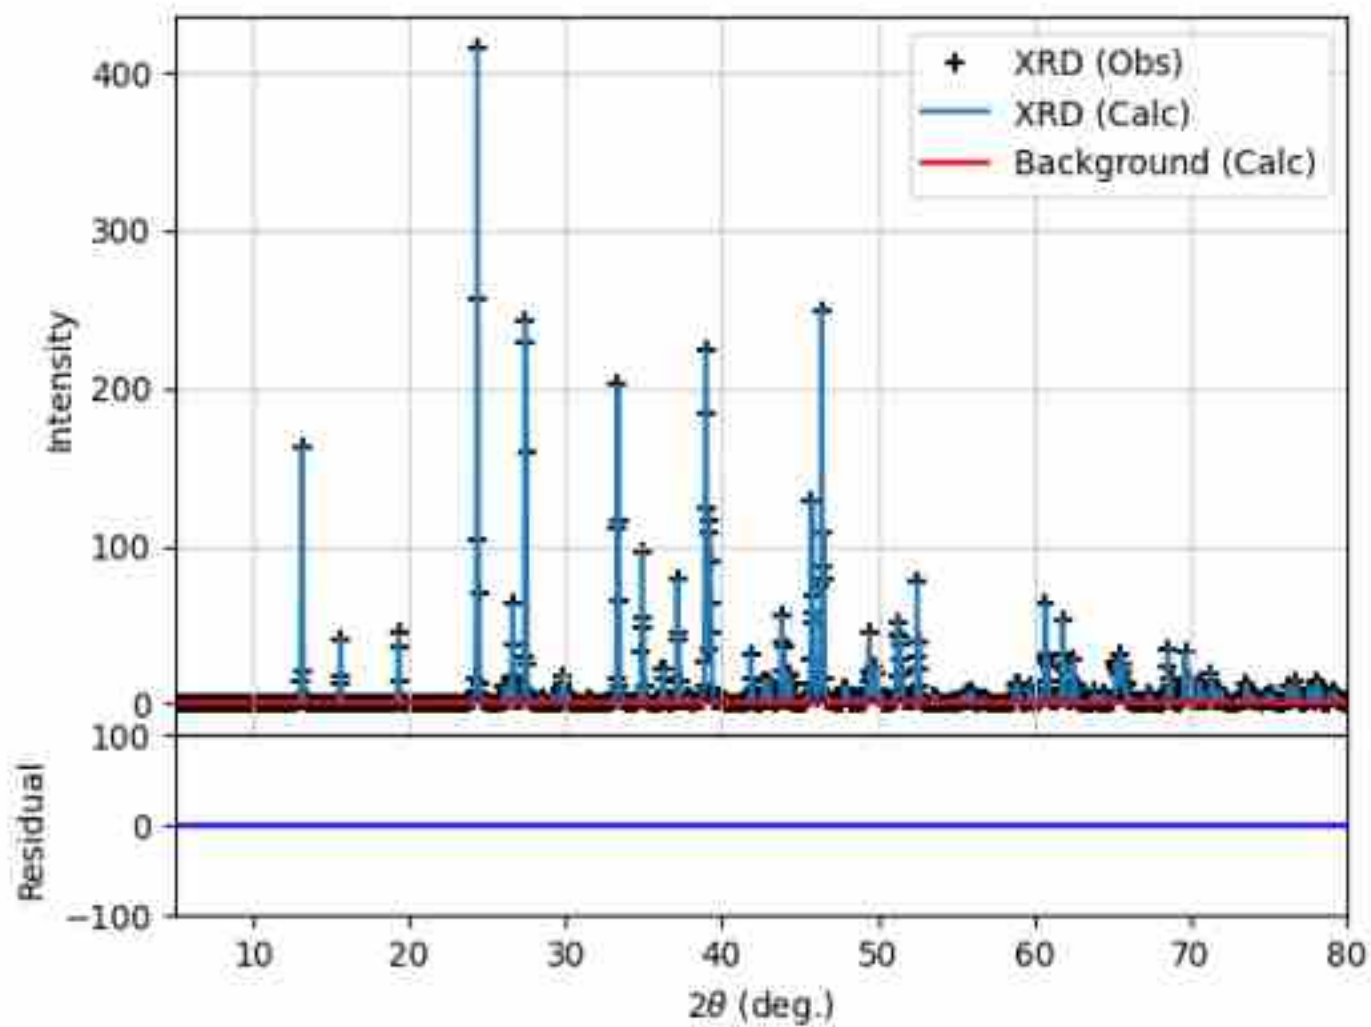

| RMSE before RR | Rwp     | RMSE after RR |
|----------------|---------|---------------|
| 0.029          | 0.00401 | 0.00049       |

# Y6T110

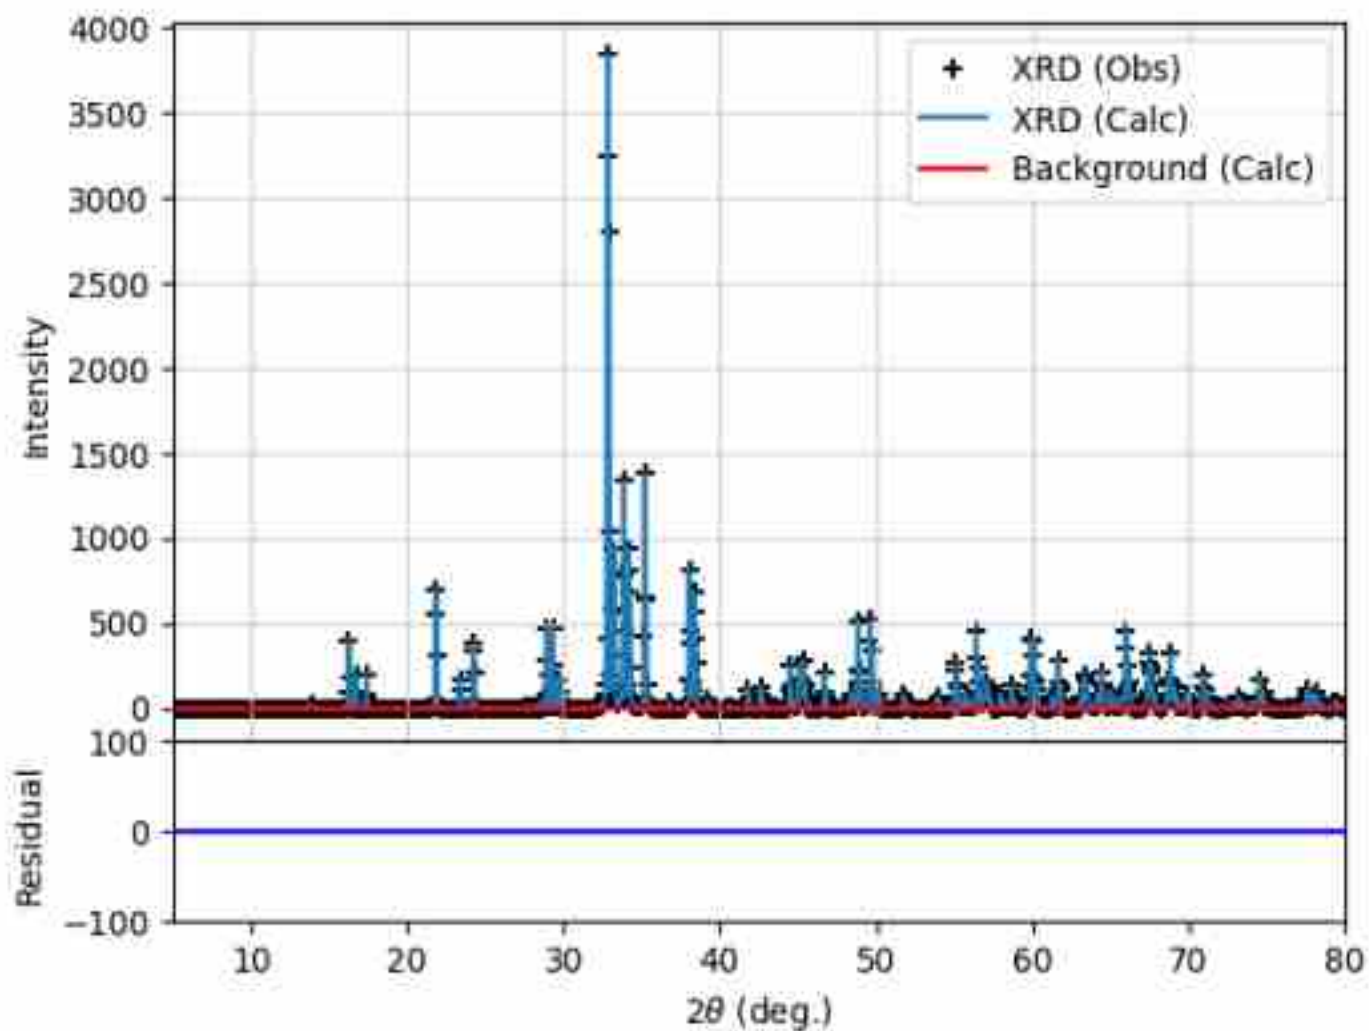

| RMSE before RR | Rwp     | RMSE after RR |
|----------------|---------|---------------|
| 0.029          | 0.00433 | 0.00032       |



# Yb<sub>4</sub>Cr<sub>4</sub>Sb<sub>12</sub>

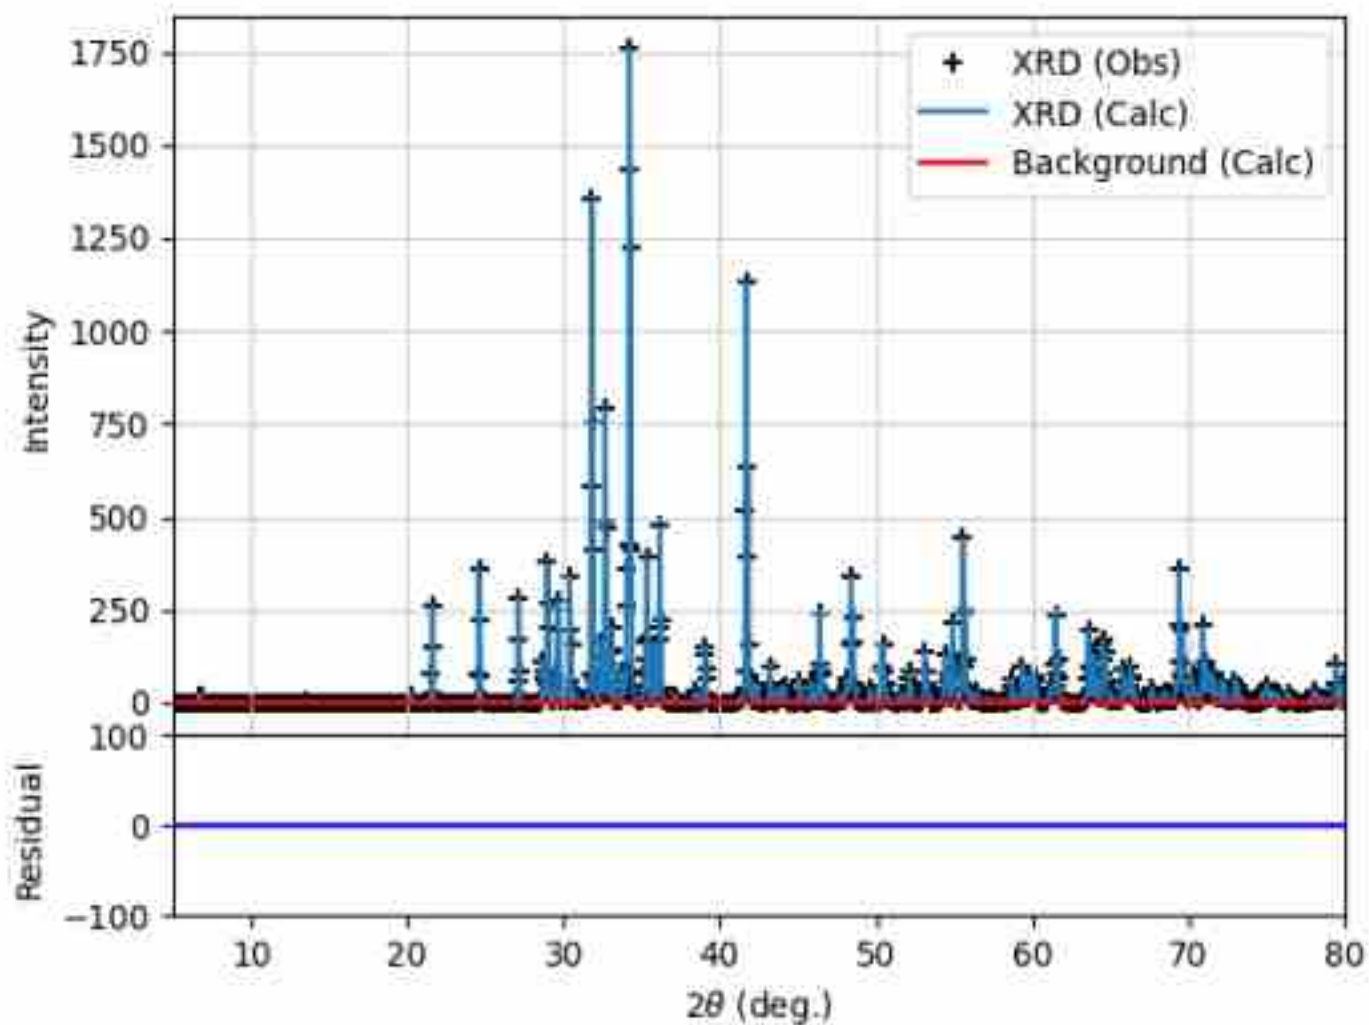

| RMSE before RR | Rwp     | RMSE after RR |
|----------------|---------|---------------|
| 0.029          | 0.00418 | 0.00045       |

# Zn<sub>1</sub>In<sub>3</sub>As<sub>1</sub>Se<sub>4</sub>

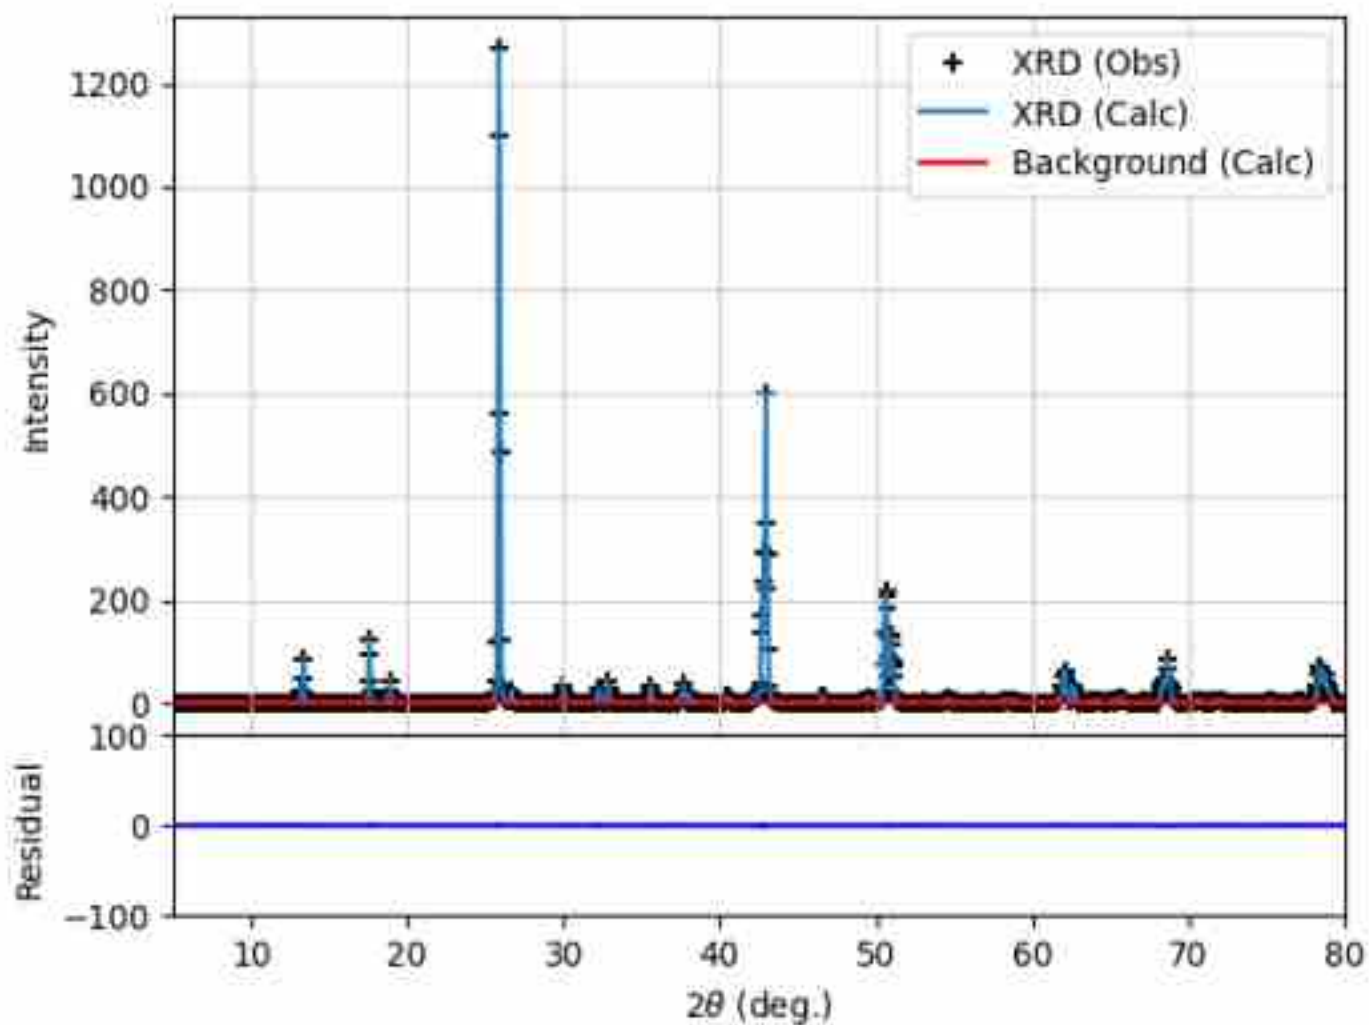

| RMSE before RR | Rwp     | RMSE after RR |
|----------------|---------|---------------|
| 0.029          | 1.12535 | 0.0236        |

# Zr<sub>2</sub>Mn<sub>2</sub>O<sub>6</sub>

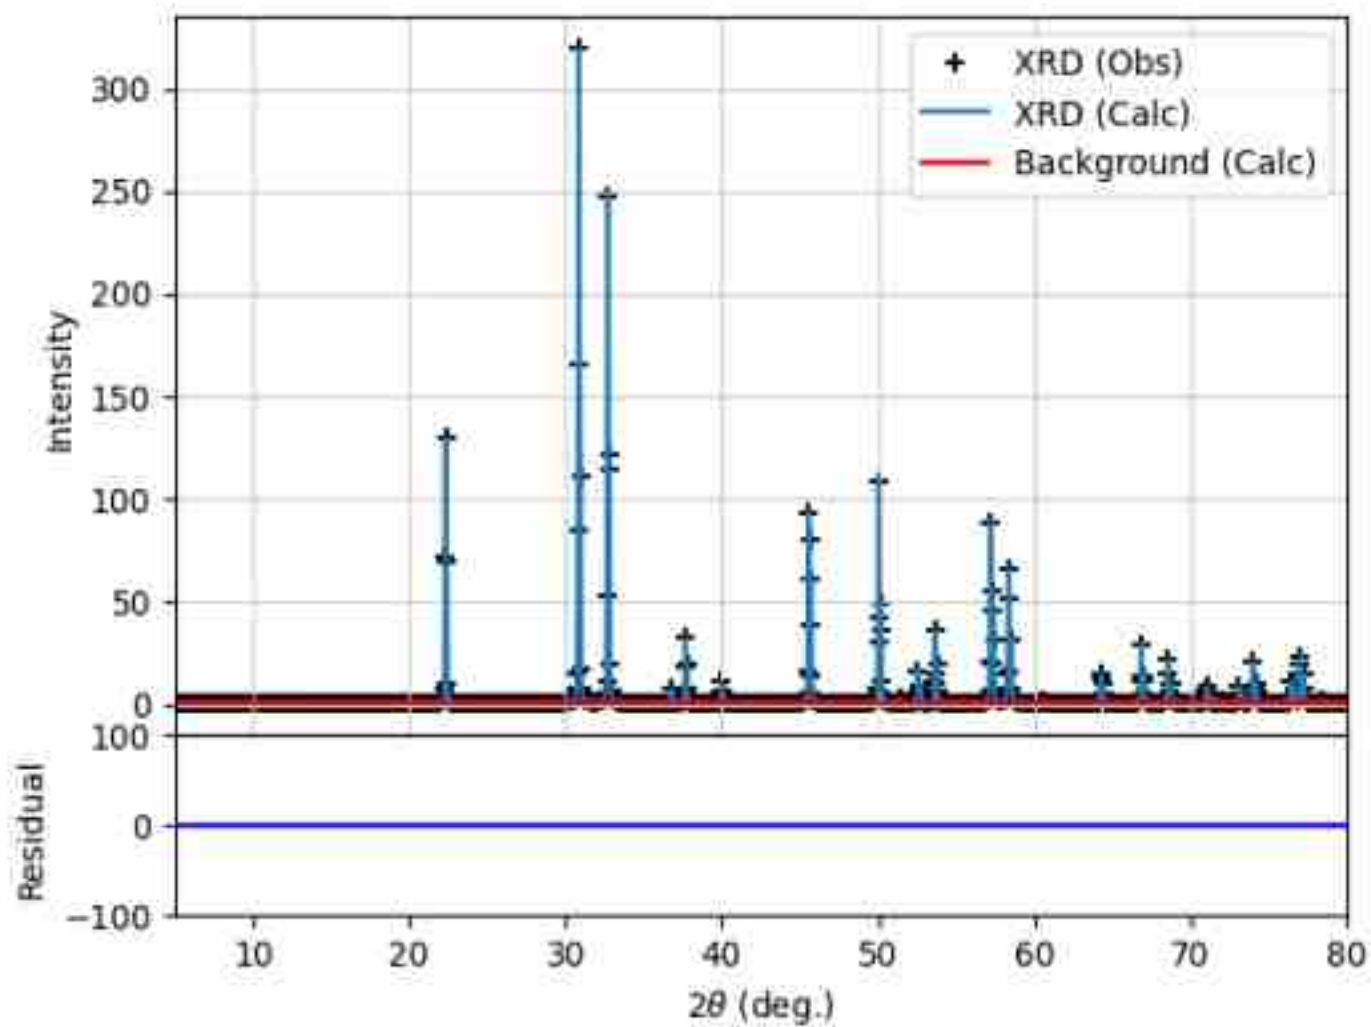

| RMSE before RR | Rwp    | RMSE after RR |
|----------------|--------|---------------|
| 0.029          | 0.0032 | 0.00092       |

# Ba<sub>2</sub>HoTaO<sub>6</sub>

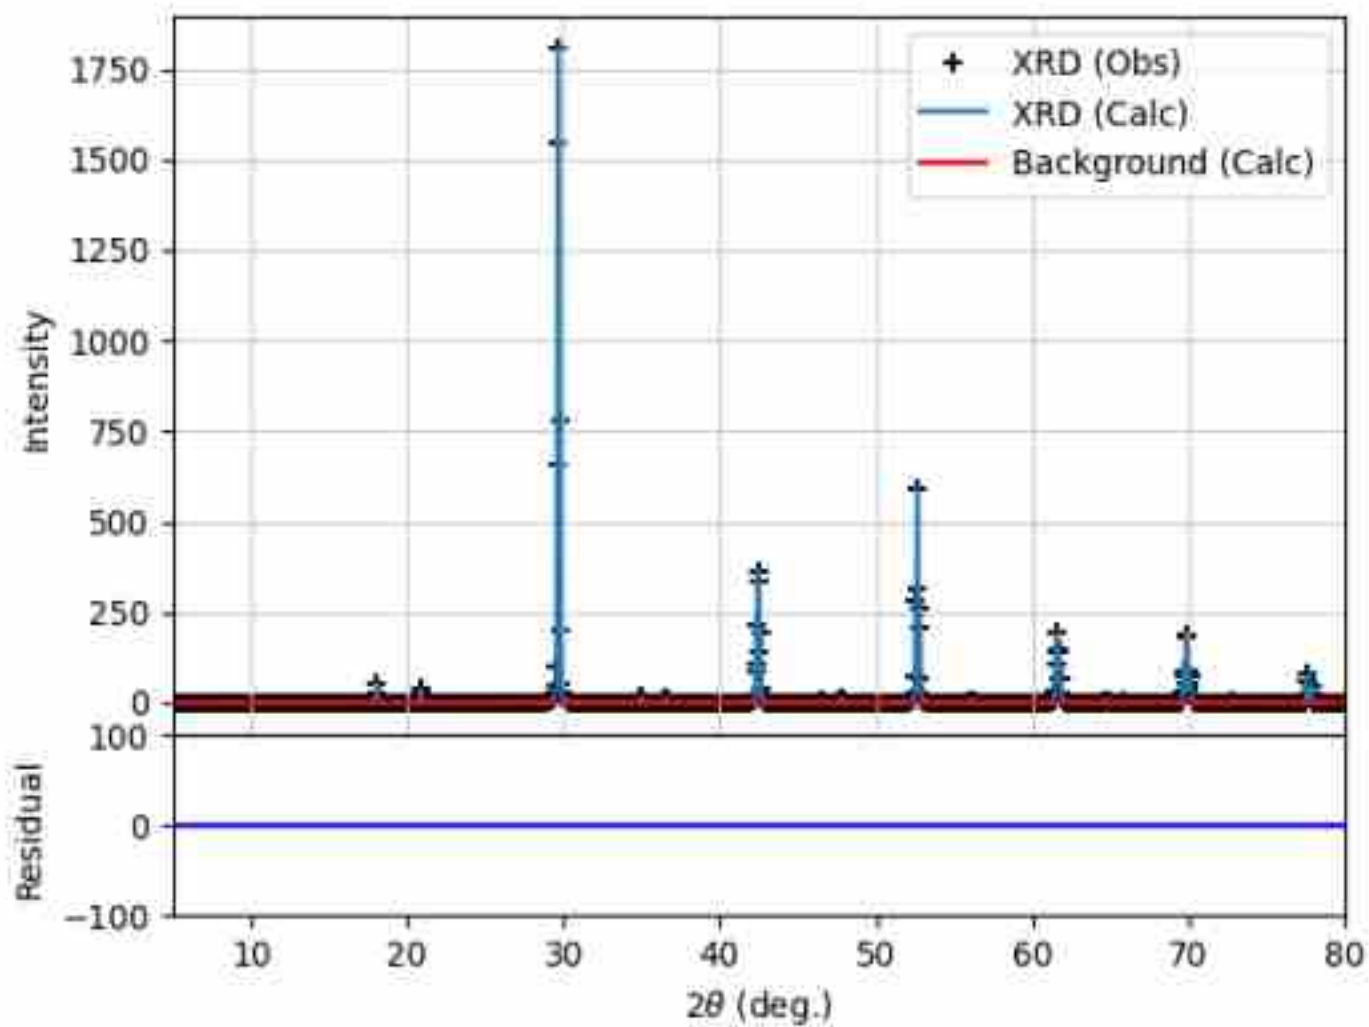

| RMSE before RR | Rwp     | RMSE after RR |
|----------------|---------|---------------|
| 0.031          | 0.00386 | 0.0017        |

# Ba<sub>2</sub>Ni<sub>2</sub>O<sub>6</sub>

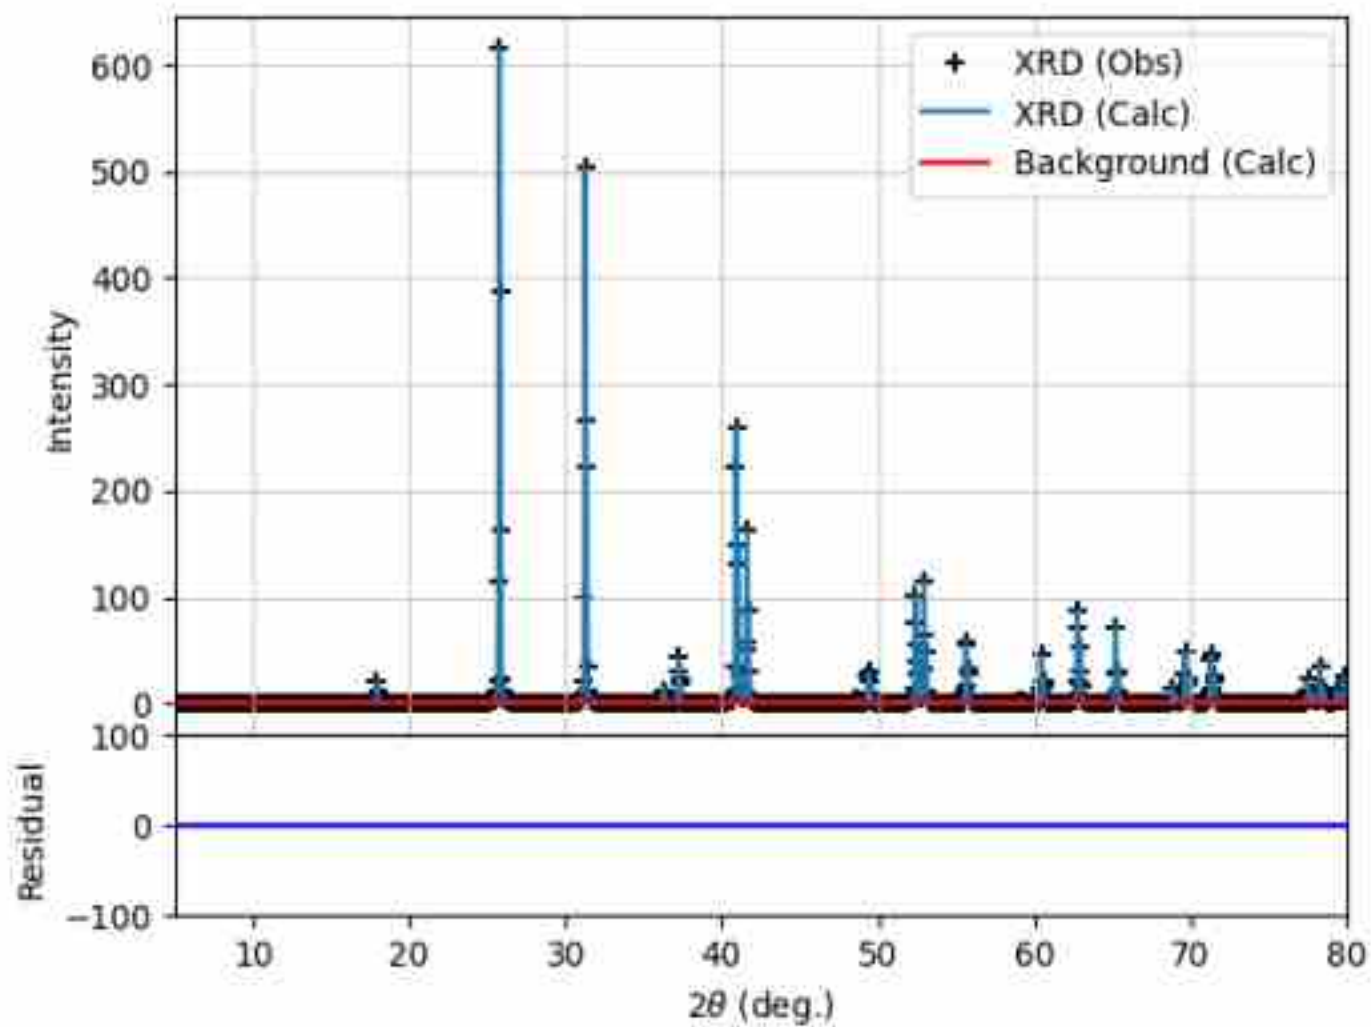

| RMSE before RR | Rwp     | RMSE after RR |
|----------------|---------|---------------|
| 0.031          | 0.00911 | 0.00348       |

# Ba<sub>2</sub>Sr<sub>2</sub>Mn<sub>4</sub>O<sub>12</sub>

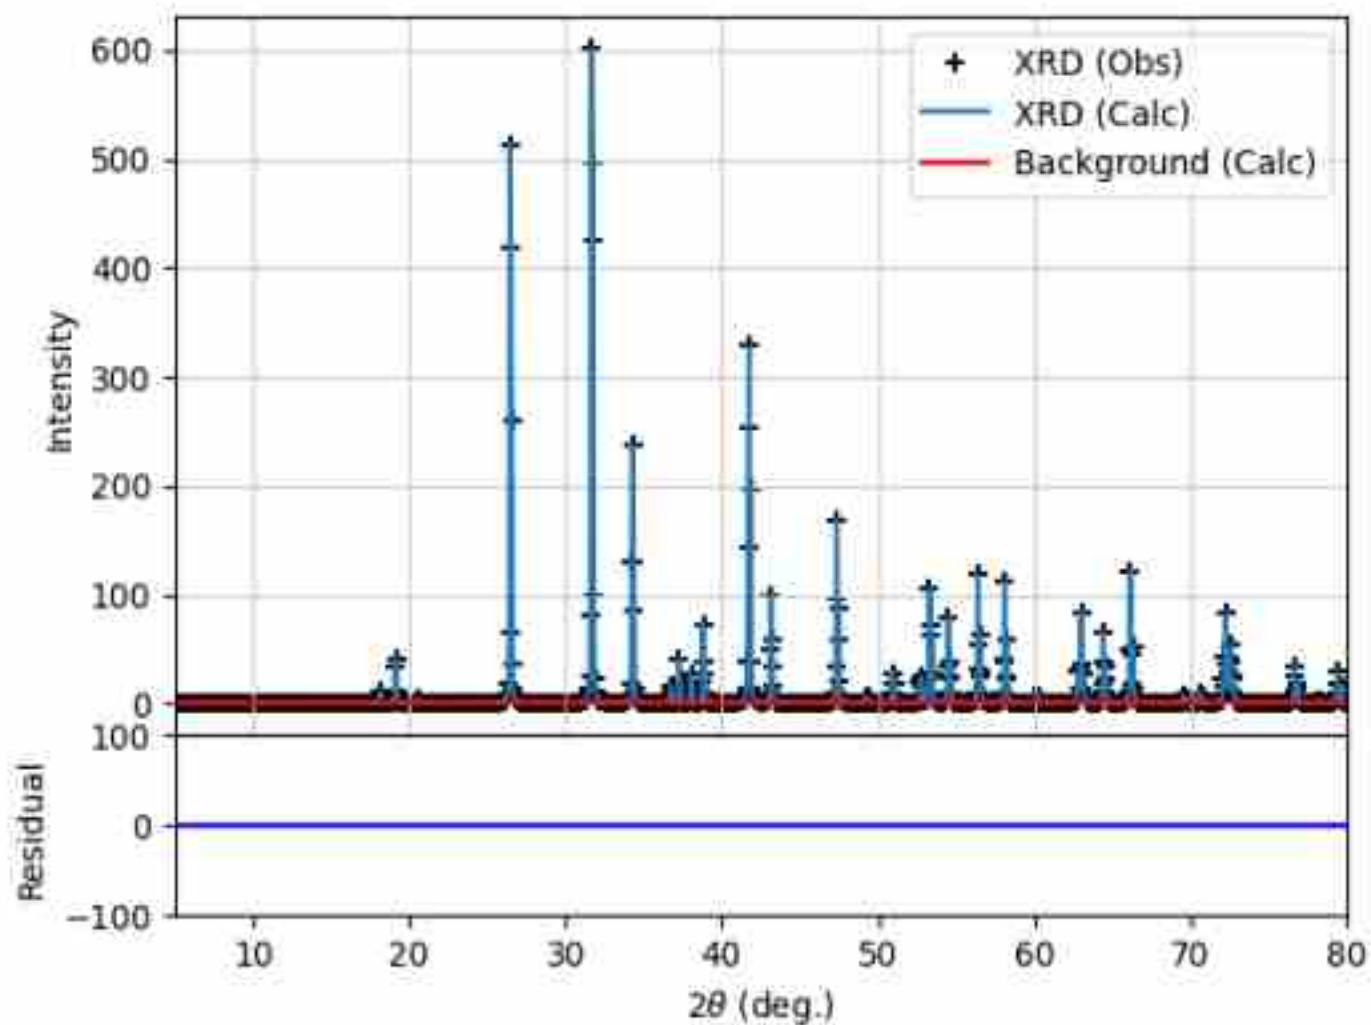

| RMSE before RR | Rwp     | RMSE after RR |
|----------------|---------|---------------|
| 0.031          | 0.01052 | 0.00342       |

# Bi<sub>4</sub>S<sub>4</sub>Cl<sub>4</sub>

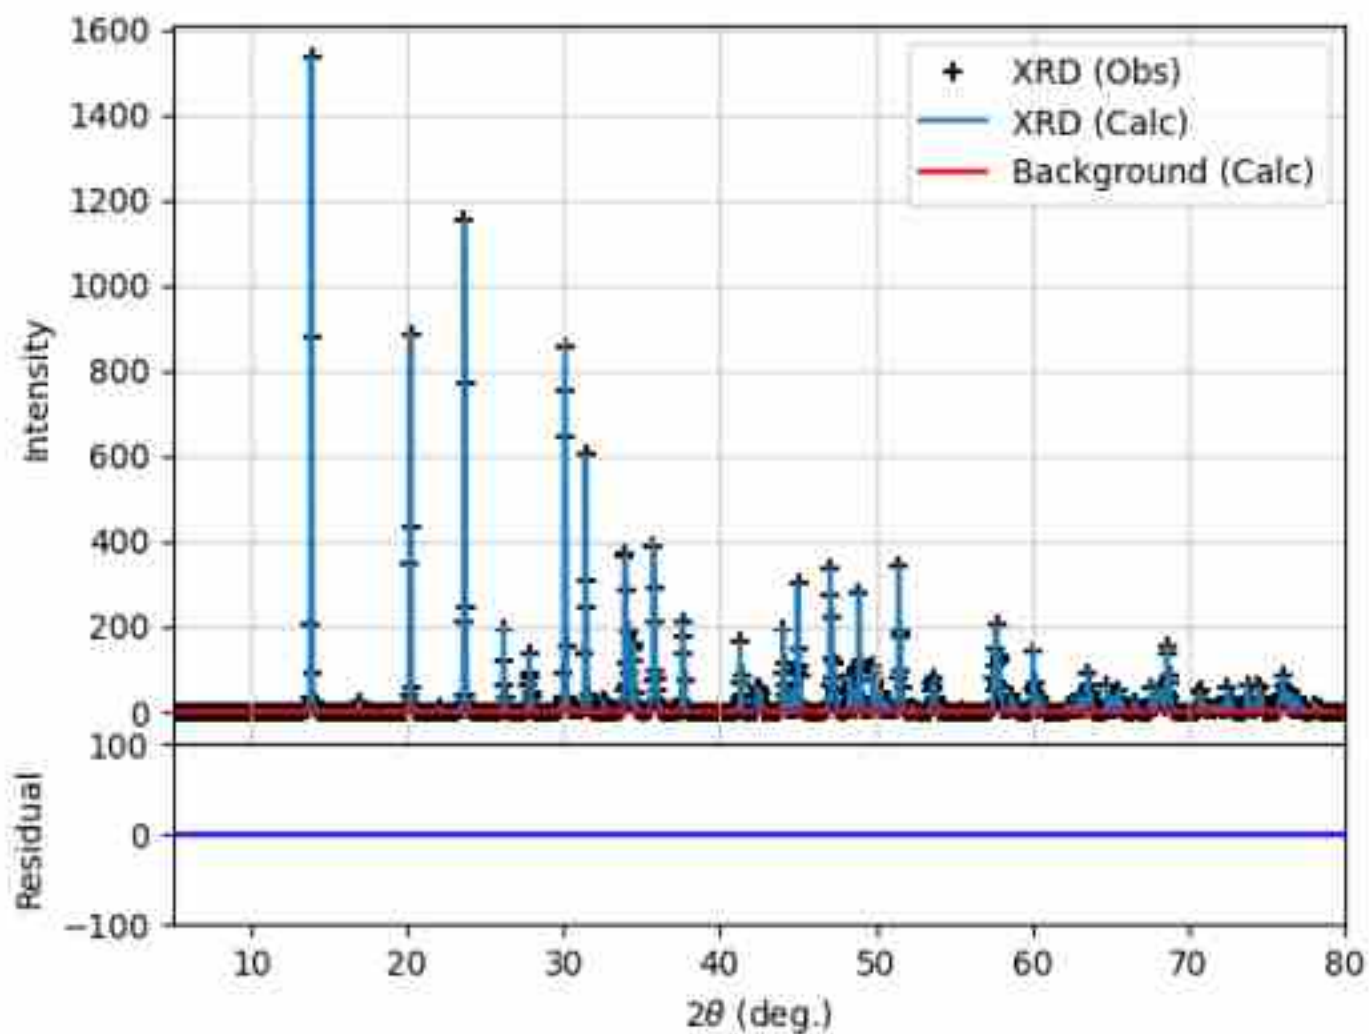

| RMSE before RR | Rwp     | RMSE after RR |
|----------------|---------|---------------|
| 0.031          | 0.00424 | 0.00107       |

# Ca4C18

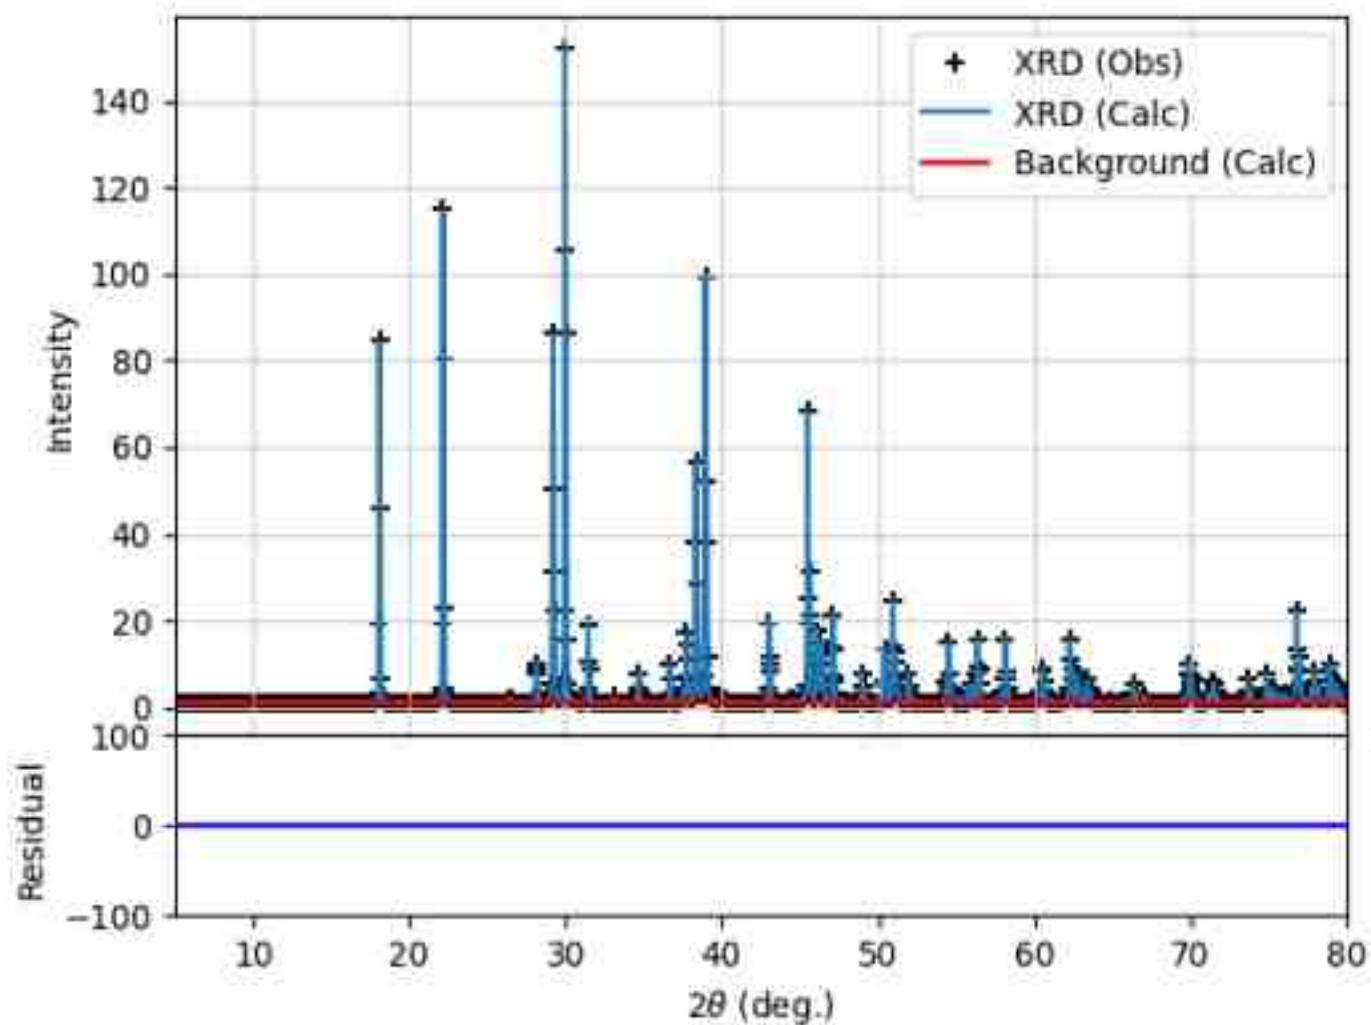

| RMSE before RR | Rwp     | RMSE after RR |
|----------------|---------|---------------|
| 0.031          | 0.00316 | 0.00044       |



# Ca<sub>4</sub>Pb<sub>2</sub>O<sub>8</sub>

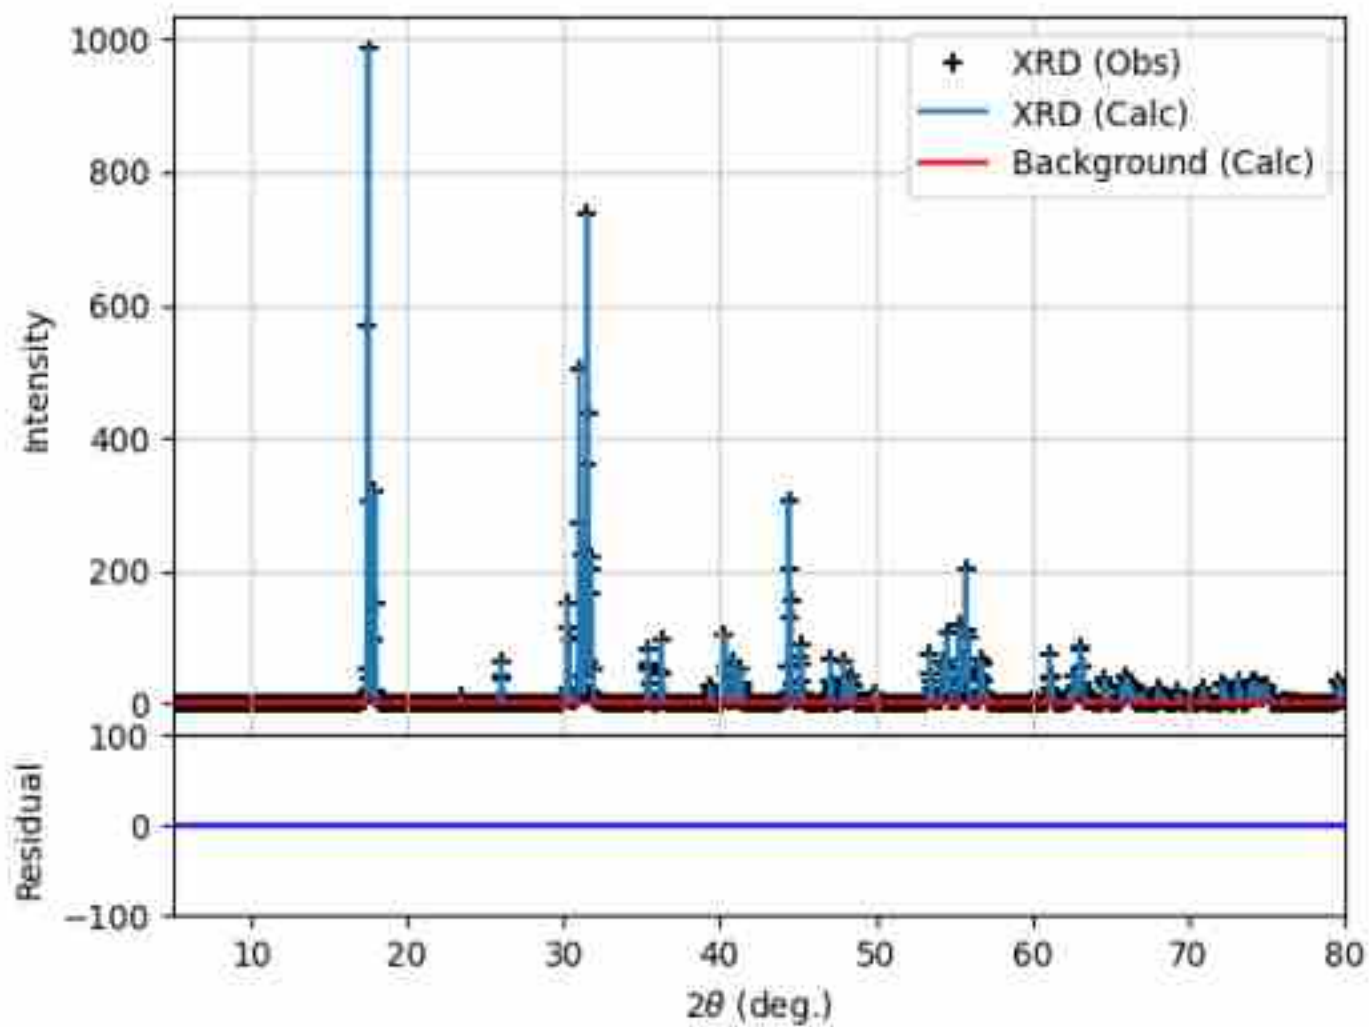

| RMSE before RR | Rwp    | RMSE after RR |
|----------------|--------|---------------|
| 0.031          | 0.0054 | 0.00214       |

# Ce4Ge7

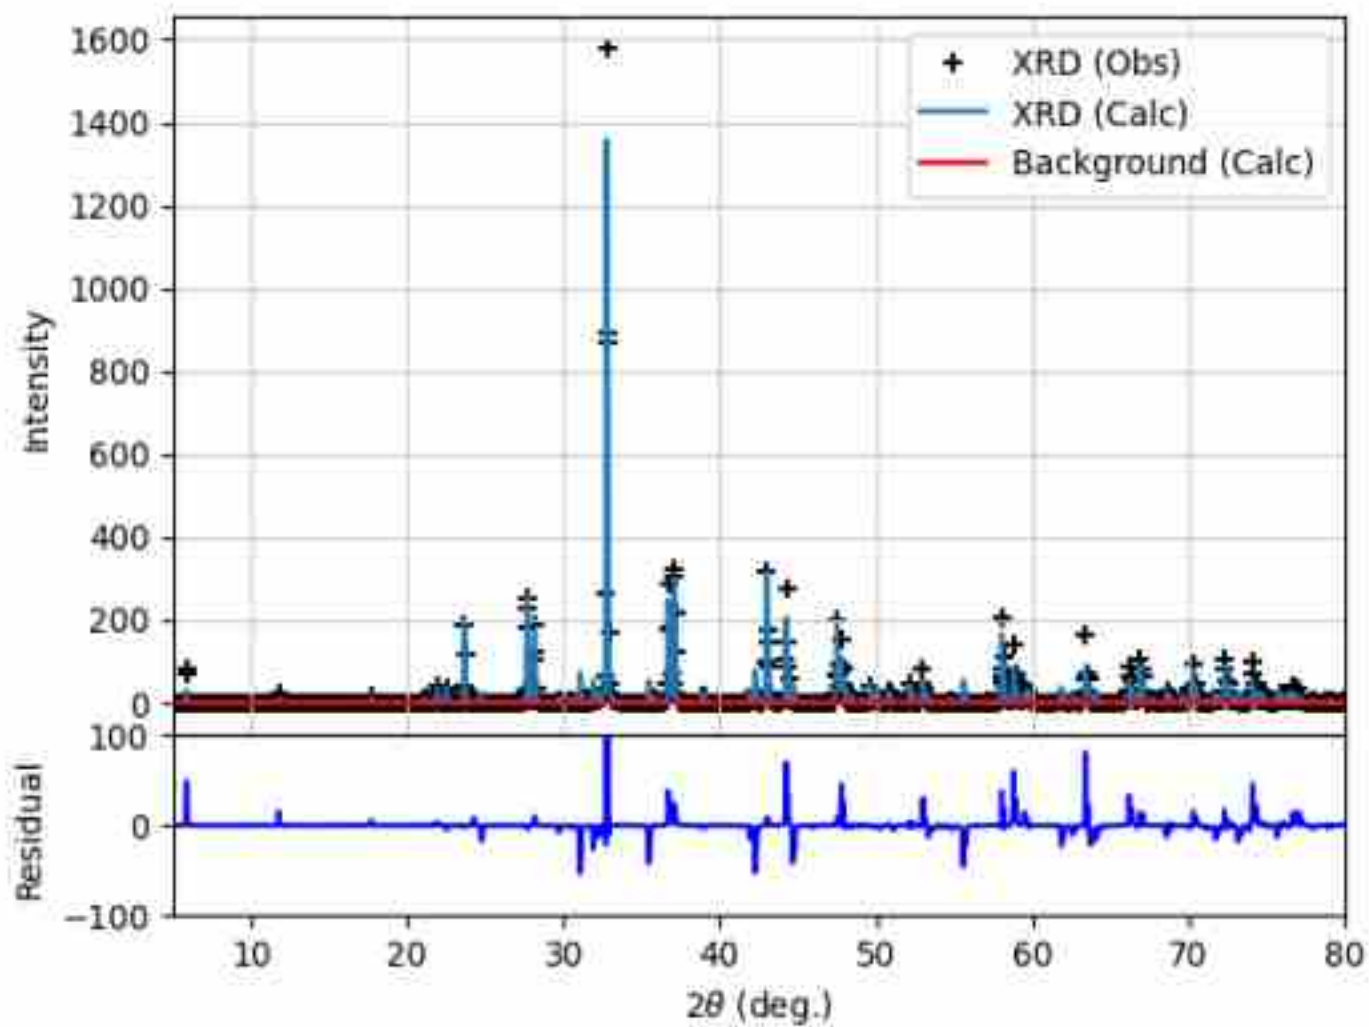

| RMSE before RR | Rwp      | RMSE after RR |
|----------------|----------|---------------|
| 0.031          | 52.36072 | 0.03364       |

Ce6Si2Pt10

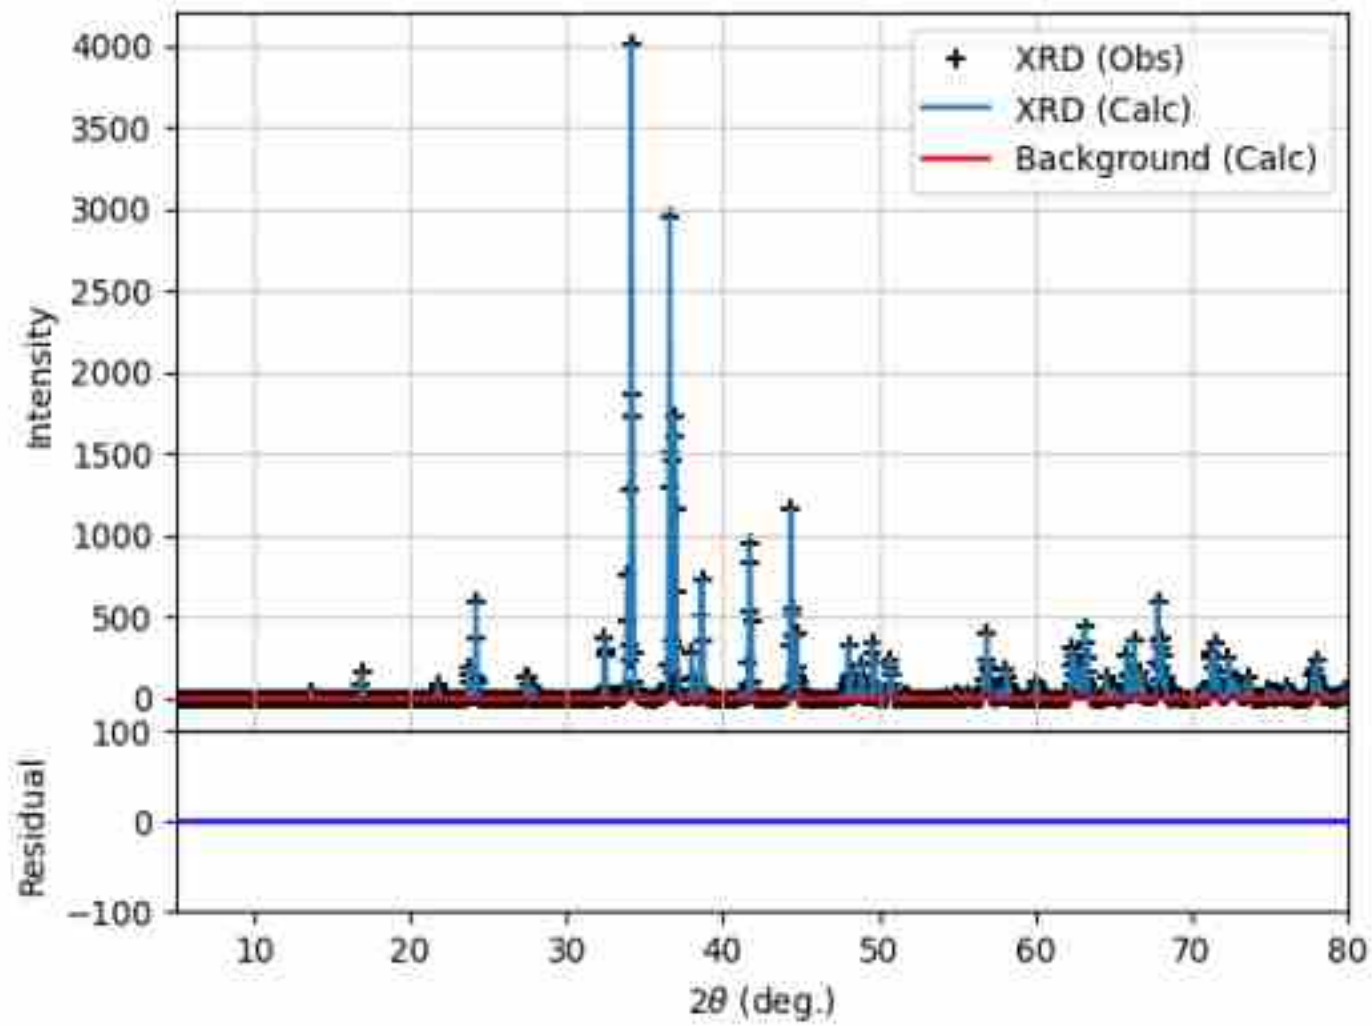

| RMSE before RR | Rwp     | RMSE after RR |
|----------------|---------|---------------|
| 0.031          | 0.00376 | 0.00062       |

# Ce10Sb6

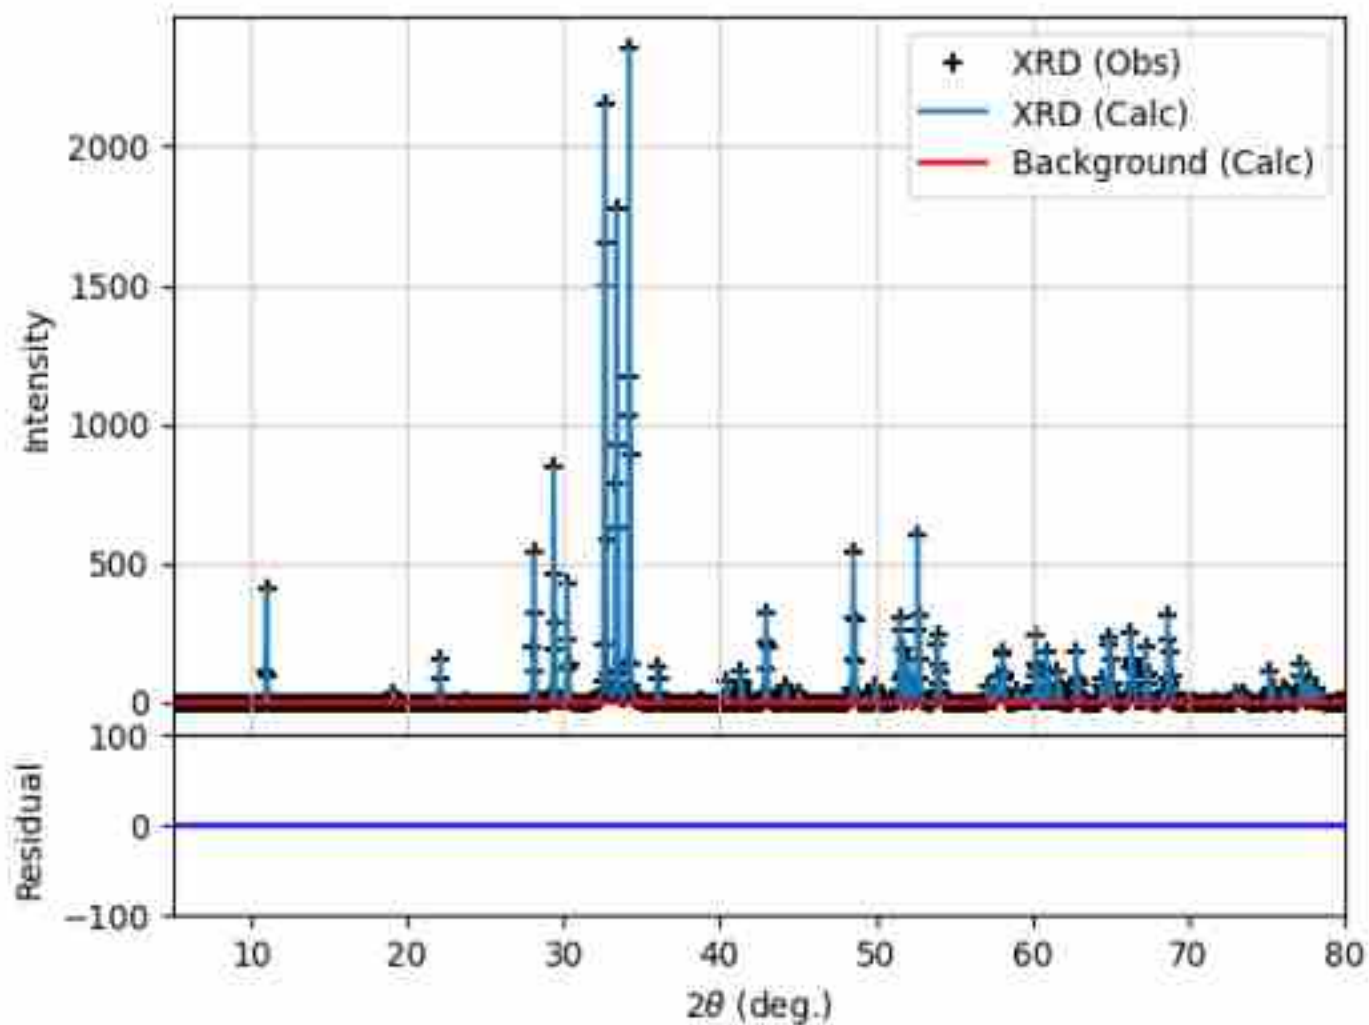

| RMSE before RR | Rwp     | RMSE after RR |
|----------------|---------|---------------|
| 0.031          | 0.00521 | 0.00034       |

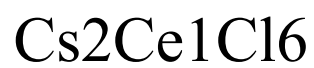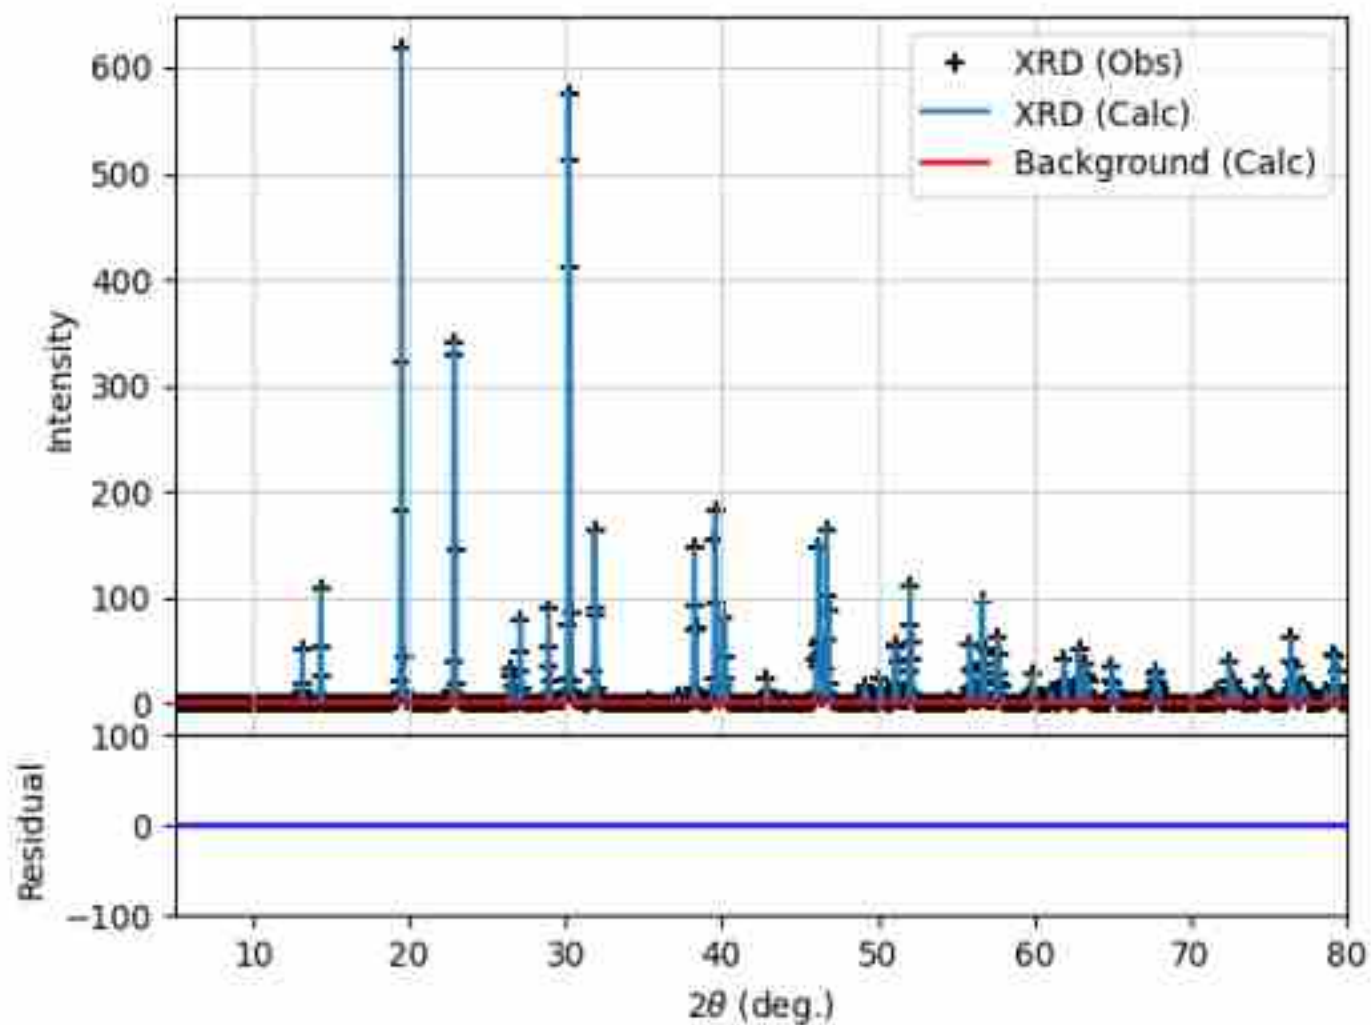

| RMSE before RR | Rwp     | RMSE after RR |
|----------------|---------|---------------|
| 0.031          | 0.00472 | 0.00111       |

# Cs<sub>2</sub>Co<sub>2</sub>Ni<sub>2</sub>F<sub>12</sub>

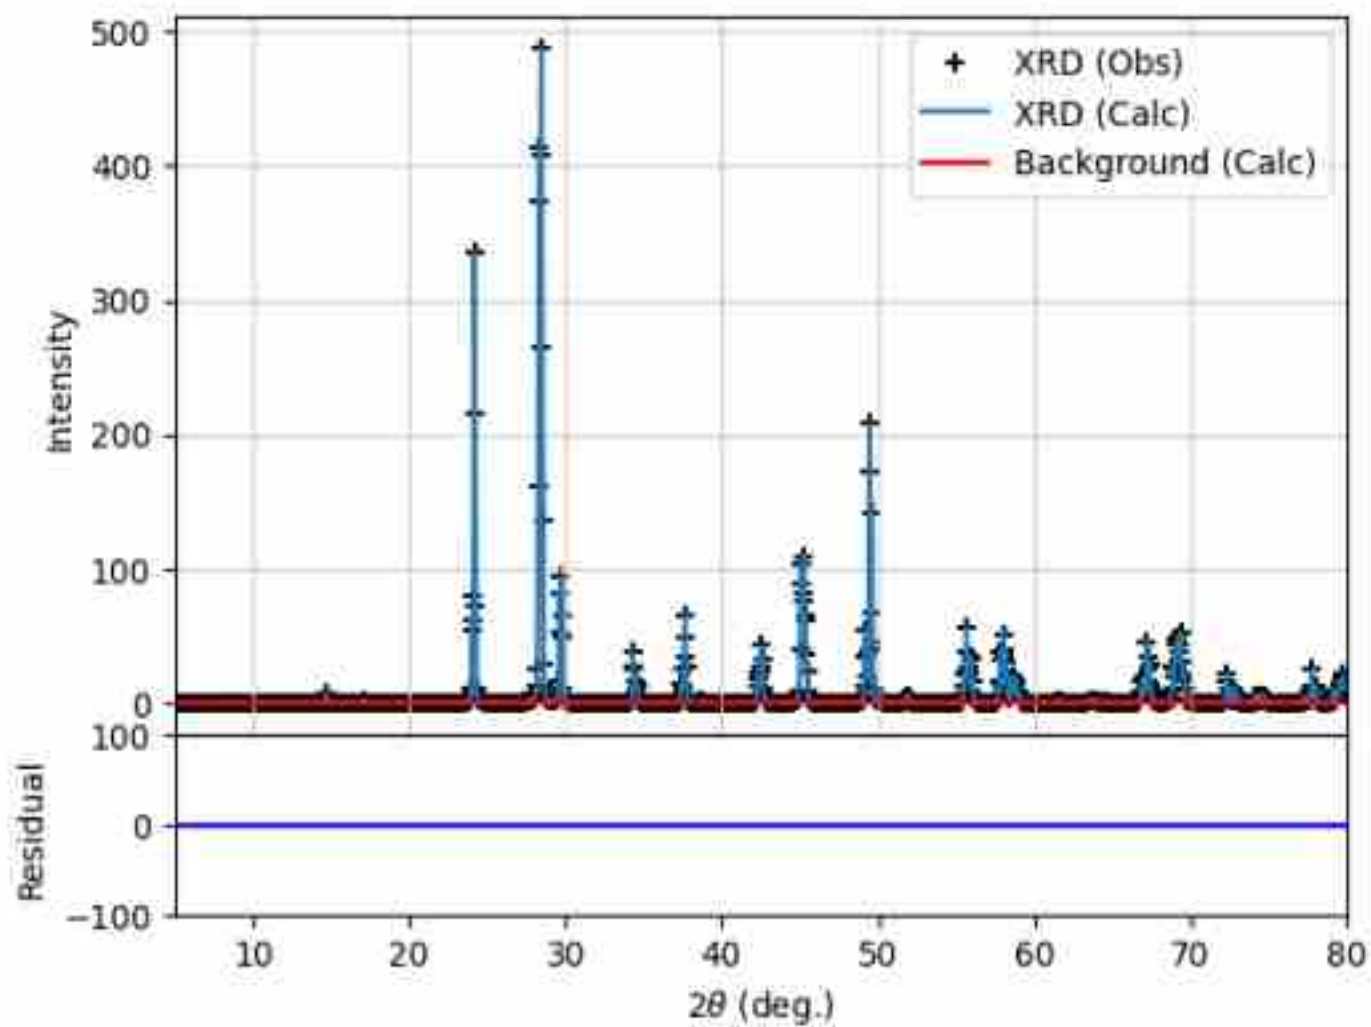

| RMSE before RR | Rwp     | RMSE after RR |
|----------------|---------|---------------|
| 0.031          | 0.00245 | 0.00052       |

# Cs<sub>2</sub>Sr<sub>2</sub>Cl<sub>6</sub>

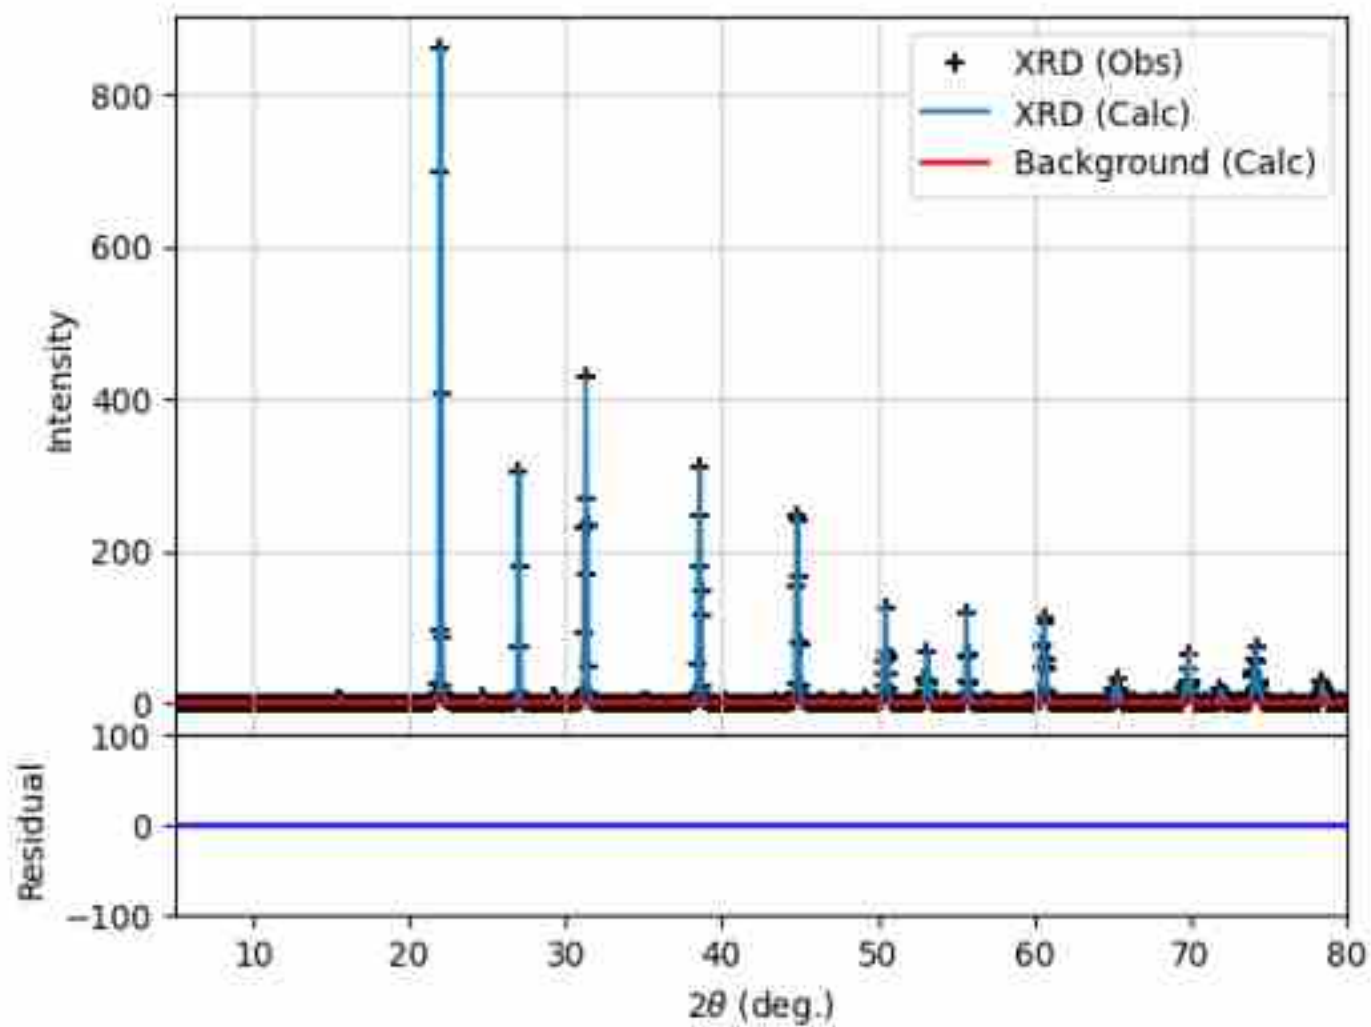

| RMSE before RR | Rwp     | RMSE after RR |
|----------------|---------|---------------|
| 0.031          | 0.00322 | 0.00062       |

$\text{Cs}_2\text{Ti}_2\text{Cu}_2\text{O}_2\text{F}_{10}$

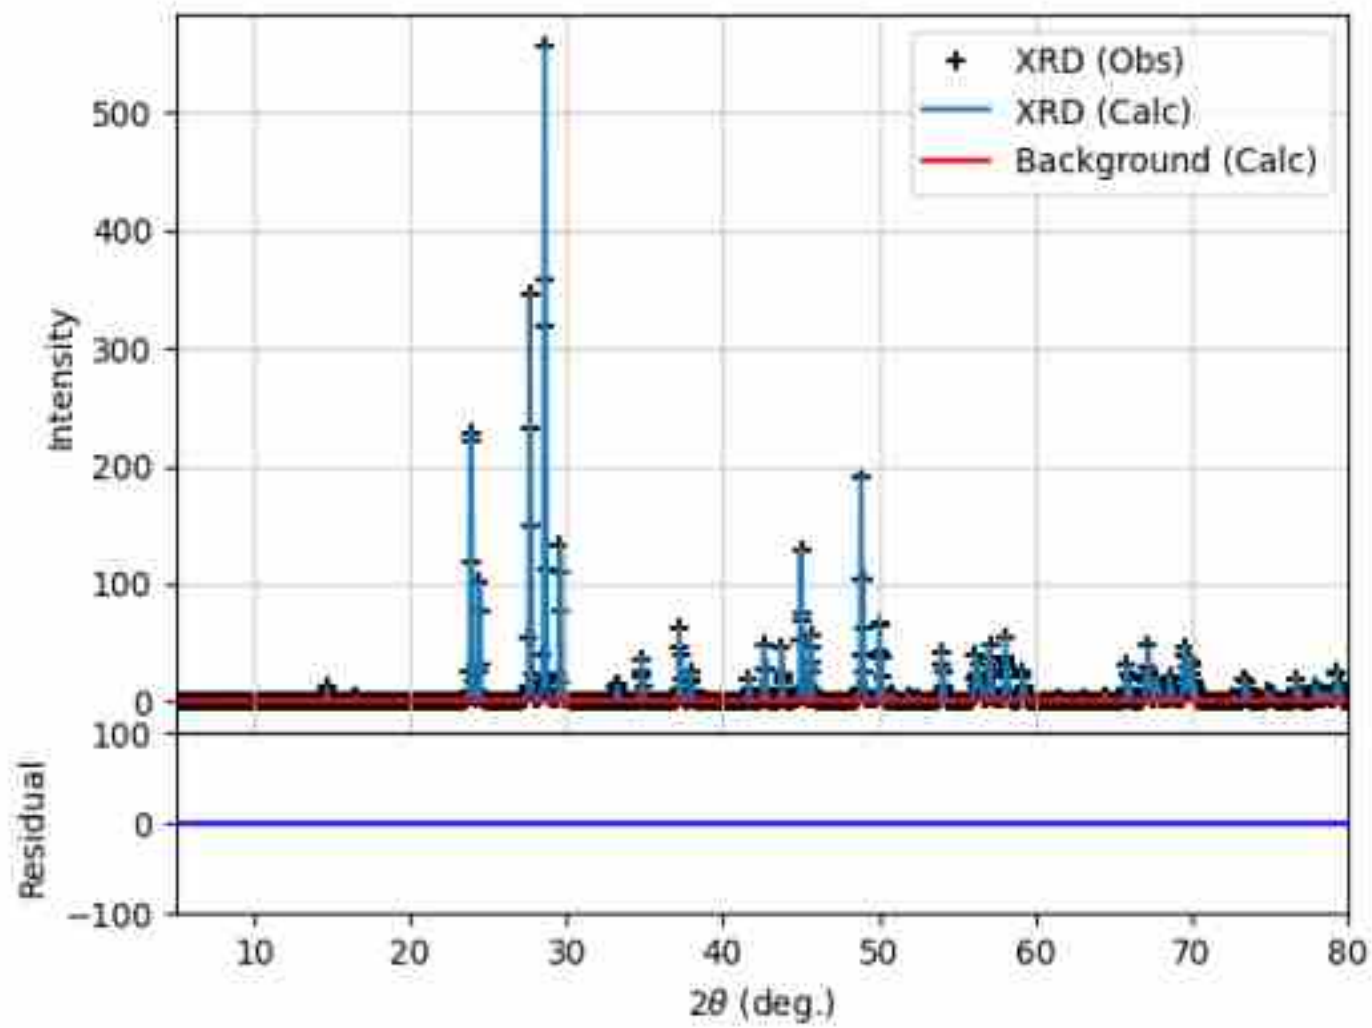

| RMSE before RR | Rwp    | RMSE after RR |
|----------------|--------|---------------|
| 0.031          | 0.0026 | 0.00094       |



# Cs<sub>2</sub>Zr<sub>1</sub>W<sub>3</sub>O<sub>12</sub>

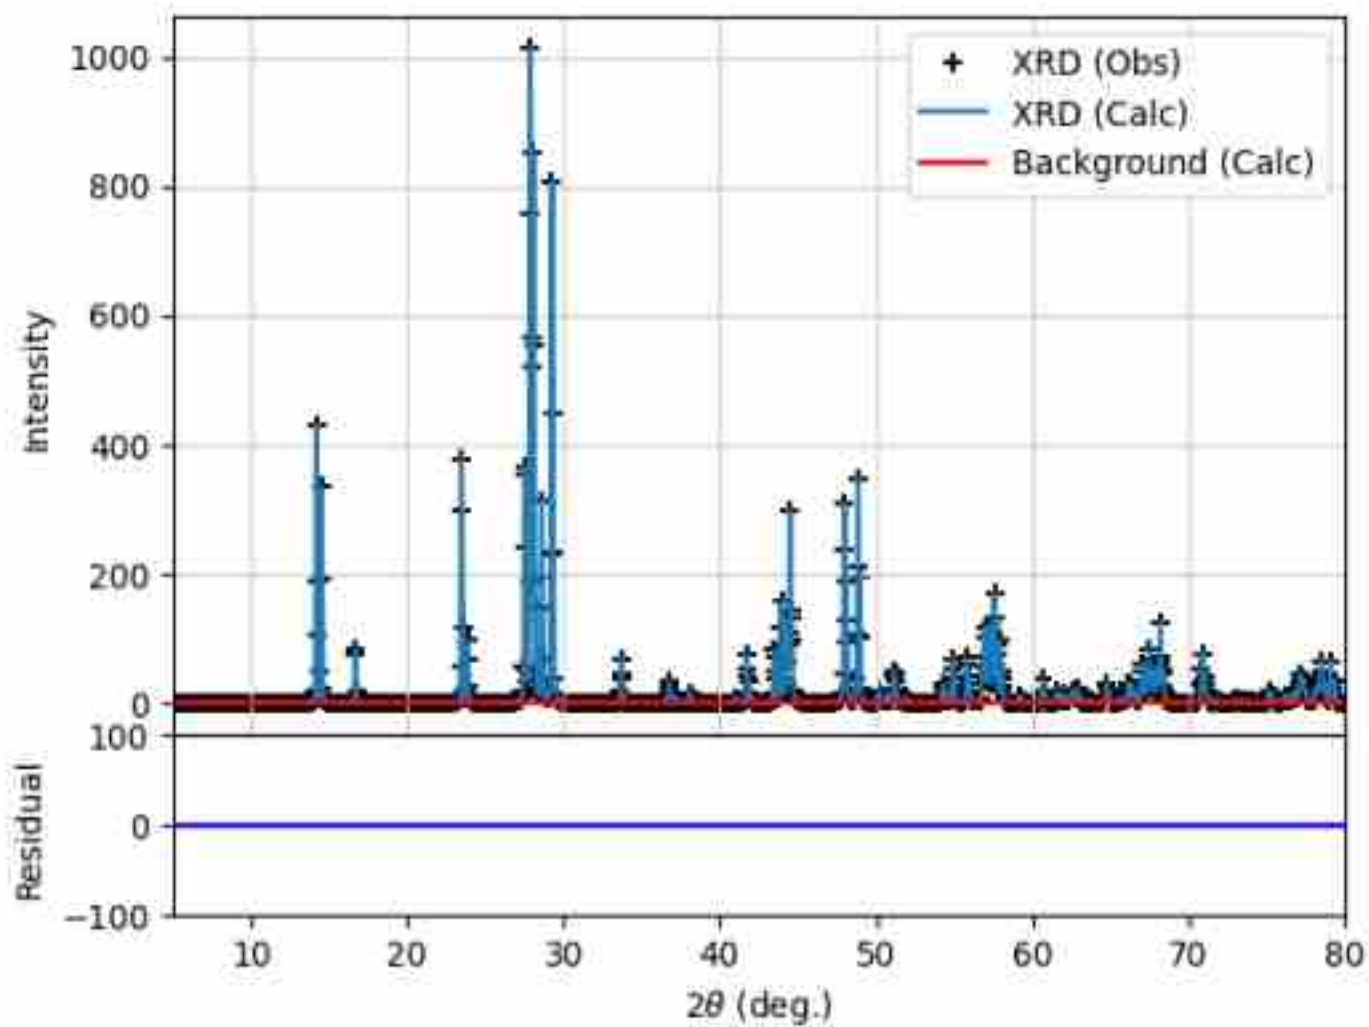

| RMSE before RR | Rwp     | RMSE after RR |
|----------------|---------|---------------|
| 0.031          | 0.00244 | 0.00133       |

# Cs<sub>4</sub>Li<sub>4</sub>Ge<sub>2</sub>O<sub>8</sub>

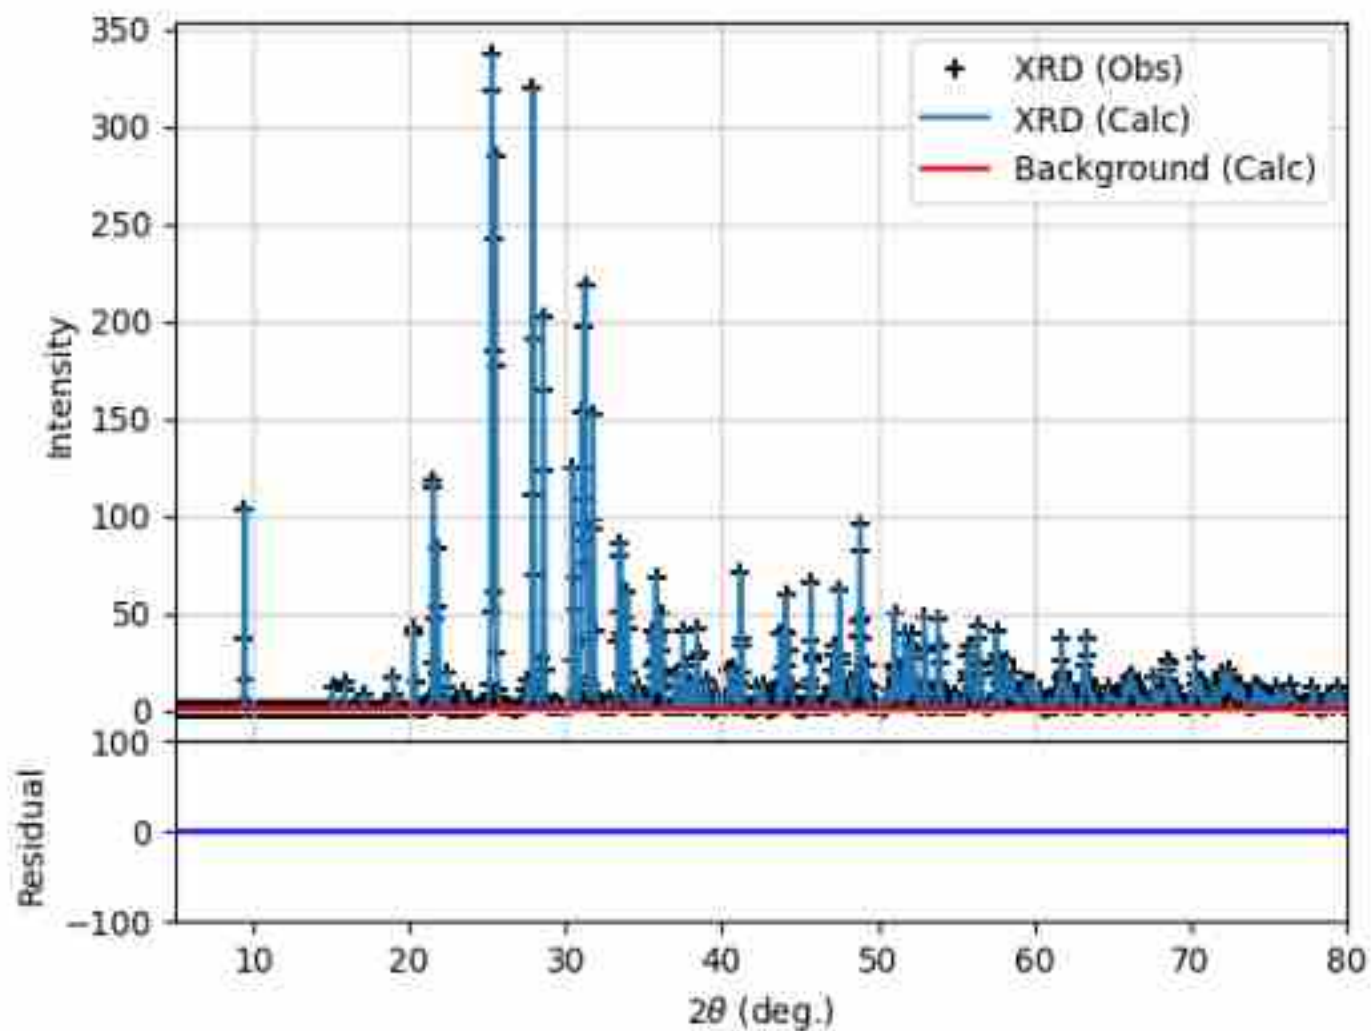

| RMSE before RR | Rwp     | RMSE after RR |
|----------------|---------|---------------|
| 0.031          | 0.00066 | 0.00076       |

# Dy<sub>4</sub>CrGe<sub>8</sub>

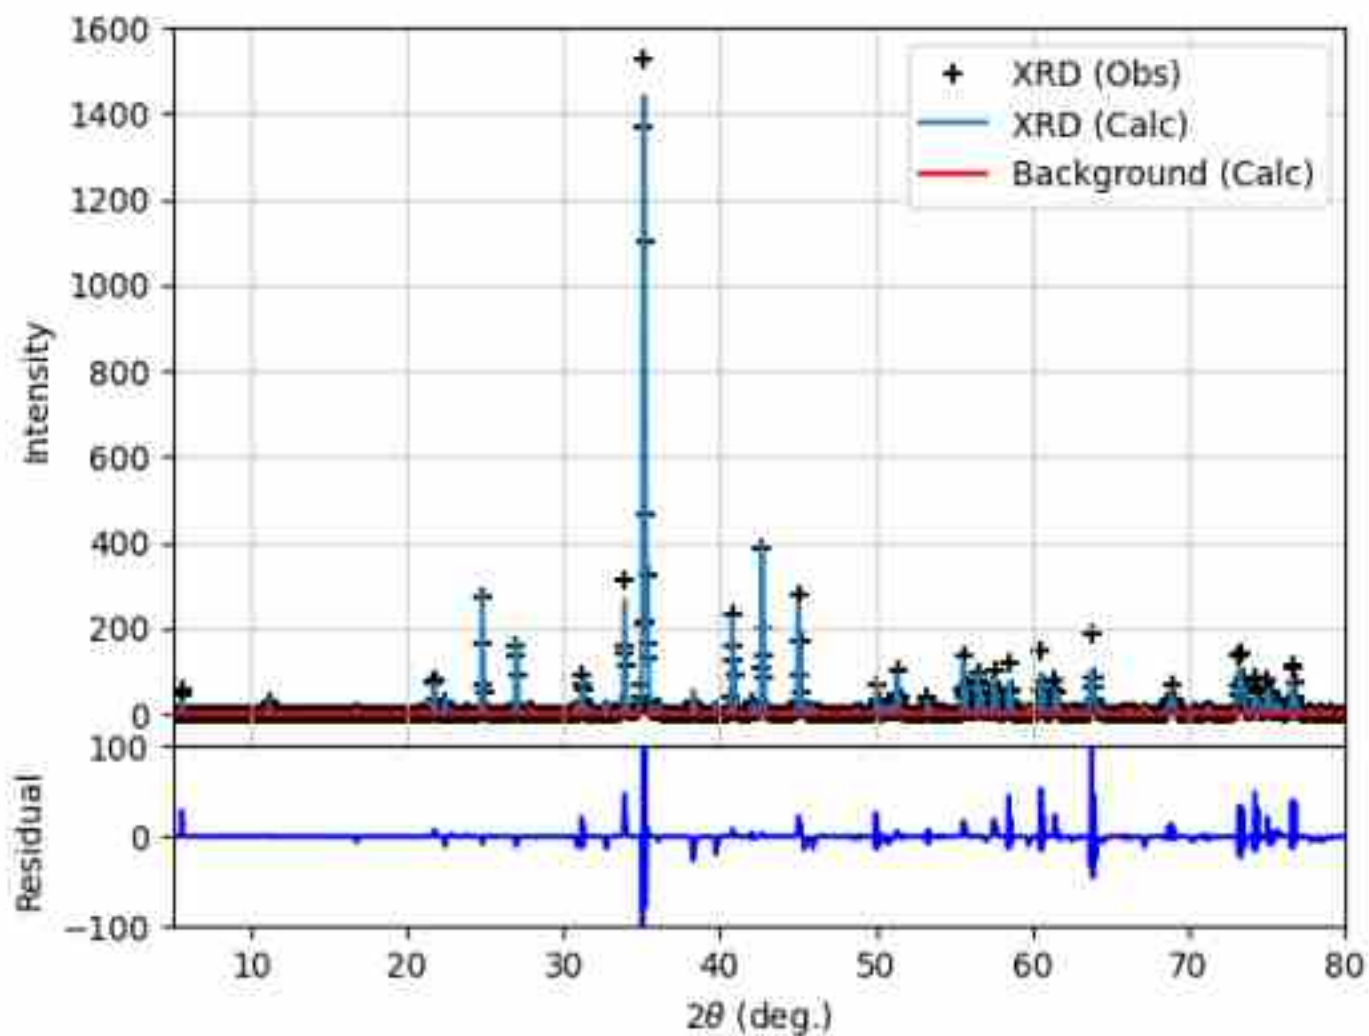

| RMSE before RR | Rwp      | RMSE after RR |
|----------------|----------|---------------|
| 0.031          | 31.36926 | 0.03165       |

# Er<sub>2</sub>Tl<sub>2</sub>P<sub>4</sub>Se<sub>12</sub>

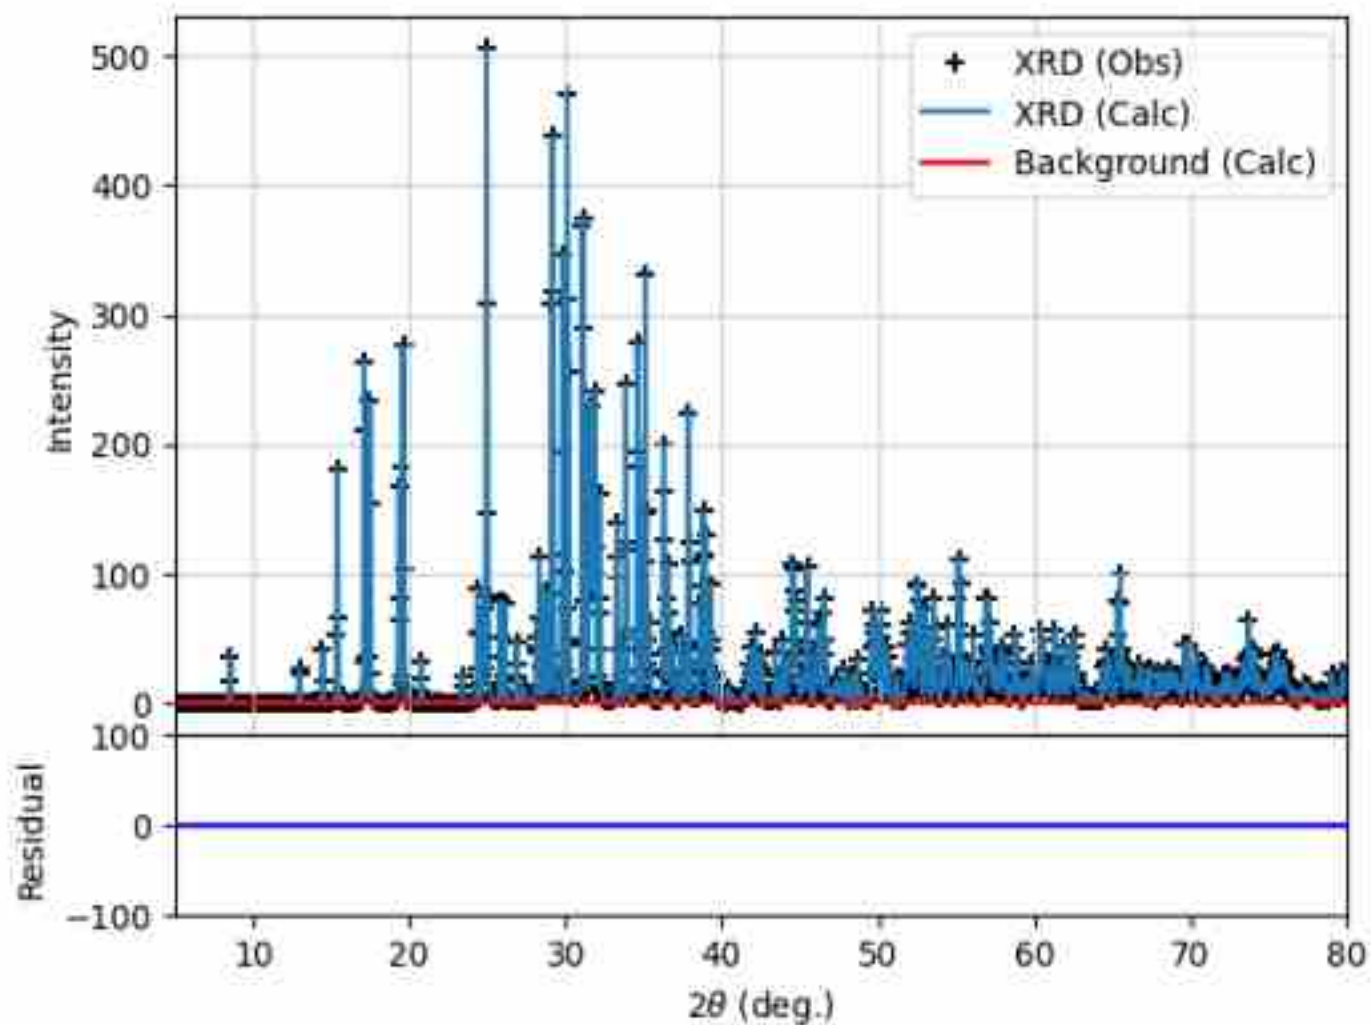

| RMSE before RR | Rwp     | RMSE after RR |
|----------------|---------|---------------|
| 0.031          | 0.00366 | 0.00047       |

# Er4F12

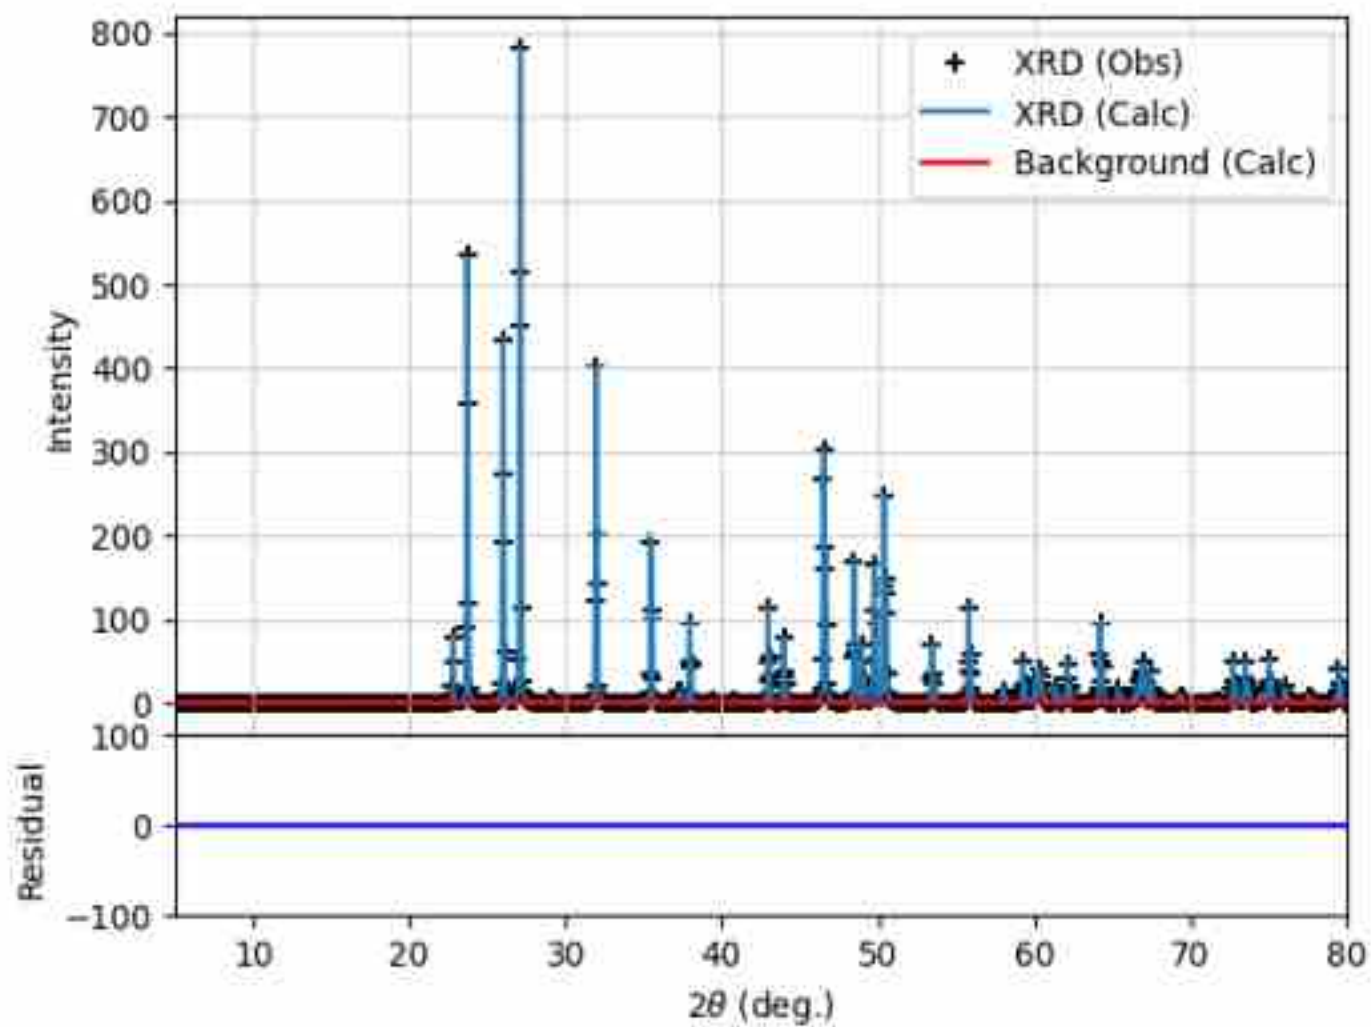

| RMSE before RR | Rwp    | RMSE after RR |
|----------------|--------|---------------|
| 0.031          | 0.0041 | 0.00133       |

# Eu<sub>2</sub>Cu<sub>4</sub>O<sub>8</sub>

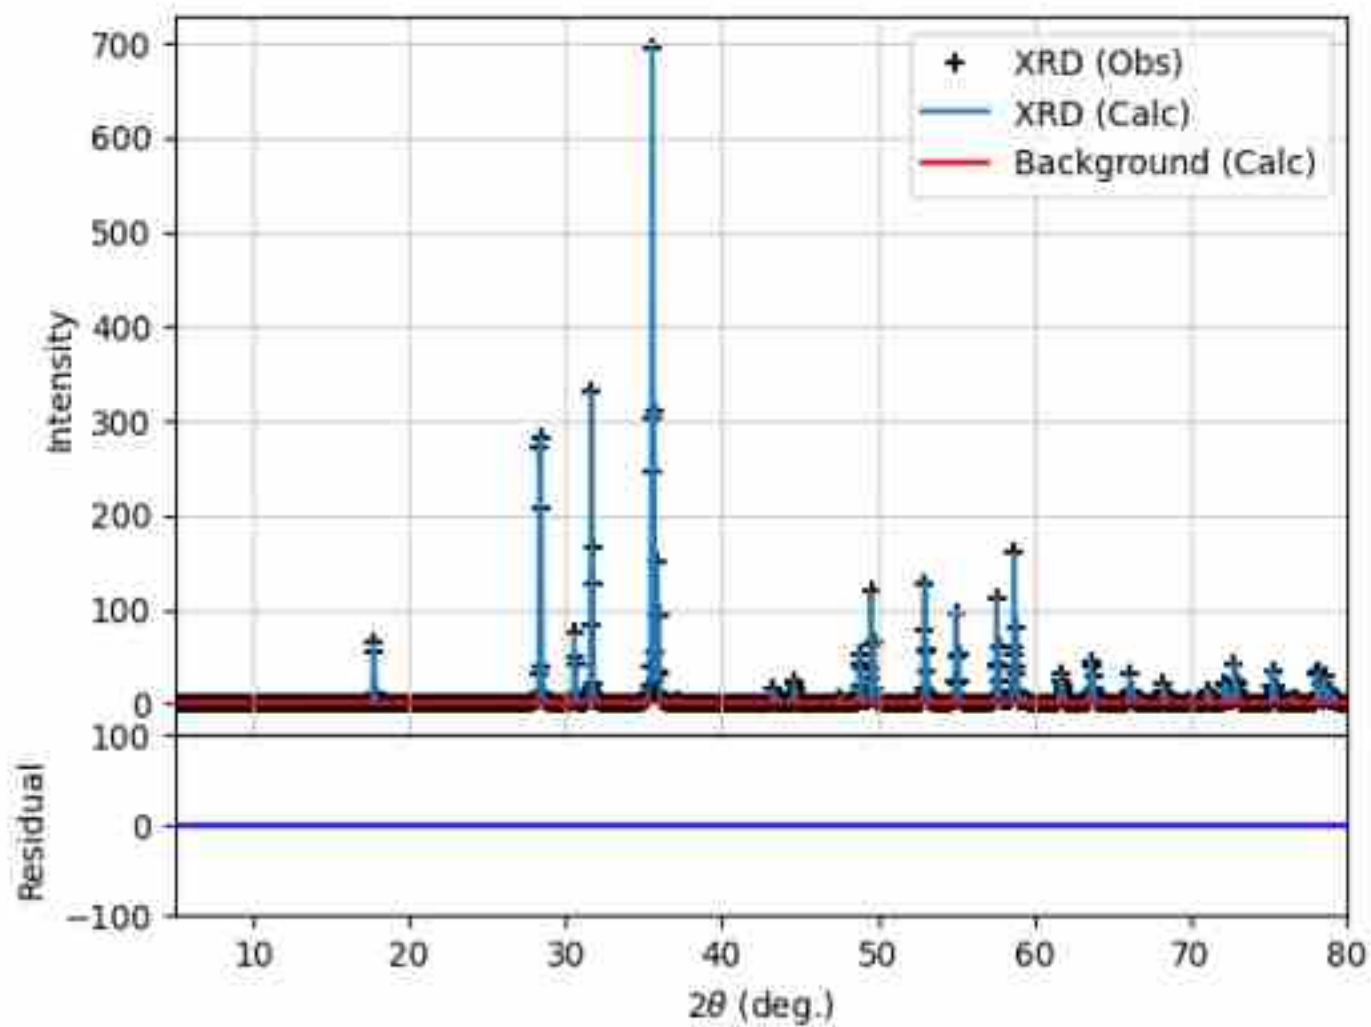

| RMSE before RR | Rwp     | RMSE after RR |
|----------------|---------|---------------|
| 0.031          | 0.00345 | 0.00184       |

# Eu4Sn2Se10

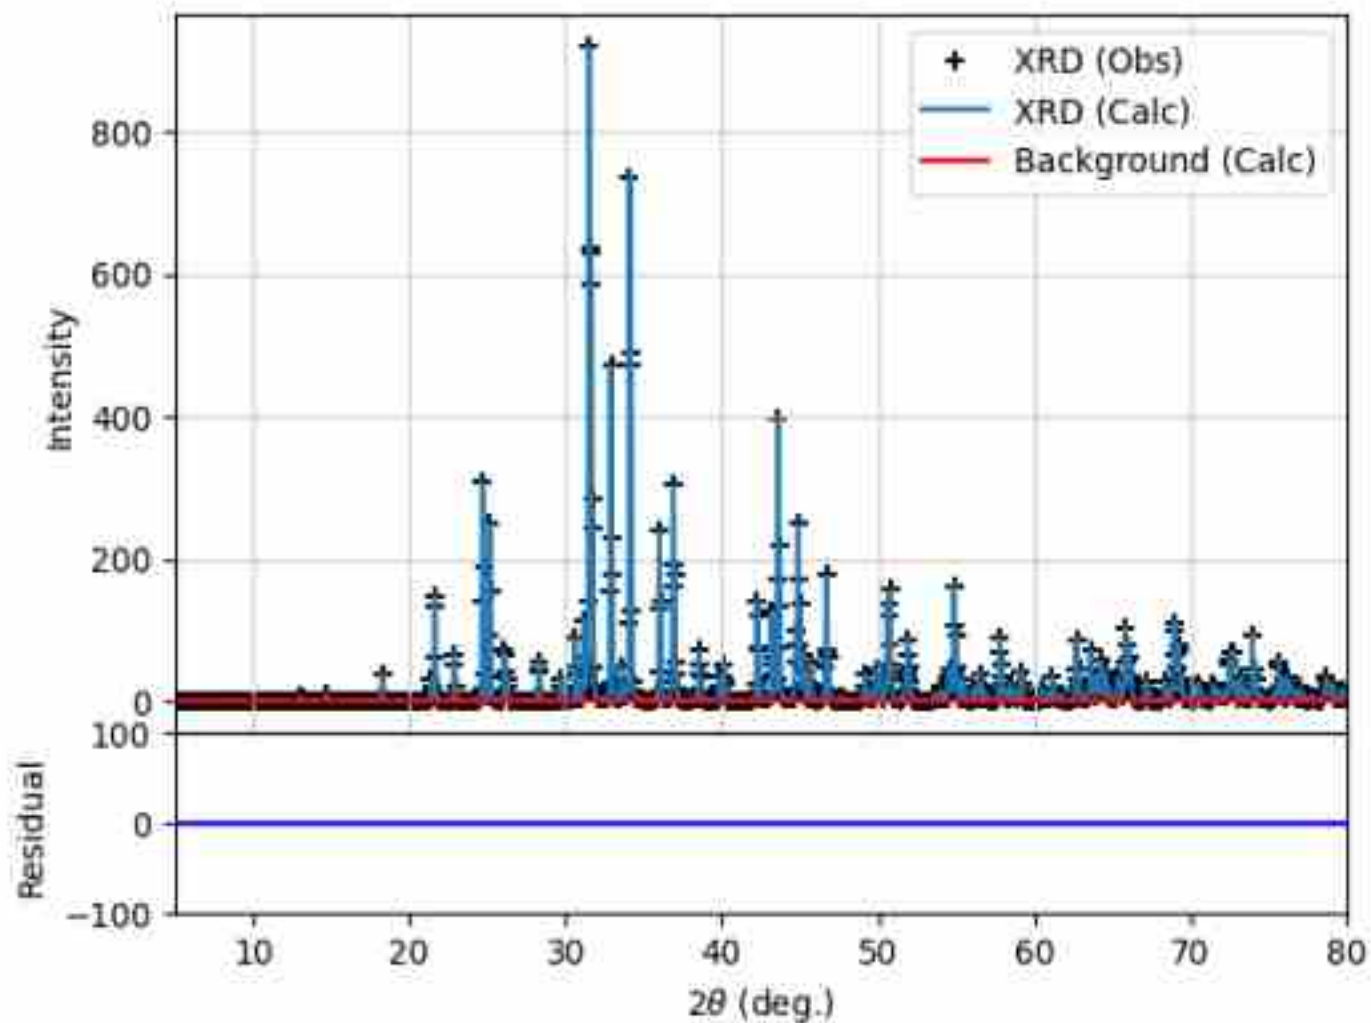

| RMSE before RR | Rwp     | RMSE after RR |
|----------------|---------|---------------|
| 0.031          | 0.00357 | 0.00035       |

# Ge<sub>2</sub>Bi<sub>2</sub>Te<sub>5</sub>

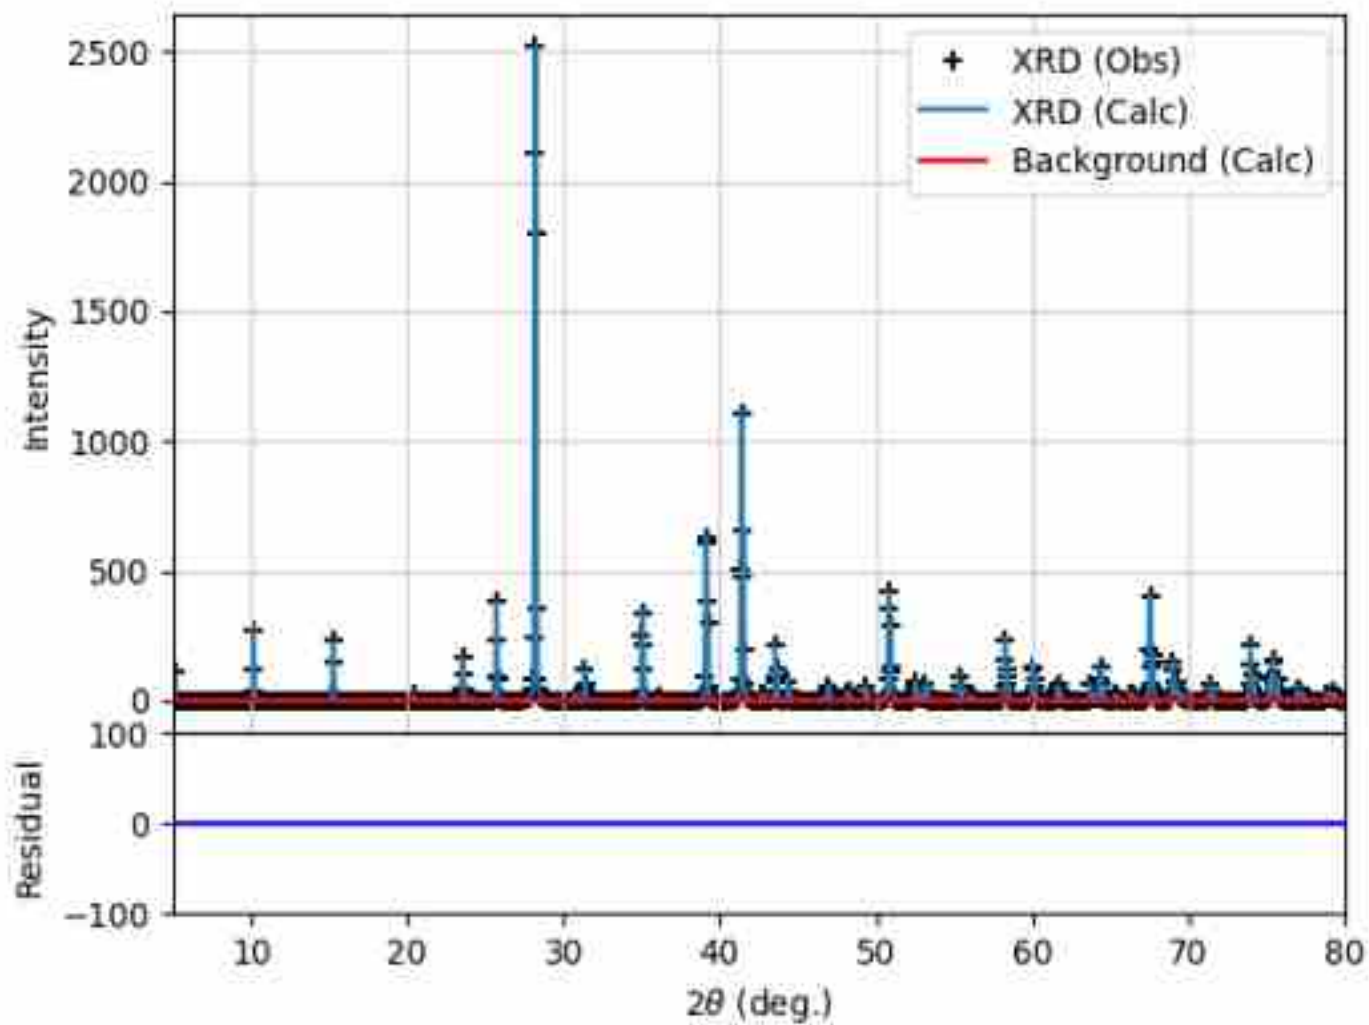

| RMSE before RR | Rwp     | RMSE after RR |
|----------------|---------|---------------|
| 0.031          | 0.00357 | 0.00026       |



# Hf1Ti1Pb2O6

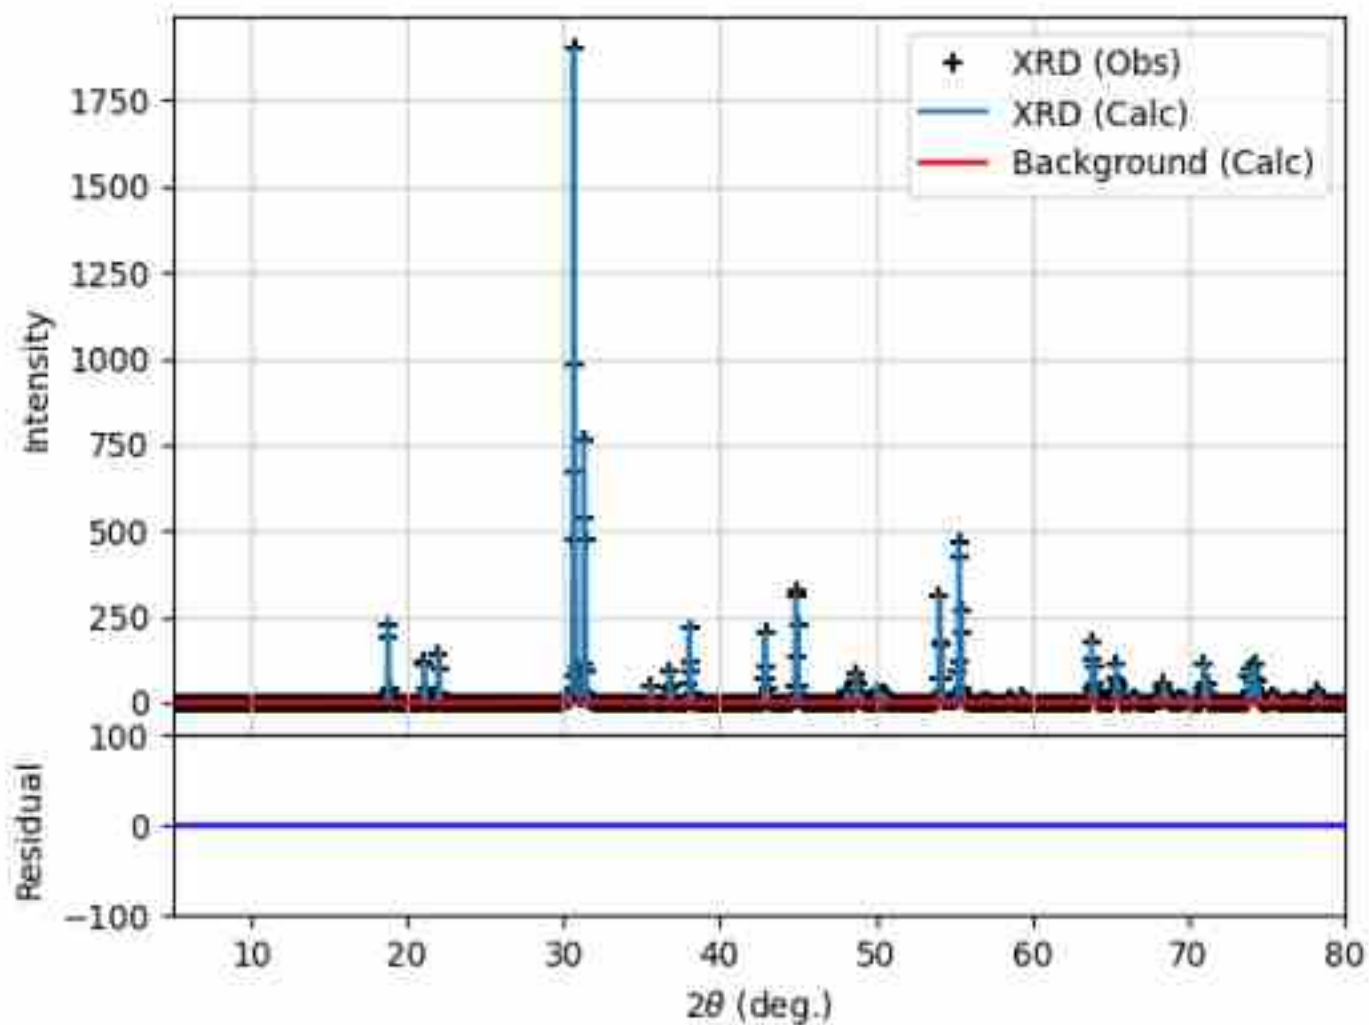

| RMSE before RR | Rwp     | RMSE after RR |
|----------------|---------|---------------|
| 0.031          | 0.00439 | 0.00205       |

# Hf<sub>2</sub>Mg<sub>2</sub>N<sub>4</sub>

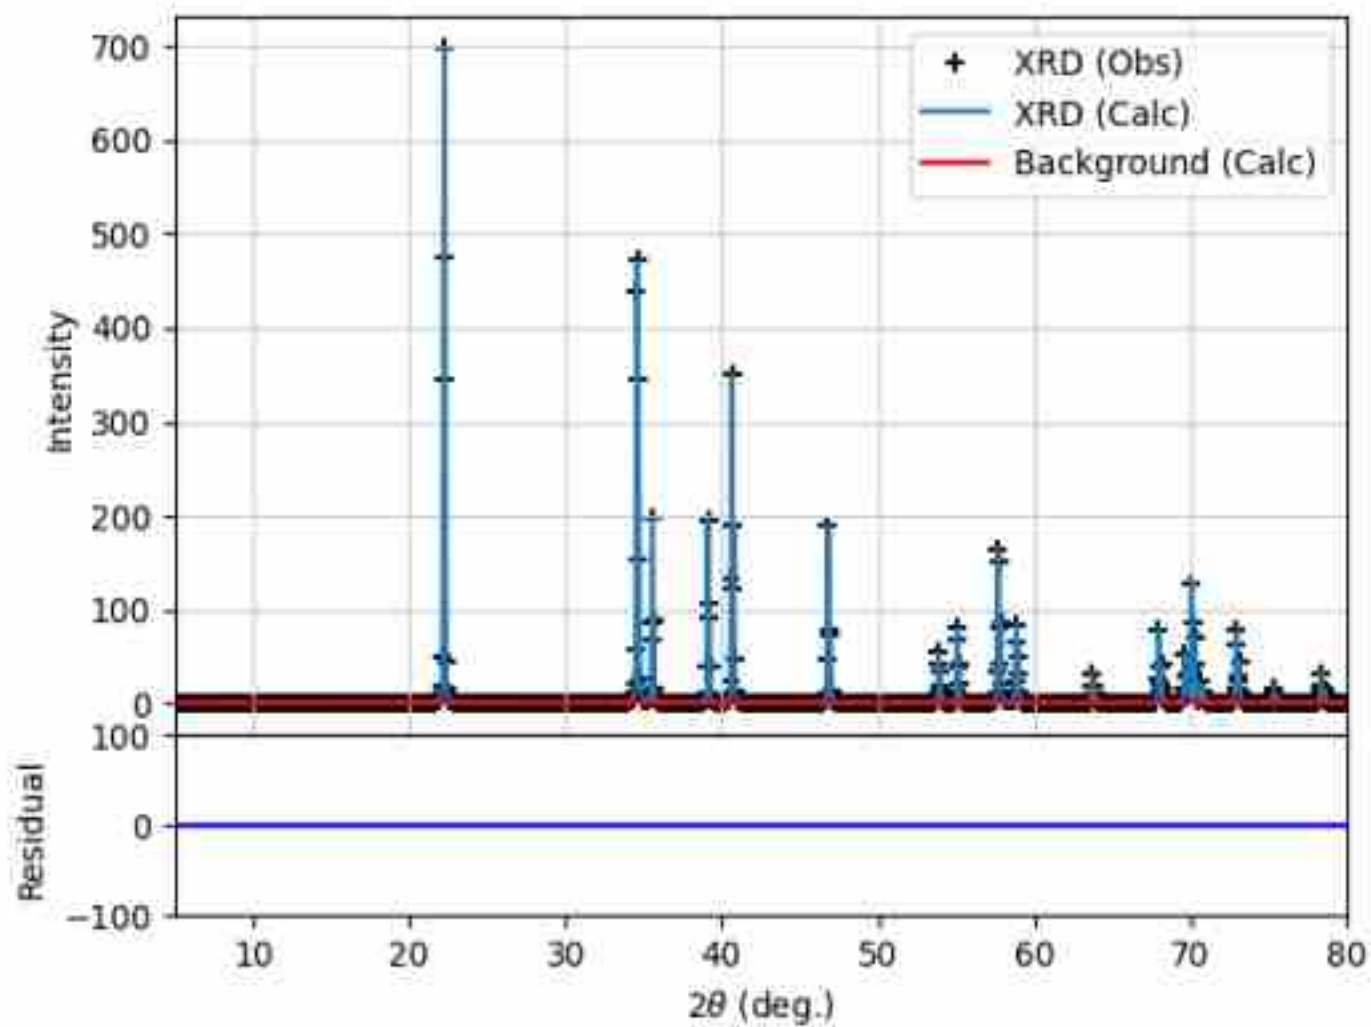

| RMSE before RR | Rwp     | RMSE after RR |
|----------------|---------|---------------|
| 0.031          | 0.00287 | 0.00168       |

# In<sub>2</sub>Pb<sub>4</sub>I<sub>10</sub>

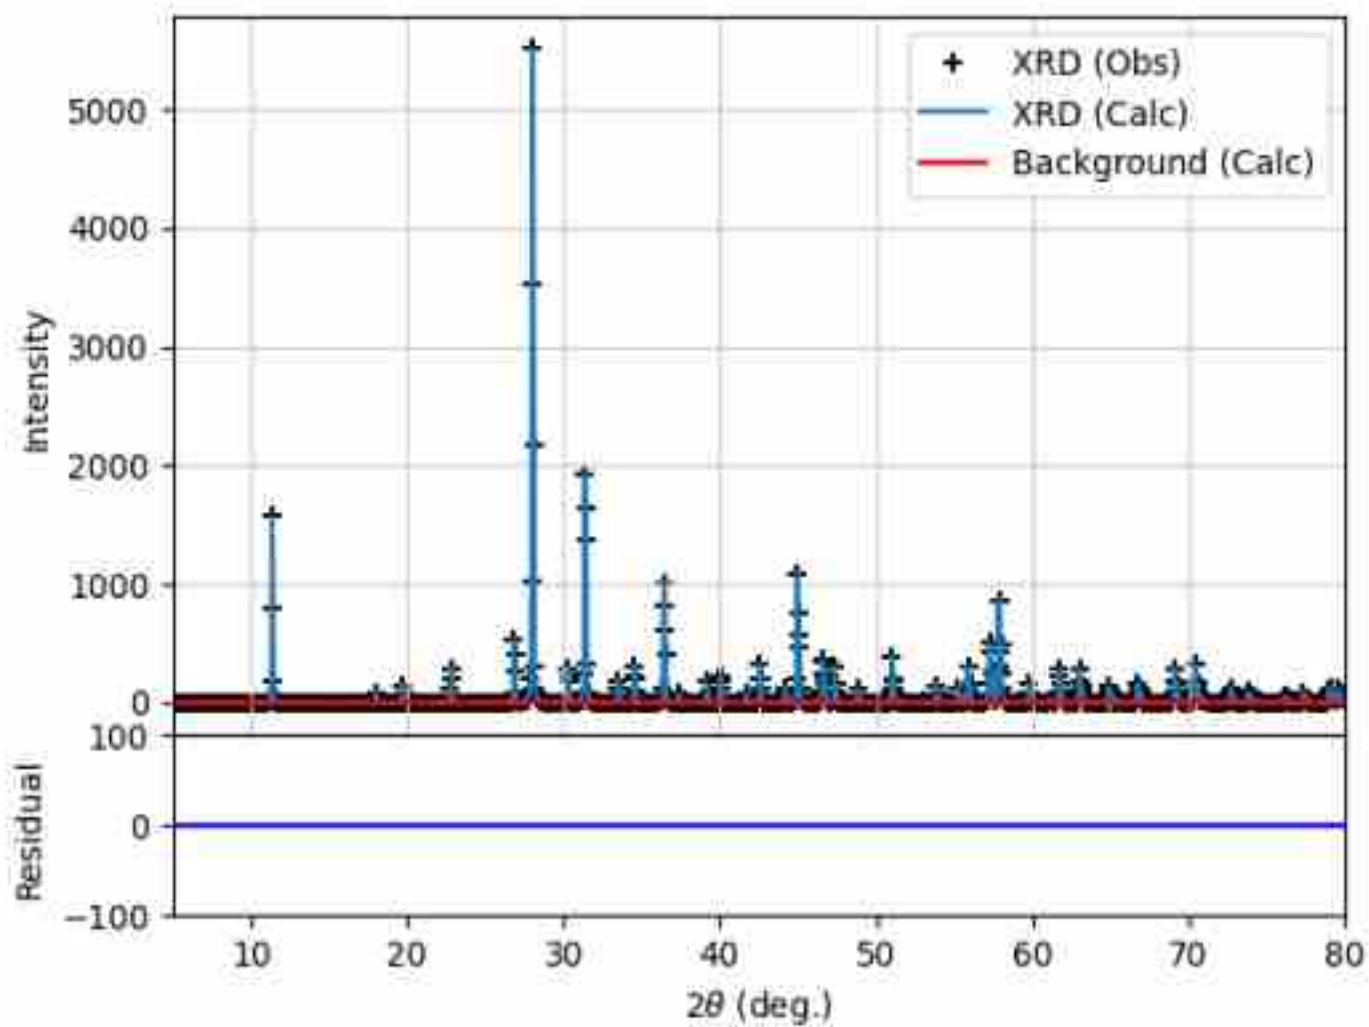

| RMSE before RR | Rwp     | RMSE after RR |
|----------------|---------|---------------|
| 0.031          | 0.00263 | 0.00041       |

# In<sub>4</sub>Sn<sub>3</sub>O<sub>12</sub>

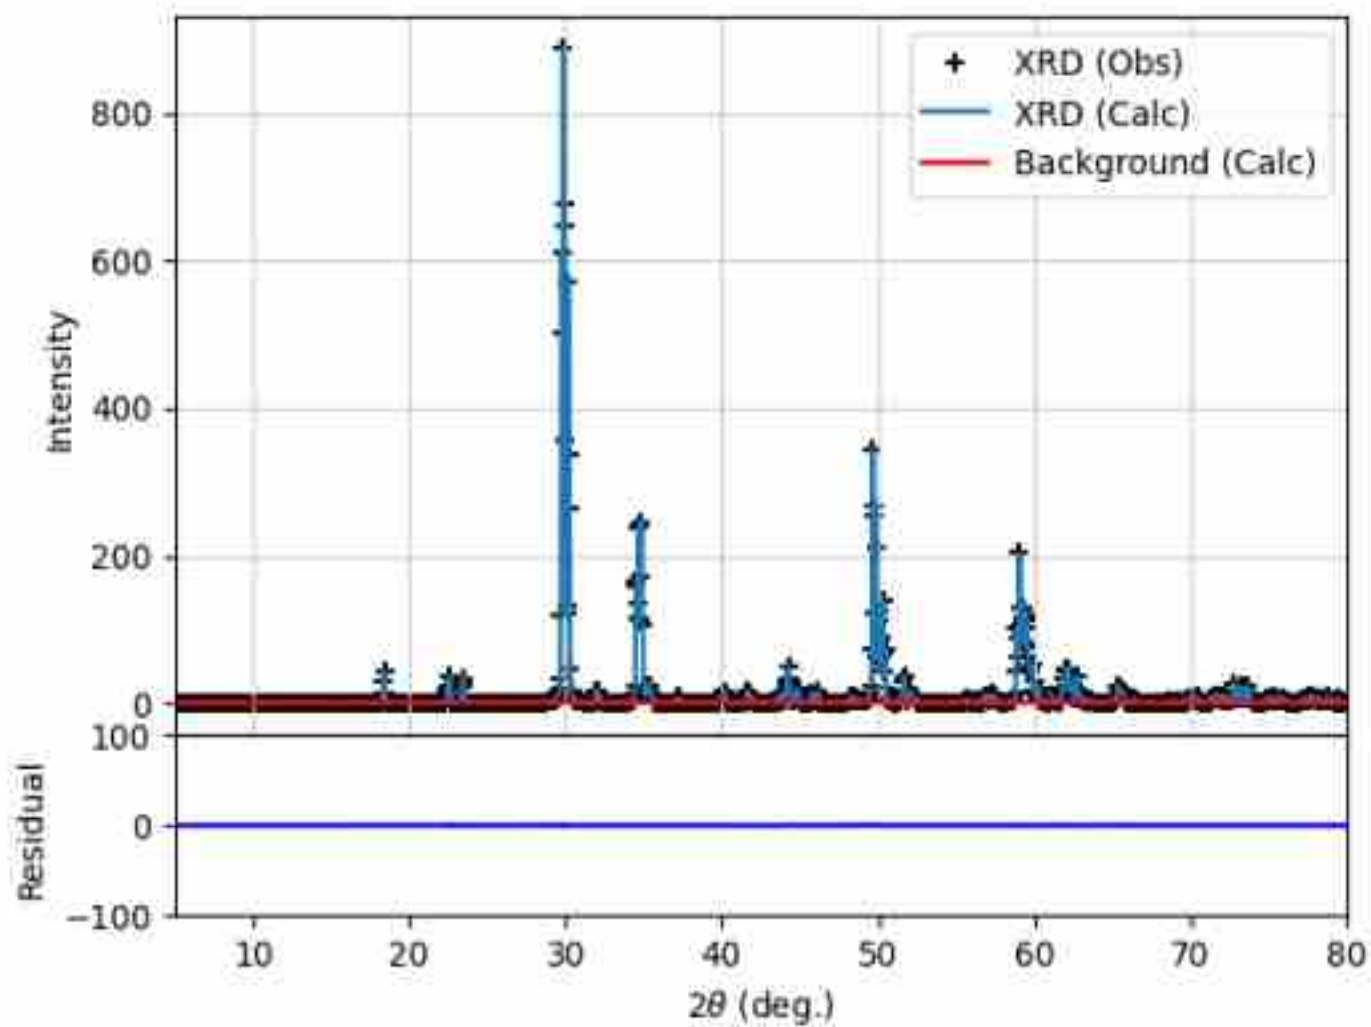

| RMSE before RR | Rwp     | RMSE after RR |
|----------------|---------|---------------|
| 0.031          | 0.51059 | 0.04512       |

# K6Gd2F12

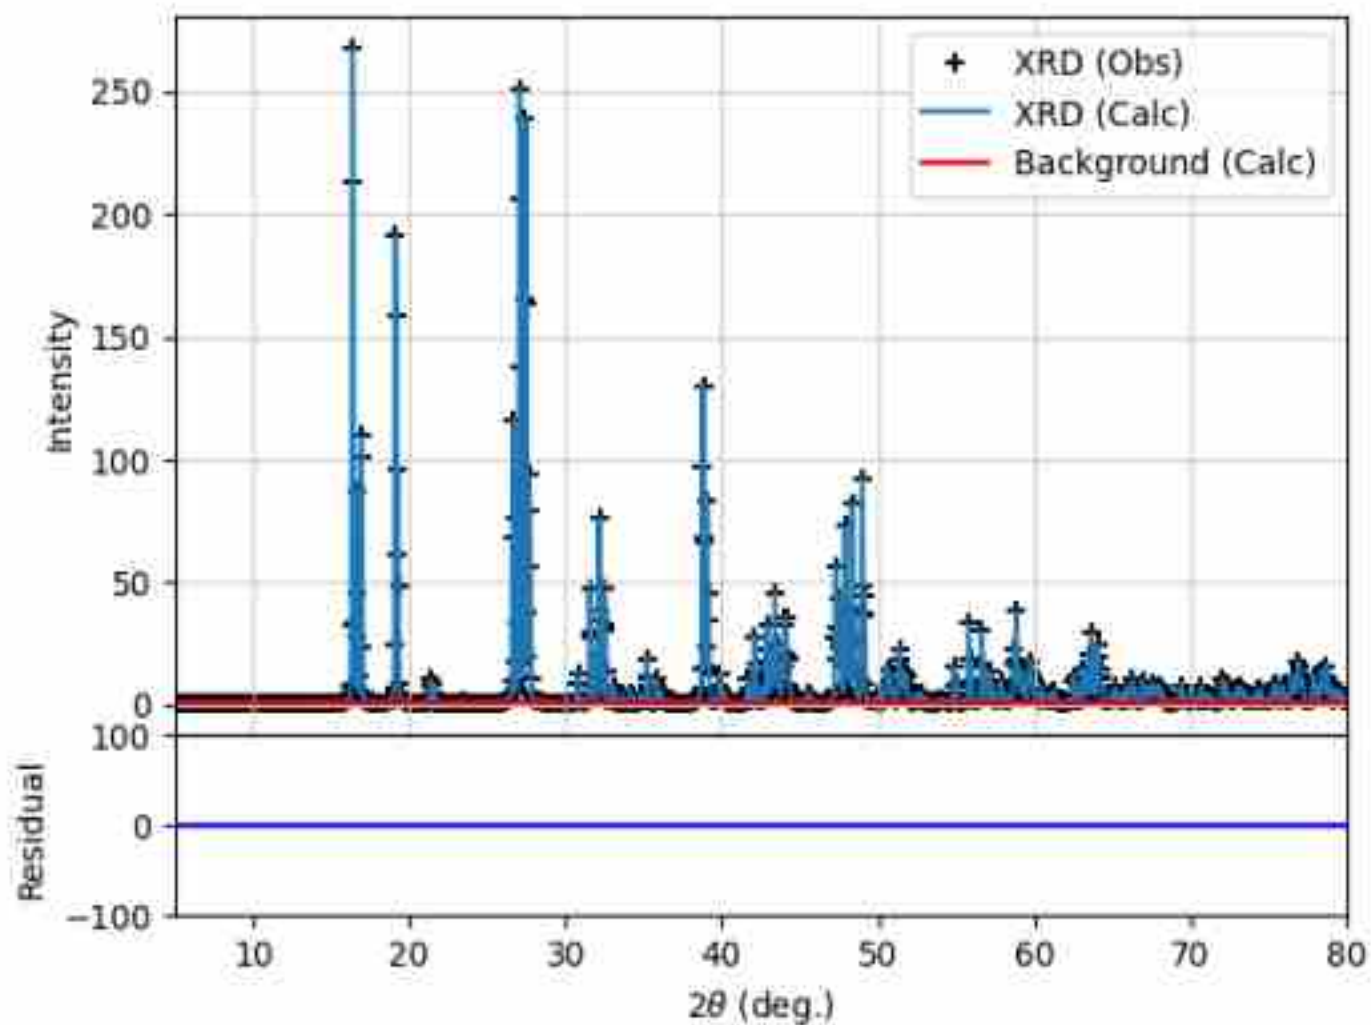

| RMSE before RR | Rwp     | RMSE after RR |
|----------------|---------|---------------|
| 0.031          | 0.00343 | 0.00077       |

# La<sub>1</sub>Mn<sub>4</sub>Bi<sub>3</sub>O<sub>12</sub>

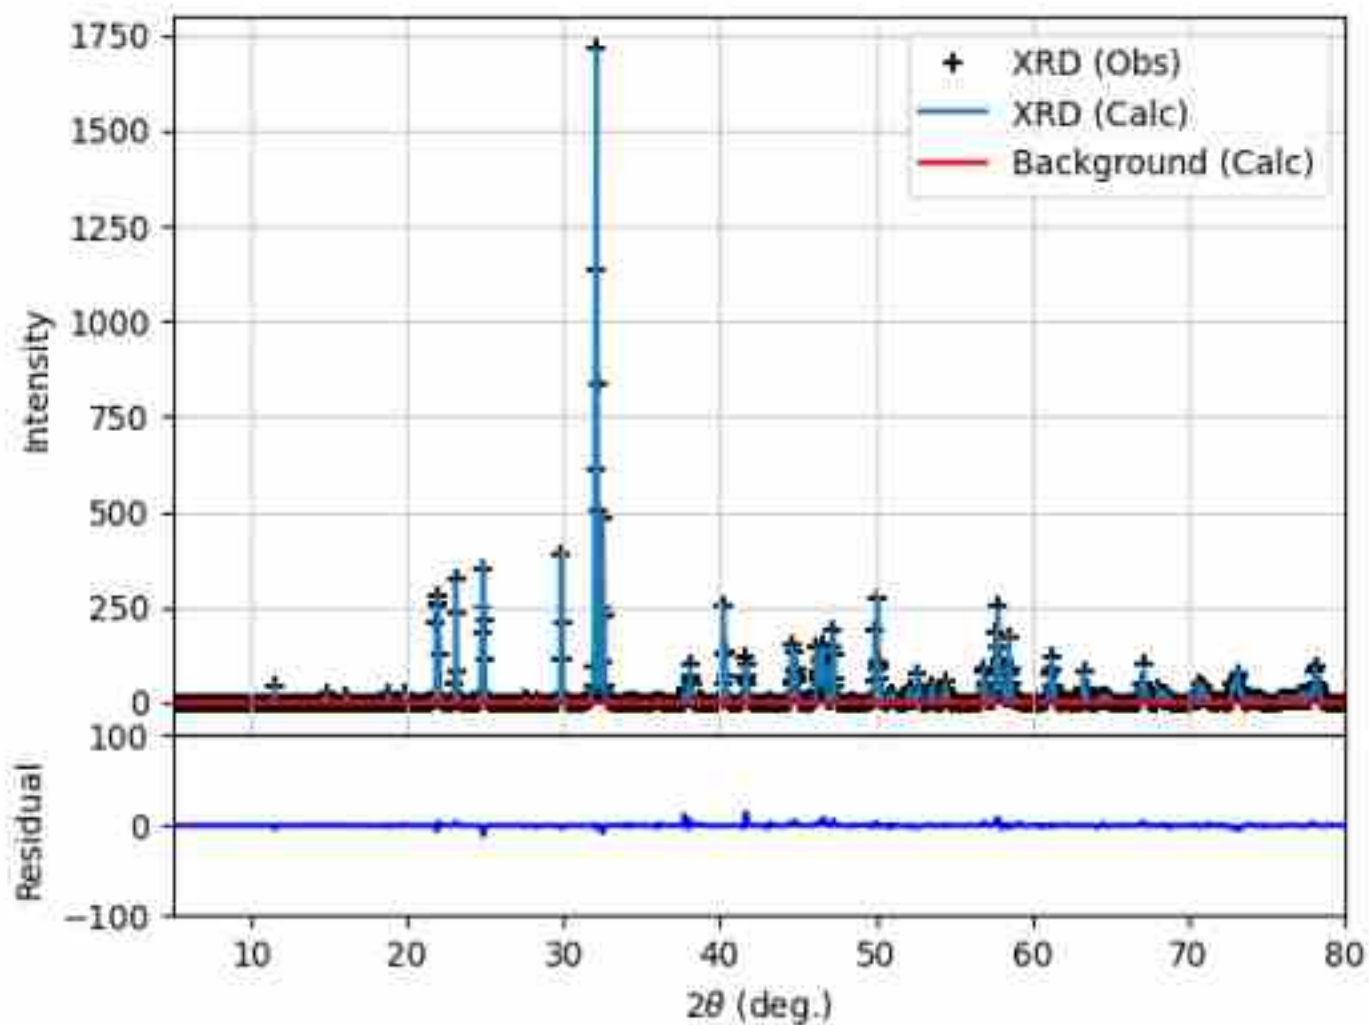

| RMSE before RR | Rwp     | RMSE after RR |
|----------------|---------|---------------|
| 0.031          | 5.21804 | 0.1643        |

# La14Rh6

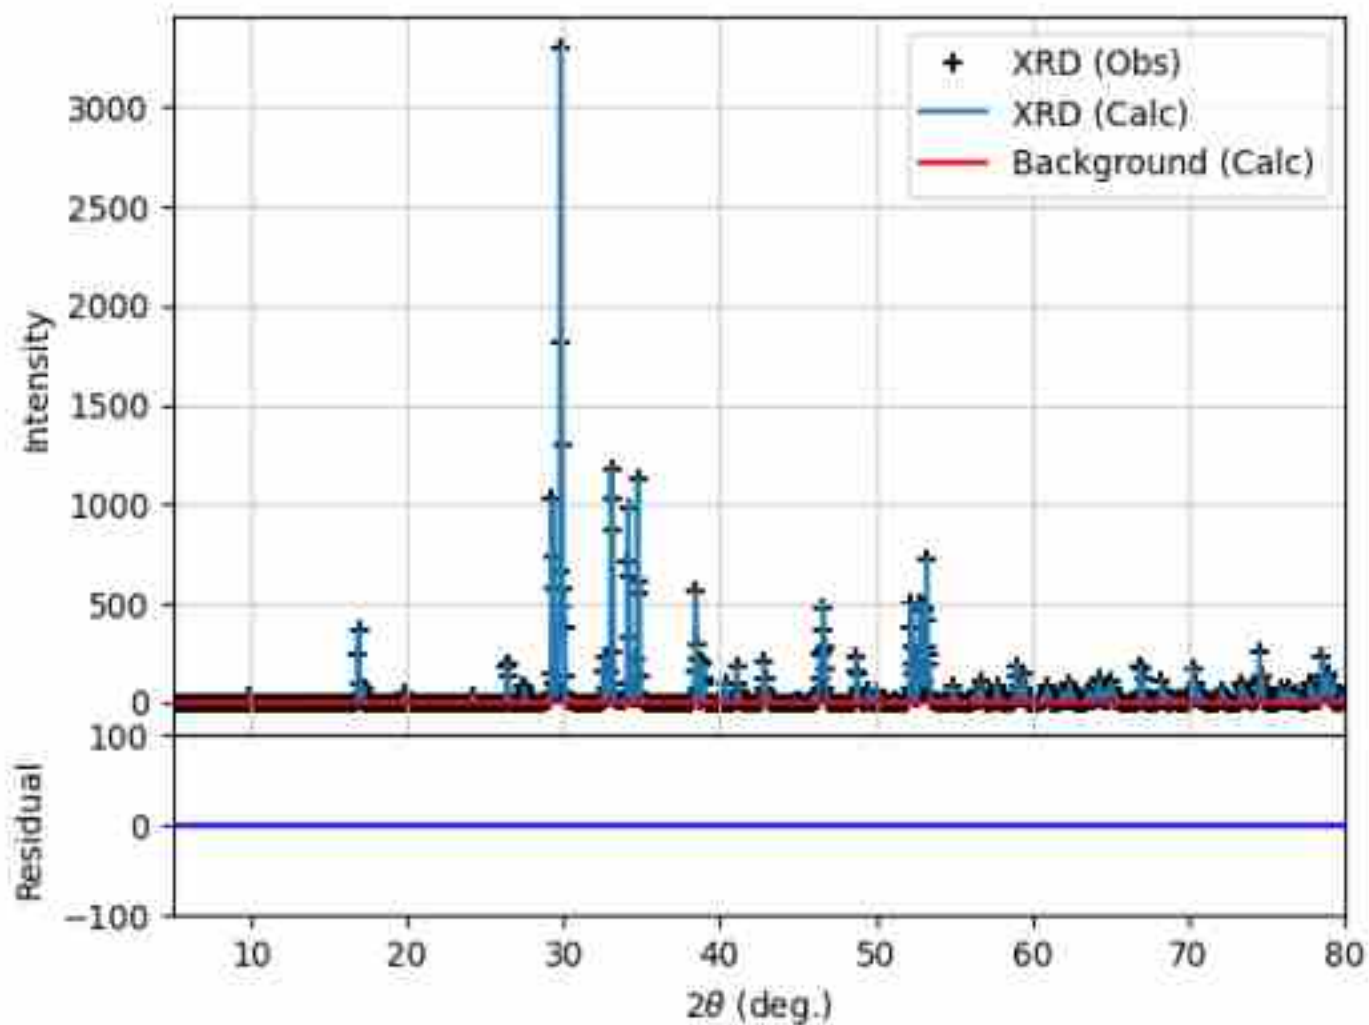

| RMSE before RR | Rwp    | RMSE after RR |
|----------------|--------|---------------|
| 0.031          | 0.0055 | 0.00059       |

# Li<sub>2</sub>Ag<sub>2</sub>F<sub>4</sub>

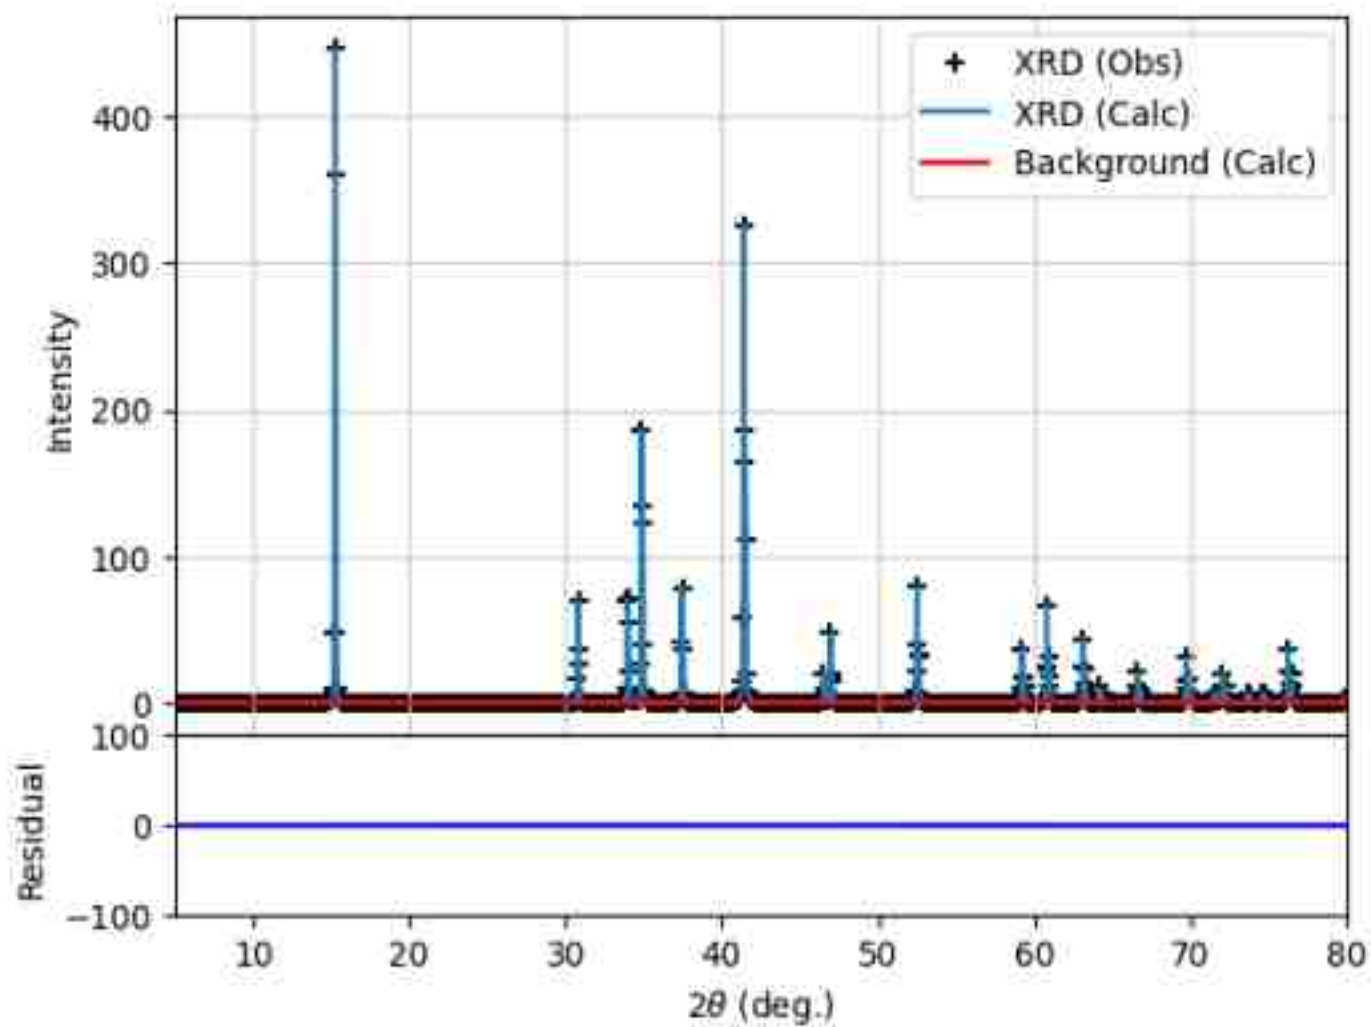

| RMSE before RR | Rwp     | RMSE after RR |
|----------------|---------|---------------|
| 0.031          | 0.26917 | 0.0257        |



# Li<sub>2</sub>Fe<sub>1</sub>Ni<sub>3</sub>O<sub>8</sub>

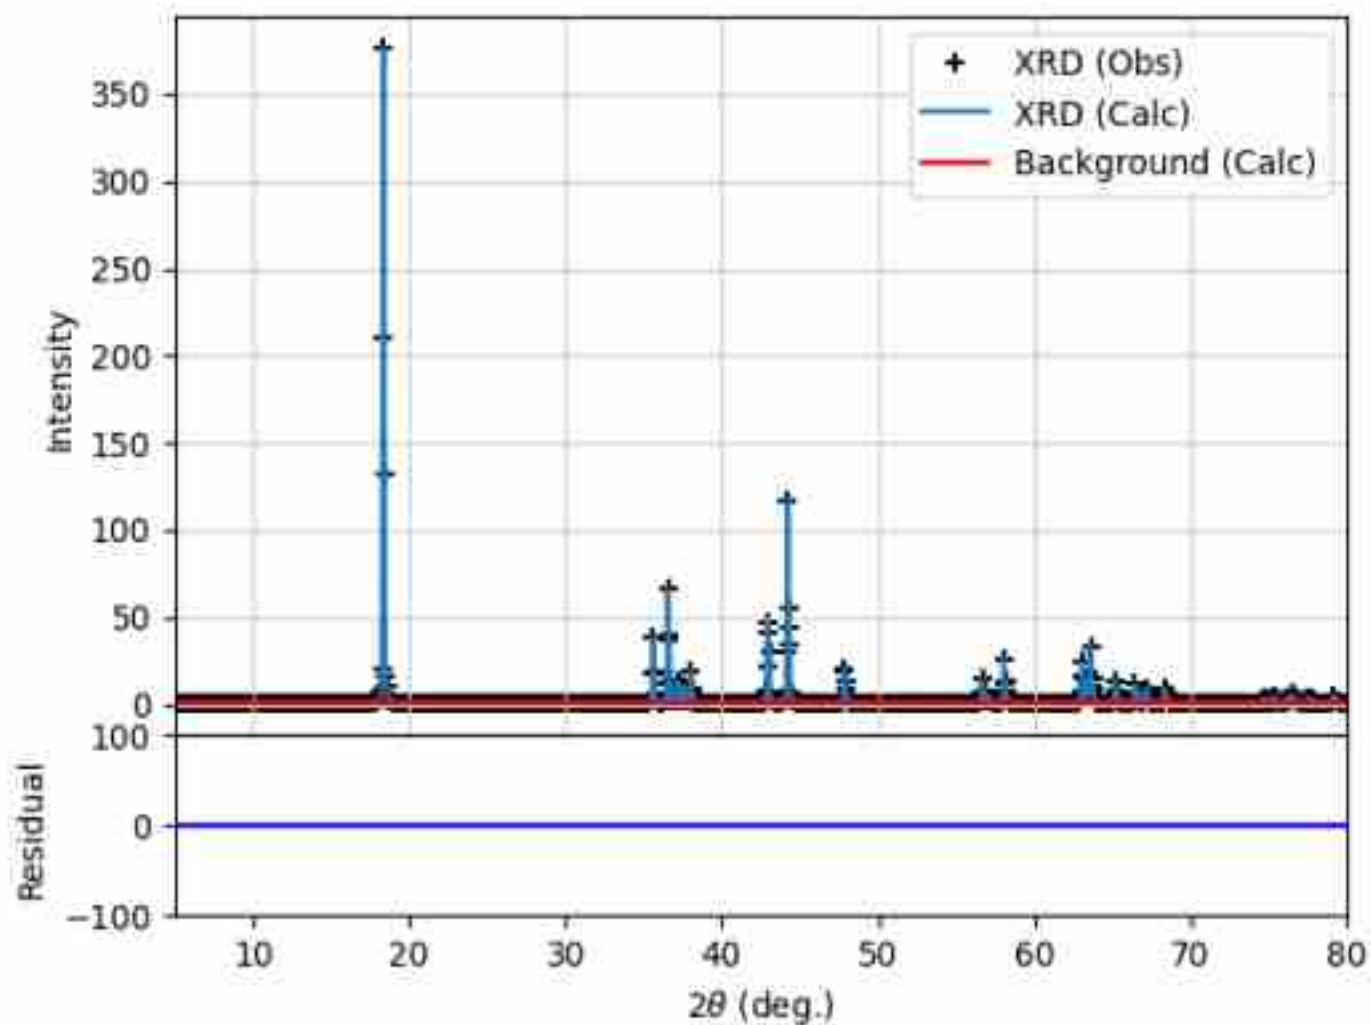

| RMSE before RR | Rwp     | RMSE after RR |
|----------------|---------|---------------|
| 0.031          | 0.02346 | 0.01021       |

# Li<sub>2</sub>Mn<sub>2</sub>Sn<sub>2</sub>O<sub>8</sub>

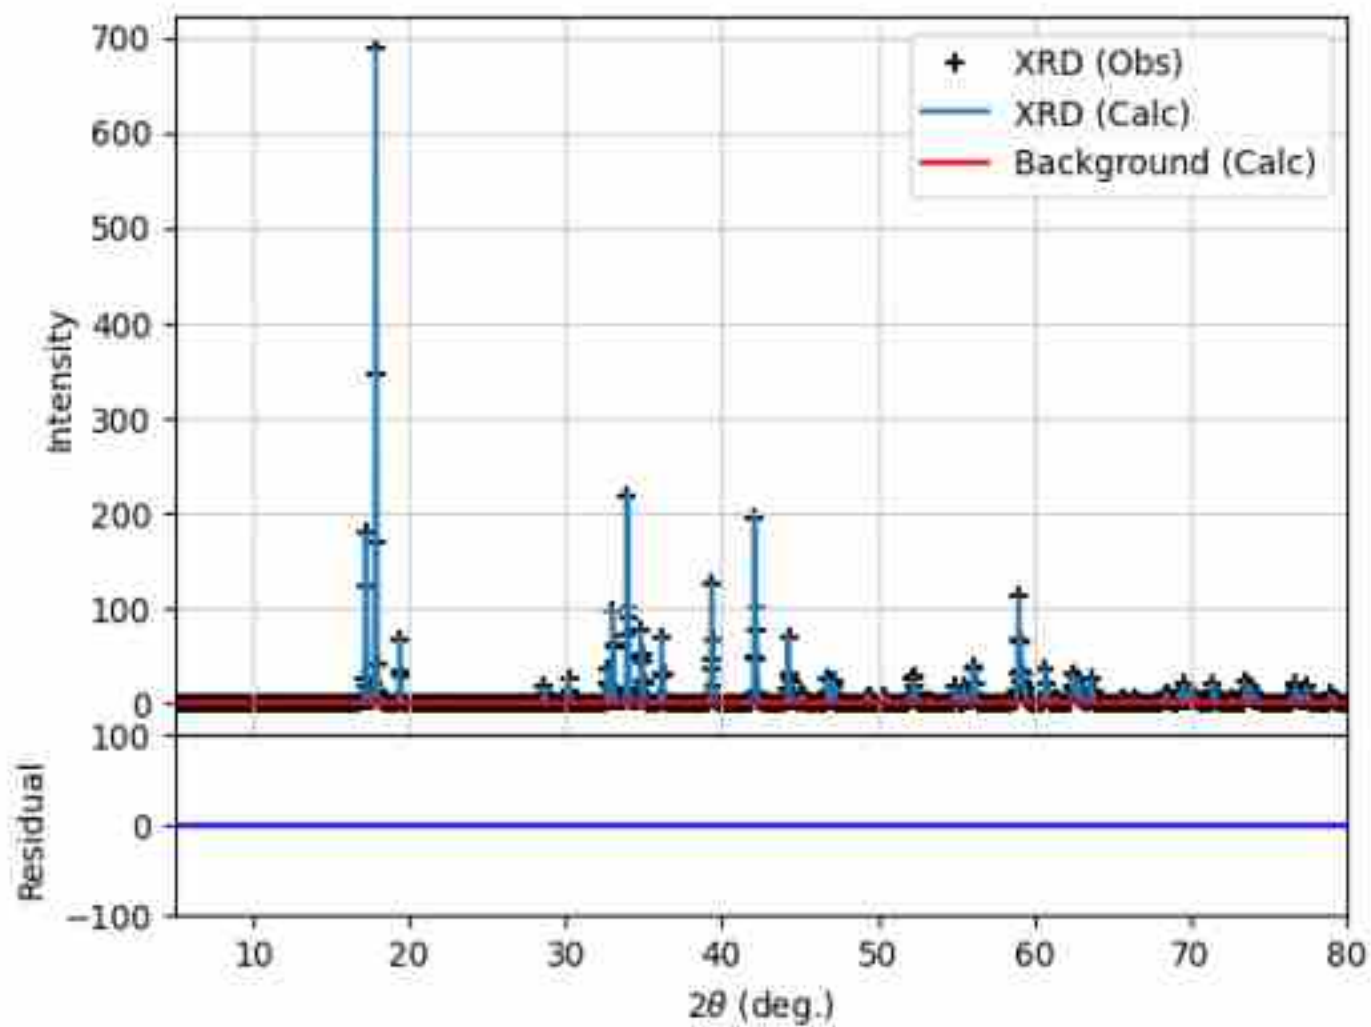

| RMSE before RR | Rwp     | RMSE after RR |
|----------------|---------|---------------|
| 0.031          | 0.00362 | 0.00169       |

# Li<sub>2</sub>V<sub>2</sub>Si<sub>2</sub>O<sub>10</sub>

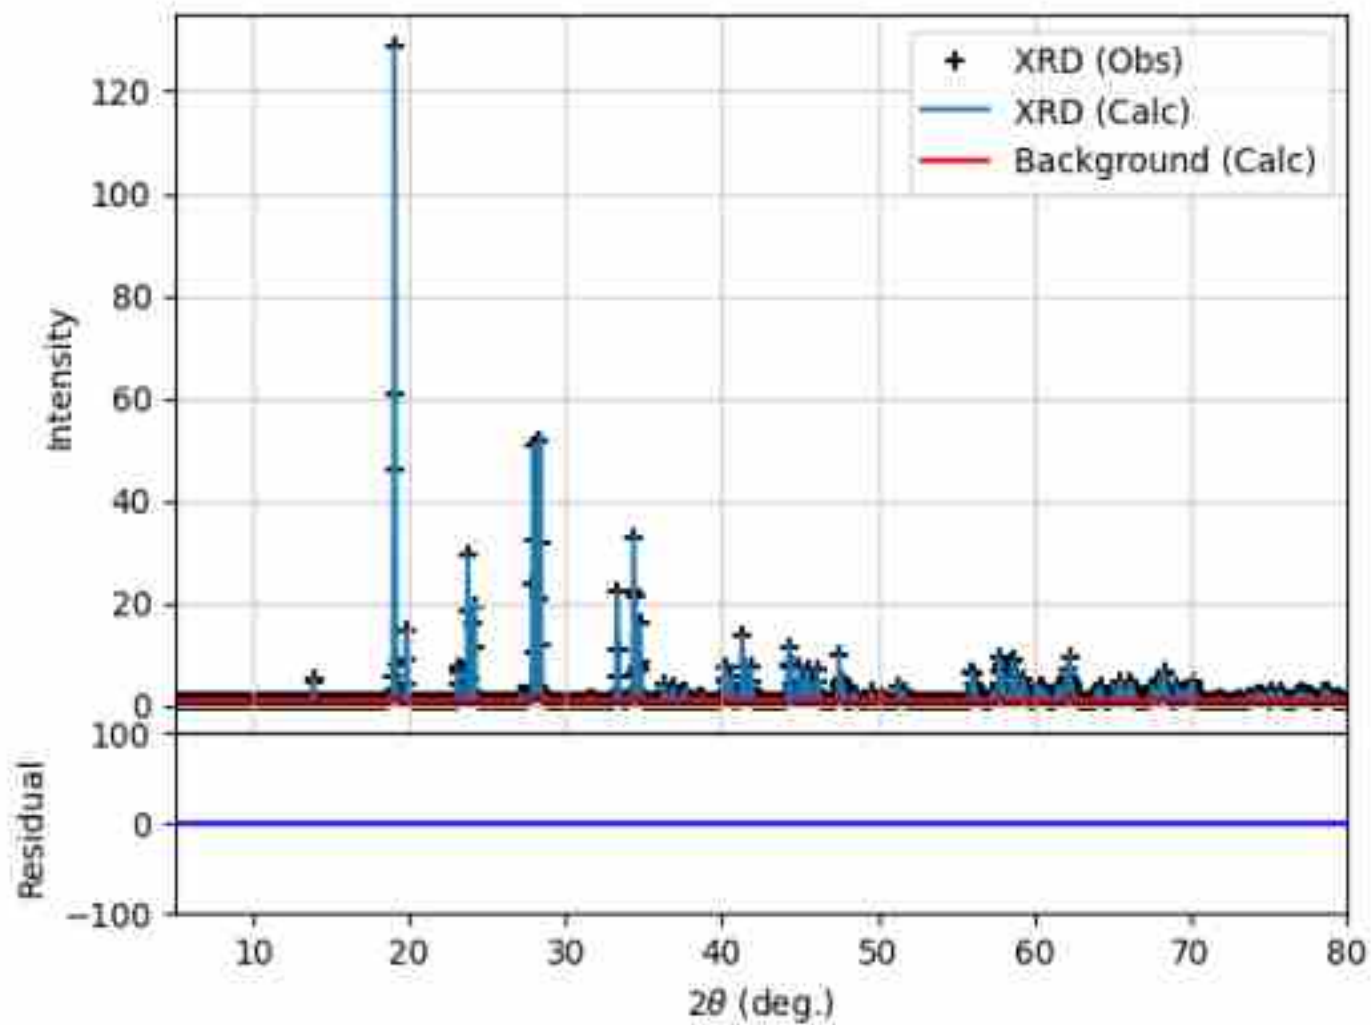

| RMSE before RR | Rwp     | RMSE after RR |
|----------------|---------|---------------|
| 0.031          | 0.00198 | 0.00059       |

# Li<sub>3</sub>Nb1Fe<sub>4</sub>O<sub>8</sub>

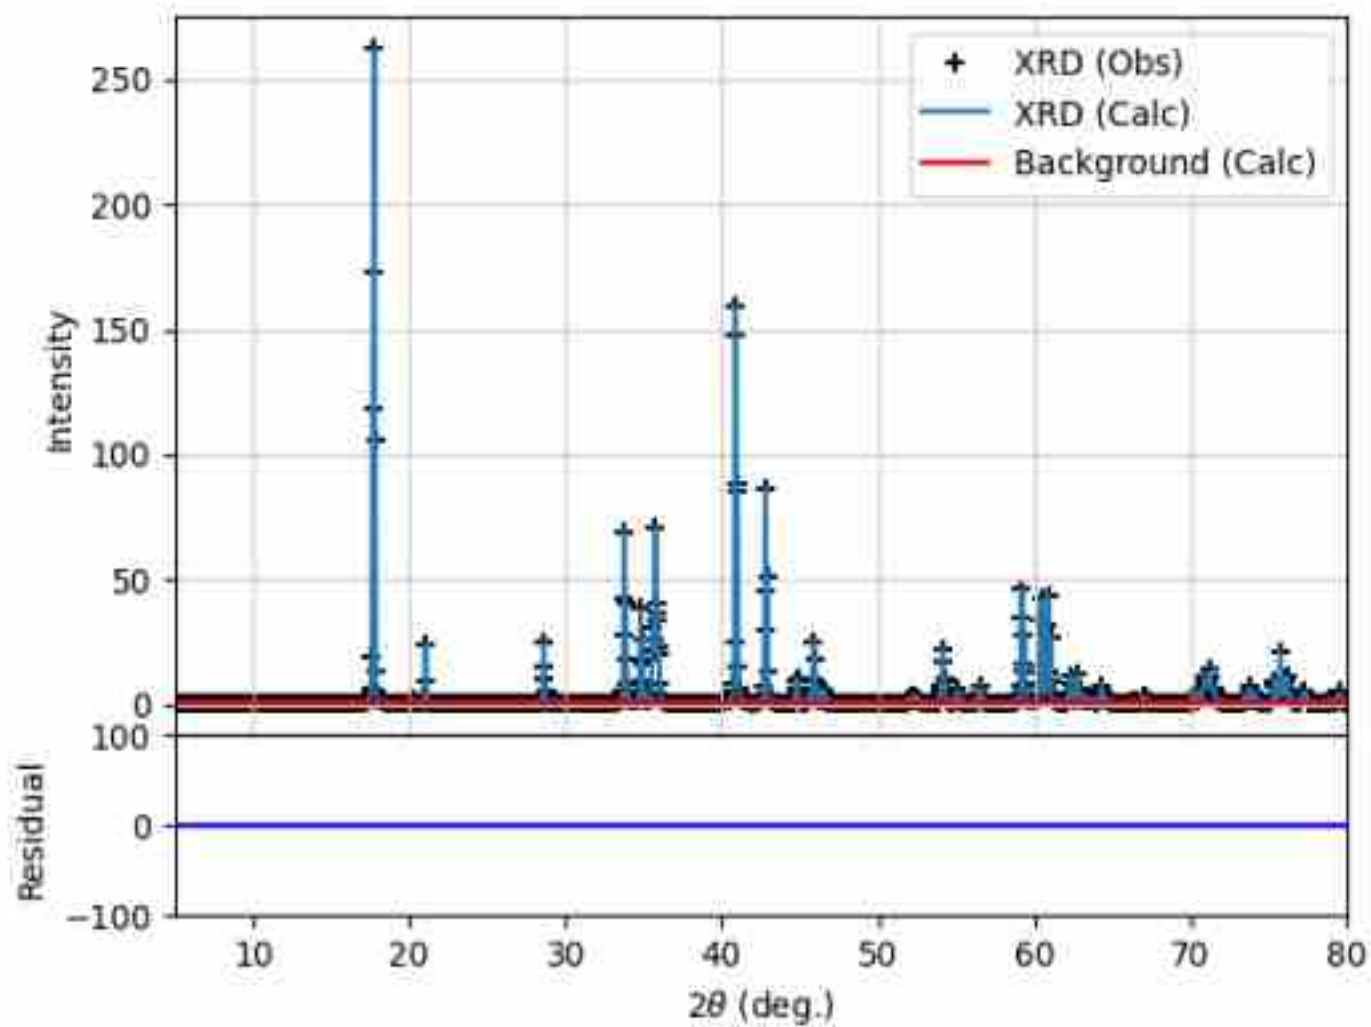

| RMSE before RR | Rwp     | RMSE after RR |
|----------------|---------|---------------|
| 0.031          | 0.00278 | 0.00062       |

# Li<sub>4</sub>S<sub>2</sub>O<sub>8</sub>

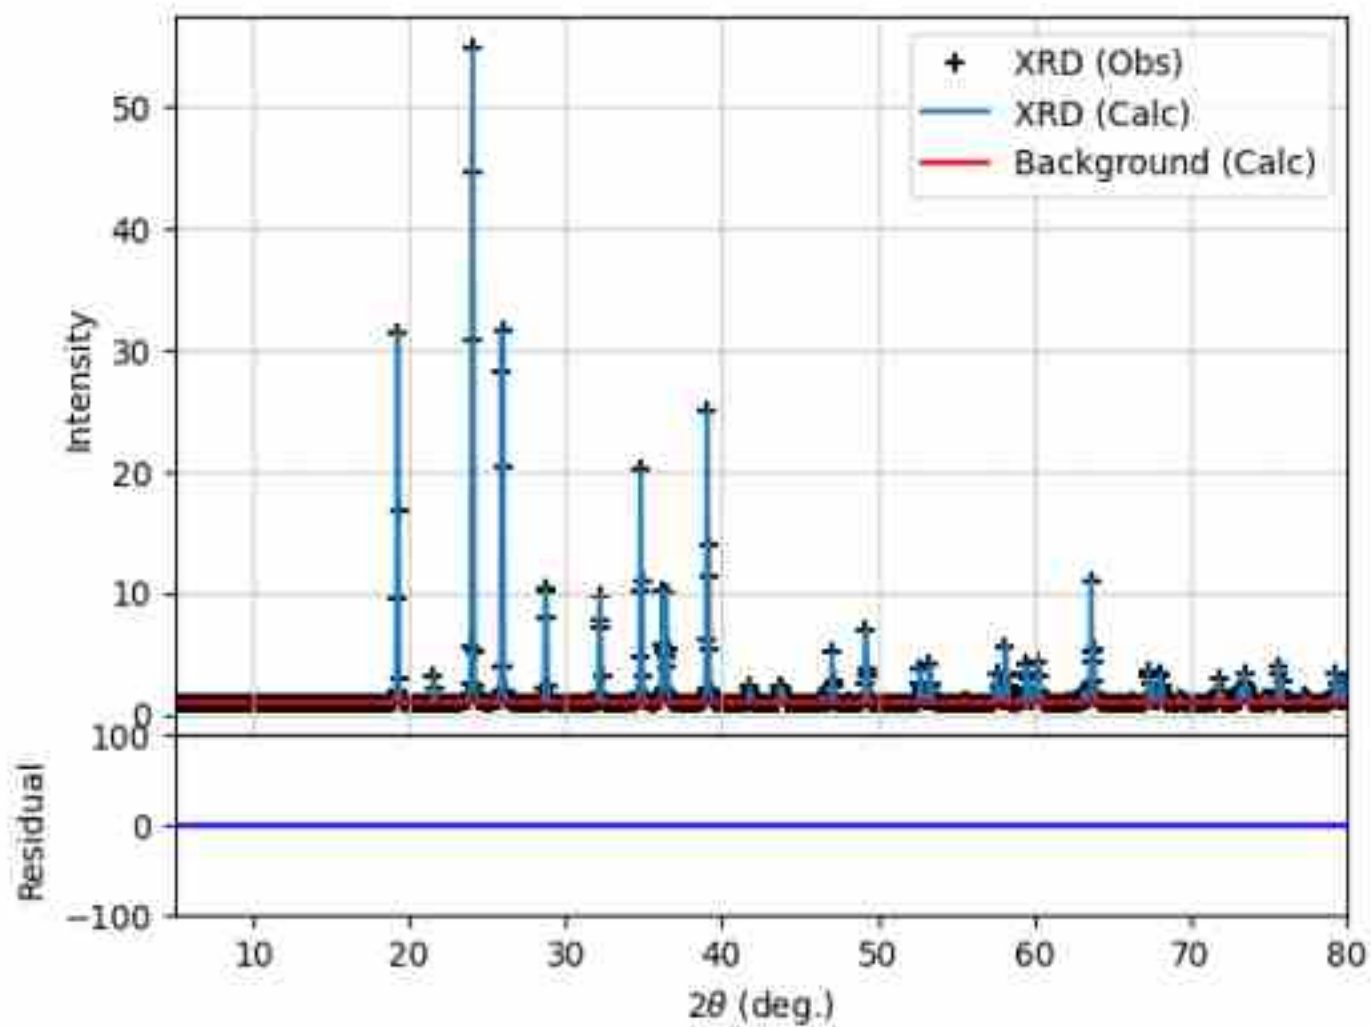

| RMSE before RR | Rwp    | RMSE after RR |
|----------------|--------|---------------|
| 0.031          | 0.0021 | 0.00128       |

# Li<sub>4</sub>Tl<sub>2</sub>

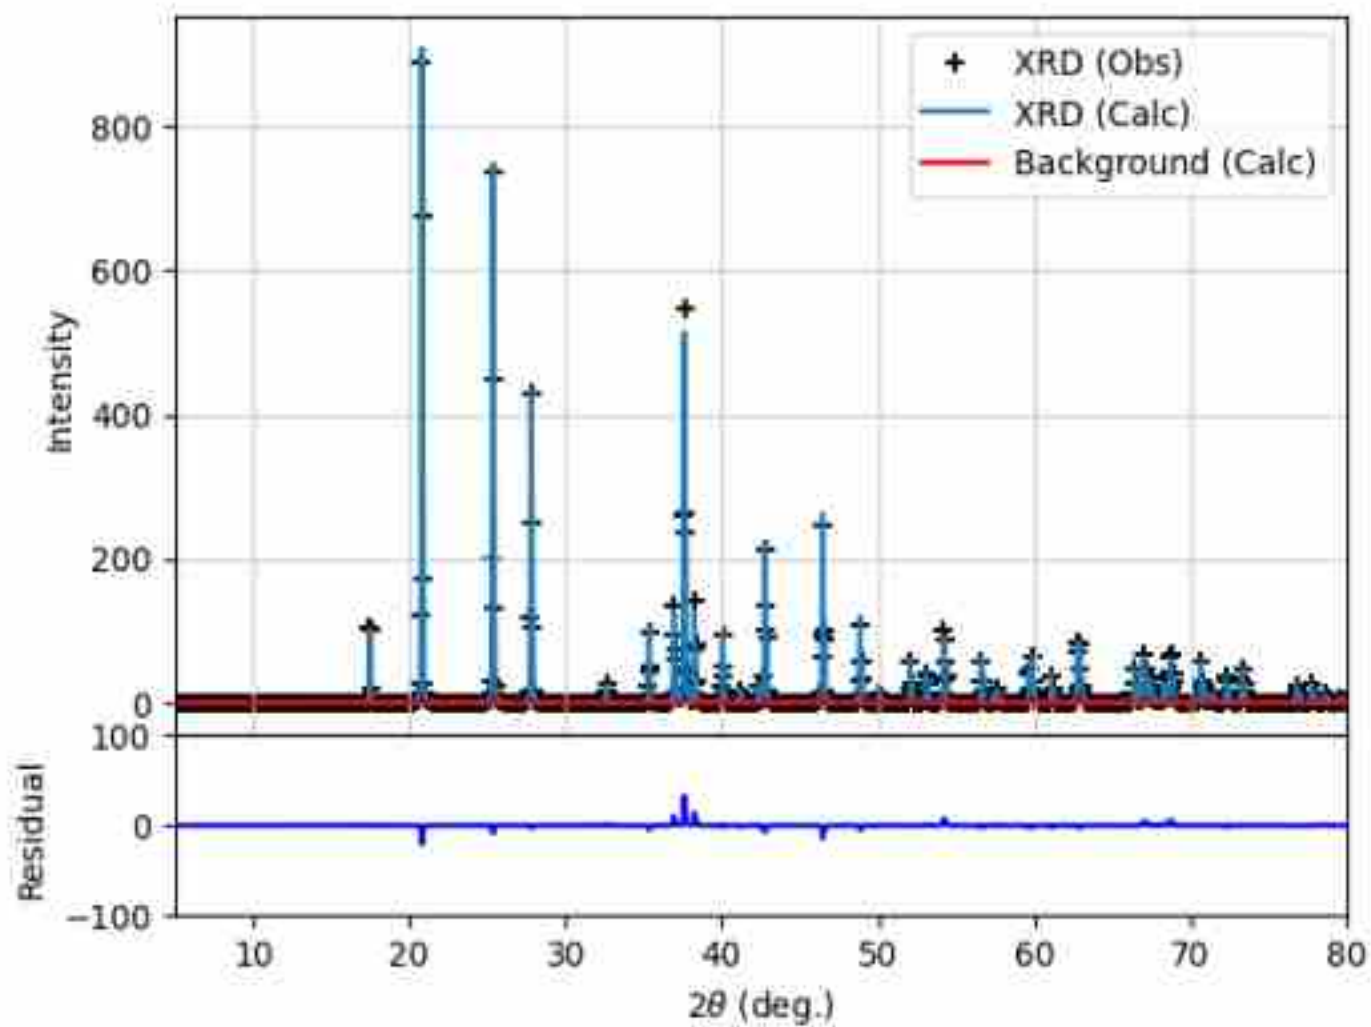

| RMSE before RR | Rwp     | RMSE after RR |
|----------------|---------|---------------|
| 0.031          | 4.29357 | 0.36779       |

# Li<sub>4</sub>U<sub>2</sub>Br<sub>12</sub>

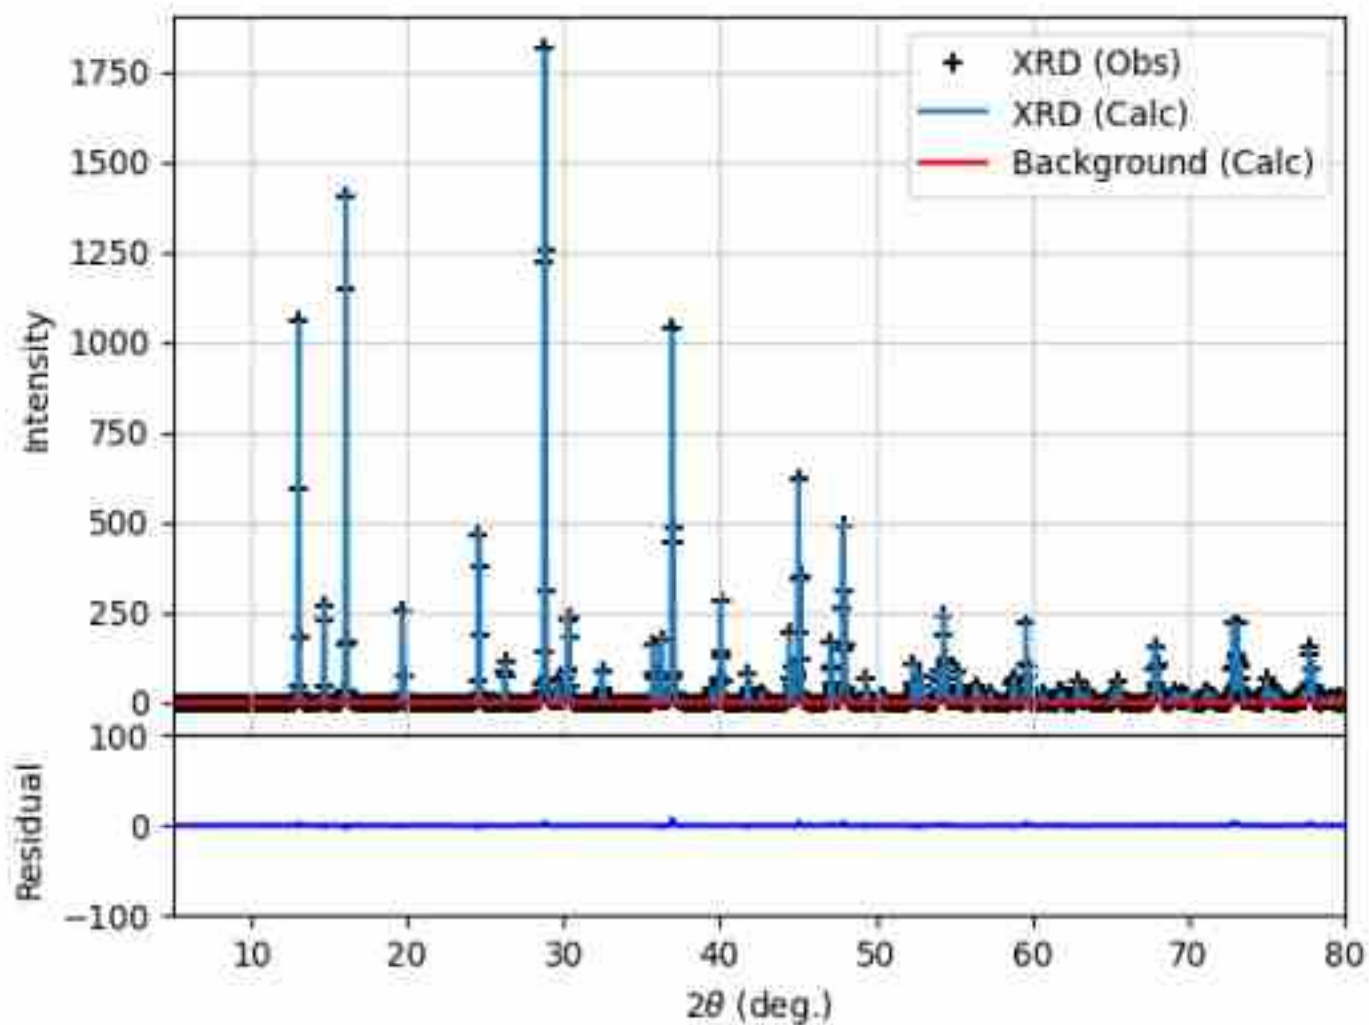

| RMSE before RR | Rwp     | RMSE after RR |
|----------------|---------|---------------|
| 0.031          | 0.79409 | 0.39515       |

# Li4V2F8

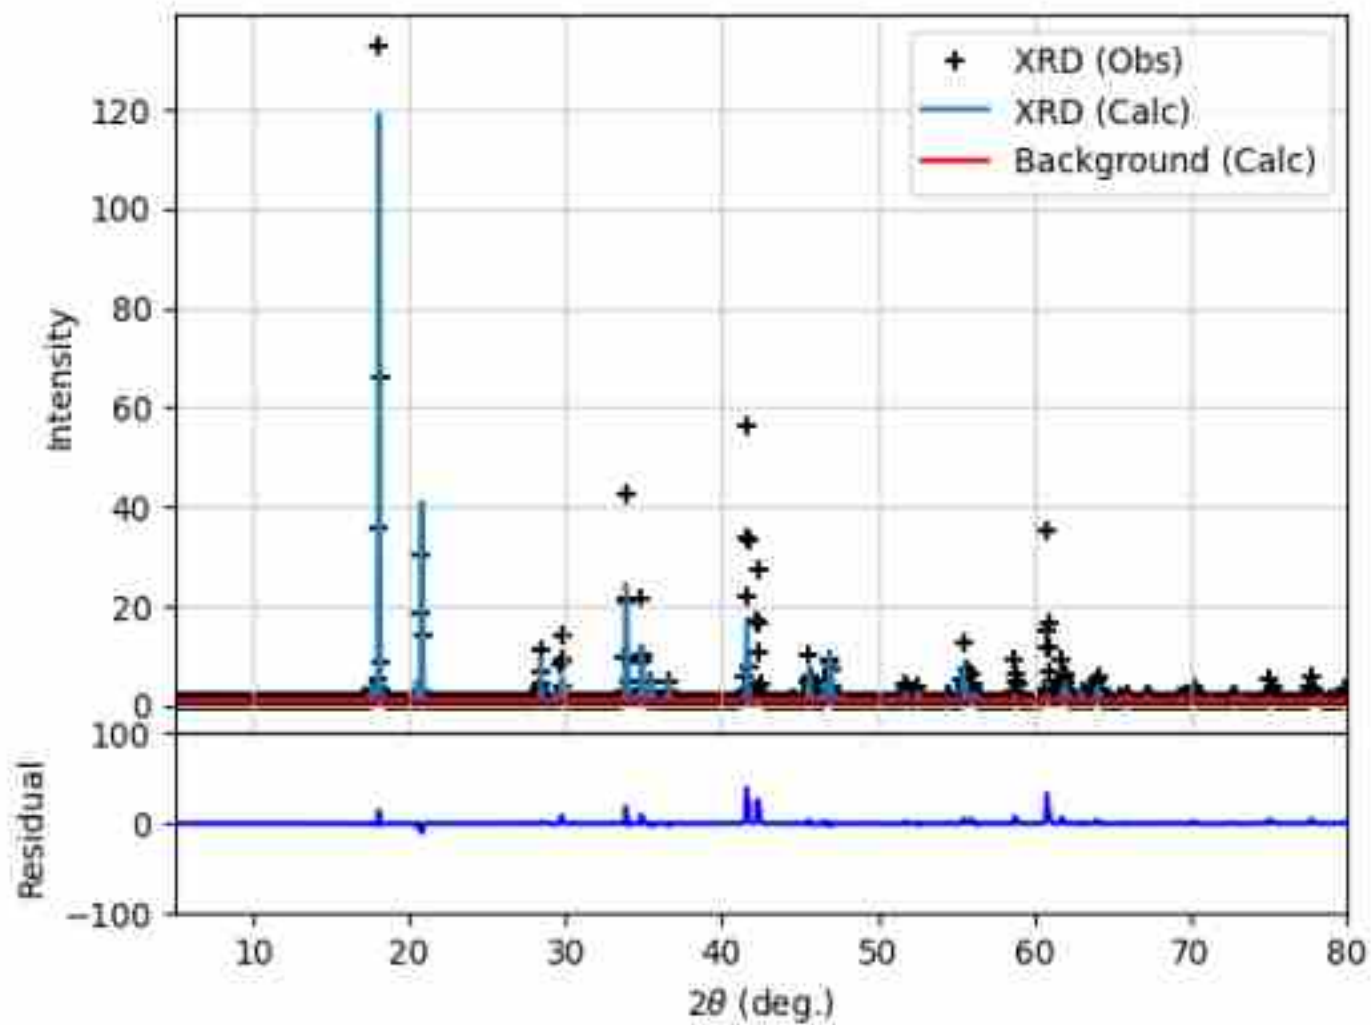

| RMSE before RR | Rwp      | RMSE after RR |
|----------------|----------|---------------|
| 0.031          | 37.55157 | None          |



# Li<sub>4</sub>V<sub>2</sub>Fe<sub>2</sub>O<sub>8</sub>

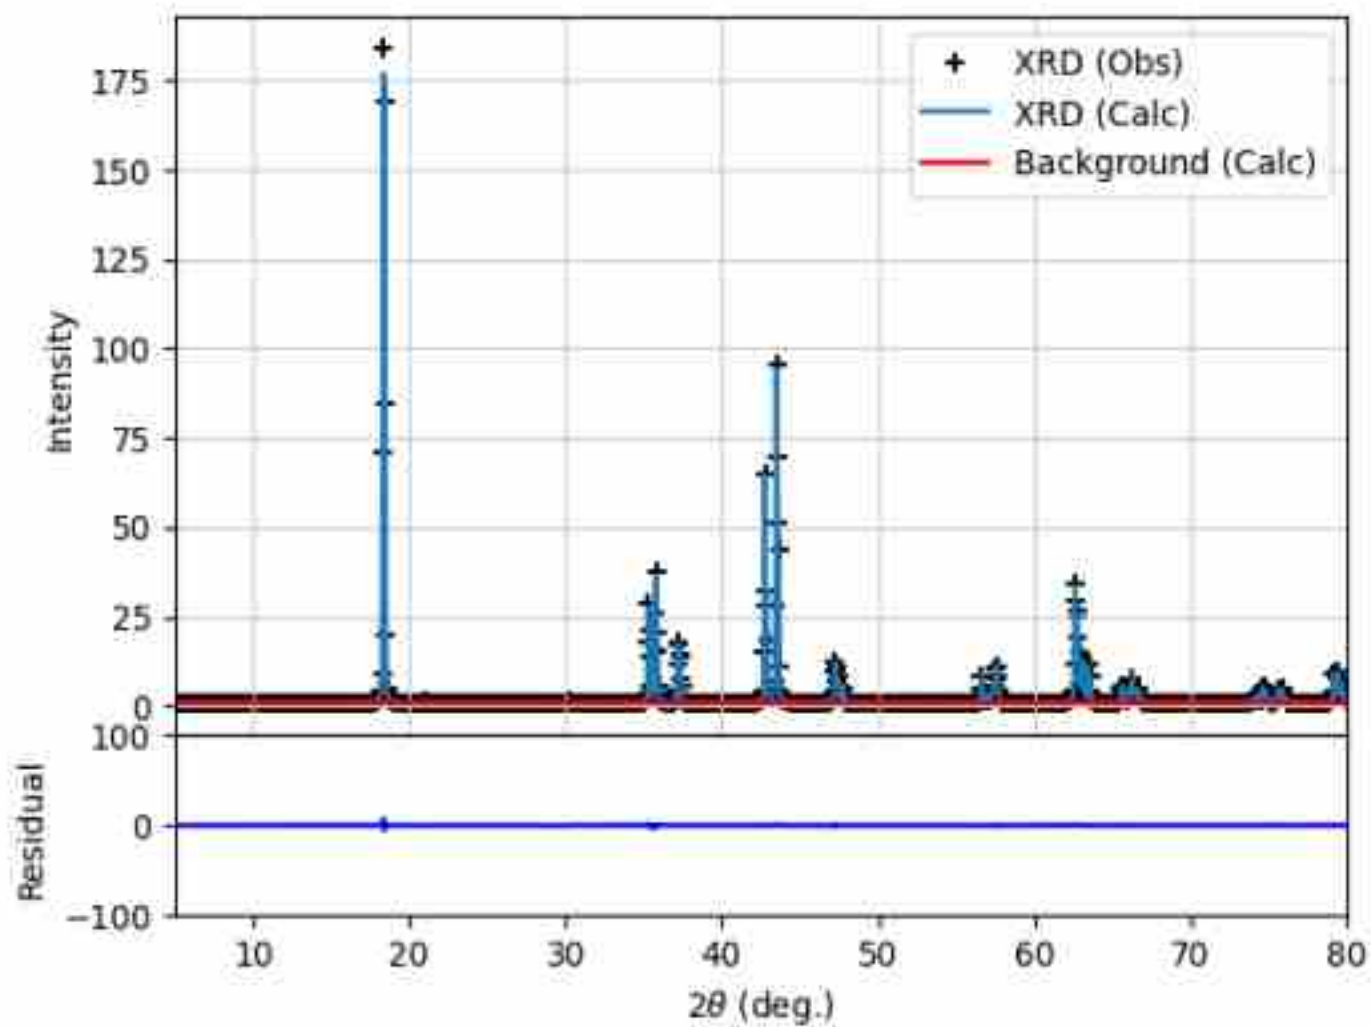

| RMSE before RR | Rwp     | RMSE after RR |
|----------------|---------|---------------|
| 0.031          | 3.49024 | 0.05408       |

# Li10Sn2P6

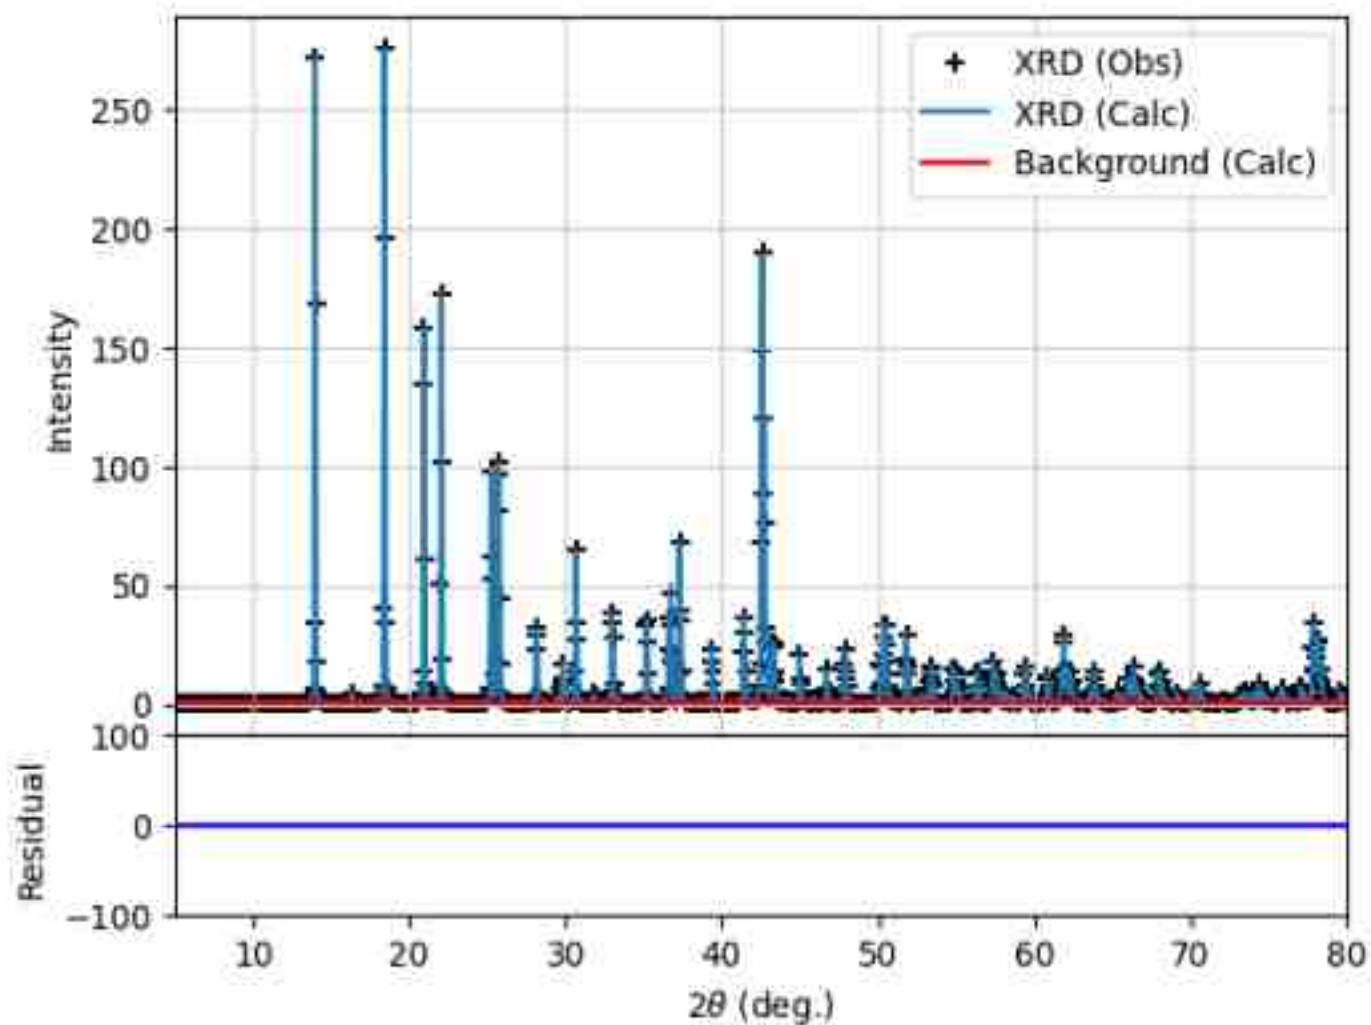

| RMSE before RR | Rwp     | RMSE after RR |
|----------------|---------|---------------|
| 0.031          | 0.00305 | 0.00088       |

# Mg<sub>4</sub>Tc<sub>2</sub>O<sub>8</sub>

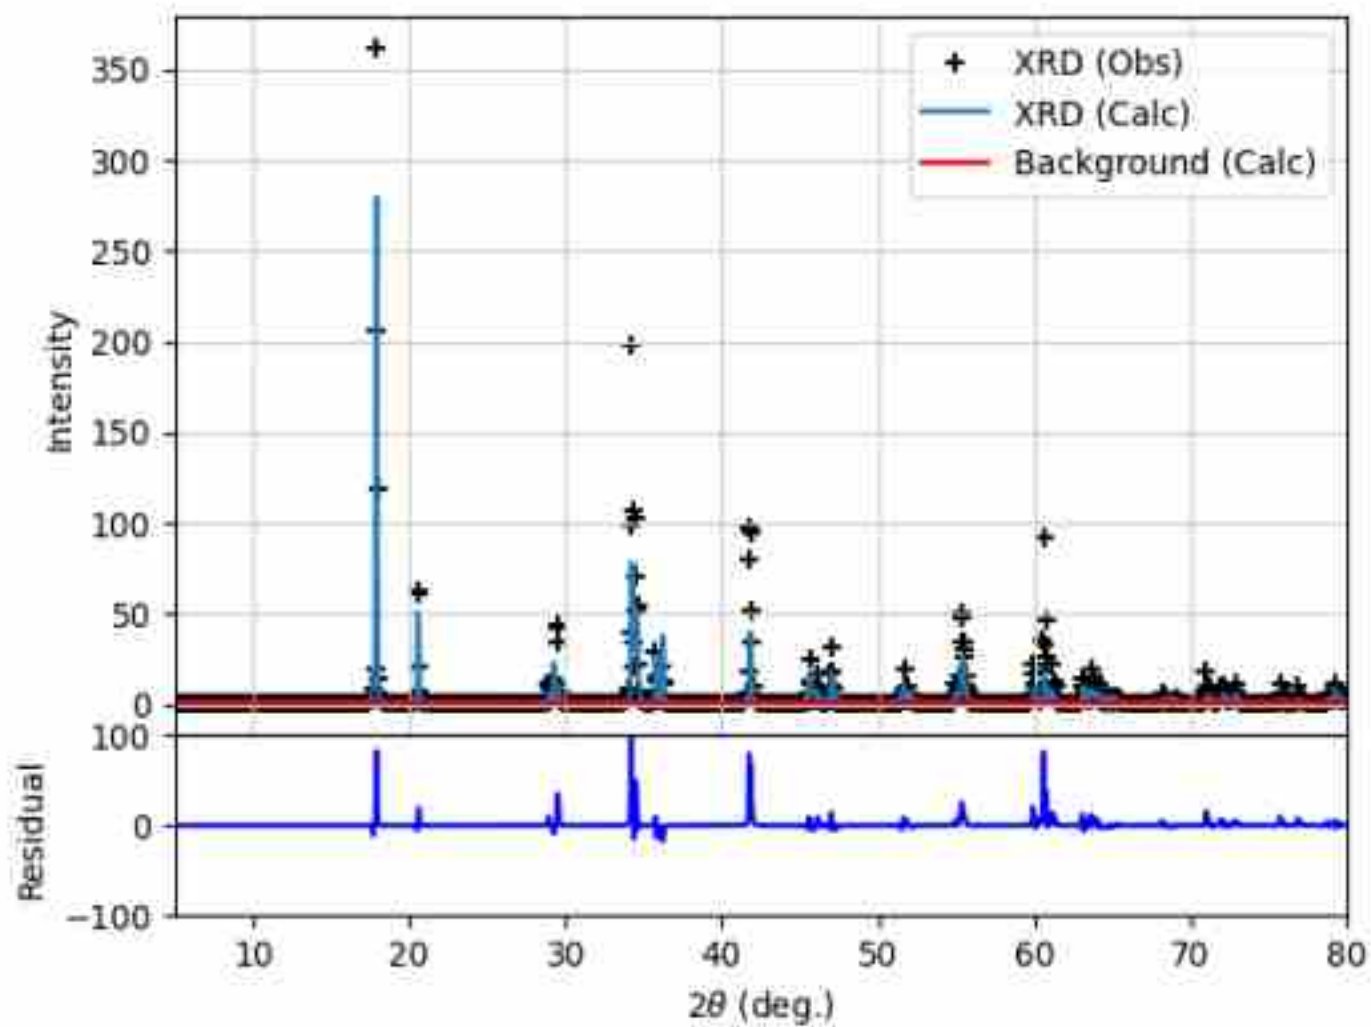

| RMSE before RR | Rwp      | RMSE after RR |
|----------------|----------|---------------|
| 0.031          | 48.26364 | None          |

# Mn<sub>2</sub>Ni<sub>2</sub>P<sub>4</sub>

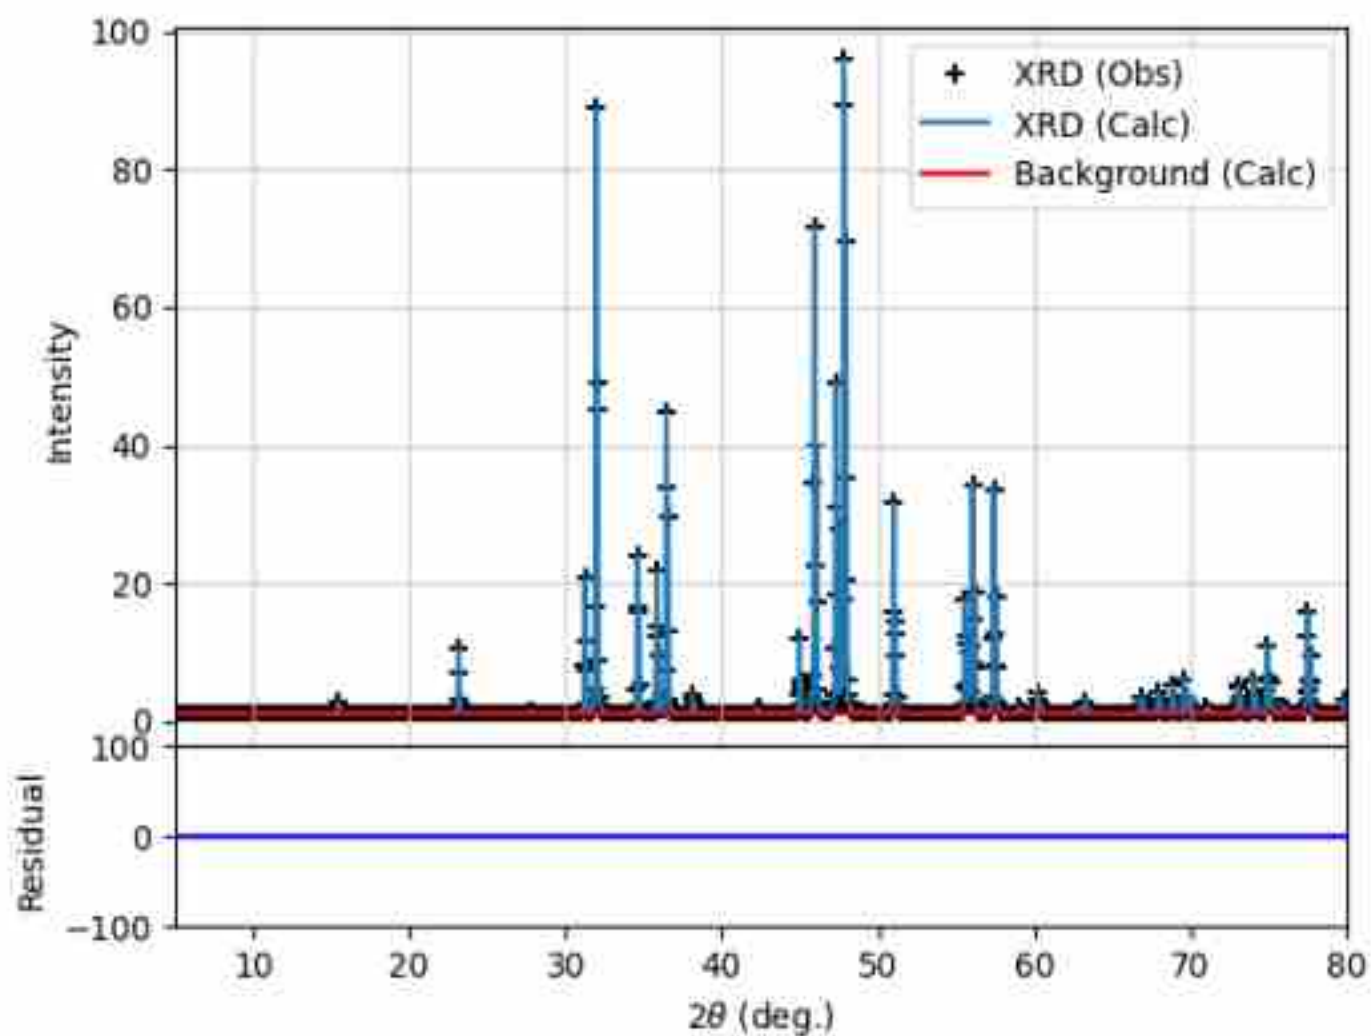

| RMSE before RR | Rwp     | RMSE after RR |
|----------------|---------|---------------|
| 0.031          | 0.00352 | 0.00071       |

# Mo2S4

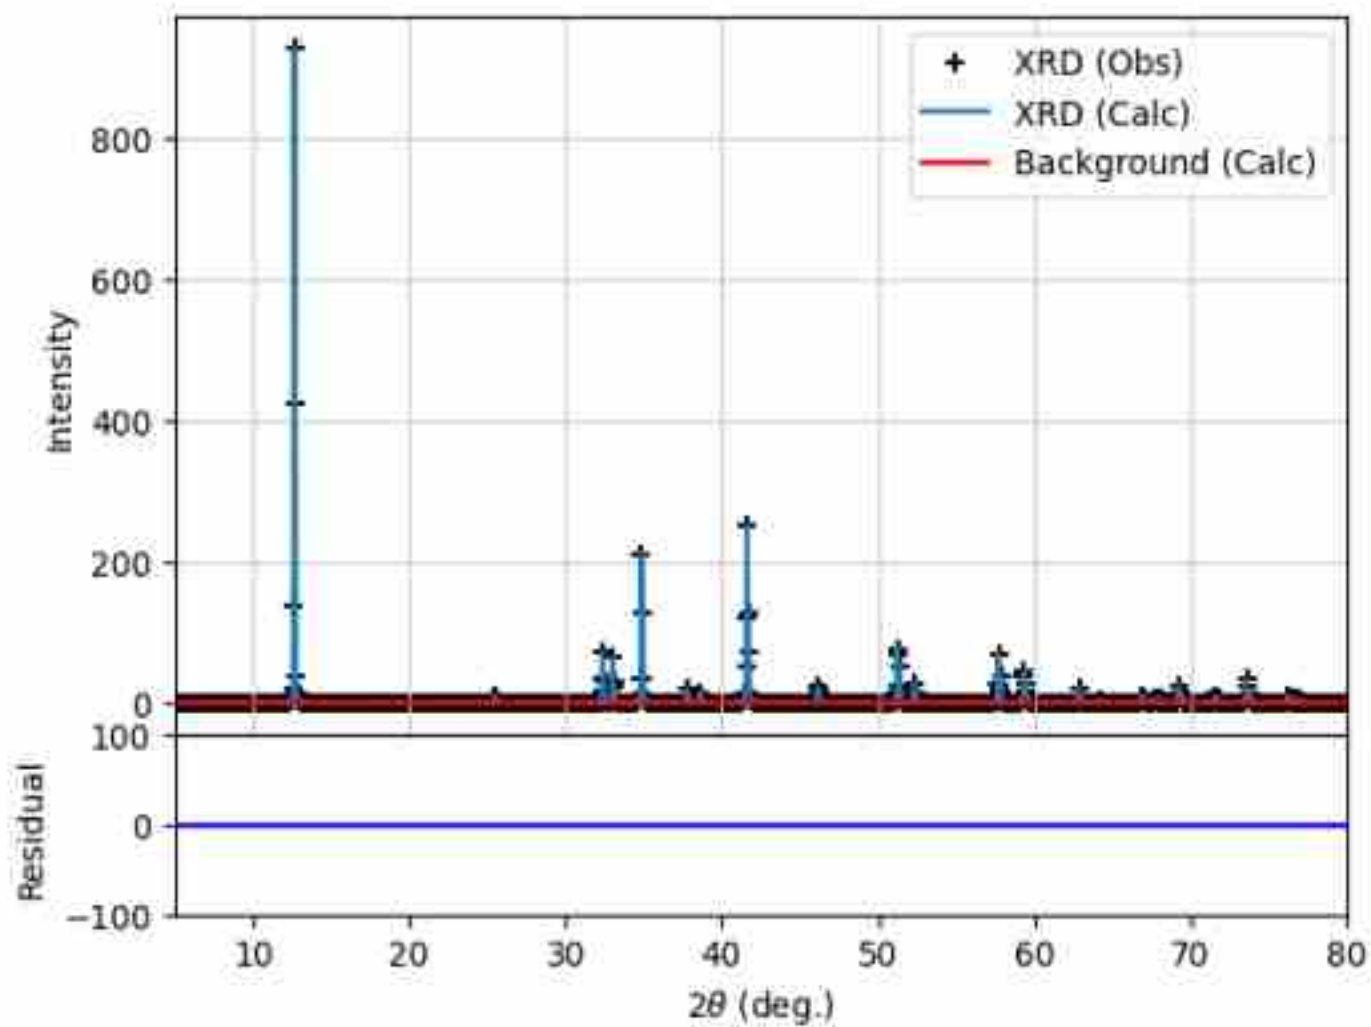

| RMSE before RR | Rwp     | RMSE after RR |
|----------------|---------|---------------|
| 0.031          | 0.00236 | 0.0004        |

# Na<sub>2</sub>Ni<sub>2</sub>O<sub>4</sub>

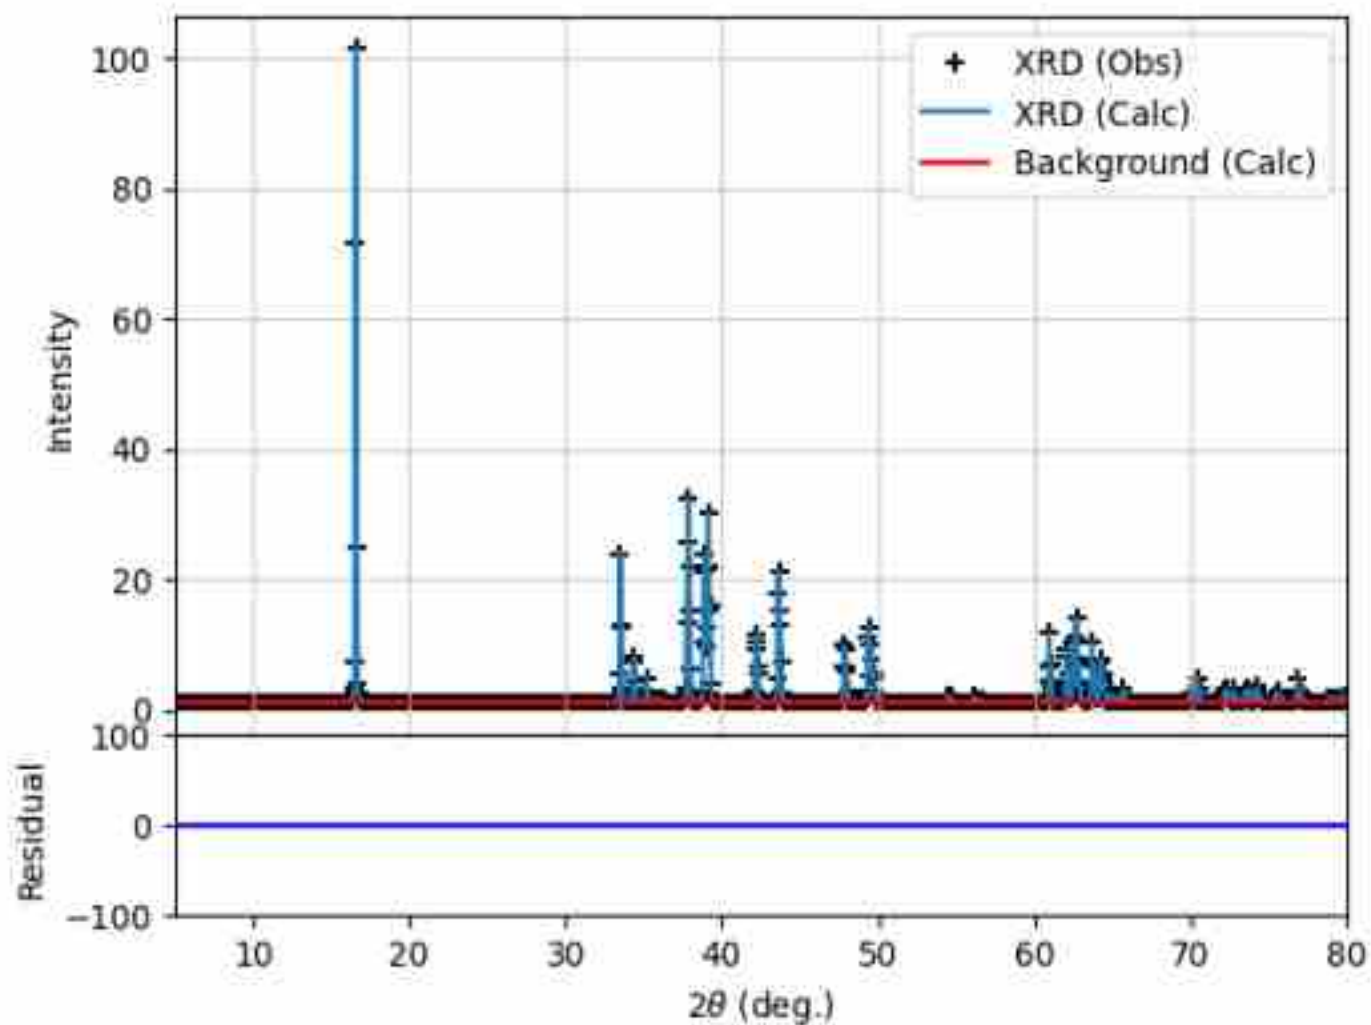

| RMSE before RR | Rwp     | RMSE after RR |
|----------------|---------|---------------|
| 0.031          | 0.00065 | 0.00056       |

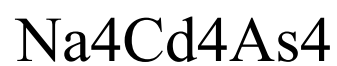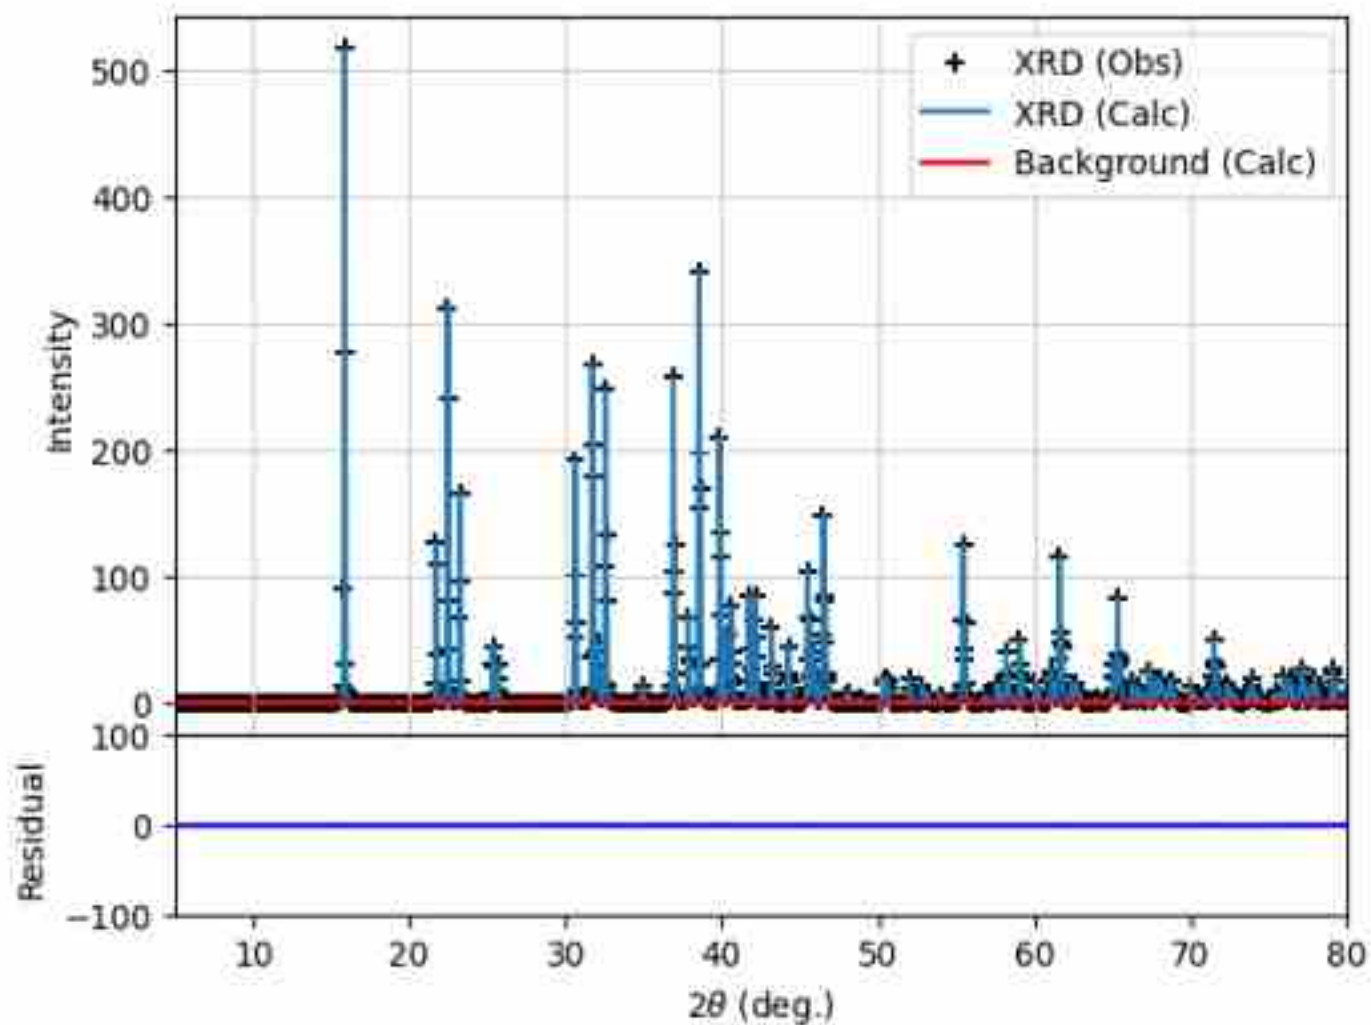

| RMSE before RR | Rwp     | RMSE after RR |
|----------------|---------|---------------|
| 0.031          | 0.50683 | 0.01336       |

# Na<sub>4</sub>Cu<sub>2</sub>O<sub>4</sub>

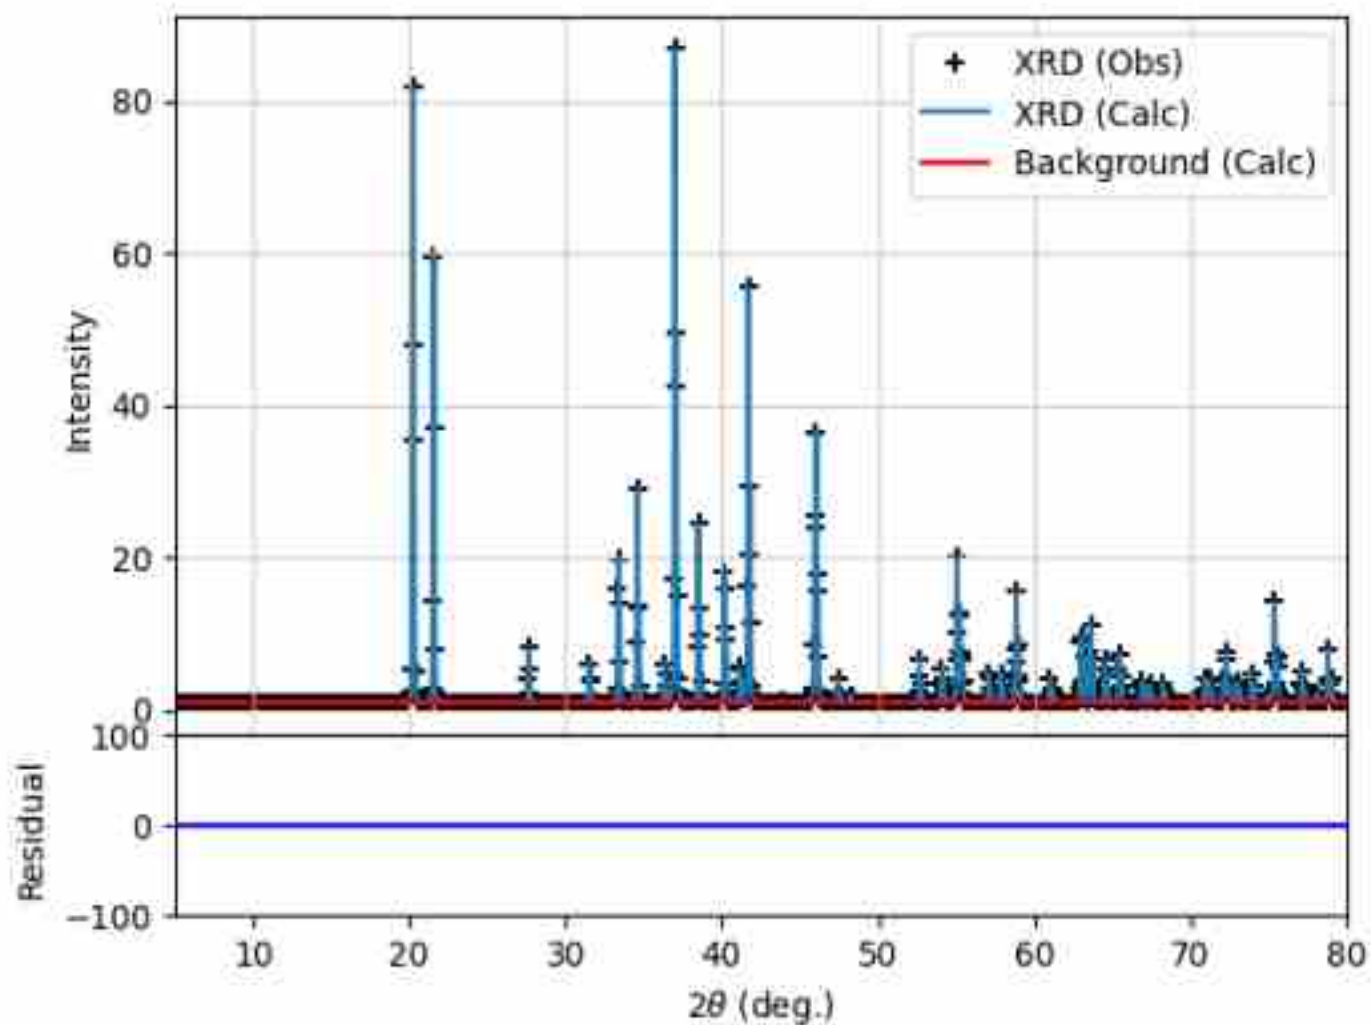

| RMSE before RR | Rwp     | RMSE after RR |
|----------------|---------|---------------|
| 0.031          | 0.00316 | 0.00079       |



# Nb<sub>2</sub>Al<sub>2</sub>Br<sub>16</sub>

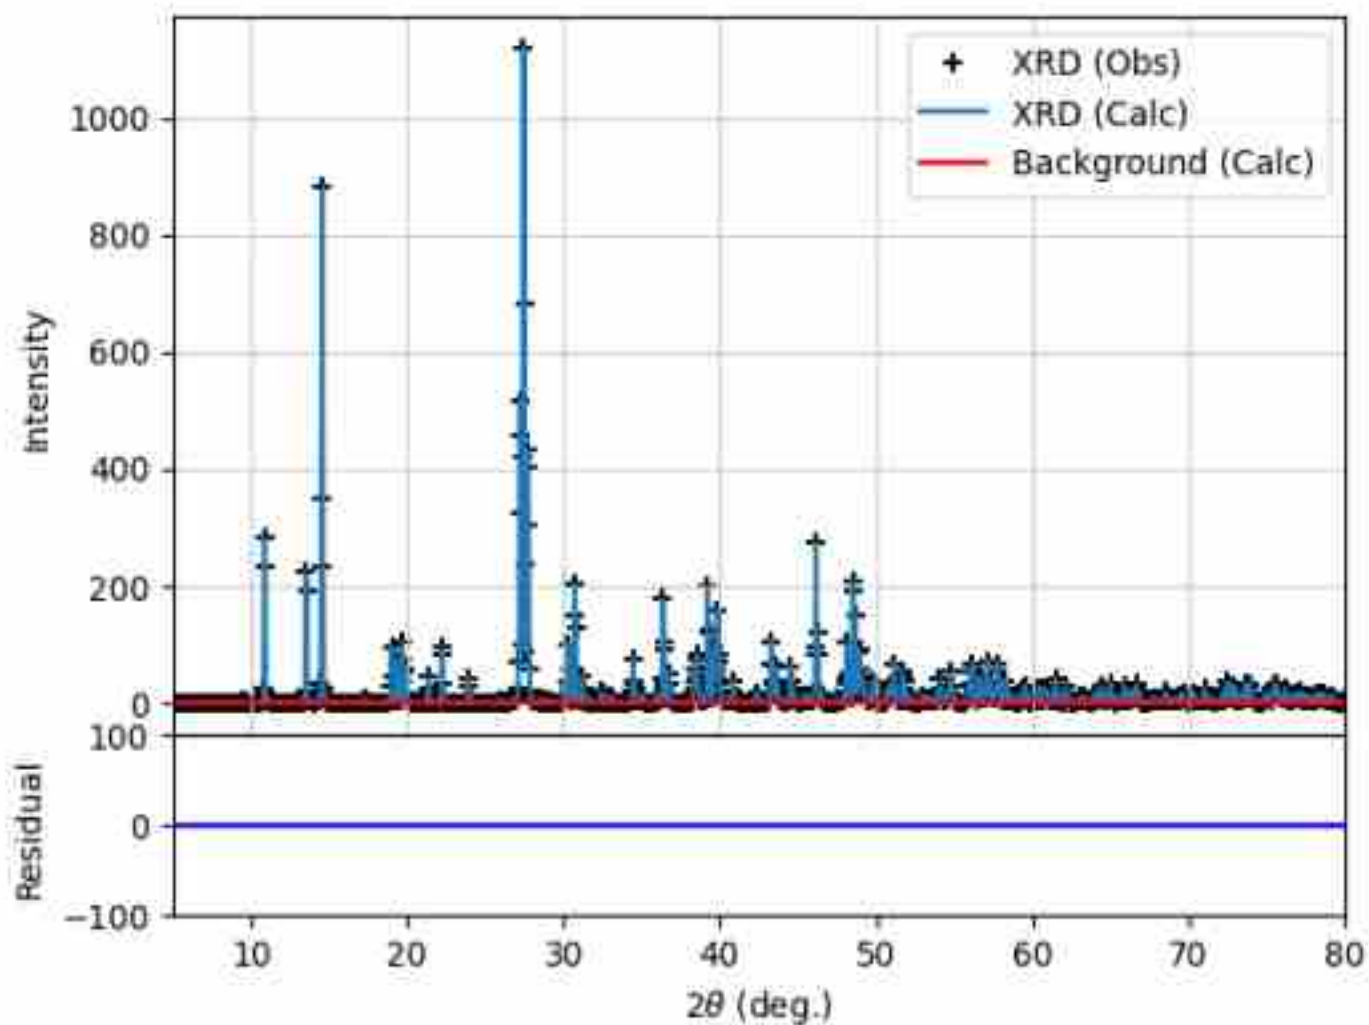

| RMSE before RR | Rwp     | RMSE after RR |
|----------------|---------|---------------|
| 0.031          | 0.00343 | 0.00023       |

# Nd<sub>4</sub>Cu<sub>2</sub>Te<sub>8</sub>

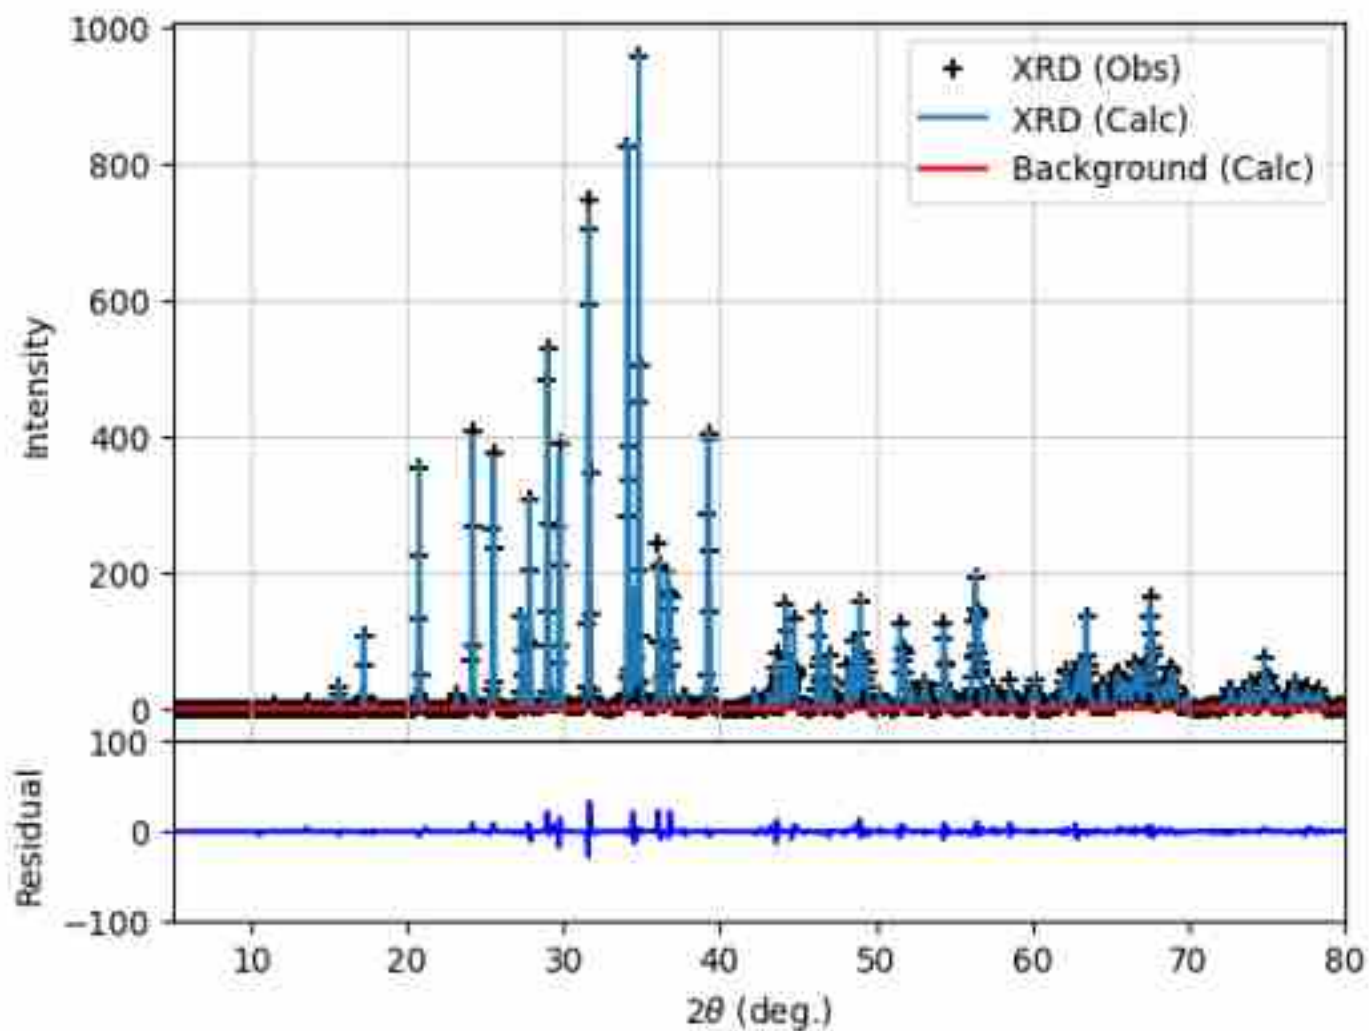

| RMSE before RR | Rwp     | RMSE after RR |
|----------------|---------|---------------|
| 0.031          | 6.71123 | 0.09399       |

# Nd<sub>4</sub>Si<sub>4</sub>Ir<sub>4</sub>

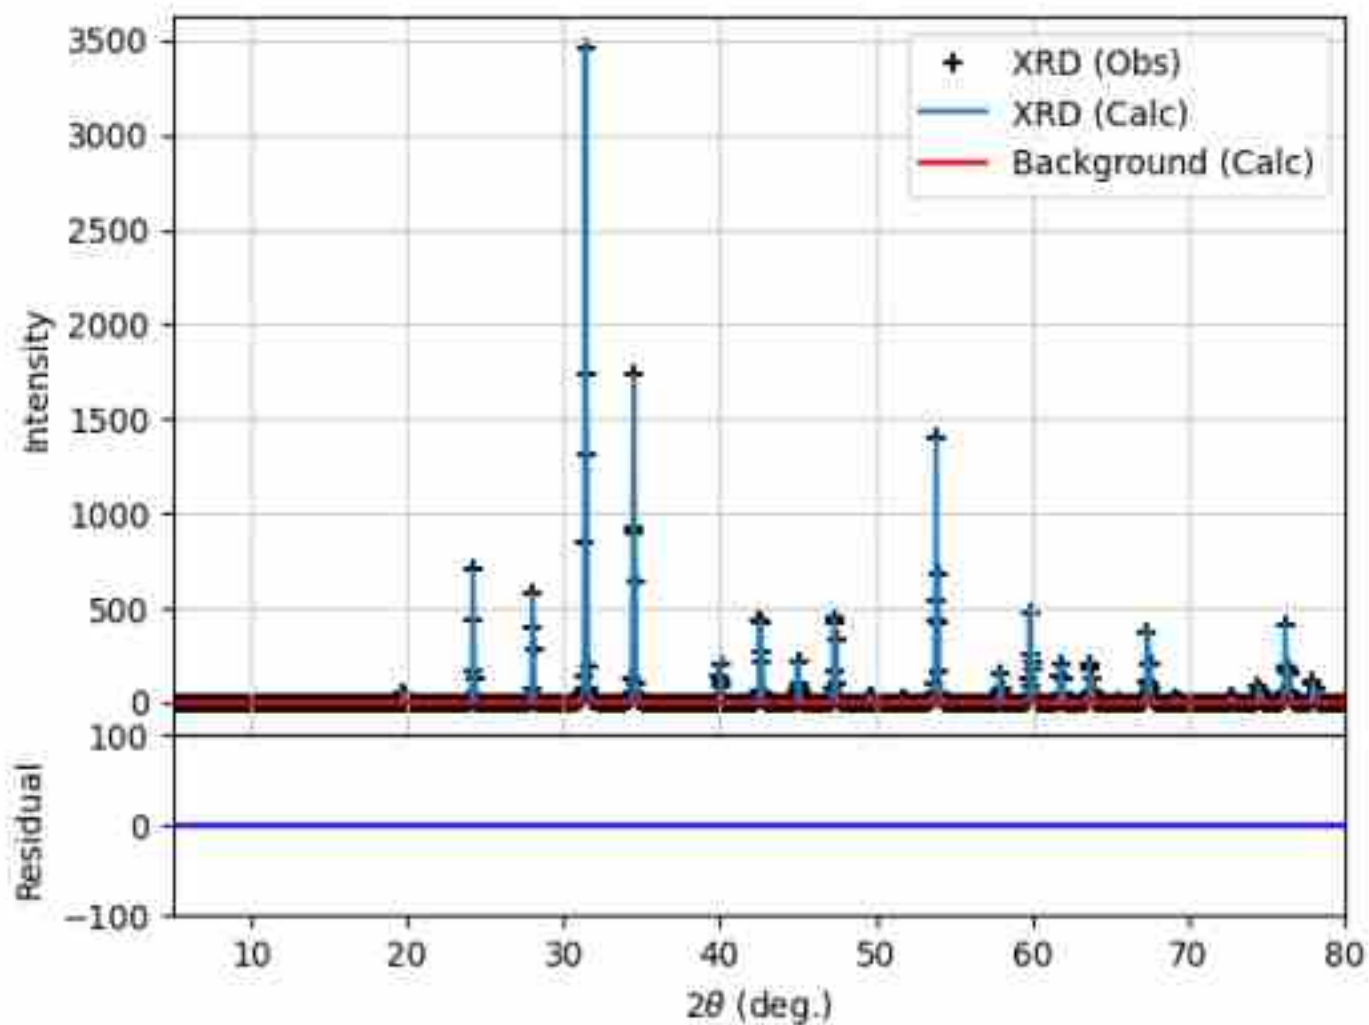

| RMSE before RR | Rwp     | RMSE after RR |
|----------------|---------|---------------|
| 0.031          | 0.01028 | 0.00203       |

P4

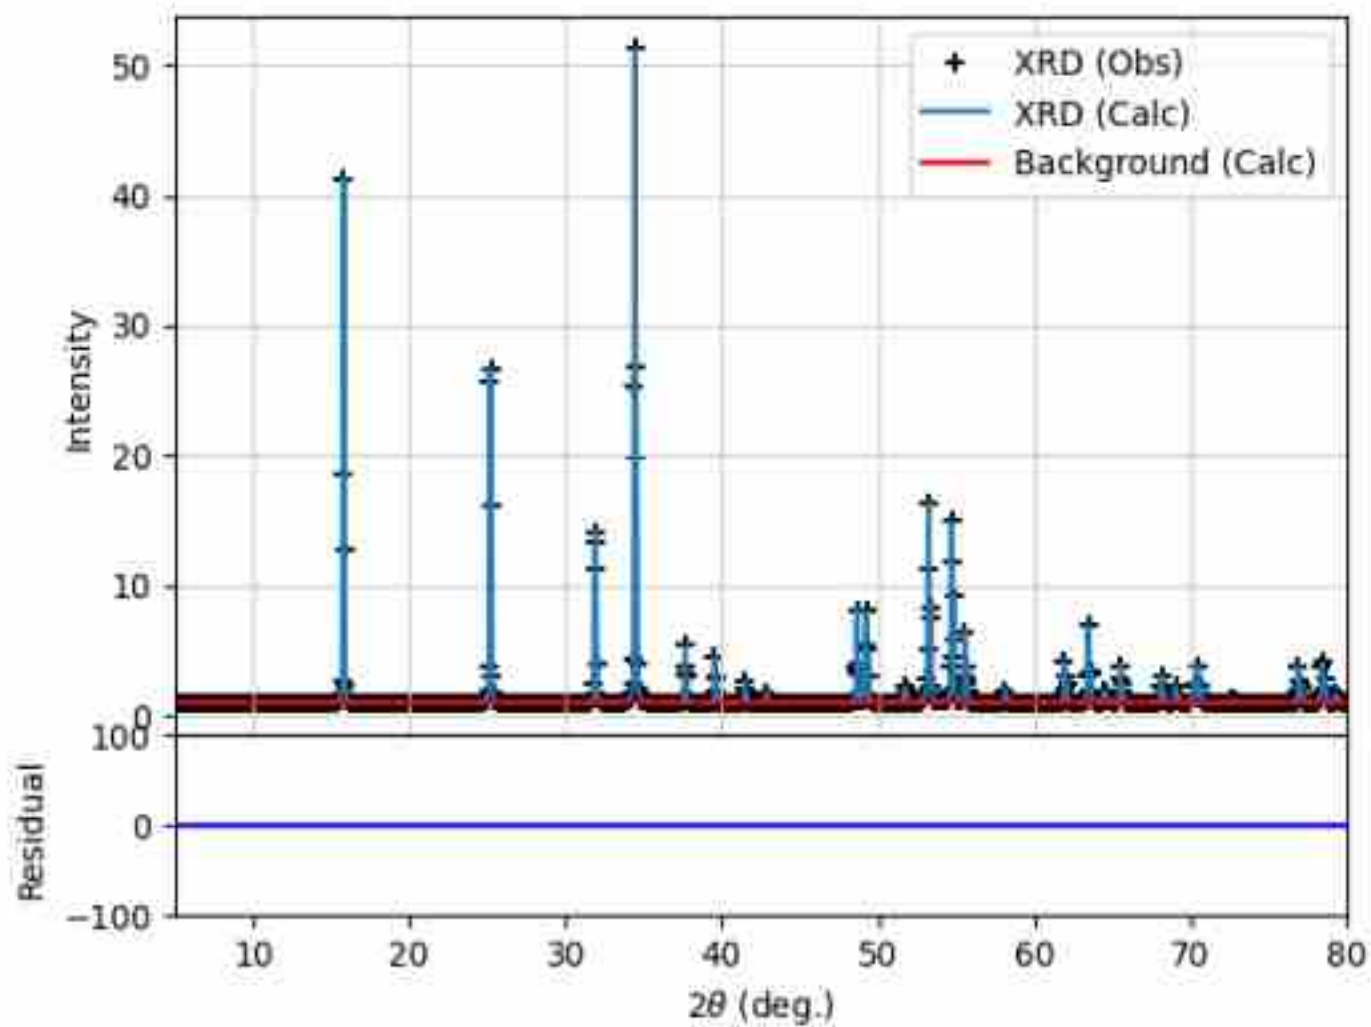

| RMSE before RR | Rwp     | RMSE after RR |
|----------------|---------|---------------|
| 0.031          | 0.00161 | 0.0002        |

# Rb<sub>2</sub>Mg<sub>2</sub>Ni<sub>2</sub>F<sub>12</sub>

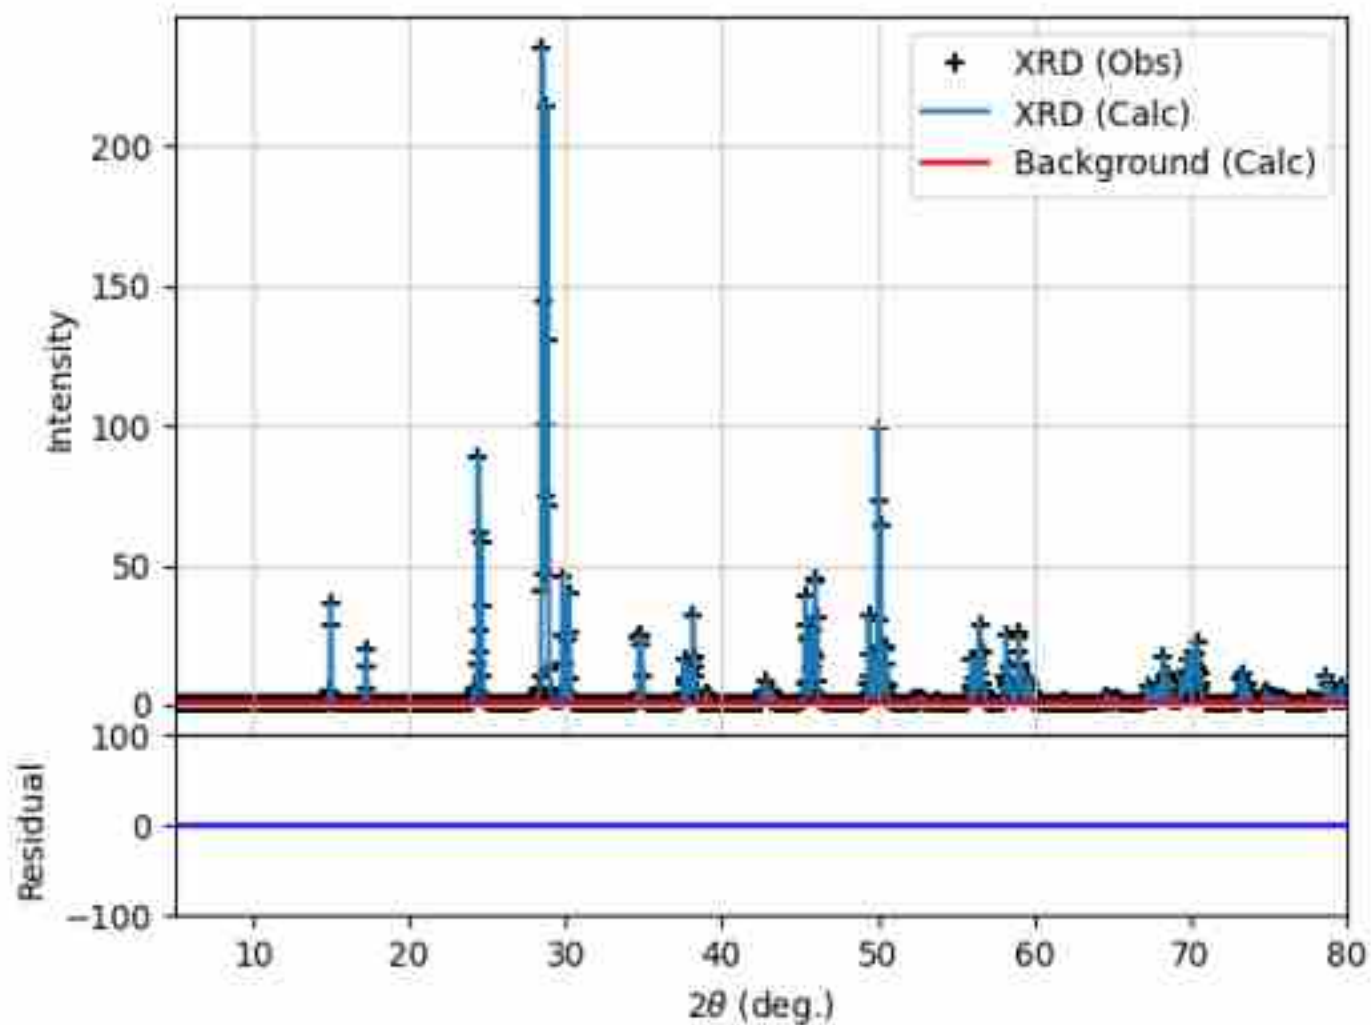

| RMSE before RR | Rwp     | RMSE after RR |
|----------------|---------|---------------|
| 0.031          | 0.03949 | 0.0048        |

# Rb<sub>2</sub>P<sub>2</sub>H<sub>4</sub>O<sub>8</sub>

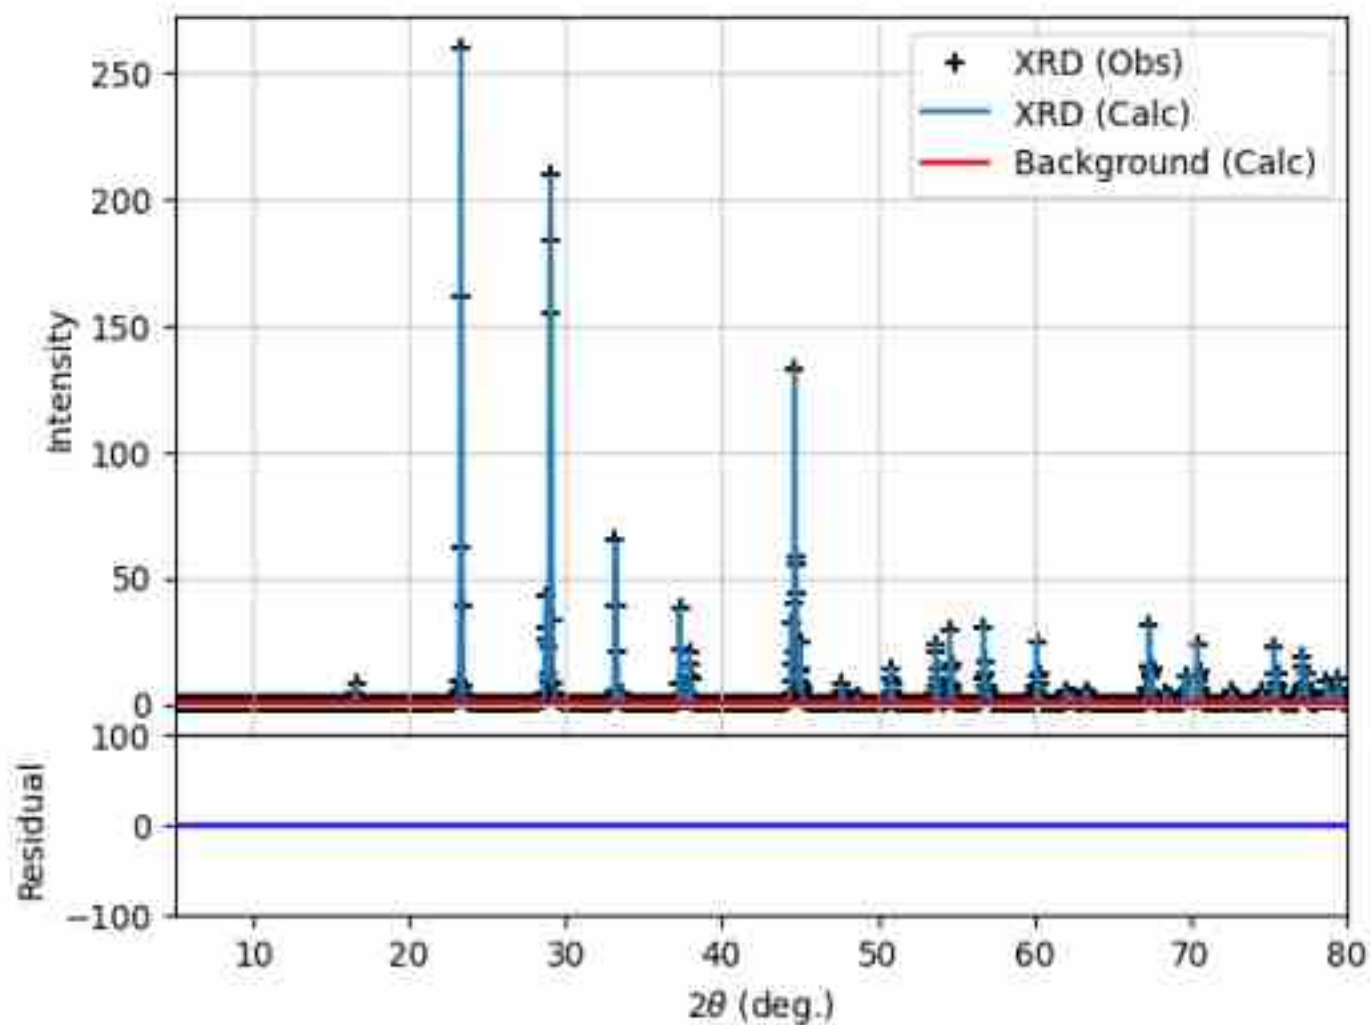

| RMSE before RR | Rwp     | RMSE after RR |
|----------------|---------|---------------|
| 0.031          | 0.00279 | 0.00354       |

# Rb<sub>2</sub>Pd<sub>4</sub>F<sub>10</sub>

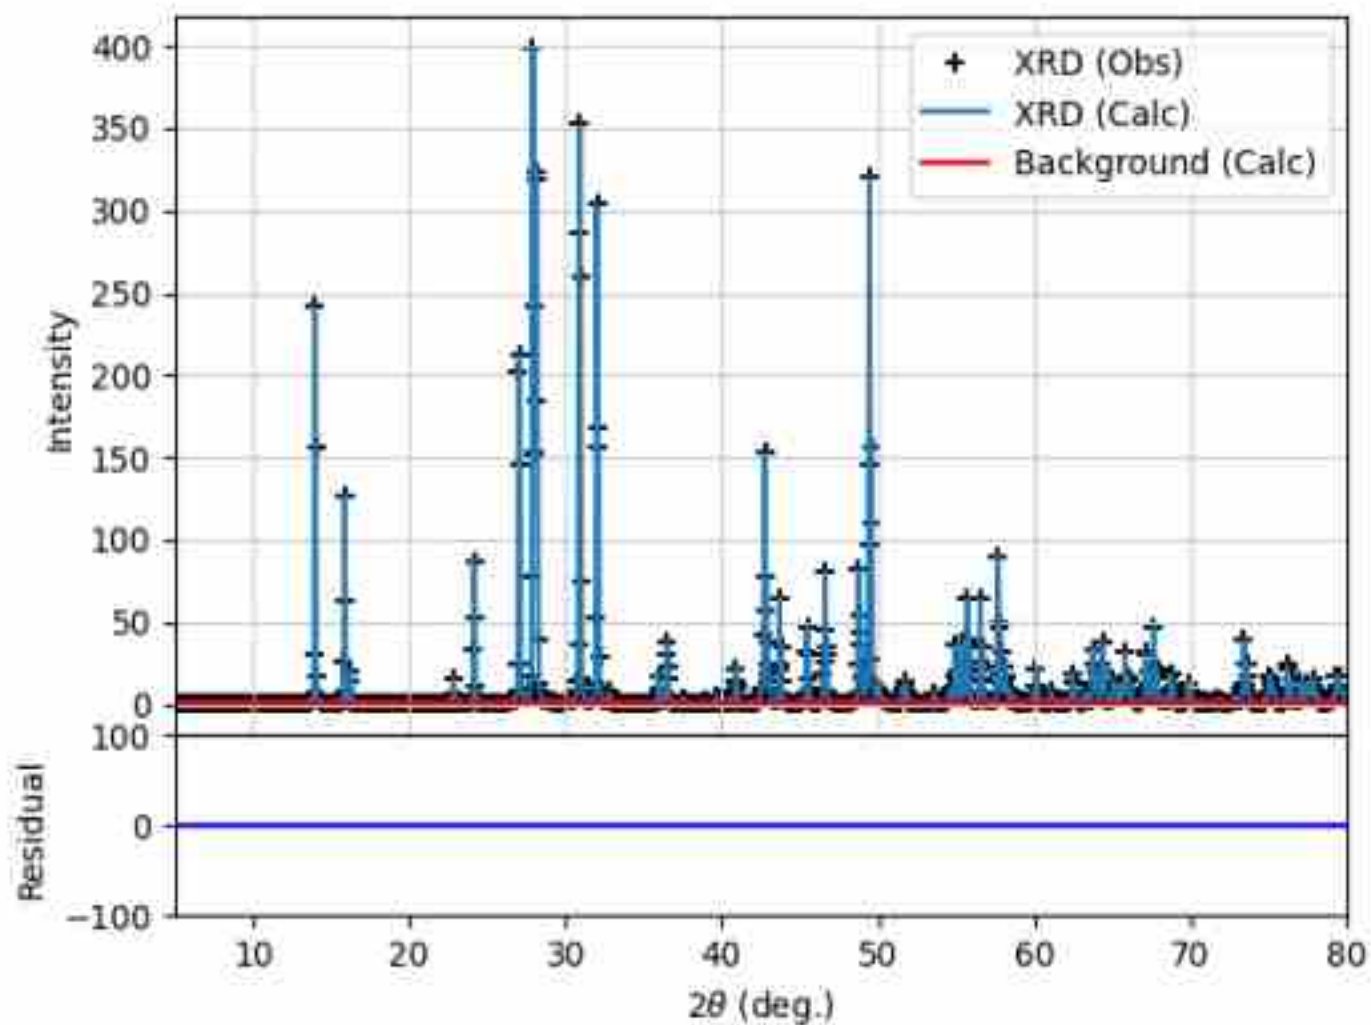

| RMSE before RR | Rwp     | RMSE after RR |
|----------------|---------|---------------|
| 0.031          | 0.00331 | 0.00083       |

# Rb<sub>2</sub>Sm<sub>4</sub>Cu<sub>2</sub>S<sub>8</sub>

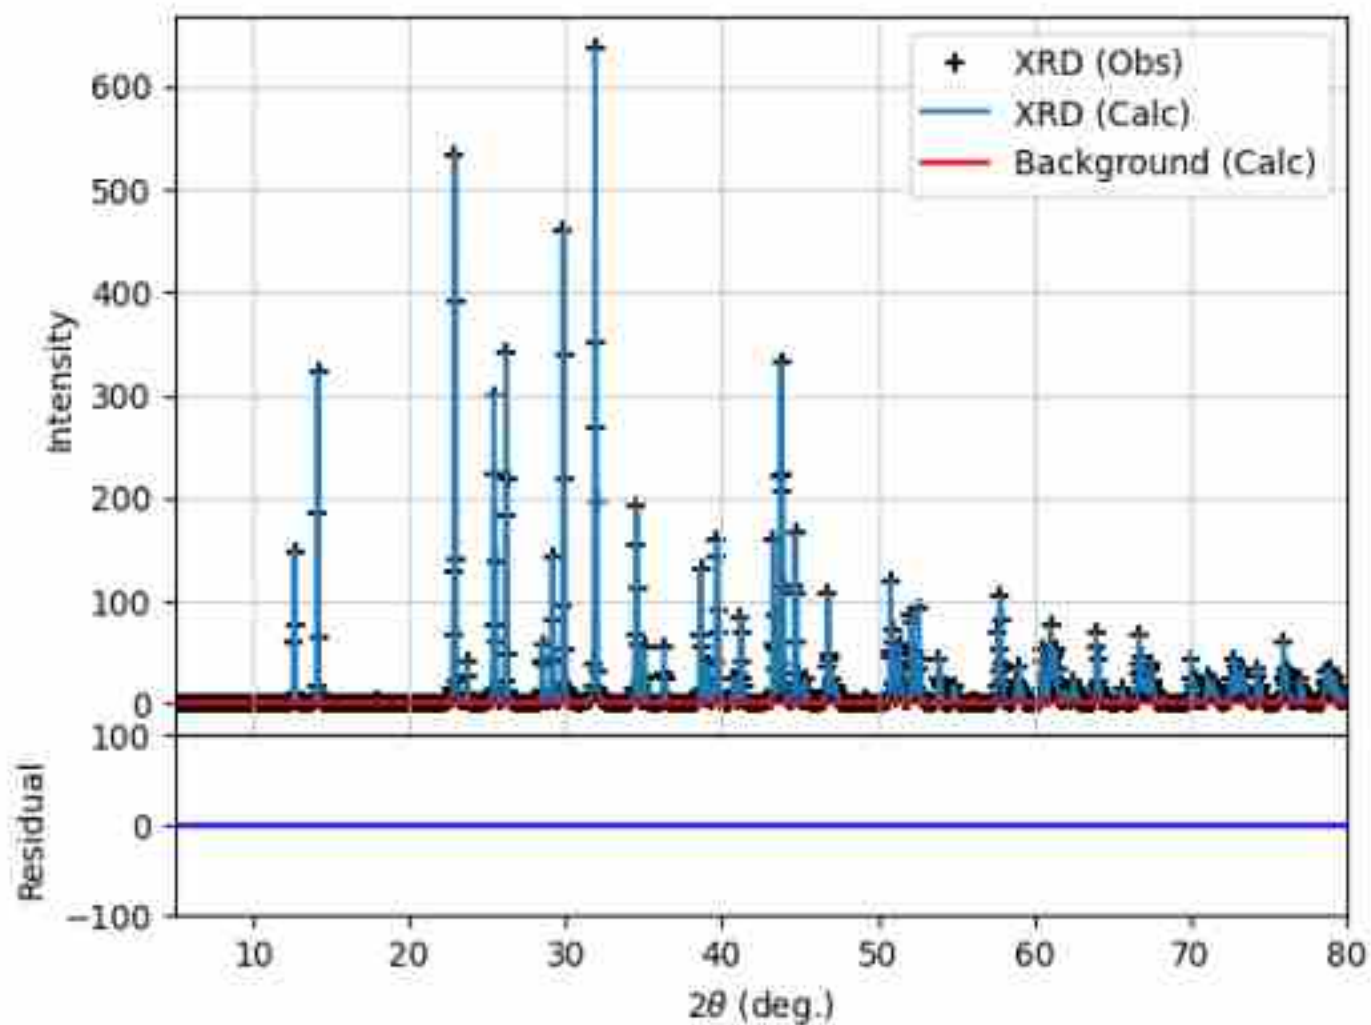

| RMSE before RR | Rwp     | RMSE after RR |
|----------------|---------|---------------|
| 0.031          | 0.00307 | 0.00048       |



# Rb<sub>4</sub>Li<sub>4</sub>Ge<sub>2</sub>O<sub>8</sub>

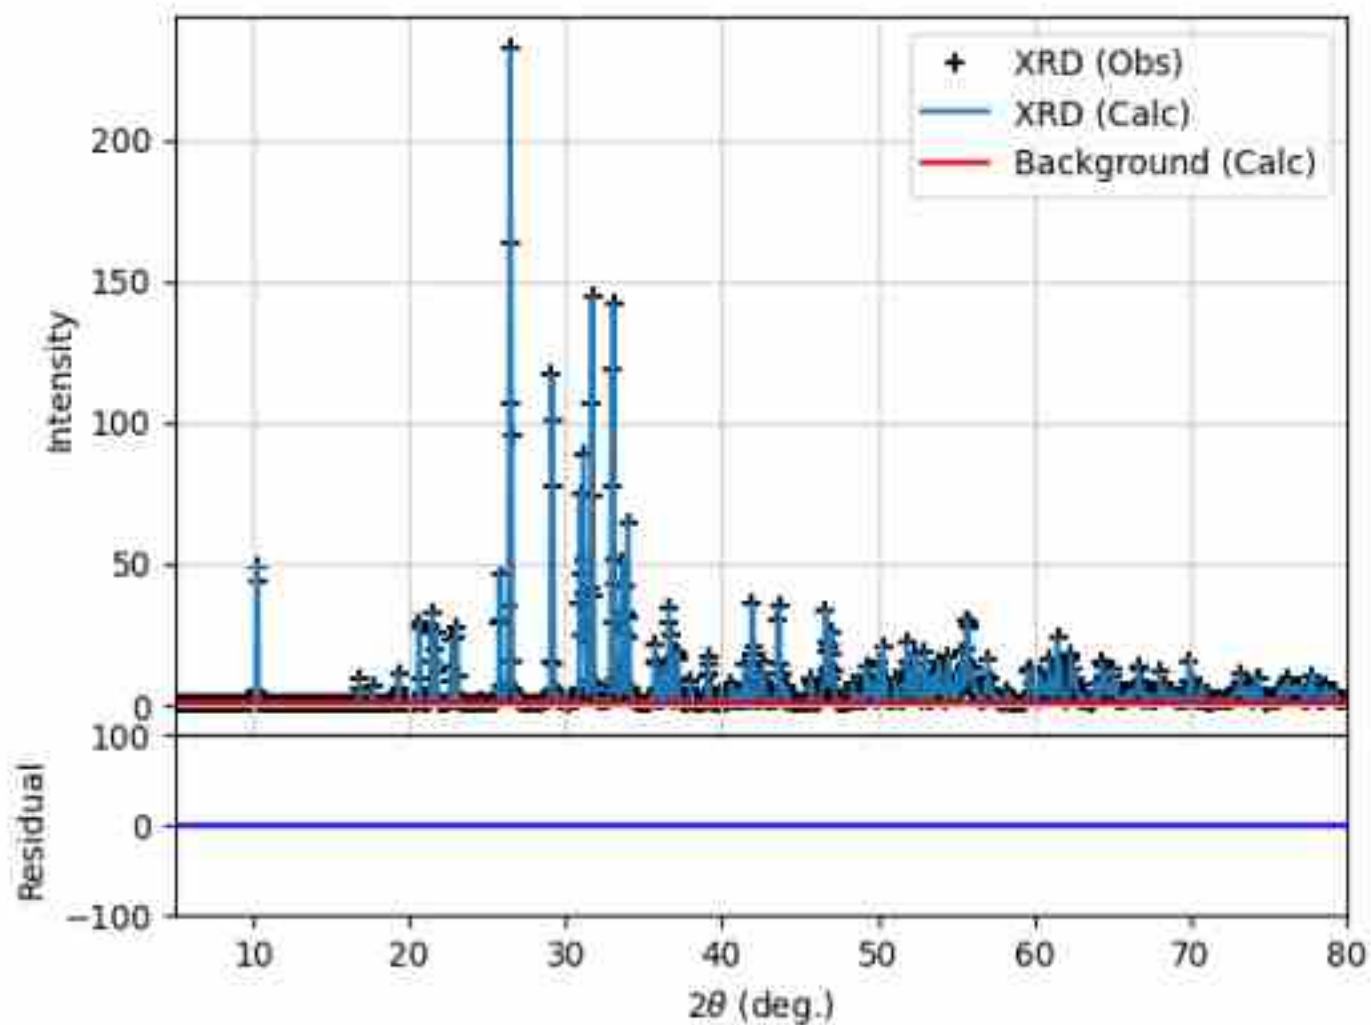

| RMSE before RR | Rwp   | RMSE after RR |
|----------------|-------|---------------|
| 0.031          | 7e-05 | 0.00015       |

# Sm4Co4Ge4

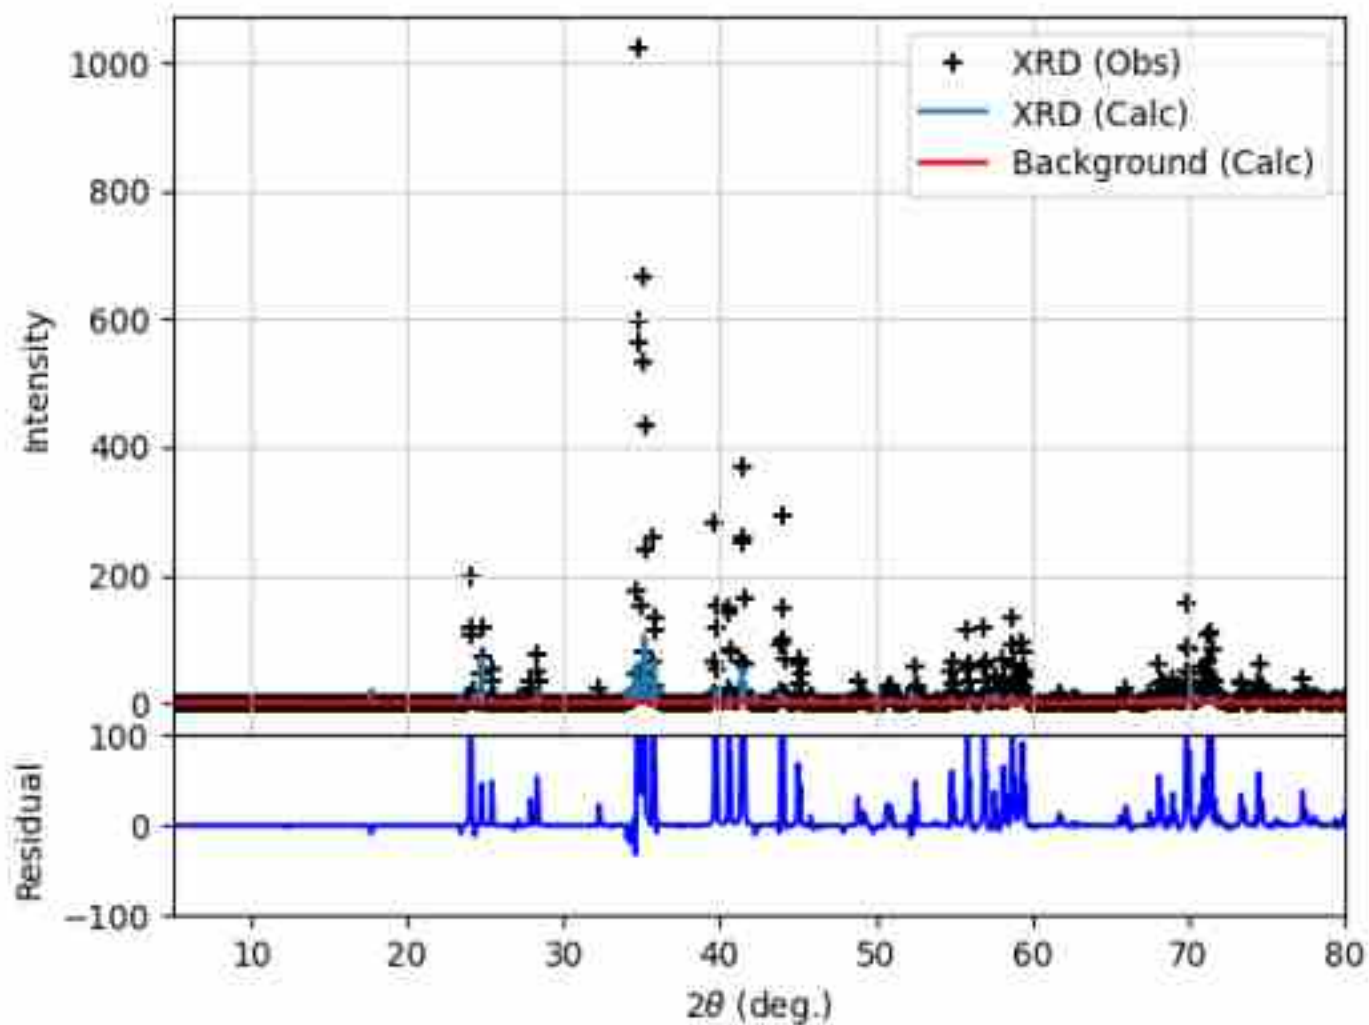

| RMSE before RR | Rwp      | RMSE after RR |
|----------------|----------|---------------|
| 0.031          | 85.92009 | 0.19906       |

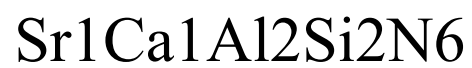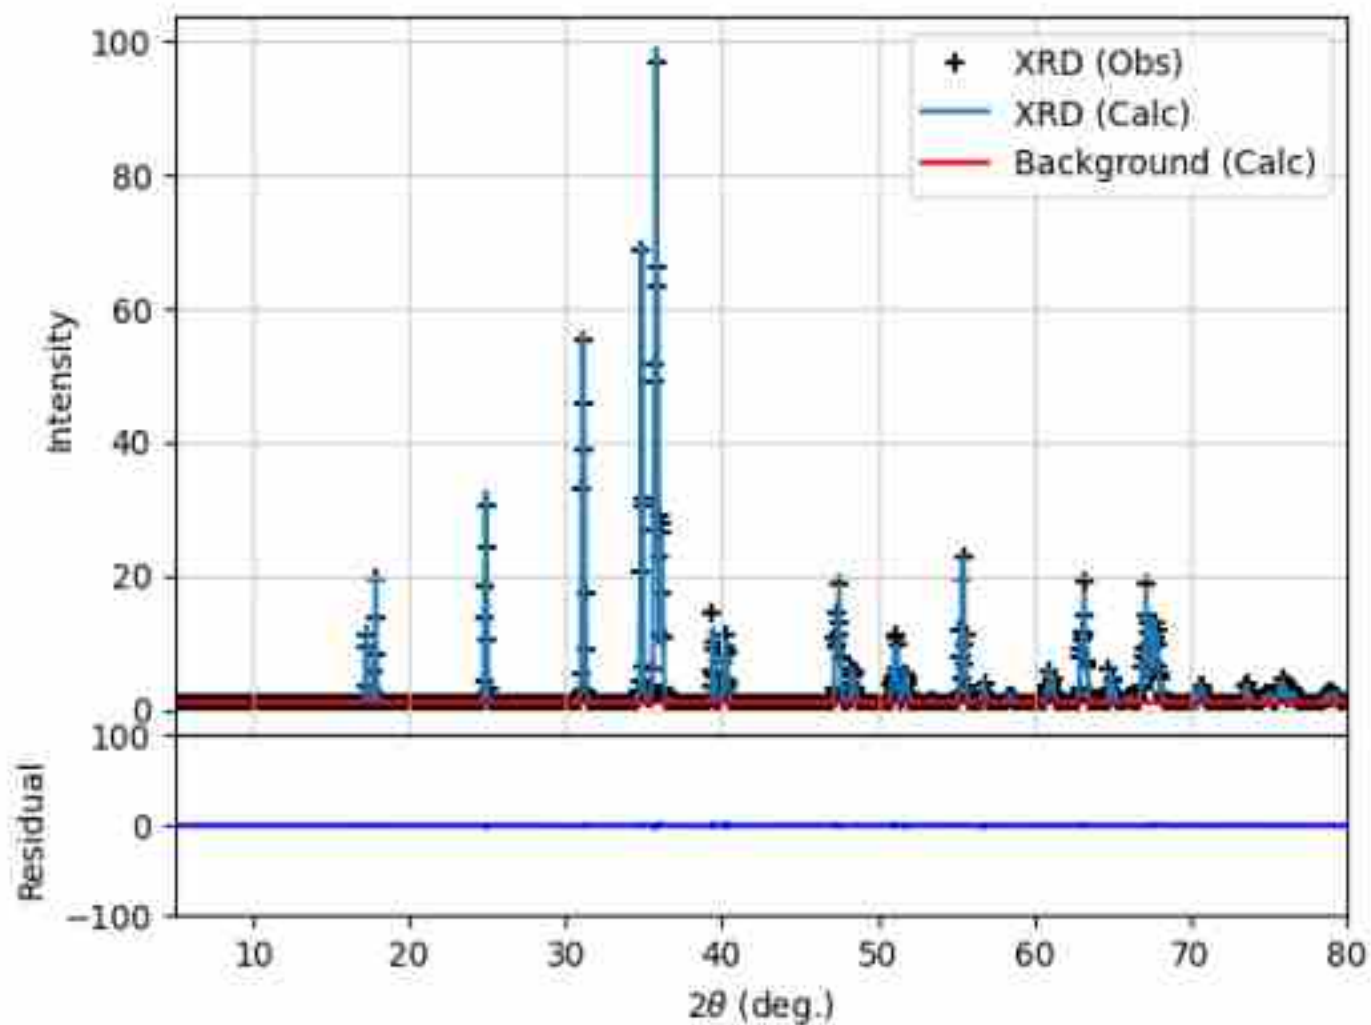

| RMSE before RR | Rwp     | RMSE after RR |
|----------------|---------|---------------|
| 0.031          | 5.56445 | 0.16302       |

# Sr1Mg3Ge1N4

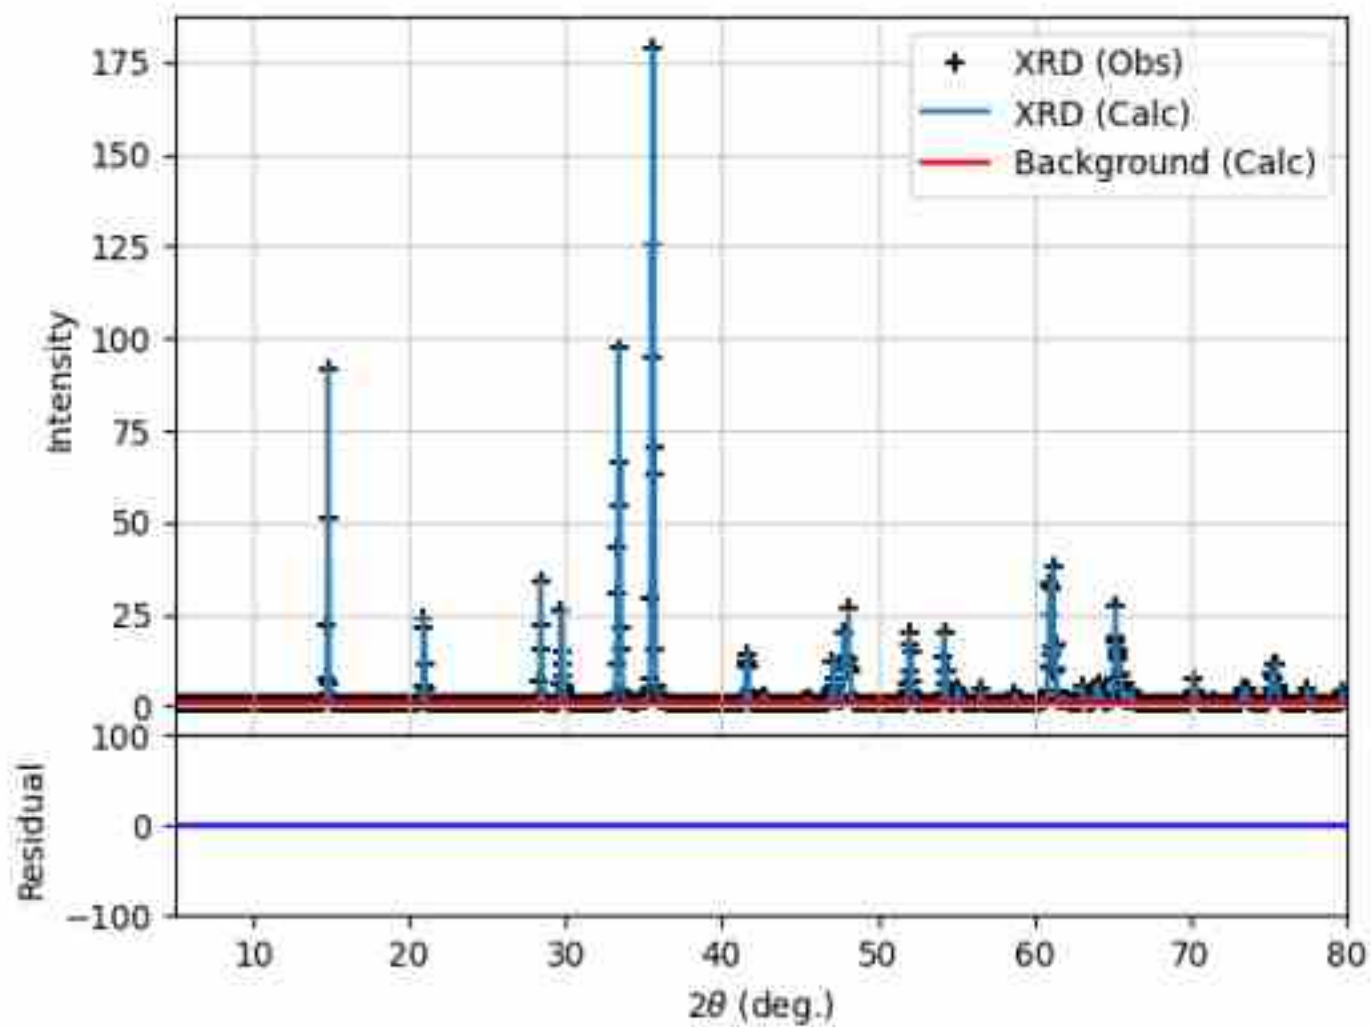

| RMSE before RR | Rwp     | RMSE after RR |
|----------------|---------|---------------|
| 0.031          | 0.00246 | 0.0006        |

# Sr2C1N2Cl2

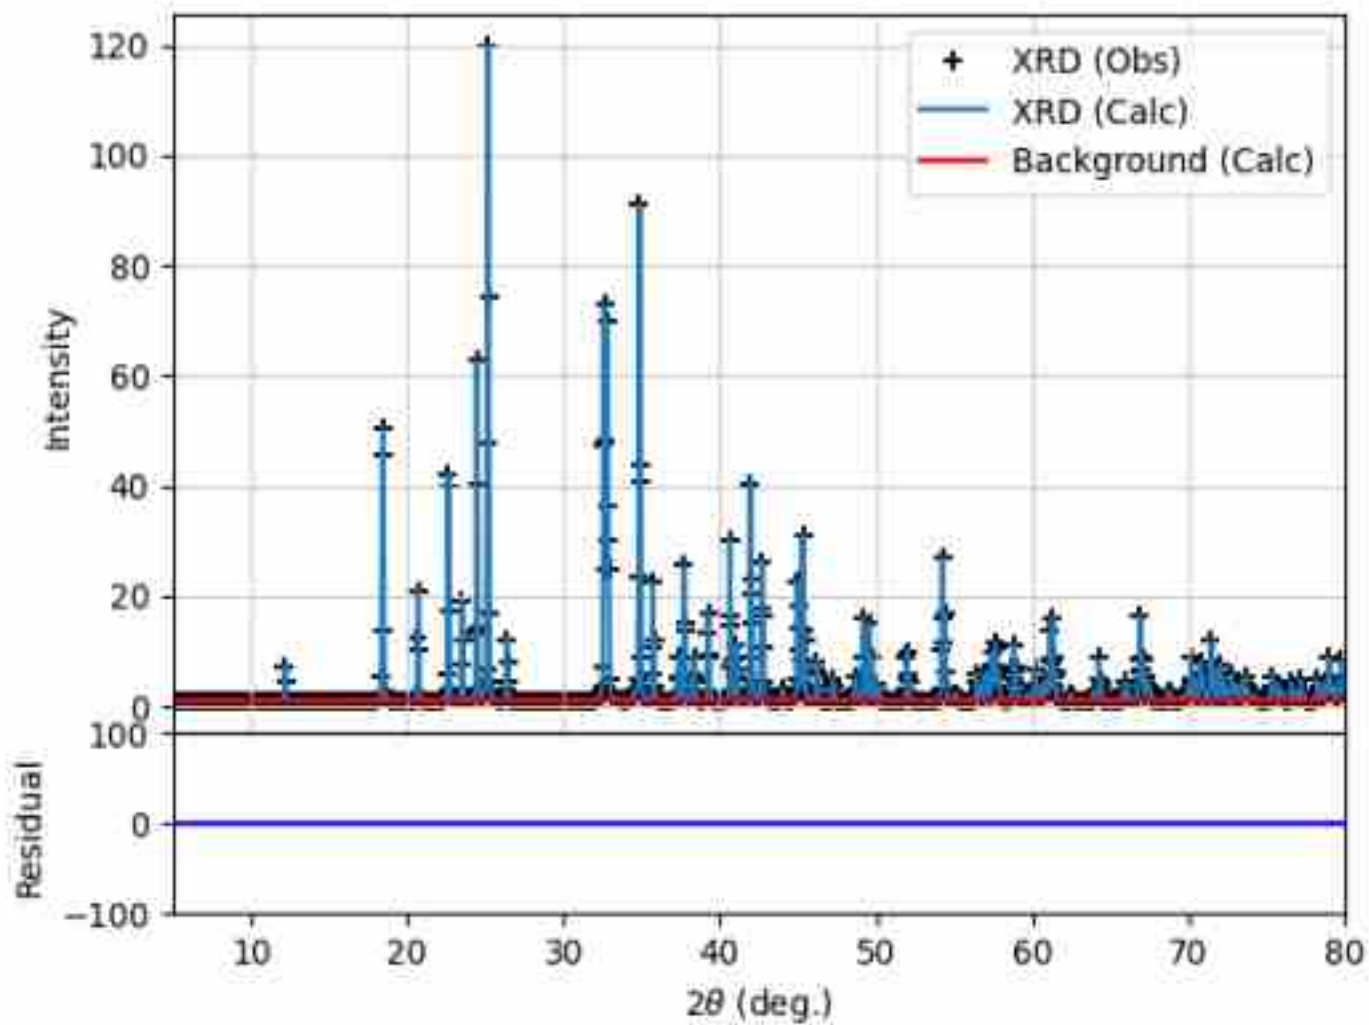

| RMSE before RR | Rwp     | RMSE after RR |
|----------------|---------|---------------|
| 0.031          | 0.00268 | 0.00041       |

# Sr<sub>2</sub>Li<sub>2</sub>P<sub>2</sub>O<sub>8</sub>

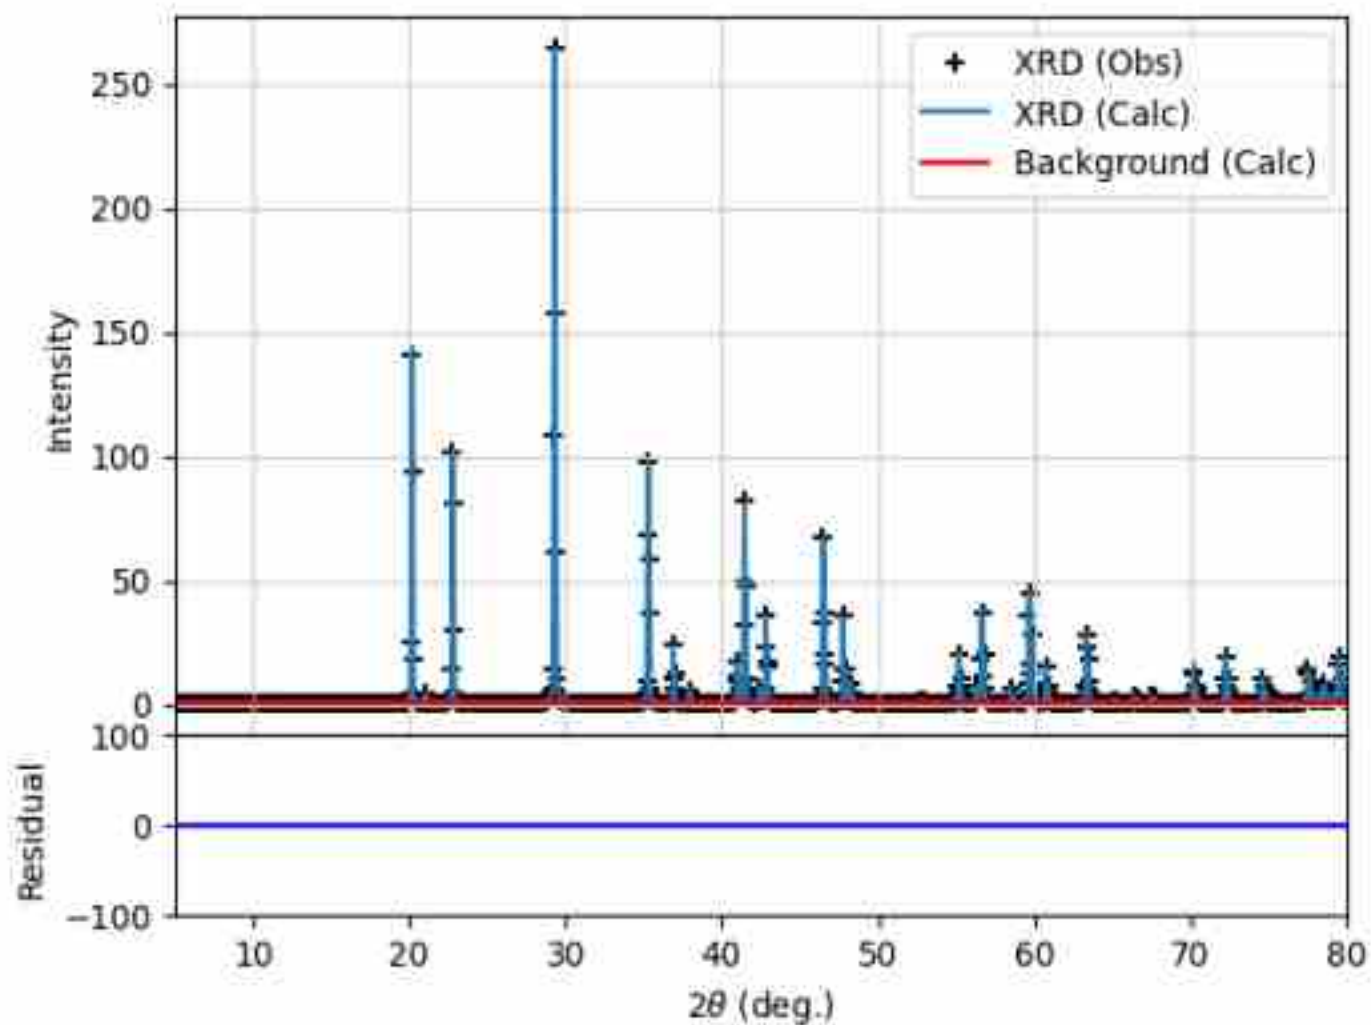

| RMSE before RR | Rwp     | RMSE after RR |
|----------------|---------|---------------|
| 0.031          | 0.00261 | 0.00199       |

# Sr<sub>2</sub>Pr<sub>2</sub>Co<sub>4</sub>O<sub>12</sub>

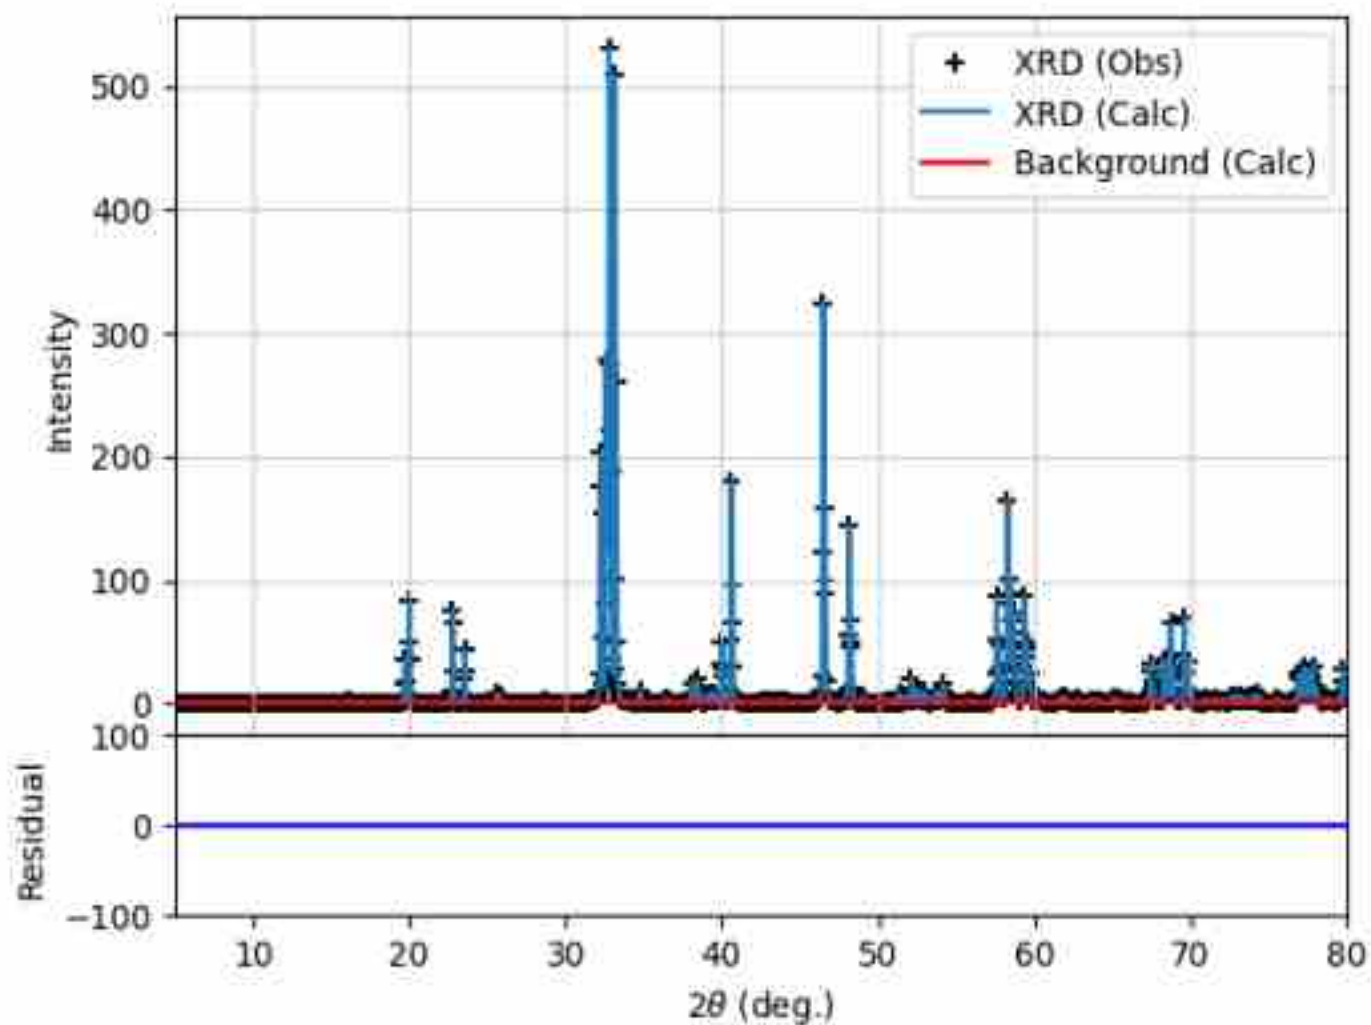

| RMSE before RR | Rwp    | RMSE after RR |
|----------------|--------|---------------|
| 0.031          | 0.0037 | 0.00045       |

# Te1Mo2S3

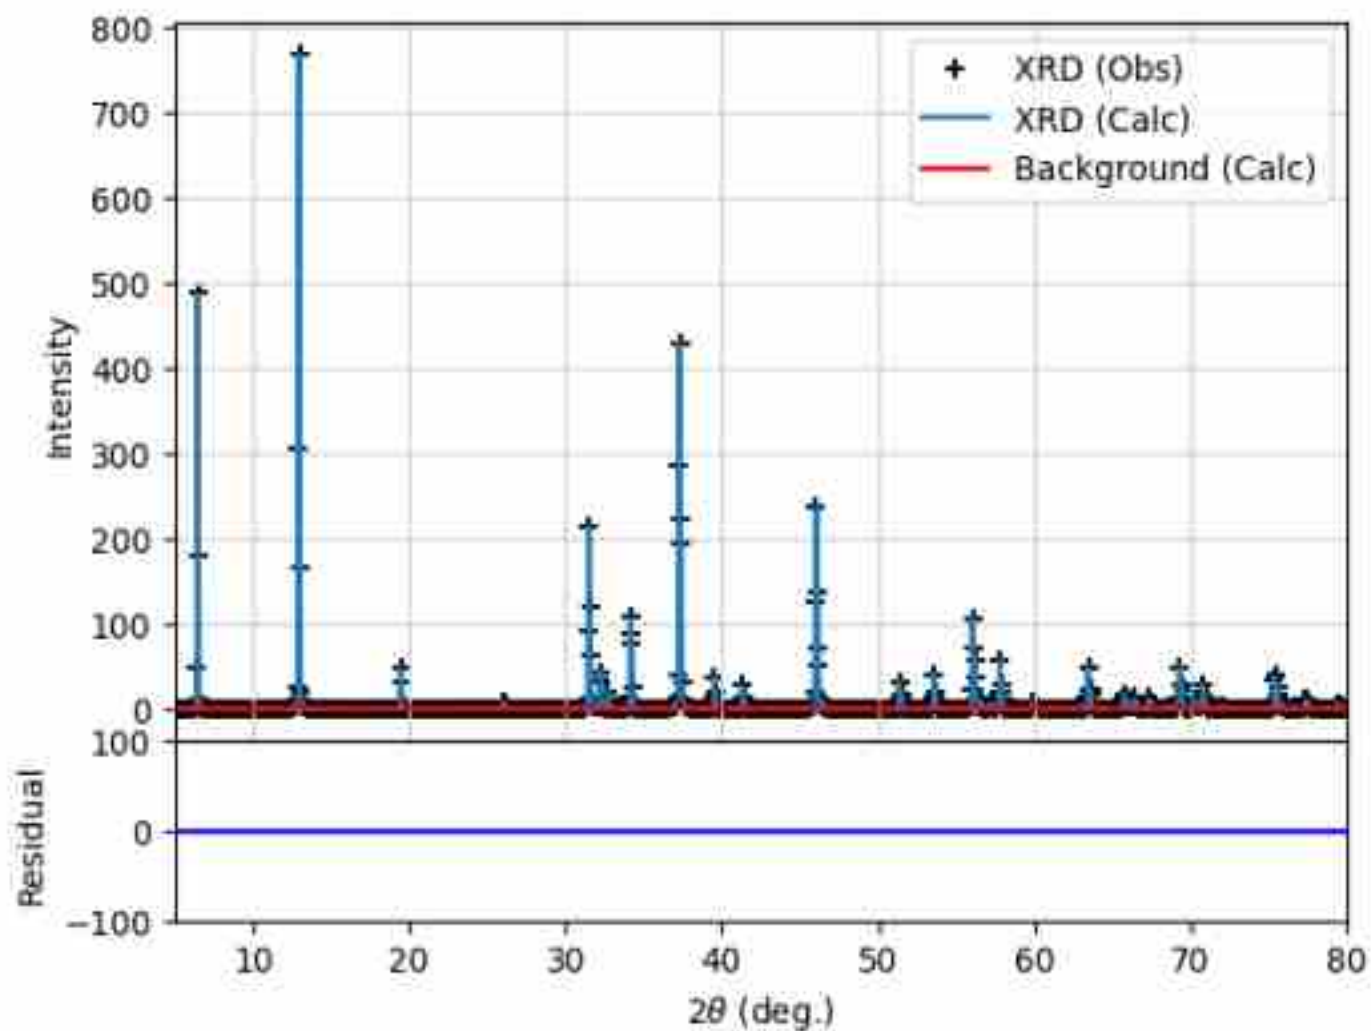

| RMSE before RR | Rwp     | RMSE after RR |
|----------------|---------|---------------|
| 0.031          | 0.00215 | 0.00063       |



# Th<sub>2</sub>Cu<sub>1</sub>Te<sub>6</sub>

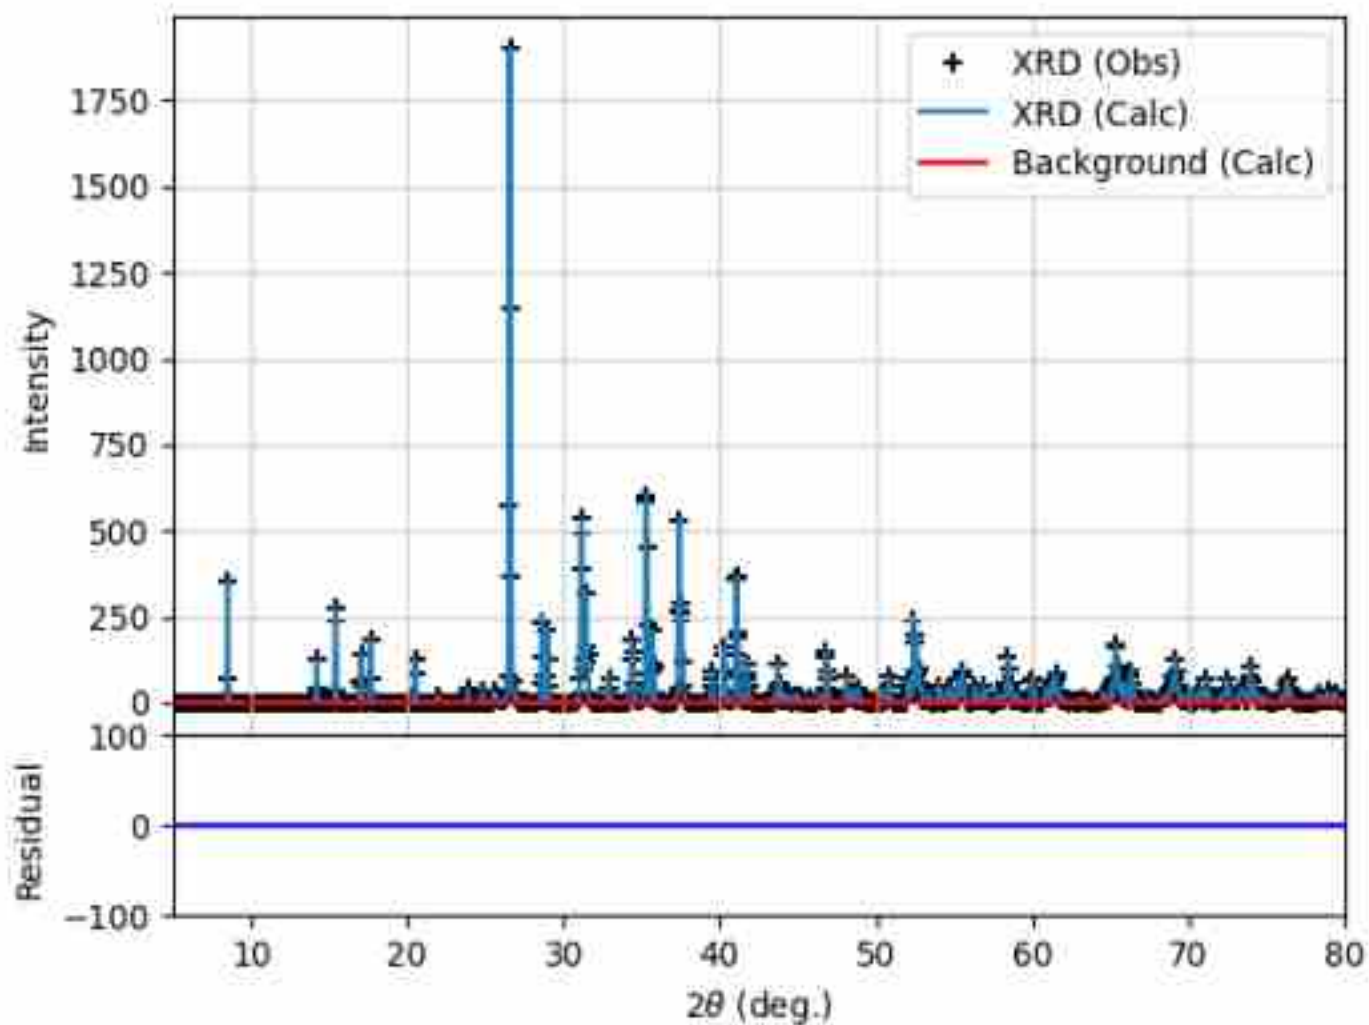

| RMSE before RR | Rwp     | RMSE after RR |
|----------------|---------|---------------|
| 0.031          | 0.00369 | 0.00019       |

# Ti<sub>2</sub>Cl<sub>2</sub>O<sub>2</sub>

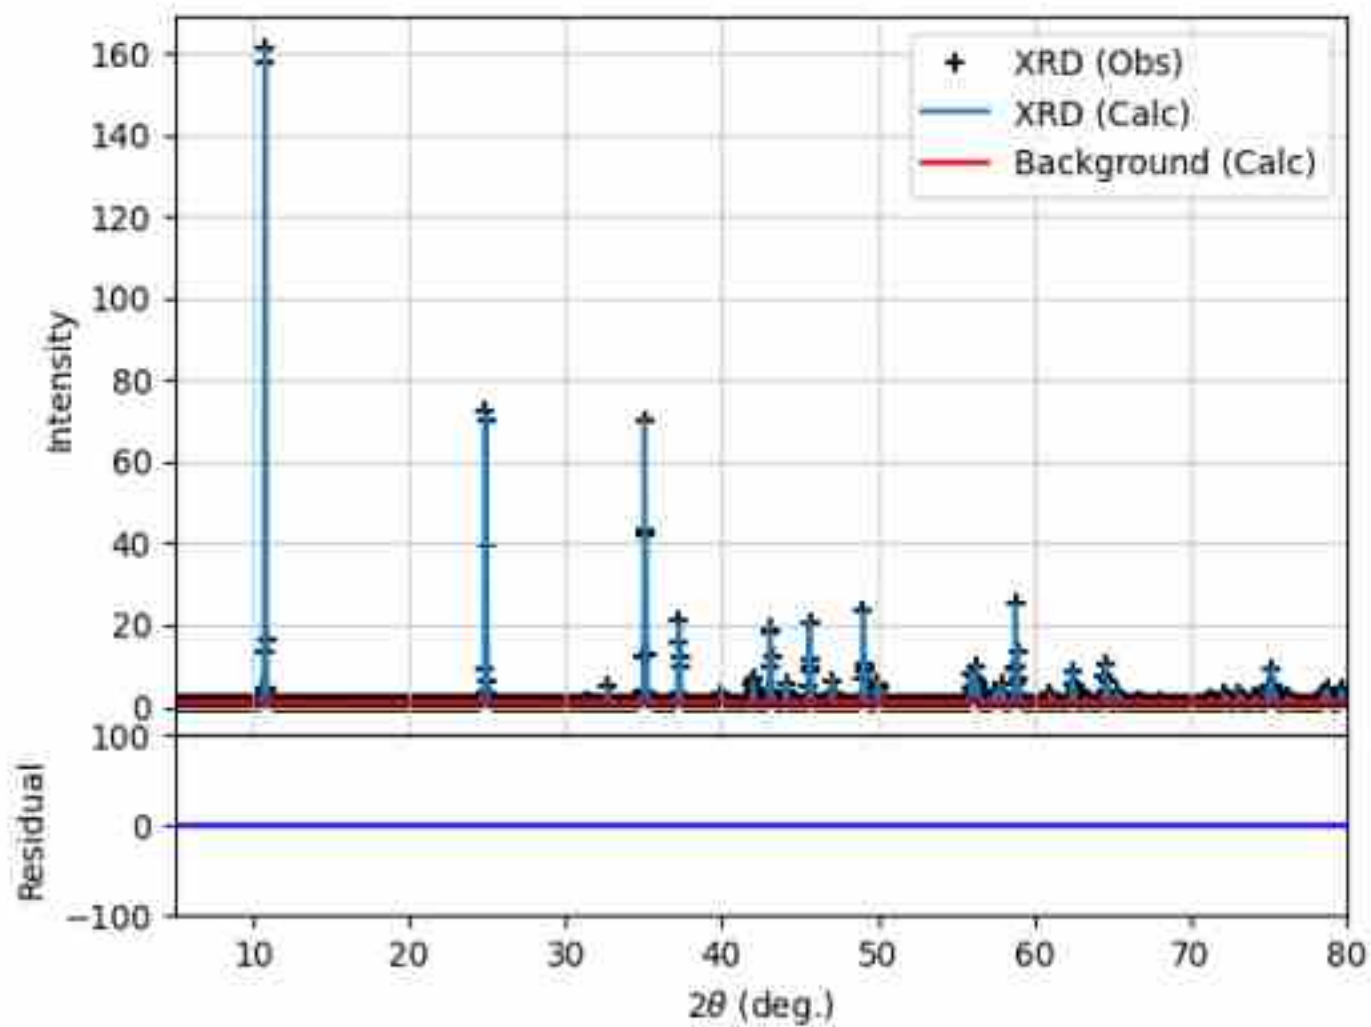

| RMSE before RR | Rwp     | RMSE after RR |
|----------------|---------|---------------|
| 0.031          | 0.00608 | 0.00031       |

# Tl8Sn2Se6

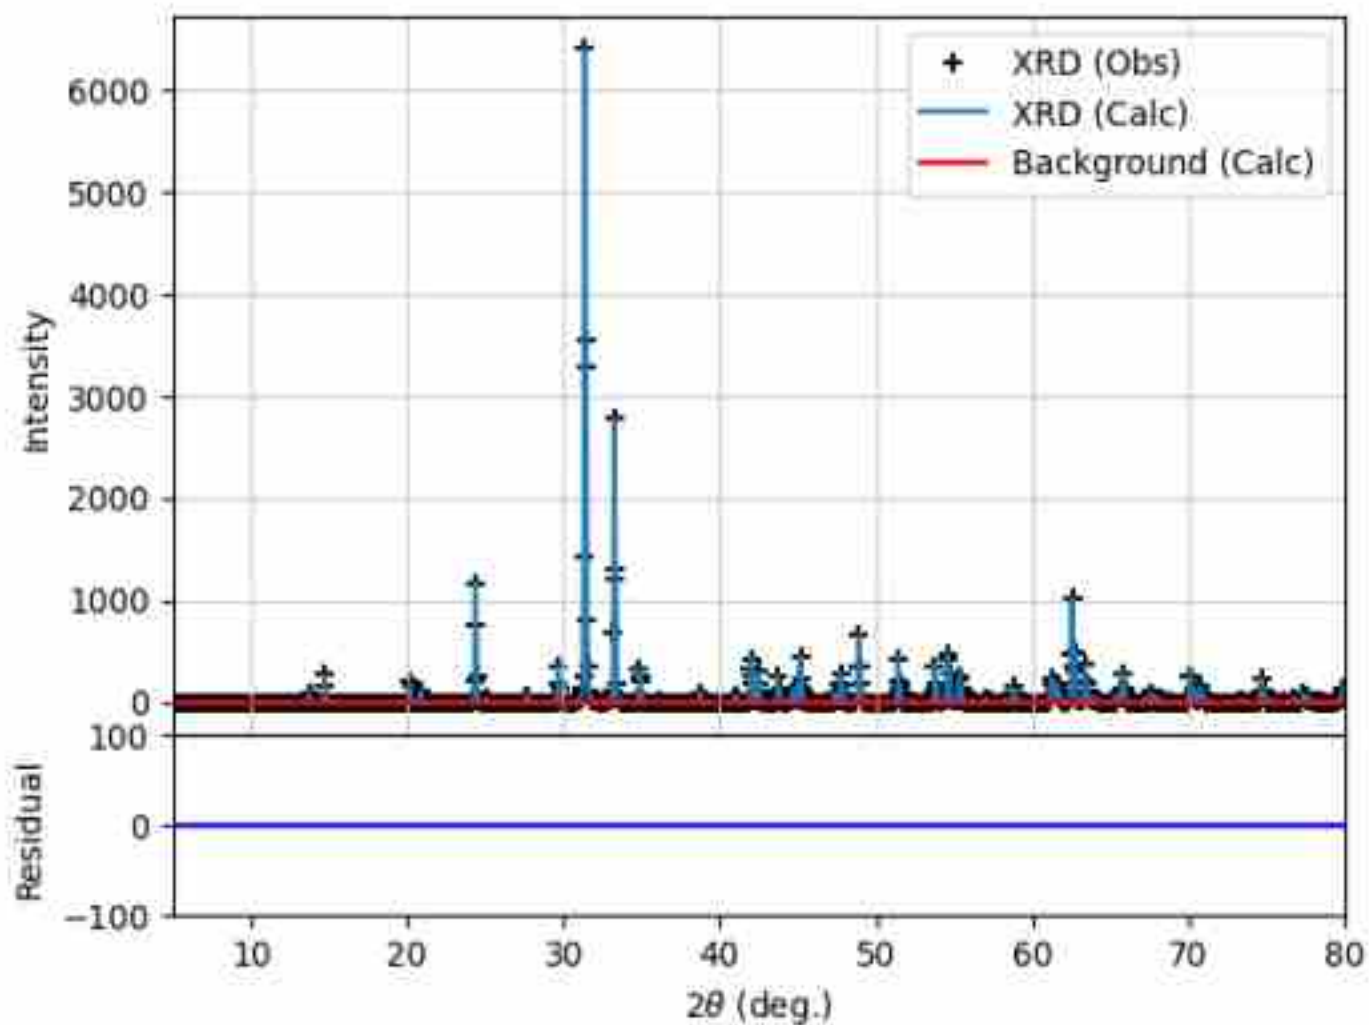

| RMSE before RR | Rwp     | RMSE after RR |
|----------------|---------|---------------|
| 0.031          | 0.00303 | 0.00034       |

# V<sub>2</sub>Cr<sub>2</sub>Ge<sub>2</sub>C<sub>2</sub>

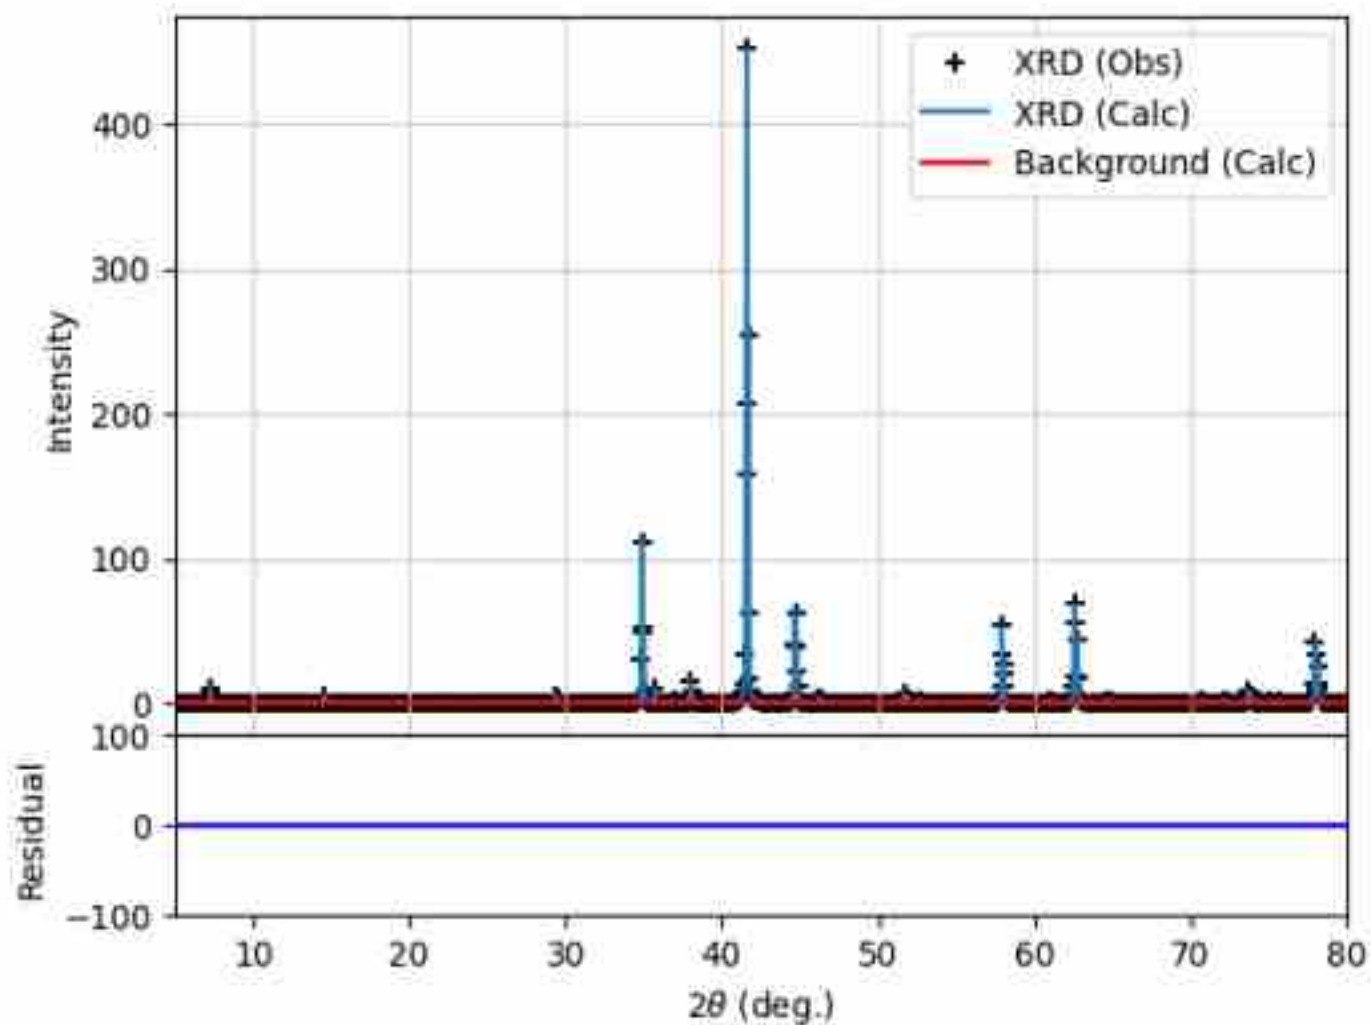

| RMSE before RR | Rwp     | RMSE after RR |
|----------------|---------|---------------|
| 0.031          | 0.00711 | 0.00104       |

# V4O1F11

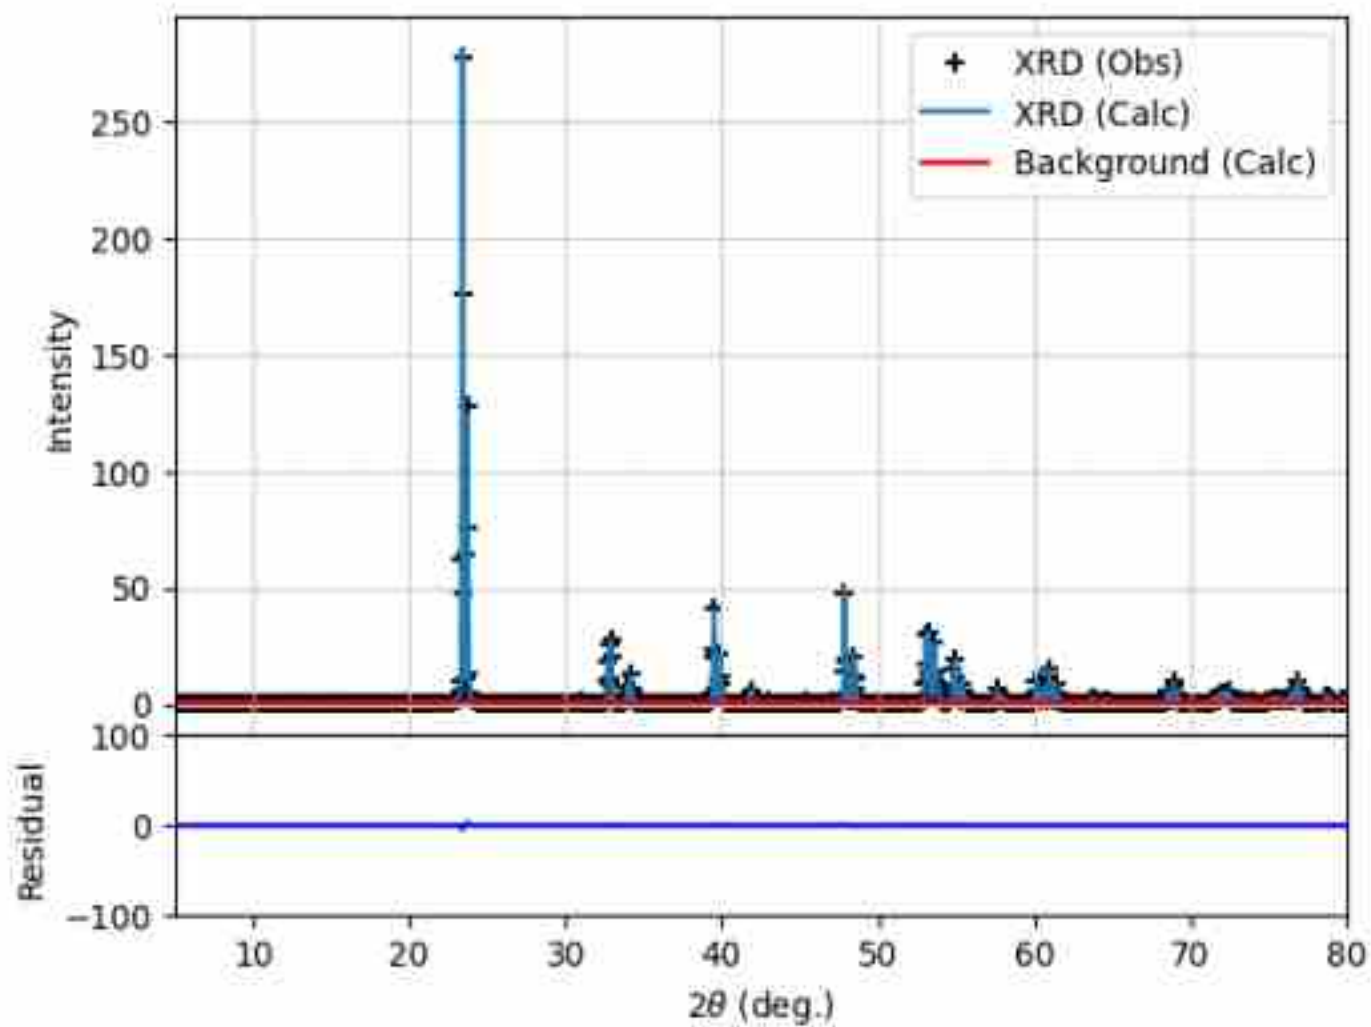

| RMSE before RR | Rwp    | RMSE after RR |
|----------------|--------|---------------|
| 0.031          | 1.5519 | 0.04329       |

# V6O8F4

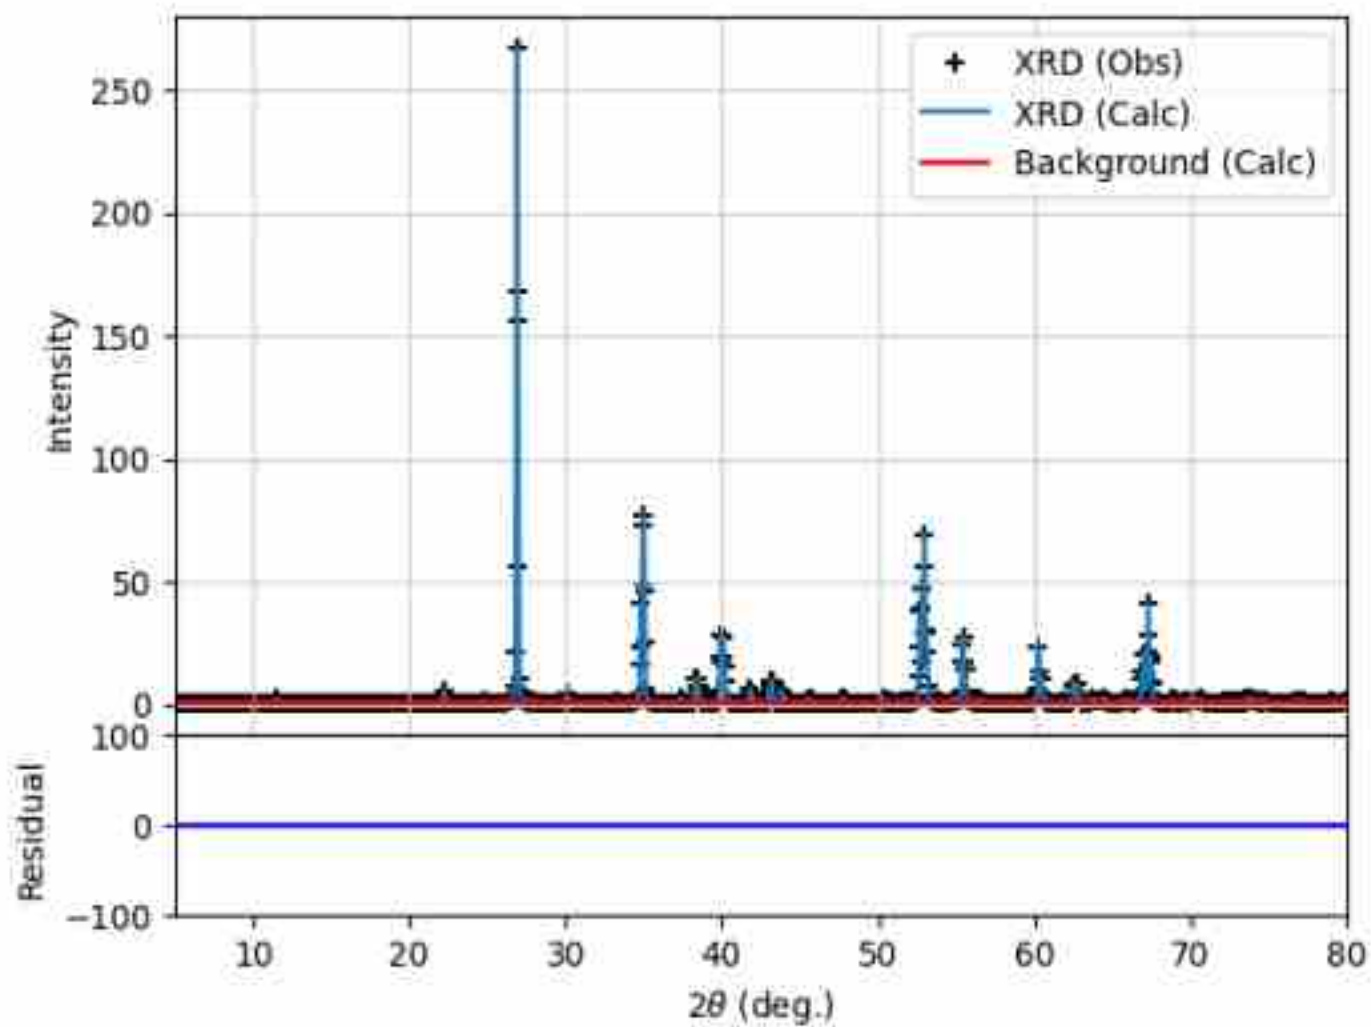

| RMSE before RR | Rwp     | RMSE after RR |
|----------------|---------|---------------|
| 0.031          | 0.00139 | 2e-05         |

# Y1Cu2Bi2Se2O4

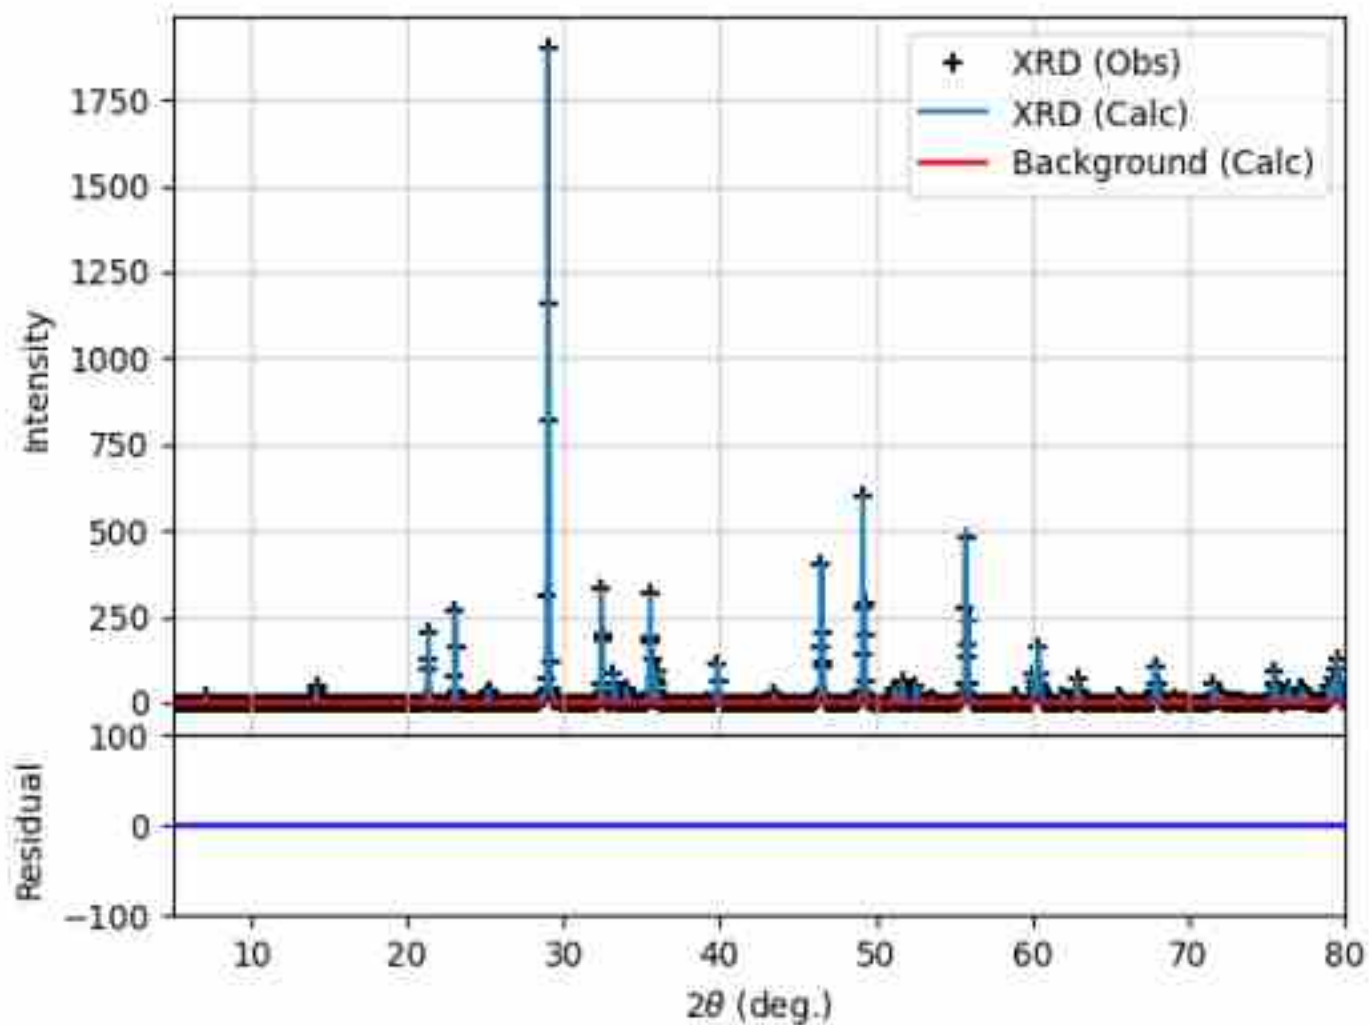

| RMSE before RR | Rwp     | RMSE after RR |
|----------------|---------|---------------|
| 0.031          | 0.00428 | 0.00095       |

# Y2Rh4

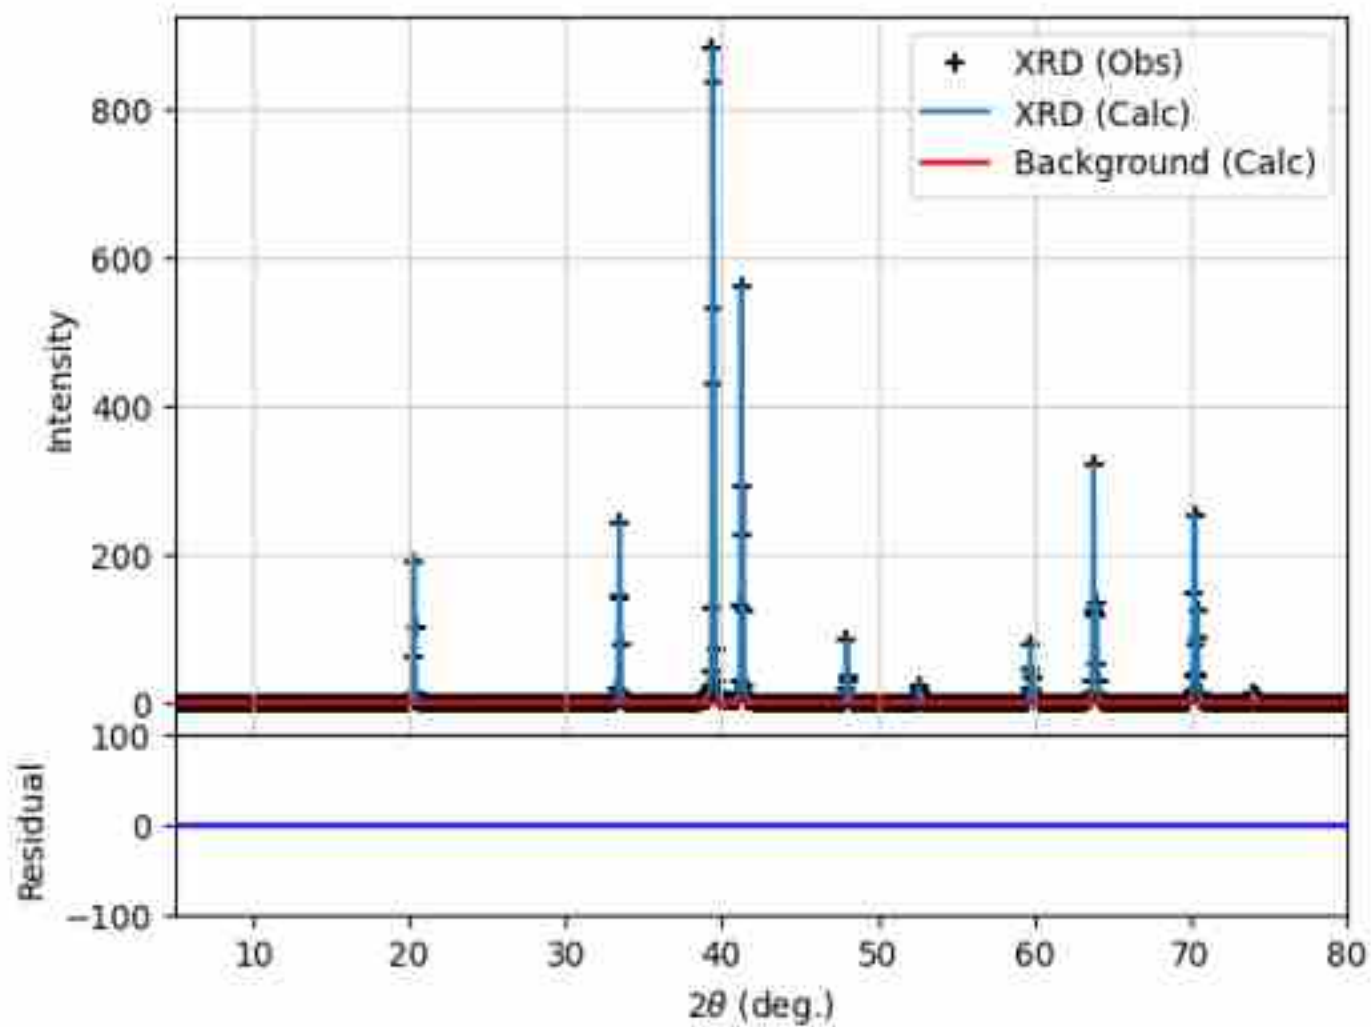

| RMSE before RR | Rwp     | RMSE after RR |
|----------------|---------|---------------|
| 0.031          | 0.01183 | 0.00061       |



# Y2W2N6

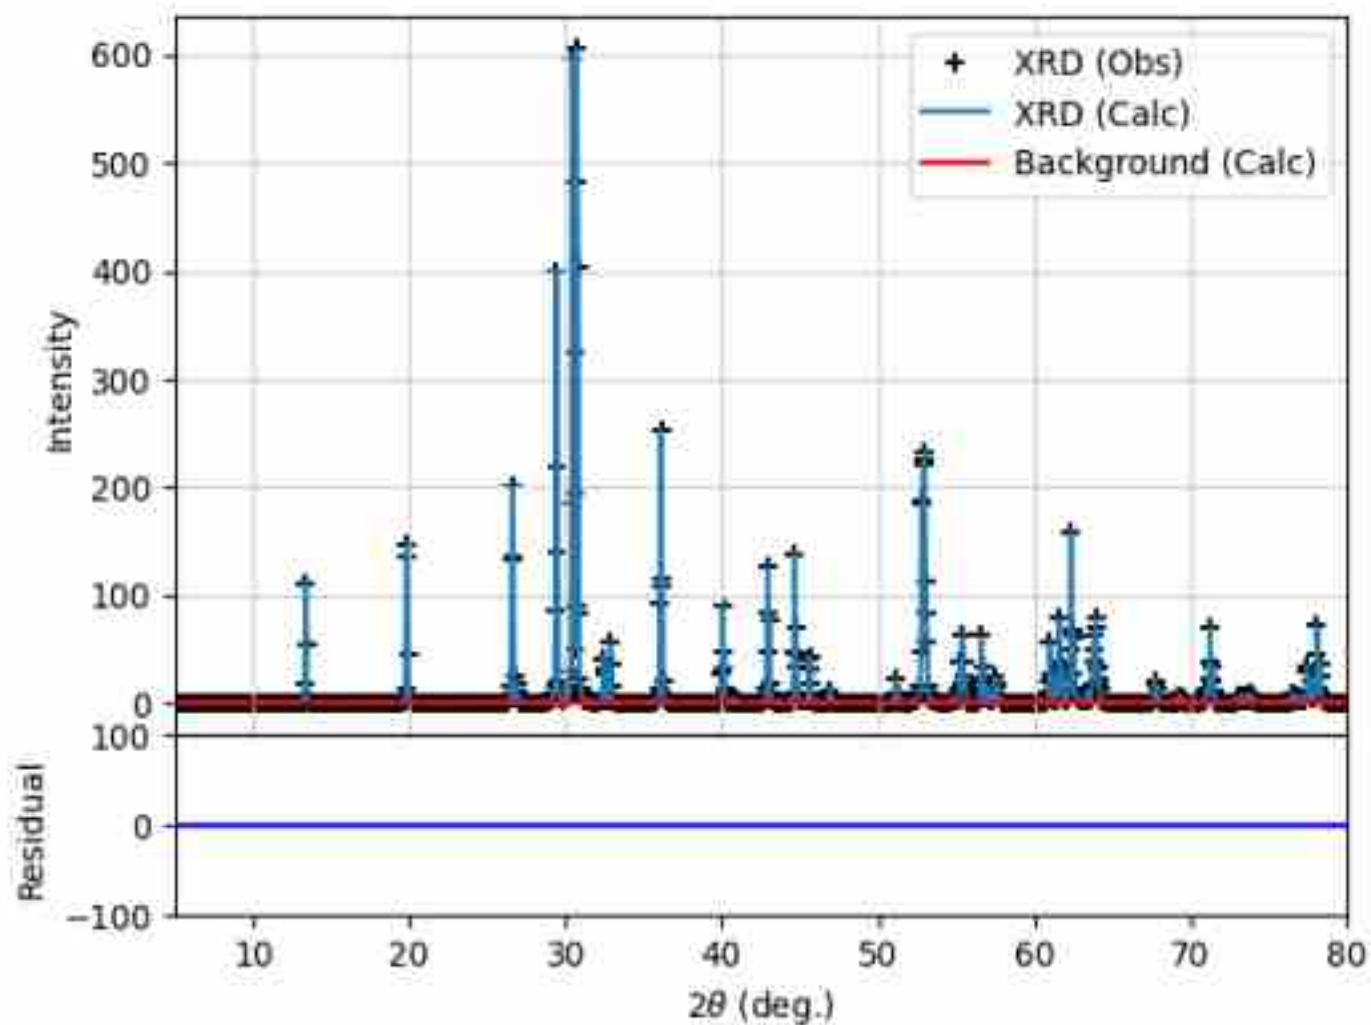

| RMSE before RR | Rwp     | RMSE after RR |
|----------------|---------|---------------|
| 0.031          | 0.00373 | 0.00111       |

# Ba<sub>1</sub>Li<sub>2</sub>Mg<sub>1</sub>P<sub>2</sub>O<sub>8</sub>

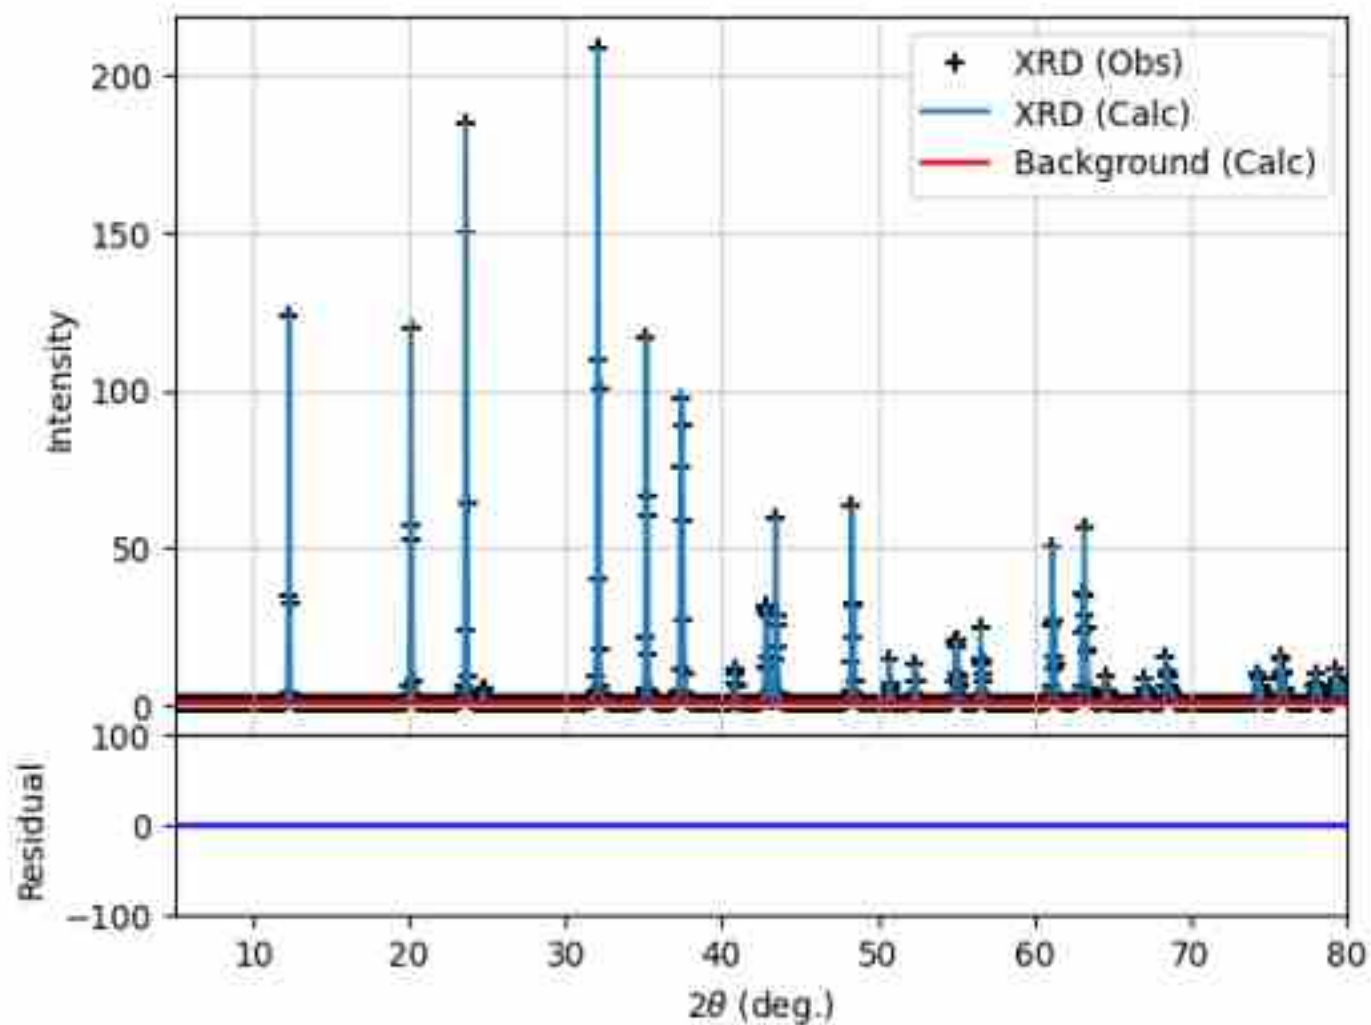

| RMSE before RR | Rwp     | RMSE after RR |
|----------------|---------|---------------|
| 0.032          | 0.00883 | 0.00427       |

# Ba<sub>2</sub>Co<sub>1</sub>N<sub>2</sub>

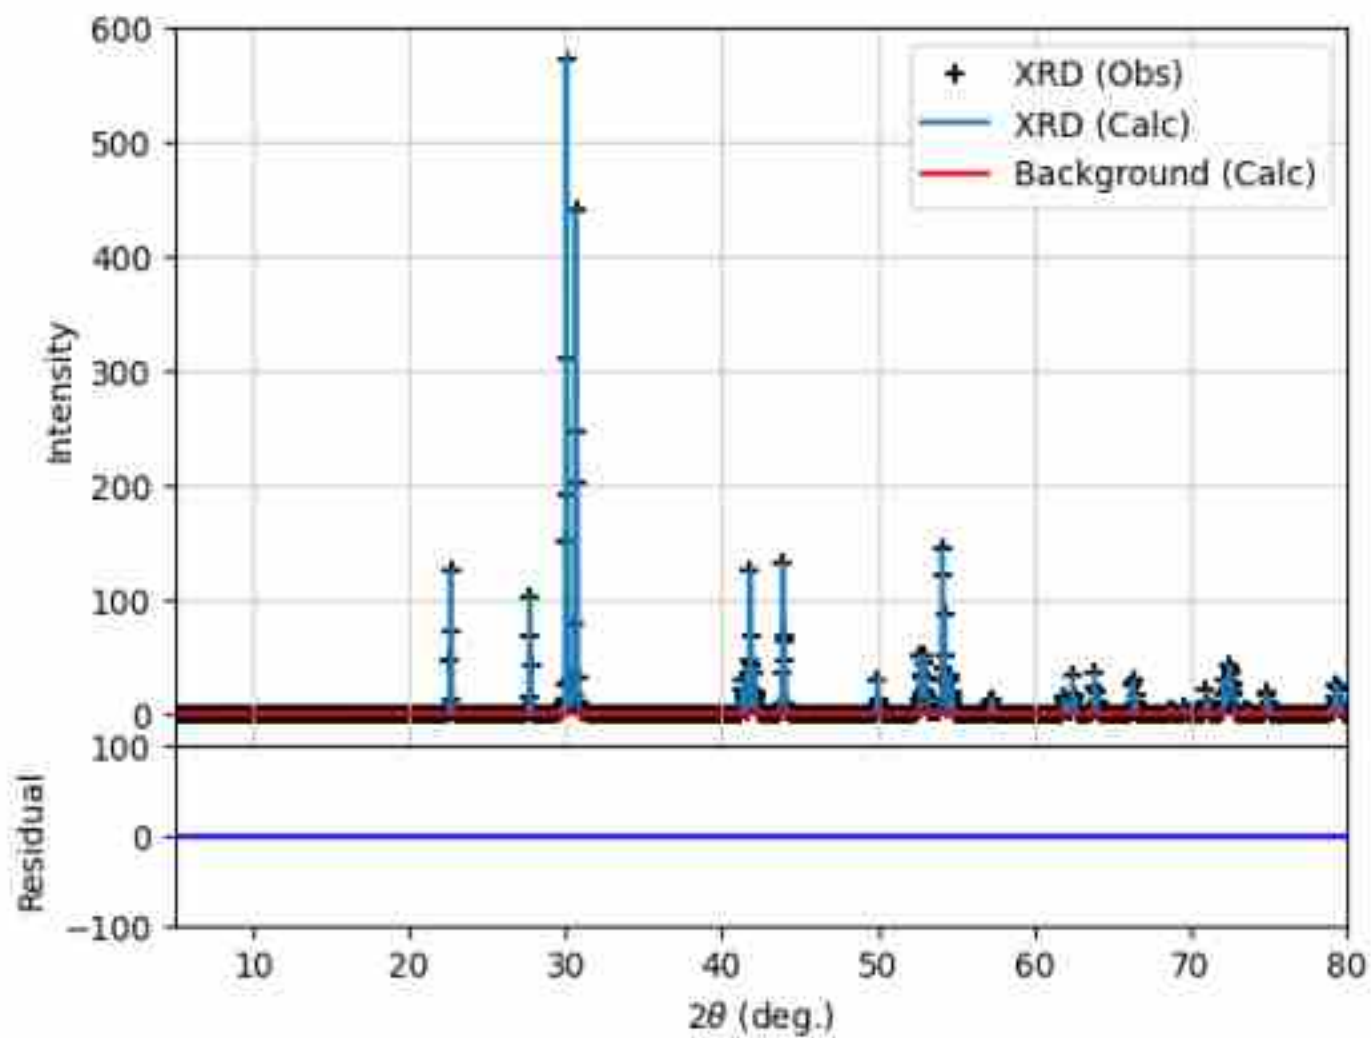

| RMSE before RR | Rwp     | RMSE after RR |
|----------------|---------|---------------|
| 0.032          | 0.00242 | 0.00087       |

# Ba<sub>2</sub>La<sub>2</sub>Mg<sub>1</sub>Ti<sub>3</sub>O<sub>12</sub>

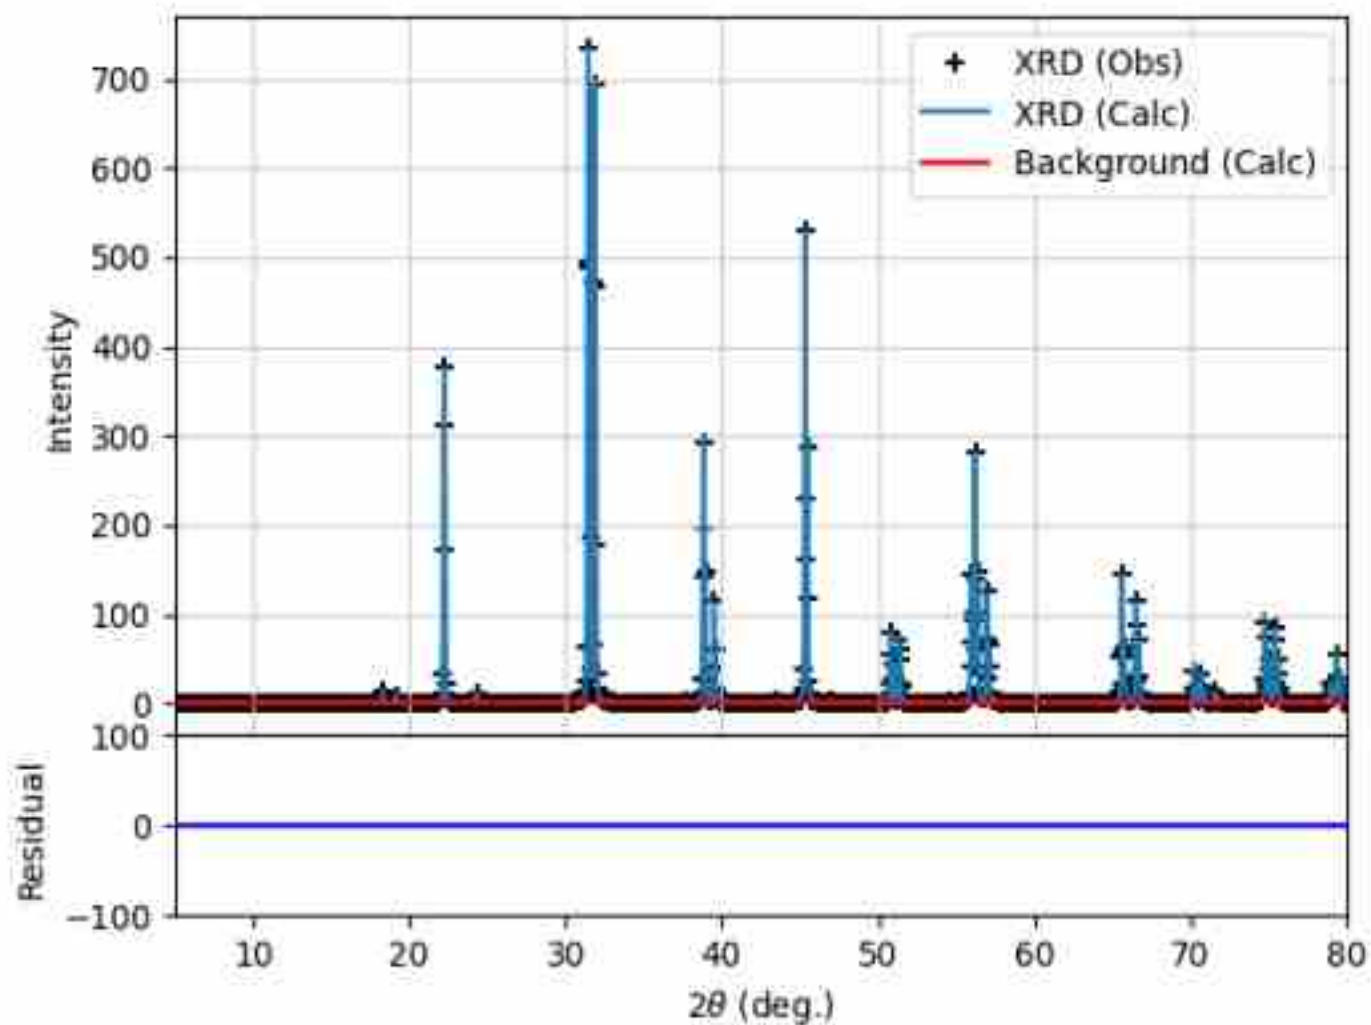

| RMSE before RR | Rwp     | RMSE after RR |
|----------------|---------|---------------|
| 0.032          | 0.00347 | 0.001         |

# Ba<sub>2</sub>Ta<sub>1</sub>Tl<sub>1</sub>O<sub>6</sub>

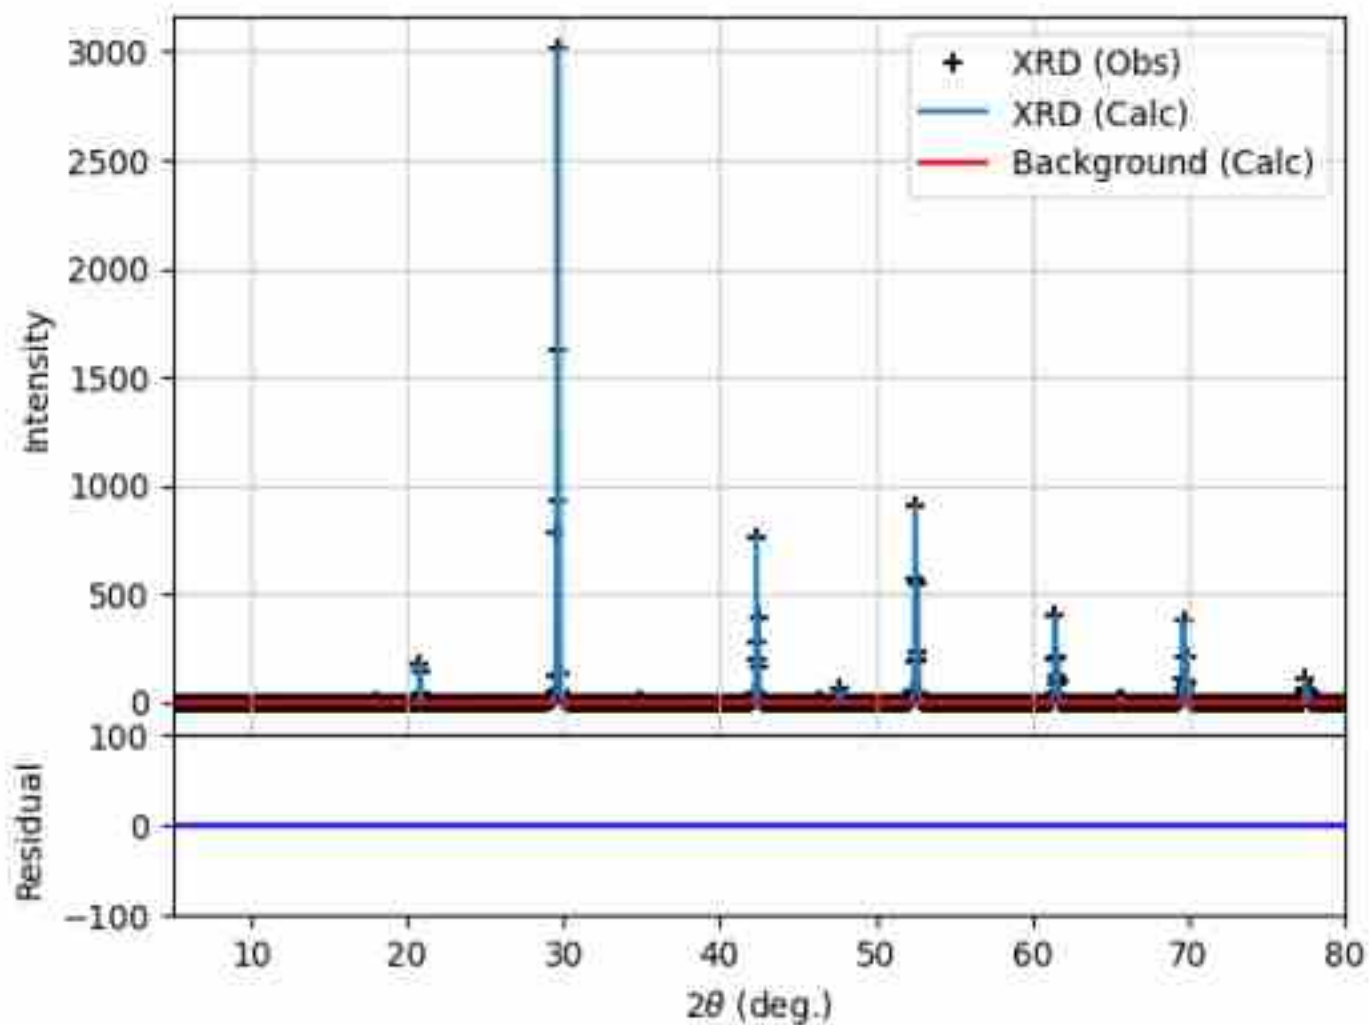

| RMSE before RR | Rwp    | RMSE after RR |
|----------------|--------|---------------|
| 0.032          | 0.0258 | 0.00654       |

# Ba<sub>4</sub>Mn<sub>4</sub>Sb<sub>4</sub>O<sub>2</sub>

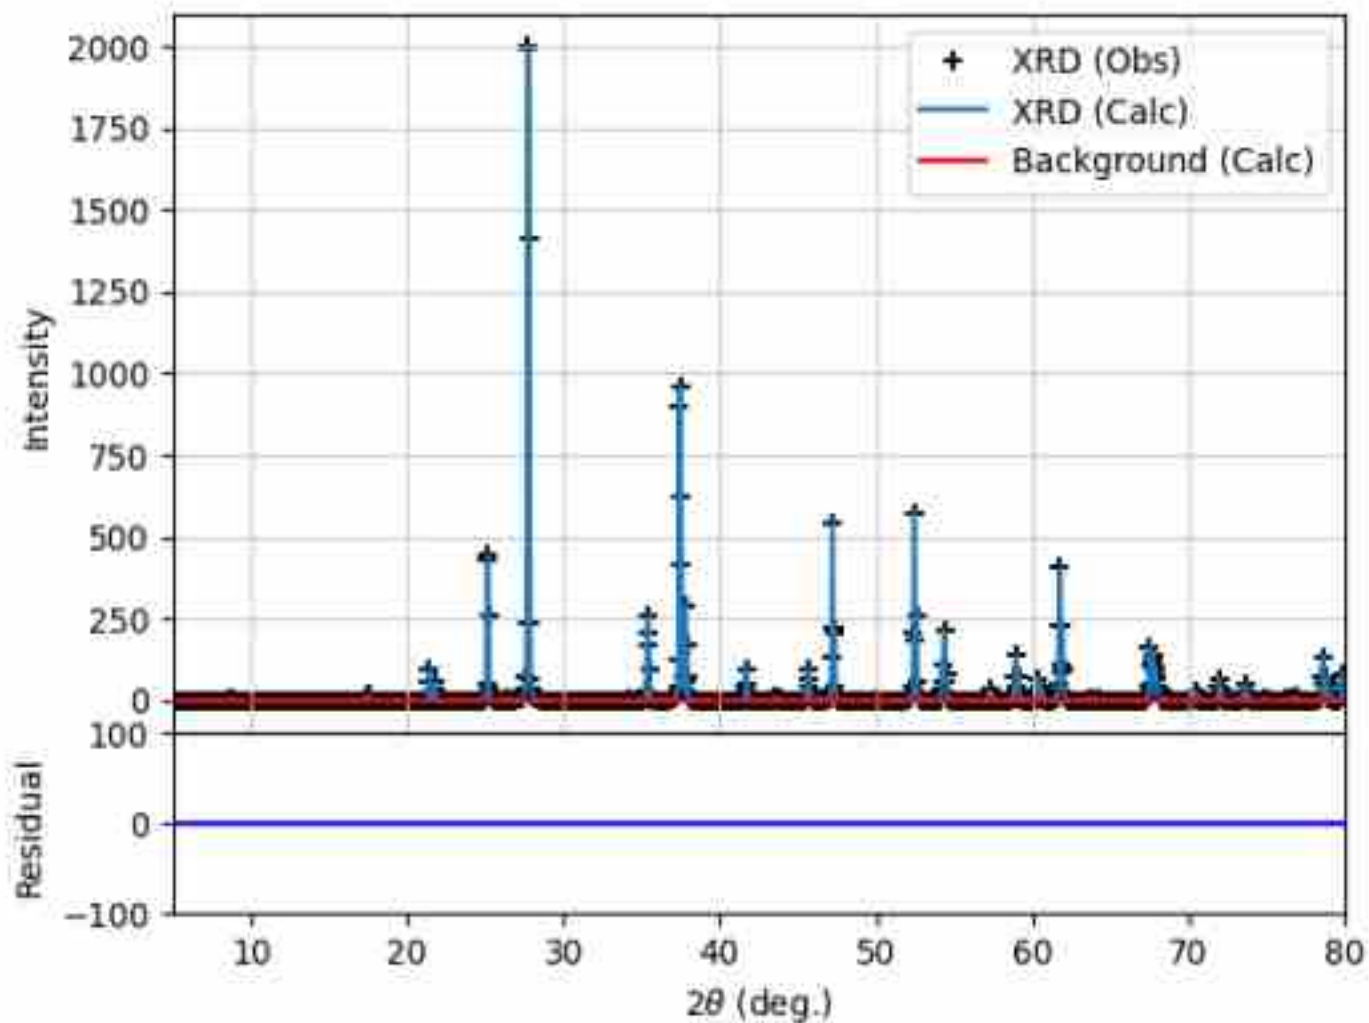

| RMSE before RR | Rwp     | RMSE after RR |
|----------------|---------|---------------|
| 0.032          | 0.00267 | 0.00066       |

# Ca<sub>2</sub>Tc<sub>2</sub>O<sub>6</sub>

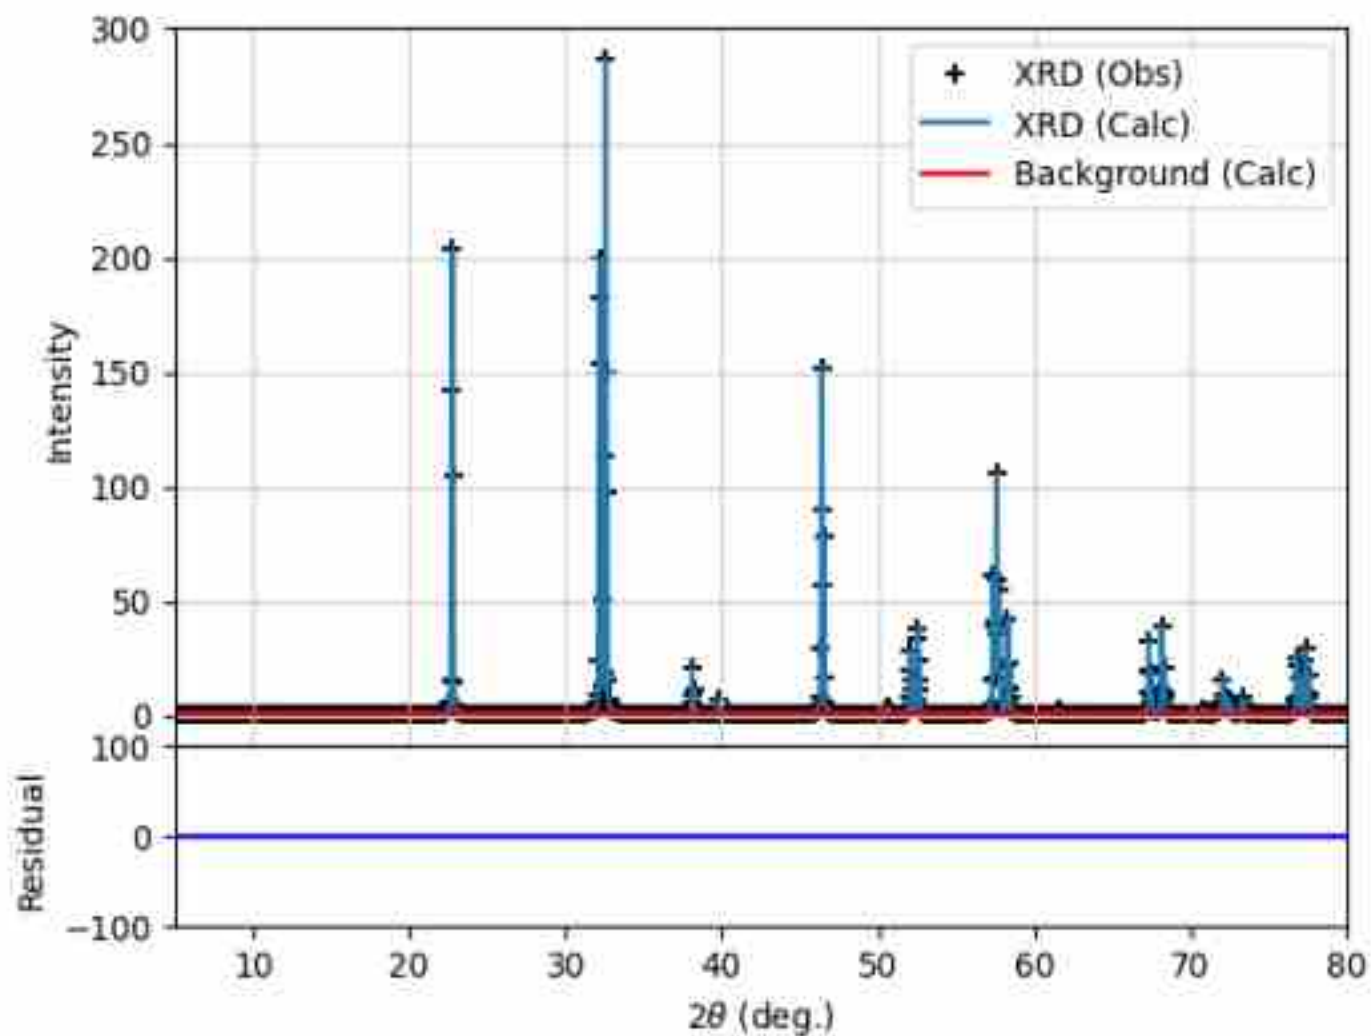

| RMSE before RR | Rwp     | RMSE after RR |
|----------------|---------|---------------|
| 0.032          | 0.00286 | 0.00069       |

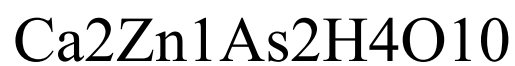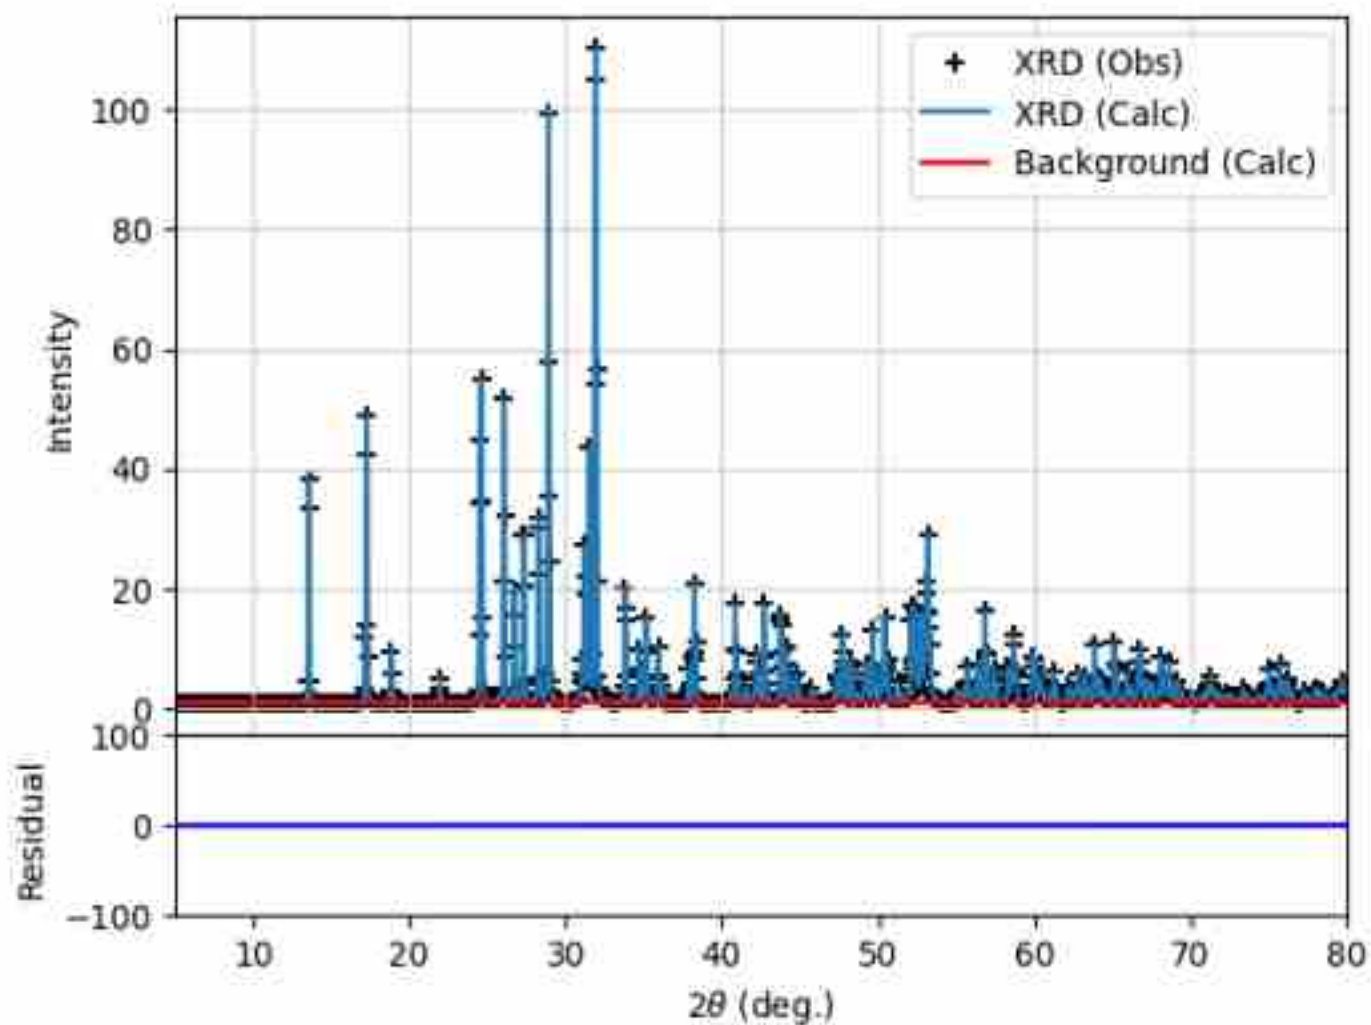

| RMSE before RR | Rwp     | RMSE after RR |
|----------------|---------|---------------|
| 0.032          | 1.10287 | 0.02908       |



# Ca<sub>8</sub>Pb<sub>2</sub>N<sub>8</sub>

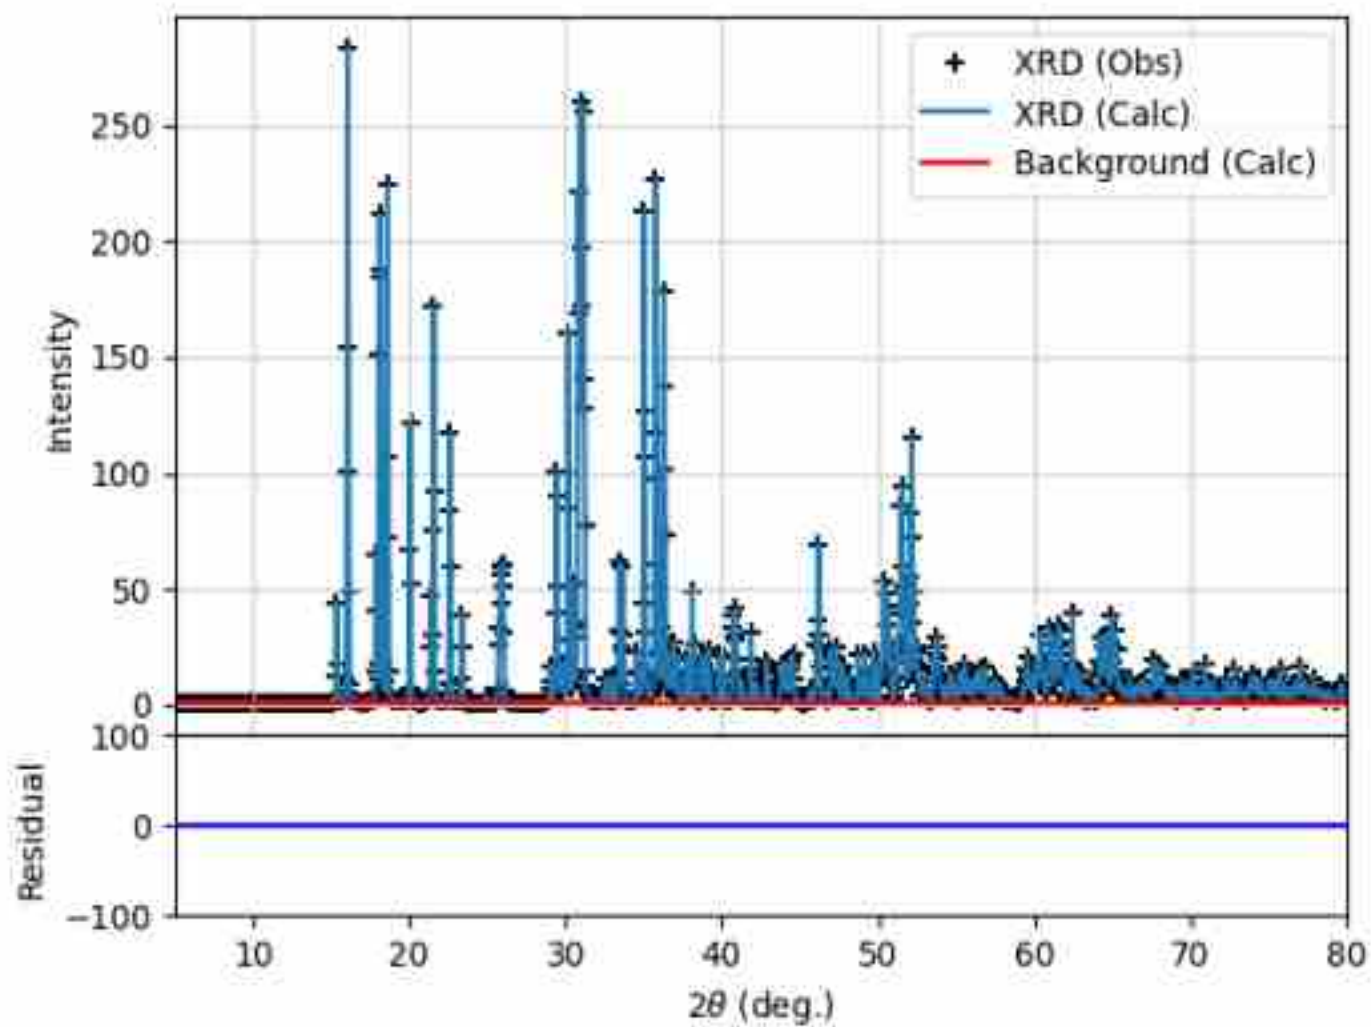

| RMSE before RR | Rwp     | RMSE after RR |
|----------------|---------|---------------|
| 0.032          | 0.00133 | 0.00034       |

# Ce<sub>2</sub>Ga<sub>10</sub>Pd<sub>1</sub>

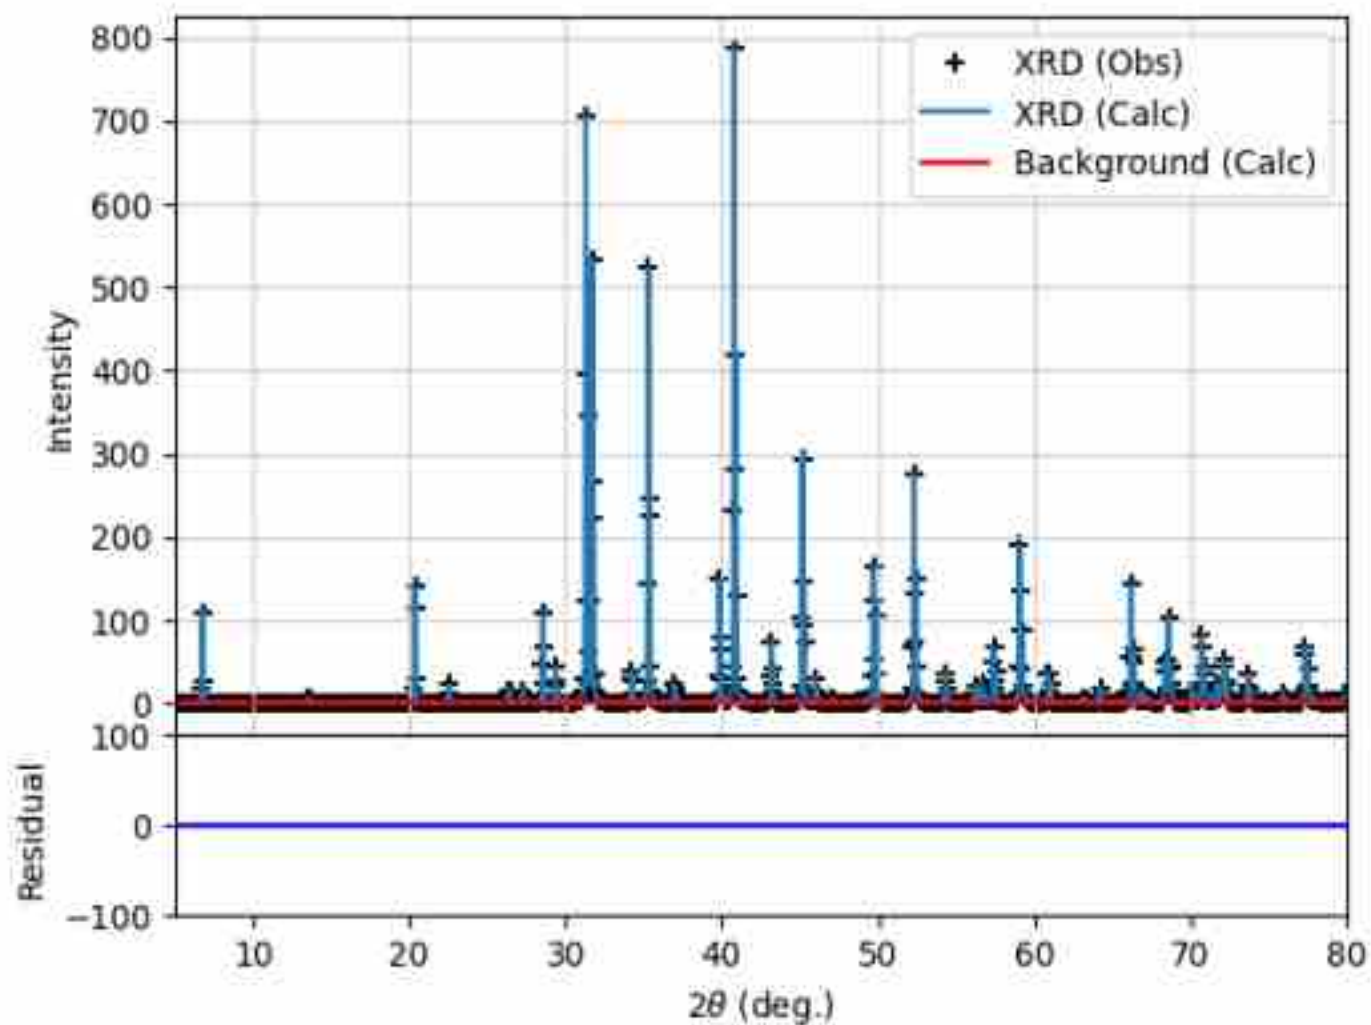

| RMSE before RR | Rwp     | RMSE after RR |
|----------------|---------|---------------|
| 0.032          | 0.01031 | 0.00079       |

# Ce<sub>3</sub>Mg<sub>2</sub>Rh<sub>4</sub>

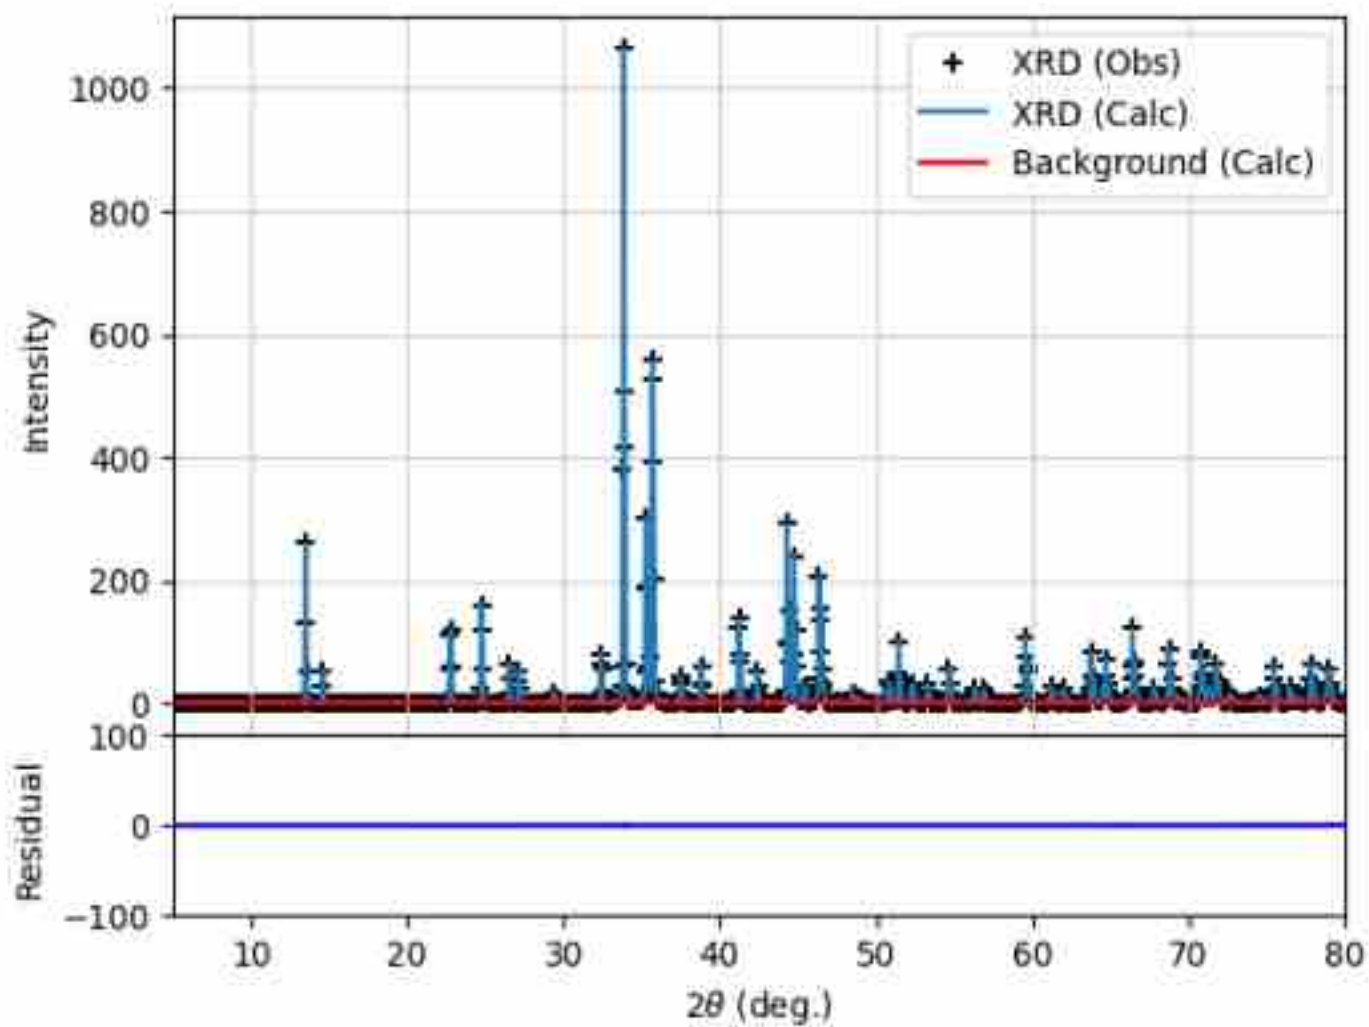

| RMSE before RR | Rwp     | RMSE after RR |
|----------------|---------|---------------|
| 0.032          | 0.42656 | 0.00804       |

# Cs<sub>2</sub>Rb<sub>2</sub>S<sub>2</sub>O<sub>8</sub>

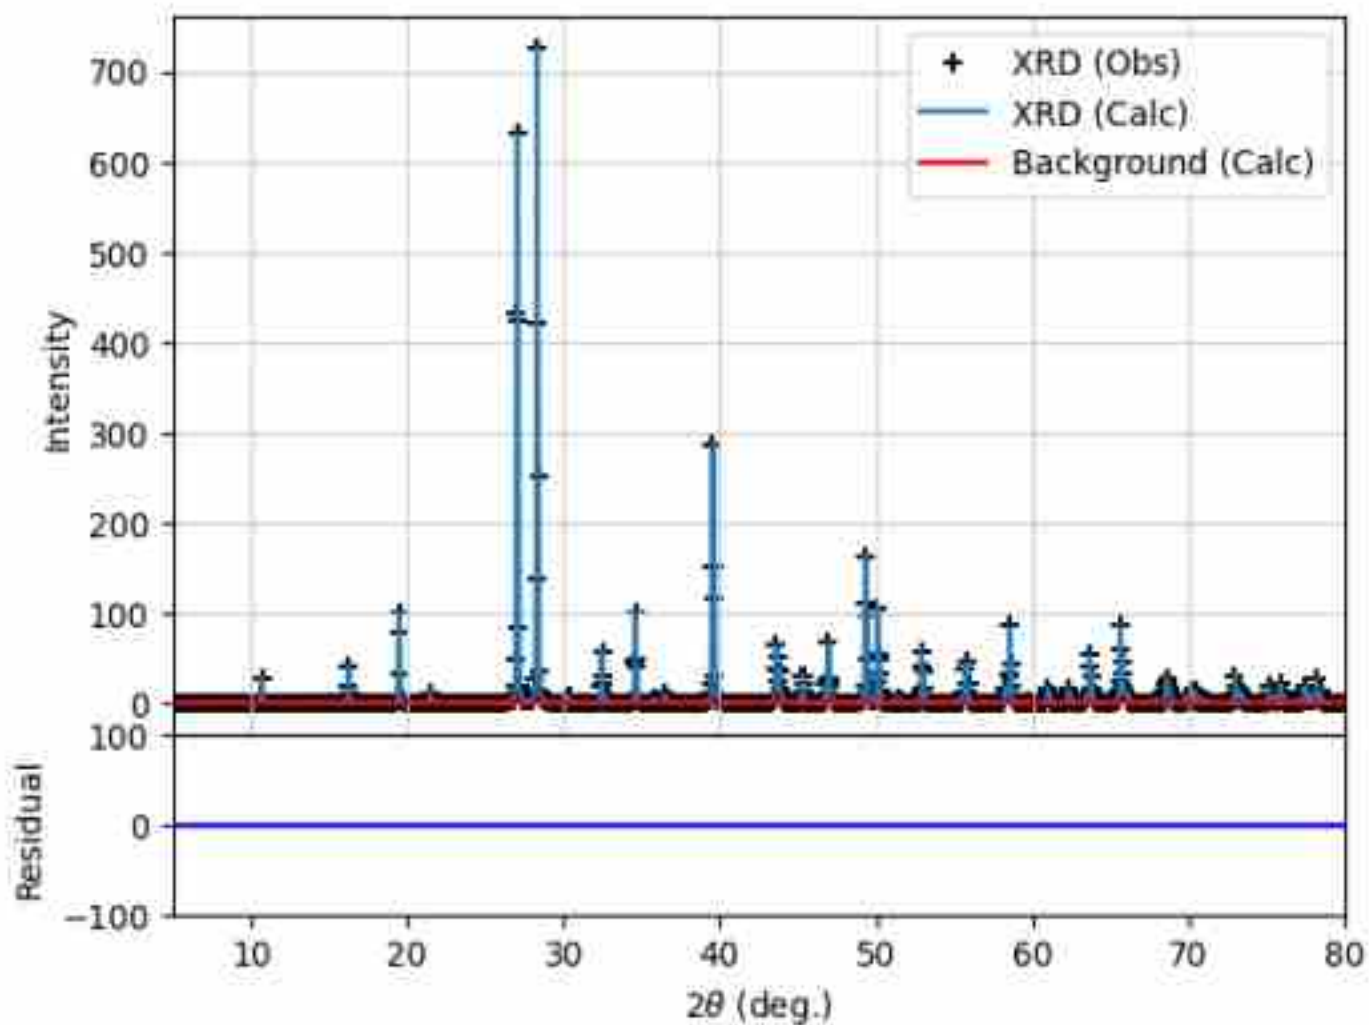

| RMSE before RR | Rwp     | RMSE after RR |
|----------------|---------|---------------|
| 0.032          | 0.00526 | 0.00202       |

# Cu<sub>2</sub>Ag<sub>2</sub>Ge<sub>2</sub>Se<sub>6</sub>

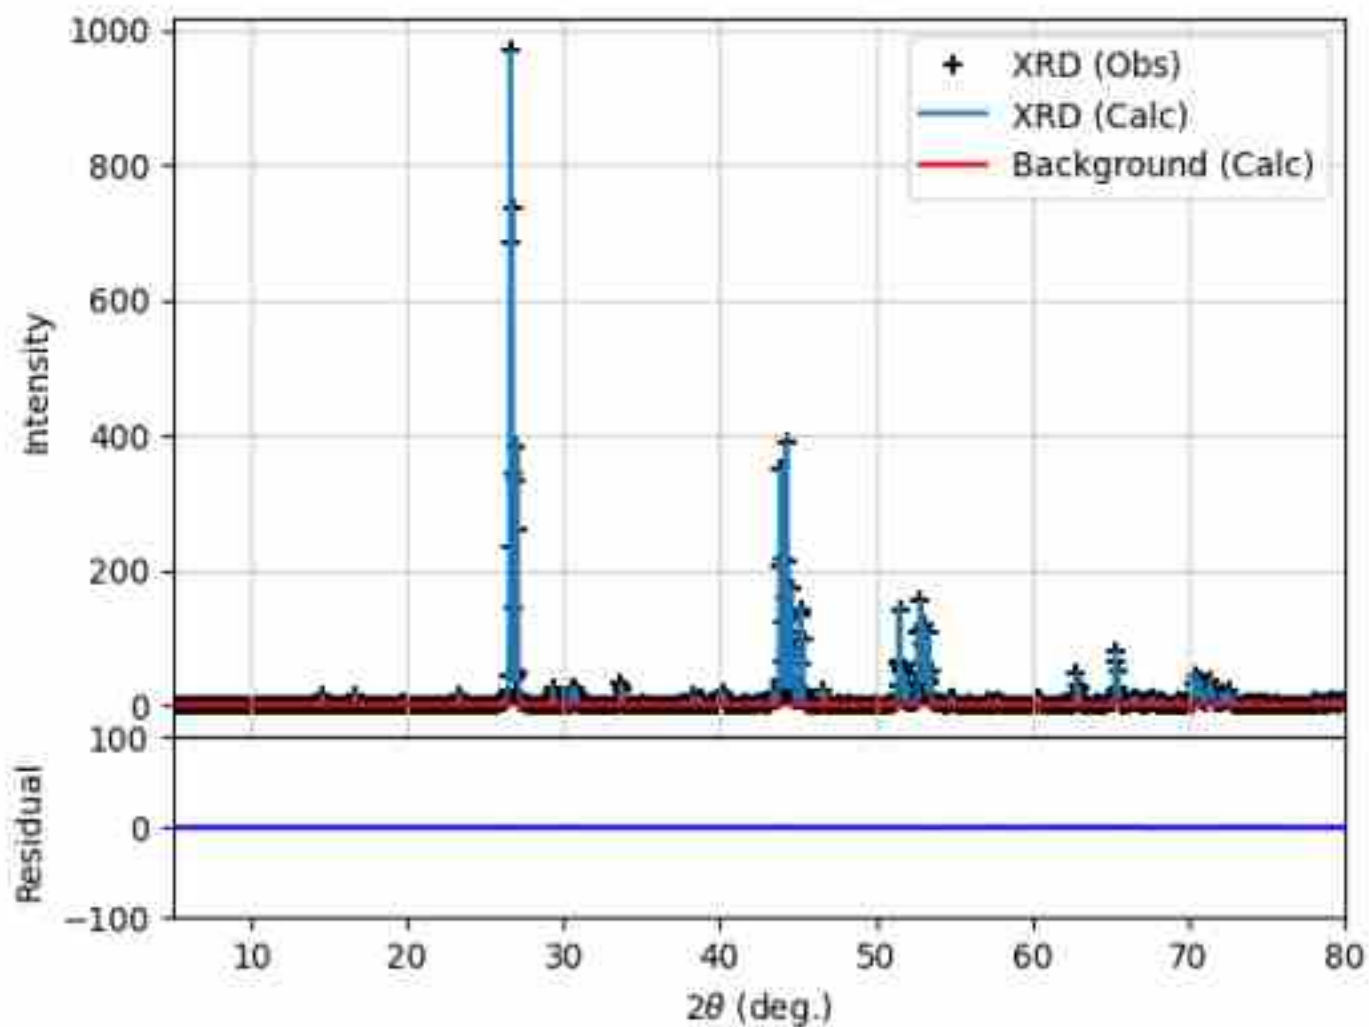

| RMSE before RR | Rwp     | RMSE after RR |
|----------------|---------|---------------|
| 0.032          | 1.35063 | 0.02352       |

# Cu<sub>6</sub>Pb<sub>10</sub>O<sub>8</sub>

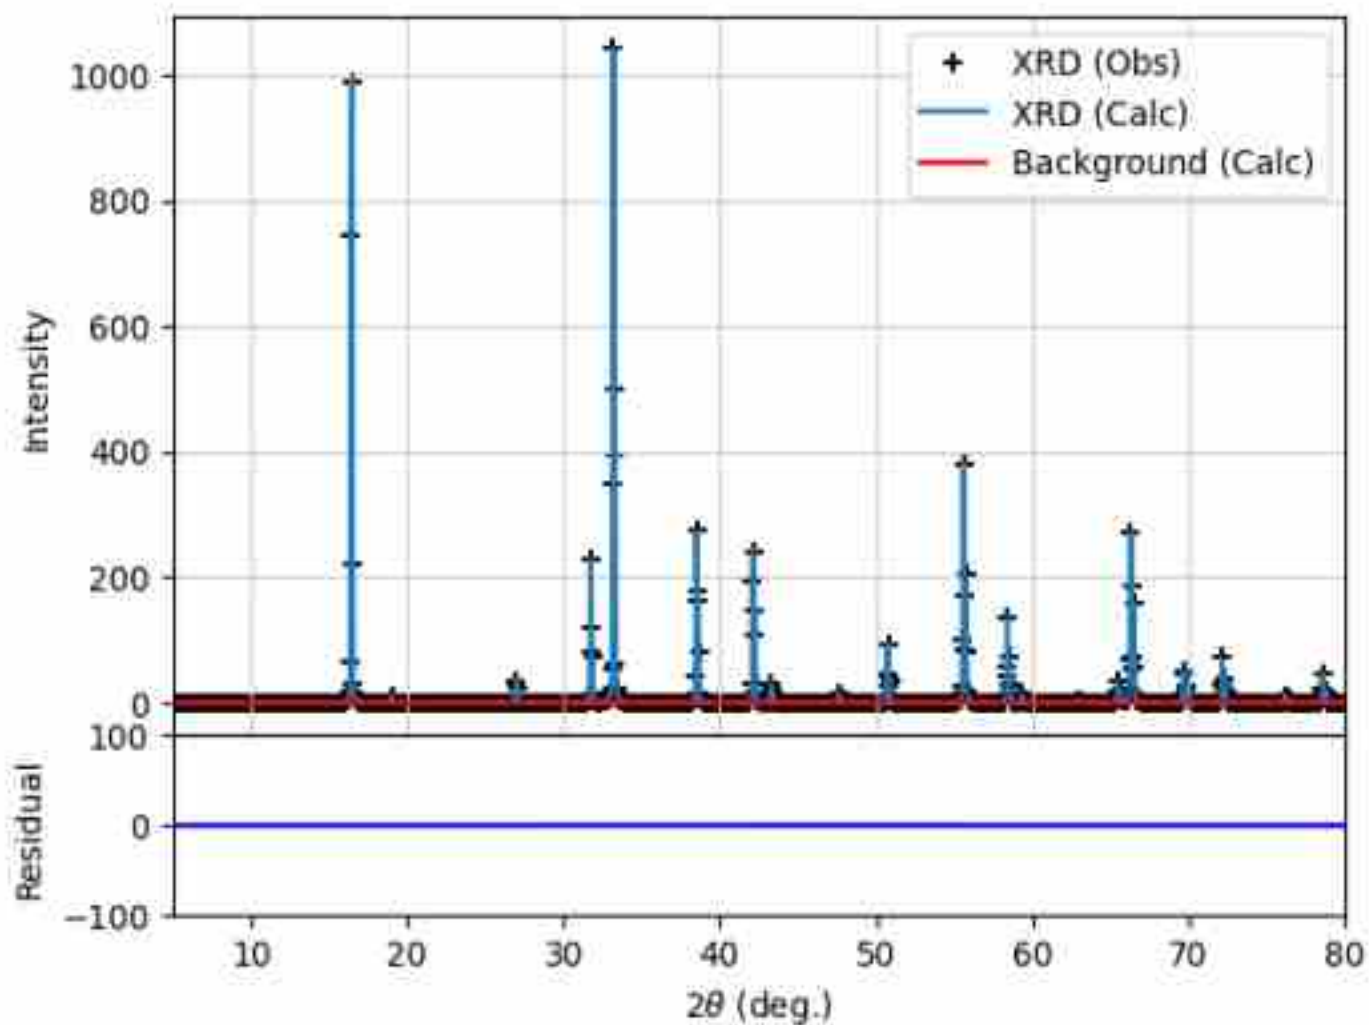

| RMSE before RR | Rwp     | RMSE after RR |
|----------------|---------|---------------|
| 0.032          | 0.08418 | 0.01241       |

# Dy6Ge10

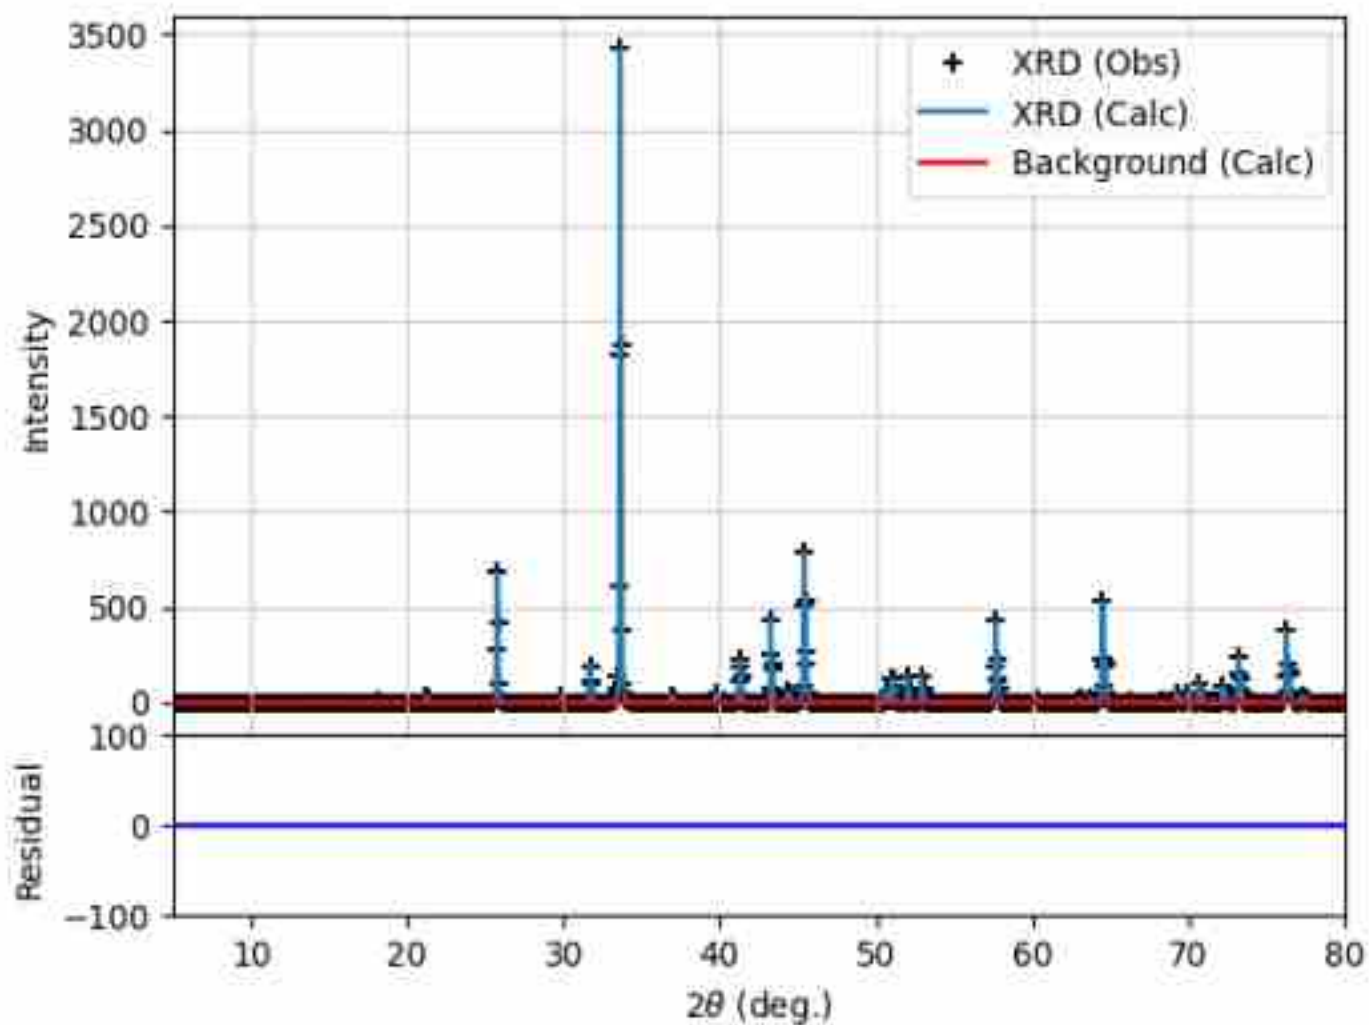

| RMSE before RR | Rwp     | RMSE after RR |
|----------------|---------|---------------|
| 0.032          | 0.00414 | 0.00052       |

# Hf<sub>2</sub>Ge<sub>2</sub>Te<sub>2</sub>

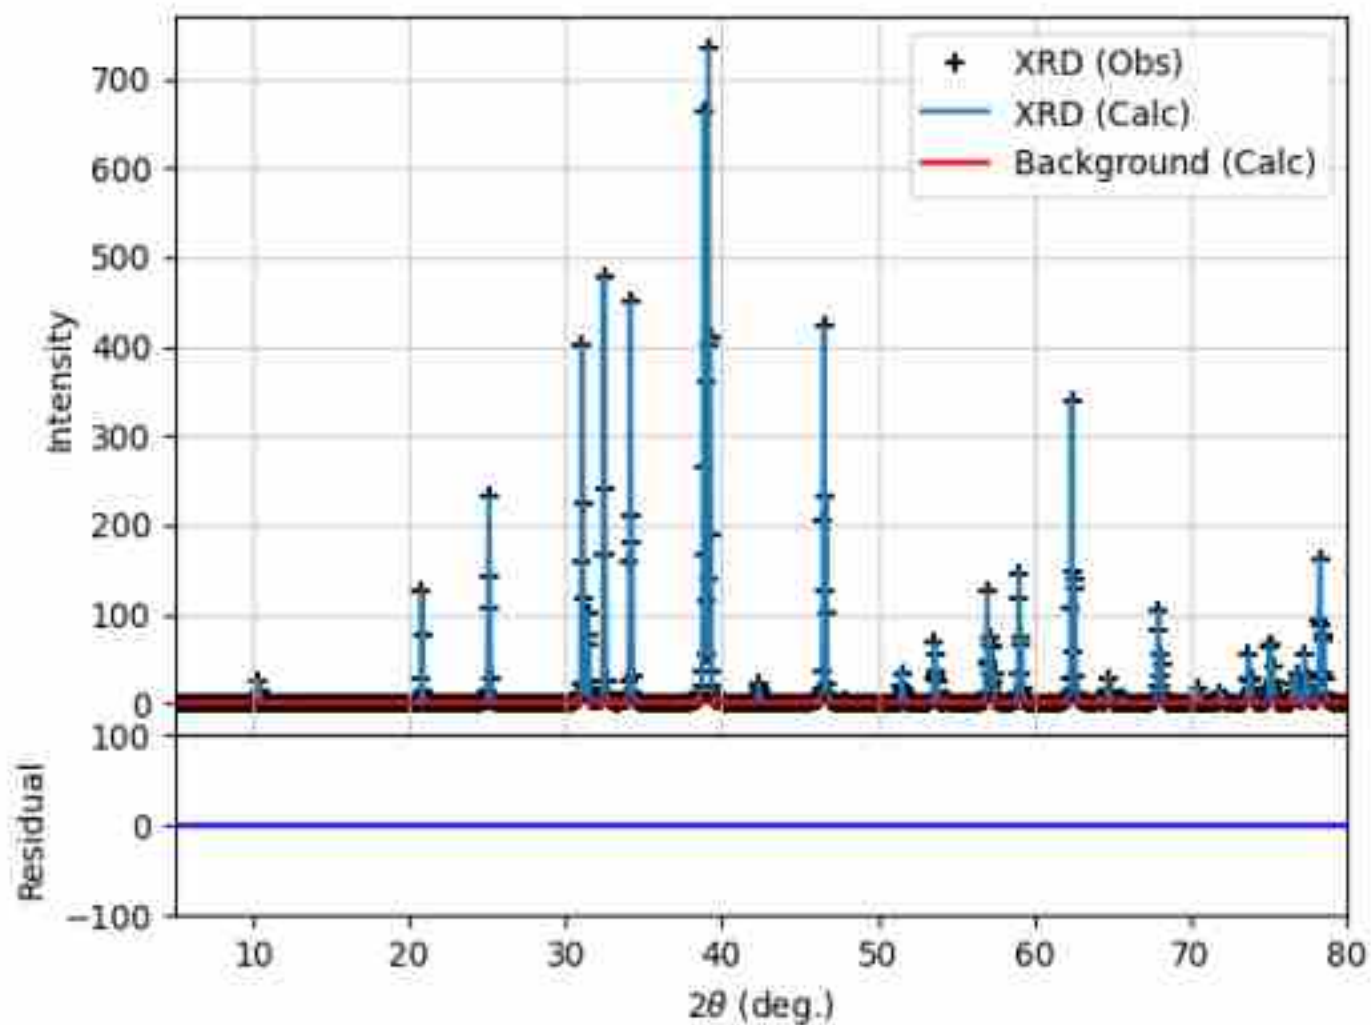

| RMSE before RR | Rwp    | RMSE after RR |
|----------------|--------|---------------|
| 0.032          | 0.0056 | 0.00037       |



# Ho<sub>4</sub>B<sub>4</sub>O<sub>12</sub>

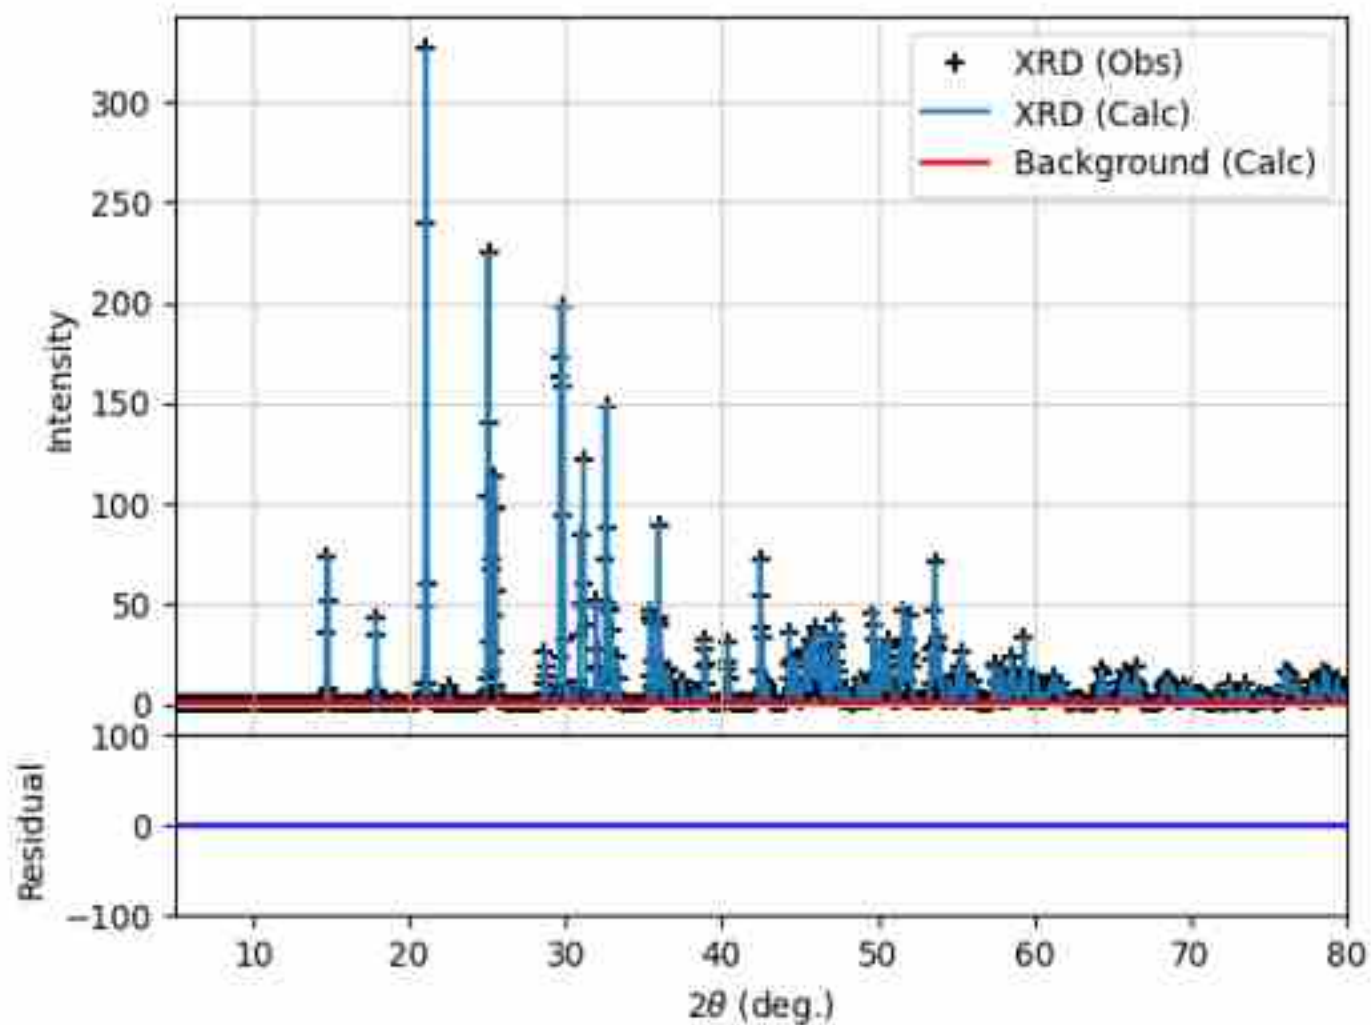

| RMSE before RR | Rwp    | RMSE after RR |
|----------------|--------|---------------|
| 0.032          | 0.0001 | 0.00021       |

# Ho10Ga6

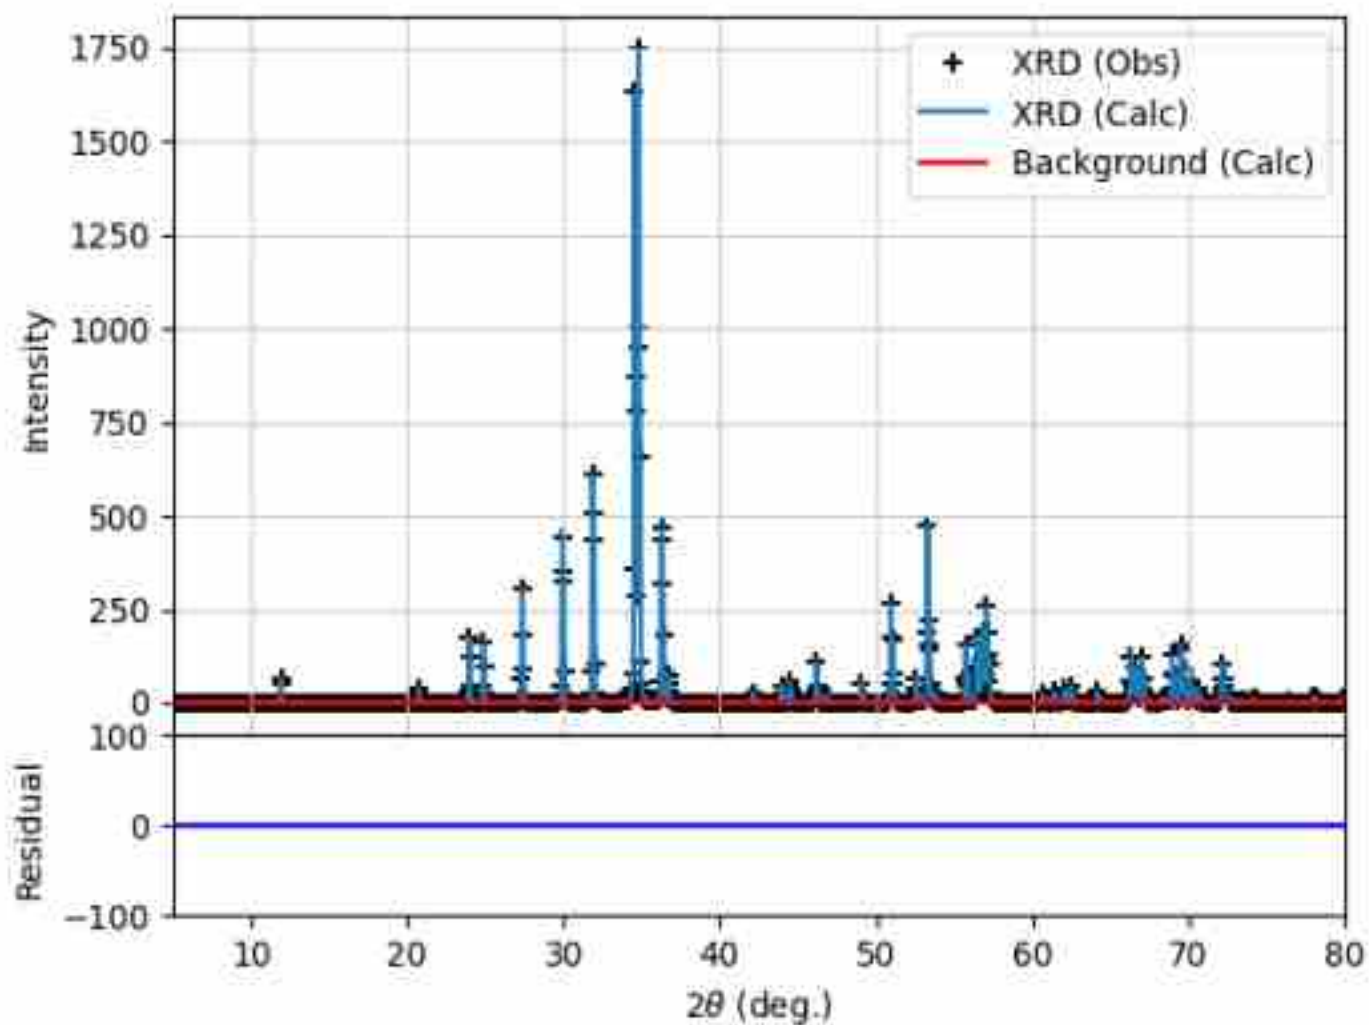

| RMSE before RR | Rwp     | RMSE after RR |
|----------------|---------|---------------|
| 0.032          | 0.00575 | 0.00033       |

# In<sub>2</sub>Cl<sub>6</sub>

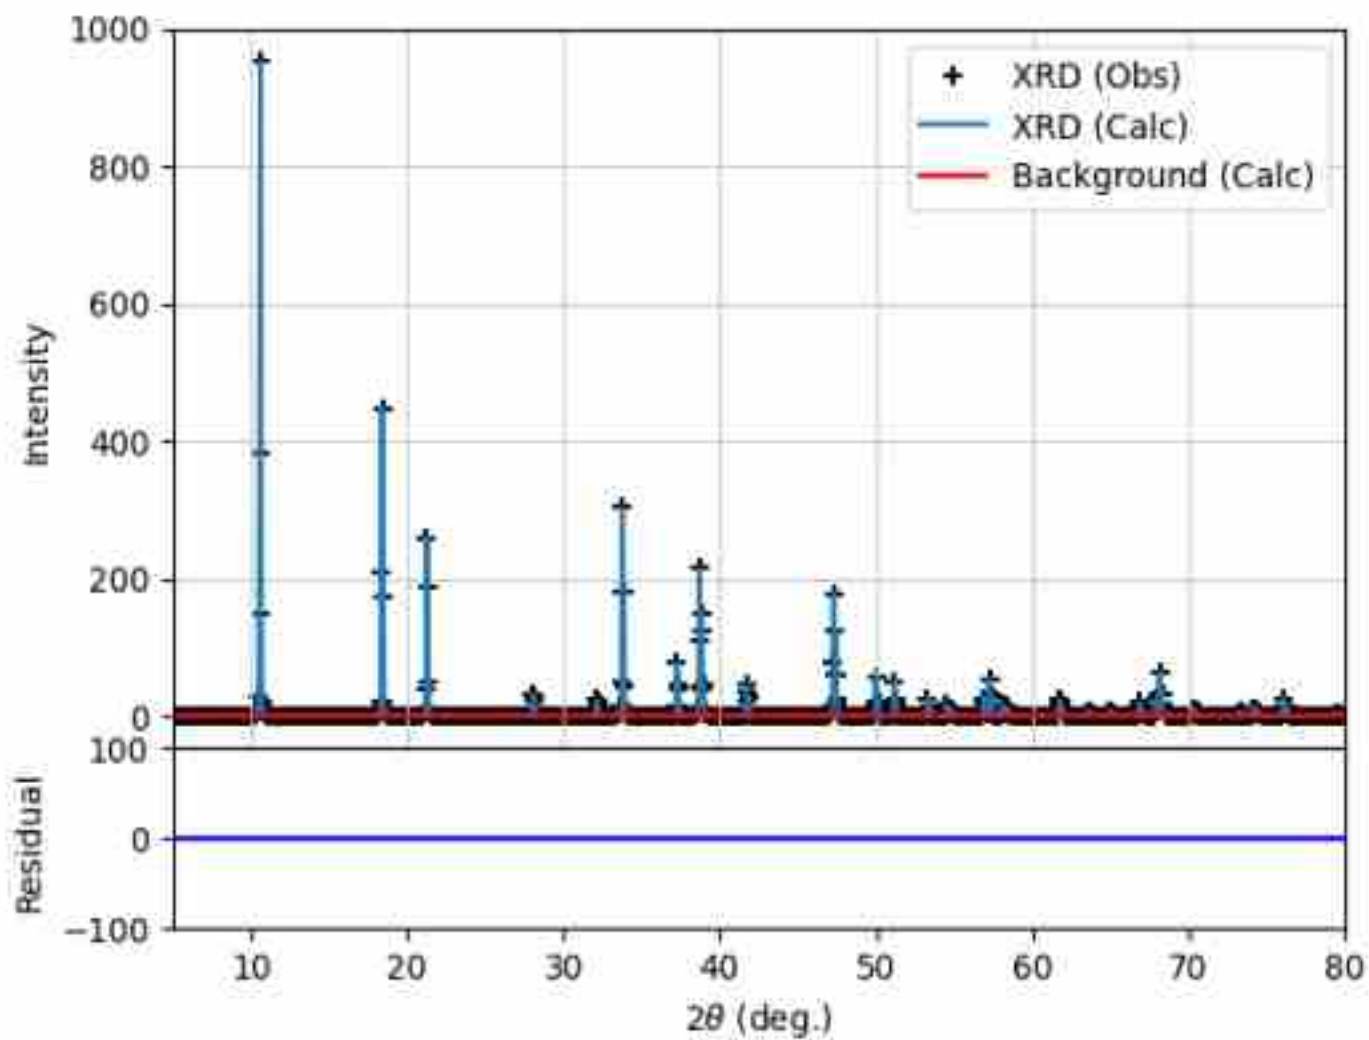

| RMSE before RR | Rwp     | RMSE after RR |
|----------------|---------|---------------|
| 0.032          | 0.01488 | 0.00229       |

# In<sub>2</sub>Sn<sub>4</sub>Br<sub>10</sub>

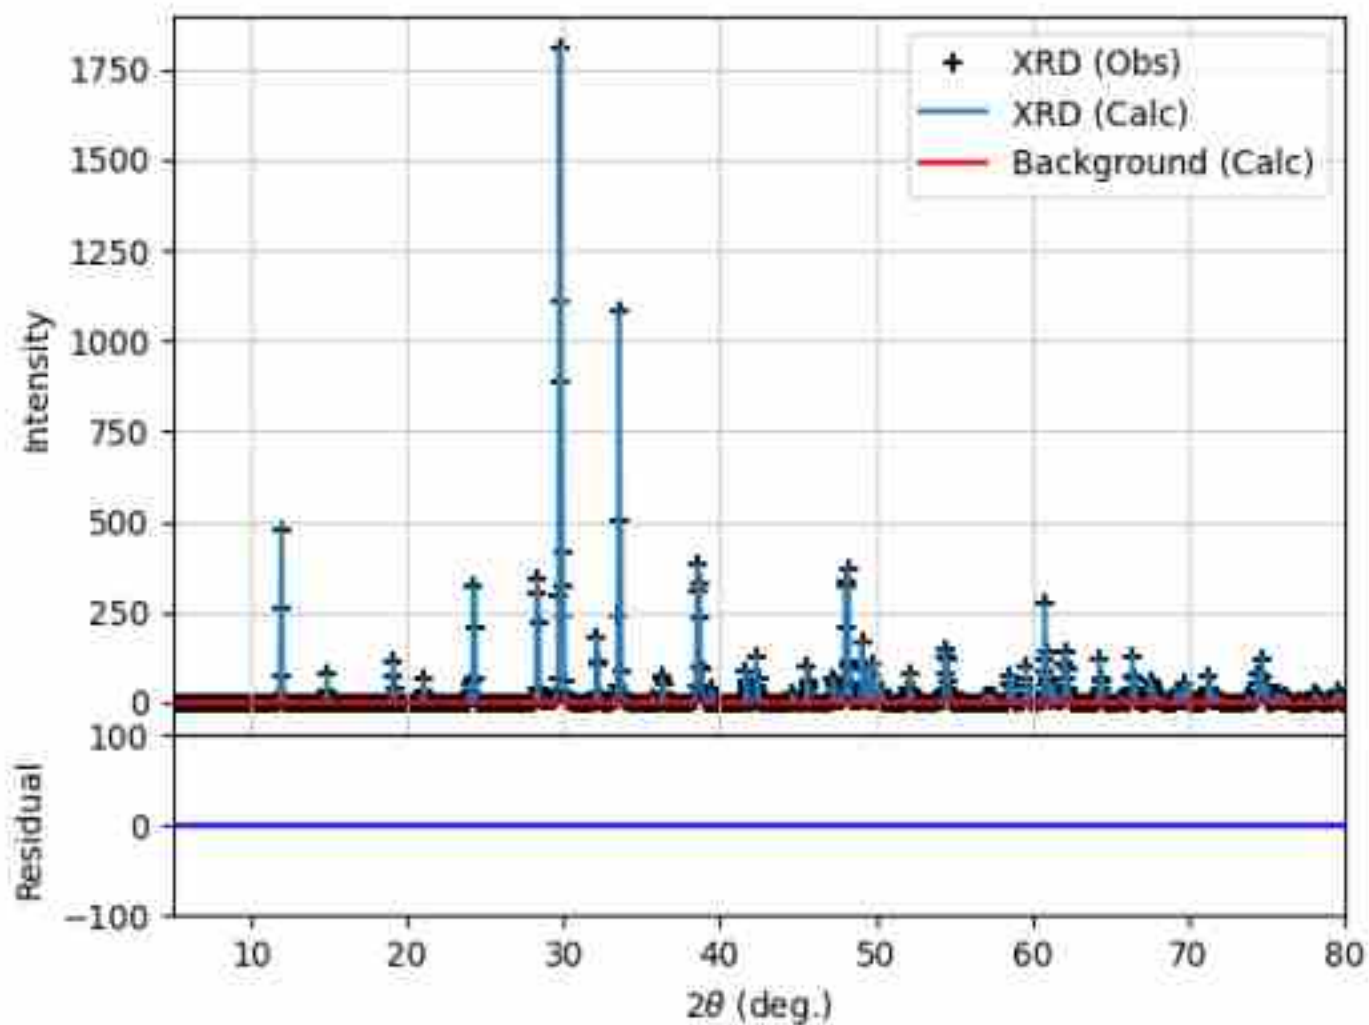

| RMSE before RR | Rwp     | RMSE after RR |
|----------------|---------|---------------|
| 0.032          | 0.00361 | 0.0005        |

# K1Rb2Mo1O3F3

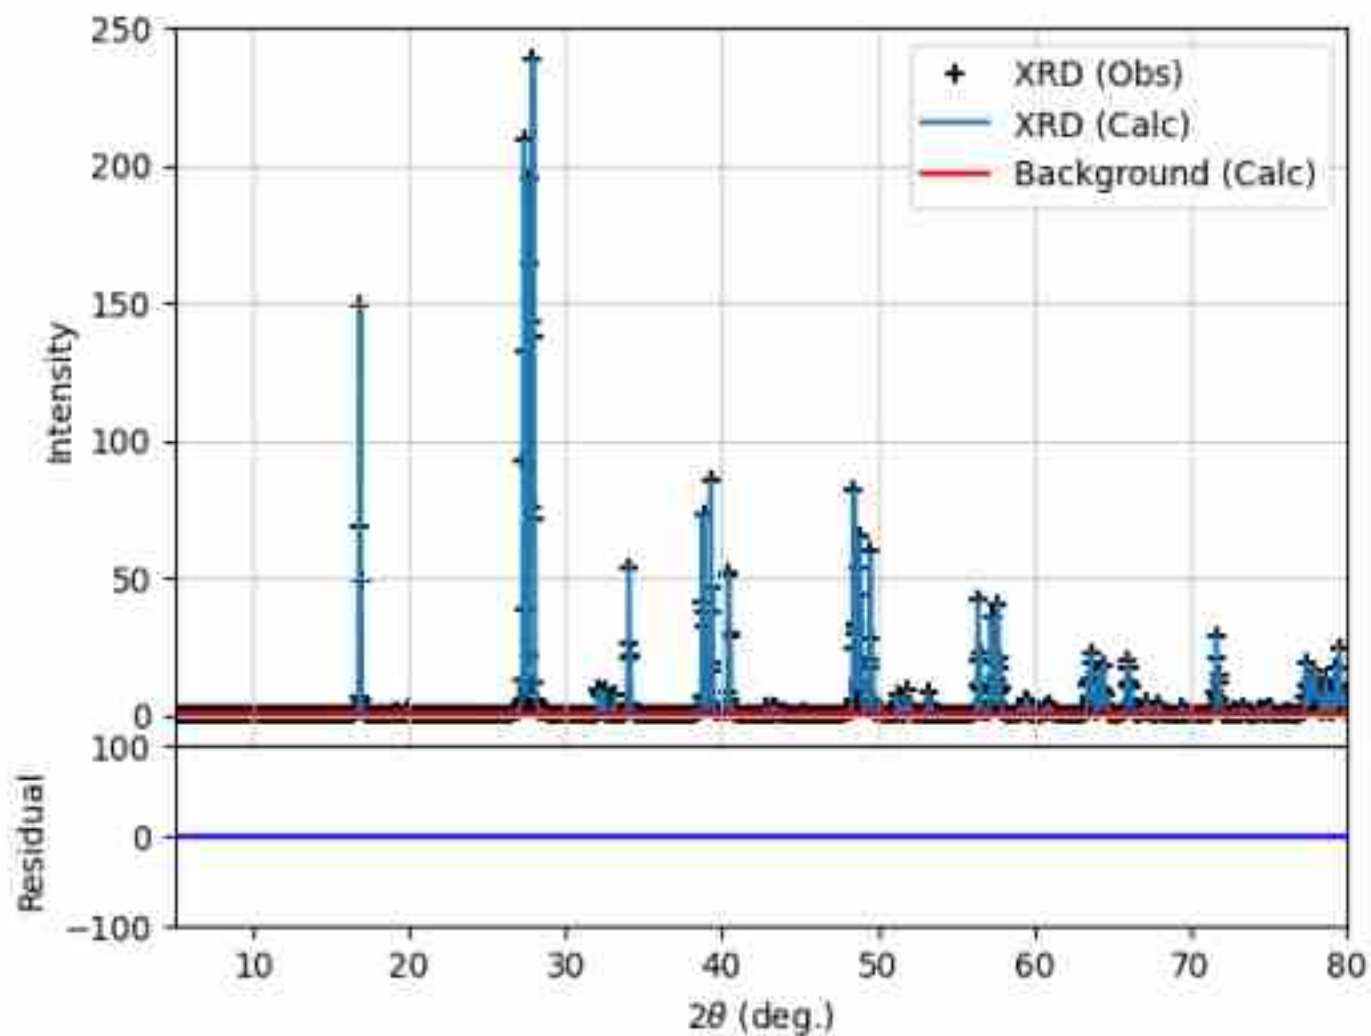

| RMSE before RR | Rwp     | RMSE after RR |
|----------------|---------|---------------|
| 0.032          | 0.00303 | 0.00057       |

# K4Mg4C112

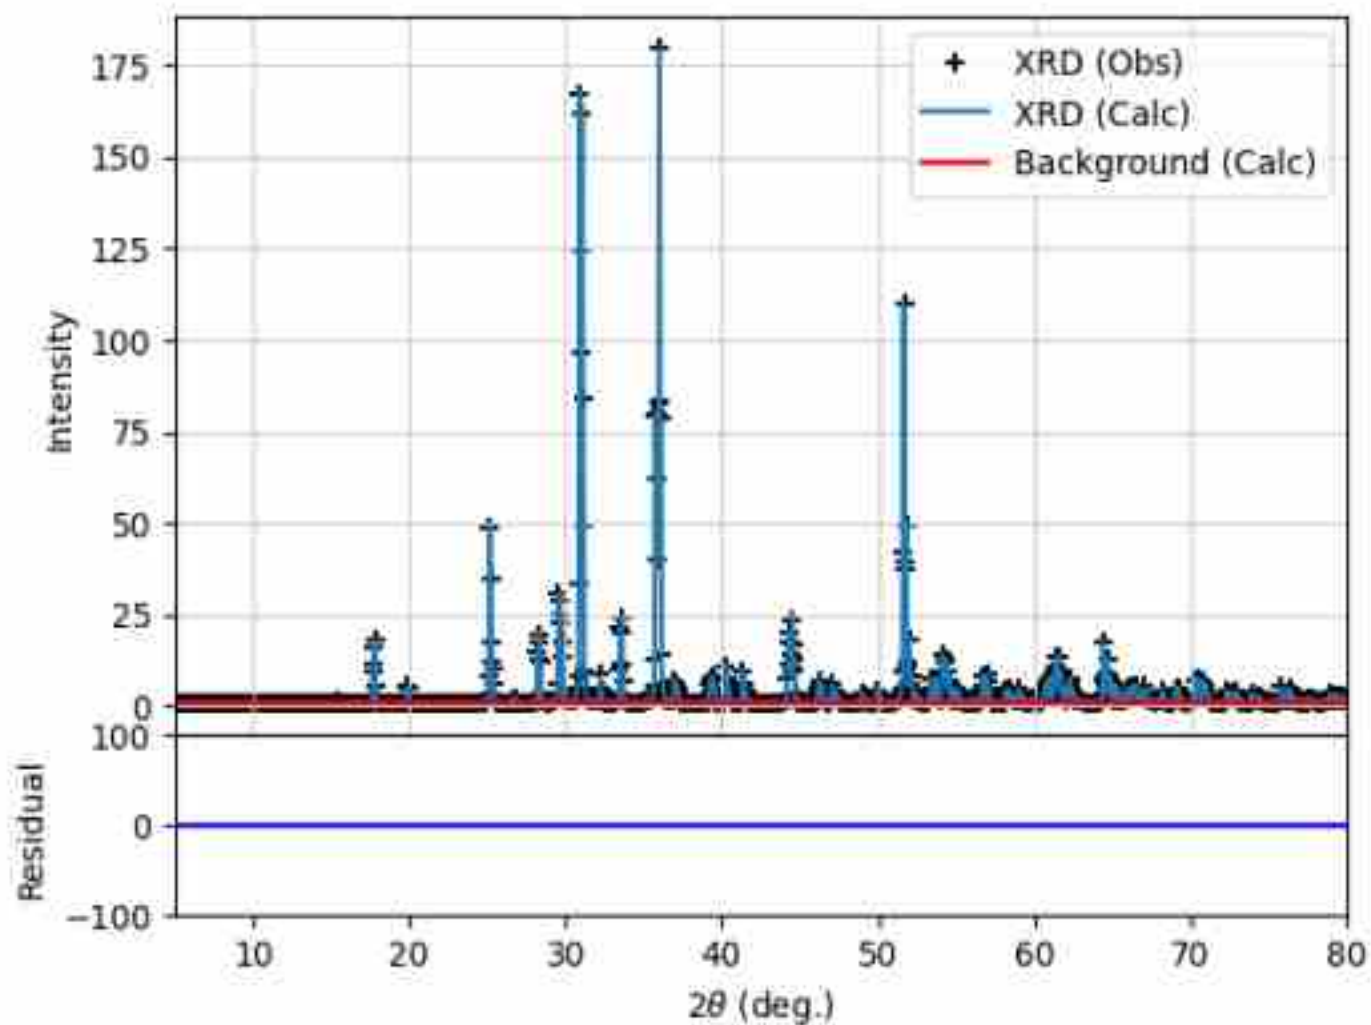

| RMSE before RR | Rwp    | RMSE after RR |
|----------------|--------|---------------|
| 0.032          | 0.0026 | 0.00044       |

# K4S2O8

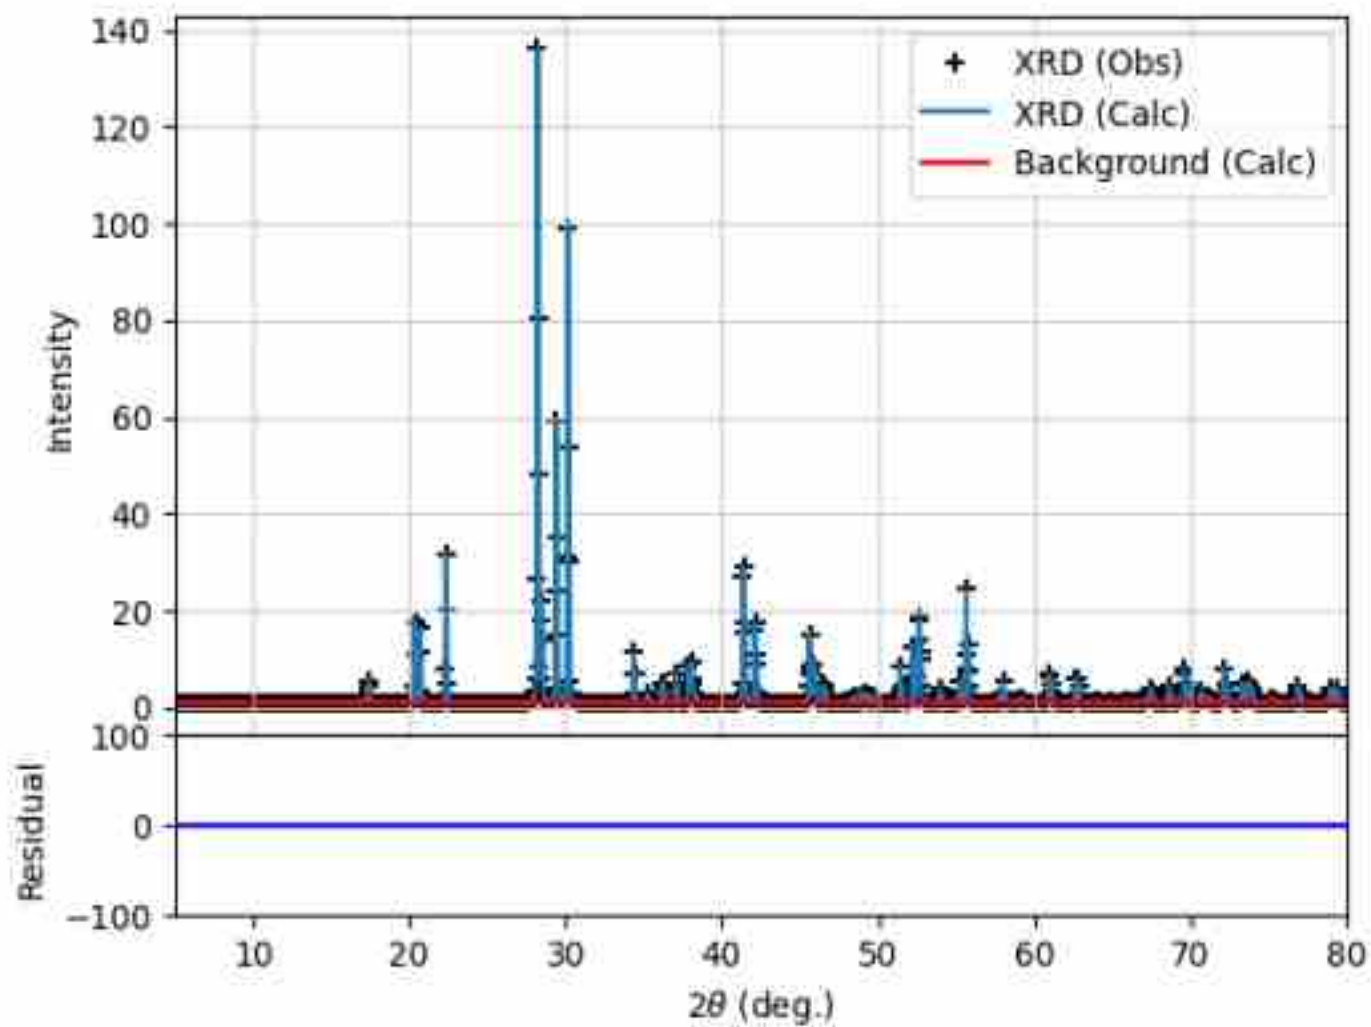

| RMSE before RR | Rwp     | RMSE after RR |
|----------------|---------|---------------|
| 0.032          | 0.00273 | 0.00063       |

# La<sub>2</sub>Cu<sub>4</sub>O<sub>8</sub>

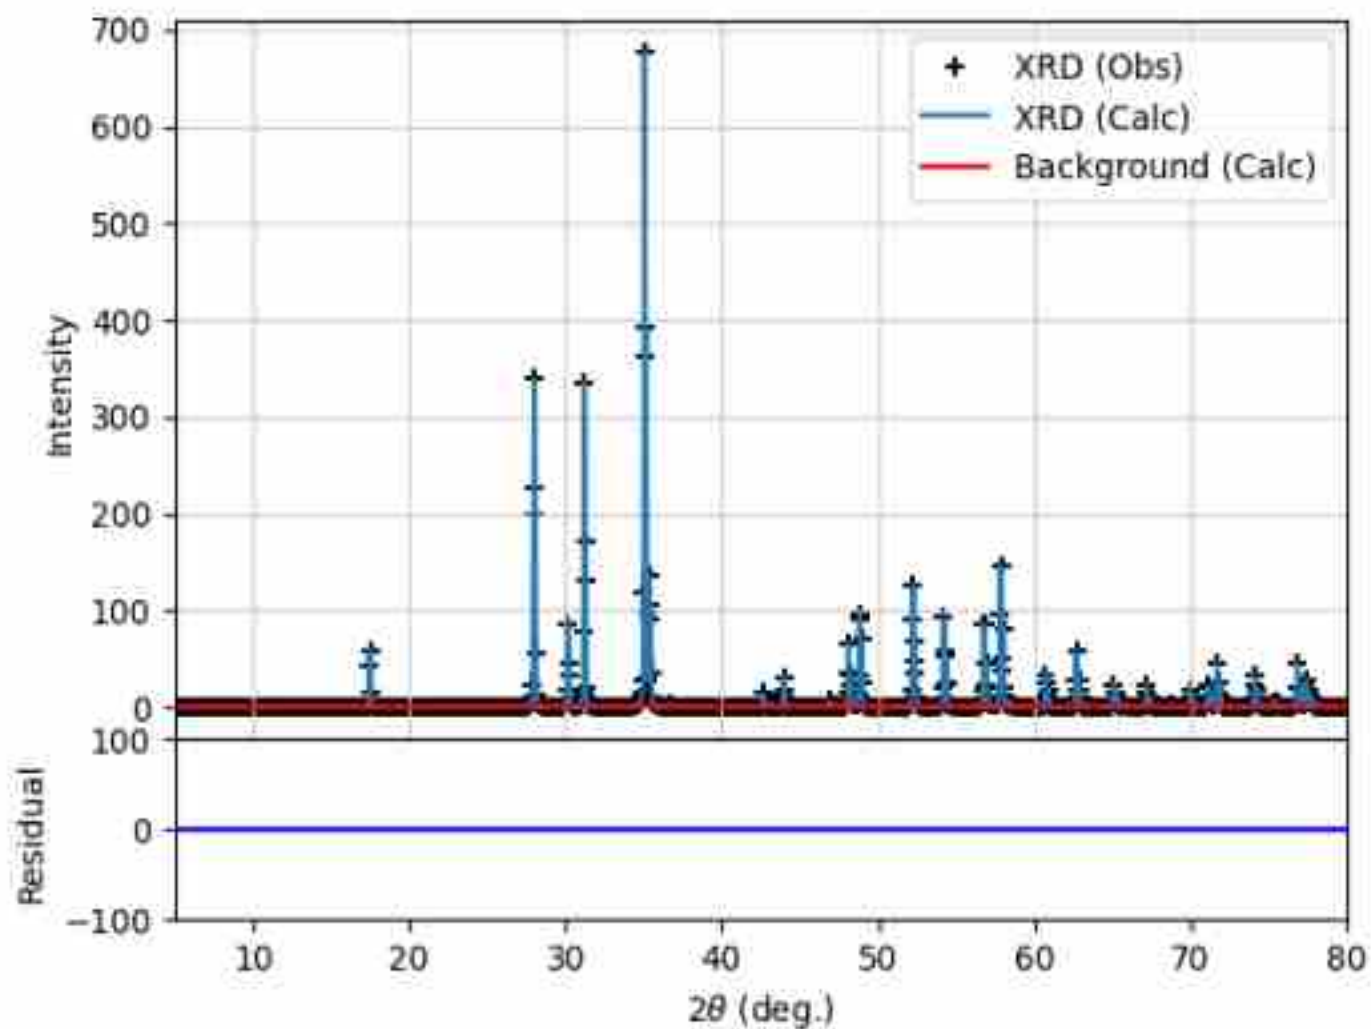

| RMSE before RR | Rwp     | RMSE after RR |
|----------------|---------|---------------|
| 0.032          | 0.00346 | 0.00174       |



# La<sub>4</sub>Fe<sub>2</sub>Co<sub>2</sub>O<sub>12</sub>

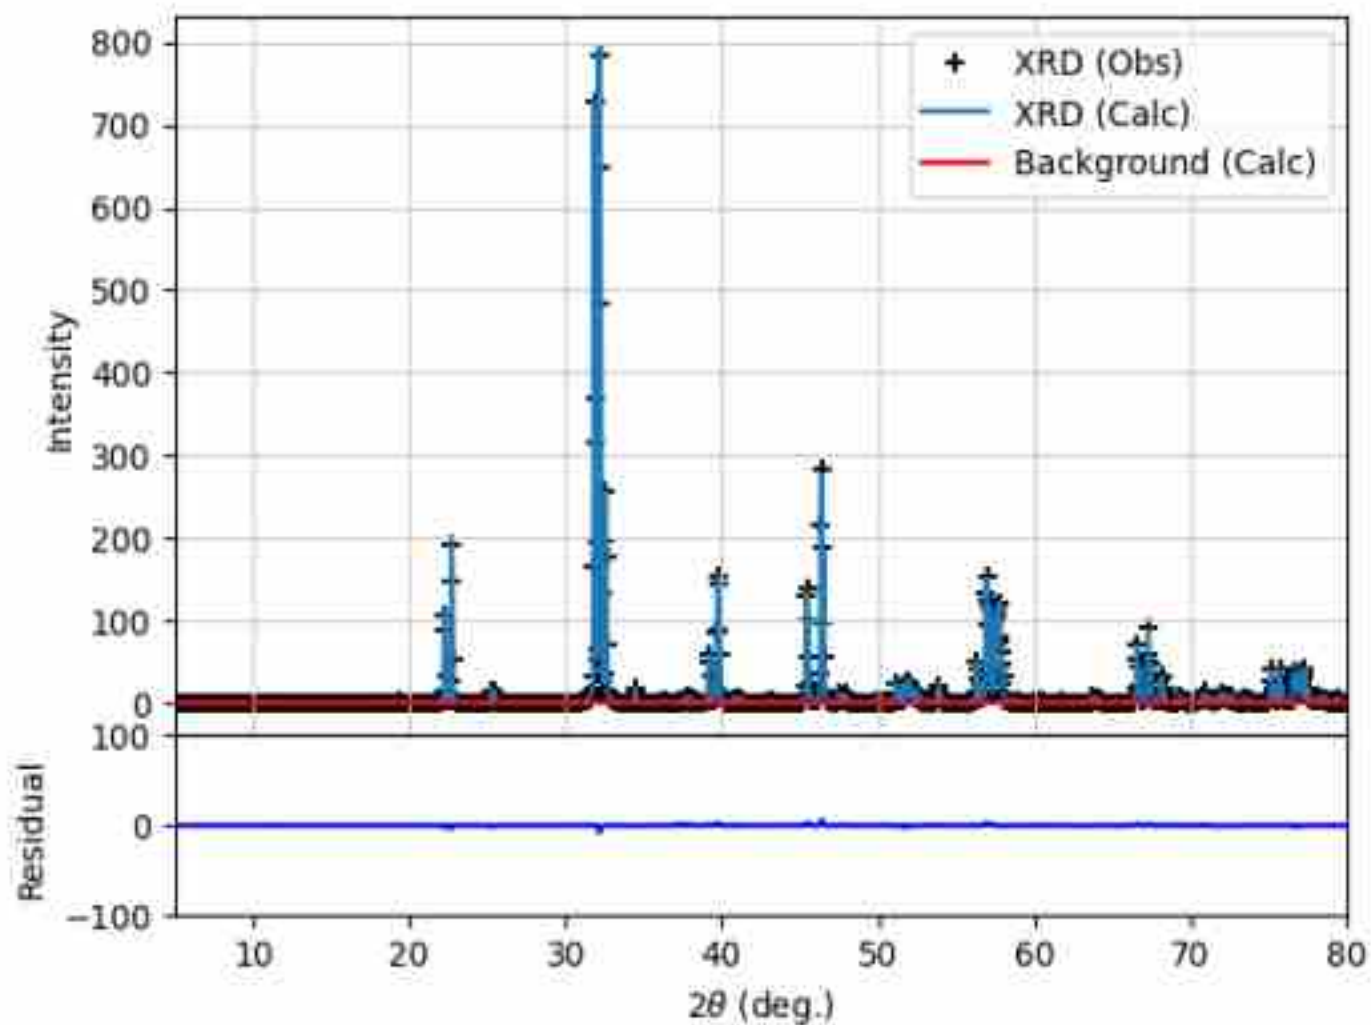

| RMSE before RR | Rwp     | RMSE after RR |
|----------------|---------|---------------|
| 0.032          | 3.36194 | 0.1186        |

# Li<sub>2</sub>Co<sub>2</sub>Cu<sub>2</sub>O<sub>8</sub>

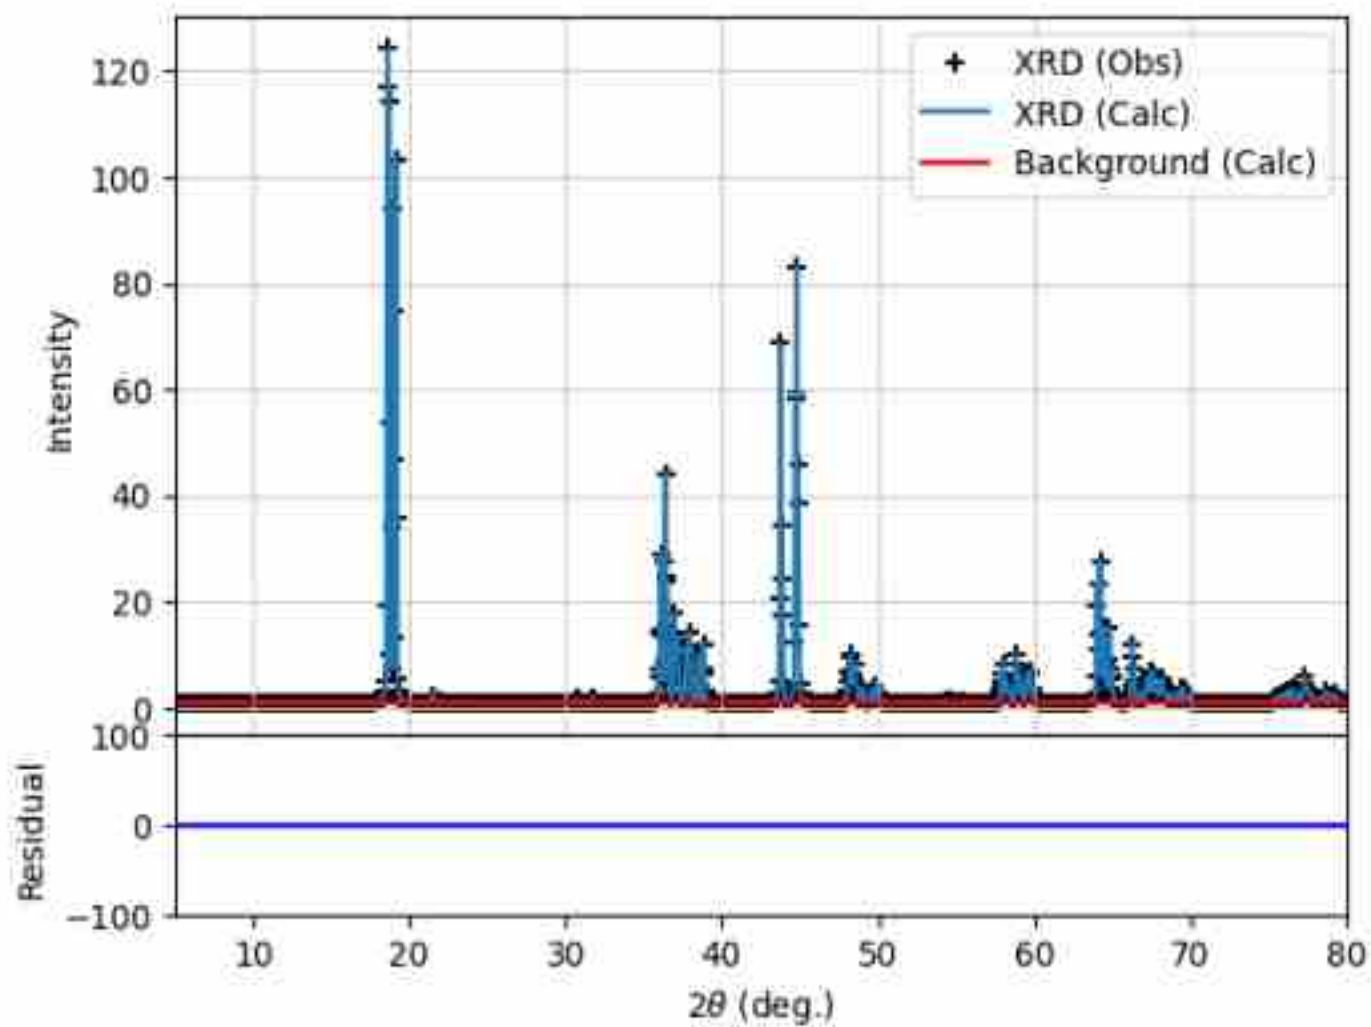

| RMSE before RR | Rwp     | RMSE after RR |
|----------------|---------|---------------|
| 0.032          | 0.00017 | 0.00023       |

# Li<sub>2</sub>U<sub>2</sub>N<sub>4</sub>

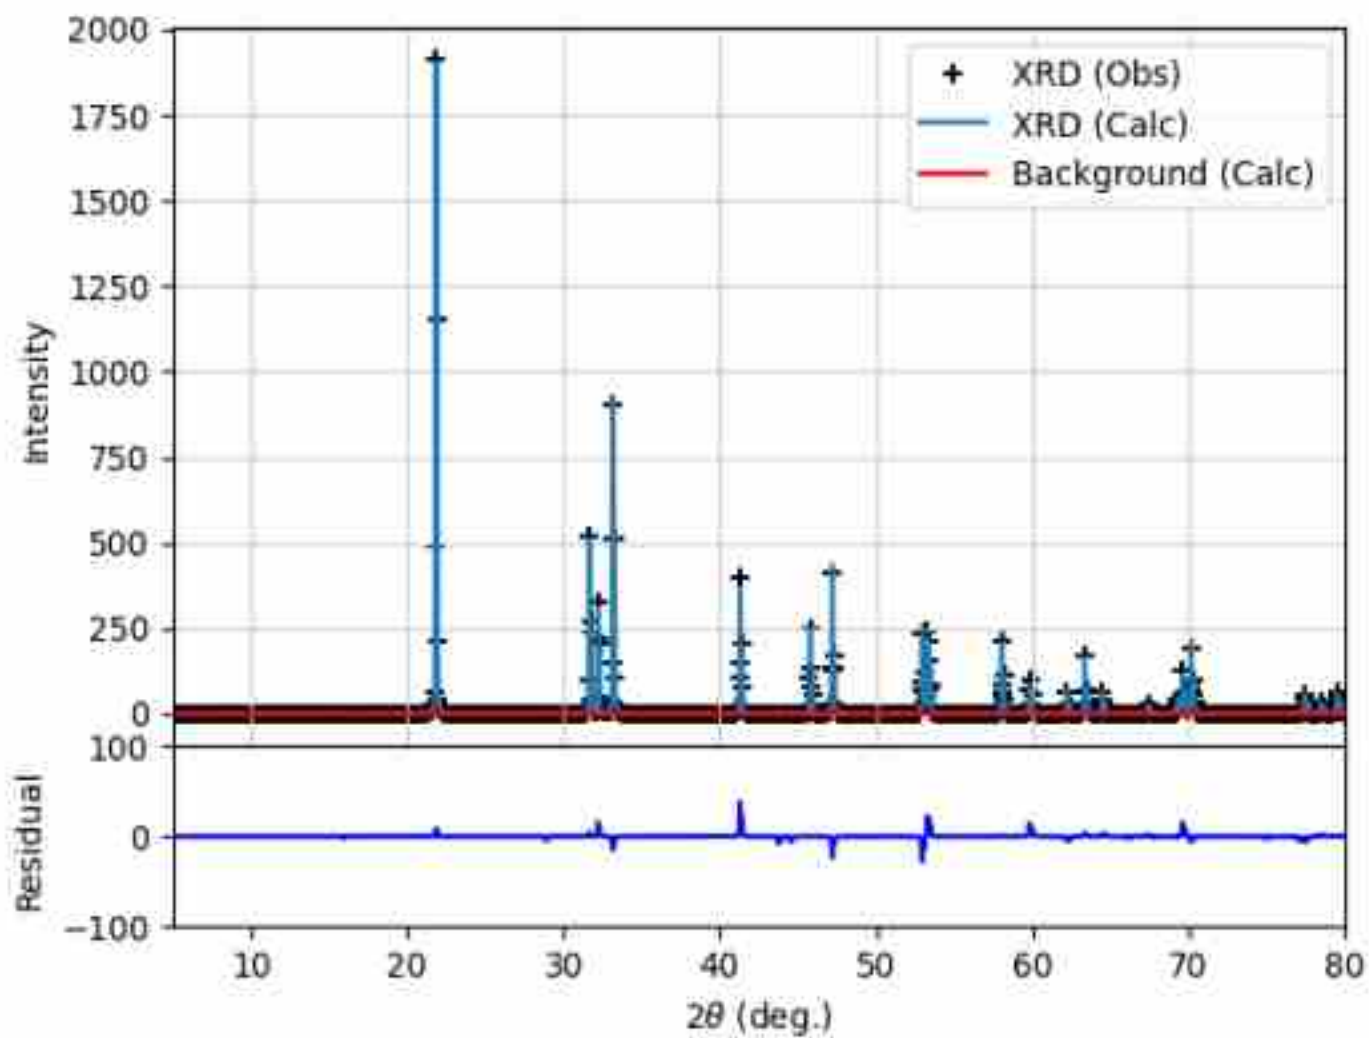

| RMSE before RR | Rwp      | RMSE after RR |
|----------------|----------|---------------|
| 0.032          | 12.32392 | 0.23189       |

# Li<sub>3</sub>Fe<sub>3</sub>Co<sub>10</sub>O<sub>8</sub>

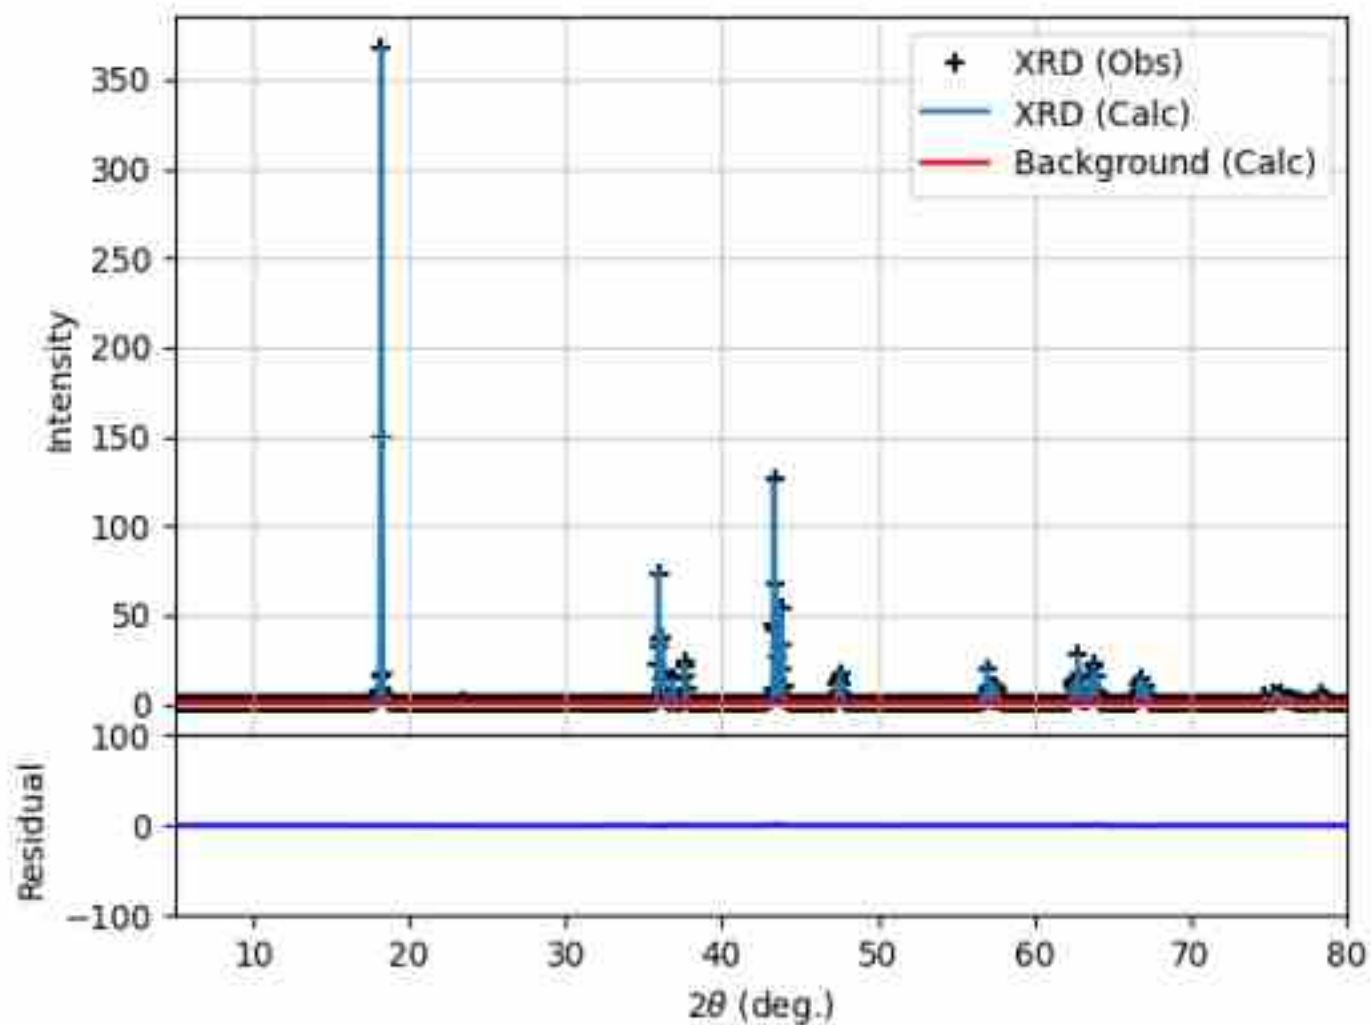

| RMSE before RR | Rwp     | RMSE after RR |
|----------------|---------|---------------|
| 0.032          | 2.29251 | 0.06785       |

# Li<sub>3</sub>Ti1Ni<sub>4</sub>O<sub>8</sub>

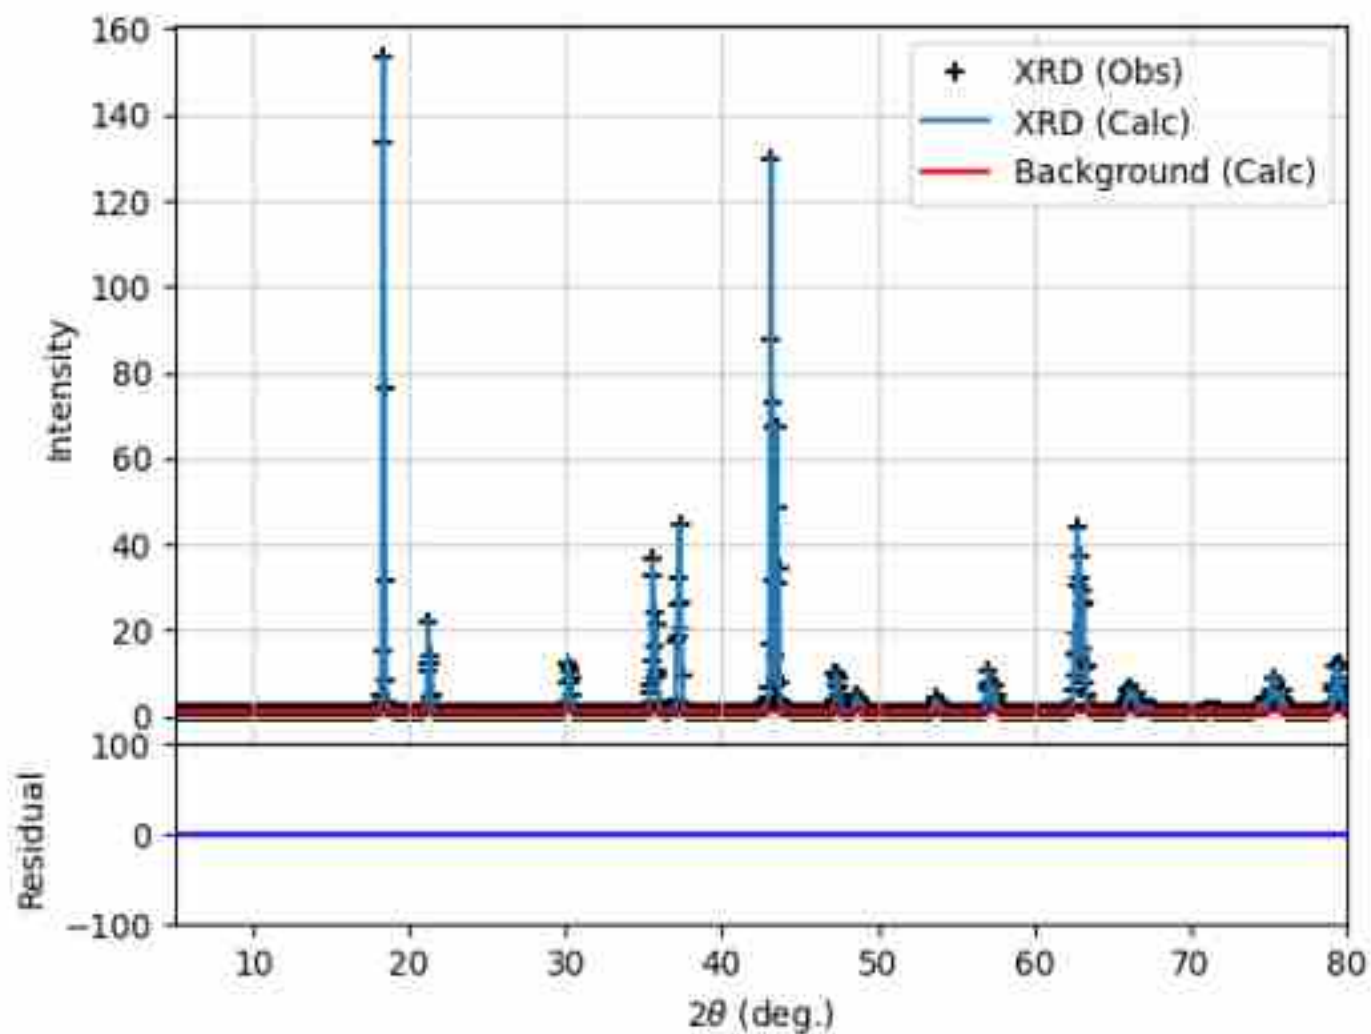

| RMSE before RR | Rwp     | RMSE after RR |
|----------------|---------|---------------|
| 0.032          | 0.00055 | 0.00107       |

# Li<sub>4</sub>Co<sub>2</sub>O<sub>4</sub>F<sub>2</sub>

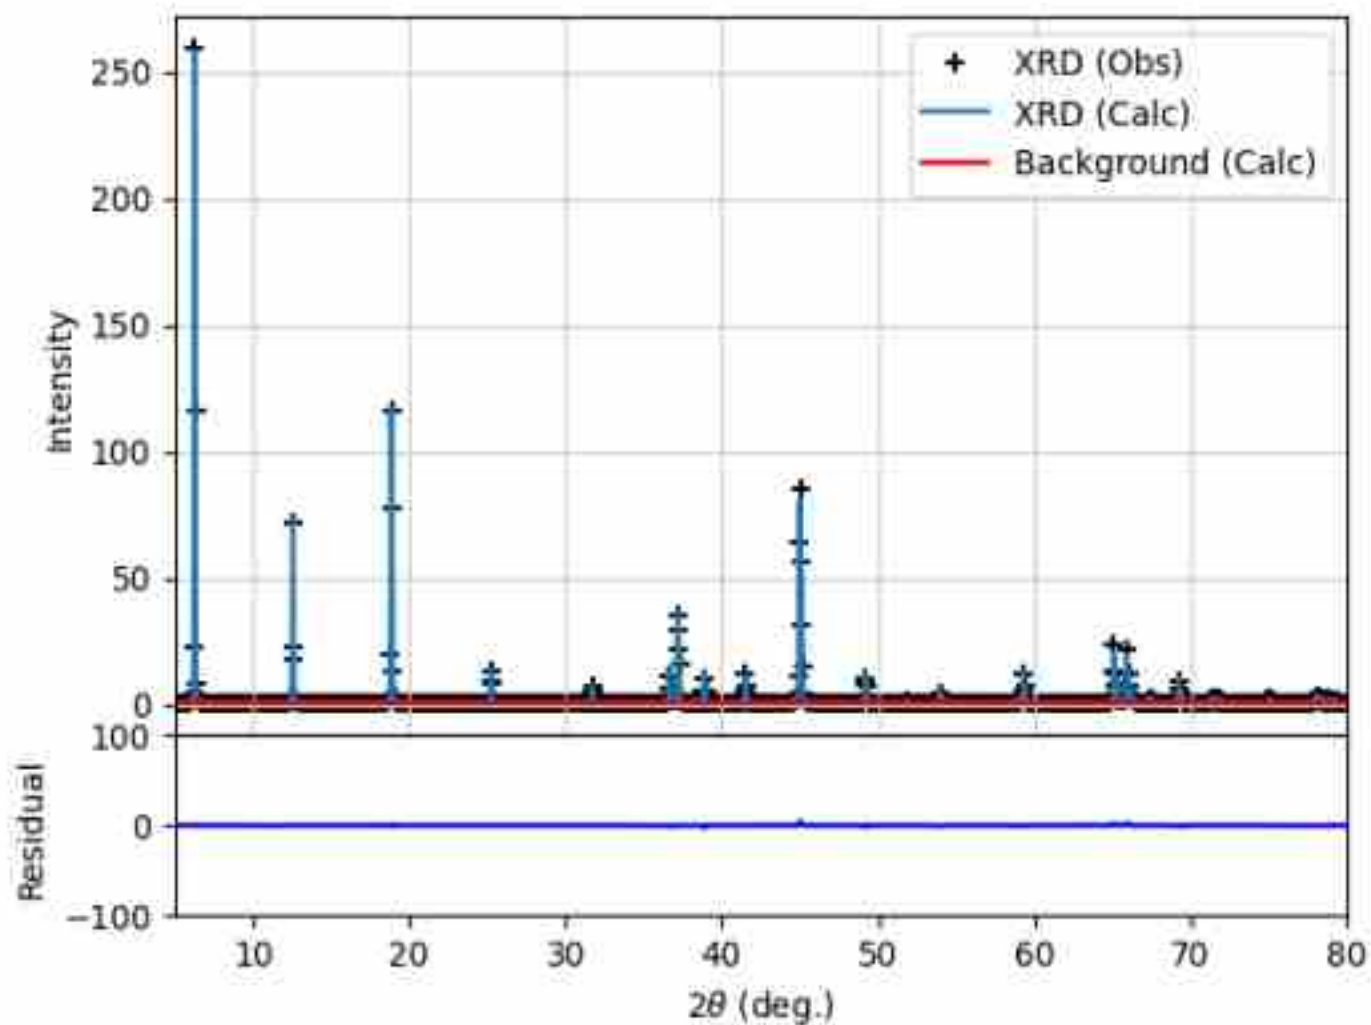

| RMSE before RR | Rwp    | RMSE after RR |
|----------------|--------|---------------|
| 0.032          | 4.9796 | 0.13923       |

# Li<sub>4</sub>Mn<sub>2</sub>Co<sub>2</sub>O<sub>8</sub>

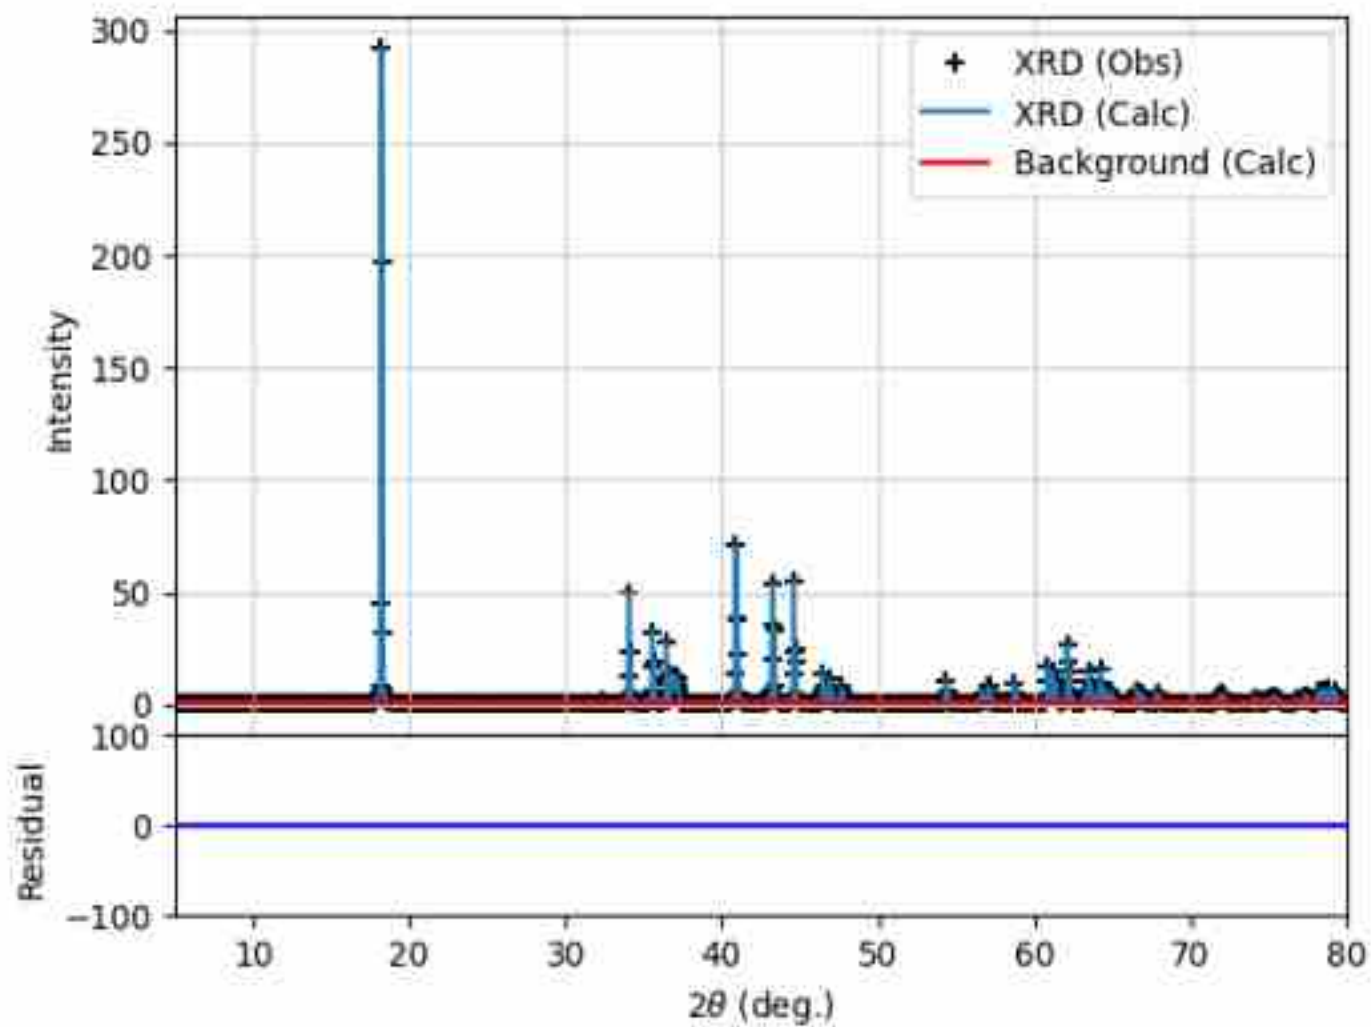

| RMSE before RR | Rwp     | RMSE after RR |
|----------------|---------|---------------|
| 0.032          | 0.04763 | 0.02296       |

# Li<sub>4</sub>V<sub>2</sub>O<sub>1</sub>F<sub>7</sub>

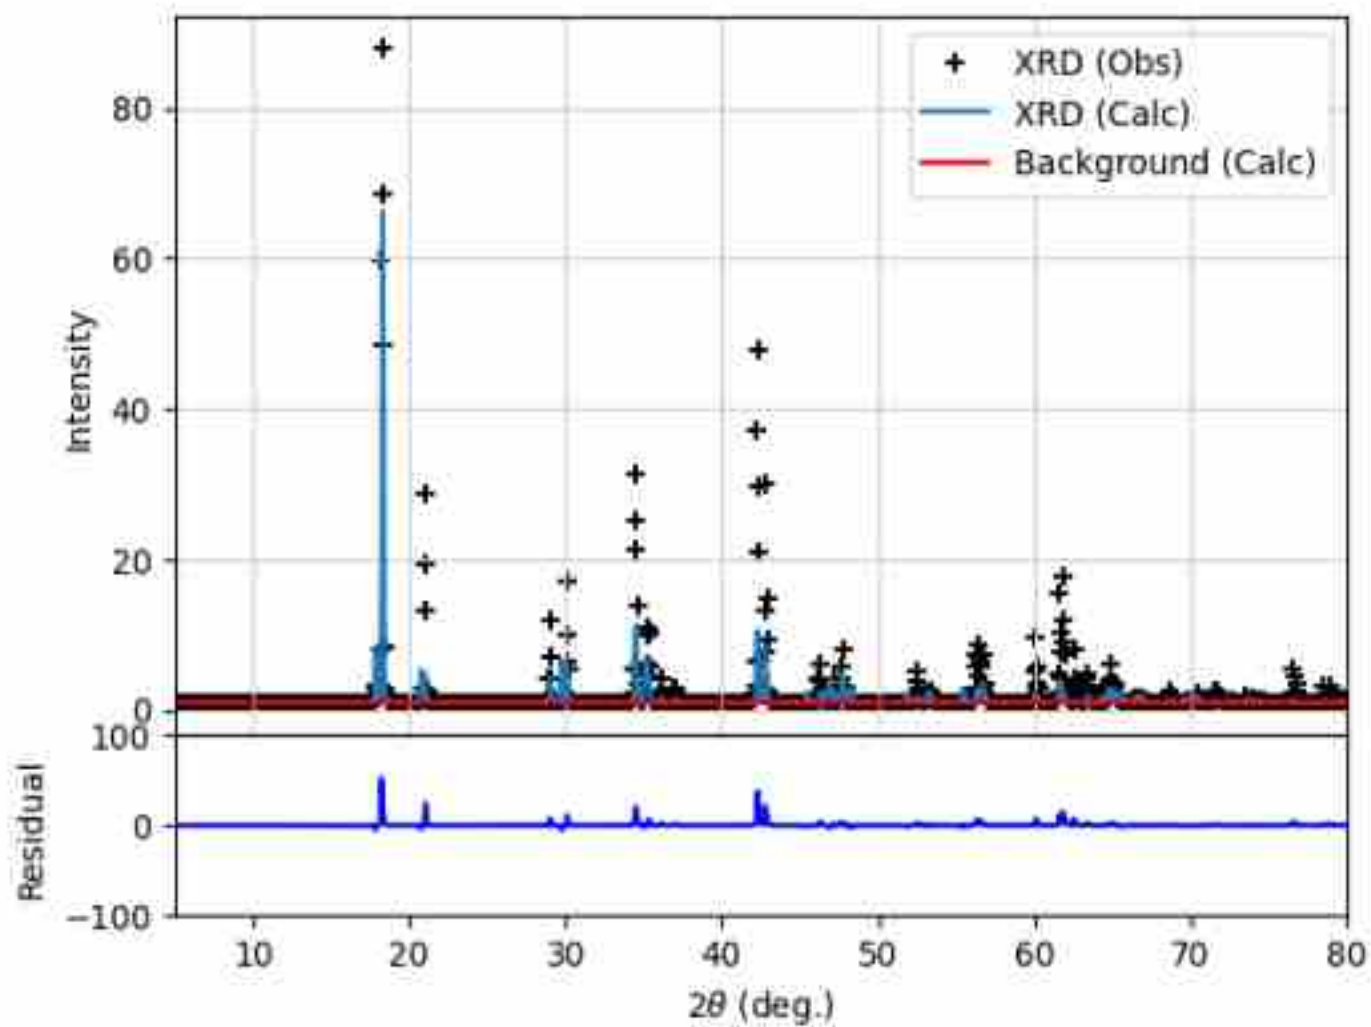

| RMSE before RR | Rwp      | RMSE after RR |
|----------------|----------|---------------|
| 0.032          | 47.82477 | 0.40512       |



# Li<sub>5</sub>Mn<sub>2</sub>Co<sub>1</sub>O<sub>8</sub>

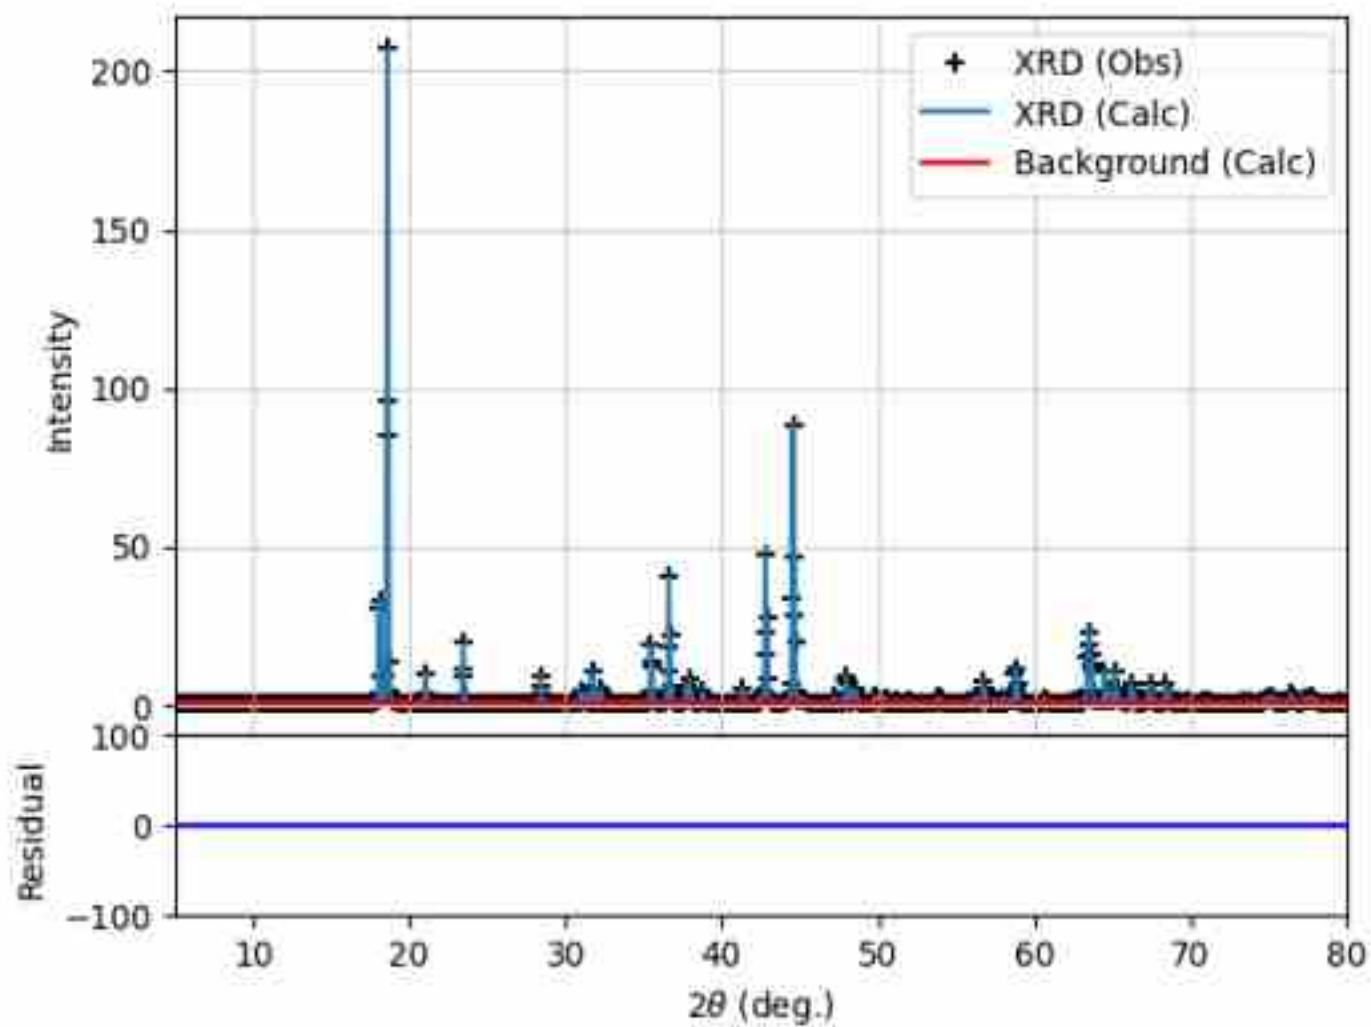

| RMSE before RR | Rwp     | RMSE after RR |
|----------------|---------|---------------|
| 0.032          | 0.00244 | 0.00154       |

# Li6Cr2F12

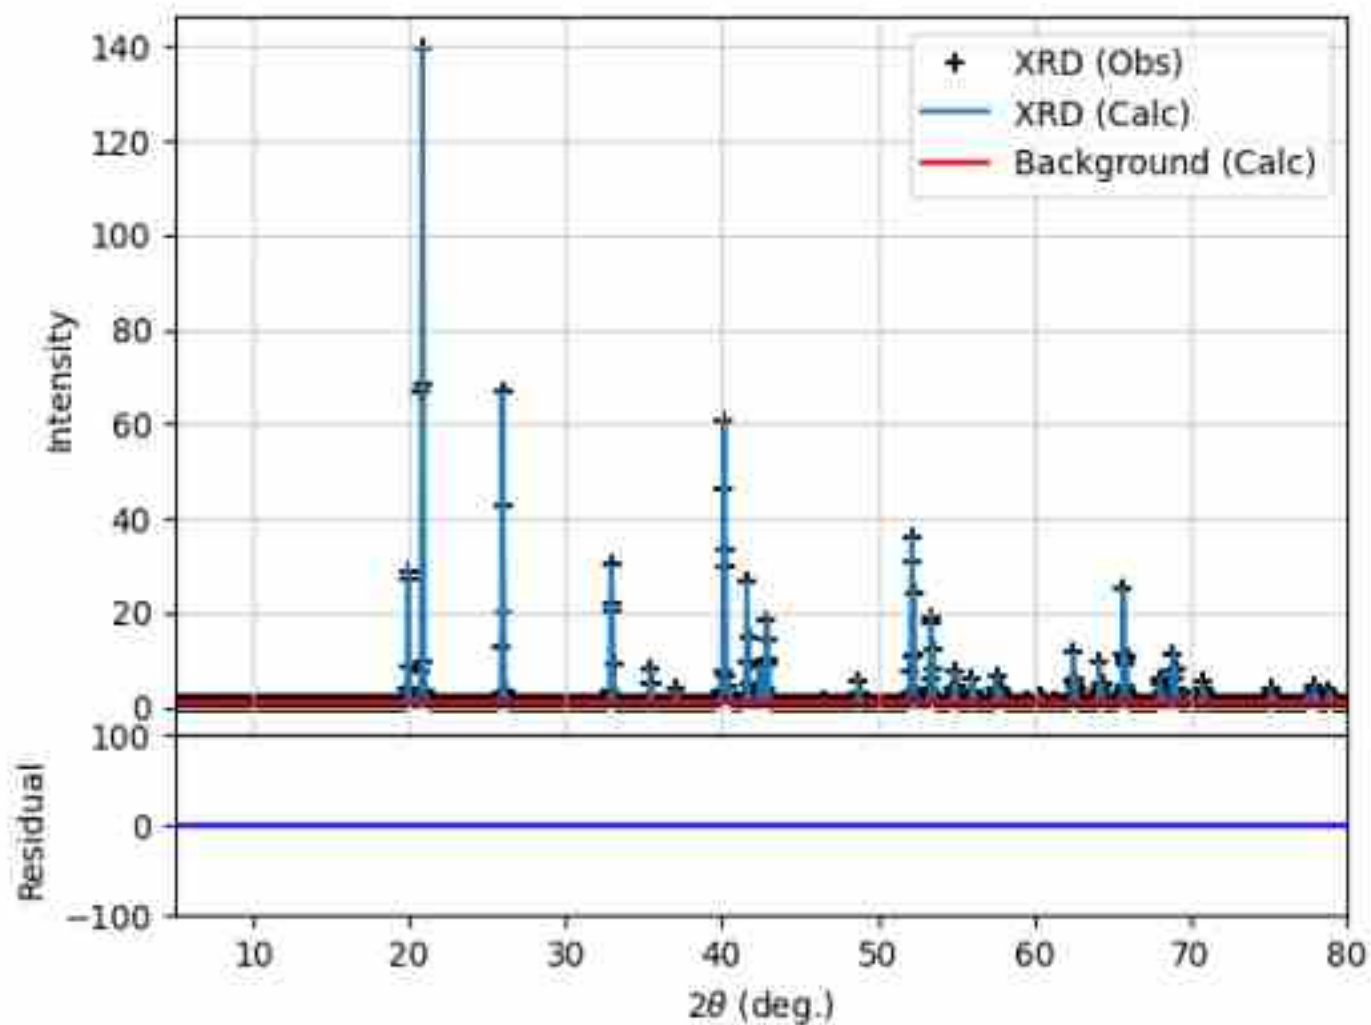

| RMSE before RR | Rwp     | RMSE after RR |
|----------------|---------|---------------|
| 0.032          | 0.00356 | 0.00153       |

# Li<sub>6</sub>Mn<sub>4</sub>O<sub>10</sub>

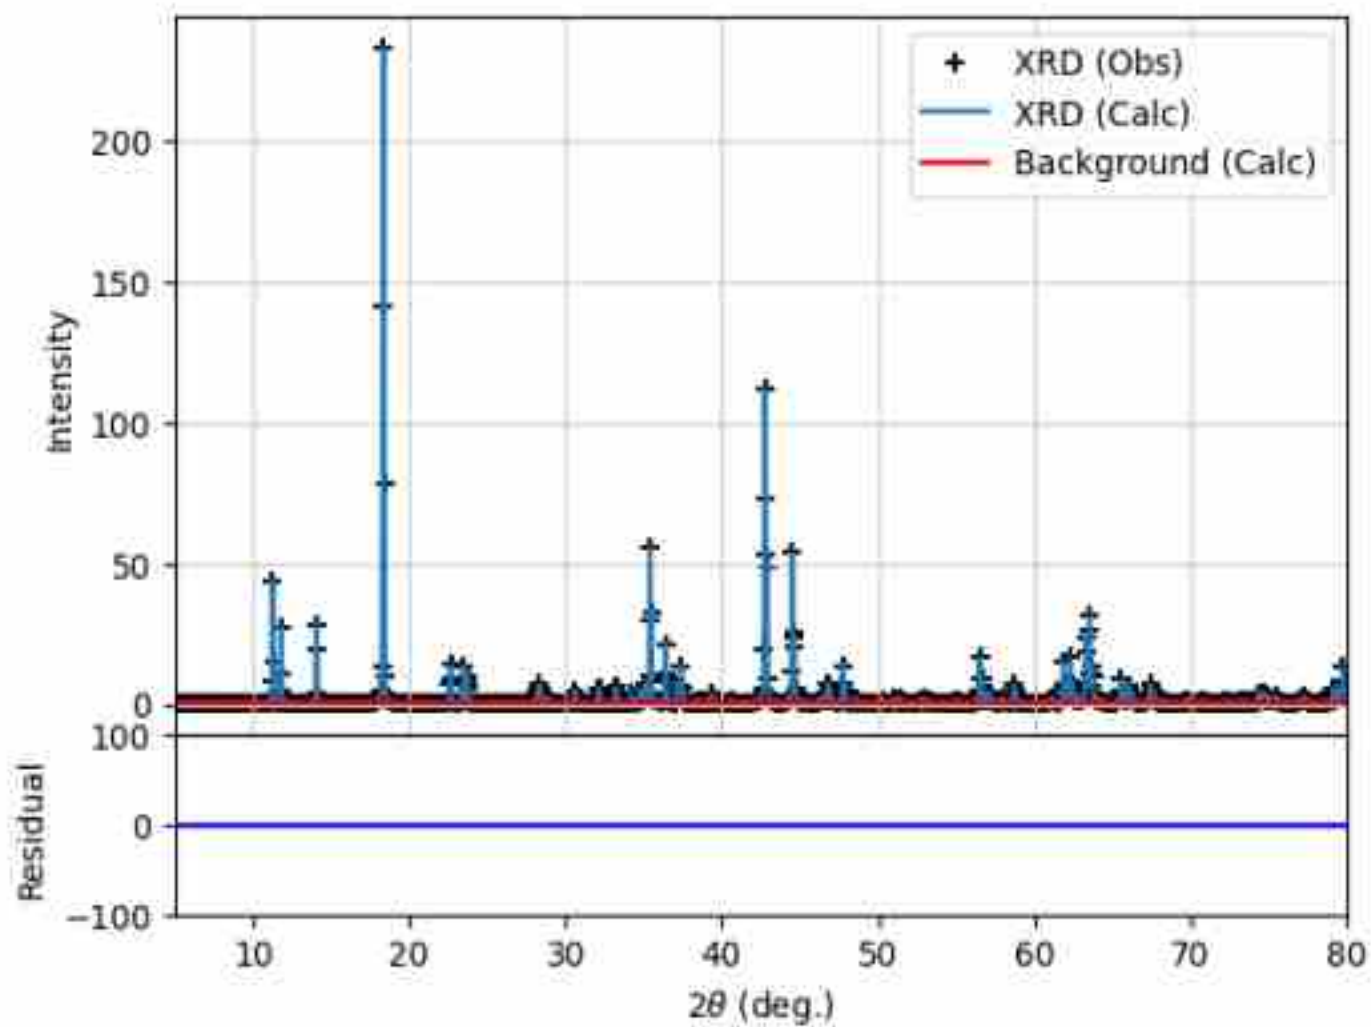

| RMSE before RR | Rwp     | RMSE after RR |
|----------------|---------|---------------|
| 0.032          | 0.00216 | 0.00078       |

# Li<sub>8</sub>Zn<sub>4</sub>Ge<sub>4</sub>

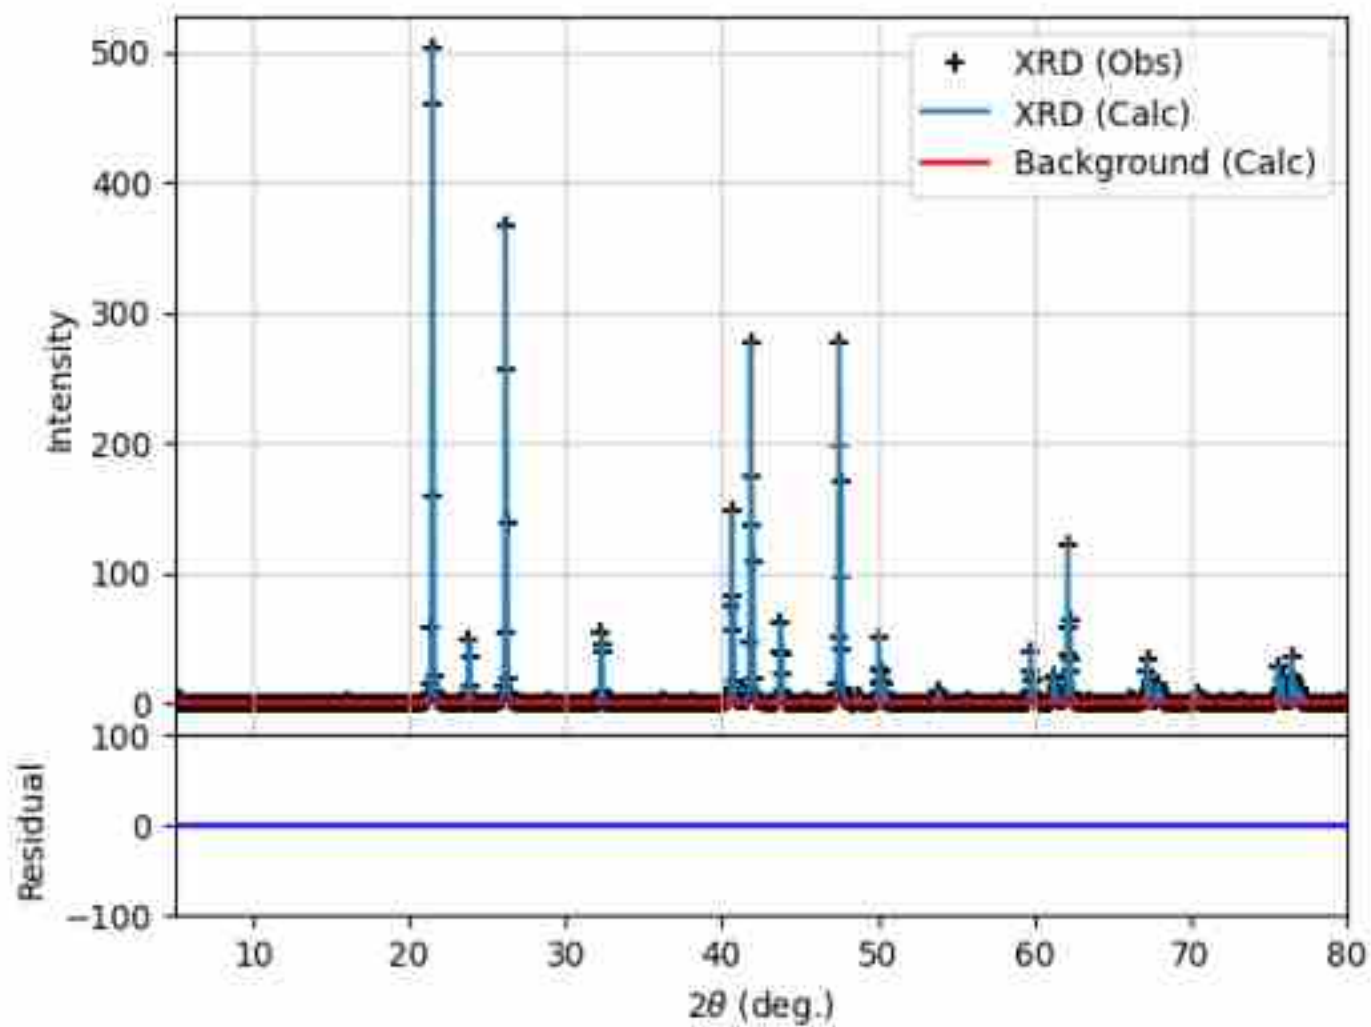

| RMSE before RR | Rwp     | RMSE after RR |
|----------------|---------|---------------|
| 0.032          | 0.00326 | 0.00176       |

# Lu6Ge8

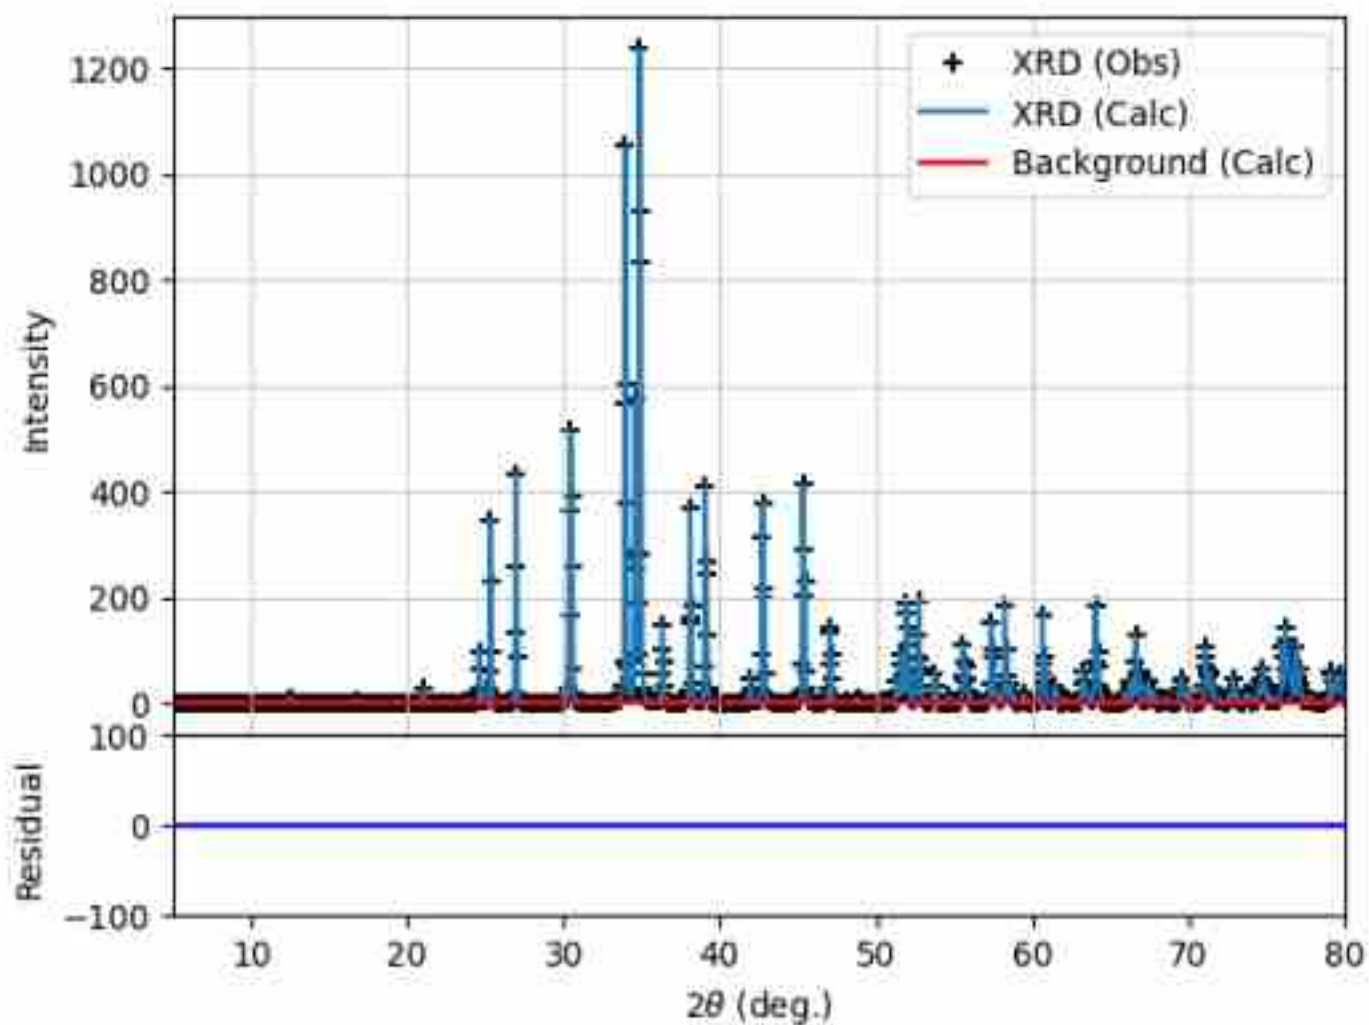

| RMSE before RR | Rwp     | RMSE after RR |
|----------------|---------|---------------|
| 0.032          | 0.00384 | 0.00033       |

# Mn1Tl1V4S8

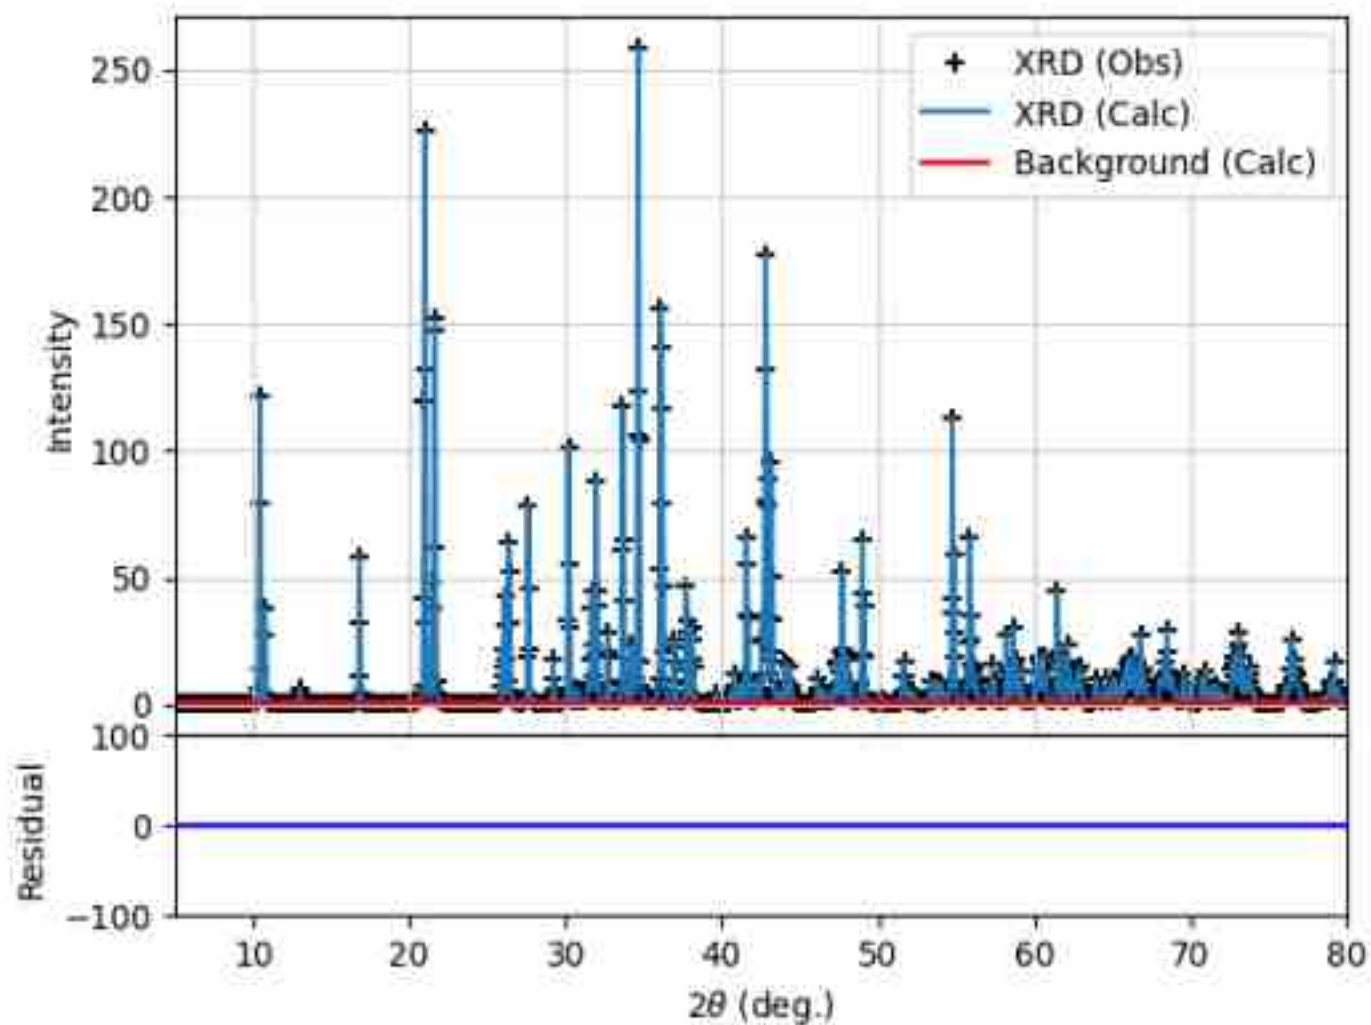

| RMSE before RR | Rwp     | RMSE after RR |
|----------------|---------|---------------|
| 0.032          | 0.00288 | 0.00052       |

# Mn<sub>2</sub>Bi<sub>2</sub>Se<sub>4</sub>I<sub>2</sub>

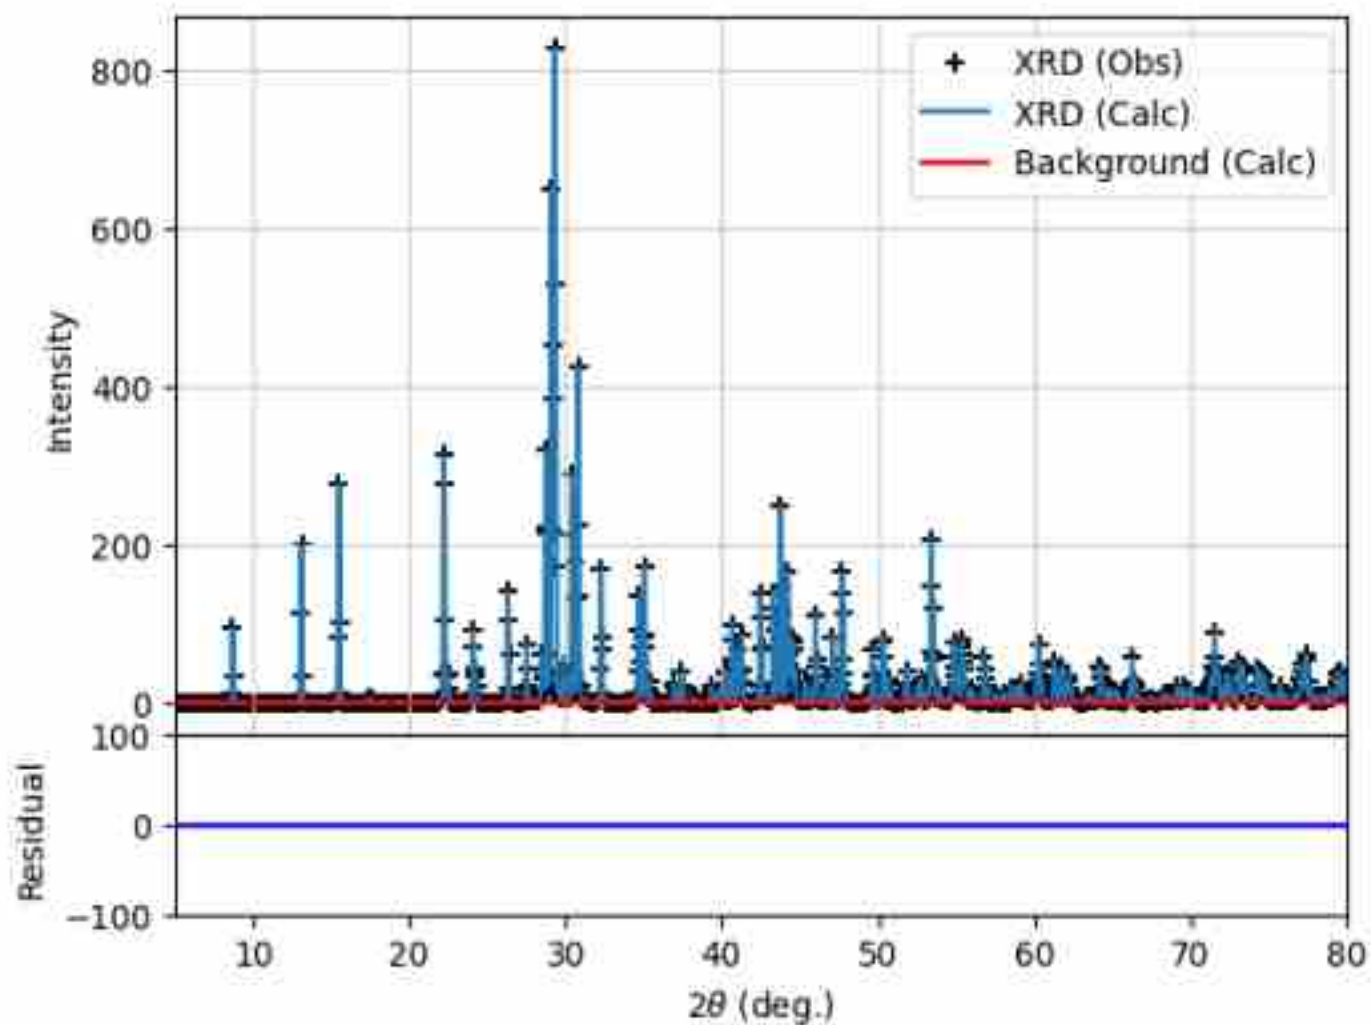

| RMSE before RR | Rwp     | RMSE after RR |
|----------------|---------|---------------|
| 0.032          | 0.00319 | 0.00022       |

# Mn<sub>2</sub>Cu<sub>2</sub>Se<sub>4</sub>O<sub>12</sub>

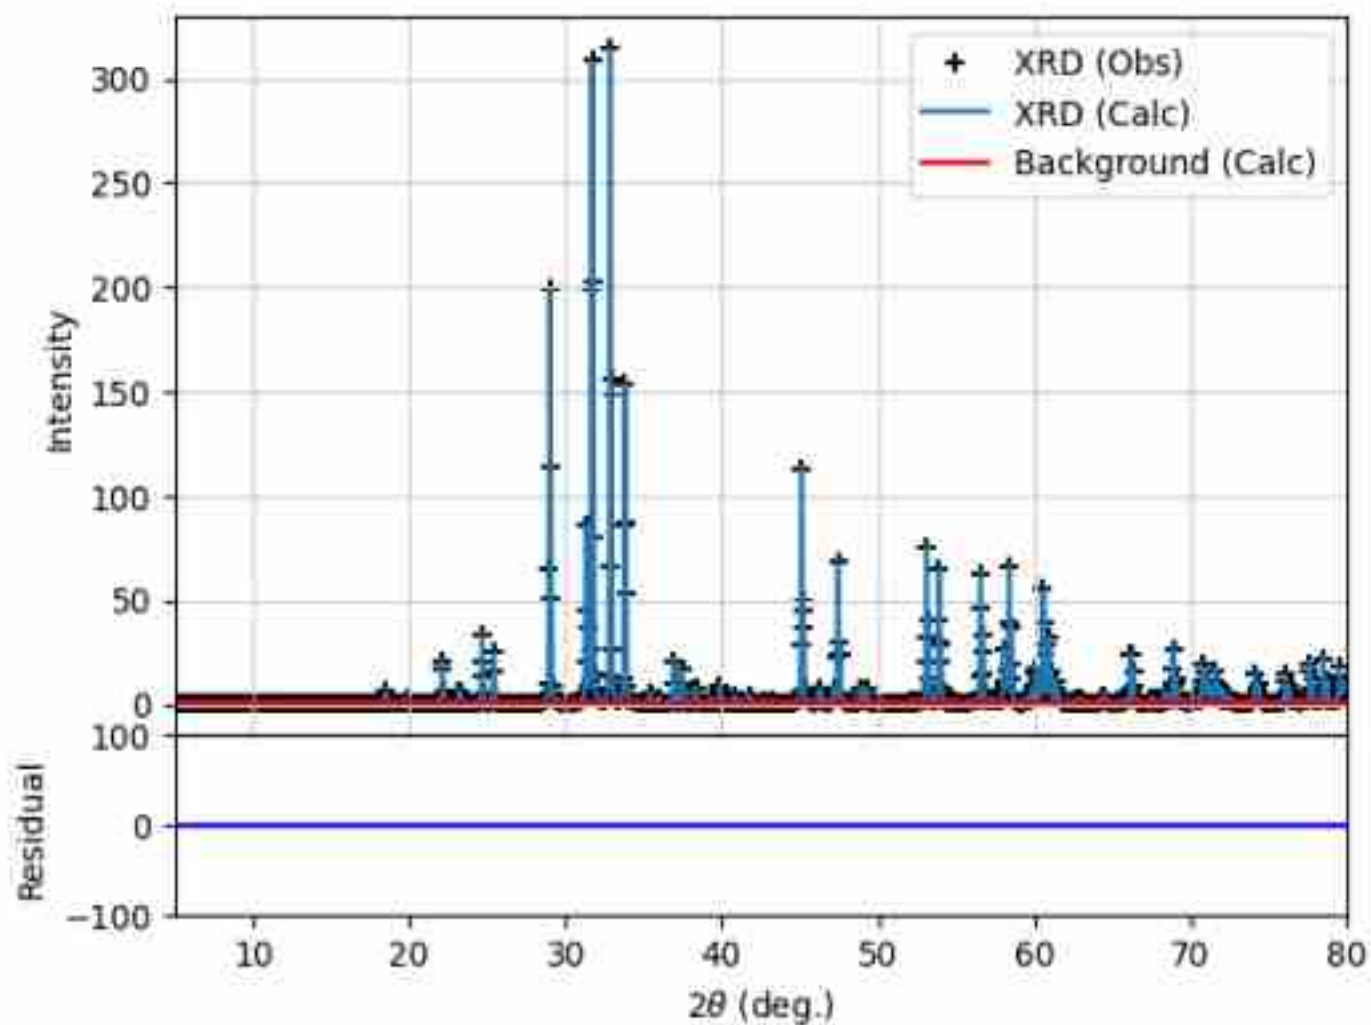

| RMSE before RR | Rwp     | RMSE after RR |
|----------------|---------|---------------|
| 0.032          | 0.00175 | 0.0006        |



# Mn<sub>4</sub>Co<sub>4</sub>Si<sub>2</sub>Ge<sub>2</sub>

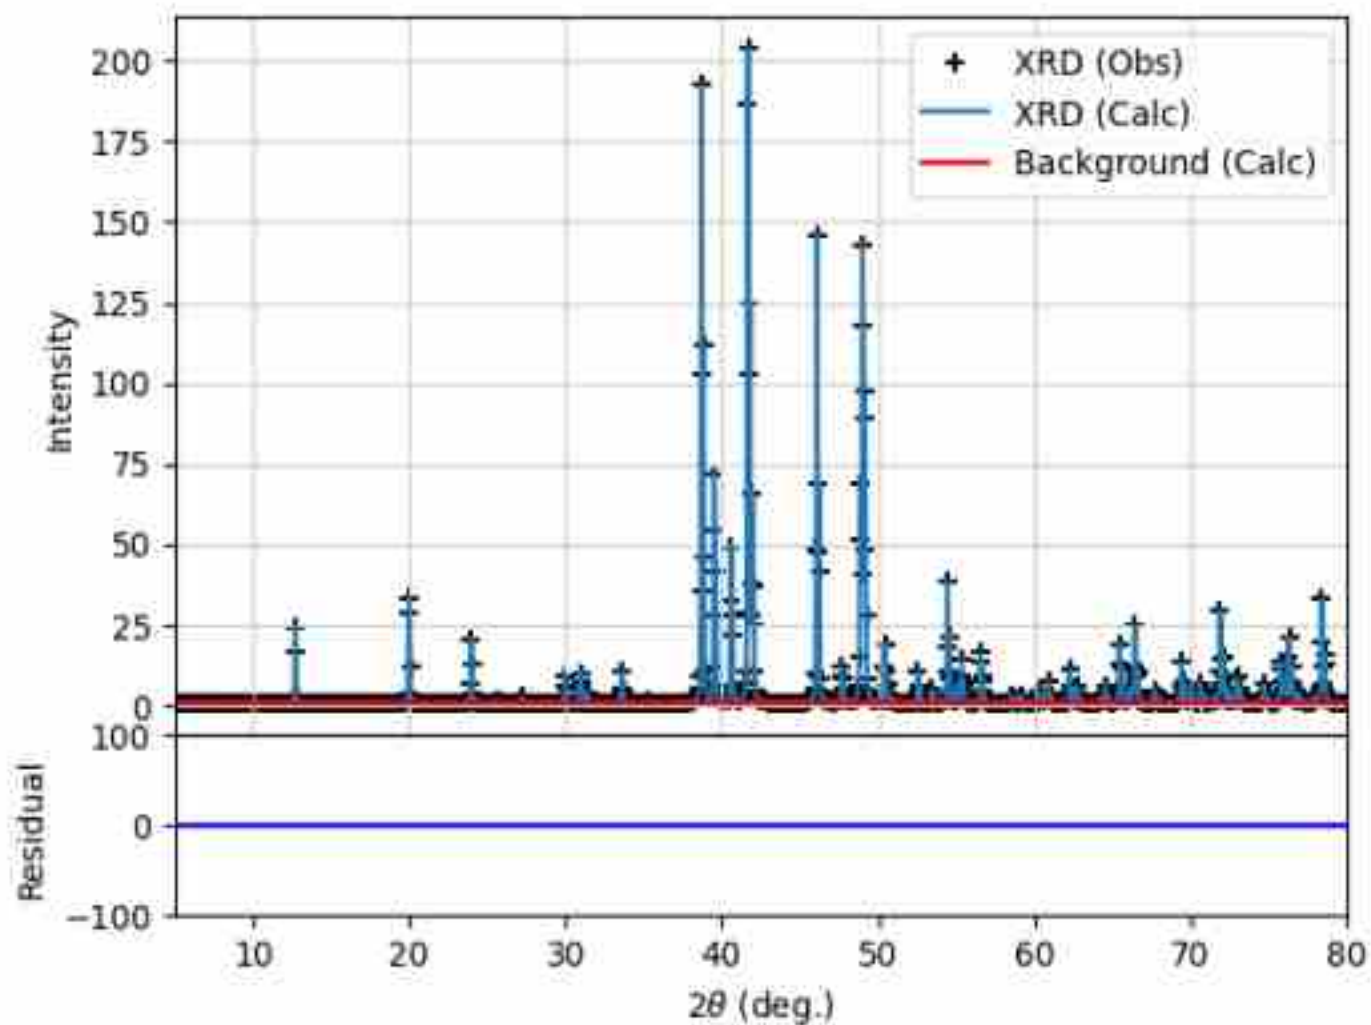

| RMSE before RR | Rwp     | RMSE after RR |
|----------------|---------|---------------|
| 0.032          | 0.00364 | 0.00046       |

# Mn<sub>5</sub>Sn<sub>10</sub>O<sub>12</sub>

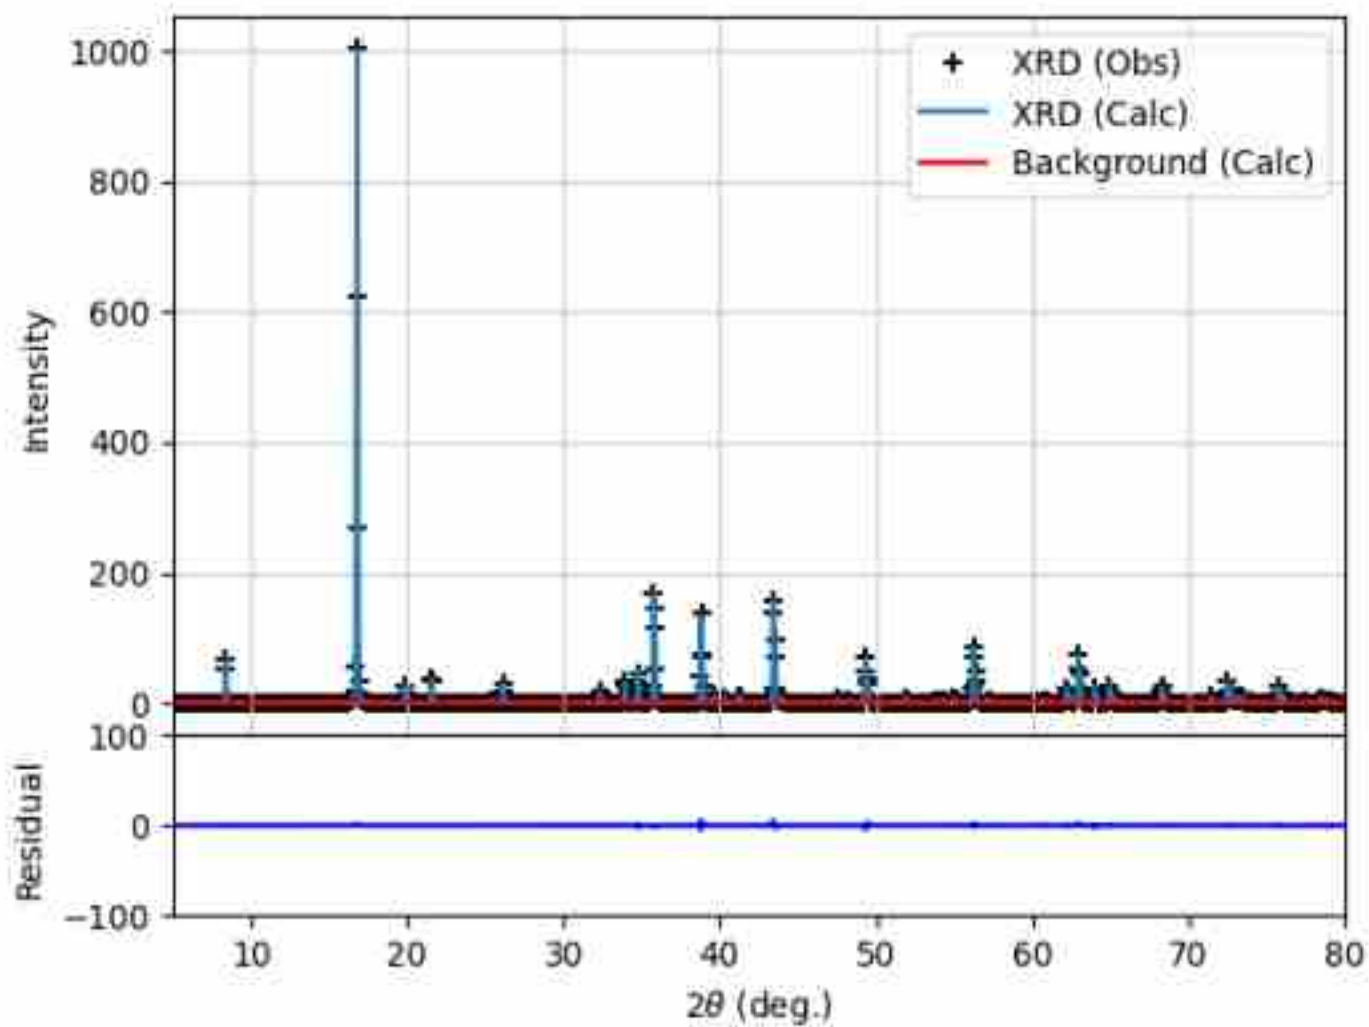

| RMSE before RR | Rwp     | RMSE after RR |
|----------------|---------|---------------|
| 0.032          | 2.49469 | 0.03728       |

# Mn<sub>6</sub>O<sub>3</sub>F<sub>9</sub>

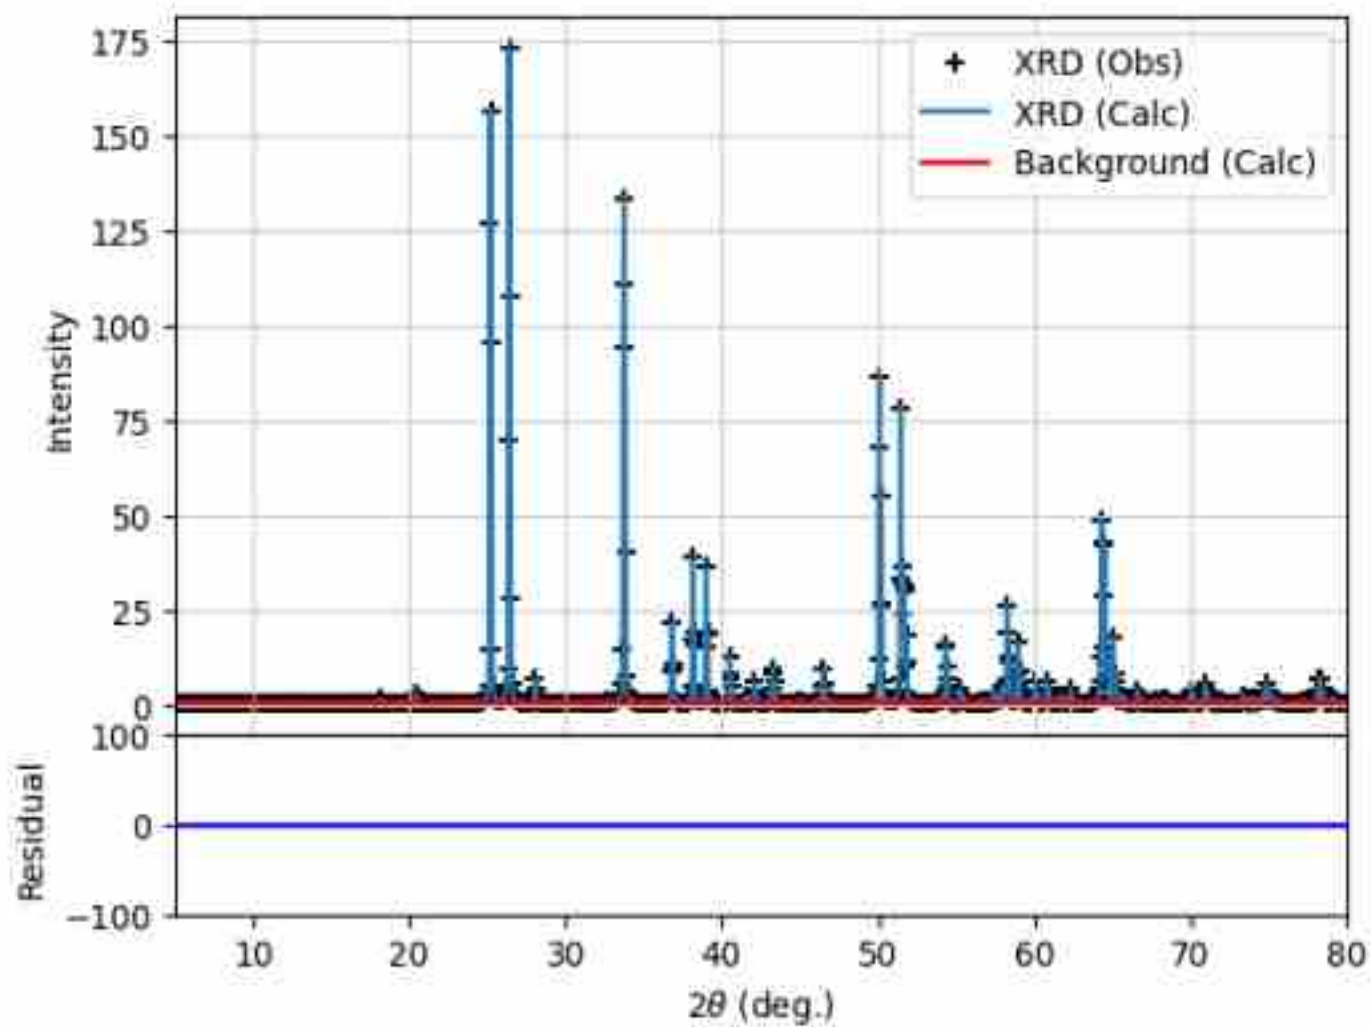

| RMSE before RR | Rwp     | RMSE after RR |
|----------------|---------|---------------|
| 0.032          | 0.00301 | 0.00052       |

# Mn<sub>6</sub>O<sub>4</sub>F<sub>8</sub>

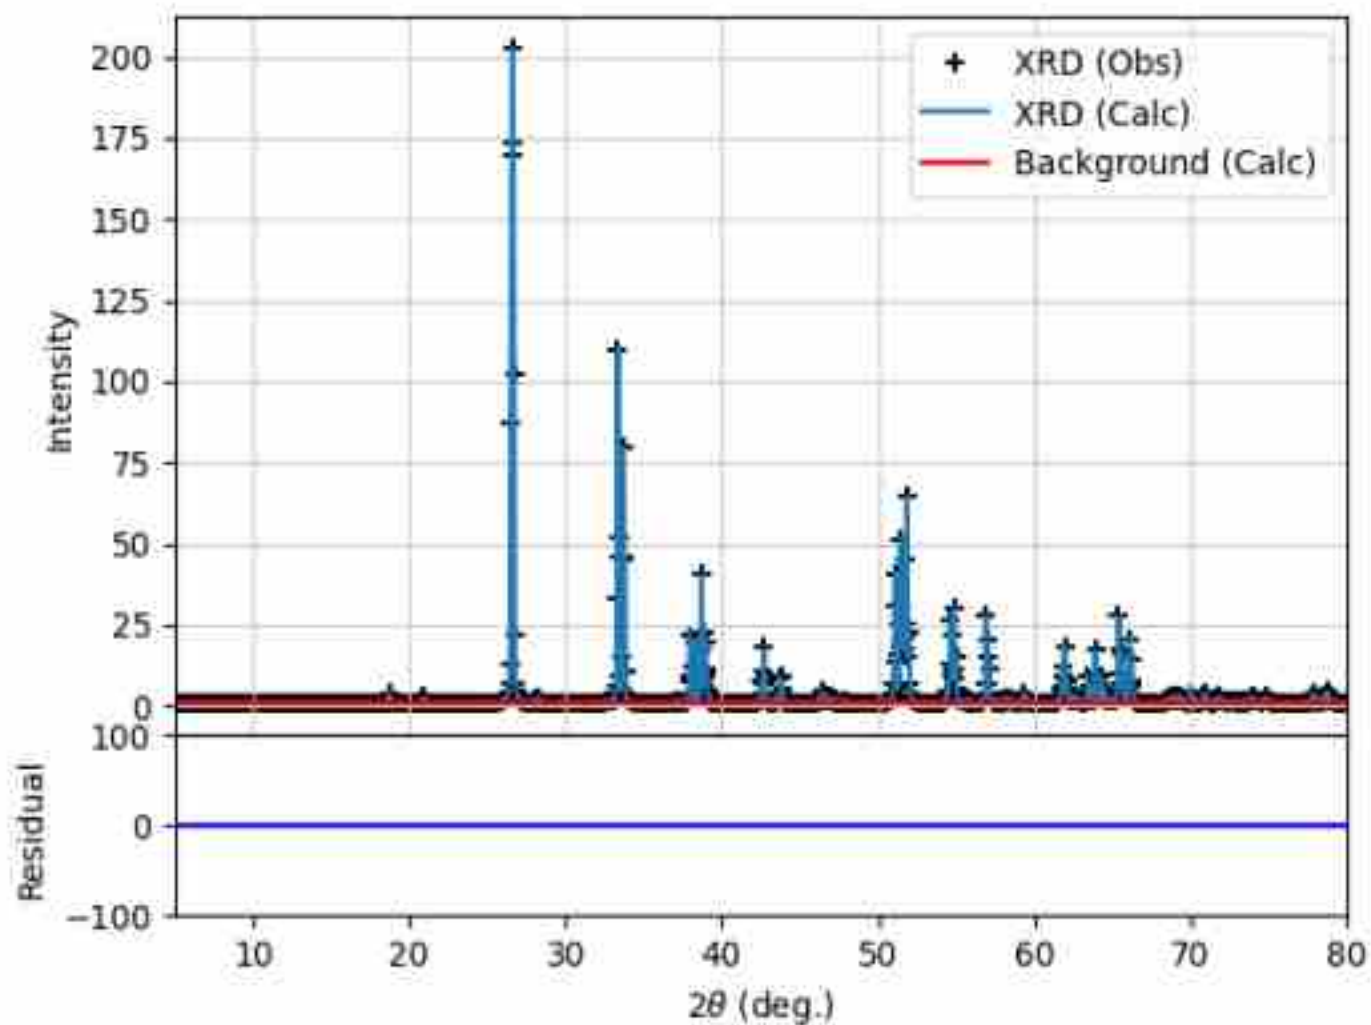

| RMSE before RR | Rwp     | RMSE after RR |
|----------------|---------|---------------|
| 0.032          | 0.00254 | 0.00052       |

Na1V4Cd3O12

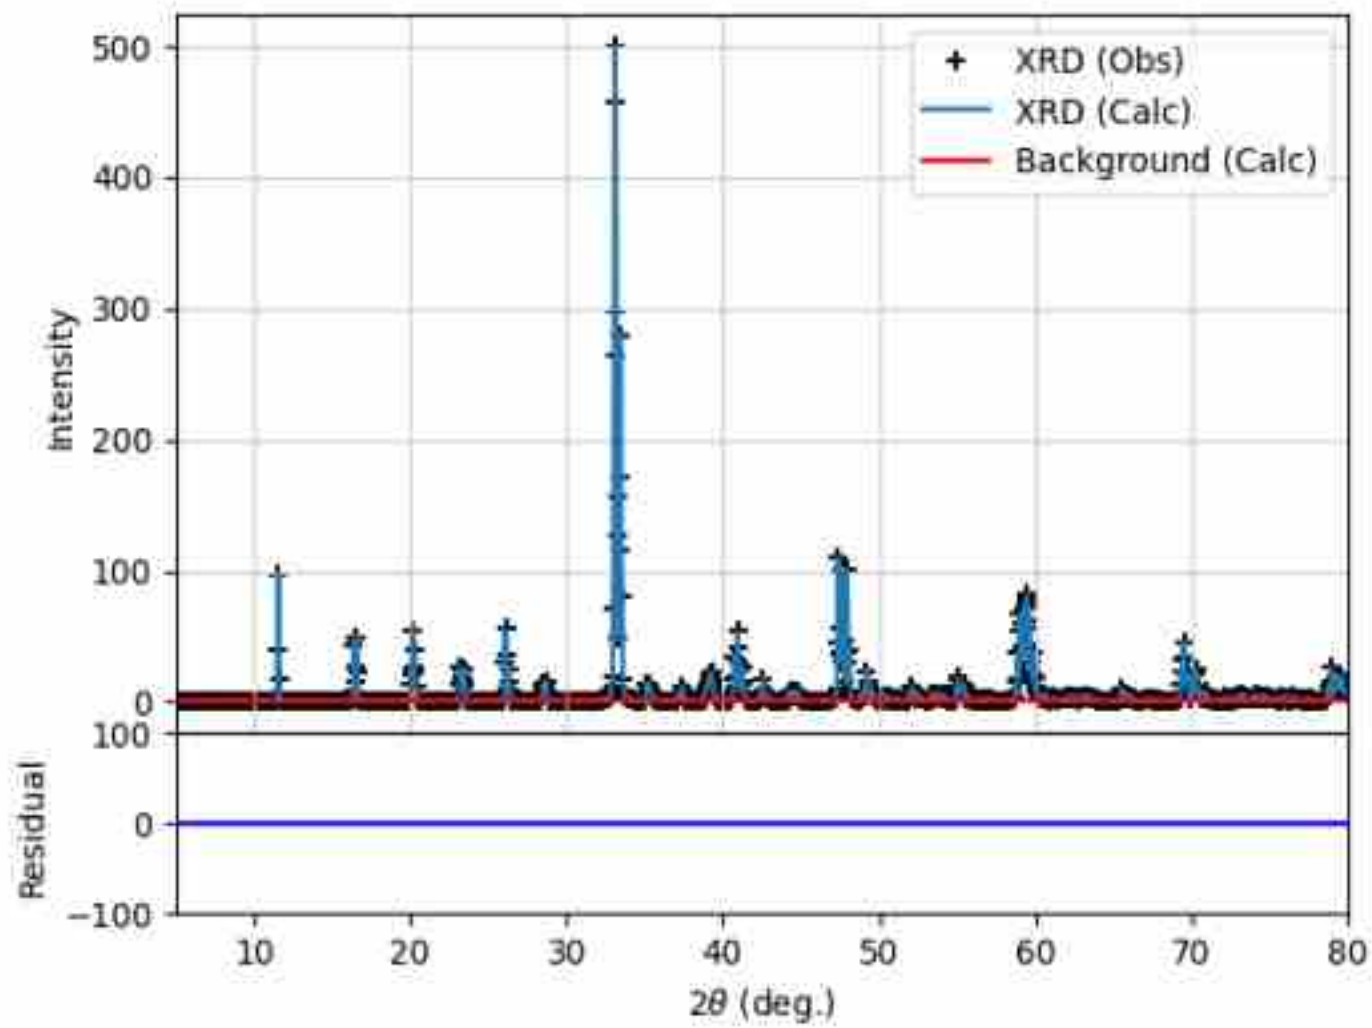

| RMSE before RR | Rwp     | RMSE after RR |
|----------------|---------|---------------|
| 0.032          | 0.00215 | 0.0           |

# Na<sub>2</sub>V<sub>4</sub>O<sub>10</sub>

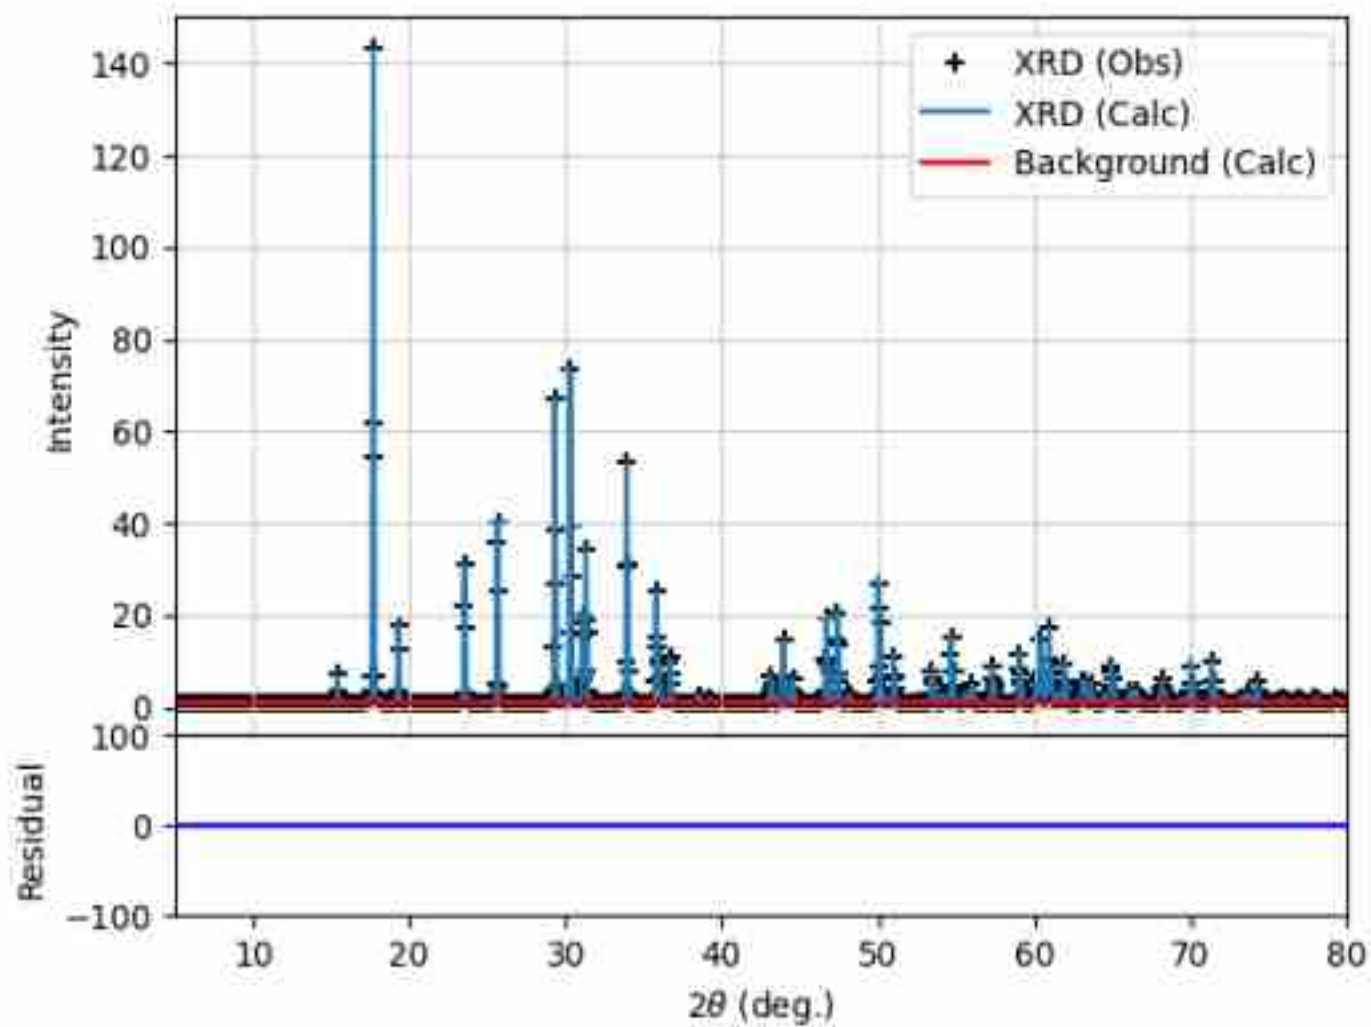

| RMSE before RR | Rwp     | RMSE after RR |
|----------------|---------|---------------|
| 0.032          | 0.00312 | 0.00062       |

# Na<sub>4</sub>Mo<sub>2</sub>O<sub>8</sub>

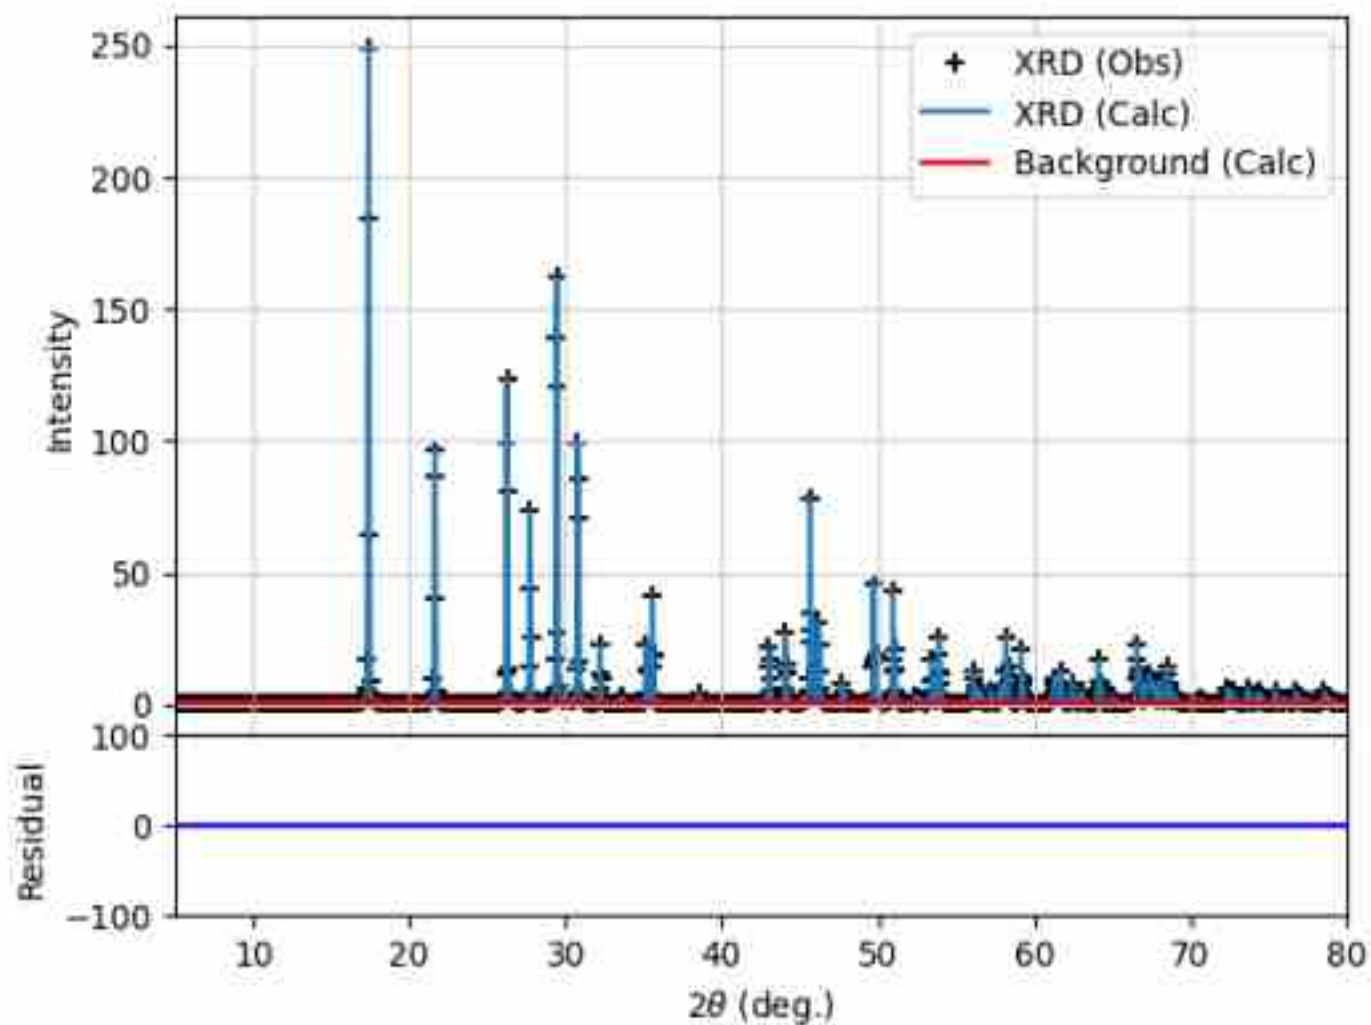

| RMSE before RR | Rwp     | RMSE after RR |
|----------------|---------|---------------|
| 0.032          | 0.00273 | 0.00089       |

# Na<sub>8</sub>Co<sub>2</sub>O<sub>6</sub>

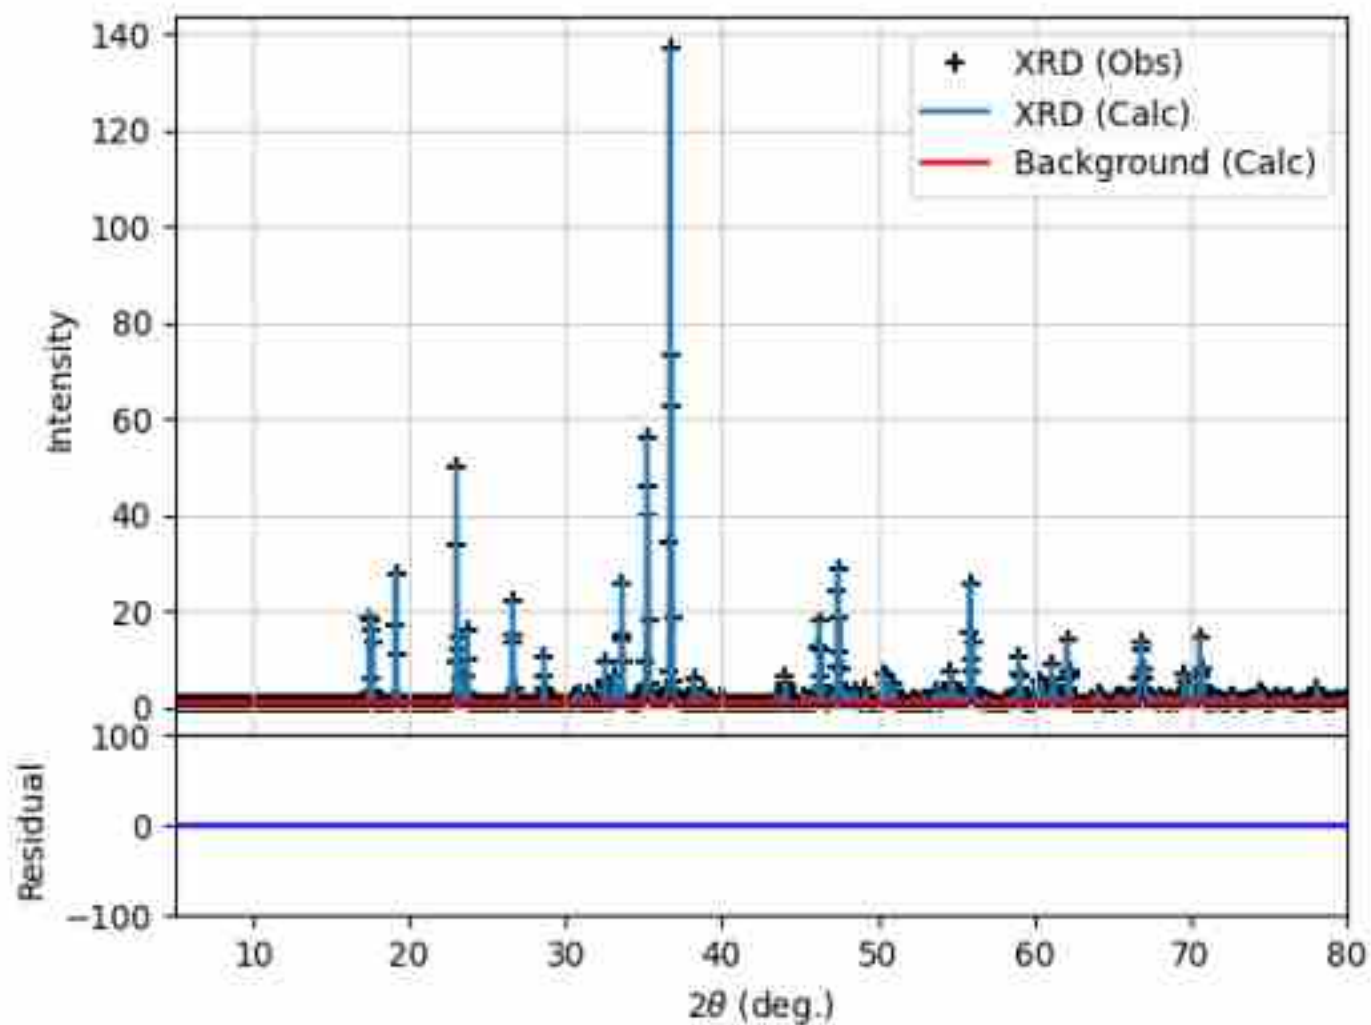

| RMSE before RR | Rwp     | RMSE after RR |
|----------------|---------|---------------|
| 0.032          | 0.00299 | 0.00033       |



# Nd<sub>2</sub>As<sub>2</sub>Ru<sub>2</sub>O<sub>2</sub>

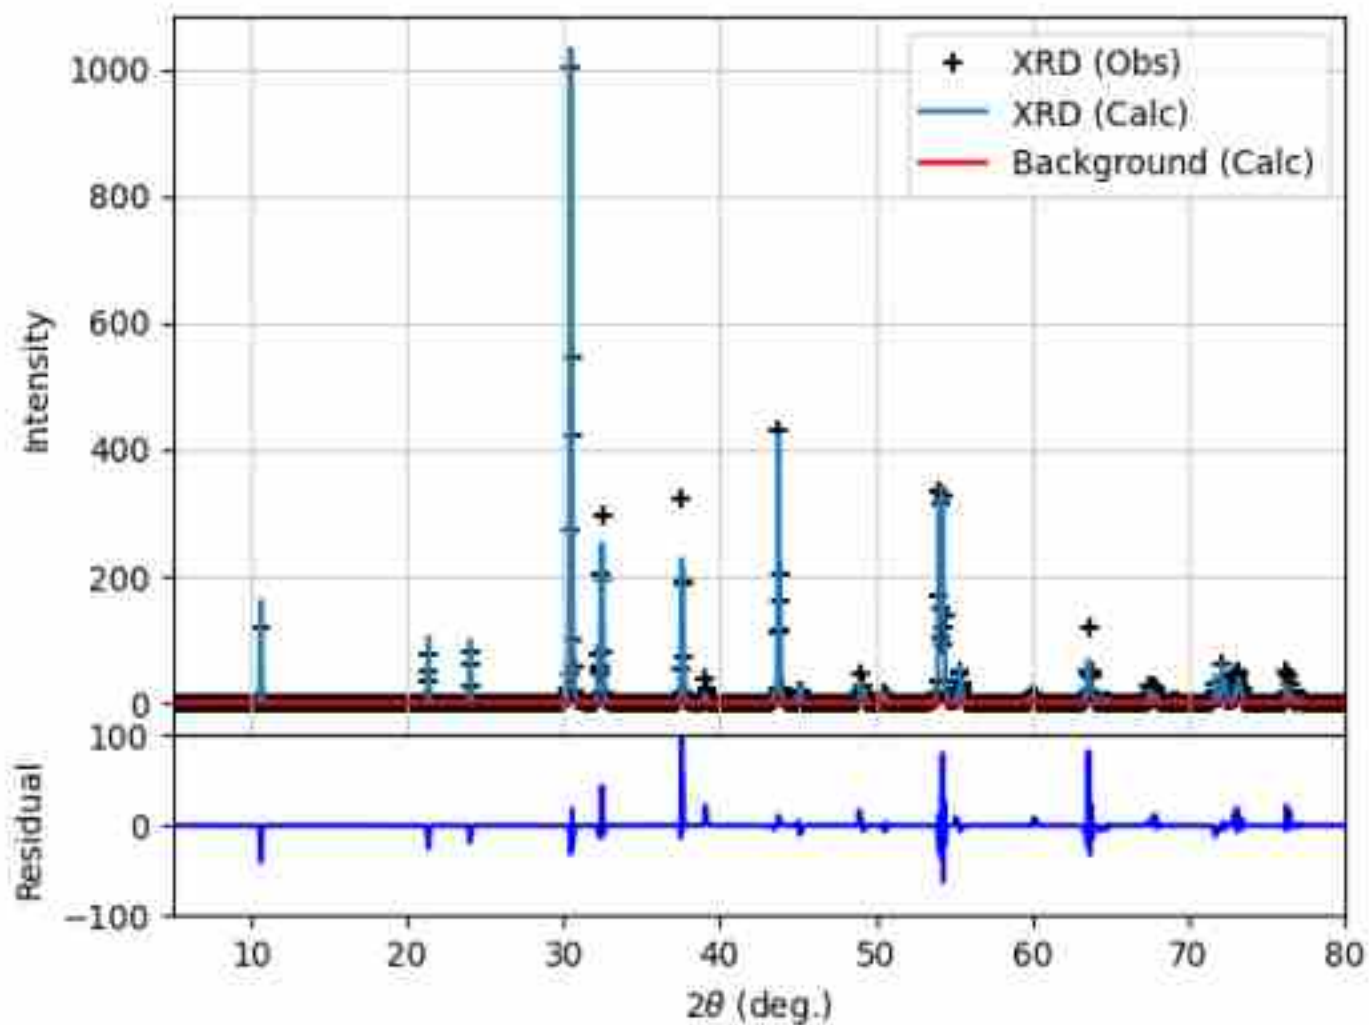

| RMSE before RR | Rwp     | RMSE after RR |
|----------------|---------|---------------|
| 0.032          | 24.7804 | 0.20993       |

# Ni<sub>2</sub>P<sub>2</sub>Se<sub>3</sub>S<sub>3</sub>

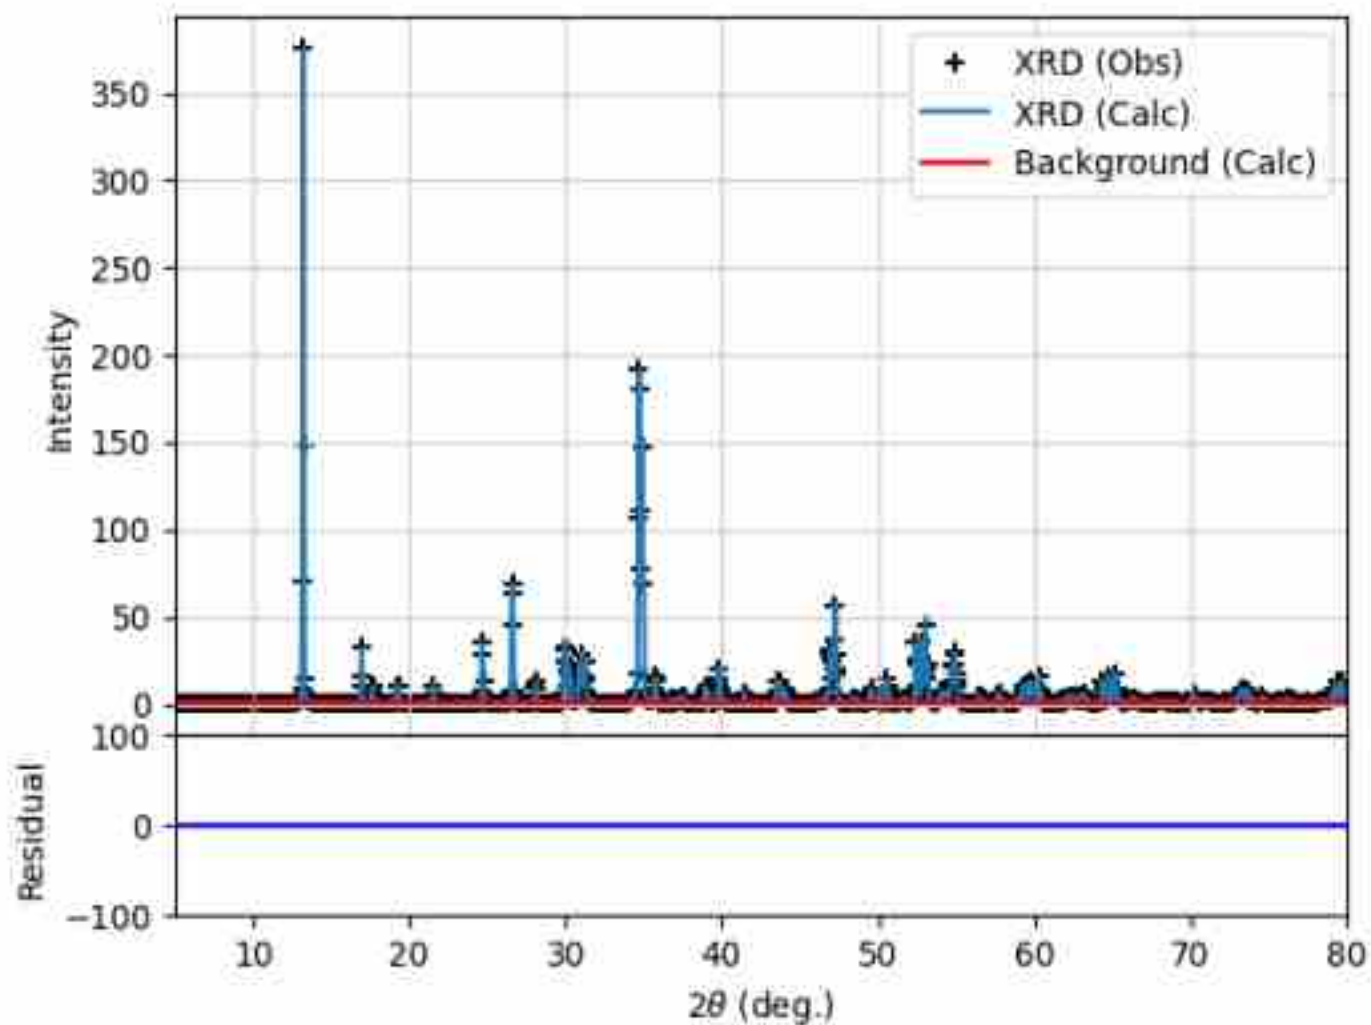

| RMSE before RR | Rwp     | RMSE after RR |
|----------------|---------|---------------|
| 0.032          | 0.00114 | 0.0           |

# Np<sub>2</sub>Ga<sub>8</sub>

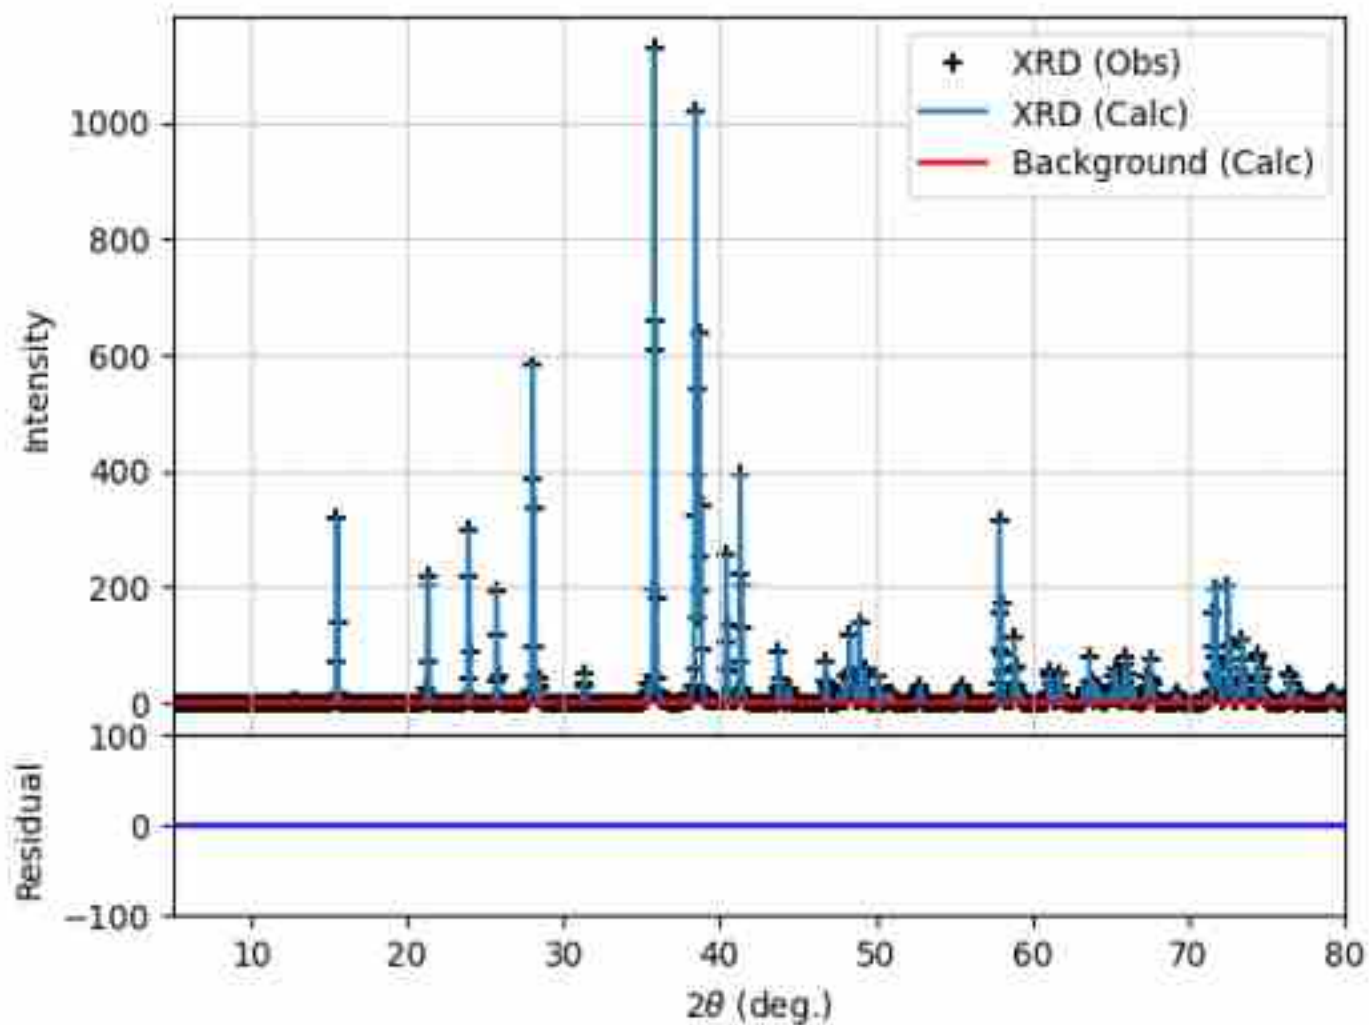

| RMSE before RR | Rwp     | RMSE after RR |
|----------------|---------|---------------|
| 0.032          | 0.00302 | 0.00057       |

# P2W2O8F2

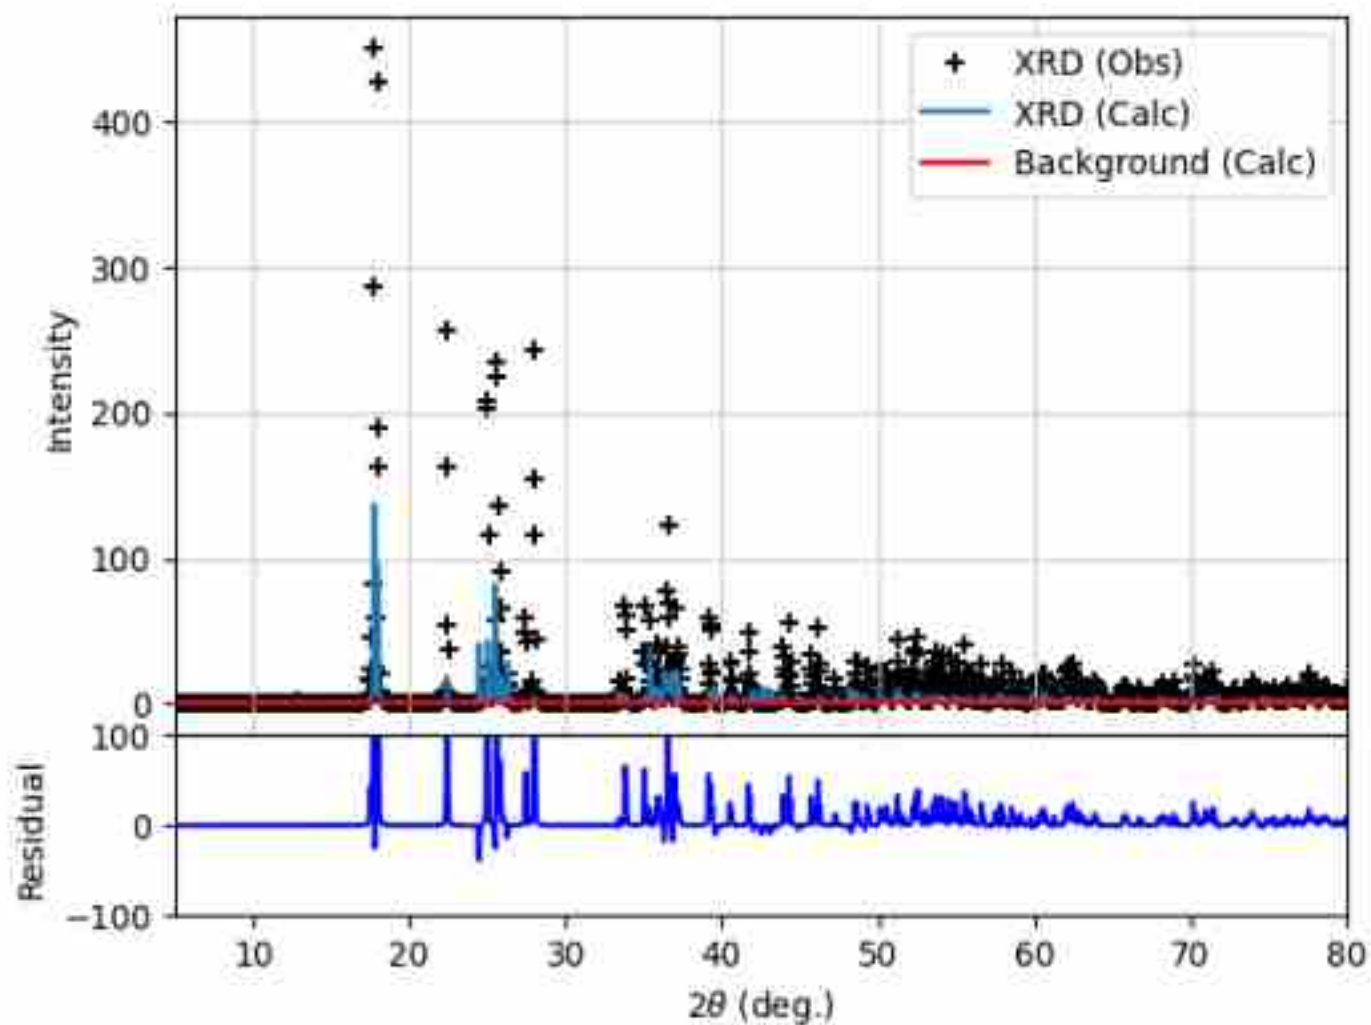

| RMSE before RR | Rwp      | RMSE after RR |
|----------------|----------|---------------|
| 0.032          | 82.76095 | 0.38523       |

# Pd2I4

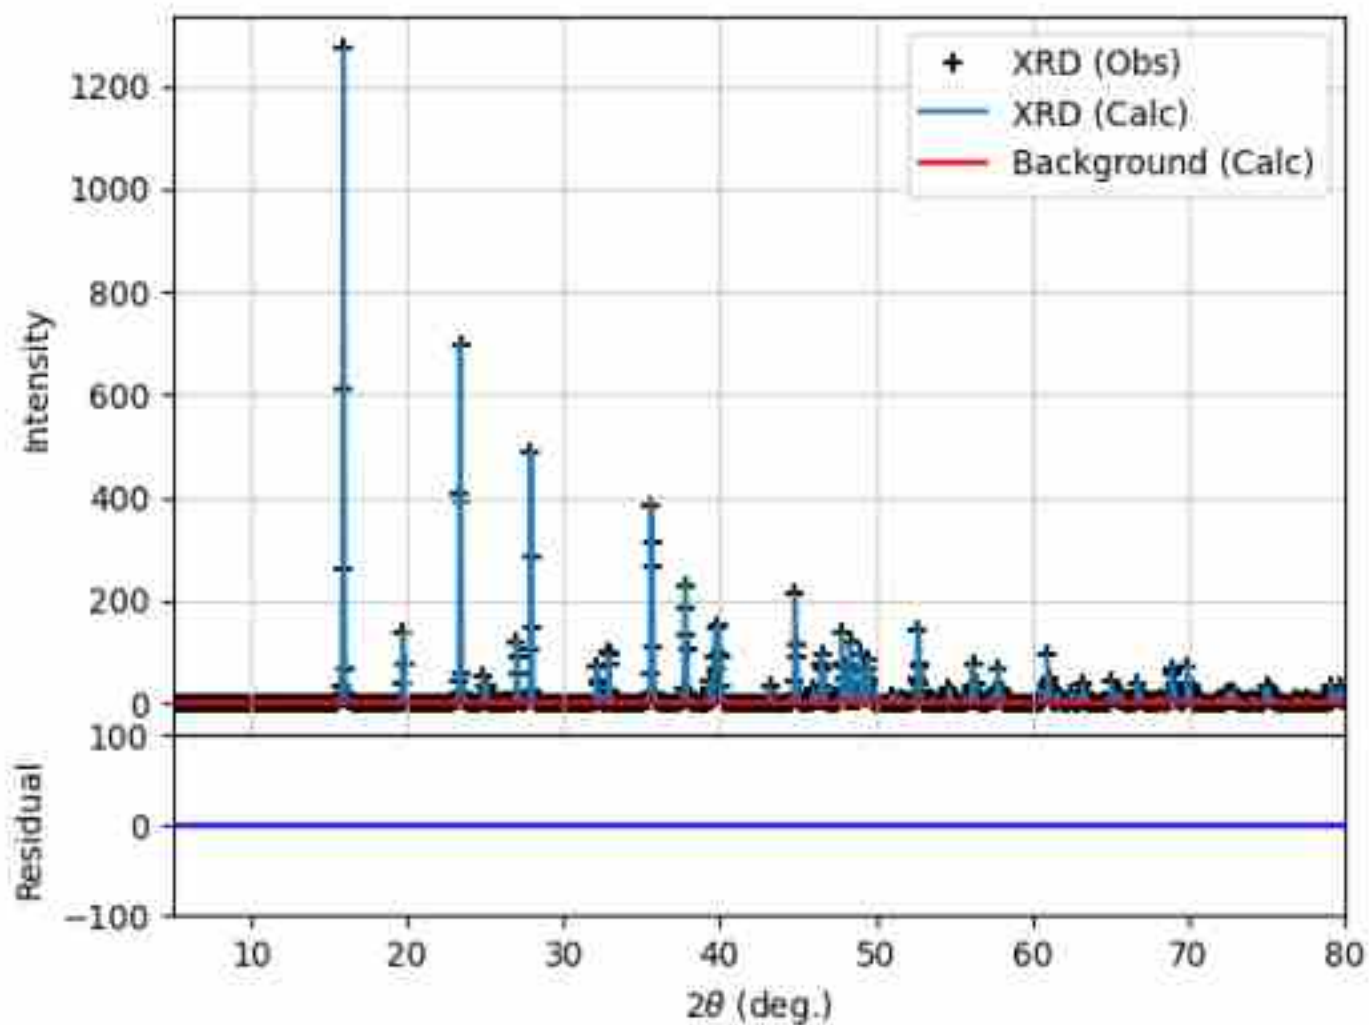

| RMSE before RR | Rwp     | RMSE after RR |
|----------------|---------|---------------|
| 0.032          | 0.00436 | 0.00017       |

# Pr<sub>2</sub>Cu<sub>4</sub>O<sub>8</sub>

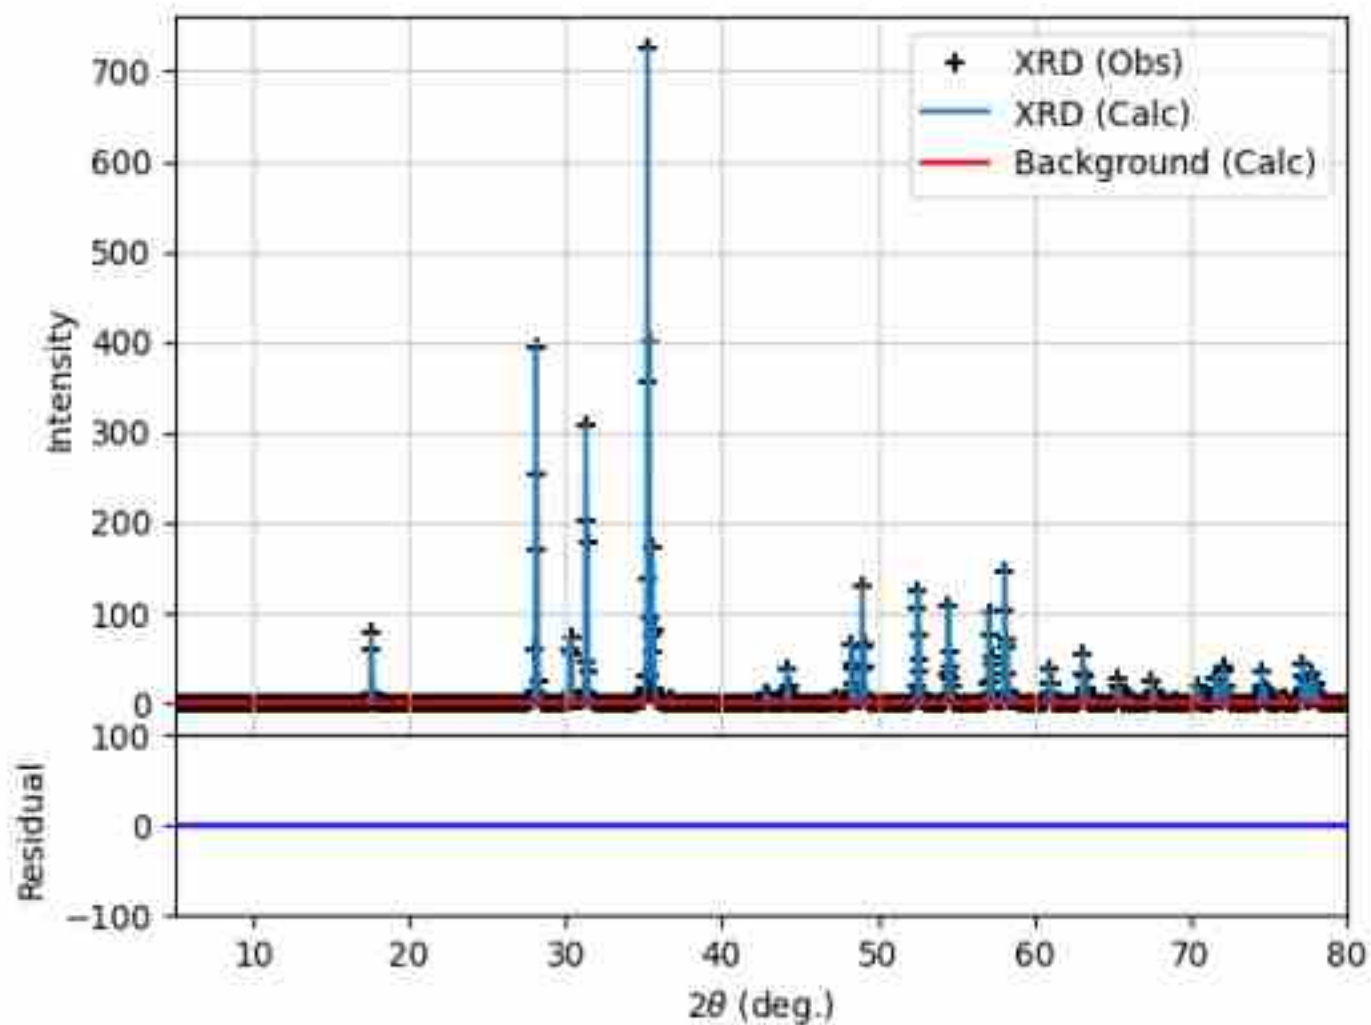

| RMSE before RR | Rwp     | RMSE after RR |
|----------------|---------|---------------|
| 0.032          | 0.00322 | 0.00183       |

# Pr<sub>4</sub>Zn<sub>4</sub>Ge<sub>4</sub>

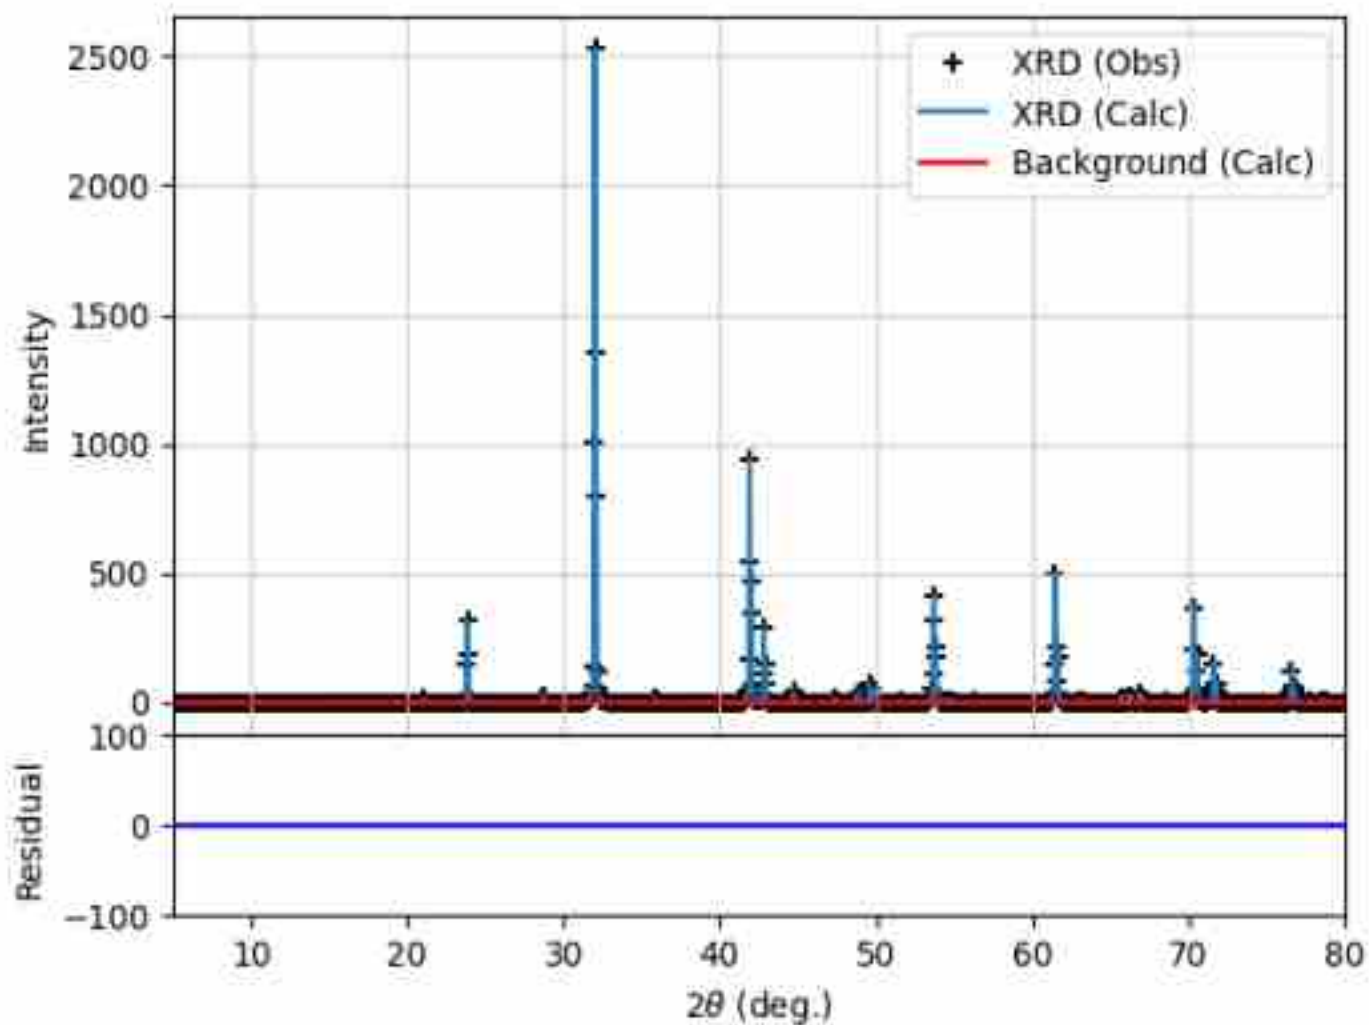

| RMSE before RR | Rwp     | RMSE after RR |
|----------------|---------|---------------|
| 0.032          | 0.00399 | 0.00074       |

# Rb<sub>2</sub>Cr<sub>2</sub>Co<sub>2</sub>F<sub>12</sub>

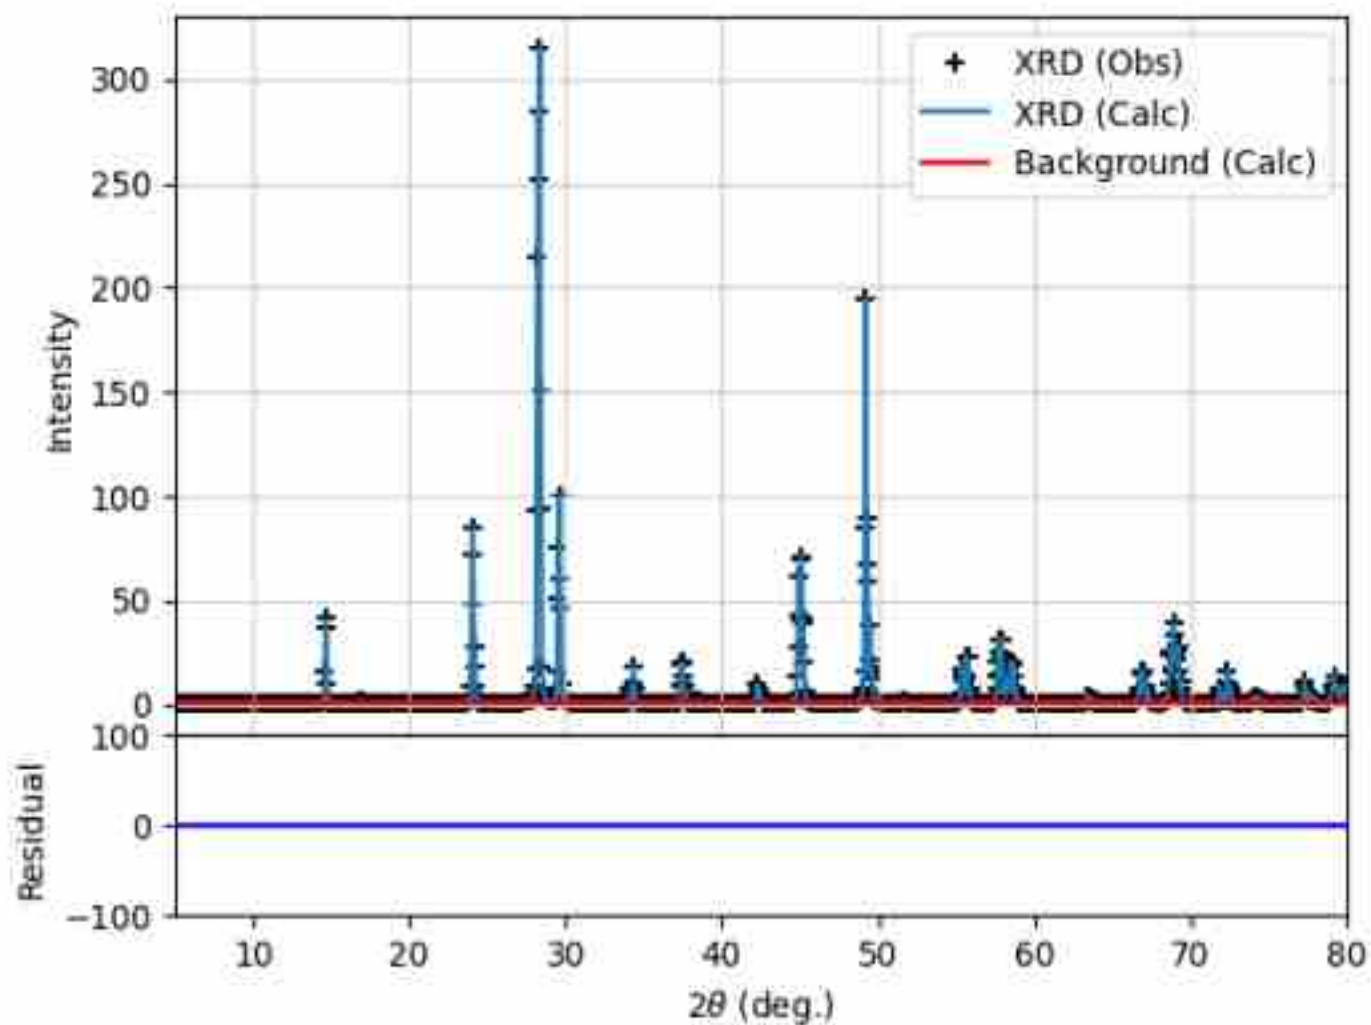

| RMSE before RR | Rwp     | RMSE after RR |
|----------------|---------|---------------|
| 0.032          | 0.00268 | 0.00091       |



# Rb<sub>2</sub>W<sub>10</sub>O<sub>2</sub>F<sub>4</sub>

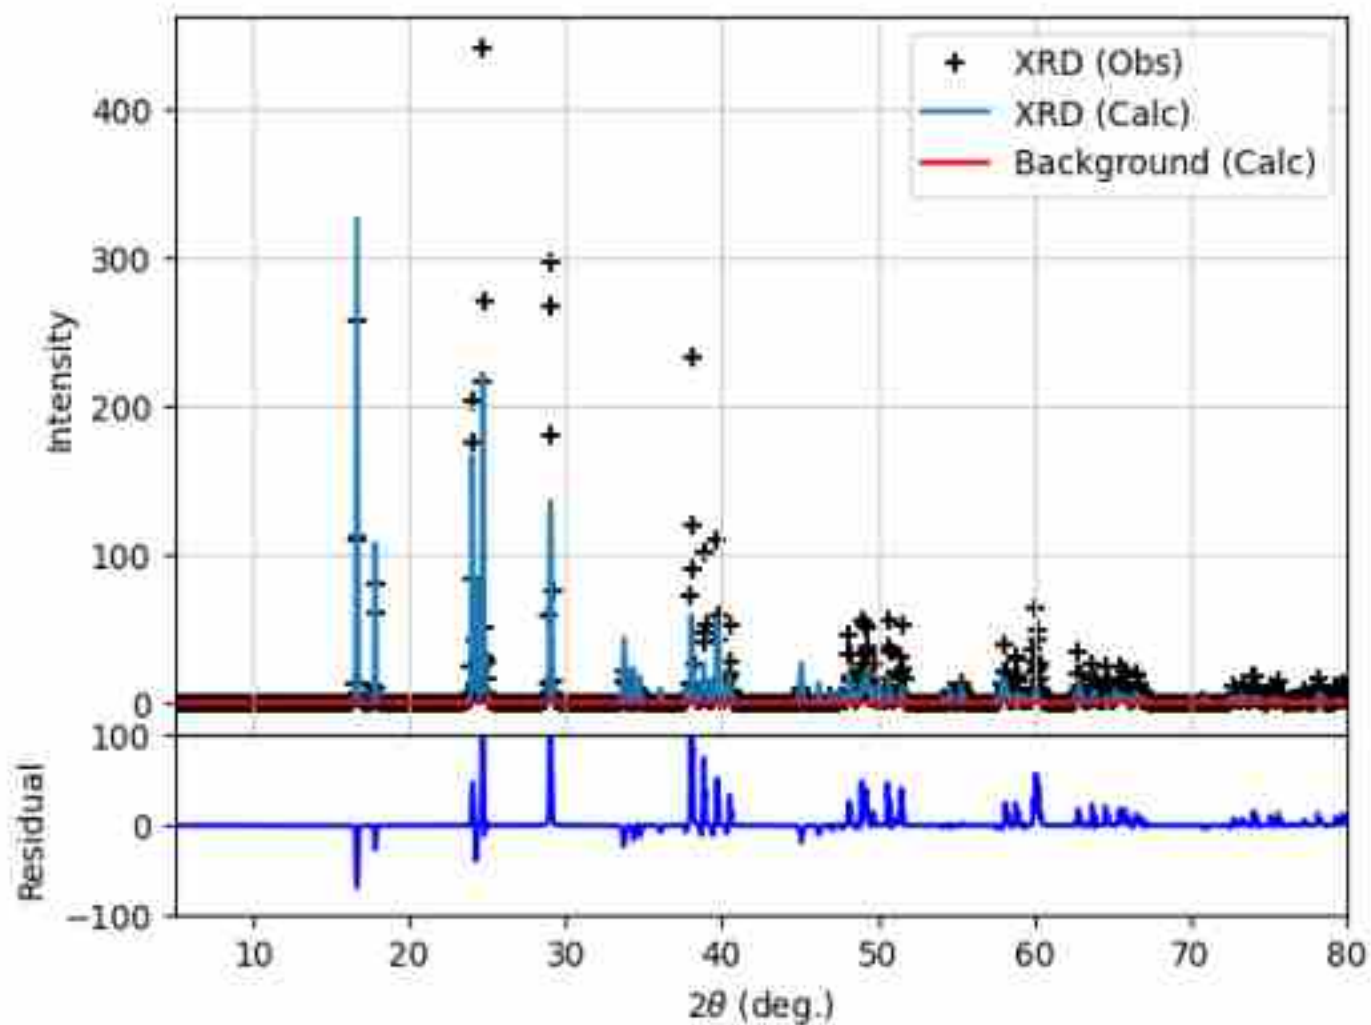

| RMSE before RR | Rwp      | RMSE after RR |
|----------------|----------|---------------|
| 0.032          | 57.50677 | None          |

# Rb<sub>4</sub>Fe<sub>1</sub>Sb<sub>1</sub>Cl<sub>12</sub>

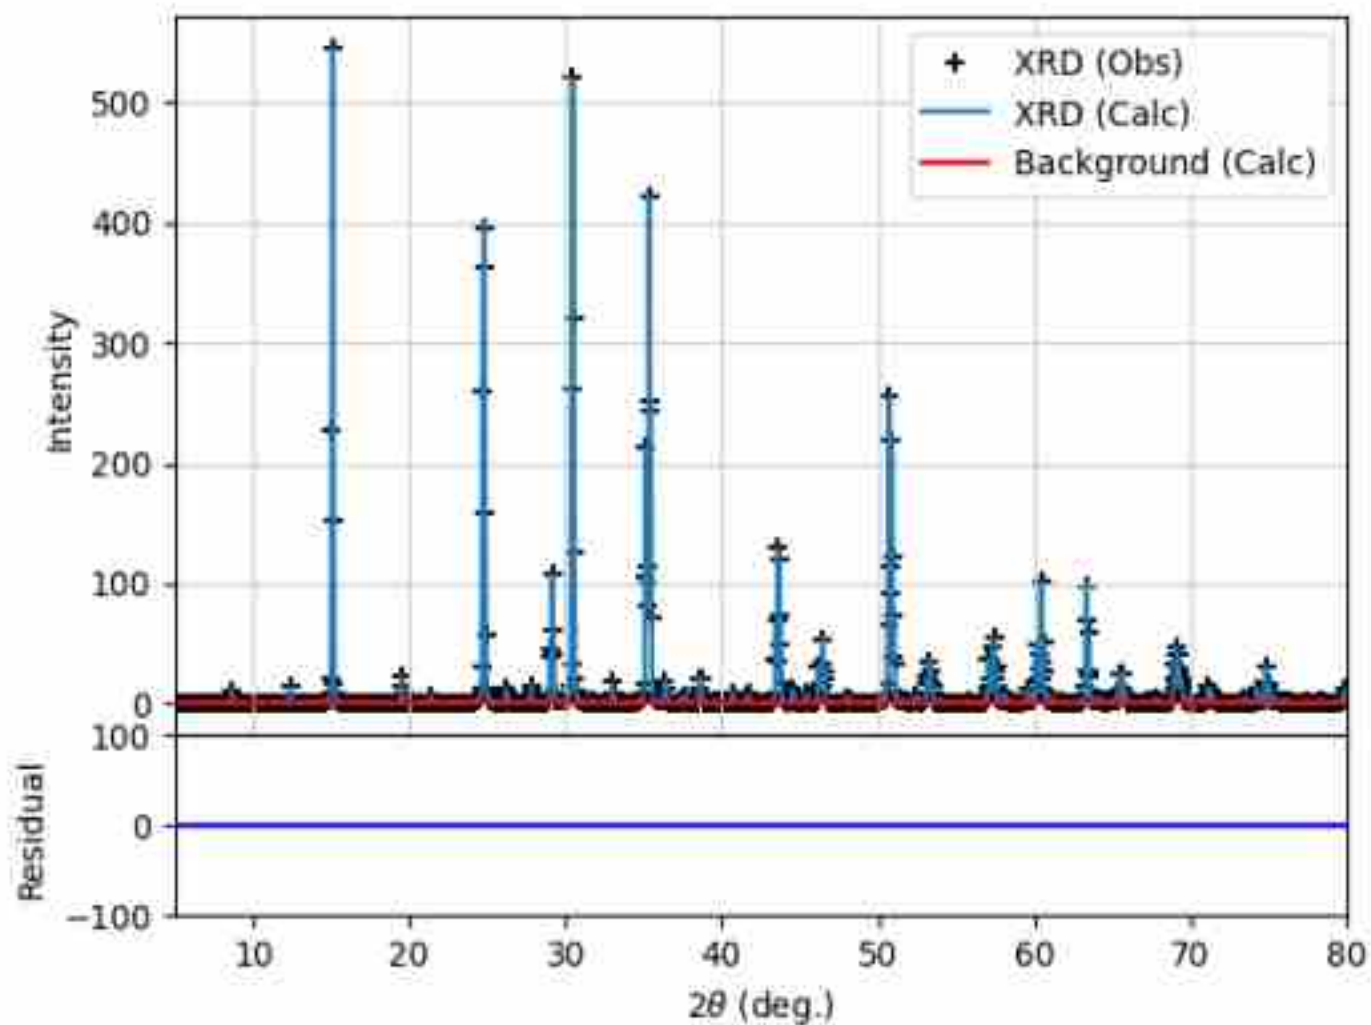

| RMSE before RR | Rwp     | RMSE after RR |
|----------------|---------|---------------|
| 0.032          | 0.00441 | 0.00055       |

# Rb<sub>8</sub>Sn<sub>2</sub>O<sub>8</sub>

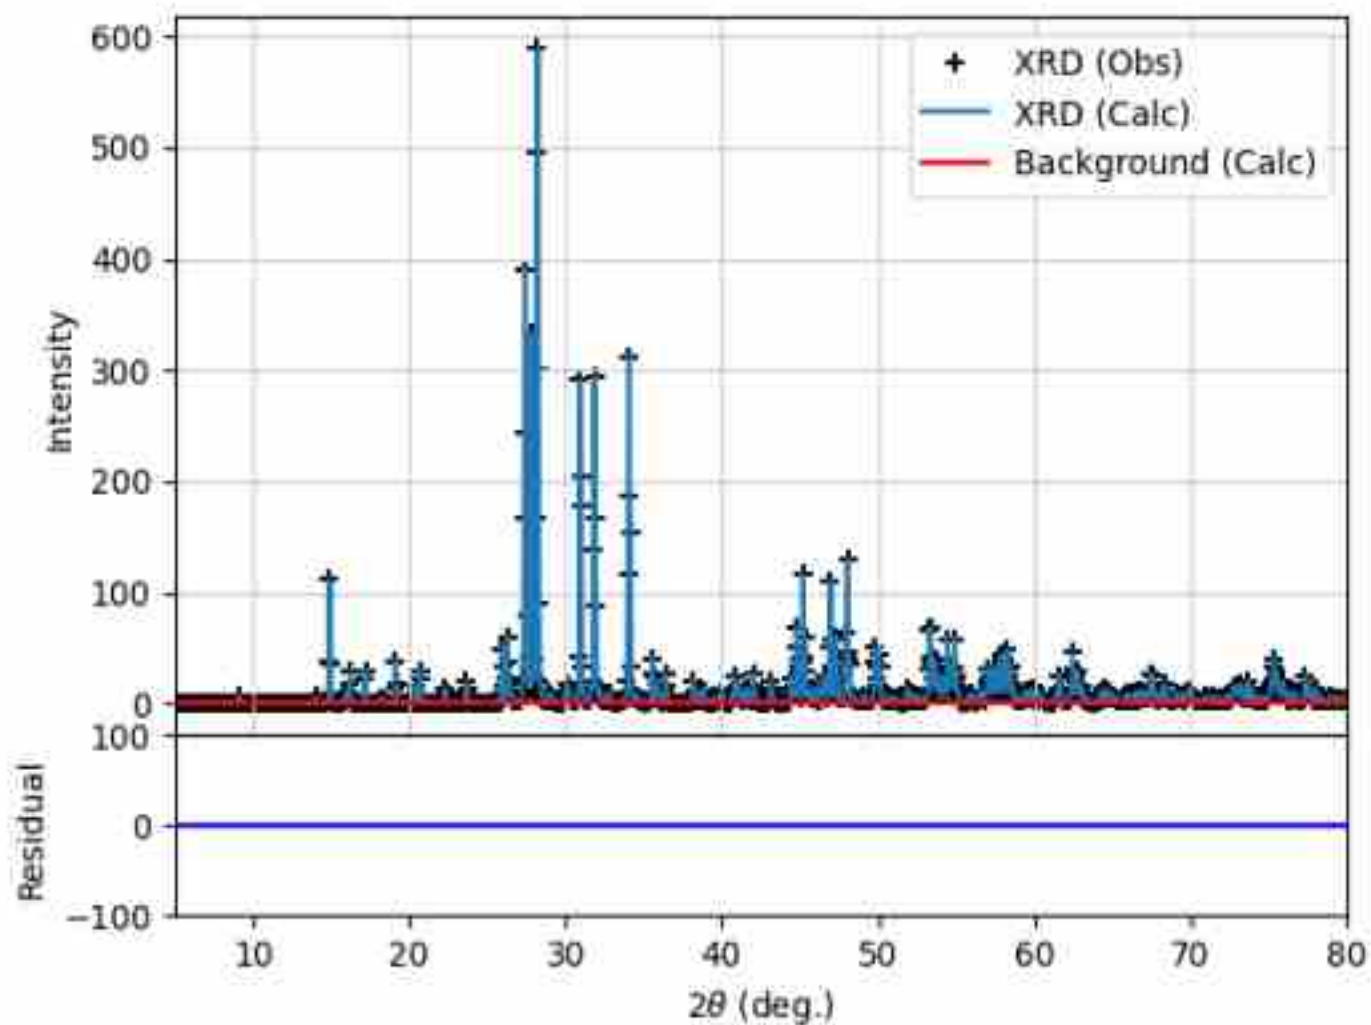

| RMSE before RR | Rwp     | RMSE after RR |
|----------------|---------|---------------|
| 0.032          | 0.00171 | 0.00034       |

# Sm1Tl9Te6

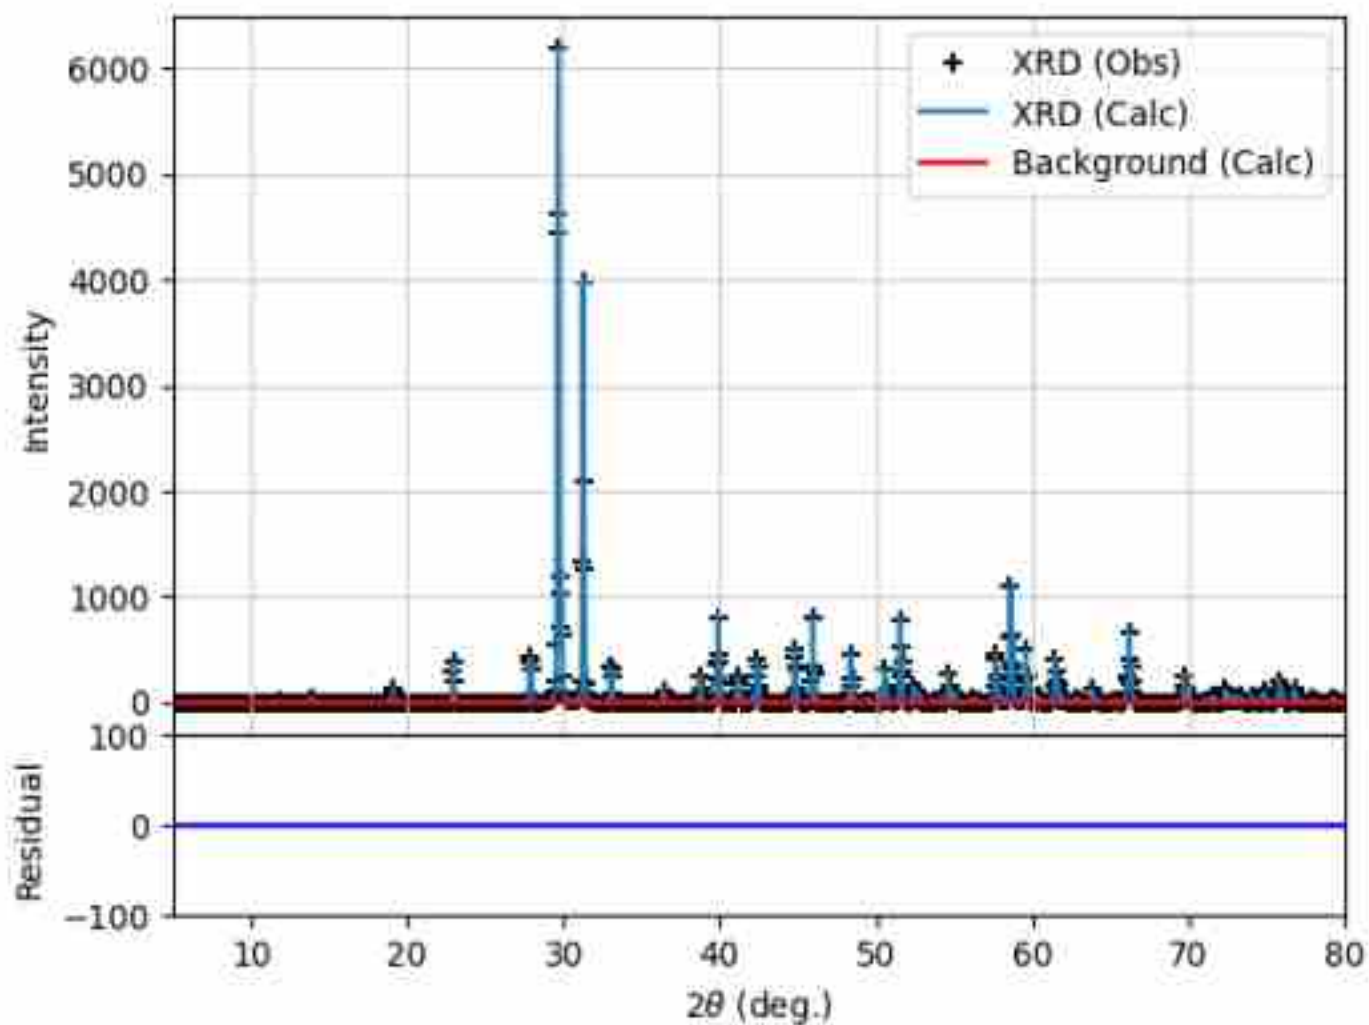

| RMSE before RR | Rwp     | RMSE after RR |
|----------------|---------|---------------|
| 0.032          | 0.00428 | 0.00036       |

# Sr<sub>2</sub>Ca<sub>2</sub>Ti<sub>2</sub>Mn<sub>2</sub>O<sub>12</sub>

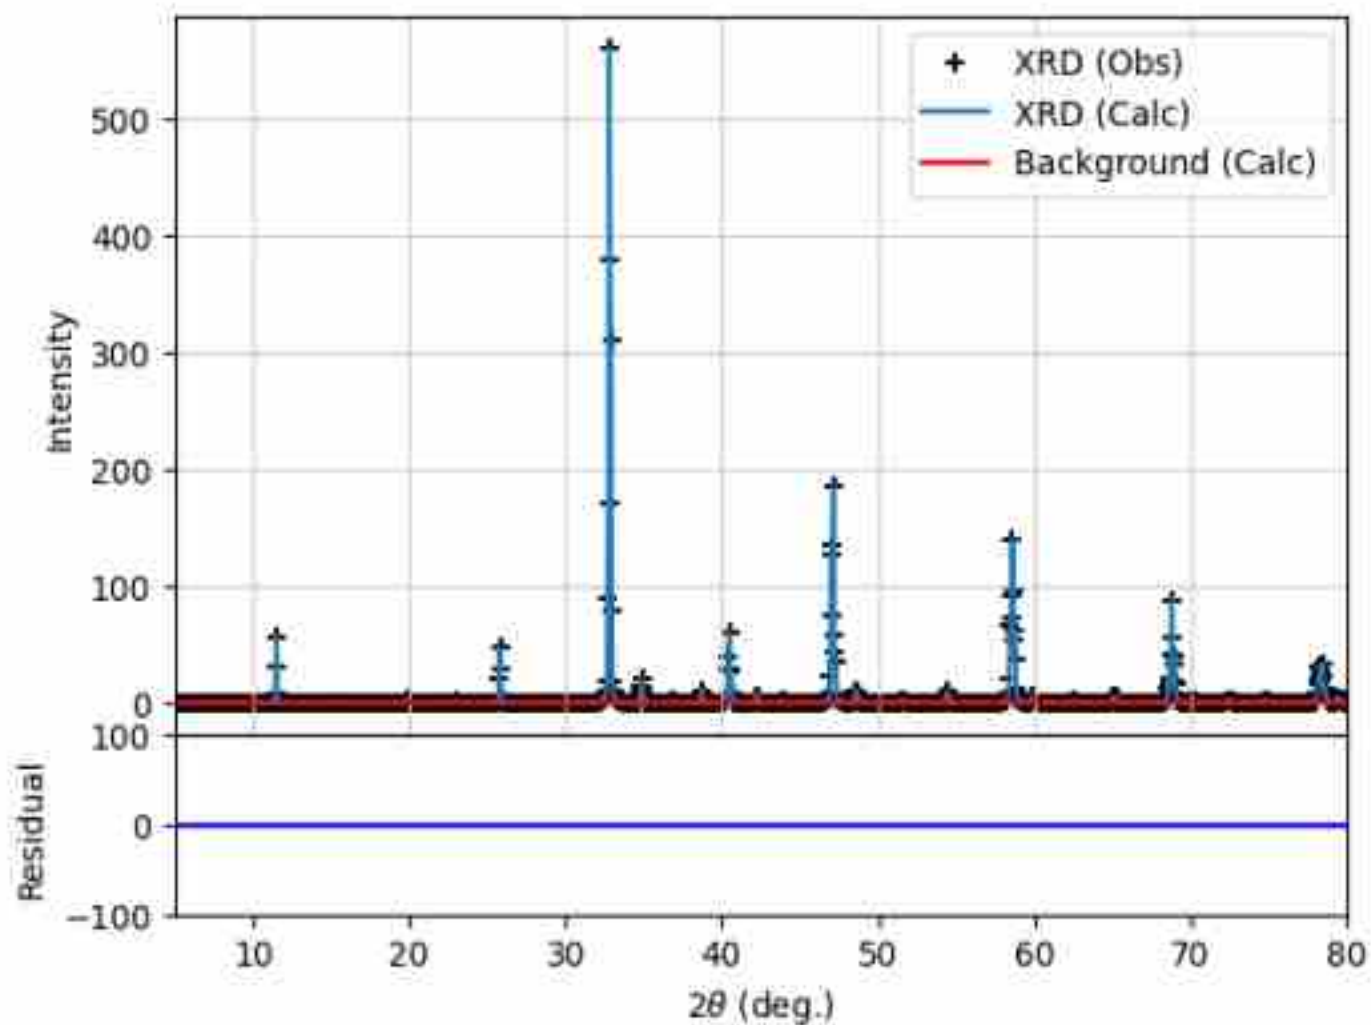

| RMSE before RR | Rwp     | RMSE after RR |
|----------------|---------|---------------|
| 0.032          | 0.00231 | 0.00079       |

# Sr<sub>2</sub>Co<sub>1</sub>N<sub>2</sub>

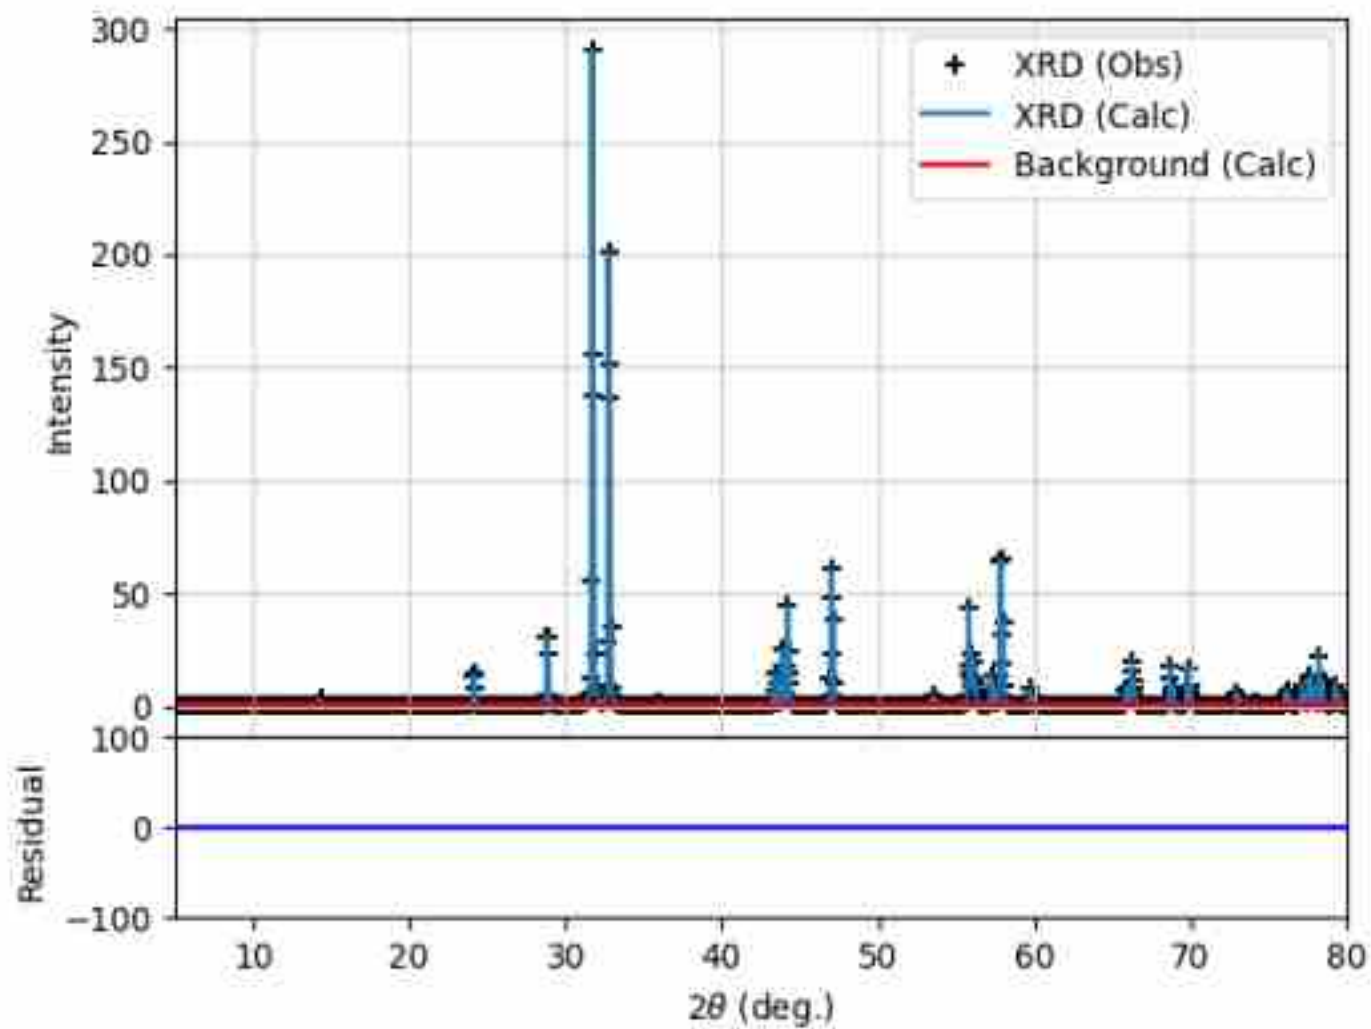

| RMSE before RR | Rwp     | RMSE after RR |
|----------------|---------|---------------|
| 0.032          | 0.00518 | 0.00087       |

# Sr<sub>3</sub>CeMn<sub>4</sub>O<sub>12</sub>

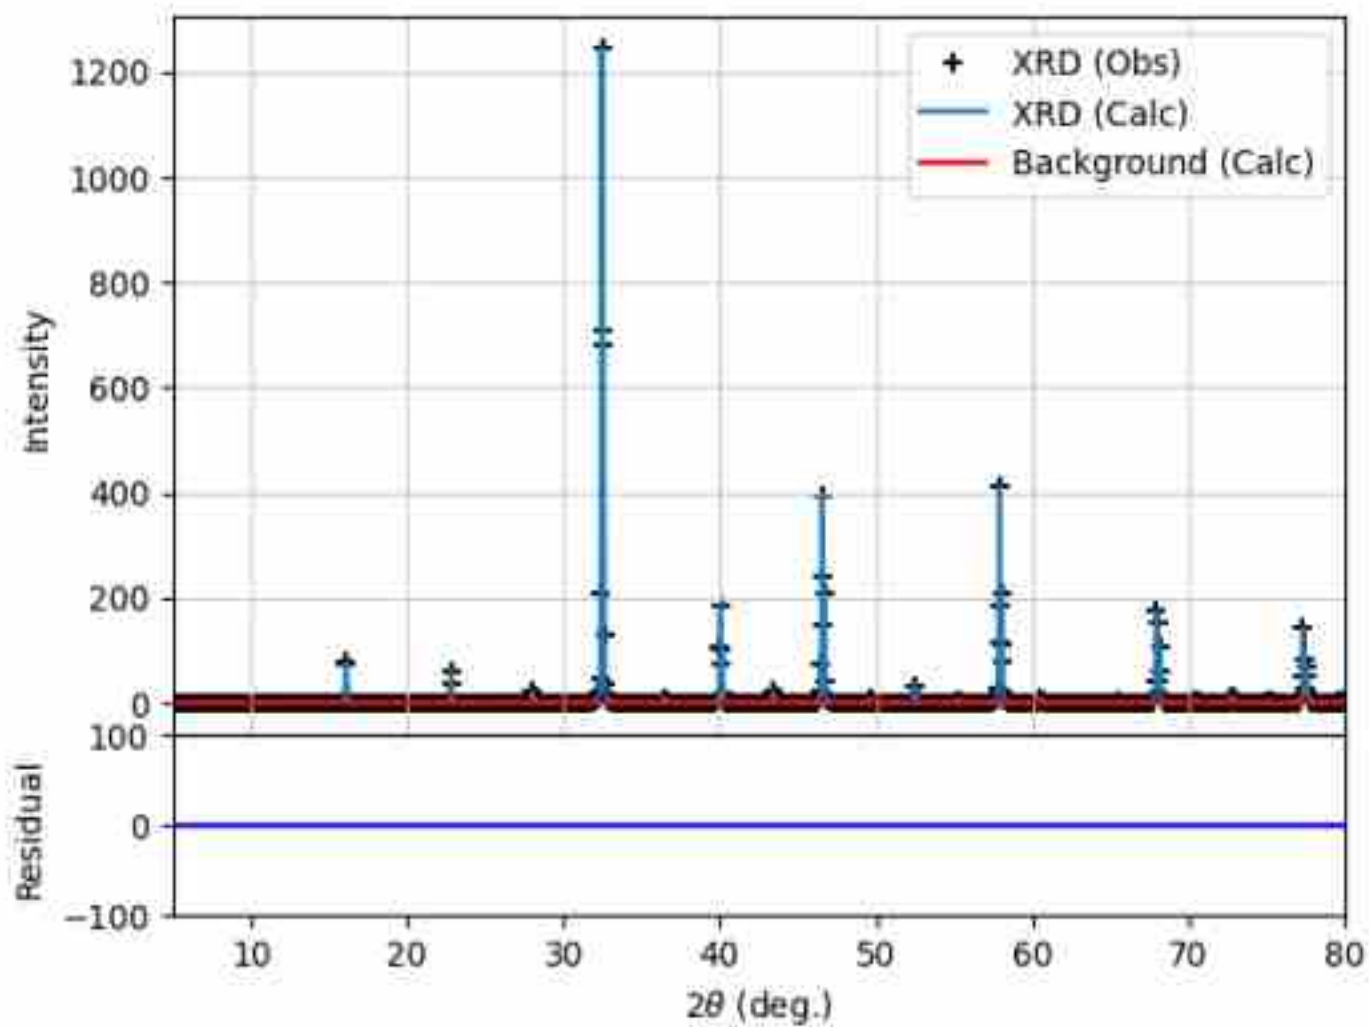

| RMSE before RR | Rwp     | RMSE after RR |
|----------------|---------|---------------|
| 0.032          | 0.05096 | 0.0083        |

# Sr<sub>3</sub>LaTi<sub>2</sub>Mn<sub>2</sub>O<sub>12</sub>

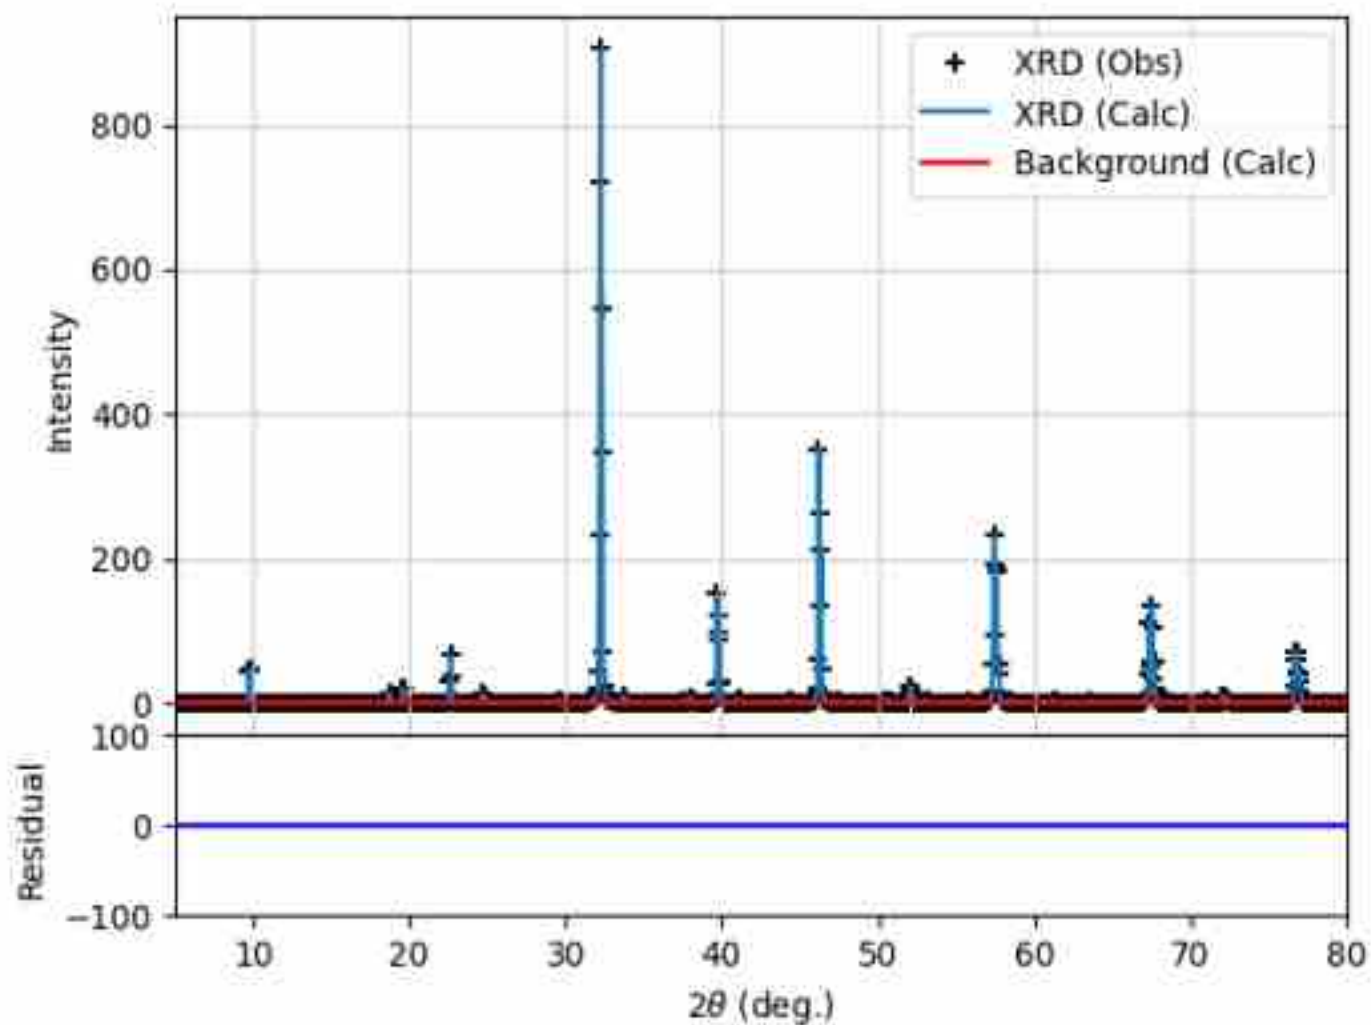

| RMSE before RR | Rwp     | RMSE after RR |
|----------------|---------|---------------|
| 0.032          | 0.01259 | 0.00357       |



# Tb<sub>2</sub>Ge<sub>4</sub>Pt<sub>4</sub>

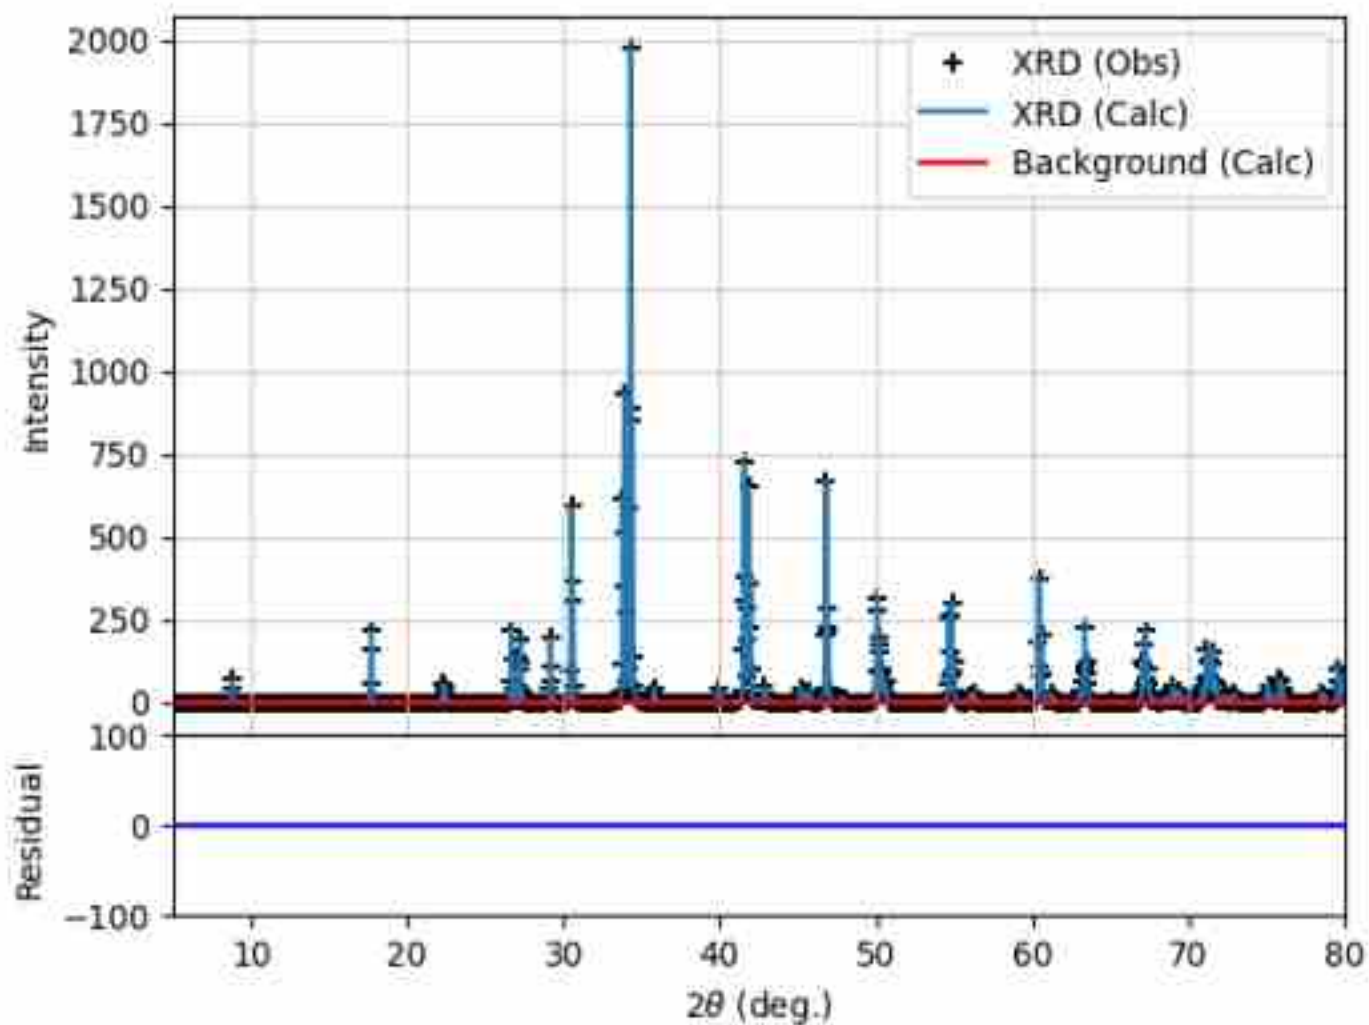

| RMSE before RR | Rwp     | RMSE after RR |
|----------------|---------|---------------|
| 0.032          | 0.00335 | 0.00039       |

# Tb<sub>4</sub>Sn<sub>2</sub>S<sub>10</sub>

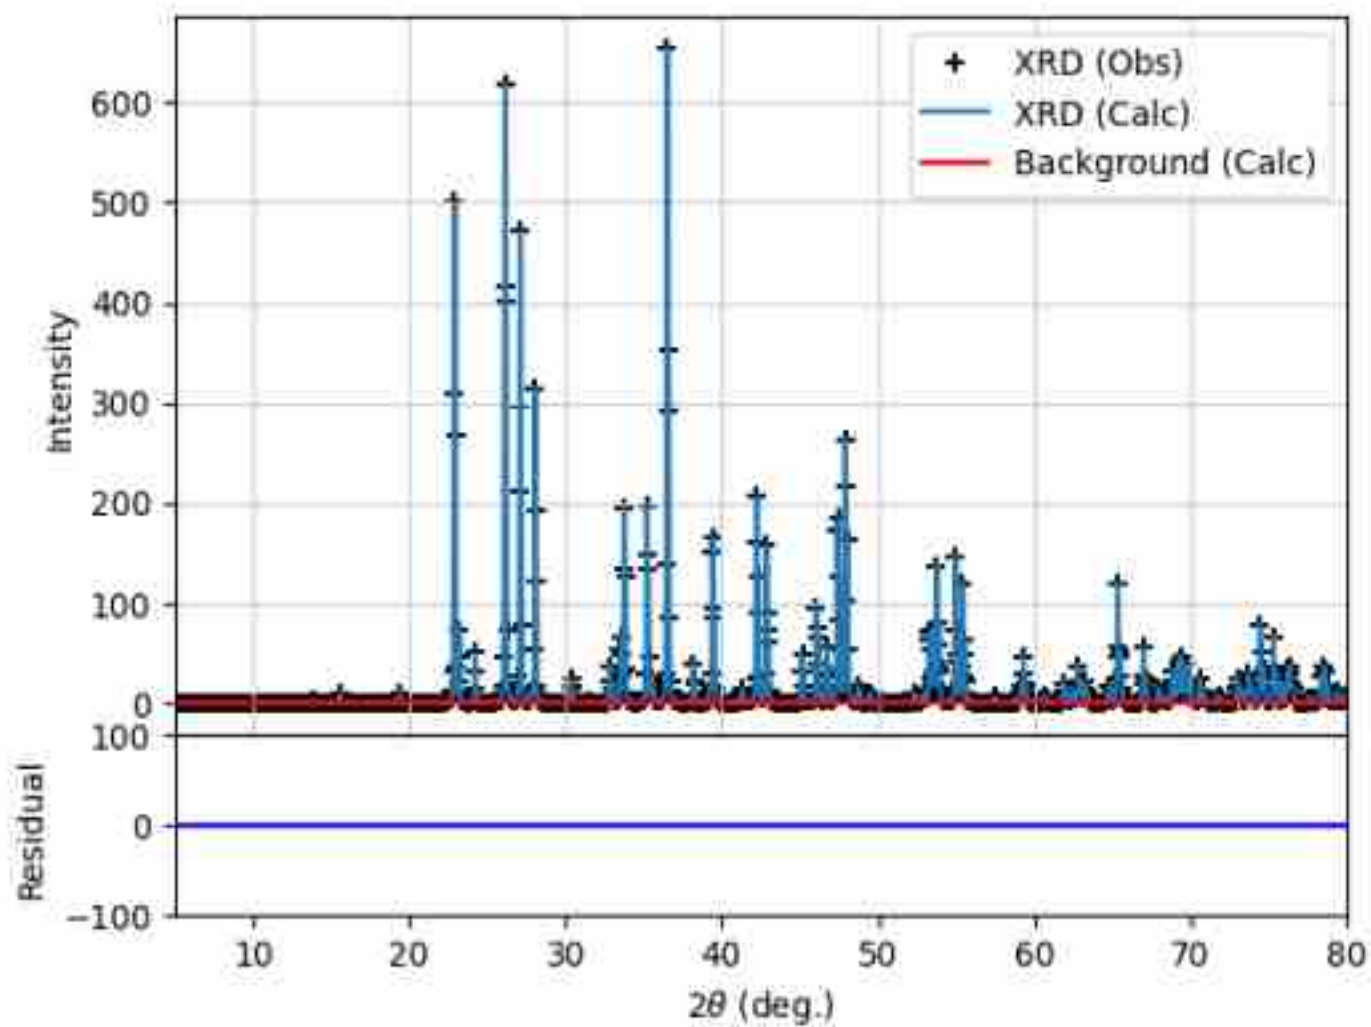

| RMSE before RR | Rwp     | RMSE after RR |
|----------------|---------|---------------|
| 0.032          | 0.00472 | 0.00103       |

# Te<sub>2</sub>Mo<sub>2</sub>Se<sub>2</sub>

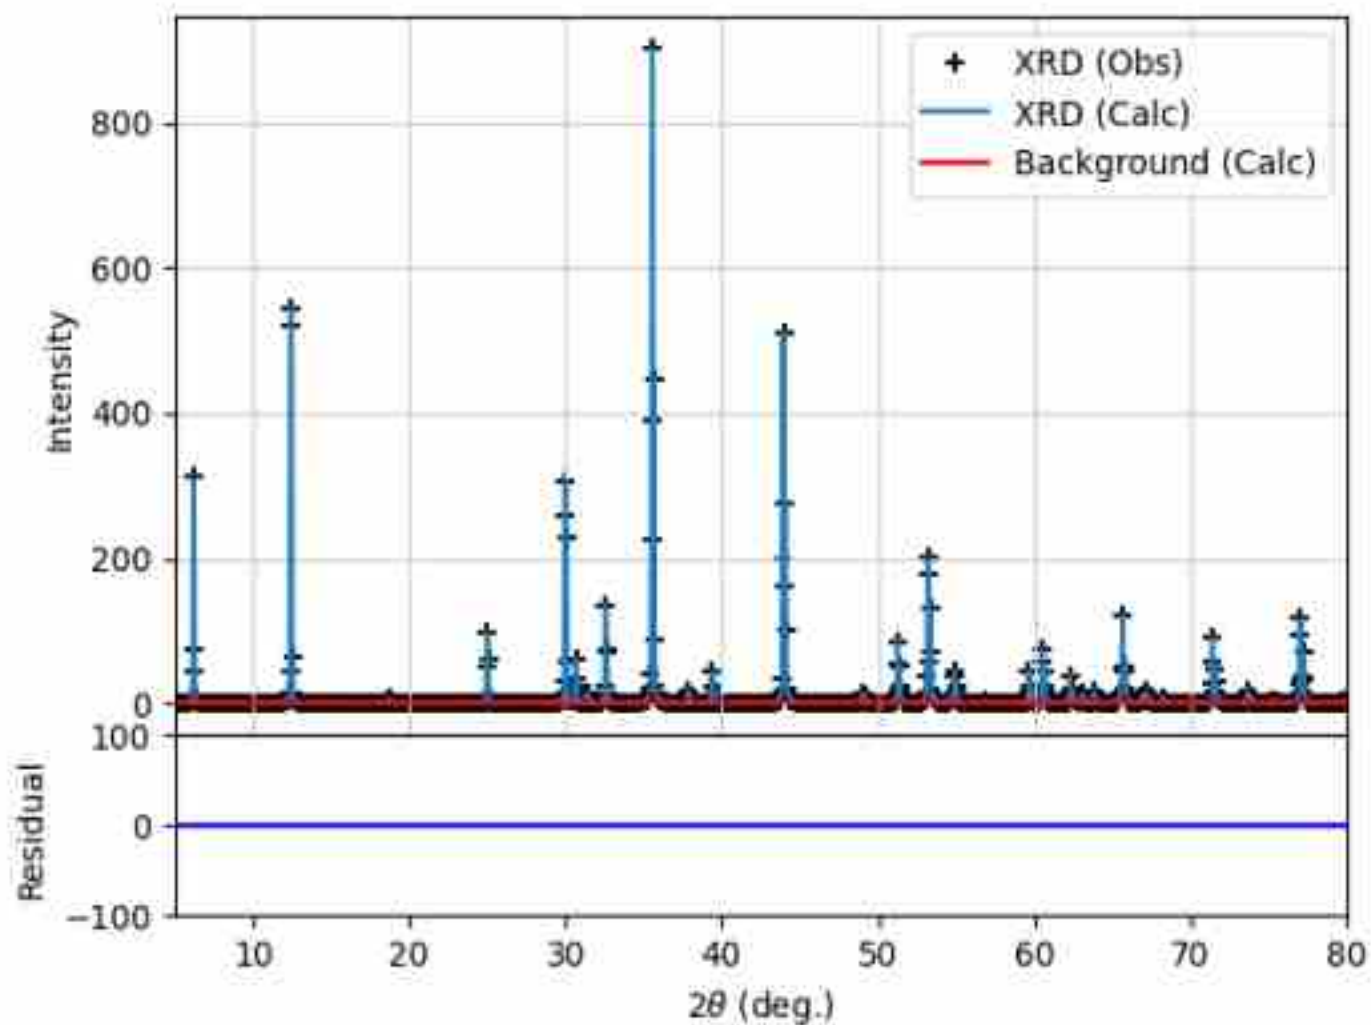

| RMSE before RR | Rwp     | RMSE after RR |
|----------------|---------|---------------|
| 0.032          | 0.00305 | 0.00044       |

# Ti<sub>2</sub>V<sub>2</sub>O<sub>6</sub>

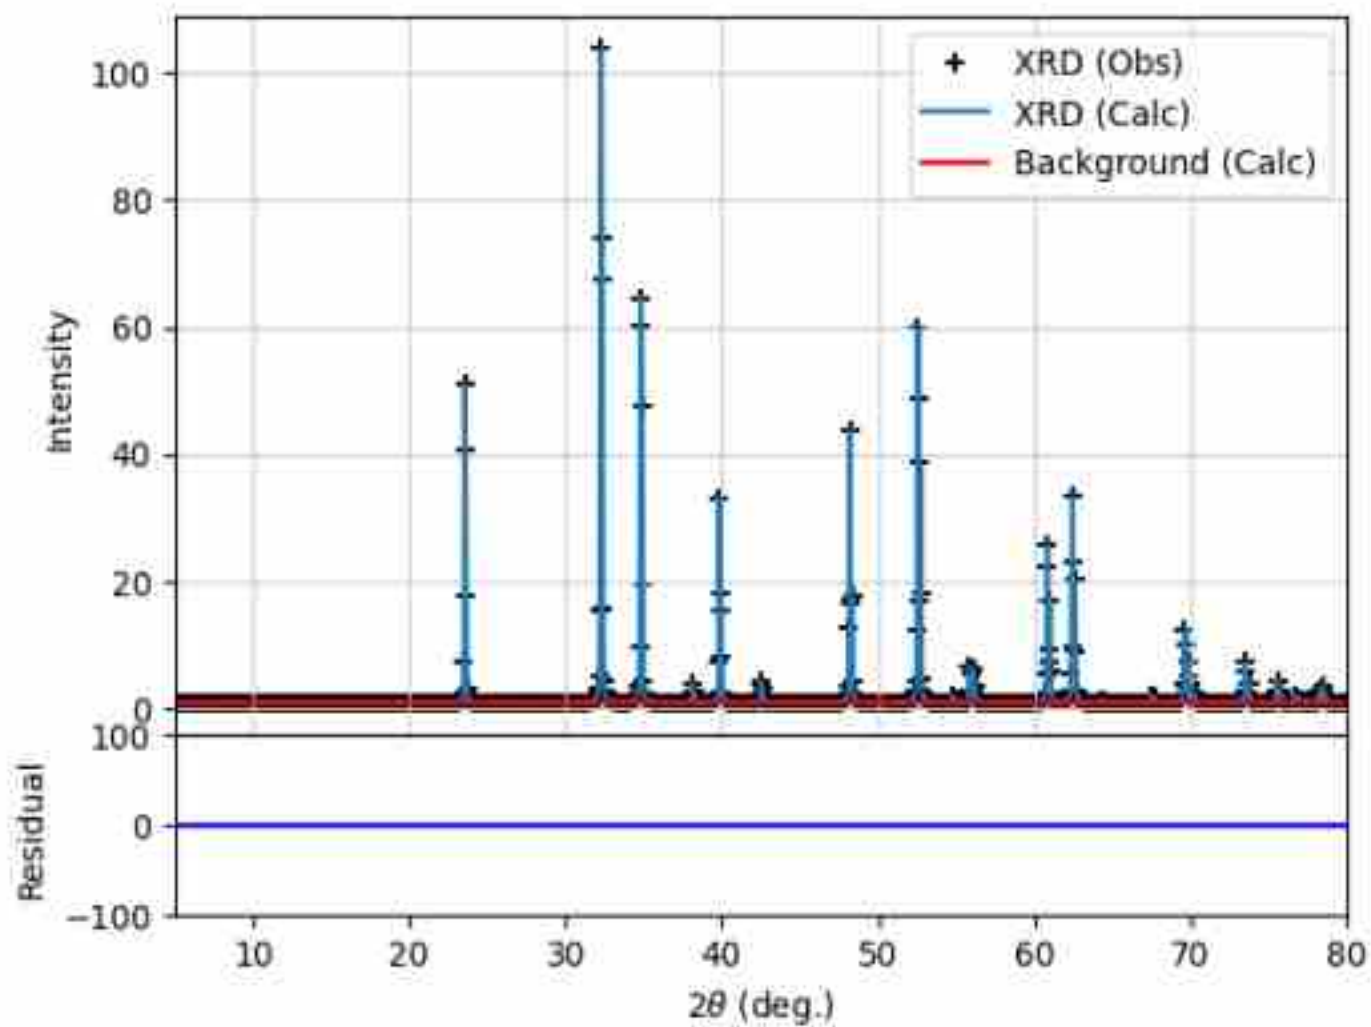

| RMSE before RR | Rwp     | RMSE after RR |
|----------------|---------|---------------|
| 0.032          | 0.00233 | 0.00073       |

# Ti<sub>3</sub>Sn<sub>3</sub>O<sub>12</sub>

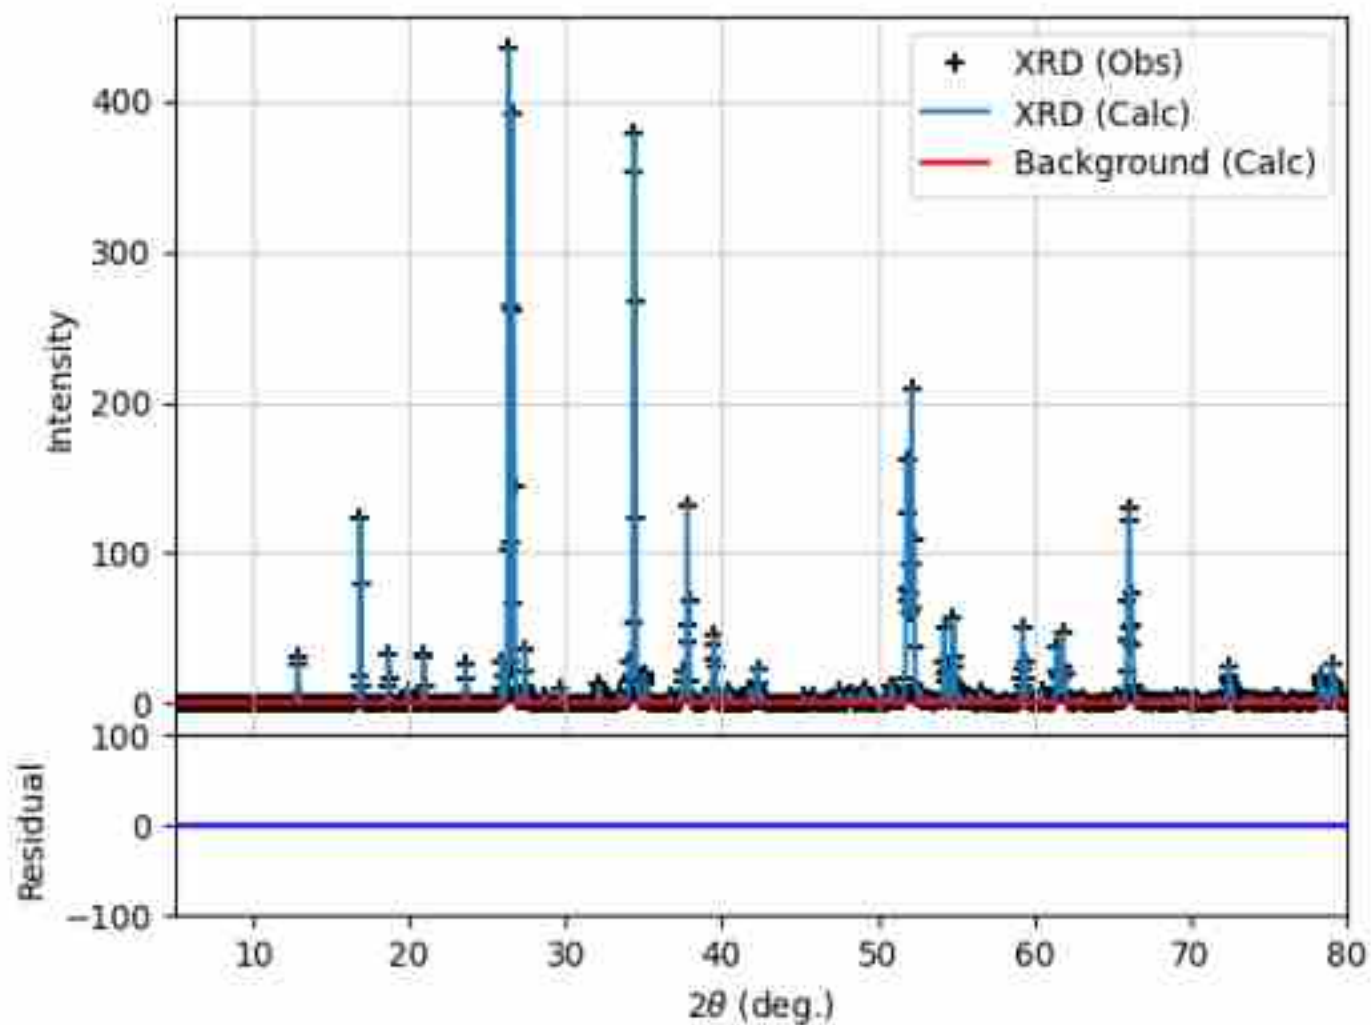

| RMSE before RR | Rwp     | RMSE after RR |
|----------------|---------|---------------|
| 0.032          | 0.00341 | 0.00073       |

# Tl<sub>2</sub>Bi<sub>2</sub>P<sub>4</sub>S<sub>12</sub>

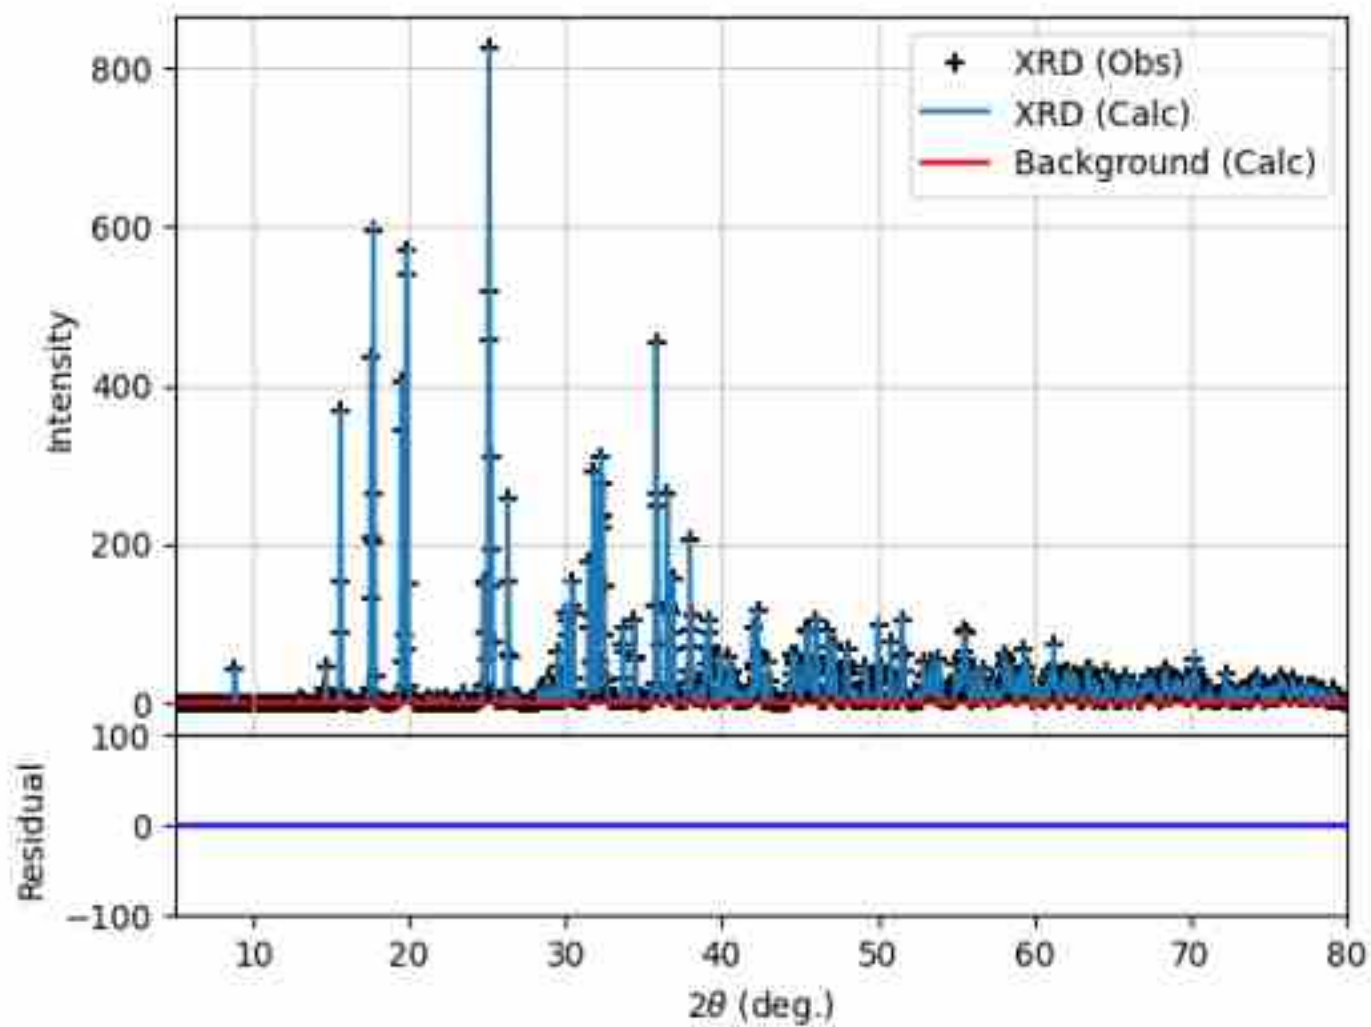

| RMSE before RR | Rwp     | RMSE after RR |
|----------------|---------|---------------|
| 0.032          | 0.00366 | 0.00087       |

# Zr<sub>4</sub>Fe<sub>4</sub>Si<sub>4</sub>

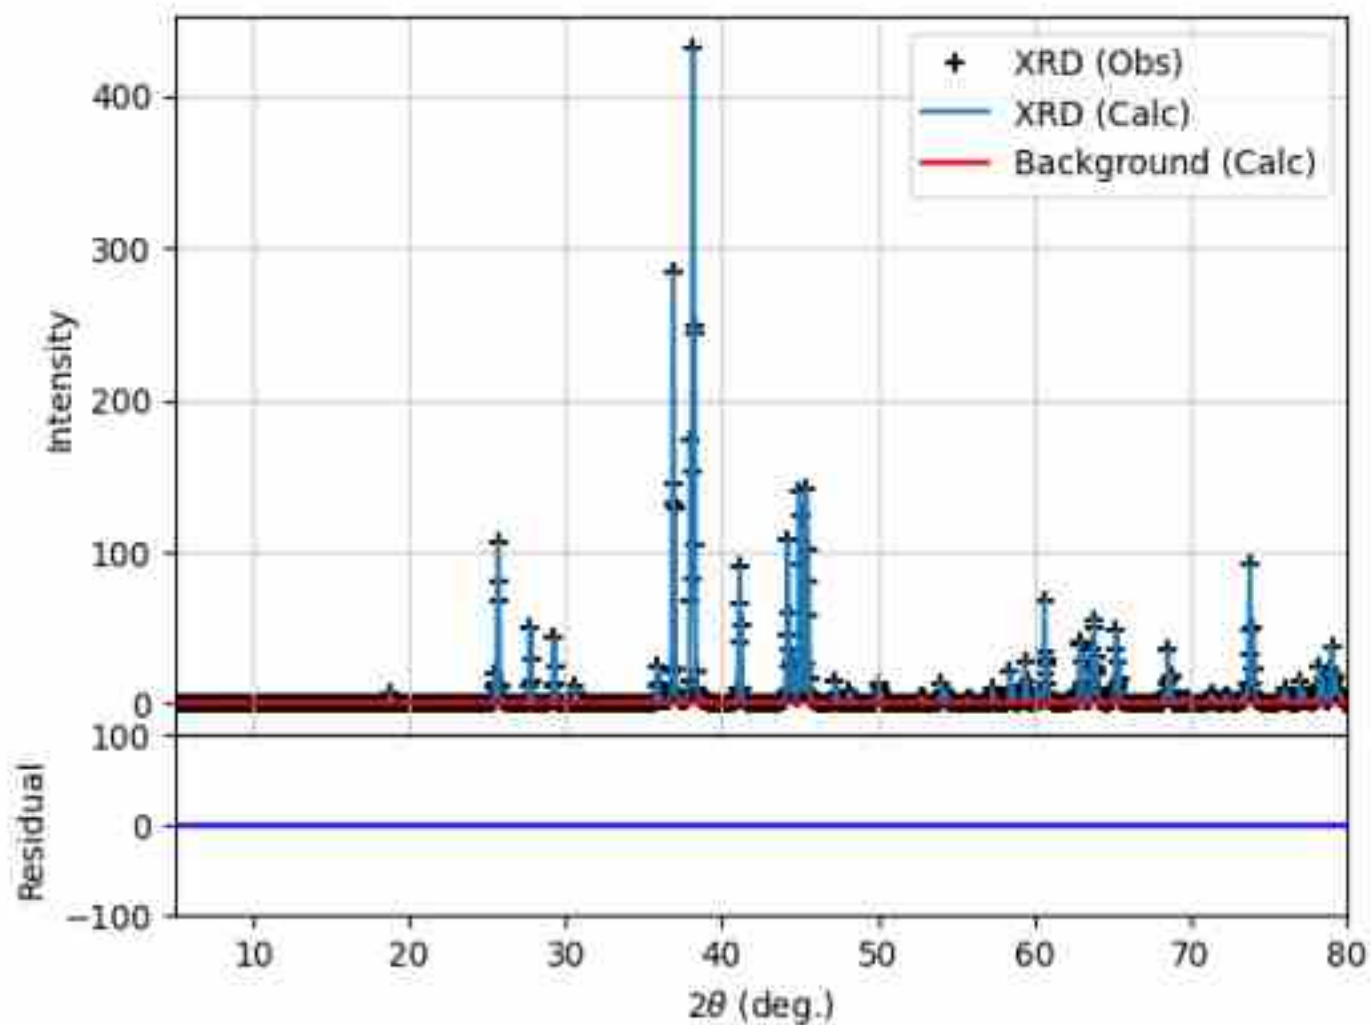

| RMSE before RR | Rwp     | RMSE after RR |
|----------------|---------|---------------|
| 0.032          | 0.00444 | 0.00043       |

# Zr10Sb6S2

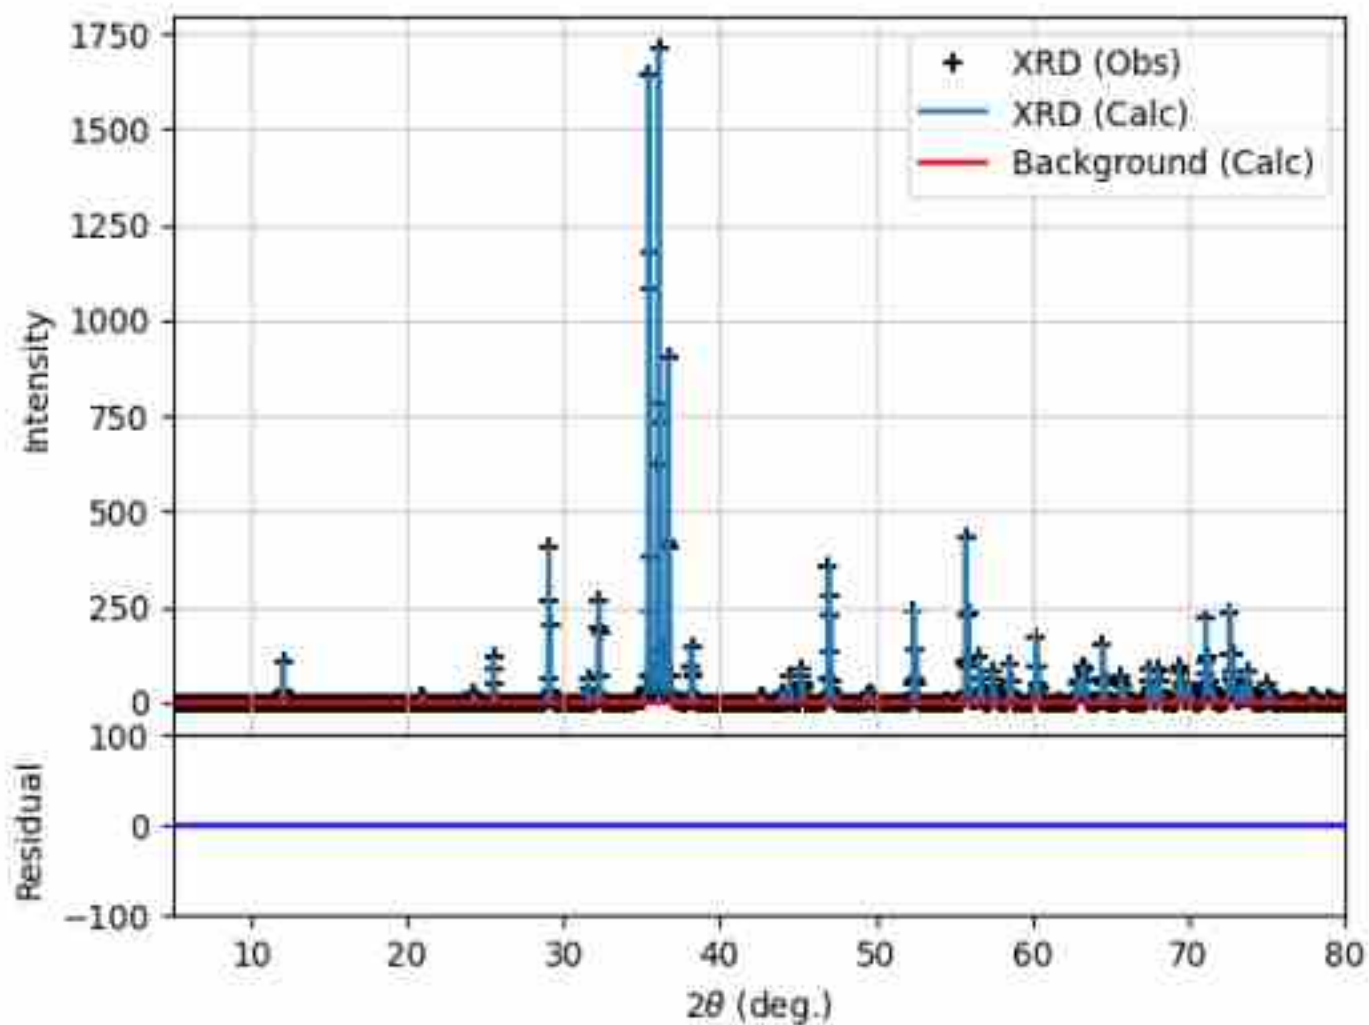

| RMSE before RR | Rwp     | RMSE after RR |
|----------------|---------|---------------|
| 0.032          | 0.00629 | 0.00041       |



# Ba1Nd2Co1O5

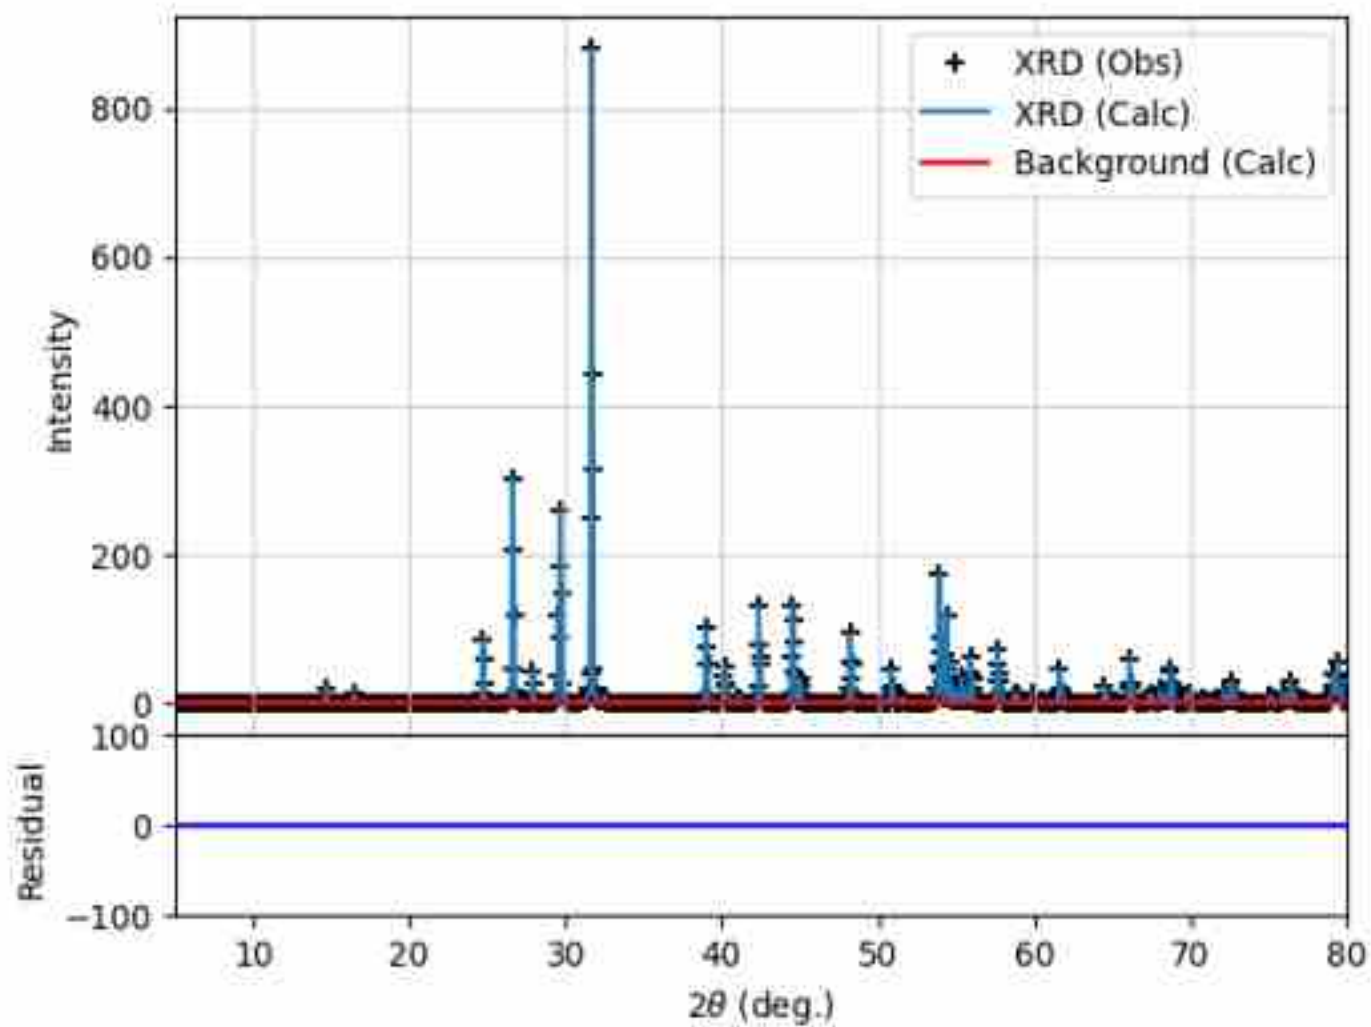

| RMSE before RR | Rwp     | RMSE after RR |
|----------------|---------|---------------|
| 0.033          | 0.00241 | 0.00072       |

# Ba1Sn1F4

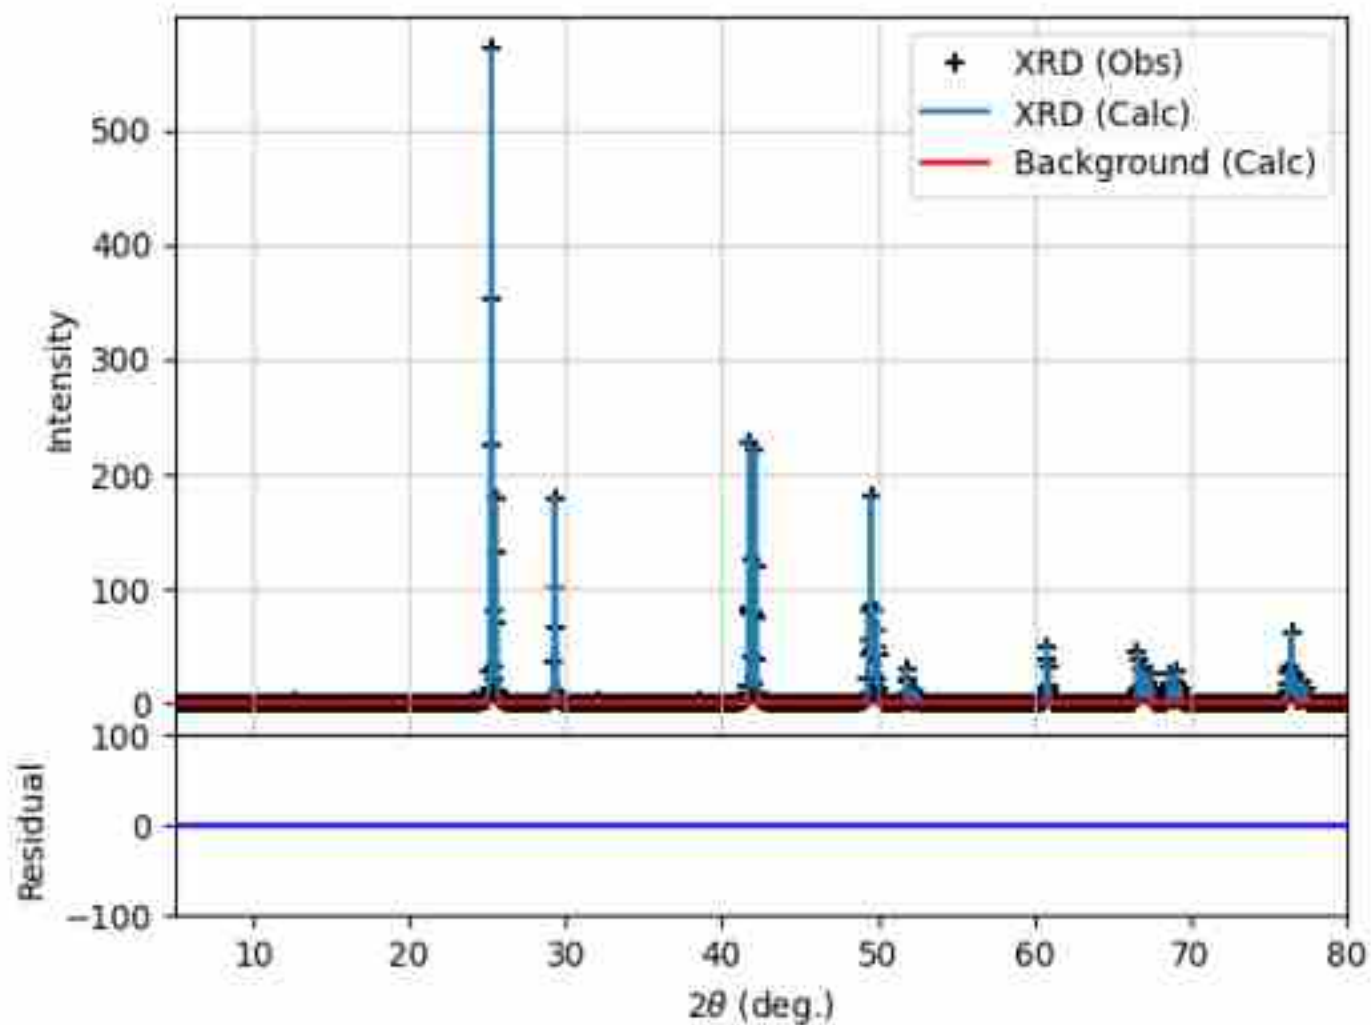

| RMSE before RR | Rwp     | RMSE after RR |
|----------------|---------|---------------|
| 0.033          | 0.00524 | 0.00083       |

# Ba<sub>2</sub>Si<sub>4</sub>N<sub>4</sub>O<sub>4</sub>

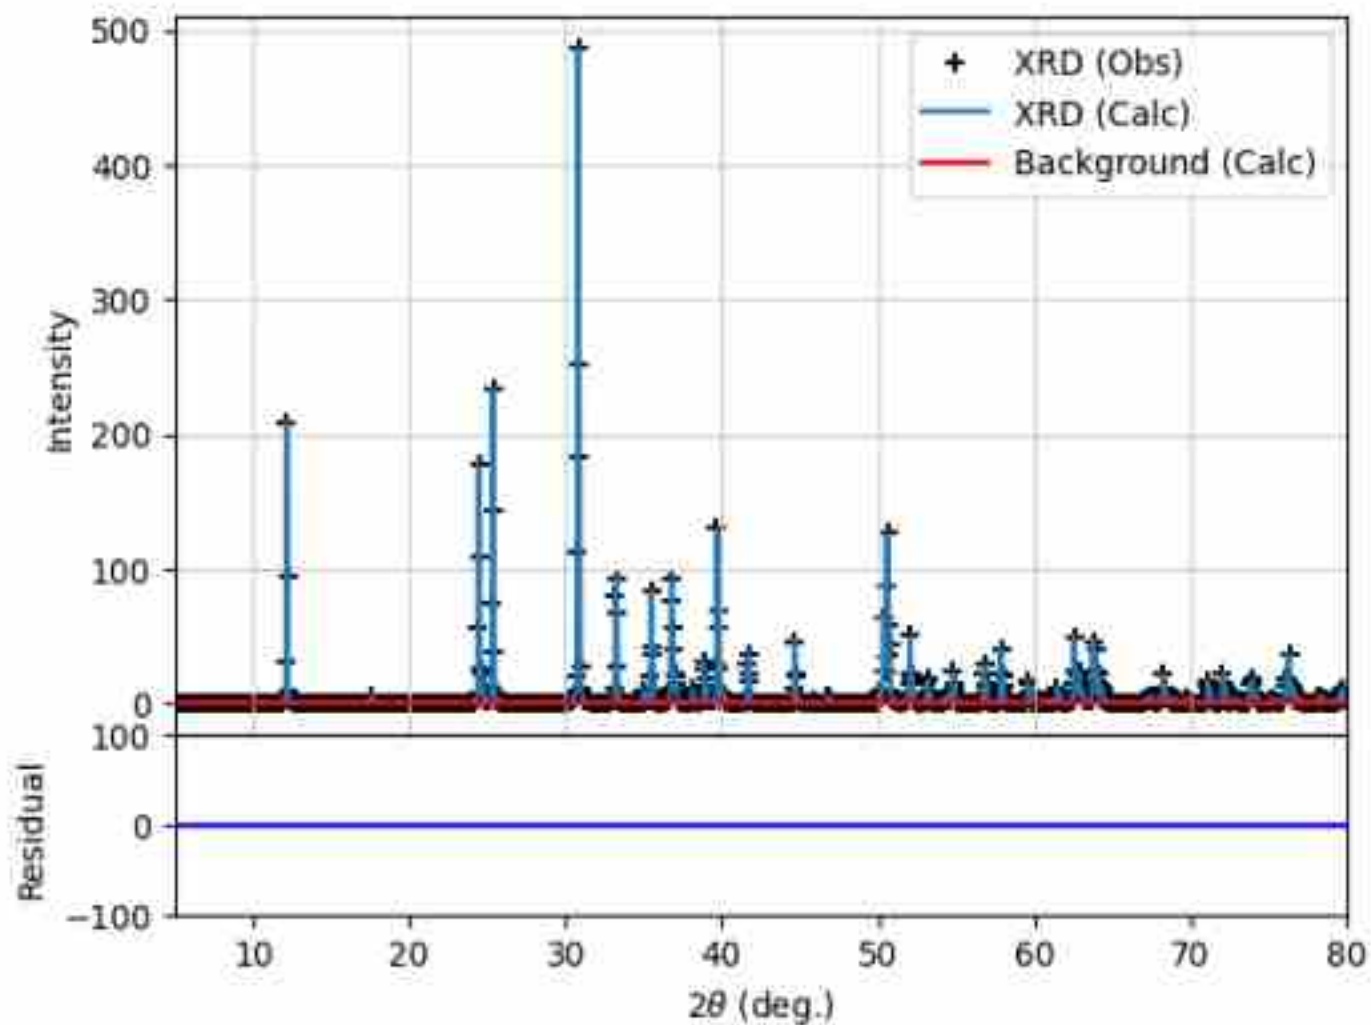

| RMSE before RR | Rwp     | RMSE after RR |
|----------------|---------|---------------|
| 0.033          | 0.00315 | 0.00131       |

# Ba<sub>2</sub>Zn<sub>2</sub>S<sub>2</sub>O<sub>2</sub>

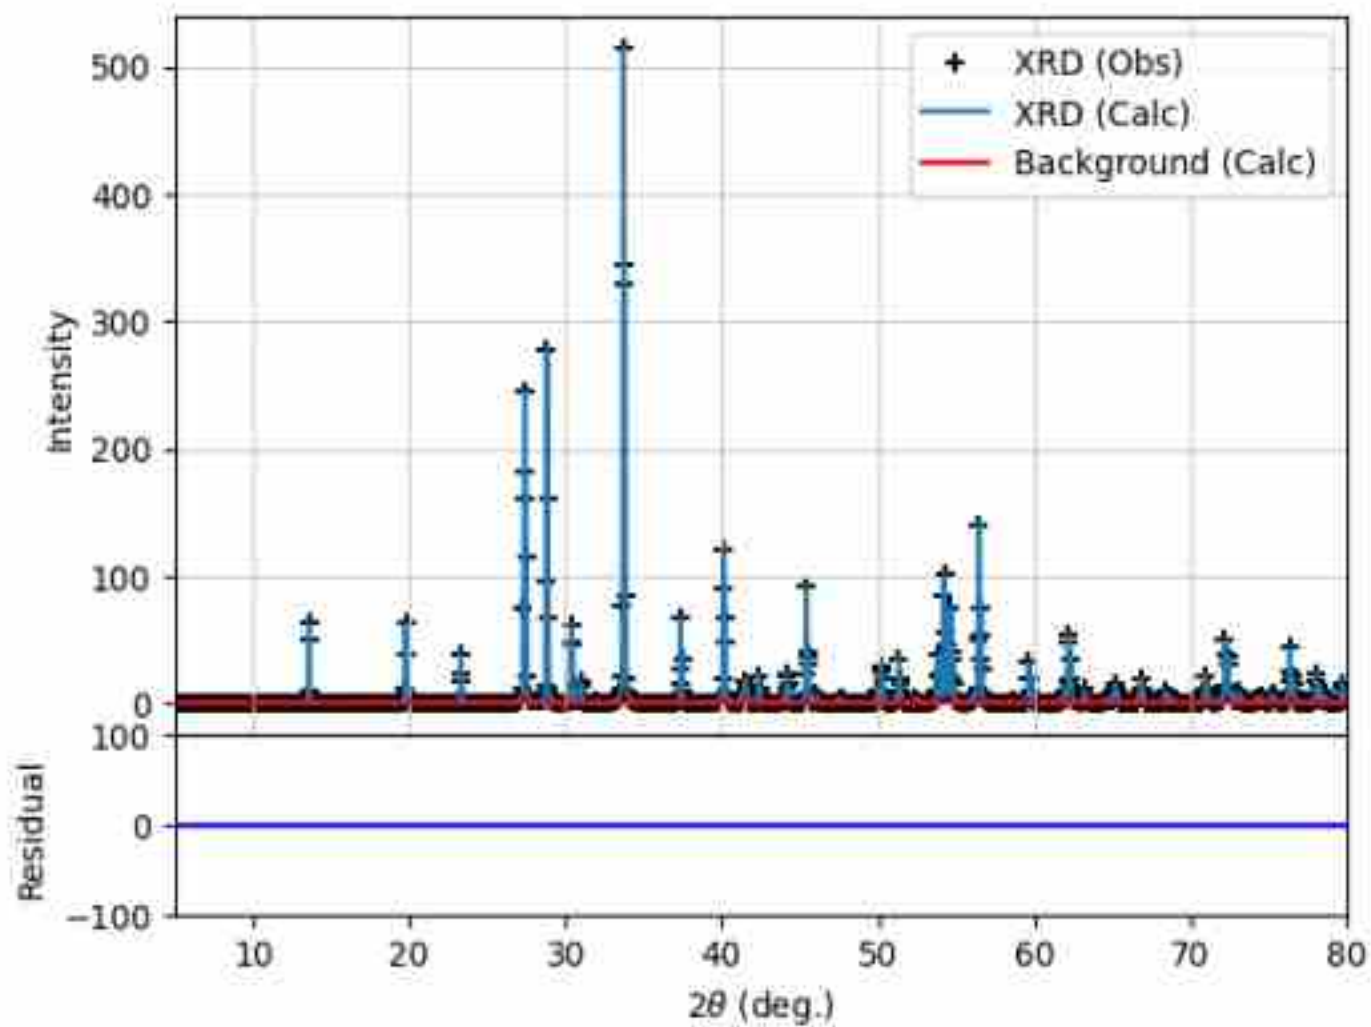

| RMSE before RR | Rwp     | RMSE after RR |
|----------------|---------|---------------|
| 0.033          | 0.00352 | 0.00081       |

# Ba6Al10

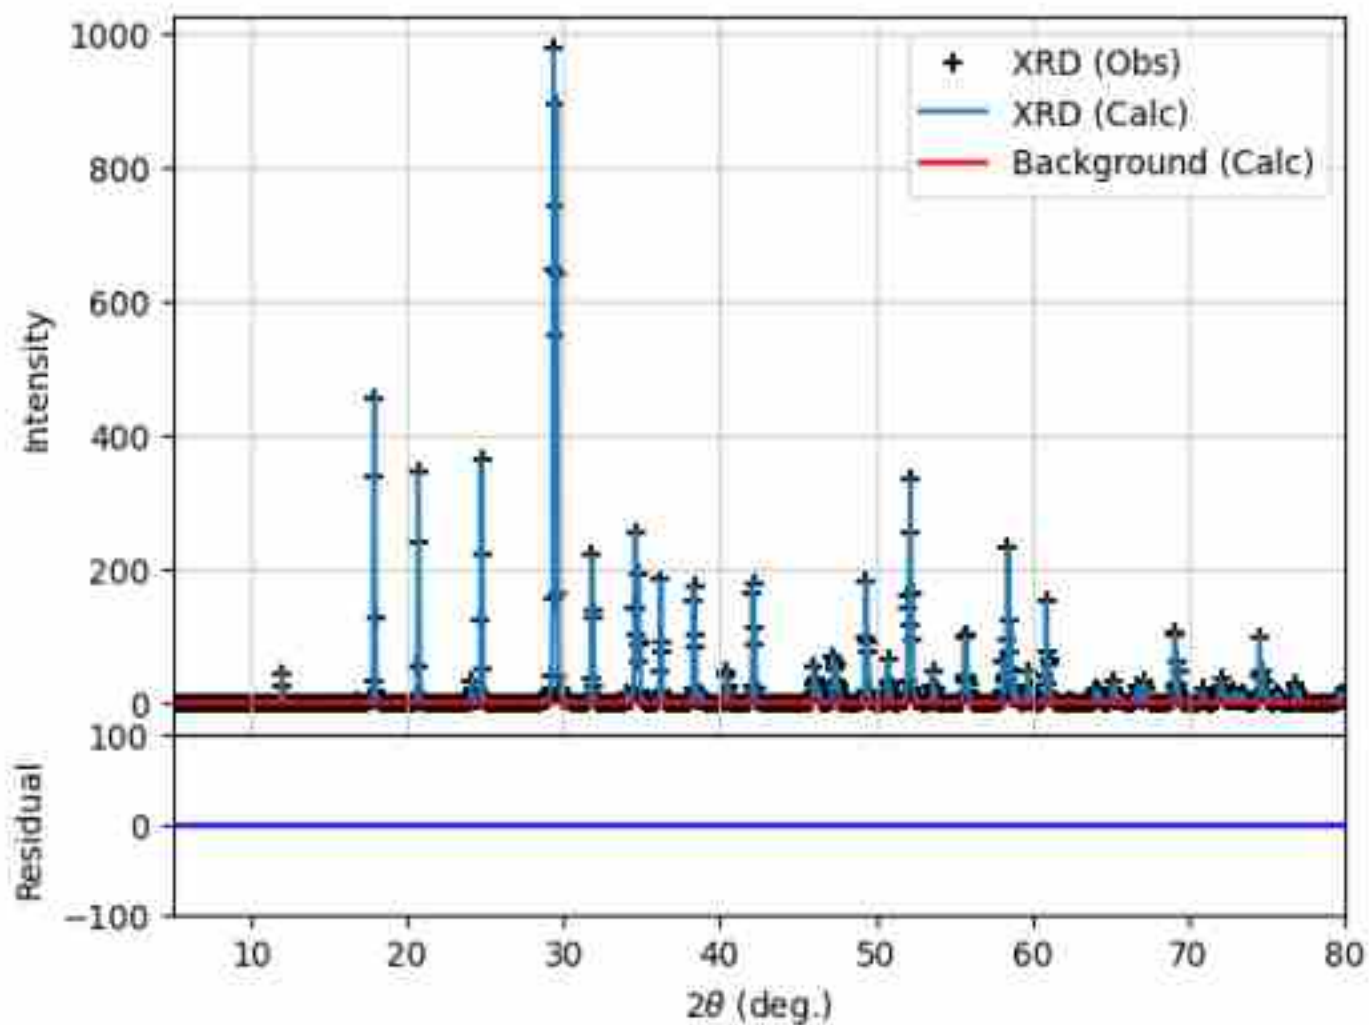

| RMSE before RR | Rwp     | RMSE after RR |
|----------------|---------|---------------|
| 0.033          | 0.01257 | 0.00187       |

# Ca<sub>2</sub>Fe<sub>2</sub>Re<sub>2</sub>O<sub>12</sub>

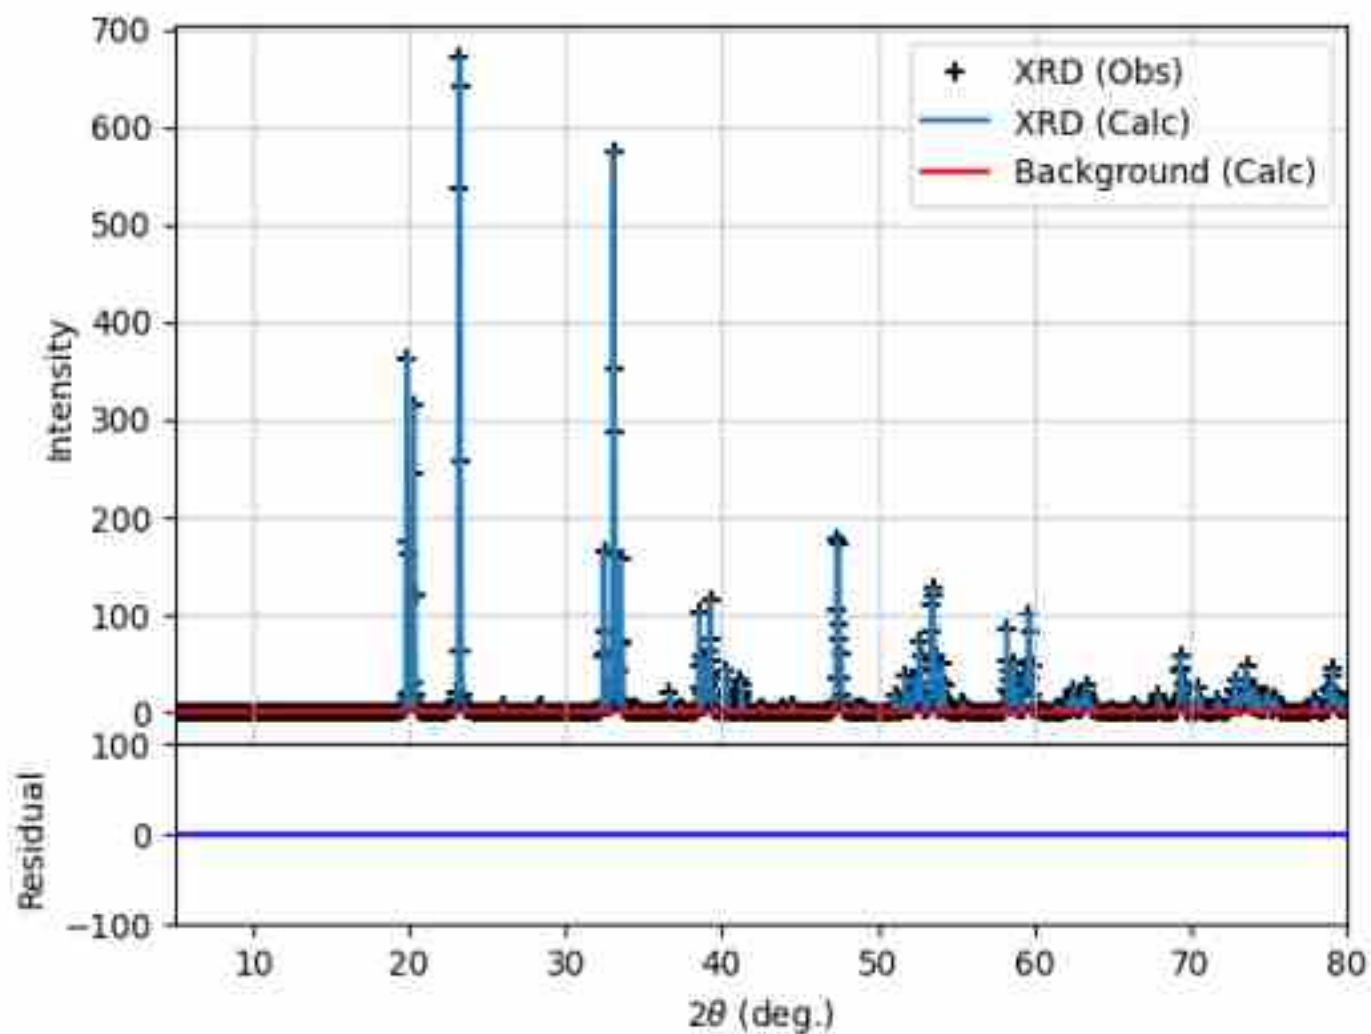

| RMSE before RR | Rwp     | RMSE after RR |
|----------------|---------|---------------|
| 0.033          | 0.00303 | 0.00095       |

# Ca<sub>2</sub>H<sub>2</sub>Cl<sub>2</sub>O<sub>2</sub>

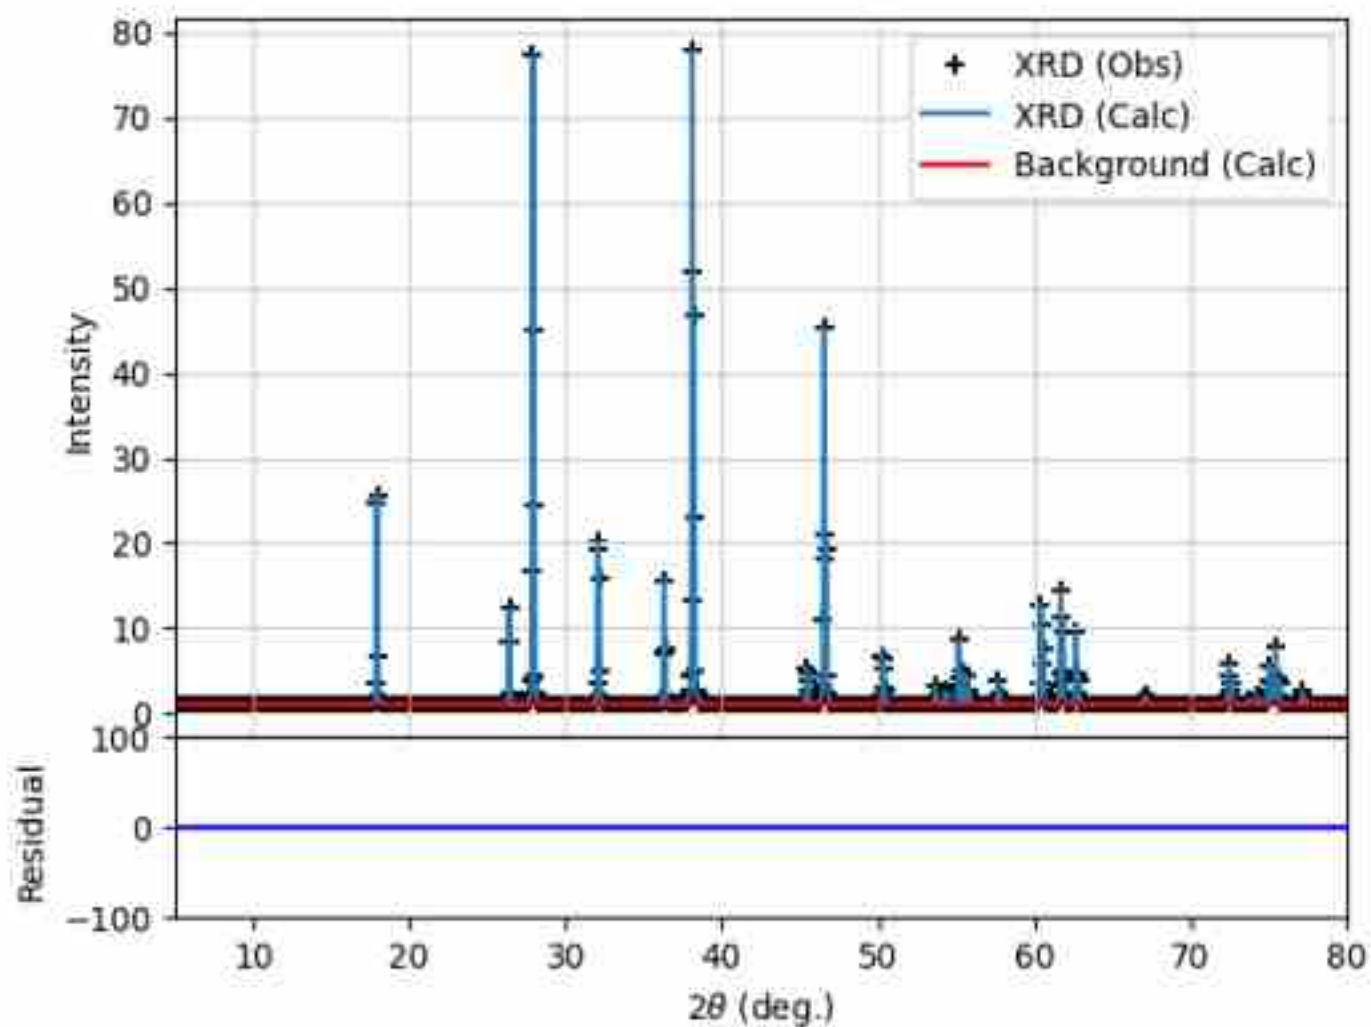

| RMSE before RR | Rwp     | RMSE after RR |
|----------------|---------|---------------|
| 0.033          | 0.00305 | 0.00418       |

# Ce<sub>2</sub>Al<sub>2</sub>O<sub>6</sub>

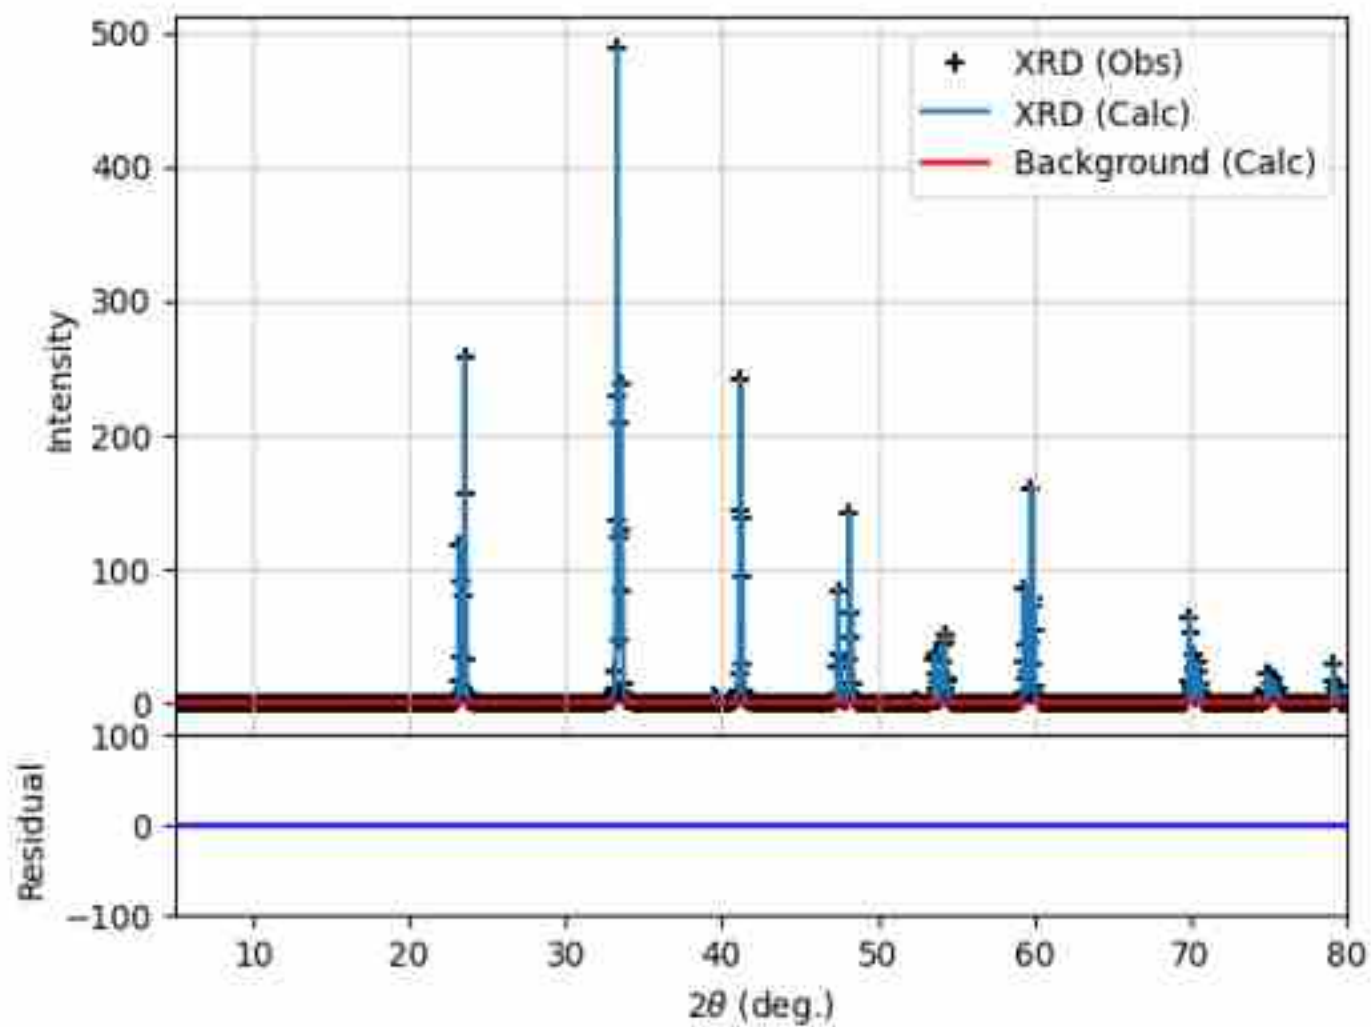

| RMSE before RR | Rwp     | RMSE after RR |
|----------------|---------|---------------|
| 0.033          | 0.00521 | 0.00207       |



Ce<sub>2</sub>Zn<sub>6</sub>P<sub>6</sub>

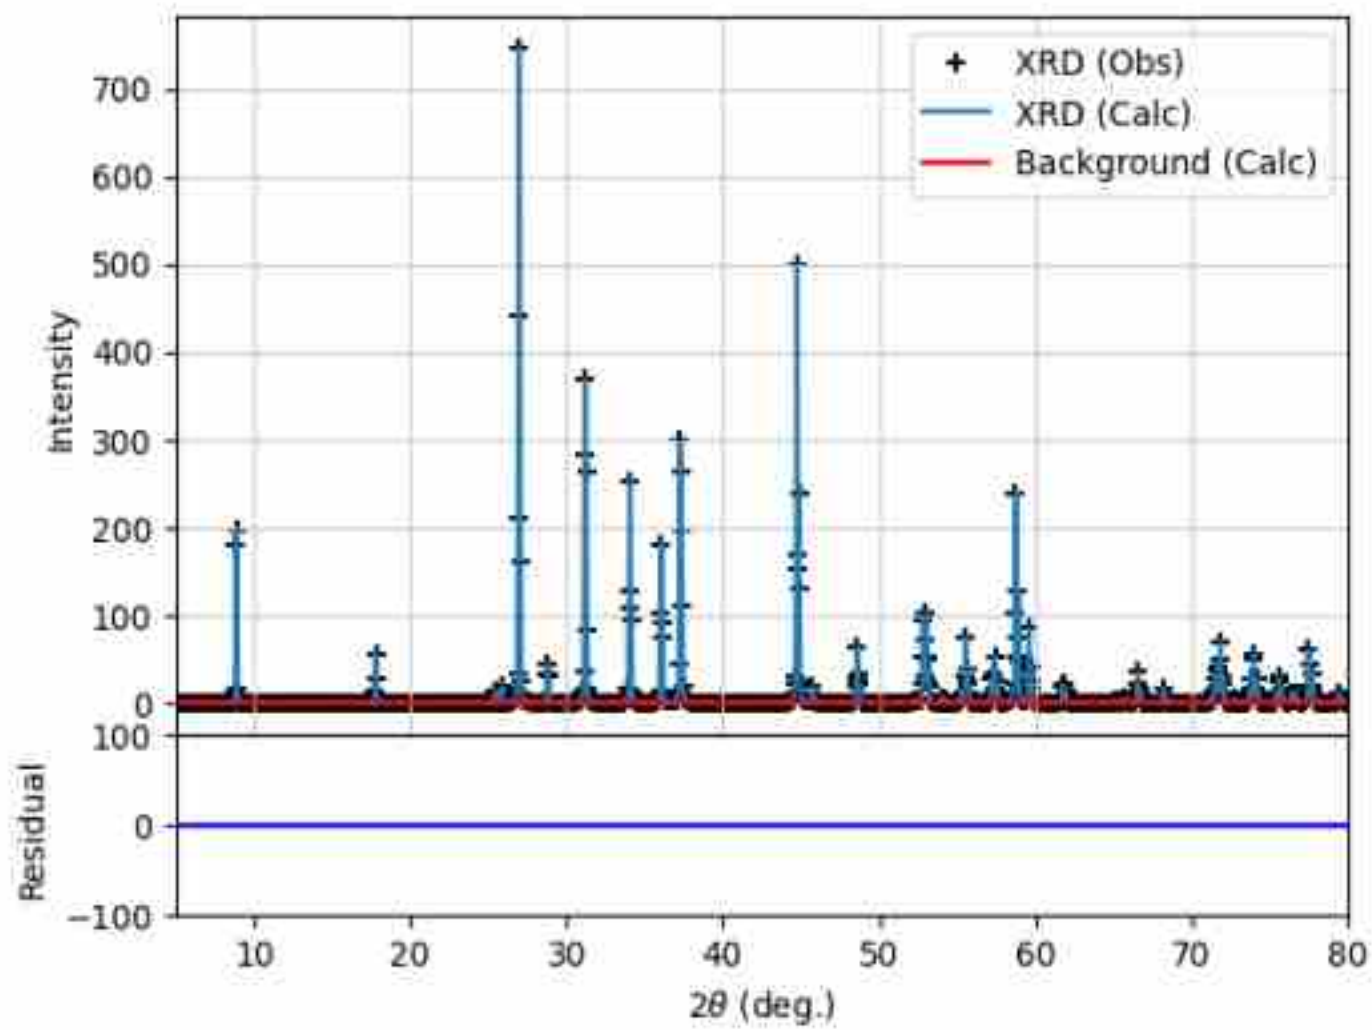

| RMSE before RR | Rwp     | RMSE after RR |
|----------------|---------|---------------|
| 0.033          | 0.00342 | 0.00083       |

# Ce14Rh6

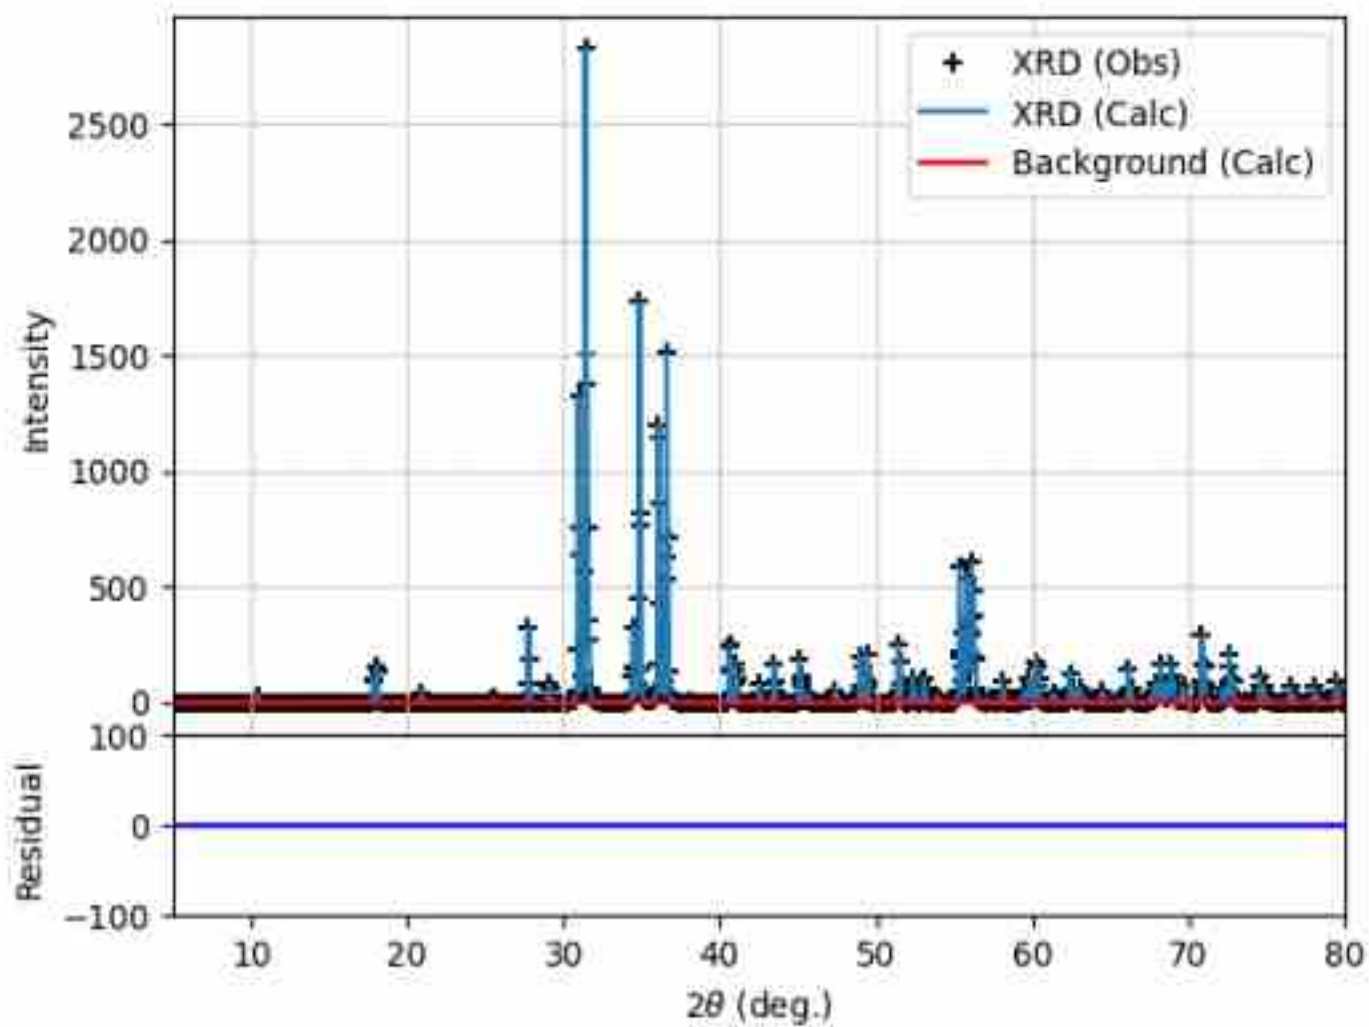

| RMSE before RR | Rwp     | RMSE after RR |
|----------------|---------|---------------|
| 0.033          | 0.00356 | 0.00029       |

# Co<sub>2</sub>Pd<sub>4</sub>Se<sub>4</sub>

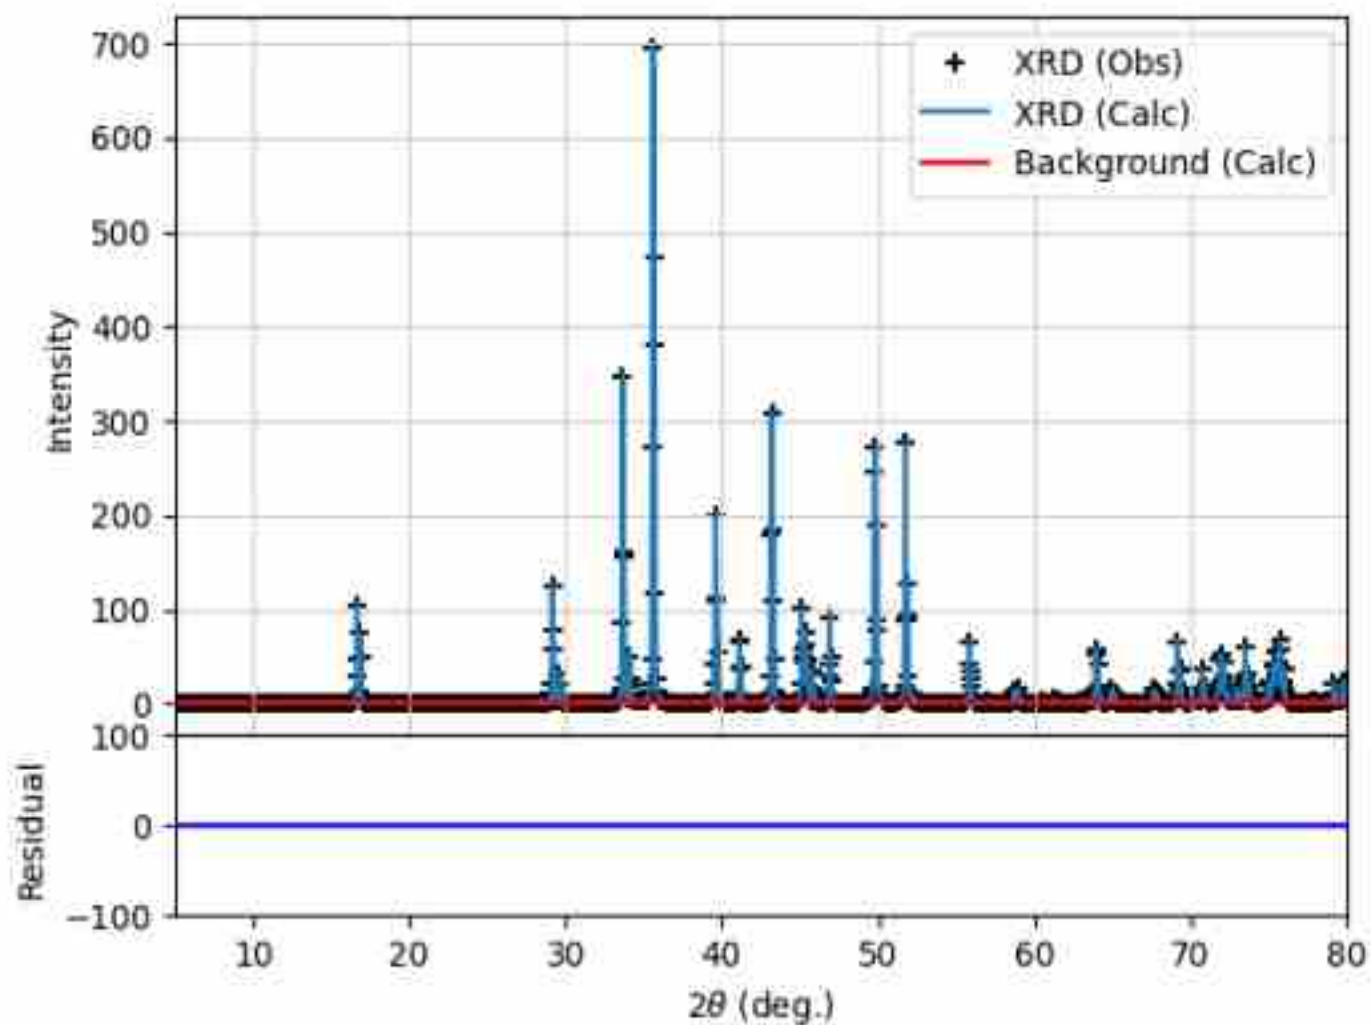

| RMSE before RR | Rwp     | RMSE after RR |
|----------------|---------|---------------|
| 0.033          | 0.00405 | 0.00051       |

# Cr<sub>5</sub>In<sub>1</sub>S<sub>8</sub>

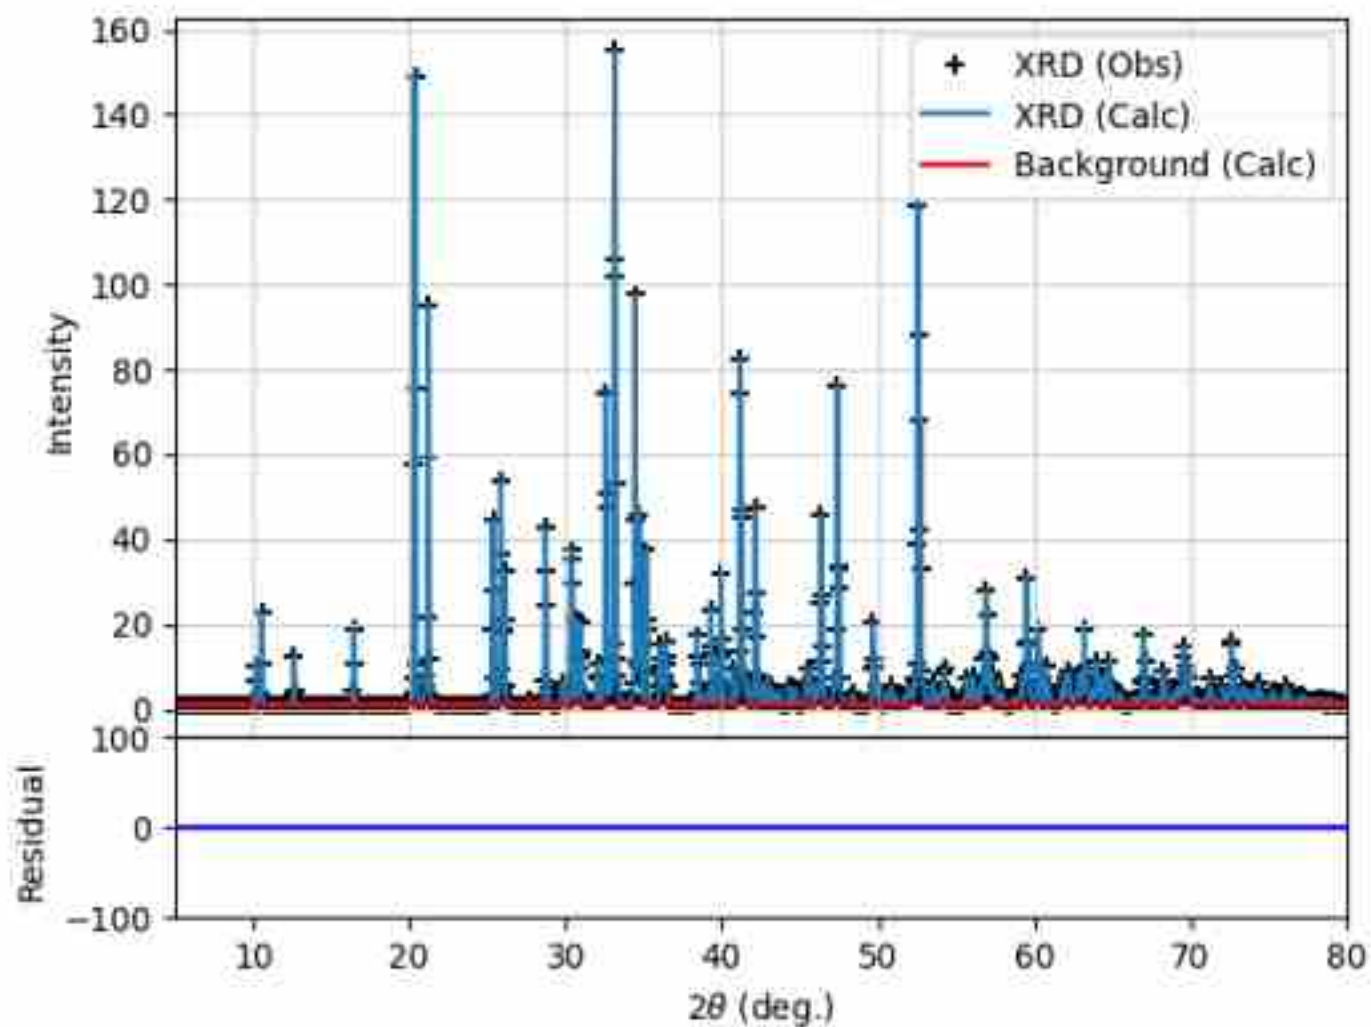

| RMSE before RR | Rwp    | RMSE after RR |
|----------------|--------|---------------|
| 0.033          | 0.0025 | 0.00045       |

# Cr12C4

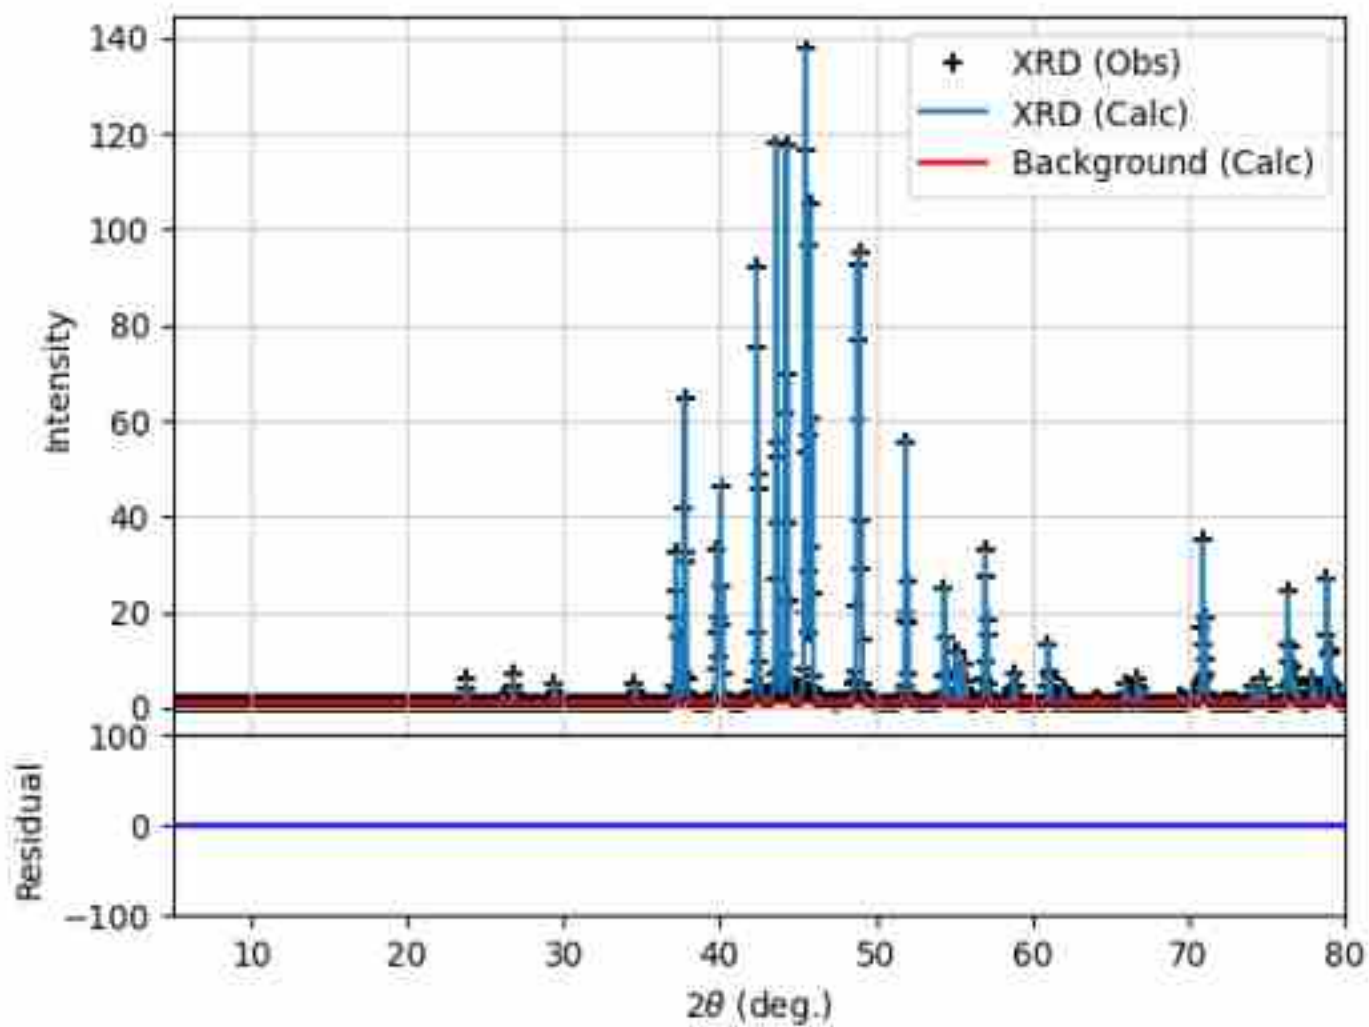

| RMSE before RR | Rwp     | RMSE after RR |
|----------------|---------|---------------|
| 0.033          | 0.00421 | 0.00134       |

# Cs1K2Ho1P2O8

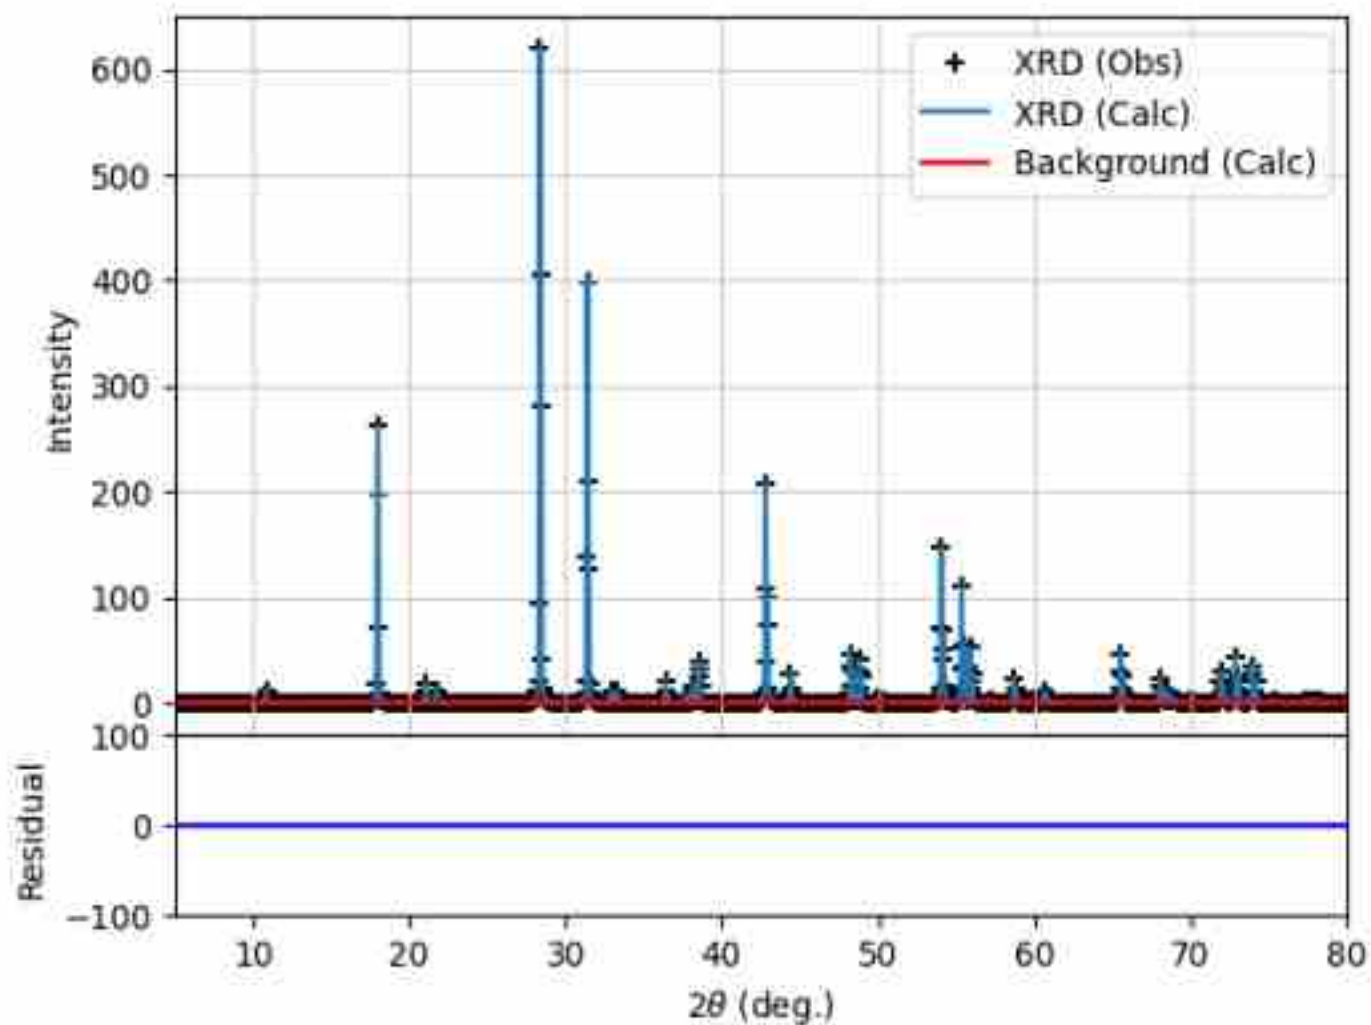

| RMSE before RR | Rwp     | RMSE after RR |
|----------------|---------|---------------|
| 0.033          | 0.00404 | 0.00202       |

# Cs<sub>3</sub>Li<sub>2</sub>C15

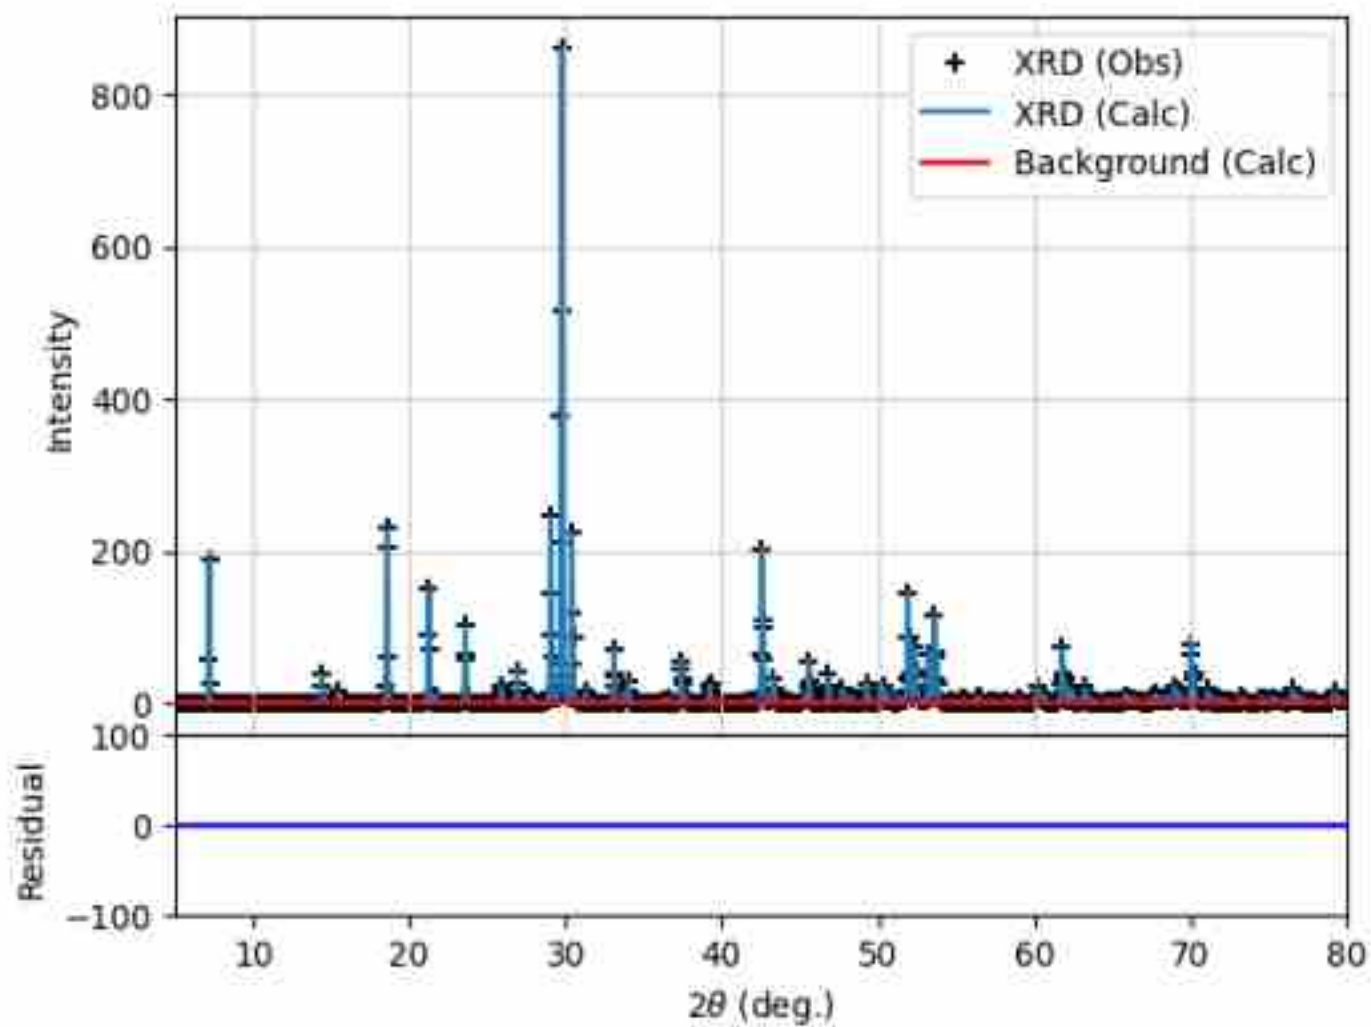

| RMSE before RR | Rwp     | RMSE after RR |
|----------------|---------|---------------|
| 0.033          | 0.00248 | 0.00058       |

# Er<sub>12</sub>In<sub>3</sub>Fe<sub>2</sub>

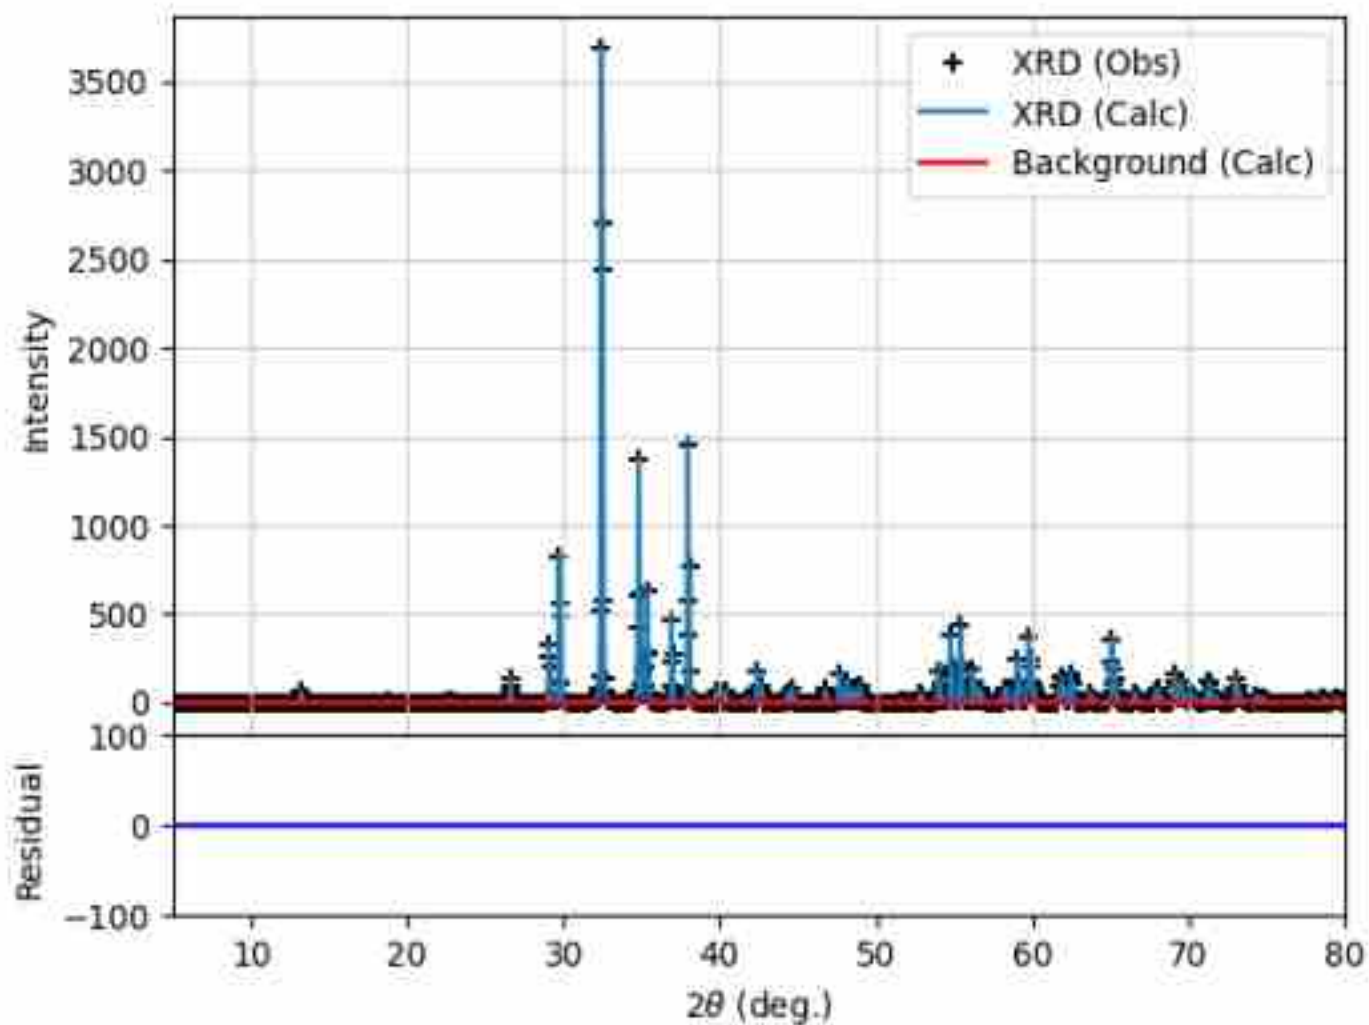

| RMSE before RR | Rwp     | RMSE after RR |
|----------------|---------|---------------|
| 0.033          | 0.00412 | 0.0004        |



# Eu<sub>4</sub>P<sub>4</sub>Ir<sub>4</sub>

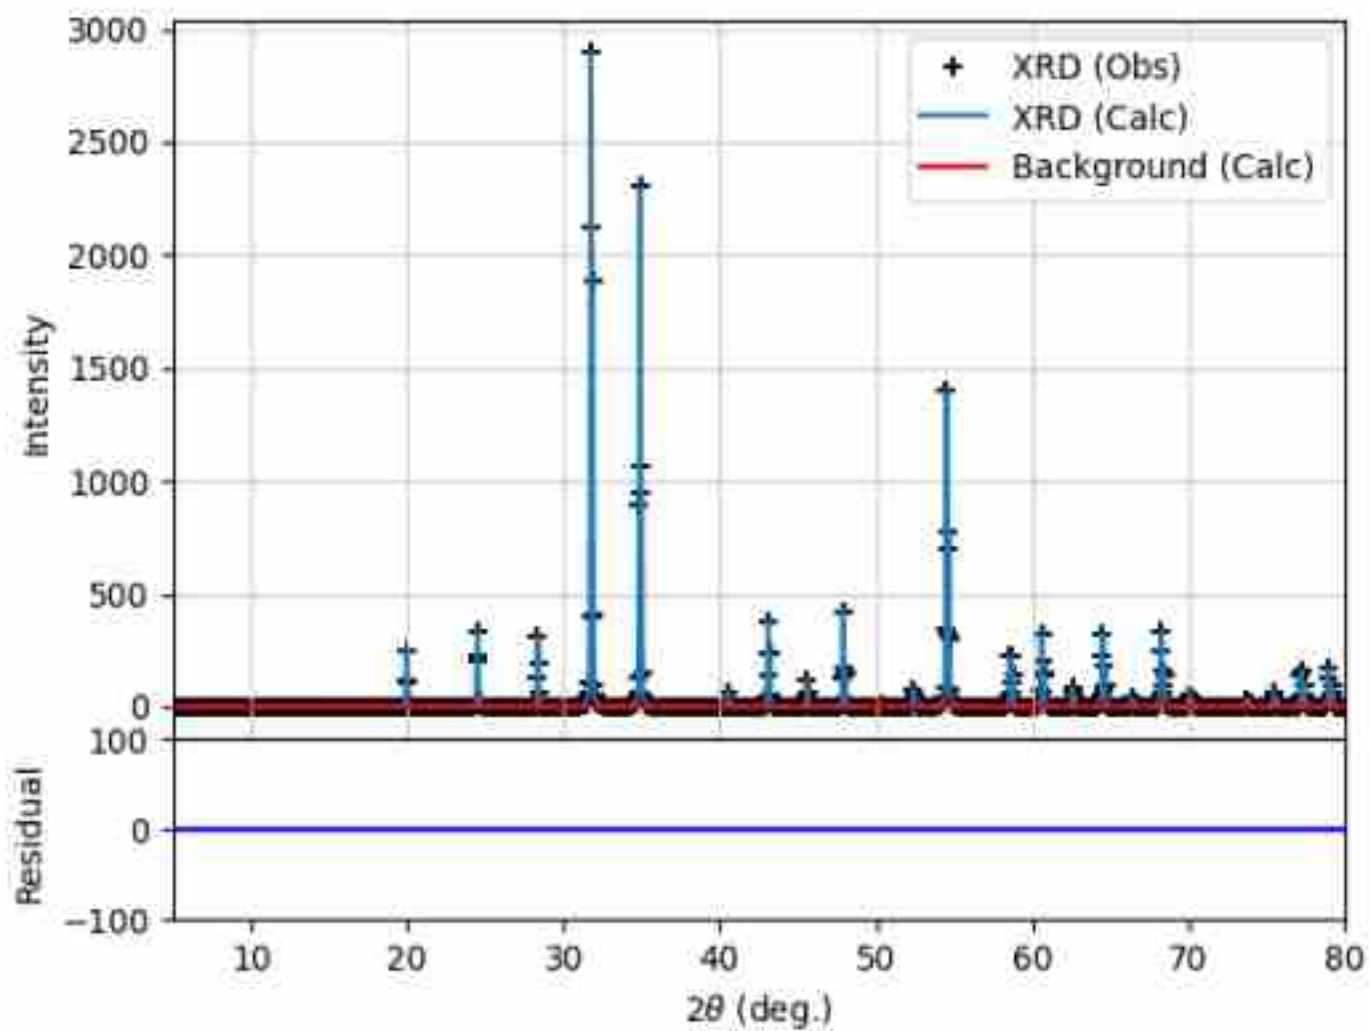

| RMSE before RR | Rwp     | RMSE after RR |
|----------------|---------|---------------|
| 0.033          | 0.00411 | 0.00122       |

# Fe<sub>4</sub>Sb<sub>4</sub>S<sub>4</sub>

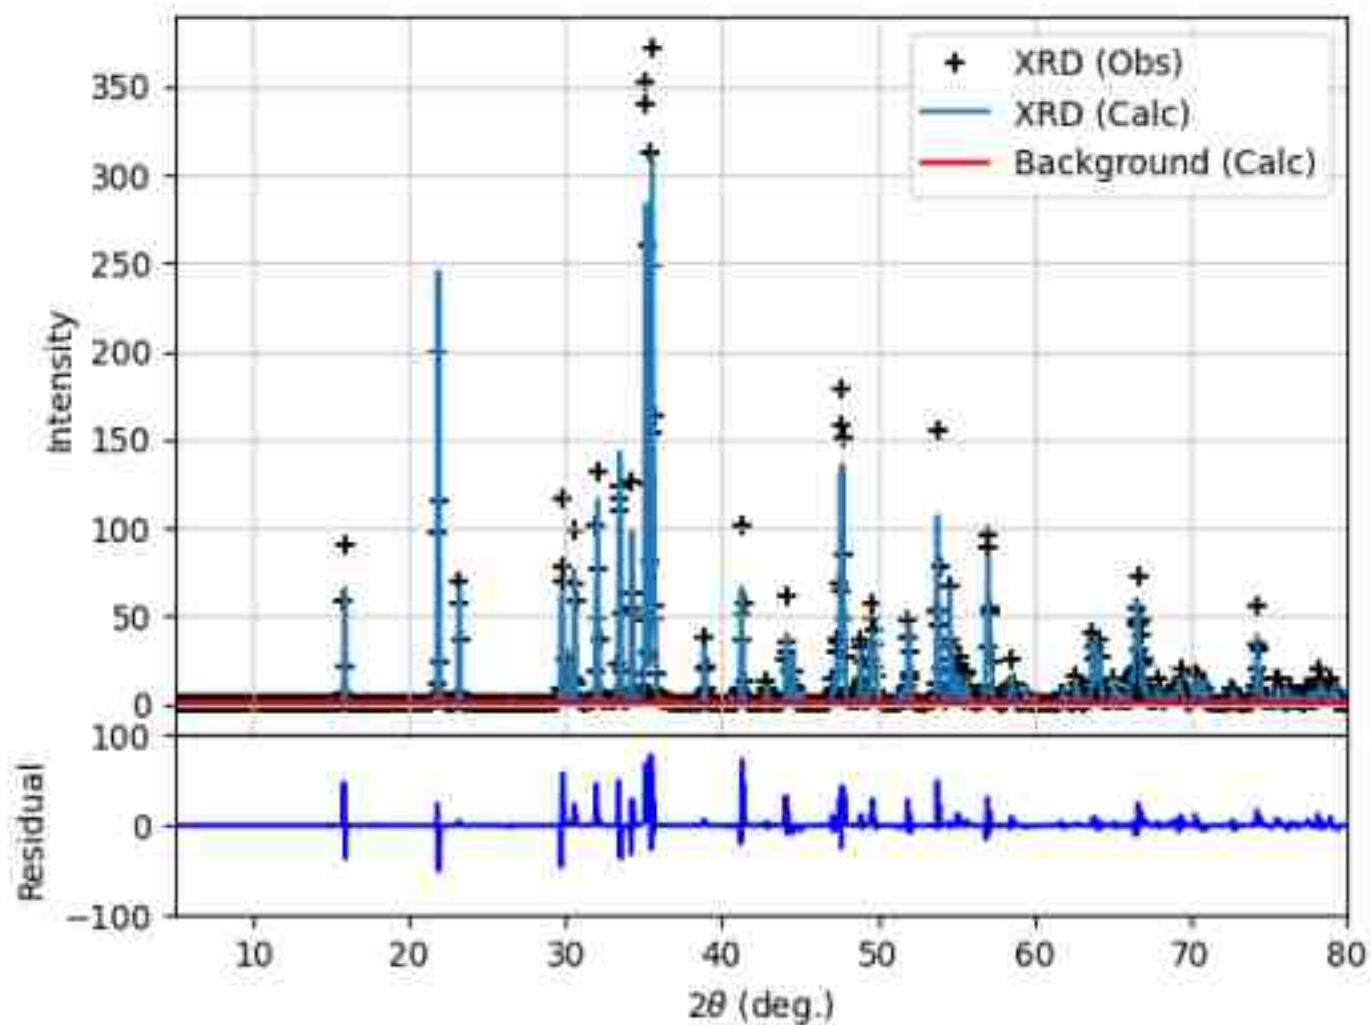

| RMSE before RR | Rwp      | RMSE after RR |
|----------------|----------|---------------|
| 0.033          | 34.64677 | 0.09558       |

# In<sub>2</sub>Sn<sub>2</sub>Br<sub>6</sub>

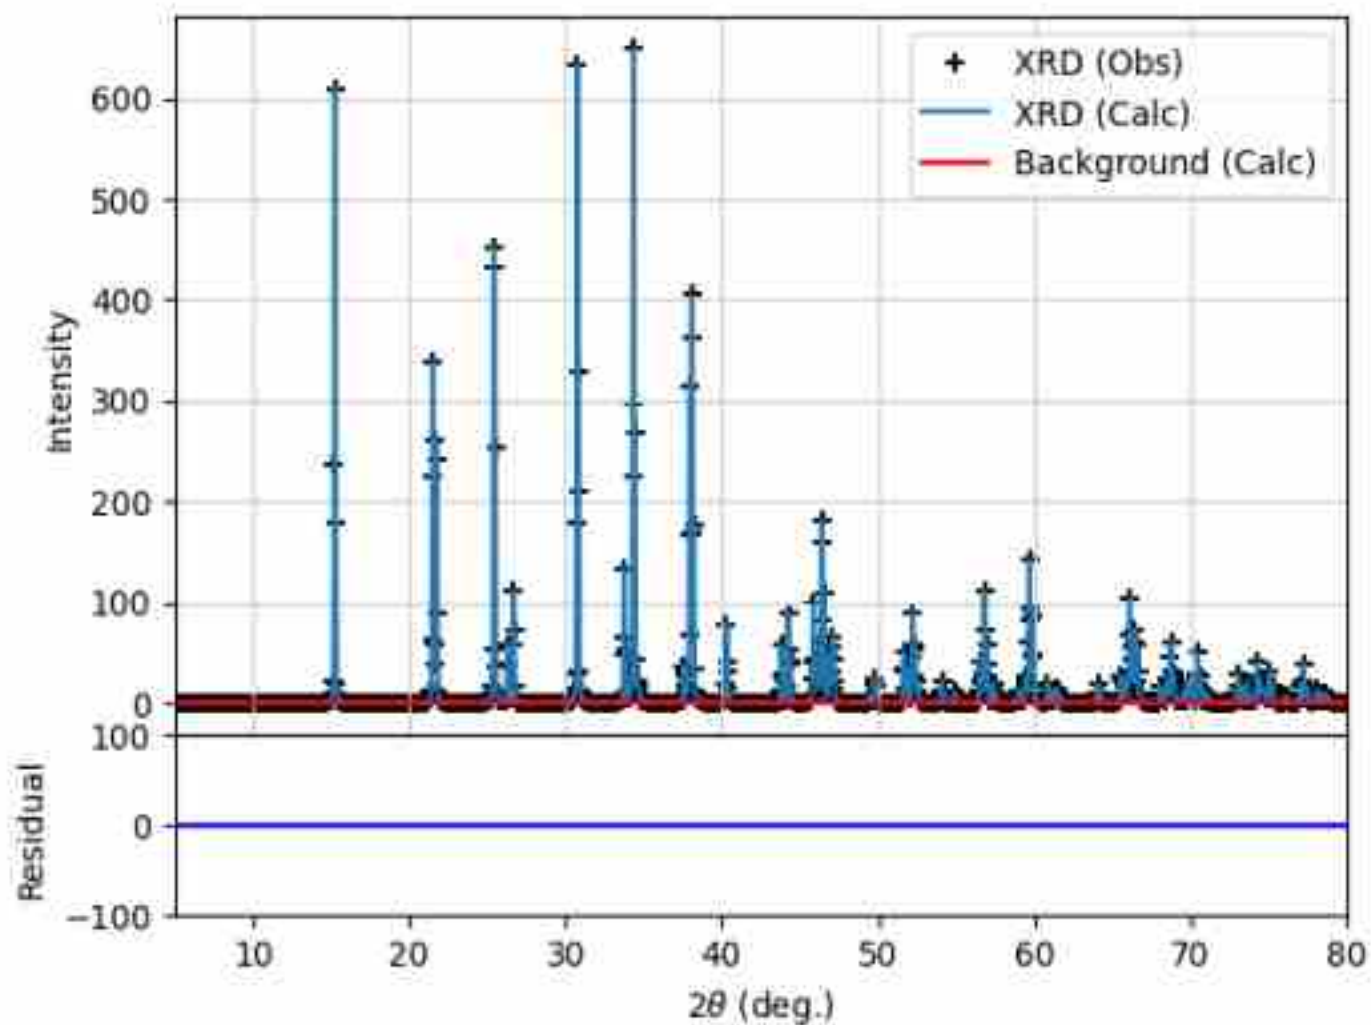

| RMSE before RR | Rwp     | RMSE after RR |
|----------------|---------|---------------|
| 0.033          | 0.00344 | 0.00043       |

# K1As4C11O6

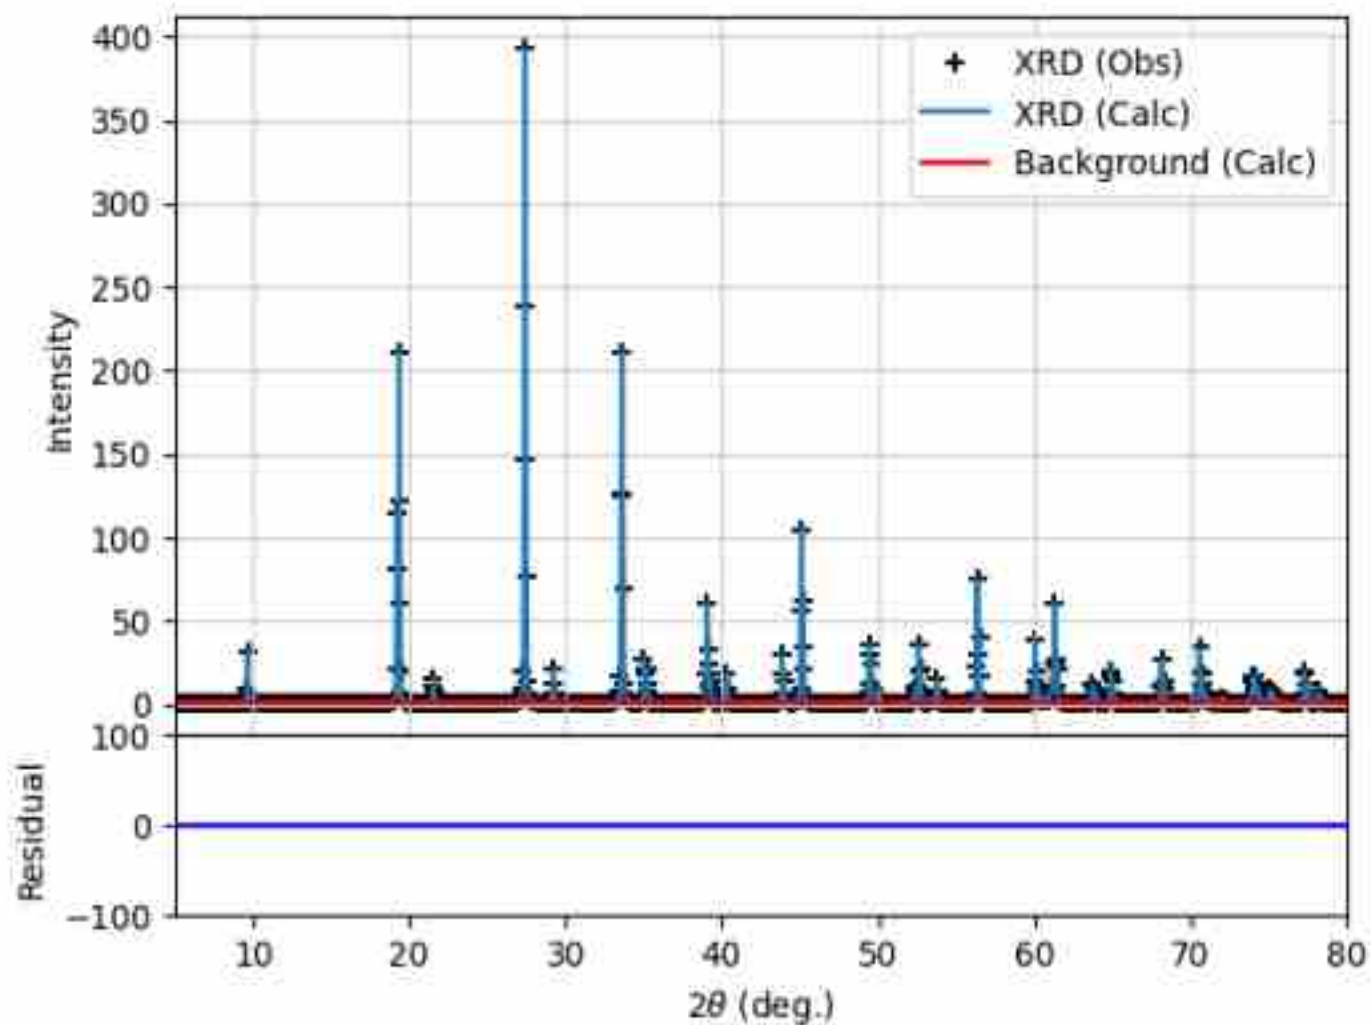

| RMSE before RR | Rwp     | RMSE after RR |
|----------------|---------|---------------|
| 0.033          | 0.00243 | 0.00068       |

# K<sub>2</sub>CuF<sub>4</sub>

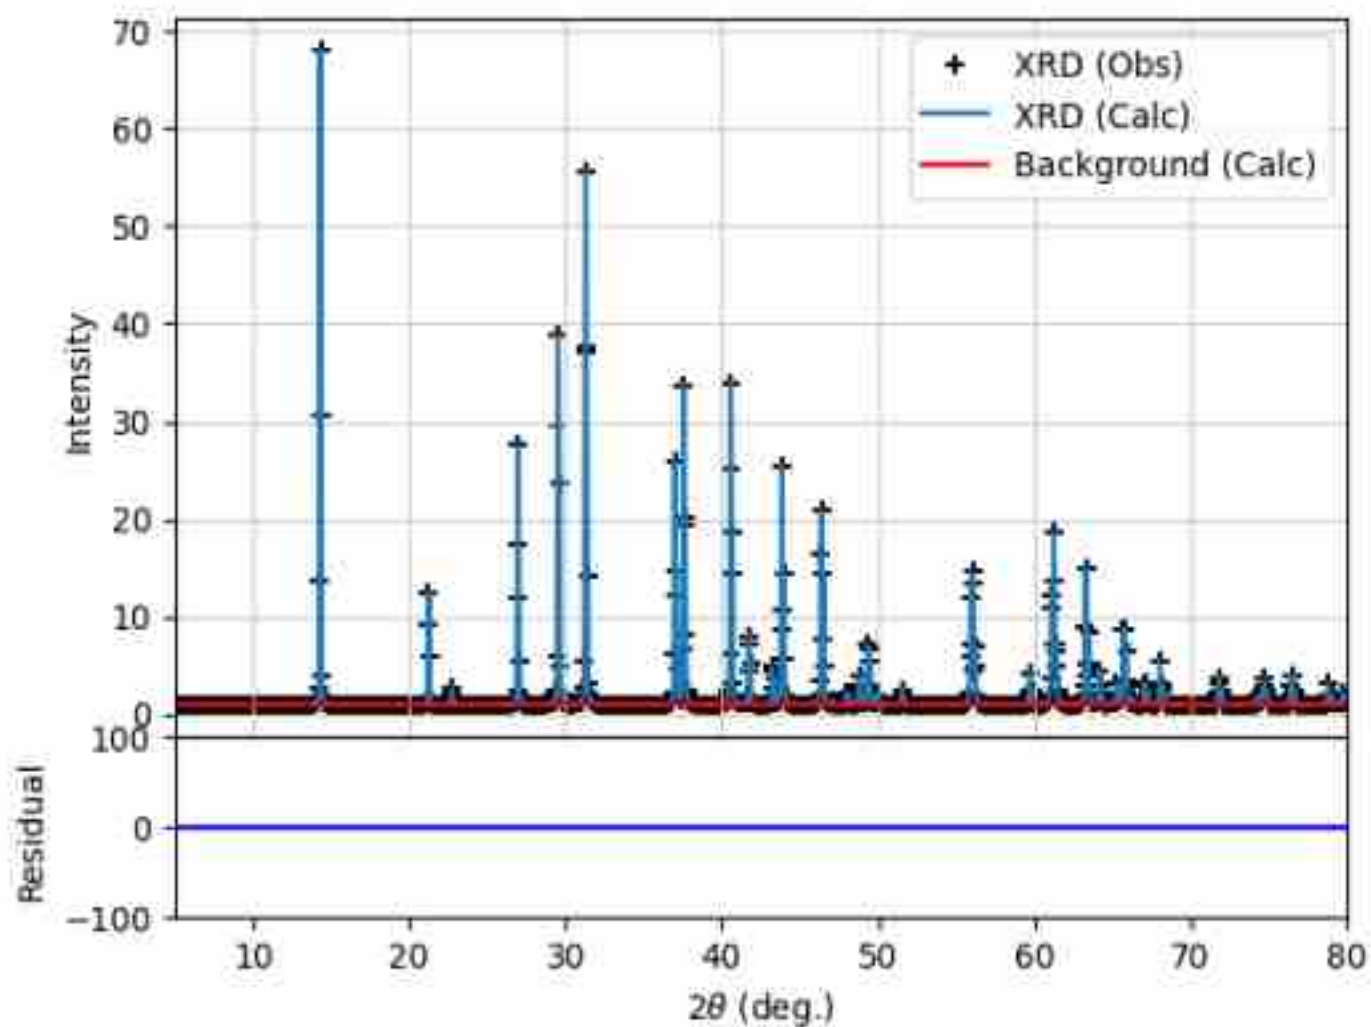

| RMSE before RR | Rwp    | RMSE after RR |
|----------------|--------|---------------|
| 0.033          | 0.0026 | 0.00066       |

# K2P2S6

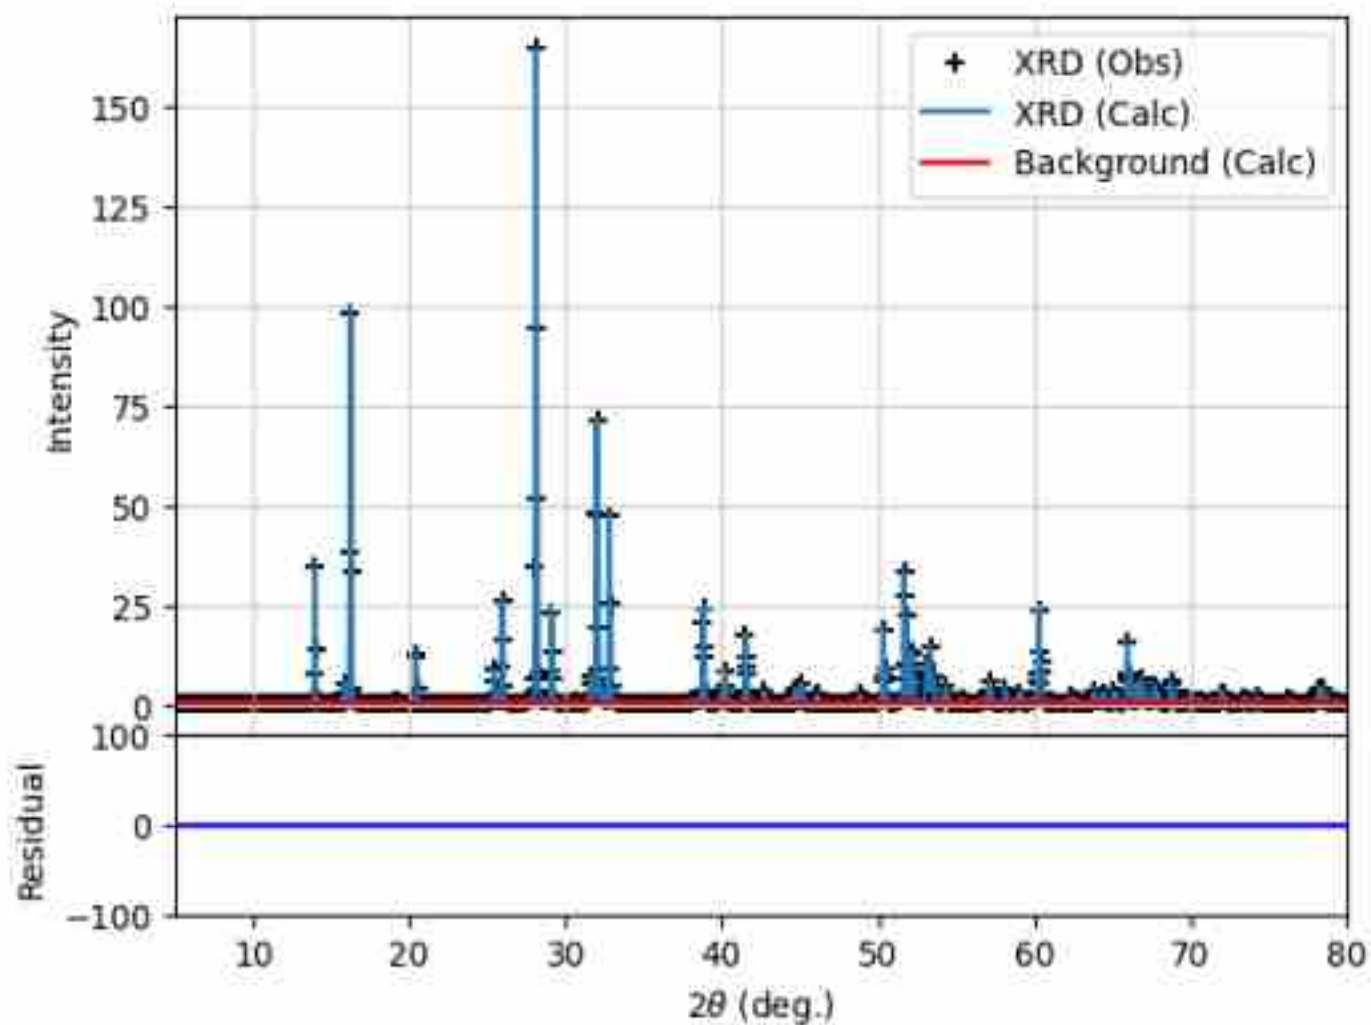

| RMSE before RR | Rwp     | RMSE after RR |
|----------------|---------|---------------|
| 0.033          | 0.00289 | 0.00034       |

# K<sub>2</sub>Pr<sub>2</sub>Ge<sub>2</sub>Se<sub>8</sub>

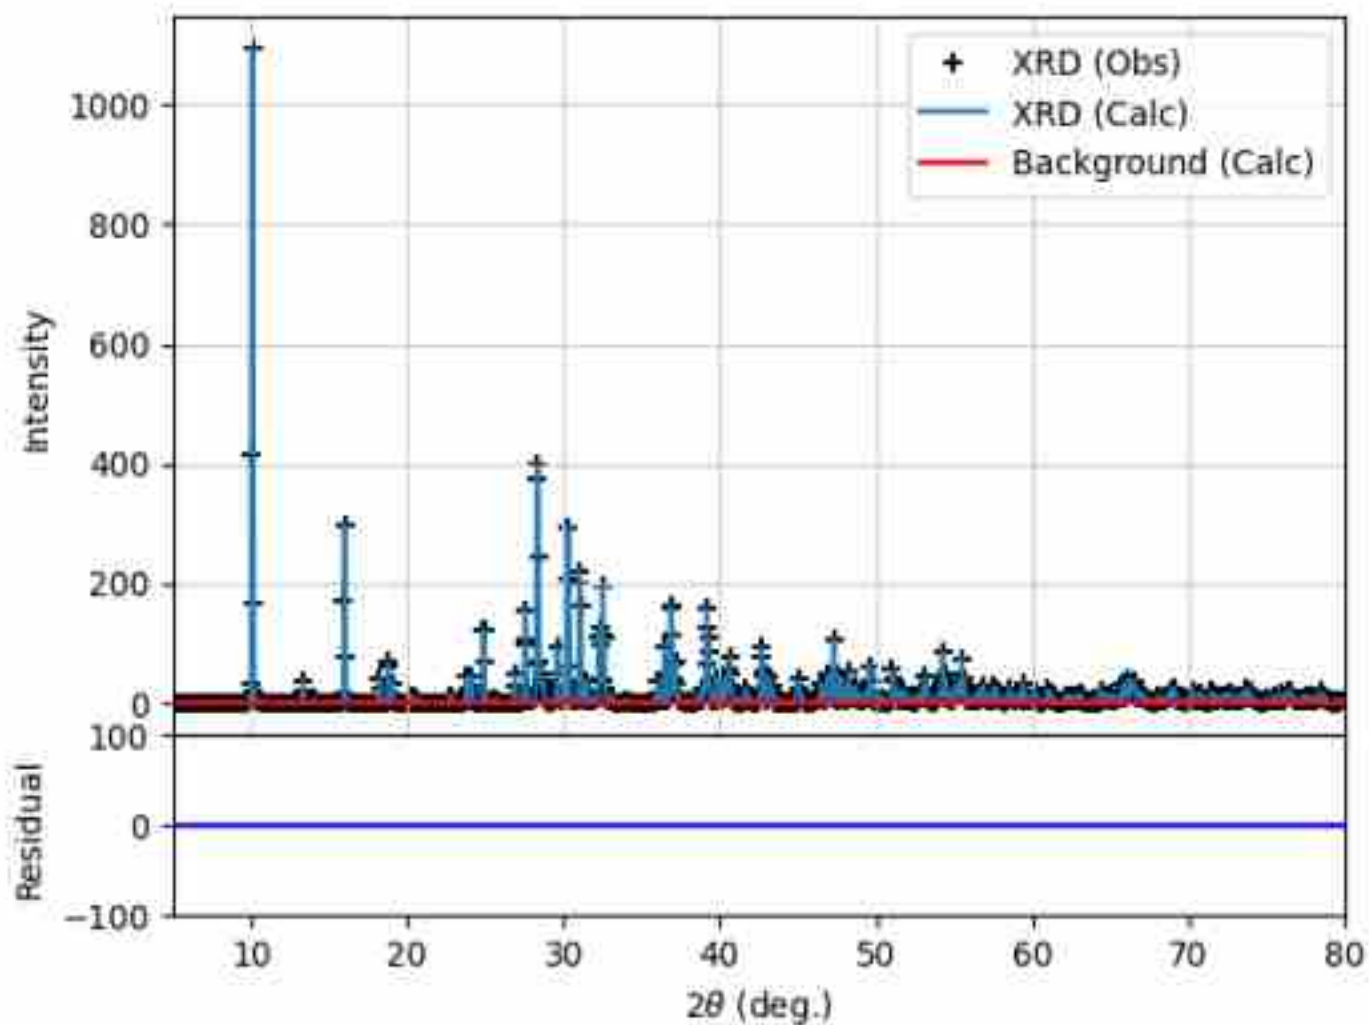

| RMSE before RR | Rwp     | RMSE after RR |
|----------------|---------|---------------|
| 0.033          | 0.00341 | 0.00045       |

# K2Rb1Sc1V2O8

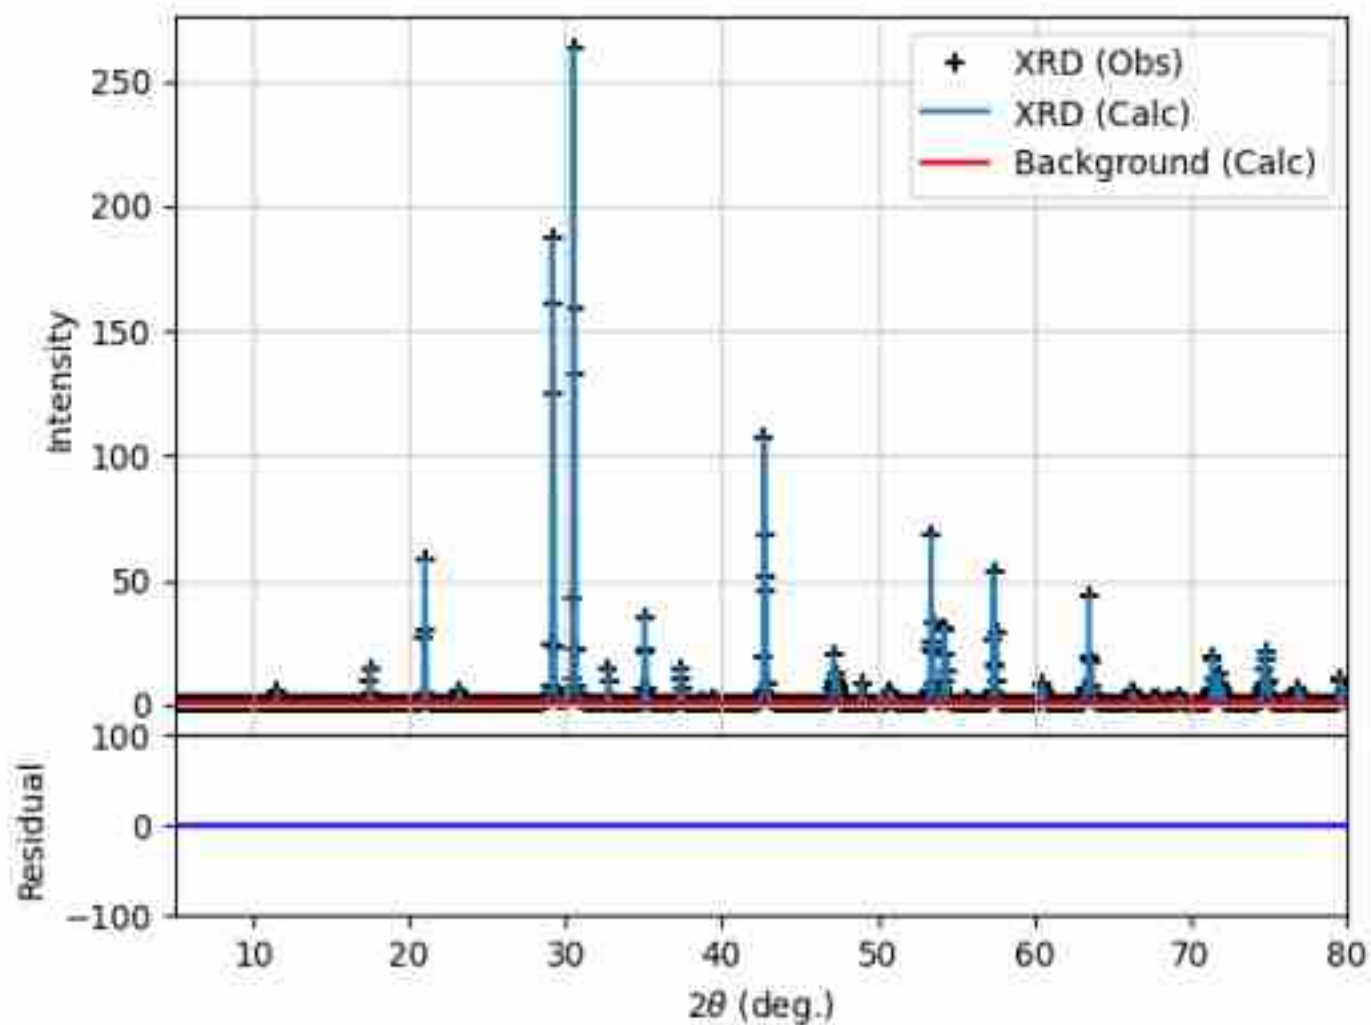

| RMSE before RR | Rwp     | RMSE after RR |
|----------------|---------|---------------|
| 0.033          | 0.00551 | 0.00195       |



# K<sub>2</sub>Sr<sub>1</sub>Be<sub>2</sub>F<sub>8</sub>

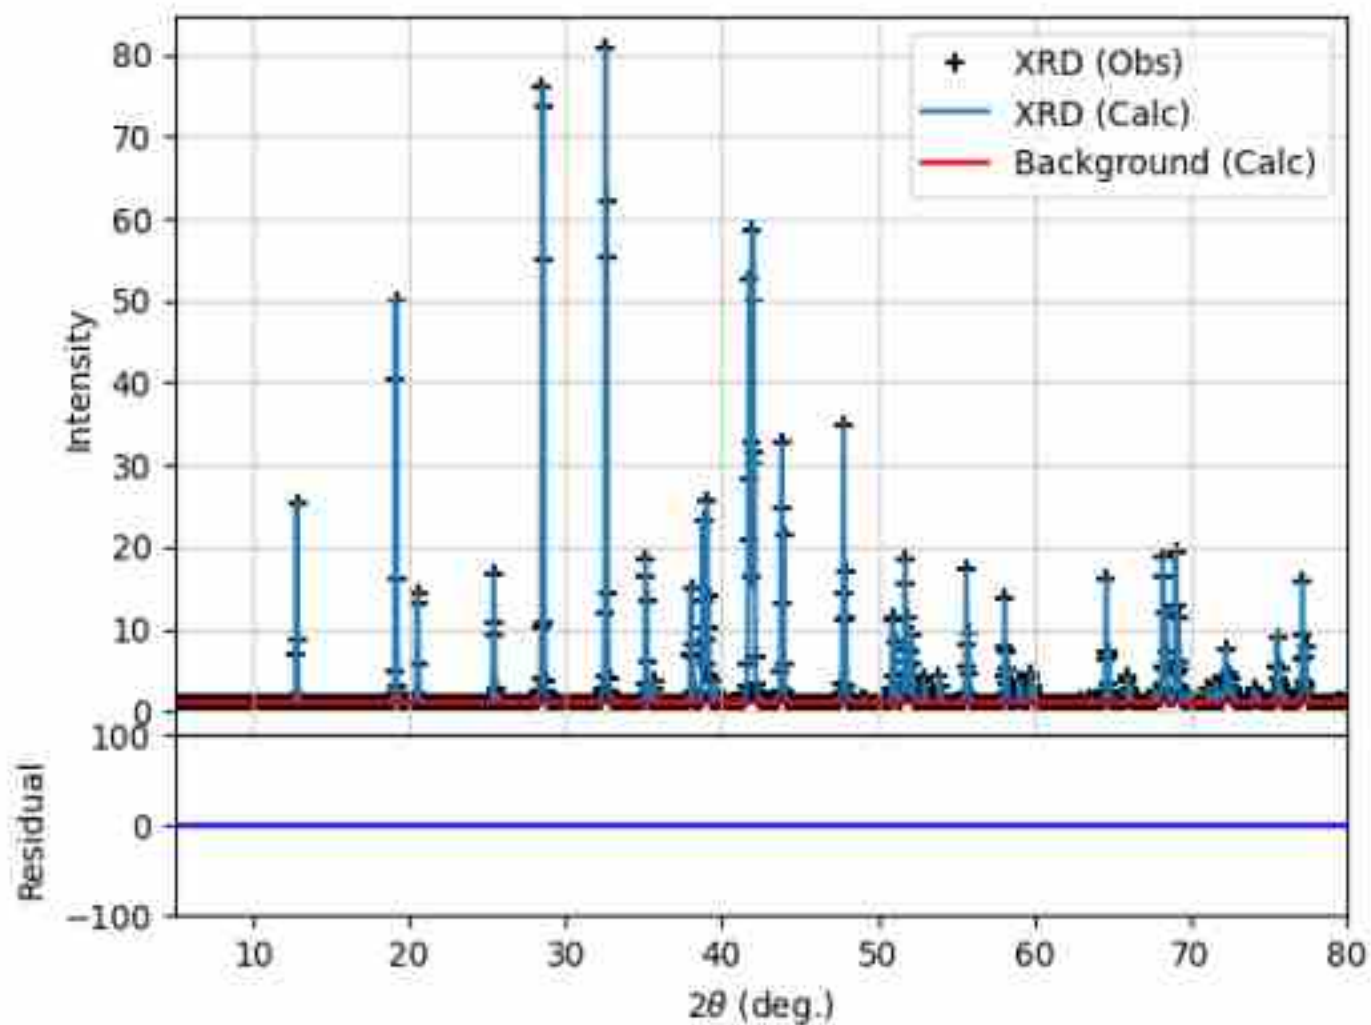

| RMSE before RR | Rwp     | RMSE after RR |
|----------------|---------|---------------|
| 0.033          | 0.00333 | 0.00071       |

# K4Sb2Au2

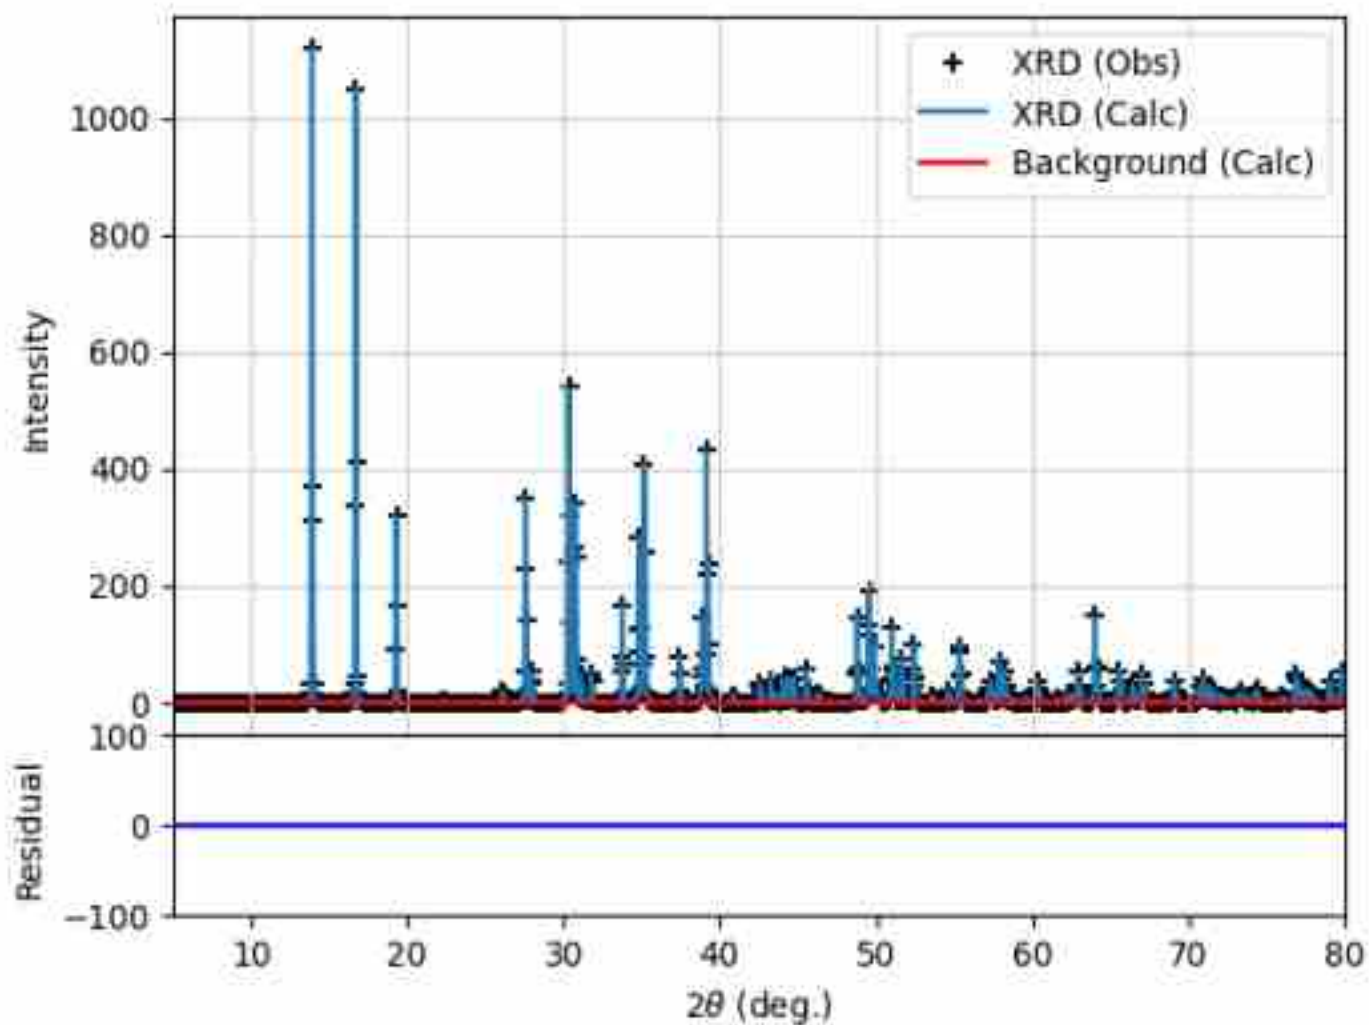

| RMSE before RR | Rwp     | RMSE after RR |
|----------------|---------|---------------|
| 0.033          | 0.00401 | 0.0005        |

# K8Sb8

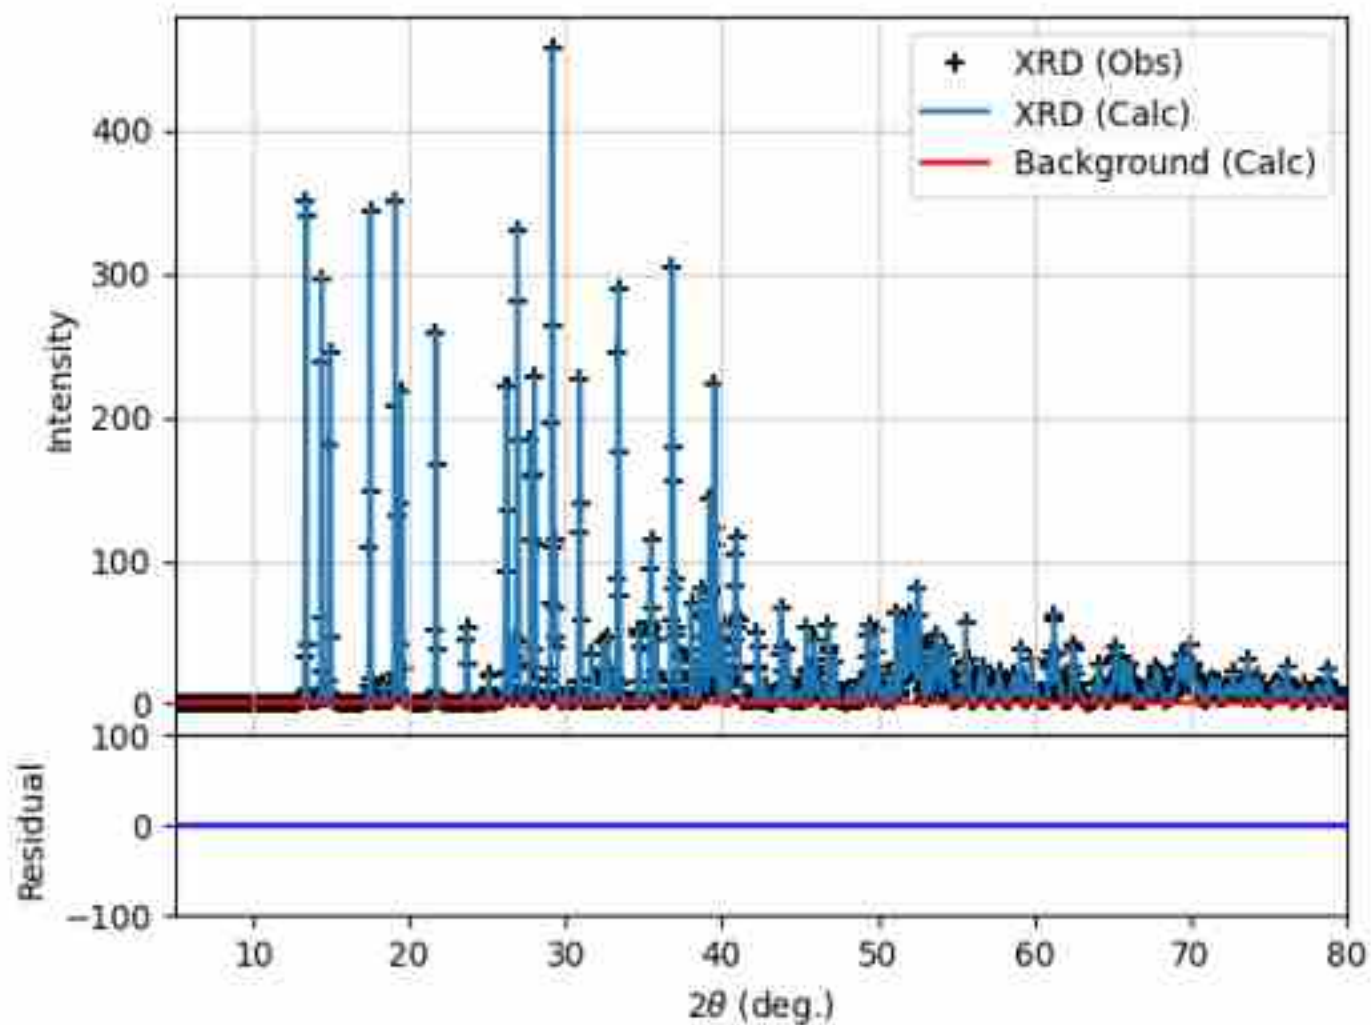

| RMSE before RR | Rwp     | RMSE after RR |
|----------------|---------|---------------|
| 0.033          | 0.00397 | 0.00045       |

# La<sub>2</sub>Th<sub>2</sub>O<sub>7</sub>

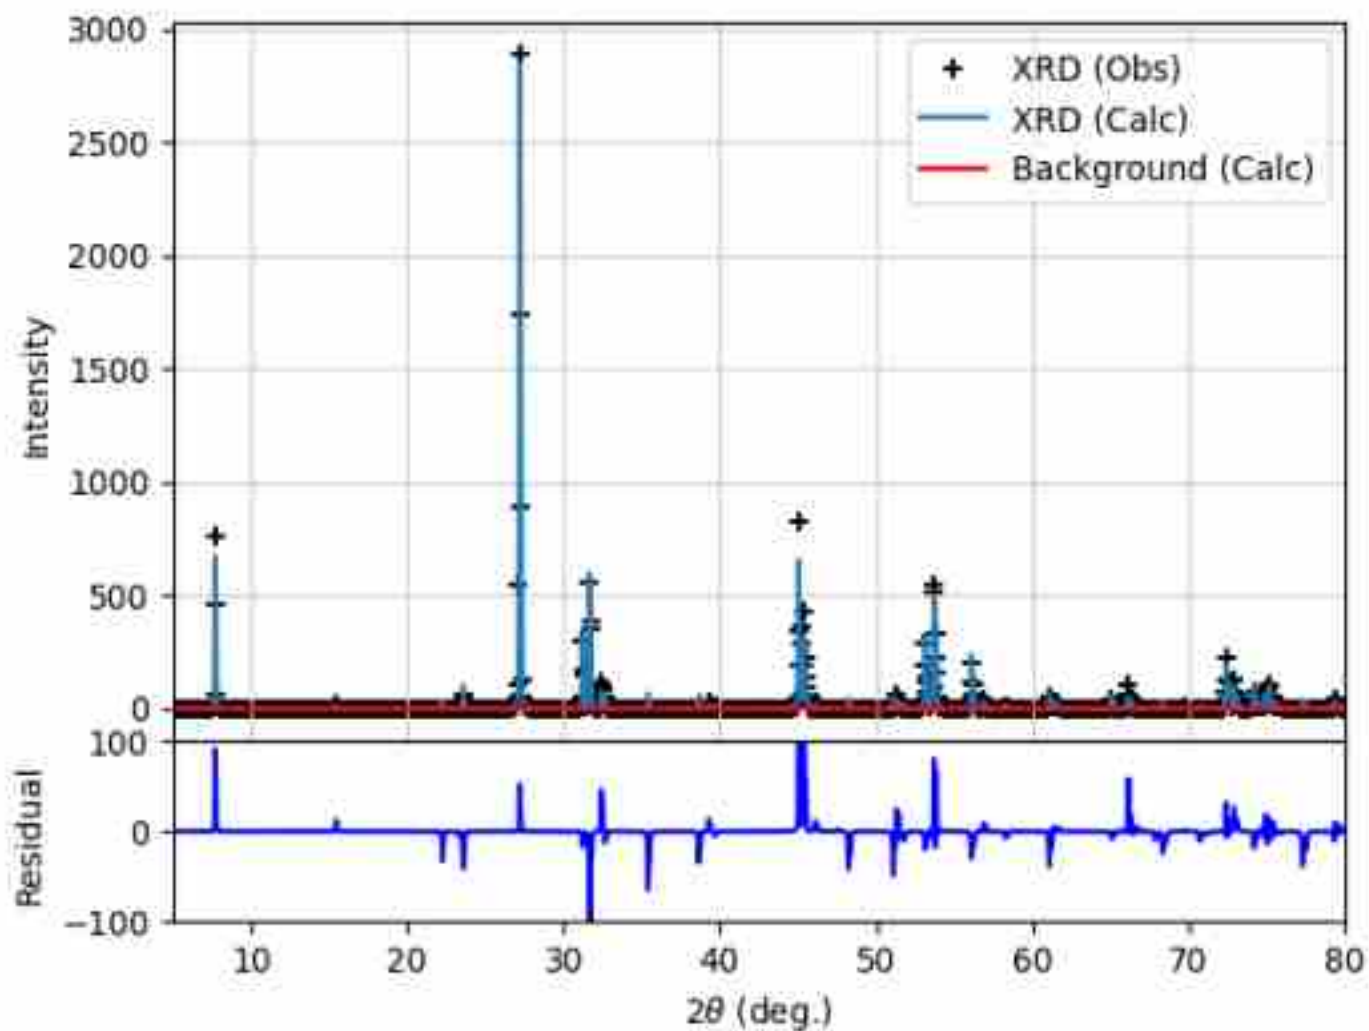

| RMSE before RR | Rwp      | RMSE after RR |
|----------------|----------|---------------|
| 0.033          | 66.75581 | 0.46801       |

# La10Pb6C2

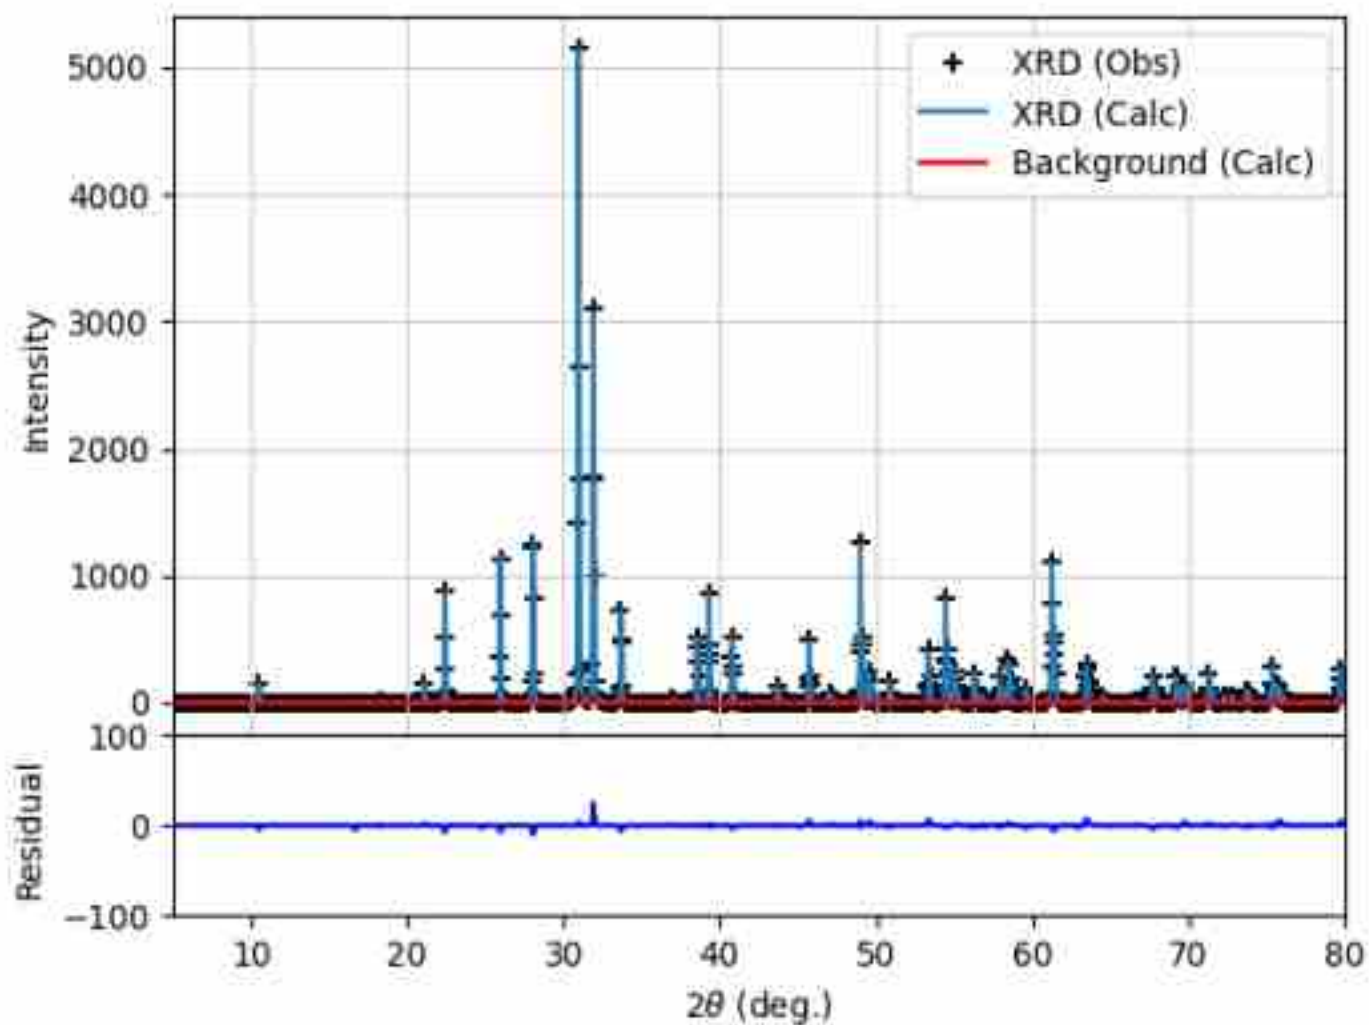

| RMSE before RR | Rwp     | RMSE after RR |
|----------------|---------|---------------|
| 0.033          | 2.93278 | 0.24397       |

# Li1Nb1Te3O12

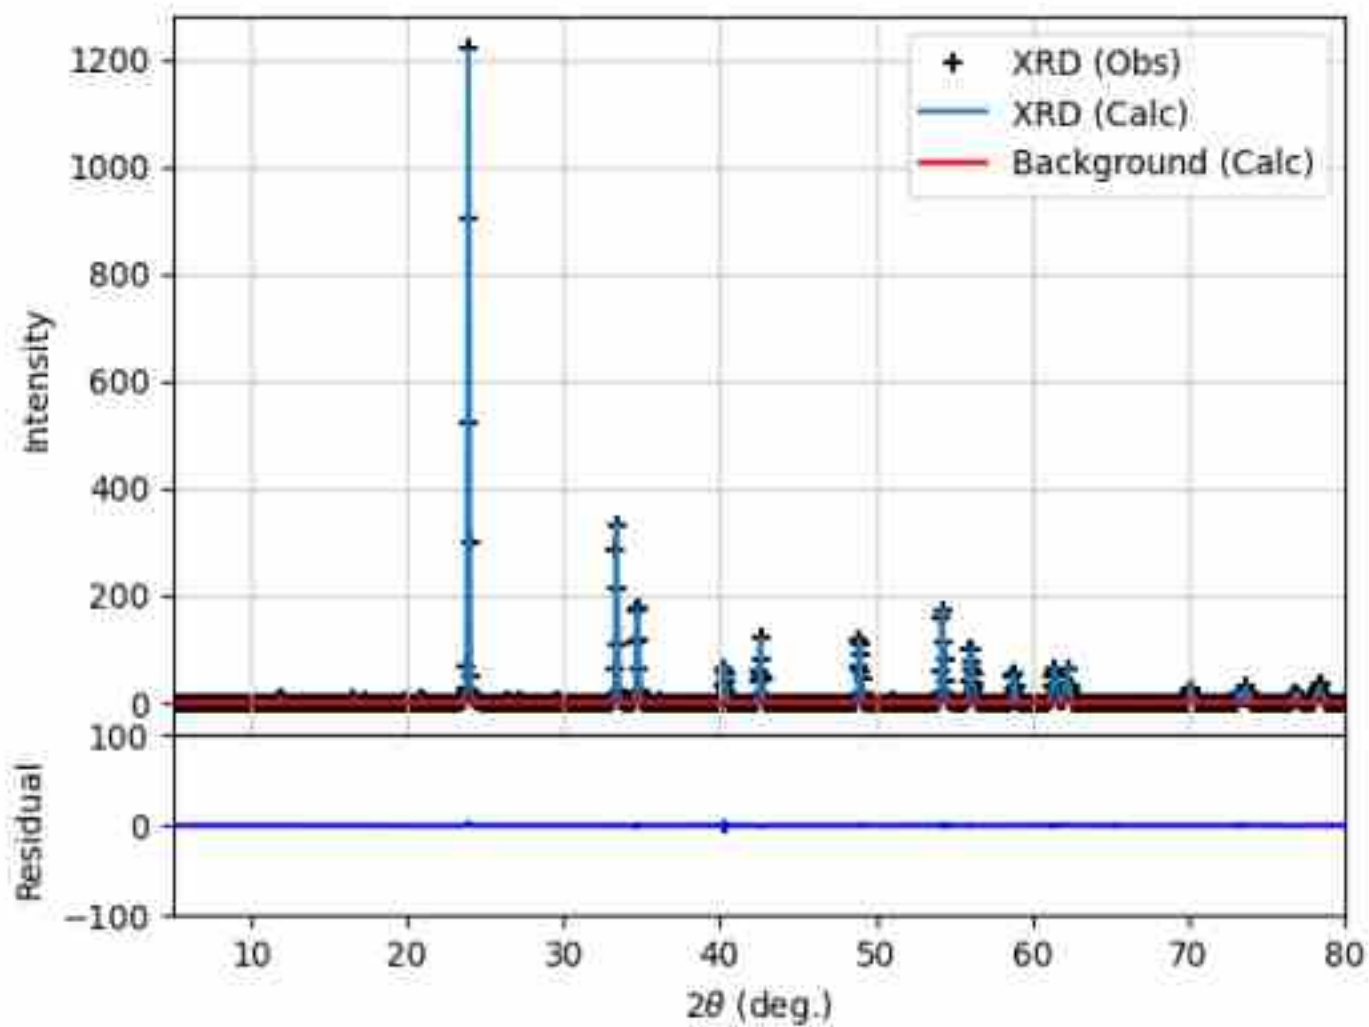

| RMSE before RR | Rwp     | RMSE after RR |
|----------------|---------|---------------|
| 0.033          | 1.90919 | 0.02933       |

# Li<sub>3</sub>V<sub>4</sub>Fe<sub>1</sub>O<sub>12</sub>

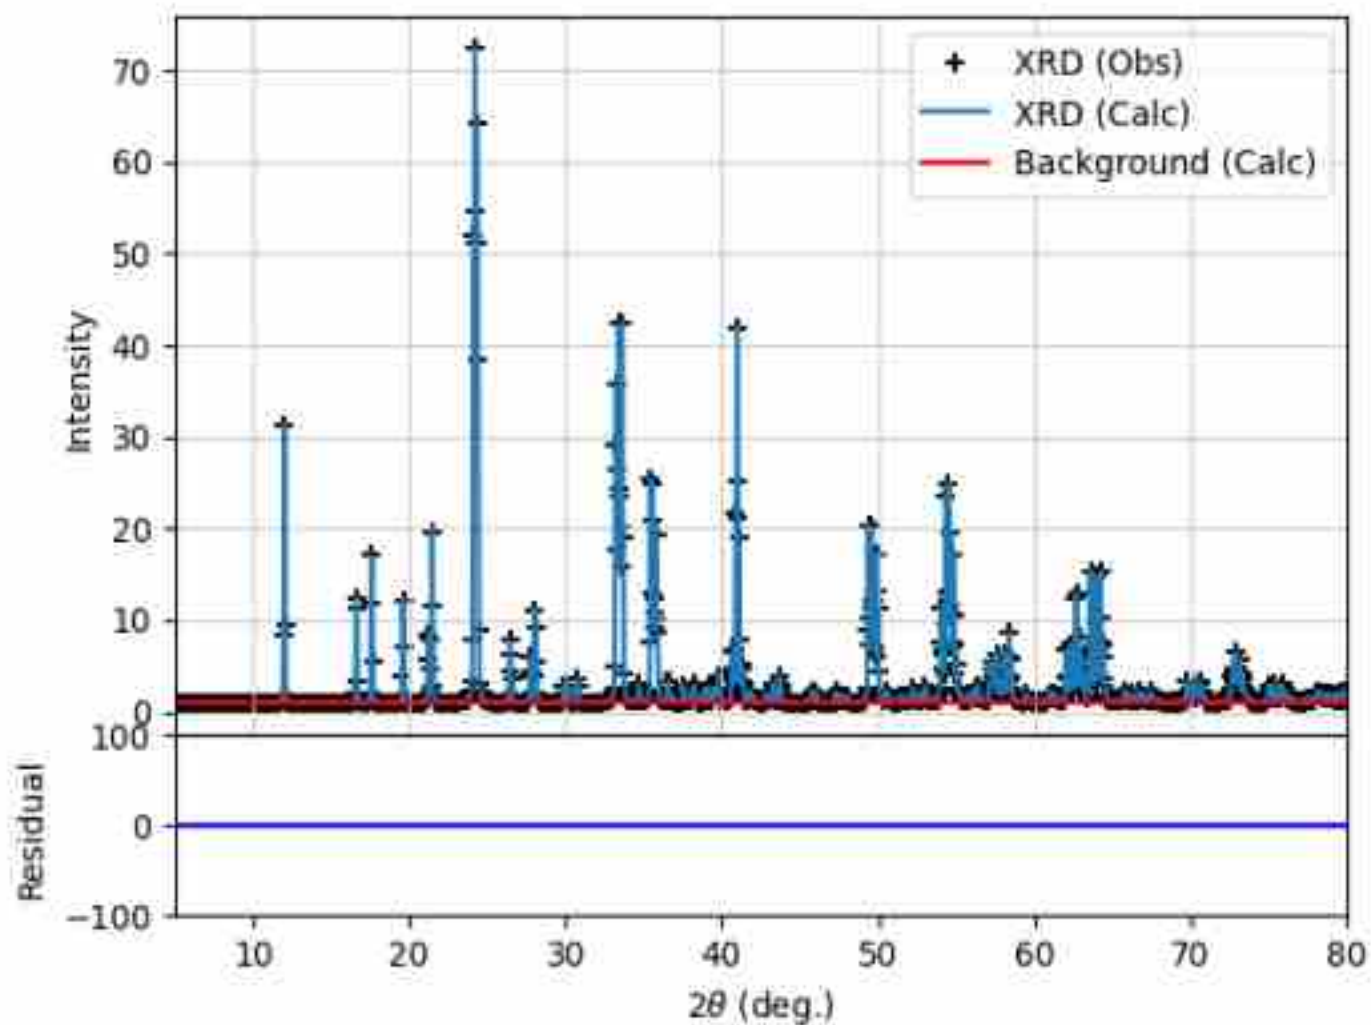

| RMSE before RR | Rwp     | RMSE after RR |
|----------------|---------|---------------|
| 0.033          | 0.00044 | 0.0           |

# Li<sub>4</sub>Mn<sub>2</sub>V<sub>2</sub>O<sub>8</sub>

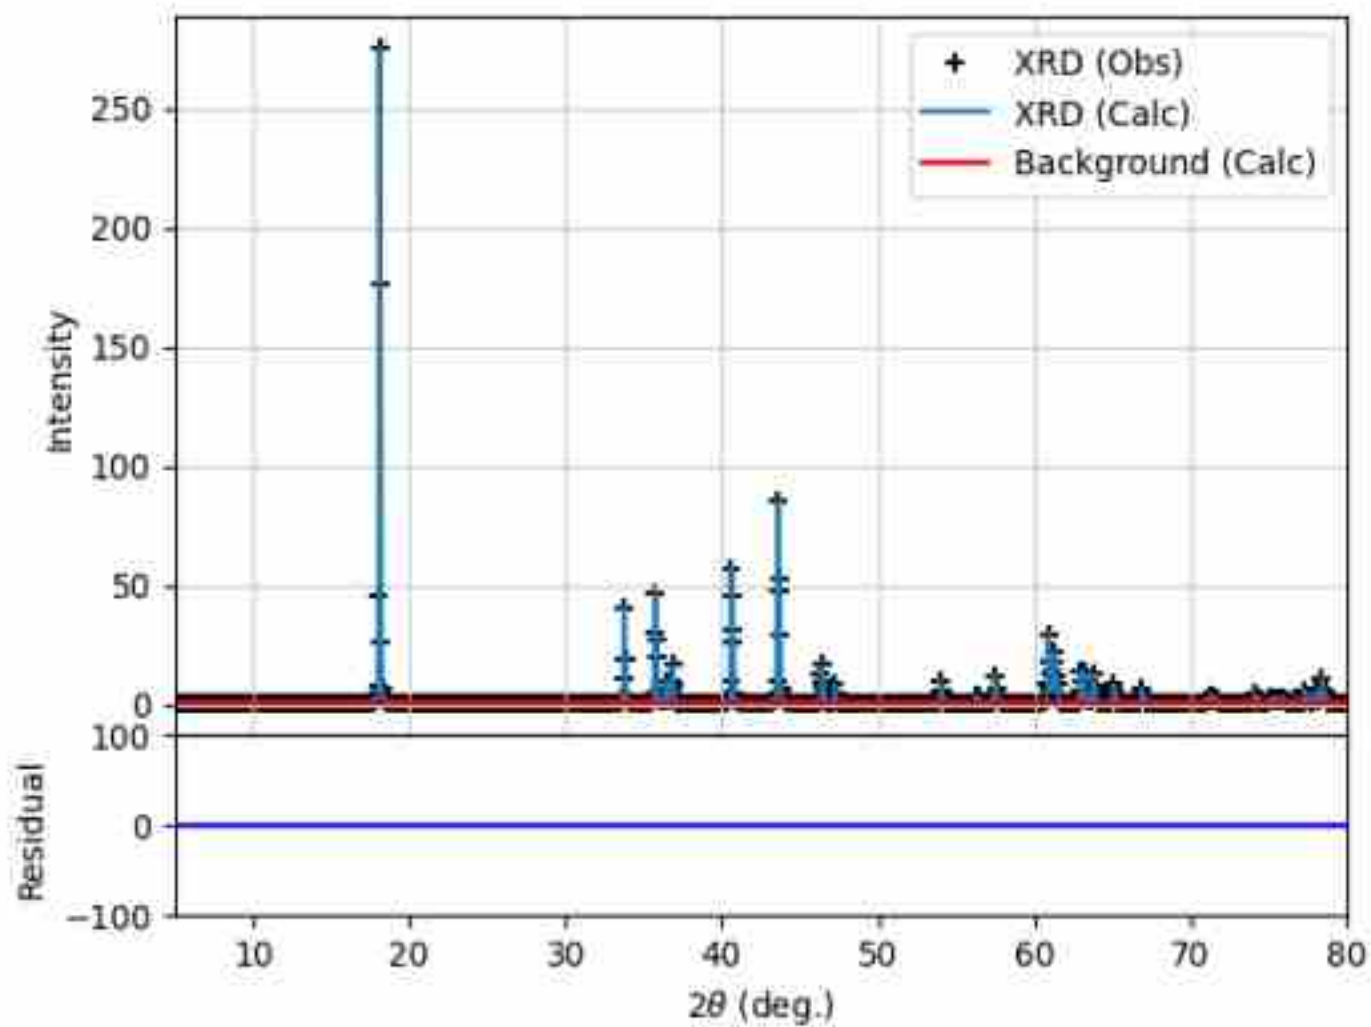

| RMSE before RR | Rwp     | RMSE after RR |
|----------------|---------|---------------|
| 0.033          | 0.00906 | 0.00169       |



# Li<sub>6</sub>Mn<sub>2</sub>Co<sub>2</sub>O<sub>10</sub>

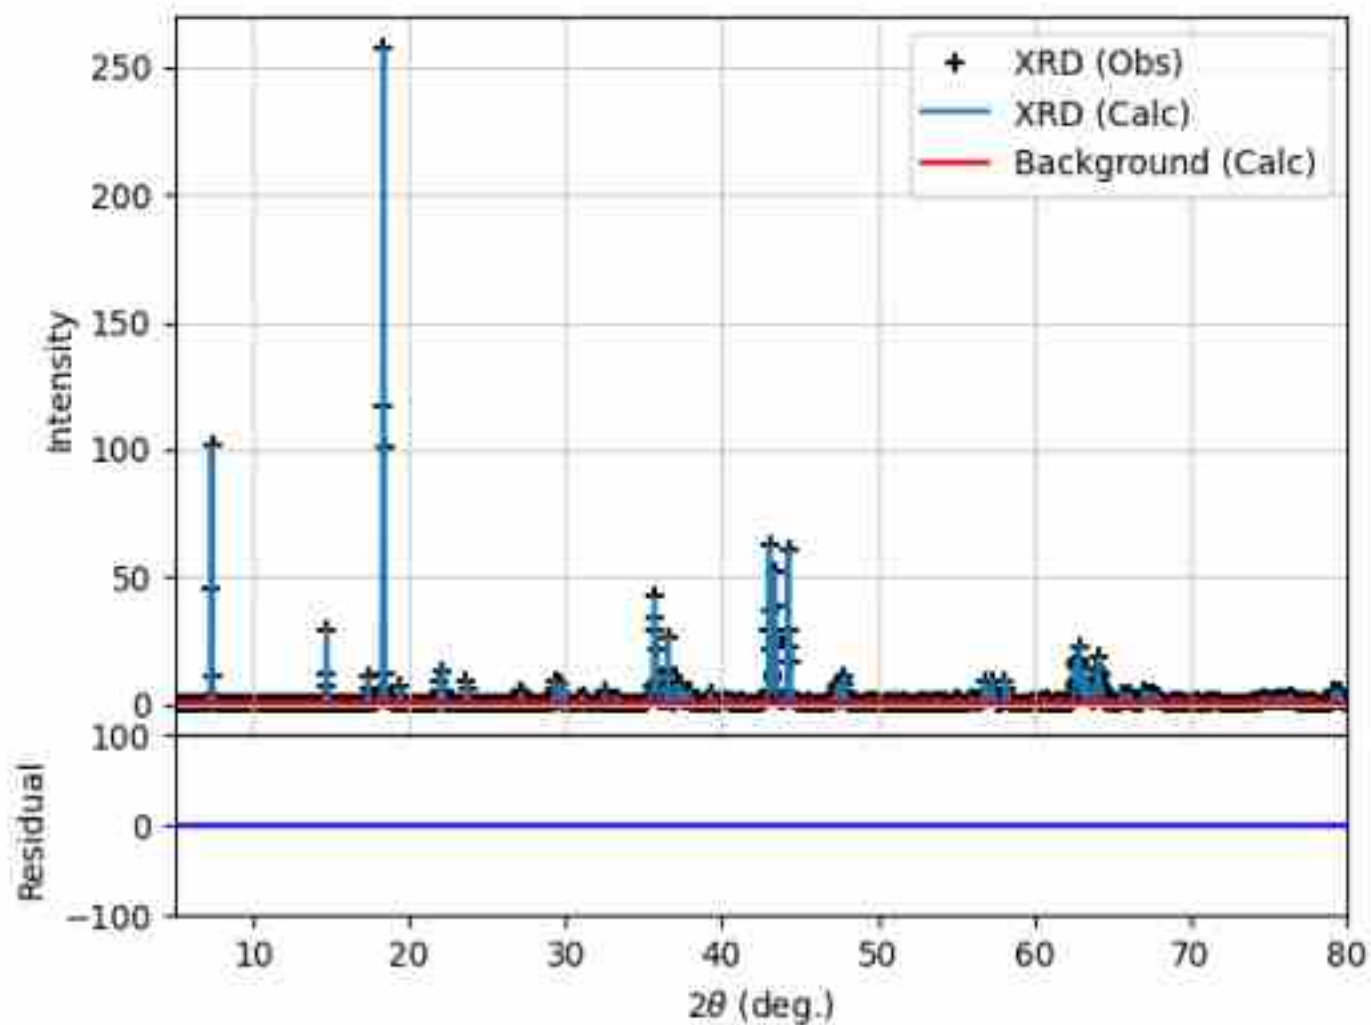

| RMSE before RR | Rwp     | RMSE after RR |
|----------------|---------|---------------|
| 0.033          | 0.00014 | 0.00018       |

# Li<sub>8</sub>Pb<sub>2</sub>O<sub>8</sub>

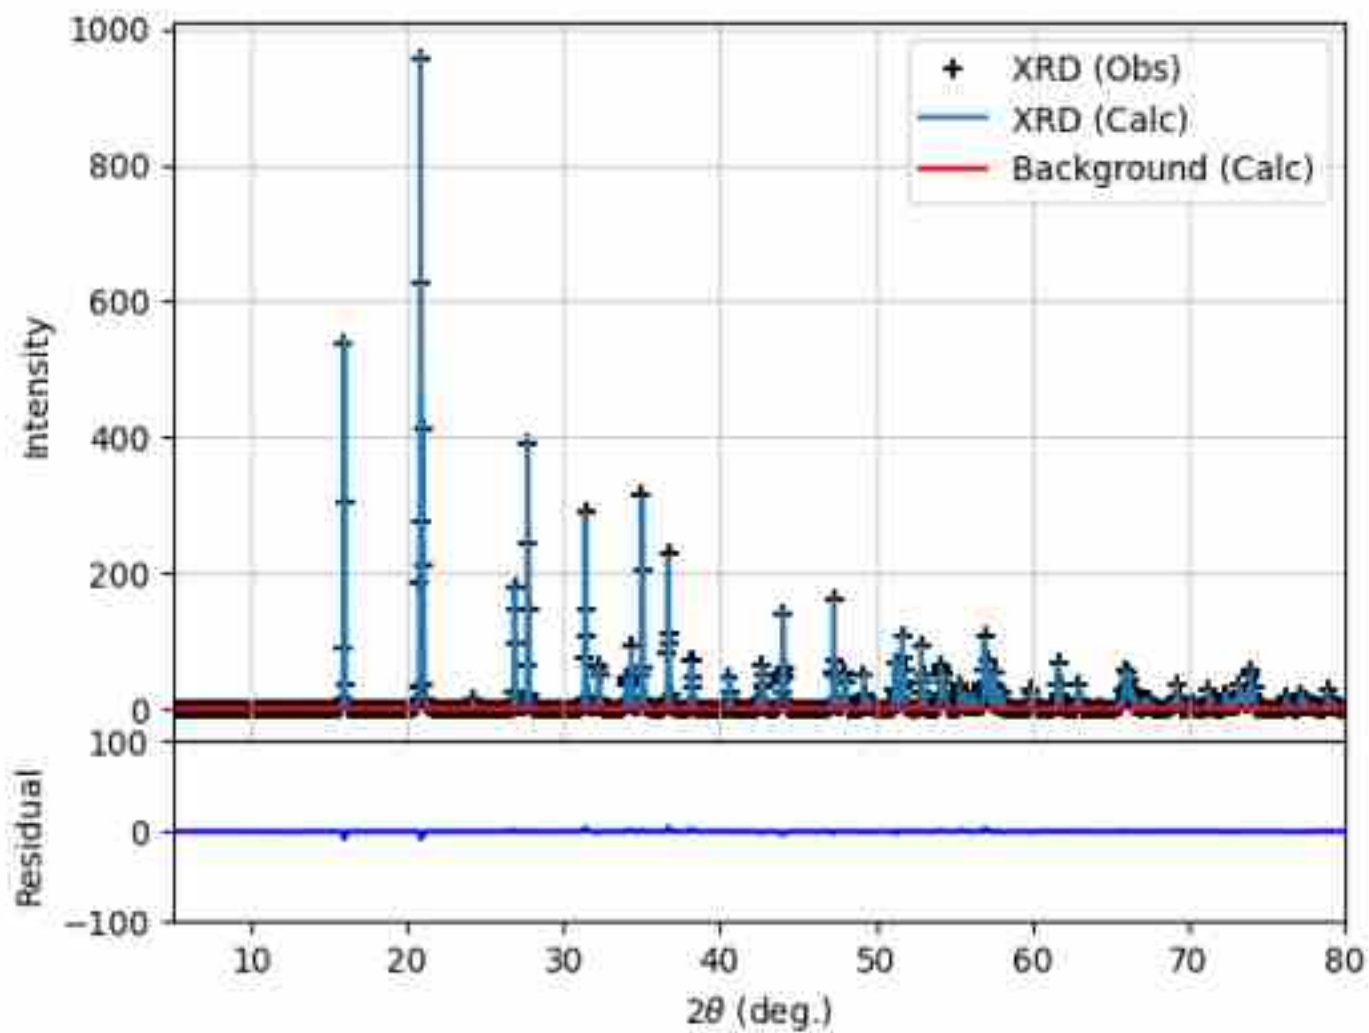

| RMSE before RR | Rwp     | RMSE after RR |
|----------------|---------|---------------|
| 0.033          | 1.97068 | 0.38923       |

# Li<sub>10</sub>In<sub>2</sub>O<sub>8</sub>

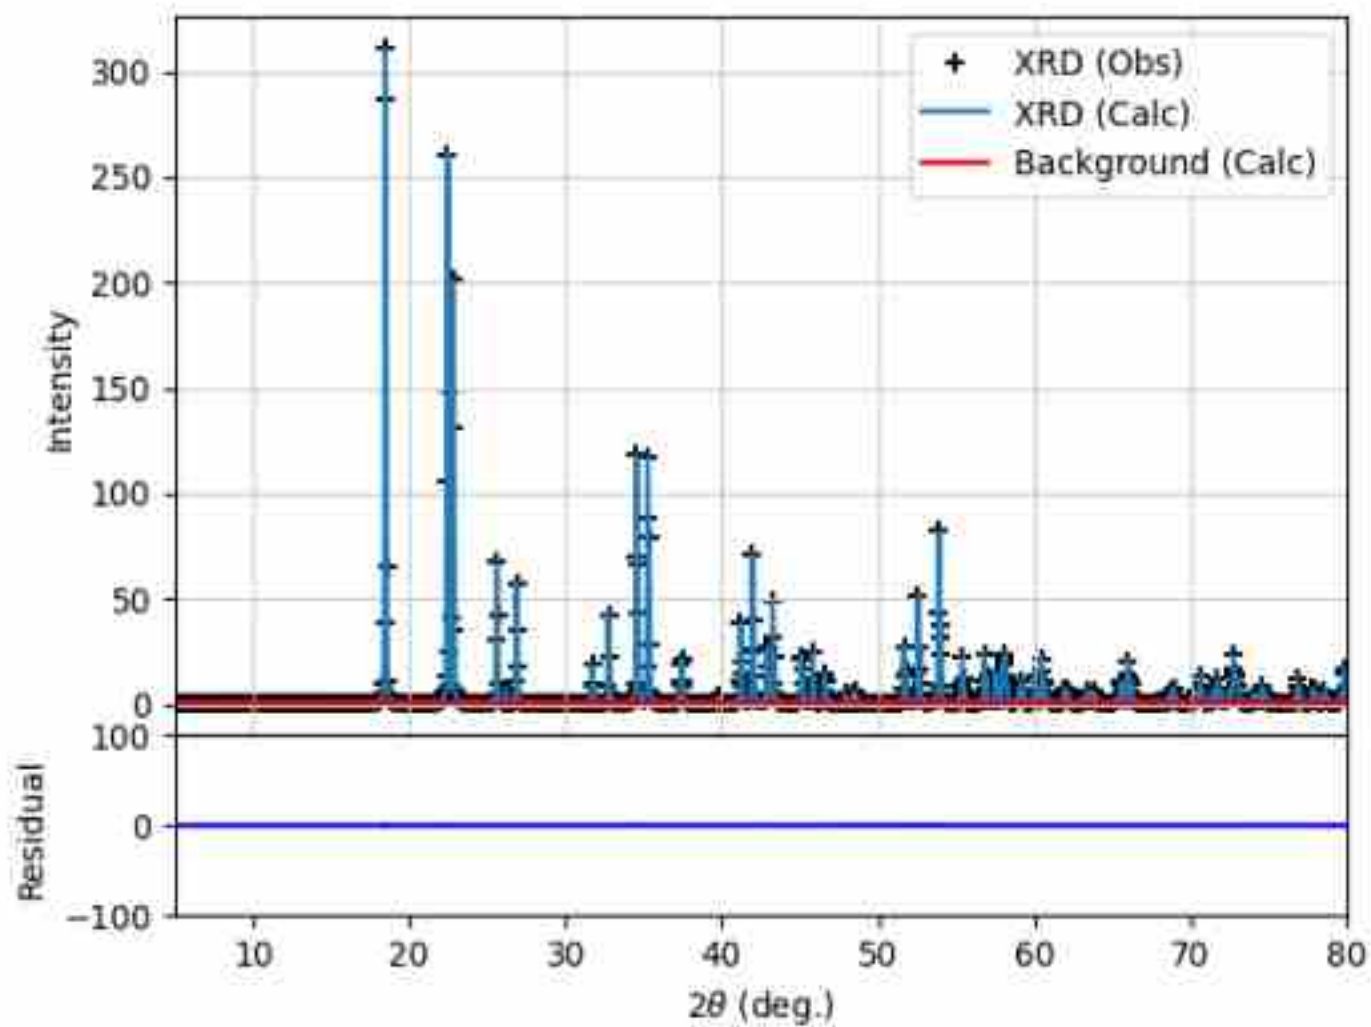

| RMSE before RR | Rwp     | RMSE after RR |
|----------------|---------|---------------|
| 0.033          | 0.59397 | None          |

# Lu<sub>12</sub>In<sub>2</sub>Fe<sub>3</sub>

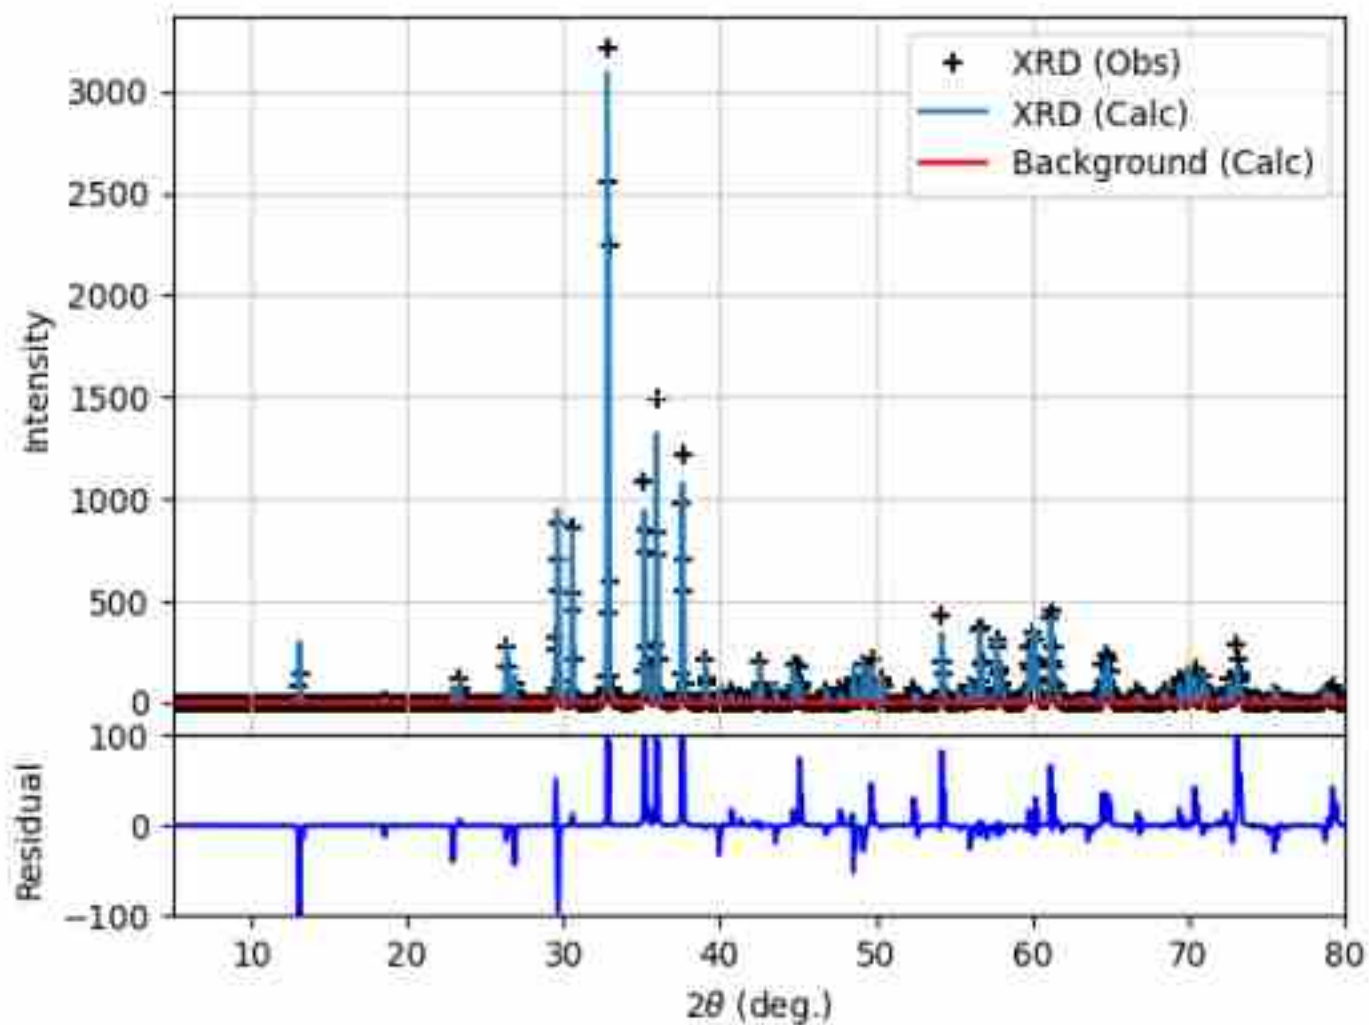

| RMSE before RR | Rwp      | RMSE after RR |
|----------------|----------|---------------|
| 0.033          | 19.28108 | 0.22148       |

# Mg1Ni1F6

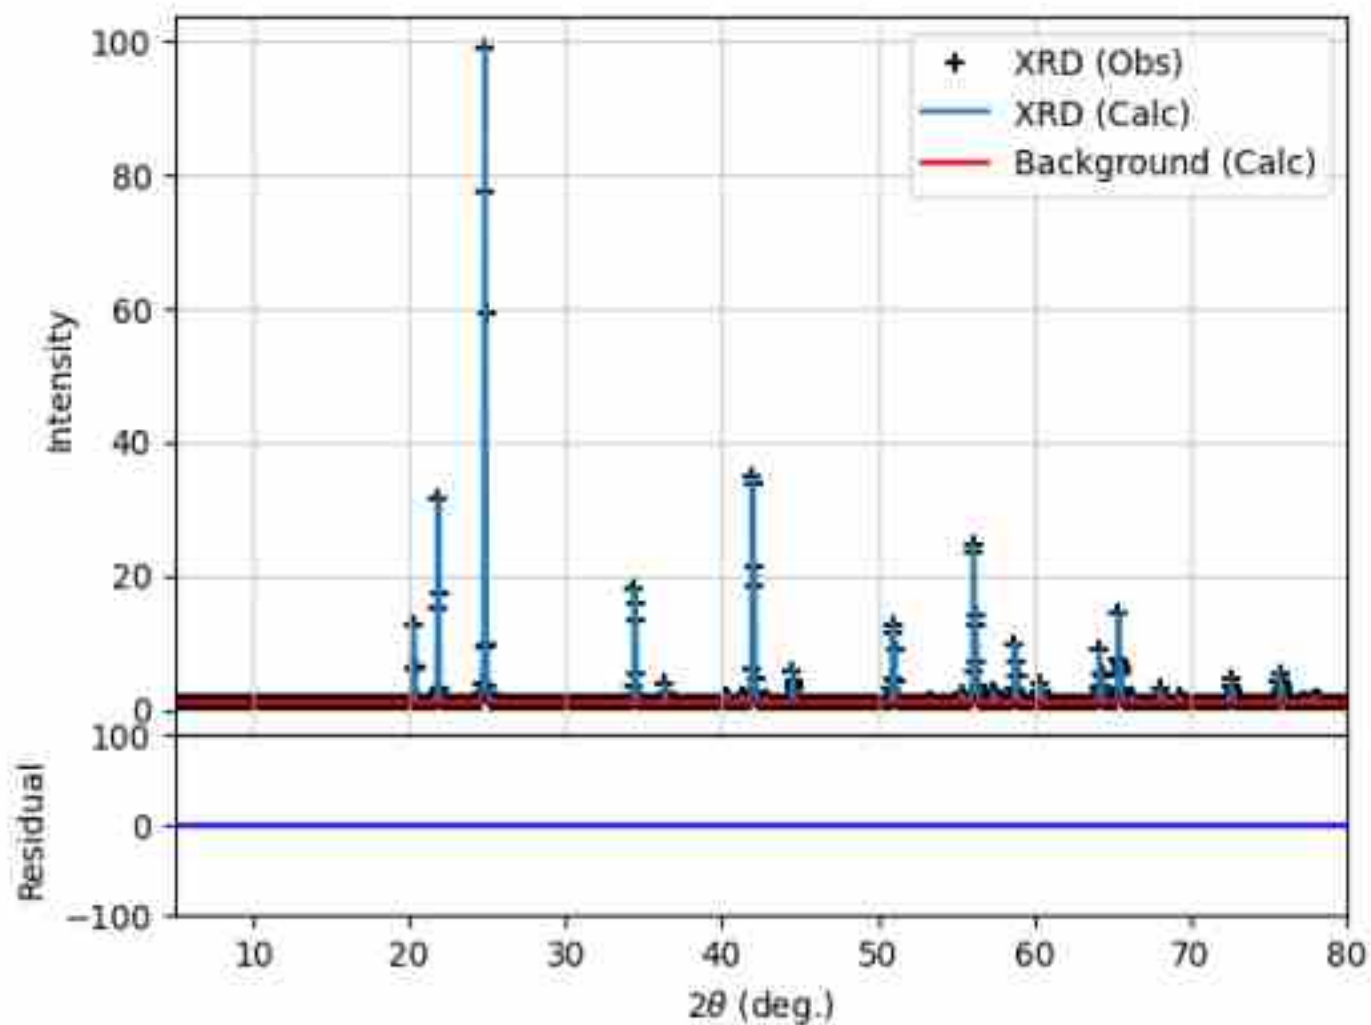

| RMSE before RR | Rwp     | RMSE after RR |
|----------------|---------|---------------|
| 0.033          | 0.00166 | 0.00036       |

# Mg1Re2O8

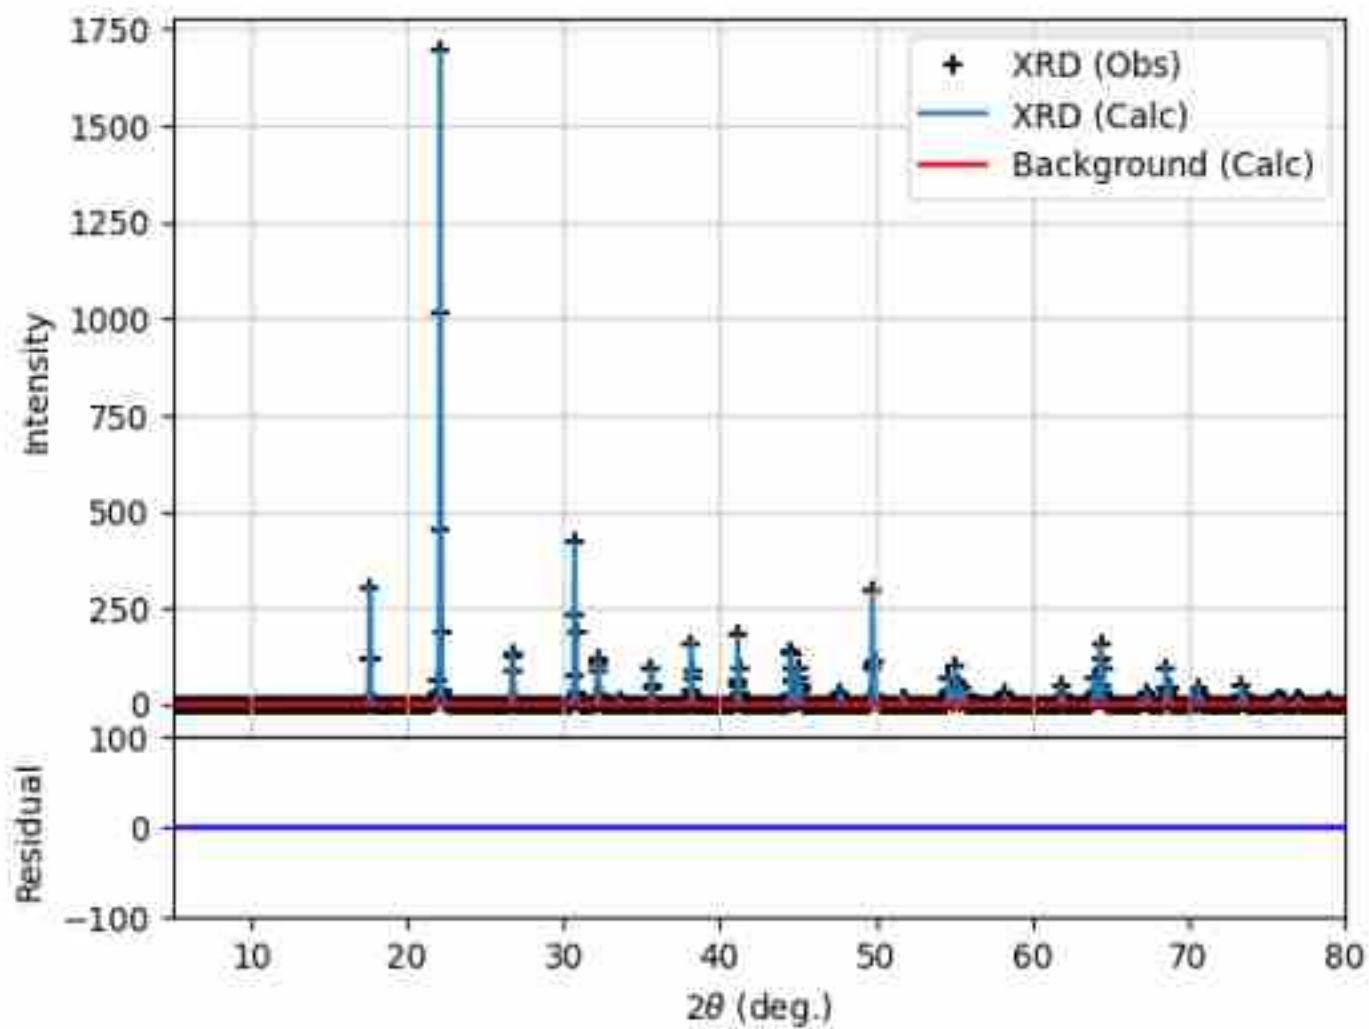

| RMSE before RR | Rwp     | RMSE after RR |
|----------------|---------|---------------|
| 0.033          | 0.00231 | 0.00098       |

# Mn<sub>2</sub>Sn<sub>2</sub>O<sub>6</sub>

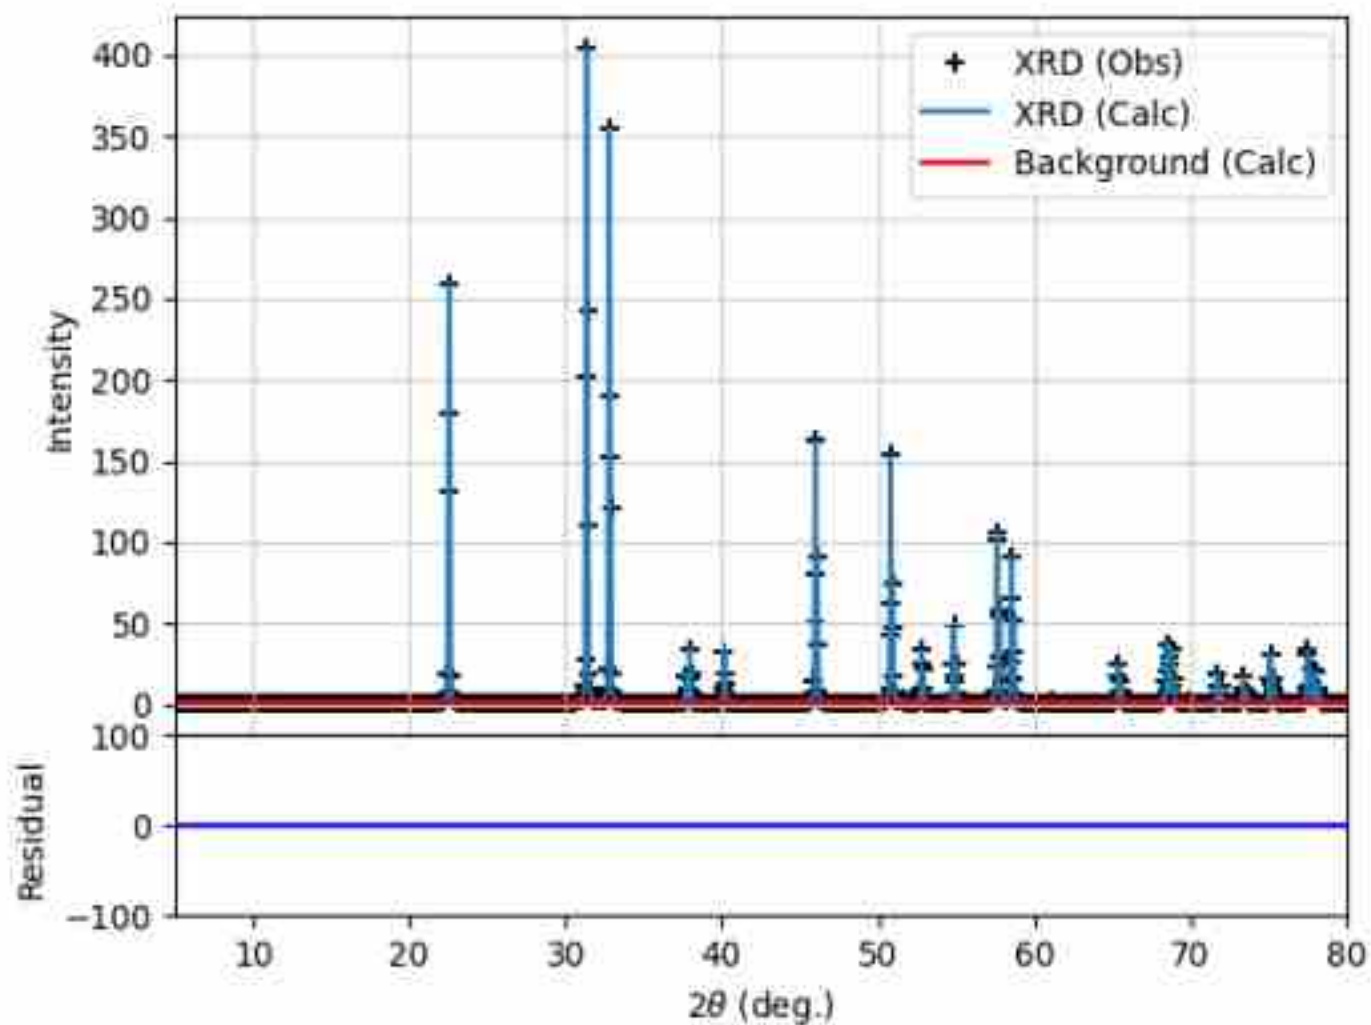

| RMSE before RR | Rwp     | RMSE after RR |
|----------------|---------|---------------|
| 0.033          | 0.00201 | 0.00069       |

# Mn<sub>4</sub>O<sub>7</sub>F<sub>1</sub>

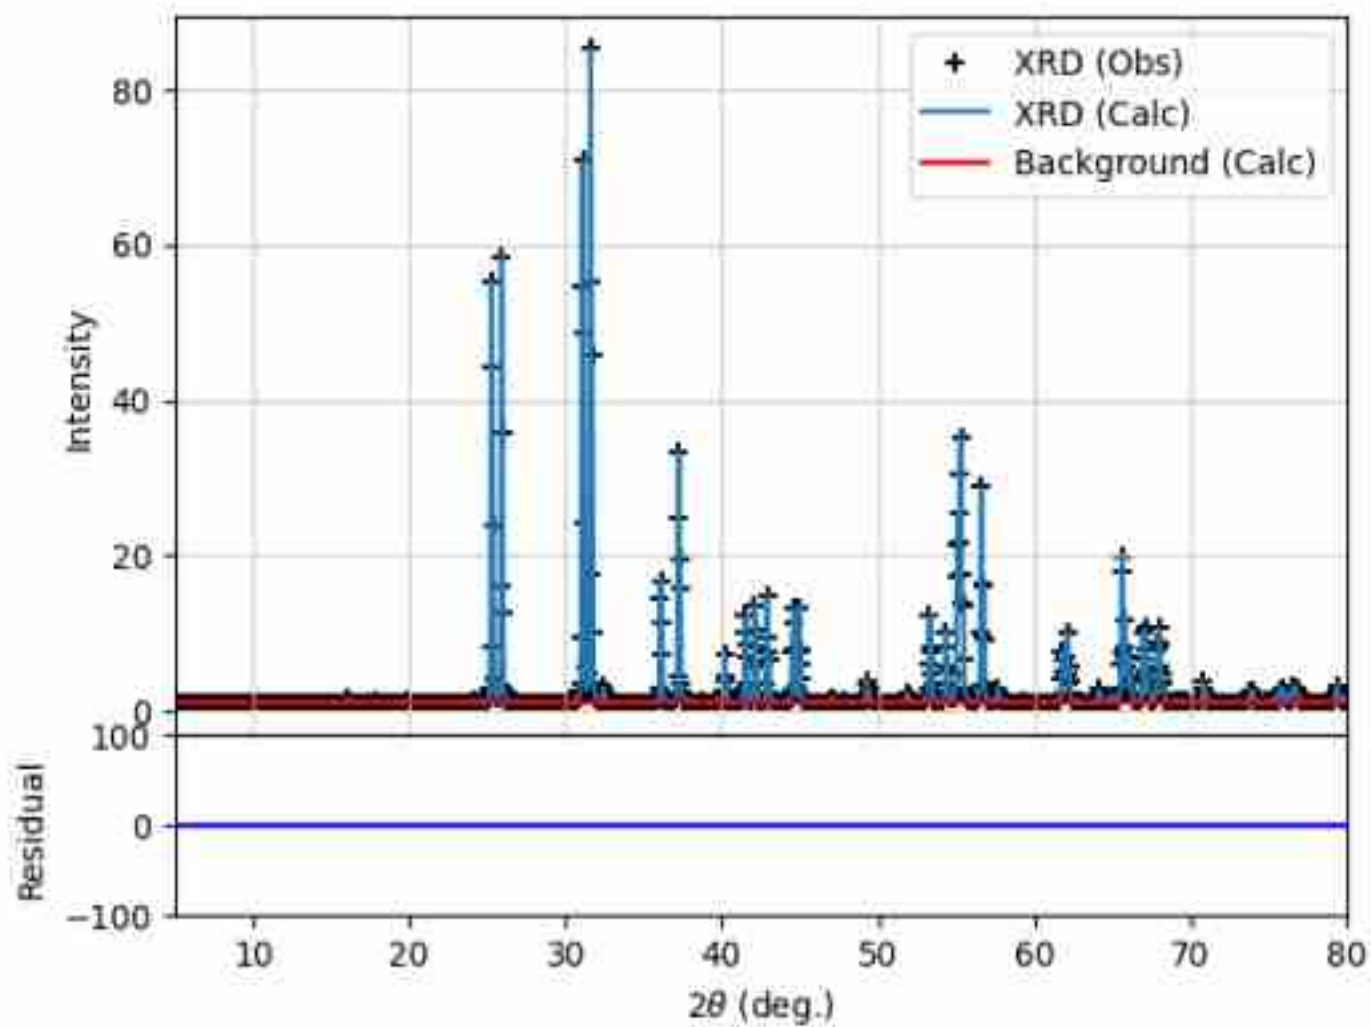

| RMSE before RR | Rwp     | RMSE after RR |
|----------------|---------|---------------|
| 0.033          | 0.00076 | 0.0           |



# Mn<sub>6</sub>O<sub>6</sub>F<sub>6</sub>

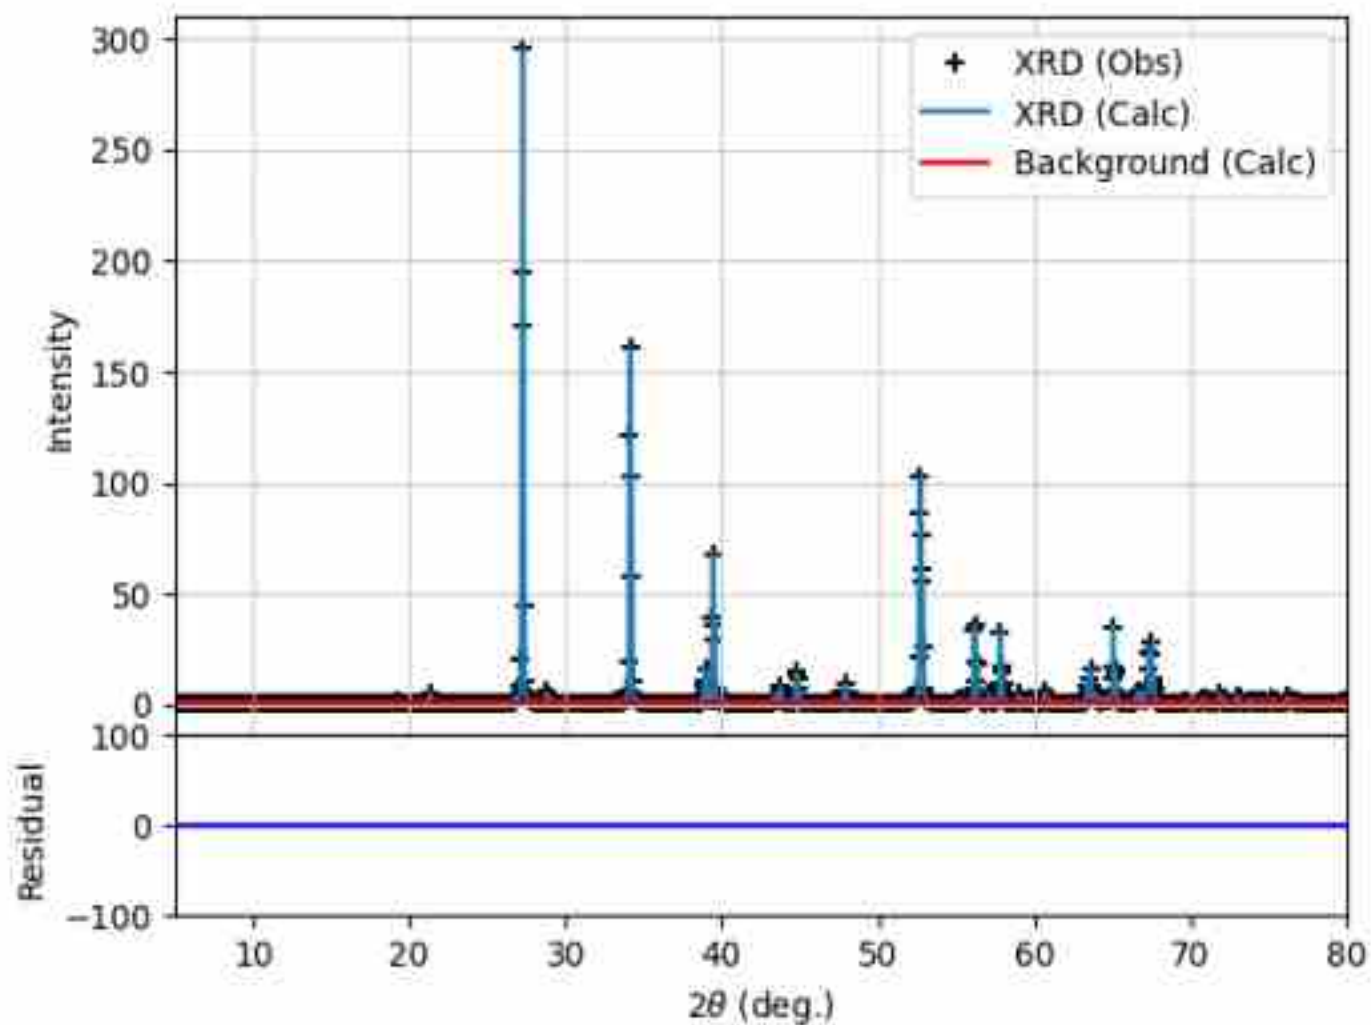

| RMSE before RR | Rwp     | RMSE after RR |
|----------------|---------|---------------|
| 0.033          | 0.00305 | 0.00089       |

# Mn2O

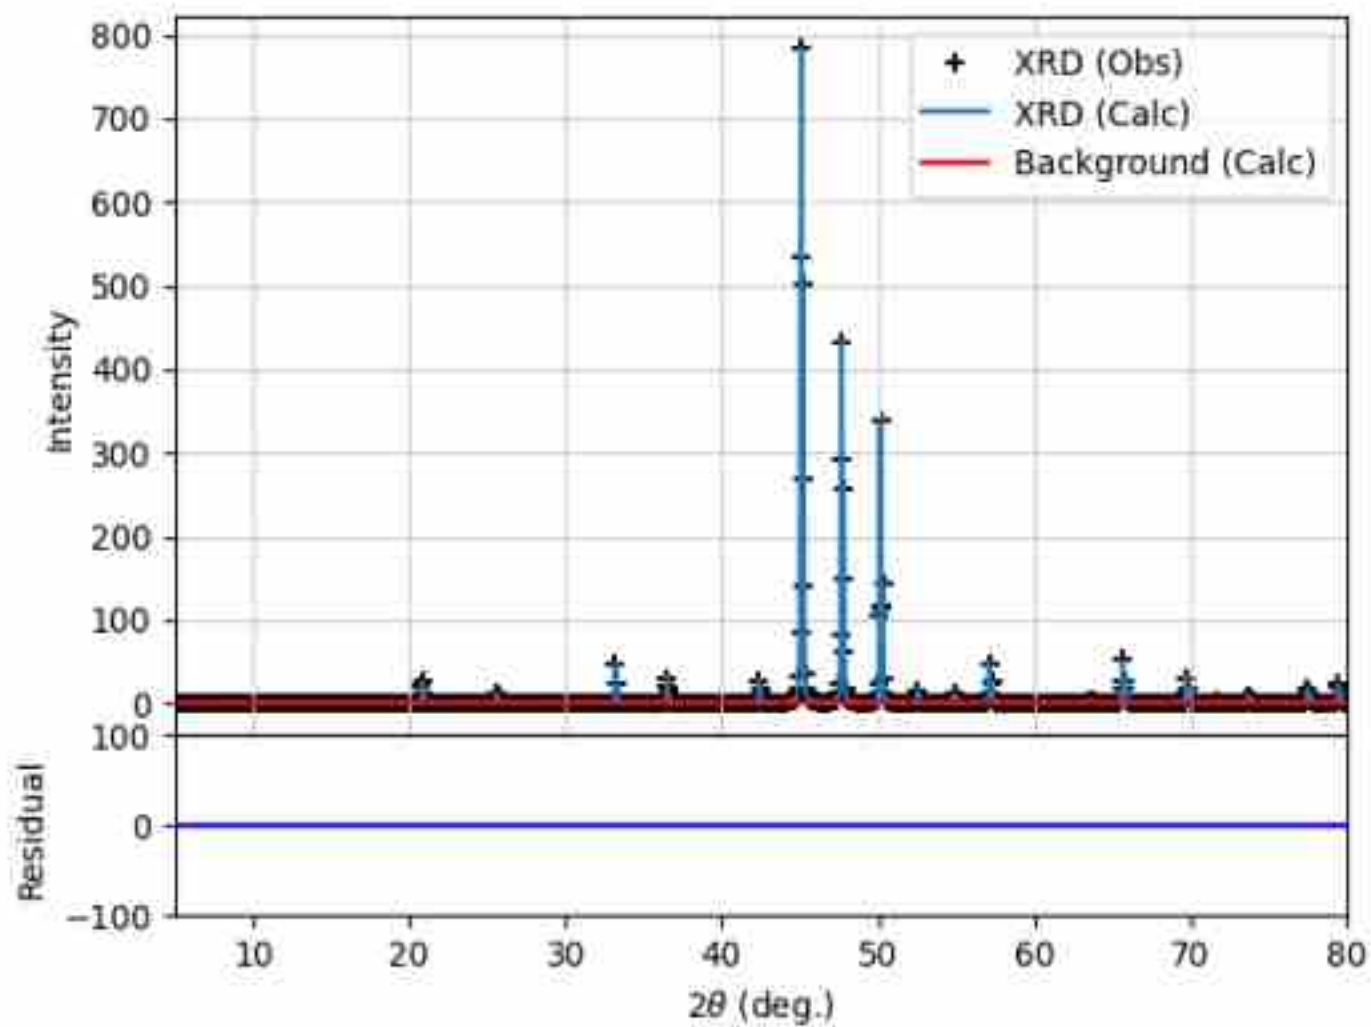

| RMSE before RR | Rwp     | RMSE after RR |
|----------------|---------|---------------|
| 0.033          | 0.01361 | 0.00153       |

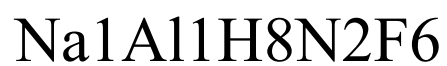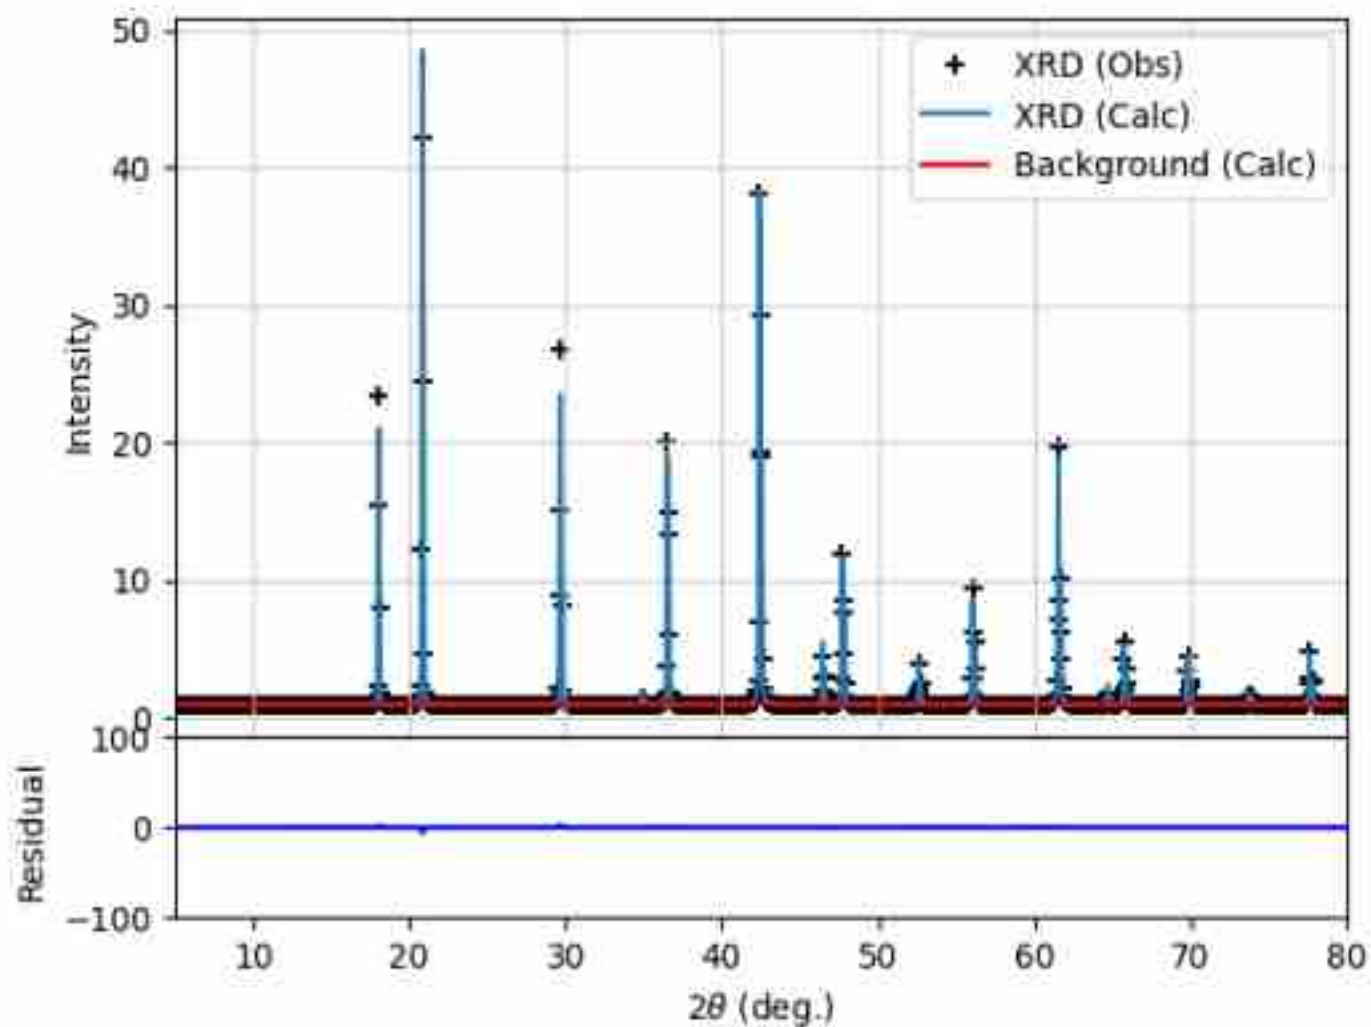

| RMSE before RR | Rwp     | RMSE after RR |
|----------------|---------|---------------|
| 0.033          | 4.72097 | 0.38483       |

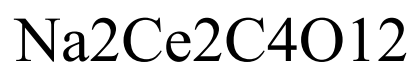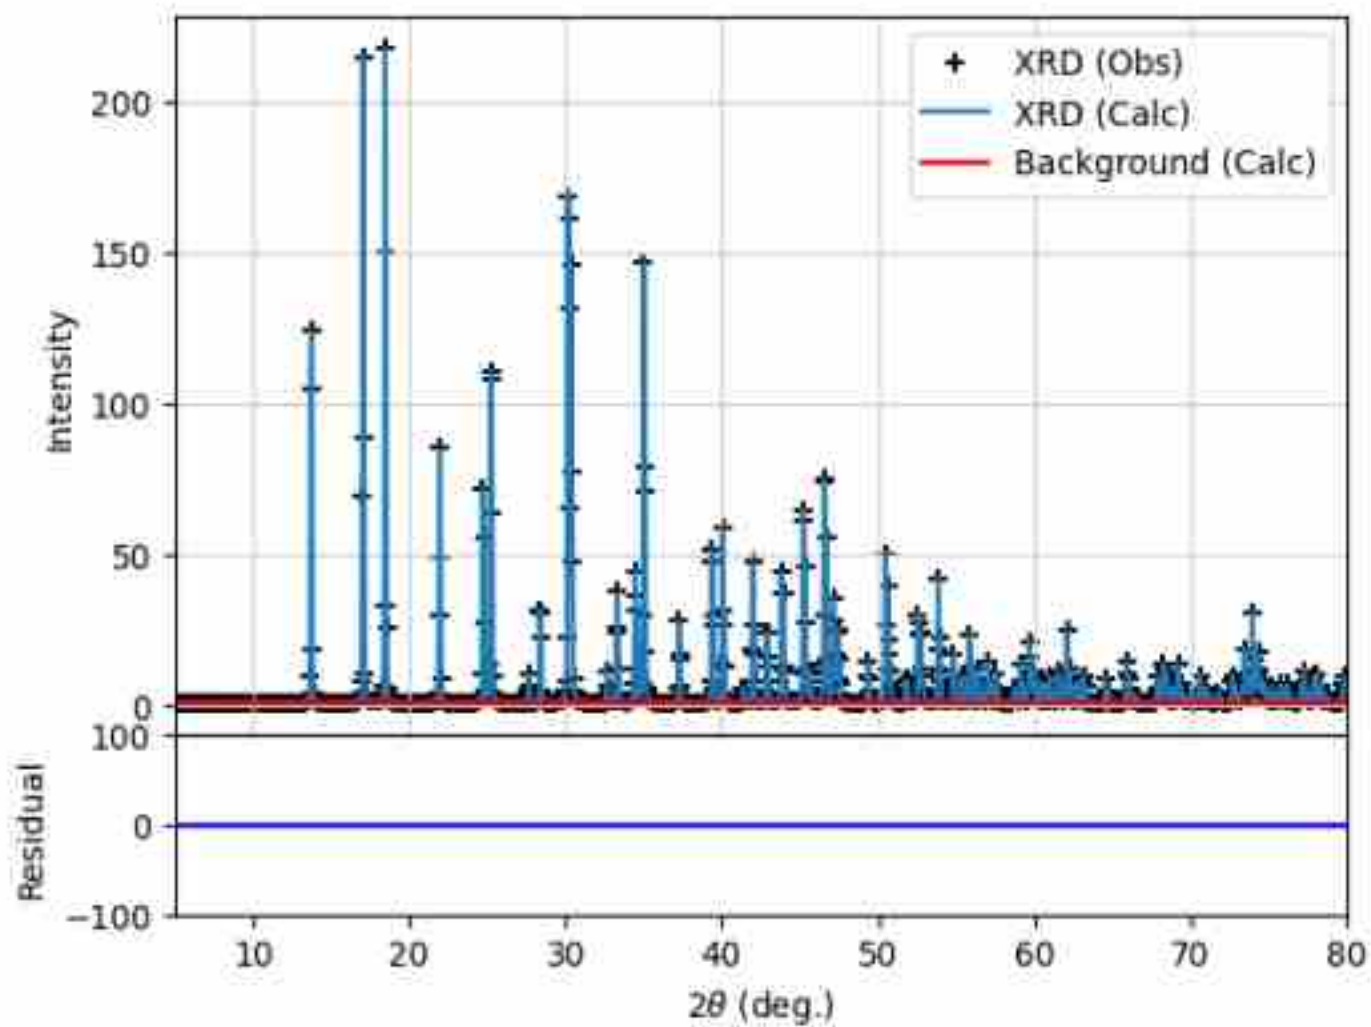

| RMSE before RR | Rwp     | RMSE after RR |
|----------------|---------|---------------|
| 0.033          | 0.00374 | 0.0015        |

# Na<sub>2</sub>Re<sub>2</sub>O<sub>8</sub>

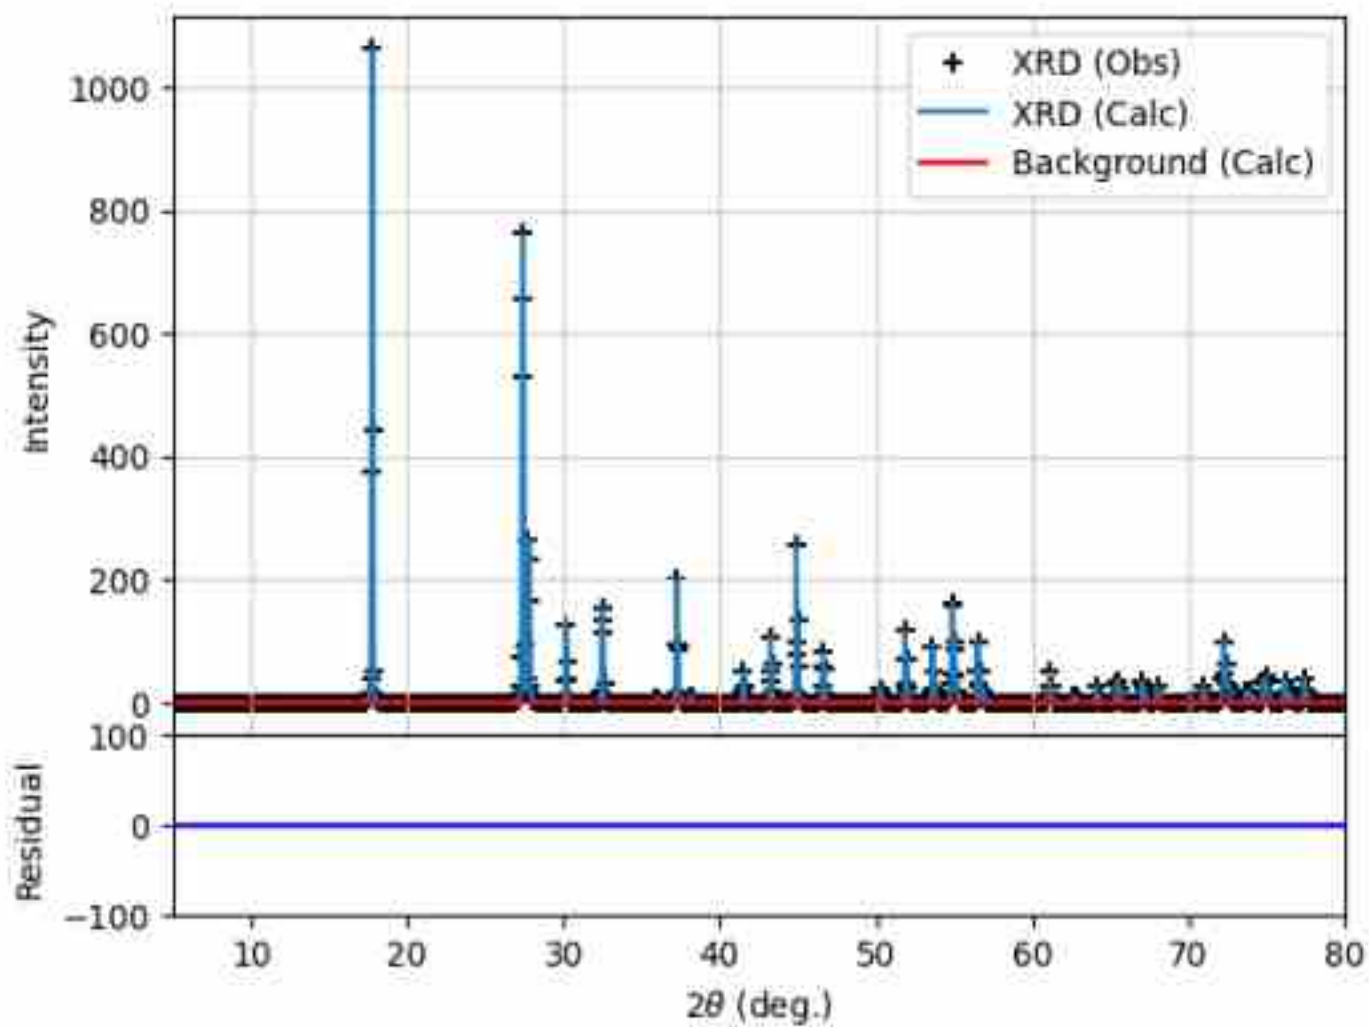

| RMSE before RR | Rwp     | RMSE after RR |
|----------------|---------|---------------|
| 0.033          | 0.00344 | 0.00138       |

# Na<sub>4</sub>W<sub>10</sub>O<sub>4</sub>

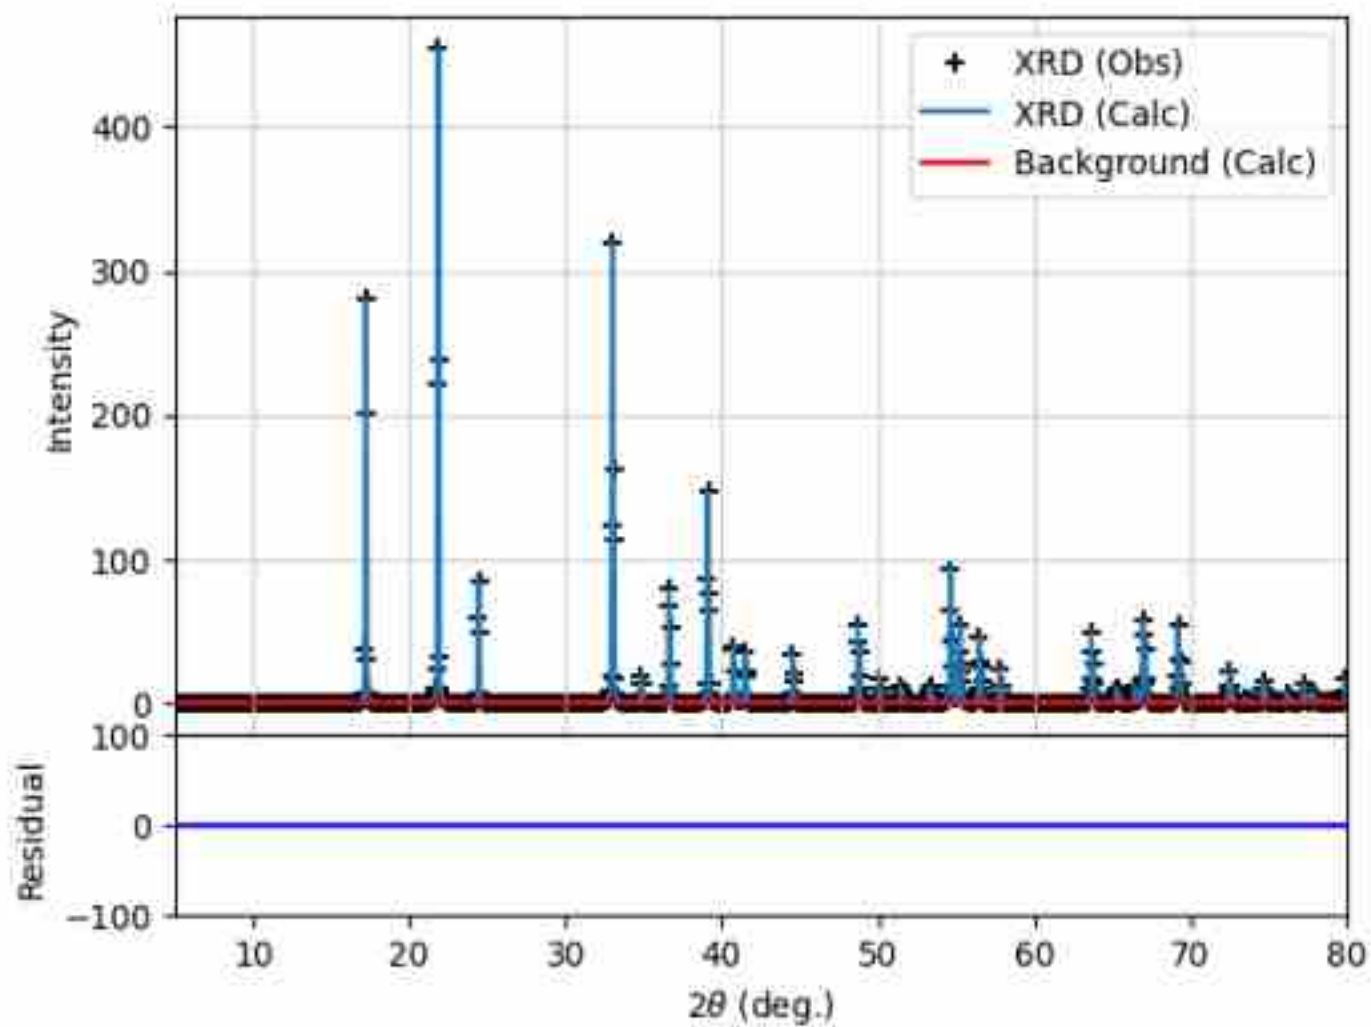

| RMSE before RR | Rwp     | RMSE after RR |
|----------------|---------|---------------|
| 0.033          | 0.00578 | 0.00325       |

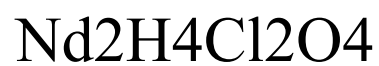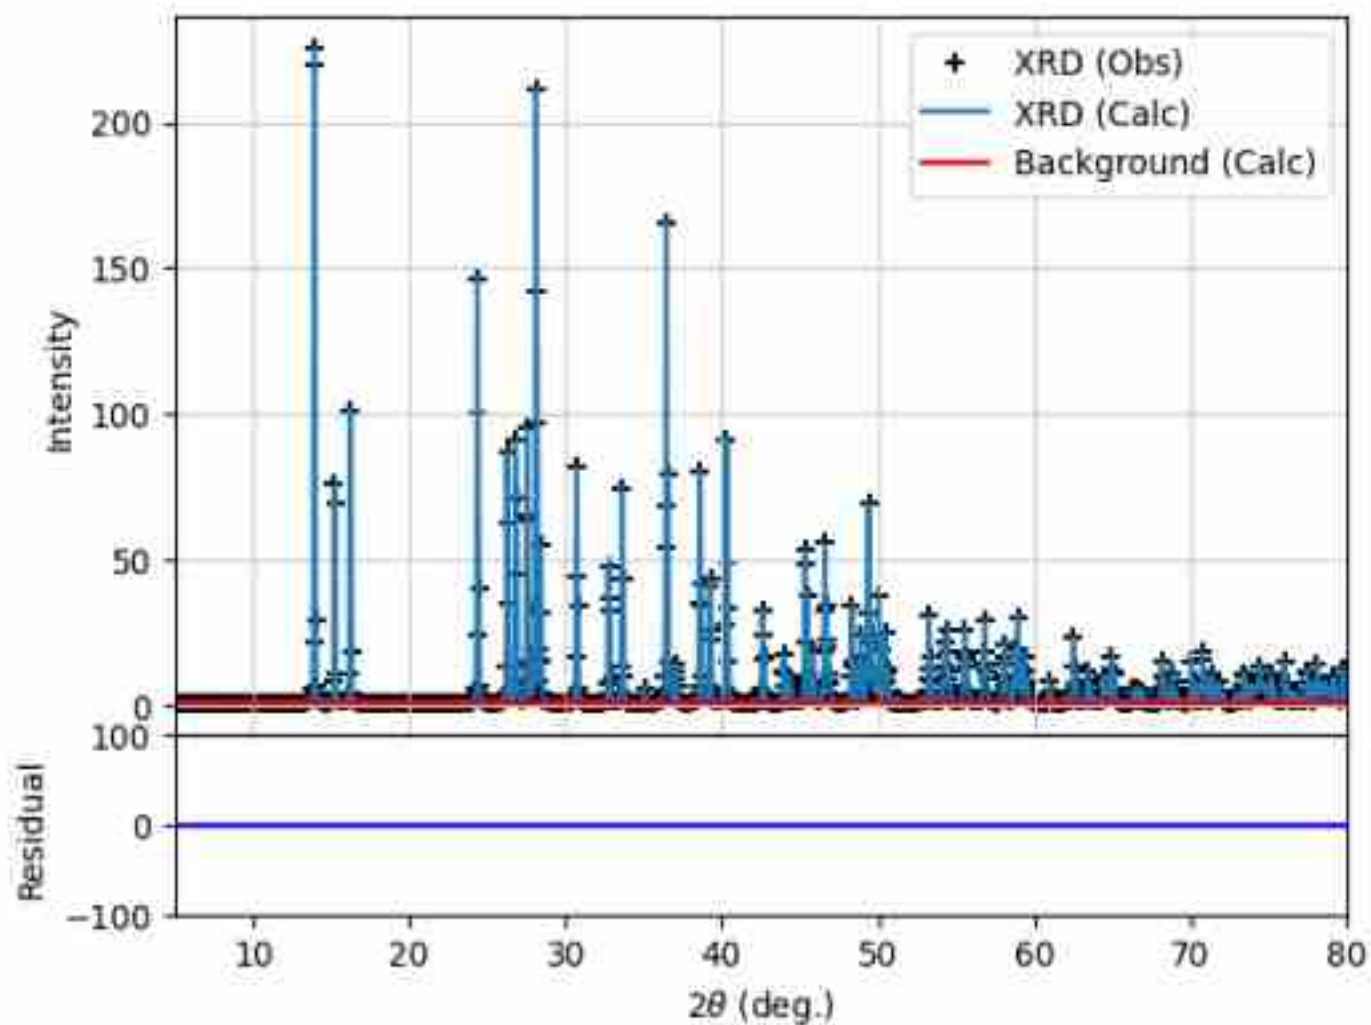

| RMSE before RR | Rwp     | RMSE after RR |
|----------------|---------|---------------|
| 0.033          | 0.00427 | 0.00621       |

# Rb8Pb2O8

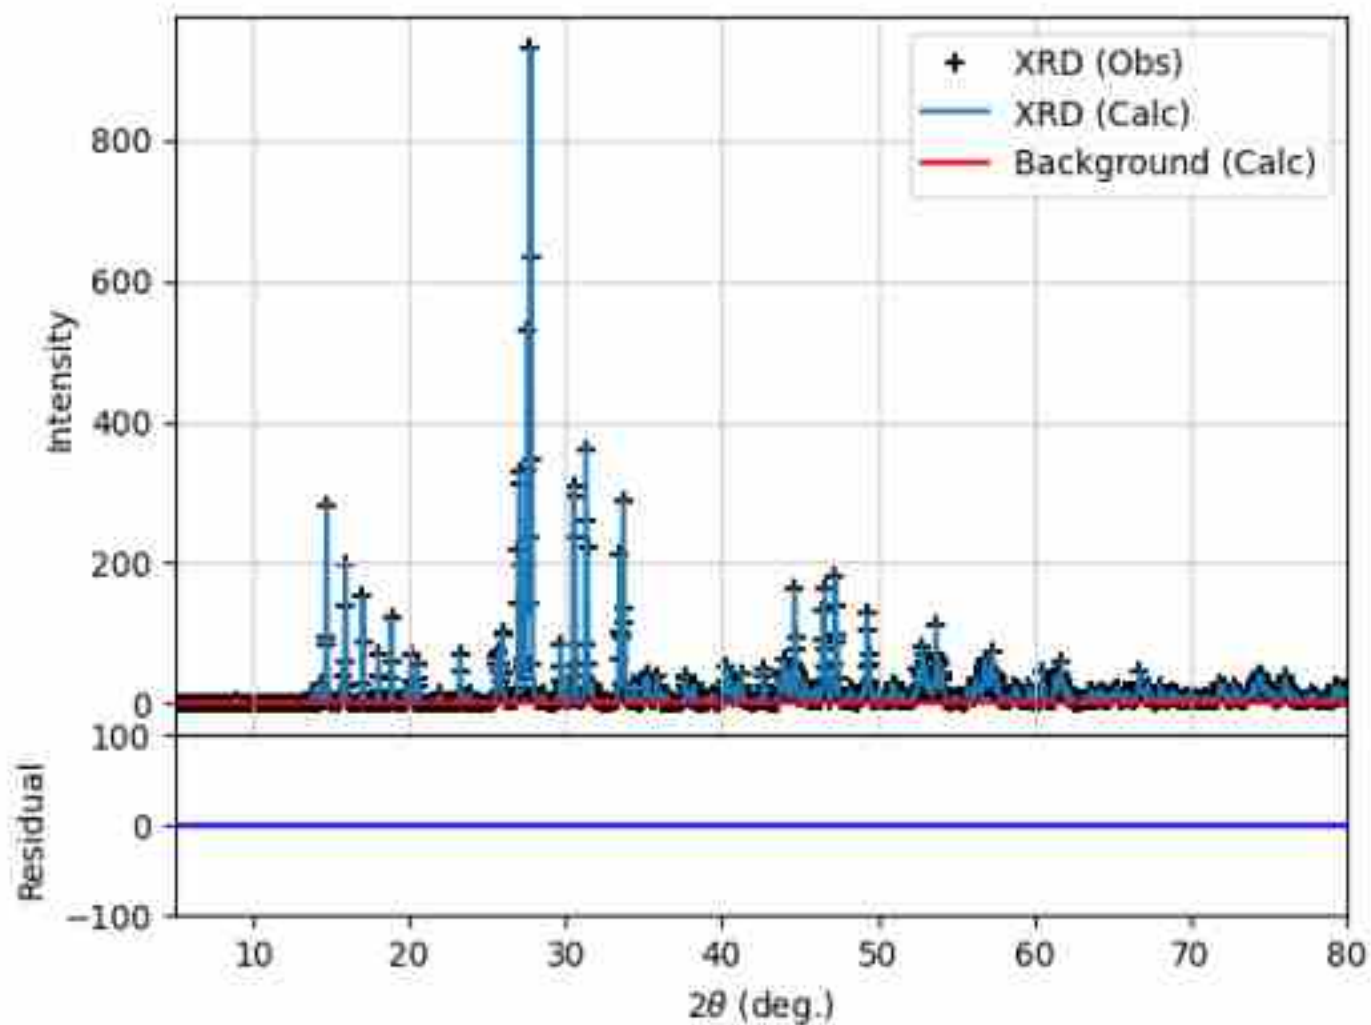

| RMSE before RR | Rwp     | RMSE after RR |
|----------------|---------|---------------|
| 0.033          | 0.00033 | 0.00041       |



# Sc<sub>4</sub>Co<sub>2</sub>Si<sub>4</sub>

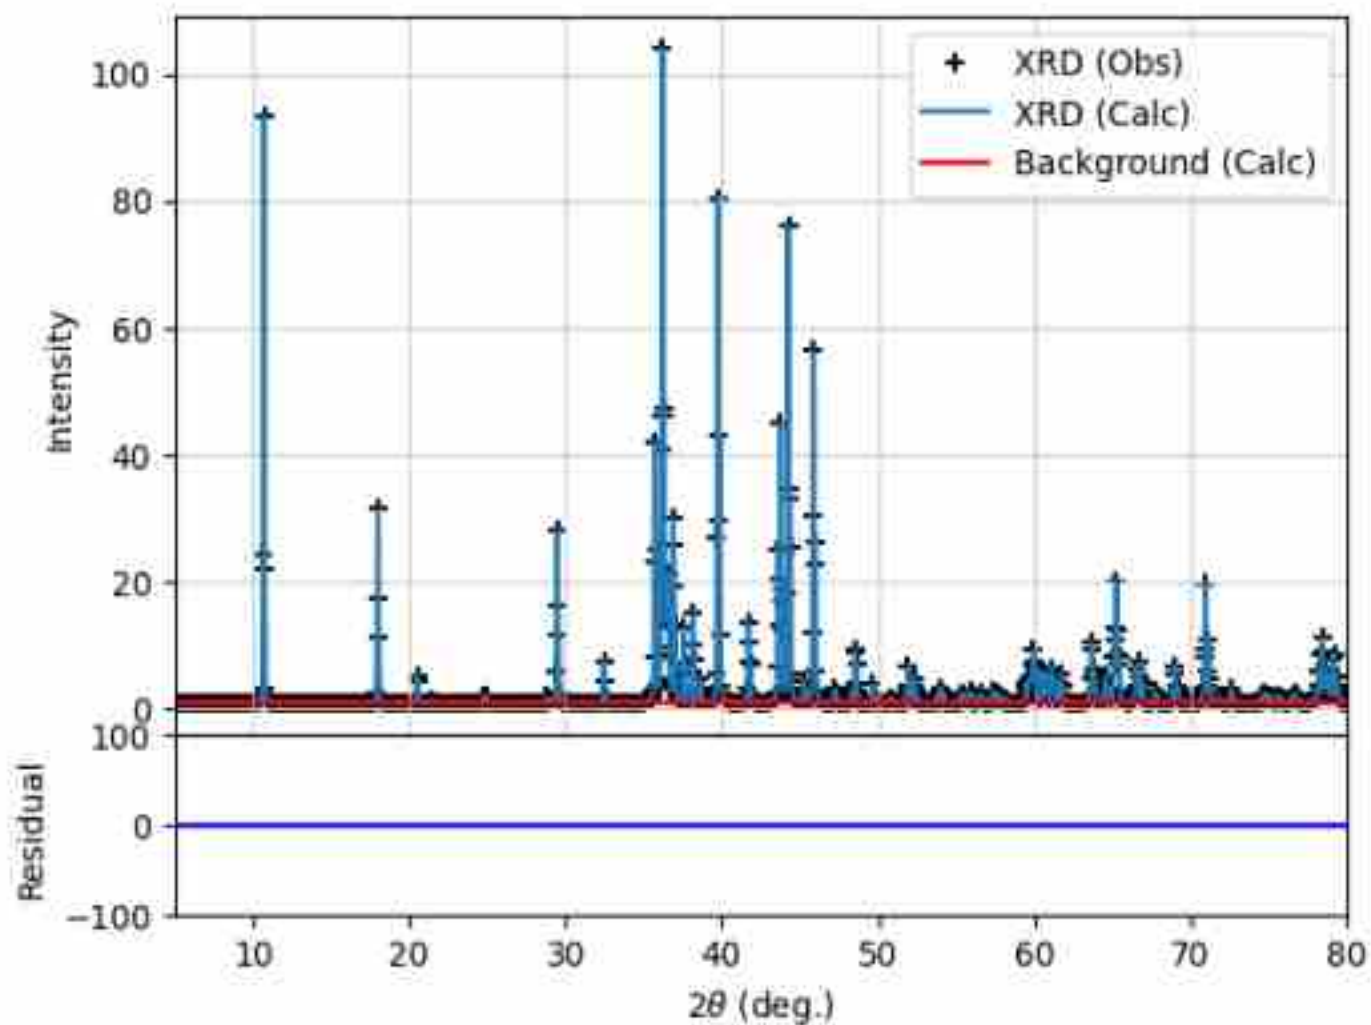

| RMSE before RR | Rwp     | RMSE after RR |
|----------------|---------|---------------|
| 0.033          | 0.00271 | 0.00022       |

# Sc4Ti4O12

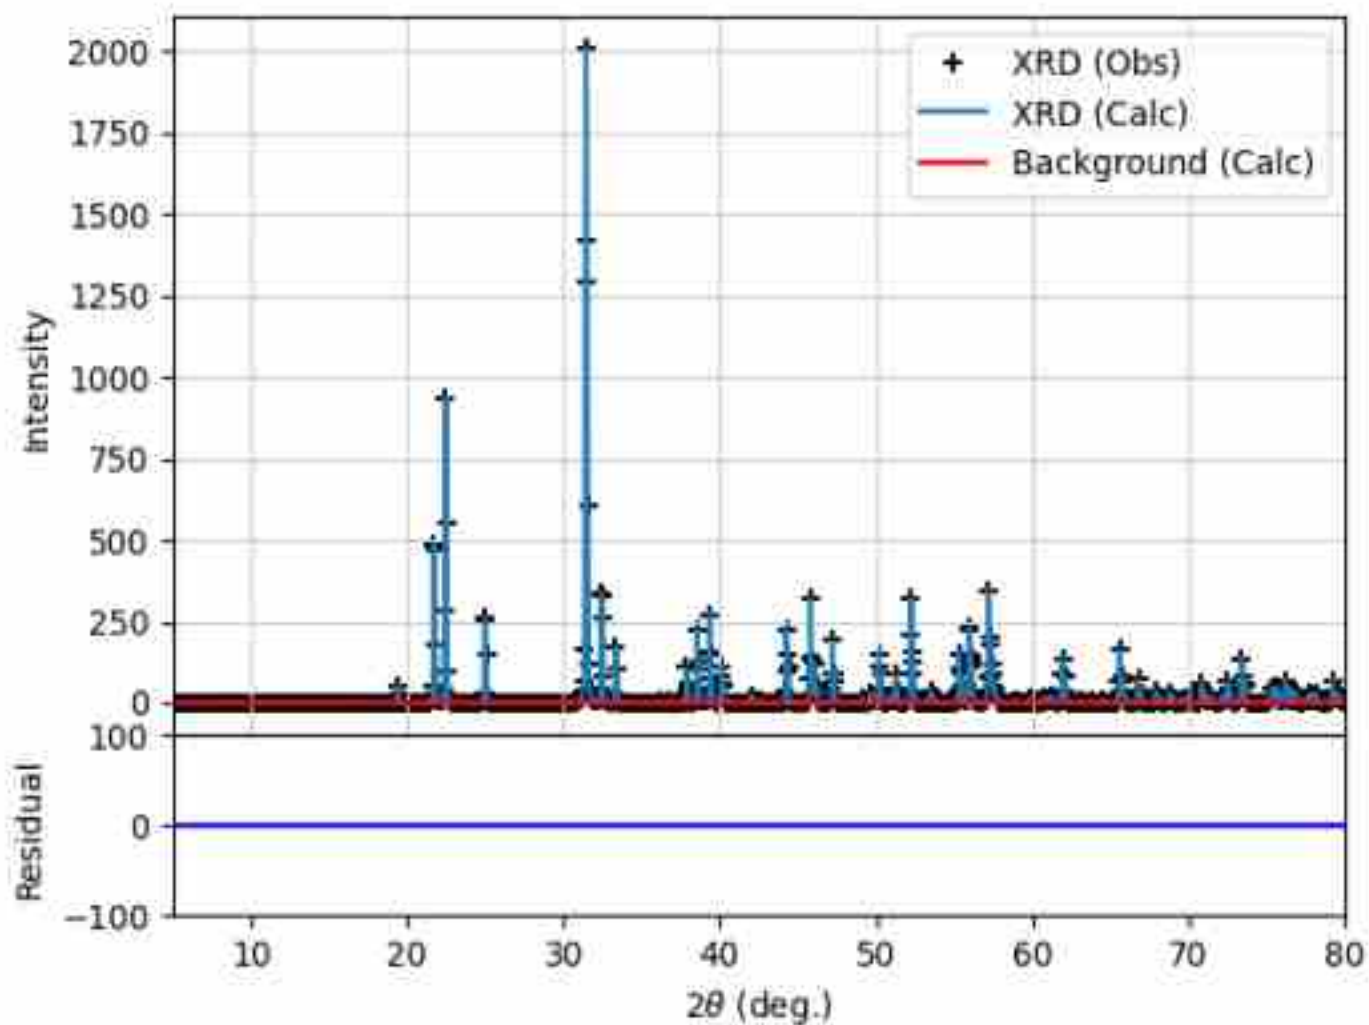

| RMSE before RR | Rwp     | RMSE after RR |
|----------------|---------|---------------|
| 0.033          | 0.00373 | 0.00116       |

# Si<sub>2</sub>Ge<sub>2</sub>N<sub>4</sub>O<sub>2</sub>

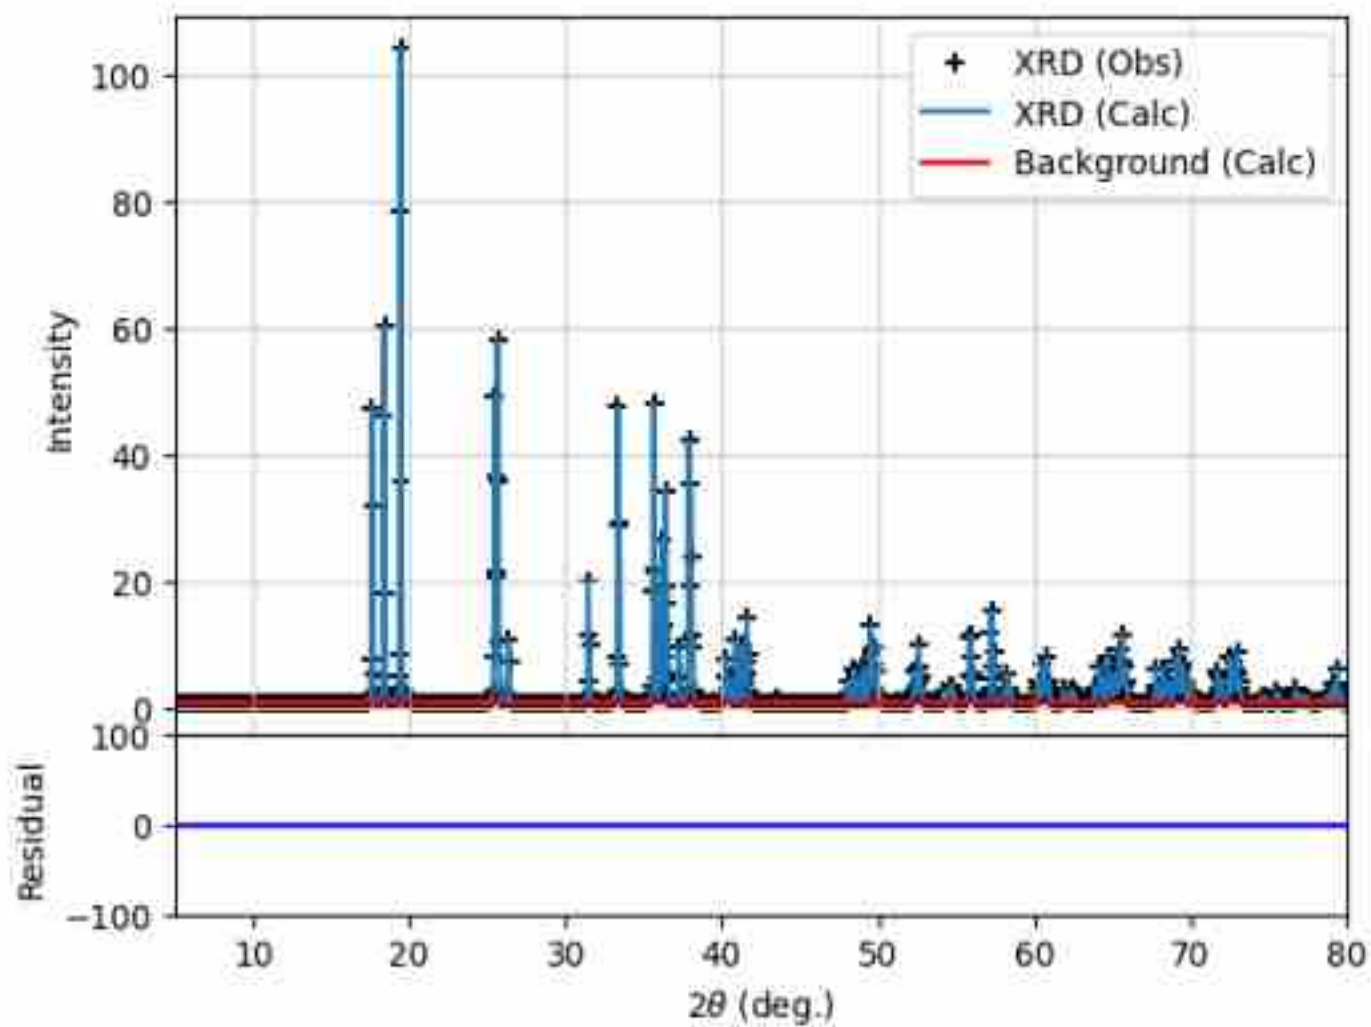

| RMSE before RR | Rwp     | RMSE after RR |
|----------------|---------|---------------|
| 0.033          | 0.00264 | 0.00052       |

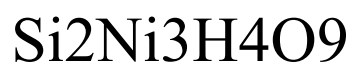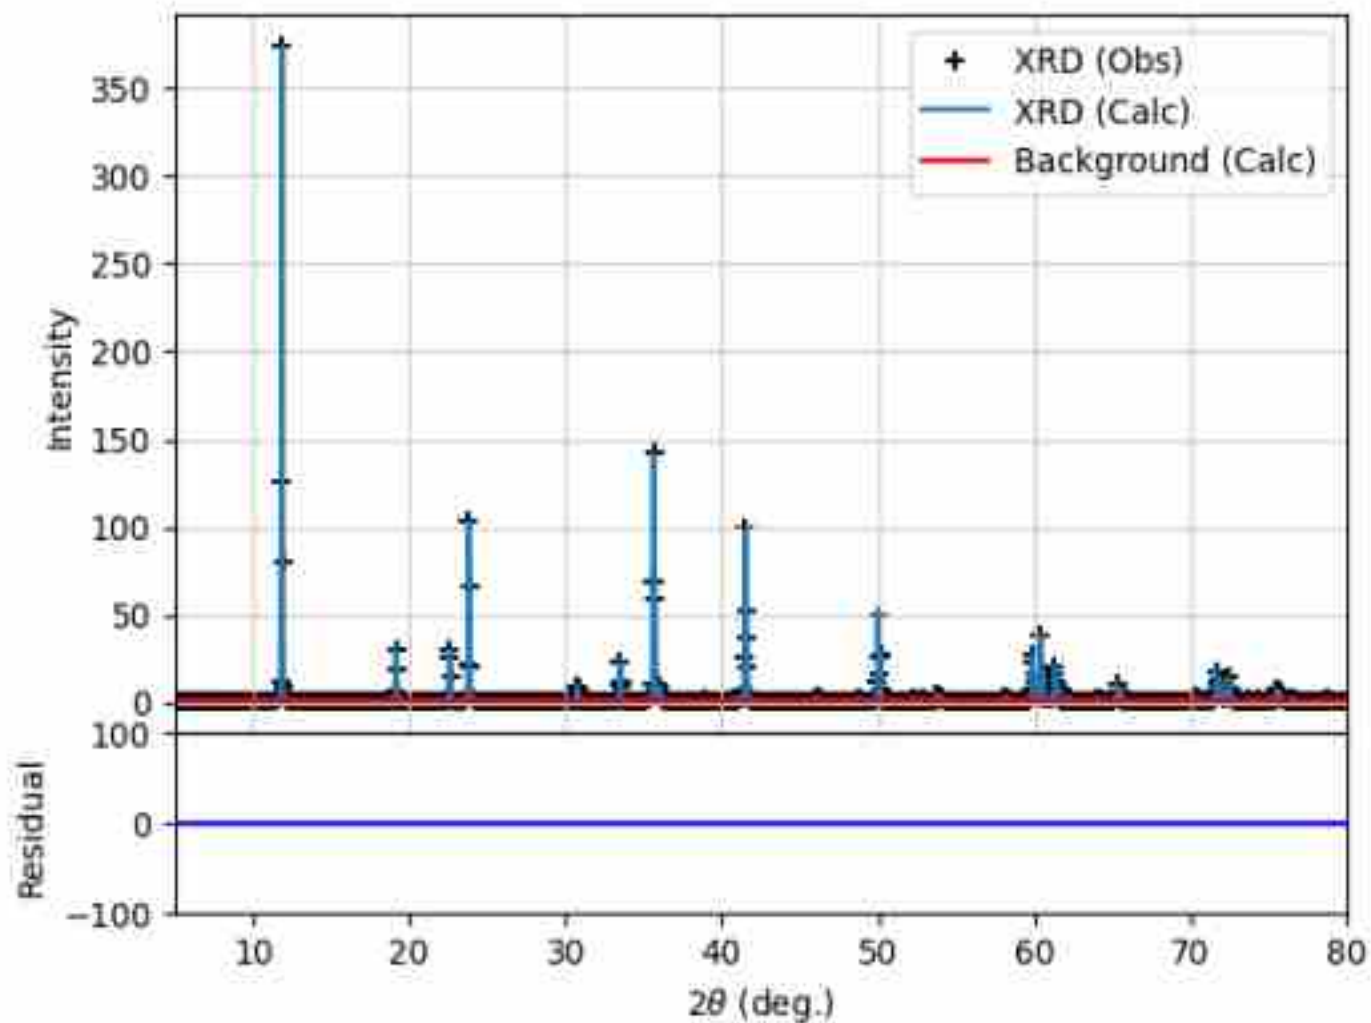

| RMSE before RR | Rwp     | RMSE after RR |
|----------------|---------|---------------|
| 0.033          | 0.00257 | 0.0036        |

# Si<sub>4</sub>Ni<sub>8</sub>

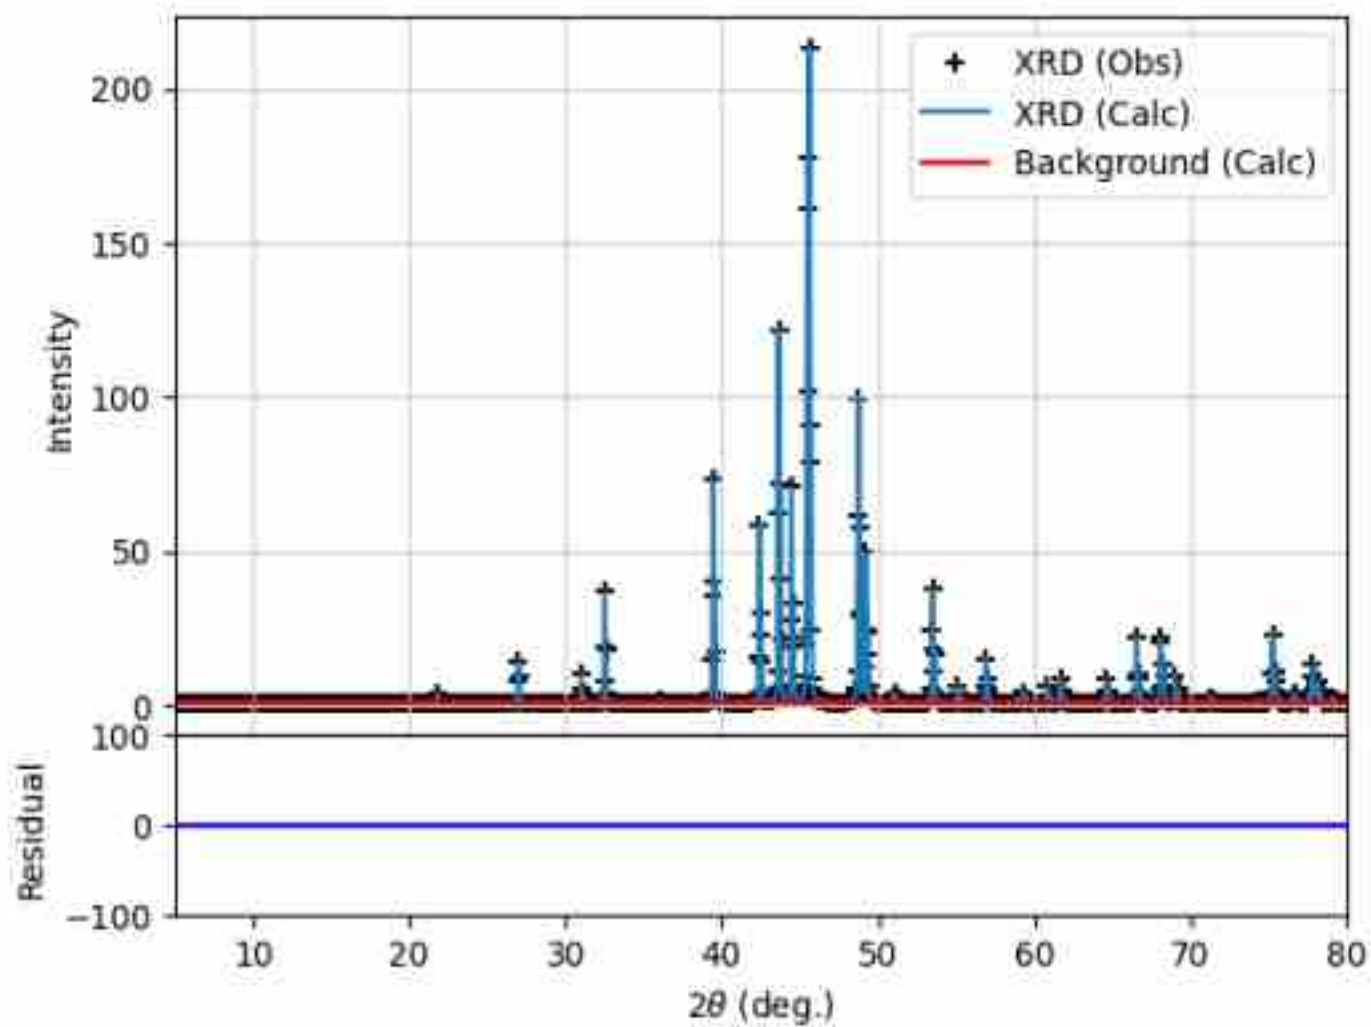

| RMSE before RR | Rwp     | RMSE after RR |
|----------------|---------|---------------|
| 0.033          | 0.00332 | 0.00046       |

# Sm<sub>2</sub>Ti<sub>3</sub>Bi<sub>2</sub>O<sub>12</sub>

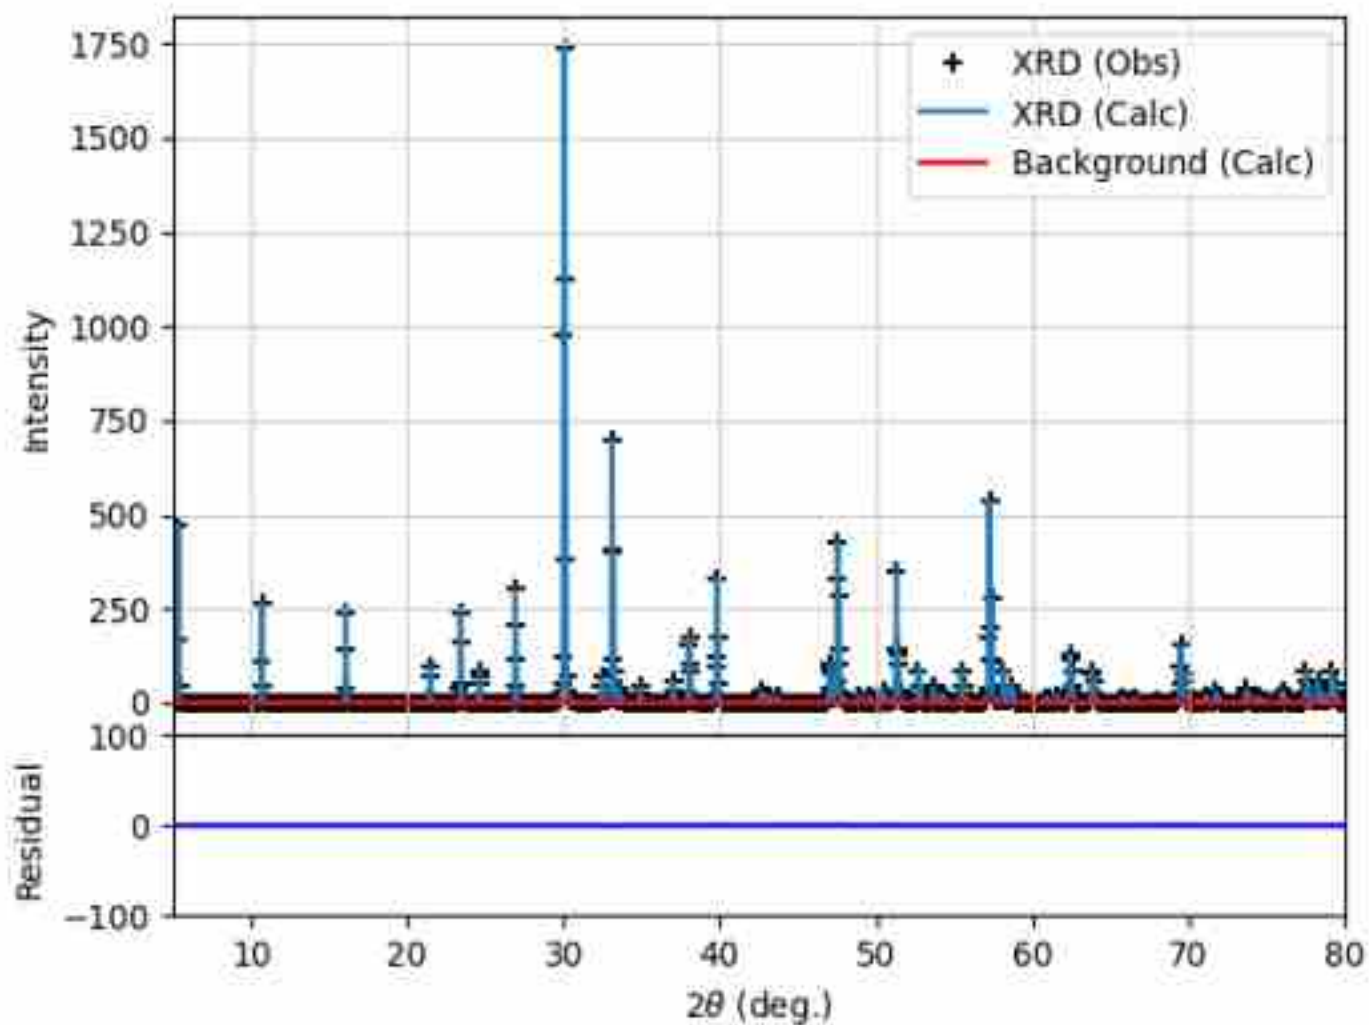

| RMSE before RR | Rwp     | RMSE after RR |
|----------------|---------|---------------|
| 0.033          | 0.24892 | 0.02107       |

# Th<sub>2</sub>Fe<sub>2</sub>Si<sub>2</sub>C<sub>1</sub>

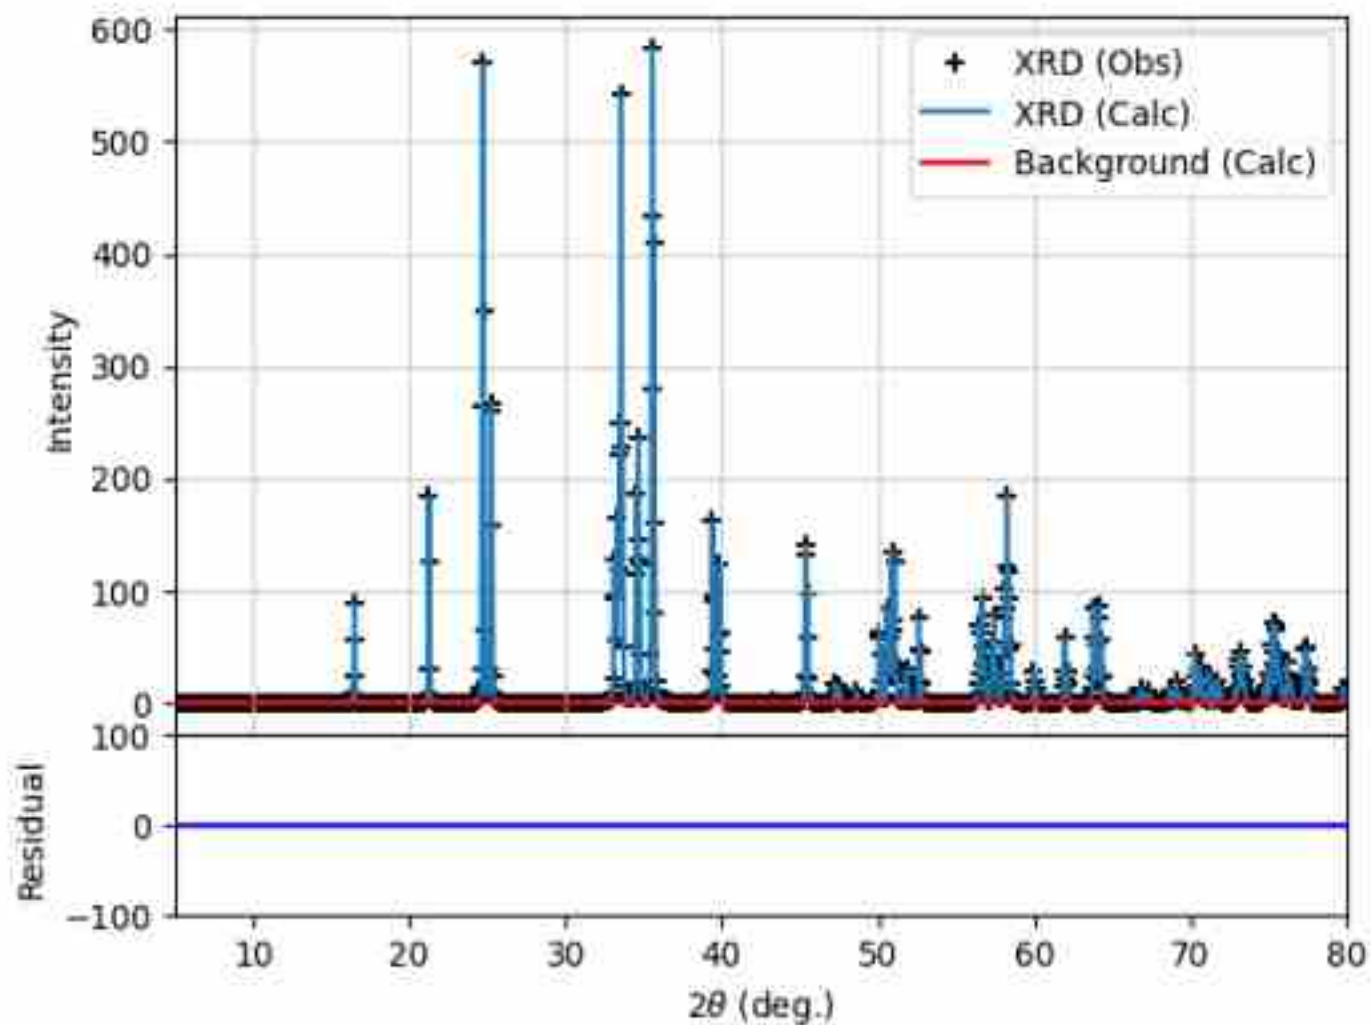

| RMSE before RR | Rwp     | RMSE after RR |
|----------------|---------|---------------|
| 0.033          | 0.00276 | 0.00078       |

# Th<sub>2</sub>Ge<sub>2</sub>Te<sub>2</sub>

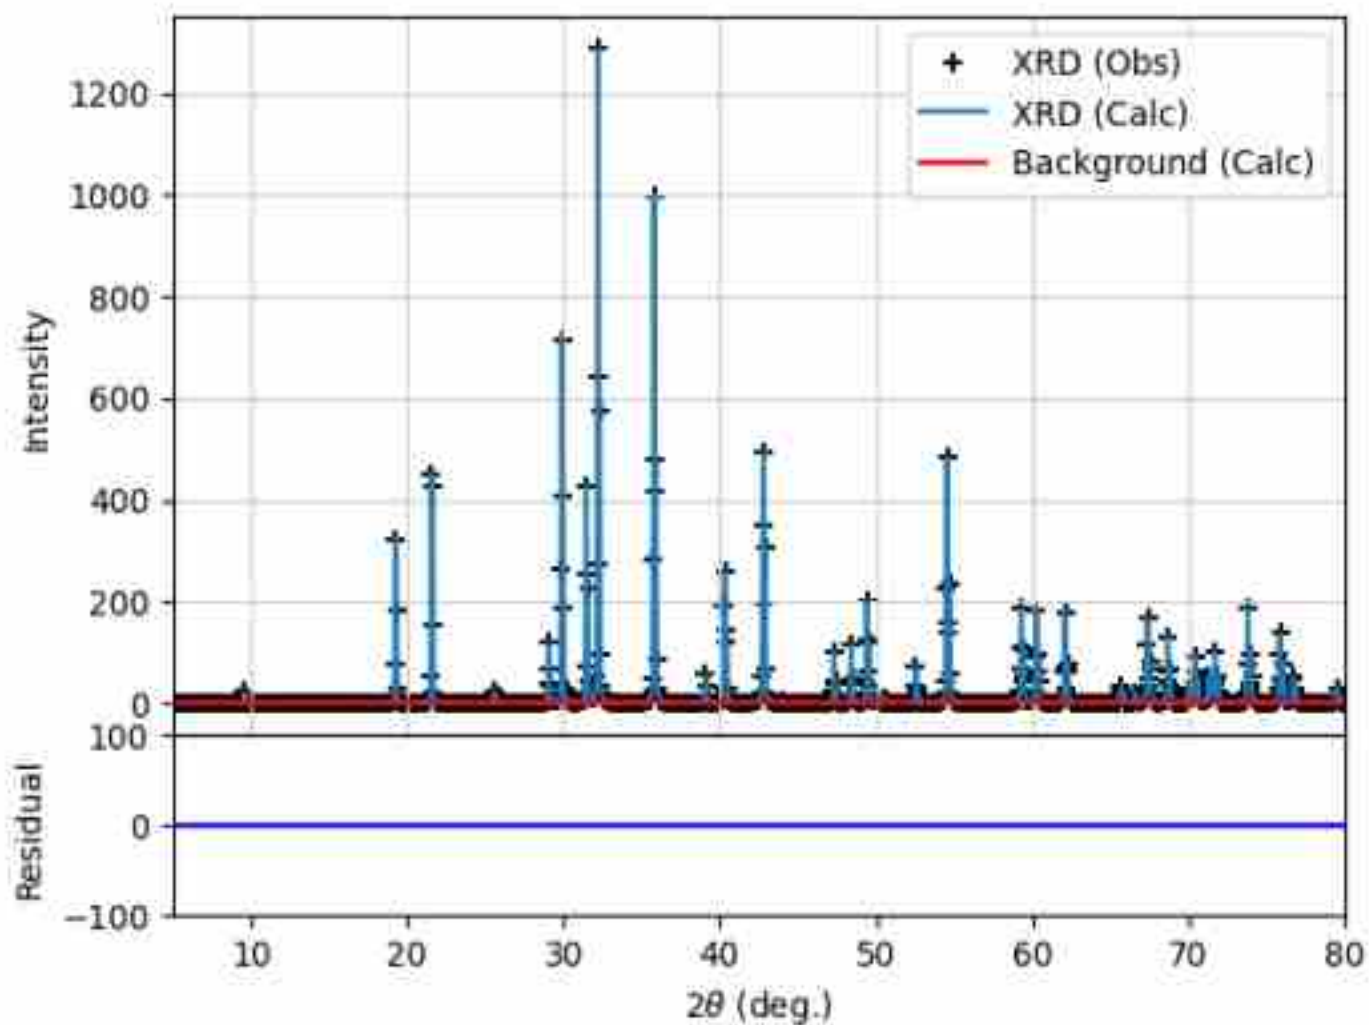

| RMSE before RR | Rwp     | RMSE after RR |
|----------------|---------|---------------|
| 0.033          | 0.00473 | 0.00049       |



# Ti1V2Te4

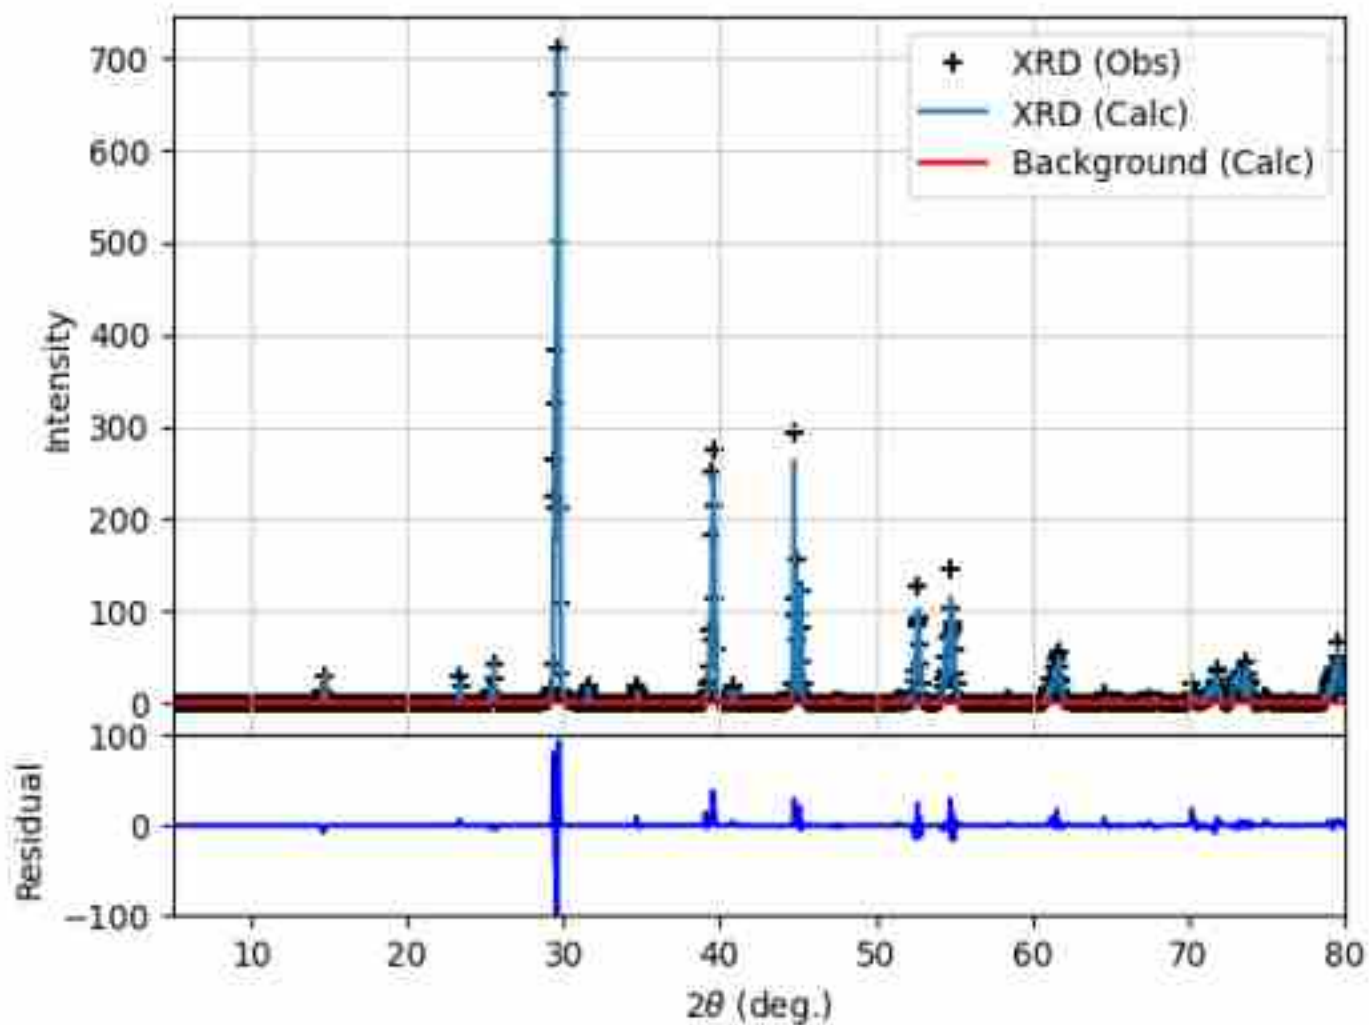

| RMSE before RR | Rwp      | RMSE after RR |
|----------------|----------|---------------|
| 0.033          | 18.52663 | 0.04771       |

# Ti<sub>2</sub>P<sub>2</sub>O<sub>8</sub>F<sub>2</sub>

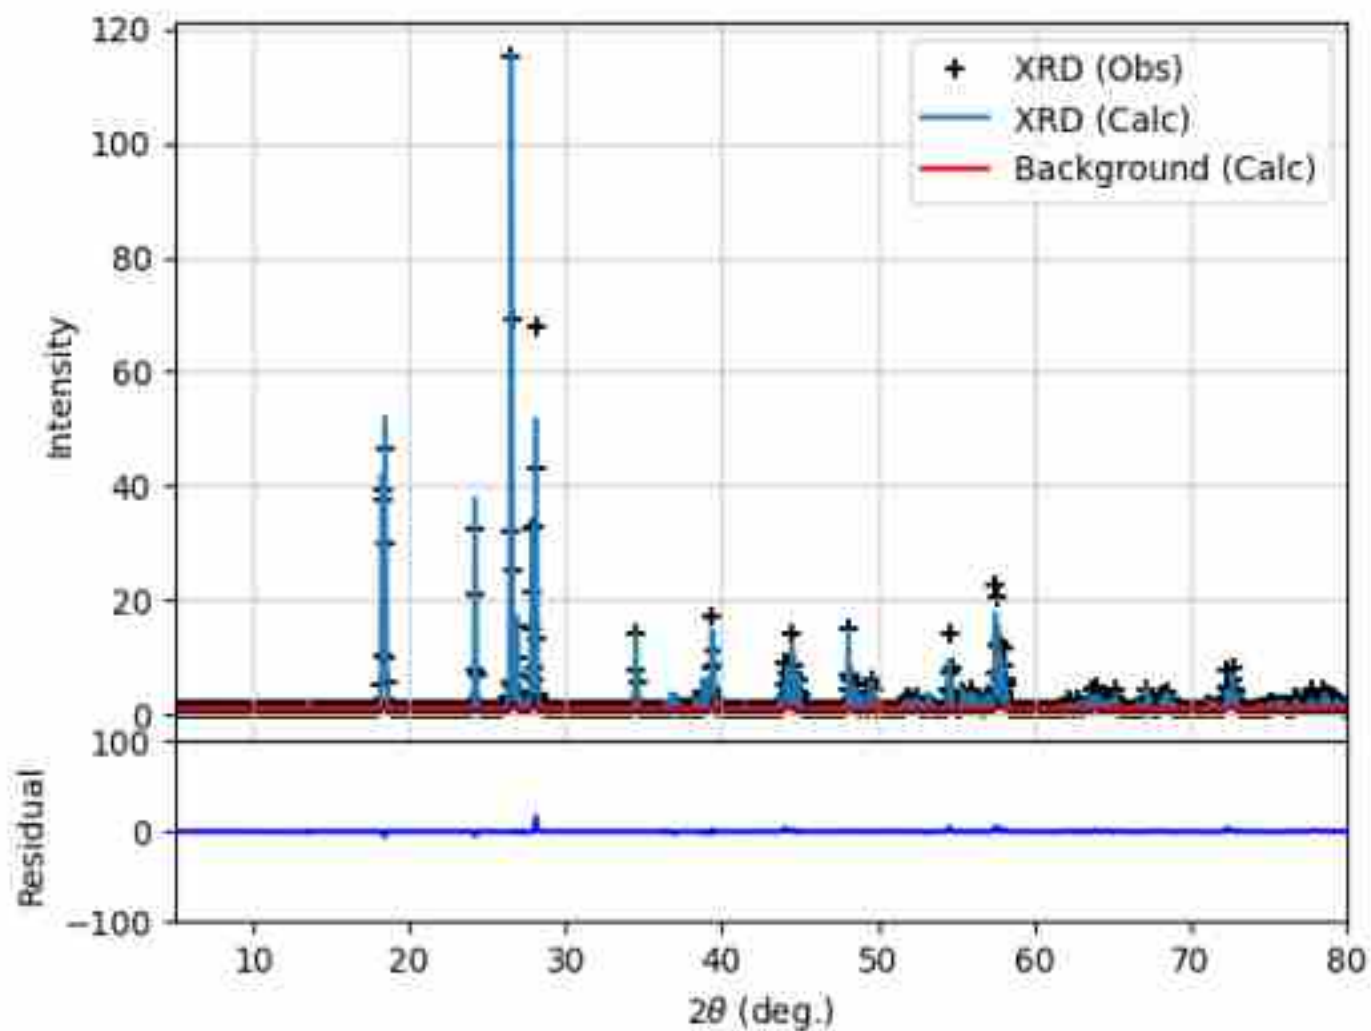

| RMSE before RR | Rwp      | RMSE after RR |
|----------------|----------|---------------|
| 0.033          | 15.59636 | None          |

# Tl4Cd4Cl12

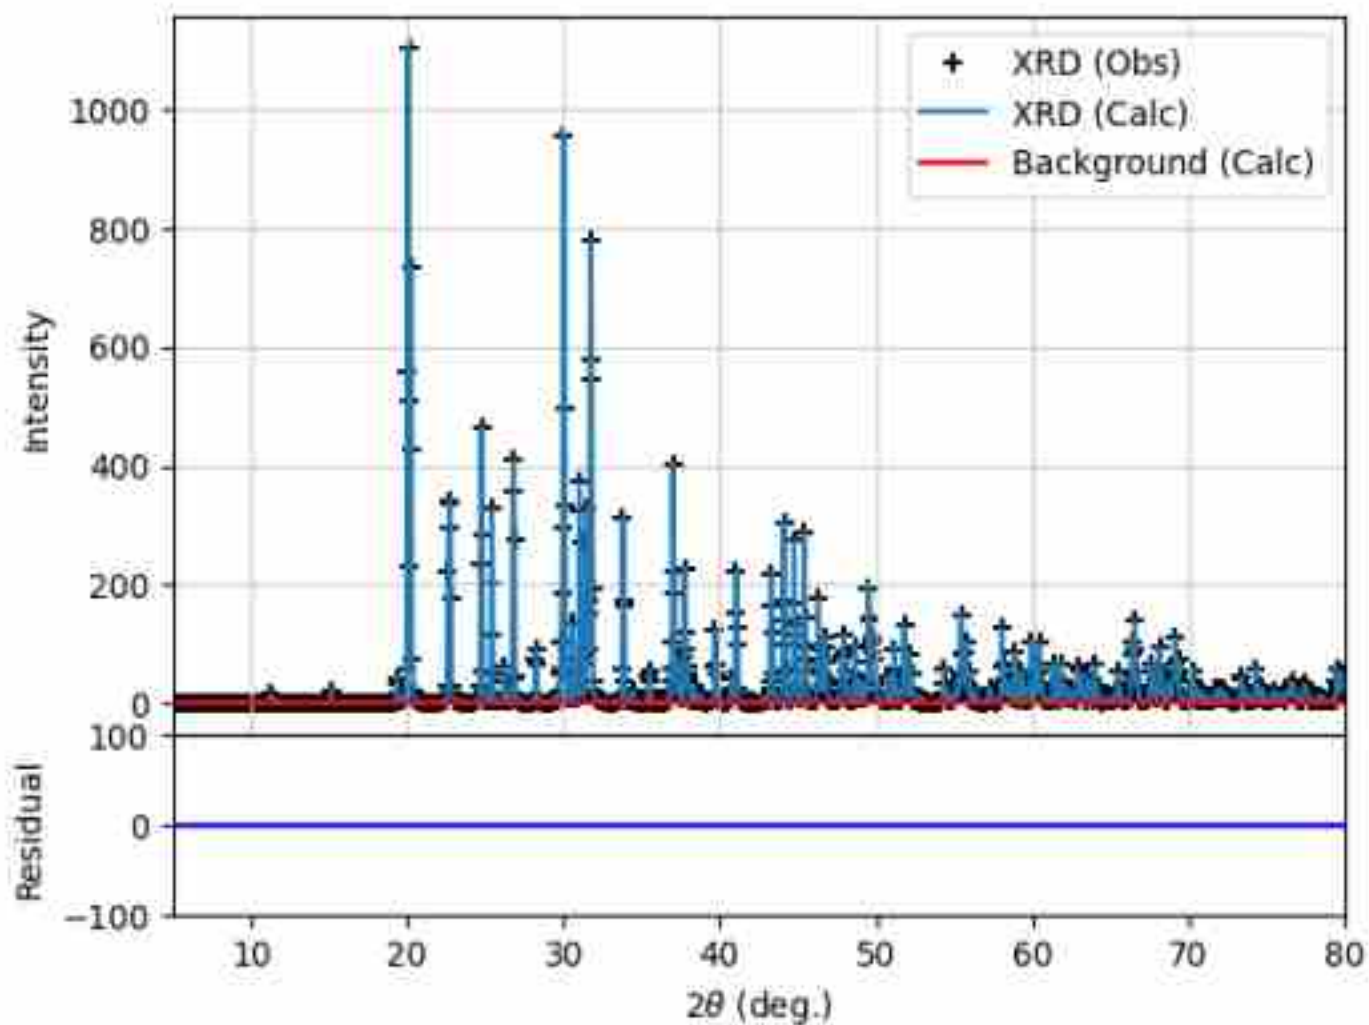

| RMSE before RR | Rwp   | RMSE after RR |
|----------------|-------|---------------|
| 0.033          | 0.004 | 0.00065       |

# Tm<sub>2</sub>Cu<sub>2</sub>Pb<sub>2</sub>Se<sub>6</sub>

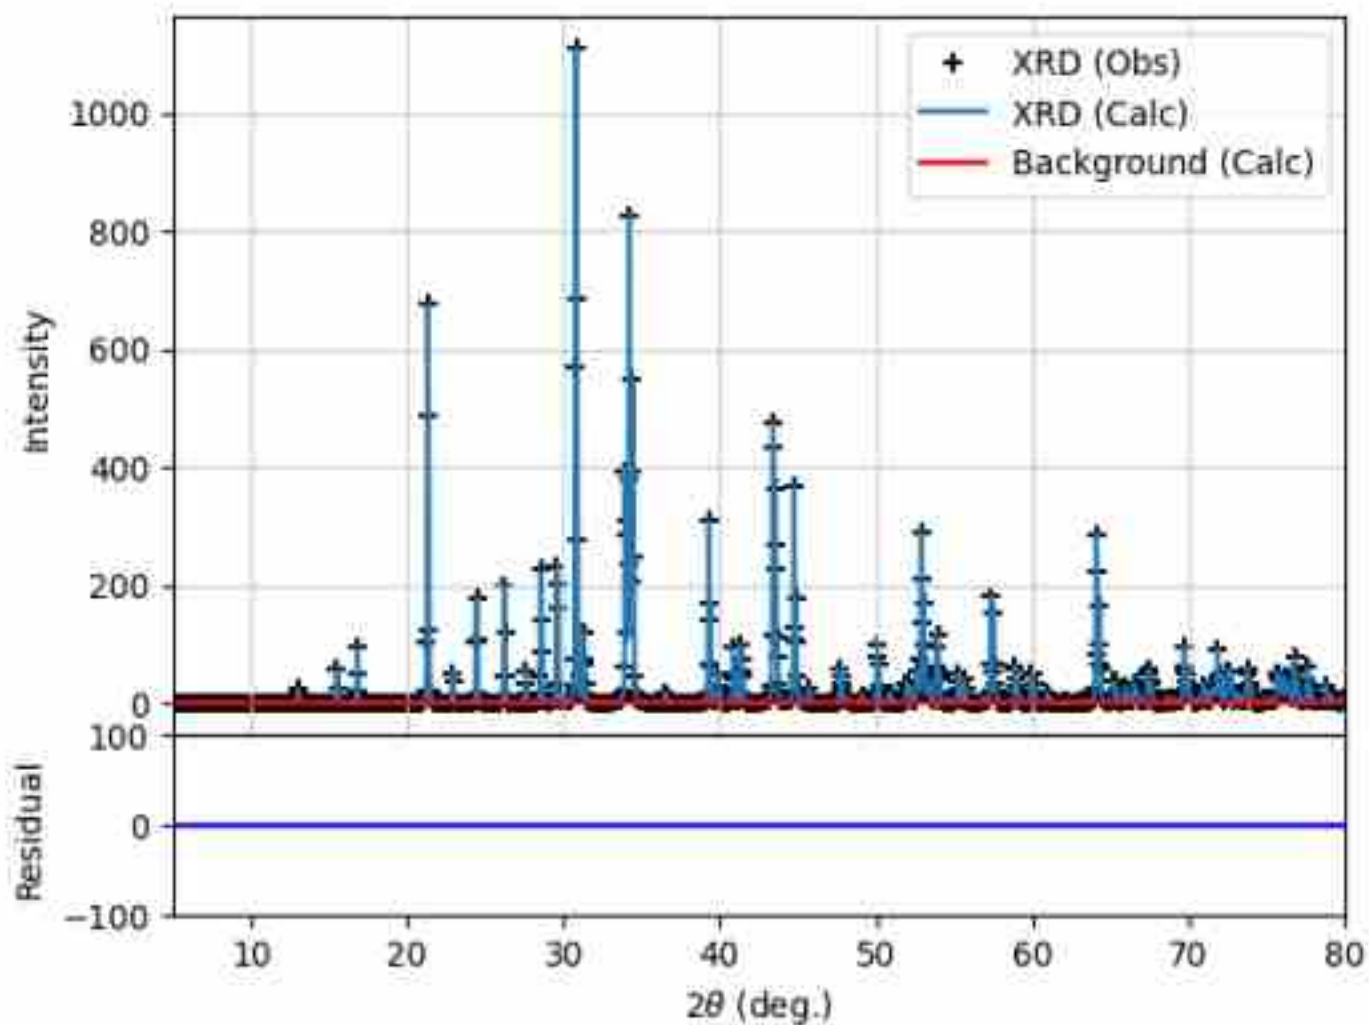

| RMSE before RR | Rwp     | RMSE after RR |
|----------------|---------|---------------|
| 0.033          | 0.00375 | 0.00056       |

# U<sub>2</sub>Ge<sub>2</sub>Te<sub>2</sub>

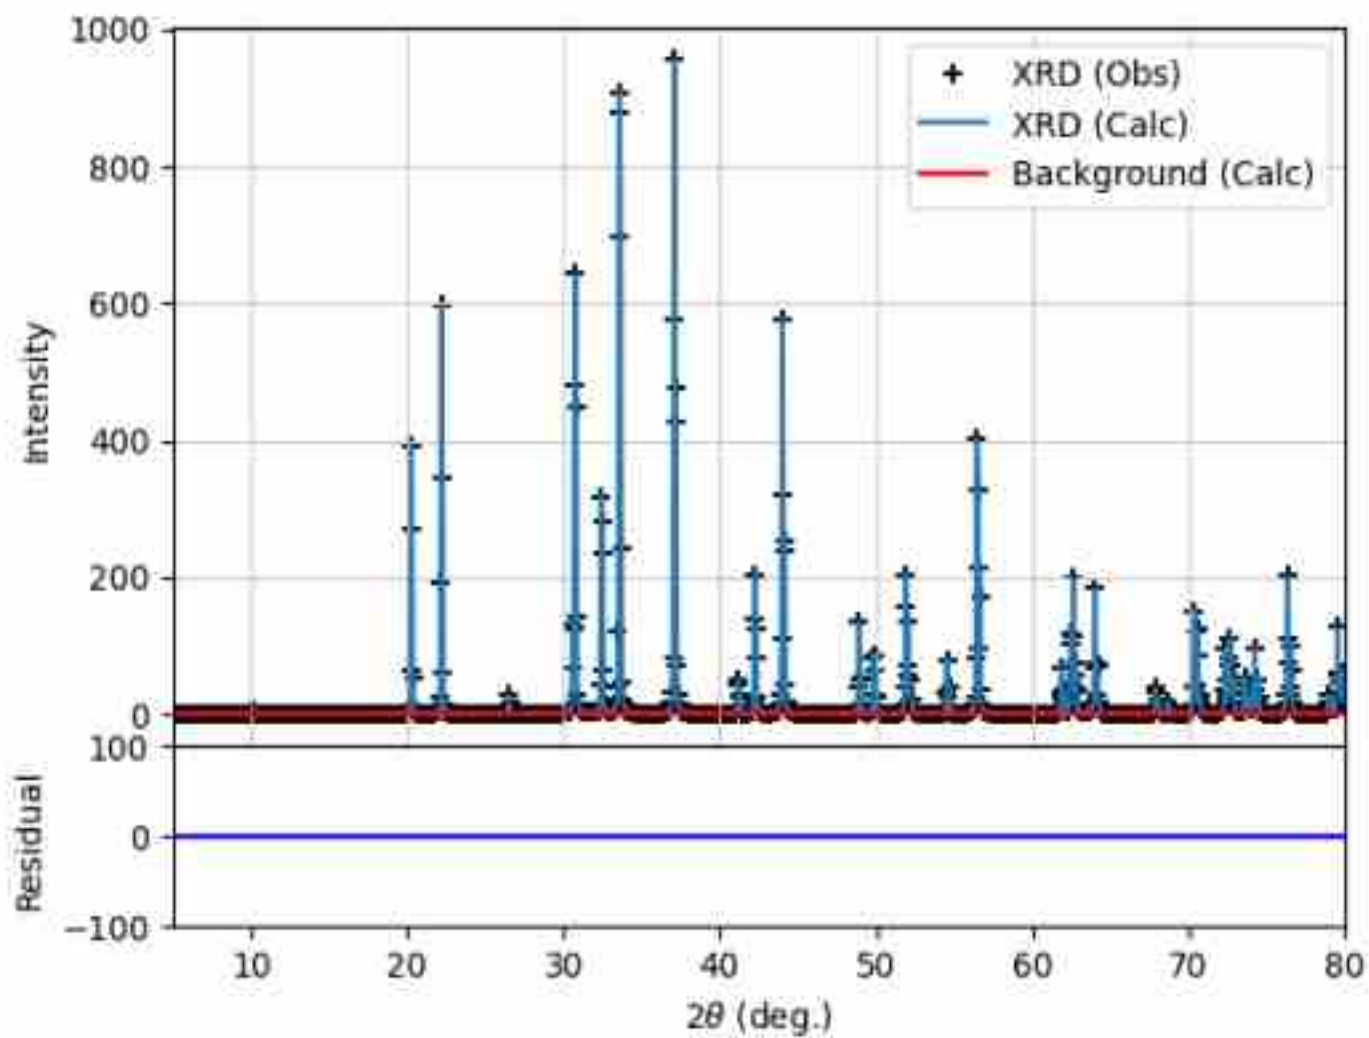

| RMSE before RR | Rwp     | RMSE after RR |
|----------------|---------|---------------|
| 0.033          | 0.00599 | 0.00069       |

# U<sub>2</sub>Ni<sub>2</sub>Ge<sub>2</sub>

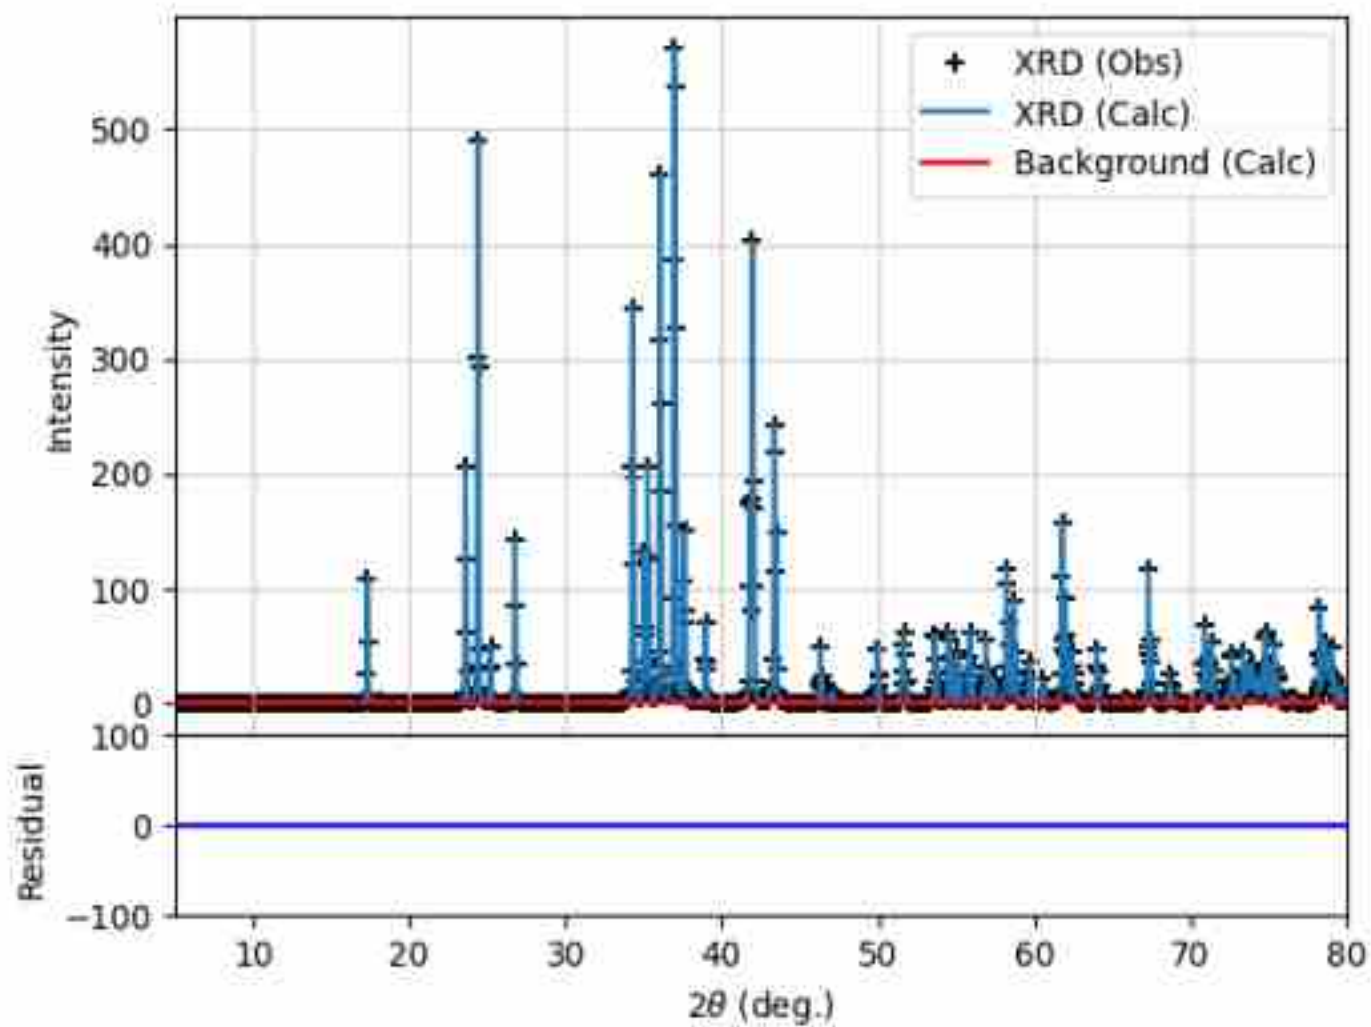

| RMSE before RR | Rwp     | RMSE after RR |
|----------------|---------|---------------|
| 0.033          | 0.00323 | 0.00041       |

# Y6Ga2Co6

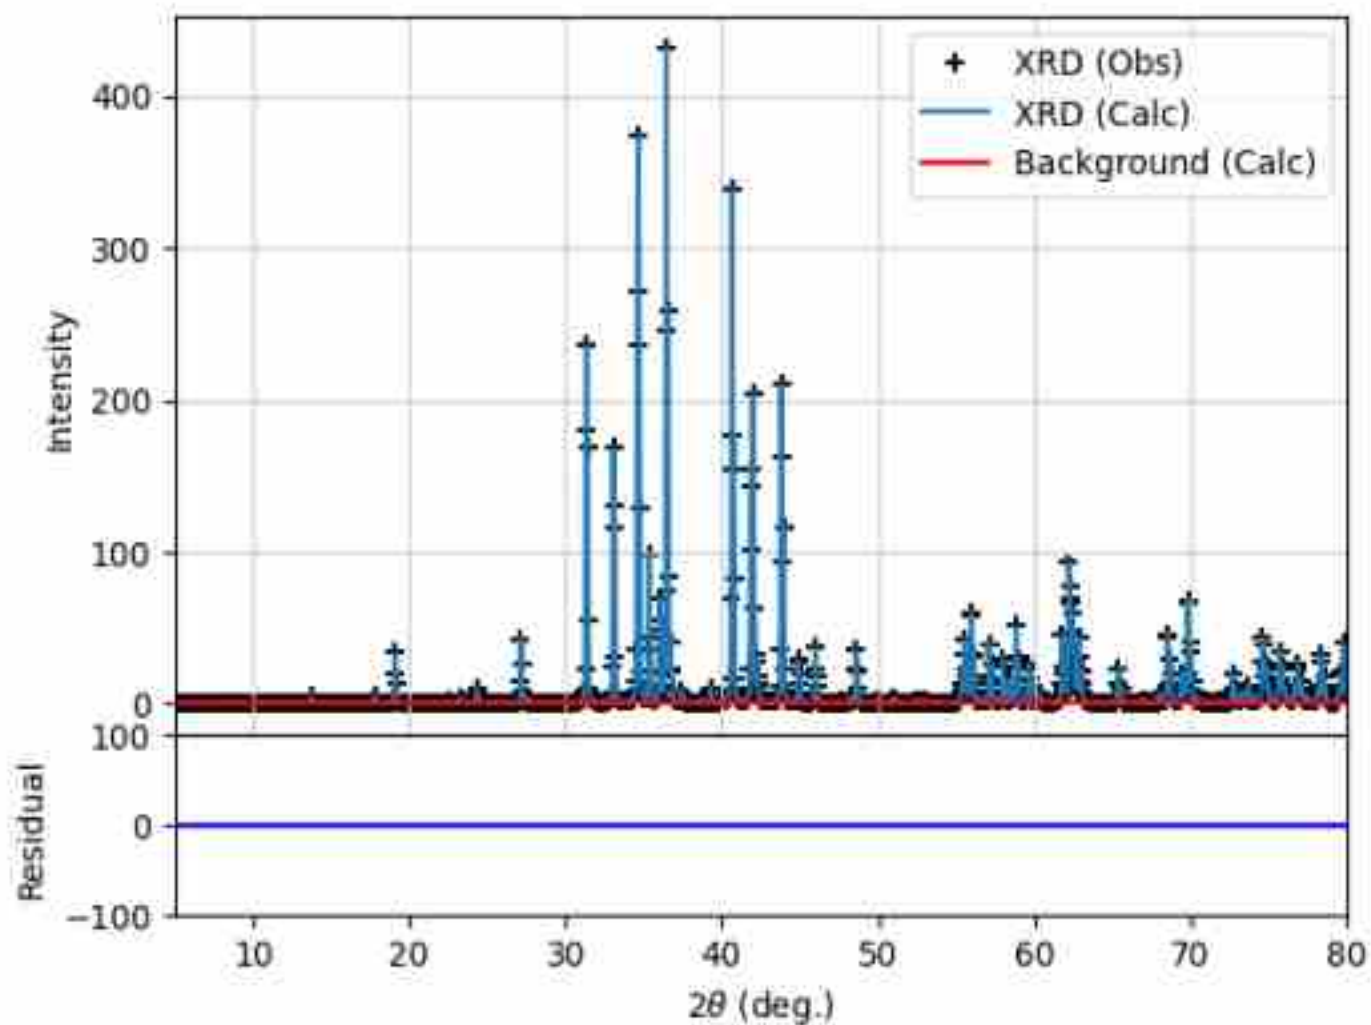

| RMSE before RR | Rwp     | RMSE after RR |
|----------------|---------|---------------|
| 0.033          | 0.00385 | 0.00031       |

# Yb5Re2O12

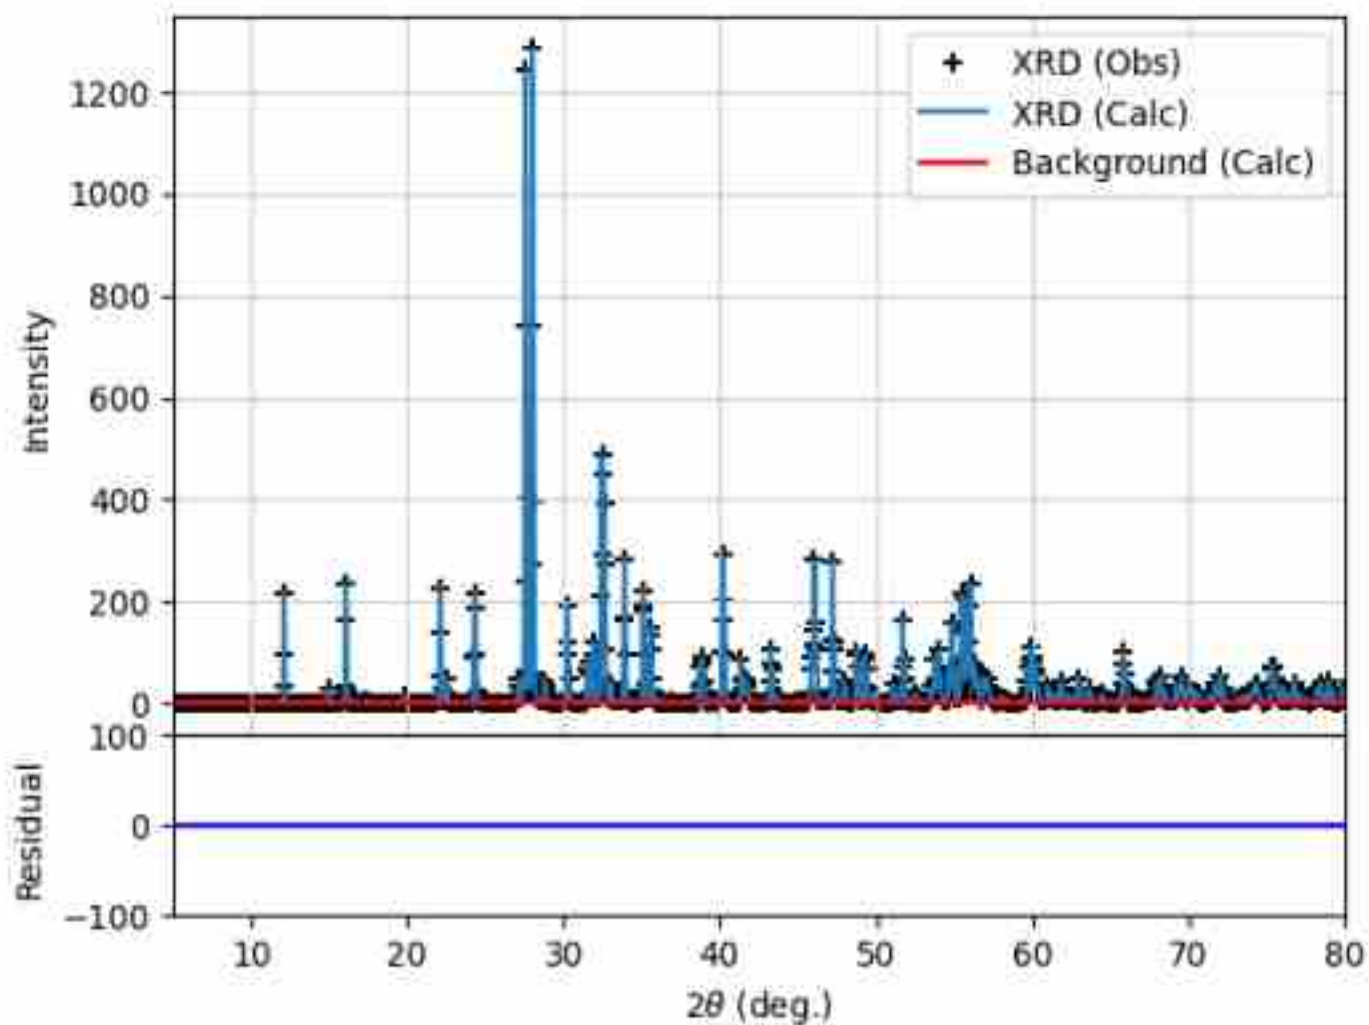

| RMSE before RR | Rwp     | RMSE after RR |
|----------------|---------|---------------|
| 0.033          | 0.00371 | 0.00165       |



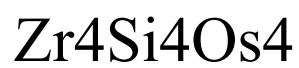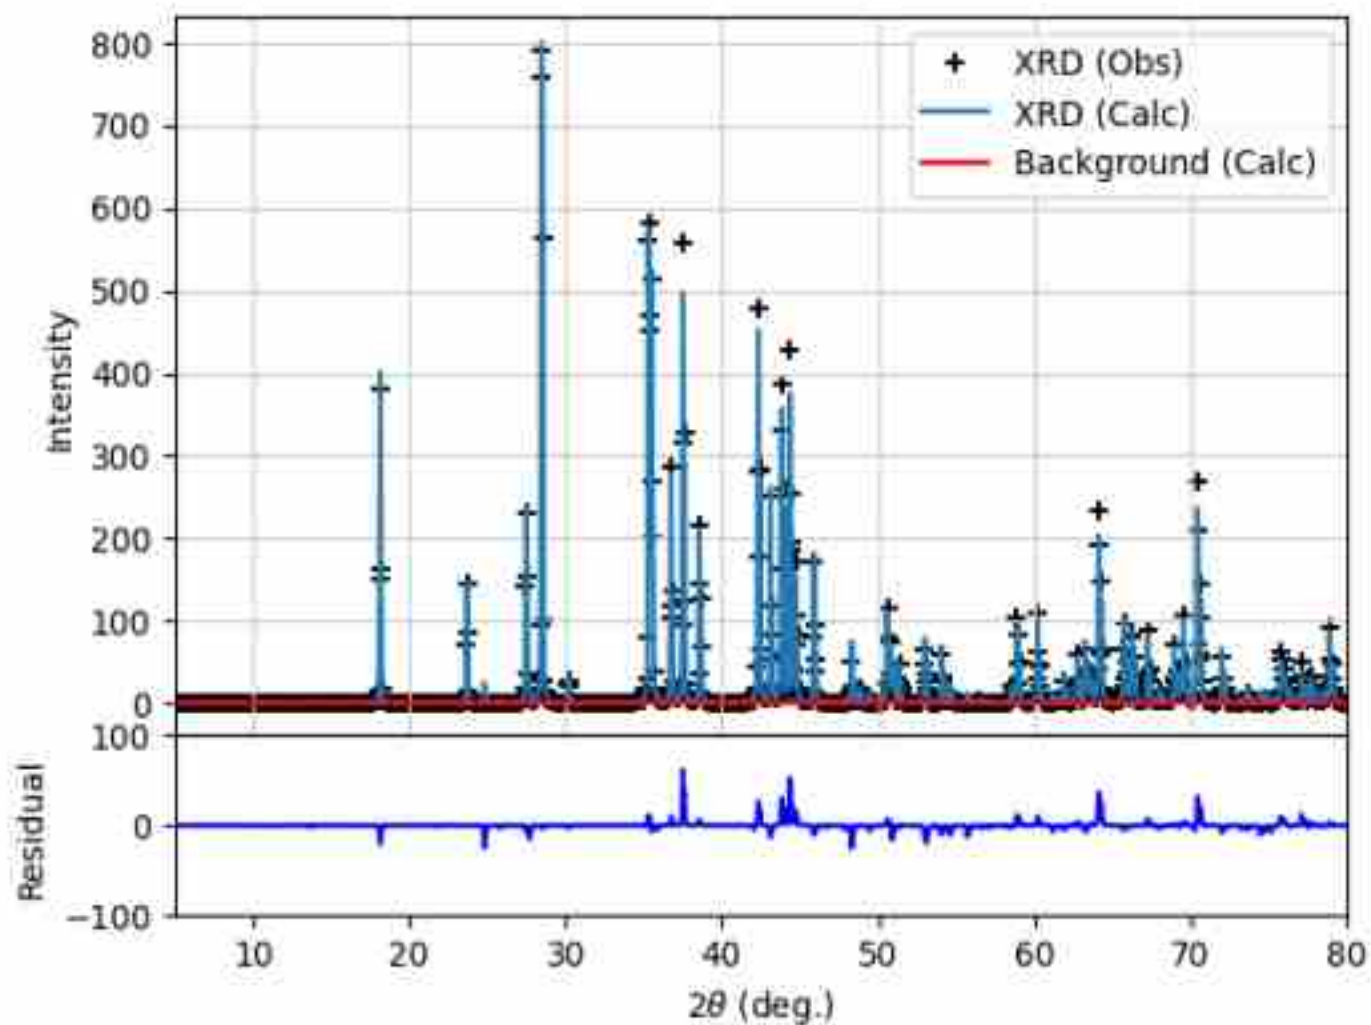

| RMSE before RR | Rwp      | RMSE after RR |
|----------------|----------|---------------|
| 0.033          | 27.46223 | 0.07722       |

# Zr<sub>10</sub>In<sub>6</sub>Cu<sub>2</sub>

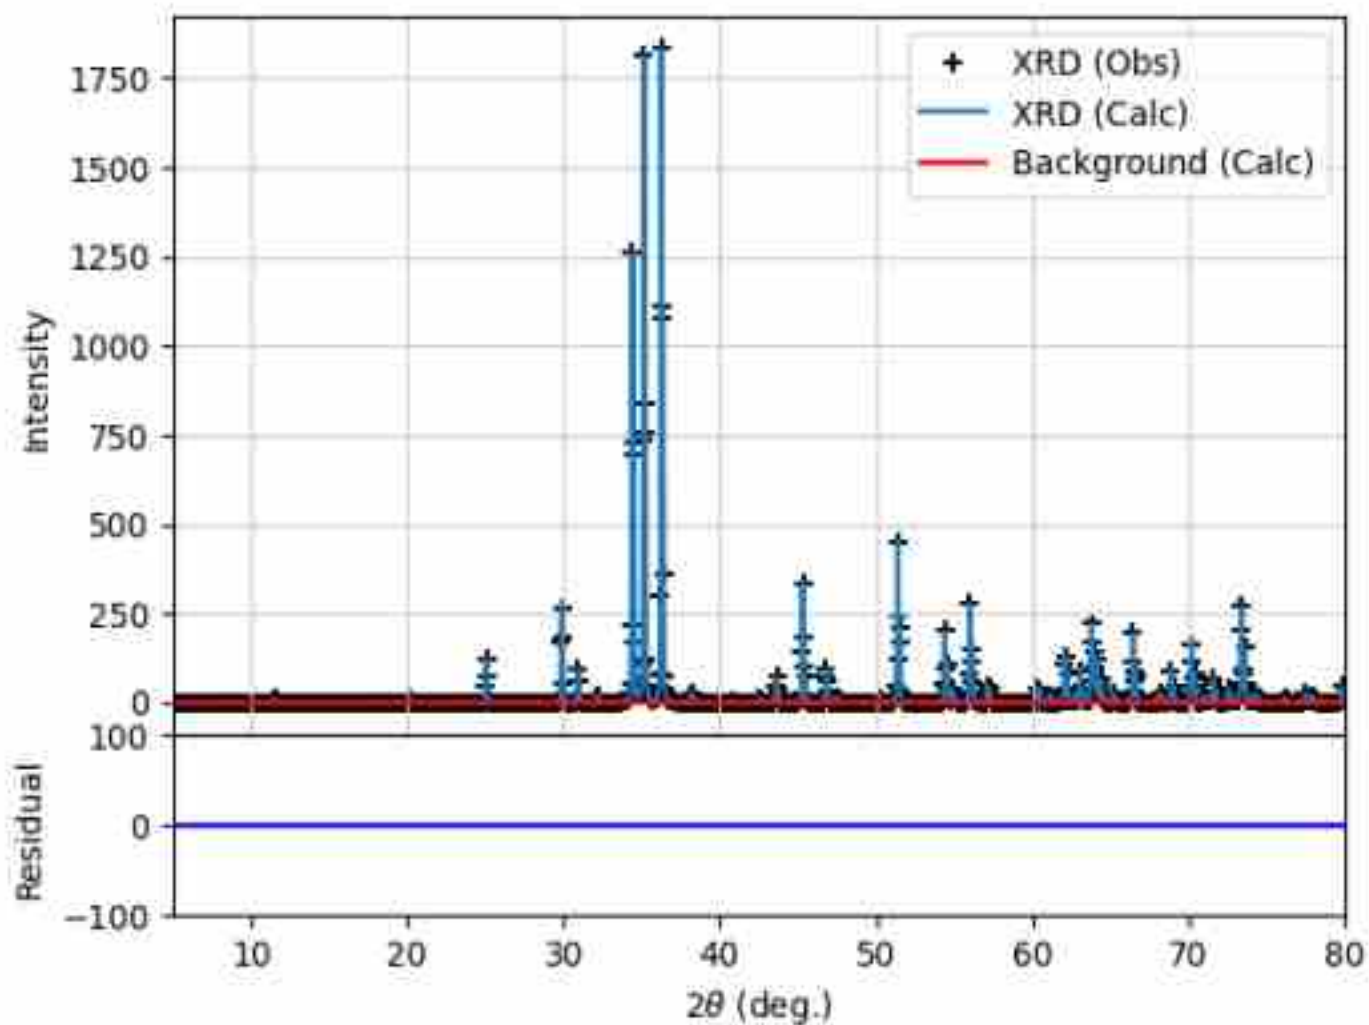

| RMSE before RR | Rwp     | RMSE after RR |
|----------------|---------|---------------|
| 0.033          | 0.00664 | 0.00055       |

# Al<sub>5</sub>Cu<sub>5</sub>

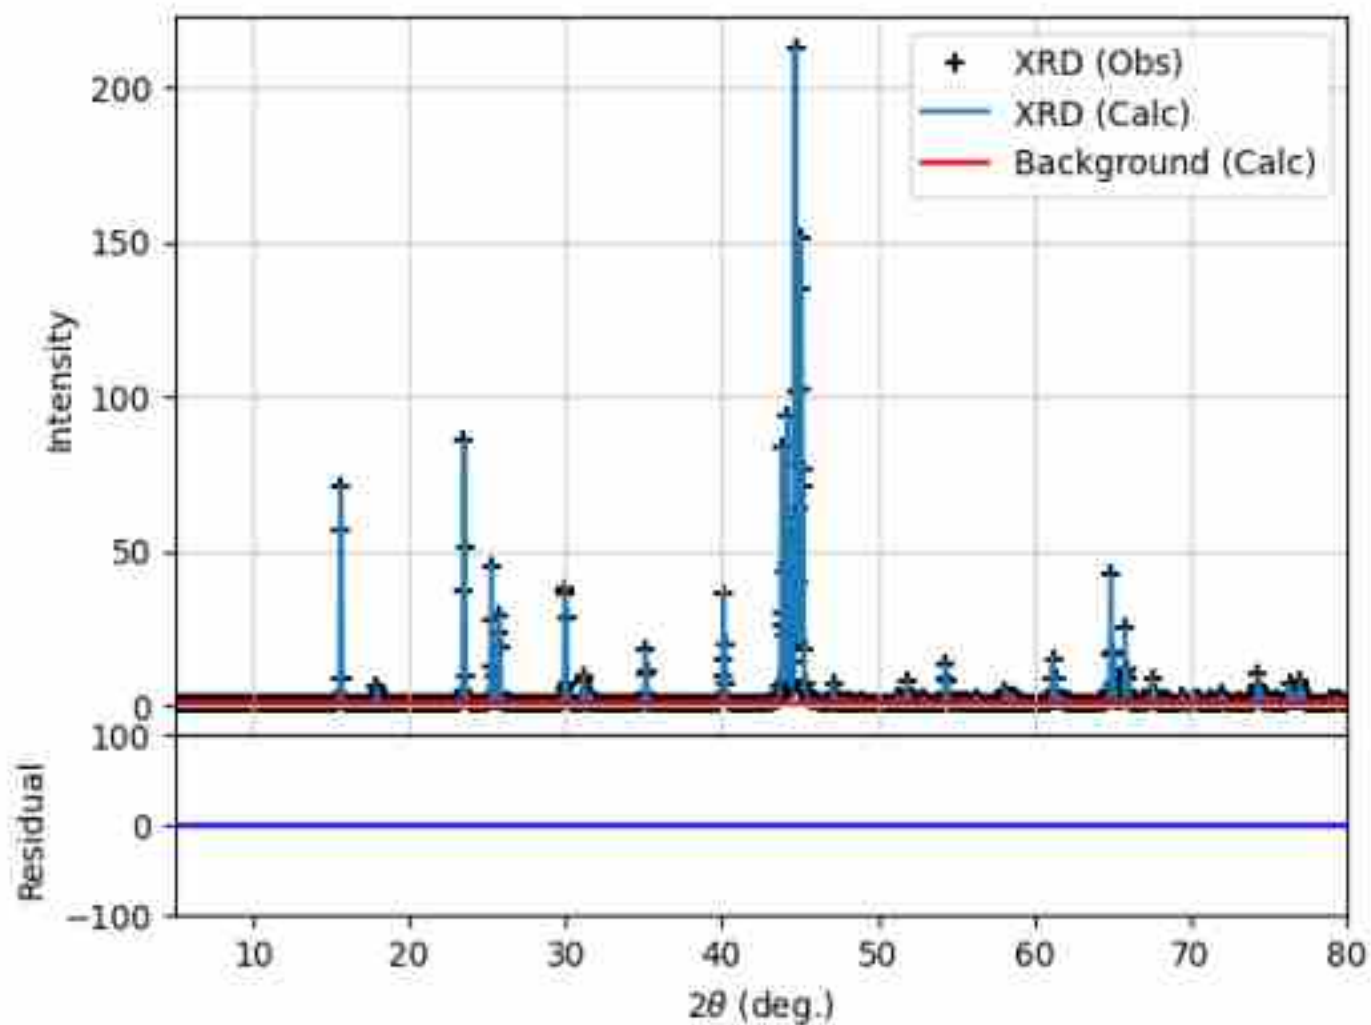

| RMSE before RR | Rwp     | RMSE after RR |
|----------------|---------|---------------|
| 0.034          | 0.00289 | 0.00057       |

# As<sub>2</sub>Pb<sub>2</sub>F<sub>14</sub>

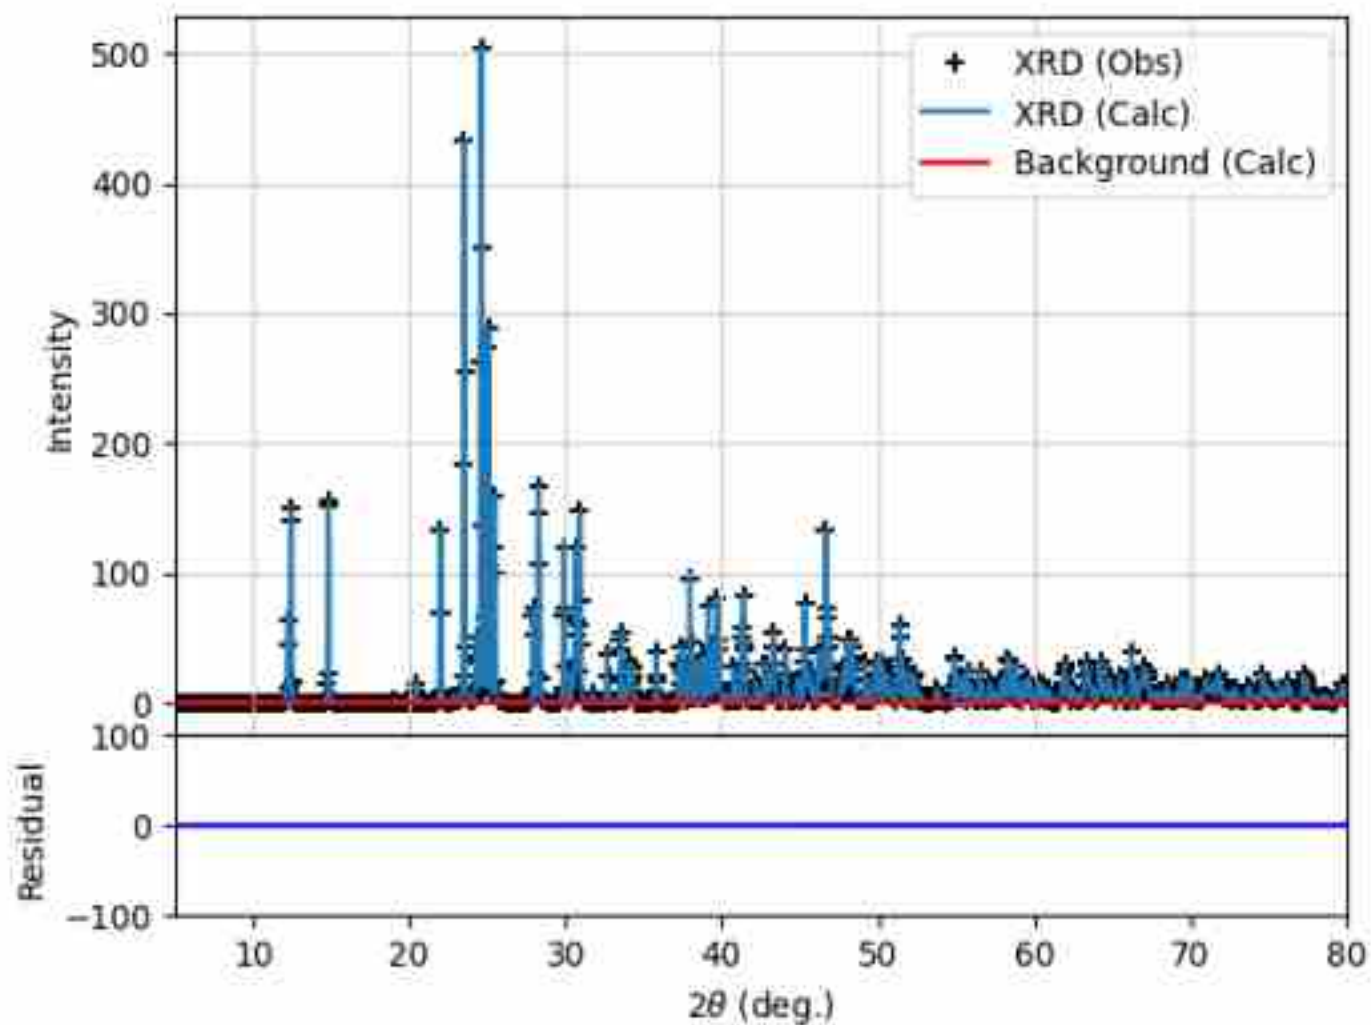

| RMSE before RR | Rwp     | RMSE after RR |
|----------------|---------|---------------|
| 0.034          | 0.69251 | 0.01182       |

# Ba6B2As2O6

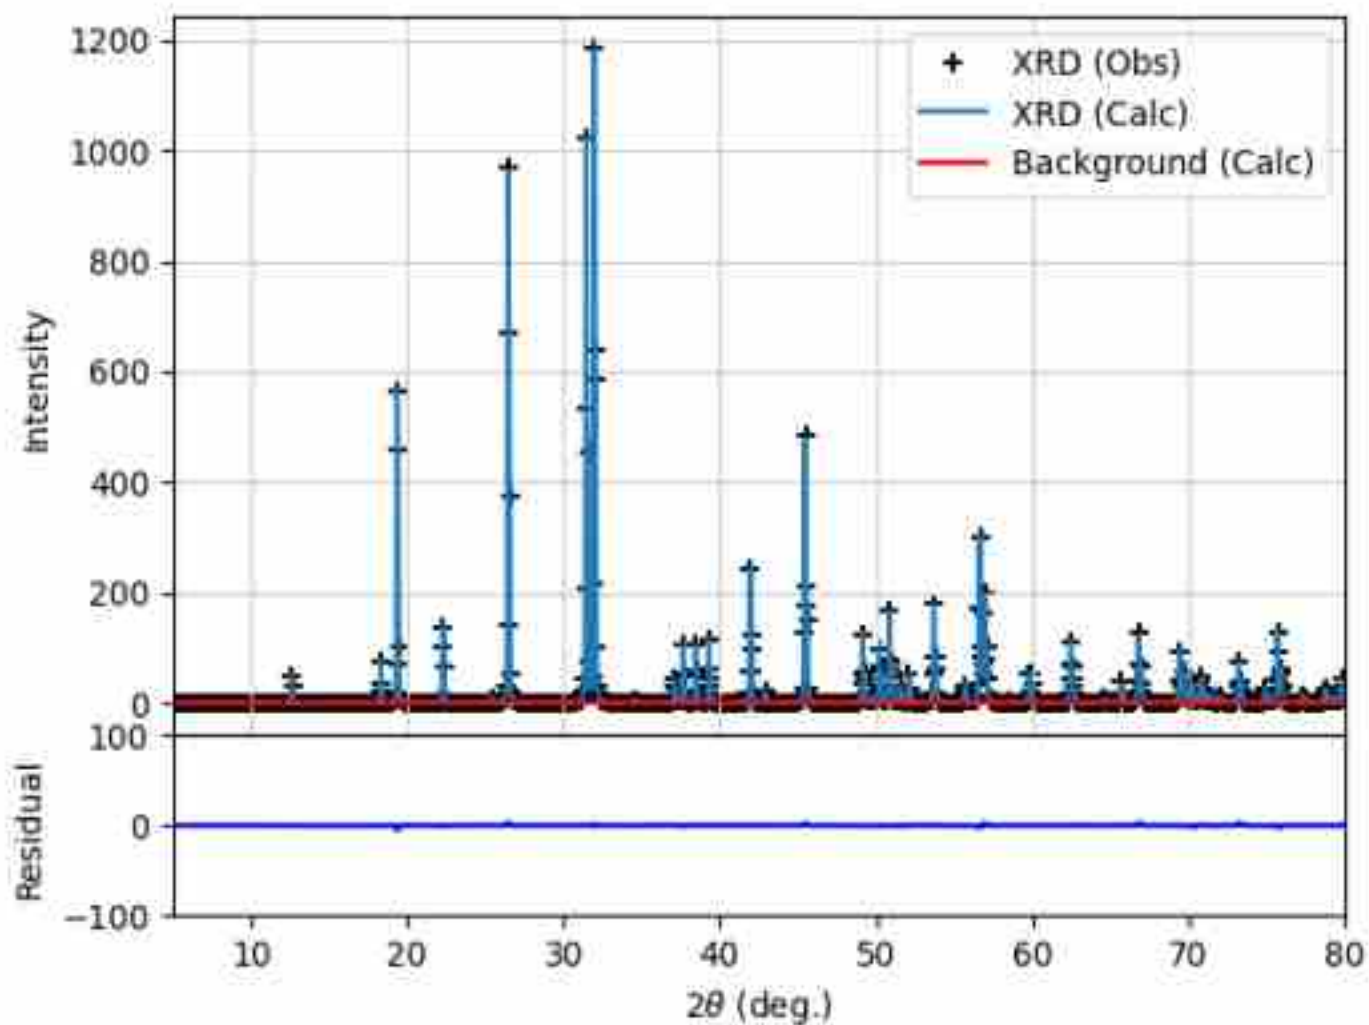

| RMSE before RR | Rwp     | RMSE after RR |
|----------------|---------|---------------|
| 0.034          | 1.30759 | 0.30869       |

# Ca1H2O2

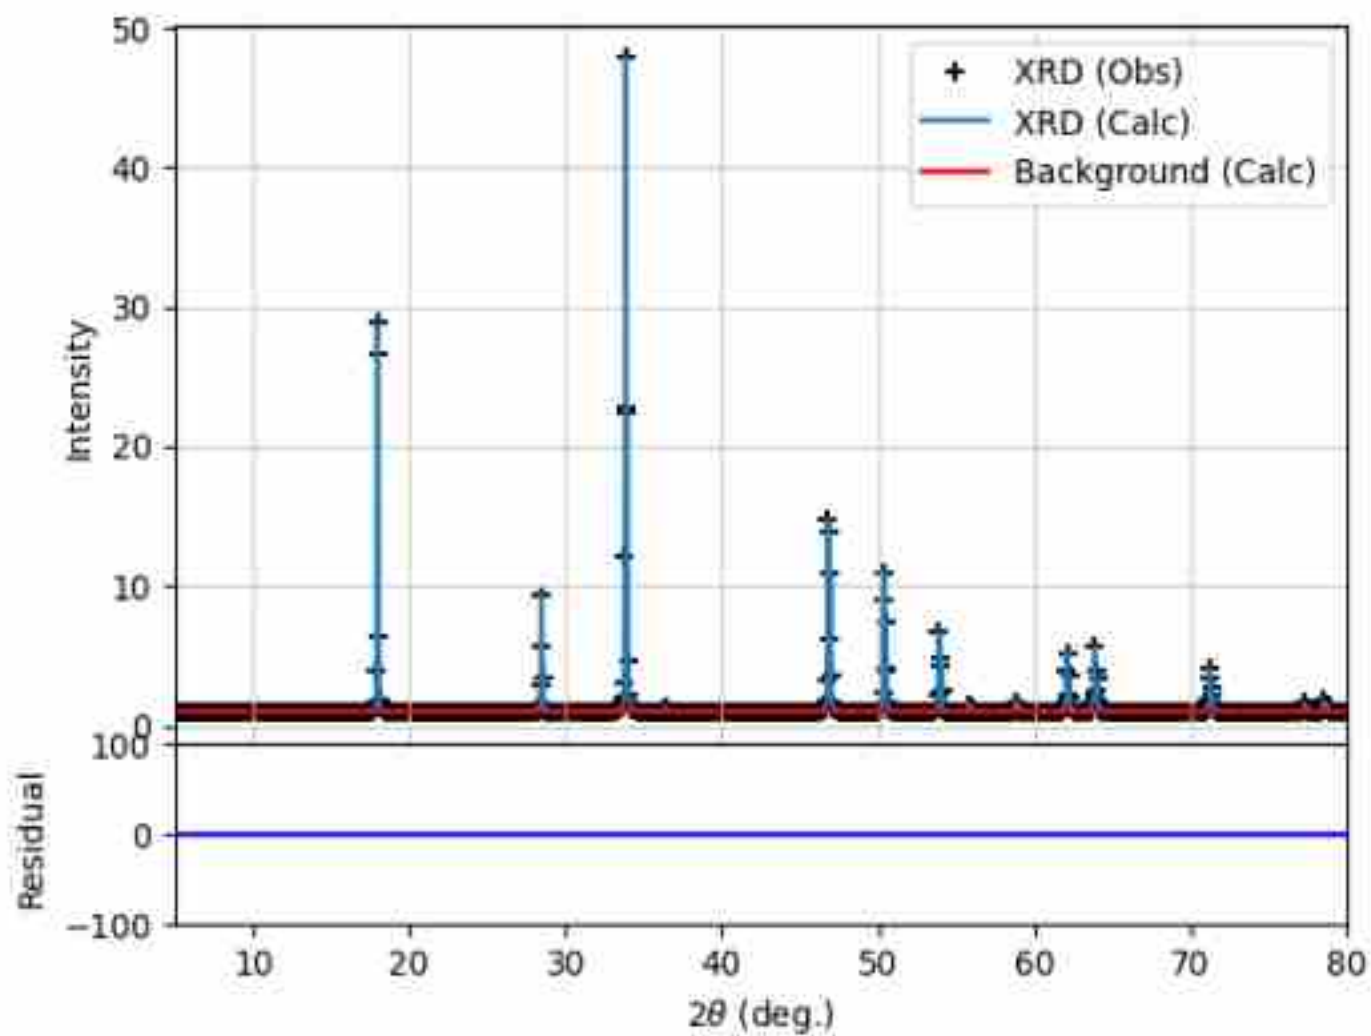

| RMSE before RR | Rwp     | RMSE after RR |
|----------------|---------|---------------|
| 0.034          | 0.00173 | 0.00365       |

# Cd<sub>2</sub>Co<sub>4</sub>O<sub>8</sub>

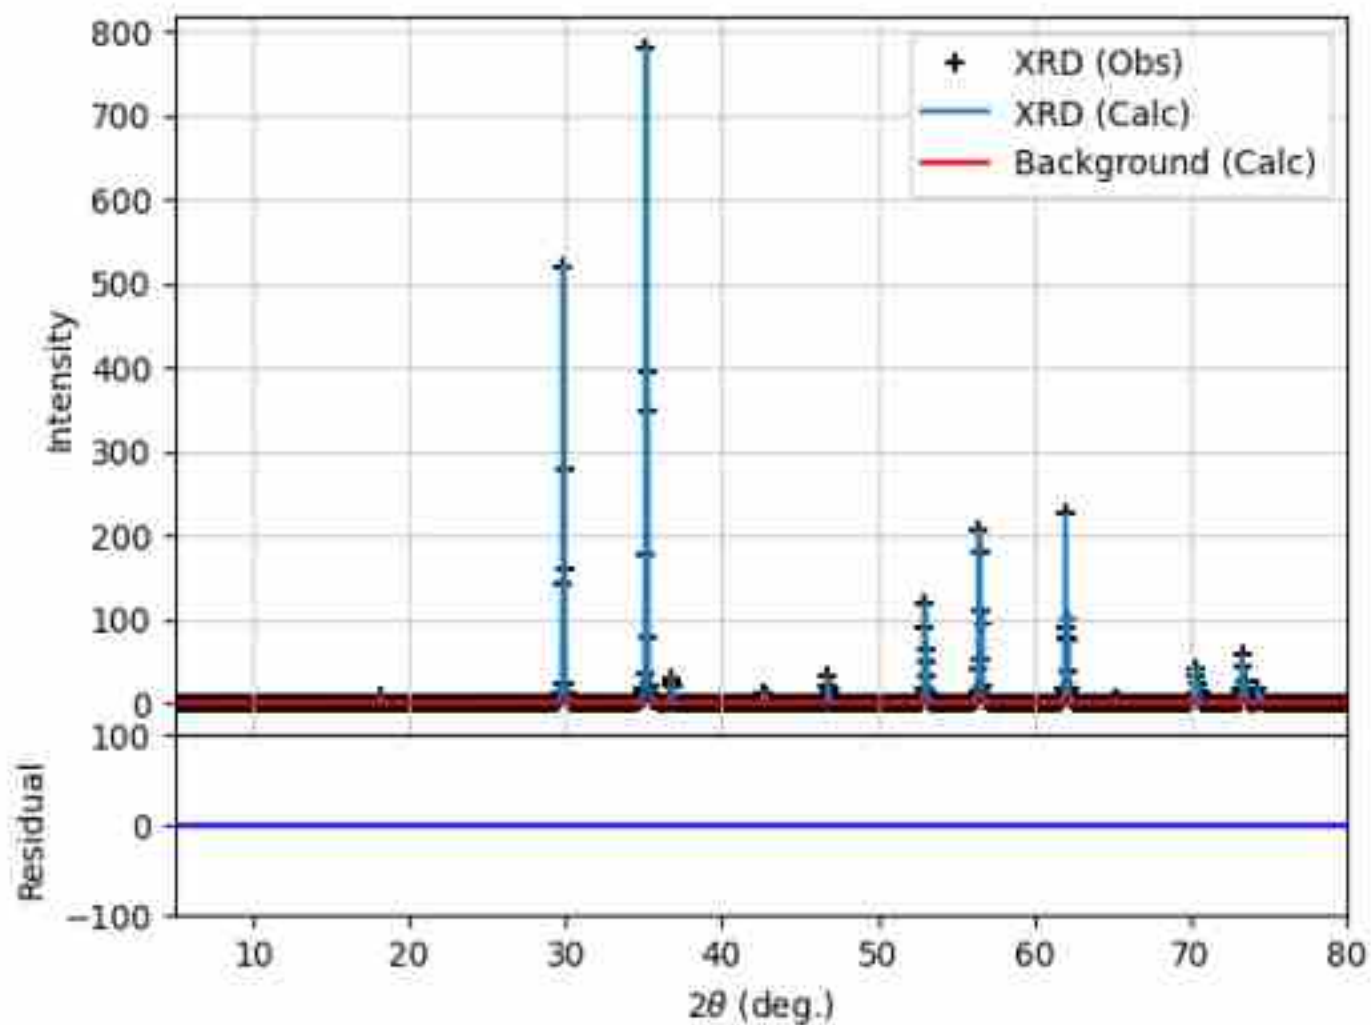

| RMSE before RR | Rwp     | RMSE after RR |
|----------------|---------|---------------|
| 0.034          | 0.01784 | 0.00462       |

# Cs<sub>6</sub>Cd<sub>2</sub>H<sub>10</sub>

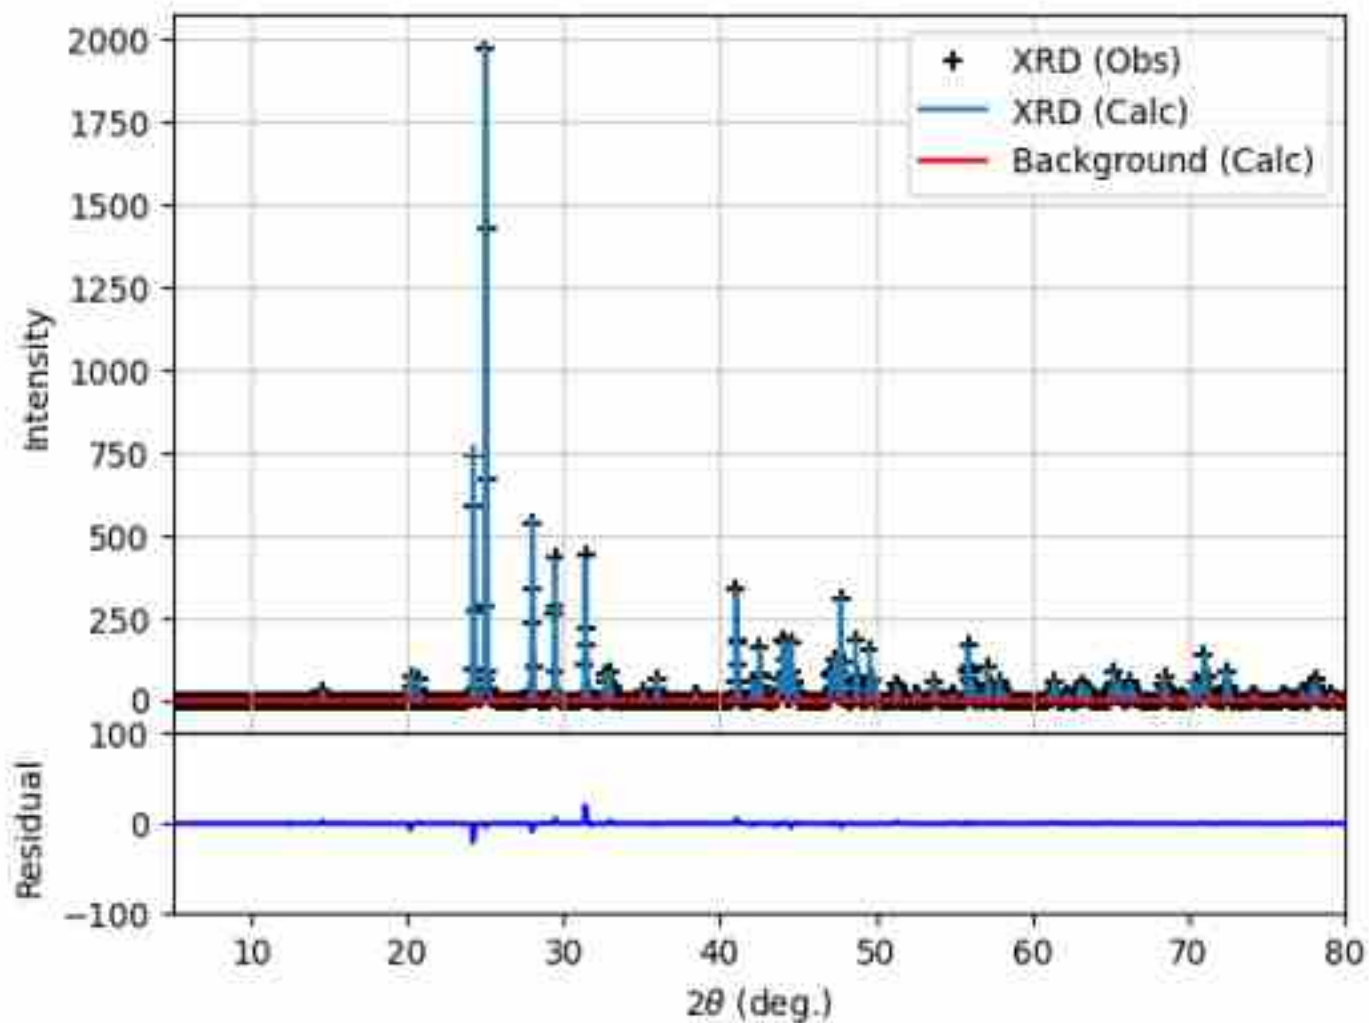

| RMSE before RR | Rwp     | RMSE after RR |
|----------------|---------|---------------|
| 0.034          | 2.31279 | 0.46632       |



# Er<sub>4</sub>Ge<sub>4</sub>Pt<sub>4</sub>

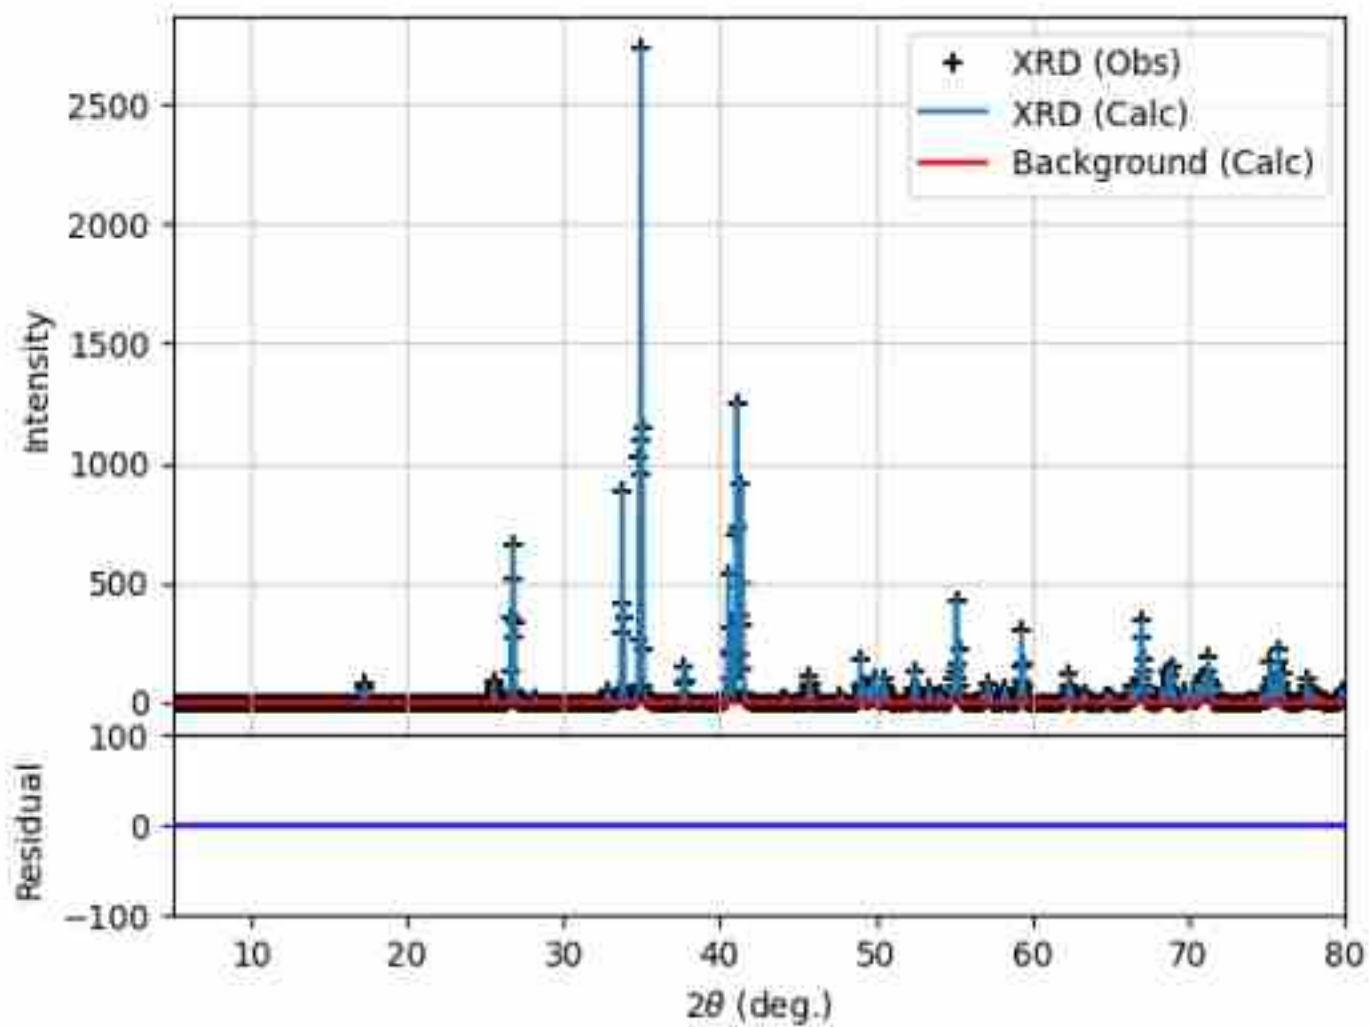

| RMSE before RR | Rwp     | RMSE after RR |
|----------------|---------|---------------|
| 0.034          | 0.00534 | 0.00037       |

# Ga<sub>3</sub>Pt<sub>5</sub>

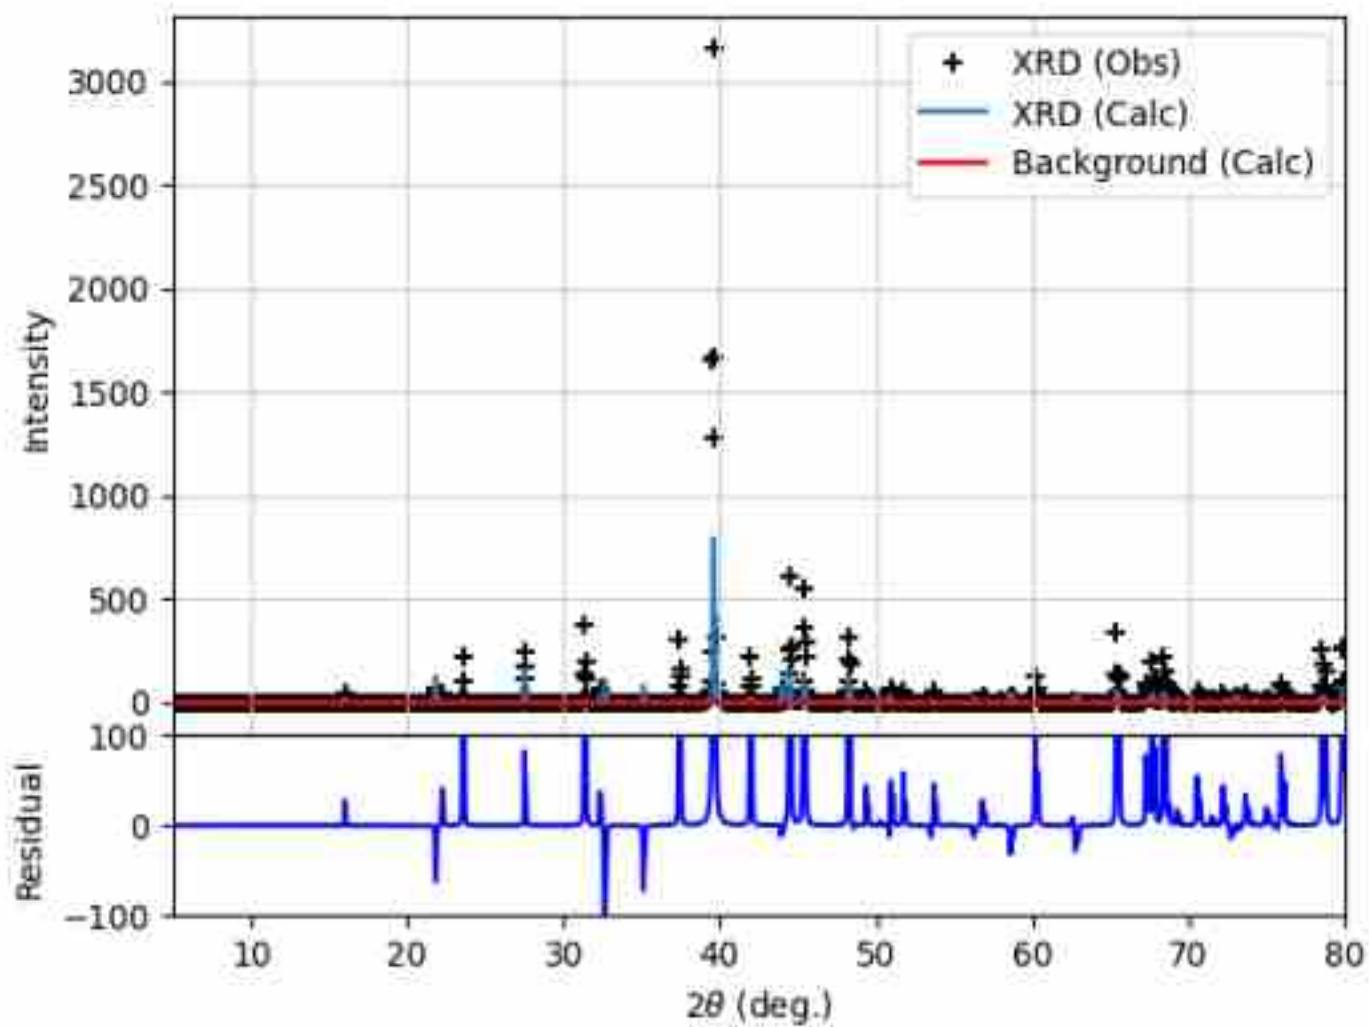

| RMSE before RR | Rwp      | RMSE after RR |
|----------------|----------|---------------|
| 0.034          | 83.62203 | 0.03666       |

# Gd<sub>2</sub>Fe<sub>4</sub>Bi<sub>2</sub>O<sub>12</sub>

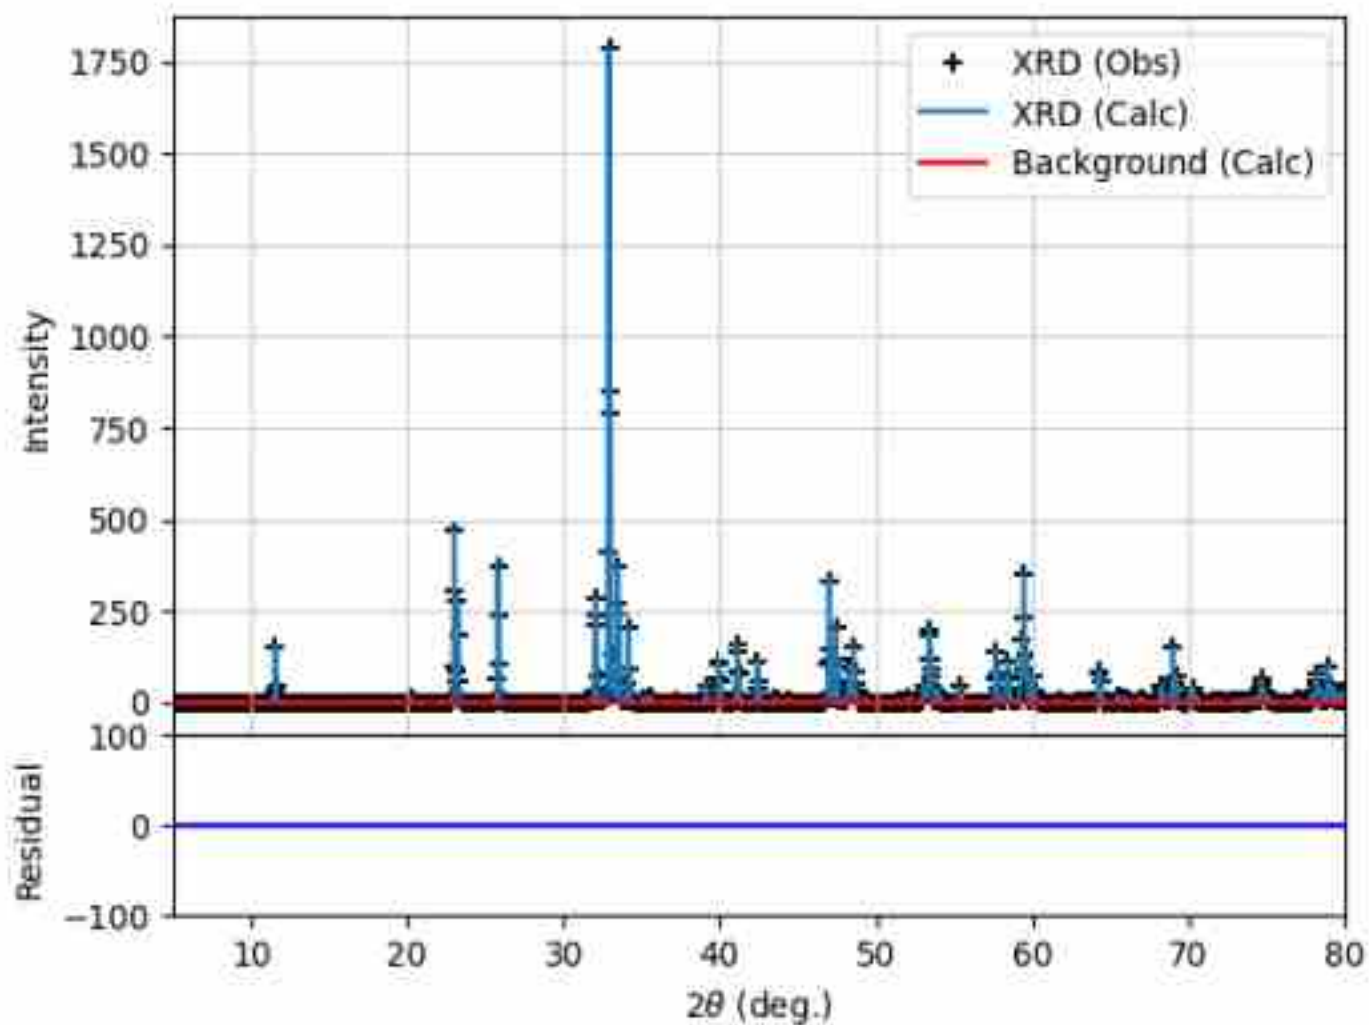

| RMSE before RR | Rwp    | RMSE after RR |
|----------------|--------|---------------|
| 0.034          | 0.0055 | 0.00187       |

# H4Pb4I4O4

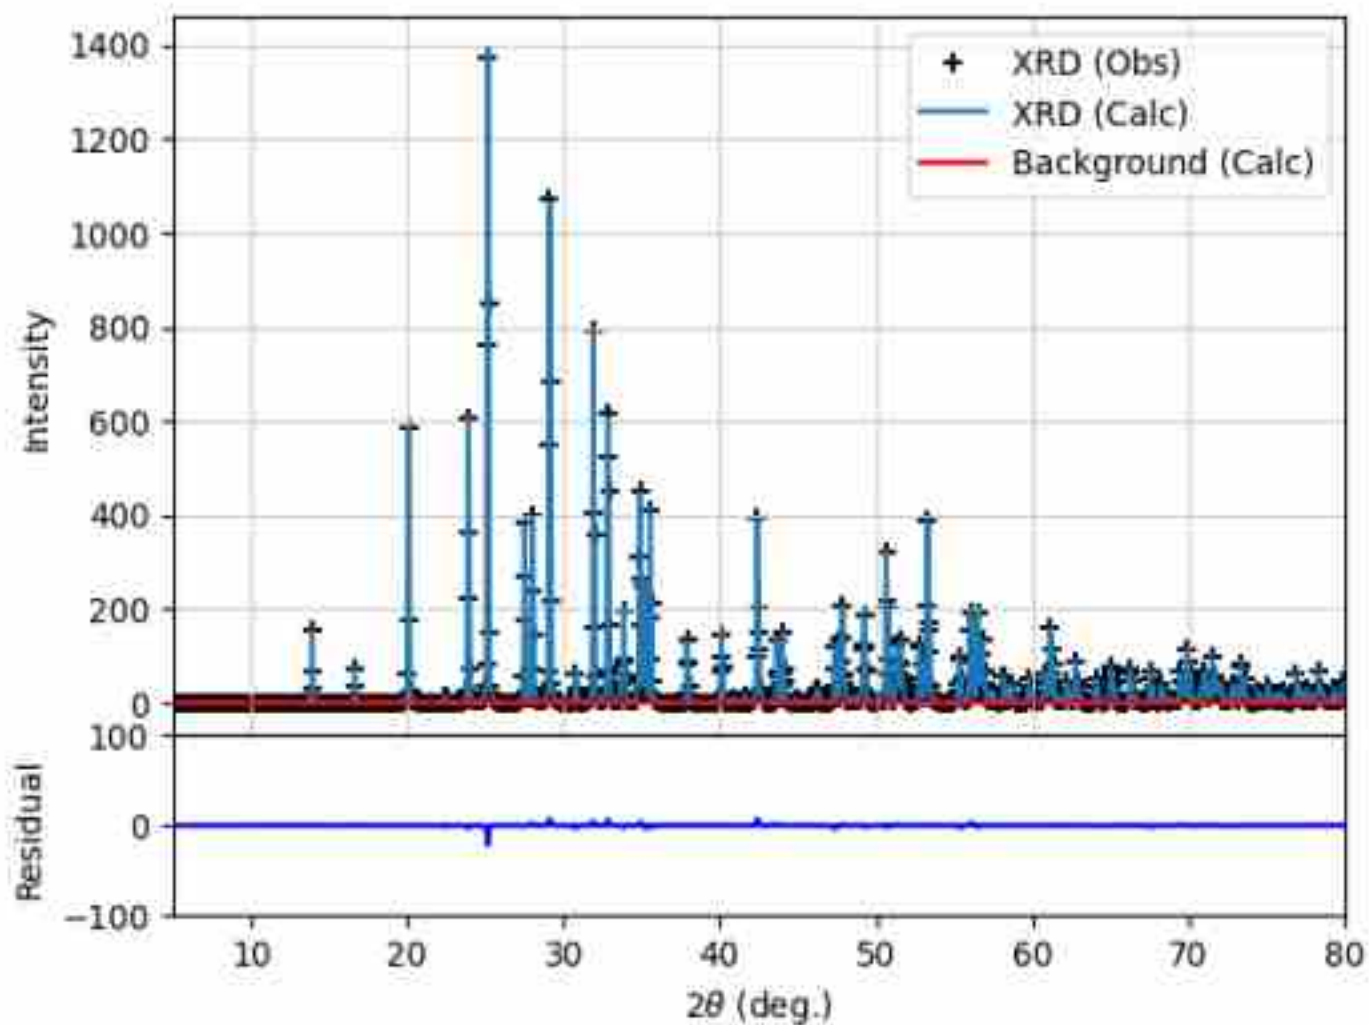

| RMSE before RR | Rwp     | RMSE after RR |
|----------------|---------|---------------|
| 0.034          | 1.10566 | None          |

# Ho<sub>2</sub>Cu<sub>2</sub>O<sub>4</sub>

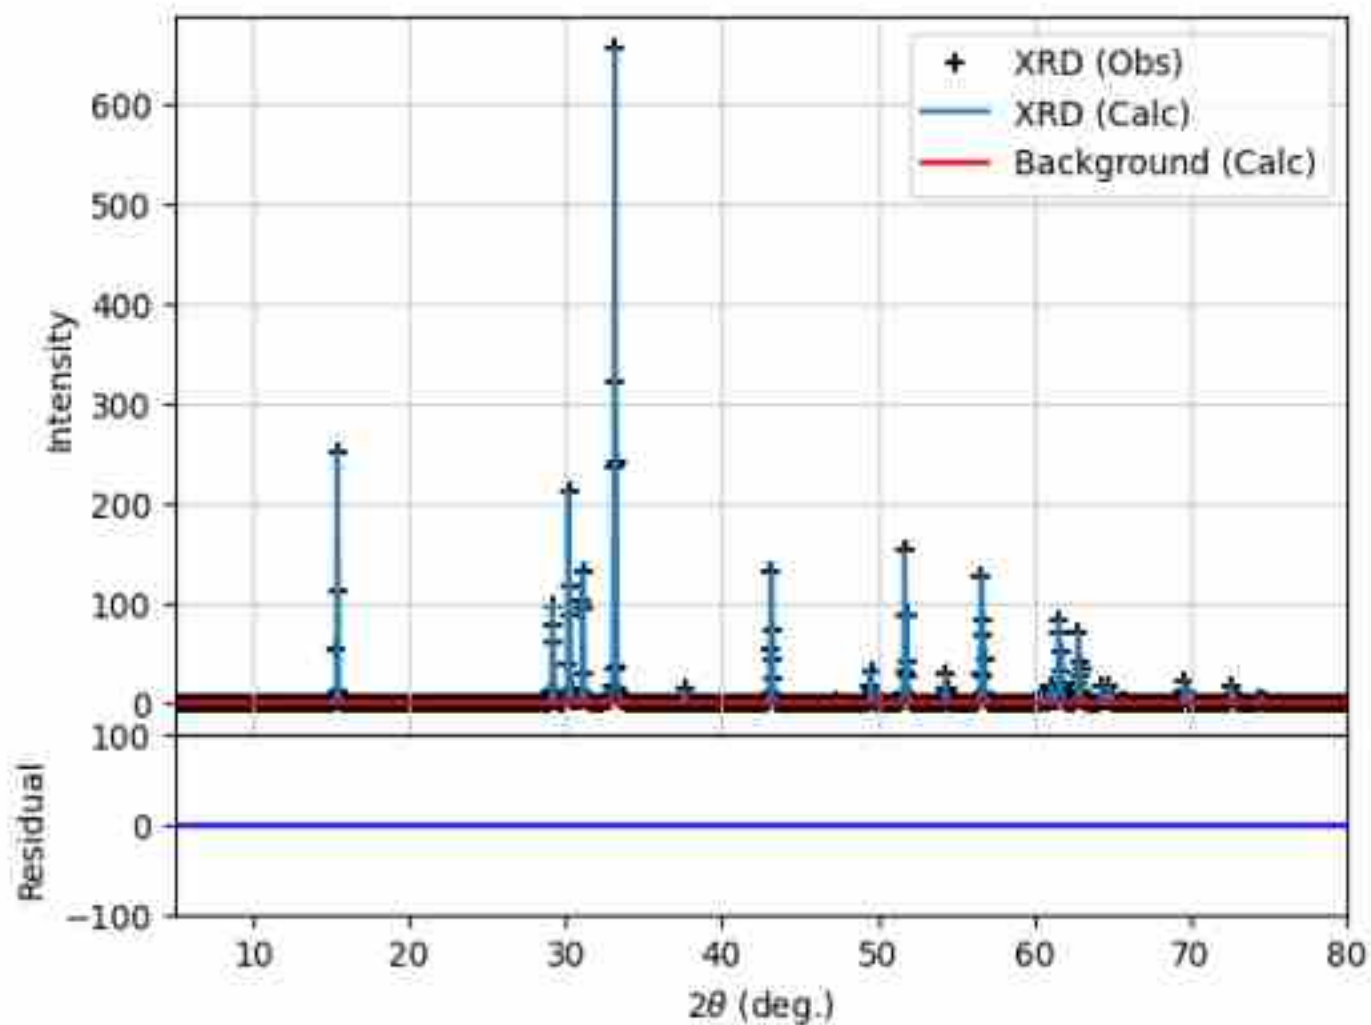

| RMSE before RR | Rwp     | RMSE after RR |
|----------------|---------|---------------|
| 0.034          | 0.00239 | 0.00125       |

# K1Na1Nb2O6

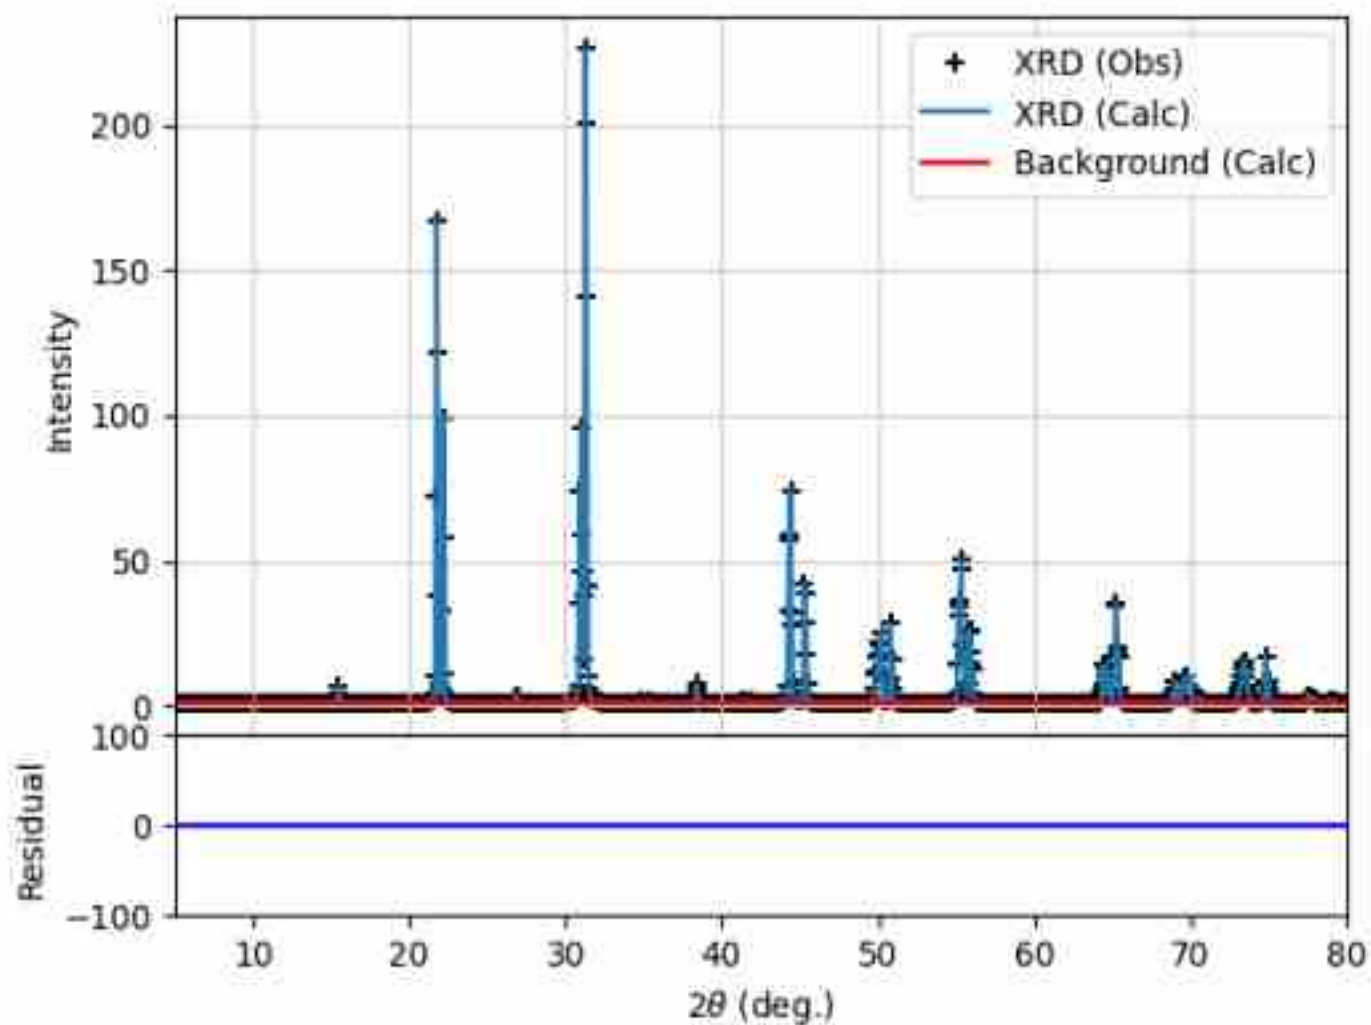

| RMSE before RR | Rwp     | RMSE after RR |
|----------------|---------|---------------|
| 0.034          | 0.00208 | 0.00027       |

# K1Na3Mg4F12

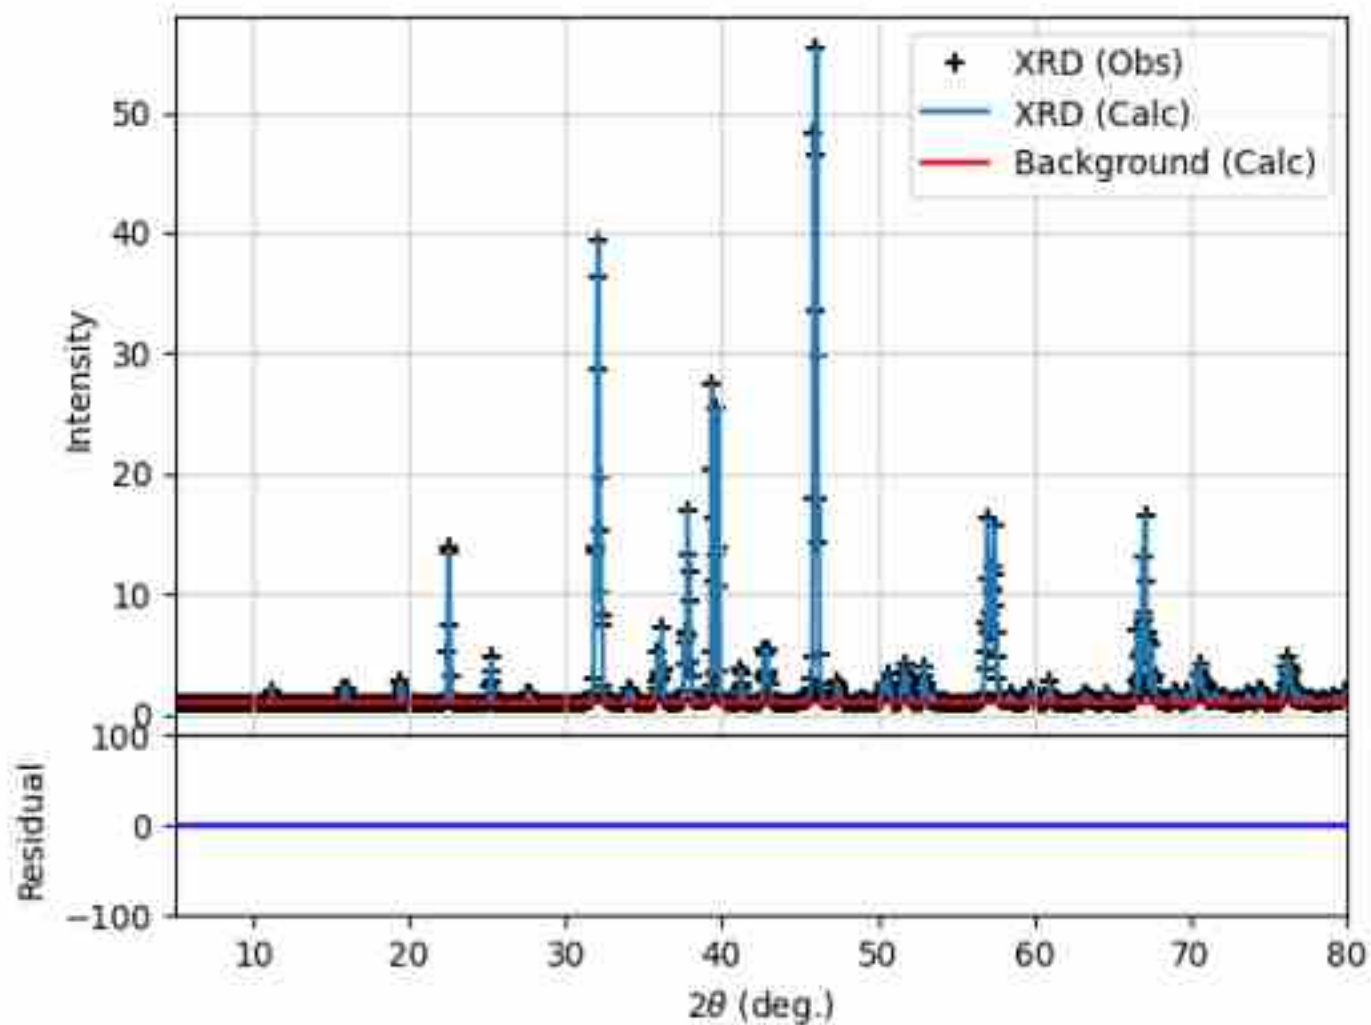

| RMSE before RR | Rwp     | RMSE after RR |
|----------------|---------|---------------|
| 0.034          | 0.00285 | 0.00069       |

# K1Nb1O3

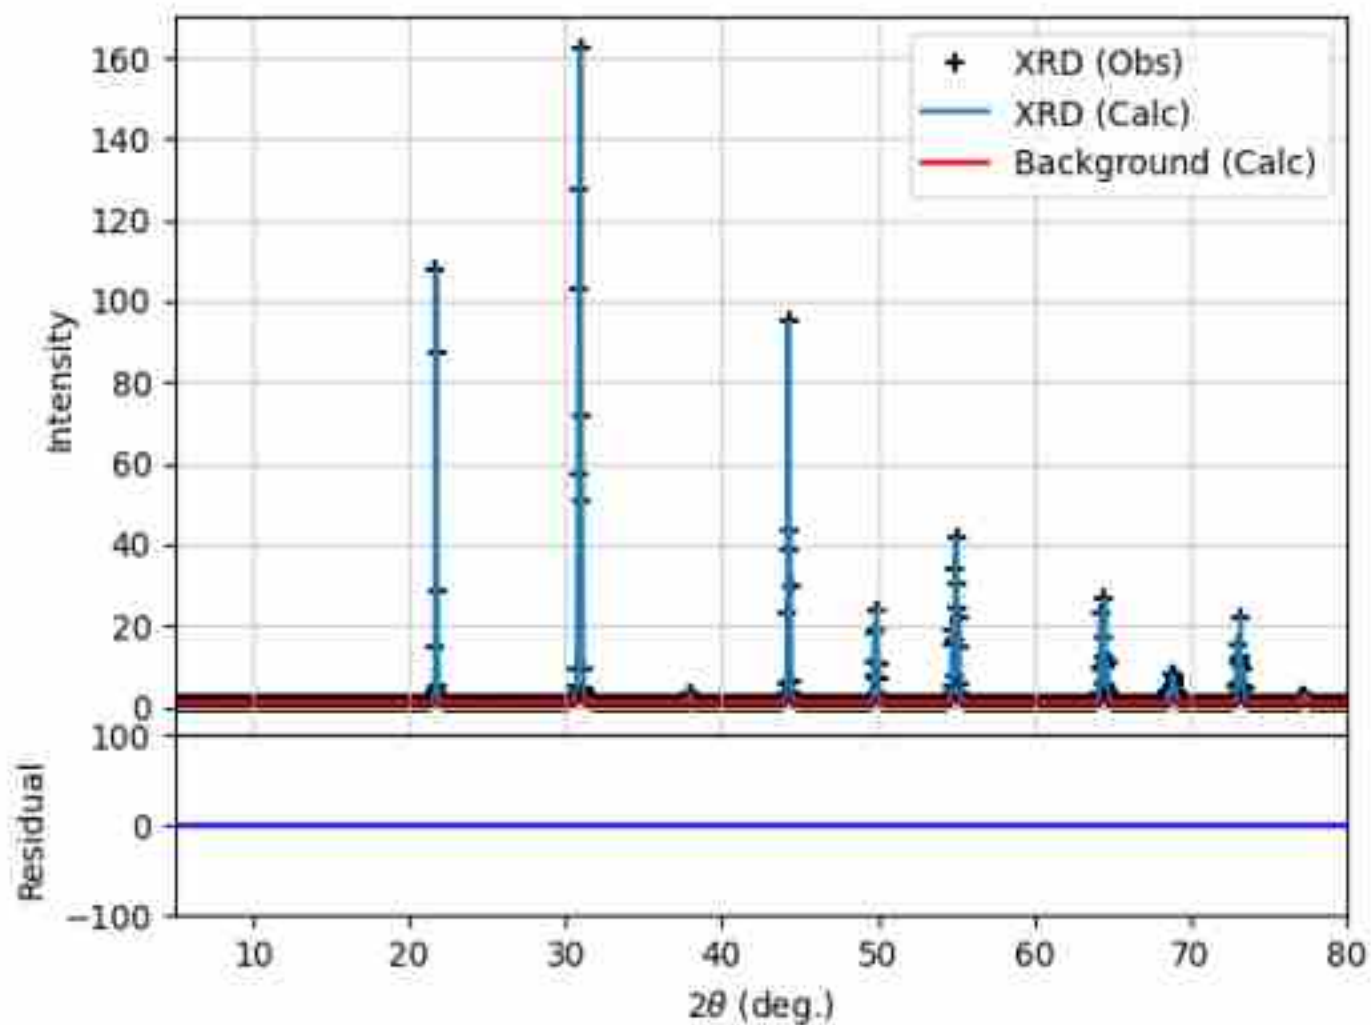

| RMSE before RR | Rwp     | RMSE after RR |
|----------------|---------|---------------|
| 0.034          | 0.00187 | 0.00085       |



# K1U2Sb1Se8

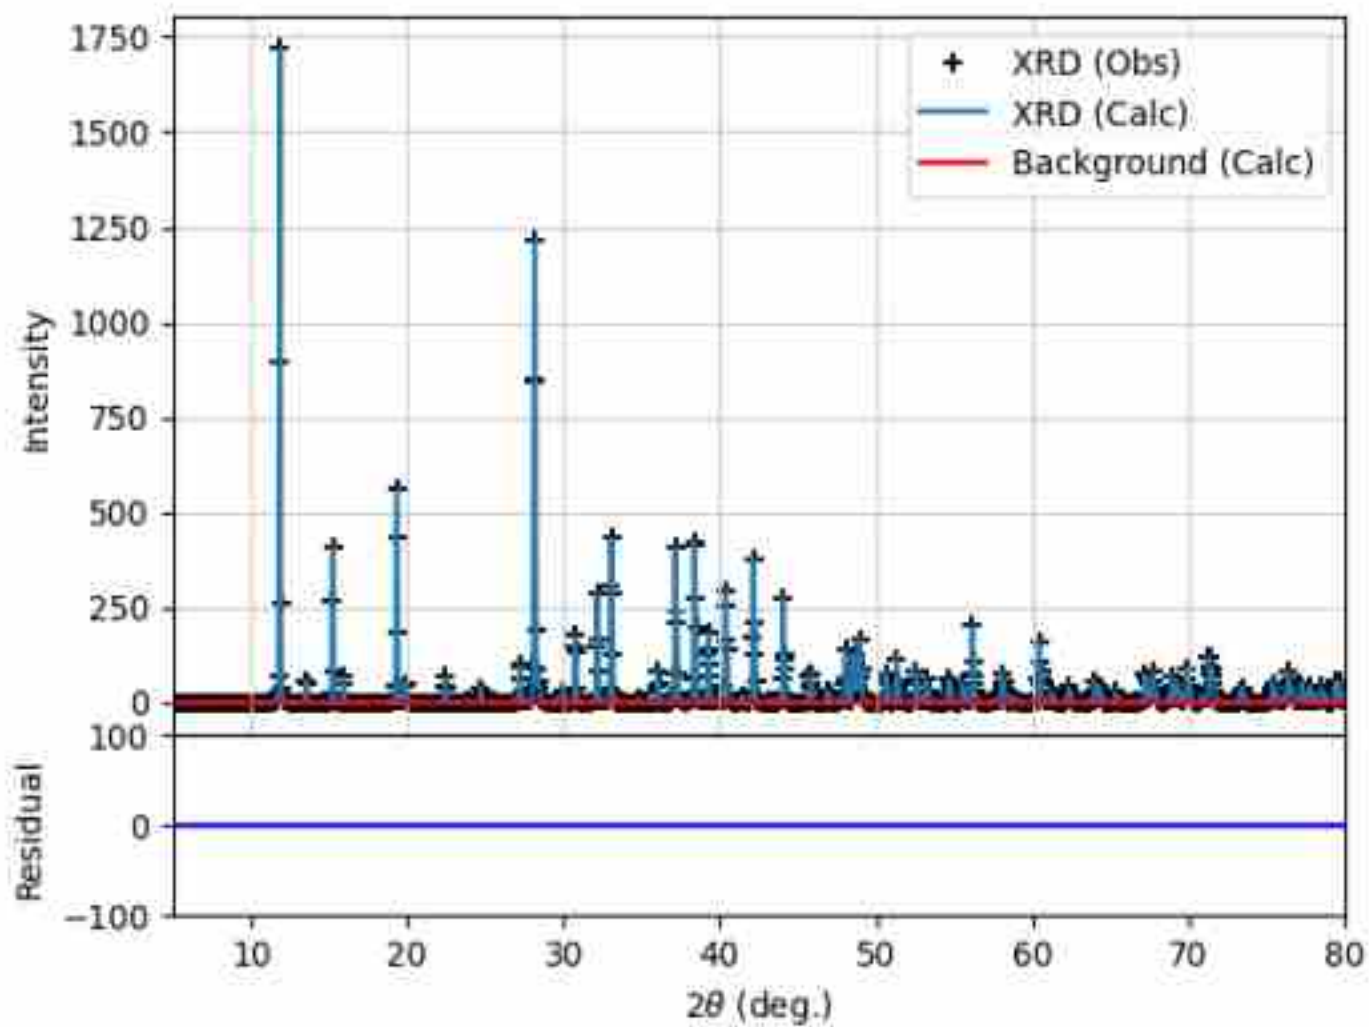

| RMSE before RR | Rwp     | RMSE after RR |
|----------------|---------|---------------|
| 0.034          | 0.00317 | 0.0004        |

# Li1Au1F6

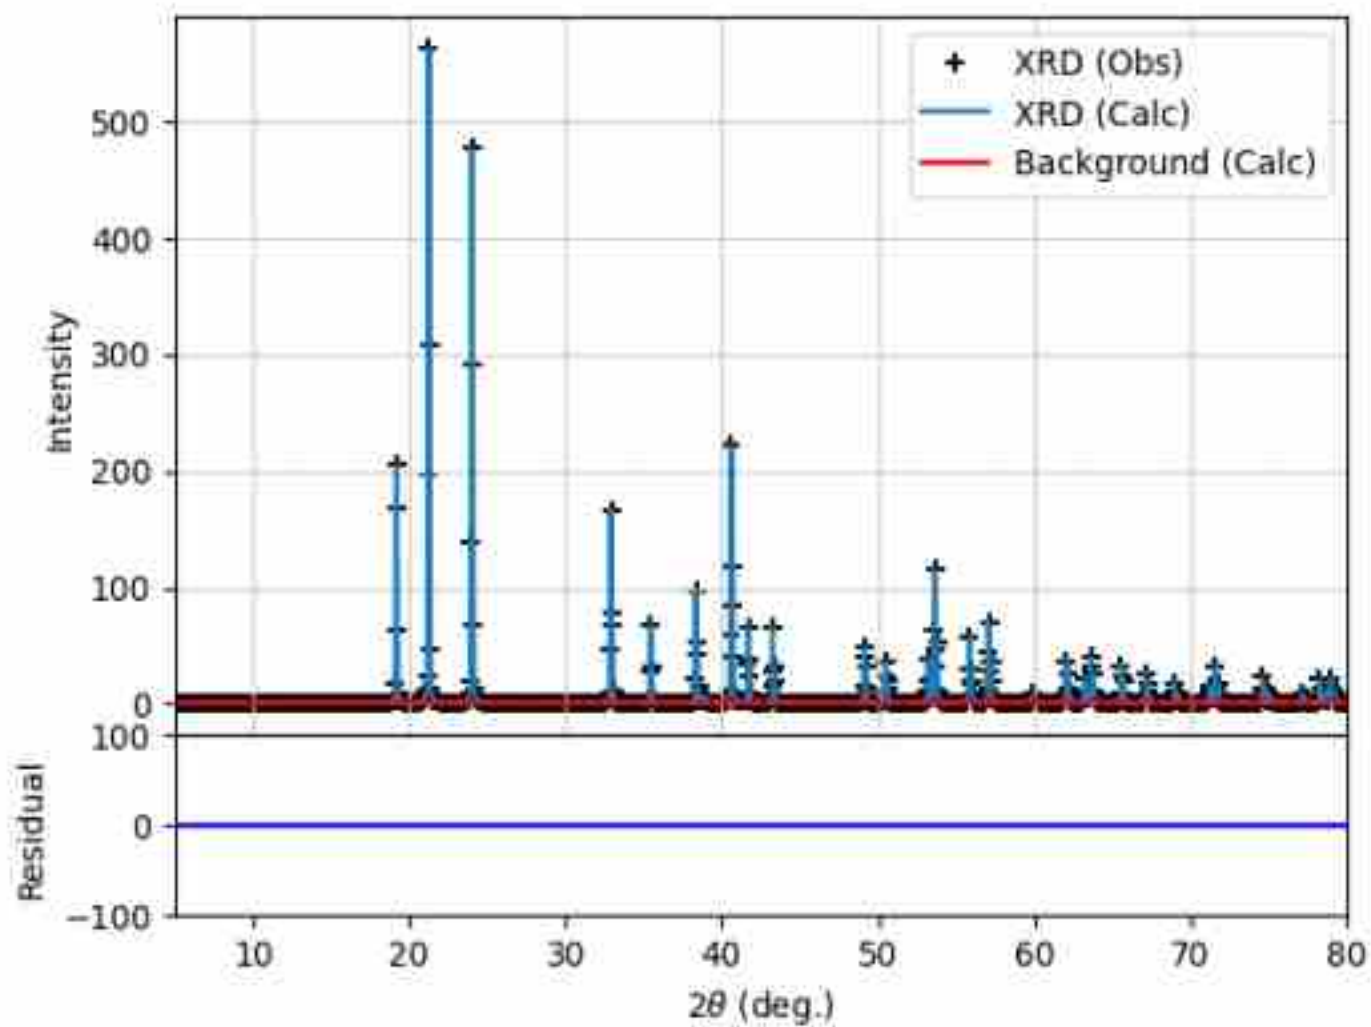

| RMSE before RR | Rwp     | RMSE after RR |
|----------------|---------|---------------|
| 0.034          | 0.00307 | 0.00254       |

# Li<sub>2</sub>Ti<sub>2</sub>O<sub>4</sub>

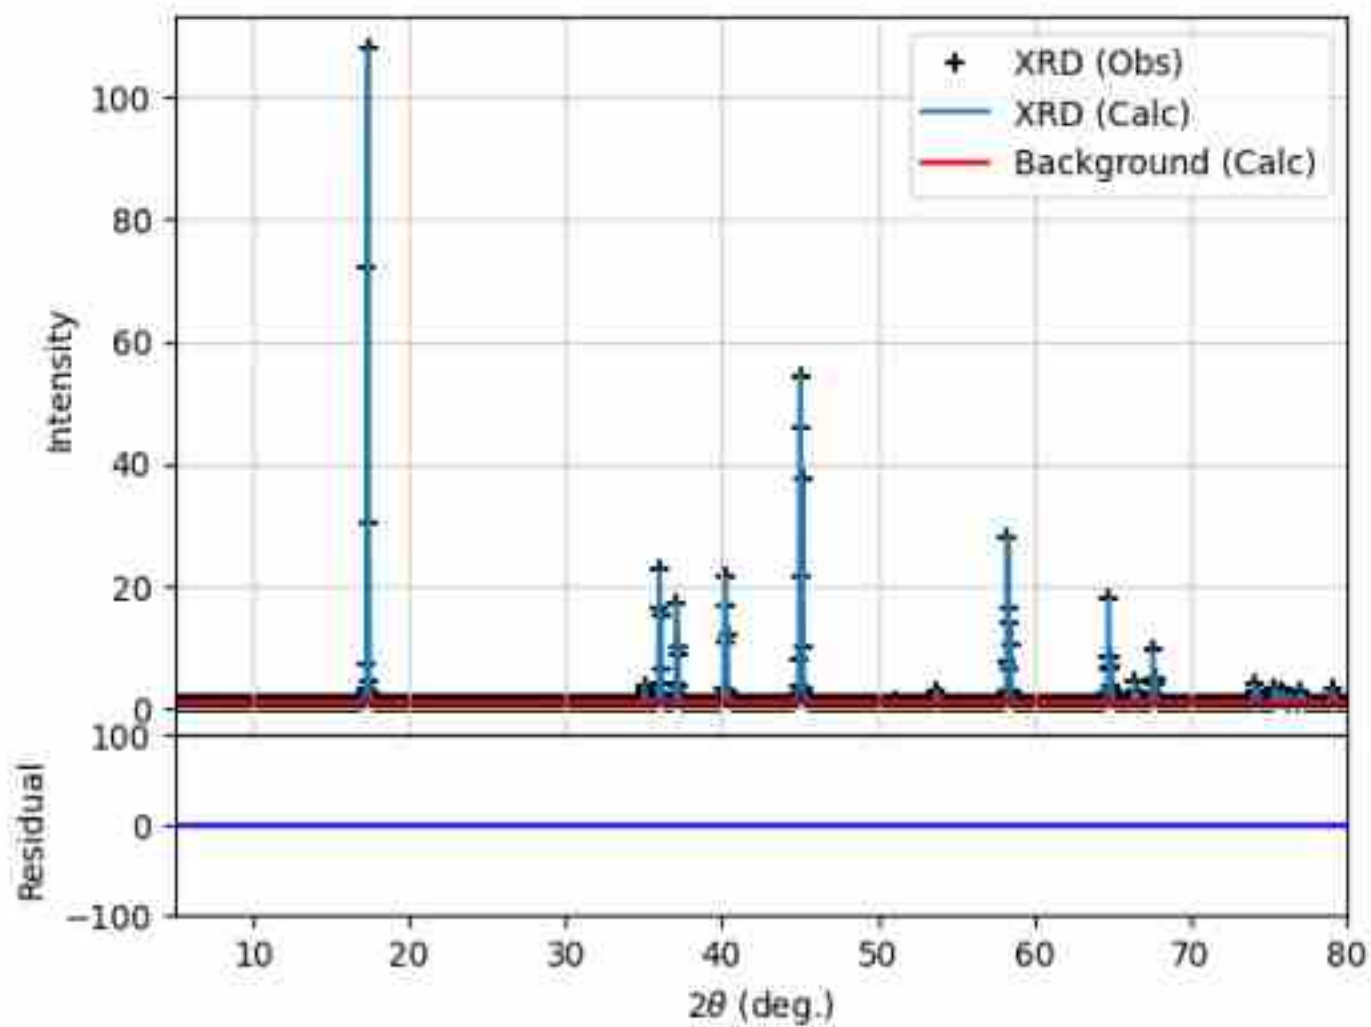

| RMSE before RR | Rwp     | RMSE after RR |
|----------------|---------|---------------|
| 0.034          | 0.00278 | 0.00143       |

# Li<sub>3</sub>Al<sub>2</sub>Co<sub>1</sub>O<sub>6</sub>

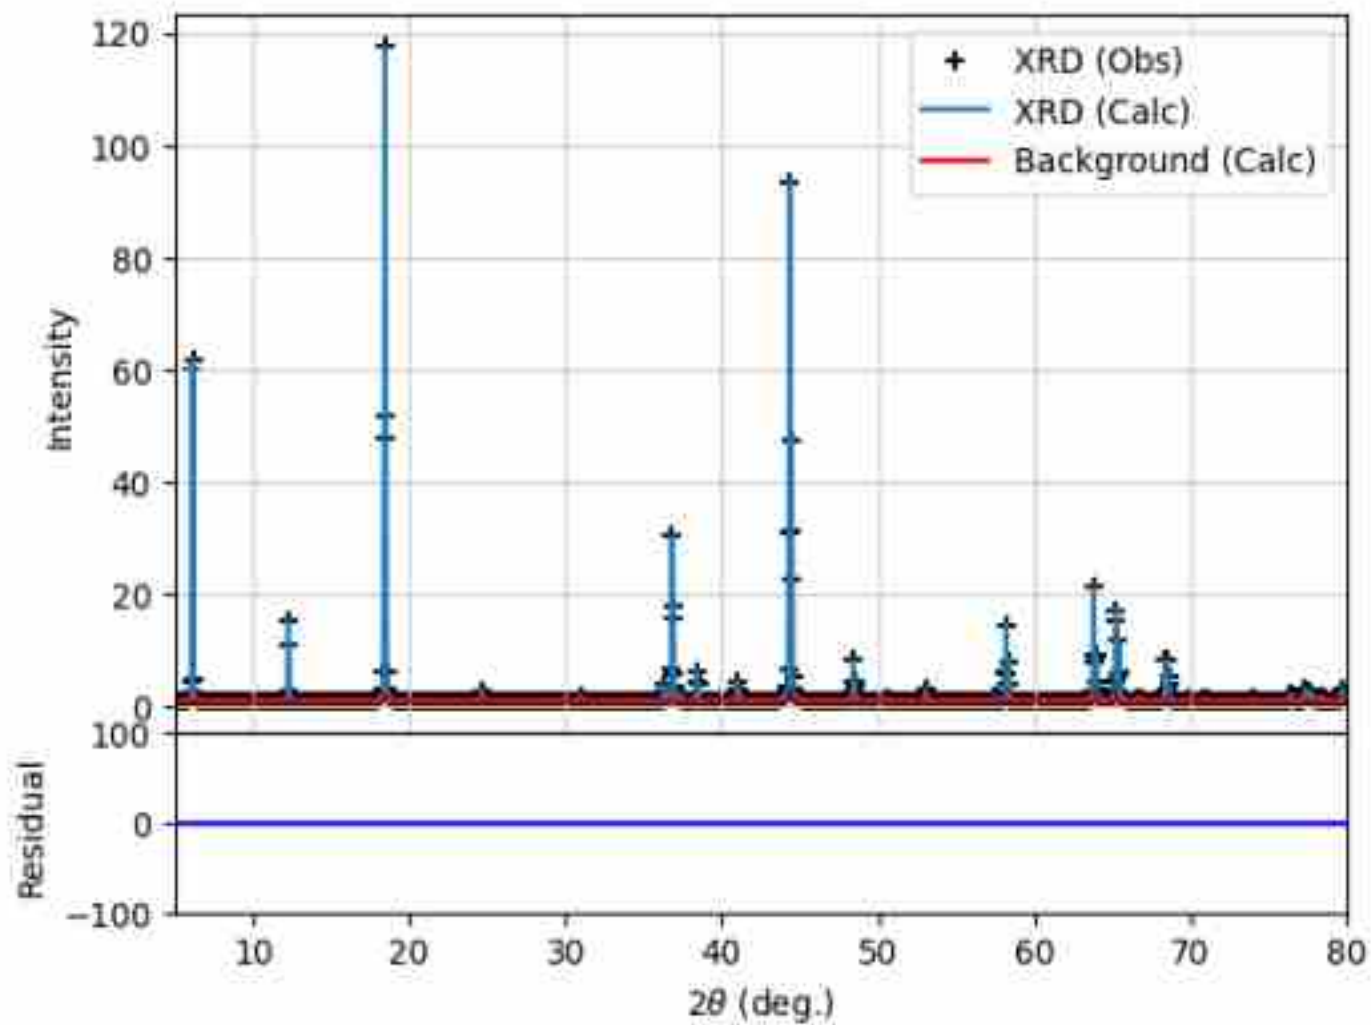

| RMSE before RR | Rwp     | RMSE after RR |
|----------------|---------|---------------|
| 0.034          | 0.00234 | 0.00139       |

# Li4Ca4As4

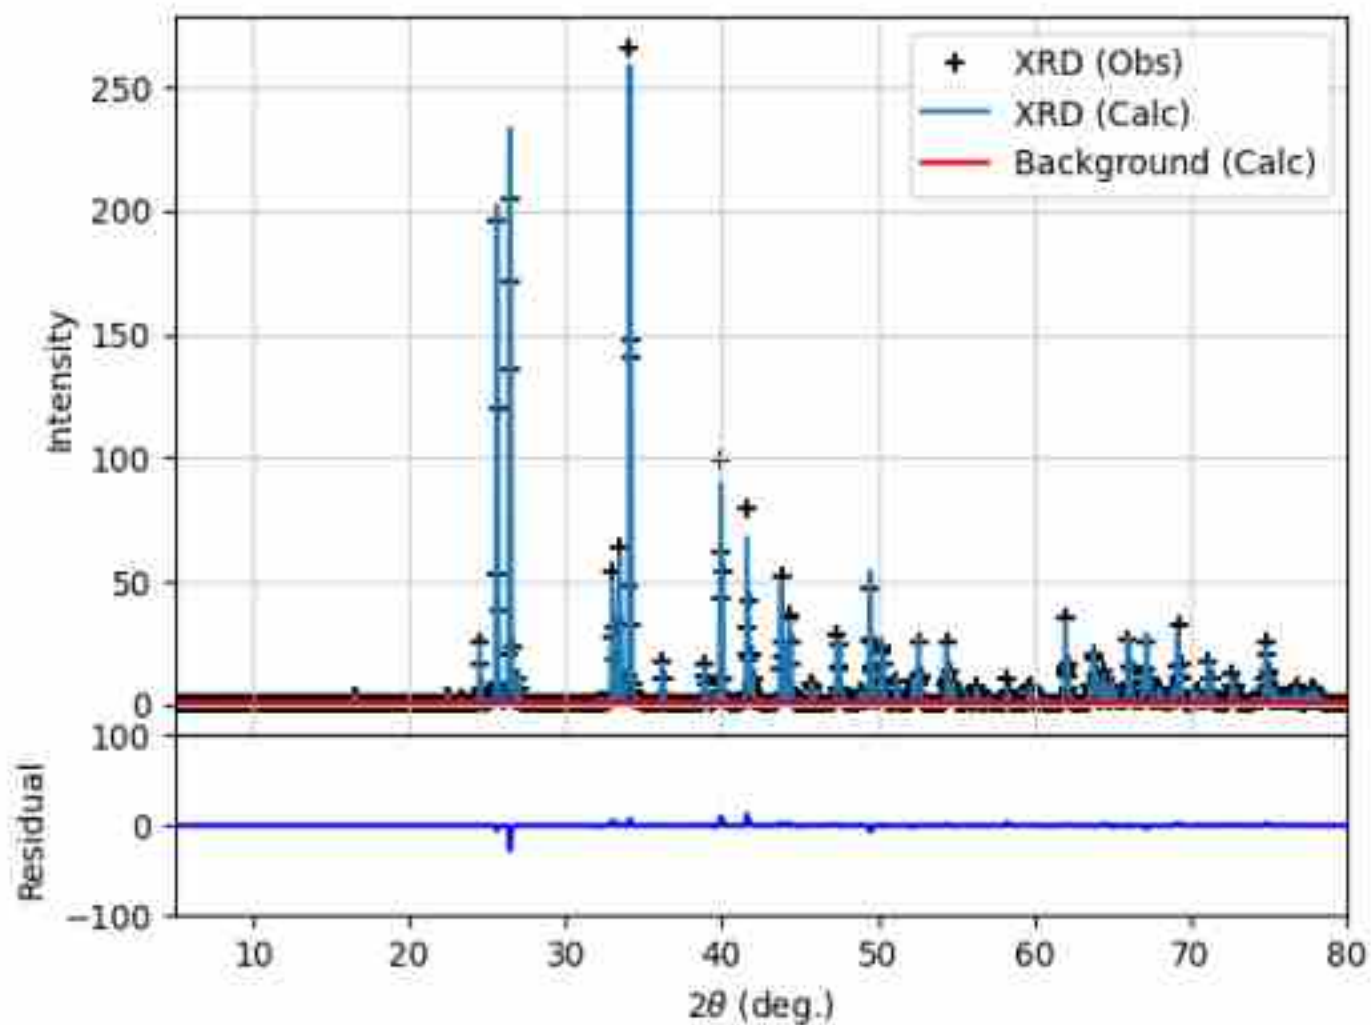

| RMSE before RR | Rwp    | RMSE after RR |
|----------------|--------|---------------|
| 0.034          | 8.8703 | 0.34732       |

# Li<sub>4</sub>Co<sub>2</sub>B<sub>2</sub>O<sub>8</sub>

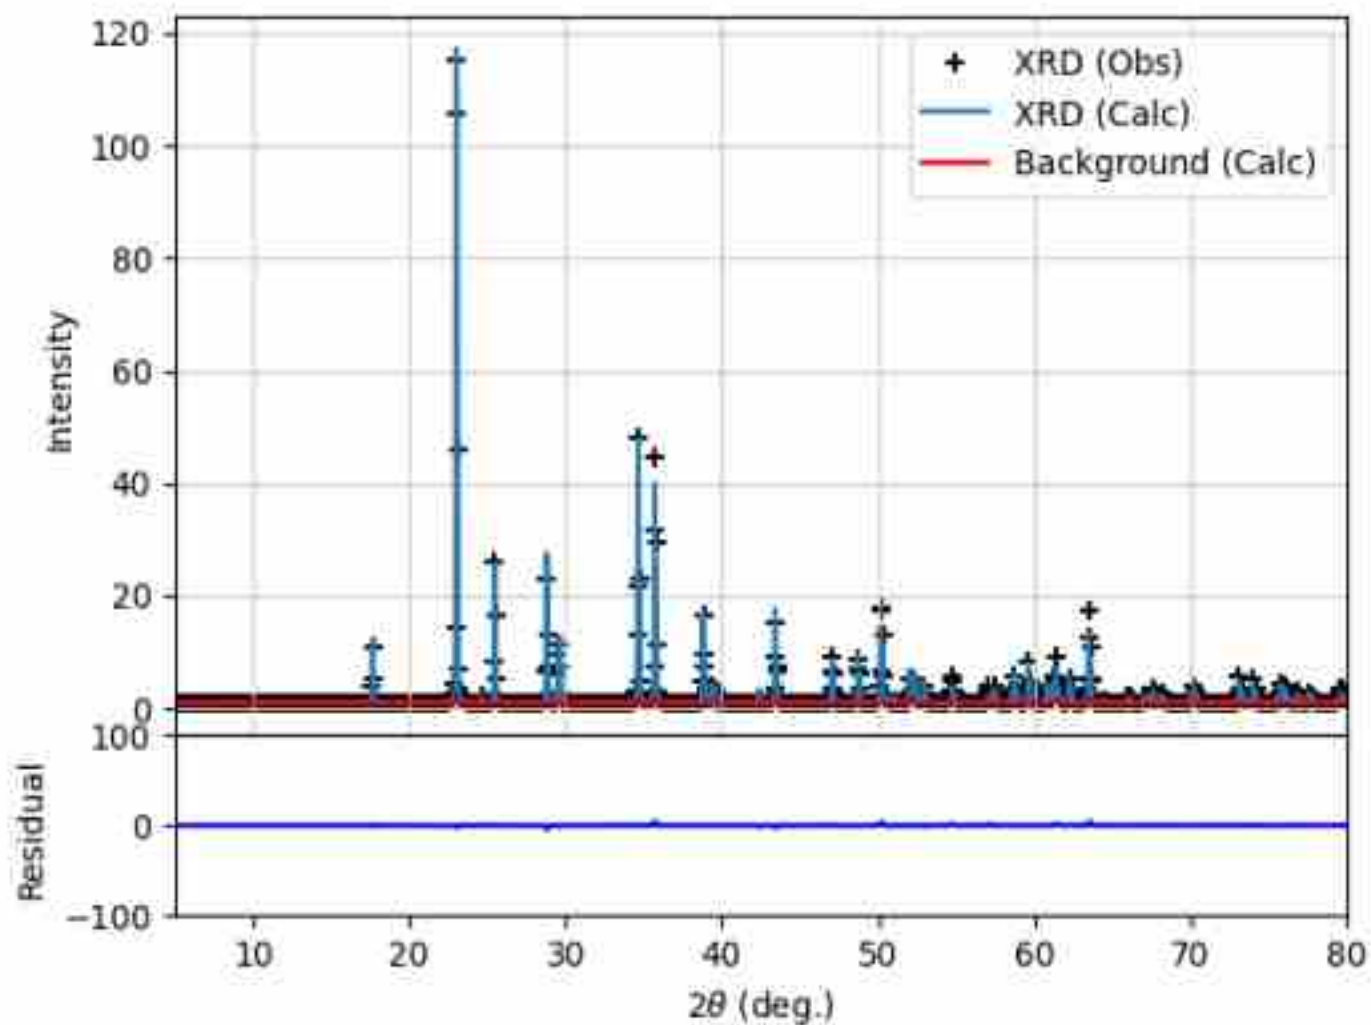

| RMSE before RR | Rwp     | RMSE after RR |
|----------------|---------|---------------|
| 0.034          | 9.67614 | None          |

# Li<sub>4</sub>Mn<sub>1</sub>V<sub>3</sub>O<sub>8</sub>

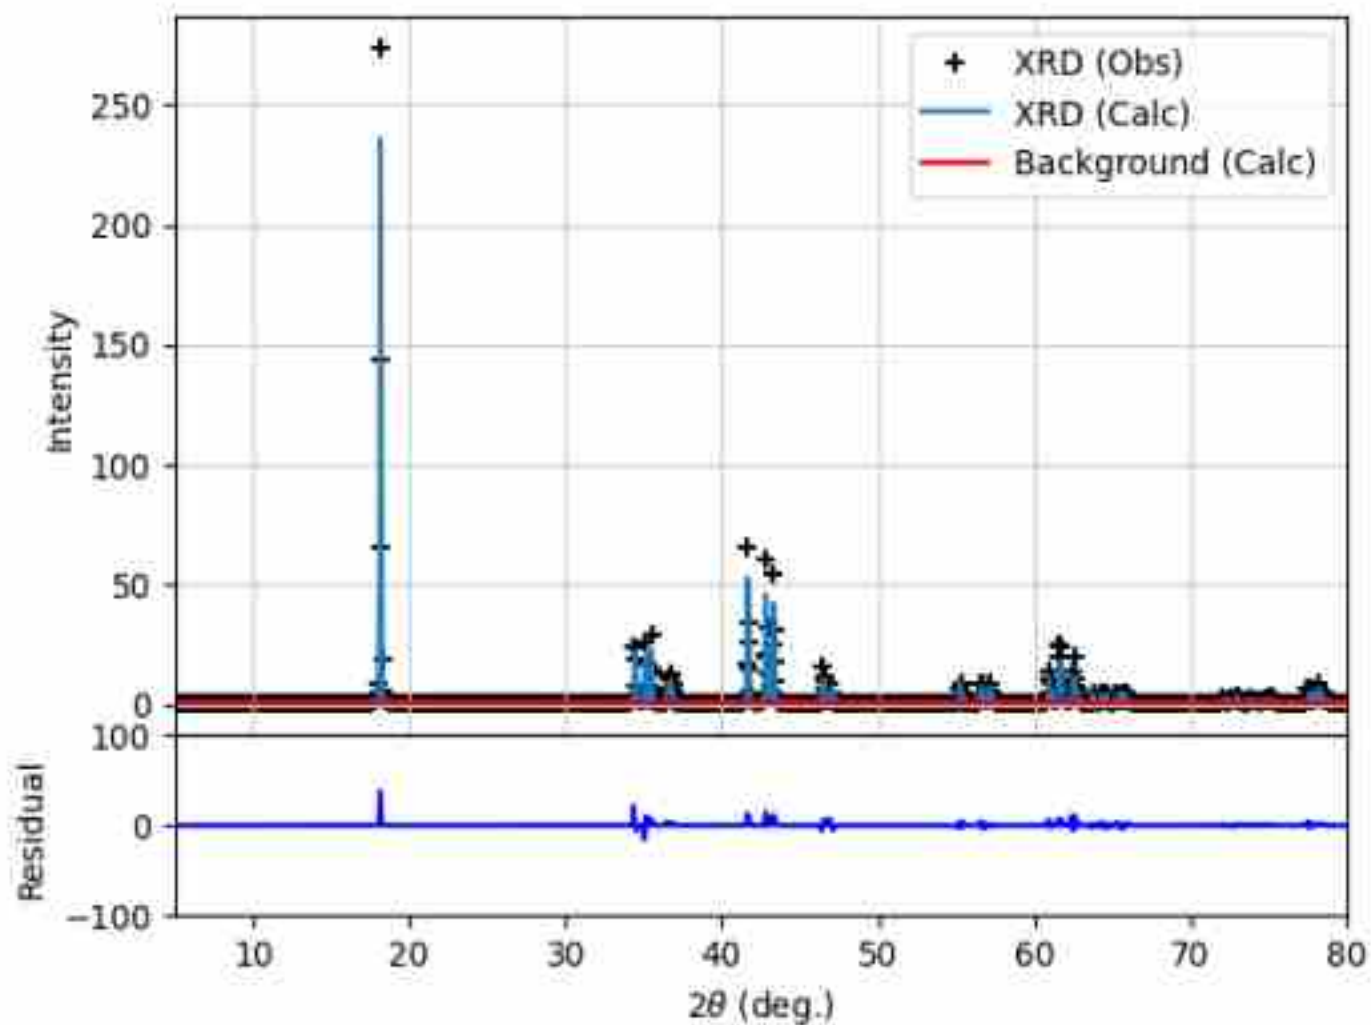

| RMSE before RR | Rwp     | RMSE after RR |
|----------------|---------|---------------|
| 0.034          | 32.0171 | 0.03847       |

# Li5Mn1Co2O8

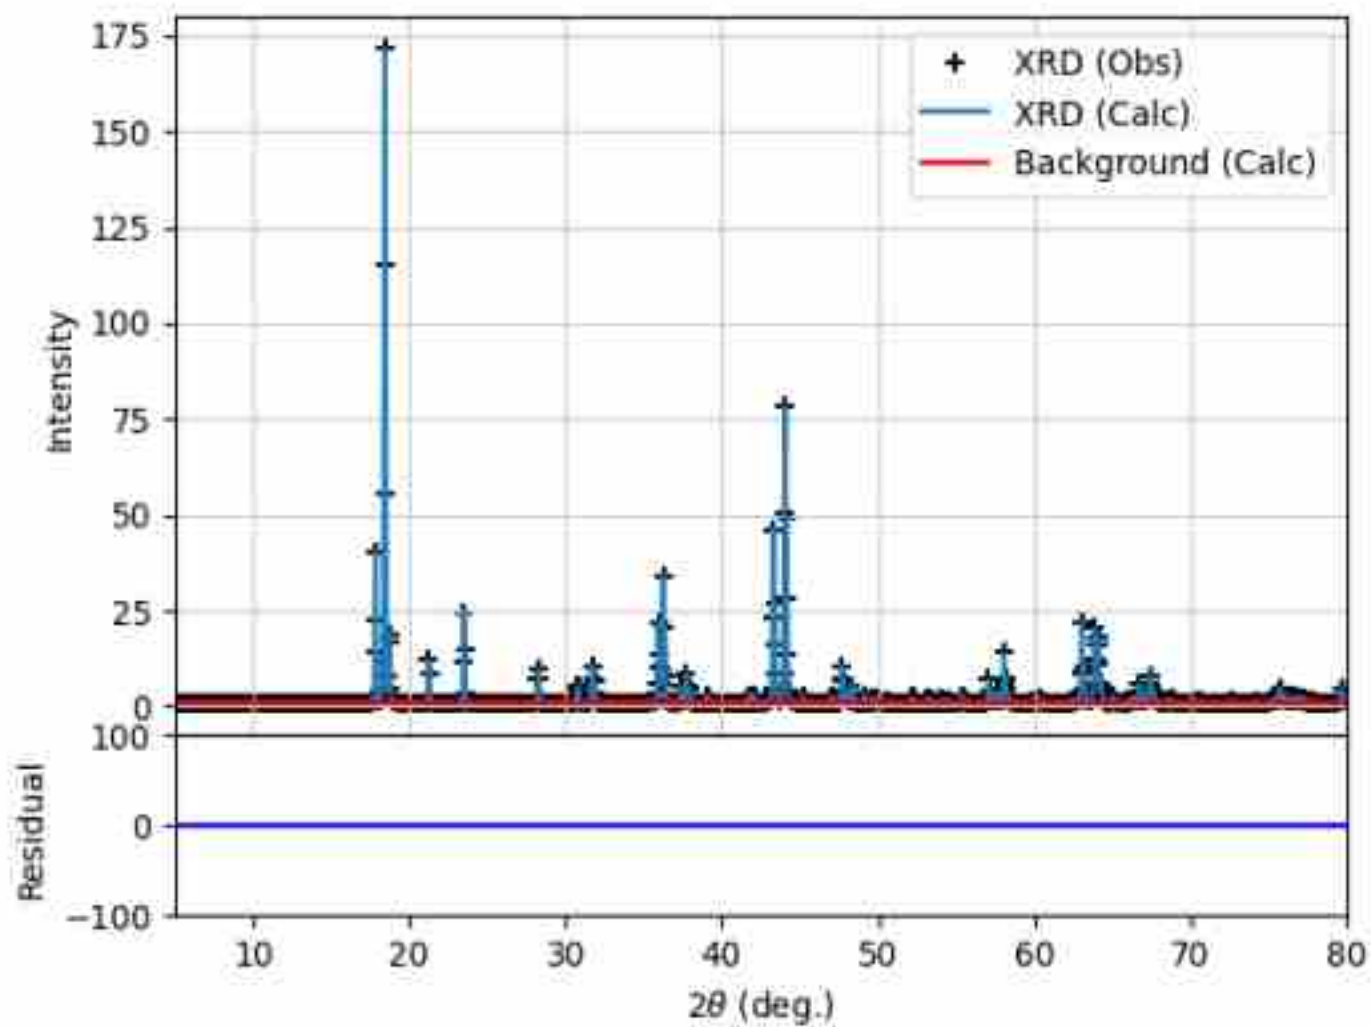

| RMSE before RR | Rwp    | RMSE after RR |
|----------------|--------|---------------|
| 0.034          | 0.0303 | 0.01422       |



# Mg<sub>1</sub>H<sub>4</sub>Cl<sub>2</sub>O<sub>2</sub>

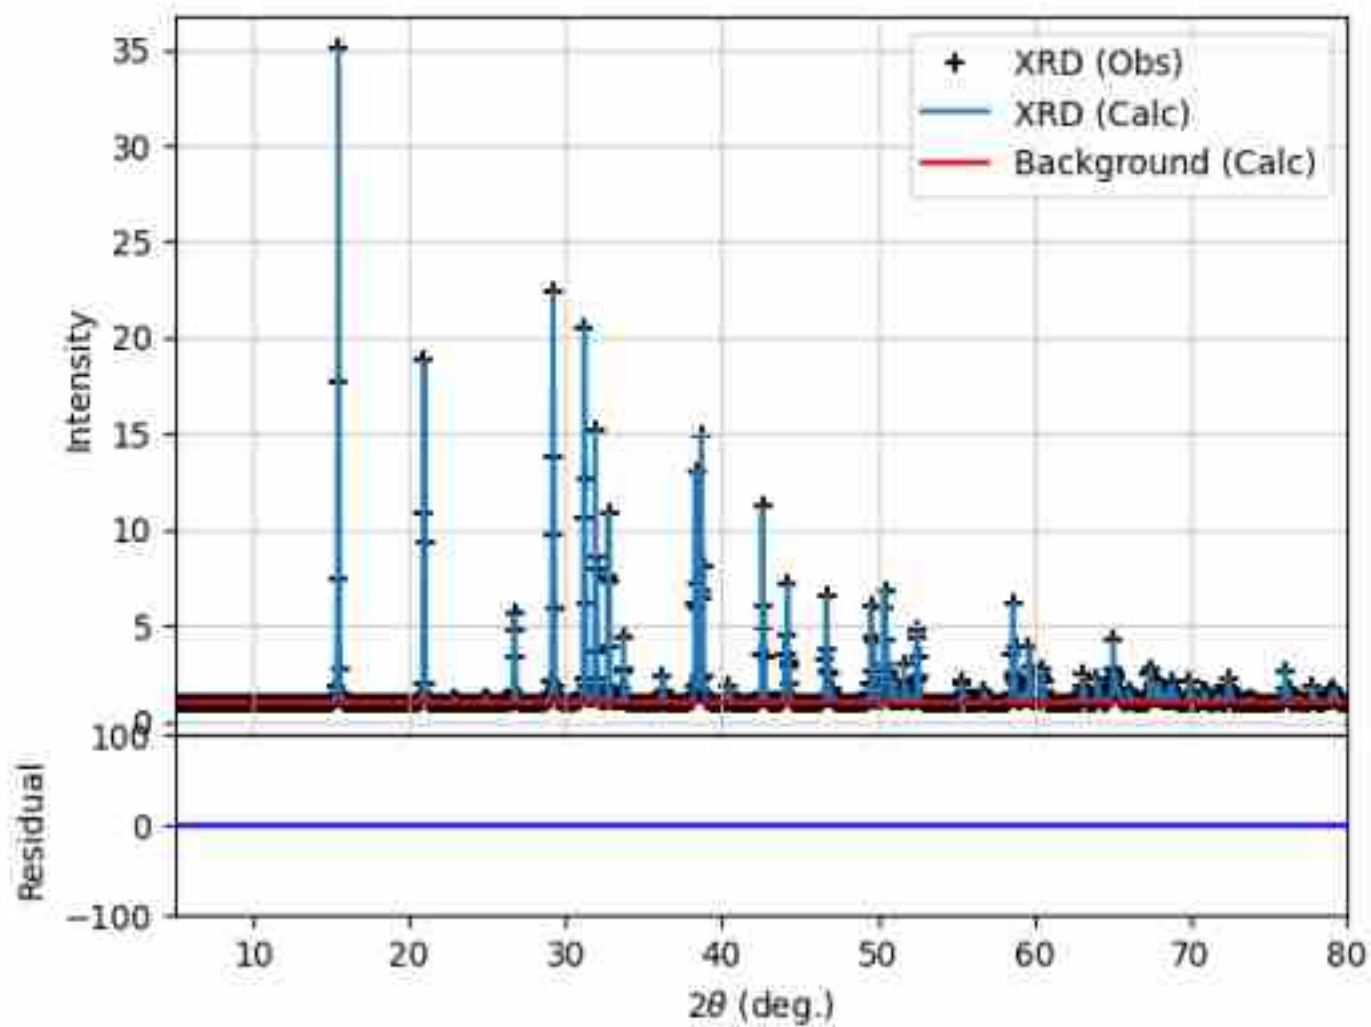

| RMSE before RR | Rwp     | RMSE after RR |
|----------------|---------|---------------|
| 0.034          | 0.00187 | 0.00241       |

# Mg<sub>2</sub>H<sub>4</sub>Se<sub>2</sub>O<sub>10</sub>

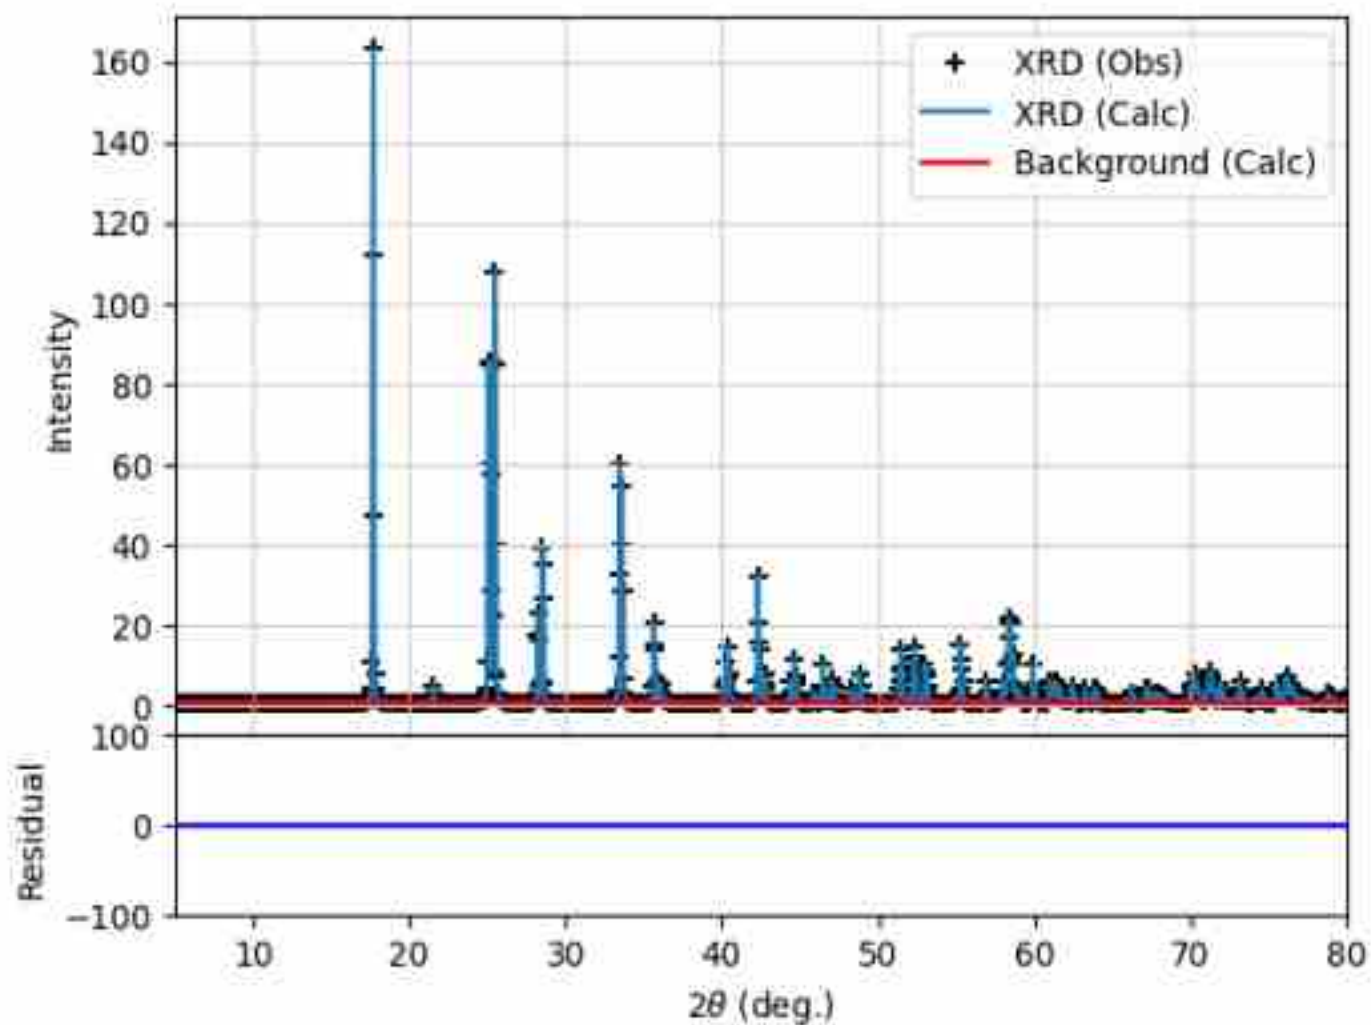

| RMSE before RR | Rwp     | RMSE after RR |
|----------------|---------|---------------|
| 0.034          | 0.00228 | 0.00154       |

# Mg<sub>2</sub>Ni<sub>4</sub>O<sub>8</sub>

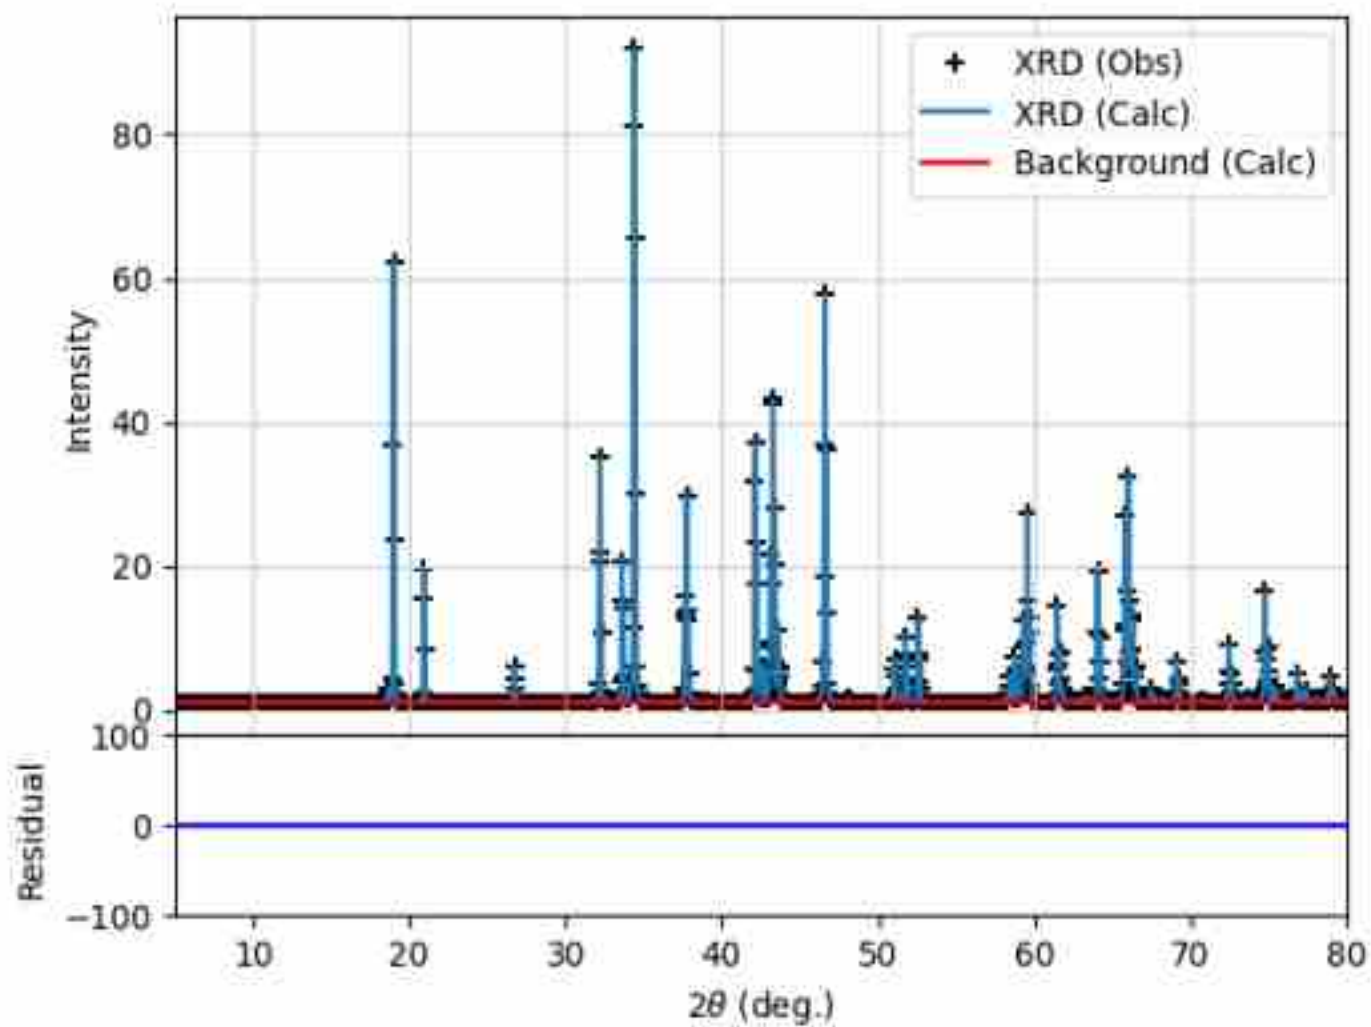

| RMSE before RR | Rwp    | RMSE after RR |
|----------------|--------|---------------|
| 0.034          | 0.0028 | 0.00096       |

# Mg<sub>2</sub>Ti<sub>4</sub>O<sub>8</sub>

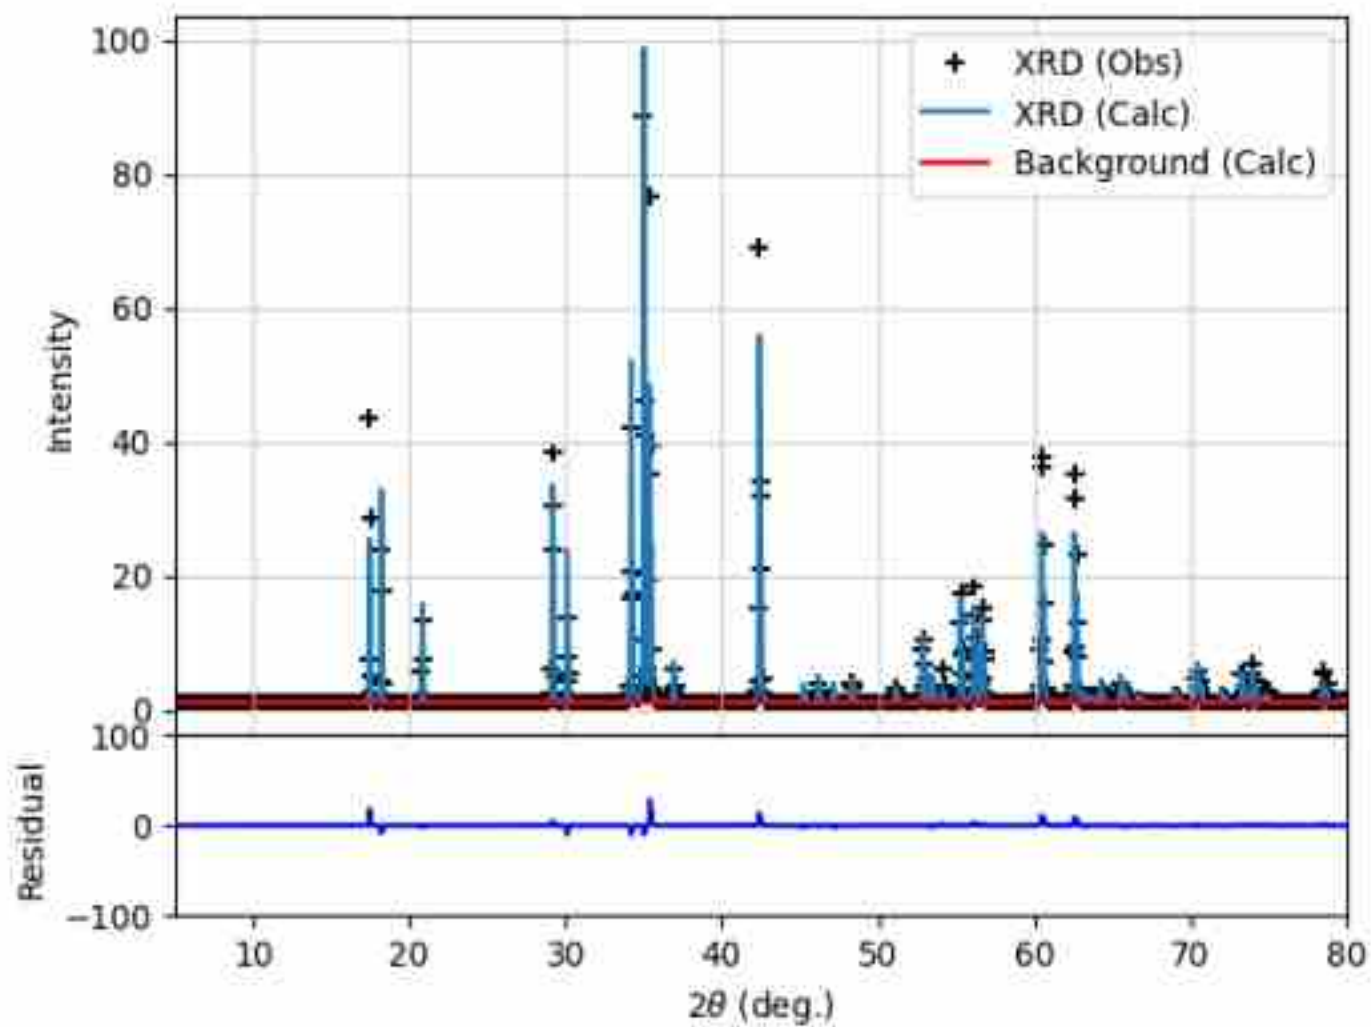

| RMSE before RR | Rwp     | RMSE after RR |
|----------------|---------|---------------|
| 0.034          | 19.9746 | 0.12719       |

# Mn<sub>2</sub>Au<sub>5</sub>

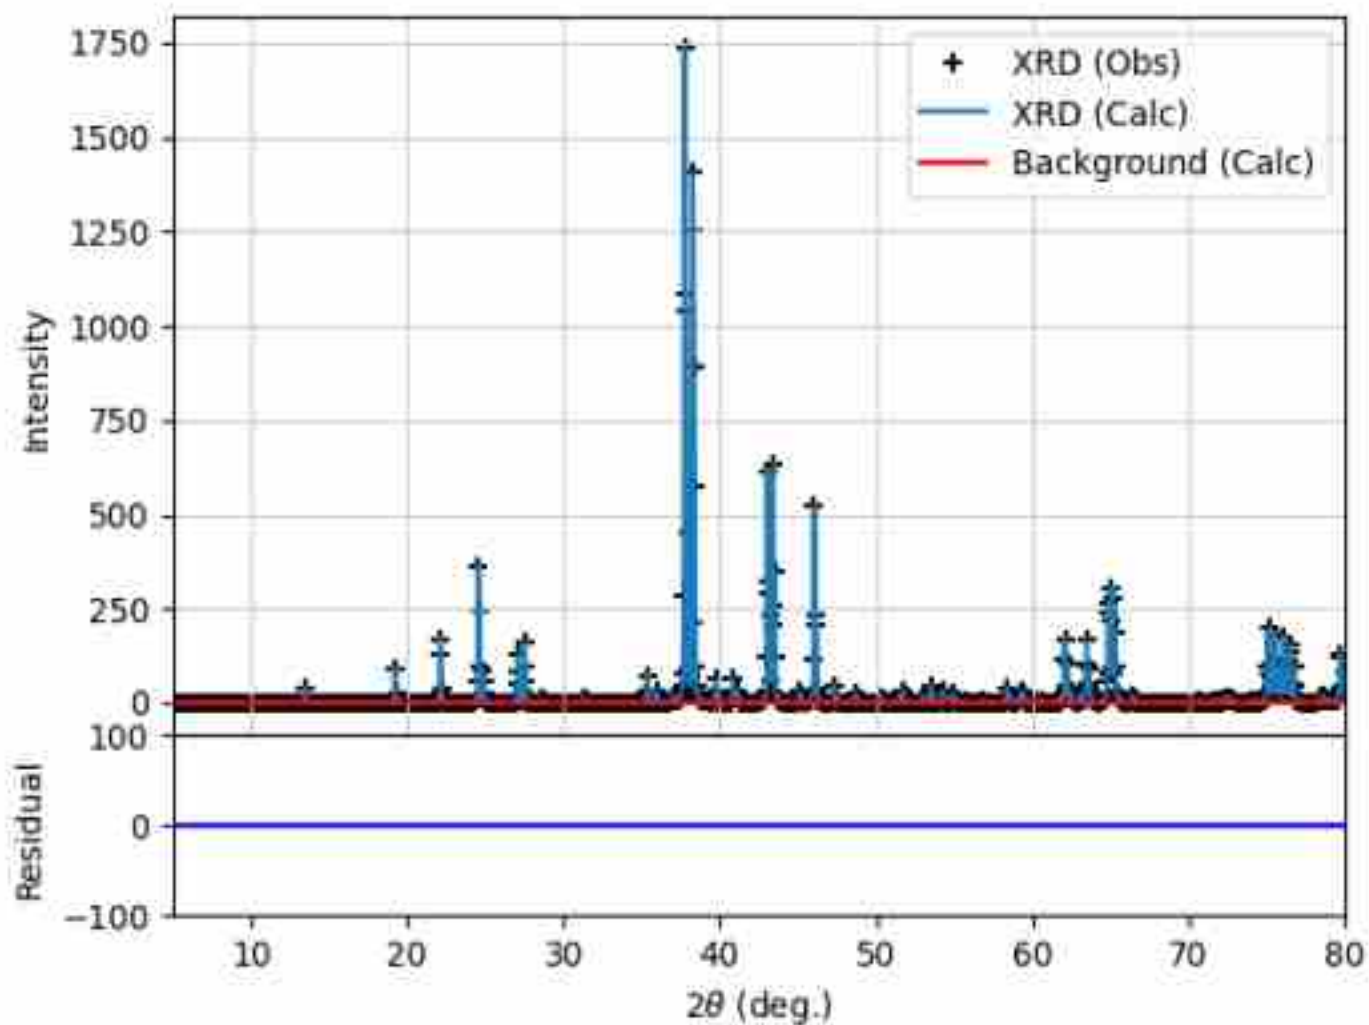

| RMSE before RR | Rwp     | RMSE after RR |
|----------------|---------|---------------|
| 0.034          | 0.00558 | 0.00022       |

# Mn6O12

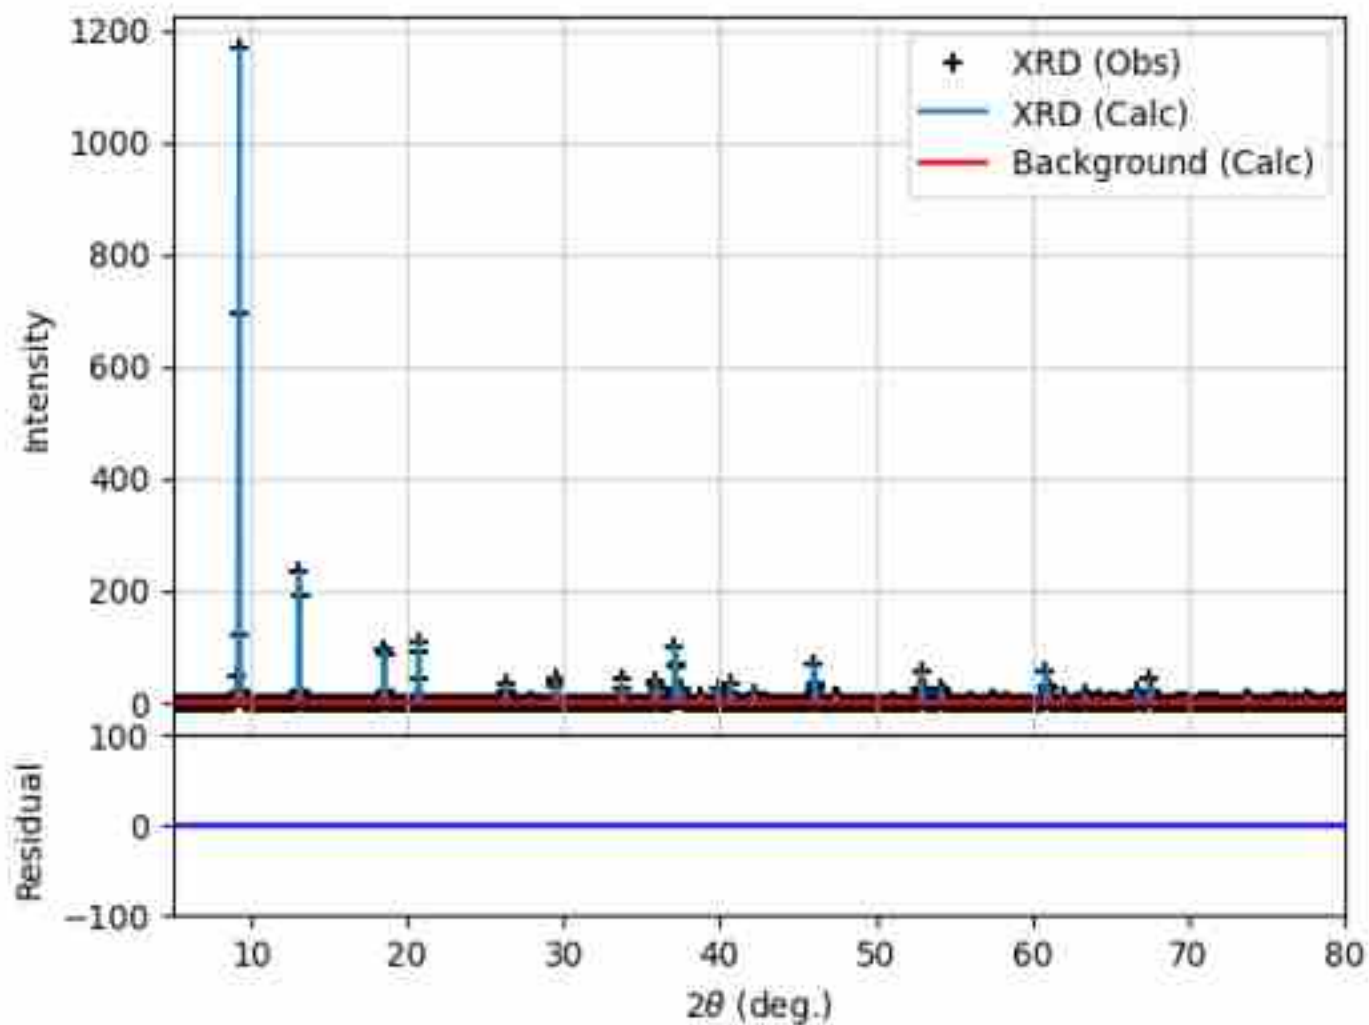

| RMSE before RR | Rwp     | RMSE after RR |
|----------------|---------|---------------|
| 0.034          | 0.00725 | 0.00167       |

# Na<sub>2</sub>Ni<sub>6</sub>O<sub>8</sub>

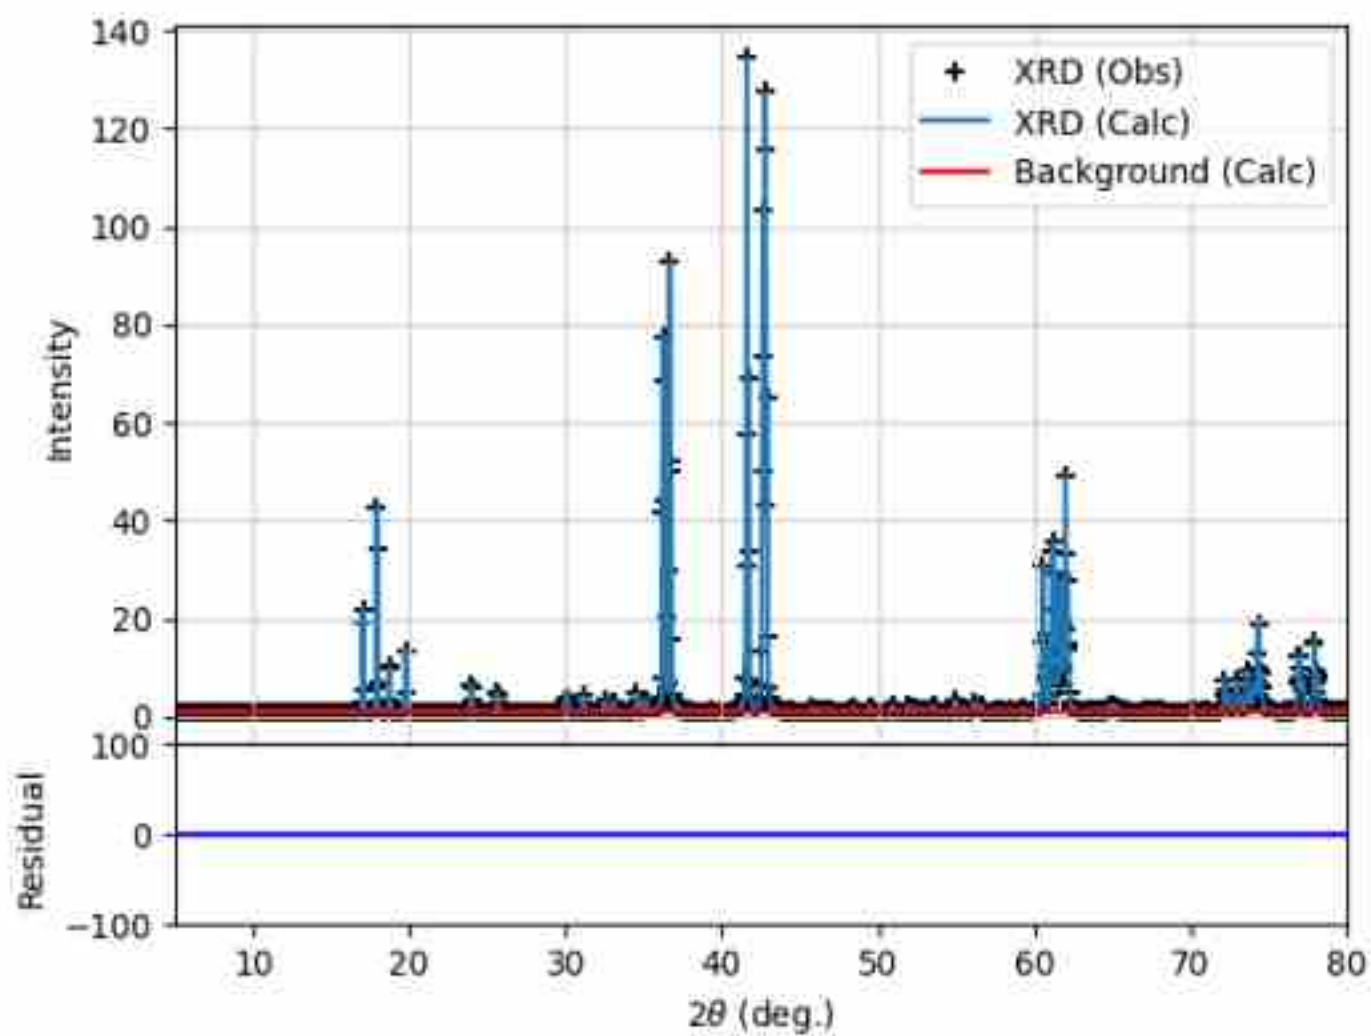

| RMSE before RR | Rwp     | RMSE after RR |
|----------------|---------|---------------|
| 0.034          | 0.00035 | 0.00012       |

# Na<sub>2</sub>Ti<sub>2</sub>Si<sub>4</sub>O<sub>12</sub>

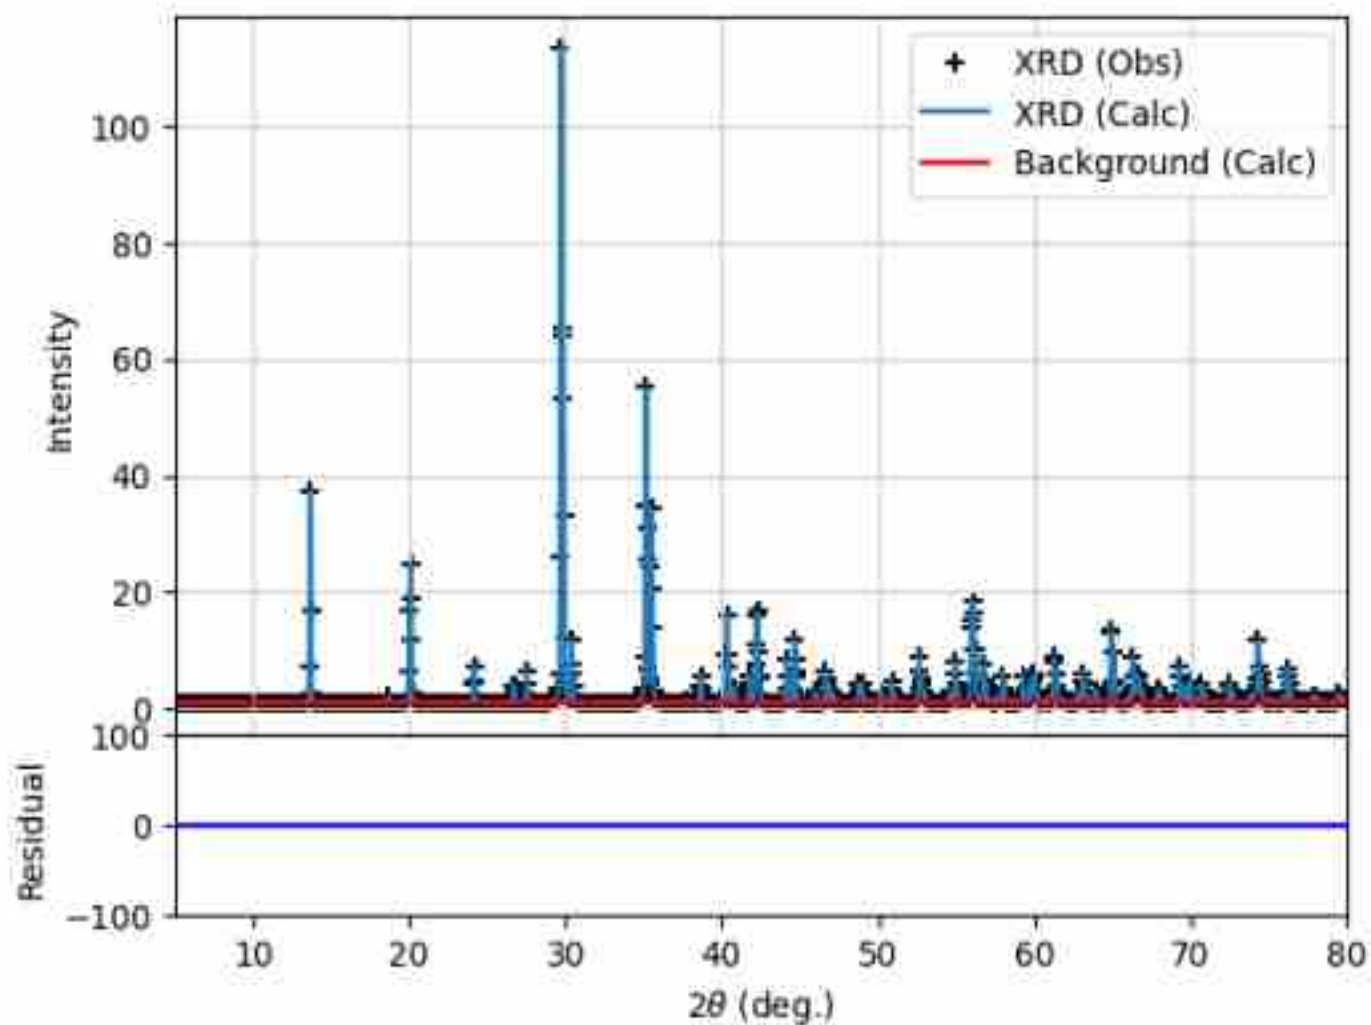

| RMSE before RR | Rwp     | RMSE after RR |
|----------------|---------|---------------|
| 0.034          | 0.00256 | 0.00062       |



# Nd<sub>2</sub>Th<sub>3</sub>O<sub>9</sub>

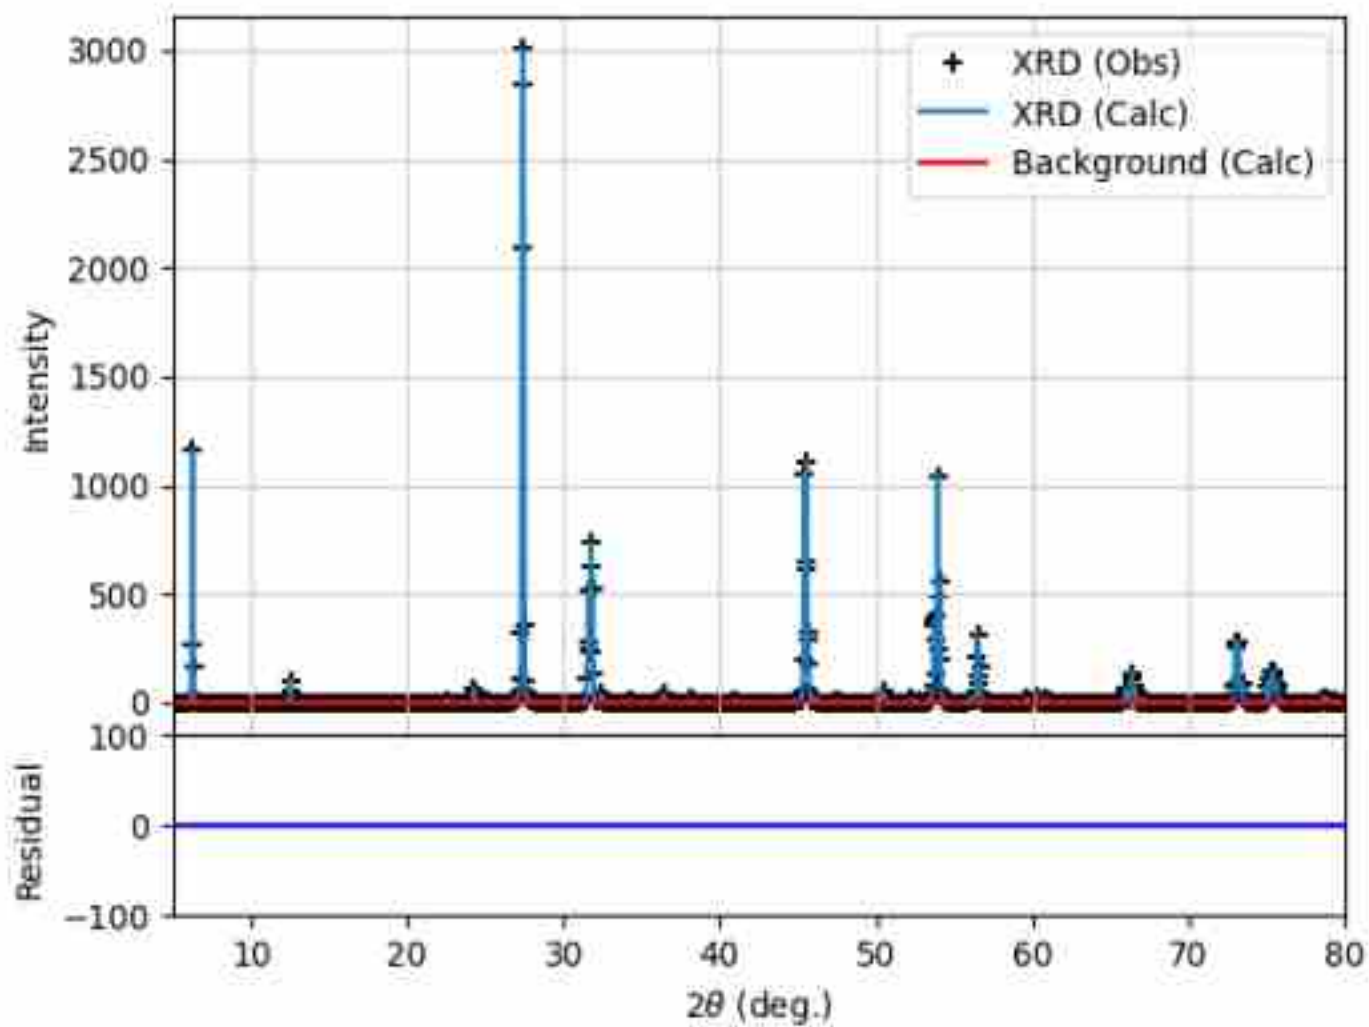

| RMSE before RR | Rwp     | RMSE after RR |
|----------------|---------|---------------|
| 0.034          | 0.00379 | 0.00184       |

# Nd8Mo4C8

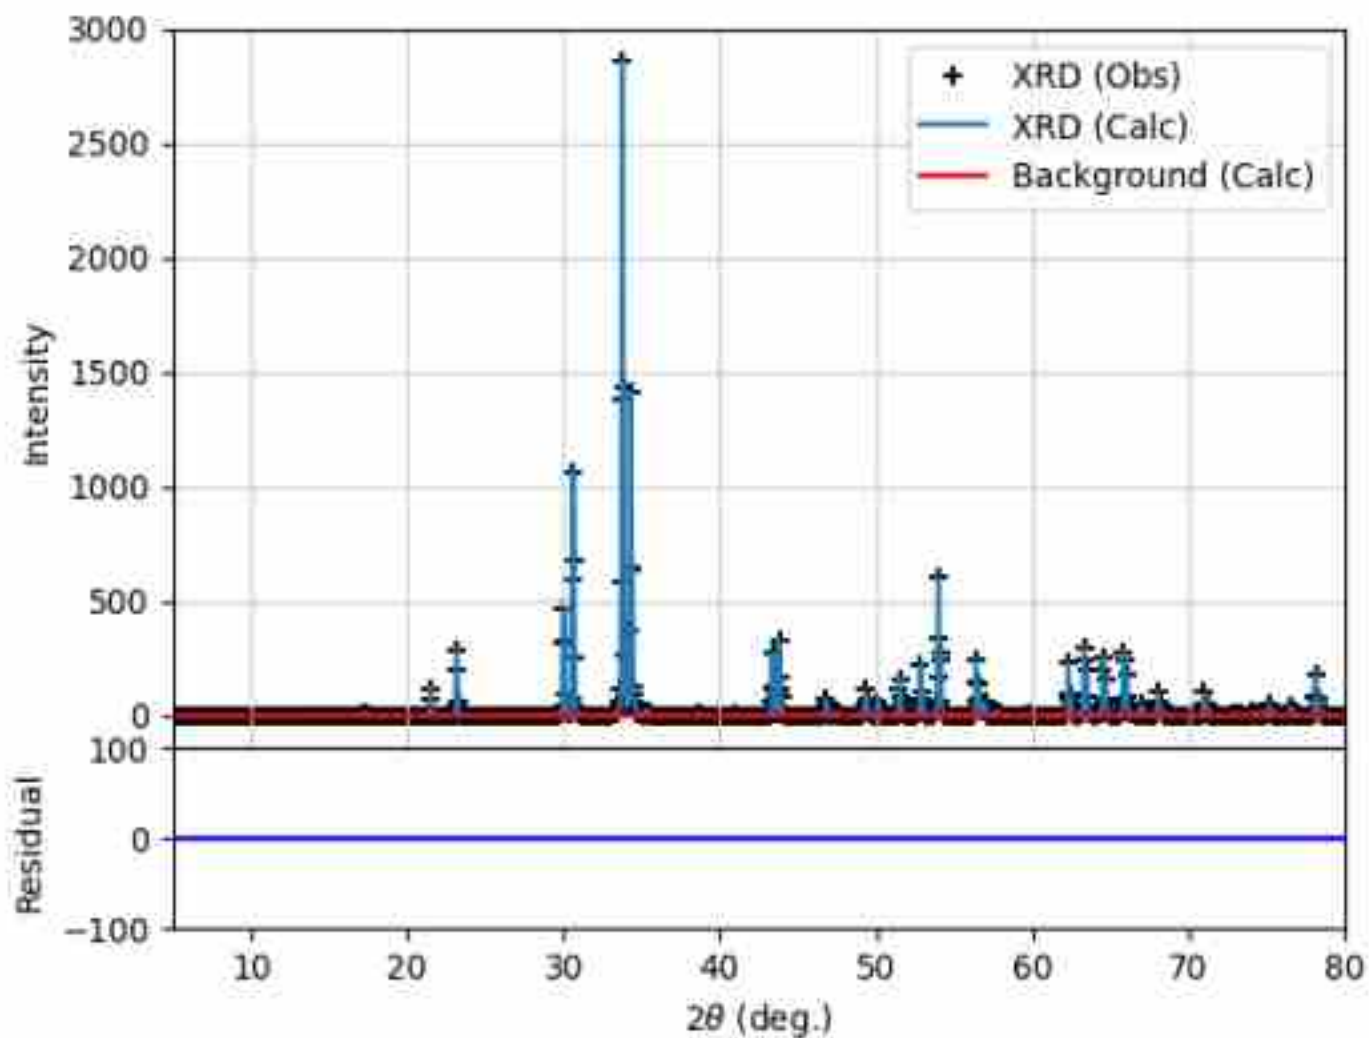

| RMSE before RR | Rwp     | RMSE after RR |
|----------------|---------|---------------|
| 0.034          | 0.00437 | 0.00146       |

# Rb7Au5O2

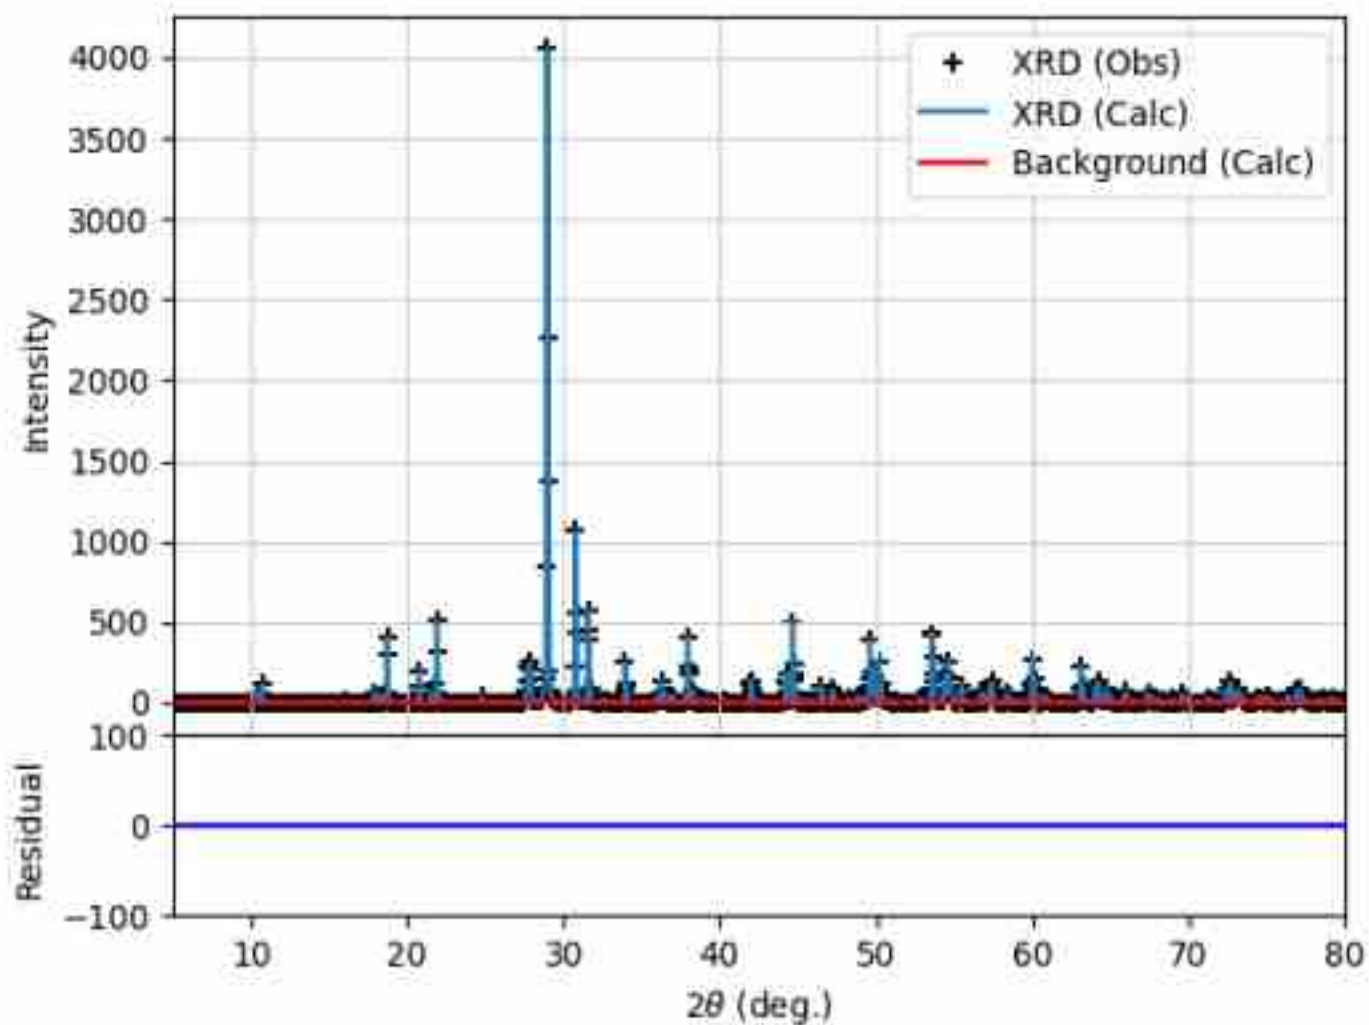

| RMSE before RR | Rwp     | RMSE after RR |
|----------------|---------|---------------|
| 0.034          | 0.00369 | 0.00066       |

# Si<sub>4</sub>Br<sub>16</sub>

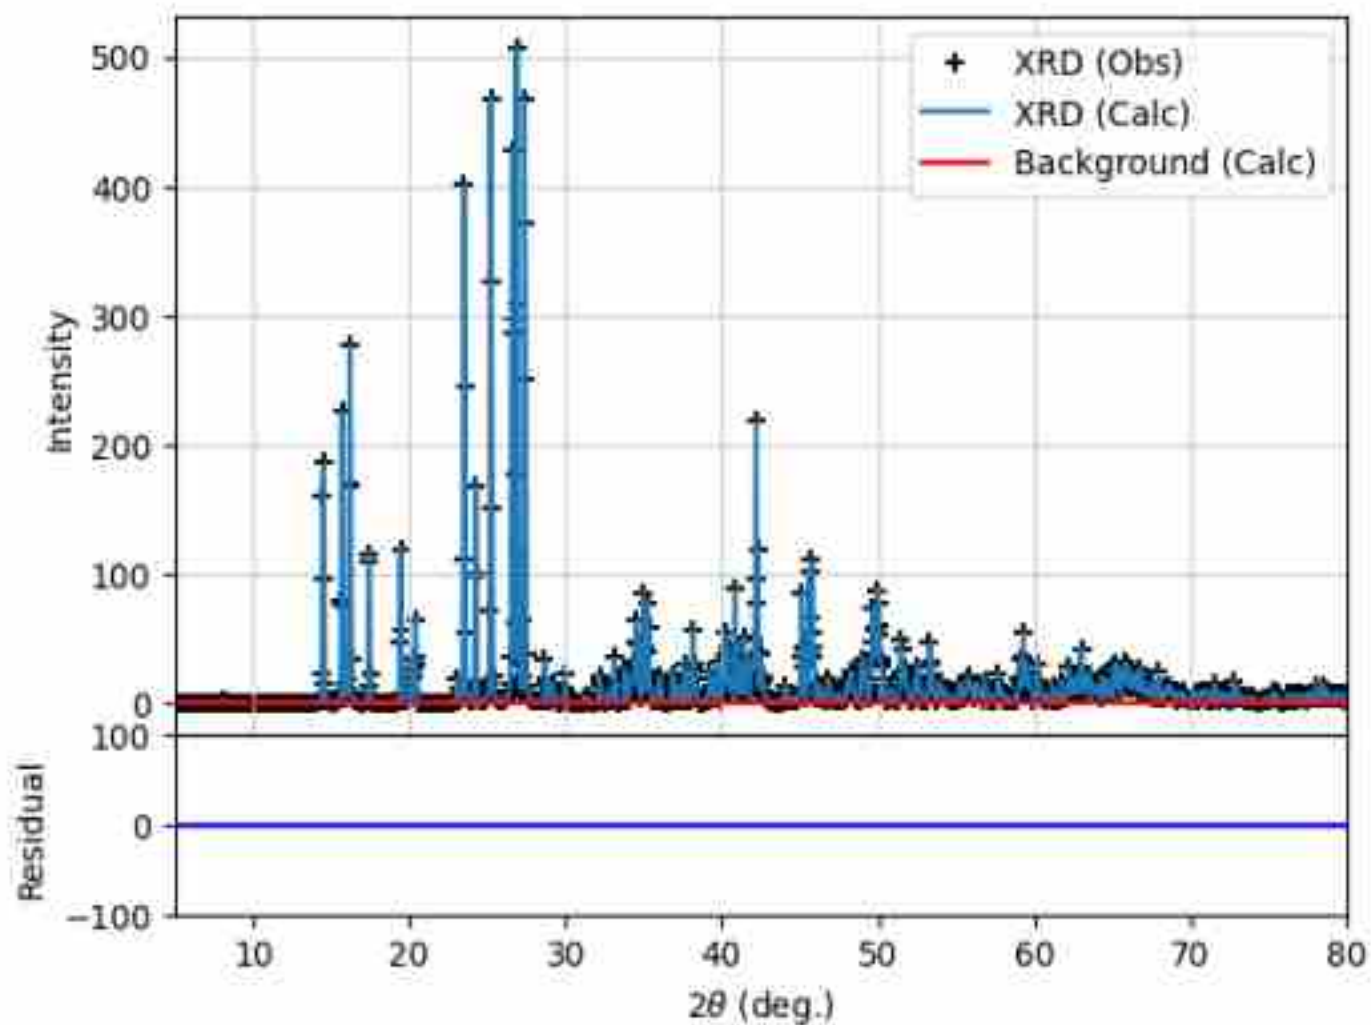

| RMSE before RR | Rwp    | RMSE after RR |
|----------------|--------|---------------|
| 0.034          | 0.0026 | 0.00026       |

# Sm4Ga4Co10

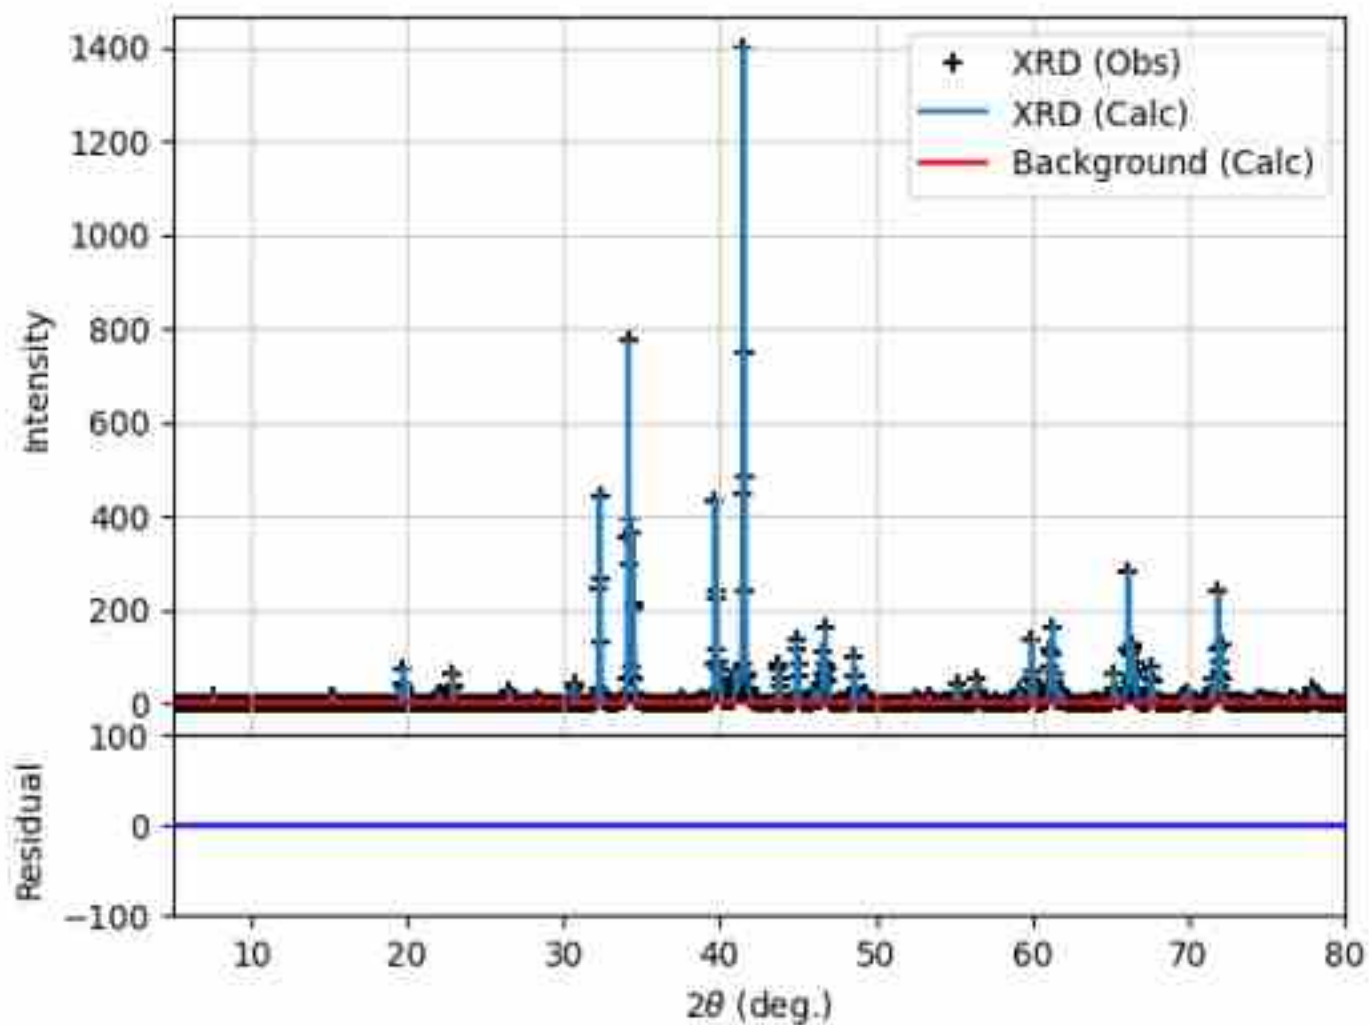

| RMSE before RR | Rwp     | RMSE after RR |
|----------------|---------|---------------|
| 0.034          | 0.00284 | 0.00043       |

# Ta<sub>2</sub>Ti<sub>2</sub>Al<sub>2</sub>C<sub>2</sub>

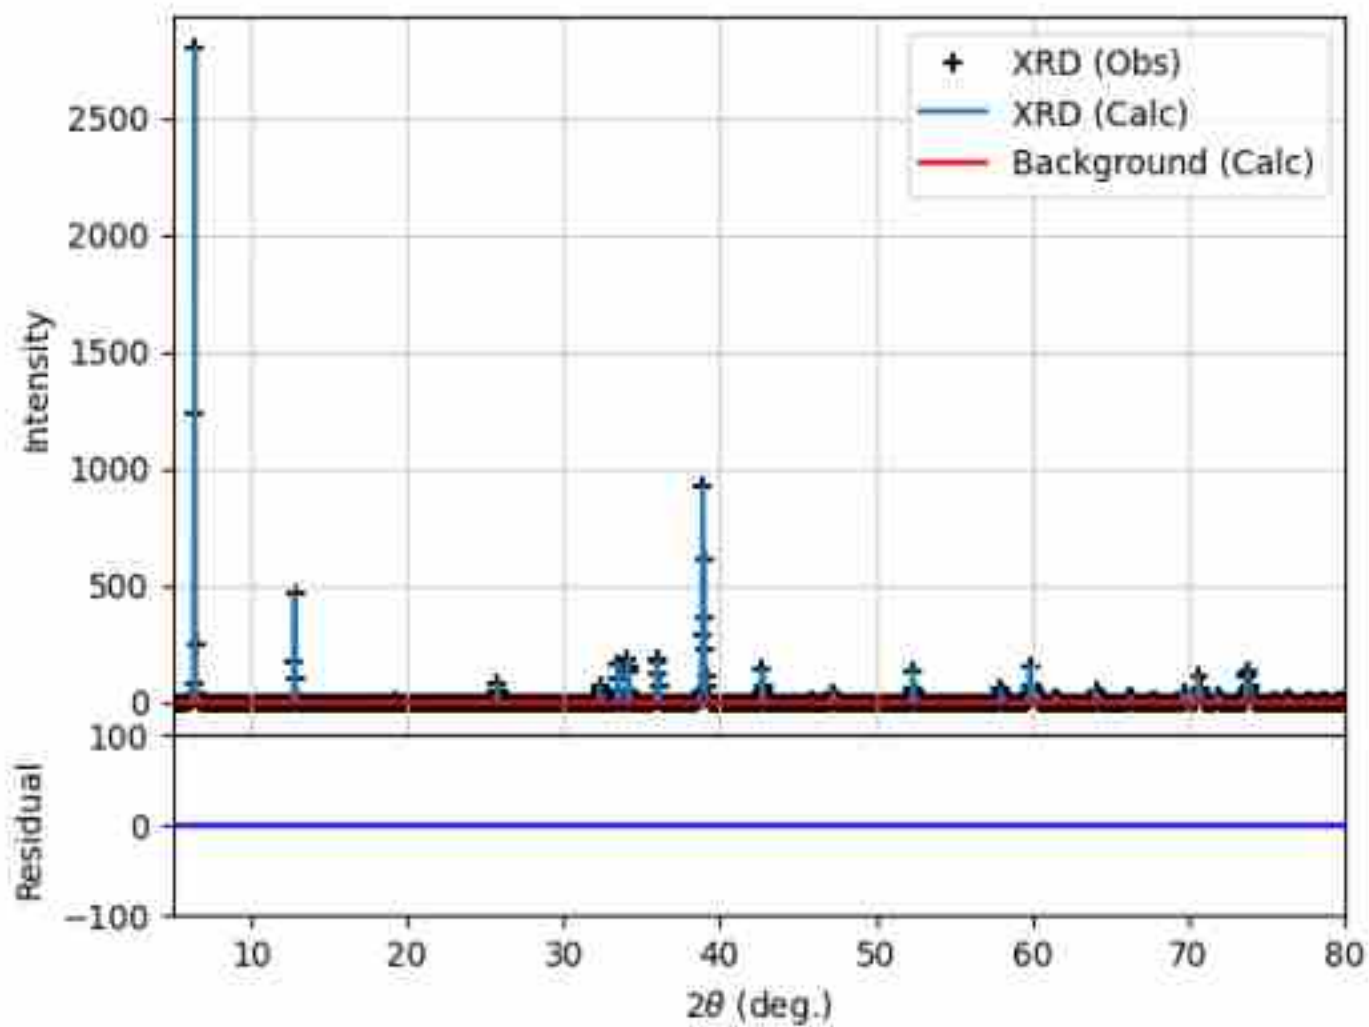

| RMSE before RR | Rwp     | RMSE after RR |
|----------------|---------|---------------|
| 0.034          | 0.00281 | 0.00235       |

# Ti1Zn1Bi2O6

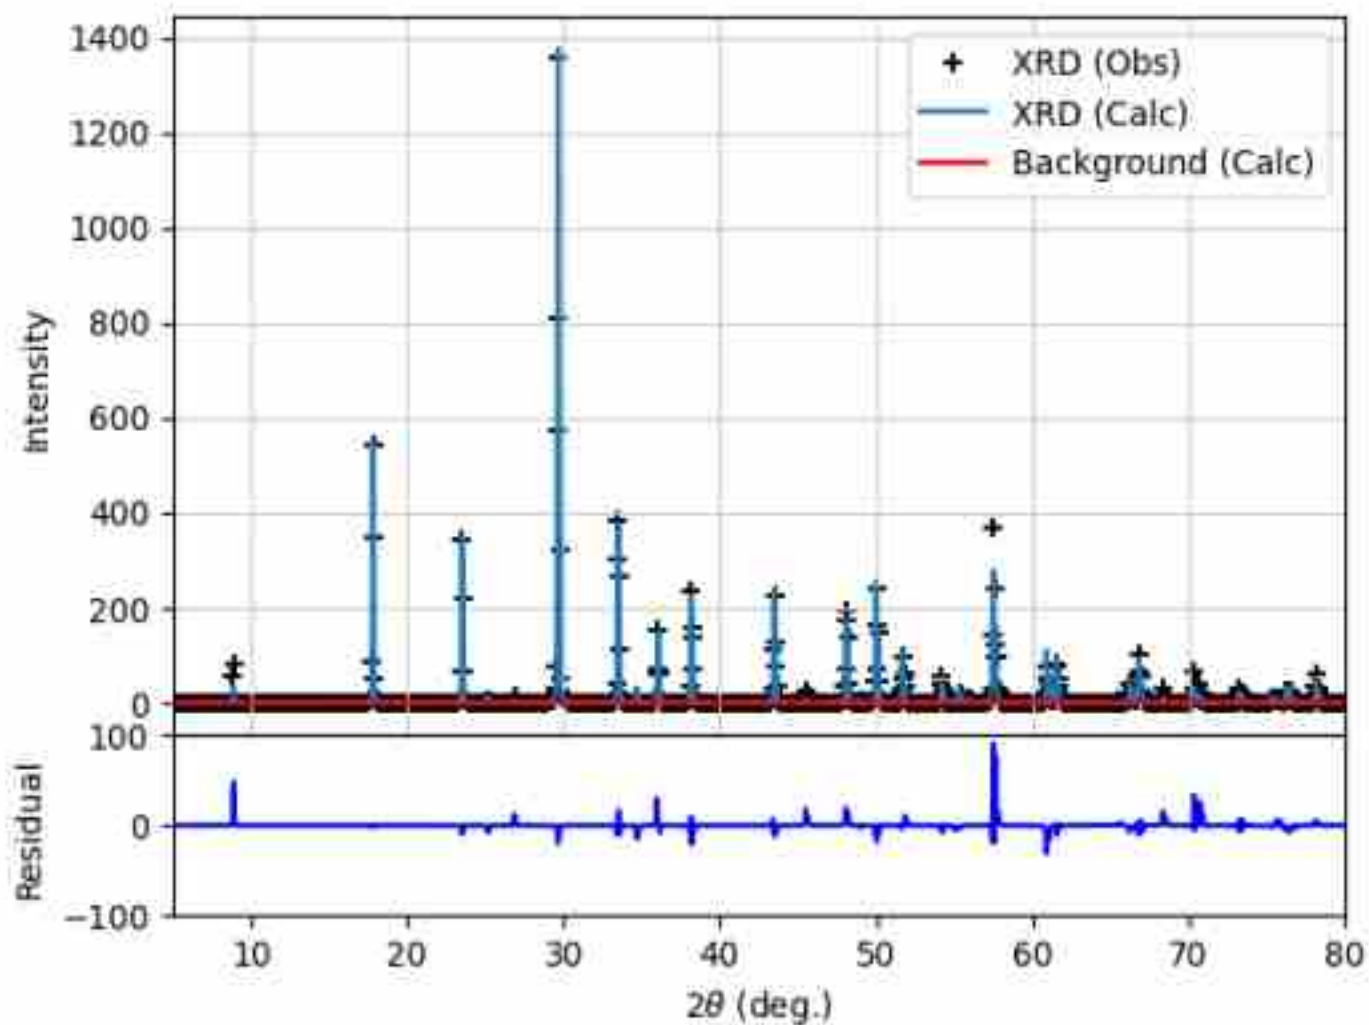

| RMSE before RR | Rwp      | RMSE after RR |
|----------------|----------|---------------|
| 0.034          | 19.03634 | 0.04734       |

# Ti4P4

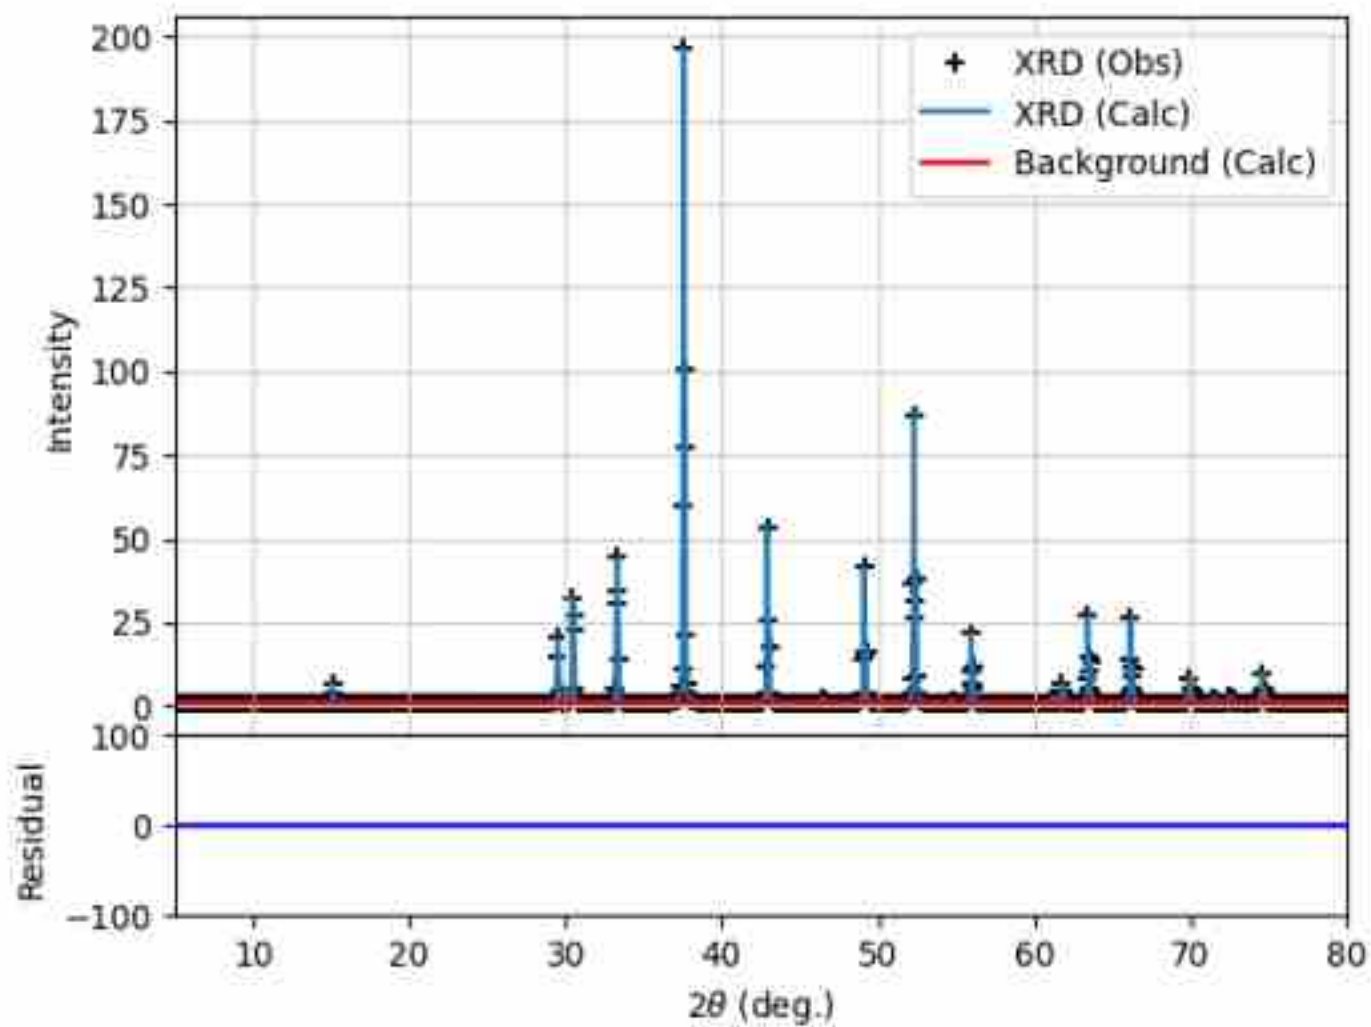

| RMSE before RR | Rwp     | RMSE after RR |
|----------------|---------|---------------|
| 0.034          | 0.00345 | 0.00037       |



# Tm<sub>12</sub>In<sub>2</sub>Fe<sub>3</sub>

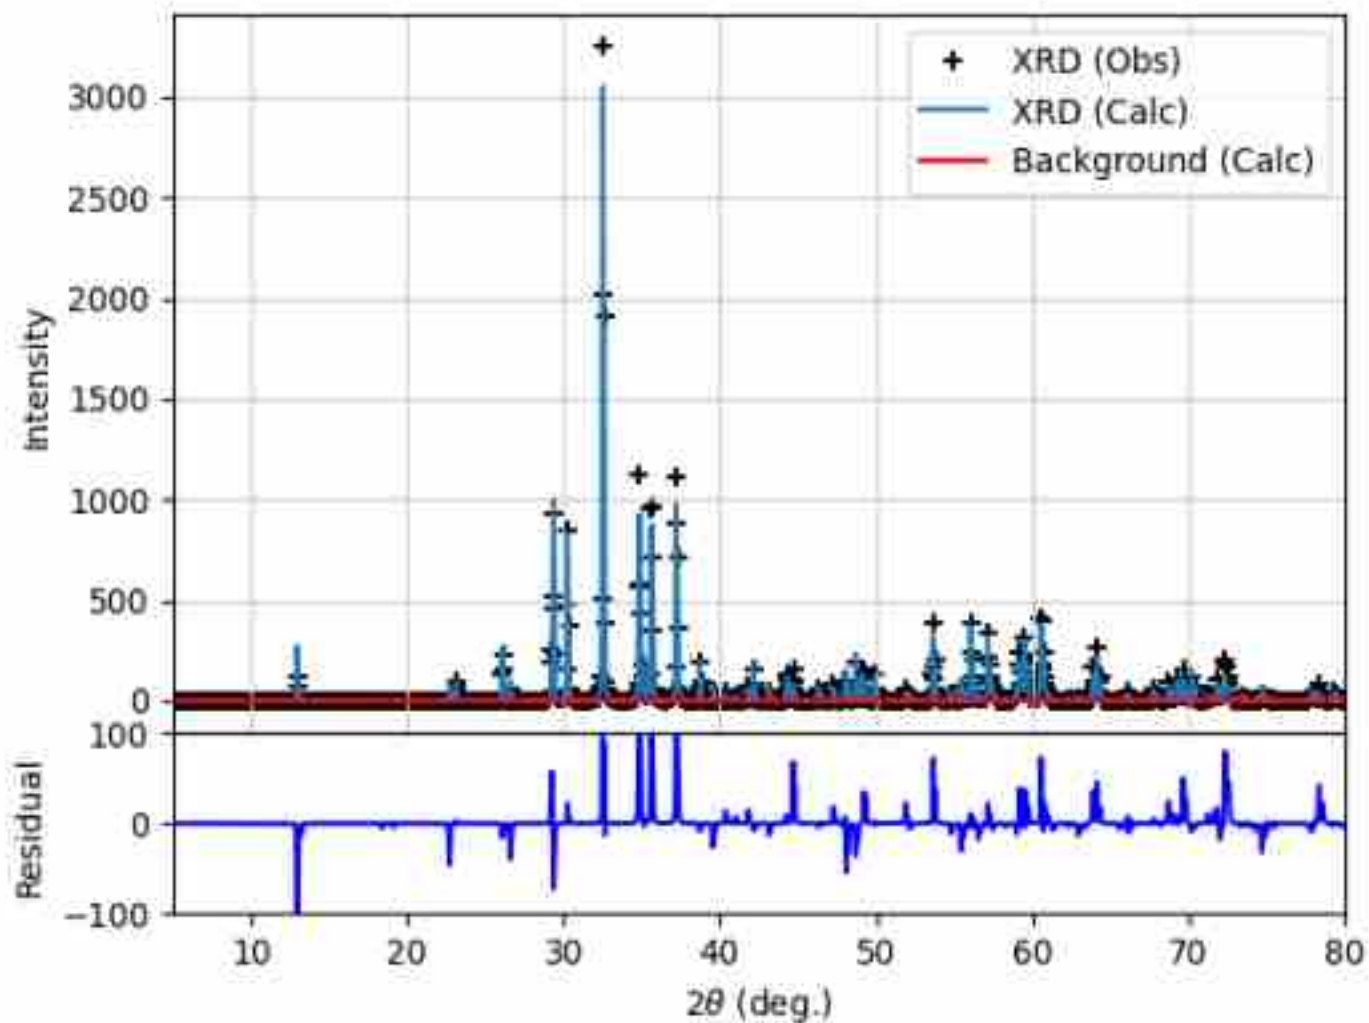

| RMSE before RR | Rwp      | RMSE after RR |
|----------------|----------|---------------|
| 0.034          | 21.63146 | 0.19869       |

# V4O3F9

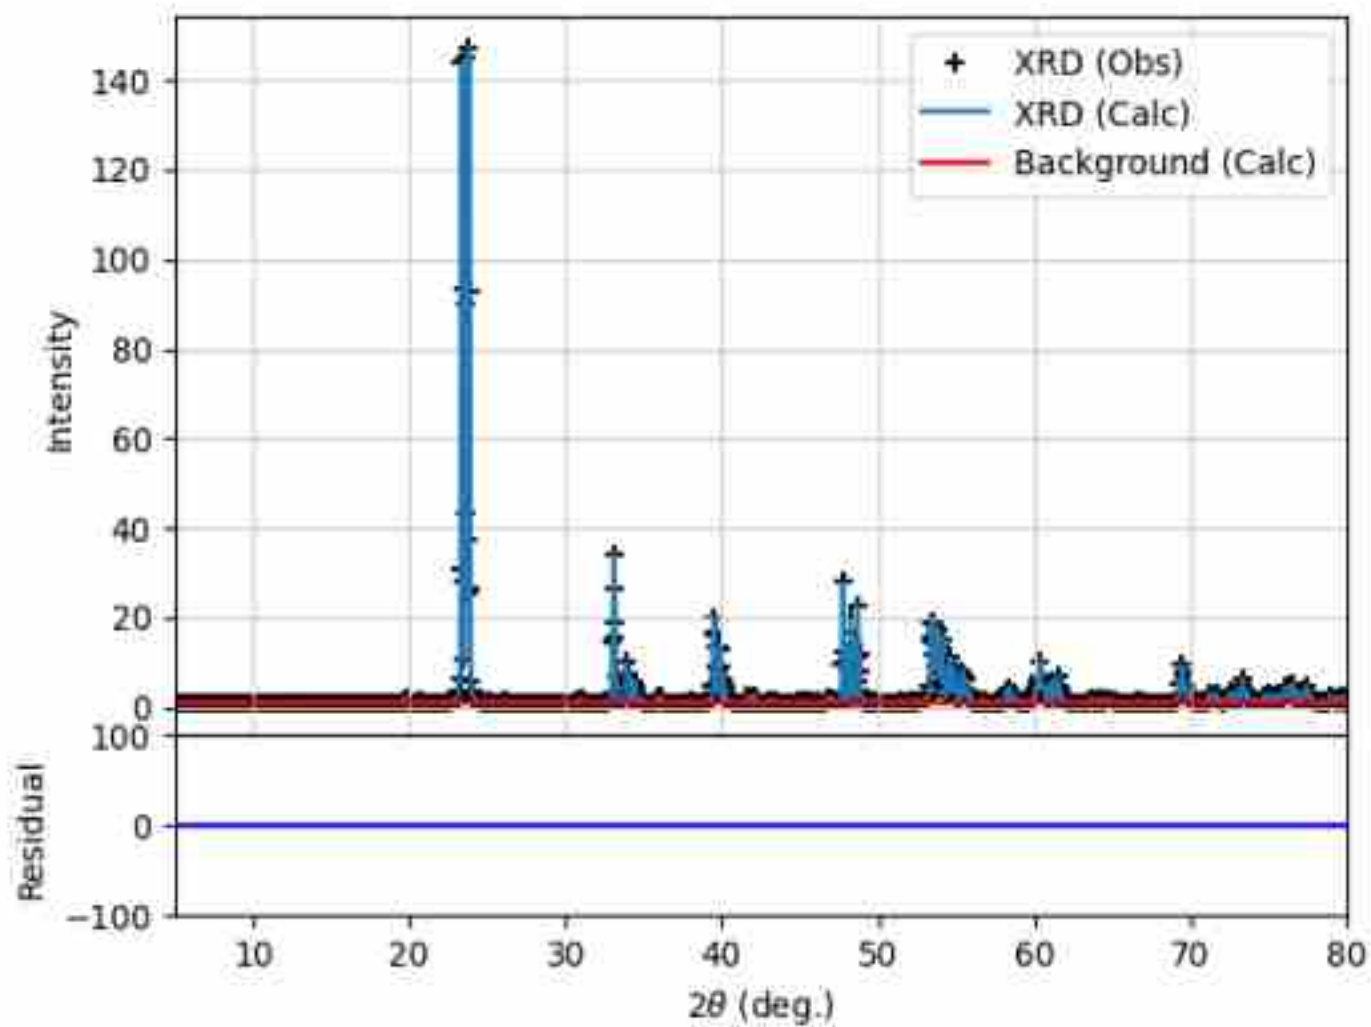

| RMSE before RR | Rwp     | RMSE after RR |
|----------------|---------|---------------|
| 0.034          | 0.00221 | 0.0           |

# V6O9F3

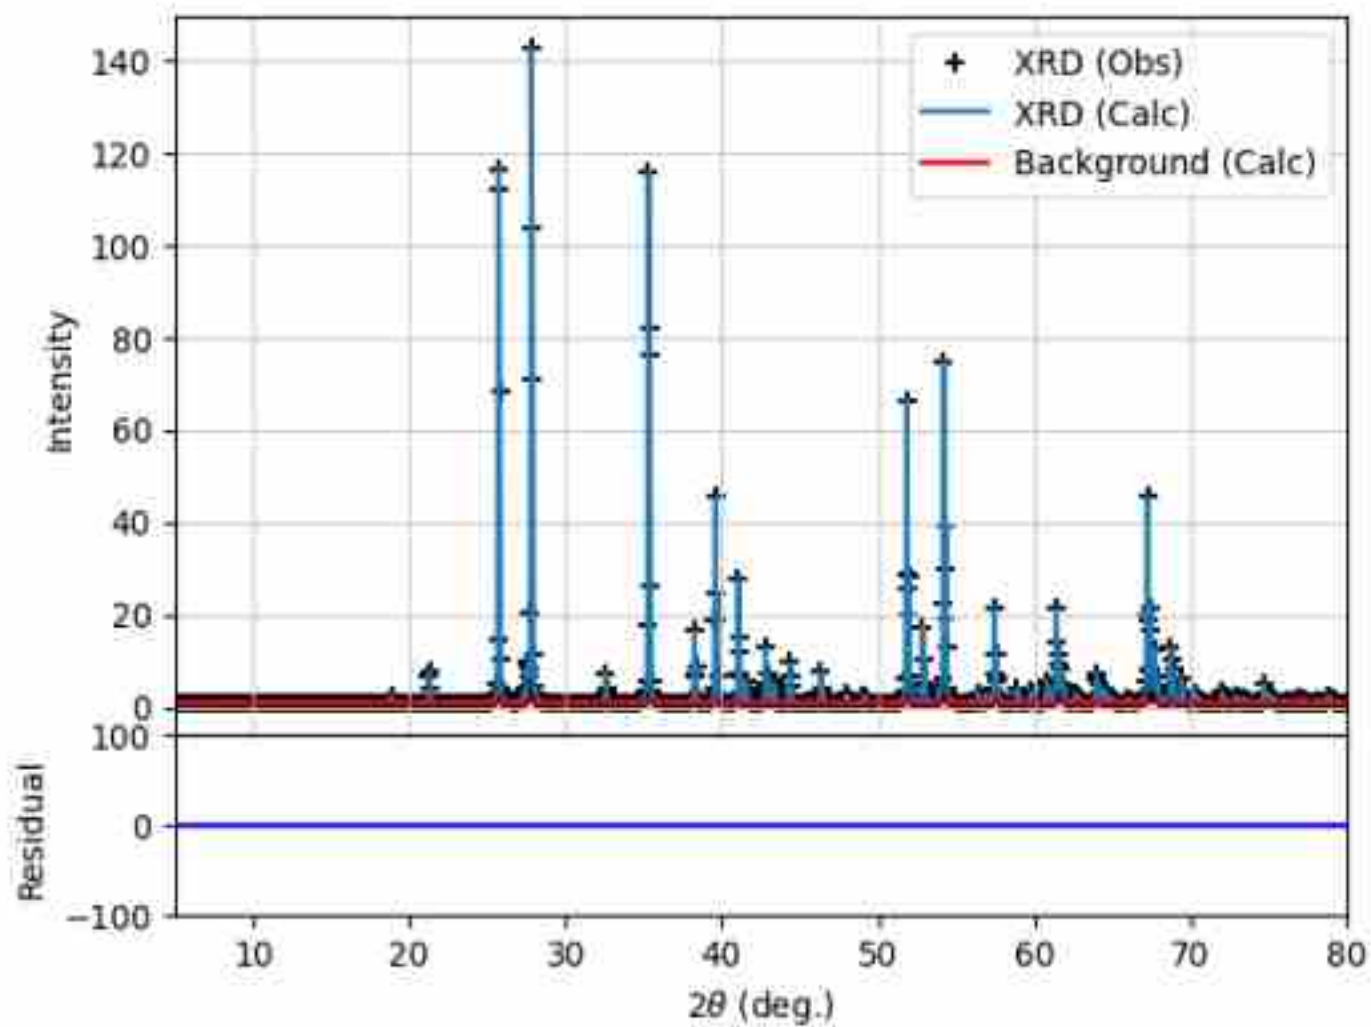

| RMSE before RR | Rwp     | RMSE after RR |
|----------------|---------|---------------|
| 0.034          | 0.00339 | 0.001         |

# V6O12

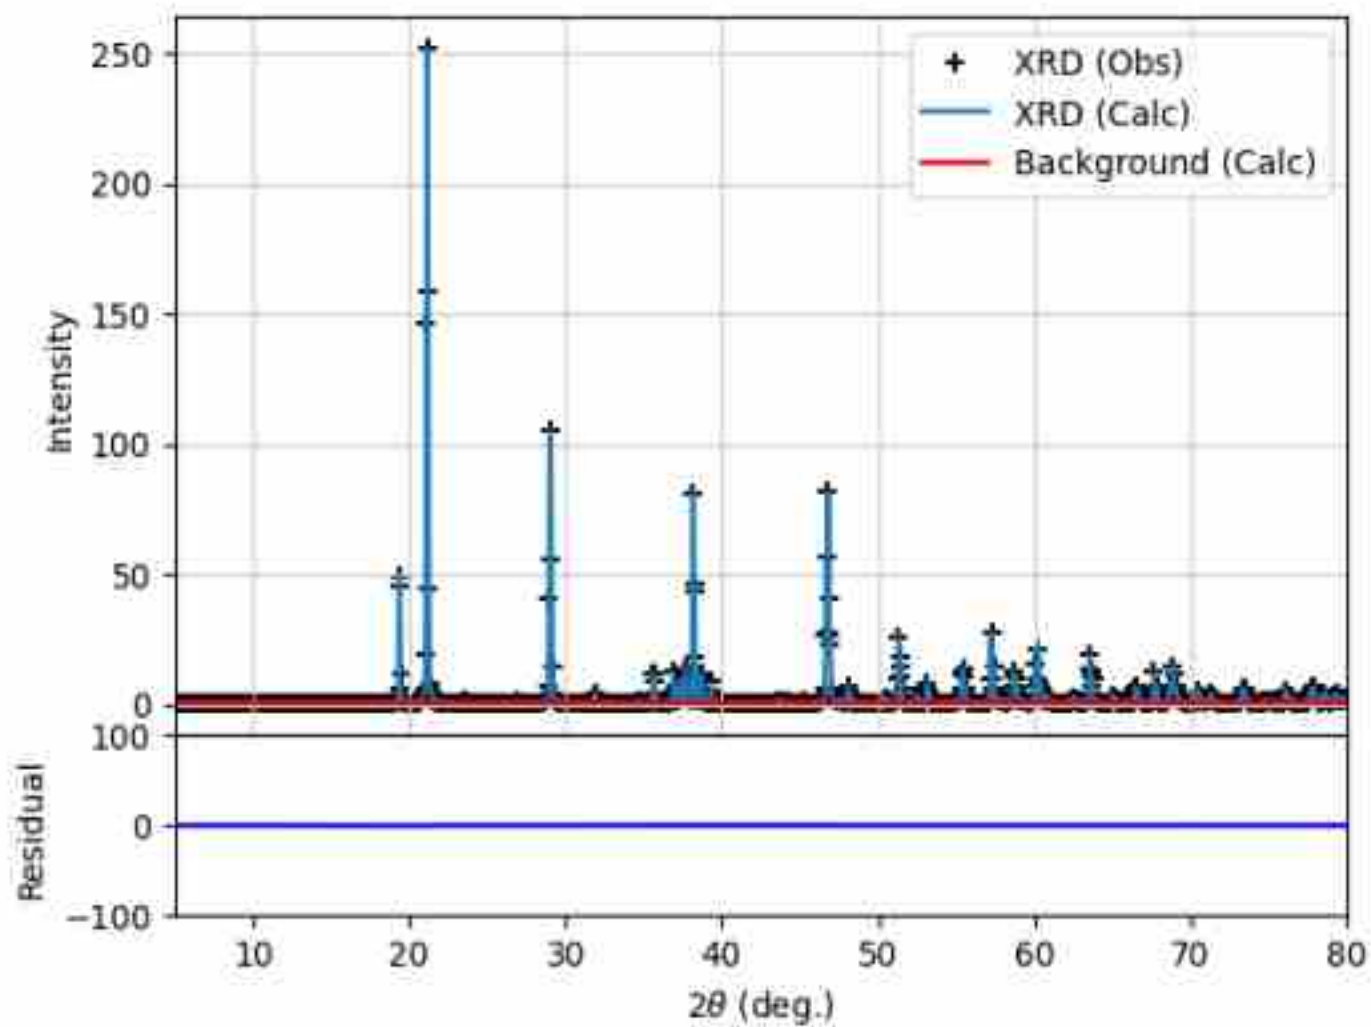

| RMSE before RR | Rwp     | RMSE after RR |
|----------------|---------|---------------|
| 0.034          | 0.68922 | 0.03675       |

# W3Se6

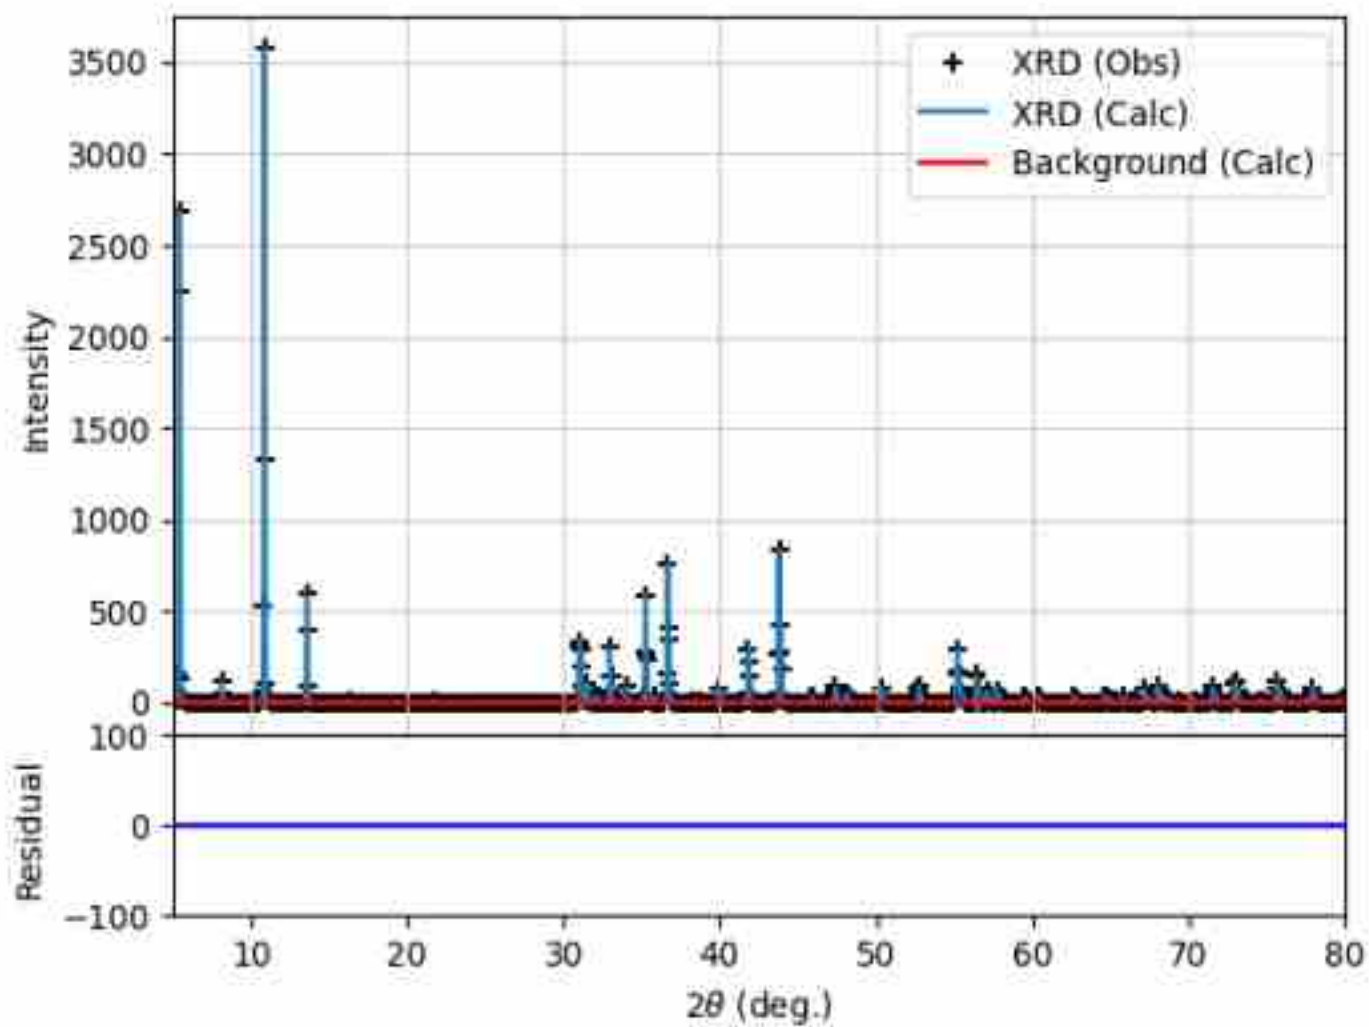

| RMSE before RR | Rwp     | RMSE after RR |
|----------------|---------|---------------|
| 0.034          | 0.00191 | 0.0003        |

# Y<sub>4</sub>Zn<sub>12</sub>

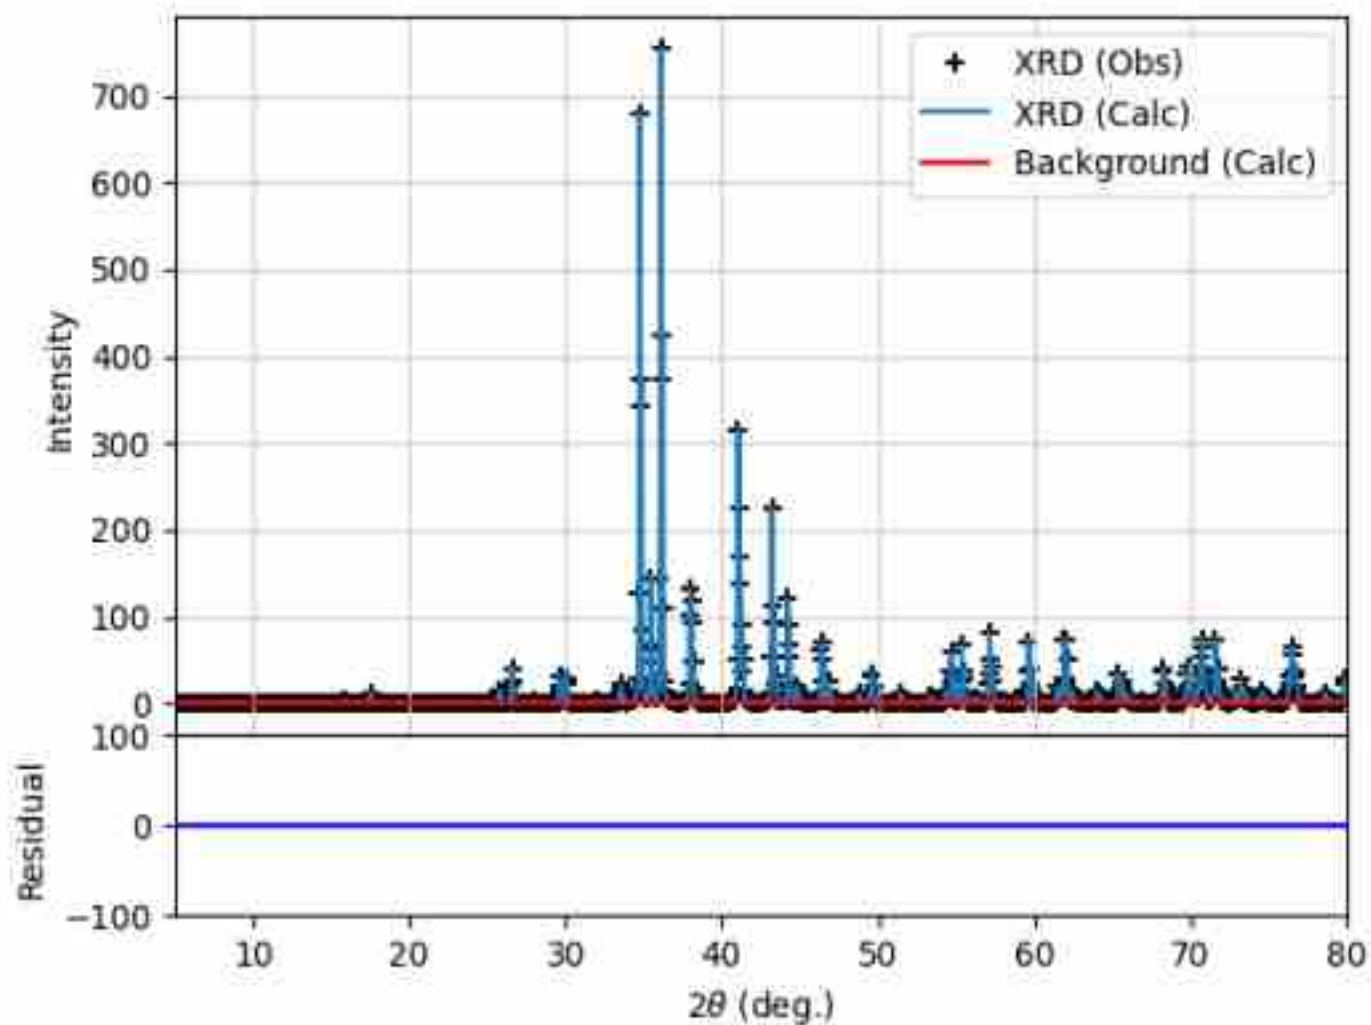

| RMSE before RR | Rwp     | RMSE after RR |
|----------------|---------|---------------|
| 0.034          | 0.00523 | 0.00065       |

# Yb1Pr1O2

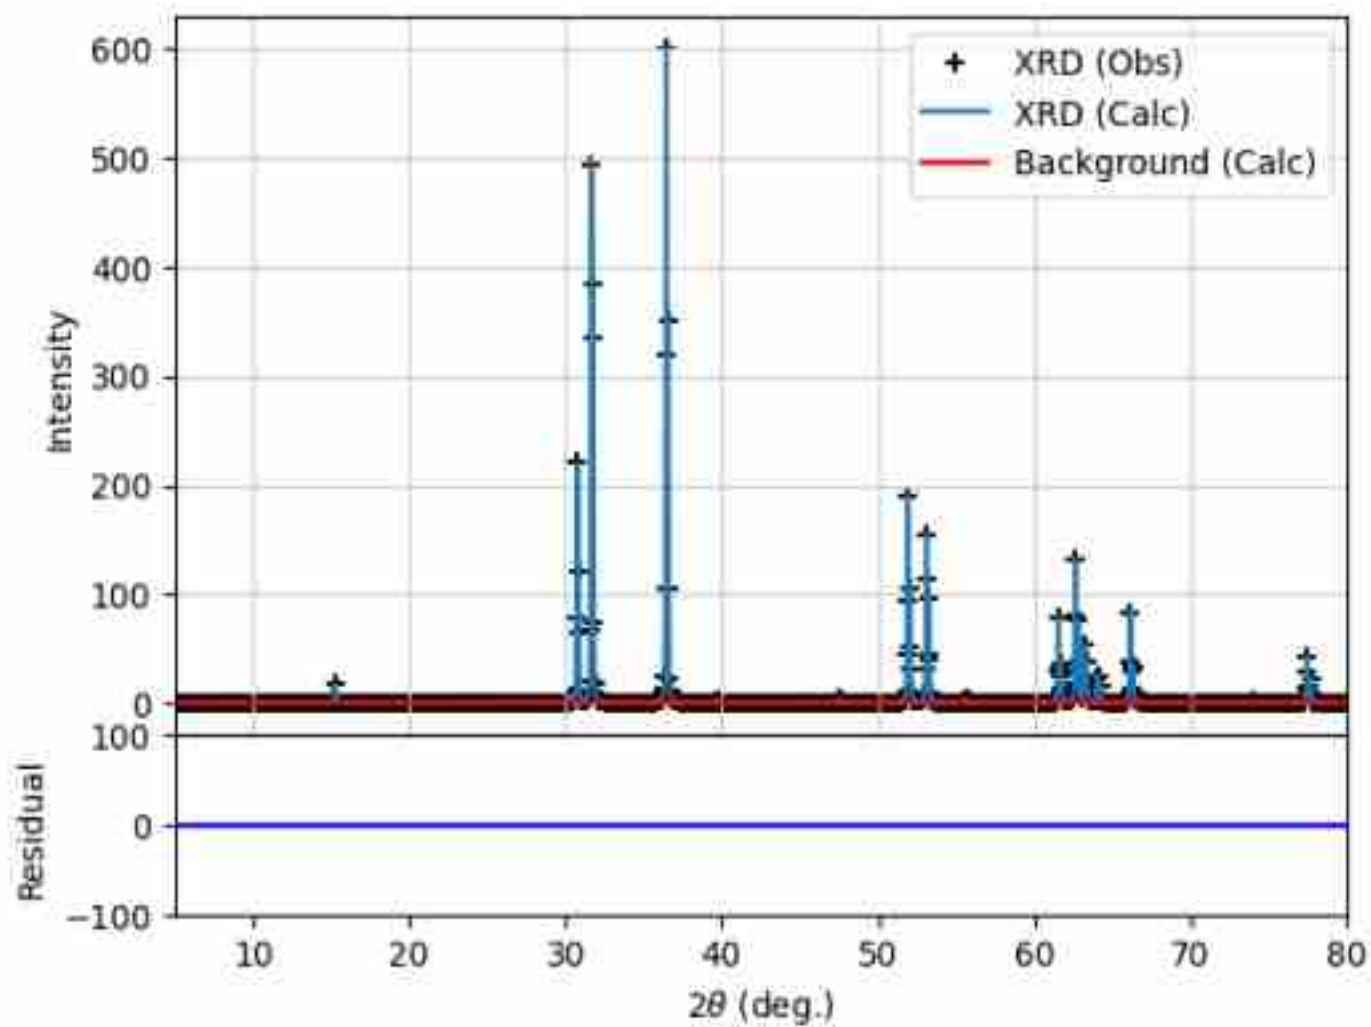

| RMSE before RR | Rwp     | RMSE after RR |
|----------------|---------|---------------|
| 0.034          | 0.00284 | 0.00363       |

# Zr<sub>4</sub>N<sub>4</sub>O<sub>2</sub>

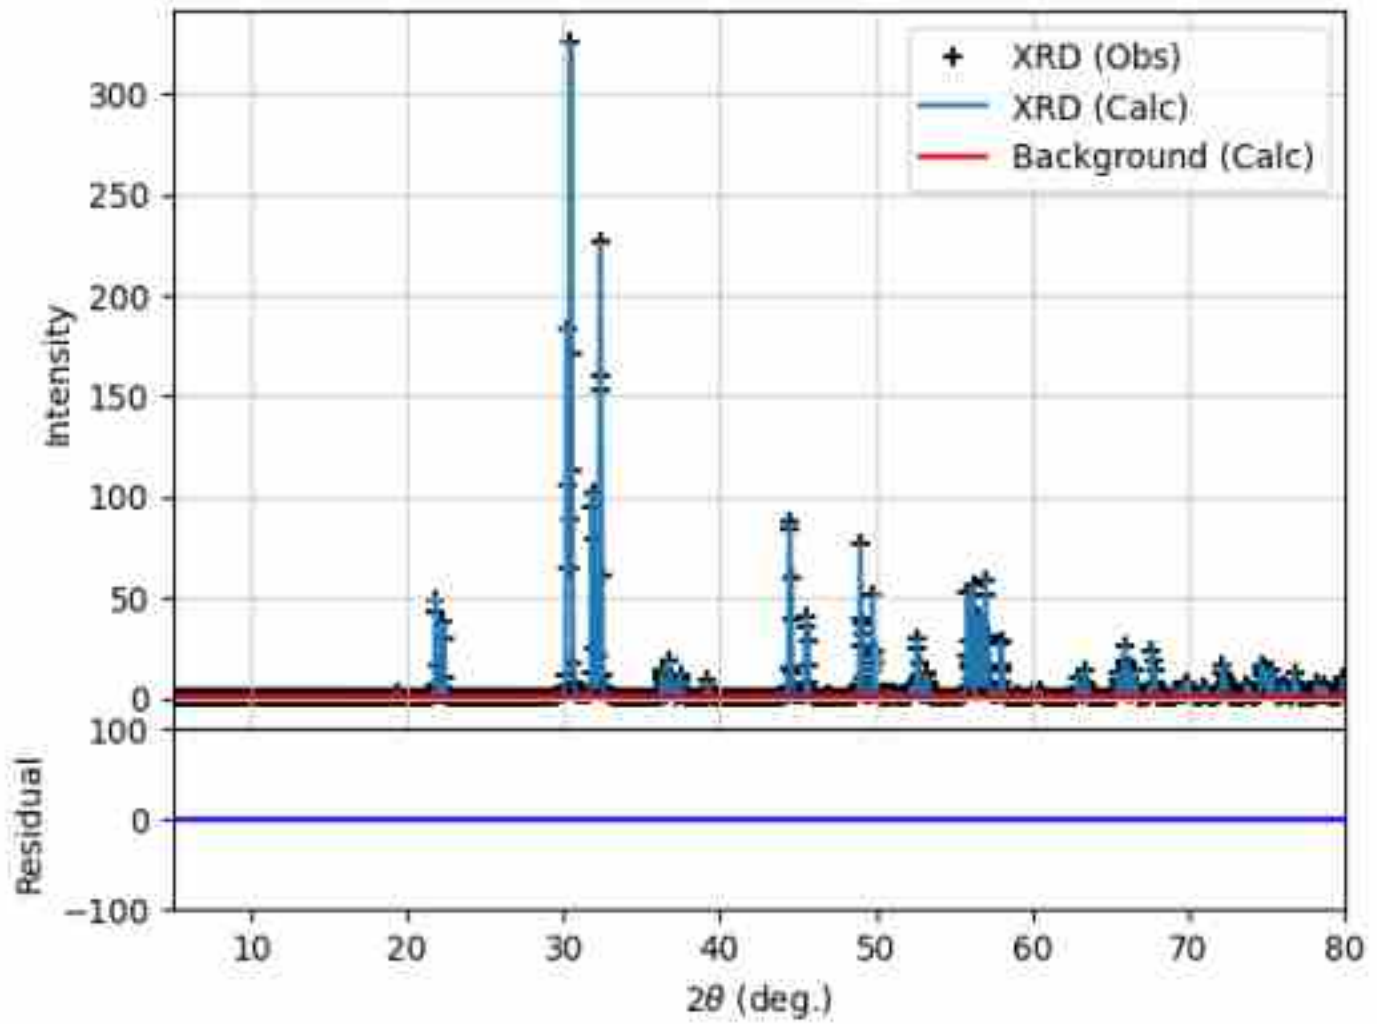

| RMSE before RR | Rwp     | RMSE after RR |
|----------------|---------|---------------|
| 0.034          | 0.00321 | 0.0006        |



# Ag<sub>4</sub>I<sub>4</sub>O<sub>12</sub>

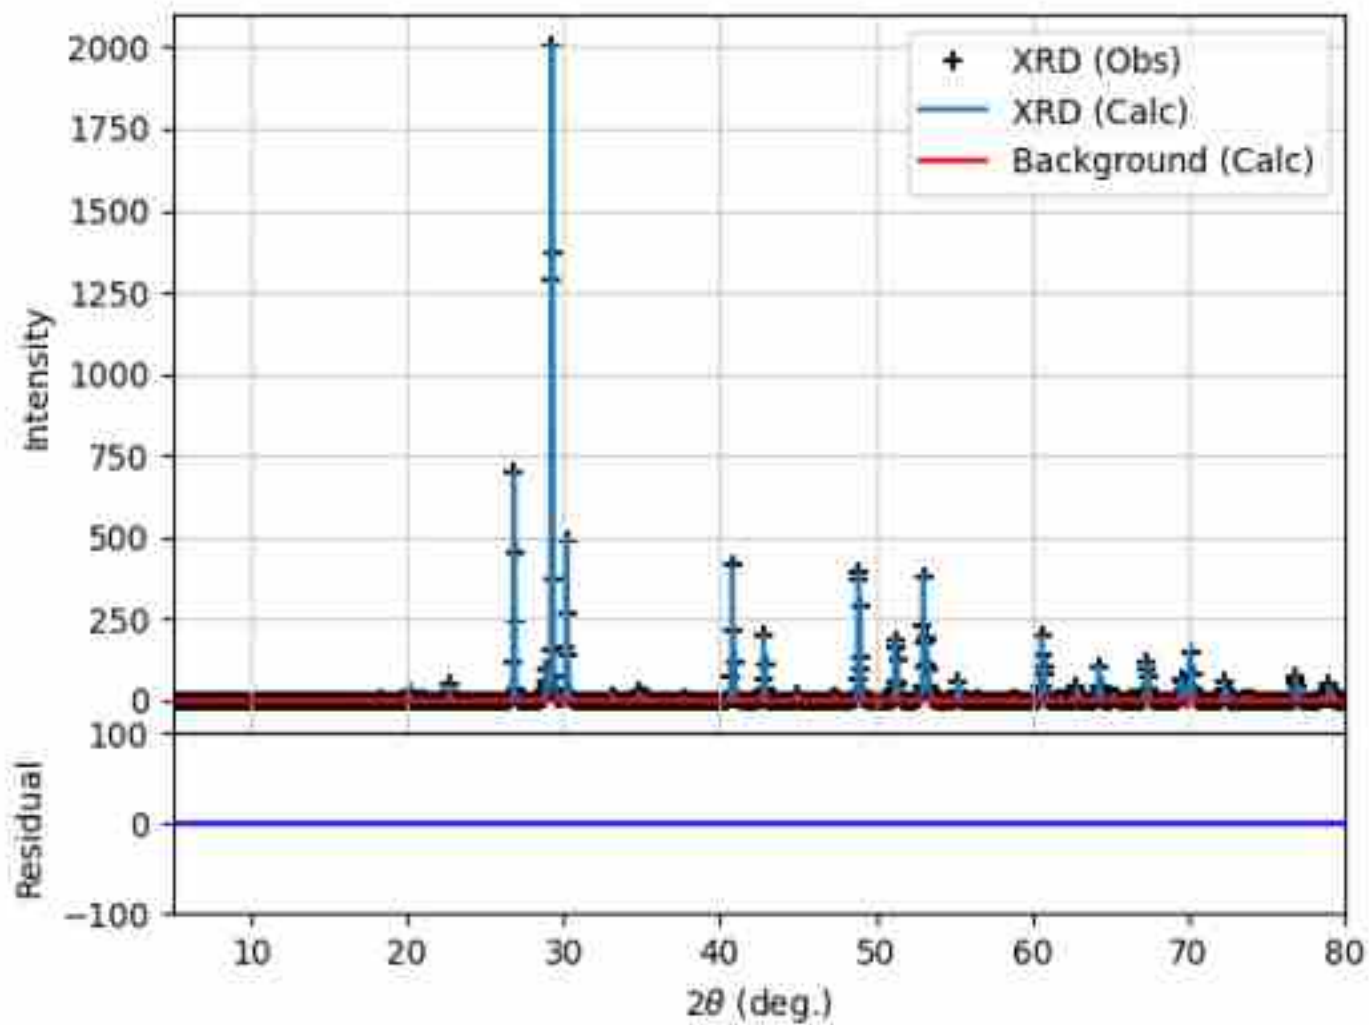

| RMSE before RR | Rwp     | RMSE after RR |
|----------------|---------|---------------|
| 0.035          | 0.00424 | 0.00102       |

# AlAu4

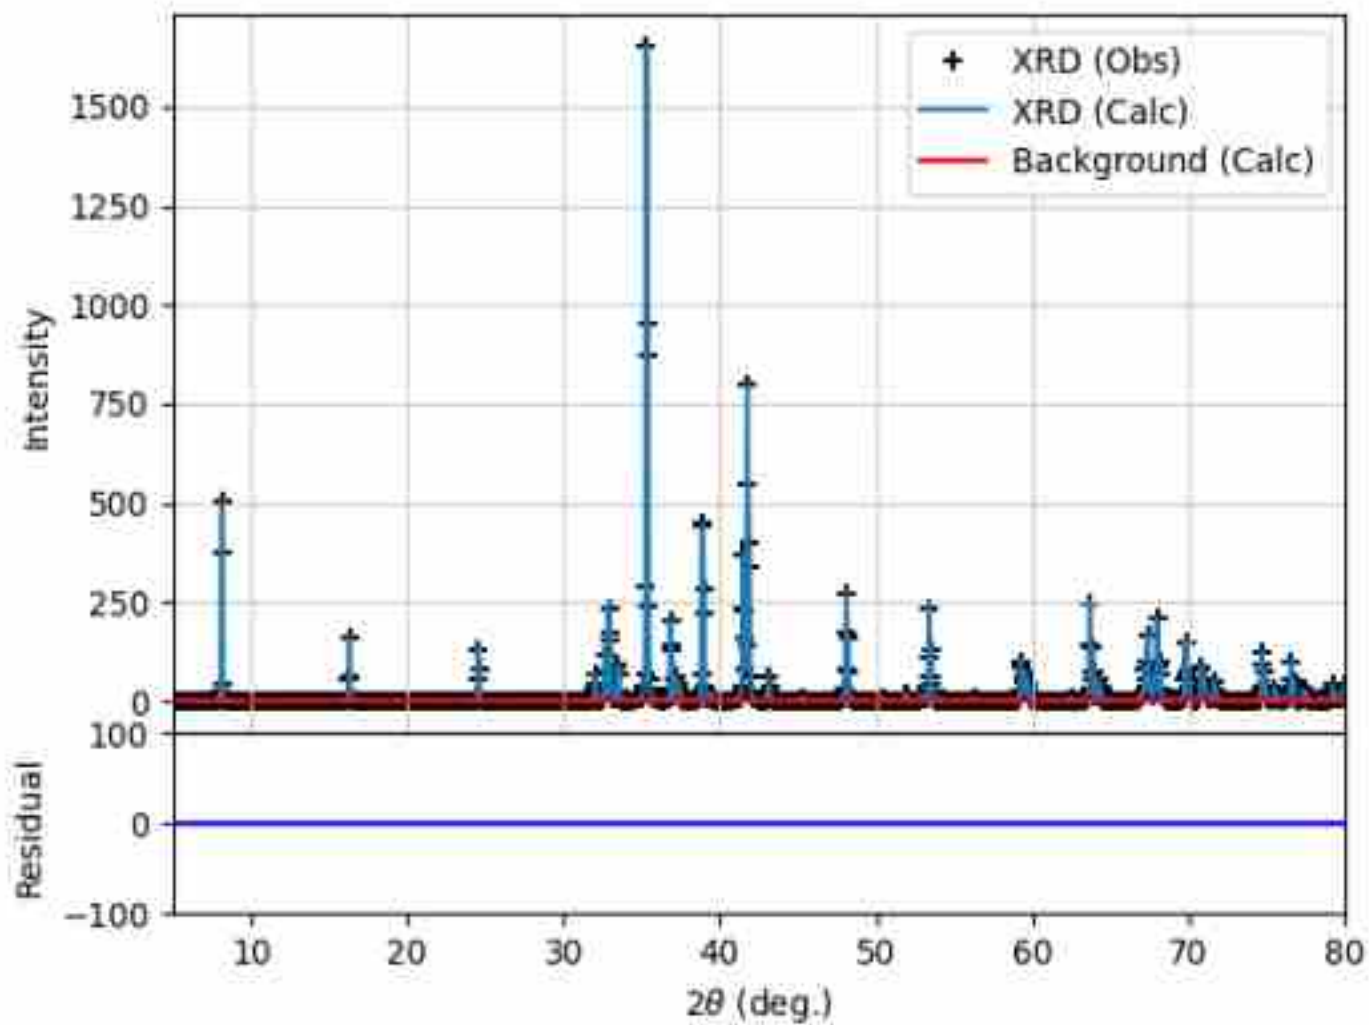

| RMSE before RR | Rwp     | RMSE after RR |
|----------------|---------|---------------|
| 0.035          | 0.00453 | 0.00026       |

# Al<sub>4</sub>Cr<sub>2</sub>O<sub>10</sub>

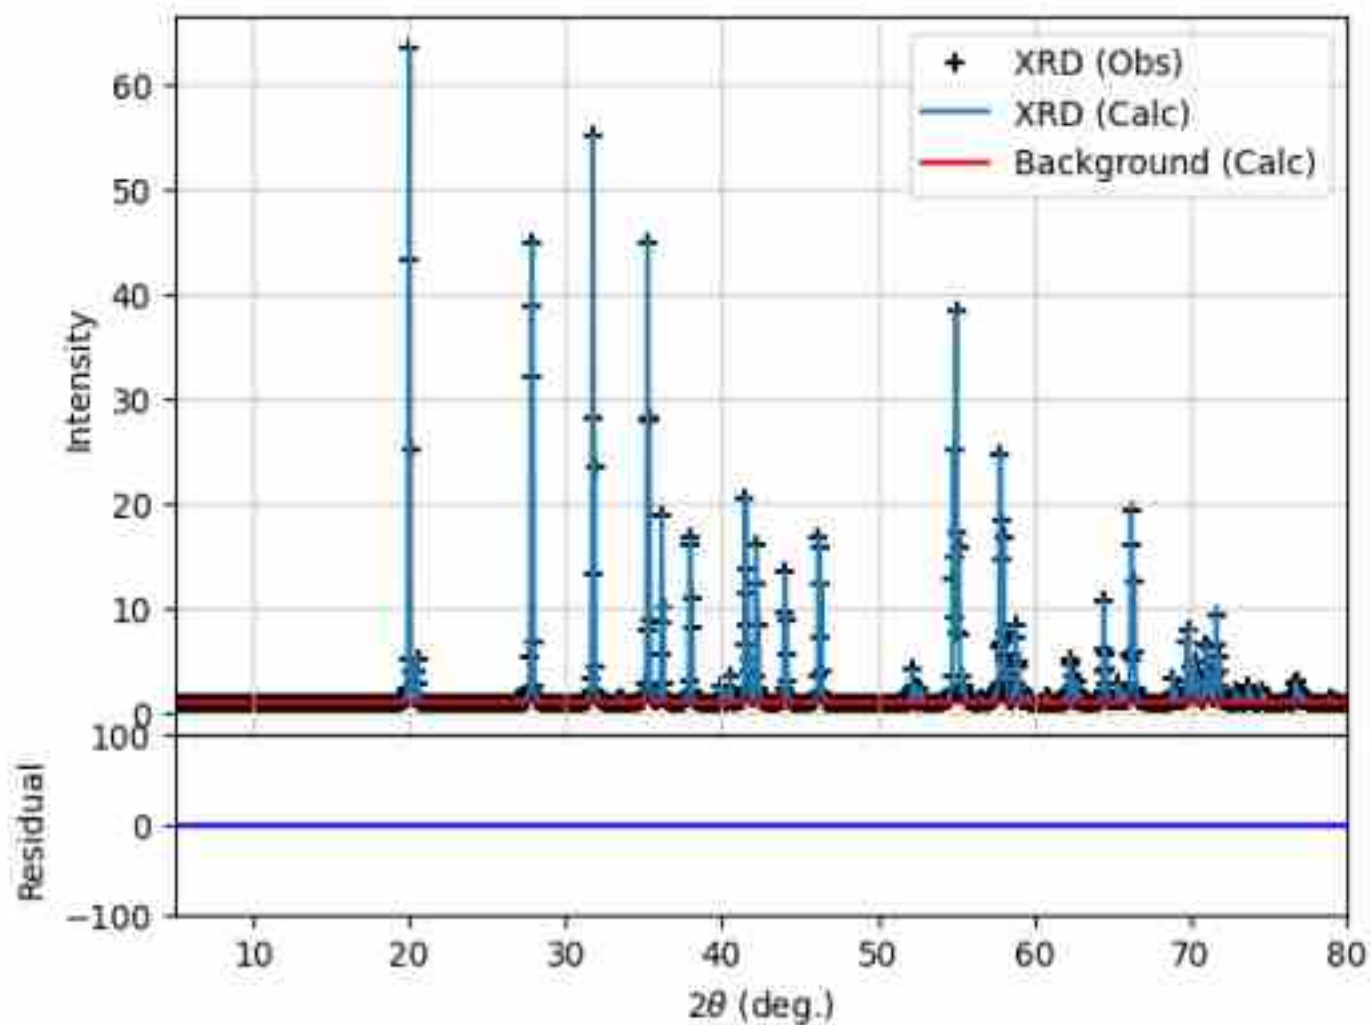

| RMSE before RR | Rwp    | RMSE after RR |
|----------------|--------|---------------|
| 0.035          | 0.0019 | 0.00125       |

# A112Mo3

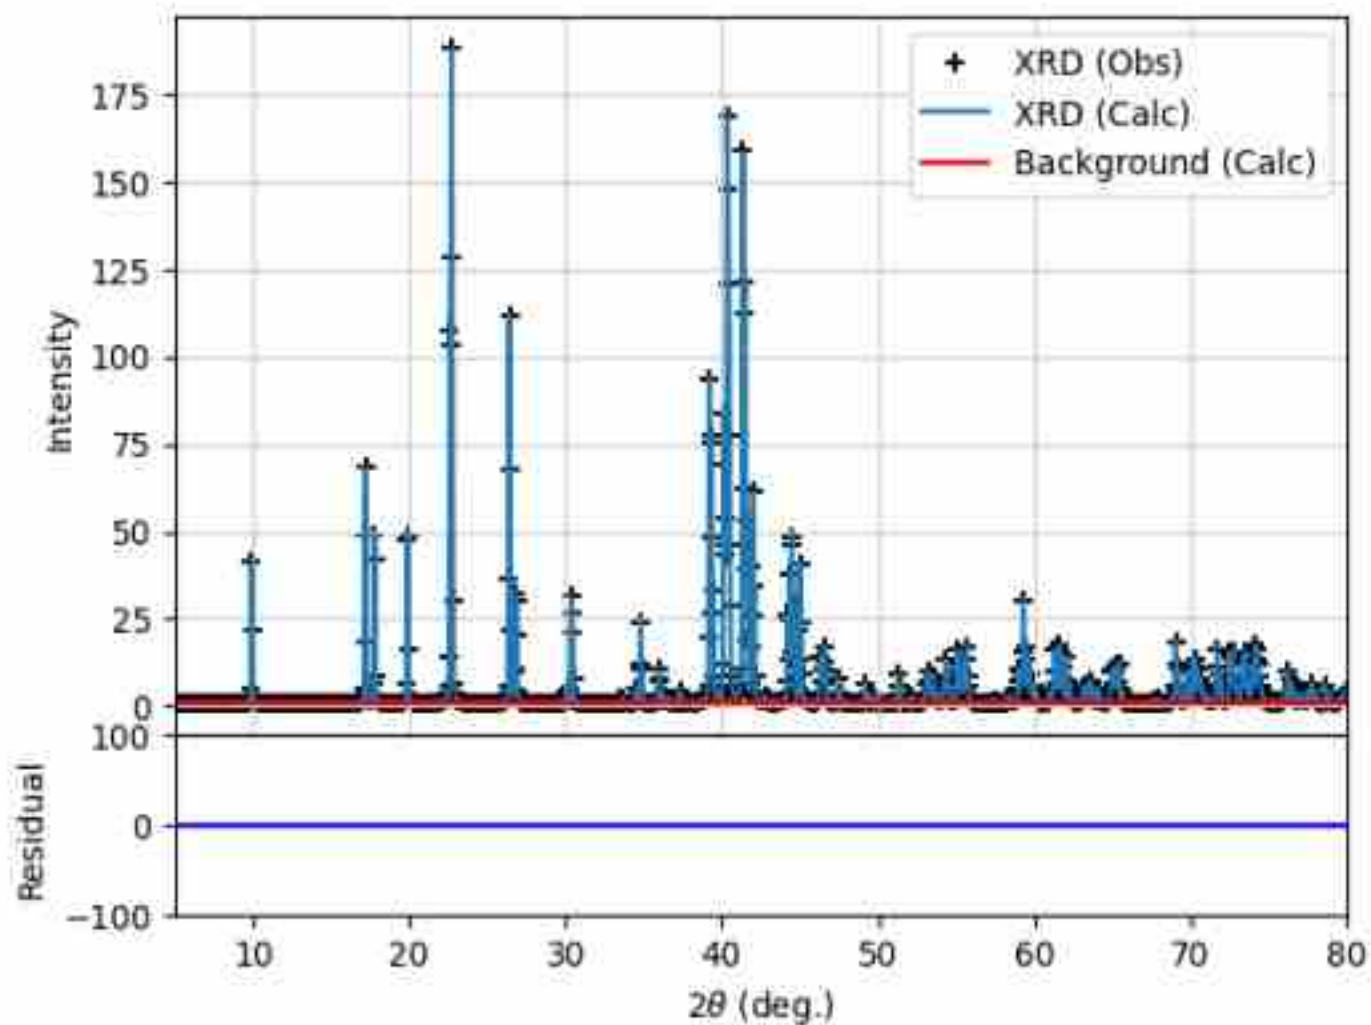

| RMSE before RR | Rwp    | RMSE after RR |
|----------------|--------|---------------|
| 0.035          | 0.0028 | 0.00066       |

# BaTiO<sub>3</sub>

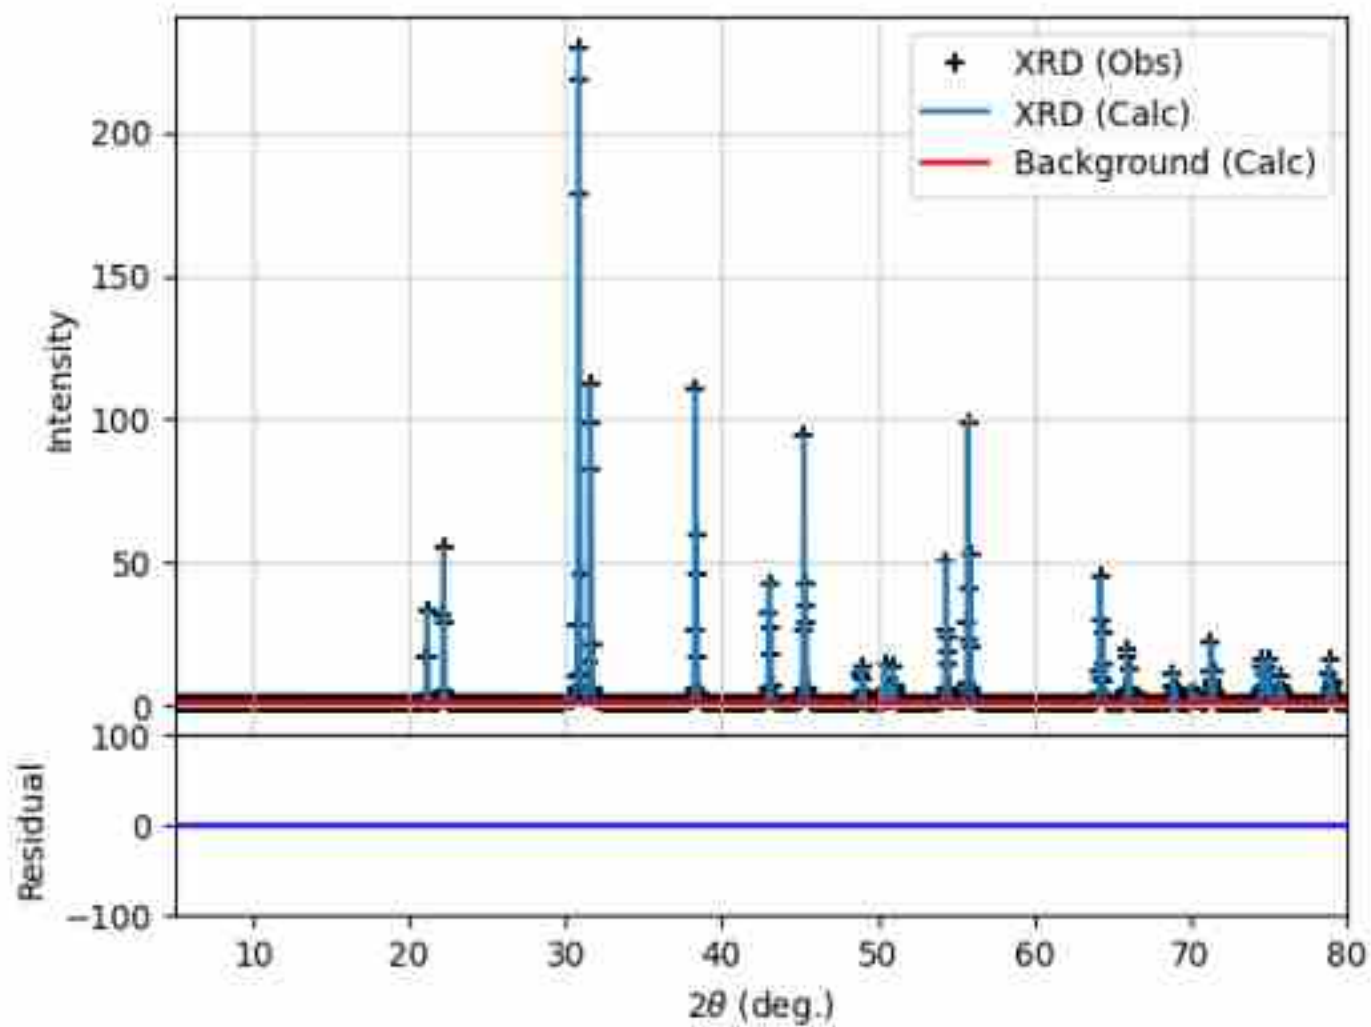

| RMSE before RR | Rwp     | RMSE after RR |
|----------------|---------|---------------|
| 0.035          | 0.00631 | 0.00192       |

# Ba<sub>2</sub>LaIrO<sub>6</sub>

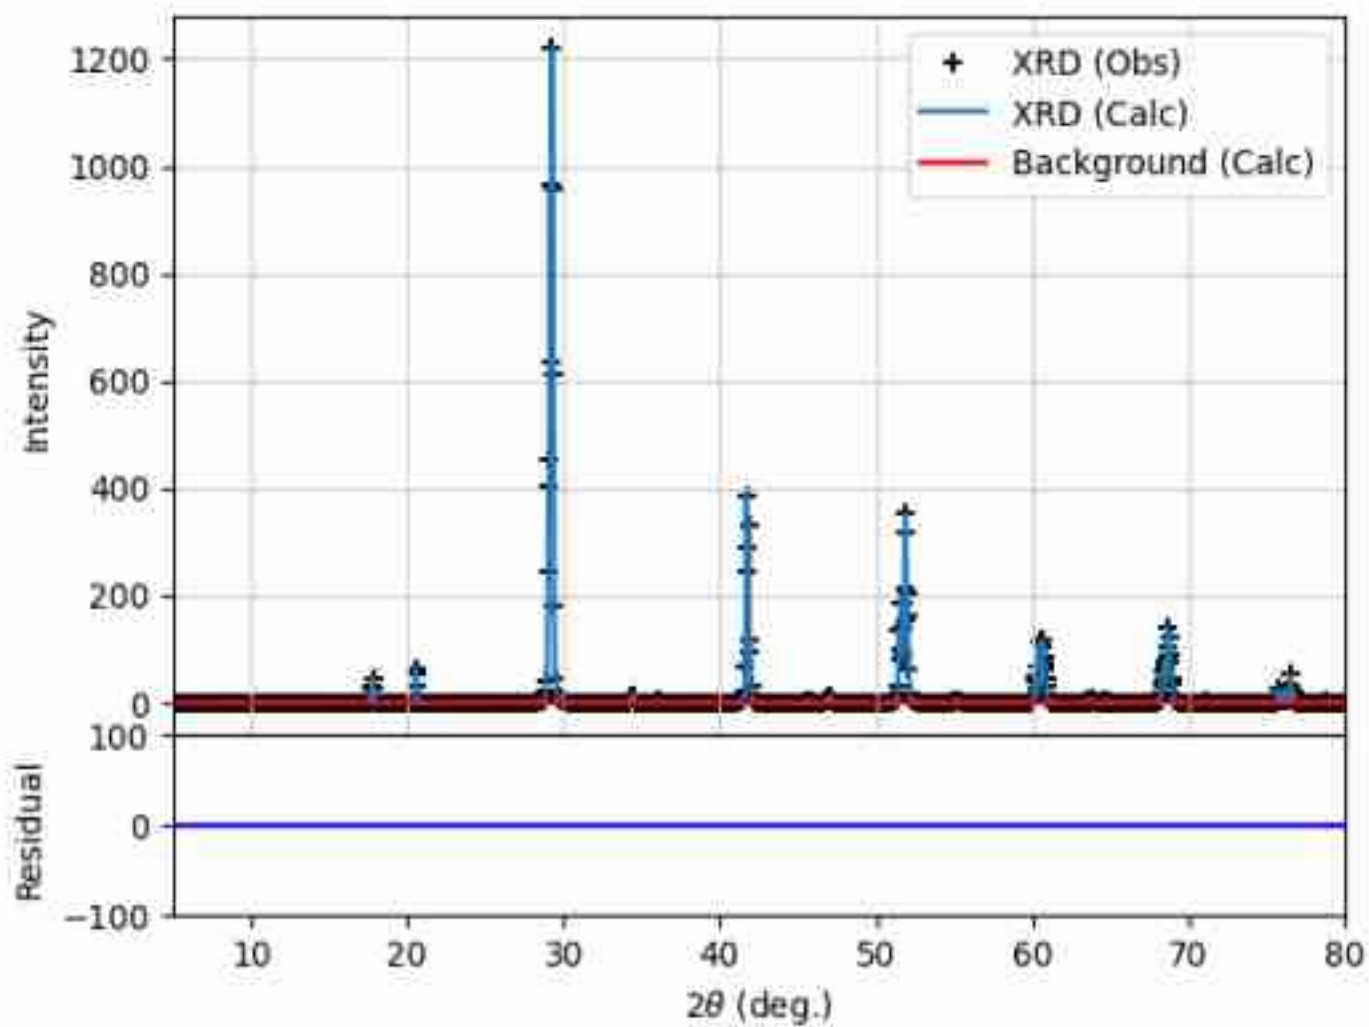

| RMSE before RR | Rwp     | RMSE after RR |
|----------------|---------|---------------|
| 0.035          | 0.00236 | 0.00108       |

# Ca<sub>12</sub>As<sub>4</sub>N<sub>4</sub>

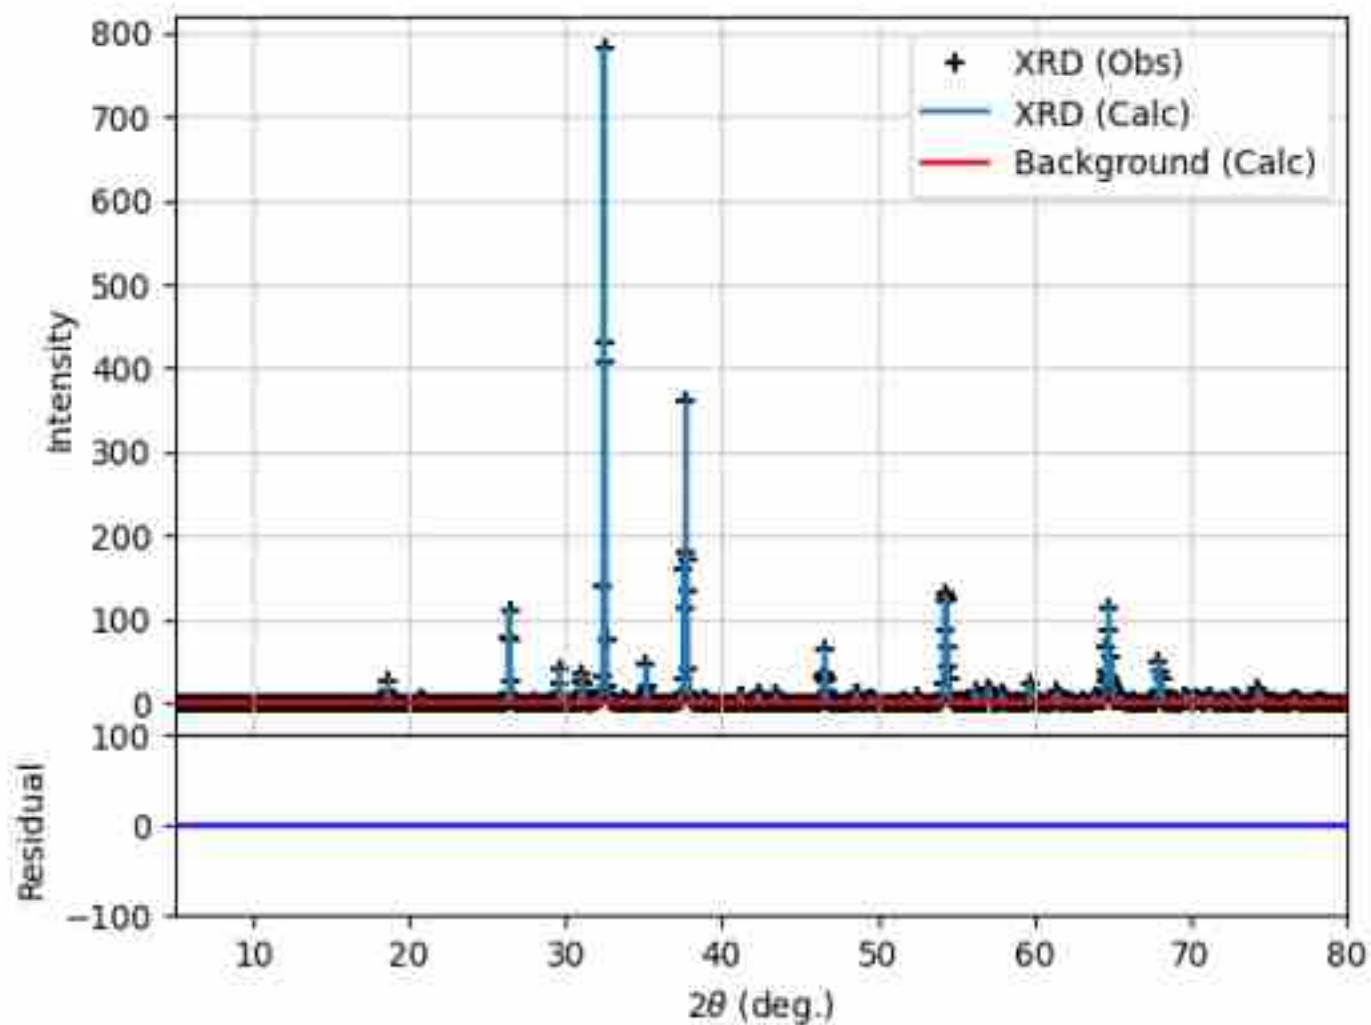

| RMSE before RR | Rwp     | RMSE after RR |
|----------------|---------|---------------|
| 0.035          | 0.00425 | 0.00089       |

# Cd3I6

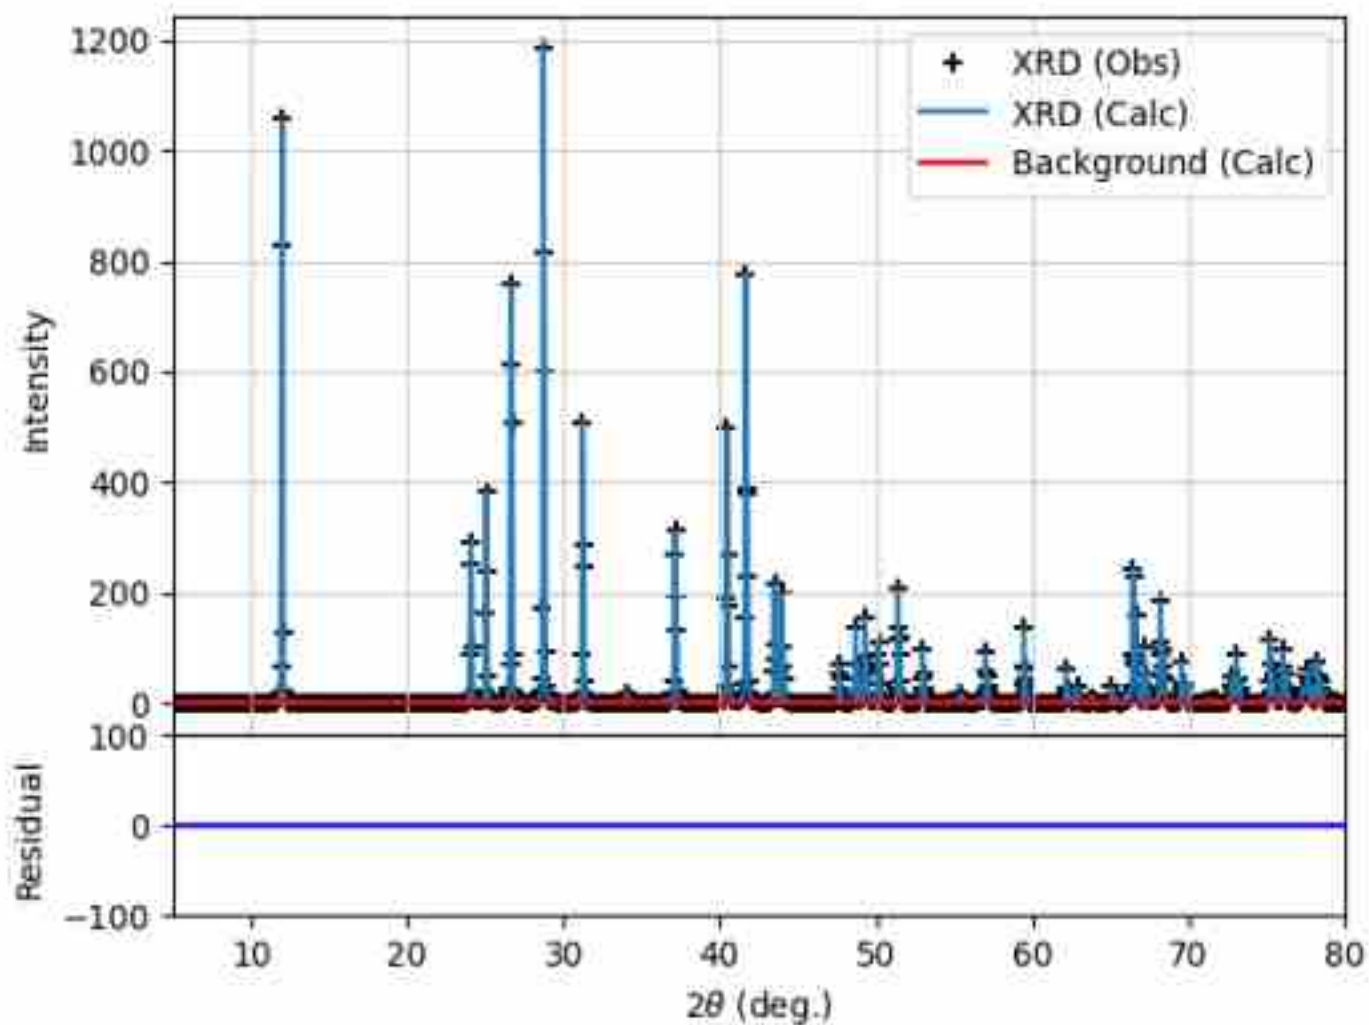

| RMSE before RR | Rwp     | RMSE after RR |
|----------------|---------|---------------|
| 0.035          | 0.02619 | 0.00119       |



# Ce<sub>8</sub>S<sub>8</sub>O<sub>4</sub>

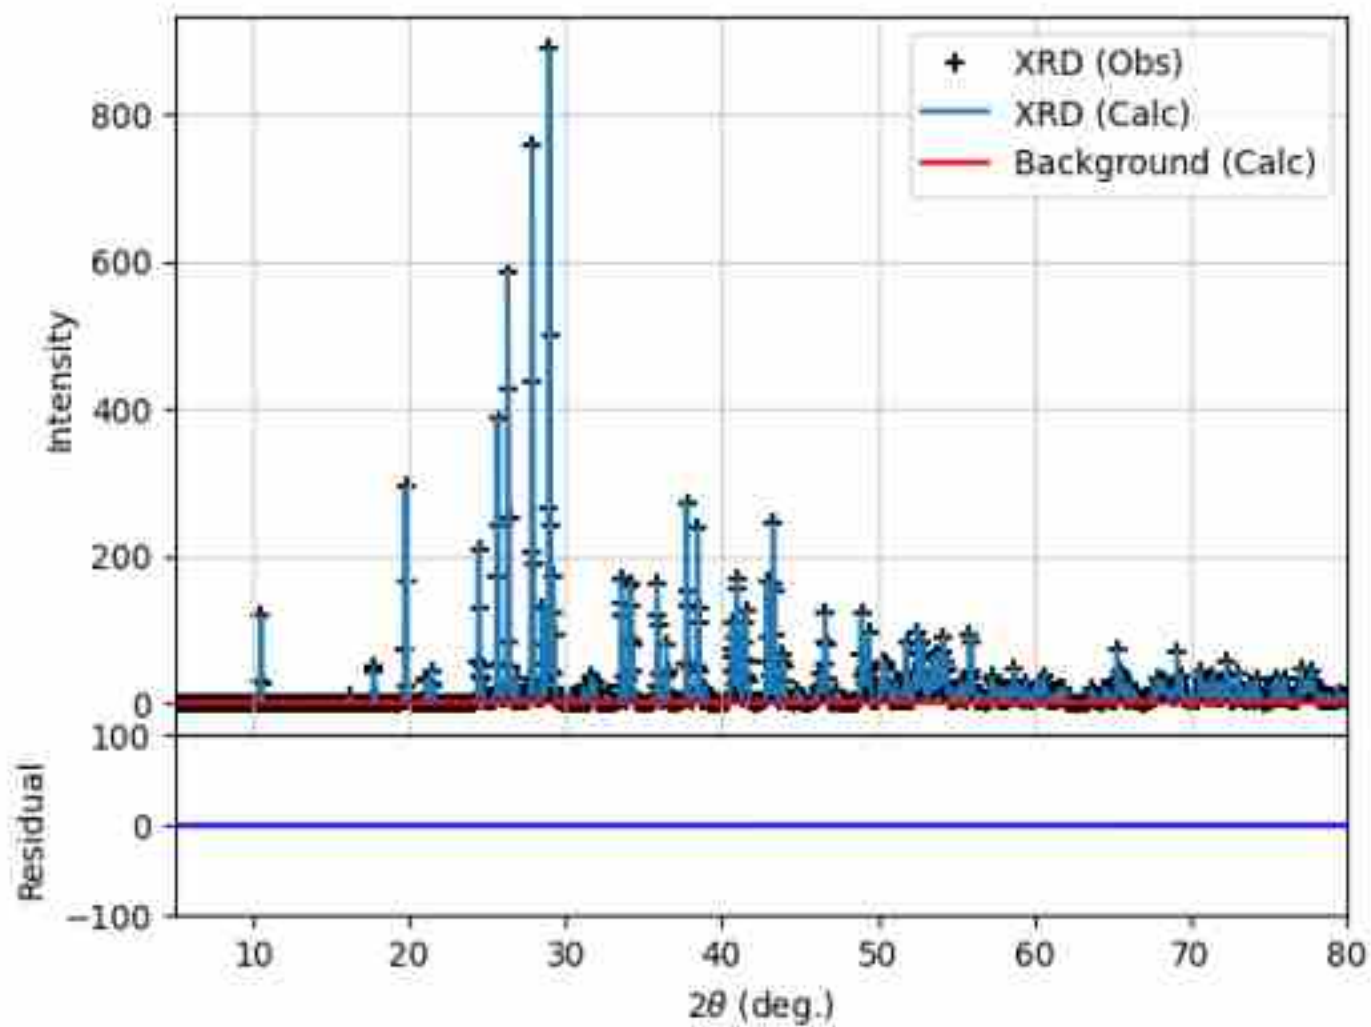

| RMSE before RR | Rwp     | RMSE after RR |
|----------------|---------|---------------|
| 0.035          | 0.06619 | 0.00318       |

# Ce10Bi6

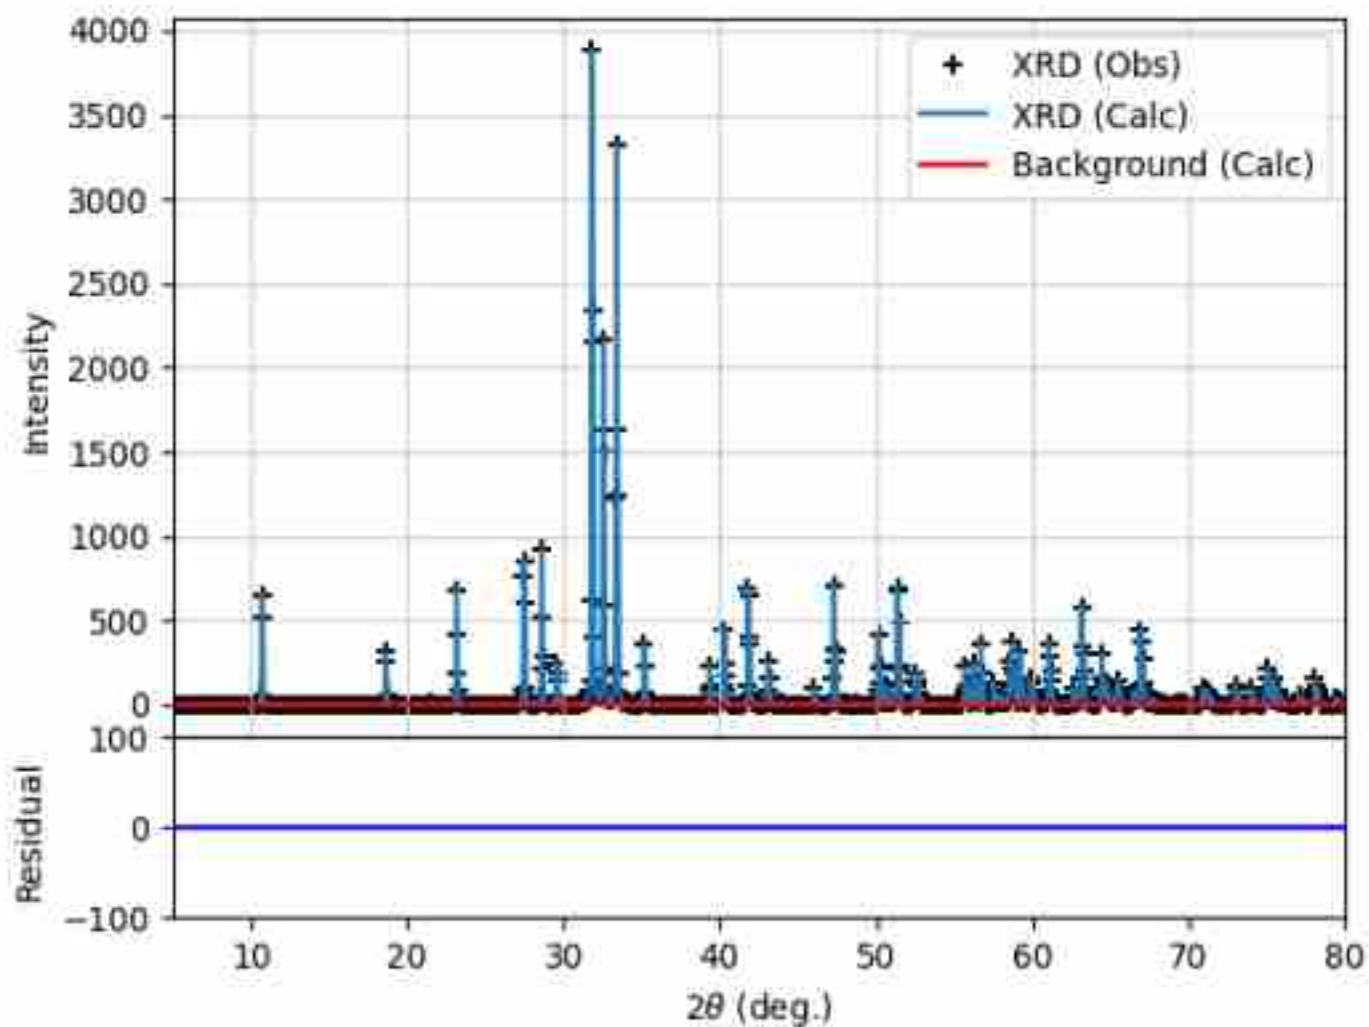

| RMSE before RR | Rwp     | RMSE after RR |
|----------------|---------|---------------|
| 0.035          | 0.00349 | 0.00036       |

# Cs<sub>4</sub>Pb<sub>4</sub>Br<sub>12</sub>

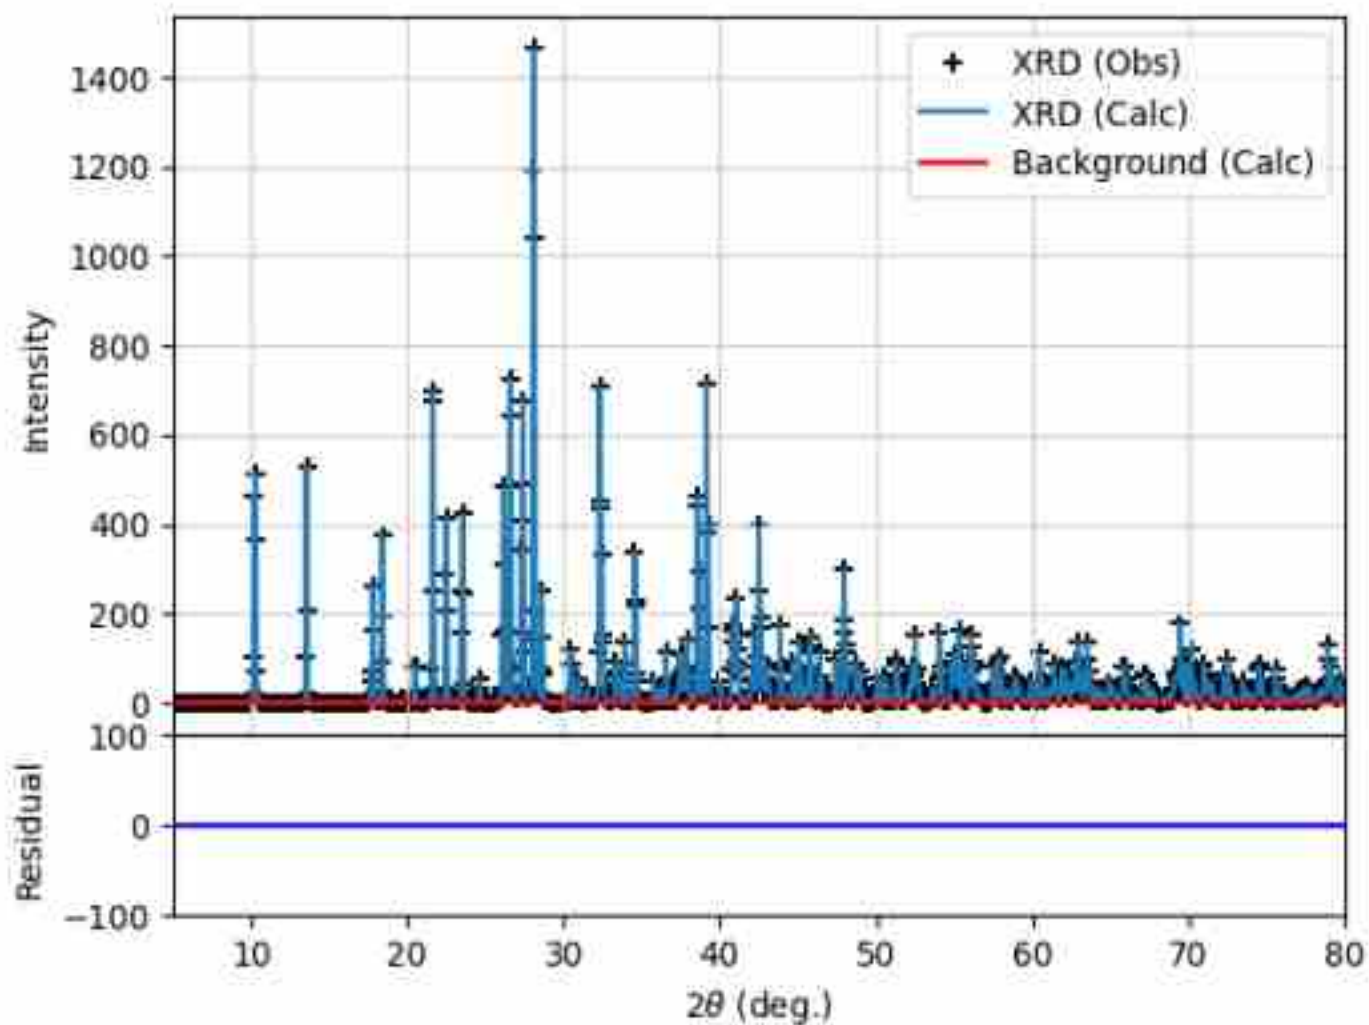

| RMSE before RR | Rwp     | RMSE after RR |
|----------------|---------|---------------|
| 0.035          | 0.00445 | 0.00043       |

# Eu<sub>2</sub>Mg<sub>2</sub>H<sub>8</sub>

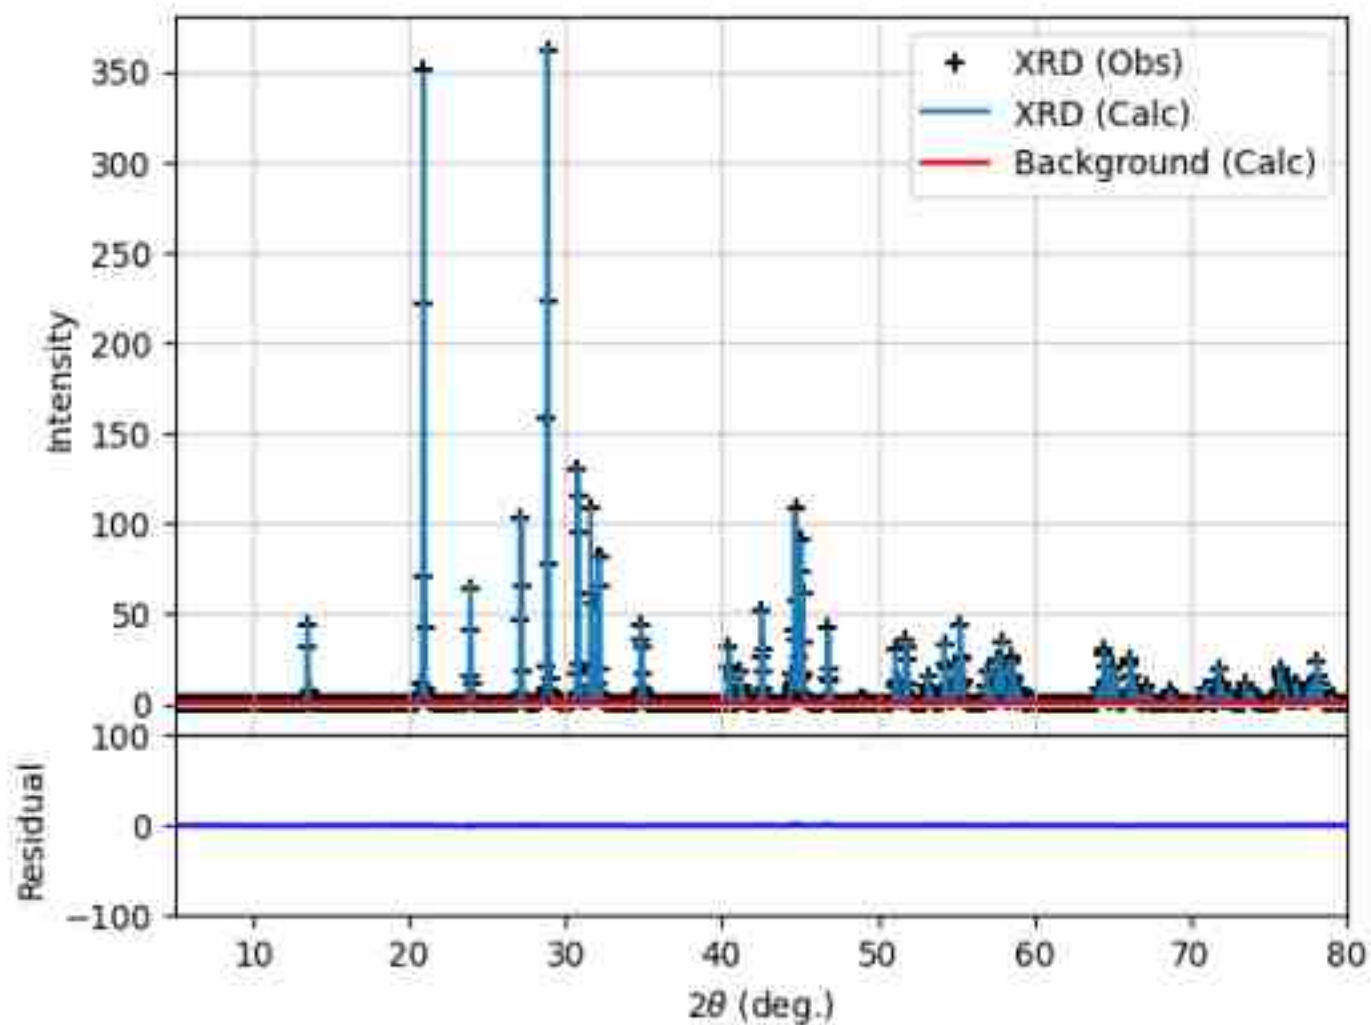

| RMSE before RR | Rwp     | RMSE after RR |
|----------------|---------|---------------|
| 0.035          | 1.09239 | 0.41714       |

# Fe<sub>4</sub>H<sub>8</sub>O<sub>8</sub>

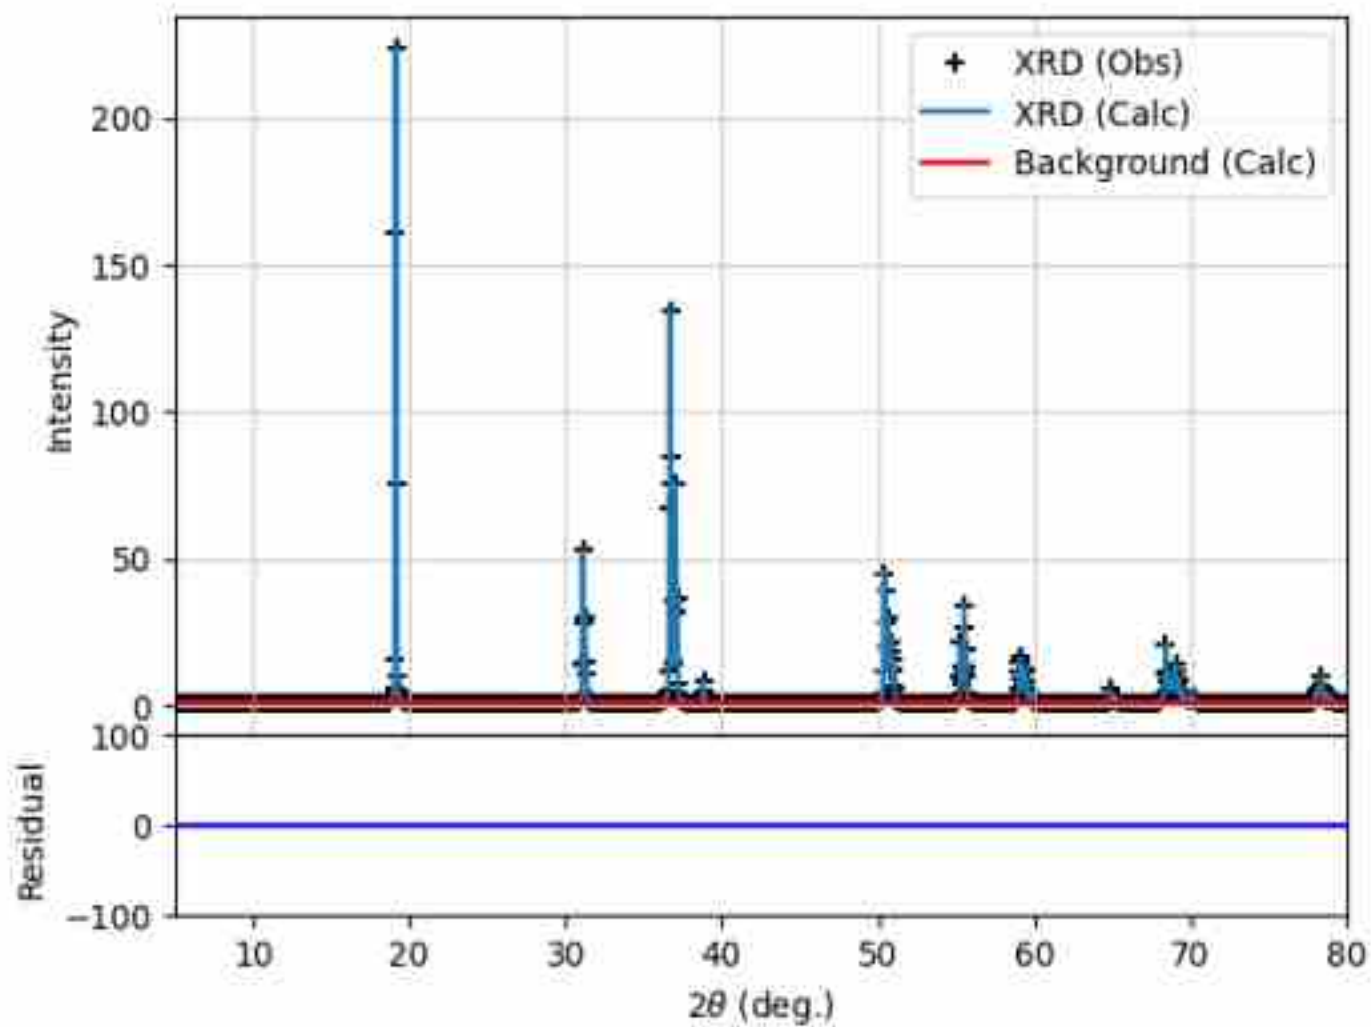

| RMSE before RR | Rwp     | RMSE after RR |
|----------------|---------|---------------|
| 0.035          | 0.00065 | 0.00055       |

# Ga<sub>3</sub>Ag<sub>6</sub>

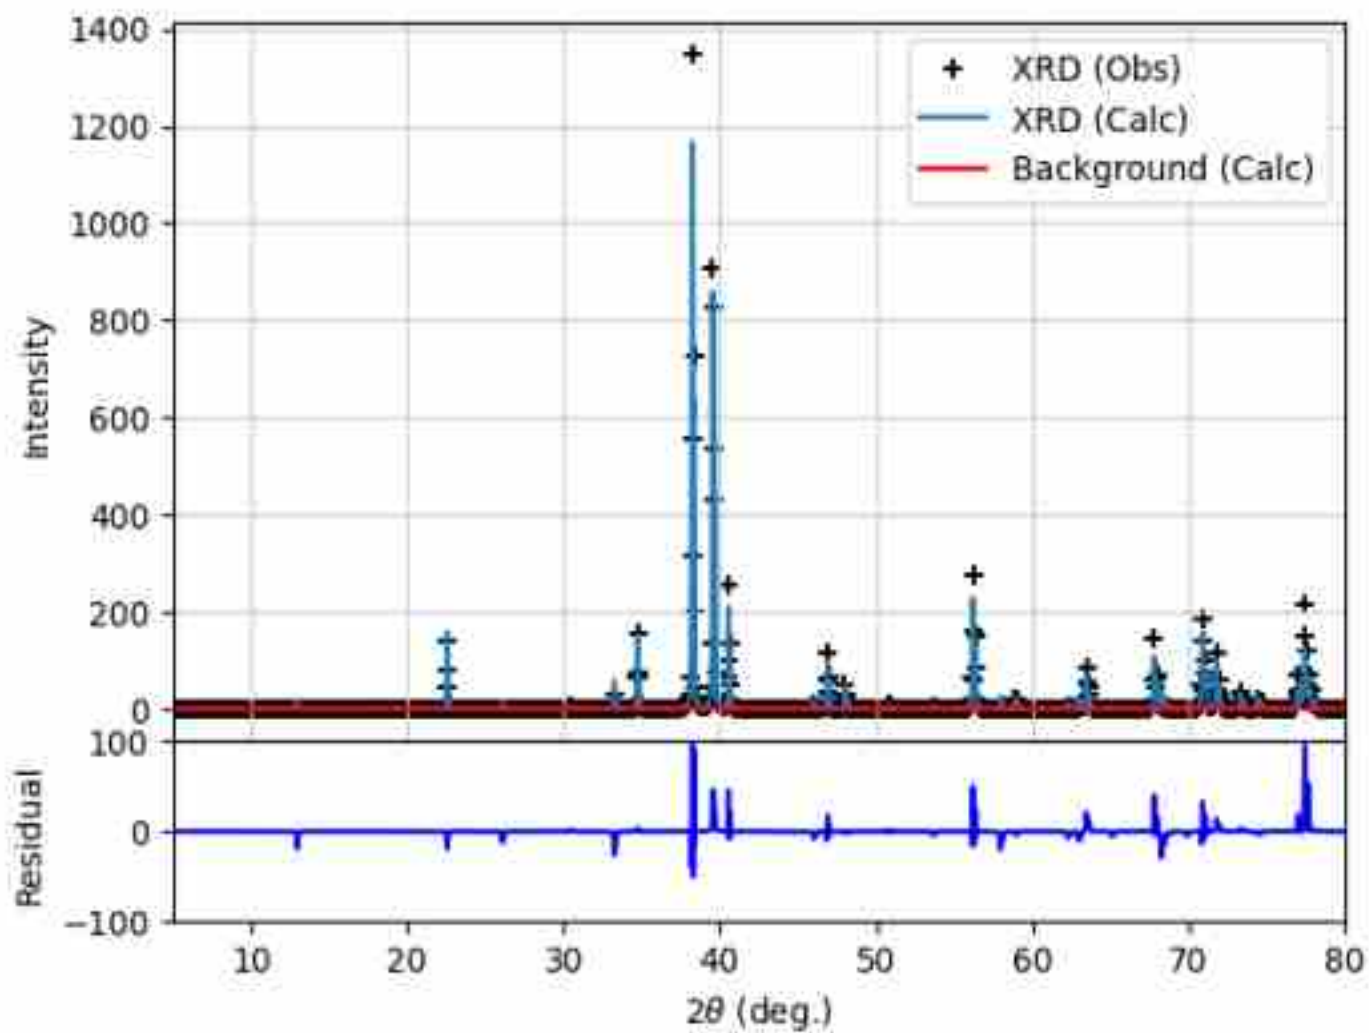

| RMSE before RR | Rwp      | RMSE after RR |
|----------------|----------|---------------|
| 0.035          | 32.20465 | 0.06841       |

# Gd<sub>2</sub>Pt<sub>4</sub>

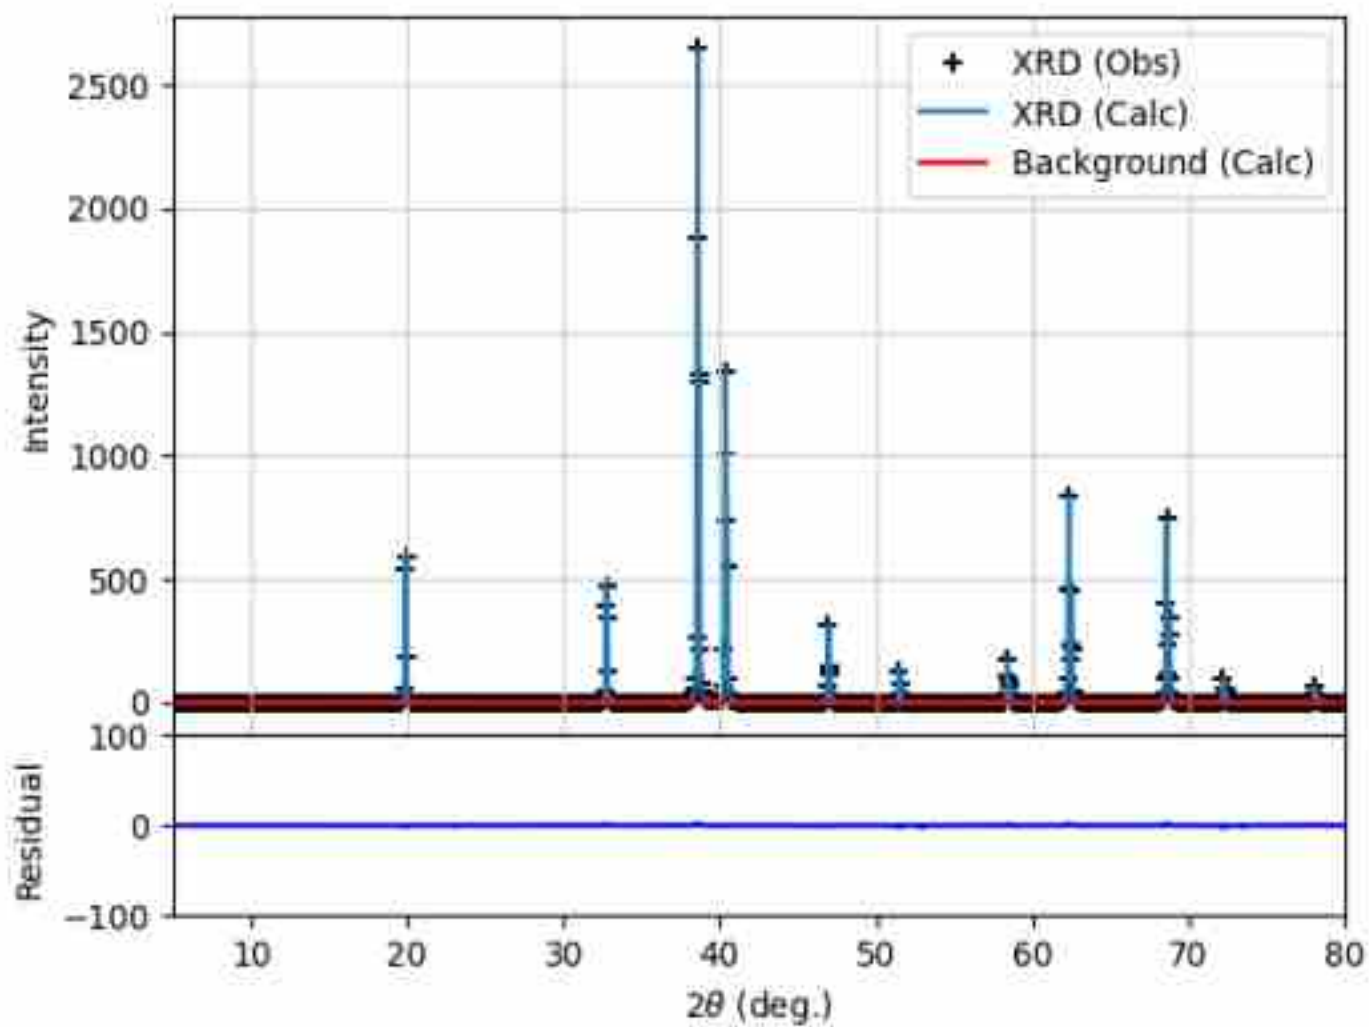

| RMSE before RR | Rwp     | RMSE after RR |
|----------------|---------|---------------|
| 0.035          | 2.43294 | 0.00582       |

# Ge4Br16

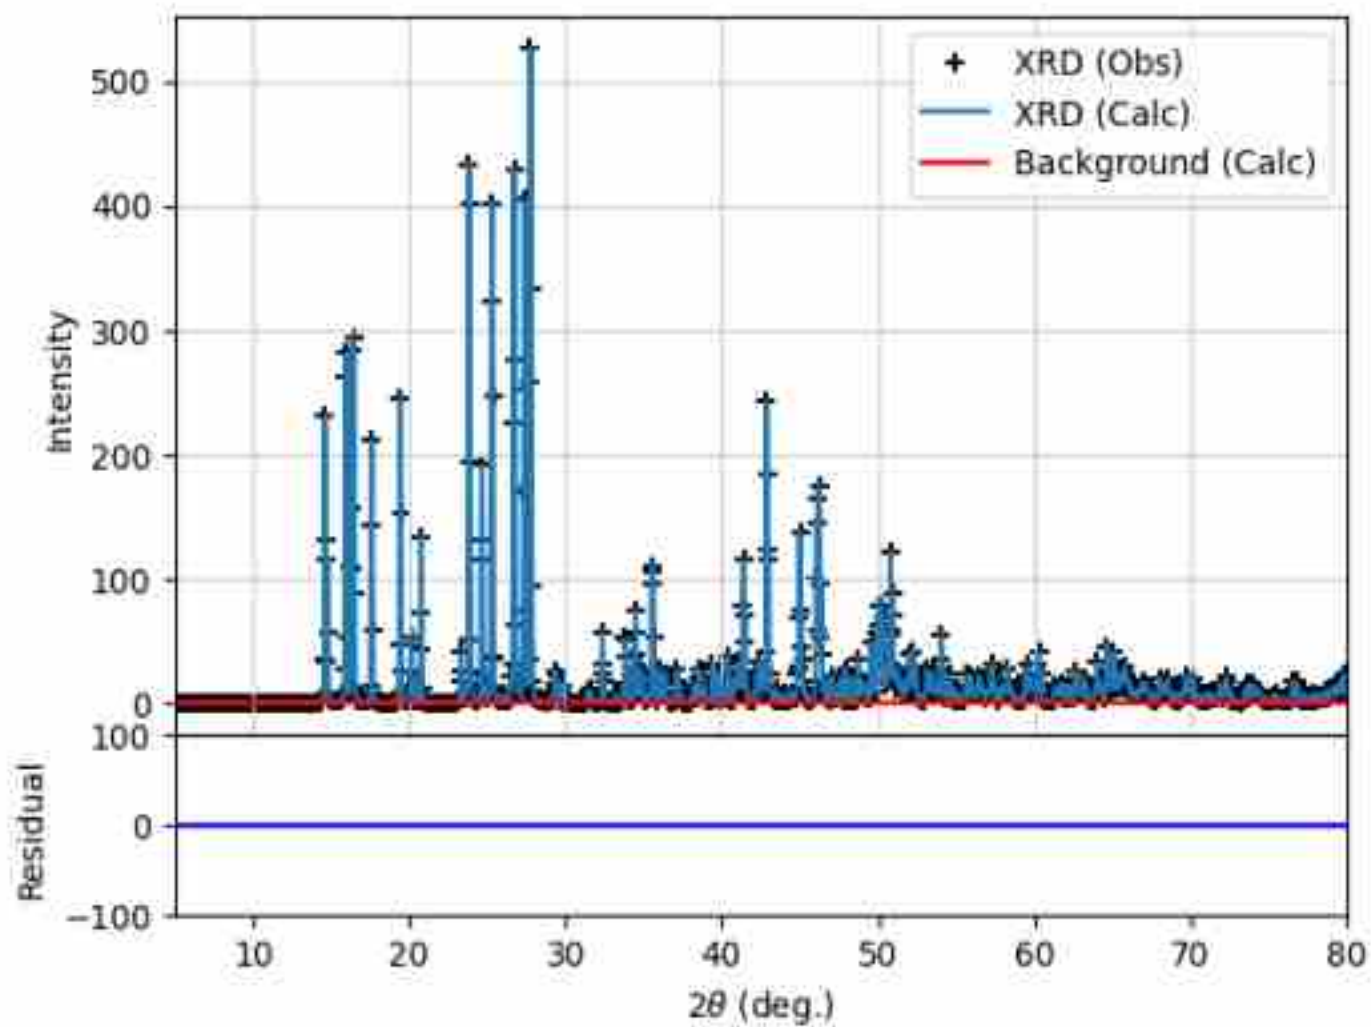

| RMSE before RR | Rwp     | RMSE after RR |
|----------------|---------|---------------|
| 0.035          | 0.00303 | 0.00027       |



# Hf<sub>4</sub>Fe<sub>4</sub>Si<sub>4</sub>

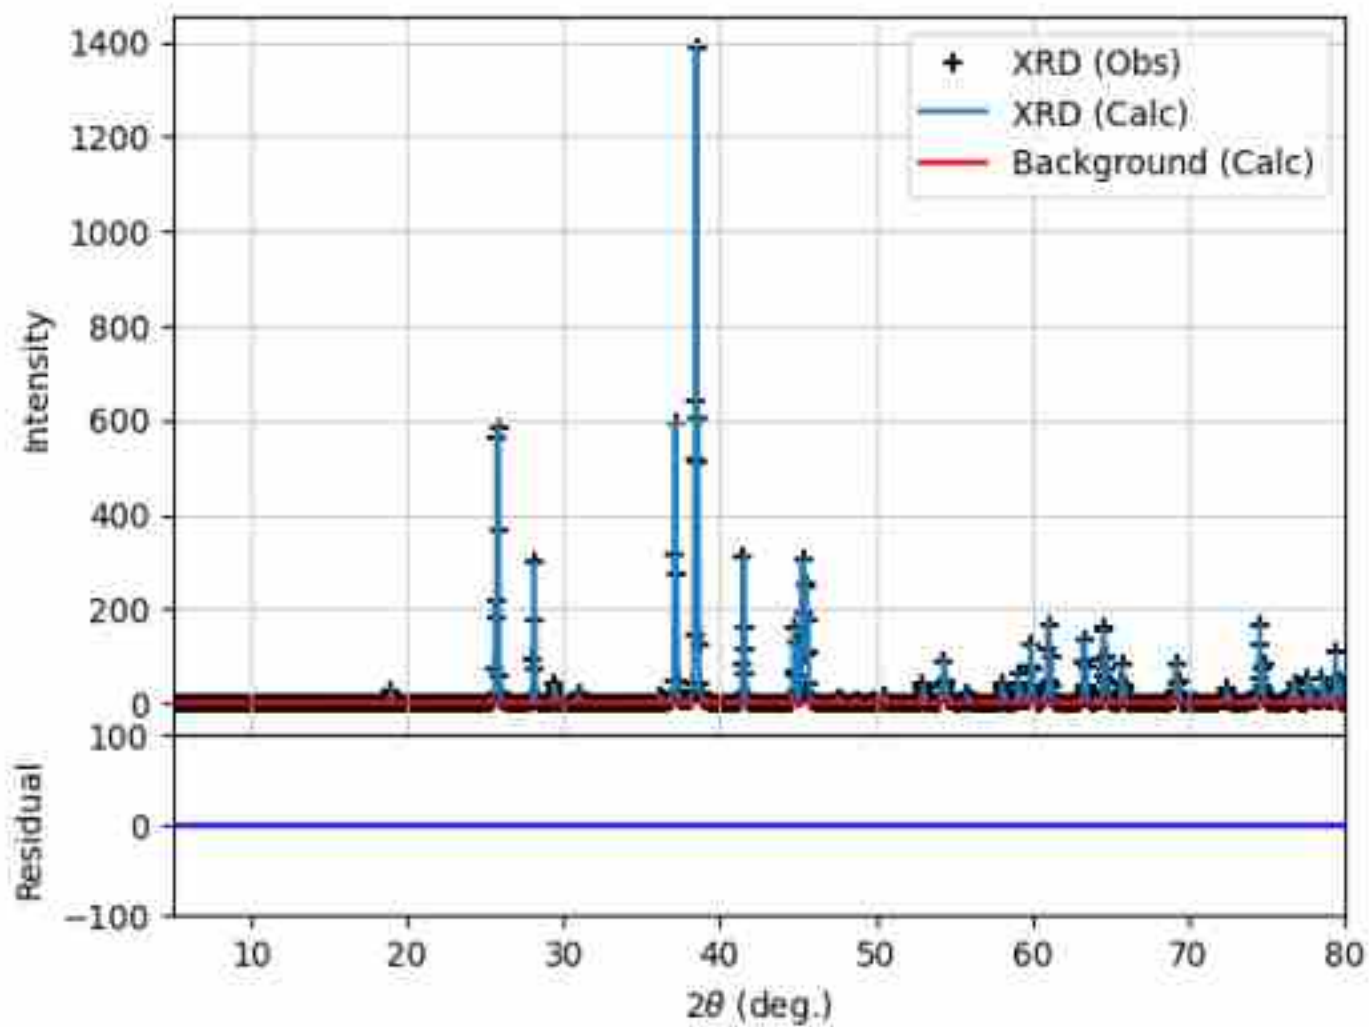

| RMSE before RR | Rwp     | RMSE after RR |
|----------------|---------|---------------|
| 0.035          | 0.00462 | 0.00088       |

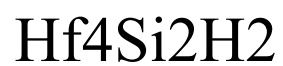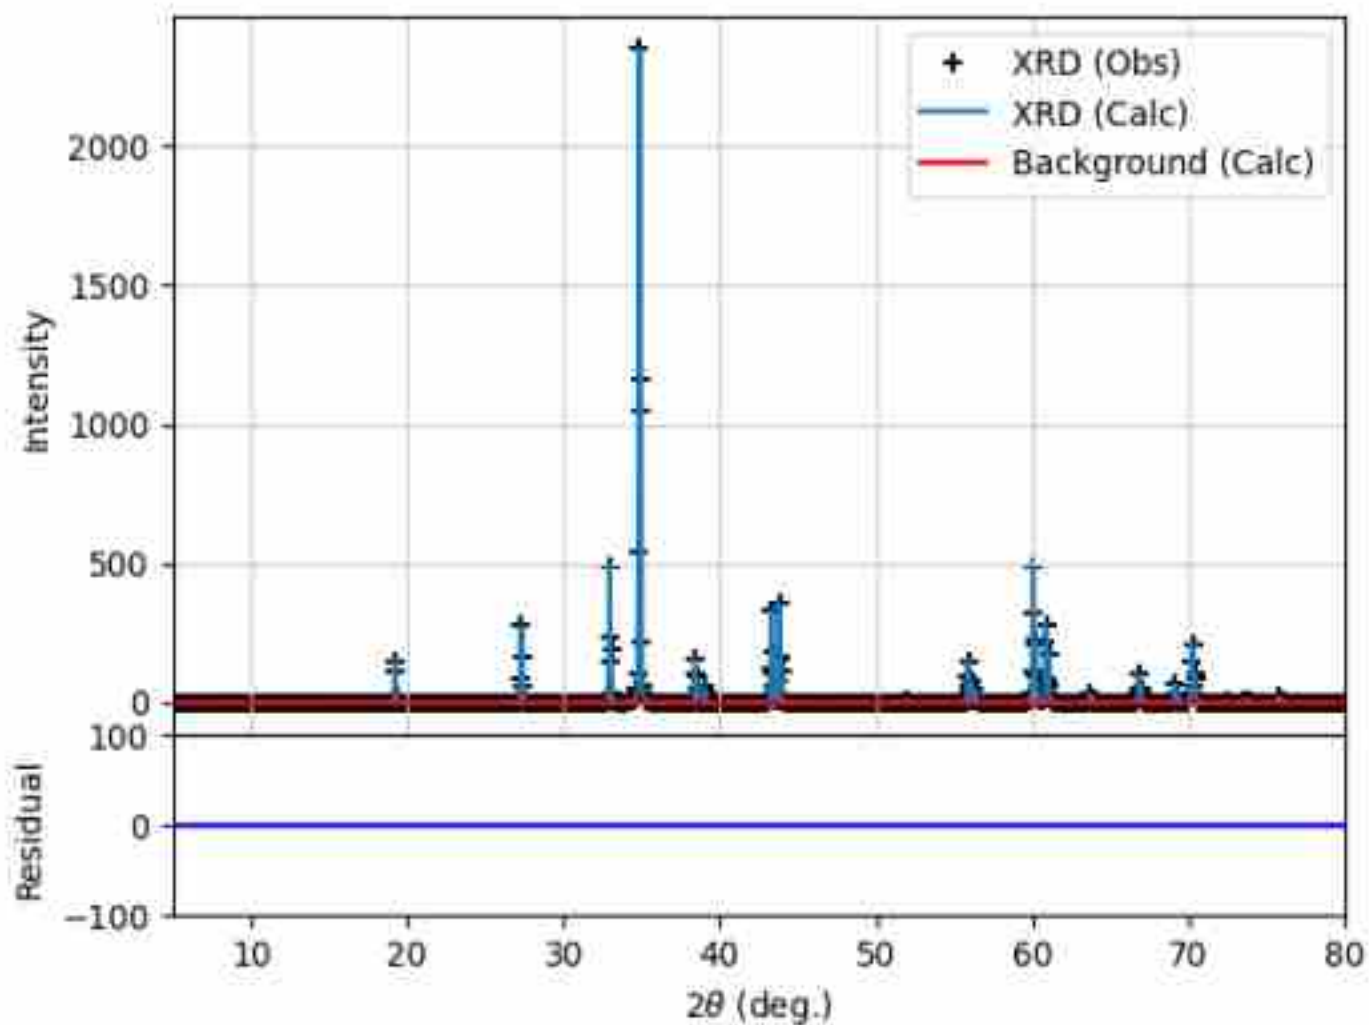

| RMSE before RR | Rwp     | RMSE after RR |
|----------------|---------|---------------|
| 0.035          | 0.00927 | 0.00591       |

# Hf8Se12

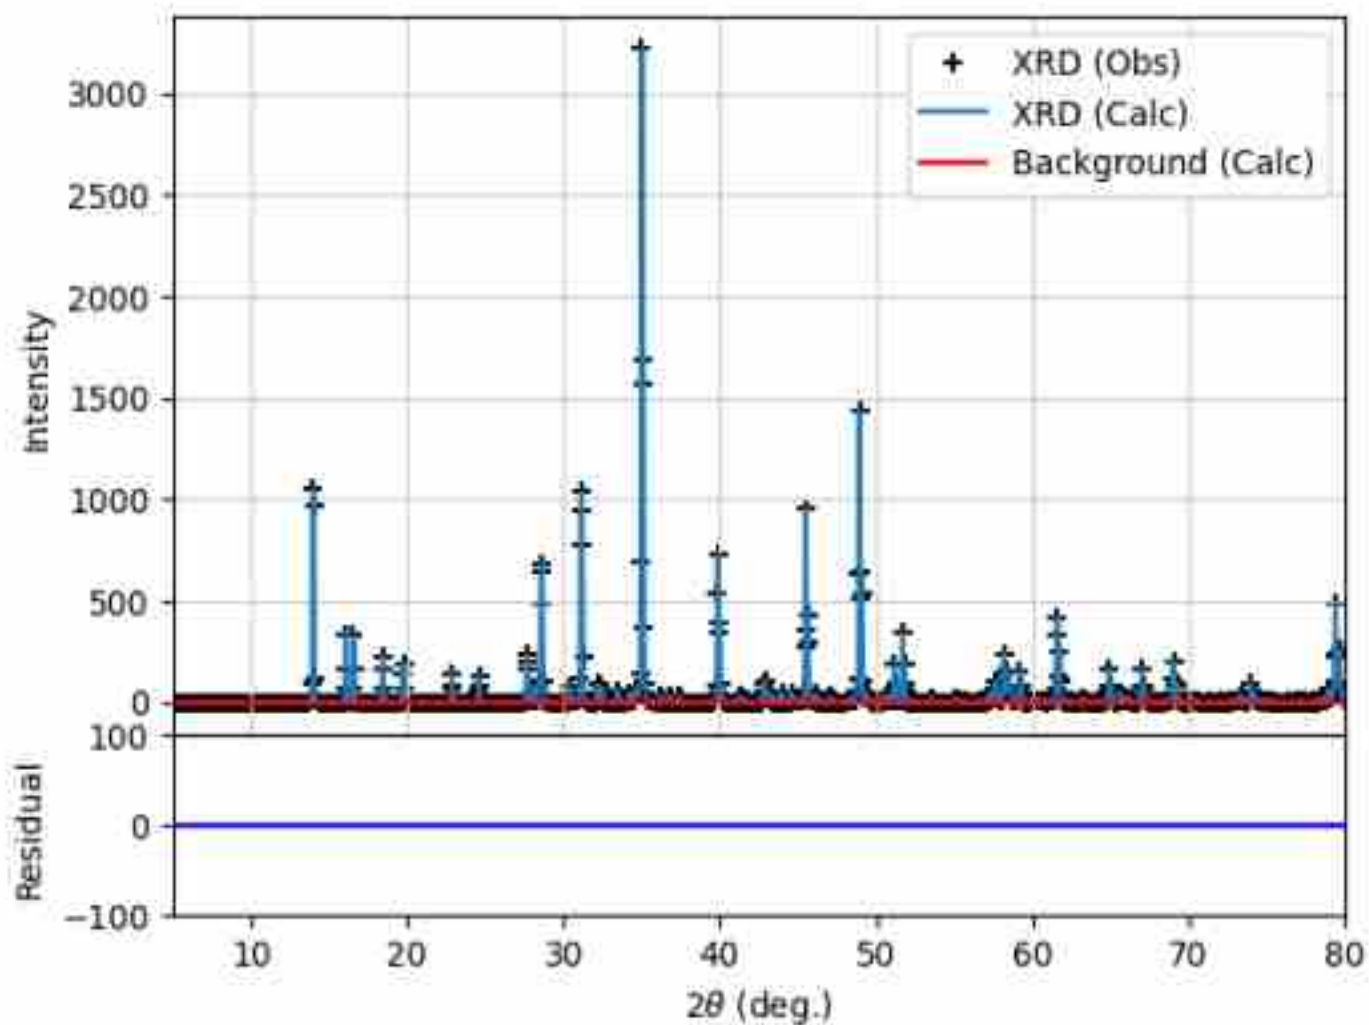

| RMSE before RR | Rwp     | RMSE after RR |
|----------------|---------|---------------|
| 0.035          | 0.00231 | 0.00031       |

# In<sub>3</sub>Ga<sub>1</sub>N<sub>4</sub>

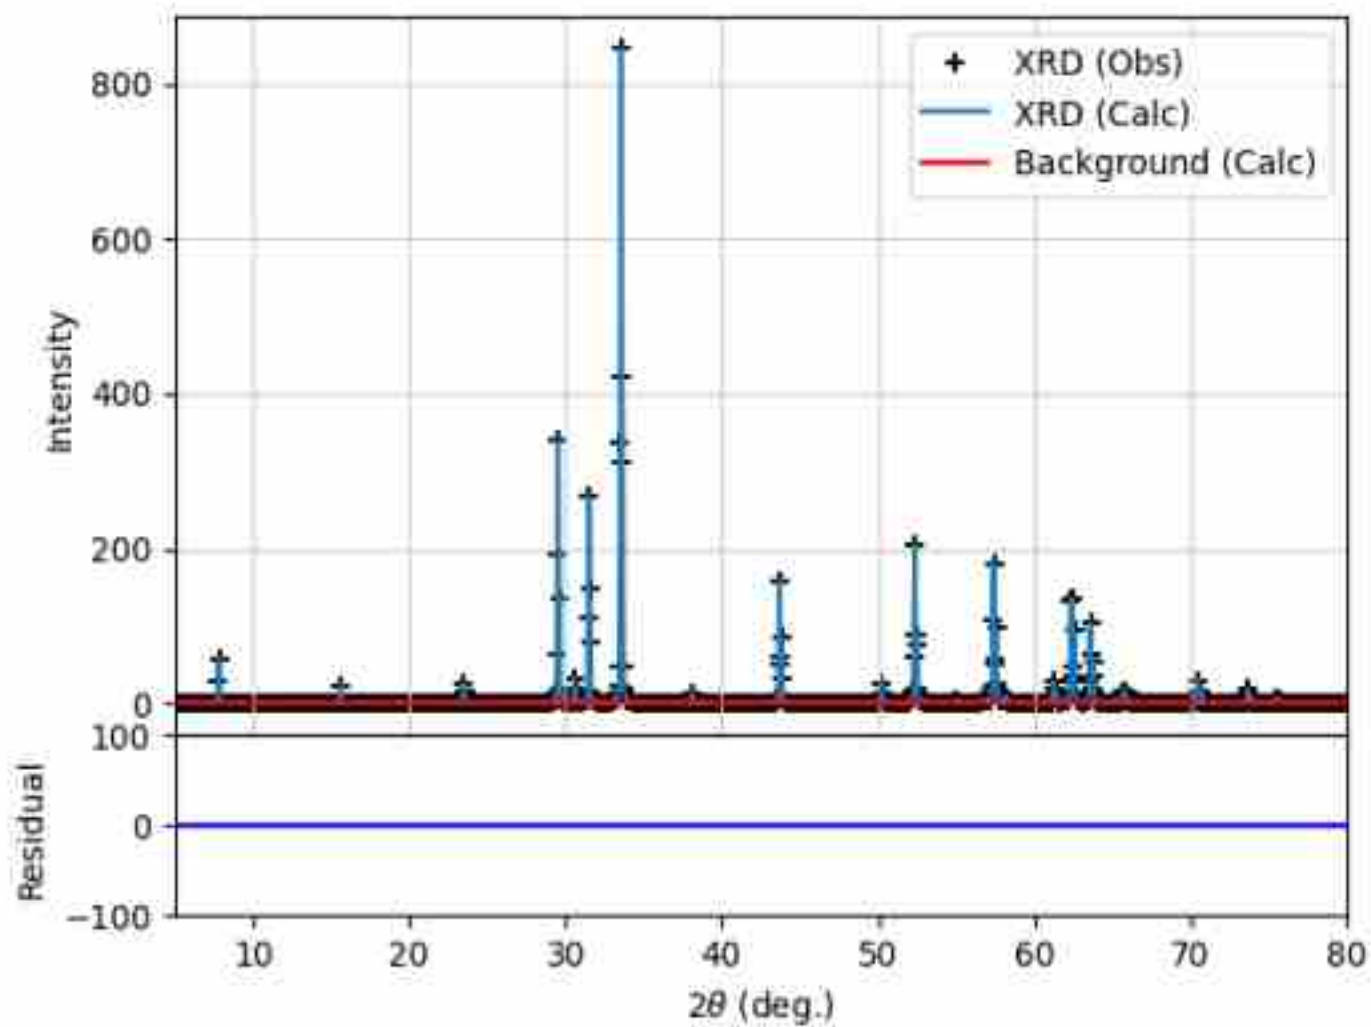

| RMSE before RR | Rwp     | RMSE after RR |
|----------------|---------|---------------|
| 0.035          | 0.00365 | 0.00194       |

# In<sub>3</sub>Ga<sub>1</sub>Te<sub>4</sub>

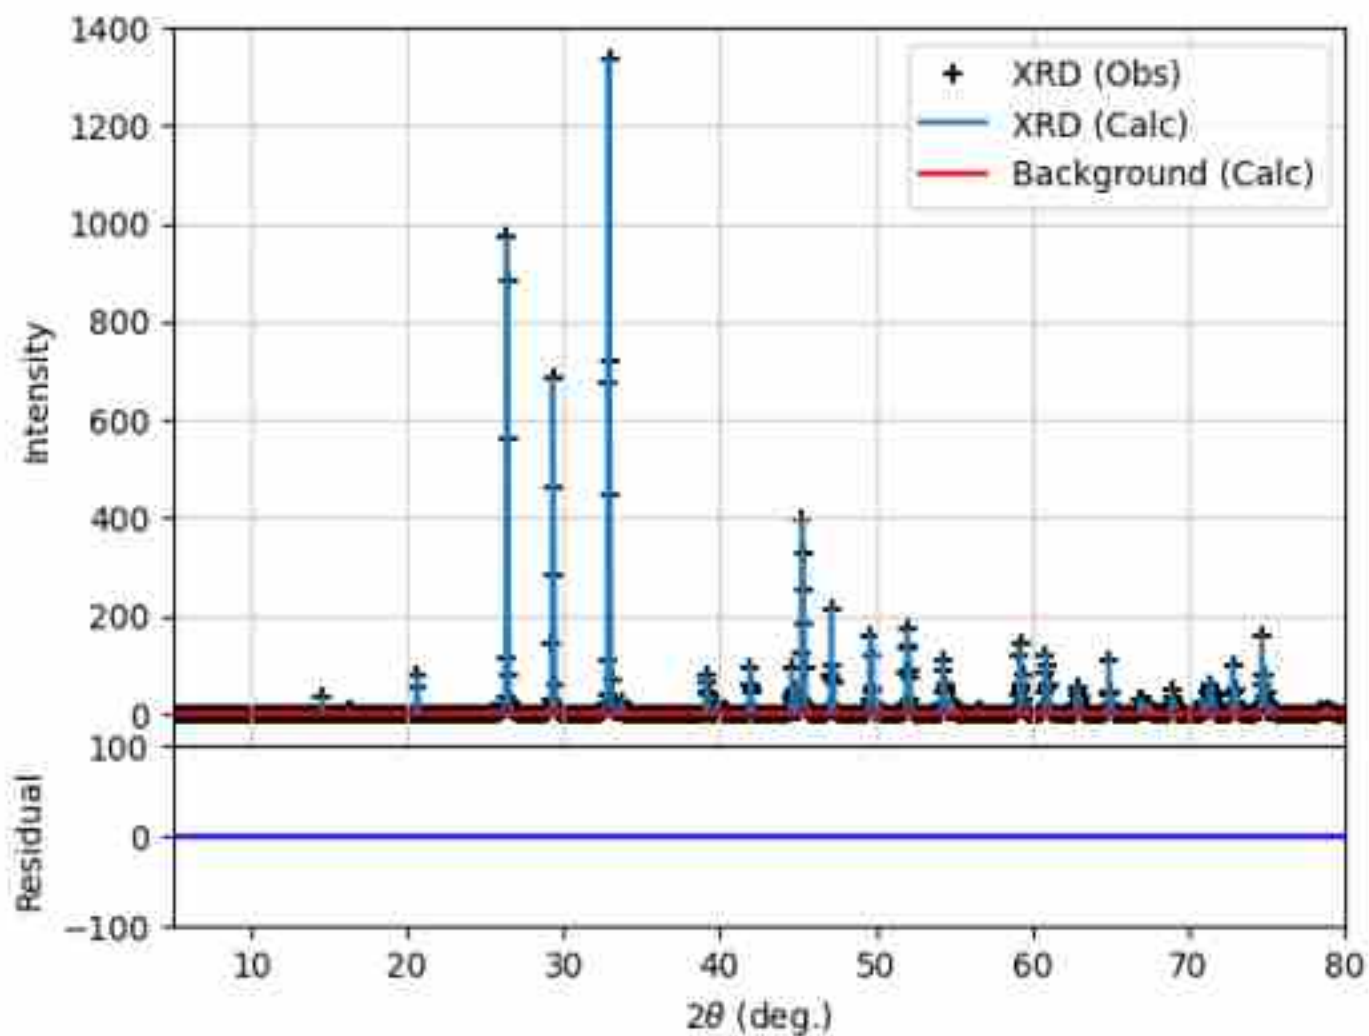

| RMSE before RR | Rwp    | RMSE after RR |
|----------------|--------|---------------|
| 0.035          | 0.0041 | 0.00043       |

# K<sub>2</sub>Bi<sub>2</sub>F<sub>12</sub>

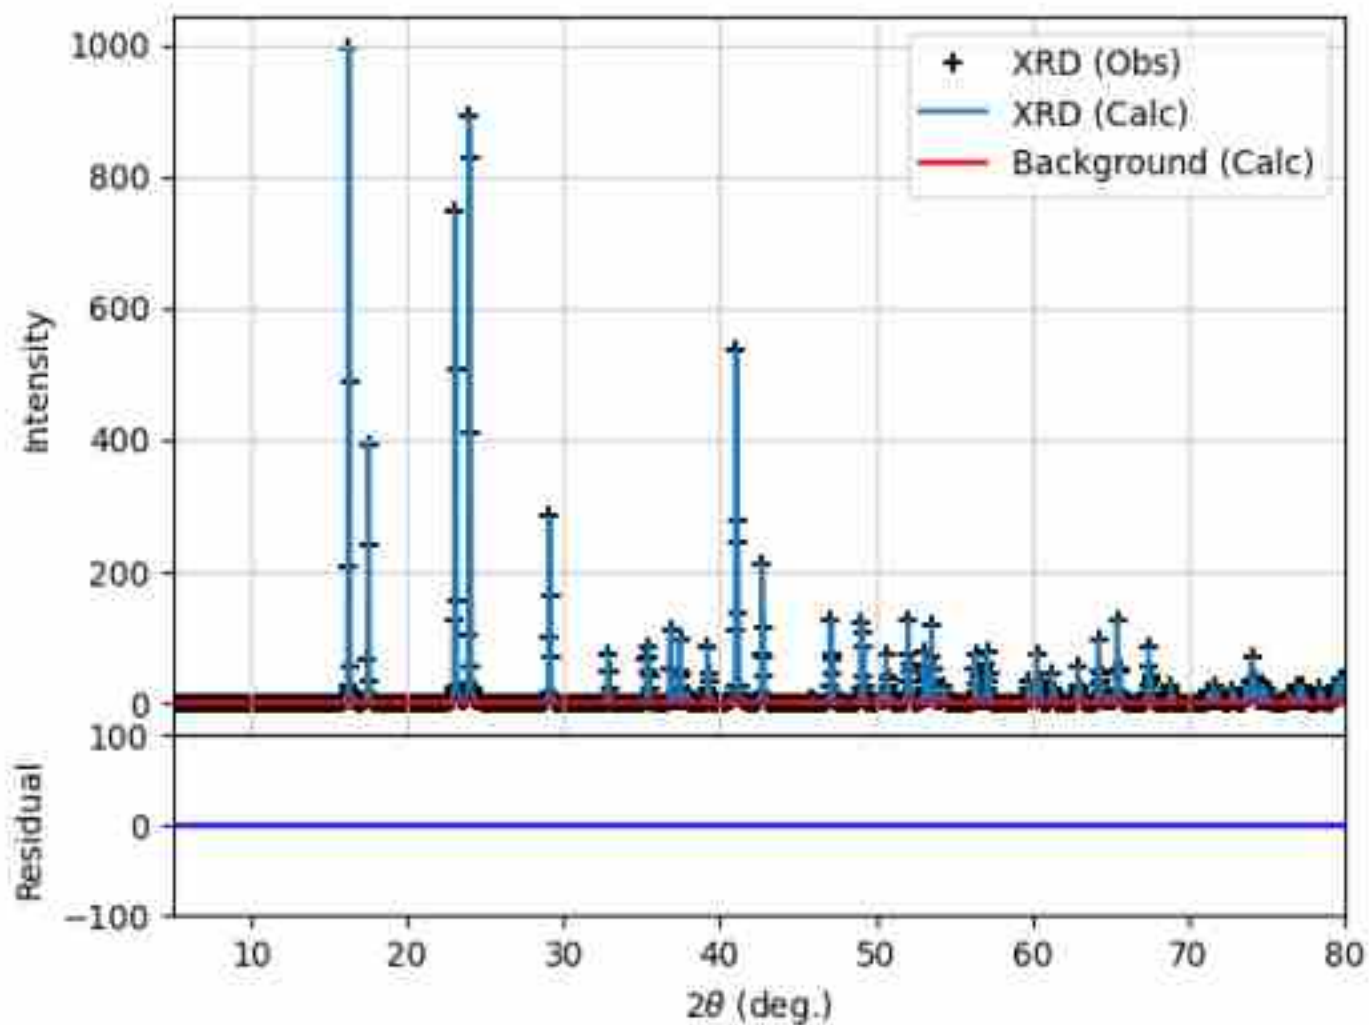

| RMSE before RR | Rwp     | RMSE after RR |
|----------------|---------|---------------|
| 0.035          | 0.00381 | 0.00124       |

# K4Sr2C18

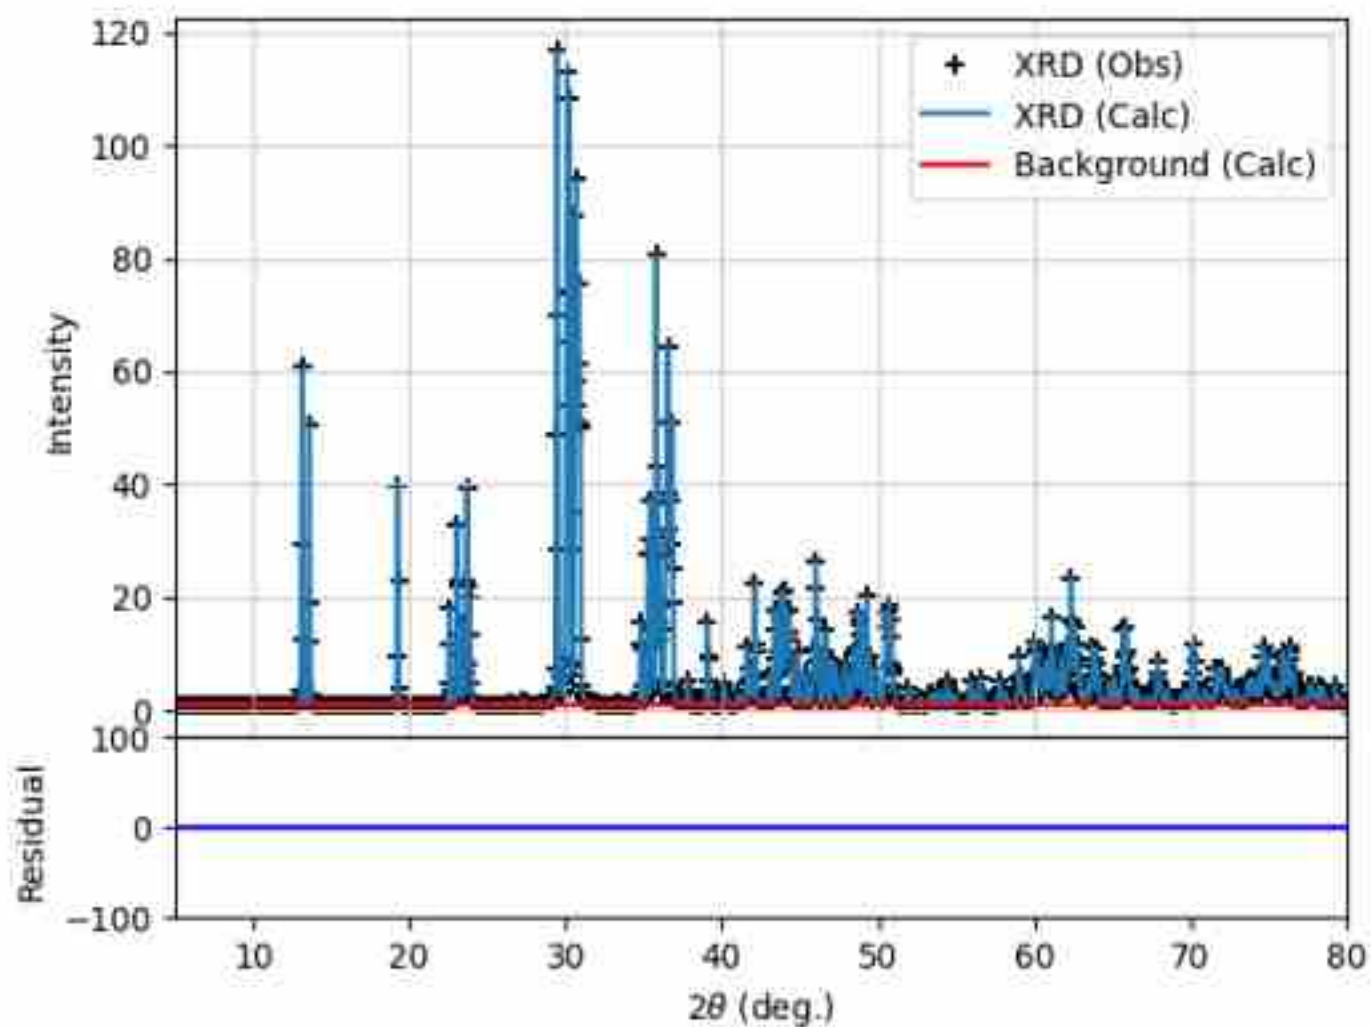

| RMSE before RR | Rwp     | RMSE after RR |
|----------------|---------|---------------|
| 0.035          | 0.00291 | 0.00028       |

# K8Cd4O8

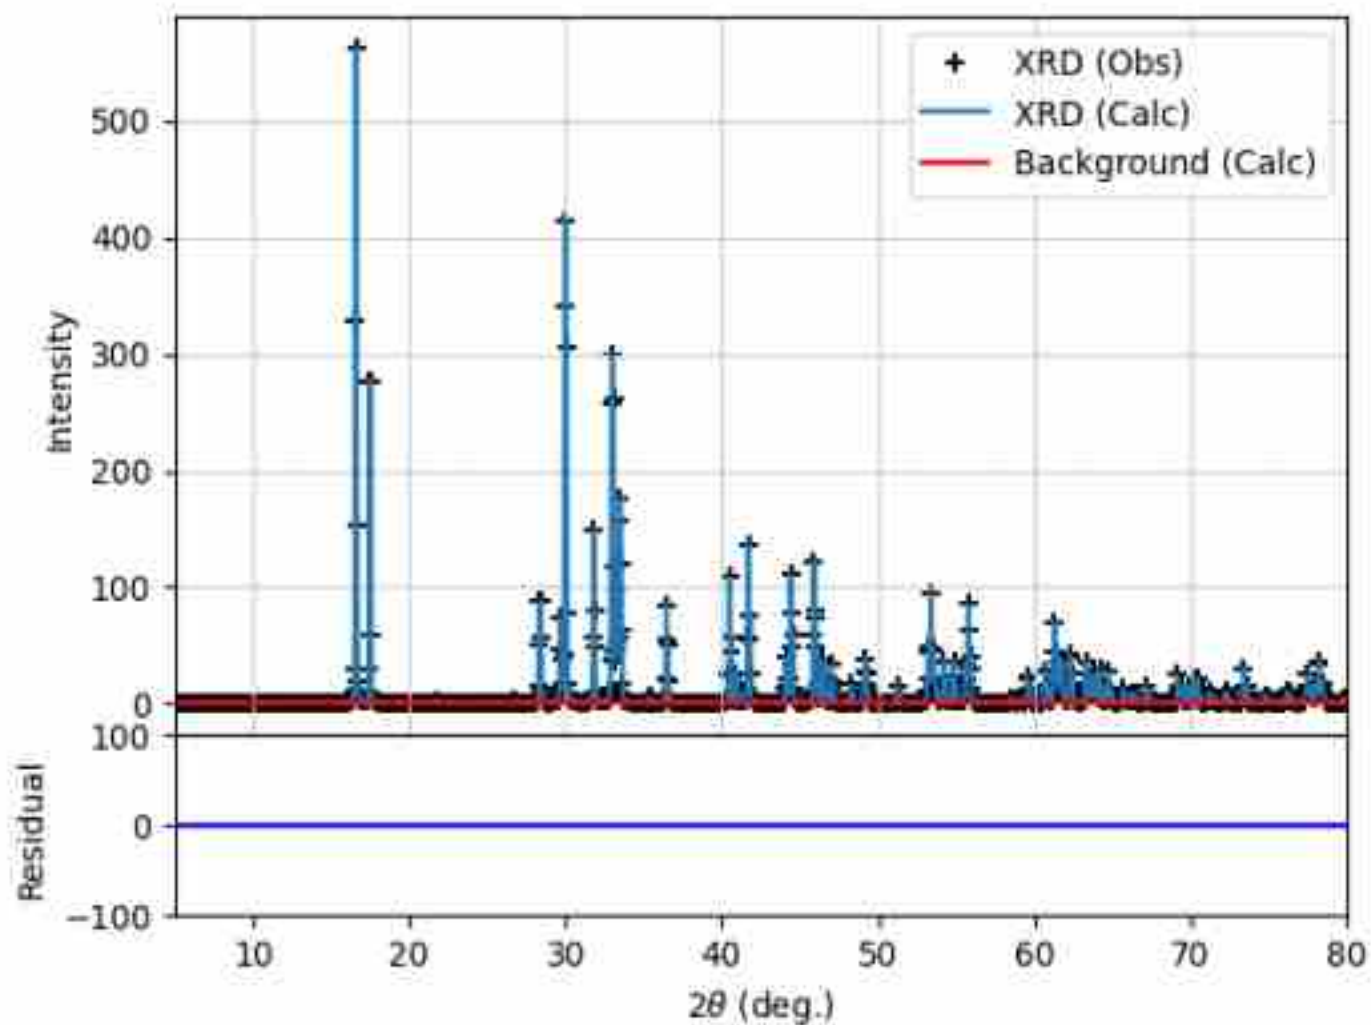

| RMSE before RR | Rwp     | RMSE after RR |
|----------------|---------|---------------|
| 0.035          | 0.00381 | 0.00094       |



# La<sub>3</sub>Re<sub>2</sub>O<sub>10</sub>

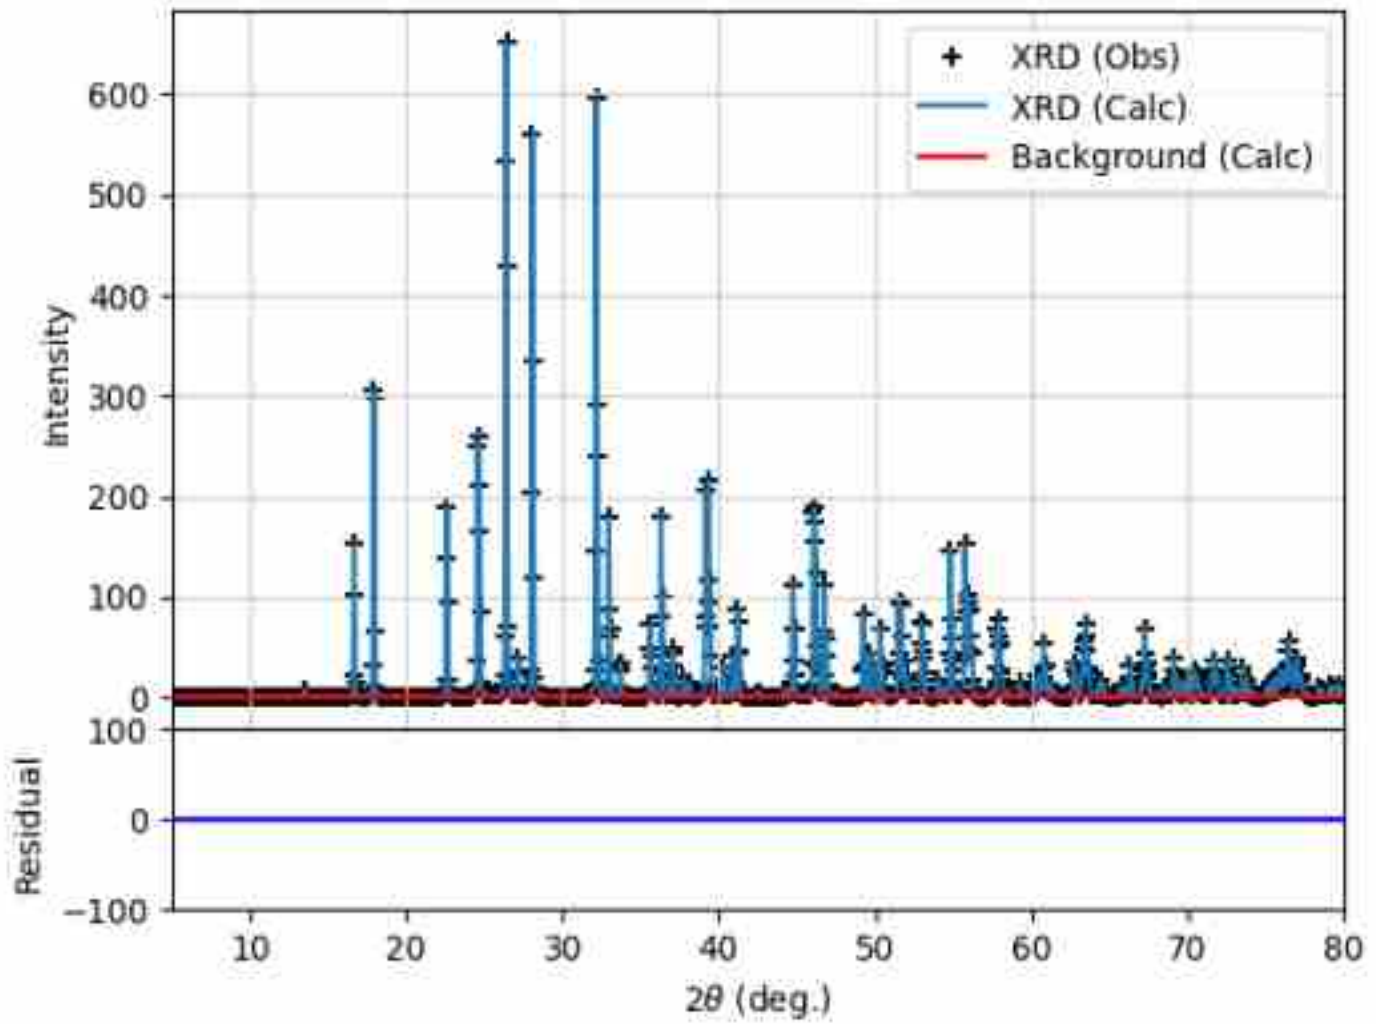

| RMSE before RR | Rwp     | RMSE after RR |
|----------------|---------|---------------|
| 0.035          | 0.00347 | 0.00078       |

# Li<sub>3</sub>Fe<sub>3</sub>W<sub>10</sub>O<sub>8</sub>

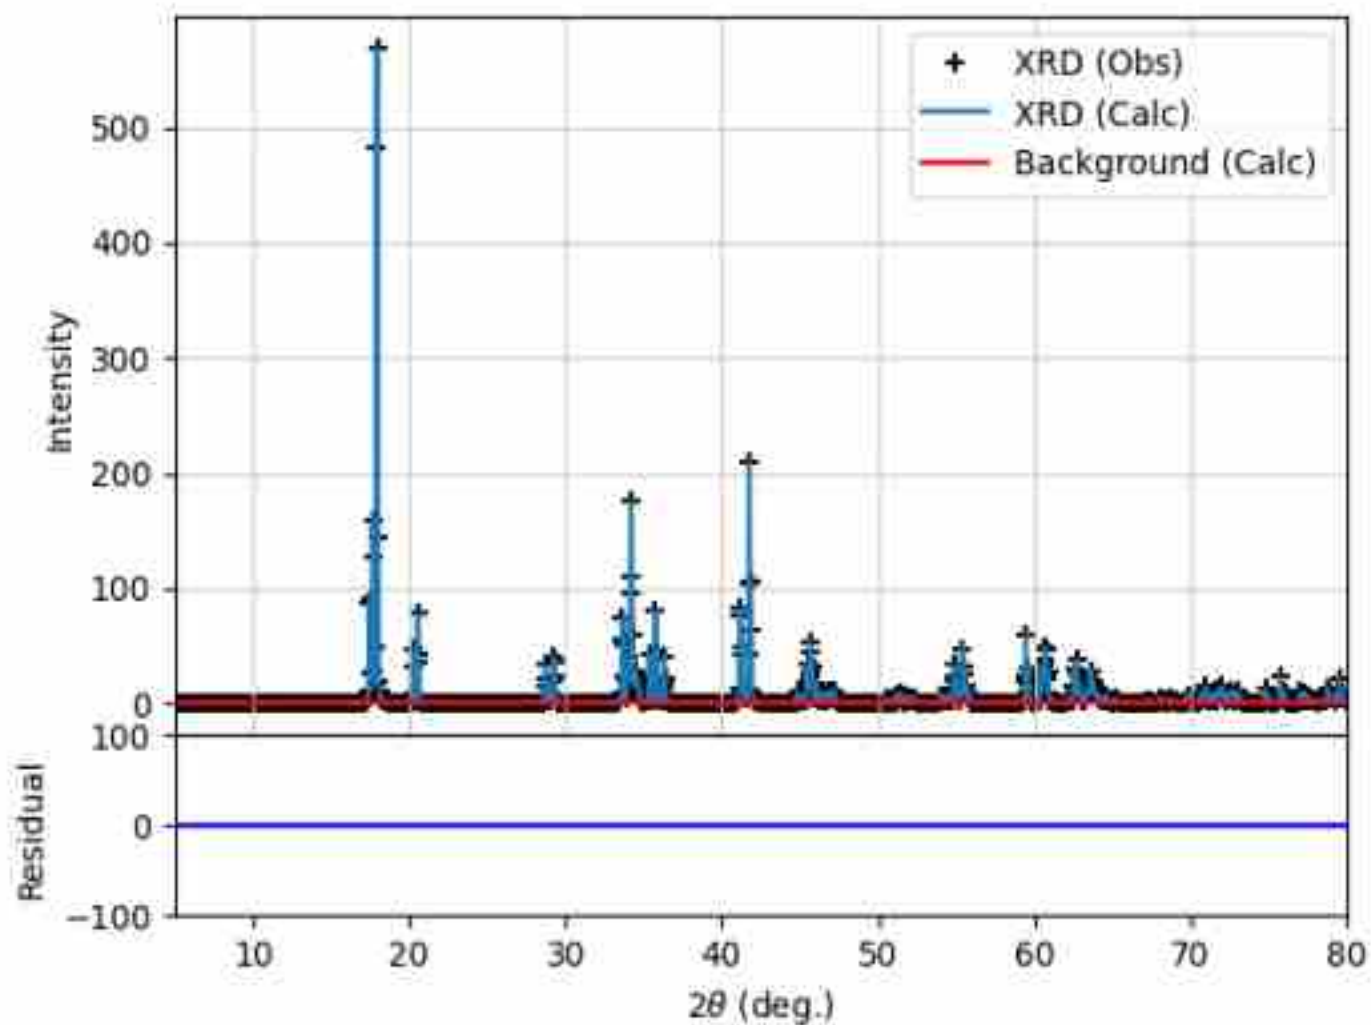

| RMSE before RR | Rwp     | RMSE after RR |
|----------------|---------|---------------|
| 0.035          | 0.00378 | 0.00136       |

# Li<sub>4</sub>Al<sub>1</sub>Ni<sub>3</sub>O<sub>8</sub>

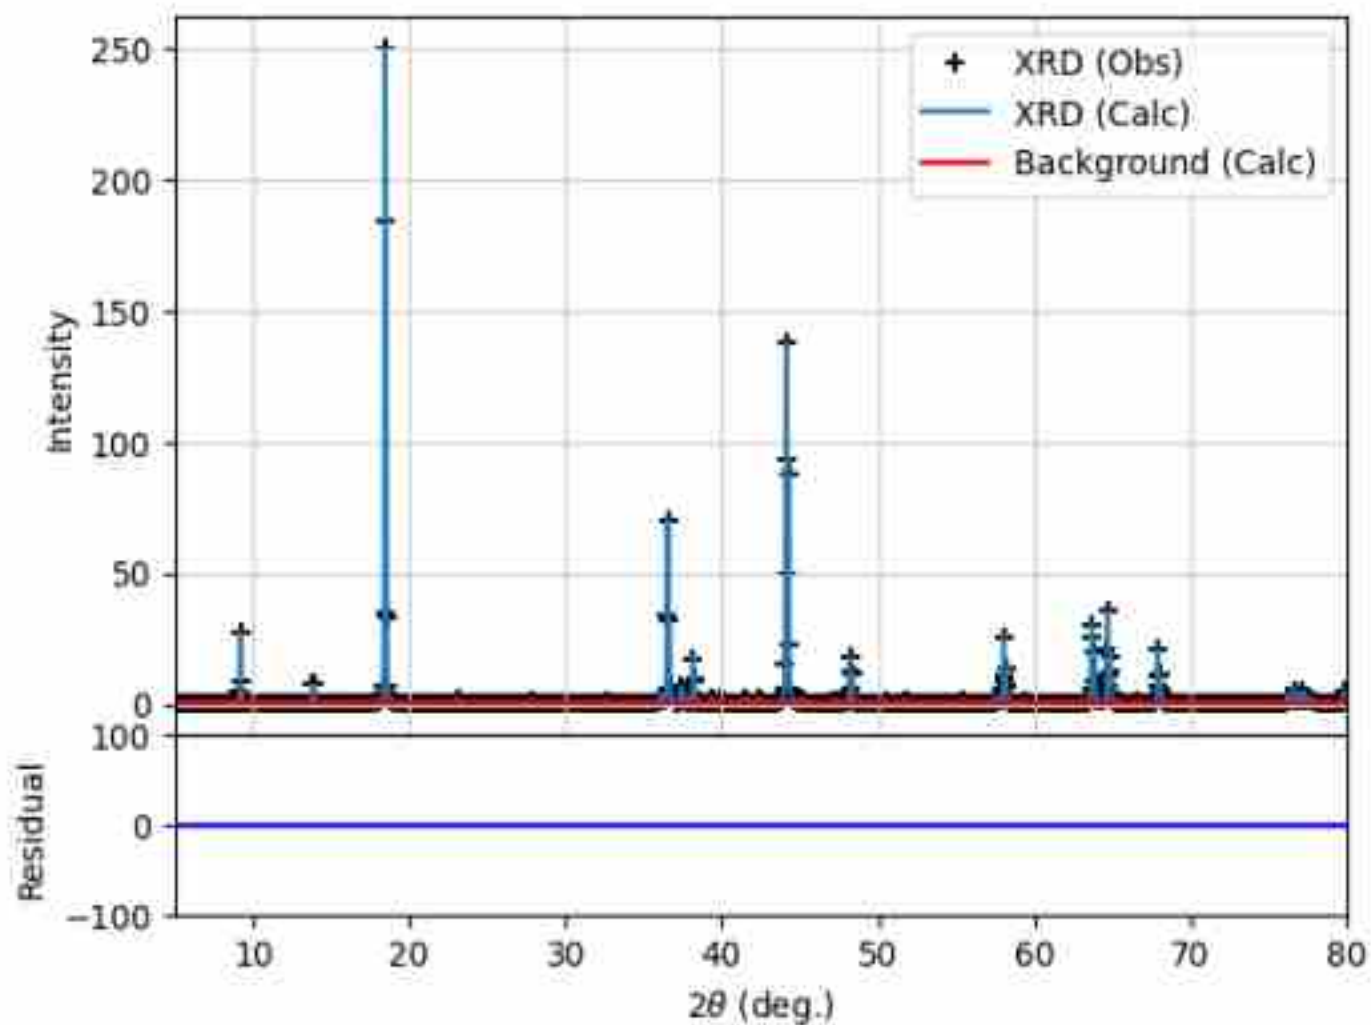

| RMSE before RR | Rwp     | RMSE after RR |
|----------------|---------|---------------|
| 0.035          | 0.00215 | 0.00084       |

# Li<sub>4</sub>Mn<sub>2</sub>O<sub>4</sub>F<sub>2</sub>

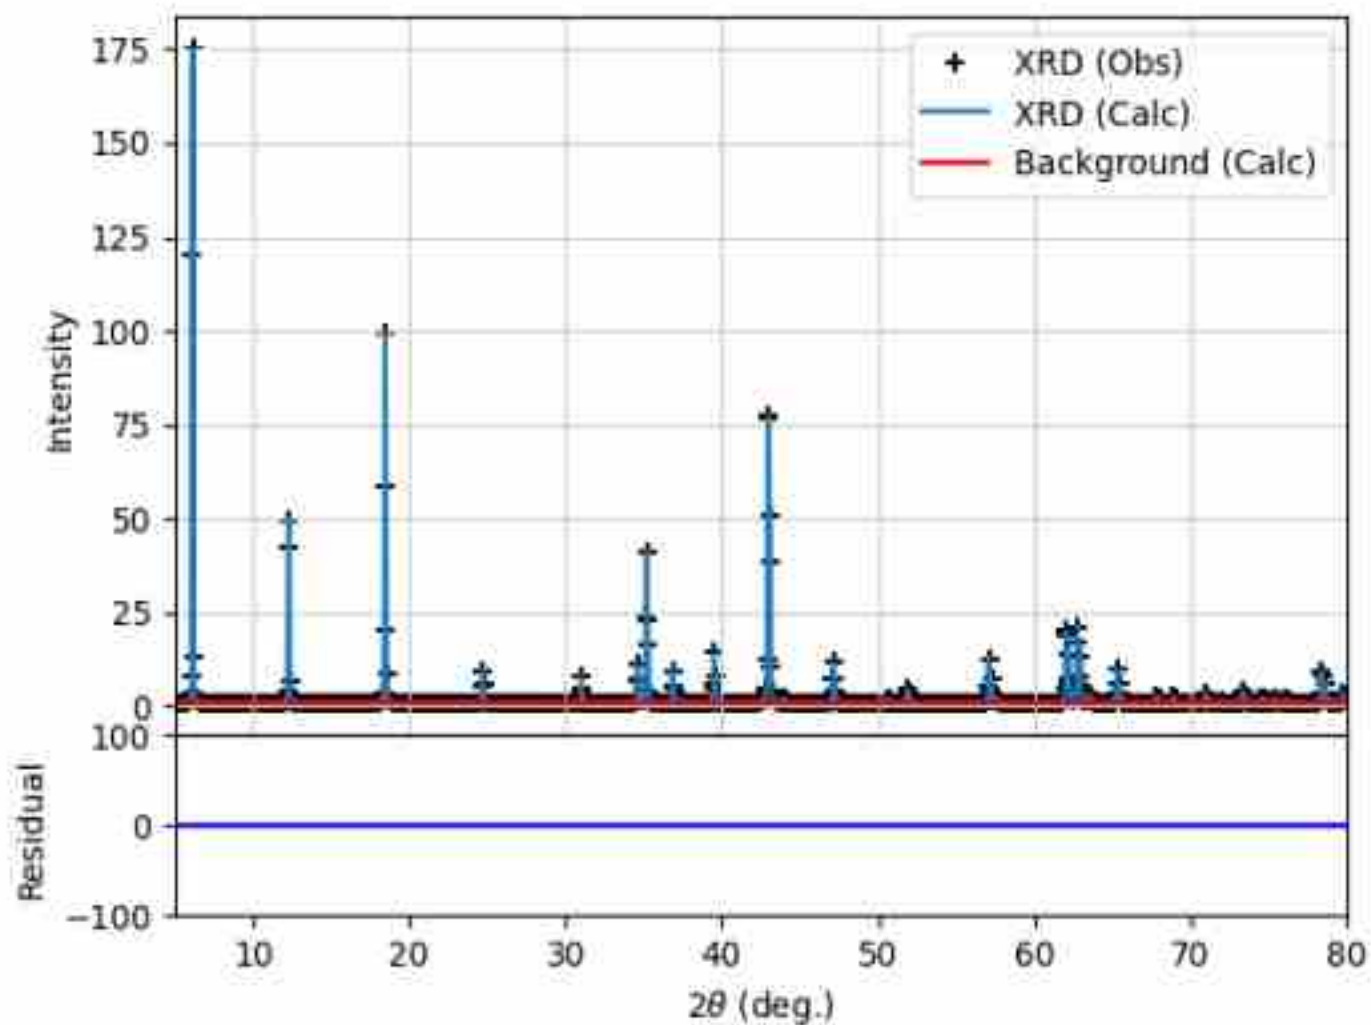

| RMSE before RR | Rwp     | RMSE after RR |
|----------------|---------|---------------|
| 0.035          | 0.00207 | 0.00108       |

# Li7Os106

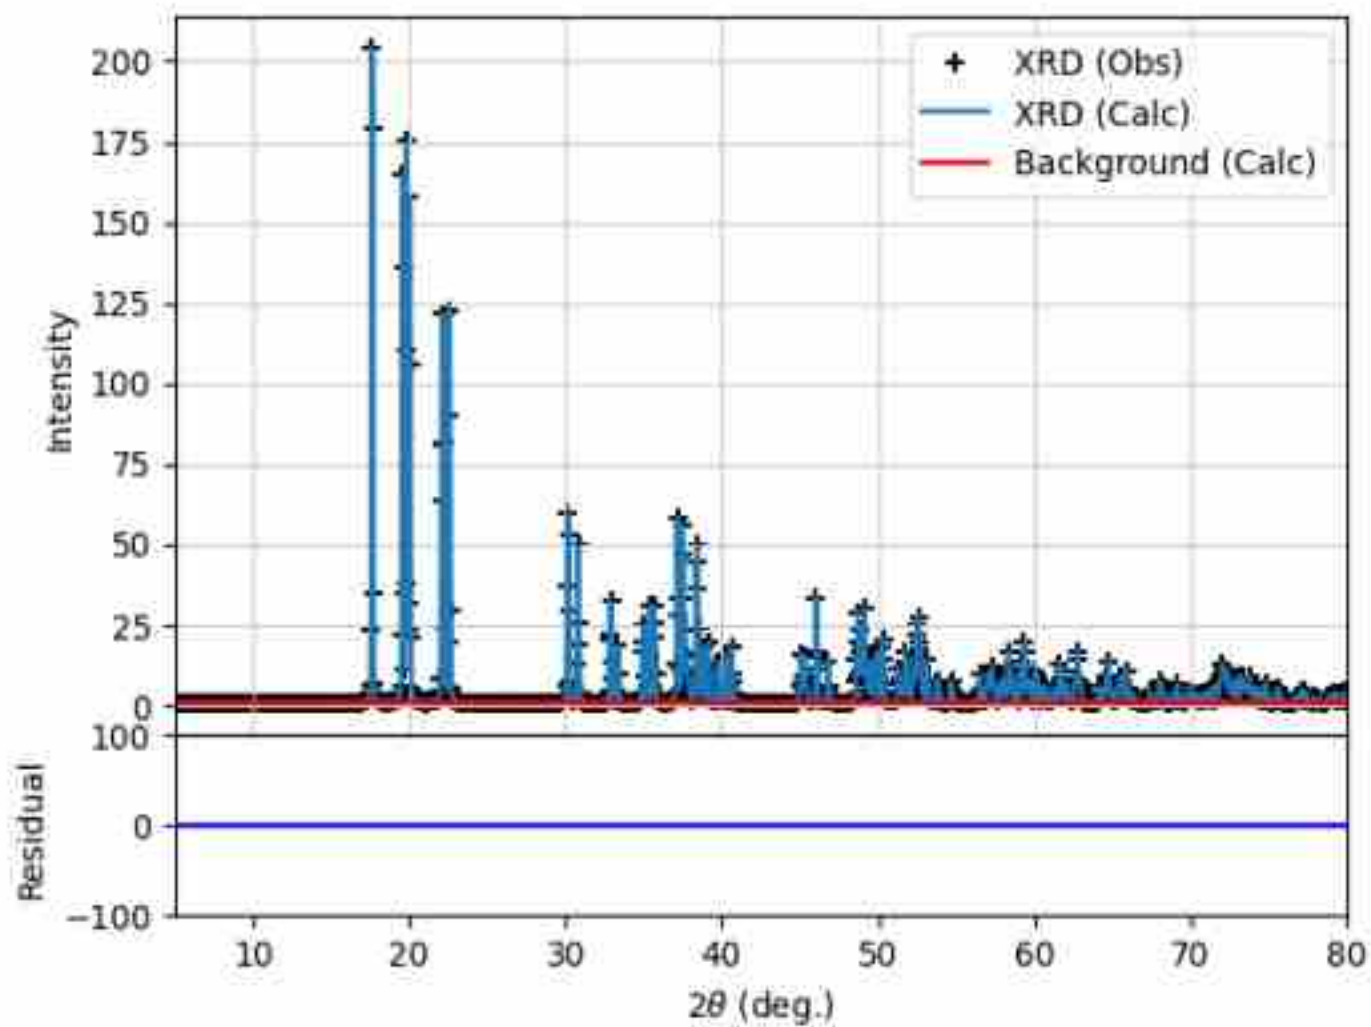

| RMSE before RR | Rwp     | RMSE after RR |
|----------------|---------|---------------|
| 0.035          | 0.00127 | 1e-05         |

# Mg<sub>4</sub>Ag<sub>2</sub>

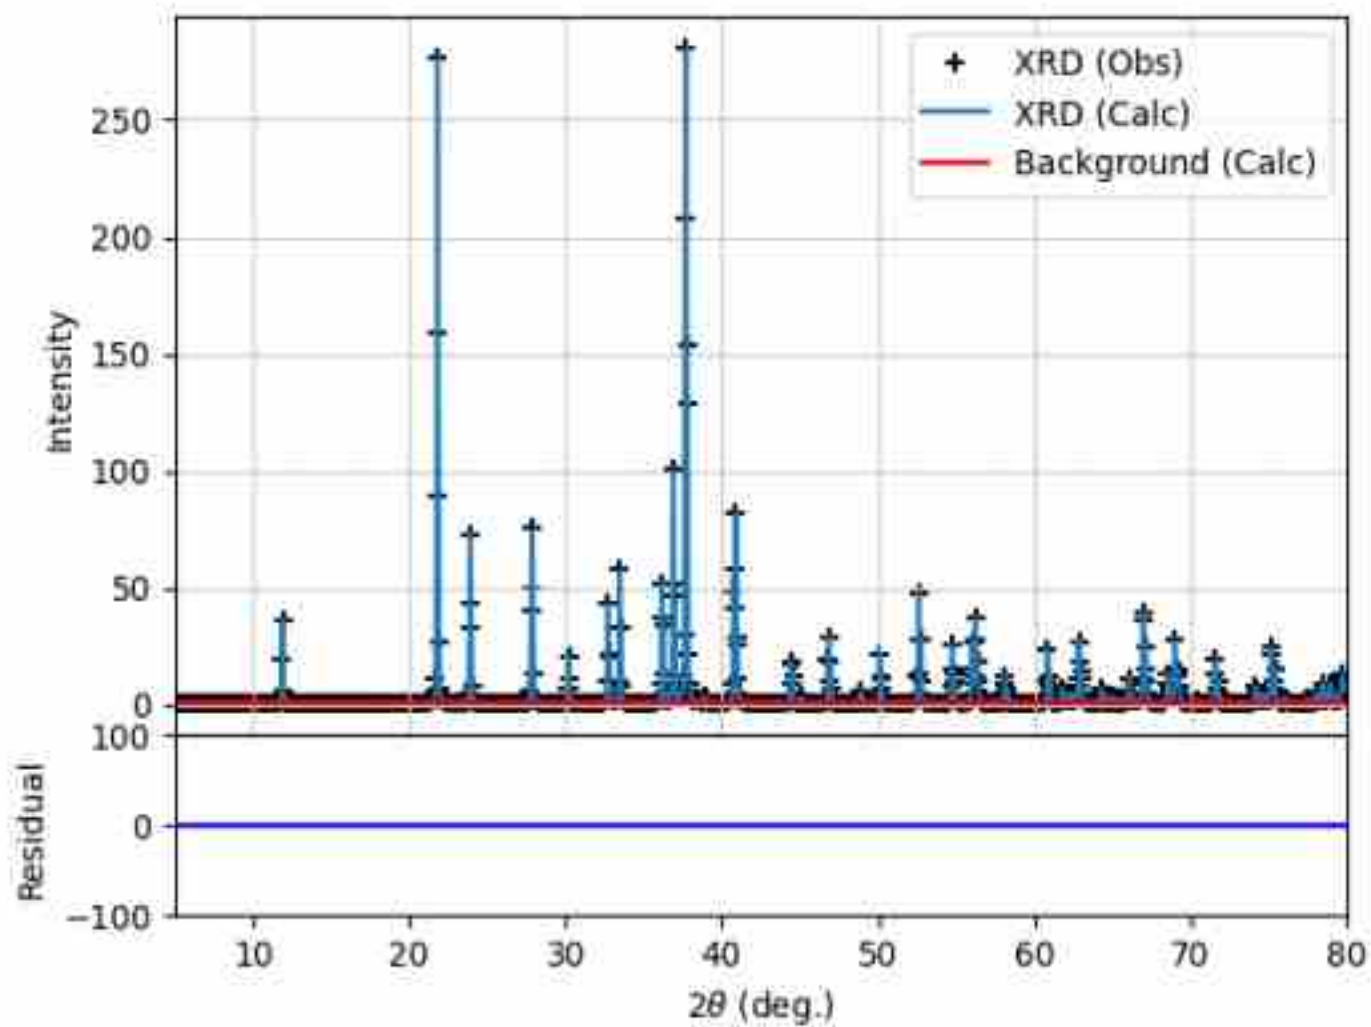

| RMSE before RR | Rwp     | RMSE after RR |
|----------------|---------|---------------|
| 0.035          | 0.00481 | 0.00106       |

# Mg<sub>10</sub>Hg<sub>6</sub>

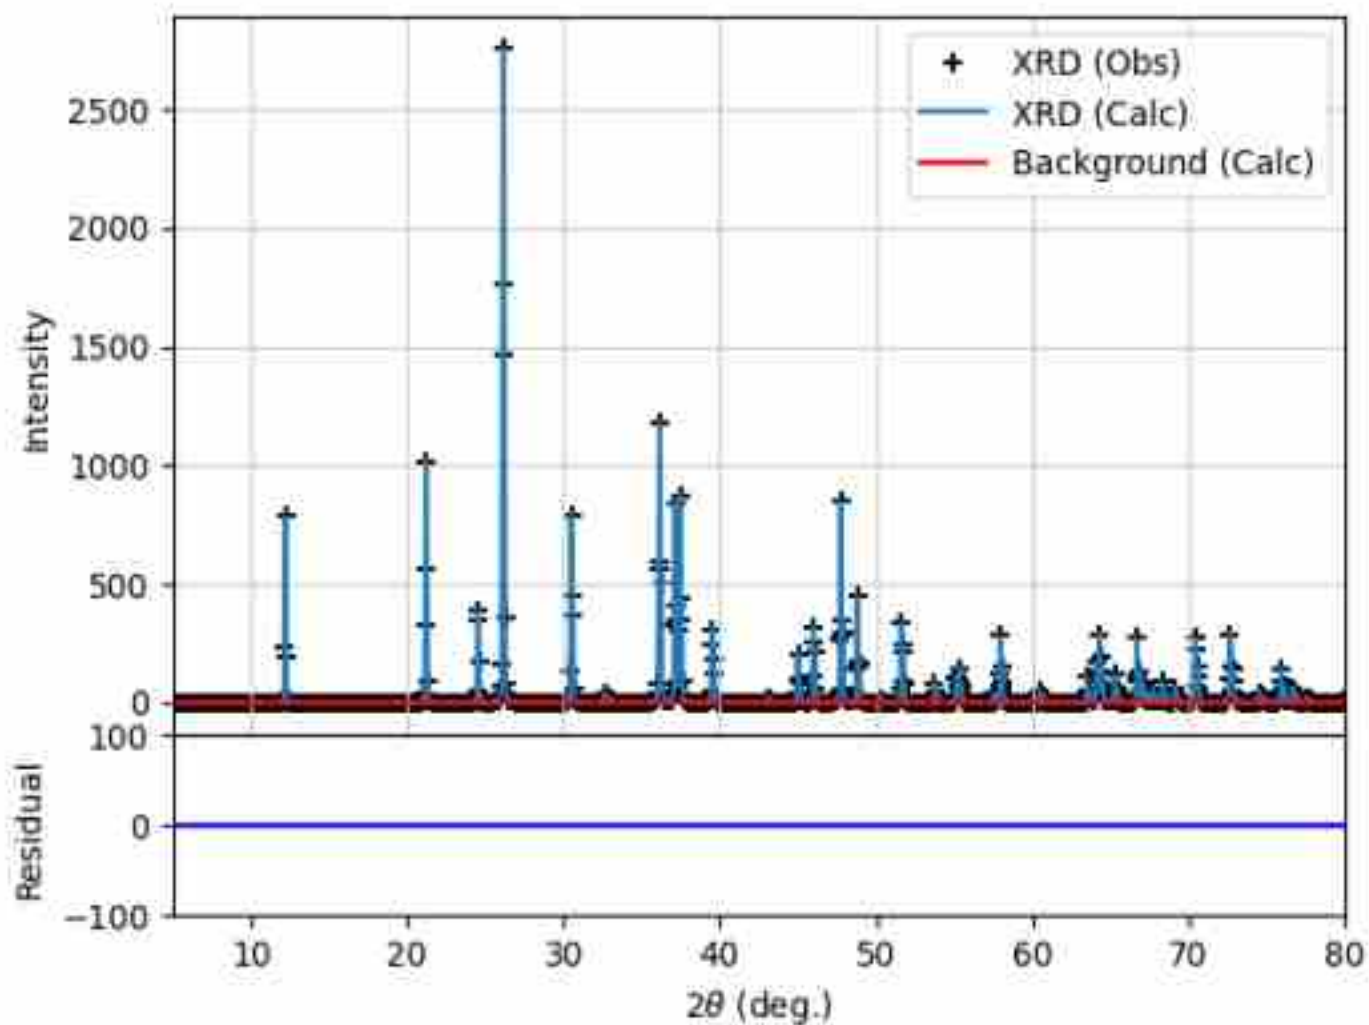

| RMSE before RR | Rwp     | RMSE after RR |
|----------------|---------|---------------|
| 0.035          | 0.00983 | 0.00242       |

# Mn4Ti4Cl12

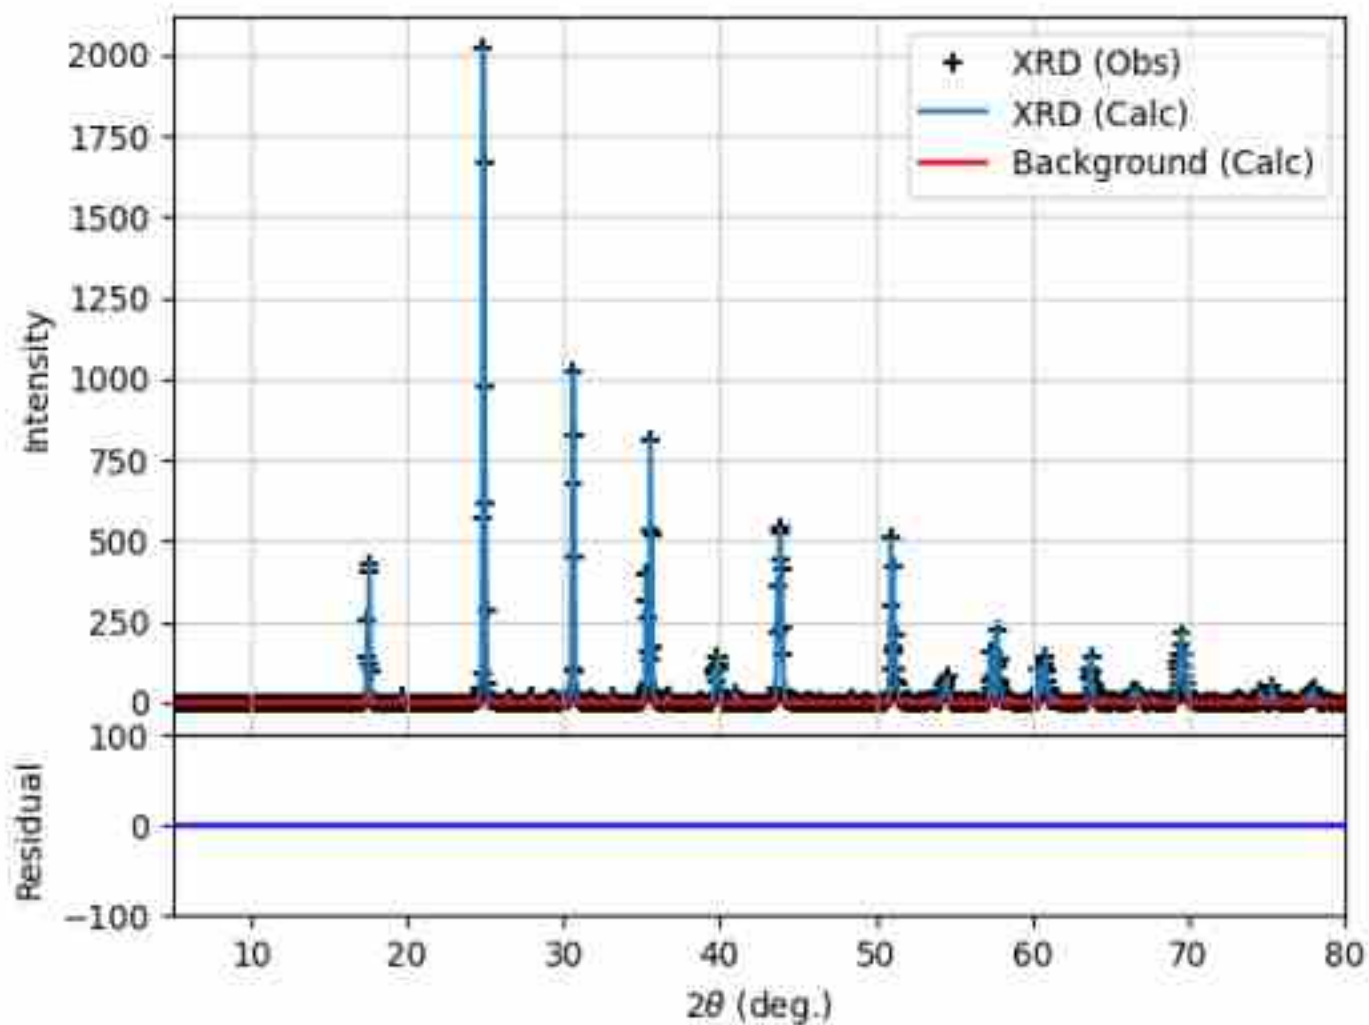

| RMSE before RR | Rwp     | RMSE after RR |
|----------------|---------|---------------|
| 0.035          | 0.00389 | 0.00066       |



# Mo2F10

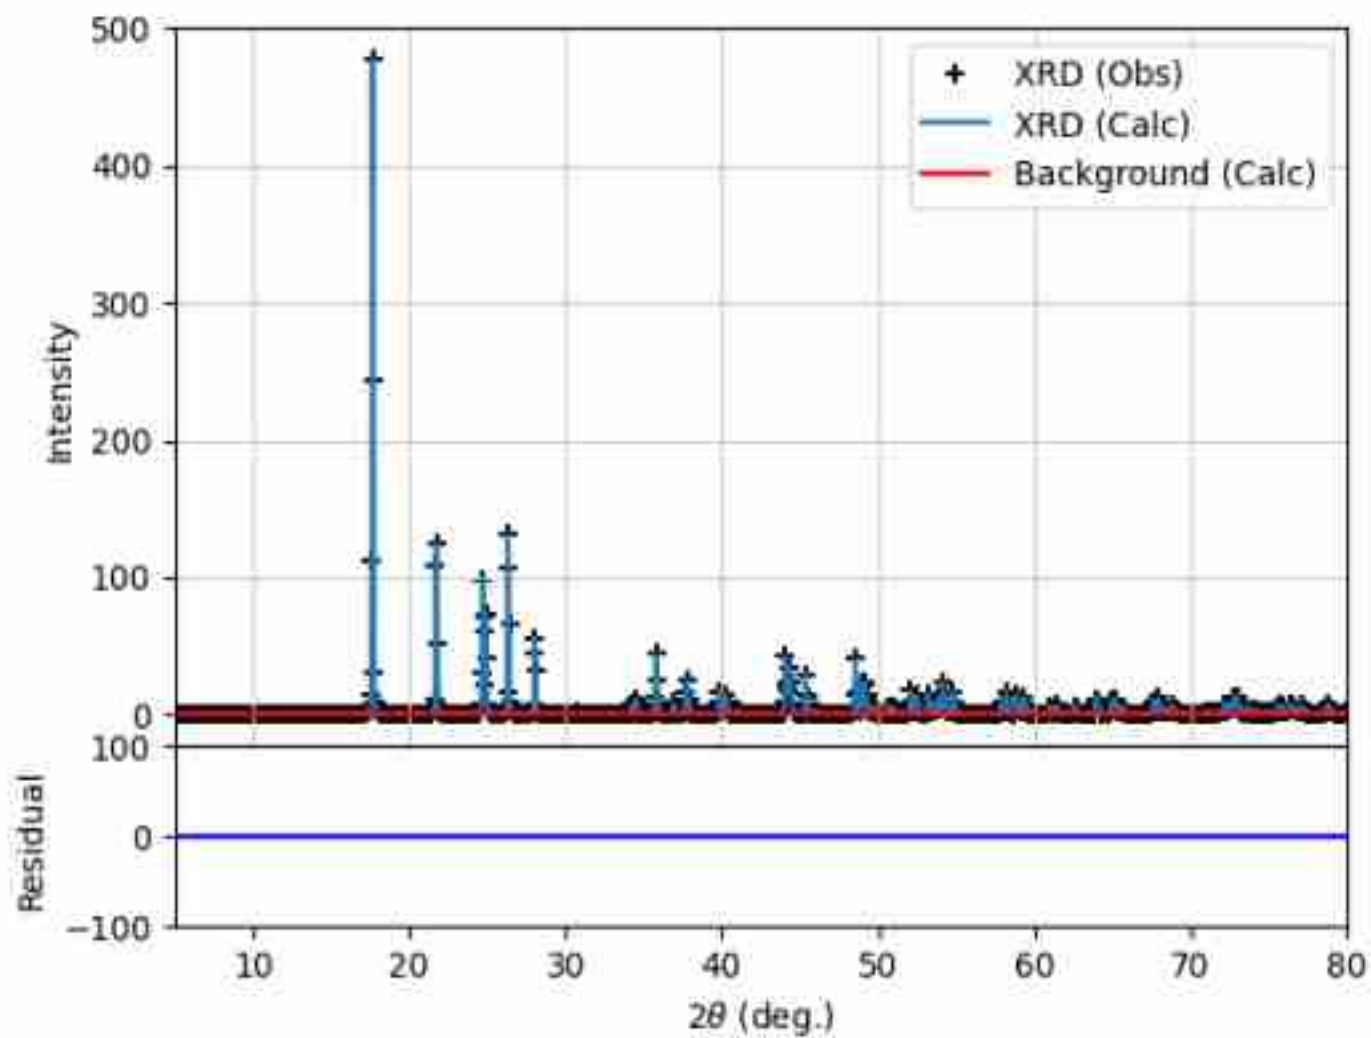

| RMSE before RR | Rwp     | RMSE after RR |
|----------------|---------|---------------|
| 0.035          | 0.00221 | 0.00076       |

# Na<sub>2</sub>Y<sub>2</sub>C18

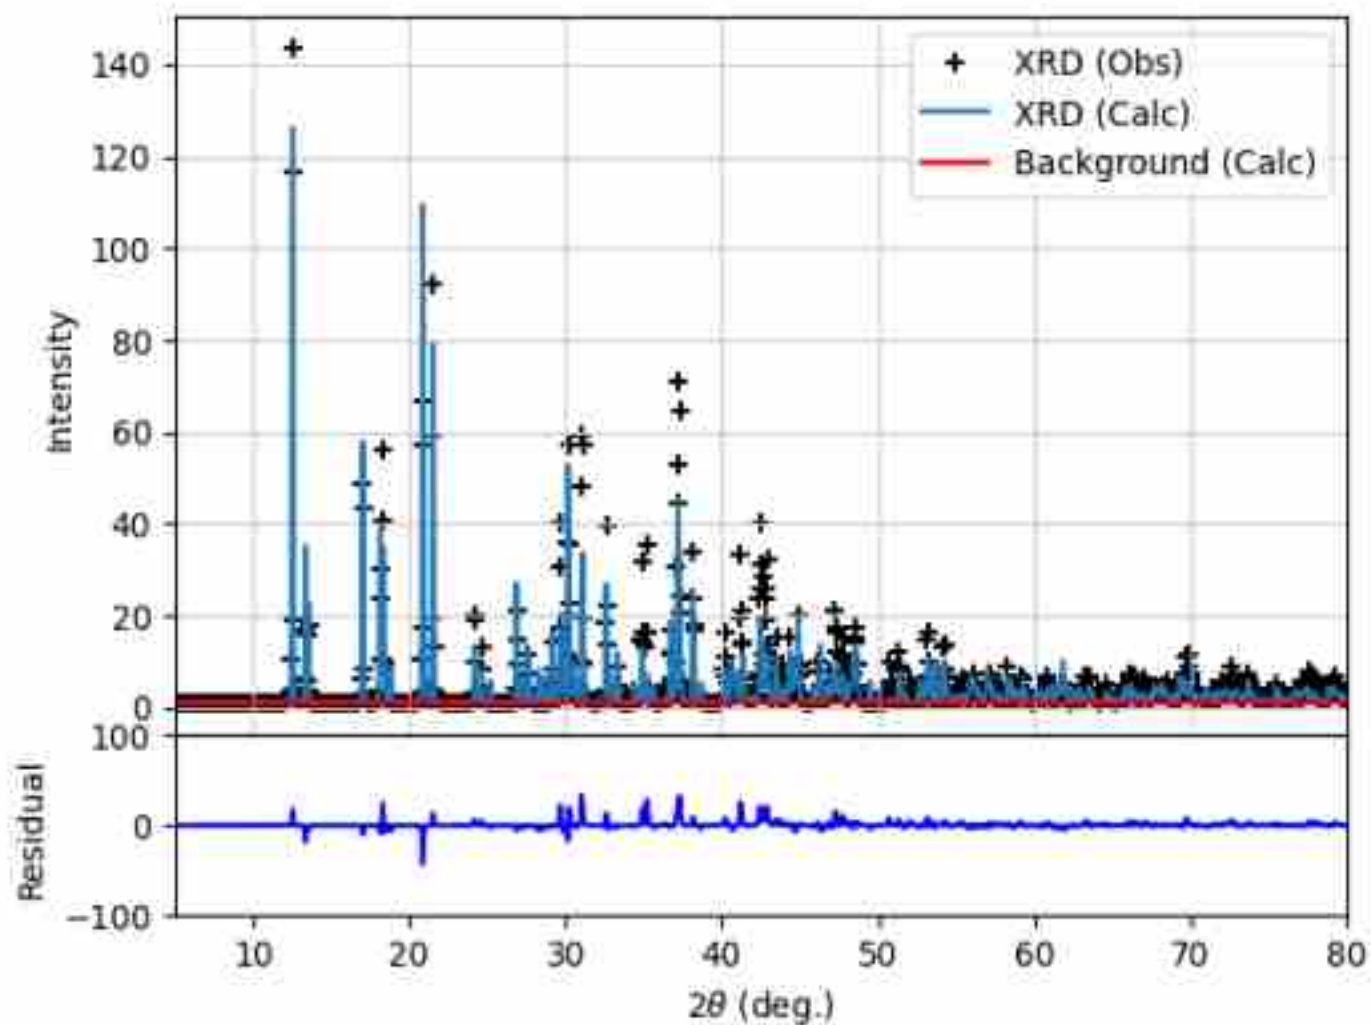

| RMSE before RR | Rwp      | RMSE after RR |
|----------------|----------|---------------|
| 0.035          | 44.01688 | 0.31796       |

# Na<sub>4</sub>Cd<sub>4</sub>Sb<sub>4</sub>

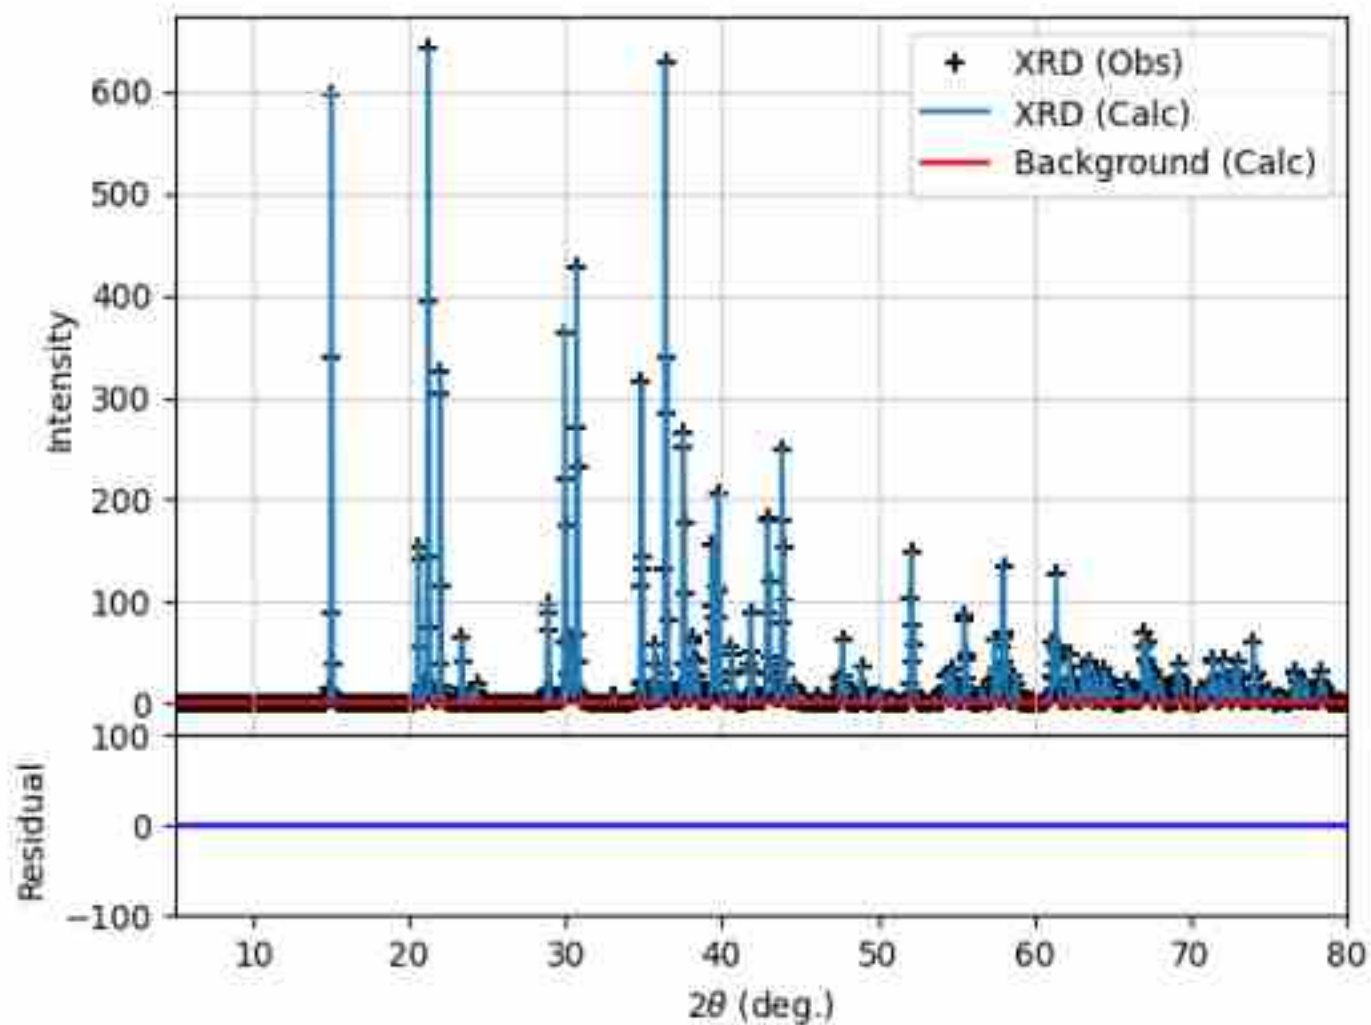

| RMSE before RR | Rwp     | RMSE after RR |
|----------------|---------|---------------|
| 0.035          | 0.00471 | 0.0009        |

# Na<sub>6</sub>Fe<sub>2</sub>O<sub>8</sub>

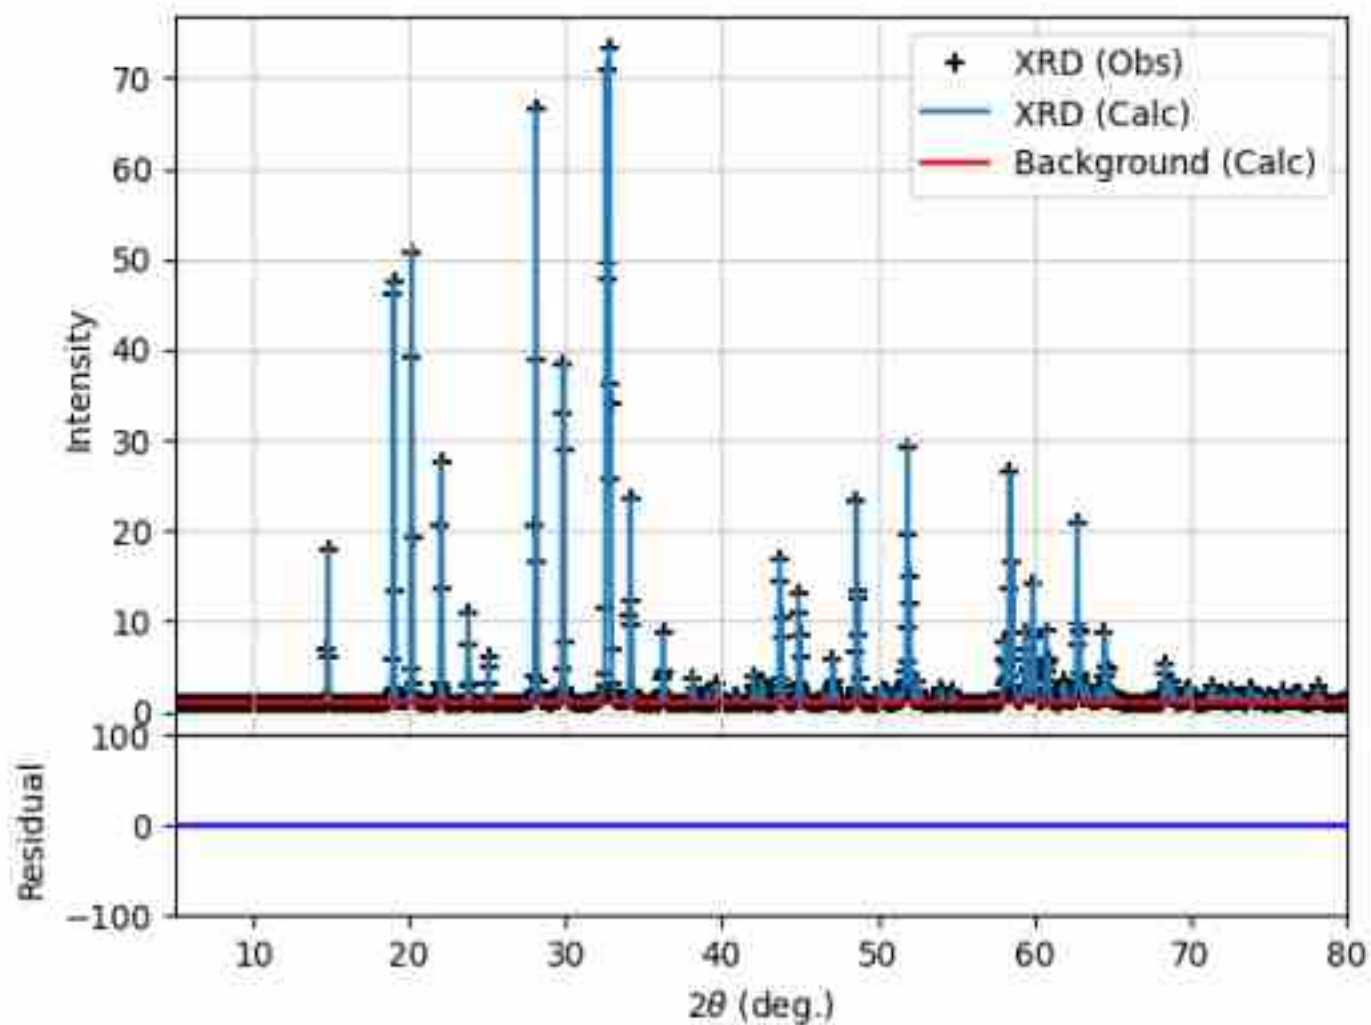

| RMSE before RR | Rwp     | RMSE after RR |
|----------------|---------|---------------|
| 0.035          | 0.00268 | 0.00093       |

# Ni<sub>2</sub>P<sub>2</sub>S<sub>6</sub>

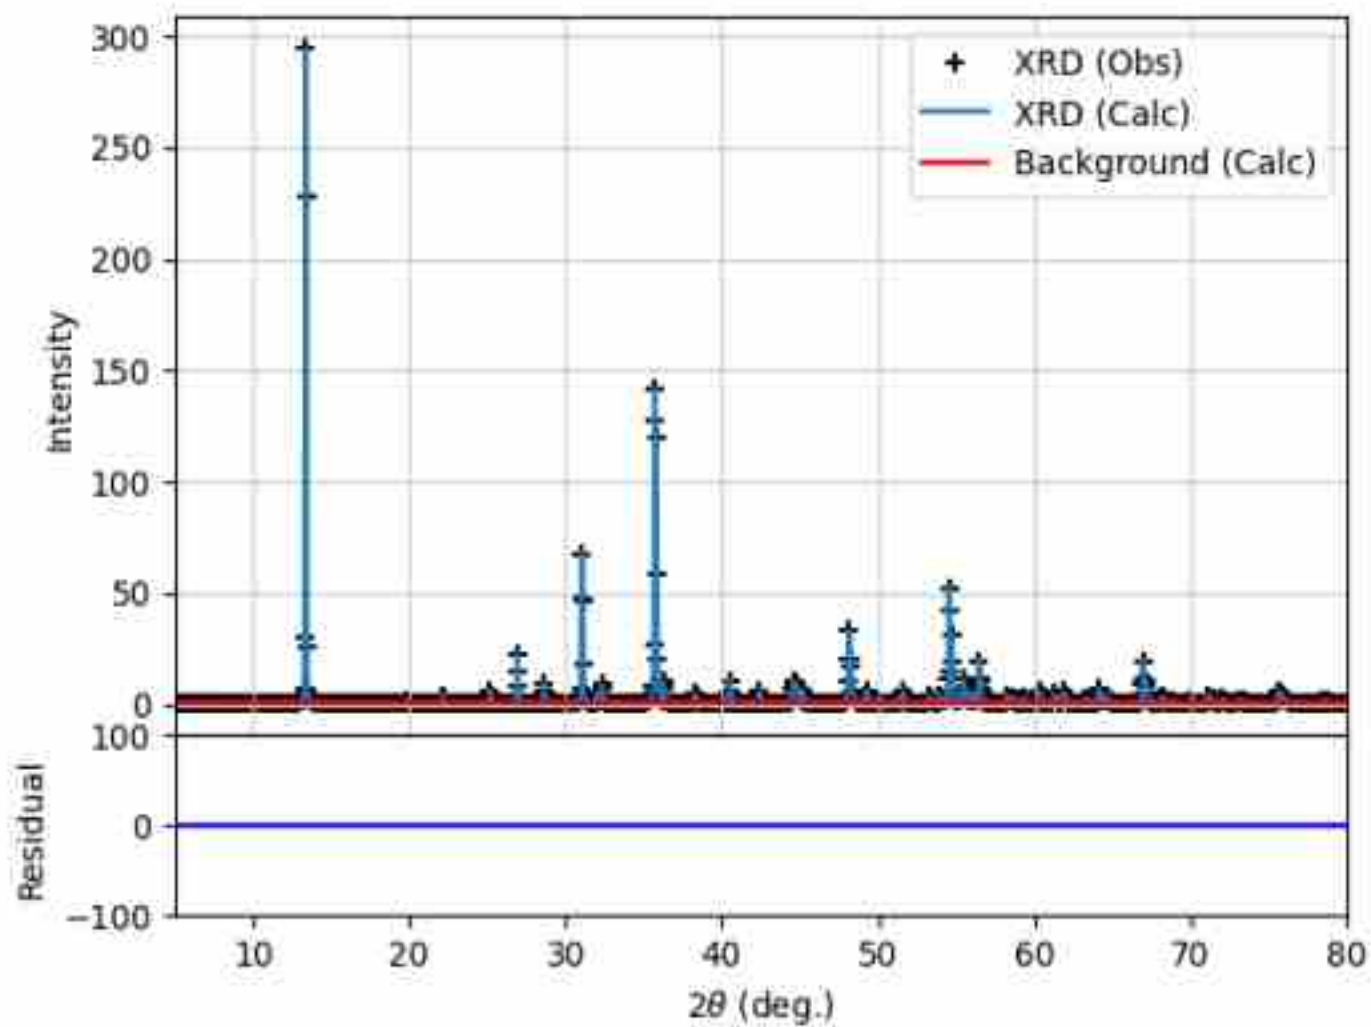

| RMSE before RR | Rwp     | RMSE after RR |
|----------------|---------|---------------|
| 0.035          | 0.00224 | 0.00049       |

# Pb4Br4Cl4

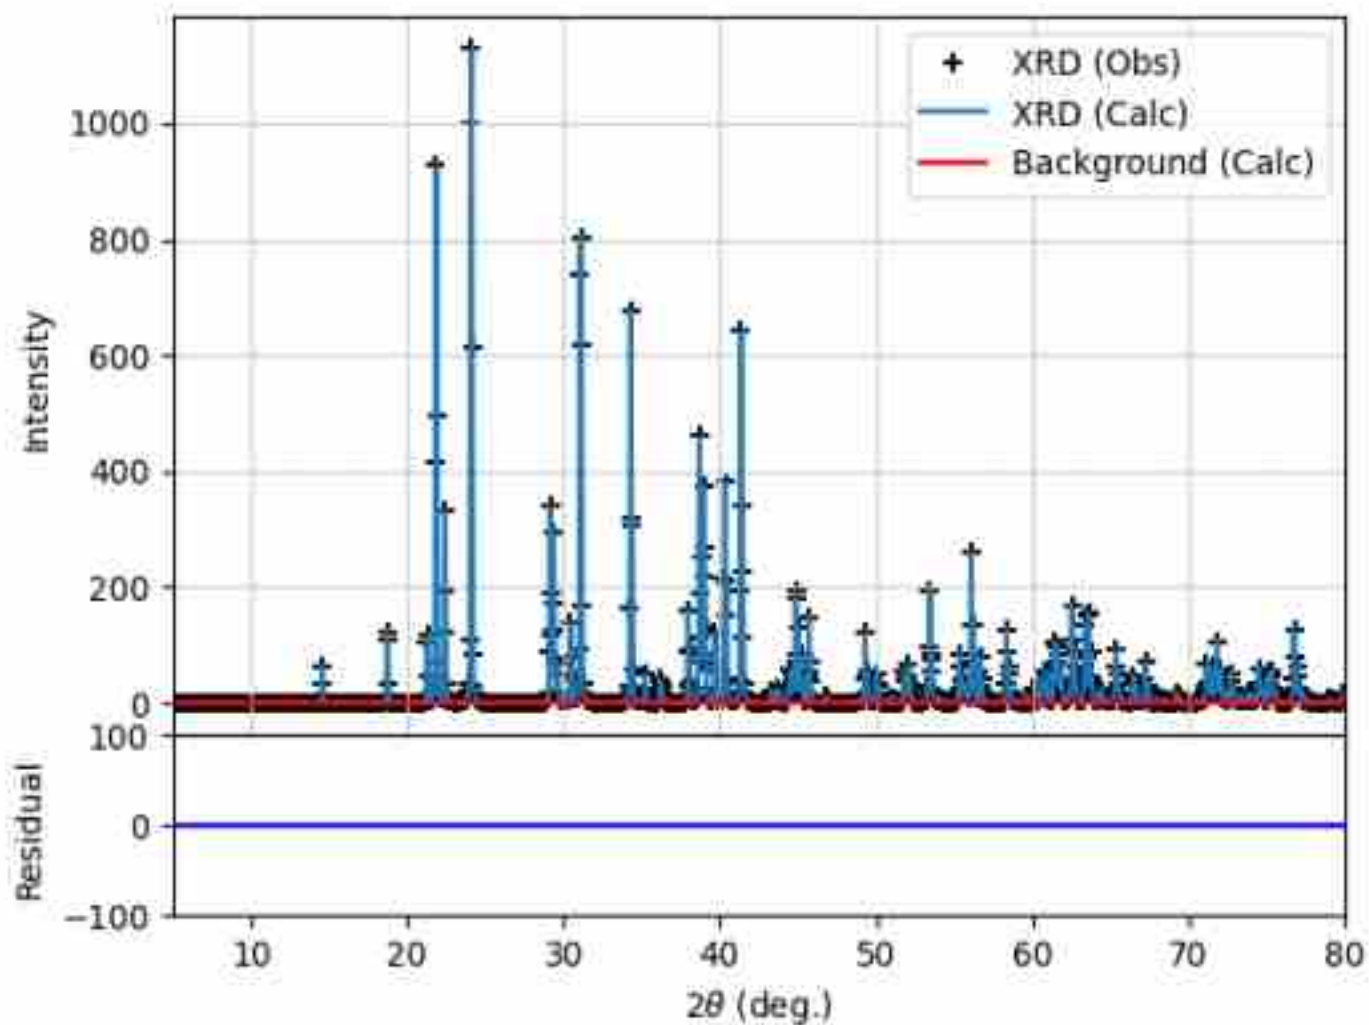

| RMSE before RR | Rwp     | RMSE after RR |
|----------------|---------|---------------|
| 0.035          | 0.00491 | 0.00061       |

# Sc4Ti12C2

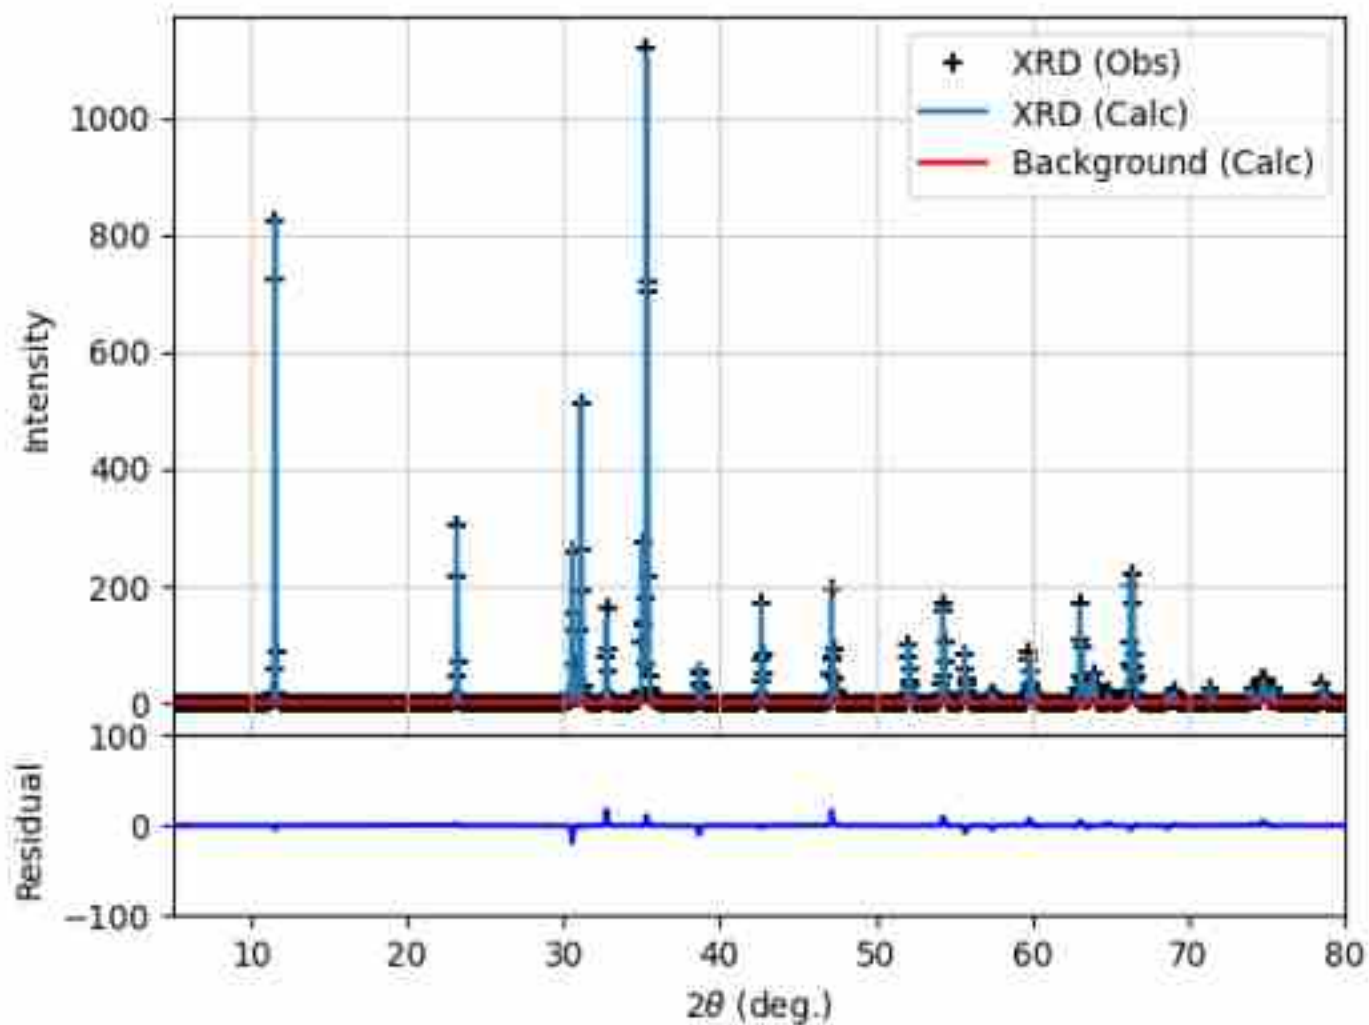

| RMSE before RR | Rwp     | RMSE after RR |
|----------------|---------|---------------|
| 0.035          | 5.27066 | 0.12972       |

# Sr1Eu1Co2O6

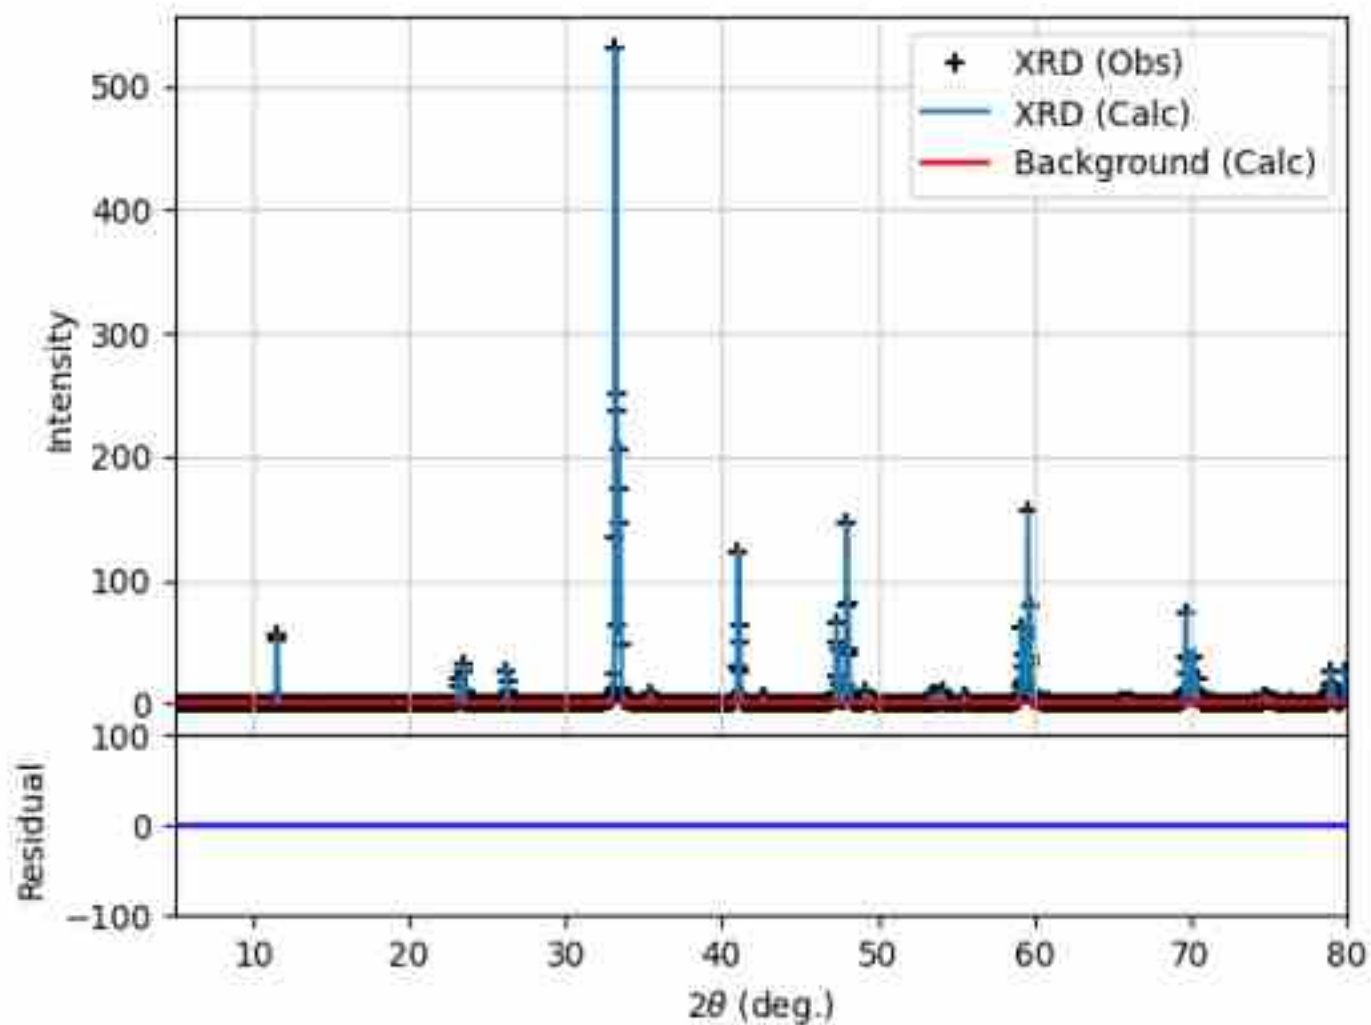

| RMSE before RR | Rwp     | RMSE after RR |
|----------------|---------|---------------|
| 0.035          | 0.00471 | 0.00159       |



# Sr4Zn8

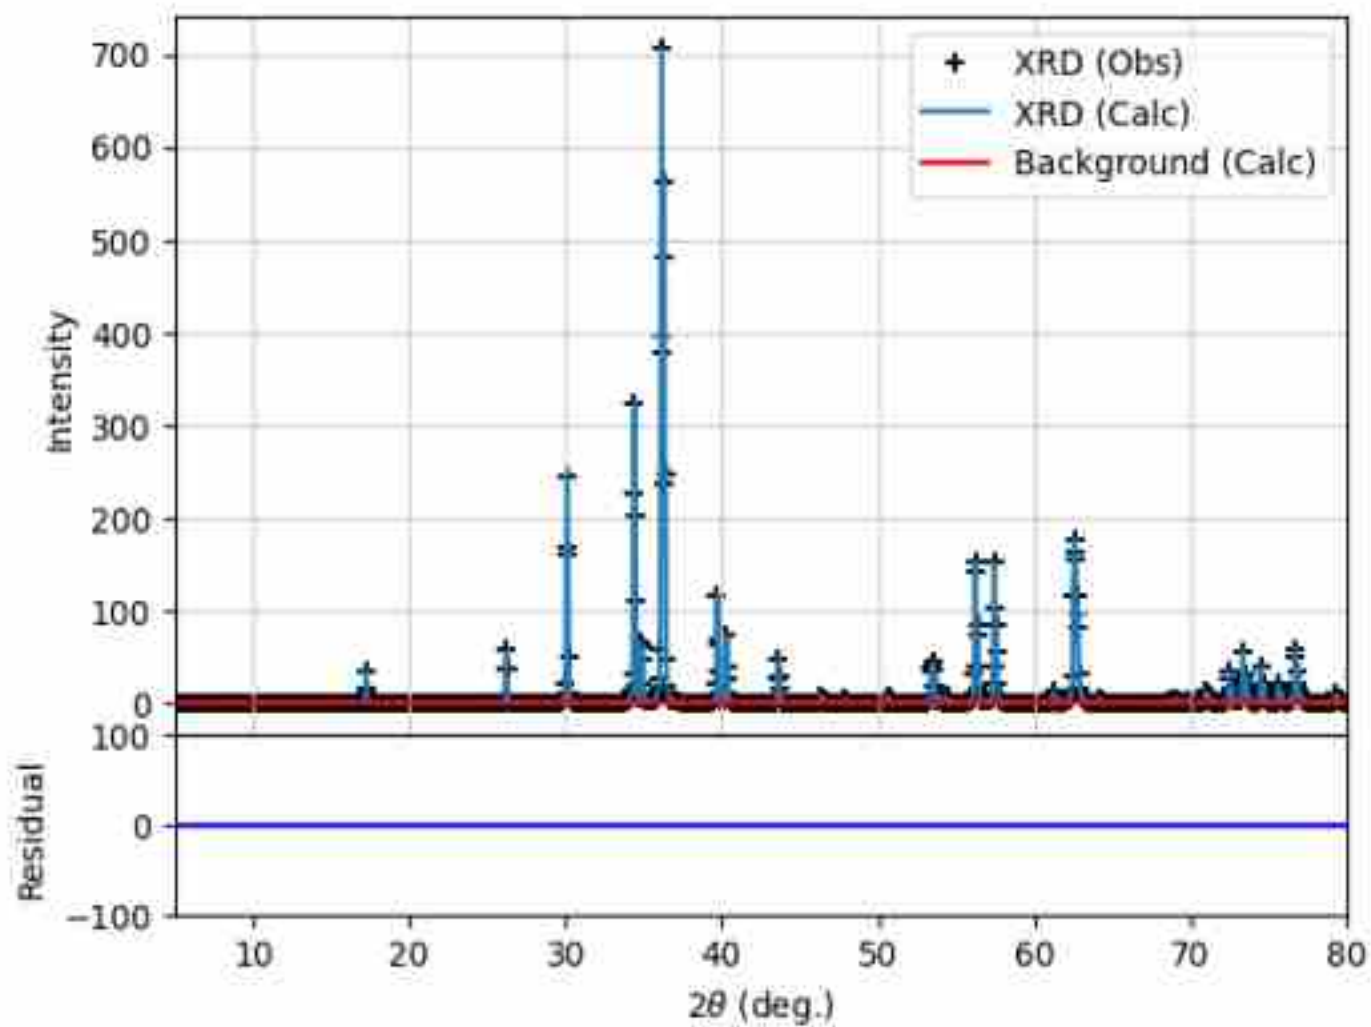

| RMSE before RR | Rwp     | RMSE after RR |
|----------------|---------|---------------|
| 0.035          | 0.00614 | 0.00096       |

# Ta<sub>4</sub>Co<sub>4</sub>As<sub>4</sub>

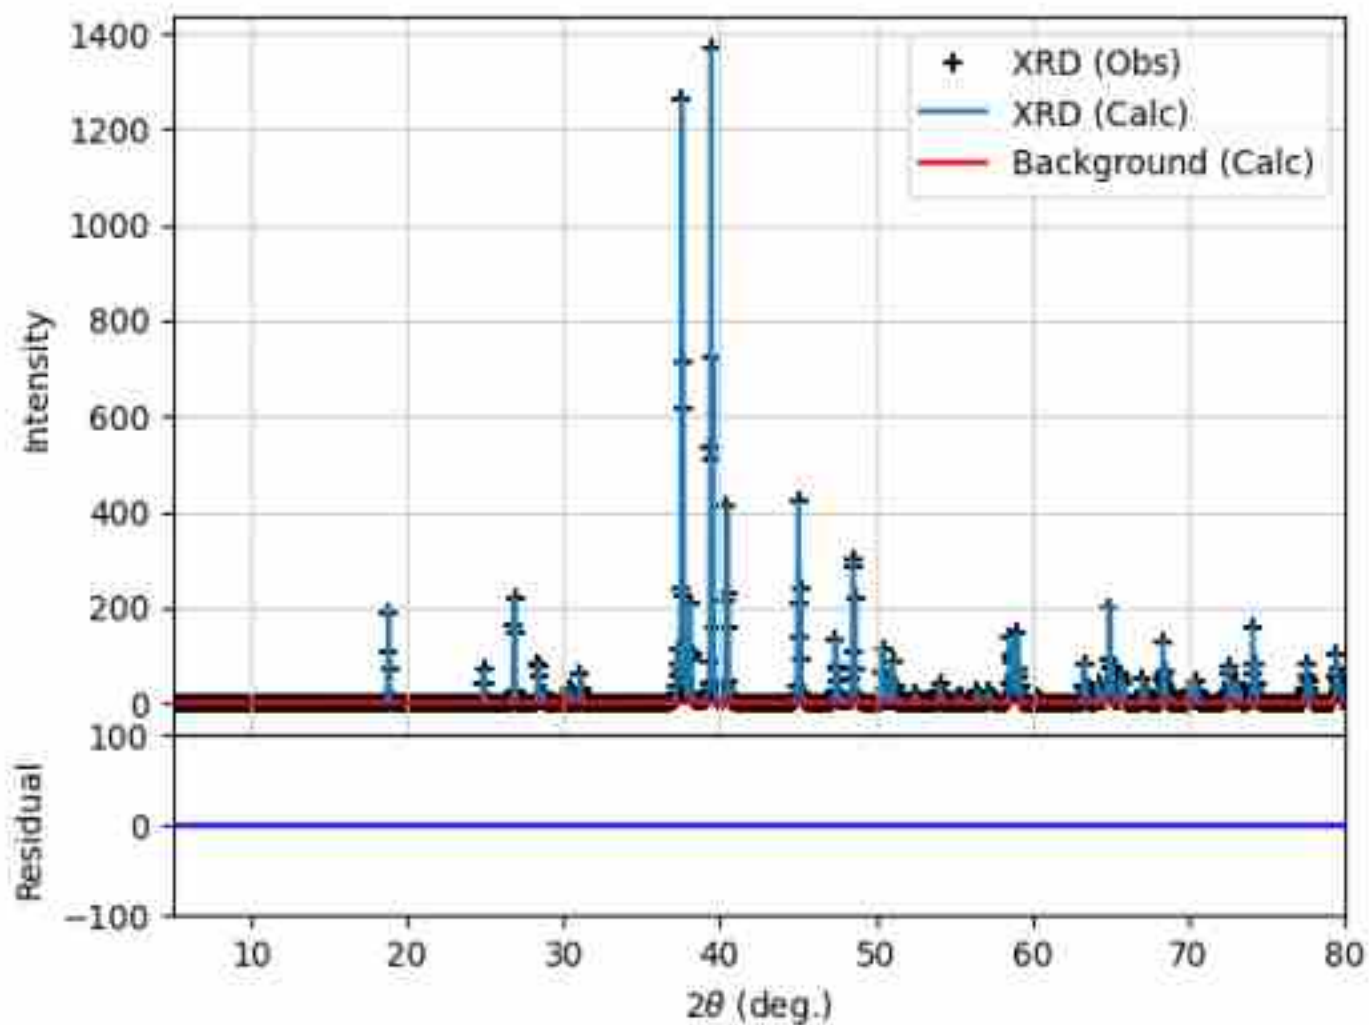

| RMSE before RR | Rwp     | RMSE after RR |
|----------------|---------|---------------|
| 0.035          | 0.00629 | 0.00062       |

# Ta<sub>4</sub>Zn<sub>2</sub>O<sub>12</sub>

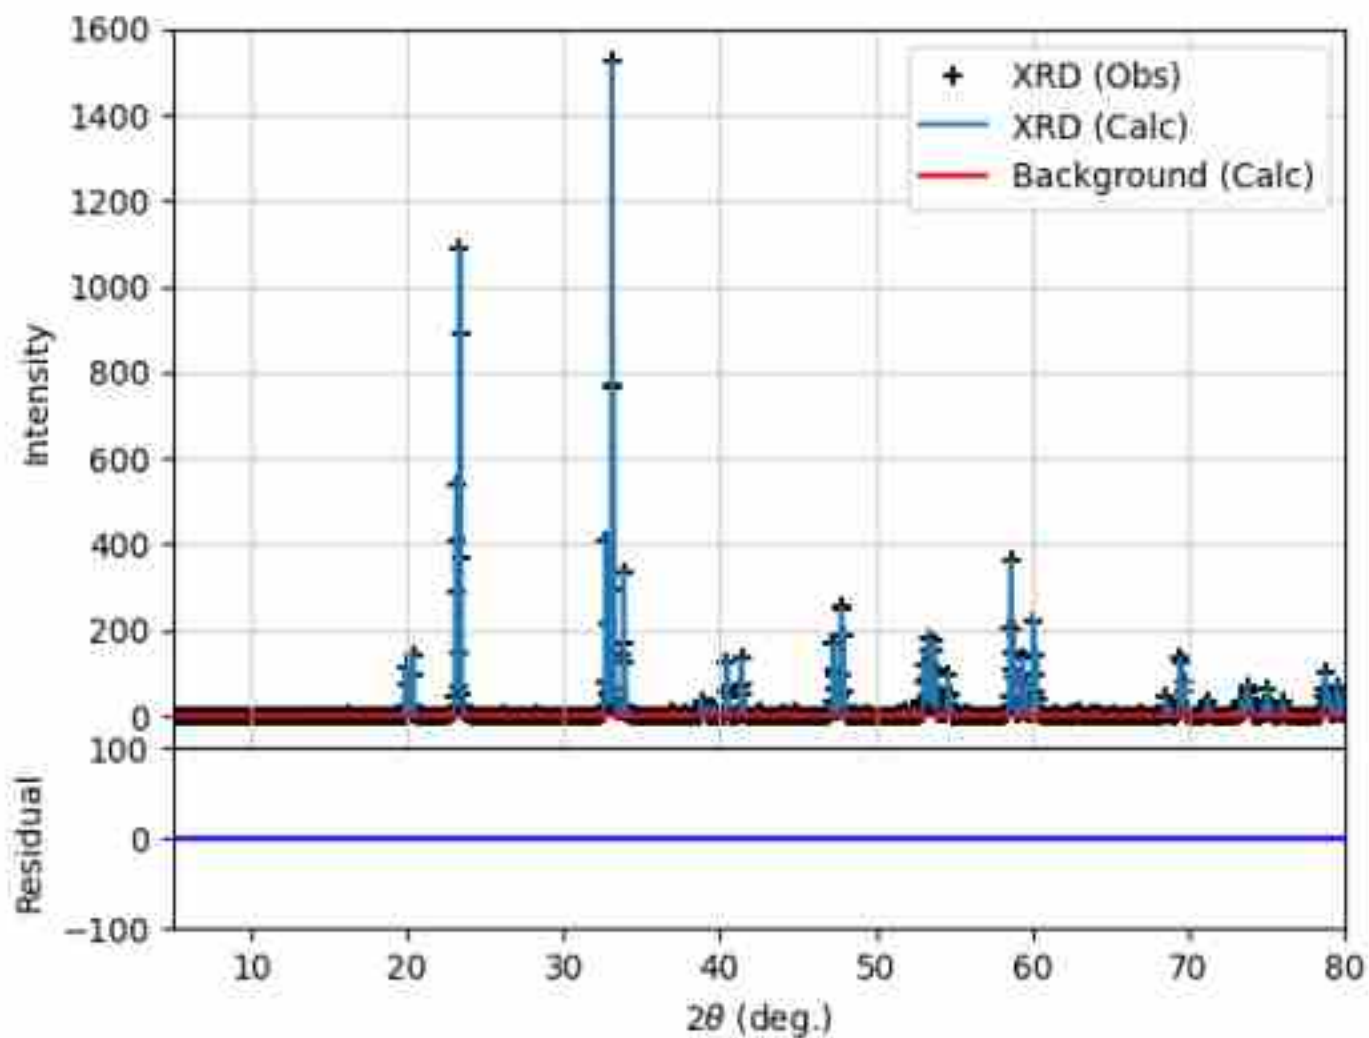

| RMSE before RR | Rwp     | RMSE after RR |
|----------------|---------|---------------|
| 0.035          | 0.00399 | 0.00208       |

# Th<sub>2</sub>Mn<sub>2</sub>Se<sub>6</sub>

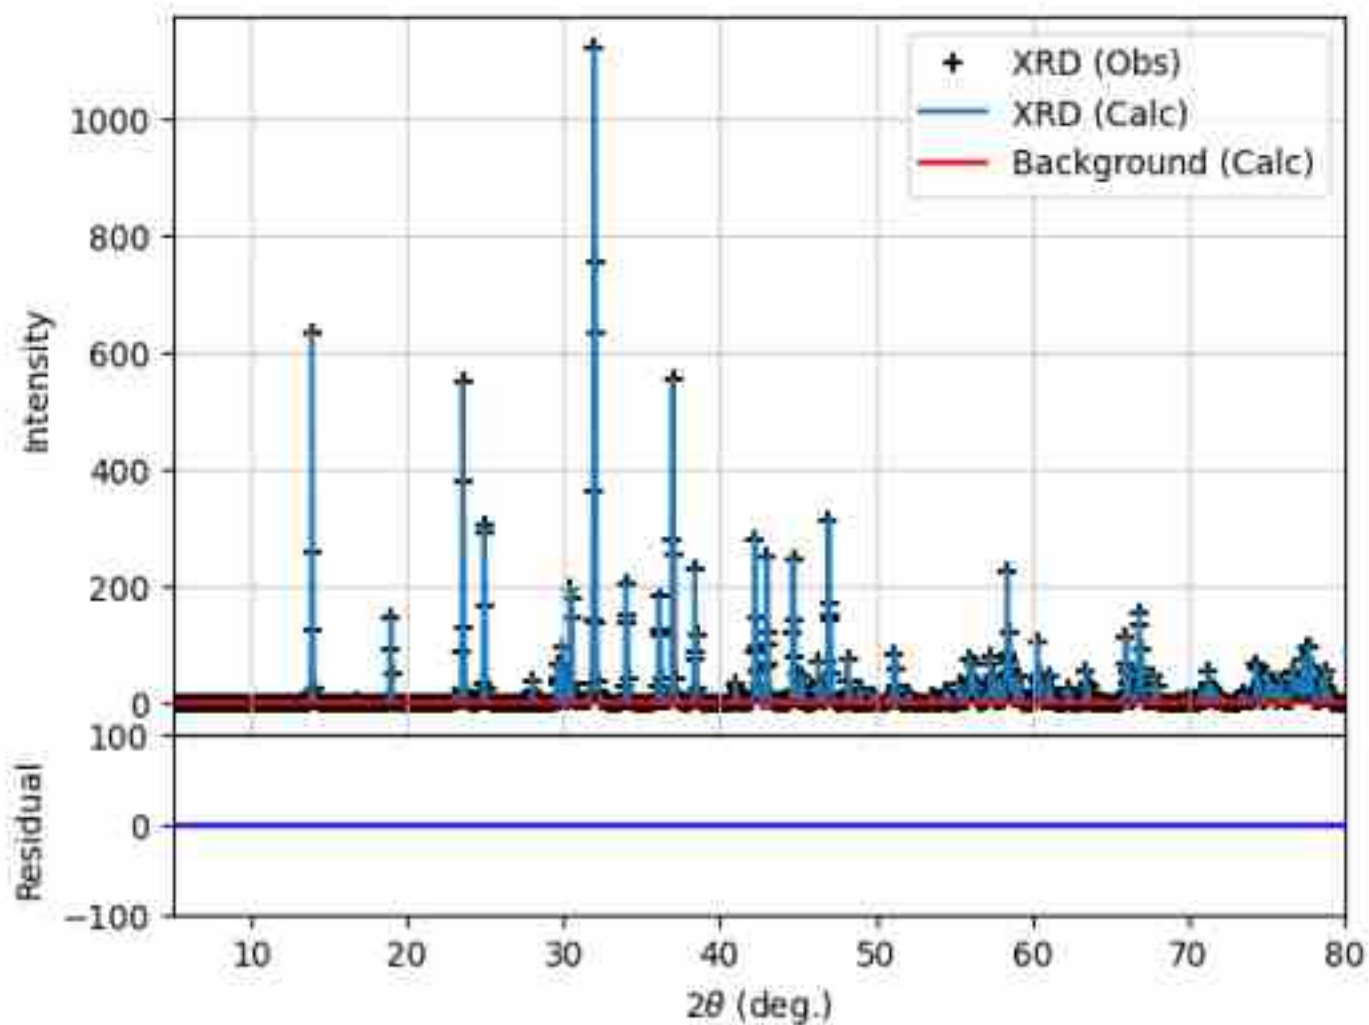

| RMSE before RR | Rwp     | RMSE after RR |
|----------------|---------|---------------|
| 0.035          | 0.00425 | 0.00032       |

# Ti<sub>2</sub>CuNi

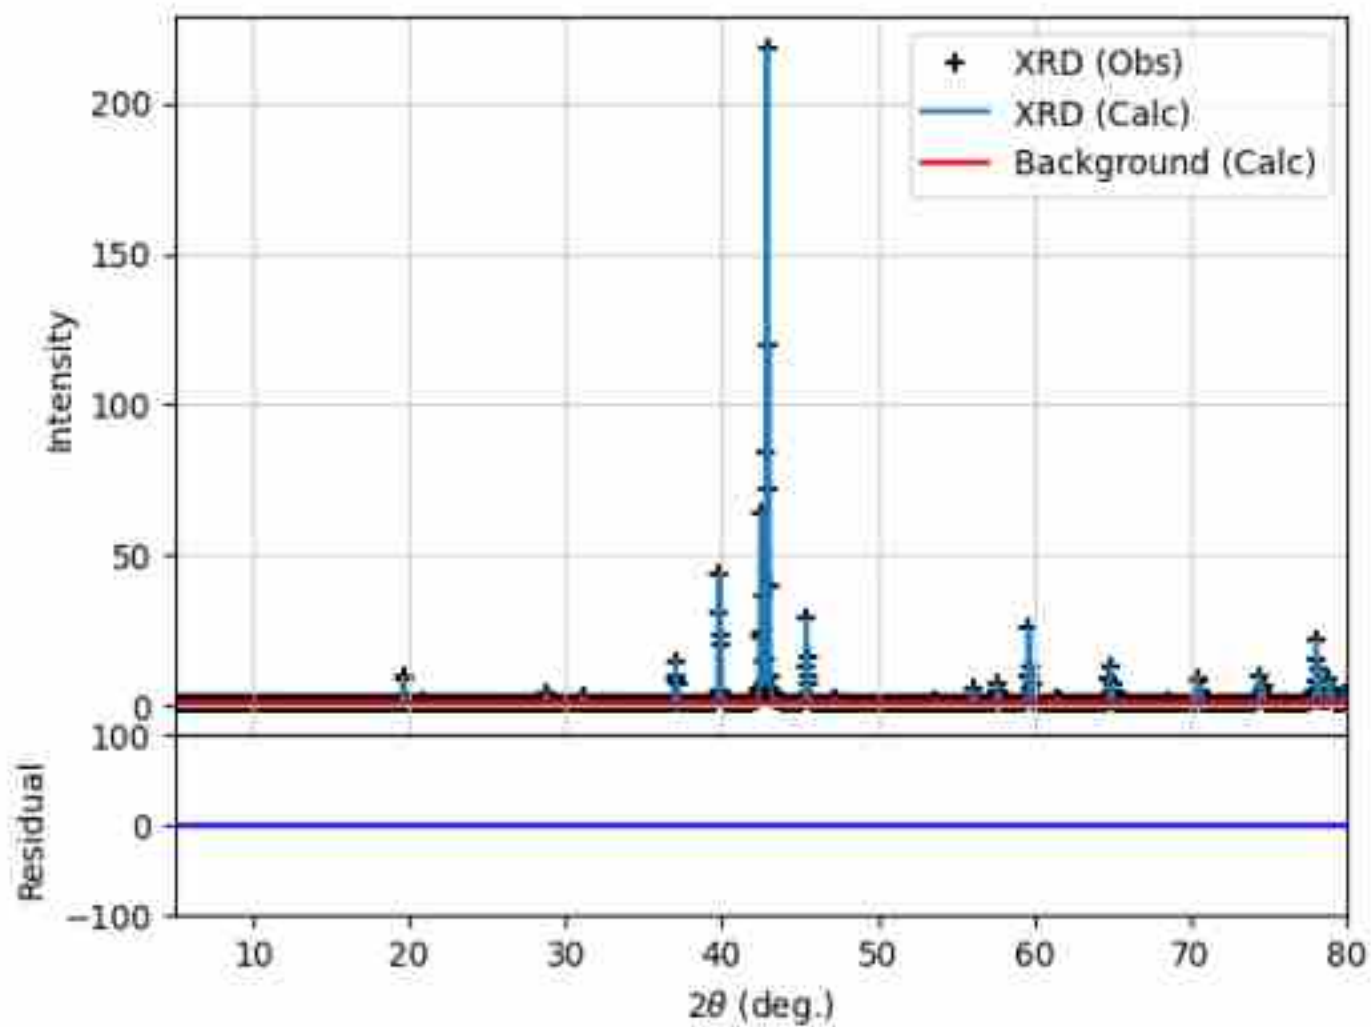

| RMSE before RR | Rwp     | RMSE after RR |
|----------------|---------|---------------|
| 0.035          | 0.00262 | 0.00018       |

# U2S6

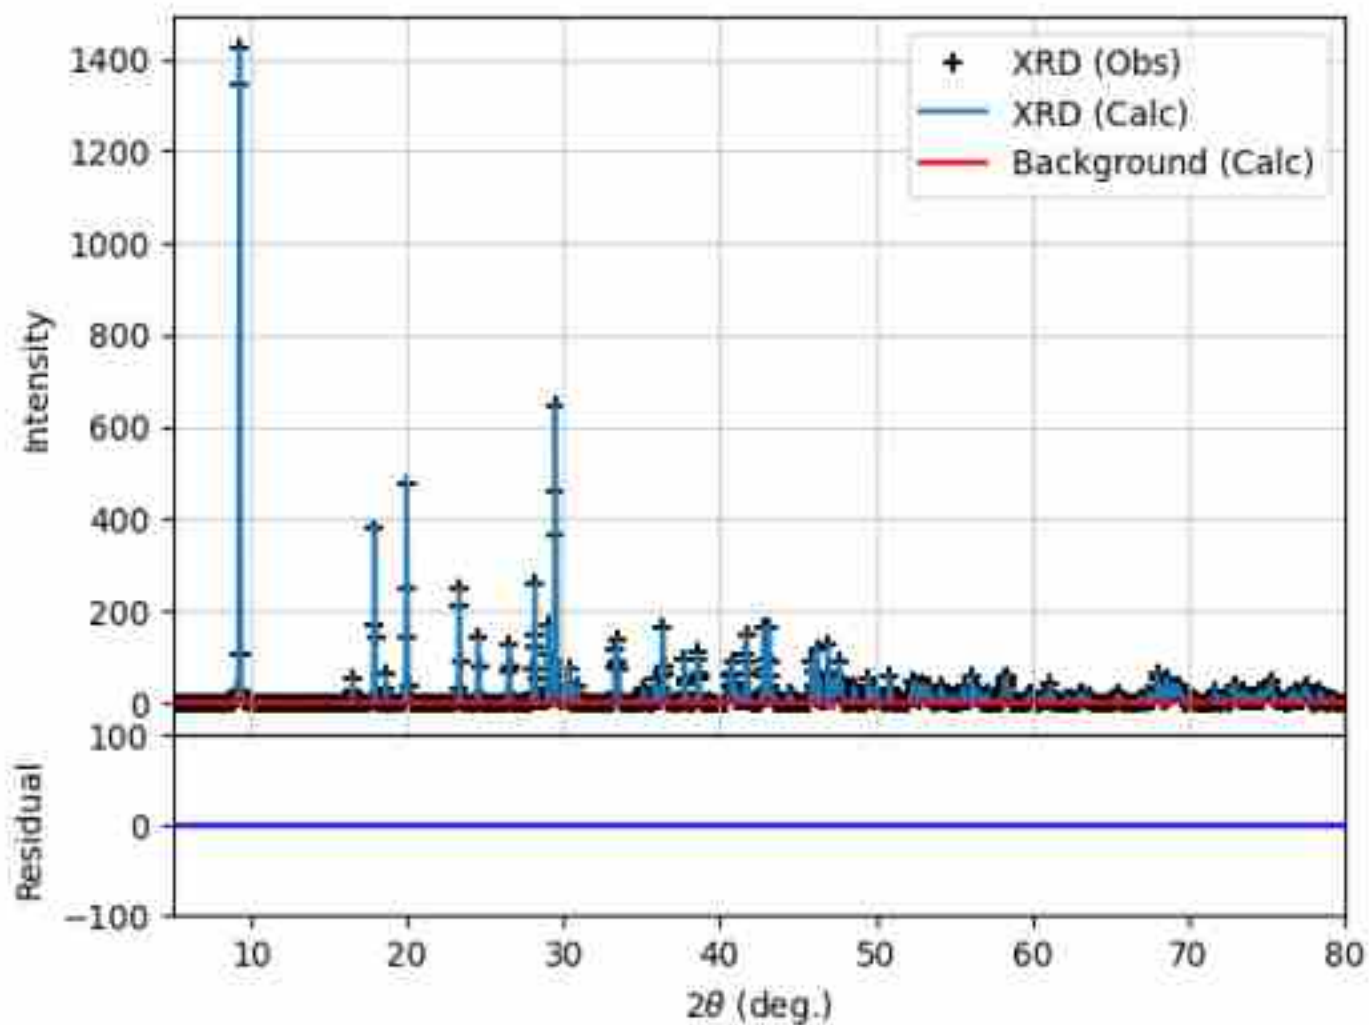

| RMSE before RR | Rwp     | RMSE after RR |
|----------------|---------|---------------|
| 0.035          | 0.00338 | 0.00095       |

# U10P6Se4

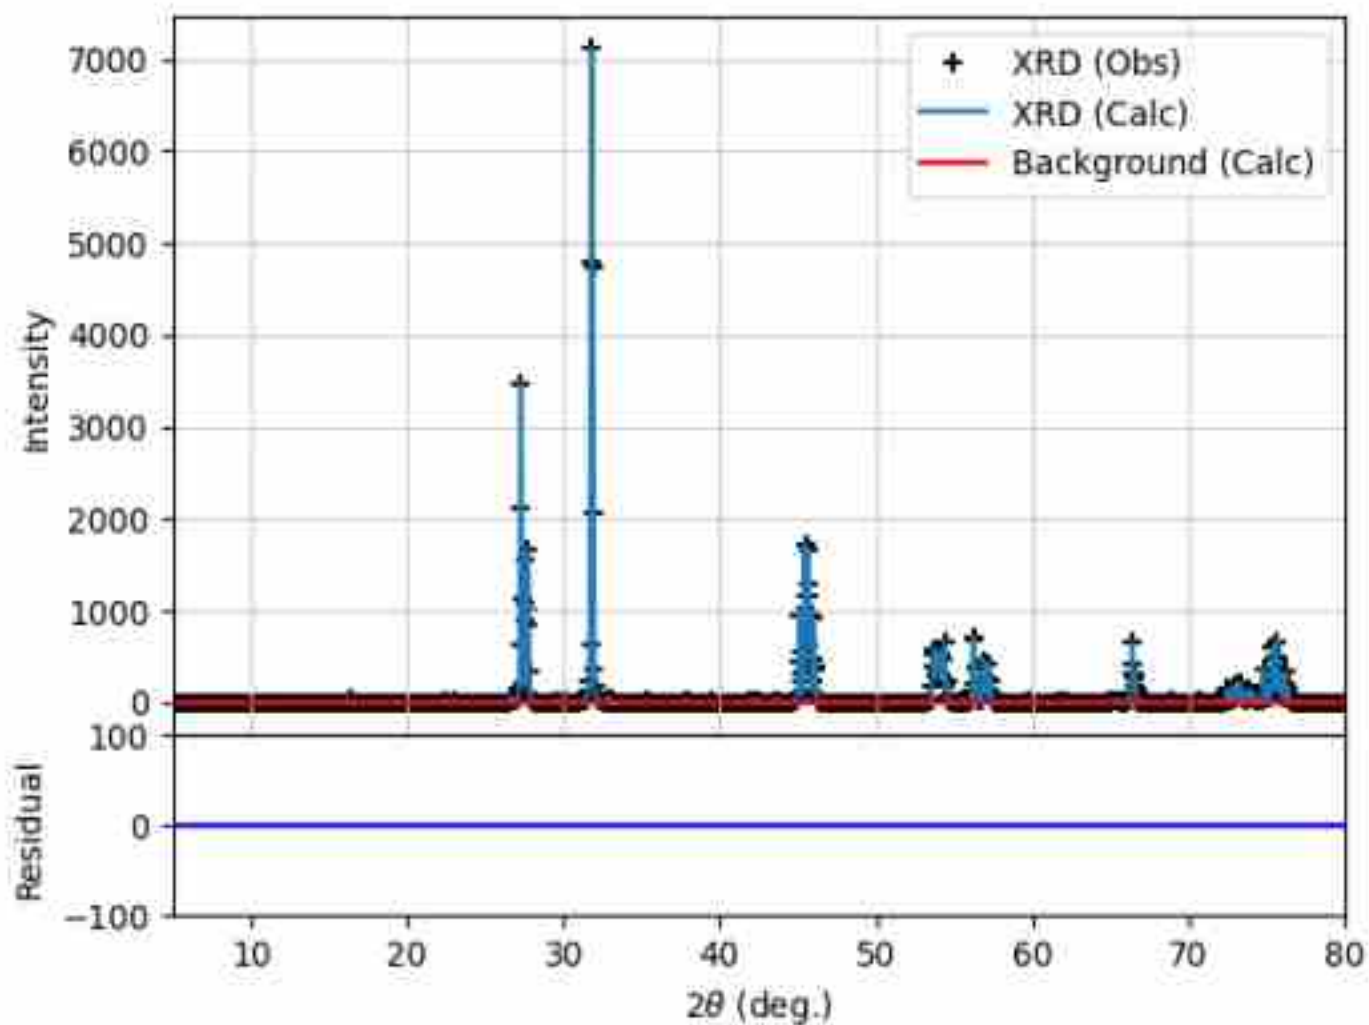

| RMSE before RR | Rwp    | RMSE after RR |
|----------------|--------|---------------|
| 0.035          | 0.0026 | 0.00047       |

# Zr<sub>2</sub>C18

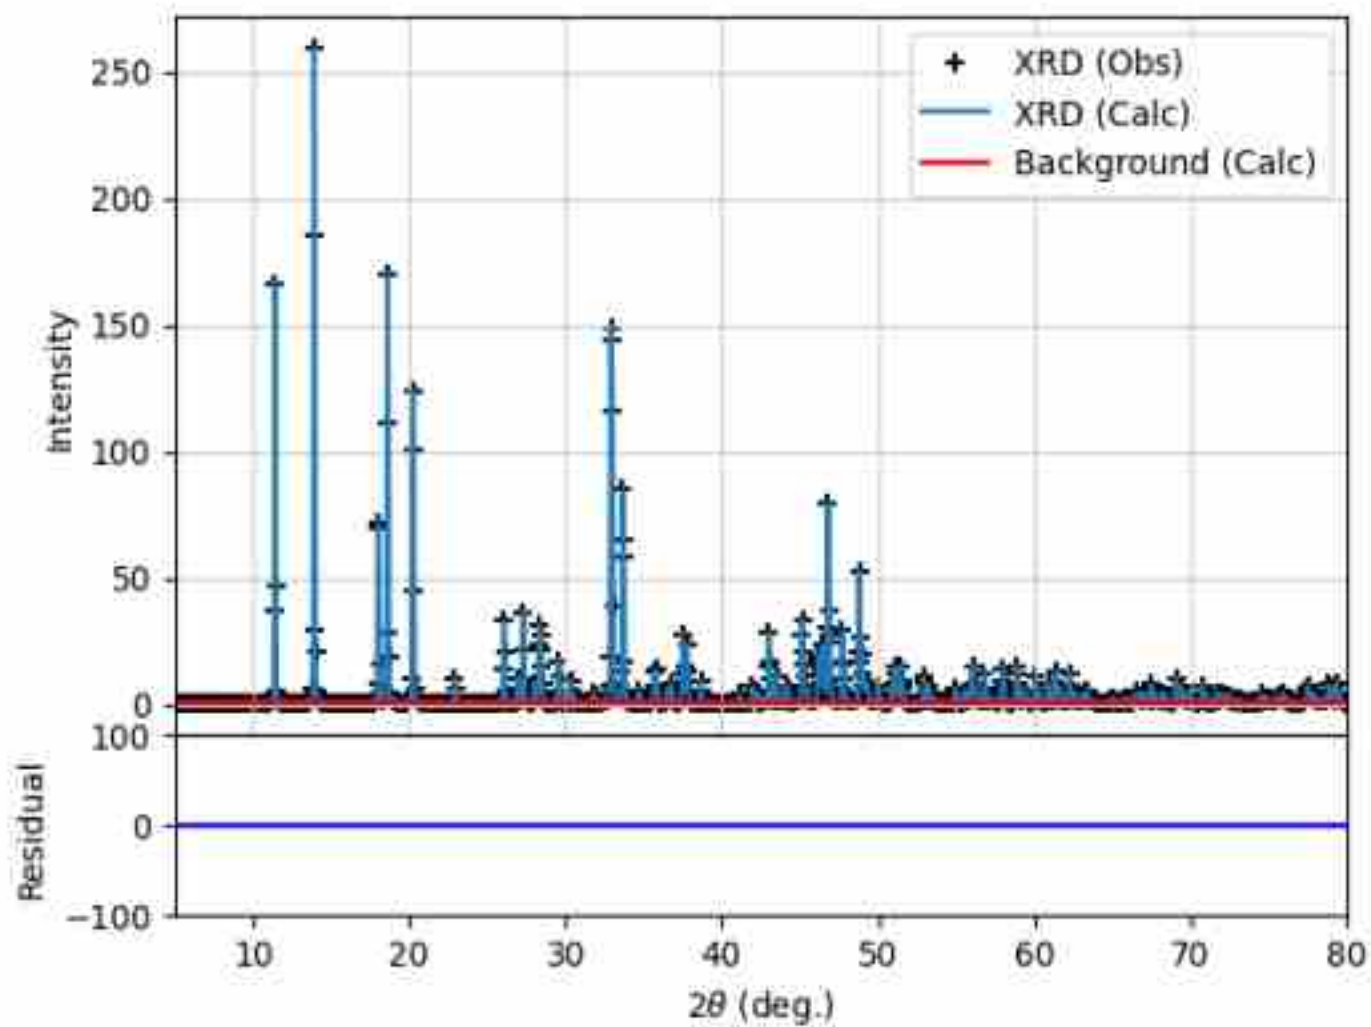

| RMSE before RR | Rwp     | RMSE after RR |
|----------------|---------|---------------|
| 0.035          | 0.00375 | 0.00046       |



# Zr4Cu2

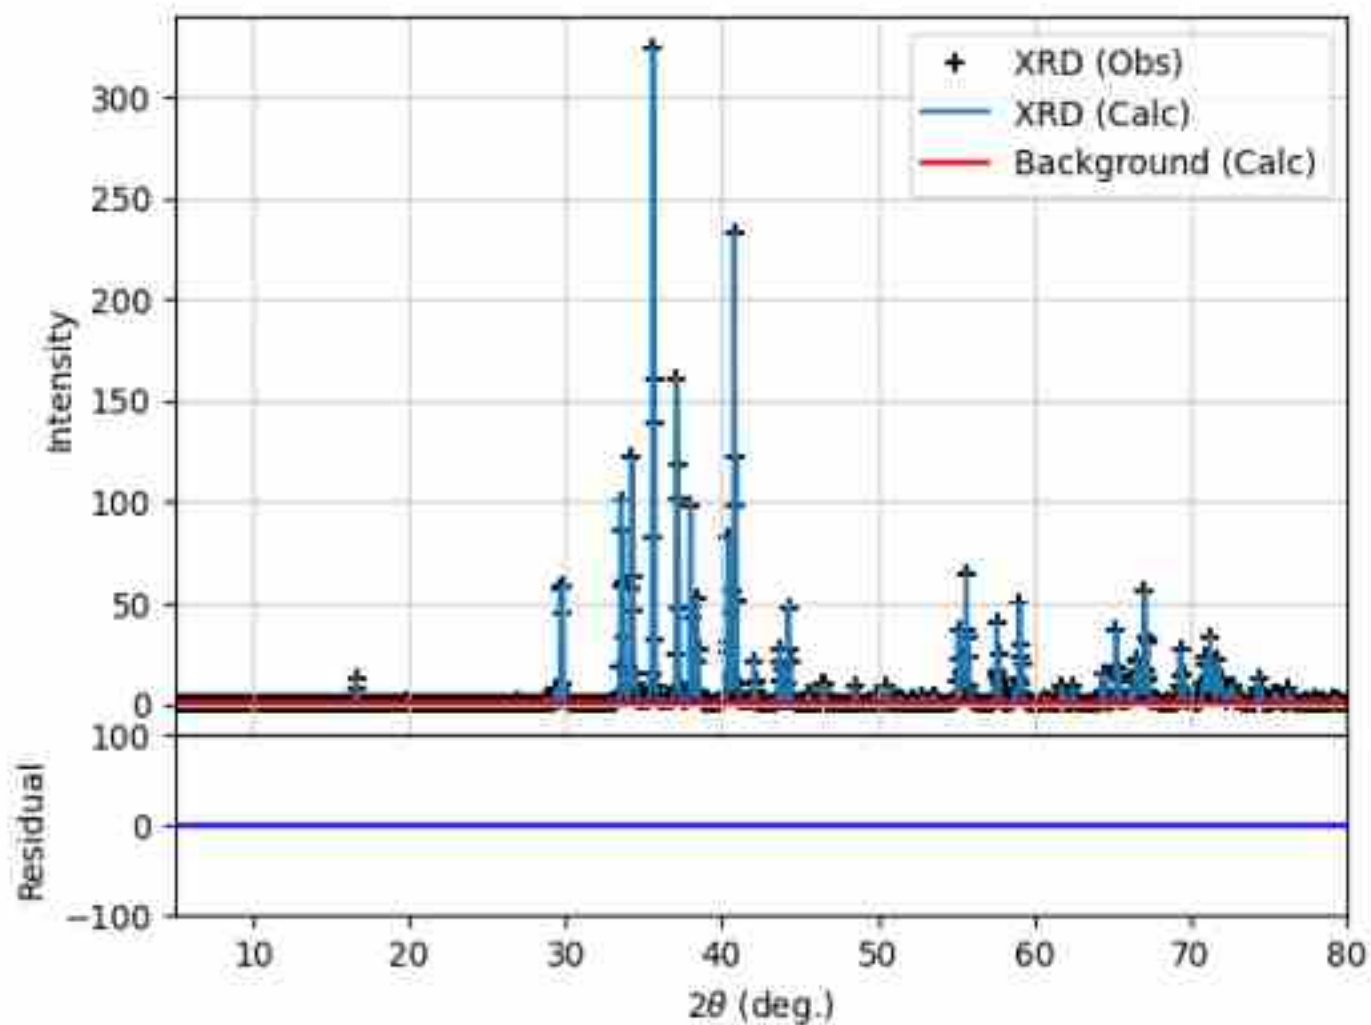

| RMSE before RR | Rwp     | RMSE after RR |
|----------------|---------|---------------|
| 0.035          | 0.00366 | 0.00023       |

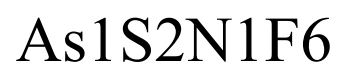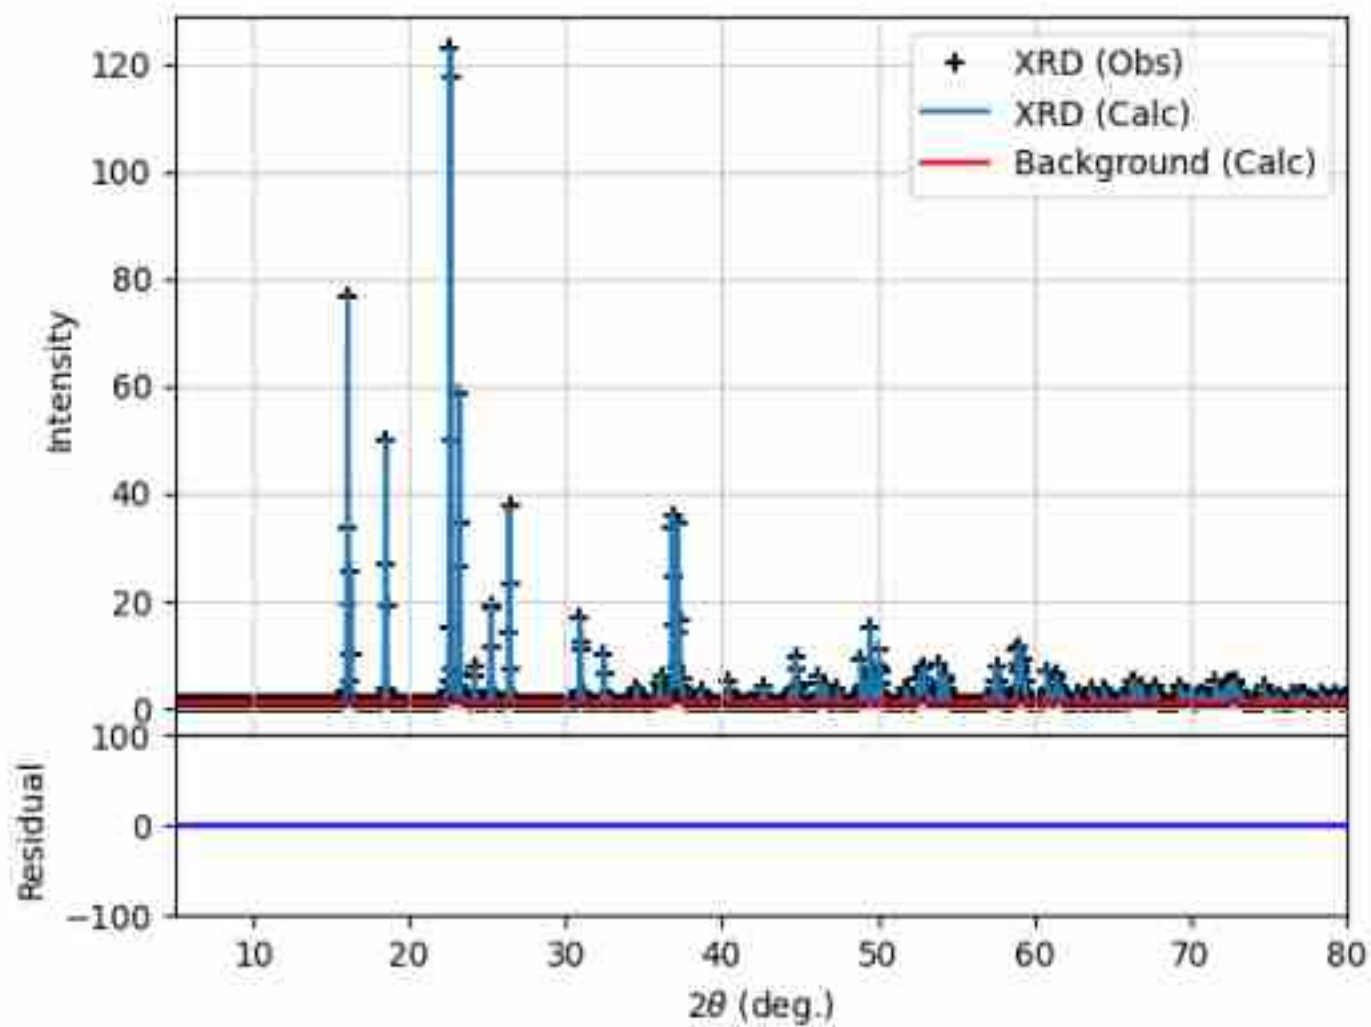

| RMSE before RR | Rwp     | RMSE after RR |
|----------------|---------|---------------|
| 0.036          | 0.00264 | 0.00049       |

# Ba2S4

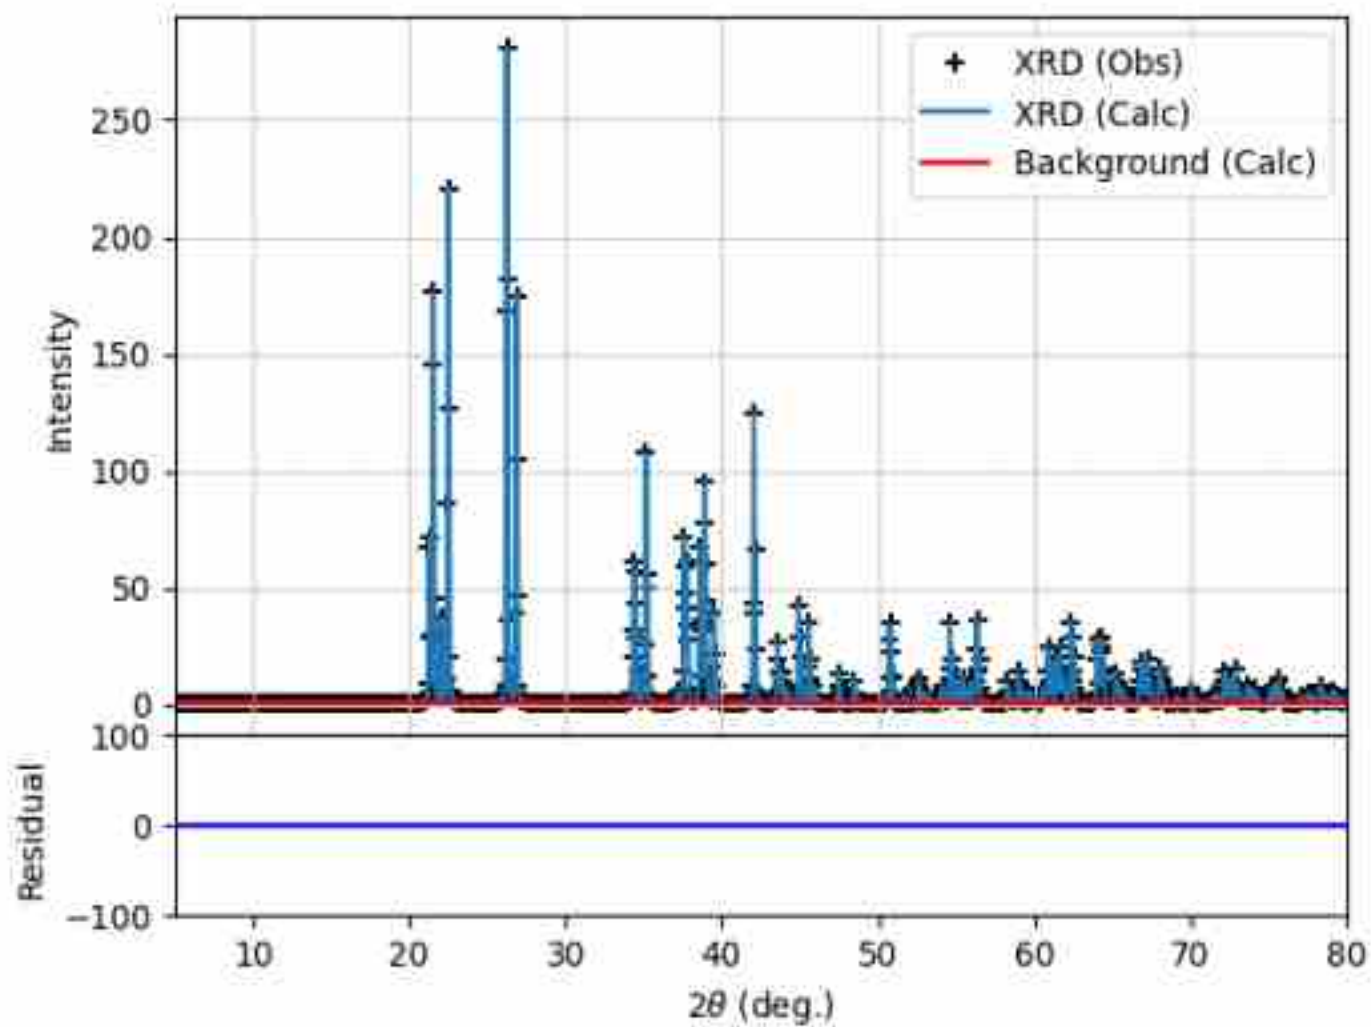

| RMSE before RR | Rwp    | RMSE after RR |
|----------------|--------|---------------|
| 0.036          | 0.0031 | 0.00045       |

# Ba<sub>2</sub>W<sub>2</sub>O<sub>8</sub>

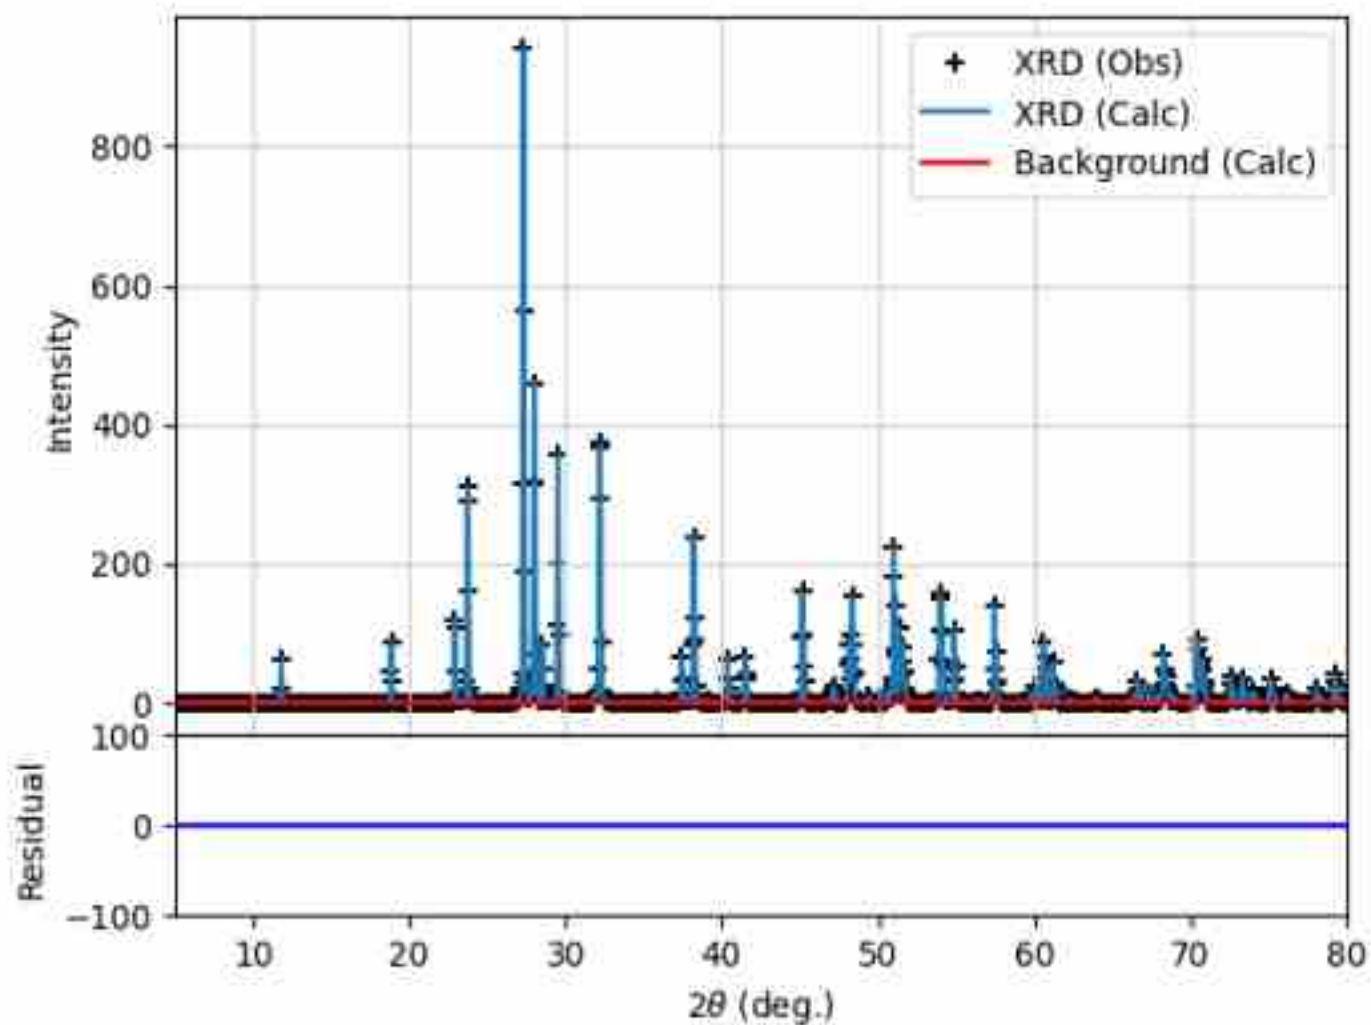

| RMSE before RR | Rwp     | RMSE after RR |
|----------------|---------|---------------|
| 0.036          | 0.00383 | 0.00162       |

# Br<sub>2</sub>Cl<sub>2</sub>

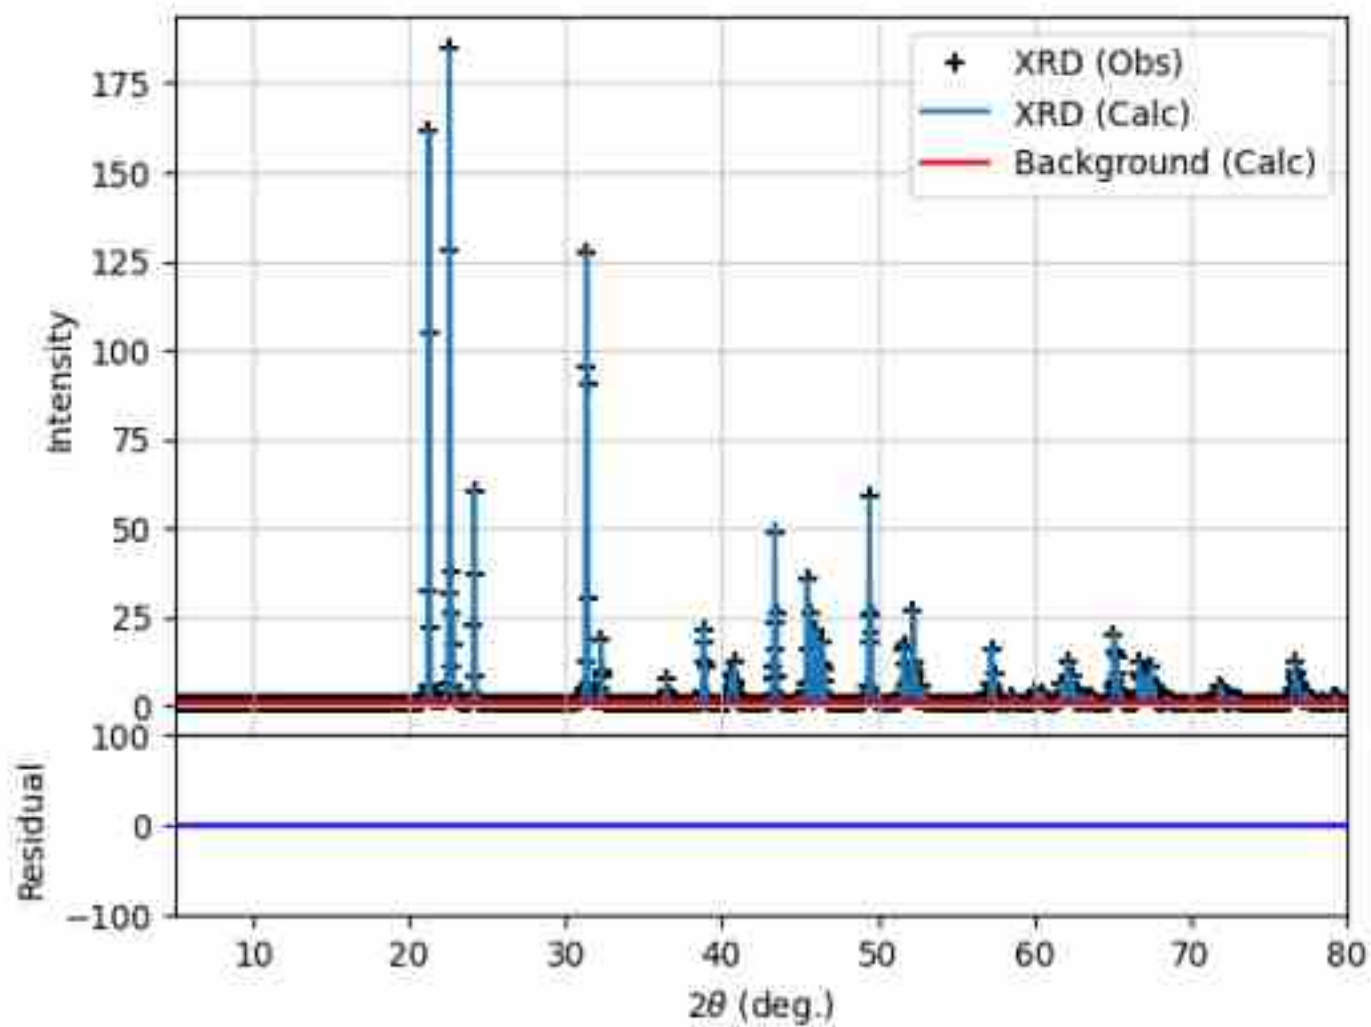

| RMSE before RR | Rwp     | RMSE after RR |
|----------------|---------|---------------|
| 0.036          | 0.00234 | 0.00021       |

# Co<sub>1</sub>Ag<sub>2</sub>Sn<sub>3</sub>S<sub>8</sub>

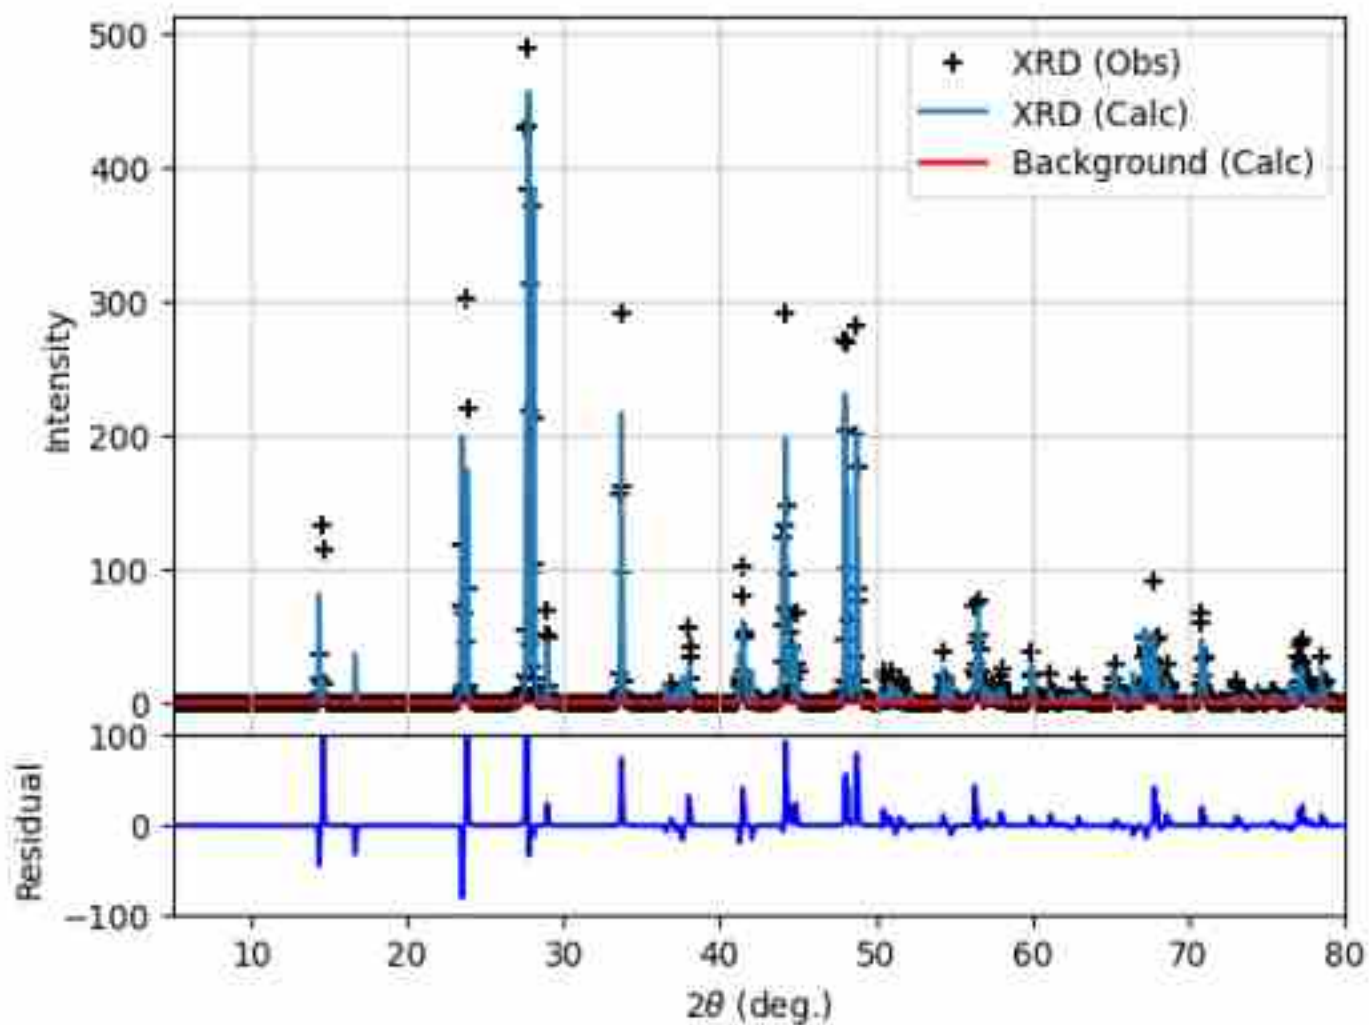

| RMSE before RR | Rwp      | RMSE after RR |
|----------------|----------|---------------|
| 0.036          | 40.64235 | 0.08262       |

# Cs<sub>1</sub>Ca<sub>2</sub>Ta<sub>3</sub>O<sub>10</sub>

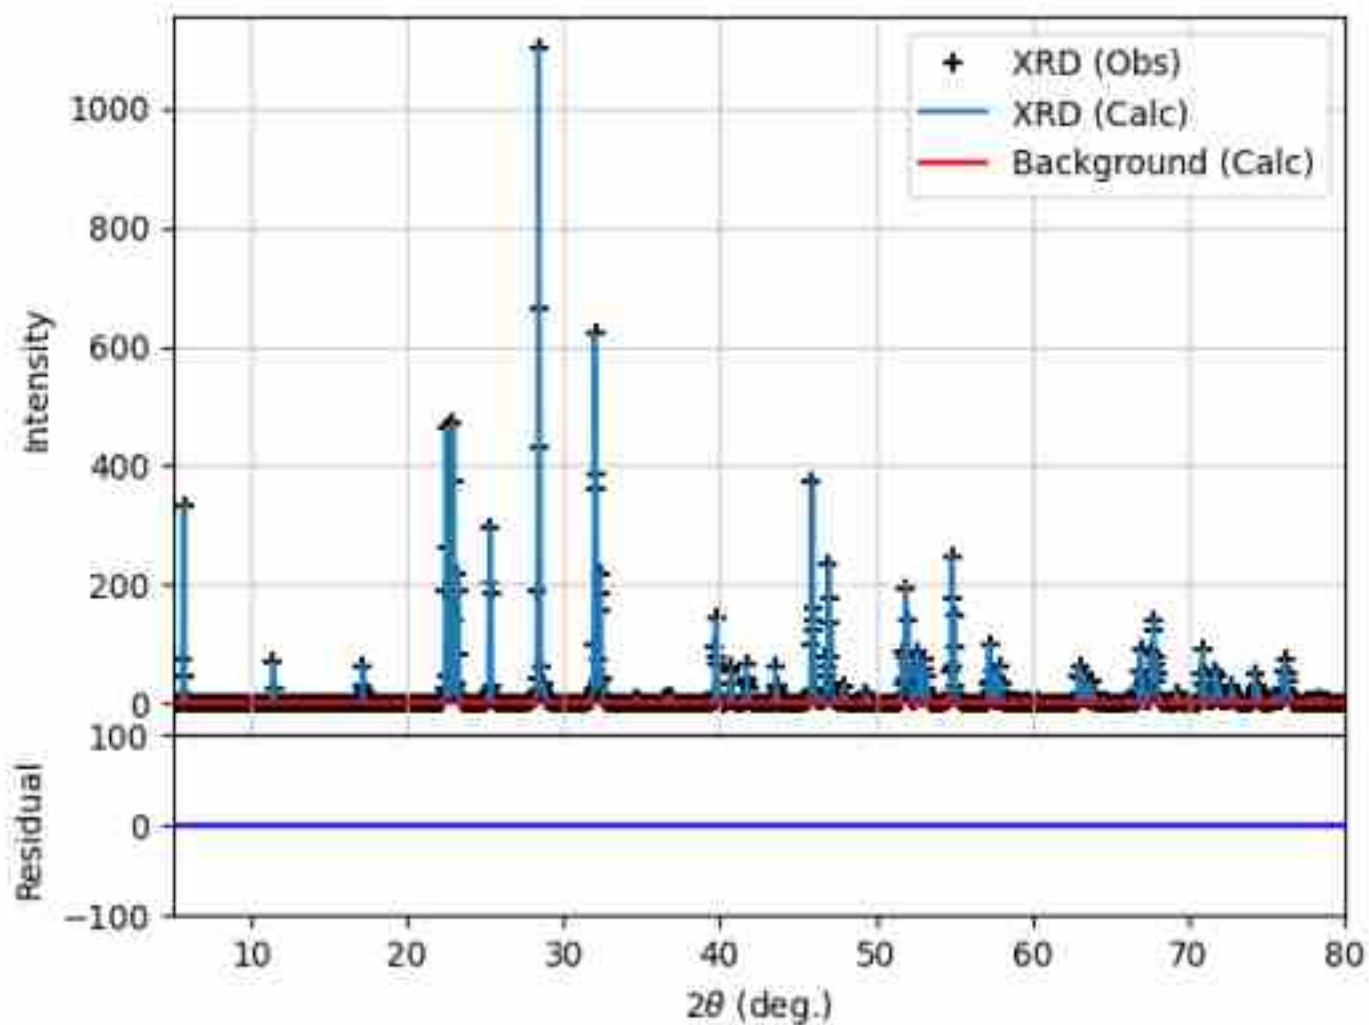

| RMSE before RR | Rwp     | RMSE after RR |
|----------------|---------|---------------|
| 0.036          | 0.00662 | 0.0017        |

# Cs<sub>2</sub>LiAl<sub>3</sub>F<sub>12</sub>

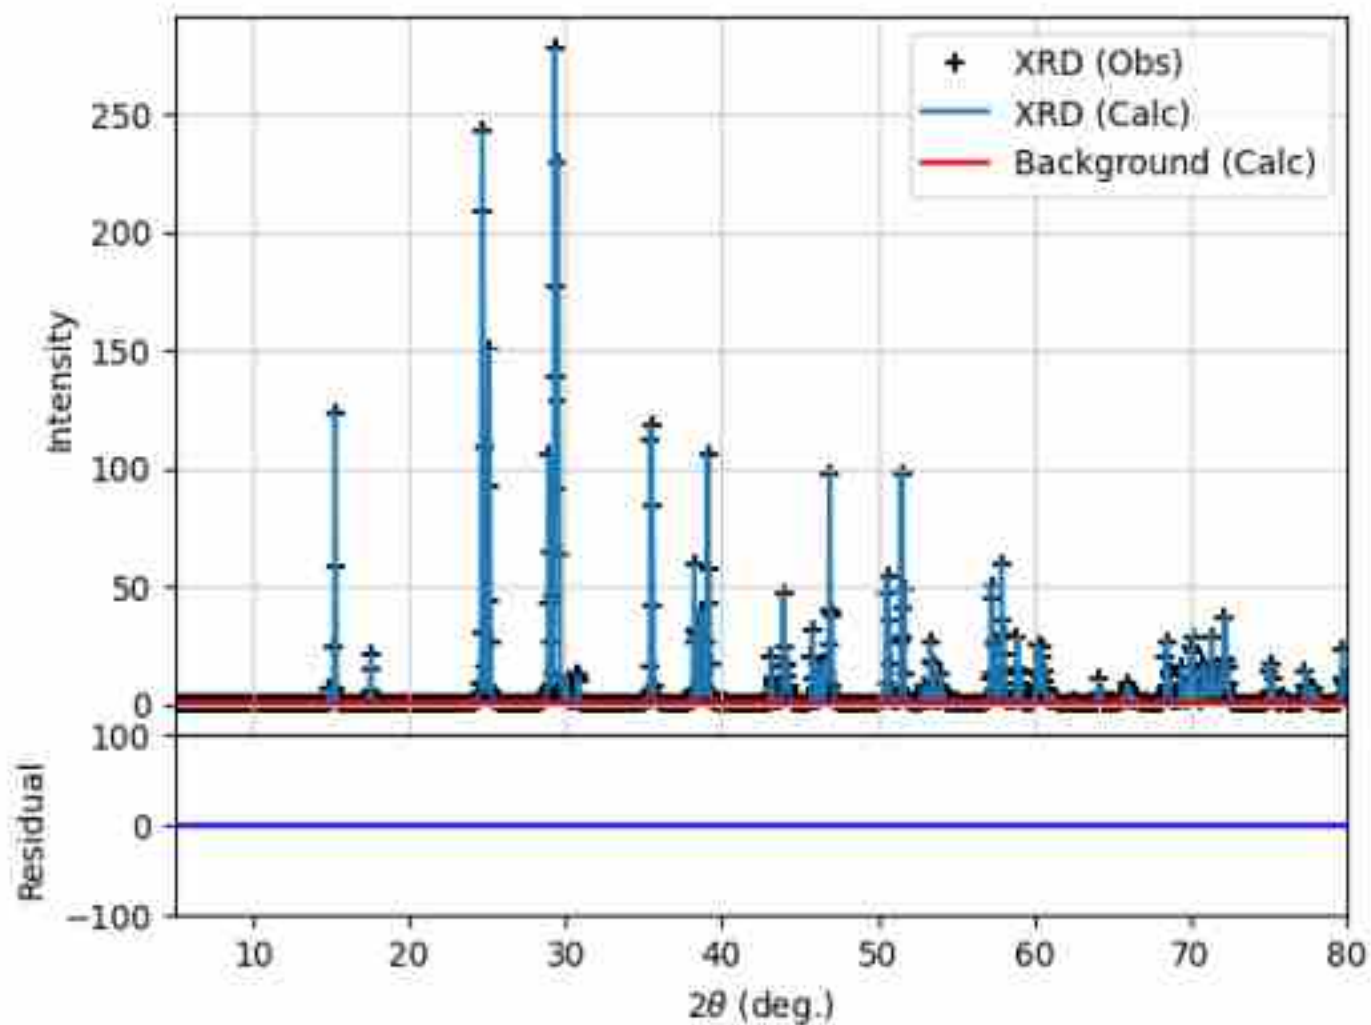

| RMSE before RR | Rwp     | RMSE after RR |
|----------------|---------|---------------|
| 0.036          | 0.00328 | 0.00138       |



# Cs<sub>2</sub>Ta<sub>2</sub>Se<sub>6</sub>

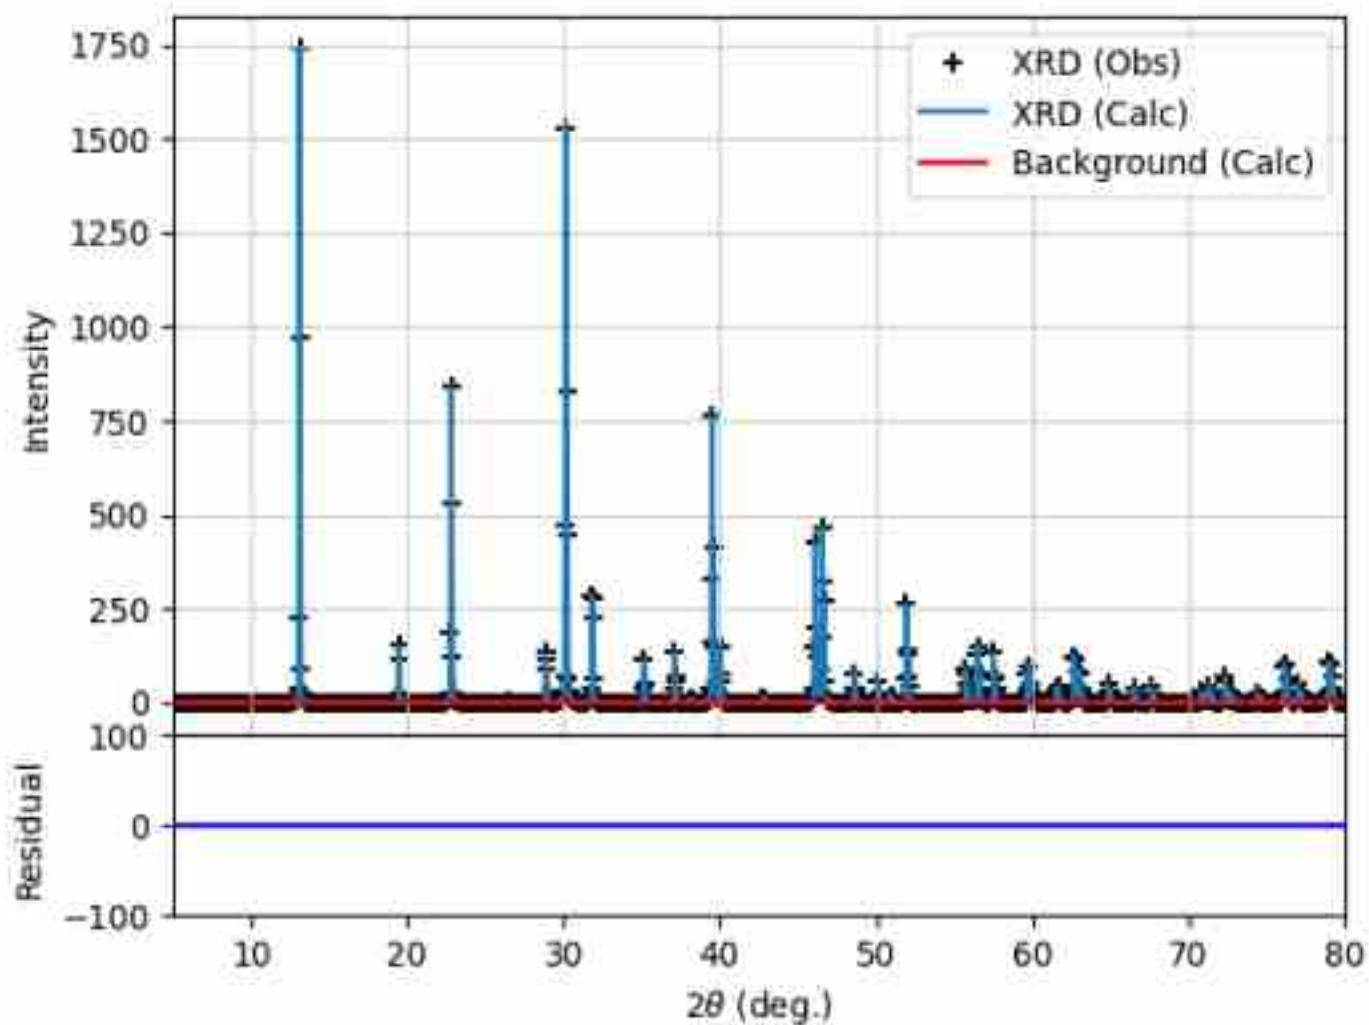

| RMSE before RR | Rwp     | RMSE after RR |
|----------------|---------|---------------|
| 0.036          | 0.00671 | 0.00069       |

Cs6Mn2I10

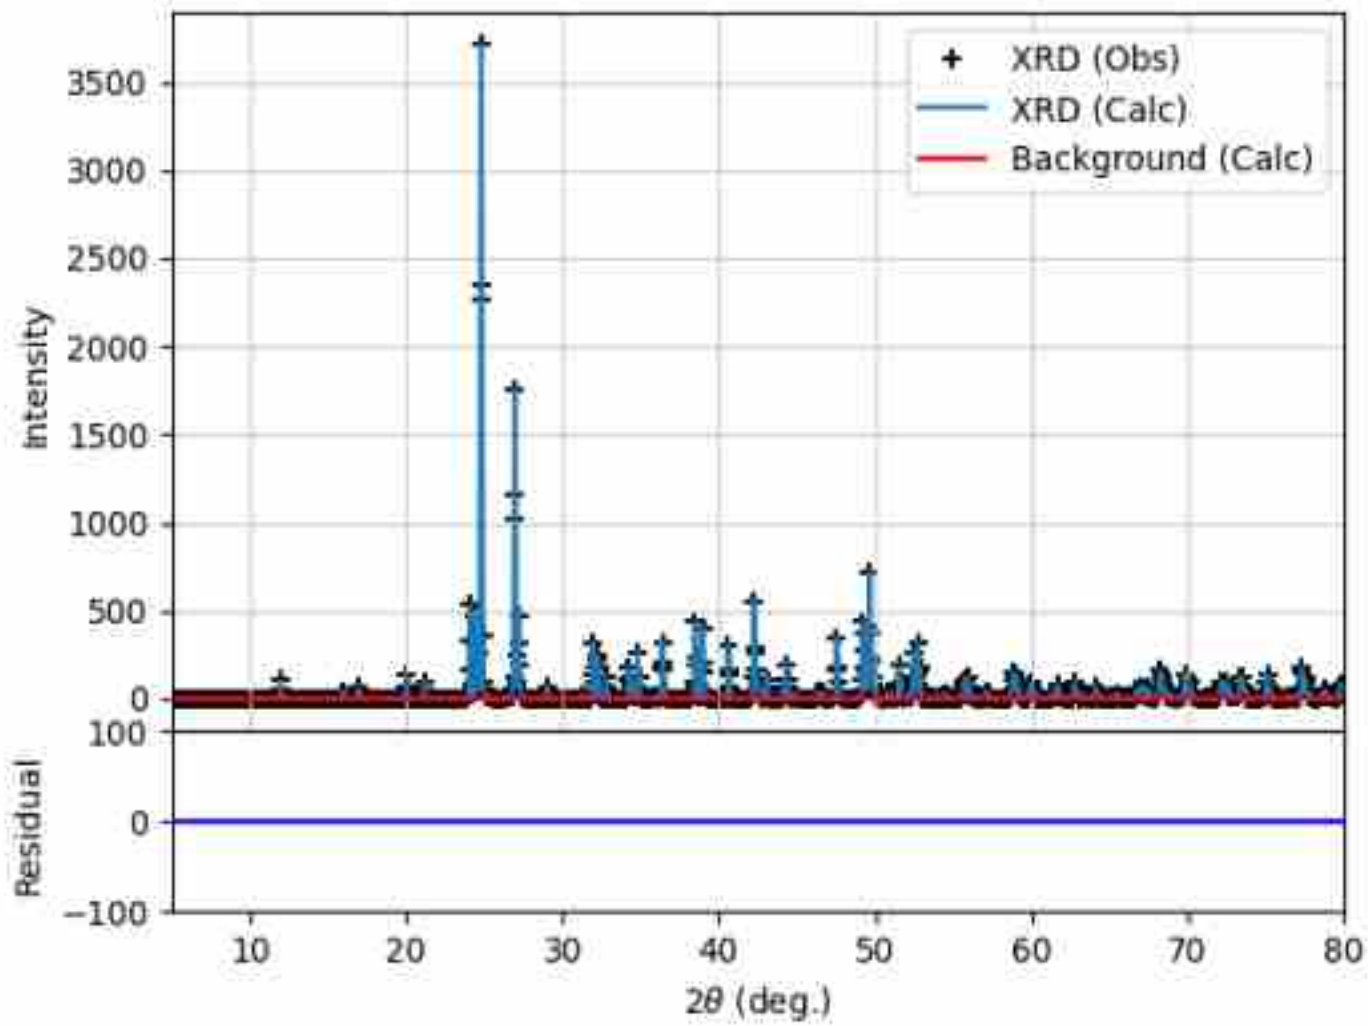

| RMSE before RR | Rwp     | RMSE after RR |
|----------------|---------|---------------|
| 0.036          | 0.00302 | 0.00029       |

# Eu<sub>2</sub>B<sub>4</sub>C<sub>4</sub>

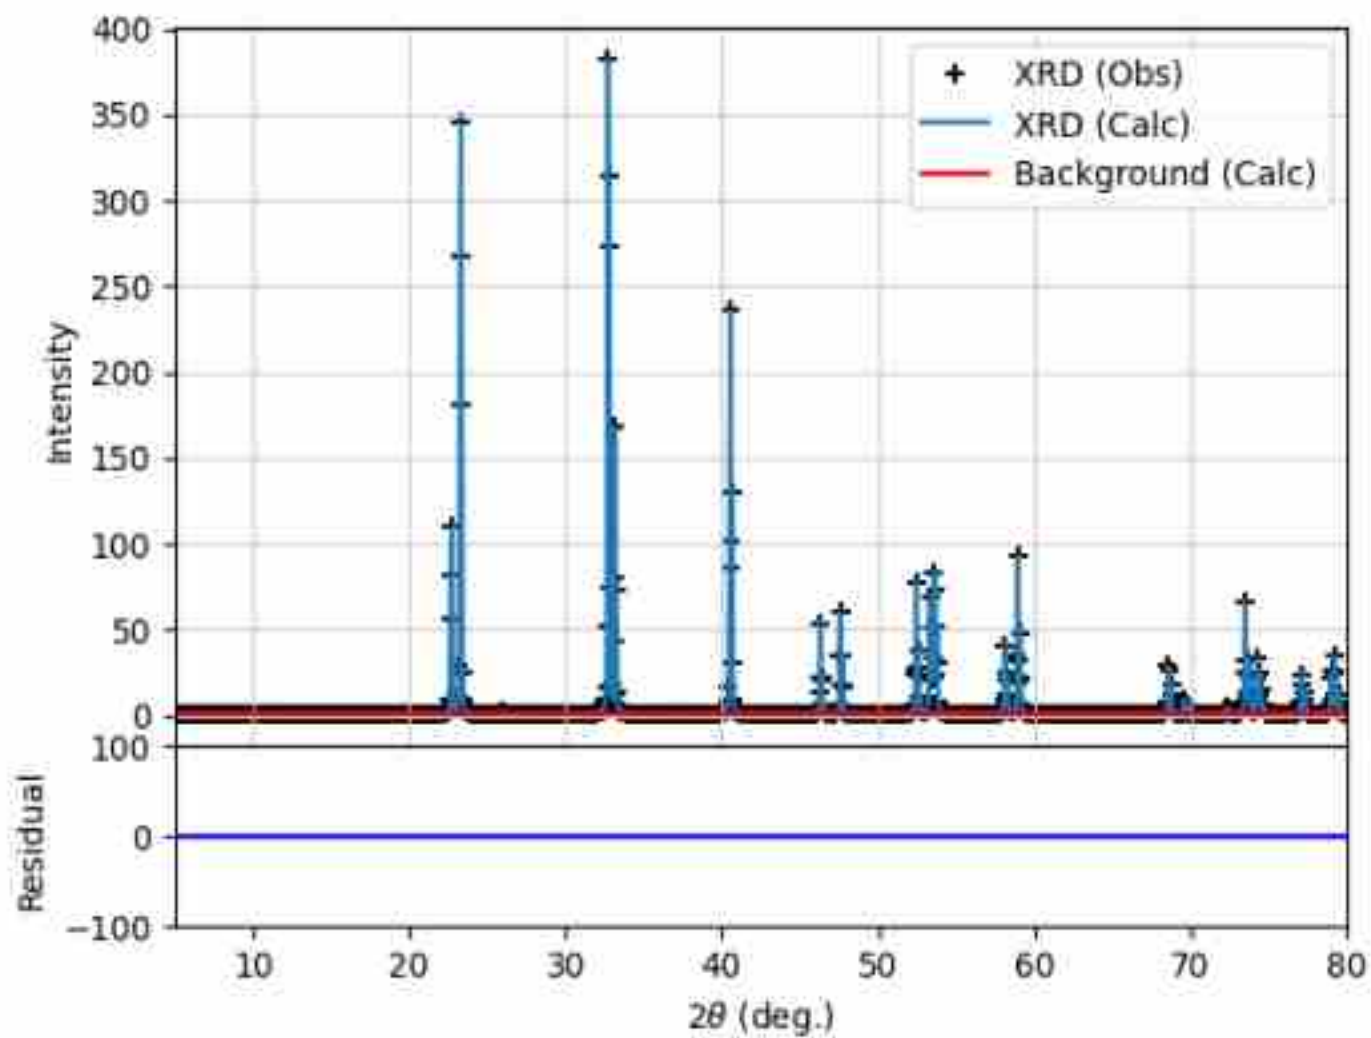

| RMSE before RR | Rwp     | RMSE after RR |
|----------------|---------|---------------|
| 0.036          | 0.00804 | 0.00329       |

# Fe<sub>6</sub>O<sub>2</sub>F<sub>10</sub>

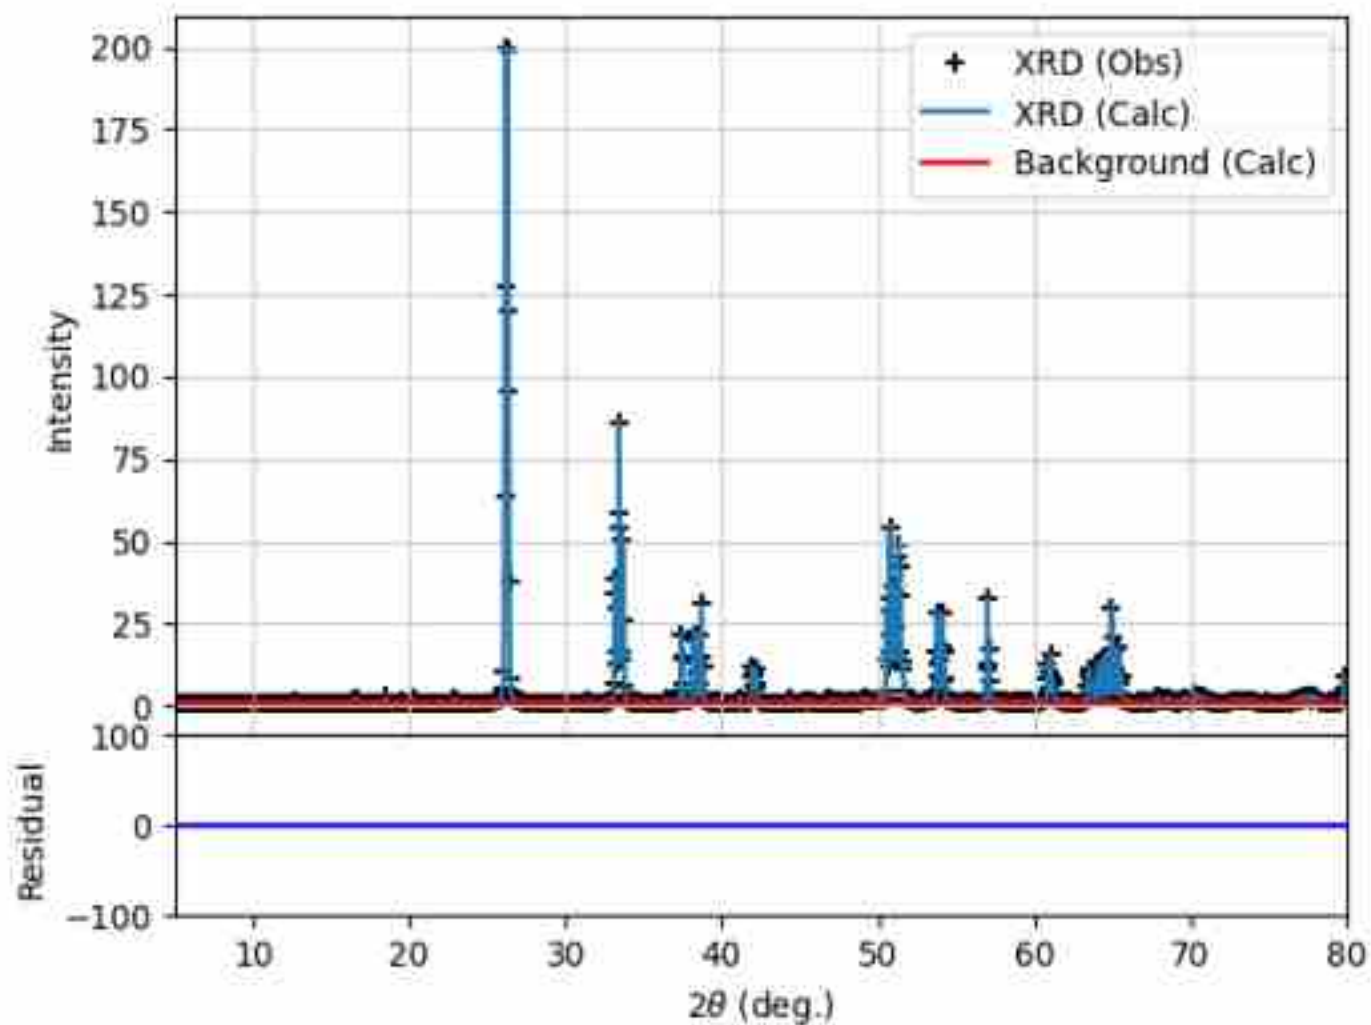

| RMSE before RR | Rwp     | RMSE after RR |
|----------------|---------|---------------|
| 0.036          | 0.00183 | 0.0           |

# Gd1Tl9Te6

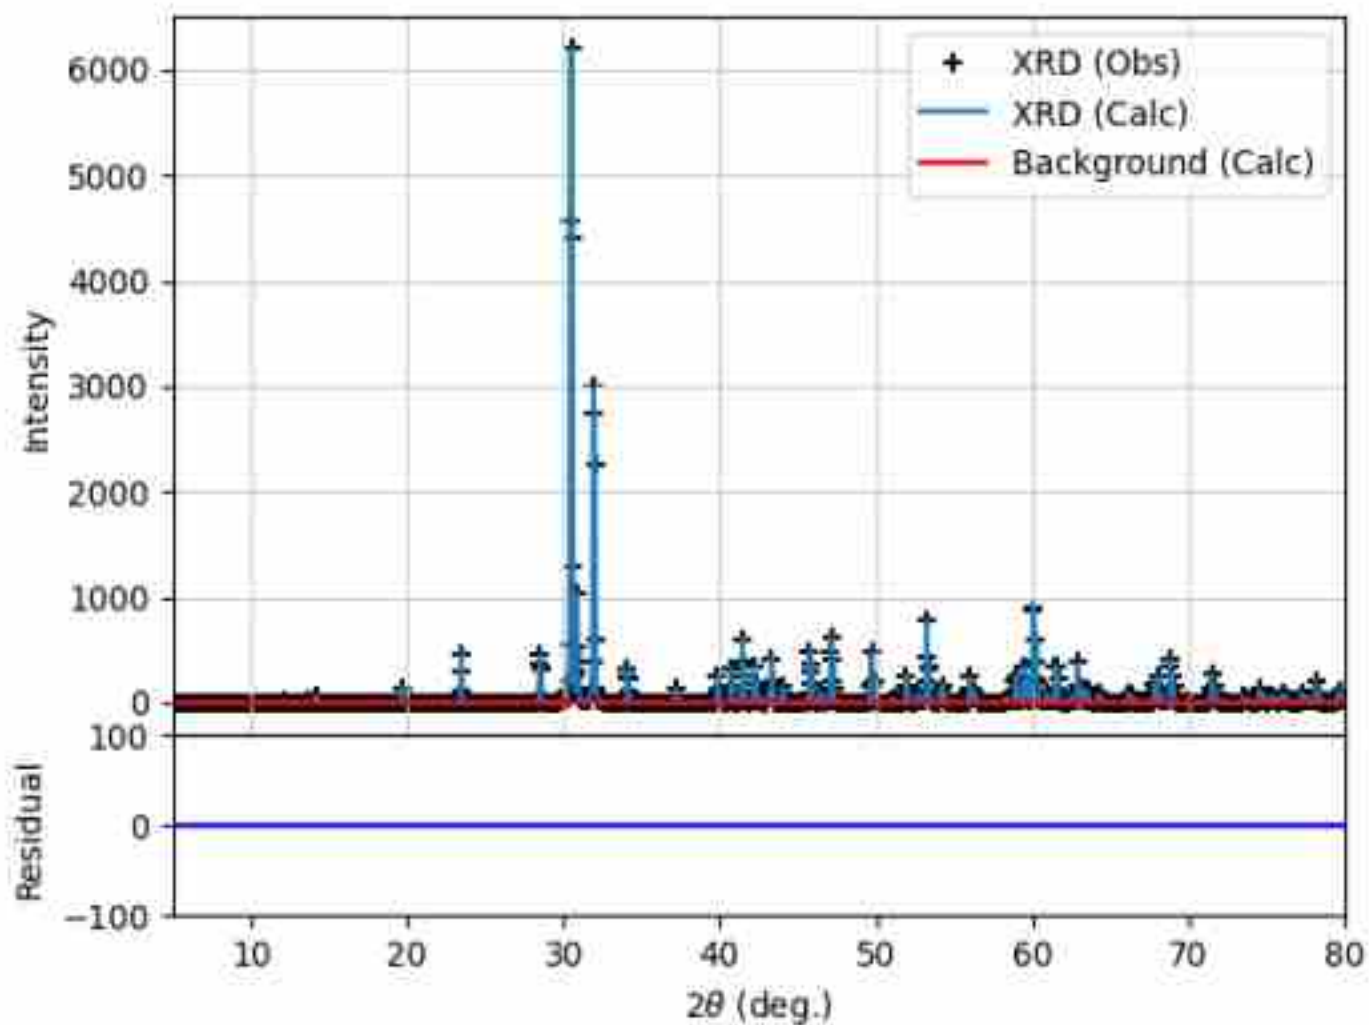

| RMSE before RR | Rwp     | RMSE after RR |
|----------------|---------|---------------|
| 0.036          | 0.00394 | 0.00031       |

# K2Pd1O2

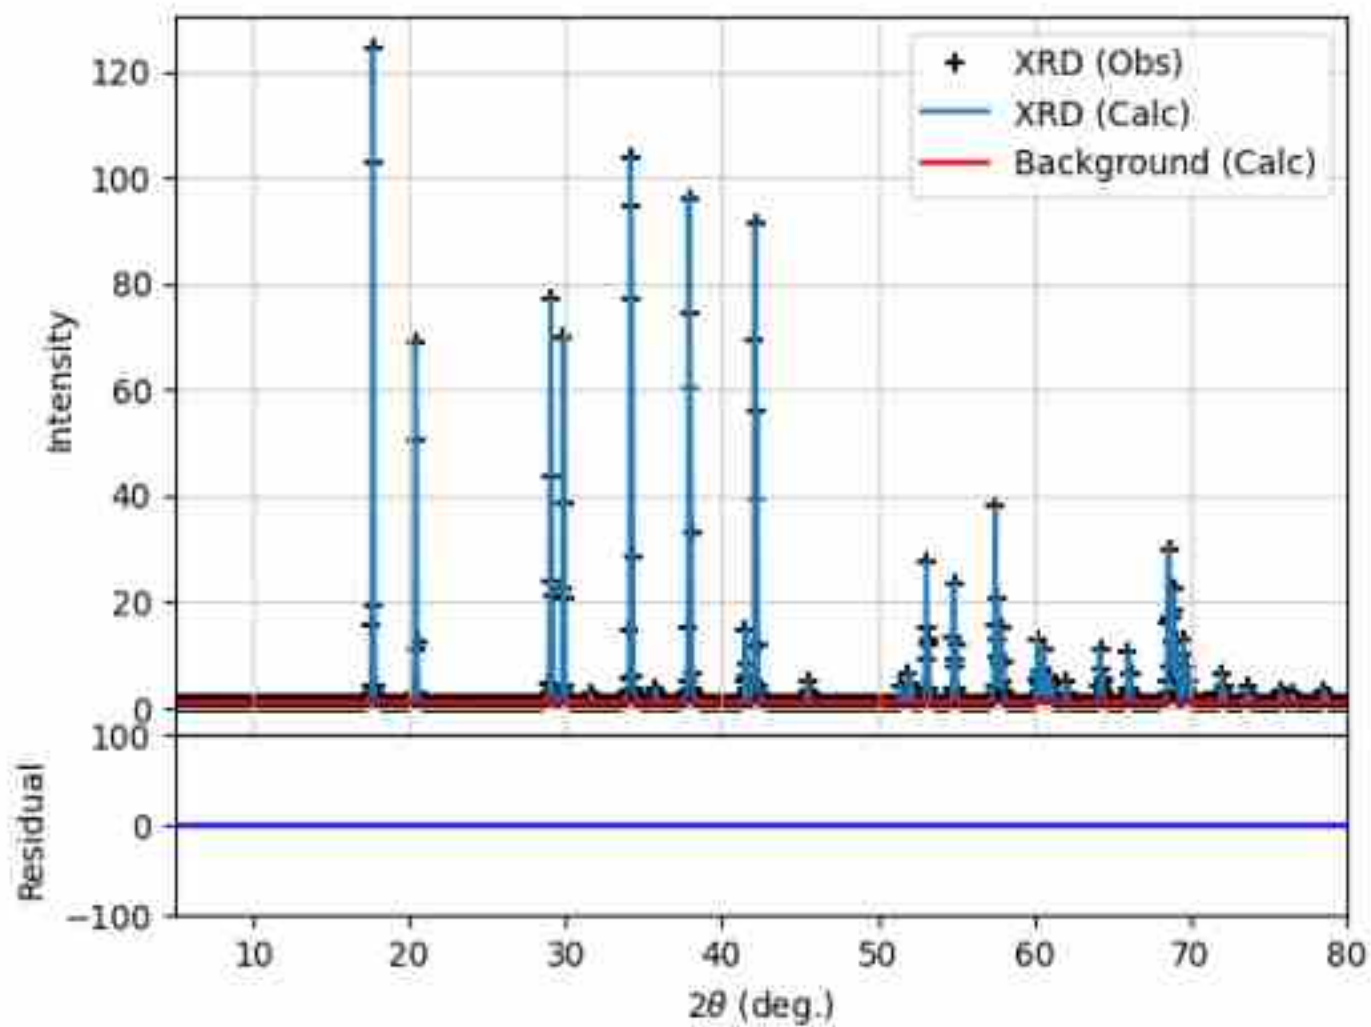

| RMSE before RR | Rwp     | RMSE after RR |
|----------------|---------|---------------|
| 0.036          | 0.00293 | 0.00071       |

# Li1Fe7O7F1

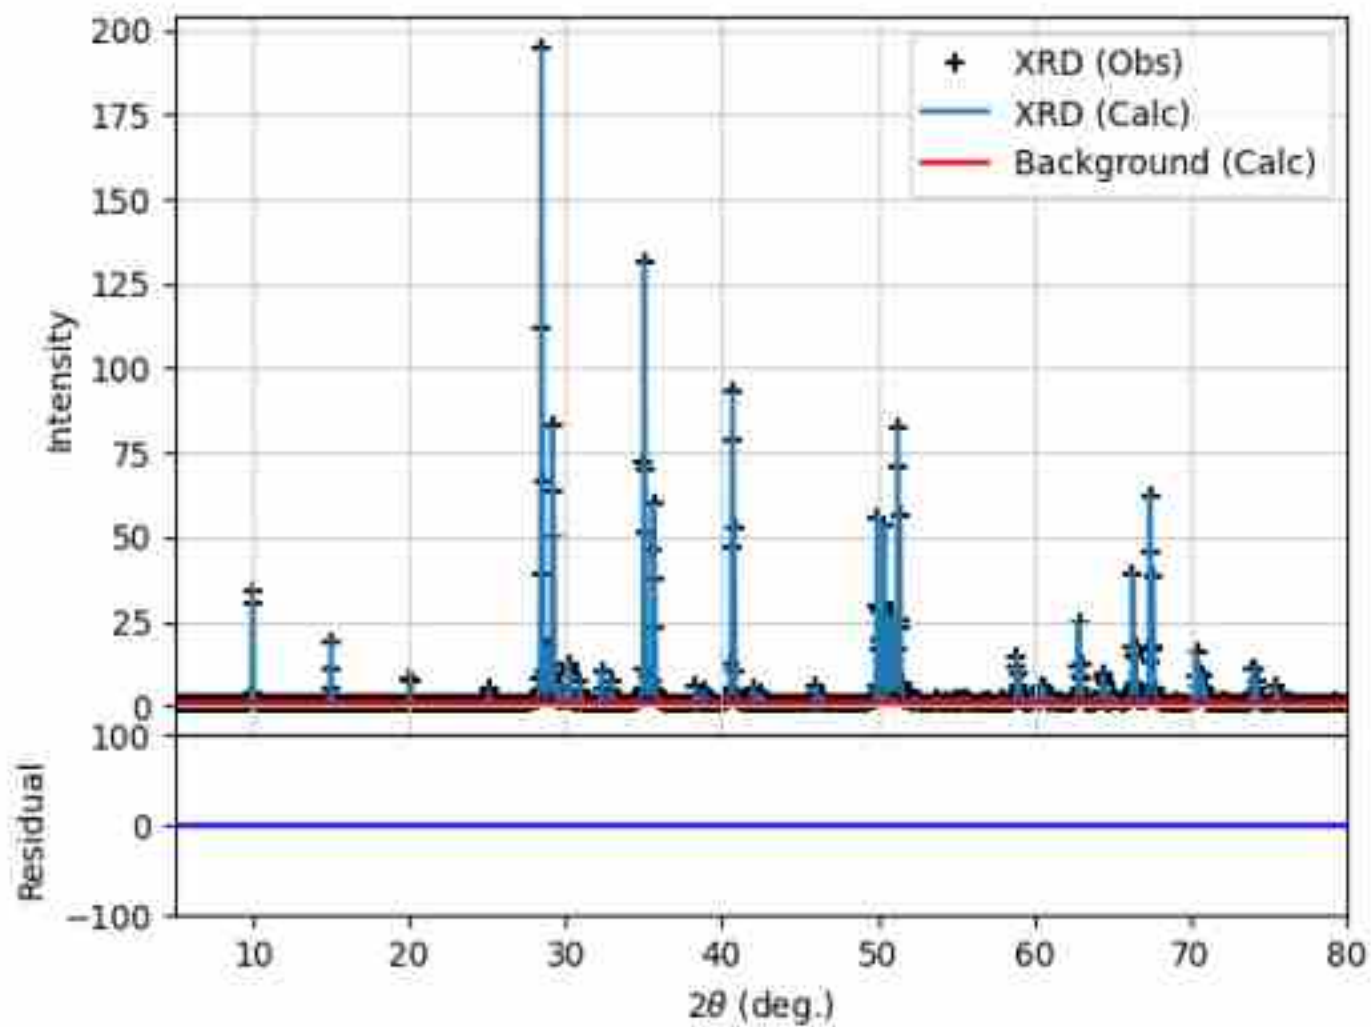

| RMSE before RR | Rwp     | RMSE after RR |
|----------------|---------|---------------|
| 0.036          | 0.00336 | 0.00117       |

# Li<sub>2</sub>Bi<sub>6</sub>Br<sub>4</sub>O<sub>8</sub>

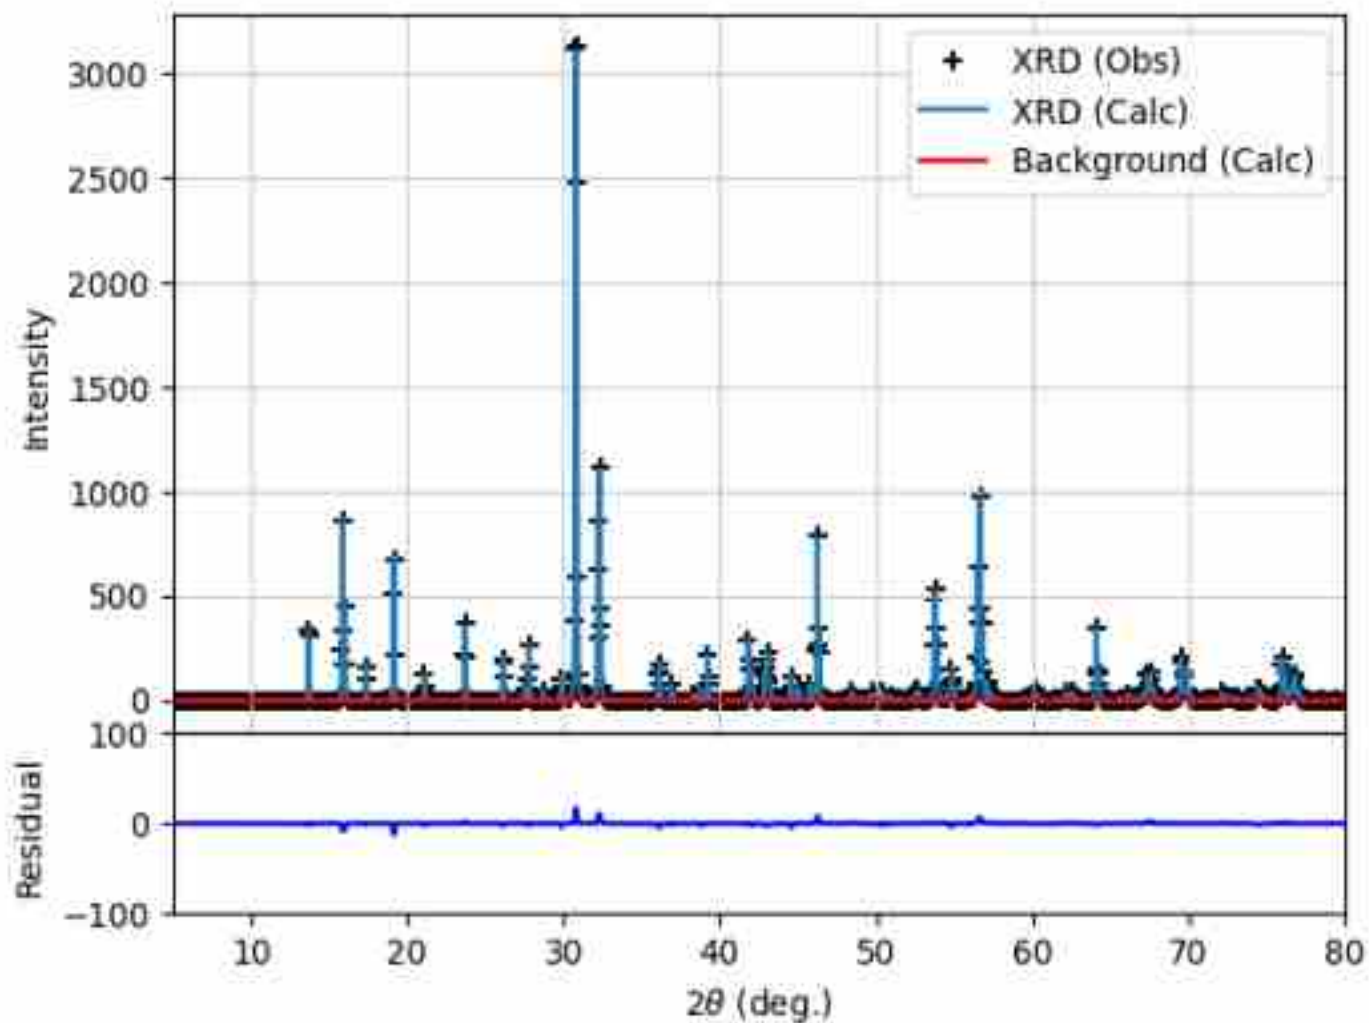

| RMSE before RR | Rwp     | RMSE after RR |
|----------------|---------|---------------|
| 0.036          | 1.27451 | 0.17345       |



# Li<sub>2</sub>Mn<sub>4</sub>O<sub>4</sub>F<sub>6</sub>

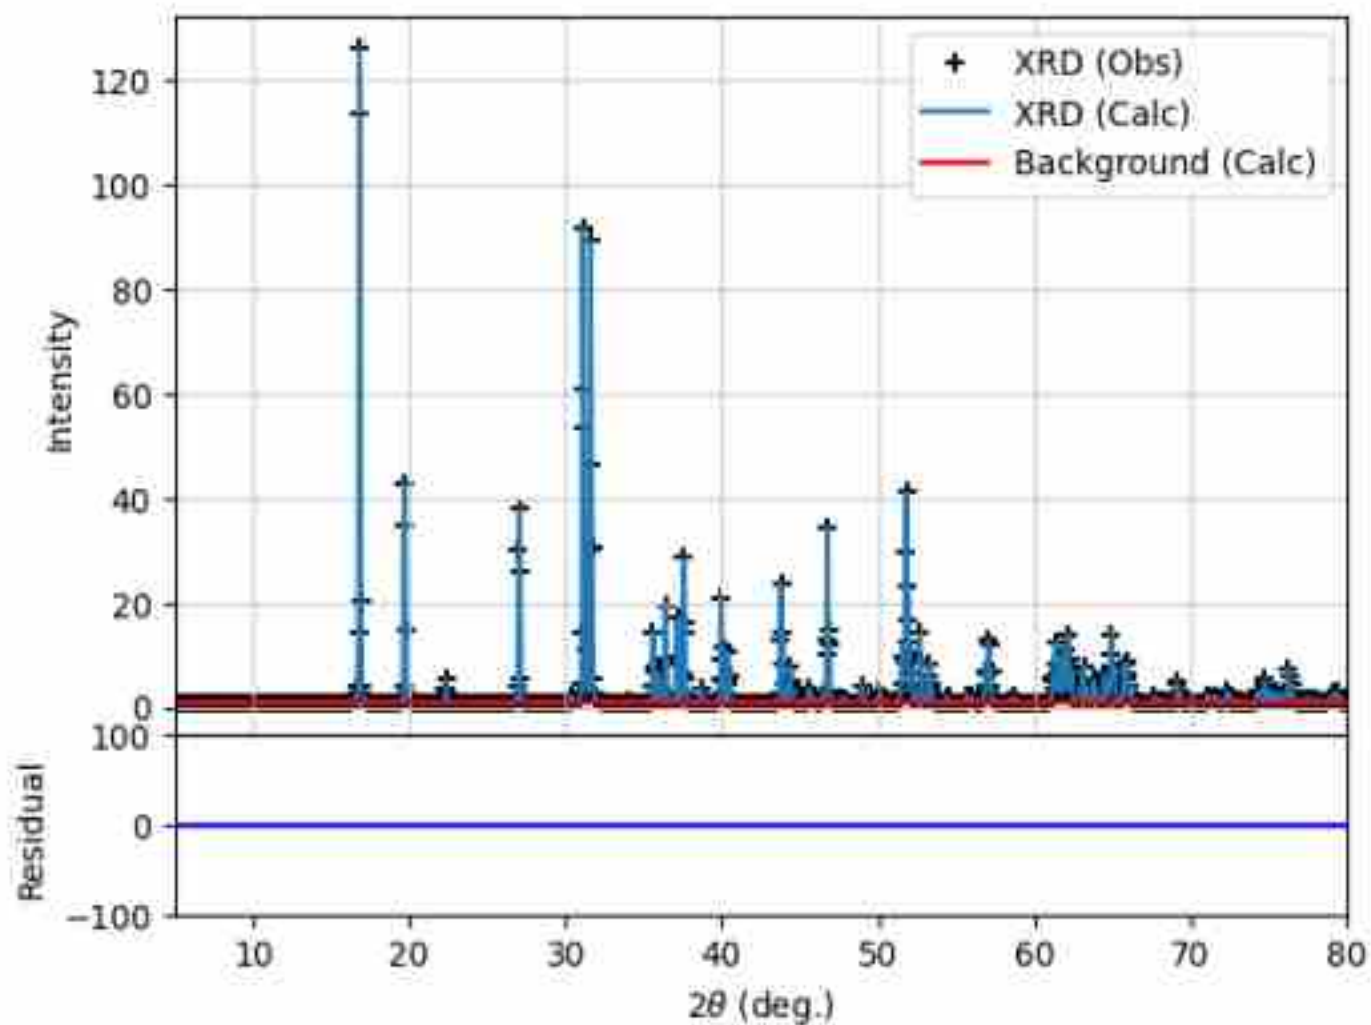

| RMSE before RR | Rwp     | RMSE after RR |
|----------------|---------|---------------|
| 0.036          | 0.01949 | 0.00697       |

# Li<sub>3</sub>Fe<sub>3</sub>Ni<sub>1</sub>O<sub>8</sub>

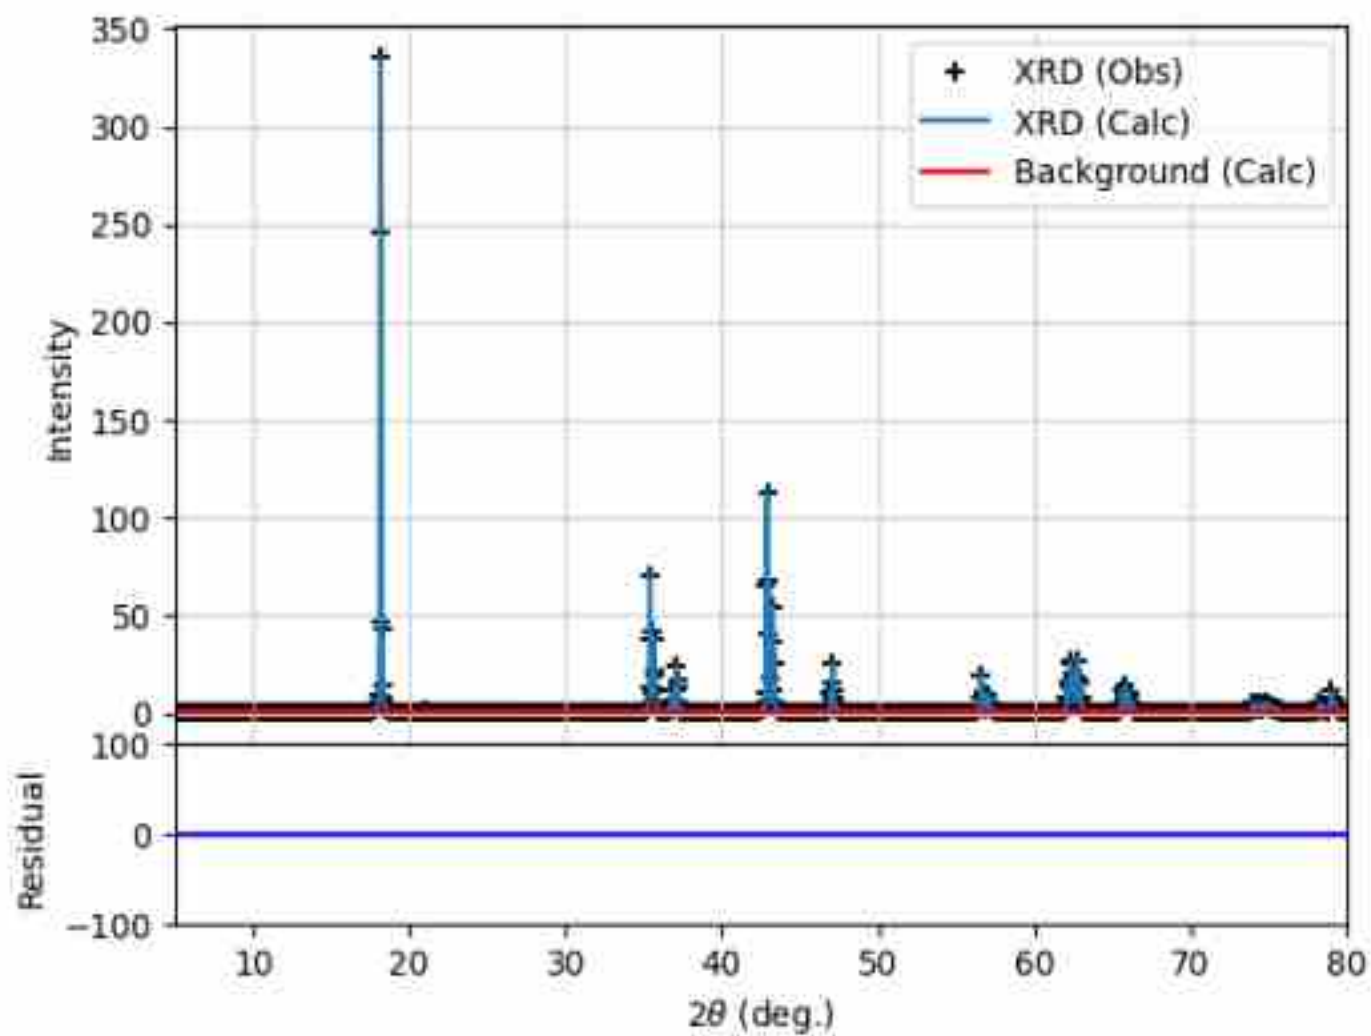

| RMSE before RR | Rwp     | RMSE after RR |
|----------------|---------|---------------|
| 0.036          | 0.00261 | 0.00189       |

# Li<sub>6</sub>Mn<sub>3</sub>Co<sub>1</sub>O<sub>10</sub>

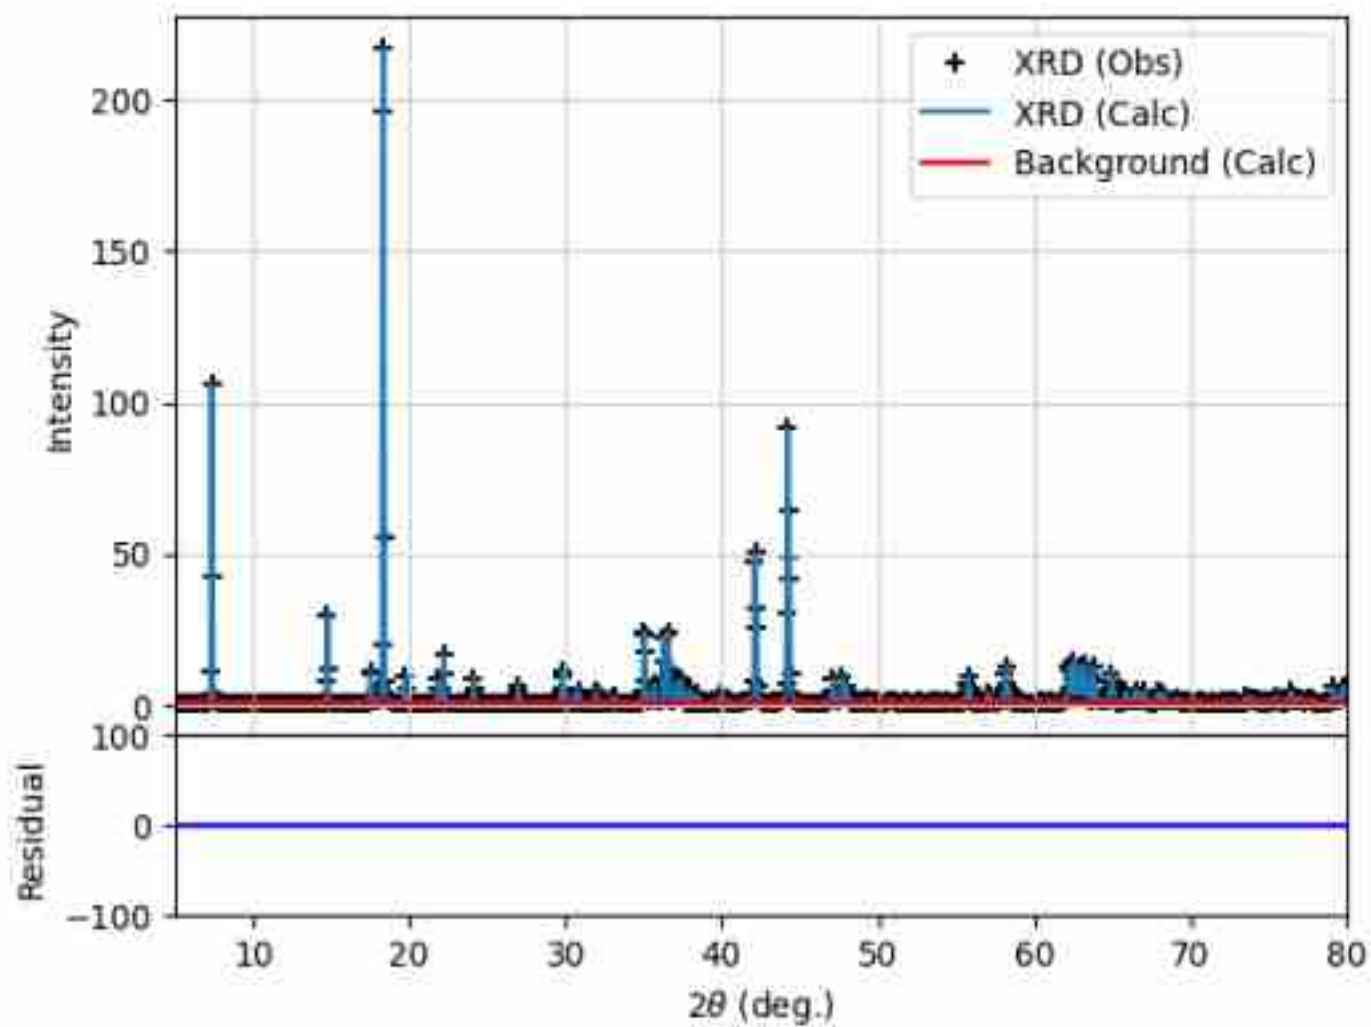

| RMSE before RR | Rwp     | RMSE after RR |
|----------------|---------|---------------|
| 0.036          | 0.00262 | 9e-05         |

# Mn<sub>4</sub>O<sub>6</sub>F<sub>2</sub>

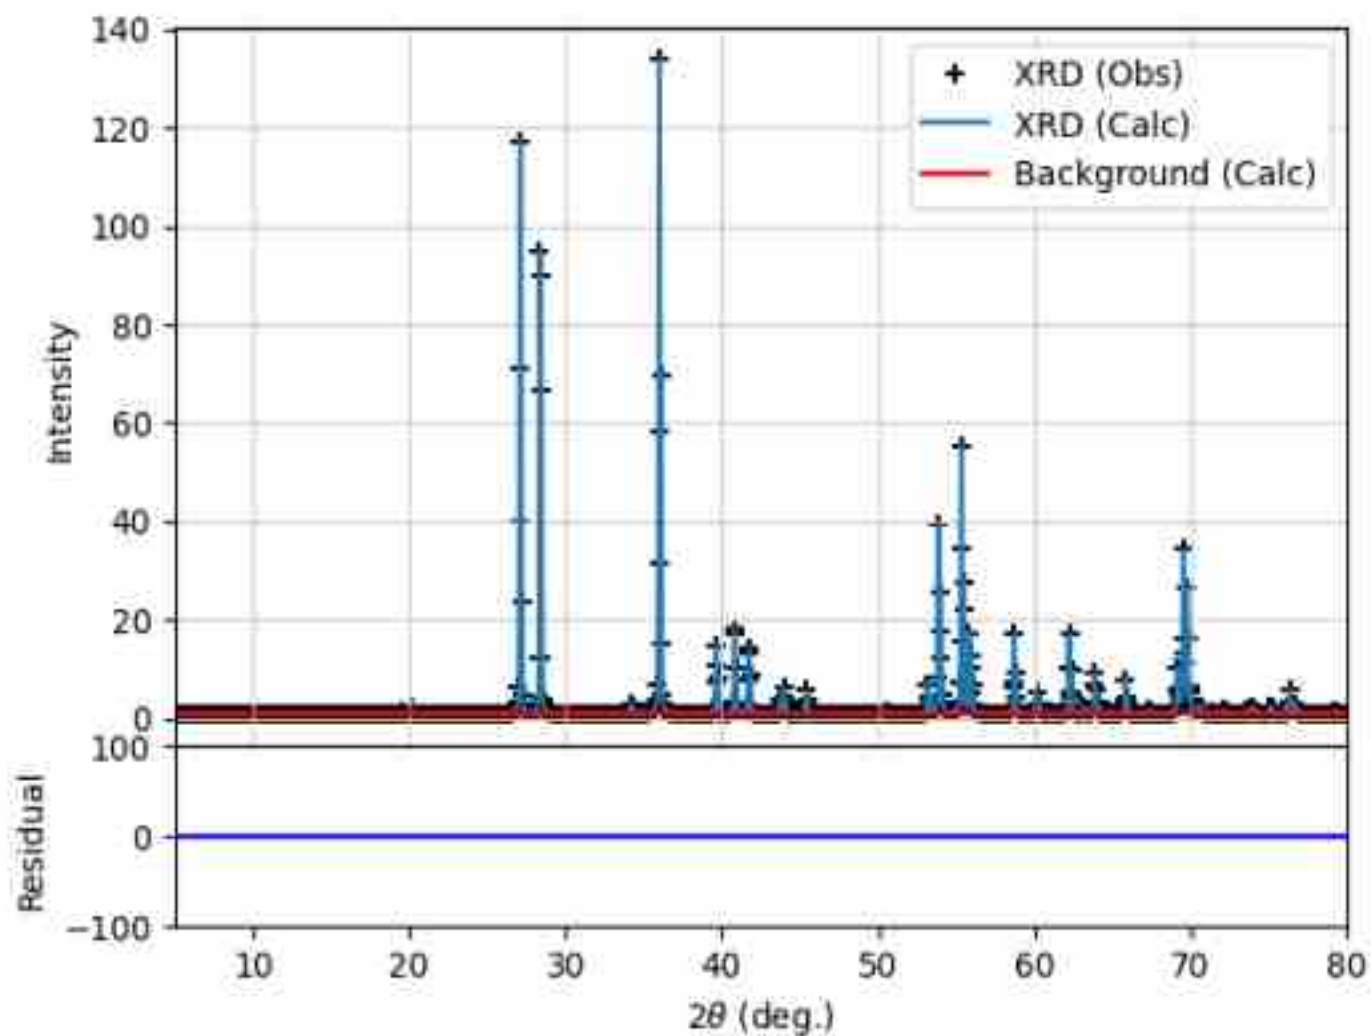

| RMSE before RR | Rwp     | RMSE after RR |
|----------------|---------|---------------|
| 0.036          | 0.00237 | 0.00054       |

Nd4Ga4Pt4

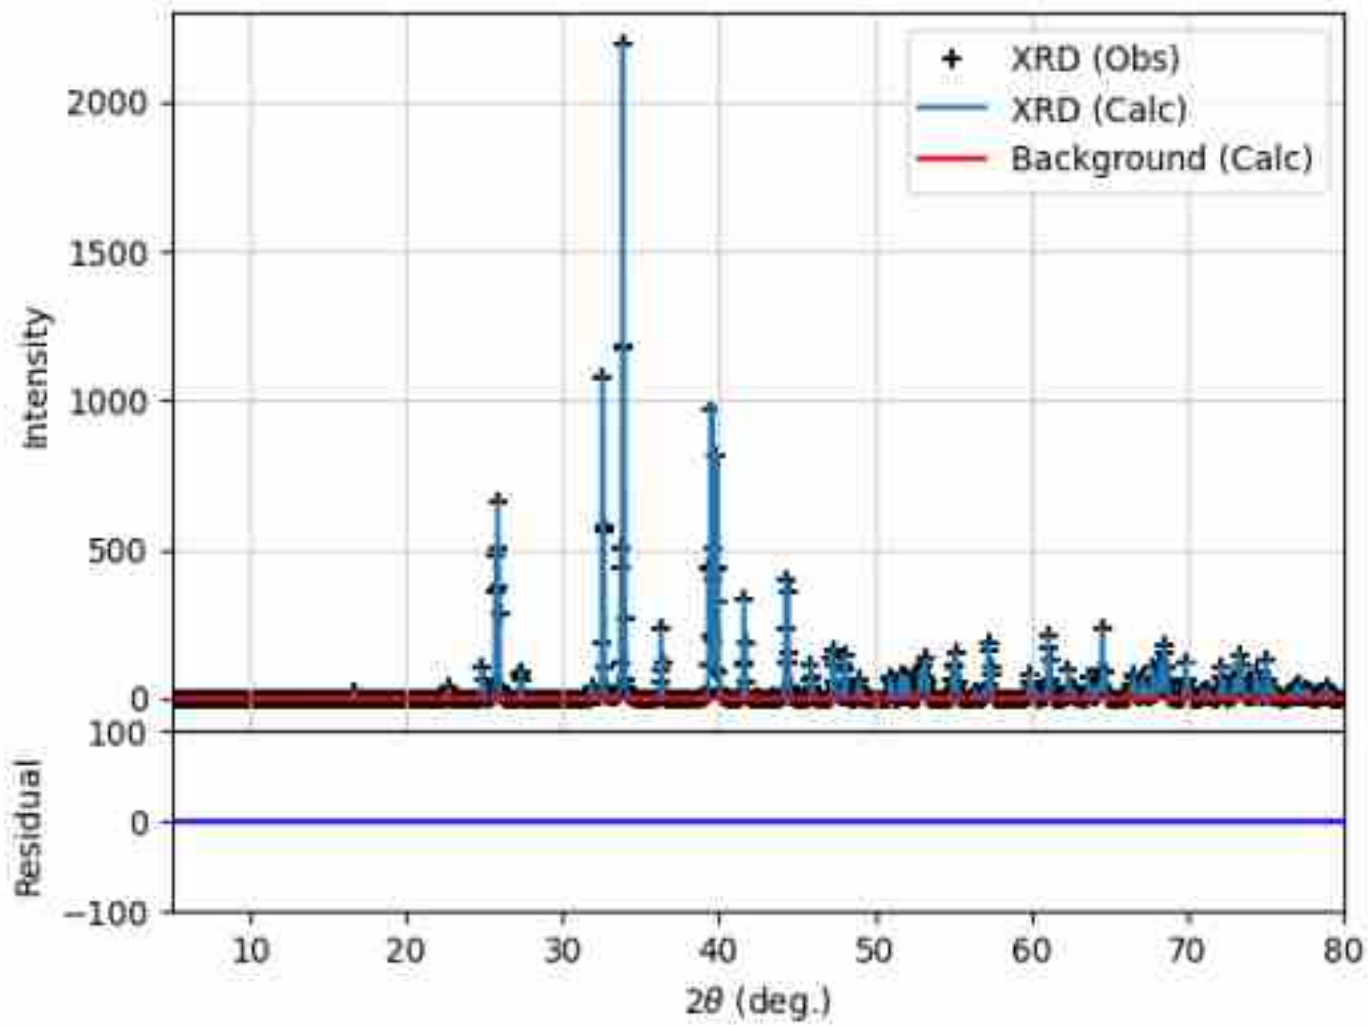

| RMSE before RR | Rwp     | RMSE after RR |
|----------------|---------|---------------|
| 0.036          | 0.00476 | 0.00051       |

# Pr<sub>6</sub>C<sub>2</sub>Br<sub>10</sub>

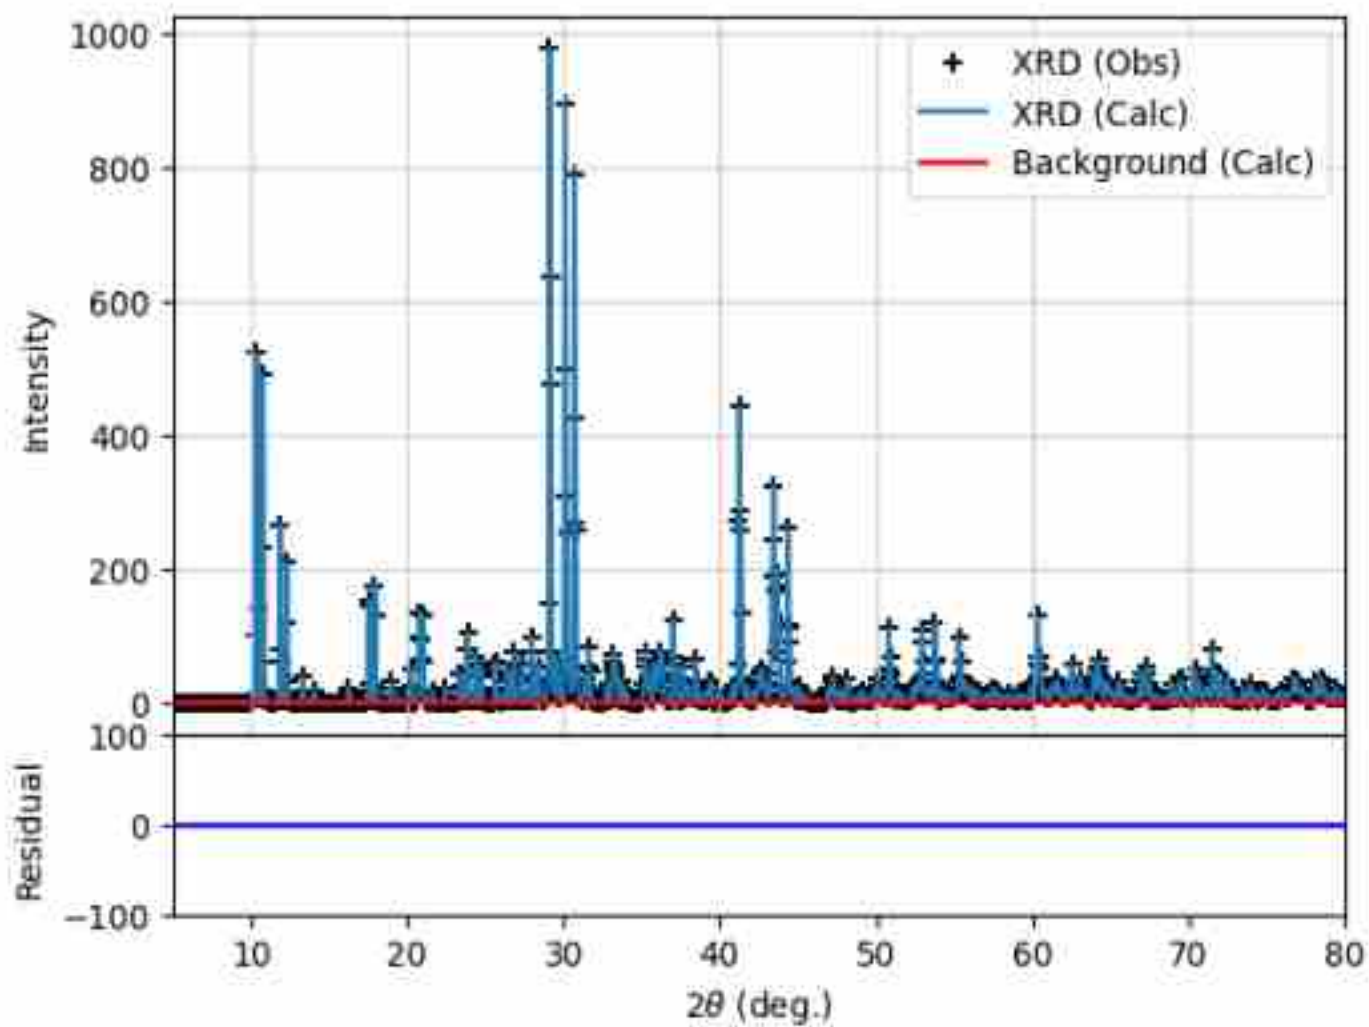

| RMSE before RR | Rwp     | RMSE after RR |
|----------------|---------|---------------|
| 0.036          | 0.00177 | 0.00032       |

# Rb<sub>2</sub>Nb<sub>2</sub>As<sub>2</sub>Cl<sub>2</sub>O<sub>10</sub>

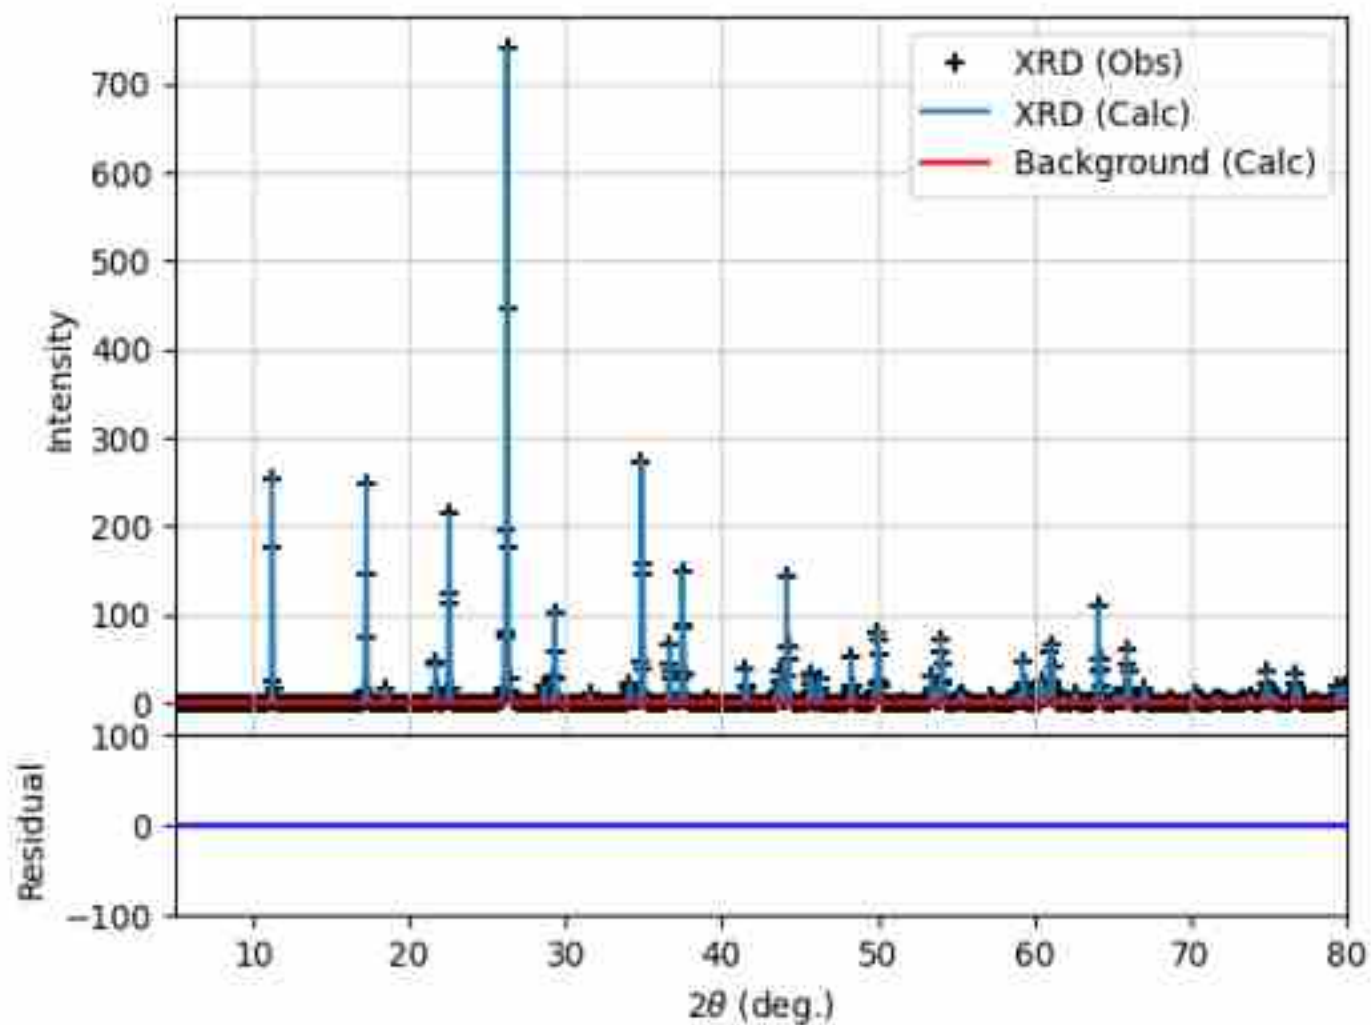

| RMSE before RR | Rwp     | RMSE after RR |
|----------------|---------|---------------|
| 0.036          | 0.01701 | 0.00264       |

# Rb<sub>4</sub>Pb<sub>4</sub>I<sub>12</sub>

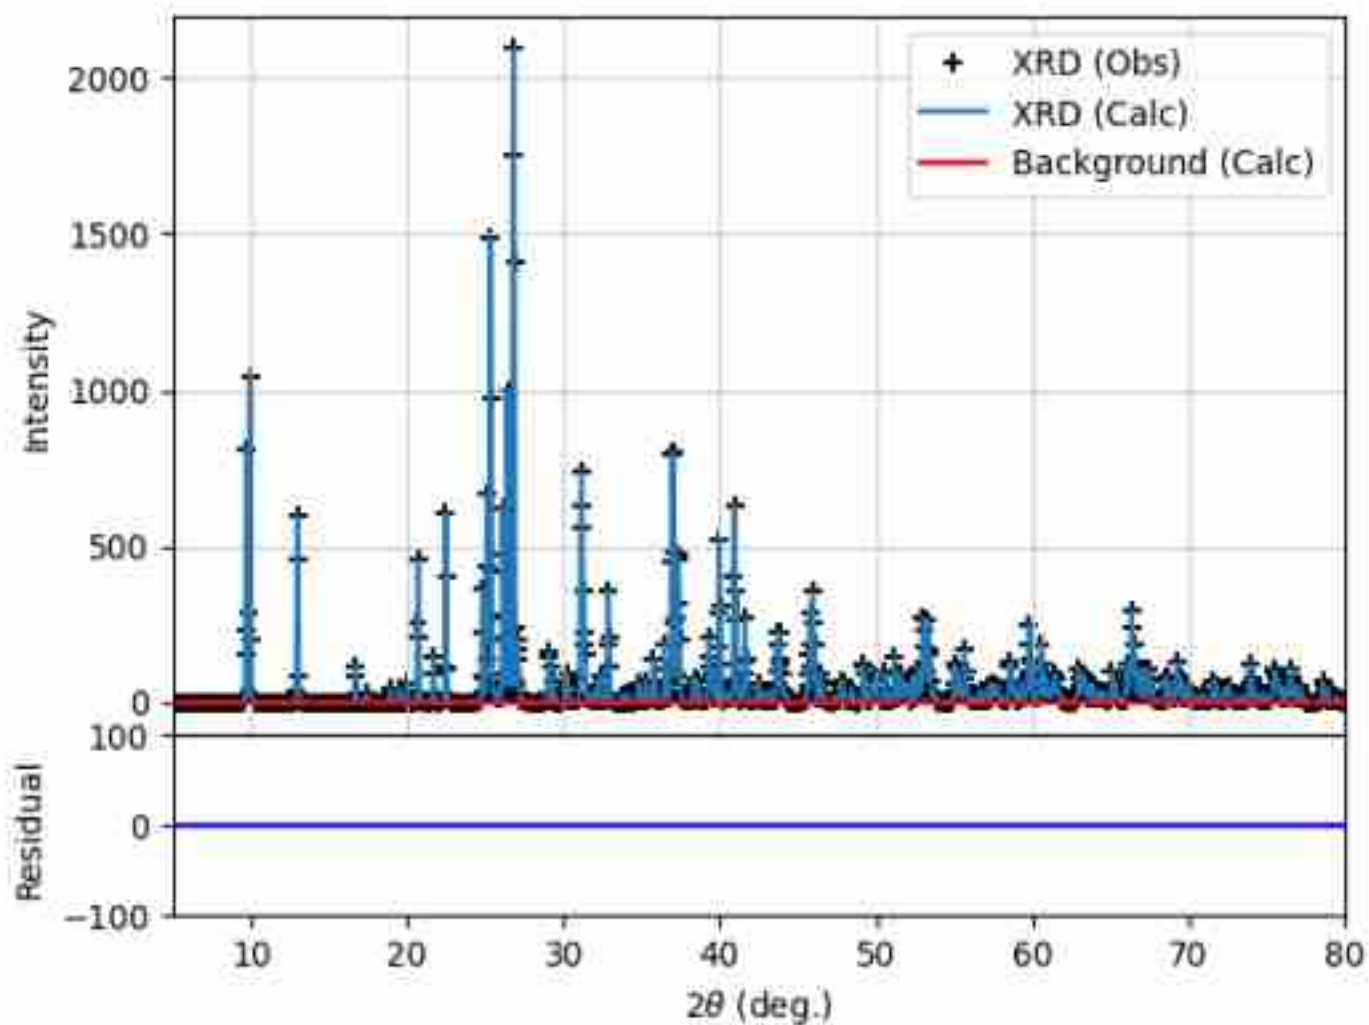

| RMSE before RR | Rwp     | RMSE after RR |
|----------------|---------|---------------|
| 0.036          | 0.00394 | 0.00038       |



# Rb<sub>4</sub>Sn<sub>4</sub>Br<sub>12</sub>

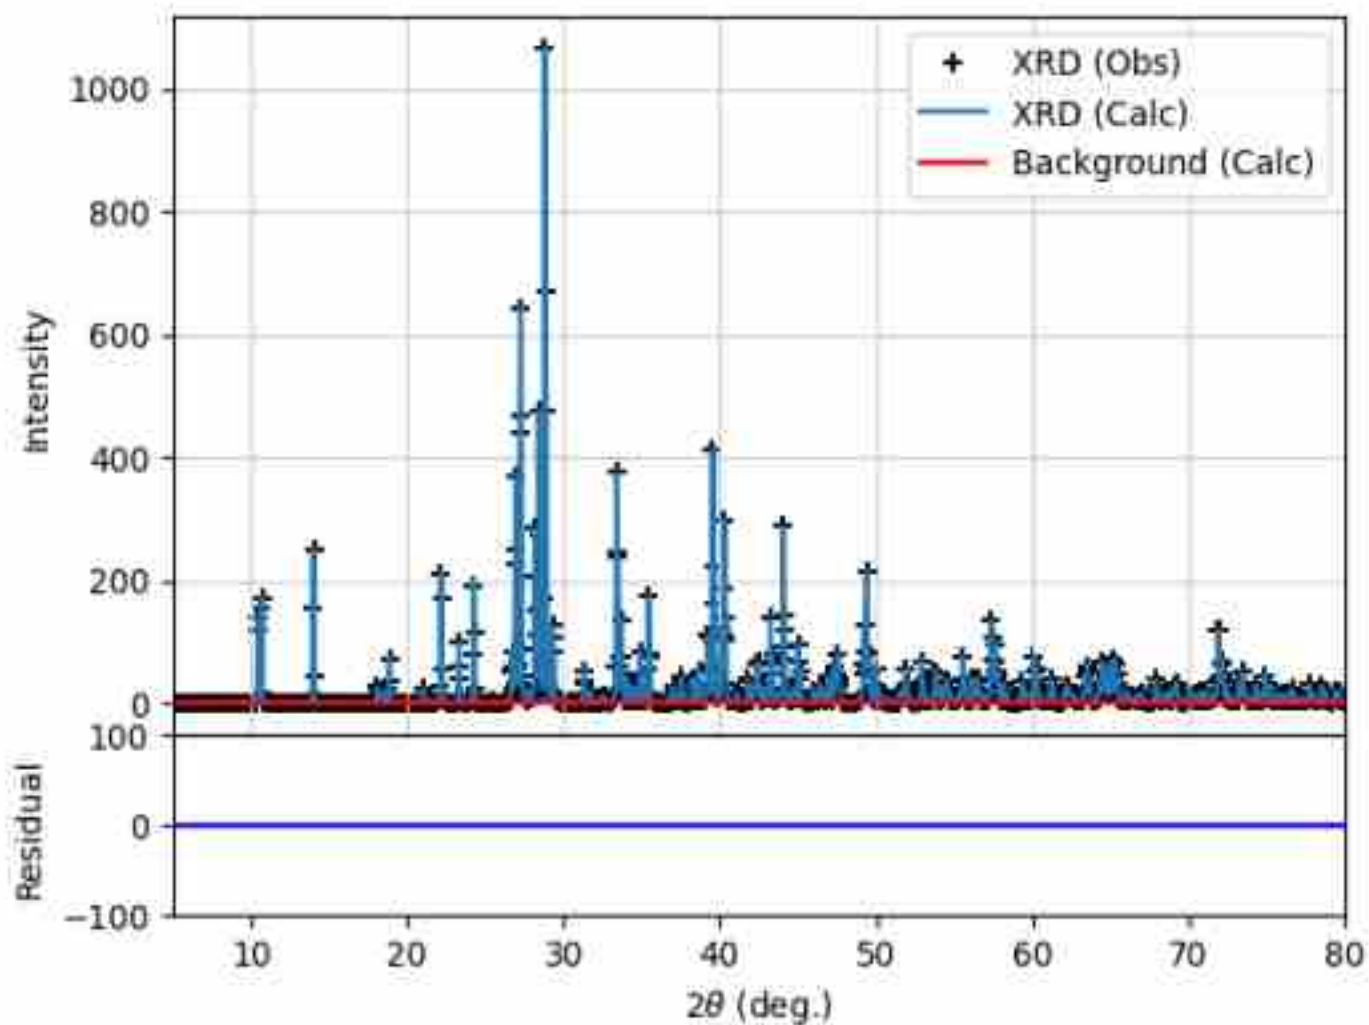

| RMSE before RR | Rwp     | RMSE after RR |
|----------------|---------|---------------|
| 0.036          | 0.00379 | 0.00026       |

# Sr1Ce2S2F4

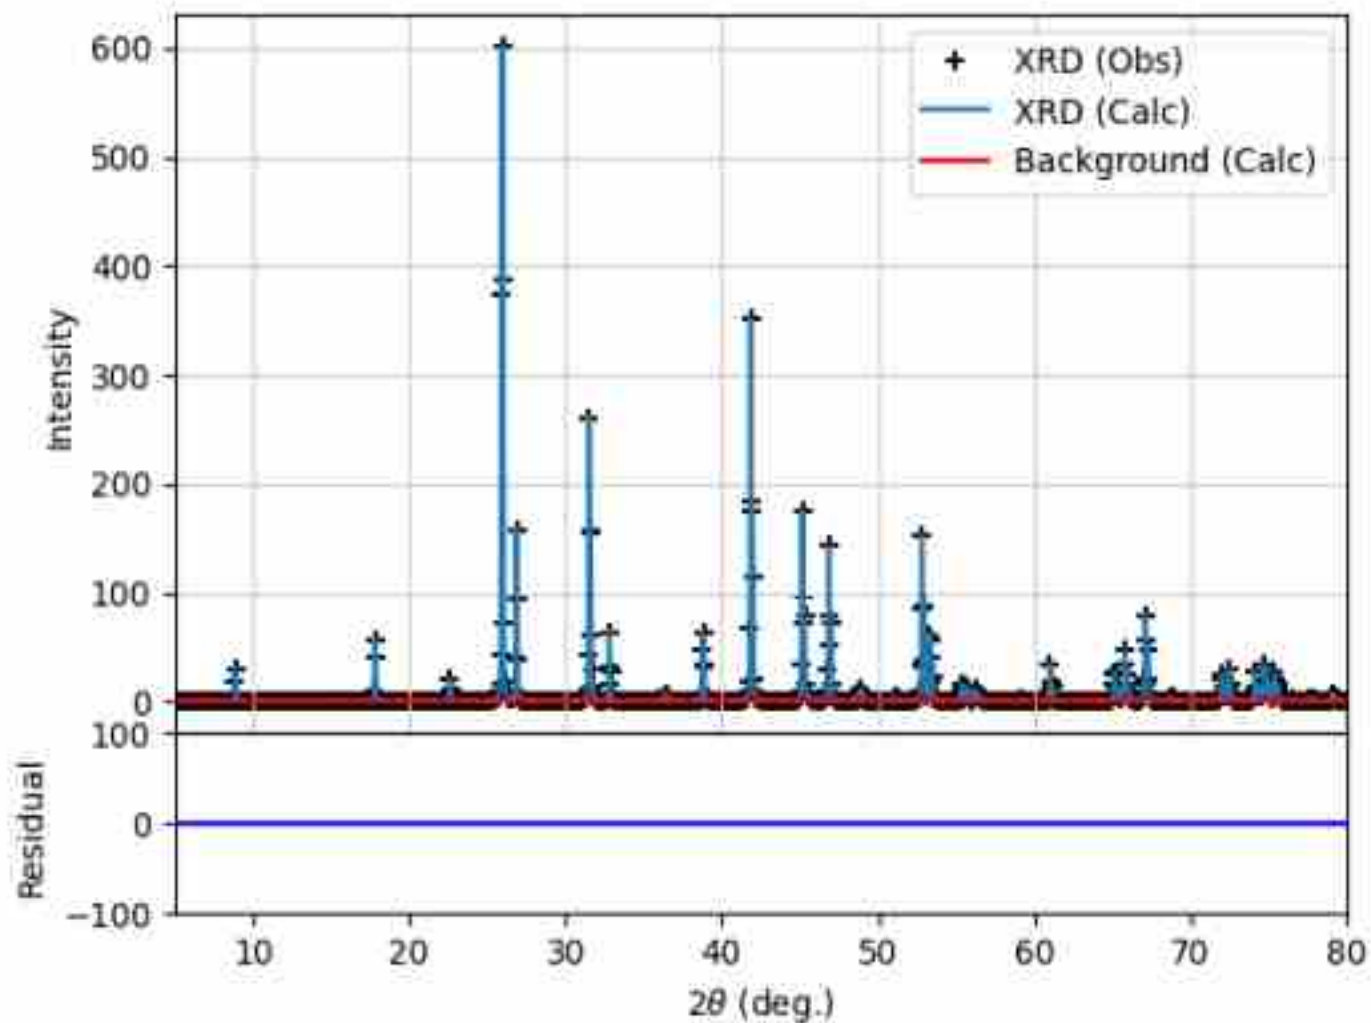

| RMSE before RR | Rwp     | RMSE after RR |
|----------------|---------|---------------|
| 0.036          | 0.00563 | 0.00117       |

# Sr1Li2Ta2O7

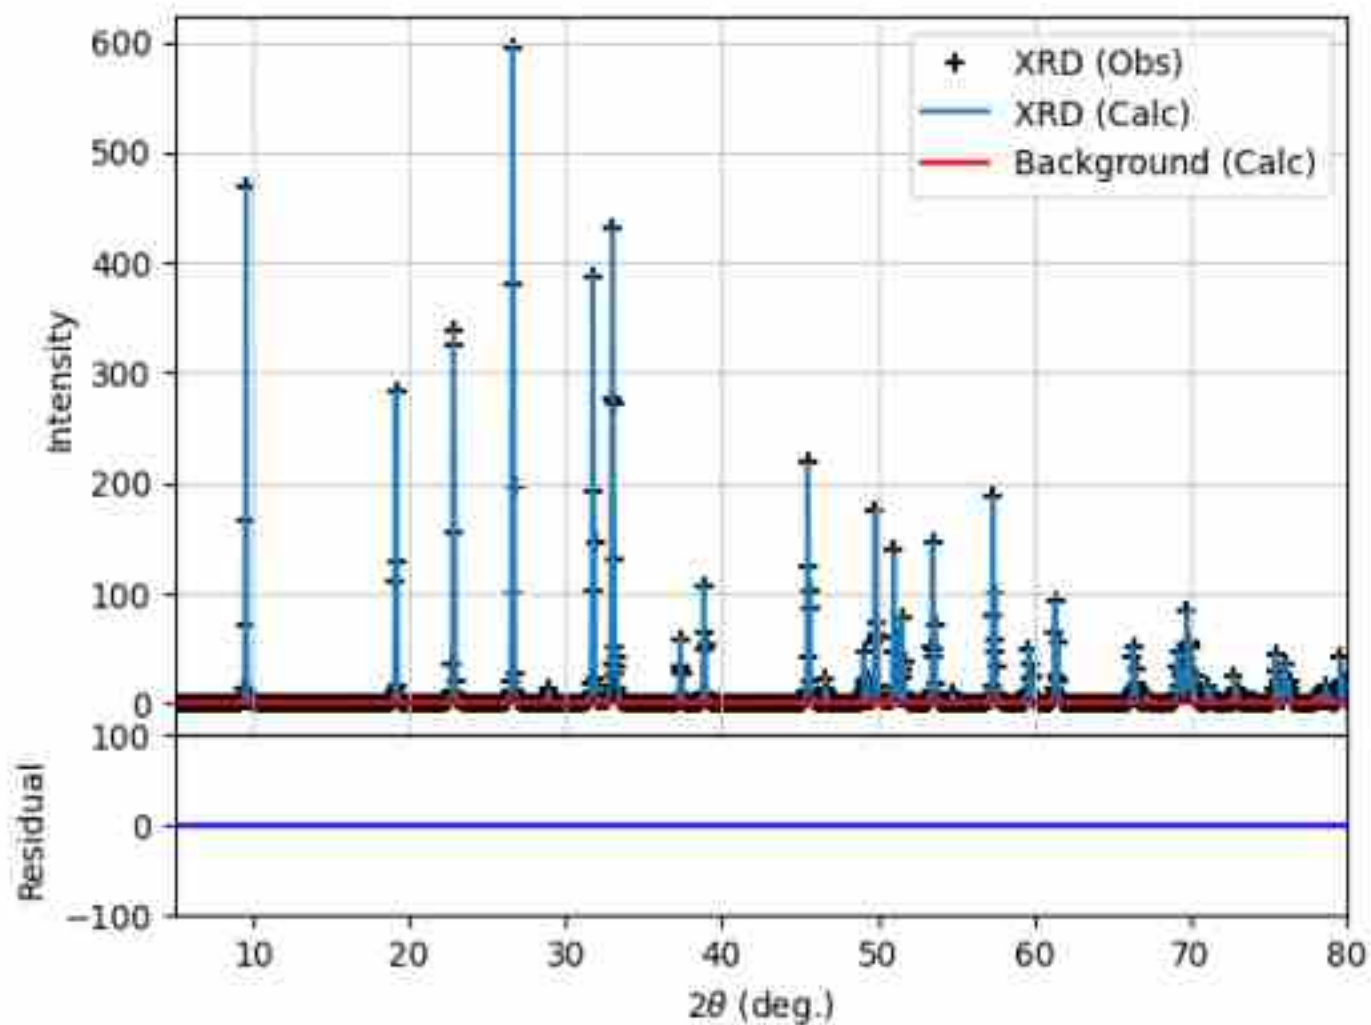

| RMSE before RR | Rwp     | RMSE after RR |
|----------------|---------|---------------|
| 0.036          | 0.00596 | 0.00217       |

Sr<sub>2</sub>La<sub>2</sub>V<sub>2</sub>Fe<sub>2</sub>O<sub>12</sub>

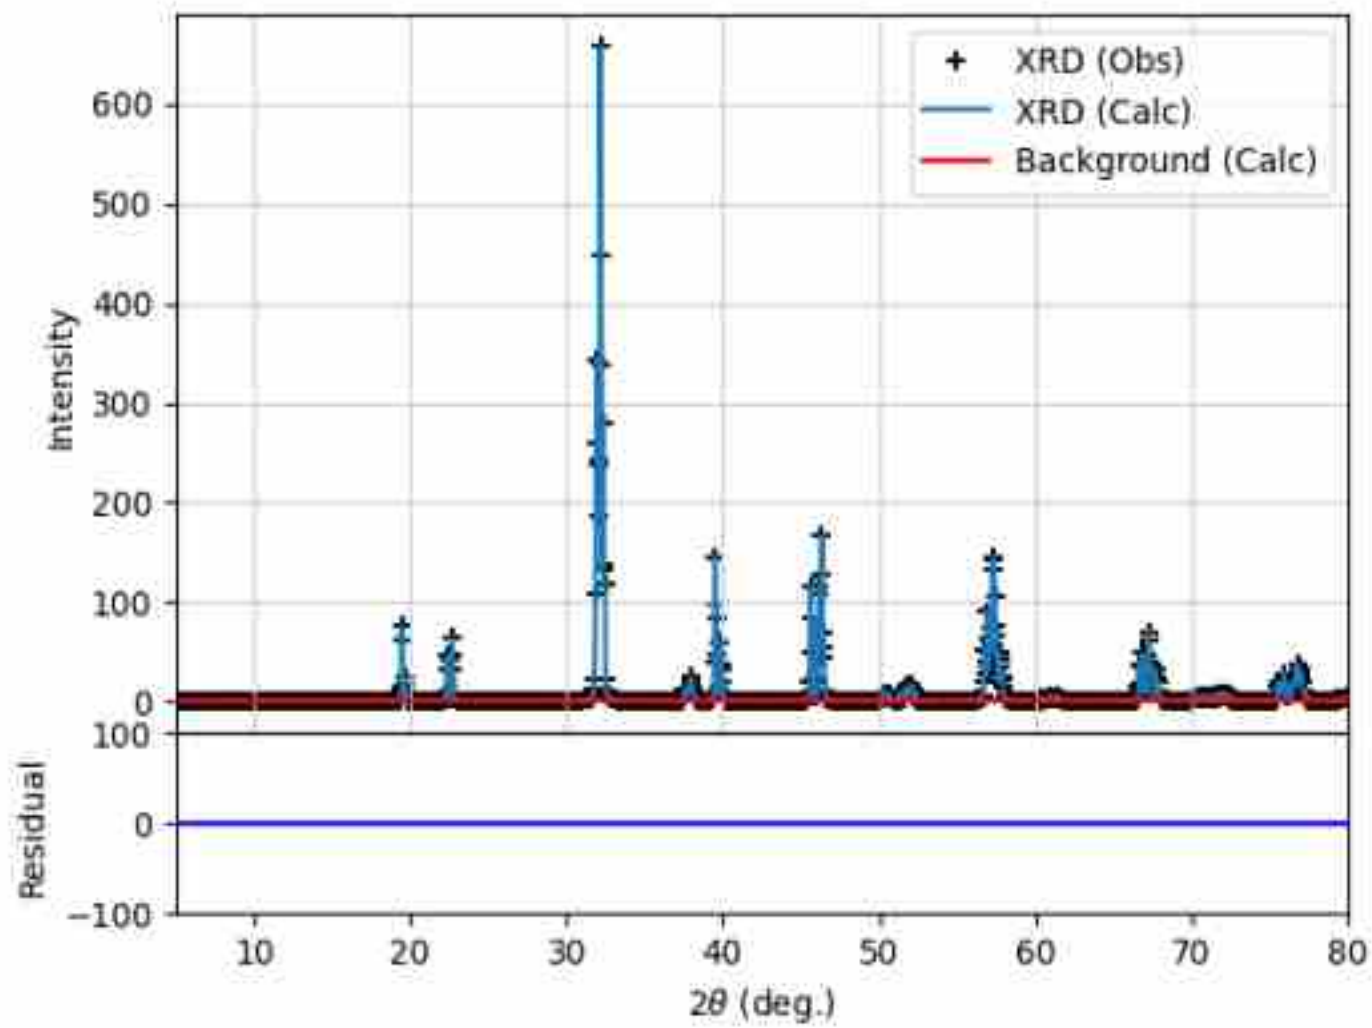

| RMSE before RR | Rwp     | RMSE after RR |
|----------------|---------|---------------|
| 0.036          | 0.16003 | 0.00273       |

# Sr<sub>2</sub>Mo<sub>2</sub>O<sub>6</sub>

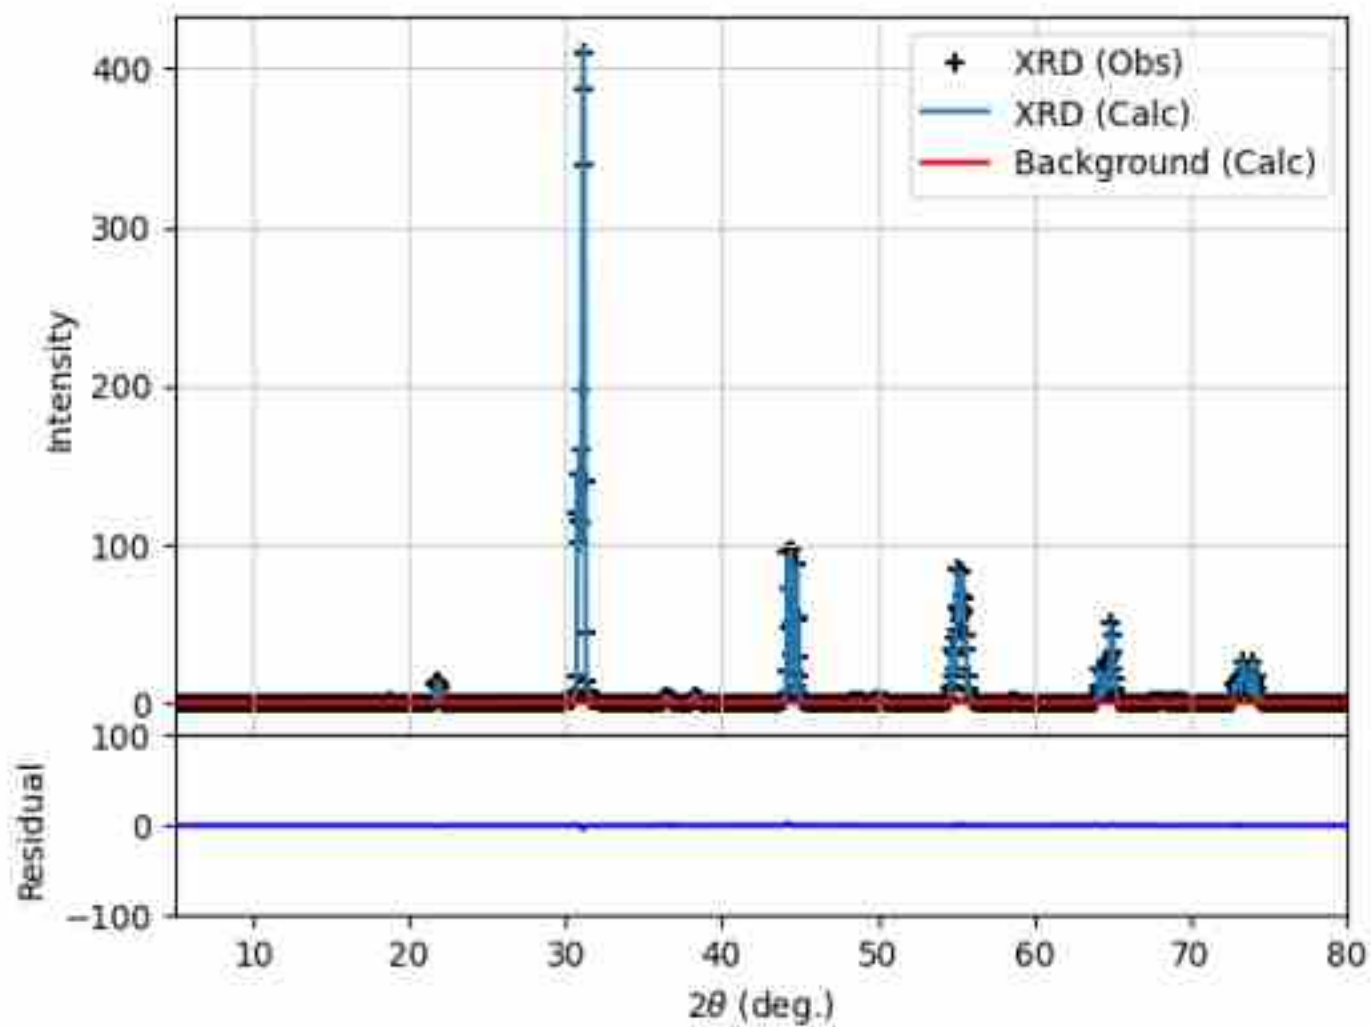

| RMSE before RR | Rwp     | RMSE after RR |
|----------------|---------|---------------|
| 0.036          | 2.70145 | 0.11742       |

# Sr<sub>2</sub>Tc<sub>2</sub>N<sub>6</sub>

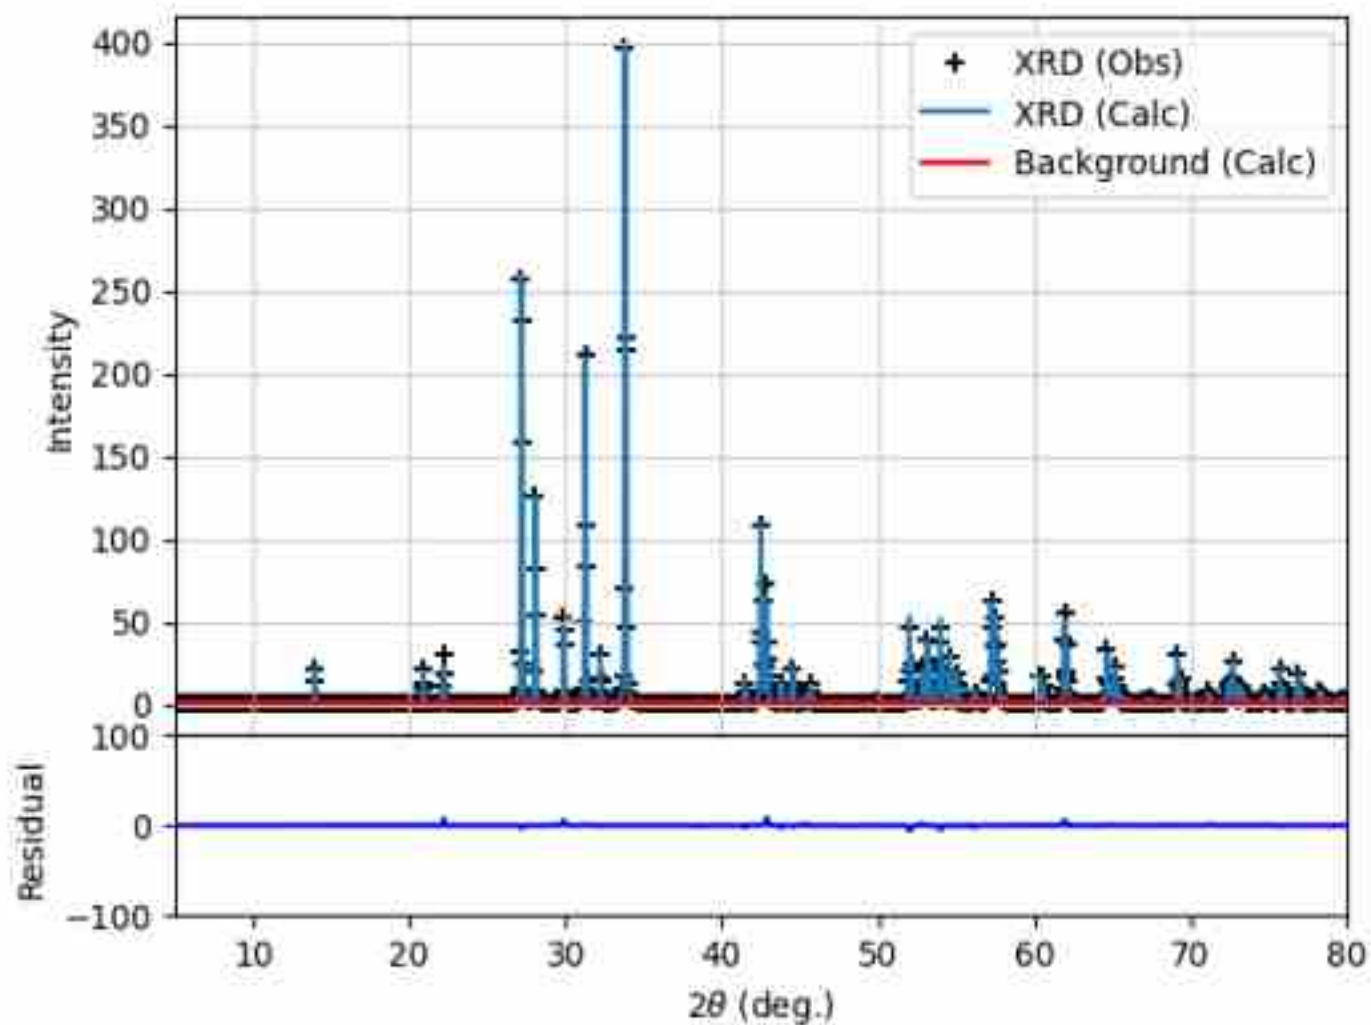

| RMSE before RR | Rwp     | RMSE after RR |
|----------------|---------|---------------|
| 0.036          | 5.97519 | 0.07904       |

# Sr<sub>2</sub>U<sub>2</sub>O<sub>7</sub>

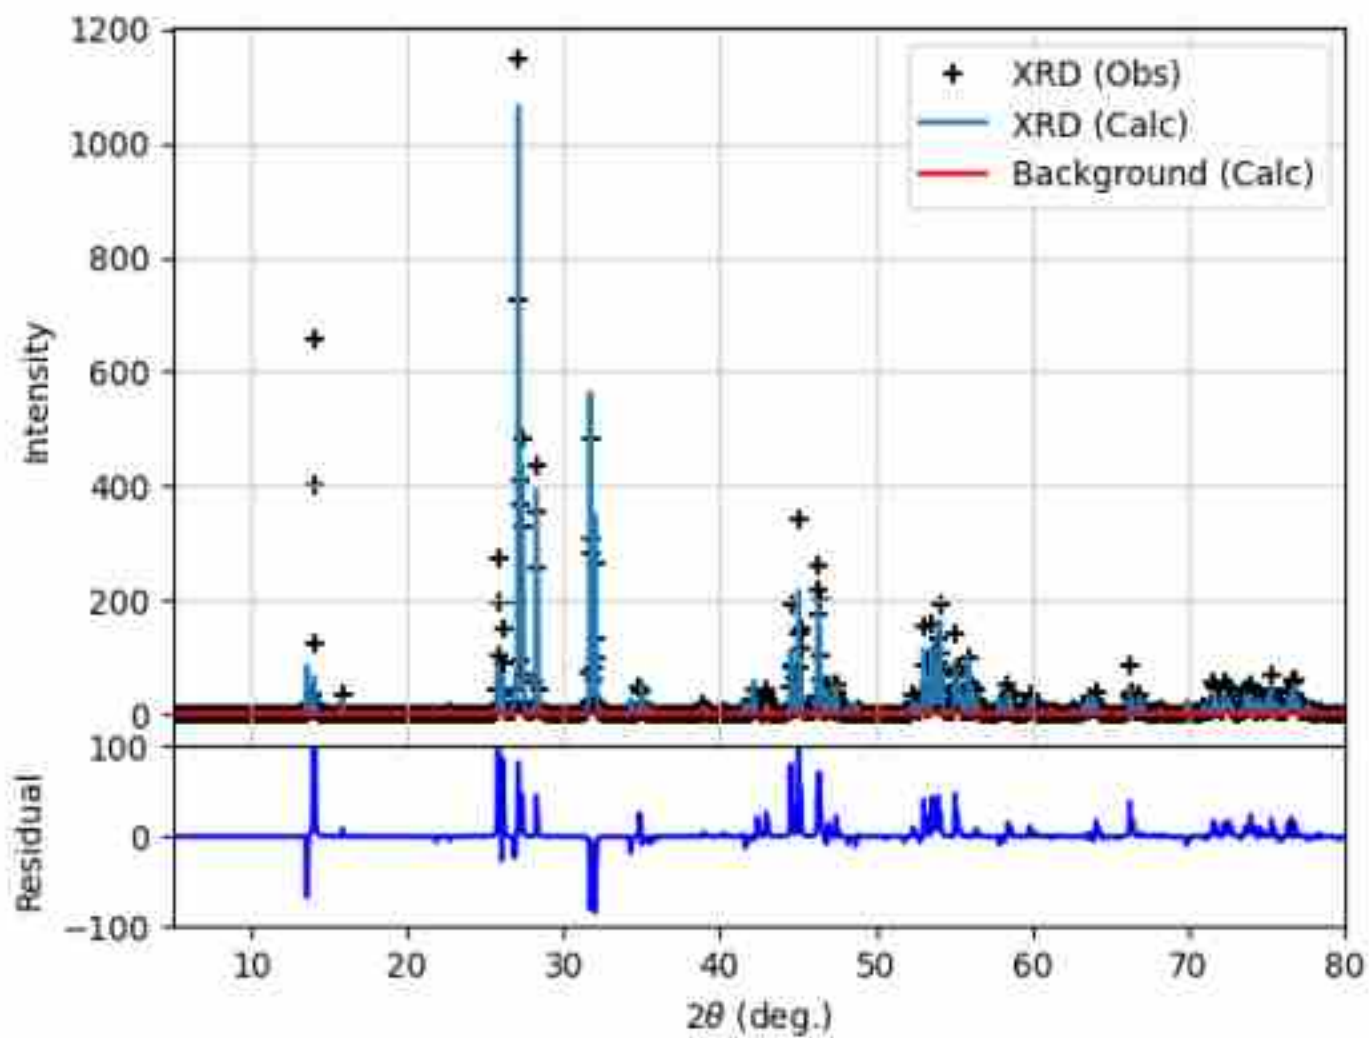

| RMSE before RR | Rwp      | RMSE after RR |
|----------------|----------|---------------|
| 0.036          | 41.14992 | None          |

# Sr4Br8

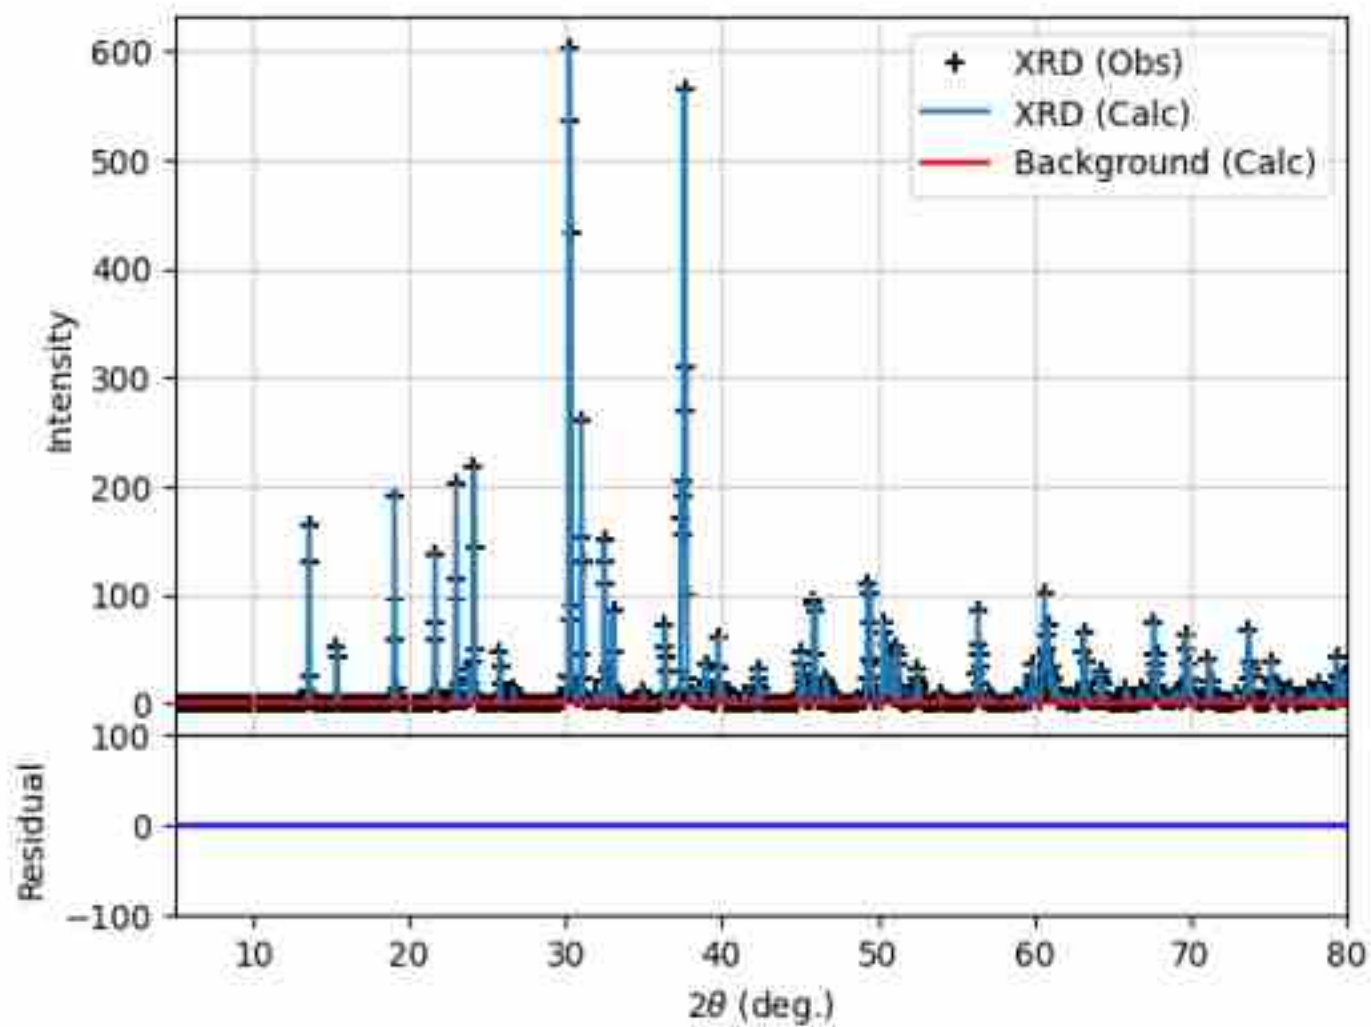

| RMSE before RR | Rwp     | RMSE after RR |
|----------------|---------|---------------|
| 0.036          | 0.04137 | 0.00127       |



# Sr9Mn2N8

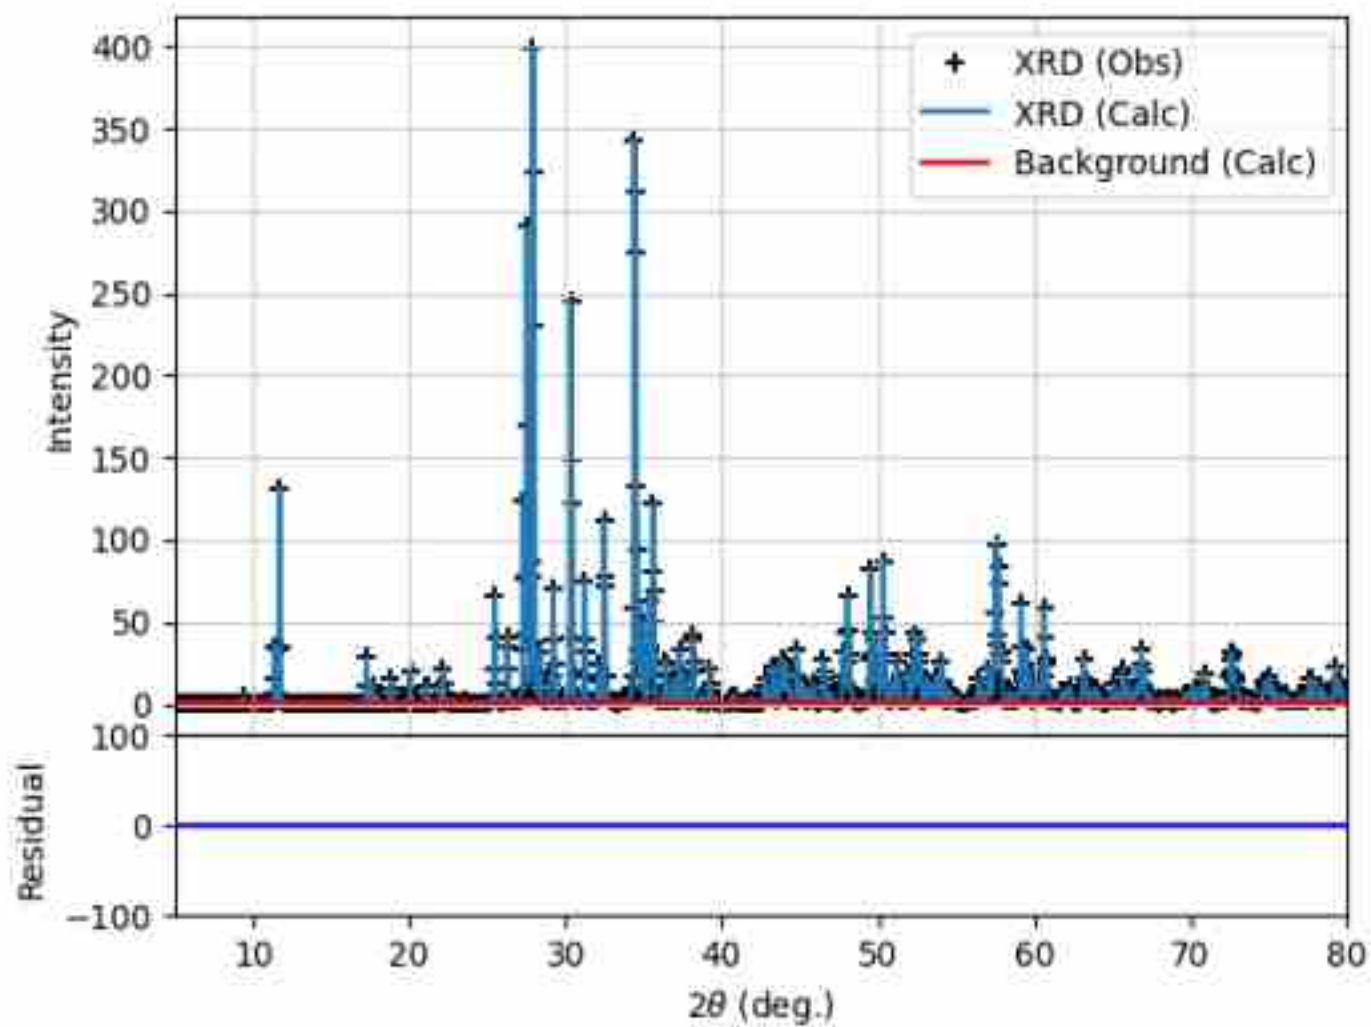

| RMSE before RR | Rwp     | RMSE after RR |
|----------------|---------|---------------|
| 0.036          | 0.00259 | 0.00055       |

# Ti6Sn2C4

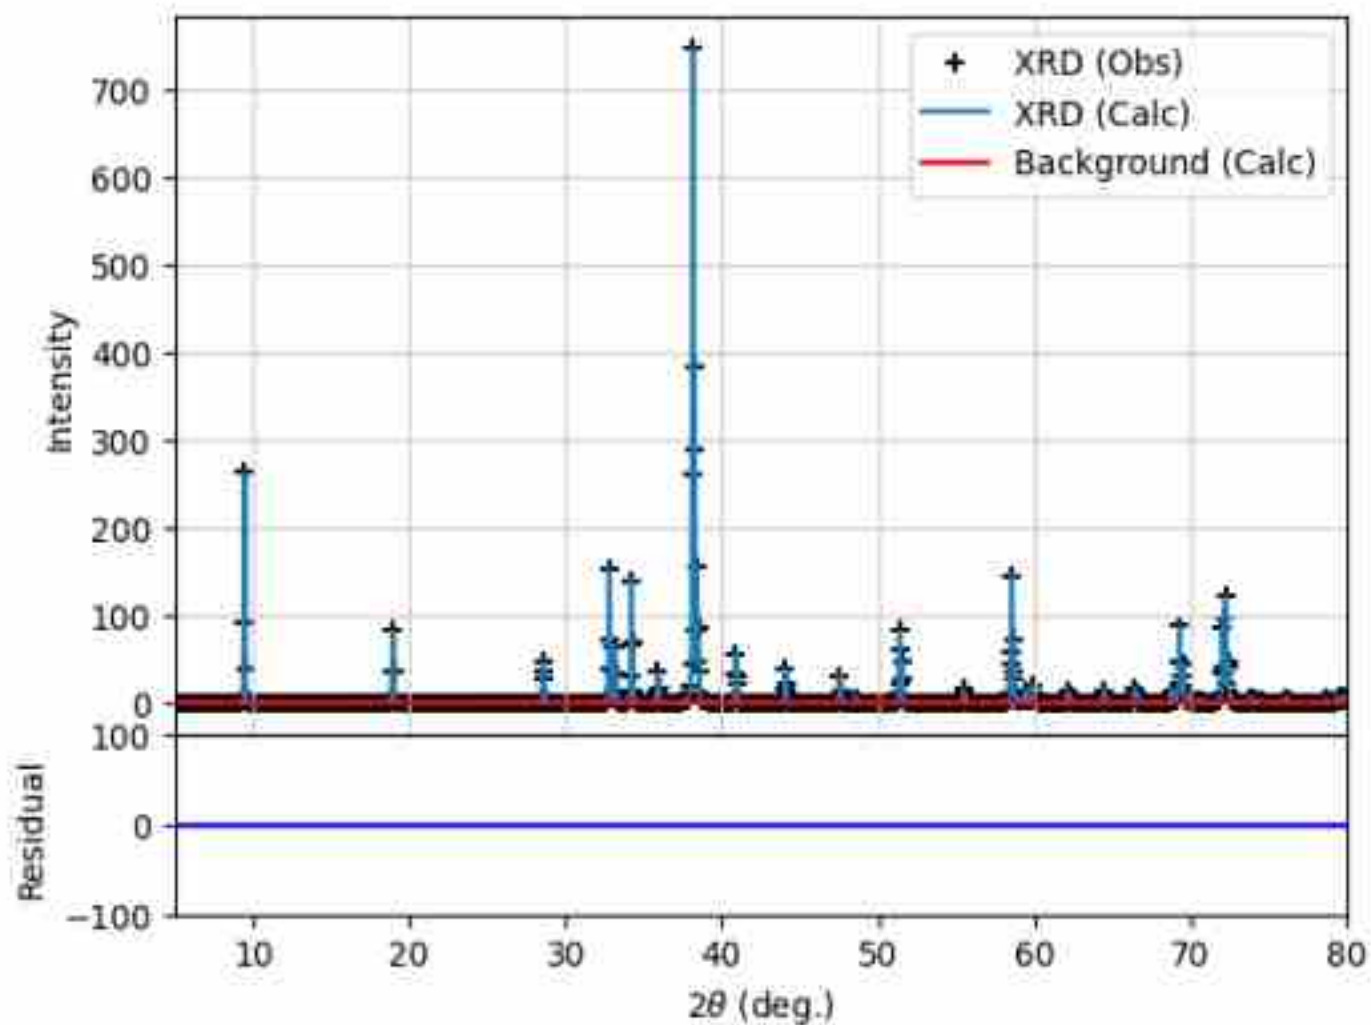

| RMSE before RR | Rwp     | RMSE after RR |
|----------------|---------|---------------|
| 0.036          | 0.00402 | 0.00168       |

# V<sub>4</sub>Cr<sub>1</sub>Ni<sub>1</sub>O<sub>12</sub>

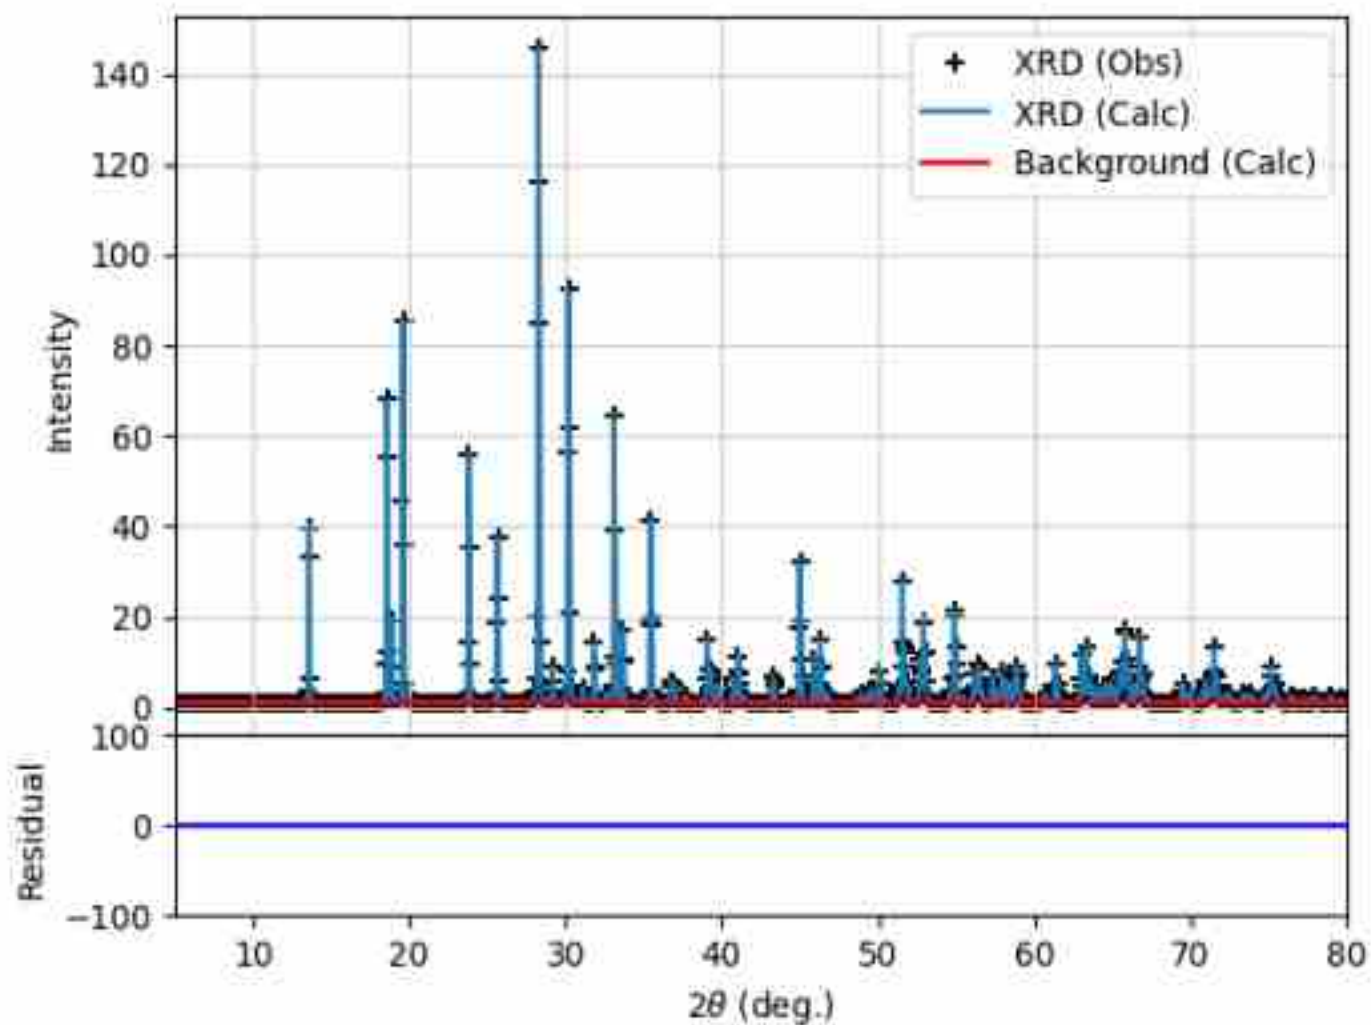

| RMSE before RR | Rwp     | RMSE after RR |
|----------------|---------|---------------|
| 0.036          | 0.00358 | 0.00084       |

# V<sub>4</sub>Fe<sub>2</sub>O<sub>8</sub>

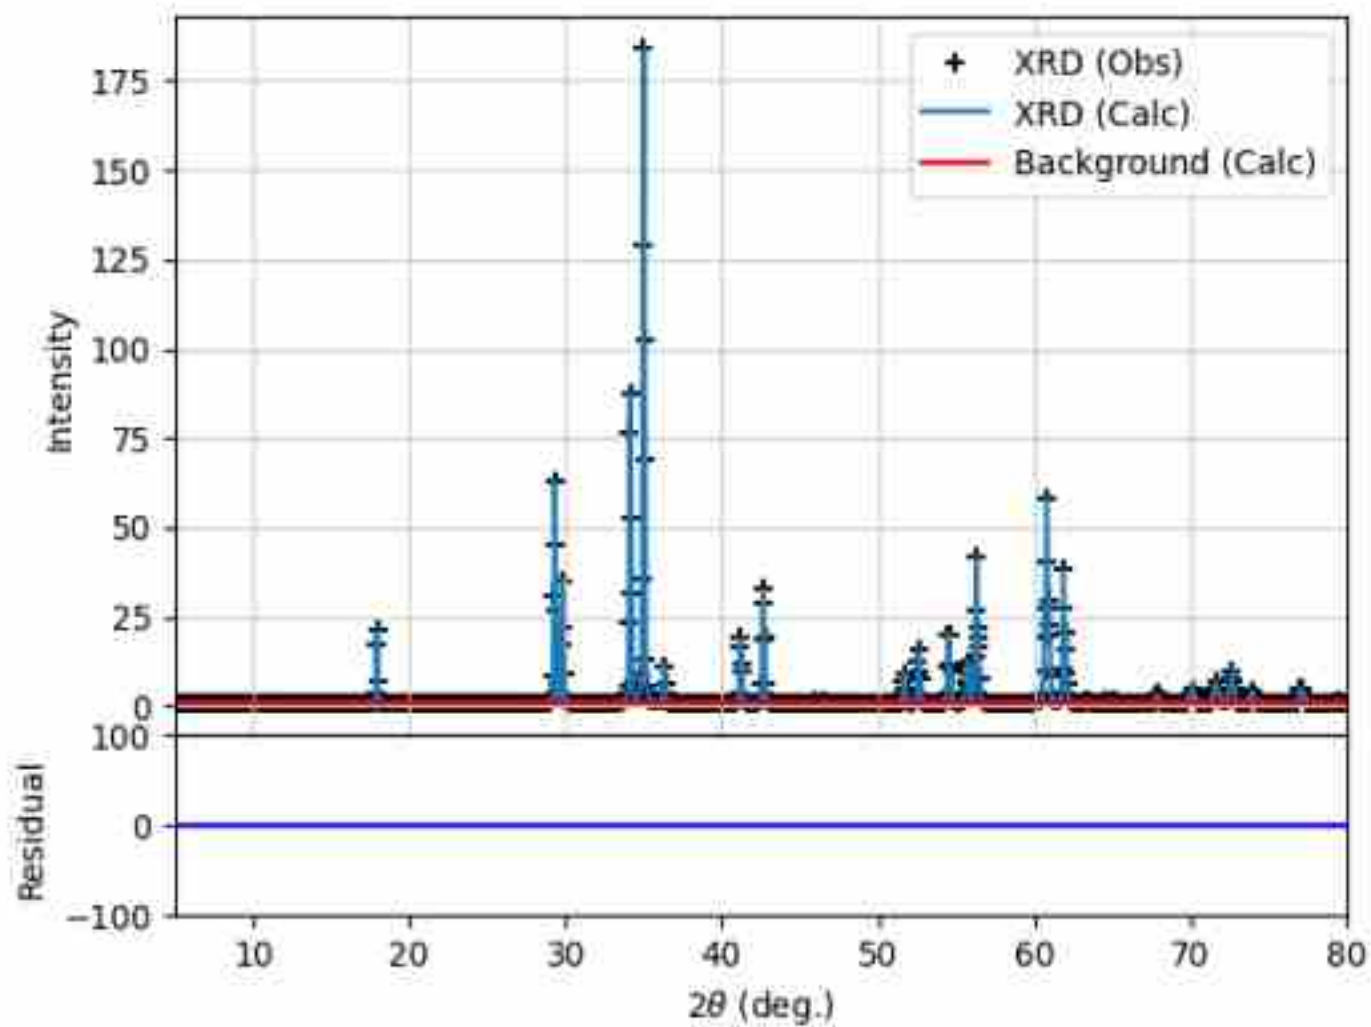

| RMSE before RR | Rwp     | RMSE after RR |
|----------------|---------|---------------|
| 0.036          | 0.00137 | 0.00047       |

# V4O8

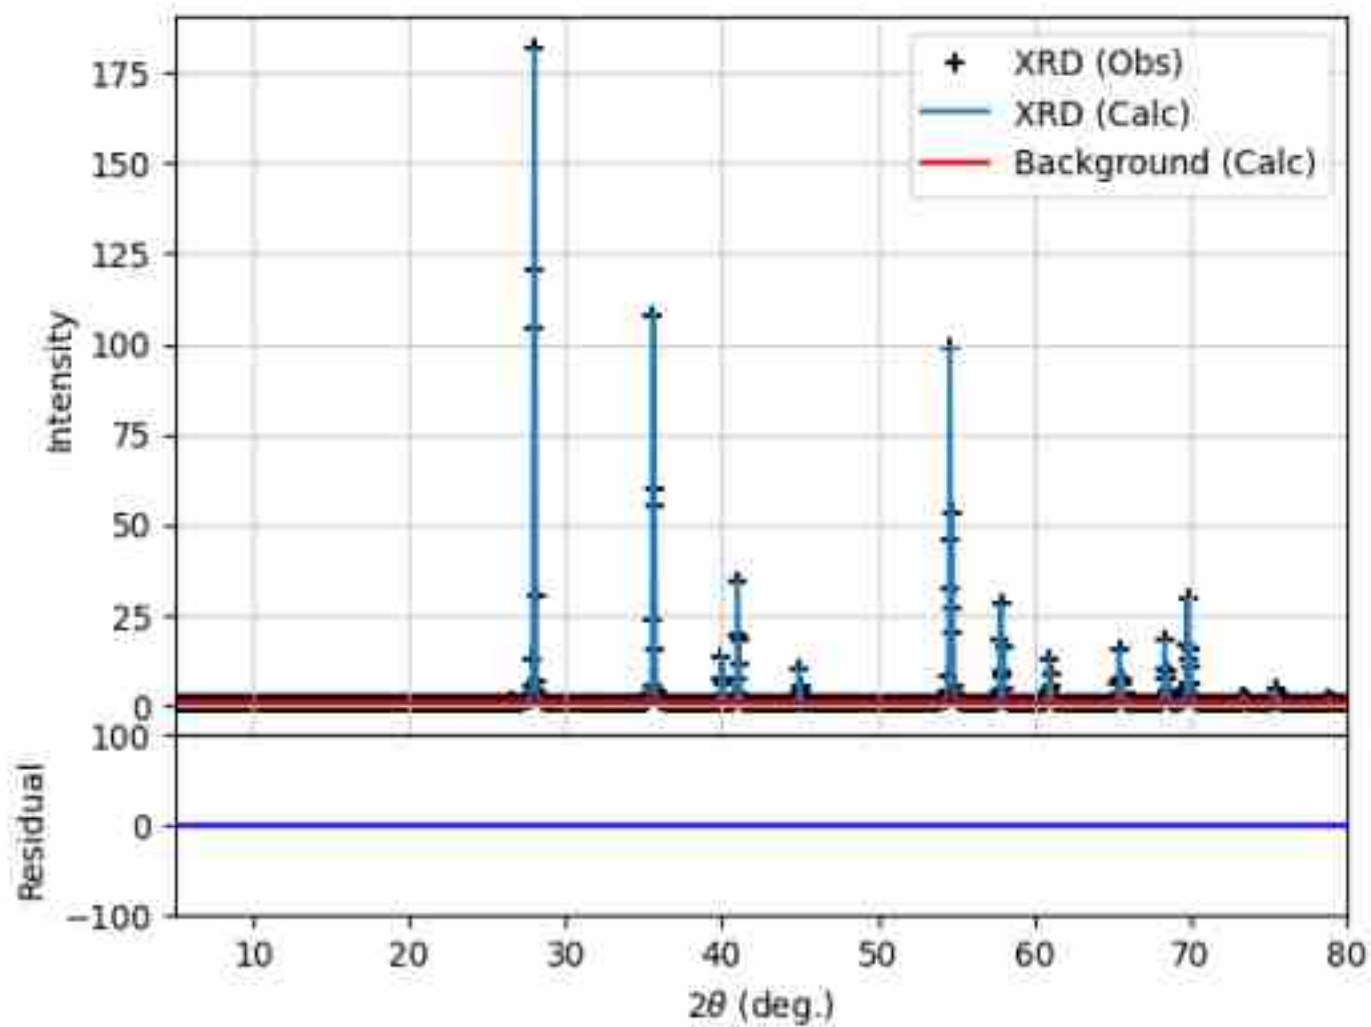

| RMSE before RR | Rwp     | RMSE after RR |
|----------------|---------|---------------|
| 0.036          | 0.00209 | 0.00049       |

# Y6Br2O8

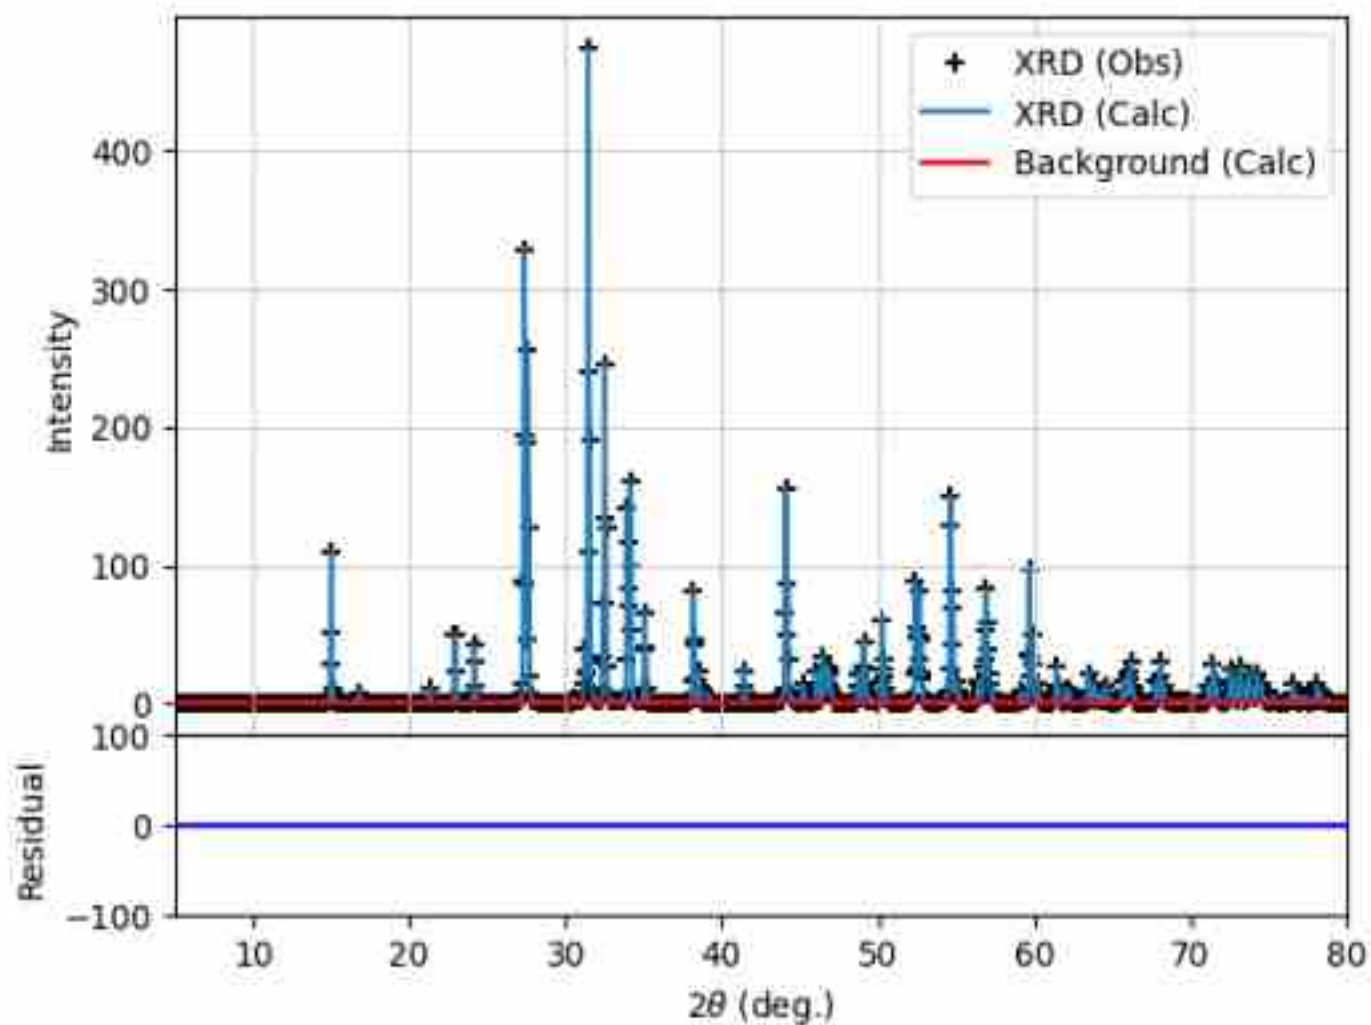

| RMSE before RR | Rwp     | RMSE after RR |
|----------------|---------|---------------|
| 0.036          | 0.00295 | 0.00099       |

# Yb8C12

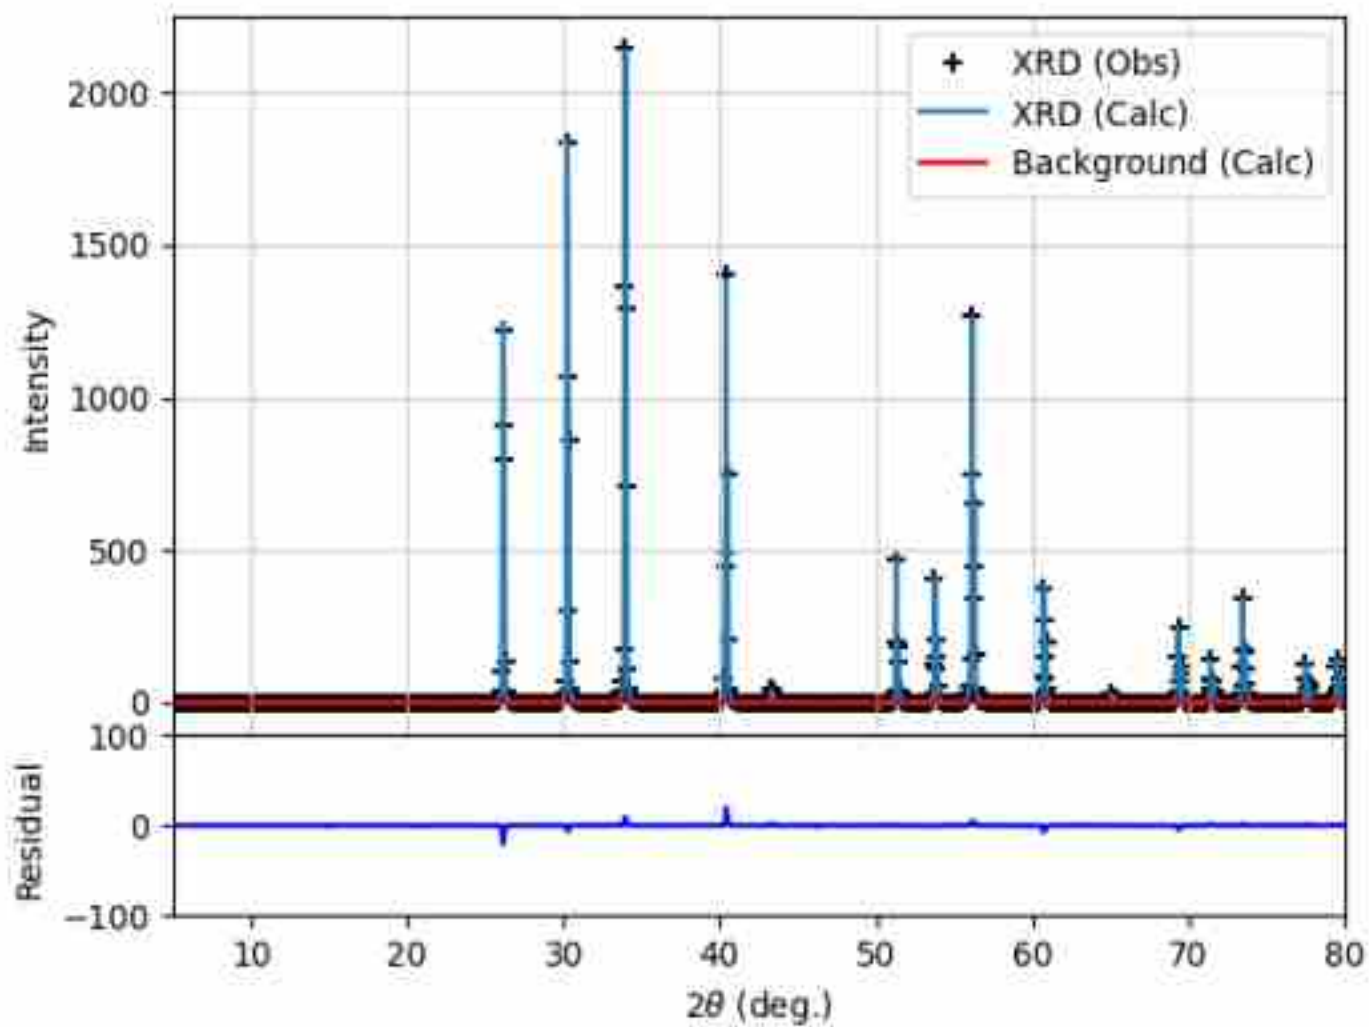

| RMSE before RR | Rwp     | RMSE after RR |
|----------------|---------|---------------|
| 0.036          | 2.01631 | 0.30221       |

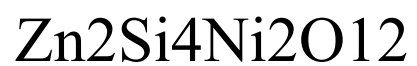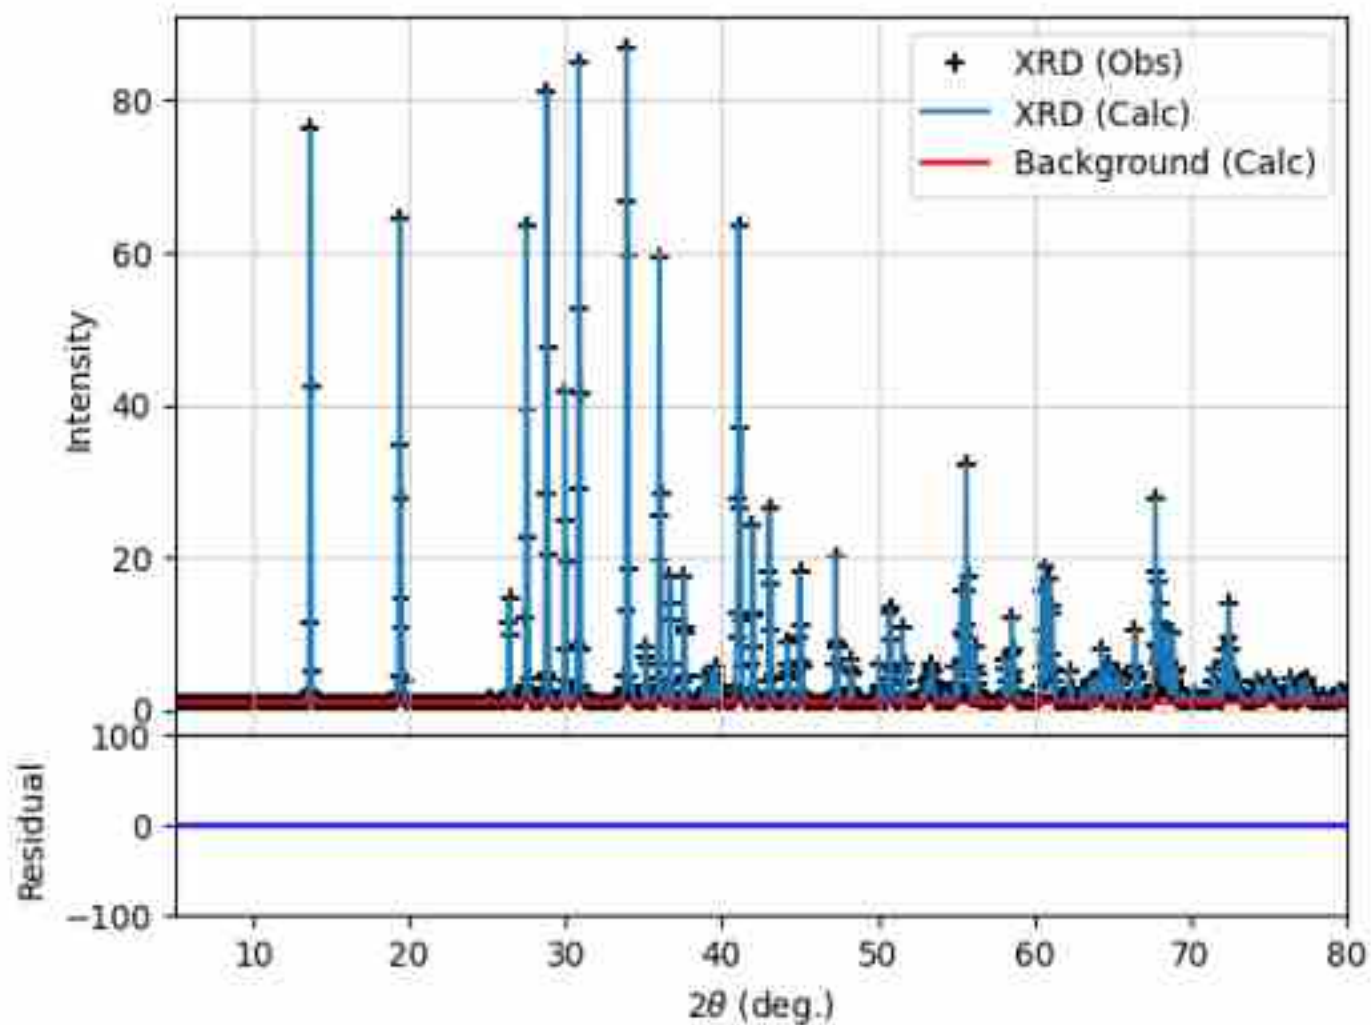

| RMSE before RR | Rwp     | RMSE after RR |
|----------------|---------|---------------|
| 0.036          | 0.00124 | 0.00069       |



# Zr1Ti1S4

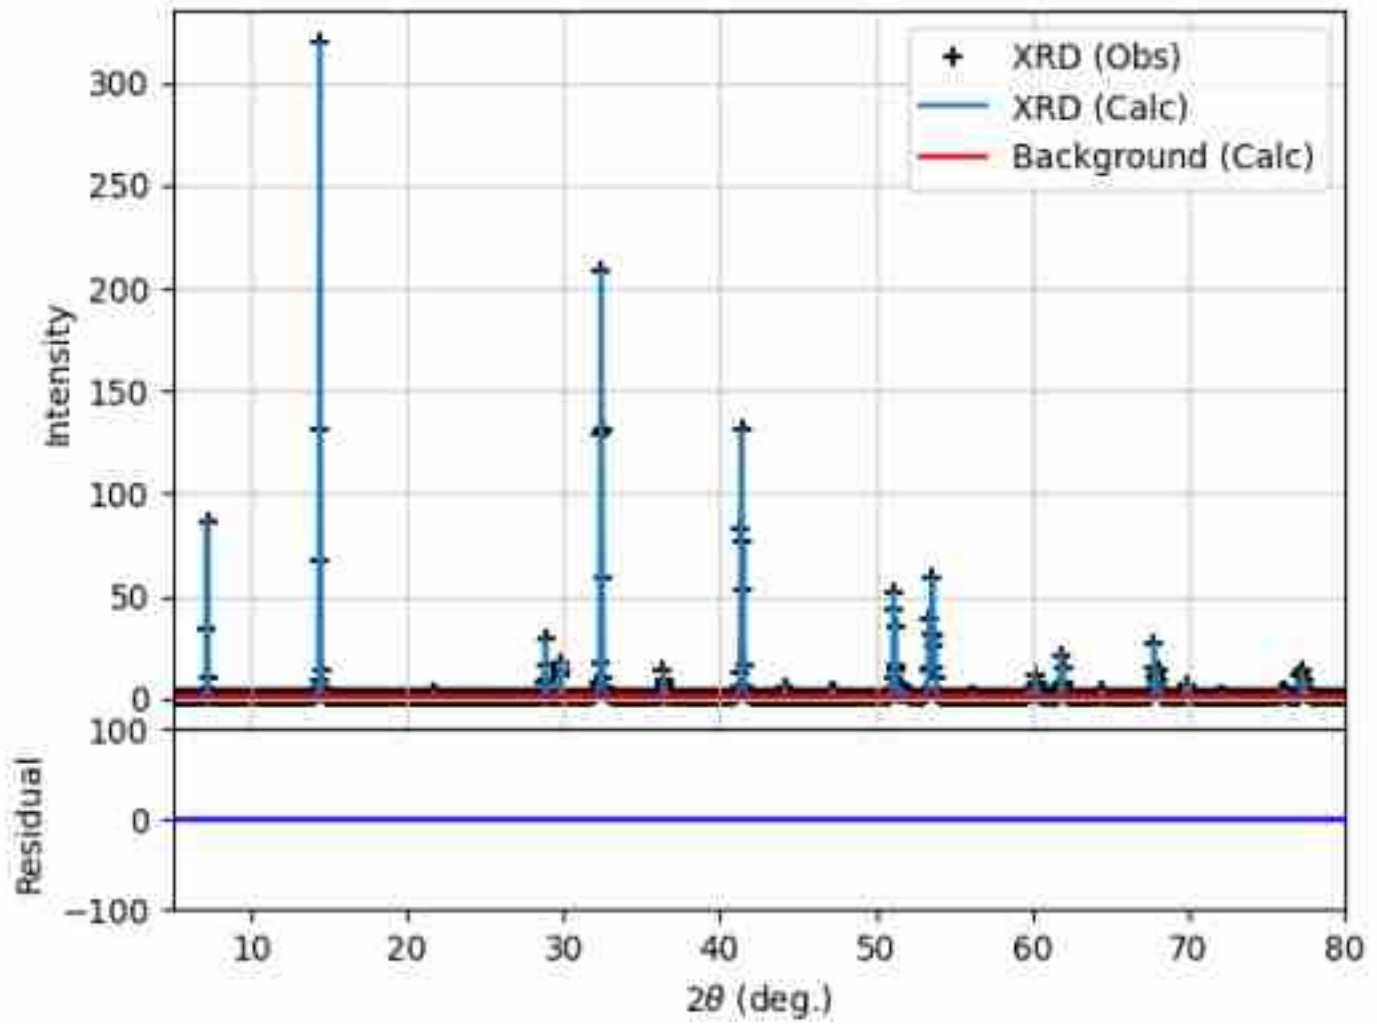

| RMSE before RR | Rwp     | RMSE after RR |
|----------------|---------|---------------|
| 0.036          | 0.00333 | 0.00078       |

# Ba<sub>2</sub>Au<sub>4</sub>O<sub>8</sub>

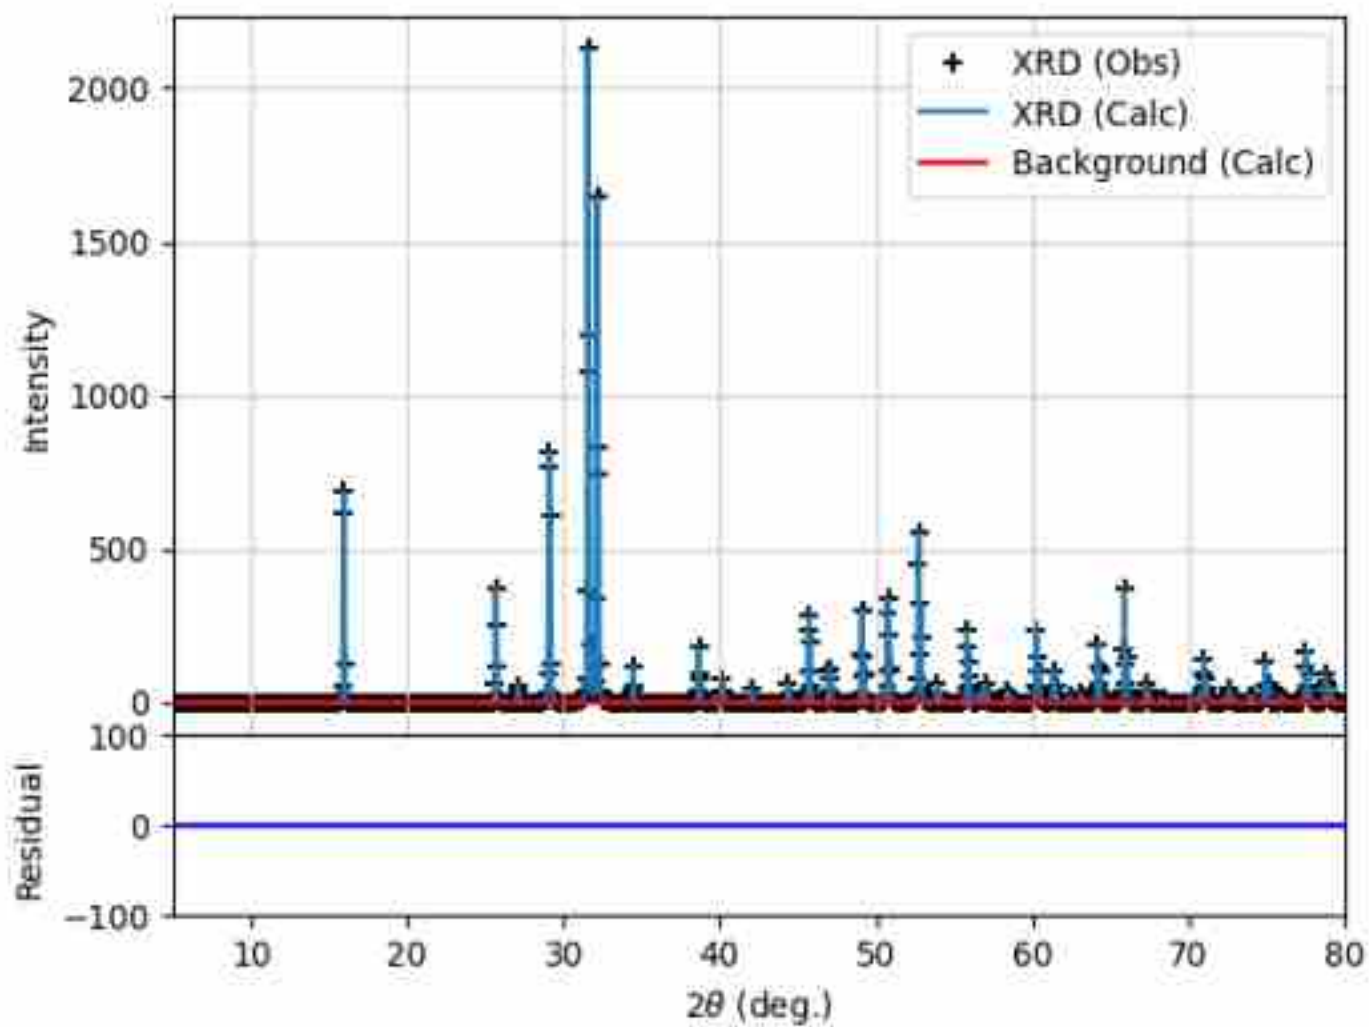

| RMSE before RR | Rwp     | RMSE after RR |
|----------------|---------|---------------|
| 0.037          | 0.00381 | 0.0014        |

# Ba6Ni2O8

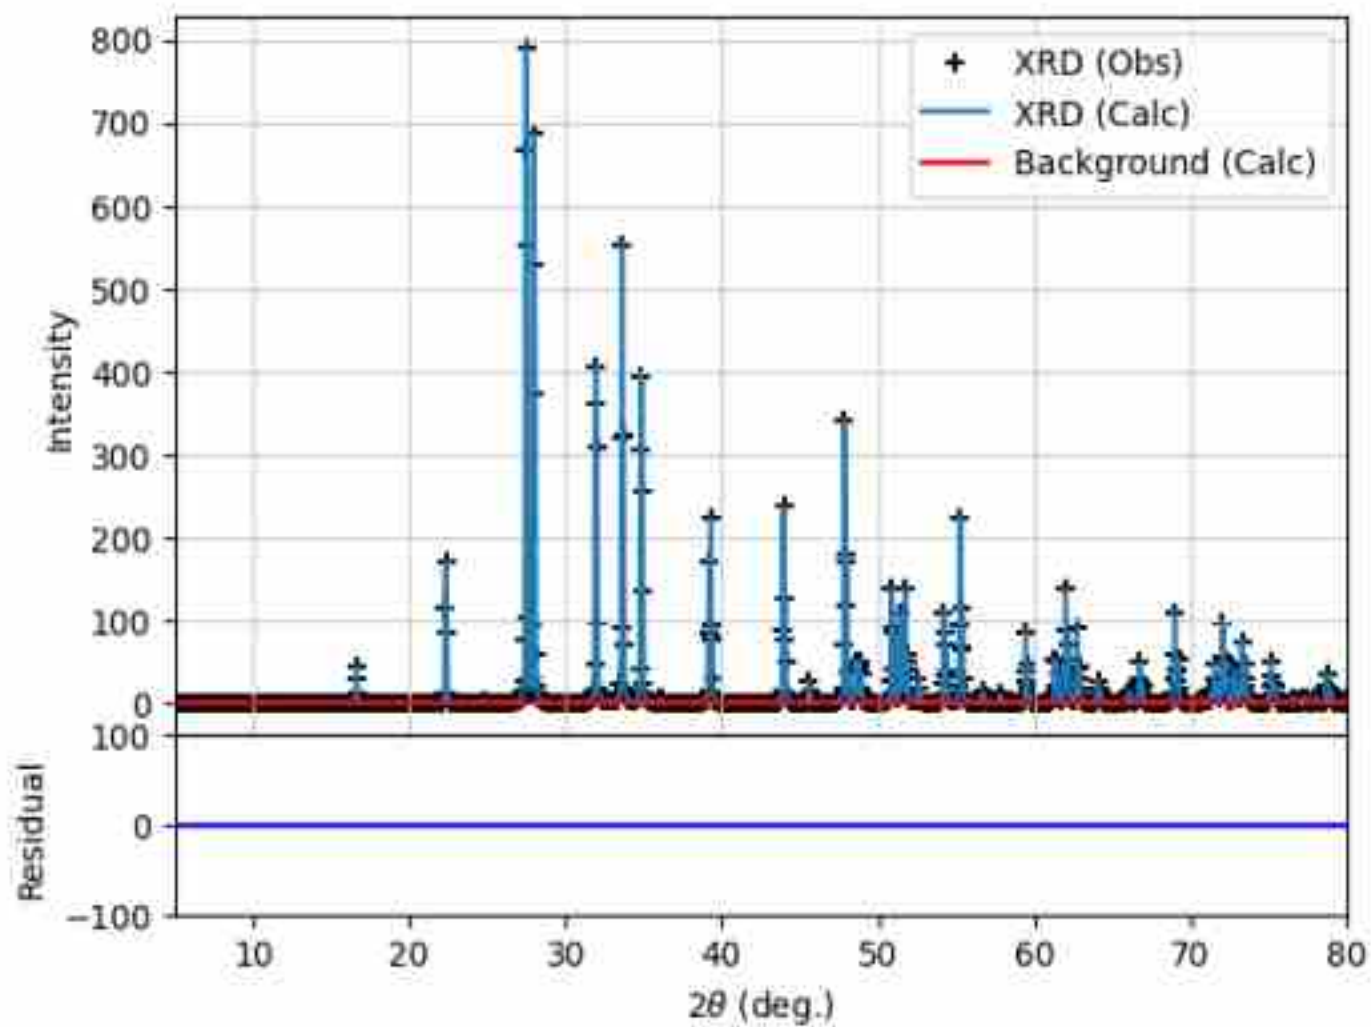

| RMSE before RR | Rwp     | RMSE after RR |
|----------------|---------|---------------|
| 0.037          | 0.00243 | 0.0008        |

# Ca<sub>4</sub>V<sub>2</sub>Mo<sub>2</sub>O<sub>12</sub>

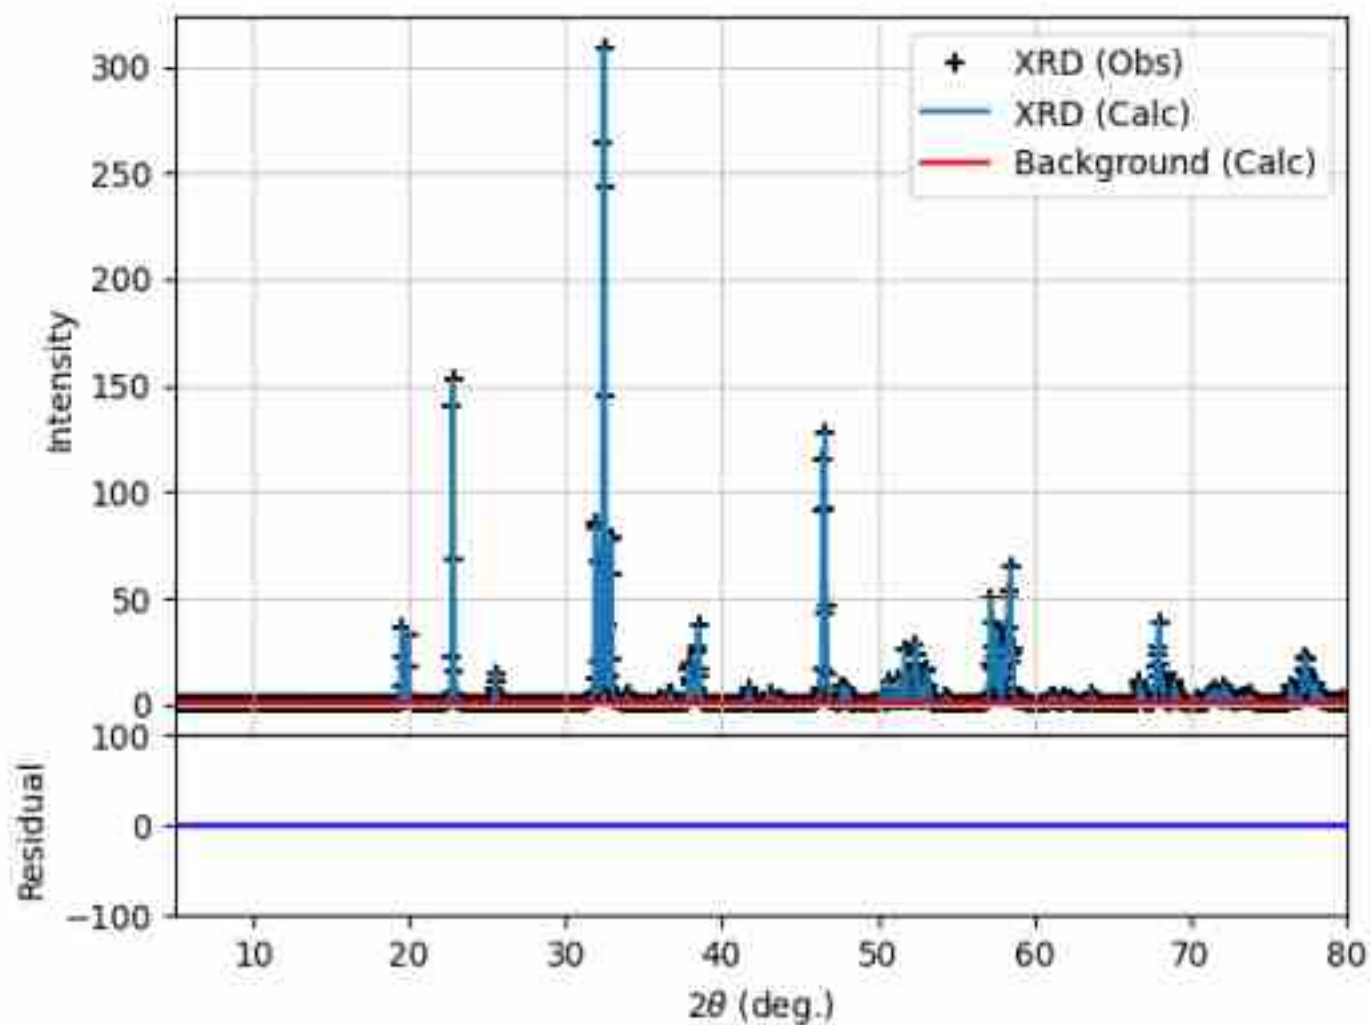

| RMSE before RR | Rwp     | RMSE after RR |
|----------------|---------|---------------|
| 0.037          | 0.00299 | 0.00106       |

# Ce<sub>2</sub>Mn<sub>2</sub>As<sub>2</sub>O<sub>2</sub>

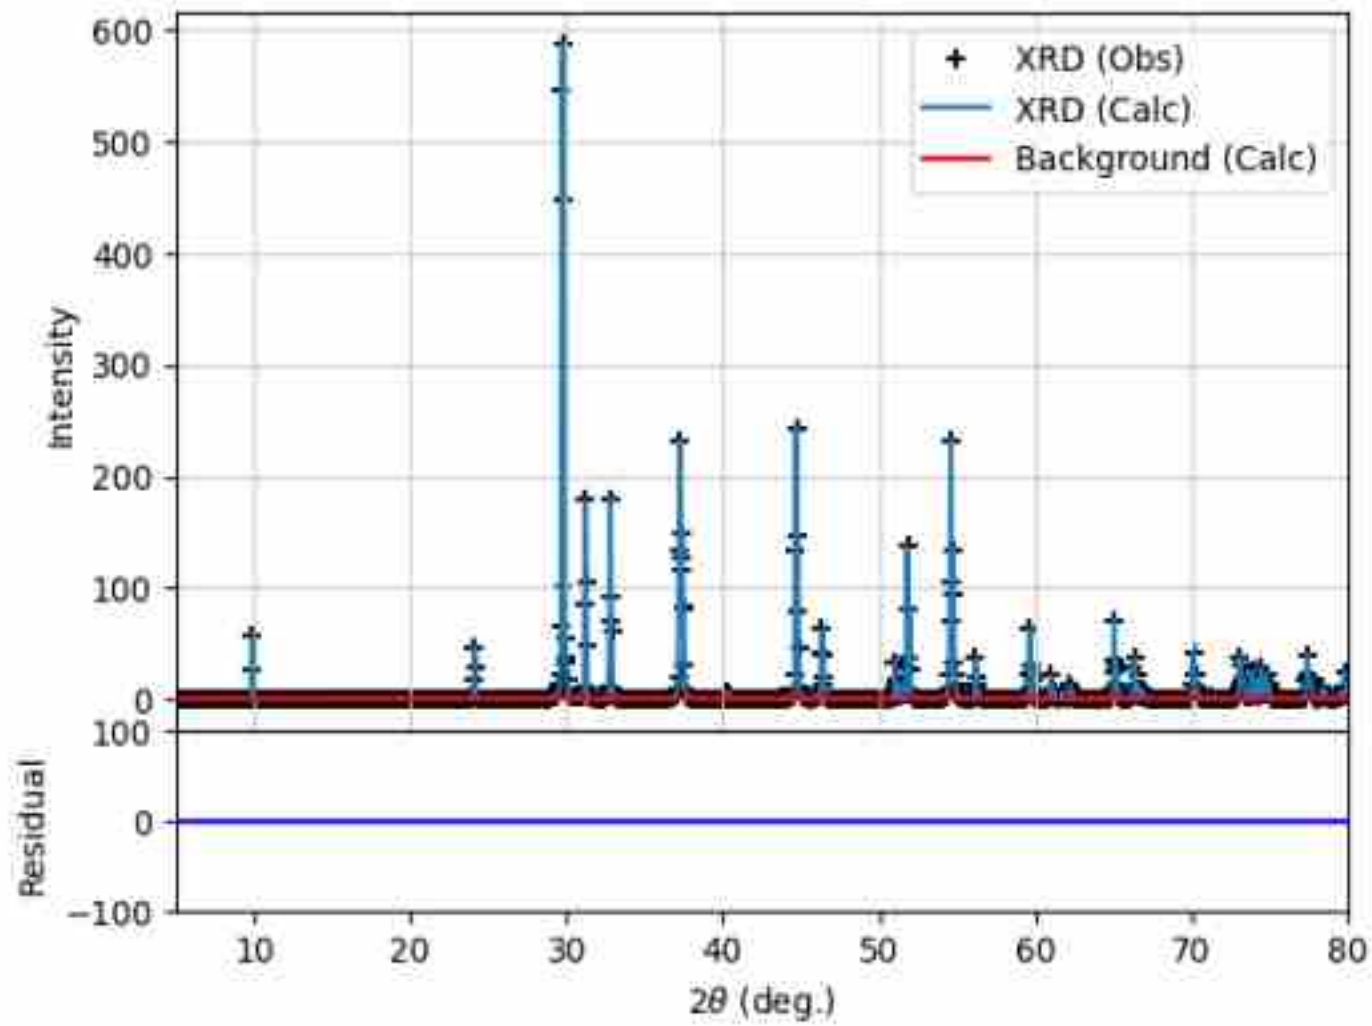

| RMSE before RR | Rwp     | RMSE after RR |
|----------------|---------|---------------|
| 0.037          | 0.00496 | 0.001         |

# Co<sub>2</sub>Ni<sub>2</sub>O<sub>6</sub>

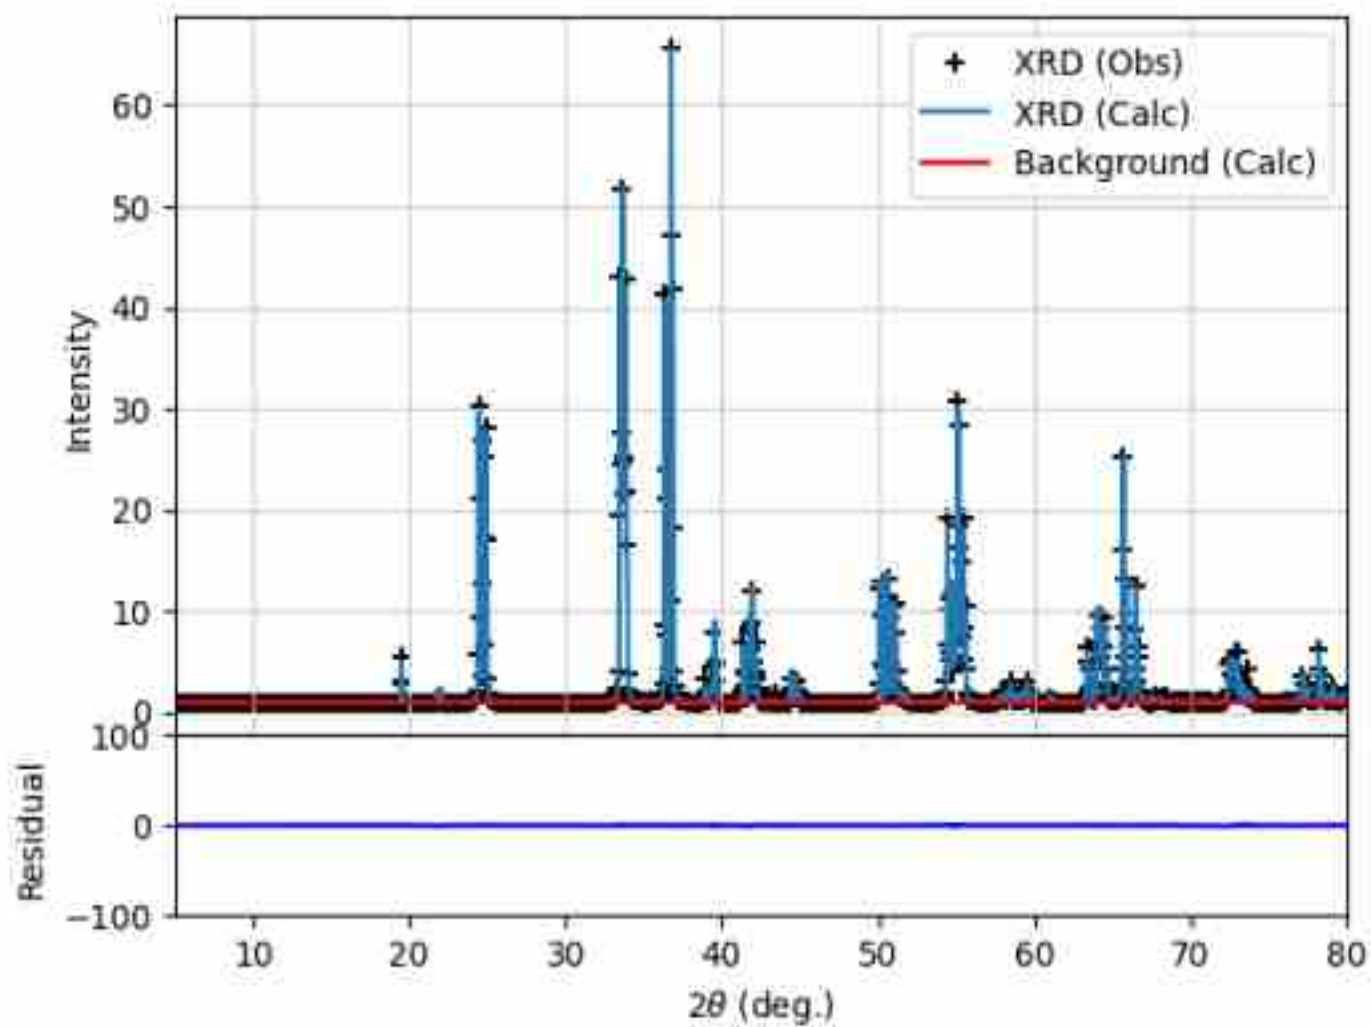

| RMSE before RR | Rwp     | RMSE after RR |
|----------------|---------|---------------|
| 0.037          | 6.21005 | 0.08155       |

# Cr12P4

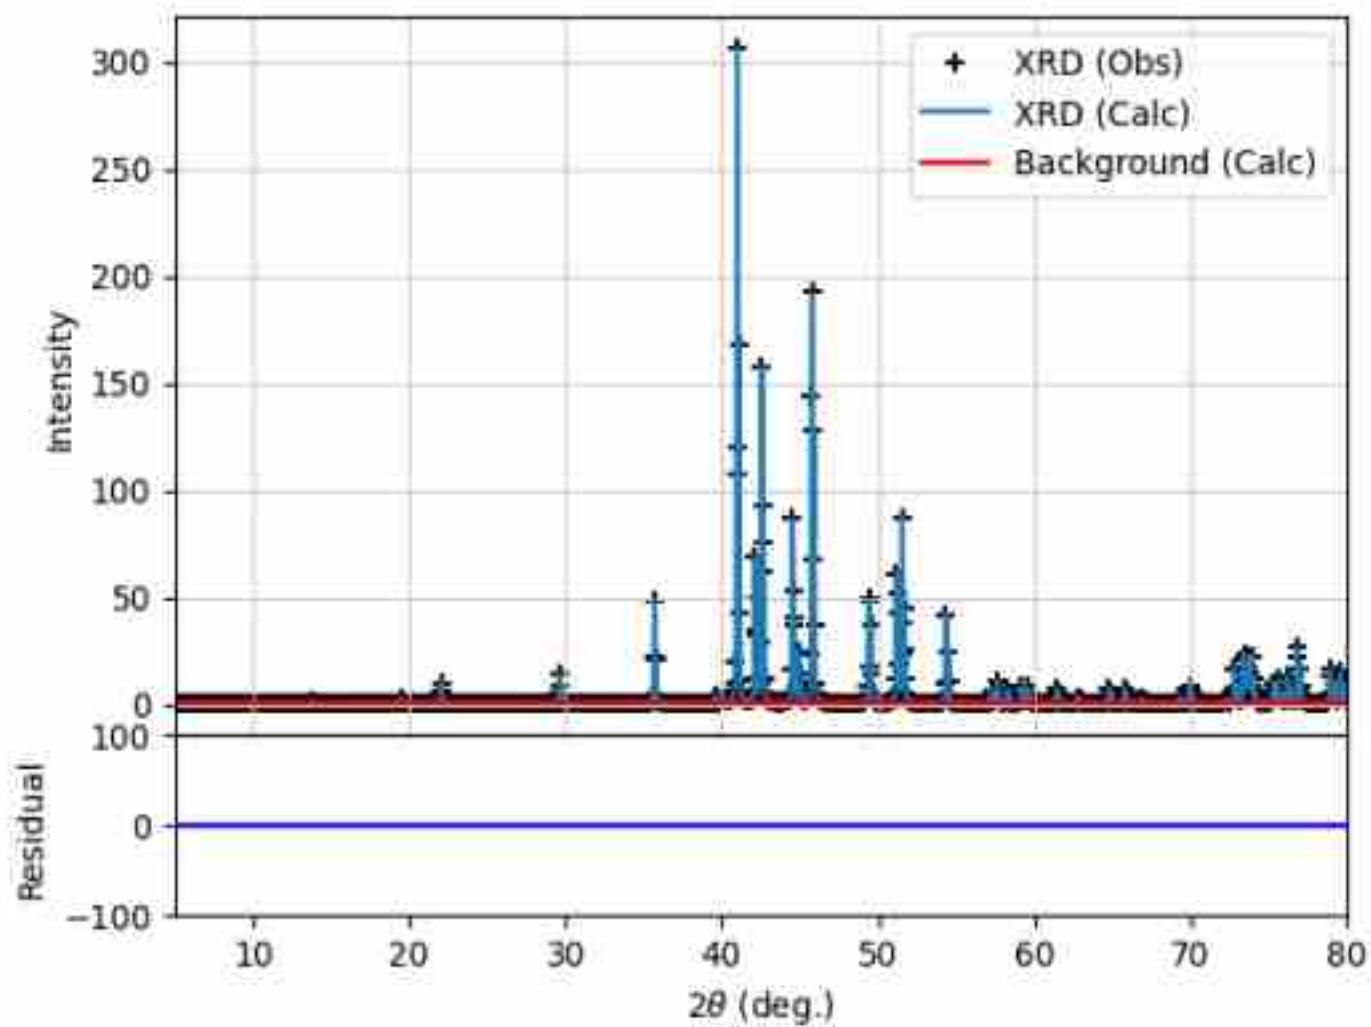

| RMSE before RR | Rwp     | RMSE after RR |
|----------------|---------|---------------|
| 0.037          | 0.00256 | 0.00042       |

# Ga<sub>4</sub>Cl<sub>4</sub>O<sub>4</sub>

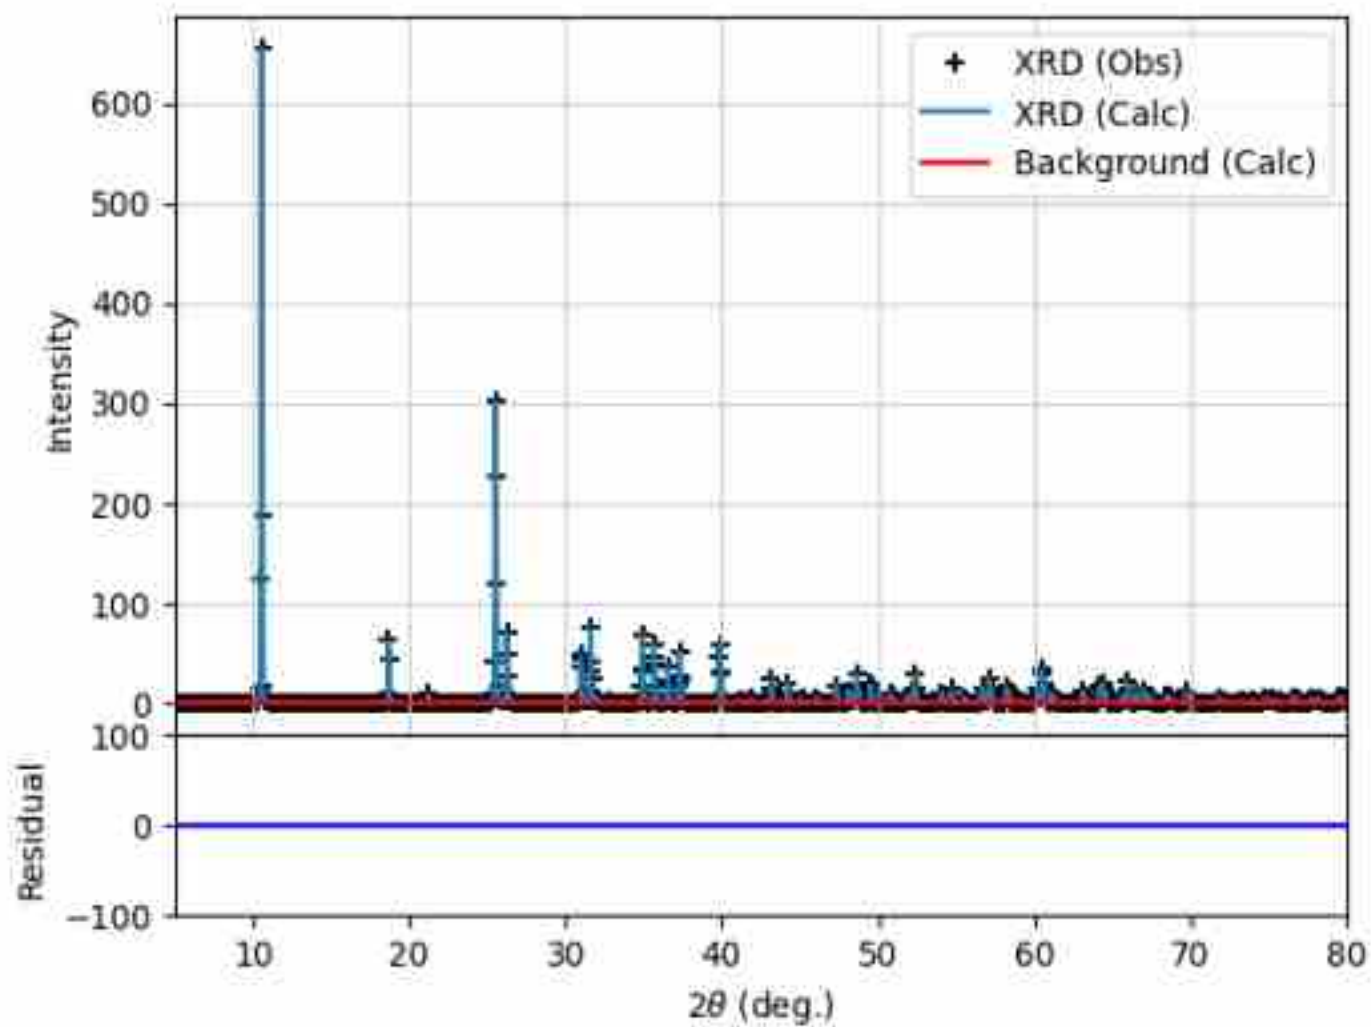

| RMSE before RR | Rwp    | RMSE after RR |
|----------------|--------|---------------|
| 0.037          | 0.0036 | 0.00099       |



# K1Nb1O3

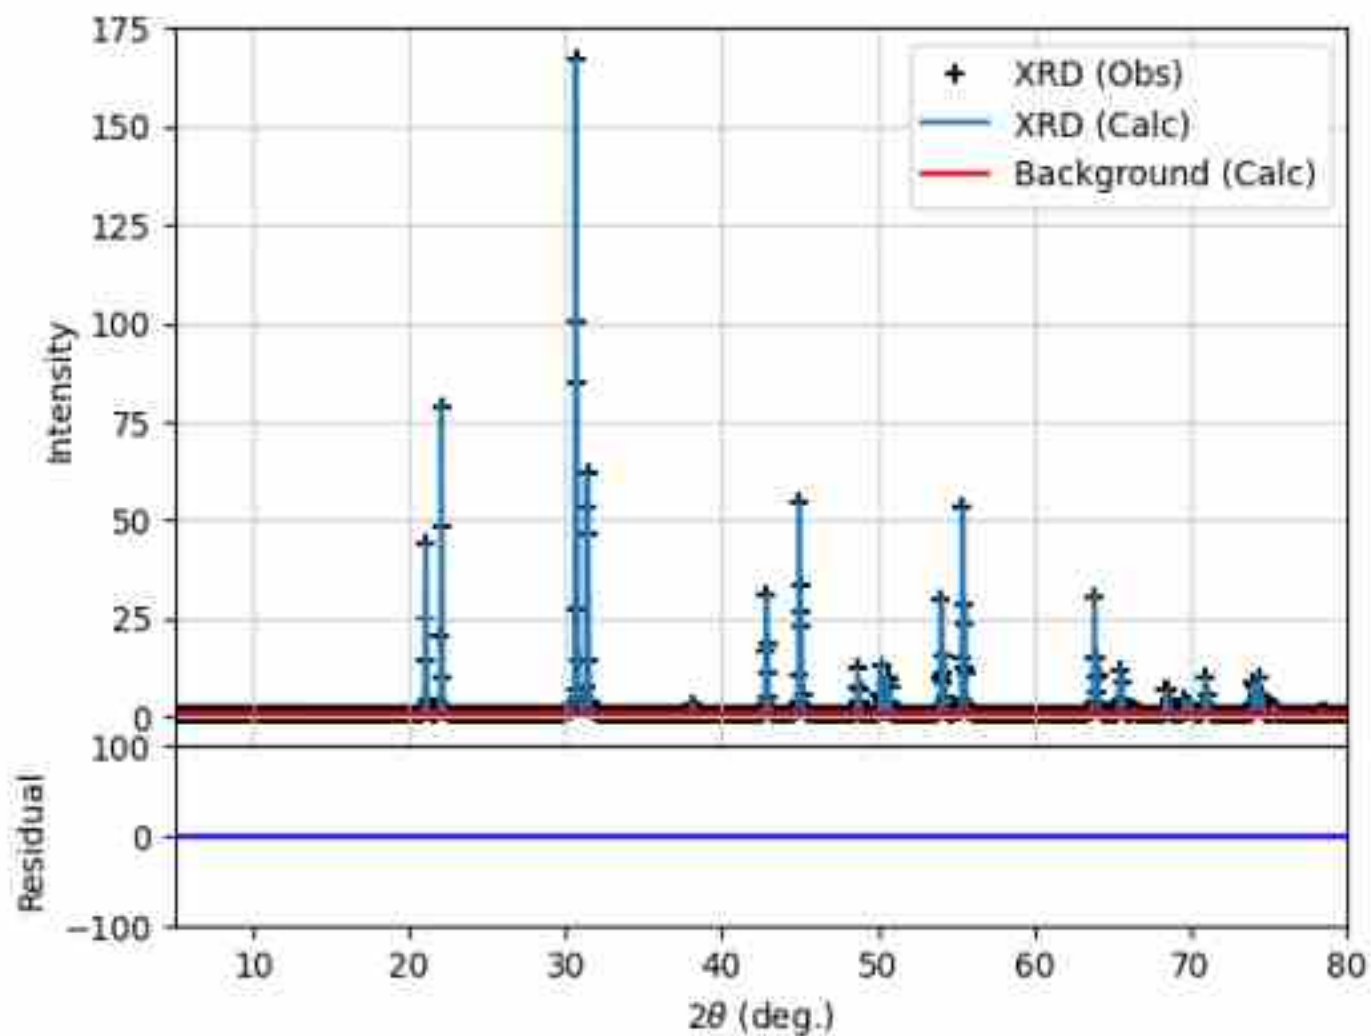

| RMSE before RR | Rwp     | RMSE after RR |
|----------------|---------|---------------|
| 0.037          | 0.00337 | 0.00128       |

# K4Ir1O4

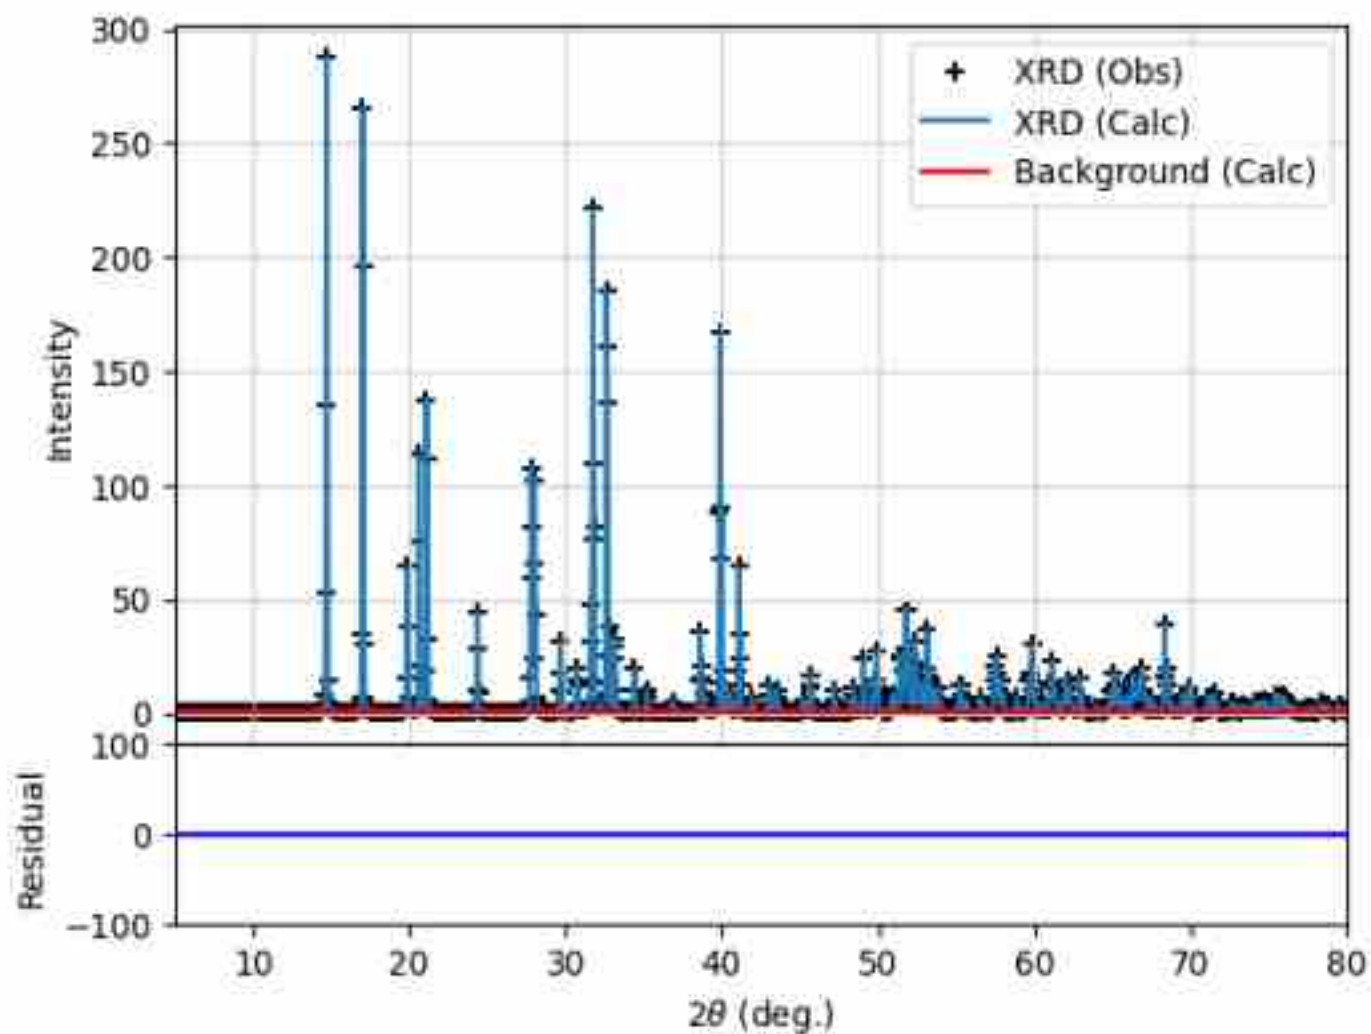

| RMSE before RR | Rwp     | RMSE after RR |
|----------------|---------|---------------|
| 0.037          | 0.00348 | 0.00034       |

# La<sub>4</sub>W<sub>4</sub>N<sub>12</sub>

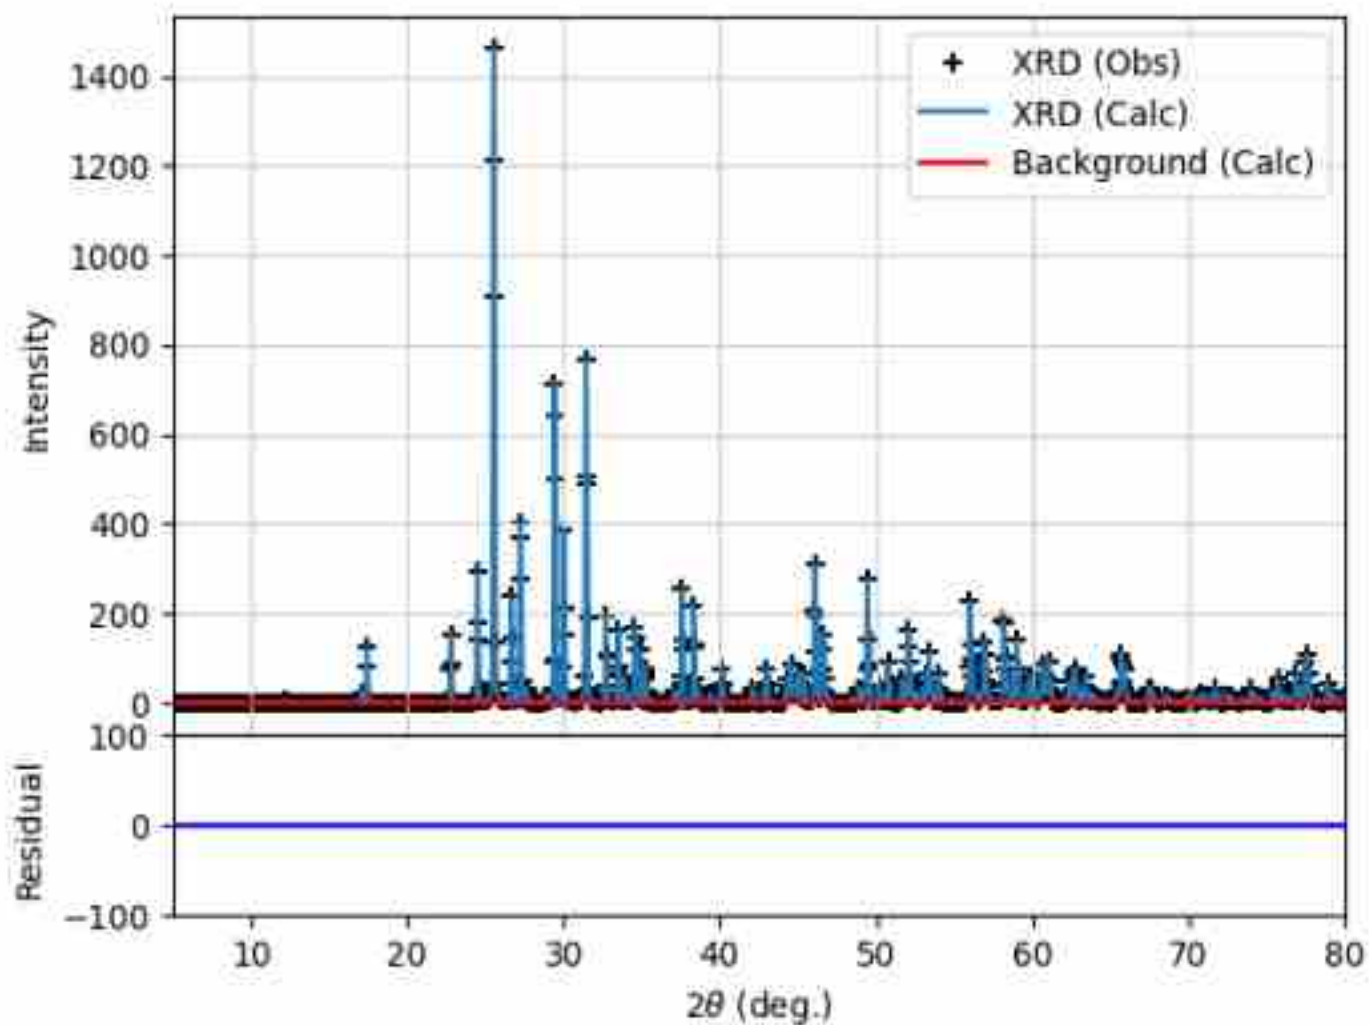

| RMSE before RR | Rwp     | RMSE after RR |
|----------------|---------|---------------|
| 0.037          | 0.00362 | 0.00101       |

# Li<sub>2</sub>Mn<sub>4</sub>F<sub>10</sub>

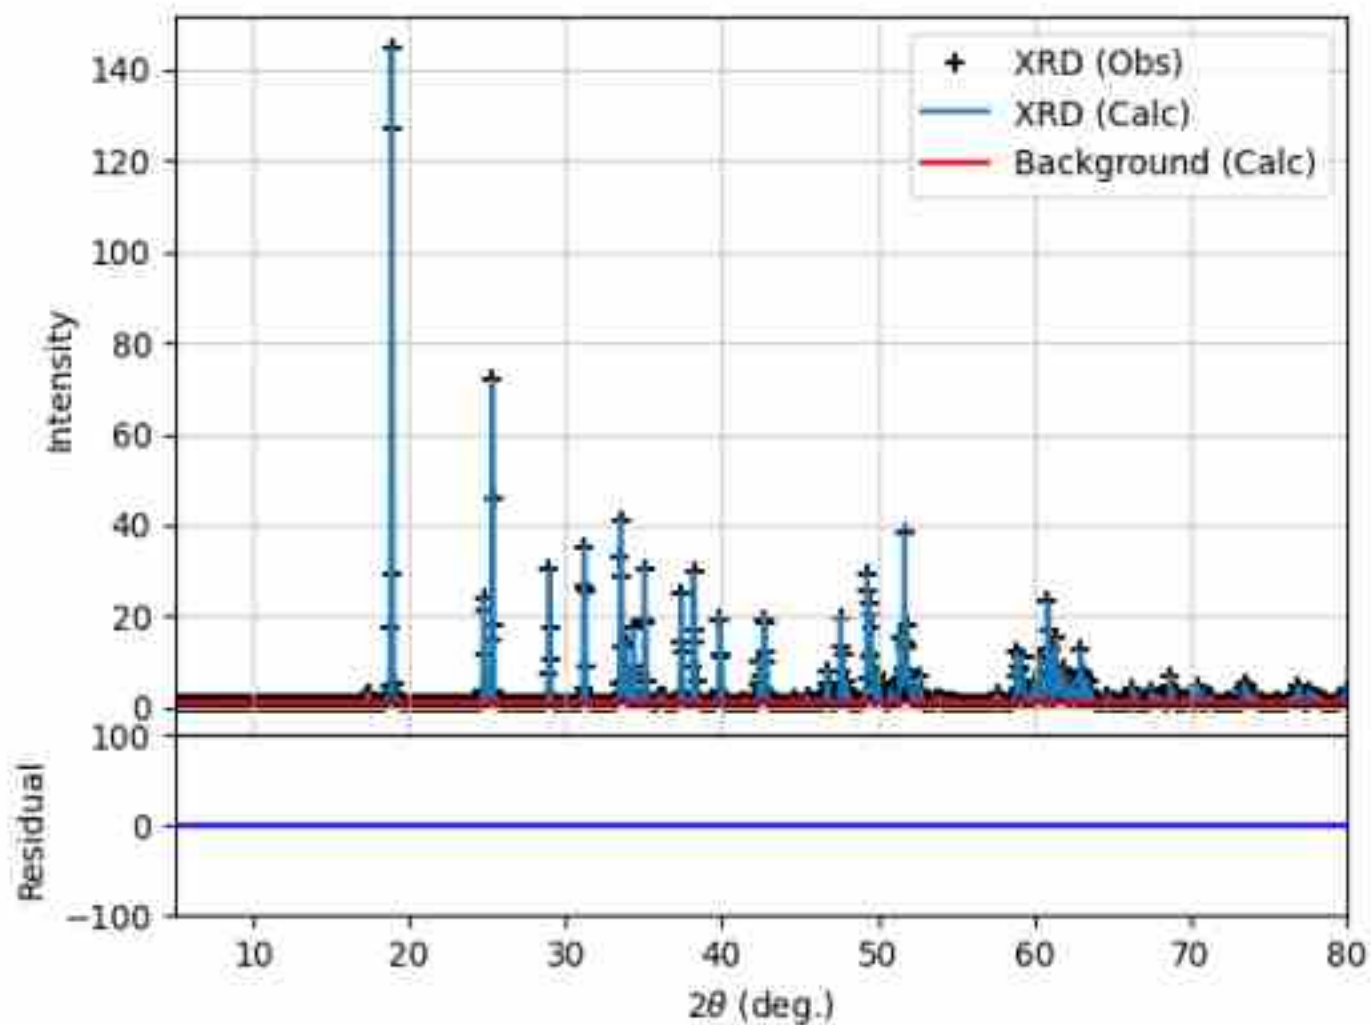

| RMSE before RR | Rwp    | RMSE after RR |
|----------------|--------|---------------|
| 0.037          | 0.0037 | 0.00121       |

# Li<sub>2</sub>Os<sub>2</sub>O<sub>6</sub>

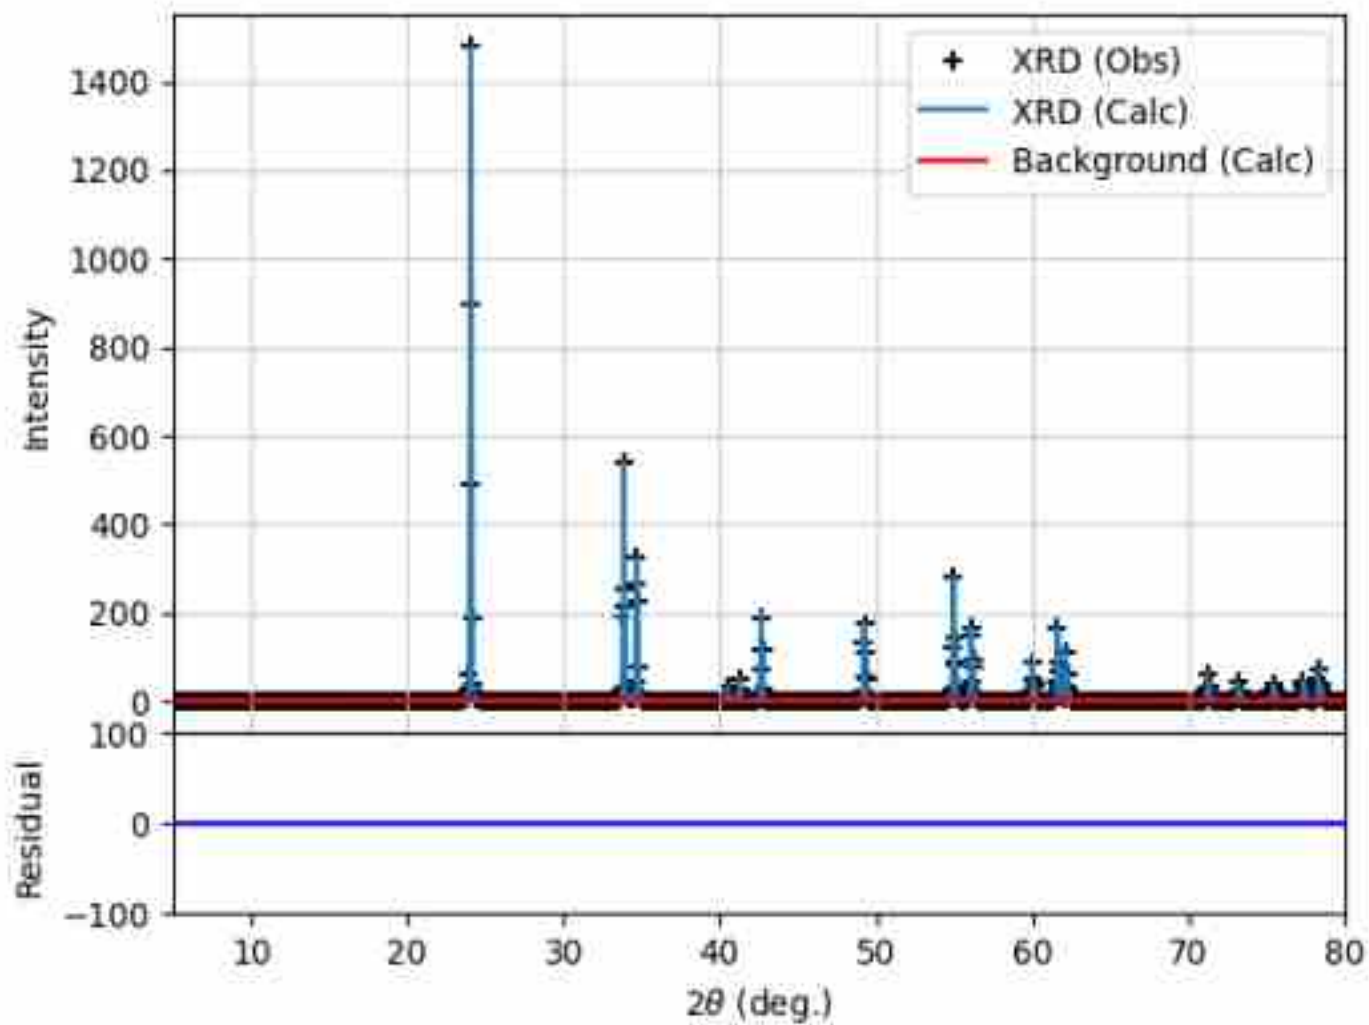

| RMSE before RR | Rwp    | RMSE after RR |
|----------------|--------|---------------|
| 0.037          | 0.0036 | 0.00204       |

# Li<sub>4</sub>Co<sub>2</sub>O<sub>6</sub>

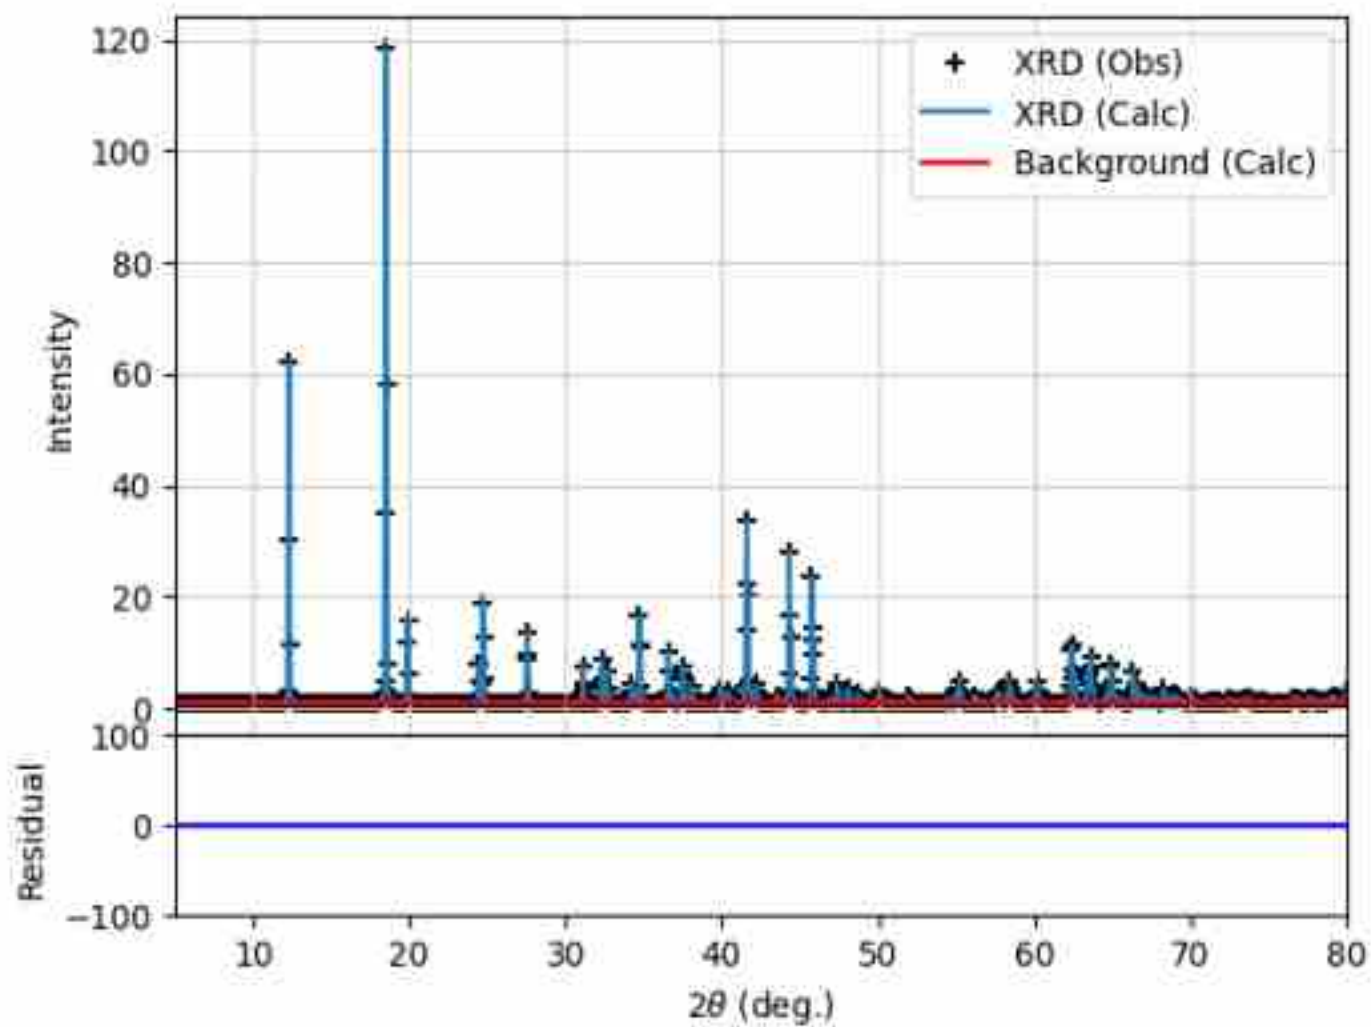

| RMSE before RR | Rwp     | RMSE after RR |
|----------------|---------|---------------|
| 0.037          | 0.00047 | 0.0004        |

# Li<sub>4</sub>Cr<sub>2</sub>Si<sub>2</sub>O<sub>8</sub>

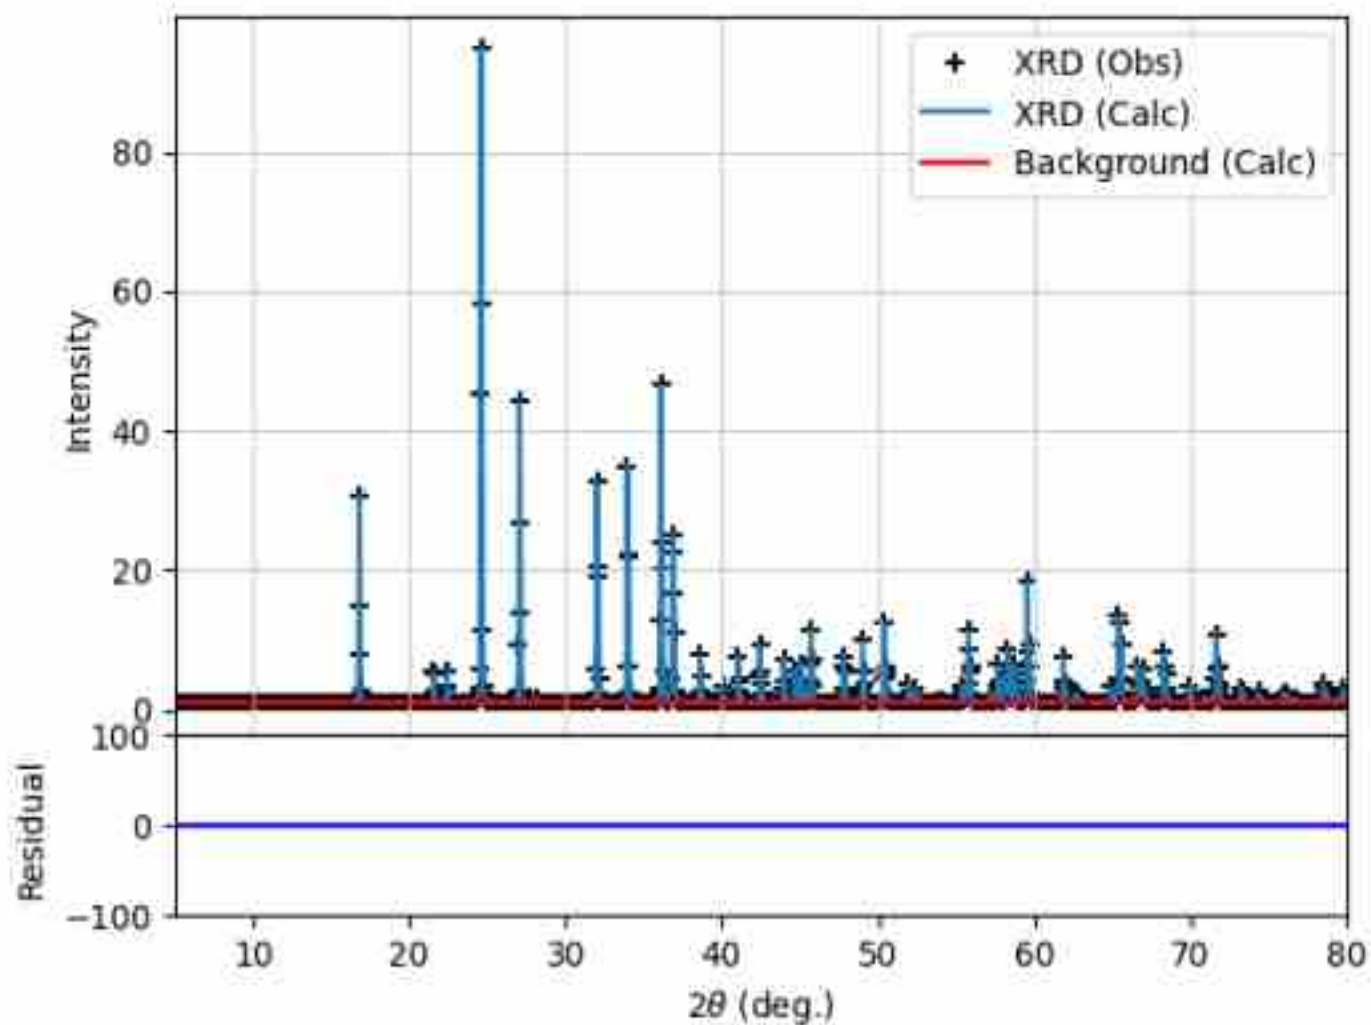

| RMSE before RR | Rwp     | RMSE after RR |
|----------------|---------|---------------|
| 0.037          | 0.00158 | 0.00057       |

# Li<sub>5</sub>Fe<sub>3</sub>Sb<sub>2</sub>O<sub>10</sub>

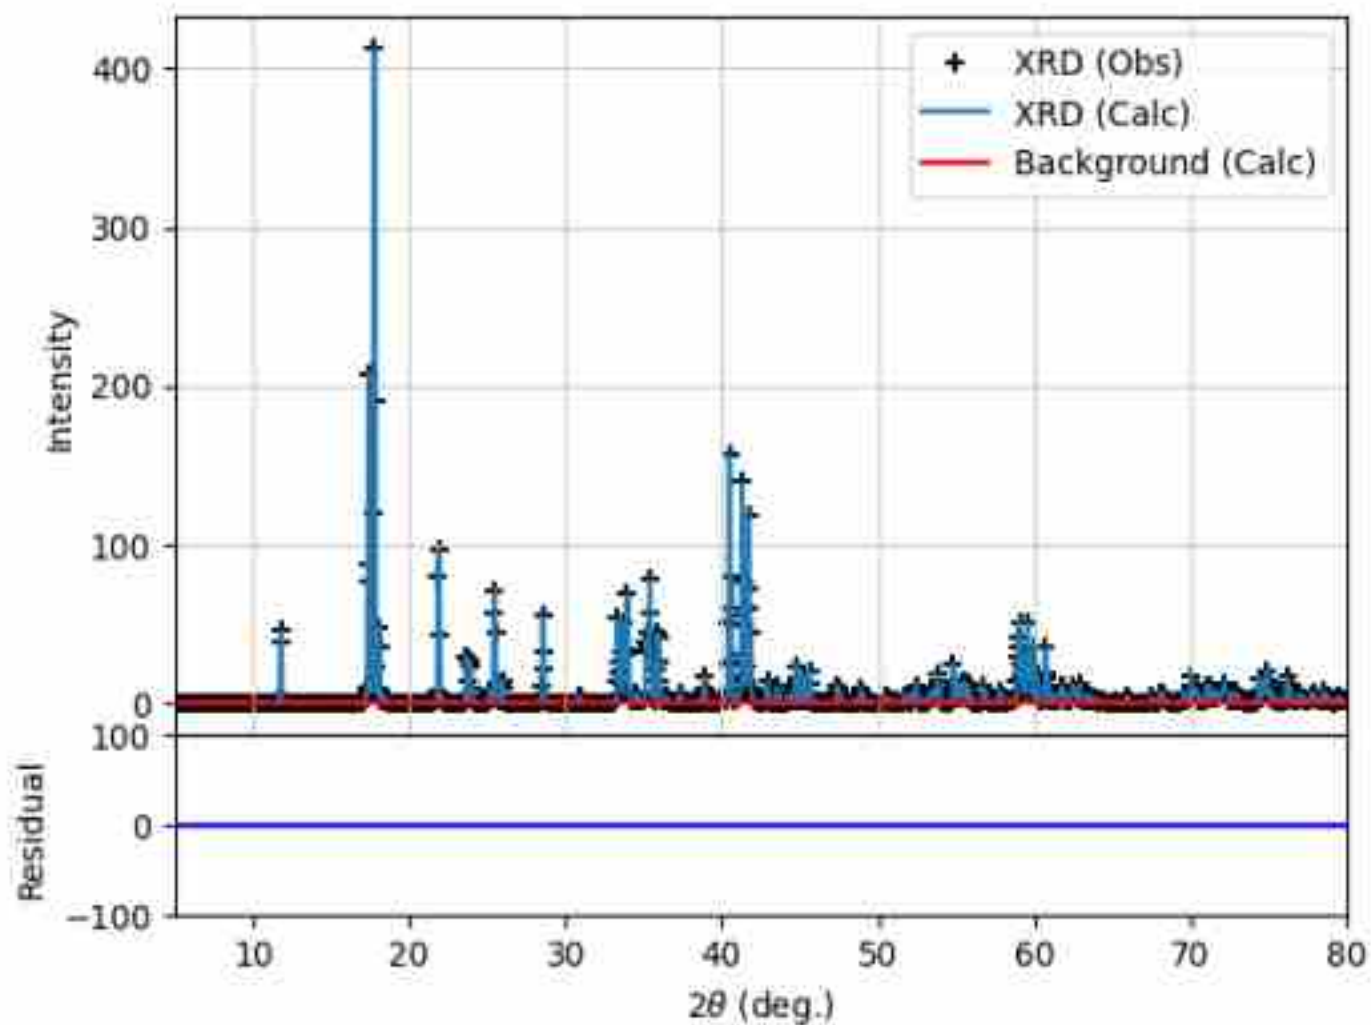

| RMSE before RR | Rwp     | RMSE after RR |
|----------------|---------|---------------|
| 0.037          | 0.10583 | 0.02868       |



# Li<sub>6</sub>Mn<sub>3</sub>Co<sub>1</sub>O<sub>10</sub>

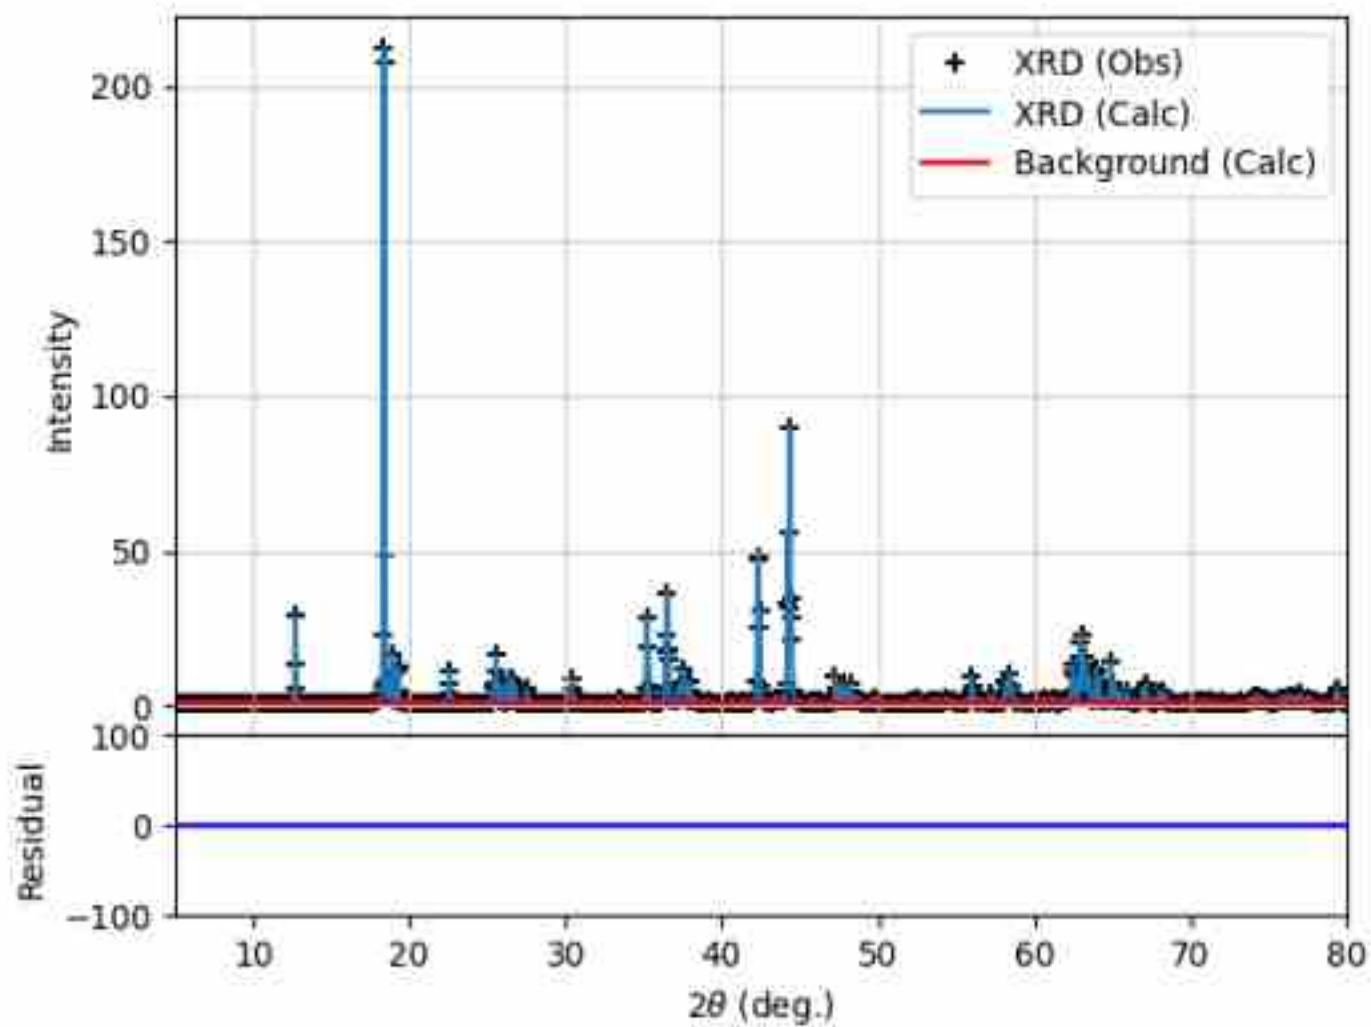

| RMSE before RR | Rwp     | RMSE after RR |
|----------------|---------|---------------|
| 0.037          | 0.07057 | 0.0178        |

# Mn<sub>2</sub>P<sub>4</sub>O<sub>14</sub>

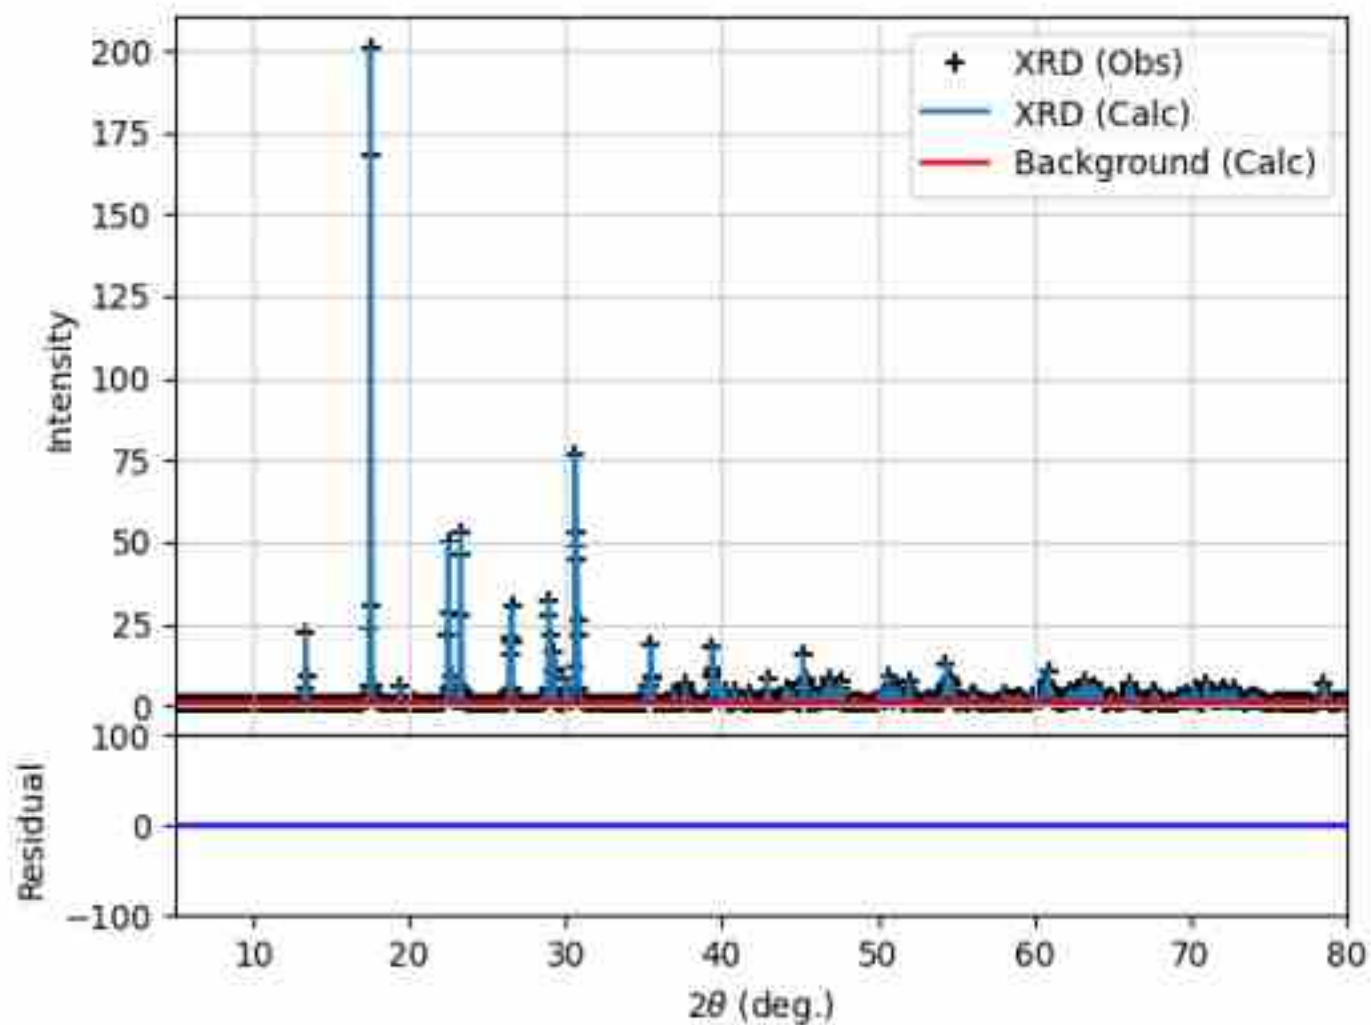

| RMSE before RR | Rwp     | RMSE after RR |
|----------------|---------|---------------|
| 0.037          | 0.00288 | 0.00069       |

# Mn<sub>4</sub>In<sub>2</sub>O<sub>10</sub>

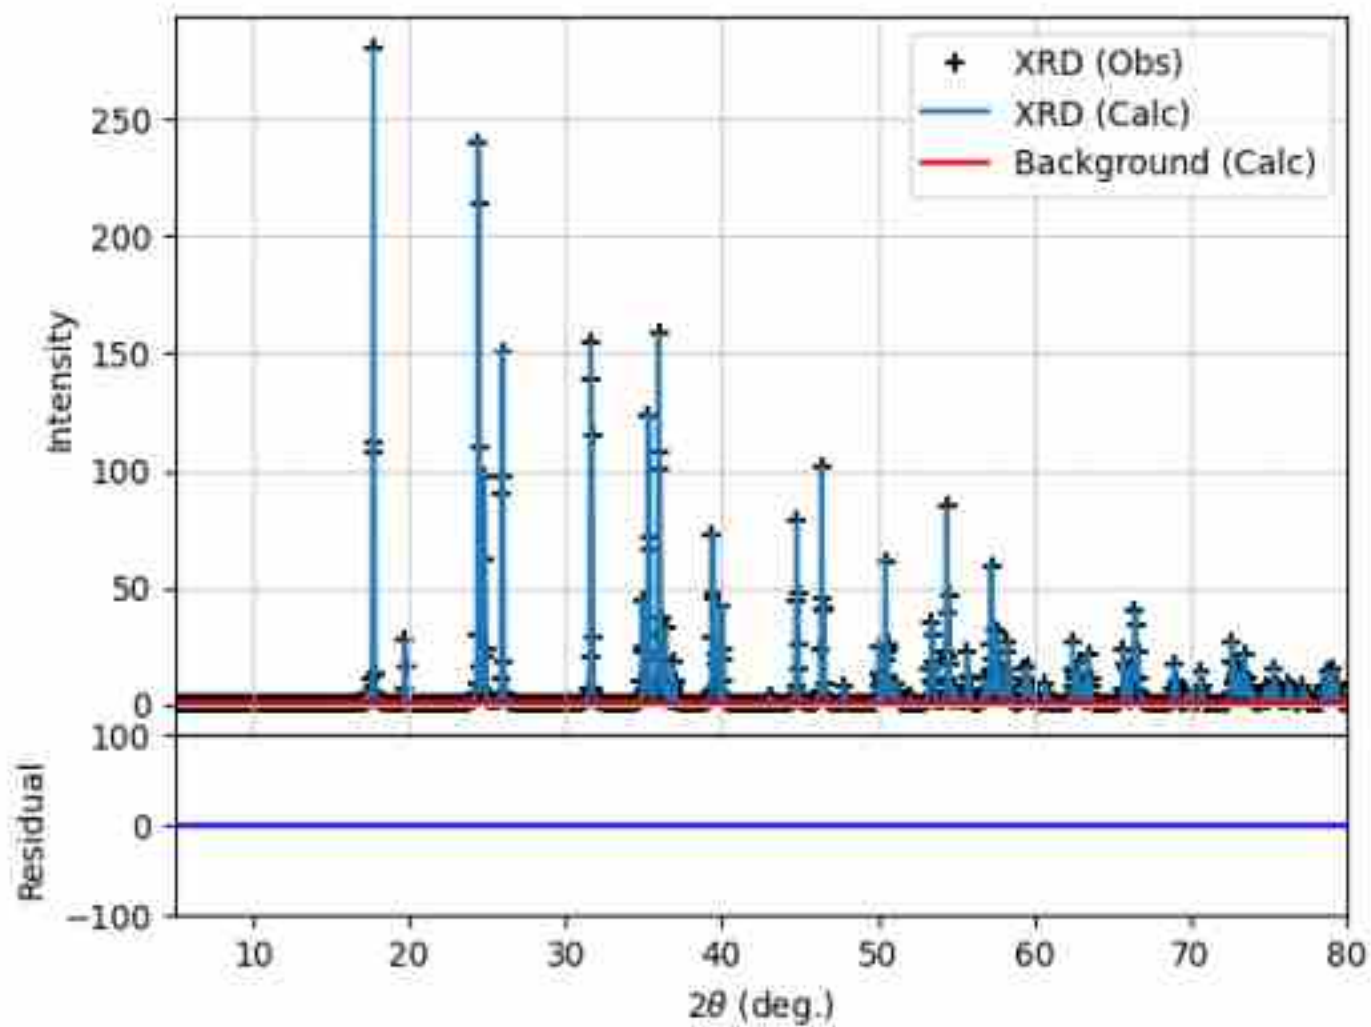

| RMSE before RR | Rwp     | RMSE after RR |
|----------------|---------|---------------|
| 0.037          | 0.00508 | 0.00174       |

# Na1V1W1O6

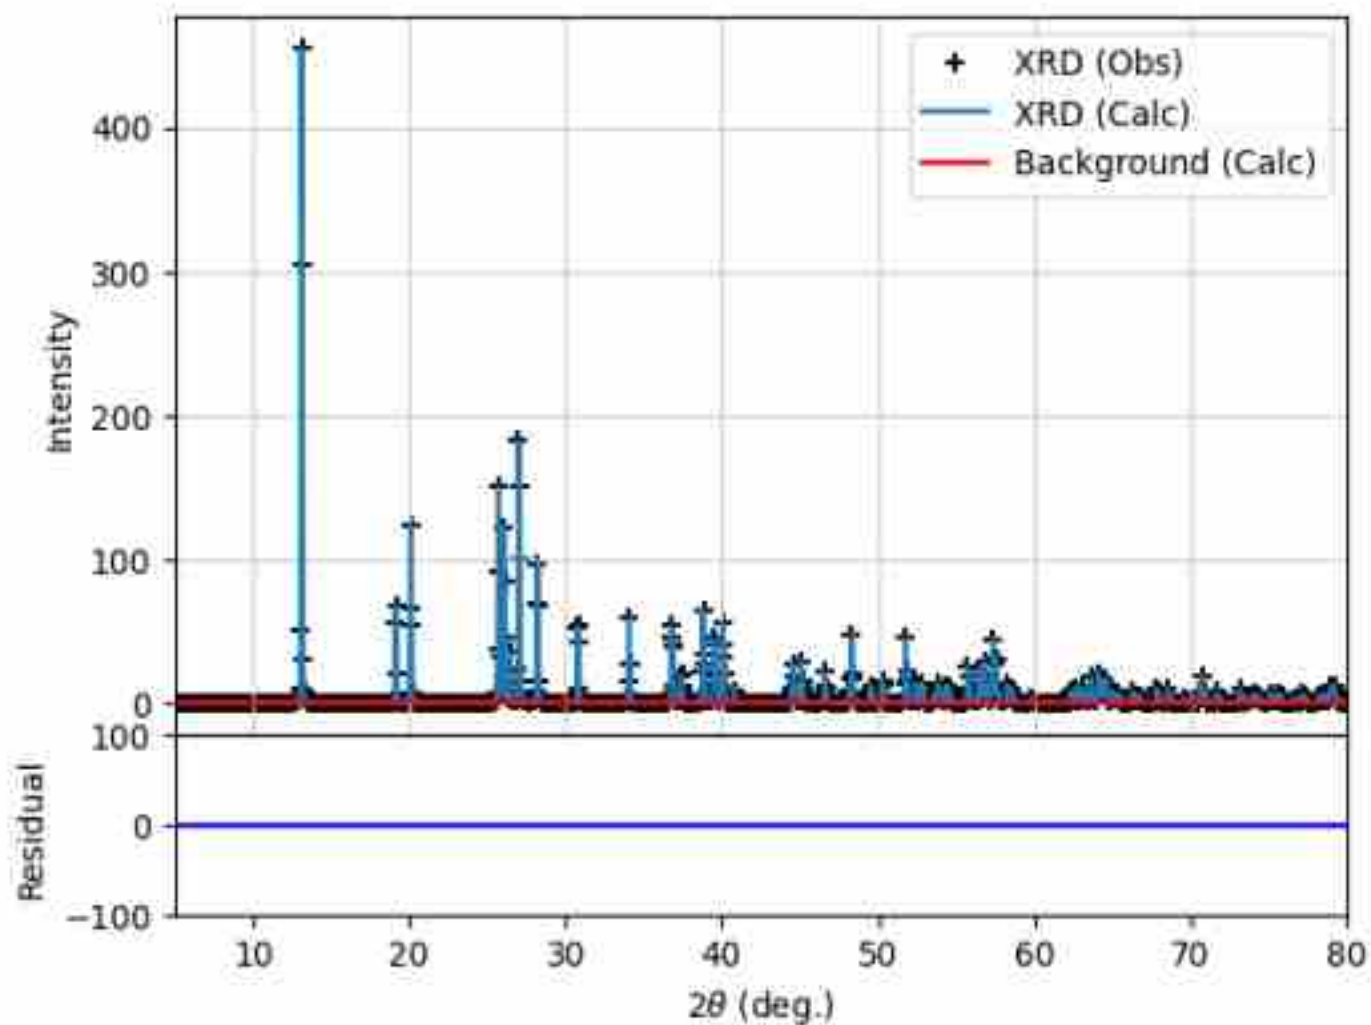

| RMSE before RR | Rwp     | RMSE after RR |
|----------------|---------|---------------|
| 0.037          | 0.00232 | 0.00074       |

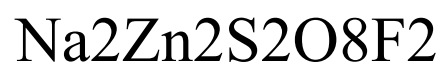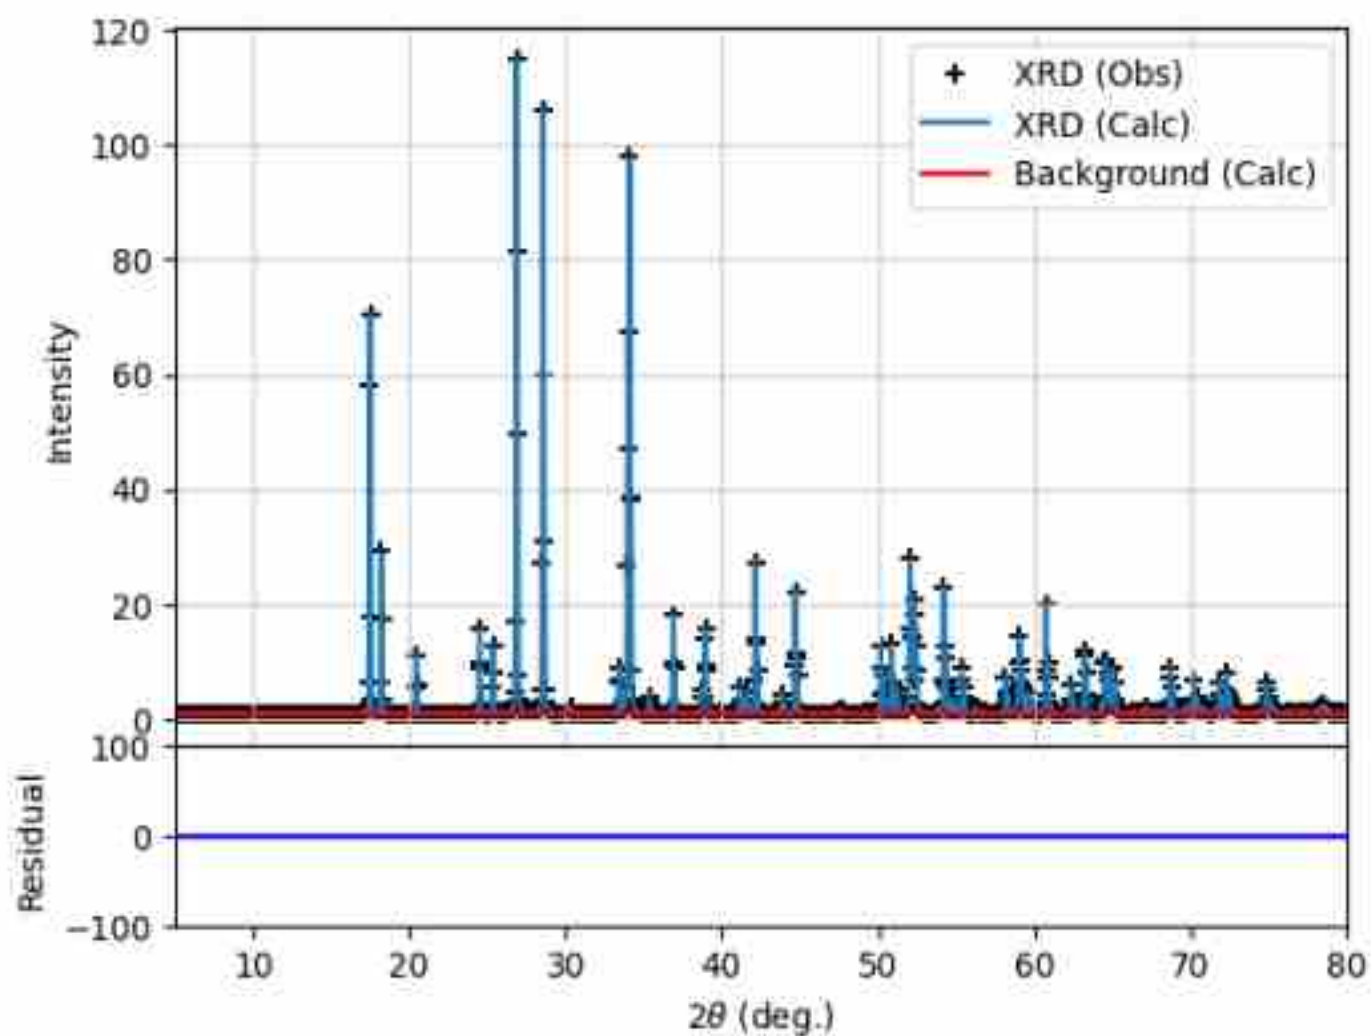

| RMSE before RR | Rwp     | RMSE after RR |
|----------------|---------|---------------|
| 0.037          | 0.00238 | 0.0005        |

# Na<sub>6</sub>Dy<sub>2</sub>C<sub>11</sub>2

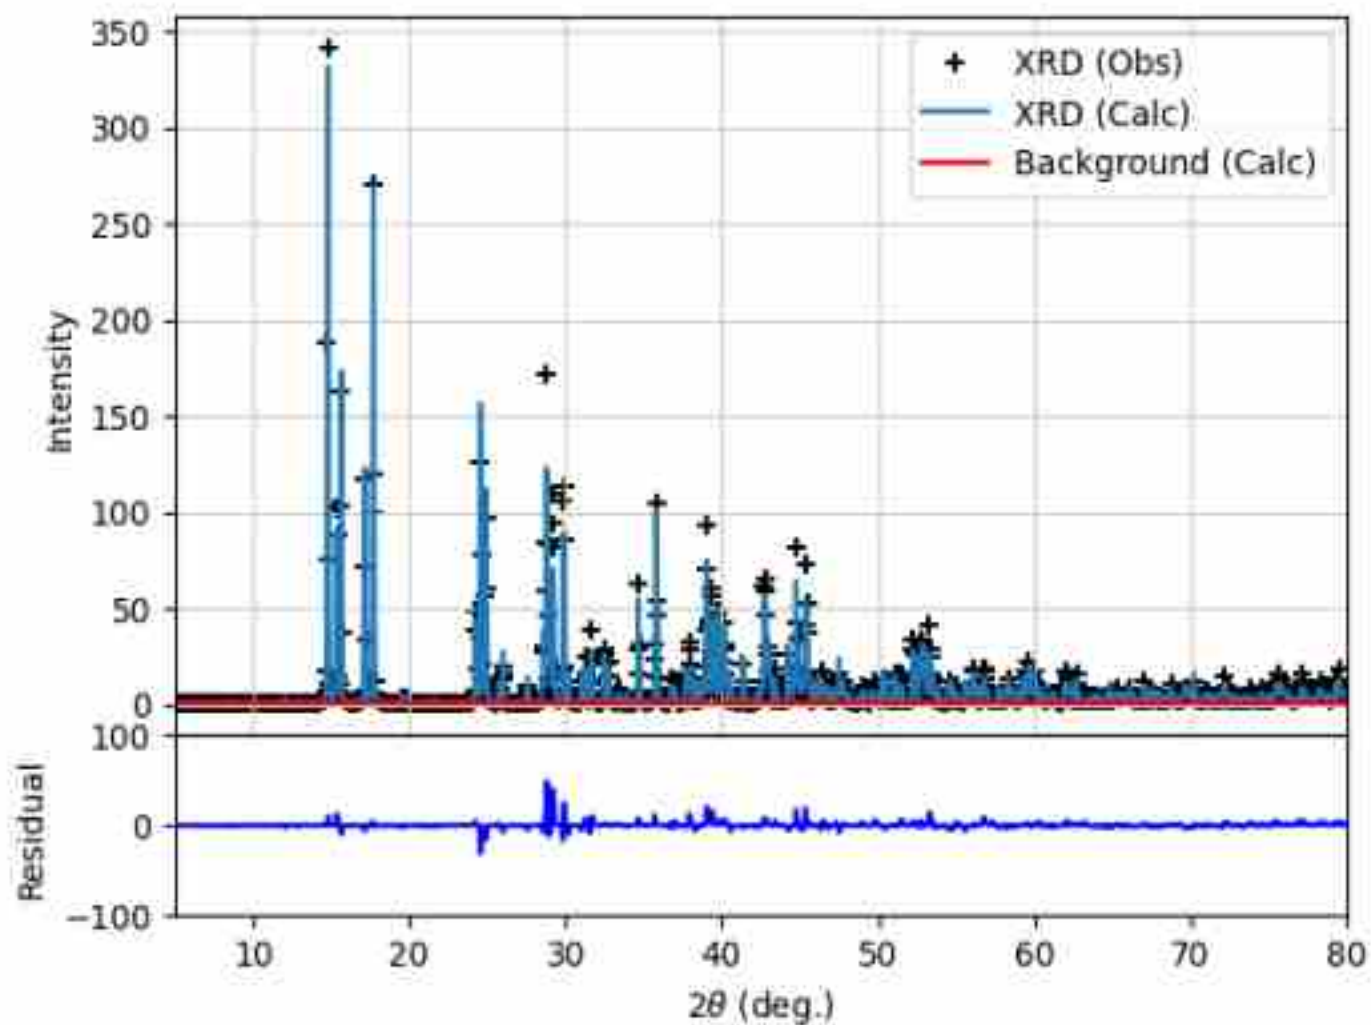

| RMSE before RR | Rwp      | RMSE after RR |
|----------------|----------|---------------|
| 0.037          | 23.82668 | 0.41927       |

# Na<sub>8</sub>Zn<sub>4</sub>S<sub>8</sub>

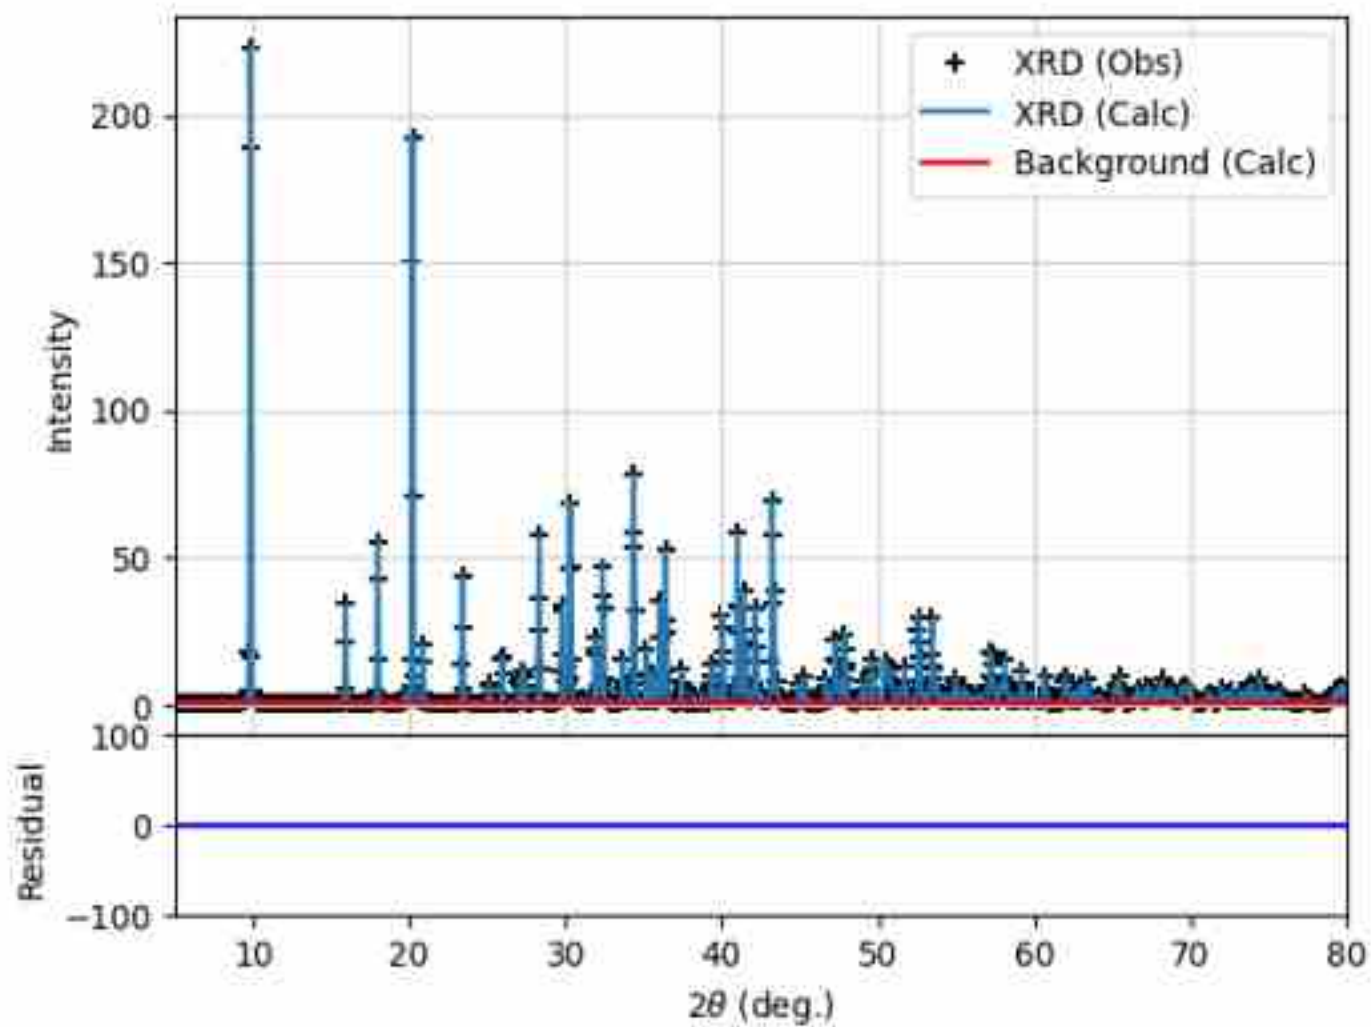

| RMSE before RR | Rwp     | RMSE after RR |
|----------------|---------|---------------|
| 0.037          | 0.00293 | 0.00051       |

# Nb<sub>2</sub>Cr<sub>2</sub>Se<sub>10</sub>

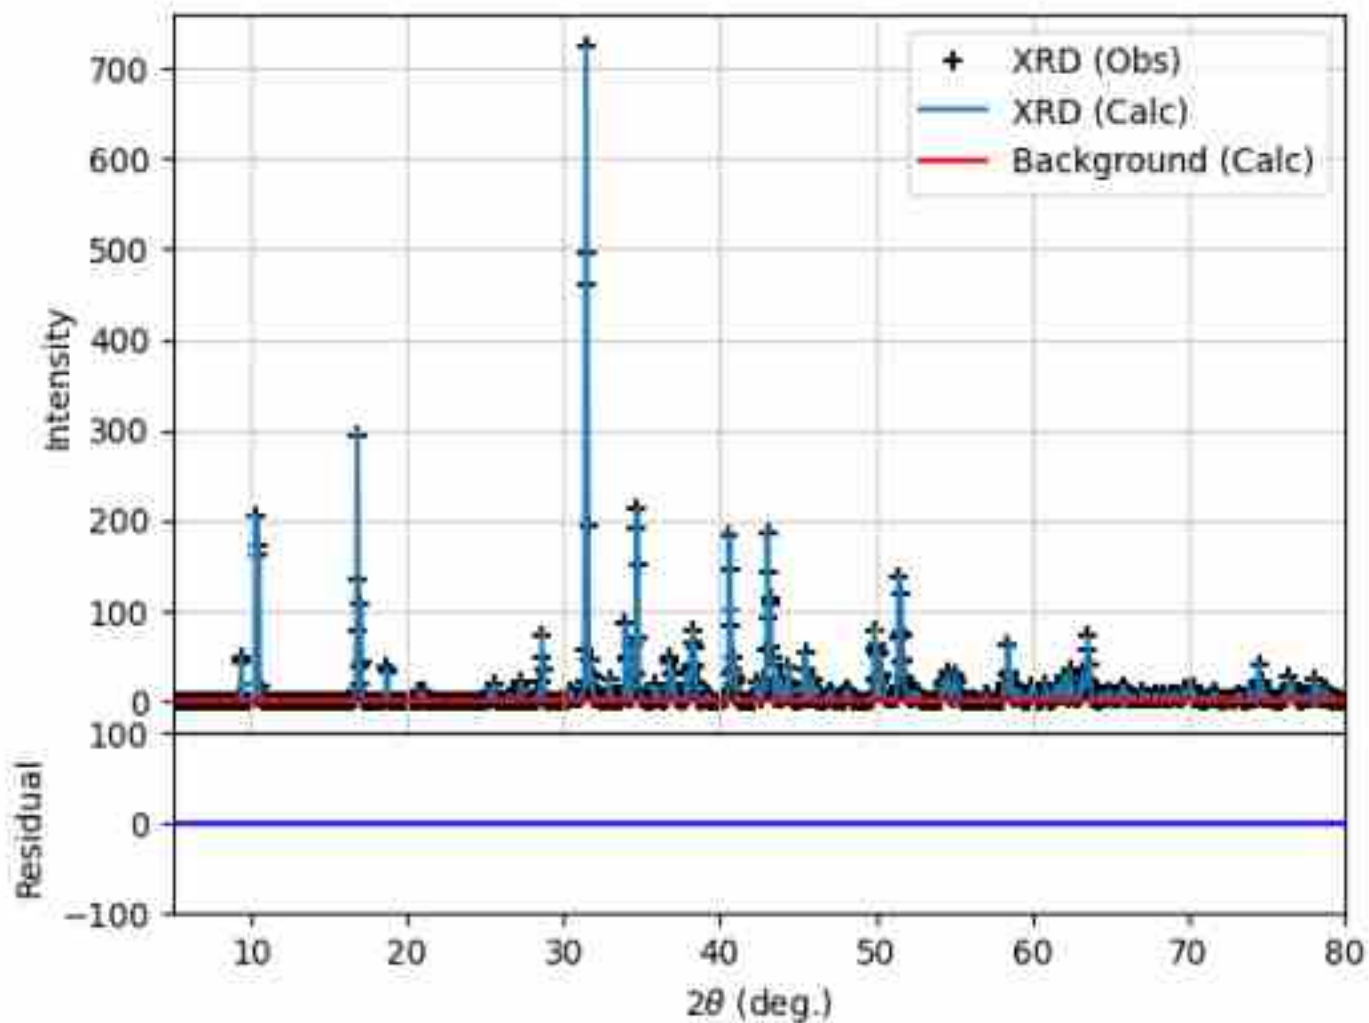

| RMSE before RR | Rwp     | RMSE after RR |
|----------------|---------|---------------|
| 0.037          | 0.00285 | 0.0003        |



# Nb<sub>2</sub>Fe<sub>2</sub>O<sub>8</sub>

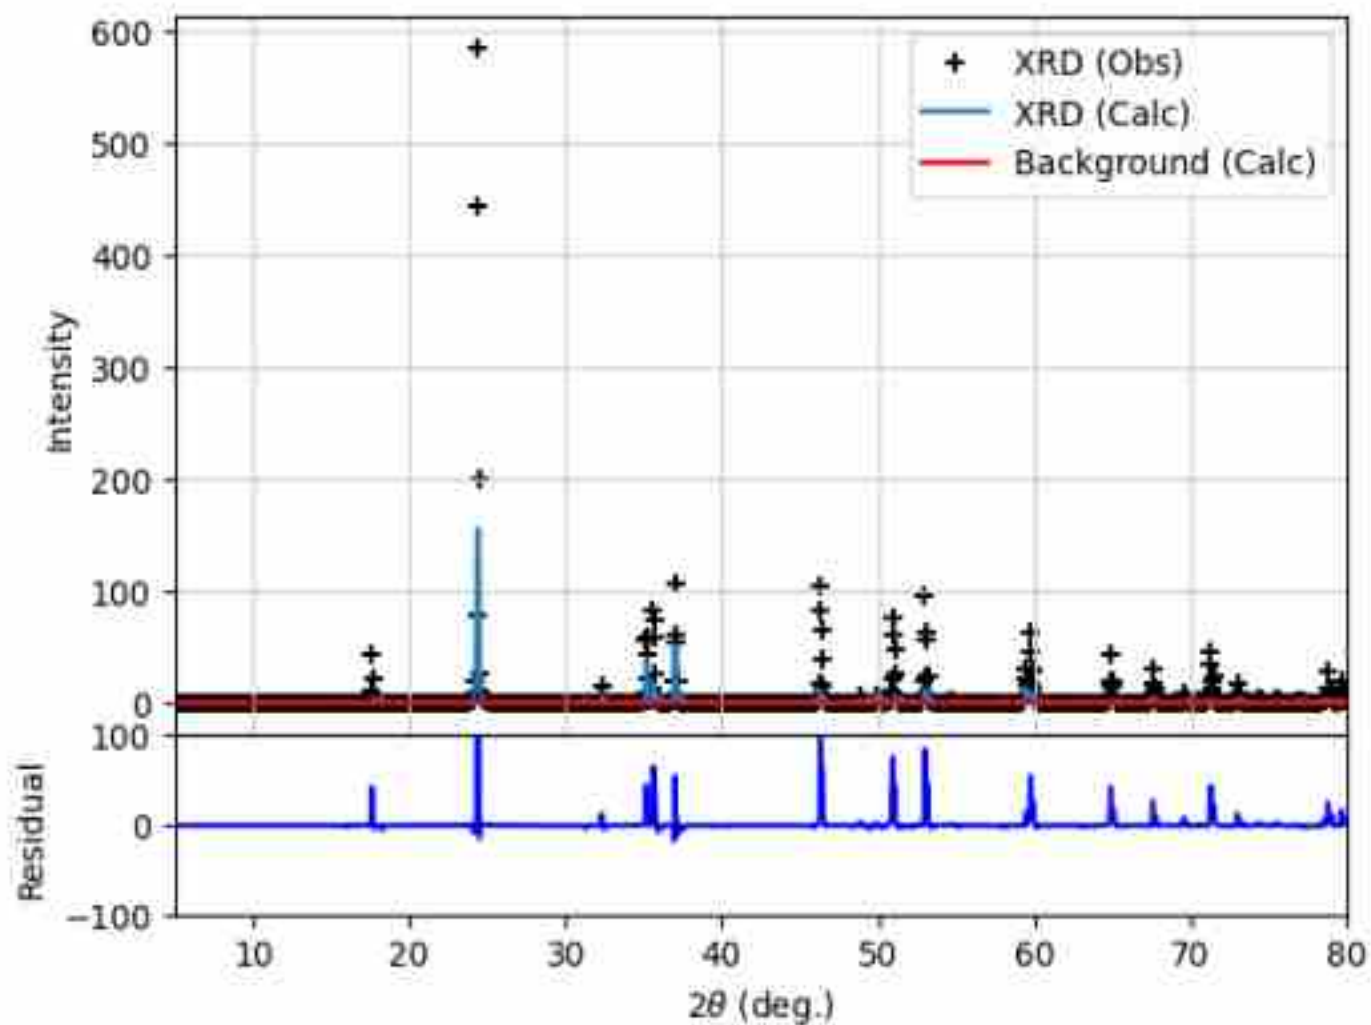

| RMSE before RR | Rwp     | RMSE after RR |
|----------------|---------|---------------|
| 0.037          | 67.2631 | None          |

# Pr<sub>2</sub>Cd<sub>6</sub>P<sub>6</sub>

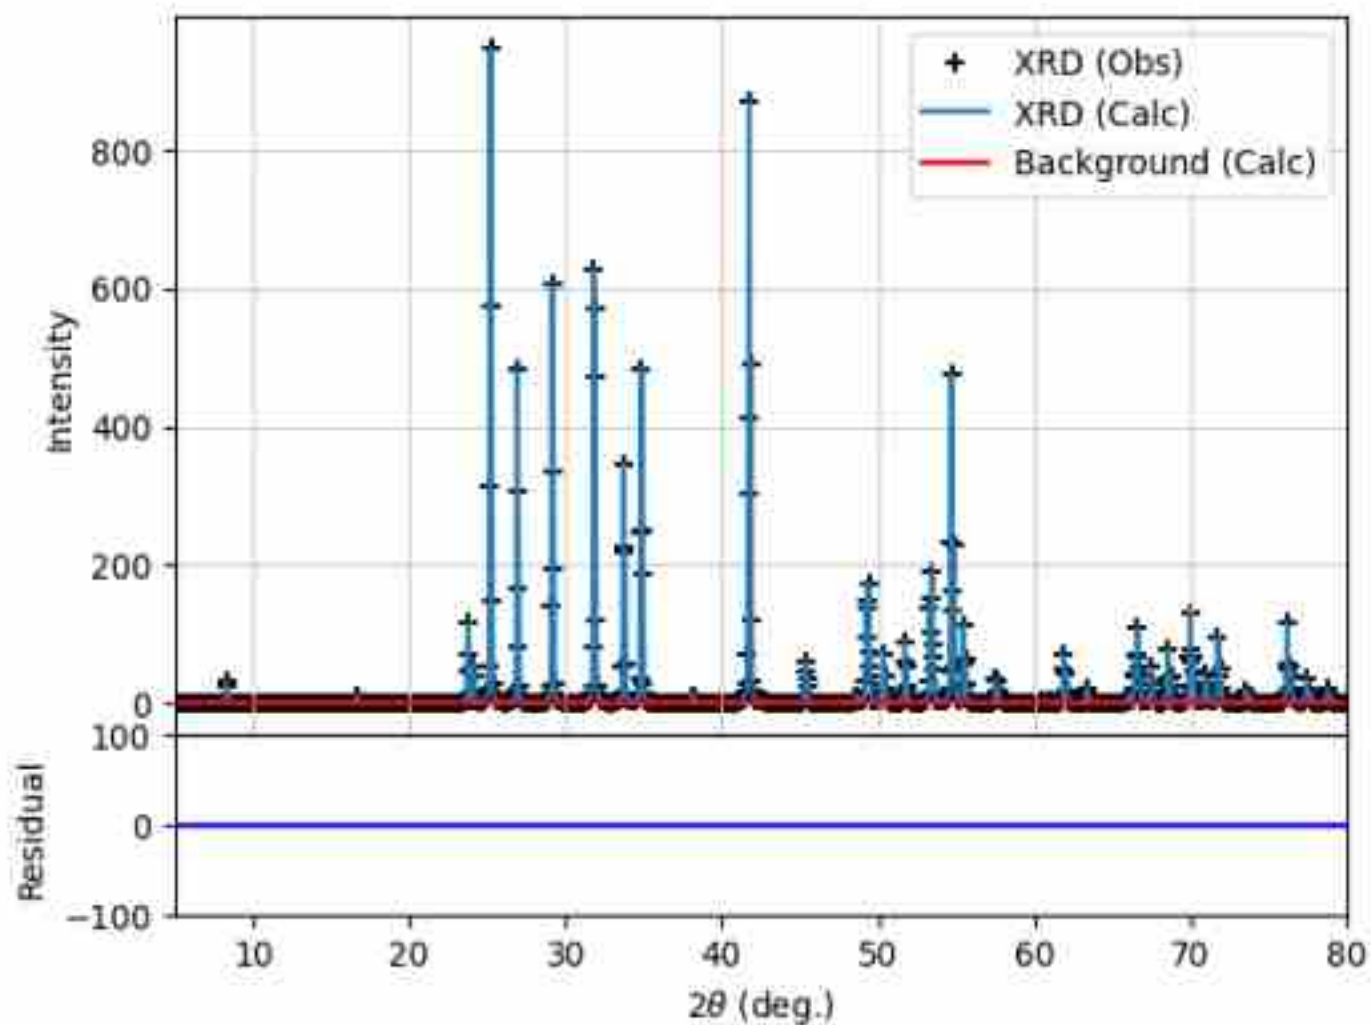

| RMSE before RR | Rwp     | RMSE after RR |
|----------------|---------|---------------|
| 0.037          | 0.00263 | 0.00069       |

# Rb<sub>8</sub>Cd<sub>4</sub>O<sub>8</sub>

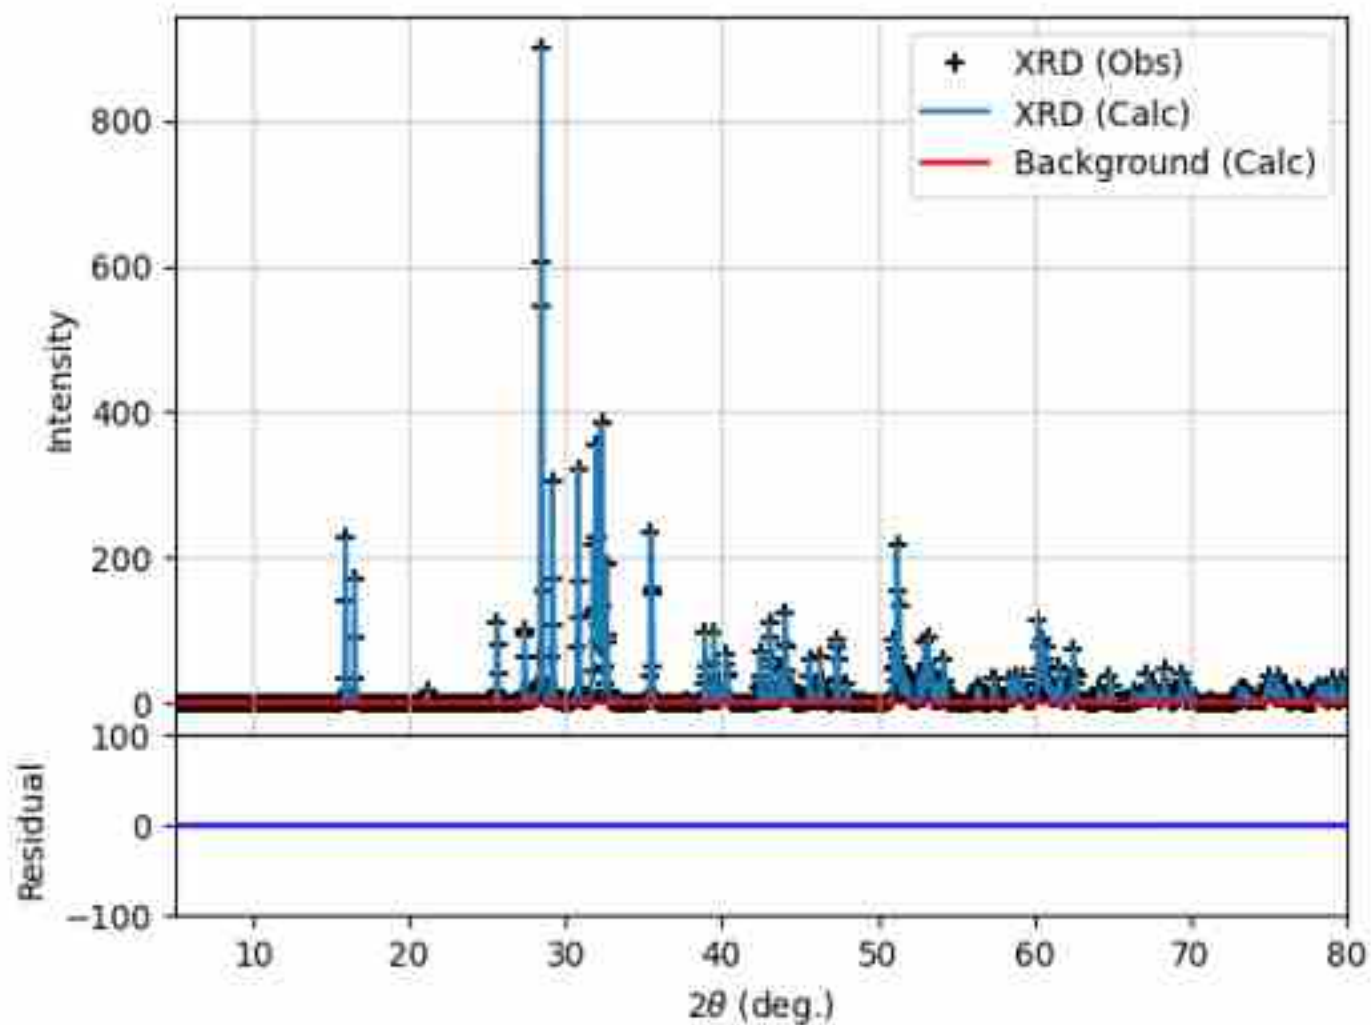

| RMSE before RR | Rwp     | RMSE after RR |
|----------------|---------|---------------|
| 0.037          | 0.02137 | 0.00131       |

# Si4O8

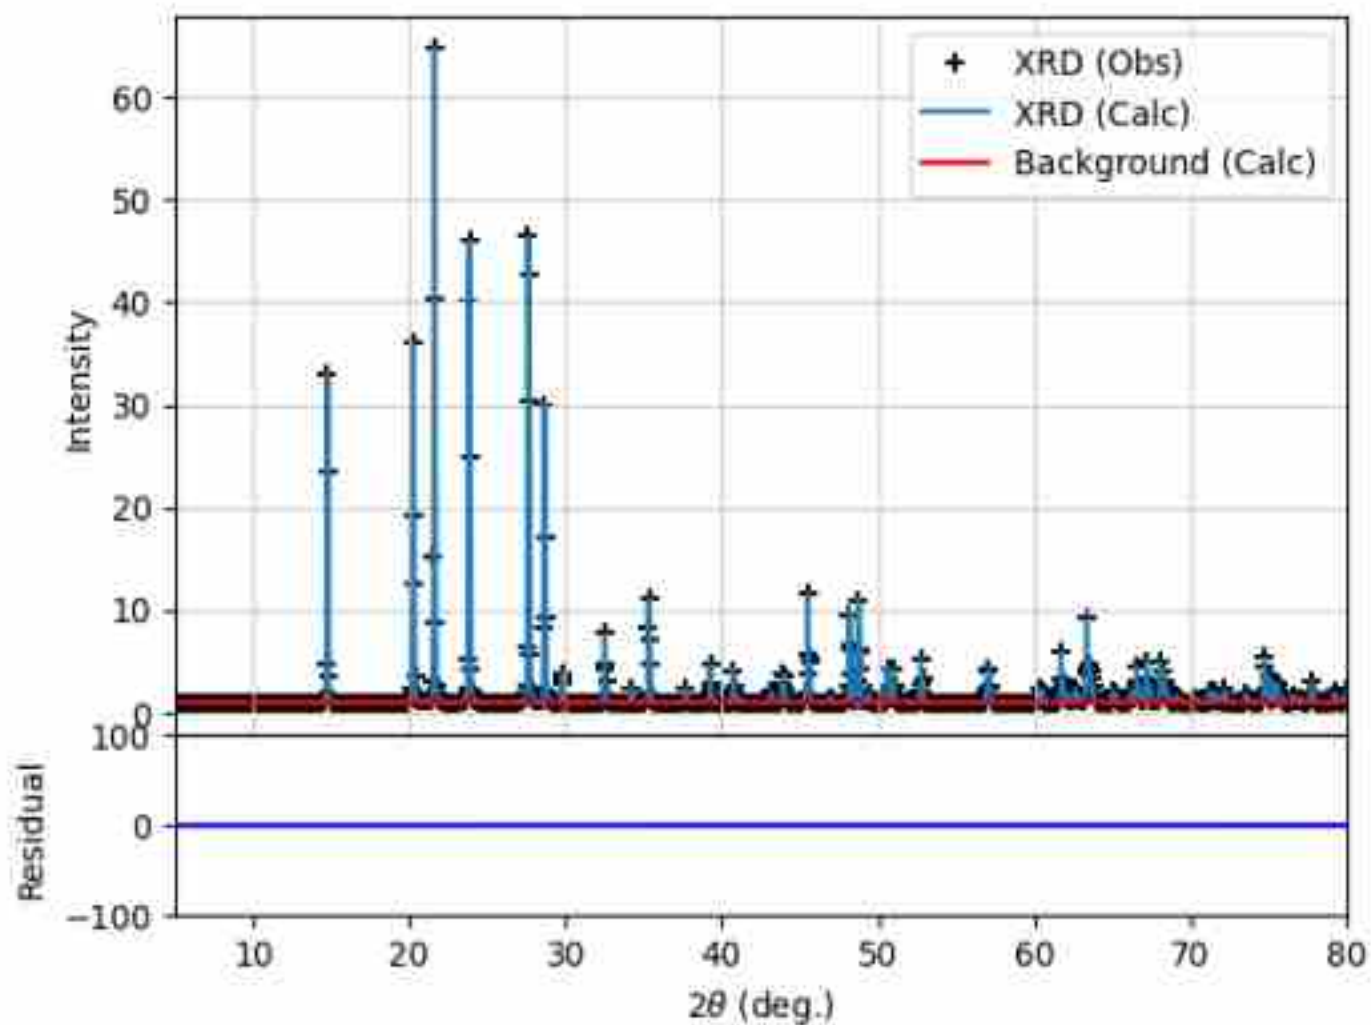

| RMSE before RR | Rwp  | RMSE after RR |
|----------------|------|---------------|
| 0.037          | 0.47 | 0.01461       |

# Sn2P2S6

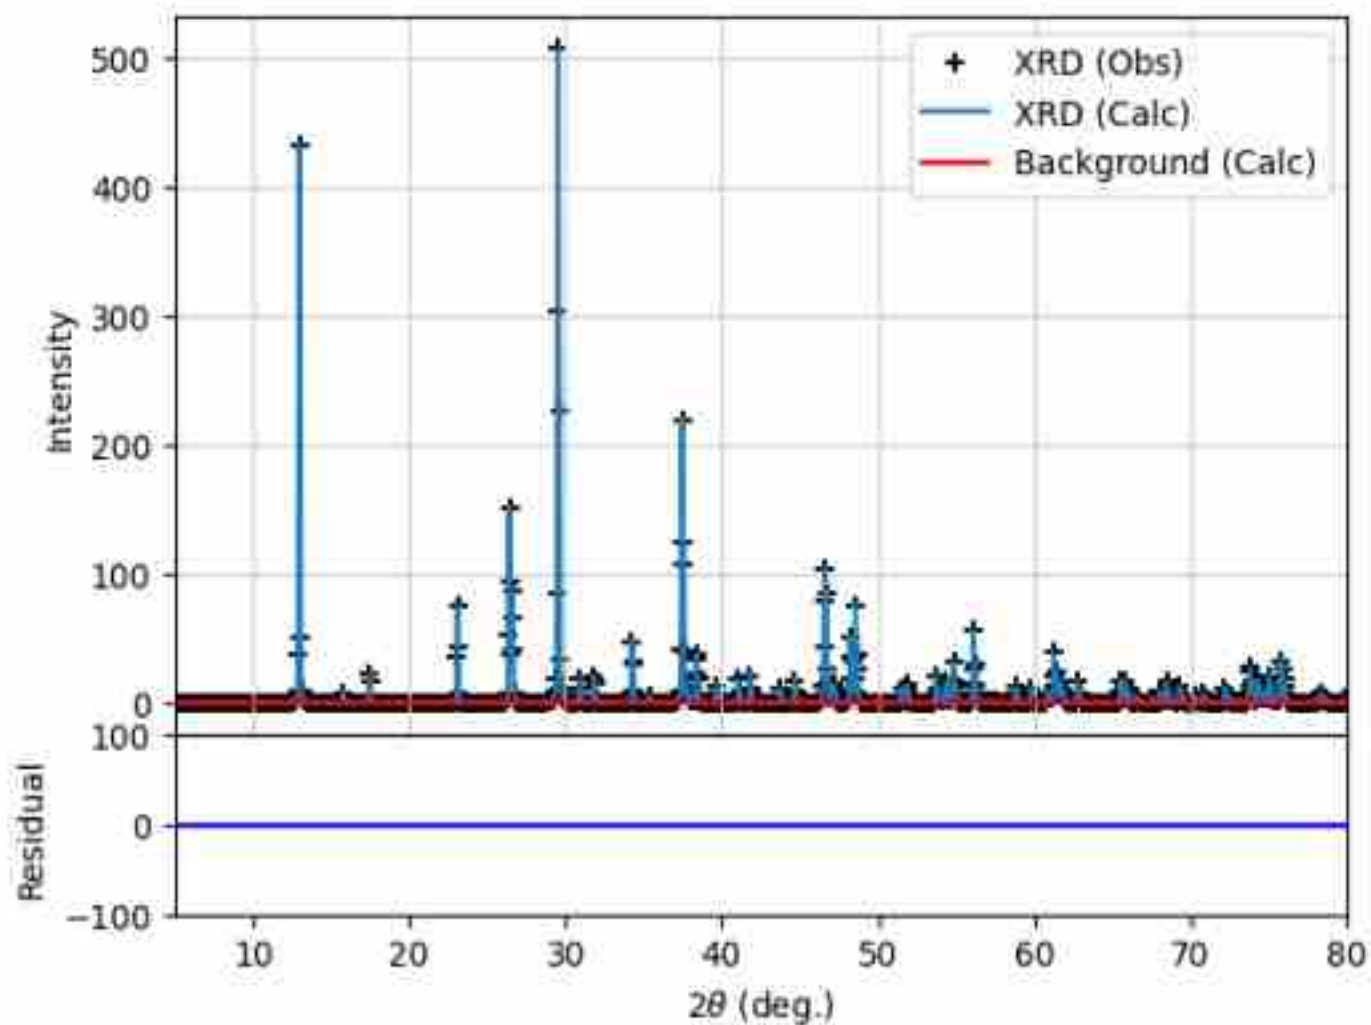

| RMSE before RR | Rwp     | RMSE after RR |
|----------------|---------|---------------|
| 0.037          | 0.00239 | 0.0006        |

# Ti<sub>6</sub>N<sub>4</sub>O<sub>6</sub>

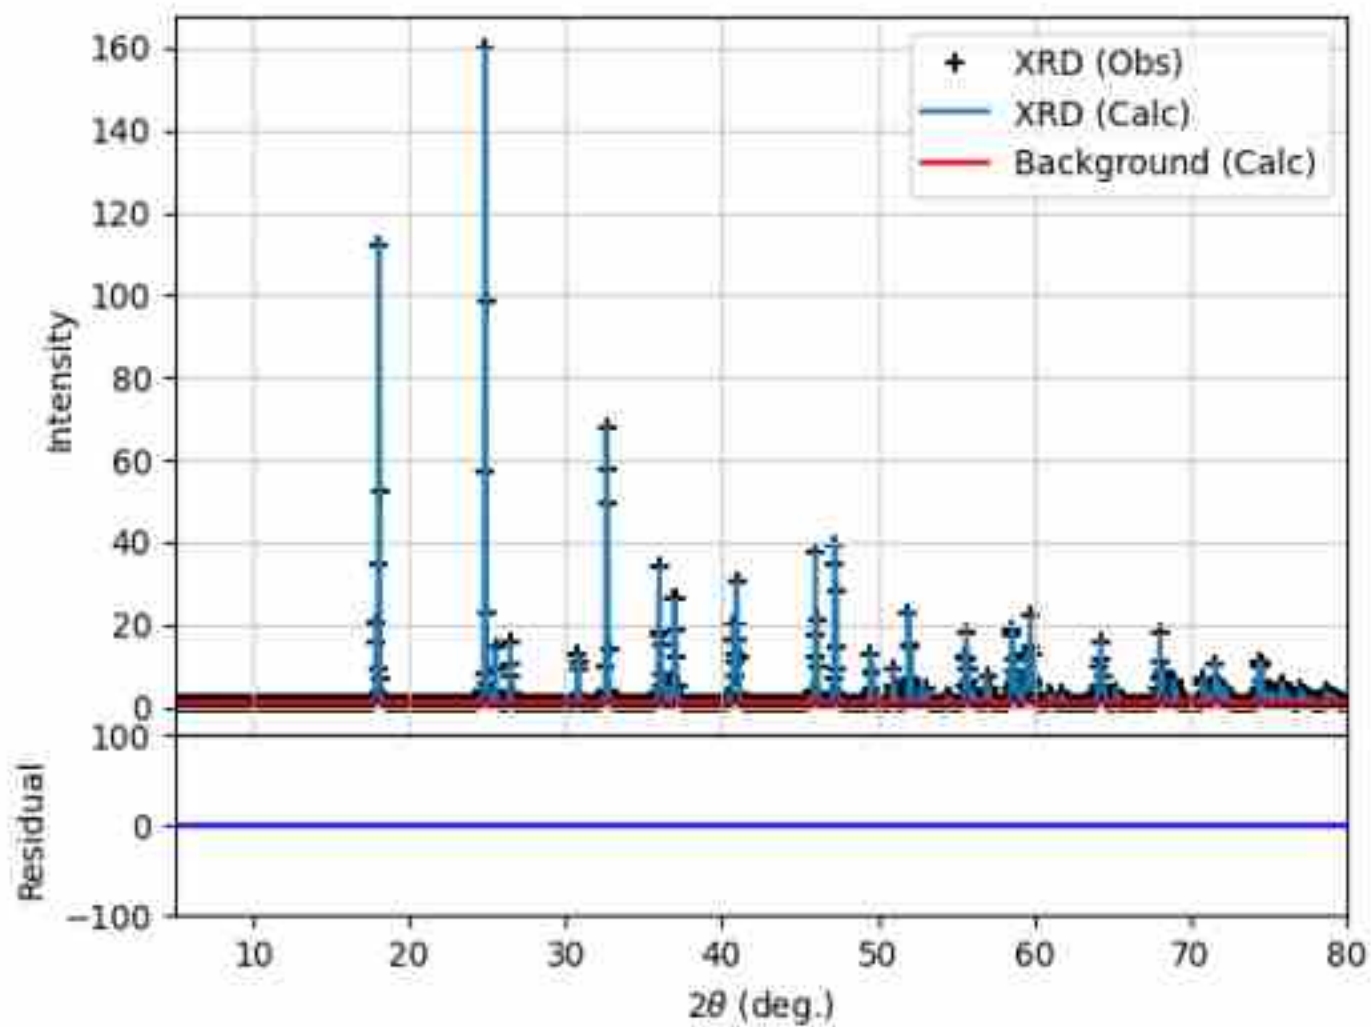

| RMSE before RR | Rwp     | RMSE after RR |
|----------------|---------|---------------|
| 0.037          | 0.00359 | 0.0012        |

# Tl4Te2I12

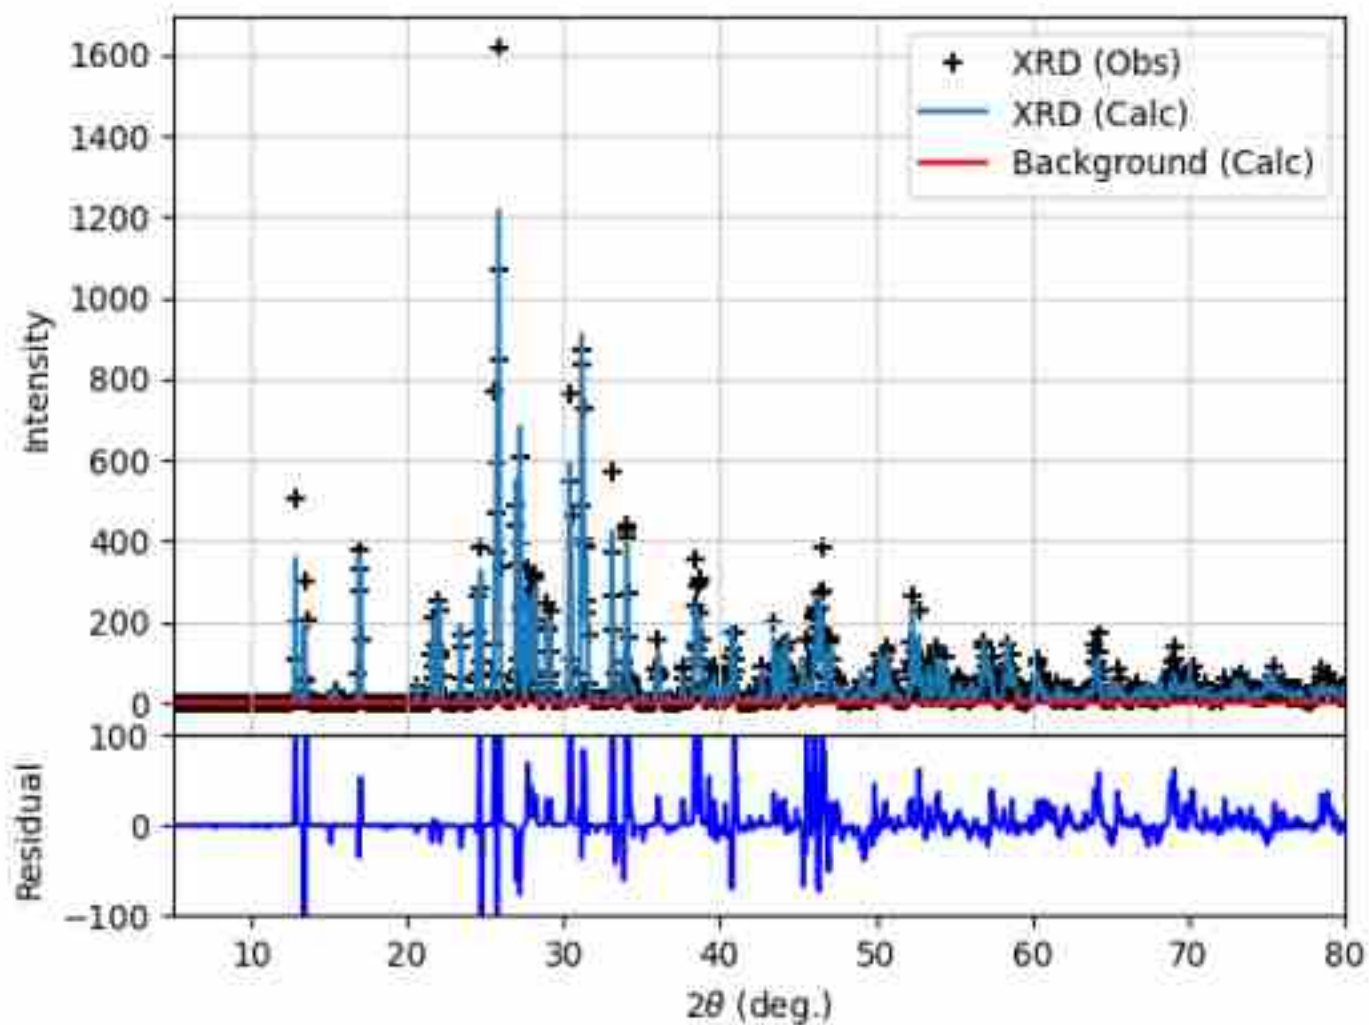

| RMSE before RR | Rwp      | RMSE after RR |
|----------------|----------|---------------|
| 0.037          | 33.28822 | 0.08238       |

# Tl9Sb1Te6

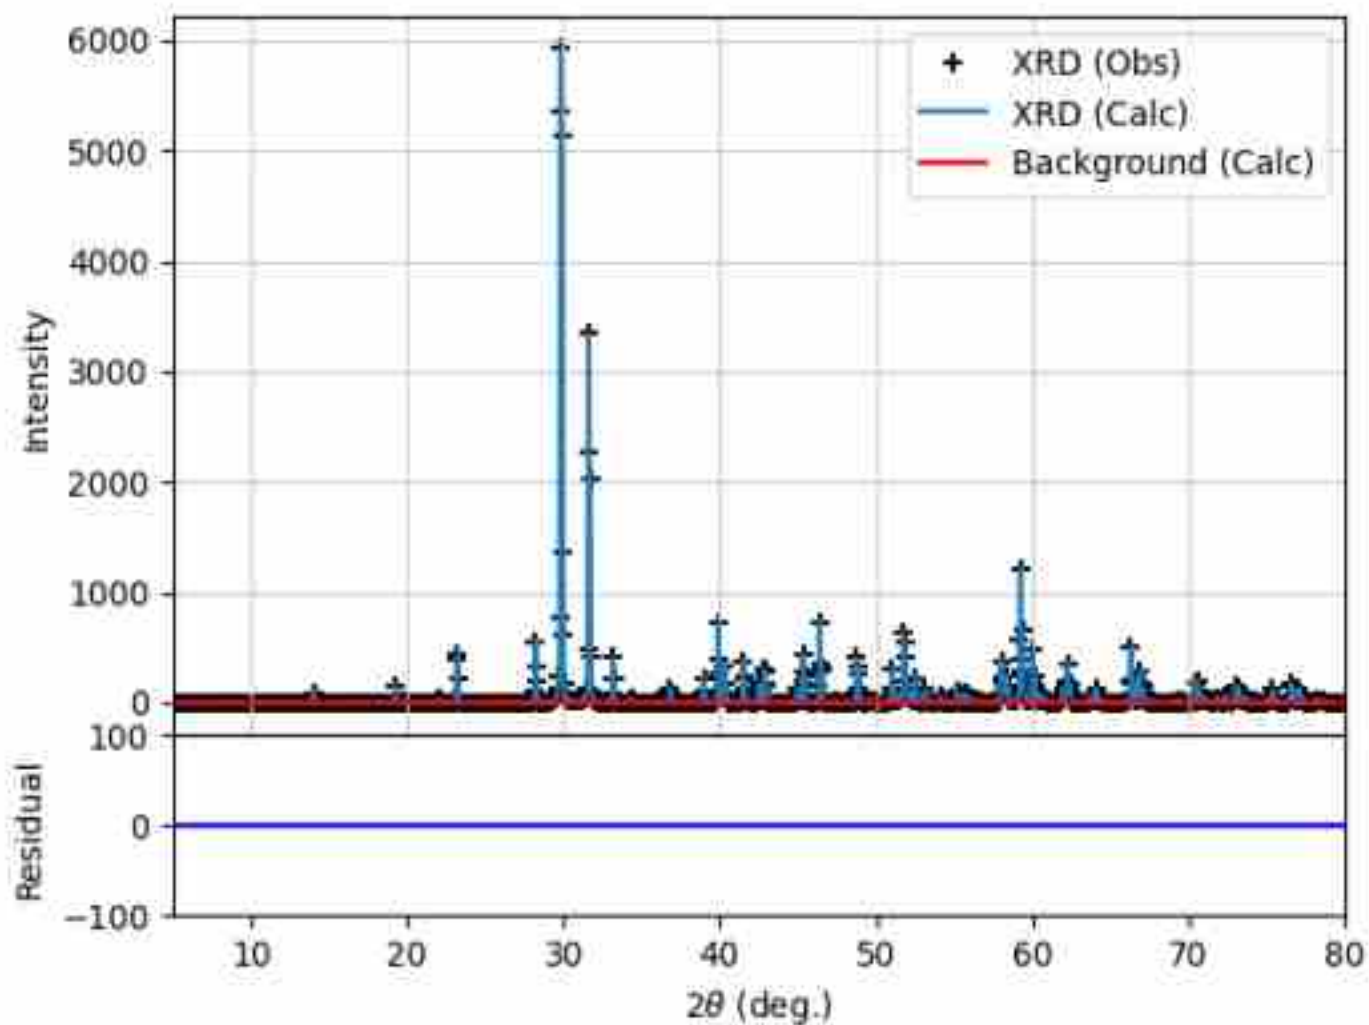

| RMSE before RR | Rwp     | RMSE after RR |
|----------------|---------|---------------|
| 0.037          | 0.00532 | 0.00033       |



# U<sub>2</sub>Fe<sub>2</sub>Si<sub>4</sub>

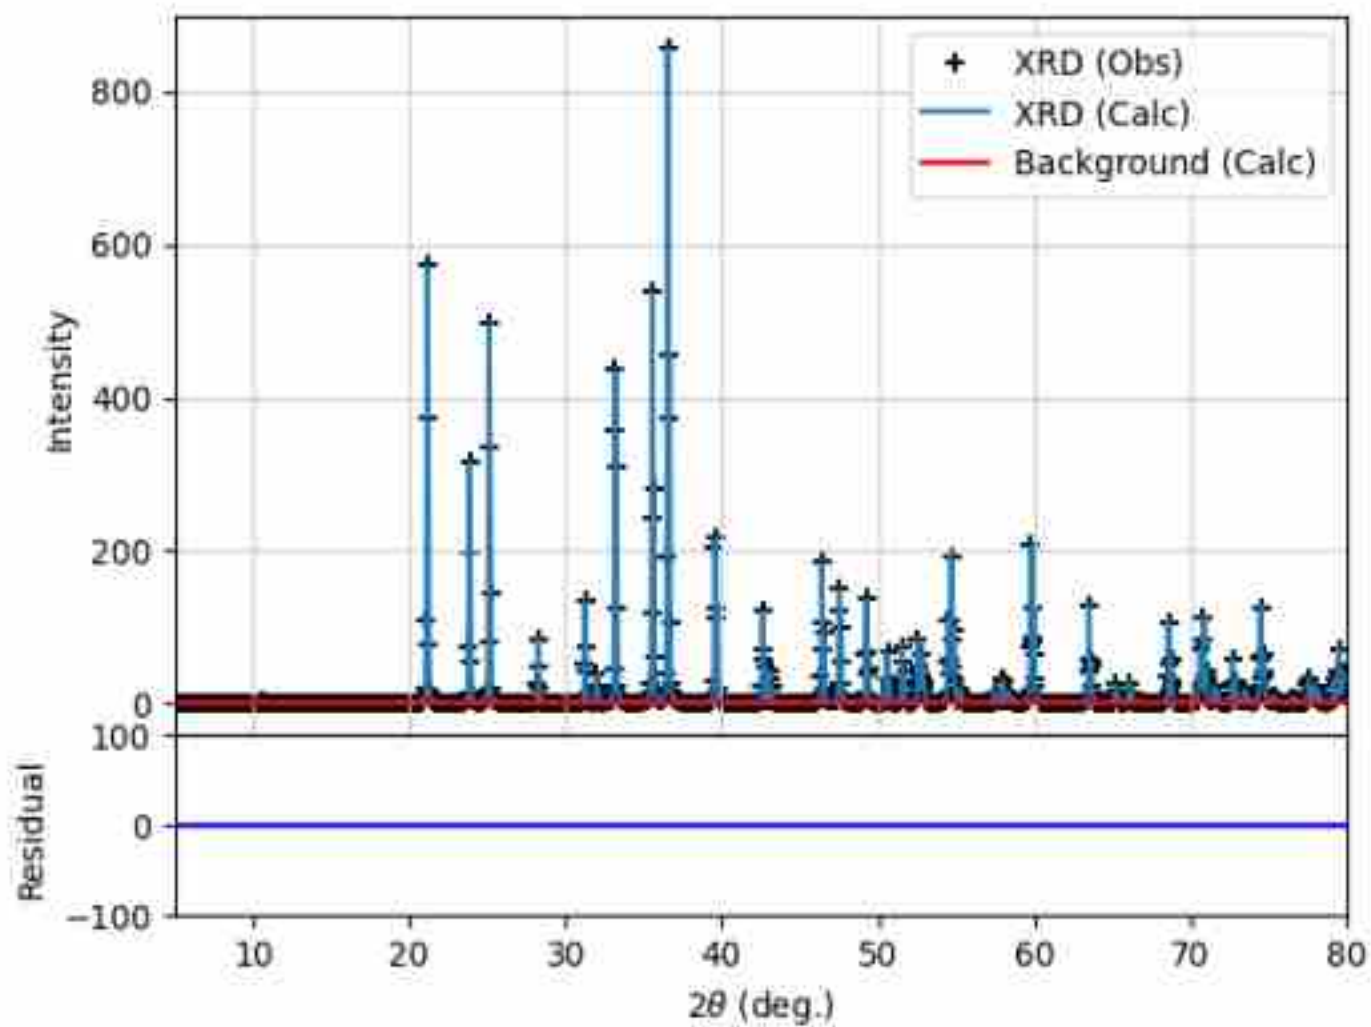

| RMSE before RR | Rwp     | RMSE after RR |
|----------------|---------|---------------|
| 0.037          | 0.00435 | 0.0013        |

# U<sub>2</sub>Sb<sub>2</sub>O<sub>10</sub>

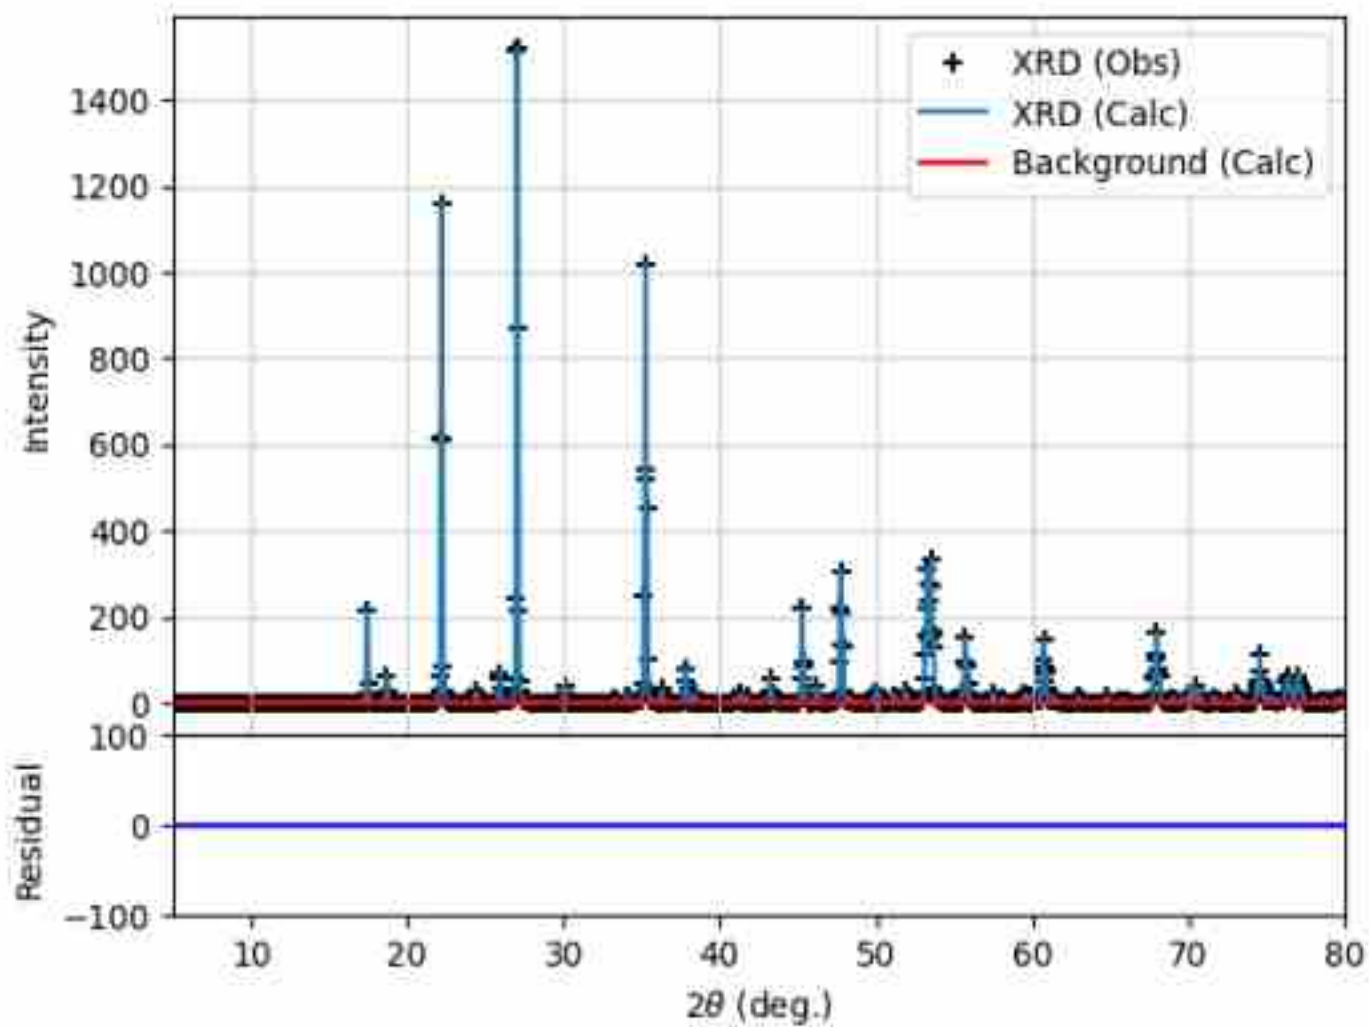

| RMSE before RR | Rwp    | RMSE after RR |
|----------------|--------|---------------|
| 0.037          | 0.0036 | 0.00181       |

# Zr<sub>2</sub>Cr<sub>2</sub>Cu<sub>2</sub>S<sub>8</sub>

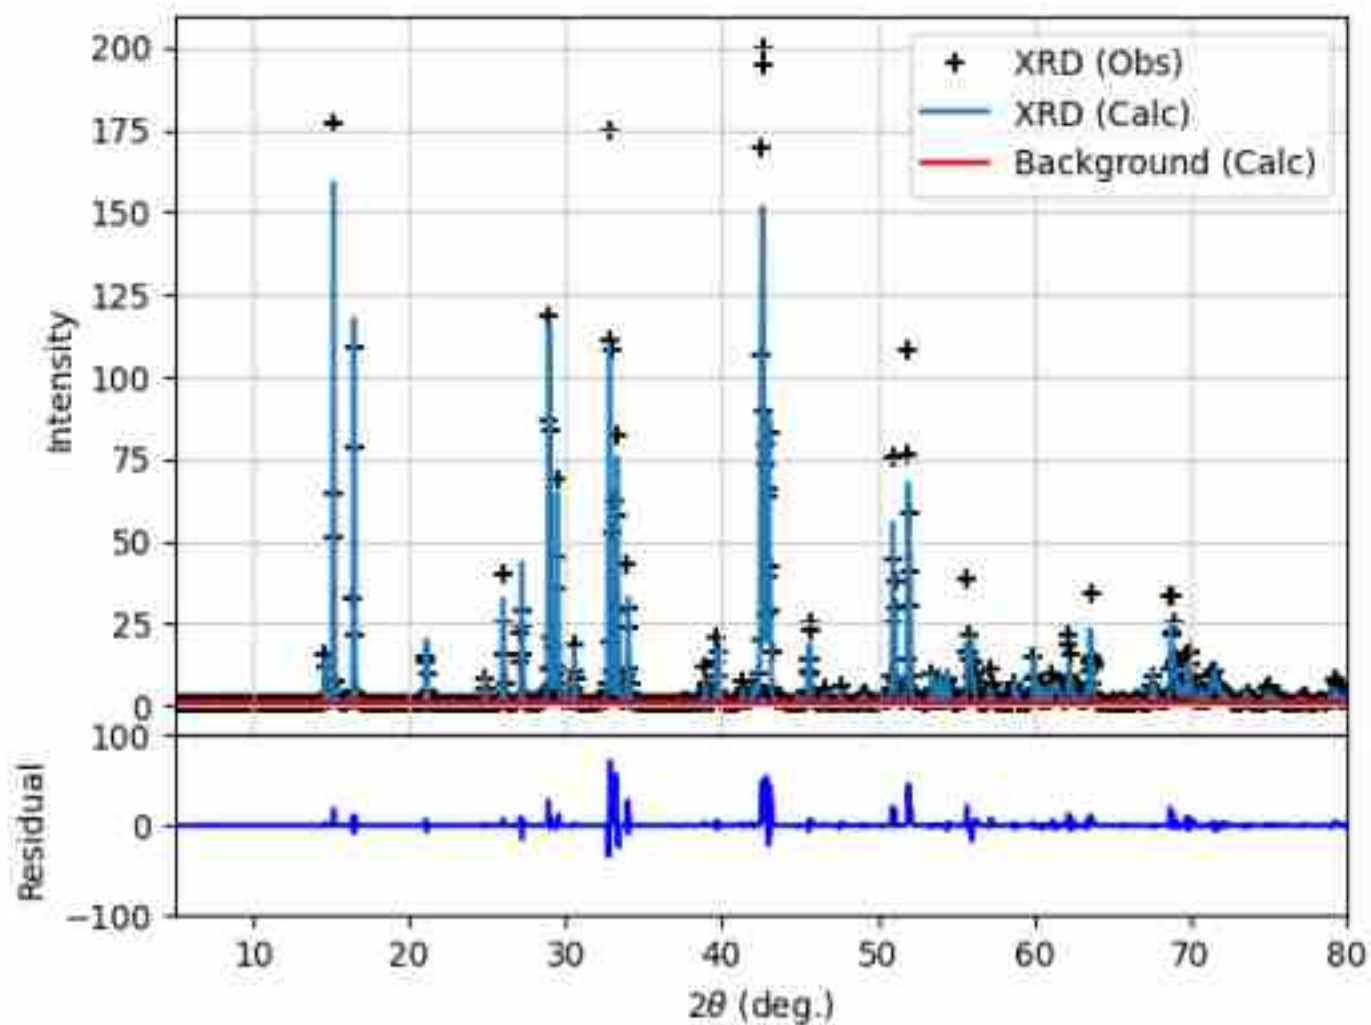

| RMSE before RR | Rwp      | RMSE after RR |
|----------------|----------|---------------|
| 0.037          | 37.74114 | 0.08052       |

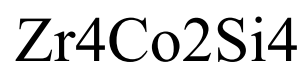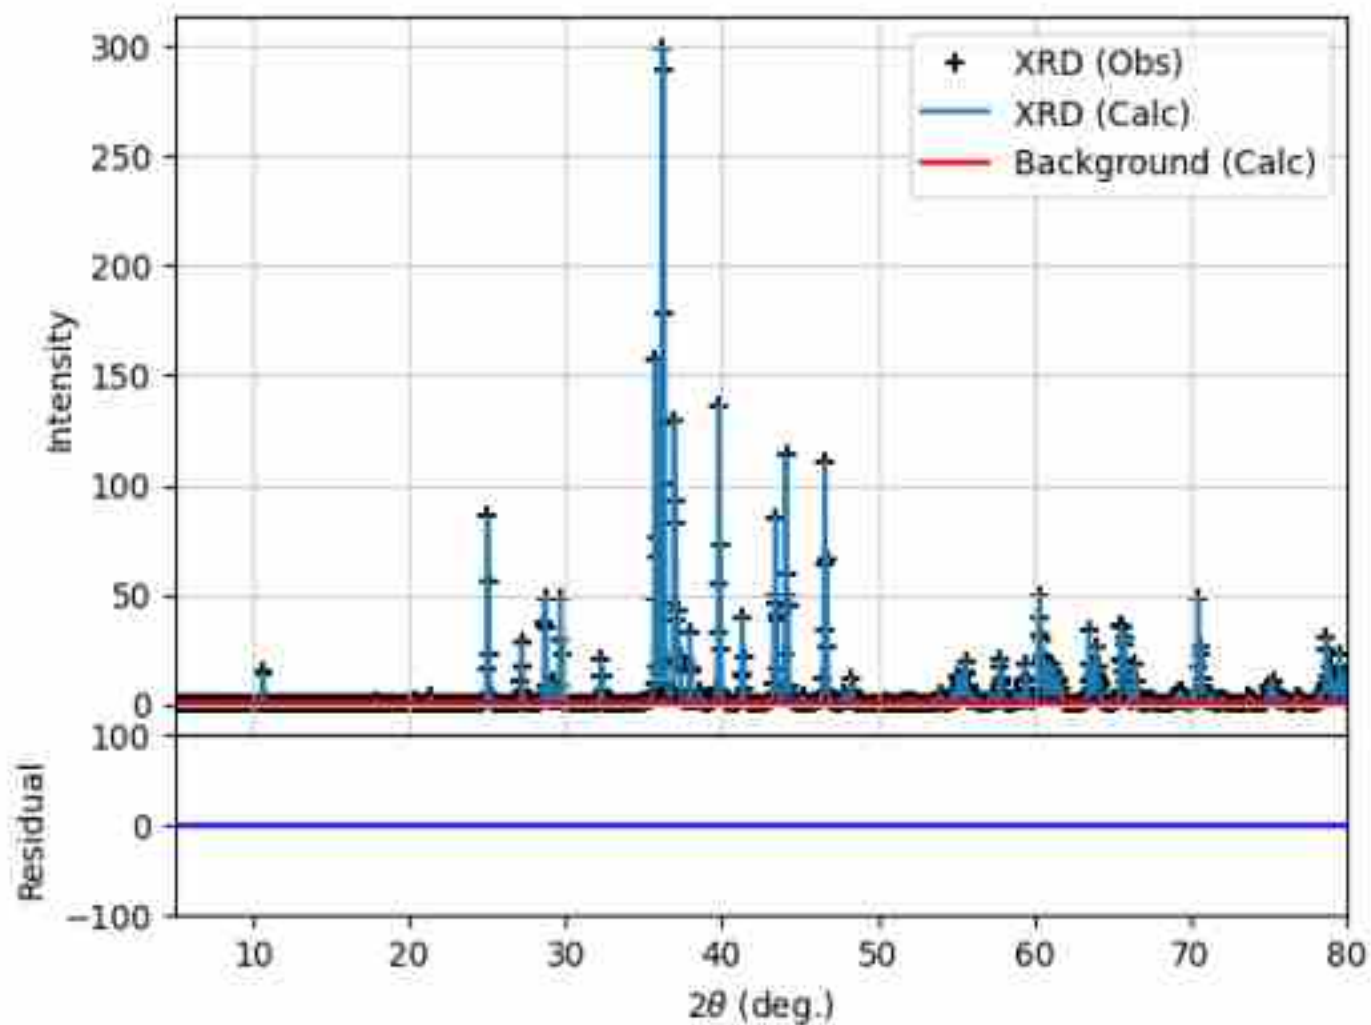

| RMSE before RR | Rwp     | RMSE after RR |
|----------------|---------|---------------|
| 0.037          | 0.00243 | 0.00021       |

# Zr12Ir4

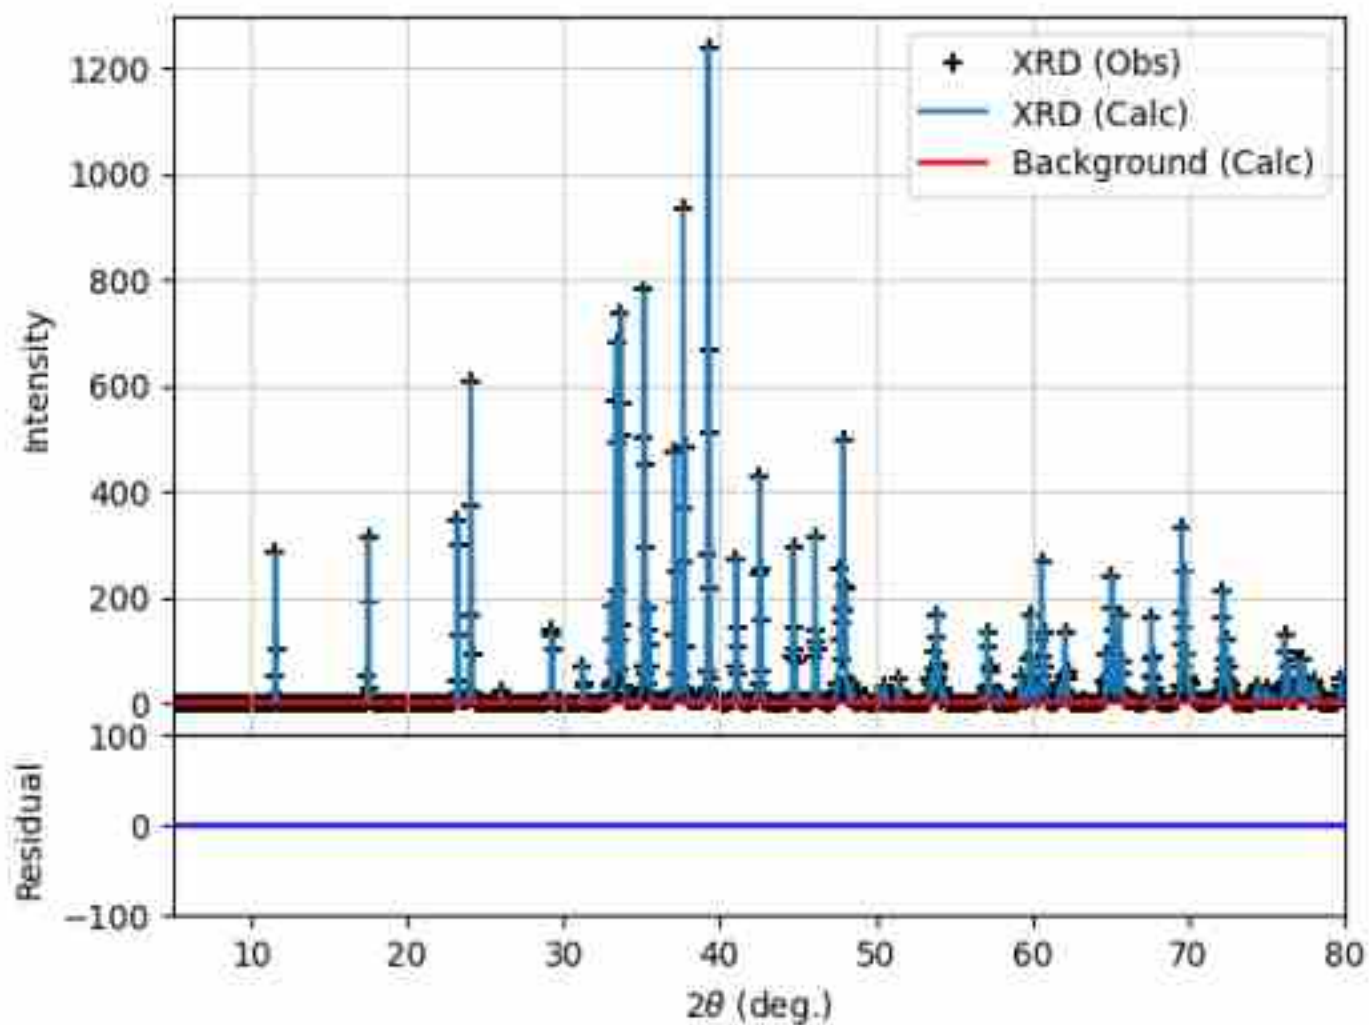

| RMSE before RR | Rwp     | RMSE after RR |
|----------------|---------|---------------|
| 0.037          | 0.00504 | 0.00063       |

# Ba1Ca1Ga4O8

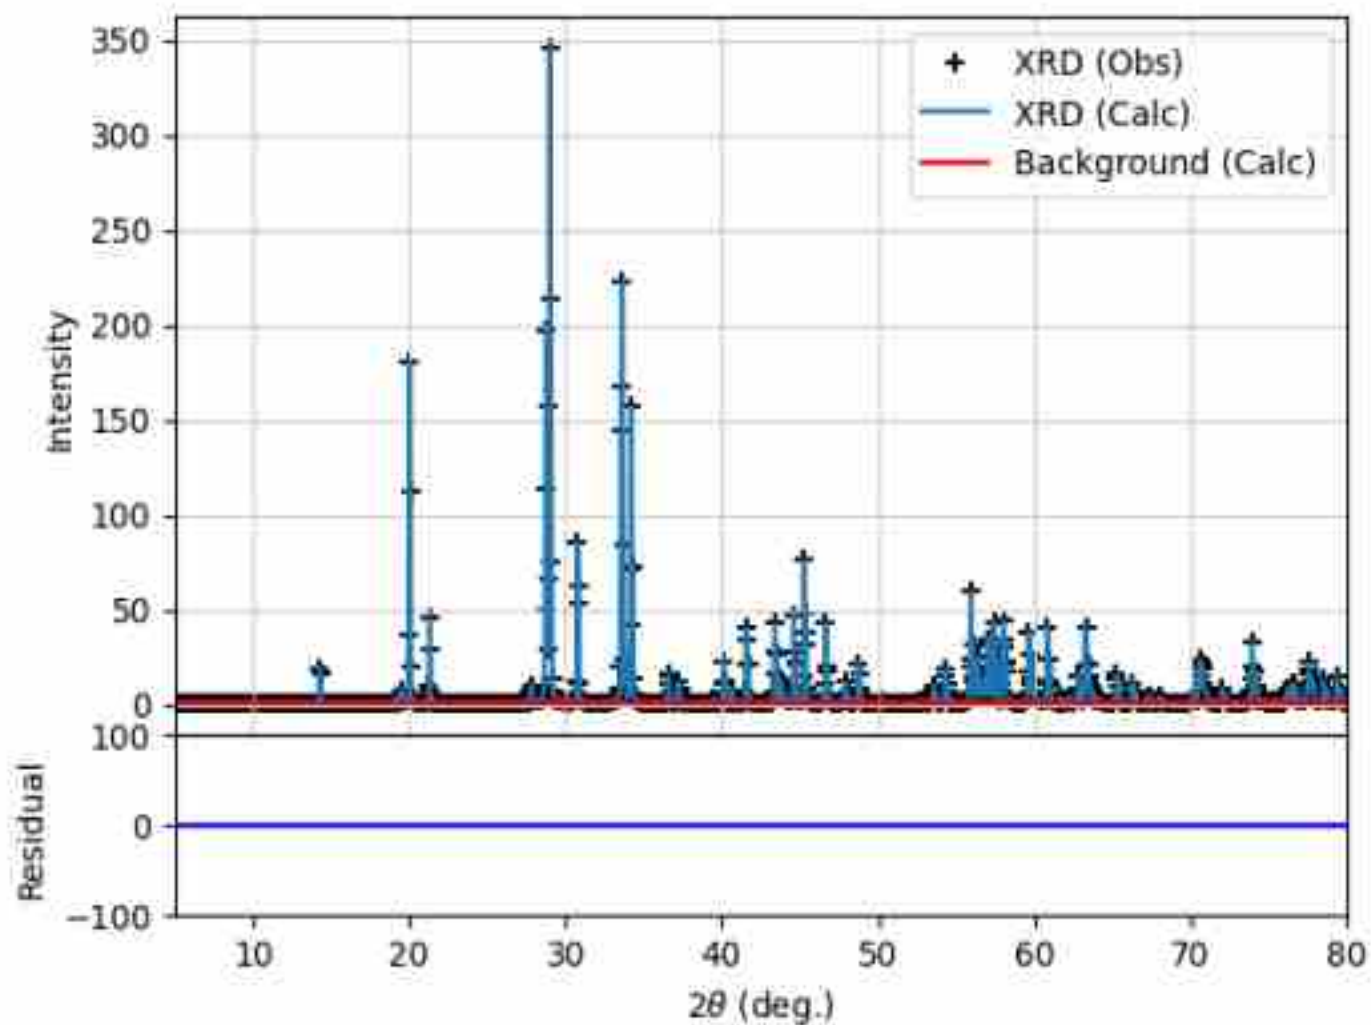

| RMSE before RR | Rwp     | RMSE after RR |
|----------------|---------|---------------|
| 0.038          | 0.00309 | 0.00098       |

# BaTiO<sub>3</sub>

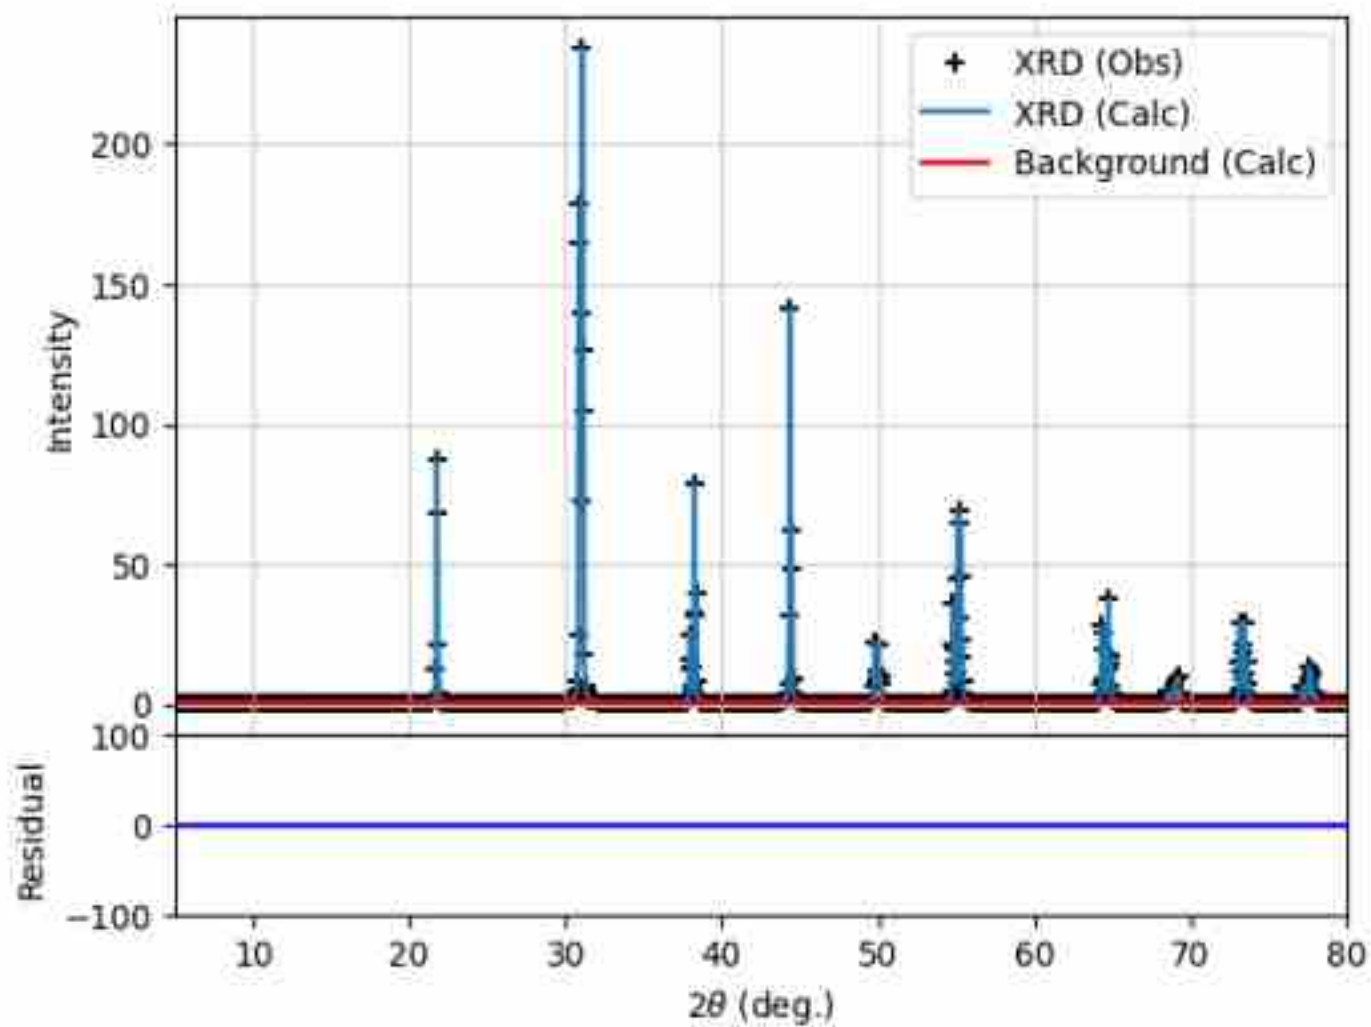

| RMSE before RR | Rwp     | RMSE after RR |
|----------------|---------|---------------|
| 0.038          | 0.00382 | 0.00088       |

# Ba<sub>2</sub>U<sub>4</sub>Te<sub>10</sub>

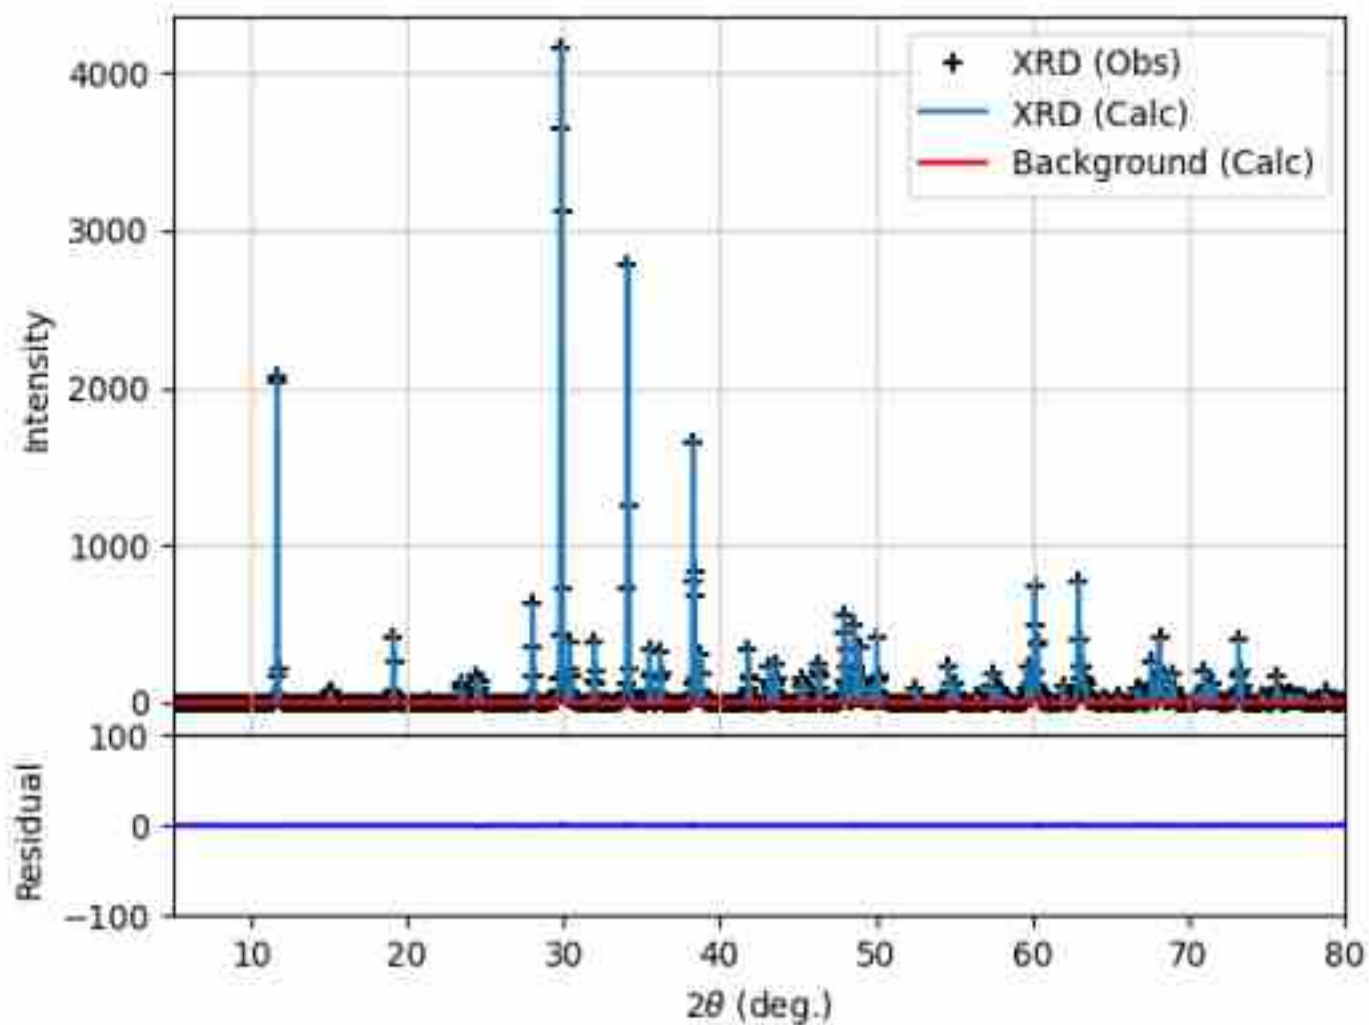

| RMSE before RR | Rwp     | RMSE after RR |
|----------------|---------|---------------|
| 0.038          | 0.23825 | 0.00489       |



# Ba<sub>2</sub>V<sub>2</sub>S<sub>6</sub>

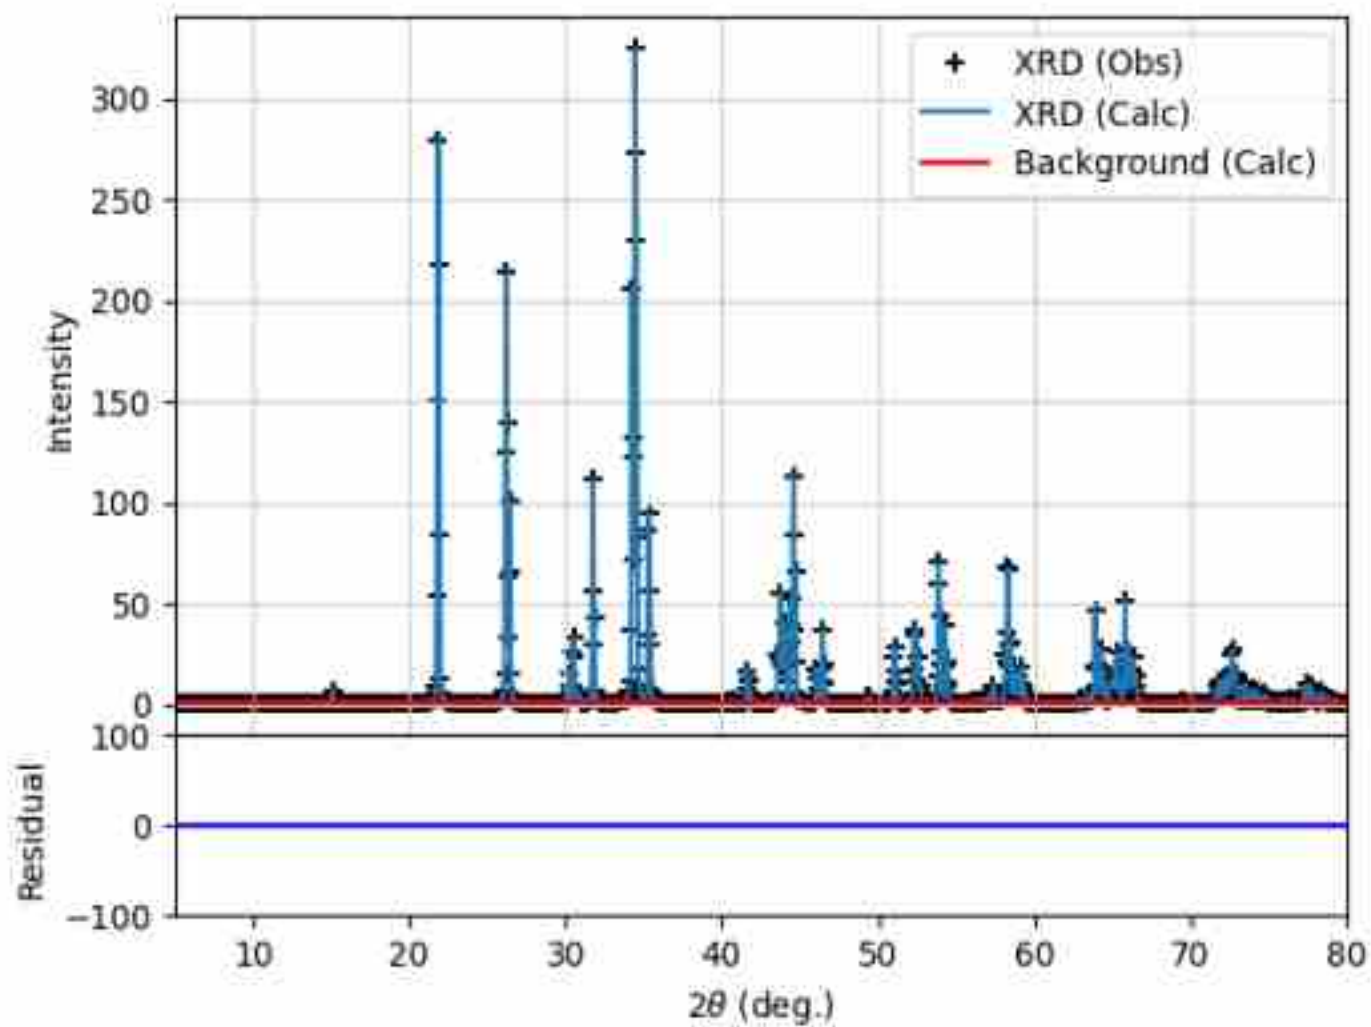

| RMSE before RR | Rwp    | RMSE after RR |
|----------------|--------|---------------|
| 0.038          | 0.0026 | 0.00046       |

# Ba<sub>2</sub>Zn<sub>4</sub>

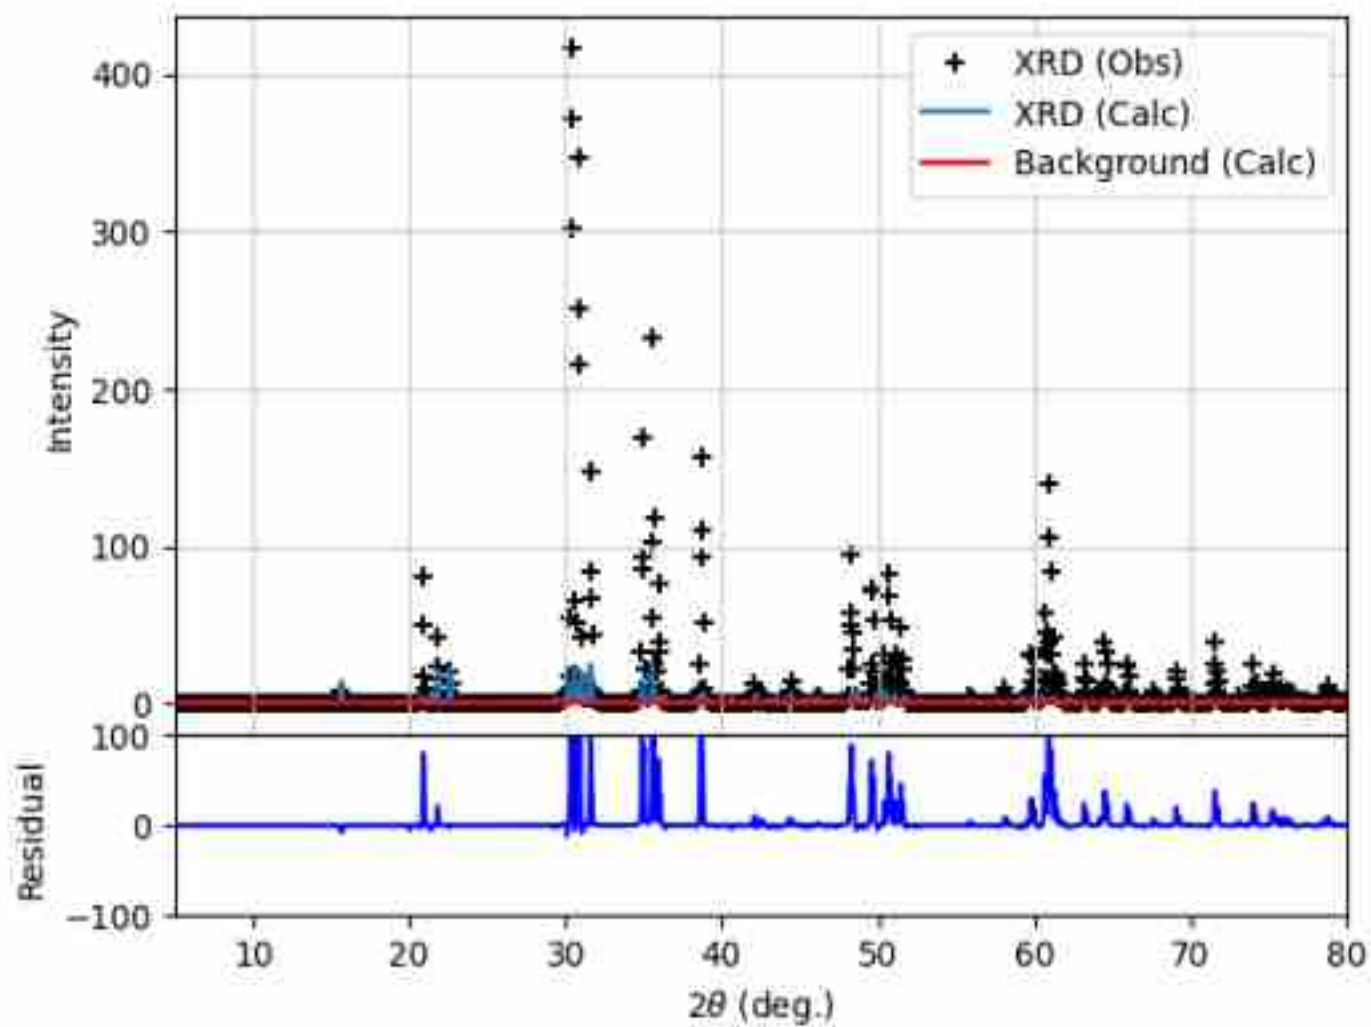

| RMSE before RR | Rwp      | RMSE after RR |
|----------------|----------|---------------|
| 0.038          | 84.56909 | 0.29124       |

# Bi<sub>4</sub>Pd<sub>10</sub>

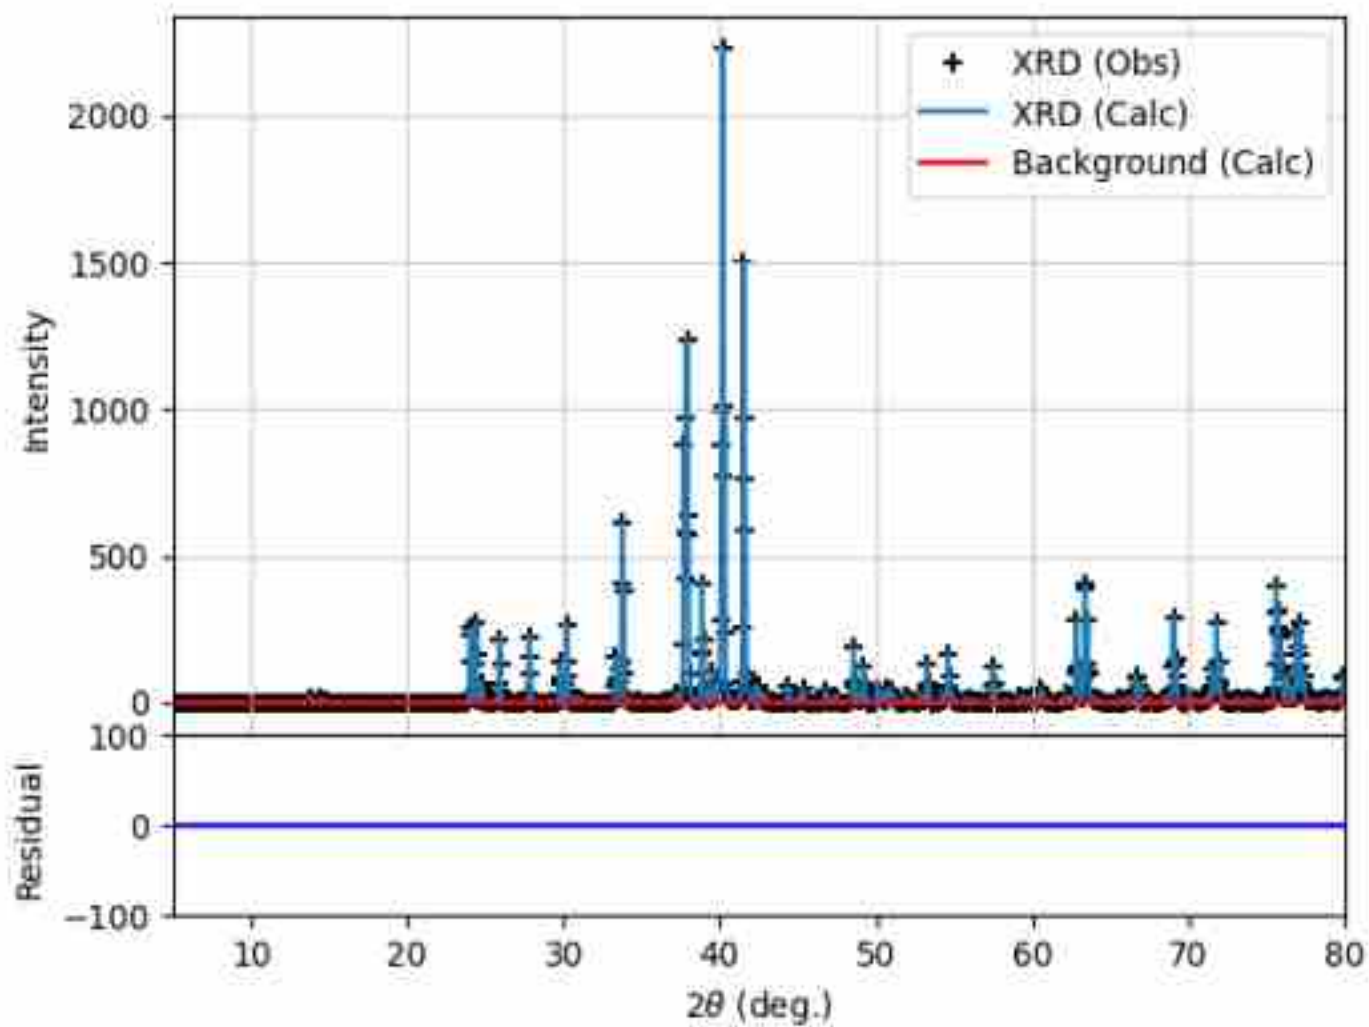

| RMSE before RR | Rwp     | RMSE after RR |
|----------------|---------|---------------|
| 0.038          | 0.00385 | 0.0002        |

# Ce14Ru6

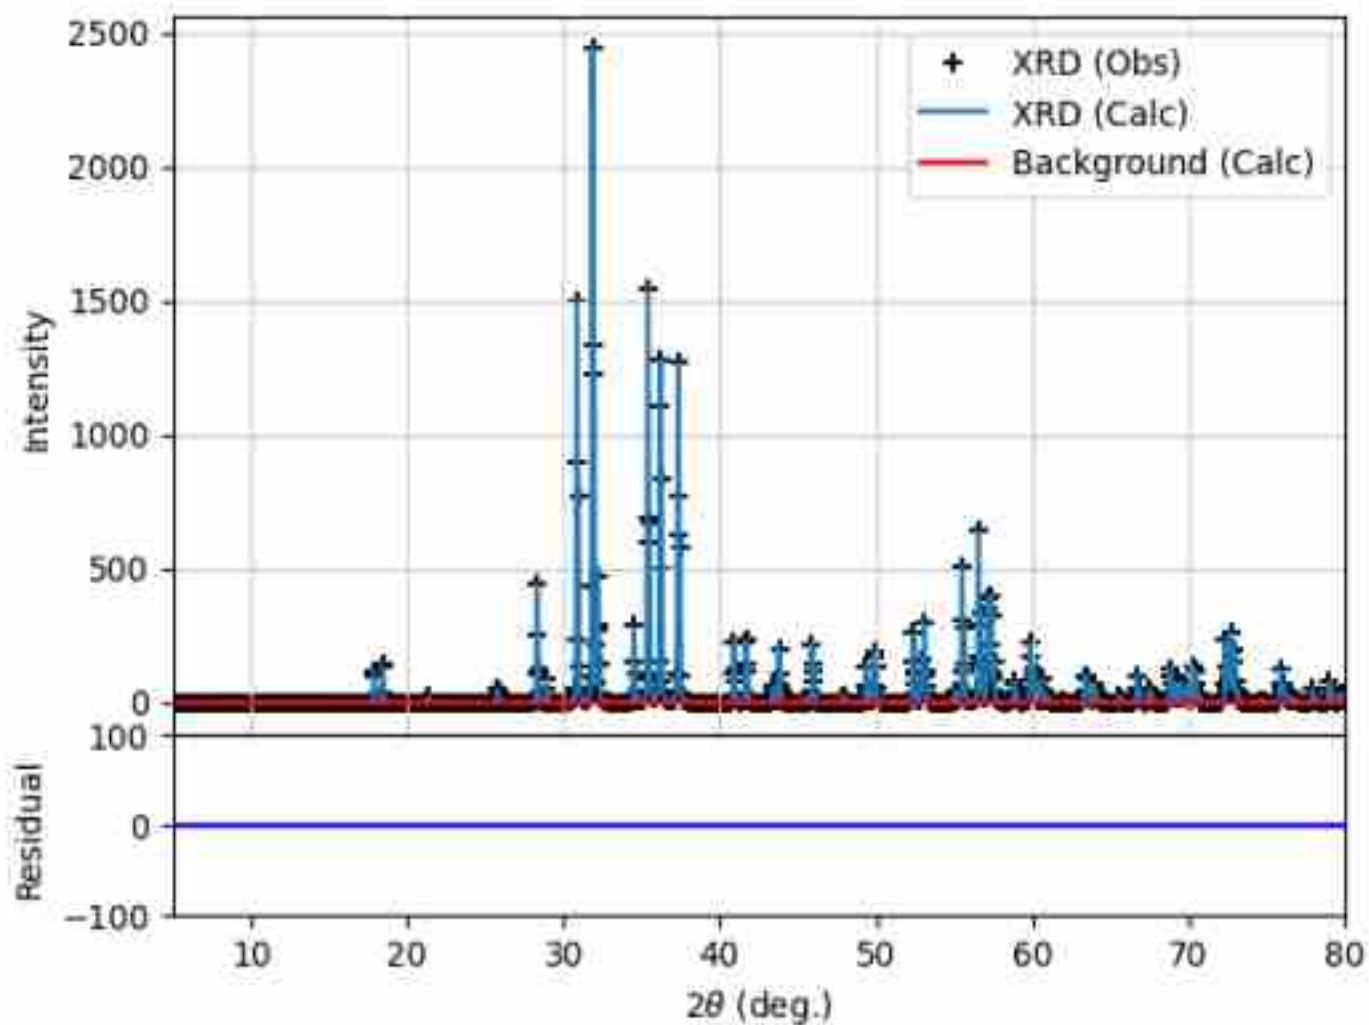

| RMSE before RR | Rwp     | RMSE after RR |
|----------------|---------|---------------|
| 0.038          | 0.00942 | 0.00069       |

# Cr<sub>3</sub>Cu<sub>10</sub>O<sub>8</sub>

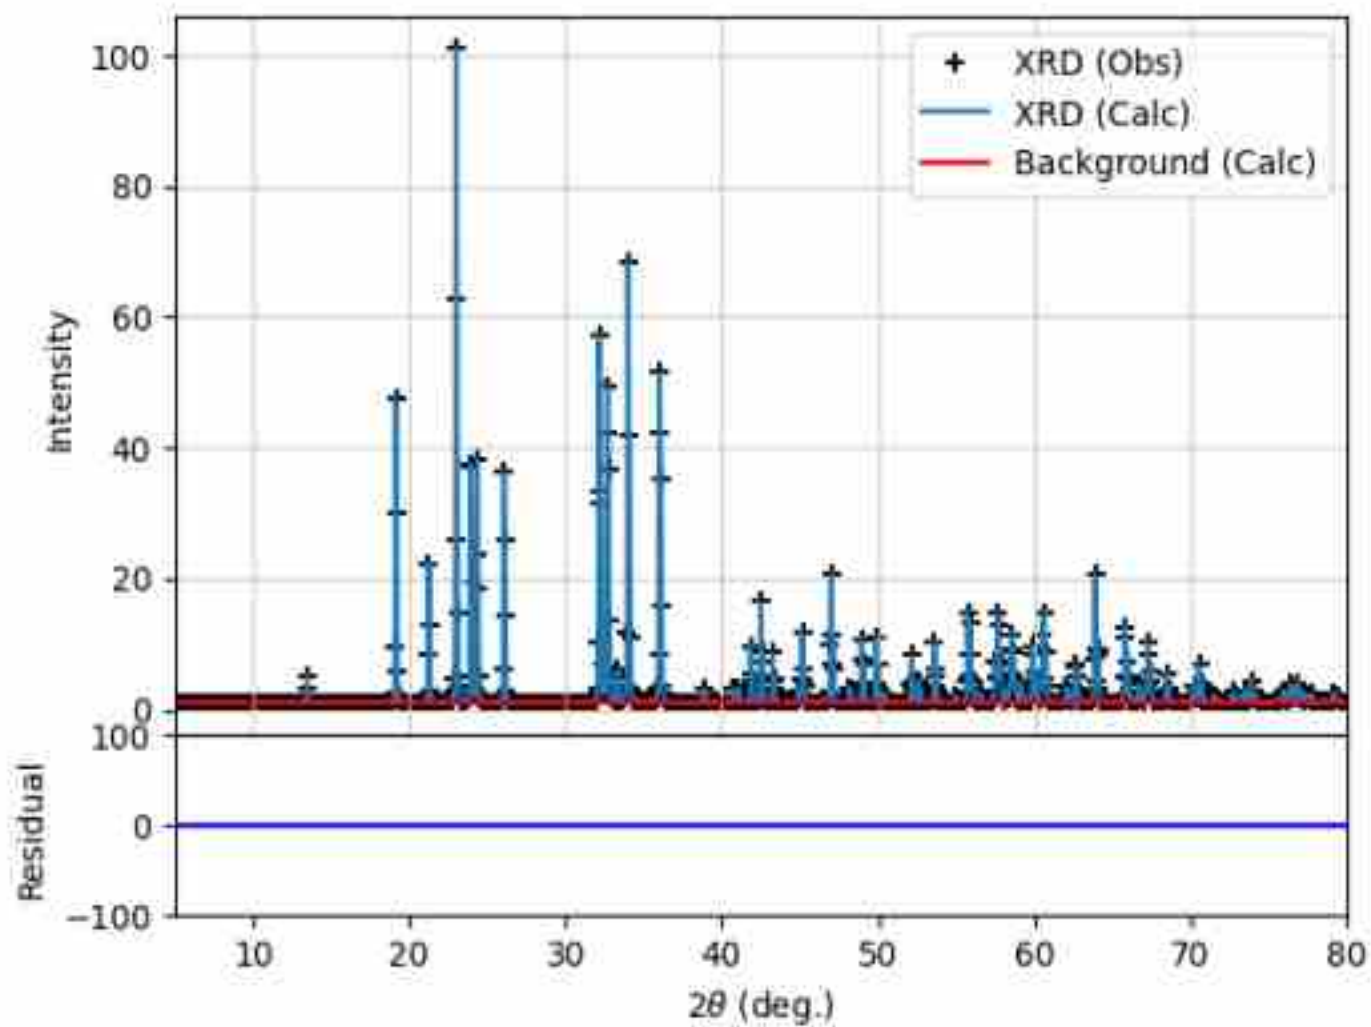

| RMSE before RR | Rwp     | RMSE after RR |
|----------------|---------|---------------|
| 0.038          | 0.00246 | 0.00069       |

# Cu<sub>3</sub>As<sub>2</sub>O<sub>8</sub>

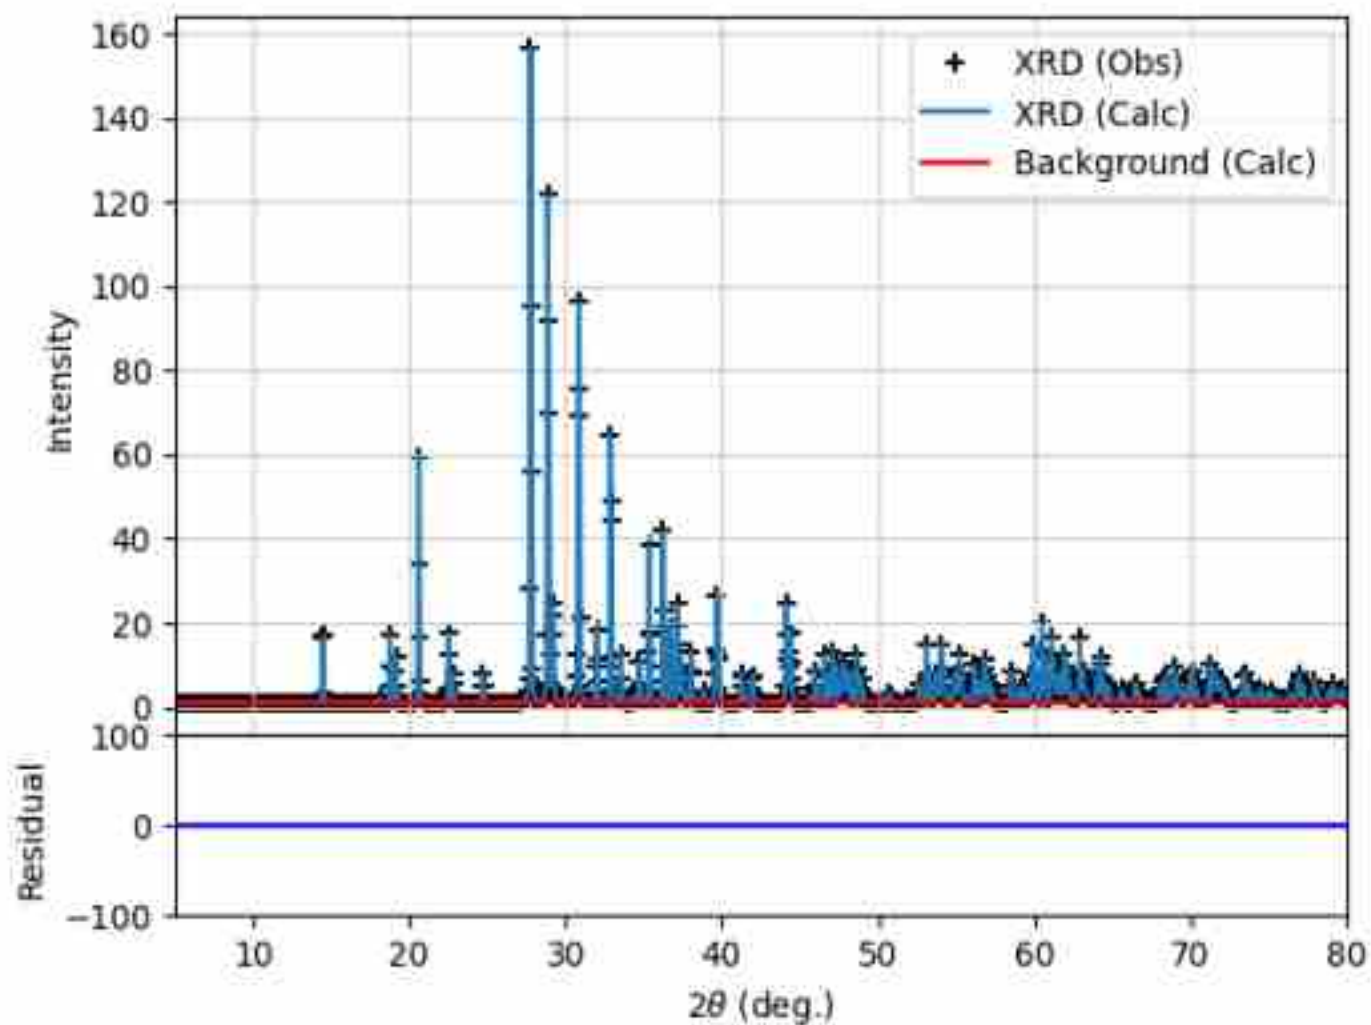

| RMSE before RR | Rwp     | RMSE after RR |
|----------------|---------|---------------|
| 0.038          | 0.00019 | 0.00016       |

# Fe<sub>2</sub>P<sub>2</sub>H<sub>4</sub>O<sub>10</sub>

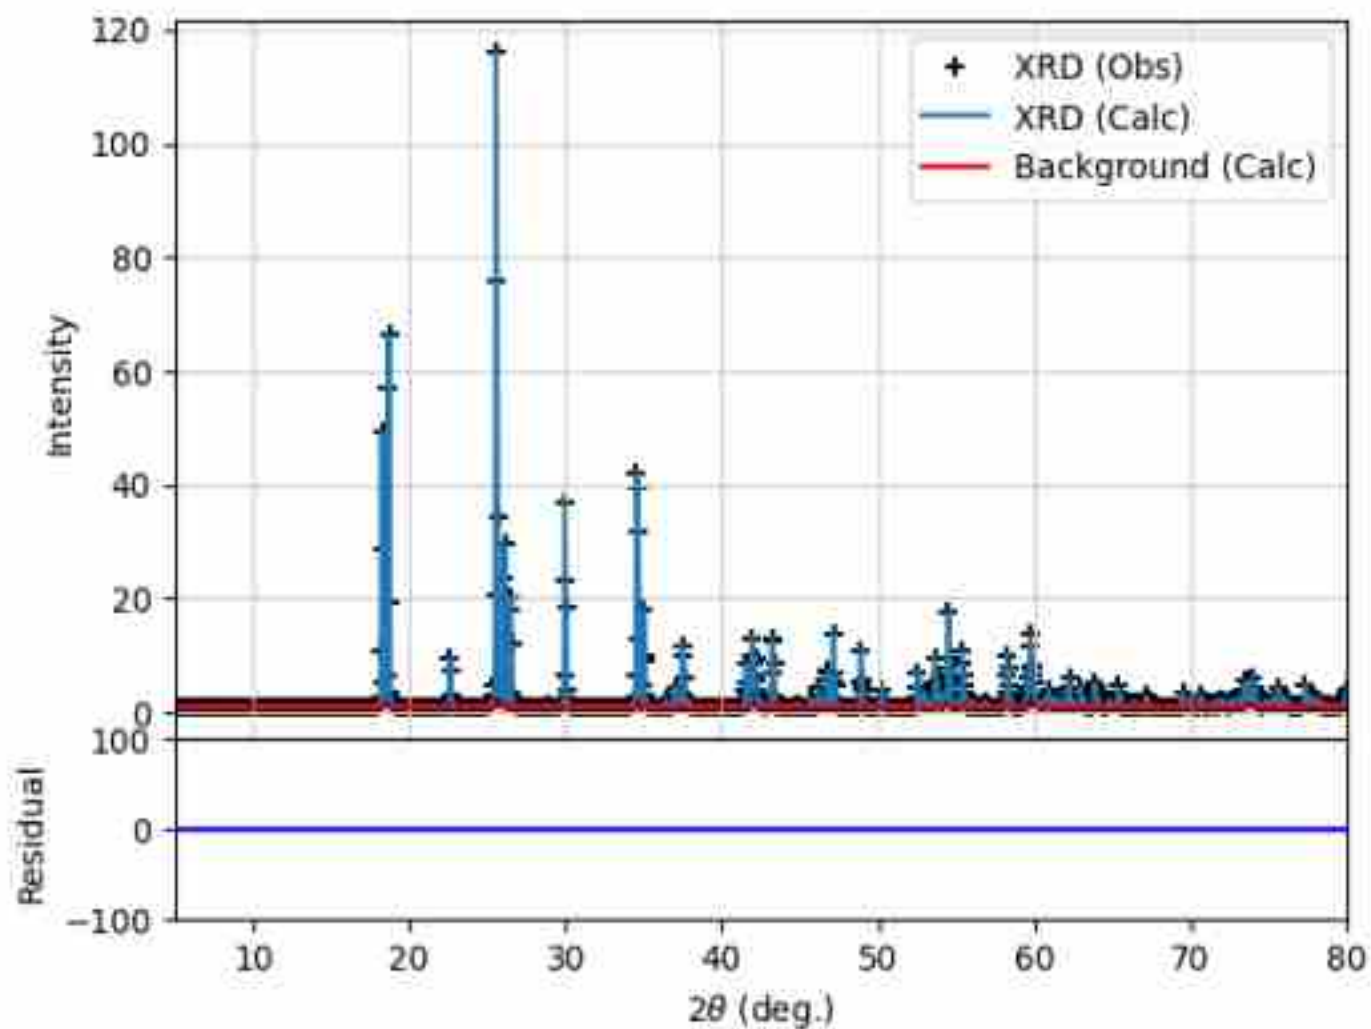

| RMSE before RR | Rwp     | RMSE after RR |
|----------------|---------|---------------|
| 0.038          | 0.03144 | 0.16918       |

# Hg<sub>6</sub>As<sub>2</sub>S<sub>8</sub>Cl<sub>2</sub>

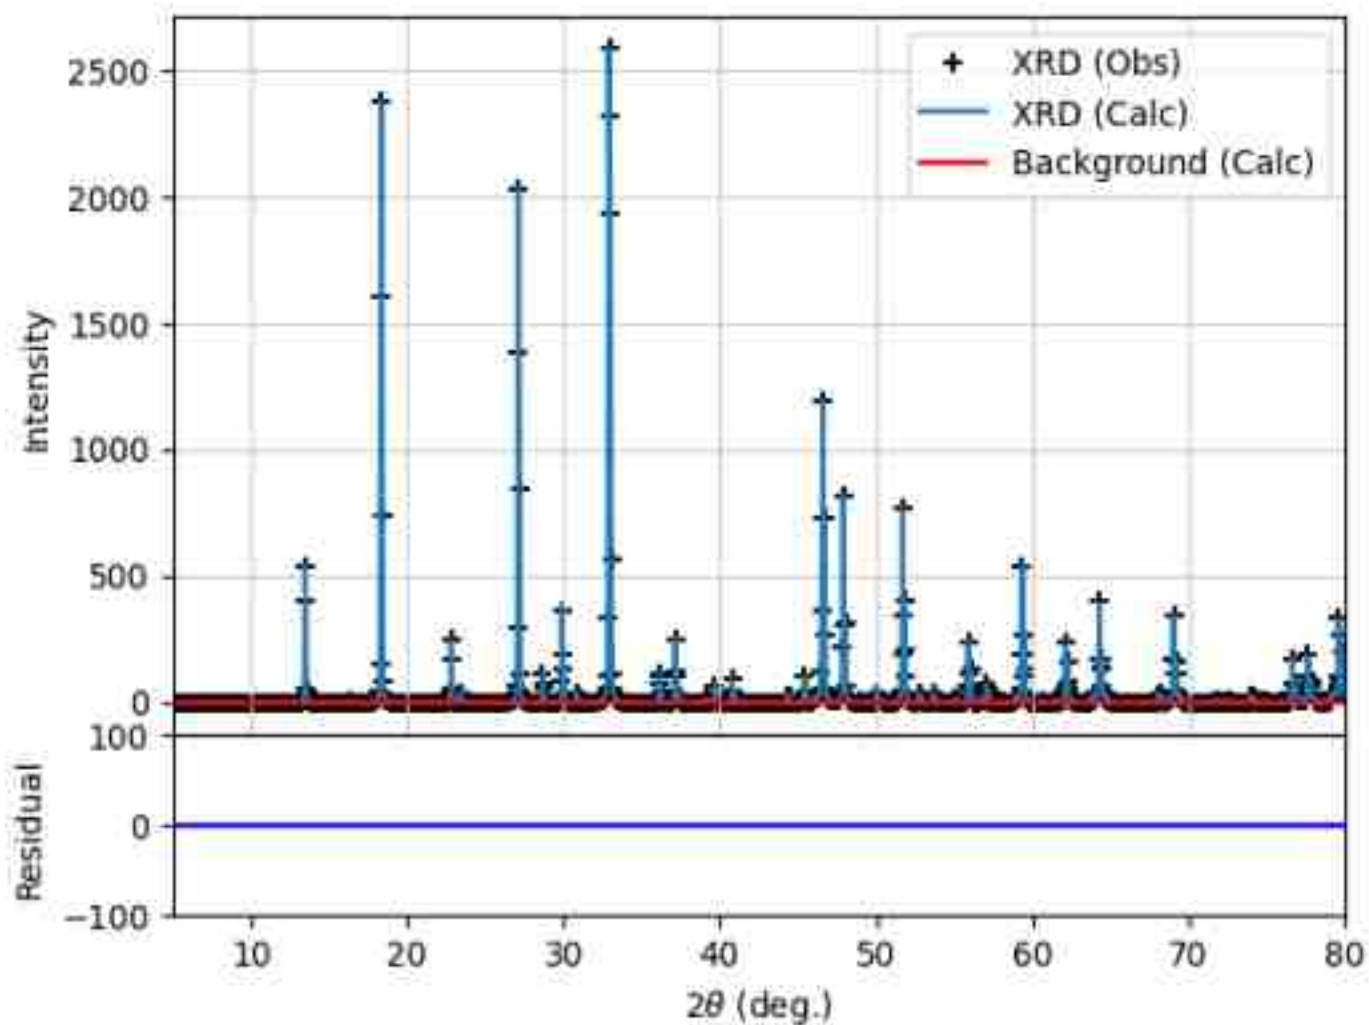

| RMSE before RR | Rwp     | RMSE after RR |
|----------------|---------|---------------|
| 0.038          | 0.00467 | 0.00065       |



# Ho<sub>4</sub>Bi<sub>4</sub>O<sub>12</sub>

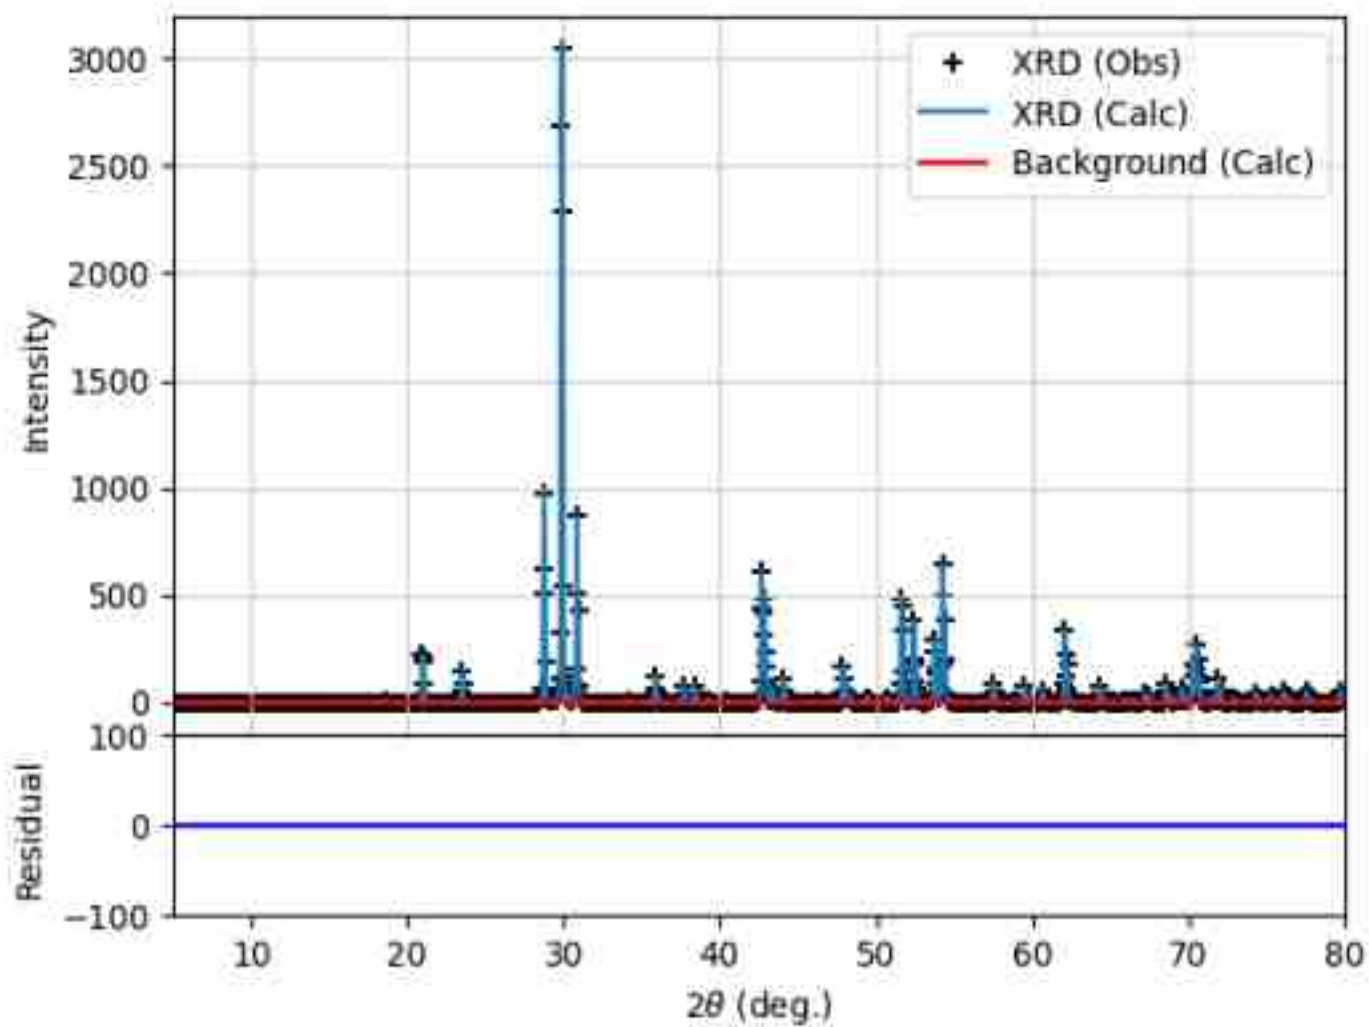

| RMSE before RR | Rwp     | RMSE after RR |
|----------------|---------|---------------|
| 0.038          | 0.00404 | 0.00098       |

# K<sub>2</sub>Bi<sub>2</sub>P<sub>4</sub>Se<sub>12</sub>

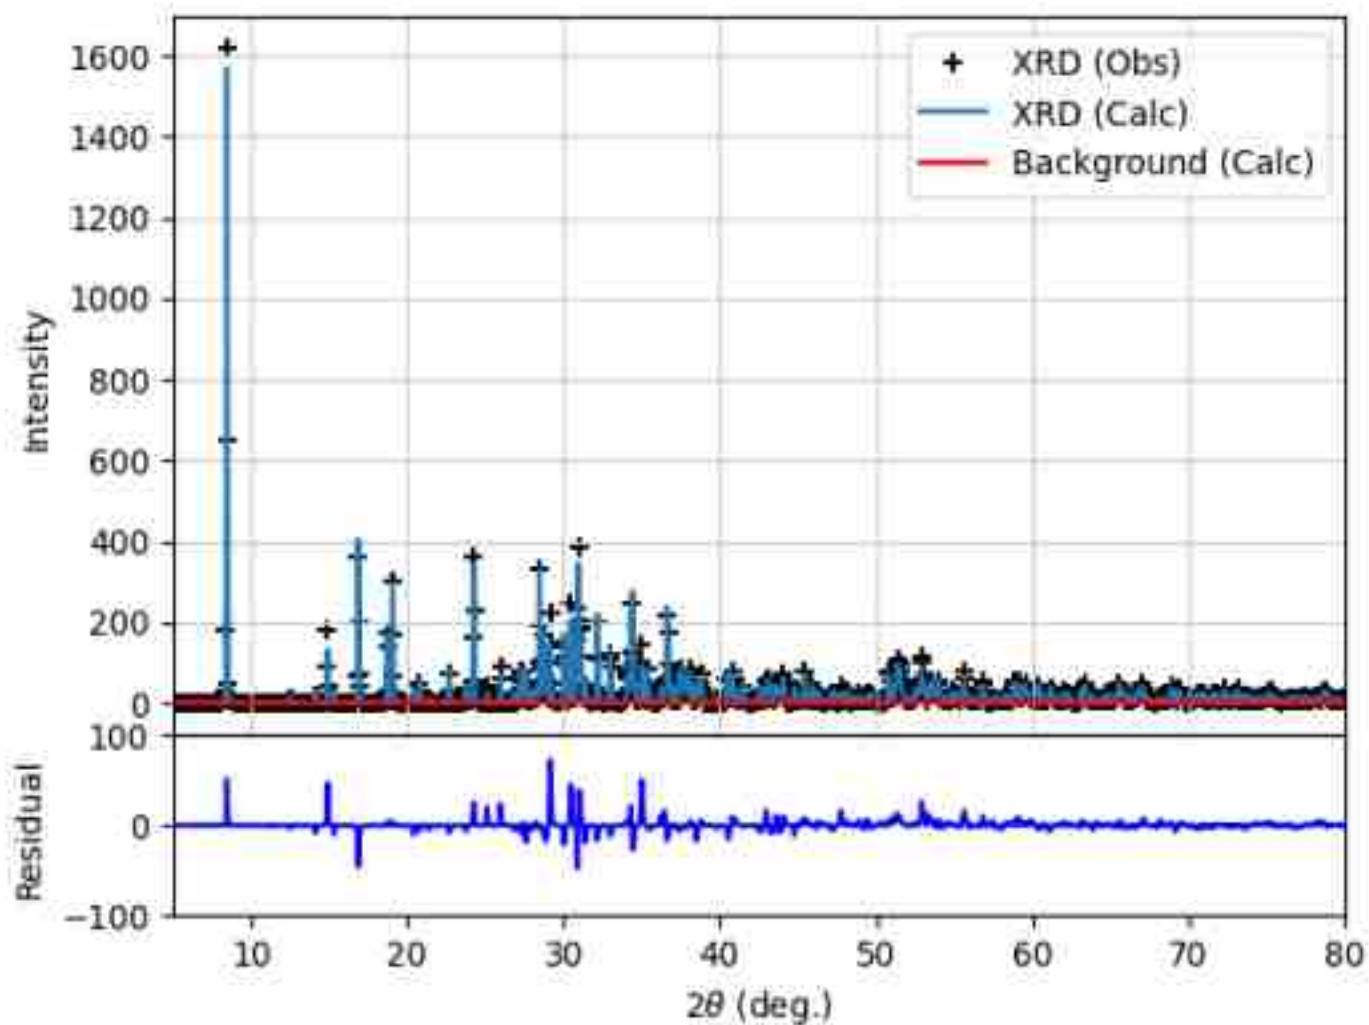

| RMSE before RR | Rwp      | RMSE after RR |
|----------------|----------|---------------|
| 0.038          | 15.19281 | 0.25404       |

# La<sub>2</sub>Zn<sub>6</sub>P<sub>6</sub>

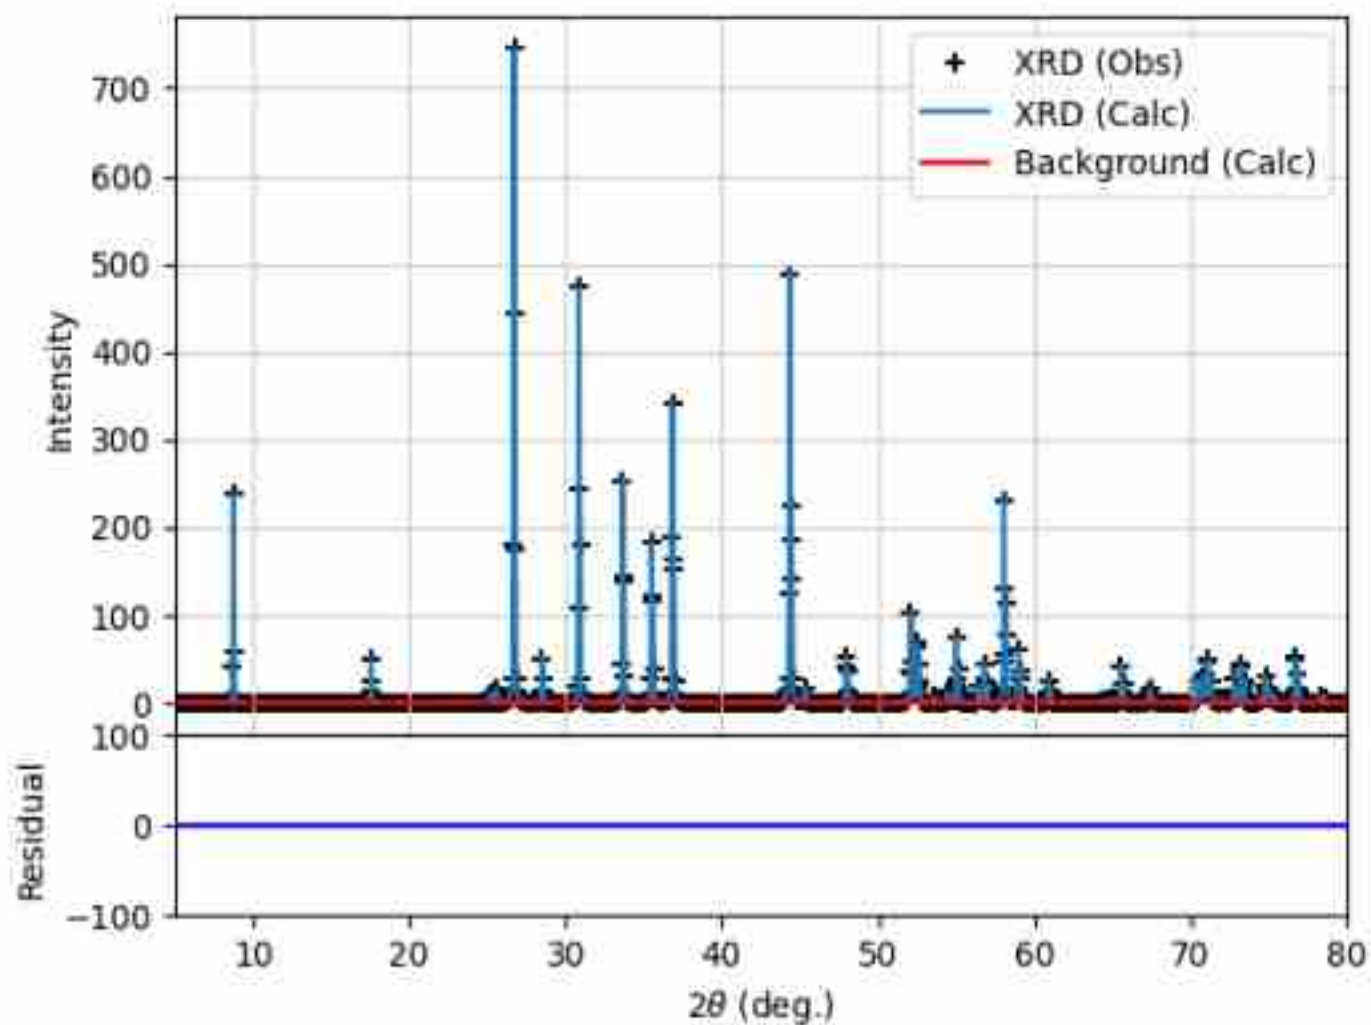

| RMSE before RR | Rwp     | RMSE after RR |
|----------------|---------|---------------|
| 0.038          | 0.00284 | 0.00044       |

# Li1Nb1W1O6

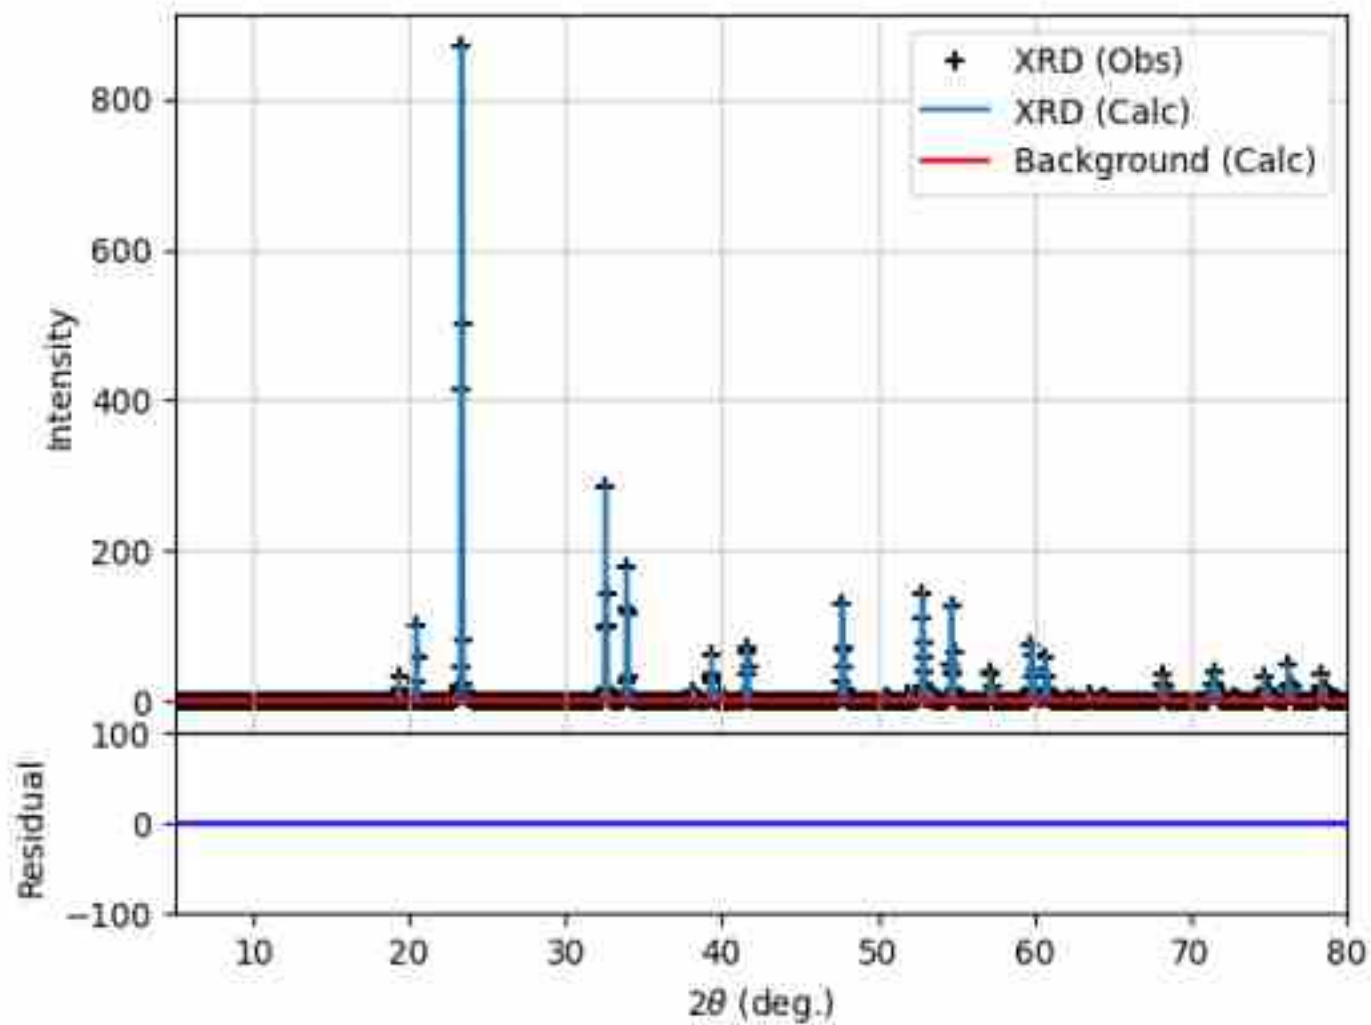

| RMSE before RR | Rwp     | RMSE after RR |
|----------------|---------|---------------|
| 0.038          | 0.00521 | 0.00269       |

# Li<sub>2</sub>Mn<sub>1</sub>Co<sub>1</sub>O<sub>4</sub>

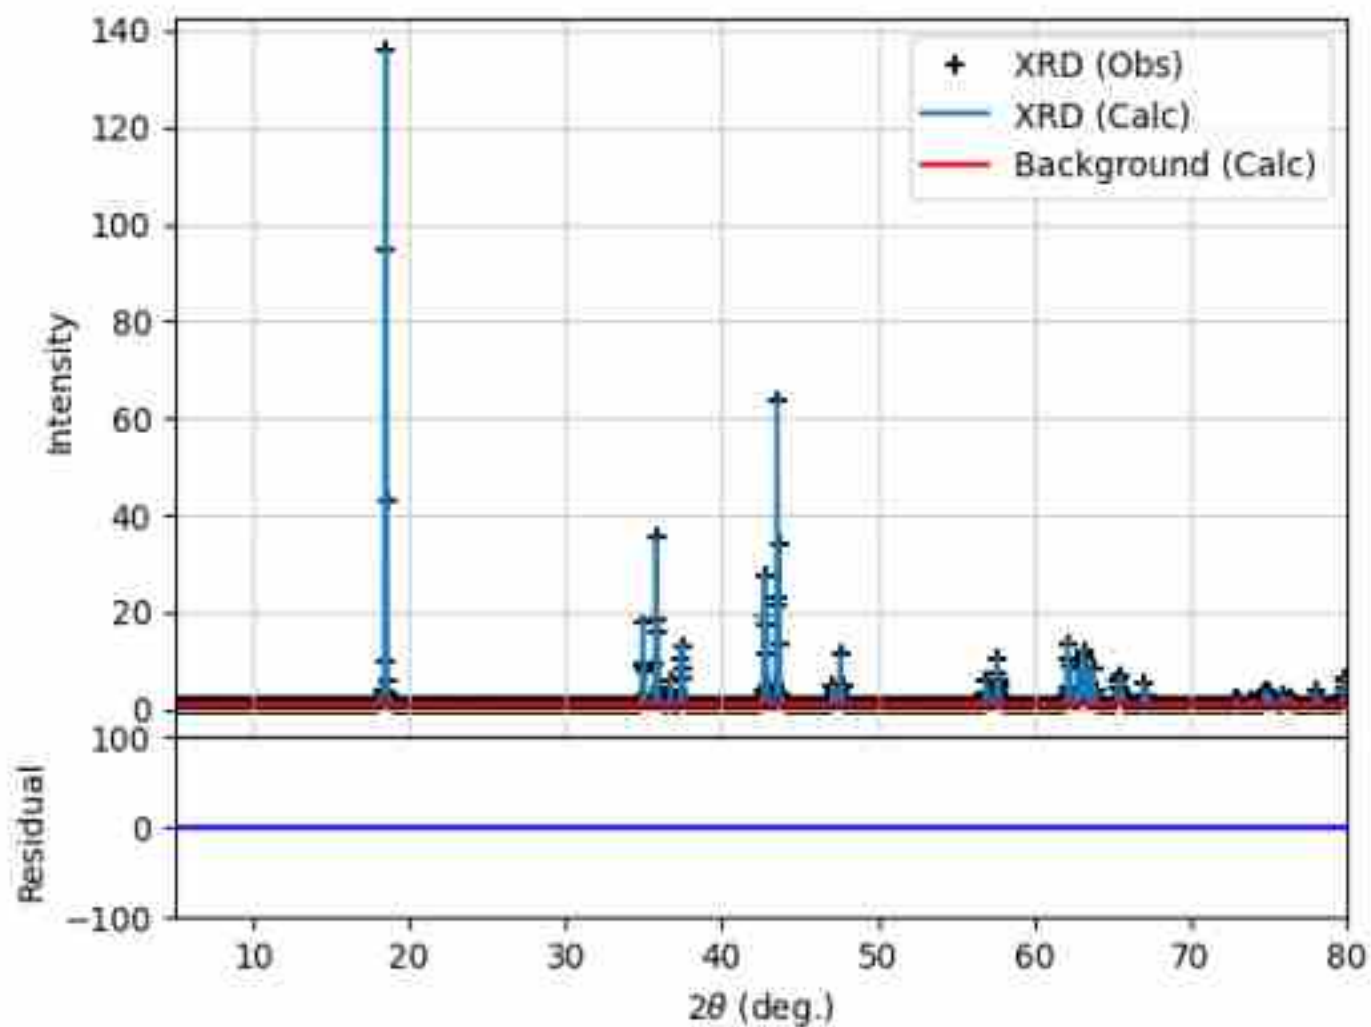

| RMSE before RR | Rwp    | RMSE after RR |
|----------------|--------|---------------|
| 0.038          | 0.0013 | 0.00055       |

# Li<sub>4</sub>Mn<sub>2</sub>Cr<sub>2</sub>O<sub>8</sub>

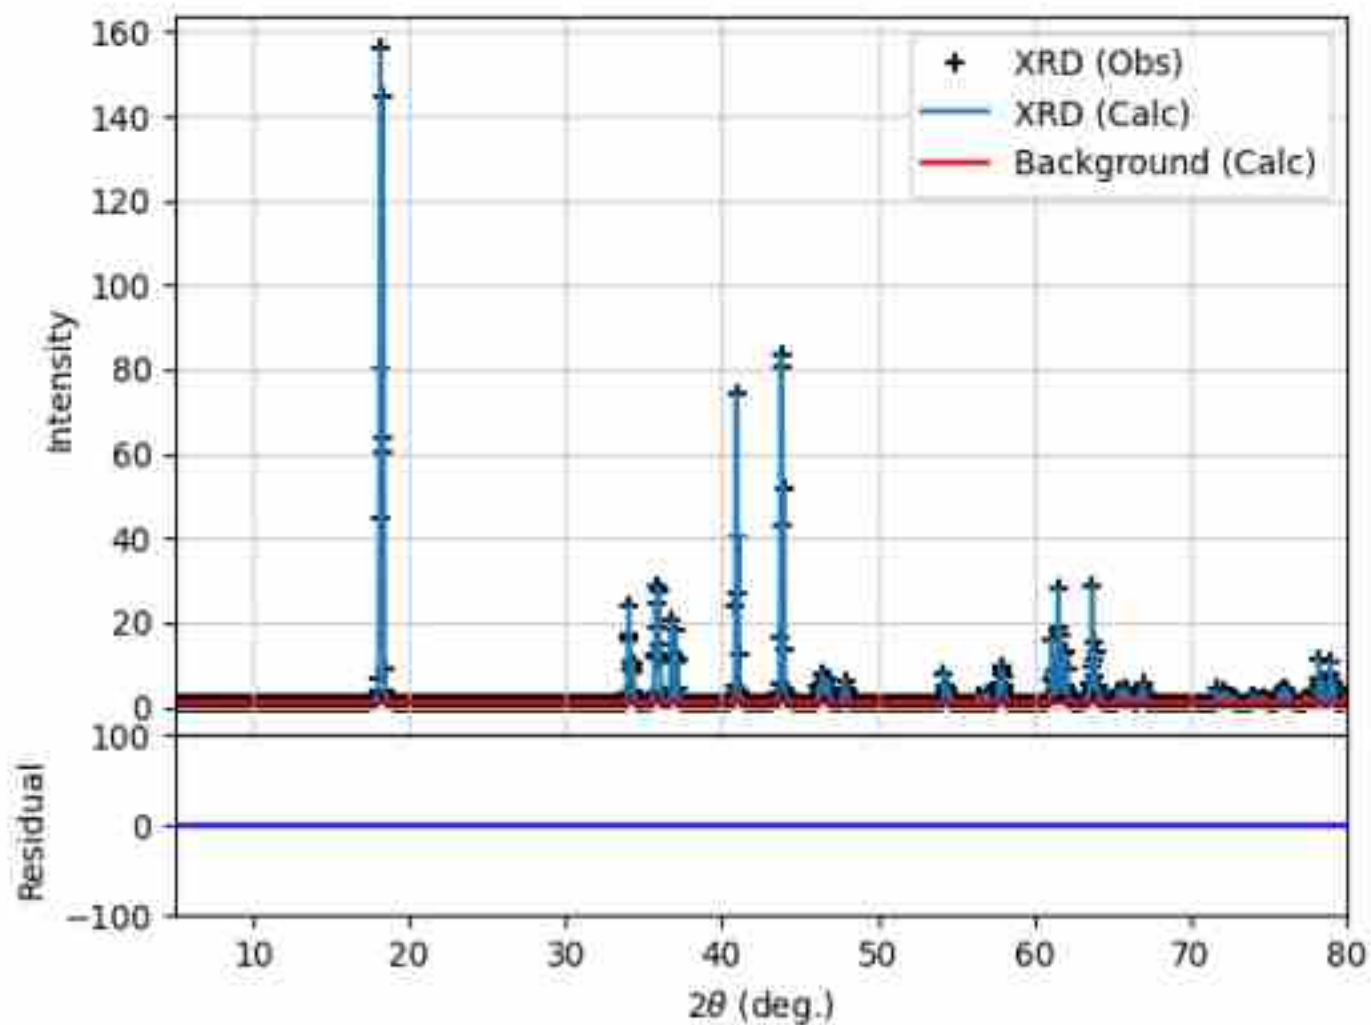

| RMSE before RR | Rwp     | RMSE after RR |
|----------------|---------|---------------|
| 0.038          | 0.00275 | 0.00112       |

# Li<sub>4</sub>Mn<sub>2</sub>F<sub>8</sub>

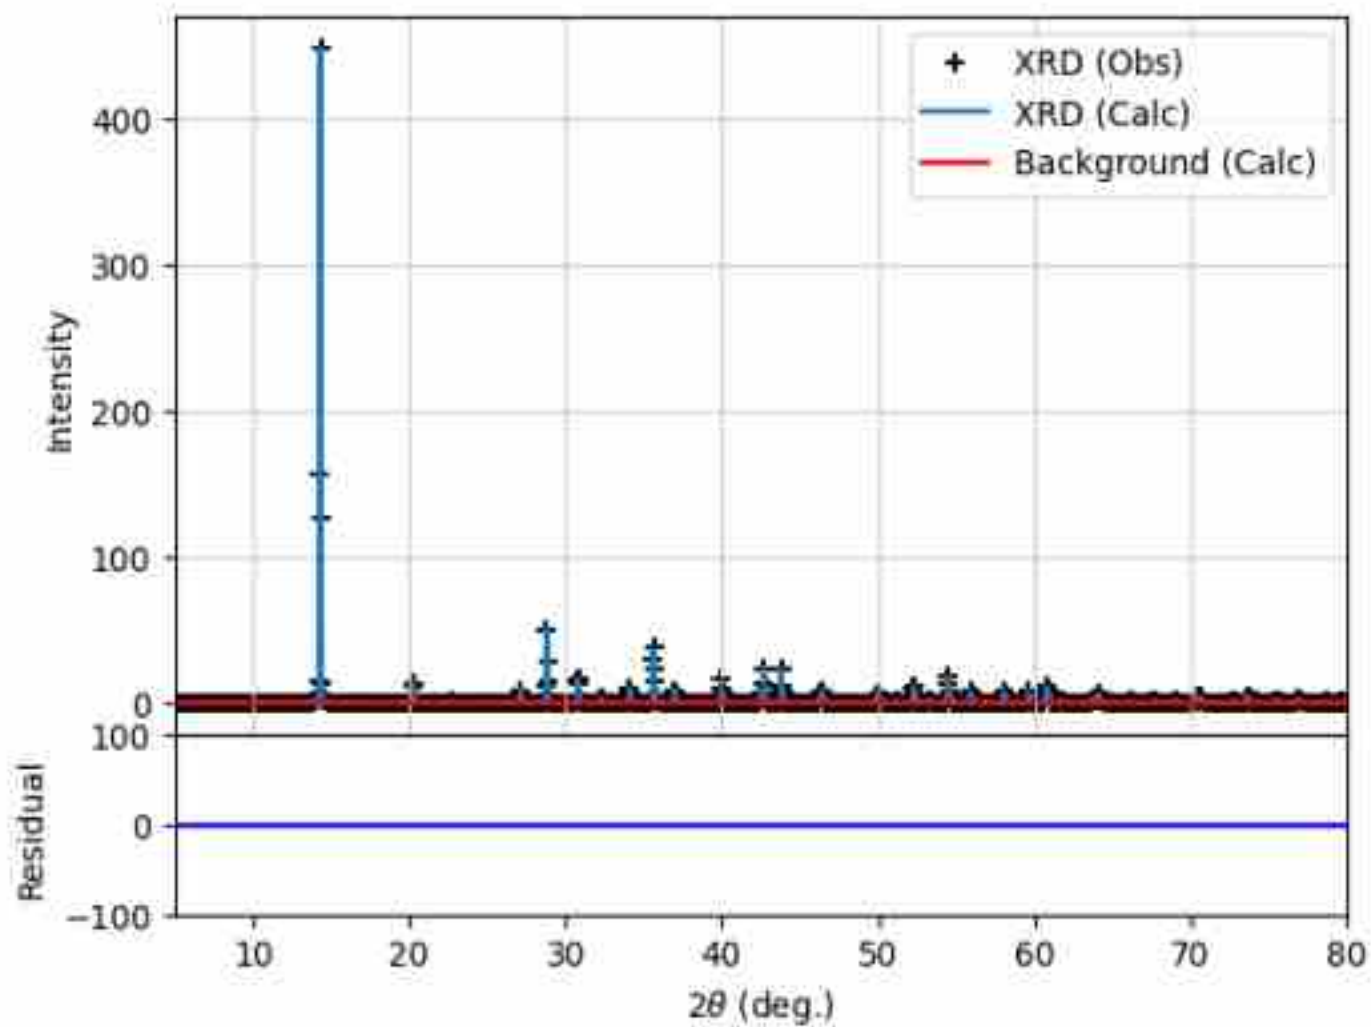

| RMSE before RR | Rwp     | RMSE after RR |
|----------------|---------|---------------|
| 0.038          | 0.00529 | 0.00313       |

# Li<sub>4</sub>Mn<sub>3</sub>Te<sub>1</sub>O<sub>12</sub>

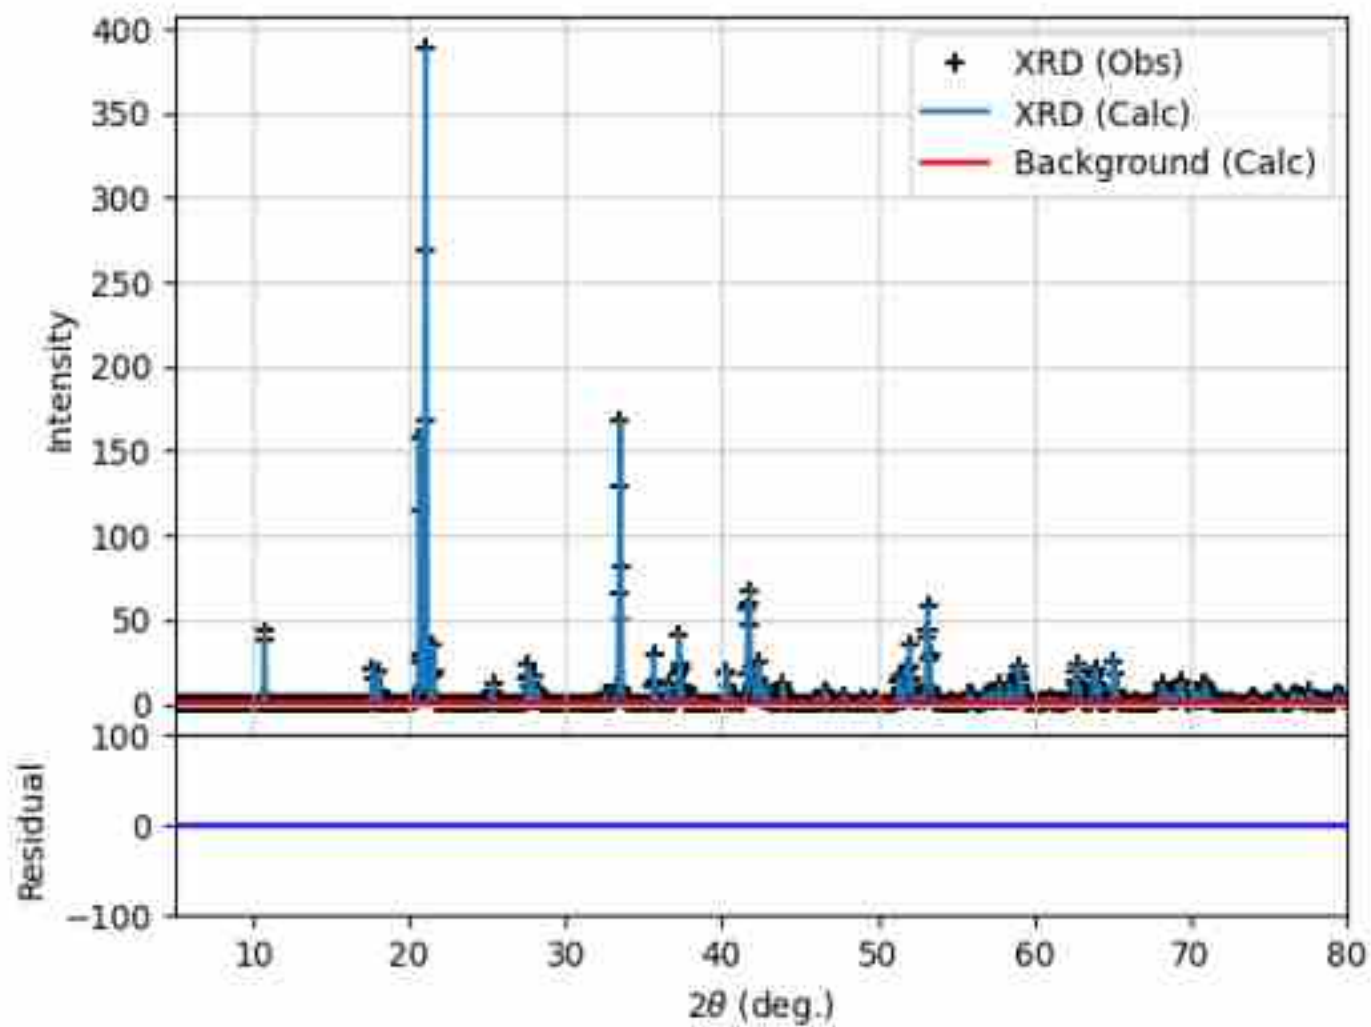

| RMSE before RR | Rwp     | RMSE after RR |
|----------------|---------|---------------|
| 0.038          | 0.00282 | 0.00129       |



# Li<sub>4</sub>Mo<sub>10</sub>O<sub>5</sub>

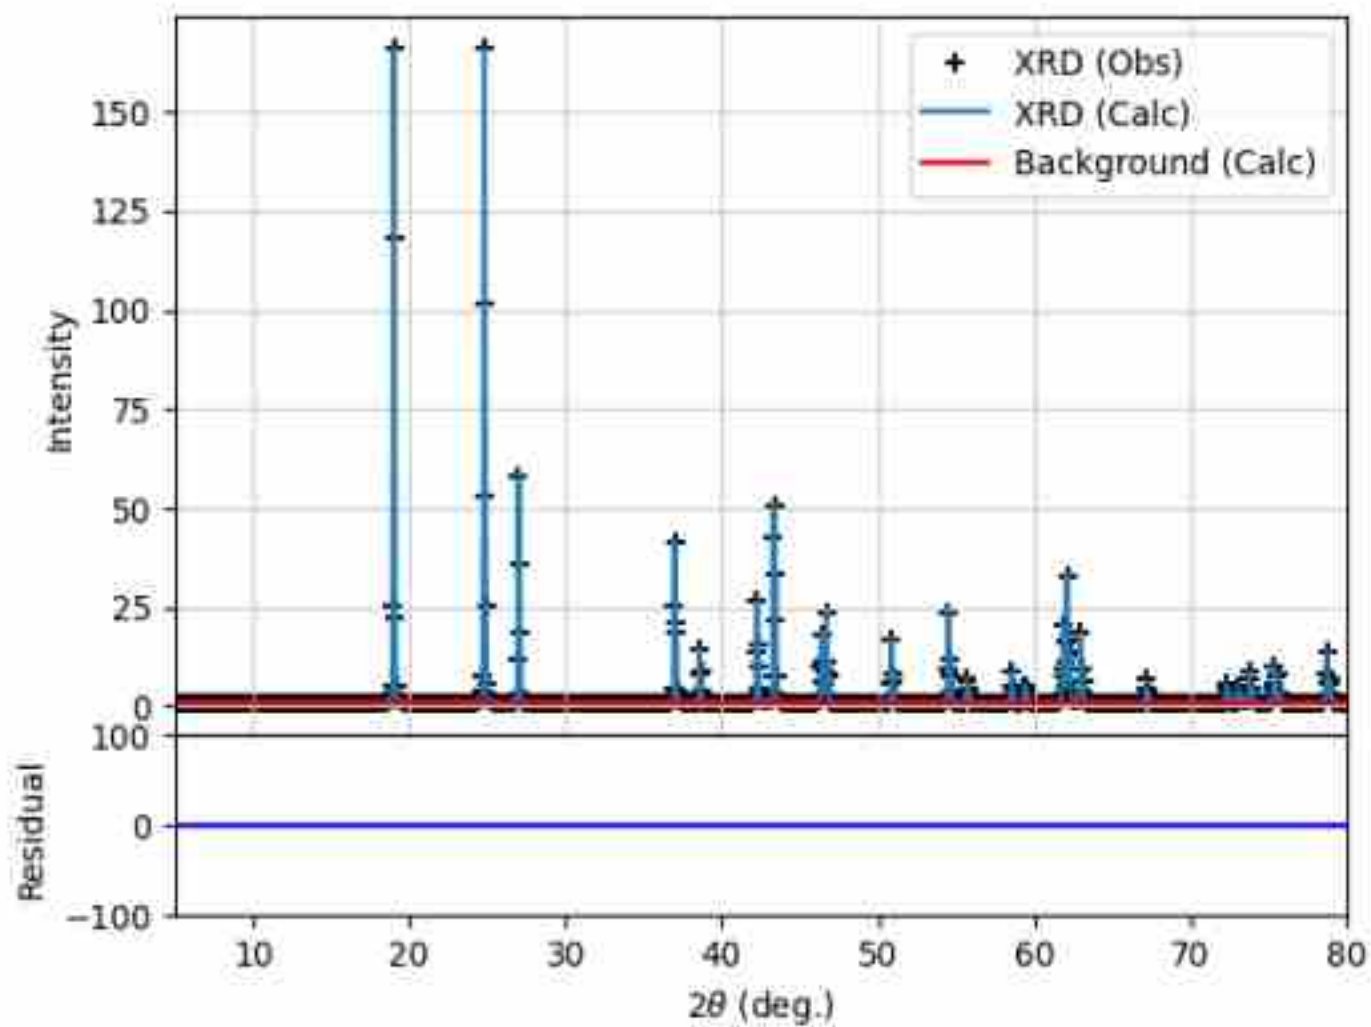

| RMSE before RR | Rwp     | RMSE after RR |
|----------------|---------|---------------|
| 0.038          | 0.00252 | 0.00352       |

# Mg<sub>4</sub>In<sub>4</sub>Br<sub>12</sub>

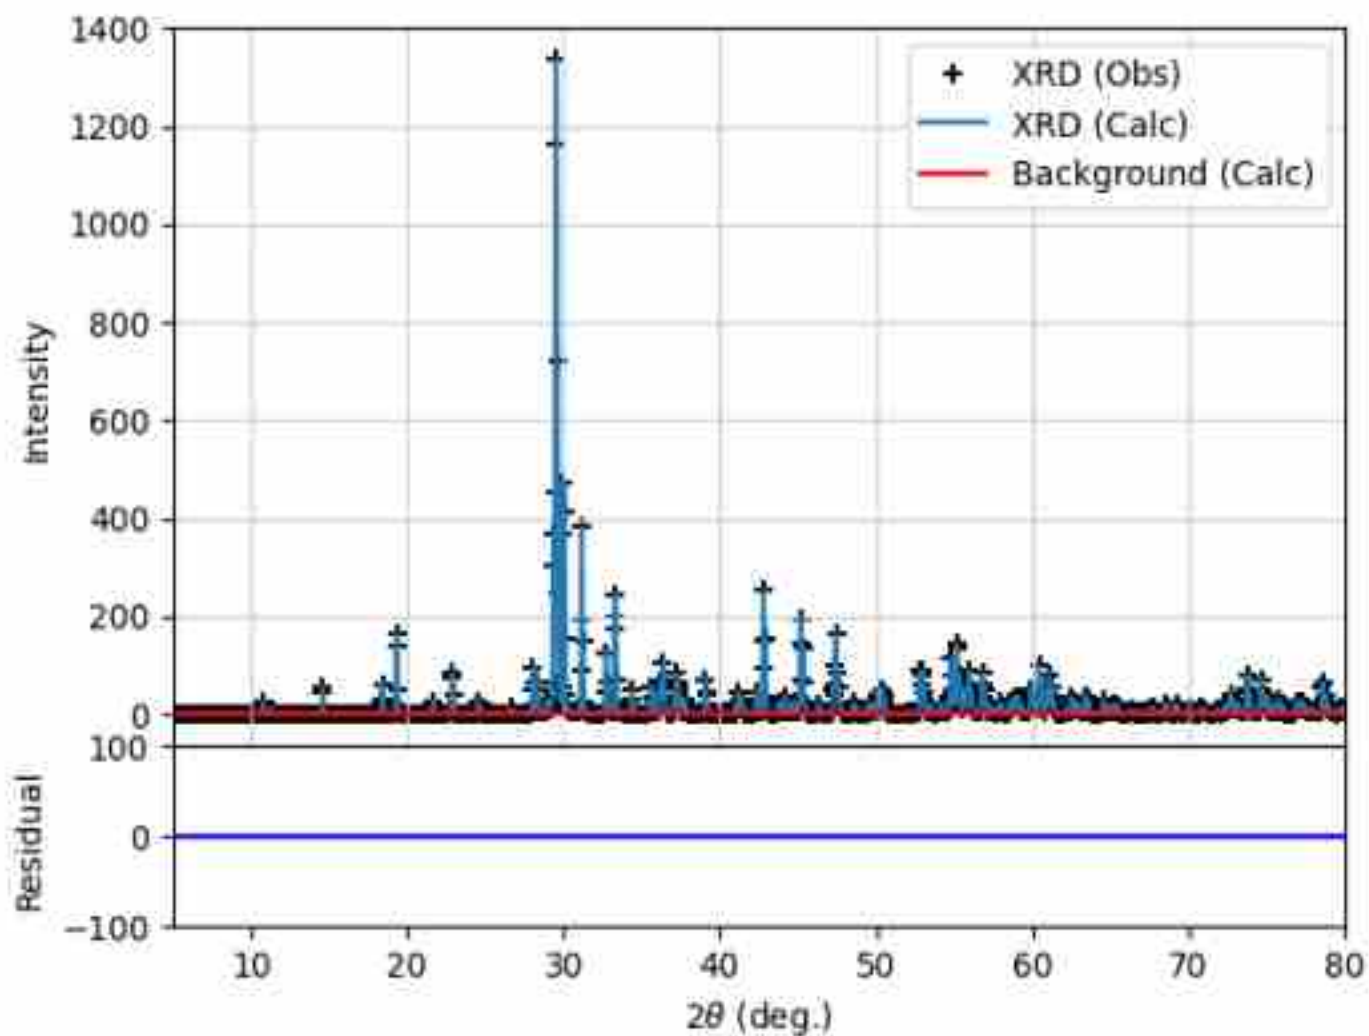

| RMSE before RR | Rwp    | RMSE after RR |
|----------------|--------|---------------|
| 0.038          | 0.0037 | 0.0004        |

# Mo<sub>2</sub>W<sub>1</sub>Se<sub>2</sub>S<sub>4</sub>

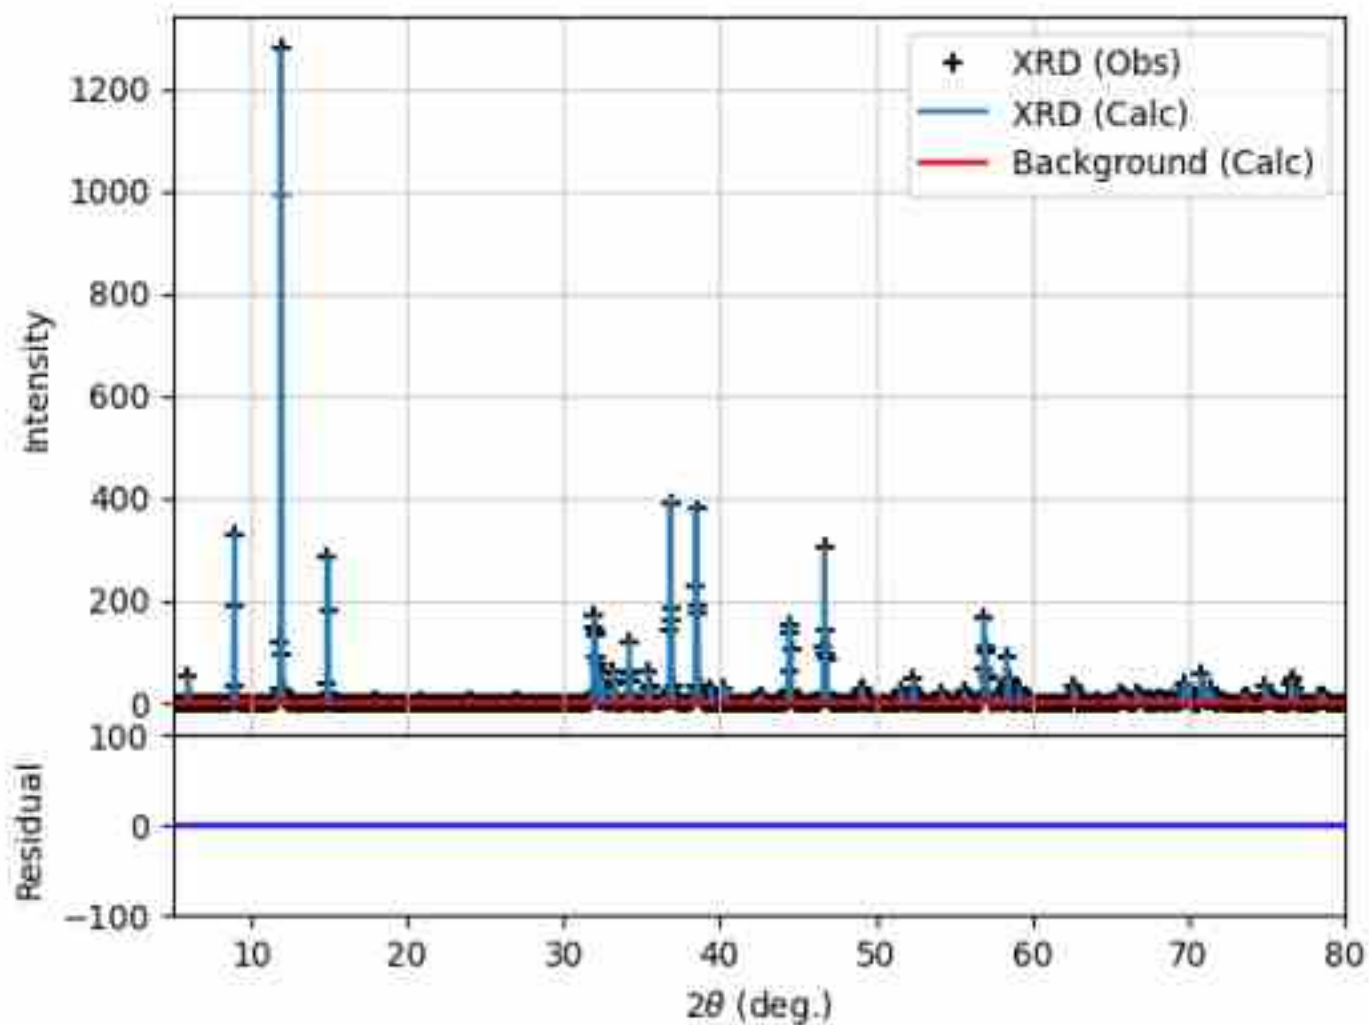

| RMSE before RR | Rwp     | RMSE after RR |
|----------------|---------|---------------|
| 0.038          | 0.00317 | 0.00065       |

# Na<sub>2</sub>Fe<sub>2</sub>Ge<sub>4</sub>O<sub>12</sub>

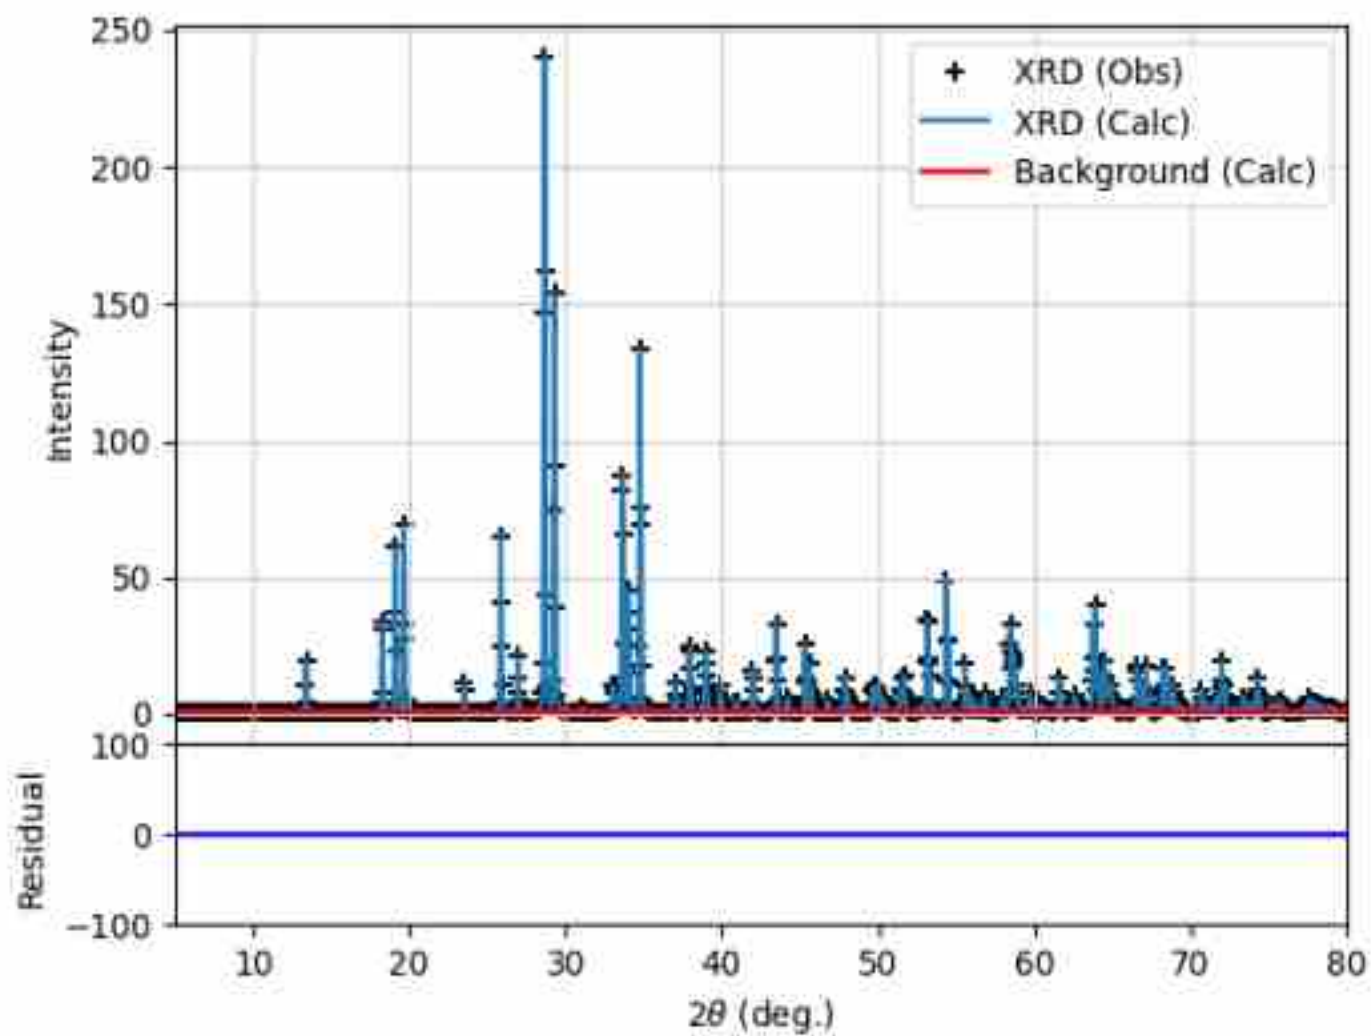

| RMSE before RR | Rwp     | RMSE after RR |
|----------------|---------|---------------|
| 0.038          | 0.00319 | 0.00108       |

# Na<sub>3</sub>U<sub>1</sub>F<sub>7</sub>

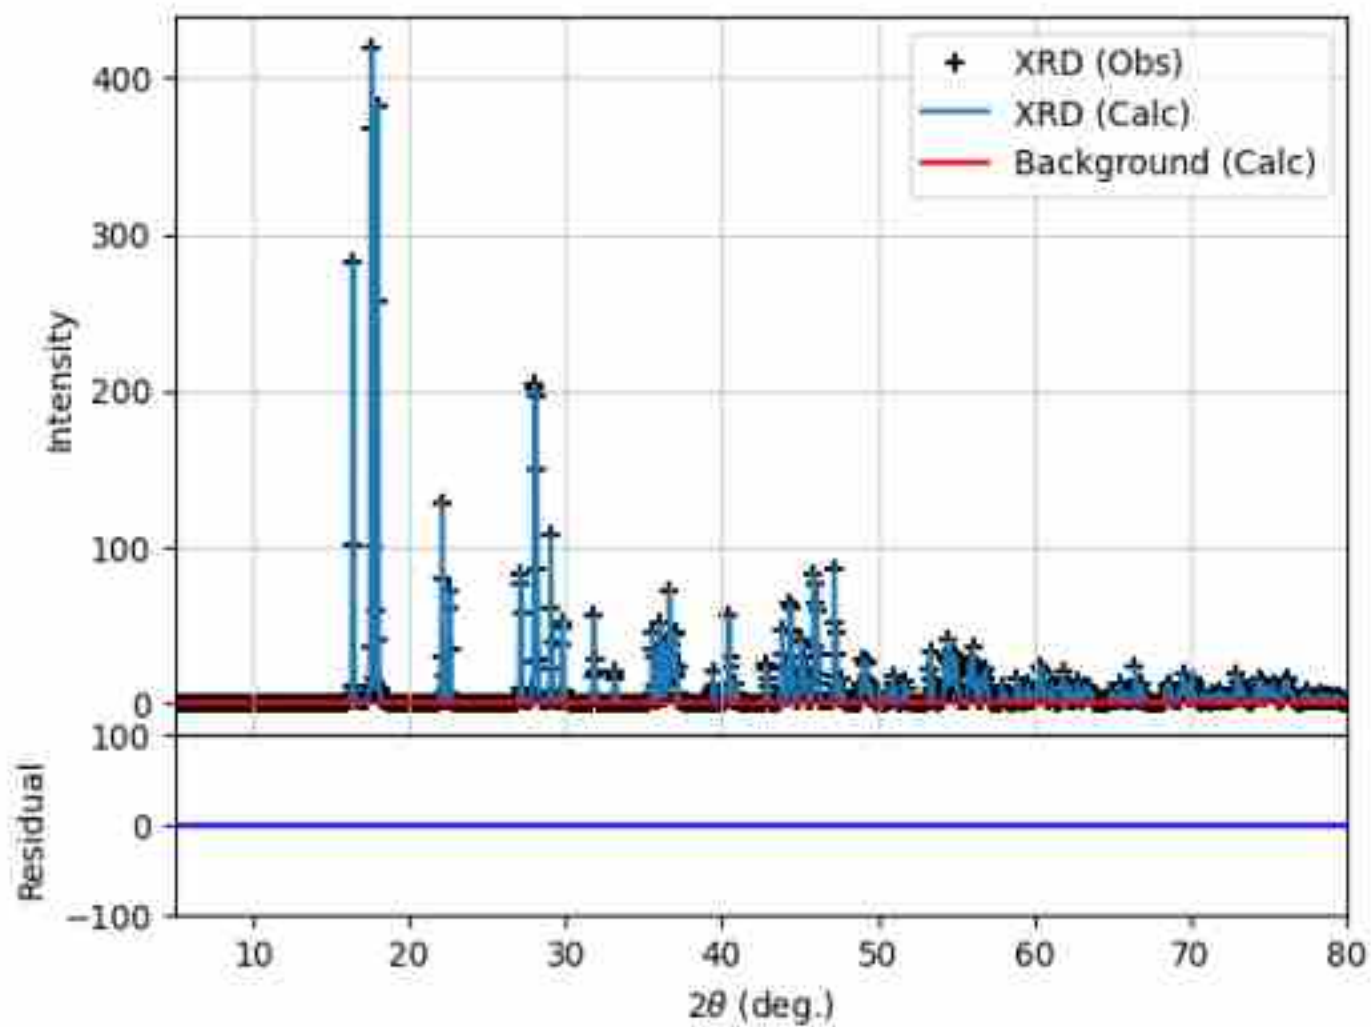

| RMSE before RR | Rwp     | RMSE after RR |
|----------------|---------|---------------|
| 0.038          | 0.00376 | 0.00081       |

# Na<sub>4</sub>Mg<sub>1</sub>Ge<sub>2</sub>Se<sub>6</sub>

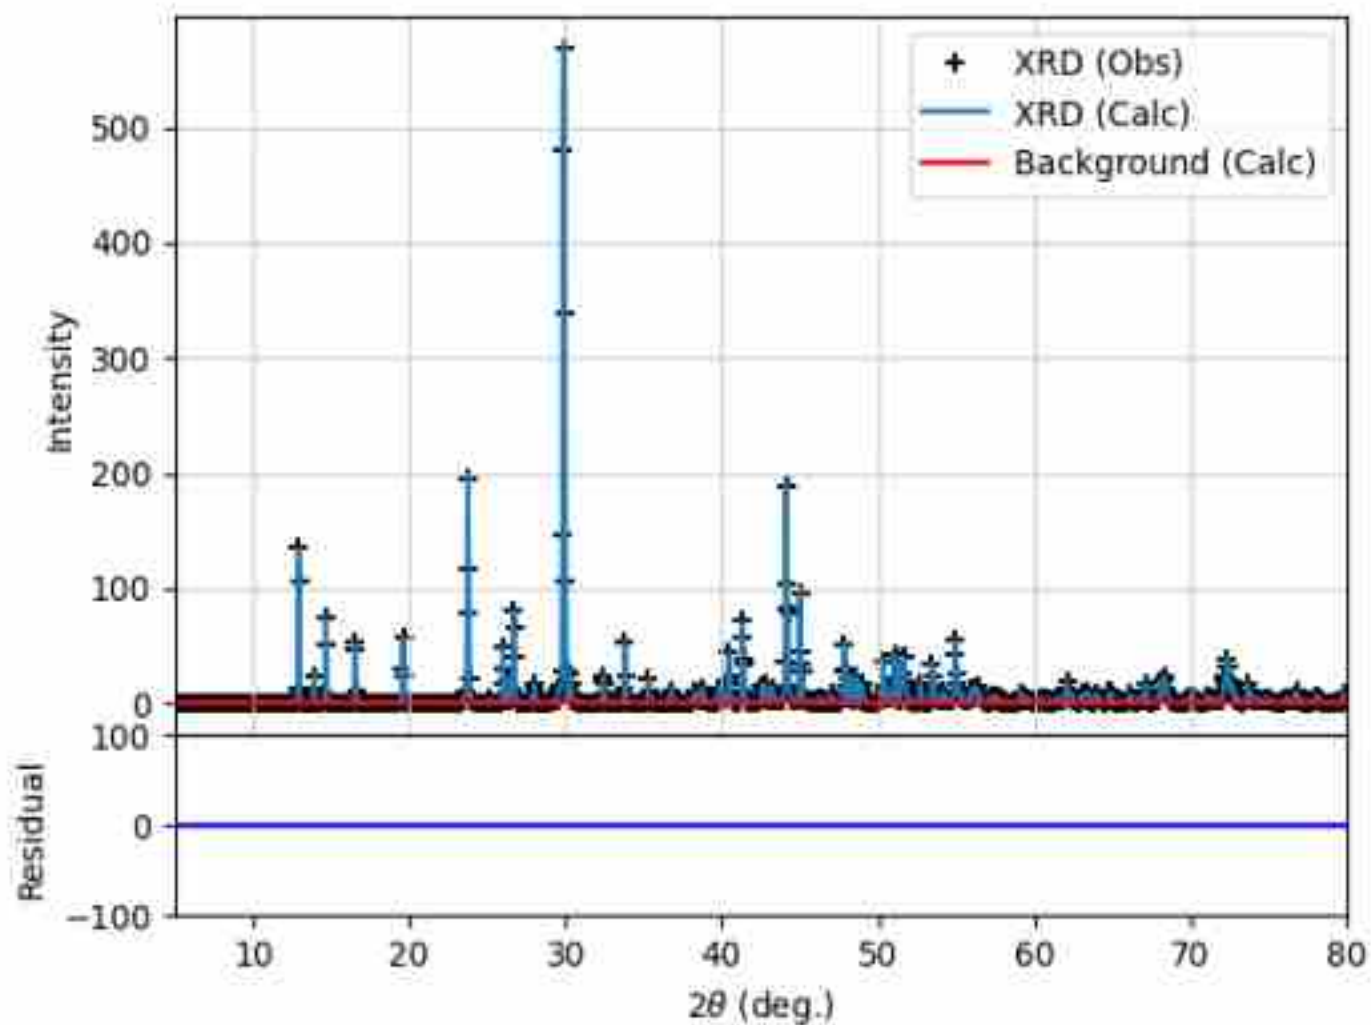

| RMSE before RR | Rwp     | RMSE after RR |
|----------------|---------|---------------|
| 0.038          | 0.00285 | 0.00029       |

# Nb<sub>2</sub>V<sub>2</sub>O<sub>8</sub>

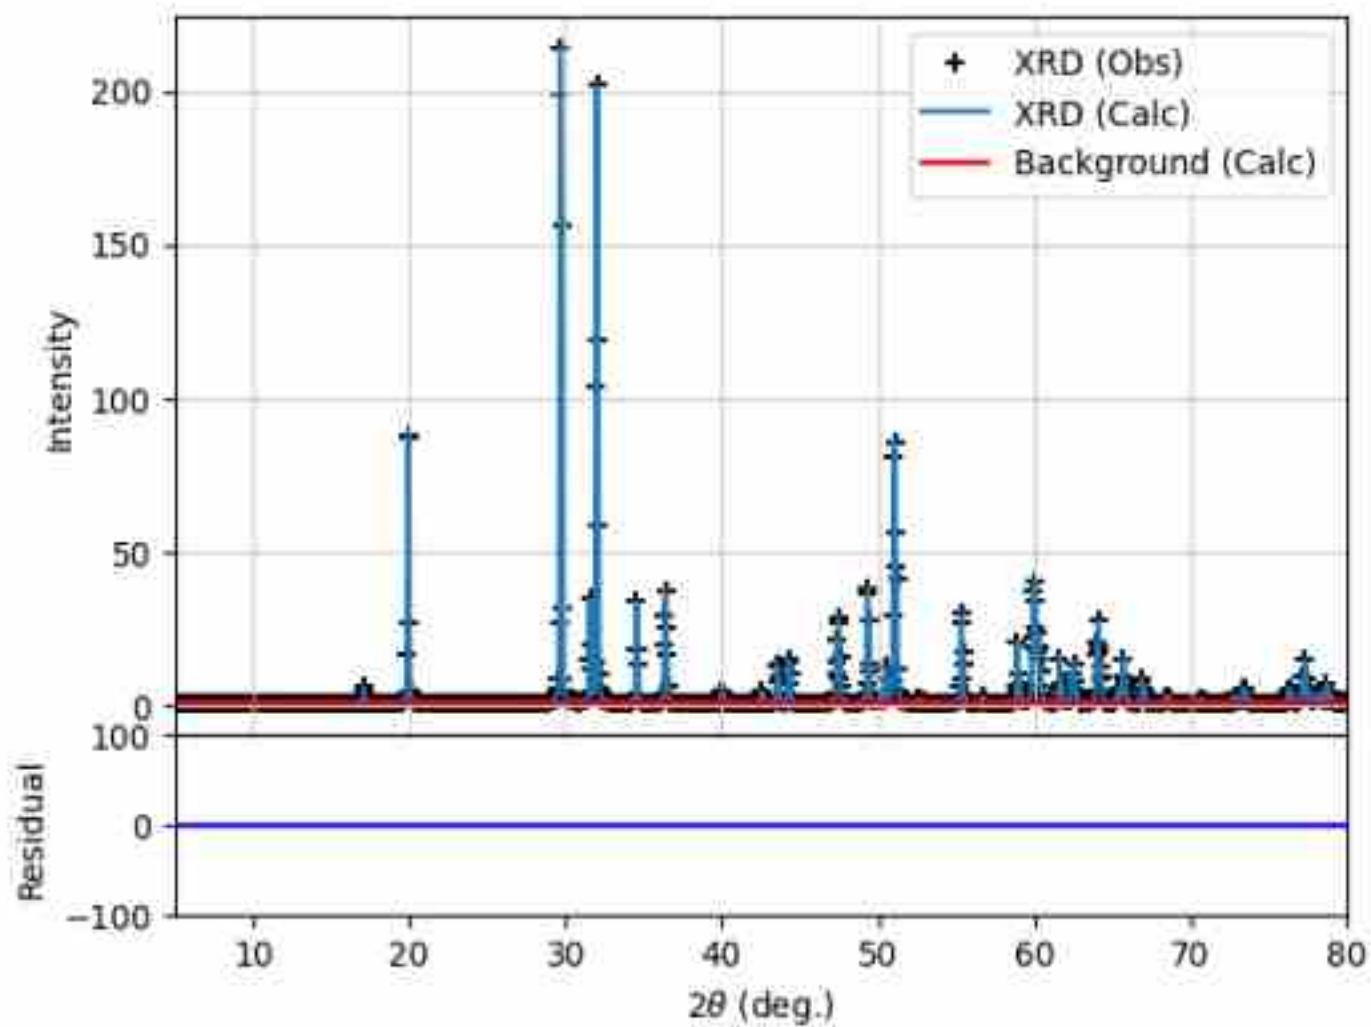

| RMSE before RR | Rwp     | RMSE after RR |
|----------------|---------|---------------|
| 0.038          | 0.00256 | 0.00077       |

# Rb<sub>2</sub>C1N<sub>2</sub>

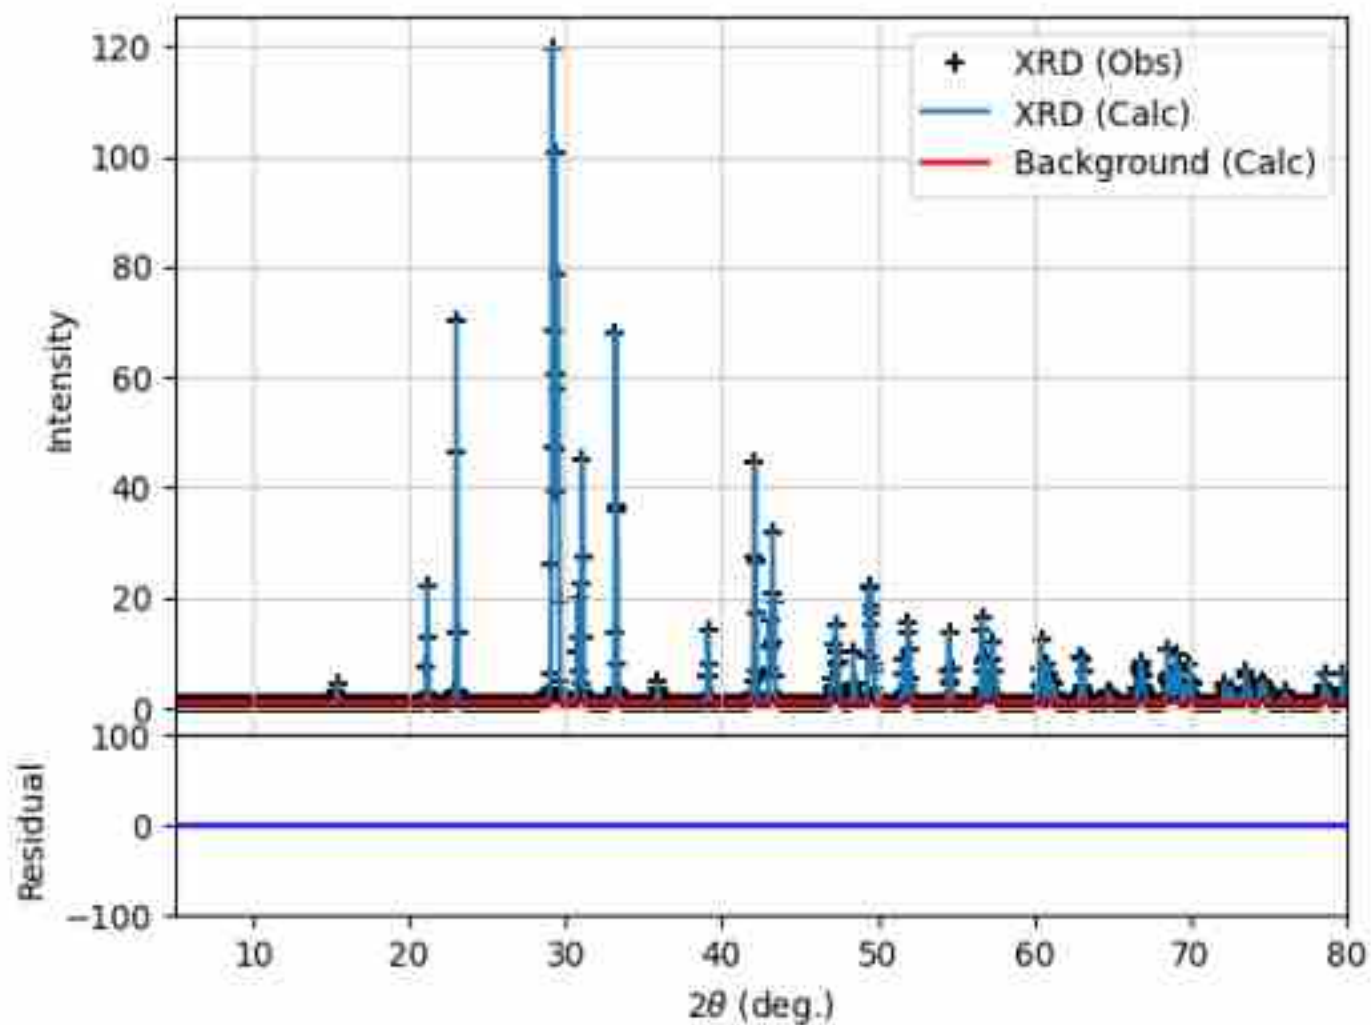

| RMSE before RR | Rwp     | RMSE after RR |
|----------------|---------|---------------|
| 0.038          | 0.00244 | 0.00085       |



# Rb<sub>2</sub>Y<sub>2</sub>Mn<sub>2</sub>W<sub>2</sub>O<sub>12</sub>

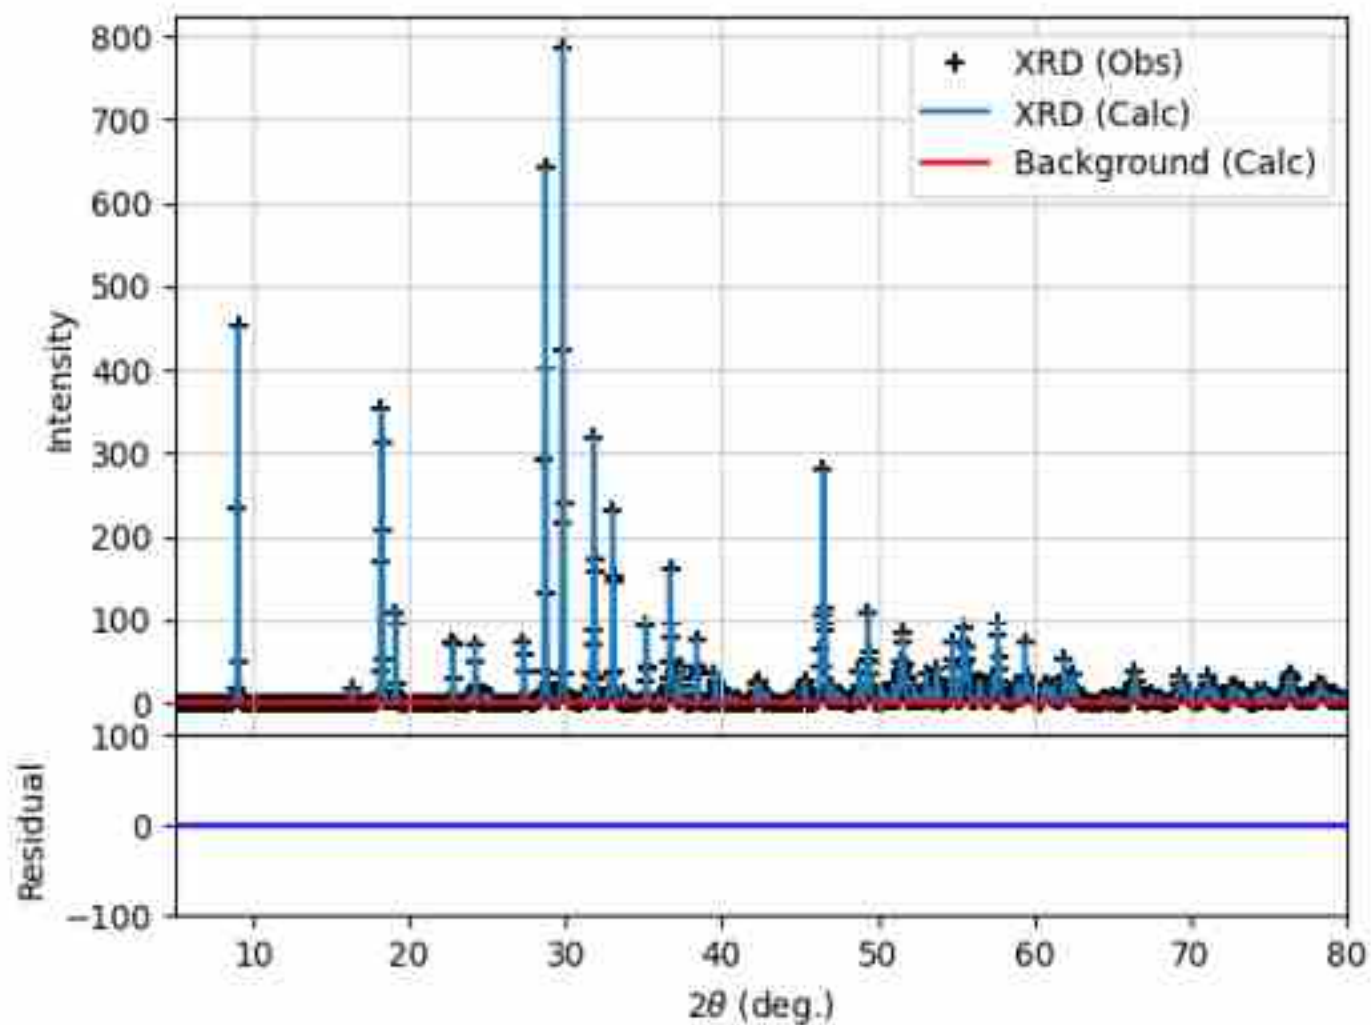

| RMSE before RR | Rwp     | RMSE after RR |
|----------------|---------|---------------|
| 0.038          | 0.00328 | 0.00065       |

# Rb3Sb1F6

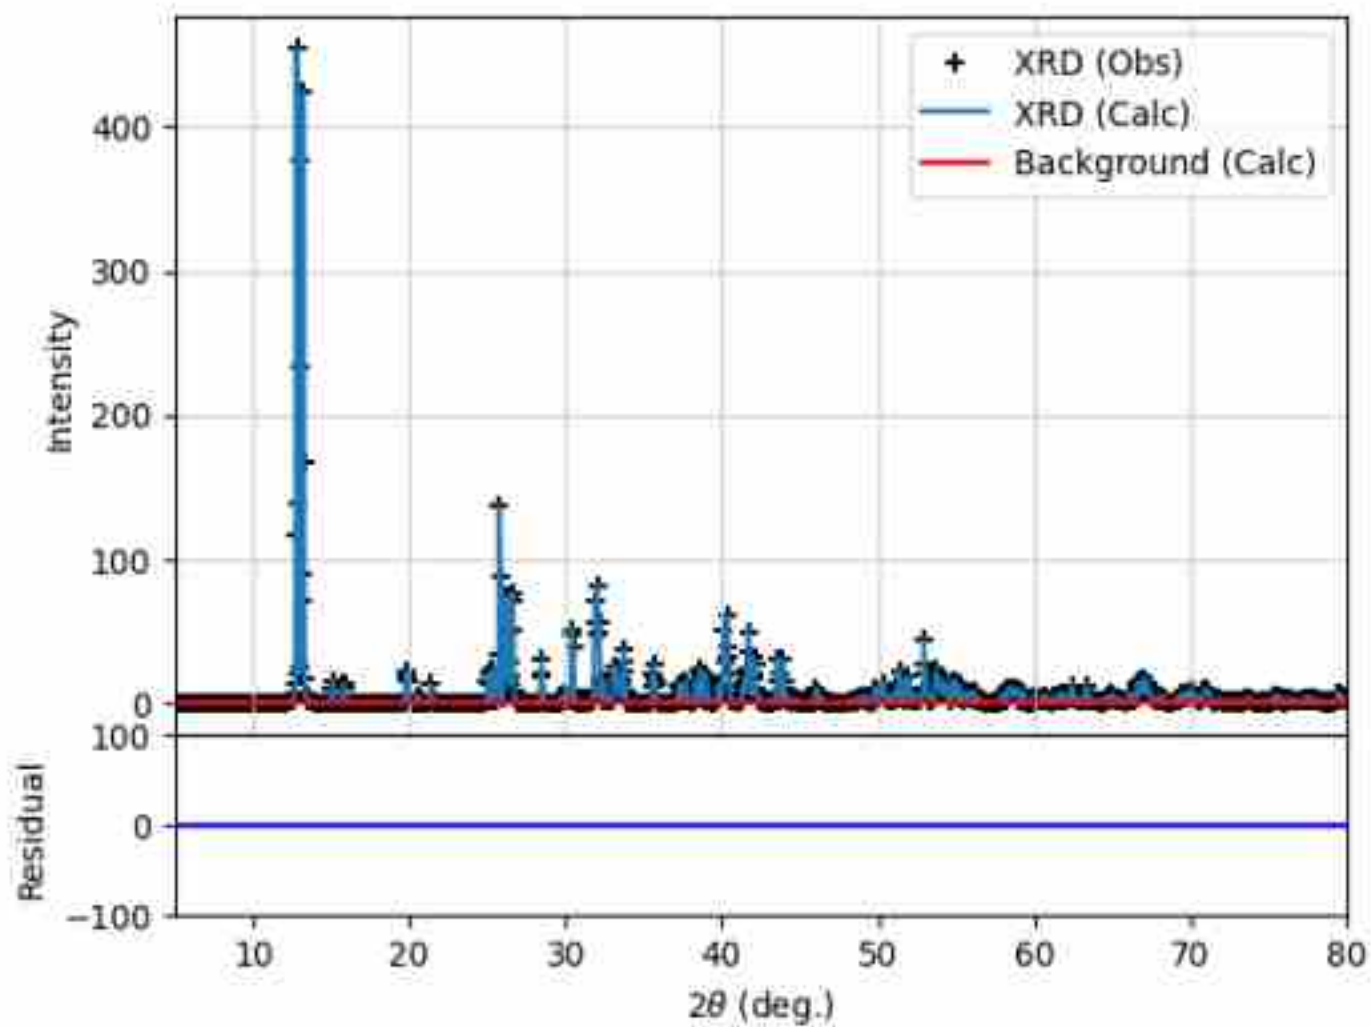

| RMSE before RR | Rwp     | RMSE after RR |
|----------------|---------|---------------|
| 0.038          | 0.00162 | 0.00018       |

# Rb<sub>4</sub>Co<sub>6</sub>S<sub>8</sub>

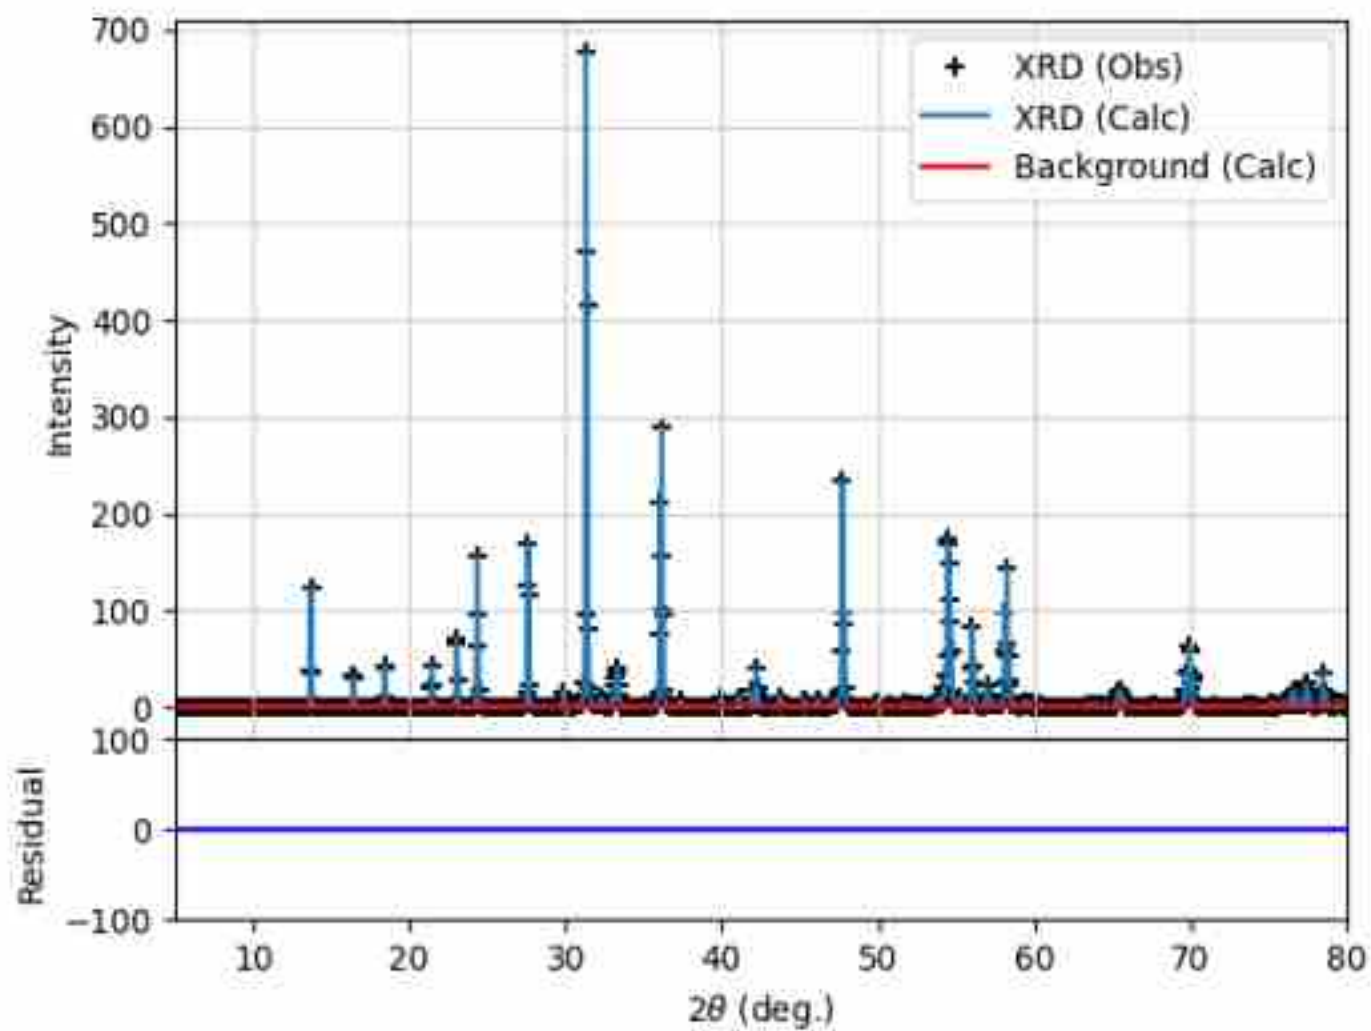

| RMSE before RR | Rwp     | RMSE after RR |
|----------------|---------|---------------|
| 0.038          | 0.00349 | 0.00042       |

# Rh2F6

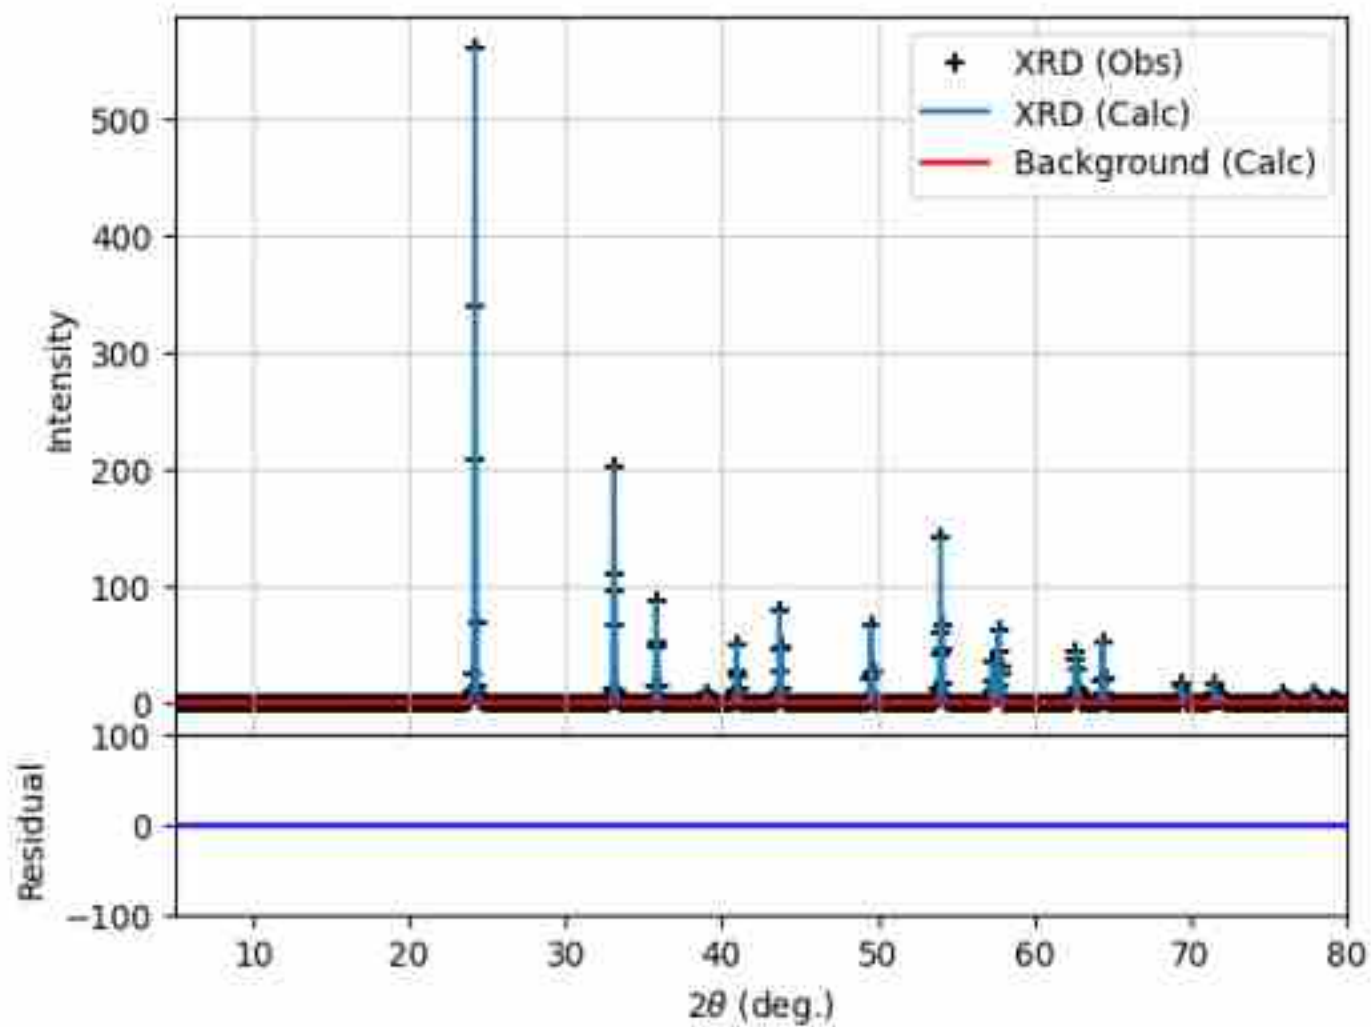

| RMSE before RR | Rwp     | RMSE after RR |
|----------------|---------|---------------|
| 0.038          | 0.00402 | 0.00153       |

# Sr<sub>2</sub>MgH<sub>6</sub>

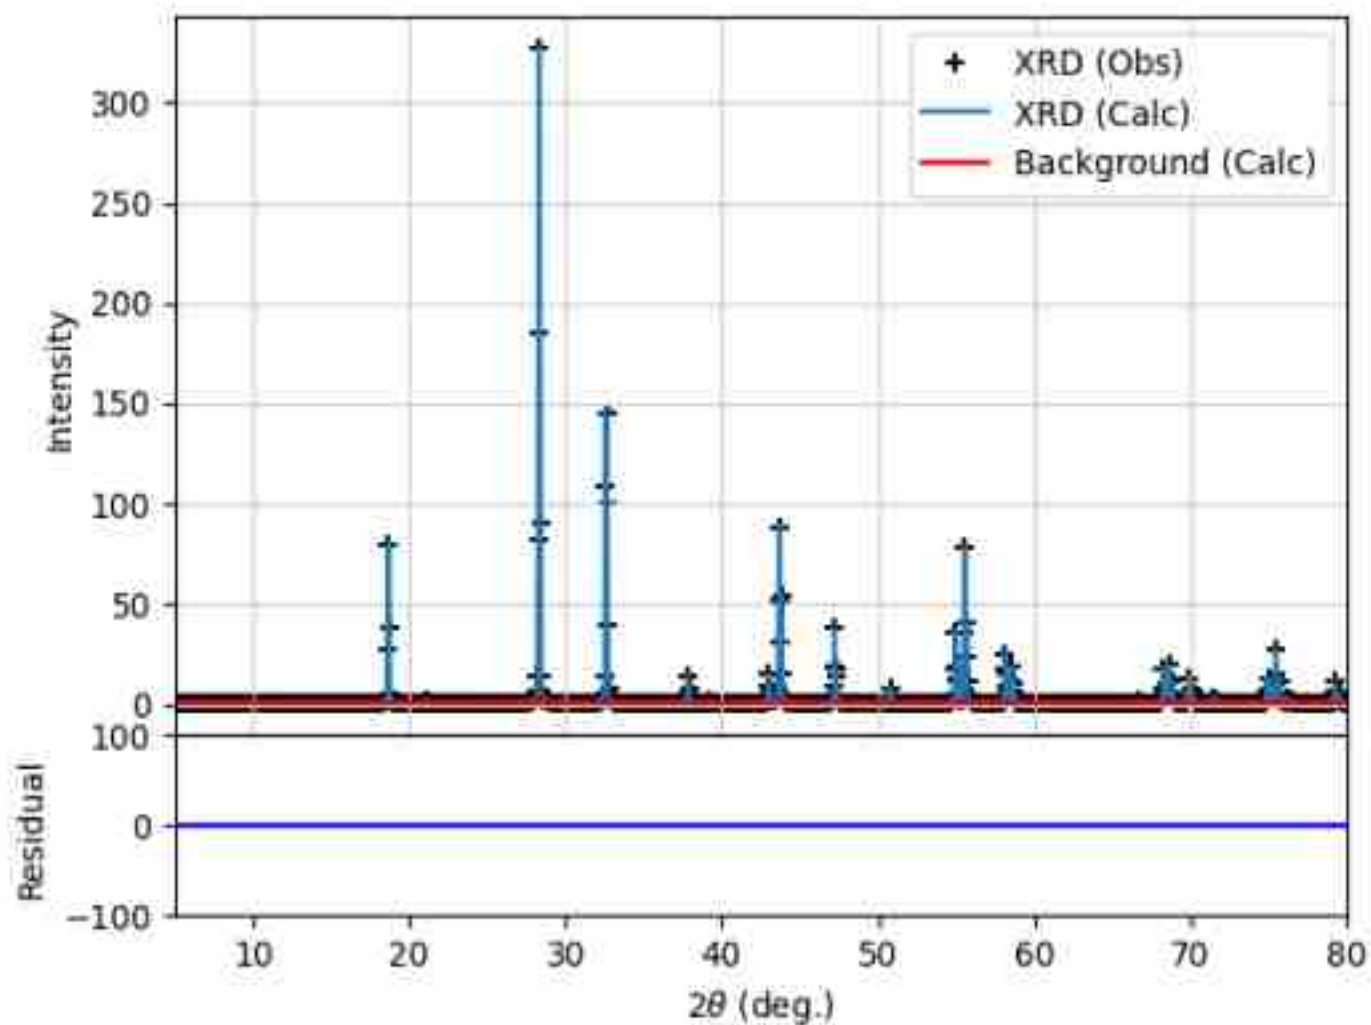

| RMSE before RR | Rwp     | RMSE after RR |
|----------------|---------|---------------|
| 0.038          | 0.00483 | 0.00774       |

# Tm<sub>2</sub>Al<sub>6</sub>C<sub>6</sub>

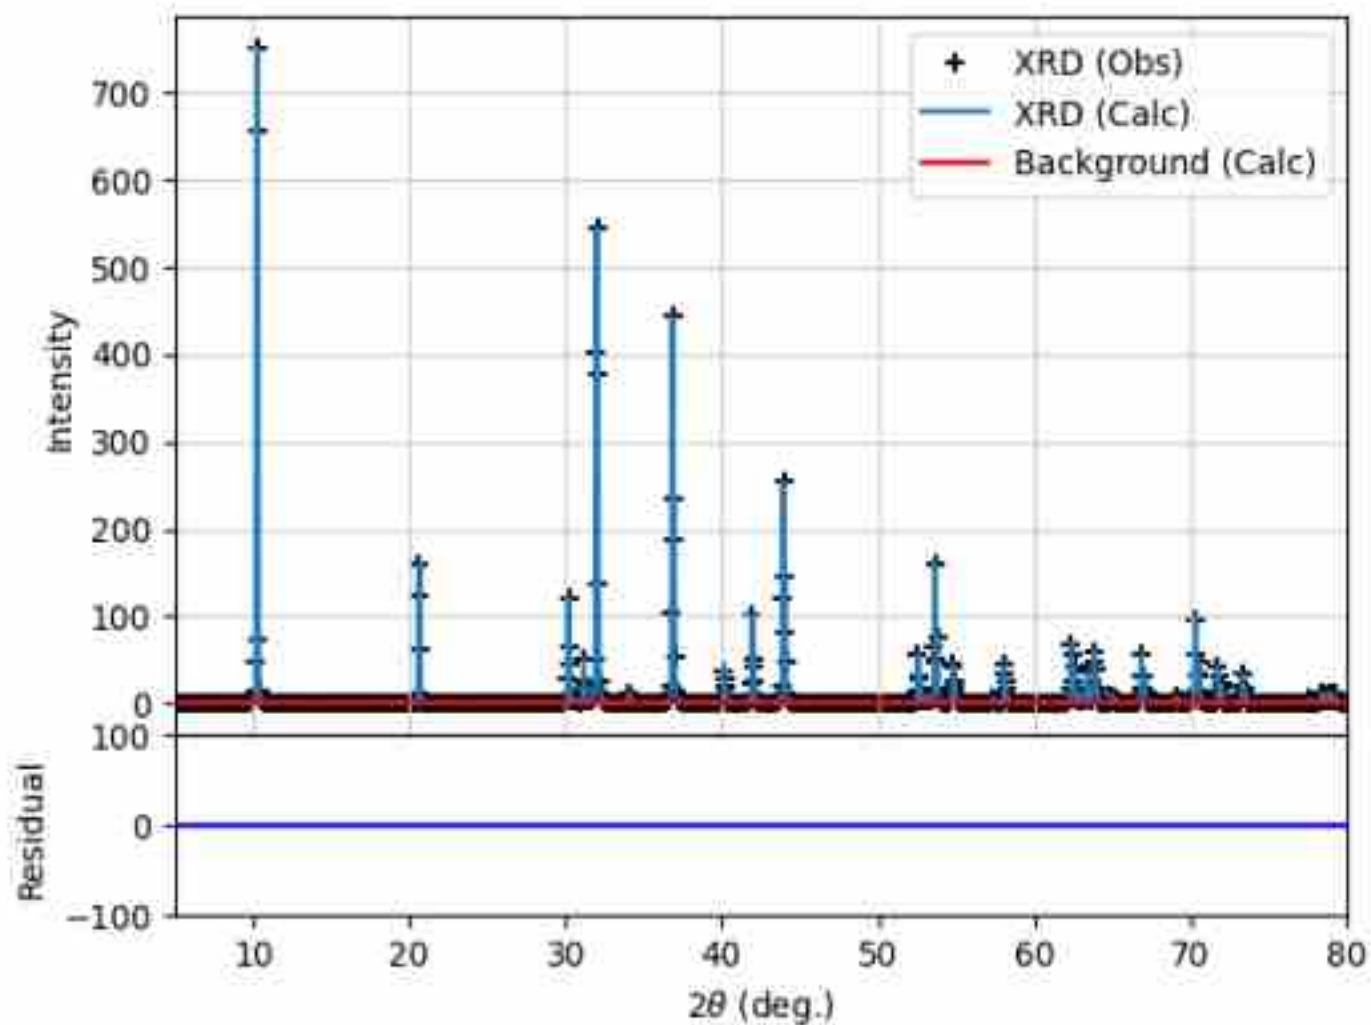

| RMSE before RR | Rwp     | RMSE after RR |
|----------------|---------|---------------|
| 0.038          | 0.03014 | 0.00775       |

# U<sub>3</sub>Fe<sub>4</sub>Ge<sub>4</sub>

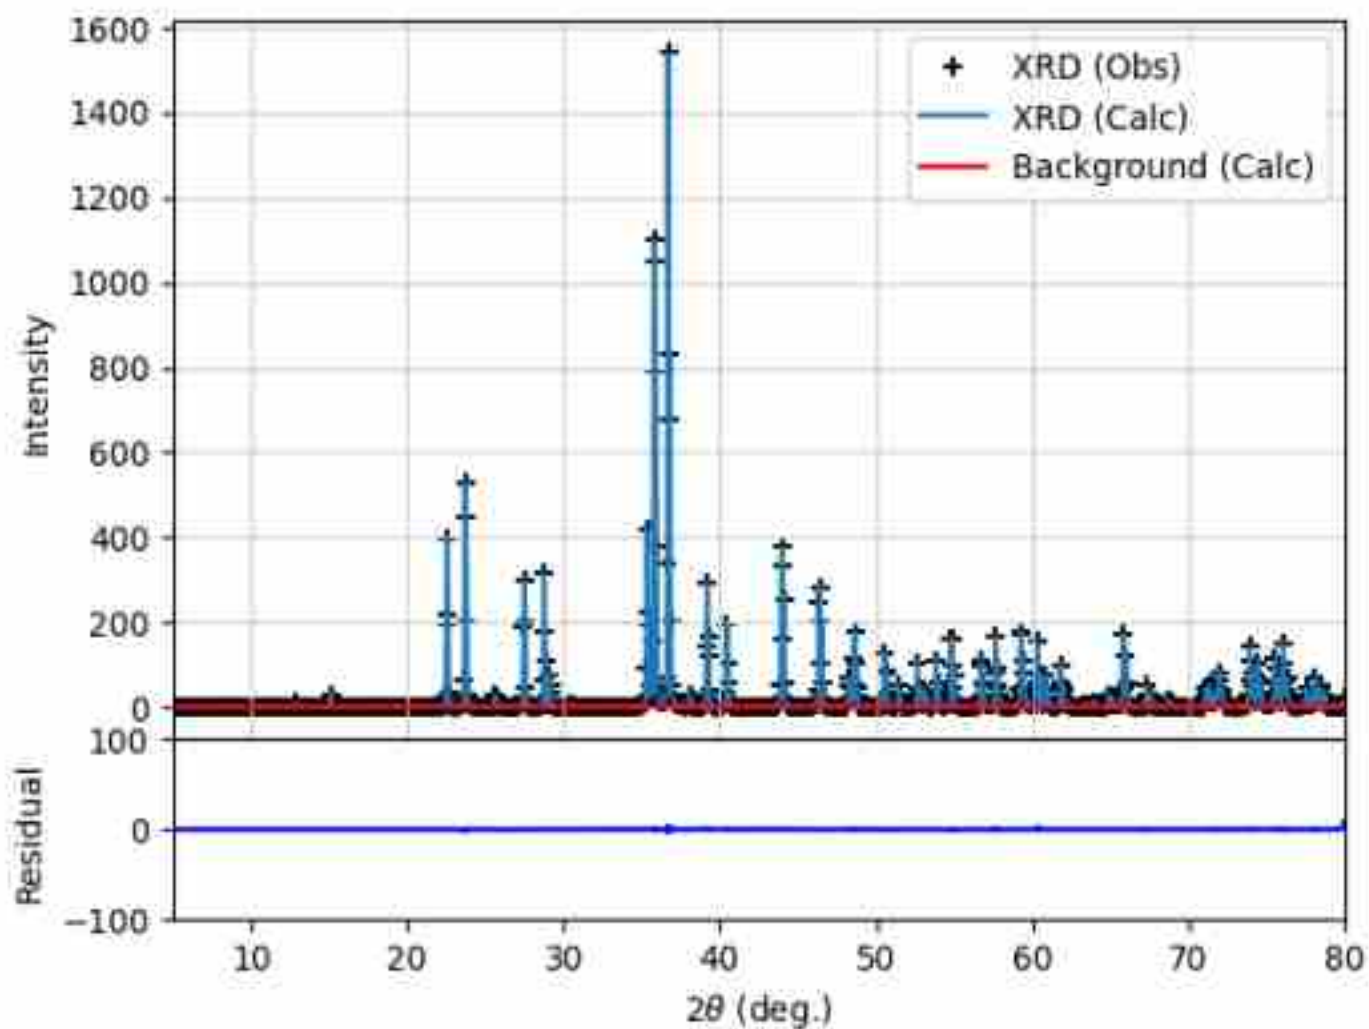

| RMSE before RR | Rwp     | RMSE after RR |
|----------------|---------|---------------|
| 0.038          | 1.76339 | 0.01293       |

# V2Br2O2

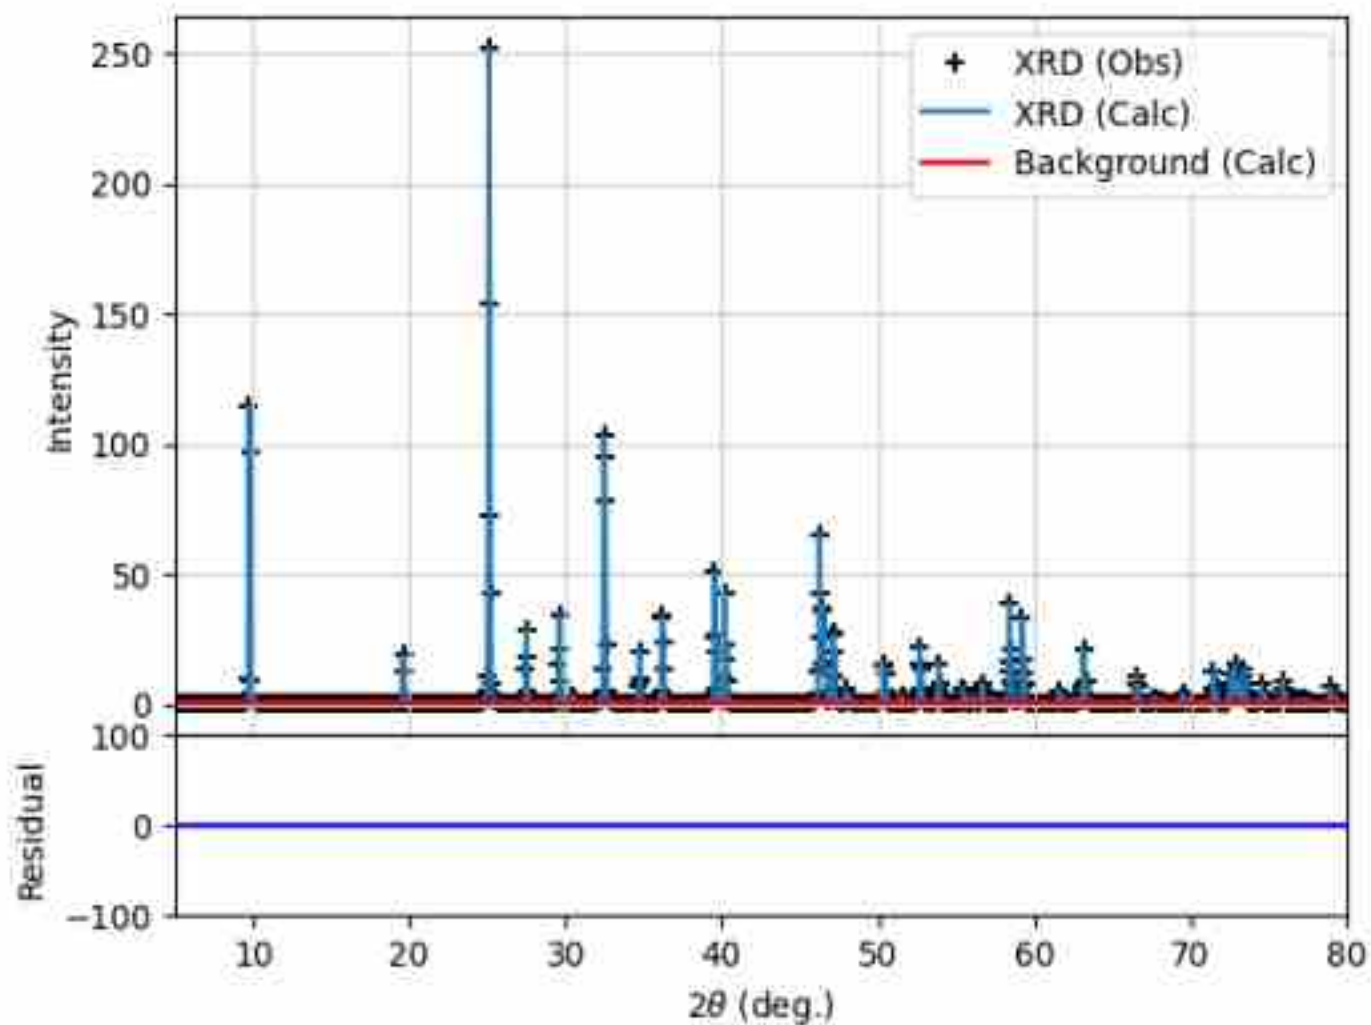

| RMSE before RR | Rwp     | RMSE after RR |
|----------------|---------|---------------|
| 0.038          | 0.00371 | 0.00077       |



# V<sub>2</sub>Cu<sub>2</sub>O<sub>4</sub>

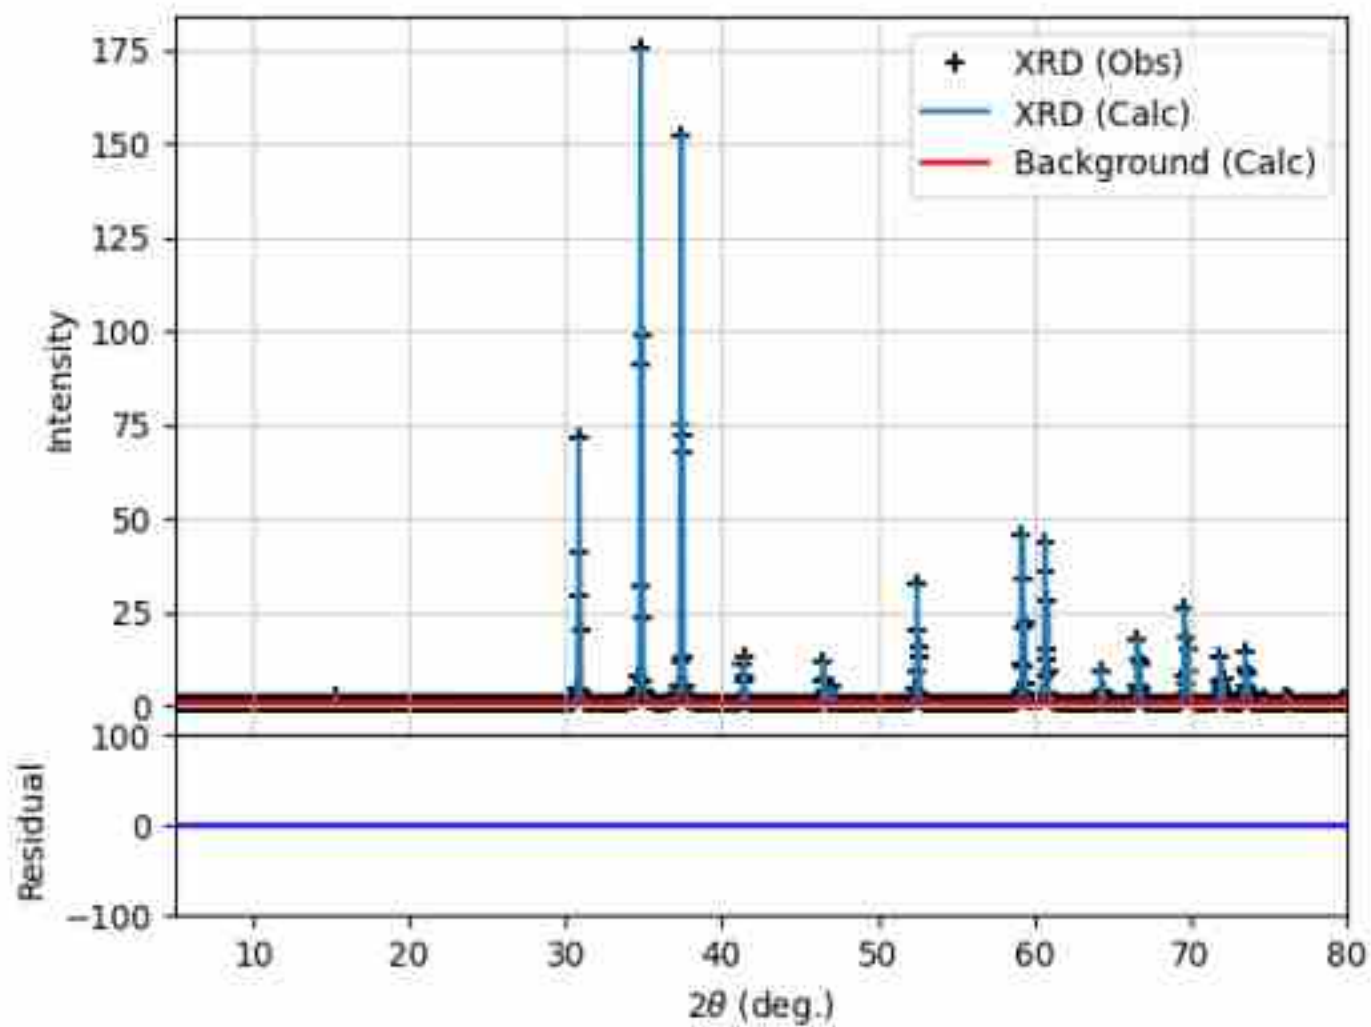

| RMSE before RR | Rwp    | RMSE after RR |
|----------------|--------|---------------|
| 0.038          | 0.0034 | 0.00115       |

# V4O3F9

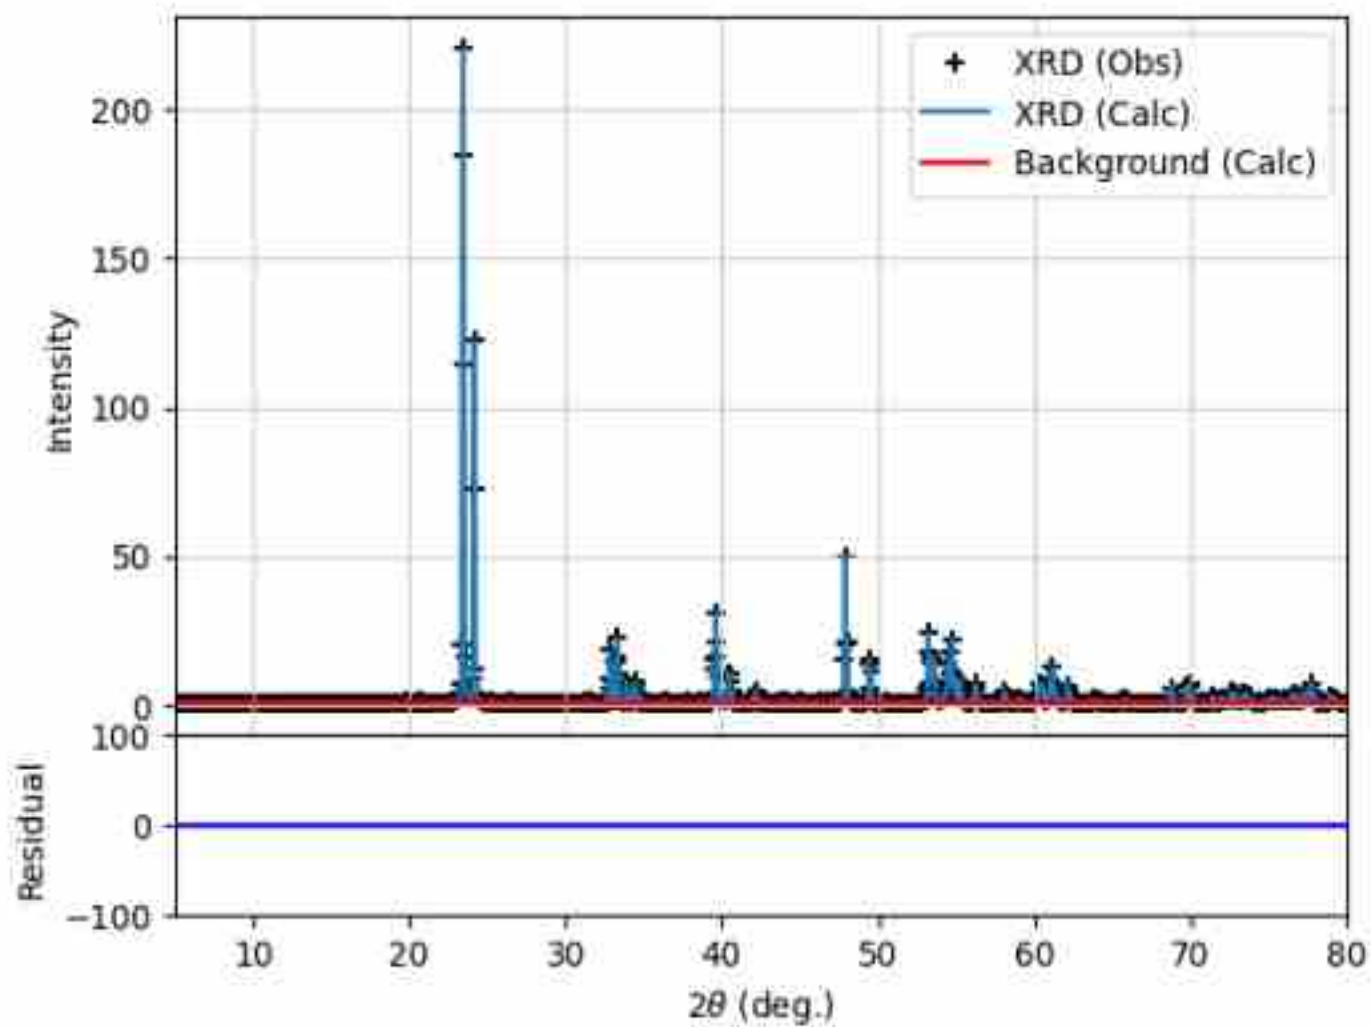

| RMSE before RR | Rwp     | RMSE after RR |
|----------------|---------|---------------|
| 0.038          | 0.00032 | 0.0           |

# Y5Mo2O12

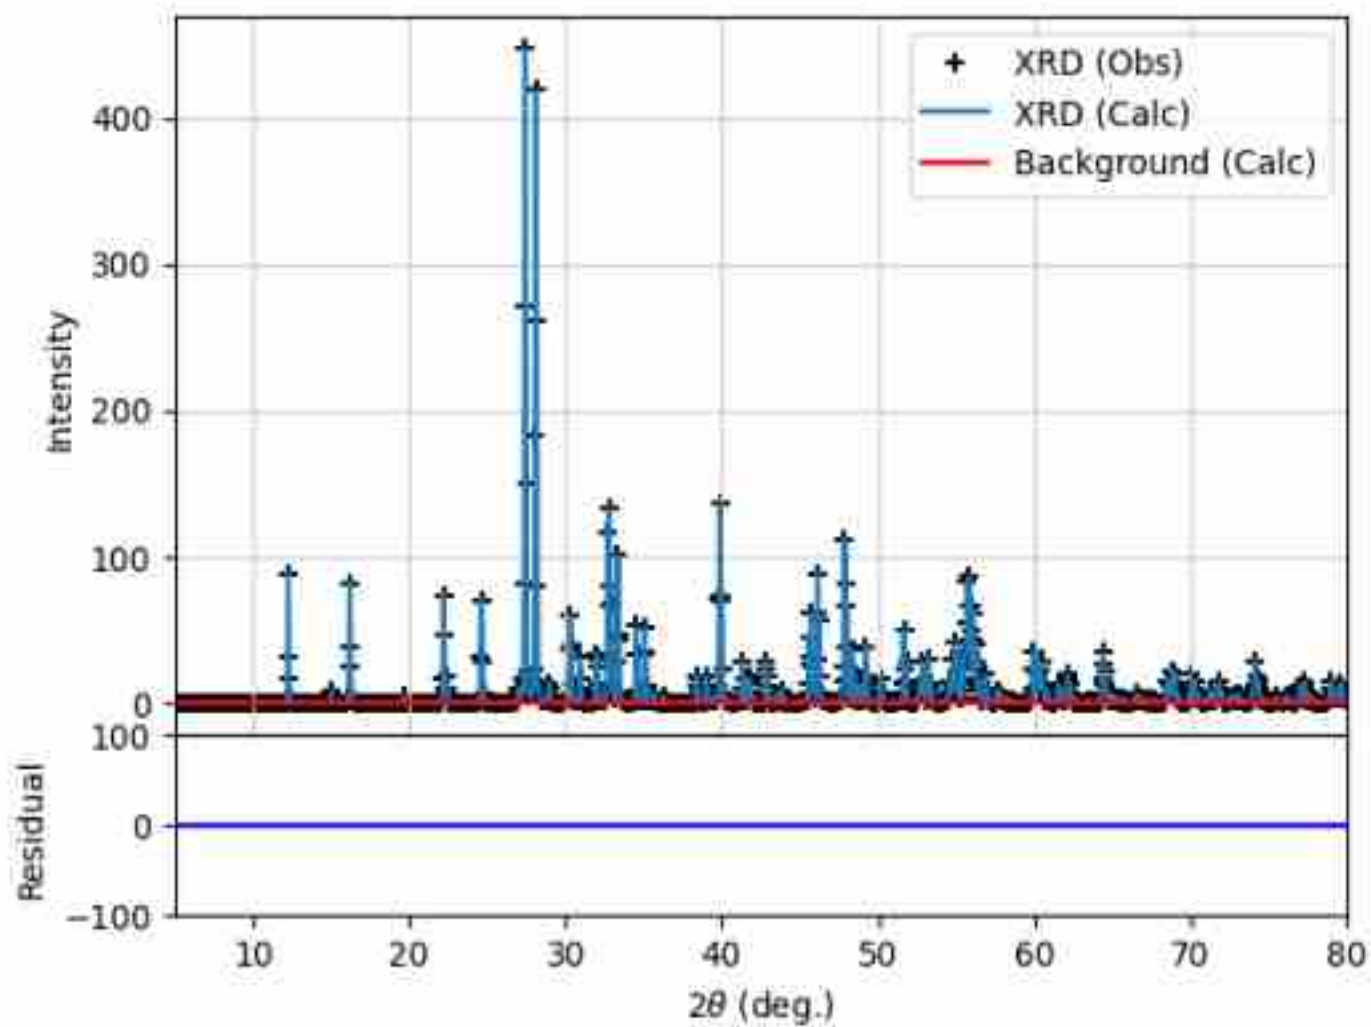

| RMSE before RR | Rwp     | RMSE after RR |
|----------------|---------|---------------|
| 0.038          | 0.00308 | 0.00104       |

# Zn<sub>1</sub>Cu<sub>1</sub>P<sub>2</sub>O<sub>7</sub>

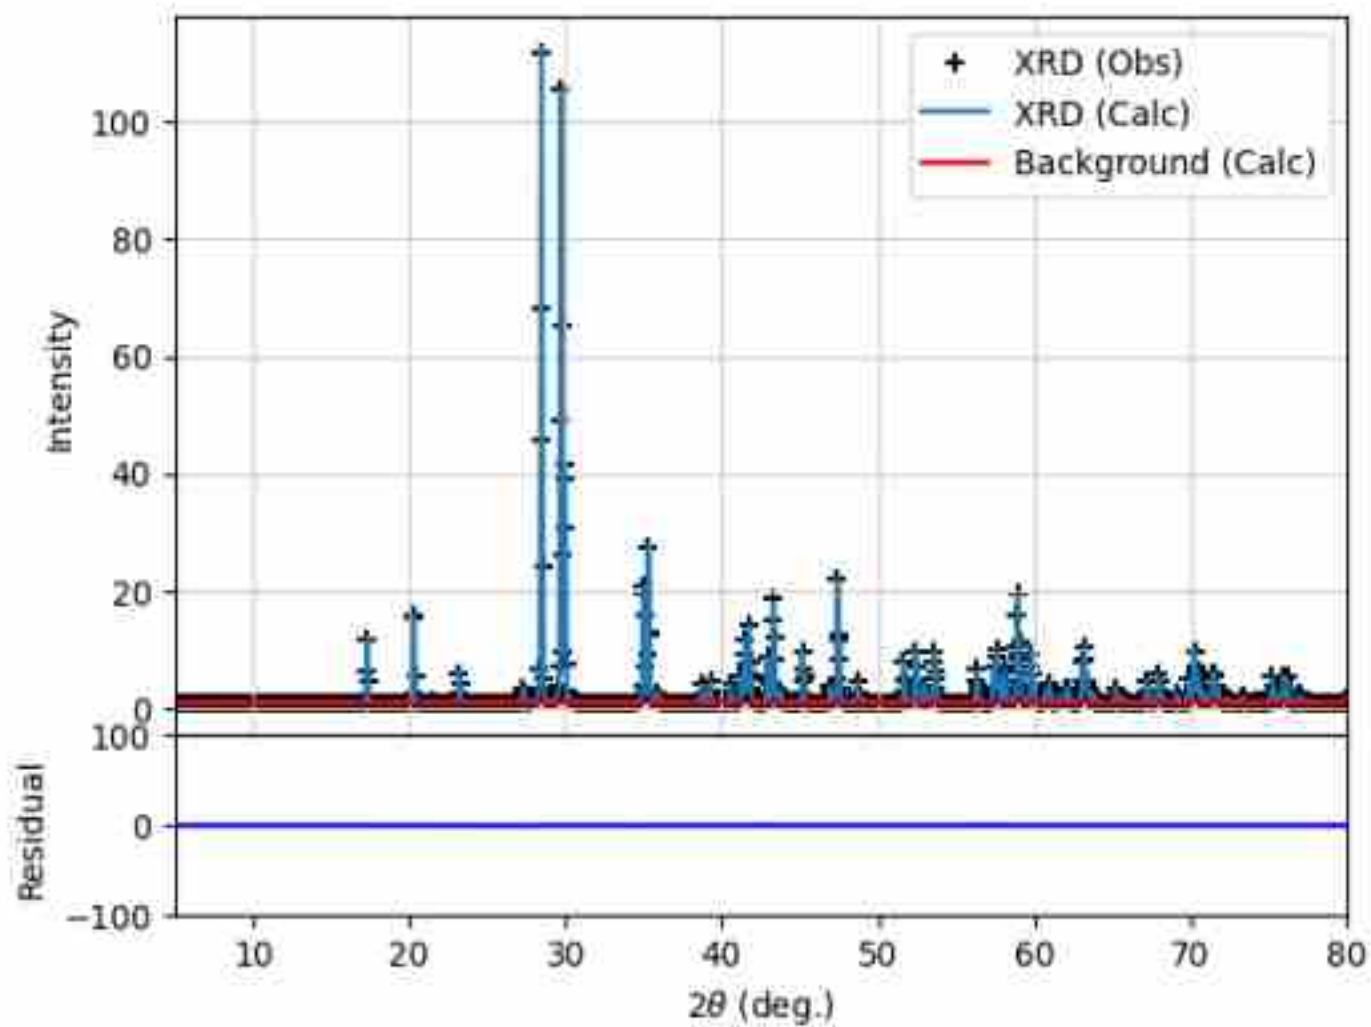

| RMSE before RR | Rwp     | RMSE after RR |
|----------------|---------|---------------|
| 0.038          | 1.19956 | 0.04987       |

# Zr9Pd11

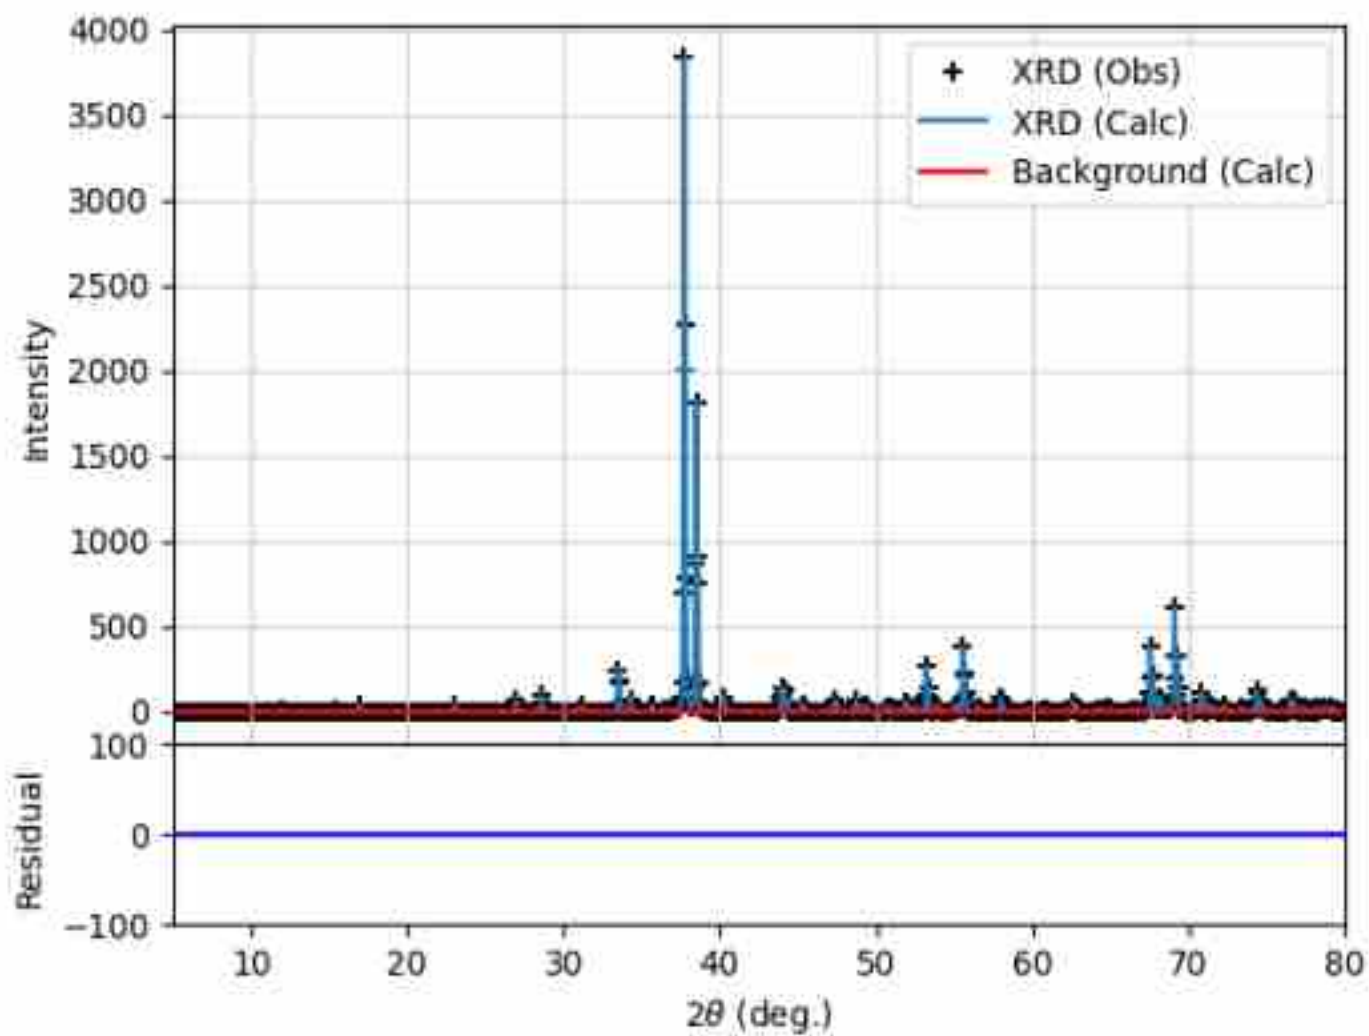

| RMSE before RR | Rwp     | RMSE after RR |
|----------------|---------|---------------|
| 0.038          | 0.00432 | 0.00032       |

# Al<sub>2</sub>Co<sub>2</sub>O<sub>6</sub>

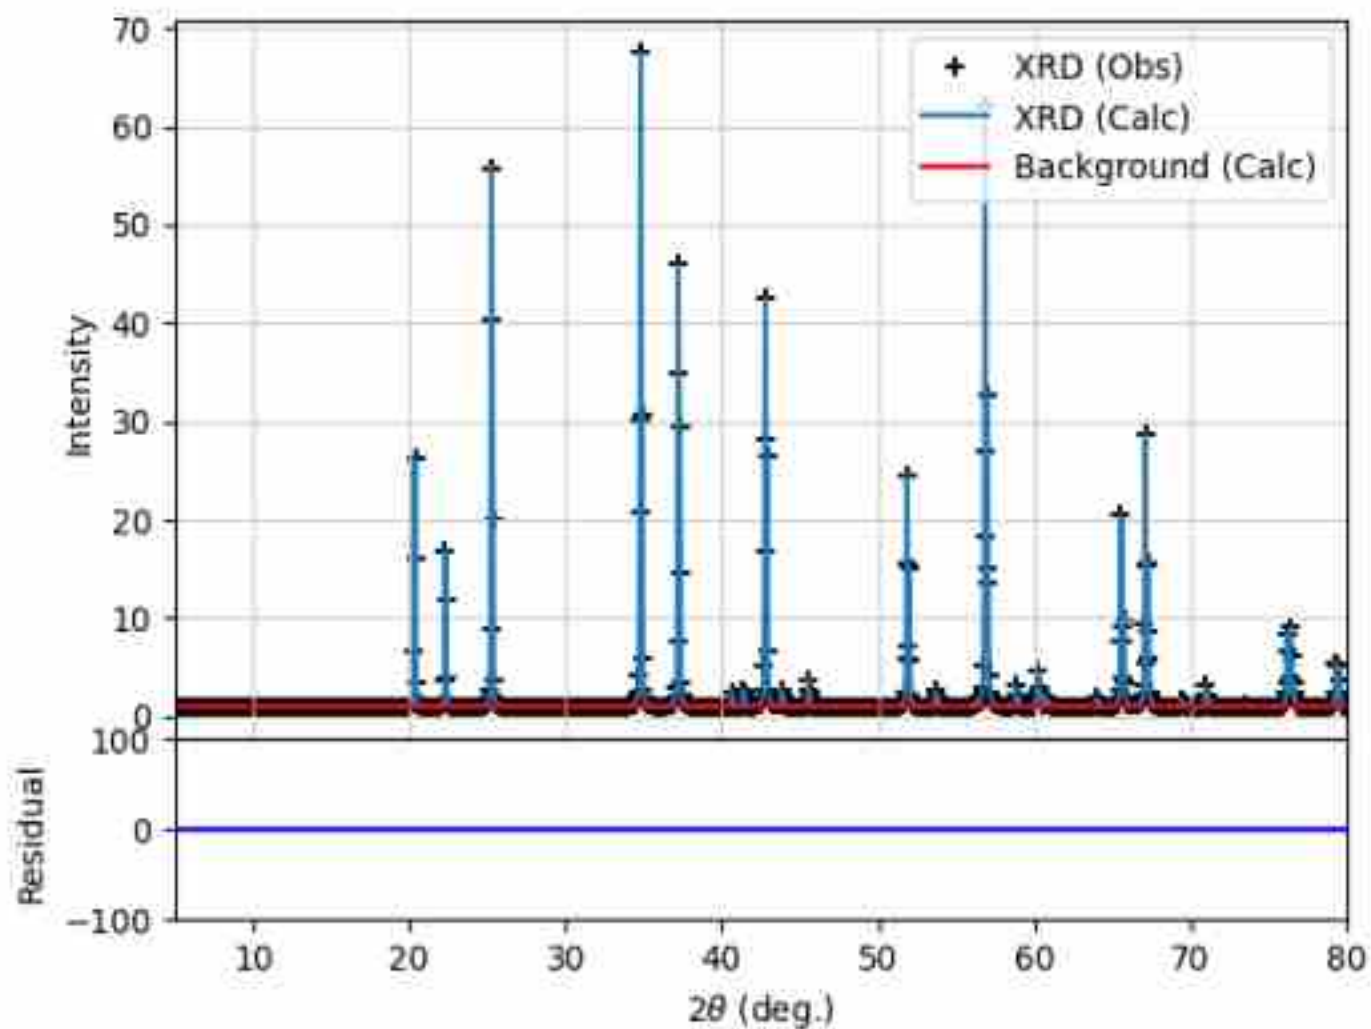

| RMSE before RR | Rwp     | RMSE after RR |
|----------------|---------|---------------|
| 0.039          | 0.00259 | 0.0012        |

# Ba<sub>2</sub>Cu<sub>8</sub>S<sub>6</sub>

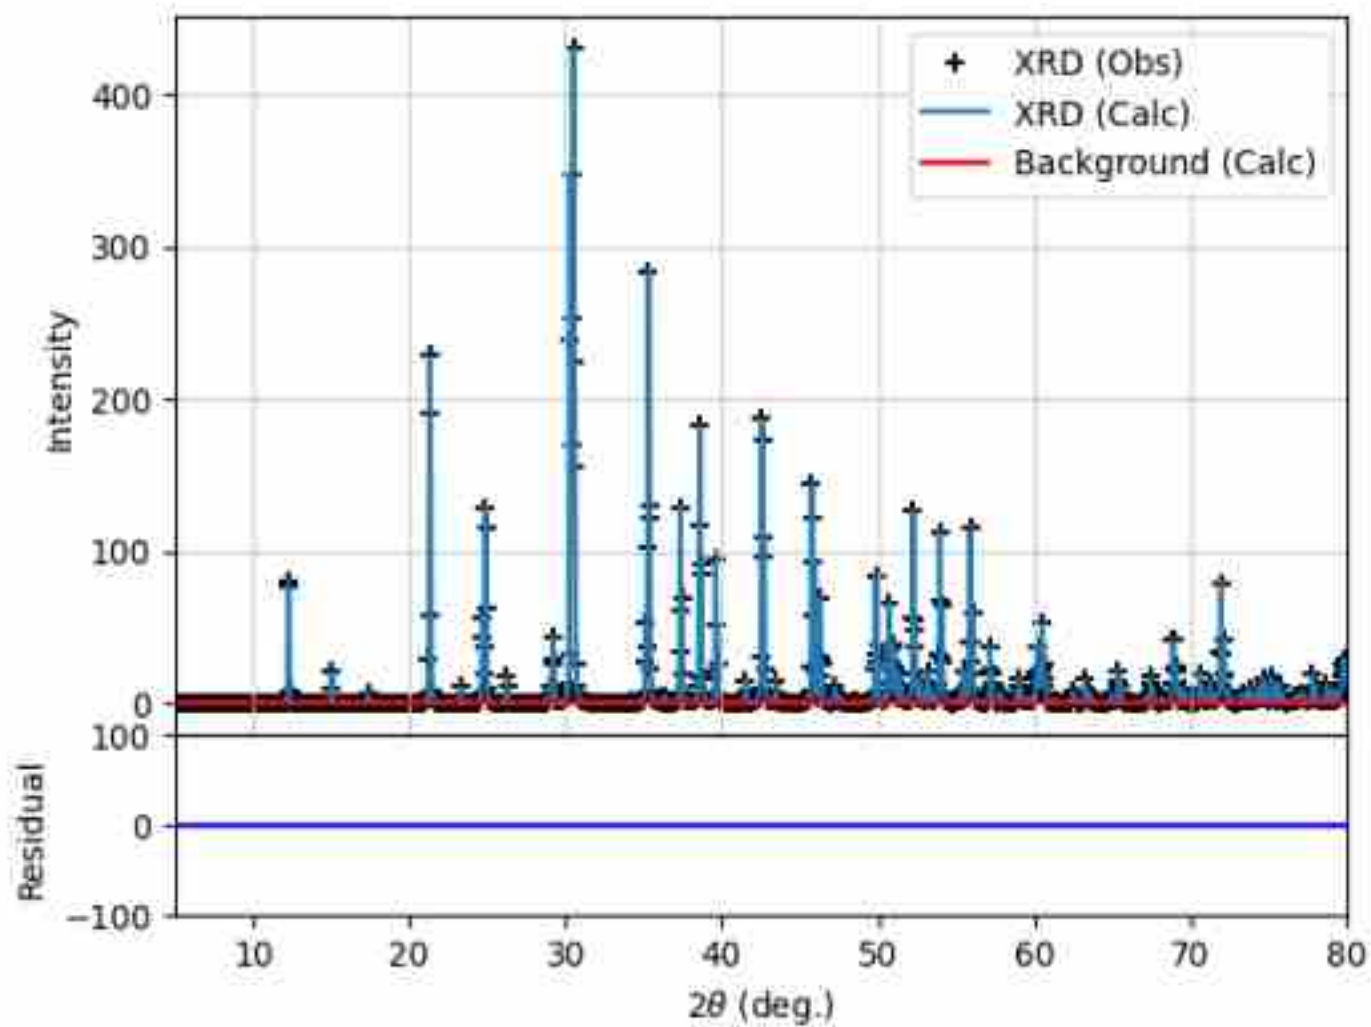

| RMSE before RR | Rwp     | RMSE after RR |
|----------------|---------|---------------|
| 0.039          | 0.00414 | 0.00056       |

# Ba<sub>2</sub>TbTaO<sub>6</sub>

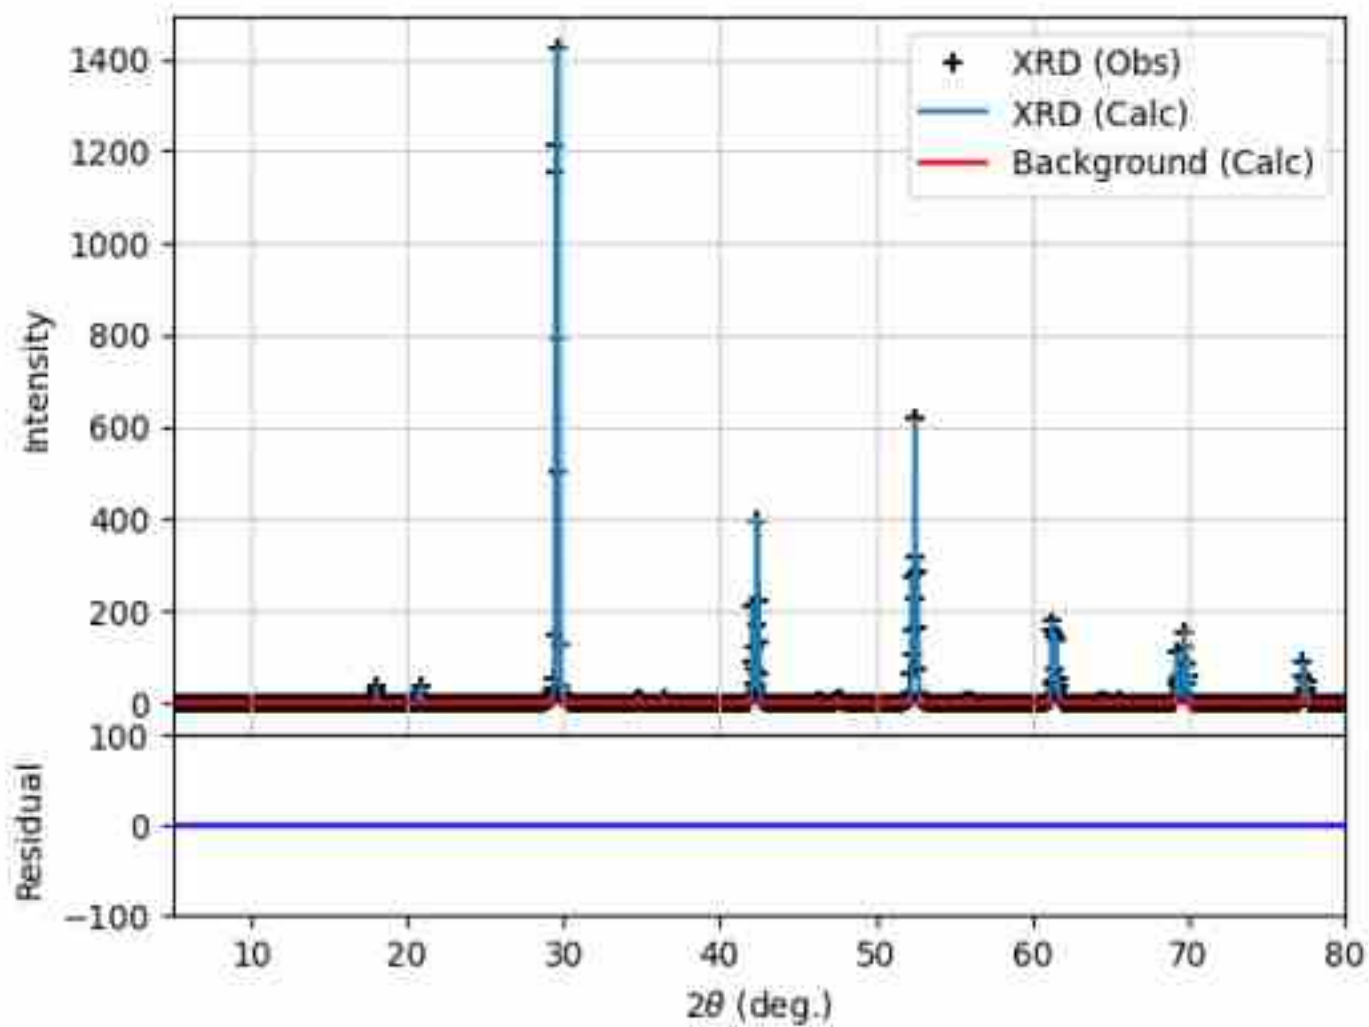

| RMSE before RR | Rwp     | RMSE after RR |
|----------------|---------|---------------|
| 0.039          | 0.00415 | 0.00174       |



# Ba<sub>2</sub>Tl<sub>2</sub>Cu<sub>1</sub>O<sub>6</sub>

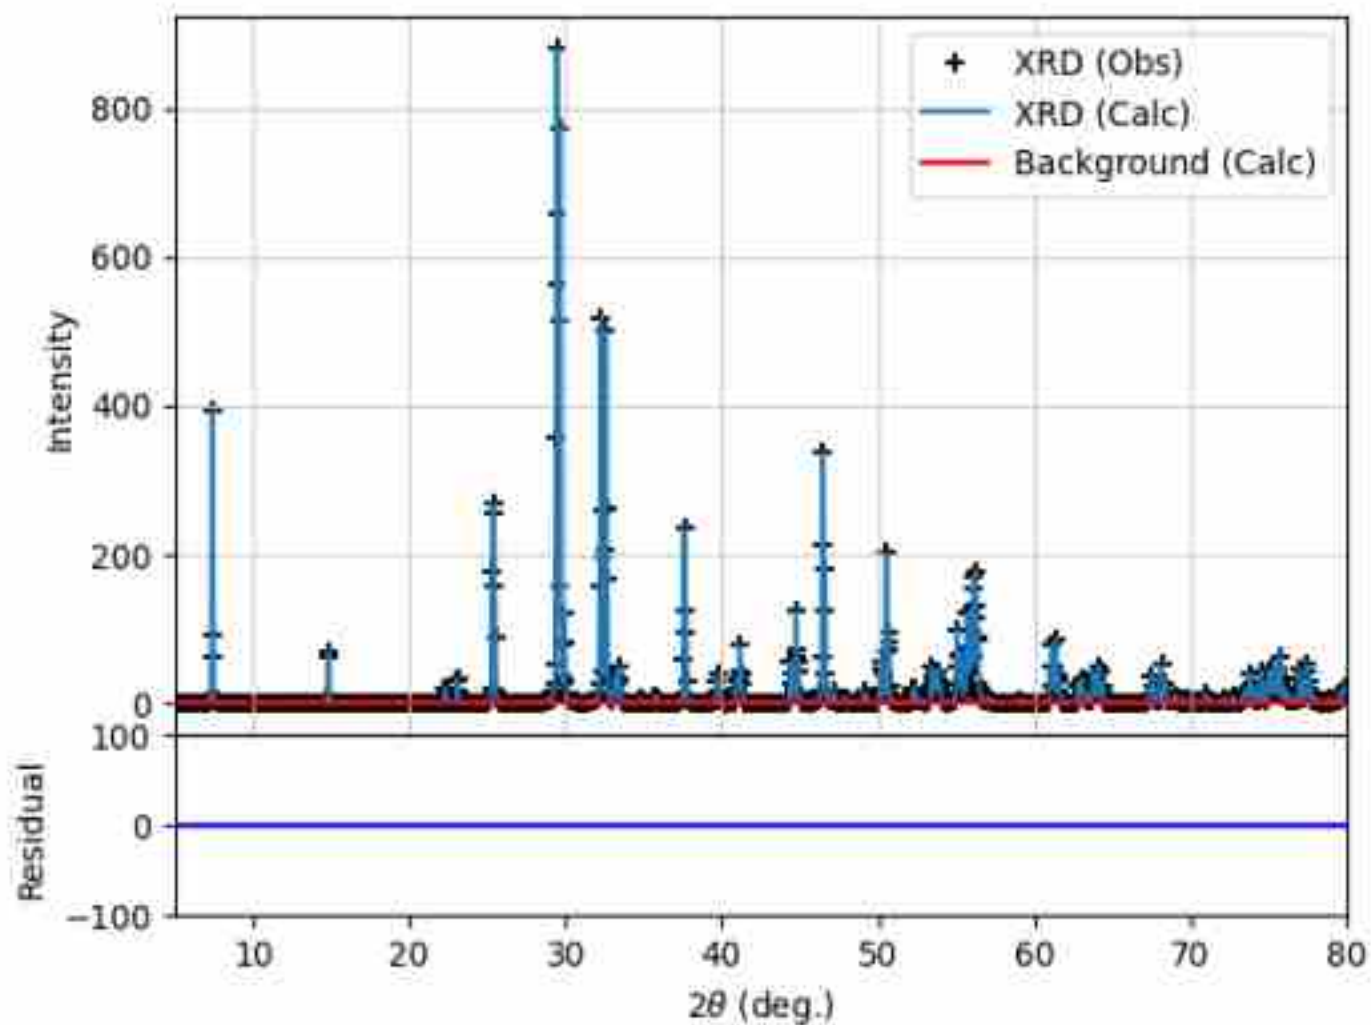

| RMSE before RR | Rwp     | RMSE after RR |
|----------------|---------|---------------|
| 0.039          | 0.00321 | 0.00049       |

# Ba<sub>4</sub>Sr<sub>2</sub>I<sub>12</sub>

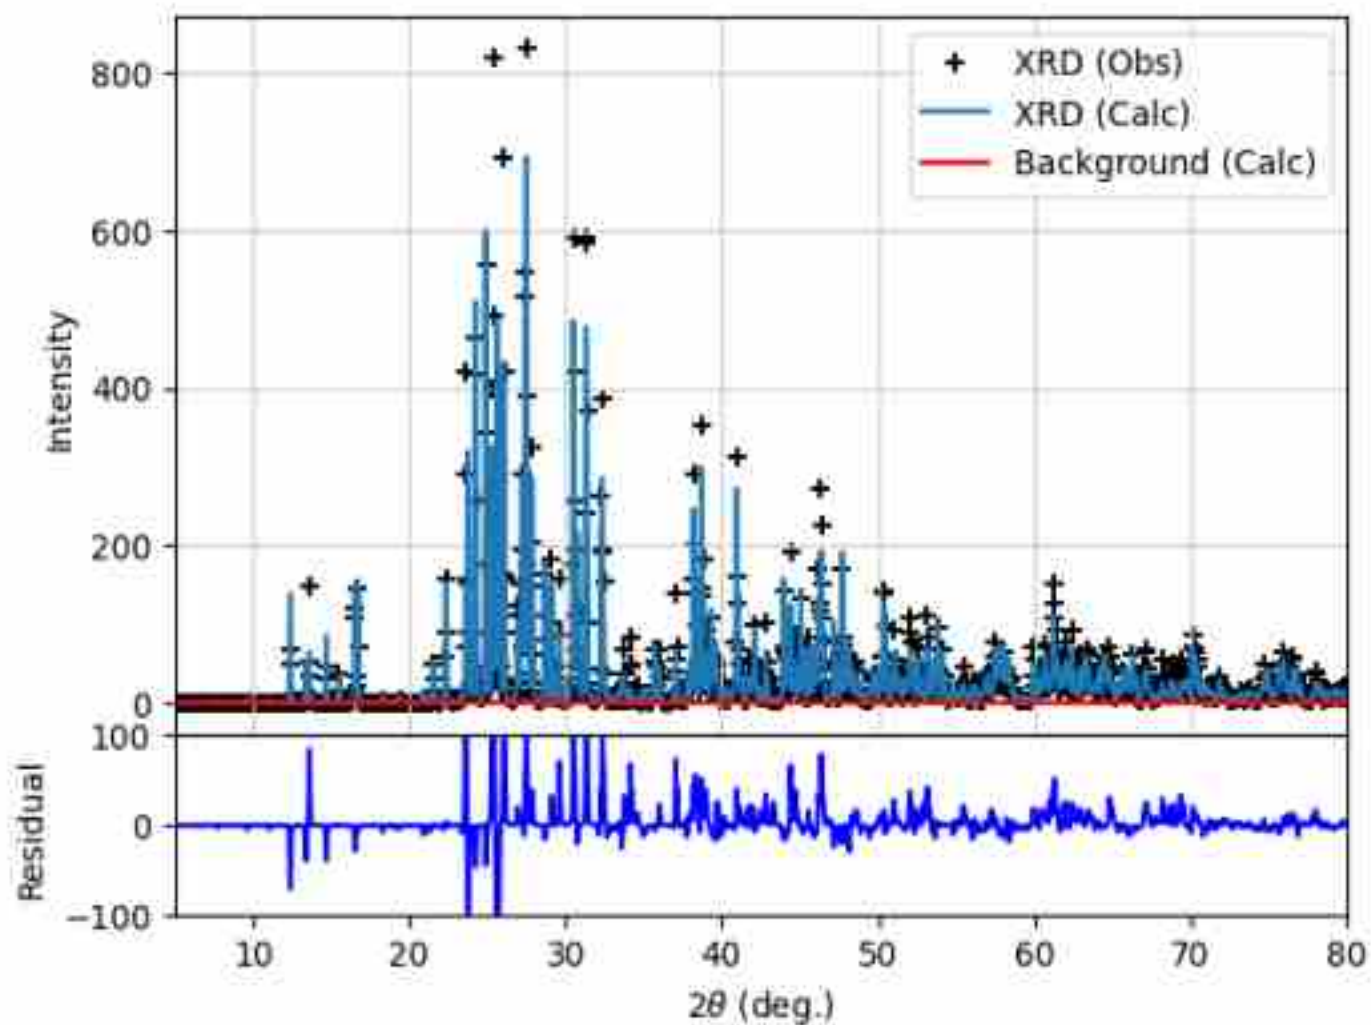

| RMSE before RR | Rwp      | RMSE after RR |
|----------------|----------|---------------|
| 0.039          | 34.48979 | 0.10808       |

# Bi<sub>2</sub>Te<sub>1</sub>Se<sub>2</sub>

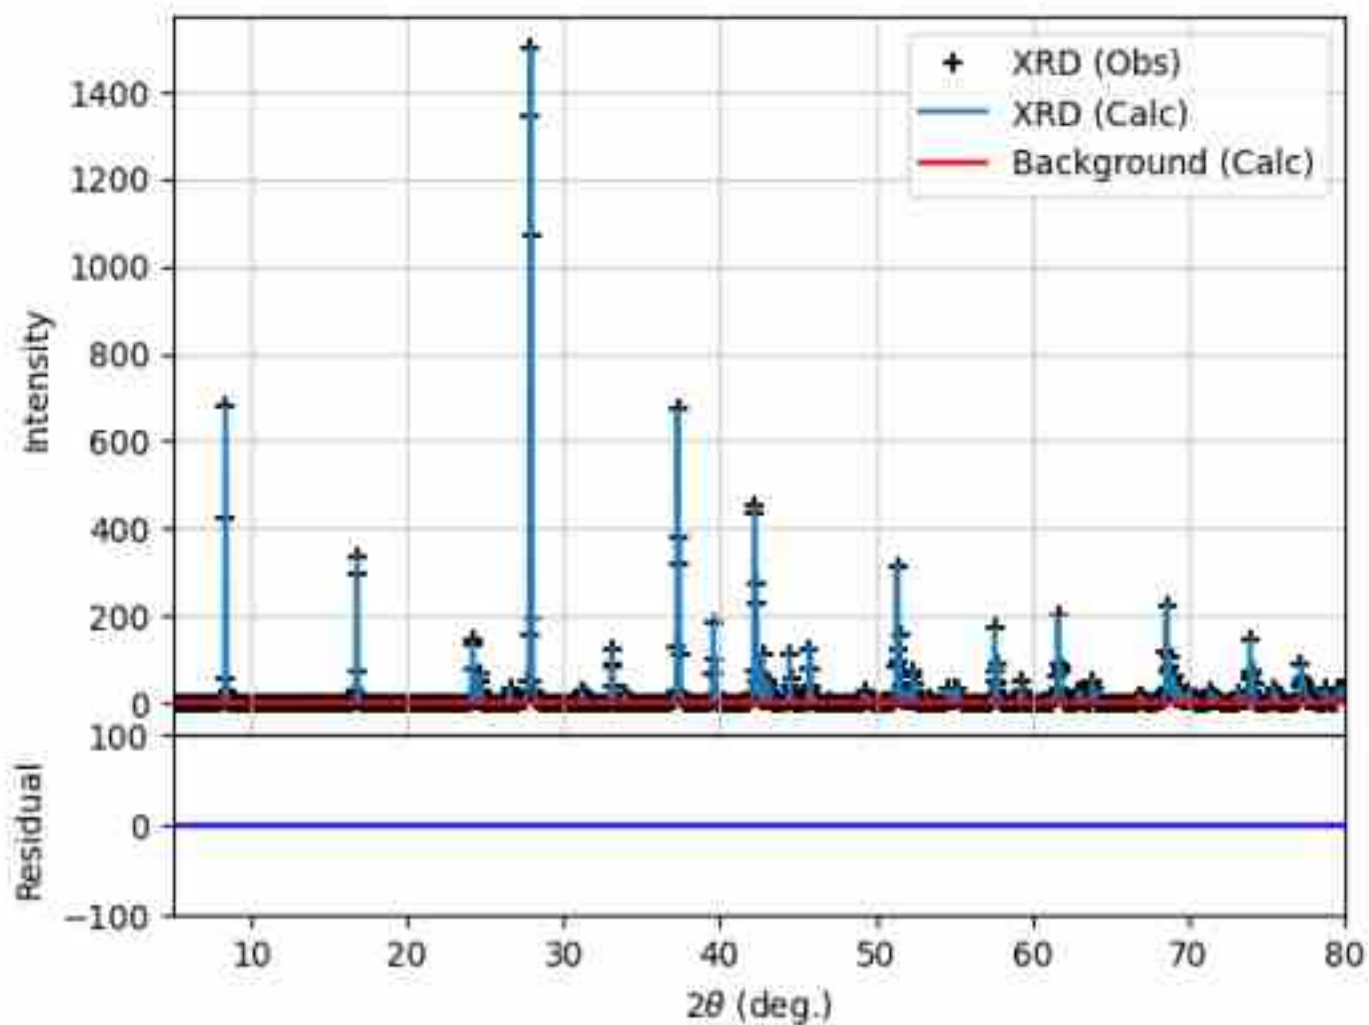

| RMSE before RR | Rwp     | RMSE after RR |
|----------------|---------|---------------|
| 0.039          | 0.00304 | 0.00044       |

# CaMn<sub>2</sub>O<sub>4</sub>

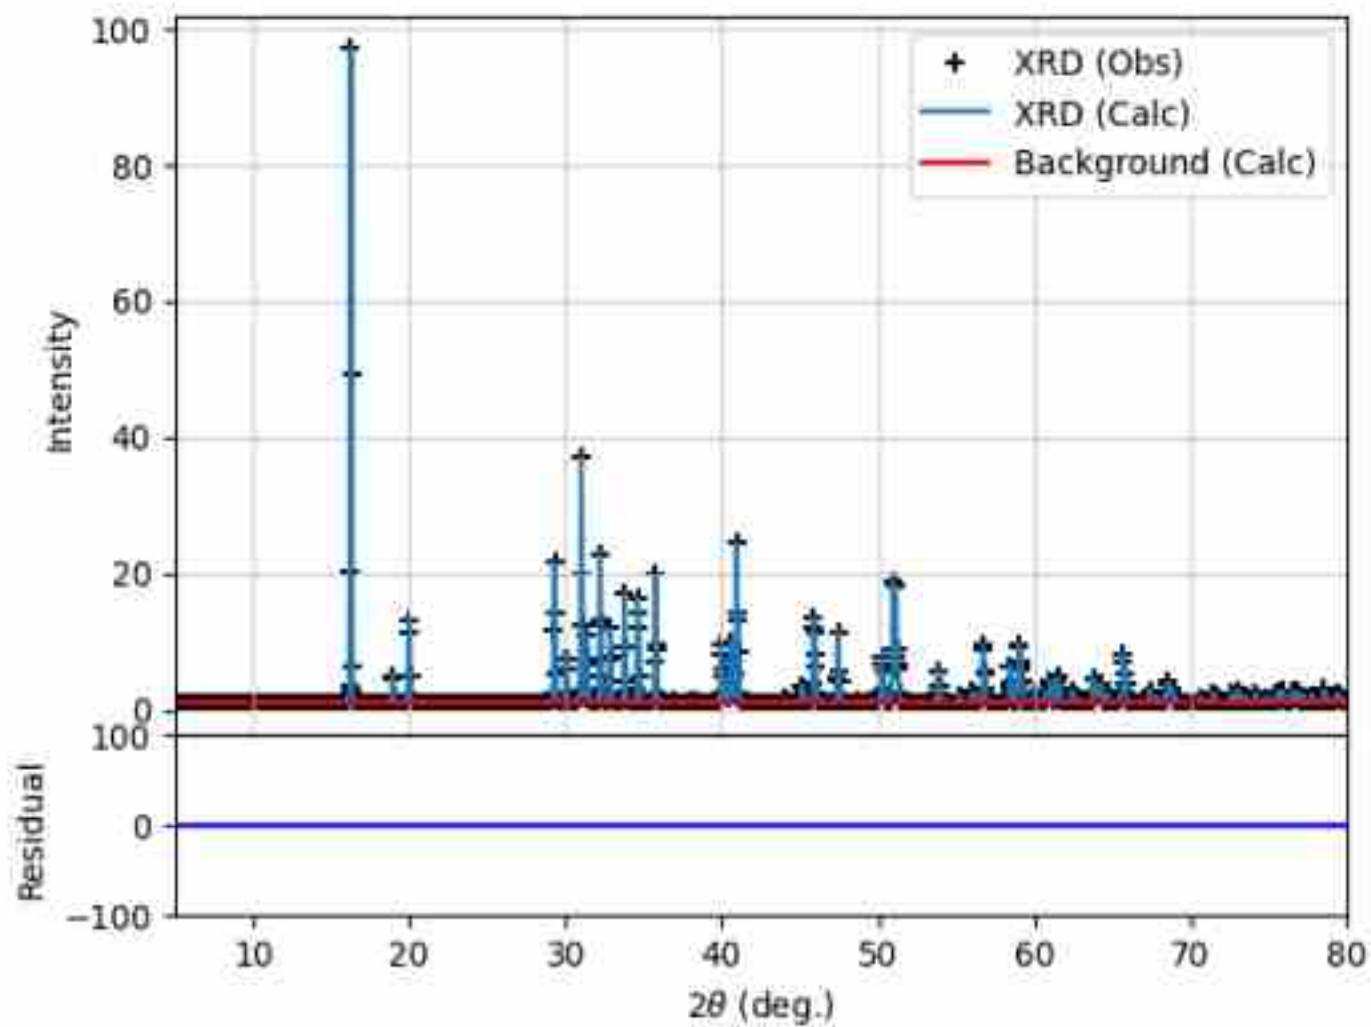

| RMSE before RR | Rwp     | RMSE after RR |
|----------------|---------|---------------|
| 0.039          | 0.00016 | 0.00011       |

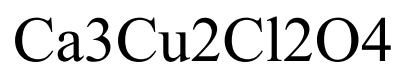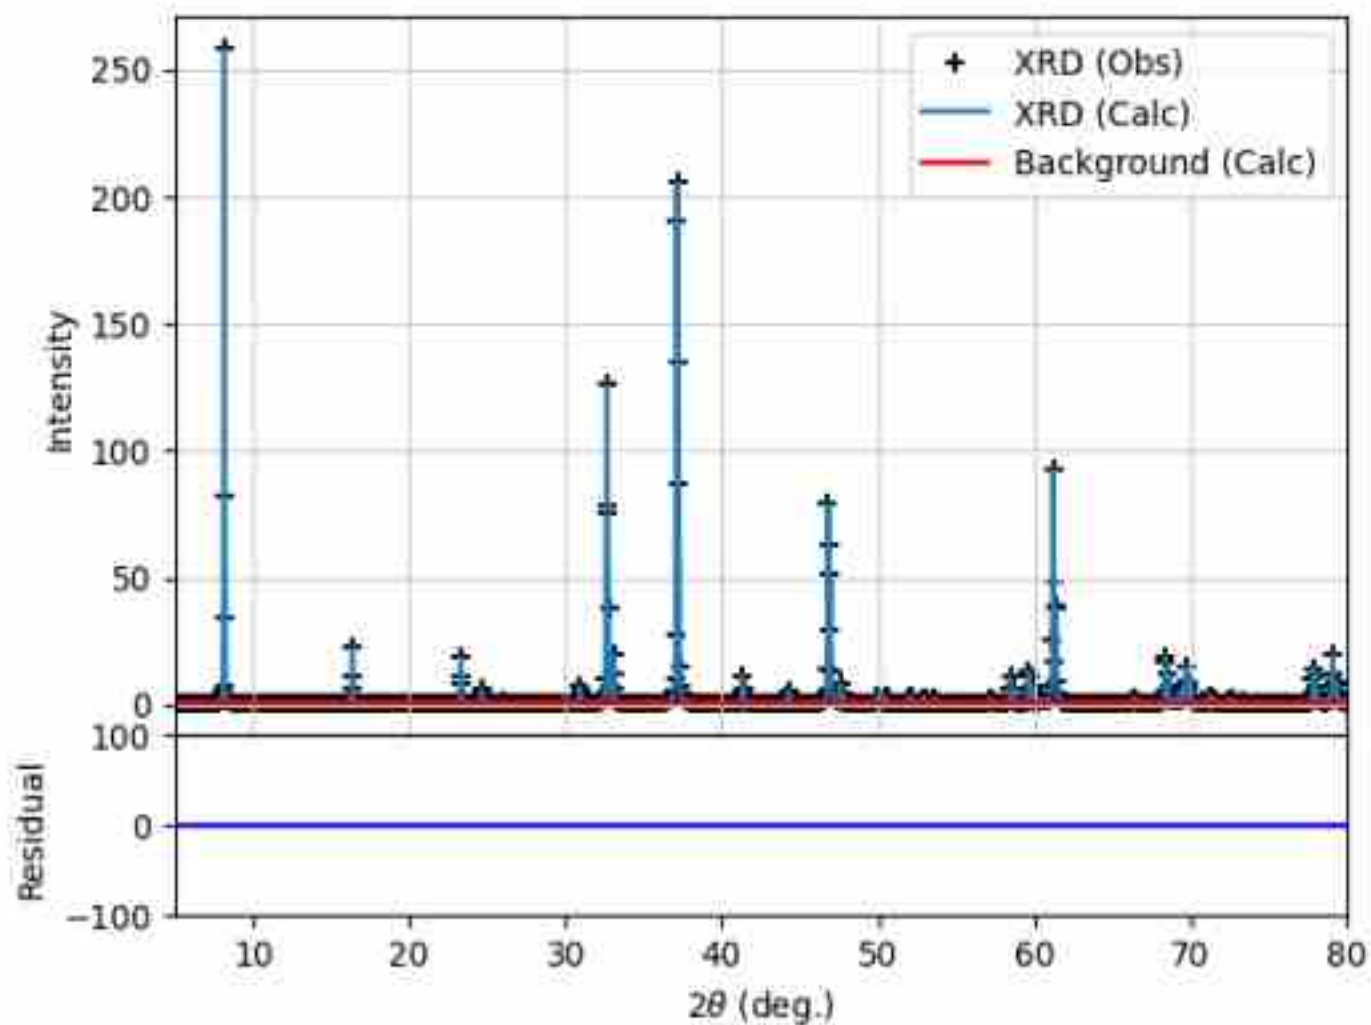

| RMSE before RR | Rwp     | RMSE after RR |
|----------------|---------|---------------|
| 0.039          | 0.00475 | 0.00084       |

# Ca<sub>10</sub>Cu<sub>2</sub>Pb<sub>6</sub>

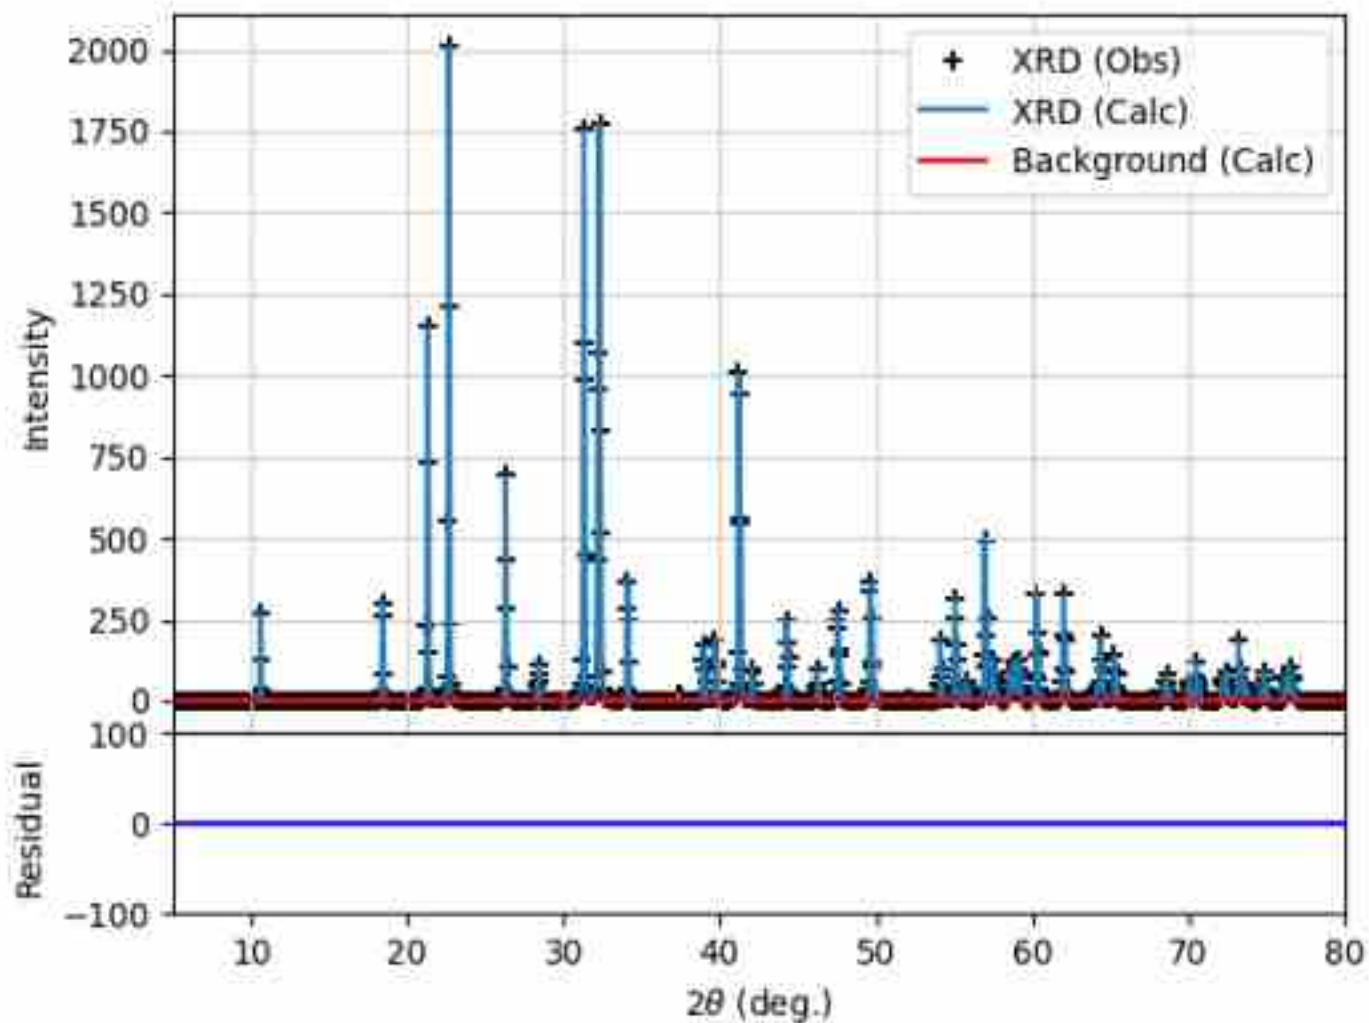

| RMSE before RR | Rwp     | RMSE after RR |
|----------------|---------|---------------|
| 0.039          | 0.00377 | 0.00045       |

# Co<sub>4</sub>S<sub>6</sub>

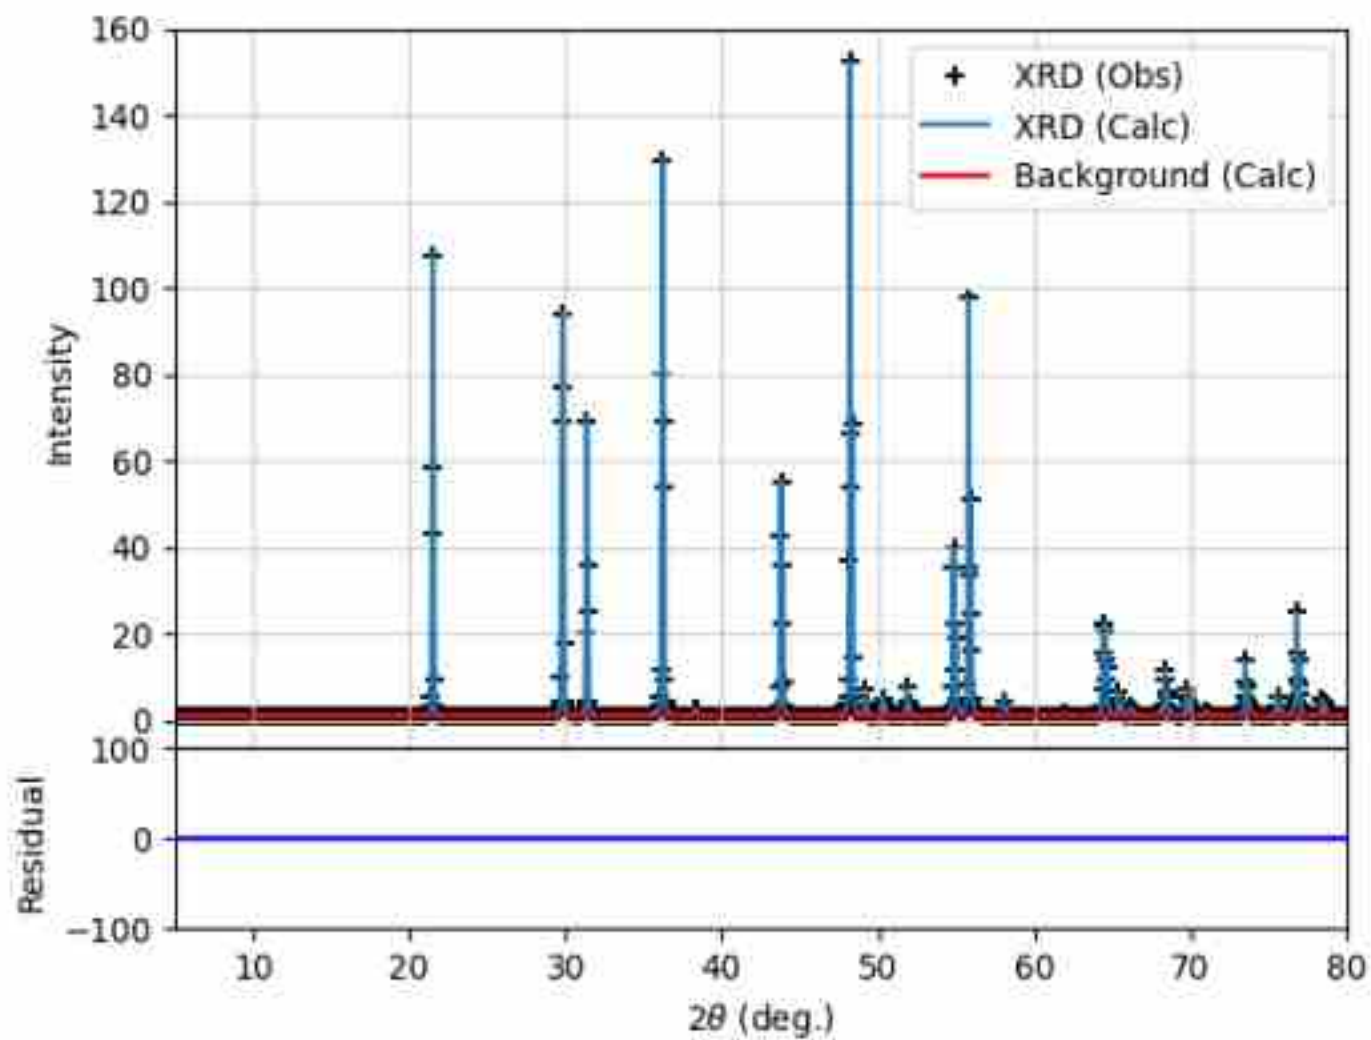

| RMSE before RR | Rwp     | RMSE after RR |
|----------------|---------|---------------|
| 0.039          | 0.00275 | 0.00035       |

# Cs1Ge1Br3

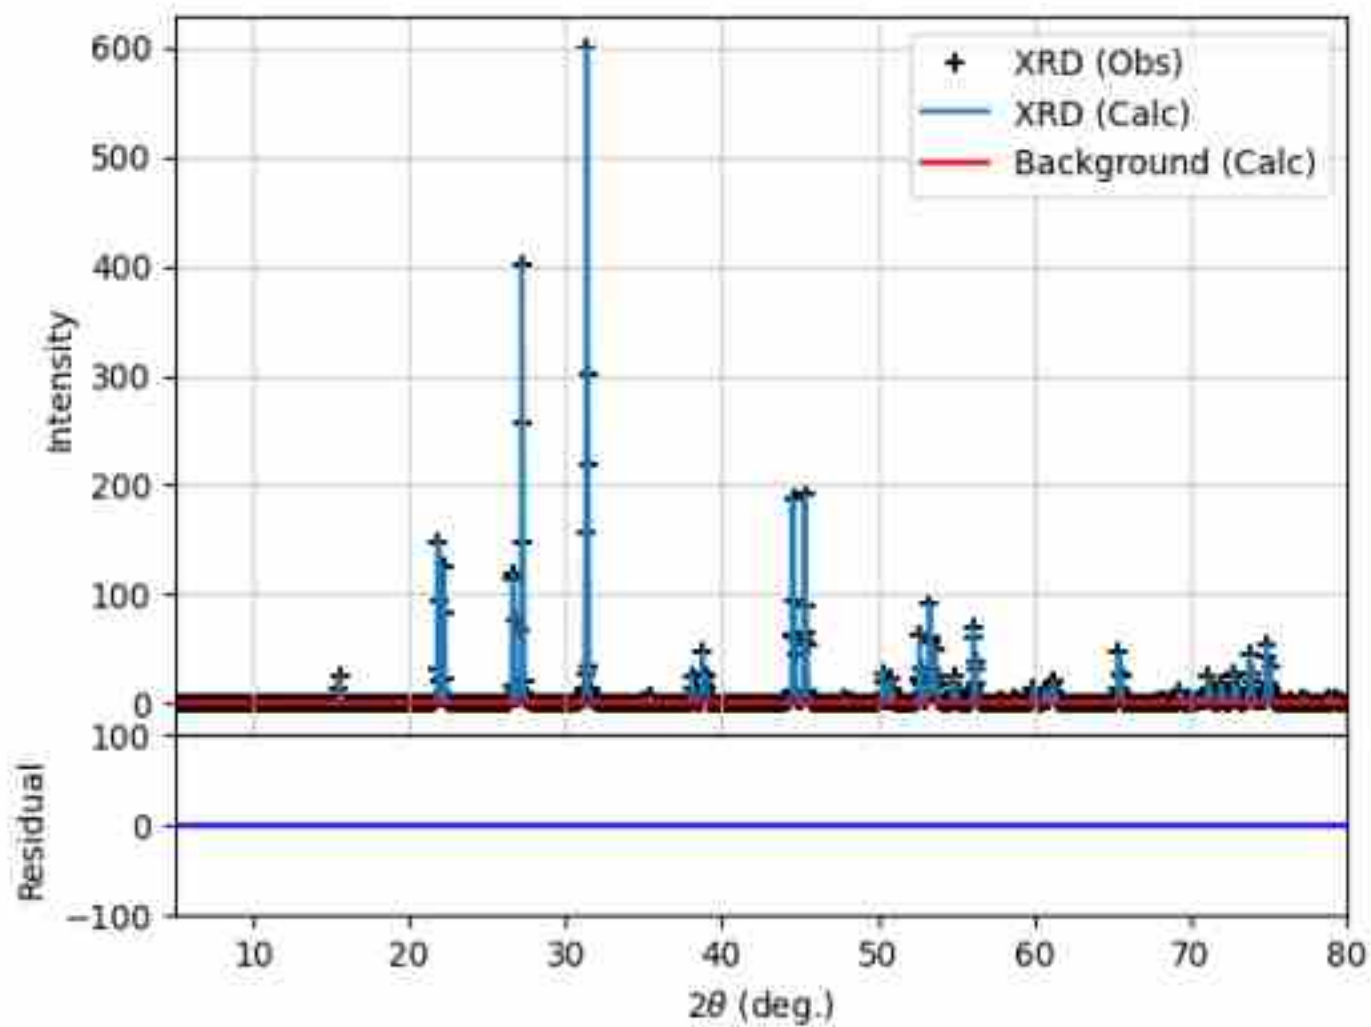

| RMSE before RR | Rwp     | RMSE after RR |
|----------------|---------|---------------|
| 0.039          | 0.00318 | 0.00029       |



# Er<sub>2</sub>Zn<sub>6</sub>P<sub>6</sub>

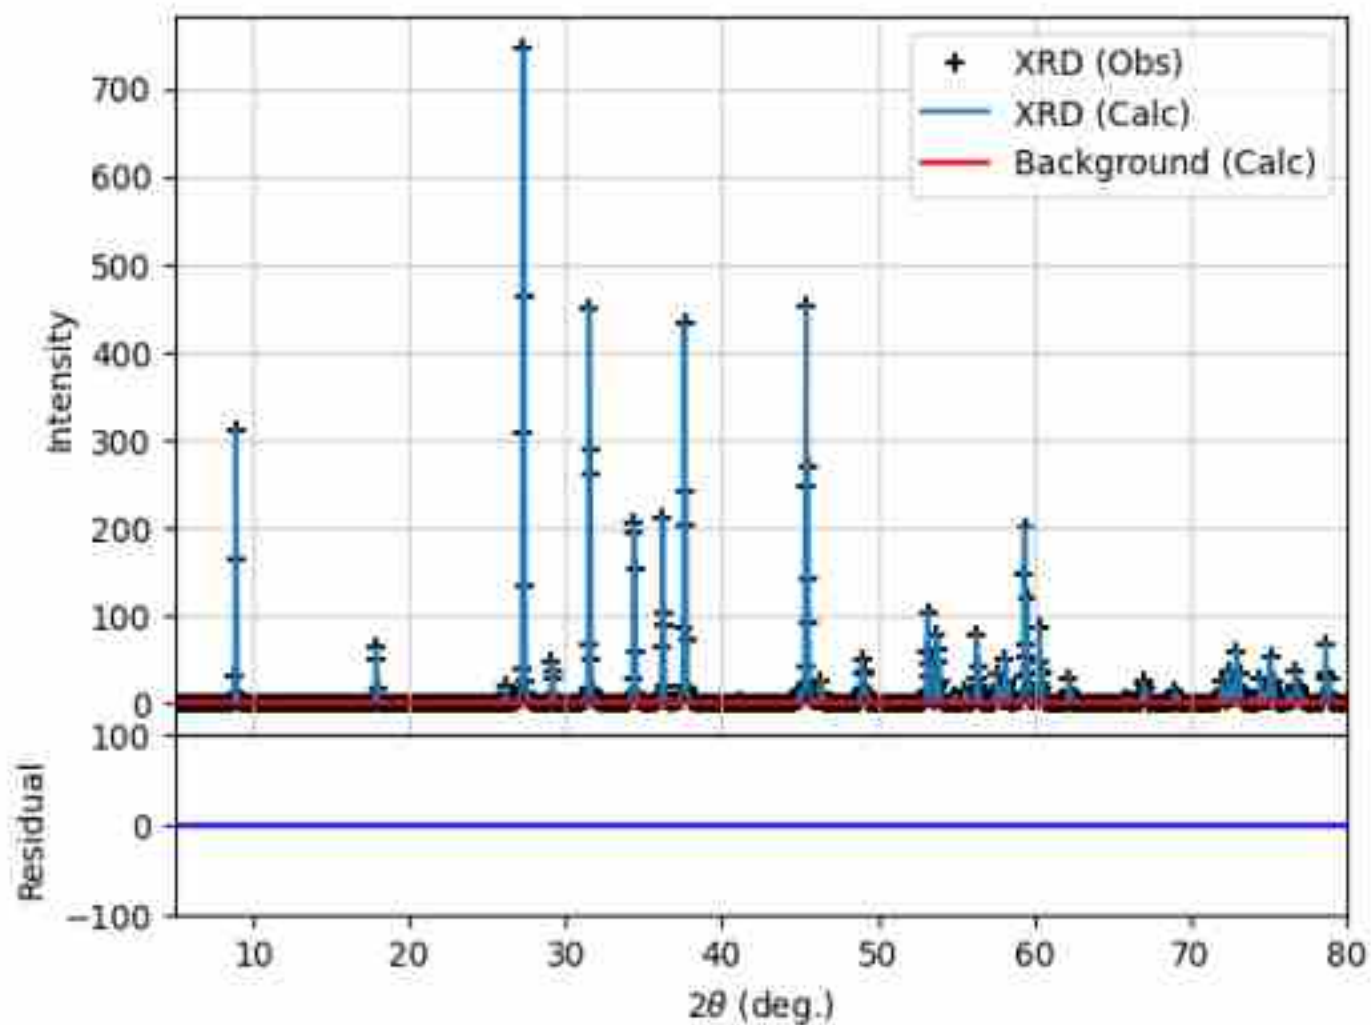

| RMSE before RR | Rwp     | RMSE after RR |
|----------------|---------|---------------|
| 0.039          | 0.00292 | 0.00073       |

# Fe<sub>2</sub>Pb<sub>3</sub>W<sub>10</sub>O<sub>9</sub>

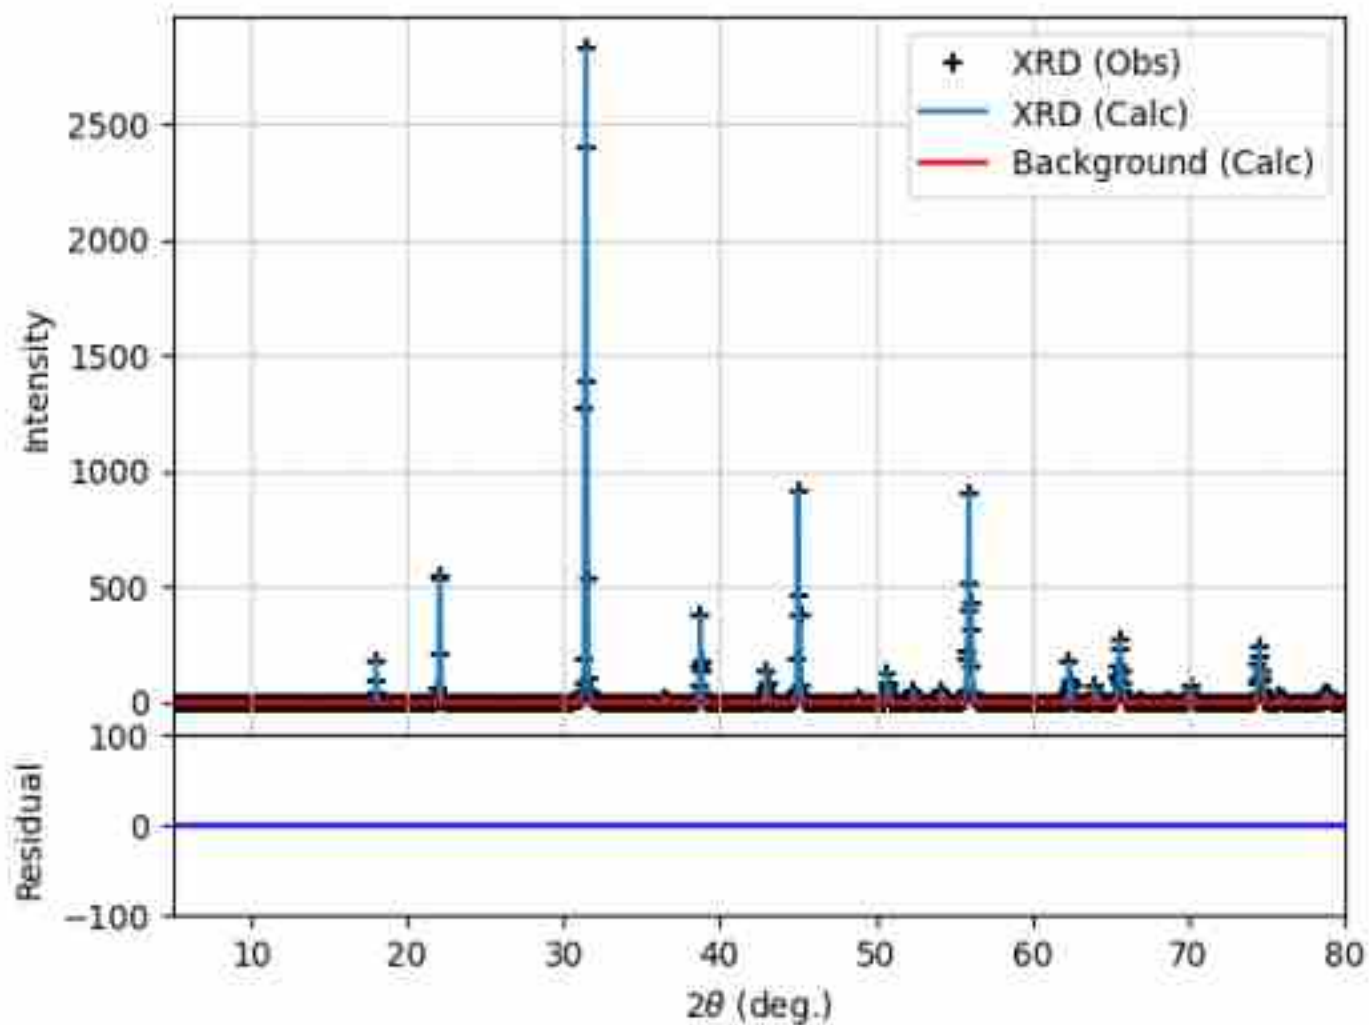

| RMSE before RR | Rwp    | RMSE after RR |
|----------------|--------|---------------|
| 0.039          | 0.0128 | 0.00491       |

# K1Rb2W1O3F3

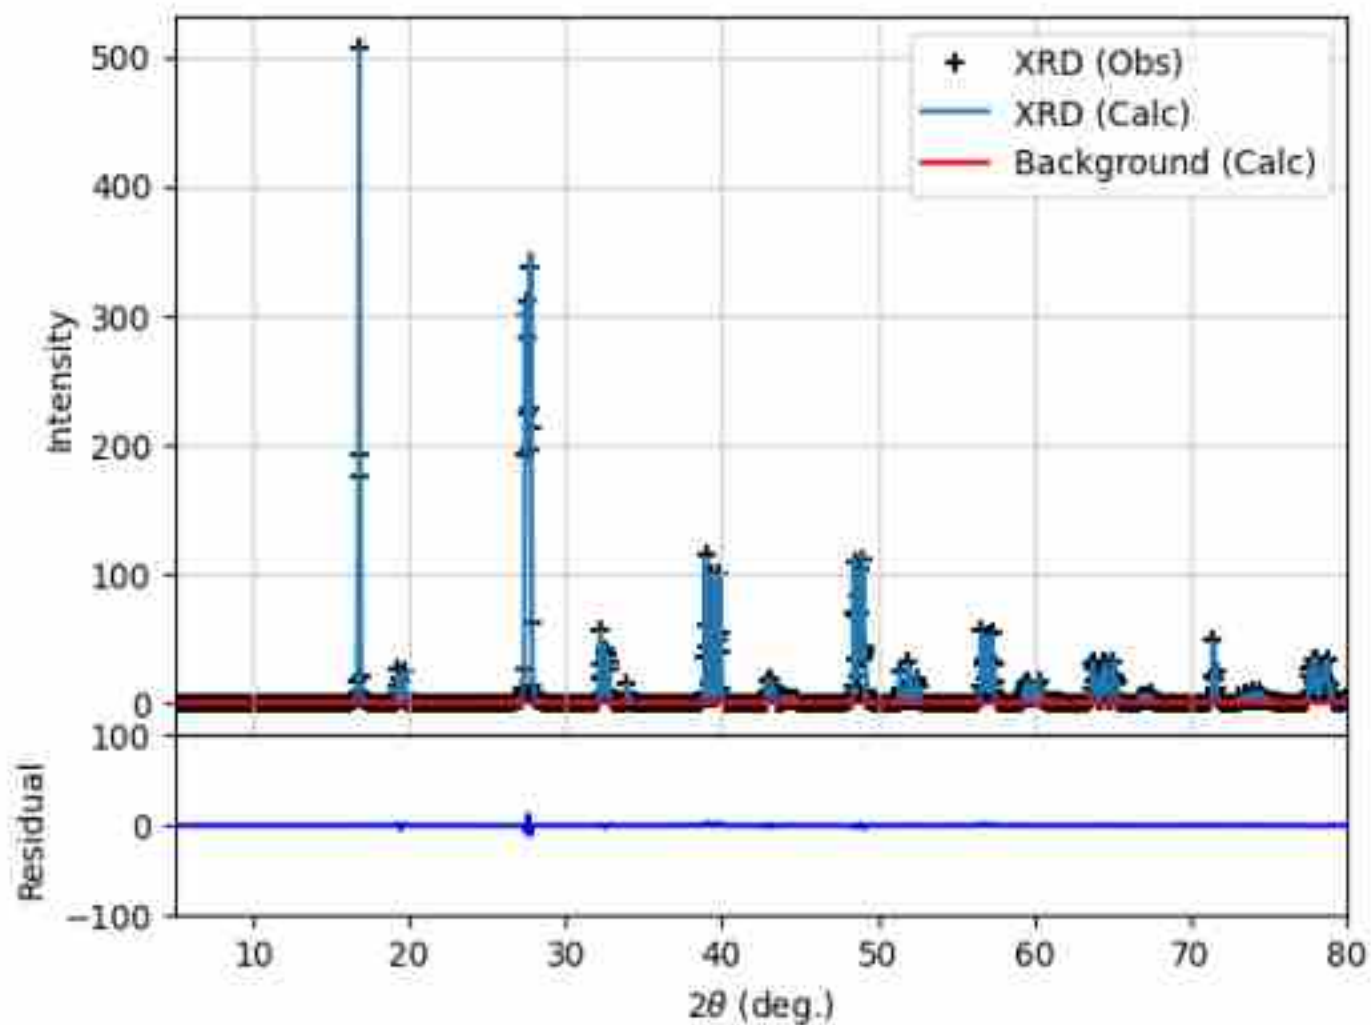

| RMSE before RR | Rwp     | RMSE after RR |
|----------------|---------|---------------|
| 0.039          | 2.97041 | 0.08796       |

# K<sub>2</sub>Pu<sub>1</sub>Cl<sub>6</sub>

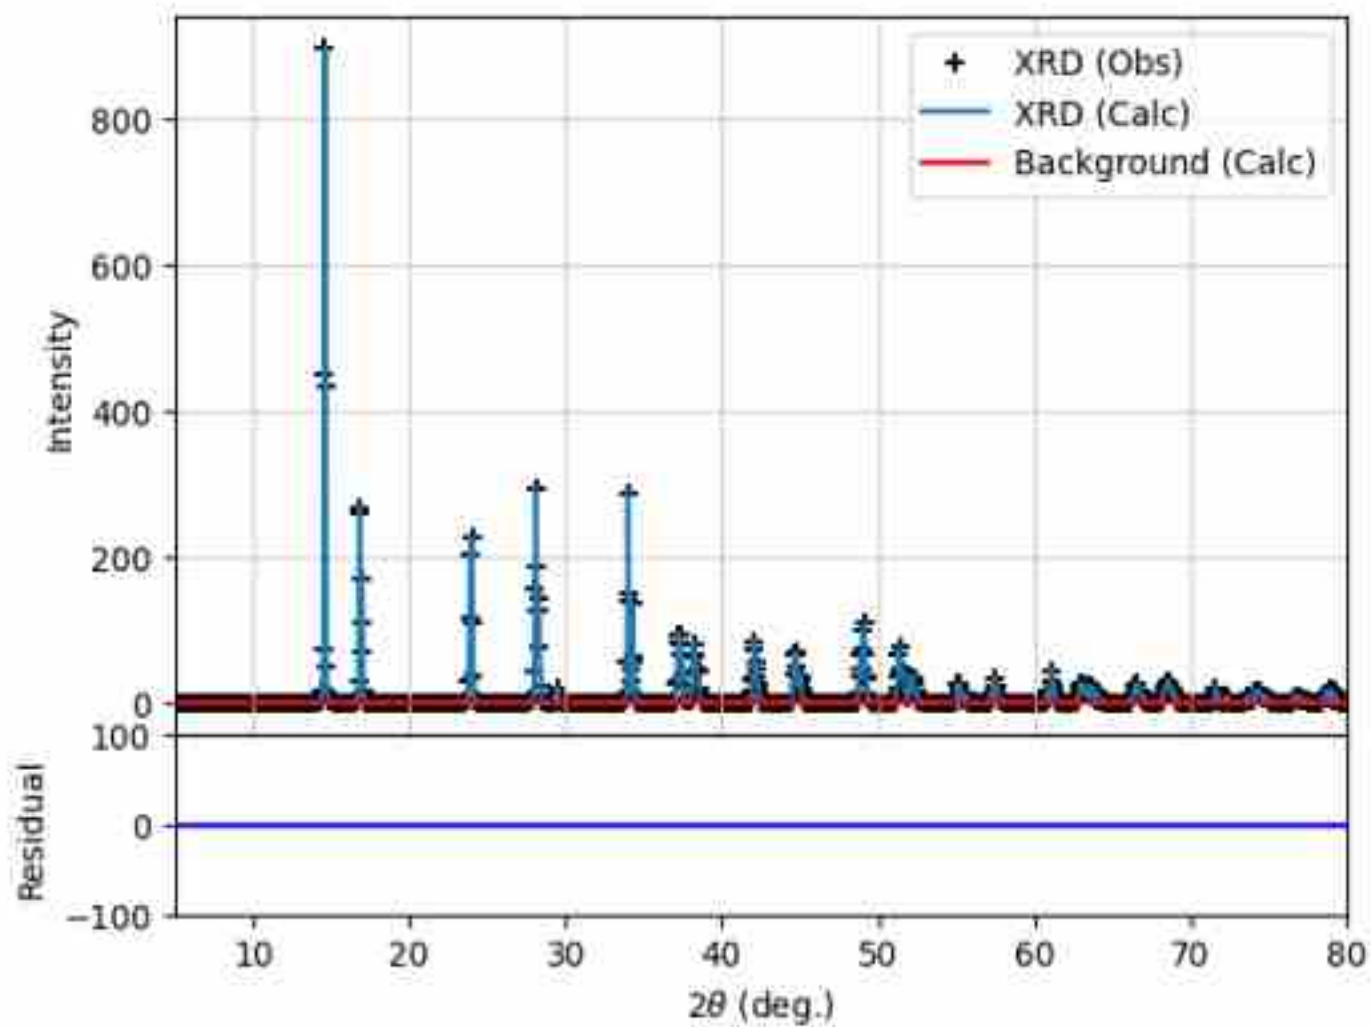

| RMSE before RR | Rwp     | RMSE after RR |
|----------------|---------|---------------|
| 0.039          | 0.00239 | 0.00046       |

# K4O2

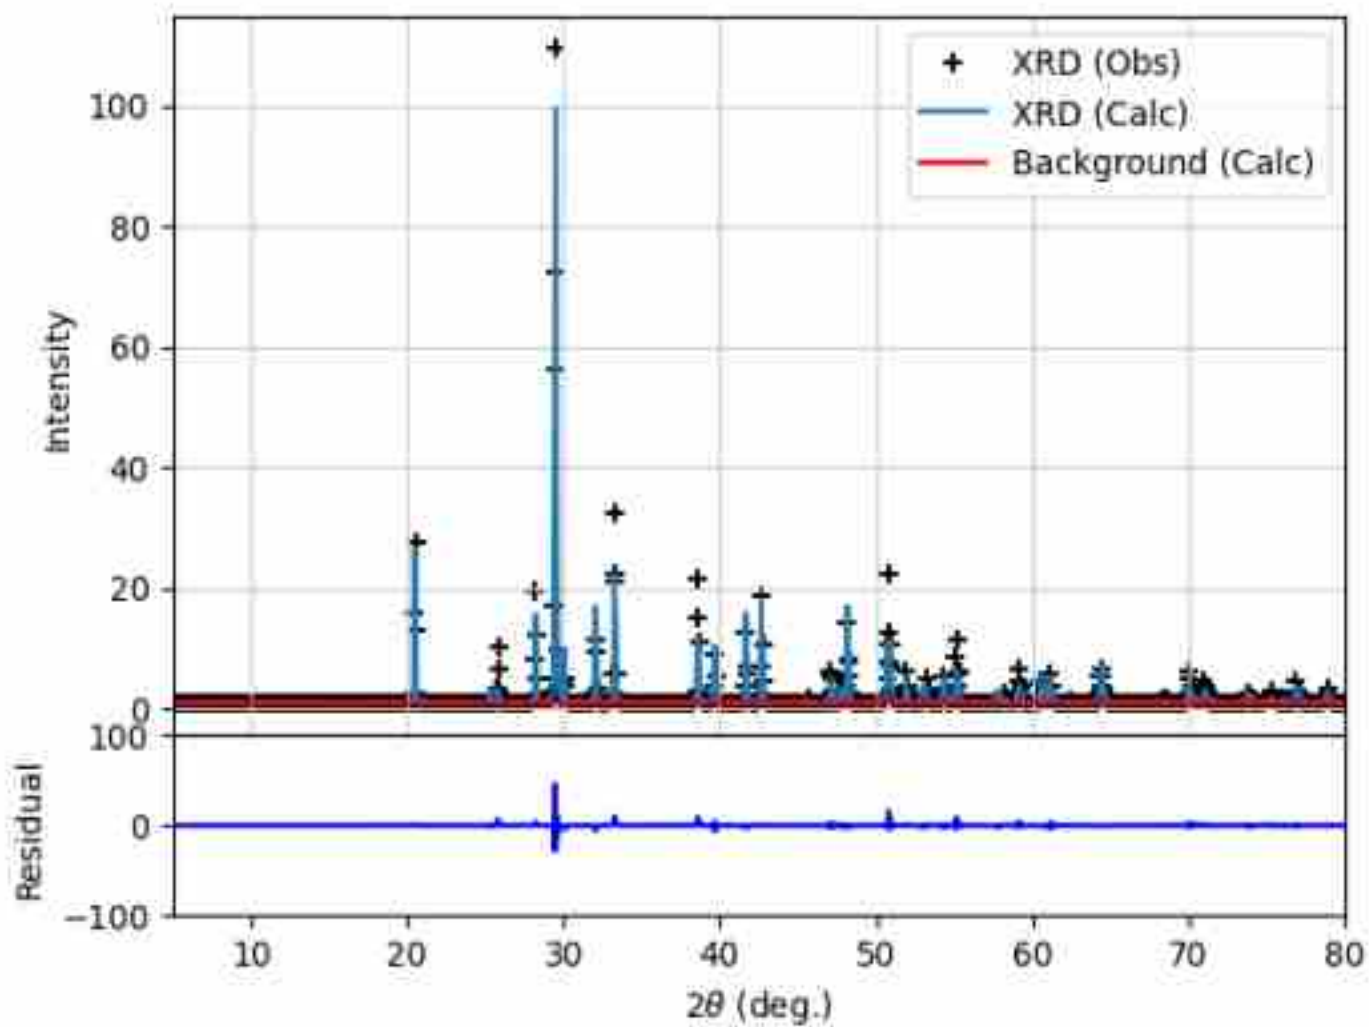

| RMSE before RR | Rwp      | RMSE after RR |
|----------------|----------|---------------|
| 0.039          | 31.51571 | 0.04812       |

# La1Mn3V4O12

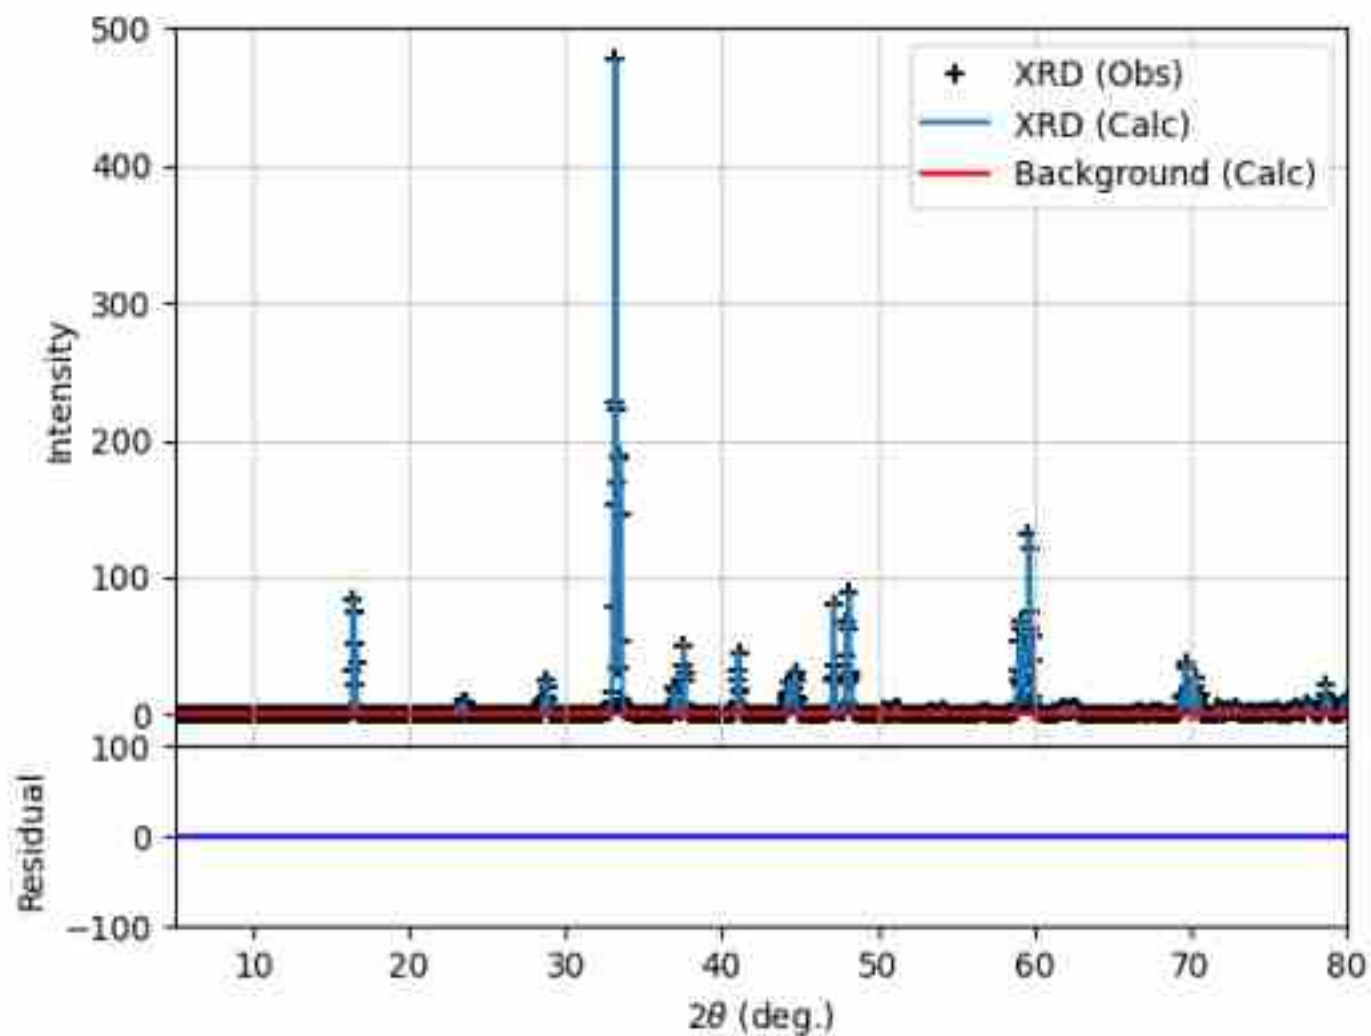

| RMSE before RR | Rwp     | RMSE after RR |
|----------------|---------|---------------|
| 0.039          | 0.00283 | 0.00089       |

# La<sub>4</sub>Al<sub>4</sub>Au<sub>4</sub>

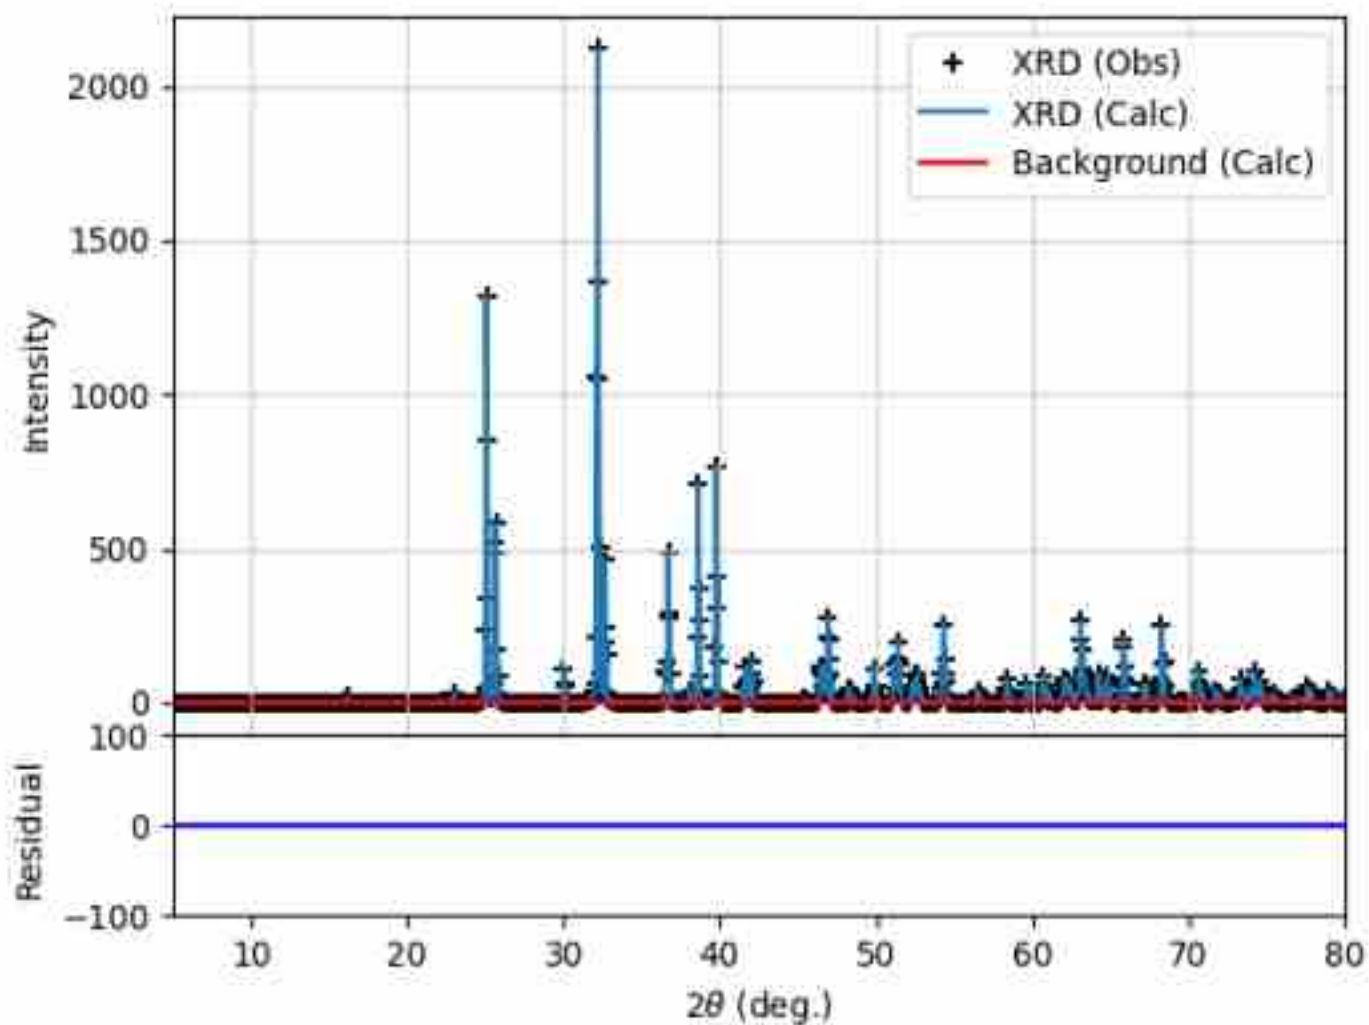

| RMSE before RR | Rwp    | RMSE after RR |
|----------------|--------|---------------|
| 0.039          | 0.0041 | 0.00079       |

# Li<sub>2</sub>V<sub>4</sub>F<sub>10</sub>

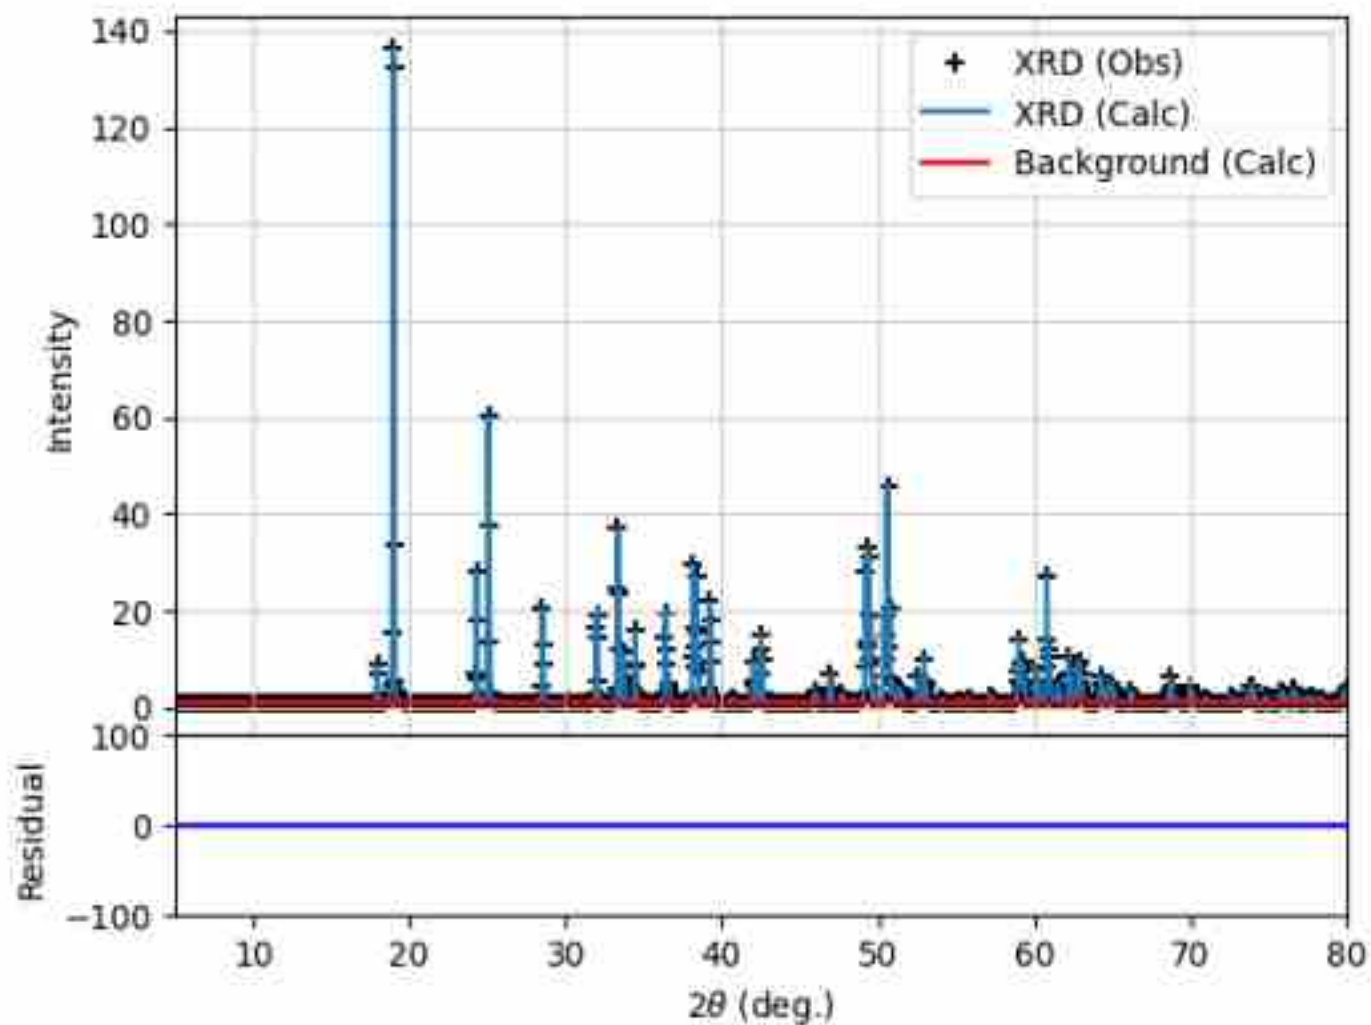

| RMSE before RR | Rwp     | RMSE after RR |
|----------------|---------|---------------|
| 0.039          | 0.00246 | 0.00064       |



# Li<sub>3</sub>Fe<sub>5</sub>O<sub>1</sub>F<sub>11</sub>

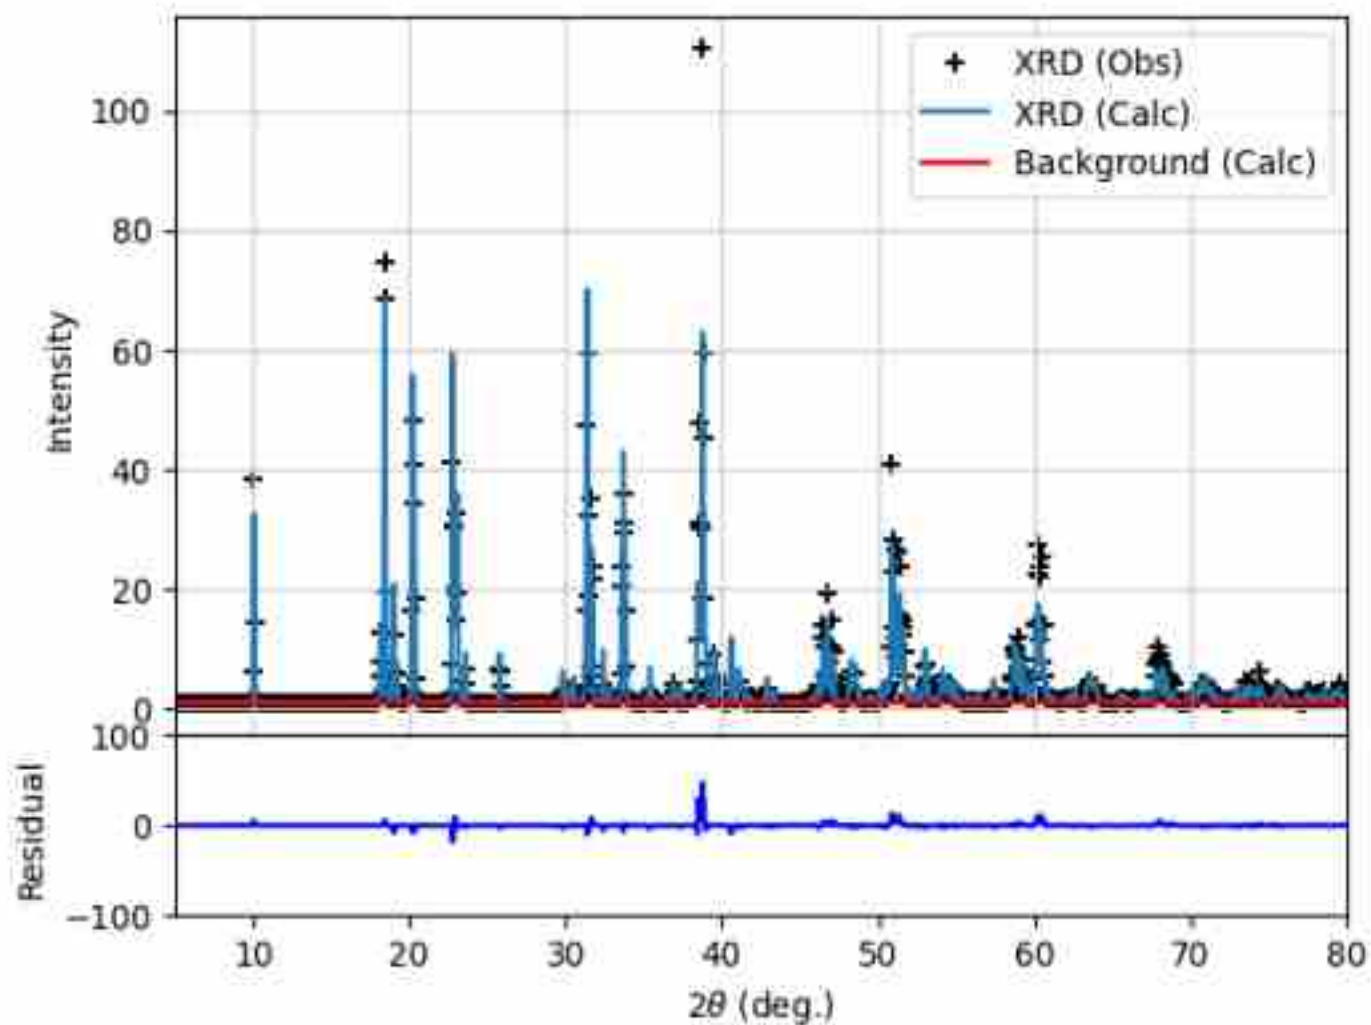

| RMSE before RR | Rwp      | RMSE after RR |
|----------------|----------|---------------|
| 0.039          | 31.07558 | None          |

# Li<sub>4</sub>Fe<sub>3</sub>O<sub>1</sub>F<sub>11</sub>

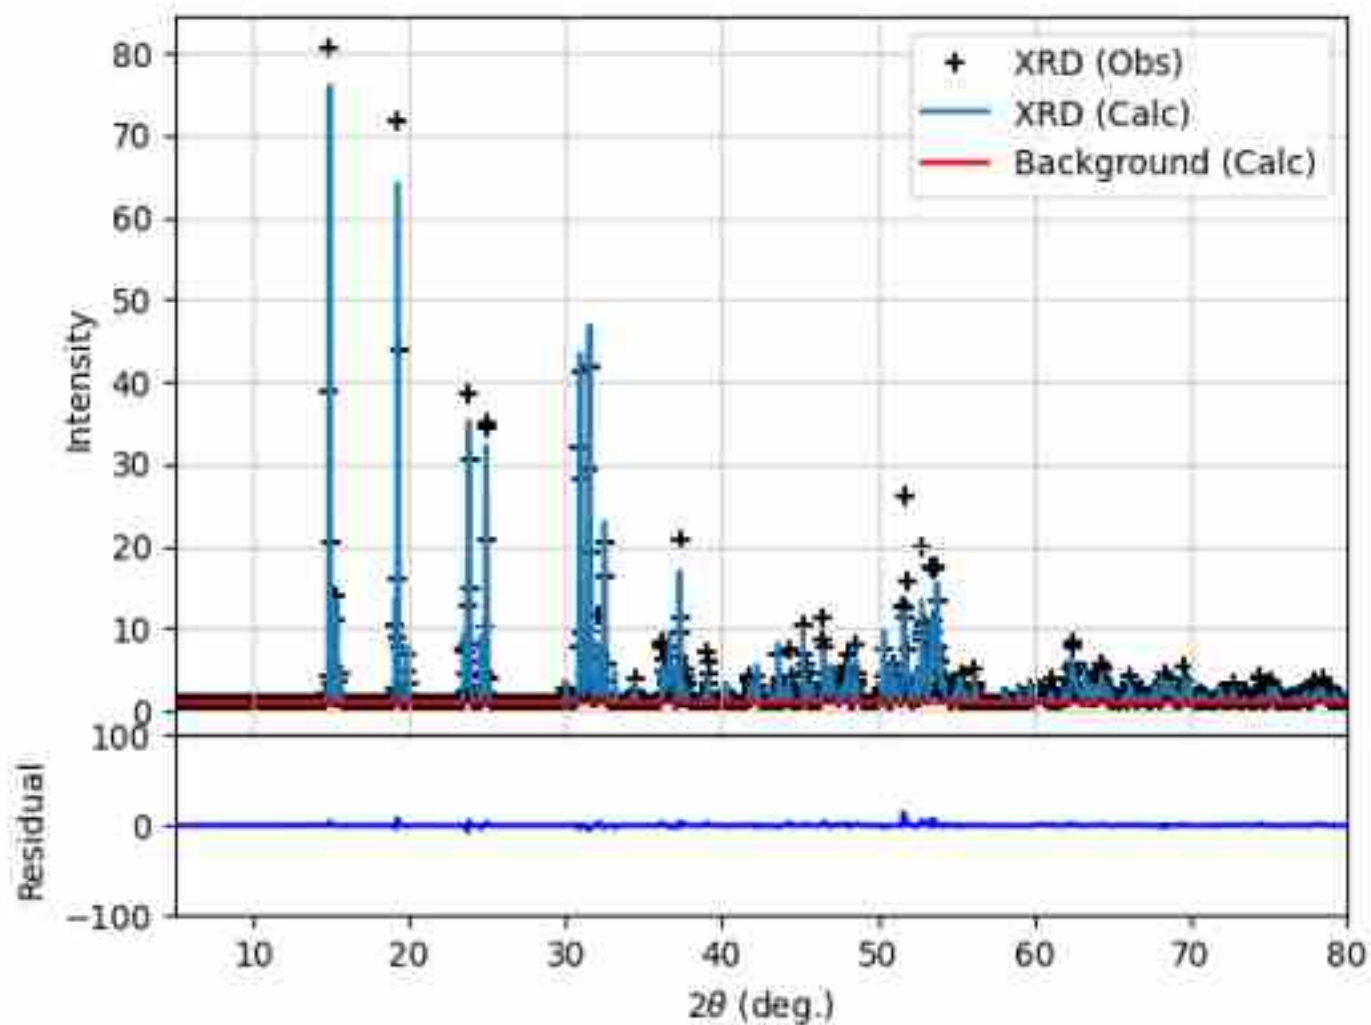

| RMSE before RR | Rwp      | RMSE after RR |
|----------------|----------|---------------|
| 0.039          | 20.03294 | None          |

# Li<sub>4</sub>La<sub>4</sub>O<sub>8</sub>

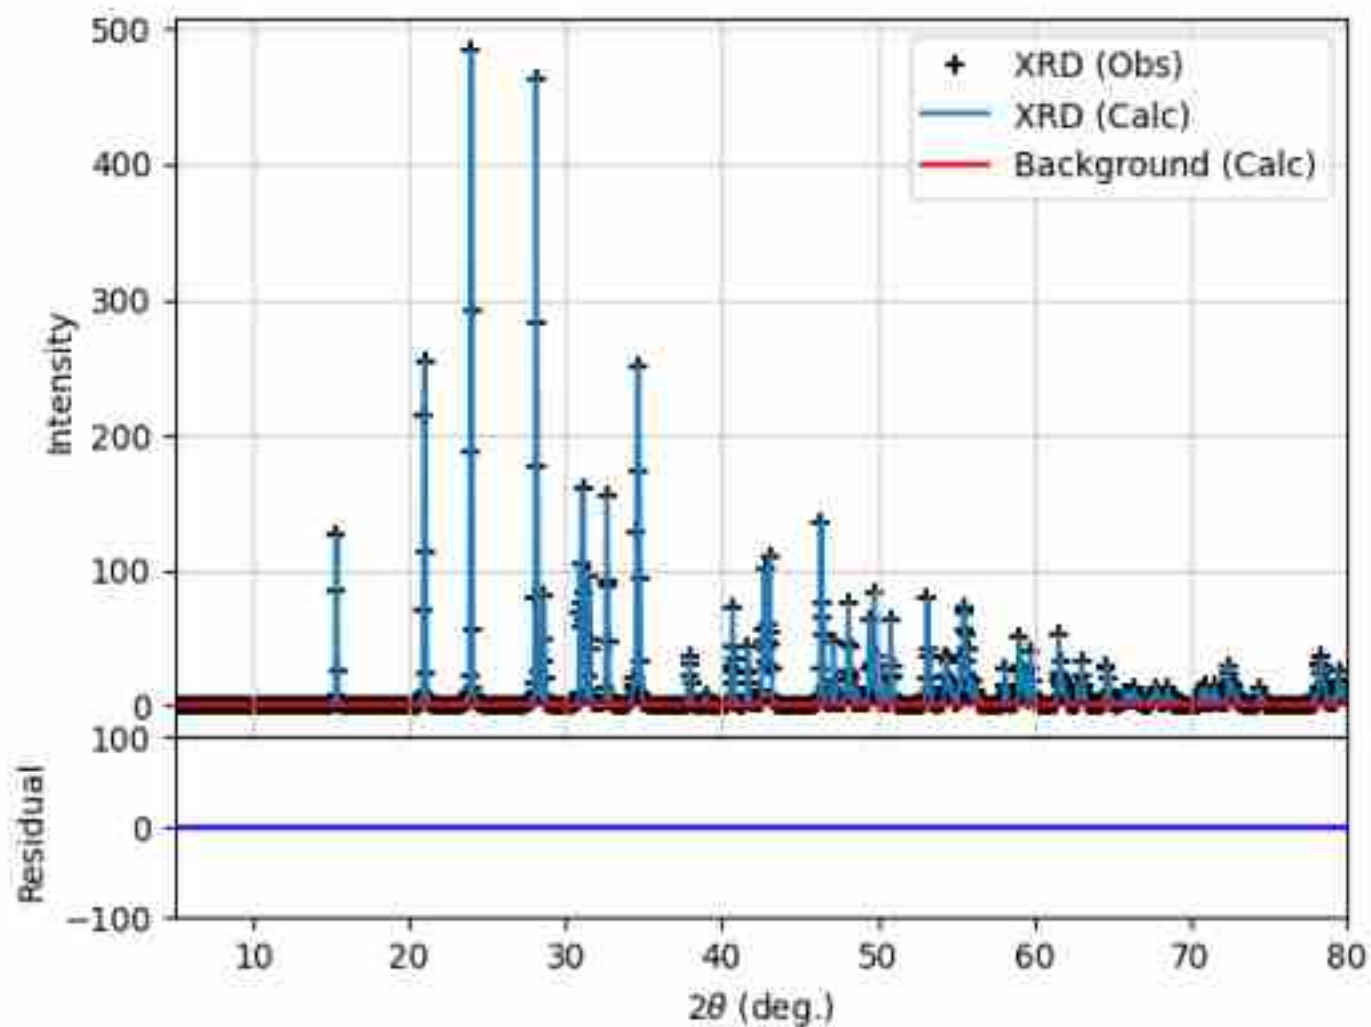

| RMSE before RR | Rwp     | RMSE after RR |
|----------------|---------|---------------|
| 0.039          | 0.00377 | 0.00191       |

# Li<sub>4</sub>Mn<sub>3</sub>Cr<sub>2</sub>O<sub>10</sub>

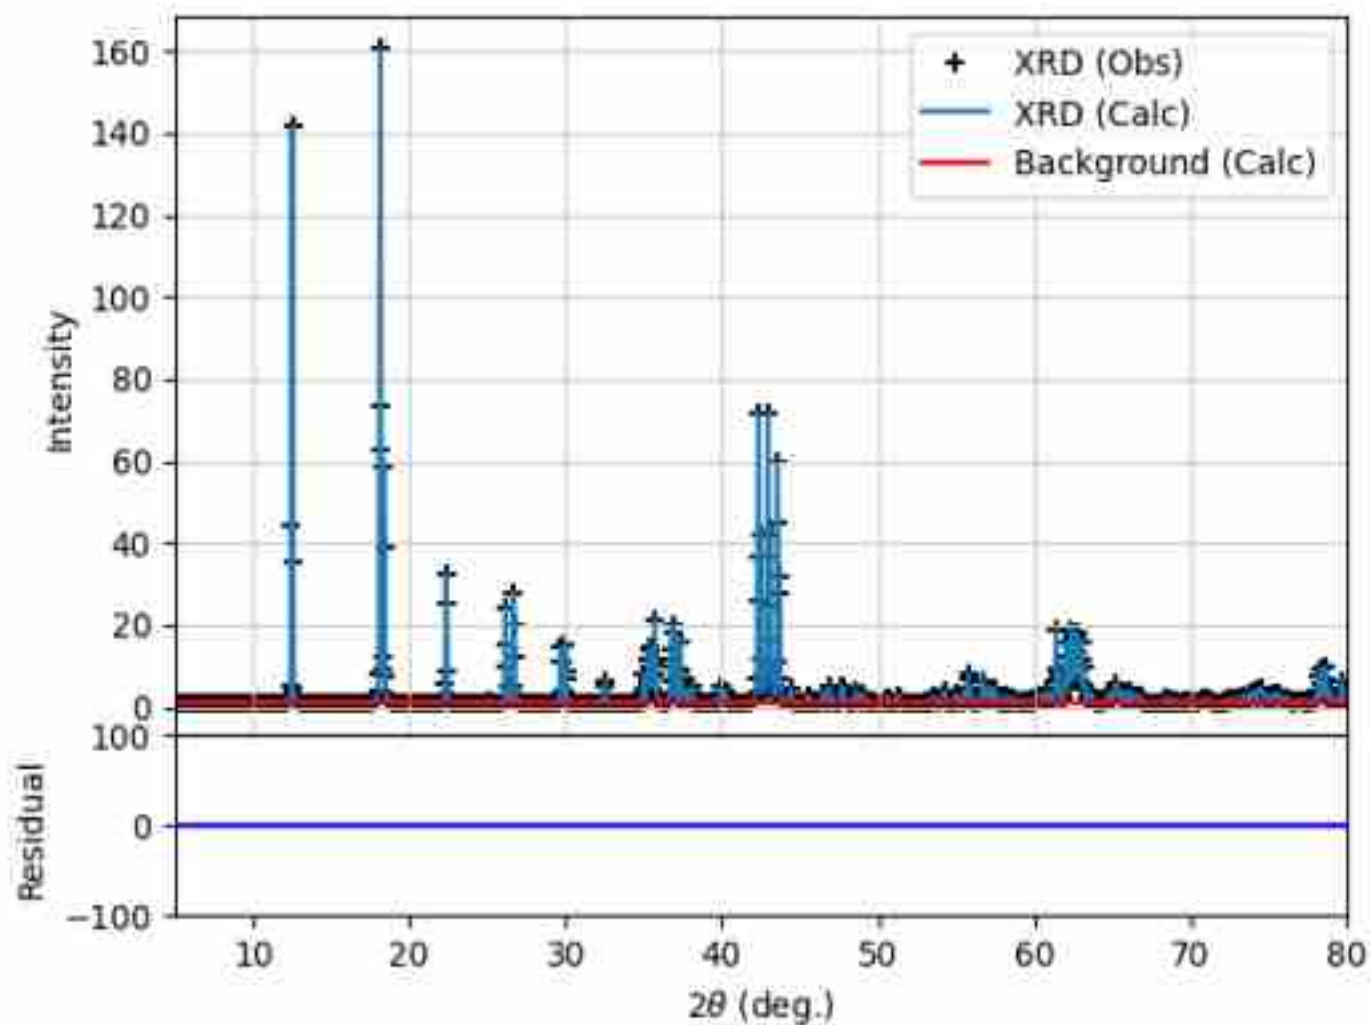

| RMSE before RR | Rwp     | RMSE after RR |
|----------------|---------|---------------|
| 0.039          | 0.00109 | 1e-05         |

# Li<sub>4</sub>V<sub>2</sub>O<sub>4</sub>F<sub>2</sub>

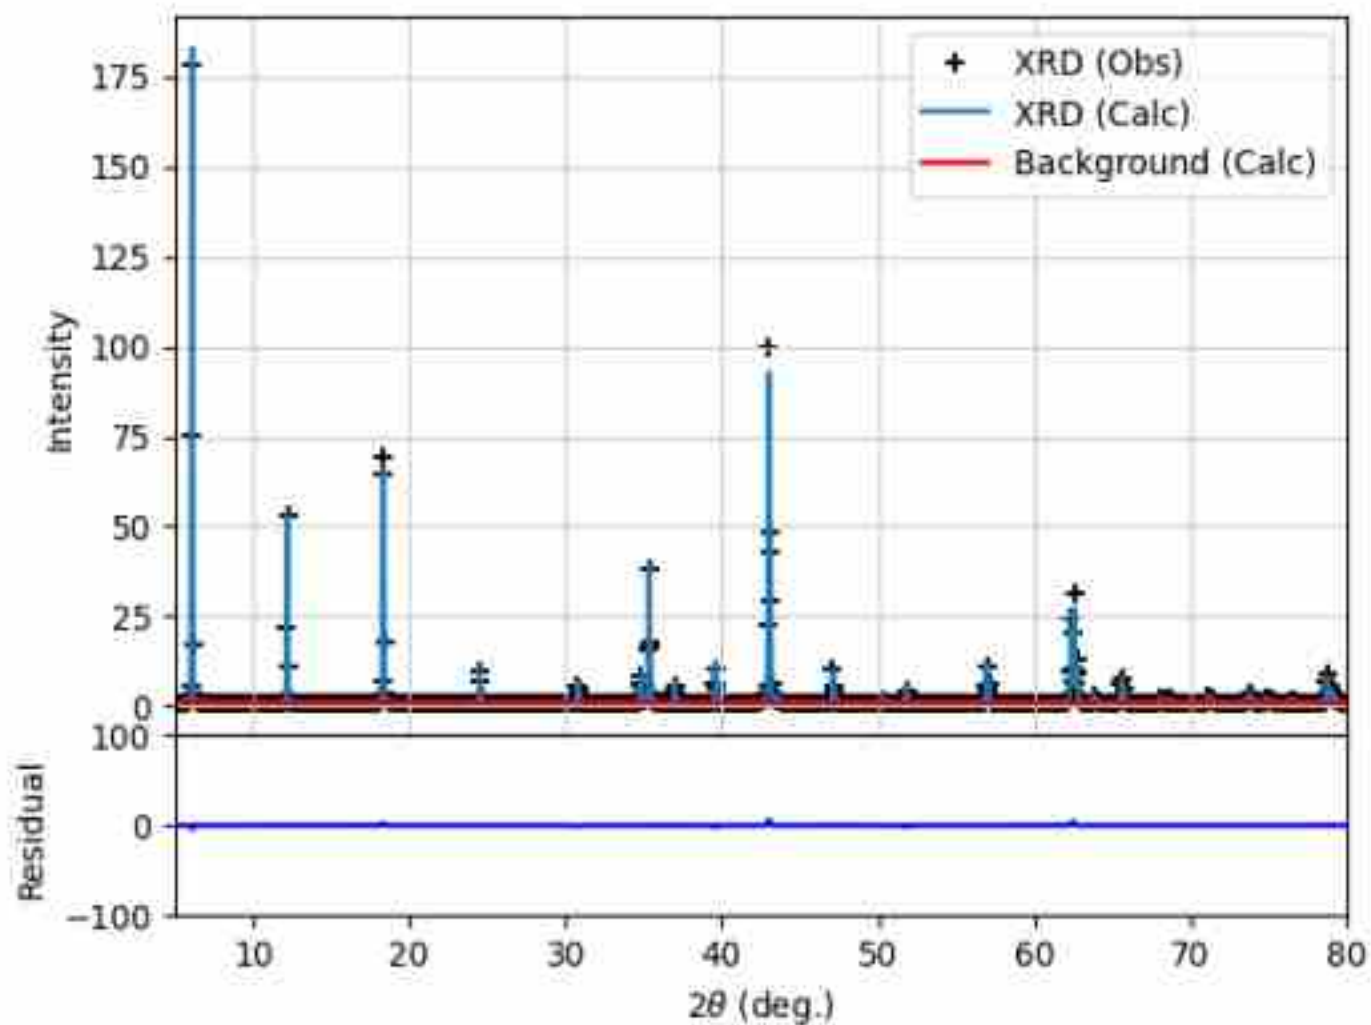

| RMSE before RR | Rwp    | RMSE after RR |
|----------------|--------|---------------|
| 0.039          | 5.6416 | 0.19184       |

# Li<sub>4</sub>V<sub>4</sub>O<sub>12</sub>

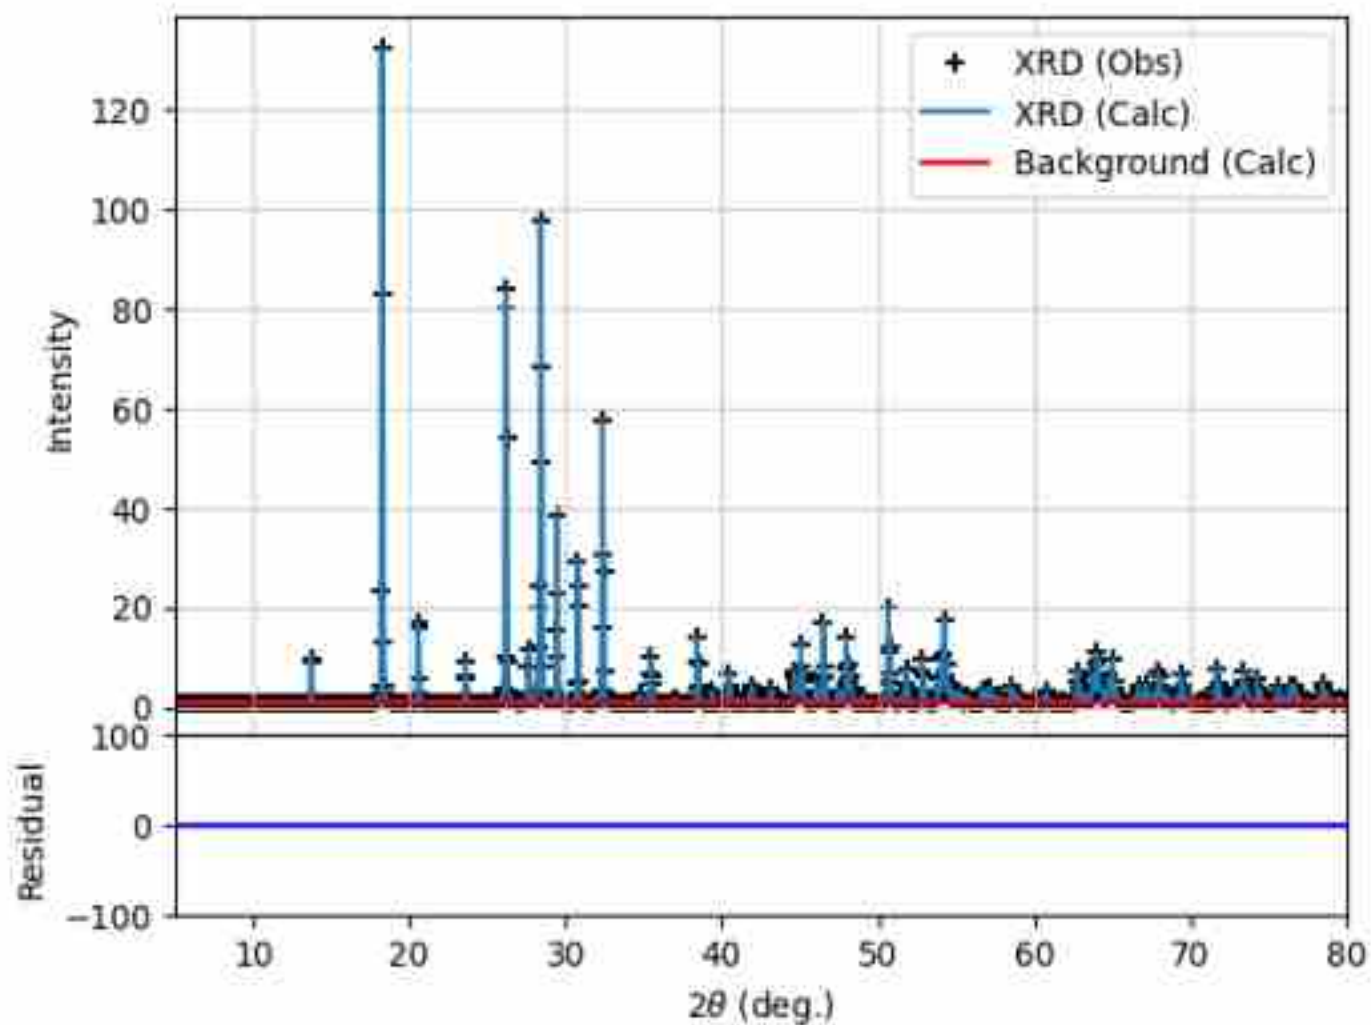

| RMSE before RR | Rwp     | RMSE after RR |
|----------------|---------|---------------|
| 0.039          | 0.00266 | 0.00103       |

# Li<sub>5</sub>Nb<sub>2</sub>Cu<sub>3</sub>O<sub>10</sub>

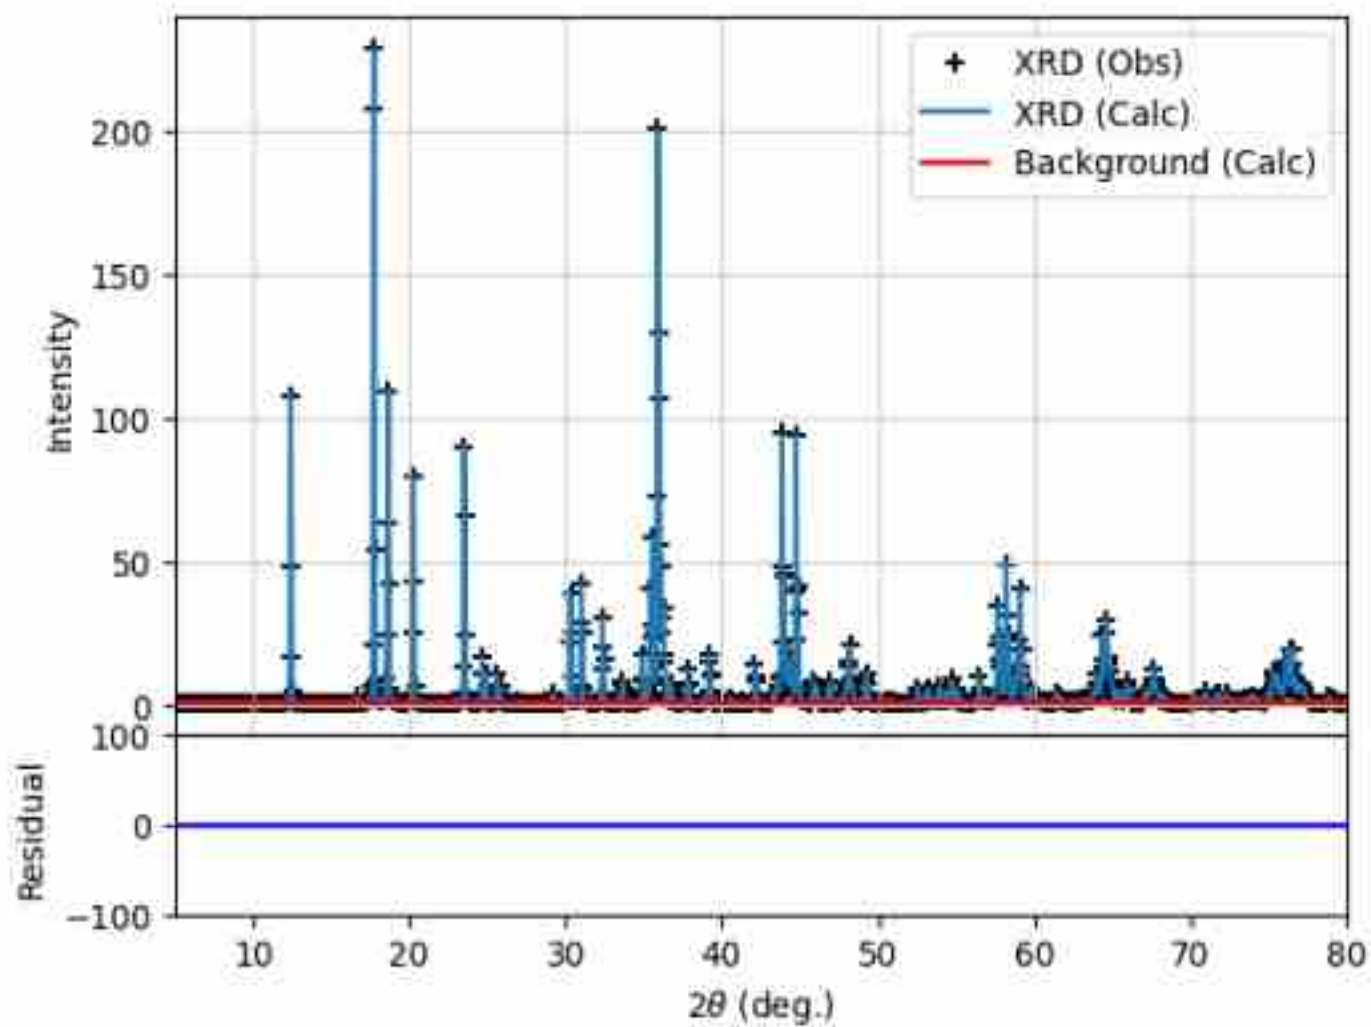

| RMSE before RR | Rwp     | RMSE after RR |
|----------------|---------|---------------|
| 0.039          | 0.00074 | 0.00028       |

# Li<sub>6</sub>Mn<sub>3</sub>Co<sub>1</sub>O<sub>10</sub>

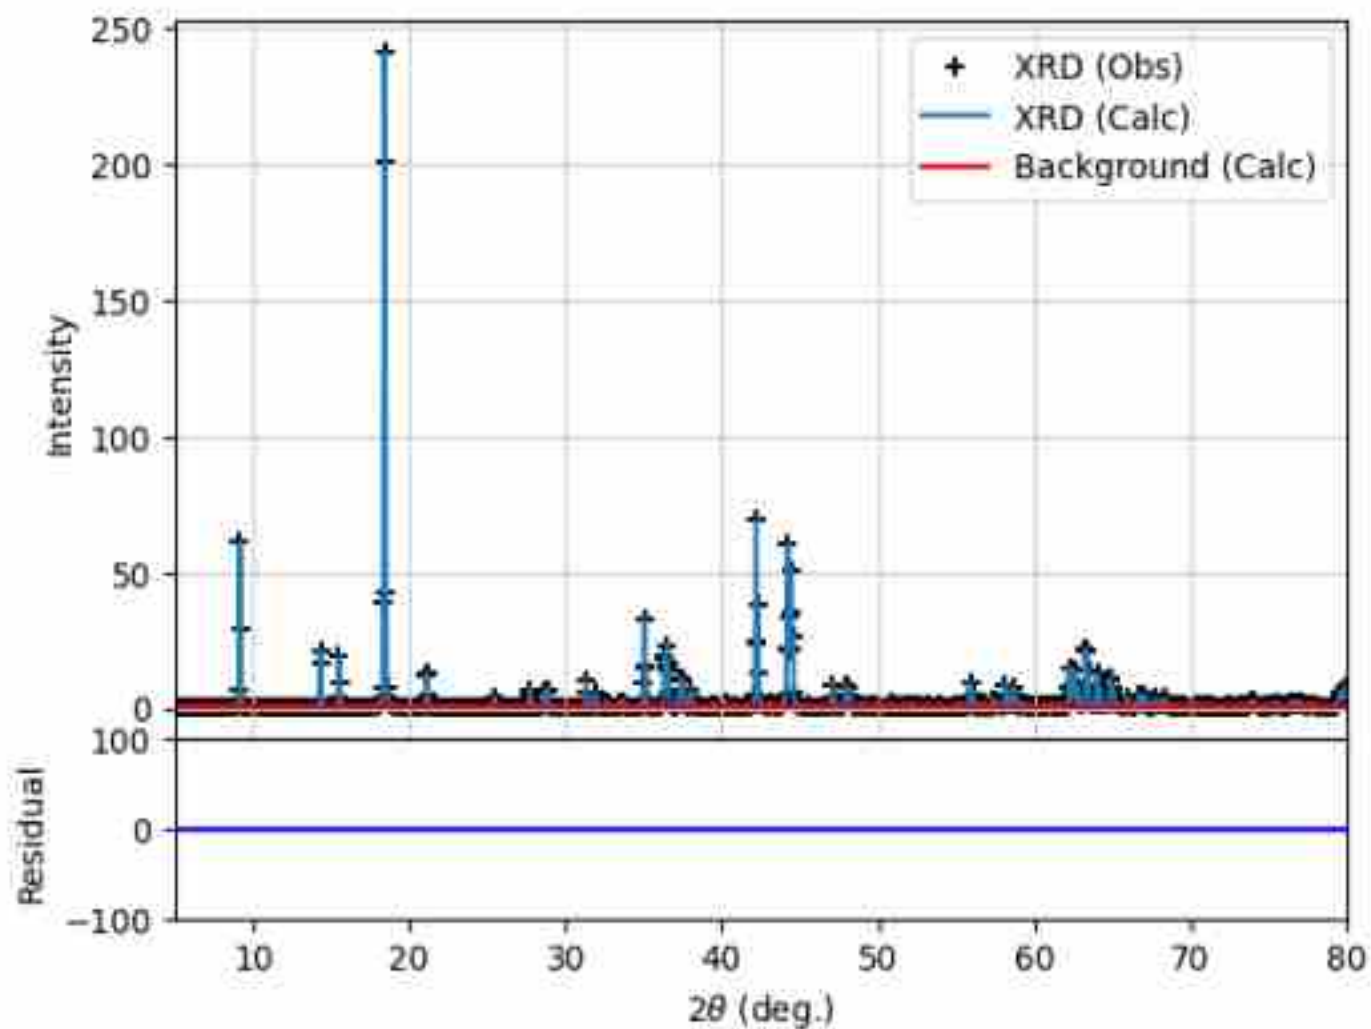

| RMSE before RR | Rwp     | RMSE after RR |
|----------------|---------|---------------|
| 0.039          | 0.00127 | 4e-05         |



# Li<sub>6</sub>Mn<sub>4</sub>O<sub>10</sub>

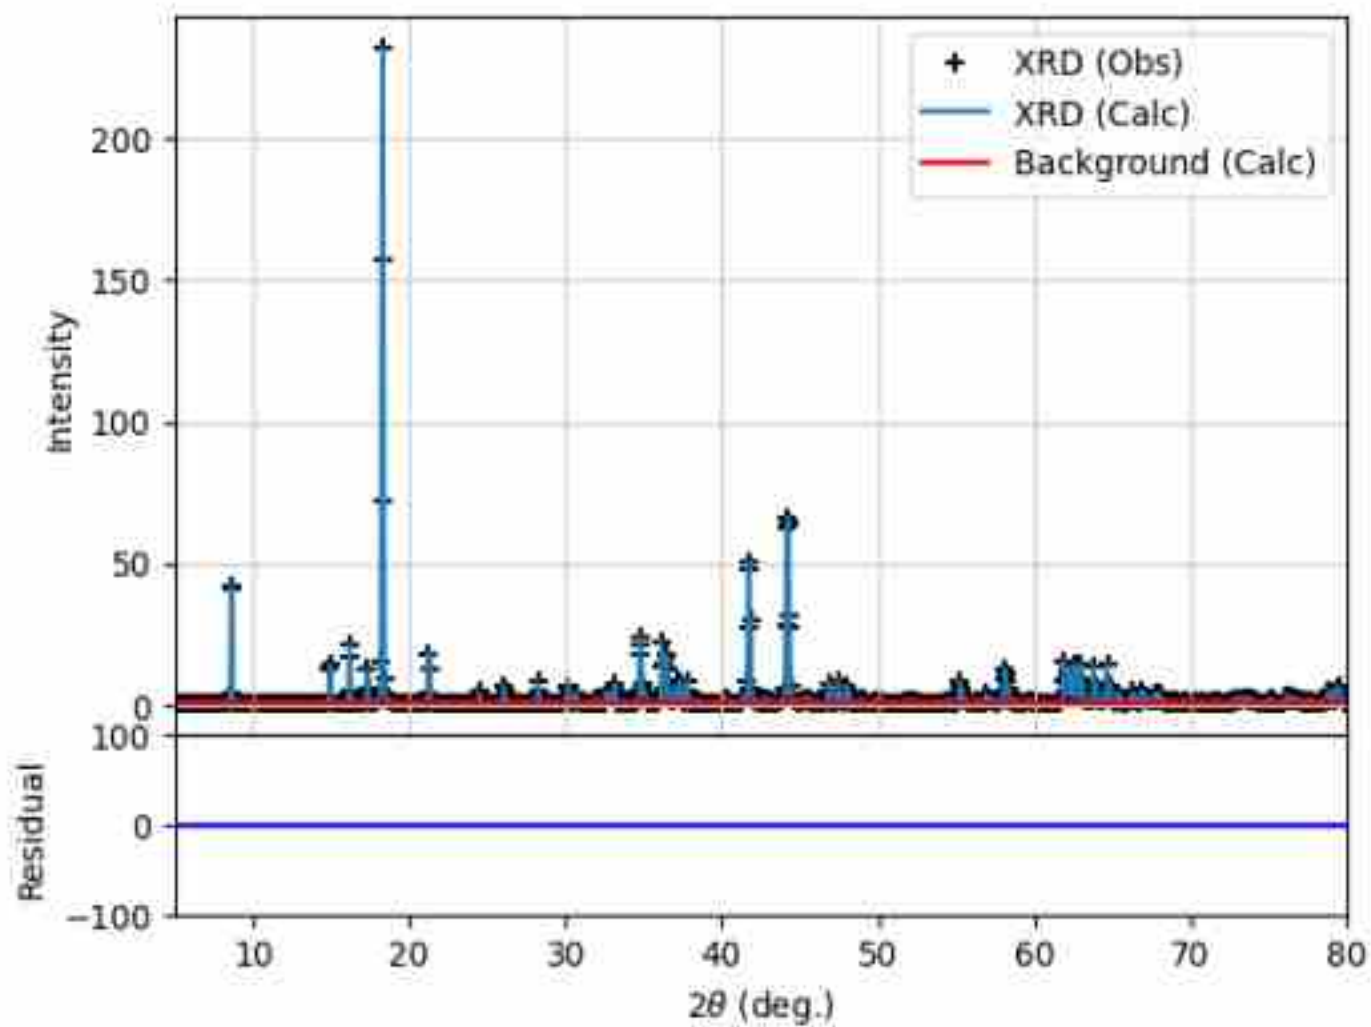

| RMSE before RR | Rwp   | RMSE after RR |
|----------------|-------|---------------|
| 0.039          | 0.002 | 0.00074       |

# Mg<sub>2</sub>Cu<sub>4</sub>O<sub>6</sub>

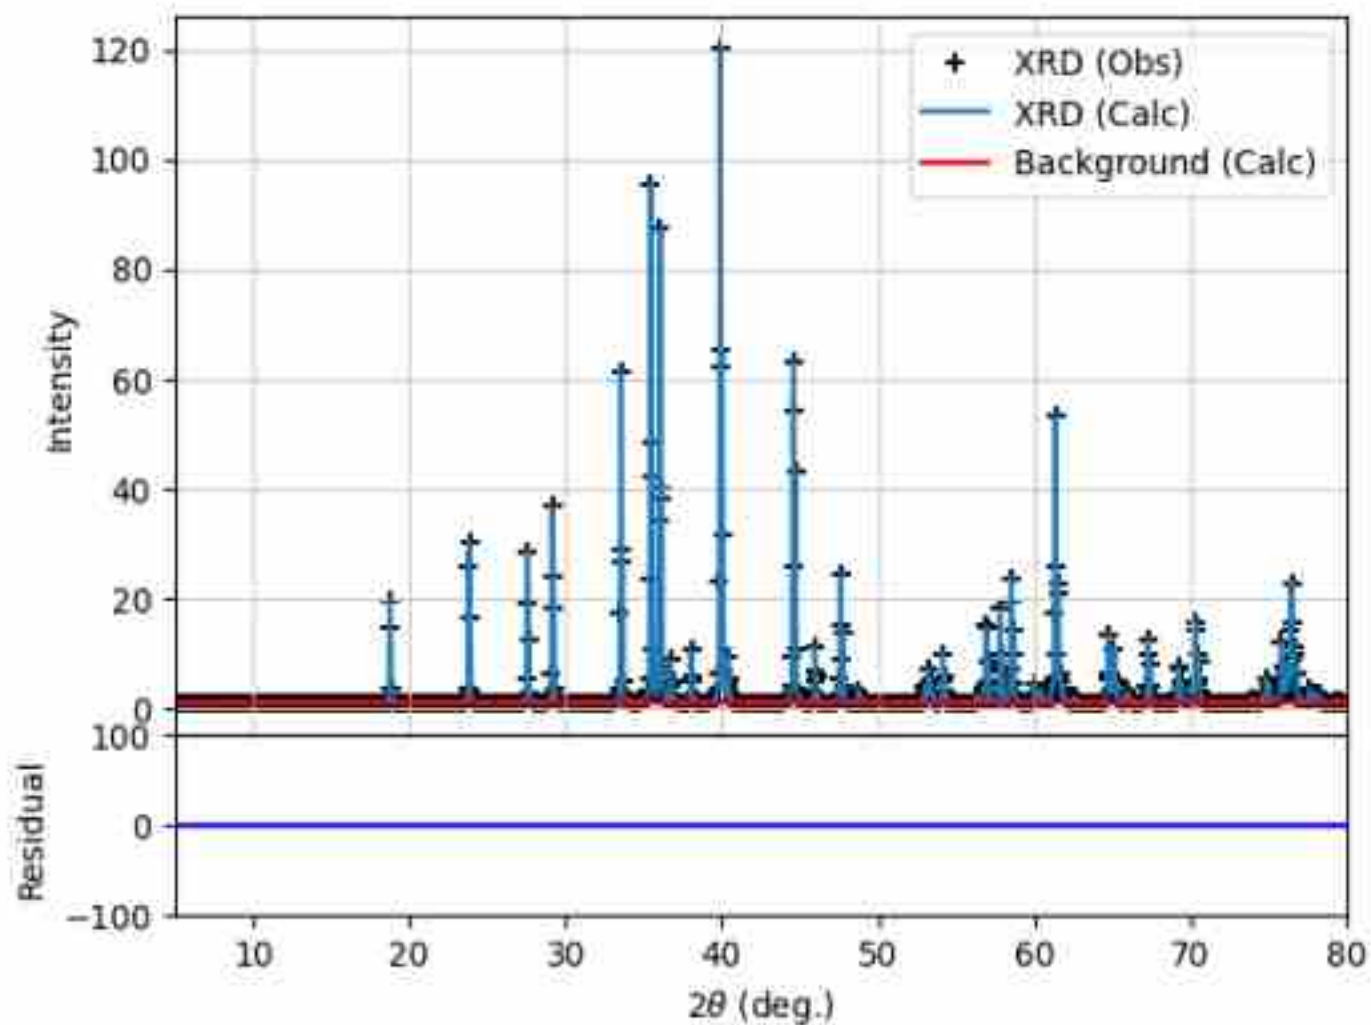

| RMSE before RR | Rwp     | RMSE after RR |
|----------------|---------|---------------|
| 0.039          | 0.00493 | 0.001         |

# Mg<sub>4</sub>Ti<sub>4</sub>N<sub>8</sub>

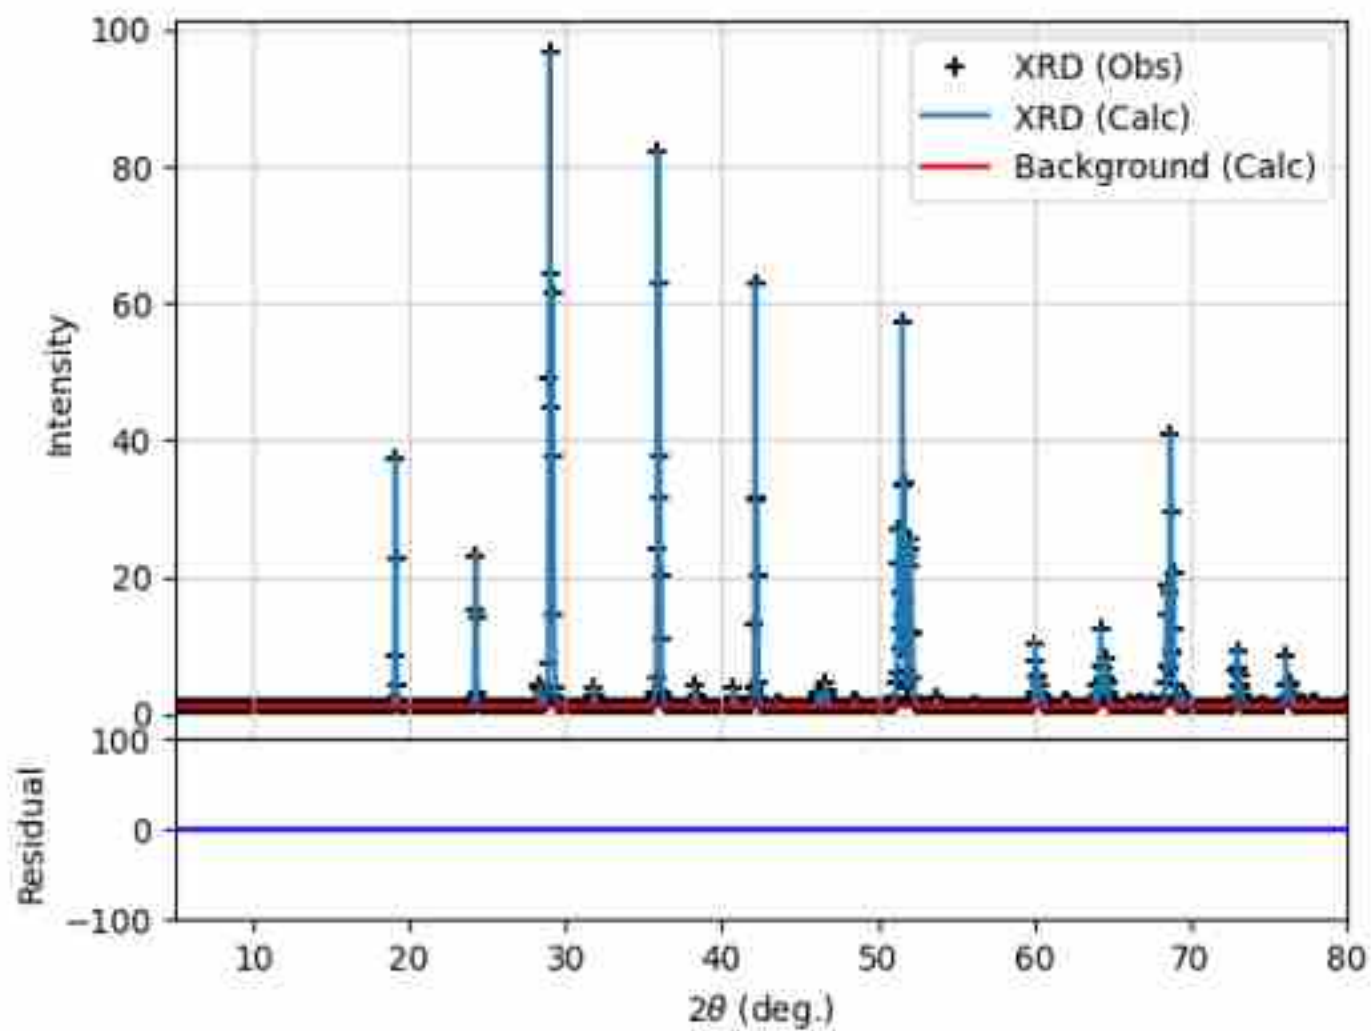

| RMSE before RR | Rwp     | RMSE after RR |
|----------------|---------|---------------|
| 0.039          | 0.00458 | 0.00152       |

# Mn<sub>2</sub>F<sub>6</sub>

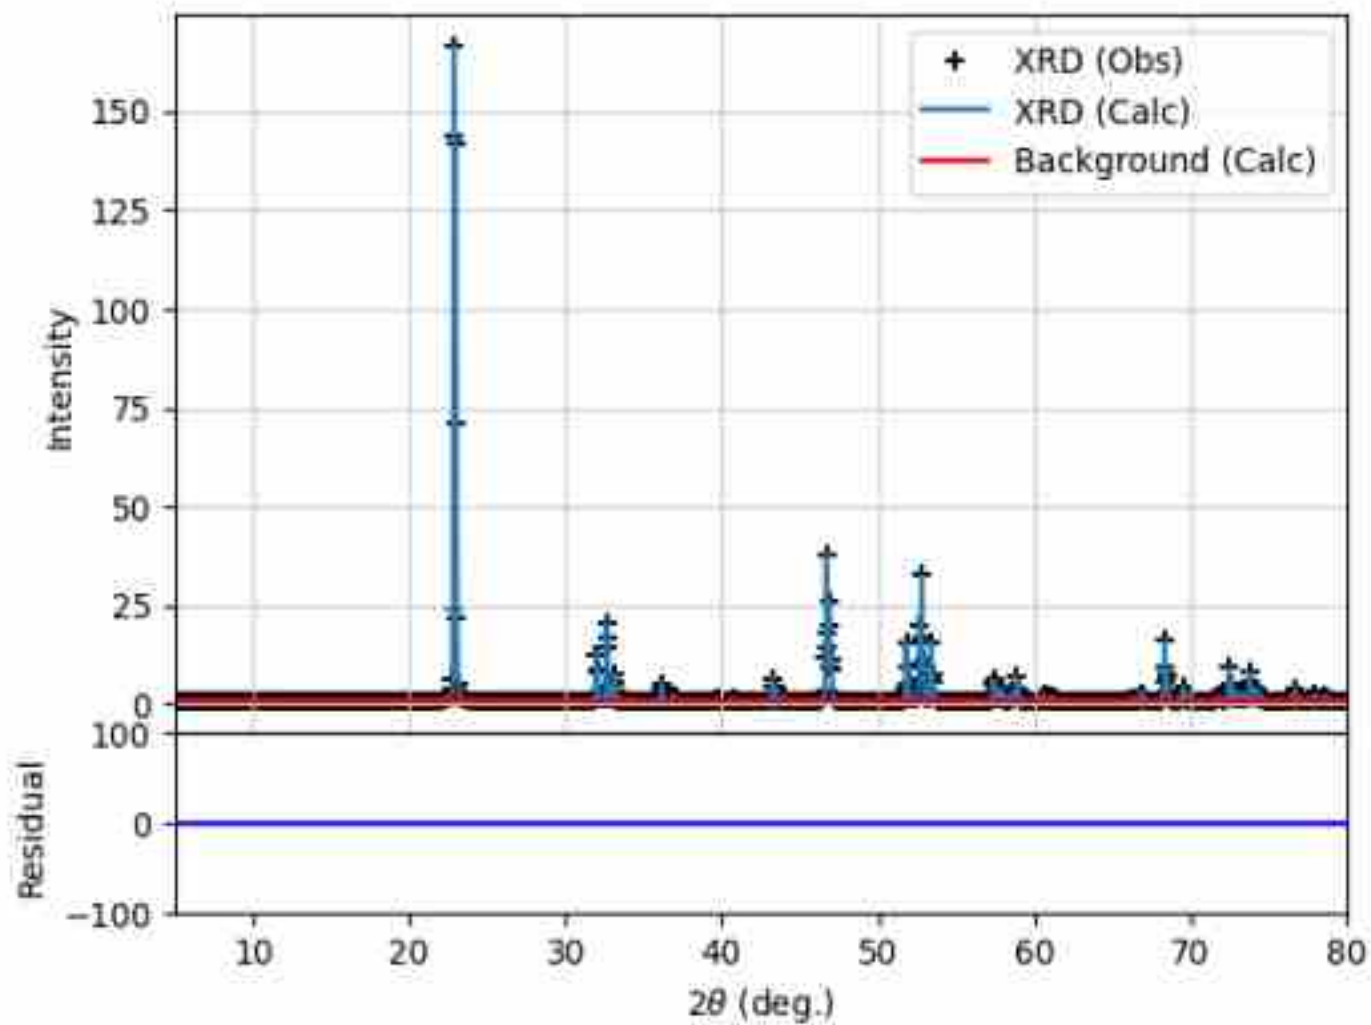

| RMSE before RR | Rwp     | RMSE after RR |
|----------------|---------|---------------|
| 0.039          | 0.00296 | 0.00085       |

# Mn<sub>4</sub>Zn<sub>4</sub>N<sub>8</sub>

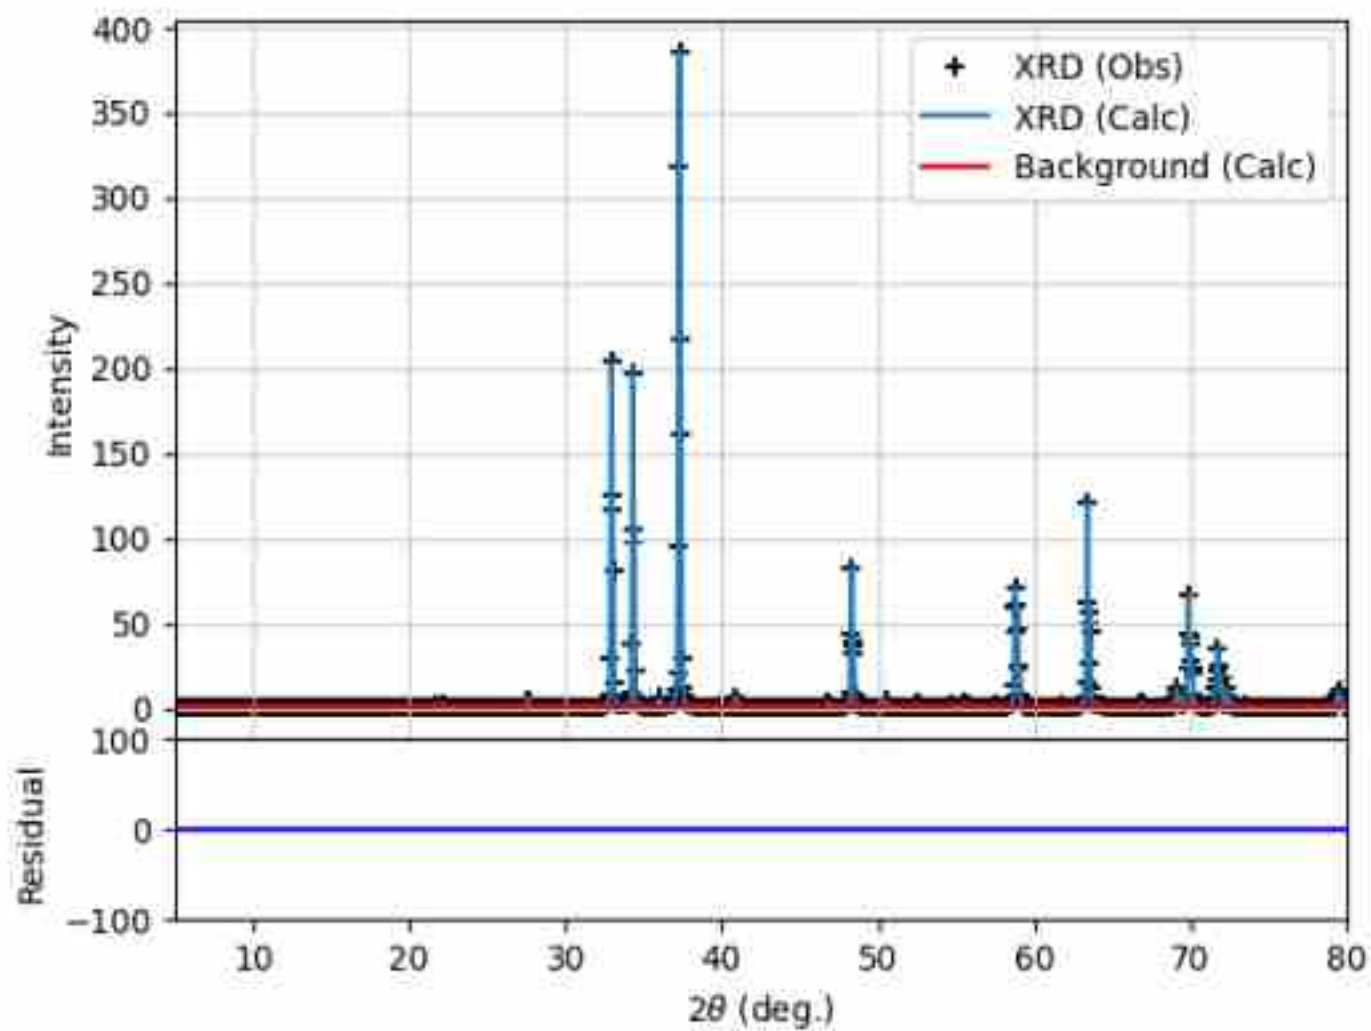

| RMSE before RR | Rwp     | RMSE after RR |
|----------------|---------|---------------|
| 0.039          | 0.00332 | 0.00122       |

# Mo<sub>3</sub>Se<sub>2</sub>S<sub>4</sub>

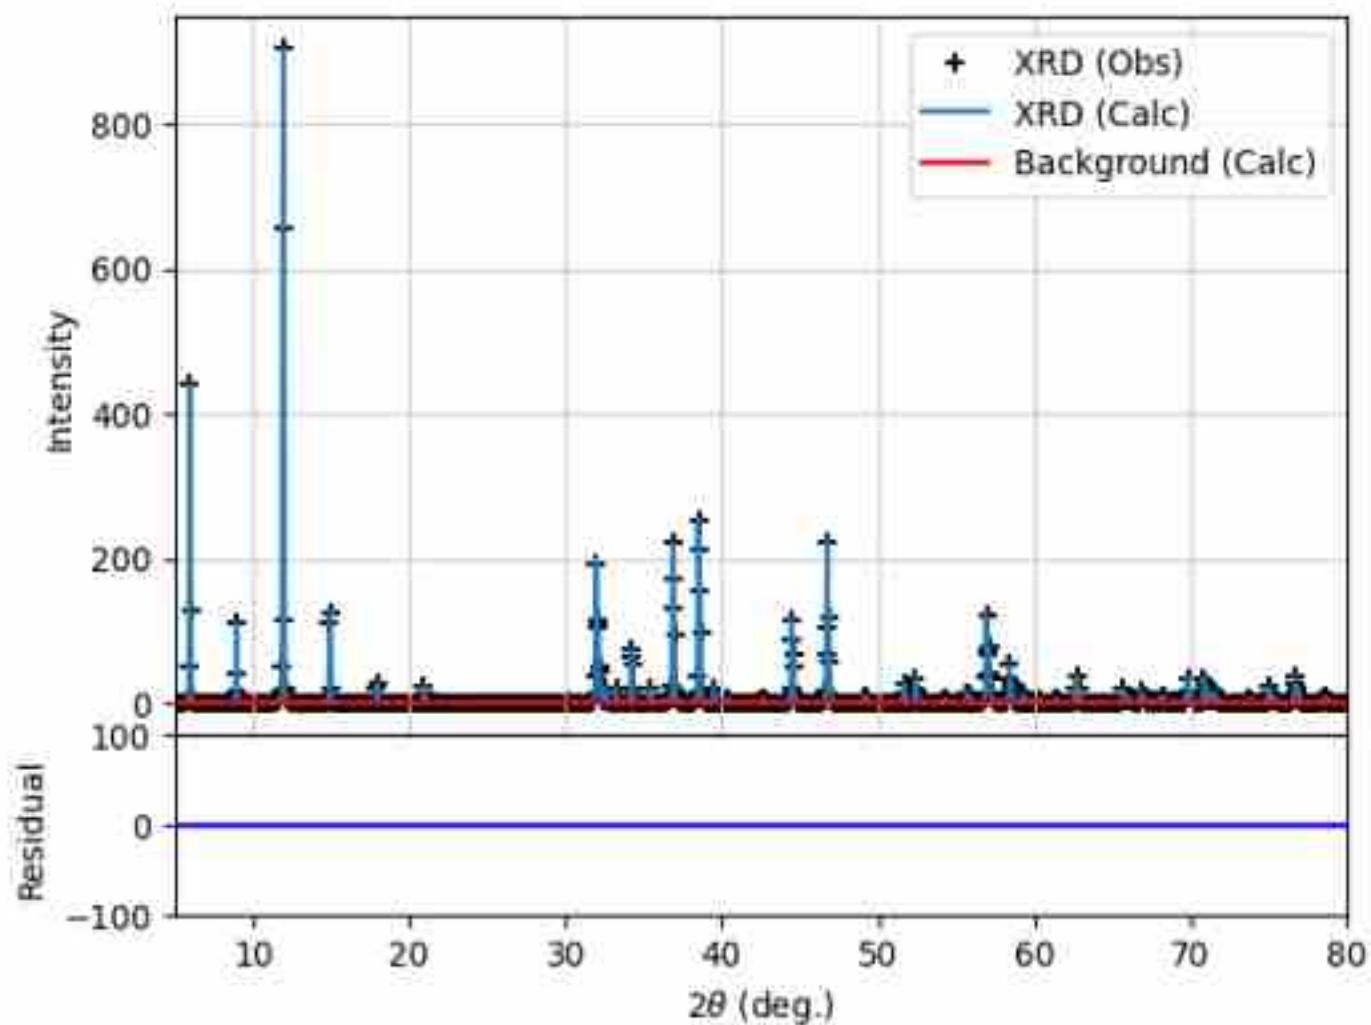

| RMSE before RR | Rwp     | RMSE after RR |
|----------------|---------|---------------|
| 0.039          | 0.00281 | 0.0004        |

# Nd<sub>4</sub>B<sub>4</sub>O<sub>12</sub>

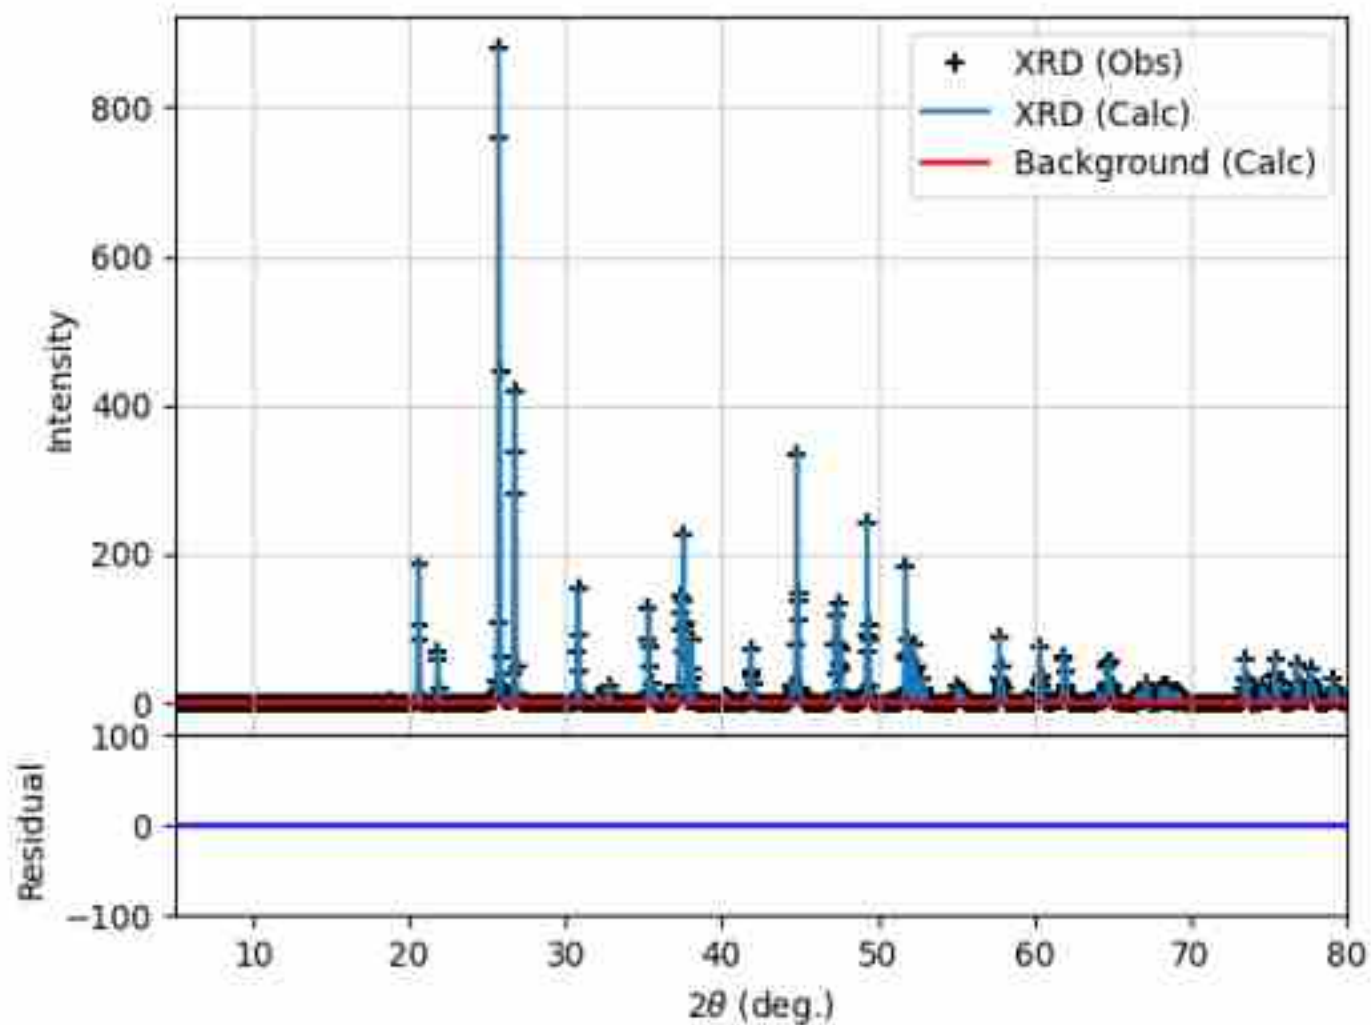

| RMSE before RR | Rwp     | RMSE after RR |
|----------------|---------|---------------|
| 0.039          | 0.00387 | 0.00156       |

# Rb<sub>2</sub>Sr<sub>2</sub>Si<sub>2</sub>H<sub>2</sub>O<sub>8</sub>

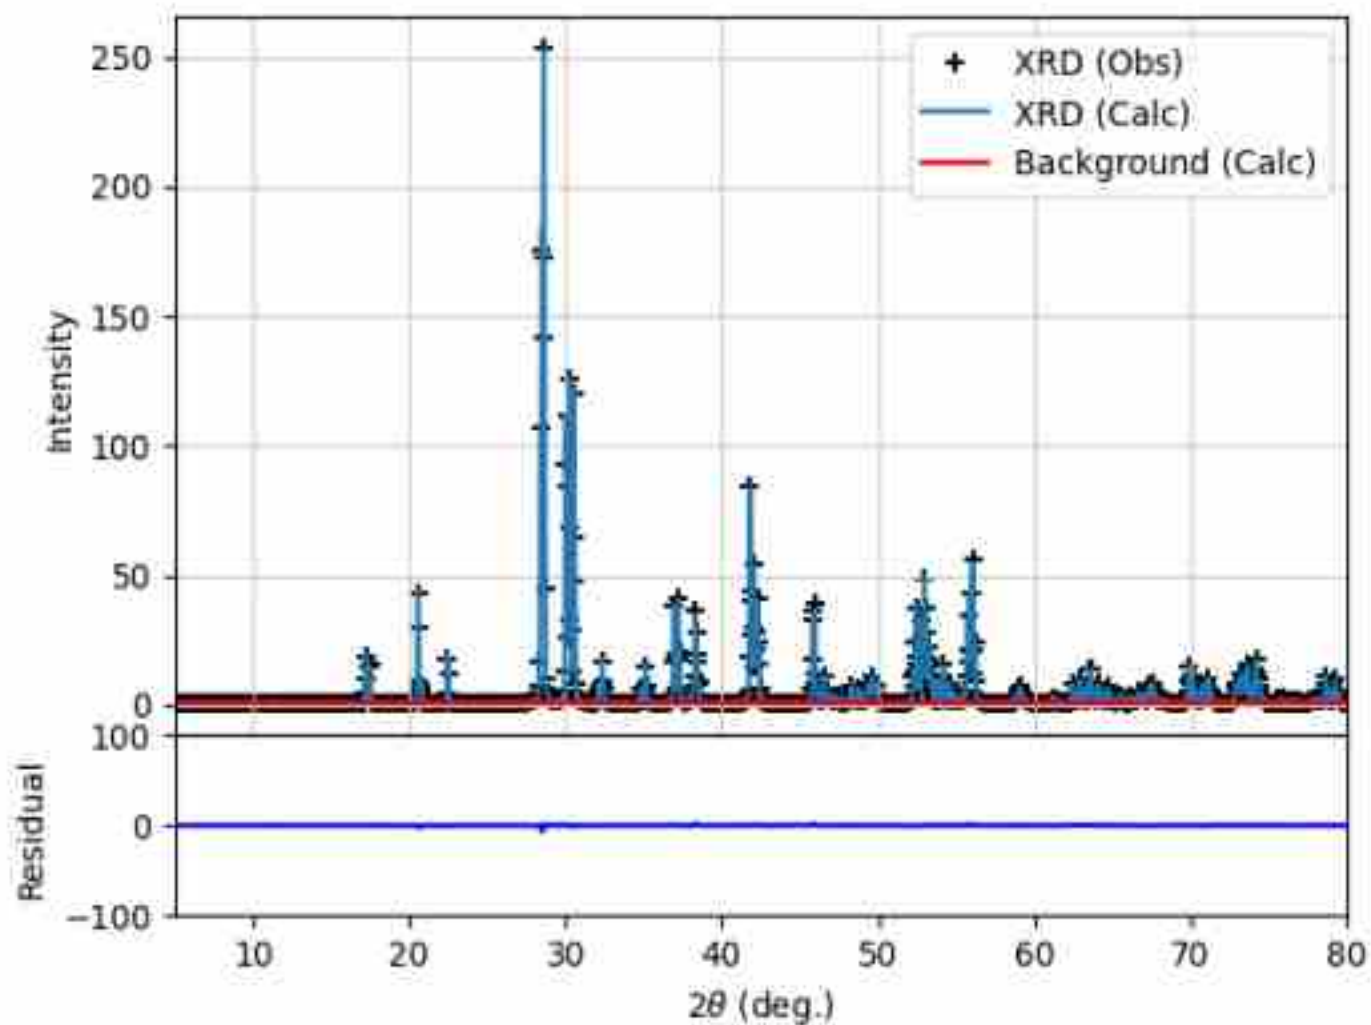

| RMSE before RR | Rwp     | RMSE after RR |
|----------------|---------|---------------|
| 0.039          | 3.81951 | None          |



# Sr<sub>2</sub>Nd<sub>2</sub>MnCuO<sub>8</sub>

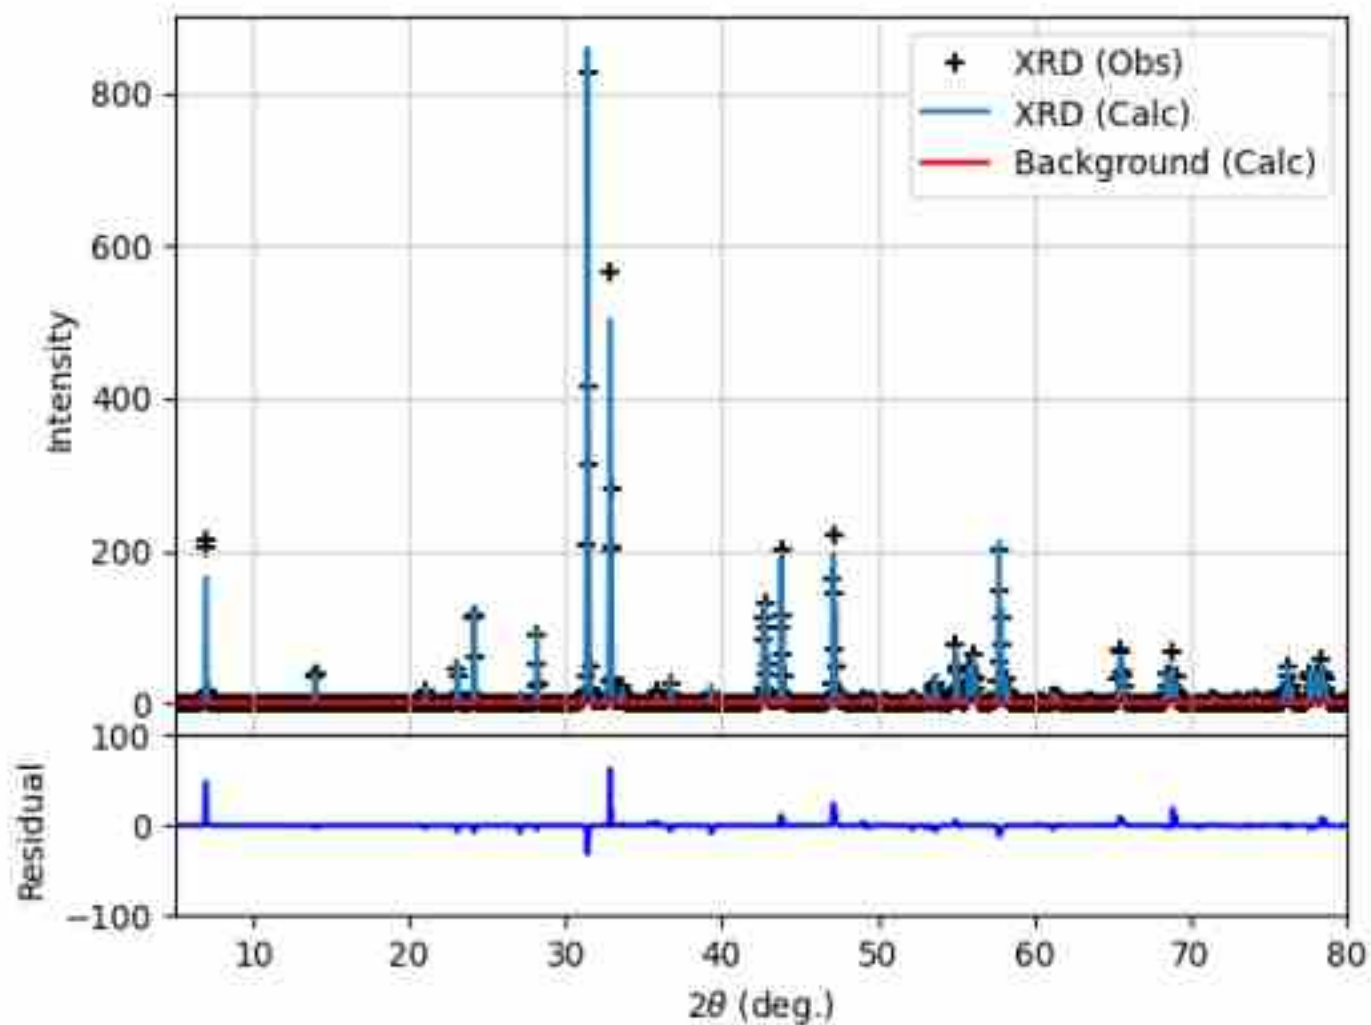

| RMSE before RR | Rwp      | RMSE after RR |
|----------------|----------|---------------|
| 0.039          | 13.05823 | 0.04102       |

# Tl4Sb2F10

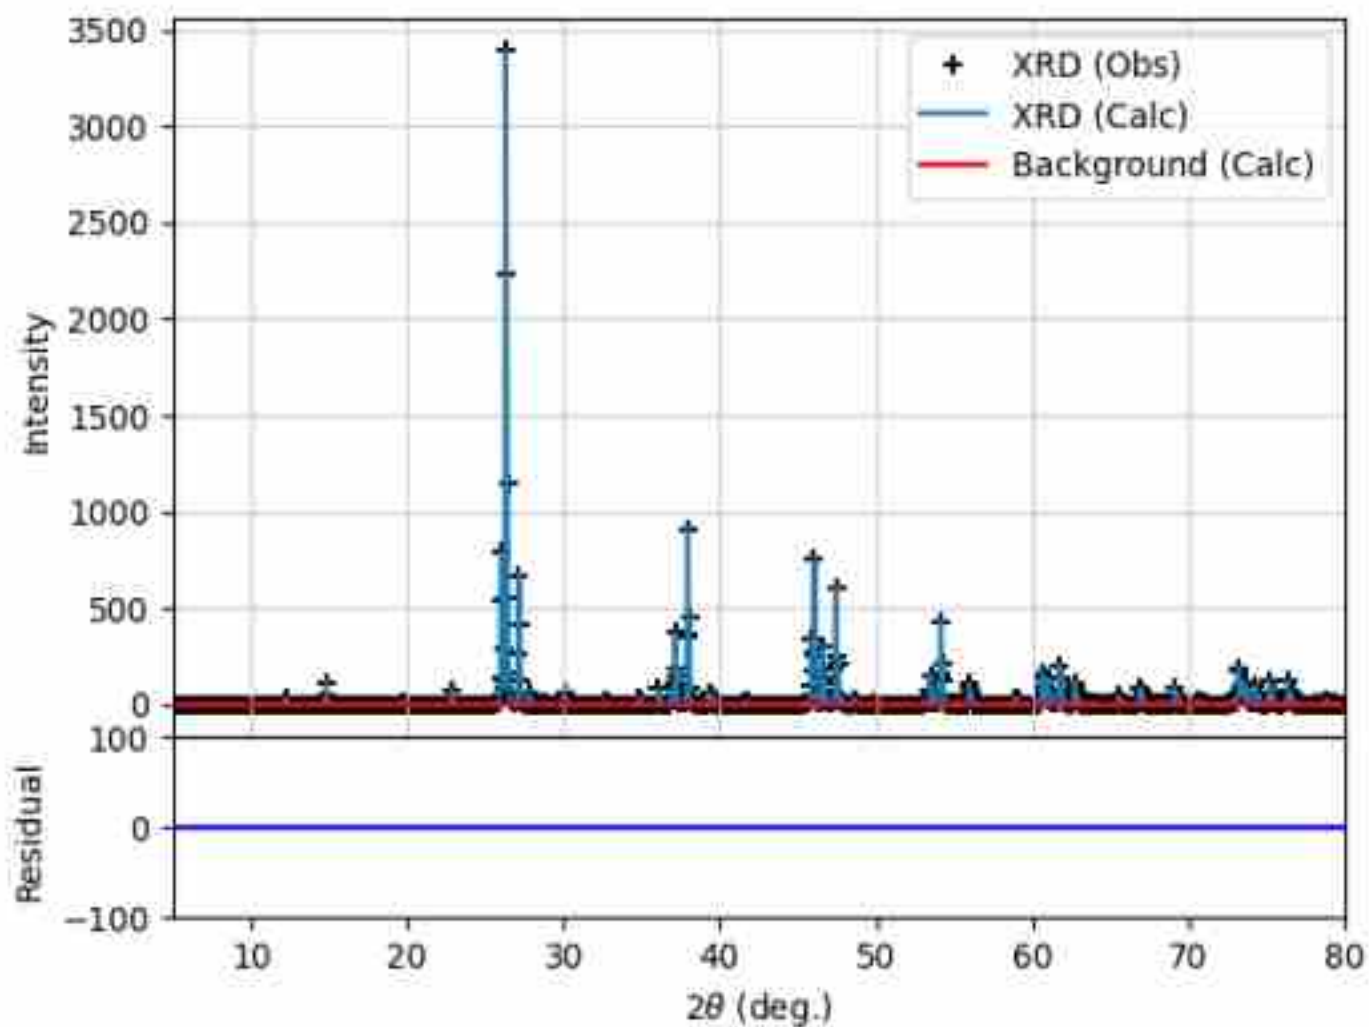

| RMSE before RR | Rwp     | RMSE after RR |
|----------------|---------|---------------|
| 0.039          | 0.00465 | 0.00104       |

# Ag<sub>4</sub>Sb<sub>4</sub>S<sub>8</sub>

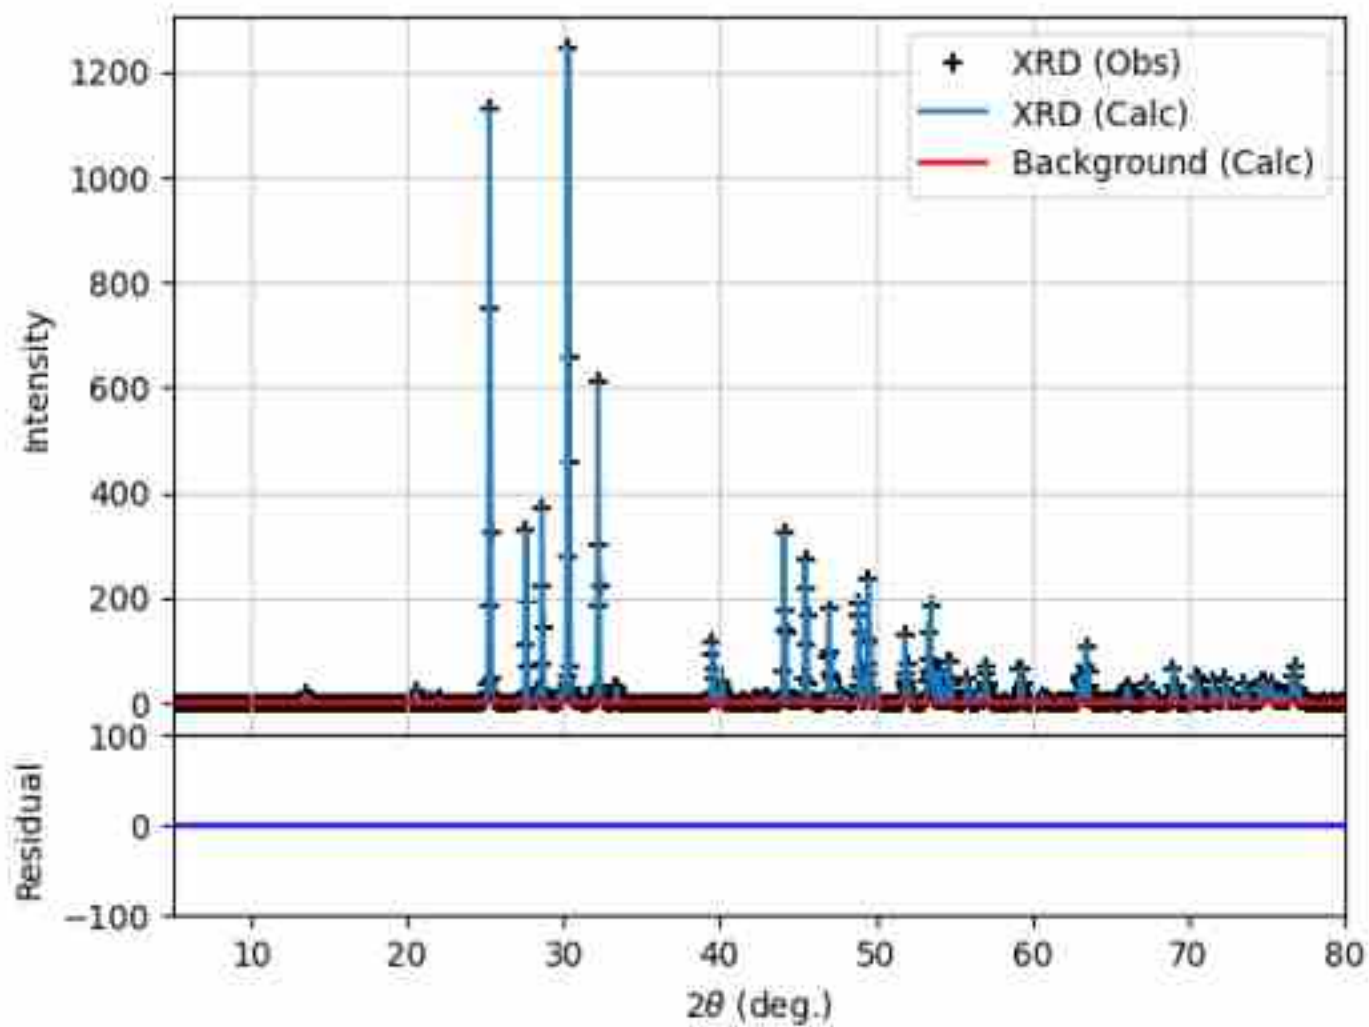

| RMSE before RR | Rwp     | RMSE after RR |
|----------------|---------|---------------|
| 0.041          | 0.00309 | 0.00042       |

# Ba<sub>2</sub>Nb<sub>1</sub>Cu<sub>2</sub>Pb<sub>2</sub>Cl<sub>11</sub>O<sub>8</sub>

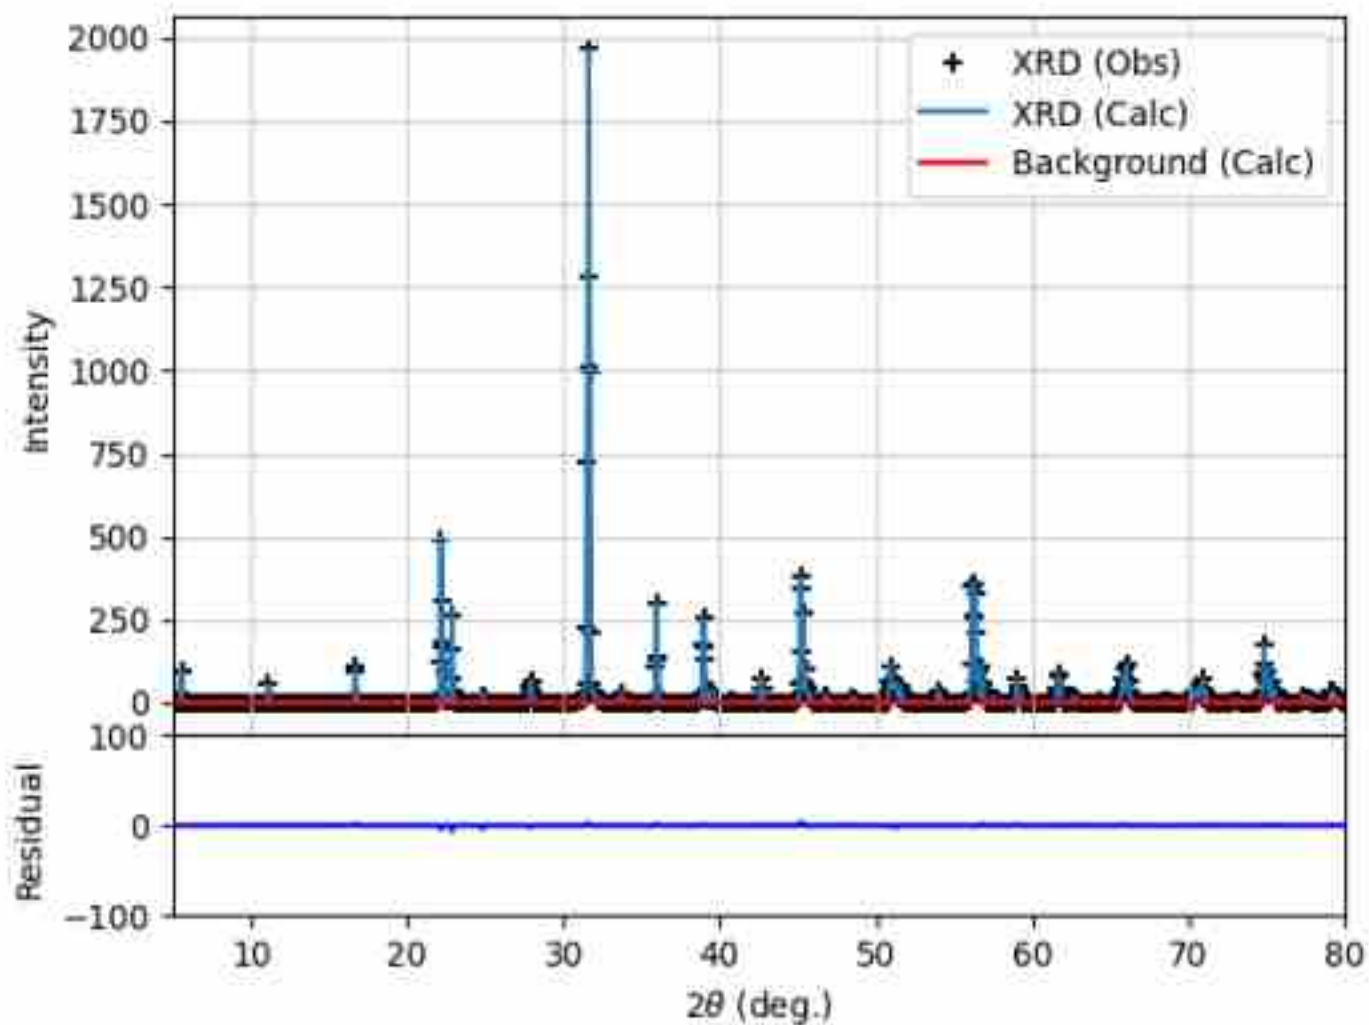

| RMSE before RR | Rwp     | RMSE after RR |
|----------------|---------|---------------|
| 0.041          | 1.16325 | 0.23098       |

# Ba<sub>6</sub>In<sub>2</sub>Se<sub>8</sub>Cl<sub>12</sub>

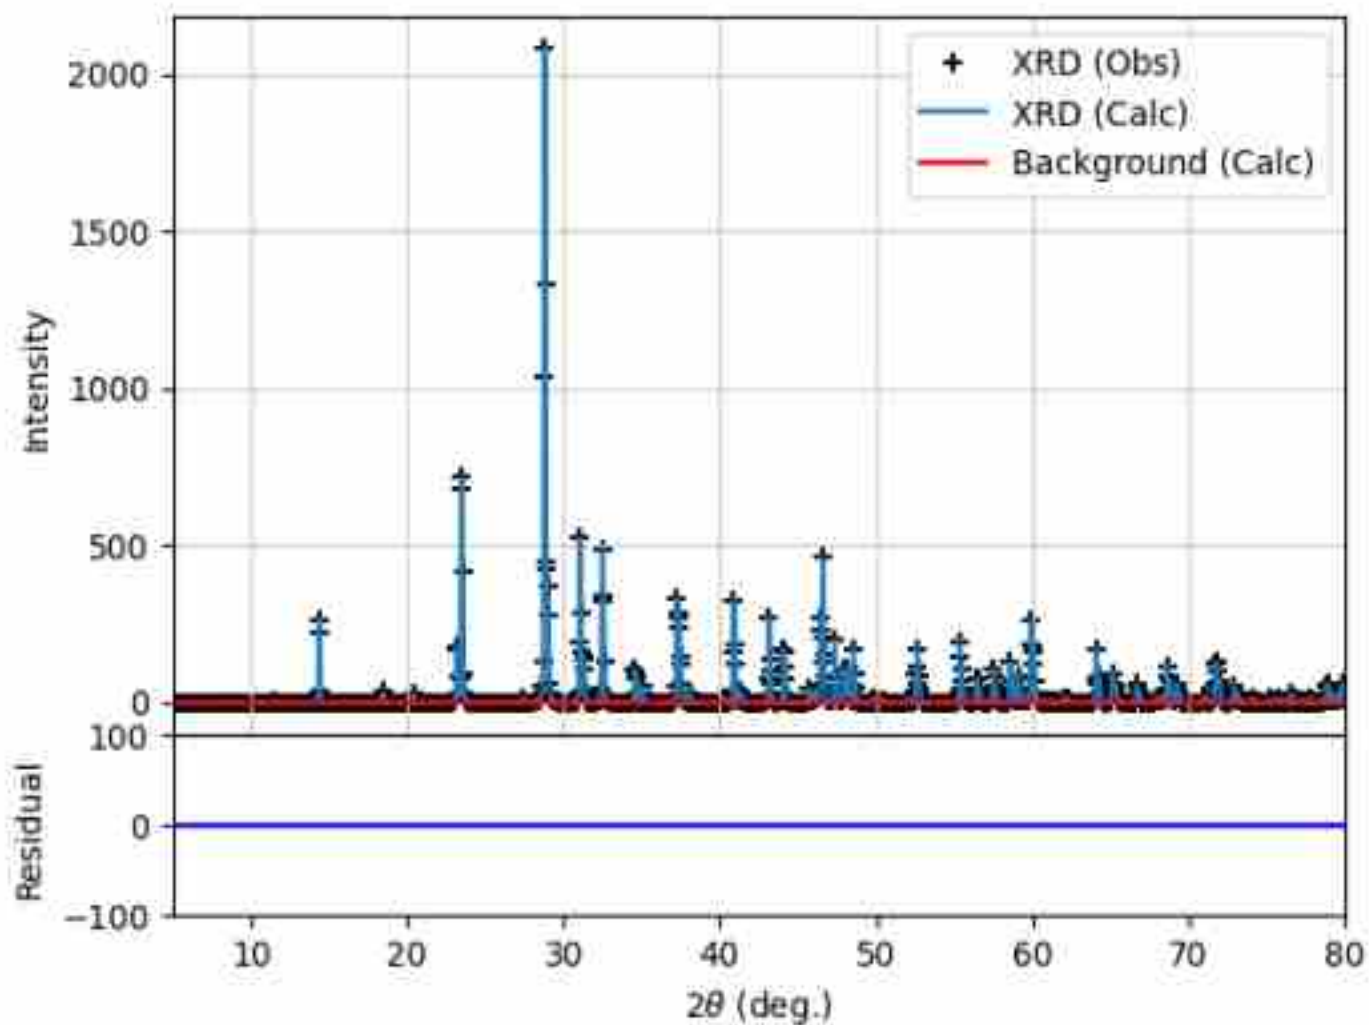

| RMSE before RR | Rwp     | RMSE after RR |
|----------------|---------|---------------|
| 0.041          | 0.00419 | 0.00058       |

# Ca<sub>4</sub>Zn<sub>4</sub>Cu<sub>2</sub>P<sub>6</sub>

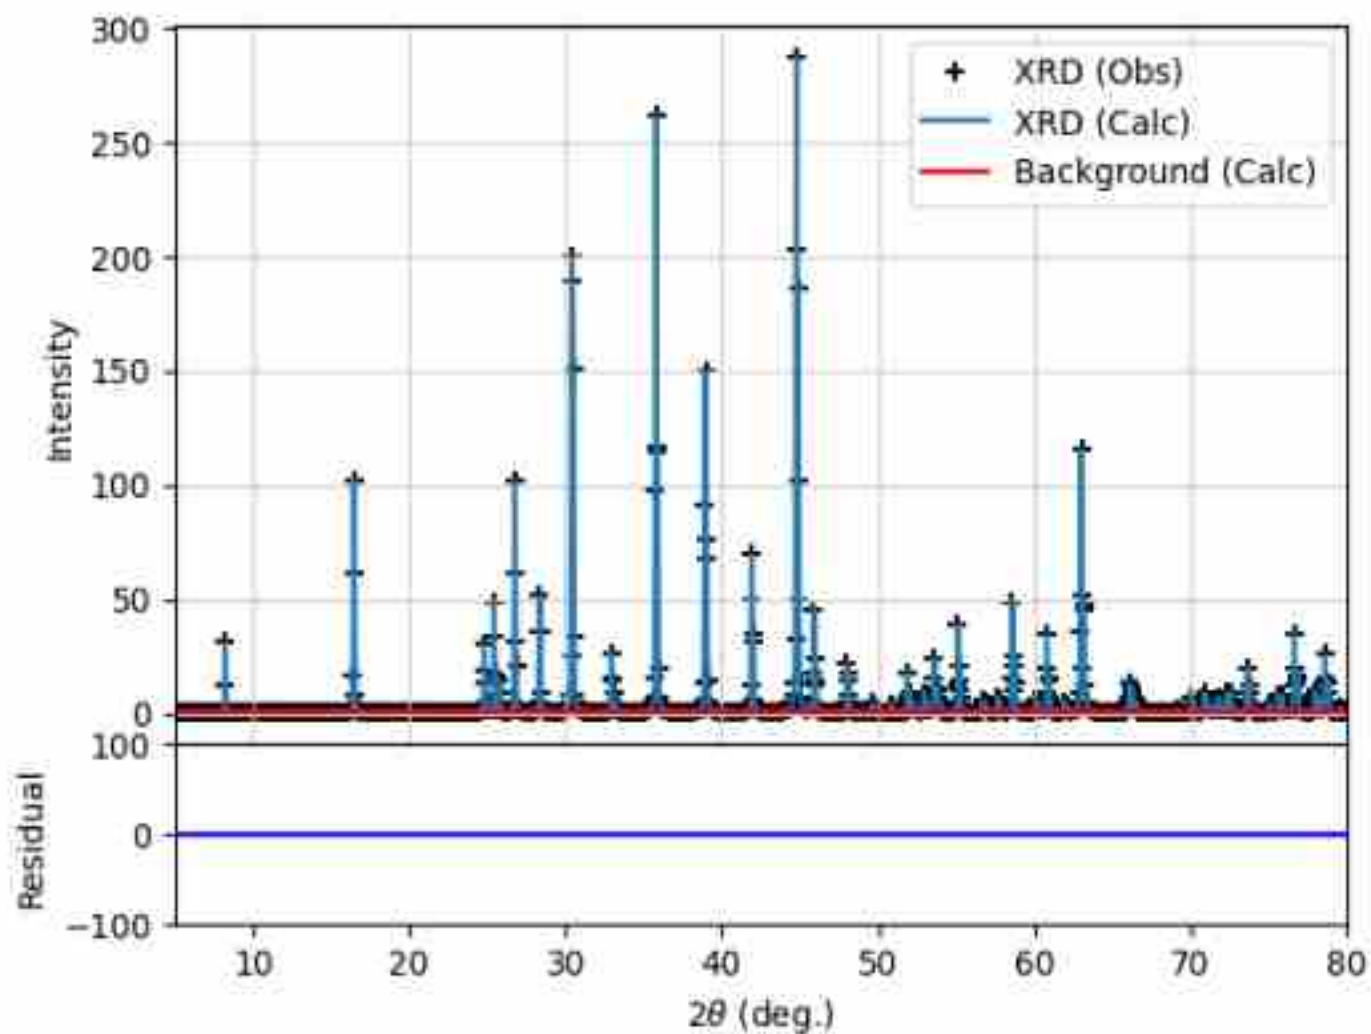

| RMSE before RR | Rwp     | RMSE after RR |
|----------------|---------|---------------|
| 0.041          | 0.00615 | 0.00099       |

# Cd1Cu2Se2

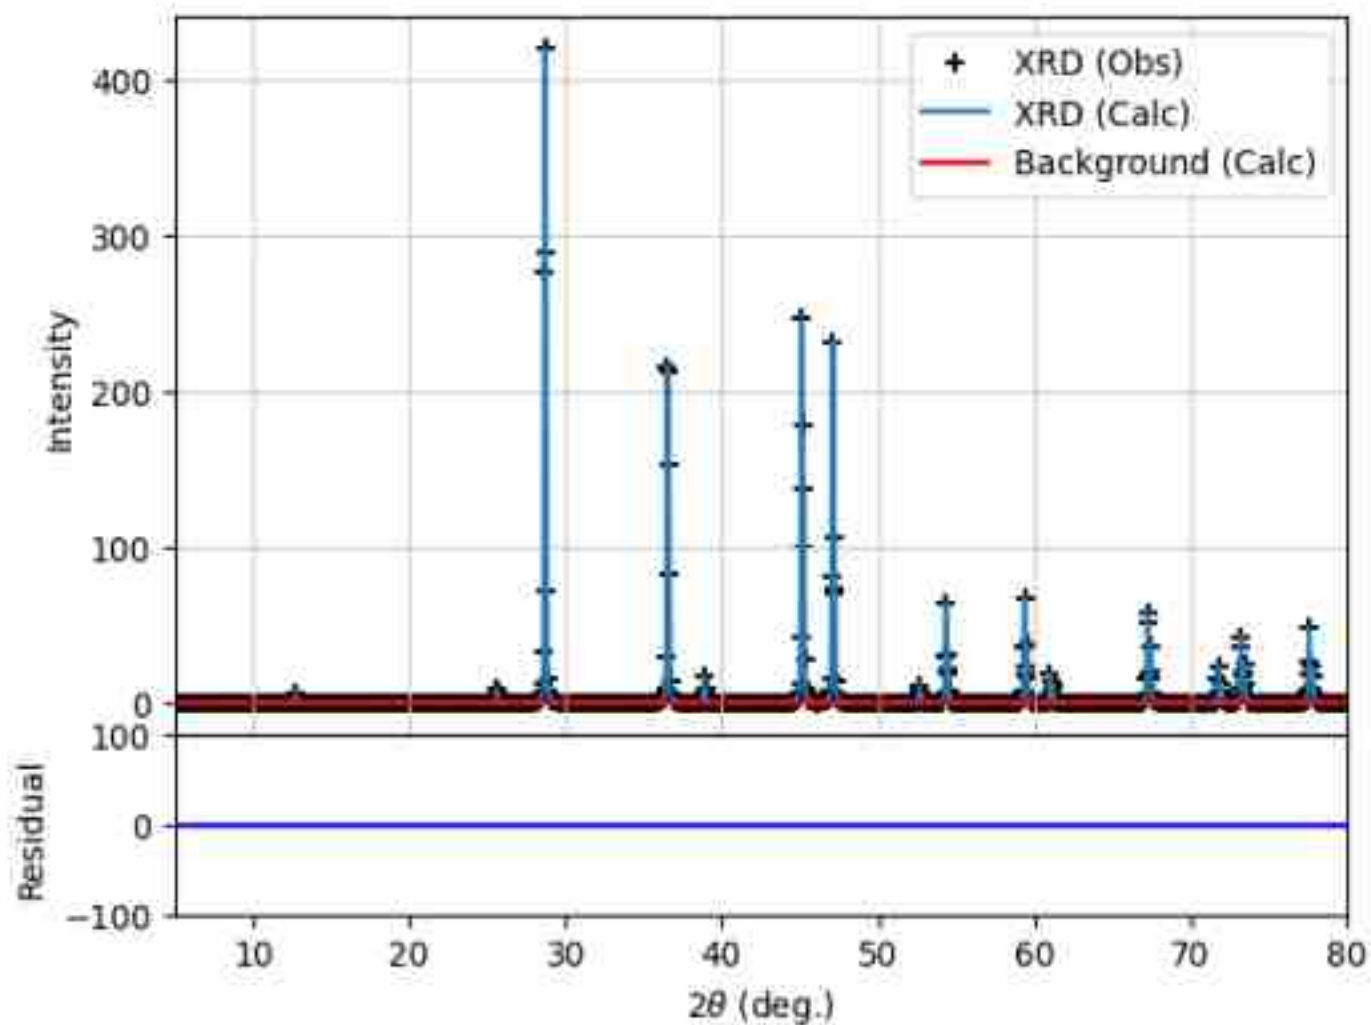

| RMSE before RR | Rwp     | RMSE after RR |
|----------------|---------|---------------|
| 0.041          | 0.00354 | 0.00068       |

# Ce<sub>4</sub>Zn<sub>4</sub>Au<sub>4</sub>

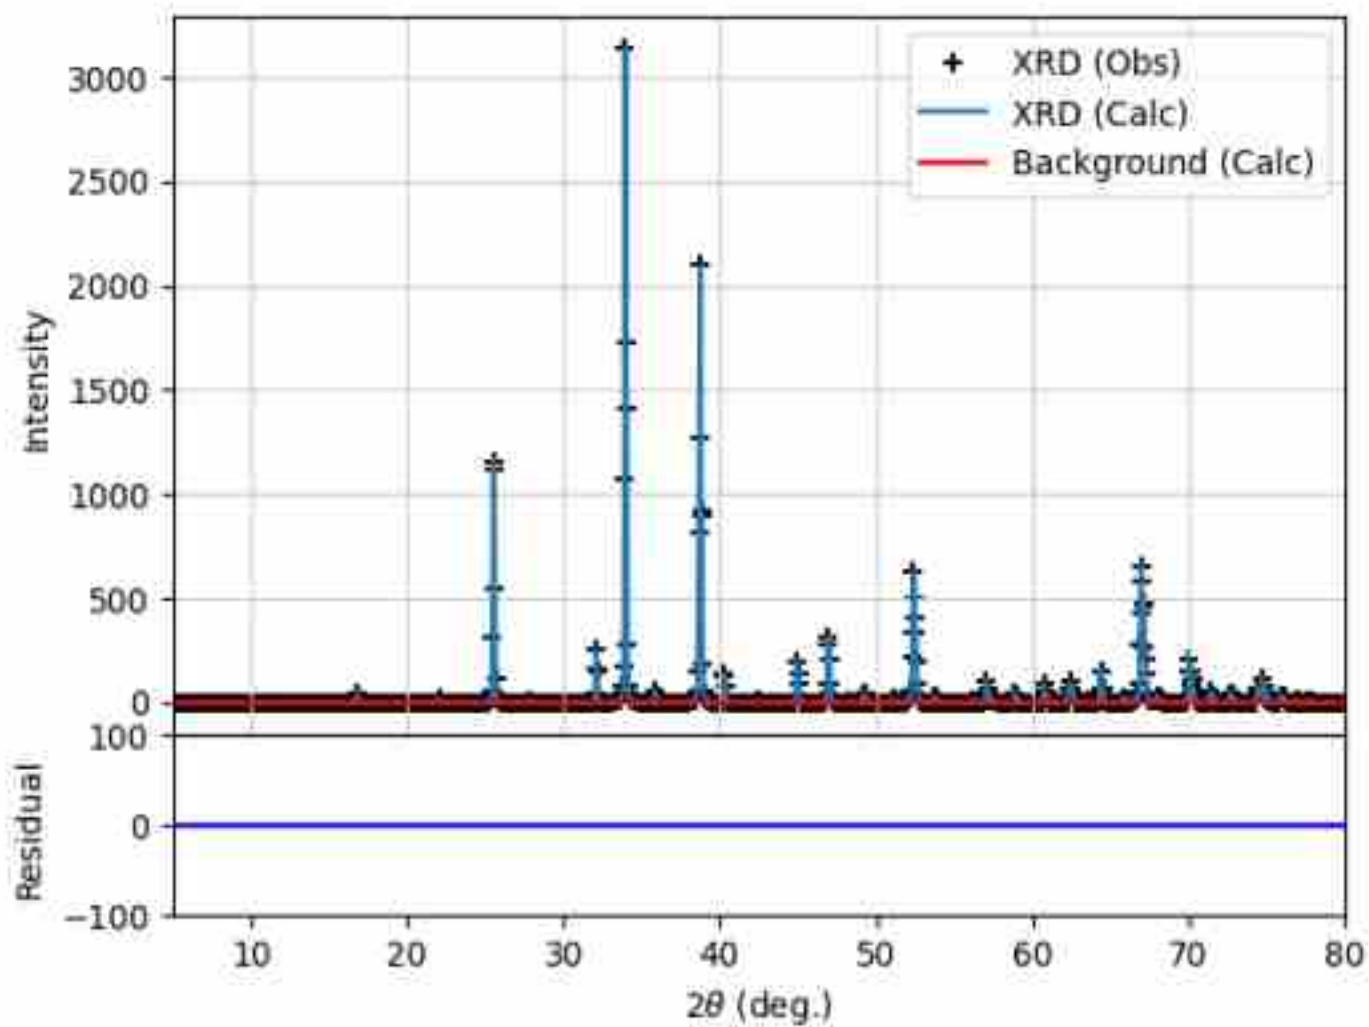

| RMSE before RR | Rwp     | RMSE after RR |
|----------------|---------|---------------|
| 0.041          | 0.00336 | 0.00033       |



# Co<sub>4</sub>Cu<sub>3</sub>O<sub>12</sub>

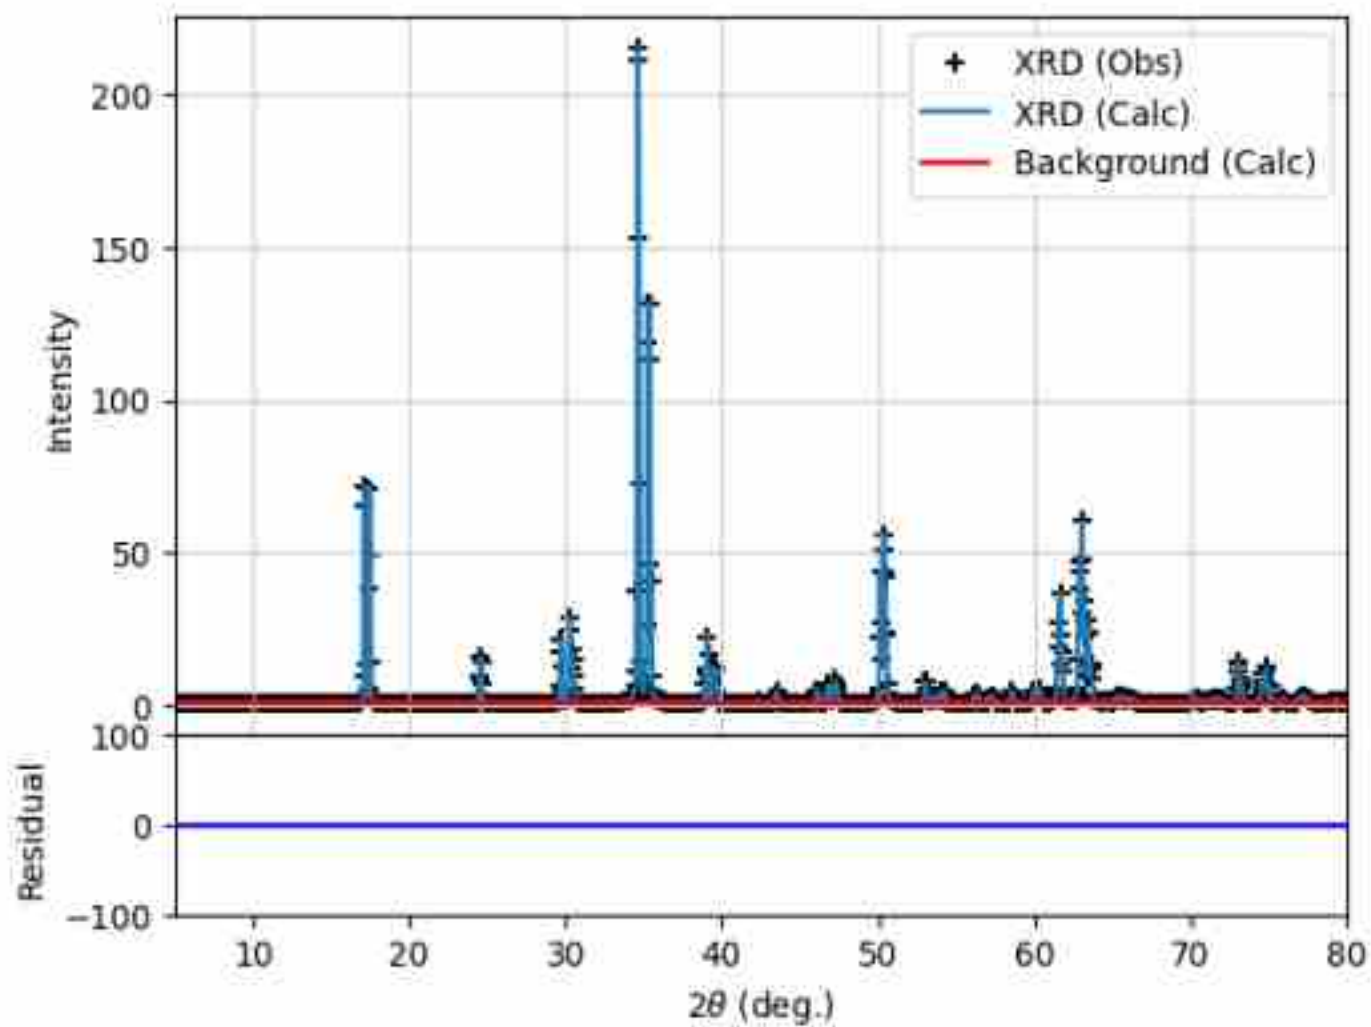

| RMSE before RR | Rwp     | RMSE after RR |
|----------------|---------|---------------|
| 0.041          | 0.00063 | 0.00053       |

# K1Ni1Sb1O4

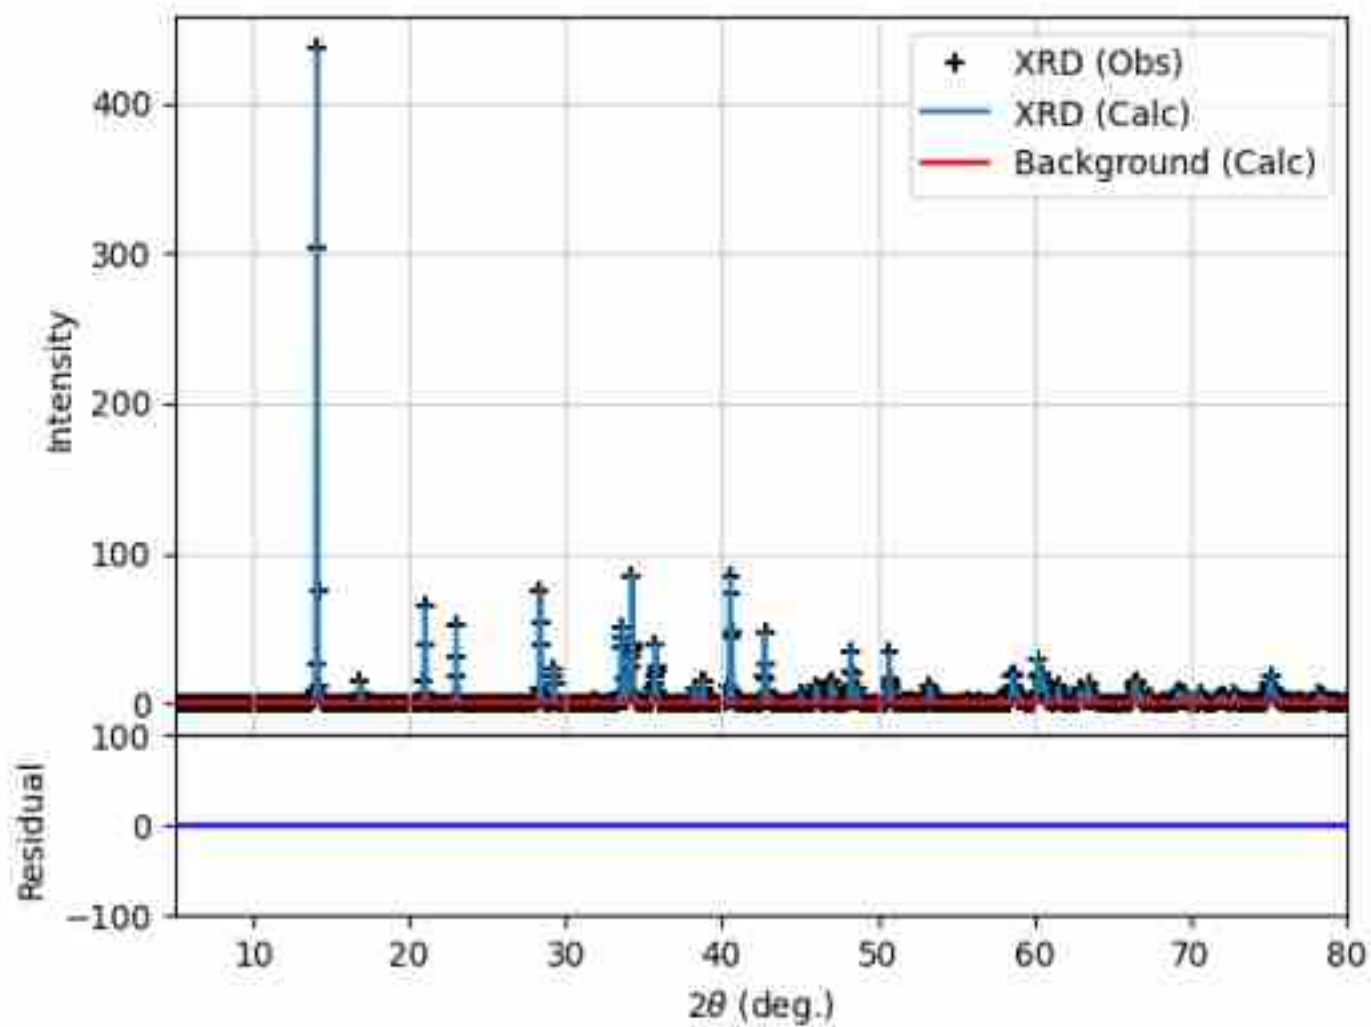

| RMSE before RR | Rwp     | RMSE after RR |
|----------------|---------|---------------|
| 0.041          | 0.00148 | 0.00045       |

# K<sub>2</sub>La<sub>2</sub>Ti<sub>2</sub>O<sub>8</sub>

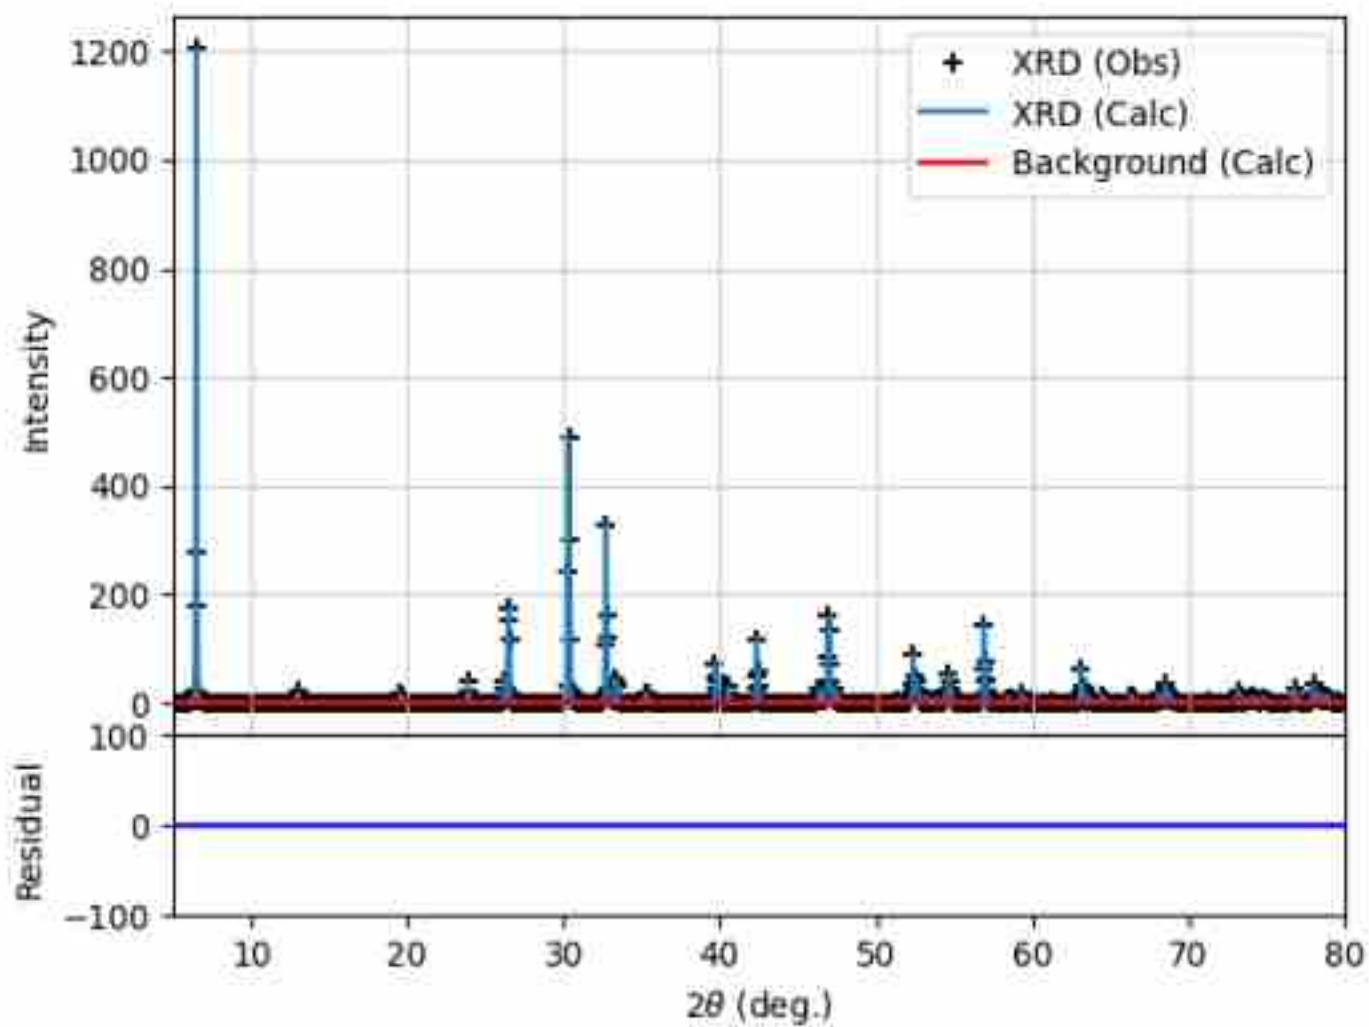

| RMSE before RR | Rwp     | RMSE after RR |
|----------------|---------|---------------|
| 0.041          | 0.00433 | 0.00177       |

# K6Sb2O8

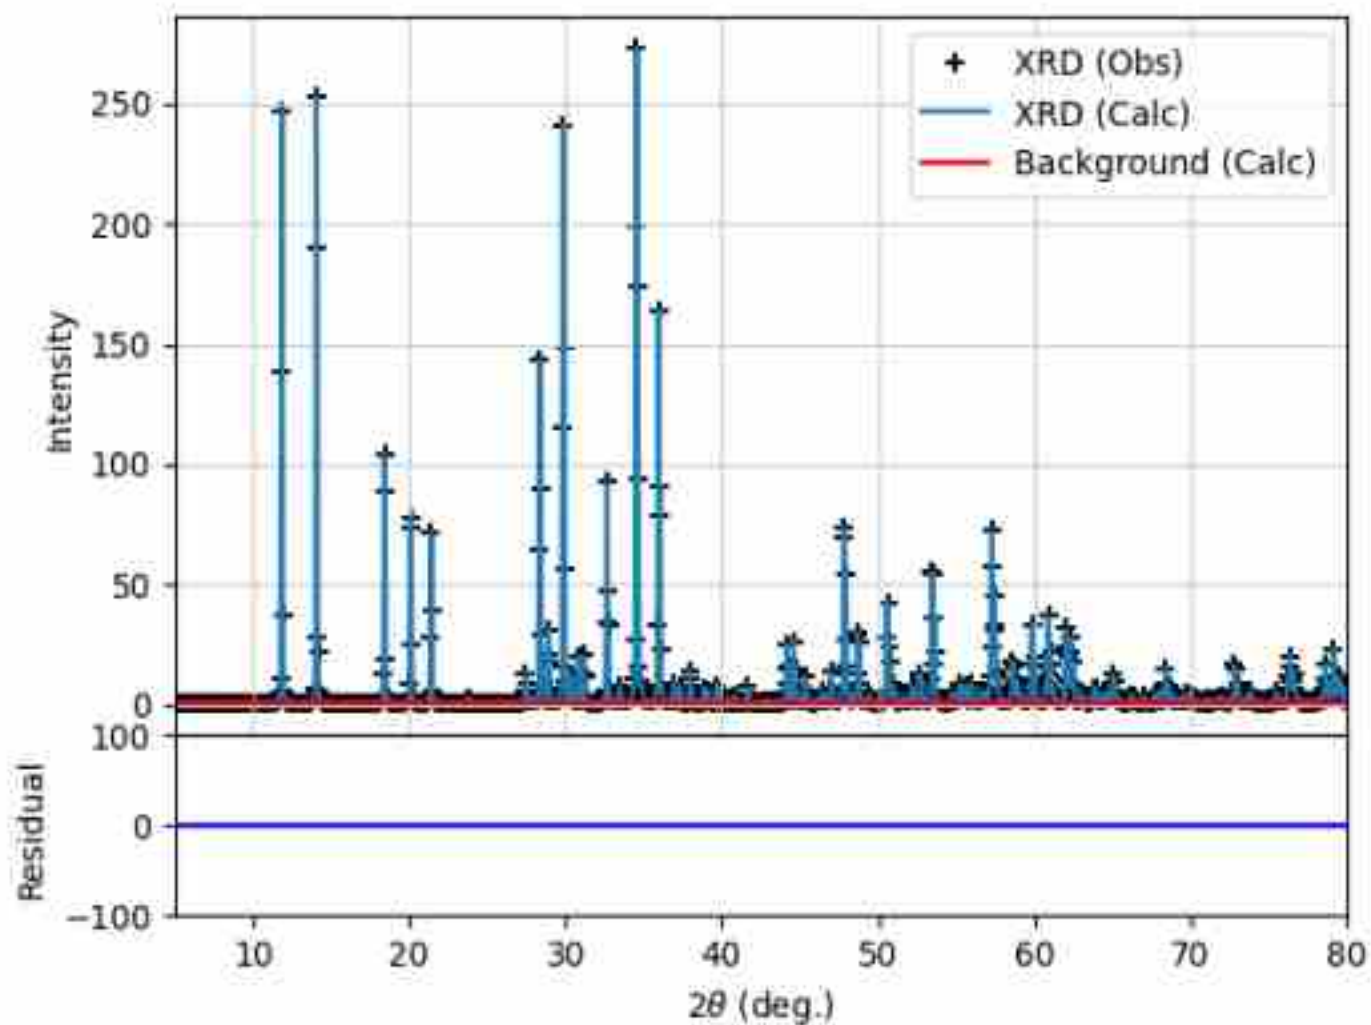

| RMSE before RR | Rwp     | RMSE after RR |
|----------------|---------|---------------|
| 0.041          | 0.00294 | 0.00056       |

# K8Sn2O8

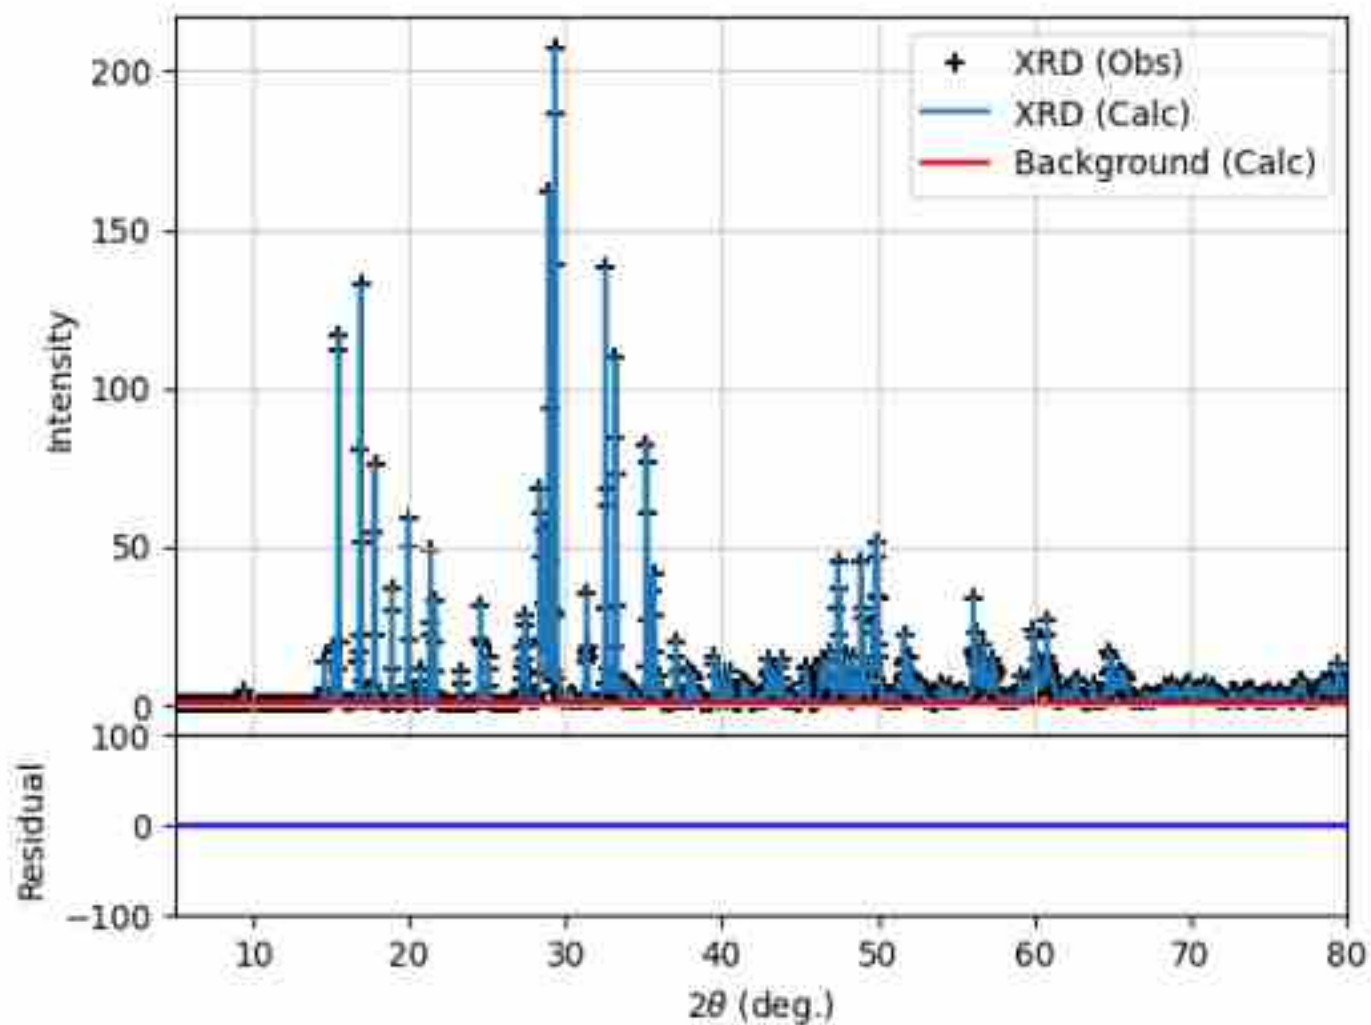

| RMSE before RR | Rwp     | RMSE after RR |
|----------------|---------|---------------|
| 0.041          | 0.00041 | 0.00019       |

# La<sub>2</sub>C<sub>2</sub>O<sub>2</sub>

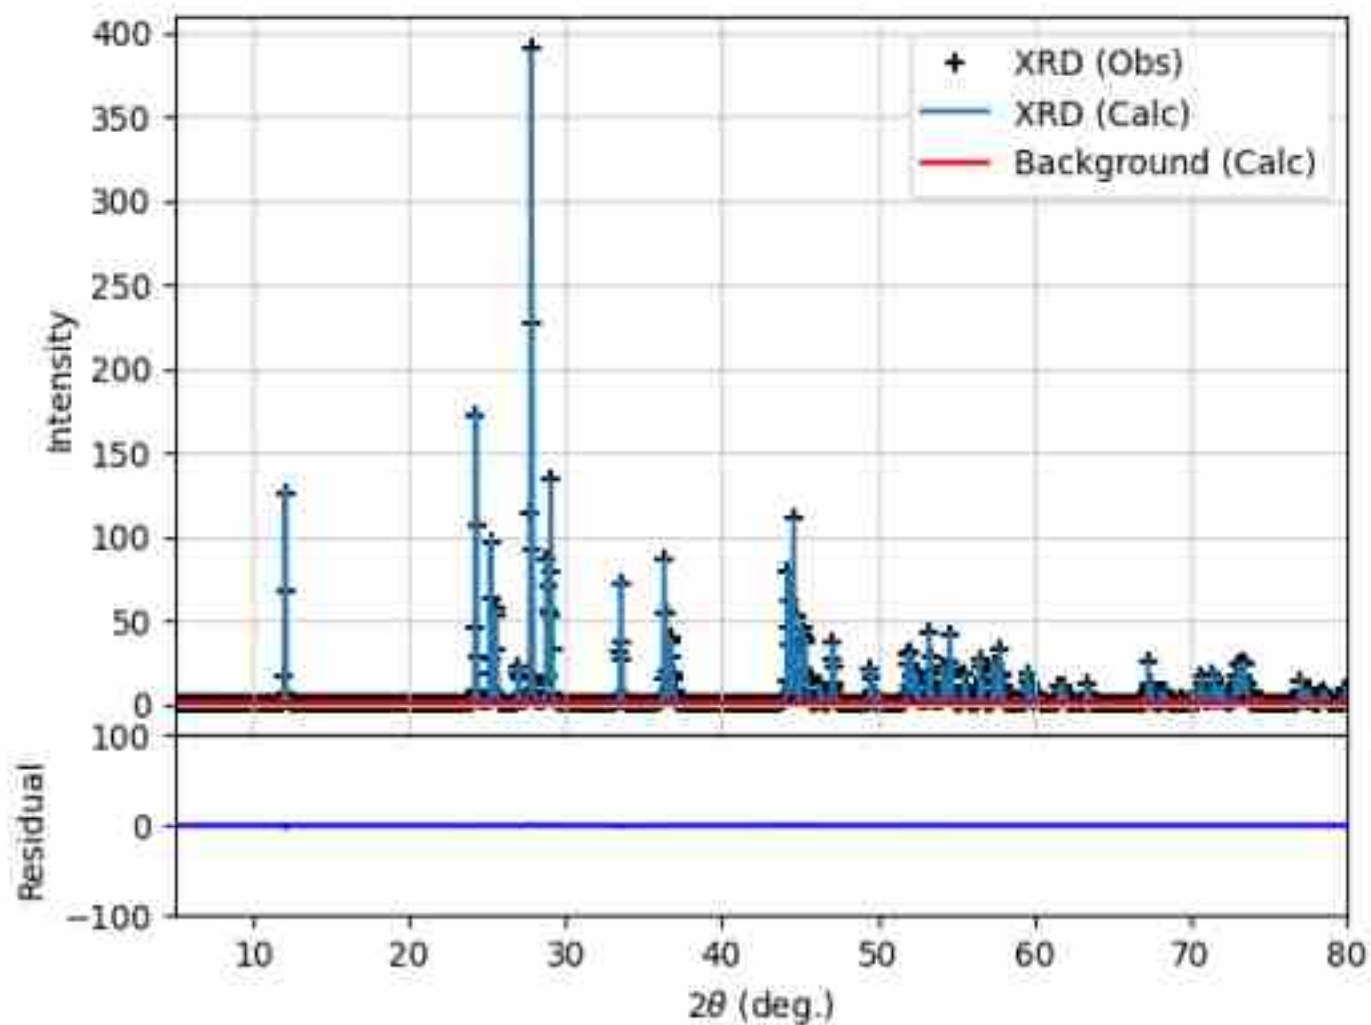

| RMSE before RR | Rwp     | RMSE after RR |
|----------------|---------|---------------|
| 0.041          | 1.13895 | 0.1846        |

# La<sub>4</sub>Pt<sub>10</sub>O<sub>7</sub>

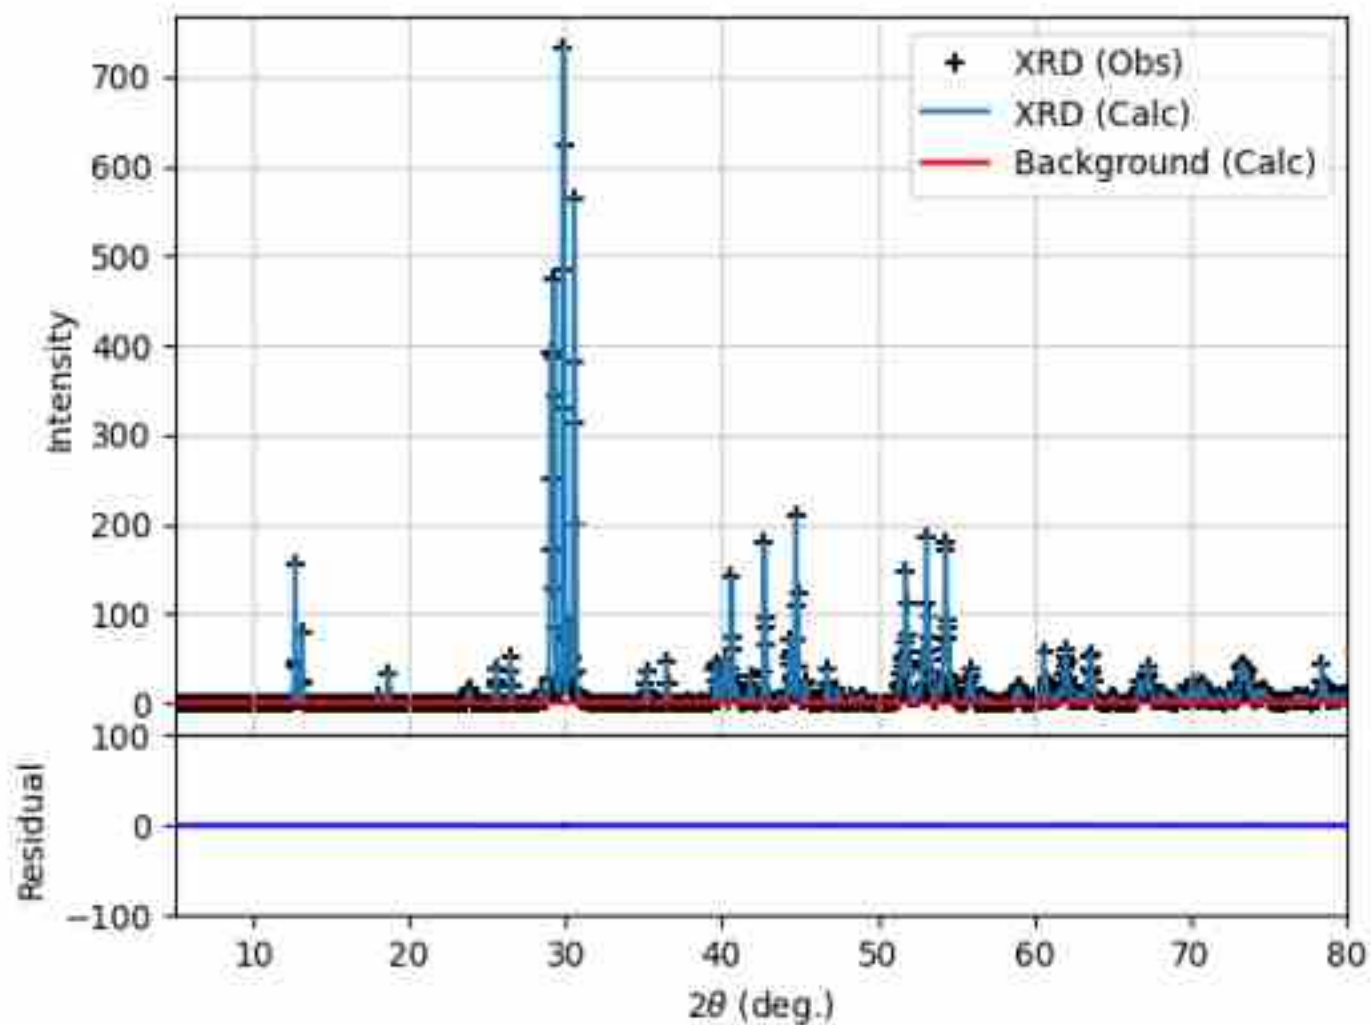

| RMSE before RR | Rwp     | RMSE after RR |
|----------------|---------|---------------|
| 0.041          | 0.50458 | 0.01568       |

# Li<sub>2</sub>MnNi<sub>2</sub>O<sub>6</sub>

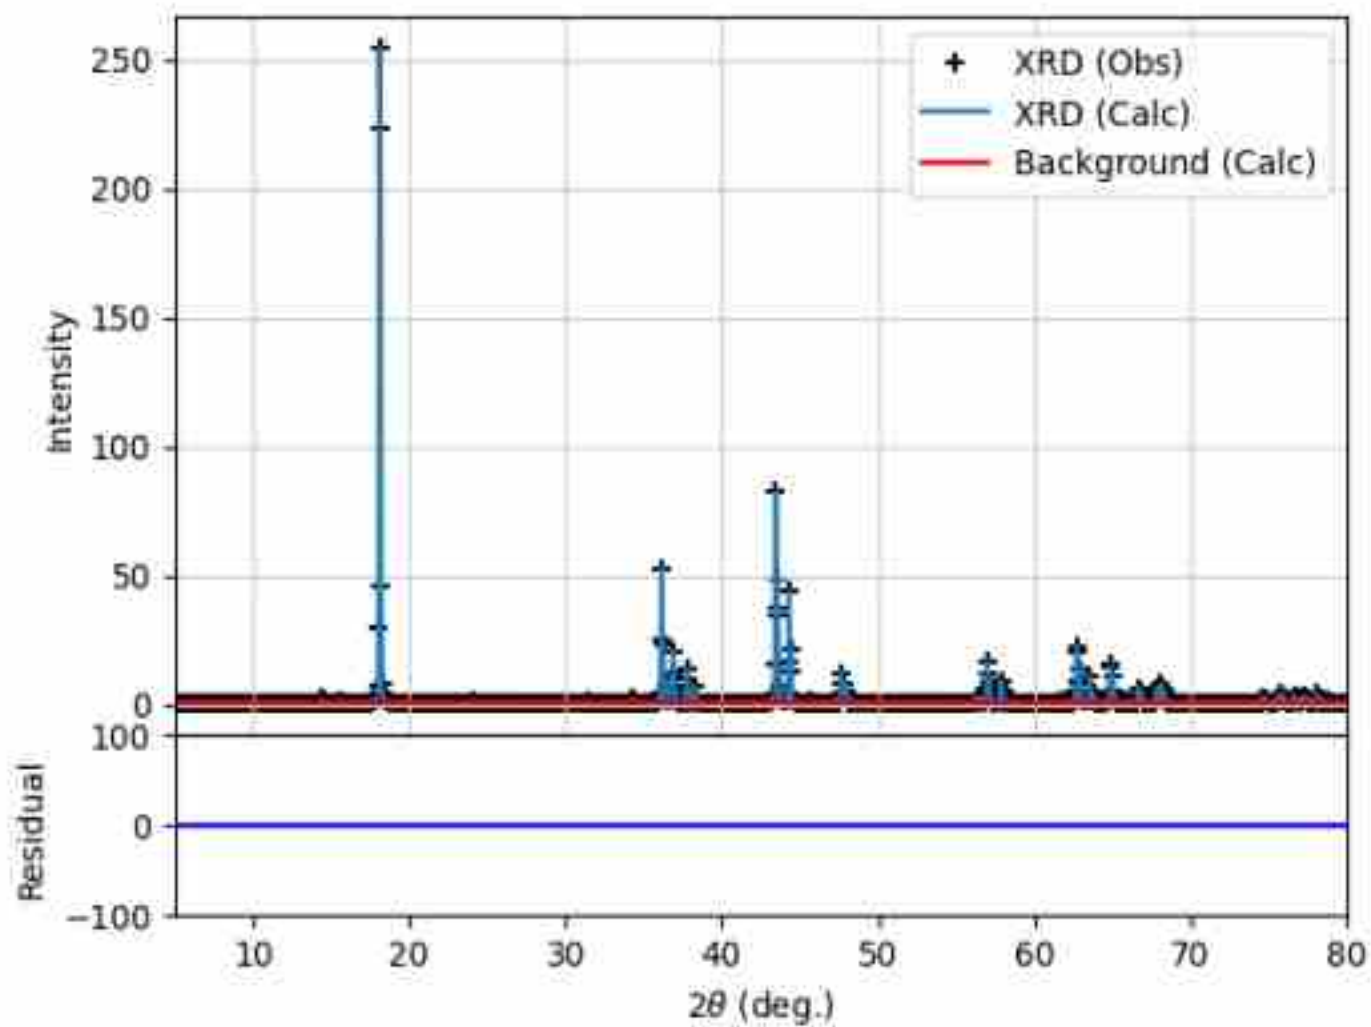

| RMSE before RR | Rwp     | RMSE after RR |
|----------------|---------|---------------|
| 0.041          | 0.00128 | 0.0012        |



# Li<sub>4</sub>Mn<sub>2</sub>Co<sub>2</sub>O<sub>8</sub>

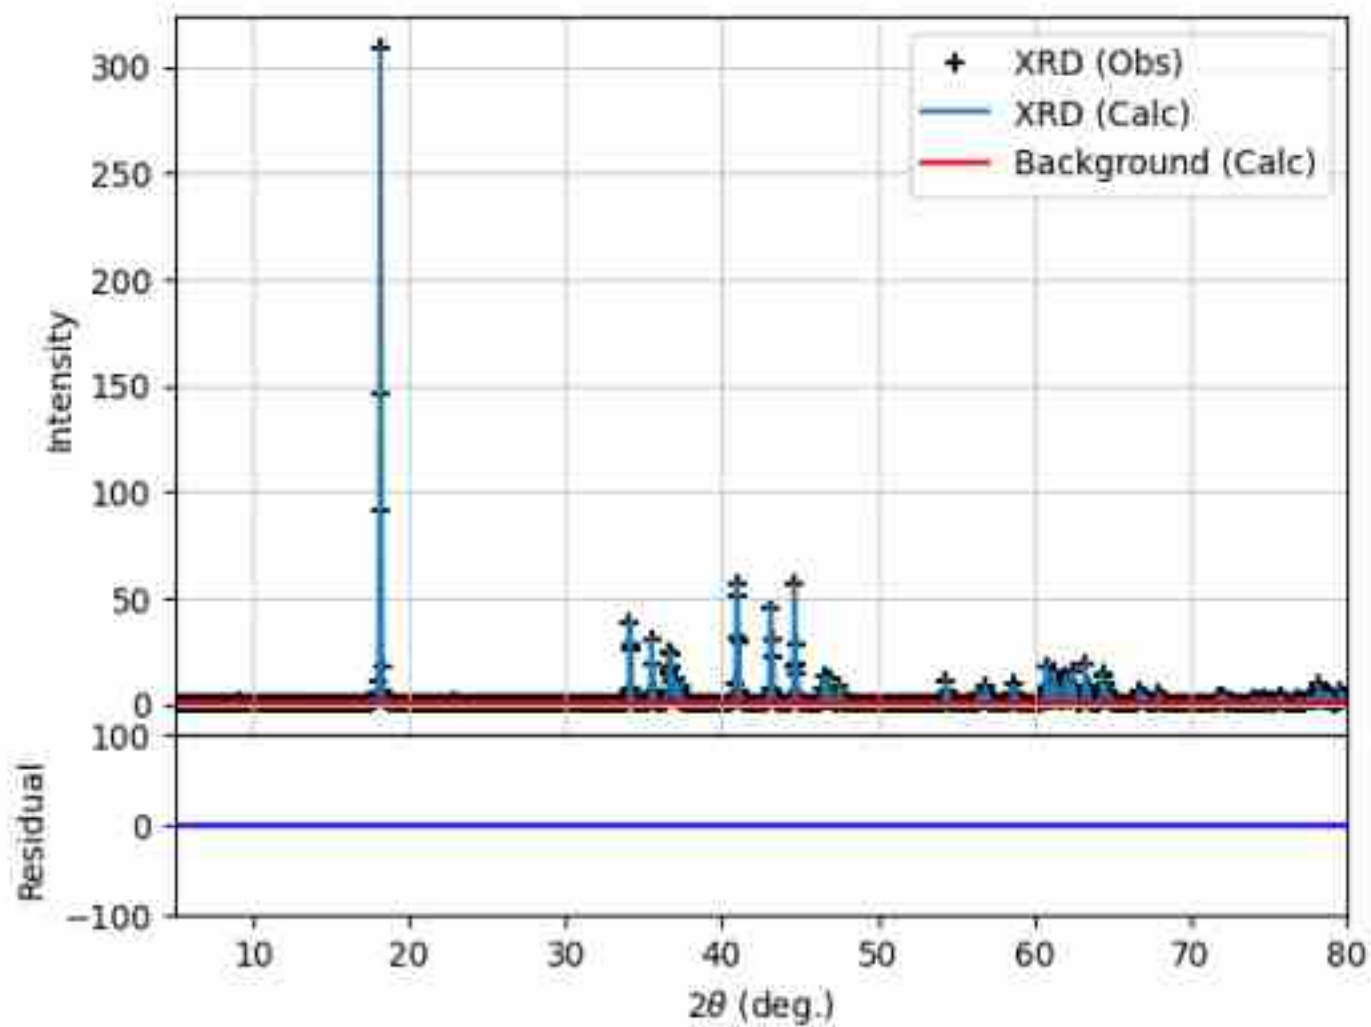

| RMSE before RR | Rwp     | RMSE after RR |
|----------------|---------|---------------|
| 0.041          | 0.02141 | 0.01158       |

# Li<sub>4</sub>Ni<sub>4</sub>O<sub>8</sub>

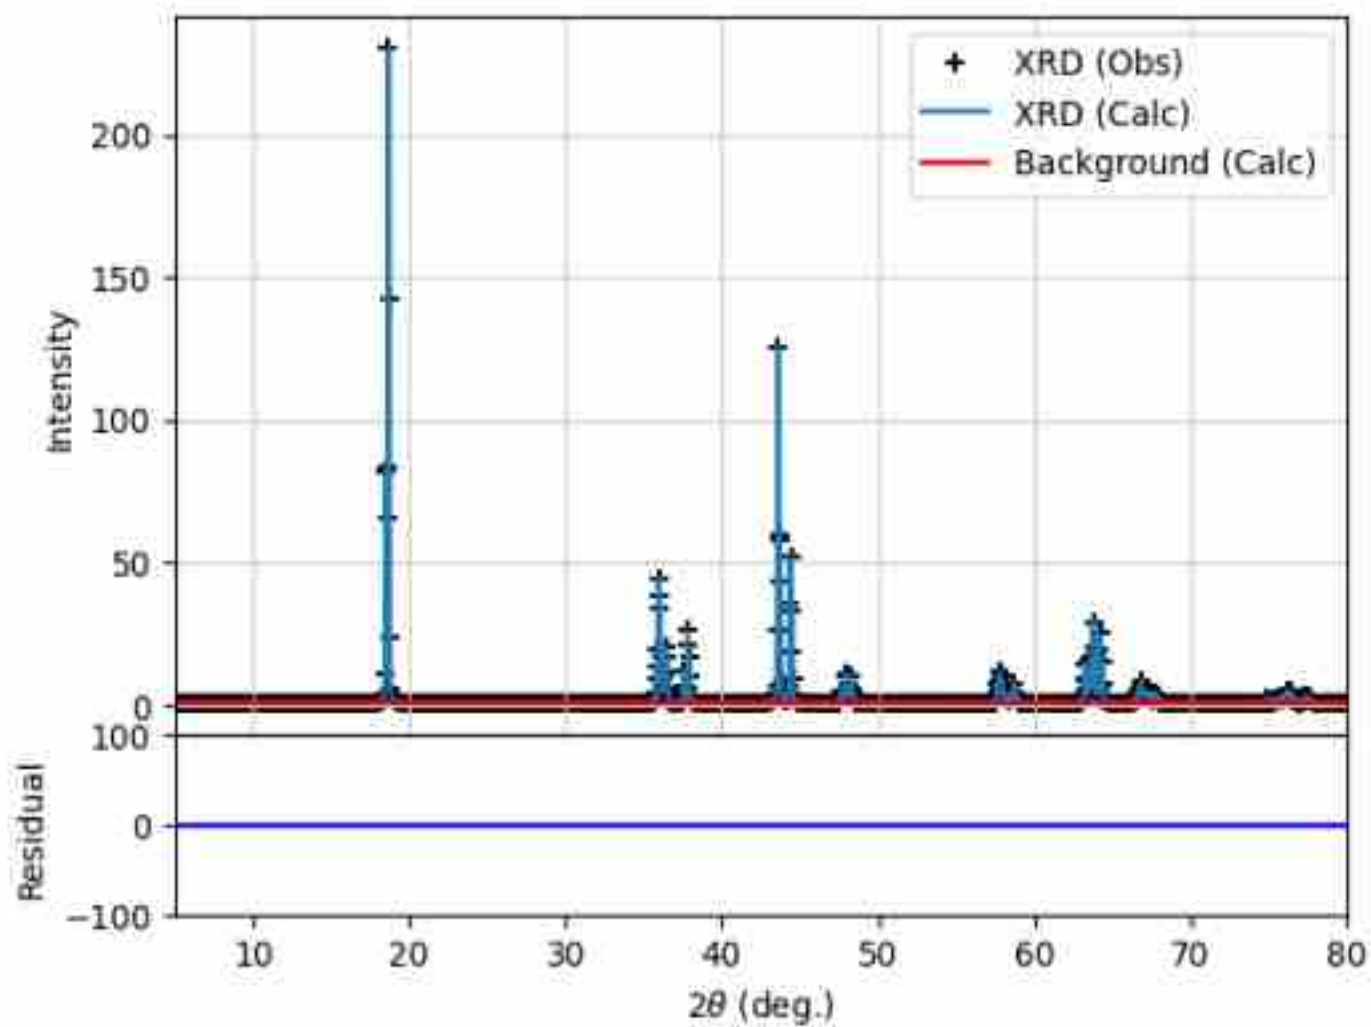

| RMSE before RR | Rwp     | RMSE after RR |
|----------------|---------|---------------|
| 0.041          | 0.00229 | 0.00163       |

# Li<sub>5</sub>Mn<sub>2</sub>Co<sub>1</sub>O<sub>8</sub>

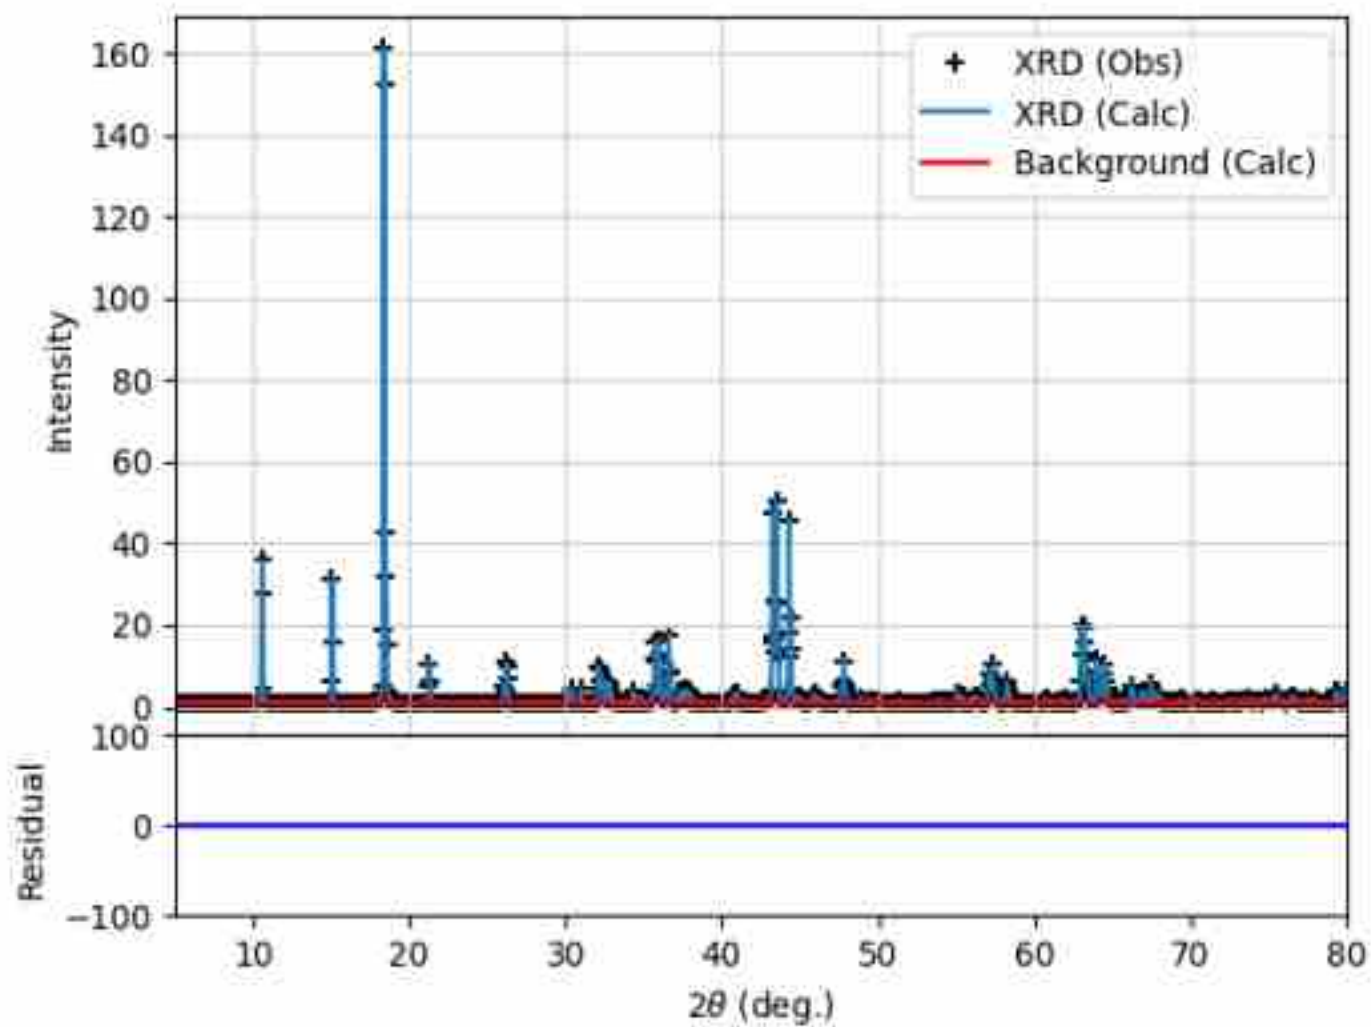

| RMSE before RR | Rwp     | RMSE after RR |
|----------------|---------|---------------|
| 0.041          | 0.00015 | 0.00024       |

# Mg<sub>2</sub>V<sub>2</sub>Cu<sub>2</sub>O<sub>8</sub>

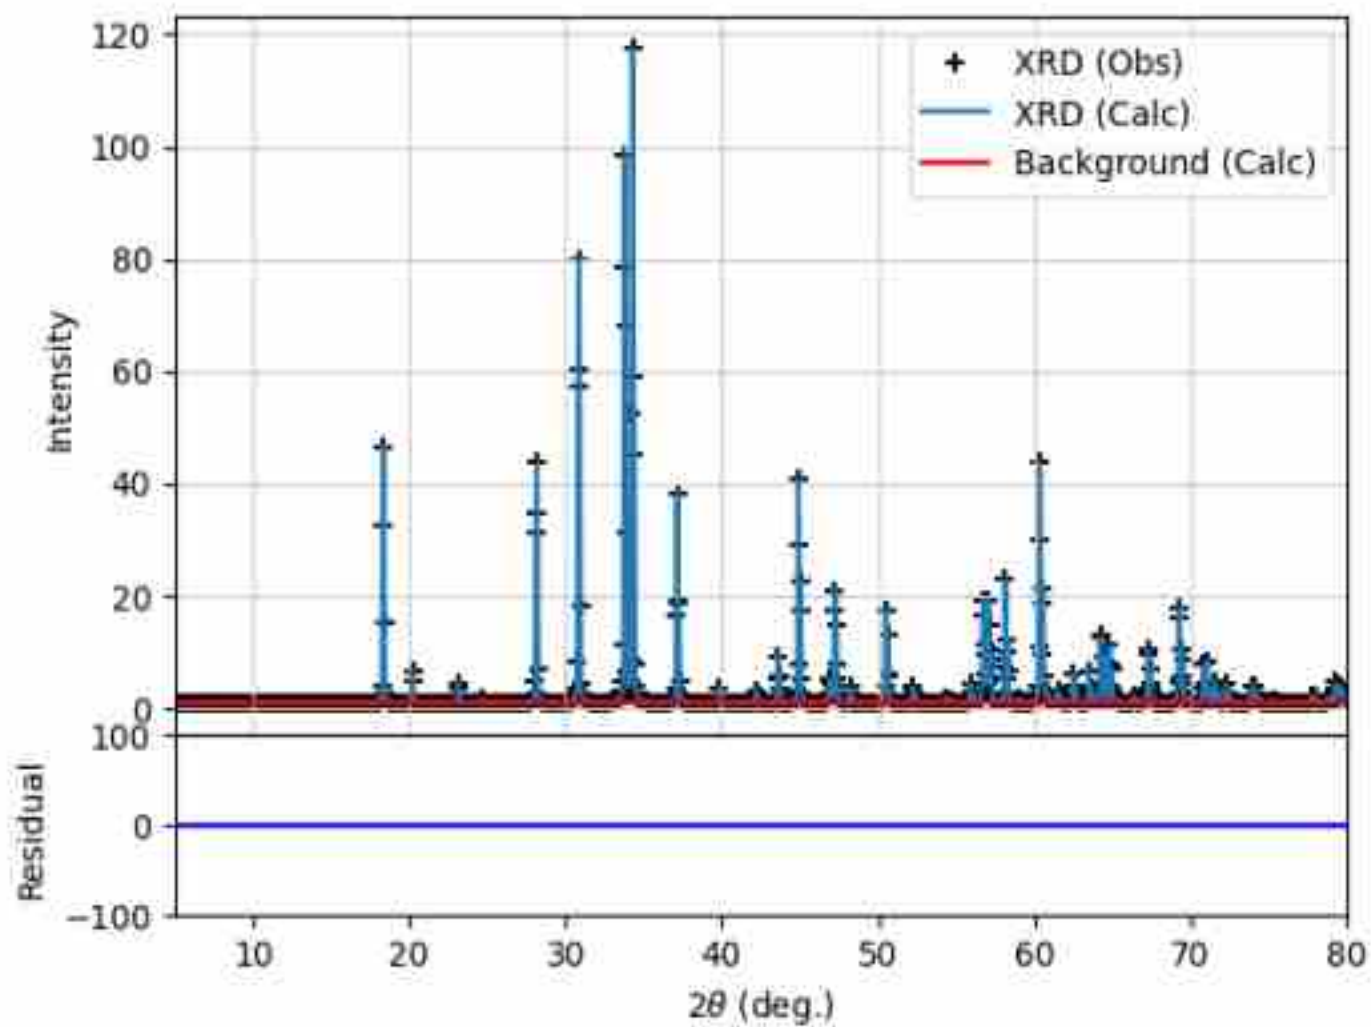

| RMSE before RR | Rwp     | RMSE after RR |
|----------------|---------|---------------|
| 0.041          | 0.00272 | 0.0007        |

# Mn<sub>4</sub>O<sub>4</sub>F<sub>4</sub>

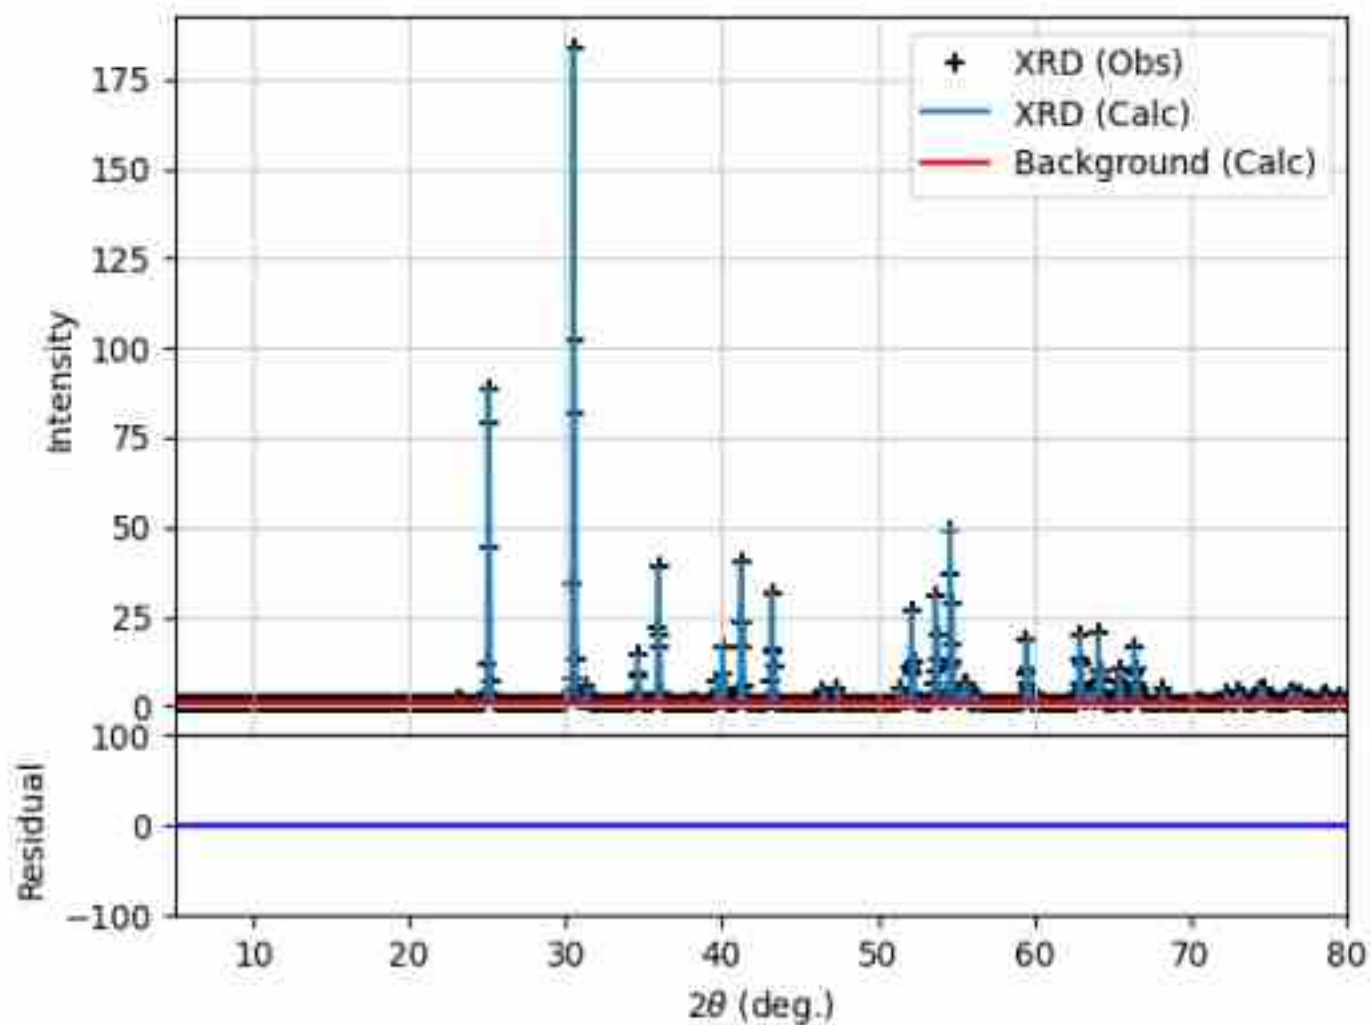

| RMSE before RR | Rwp     | RMSE after RR |
|----------------|---------|---------------|
| 0.041          | 0.00235 | 0.00086       |

# Na1Pd1O2

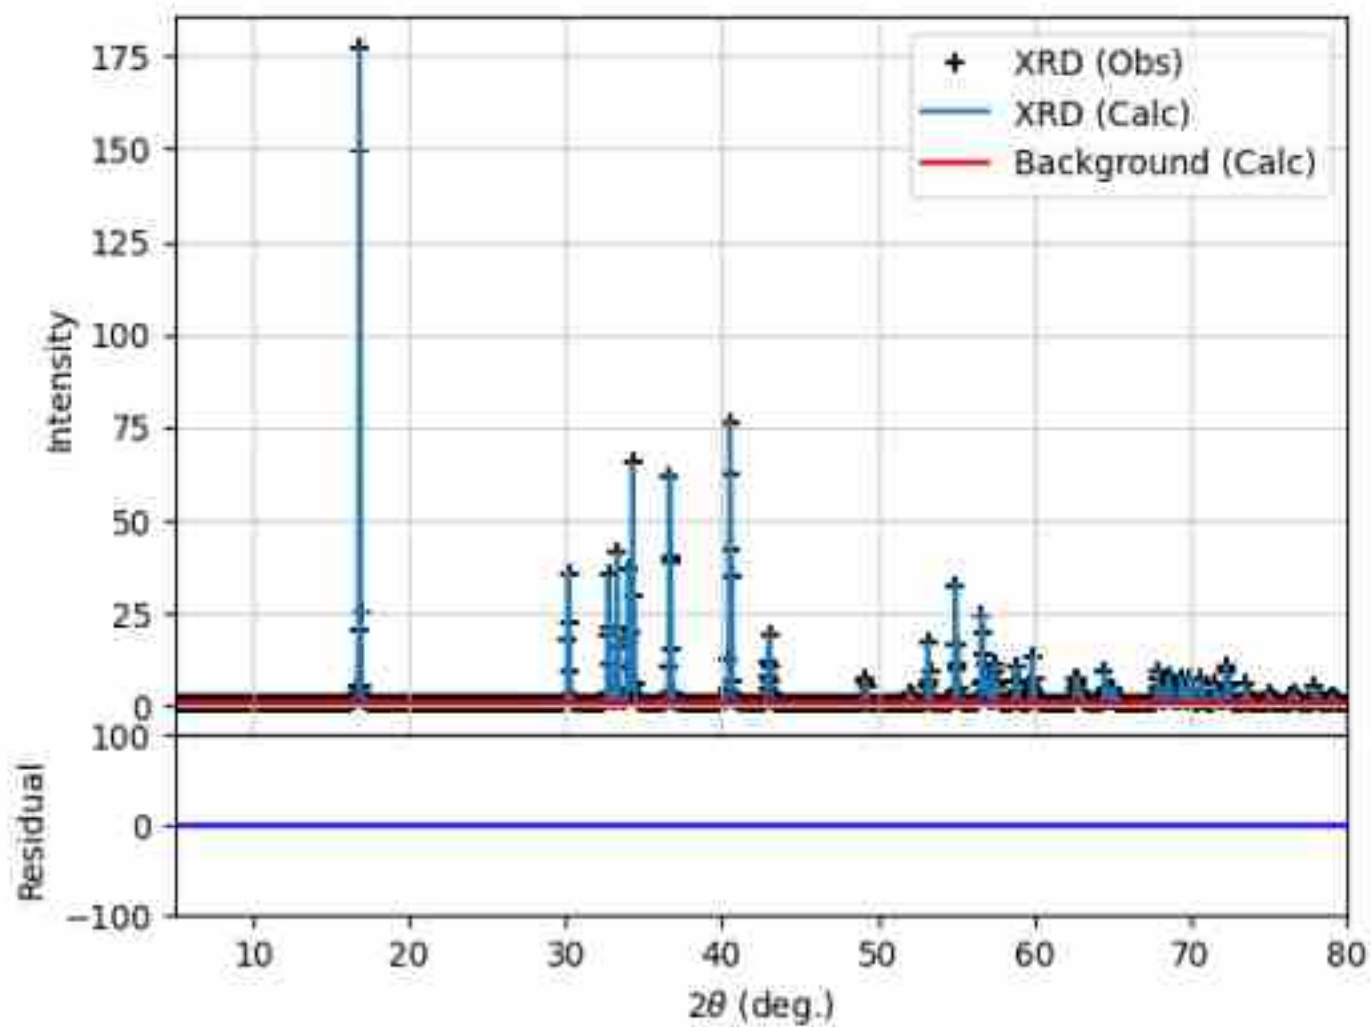

| RMSE before RR | Rwp    | RMSE after RR |
|----------------|--------|---------------|
| 0.041          | 0.0024 | 0.00069       |

# Nb<sub>3</sub>Te<sub>6</sub>

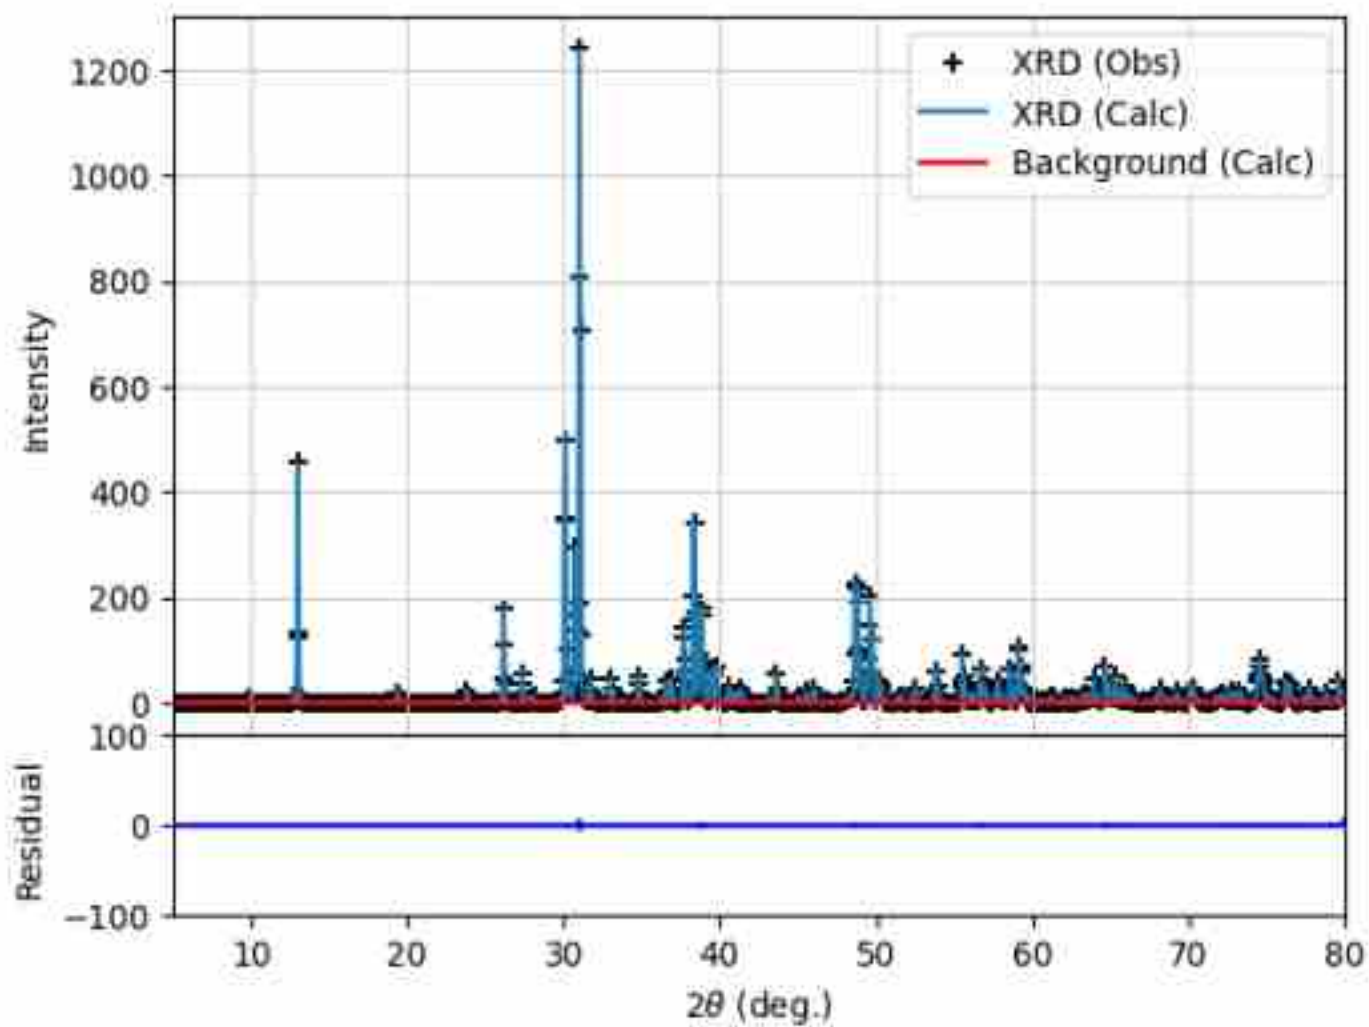

| RMSE before RR | Rwp     | RMSE after RR |
|----------------|---------|---------------|
| 0.041          | 1.57386 | 0.00535       |

# Nd<sub>3</sub>Sb<sub>4</sub>Pt<sub>7</sub>

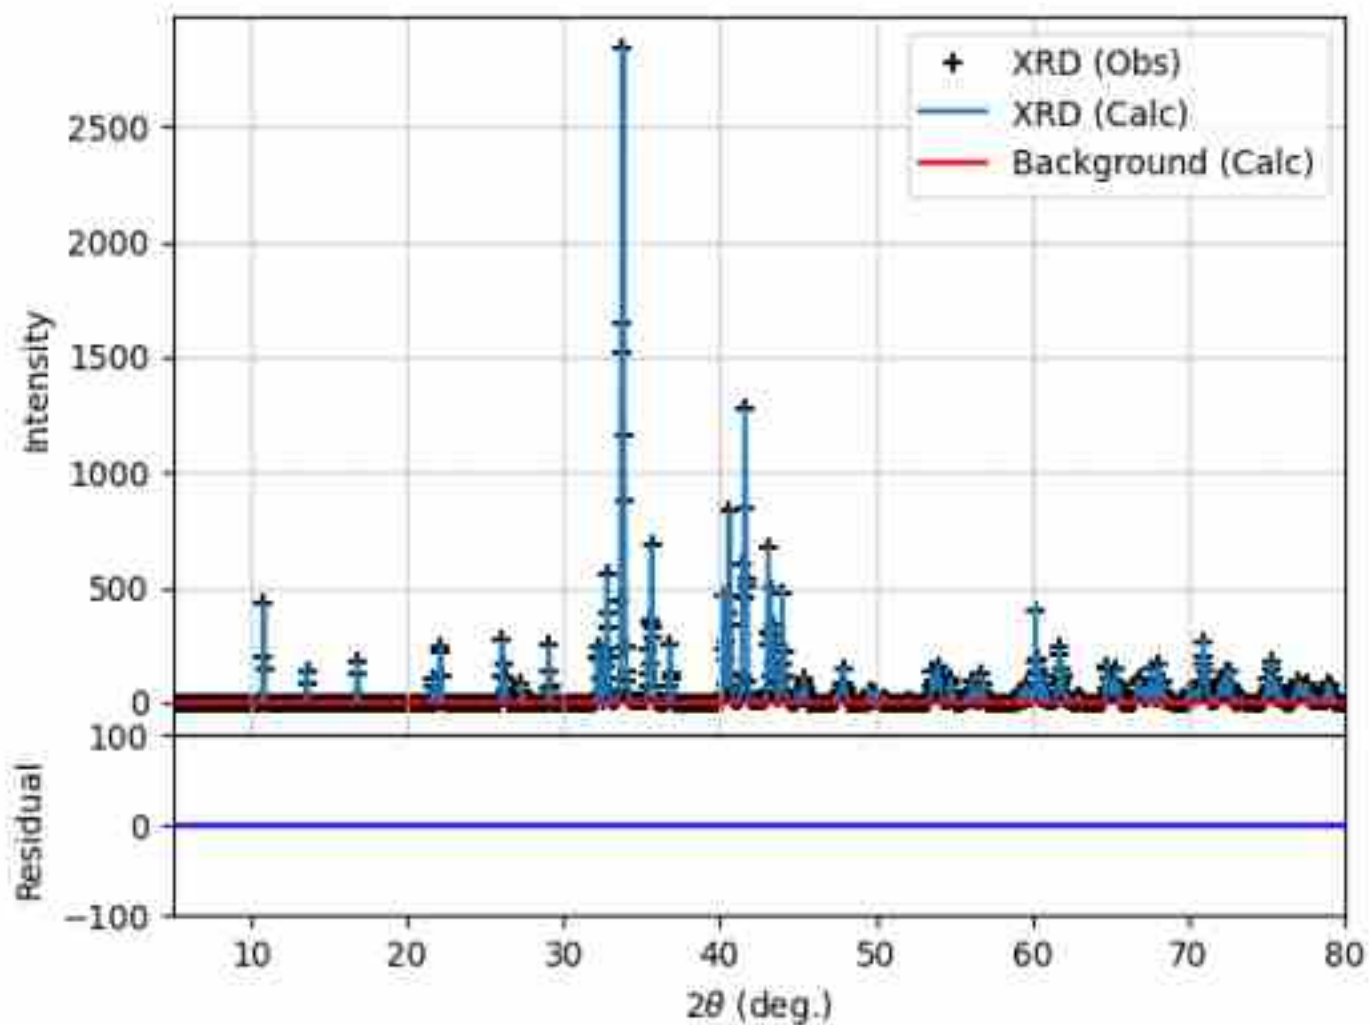

| RMSE before RR | Rwp     | RMSE after RR |
|----------------|---------|---------------|
| 0.041          | 0.00262 | 0.00023       |



# Pr<sub>4</sub>B<sub>4</sub>O<sub>12</sub>

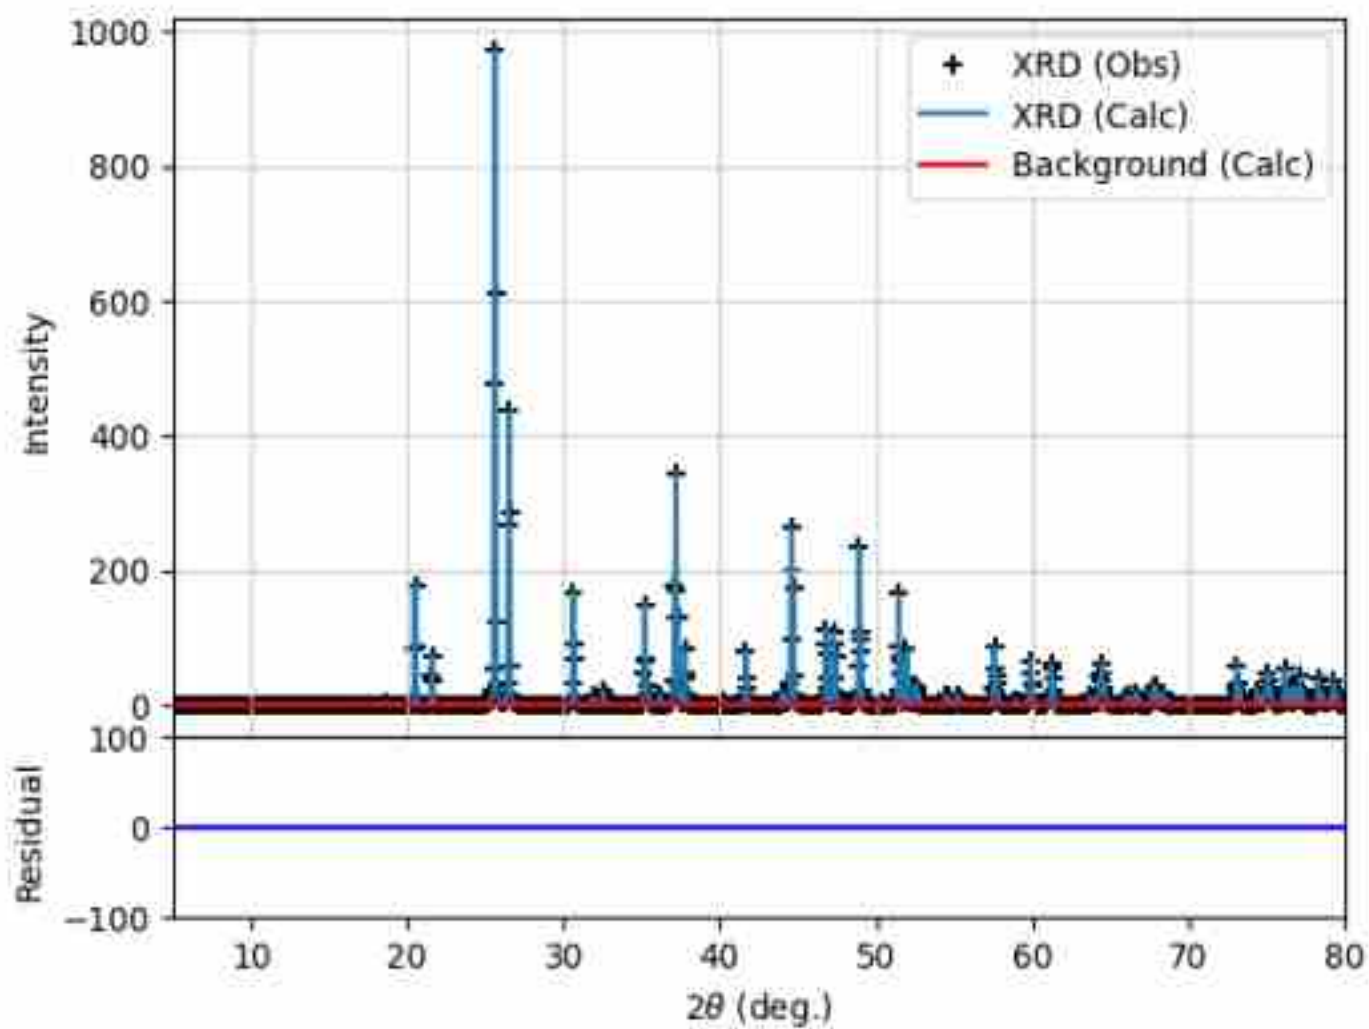

| RMSE before RR | Rwp     | RMSE after RR |
|----------------|---------|---------------|
| 0.041          | 0.00428 | 0.00143       |

# Sr1Bi3I3O4

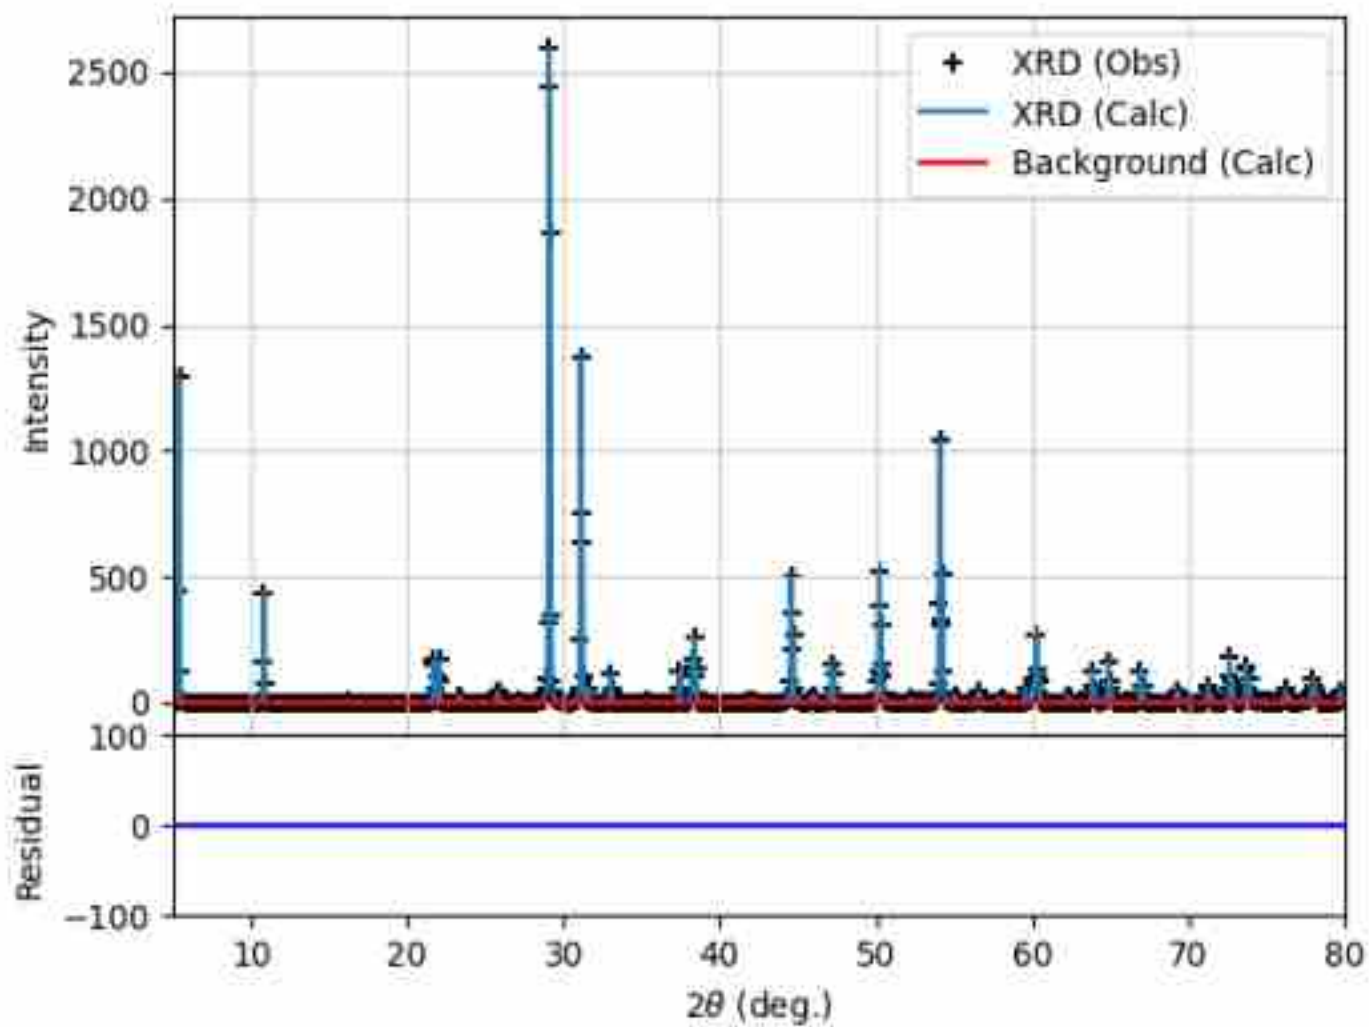

| RMSE before RR | Rwp     | RMSE after RR |
|----------------|---------|---------------|
| 0.041          | 0.00337 | 0.00097       |

# Sr1Li2Nb2O7

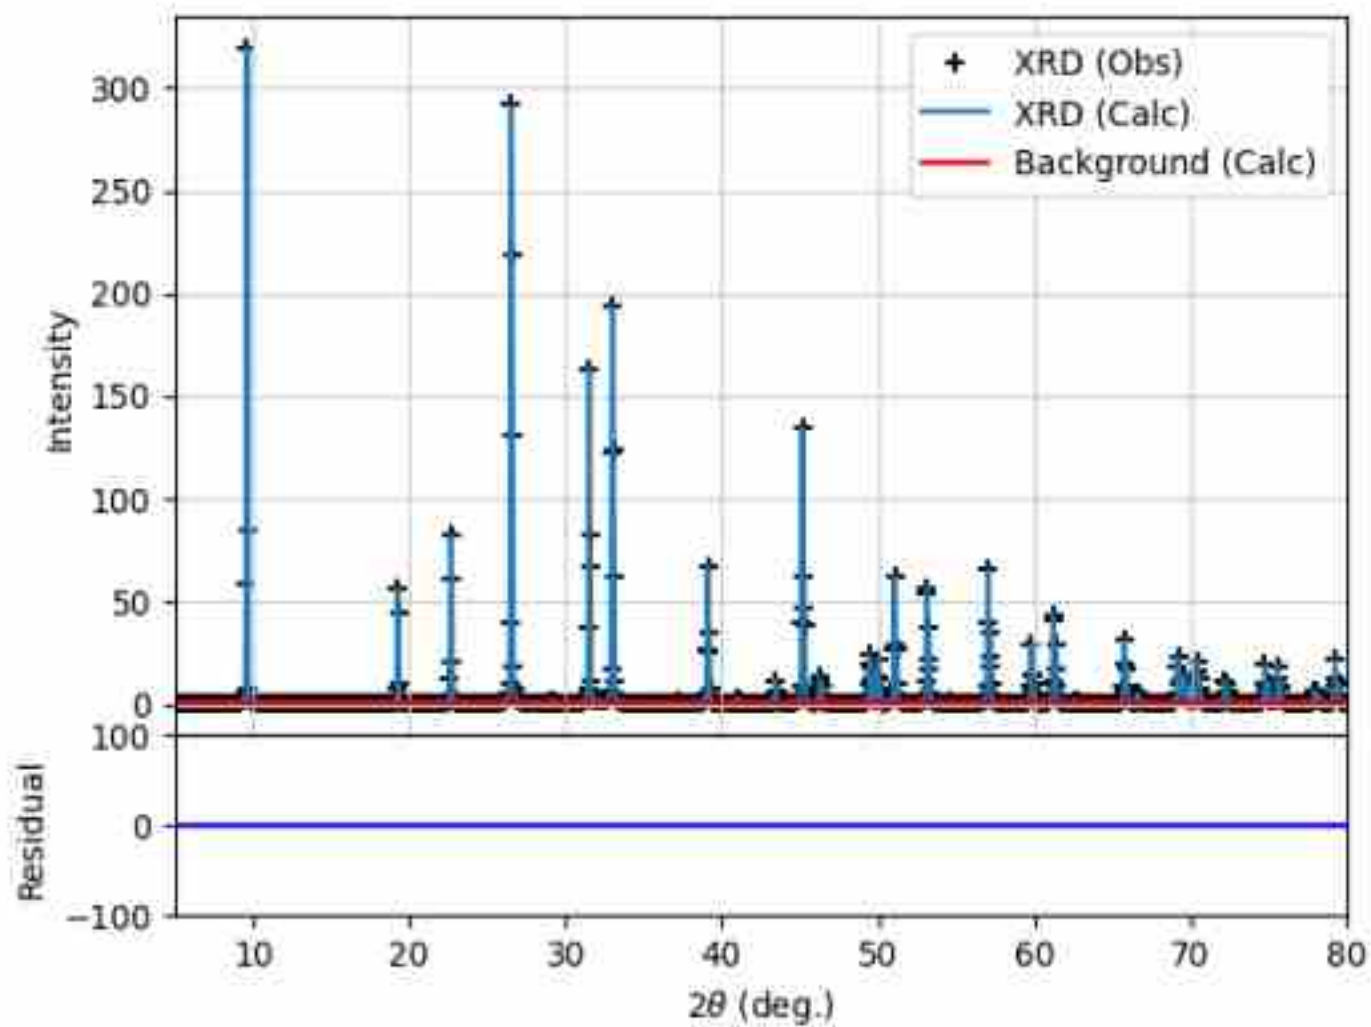

| RMSE before RR | Rwp     | RMSE after RR |
|----------------|---------|---------------|
| 0.041          | 0.00353 | 0.00198       |

# Ta<sub>2</sub>F<sub>10</sub>

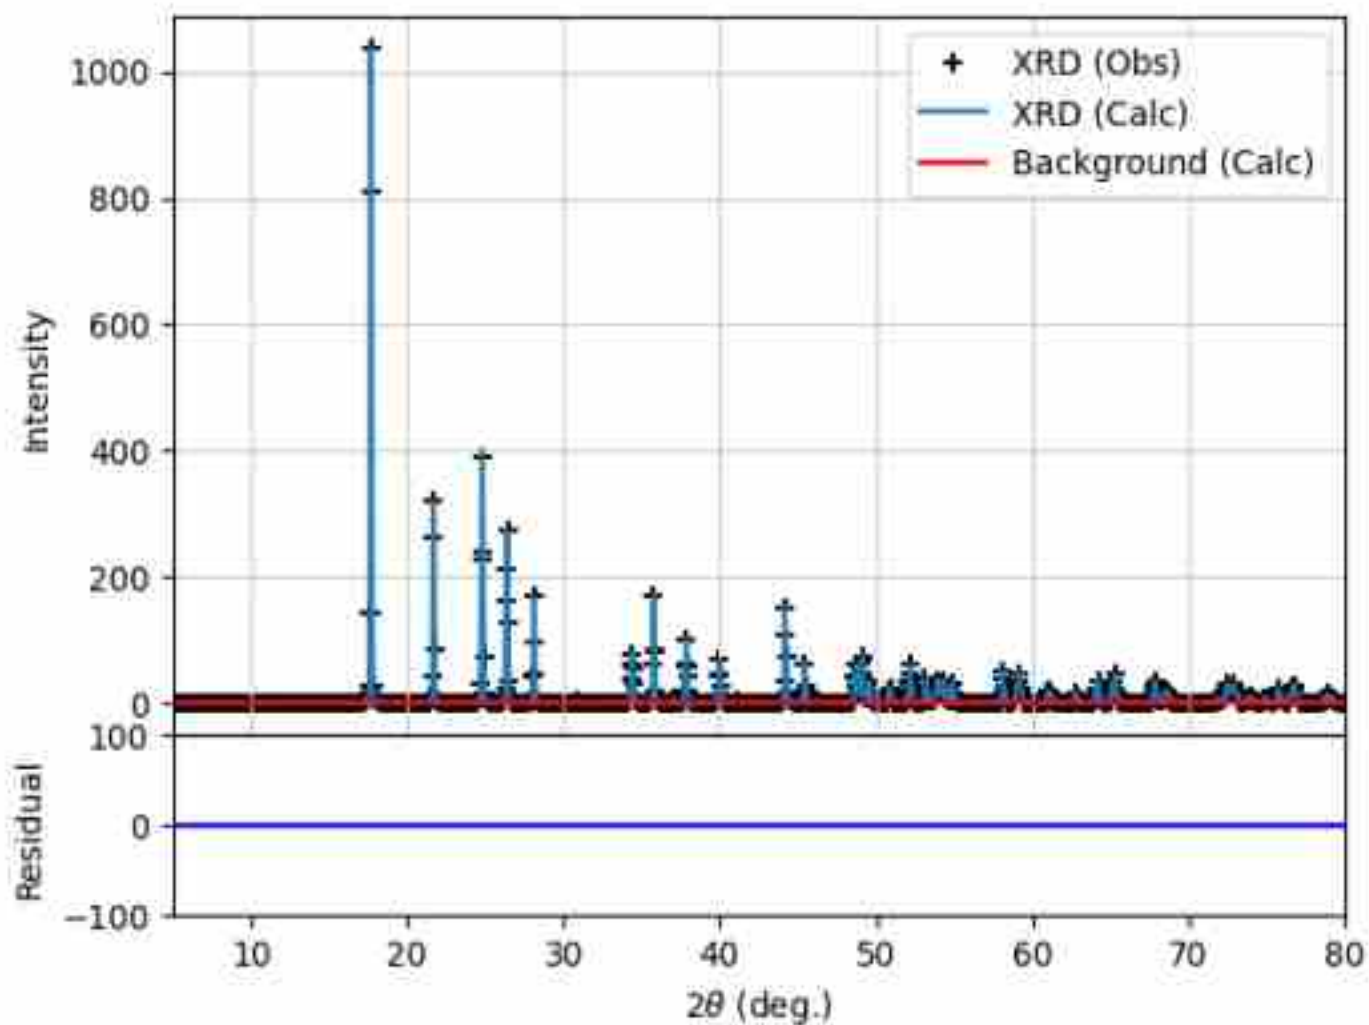

| RMSE before RR | Rwp     | RMSE after RR |
|----------------|---------|---------------|
| 0.041          | 0.08166 | 0.00892       |

# V1N1

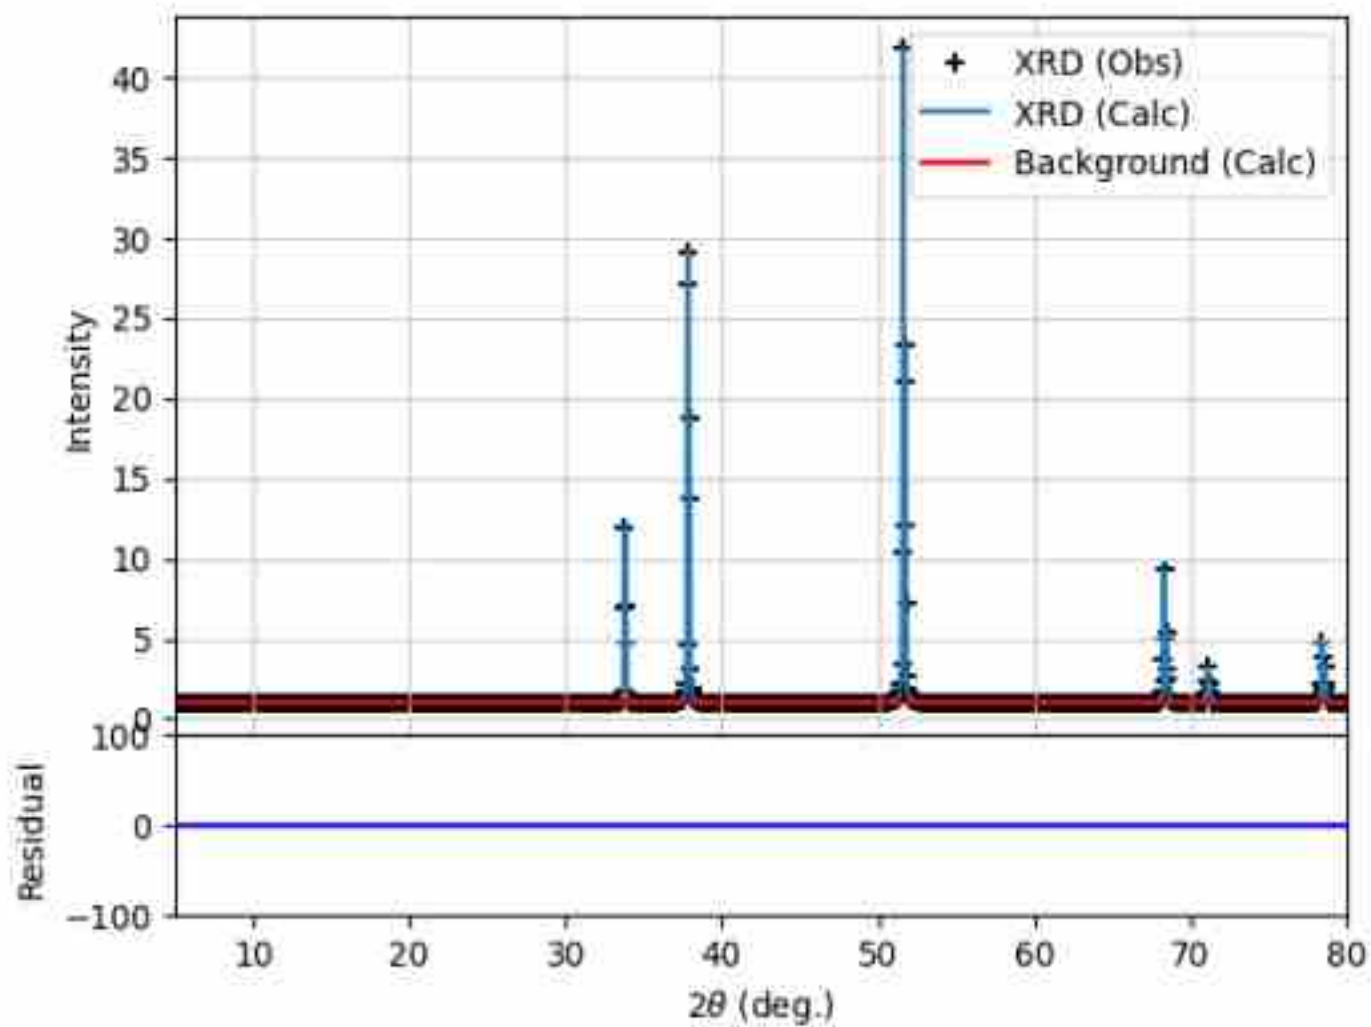

| RMSE before RR | Rwp     | RMSE after RR |
|----------------|---------|---------------|
| 0.041          | 0.00093 | 0.00029       |

# W2O4F2

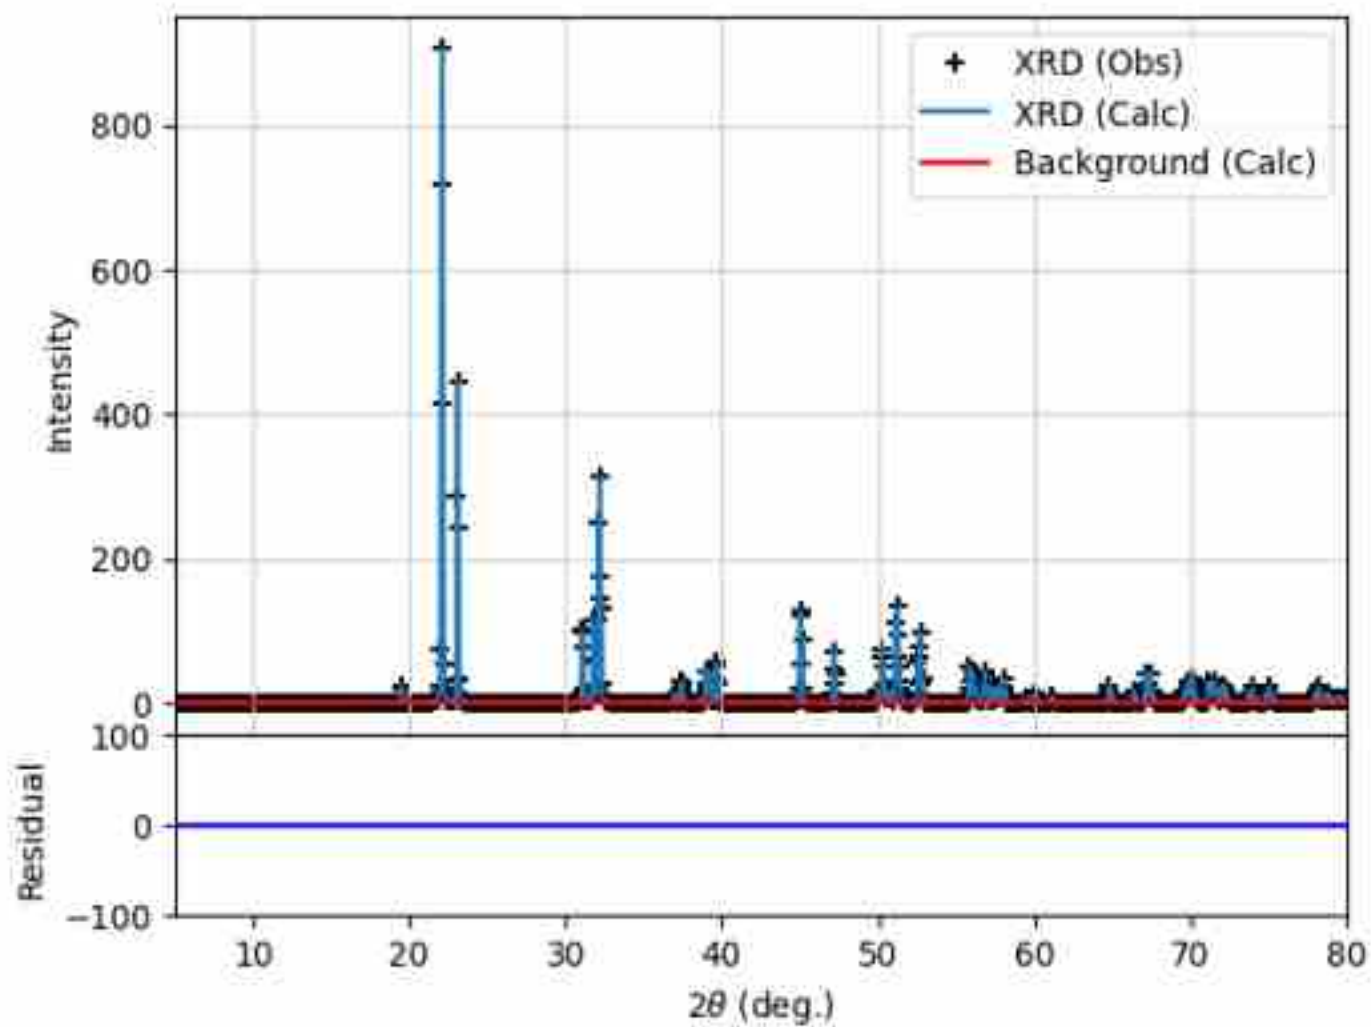

| RMSE before RR | Rwp     | RMSE after RR |
|----------------|---------|---------------|
| 0.041          | 0.00316 | 0.00065       |

# Al<sub>4</sub>Ag<sub>4</sub>O<sub>8</sub>

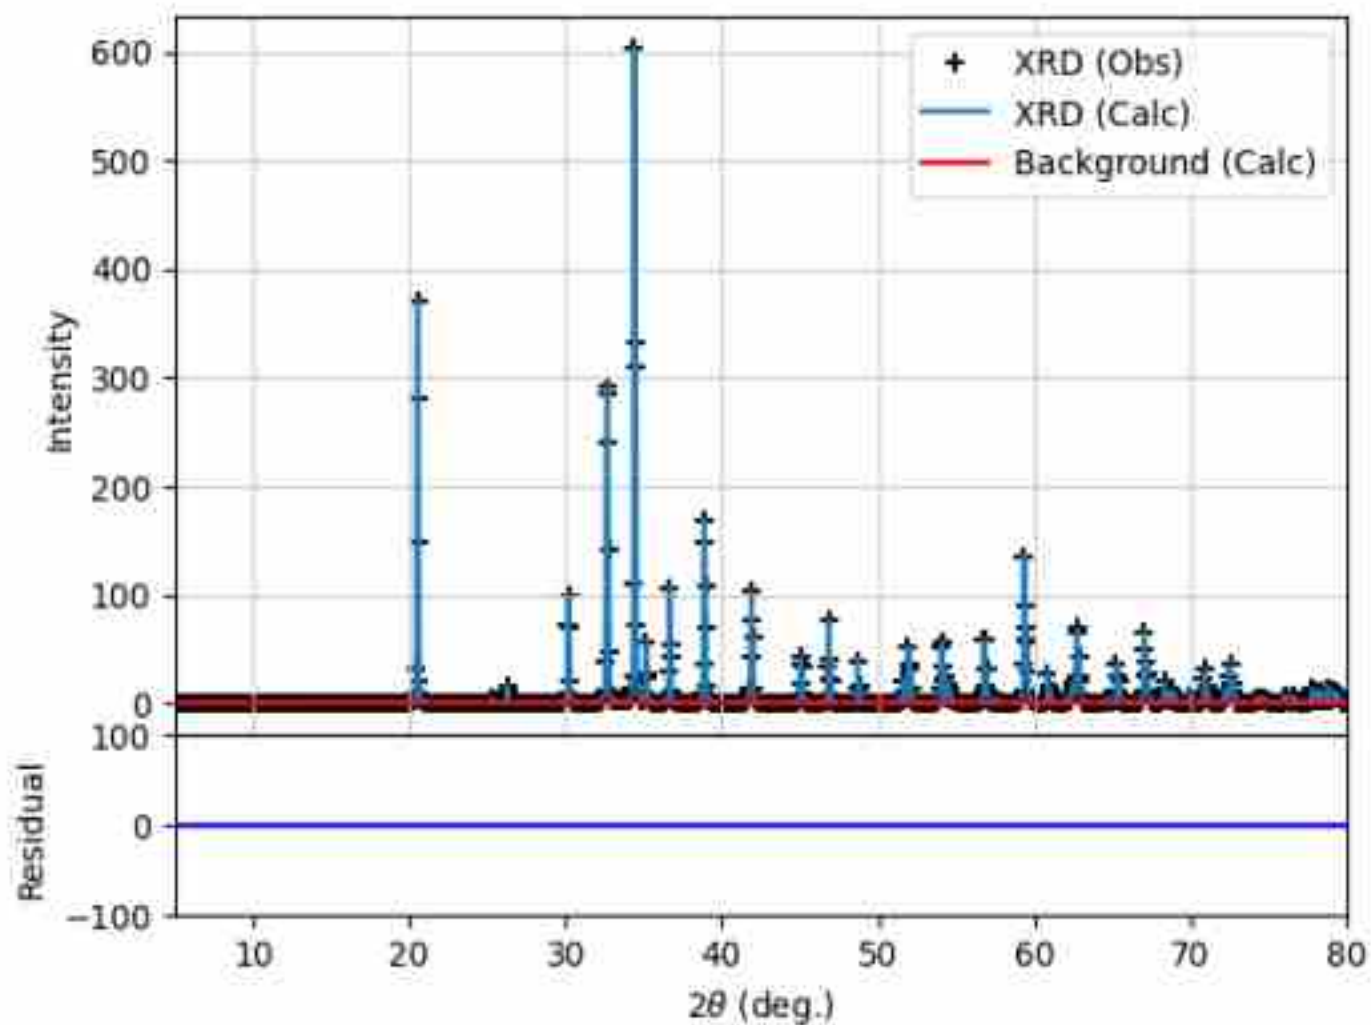

| RMSE before RR | Rwp     | RMSE after RR |
|----------------|---------|---------------|
| 0.042          | 0.00386 | 0.00097       |

# Bi<sub>2</sub>O<sub>2</sub>F<sub>2</sub>

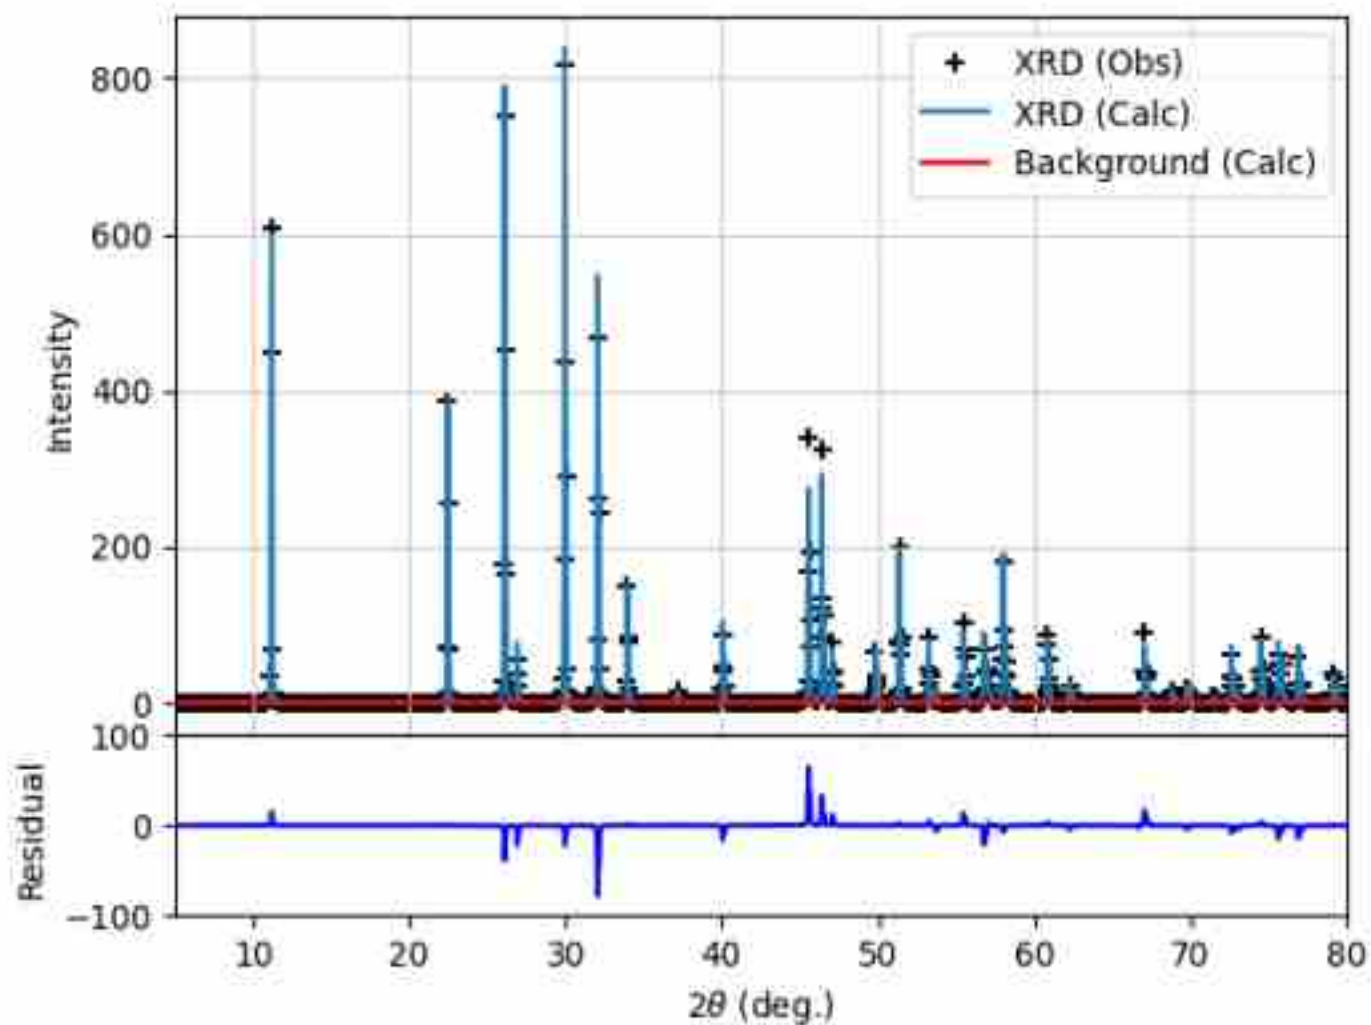

| RMSE before RR | Rwp      | RMSE after RR |
|----------------|----------|---------------|
| 0.042          | 11.56666 | 0.20667       |



# Cs<sub>4</sub>Ba<sub>4</sub>O<sub>6</sub>

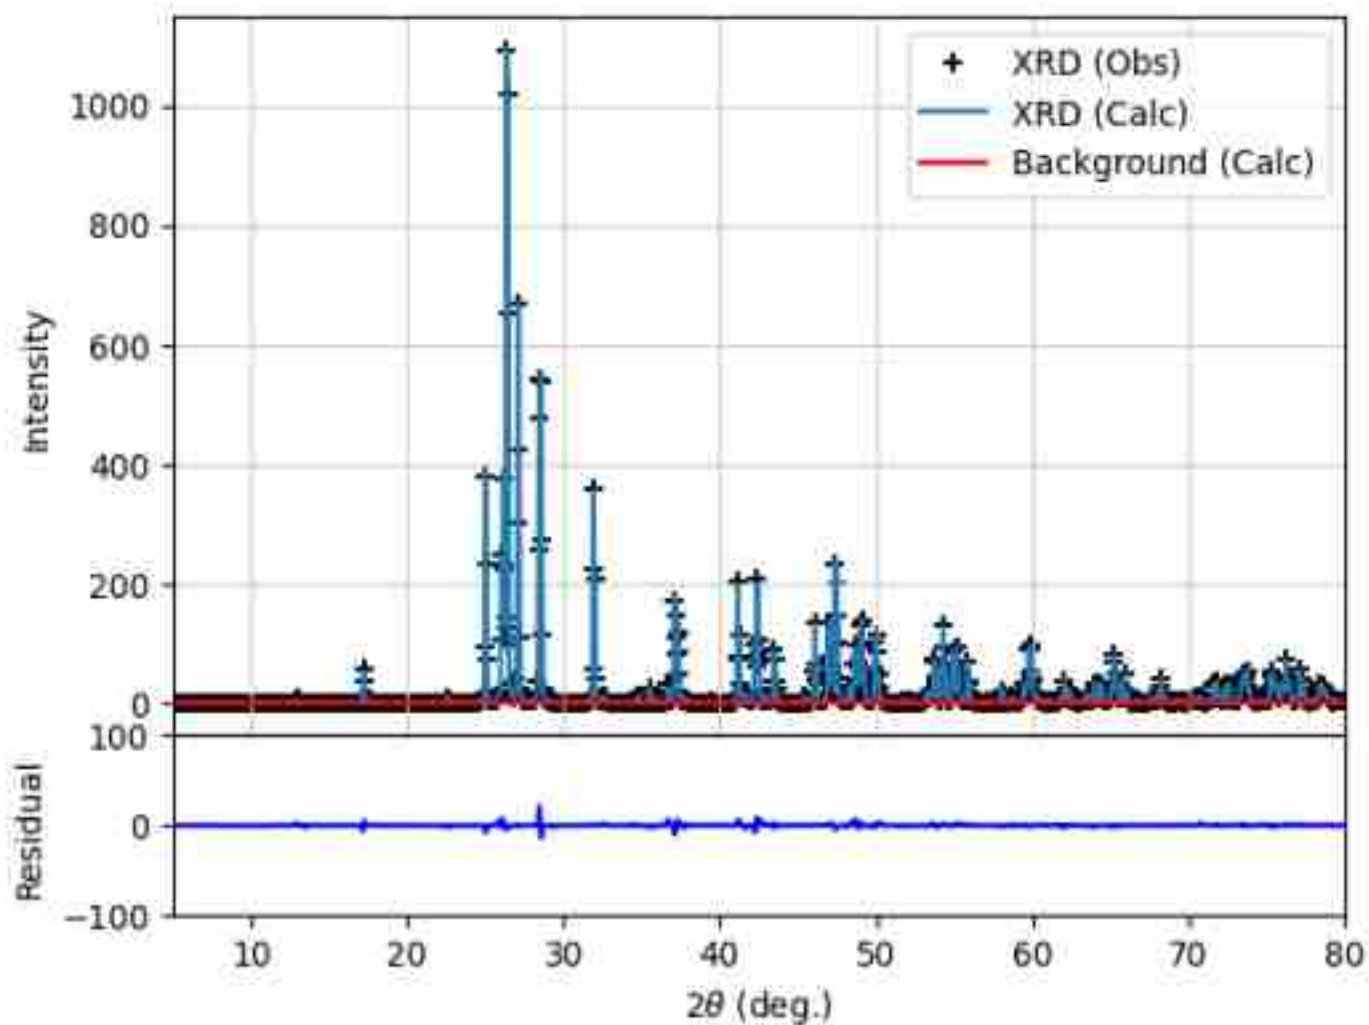

| RMSE before RR | Rwp     | RMSE after RR |
|----------------|---------|---------------|
| 0.042          | 4.89862 | 0.24306       |

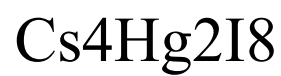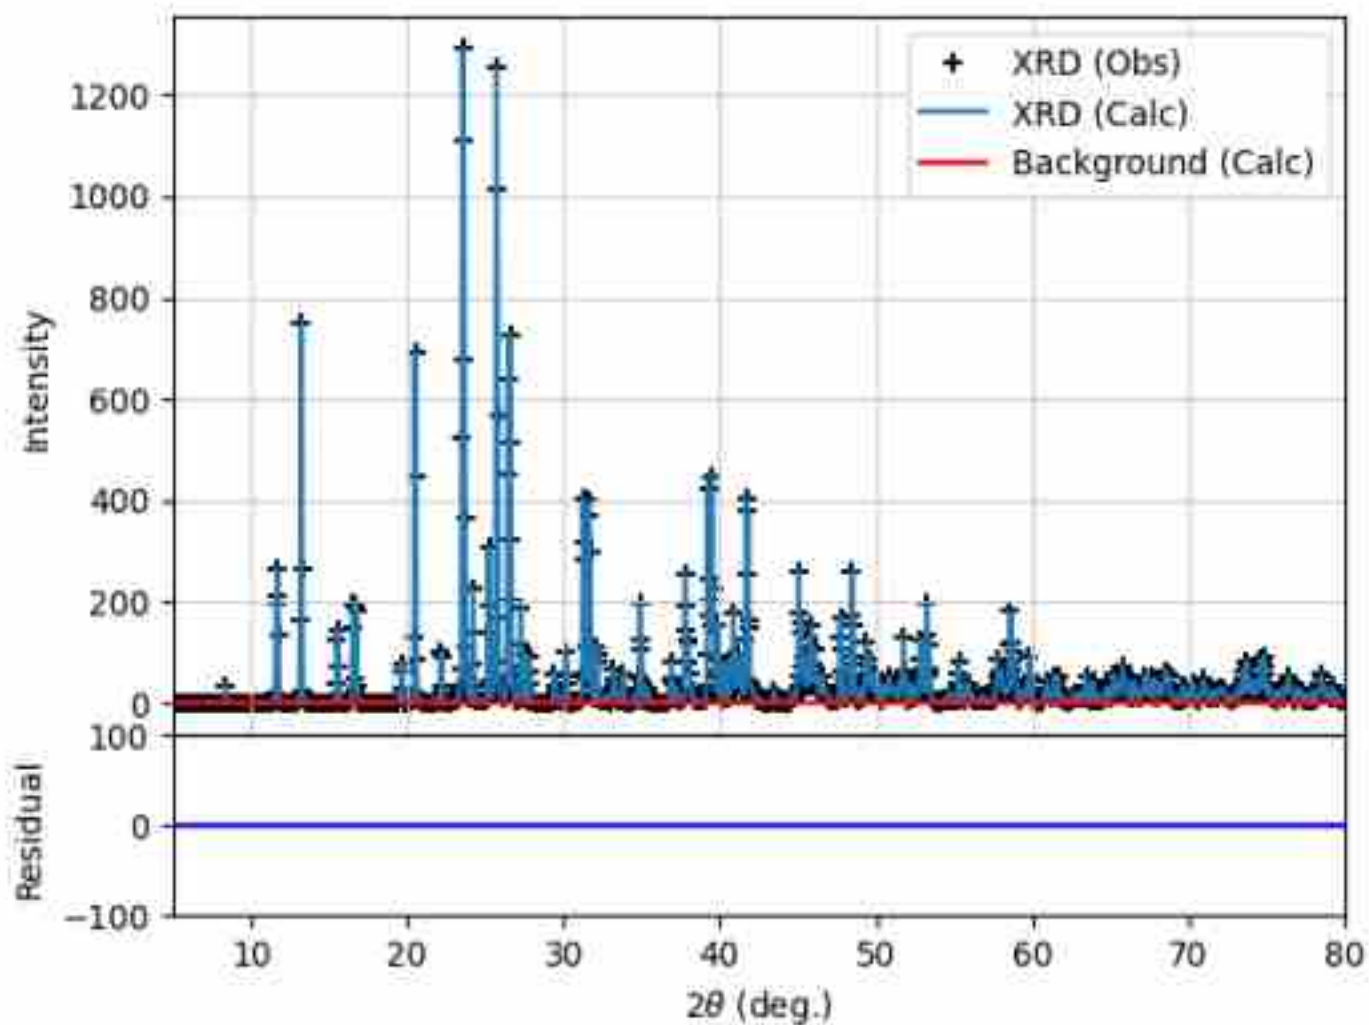

| RMSE before RR | Rwp     | RMSE after RR |
|----------------|---------|---------------|
| 0.042          | 0.00361 | 0.0002        |

# Fe<sub>6</sub>Te<sub>4</sub>Se<sub>2</sub>

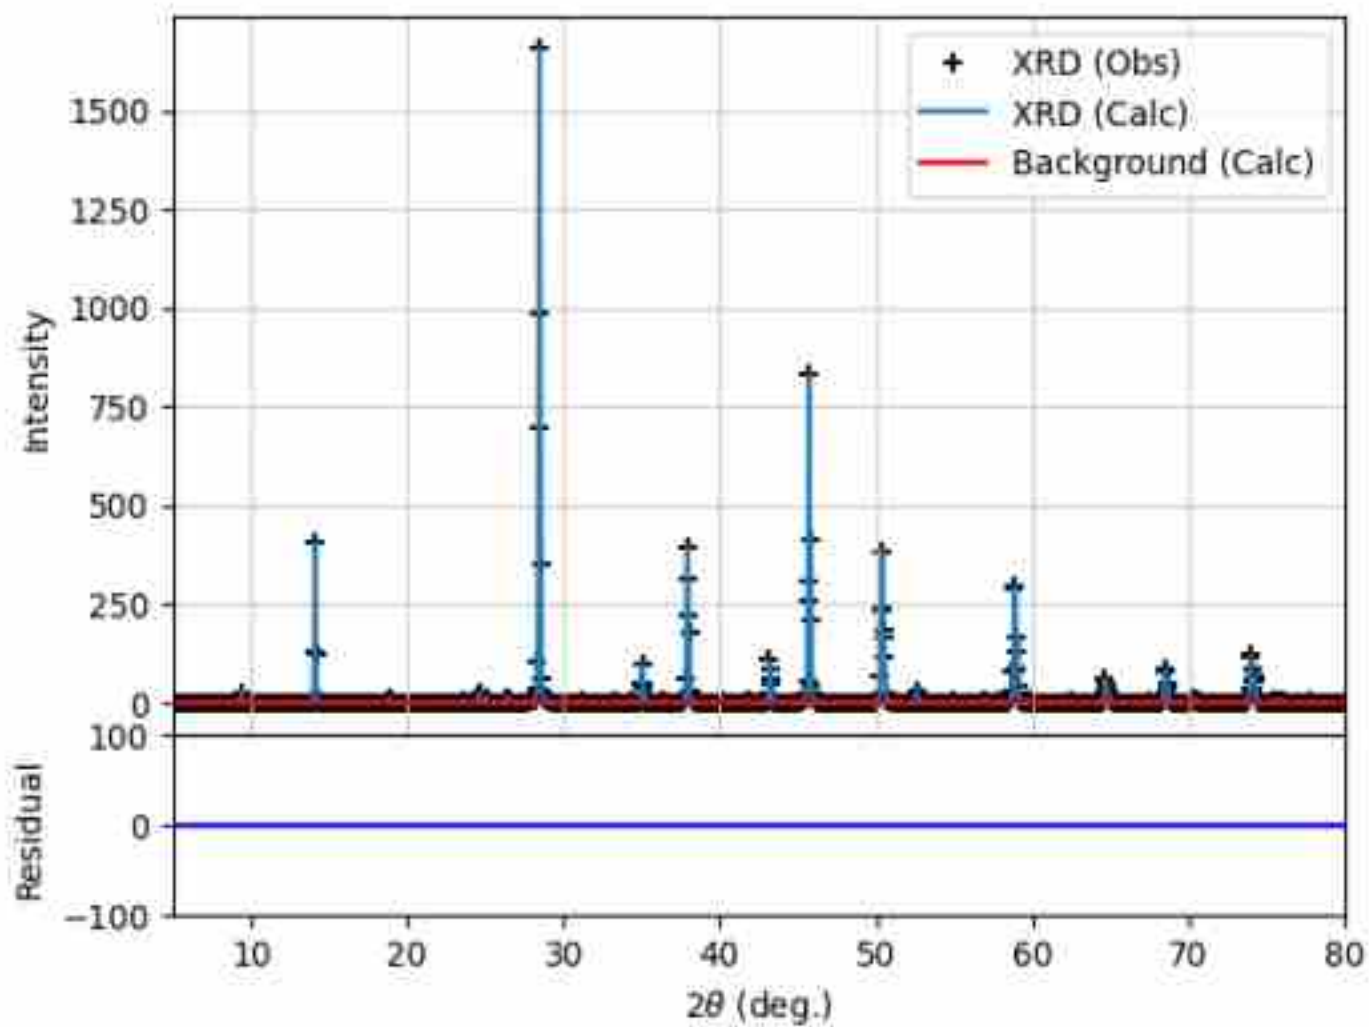

| RMSE before RR | Rwp     | RMSE after RR |
|----------------|---------|---------------|
| 0.042          | 0.01837 | 0.00149       |

# Ga<sub>2</sub>Ag<sub>2</sub>P<sub>4</sub>Se<sub>12</sub>

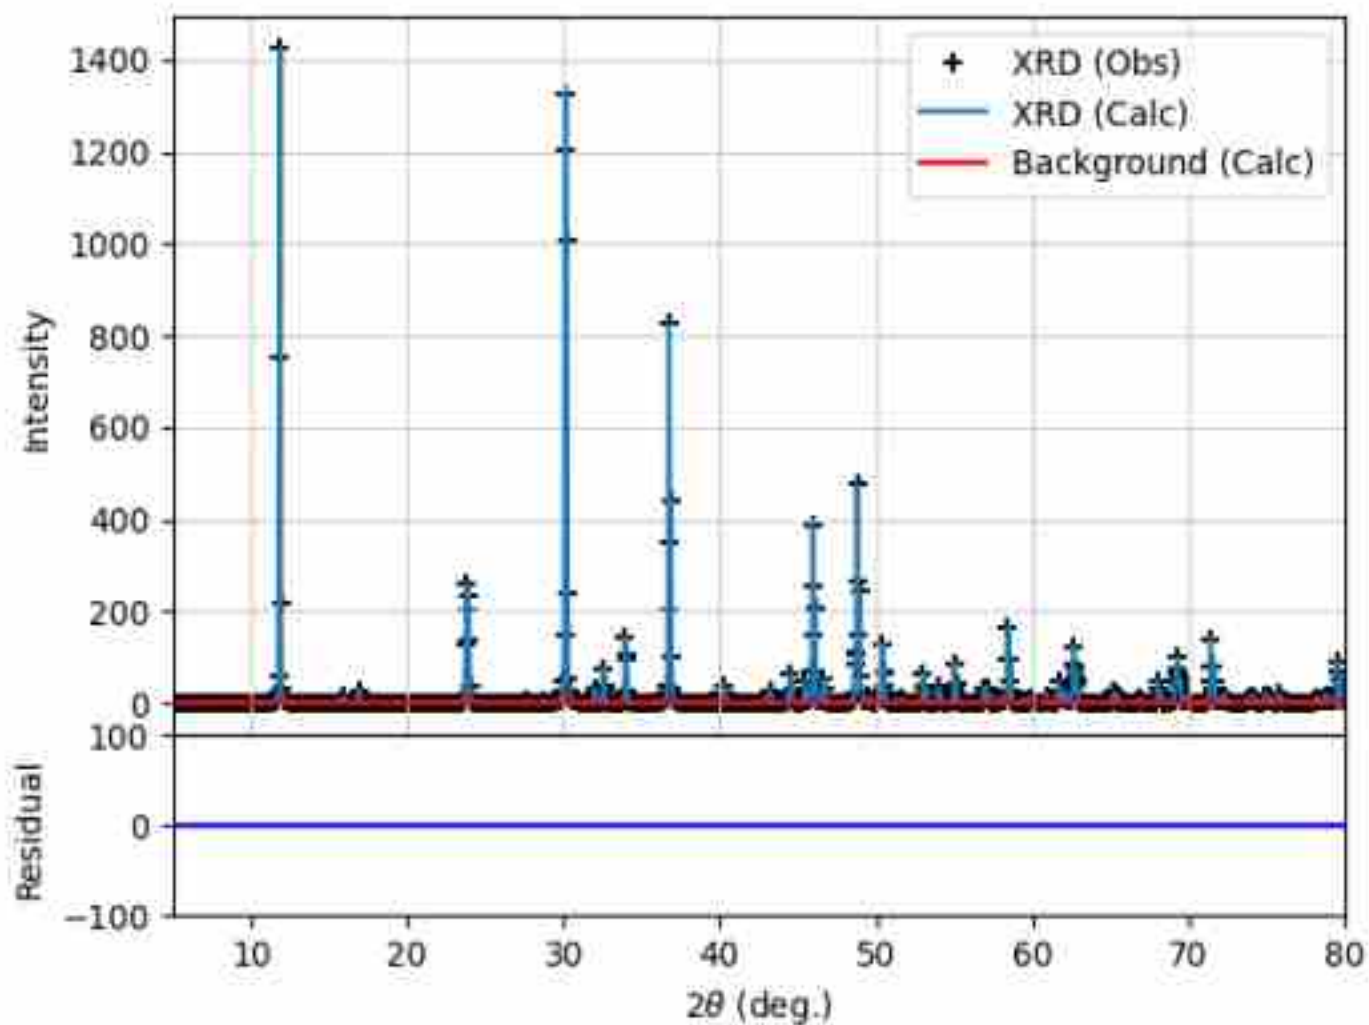

| RMSE before RR | Rwp     | RMSE after RR |
|----------------|---------|---------------|
| 0.042          | 0.00263 | 0.00033       |

# Gd<sub>2</sub>Al<sub>6</sub>C<sub>6</sub>

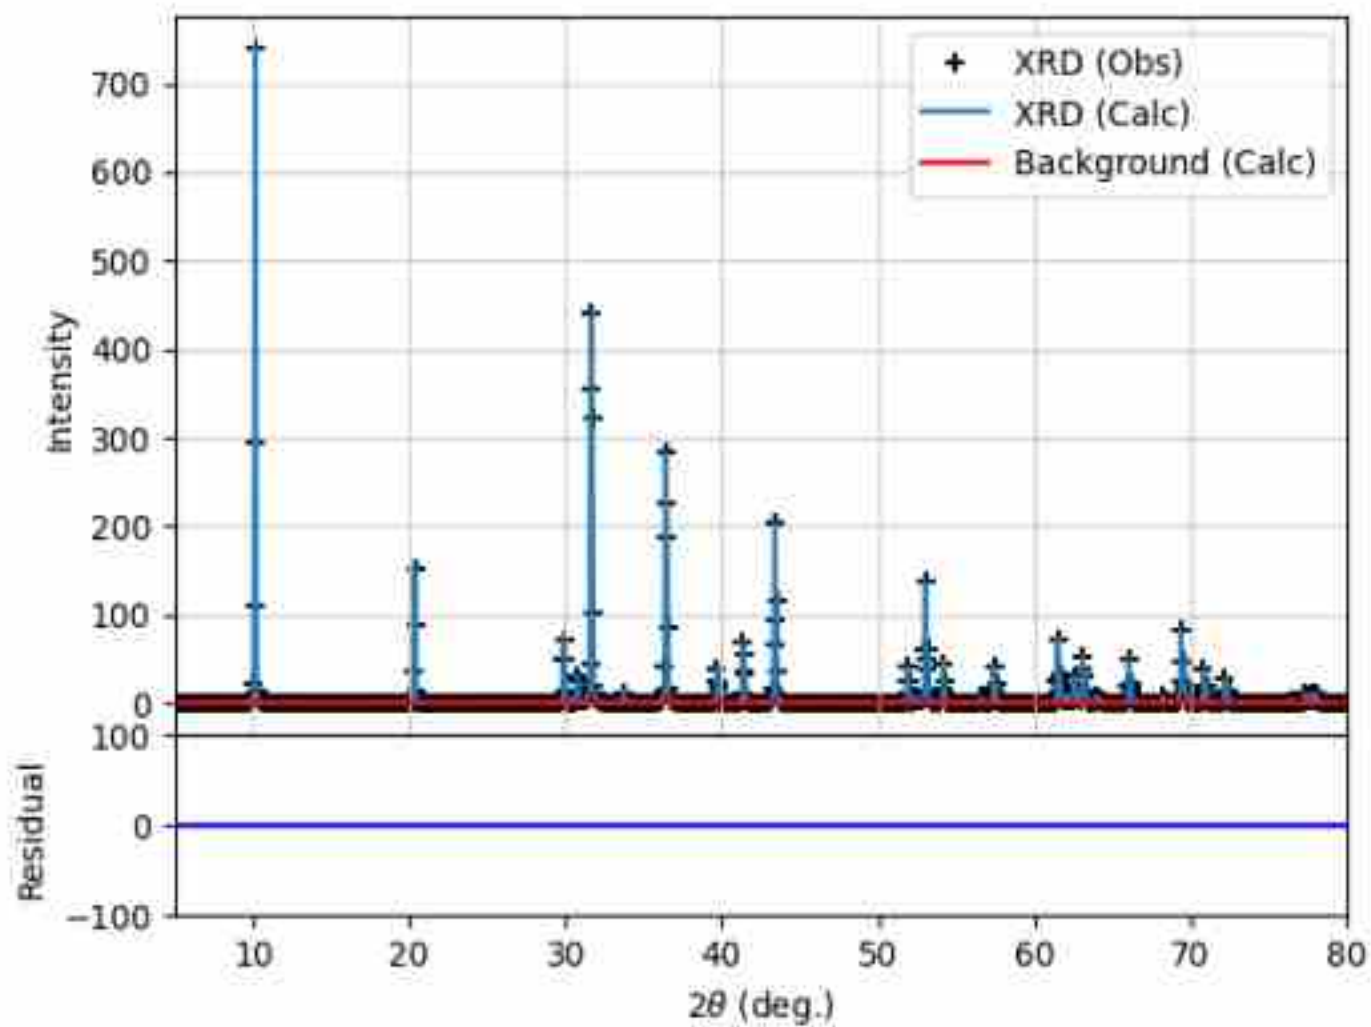

| RMSE before RR | Rwp     | RMSE after RR |
|----------------|---------|---------------|
| 0.042          | 0.00325 | 0.00122       |

# H6C2Br2

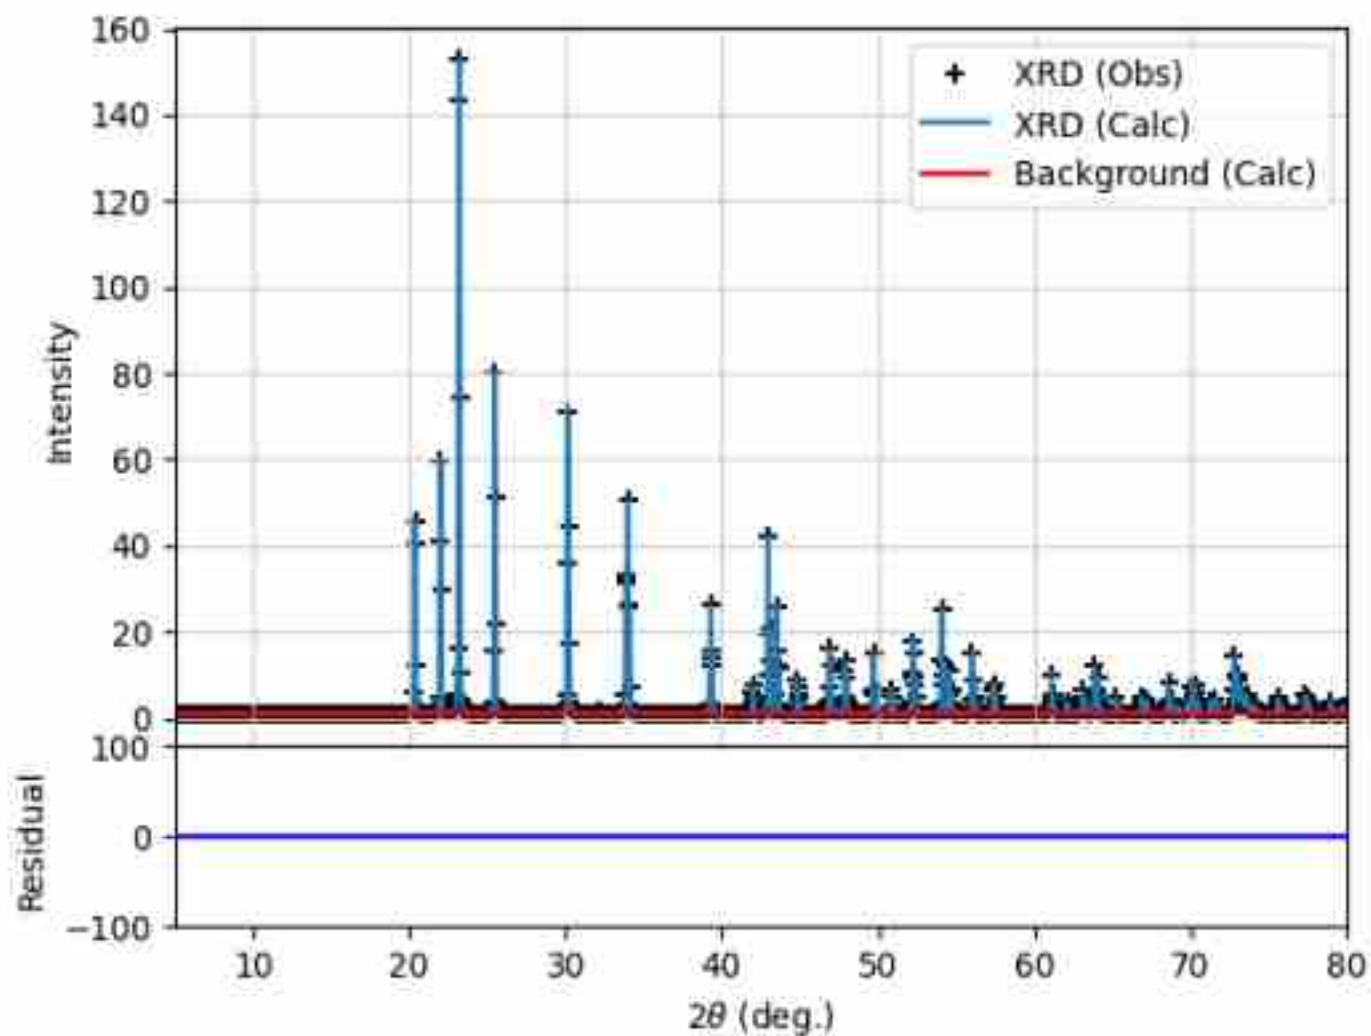

| RMSE before RR | Rwp     | RMSE after RR |
|----------------|---------|---------------|
| 0.042          | 0.00302 | 0.00335       |

# Hg<sub>2</sub>S<sub>2</sub>O<sub>8</sub>

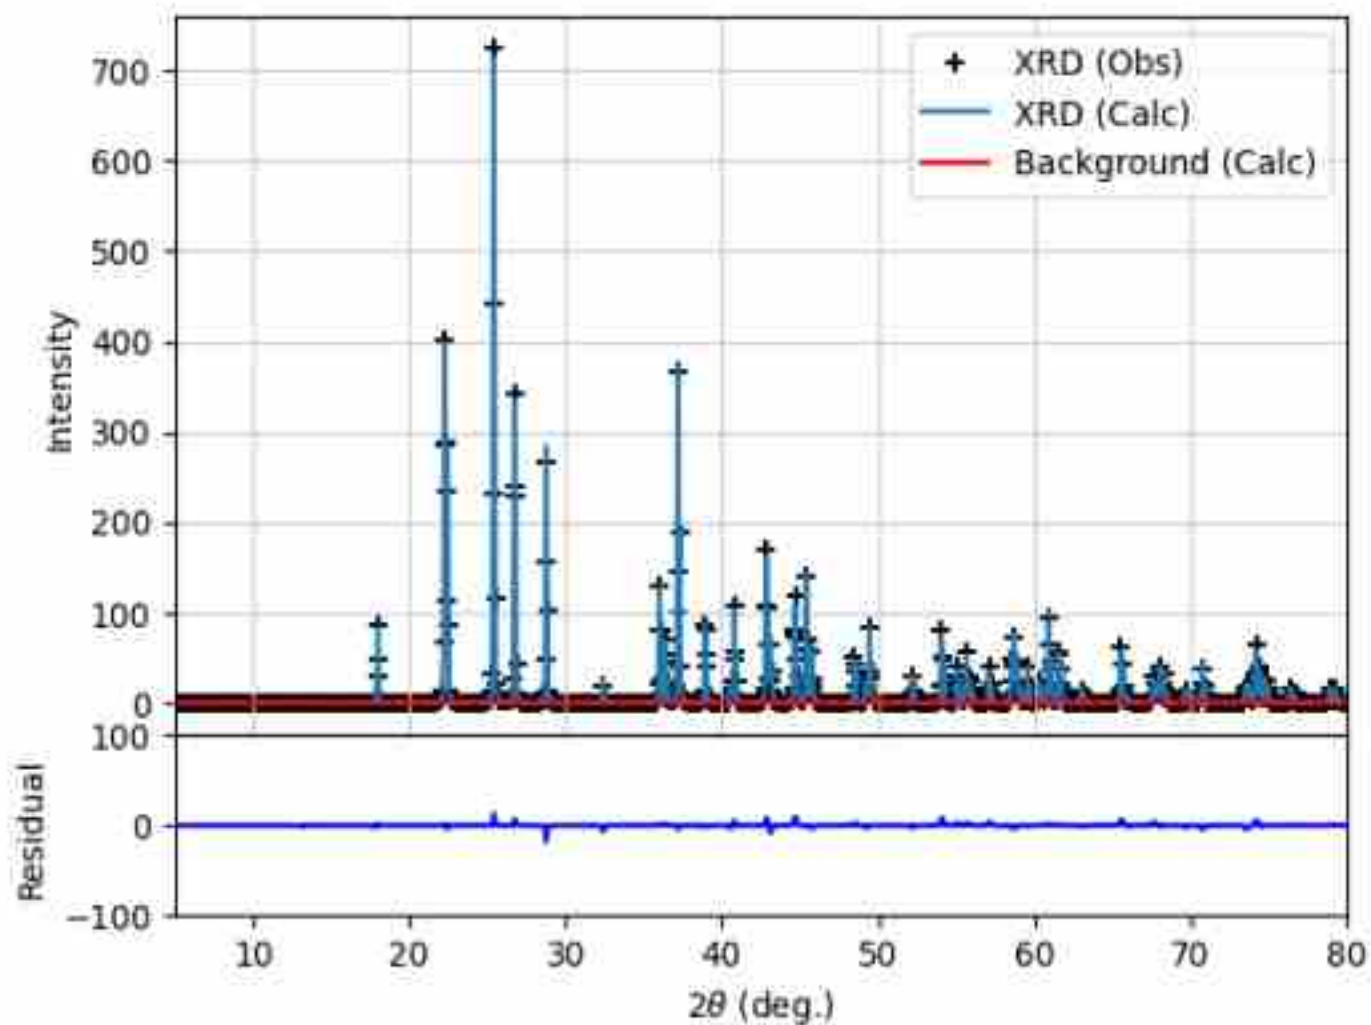

| RMSE before RR | Rwp     | RMSE after RR |
|----------------|---------|---------------|
| 0.042          | 6.28569 | 0.46497       |

# K<sub>2</sub>Be<sub>4</sub>B<sub>2</sub>O<sub>6</sub>F<sub>4</sub>

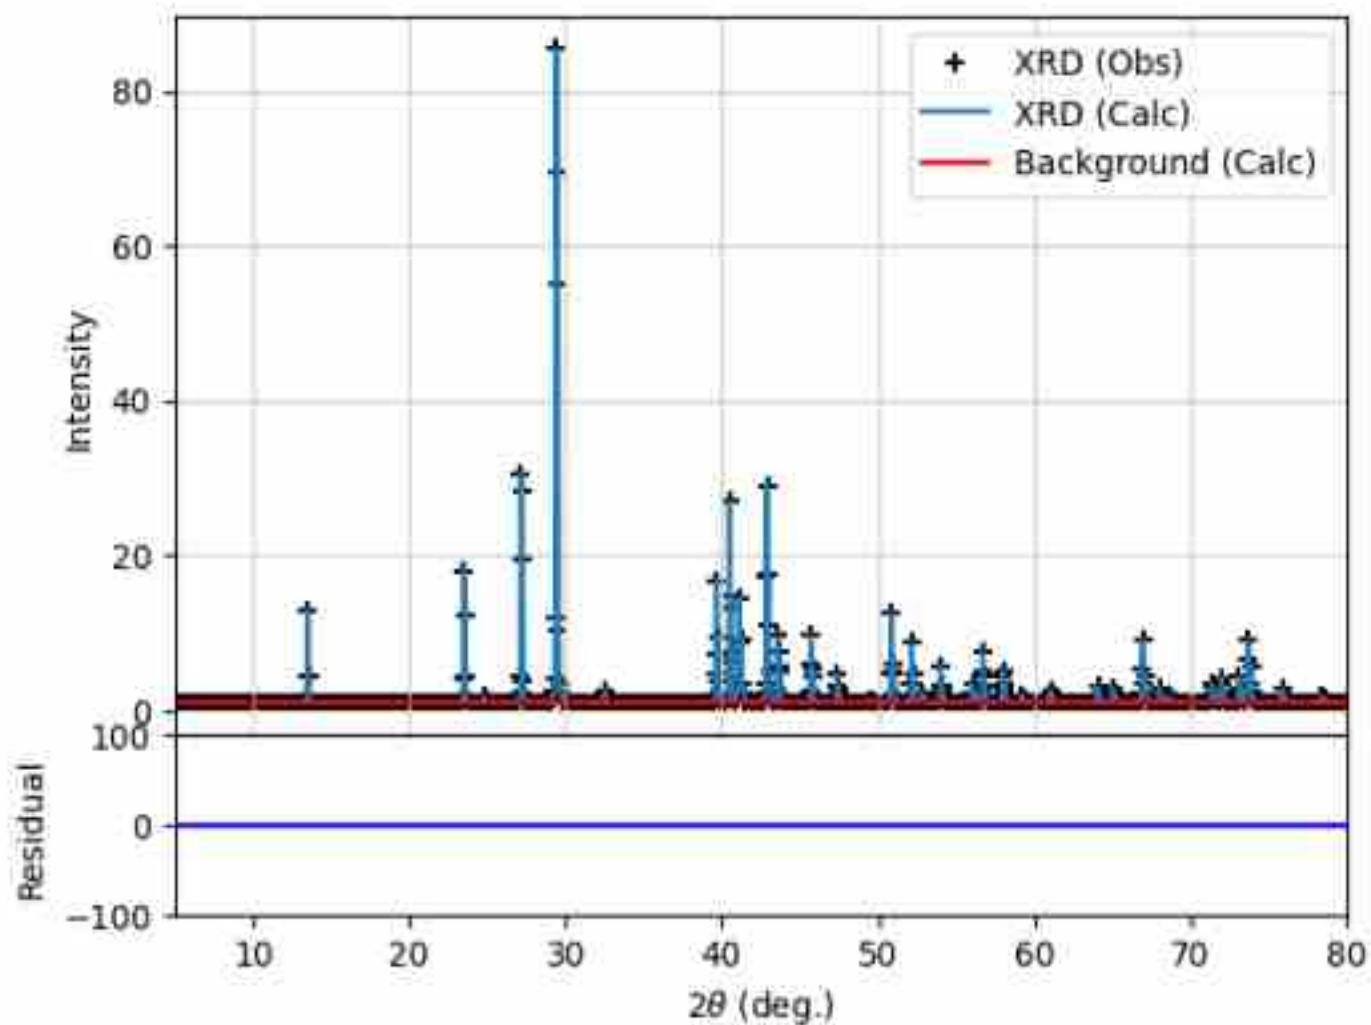

| RMSE before RR | Rwp     | RMSE after RR |
|----------------|---------|---------------|
| 0.042          | 0.00205 | 0.001         |



# K<sub>2</sub>Cr<sub>2</sub>Cl<sub>6</sub>

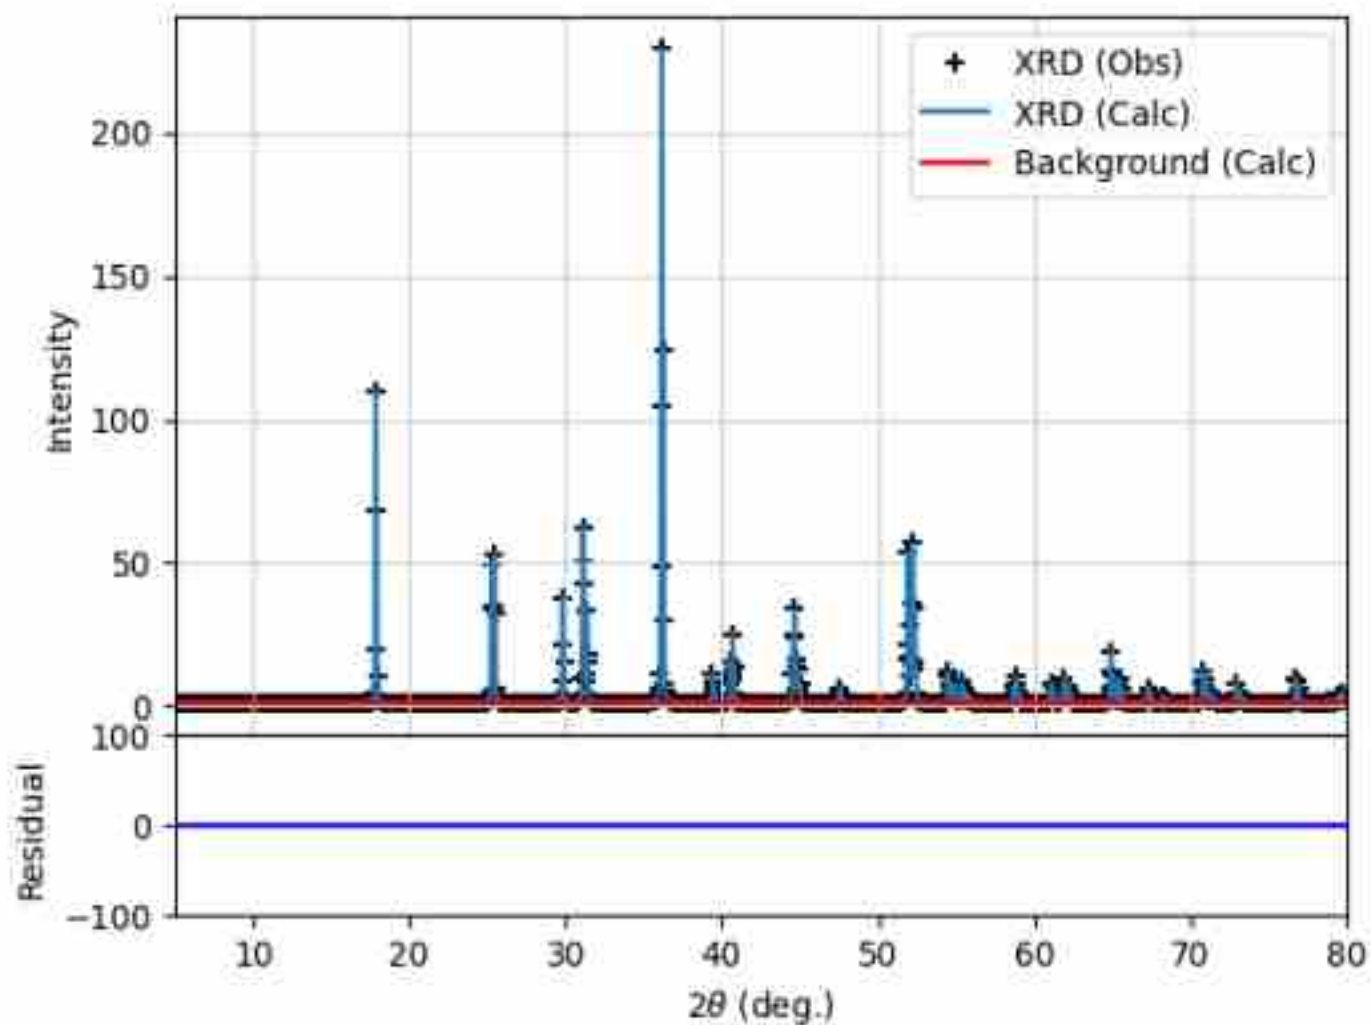

| RMSE before RR | Rwp     | RMSE after RR |
|----------------|---------|---------------|
| 0.042          | 0.00246 | 0.00039       |

# K<sub>2</sub>Mg<sub>5</sub>Sn<sub>3</sub>

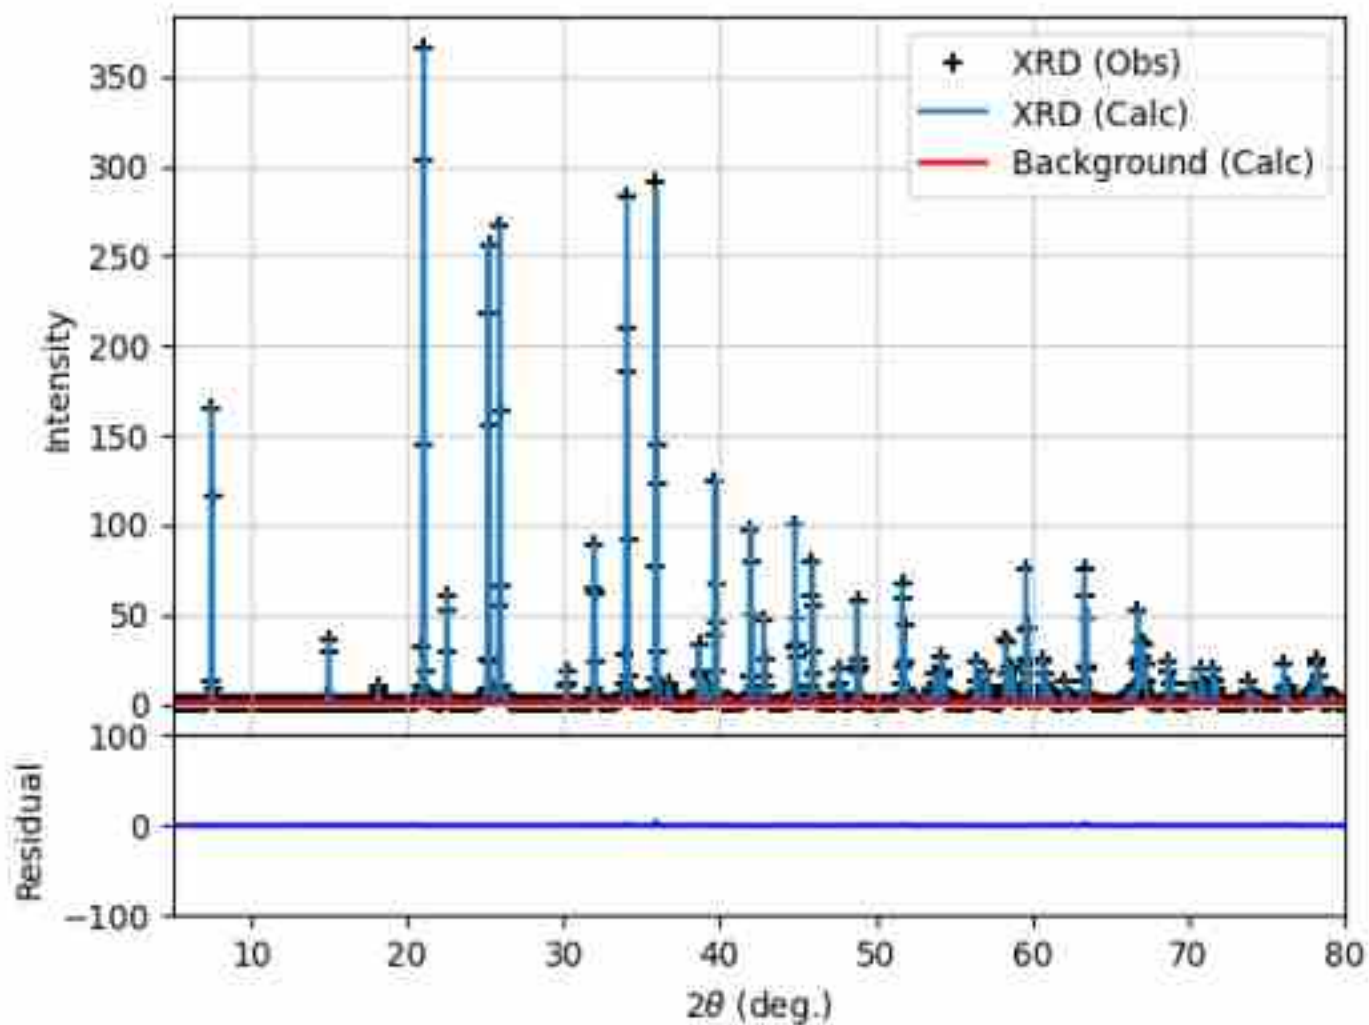

| RMSE before RR | Rwp     | RMSE after RR |
|----------------|---------|---------------|
| 0.042          | 1.72738 | 0.02442       |

# Li<sub>1</sub>Ti<sub>2</sub>Bi<sub>1</sub>O<sub>6</sub>

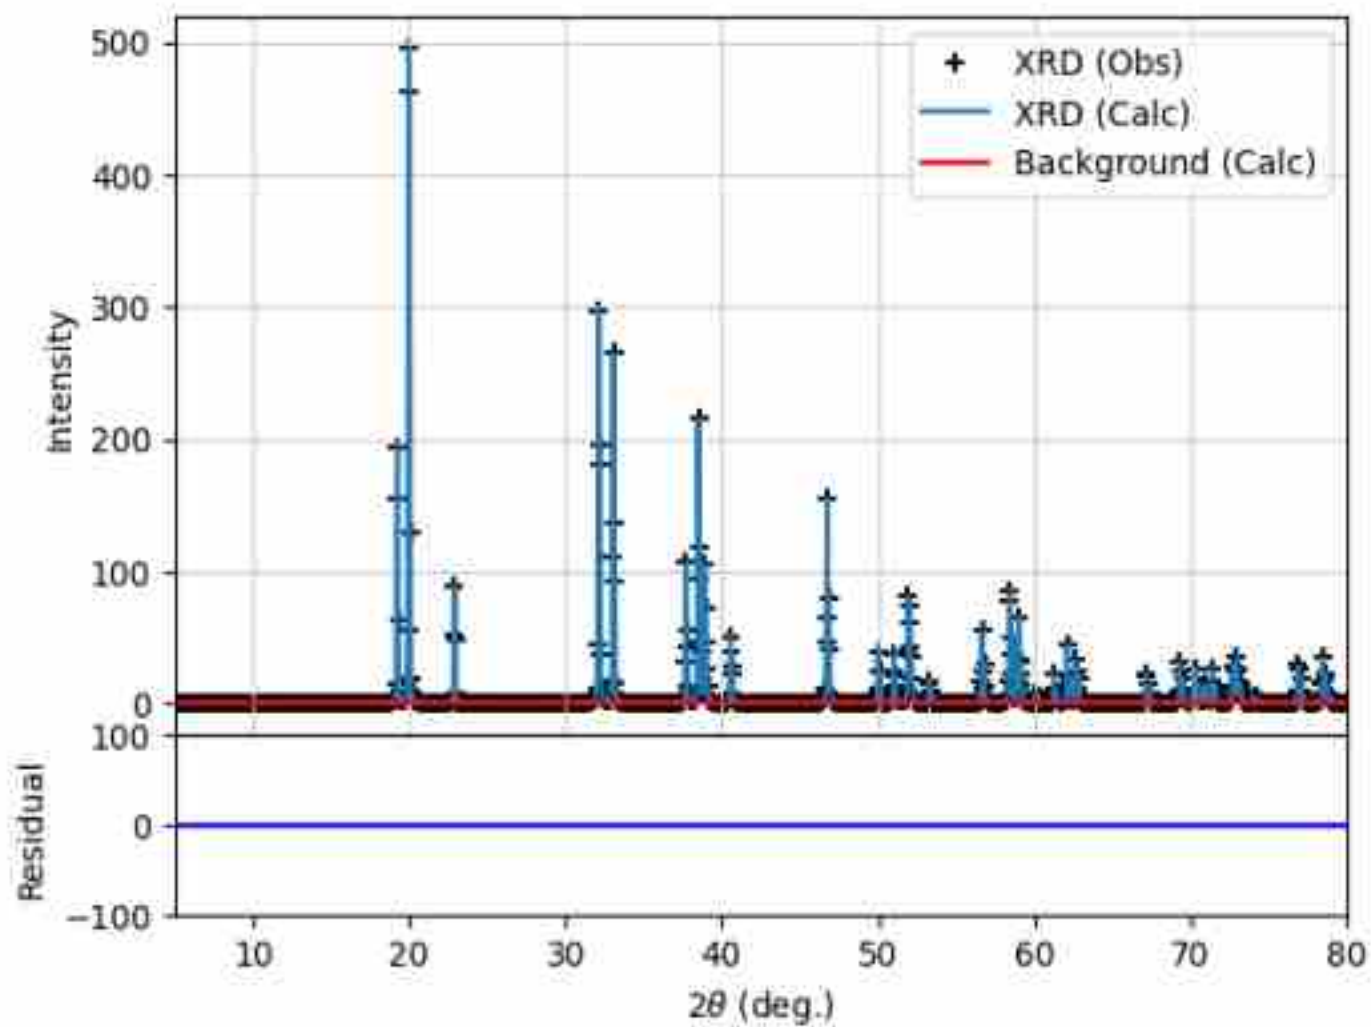

| RMSE before RR | Rwp     | RMSE after RR |
|----------------|---------|---------------|
| 0.042          | 0.00282 | 0.00203       |

# Li<sub>2</sub>Fe<sub>2</sub>F<sub>6</sub>

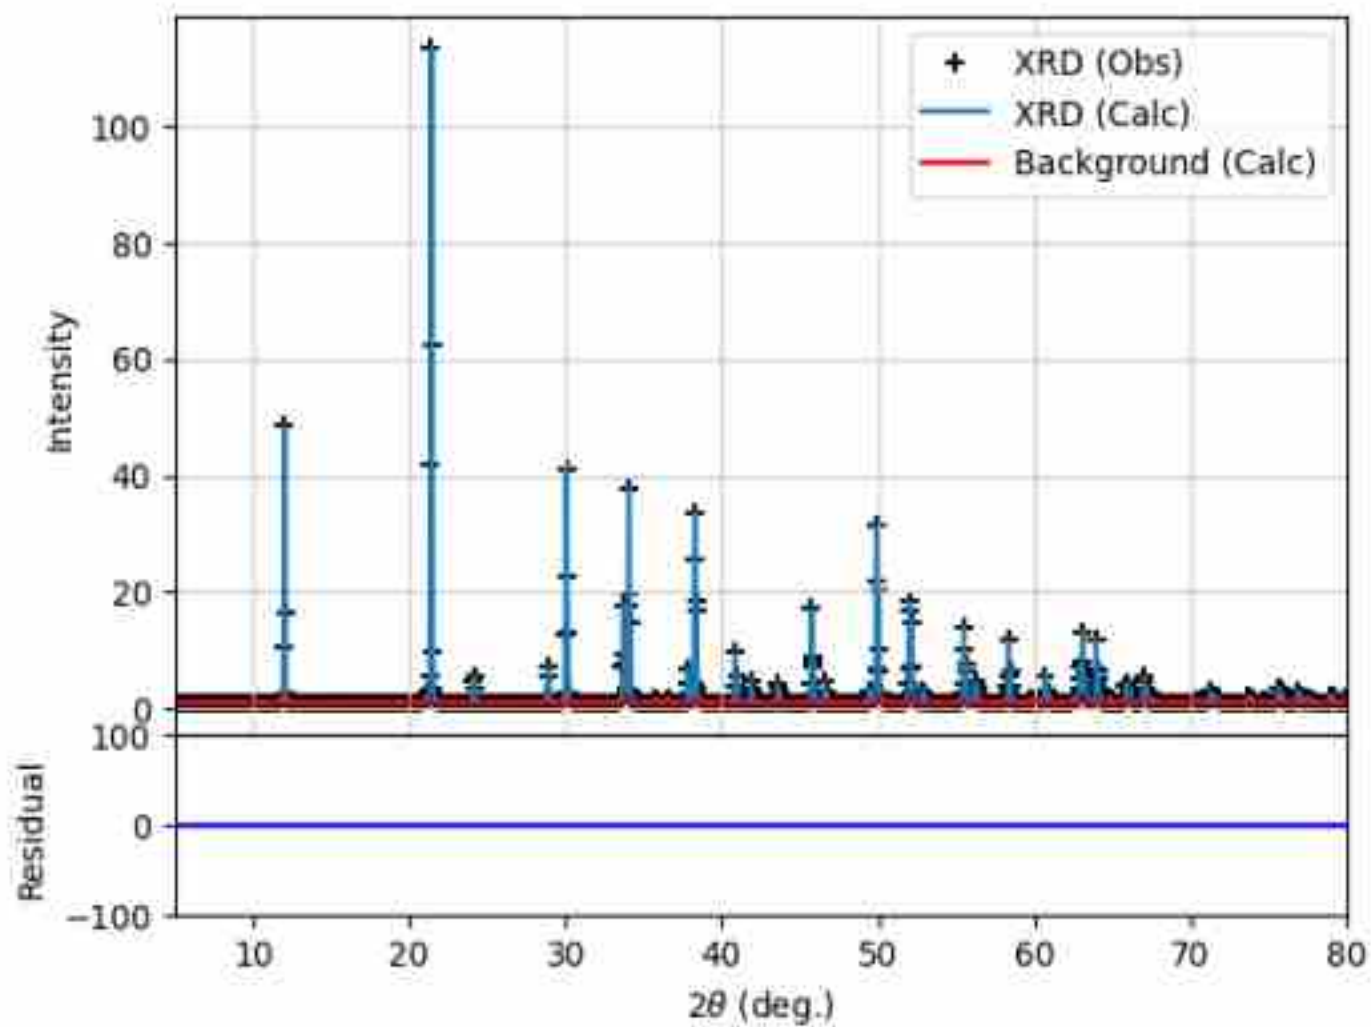

| RMSE before RR | Rwp     | RMSE after RR |
|----------------|---------|---------------|
| 0.042          | 0.00262 | 0.00122       |

# Li<sub>3</sub>TiMn<sub>4</sub>O<sub>8</sub>

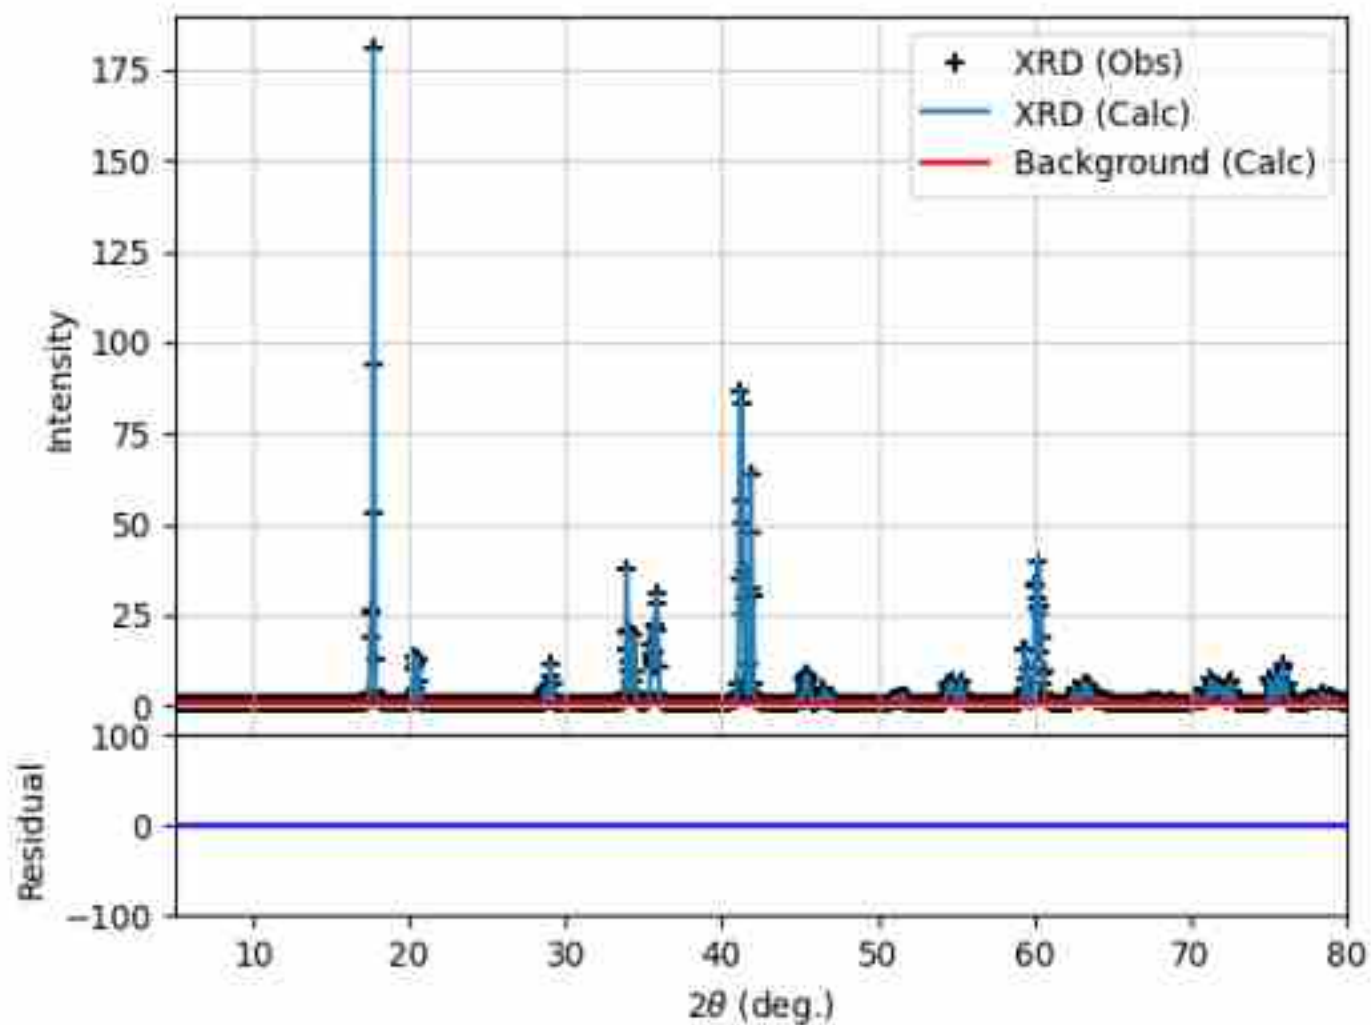

| RMSE before RR | Rwp     | RMSE after RR |
|----------------|---------|---------------|
| 0.042          | 0.00046 | 0.00073       |

# Li<sub>4</sub>Fe<sub>2</sub>P<sub>2</sub>H<sub>2</sub>O<sub>10</sub>

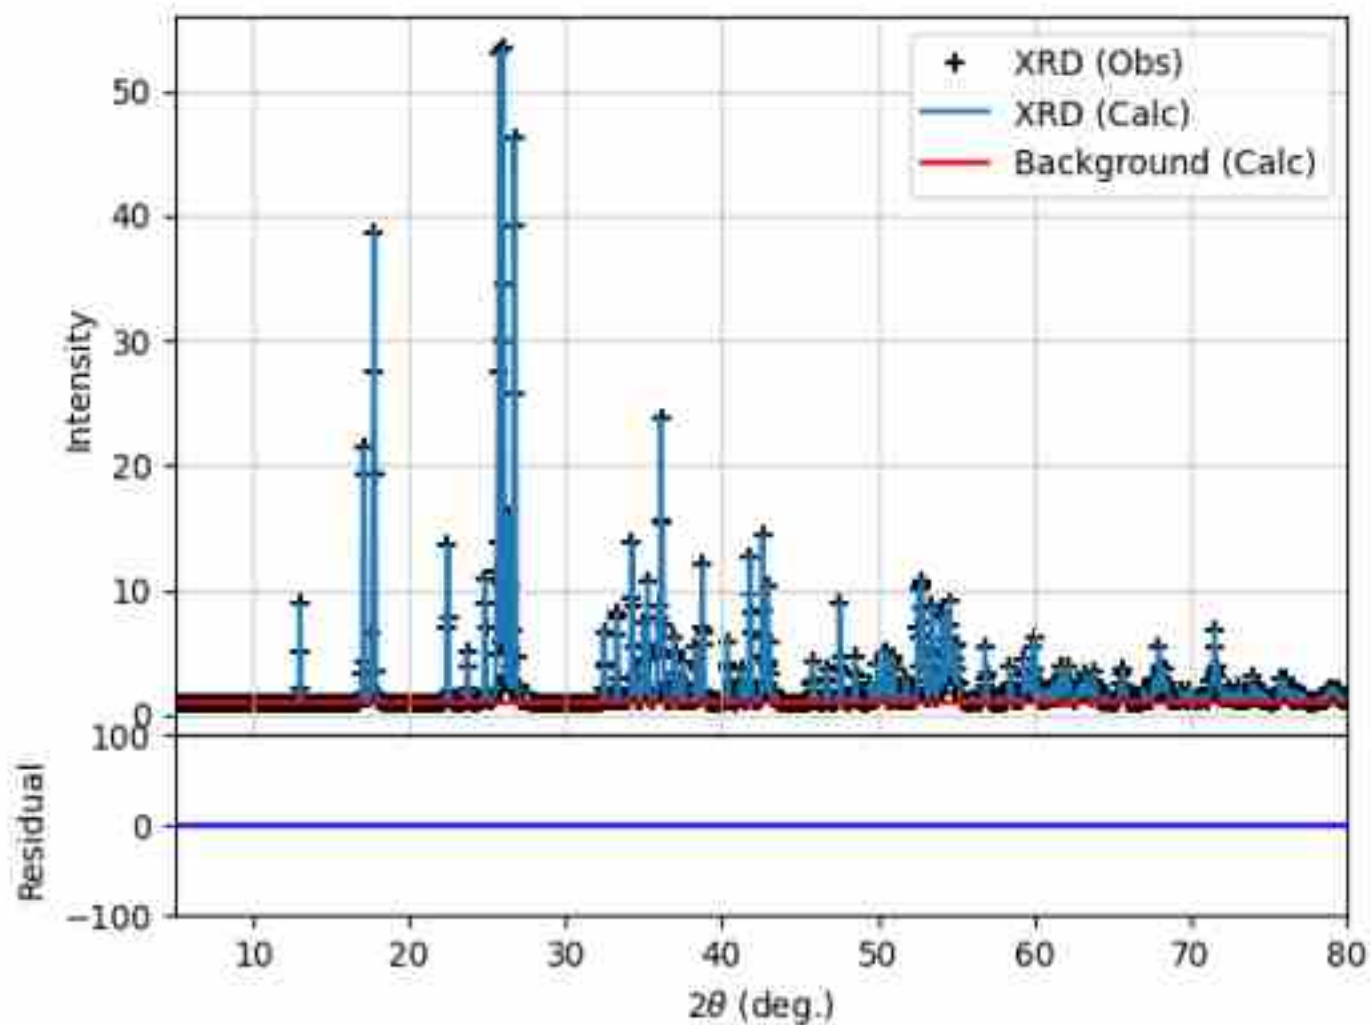

| RMSE before RR | Rwp     | RMSE after RR |
|----------------|---------|---------------|
| 0.042          | 0.00079 | 0.00077       |

# Li<sub>4</sub>H<sub>8</sub>N<sub>4</sub>

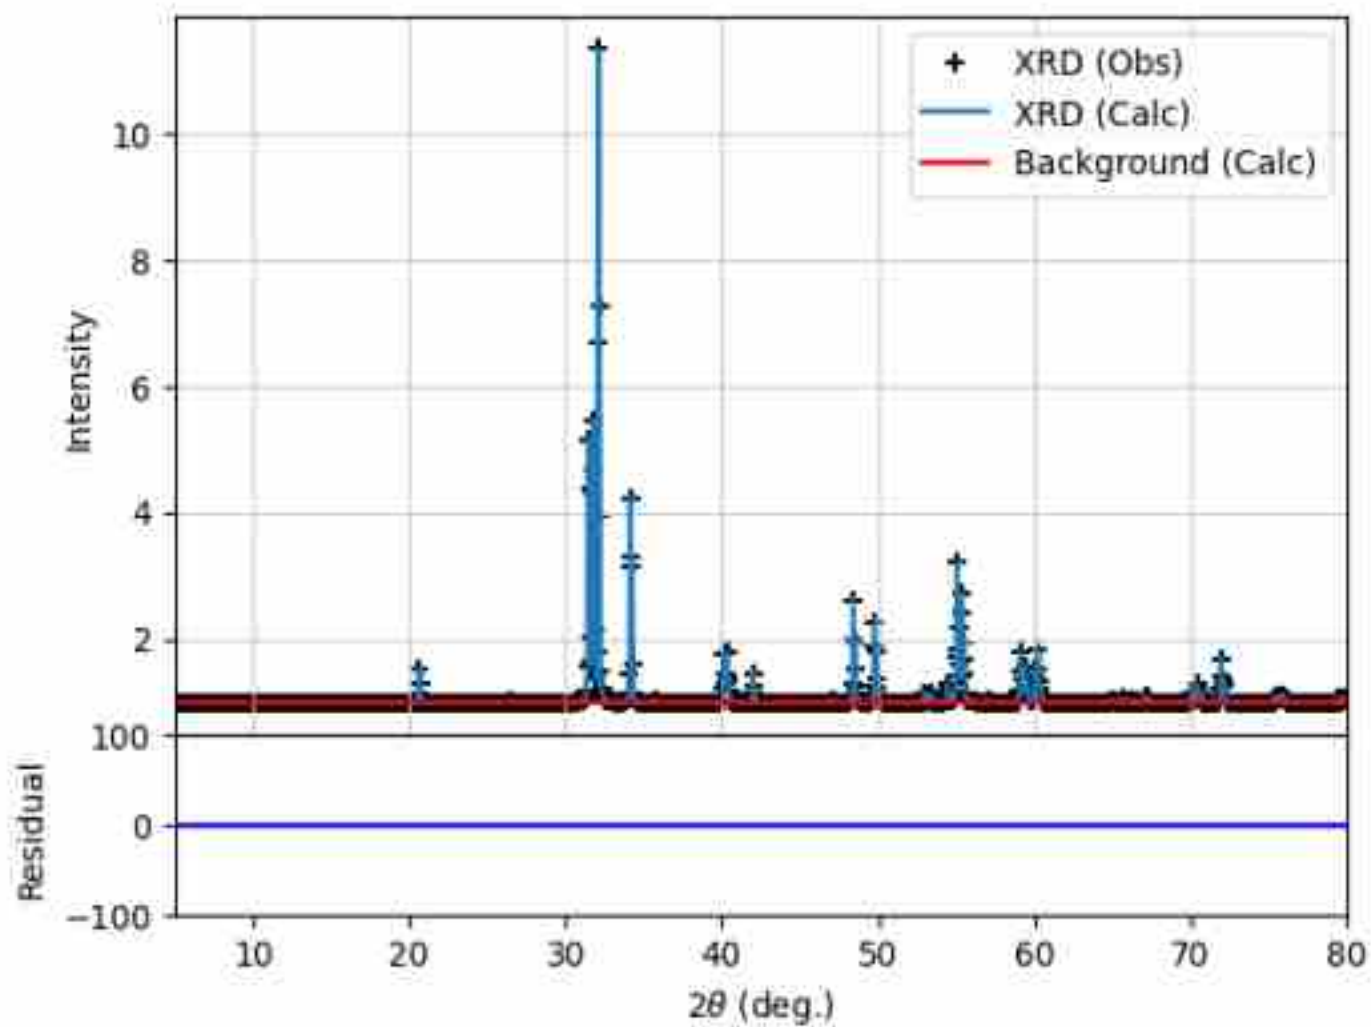

| RMSE before RR | Rwp     | RMSE after RR |
|----------------|---------|---------------|
| 0.042          | 0.00096 | 0.003         |

# Li<sub>4</sub>Mn<sub>2</sub>Co<sub>2</sub>O<sub>8</sub>

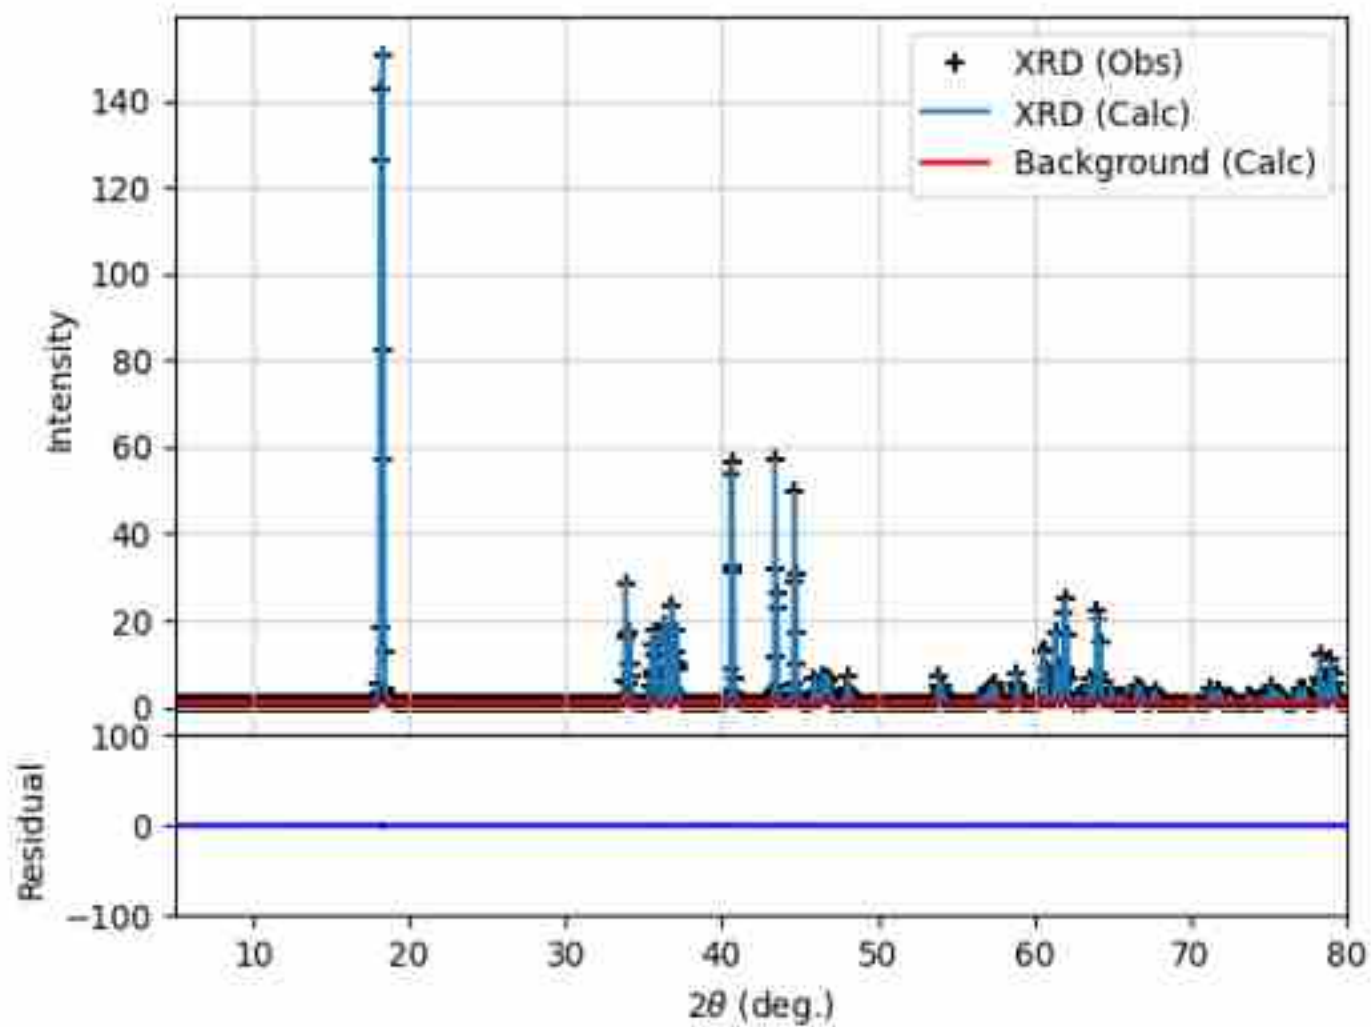

| RMSE before RR | Rwp     | RMSE after RR |
|----------------|---------|---------------|
| 0.042          | 1.15492 | 0.05402       |



# Mg<sub>1</sub>Cd<sub>3</sub>C<sub>4</sub>O<sub>12</sub>

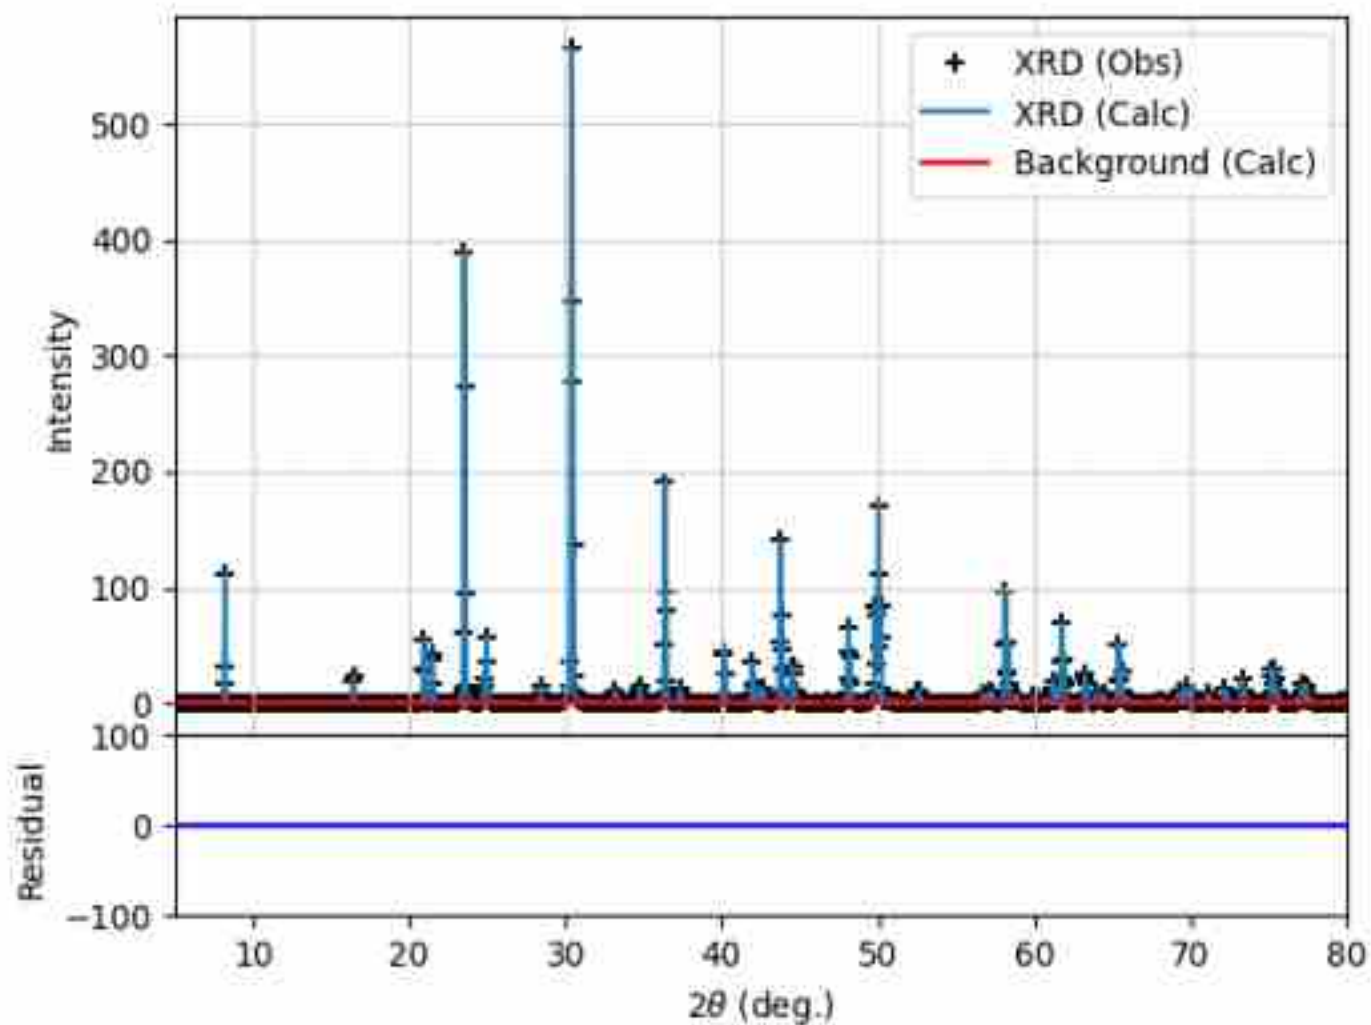

| RMSE before RR | Rwp     | RMSE after RR |
|----------------|---------|---------------|
| 0.042          | 0.00357 | 0.00155       |

# Mg<sub>2</sub>Cu<sub>2</sub>As<sub>2</sub>

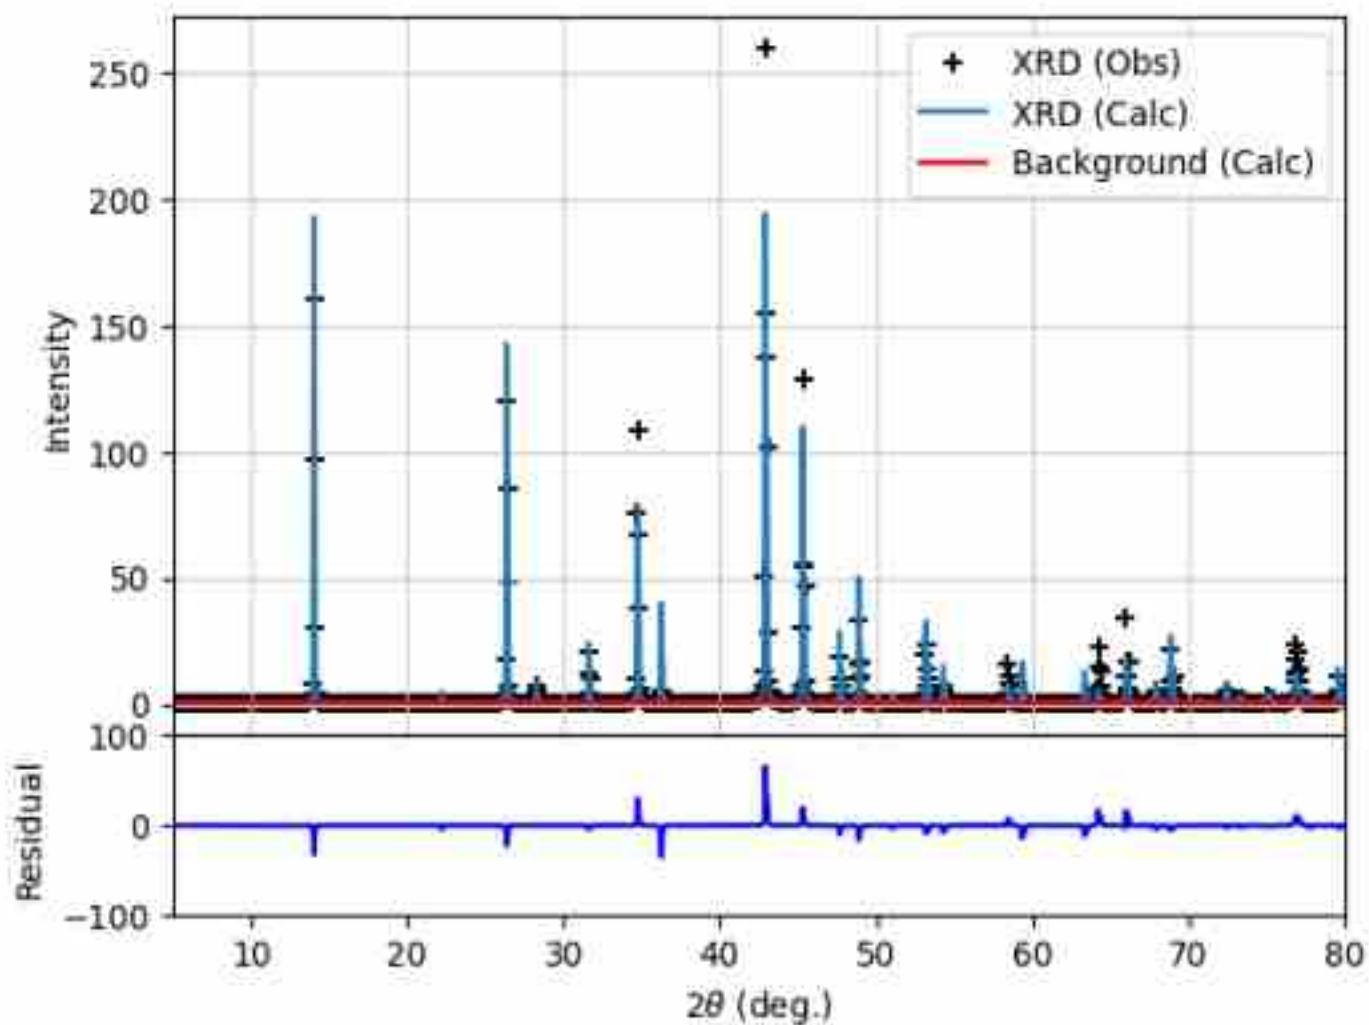

| RMSE before RR | Rwp      | RMSE after RR |
|----------------|----------|---------------|
| 0.042          | 52.35532 | 0.13821       |

# Mg<sub>2</sub>Mn<sub>4</sub>O<sub>8</sub>

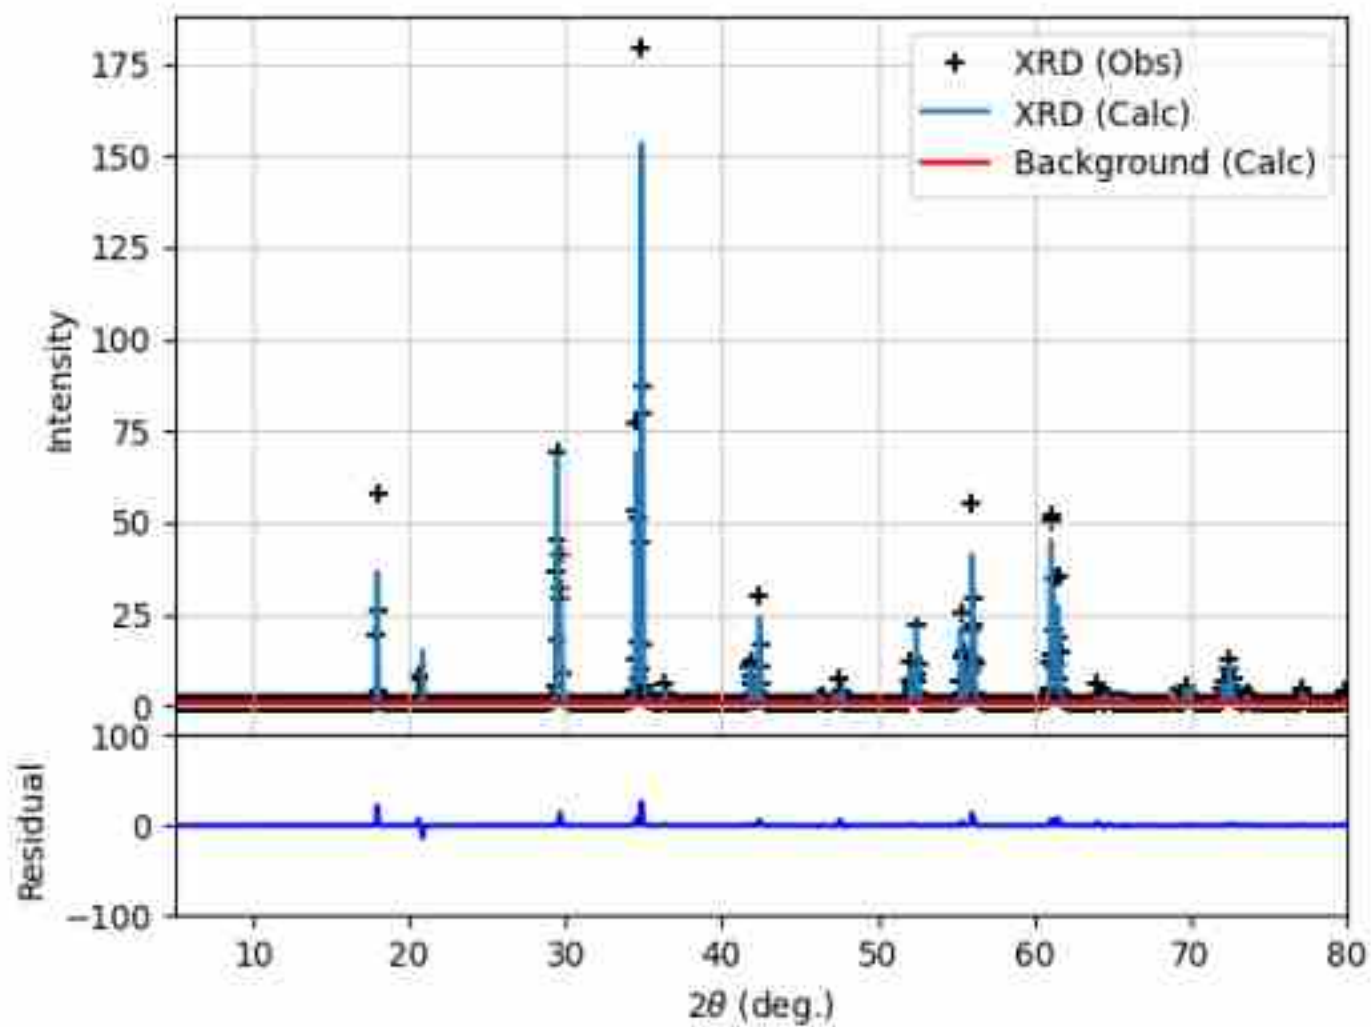

| RMSE before RR | Rwp      | RMSE after RR |
|----------------|----------|---------------|
| 0.042          | 33.25833 | 0.04564       |

# Mn<sub>2</sub>P<sub>2</sub>O<sub>8</sub>F<sub>2</sub>

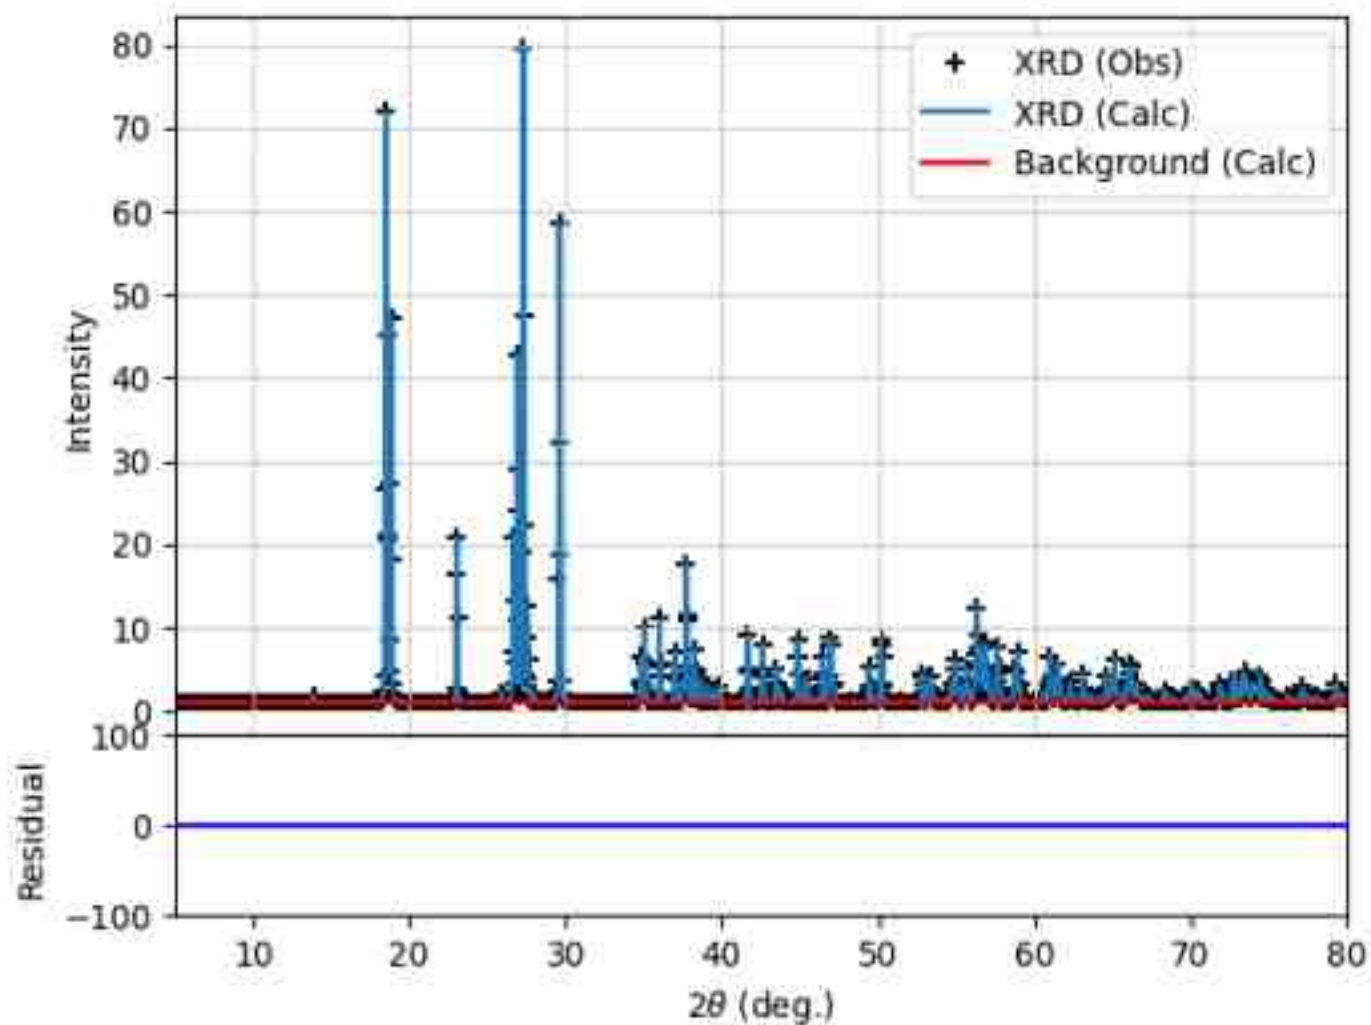

| RMSE before RR | Rwp     | RMSE after RR |
|----------------|---------|---------------|
| 0.042          | 0.00119 | 0.00033       |

# Mn<sub>3</sub>Cd<sub>2</sub>O<sub>8</sub>

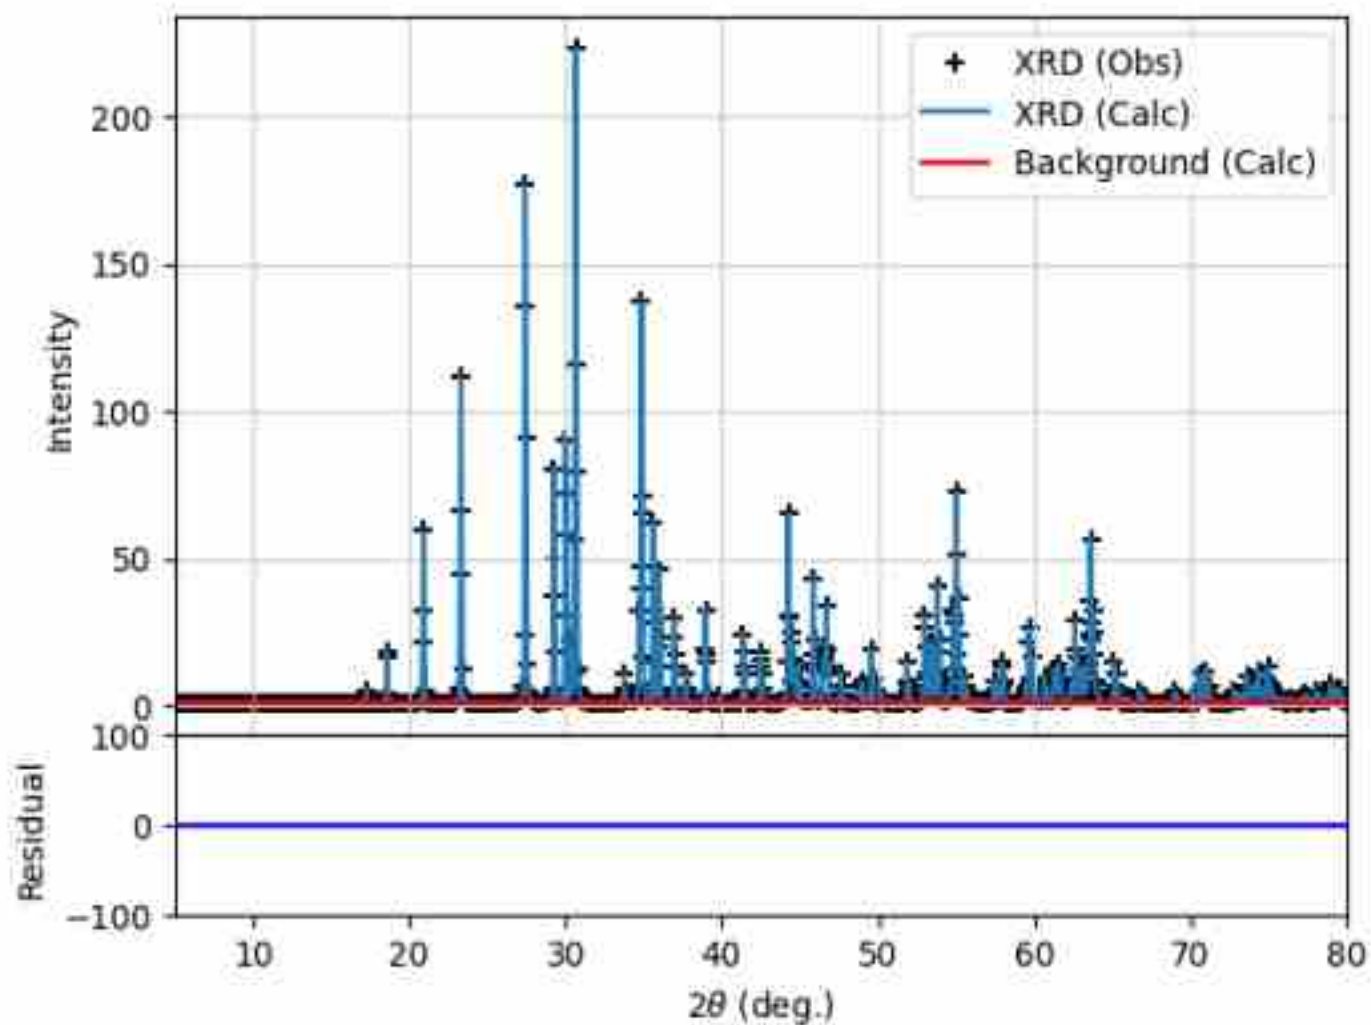

| RMSE before RR | Rwp     | RMSE after RR |
|----------------|---------|---------------|
| 0.042          | 0.00396 | 0.00165       |

# Na<sub>4</sub>Co<sub>4</sub>O<sub>6</sub>

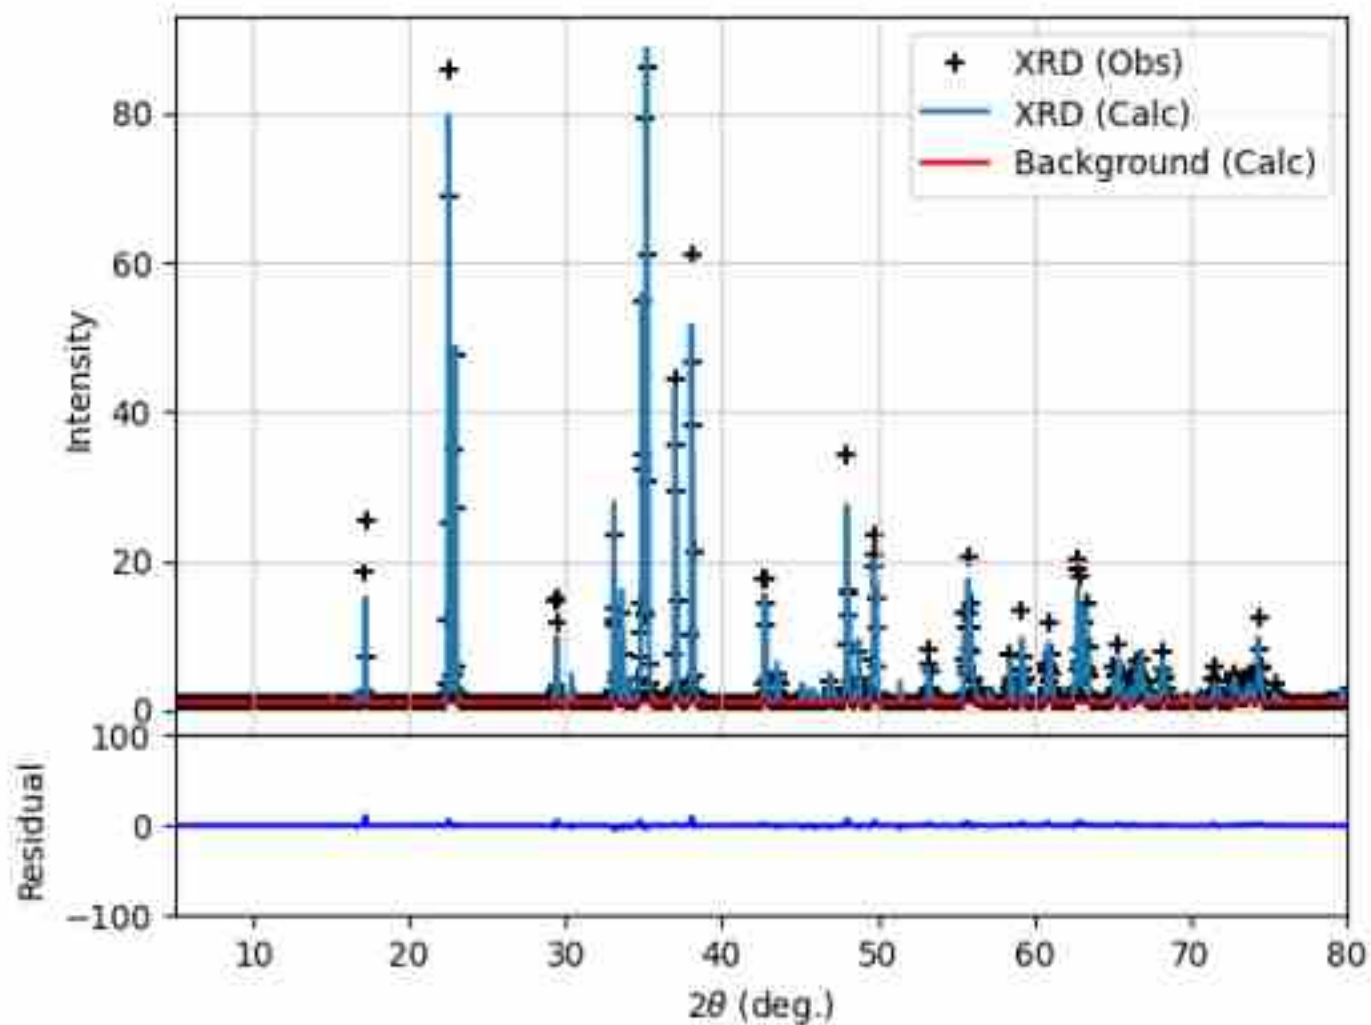

| RMSE before RR | Rwp      | RMSE after RR |
|----------------|----------|---------------|
| 0.042          | 19.07414 | 0.3323        |

# Na5Co1C10S

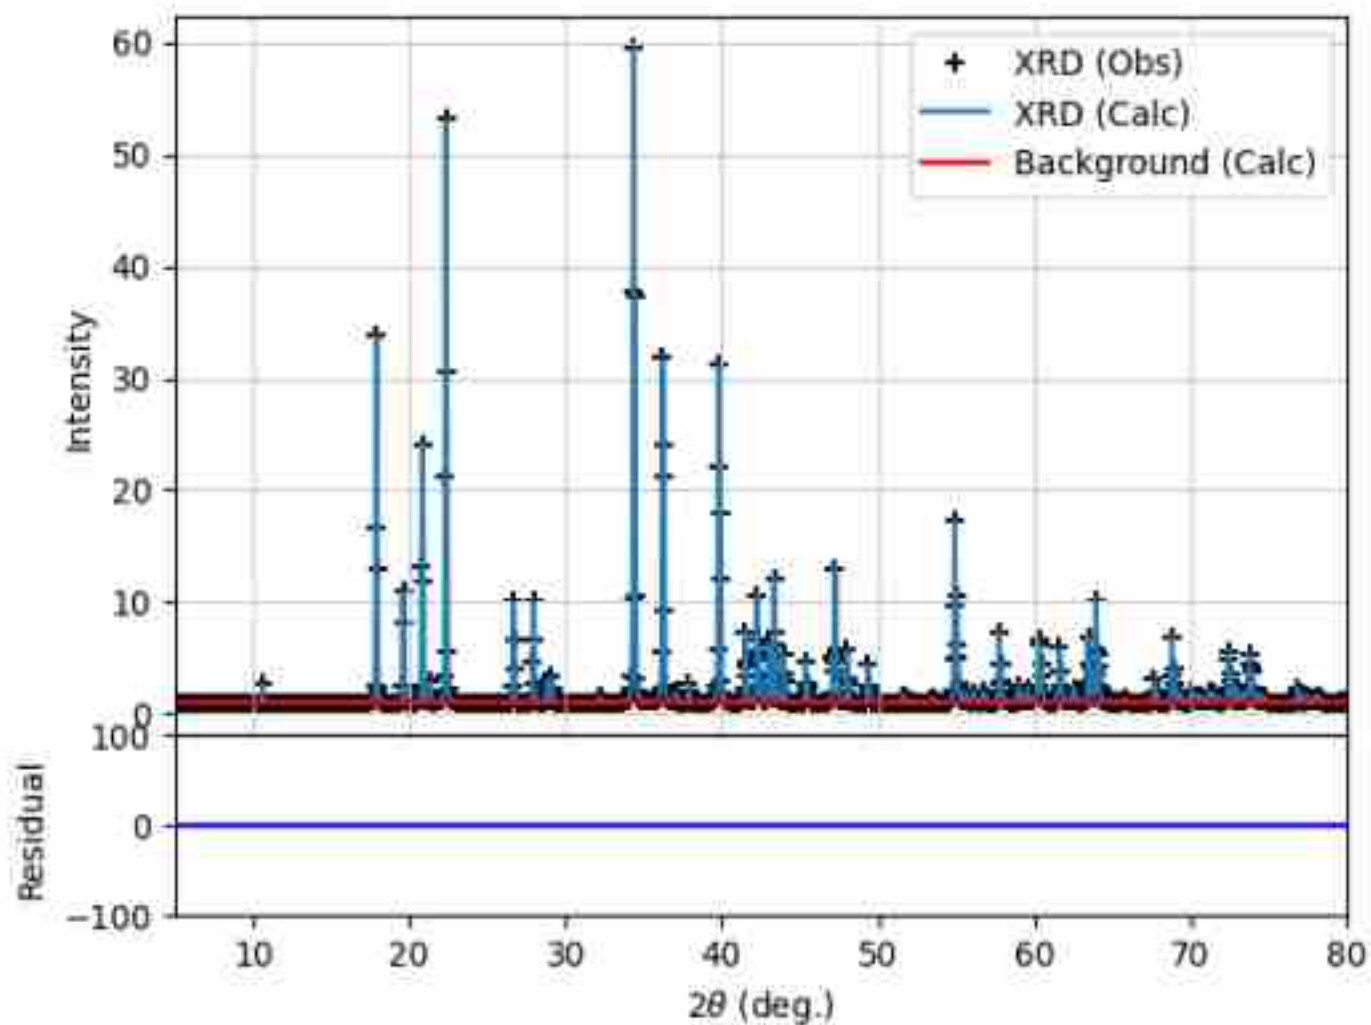

| RMSE before RR | Rwp     | RMSE after RR |
|----------------|---------|---------------|
| 0.042          | 0.00217 | 0.00053       |

# Sc2Ga4

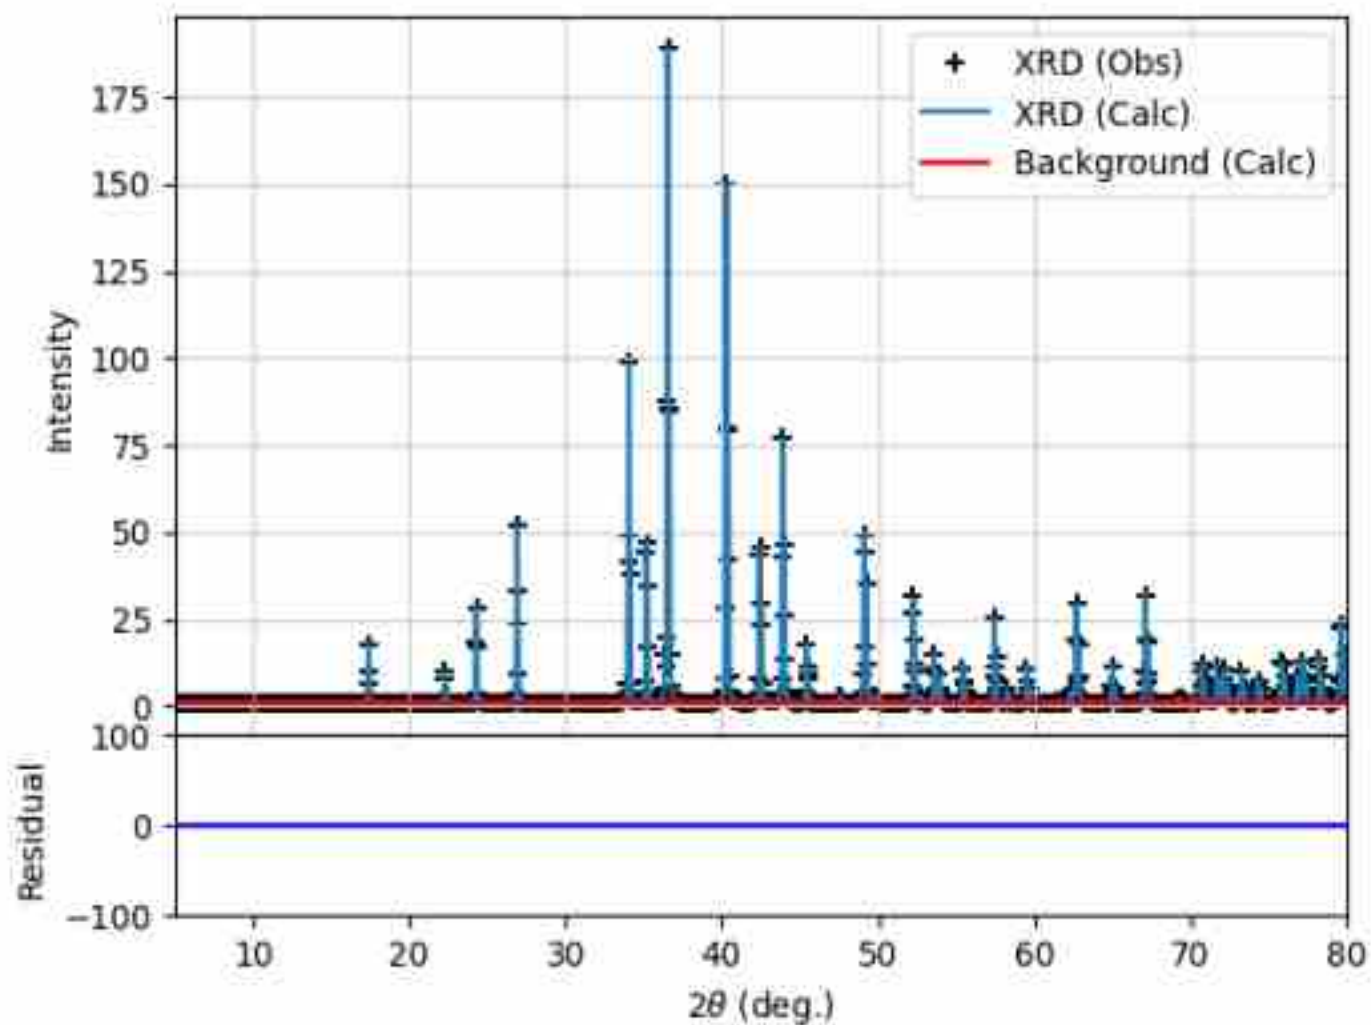

| RMSE before RR | Rwp     | RMSE after RR |
|----------------|---------|---------------|
| 0.042          | 0.00301 | 0.00033       |



# Sm<sub>4</sub>Cu<sub>2</sub>Te<sub>8</sub>

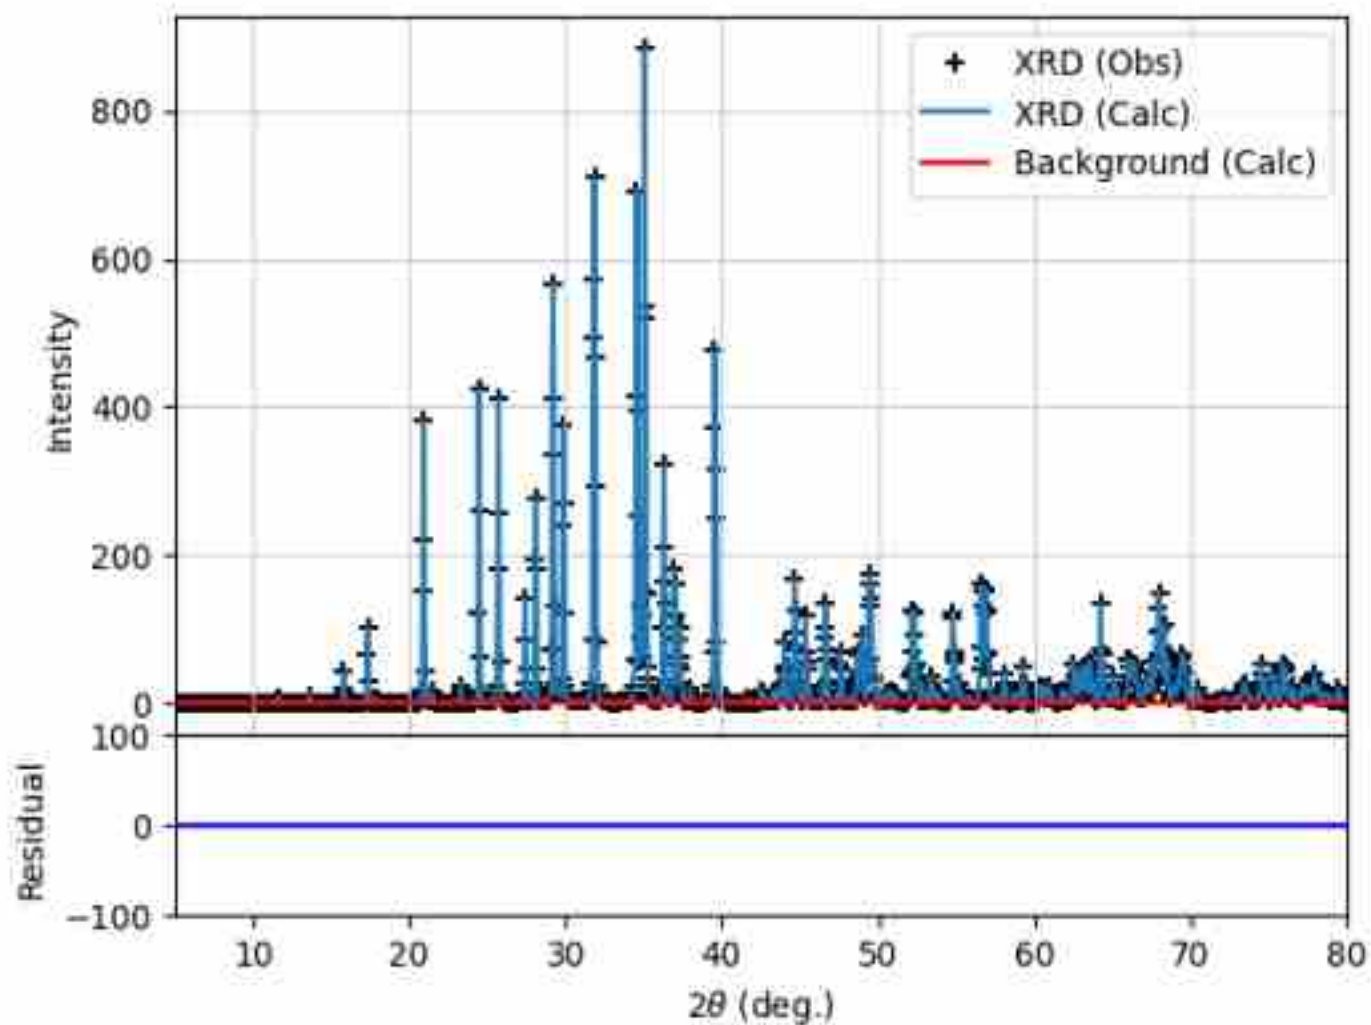

| RMSE before RR | Rwp    | RMSE after RR |
|----------------|--------|---------------|
| 0.042          | 0.0037 | 0.00025       |

# Sr1Si6N8

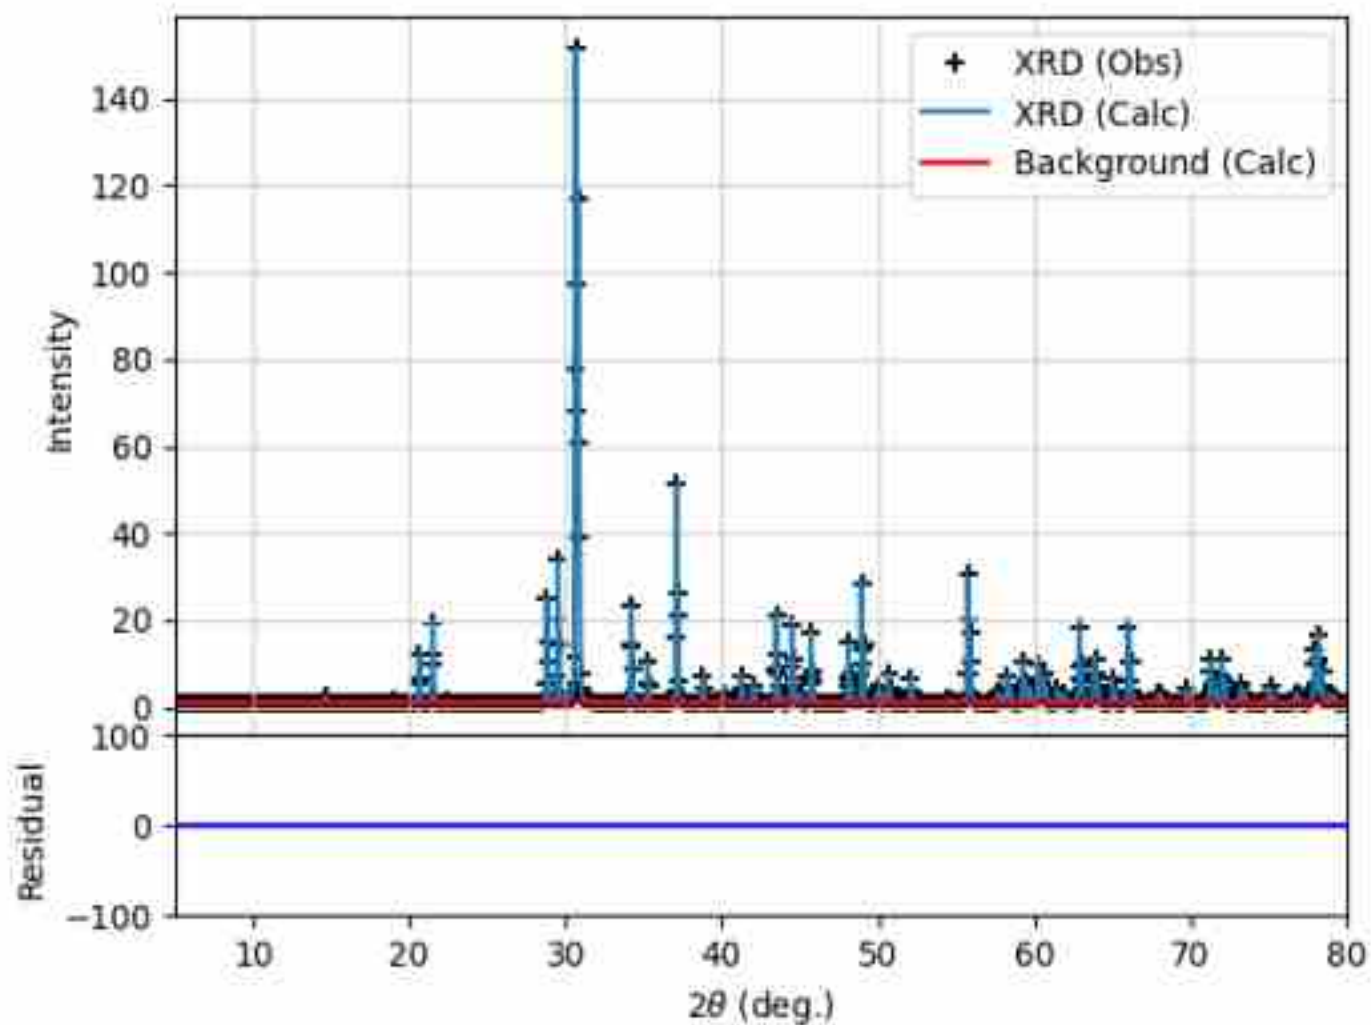

| RMSE before RR | Rwp     | RMSE after RR |
|----------------|---------|---------------|
| 0.042          | 0.00247 | 0.00059       |

# Sr<sub>2</sub>ZnSb<sub>2</sub>

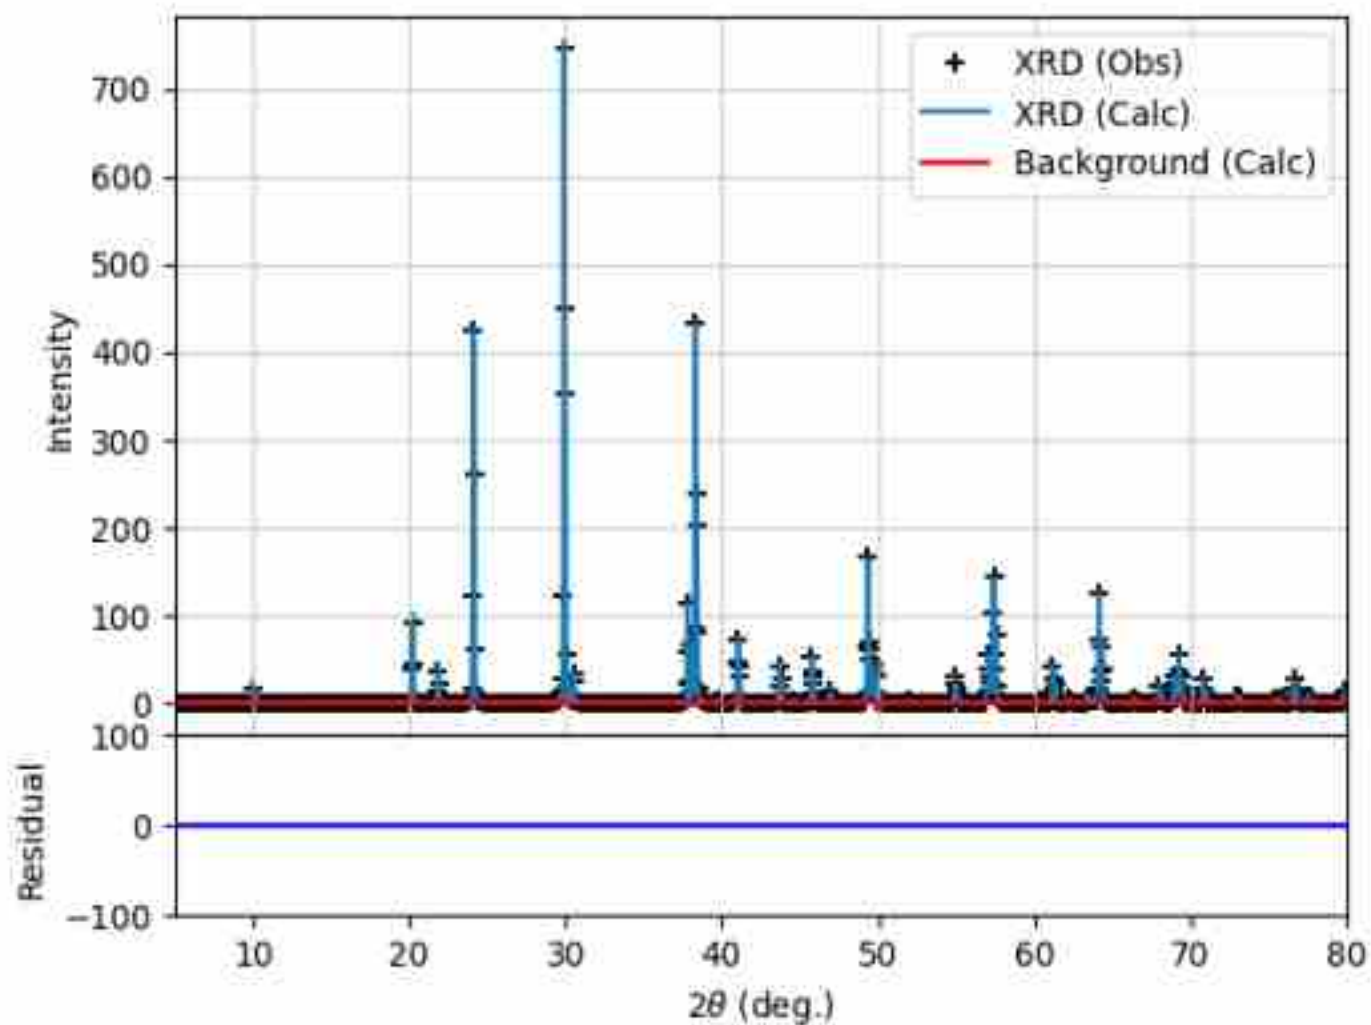

| RMSE before RR | Rwp     | RMSE after RR |
|----------------|---------|---------------|
| 0.042          | 0.00307 | 0.00026       |

# Tl<sub>2</sub>CuF<sub>4</sub>

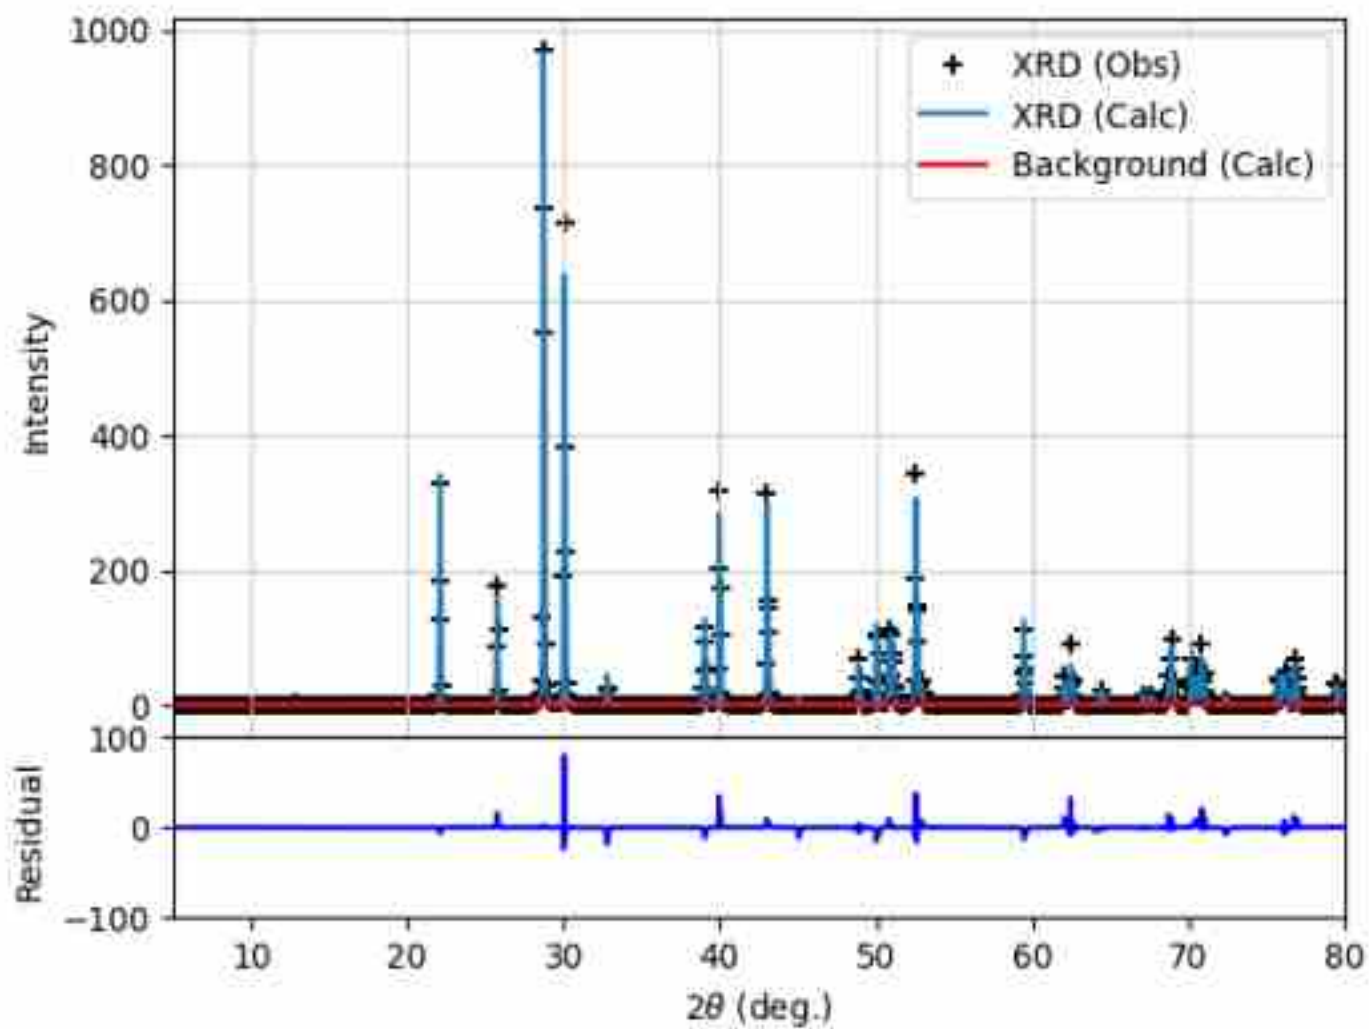

| RMSE before RR | Rwp      | RMSE after RR |
|----------------|----------|---------------|
| 0.042          | 16.39658 | 0.05751       |

# V2O2F4

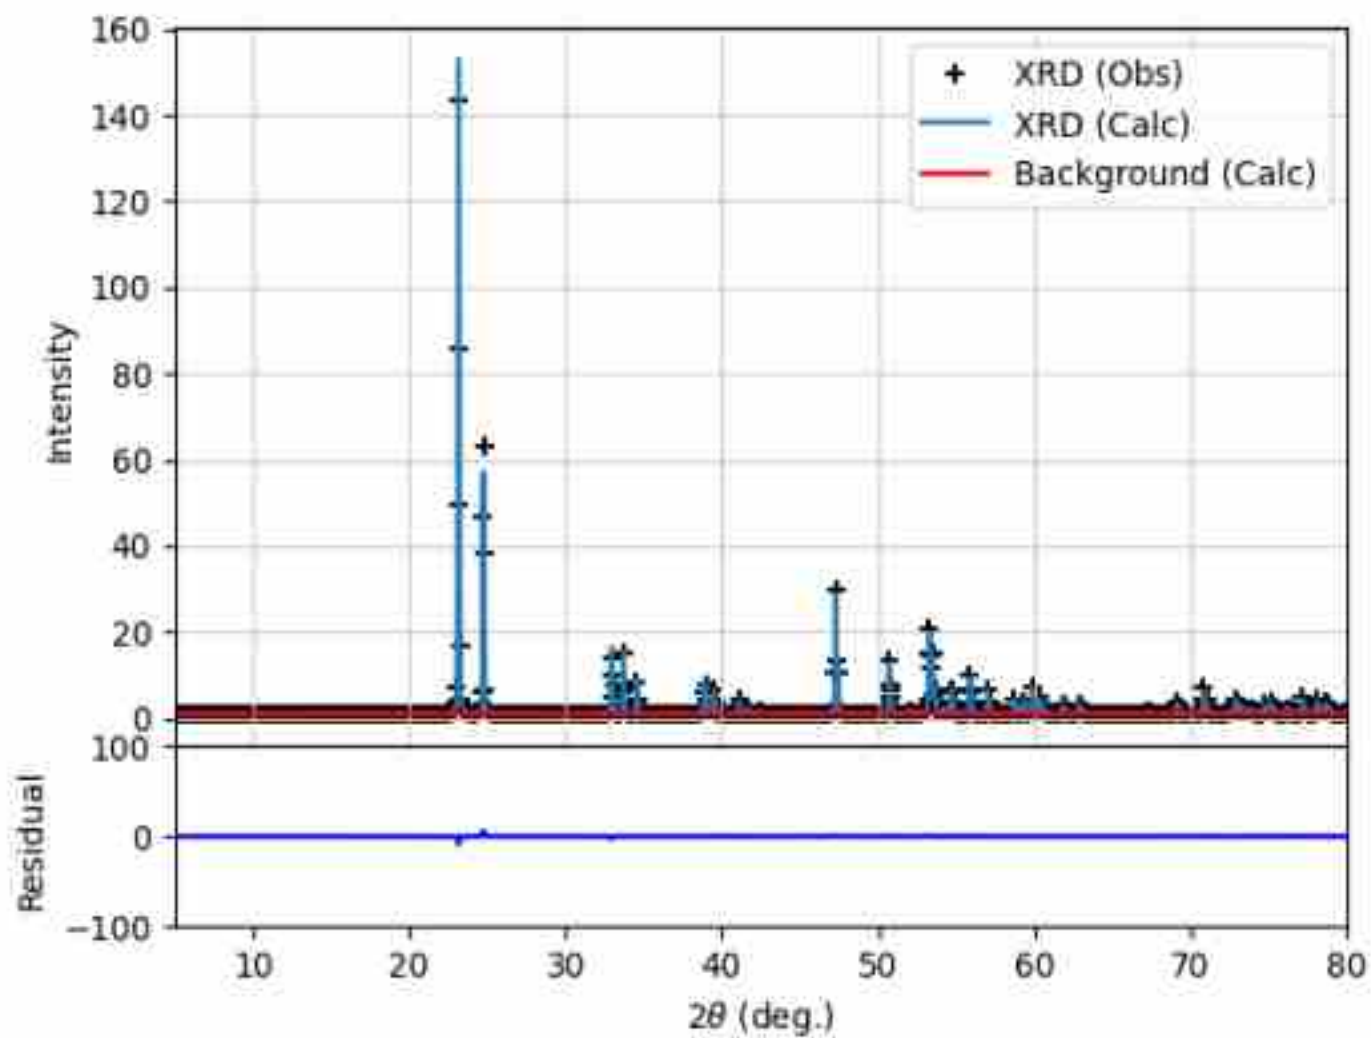

| RMSE before RR | Rwp     | RMSE after RR |
|----------------|---------|---------------|
| 0.042          | 5.08964 | 0.09308       |

# V2P2O10

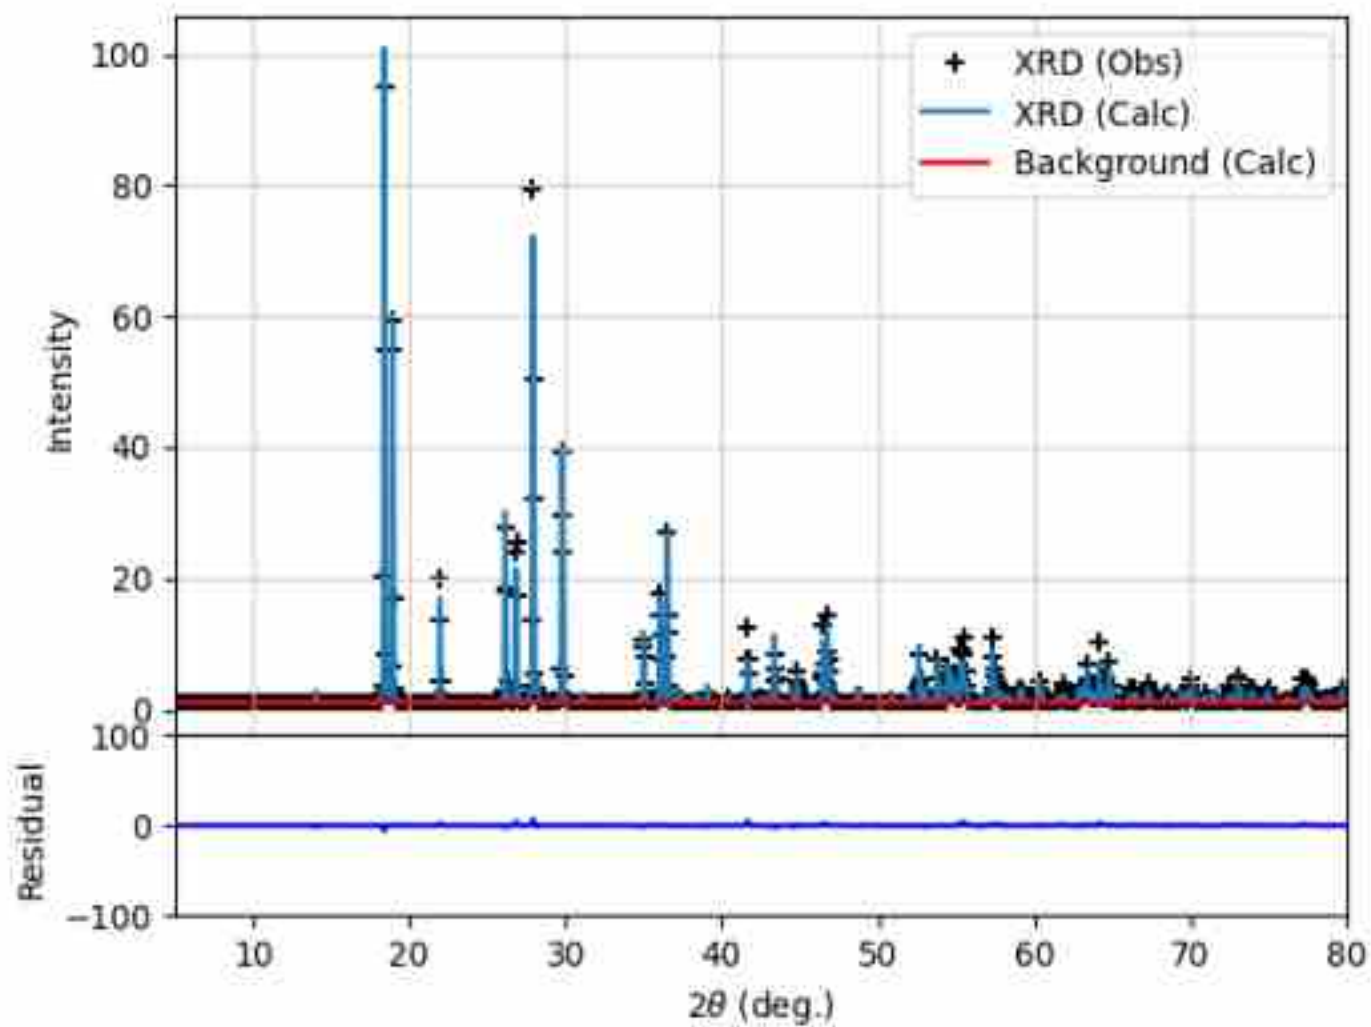

| RMSE before RR | Rwp     | RMSE after RR |
|----------------|---------|---------------|
| 0.042          | 15.1228 | None          |

# V6O8F4

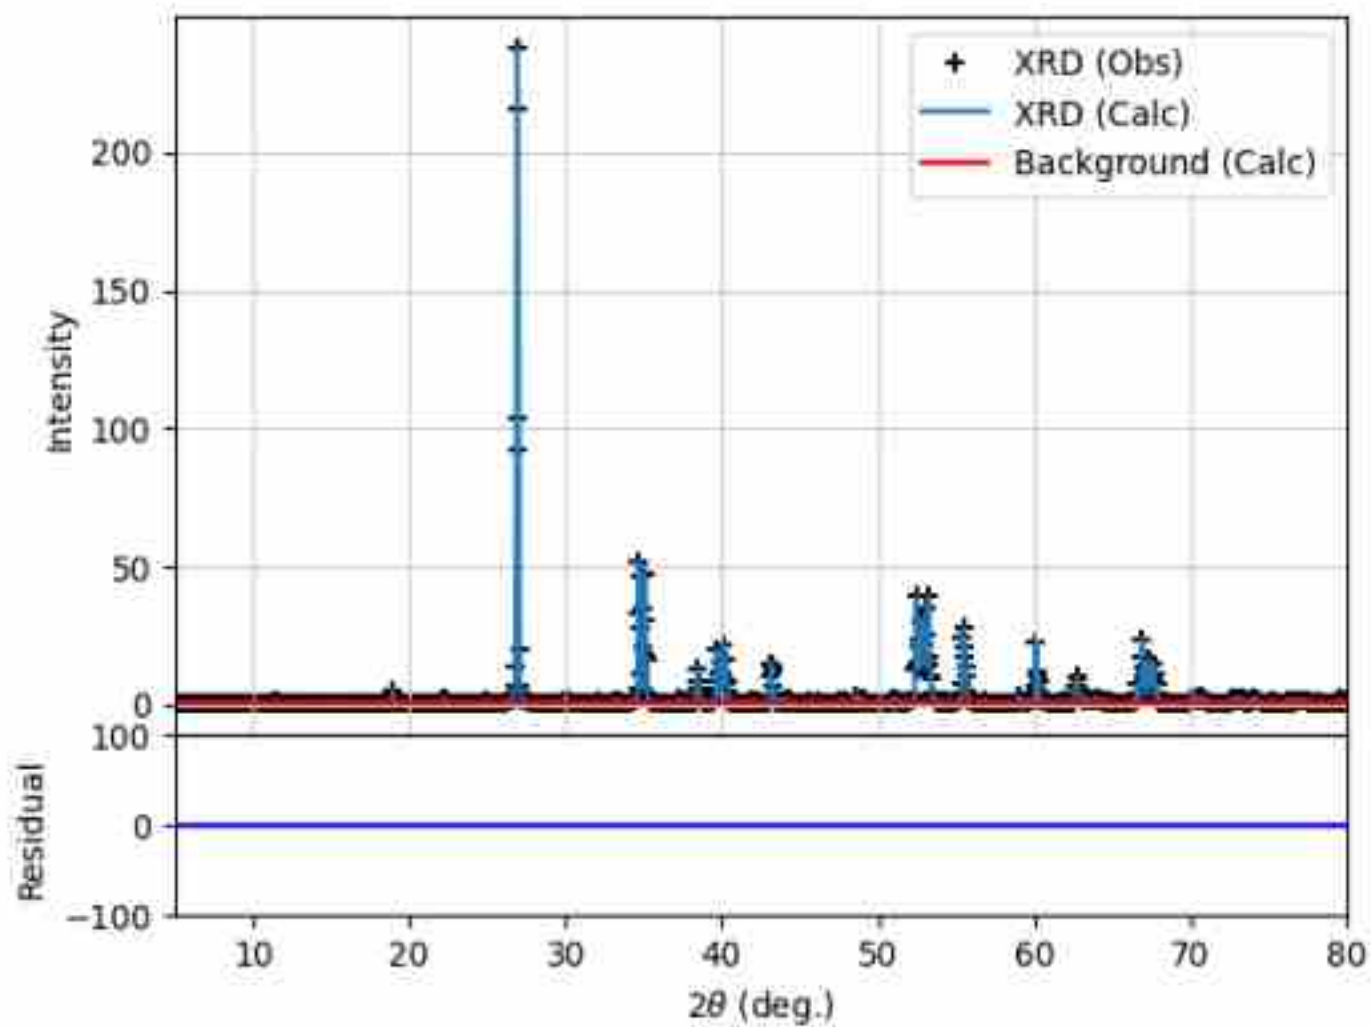

| RMSE before RR | Rwp     | RMSE after RR |
|----------------|---------|---------------|
| 0.042          | 0.00017 | 0.0           |

# Ba<sub>2</sub>U<sub>2</sub>Te<sub>8</sub>

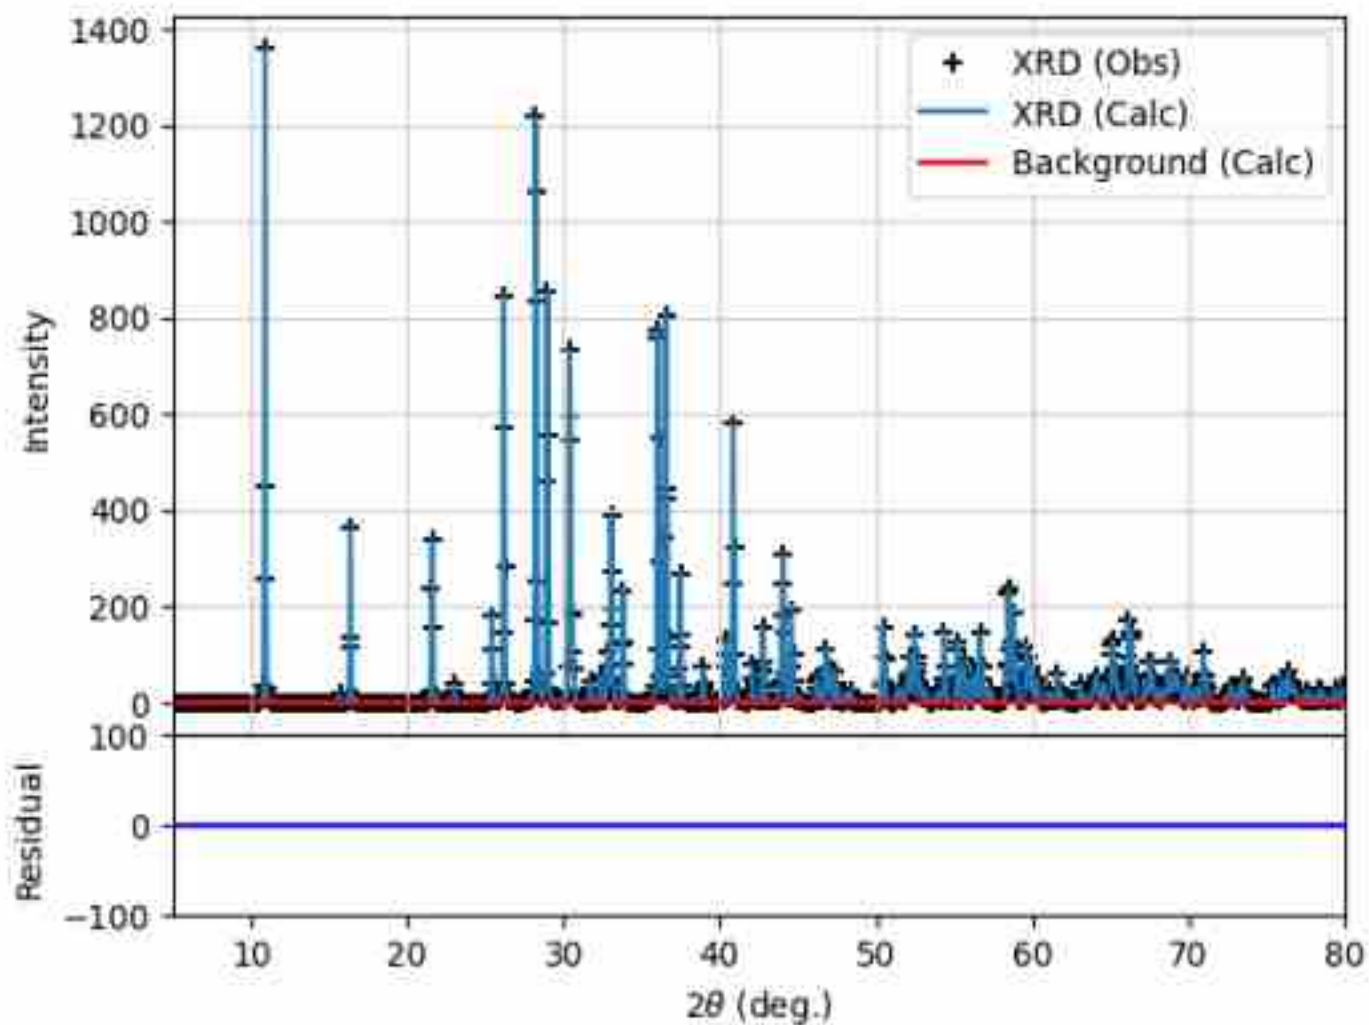

| RMSE before RR | Rwp    | RMSE after RR |
|----------------|--------|---------------|
| 0.043          | 0.0028 | 0.00025       |



# Cr1N1

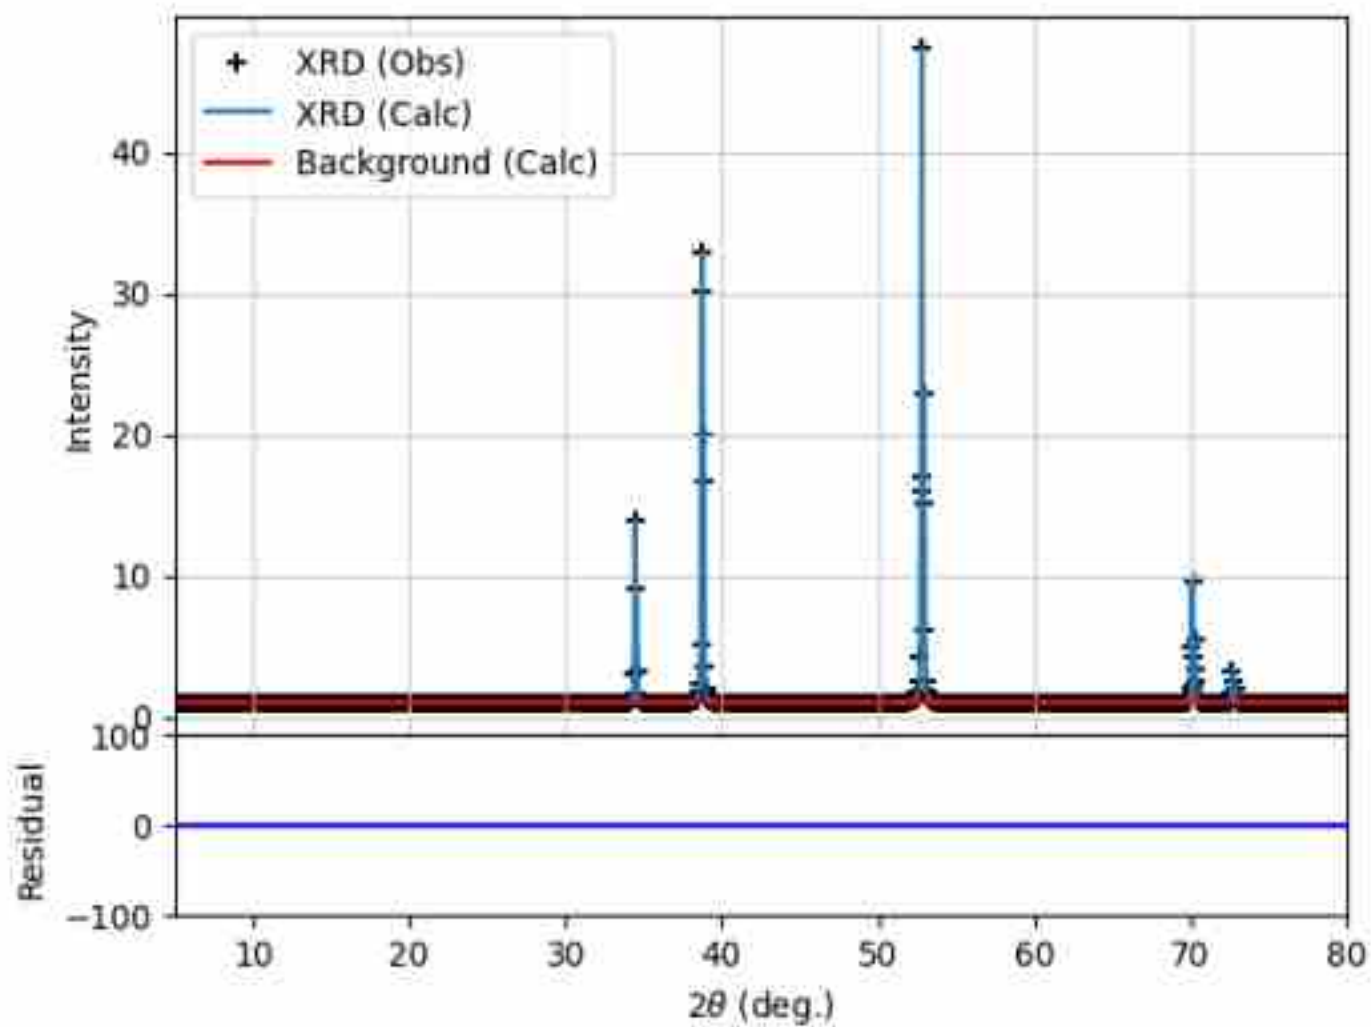

| RMSE before RR | Rwp     | RMSE after RR |
|----------------|---------|---------------|
| 0.043          | 0.00156 | 0.00119       |

# In4Pd8

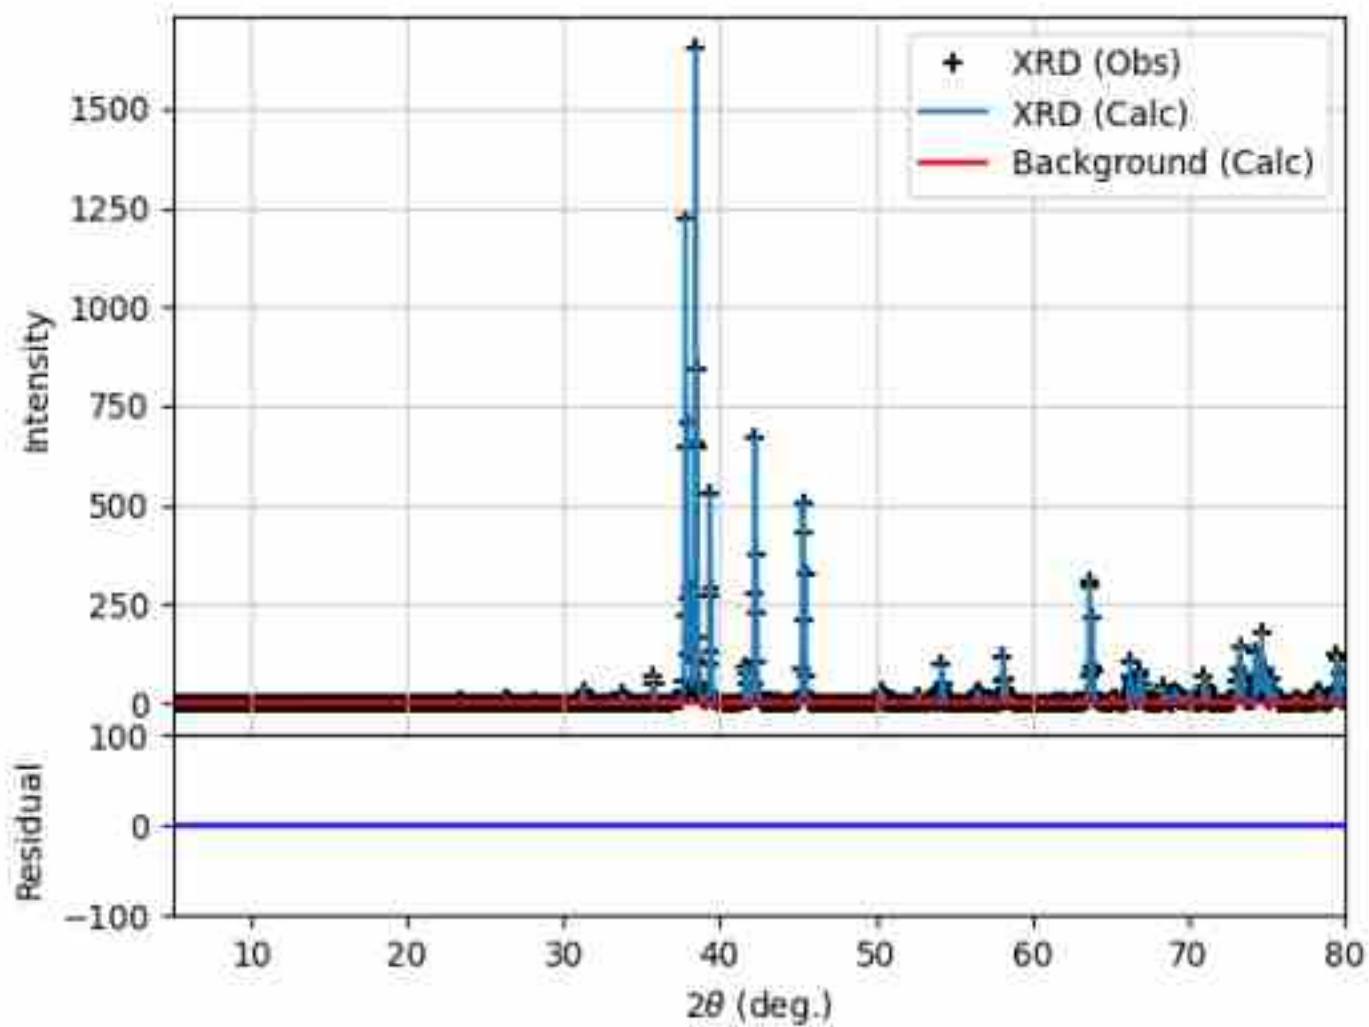

| RMSE before RR | Rwp    | RMSE after RR |
|----------------|--------|---------------|
| 0.043          | 0.0042 | 0.0003        |

# K<sub>2</sub>H<sub>2</sub>O<sub>2</sub>

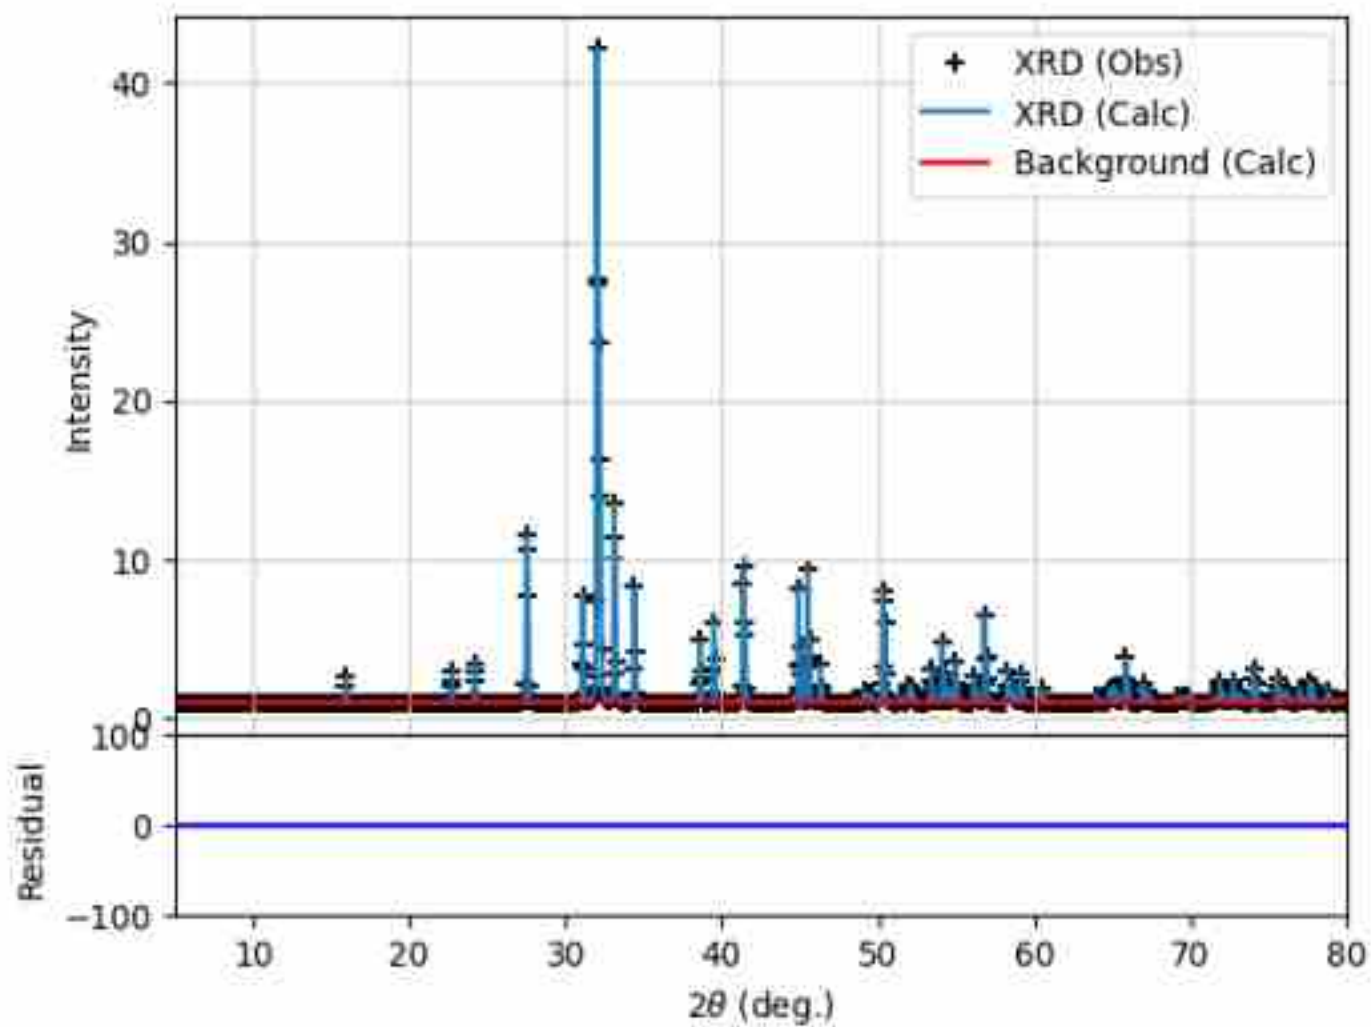

| RMSE before RR | Rwp     | RMSE after RR |
|----------------|---------|---------------|
| 0.043          | 0.00159 | 0.00087       |

# Li<sub>3</sub>Zn<sub>3</sub>Ge<sub>3</sub>

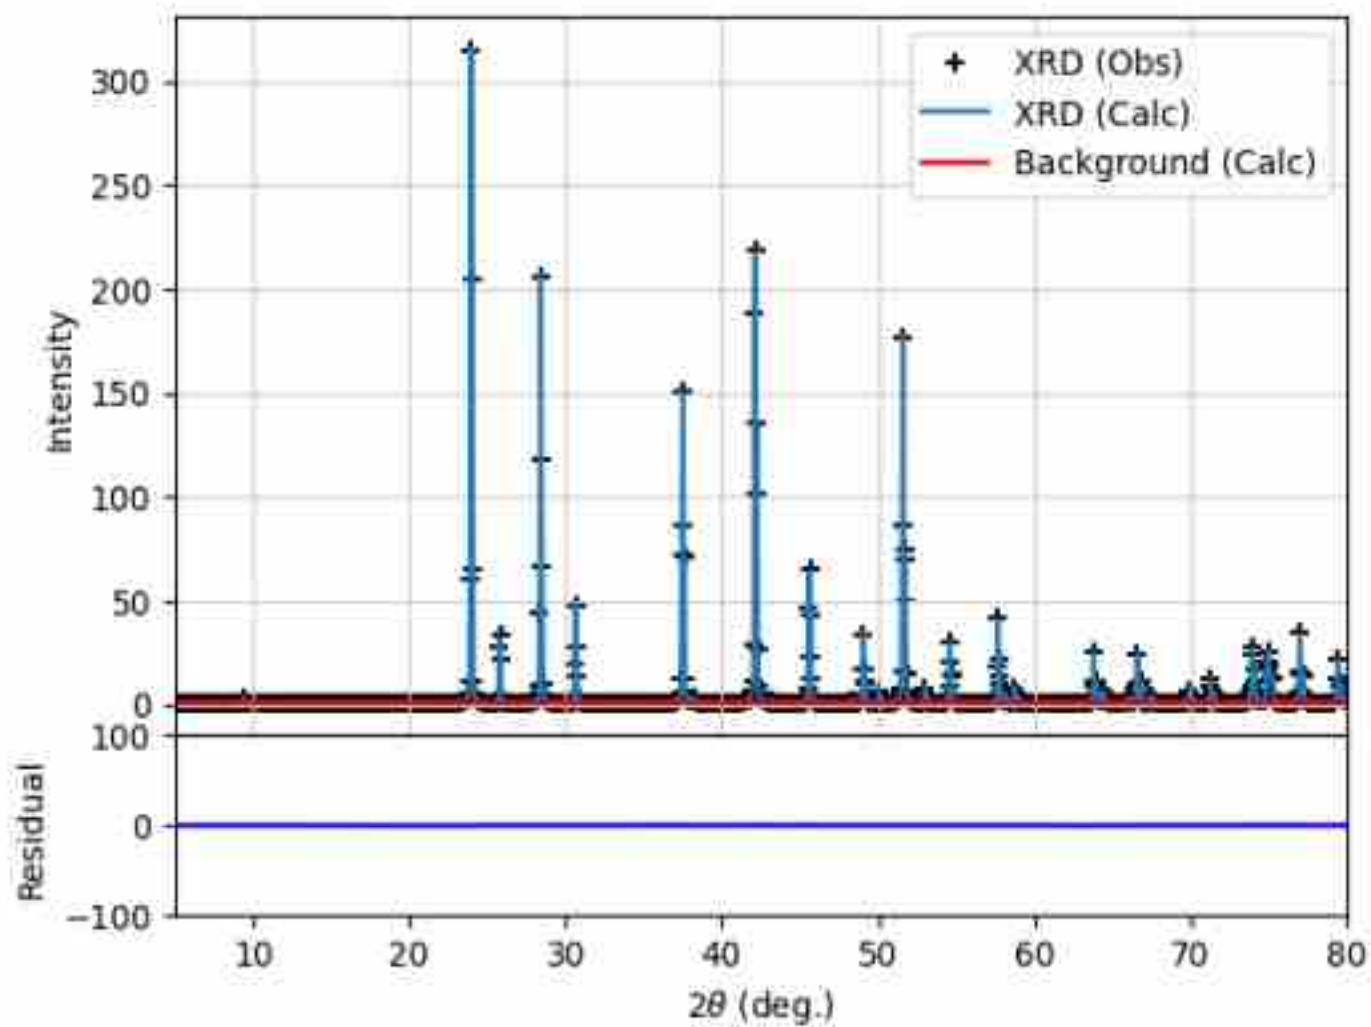

| RMSE before RR | Rwp    | RMSE after RR |
|----------------|--------|---------------|
| 0.043          | 0.7907 | 0.03725       |

# Li10Mn2O8

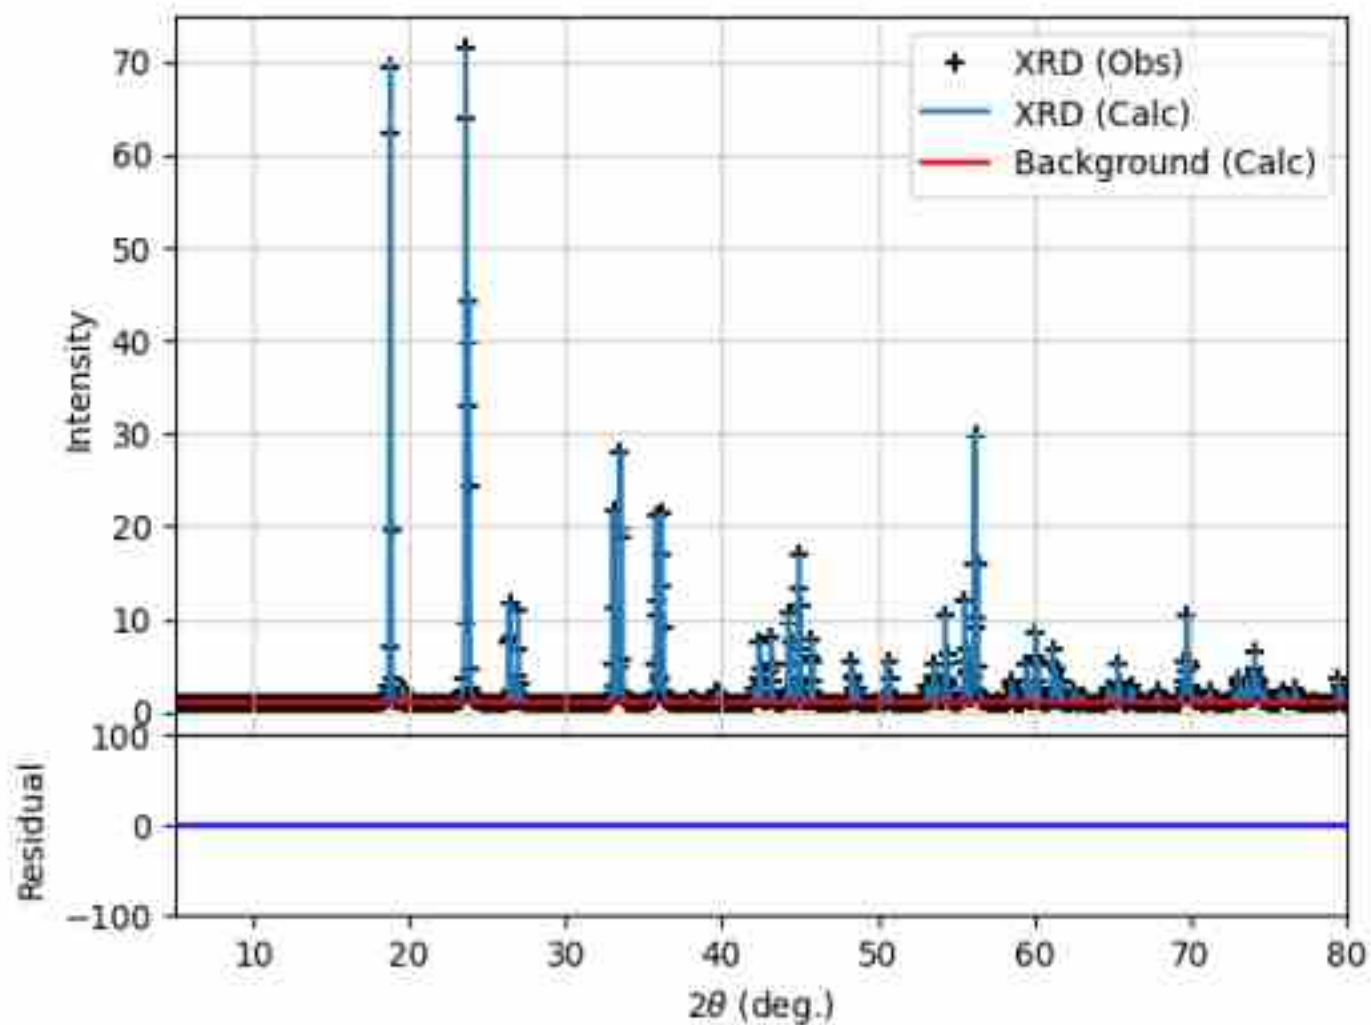

| RMSE before RR | Rwp     | RMSE after RR |
|----------------|---------|---------------|
| 0.043          | 0.00246 | 0.0017        |

# Mn<sub>1</sub>Zn<sub>1</sub>In<sub>4</sub>S<sub>8</sub>

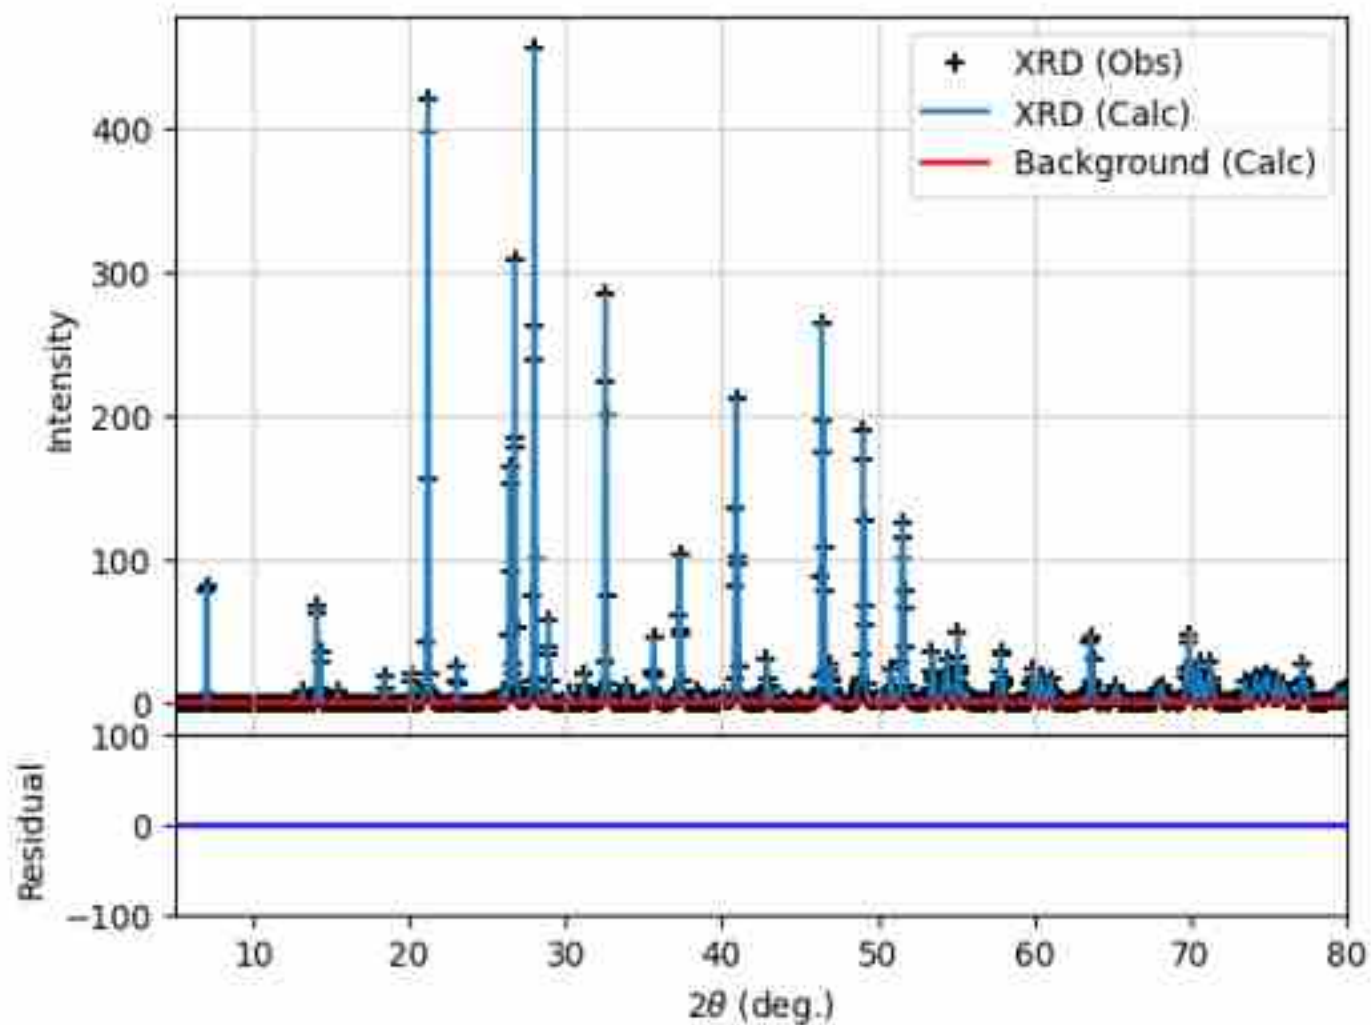

| RMSE before RR | Rwp     | RMSE after RR |
|----------------|---------|---------------|
| 0.043          | 0.00261 | 0.00025       |

# Mn<sub>4</sub>CrCo<sub>10</sub>Si<sub>5</sub>

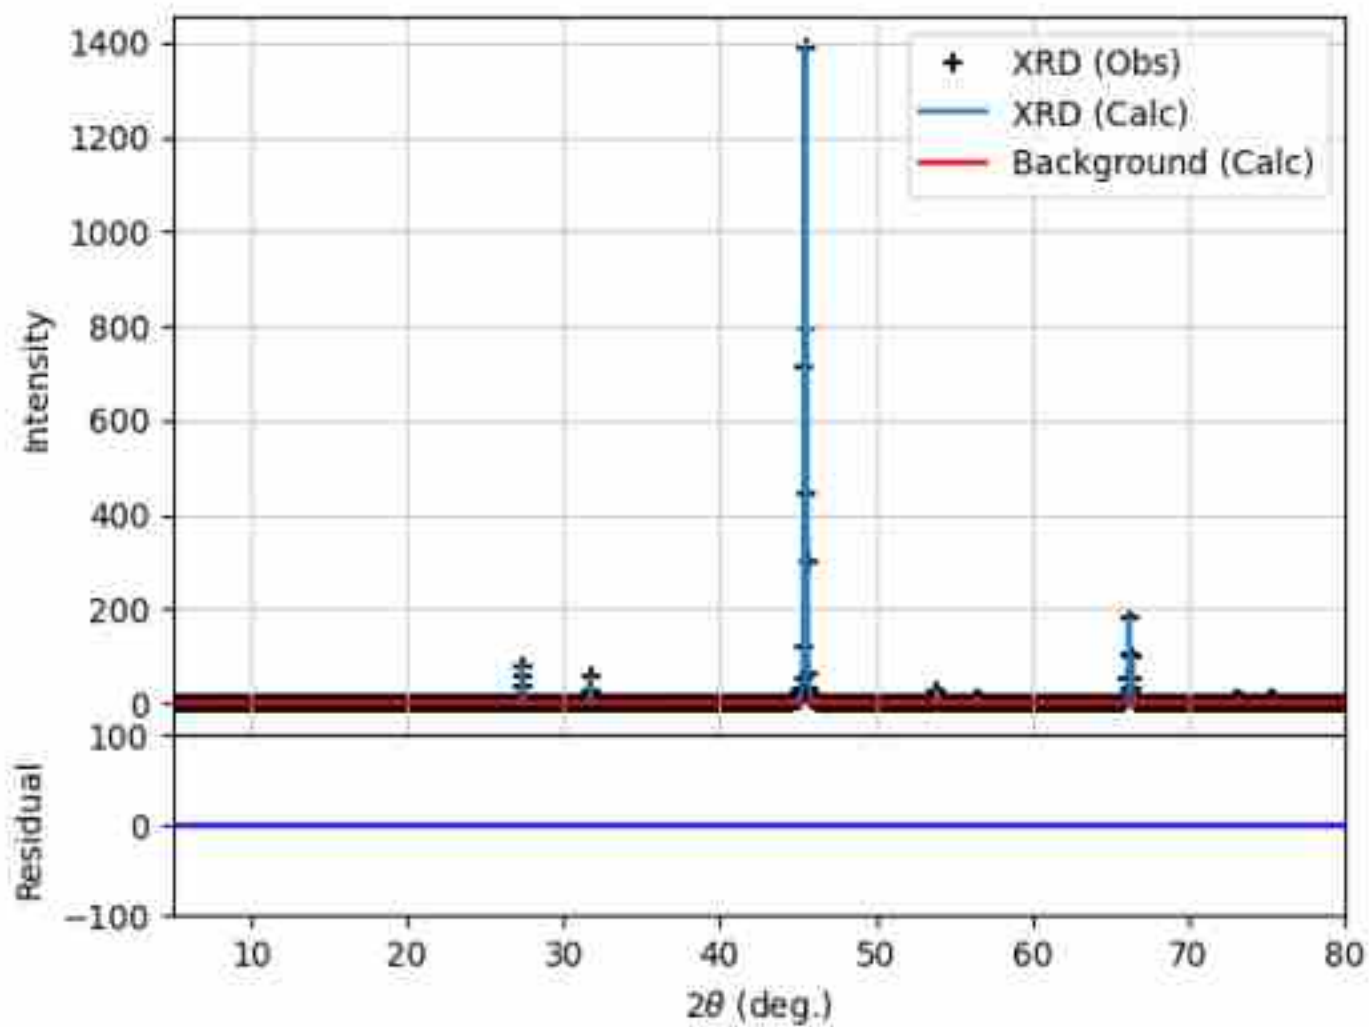

| RMSE before RR | Rwp     | RMSE after RR |
|----------------|---------|---------------|
| 0.043          | 0.01141 | 0.0008        |

# Na<sub>4</sub>Br<sub>2</sub>Cl<sub>2</sub>O<sub>12</sub>

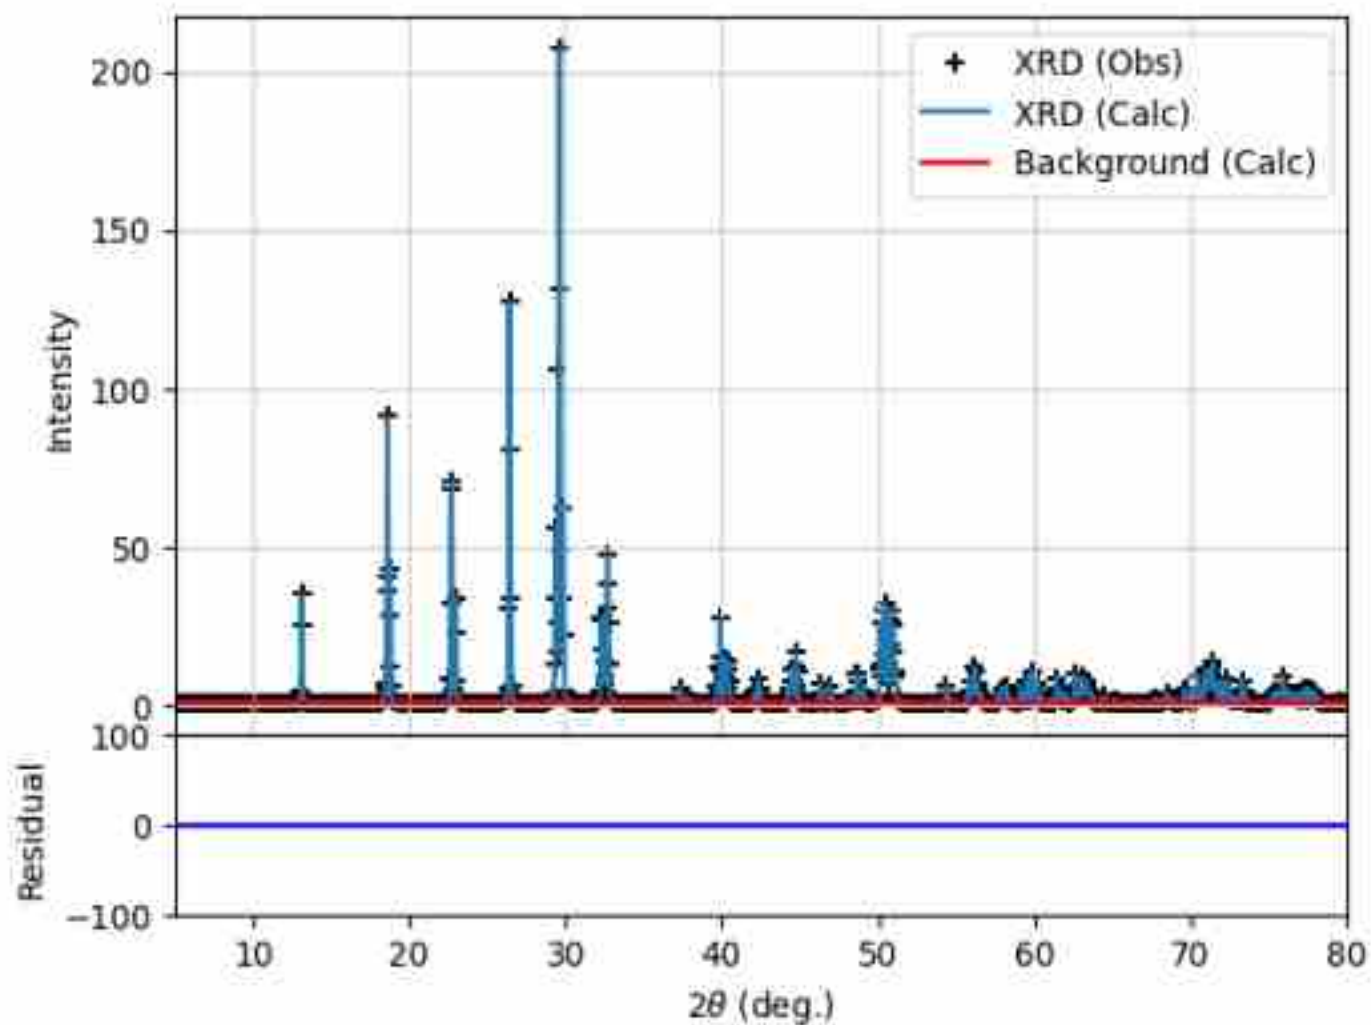

| RMSE before RR | Rwp     | RMSE after RR |
|----------------|---------|---------------|
| 0.043          | 0.00268 | 0.00094       |



# Na<sub>4</sub>Br<sub>2</sub>O<sub>1</sub>

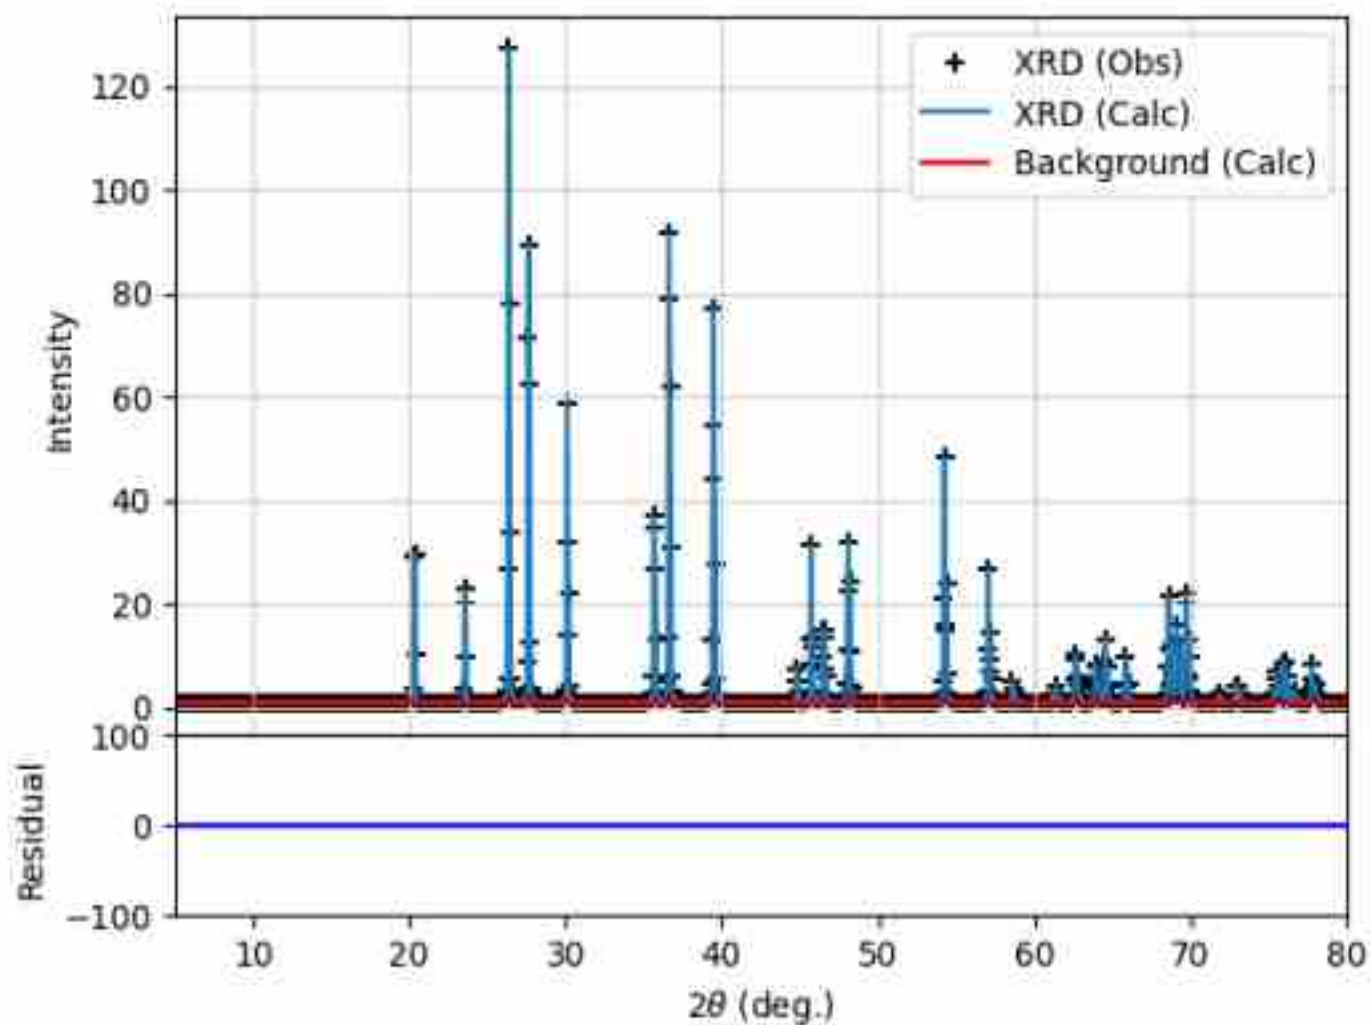

| RMSE before RR | Rwp    | RMSE after RR |
|----------------|--------|---------------|
| 0.043          | 0.0044 | 0.00069       |

# Na<sub>4</sub>Pt<sub>2</sub>Se<sub>4</sub>

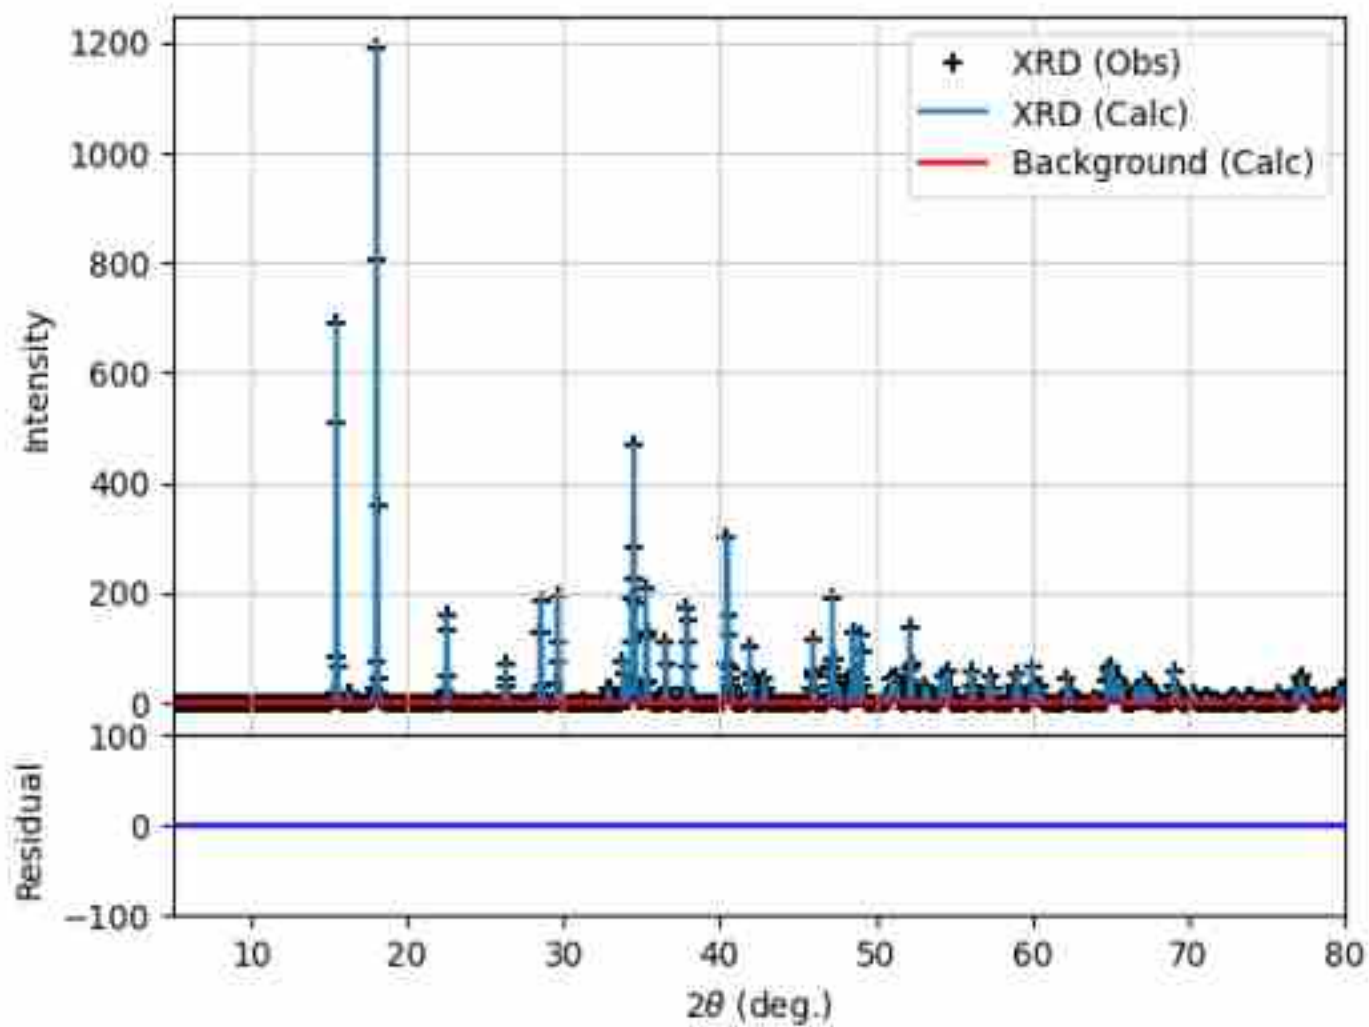

| RMSE before RR | Rwp     | RMSE after RR |
|----------------|---------|---------------|
| 0.043          | 0.00398 | 0.00072       |

# Sb2F10

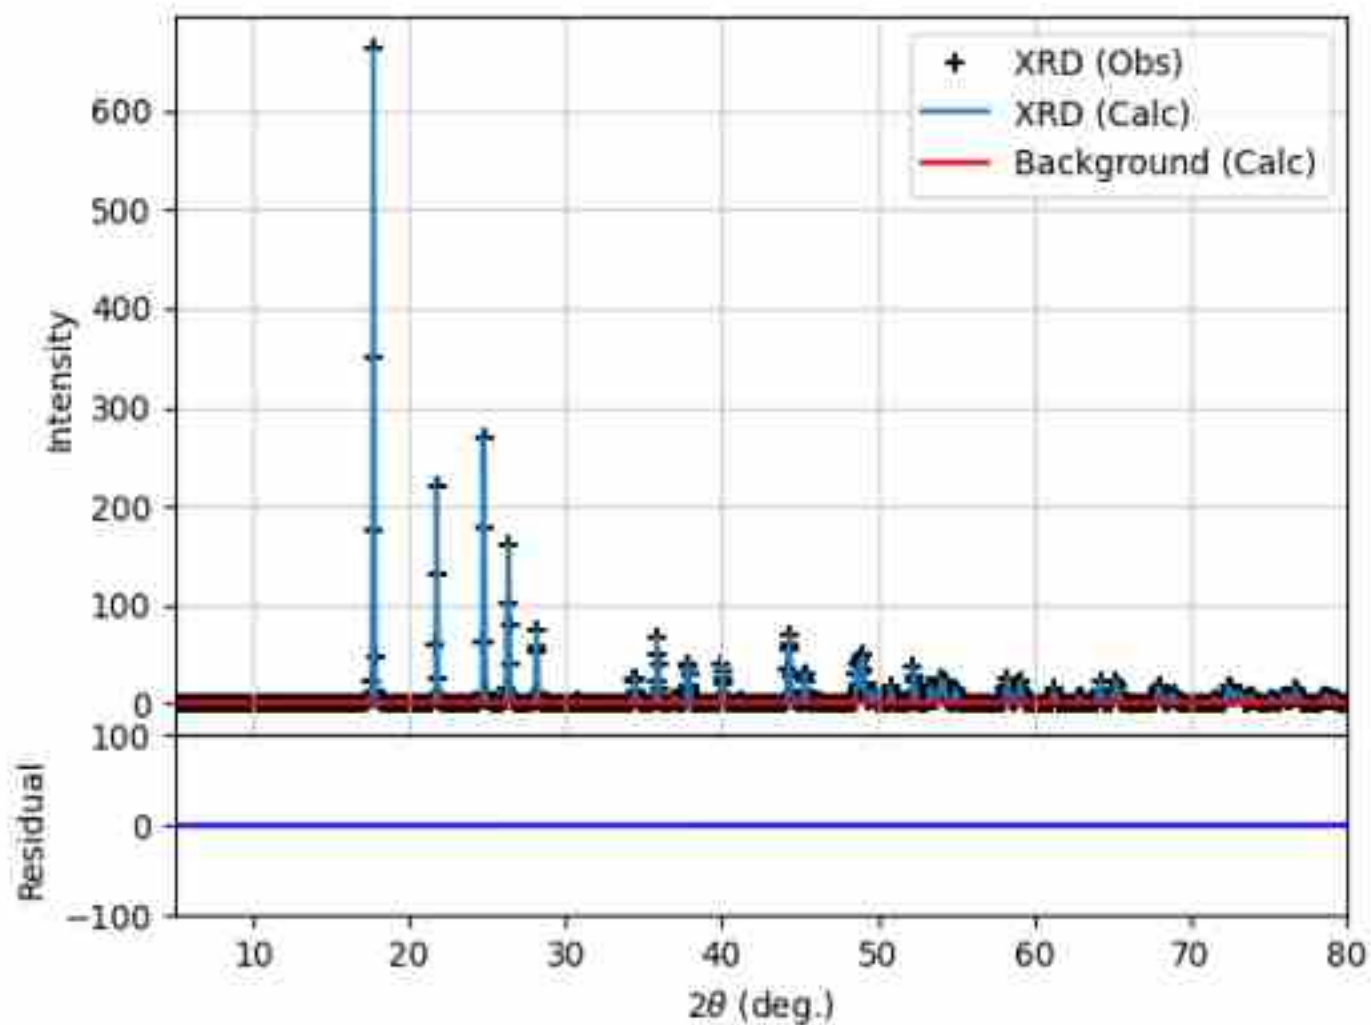

| RMSE before RR | Rwp     | RMSE after RR |
|----------------|---------|---------------|
| 0.043          | 0.90757 | 0.01033       |

# Ta1Nb1Cu3O8

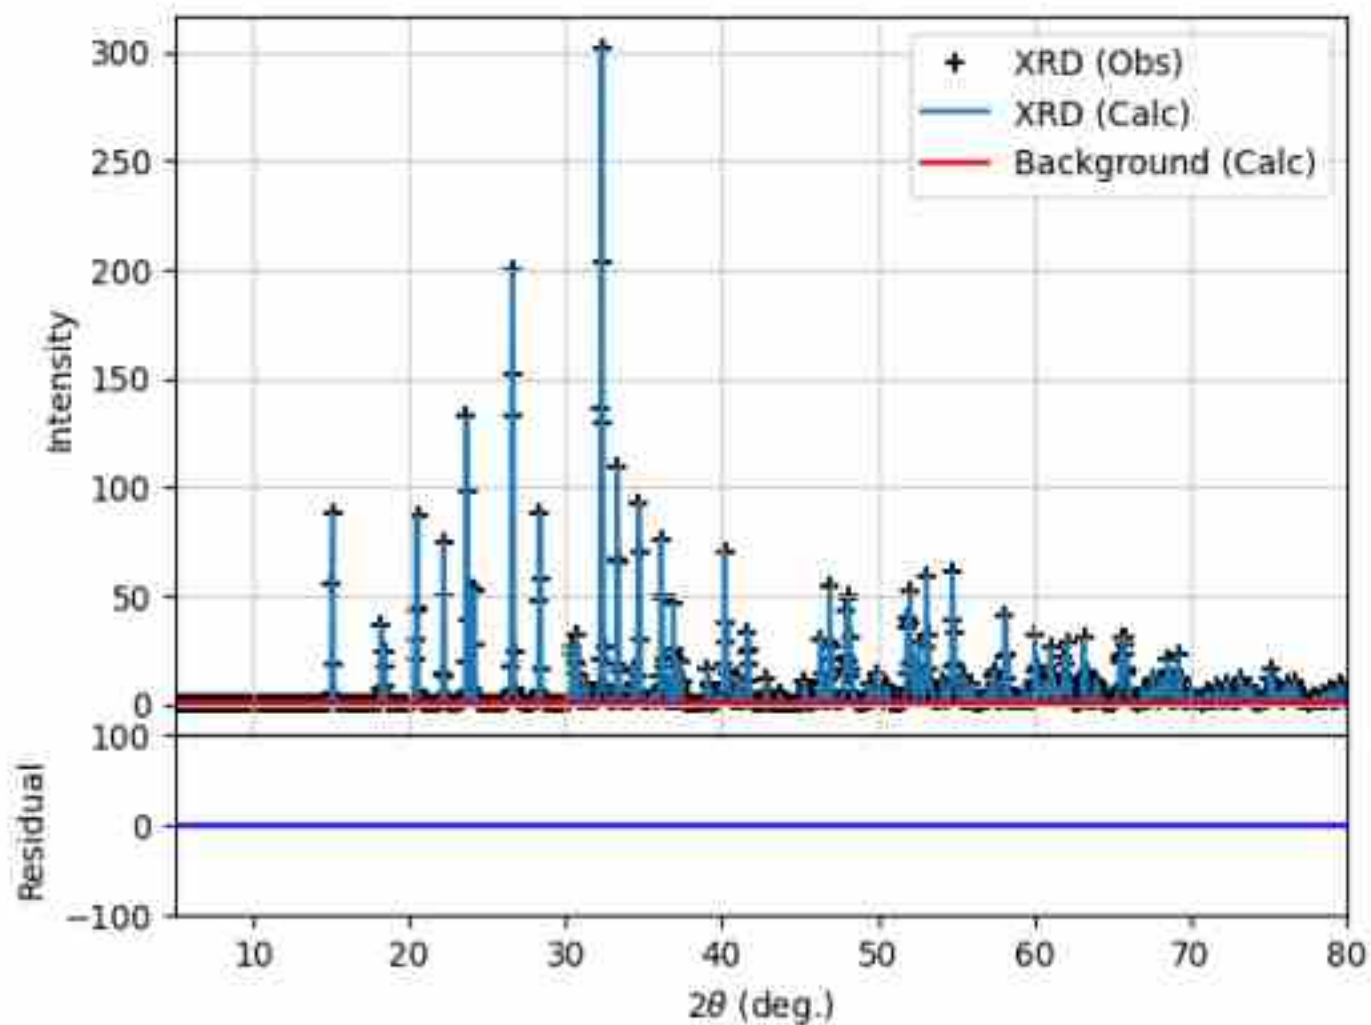

| RMSE before RR | Rwp     | RMSE after RR |
|----------------|---------|---------------|
| 0.043          | 0.00176 | 0.0           |

# Te<sub>2</sub>Mo<sub>3</sub>S<sub>4</sub>

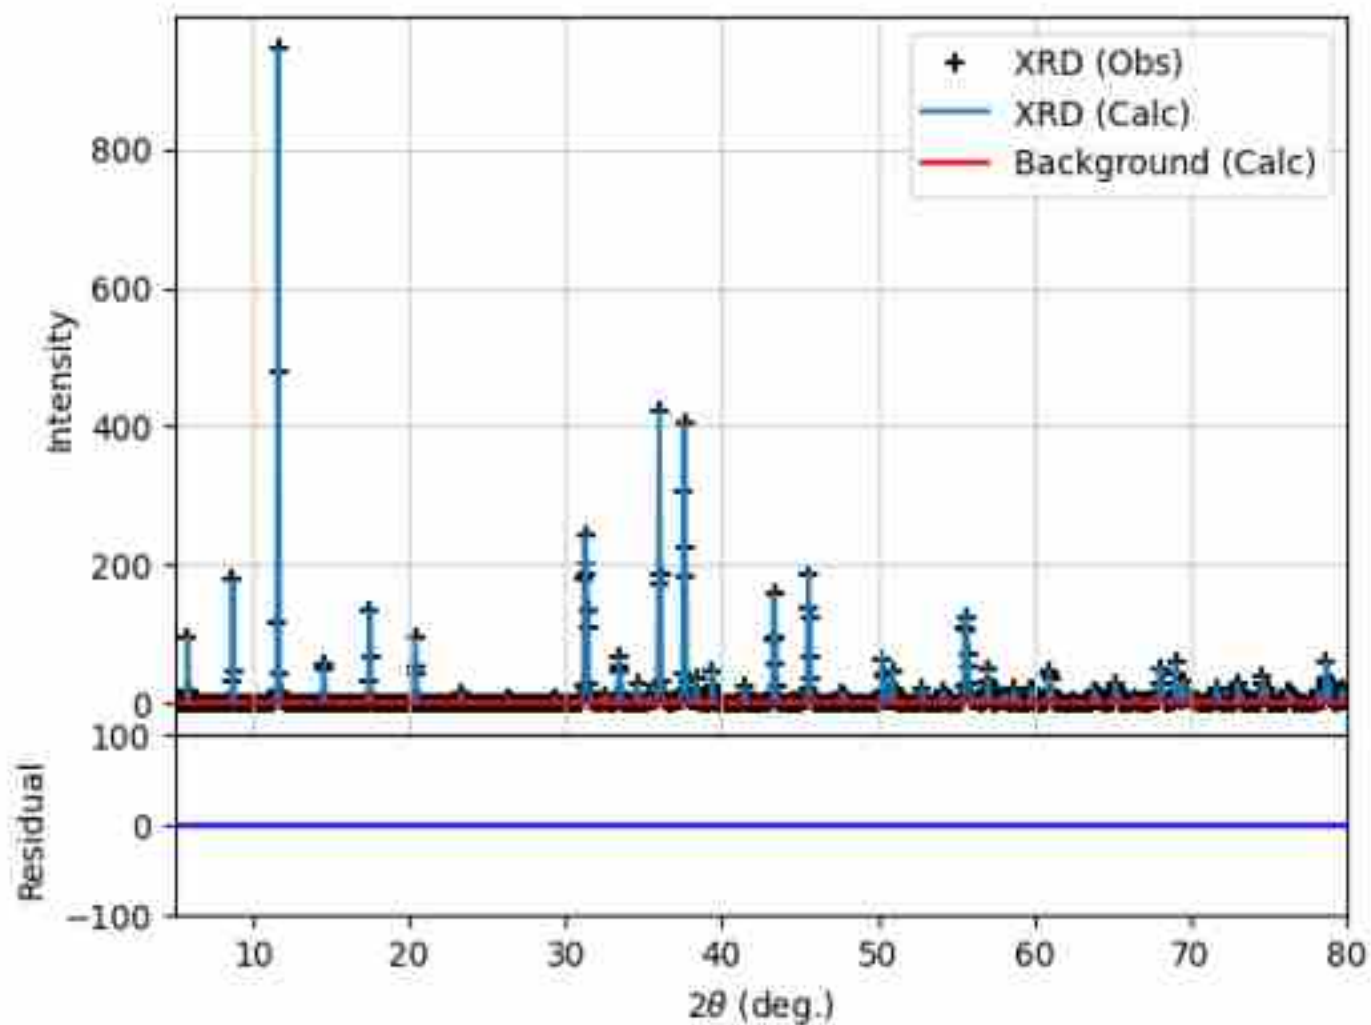

| RMSE before RR | Rwp     | RMSE after RR |
|----------------|---------|---------------|
| 0.043          | 0.00401 | 0.00053       |

# Tl3As1F6

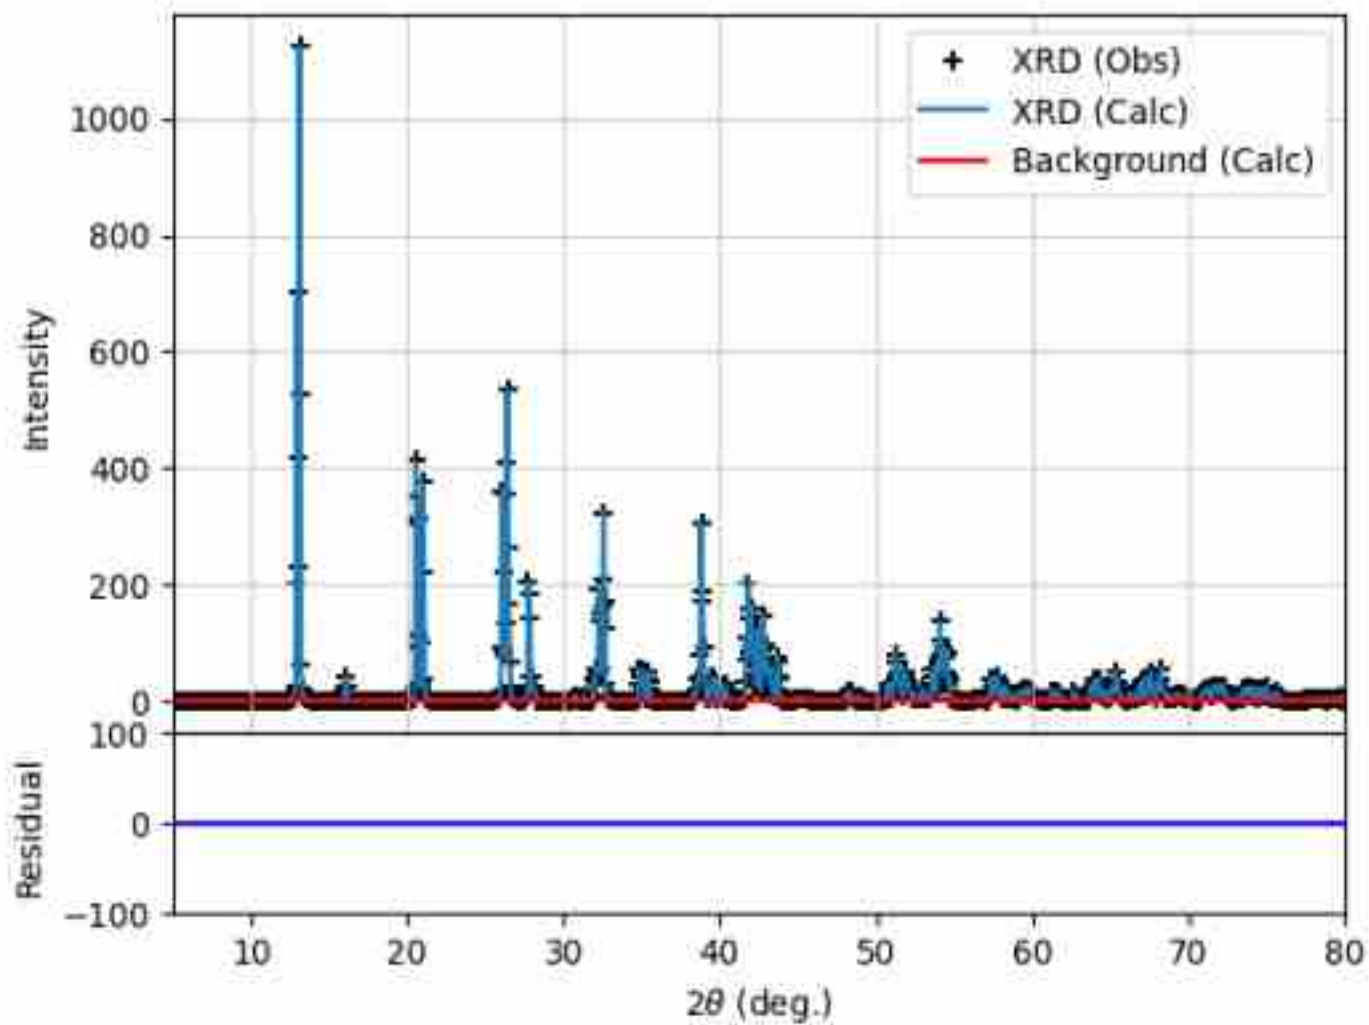

| RMSE before RR | Rwp     | RMSE after RR |
|----------------|---------|---------------|
| 0.043          | 0.00099 | 0.0003        |

# Tl6B2Se6

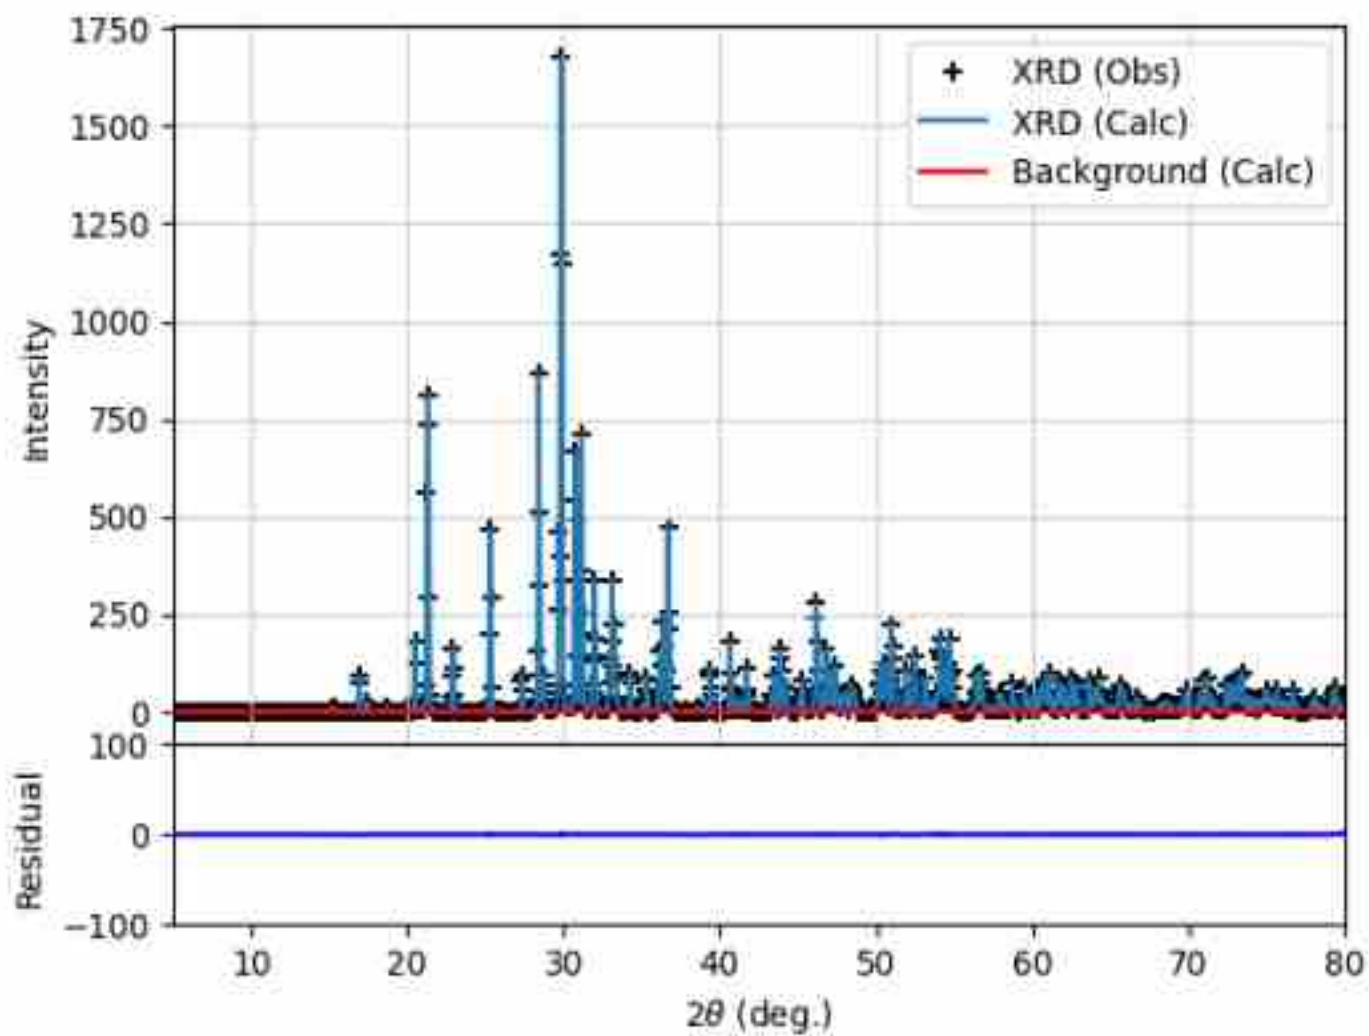

| RMSE before RR | Rwp     | RMSE after RR |
|----------------|---------|---------------|
| 0.043          | 0.64876 | 0.00966       |

# Tl6Te1O12

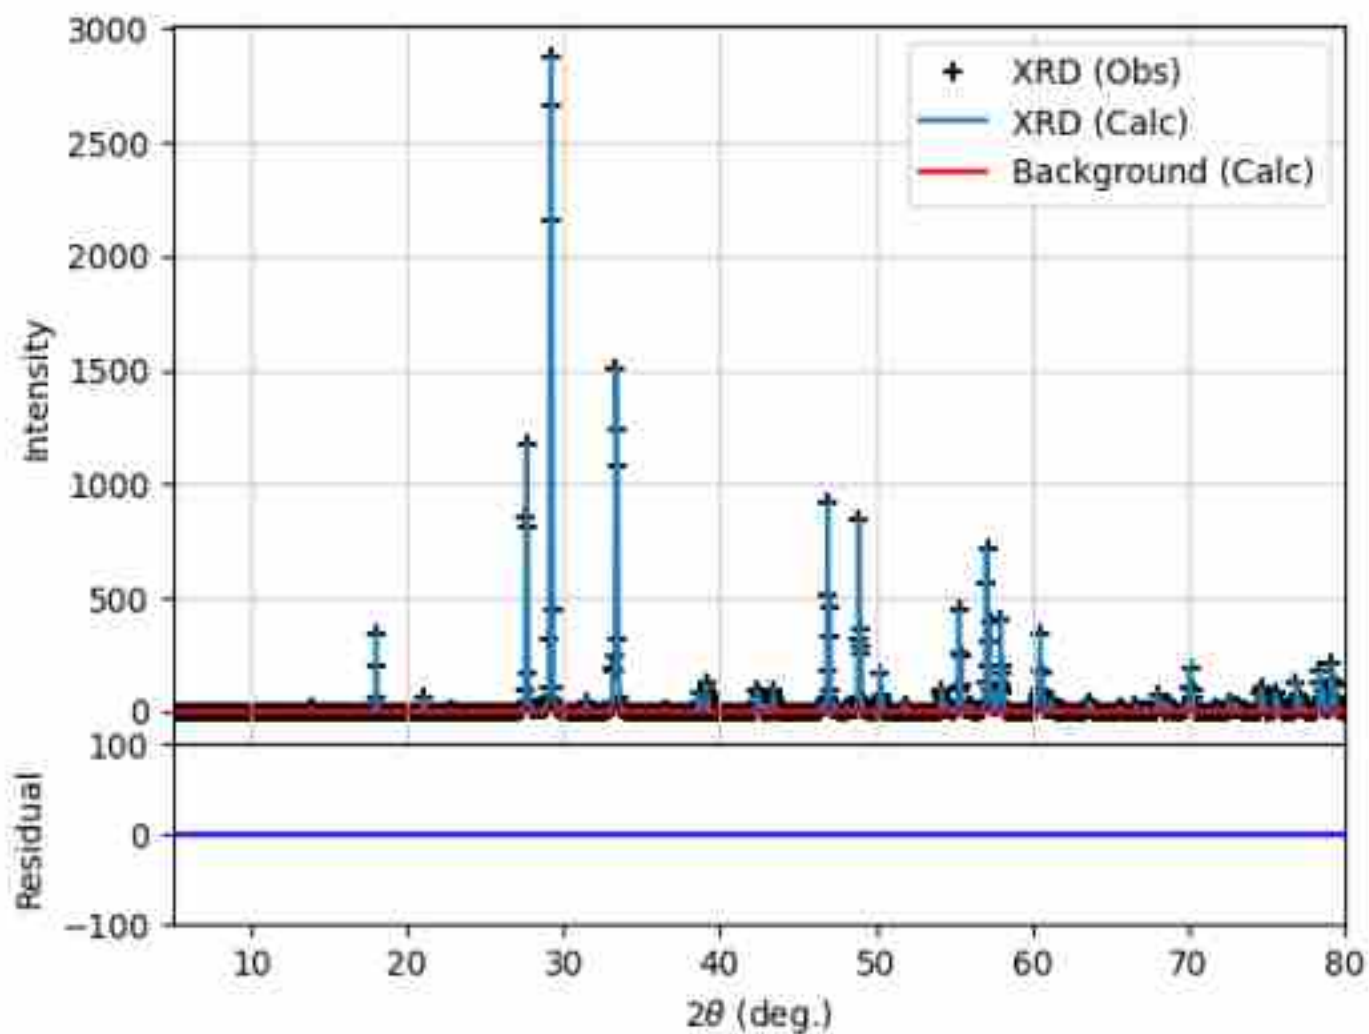

| RMSE before RR | Rwp    | RMSE after RR |
|----------------|--------|---------------|
| 0.043          | 0.0035 | 0.00245       |



# Zr<sub>2</sub>Si<sub>2</sub>Te<sub>2</sub>

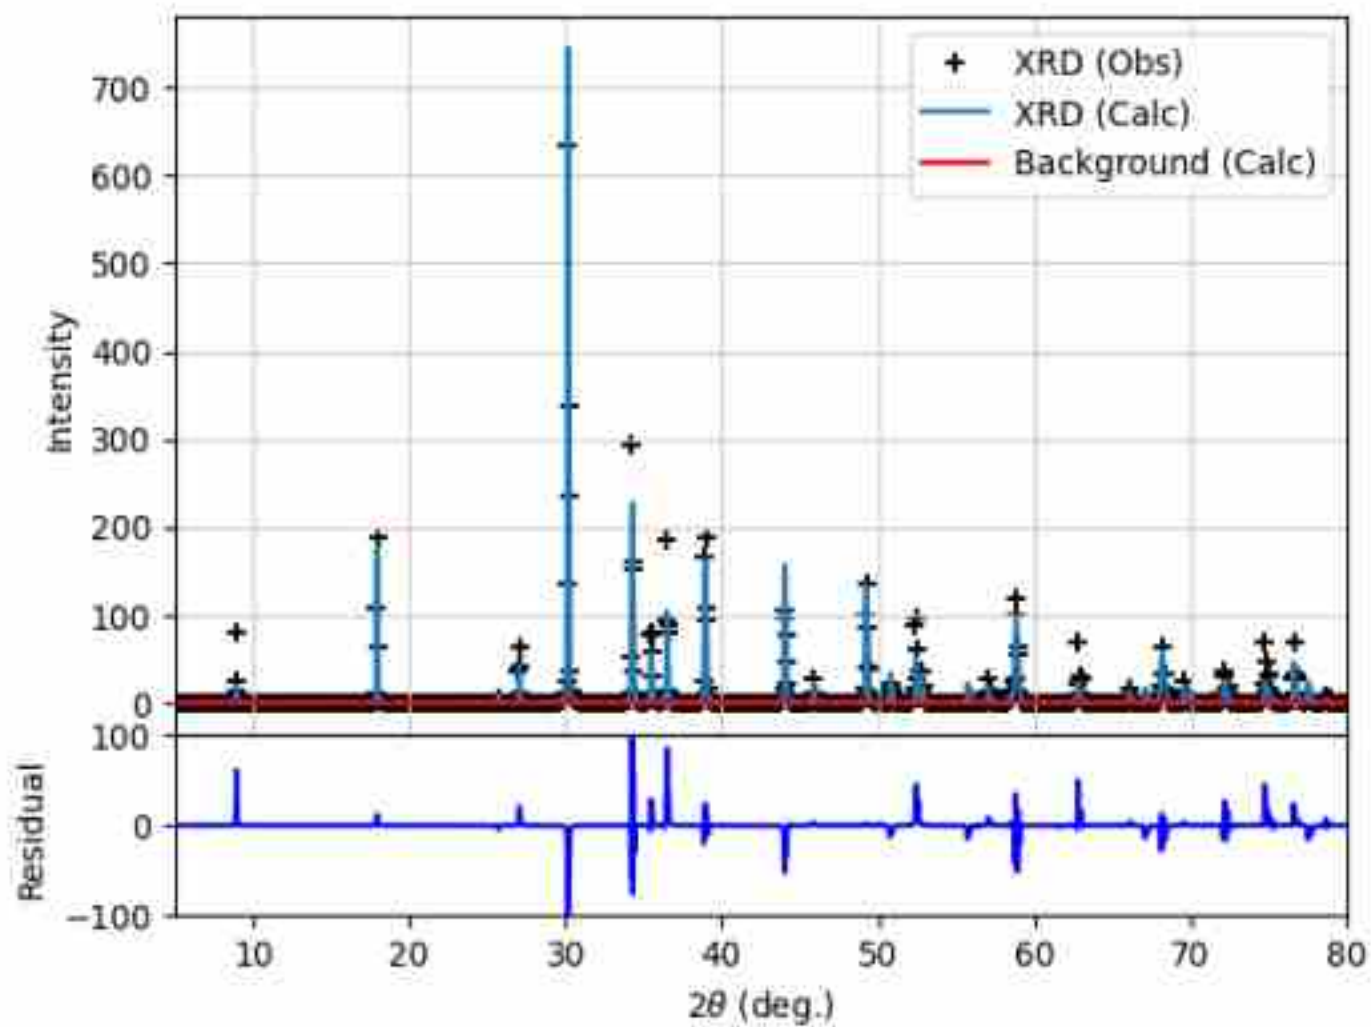

| RMSE before RR | Rwp      | RMSE after RR |
|----------------|----------|---------------|
| 0.043          | 43.40805 | 0.04568       |

# Zr<sub>4</sub>Ni<sub>4</sub>Sb<sub>4</sub>

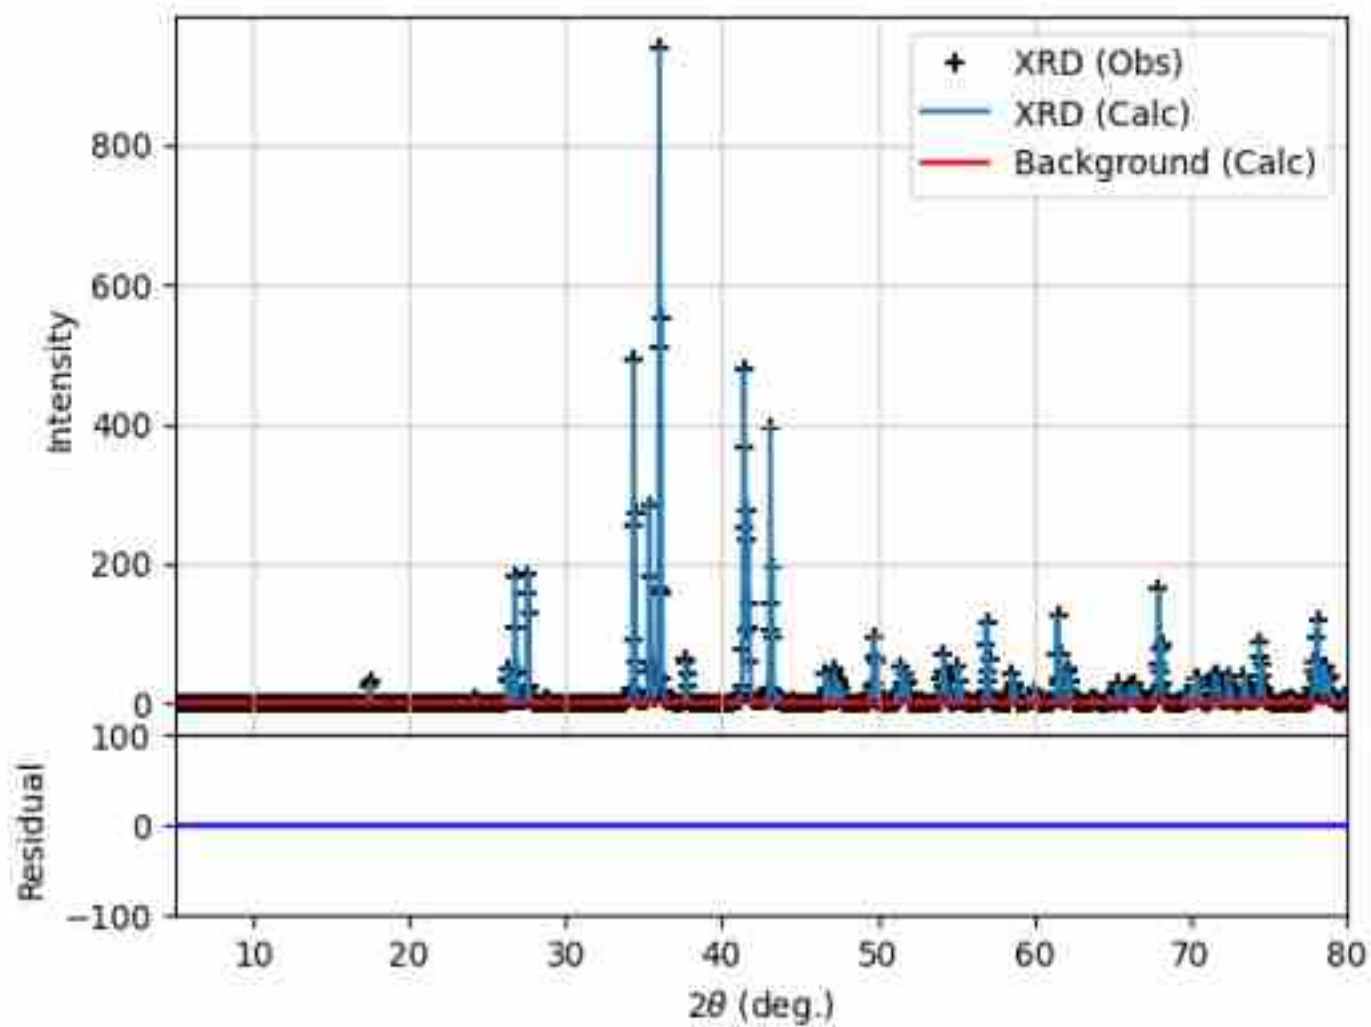

| RMSE before RR | Rwp     | RMSE after RR |
|----------------|---------|---------------|
| 0.043          | 0.00534 | 0.00056       |

# Ba<sub>3</sub>SrNb<sub>2</sub>O<sub>9</sub>

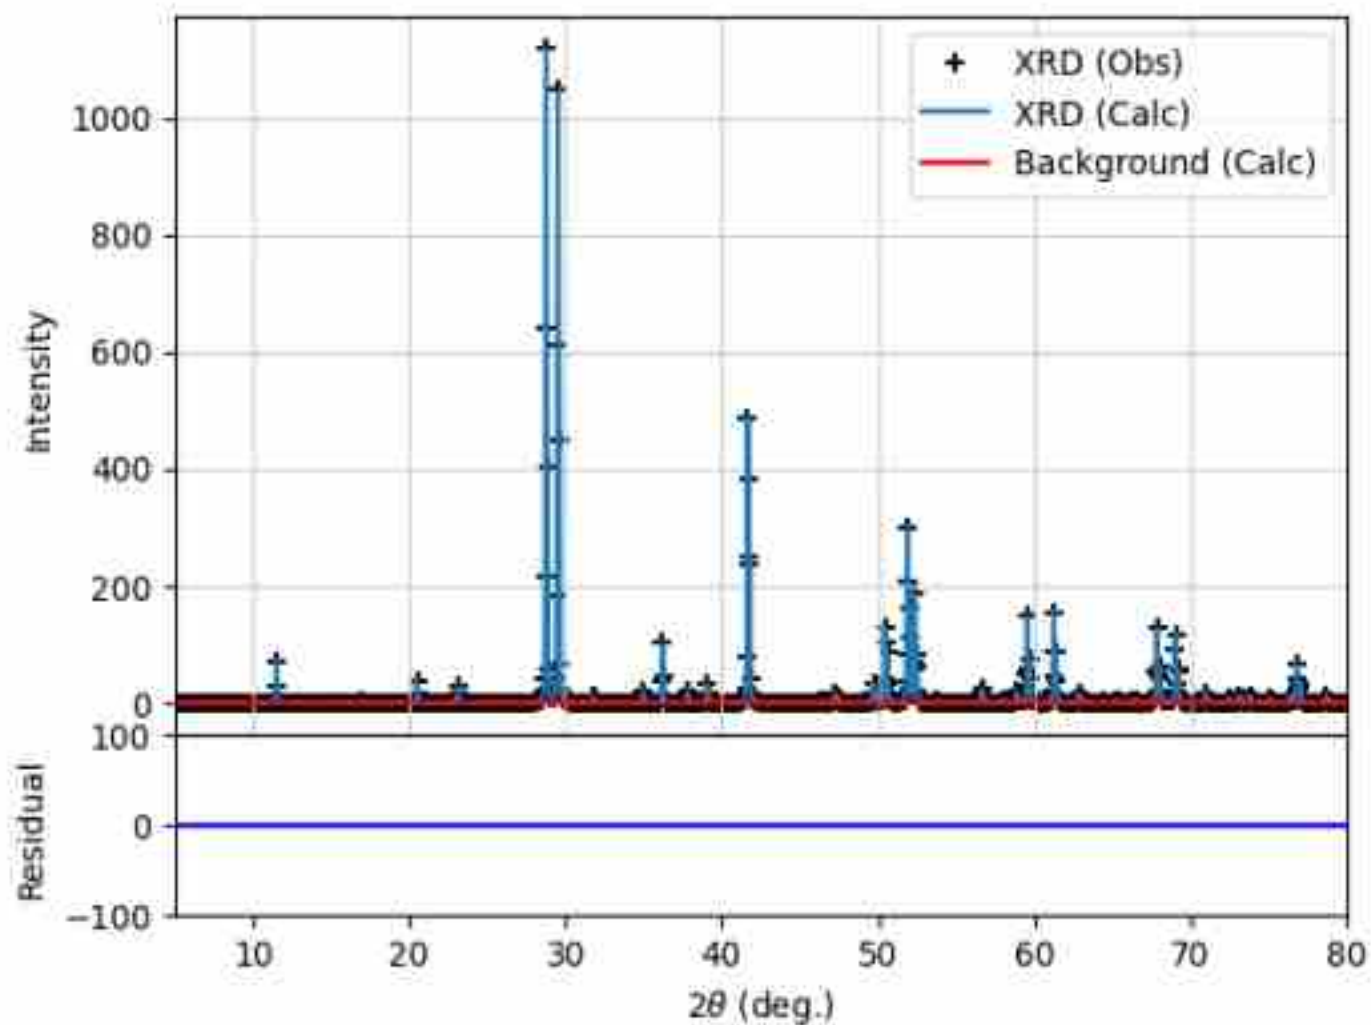

| RMSE before RR | Rwp     | RMSE after RR |
|----------------|---------|---------------|
| 0.044          | 0.00245 | 0.0012        |

# Ca<sub>2</sub>La<sub>4</sub>Co<sub>2</sub>O<sub>12</sub>

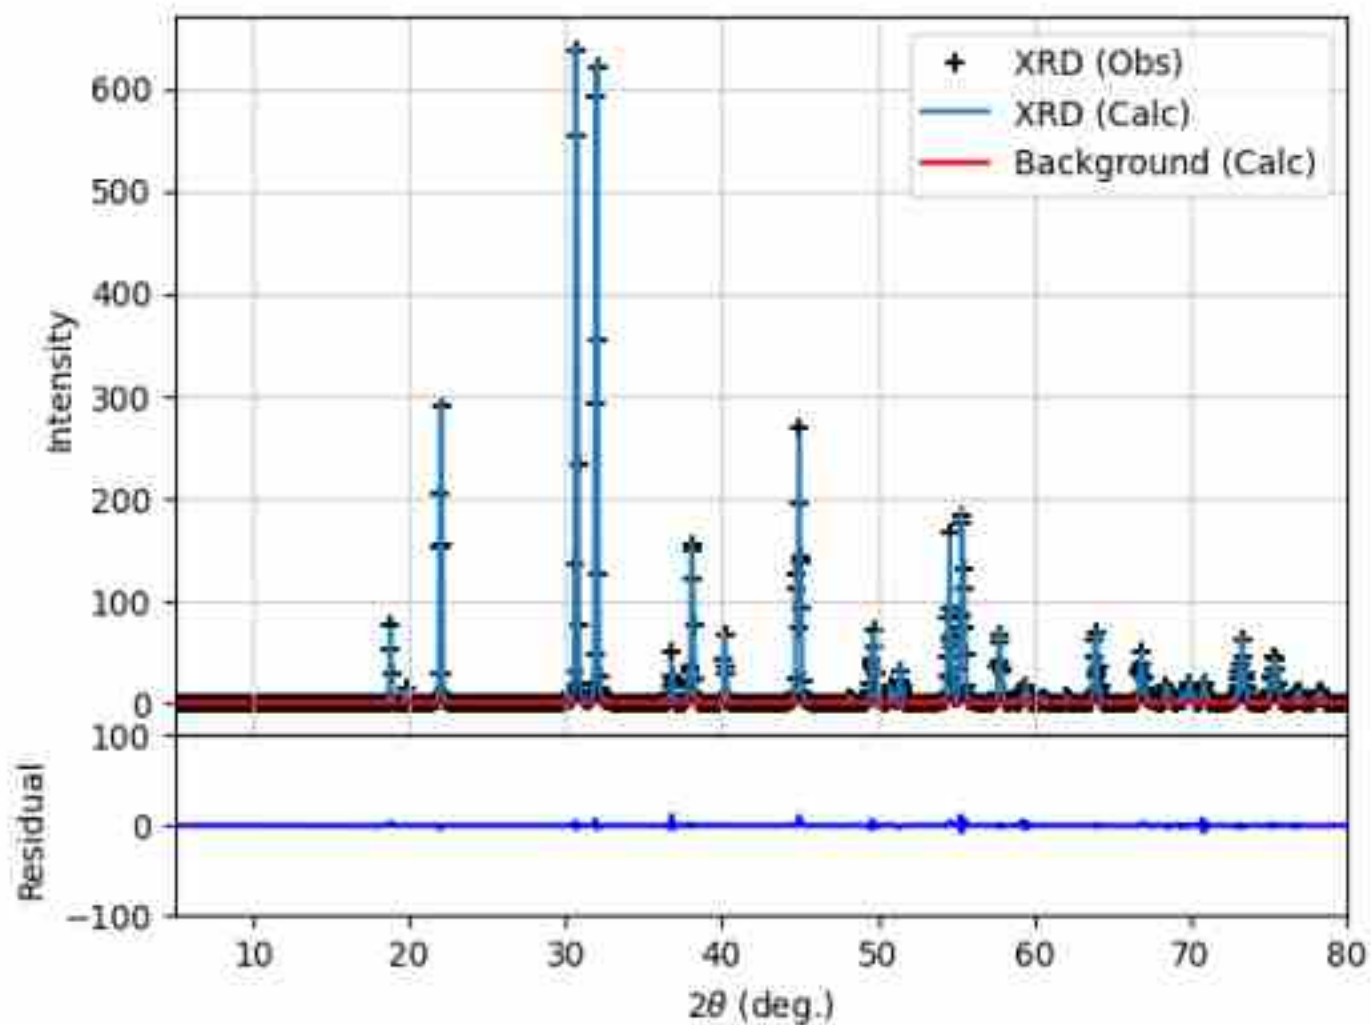

| RMSE before RR | Rwp     | RMSE after RR |
|----------------|---------|---------------|
| 0.044          | 6.17024 | None          |

# Cs<sub>2</sub>Co<sub>1</sub>Cu<sub>3</sub>F<sub>10</sub>

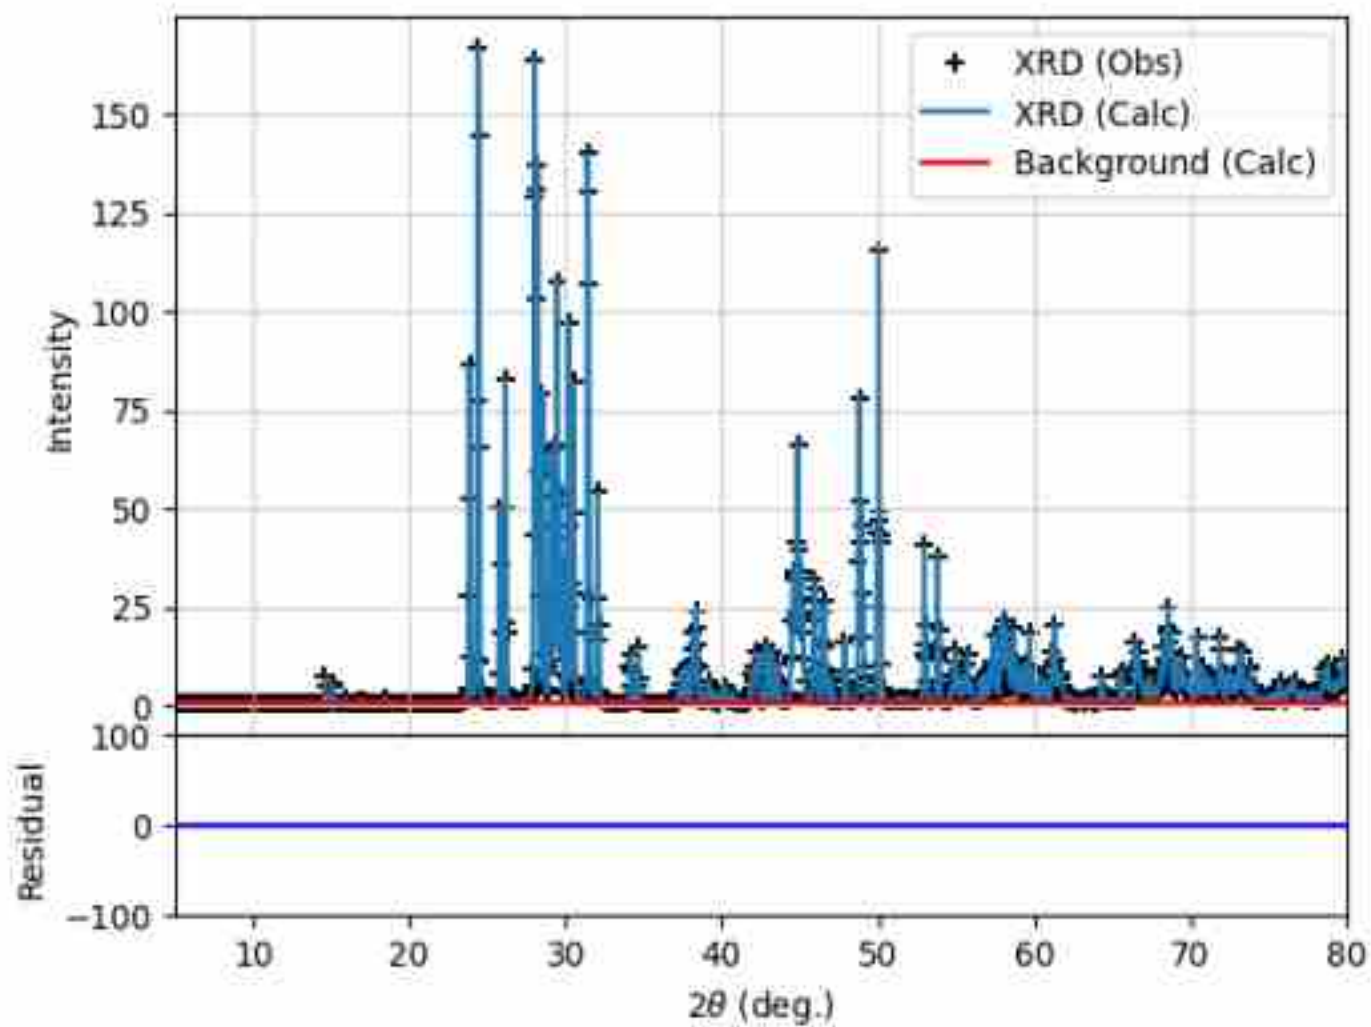

| RMSE before RR | Rwp     | RMSE after RR |
|----------------|---------|---------------|
| 0.044          | 0.00072 | 0.00047       |

# La<sub>2</sub>Ti<sub>3</sub>Ag<sub>2</sub>O<sub>10</sub>

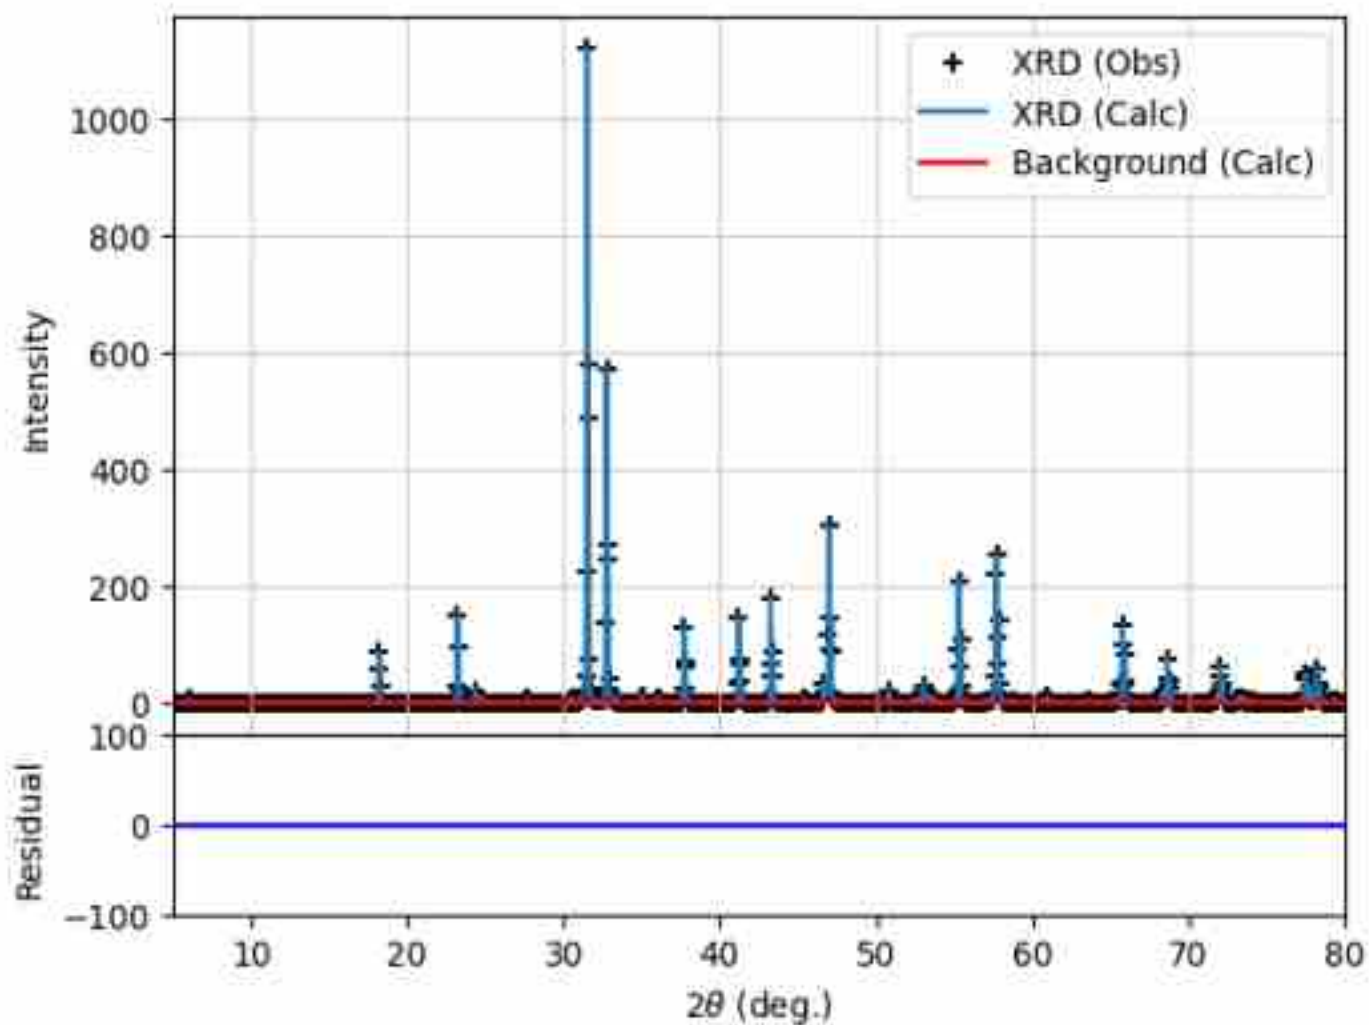

| RMSE before RR | Rwp     | RMSE after RR |
|----------------|---------|---------------|
| 0.044          | 0.00513 | 0.00088       |

# La<sub>3</sub>Gd<sub>1</sub>Cl<sub>4</sub>O<sub>4</sub>

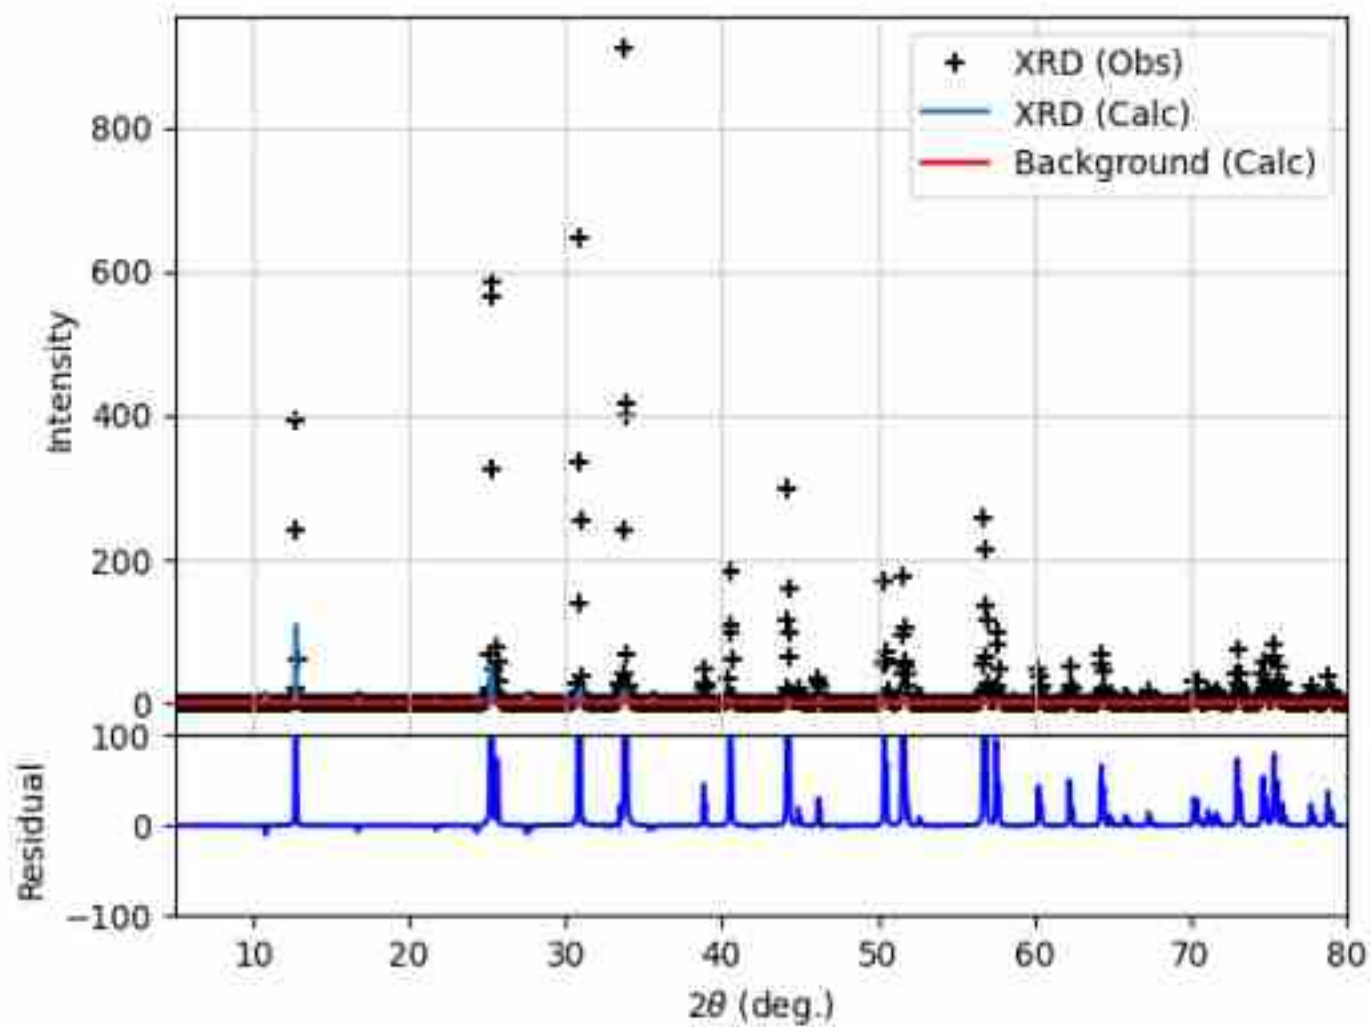

| RMSE before RR | Rwp      | RMSE after RR |
|----------------|----------|---------------|
| 0.044          | 88.39774 | None          |

# La<sub>4</sub>Cr<sub>4</sub>Se<sub>8</sub>O<sub>4</sub>

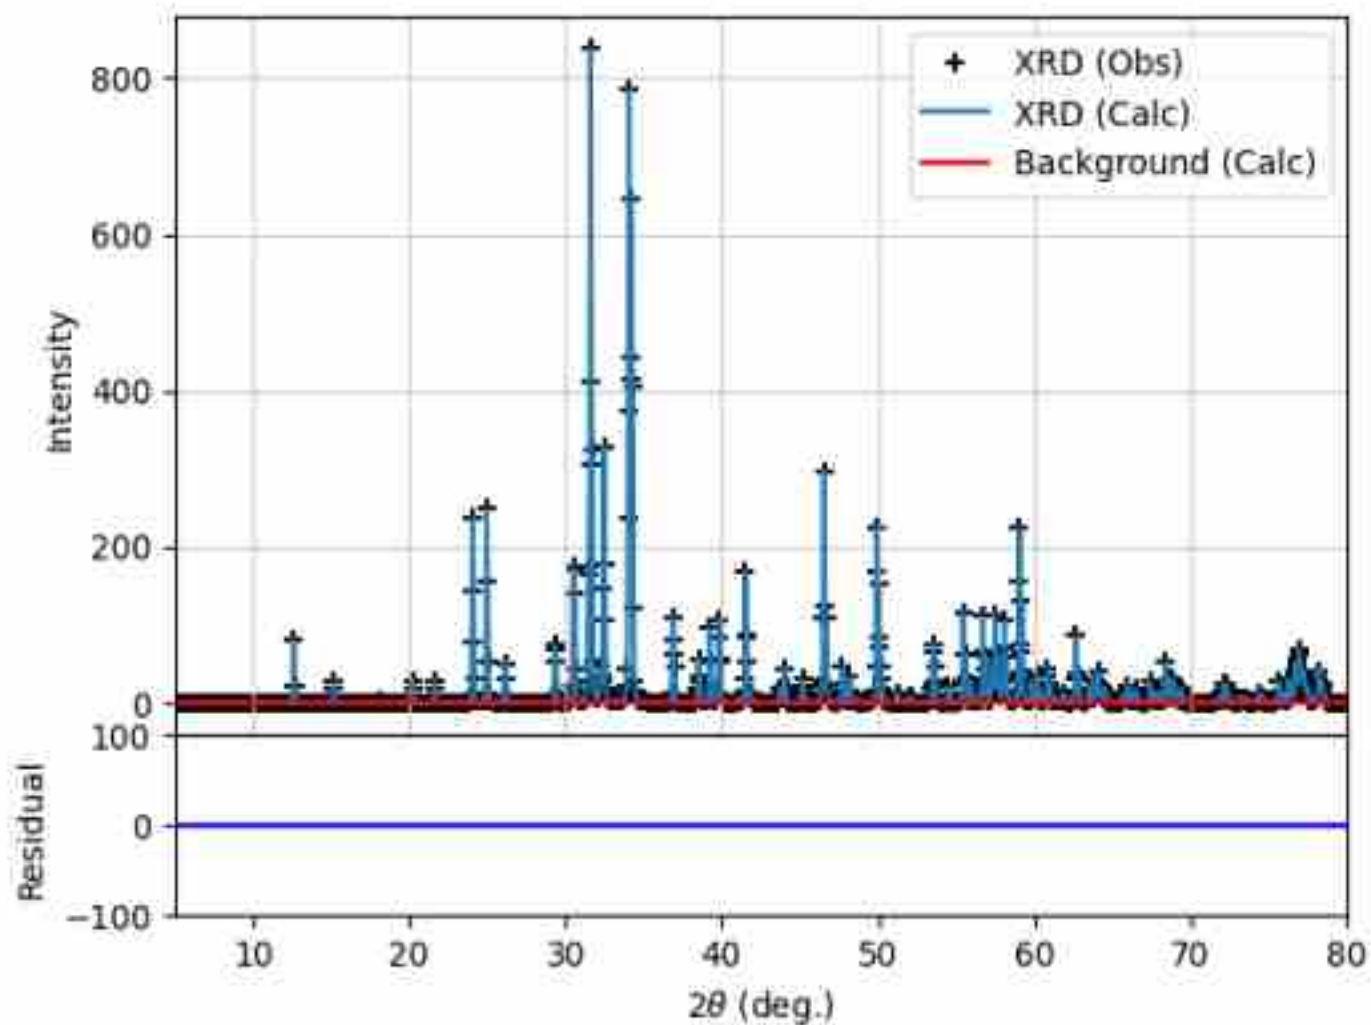

| RMSE before RR | Rwp     | RMSE after RR |
|----------------|---------|---------------|
| 0.044          | 0.00267 | 0.00065       |



# Li<sub>3</sub>Mn<sub>3</sub>Ni<sub>1</sub>O<sub>8</sub>

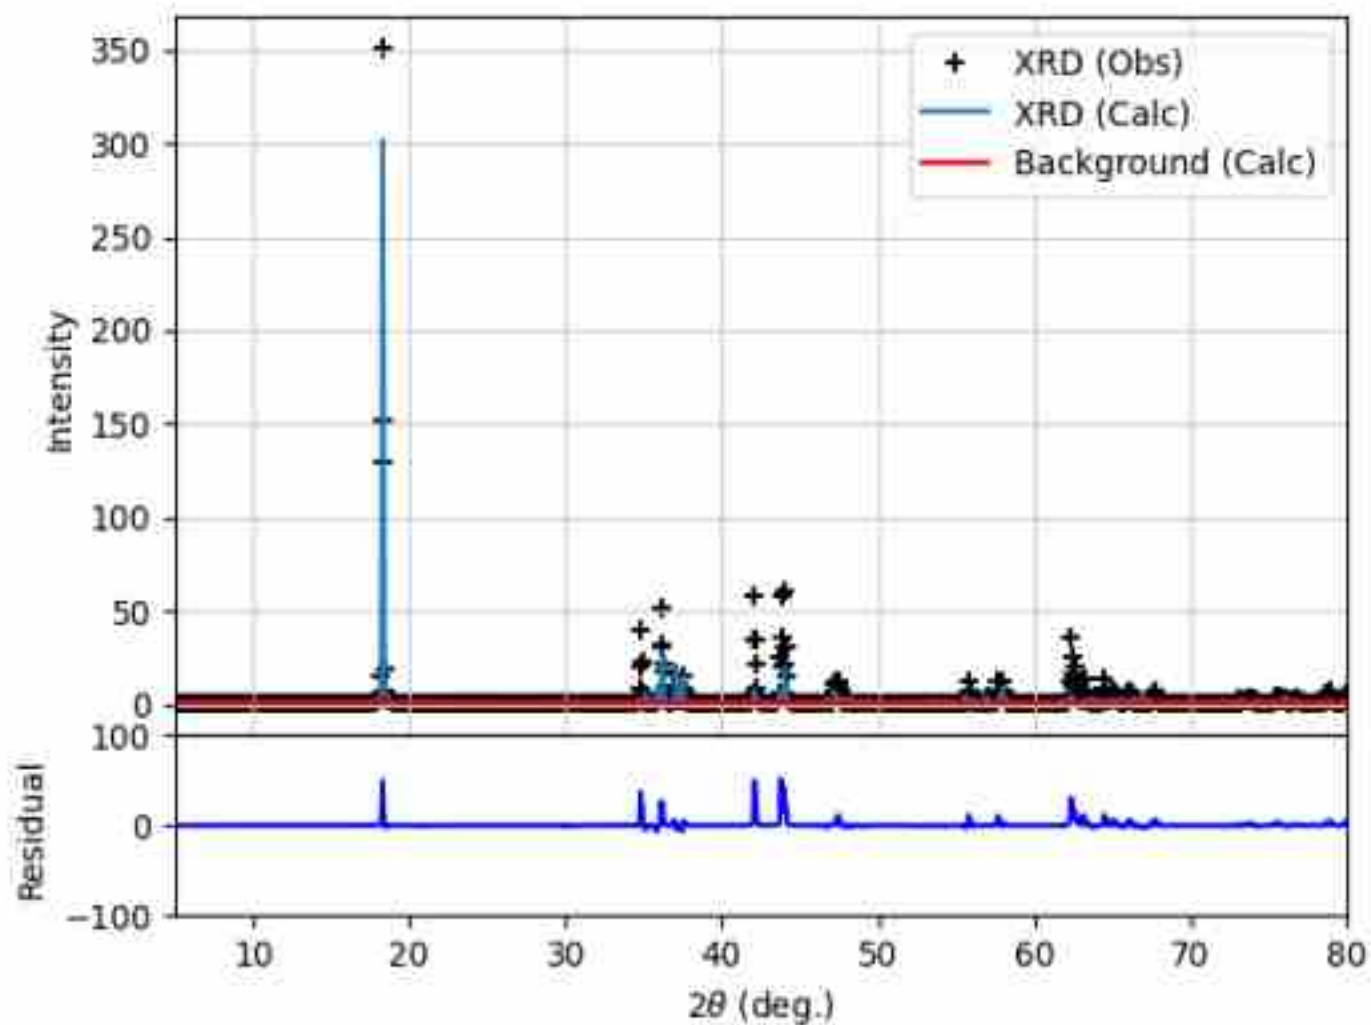

| RMSE before RR | Rwp      | RMSE after RR |
|----------------|----------|---------------|
| 0.044          | 52.28723 | None          |

# Li<sub>4</sub>Mn<sub>3</sub>Ni<sub>1</sub>O<sub>8</sub>

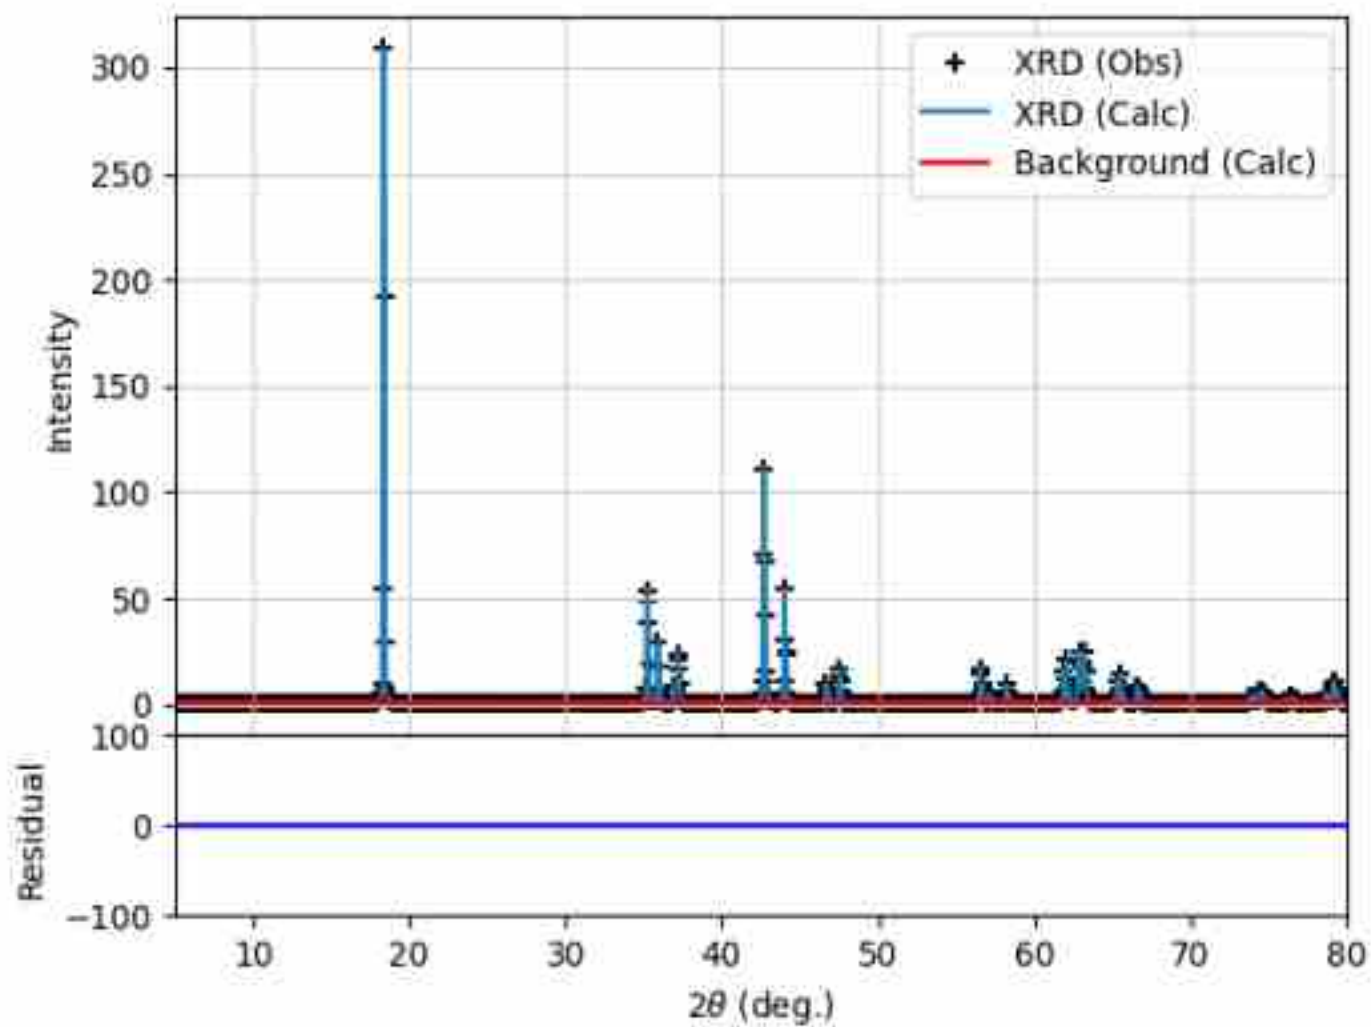

| RMSE before RR | Rwp     | RMSE after RR |
|----------------|---------|---------------|
| 0.044          | 0.12209 | 0.02821       |

# Li<sub>4</sub>V<sub>4</sub>F<sub>12</sub>

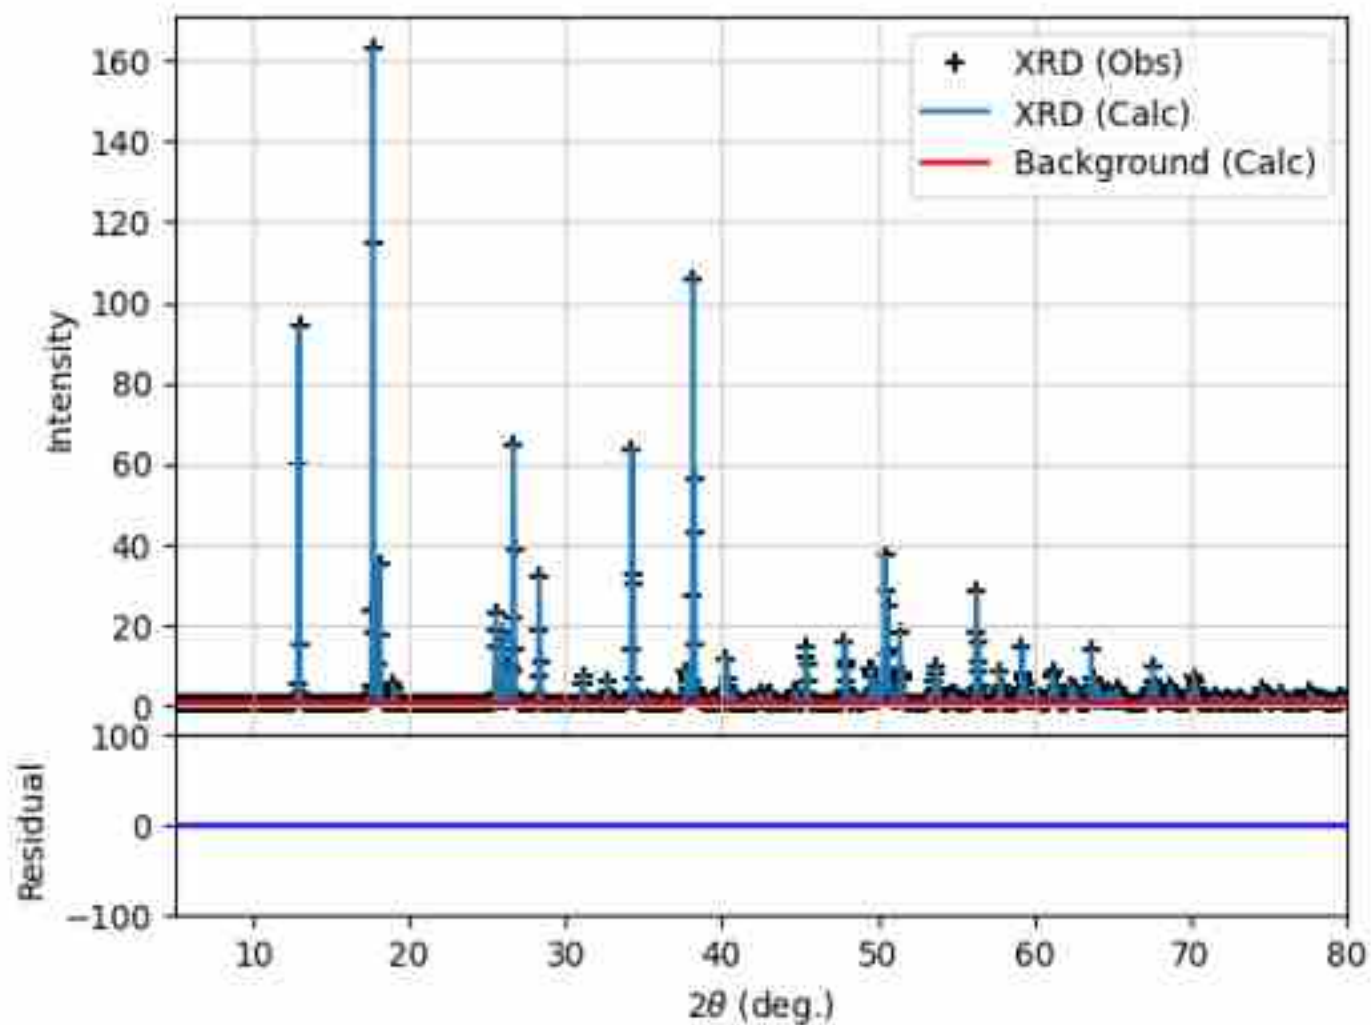

| RMSE before RR | Rwp    | RMSE after RR |
|----------------|--------|---------------|
| 0.044          | 0.0033 | 0.00078       |

# Li<sub>5</sub>Mn<sub>3</sub>O<sub>8</sub>

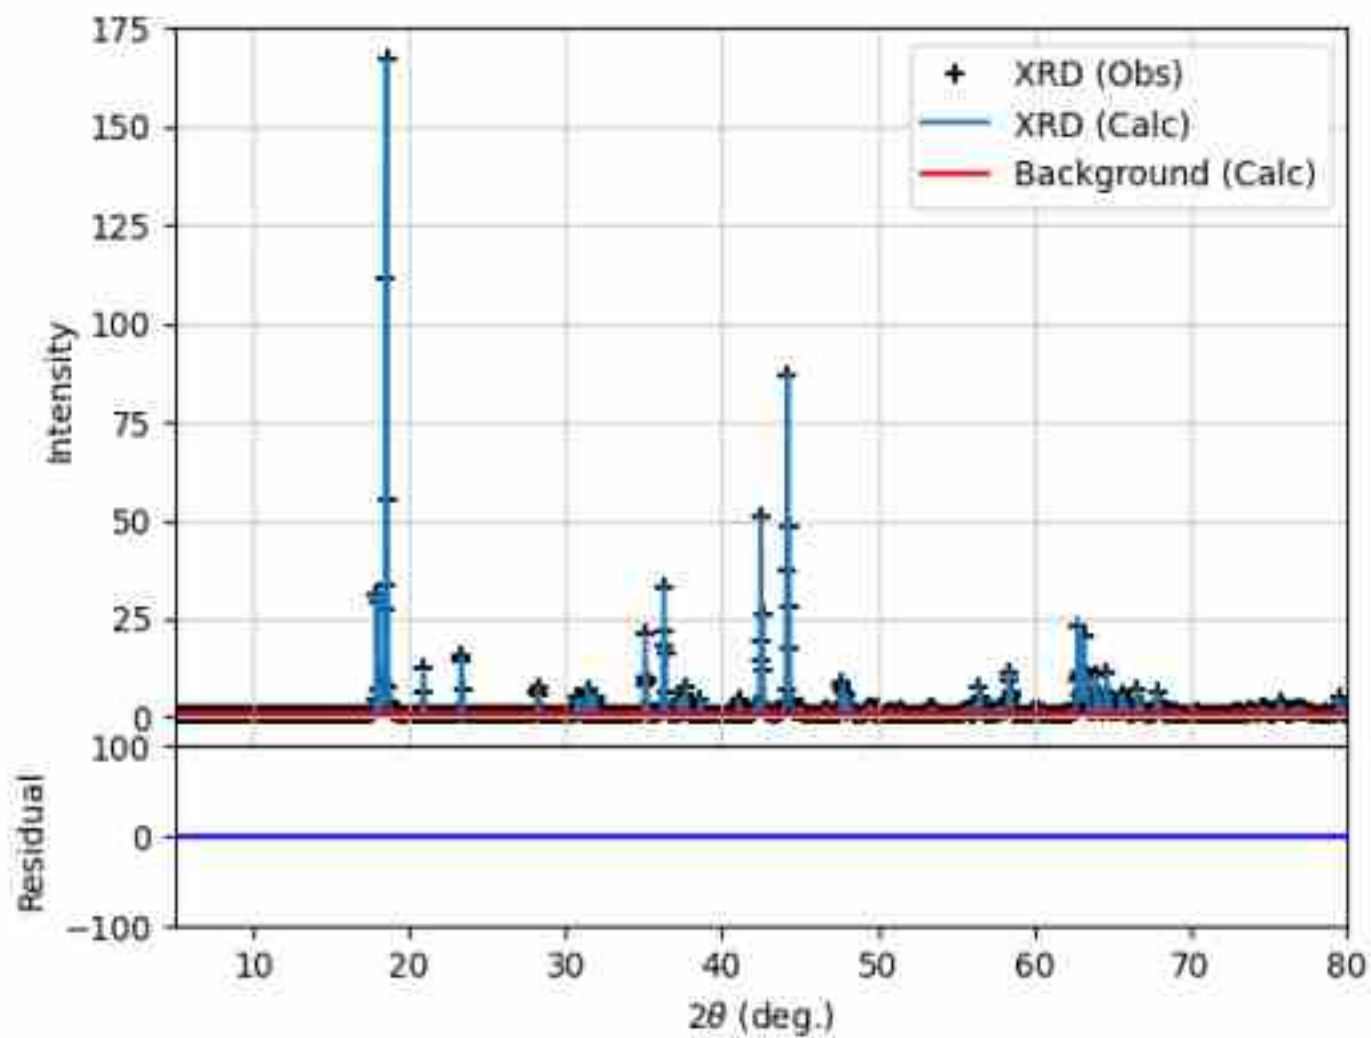

| RMSE before RR | Rwp     | RMSE after RR |
|----------------|---------|---------------|
| 0.044          | 0.00214 | 0.00108       |

# Na<sub>4</sub>I<sub>2</sub>O<sub>1</sub>

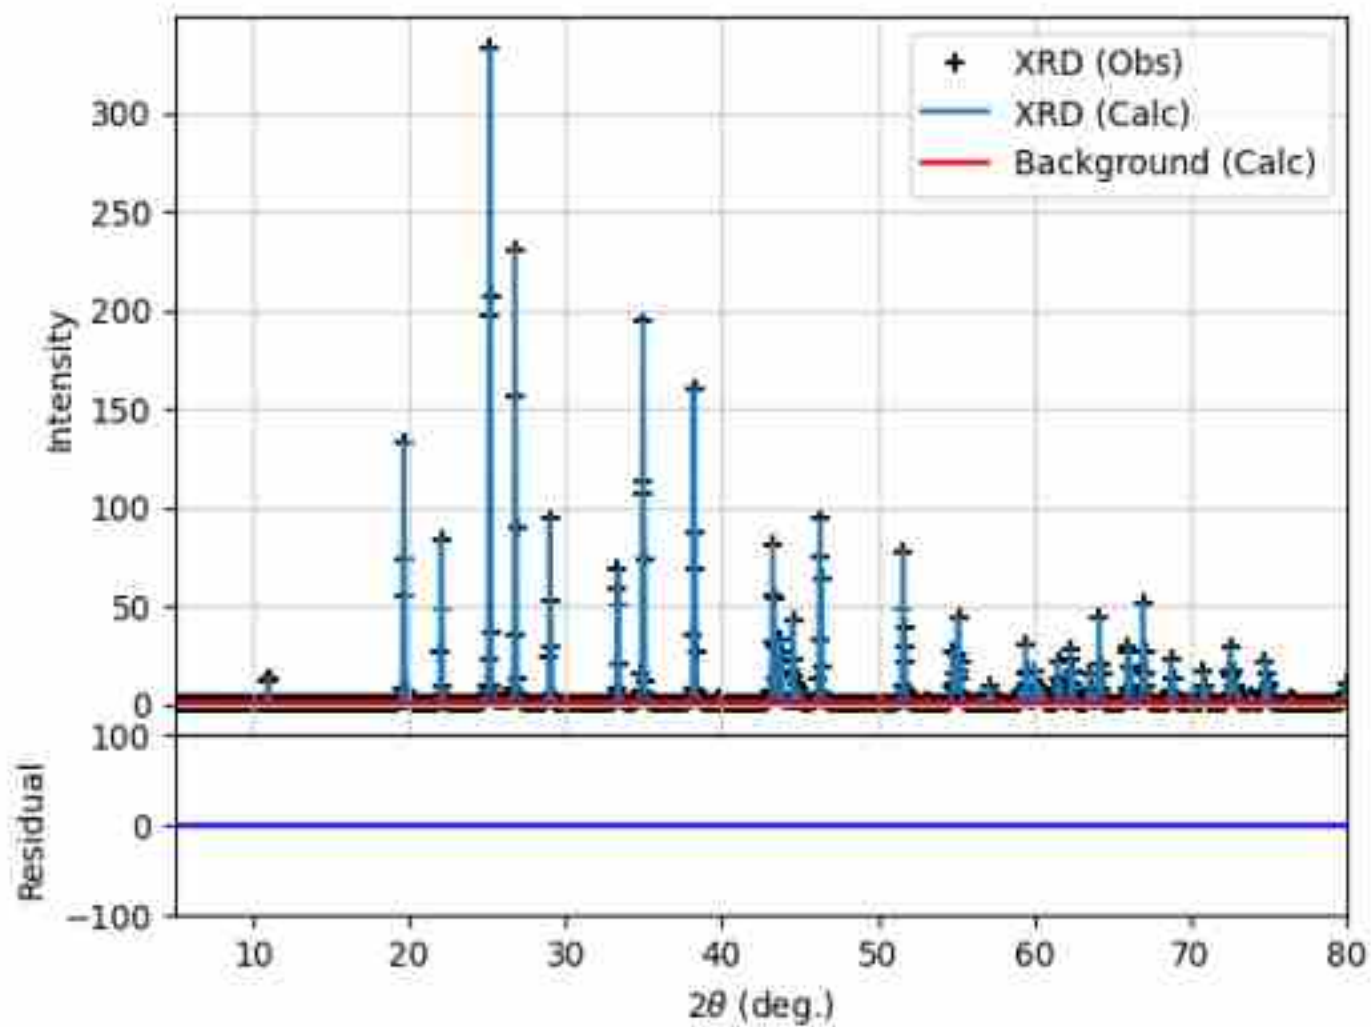

| RMSE before RR | Rwp     | RMSE after RR |
|----------------|---------|---------------|
| 0.044          | 0.00379 | 0.00156       |

# Pr<sub>4</sub>Ge<sub>4</sub>Rh<sub>4</sub>

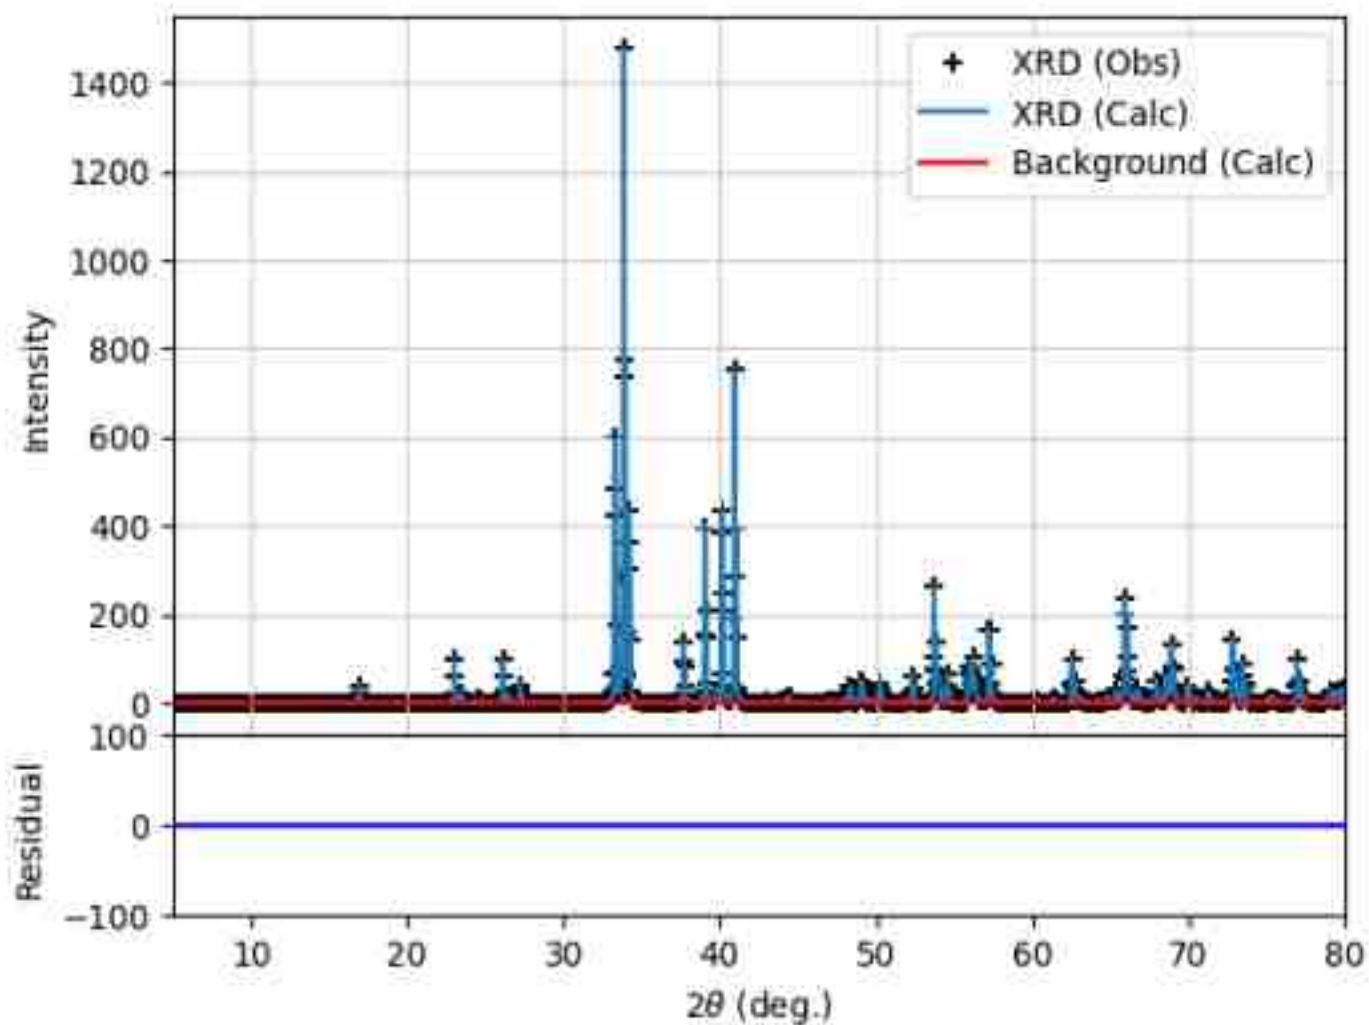

| RMSE before RR | Rwp     | RMSE after RR |
|----------------|---------|---------------|
| 0.044          | 0.00605 | 0.00037       |

# Sr<sub>2</sub>Li<sub>2</sub>Nb<sub>3</sub>O<sub>10</sub>

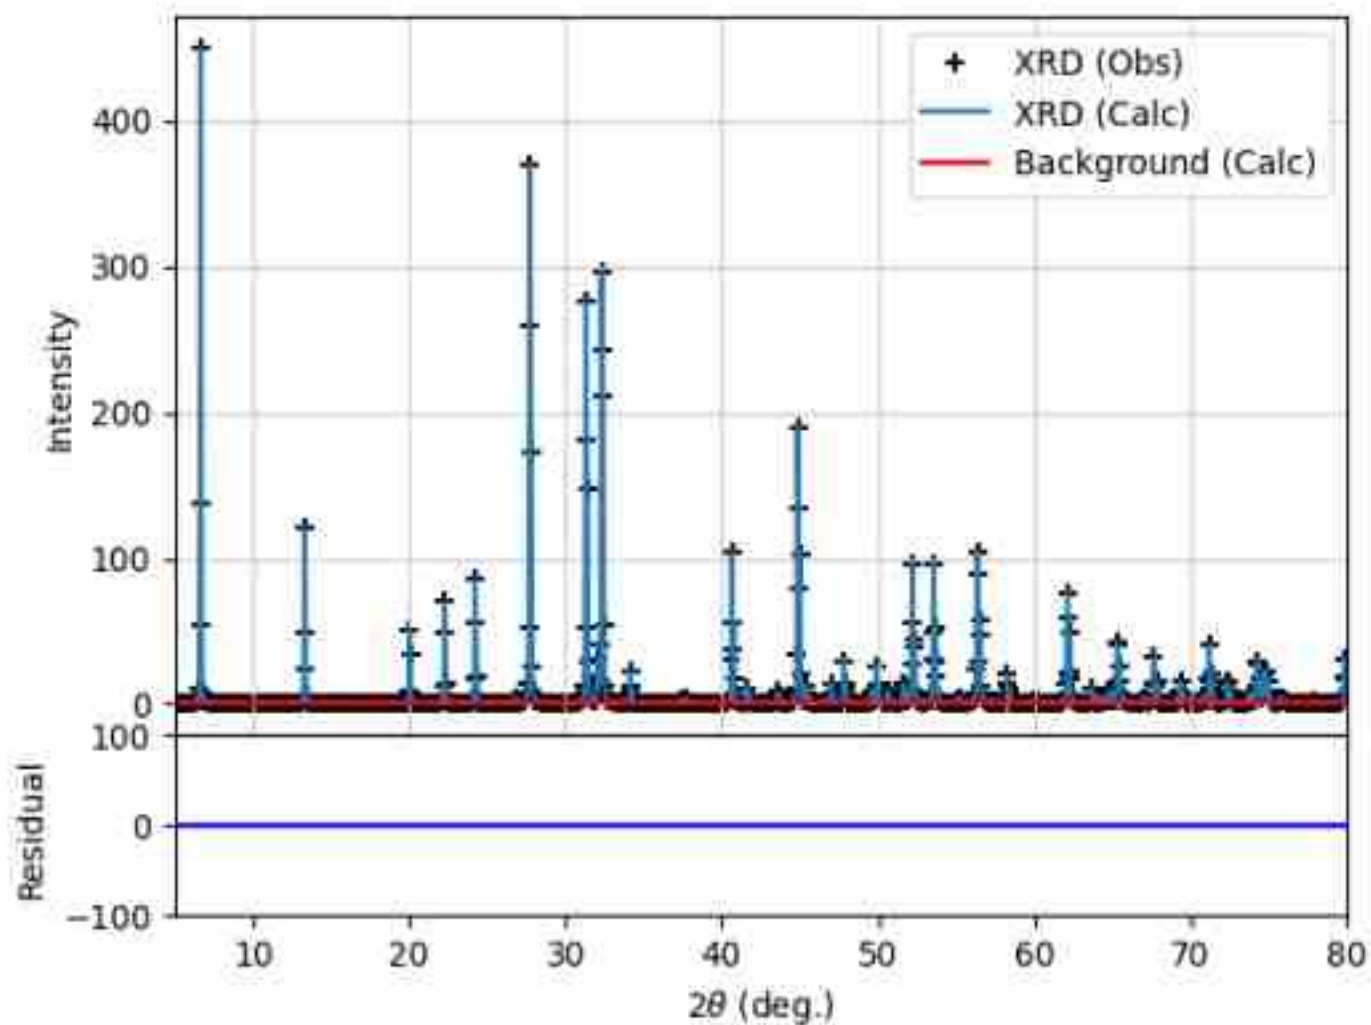

| RMSE before RR | Rwp     | RMSE after RR |
|----------------|---------|---------------|
| 0.044          | 0.00378 | 0.00277       |

# Tl4Ge4I12

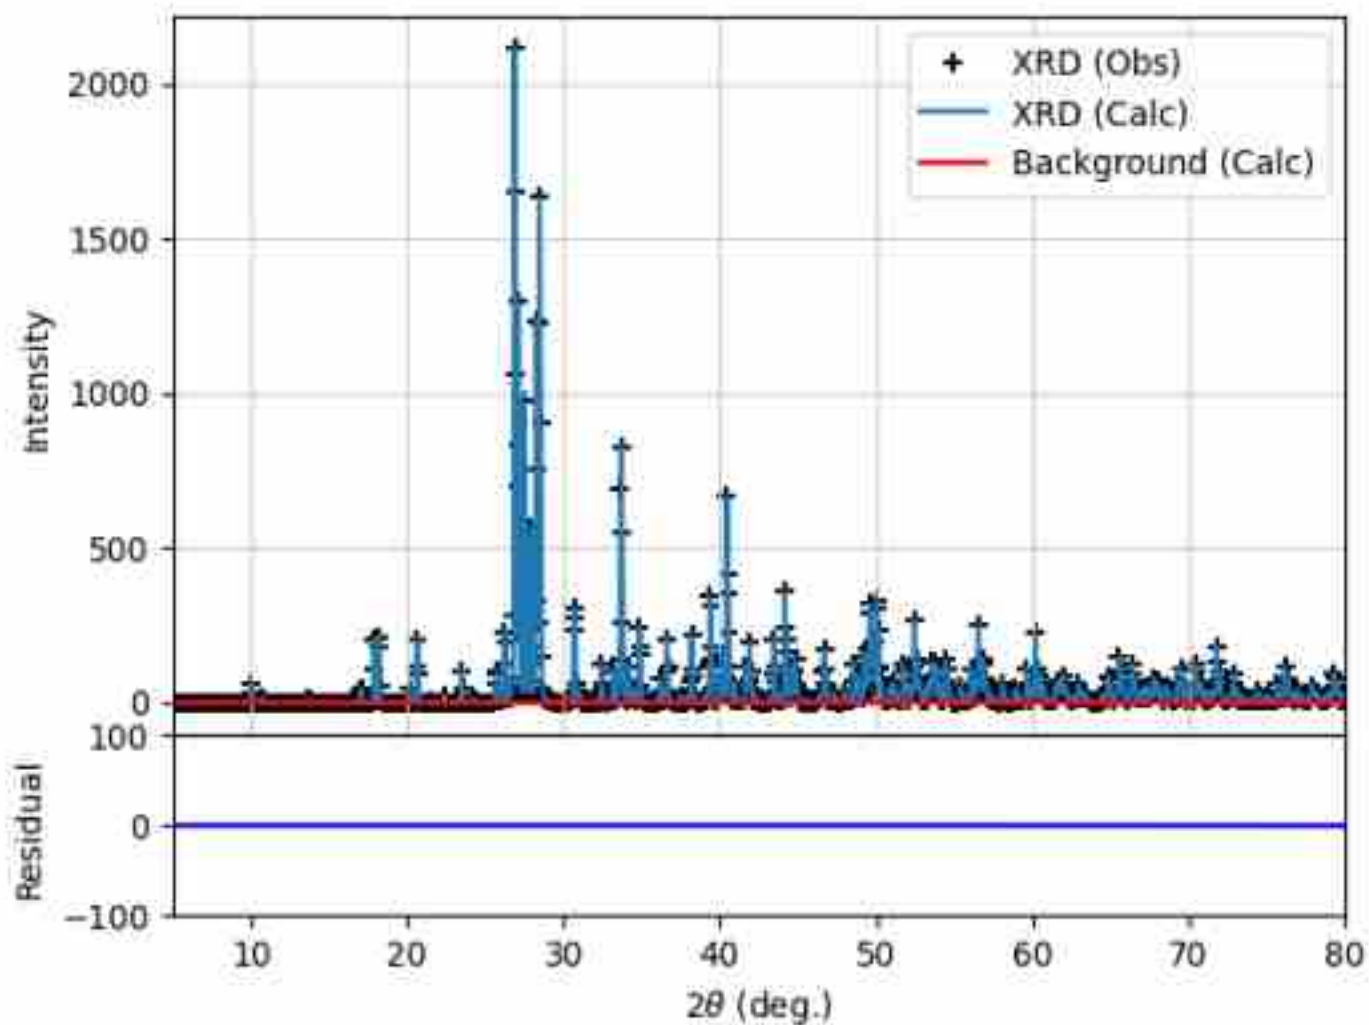

| RMSE before RR | Rwp     | RMSE after RR |
|----------------|---------|---------------|
| 0.044          | 0.17138 | 0.00238       |



# Tm<sub>4</sub>Ni<sub>4</sub>As<sub>4</sub>

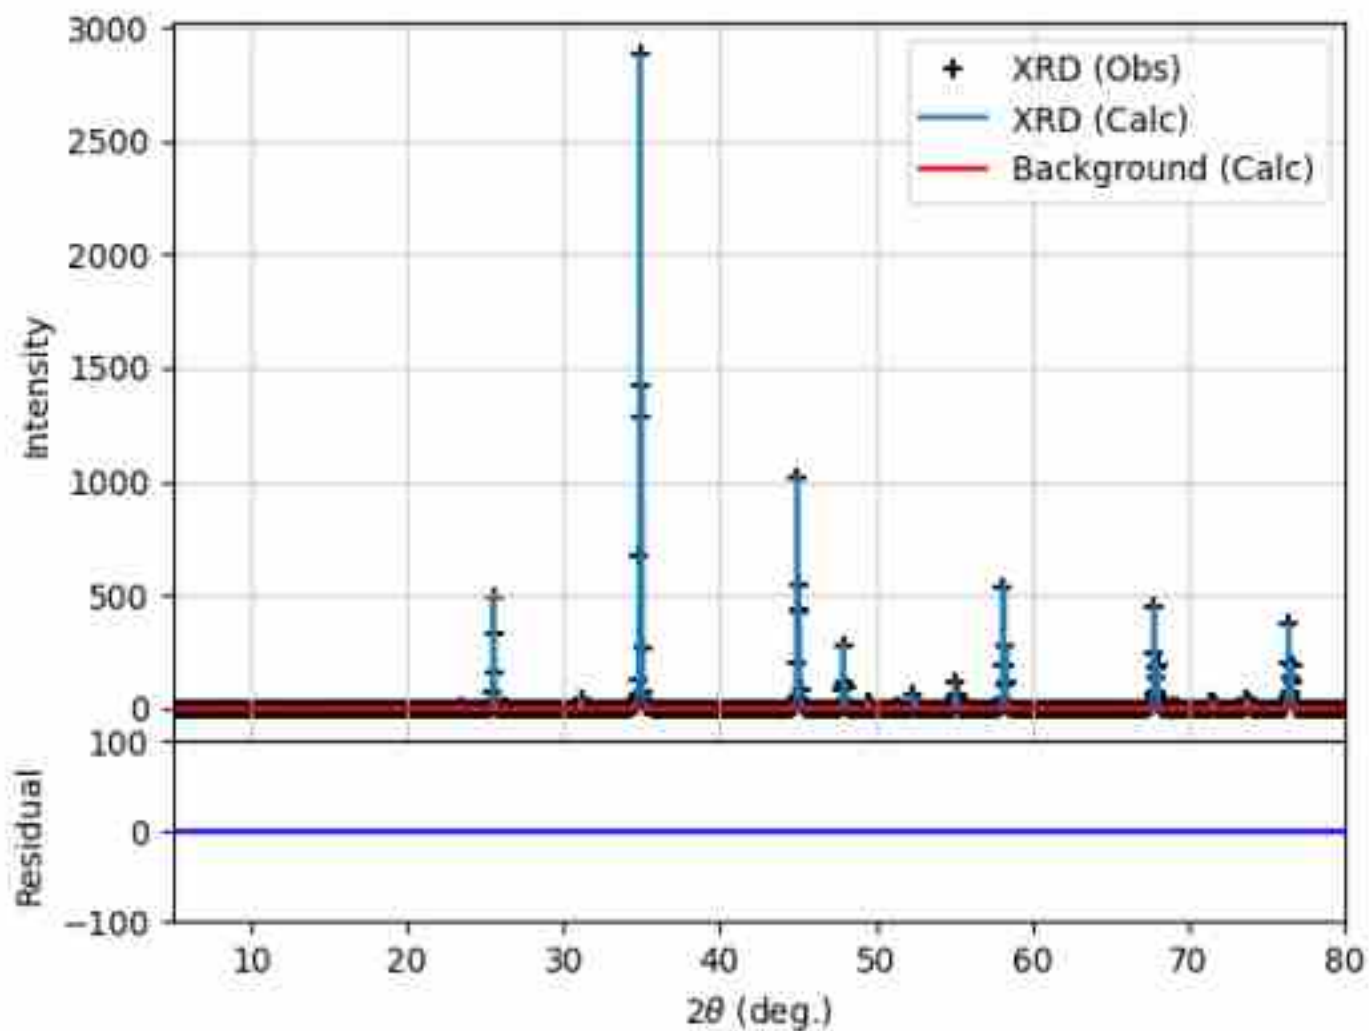

| RMSE before RR | Rwp     | RMSE after RR |
|----------------|---------|---------------|
| 0.044          | 0.00662 | 0.00093       |

# V4Ni1S8

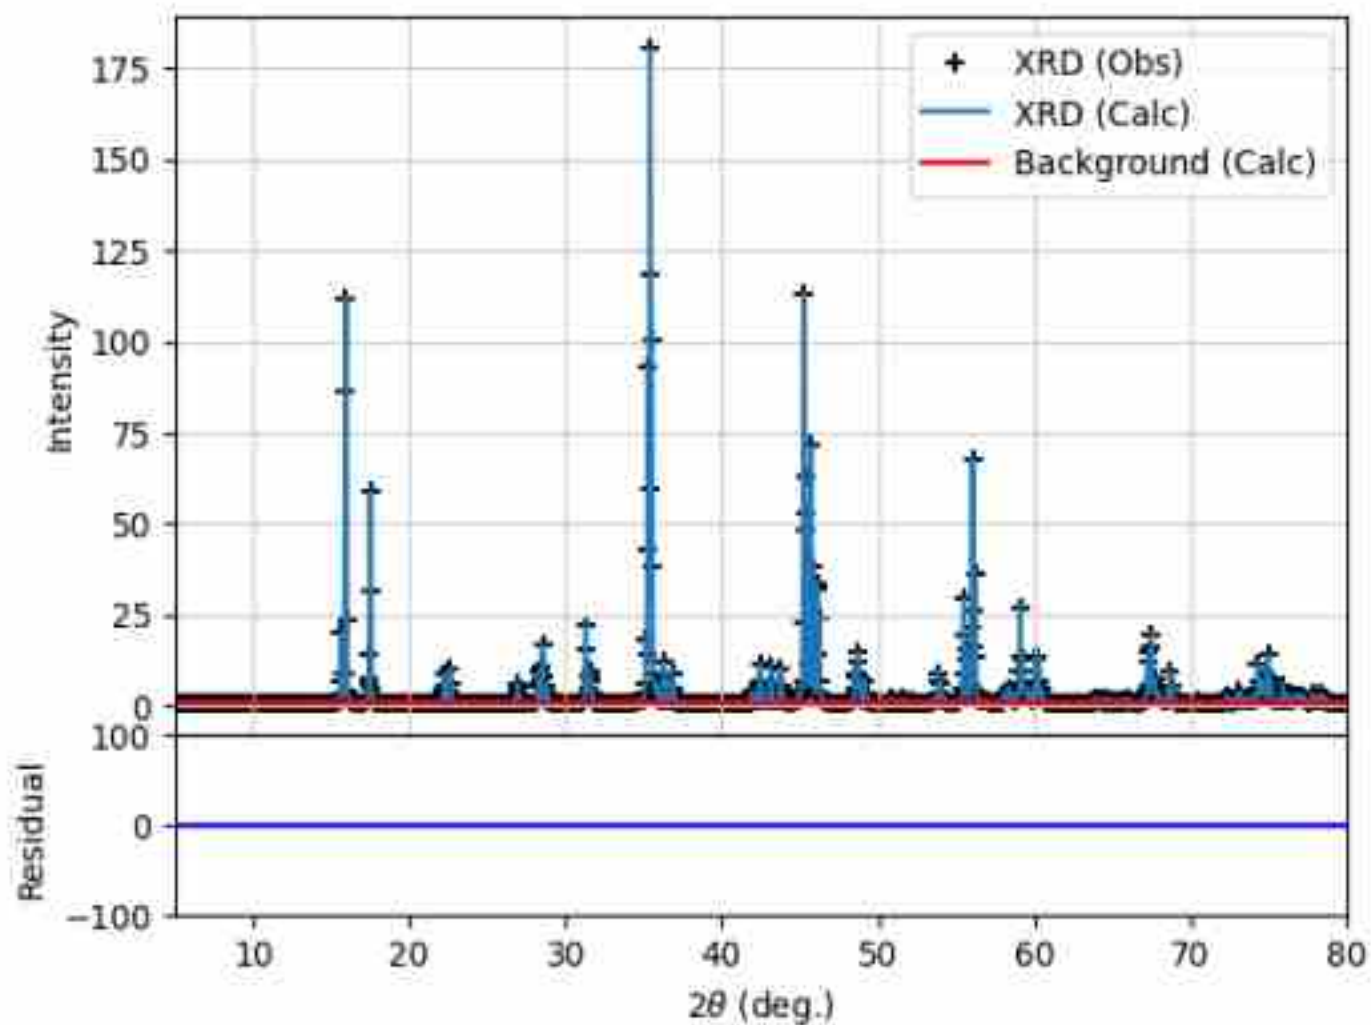

| RMSE before RR | Rwp     | RMSE after RR |
|----------------|---------|---------------|
| 0.044          | 0.00258 | 0.00029       |

# Ca<sub>3</sub>Mn<sub>2</sub>W<sub>2</sub>O<sub>12</sub>

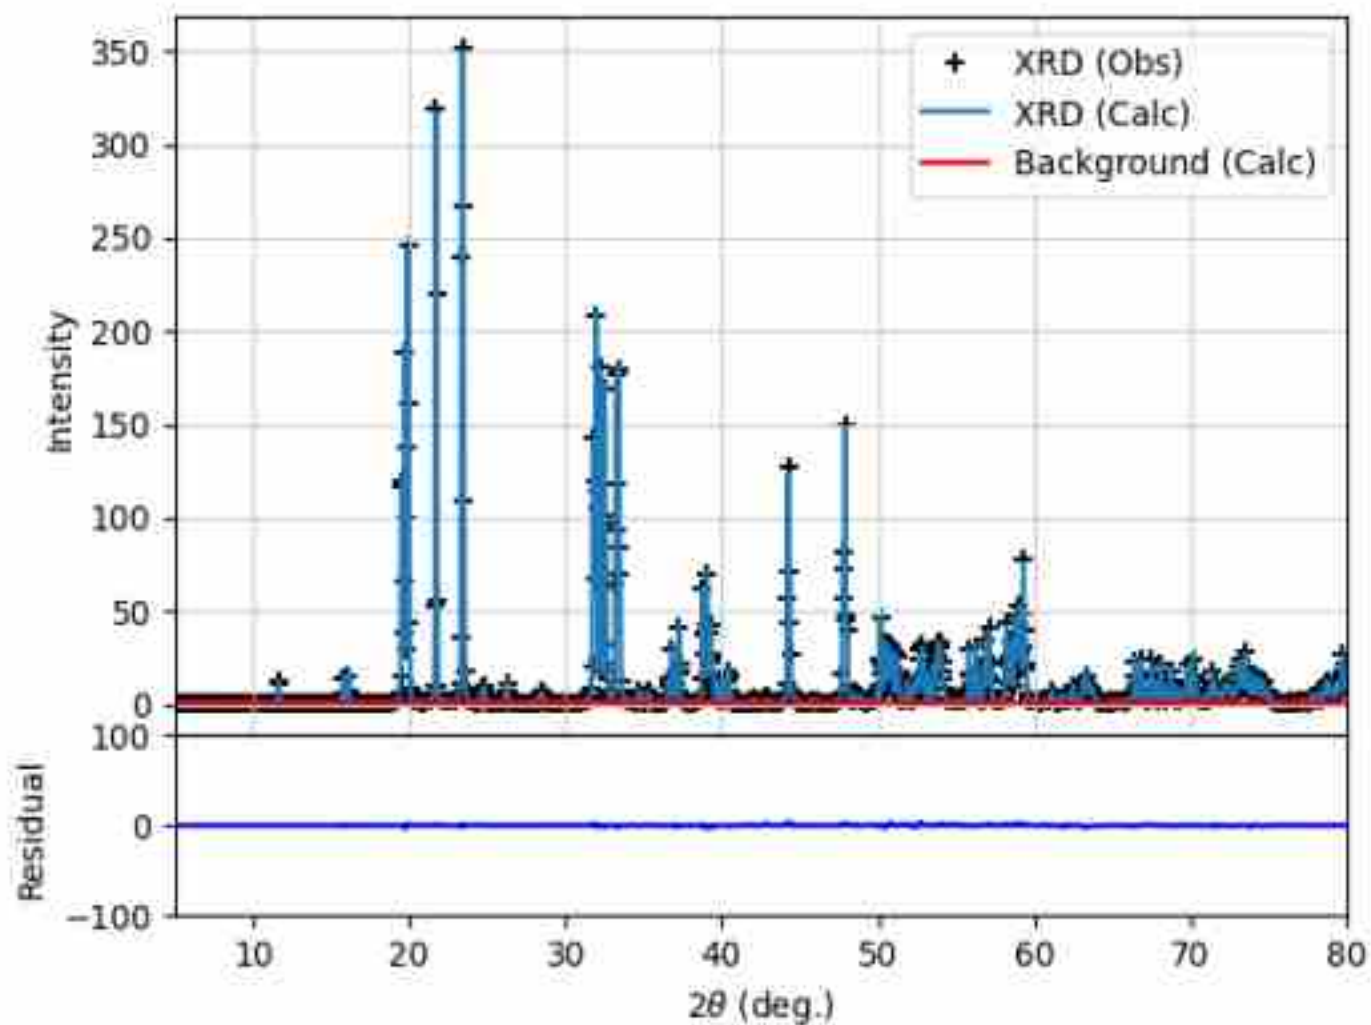

| RMSE before RR | Rwp     | RMSE after RR |
|----------------|---------|---------------|
| 0.045          | 5.31722 | 0.1277        |

# Cd<sub>2</sub>Te<sub>2</sub>Mo<sub>2</sub>O<sub>12</sub>

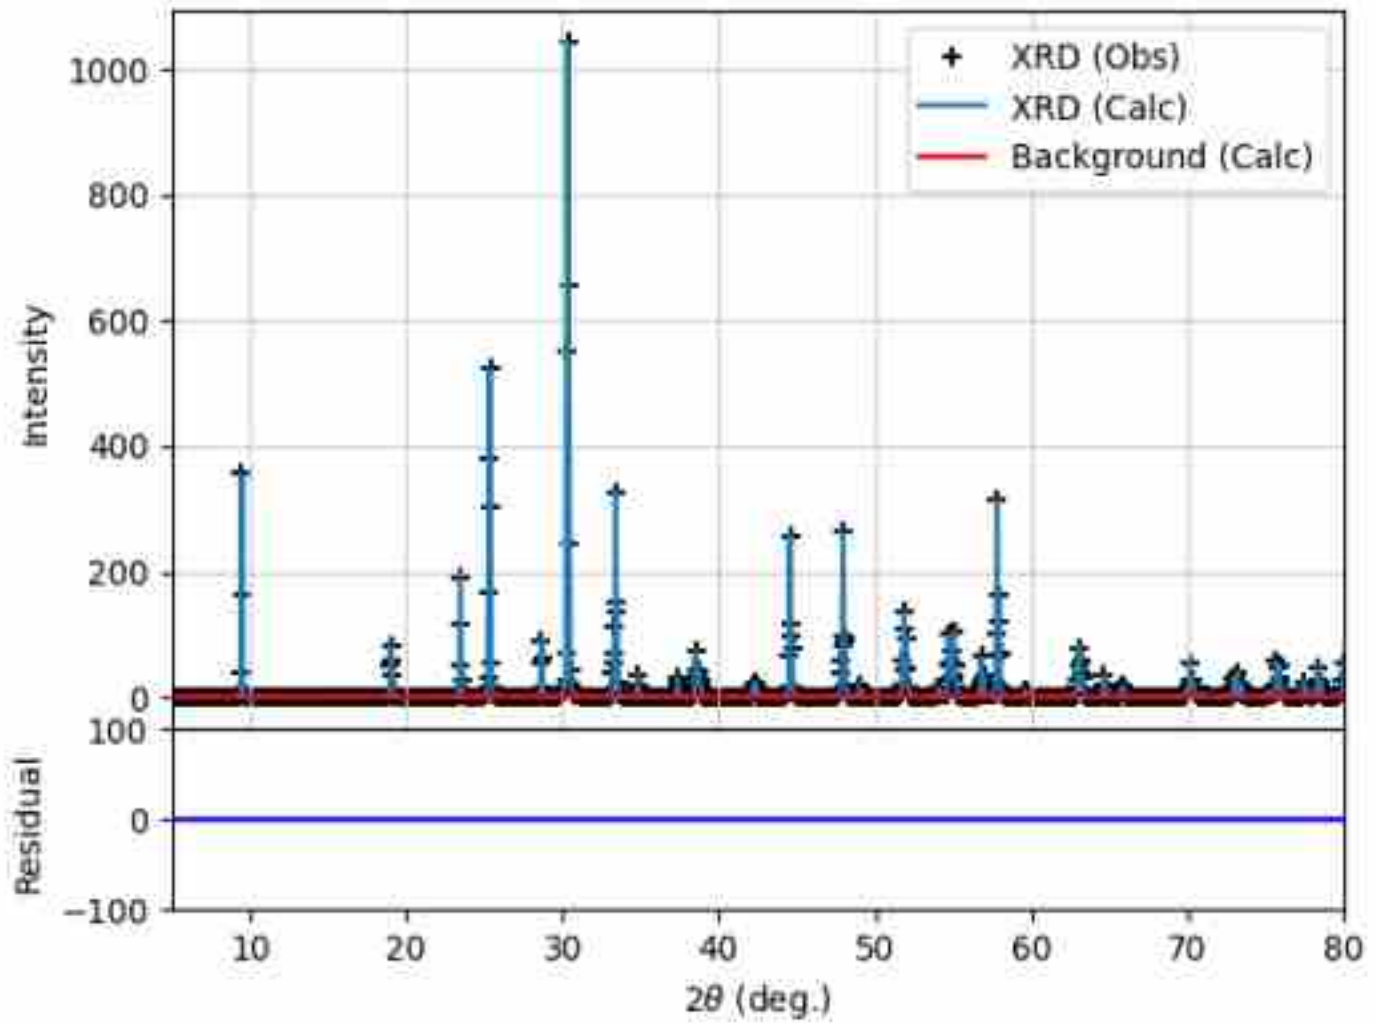

| RMSE before RR | Rwp    | RMSE after RR |
|----------------|--------|---------------|
| 0.045          | 0.0044 | 0.0017        |

# Co<sub>4</sub>Ni<sub>2</sub>O<sub>8</sub>

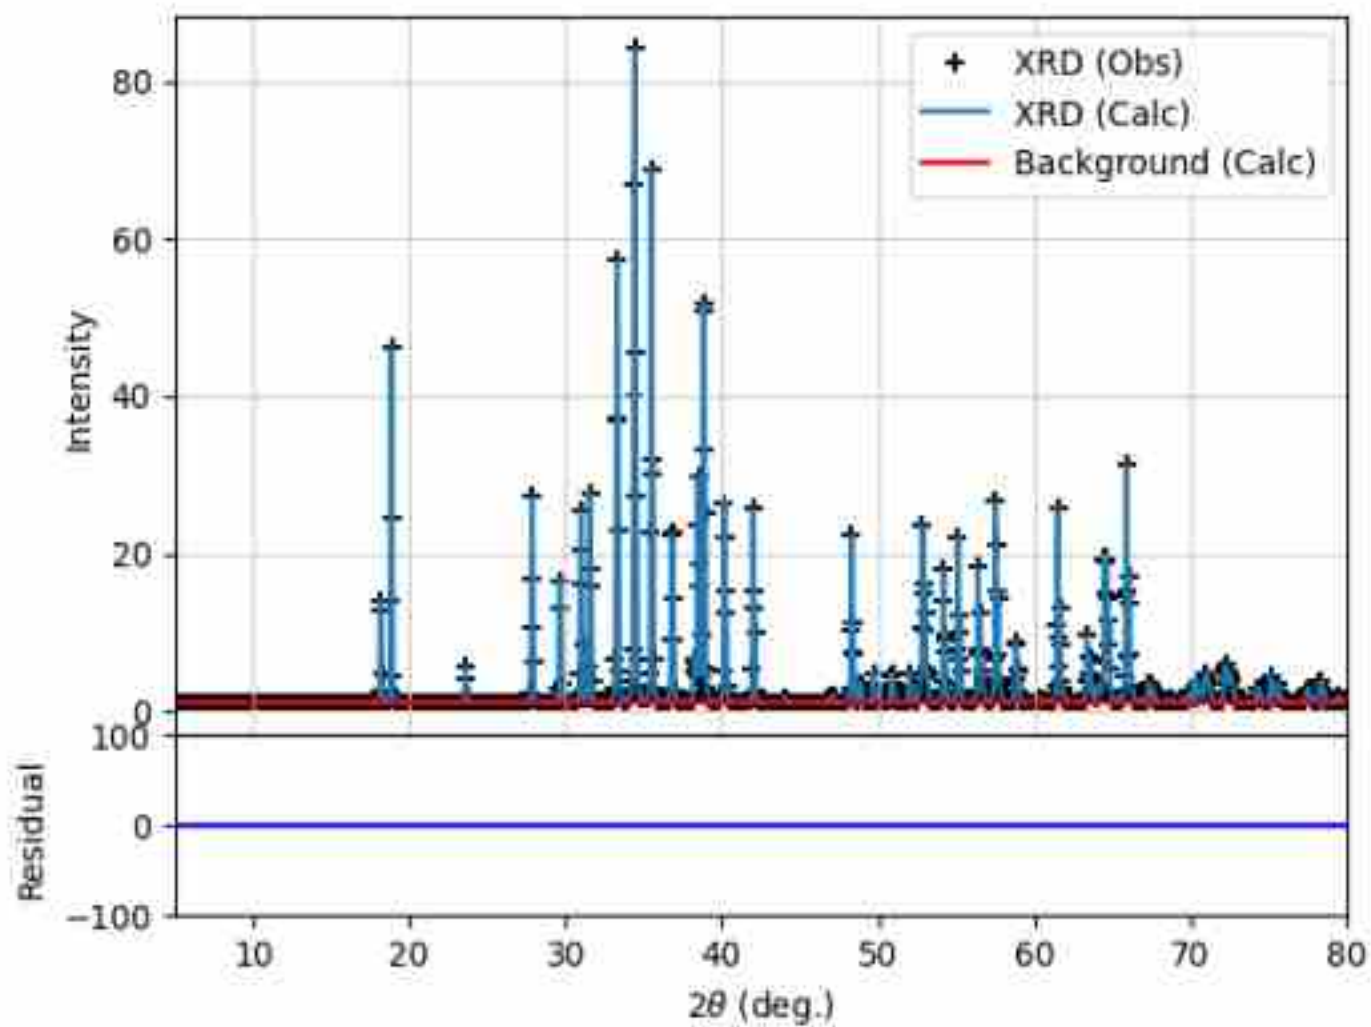

| RMSE before RR | Rwp     | RMSE after RR |
|----------------|---------|---------------|
| 0.045          | 0.00185 | 0.0005        |

# Cr<sub>4</sub>Sb<sub>4</sub>Se<sub>12</sub>

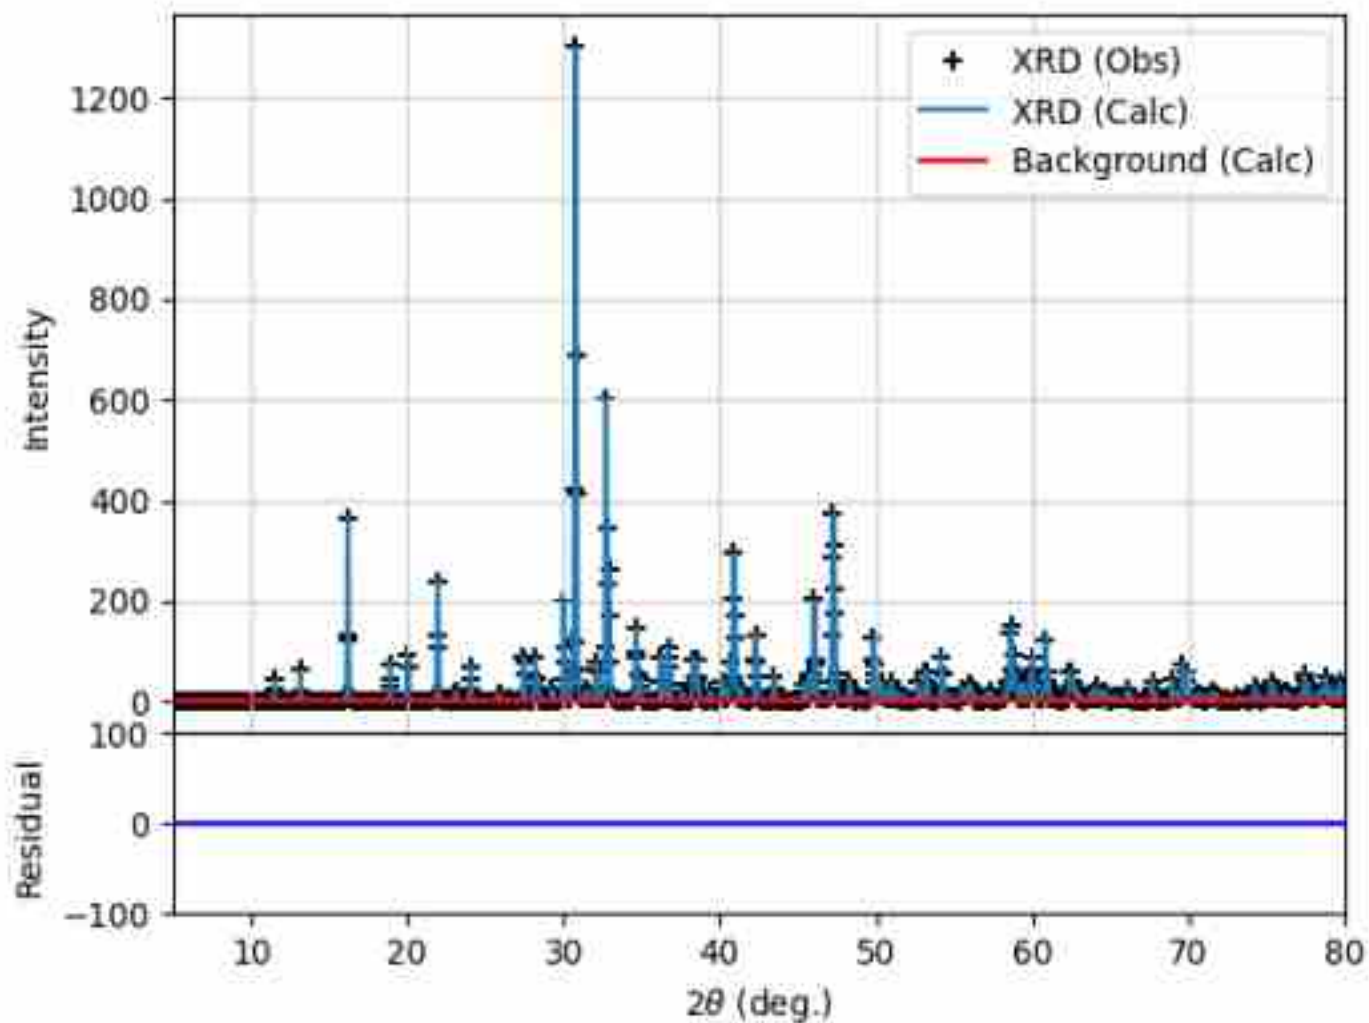

| RMSE before RR | Rwp     | RMSE after RR |
|----------------|---------|---------------|
| 0.045          | 0.00487 | 0.00038       |

# Cs<sub>2</sub>Sn<sub>4</sub>Br<sub>10</sub>

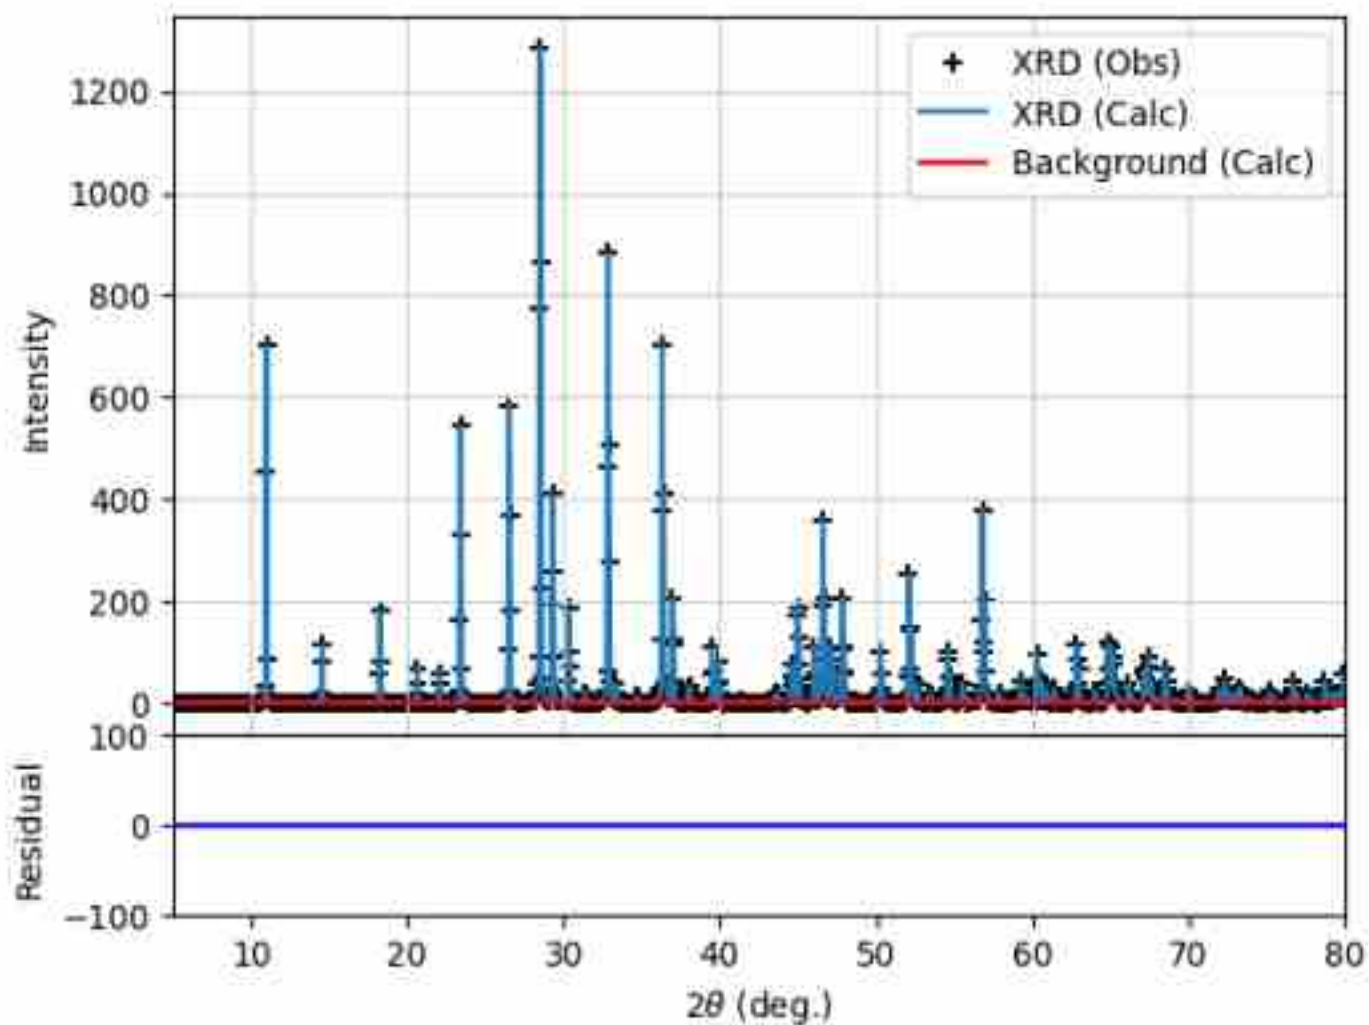

| RMSE before RR | Rwp     | RMSE after RR |
|----------------|---------|---------------|
| 0.045          | 0.00573 | 0.00046       |

# Cu<sub>2</sub>Ni<sub>6</sub>O<sub>8</sub>

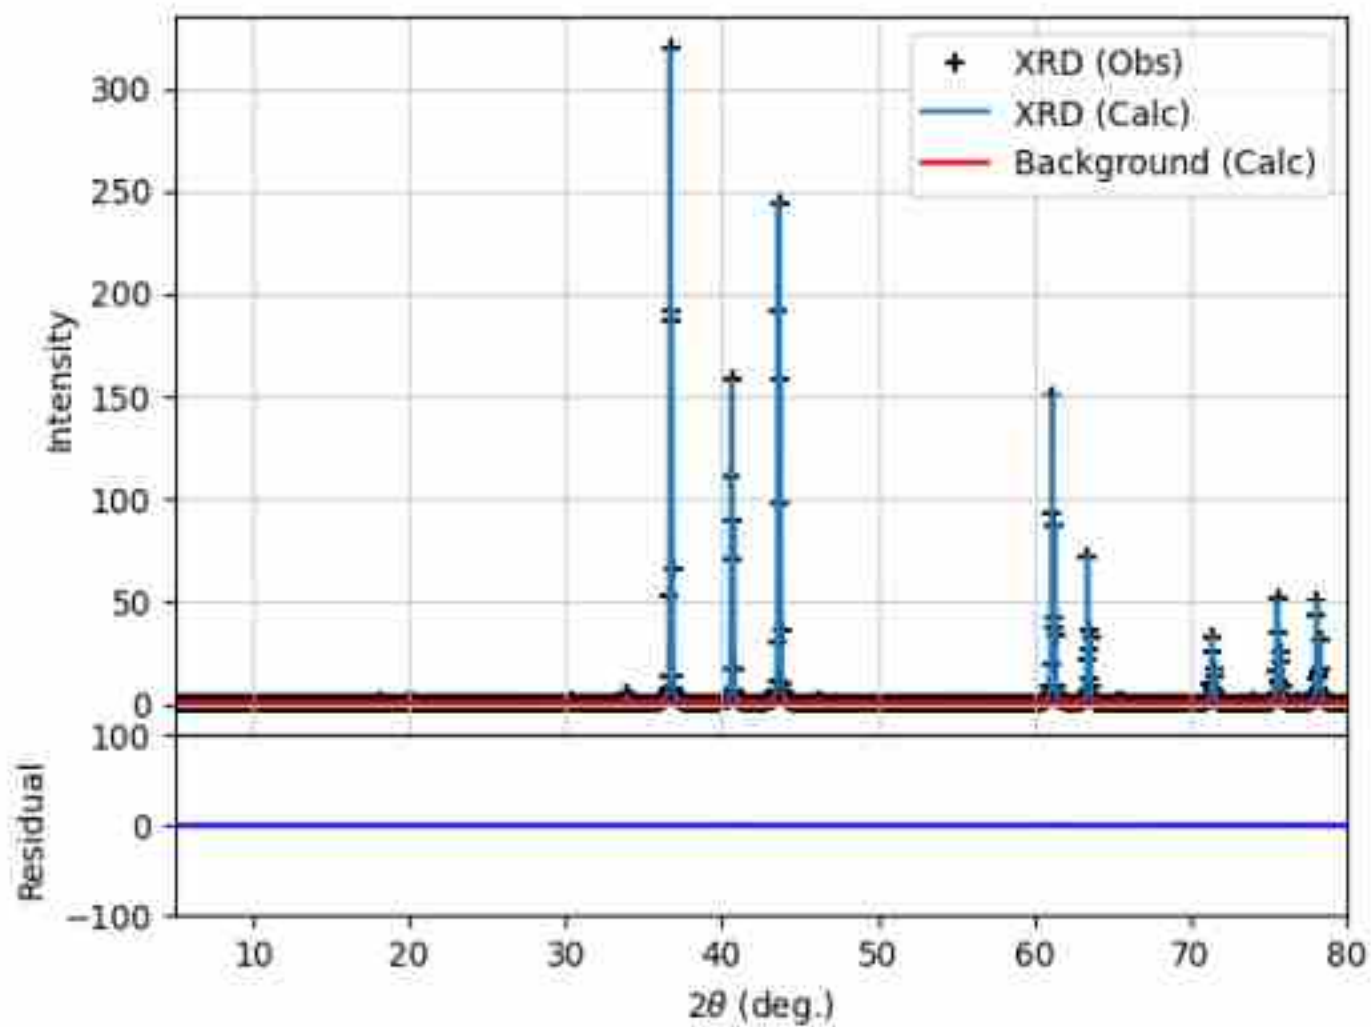

| RMSE before RR | Rwp     | RMSE after RR |
|----------------|---------|---------------|
| 0.045          | 1.77019 | 0.08131       |



# Dy<sub>8</sub>S<sub>8</sub>O<sub>4</sub>

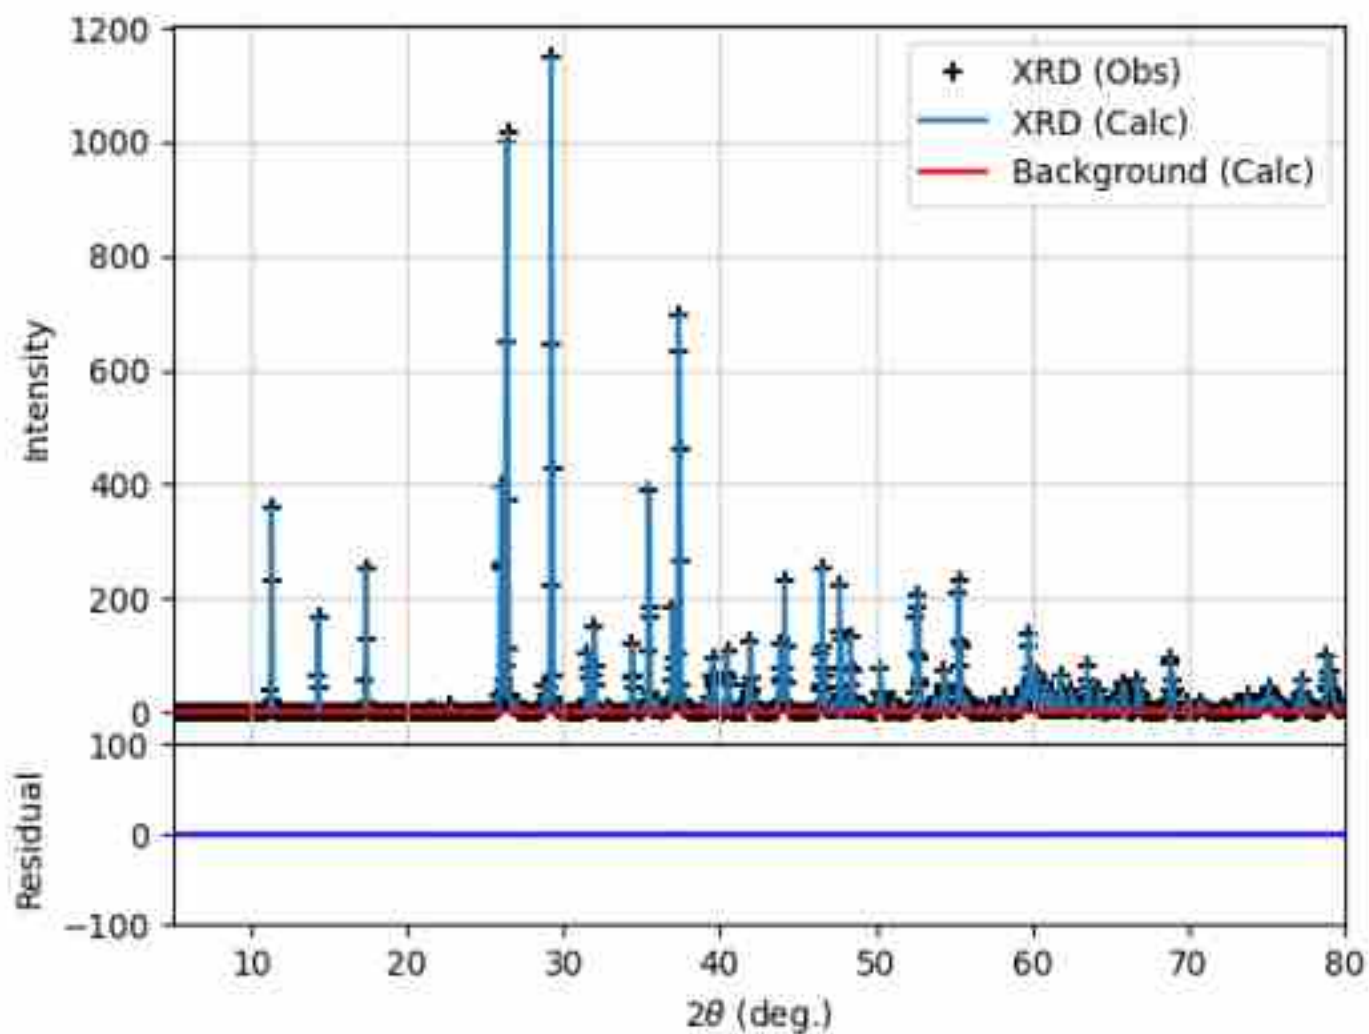

| RMSE before RR | Rwp     | RMSE after RR |
|----------------|---------|---------------|
| 0.045          | 0.21461 | 0.00918       |

# K<sub>2</sub>Sb<sub>2</sub>P<sub>4</sub>Se<sub>12</sub>

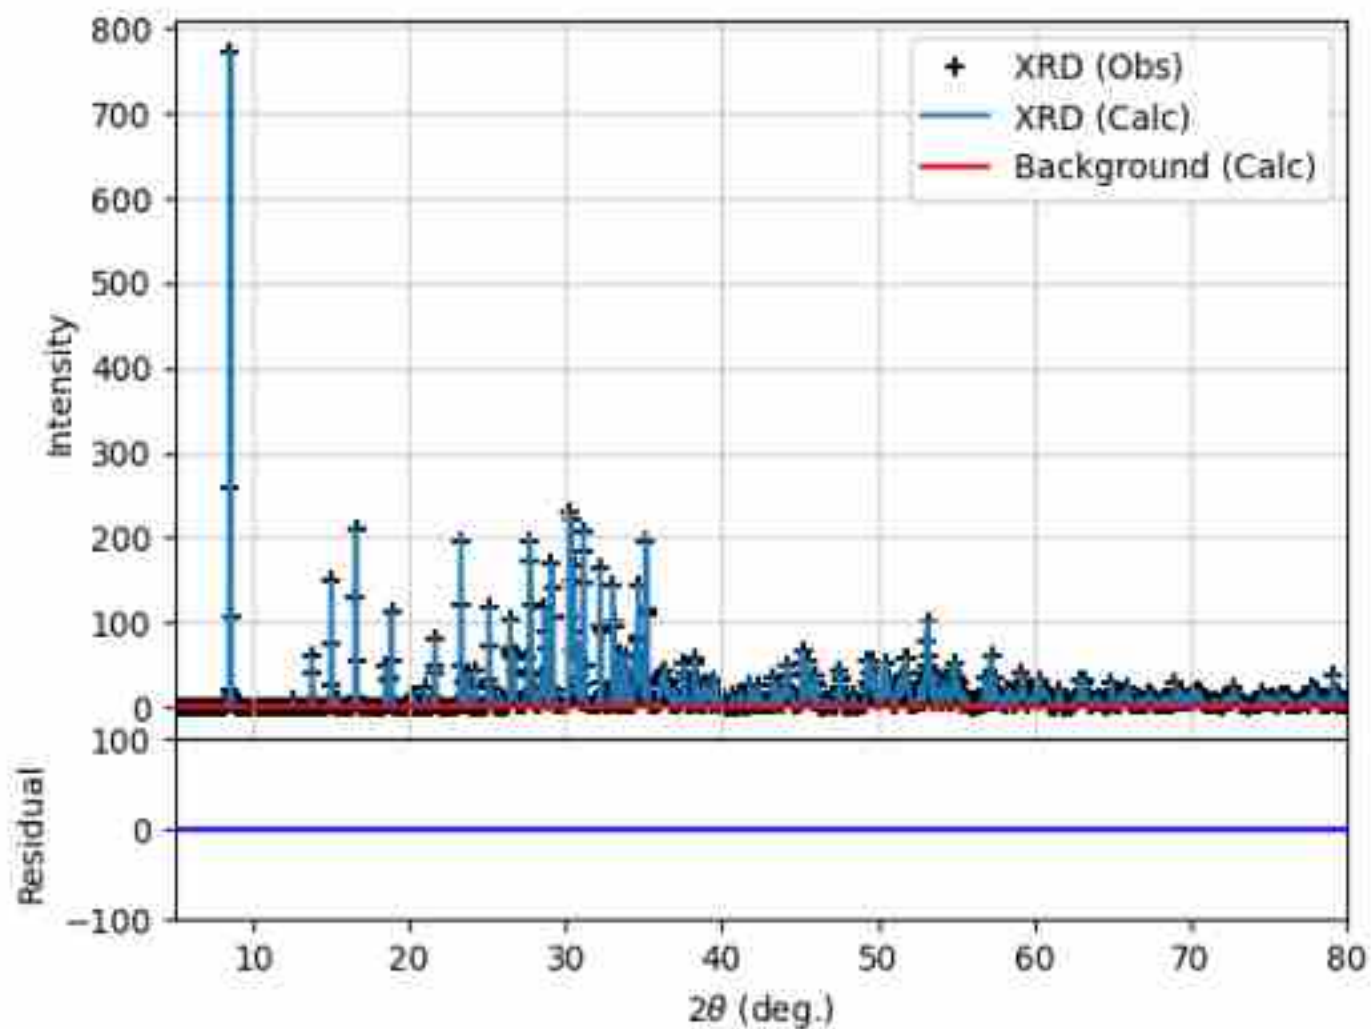

| RMSE before RR | Rwp     | RMSE after RR |
|----------------|---------|---------------|
| 0.045          | 0.00369 | 0.00048       |

# Li<sub>1</sub>V<sub>4</sub>Cu<sub>1</sub>O<sub>12</sub>

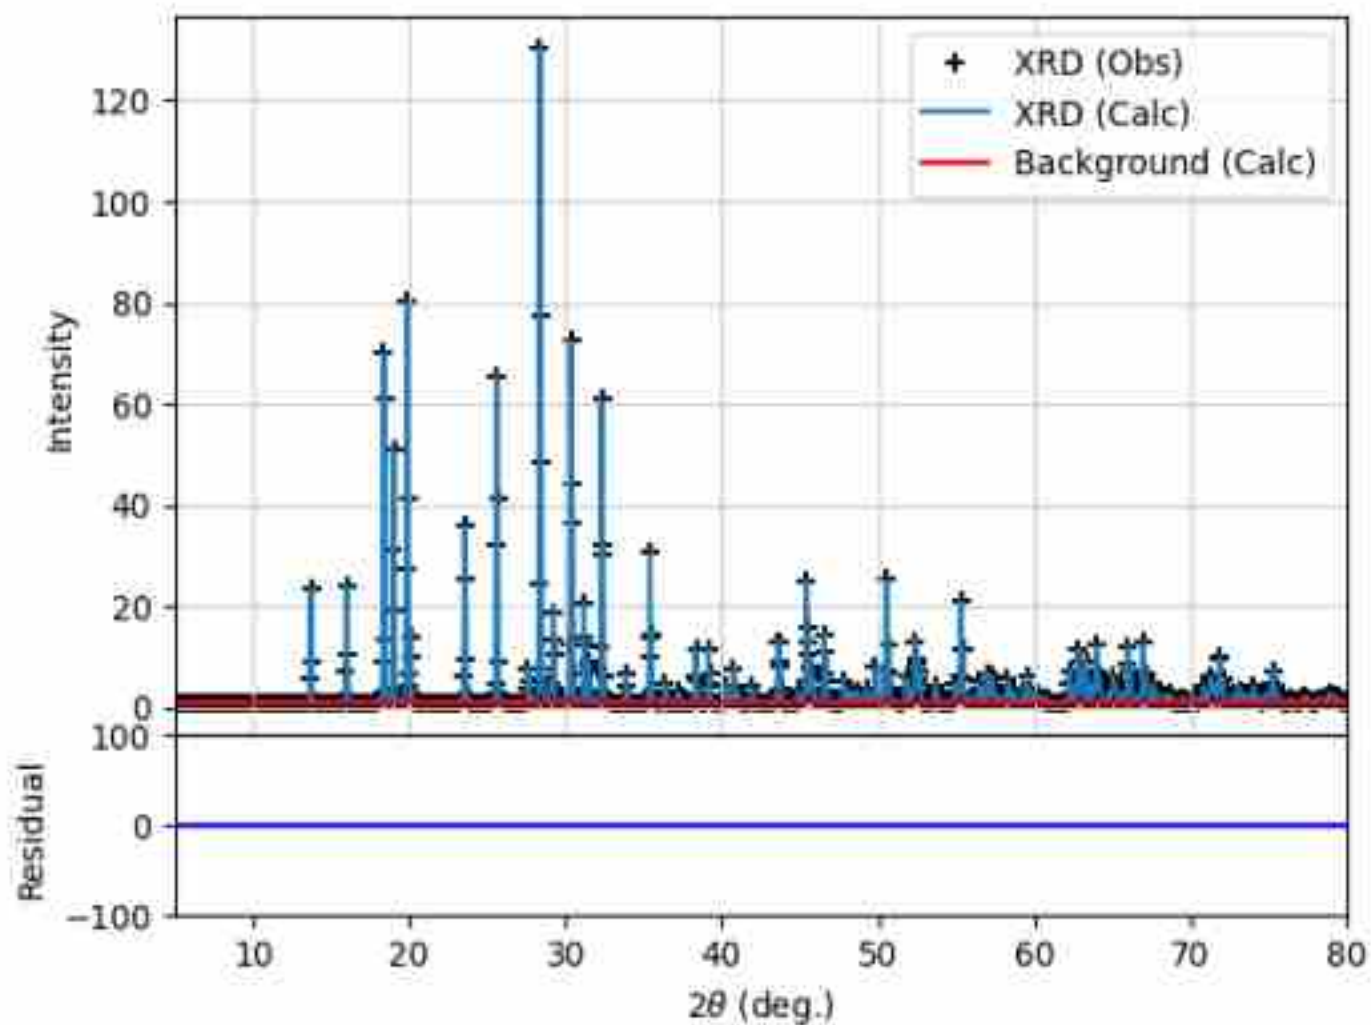

| RMSE before RR | Rwp    | RMSE after RR |
|----------------|--------|---------------|
| 0.045          | 0.0031 | 0.00089       |

# Li<sub>3</sub>Mn<sub>3</sub>Cr<sub>1</sub>O<sub>8</sub>

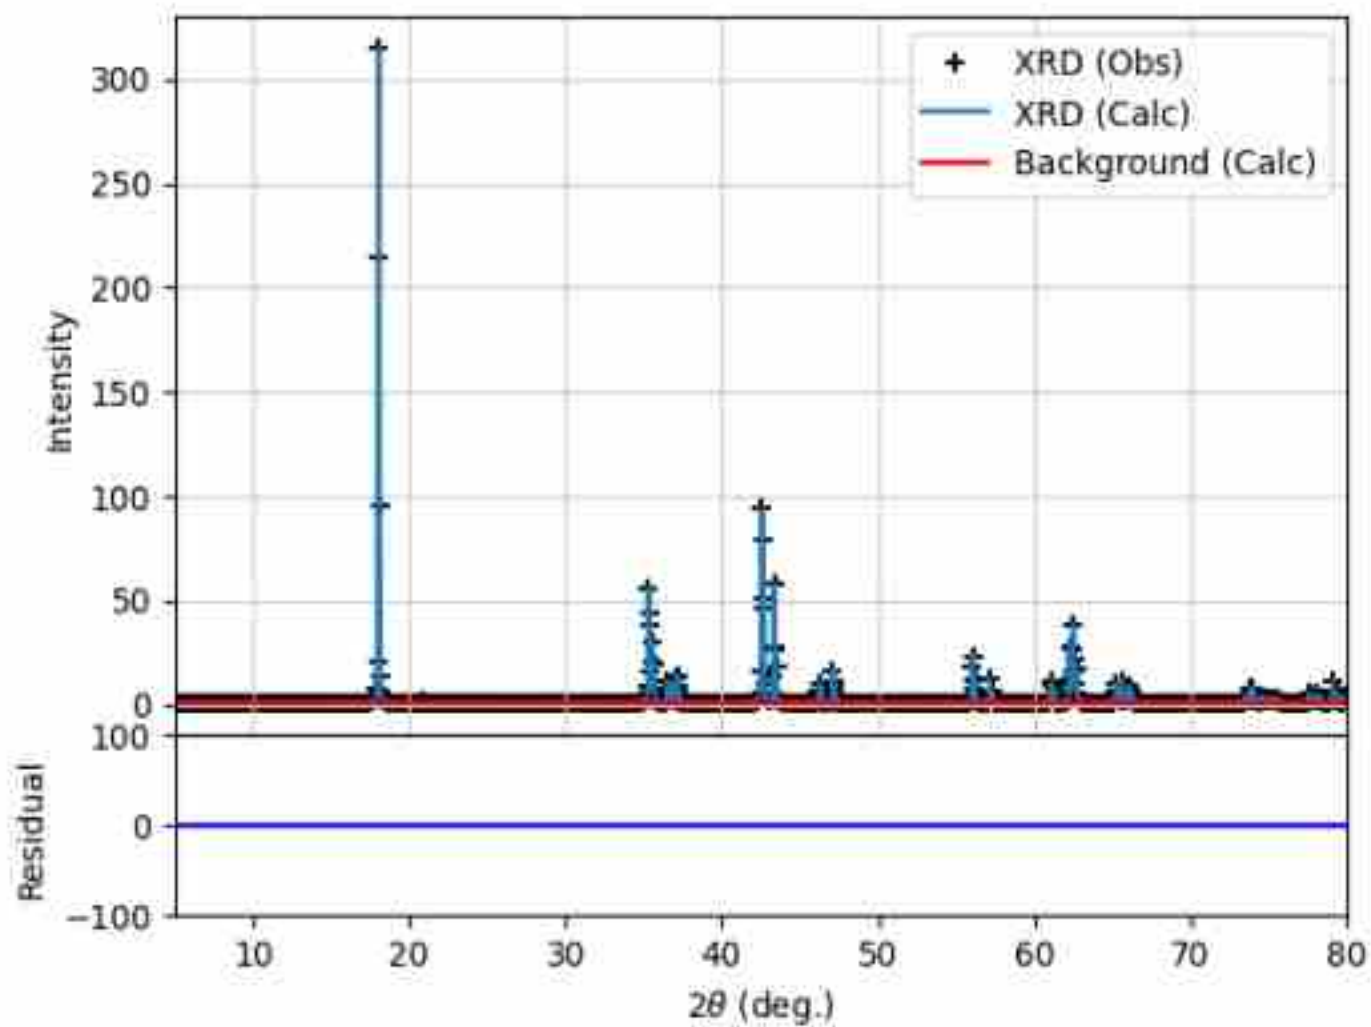

| RMSE before RR | Rwp     | RMSE after RR |
|----------------|---------|---------------|
| 0.045          | 0.00393 | 0.00215       |

# Li10Mn2O8

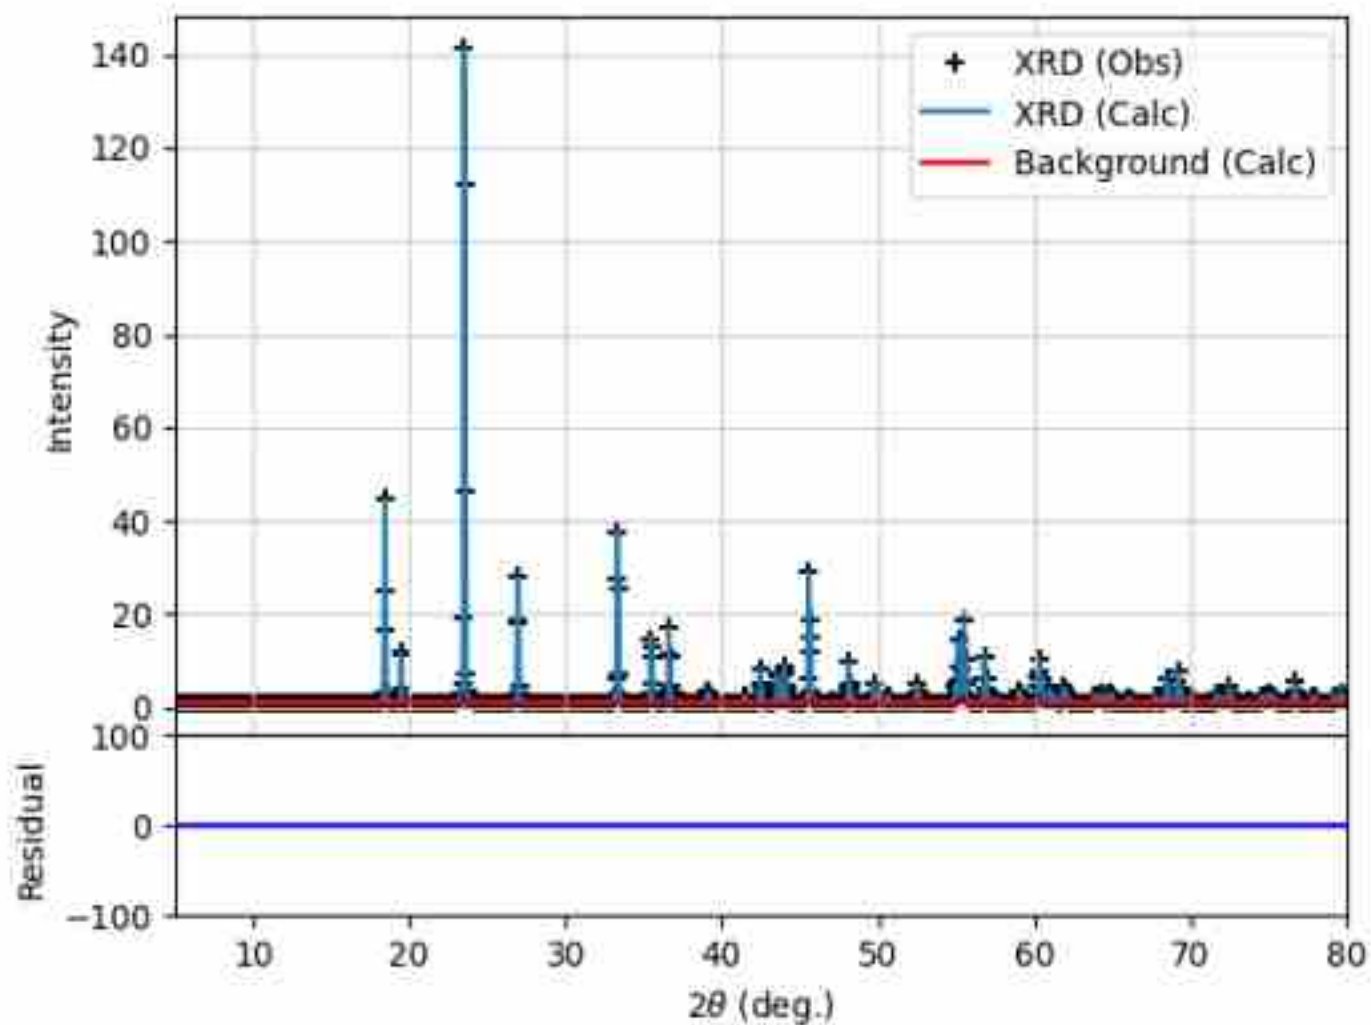

| RMSE before RR | Rwp     | RMSE after RR |
|----------------|---------|---------------|
| 0.045          | 0.00177 | 0.0012        |

# Li11Ti1P5

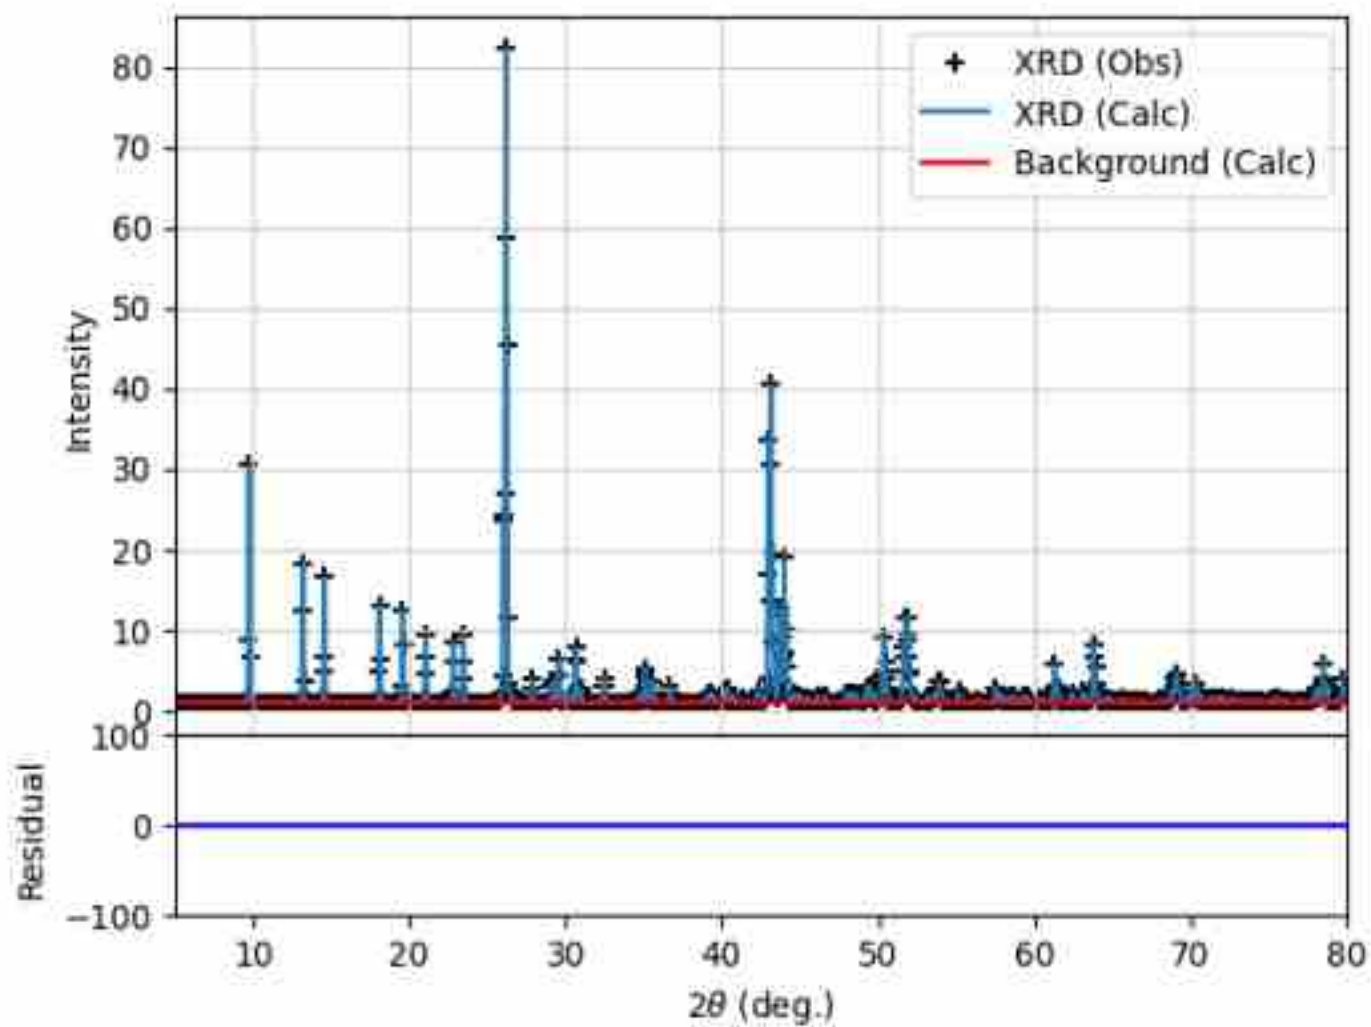

| RMSE before RR | Rwp     | RMSE after RR |
|----------------|---------|---------------|
| 0.045          | 0.00139 | 0.00063       |

# Nb<sub>3</sub>Te1I7

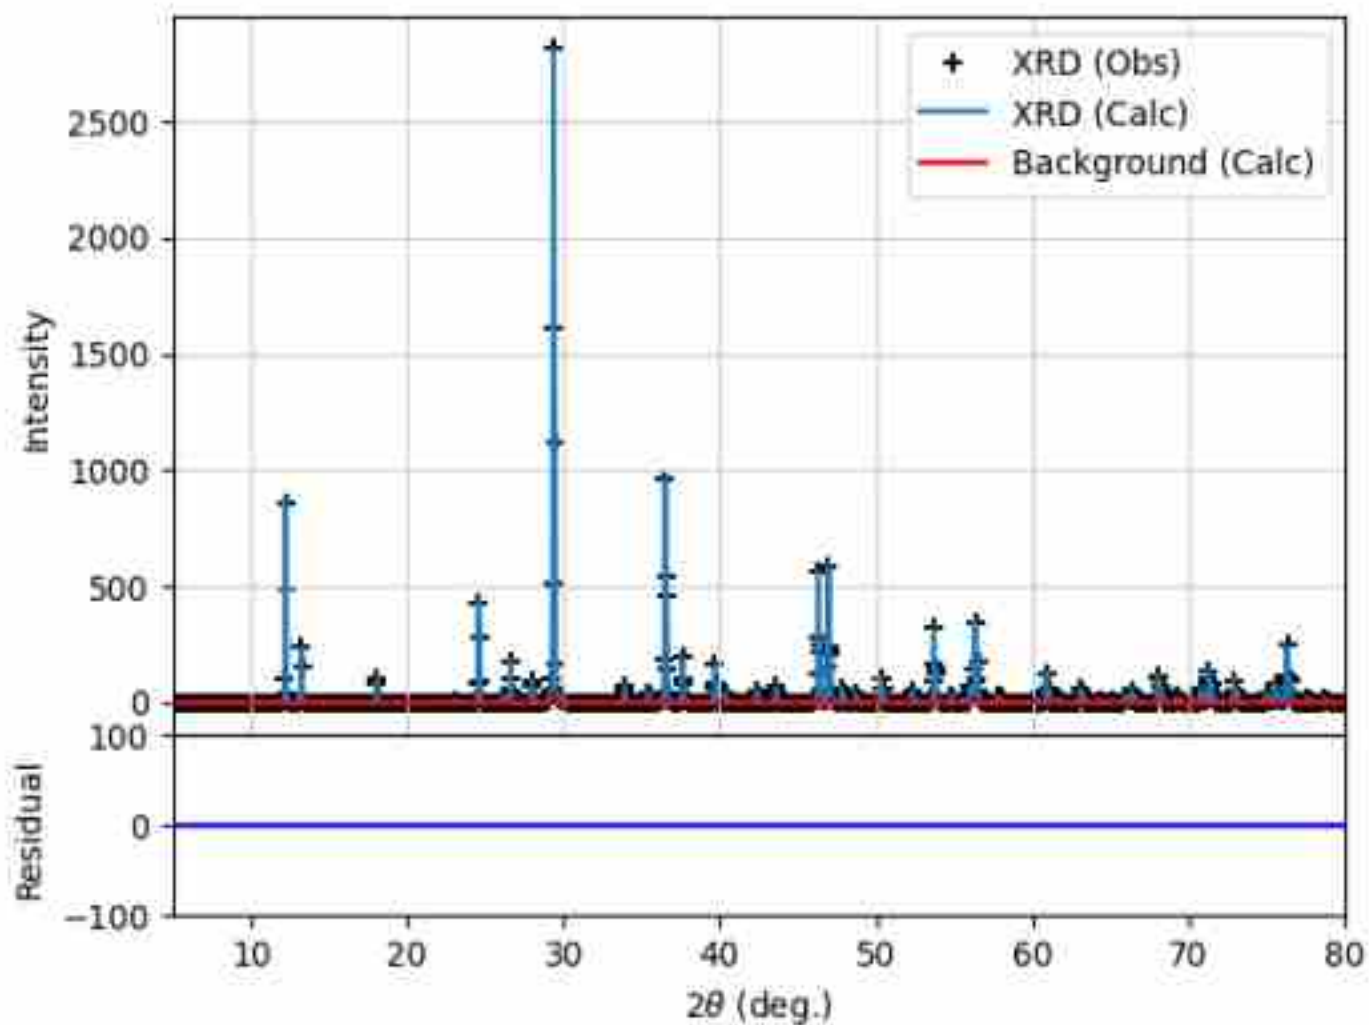

| RMSE before RR | Rwp     | RMSE after RR |
|----------------|---------|---------------|
| 0.045          | 0.00393 | 0.00041       |

# Sr<sub>2</sub>Sb<sub>2</sub>Se<sub>4</sub>F<sub>2</sub>

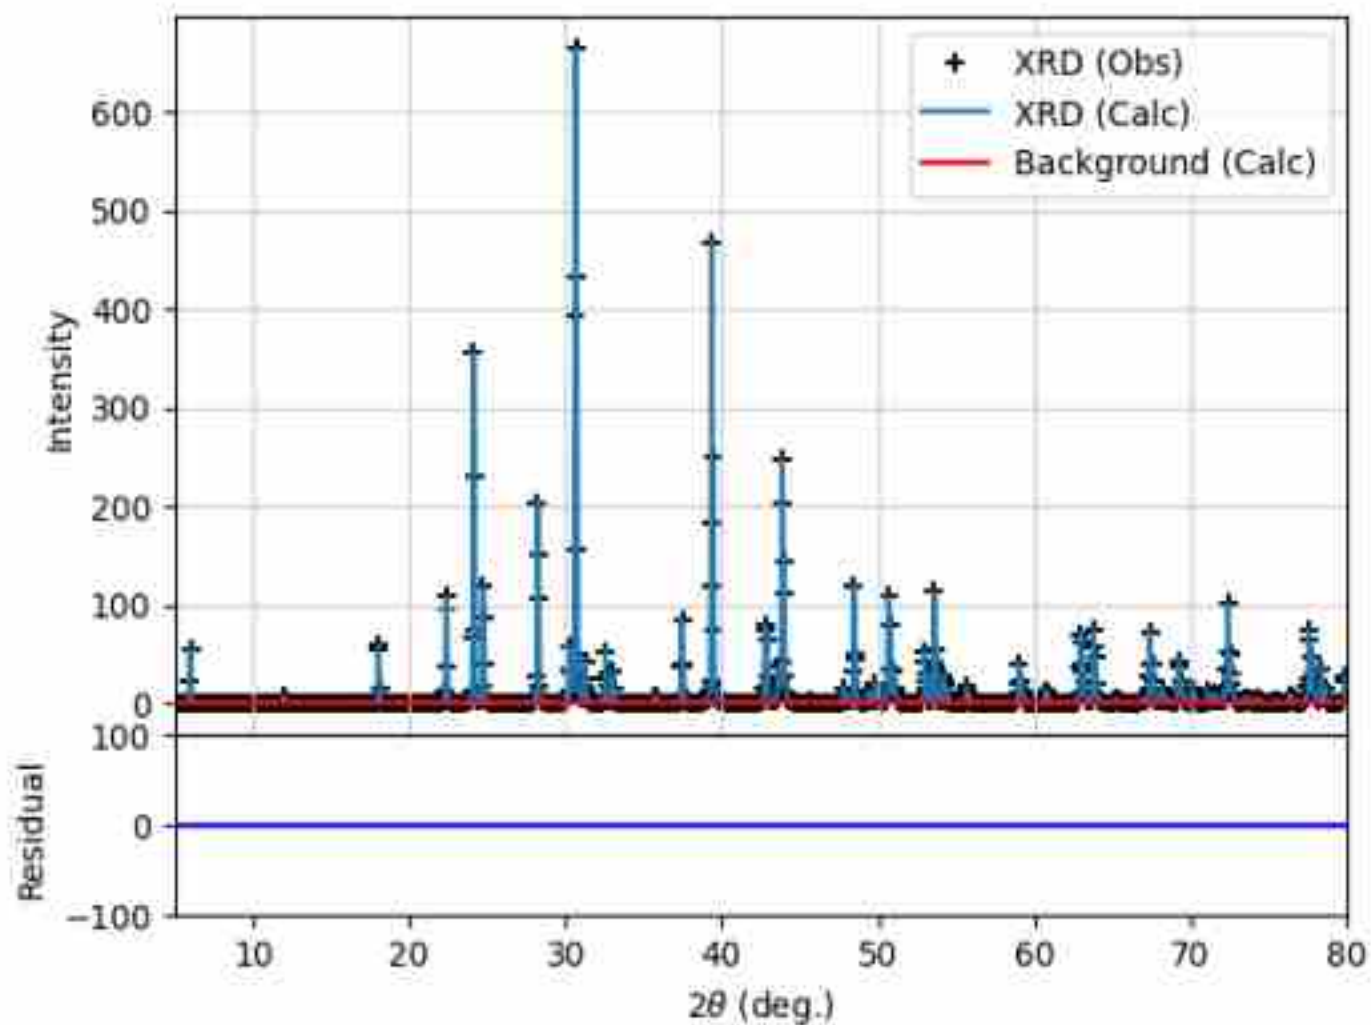

| RMSE before RR | Rwp     | RMSE after RR |
|----------------|---------|---------------|
| 0.045          | 0.00877 | 0.00141       |



# Te<sub>2</sub>Br<sub>12</sub>

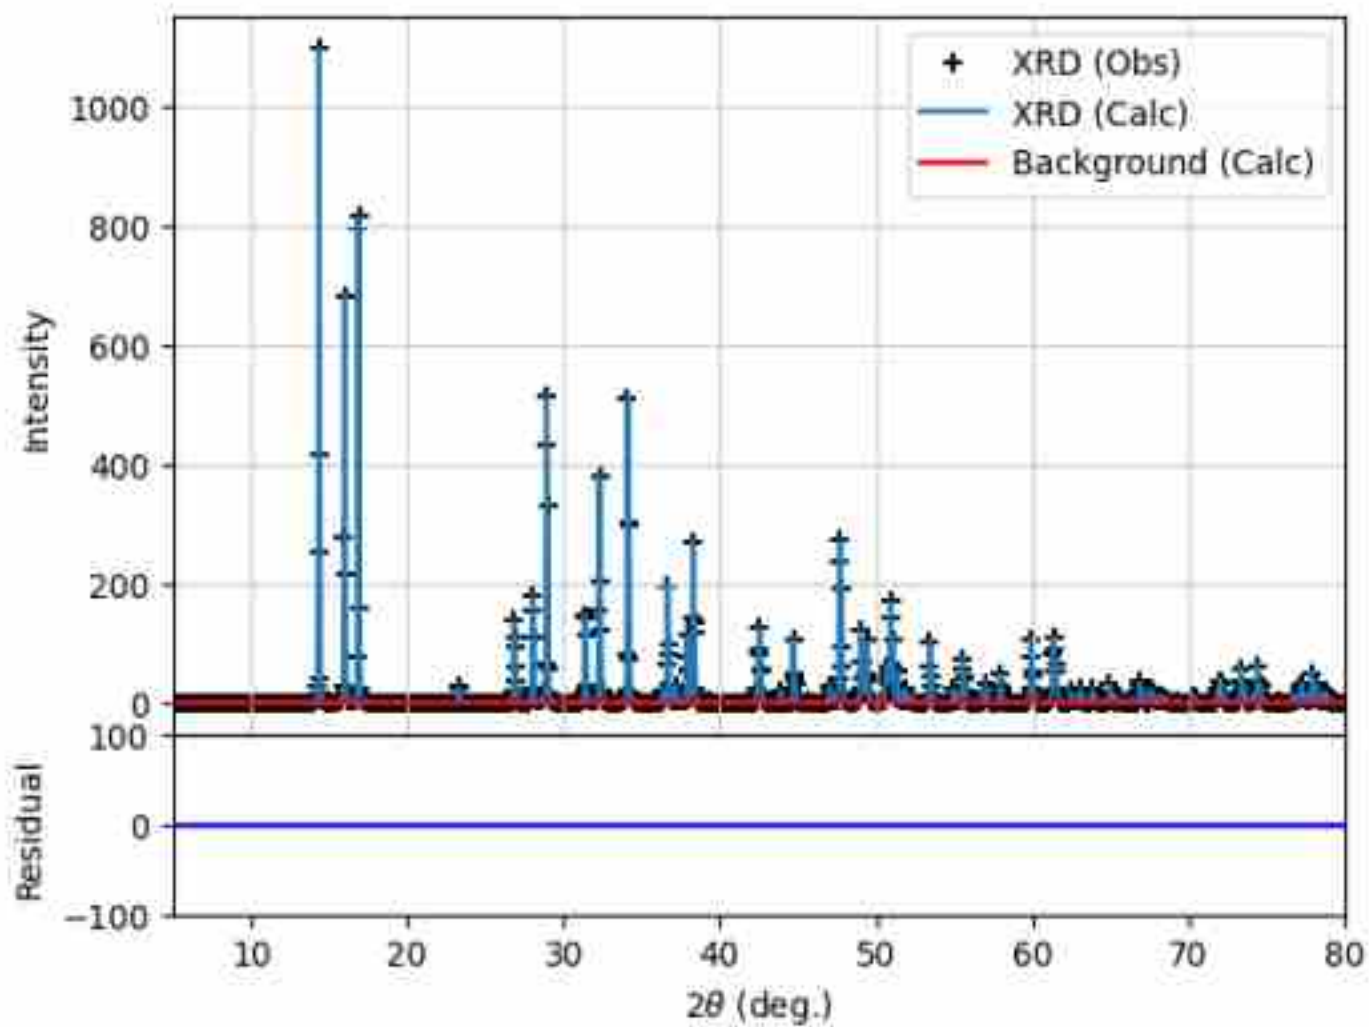

| RMSE before RR | Rwp     | RMSE after RR |
|----------------|---------|---------------|
| 0.045          | 0.00418 | 0.00035       |

# Tm<sub>2</sub>Cu<sub>2</sub>Pb<sub>2</sub>S<sub>6</sub>

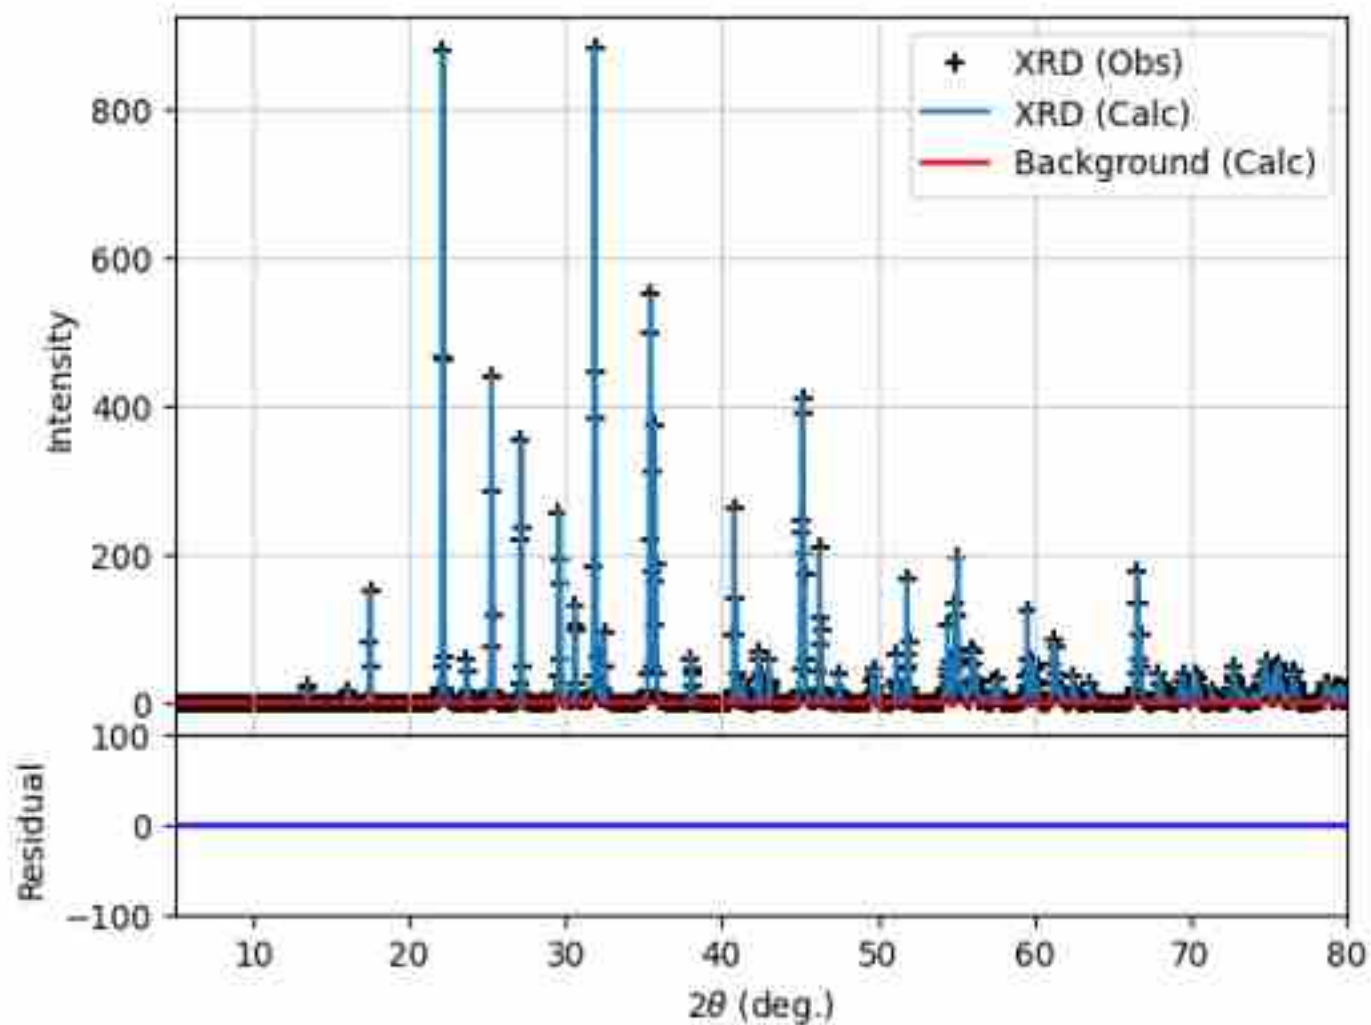

| RMSE before RR | Rwp     | RMSE after RR |
|----------------|---------|---------------|
| 0.045          | 0.00373 | 0.00047       |

# Zn2Pd4

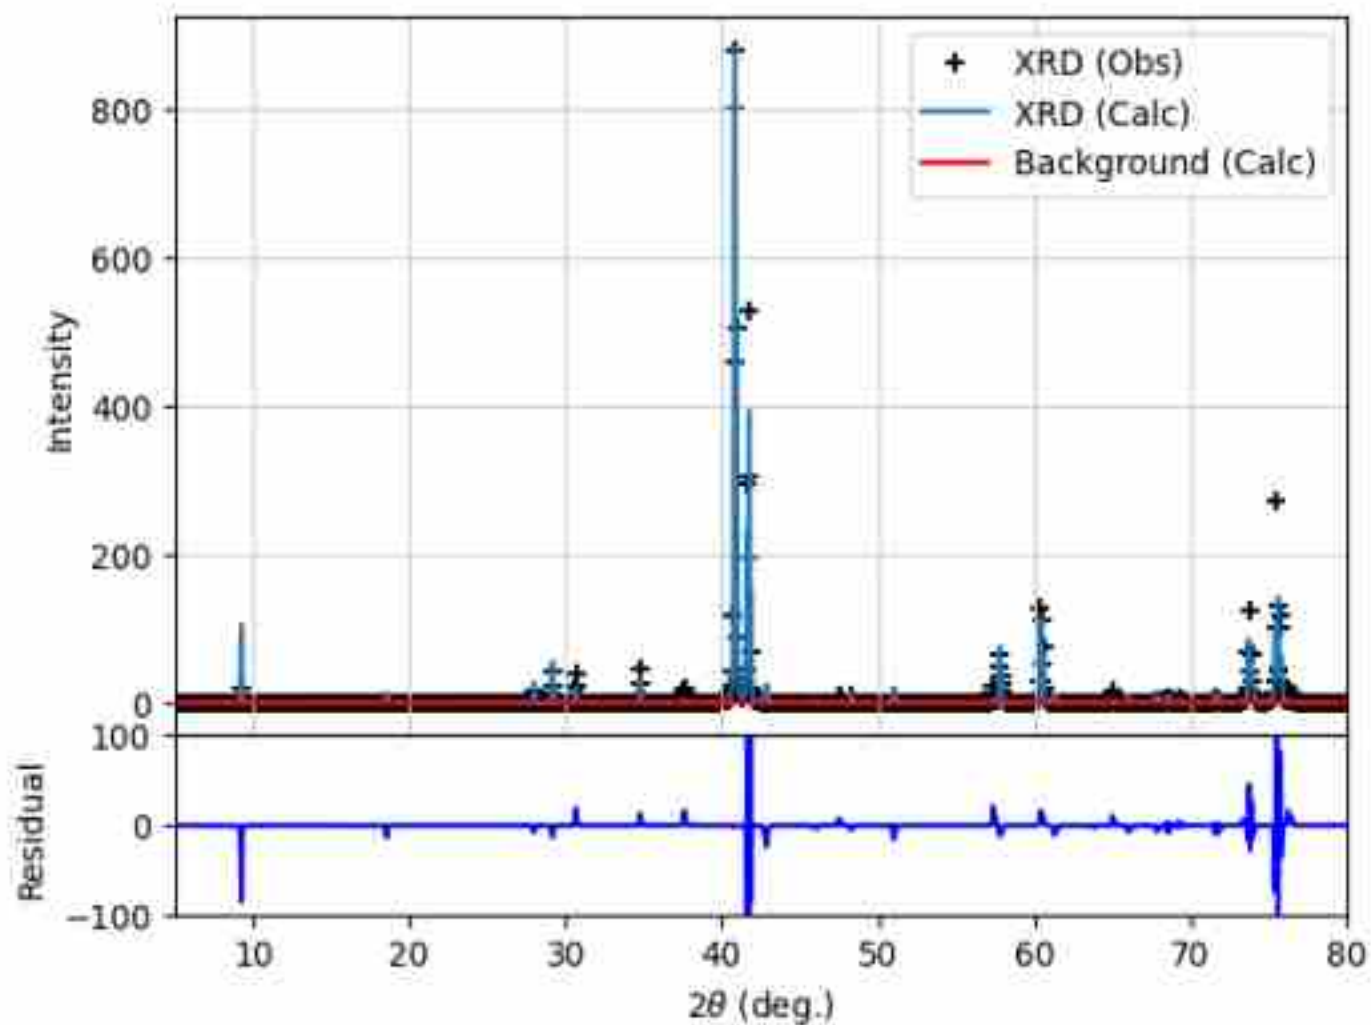

| RMSE before RR | Rwp      | RMSE after RR |
|----------------|----------|---------------|
| 0.045          | 64.75624 | 0.40427       |

# Al<sub>6</sub>Co<sub>1</sub>Cu<sub>3</sub>

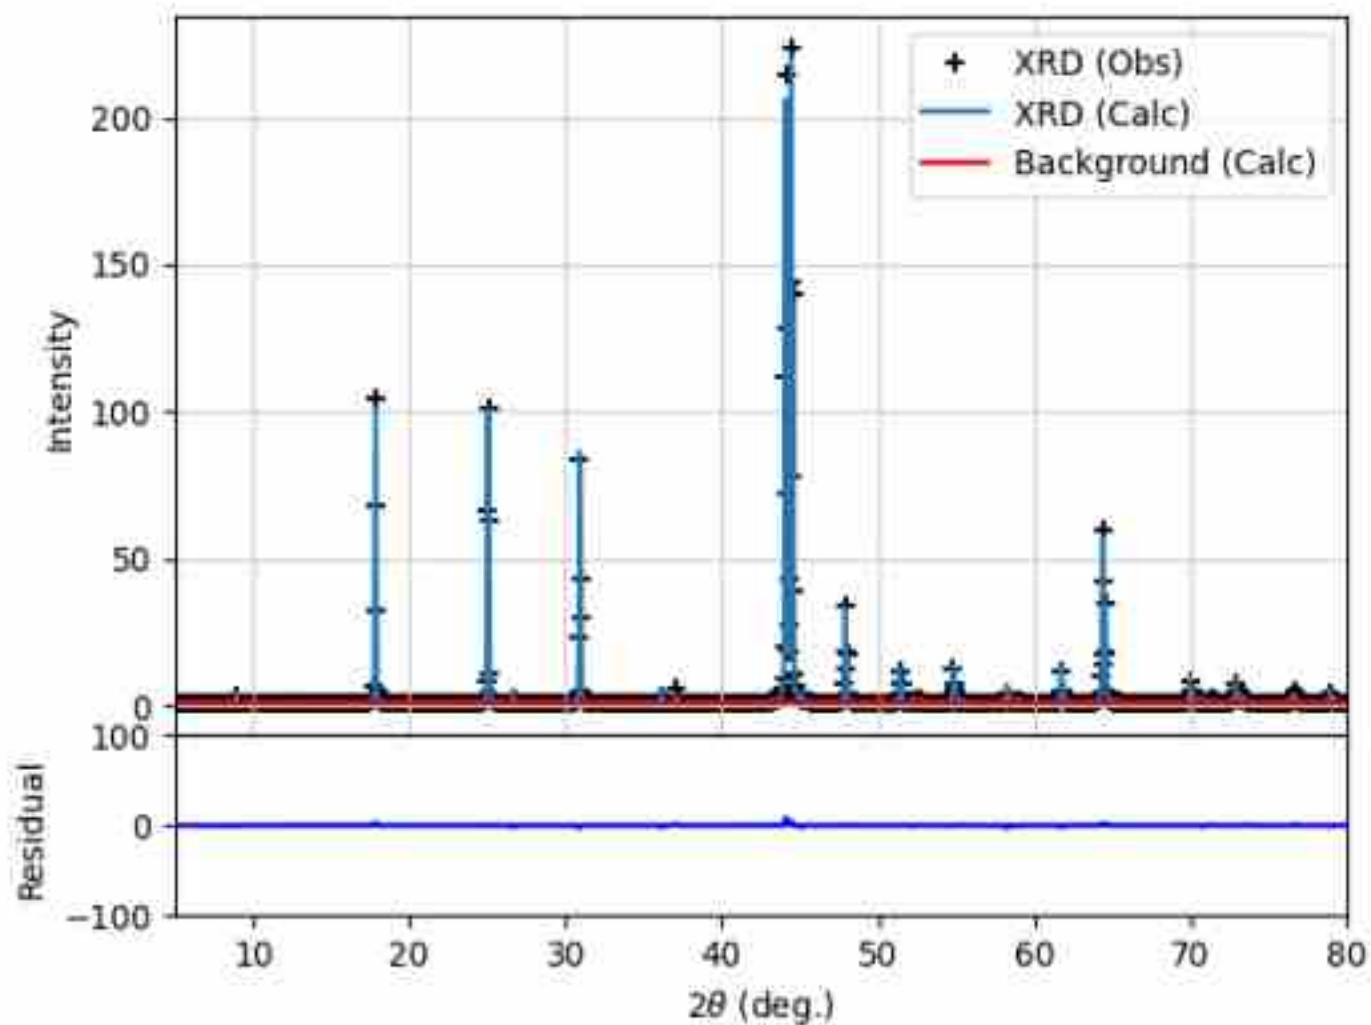

| RMSE before RR | Rwp    | RMSE after RR |
|----------------|--------|---------------|
| 0.046          | 8.2095 | 0.05713       |

# Ba<sub>2</sub>Gd<sub>1</sub>Mo<sub>1</sub>O<sub>6</sub>

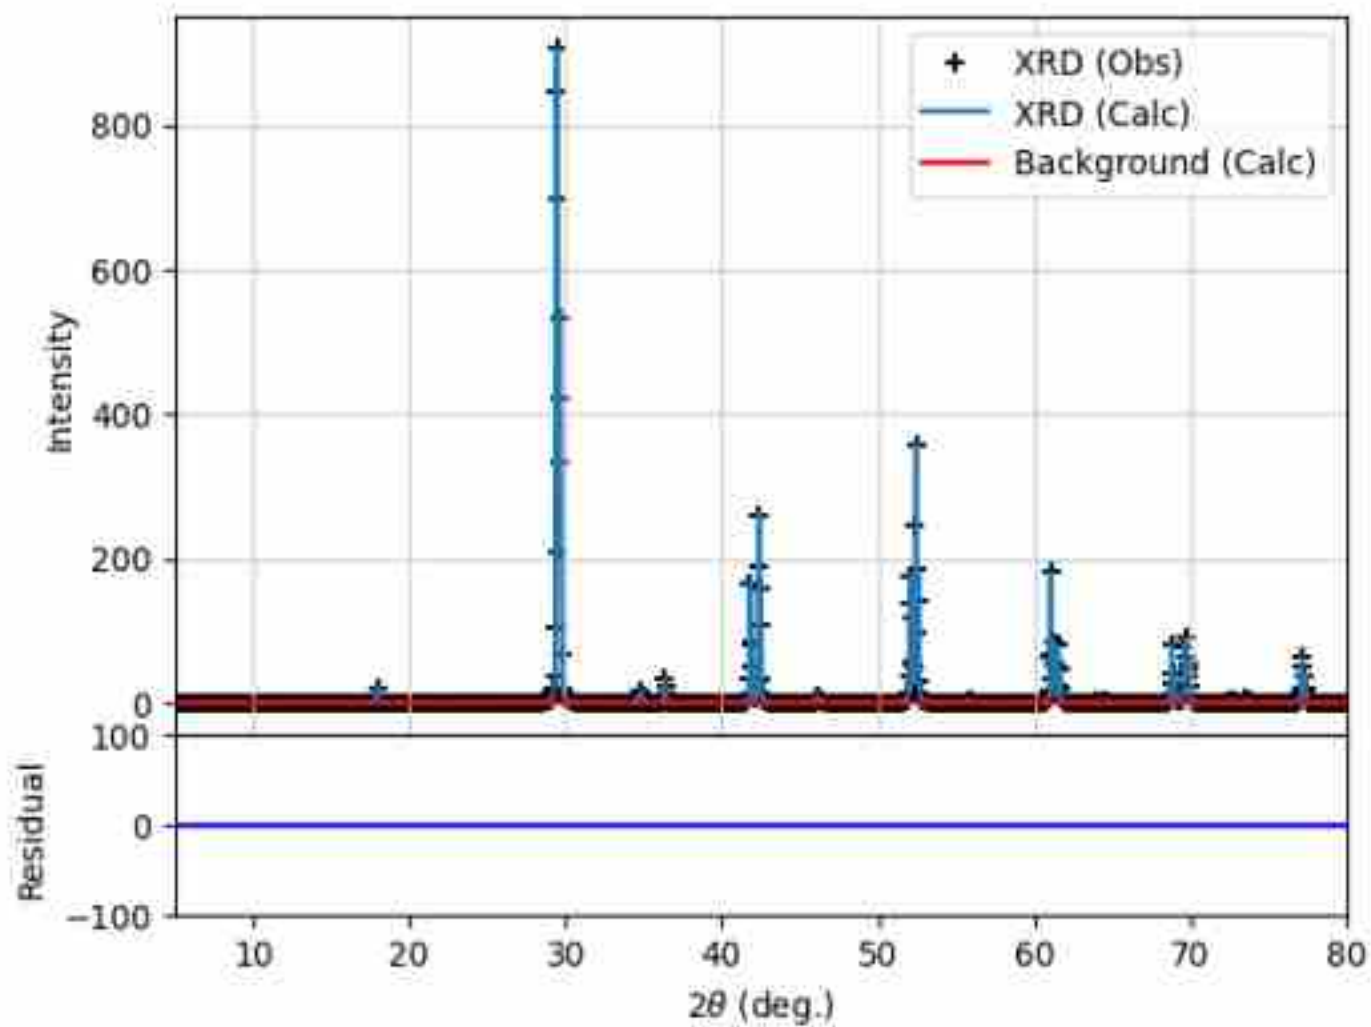

| RMSE before RR | Rwp     | RMSE after RR |
|----------------|---------|---------------|
| 0.046          | 0.00339 | 0.00188       |

# Ca<sub>2</sub>Br<sub>4</sub>

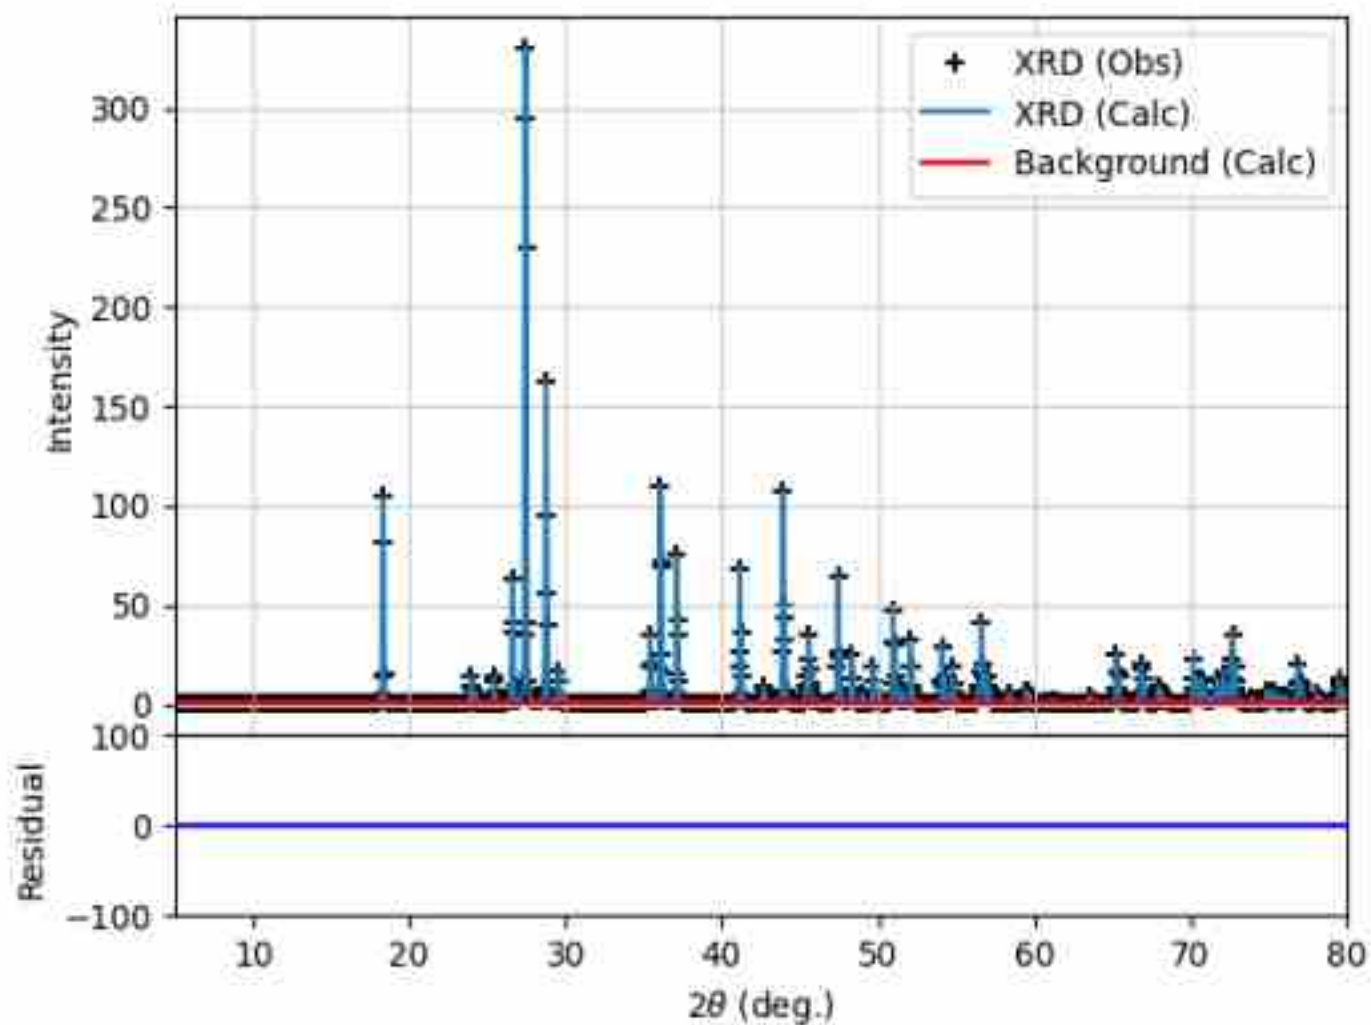

| RMSE before RR | Rwp     | RMSE after RR |
|----------------|---------|---------------|
| 0.046          | 0.00359 | 0.00046       |

# Ca<sub>2</sub>CrW<sub>10</sub>O<sub>6</sub>

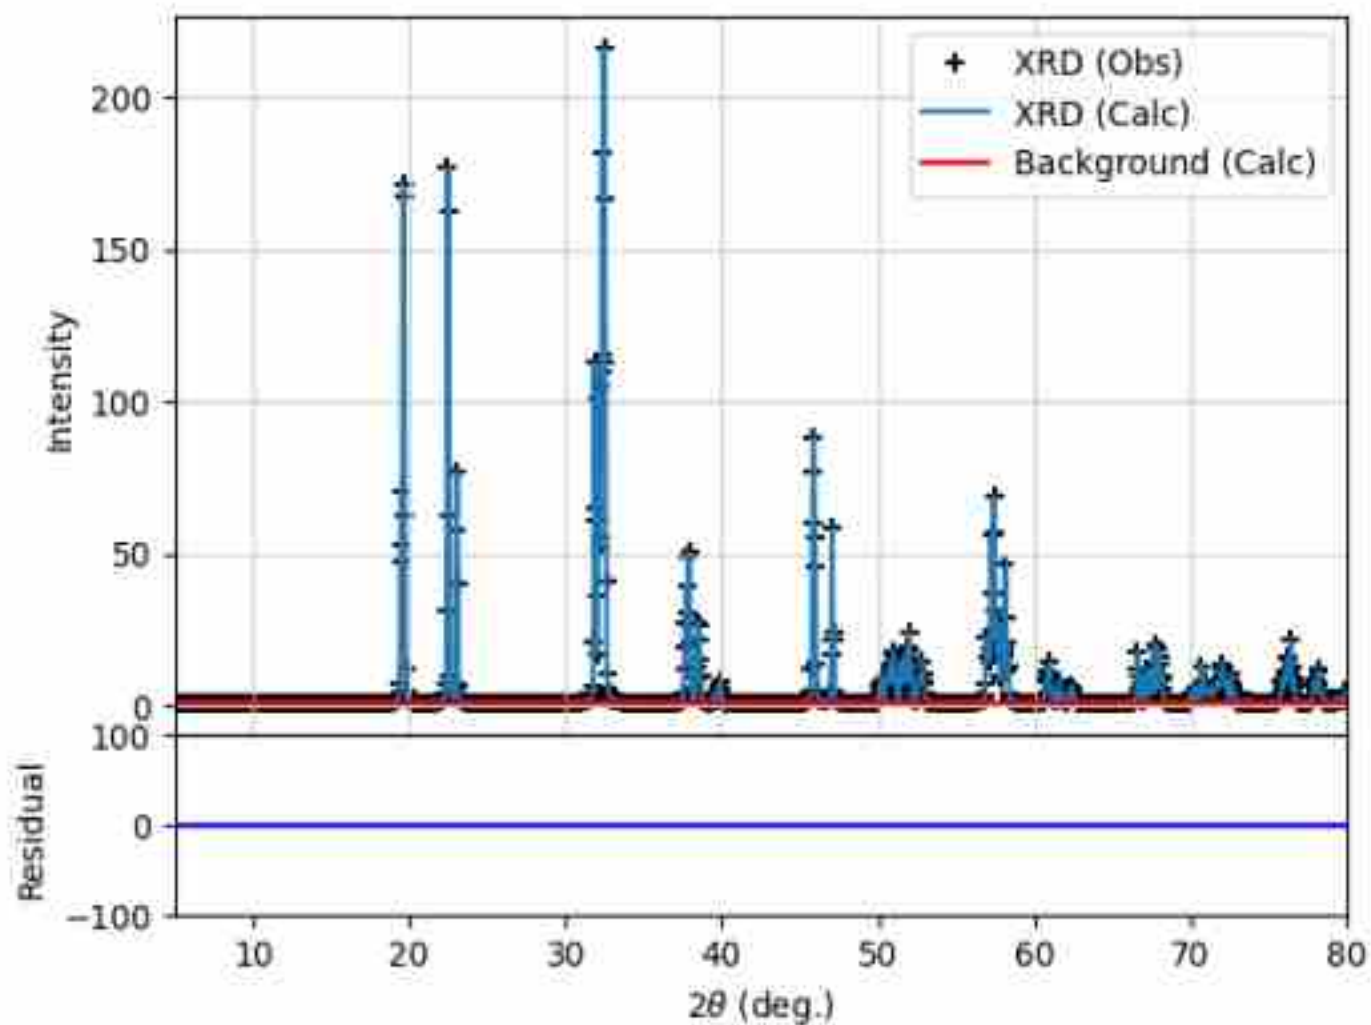

| RMSE before RR | Rwp   | RMSE after RR |
|----------------|-------|---------------|
| 0.046          | 0.001 | 1e-05         |

# Cs<sub>4</sub>Fe<sub>1</sub>Sb<sub>1</sub>Cl<sub>12</sub>

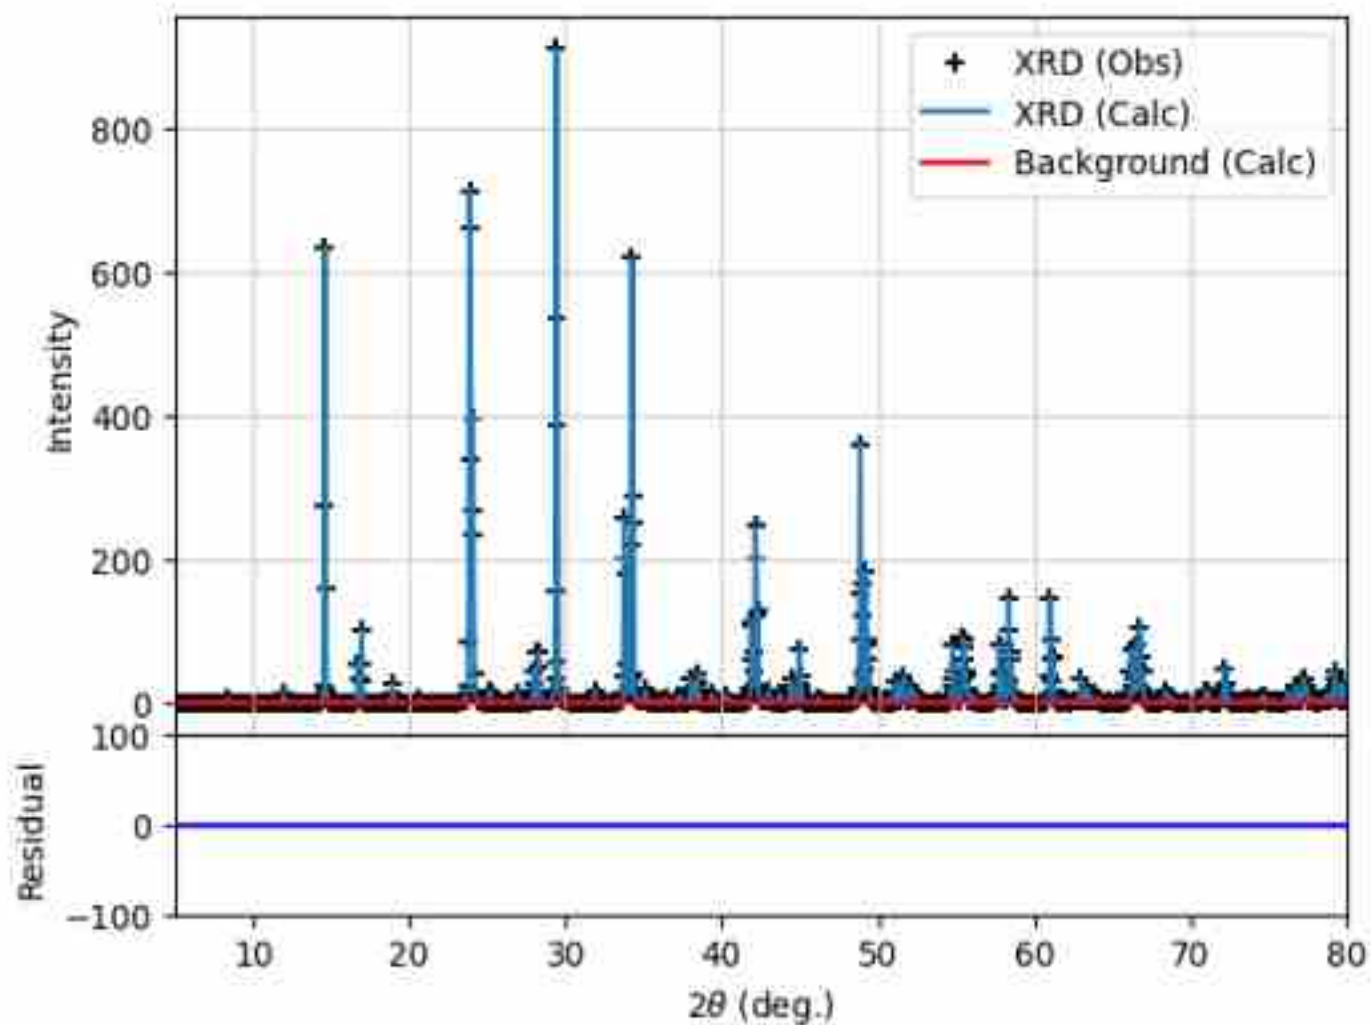

| RMSE before RR | Rwp     | RMSE after RR |
|----------------|---------|---------------|
| 0.046          | 0.00324 | 0.00038       |



# Cs4Se2

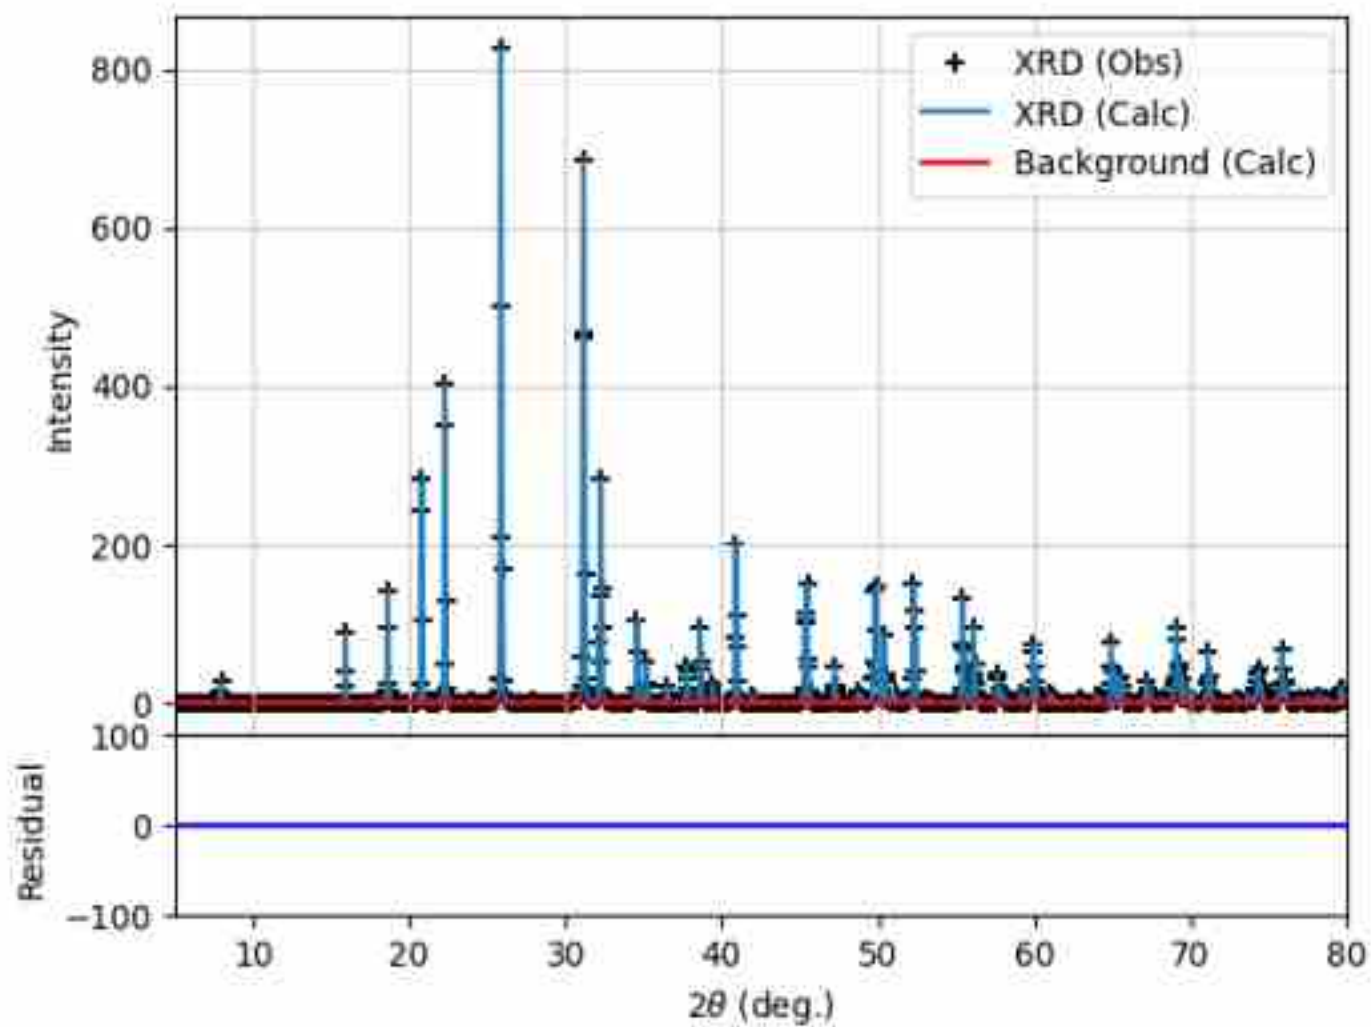

| RMSE before RR | Rwp     | RMSE after RR |
|----------------|---------|---------------|
| 0.046          | 0.00343 | 0.00029       |

# K<sub>2</sub>Na<sub>2</sub>S<sub>2</sub>O<sub>8</sub>

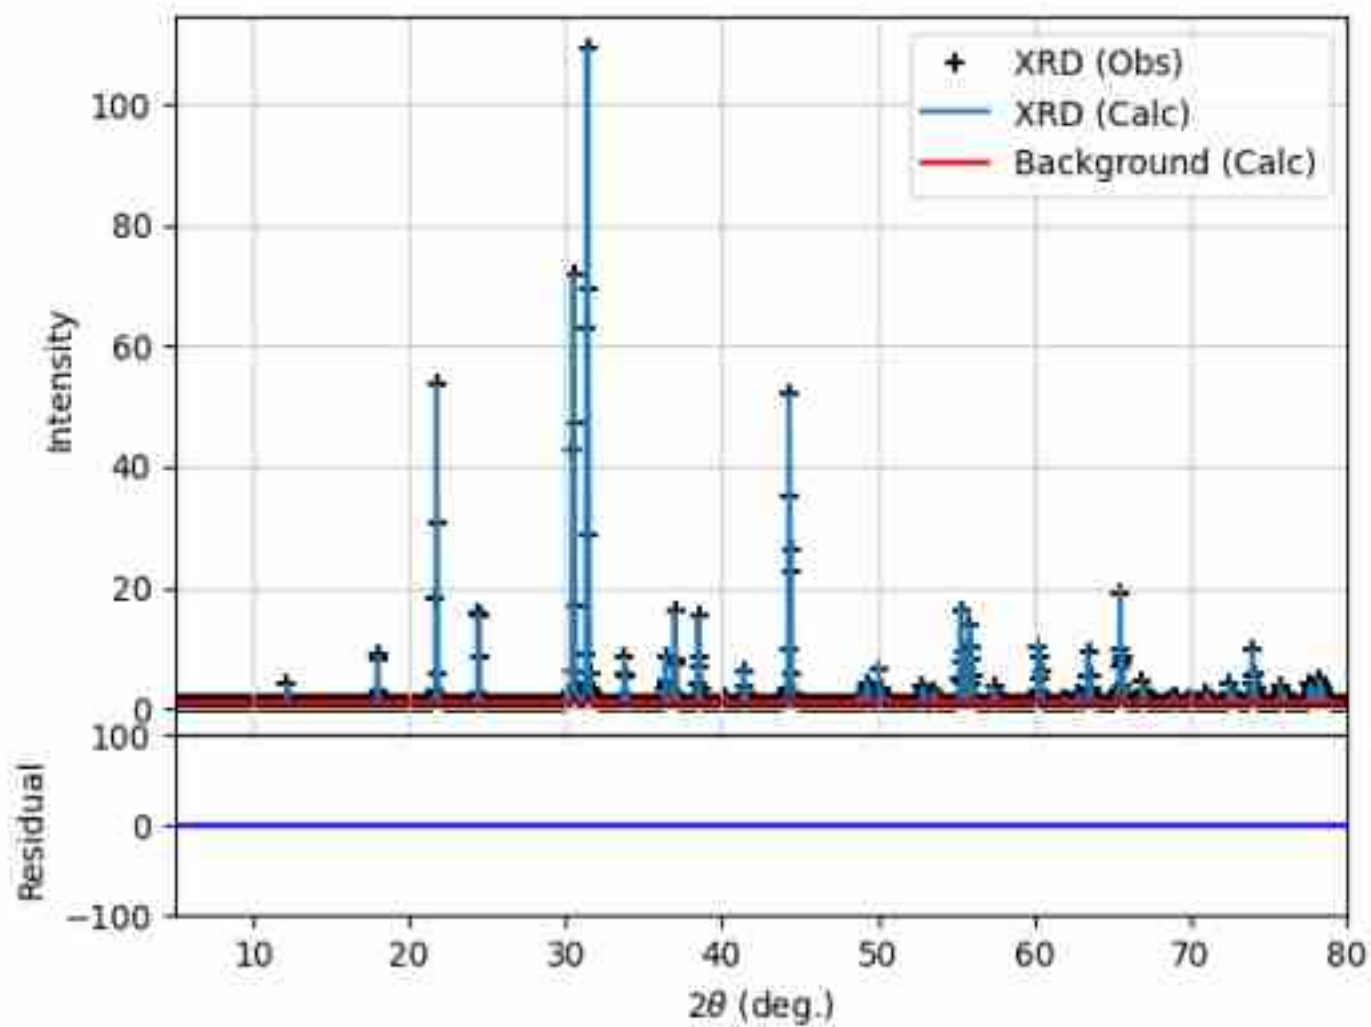

| RMSE before RR | Rwp     | RMSE after RR |
|----------------|---------|---------------|
| 0.046          | 0.00258 | 0.00147       |

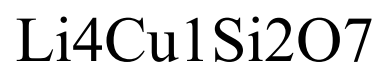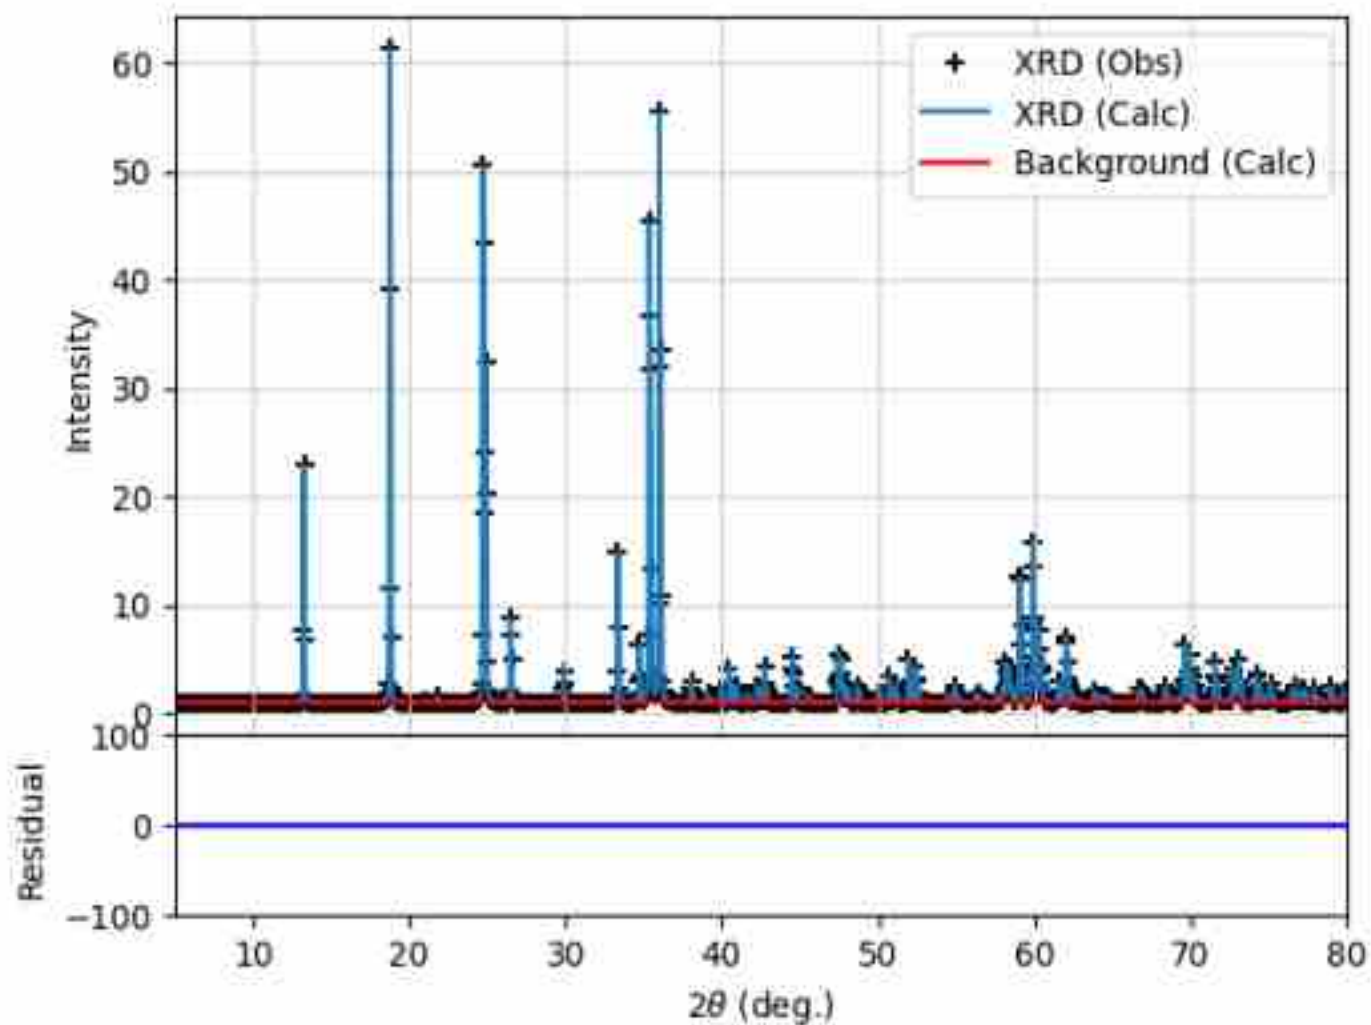

| RMSE before RR | Rwp     | RMSE after RR |
|----------------|---------|---------------|
| 0.046          | 0.00248 | 0.00106       |

# Li<sub>4</sub>Mn<sub>3</sub>Co<sub>1</sub>O<sub>8</sub>

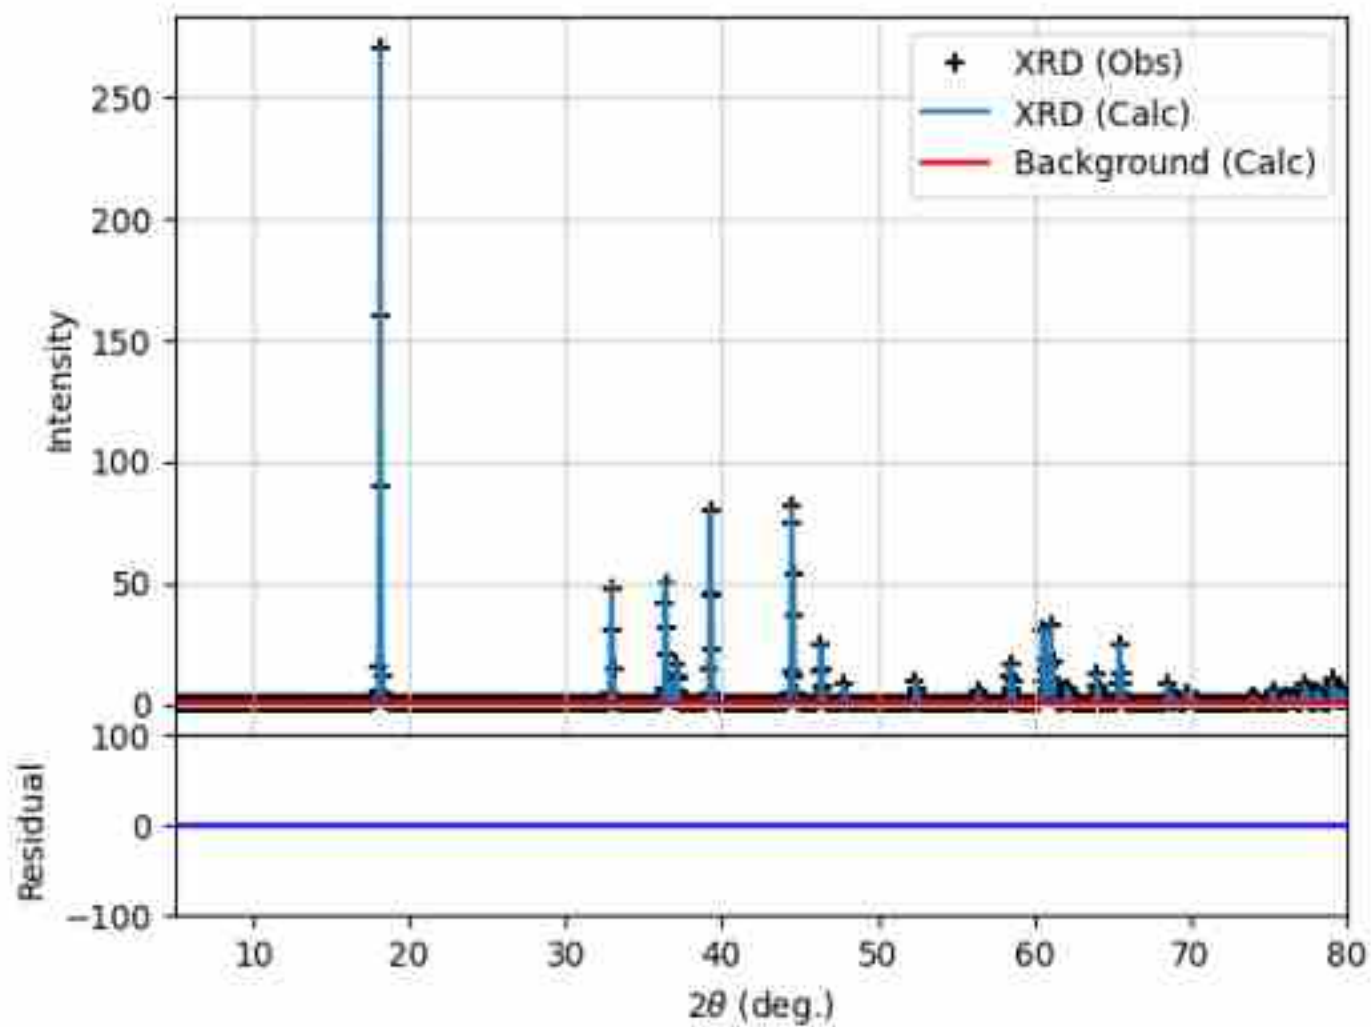

| RMSE before RR | Rwp     | RMSE after RR |
|----------------|---------|---------------|
| 0.046          | 0.00184 | 0.00129       |

# Na<sub>2</sub>La<sub>2</sub>Fe<sub>2</sub>W<sub>2</sub>O<sub>12</sub>

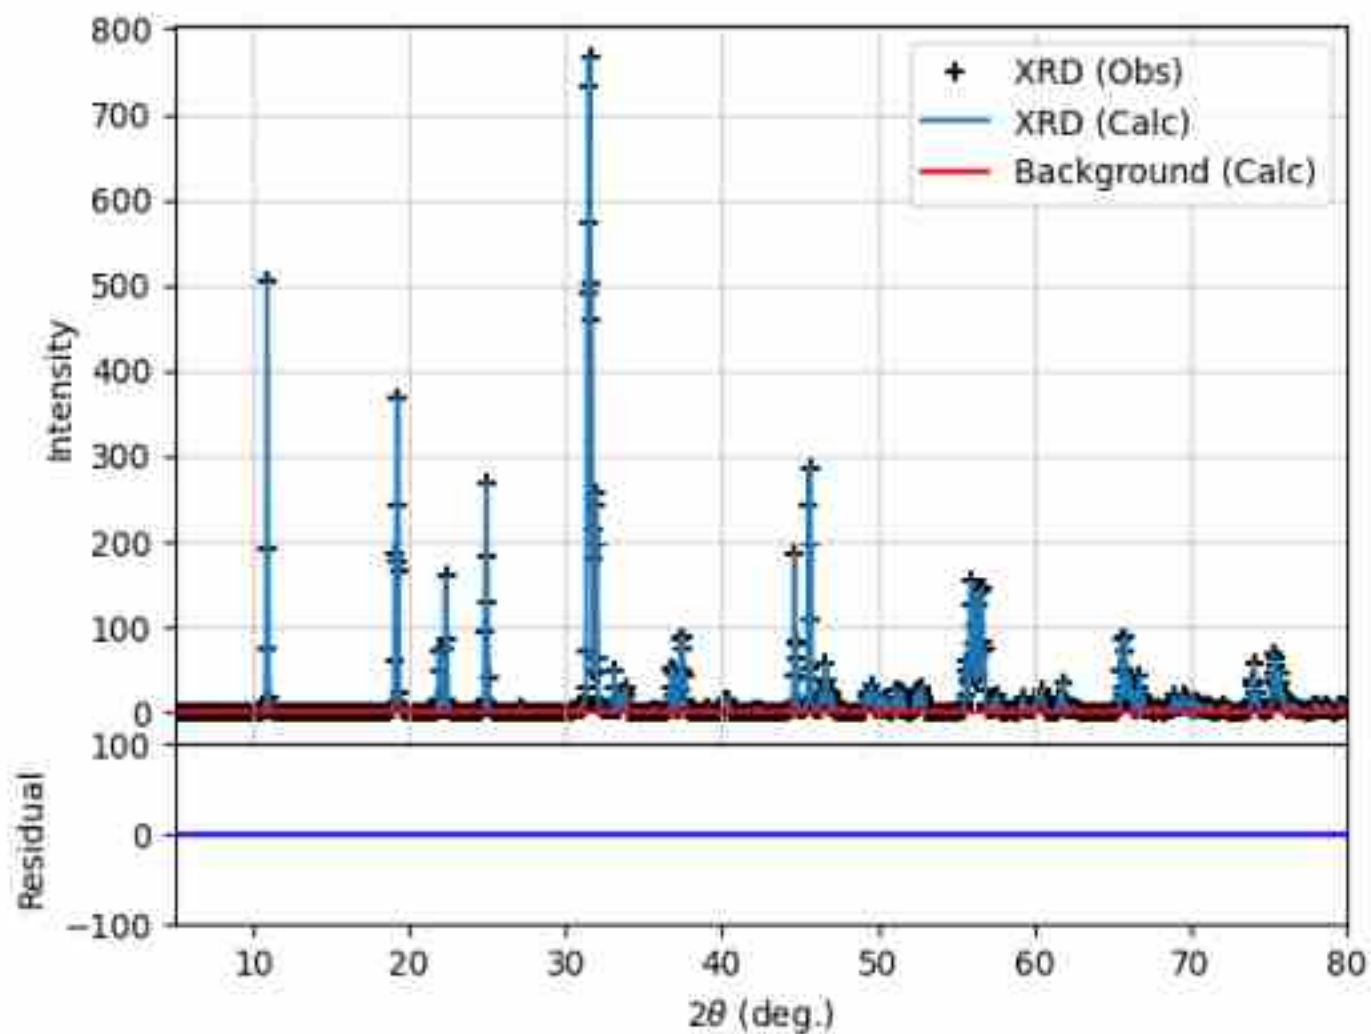

| RMSE before RR | Rwp     | RMSE after RR |
|----------------|---------|---------------|
| 0.046          | 0.00361 | 0.00103       |

# Pb4O8

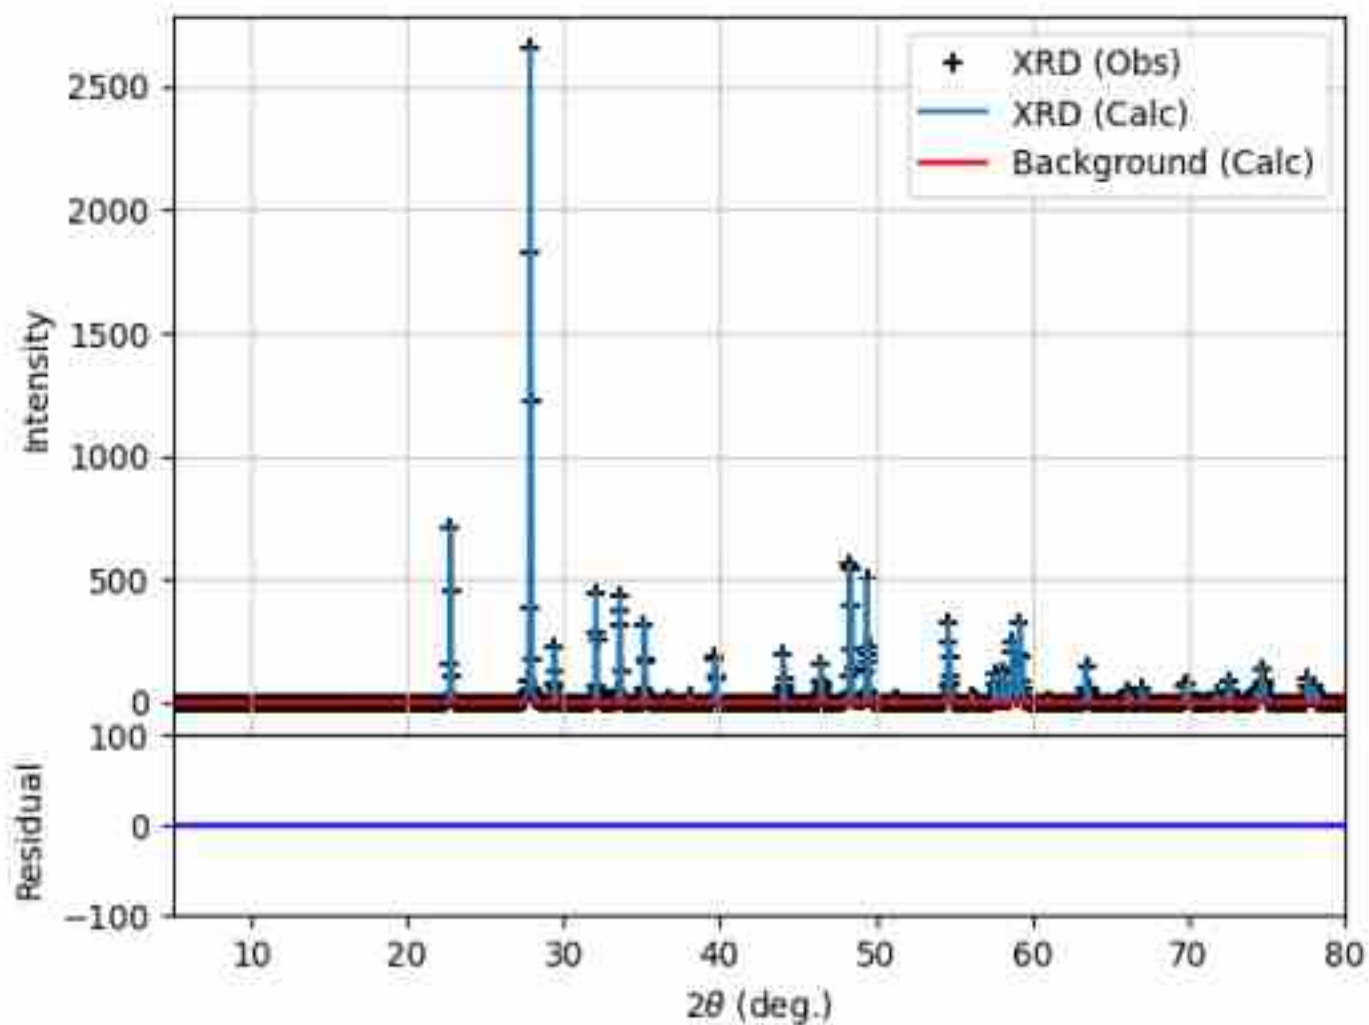

| RMSE before RR | Rwp     | RMSE after RR |
|----------------|---------|---------------|
| 0.046          | 0.00453 | 0.00157       |

# Rb<sub>2</sub>Sn<sub>2</sub>I<sub>2</sub>O<sub>12</sub>

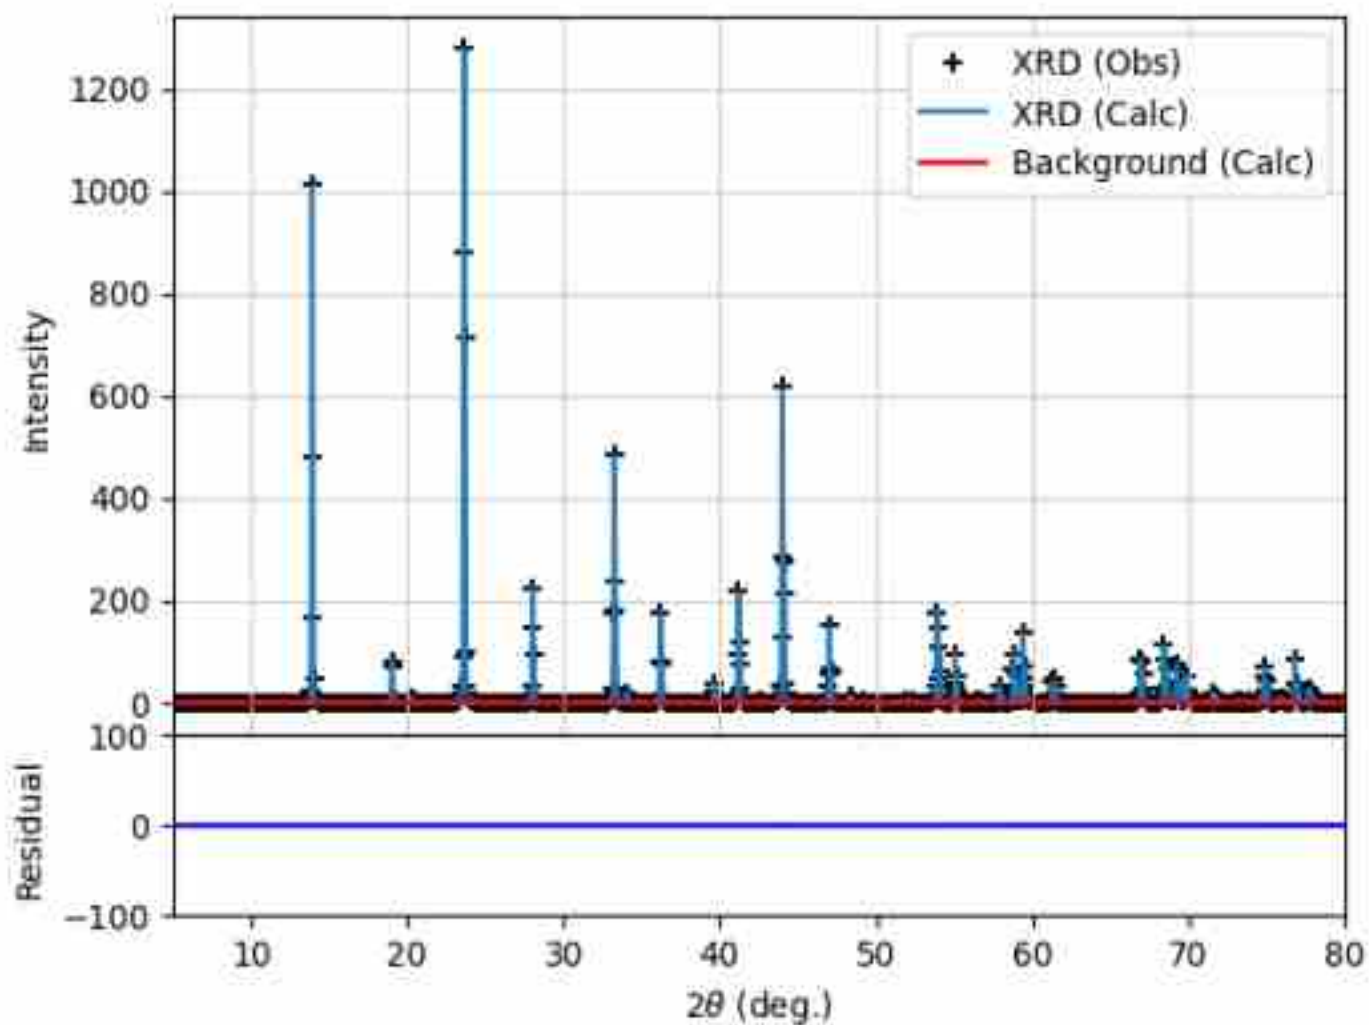

| RMSE before RR | Rwp     | RMSE after RR |
|----------------|---------|---------------|
| 0.046          | 0.23816 | 0.01508       |

# Tb4Sn10Rh6

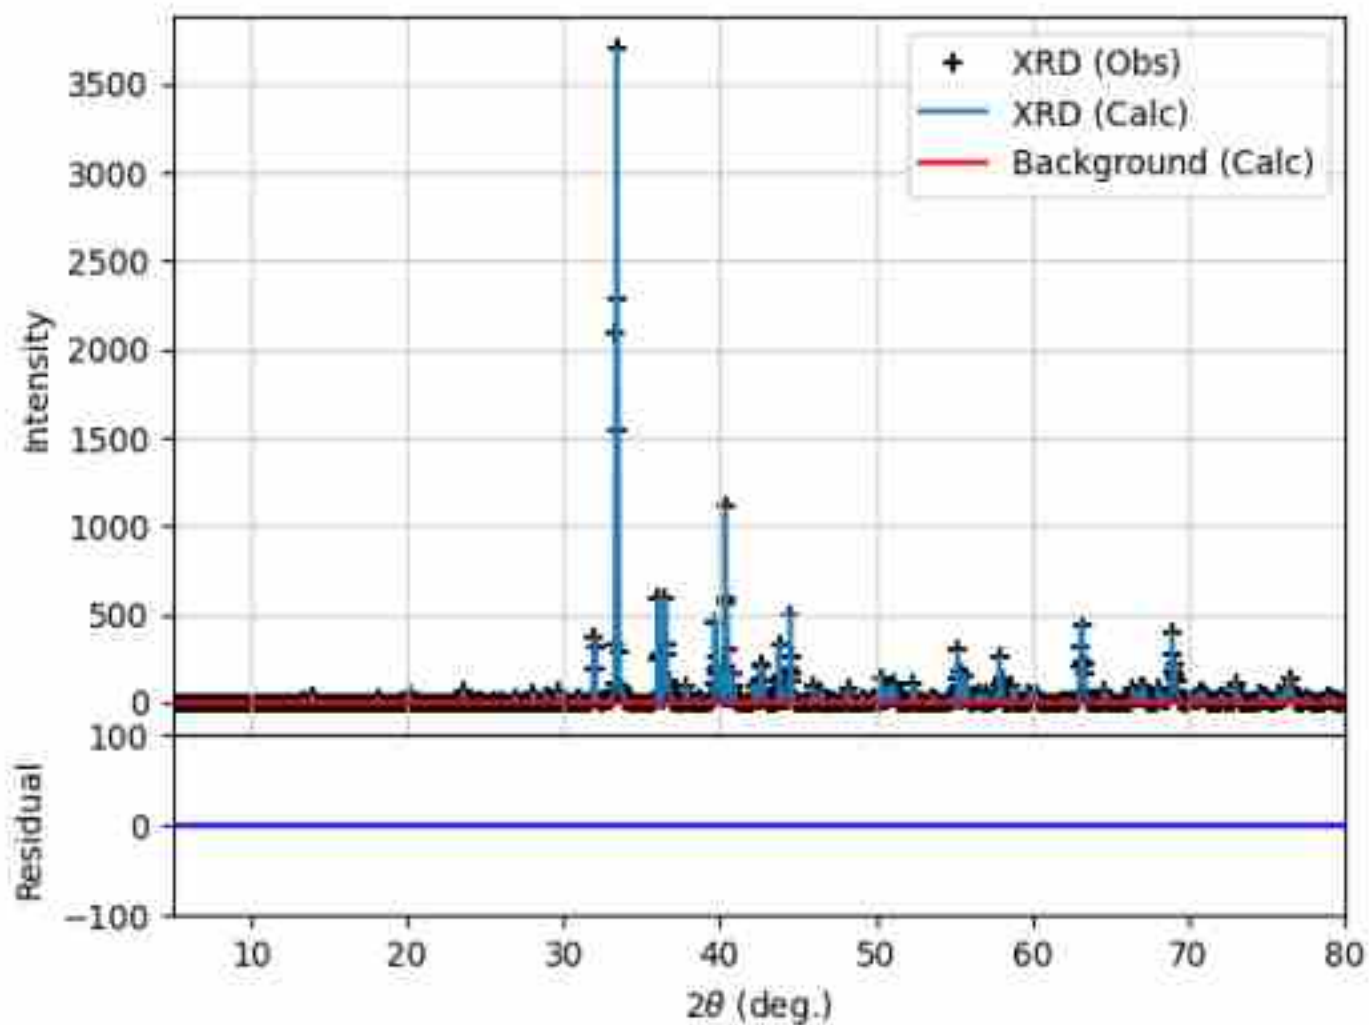

| RMSE before RR | Rwp     | RMSE after RR |
|----------------|---------|---------------|
| 0.046          | 0.00366 | 0.00026       |



# Th<sub>2</sub>Si<sub>2</sub>Te<sub>2</sub>

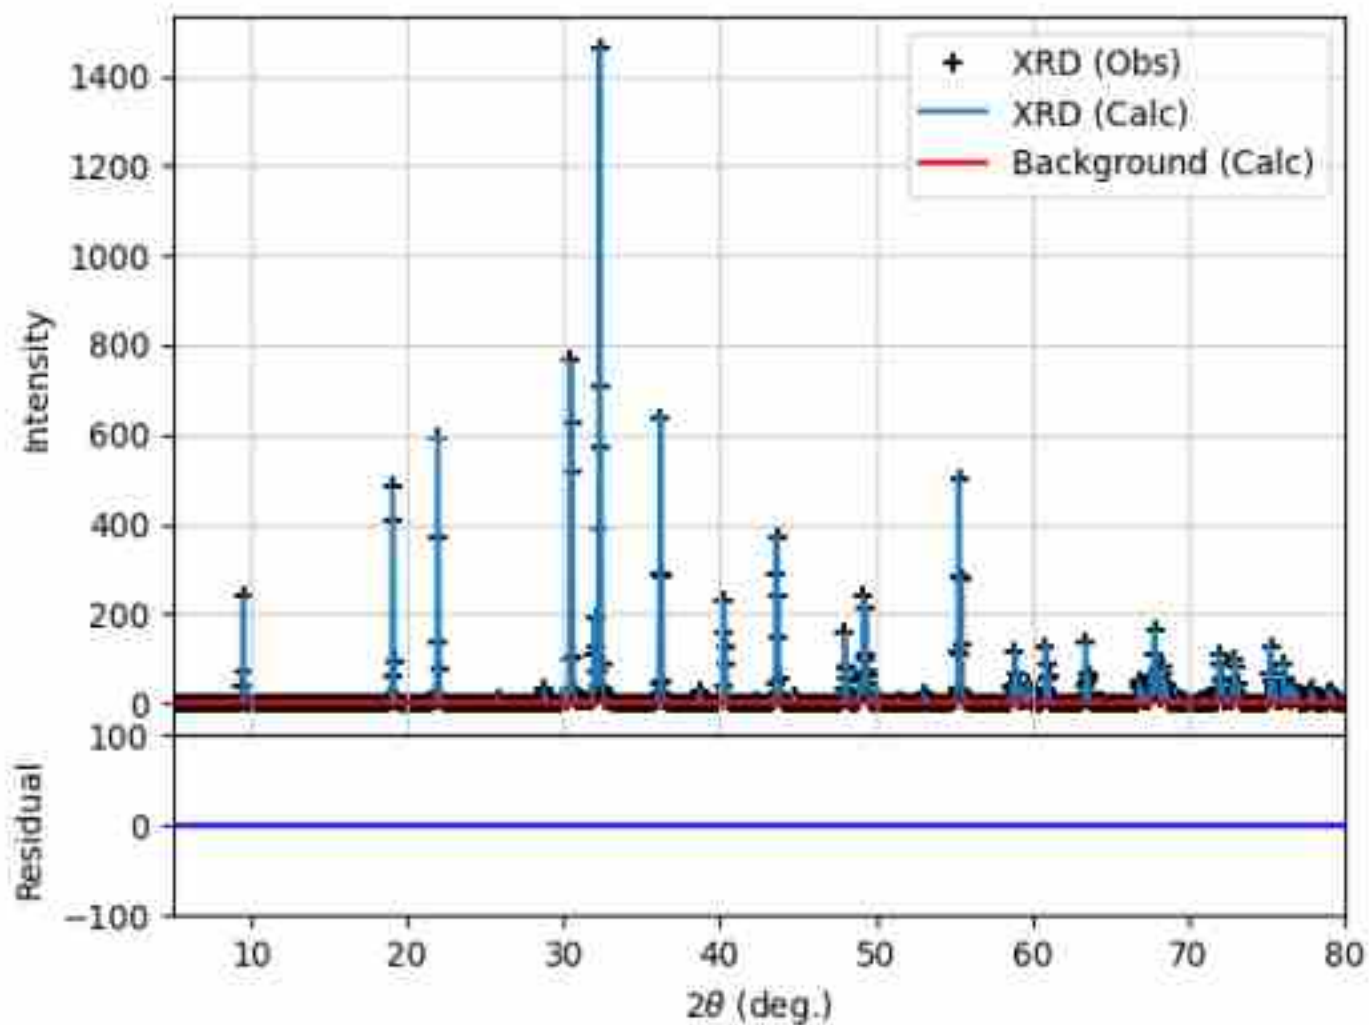

| RMSE before RR | Rwp     | RMSE after RR |
|----------------|---------|---------------|
| 0.046          | 0.00539 | 0.00117       |

# Zn<sub>1</sub>In<sub>2</sub>S<sub>4</sub>

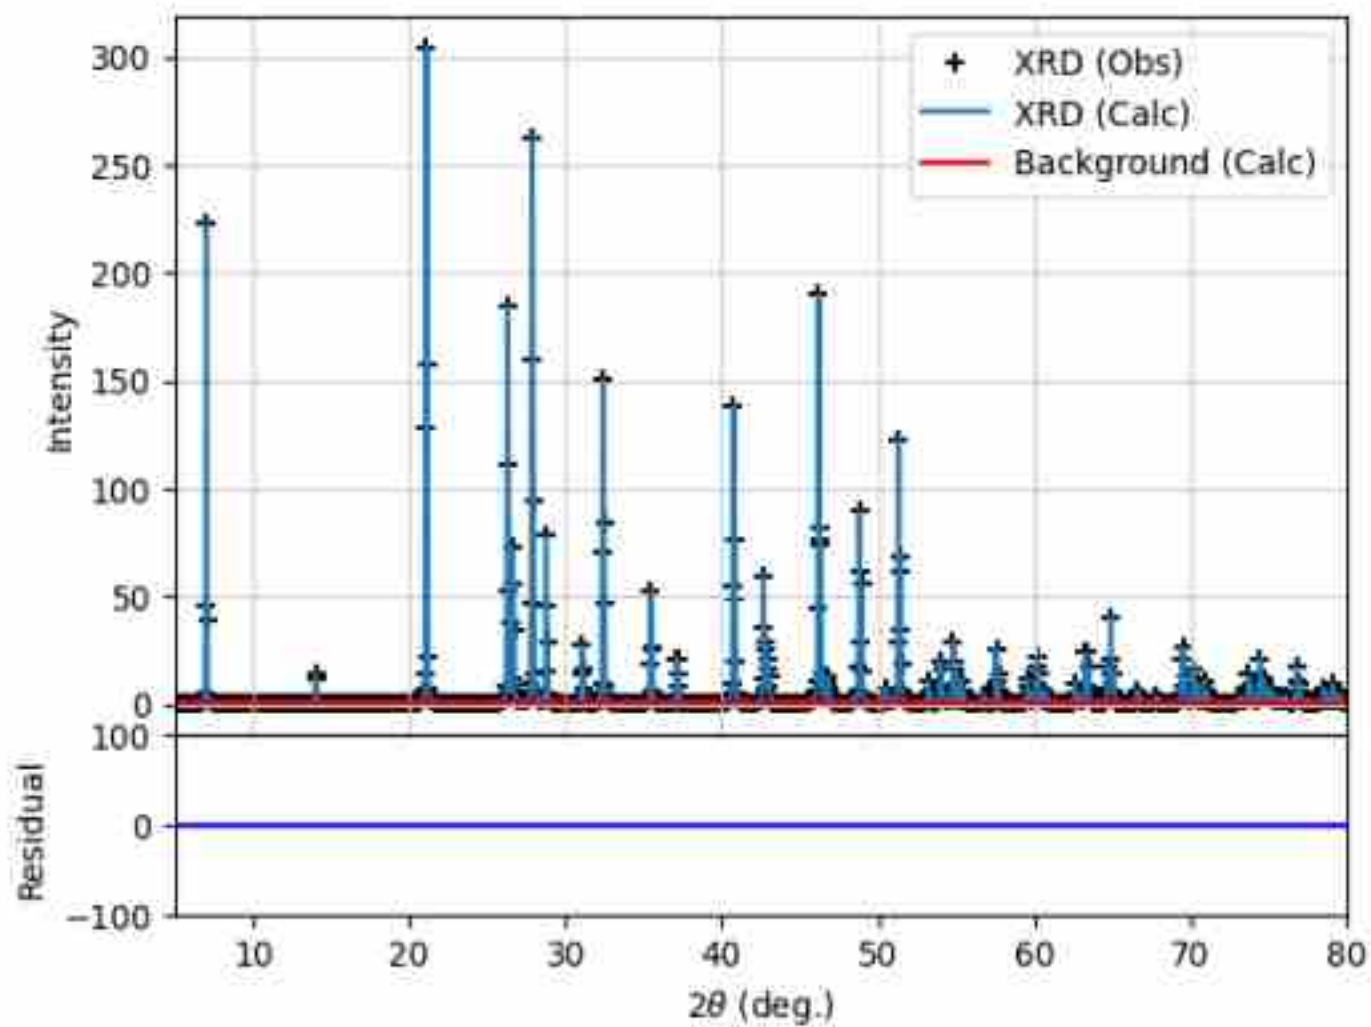

| RMSE before RR | Rwp     | RMSE after RR |
|----------------|---------|---------------|
| 0.046          | 0.00302 | 0.0005        |

# Cd1Cl2

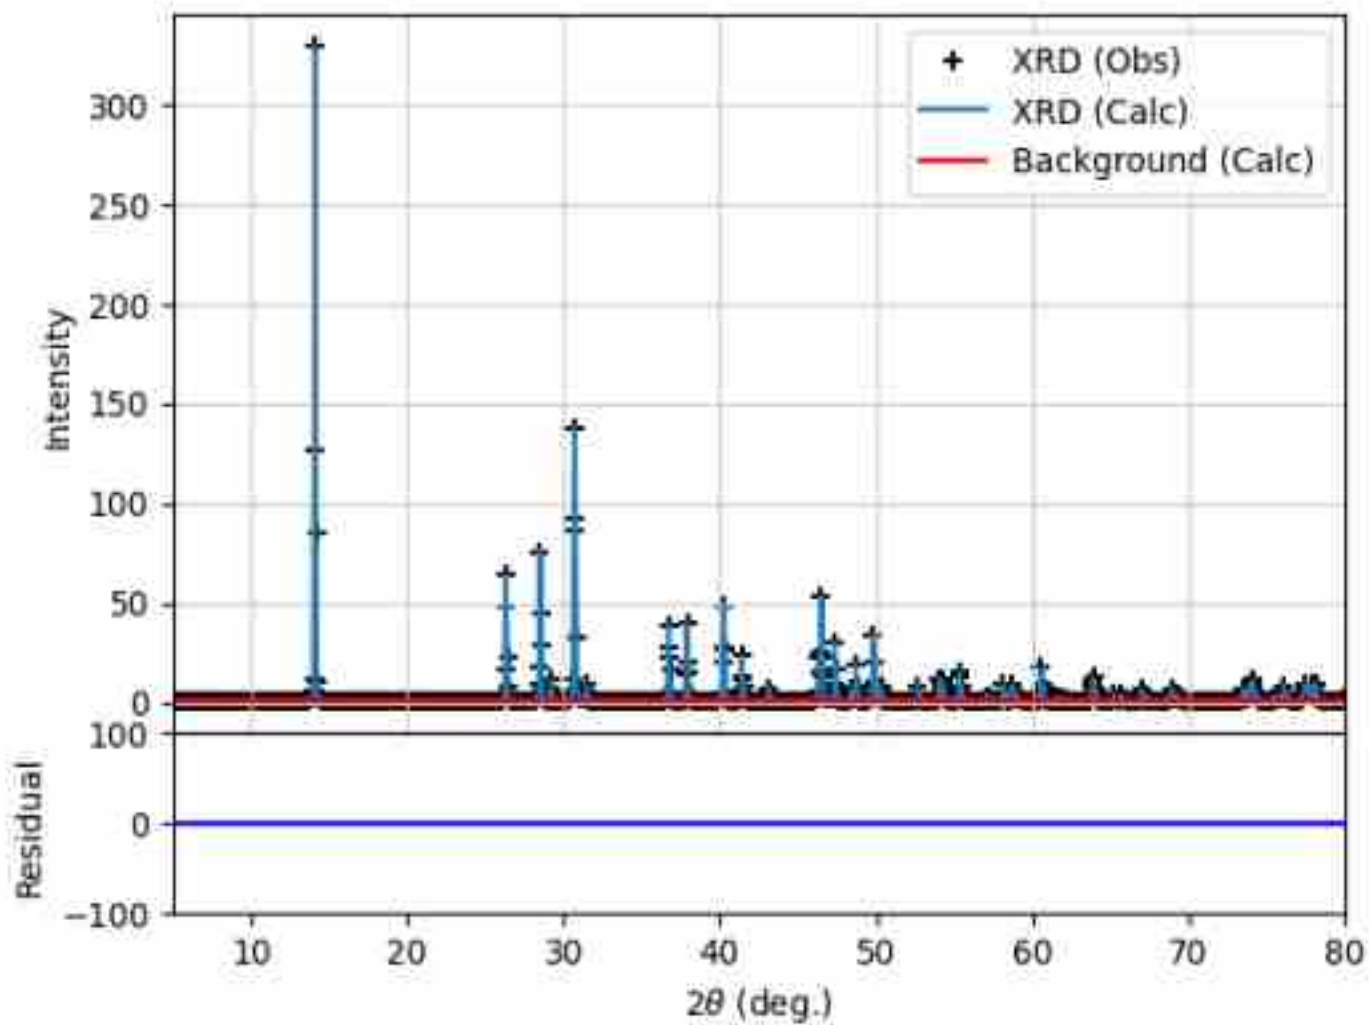

| RMSE before RR | Rwp     | RMSE after RR |
|----------------|---------|---------------|
| 0.047          | 0.00315 | 0.00043       |

# Ga<sub>6</sub>N<sub>2</sub>O<sub>6</sub>

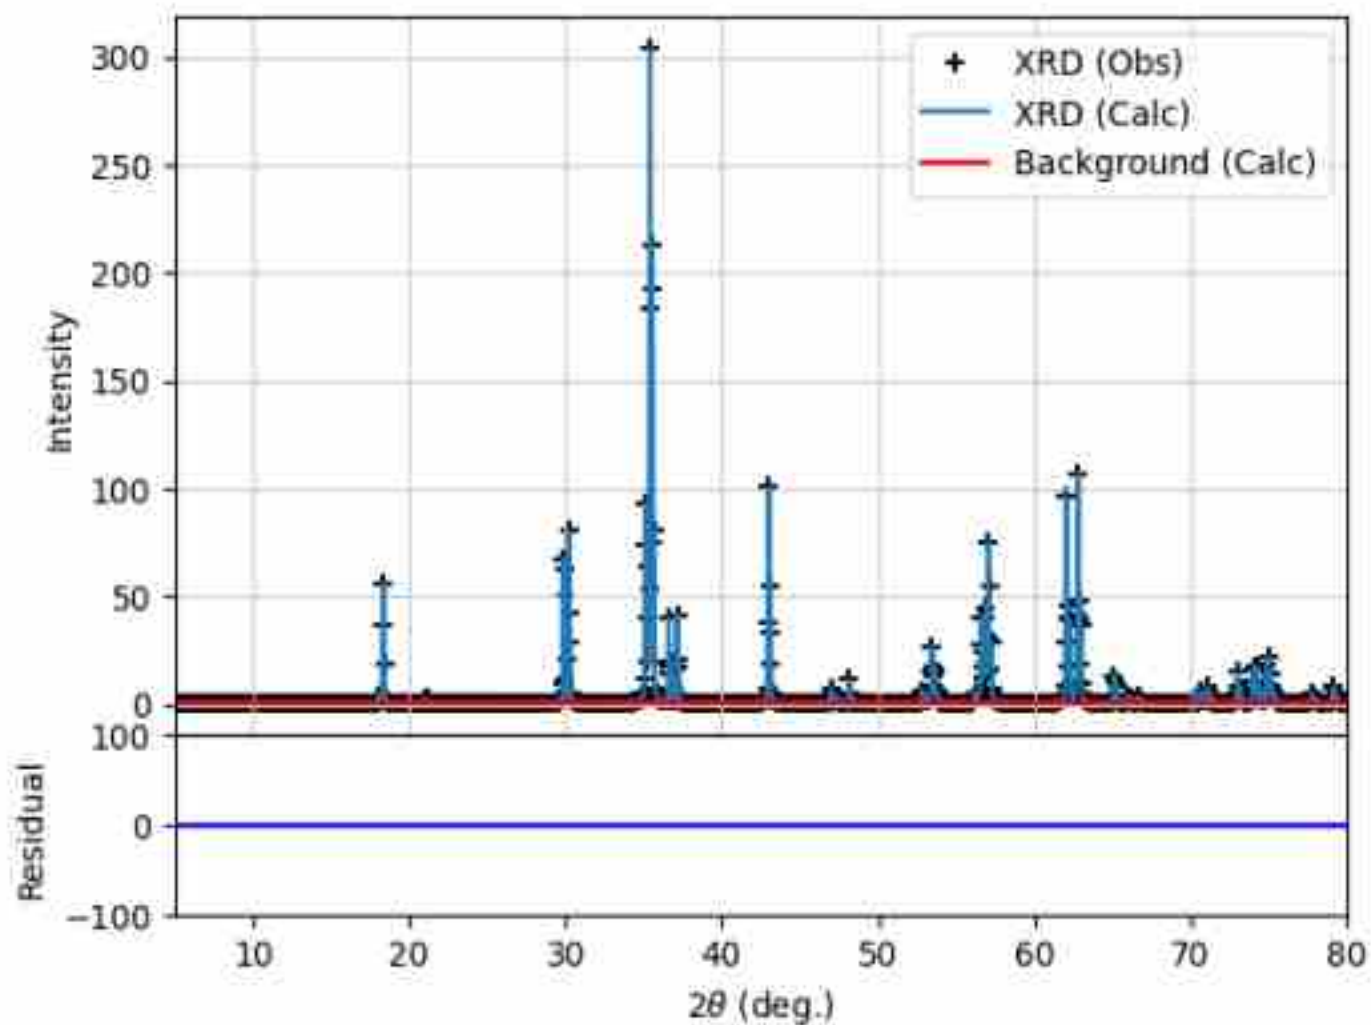

| RMSE before RR | Rwp     | RMSE after RR |
|----------------|---------|---------------|
| 0.047          | 0.00579 | 0.00203       |

# In<sub>4</sub>Ag<sub>2</sub>Se<sub>6</sub>Br<sub>2</sub>

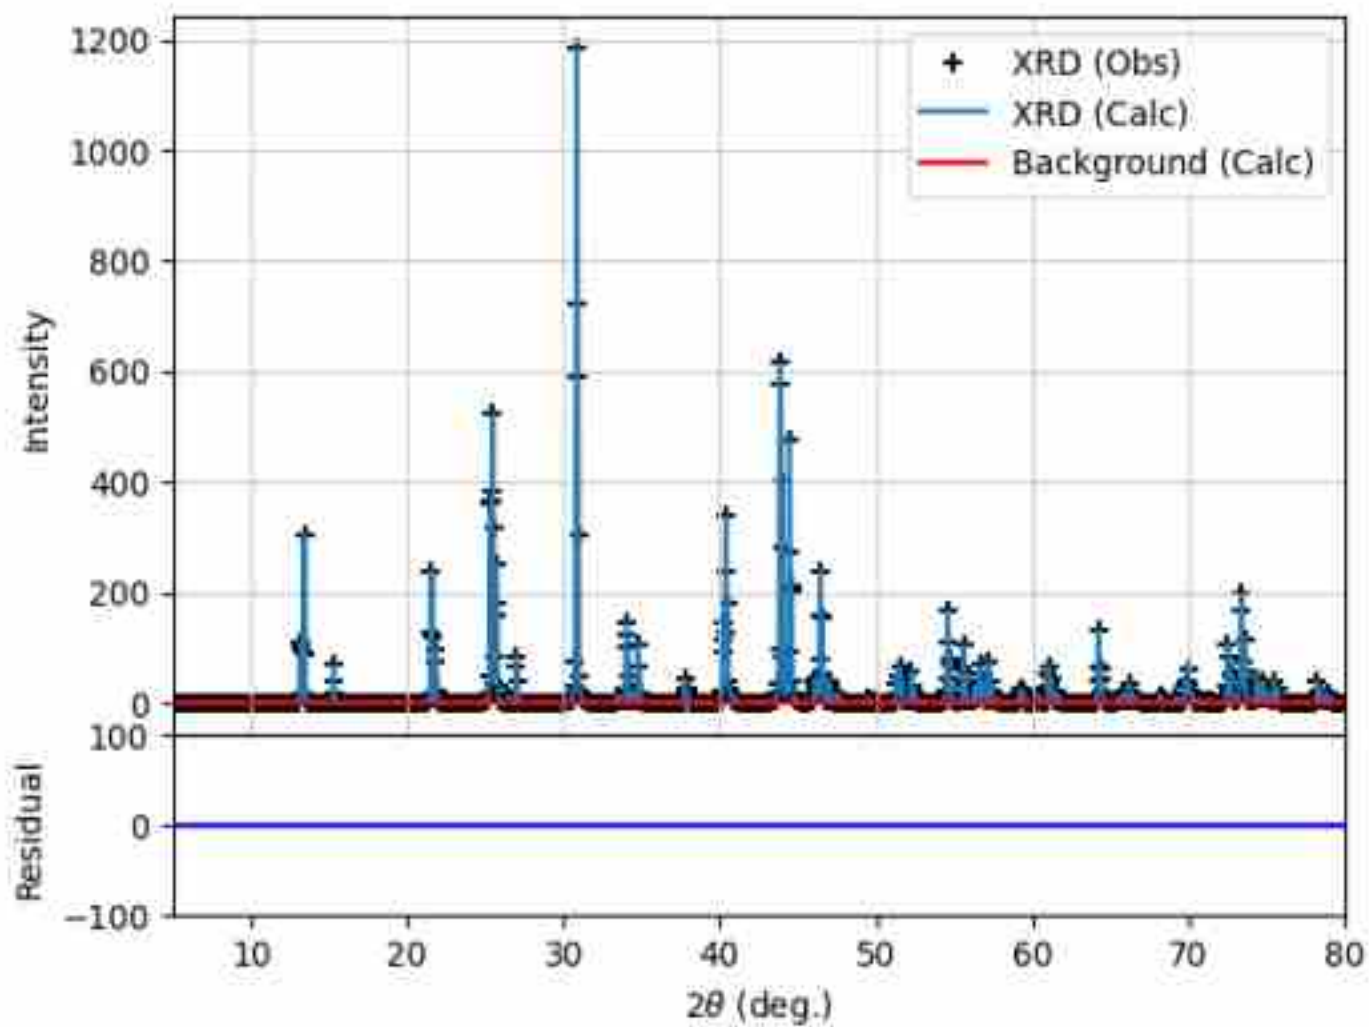

| RMSE before RR | Rwp     | RMSE after RR |
|----------------|---------|---------------|
| 0.047          | 0.00293 | 0.00027       |

# K<sub>4</sub>N<sub>2</sub>O<sub>5</sub>

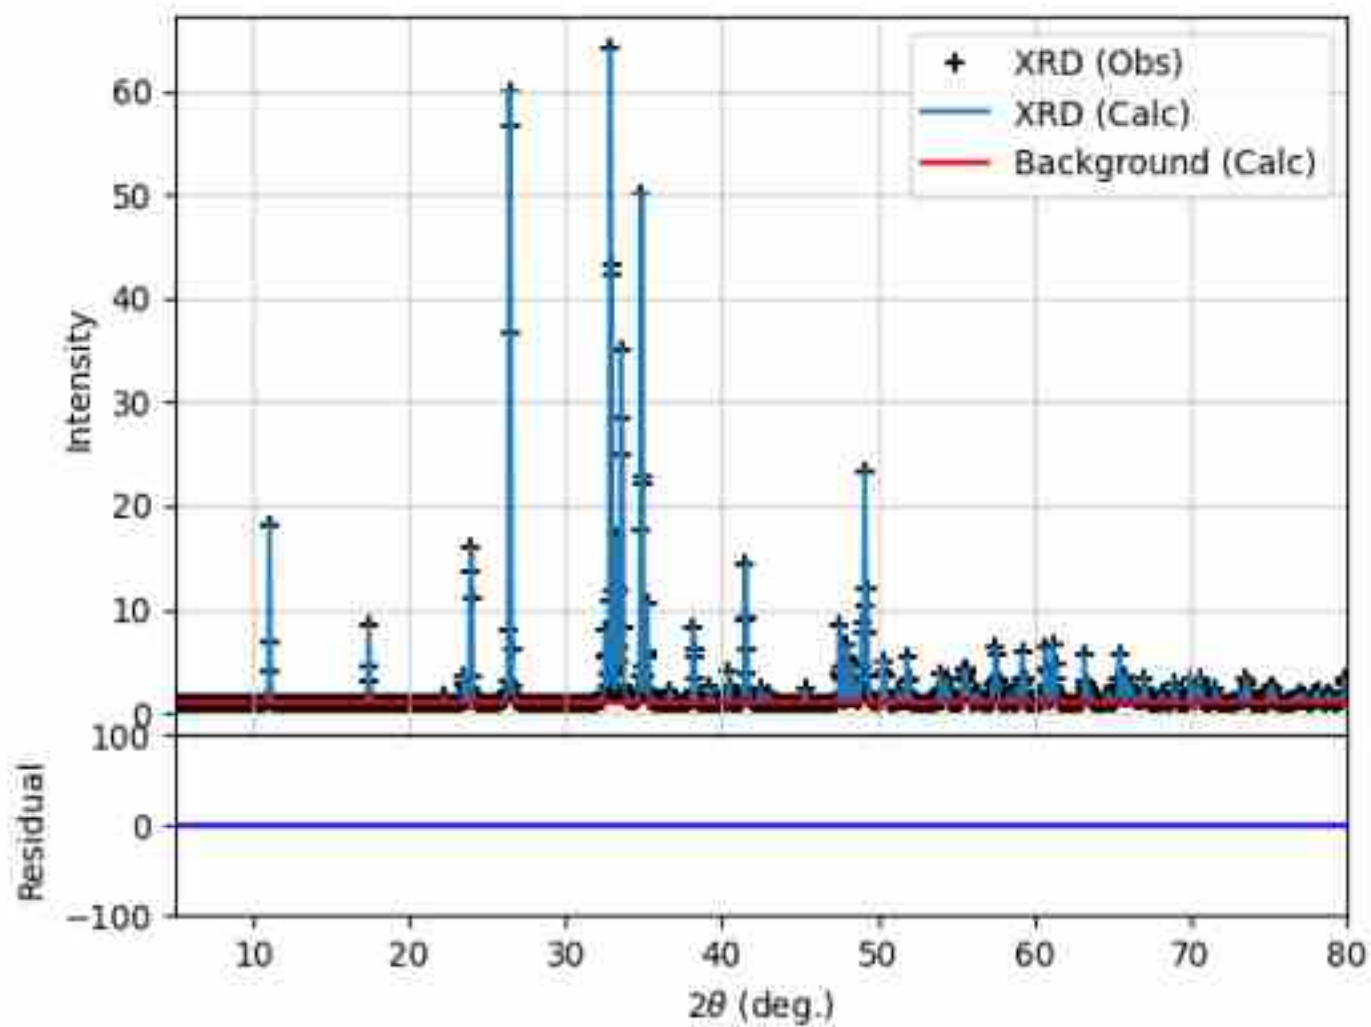

| RMSE before RR | Rwp     | RMSE after RR |
|----------------|---------|---------------|
| 0.047          | 0.00229 | 0.00109       |

# K8

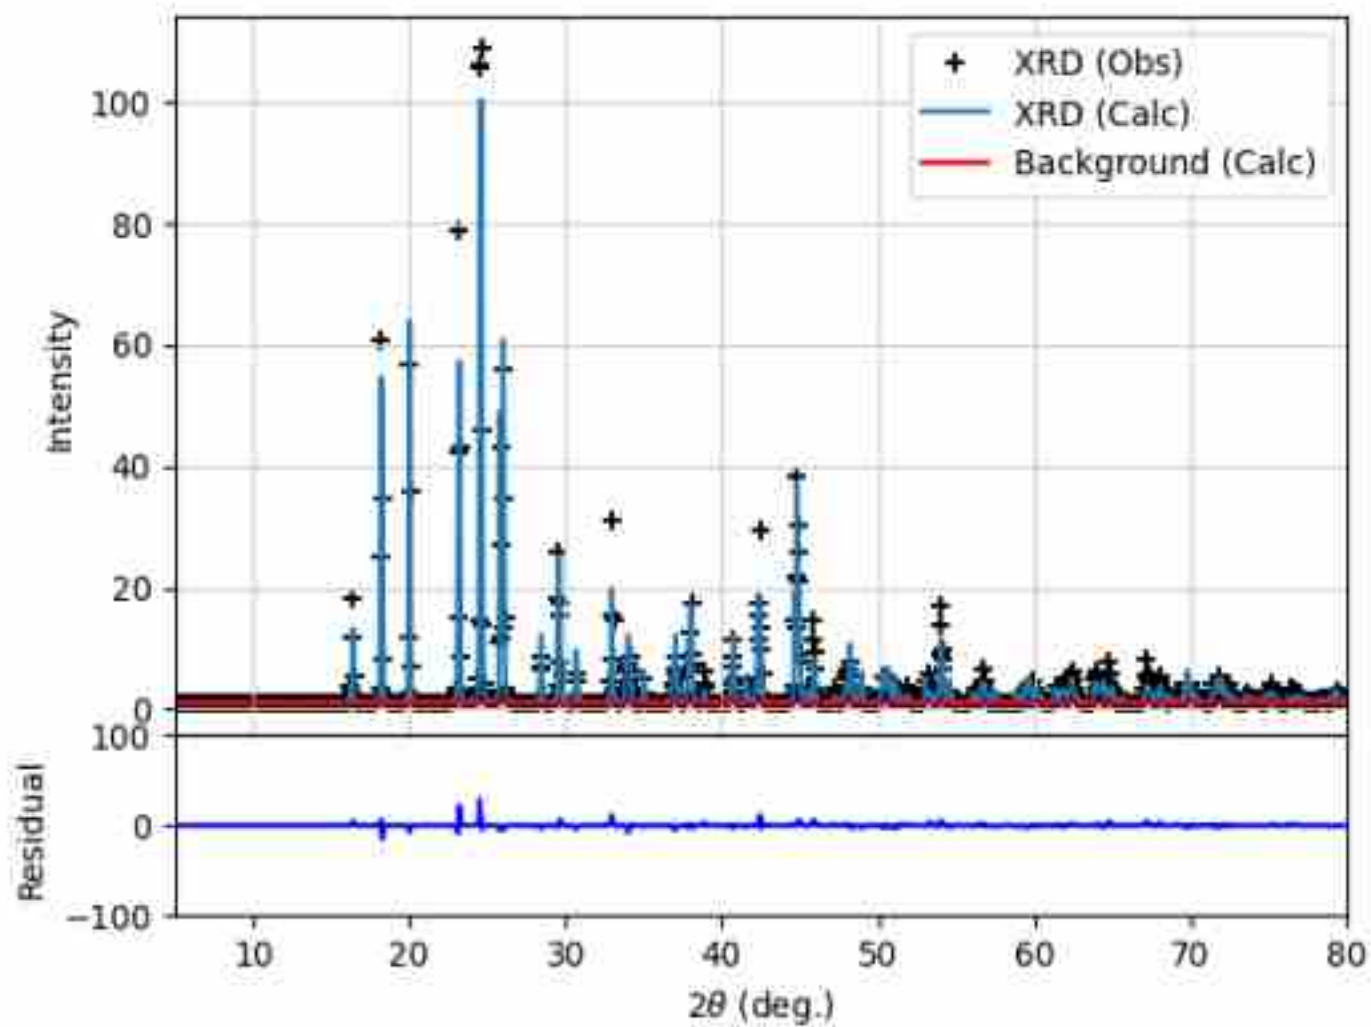

| RMSE before RR | Rwp      | RMSE after RR |
|----------------|----------|---------------|
| 0.047          | 27.91228 | 0.05045       |

# Li6Br3N1

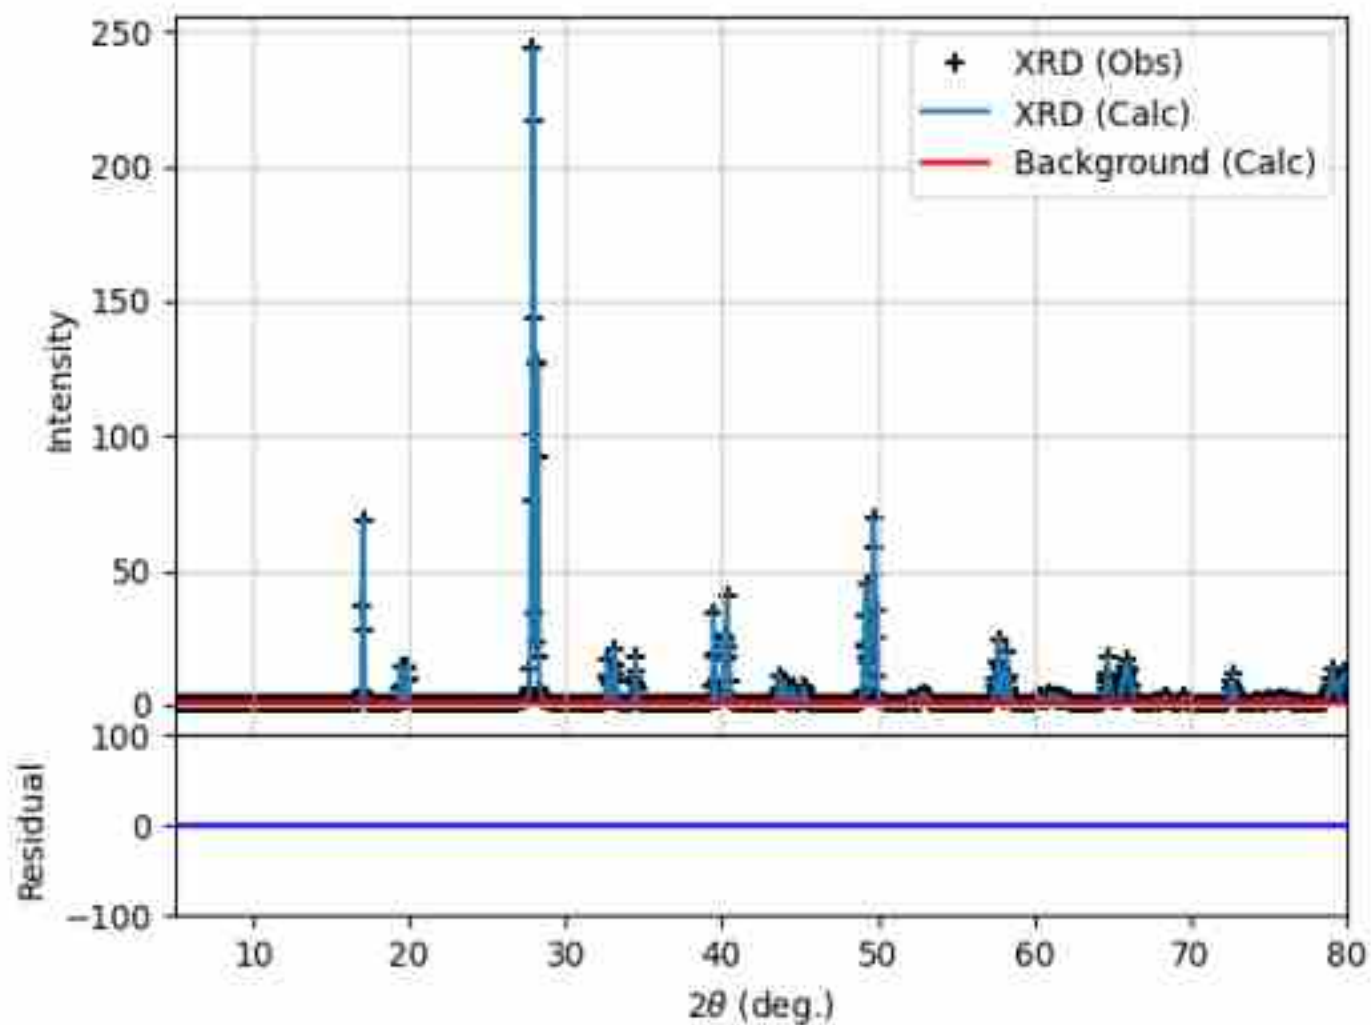

| RMSE before RR | Rwp     | RMSE after RR |
|----------------|---------|---------------|
| 0.047          | 0.00182 | 0.00104       |



# Mo<sub>4</sub>Se<sub>4</sub>S<sub>4</sub>

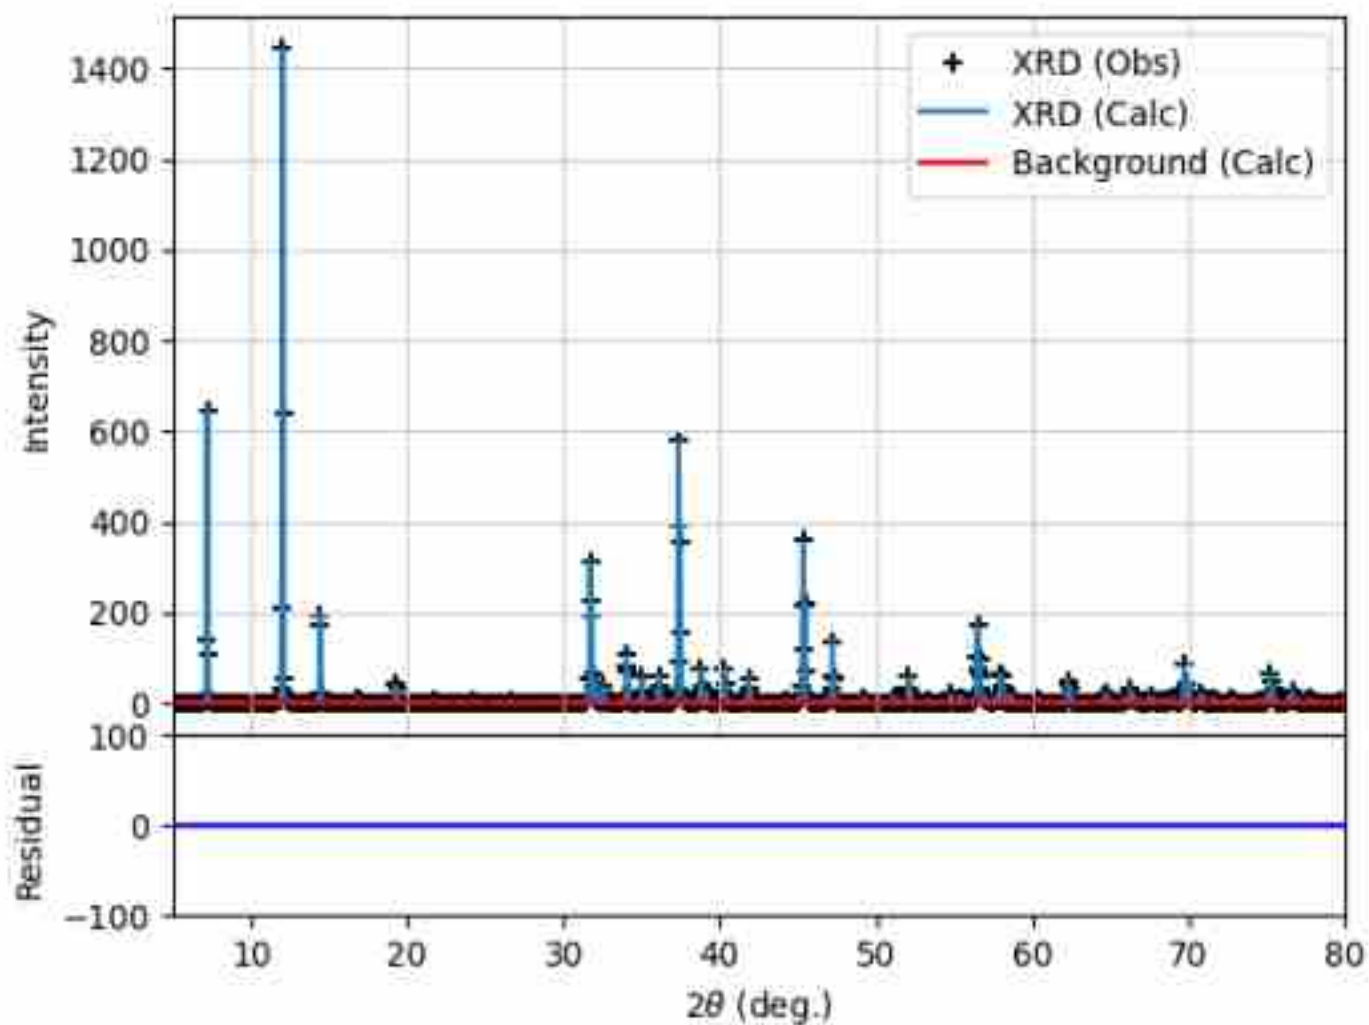

| RMSE before RR | Rwp    | RMSE after RR |
|----------------|--------|---------------|
| 0.047          | 0.0036 | 0.00046       |

# Rb<sub>4</sub>Pb<sub>2</sub>O<sub>6</sub>

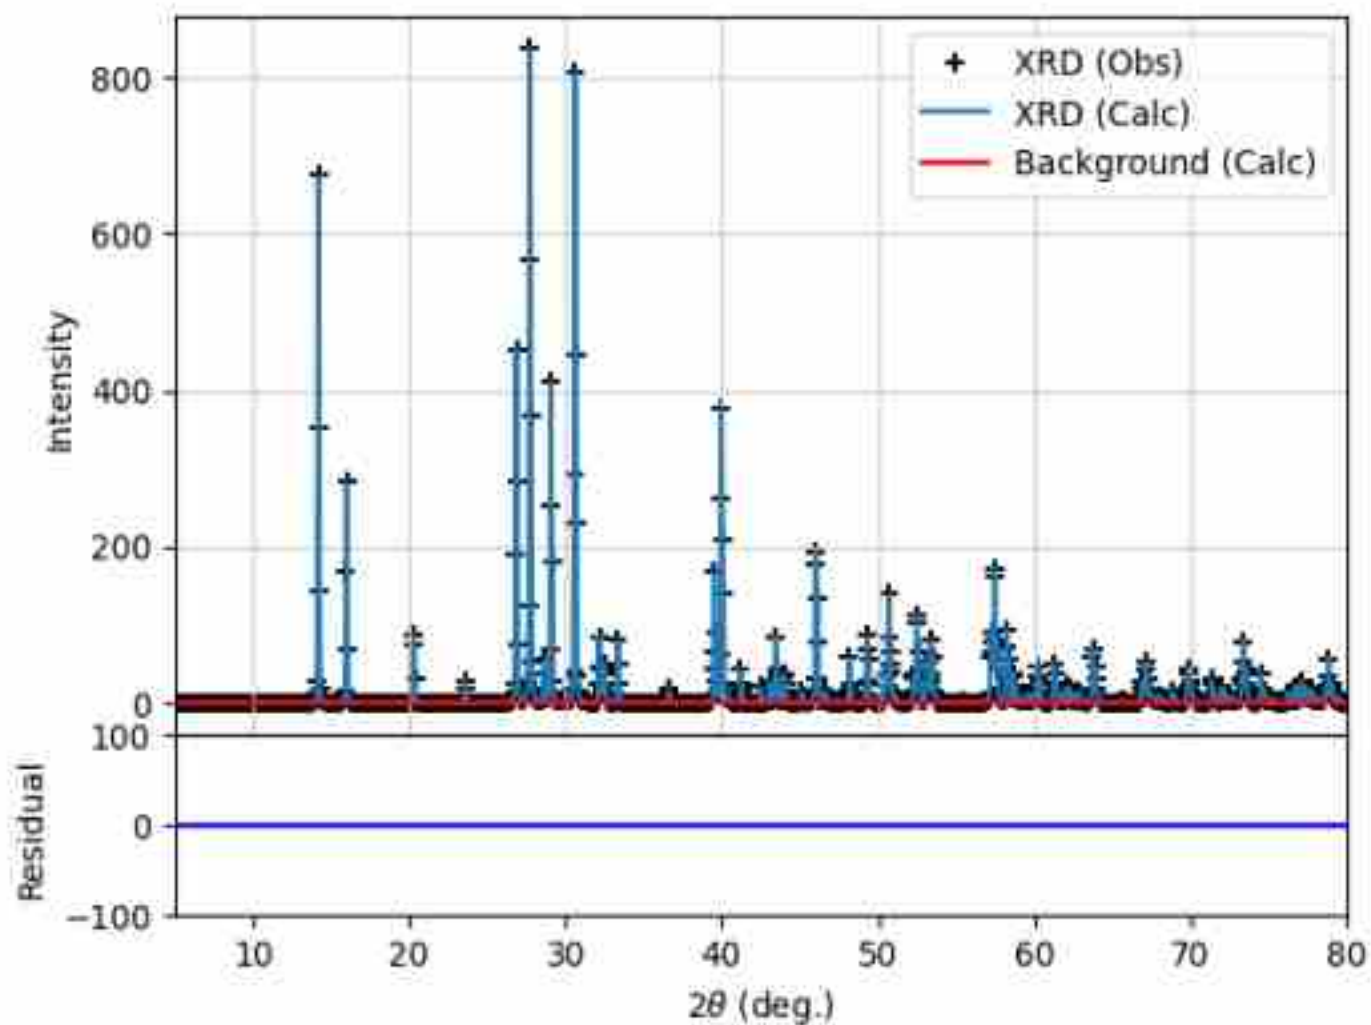

| RMSE before RR | Rwp     | RMSE after RR |
|----------------|---------|---------------|
| 0.047          | 0.00385 | 0.00101       |

# Si4Rh4

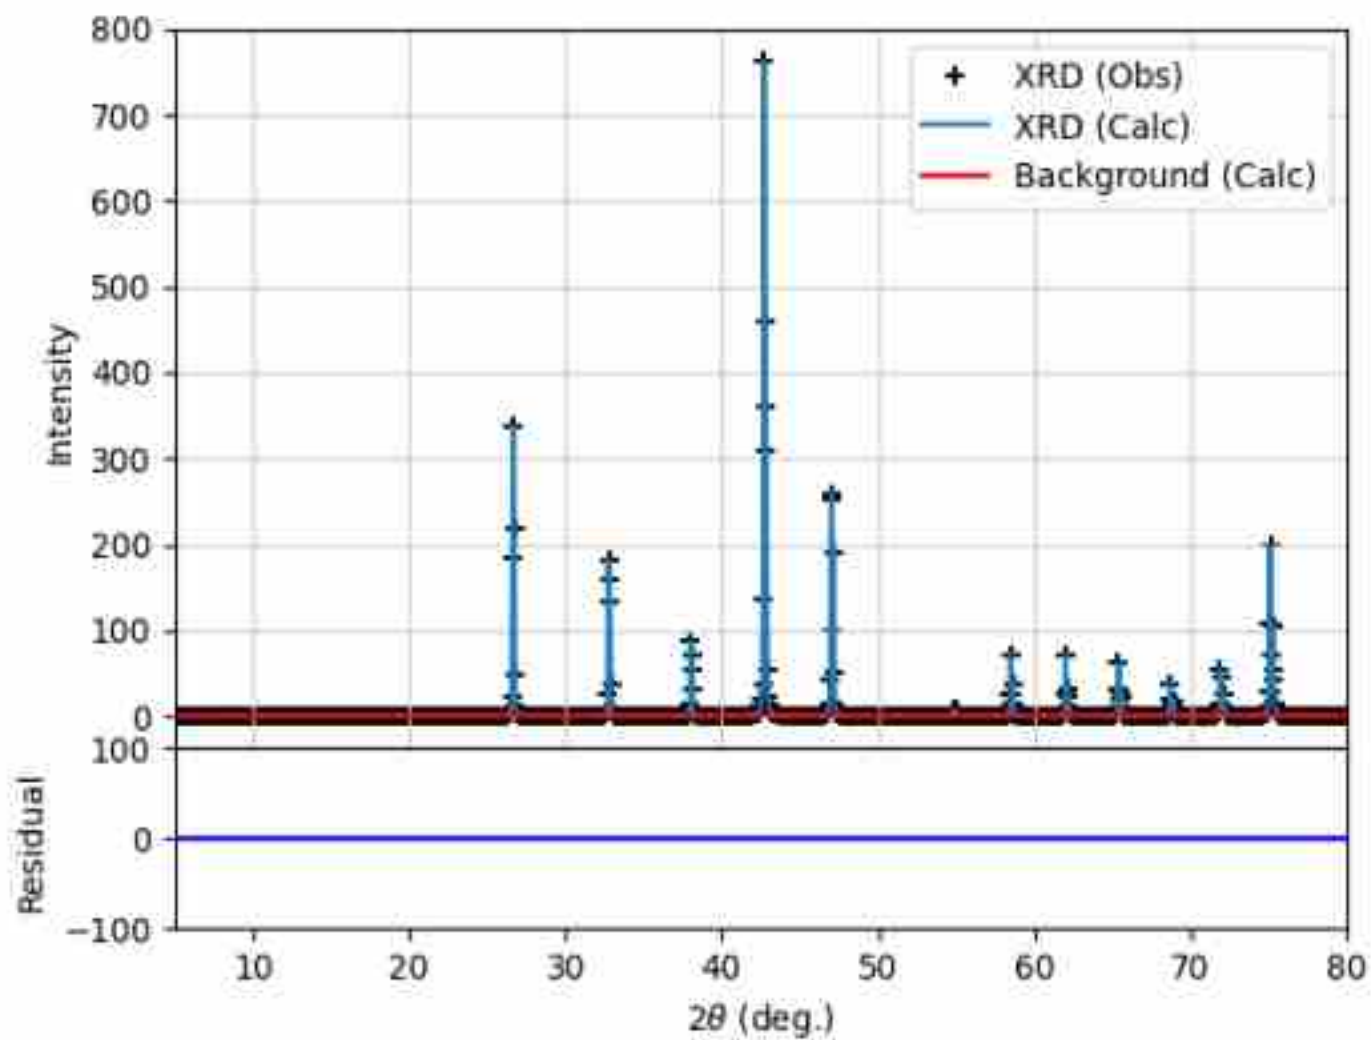

| RMSE before RR | Rwp     | RMSE after RR |
|----------------|---------|---------------|
| 0.047          | 0.01266 | 0.0027        |

# Sr6Tl10

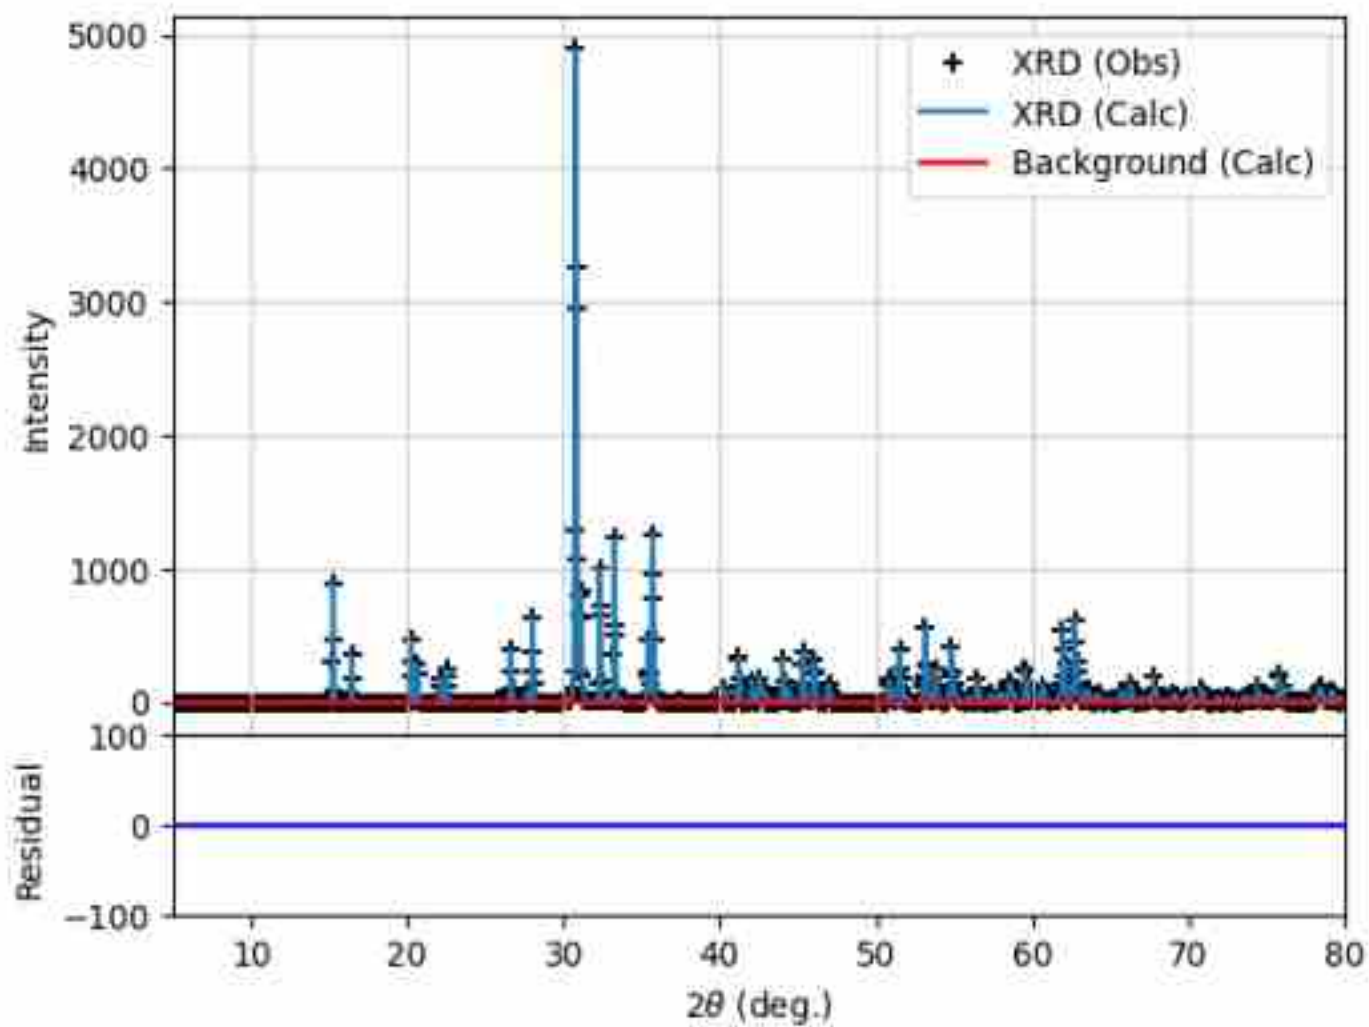

| RMSE before RR | Rwp     | RMSE after RR |
|----------------|---------|---------------|
| 0.047          | 0.00408 | 0.00029       |

# Ti<sub>4</sub>Fe<sub>2</sub>O<sub>10</sub>

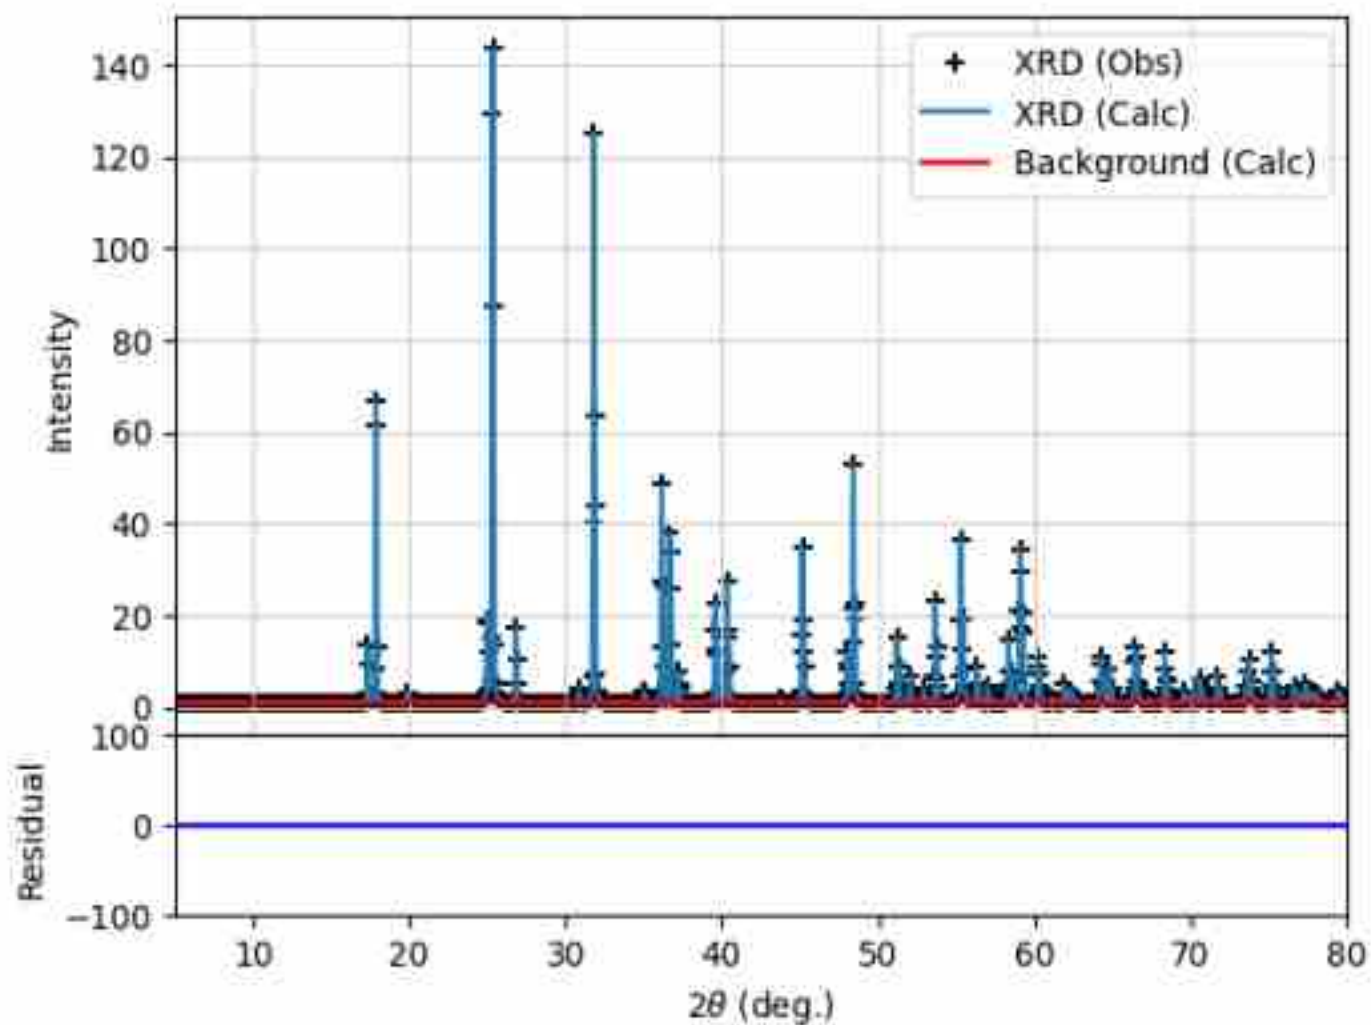

| RMSE before RR | Rwp    | RMSE after RR |
|----------------|--------|---------------|
| 0.047          | 0.0033 | 0.00071       |

# V<sub>2</sub>Bi<sub>2</sub>Pb<sub>2</sub>O<sub>10</sub>

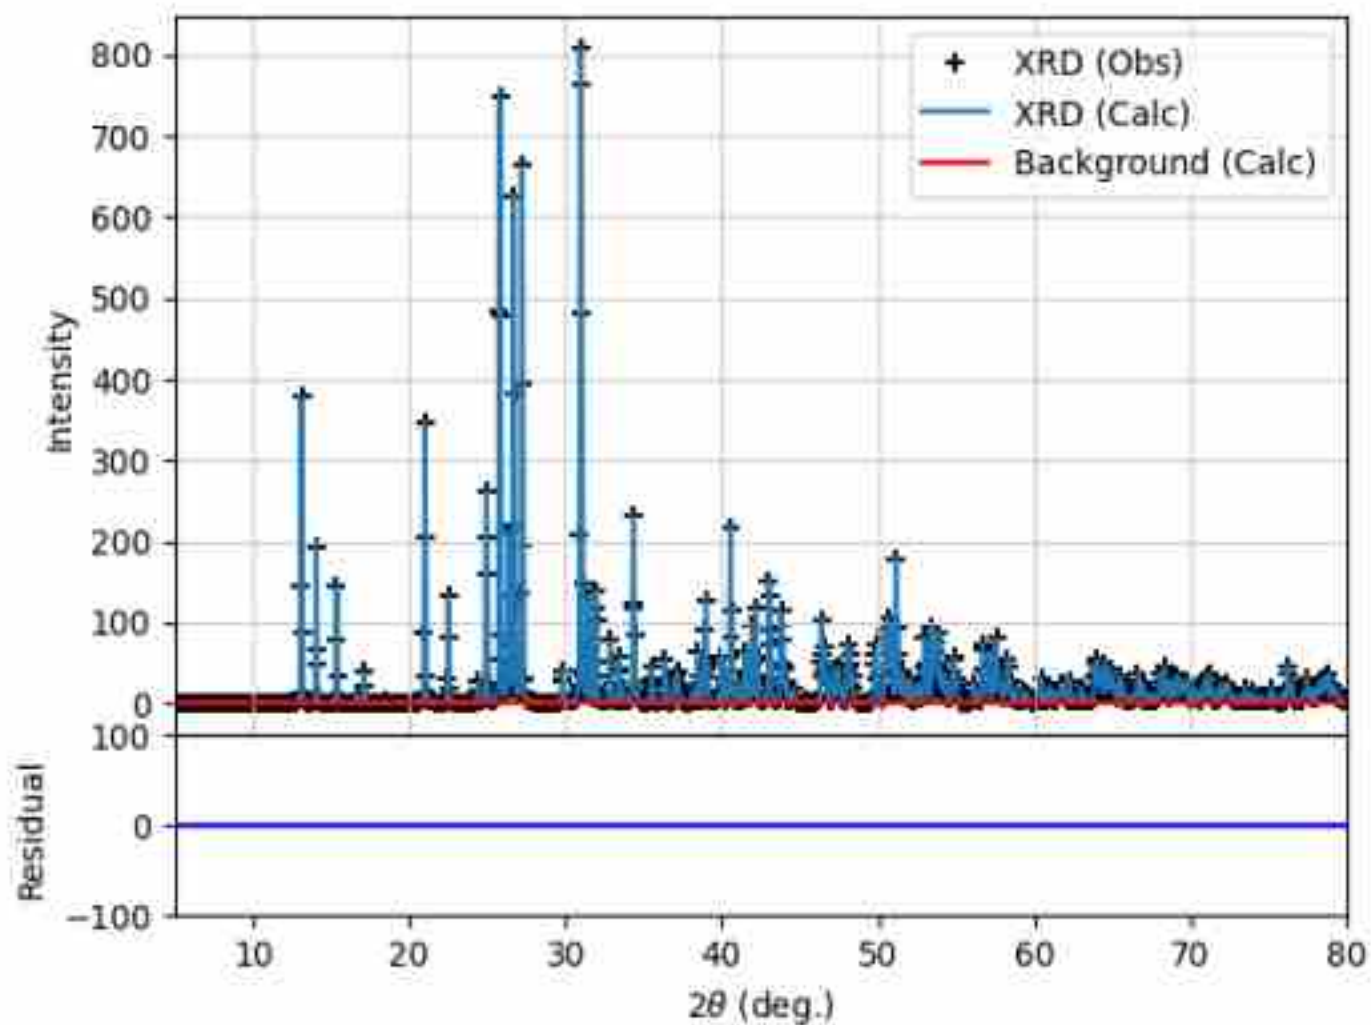

| RMSE before RR | Rwp     | RMSE after RR |
|----------------|---------|---------------|
| 0.047          | 0.03199 | 0.01726       |

# B3As3O12

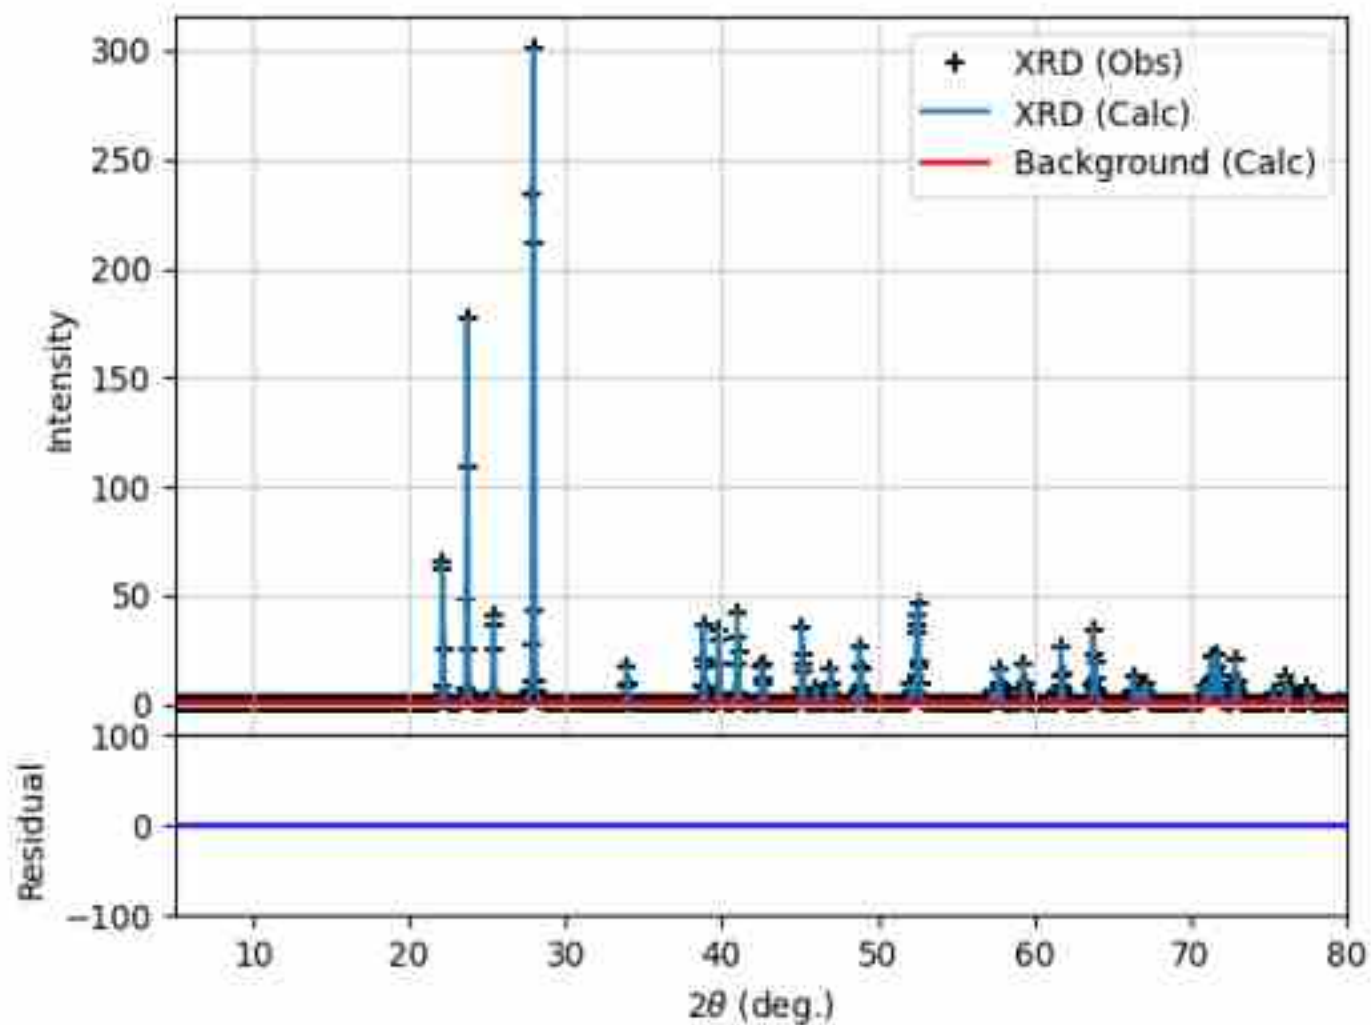

| RMSE before RR | Rwp     | RMSE after RR |
|----------------|---------|---------------|
| 0.048          | 0.00398 | 0.00186       |

# Ba<sub>4</sub>Mn<sub>4</sub>N<sub>8</sub>

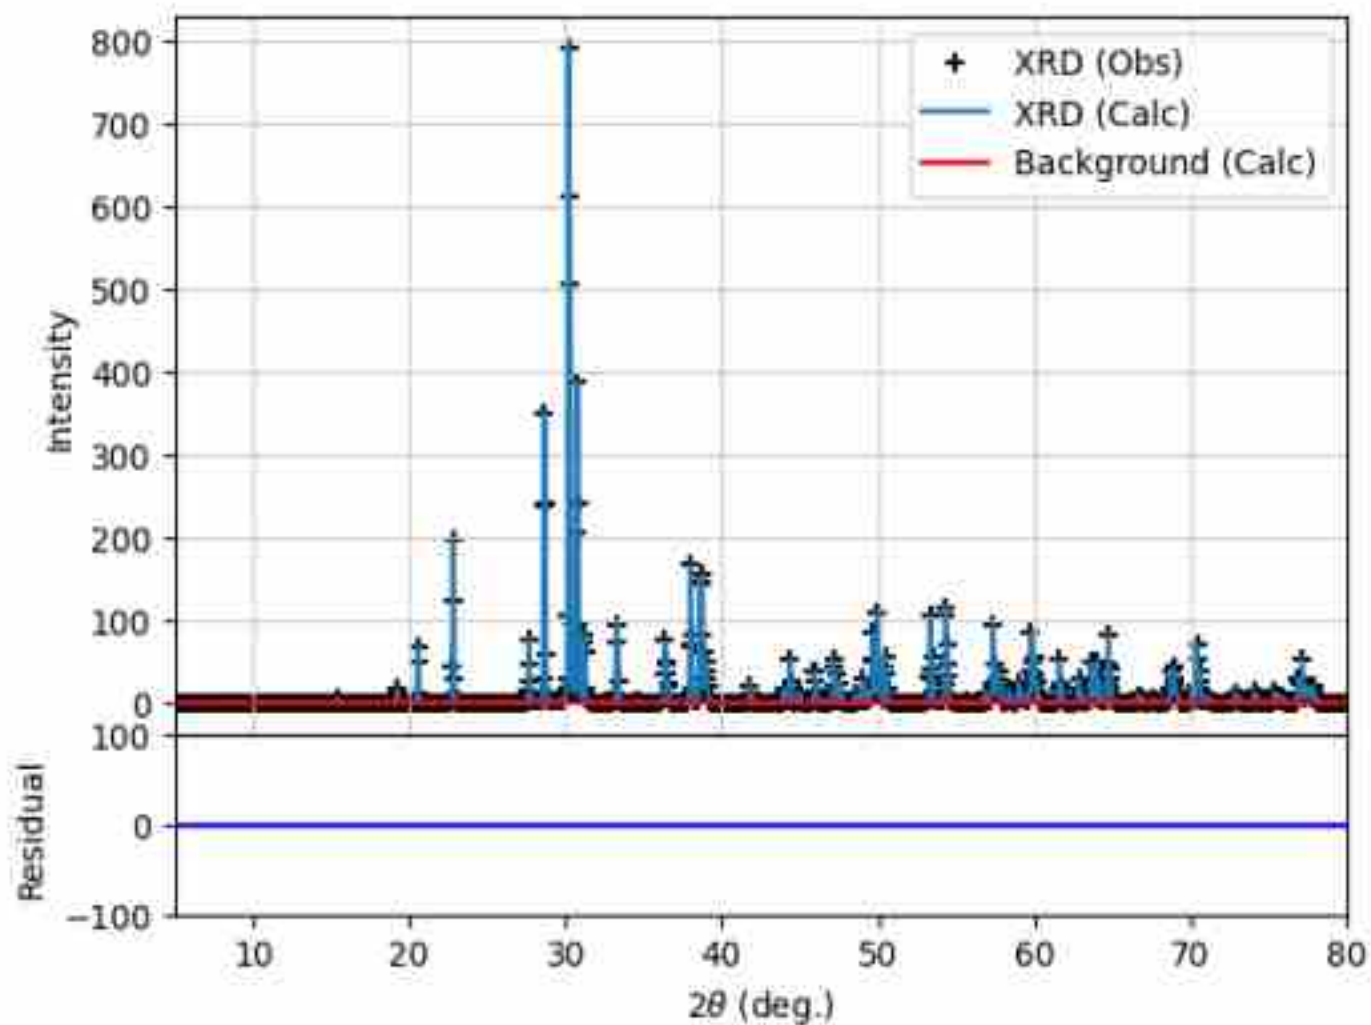

| RMSE before RR | Rwp     | RMSE after RR |
|----------------|---------|---------------|
| 0.048          | 0.00353 | 0.0014        |



# Bi<sub>2</sub>P<sub>2</sub>O<sub>8</sub>

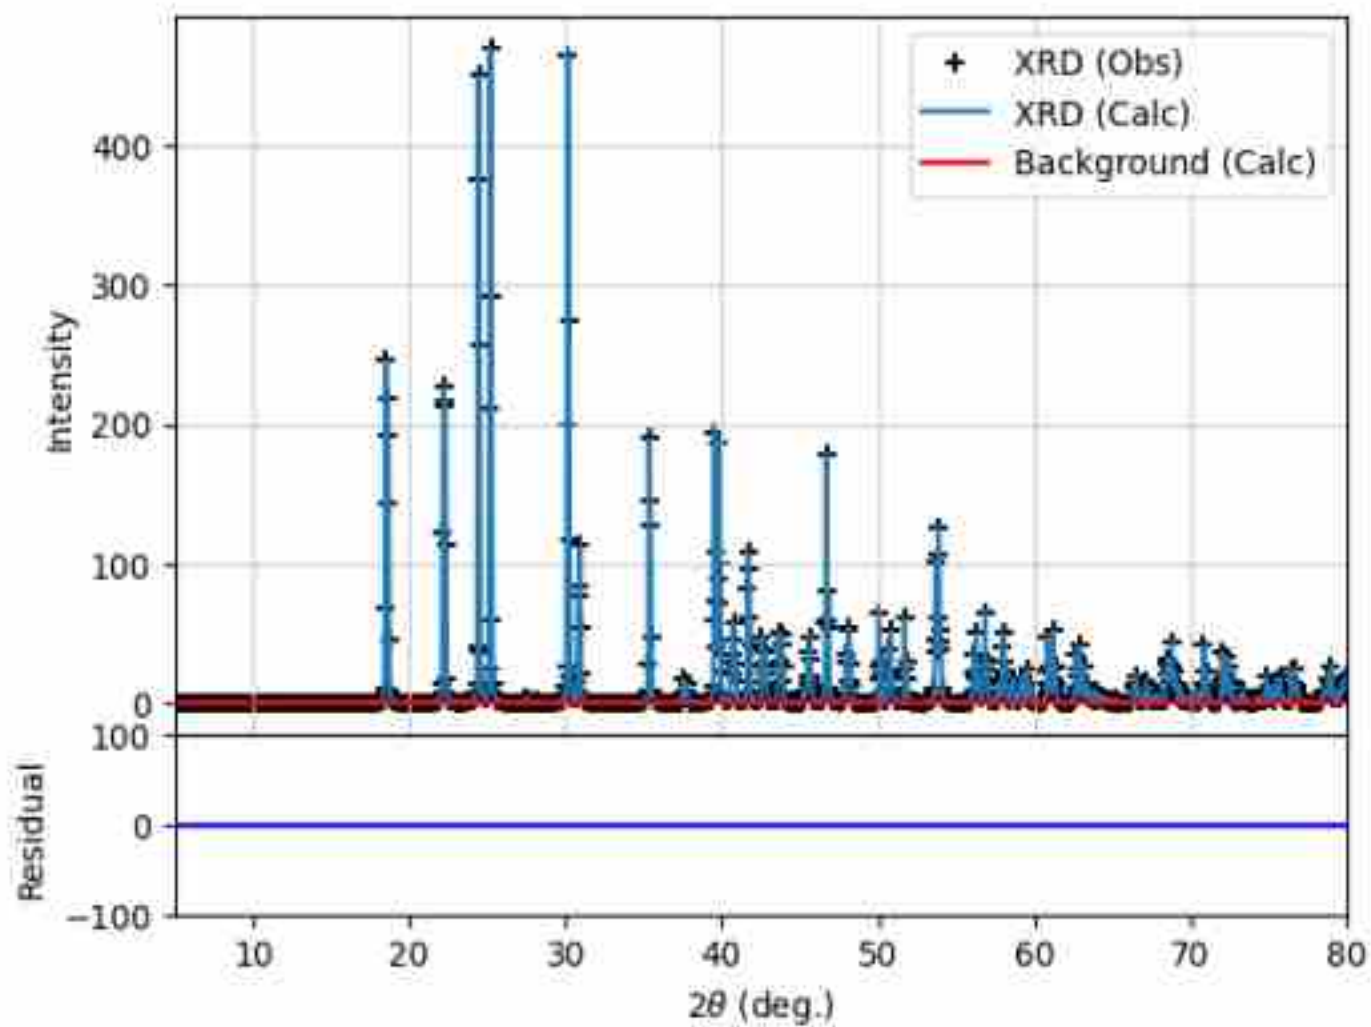

| RMSE before RR | Rwp     | RMSE after RR |
|----------------|---------|---------------|
| 0.048          | 0.00435 | 0.00122       |

# Ca<sub>2</sub>Eu<sub>2</sub>In<sub>3</sub>Ge<sub>4</sub>

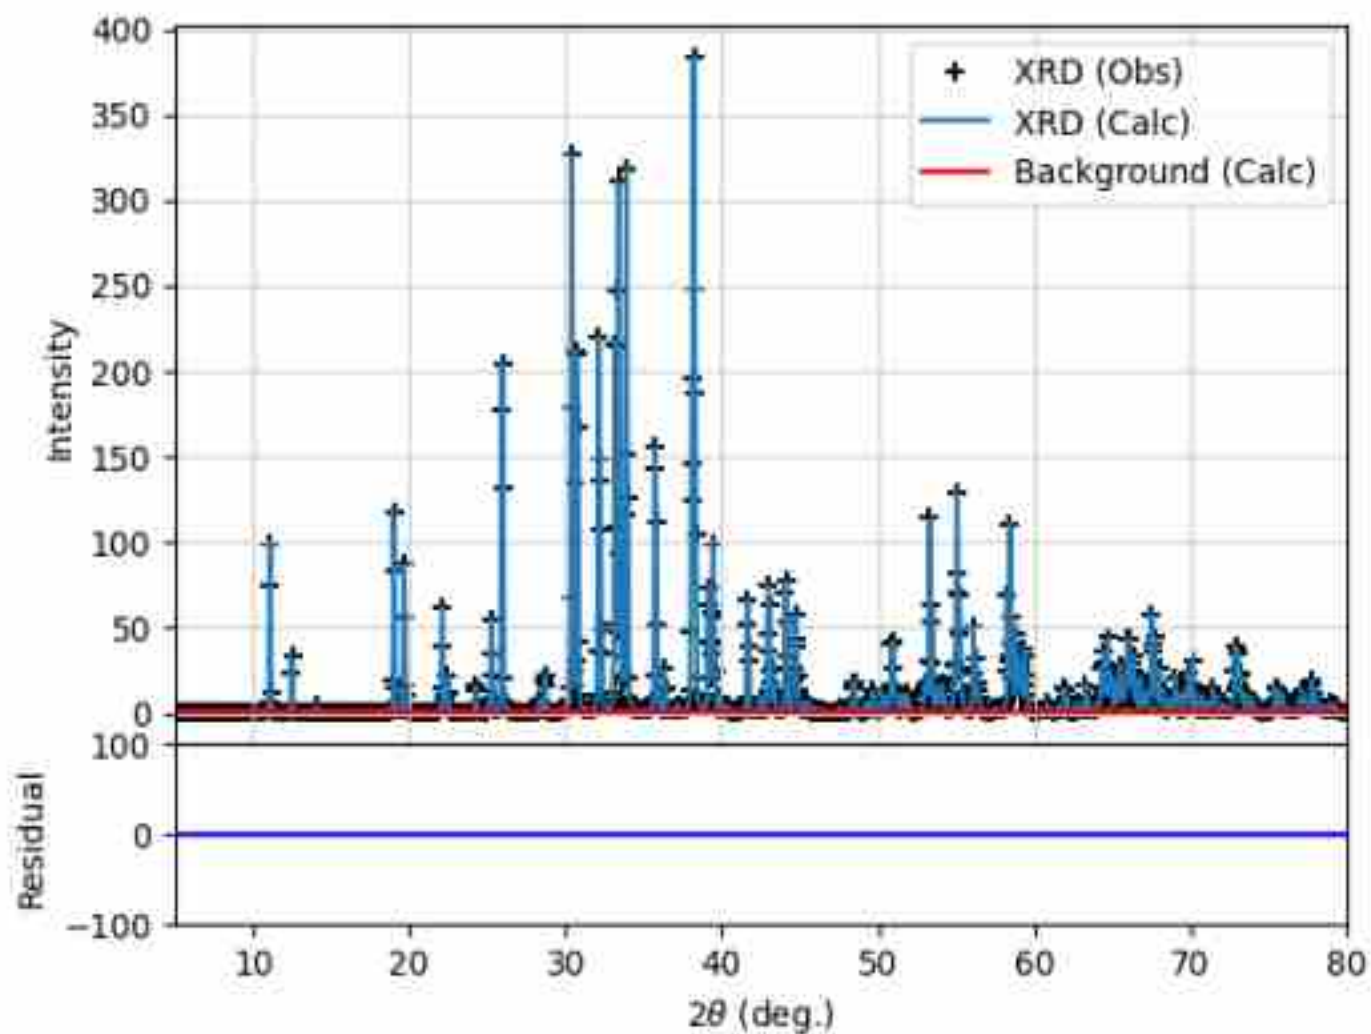

| RMSE before RR | Rwp     | RMSE after RR |
|----------------|---------|---------------|
| 0.048          | 0.00347 | 0.00041       |

# Ce<sub>2</sub>Ge<sub>2</sub>Au<sub>2</sub>

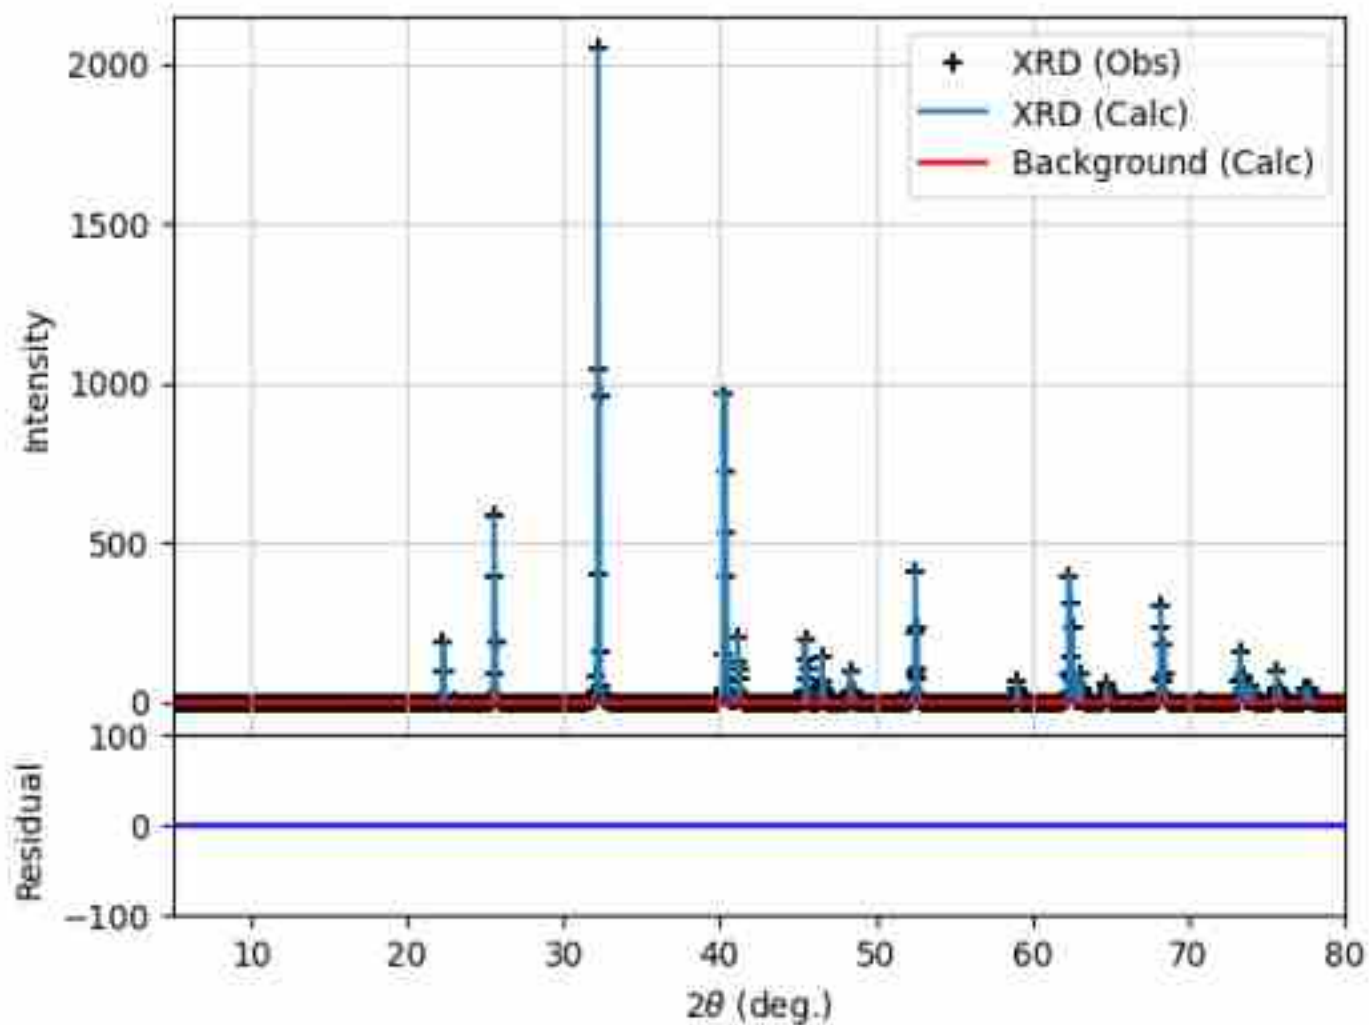

| RMSE before RR | Rwp     | RMSE after RR |
|----------------|---------|---------------|
| 0.048          | 0.00407 | 0.00048       |

# Ce<sub>4</sub>Sn<sub>1</sub>O<sub>10</sub>

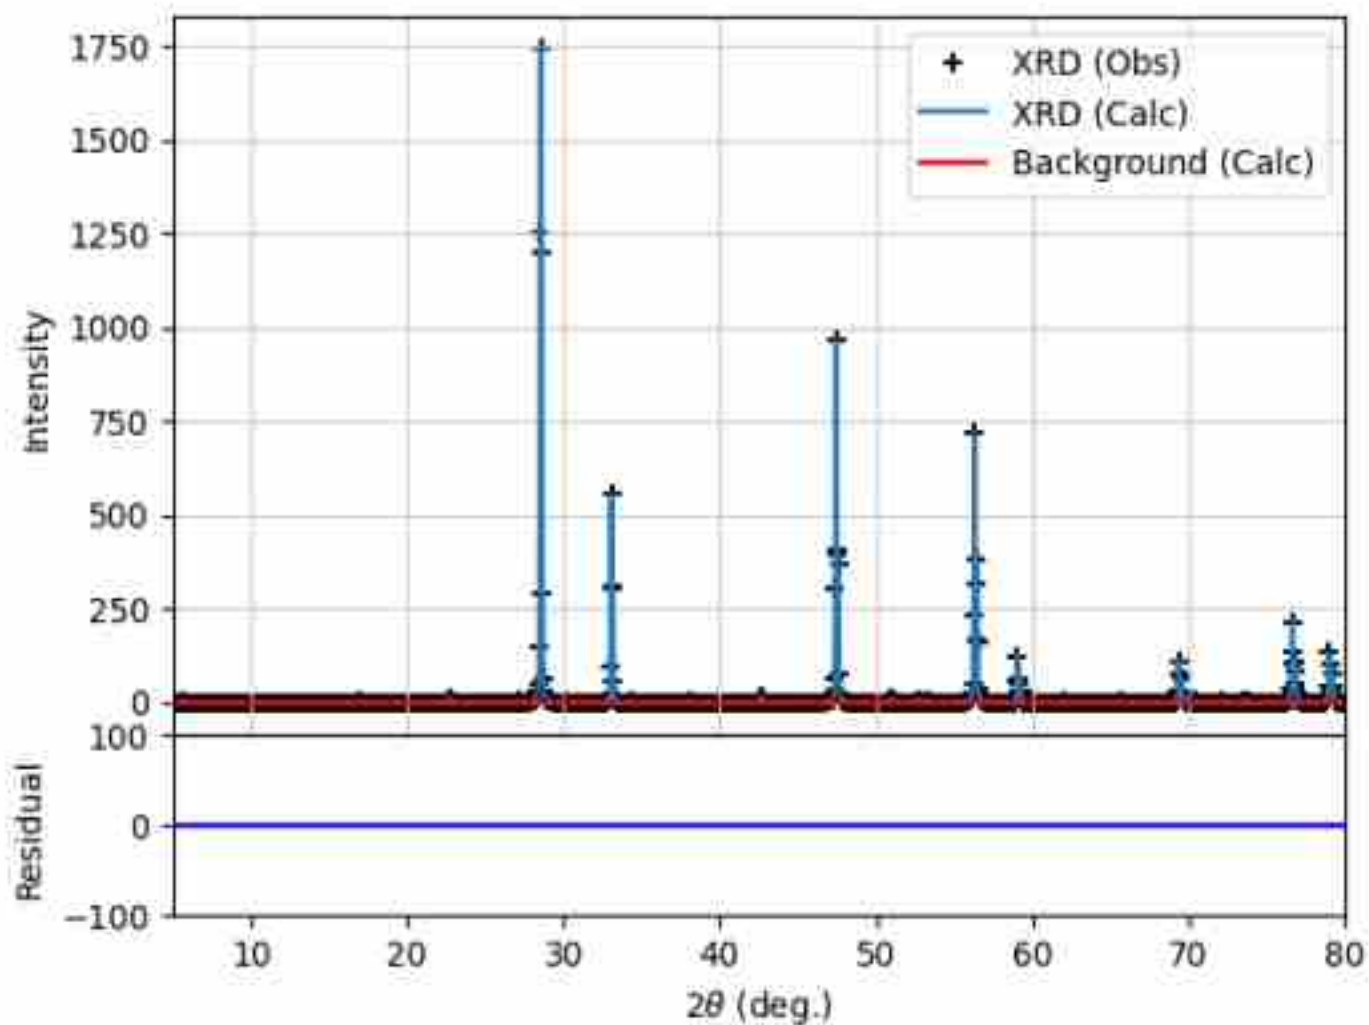

| RMSE before RR | Rwp     | RMSE after RR |
|----------------|---------|---------------|
| 0.048          | 0.00289 | 0.00109       |

# Co<sub>4</sub>Bi<sub>12</sub>

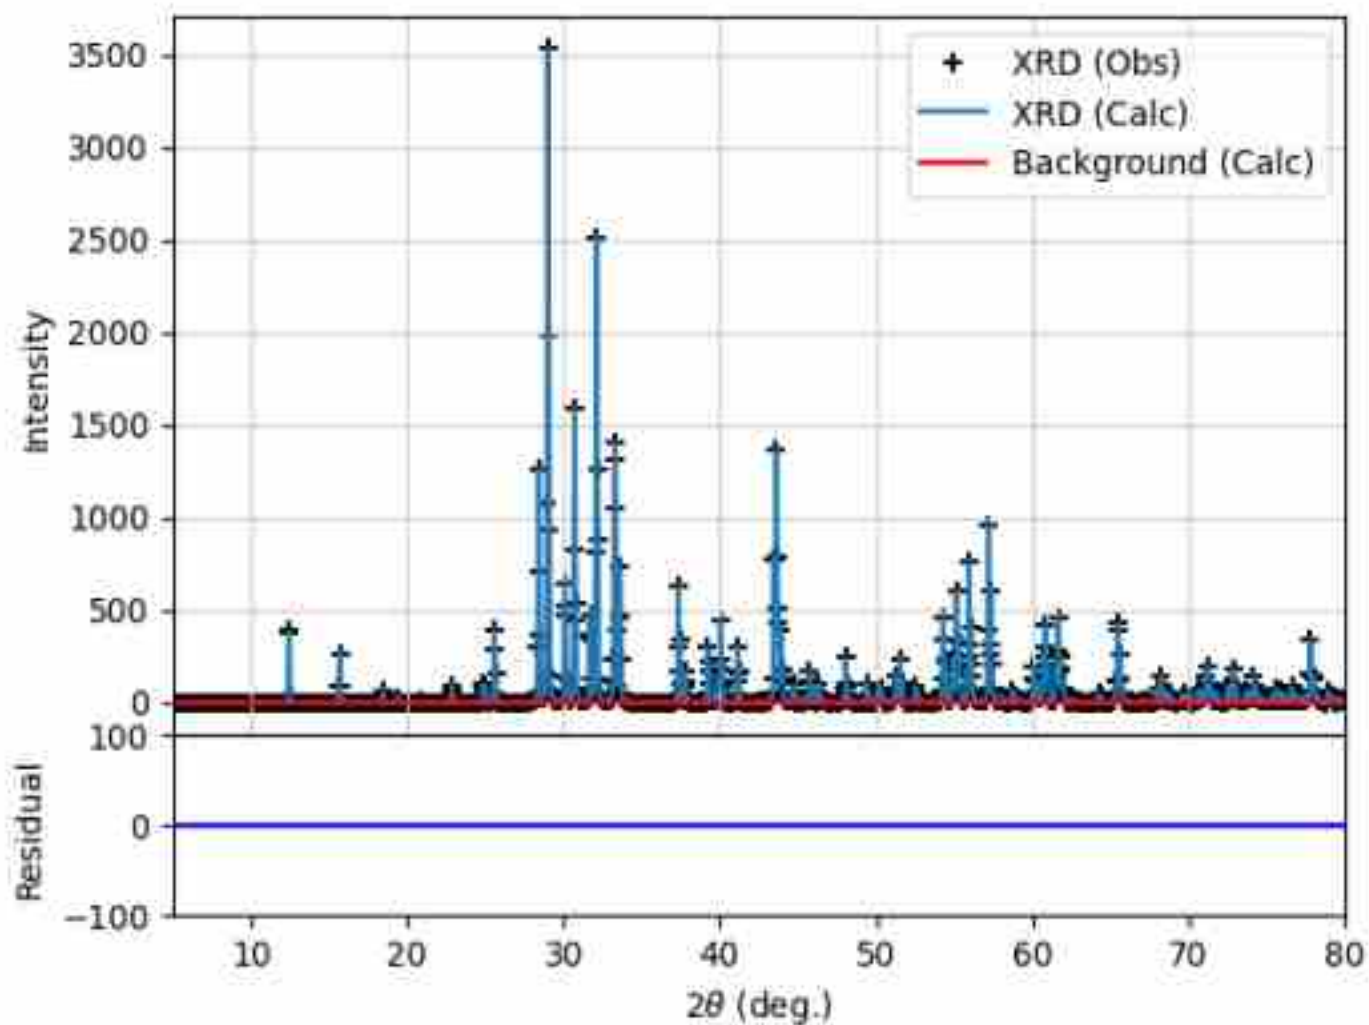

| RMSE before RR | Rwp     | RMSE after RR |
|----------------|---------|---------------|
| 0.048          | 0.00477 | 0.00077       |

# Cs<sub>4</sub>Li<sub>4</sub>O<sub>4</sub>

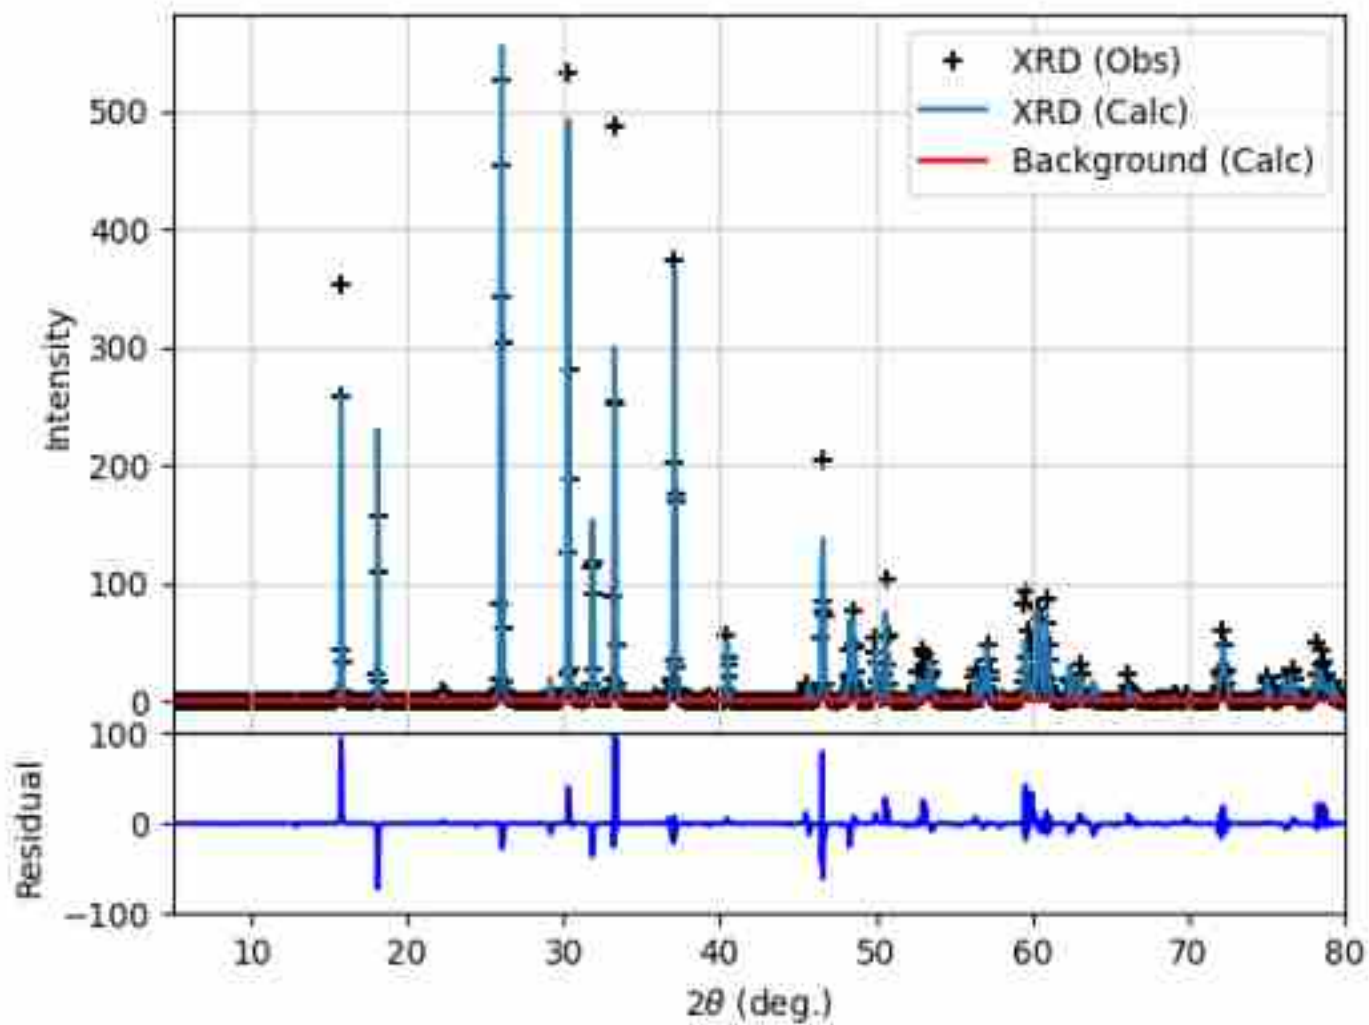

| RMSE before RR | Rwp      | RMSE after RR |
|----------------|----------|---------------|
| 0.048          | 32.77746 | 0.24852       |

# Li<sub>2</sub>Cr<sub>4</sub>O<sub>6</sub>

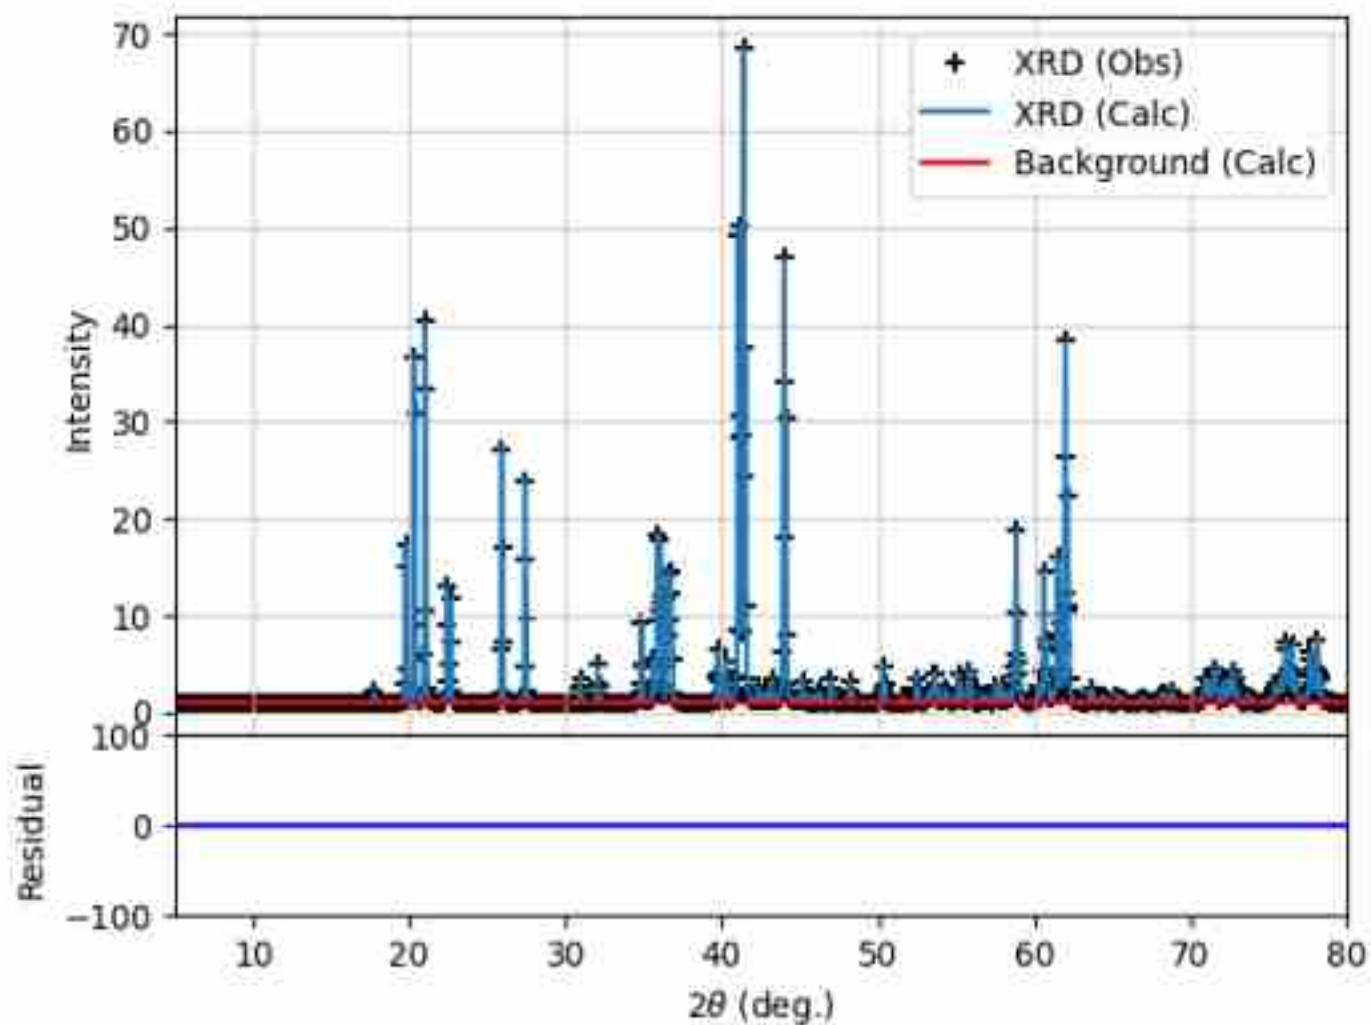

| RMSE before RR | Rwp     | RMSE after RR |
|----------------|---------|---------------|
| 0.048          | 0.00031 | 0.0           |

# Li<sub>2</sub>Mn<sub>2</sub>F<sub>8</sub>

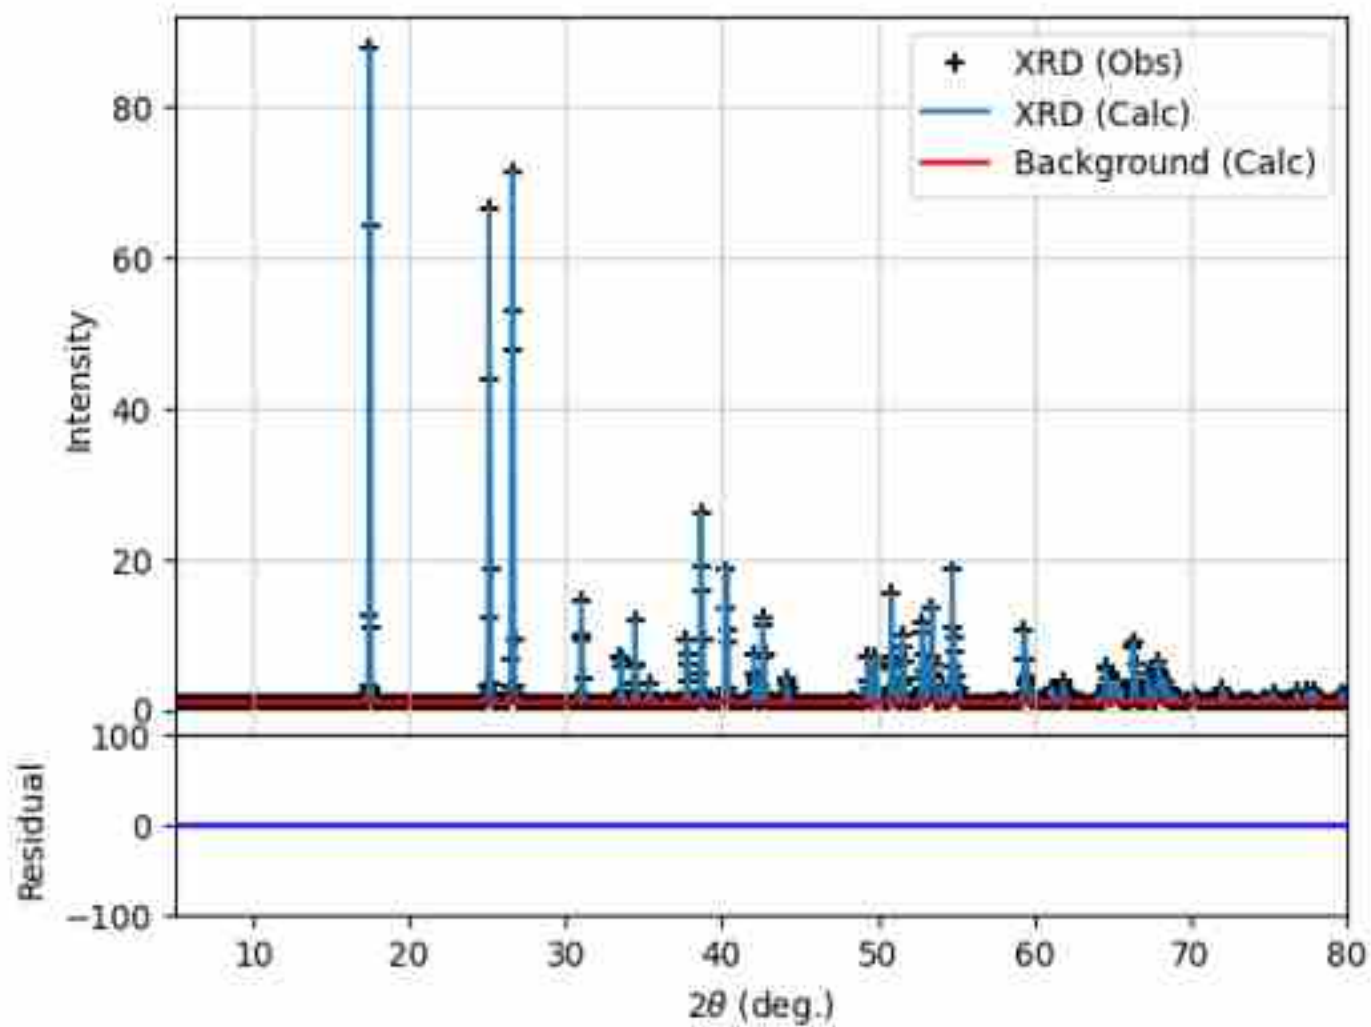

| RMSE before RR | Rwp    | RMSE after RR |
|----------------|--------|---------------|
| 0.048          | 0.0028 | 0.0009        |



# Li<sub>2</sub>Mn<sub>2</sub>P<sub>2</sub>O<sub>8</sub>F<sub>2</sub>

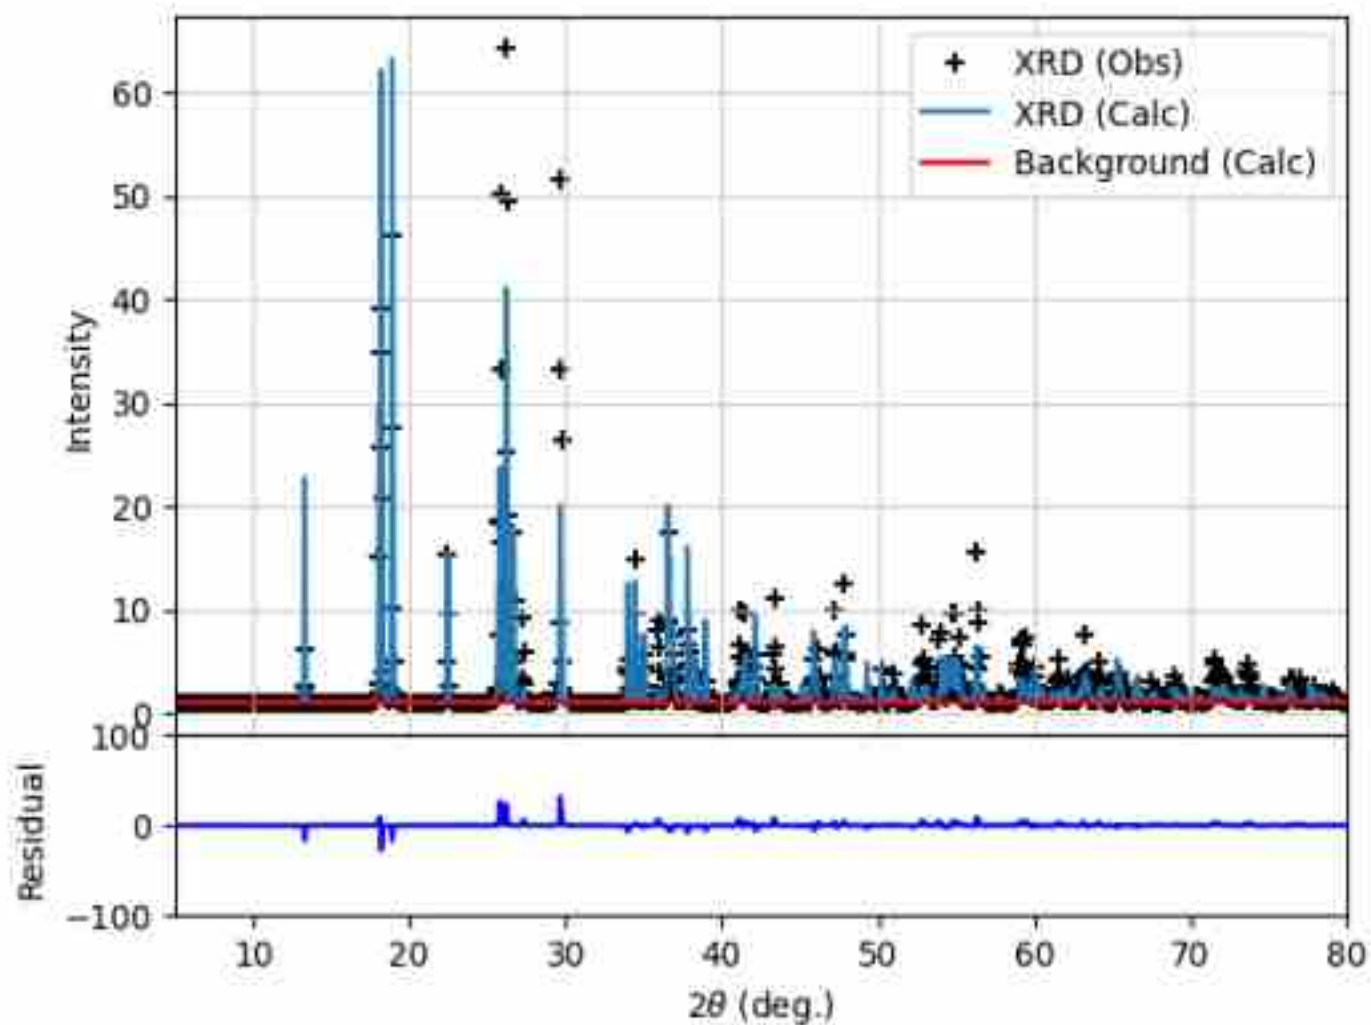

| RMSE before RR | Rwp      | RMSE after RR |
|----------------|----------|---------------|
| 0.048          | 44.34465 | None          |

# Mn<sub>2</sub>Co<sub>2</sub>Sb<sub>2</sub>

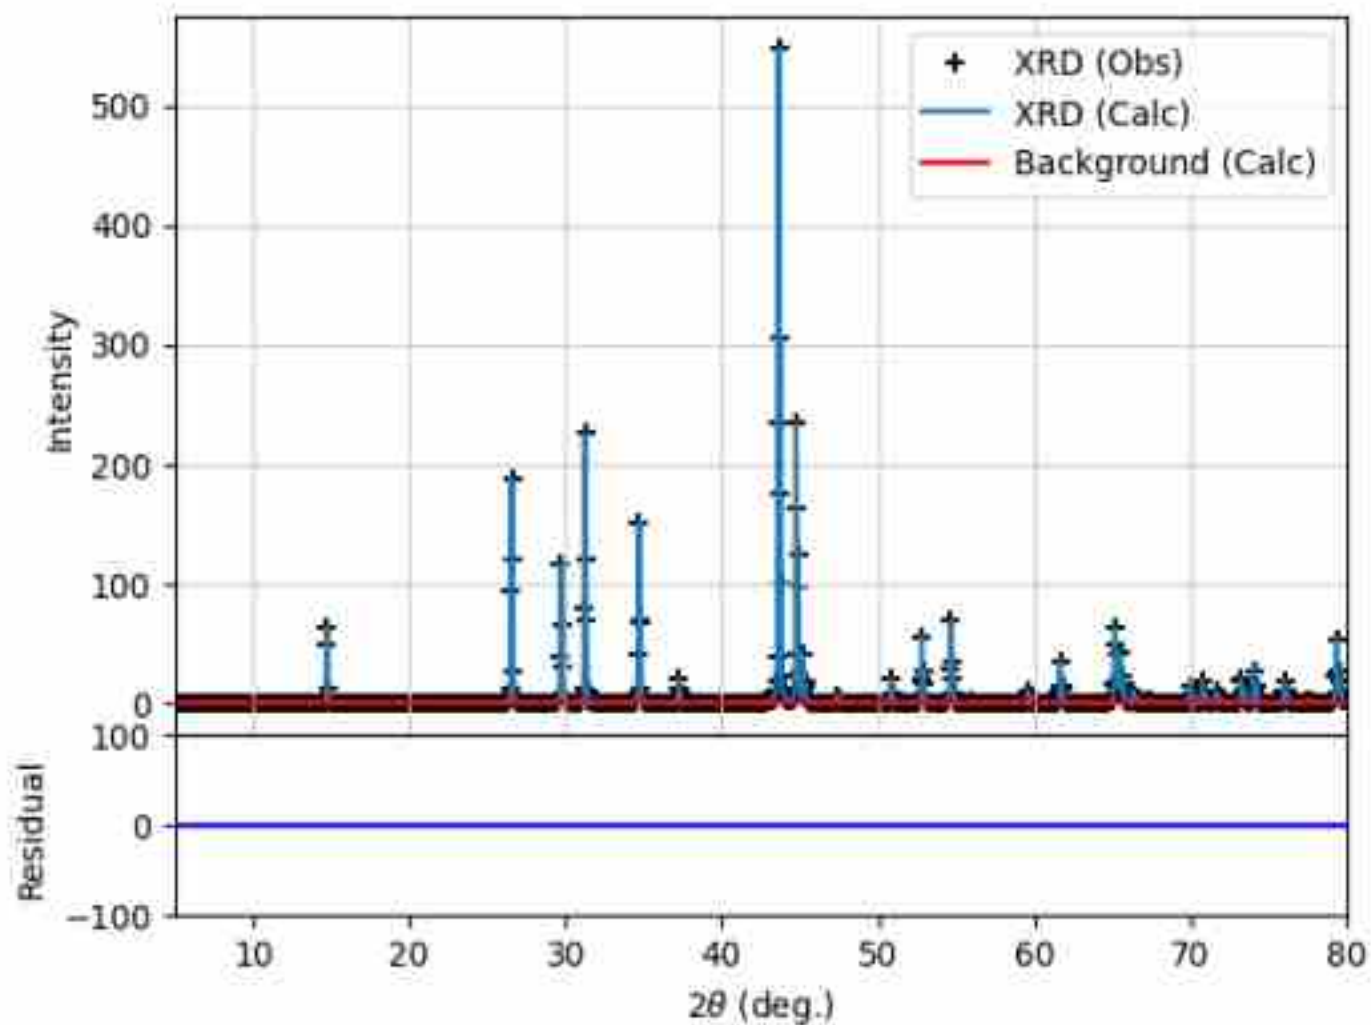

| RMSE before RR | Rwp     | RMSE after RR |
|----------------|---------|---------------|
| 0.048          | 0.00535 | 0.00082       |

# Mn<sub>2</sub>Ge<sub>2</sub>O<sub>6</sub>

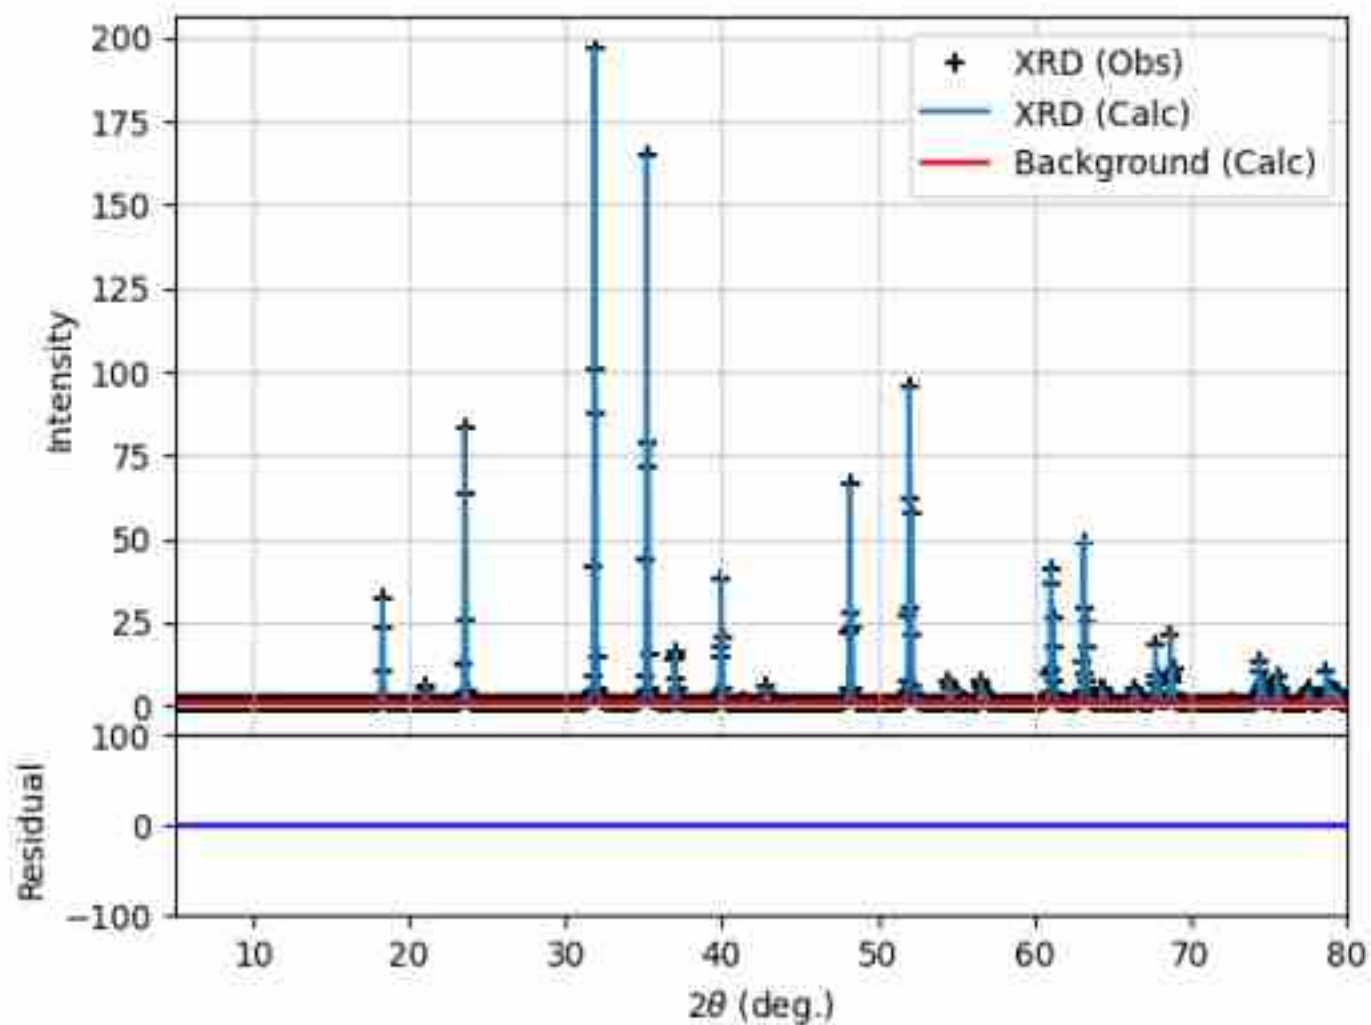

| RMSE before RR | Rwp     | RMSE after RR |
|----------------|---------|---------------|
| 0.048          | 0.00376 | 0.00043       |

# Na<sub>4</sub>Ni<sub>4</sub>O<sub>8</sub>

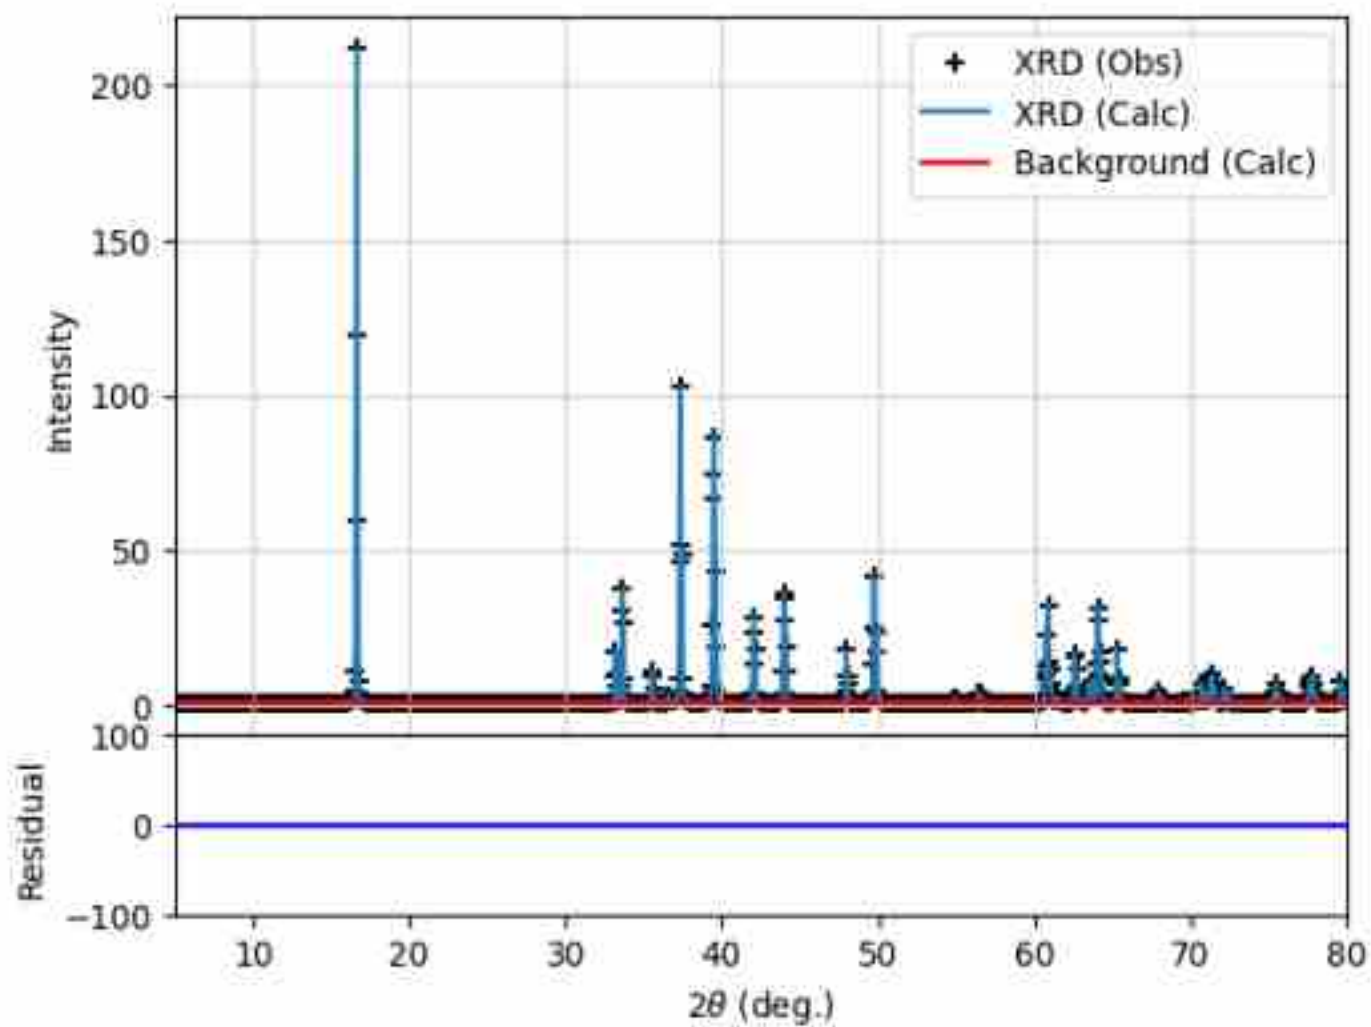

| RMSE before RR | Rwp     | RMSE after RR |
|----------------|---------|---------------|
| 0.048          | 0.00197 | 0.00019       |

# Rb4P4O12

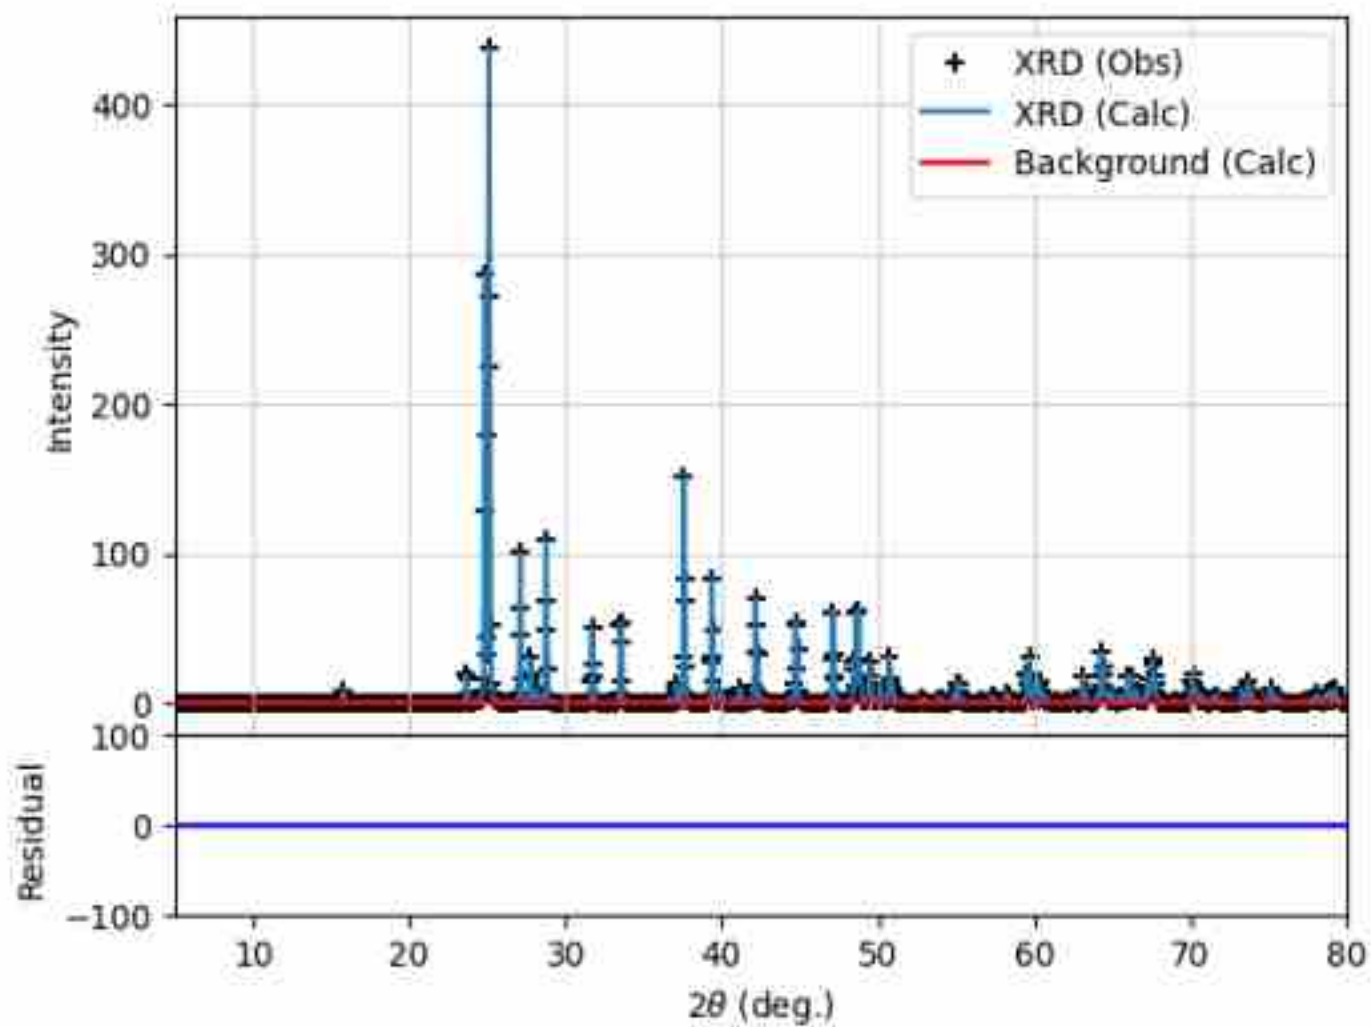

| RMSE before RR | Rwp     | RMSE after RR |
|----------------|---------|---------------|
| 0.048          | 0.00348 | 0.00076       |

# Sr2S4

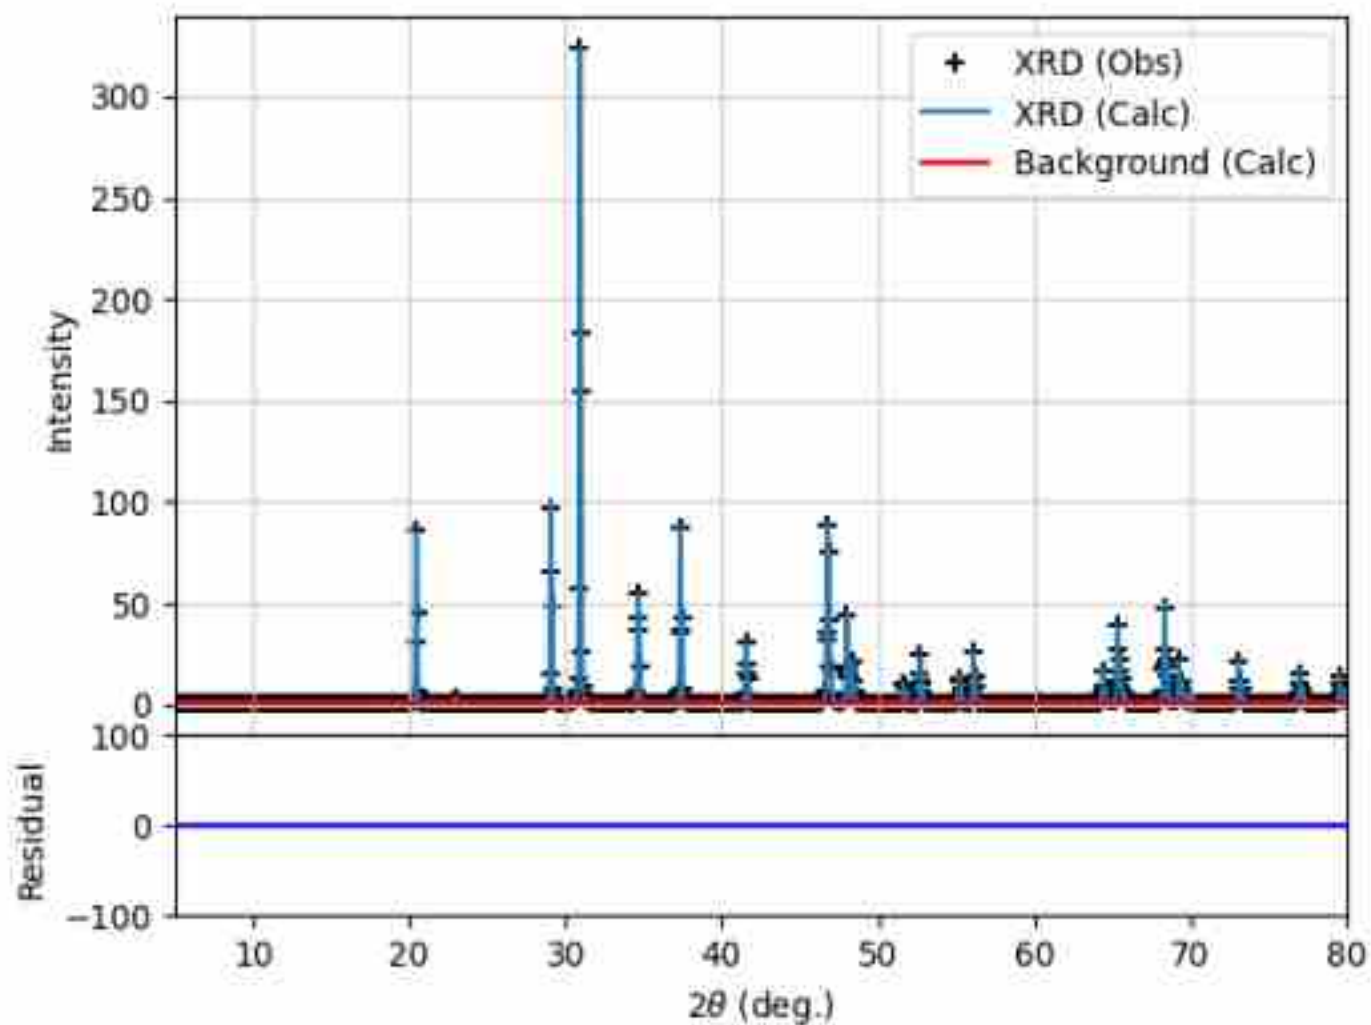

| RMSE before RR | Rwp     | RMSE after RR |
|----------------|---------|---------------|
| 0.048          | 0.00368 | 0.00042       |

# U10Ge8

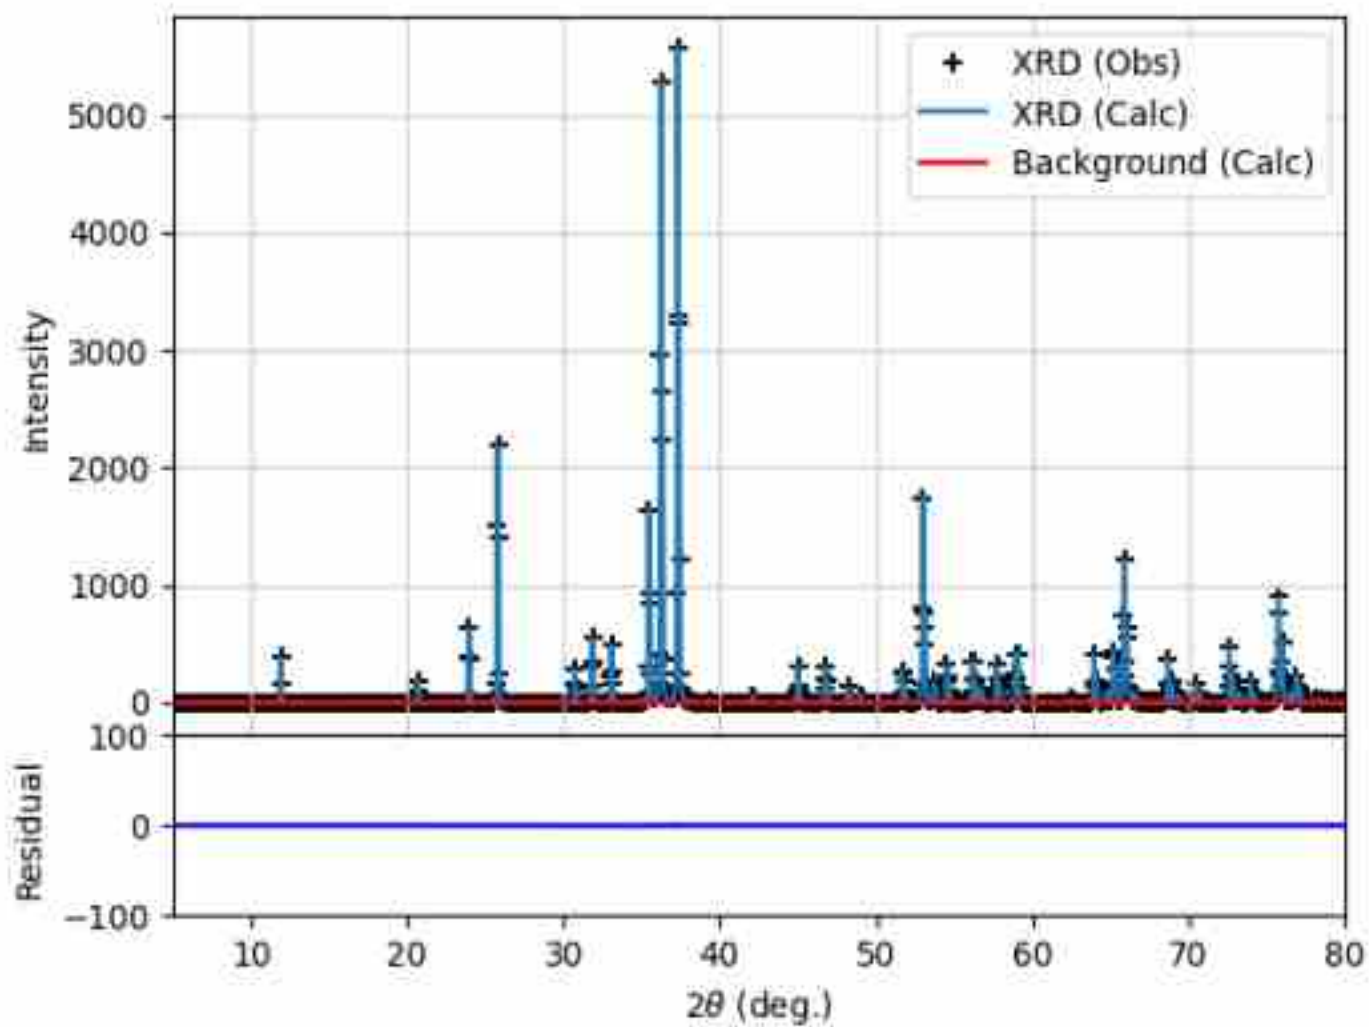

| RMSE before RR | Rwp     | RMSE after RR |
|----------------|---------|---------------|
| 0.048          | 0.02501 | 0.00149       |

# Ca<sub>4</sub>Si<sub>4</sub>N<sub>8</sub>

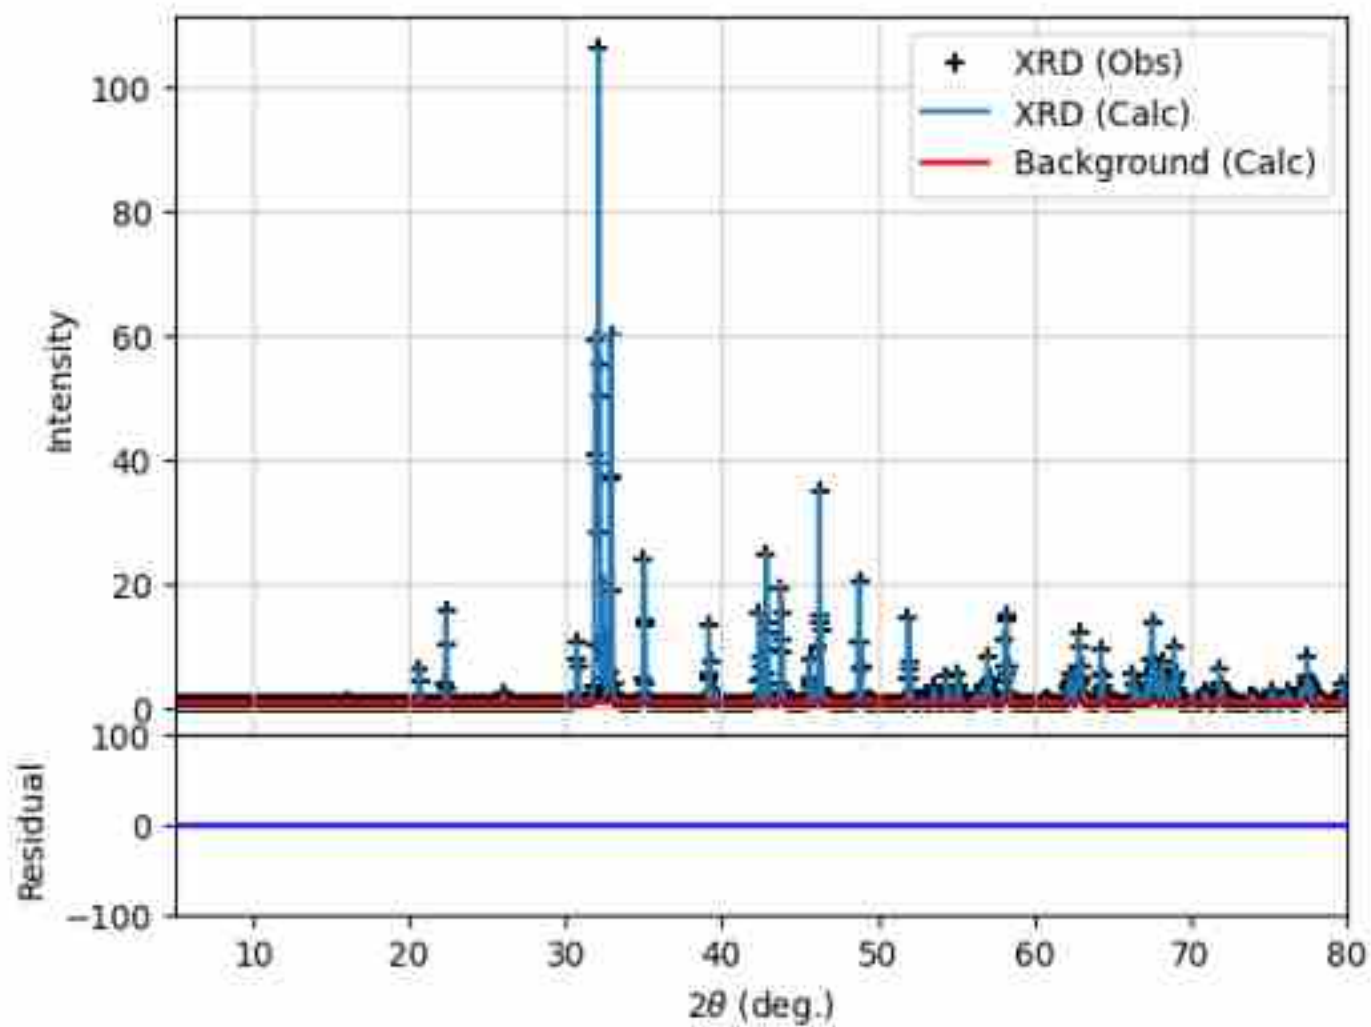

| RMSE before RR | Rwp     | RMSE after RR |
|----------------|---------|---------------|
| 0.049          | 0.00336 | 0.00096       |



# Cu<sub>4</sub>As<sub>4</sub>S<sub>4</sub>

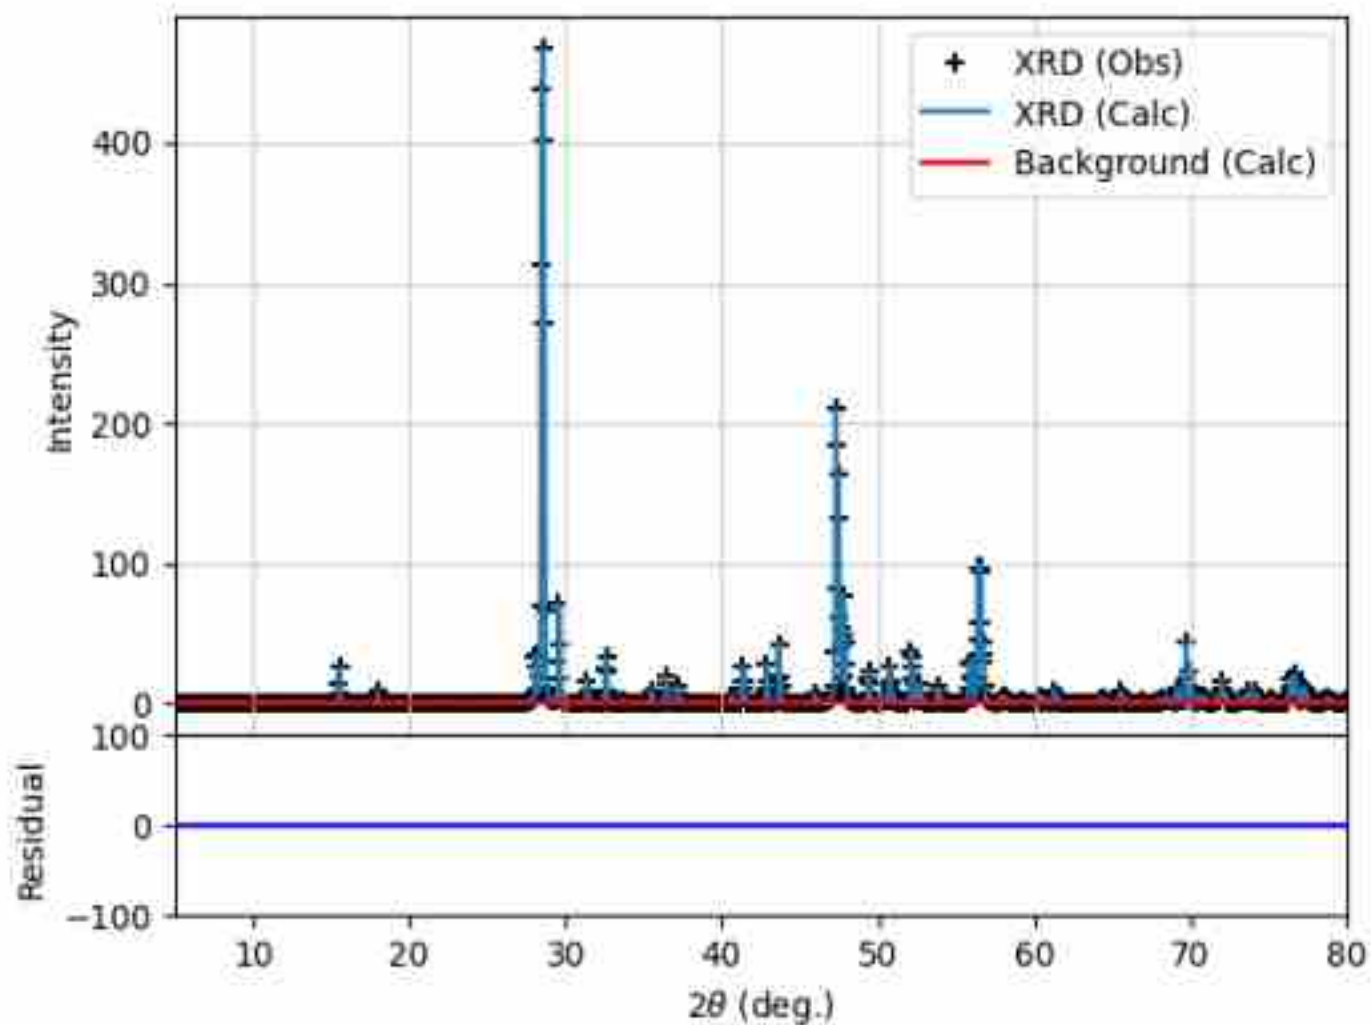

| RMSE before RR | Rwp     | RMSE after RR |
|----------------|---------|---------------|
| 0.049          | 0.00389 | 0.00058       |

# Li<sub>2</sub>Mn<sub>4</sub>N<sub>6</sub>

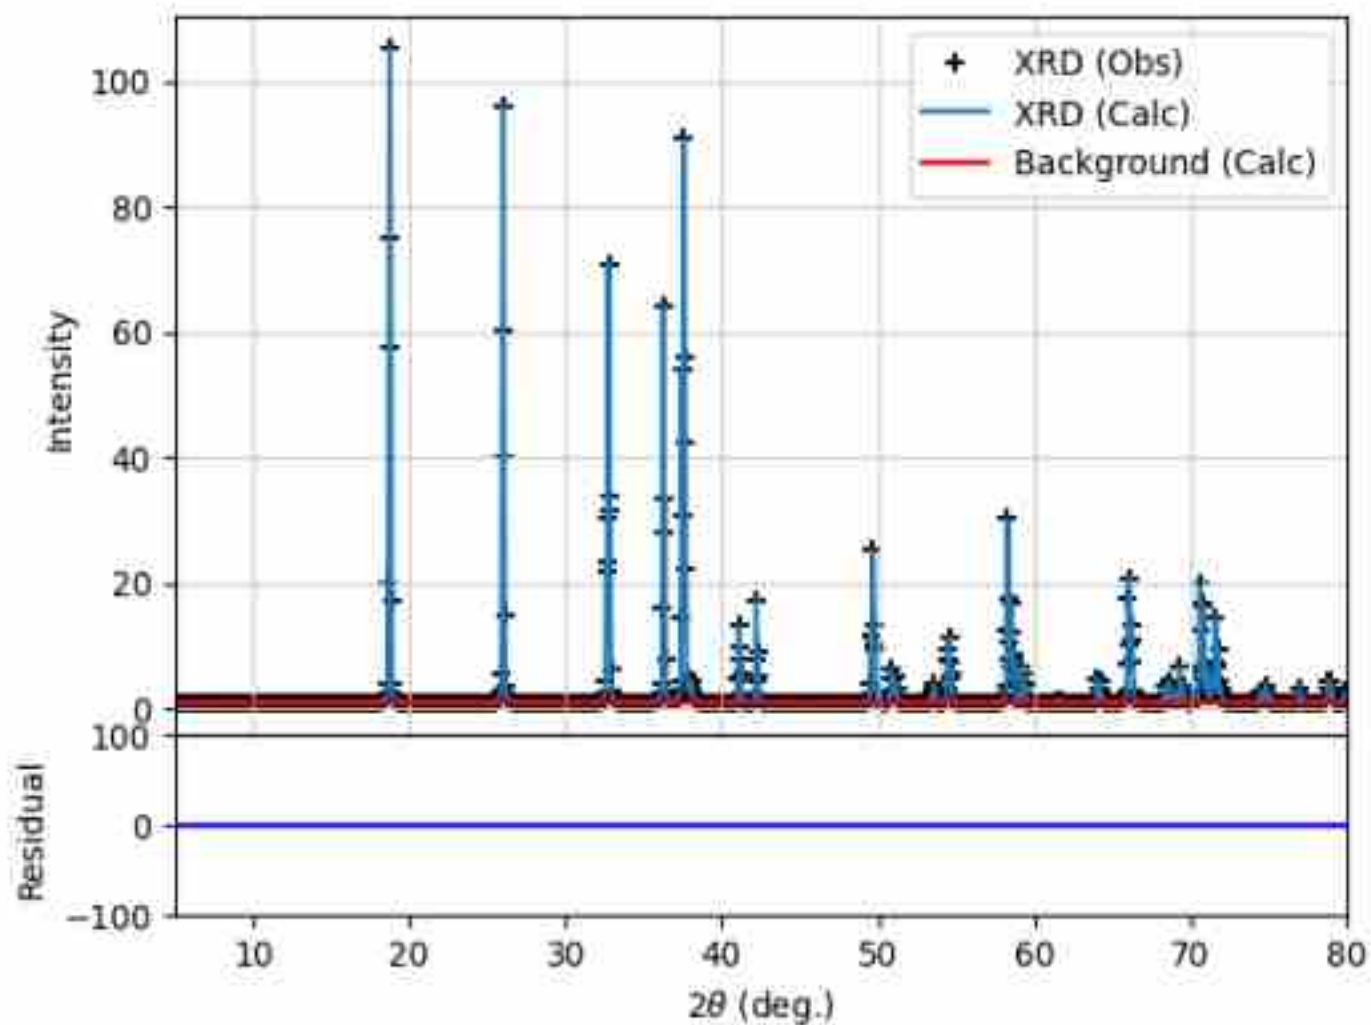

| RMSE before RR | Rwp     | RMSE after RR |
|----------------|---------|---------------|
| 0.049          | 0.00302 | 0.00139       |

# Li<sub>4</sub>Mg<sub>2</sub>

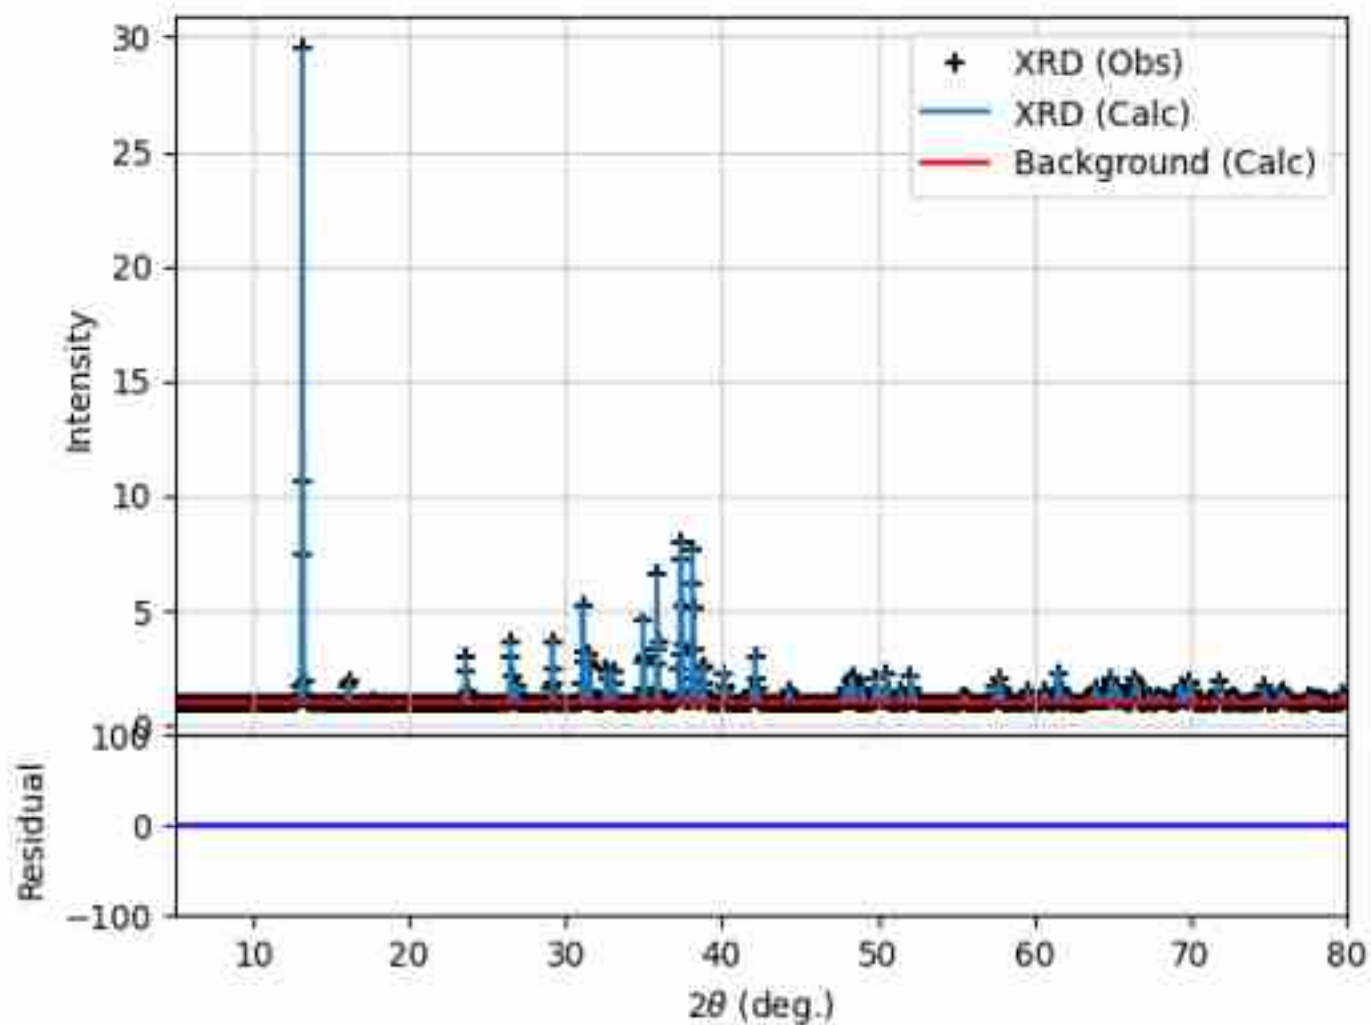

| RMSE before RR | Rwp     | RMSE after RR |
|----------------|---------|---------------|
| 0.049          | 0.00101 | 0.00064       |

# Lu<sub>2</sub>Cu<sub>2</sub>Pb<sub>2</sub>S<sub>6</sub>

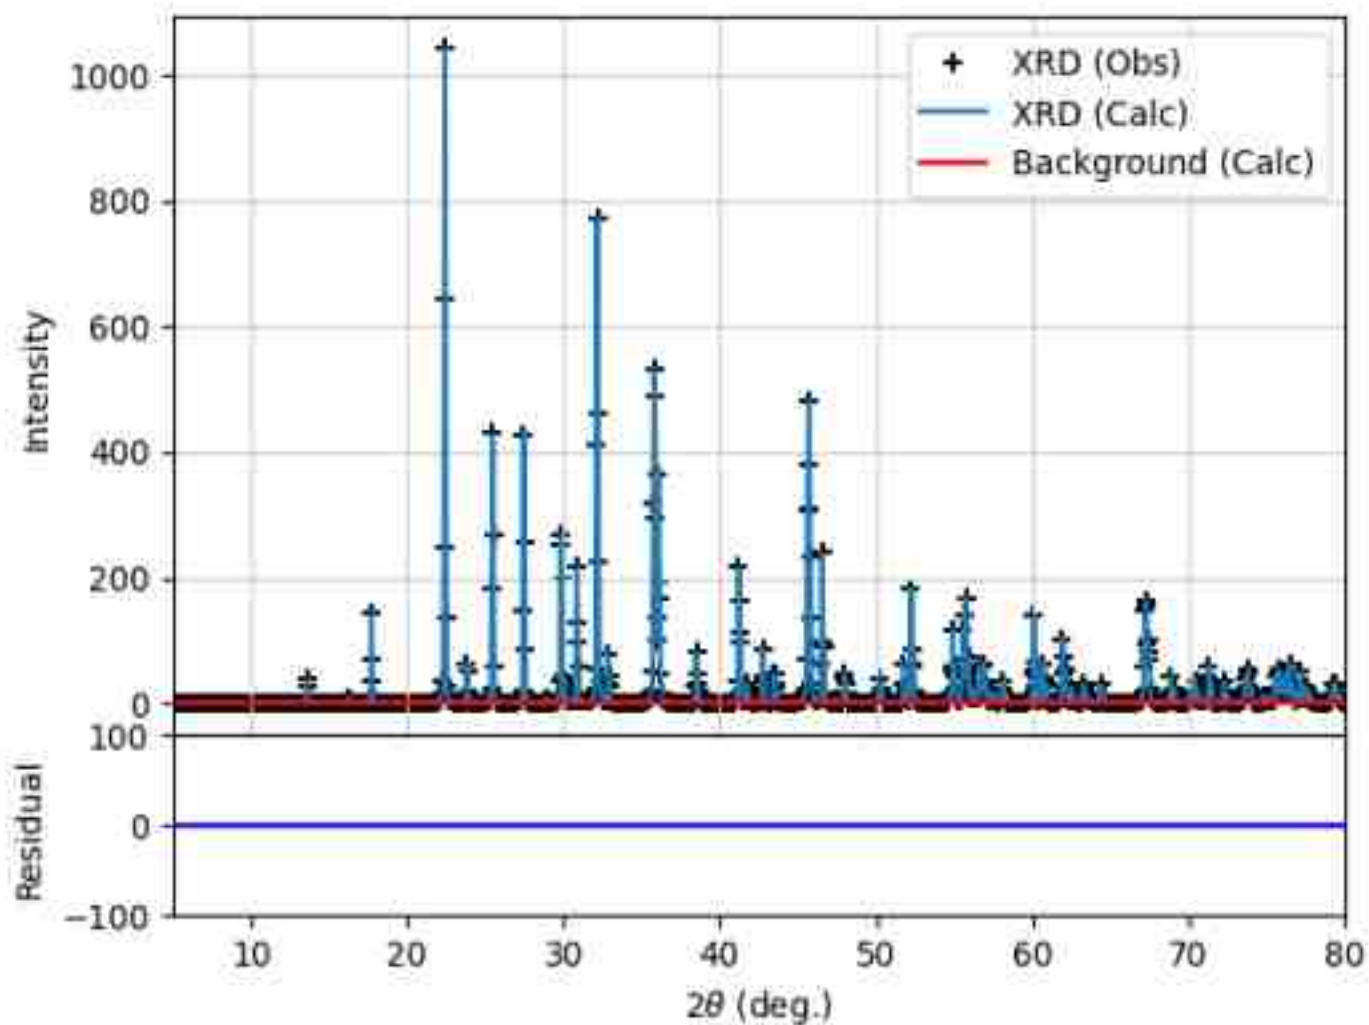

| RMSE before RR | Rwp     | RMSE after RR |
|----------------|---------|---------------|
| 0.049          | 0.00381 | 0.00089       |

# Mn<sub>4</sub>CrCo<sub>10</sub>Sn<sub>5</sub>

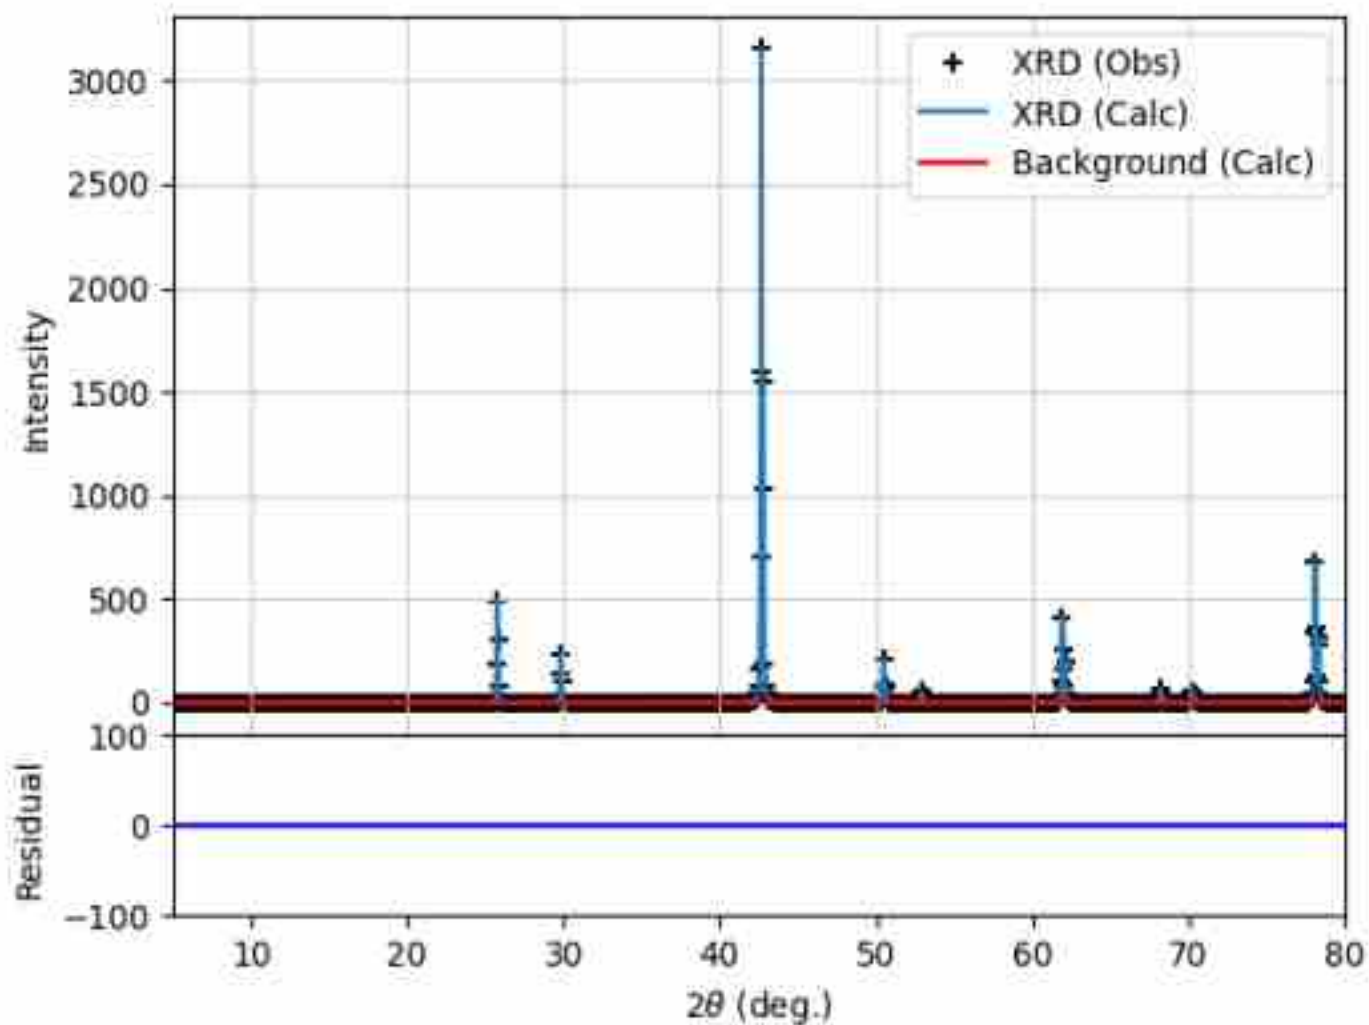

| RMSE before RR | Rwp     | RMSE after RR |
|----------------|---------|---------------|
| 0.049          | 0.01162 | 0.00106       |

# Na<sub>3</sub>Eu<sub>3</sub>F<sub>12</sub>

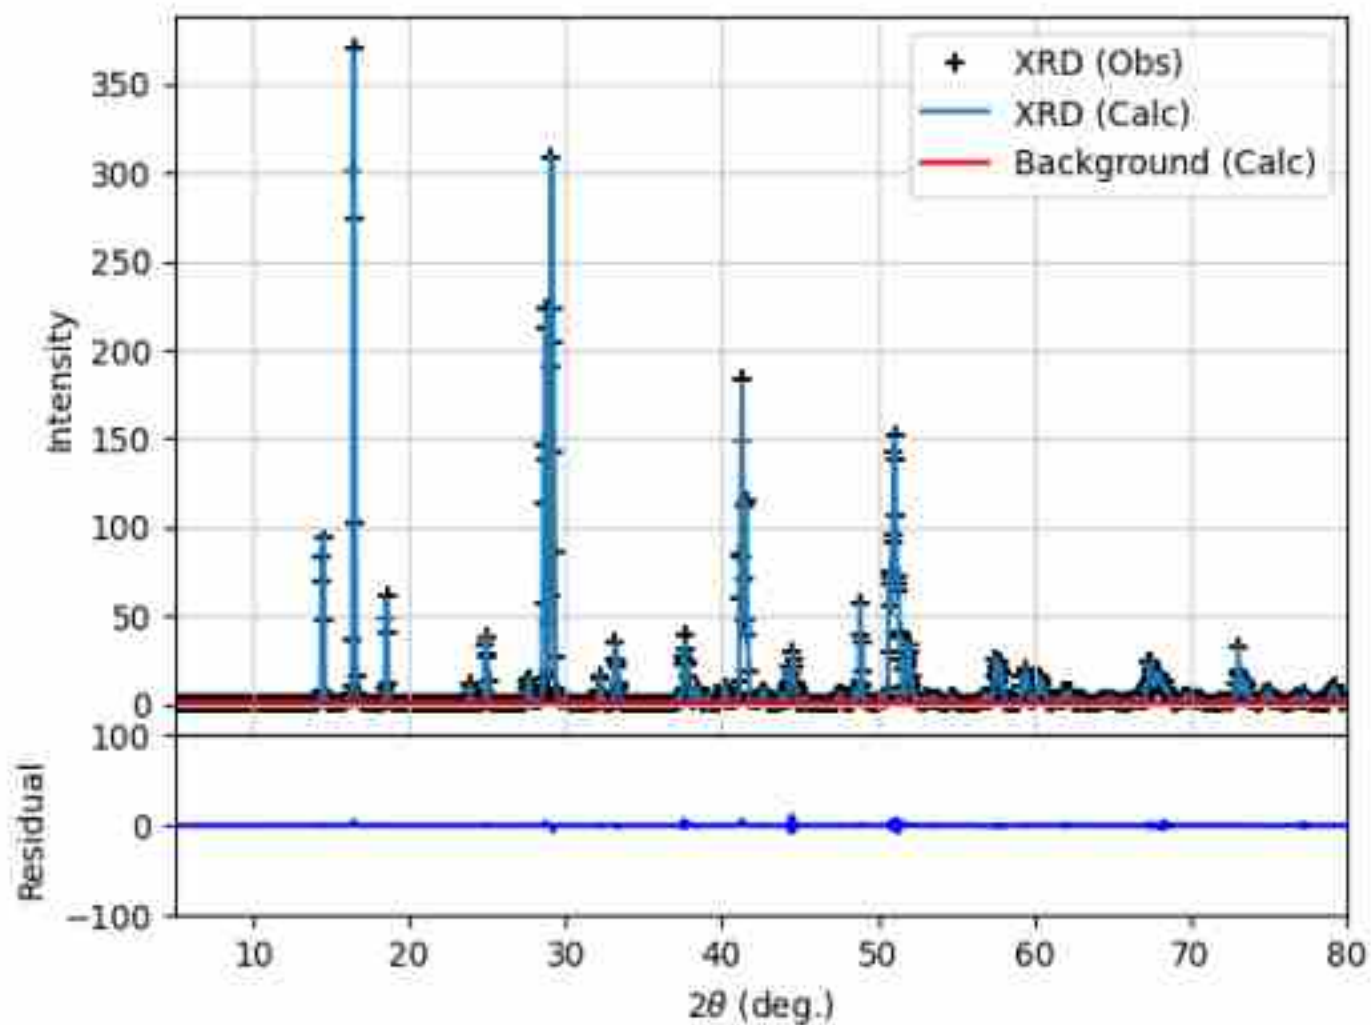

| RMSE before RR | Rwp     | RMSE after RR |
|----------------|---------|---------------|
| 0.049          | 6.73369 | 0.06621       |

# Na<sub>3</sub>Pr<sub>3</sub>F<sub>12</sub>

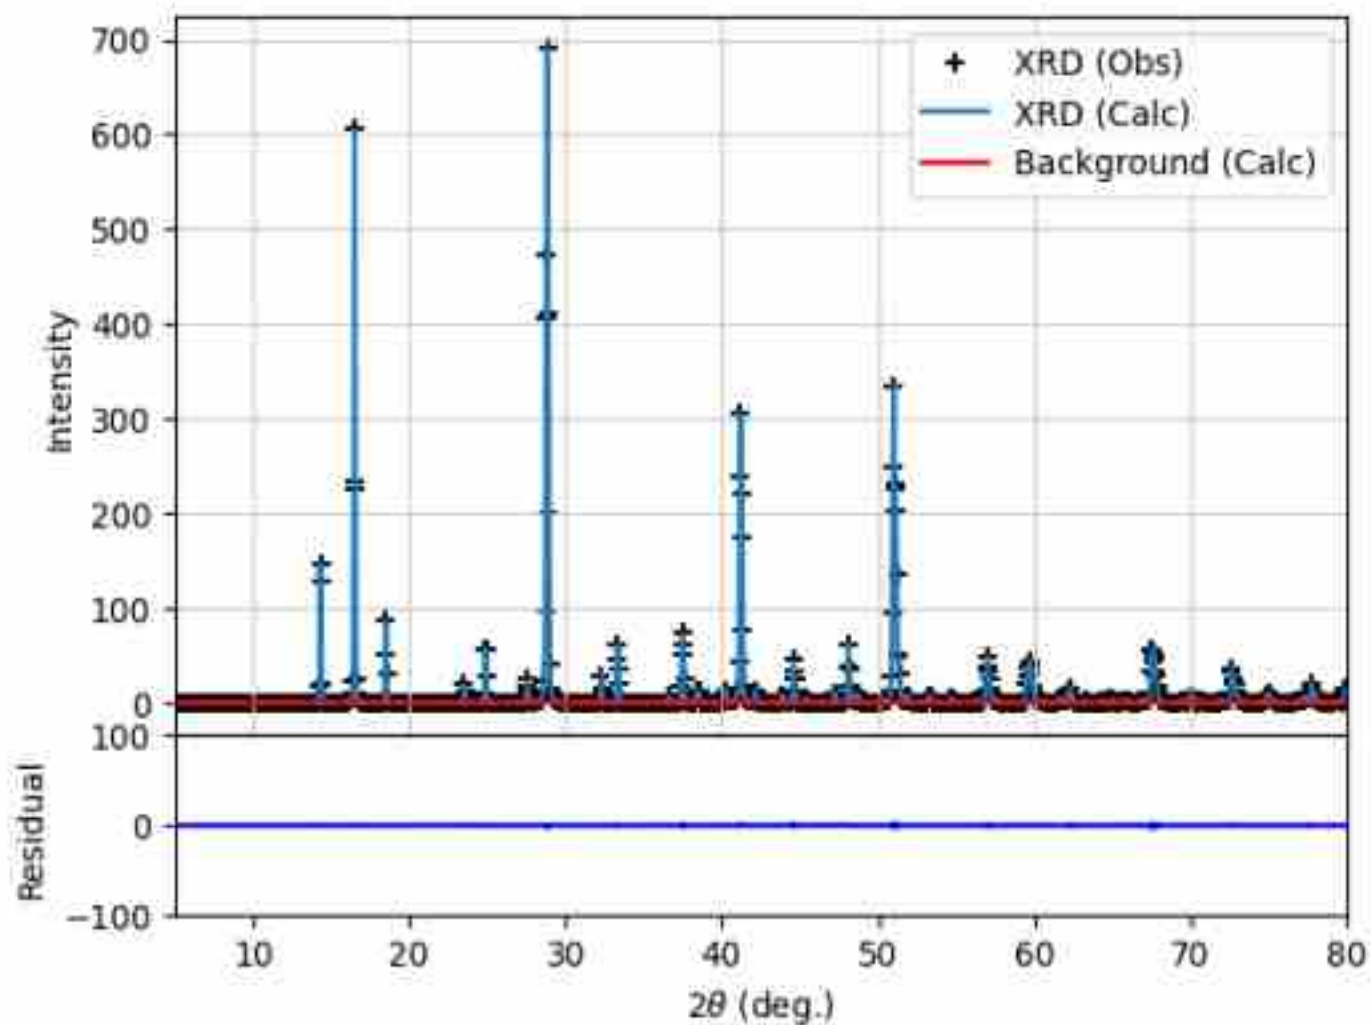

| RMSE before RR | Rwp    | RMSE after RR |
|----------------|--------|---------------|
| 0.049          | 1.5074 | 0.02384       |

# Sn<sub>4</sub>P<sub>4</sub>Se<sub>12</sub>

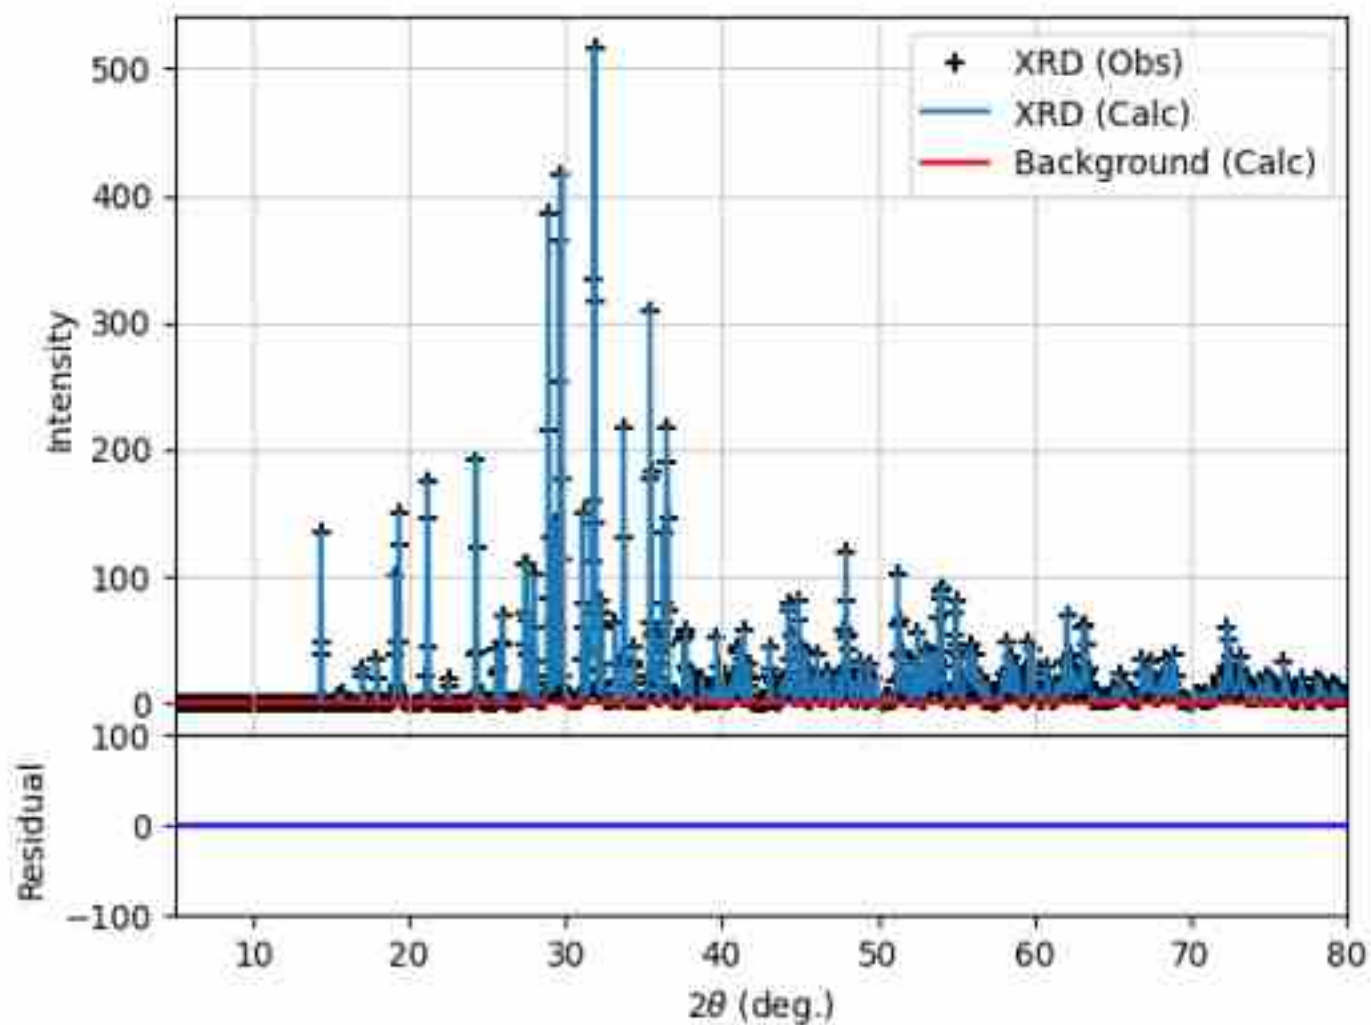

| RMSE before RR | Rwp     | RMSE after RR |
|----------------|---------|---------------|
| 0.049          | 0.00364 | 0.00033       |



# Sr<sub>2</sub>Zn<sub>1</sub>P<sub>2</sub>

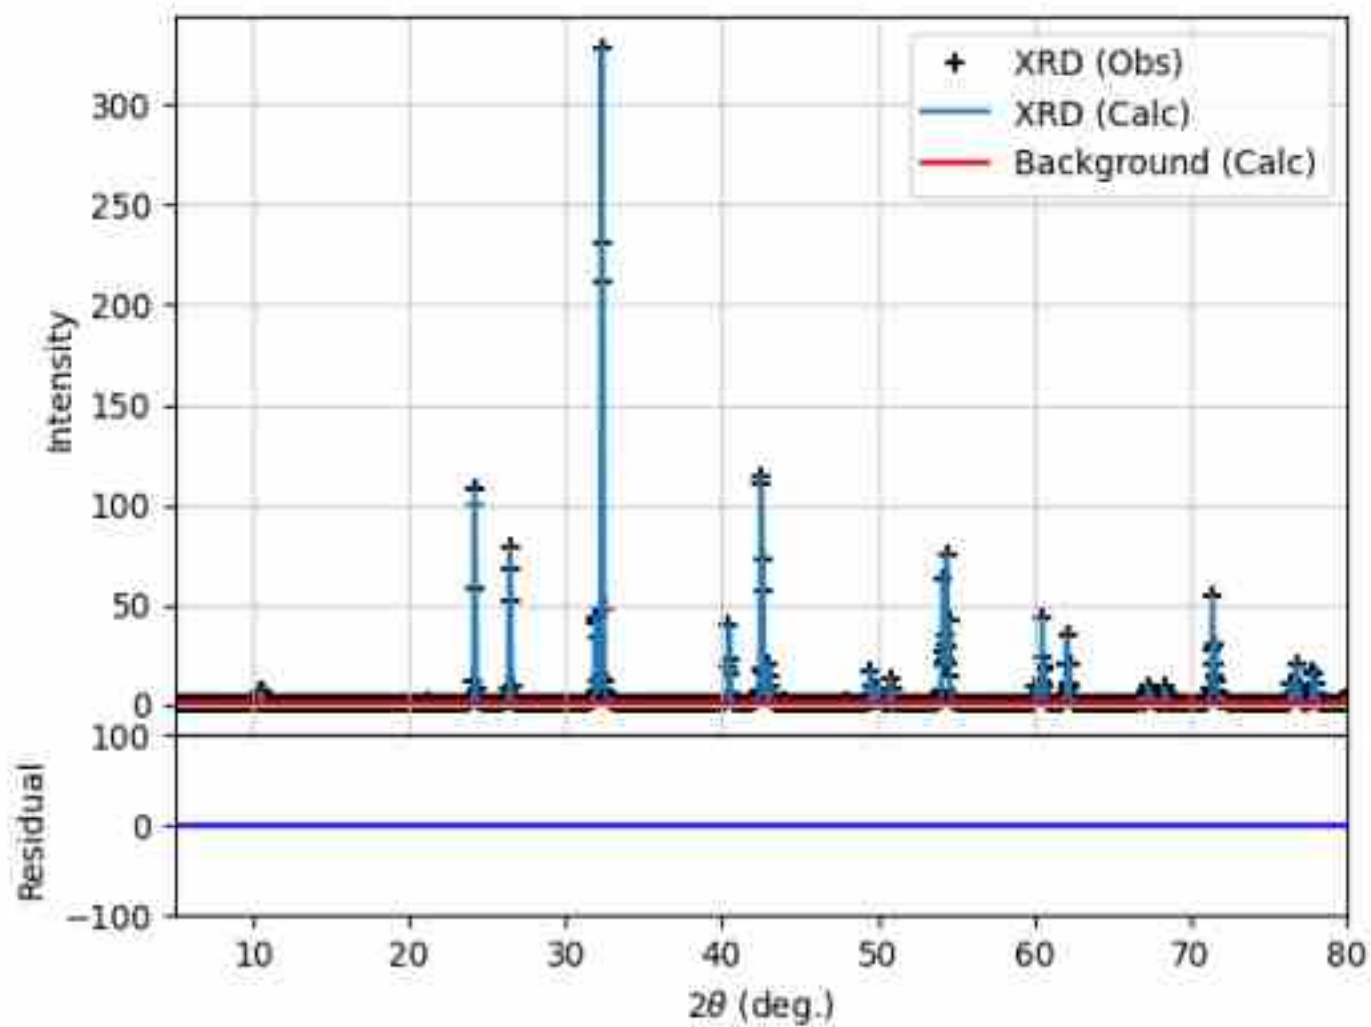

| RMSE before RR | Rwp     | RMSE after RR |
|----------------|---------|---------------|
| 0.049          | 0.00393 | 0.00055       |

# Sr<sub>4</sub>Fe<sub>3</sub>Cl<sub>11</sub>O<sub>8</sub>

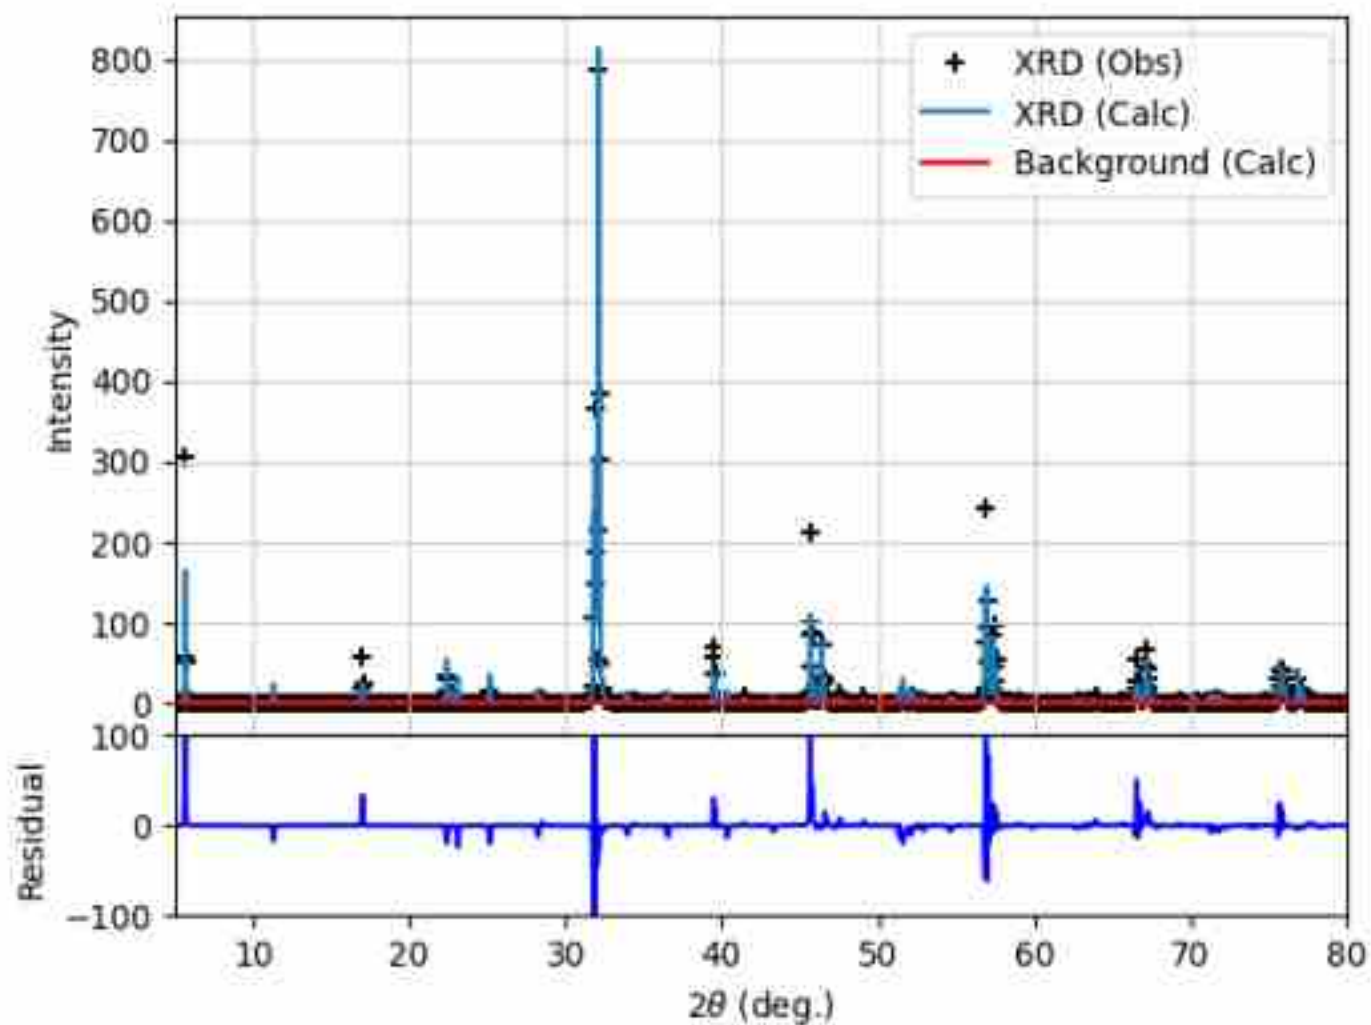

| RMSE before RR | Rwp      | RMSE after RR |
|----------------|----------|---------------|
| 0.049          | 57.91194 | 0.29653       |

# W4Se6S2

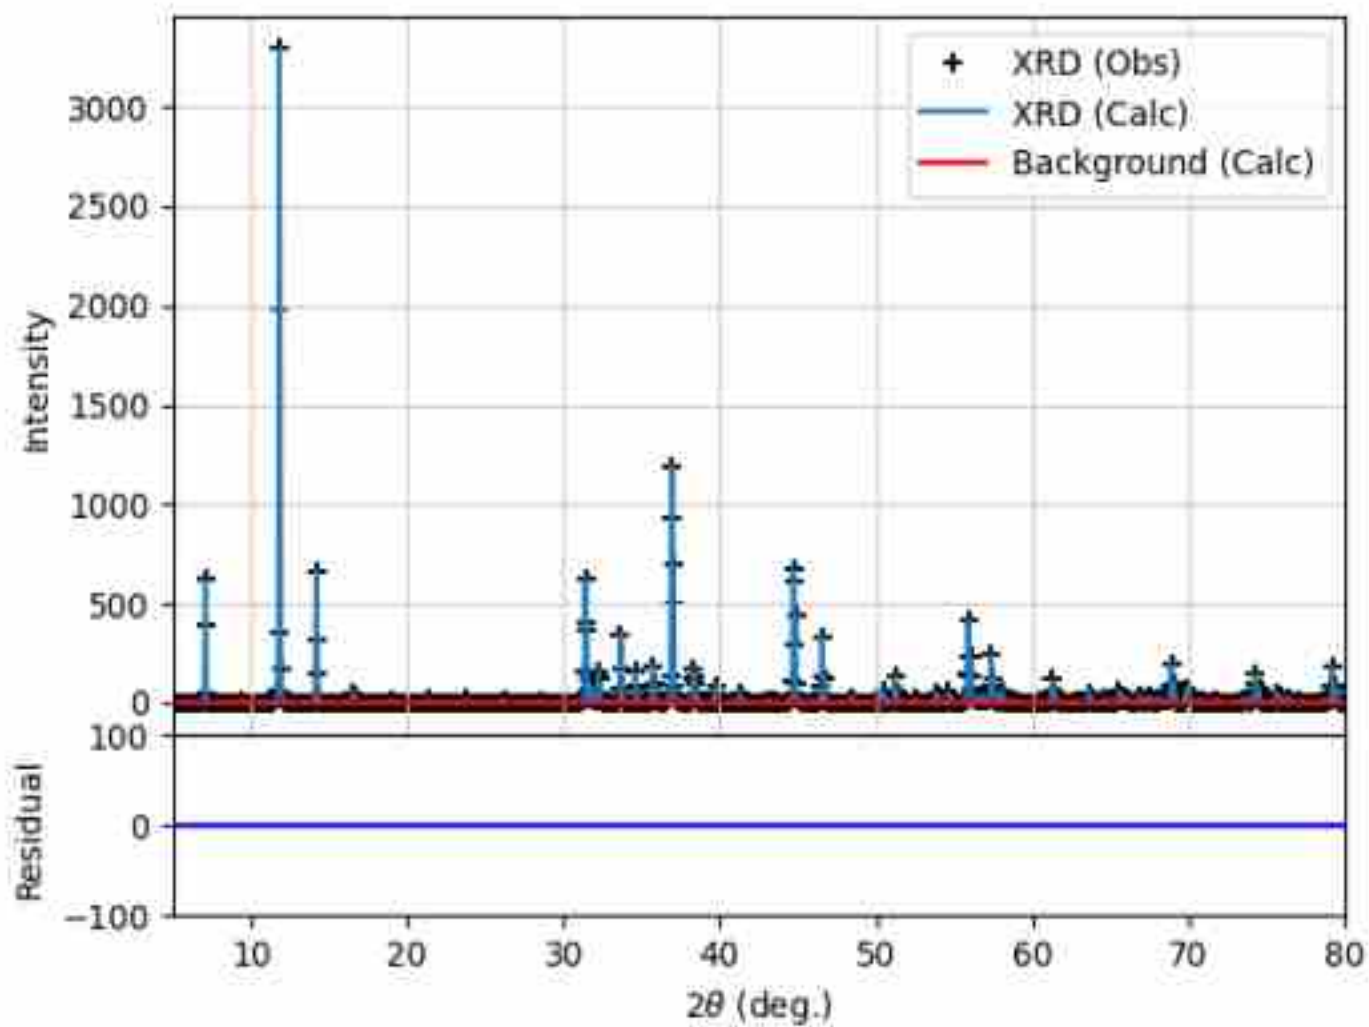

| RMSE before RR | Rwp     | RMSE after RR |
|----------------|---------|---------------|
| 0.049          | 0.00381 | 0.00037       |

# Ca<sub>2</sub>In<sub>2</sub>Br<sub>6</sub>

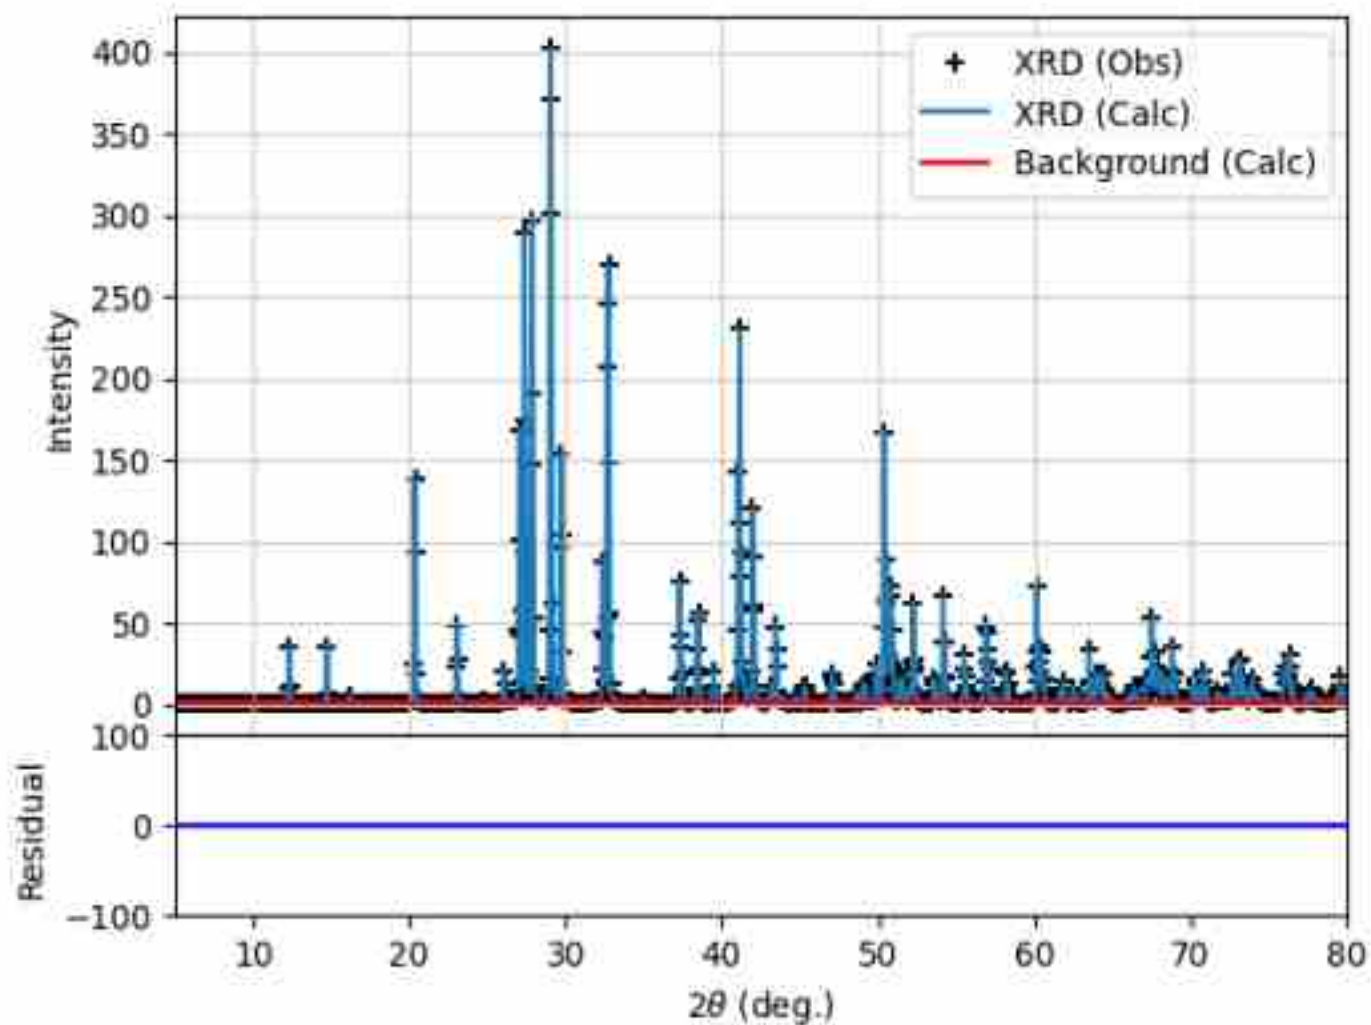

| RMSE before RR | Rwp     | RMSE after RR |
|----------------|---------|---------------|
| 0.051          | 0.00352 | 0.00023       |

# Cs1Al1Fe3Si3O12

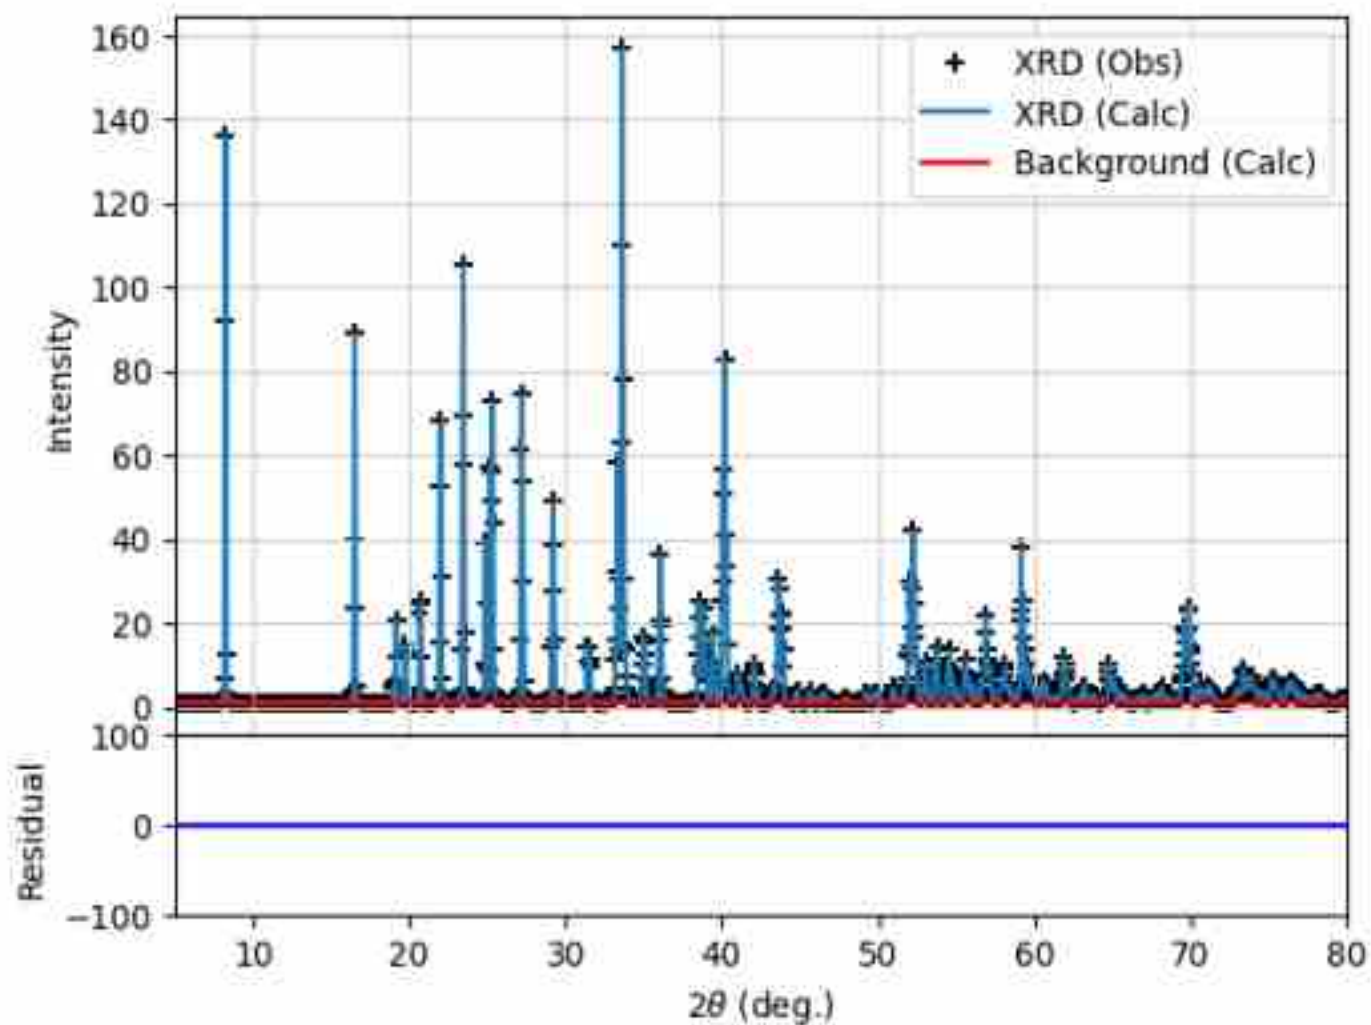

| RMSE before RR | Rwp     | RMSE after RR |
|----------------|---------|---------------|
| 0.051          | 0.00042 | 0.0           |

# Dy<sub>4</sub>C<sub>2</sub>O<sub>10</sub>

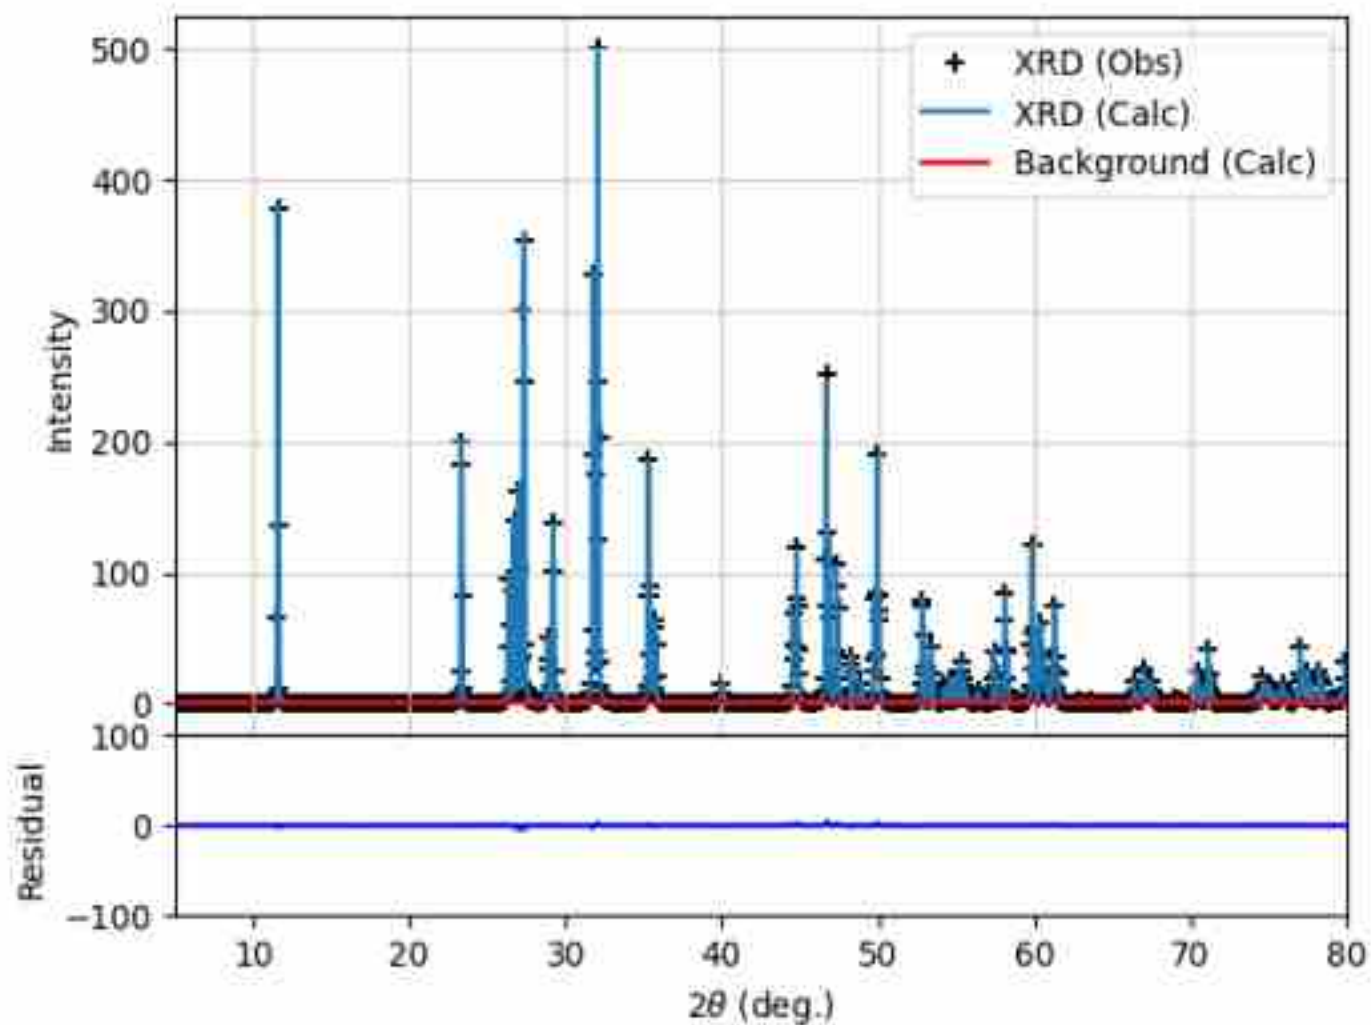

| RMSE before RR | Rwp     | RMSE after RR |
|----------------|---------|---------------|
| 0.051          | 1.34951 | 0.30769       |

# Er<sub>3</sub>Ni<sub>12</sub>

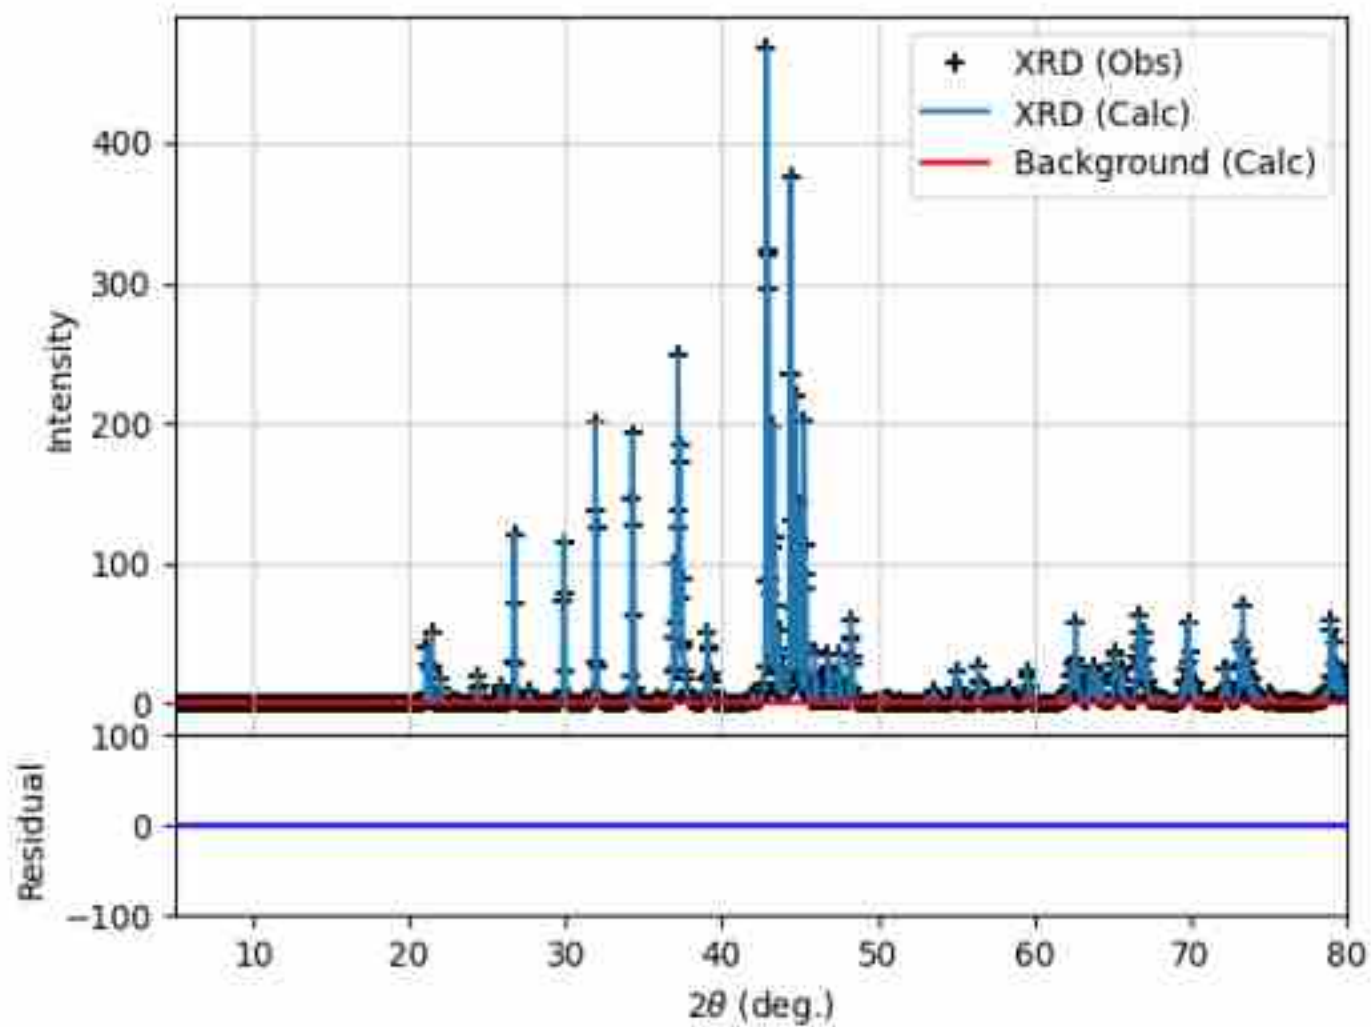

| RMSE before RR | Rwp     | RMSE after RR |
|----------------|---------|---------------|
| 0.051          | 0.00264 | 0.00047       |

# K1Sr2Bi3O9

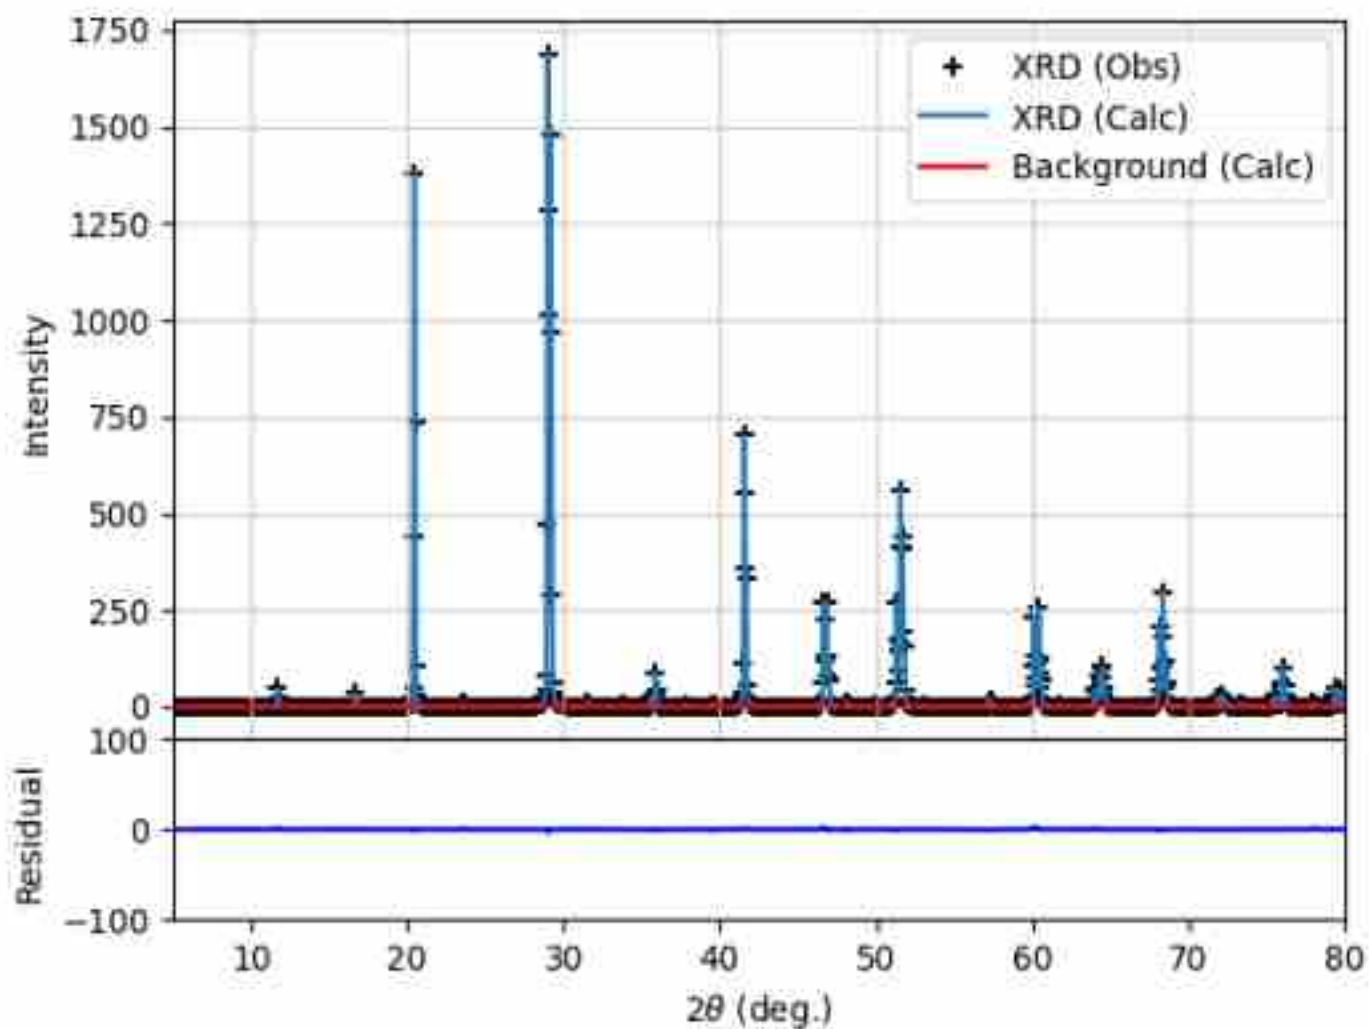

| RMSE before RR | Rwp     | RMSE after RR |
|----------------|---------|---------------|
| 0.051          | 1.35845 | 0.04493       |



# K4Ca4F12

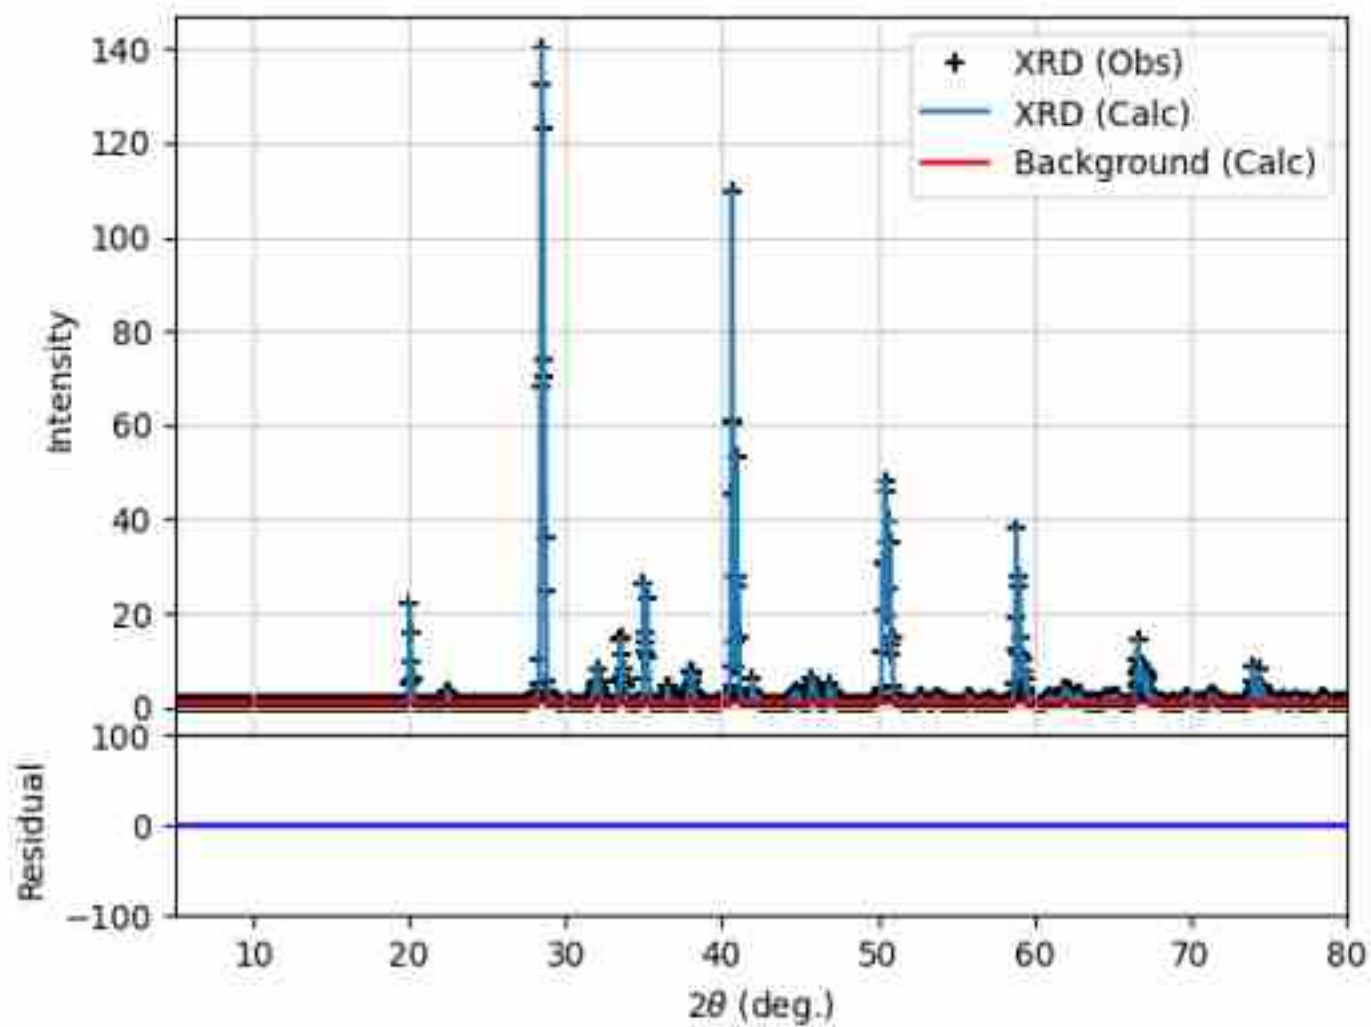

| RMSE before RR | Rwp     | RMSE after RR |
|----------------|---------|---------------|
| 0.051          | 0.00193 | 0.00061       |

# La<sub>2</sub>As<sub>2</sub>O<sub>6</sub>

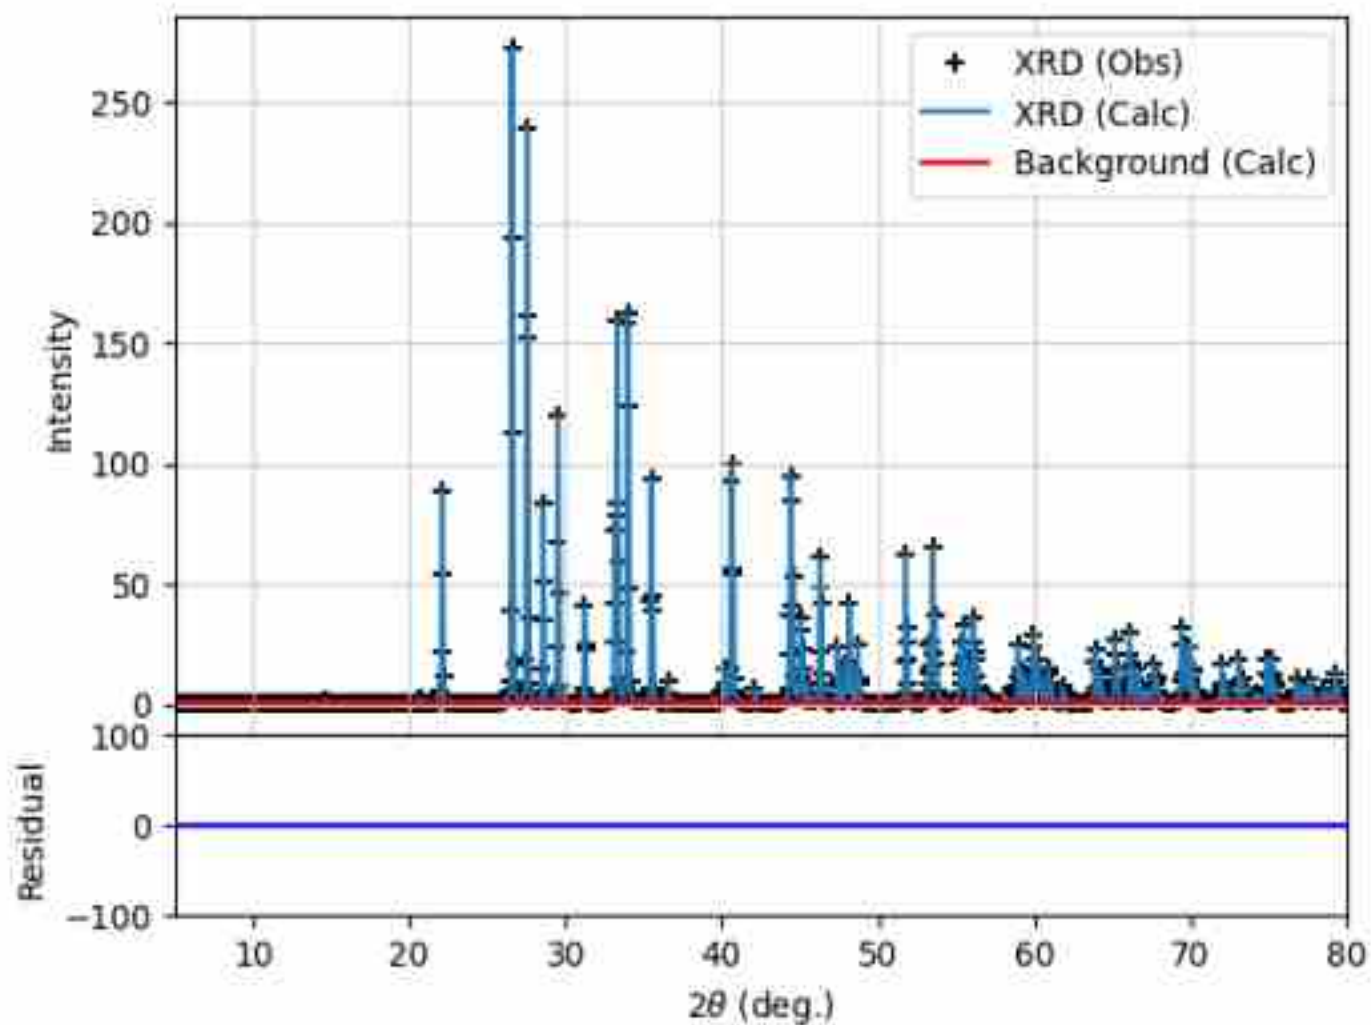

| RMSE before RR | Rwp     | RMSE after RR |
|----------------|---------|---------------|
| 0.051          | 0.00428 | 0.00104       |

# Li<sub>2</sub>Al<sub>2</sub>H<sub>8</sub>

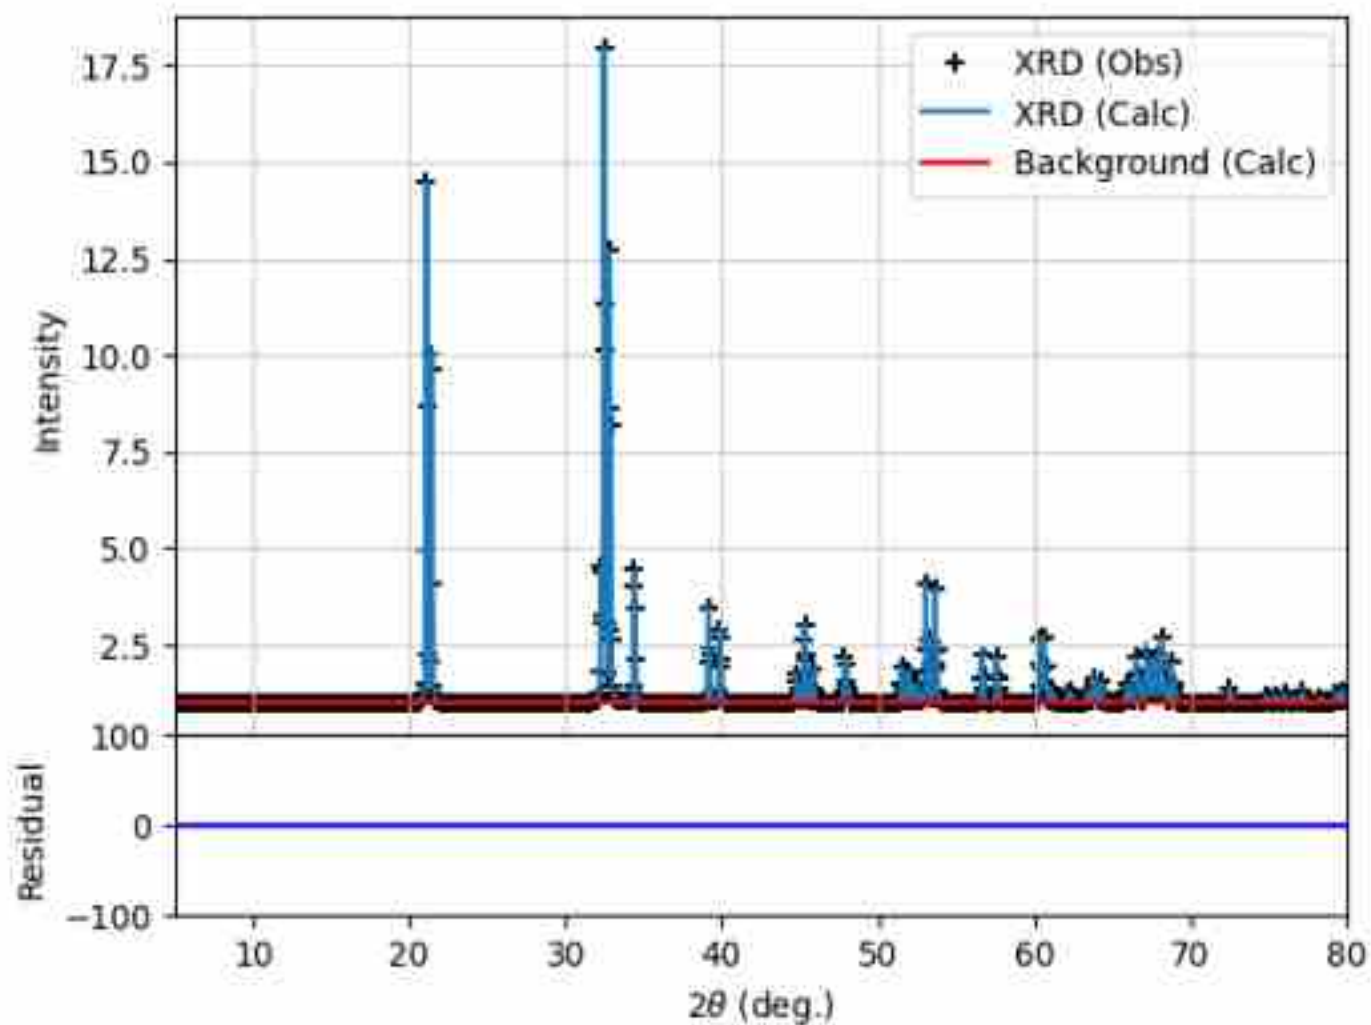

| RMSE before RR | Rwp     | RMSE after RR |
|----------------|---------|---------------|
| 0.051          | 0.00132 | 0.00325       |

# Li<sub>2</sub>Ti<sub>2</sub>Sb<sub>2</sub>O<sub>1</sub>

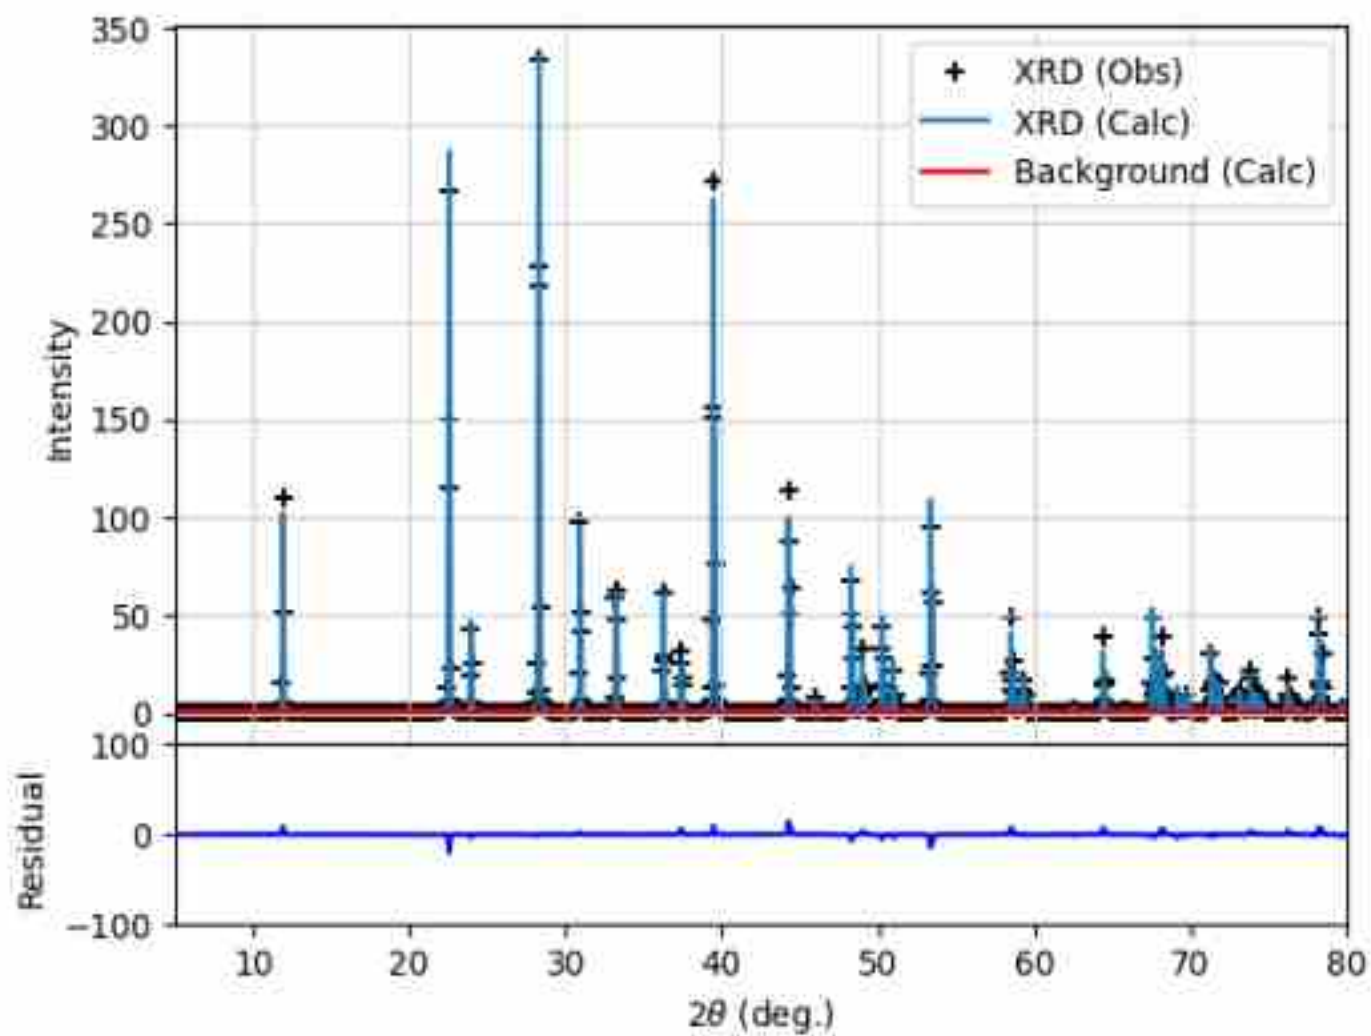

| RMSE before RR | Rwp     | RMSE after RR |
|----------------|---------|---------------|
| 0.051          | 9.29731 | 0.16328       |

# Li<sub>4</sub>V<sub>1</sub>Te<sub>3</sub>O<sub>12</sub>

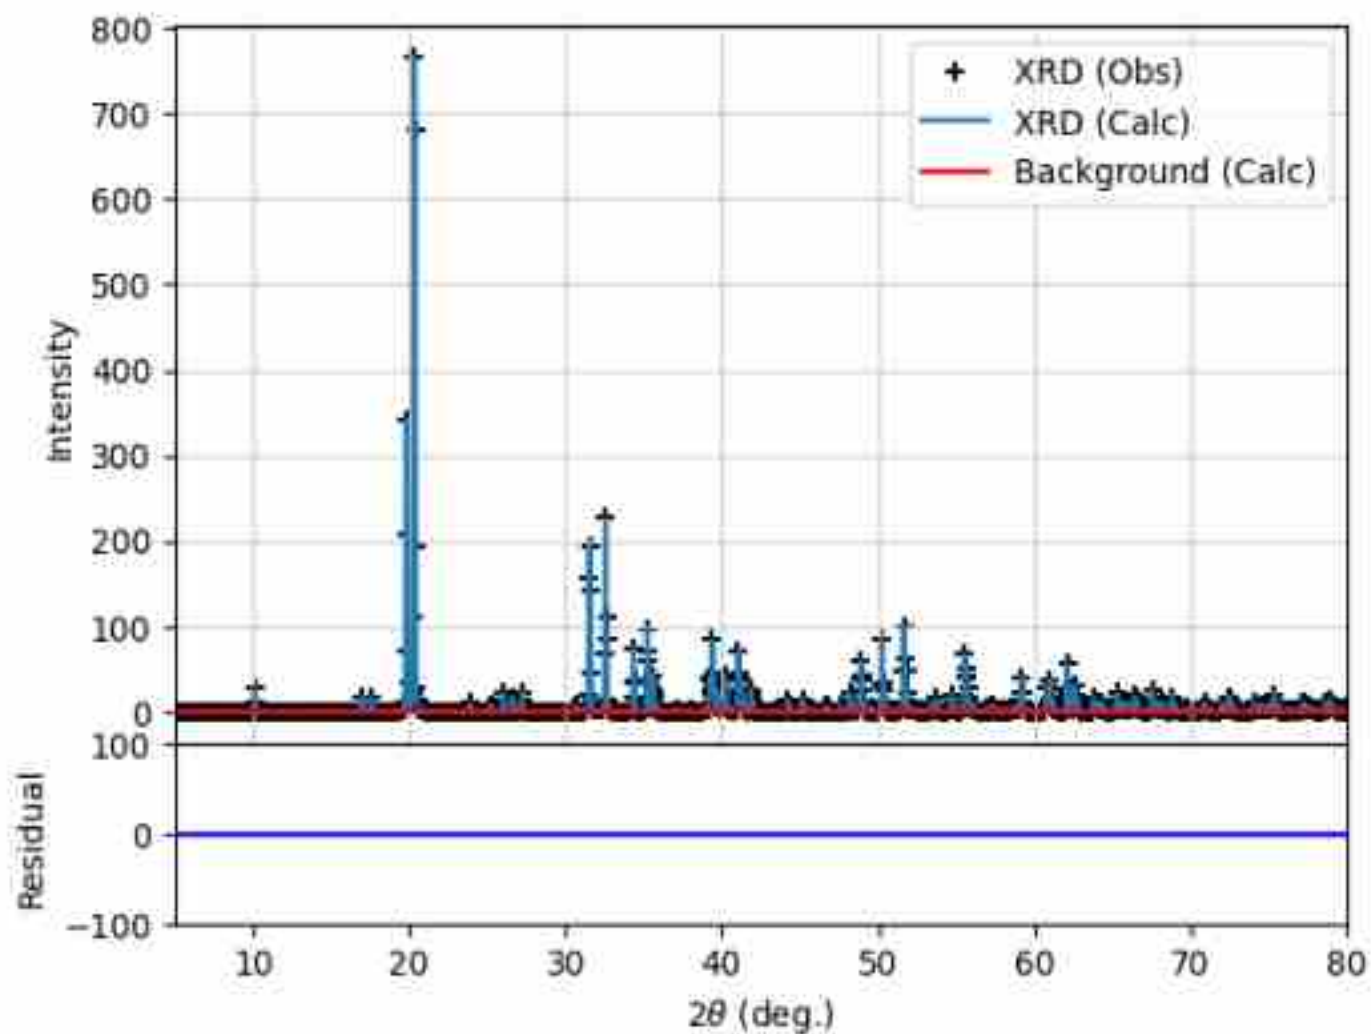

| RMSE before RR | Rwp     | RMSE after RR |
|----------------|---------|---------------|
| 0.051          | 0.00453 | 0.00159       |

# Mo<sub>2</sub>Pb<sub>4</sub>O<sub>10</sub>

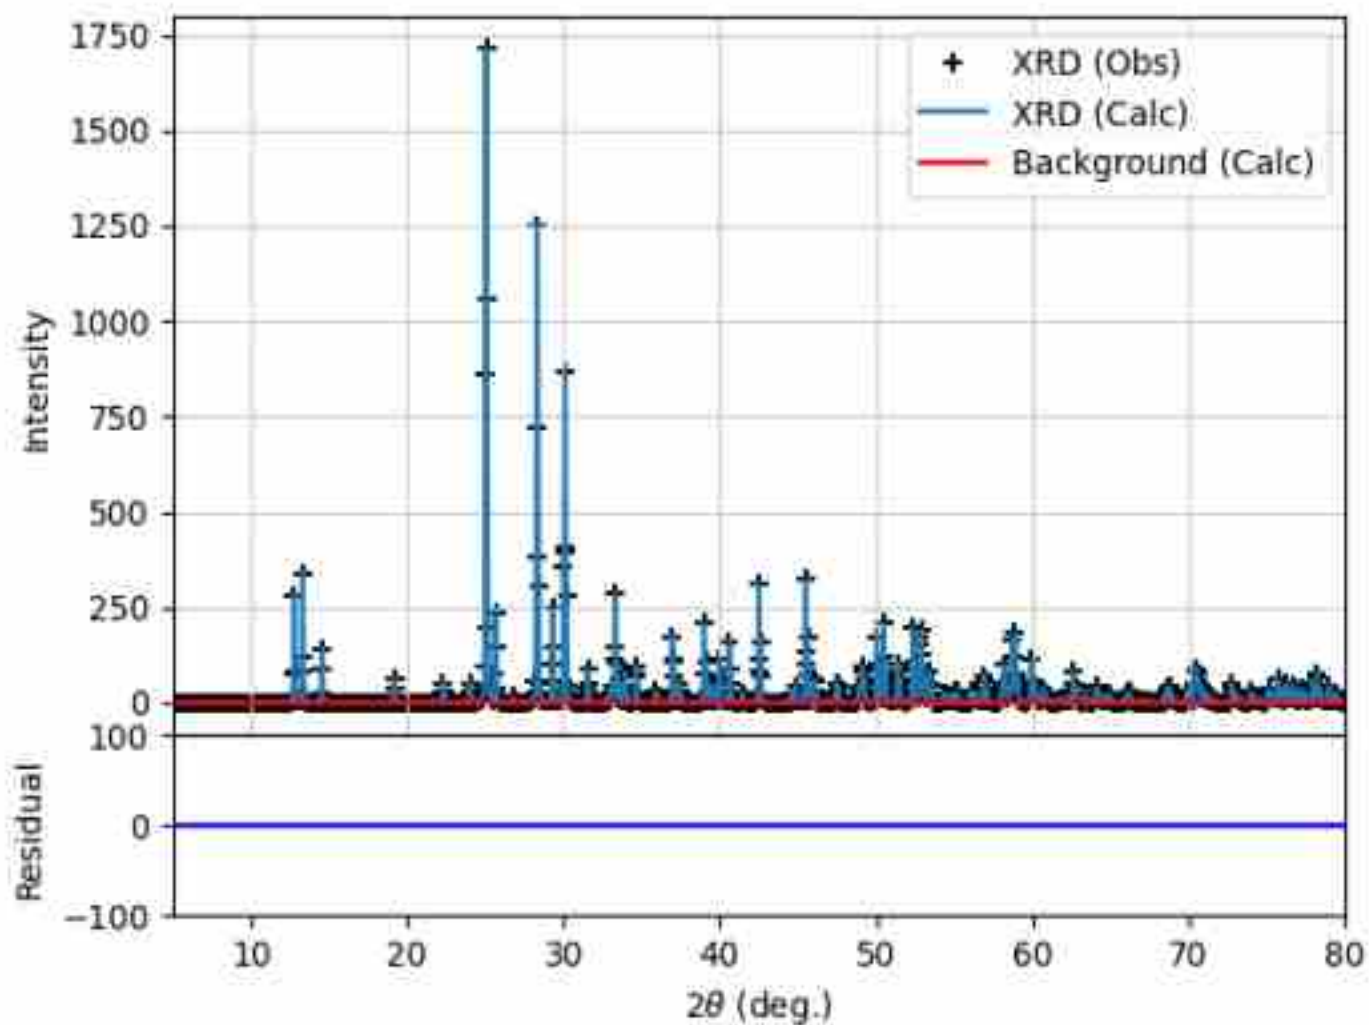

| RMSE before RR | Rwp     | RMSE after RR |
|----------------|---------|---------------|
| 0.051          | 0.00353 | 0.00119       |

# Mo<sub>3</sub>W<sub>1</sub>Se<sub>4</sub>S<sub>4</sub>

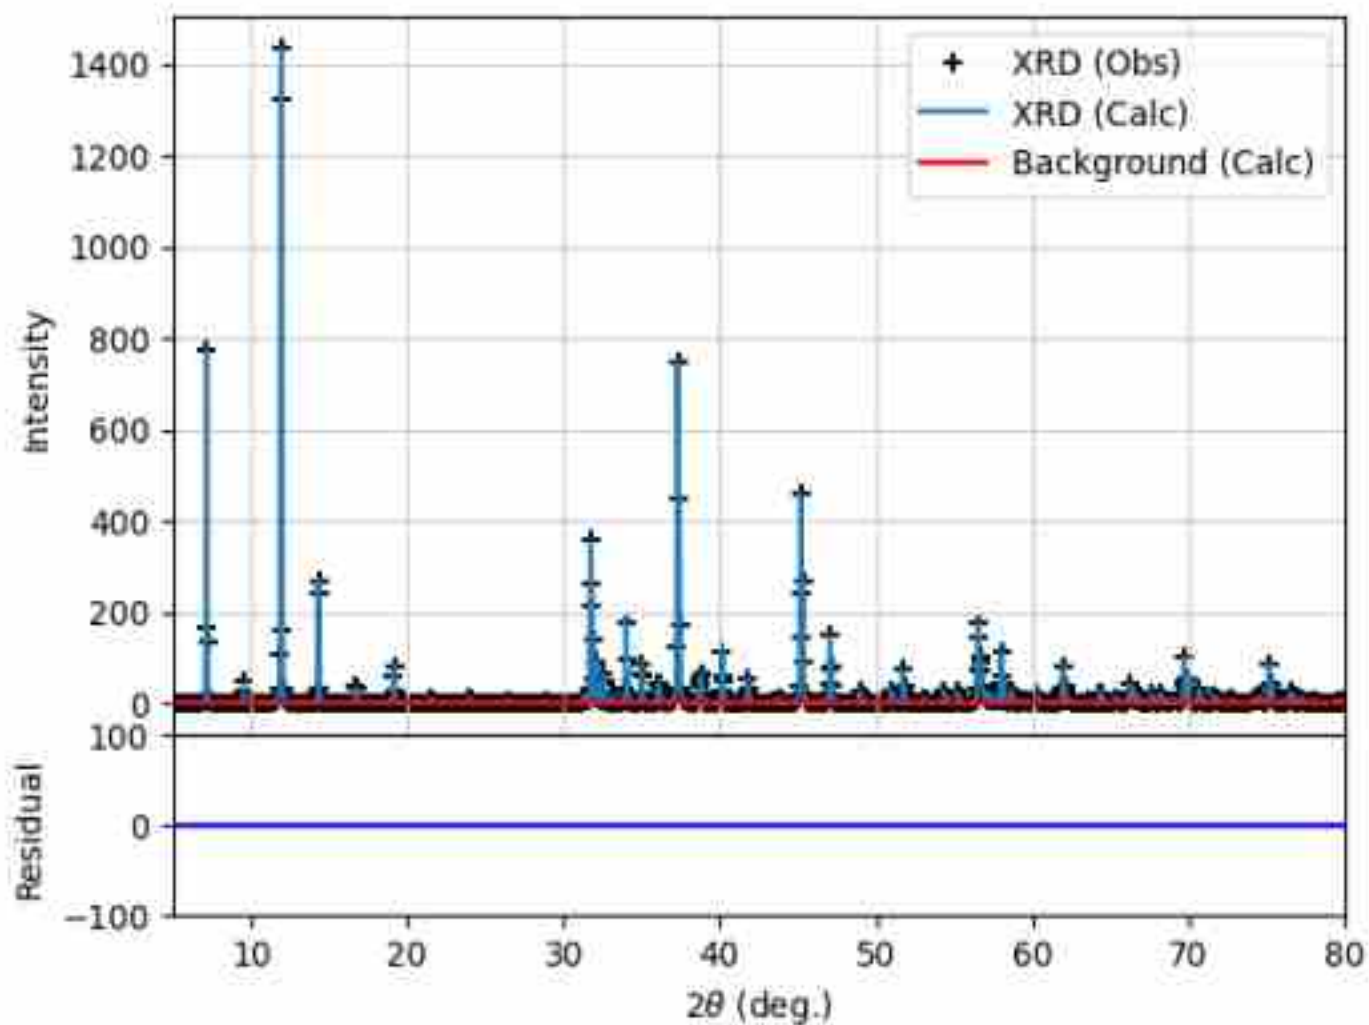

| RMSE before RR | Rwp     | RMSE after RR |
|----------------|---------|---------------|
| 0.051          | 0.00367 | 0.00053       |

# Rb<sub>4</sub>Co<sub>4</sub>N<sub>4</sub>

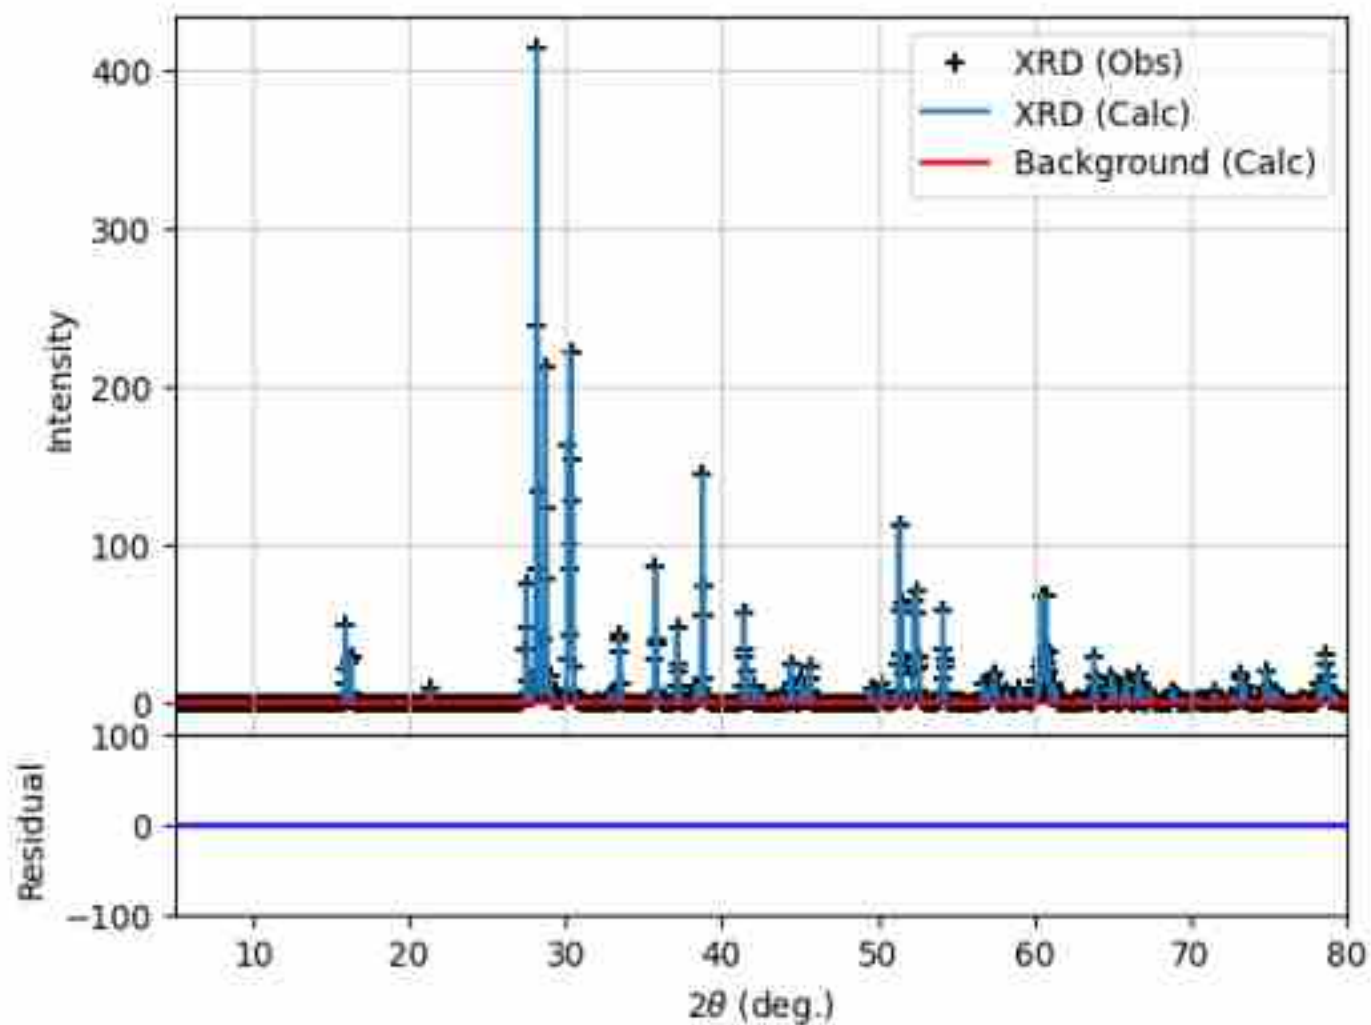

| RMSE before RR | Rwp     | RMSE after RR |
|----------------|---------|---------------|
| 0.051          | 0.00468 | 0.0015        |



# Sb<sub>2</sub>Pt<sub>6</sub>

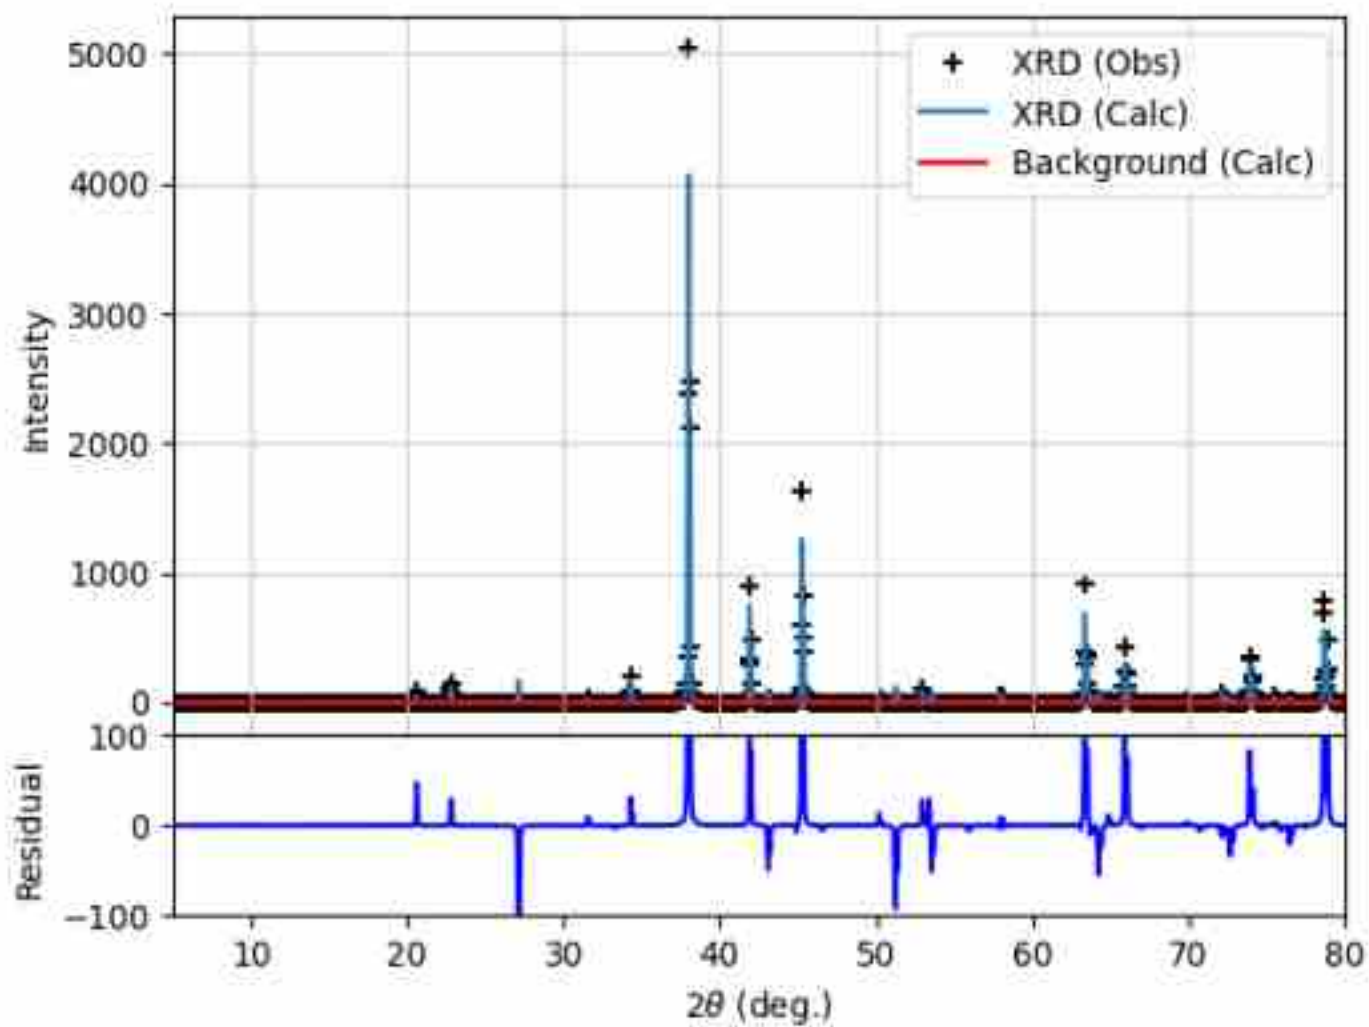

| RMSE before RR | Rwp   | RMSE after RR |
|----------------|-------|---------------|
| 0.051          | 100.0 | 0.06409       |

# Sc10Ga6

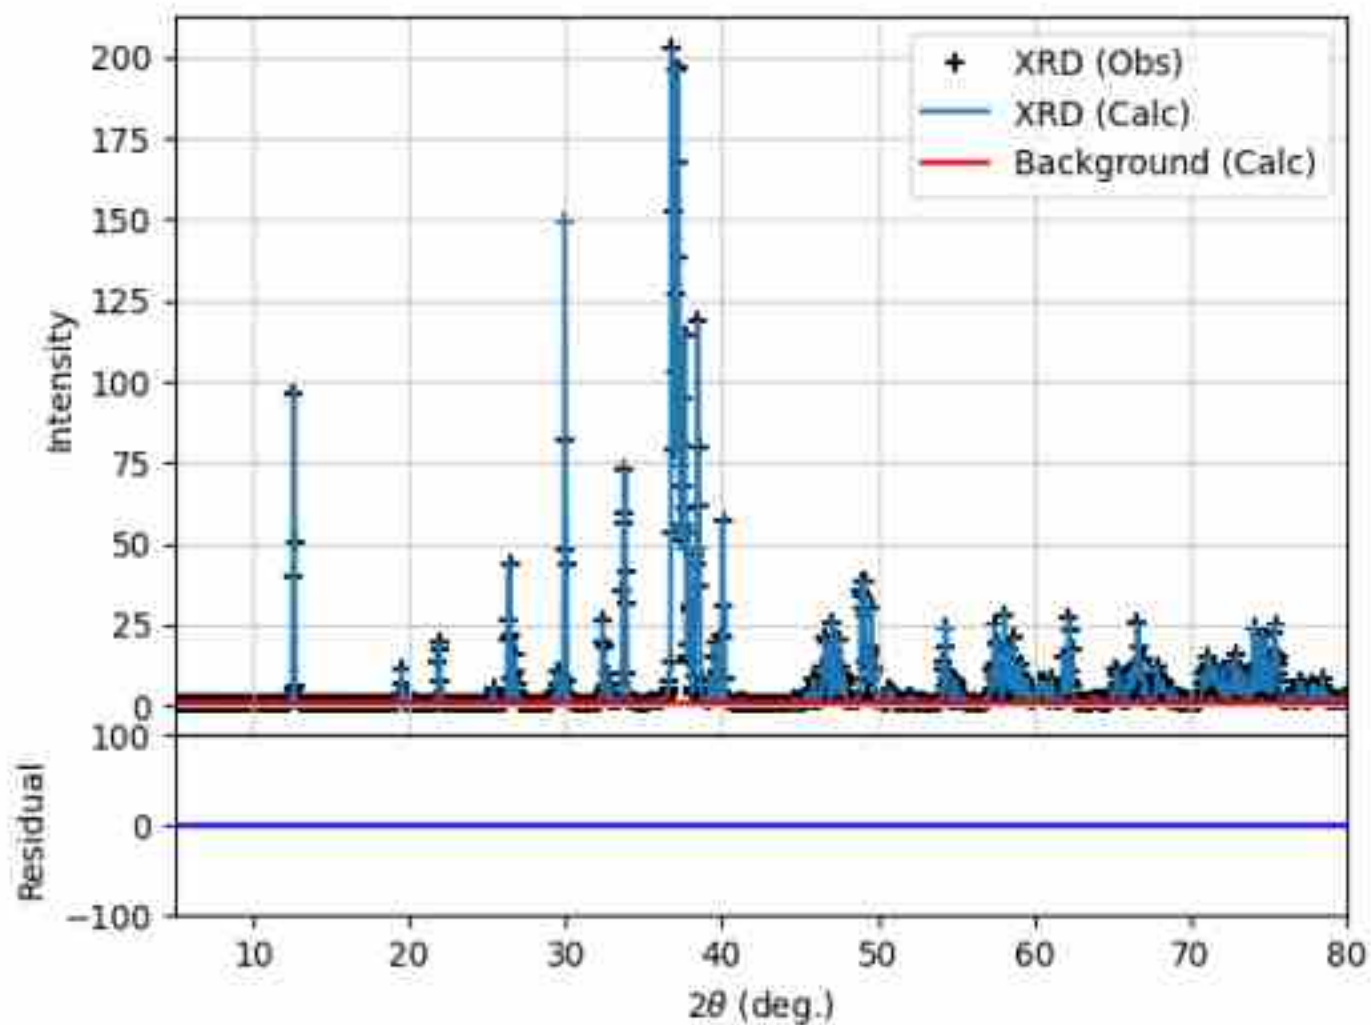

| RMSE before RR | Rwp     | RMSE after RR |
|----------------|---------|---------------|
| 0.051          | 0.00267 | 0.00023       |

# Zr<sub>4</sub>Cu<sub>4</sub>

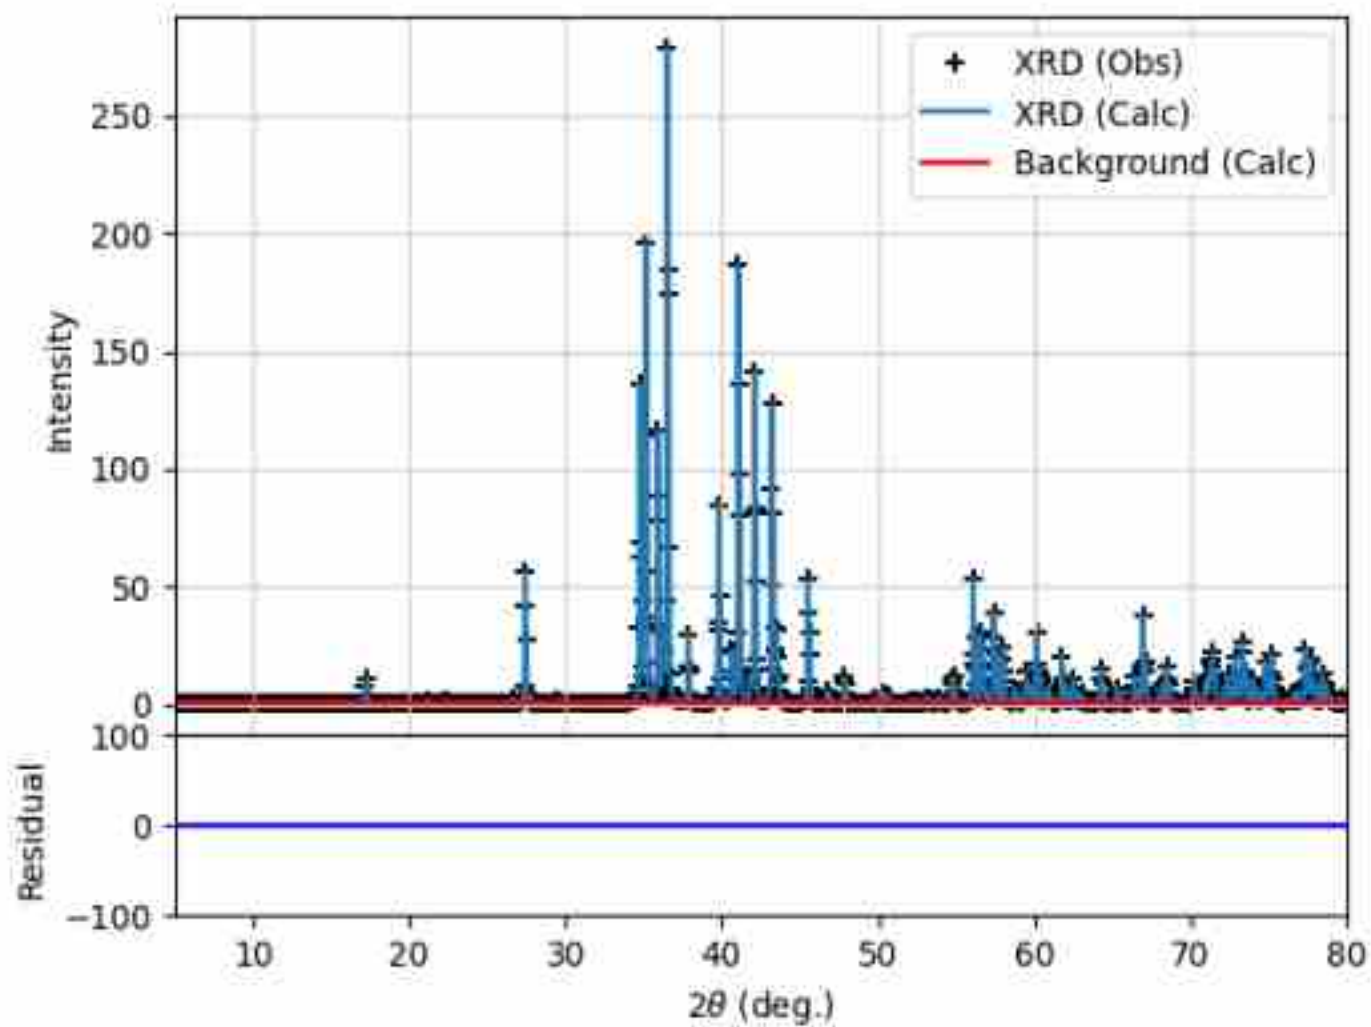

| RMSE before RR | Rwp     | RMSE after RR |
|----------------|---------|---------------|
| 0.051          | 0.00366 | 0.00023       |

# Al<sub>3</sub>As<sub>3</sub>O<sub>12</sub>

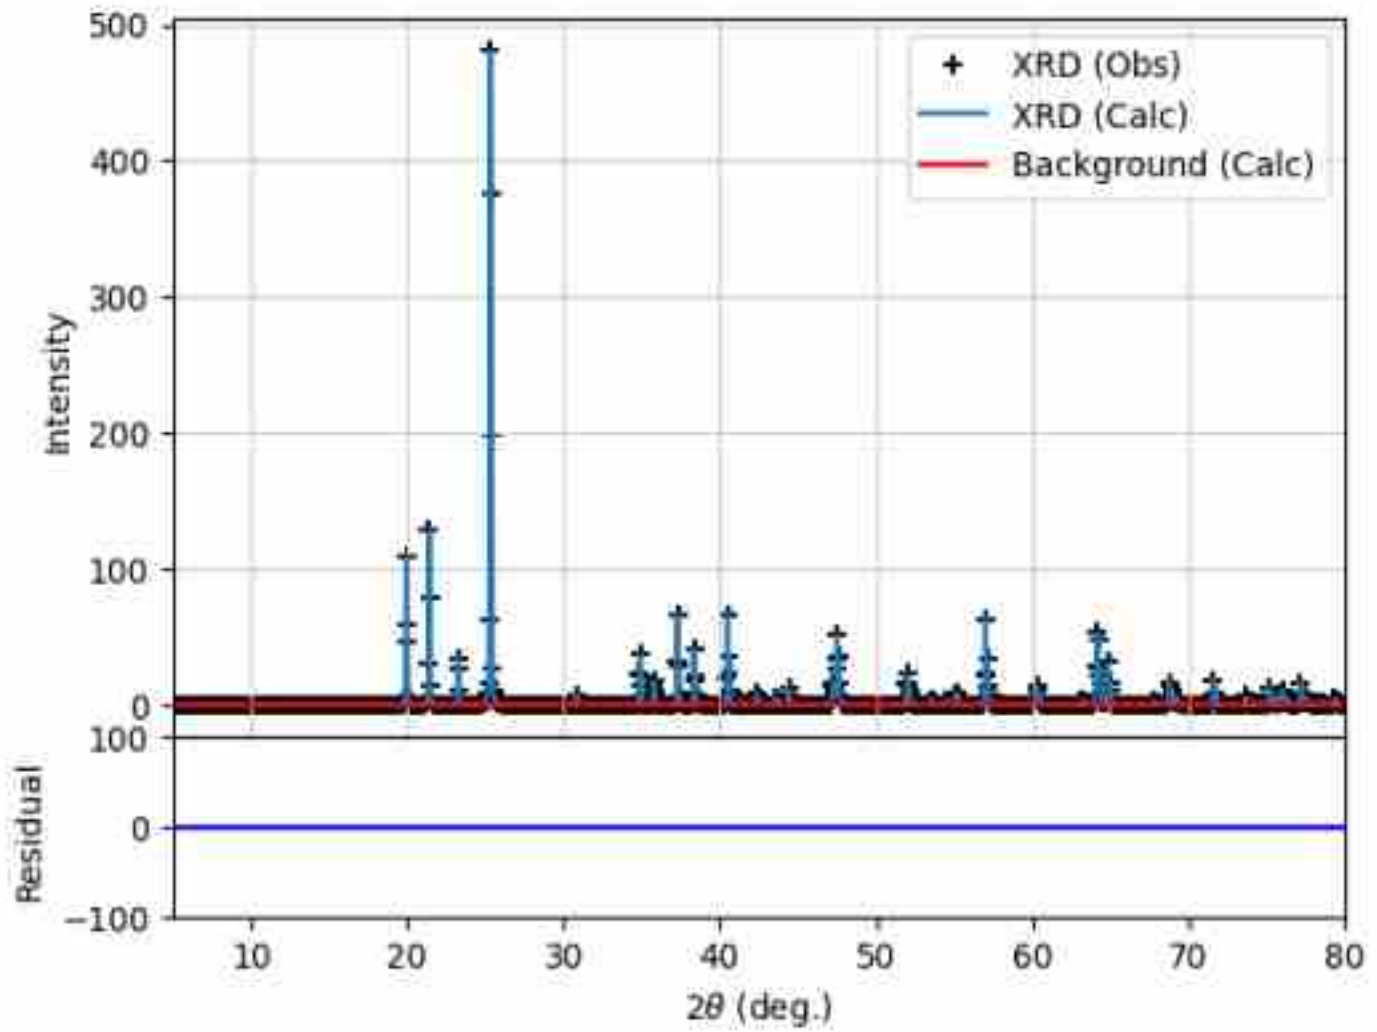

| RMSE before RR | Rwp     | RMSE after RR |
|----------------|---------|---------------|
| 0.052          | 0.00349 | 0.00105       |

# Ba1Y1Co1Cu1O5

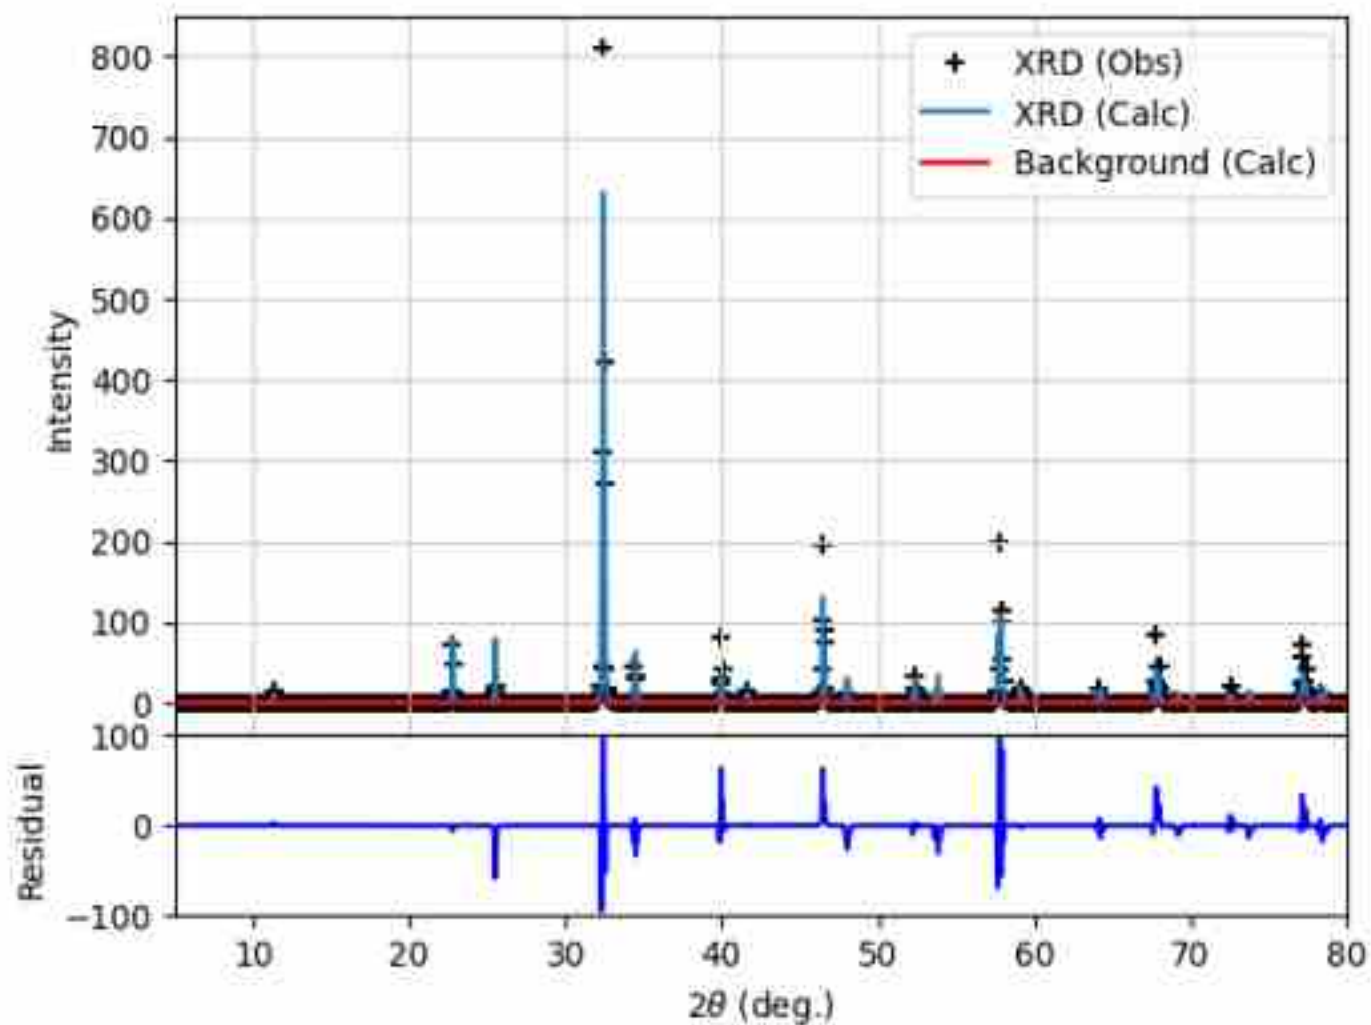

| RMSE before RR | Rwp      | RMSE after RR |
|----------------|----------|---------------|
| 0.052          | 80.77452 | 0.35093       |

# Ba<sub>2</sub>Tb<sub>2</sub>F<sub>12</sub>

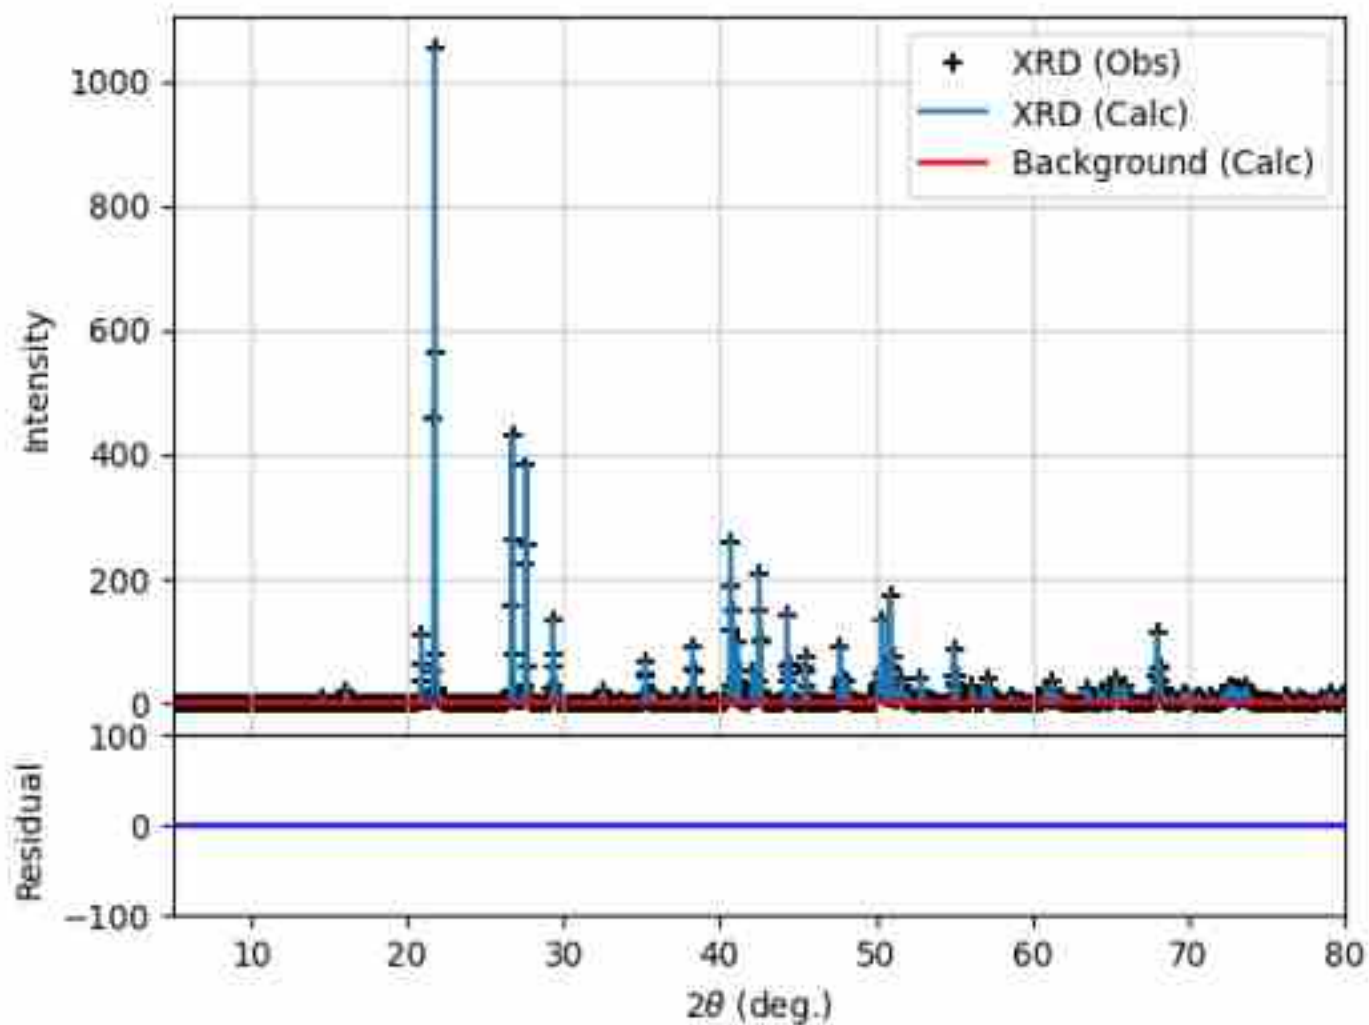

| RMSE before RR | Rwp     | RMSE after RR |
|----------------|---------|---------------|
| 0.052          | 0.00456 | 0.00088       |

# Bi4Pb1S7

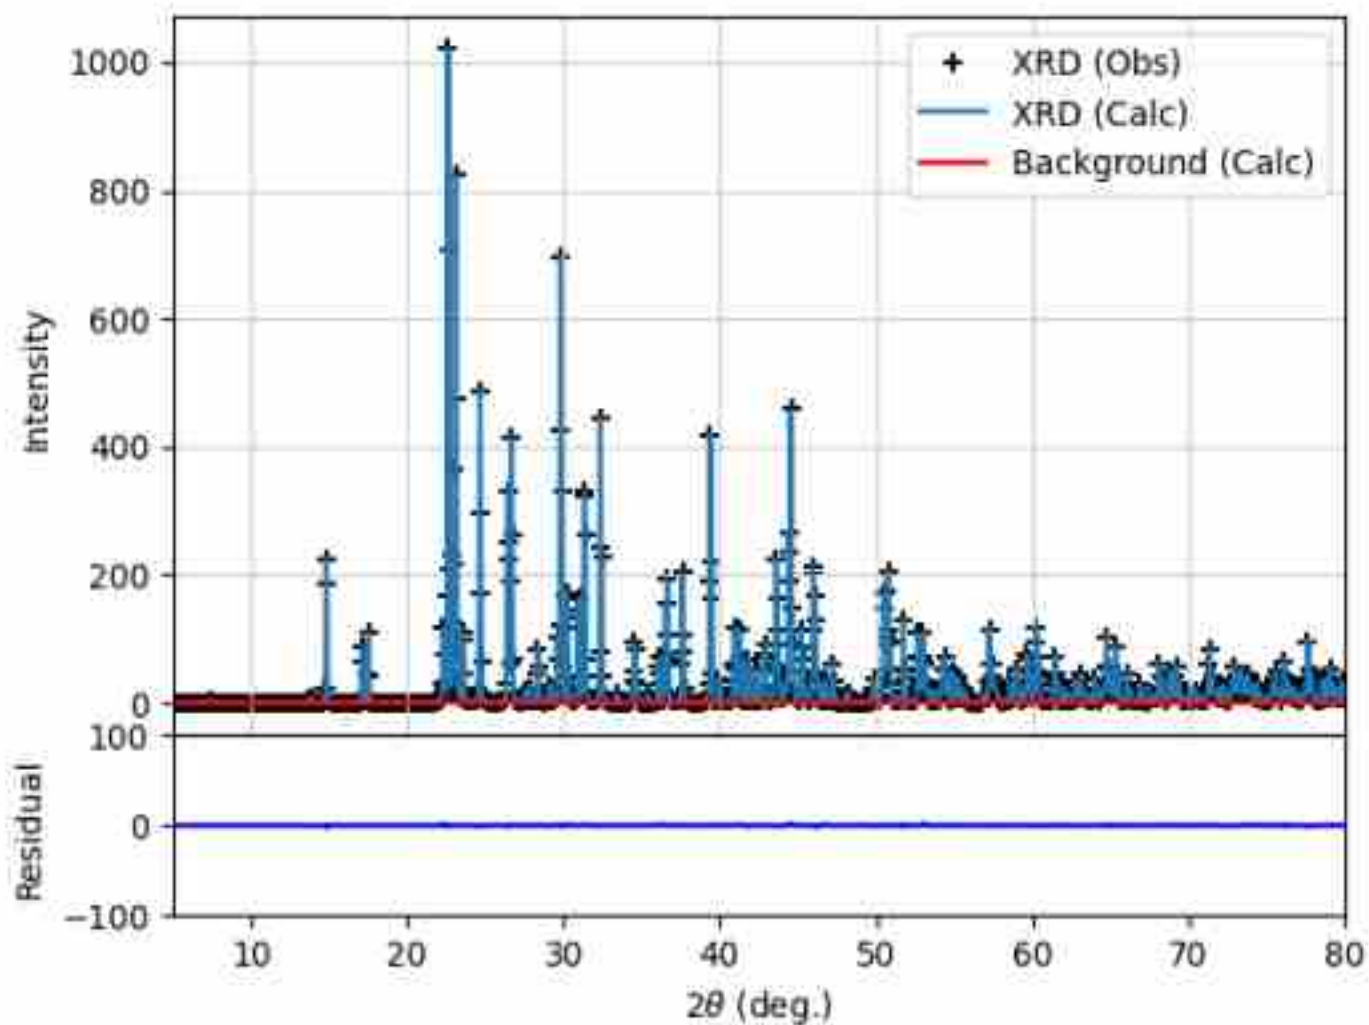

| RMSE before RR | Rwp     | RMSE after RR |
|----------------|---------|---------------|
| 0.052          | 0.98509 | 0.04003       |

# Ce<sub>2</sub>Zn<sub>4</sub>Co<sub>2</sub>

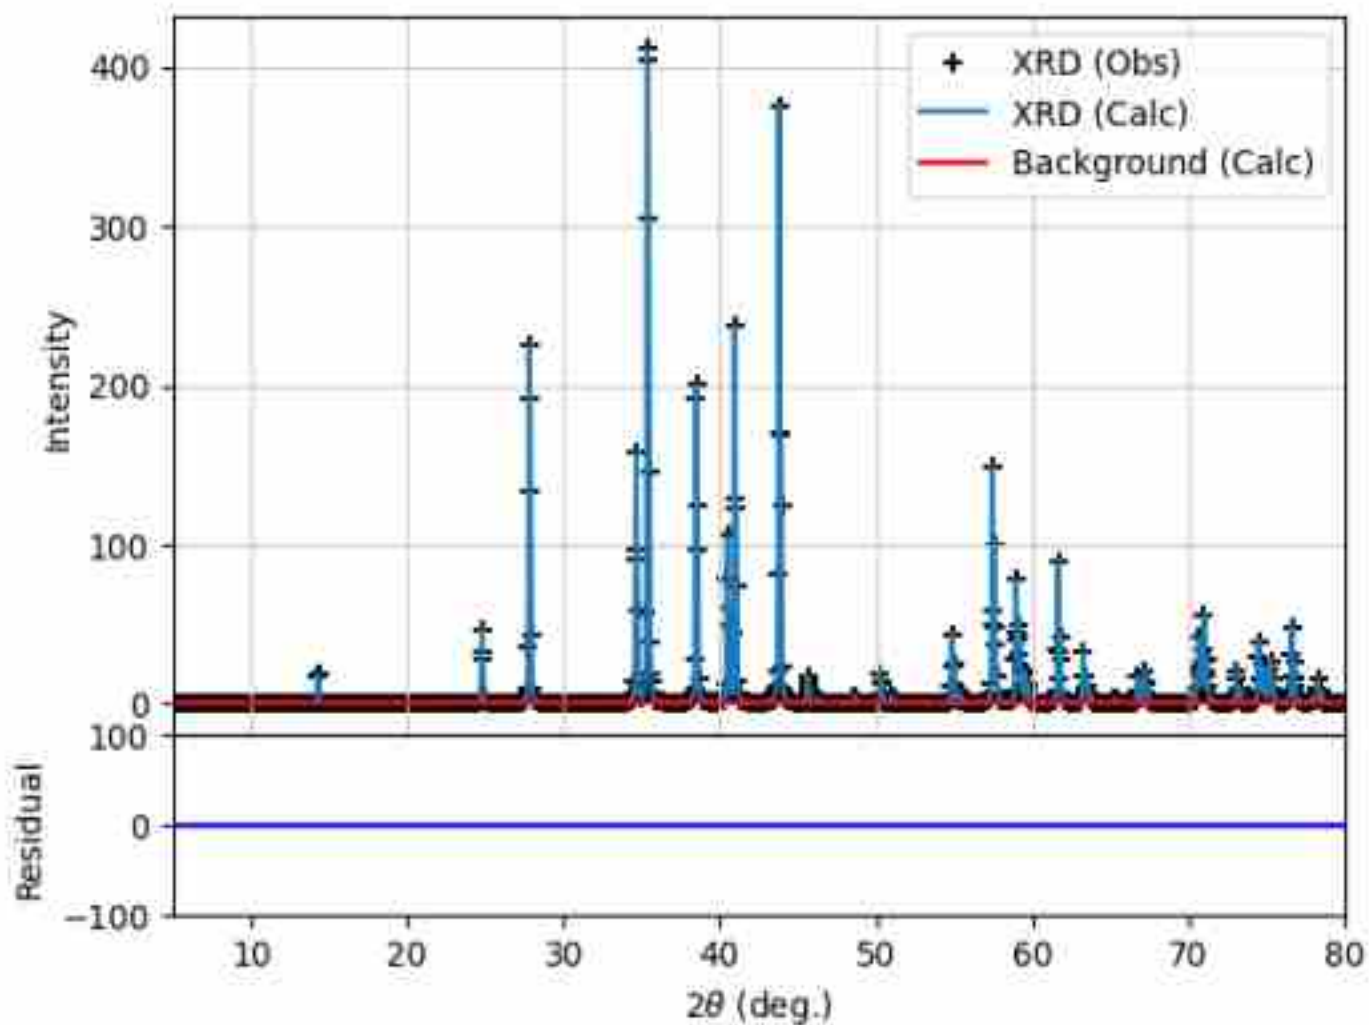

| RMSE before RR | Rwp    | RMSE after RR |
|----------------|--------|---------------|
| 0.052          | 0.0055 | 0.00053       |



# K4Pa2F14

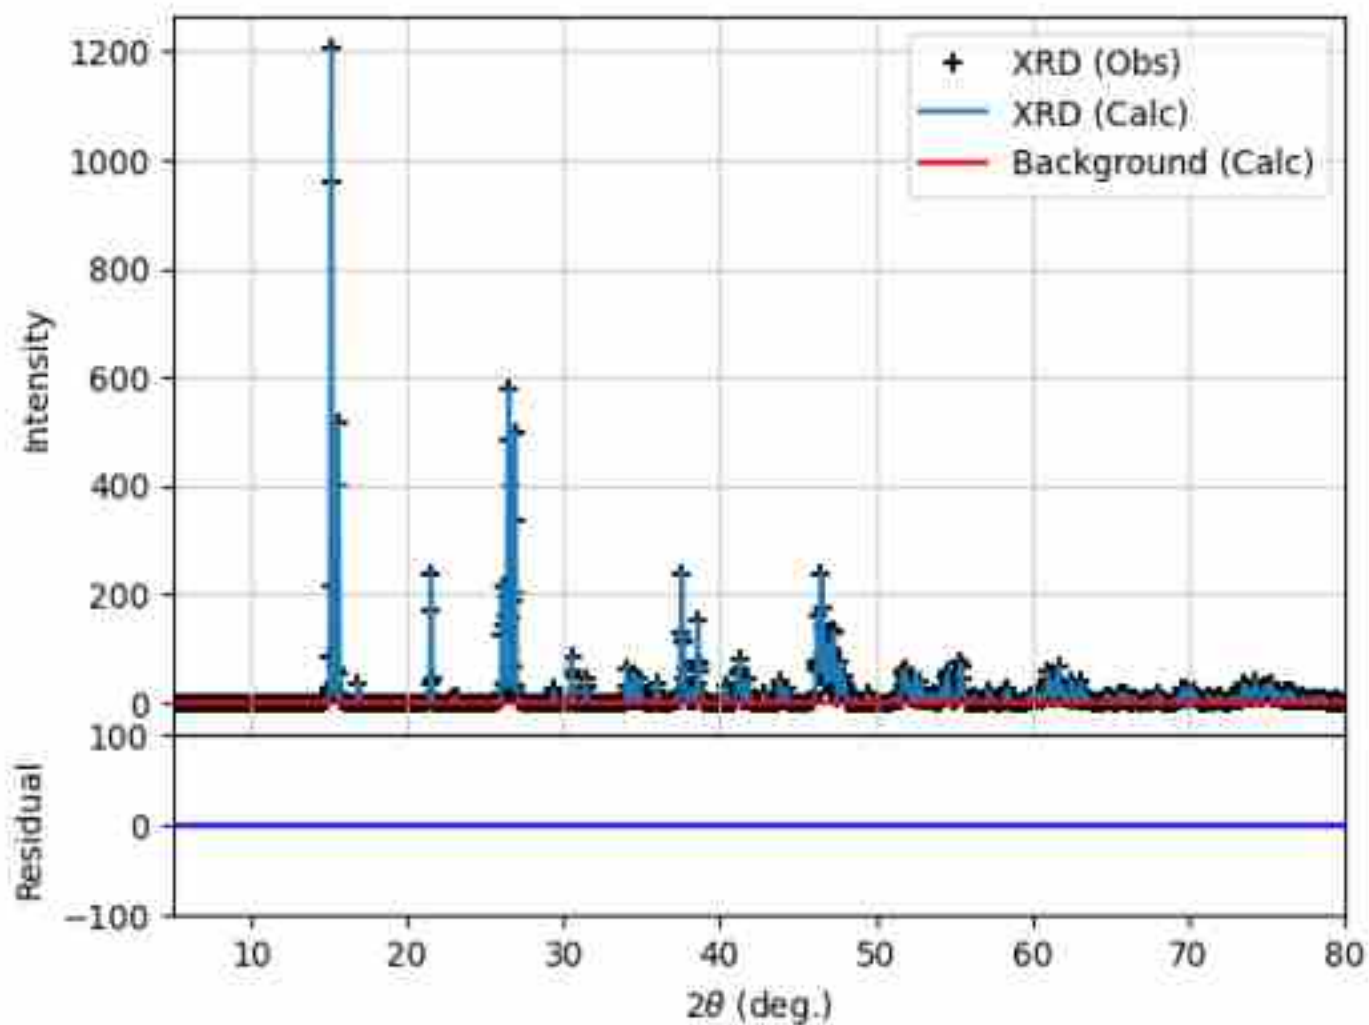

| RMSE before RR | Rwp     | RMSE after RR |
|----------------|---------|---------------|
| 0.052          | 0.00306 | 0.00106       |

# Li1V4O5F7

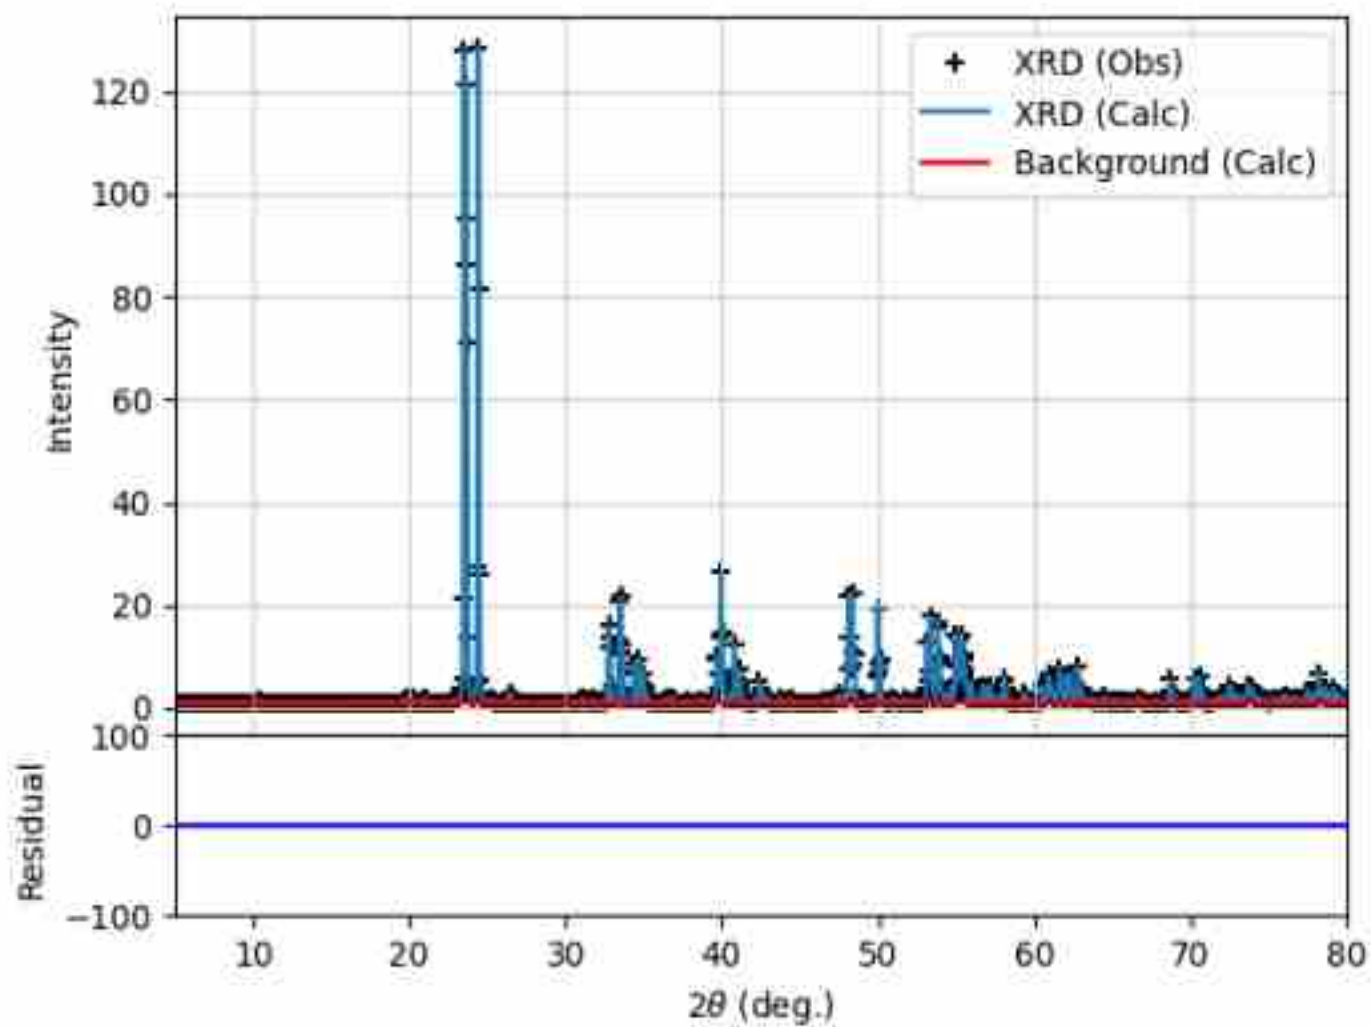

| RMSE before RR | Rwp   | RMSE after RR |
|----------------|-------|---------------|
| 0.052          | 3e-05 | 0.0           |

# Li<sub>2</sub>Mn<sub>2</sub>F<sub>8</sub>

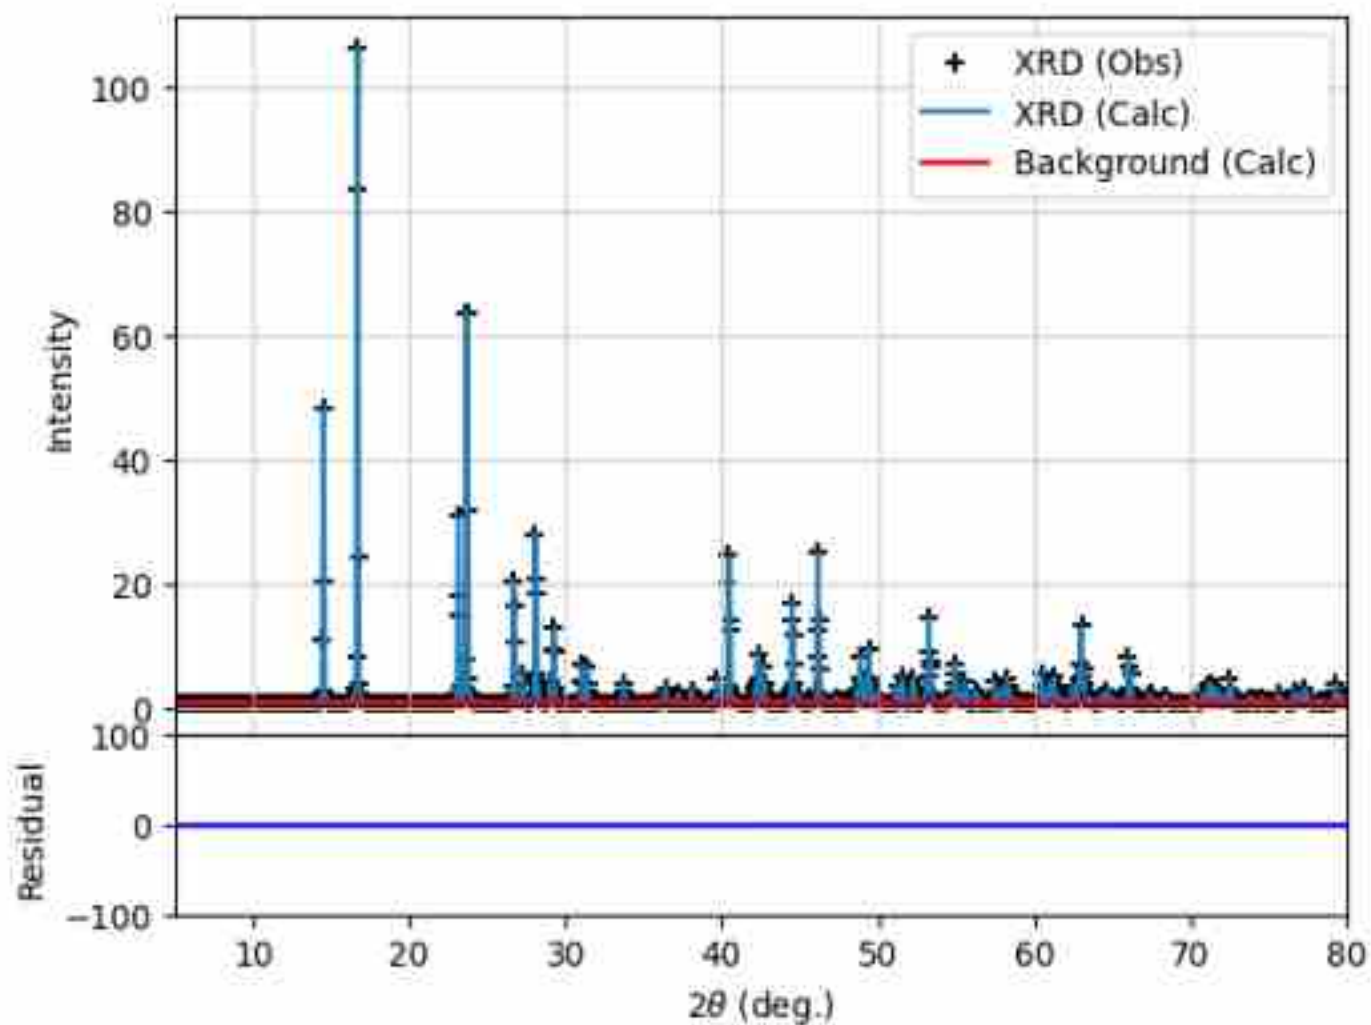

| RMSE before RR | Rwp     | RMSE after RR |
|----------------|---------|---------------|
| 0.052          | 0.87832 | 0.01763       |

# Li<sub>4</sub>Mg<sub>2</sub>

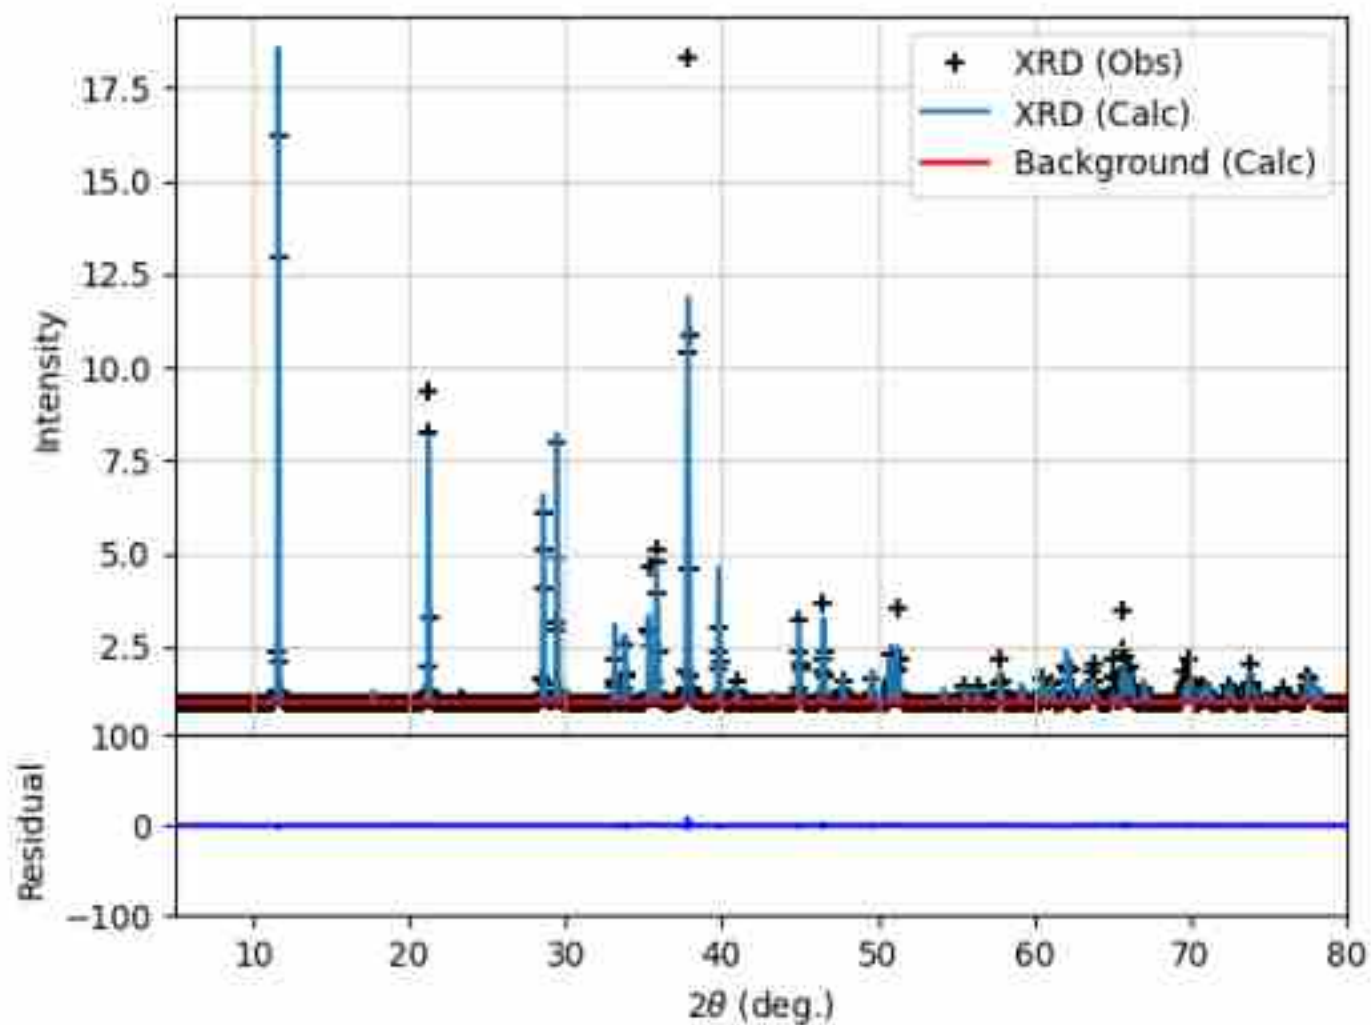

| RMSE before RR | Rwp      | RMSE after RR |
|----------------|----------|---------------|
| 0.052          | 11.67369 | 0.06229       |

# Li6Sb2S8

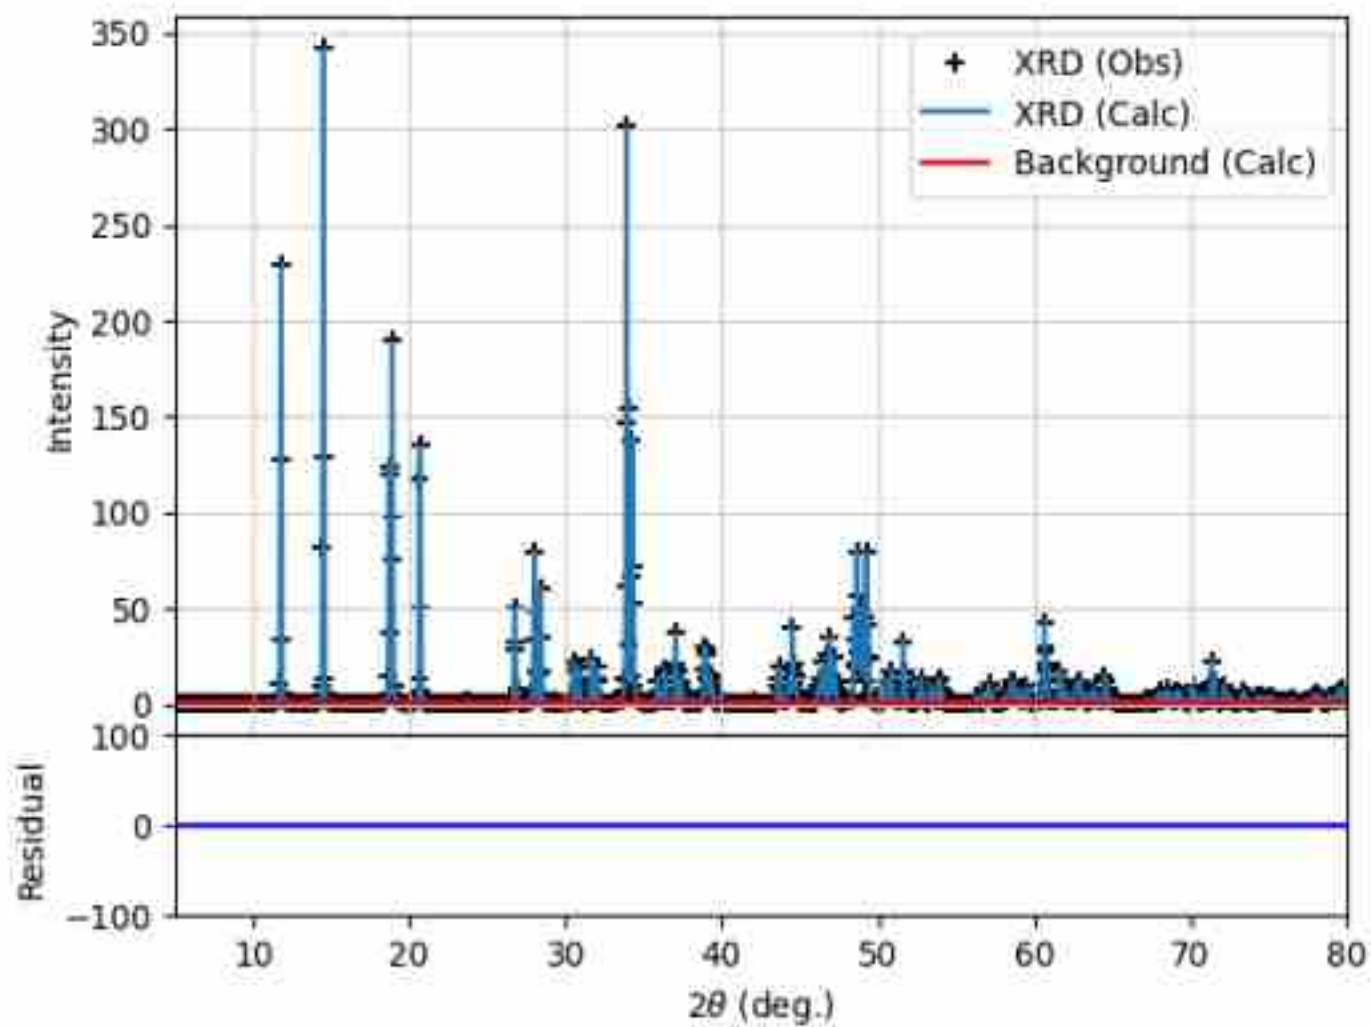

| RMSE before RR | Rwp     | RMSE after RR |
|----------------|---------|---------------|
| 0.052          | 0.00331 | 0.00127       |

# Mn1Sb2F12

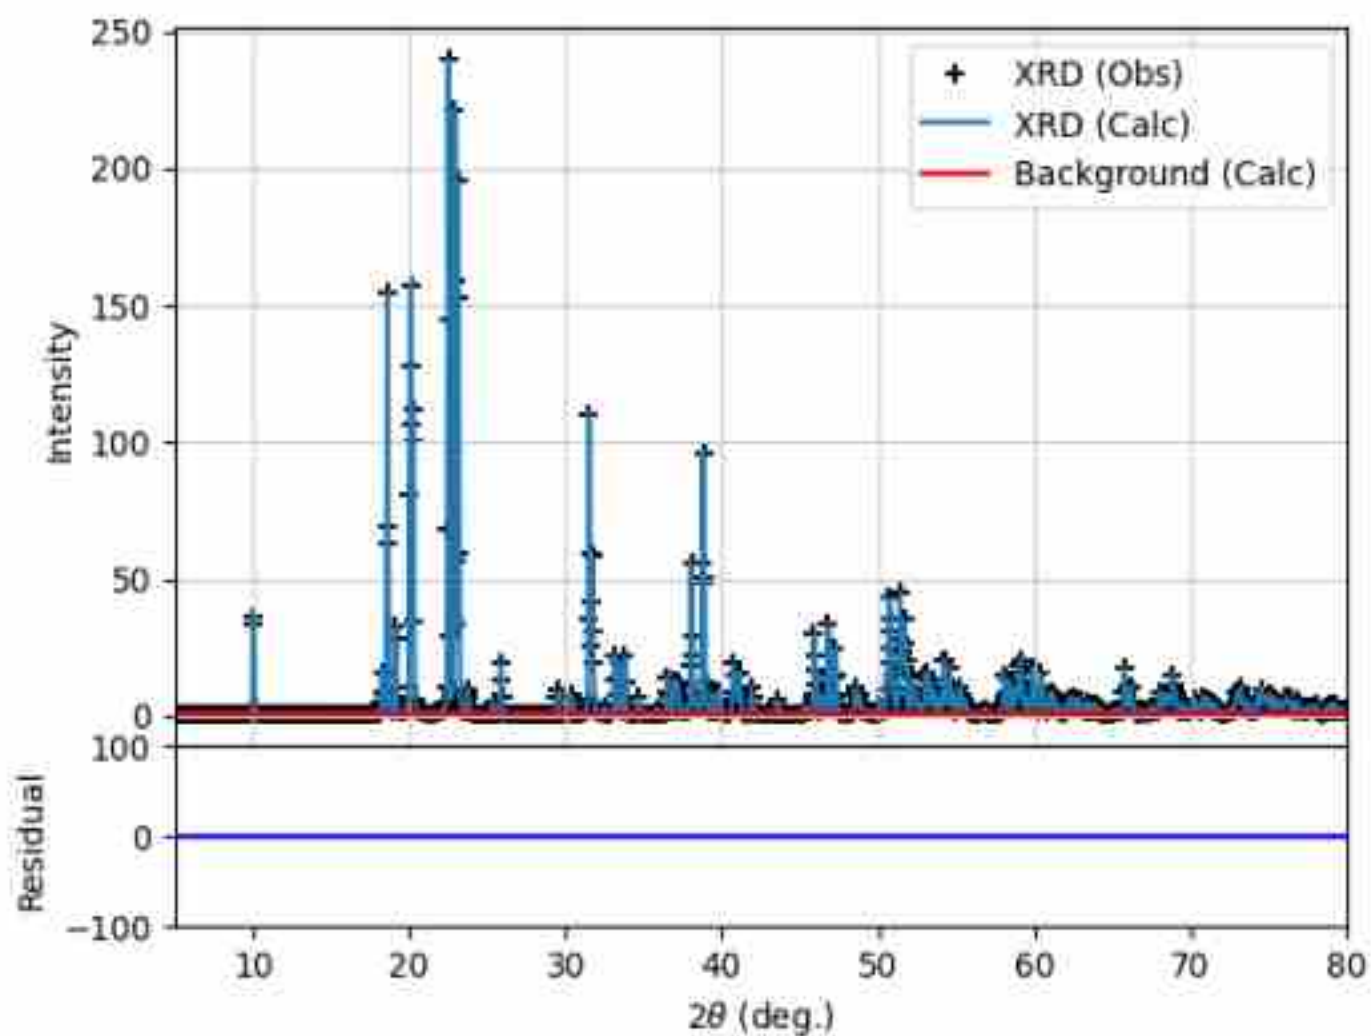

| RMSE before RR | Rwp     | RMSE after RR |
|----------------|---------|---------------|
| 0.052          | 0.00048 | 0.0002        |

# Mo<sub>2</sub>W<sub>2</sub>Se<sub>4</sub>S<sub>4</sub>

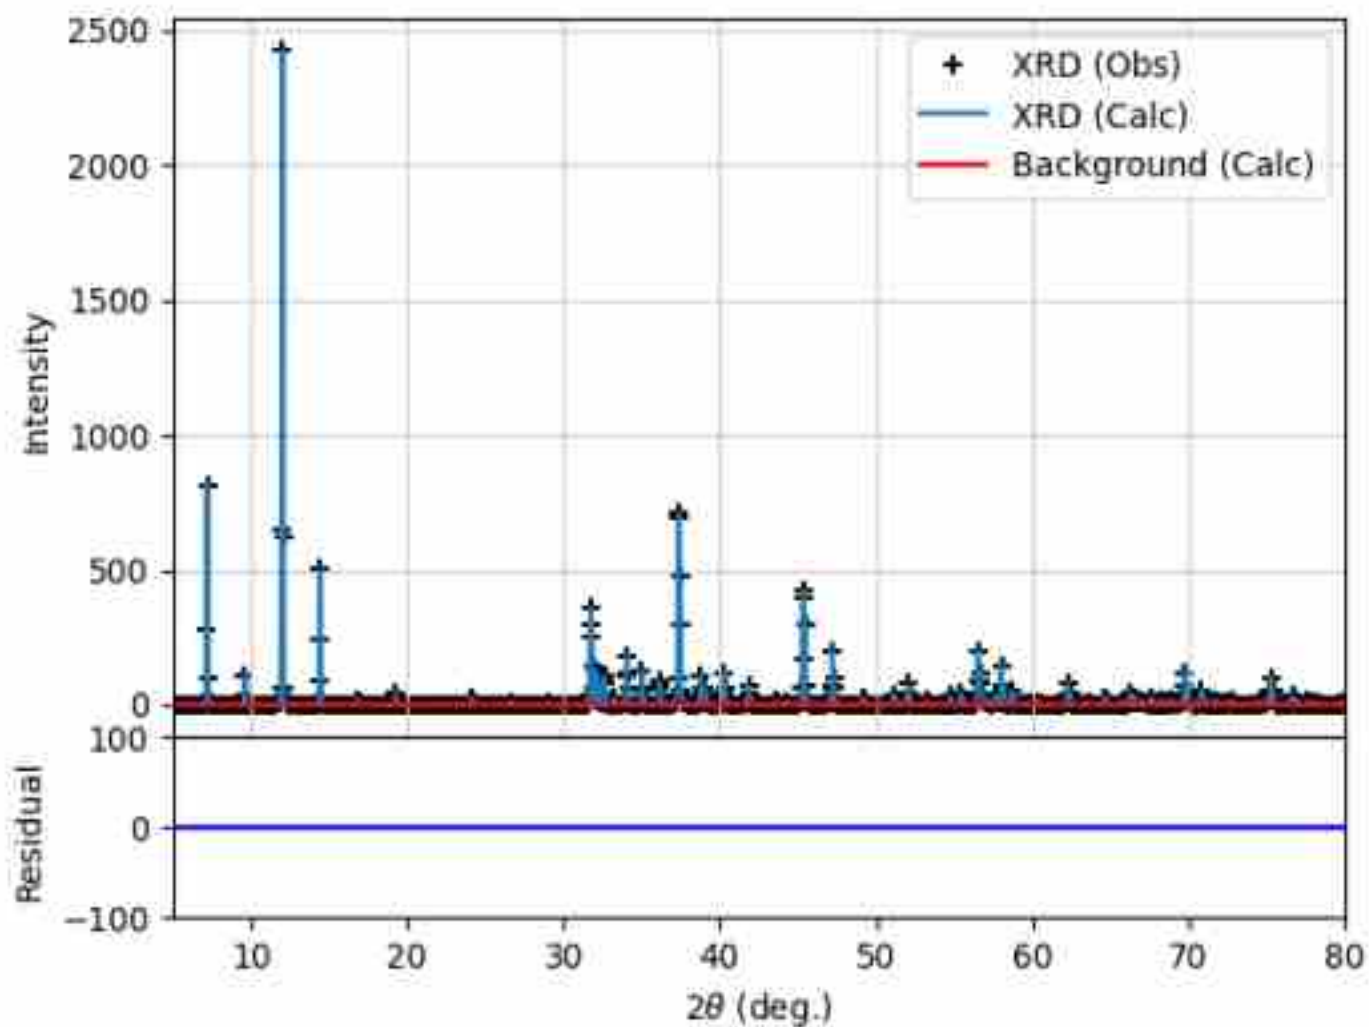

| RMSE before RR | Rwp     | RMSE after RR |
|----------------|---------|---------------|
| 0.052          | 0.00254 | 0.0005        |

# Na<sub>4</sub>Cu<sub>2</sub>O<sub>4</sub>

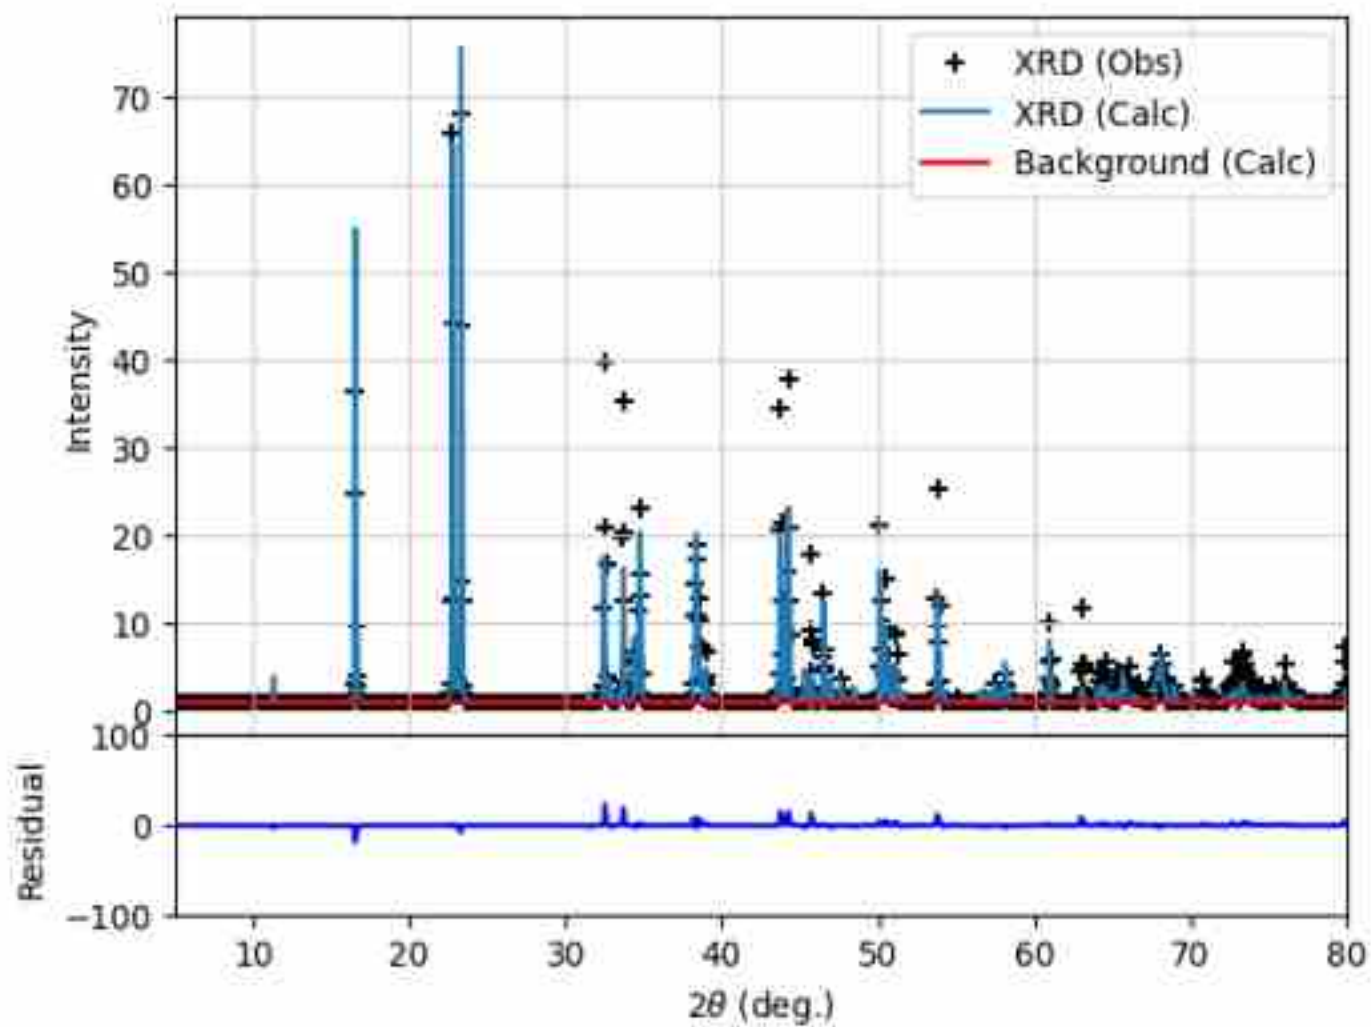

| RMSE before RR | Rwp      | RMSE after RR |
|----------------|----------|---------------|
| 0.052          | 32.66908 | None          |



# V4O3F9

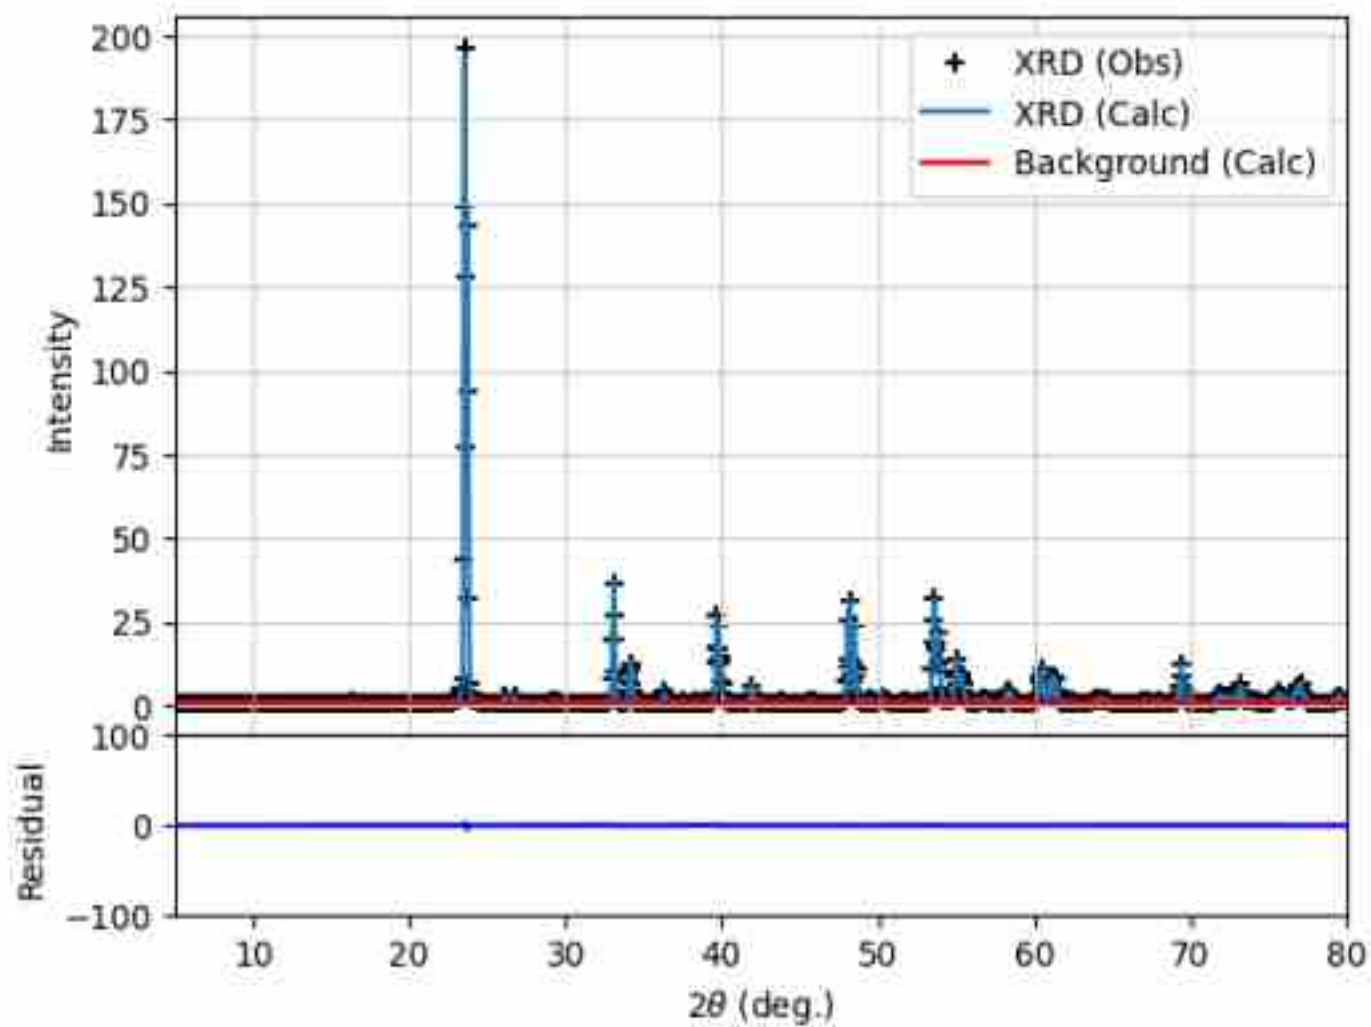

| RMSE before RR | Rwp     | RMSE after RR |
|----------------|---------|---------------|
| 0.052          | 1.96644 | 0.08082       |

# Y<sub>2</sub>Fe<sub>8</sub>Ge<sub>4</sub>

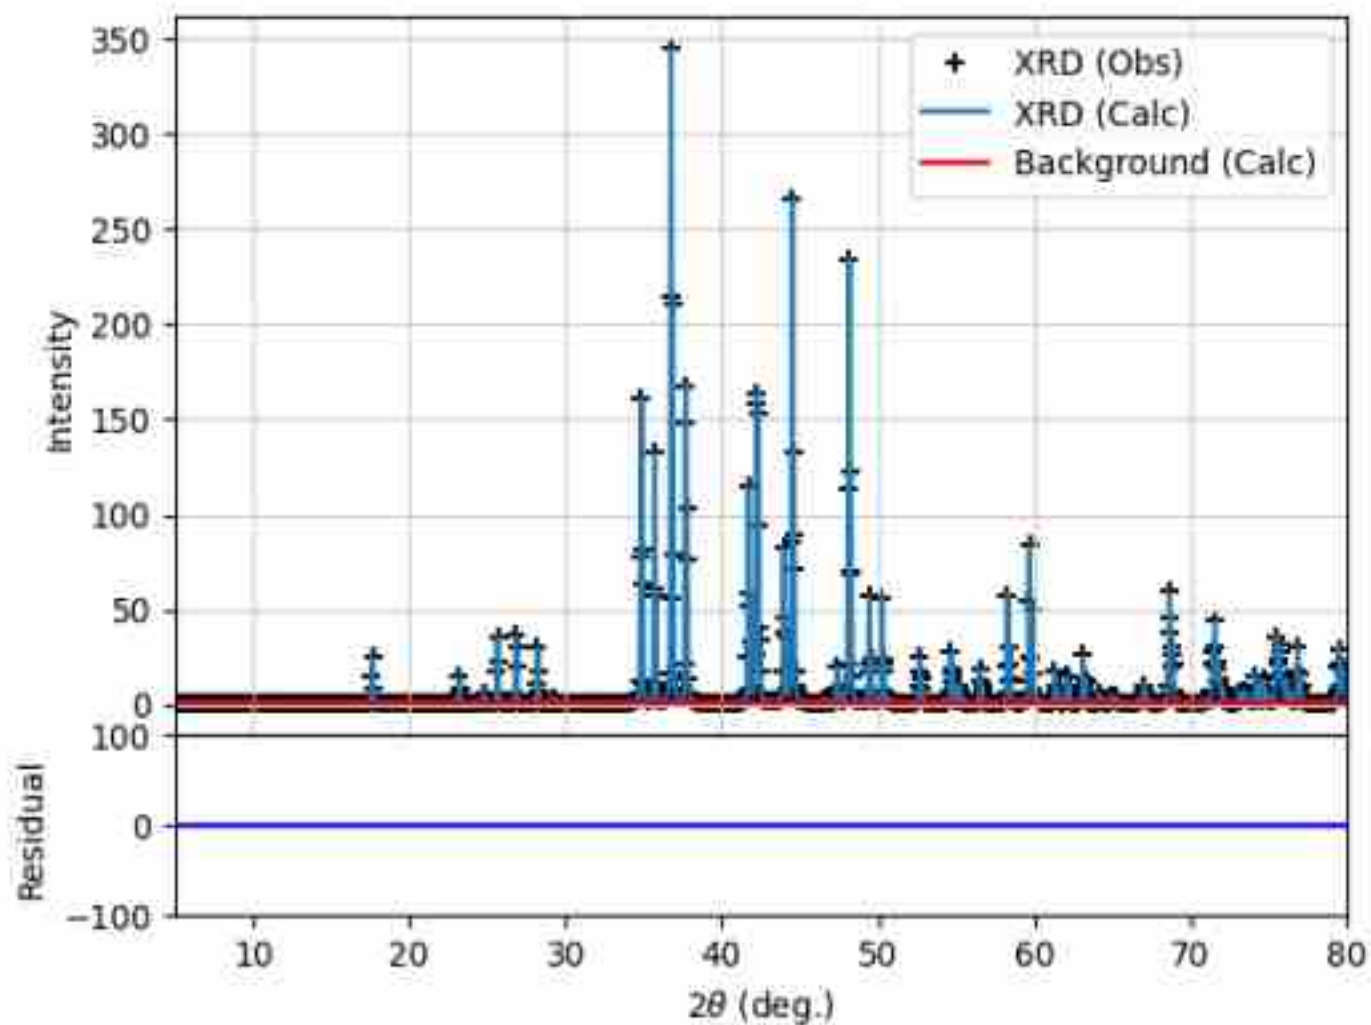

| RMSE before RR | Rwp     | RMSE after RR |
|----------------|---------|---------------|
| 0.052          | 0.00455 | 0.00034       |

# $\text{Cd}_1\text{Pb}_2\text{Cl}_2\text{O}_2$

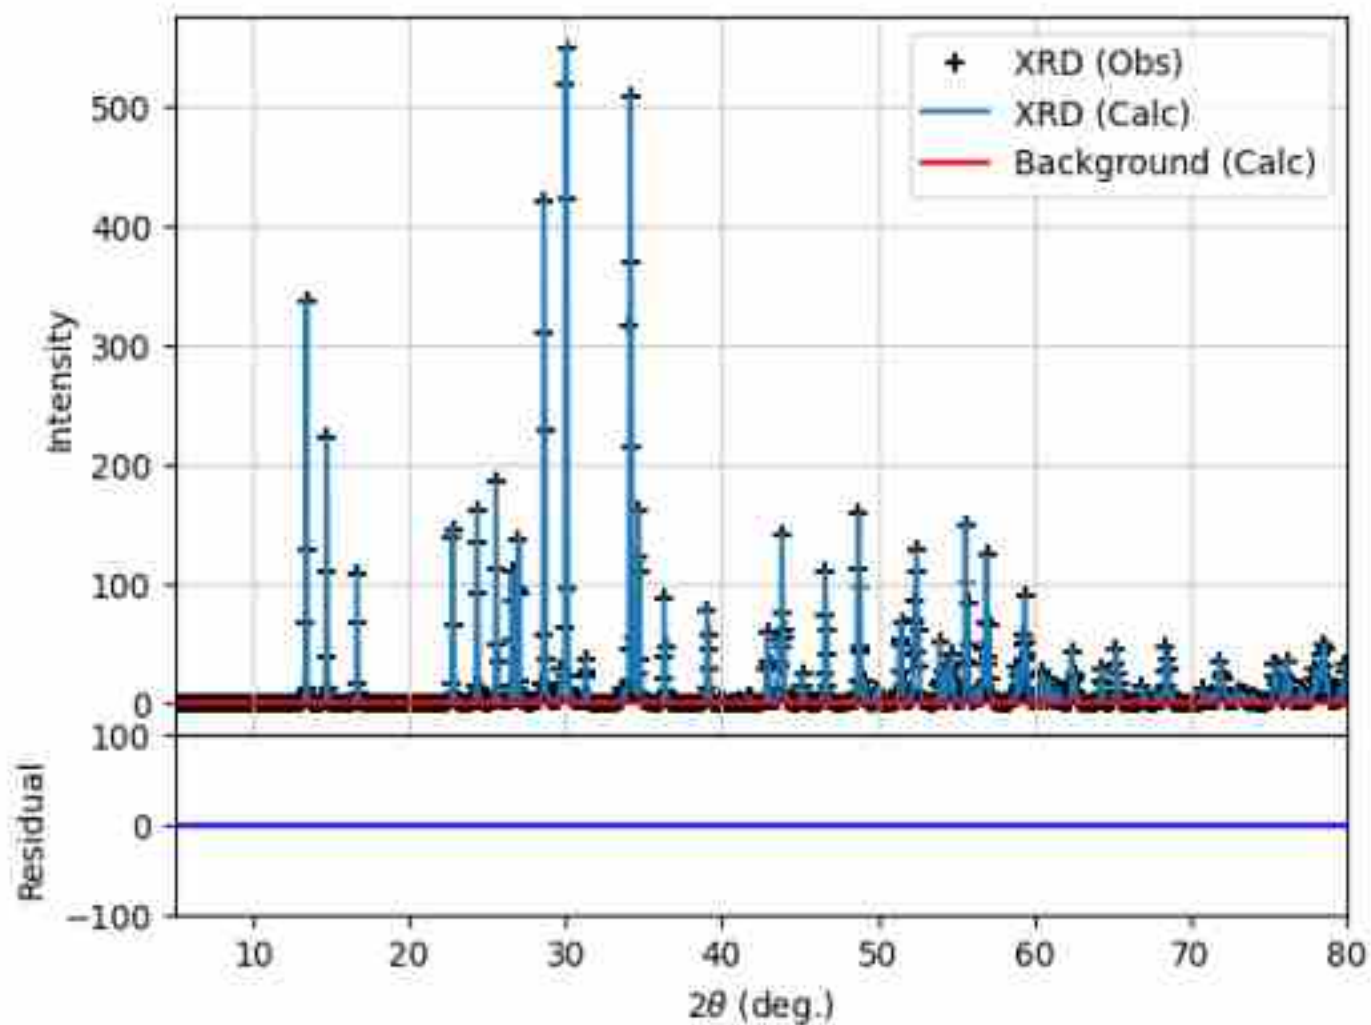

| RMSE before RR | Rwp     | RMSE after RR |
|----------------|---------|---------------|
| 0.053          | 0.00286 | 0.00066       |

# K<sub>2</sub>Ba<sub>2</sub>Si<sub>2</sub>H<sub>2</sub>O<sub>8</sub>

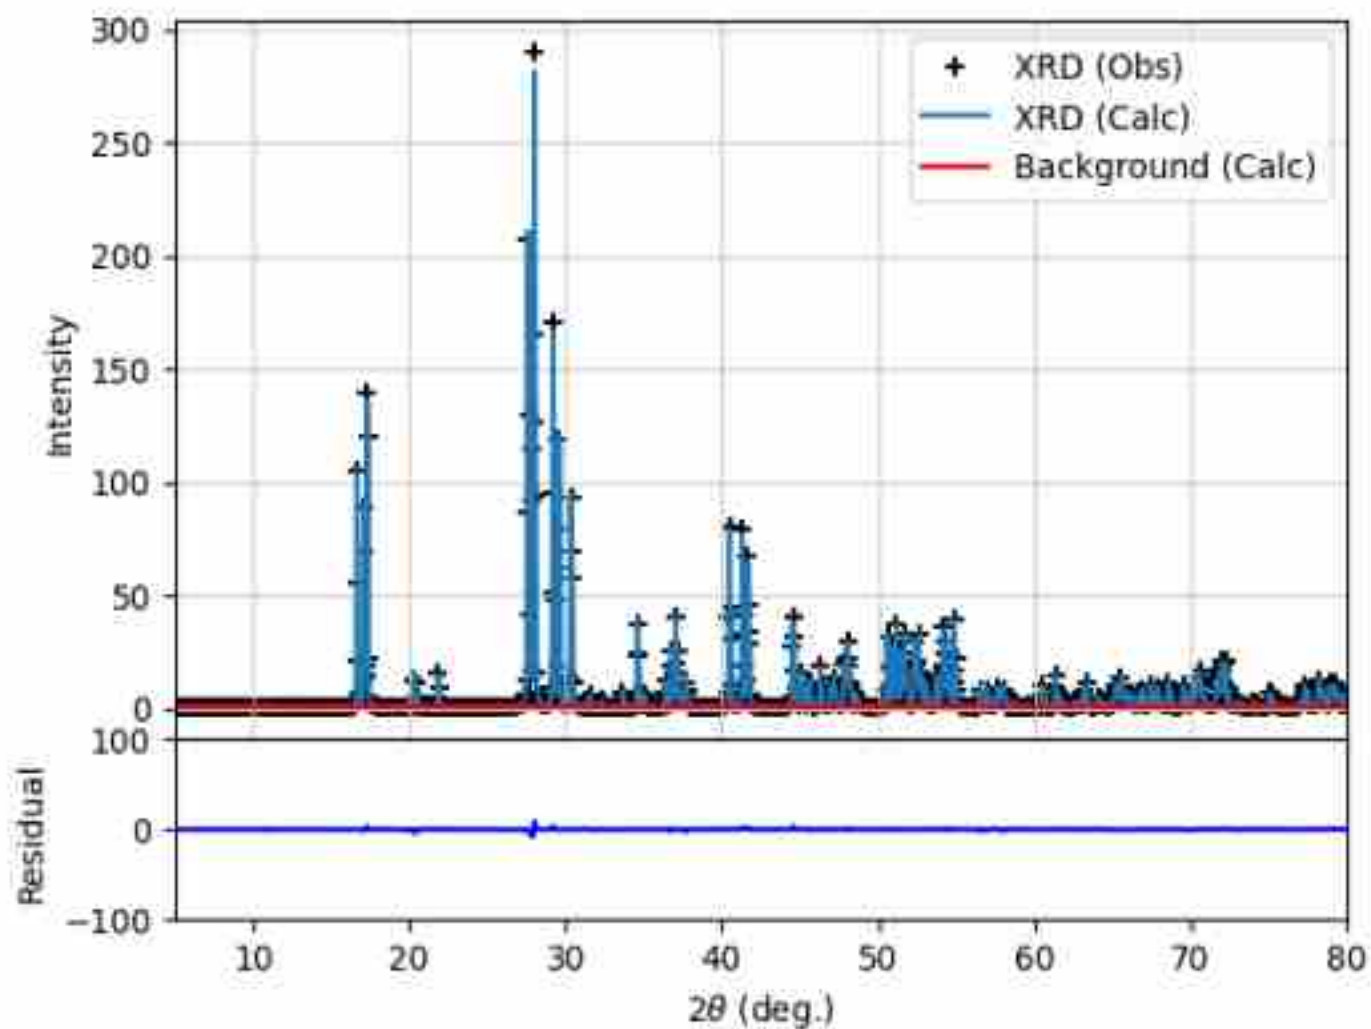

| RMSE before RR | Rwp     | RMSE after RR |
|----------------|---------|---------------|
| 0.053          | 5.14922 | 0.36355       |

# La<sub>4</sub>Mo<sub>4</sub>N<sub>12</sub>

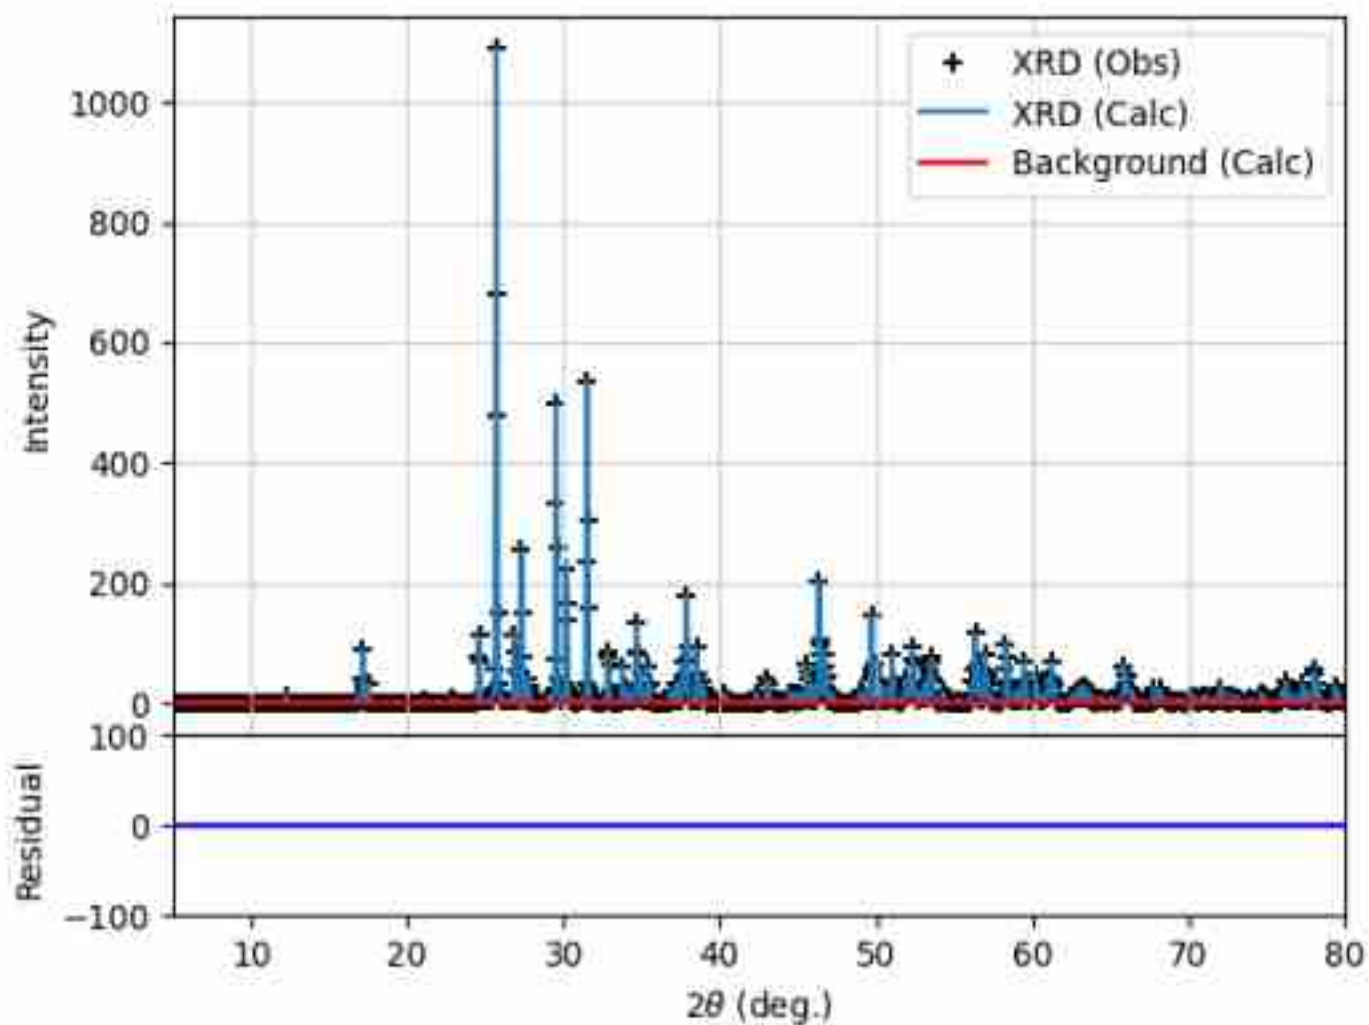

| RMSE before RR | Rwp     | RMSE after RR |
|----------------|---------|---------------|
| 0.053          | 0.00367 | 0.00072       |

# Li<sub>2</sub>Si<sub>4</sub>Bi<sub>2</sub>O<sub>12</sub>

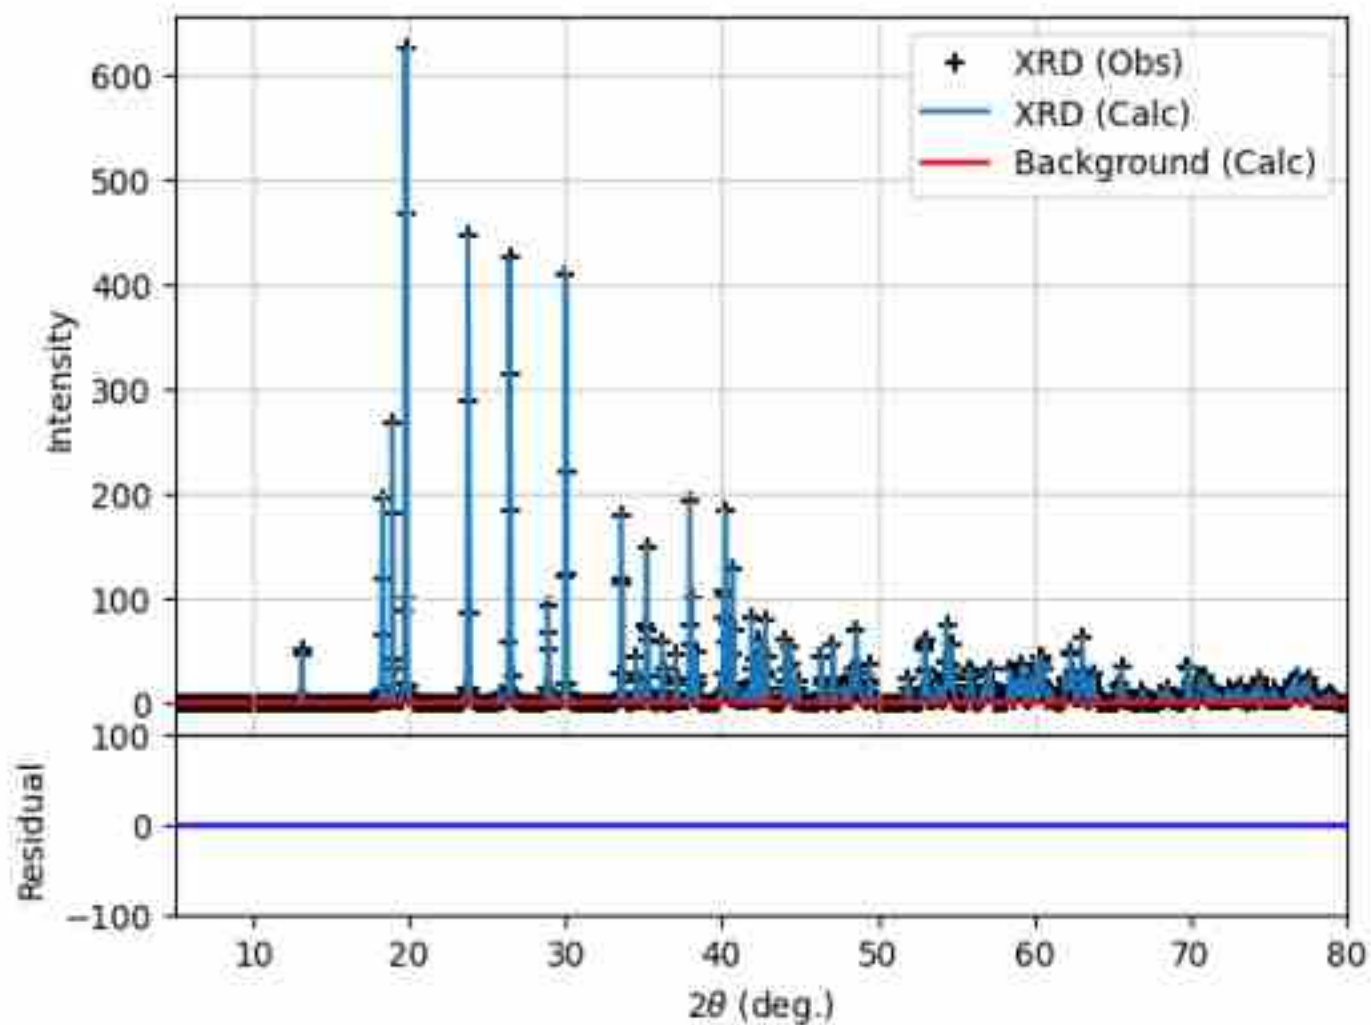

| RMSE before RR | Rwp     | RMSE after RR |
|----------------|---------|---------------|
| 0.053          | 0.00424 | 0.0014        |

# Li<sub>3</sub>V<sub>1</sub>Cr<sub>1</sub>P<sub>2</sub>O<sub>8</sub>F<sub>2</sub>

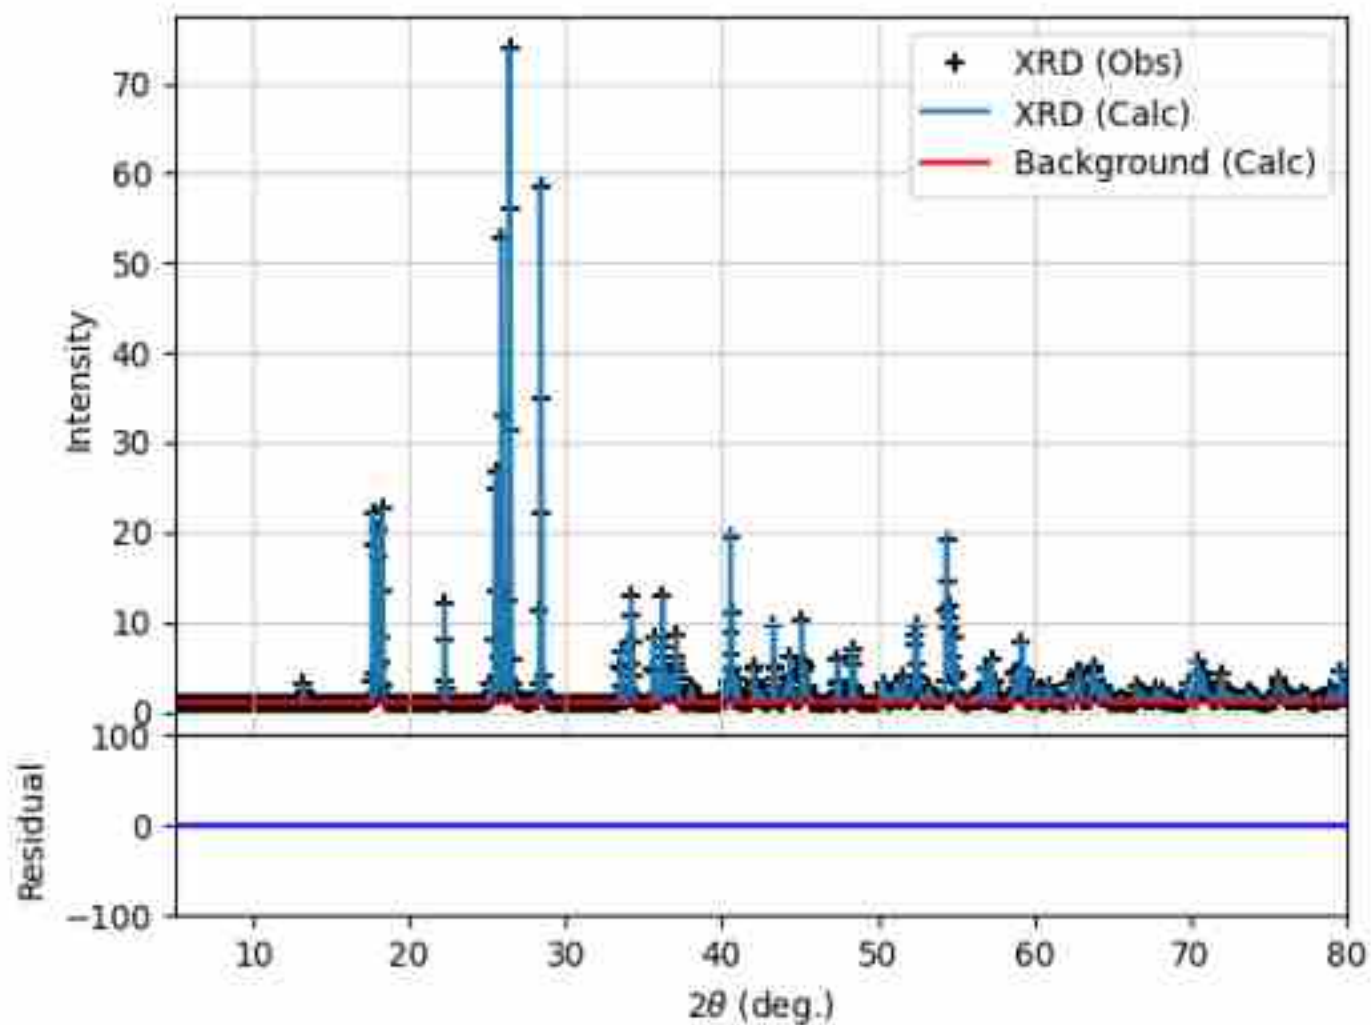

| RMSE before RR | Rwp     | RMSE after RR |
|----------------|---------|---------------|
| 0.053          | 0.00011 | 0.0           |

# Mo1W3S8

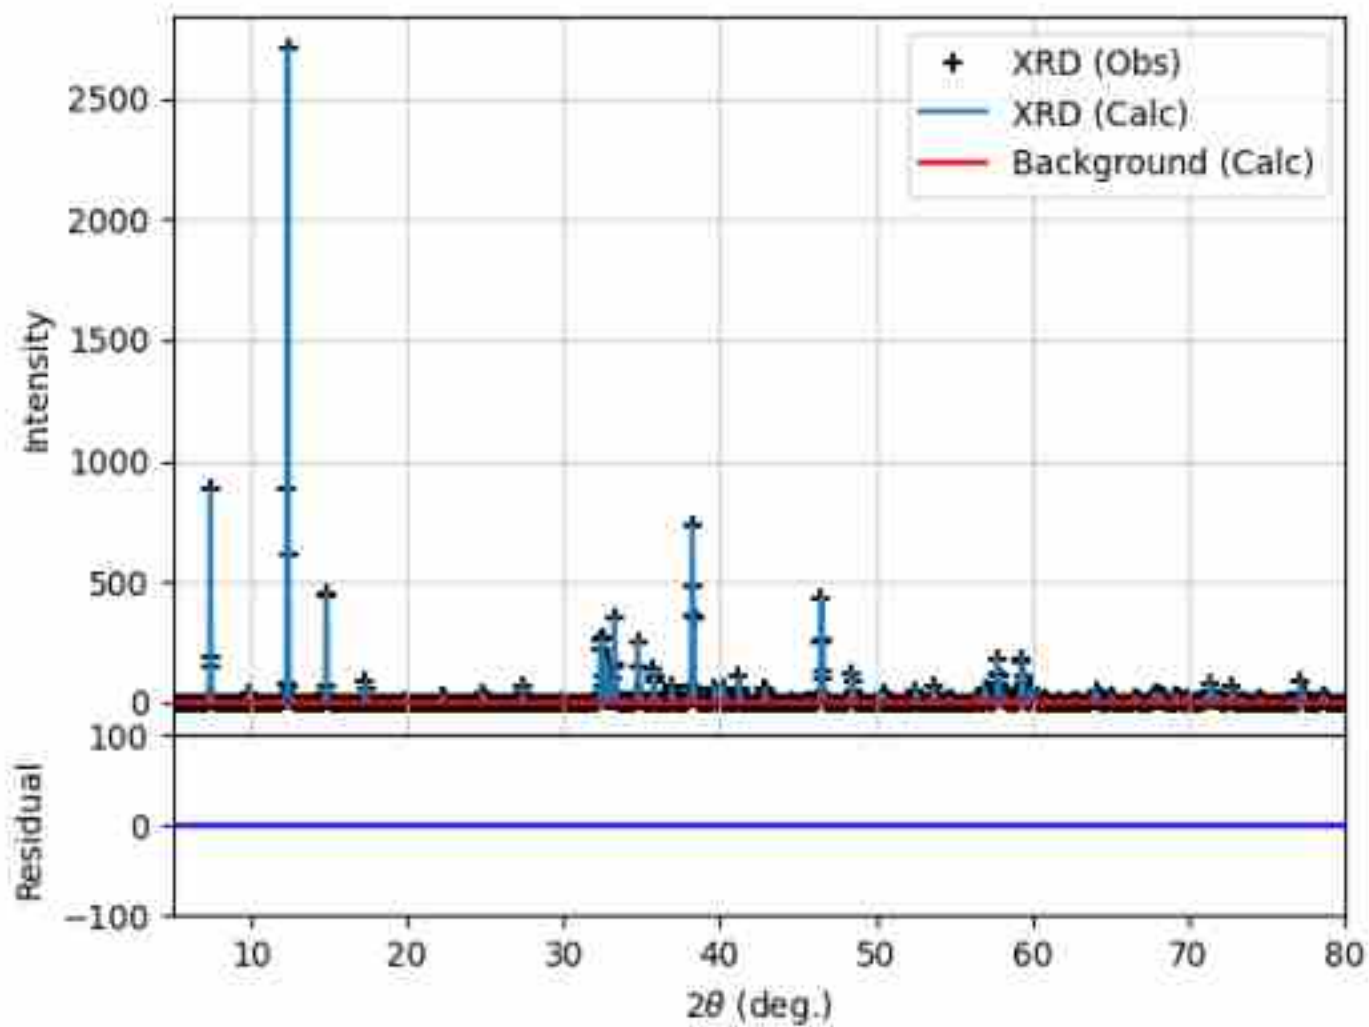

| RMSE before RR | Rwp     | RMSE after RR |
|----------------|---------|---------------|
| 0.053          | 0.00262 | 0.00054       |



# Sc4Co2Ge4

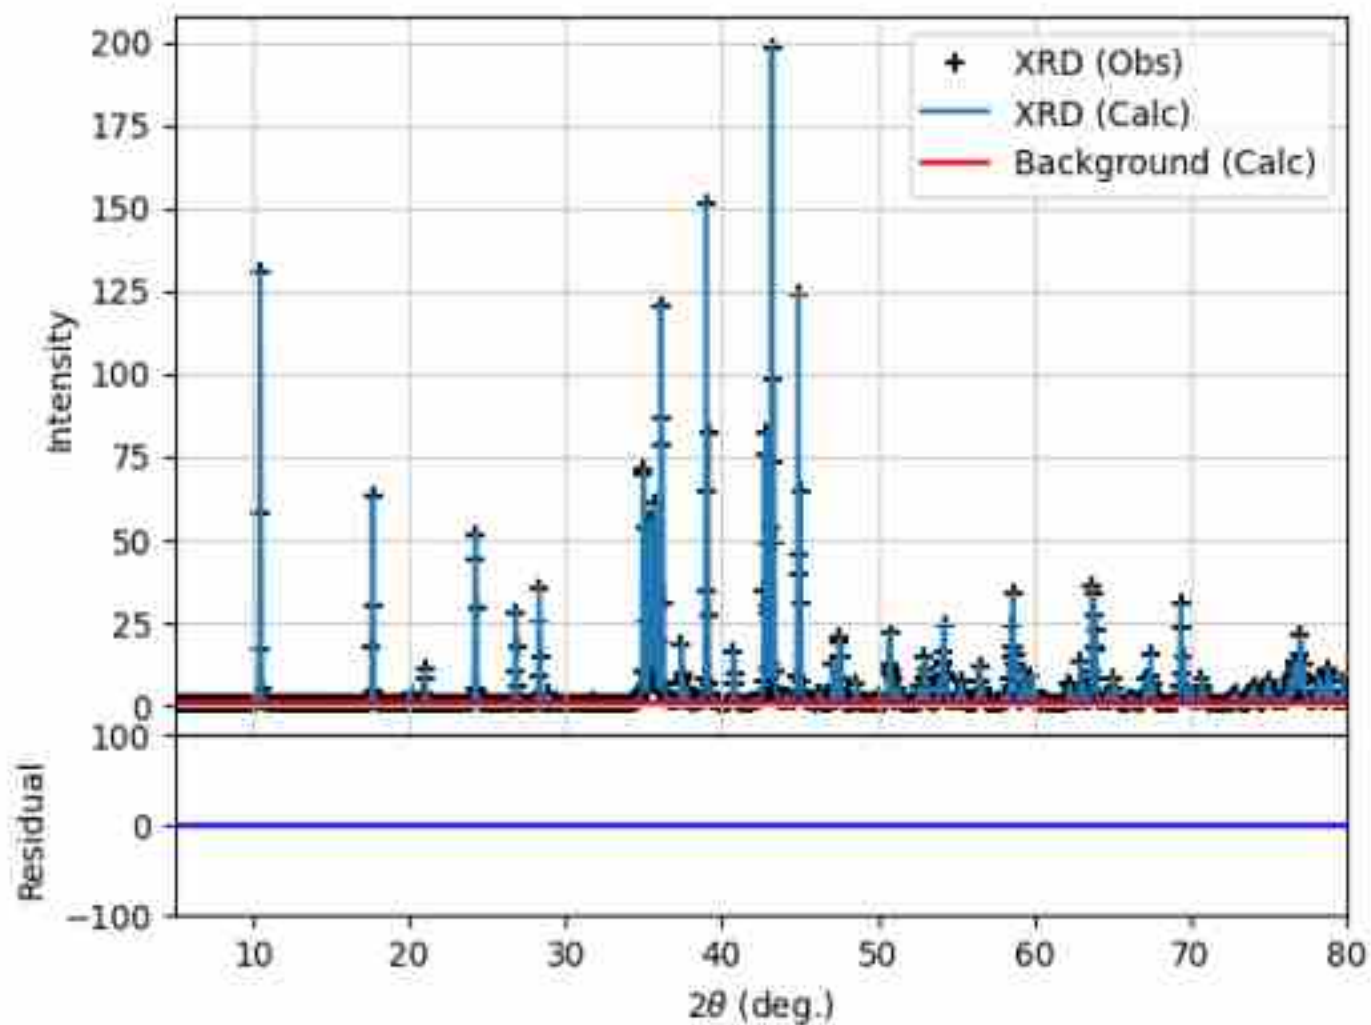

| RMSE before RR | Rwp     | RMSE after RR |
|----------------|---------|---------------|
| 0.053          | 0.00277 | 0.00023       |

# Tm<sub>4</sub>Cu<sub>4</sub>S<sub>8</sub>

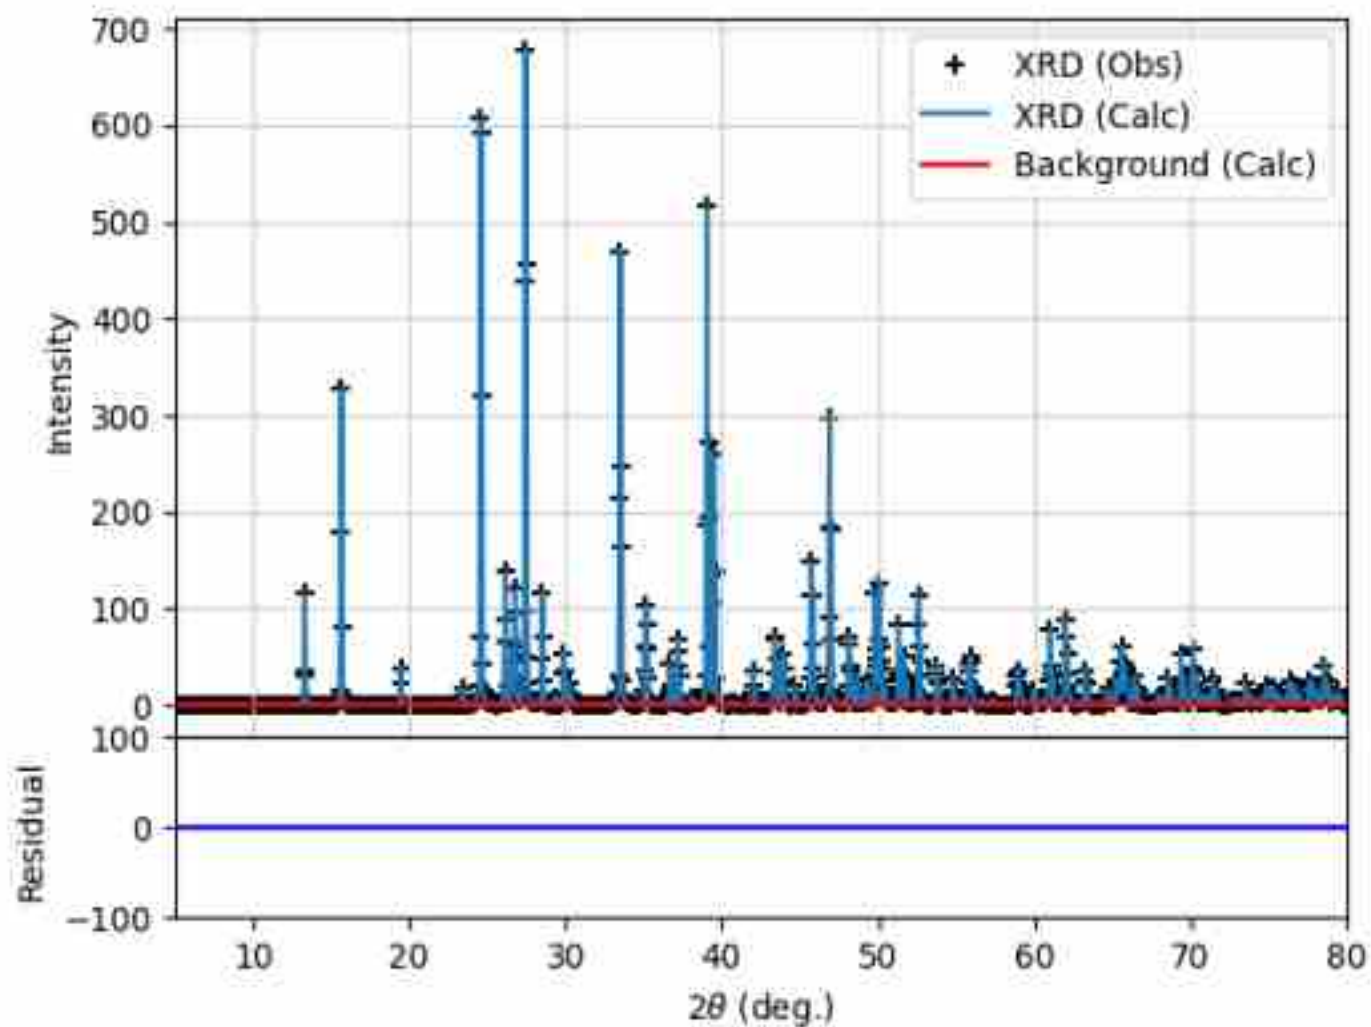

| RMSE before RR | Rwp     | RMSE after RR |
|----------------|---------|---------------|
| 0.053          | 0.00398 | 0.00068       |

# V4O6F6

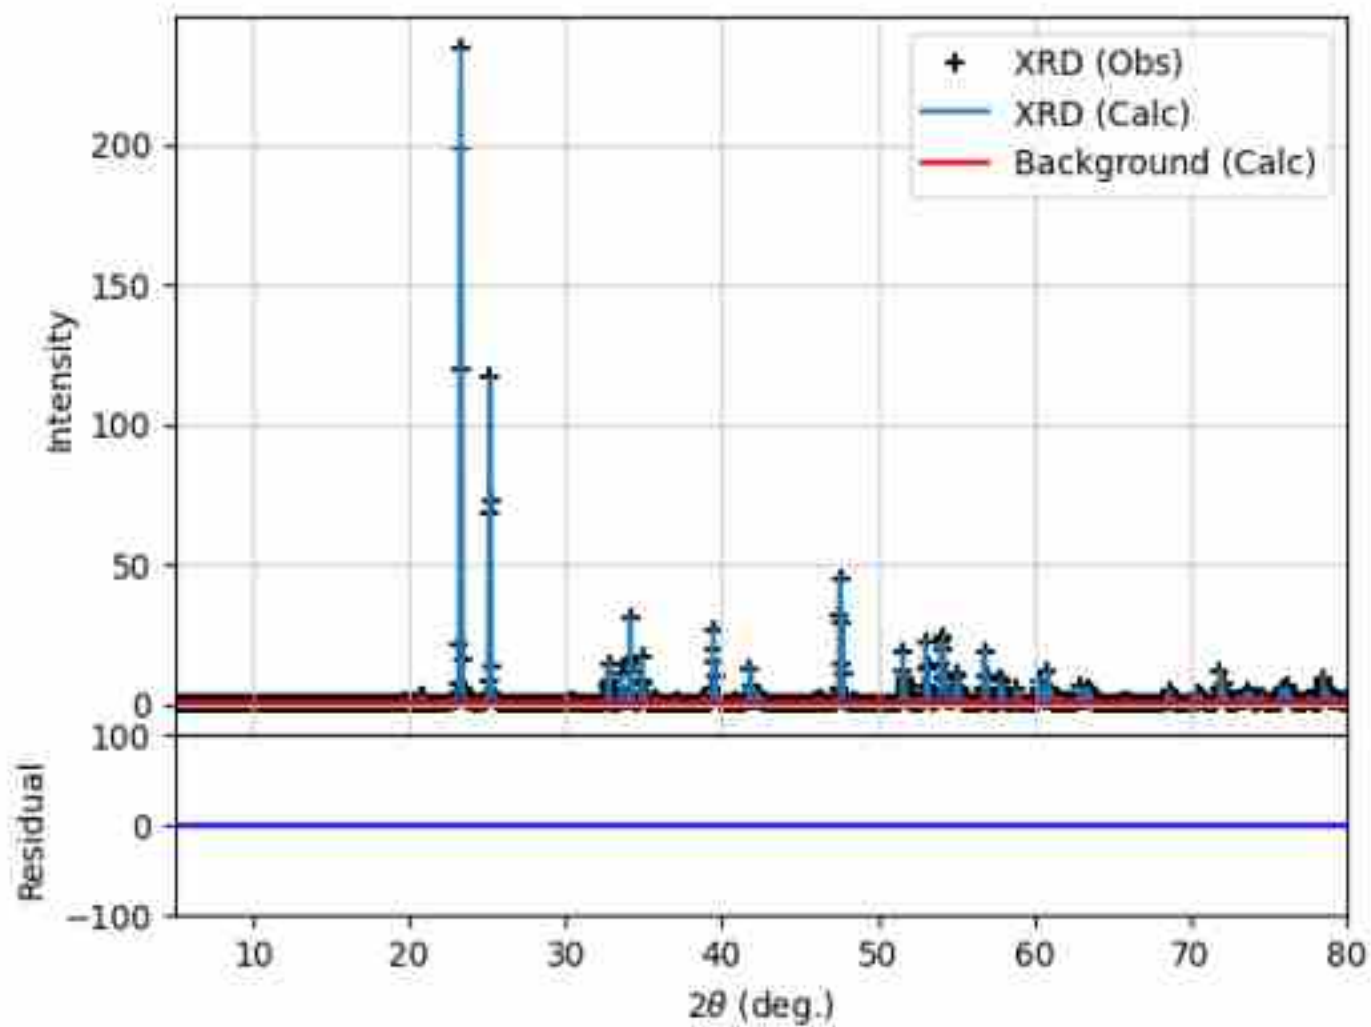

| RMSE before RR | Rwp     | RMSE after RR |
|----------------|---------|---------------|
| 0.053          | 0.00255 | 0.00059       |

# Ba<sub>2</sub>Br<sub>4</sub>O<sub>12</sub>

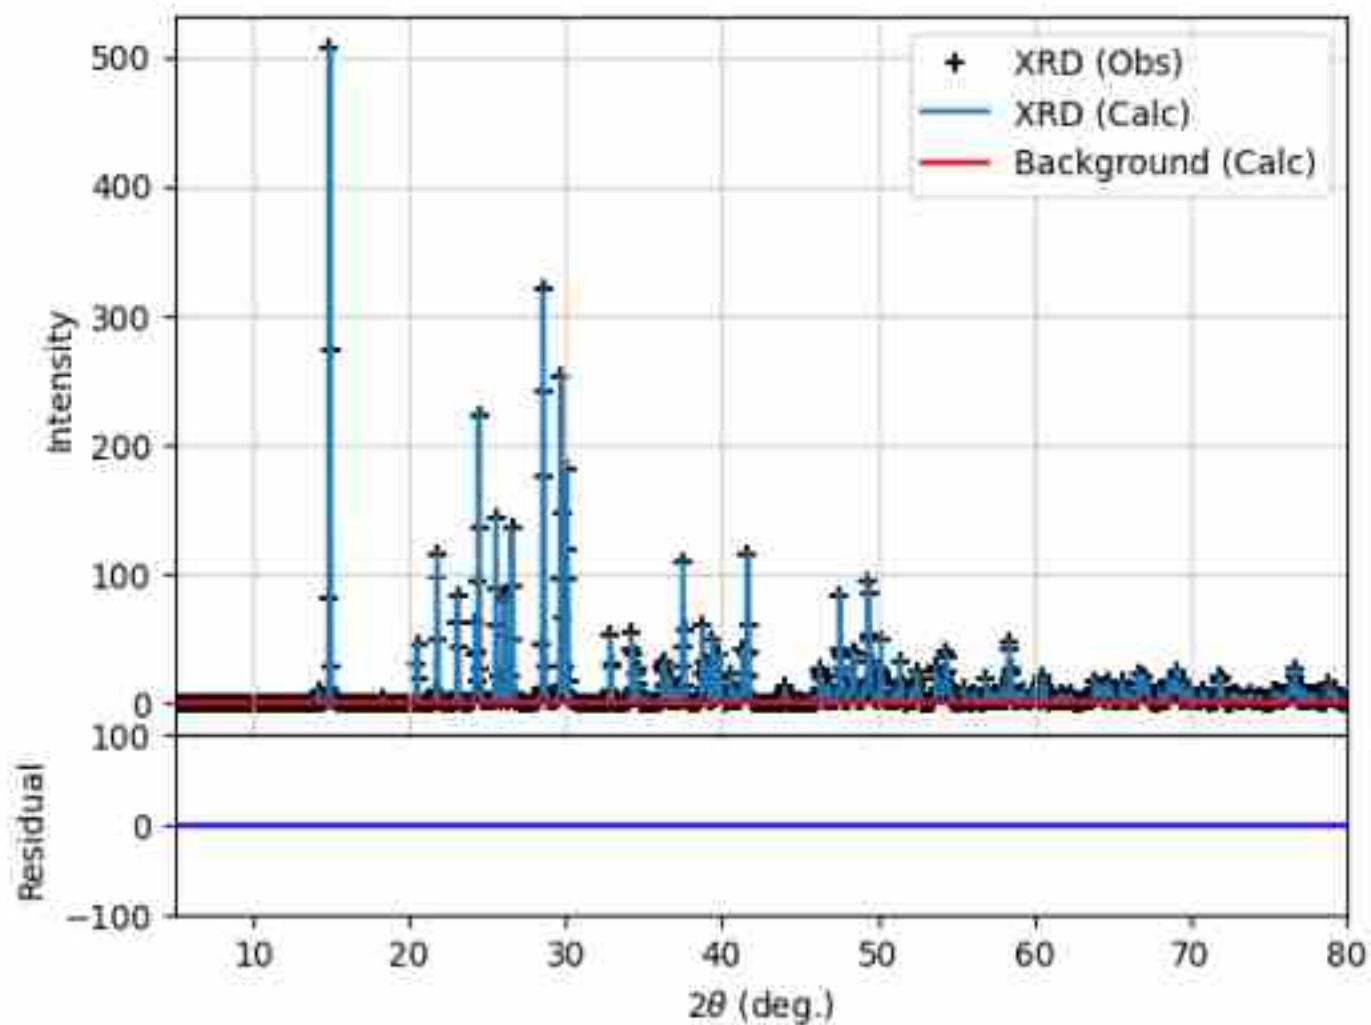

| RMSE before RR | Rwp     | RMSE after RR |
|----------------|---------|---------------|
| 0.054          | 0.00326 | 0.0007        |

# Ca9N6

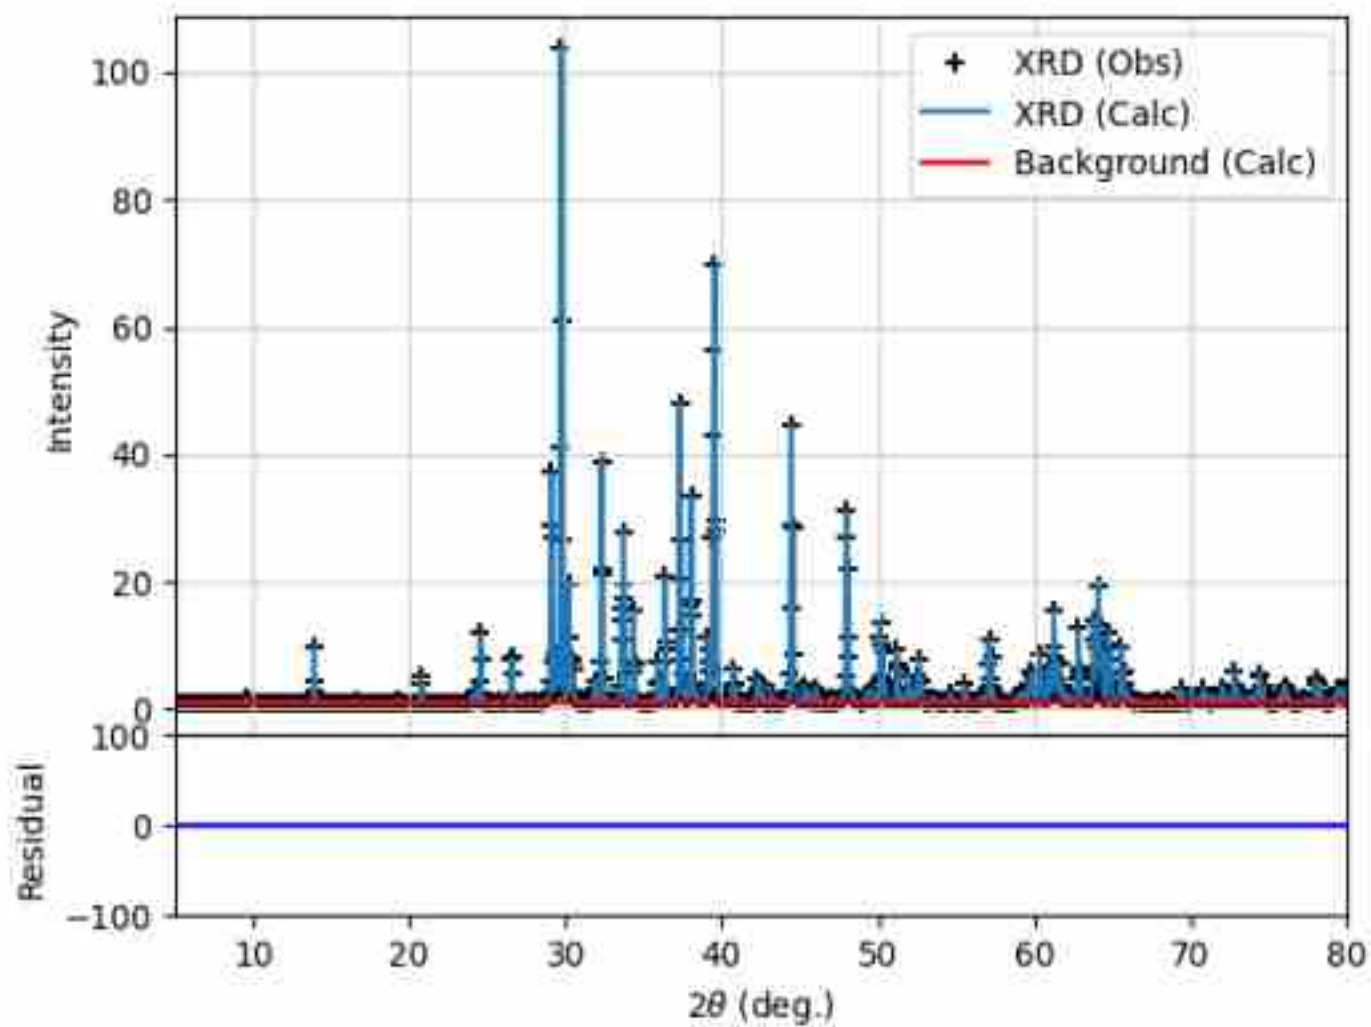

| RMSE before RR | Rwp     | RMSE after RR |
|----------------|---------|---------------|
| 0.054          | 0.00225 | 0.00035       |

# Ce2Ga2Co2

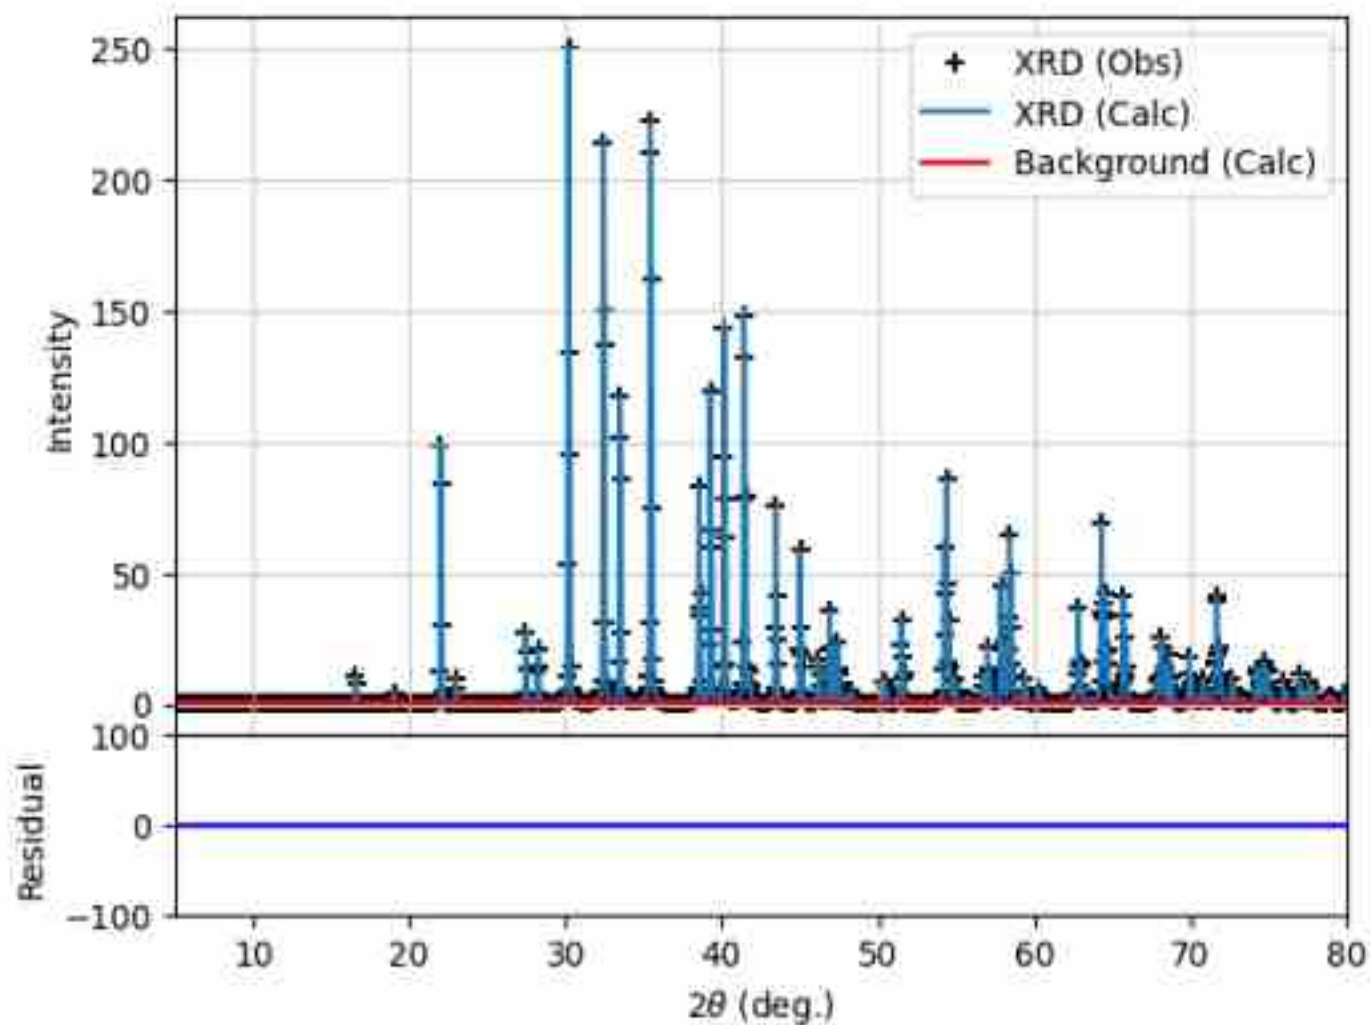

| RMSE before RR | Rwp     | RMSE after RR |
|----------------|---------|---------------|
| 0.054          | 0.00371 | 0.00033       |

# Cs1Ge1I3

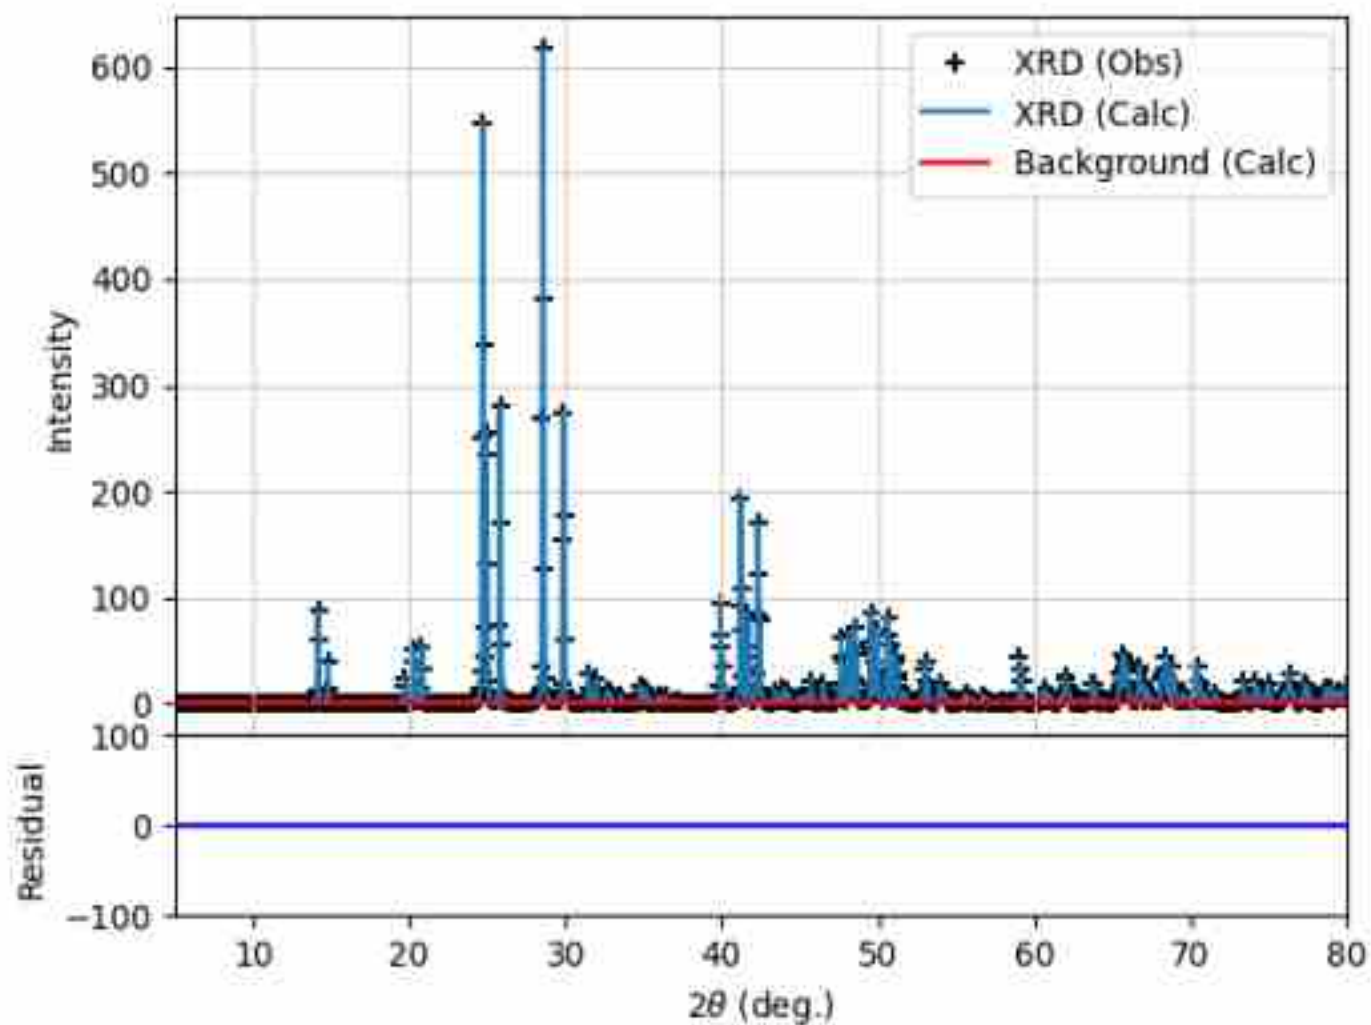

| RMSE before RR | Rwp     | RMSE after RR |
|----------------|---------|---------------|
| 0.054          | 0.00353 | 0.00016       |

# Li<sub>4</sub>Mn<sub>3</sub>Co<sub>1</sub>O<sub>8</sub>

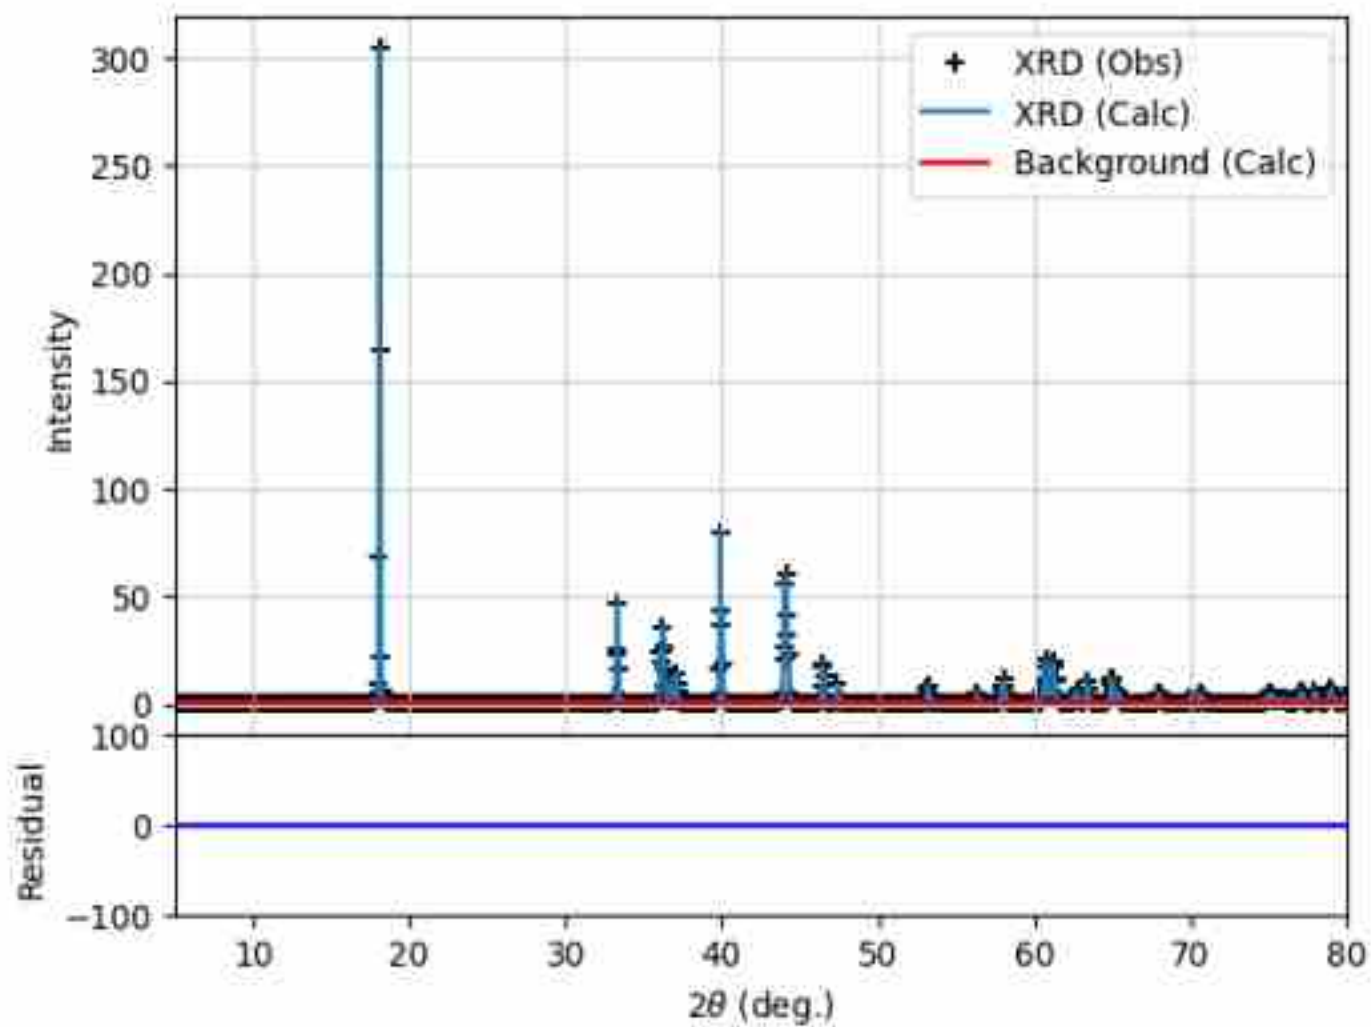

| RMSE before RR | Rwp     | RMSE after RR |
|----------------|---------|---------------|
| 0.054          | 0.00087 | 0.00094       |



# Mo2C16

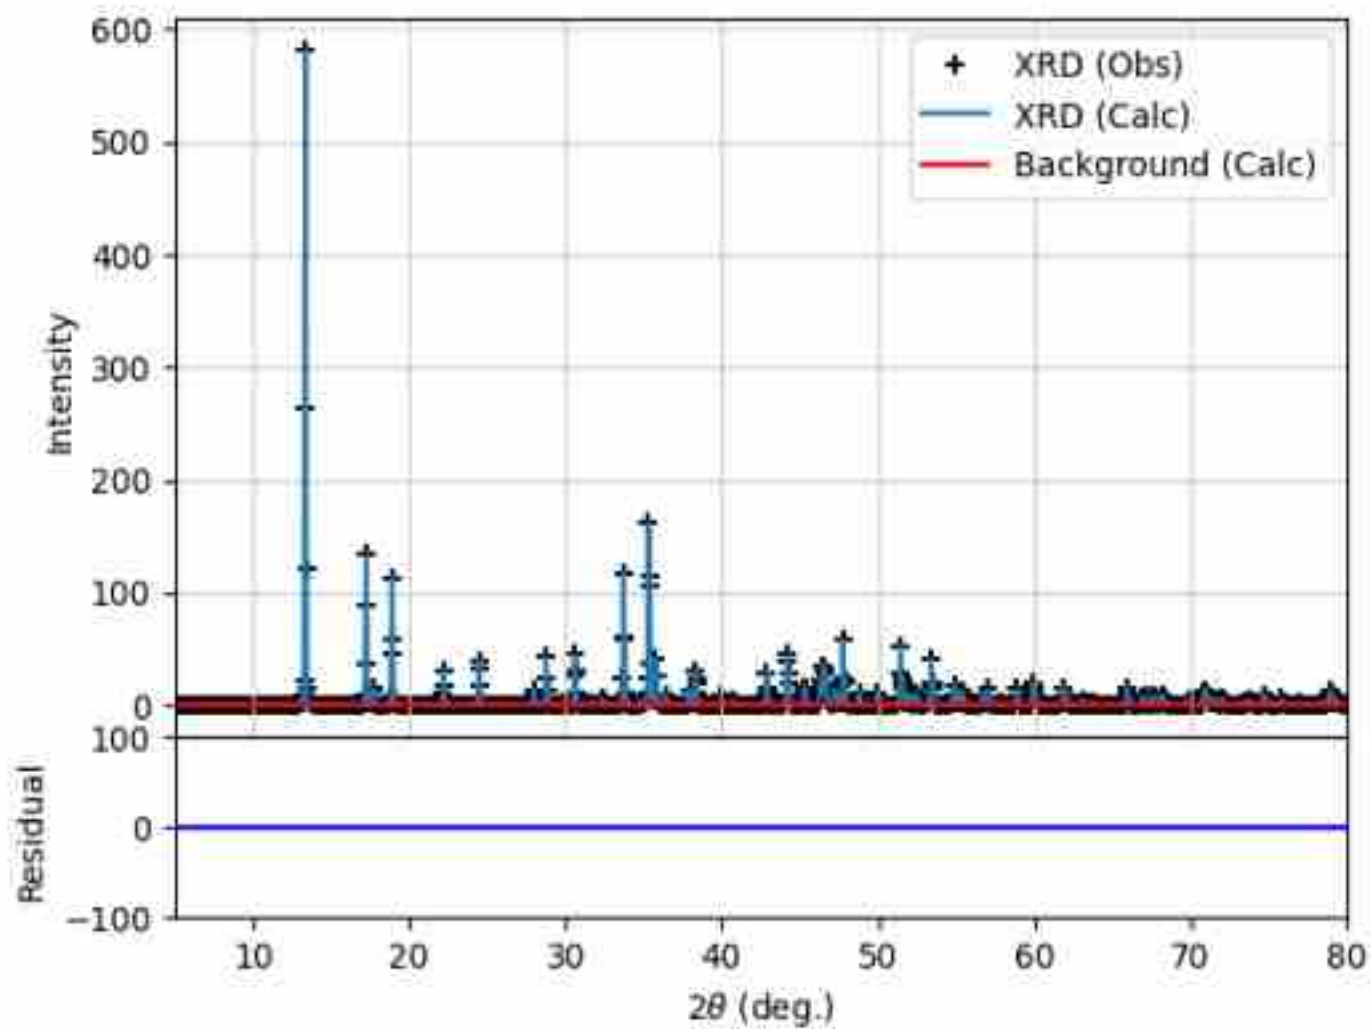

| RMSE before RR | Rwp     | RMSE after RR |
|----------------|---------|---------------|
| 0.054          | 0.00286 | 0.00027       |

# Nb<sub>4</sub>Br<sub>12</sub>O<sub>4</sub>

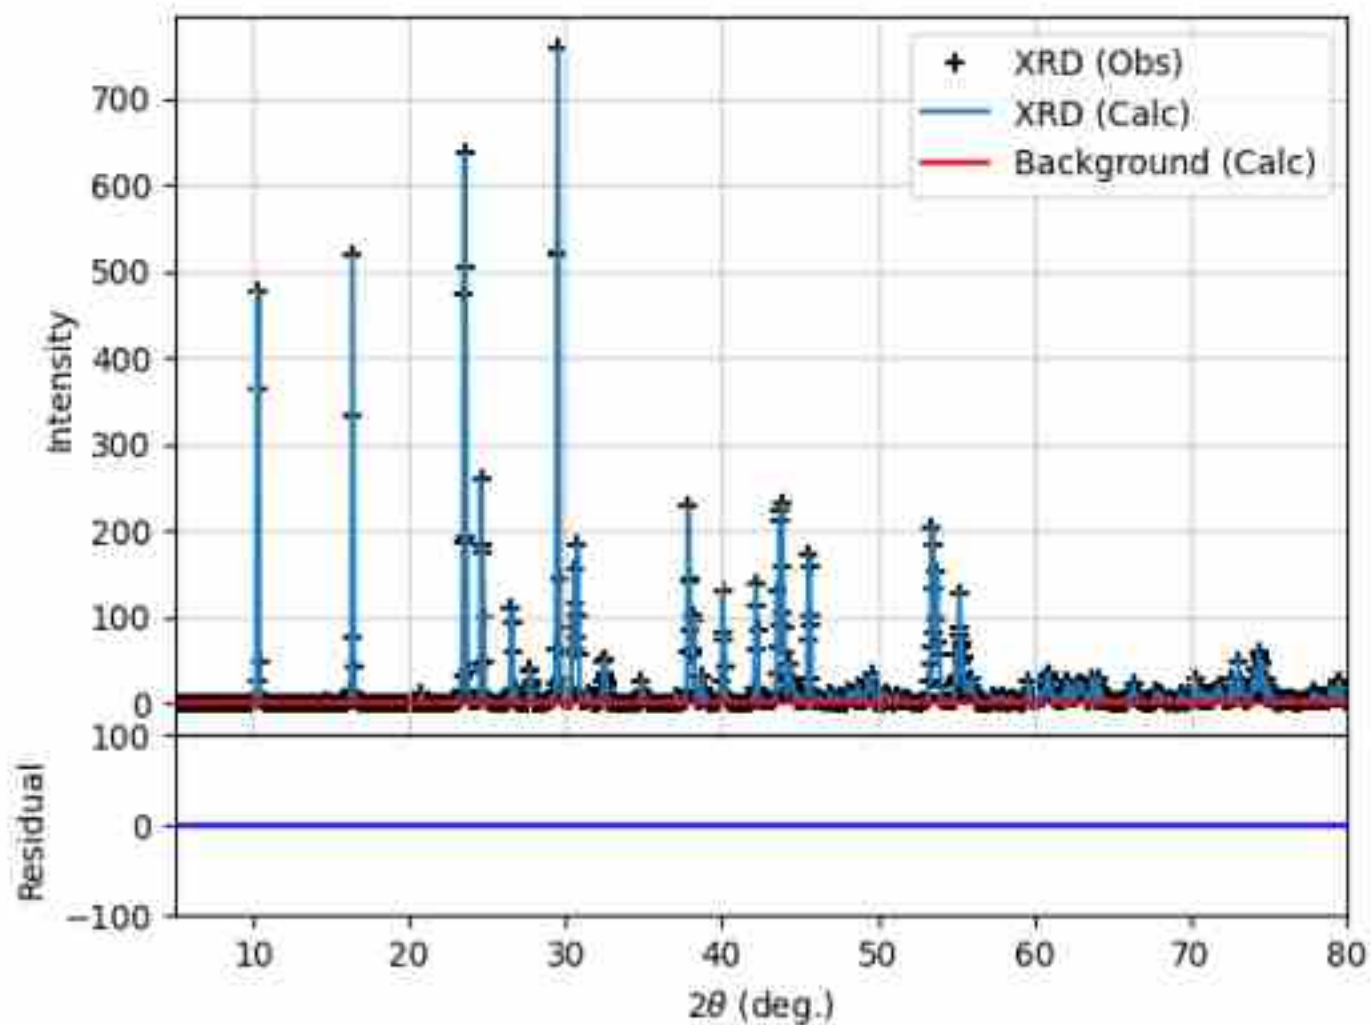

| RMSE before RR | Rwp     | RMSE after RR |
|----------------|---------|---------------|
| 0.054          | 0.00298 | 0.00044       |

# U<sub>4</sub>Ni<sub>4</sub>As<sub>4</sub>

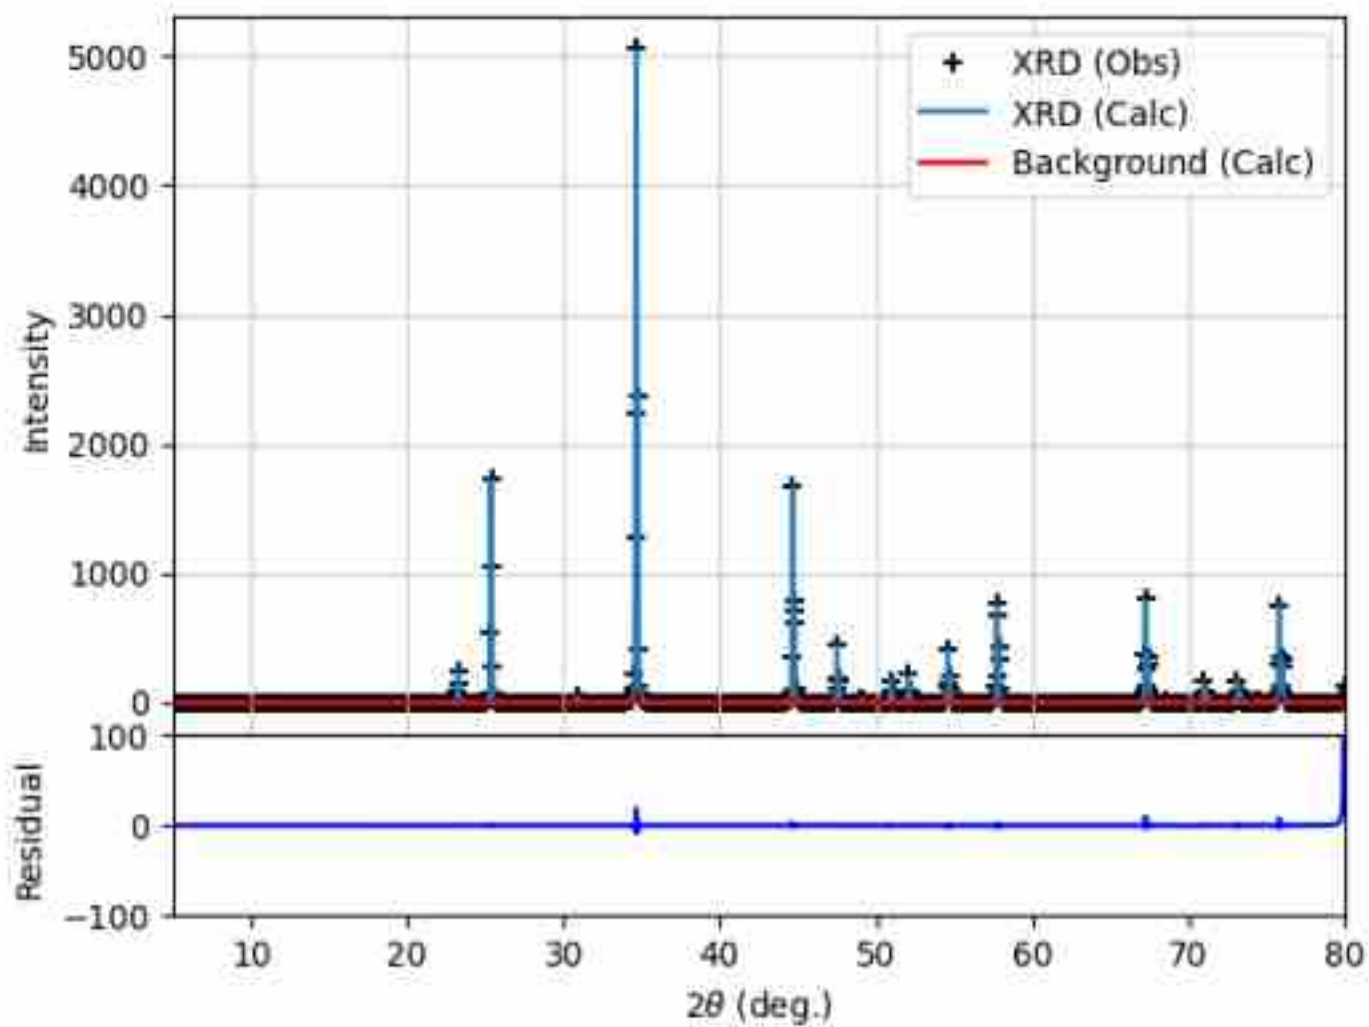

| RMSE before RR | Rwp     | RMSE after RR |
|----------------|---------|---------------|
| 0.054          | 9.57718 | 0.01013       |

# W4I12O4

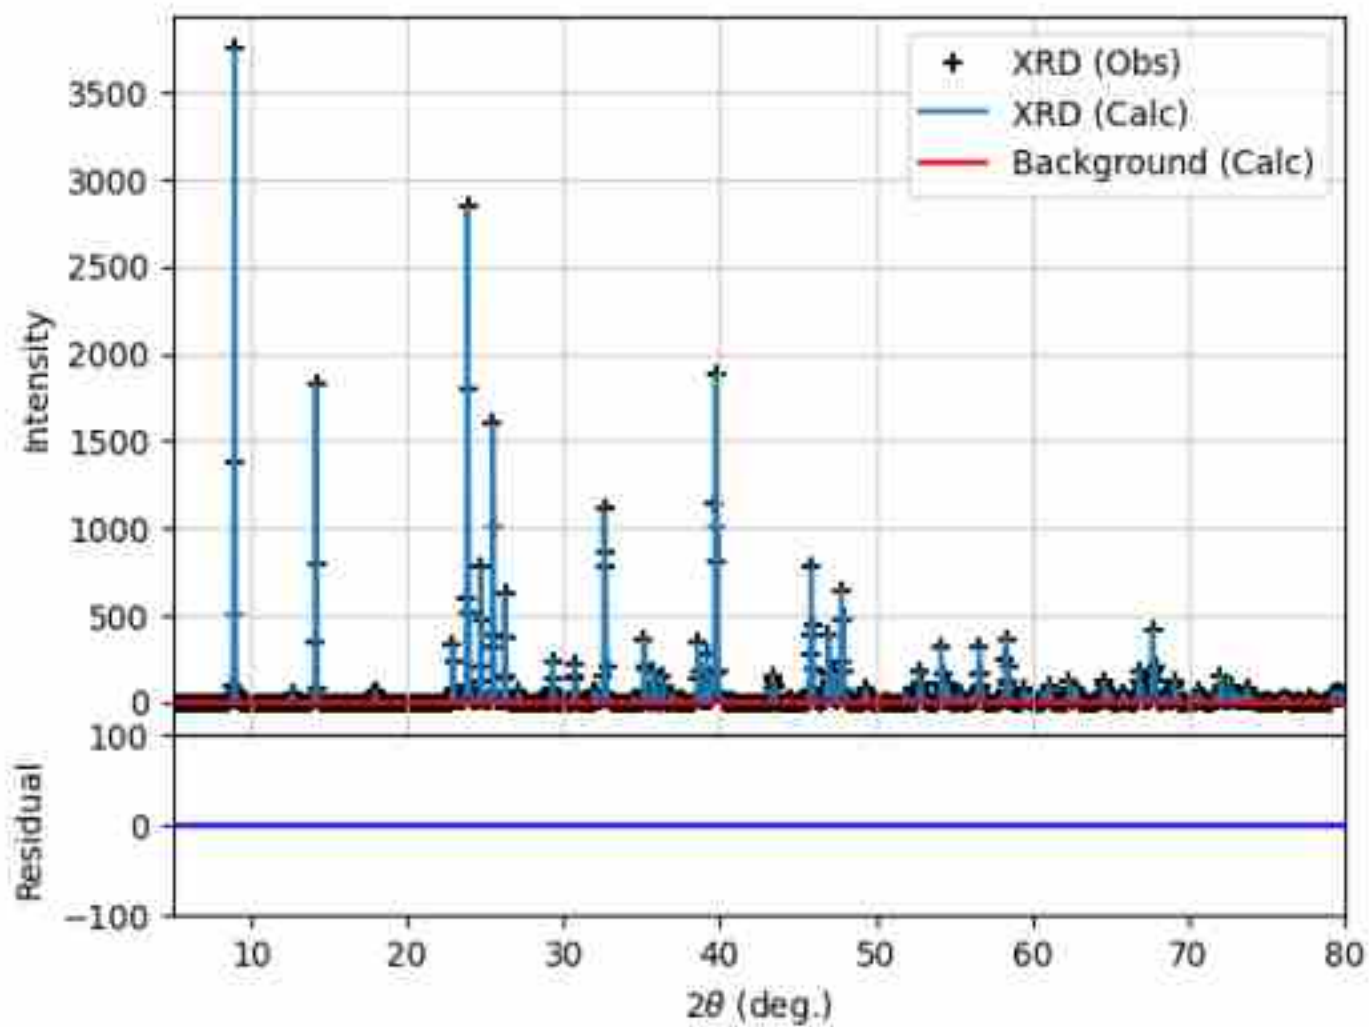

| RMSE before RR | Rwp    | RMSE after RR |
|----------------|--------|---------------|
| 0.054          | 0.0056 | 0.00096       |

# Ba1Sr1Y1Cu3Pb1O7

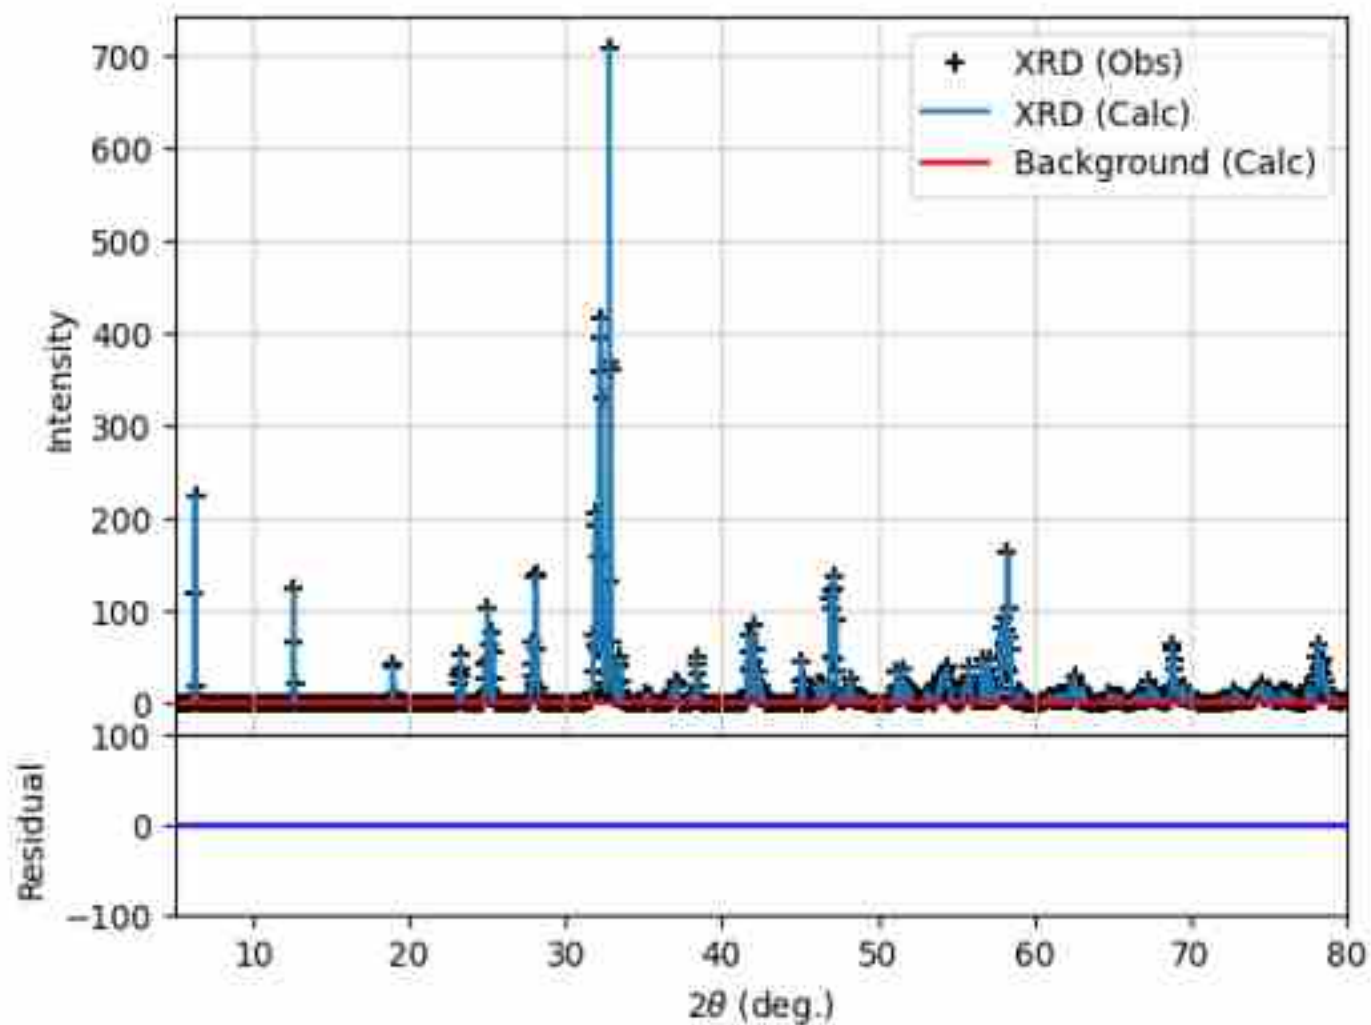

| RMSE before RR | Rwp     | RMSE after RR |
|----------------|---------|---------------|
| 0.055          | 0.00356 | 0.00057       |

# Ba<sub>1</sub>Yb<sub>2</sub>F<sub>8</sub>

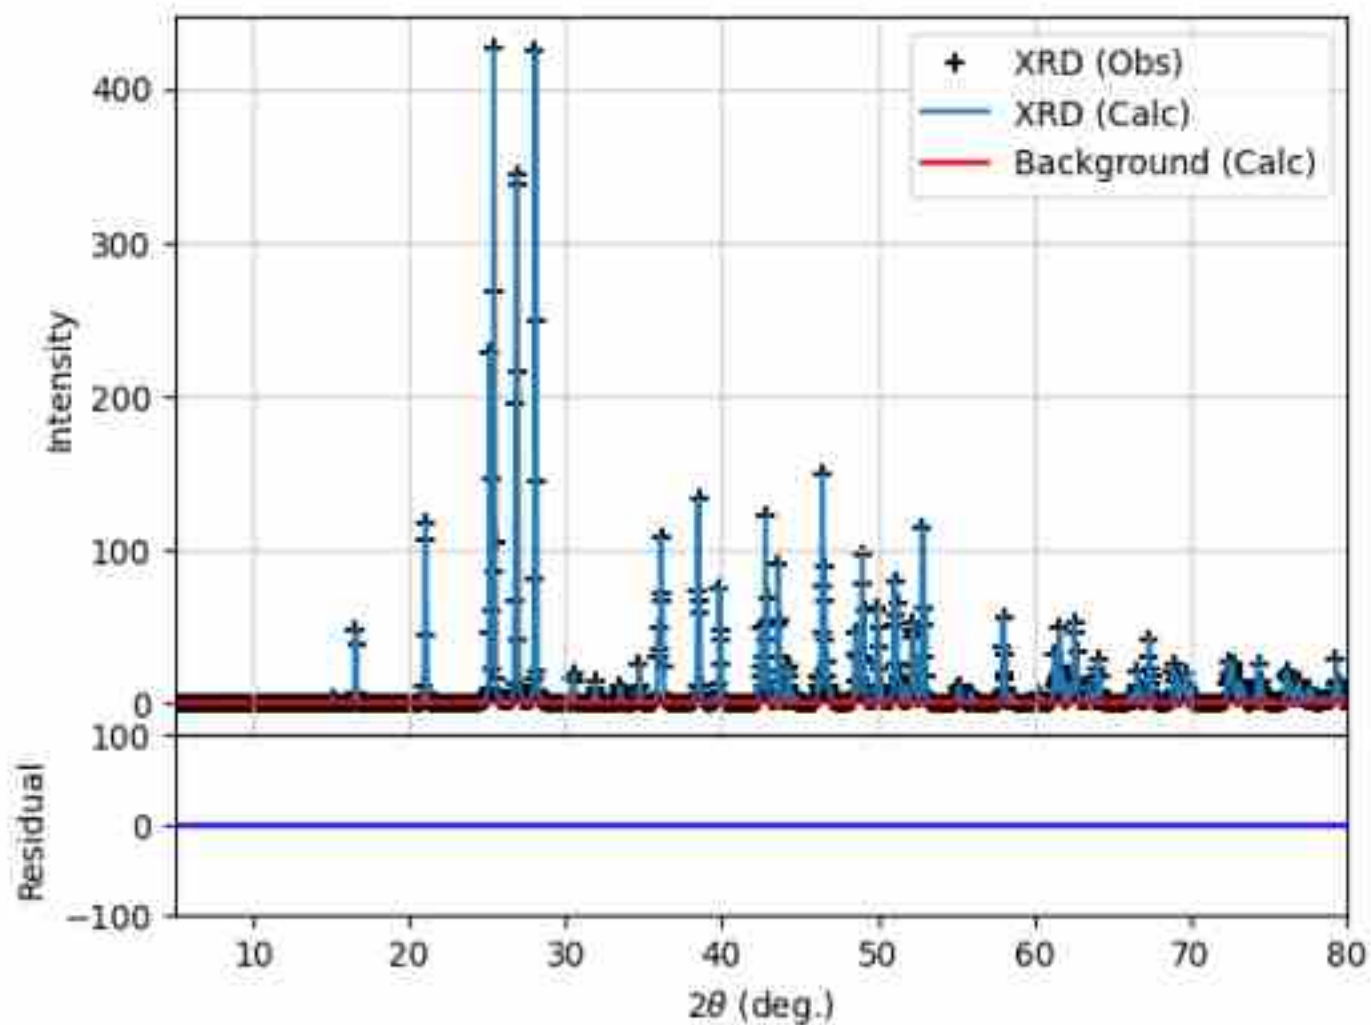

| RMSE before RR | Rwp     | RMSE after RR |
|----------------|---------|---------------|
| 0.055          | 0.00352 | 0.00164       |

# Ba<sub>4</sub>Y<sub>2</sub>F<sub>14</sub>

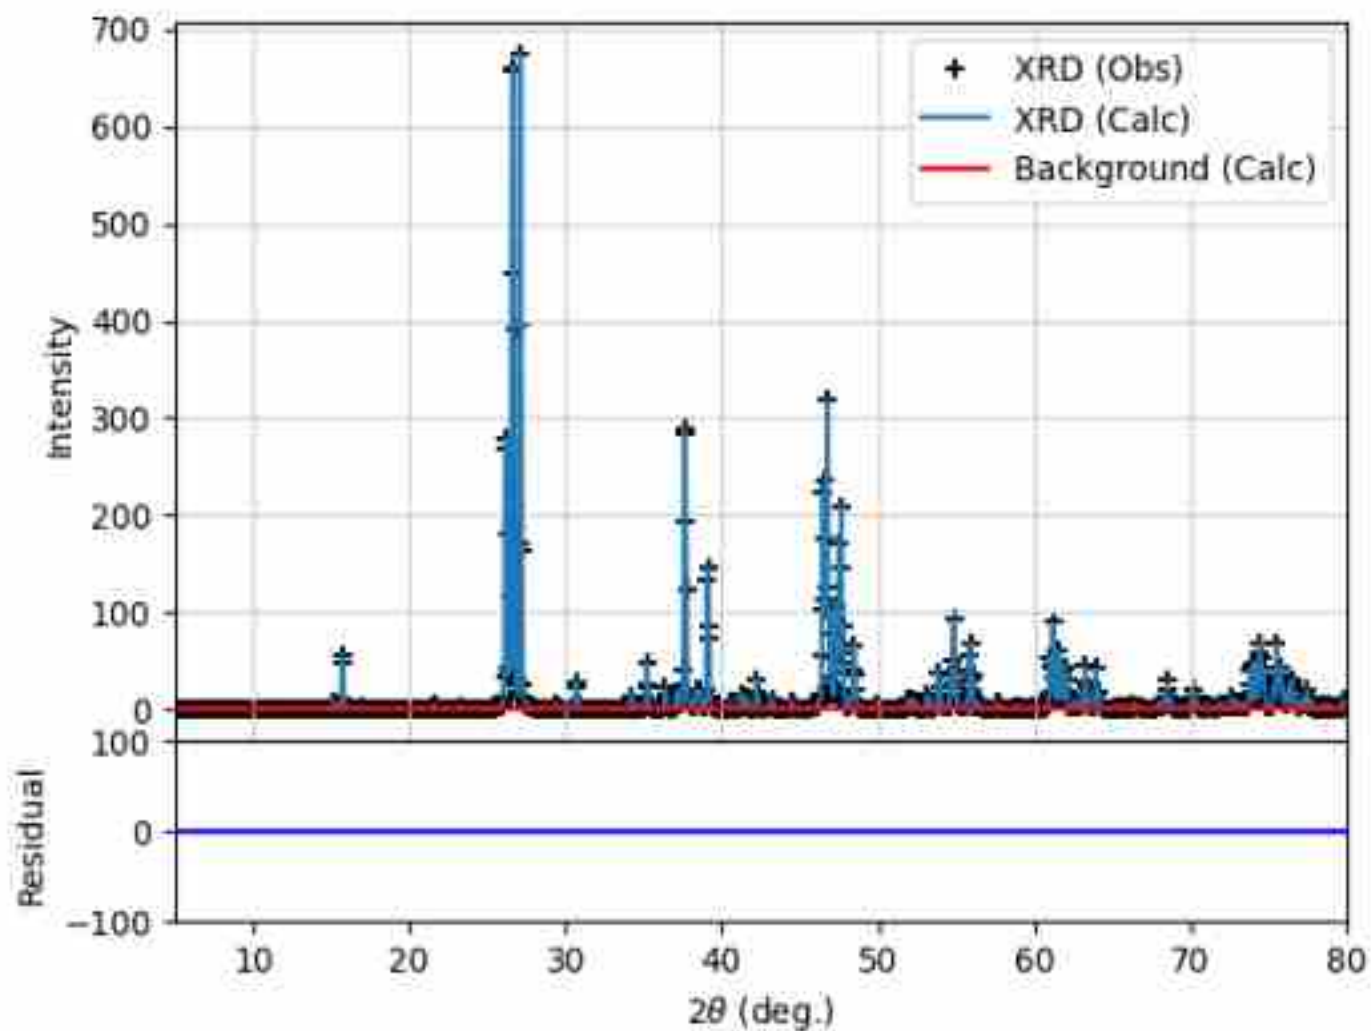

| RMSE before RR | Rwp     | RMSE after RR |
|----------------|---------|---------------|
| 0.055          | 0.00388 | 0.00083       |

# Cd5I10

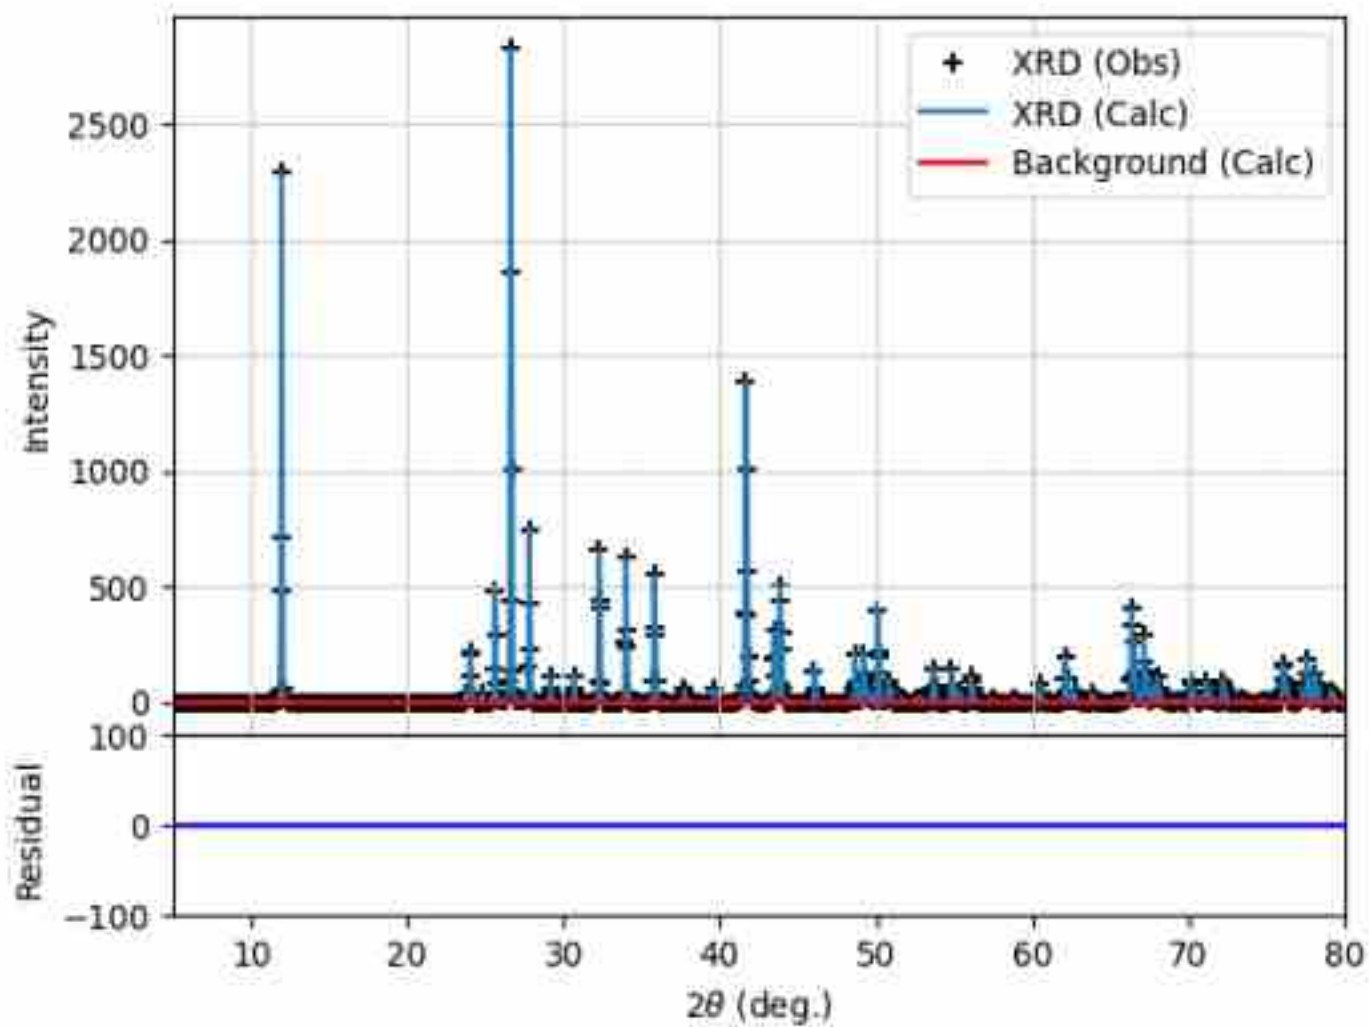

| RMSE before RR | Rwp     | RMSE after RR |
|----------------|---------|---------------|
| 0.055          | 0.00369 | 0.00034       |



# Cs<sub>4</sub>V<sub>2</sub>H<sub>2</sub>O<sub>8</sub>

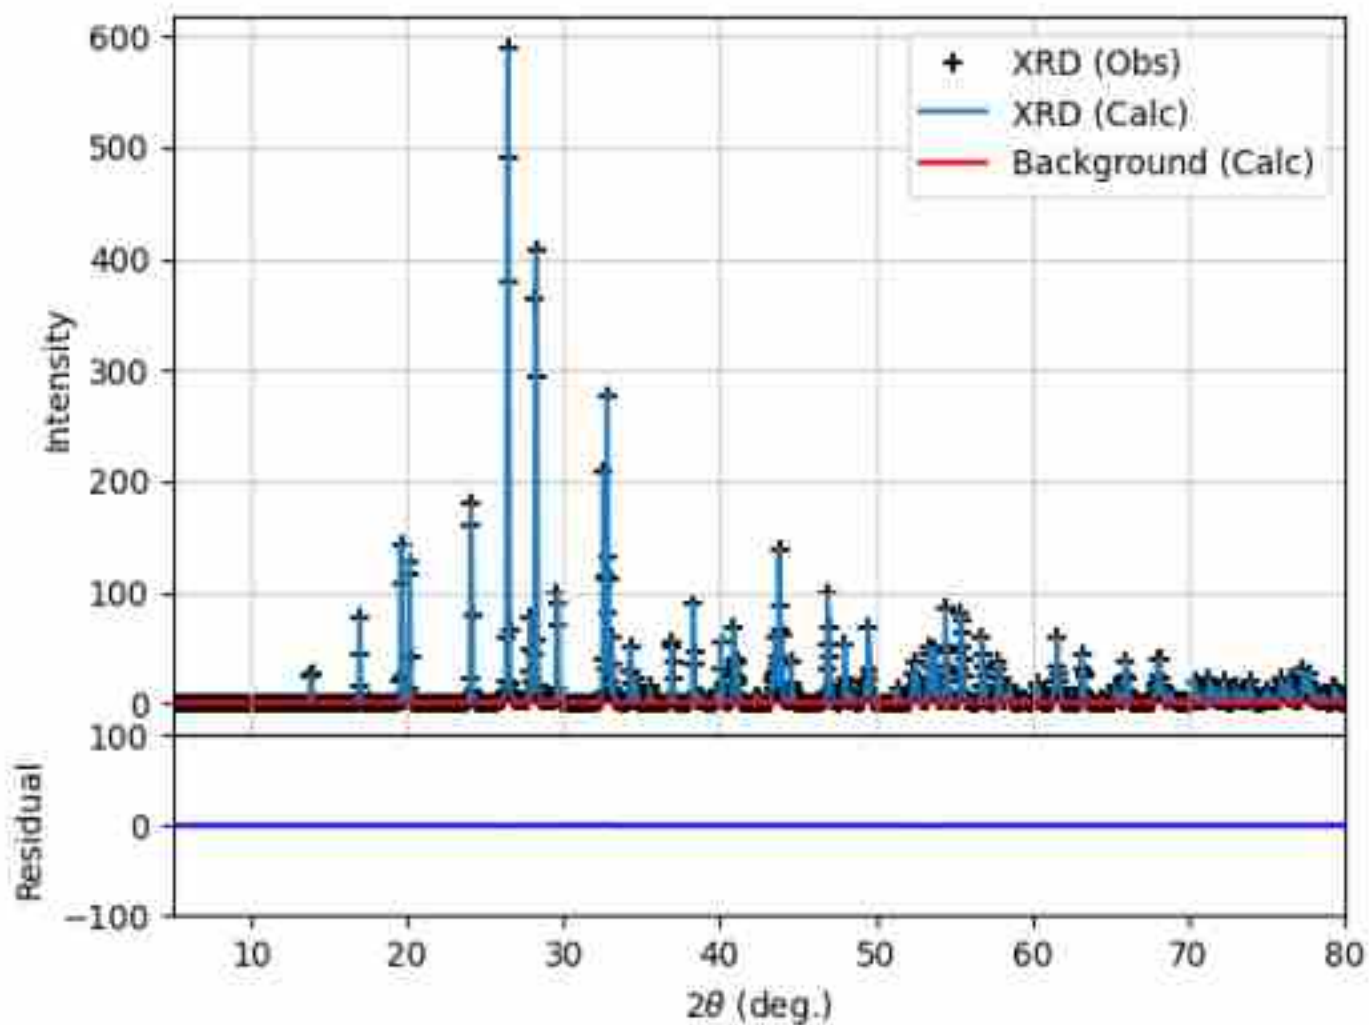

| RMSE before RR | Rwp     | RMSE after RR |
|----------------|---------|---------------|
| 0.055          | 0.34506 | 0.09912       |

# H4Pb1I3N1

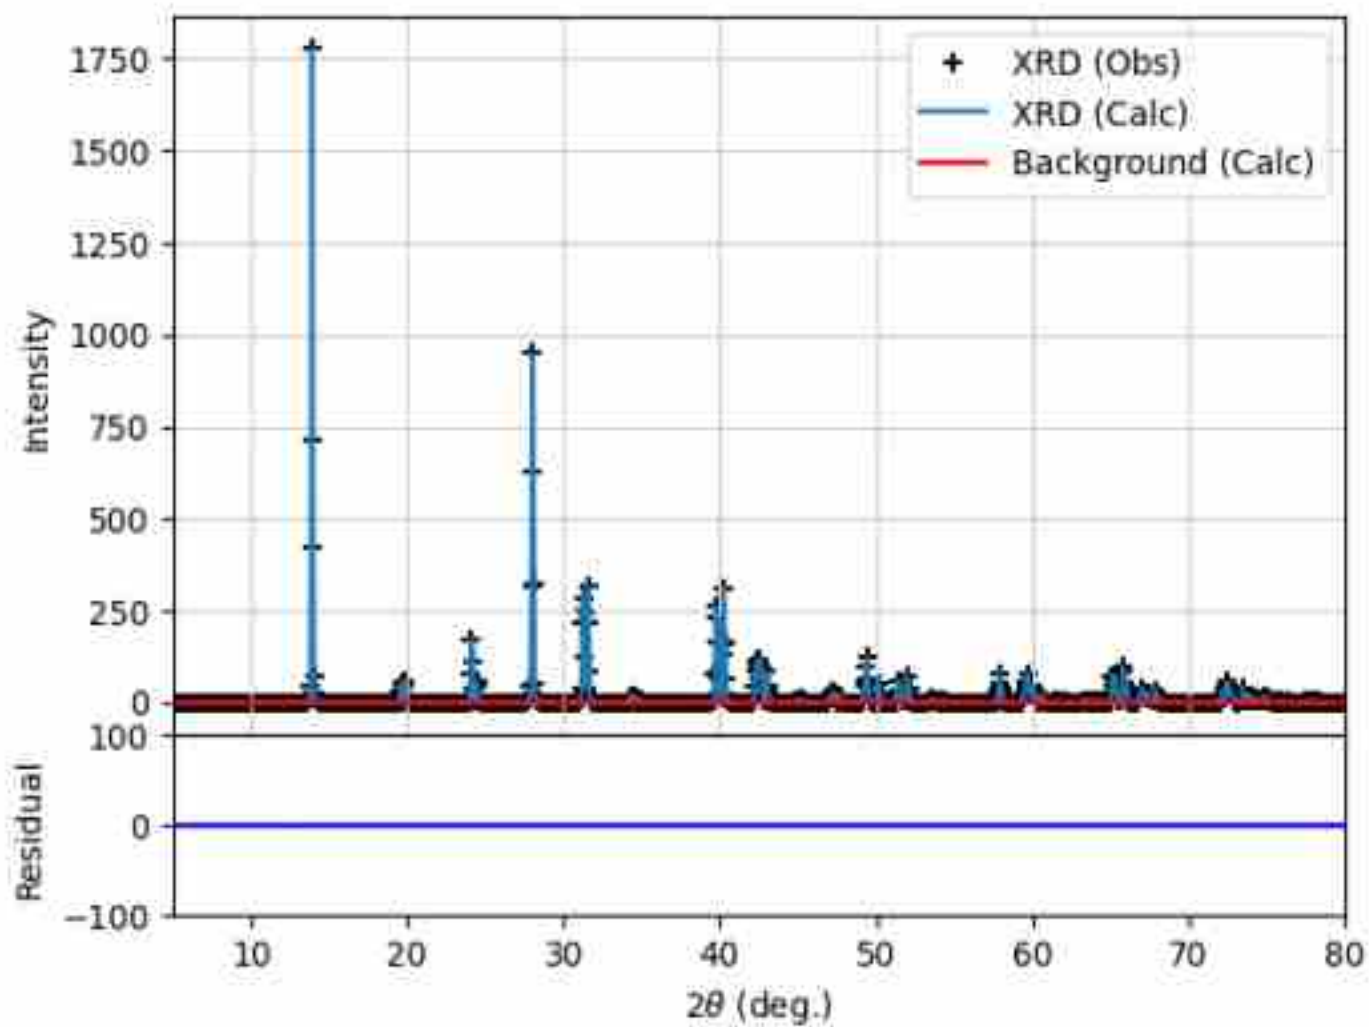

| RMSE before RR | Rwp    | RMSE after RR |
|----------------|--------|---------------|
| 0.055          | 0.1035 | 0.09003       |

# In<sub>4</sub>H<sub>4</sub>O<sub>8</sub>

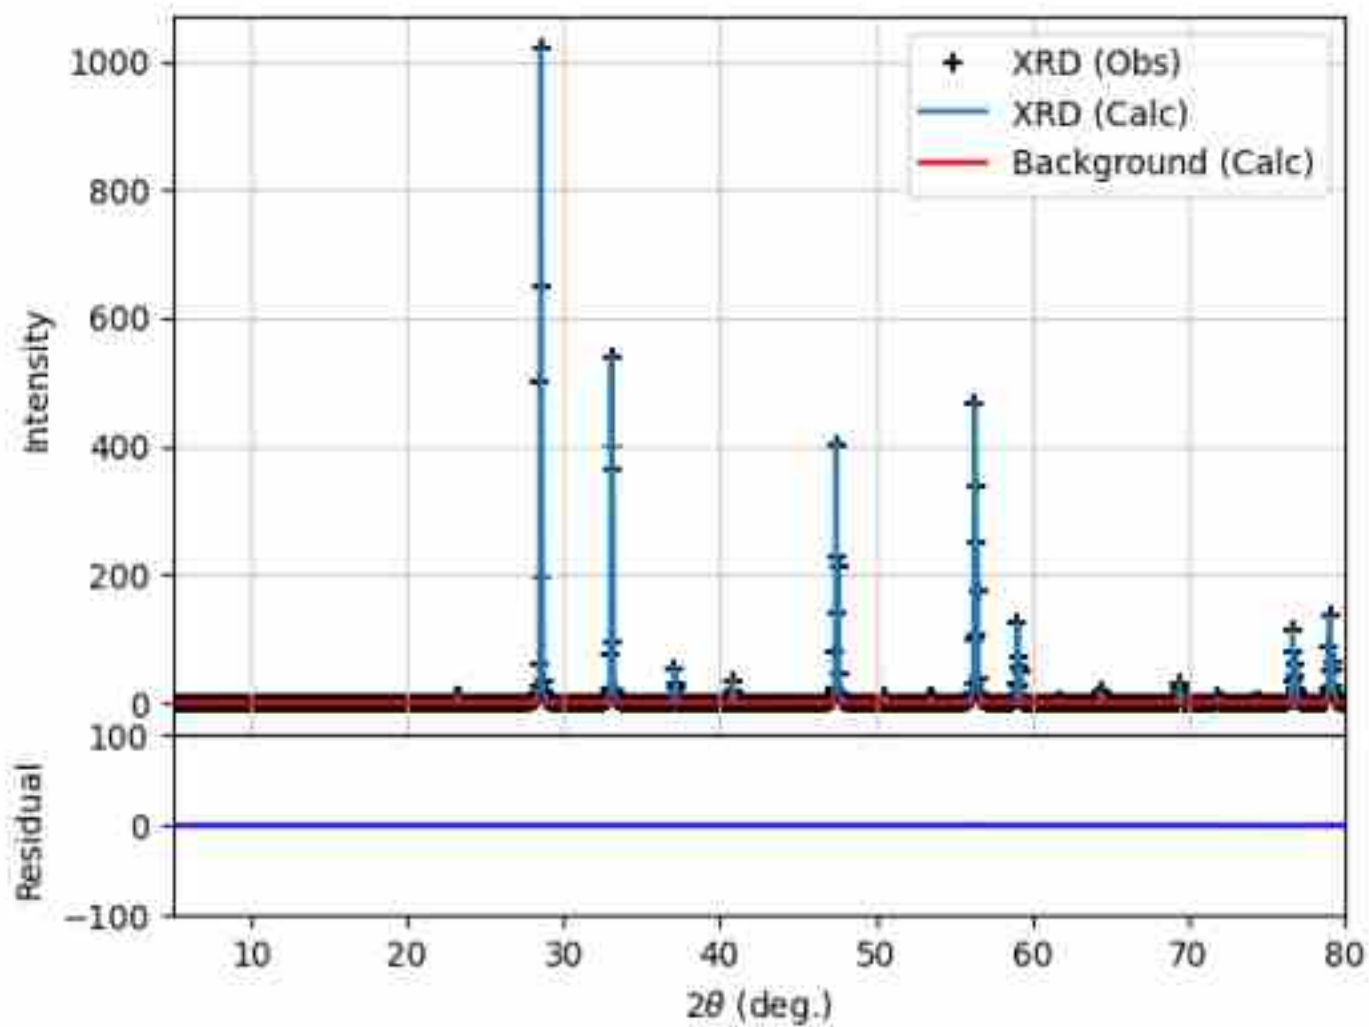

| RMSE before RR | Rwp     | RMSE after RR |
|----------------|---------|---------------|
| 0.055          | 0.14982 | 0.03145       |

# Lu<sub>3</sub>Cu<sub>4</sub>Sn<sub>4</sub>

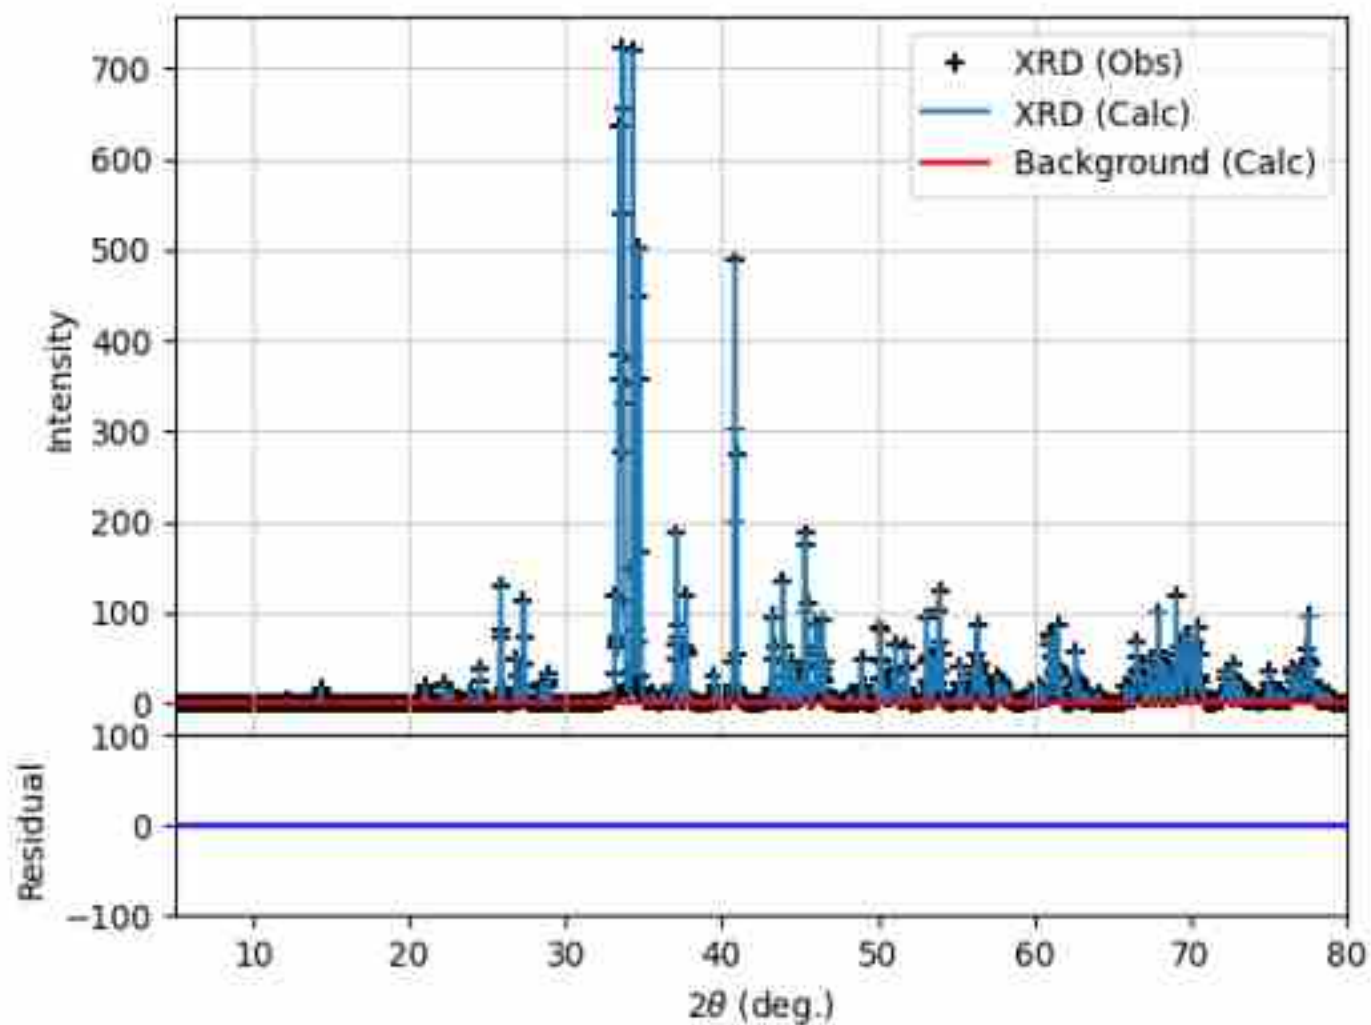

| RMSE before RR | Rwp     | RMSE after RR |
|----------------|---------|---------------|
| 0.055          | 0.00356 | 0.00043       |

# Mg<sub>2</sub>Te<sub>2</sub>Mo<sub>2</sub>O<sub>12</sub>

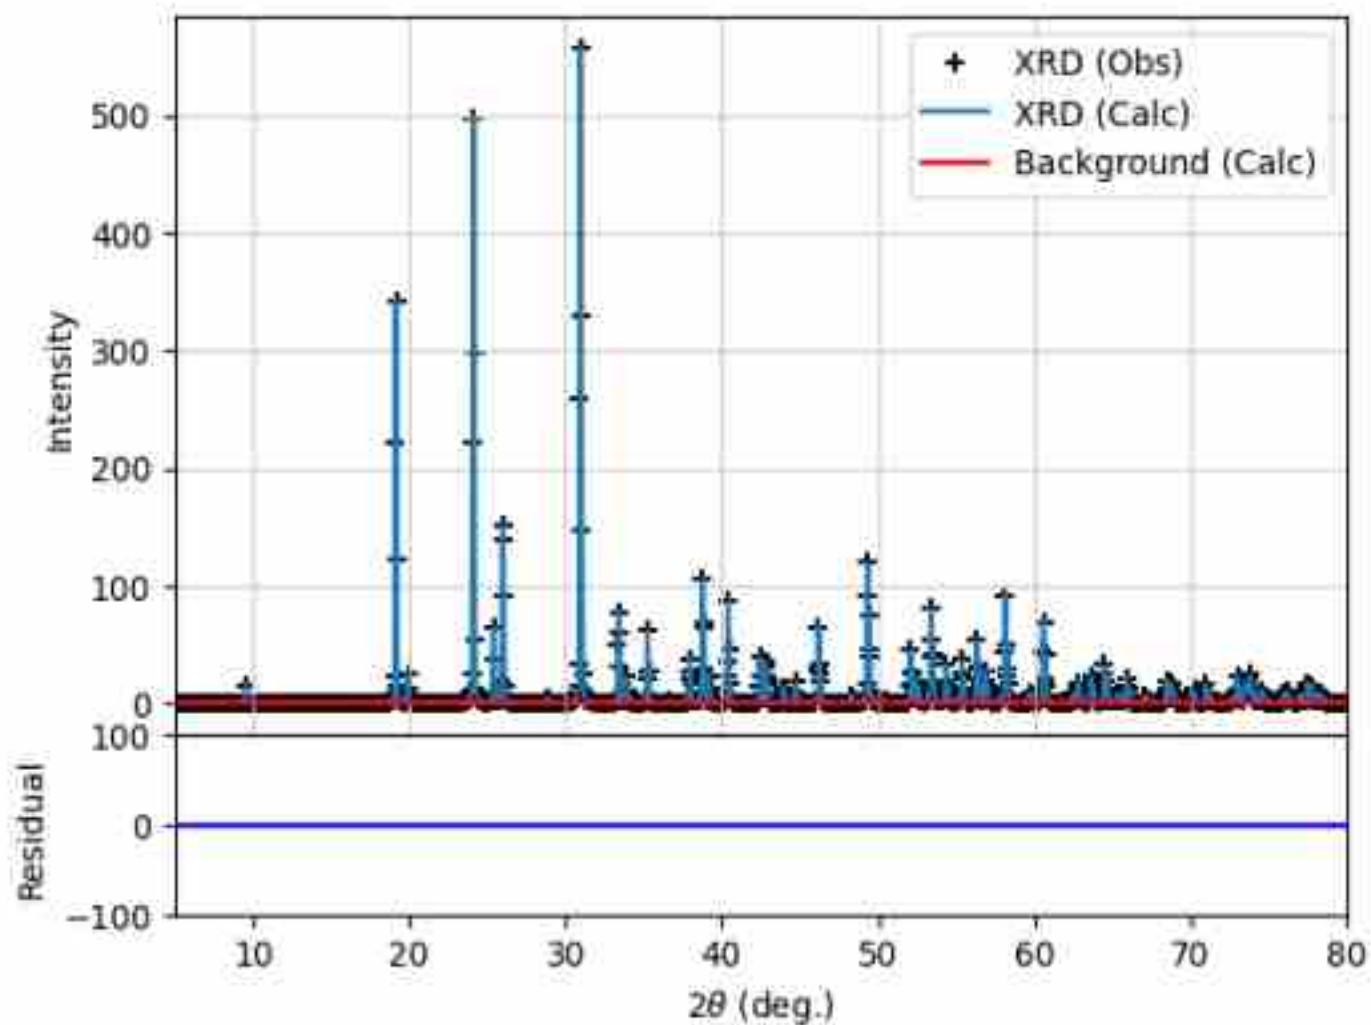

| RMSE before RR | Rwp     | RMSE after RR |
|----------------|---------|---------------|
| 0.055          | 0.00308 | 0.0012        |

# Mo<sub>4</sub>Se<sub>2</sub>S<sub>6</sub>

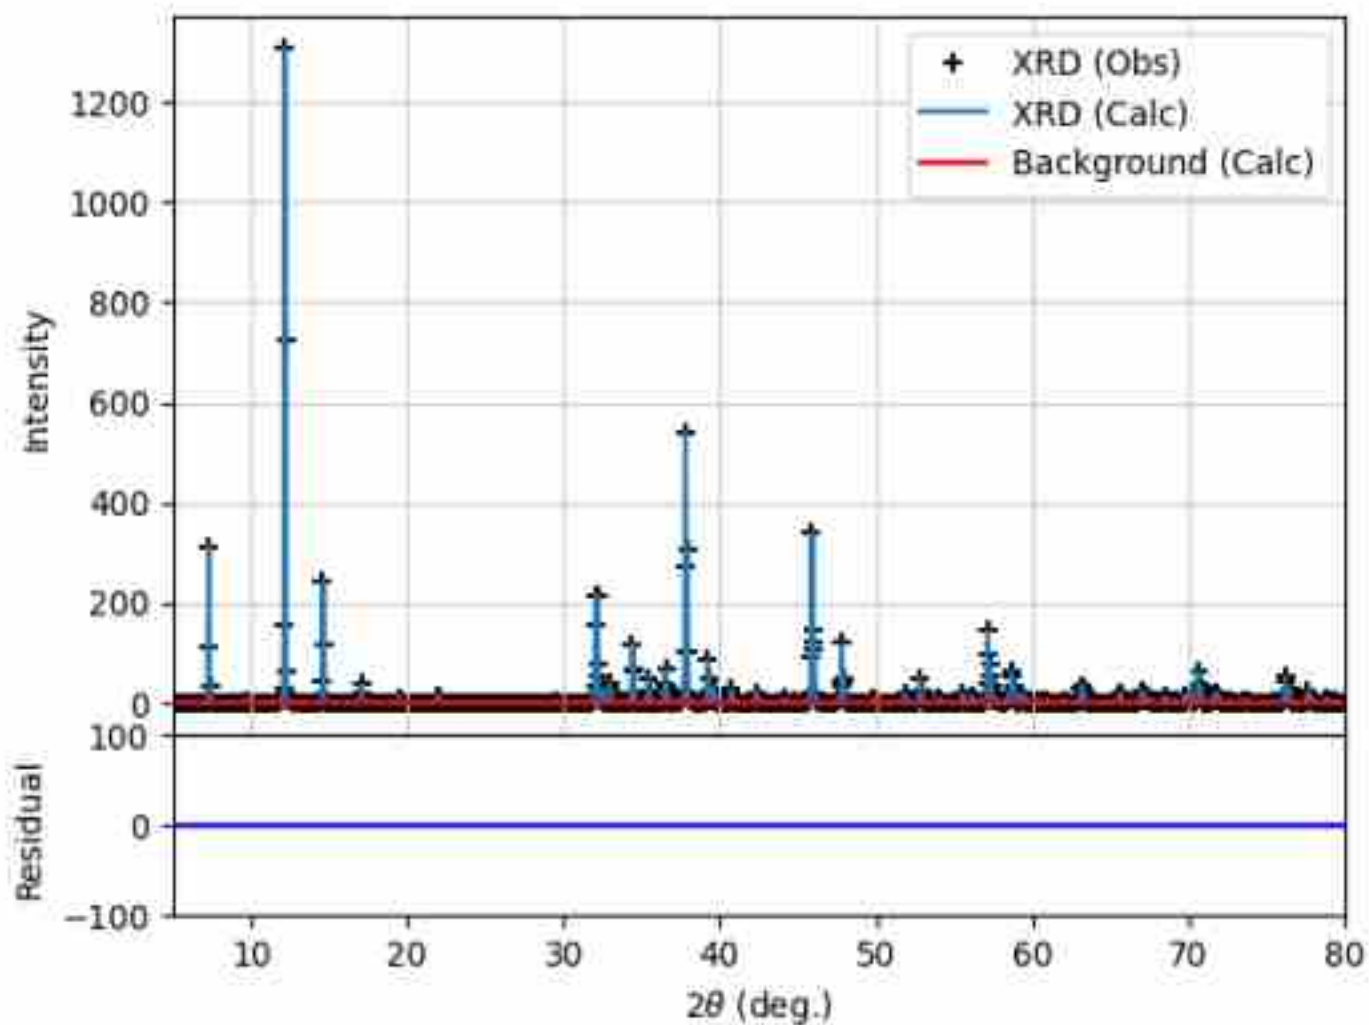

| RMSE before RR | Rwp     | RMSE after RR |
|----------------|---------|---------------|
| 0.055          | 0.00472 | 0.00029       |

# Sb<sub>4</sub>Se<sub>4</sub>Br<sub>4</sub>

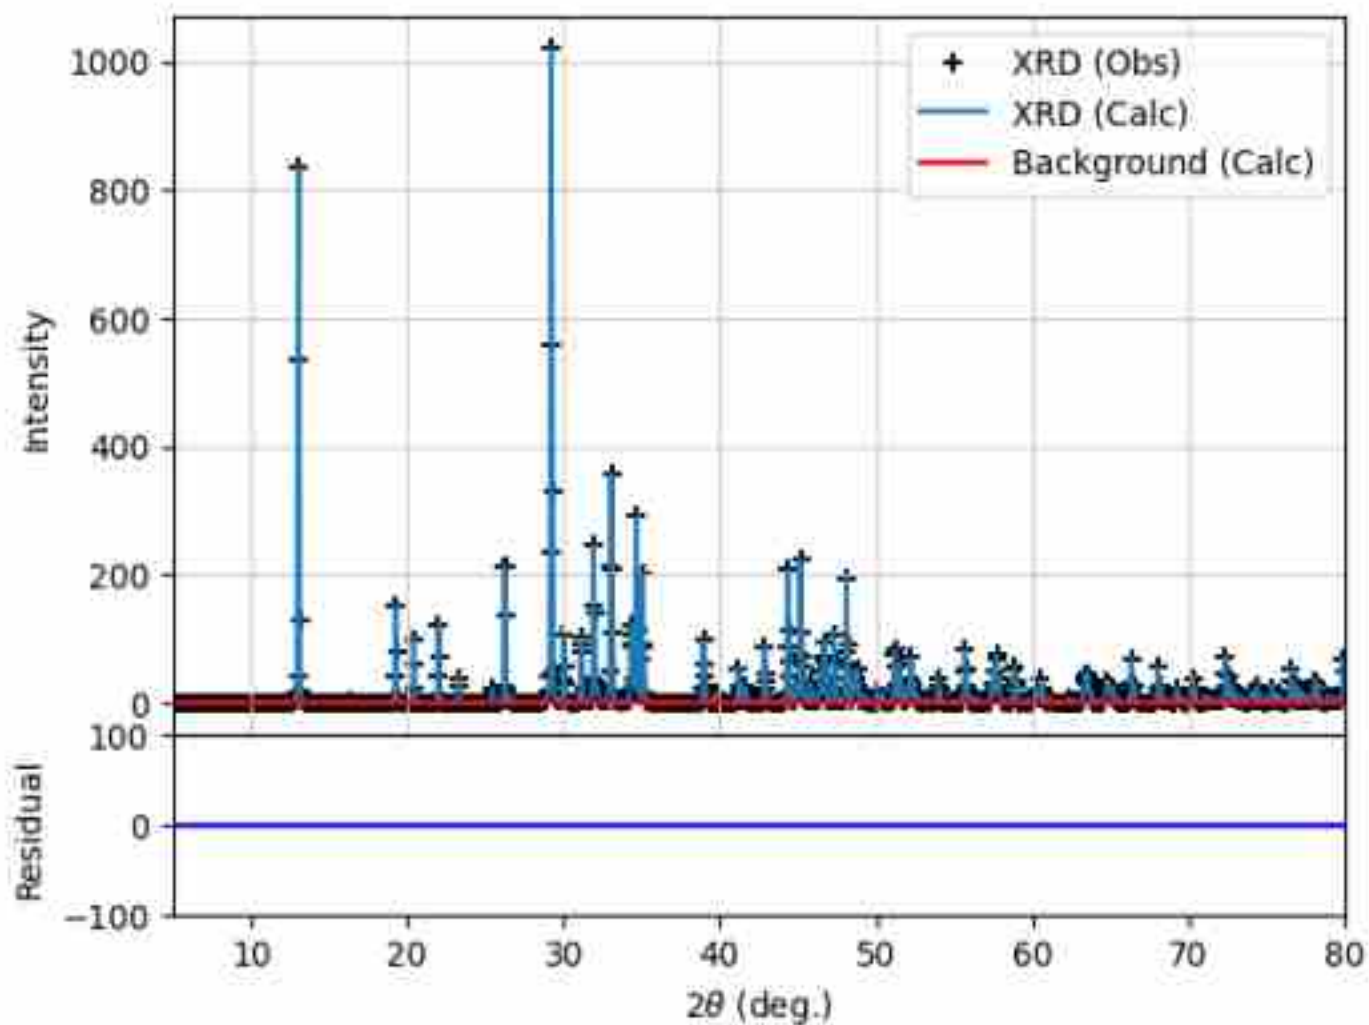

| RMSE before RR | Rwp     | RMSE after RR |
|----------------|---------|---------------|
| 0.055          | 0.00464 | 0.00045       |

# Sr4Sn12

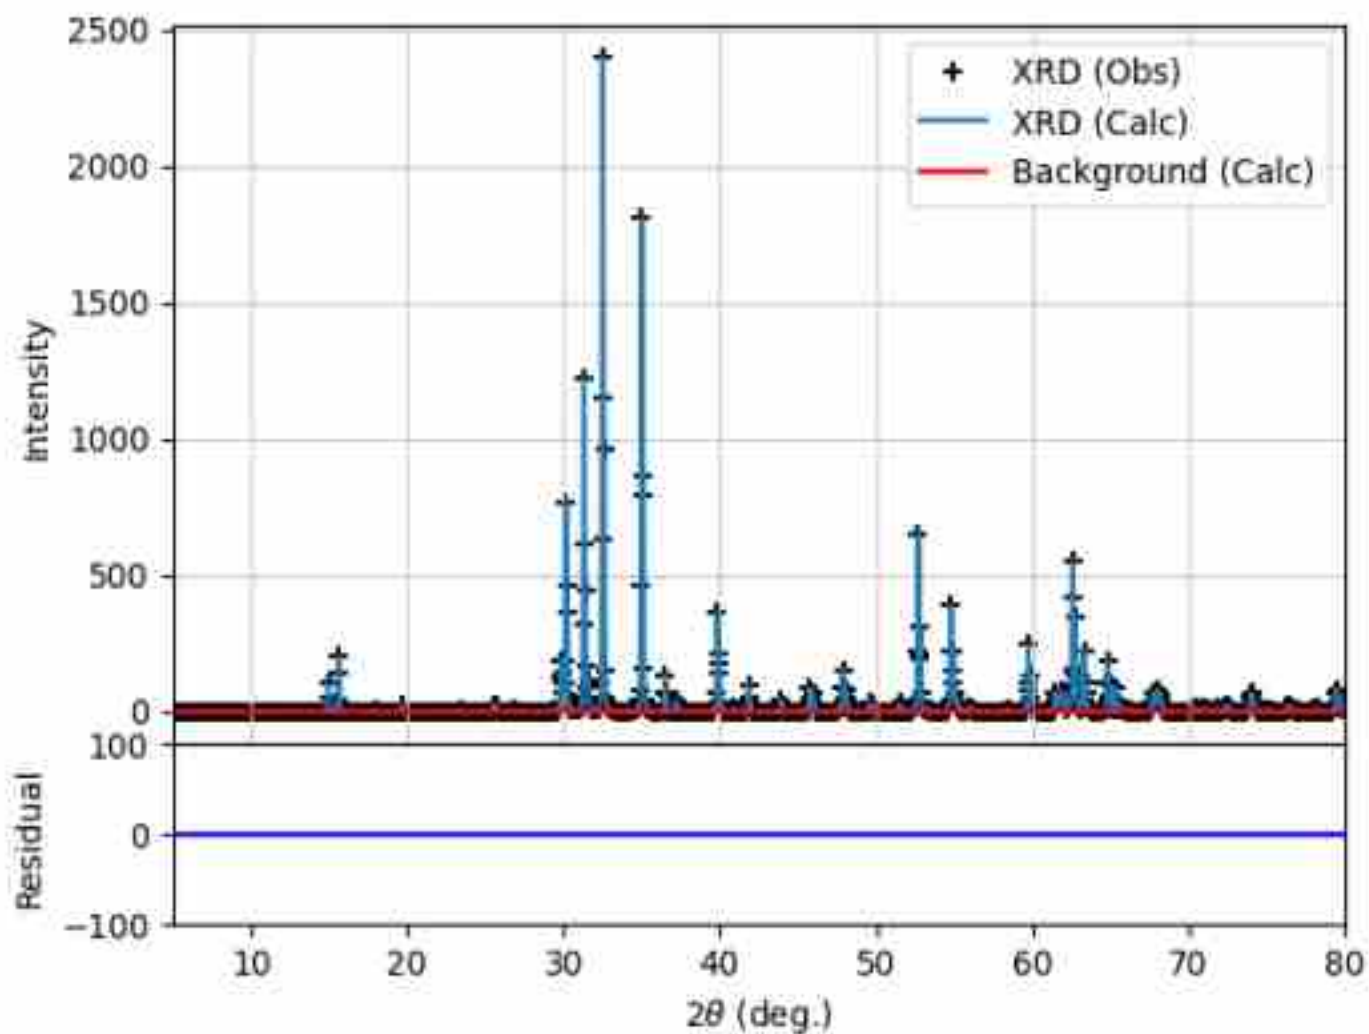

| RMSE before RR | Rwp     | RMSE after RR |
|----------------|---------|---------------|
| 0.055          | 0.00359 | 0.00039       |



# Tl4Zn2I8

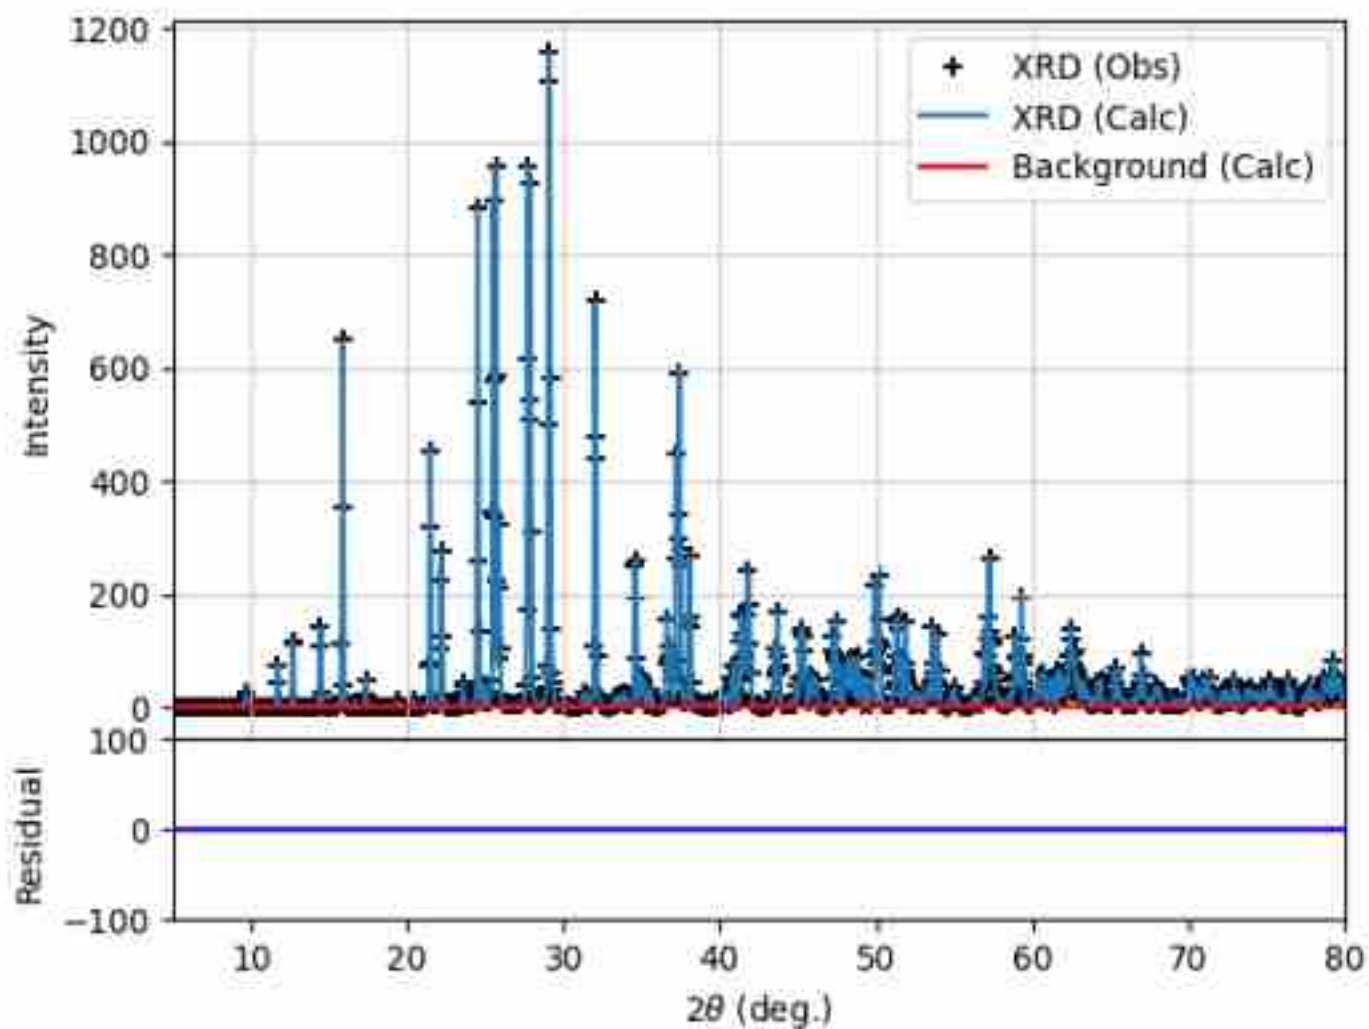

| RMSE before RR | Rwp     | RMSE after RR |
|----------------|---------|---------------|
| 0.055          | 0.00327 | 0.00027       |

# Ba<sub>2</sub>U<sub>1</sub>Cu<sub>1</sub>O<sub>6</sub>

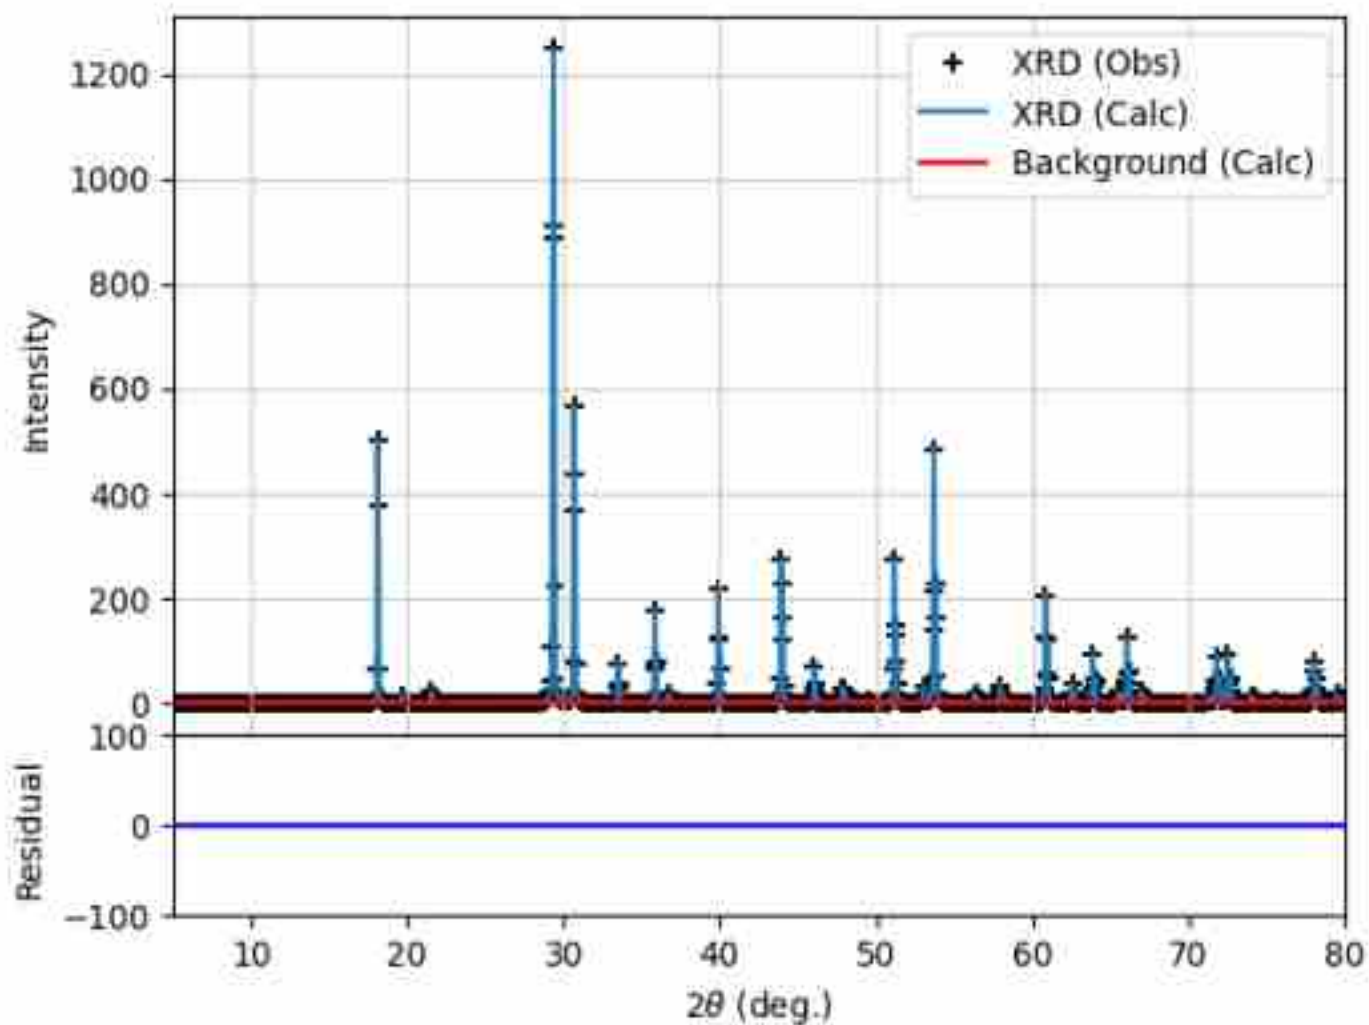

| RMSE before RR | Rwp     | RMSE after RR |
|----------------|---------|---------------|
| 0.056          | 0.00475 | 0.00266       |

# Cs1Pb1Cl3

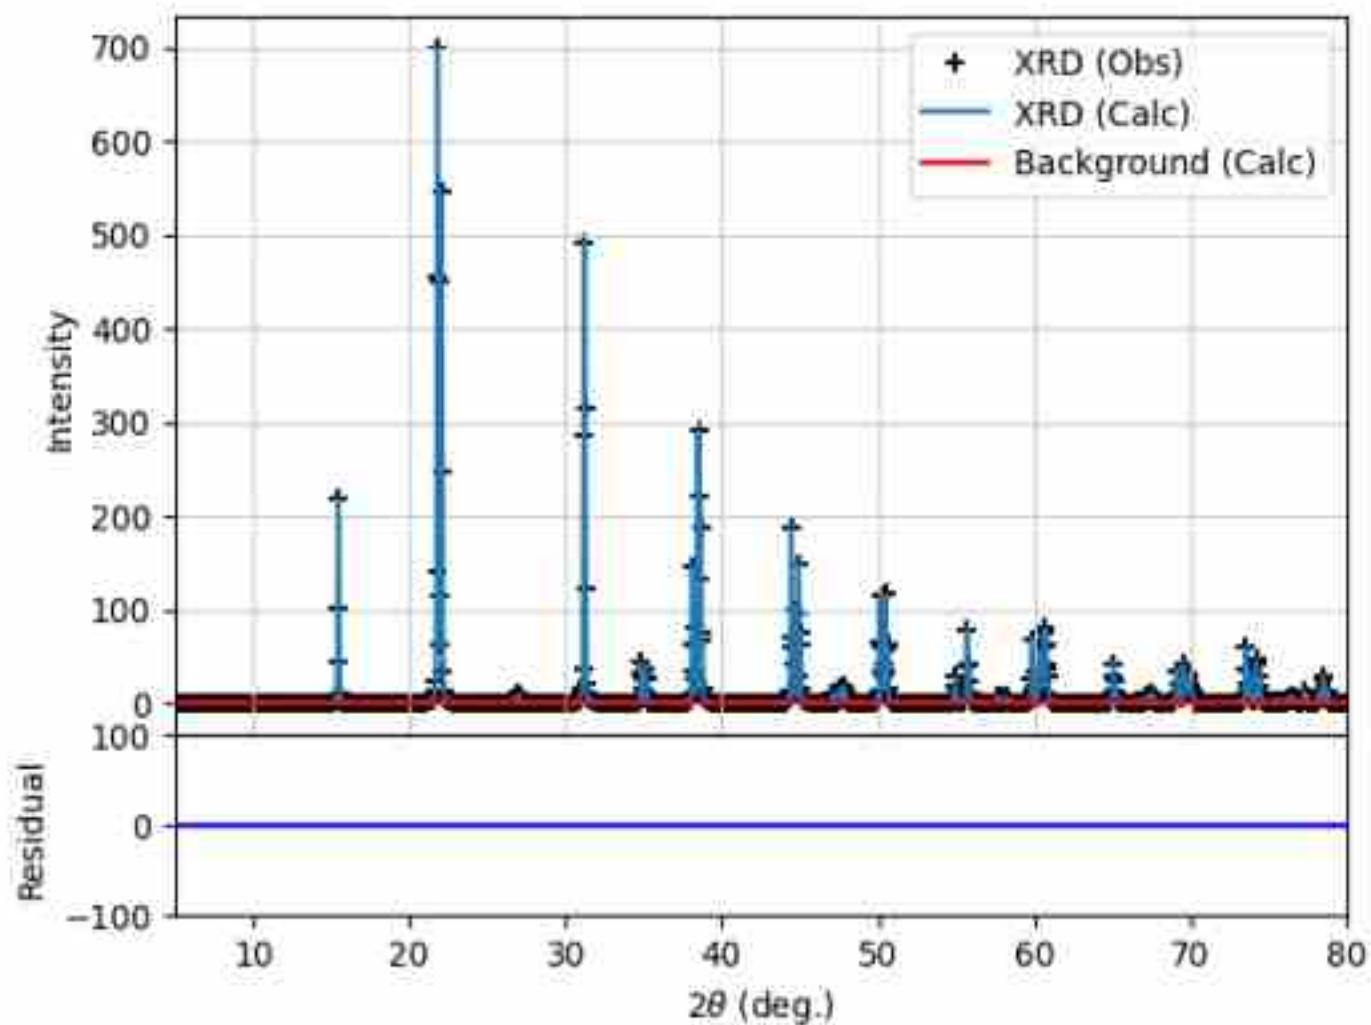

| RMSE before RR | Rwp     | RMSE after RR |
|----------------|---------|---------------|
| 0.056          | 0.00324 | 0.00058       |

# Li1Ag1F2

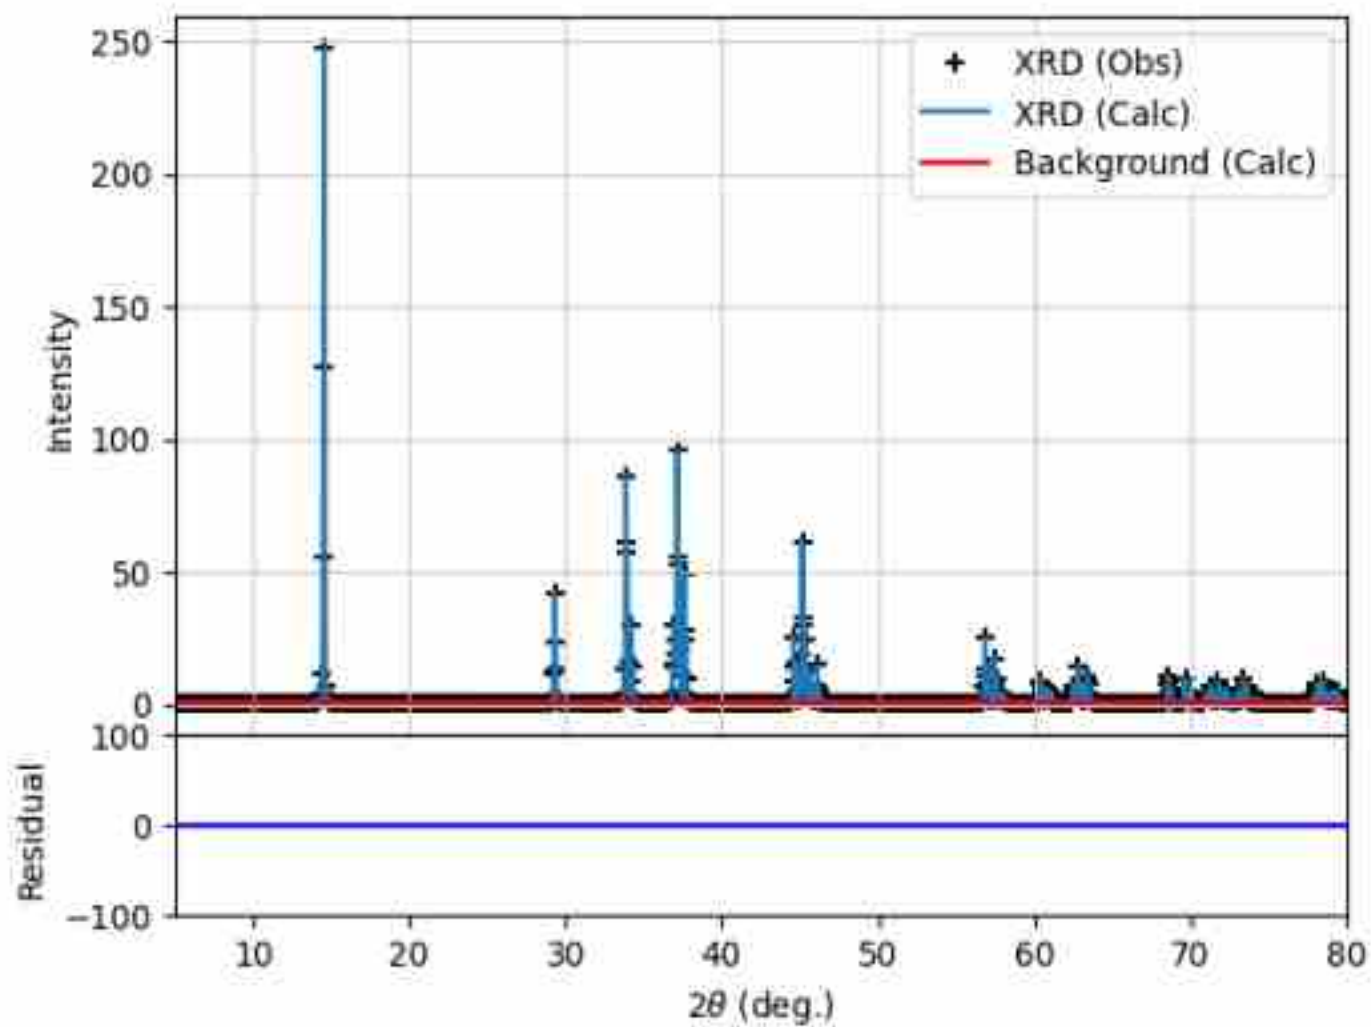

| RMSE before RR | Rwp     | RMSE after RR |
|----------------|---------|---------------|
| 0.056          | 0.00292 | 0.00043       |

# Li<sub>3</sub>Yb<sub>3</sub>Pb<sub>3</sub>

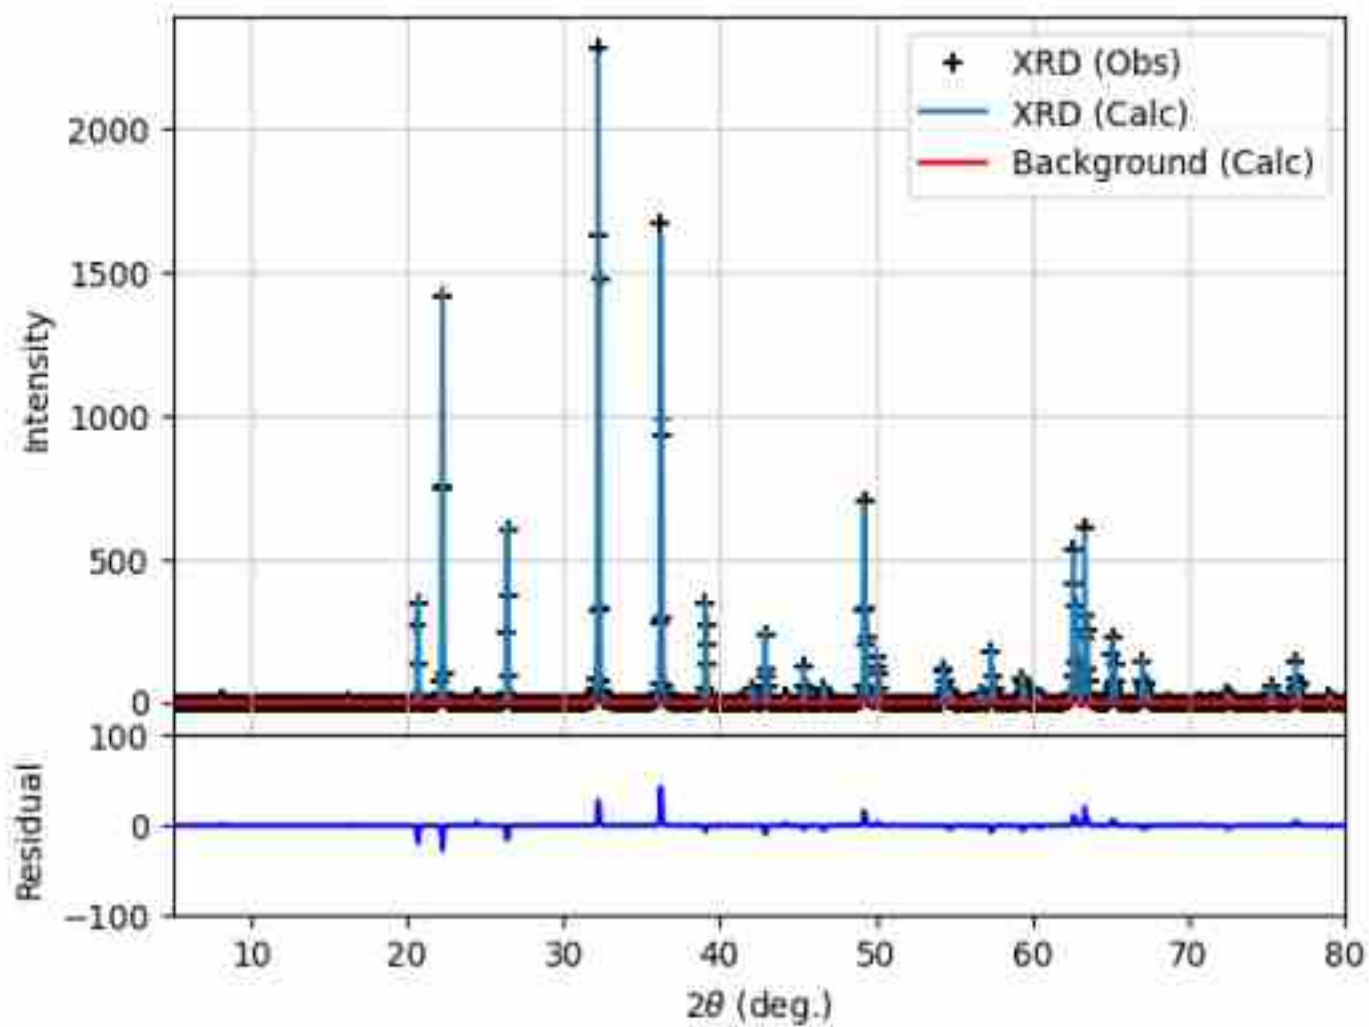

| RMSE before RR | Rwp     | RMSE after RR |
|----------------|---------|---------------|
| 0.056          | 3.09625 | None          |

# Li6Mn2O1F11

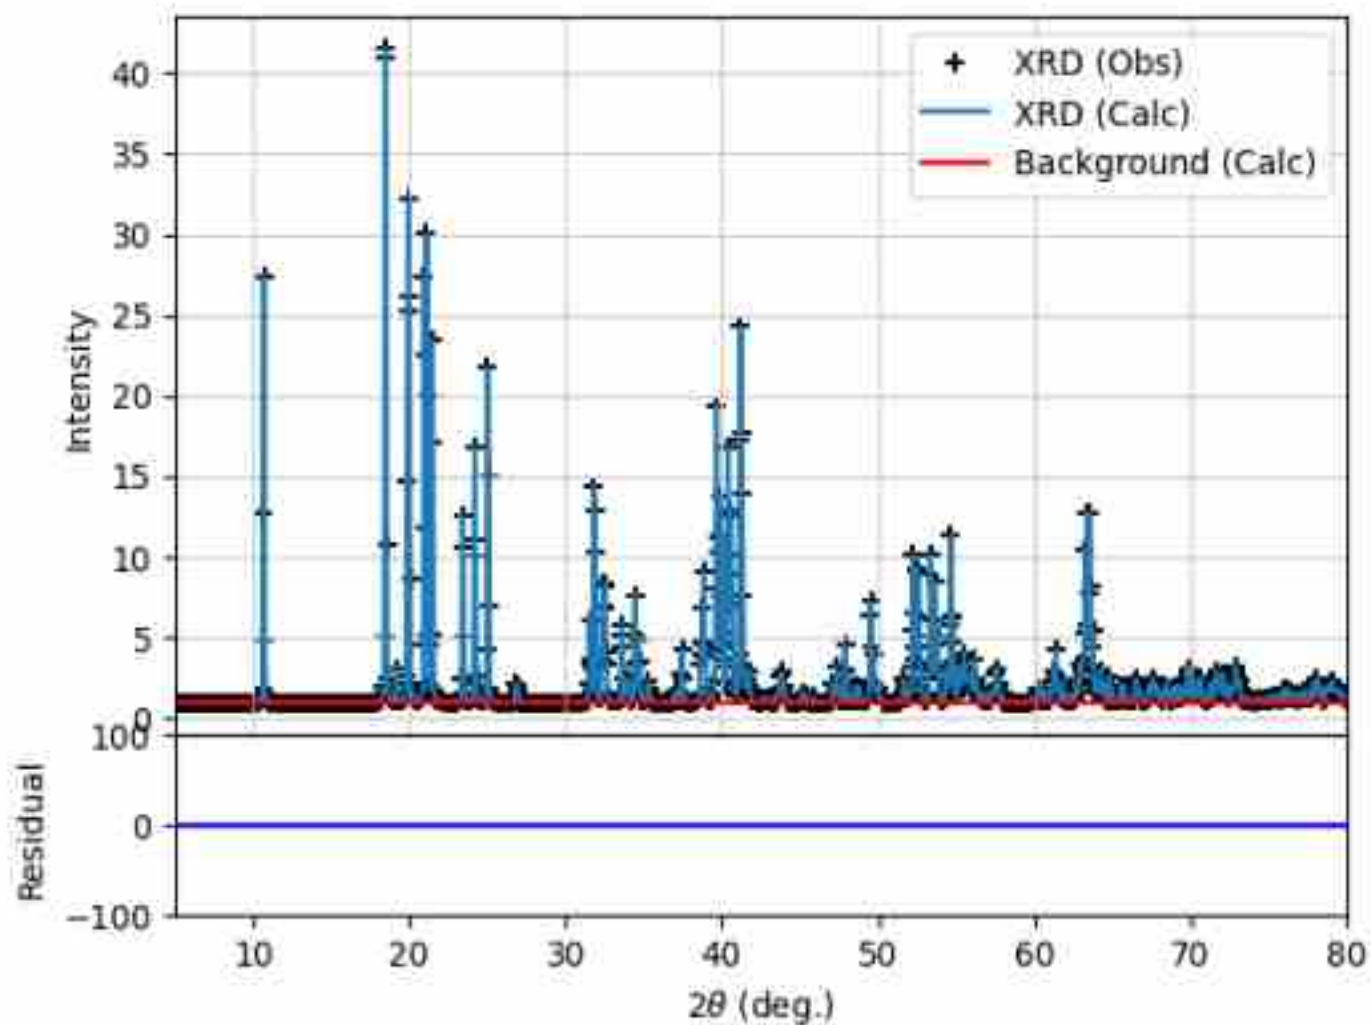

| RMSE before RR | Rwp     | RMSE after RR |
|----------------|---------|---------------|
| 0.056          | 0.00062 | 0.0           |

# Mn<sub>2</sub>Co<sub>2</sub>O<sub>6</sub>

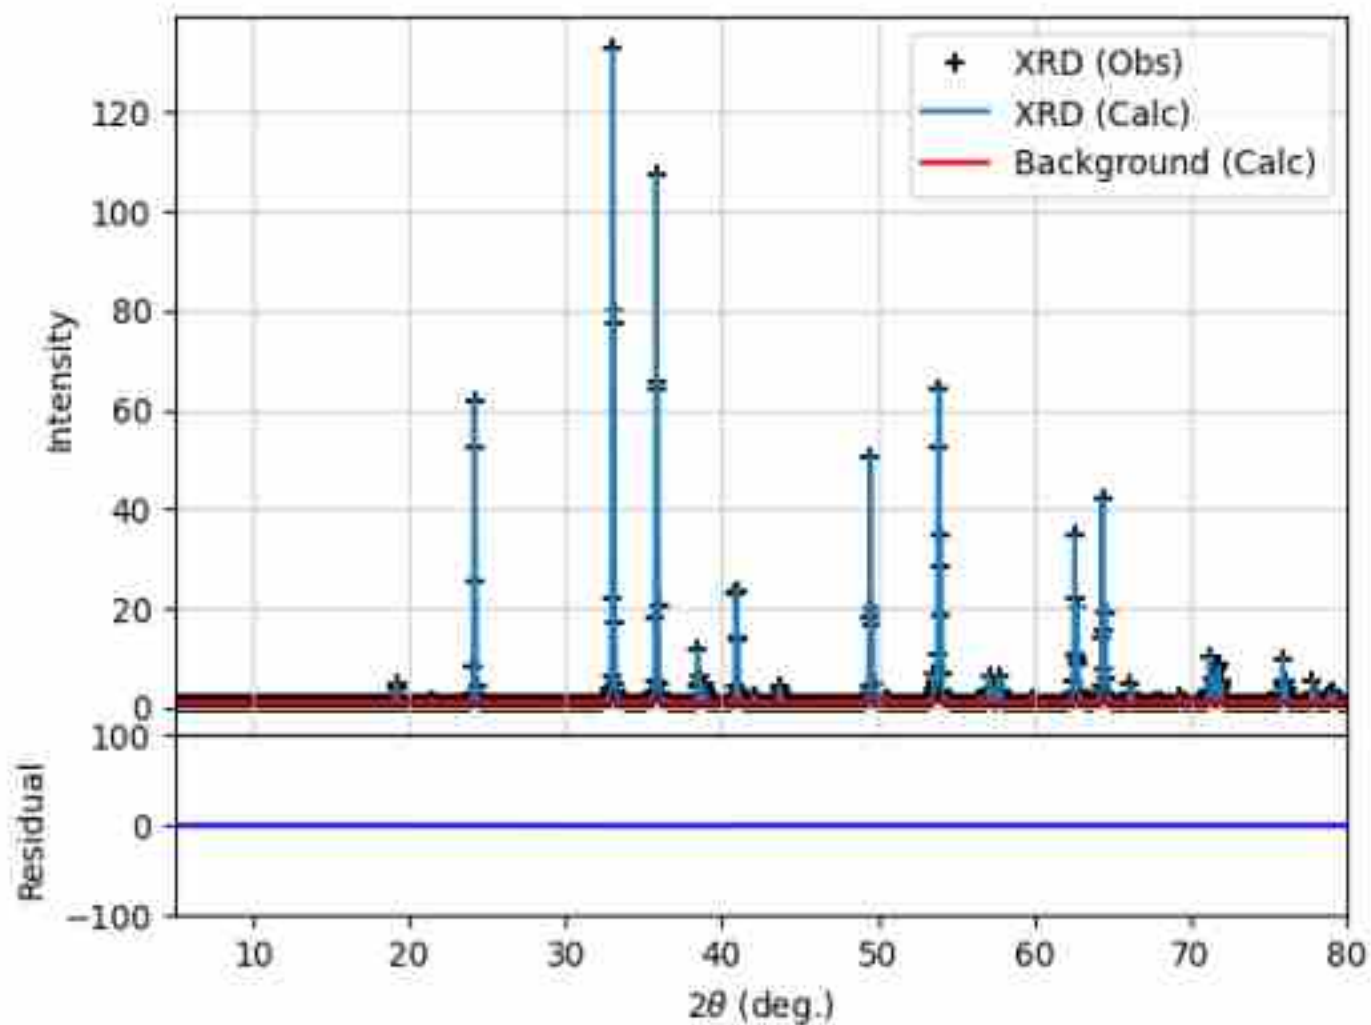

| RMSE before RR | Rwp     | RMSE after RR |
|----------------|---------|---------------|
| 0.056          | 0.70116 | 0.11044       |

# Mo<sub>4</sub>Se<sub>6</sub>S<sub>2</sub>

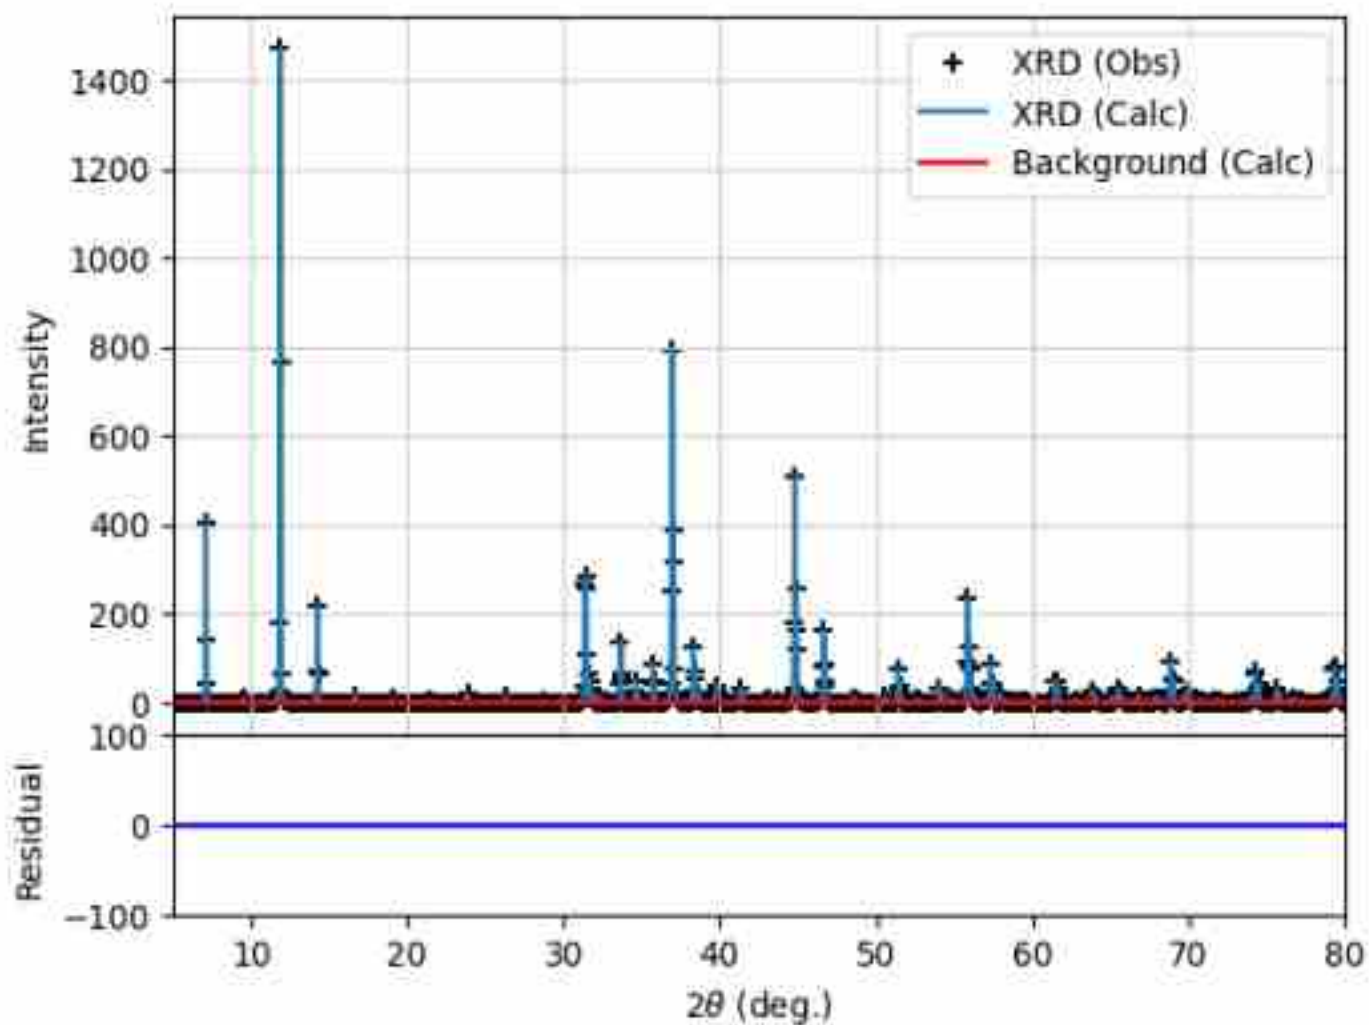

| RMSE before RR | Rwp     | RMSE after RR |
|----------------|---------|---------------|
| 0.056          | 0.00259 | 0.00028       |



# Na<sub>4</sub>Nb<sub>4</sub>O<sub>12</sub>

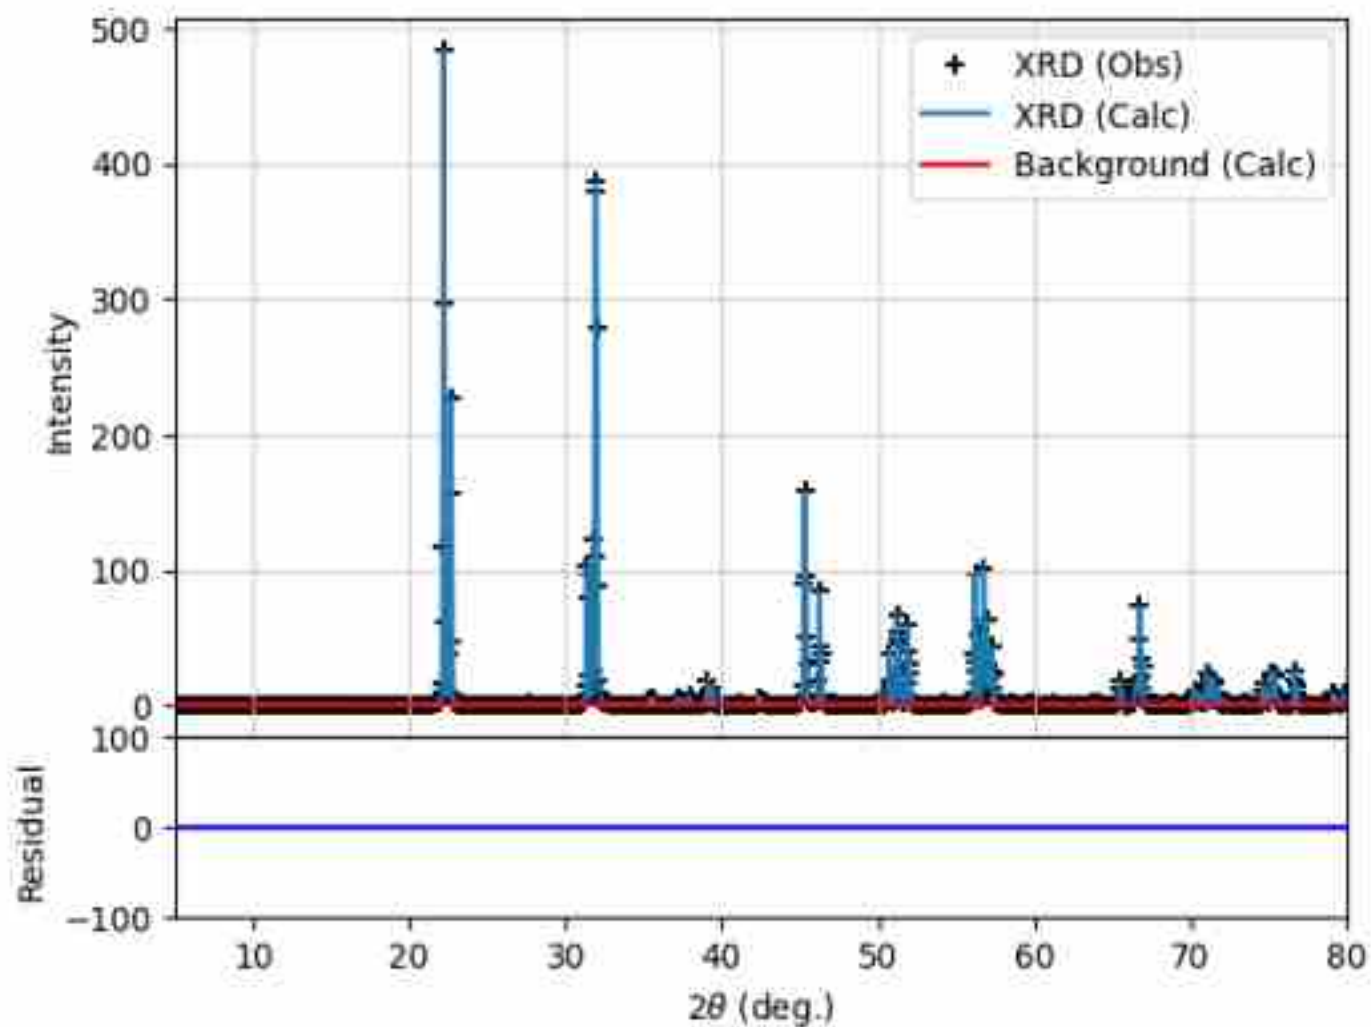

| RMSE before RR | Rwp     | RMSE after RR |
|----------------|---------|---------------|
| 0.056          | 0.00395 | 0.00106       |

# Ti4O8

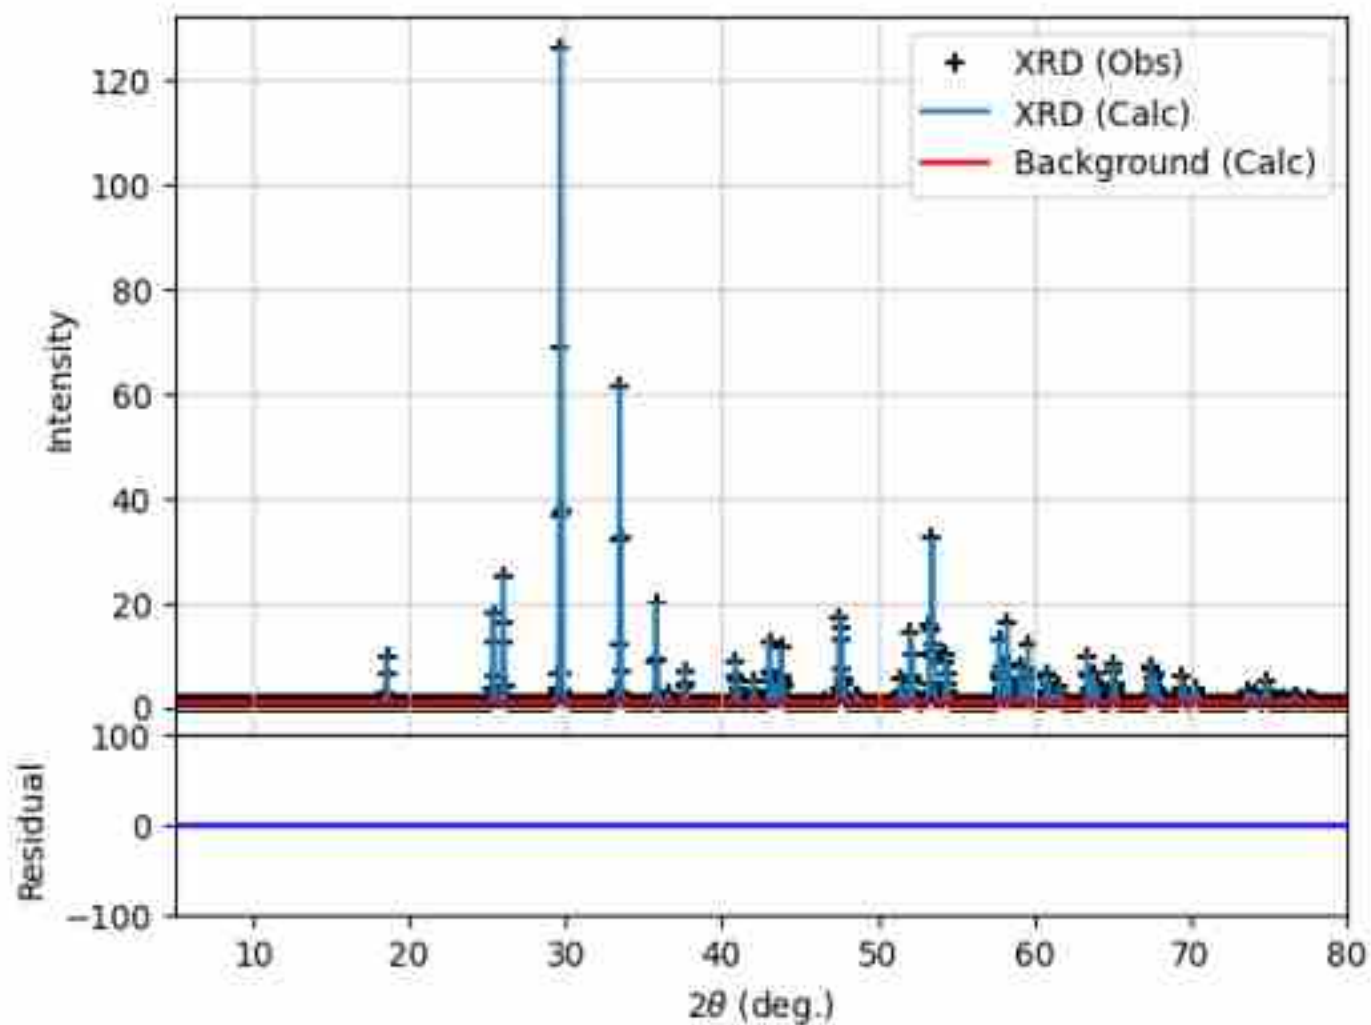

| RMSE before RR | Rwp     | RMSE after RR |
|----------------|---------|---------------|
| 0.056          | 0.00253 | 0.00072       |

# Ba<sub>4</sub>In<sub>4</sub>

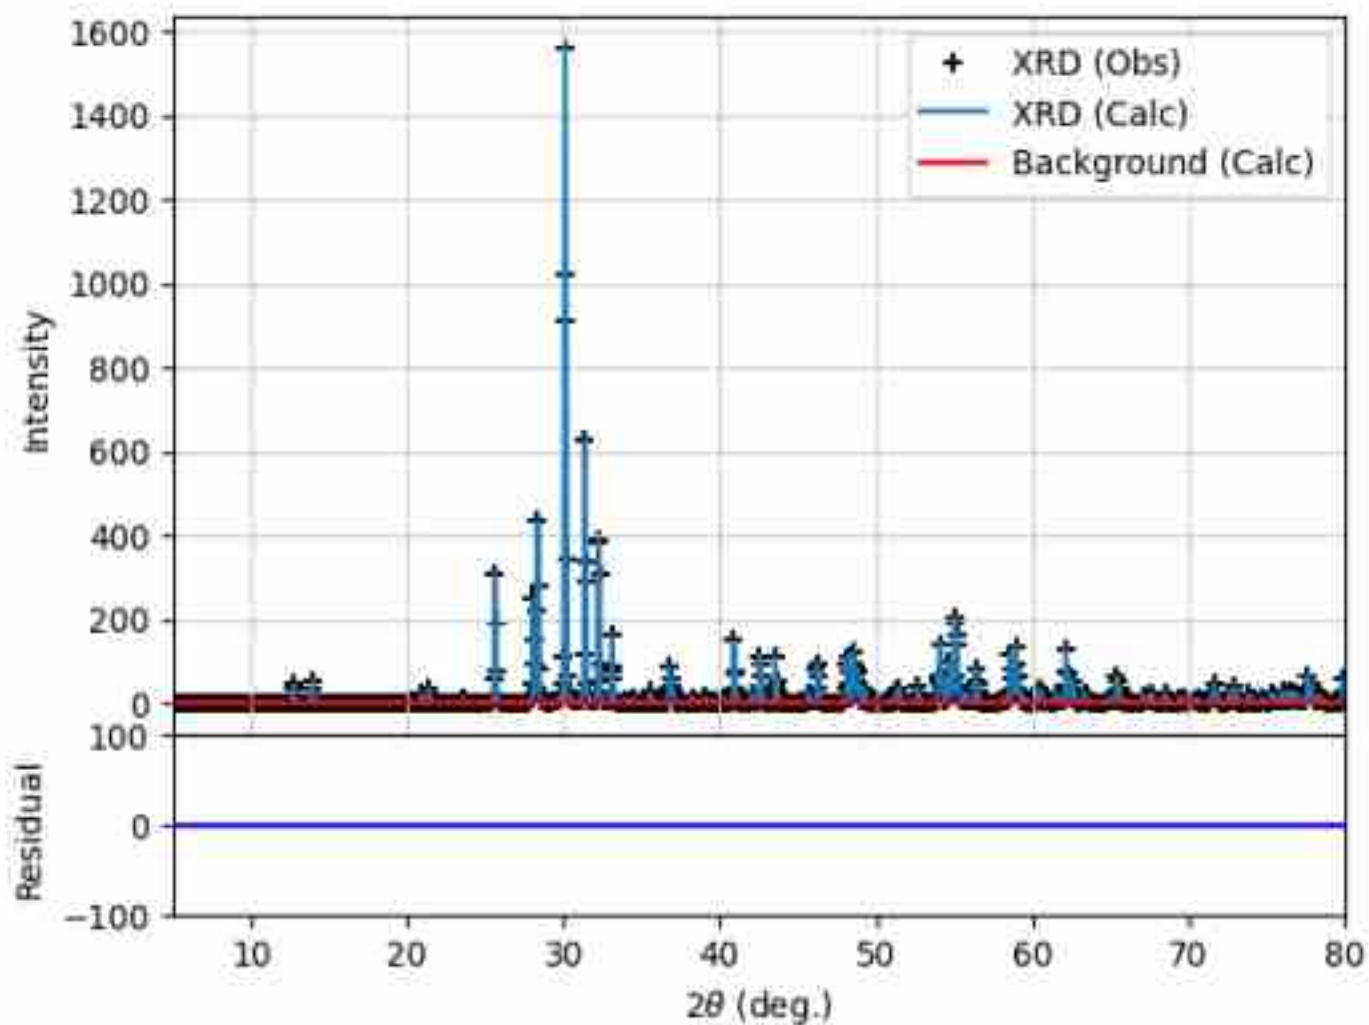

| RMSE before RR | Rwp     | RMSE after RR |
|----------------|---------|---------------|
| 0.057          | 0.00432 | 0.00026       |

# Ca<sub>2</sub>U<sub>2</sub>Pb<sub>4</sub>O<sub>12</sub>

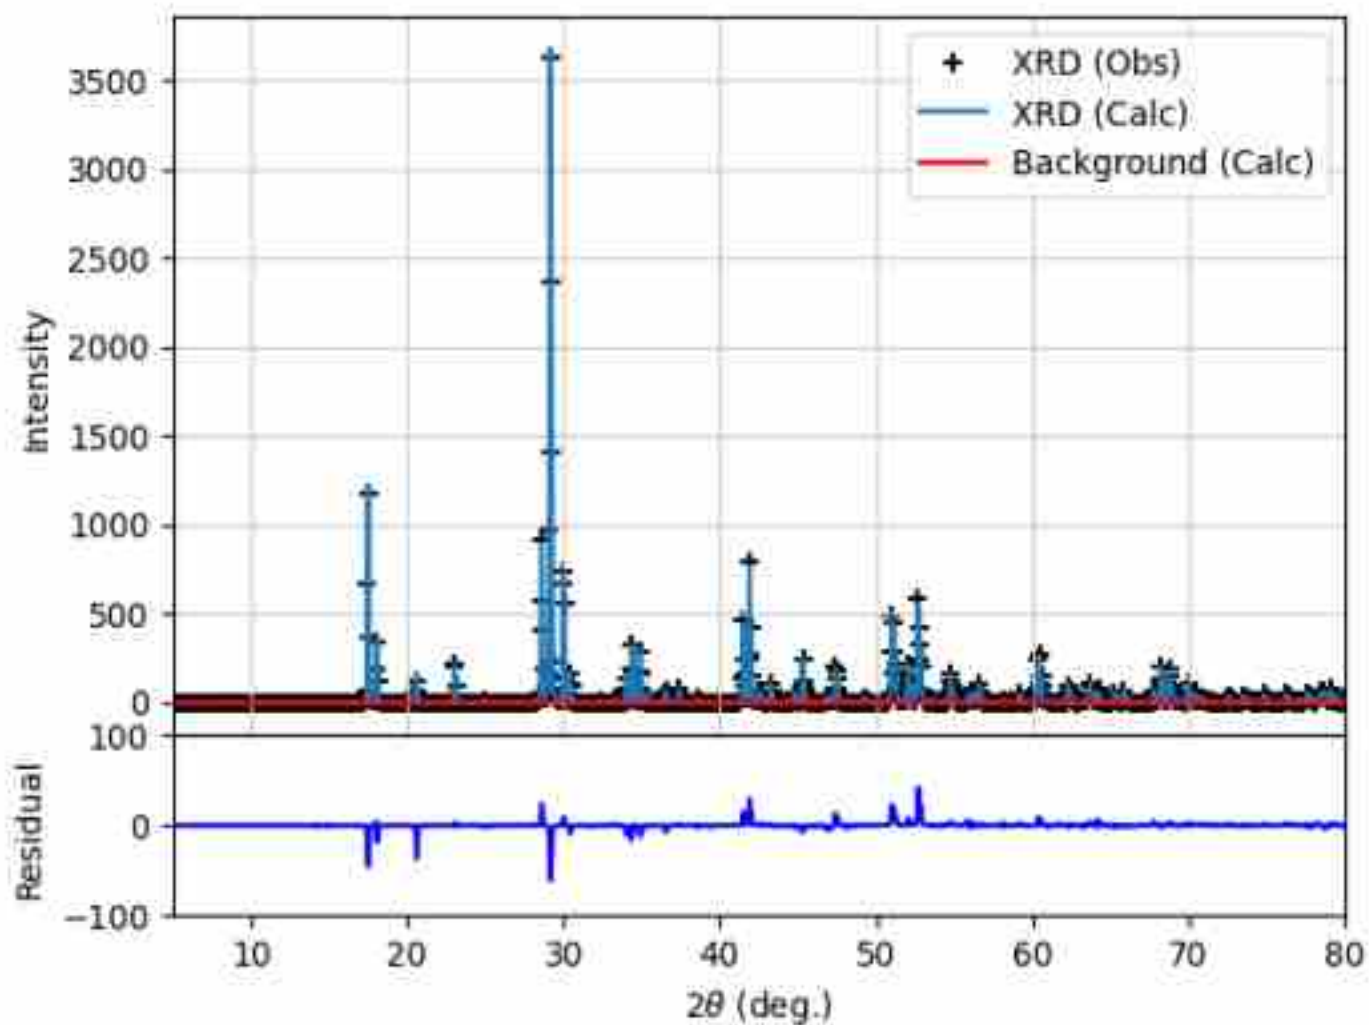

| RMSE before RR | Rwp     | RMSE after RR |
|----------------|---------|---------------|
| 0.057          | 5.08851 | None          |

# Cr<sub>2</sub>Hg<sub>2</sub>O<sub>8</sub>

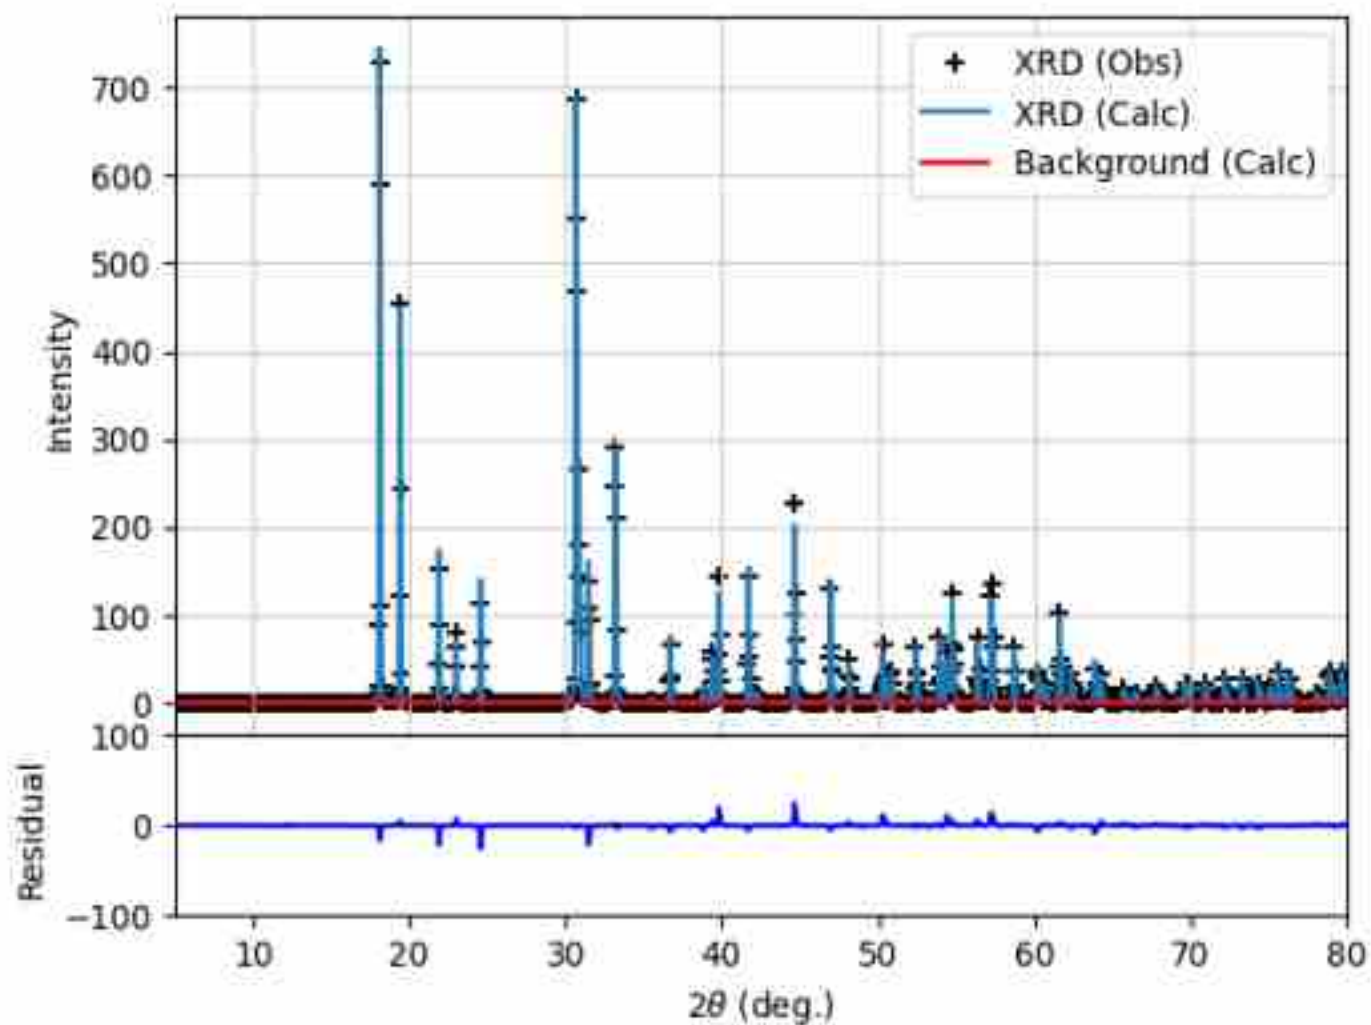

| RMSE before RR | Rwp   | RMSE after RR |
|----------------|-------|---------------|
| 0.057          | 8.588 | 0.36092       |

# Cu<sub>1</sub>Hg<sub>1</sub>O<sub>2</sub>

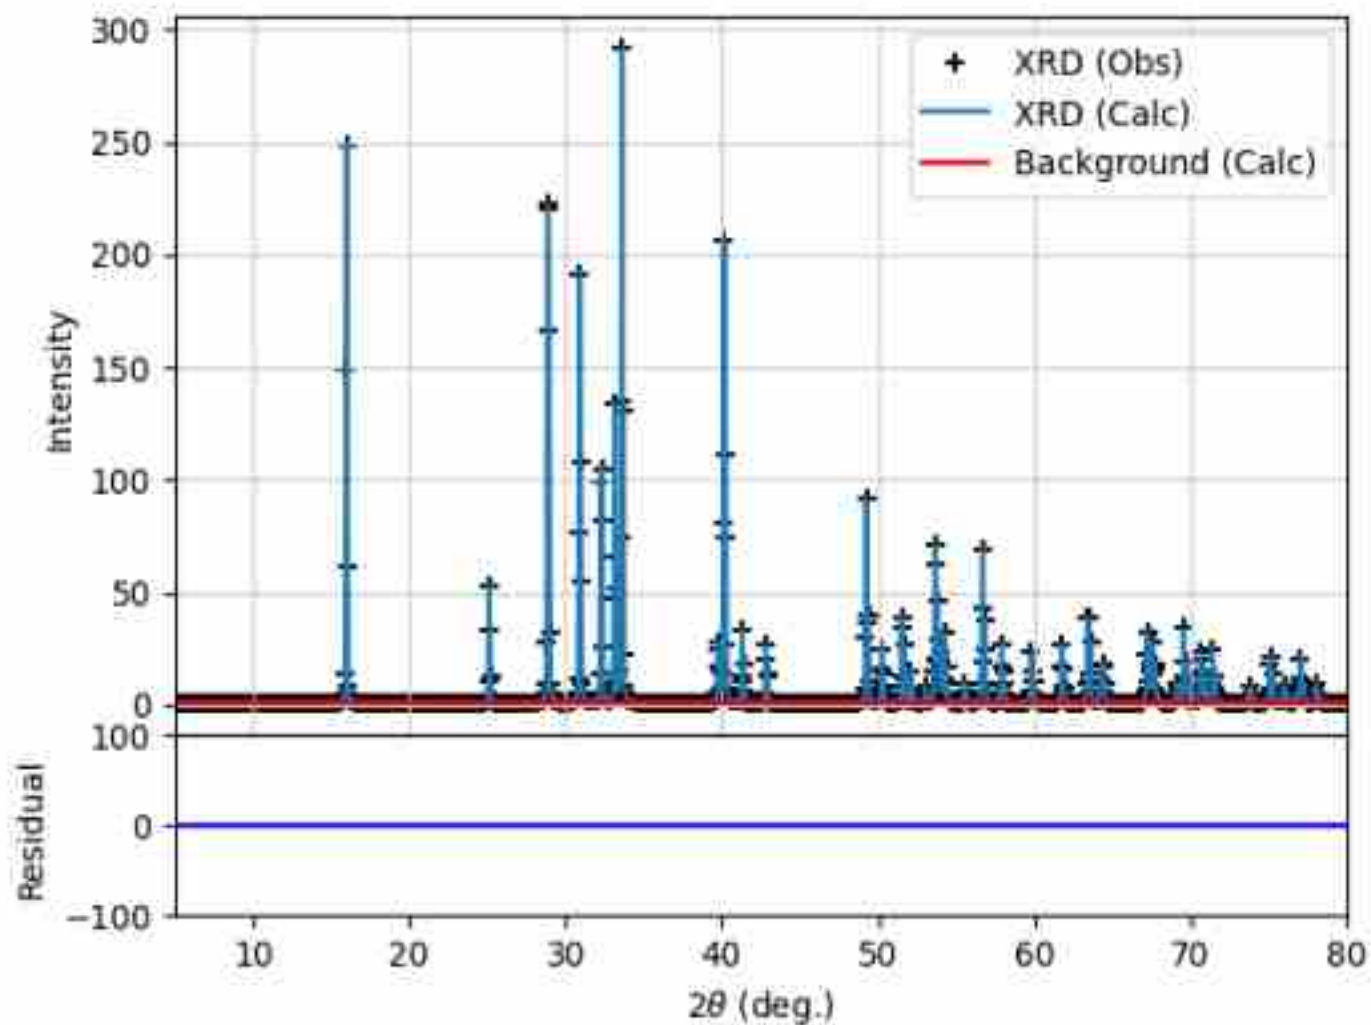

| RMSE before RR | Rwp     | RMSE after RR |
|----------------|---------|---------------|
| 0.057          | 0.00318 | 0.00103       |

# Li<sub>4</sub>MnNb<sub>2</sub>W<sub>10</sub>O<sub>12</sub>

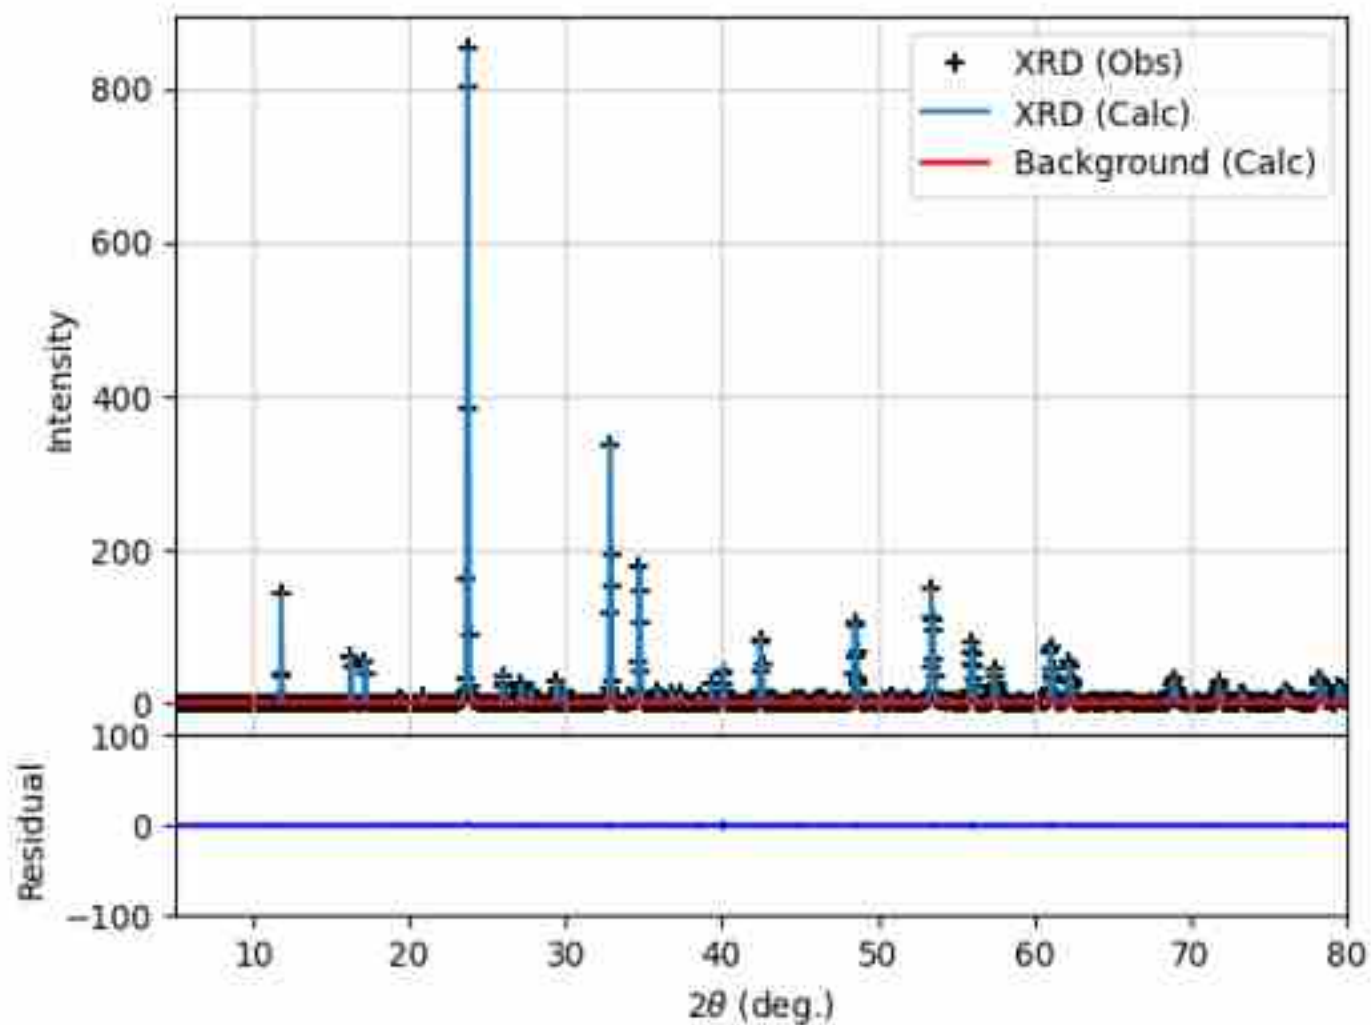

| RMSE before RR | Rwp     | RMSE after RR |
|----------------|---------|---------------|
| 0.057          | 1.91288 | 0.06831       |

# Mg<sub>4</sub>Ti<sub>4</sub>

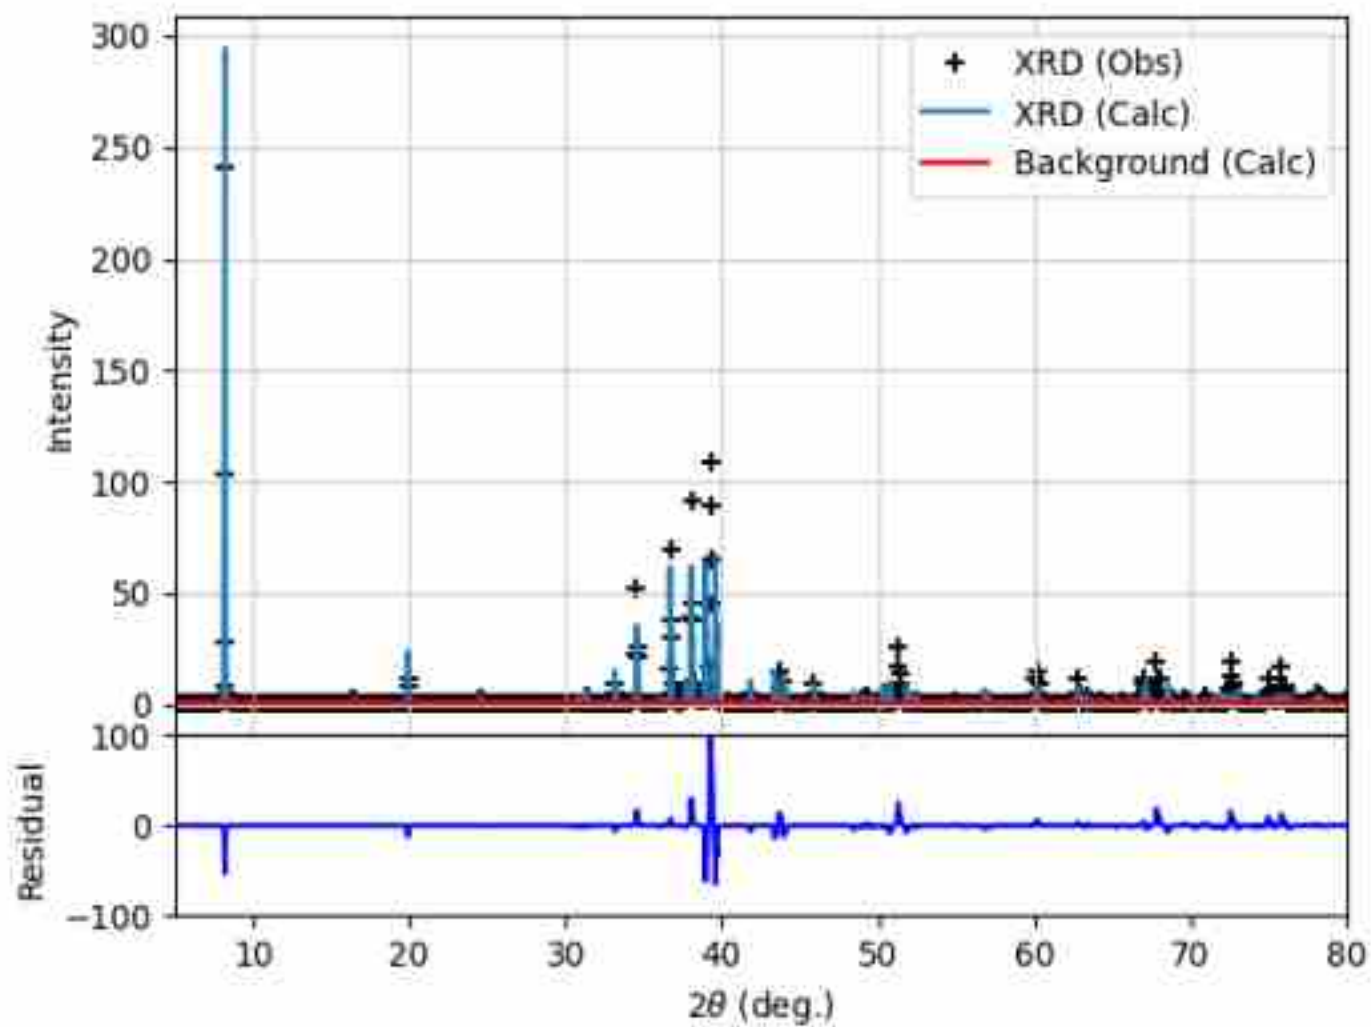

| RMSE before RR | Rwp   | RMSE after RR |
|----------------|-------|---------------|
| 0.057          | 100.0 | 0.05994       |



# Mo<sub>3</sub>W<sub>1</sub>Se<sub>2</sub>S<sub>6</sub>

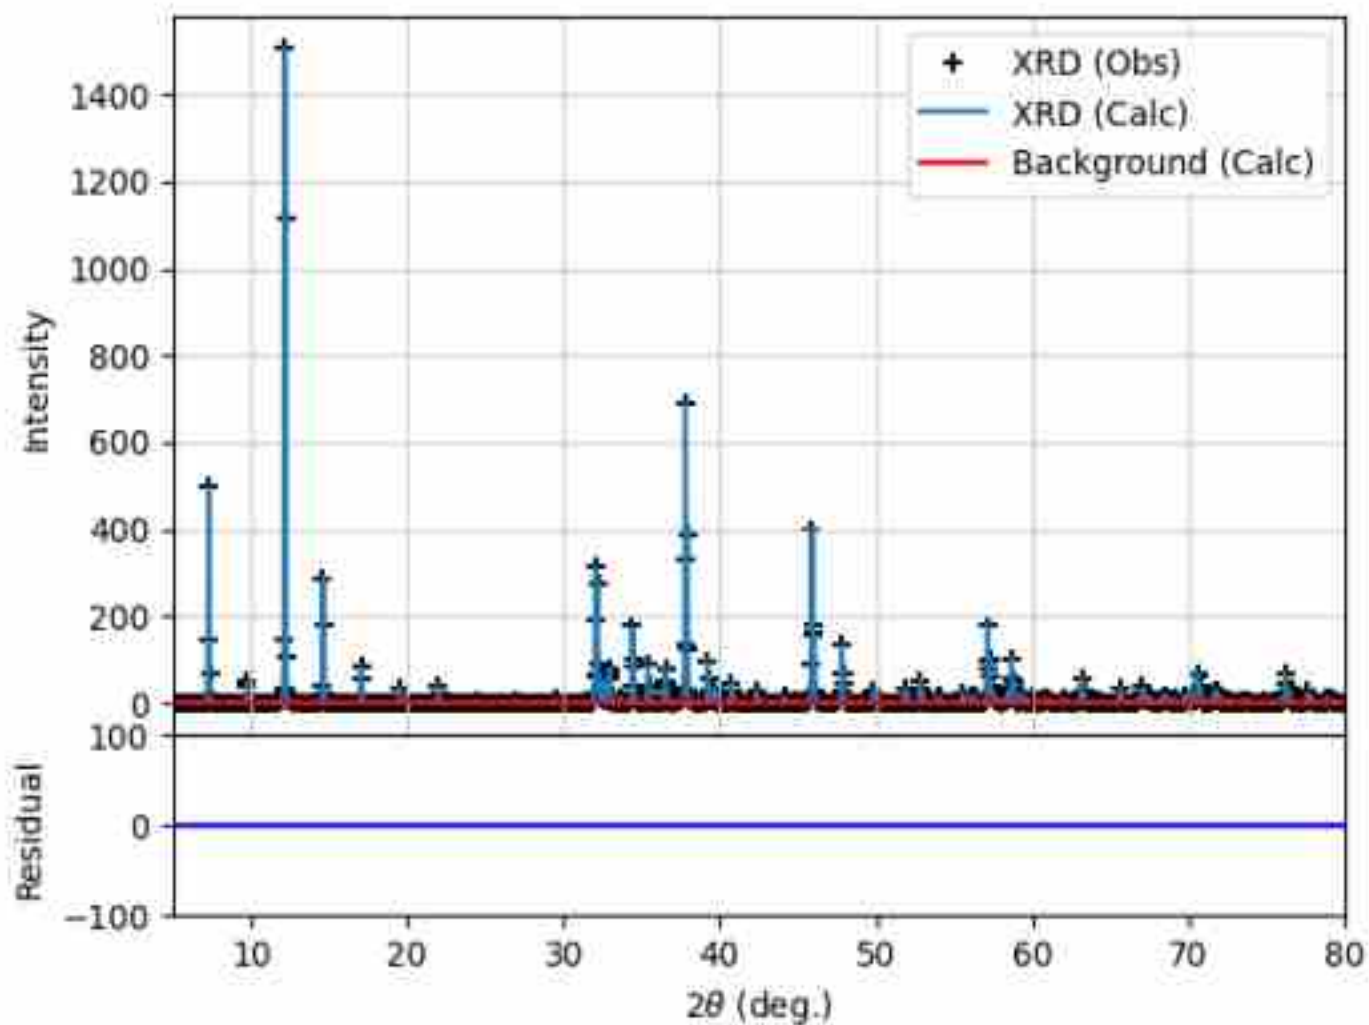

| RMSE before RR | Rwp     | RMSE after RR |
|----------------|---------|---------------|
| 0.057          | 0.00368 | 0.0007        |

# Pb8O4F8

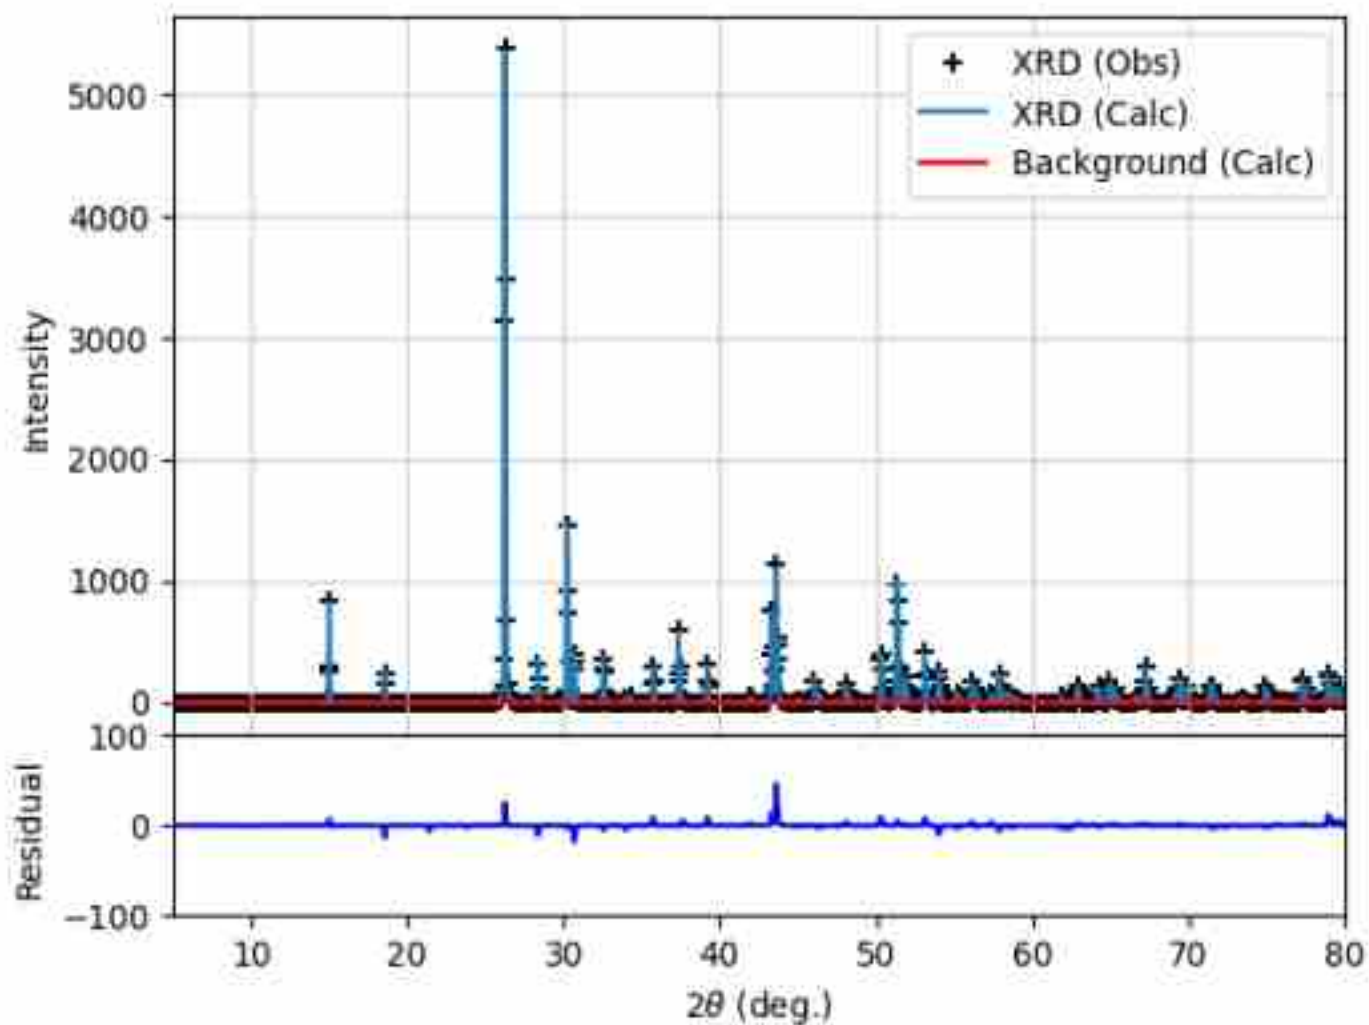

| RMSE before RR | Rwp     | RMSE after RR |
|----------------|---------|---------------|
| 0.057          | 4.26701 | 0.18531       |

# Tl<sub>2</sub>SnAs<sub>2</sub>S<sub>6</sub>

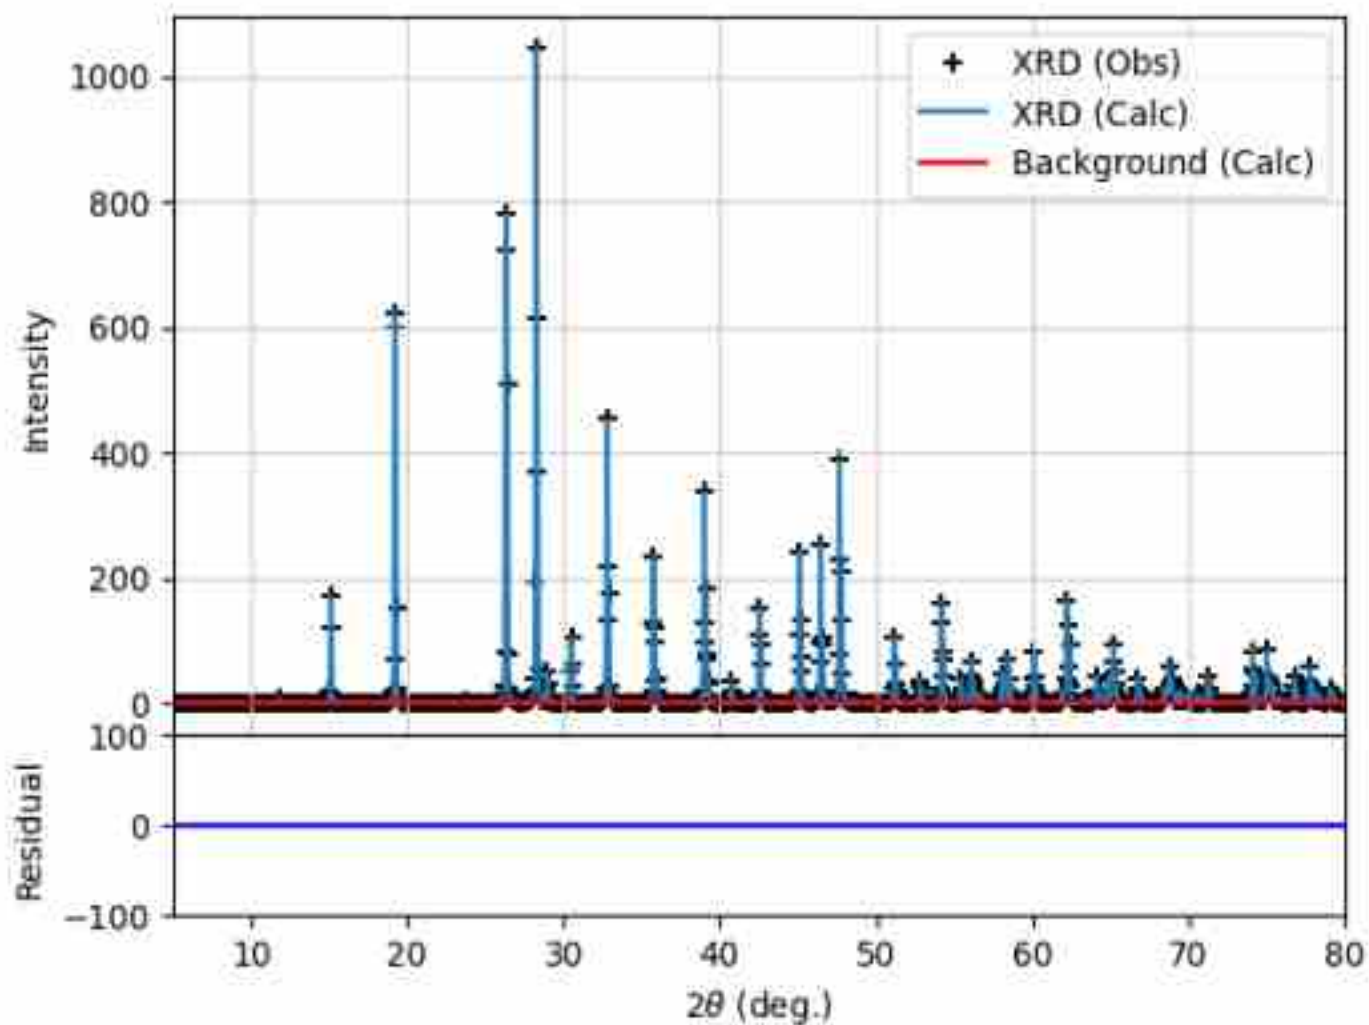

| RMSE before RR | Rwp     | RMSE after RR |
|----------------|---------|---------------|
| 0.057          | 0.00474 | 0.00117       |

# Y1Ag1W2O8

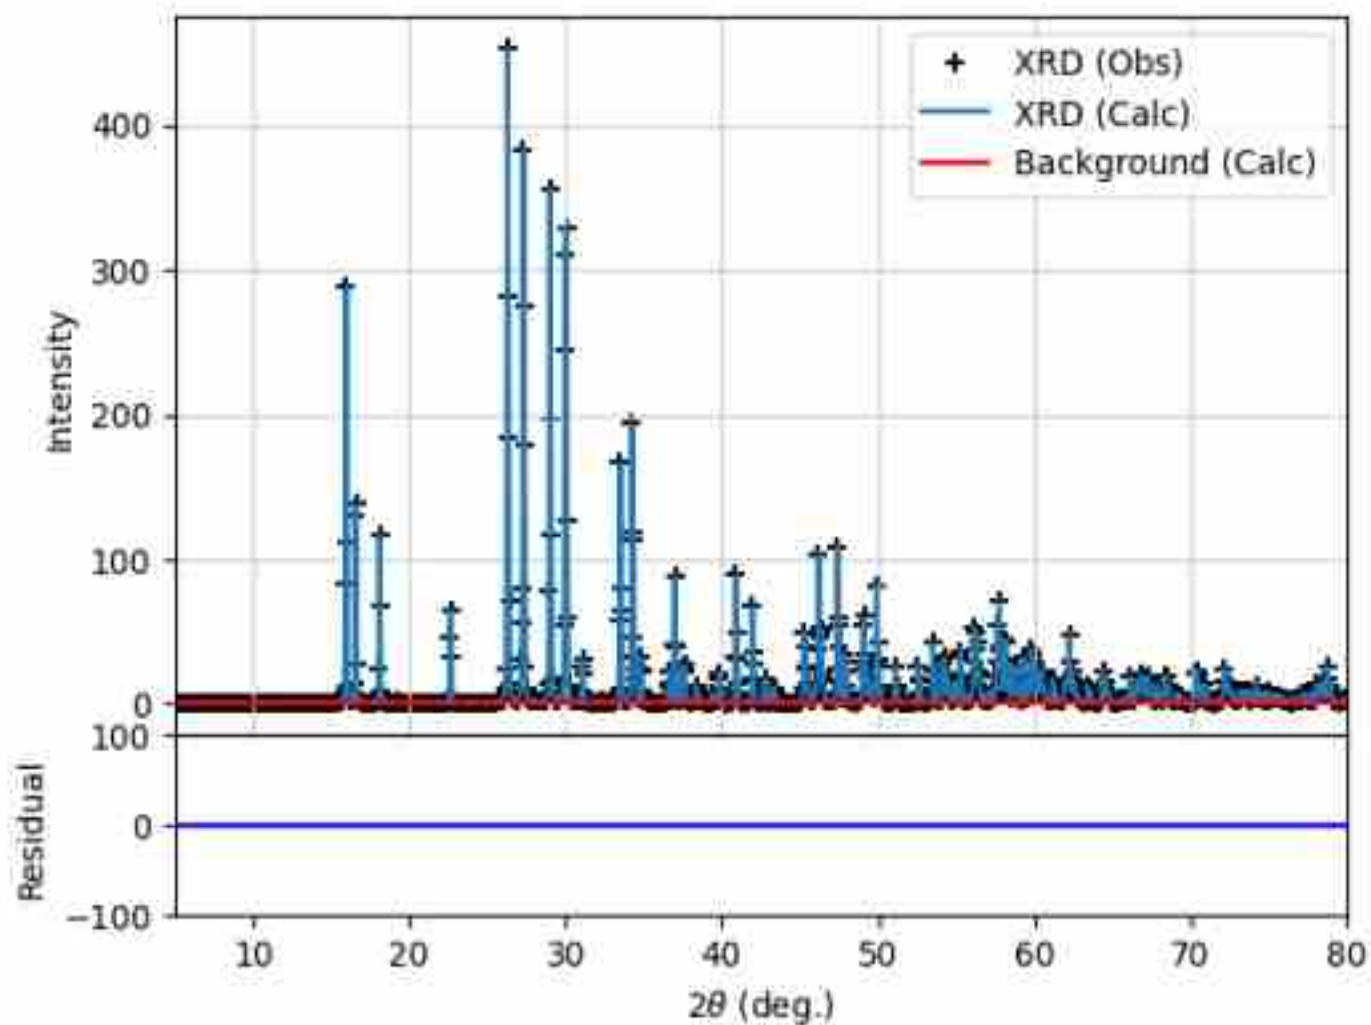

| RMSE before RR | Rwp     | RMSE after RR |
|----------------|---------|---------------|
| 0.057          | 0.00109 | 0.00051       |

# Ba1Co2As2O8

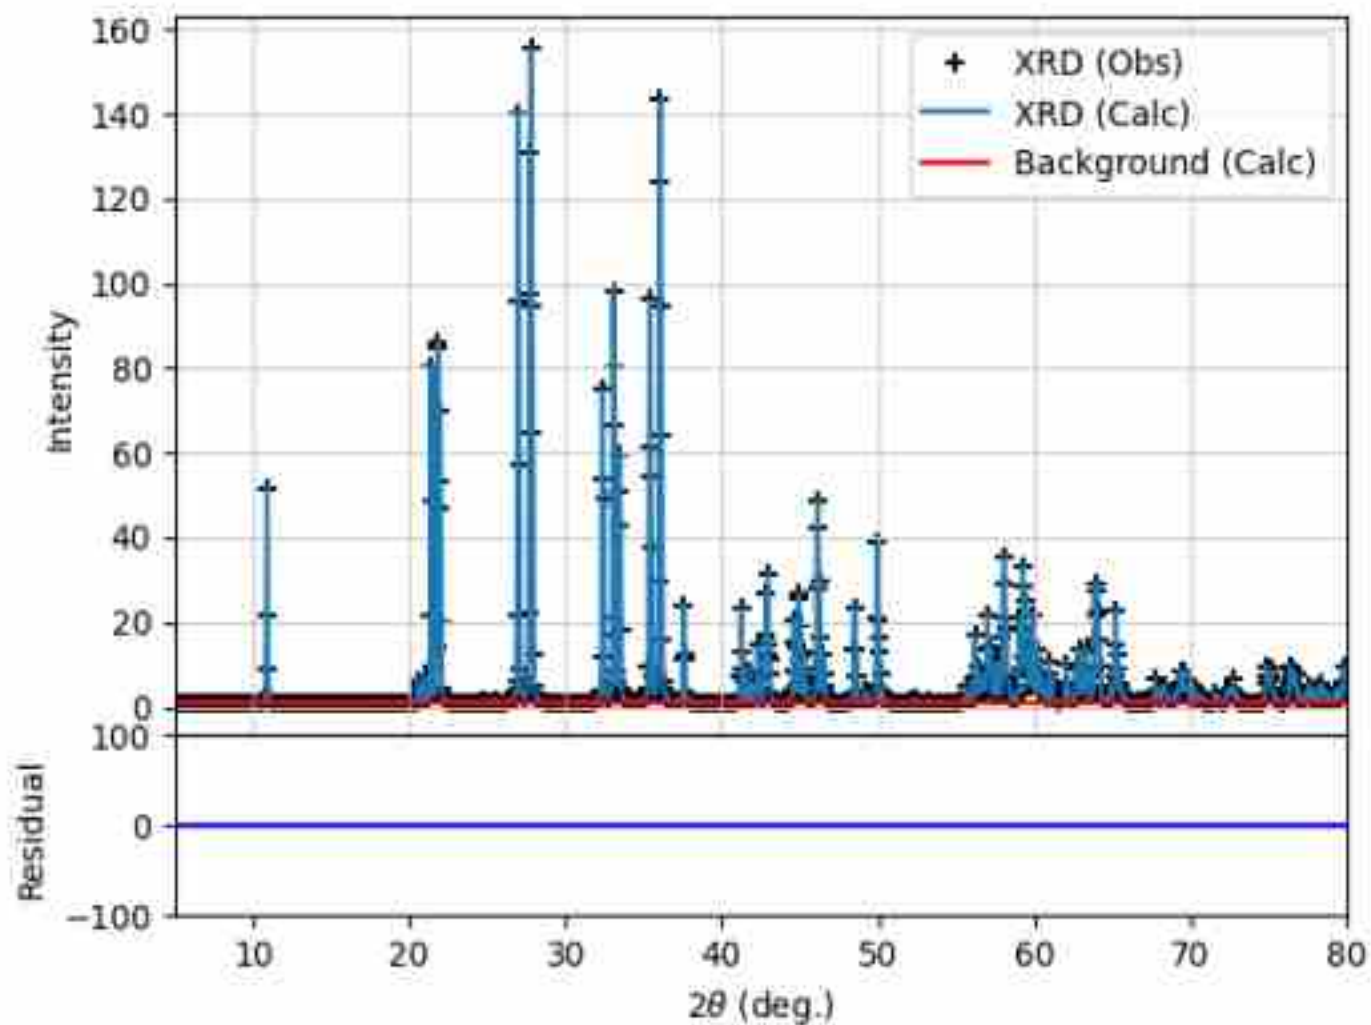

| RMSE before RR | Rwp     | RMSE after RR |
|----------------|---------|---------------|
| 0.058          | 0.00276 | 0.00159       |

# Cr<sub>2</sub>Ag<sub>2</sub>O<sub>8</sub>

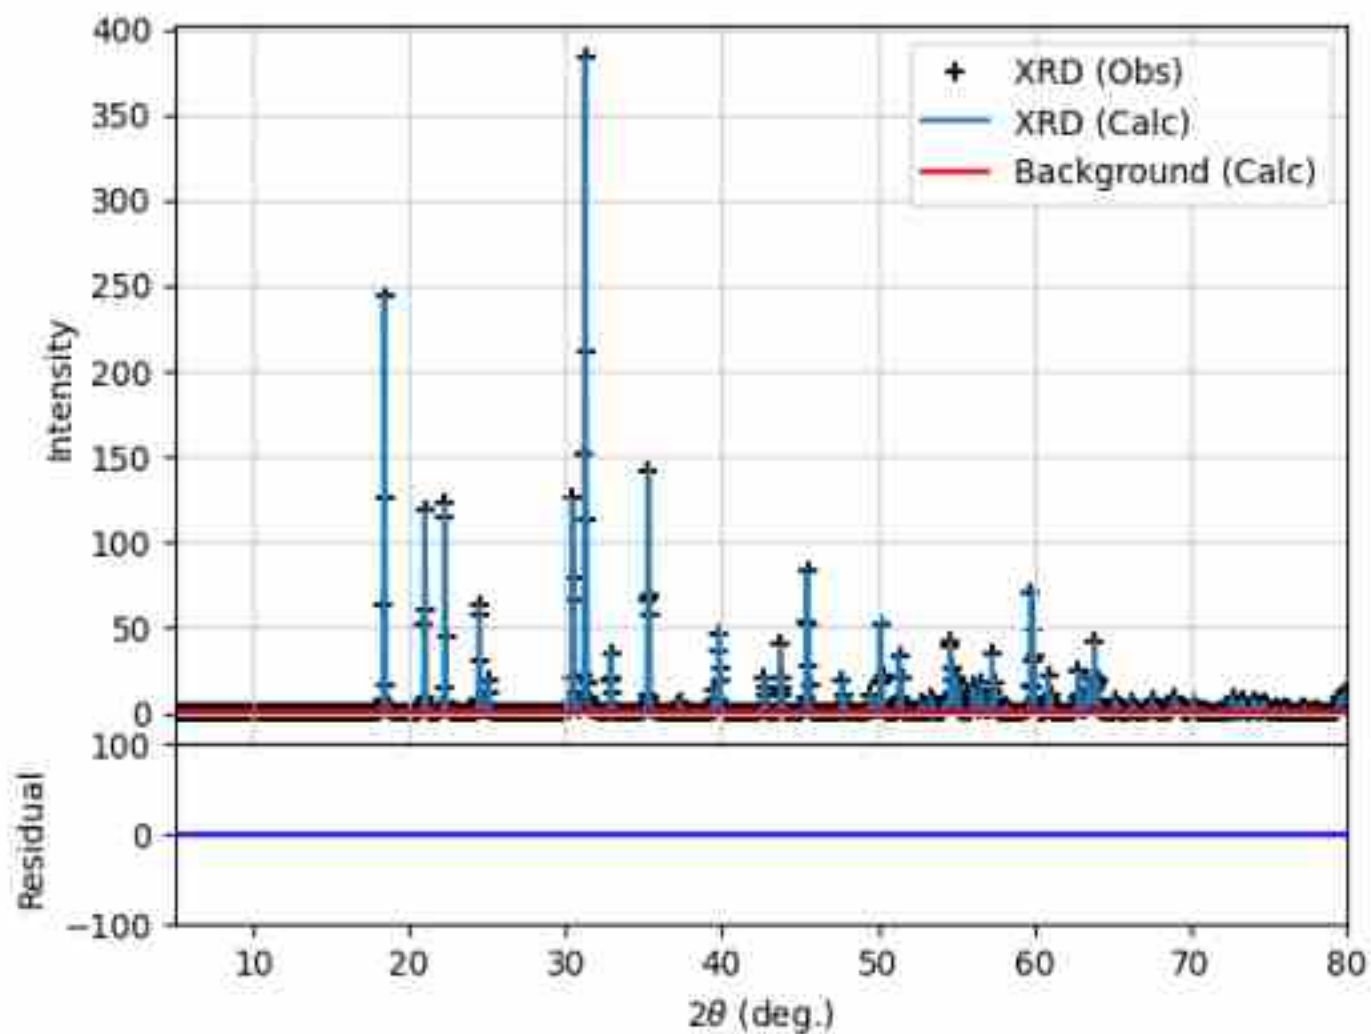

| RMSE before RR | Rwp     | RMSE after RR |
|----------------|---------|---------------|
| 0.058          | 0.00347 | 0.00111       |

# Dy1P2Pt8

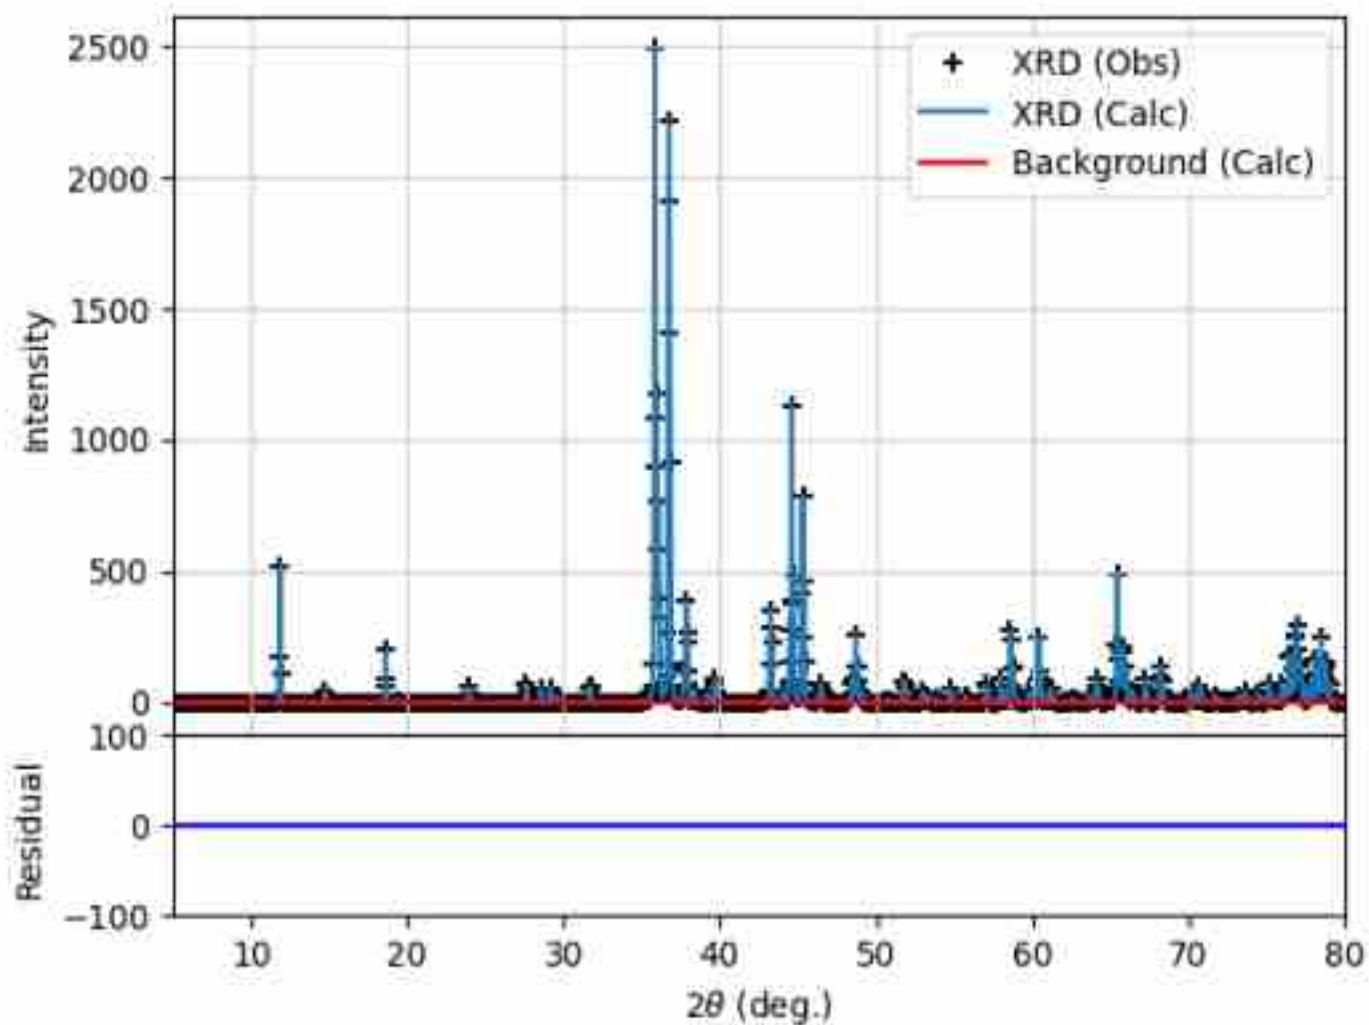

| RMSE before RR | Rwp     | RMSE after RR |
|----------------|---------|---------------|
| 0.058          | 0.00376 | 0.0005        |

# In<sub>2</sub>Cu<sub>1</sub>Te<sub>3</sub>Cl<sub>1</sub>

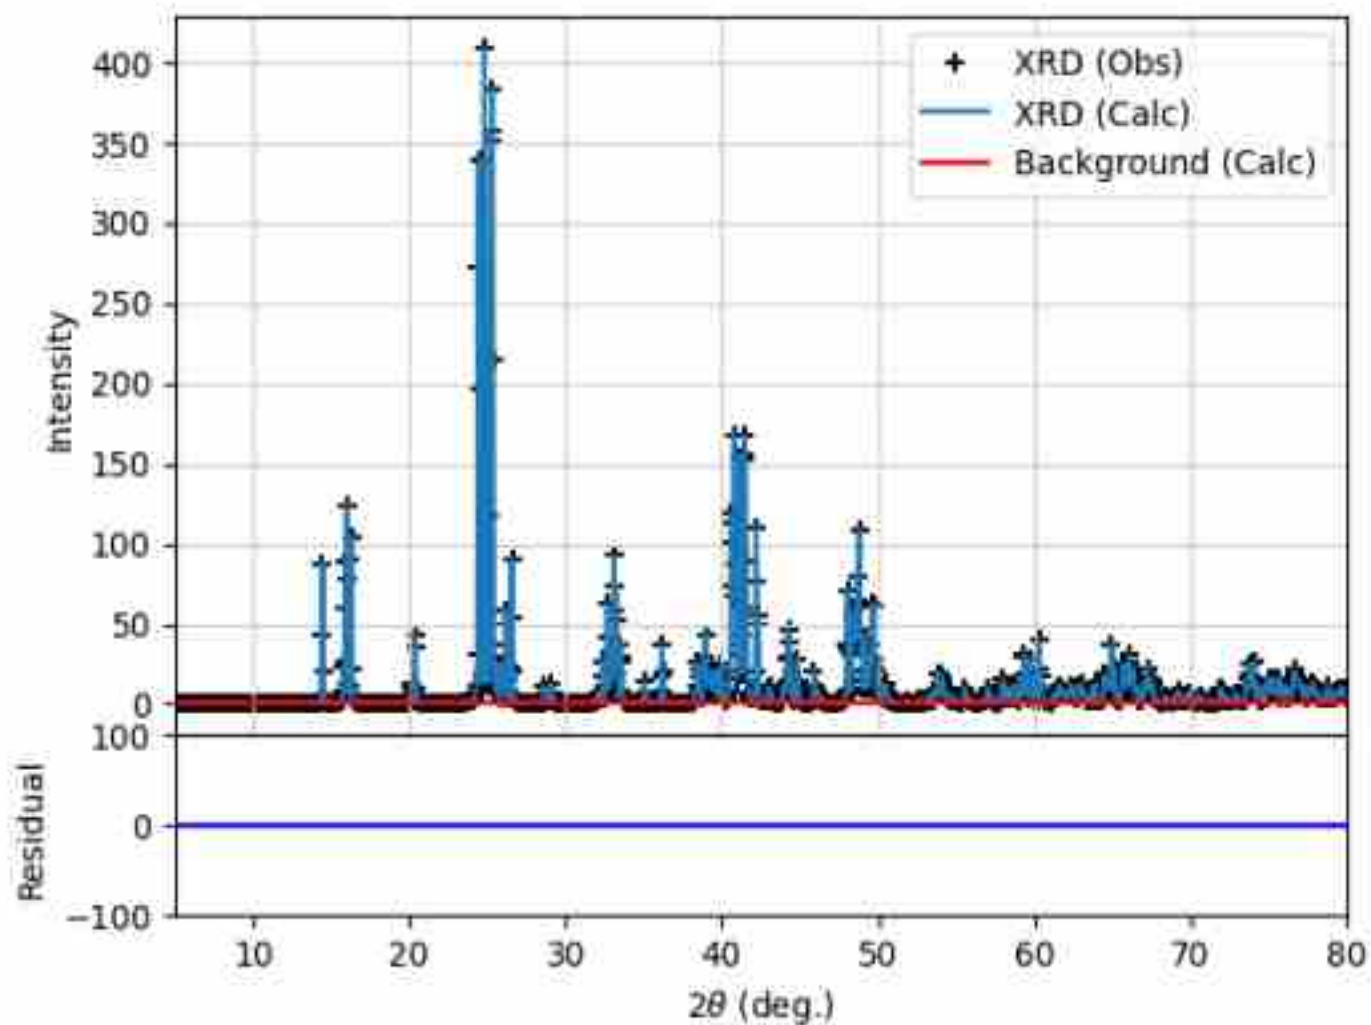

| RMSE before RR | Rwp     | RMSE after RR |
|----------------|---------|---------------|
| 0.058          | 0.00052 | 0.0           |



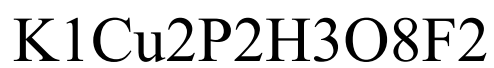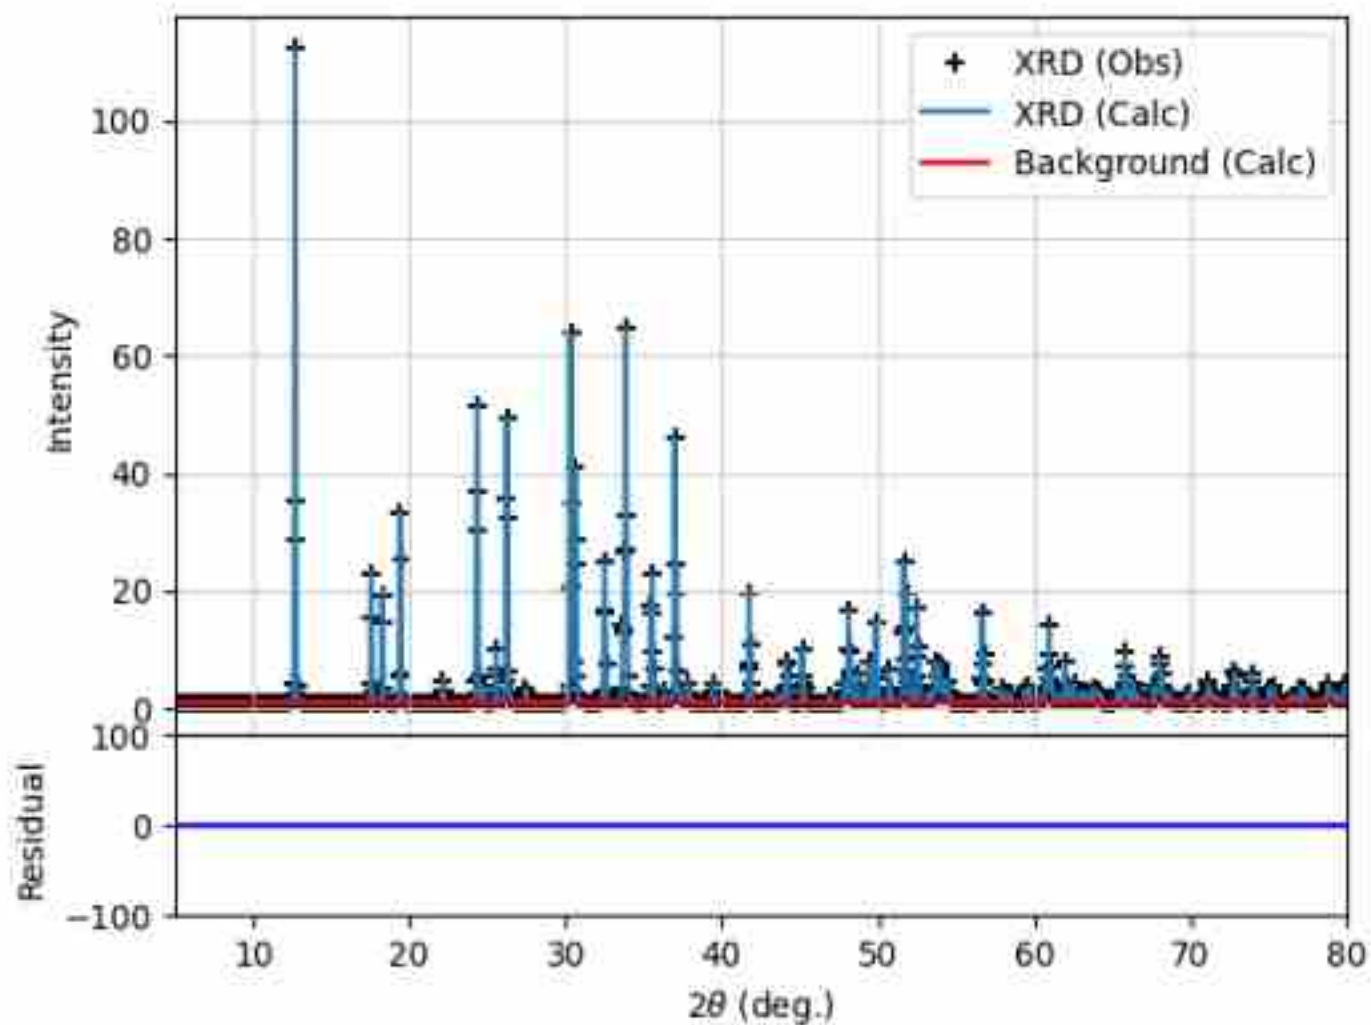

| RMSE before RR | Rwp     | RMSE after RR |
|----------------|---------|---------------|
| 0.058          | 0.00227 | 0.00133       |

# Li<sub>4</sub>Mn<sub>2</sub>W<sub>2</sub>O<sub>12</sub>

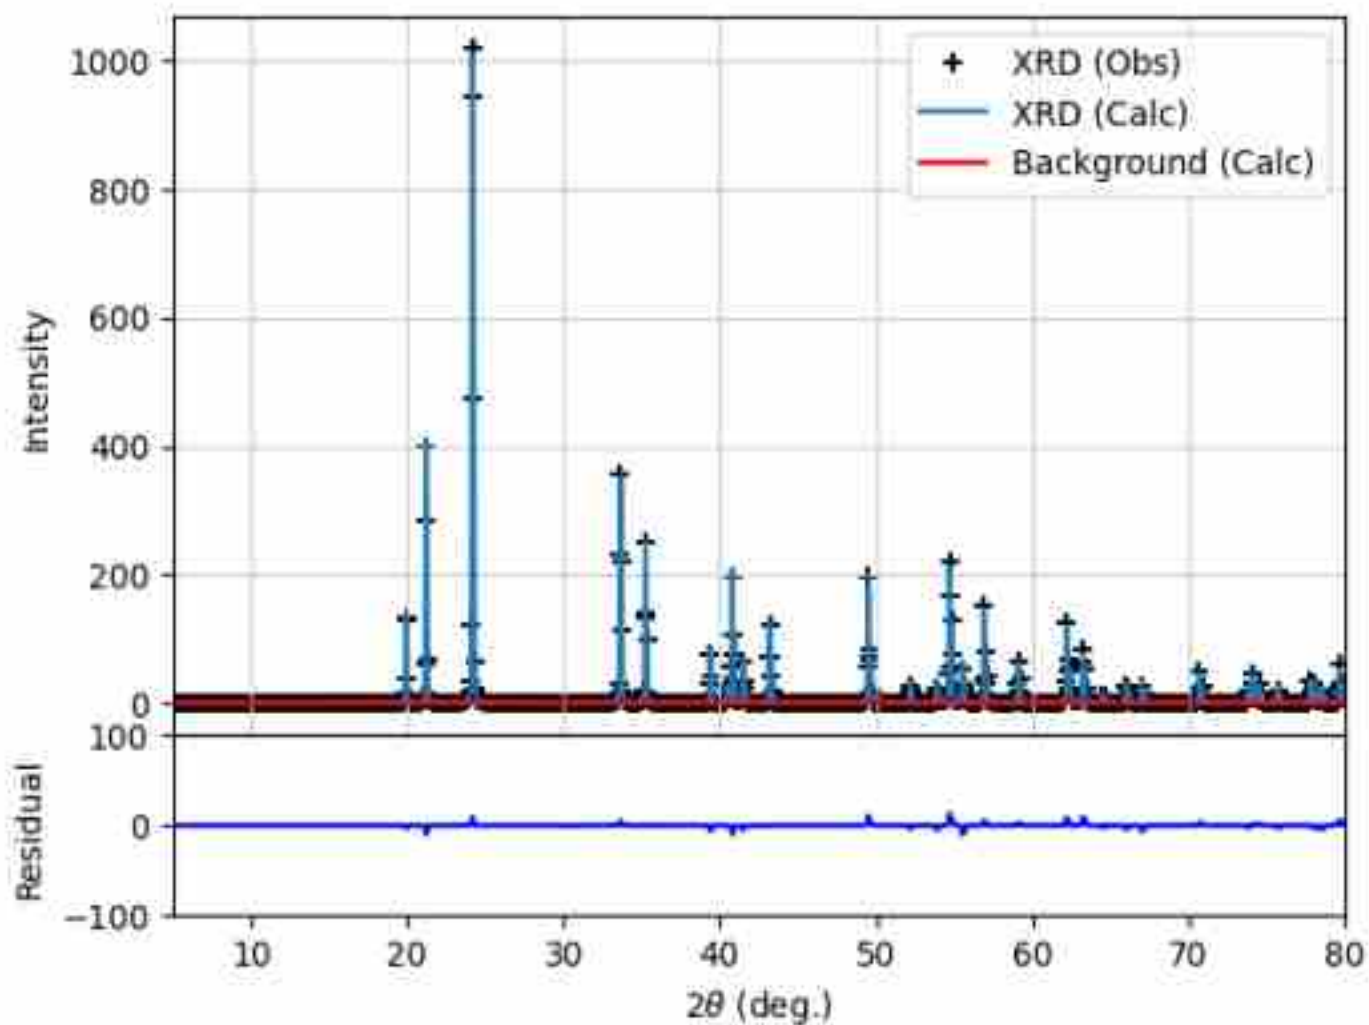

| RMSE before RR | Rwp     | RMSE after RR |
|----------------|---------|---------------|
| 0.058          | 6.34057 | None          |

# Na<sub>4</sub>Ni<sub>4</sub>O<sub>8</sub>

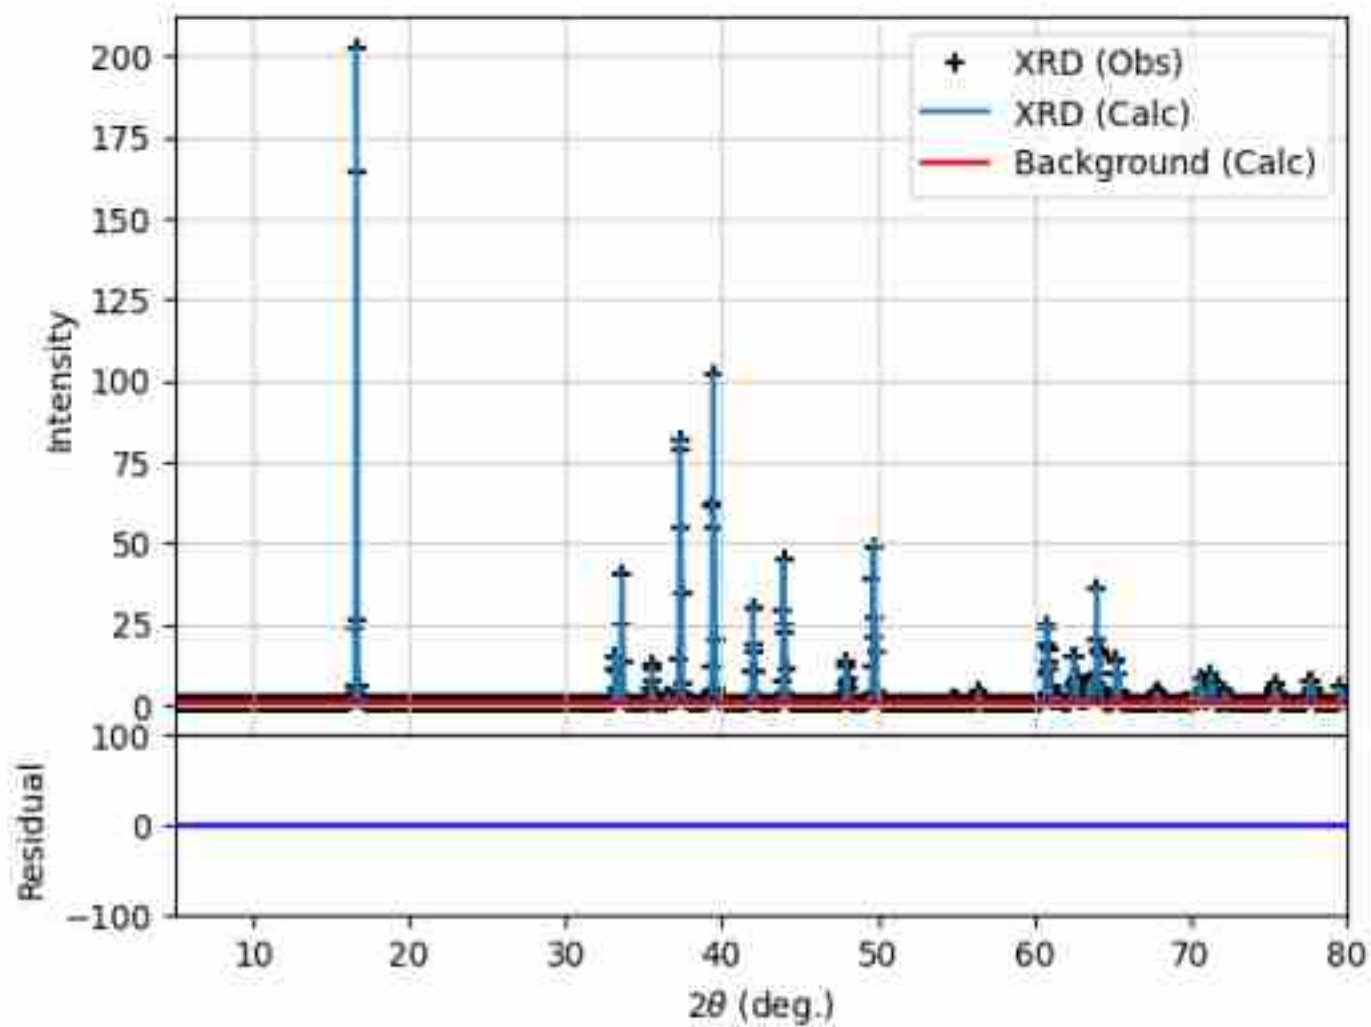

| RMSE before RR | Rwp     | RMSE after RR |
|----------------|---------|---------------|
| 0.058          | 0.00054 | 2e-05         |

# Nd4As4S4

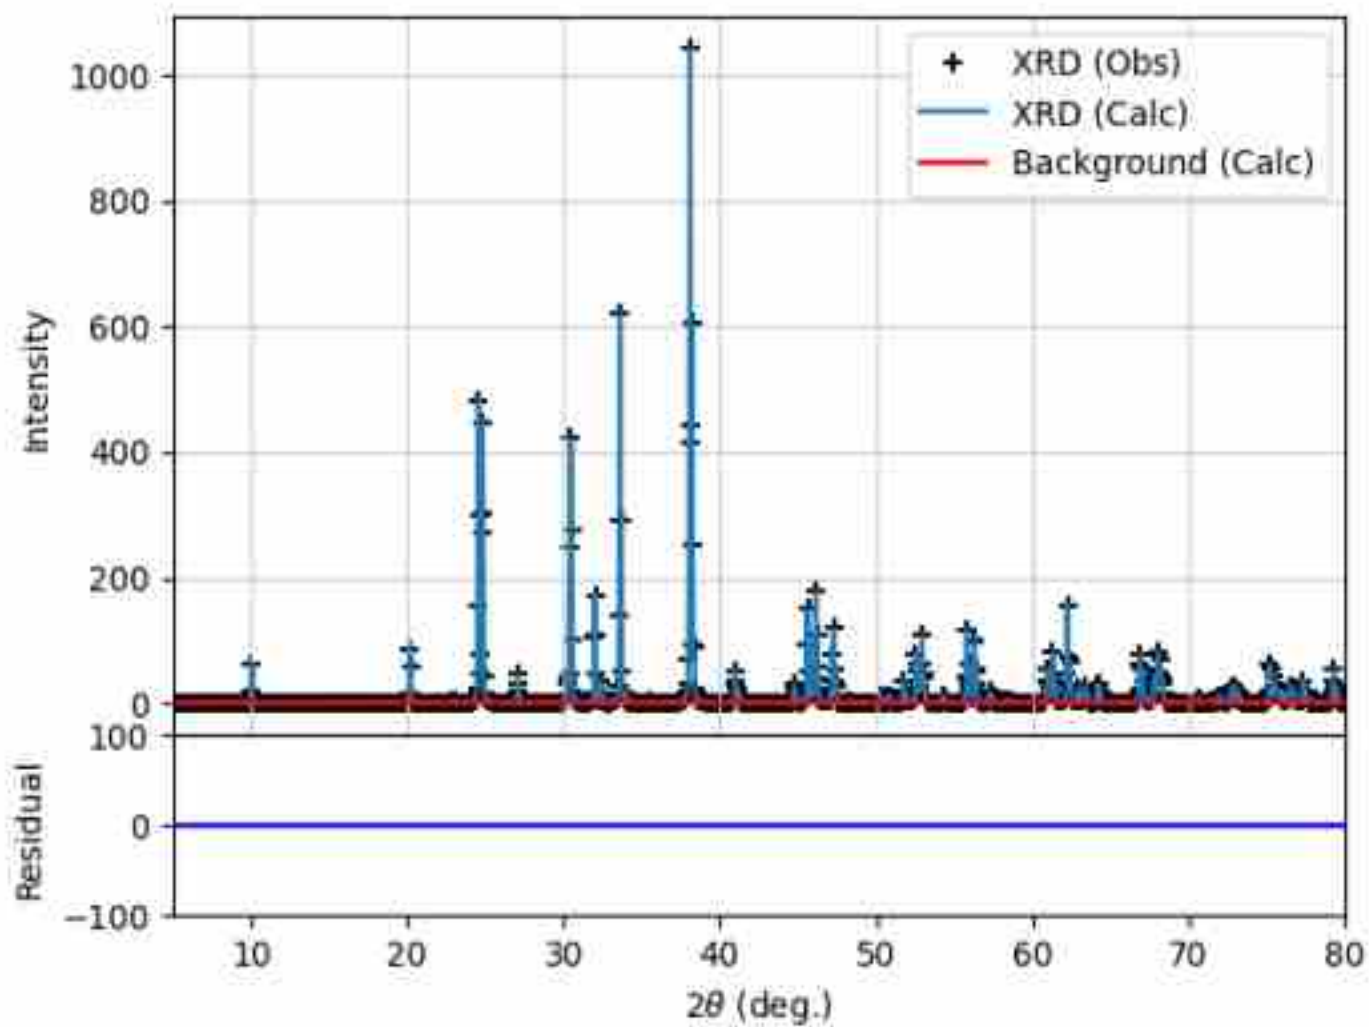

| RMSE before RR | Rwp     | RMSE after RR |
|----------------|---------|---------------|
| 0.058          | 0.00443 | 0.00058       |

# Sn<sub>4</sub>P<sub>4</sub>Se<sub>12</sub>

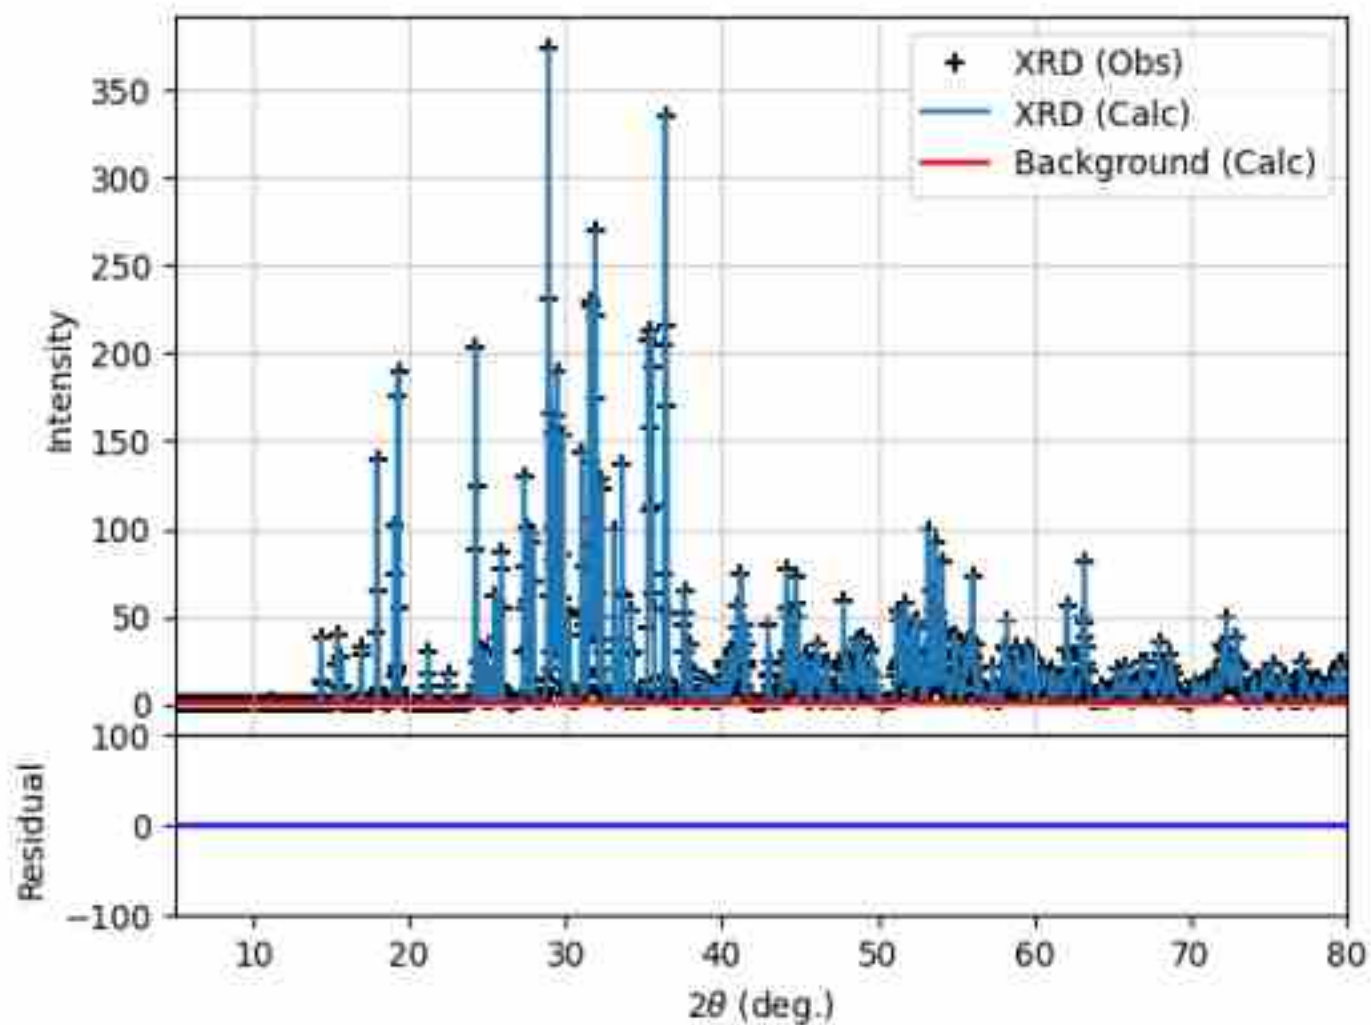

| RMSE before RR | Rwp     | RMSE after RR |
|----------------|---------|---------------|
| 0.058          | 0.00368 | 0.00036       |

# Ta<sub>2</sub>Tl<sub>2</sub>Cu<sub>4</sub>S<sub>8</sub>

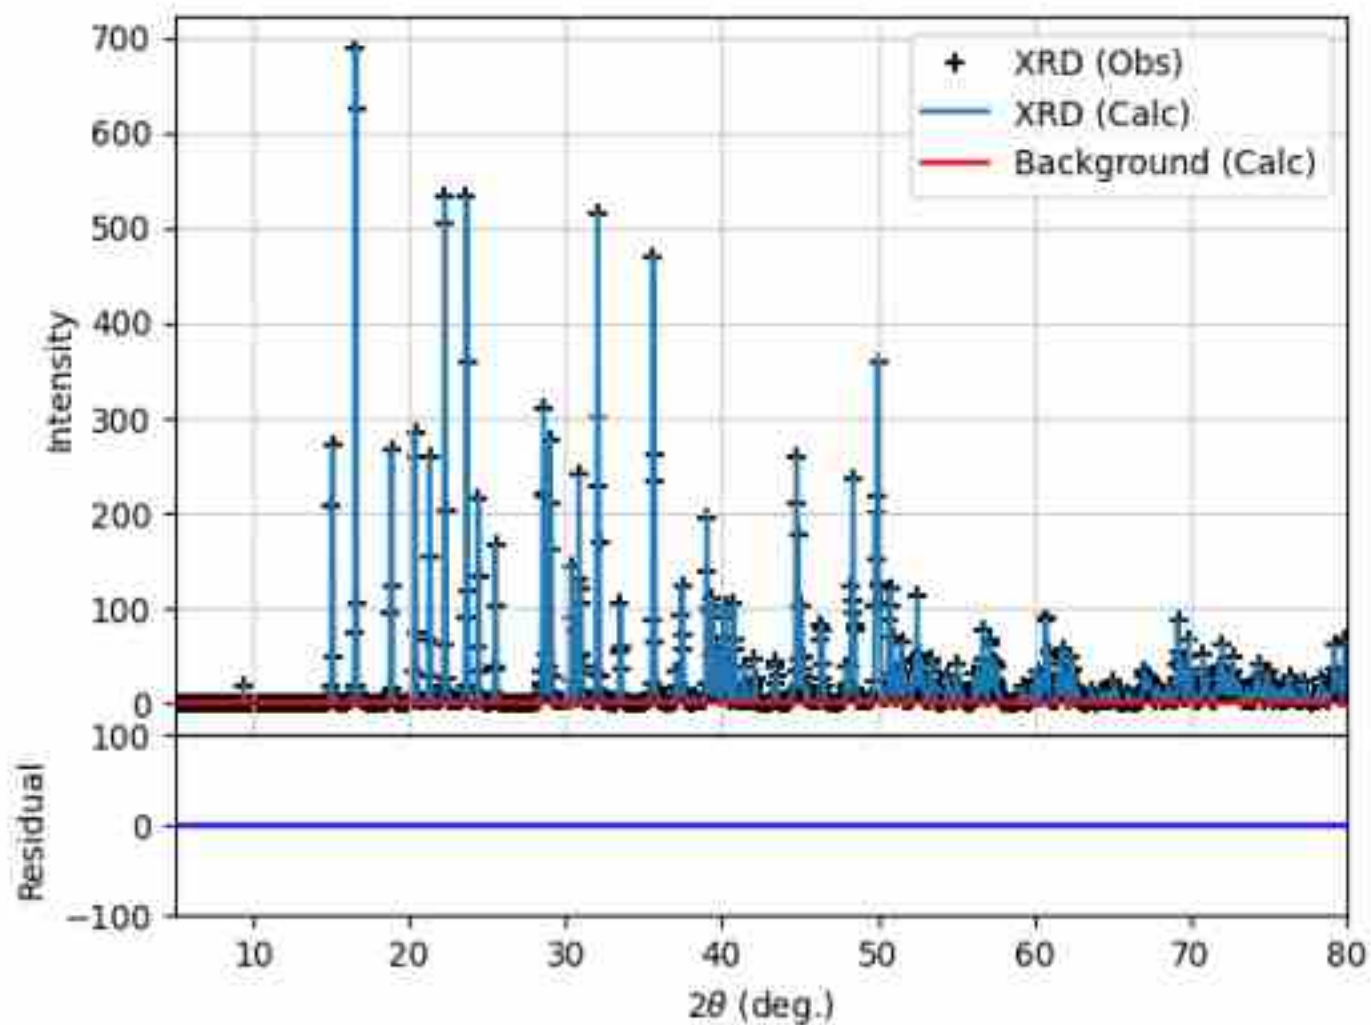

| RMSE before RR | Rwp     | RMSE after RR |
|----------------|---------|---------------|
| 0.058          | 0.00382 | 0.00068       |

# Ti4P8

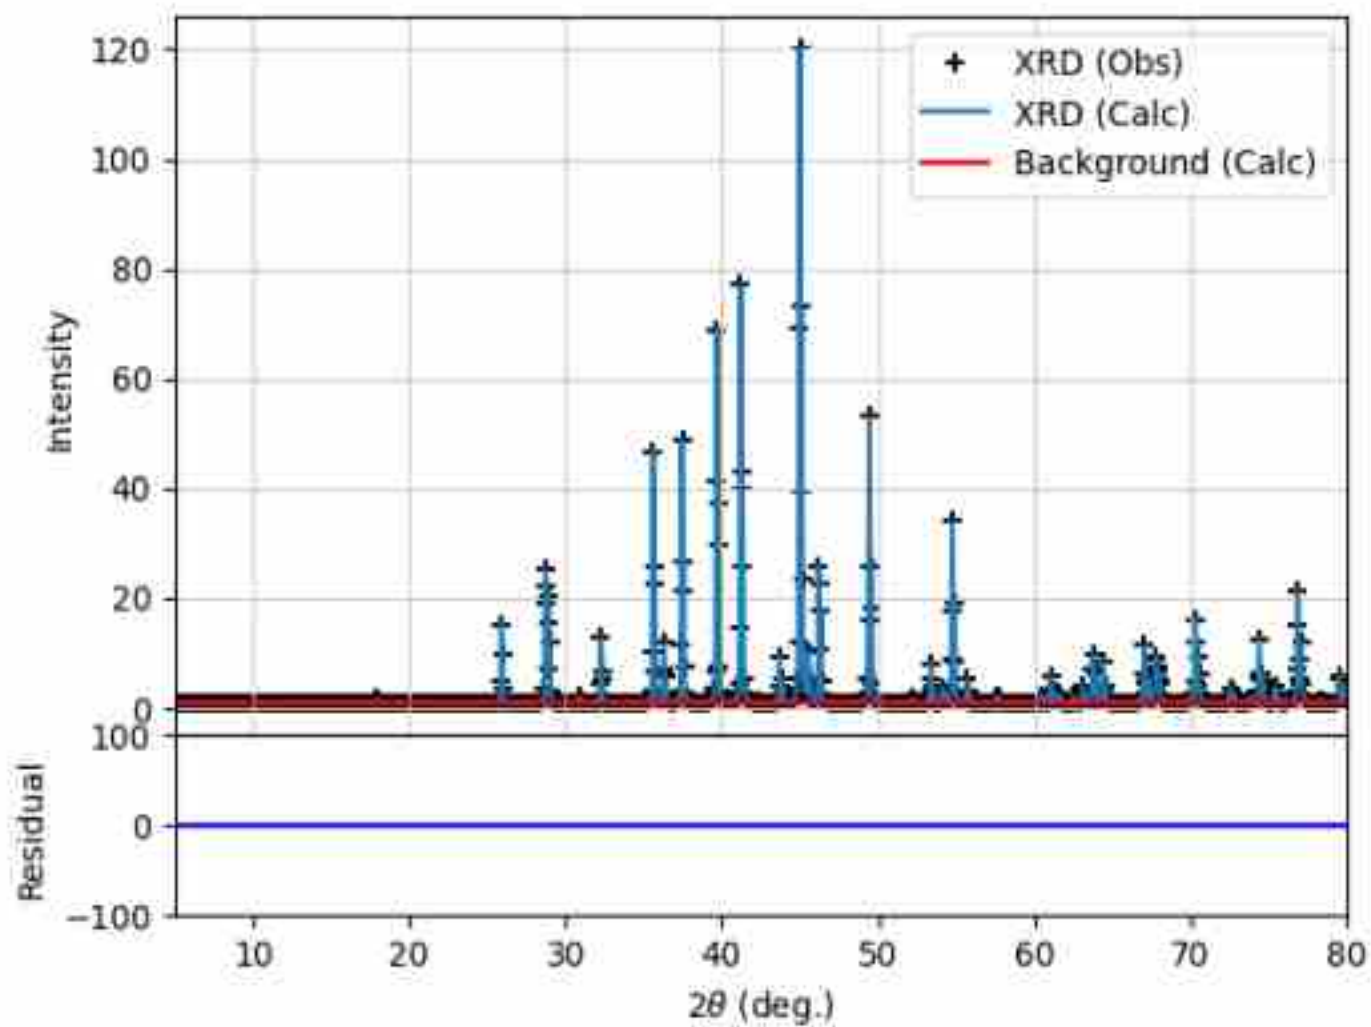

| RMSE before RR | Rwp     | RMSE after RR |
|----------------|---------|---------------|
| 0.058          | 0.00312 | 0.00051       |

# Tl4Te2Br12

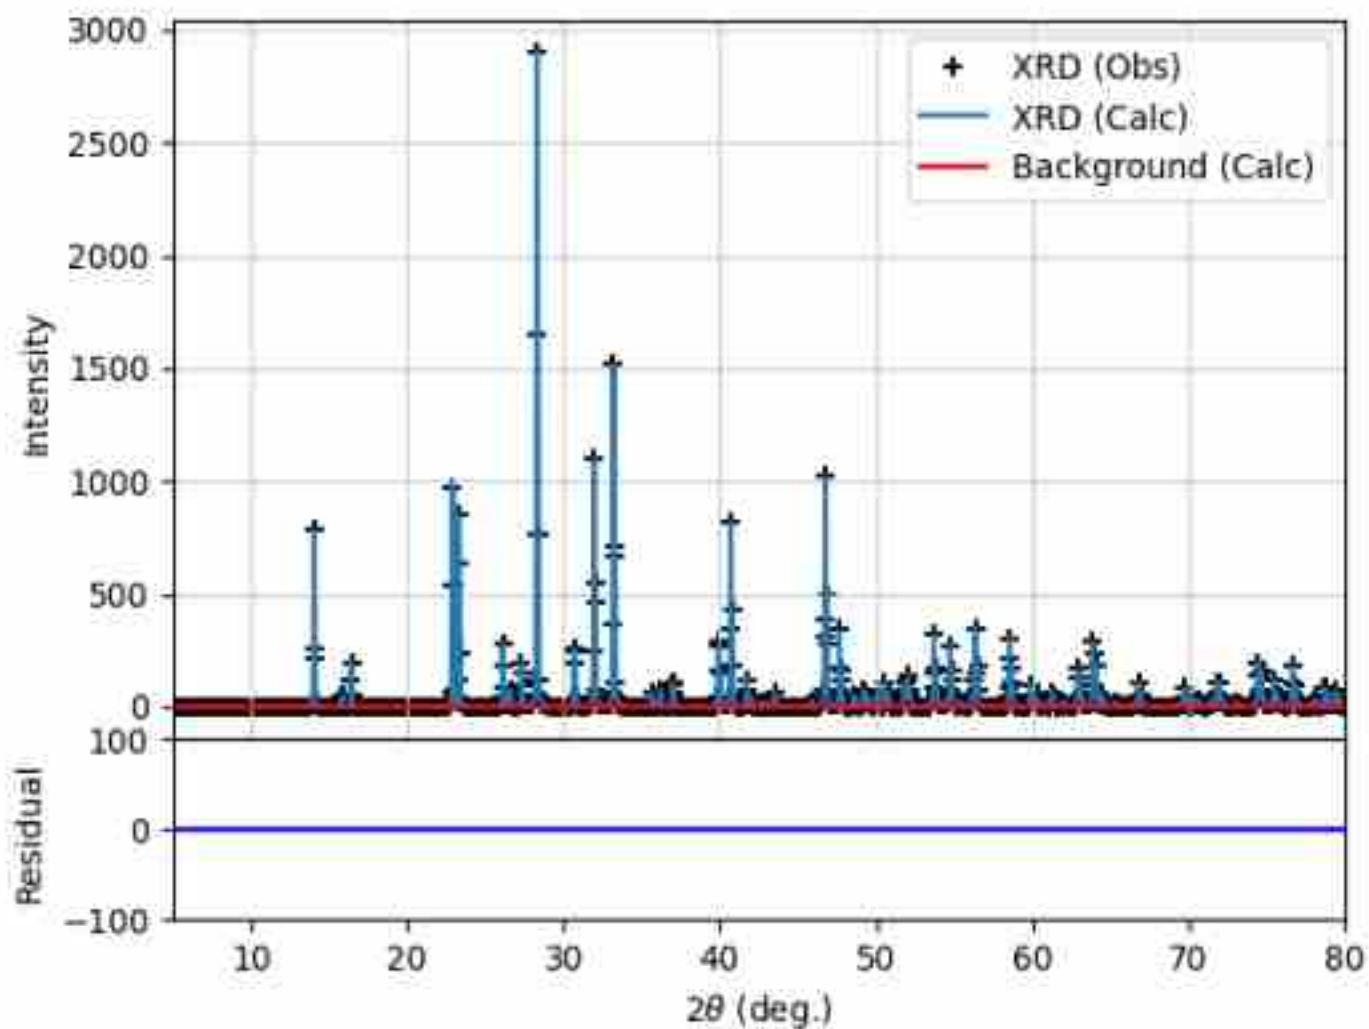

| RMSE before RR | Rwp     | RMSE after RR |
|----------------|---------|---------------|
| 0.058          | 0.01054 | 0.00087       |



# Ag<sub>6</sub>Sb<sub>2</sub>S<sub>6</sub>

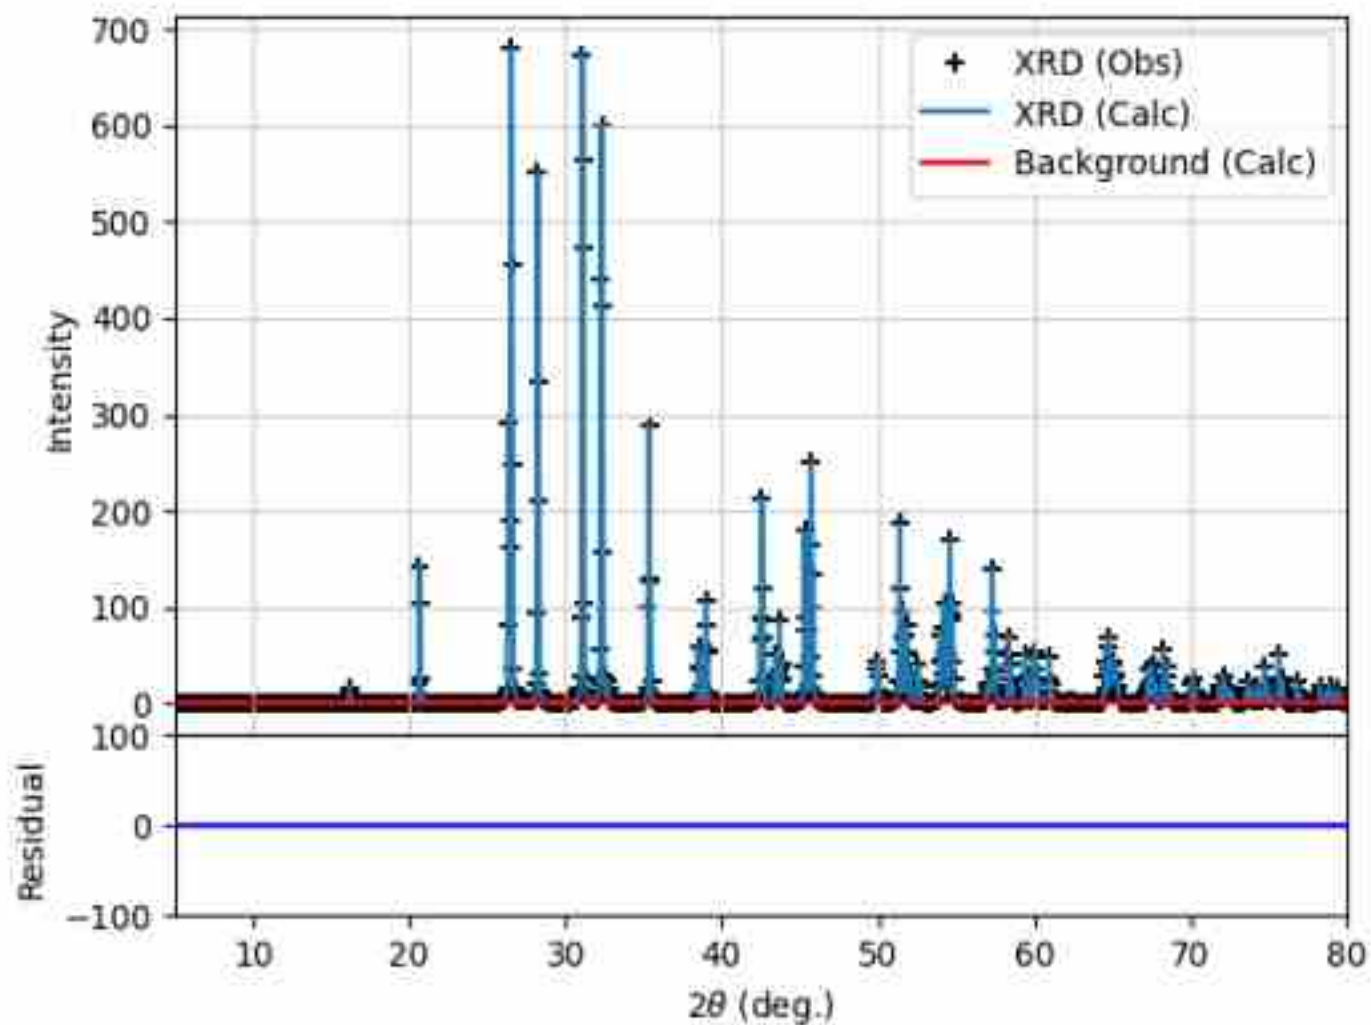

| RMSE before RR | Rwp     | RMSE after RR |
|----------------|---------|---------------|
| 0.059          | 0.00287 | 0.00035       |

# Ba<sub>4</sub>Y<sub>2</sub>Ga<sub>2</sub>Te<sub>10</sub>

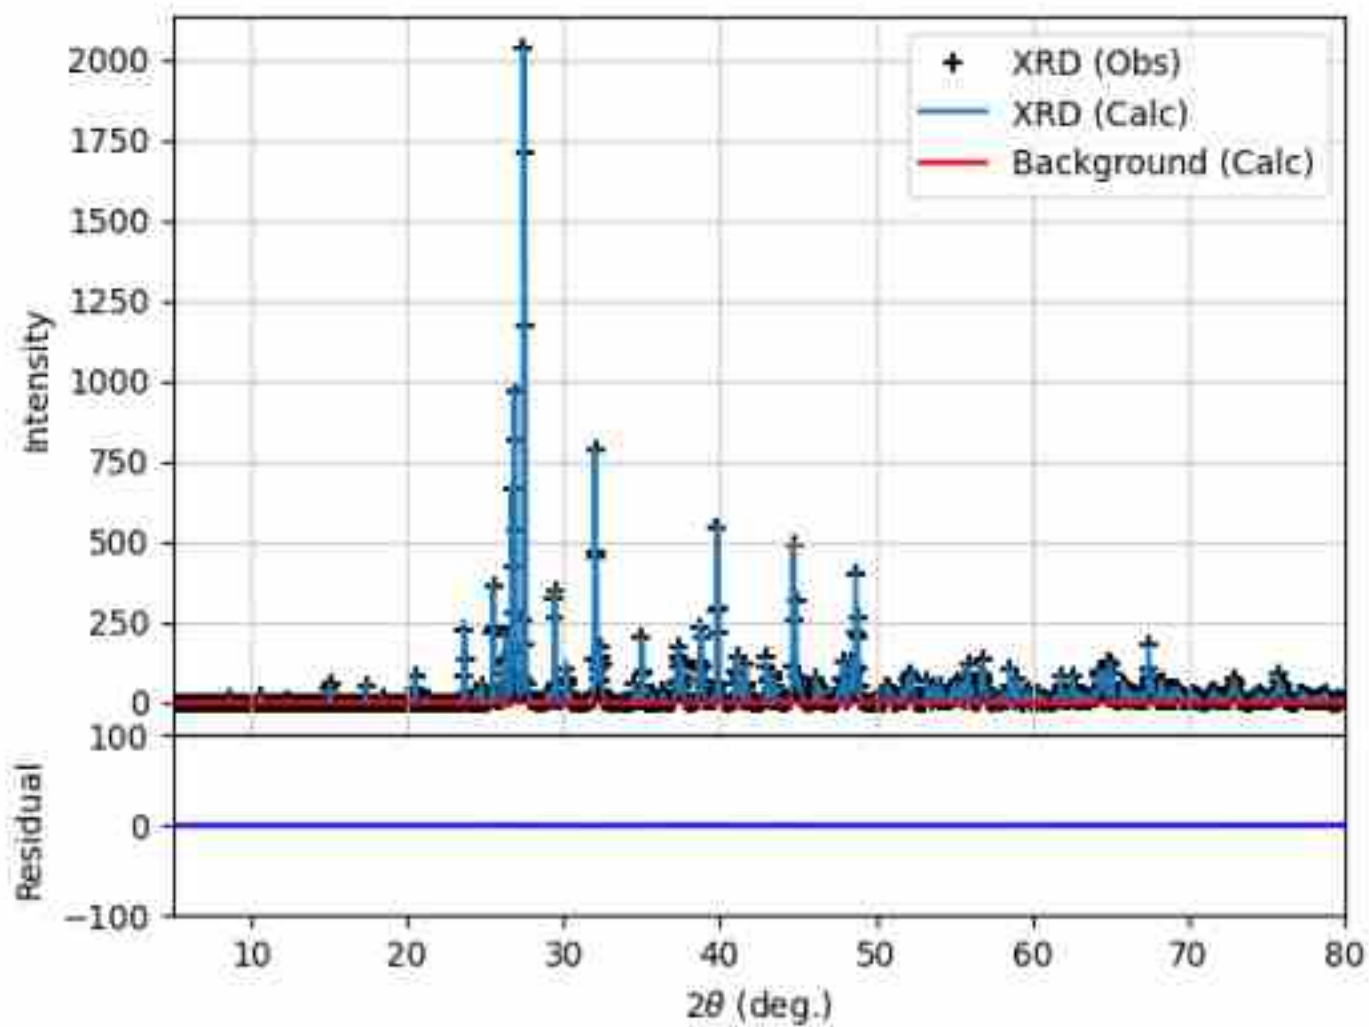

| RMSE before RR | Rwp     | RMSE after RR |
|----------------|---------|---------------|
| 0.059          | 0.38512 | 0.00622       |

# Cs<sub>4</sub>Co<sub>6</sub>S<sub>8</sub>

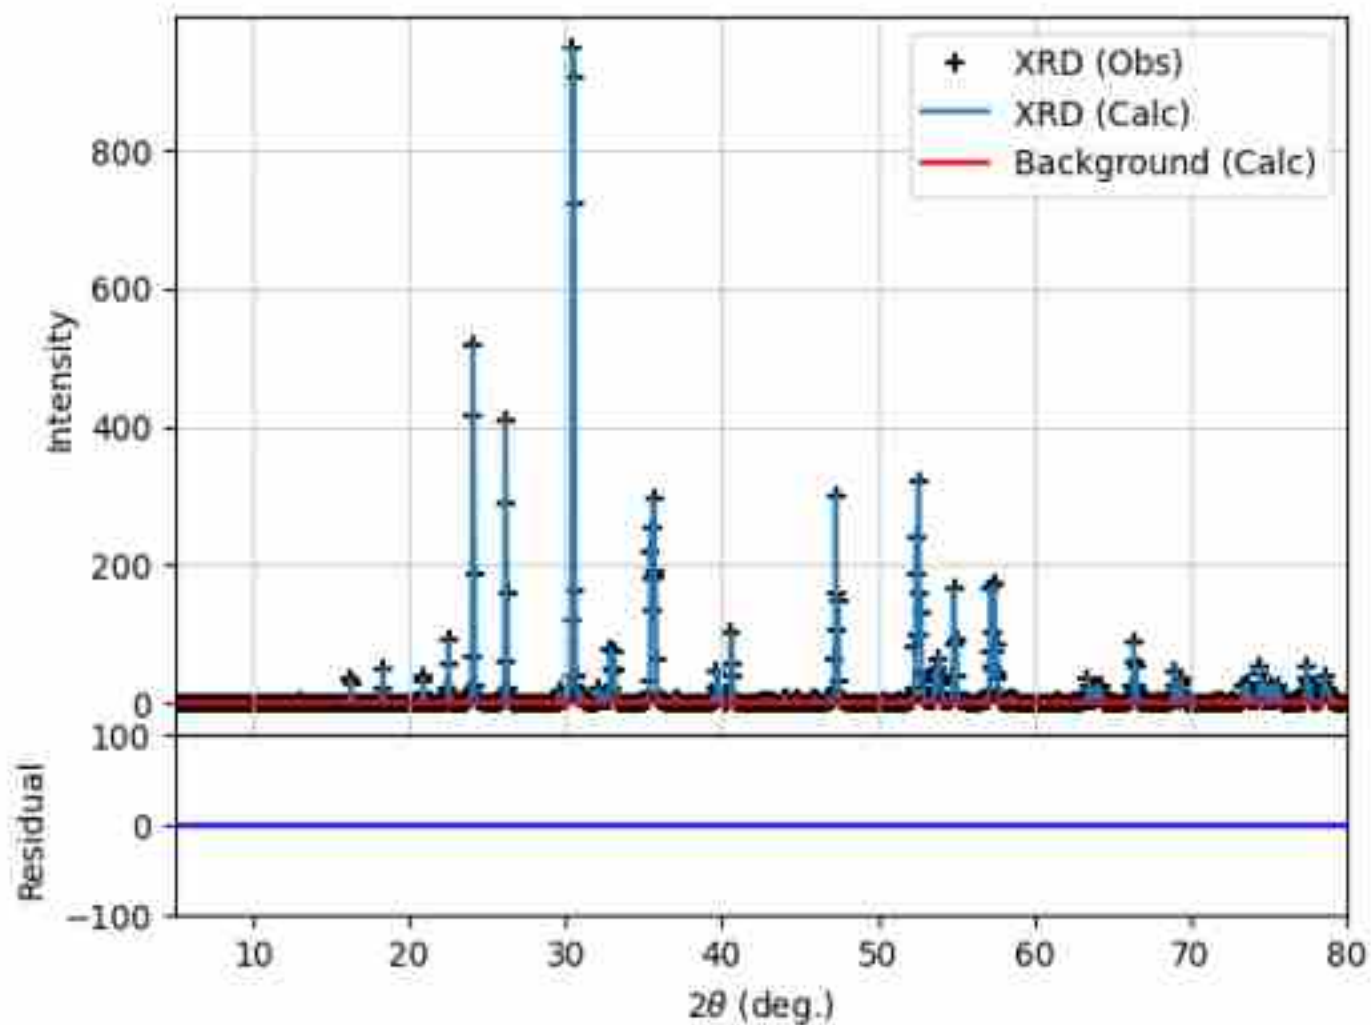

| RMSE before RR | Rwp     | RMSE after RR |
|----------------|---------|---------------|
| 0.059          | 0.00303 | 0.00031       |

# Cu6O1F11

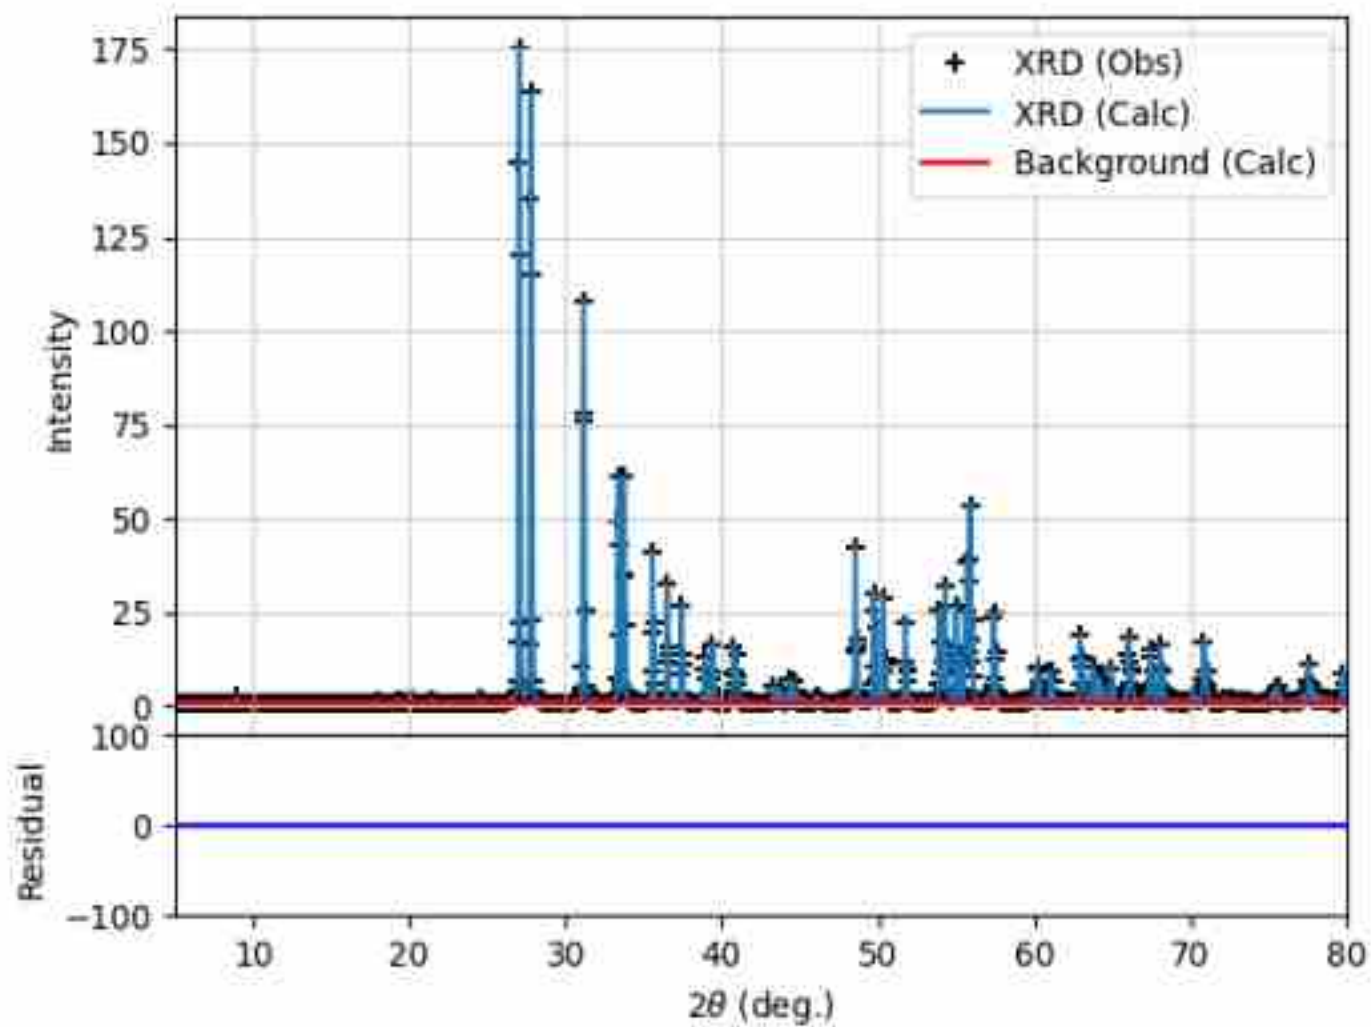

| RMSE before RR | Rwp     | RMSE after RR |
|----------------|---------|---------------|
| 0.059          | 0.00164 | 0.0           |

# Cu<sub>6</sub>Se<sub>6</sub>

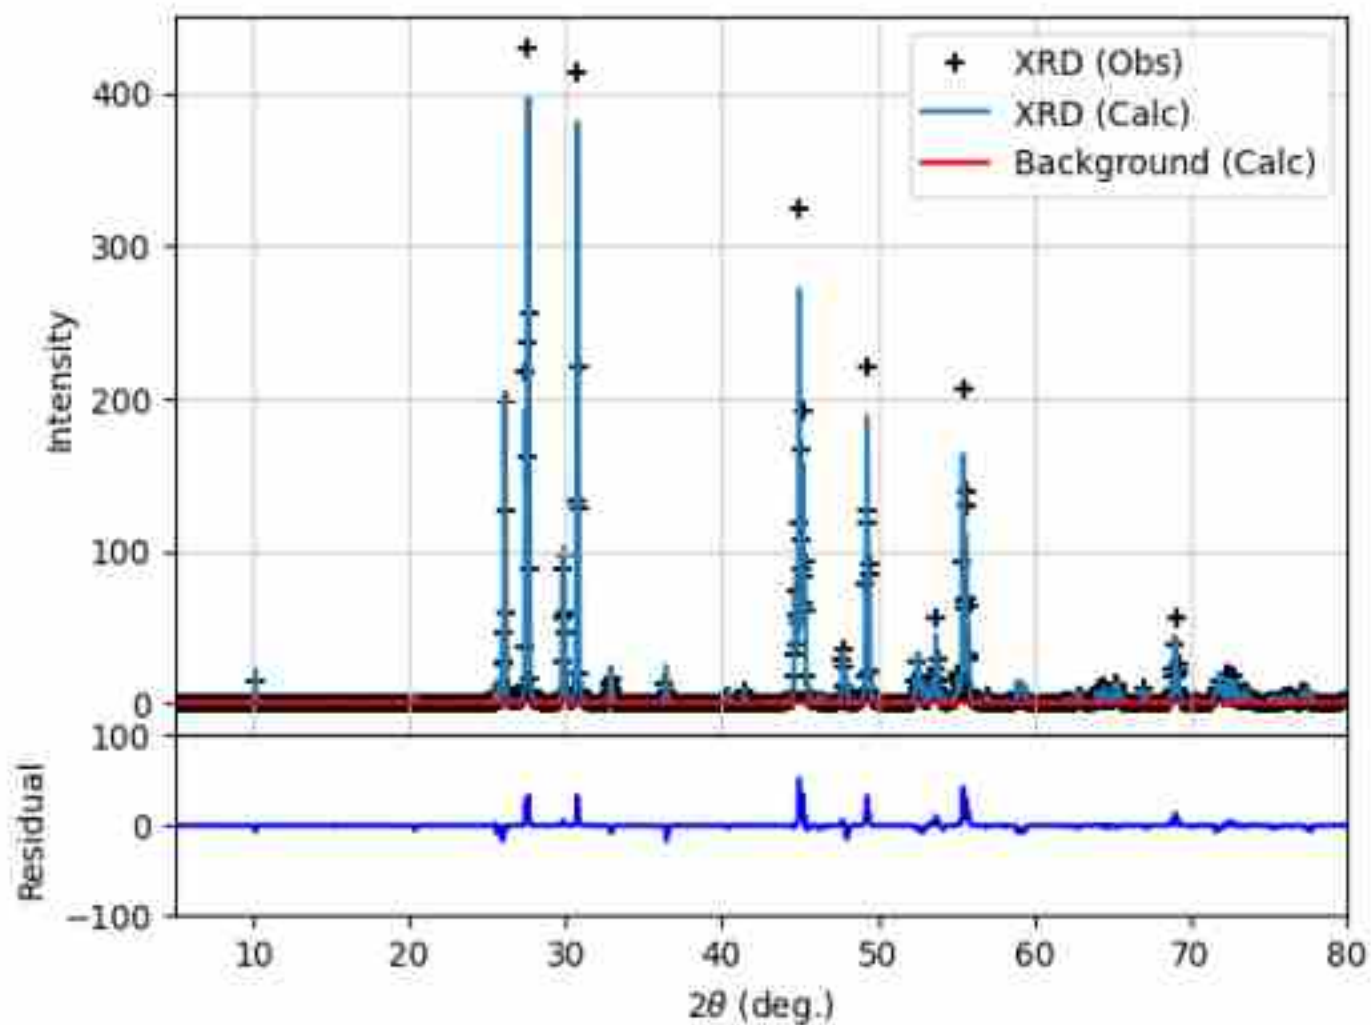

| RMSE before RR | Rwp      | RMSE after RR |
|----------------|----------|---------------|
| 0.059          | 31.51977 | 0.07156       |

# Mg<sub>2</sub>Al<sub>2</sub>Se<sub>5</sub>

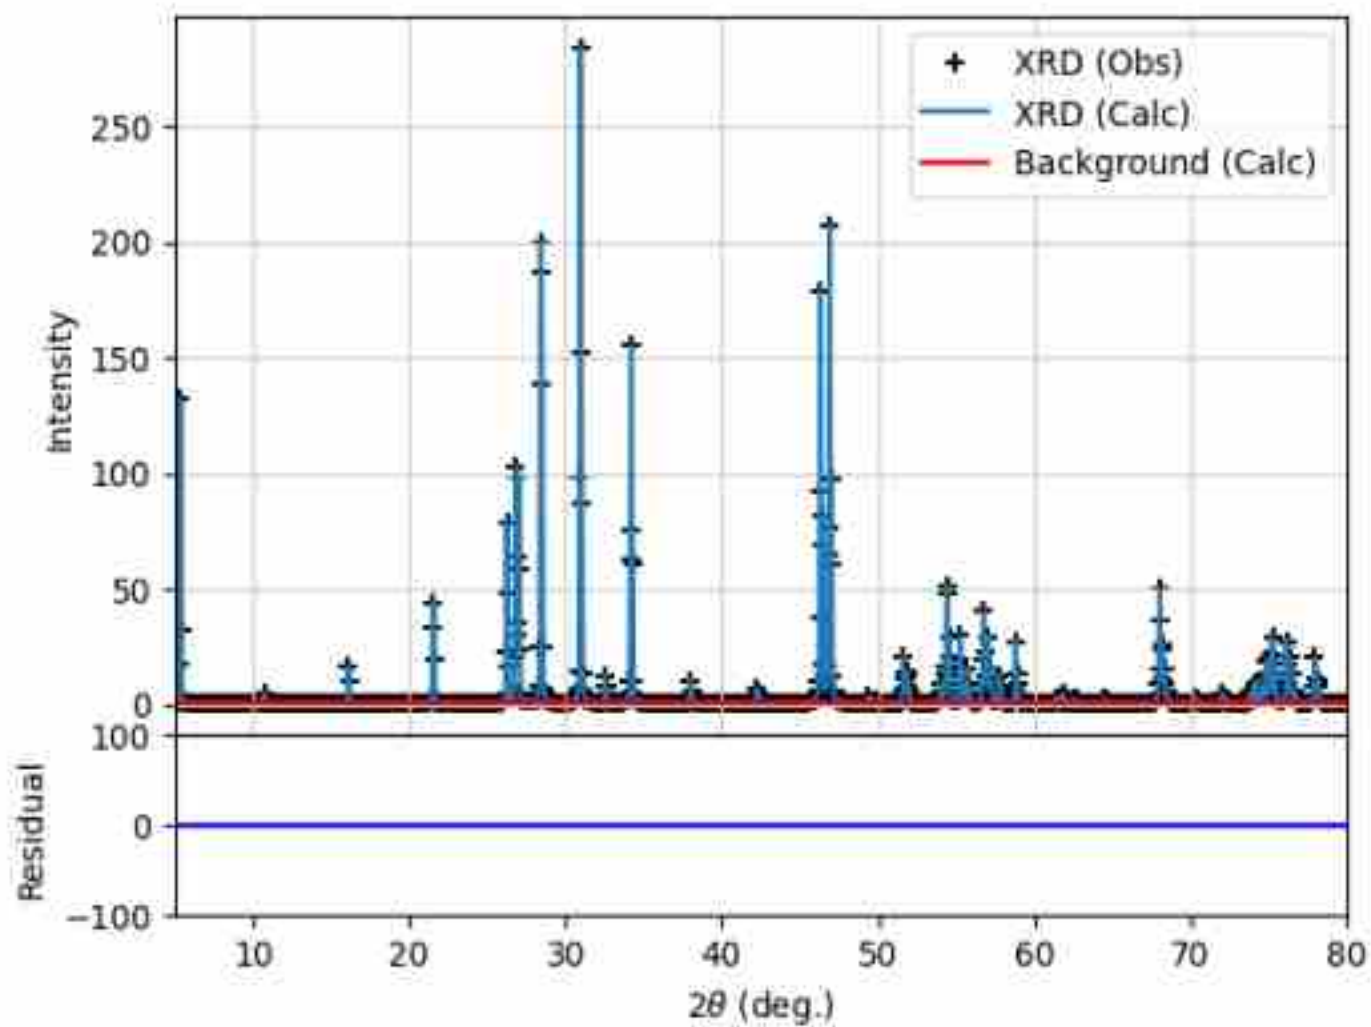

| RMSE before RR | Rwp     | RMSE after RR |
|----------------|---------|---------------|
| 0.059          | 0.00229 | 0.00045       |

# Na<sub>3</sub>Mg<sub>1</sub>P<sub>2</sub>H<sub>1</sub>O<sub>8</sub>

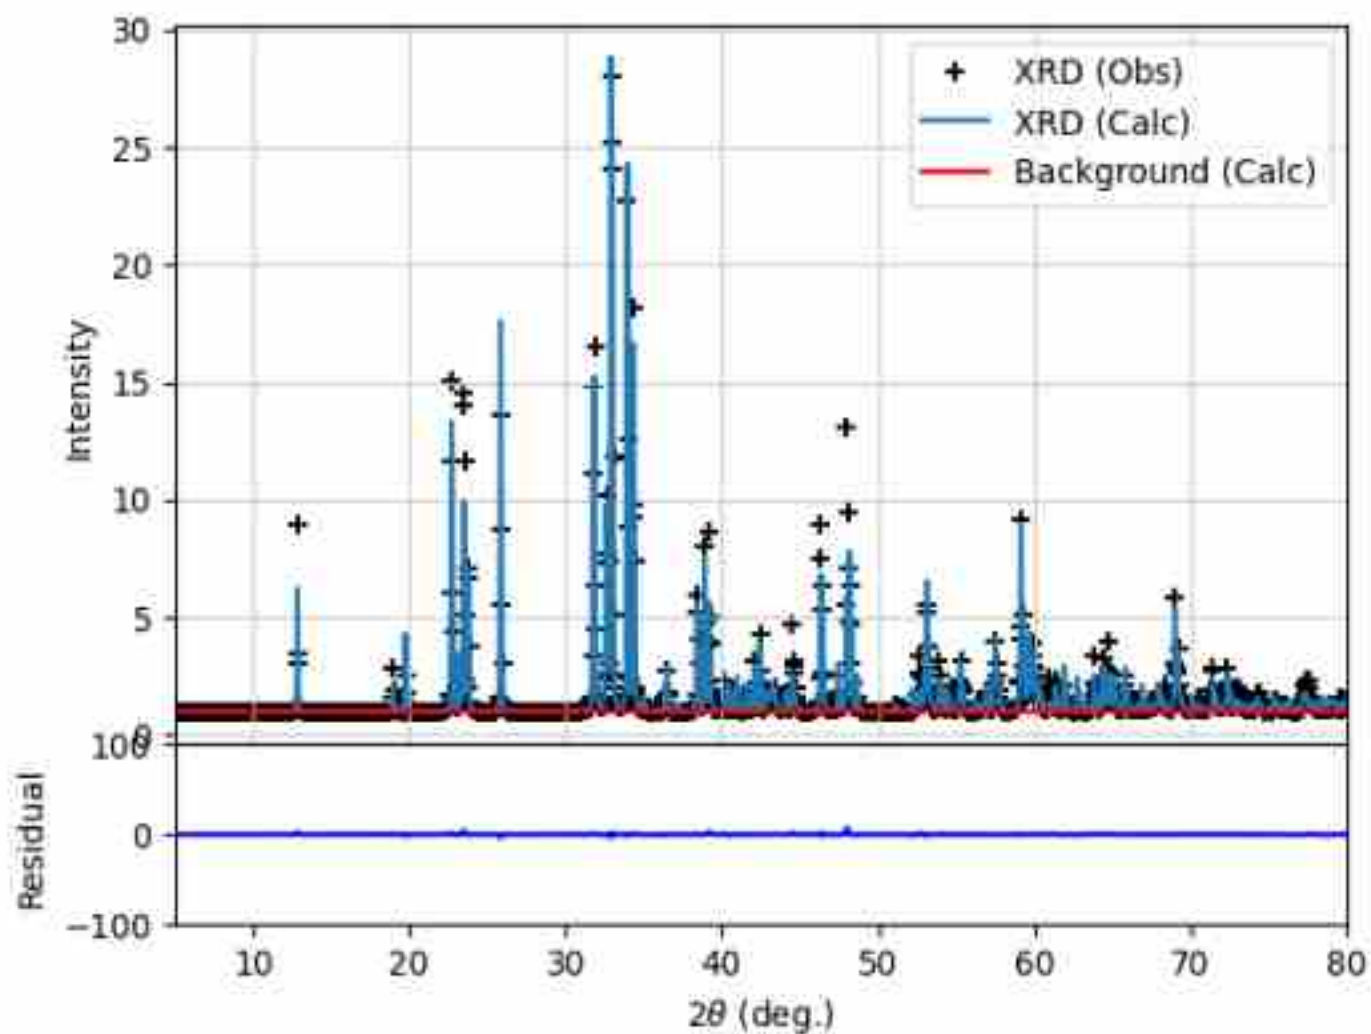

| RMSE before RR | Rwp      | RMSE after RR |
|----------------|----------|---------------|
| 0.059          | 15.10153 | 0.30891       |

# Nb<sub>4</sub>Pb<sub>3</sub>O<sub>13</sub>

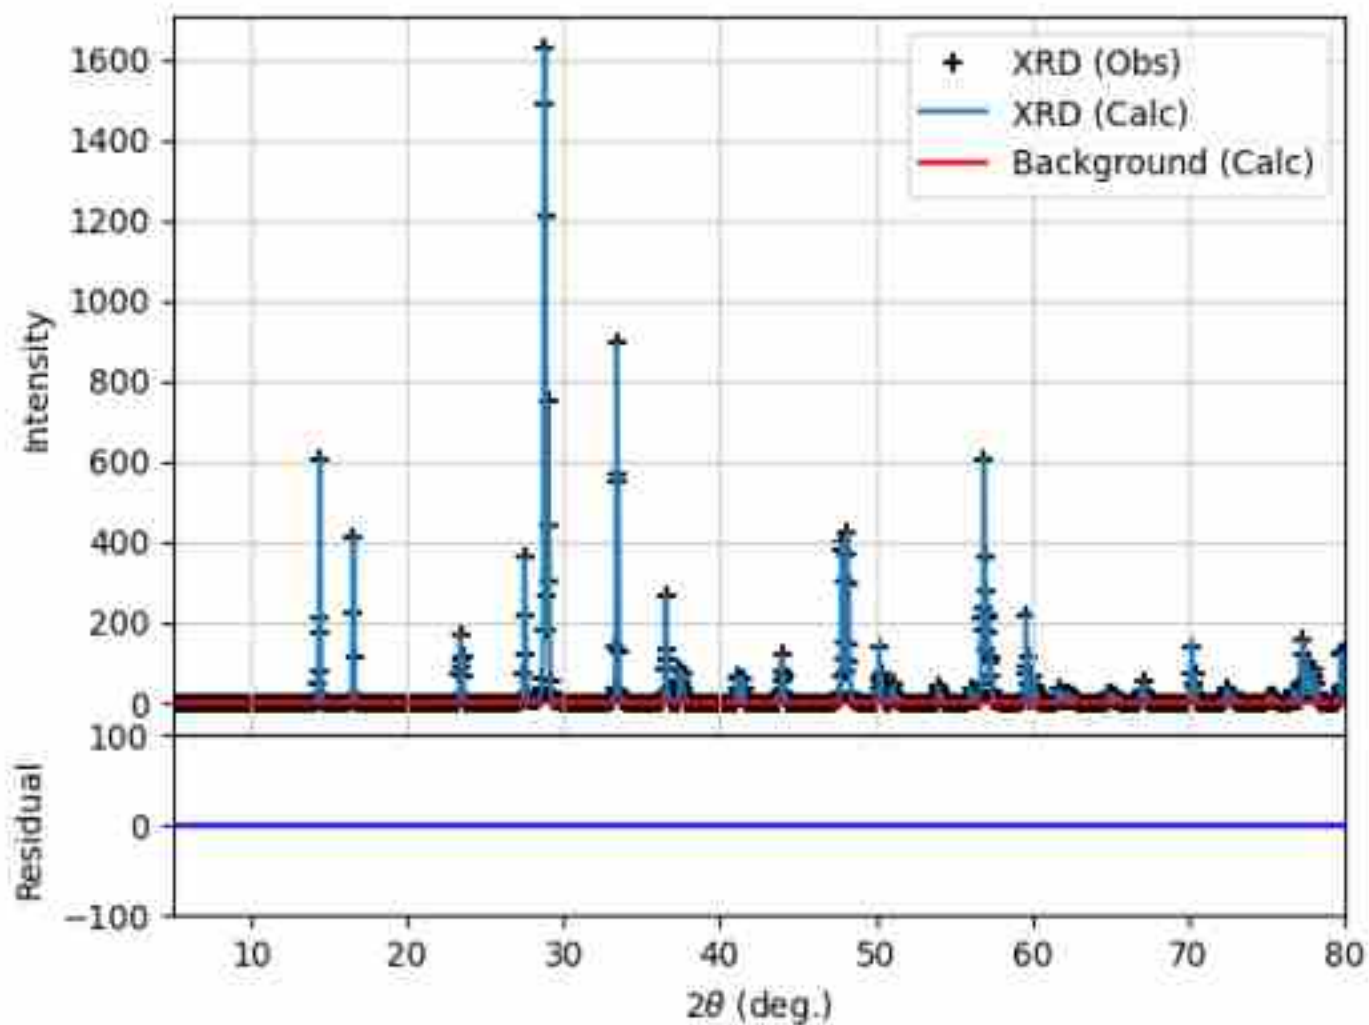

| RMSE before RR | Rwp     | RMSE after RR |
|----------------|---------|---------------|
| 0.059          | 0.00333 | 0.0013        |



# P2H8I2

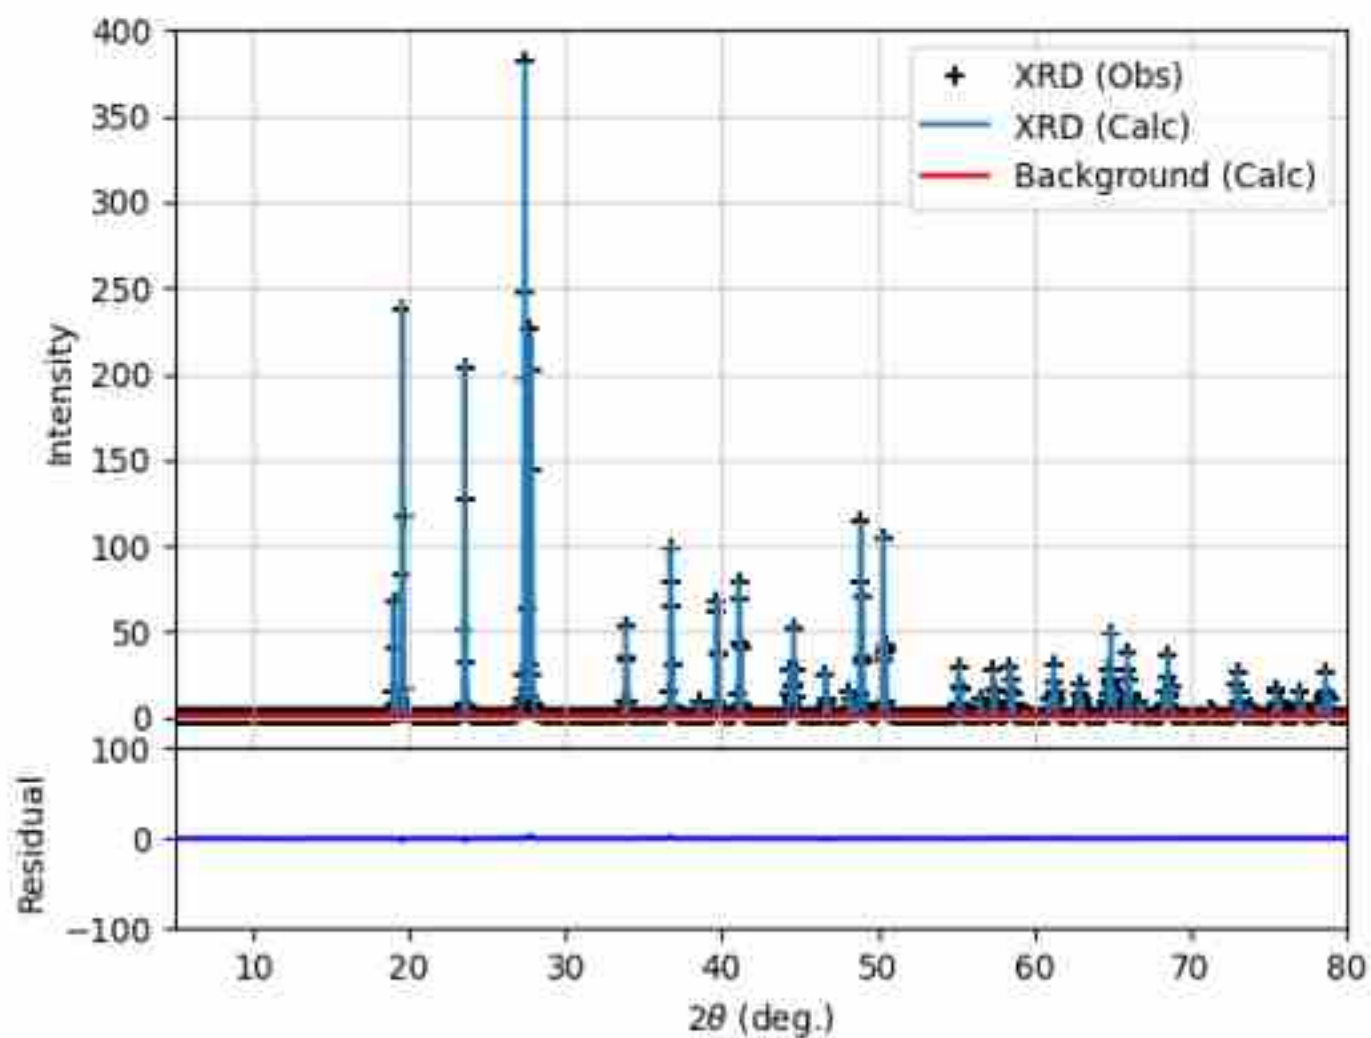

| RMSE before RR | Rwp     | RMSE after RR |
|----------------|---------|---------------|
| 0.059          | 1.34015 | 0.44793       |

# Rb6Ge8Au2

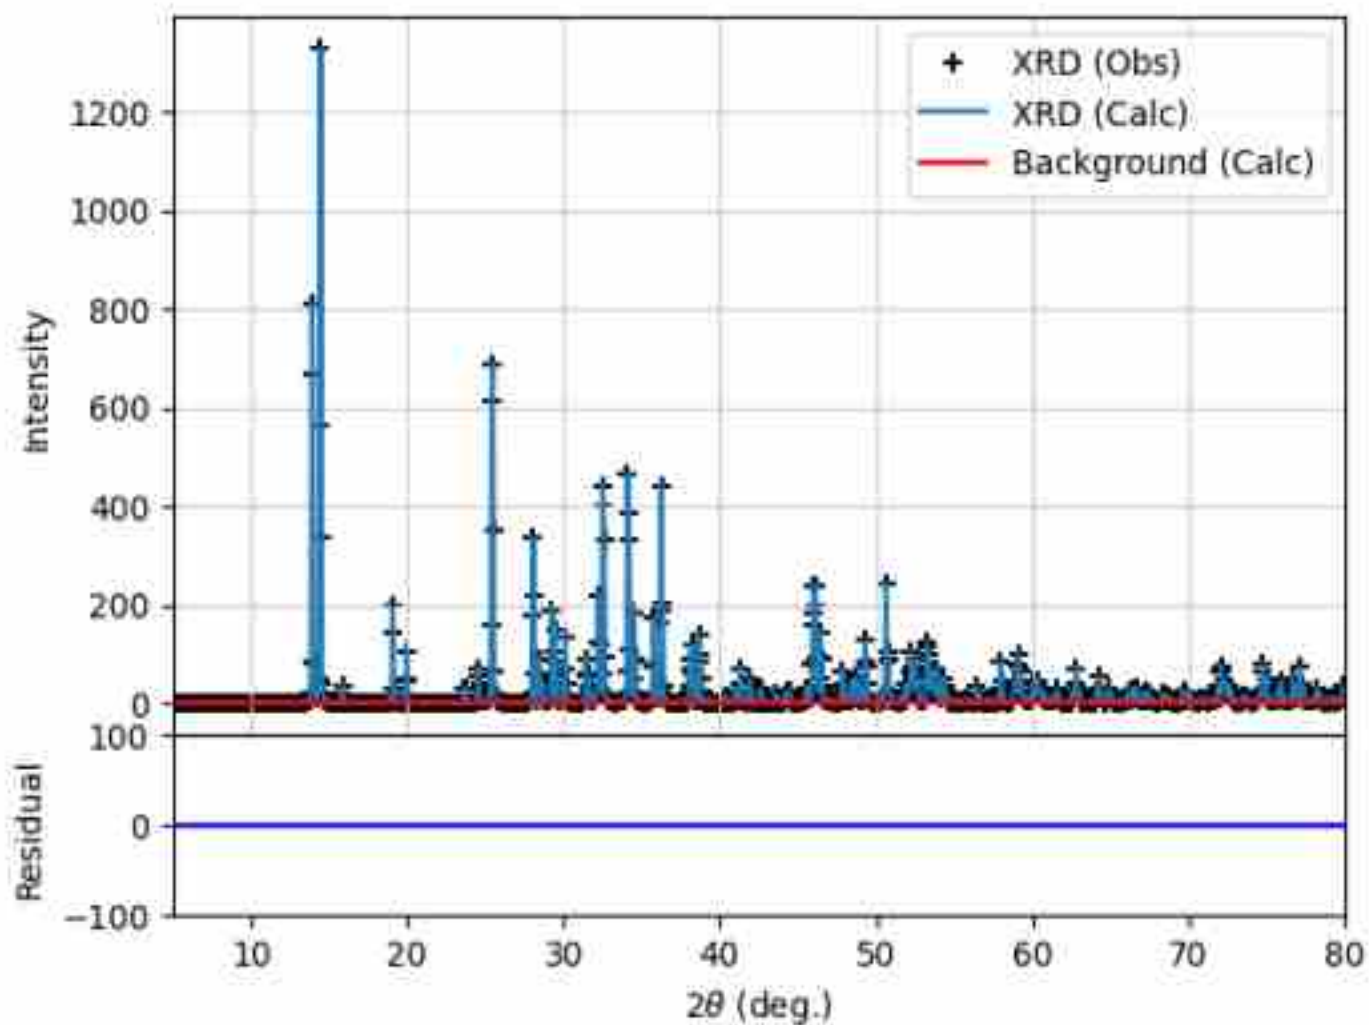

| RMSE before RR | Rwp     | RMSE after RR |
|----------------|---------|---------------|
| 0.059          | 0.00404 | 0.00037       |

# Sr1Cu2Ge1S4

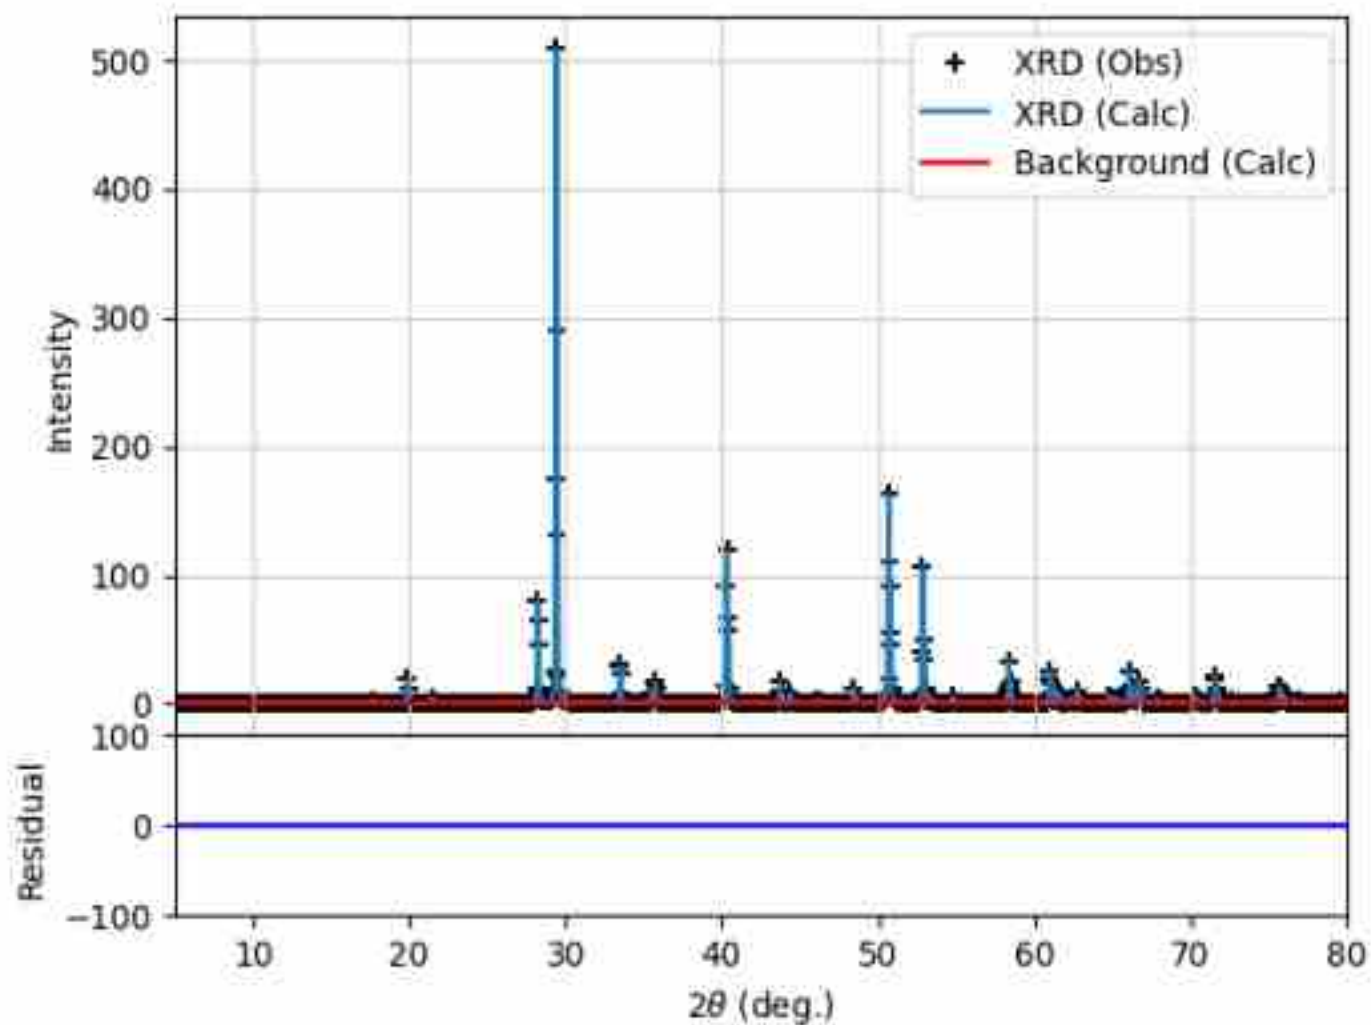

| RMSE before RR | Rwp     | RMSE after RR |
|----------------|---------|---------------|
| 0.059          | 0.00369 | 0.00067       |

# Te6Mo4Se2

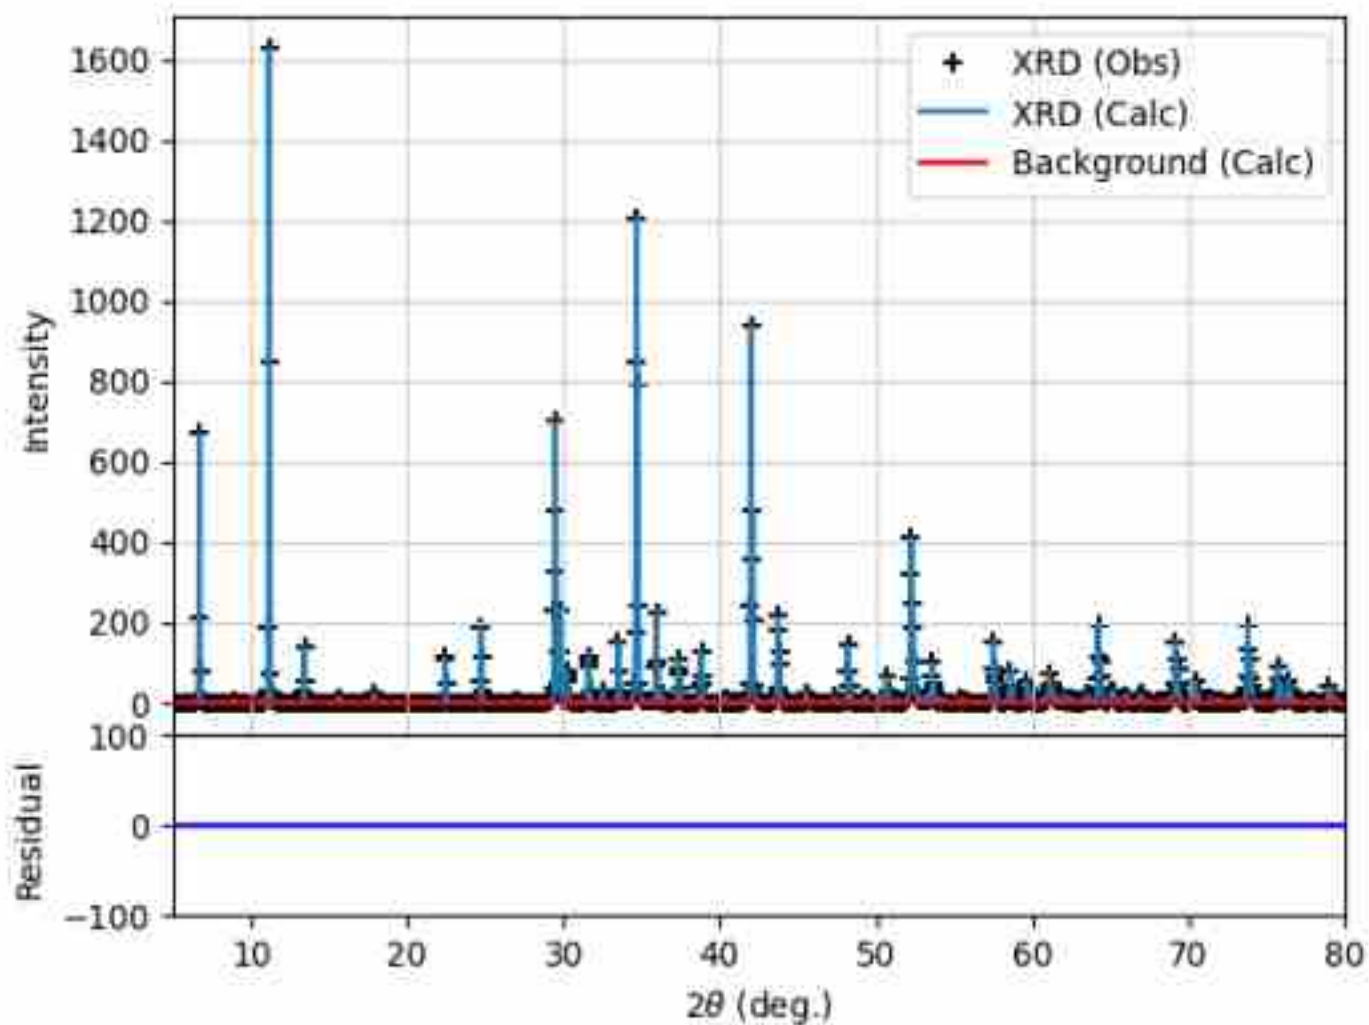

| RMSE before RR | Rwp     | RMSE after RR |
|----------------|---------|---------------|
| 0.059          | 0.00373 | 0.0003        |

# Tl4Cd4Sb4

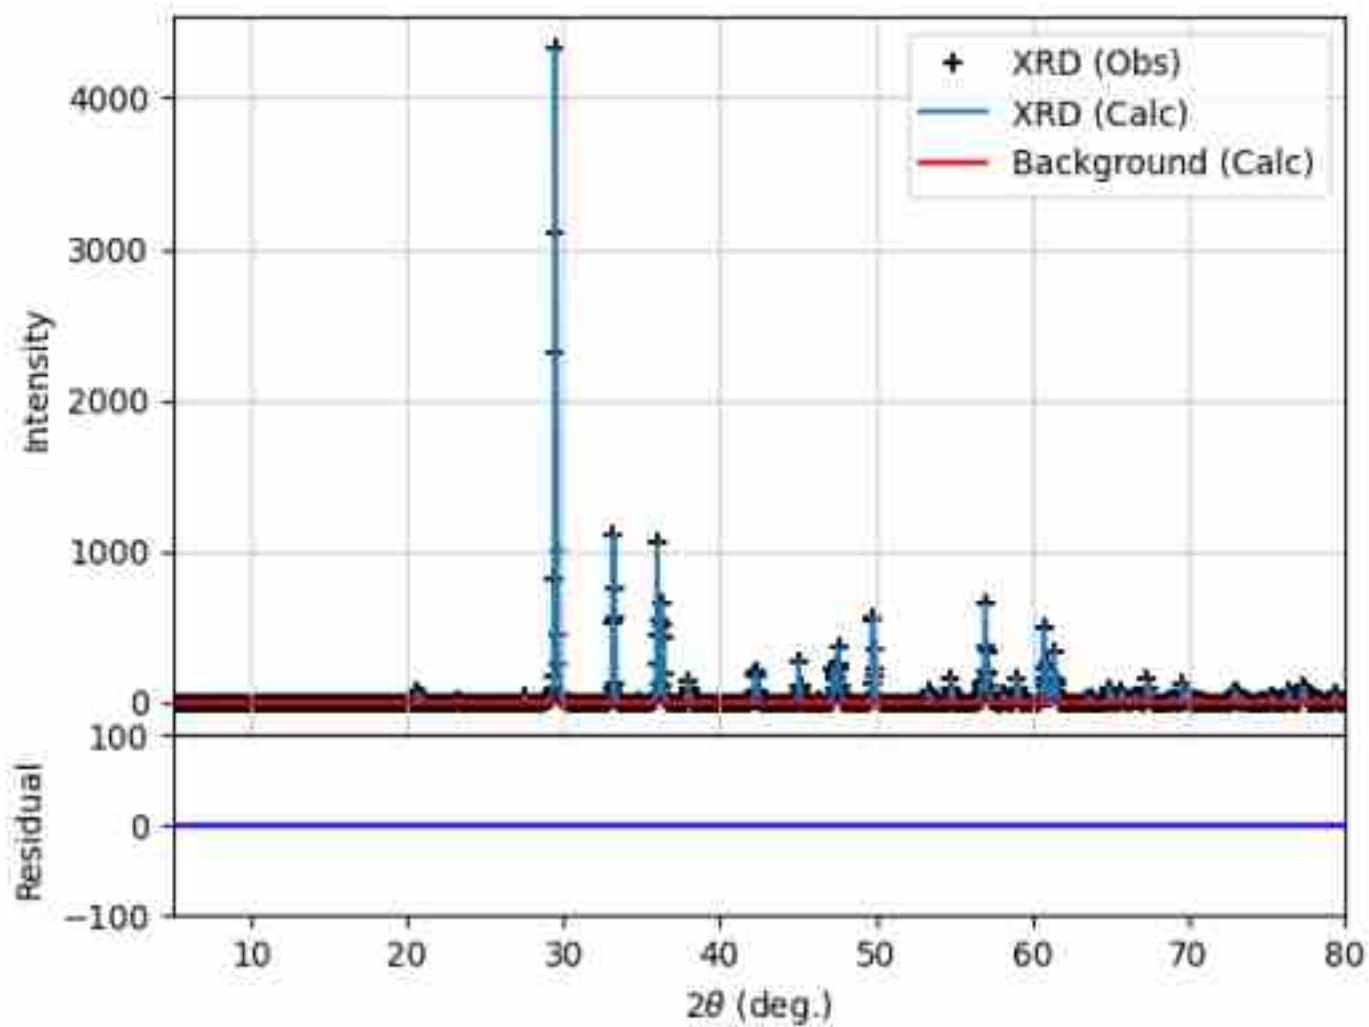

| RMSE before RR | Rwp     | RMSE after RR |
|----------------|---------|---------------|
| 0.059          | 0.00354 | 0.00018       |

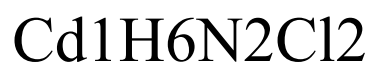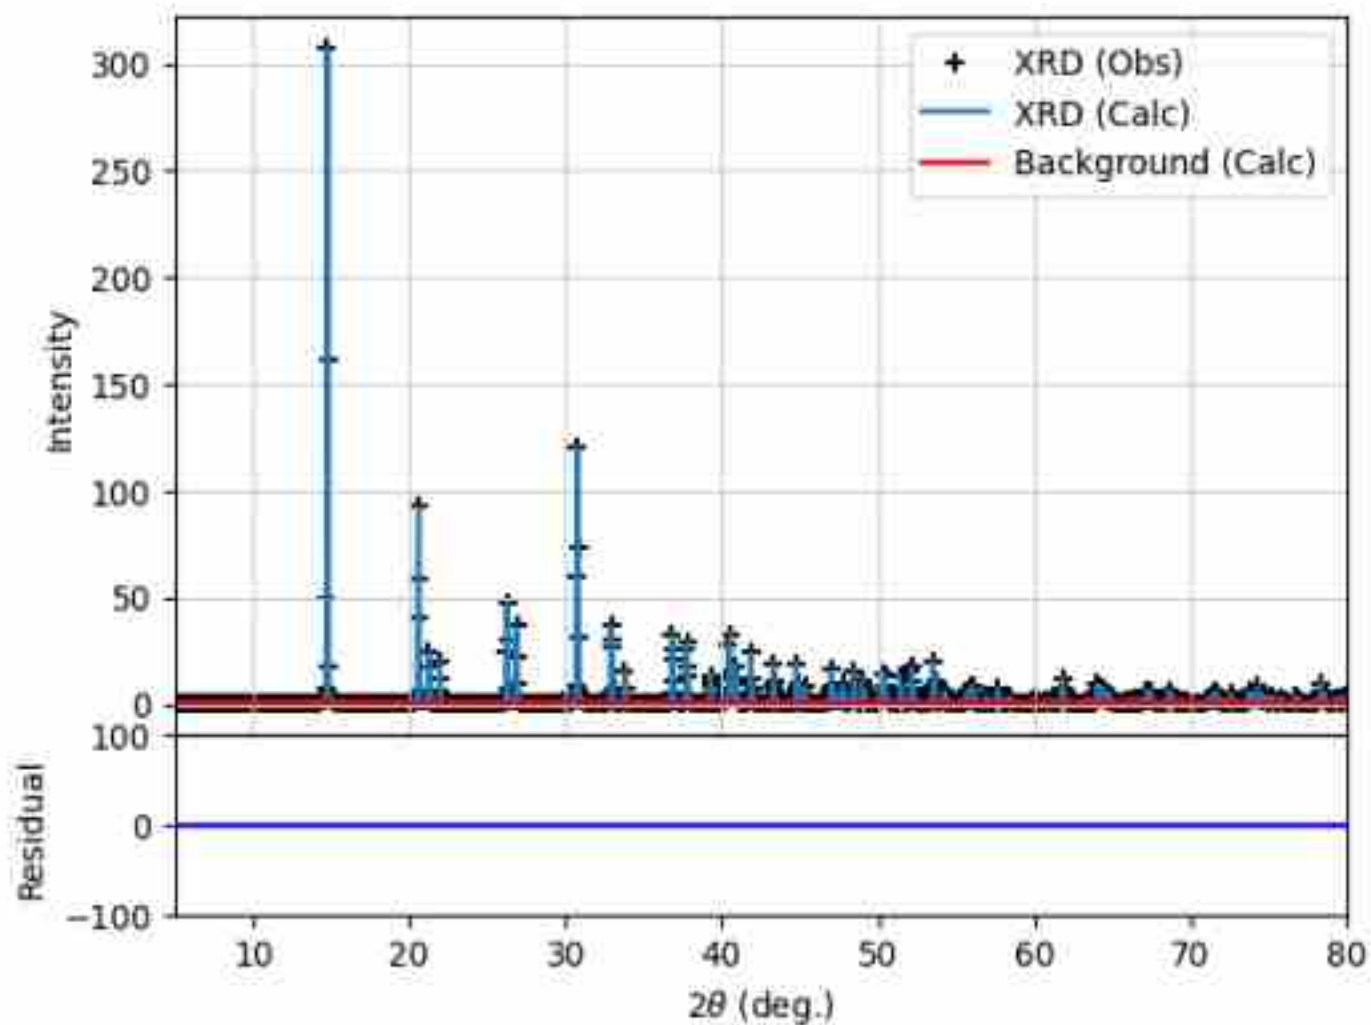

| RMSE before RR | Rwp     | RMSE after RR |
|----------------|---------|---------------|
| 0.061          | 0.03796 | 0.07466       |

# Li<sub>2</sub>H<sub>6</sub>O<sub>4</sub>

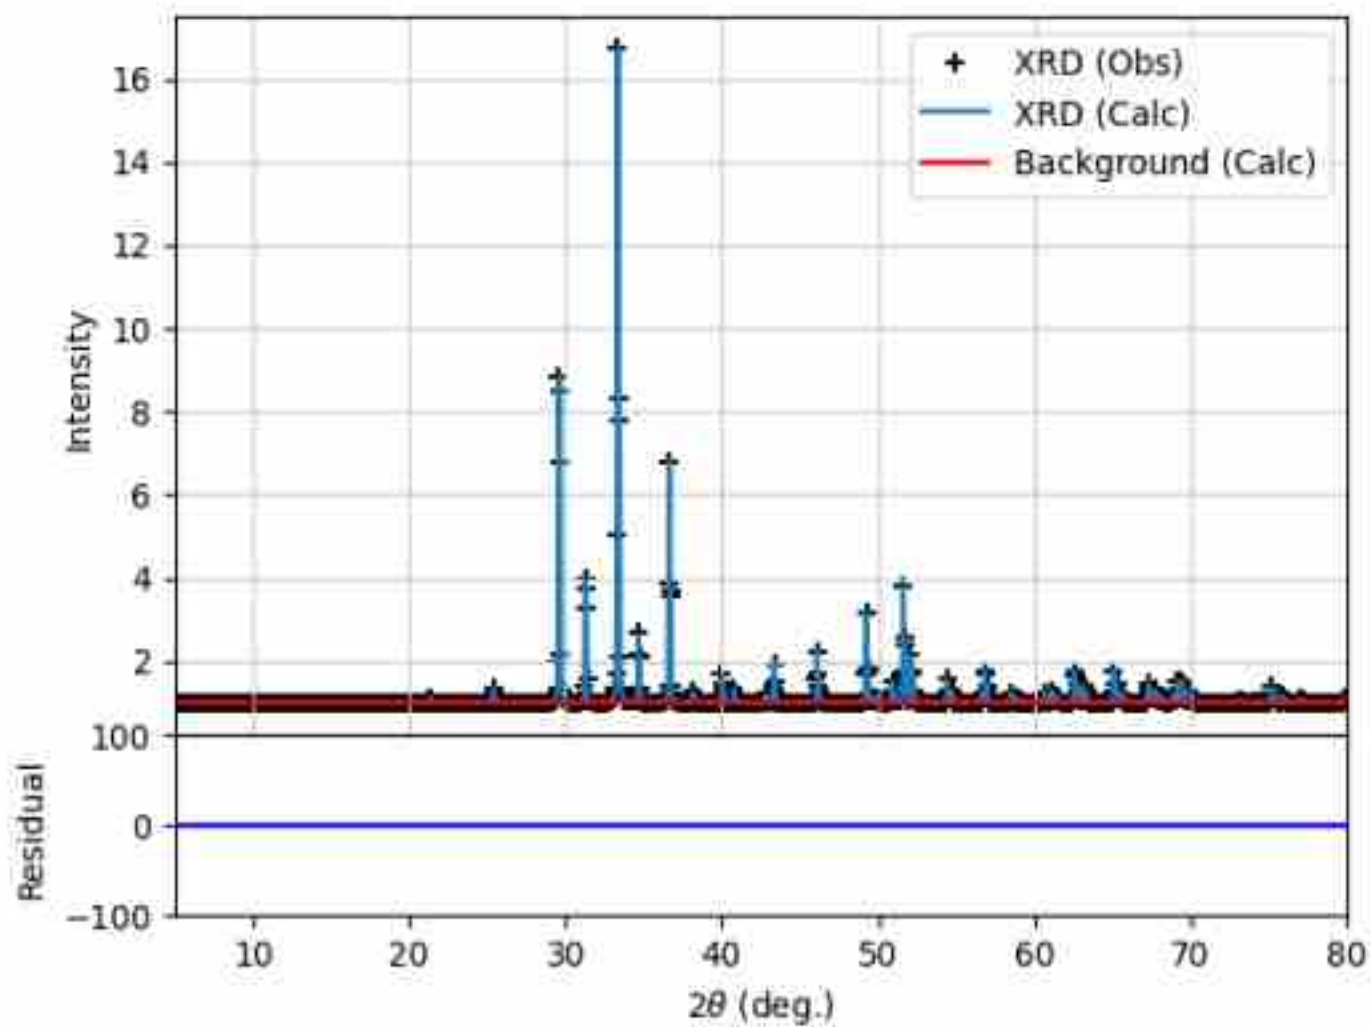

| RMSE before RR | Rwp     | RMSE after RR |
|----------------|---------|---------------|
| 0.061          | 0.00058 | 0.00202       |

# Li<sub>3</sub>Ca<sub>3</sub>Sn<sub>3</sub>

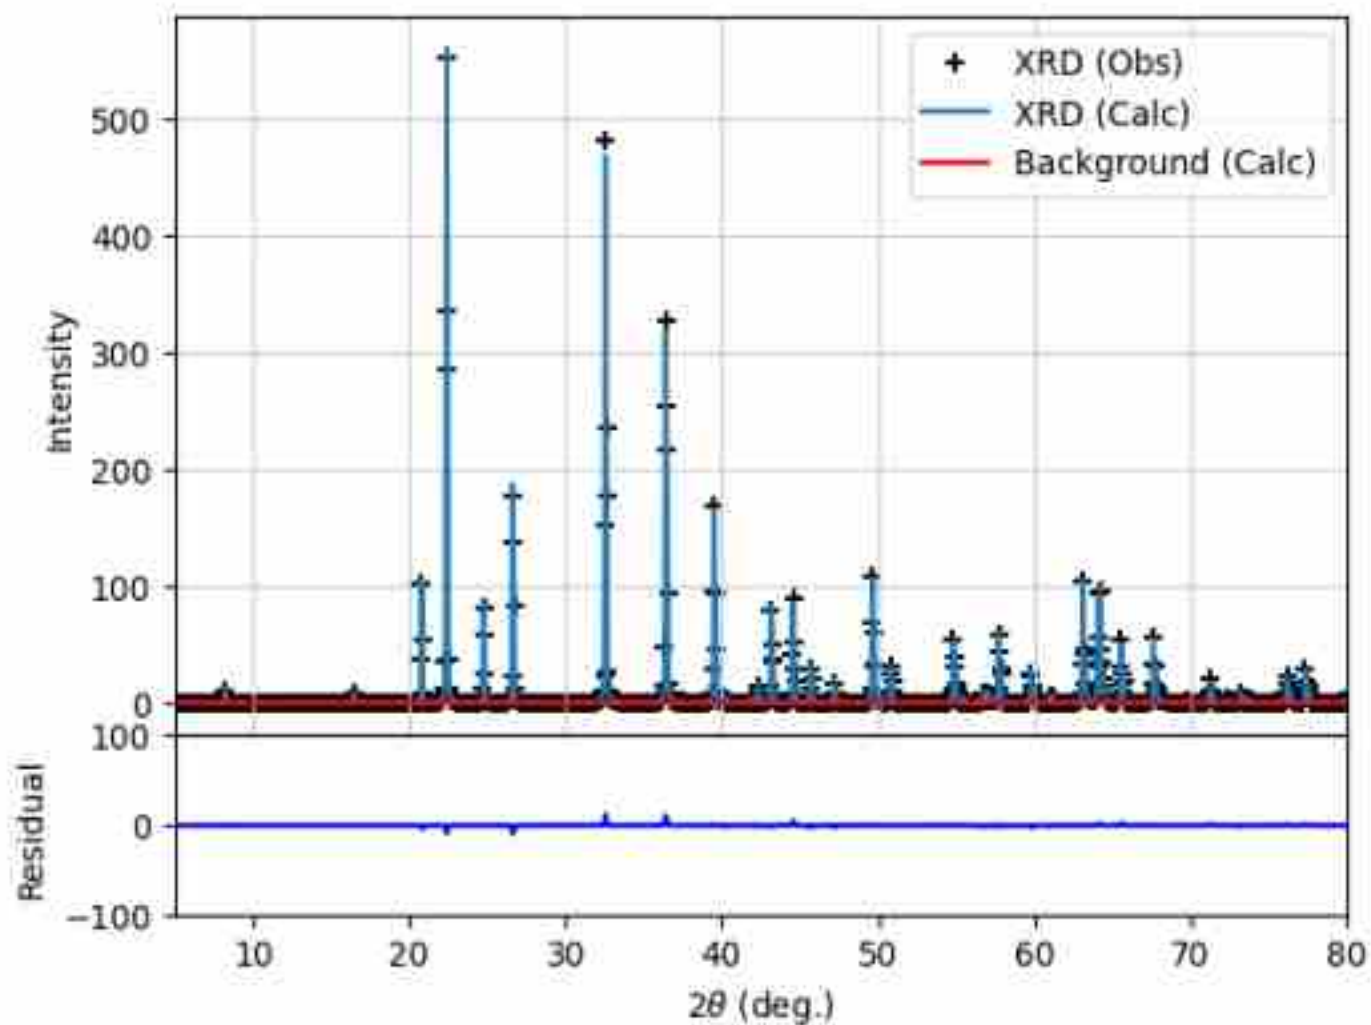

| RMSE before RR | Rwp     | RMSE after RR |
|----------------|---------|---------------|
| 0.061          | 3.31461 | 0.22874       |



# Mn<sub>2</sub>Se<sub>2</sub>

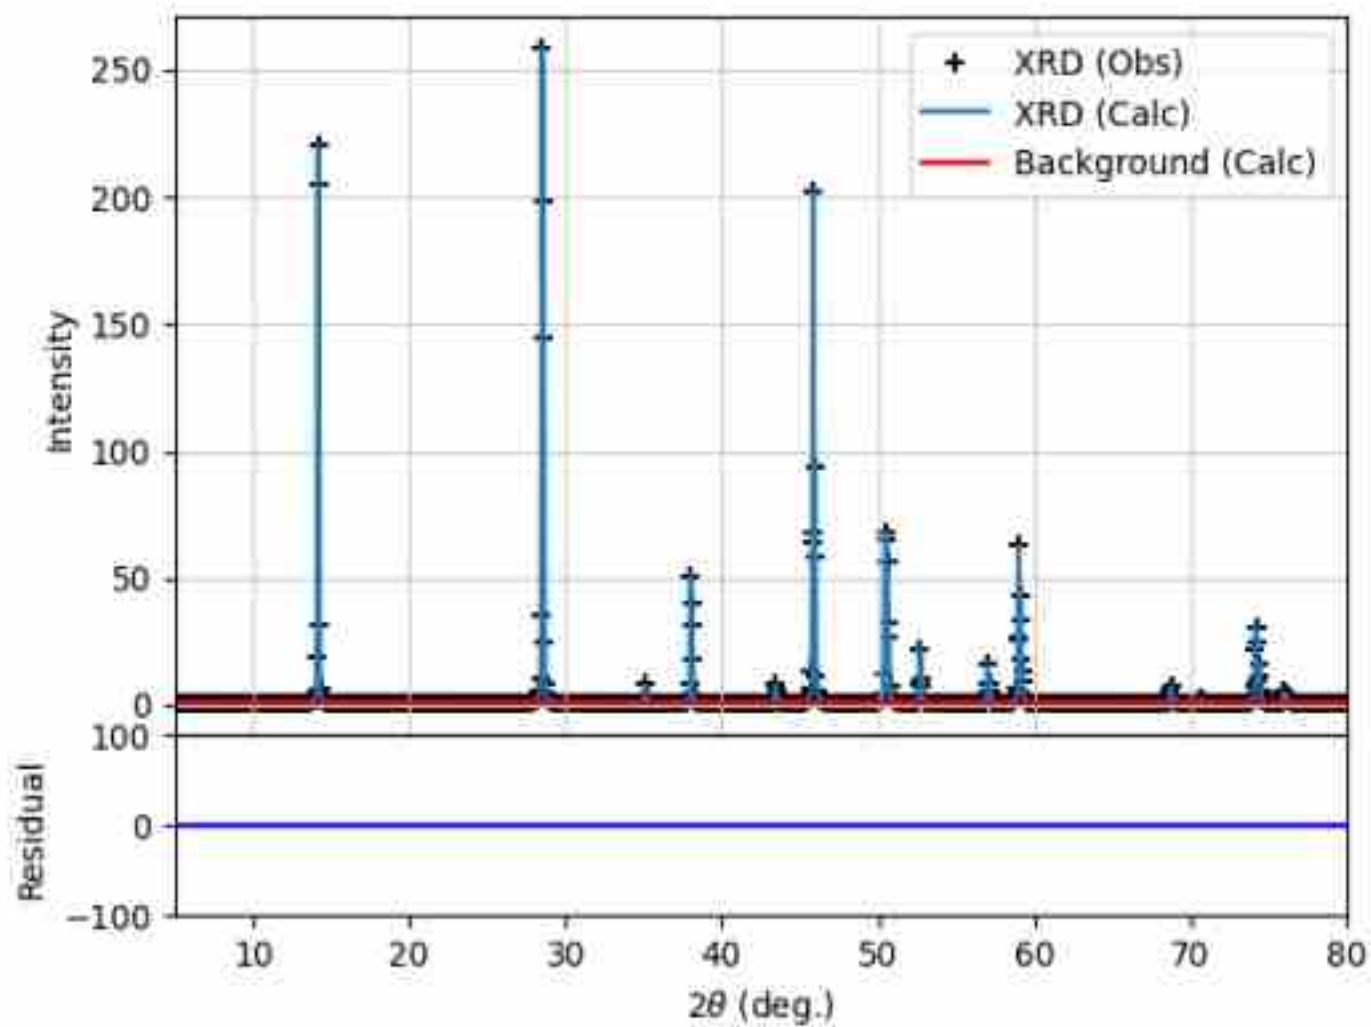

| RMSE before RR | Rwp     | RMSE after RR |
|----------------|---------|---------------|
| 0.061          | 0.00357 | 0.00049       |

# Na<sub>2</sub>U<sub>1</sub>F<sub>6</sub>

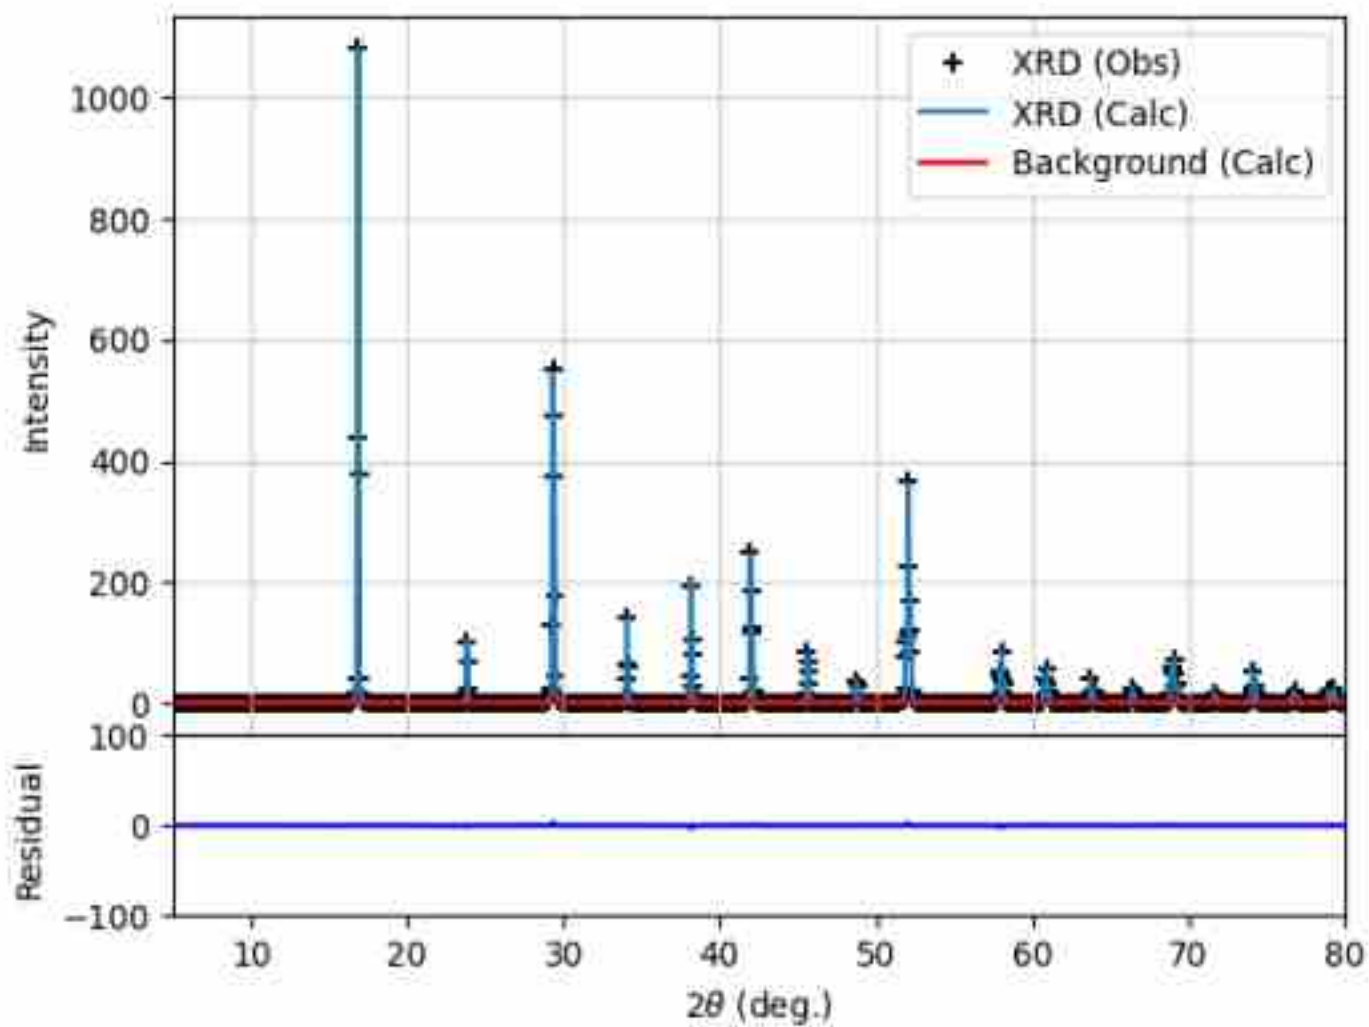

| RMSE before RR | Rwp     | RMSE after RR |
|----------------|---------|---------------|
| 0.061          | 0.71317 | 0.07114       |

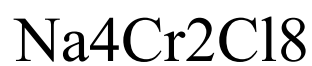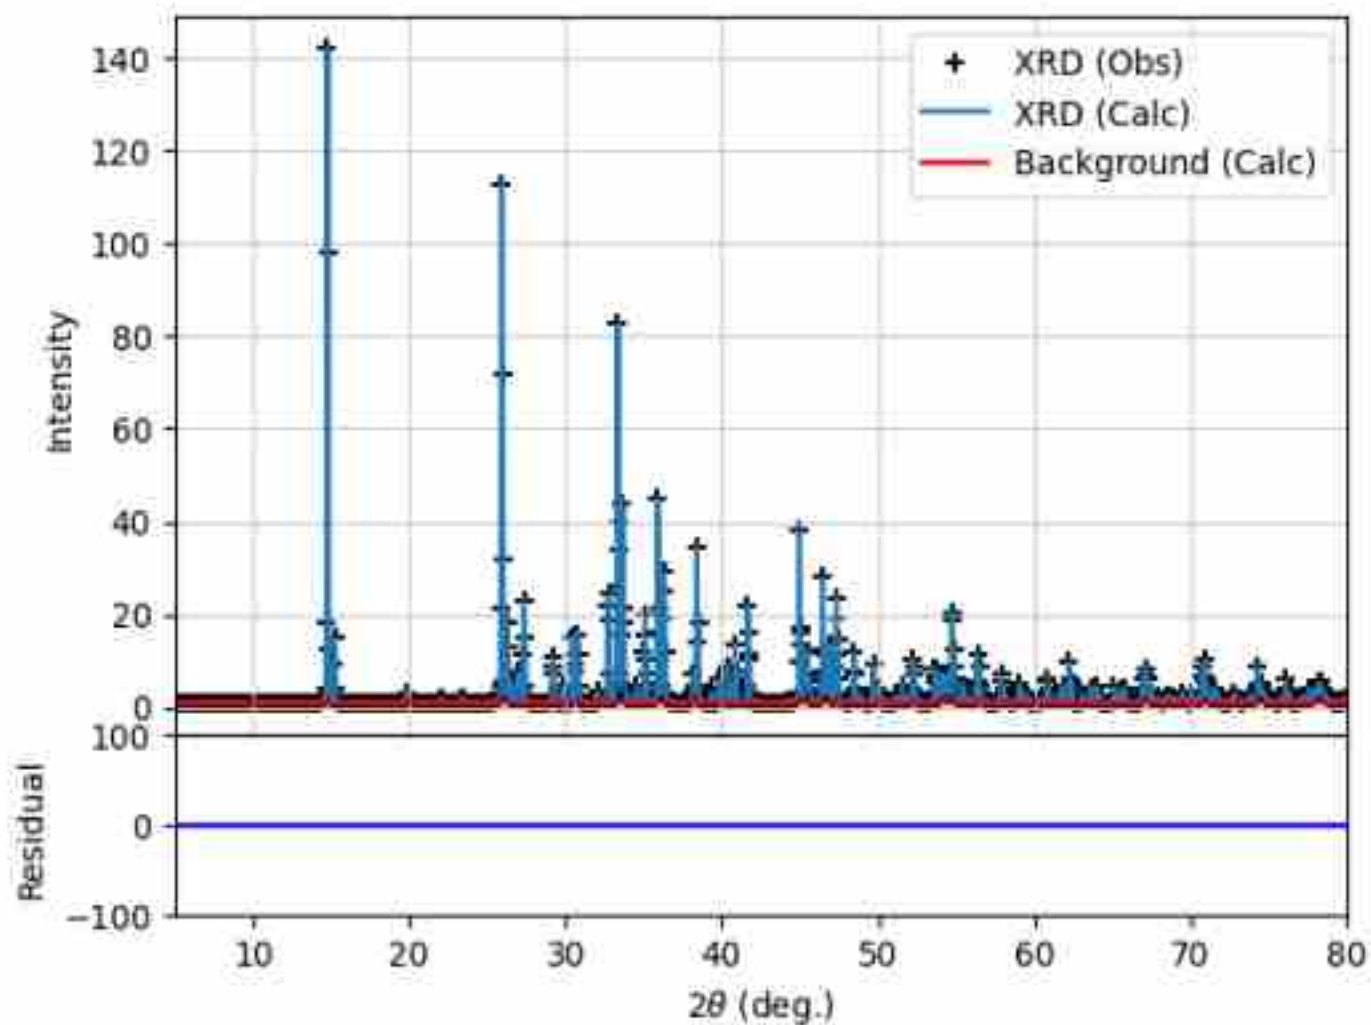

| RMSE before RR | Rwp     | RMSE after RR |
|----------------|---------|---------------|
| 0.061          | 0.00303 | 0.00028       |

# Sr<sub>2</sub>TaCr<sub>10</sub>O<sub>6</sub>

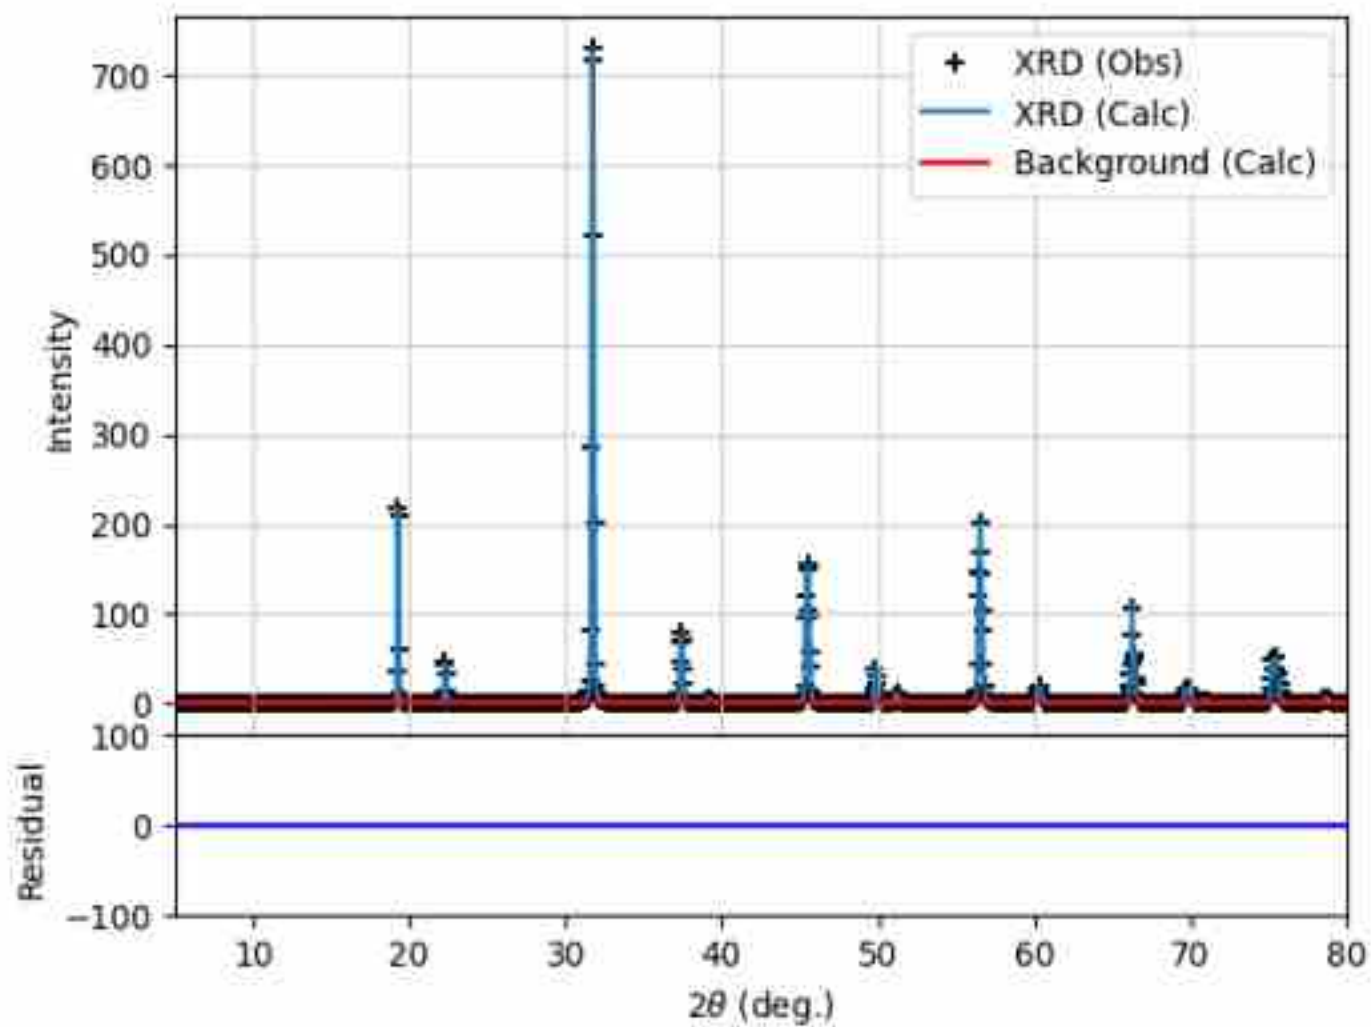

| RMSE before RR | Rwp     | RMSE after RR |
|----------------|---------|---------------|
| 0.061          | 0.00164 | 0.00082       |

# Yb<sub>4</sub>Ag<sub>4</sub>Sb<sub>4</sub>

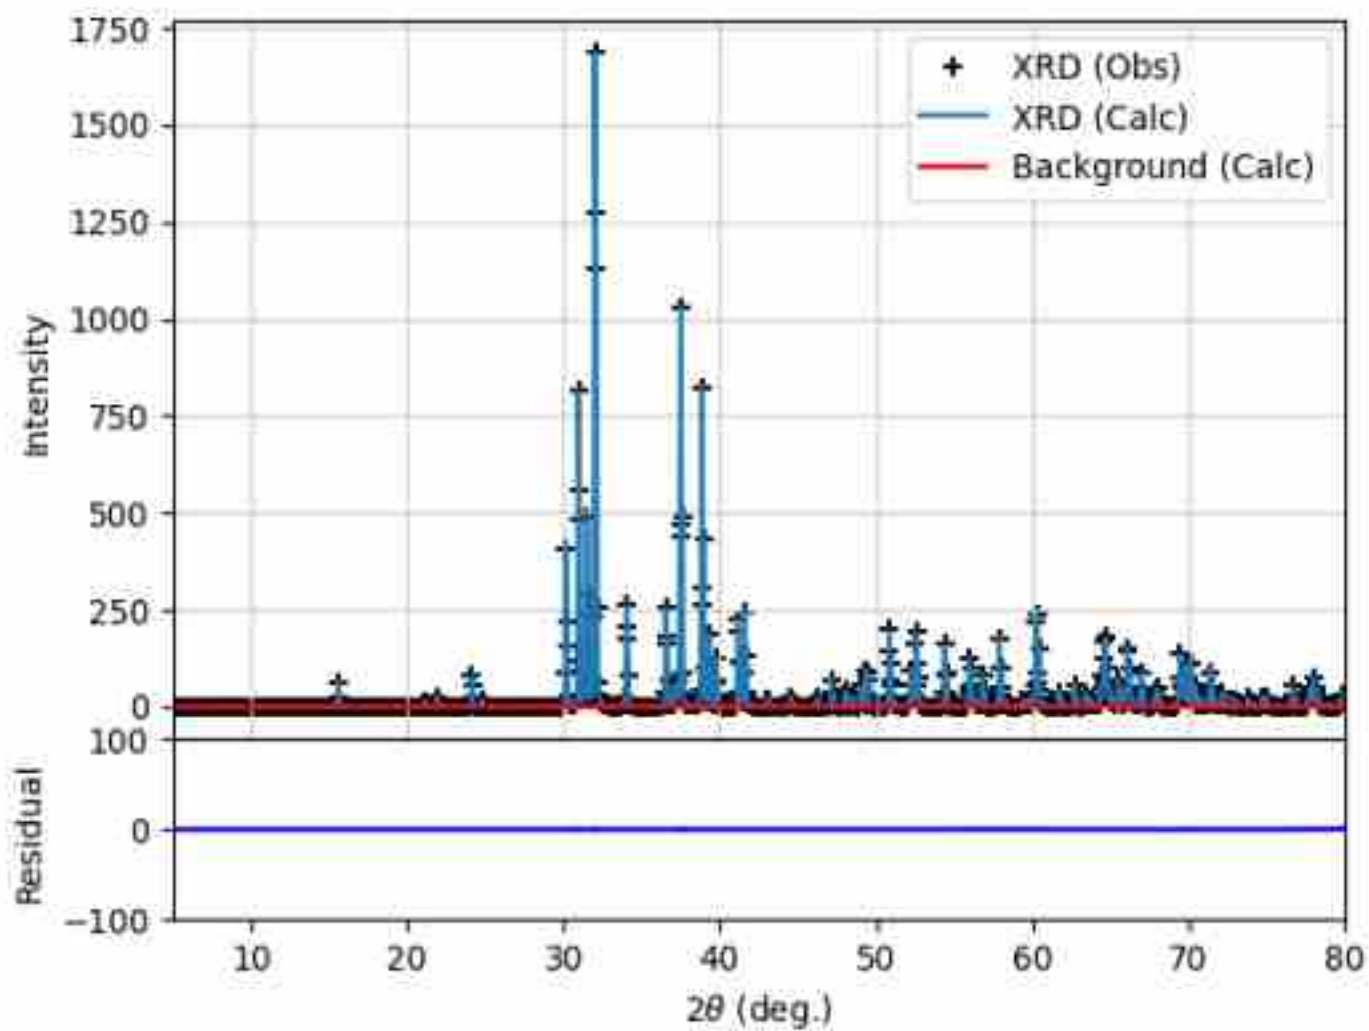

| RMSE before RR | Rwp     | RMSE after RR |
|----------------|---------|---------------|
| 0.061          | 0.48263 | 0.00432       |

# Ce<sub>2</sub>Al<sub>2</sub>O<sub>6</sub>

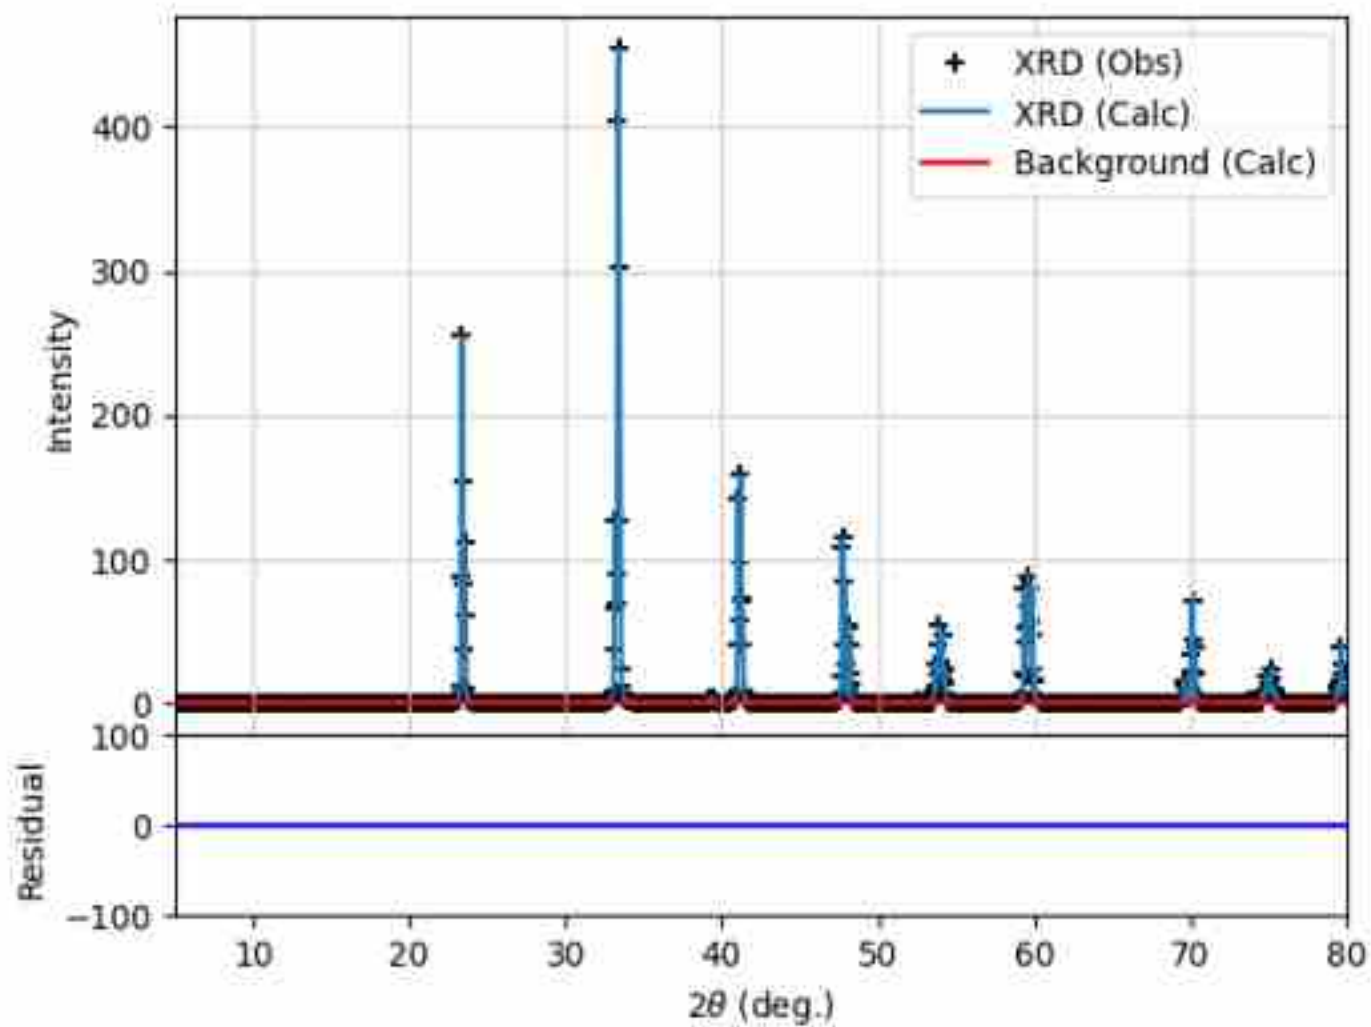

| RMSE before RR | Rwp     | RMSE after RR |
|----------------|---------|---------------|
| 0.062          | 0.00312 | 0.00182       |

# Cr<sub>4</sub>P<sub>2</sub>O<sub>10</sub>

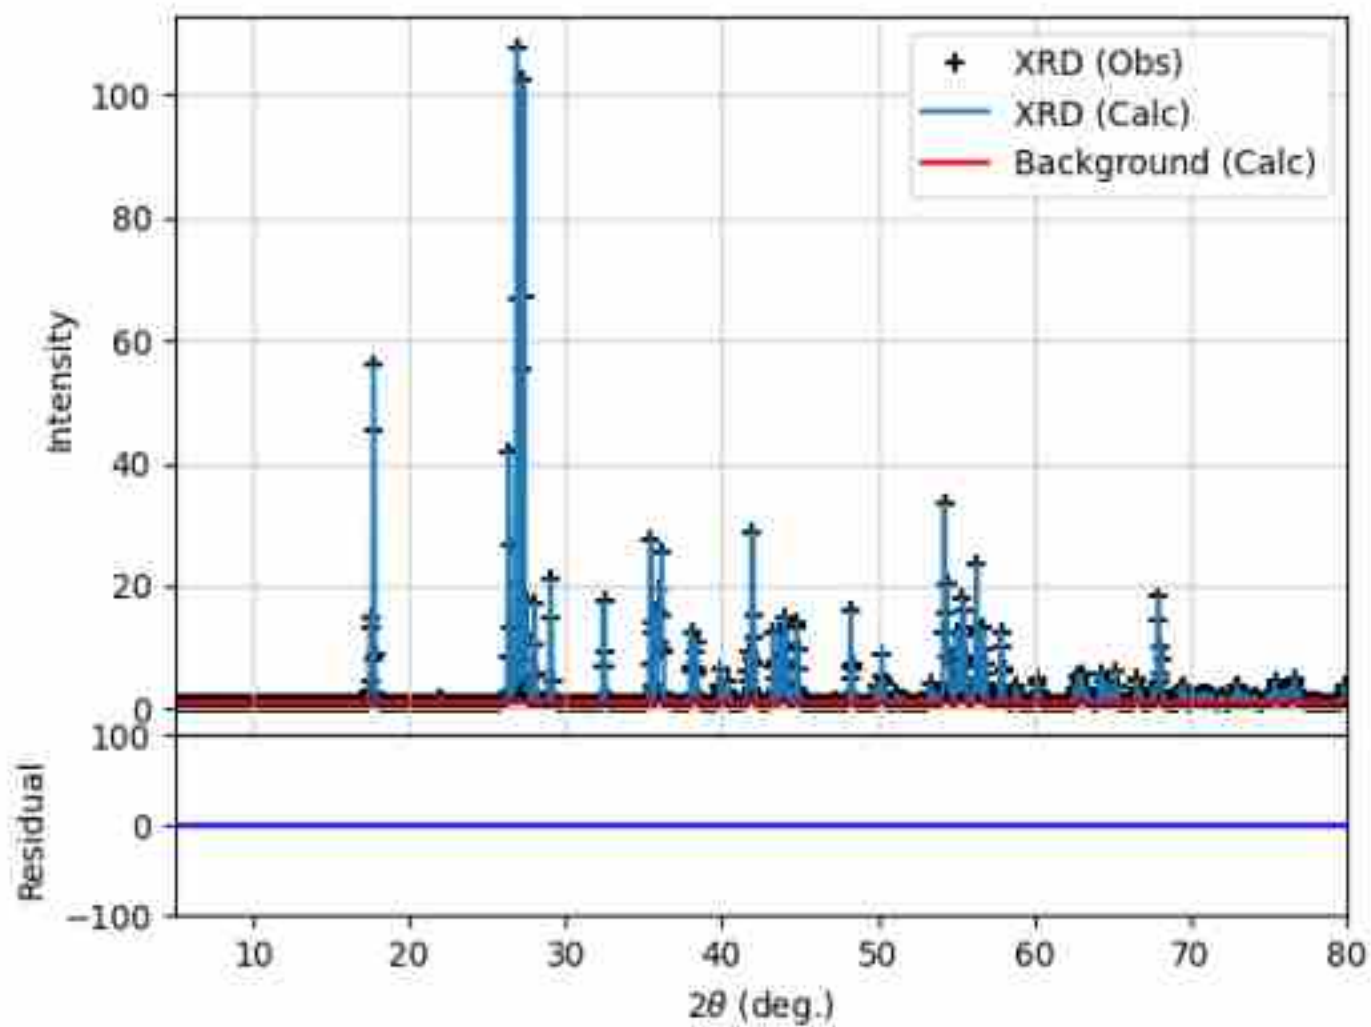

| RMSE before RR | Rwp     | RMSE after RR |
|----------------|---------|---------------|
| 0.062          | 0.00143 | 0.00046       |

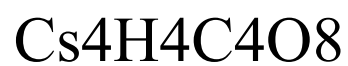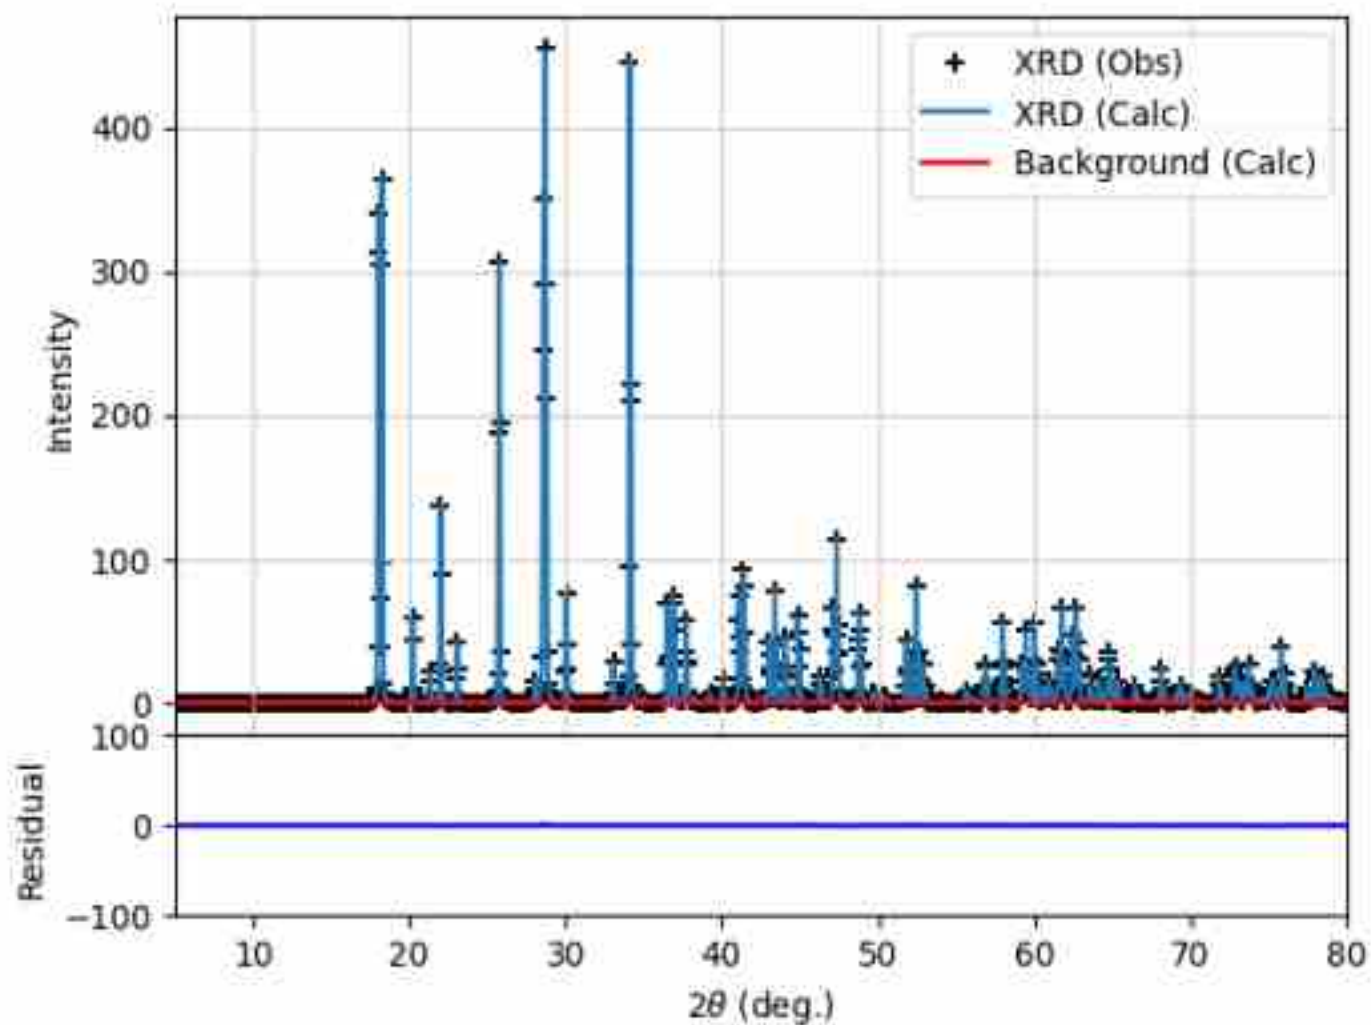

| RMSE before RR | Rwp     | RMSE after RR |
|----------------|---------|---------------|
| 0.062          | 0.58873 | 0.15058       |



# K<sub>2</sub>Pr<sub>2</sub>Si<sub>2</sub>Se<sub>8</sub>

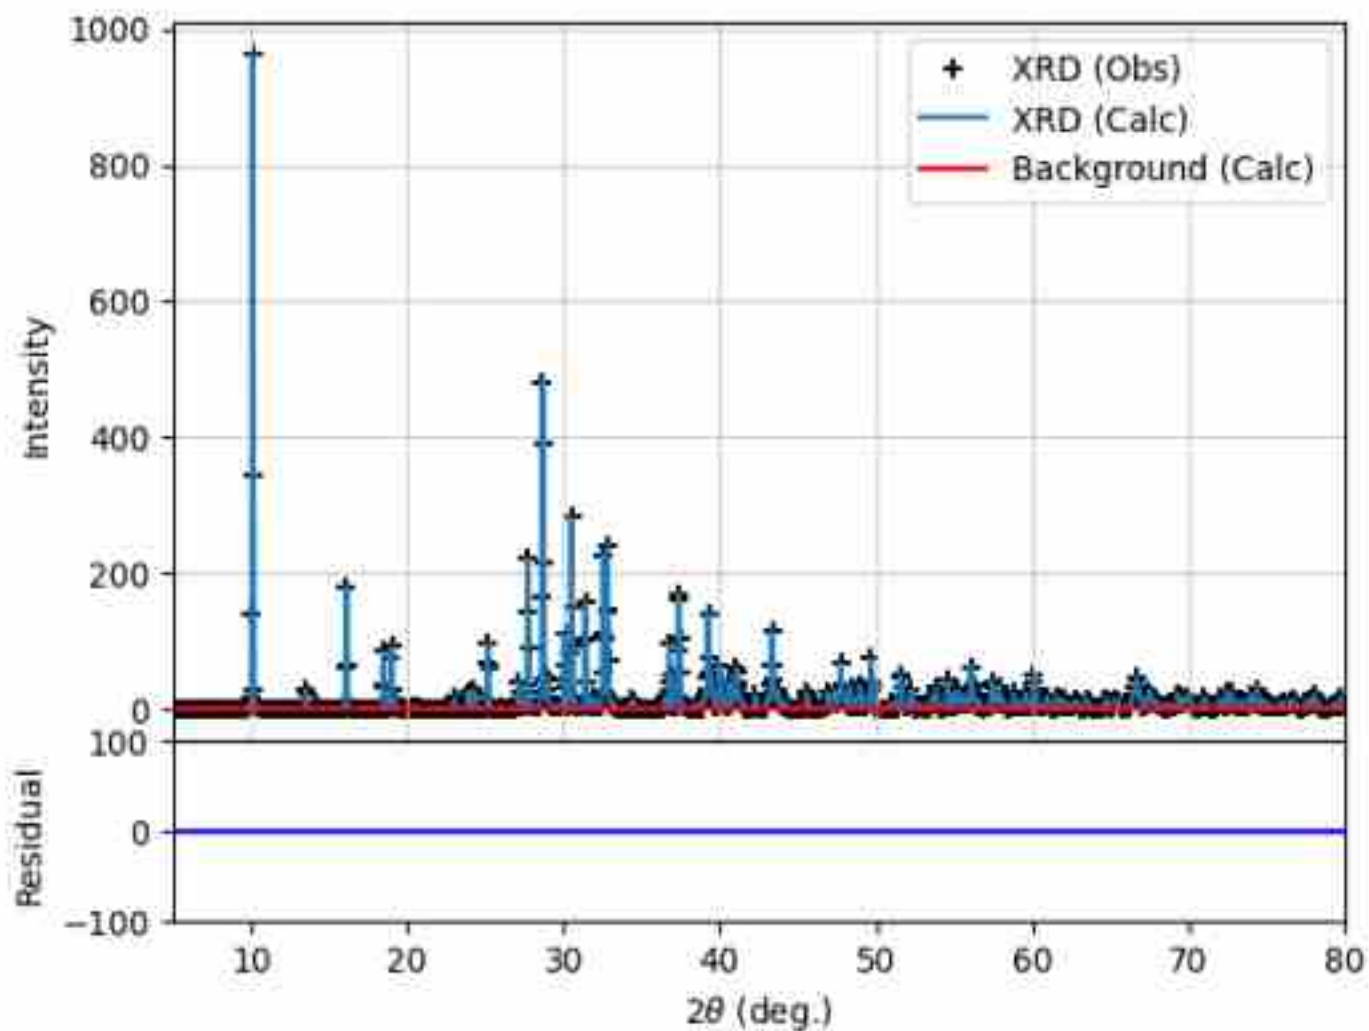

| RMSE before RR | Rwp    | RMSE after RR |
|----------------|--------|---------------|
| 0.062          | 0.0034 | 0.0003        |

# K4Ge2Se6

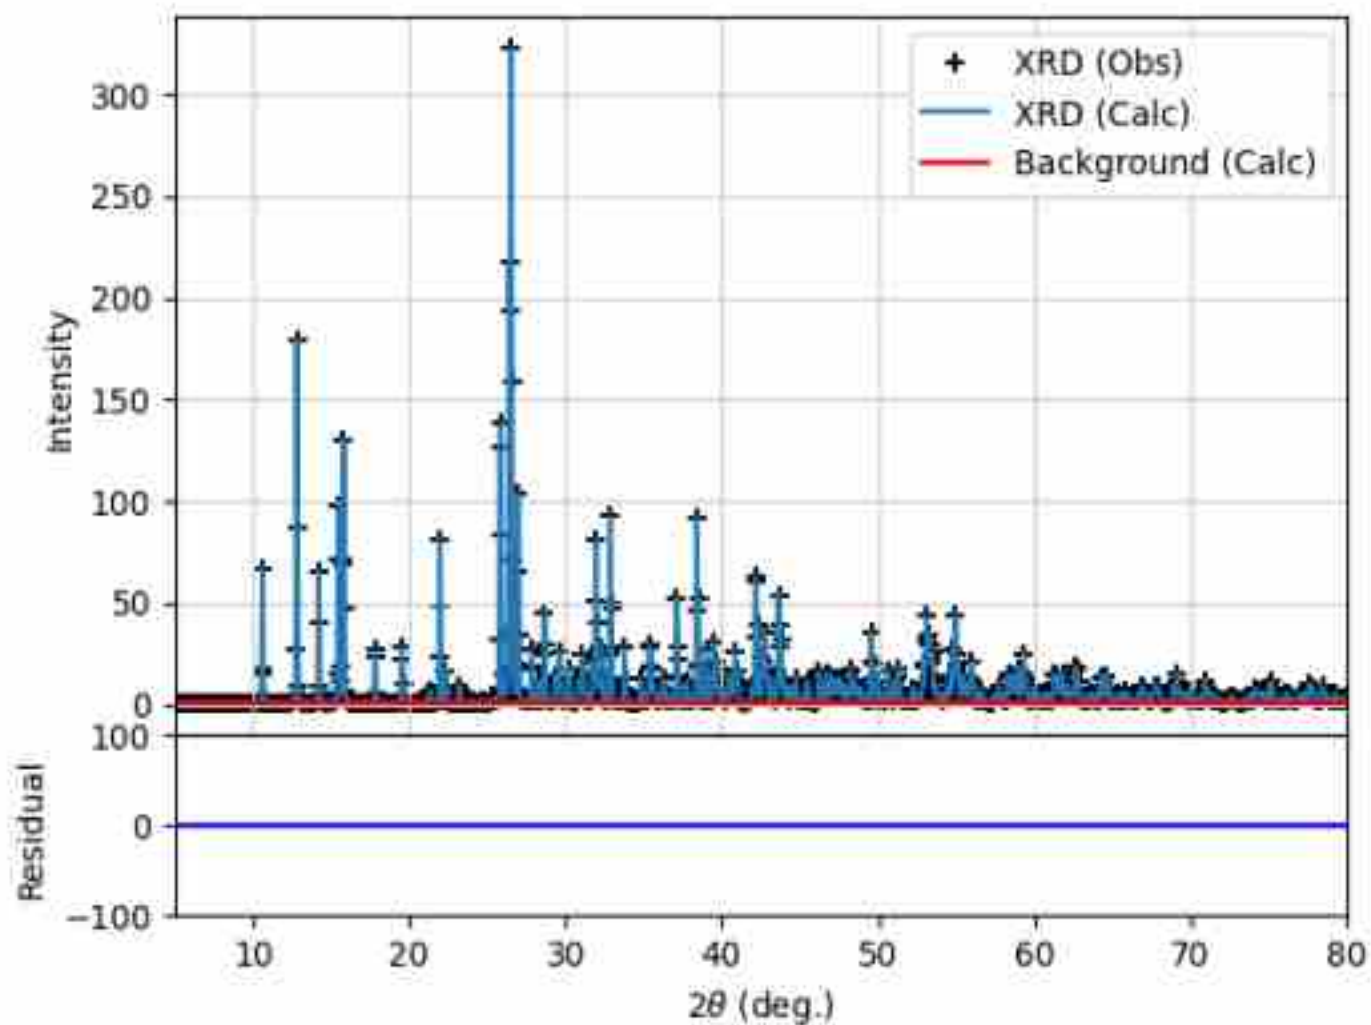

| RMSE before RR | Rwp     | RMSE after RR |
|----------------|---------|---------------|
| 0.062          | 0.00154 | 0.00033       |

# Li2V2F12

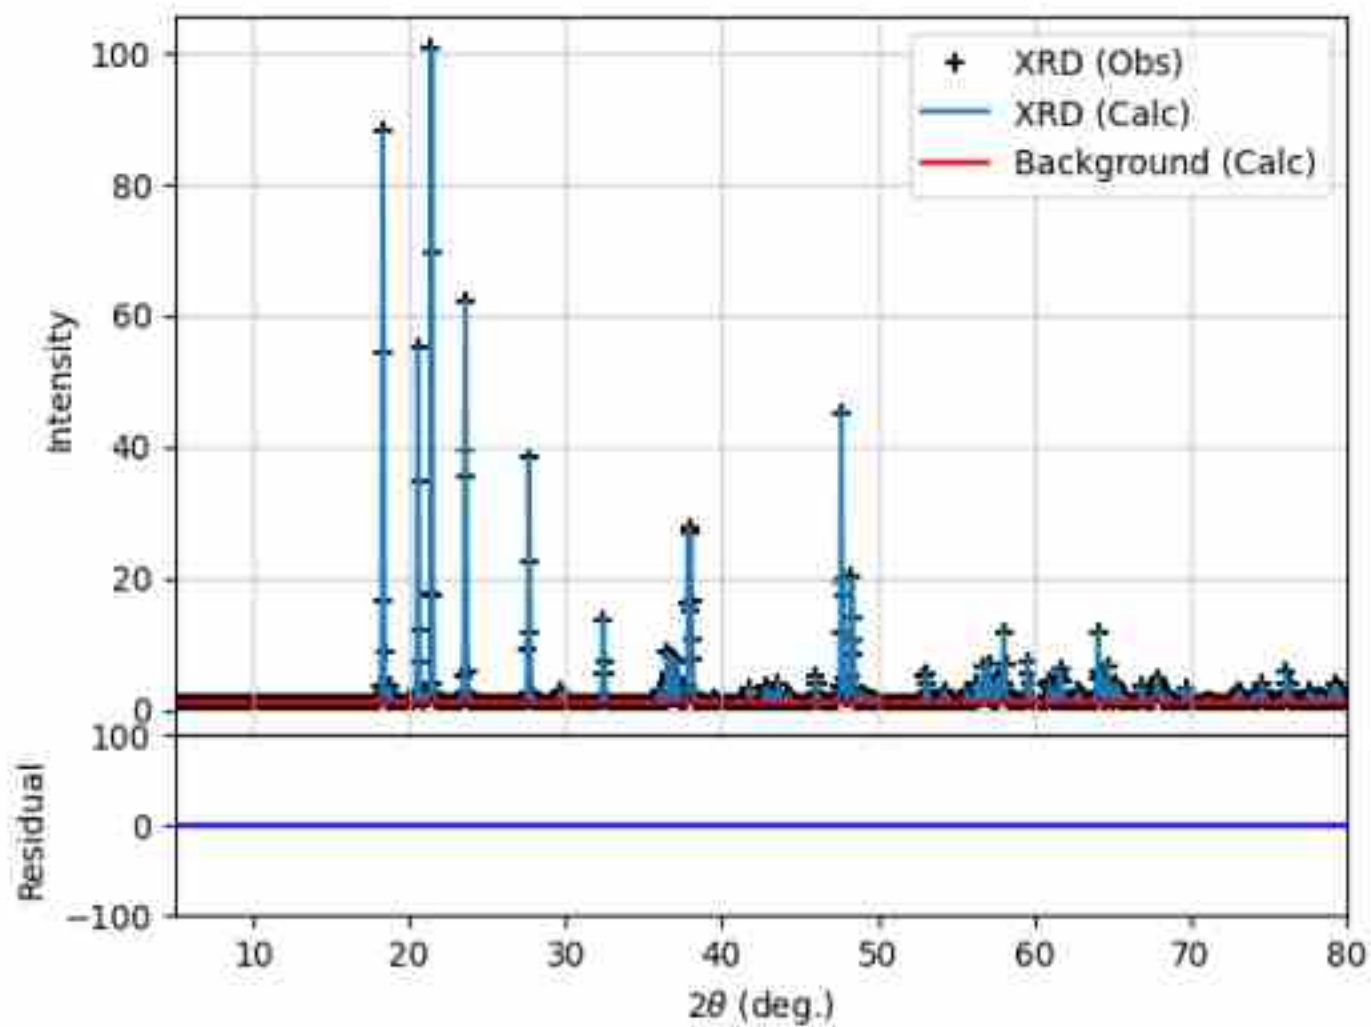

| RMSE before RR | Rwp     | RMSE after RR |
|----------------|---------|---------------|
| 0.062          | 0.00223 | 0.0006        |

# Mo<sub>2</sub>W<sub>2</sub>S<sub>8</sub>

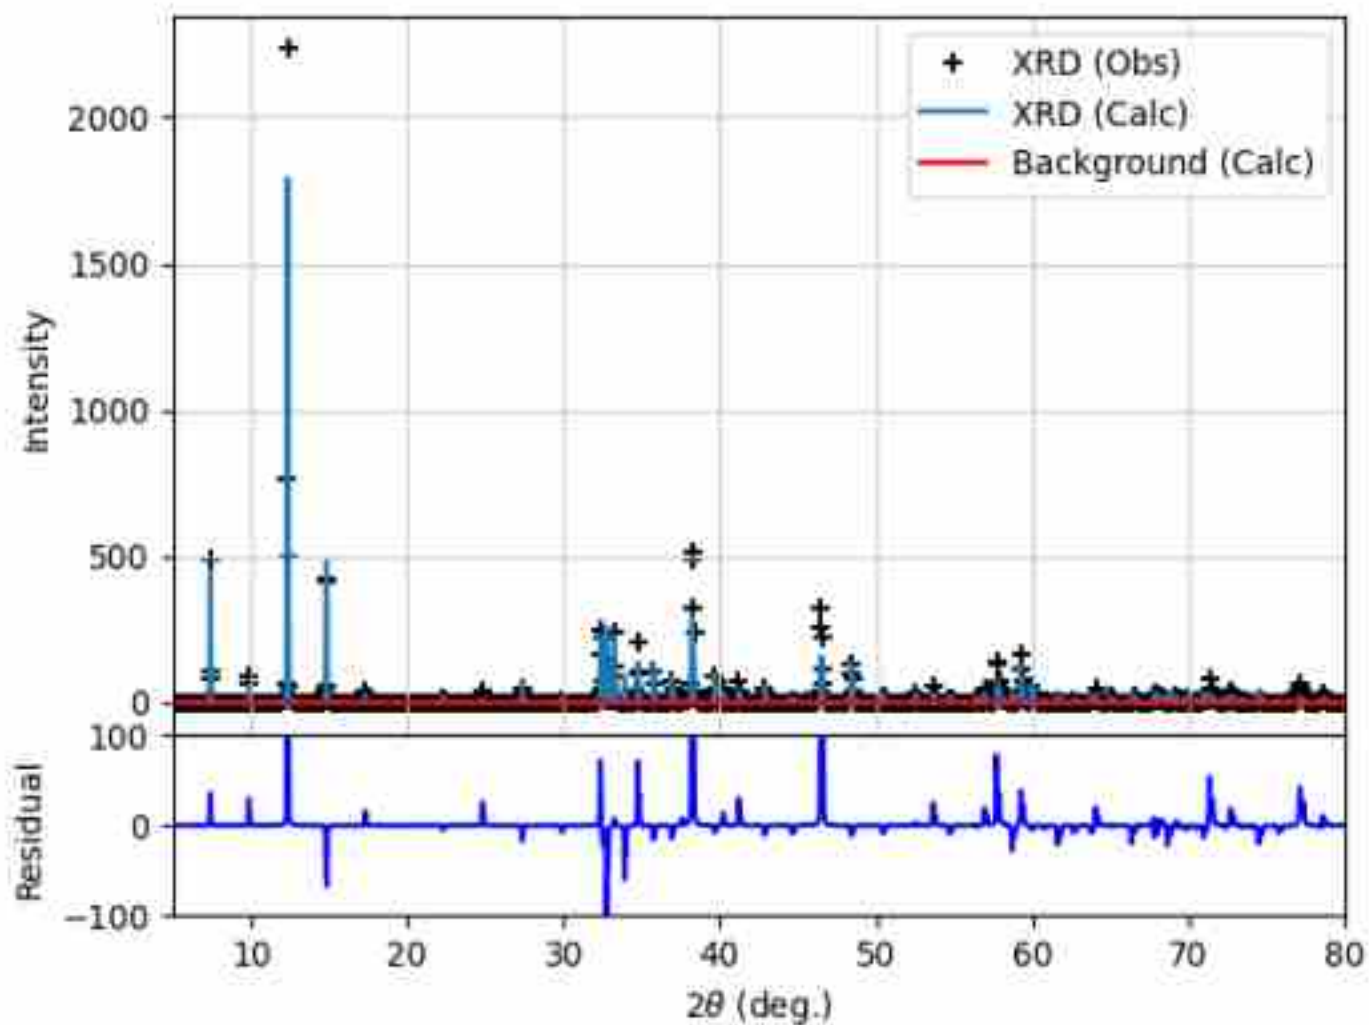

| RMSE before RR | Rwp      | RMSE after RR |
|----------------|----------|---------------|
| 0.062          | 41.38442 | 0.18439       |

# Na<sub>3</sub>HfF<sub>7</sub>

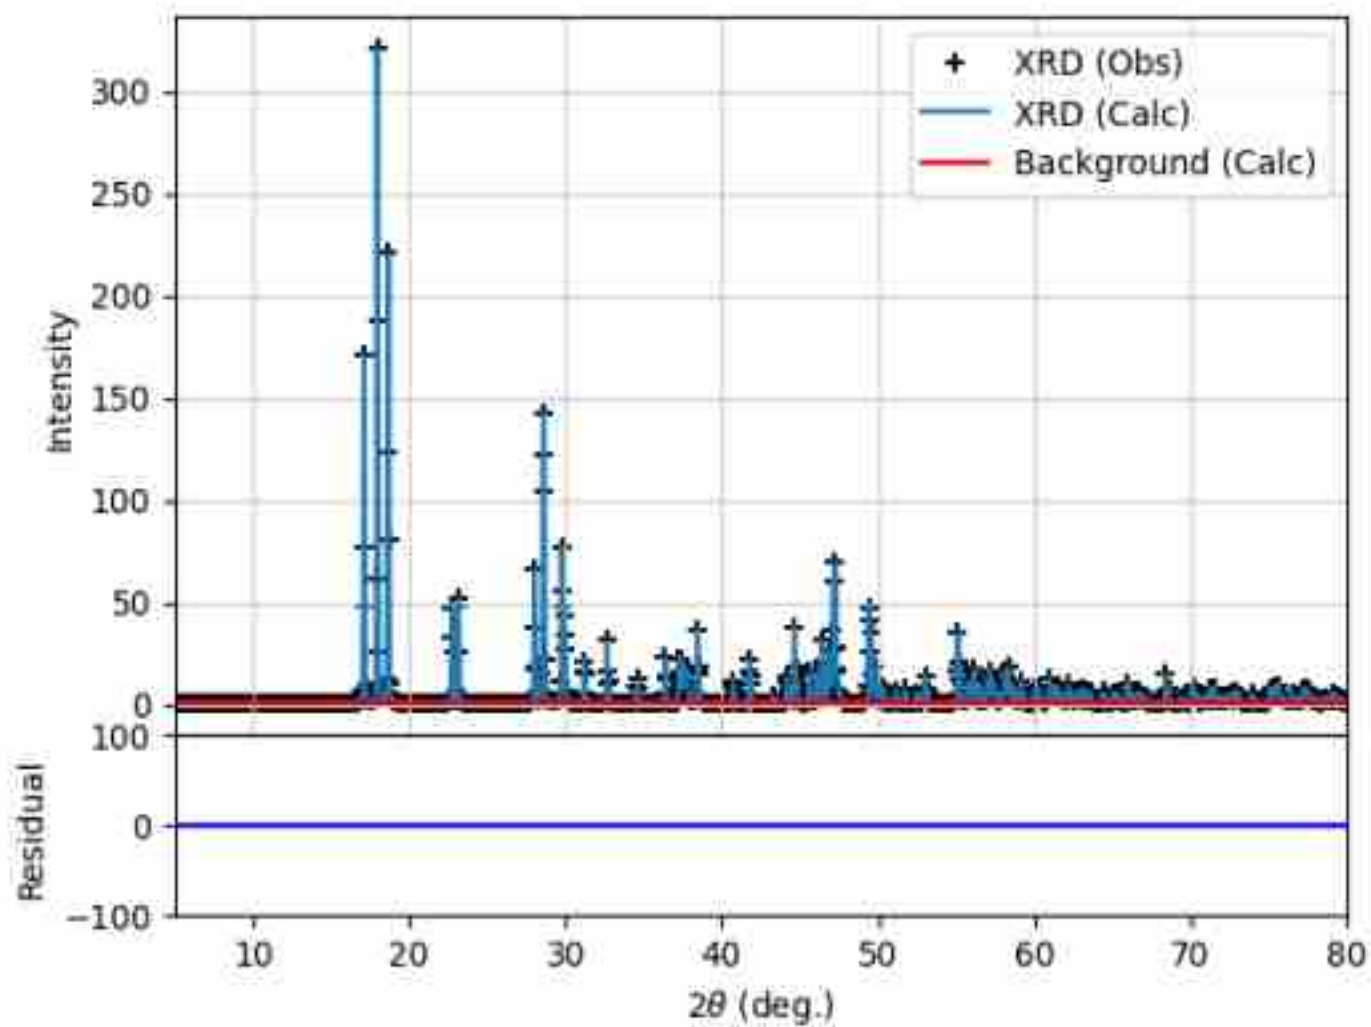

| RMSE before RR | Rwp     | RMSE after RR |
|----------------|---------|---------------|
| 0.062          | 0.00342 | 0.00067       |

# Ba<sub>4</sub>Mn<sub>4</sub>O<sub>10</sub>

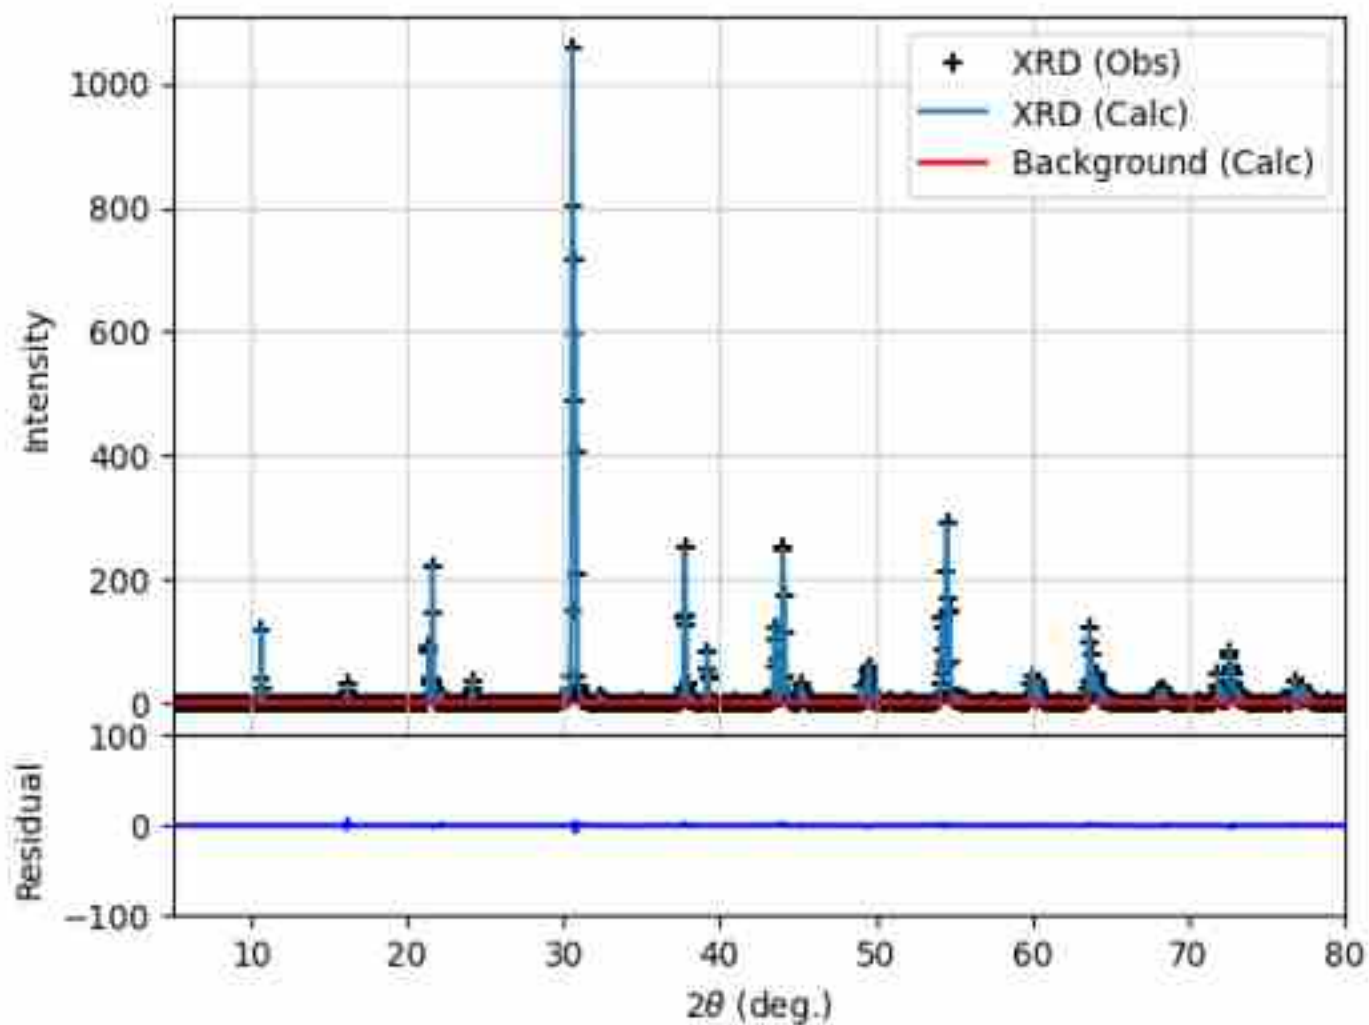

| RMSE before RR | Rwp     | RMSE after RR |
|----------------|---------|---------------|
| 0.063          | 2.59984 | 0.10366       |

# Ba10Sb8

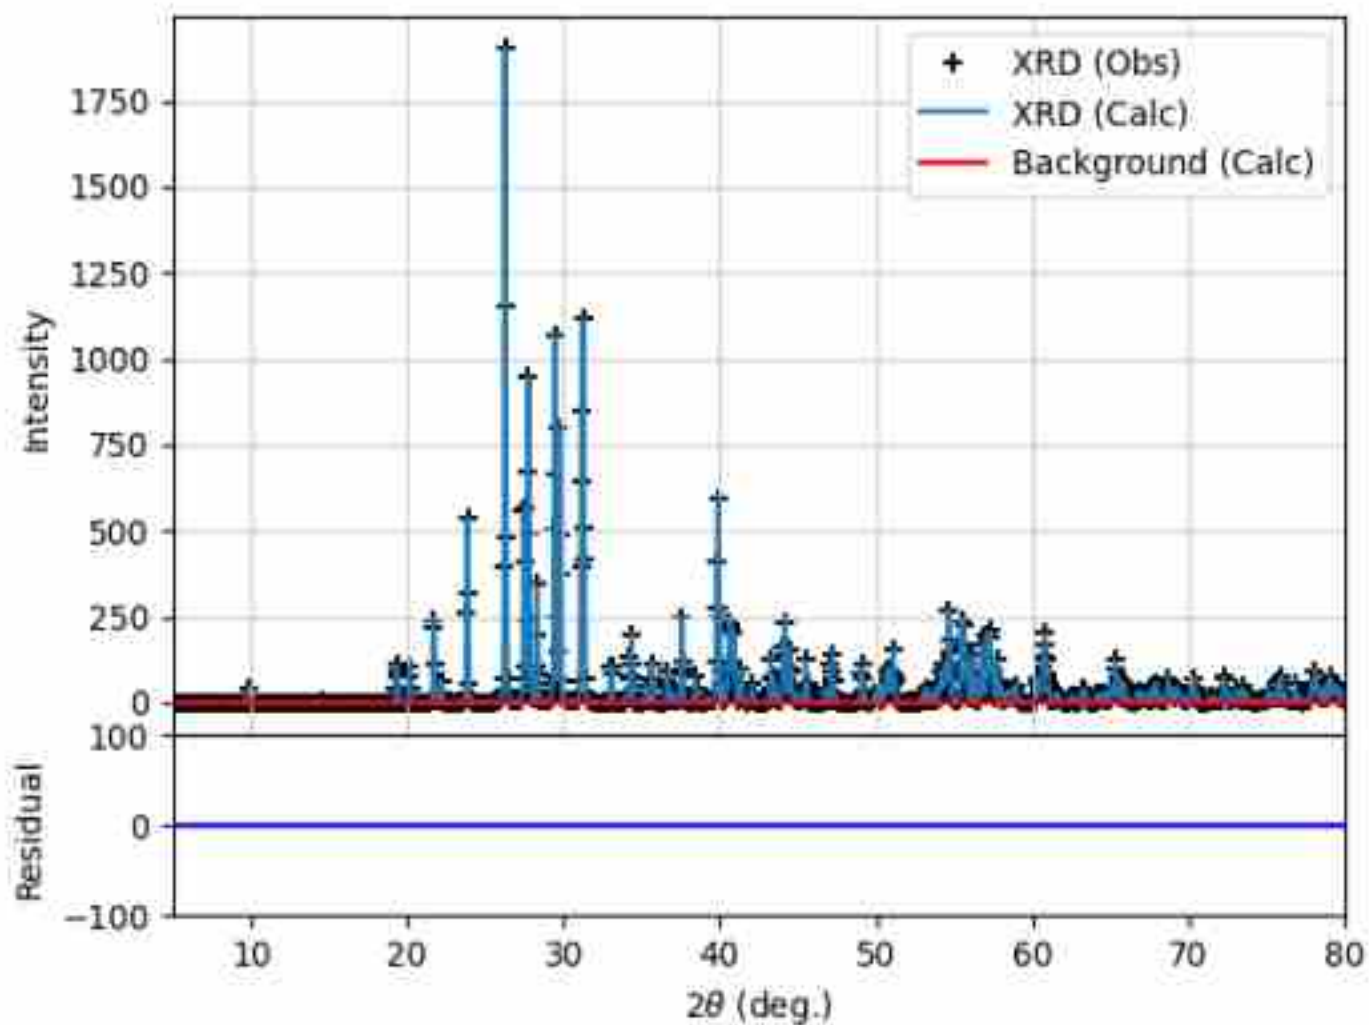

| RMSE before RR | Rwp     | RMSE after RR |
|----------------|---------|---------------|
| 0.063          | 0.00384 | 0.00027       |

# Er<sub>2</sub>Ag<sub>2</sub>S<sub>4</sub>

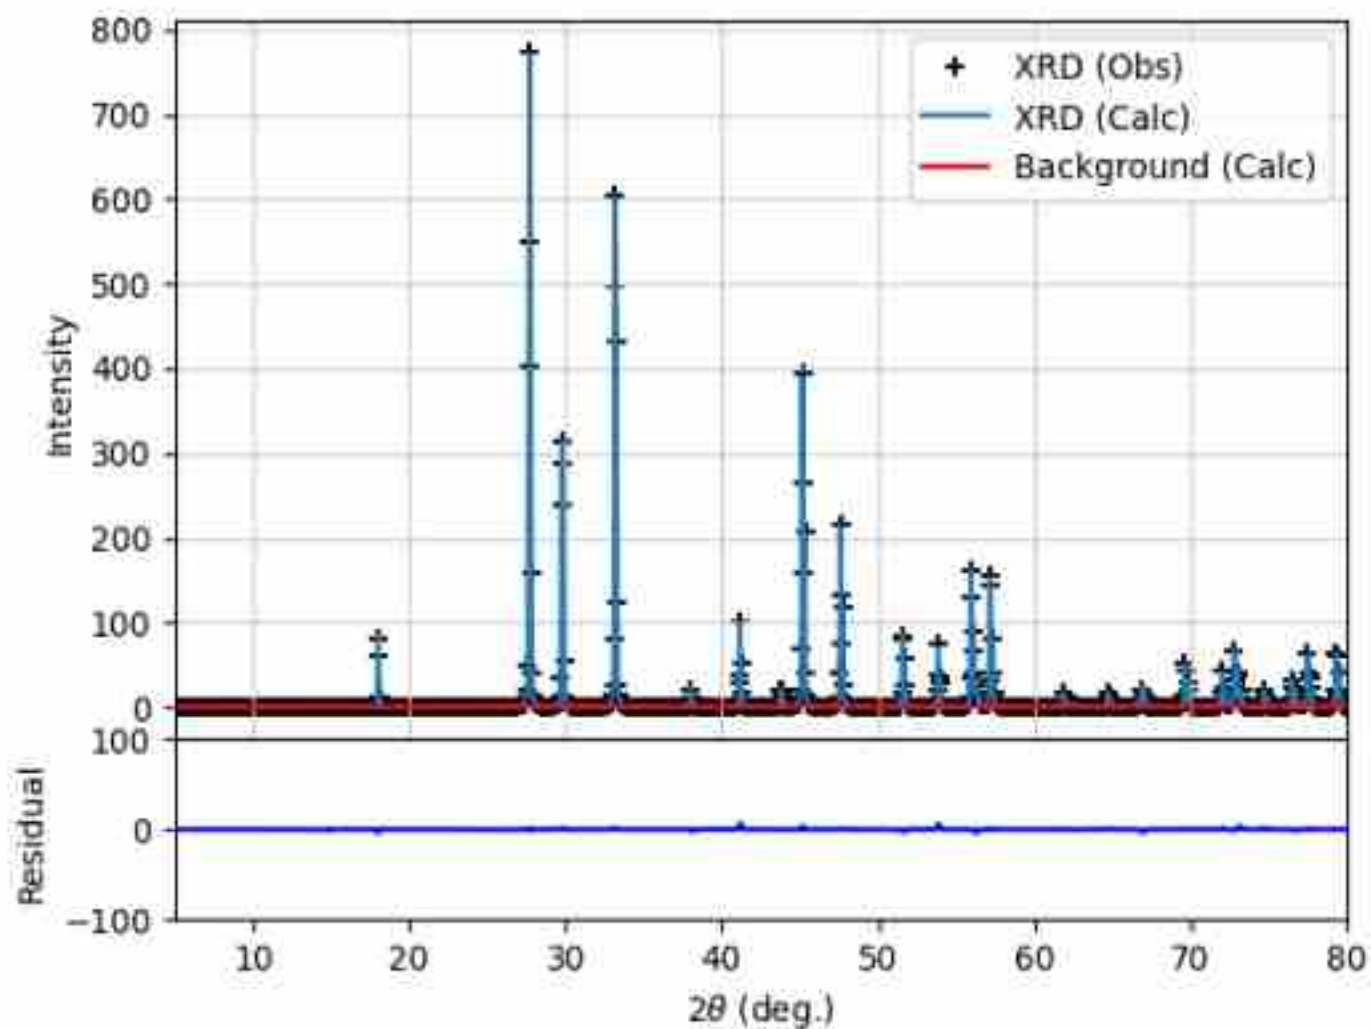

| RMSE before RR | Rwp     | RMSE after RR |
|----------------|---------|---------------|
| 0.063          | 3.75883 | 0.08319       |



# Li<sub>2</sub>Cu<sub>2</sub>F<sub>8</sub>

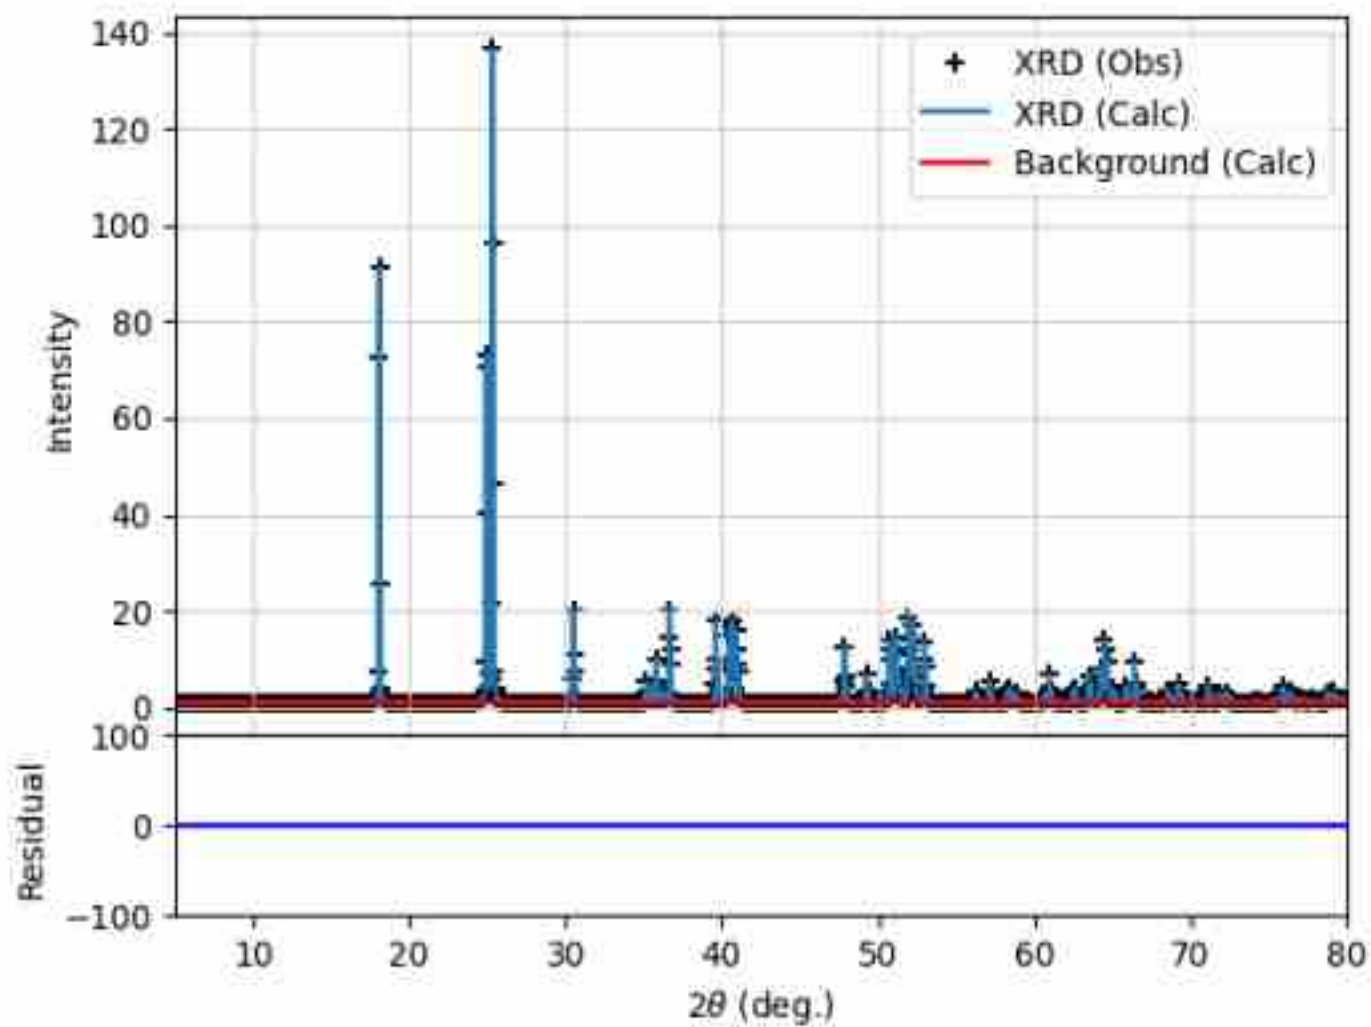

| RMSE before RR | Rwp     | RMSE after RR |
|----------------|---------|---------------|
| 0.063          | 0.00322 | 0.00082       |

# Mg<sub>1</sub>Al<sub>2</sub>Se<sub>4</sub>

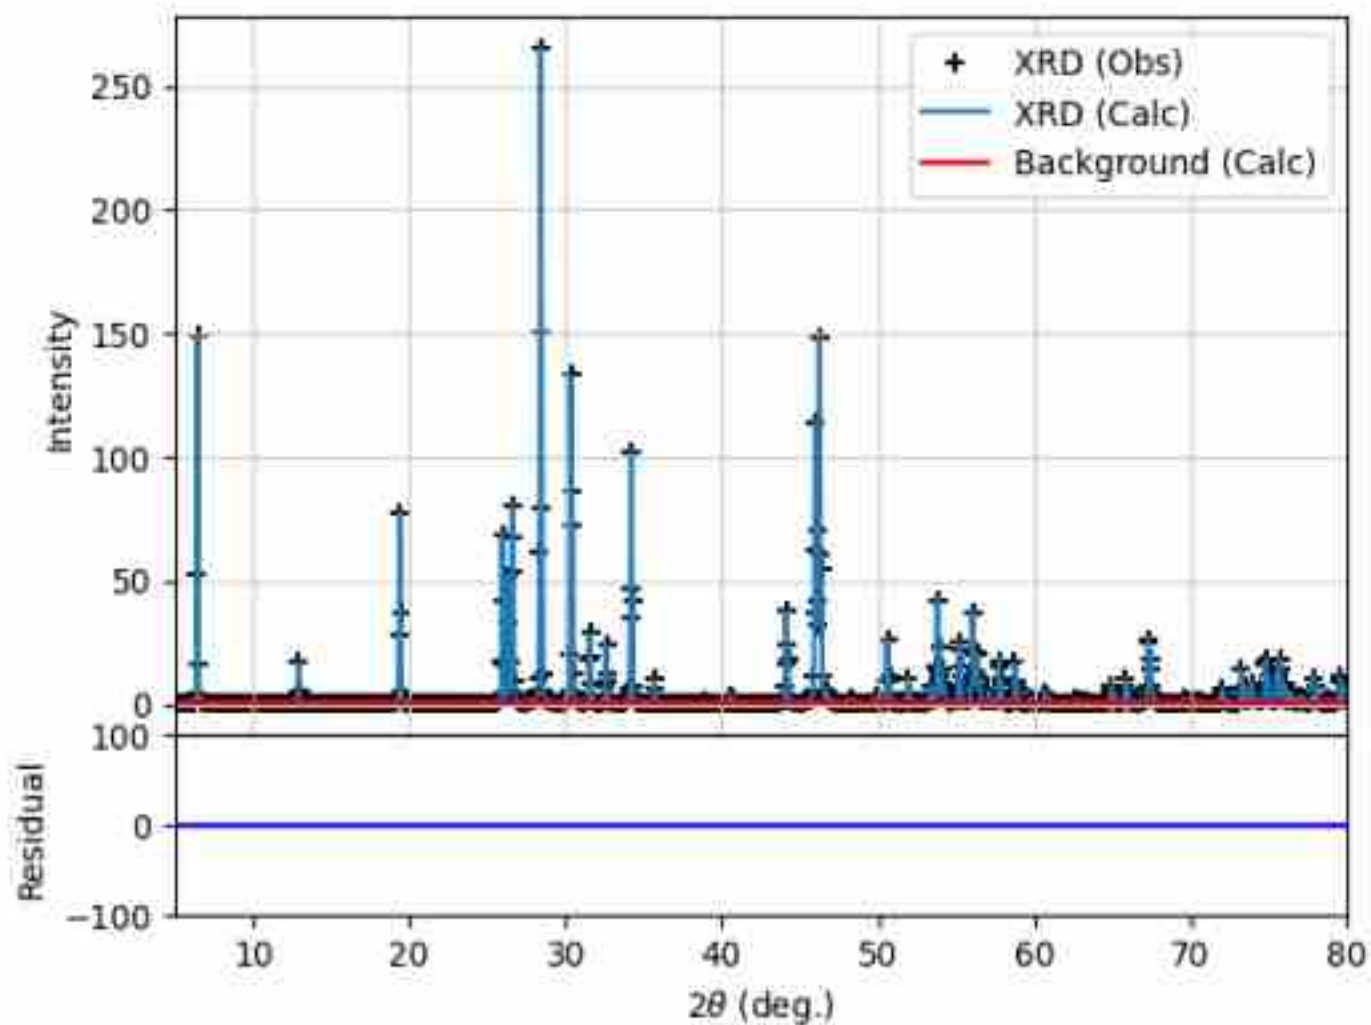

| RMSE before RR | Rwp     | RMSE after RR |
|----------------|---------|---------------|
| 0.063          | 0.00325 | 0.00051       |

# Mo<sub>2</sub>W<sub>2</sub>S<sub>8</sub>

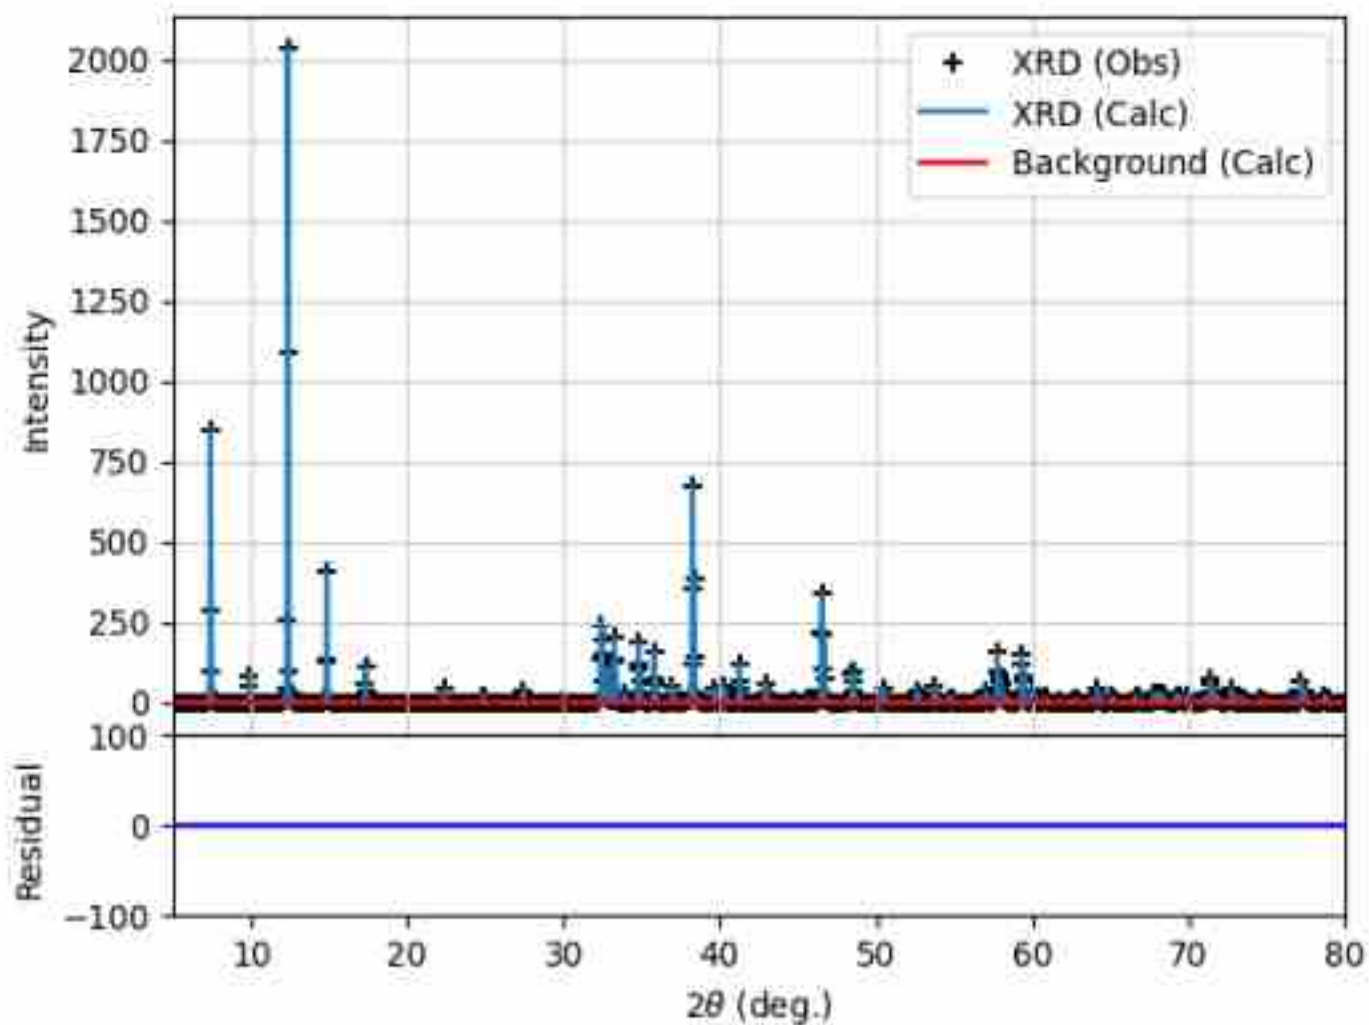

| RMSE before RR | Rwp    | RMSE after RR |
|----------------|--------|---------------|
| 0.063          | 0.0032 | 0.00099       |

# Mo<sub>3</sub>W<sub>1</sub>Se<sub>6</sub>S<sub>2</sub>

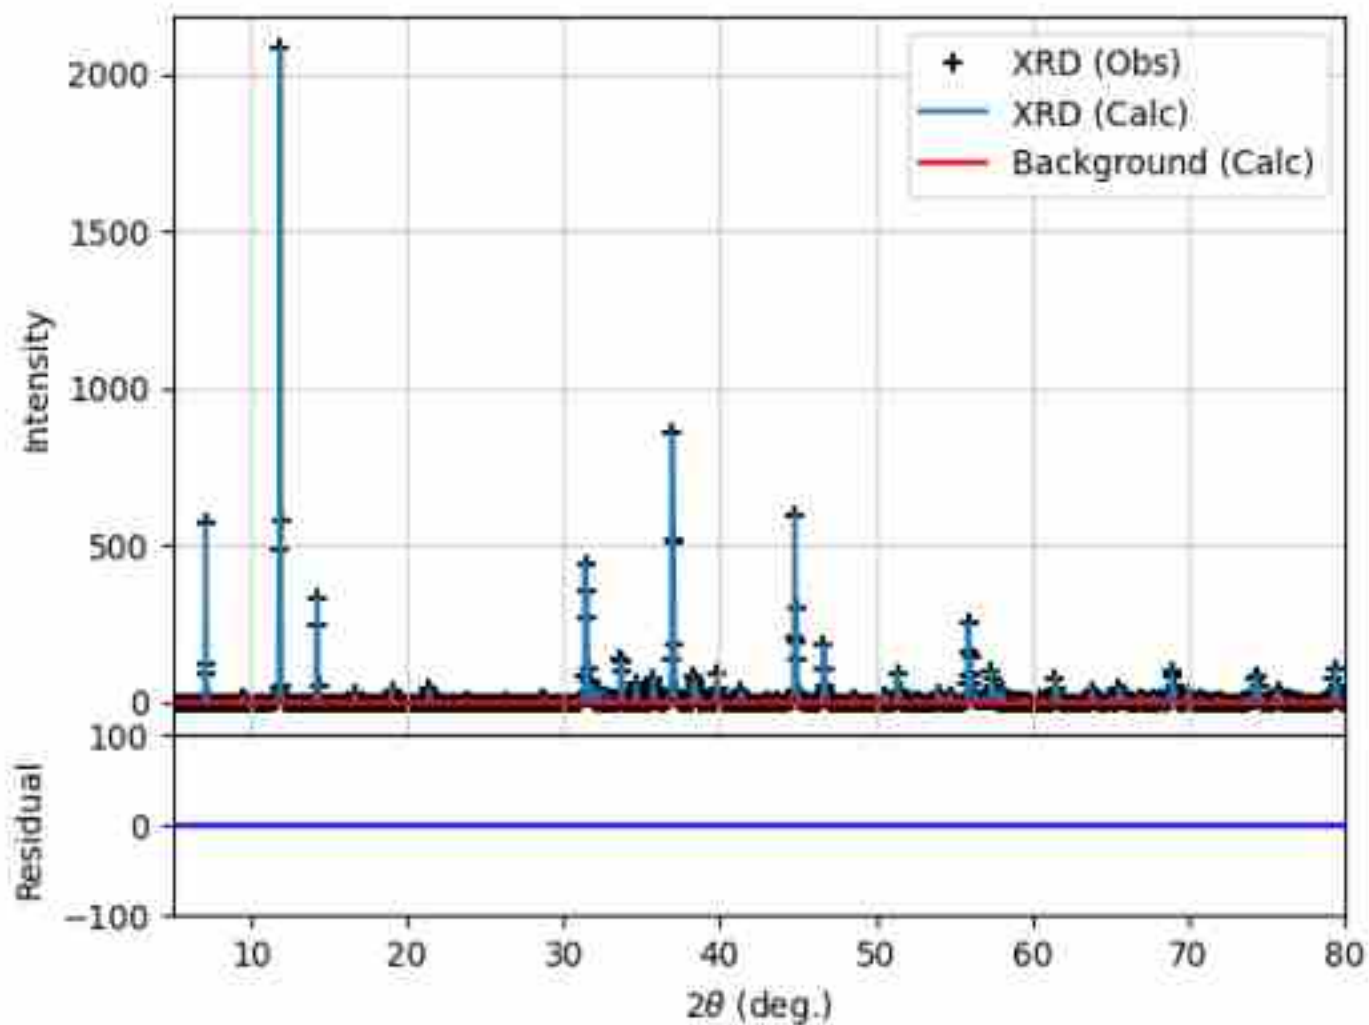

| RMSE before RR | Rwp     | RMSE after RR |
|----------------|---------|---------------|
| 0.063          | 0.00281 | 0.00036       |

# Sr<sub>2</sub>La<sub>2</sub>Fe<sub>4</sub>O<sub>12</sub>

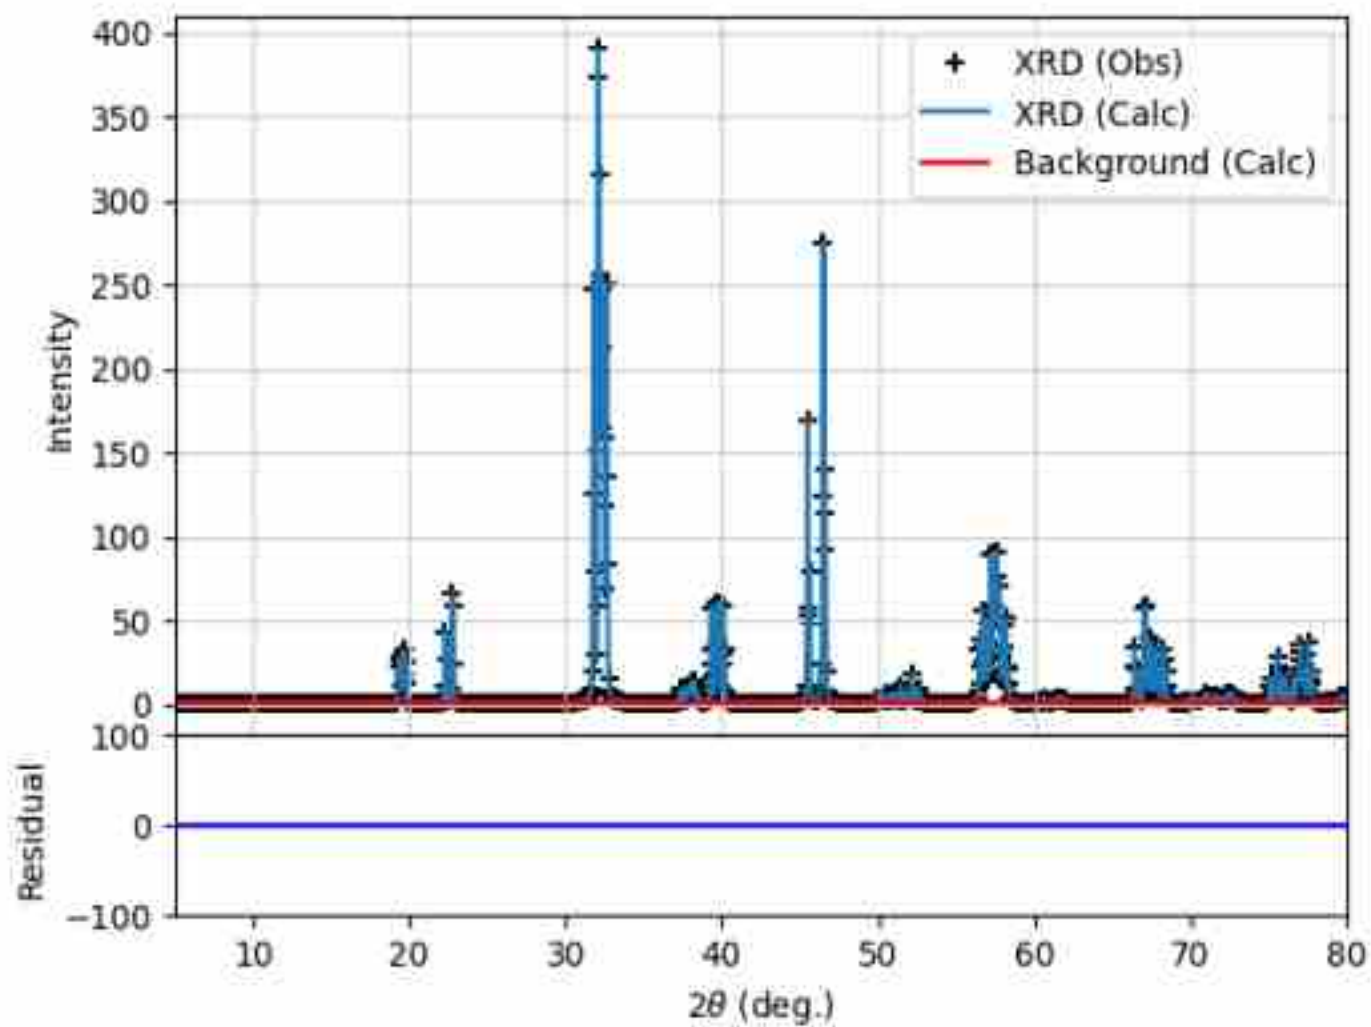

| RMSE before RR | Rwp     | RMSE after RR |
|----------------|---------|---------------|
| 0.063          | 0.00136 | 1e-05         |

# Sr4Re4N8

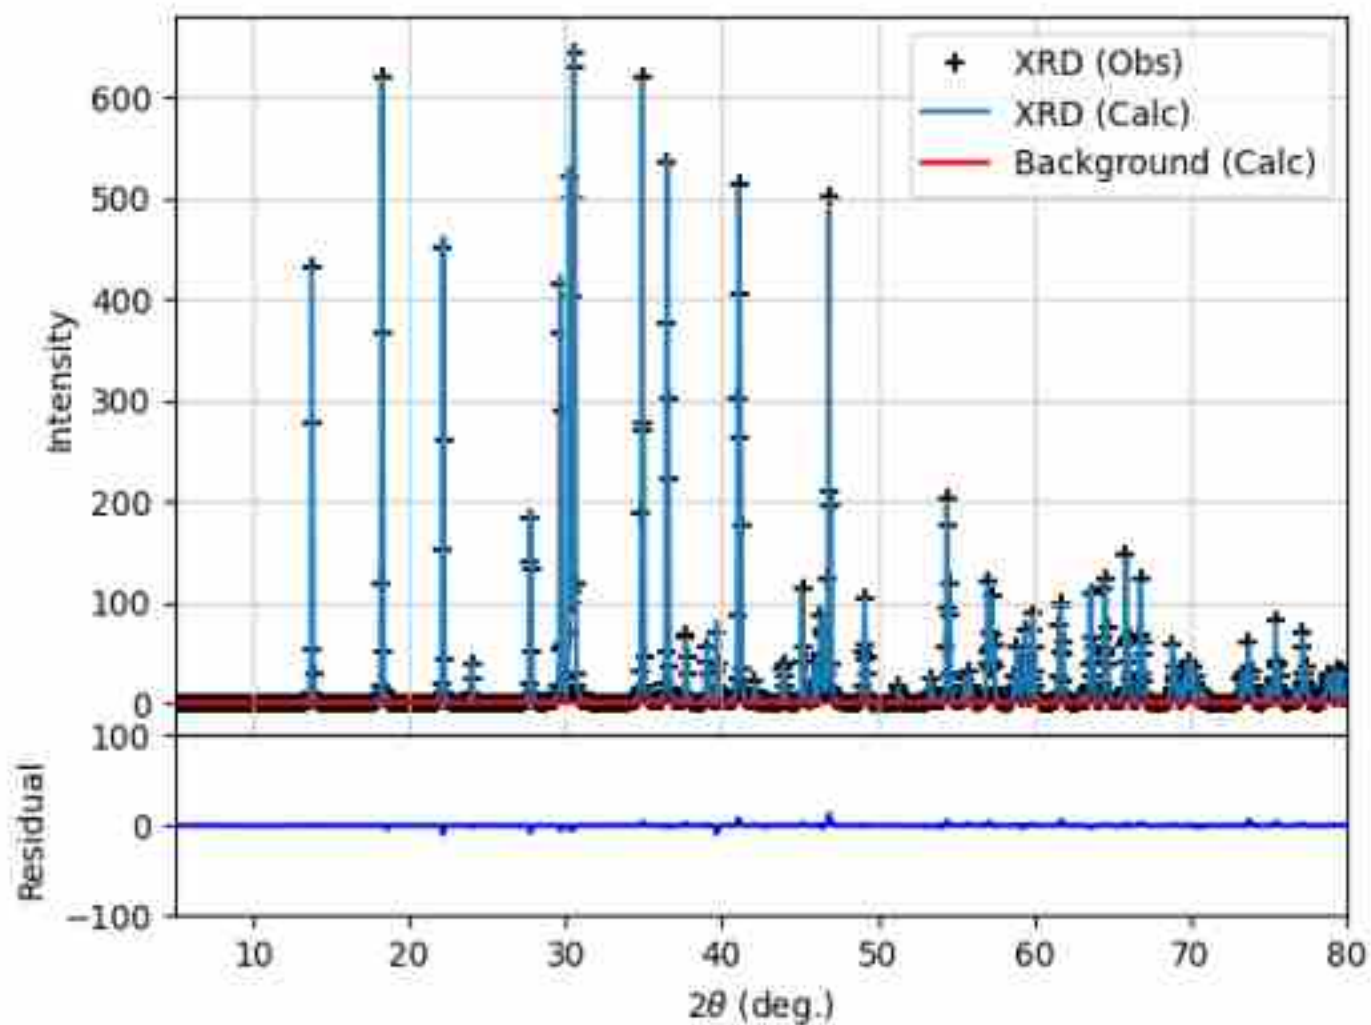

| RMSE before RR | Rwp     | RMSE after RR |
|----------------|---------|---------------|
| 0.063          | 3.93642 | 0.44798       |

# Tc12P4

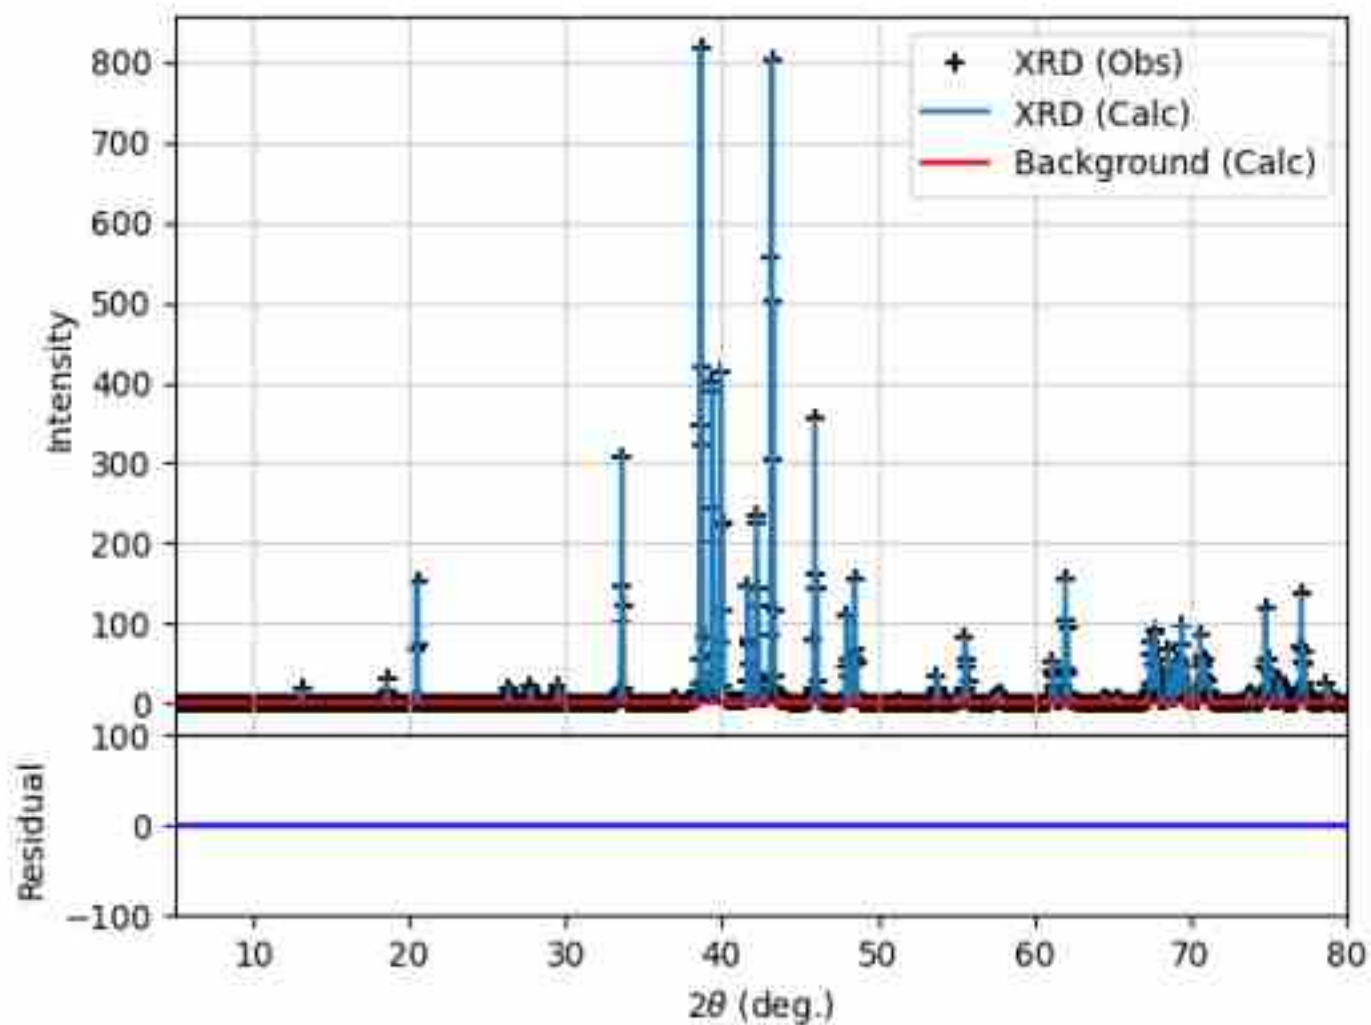

| RMSE before RR | Rwp     | RMSE after RR |
|----------------|---------|---------------|
| 0.063          | 0.00446 | 0.00051       |

# Ba<sub>2</sub>Nd<sub>1</sub>Ru<sub>1</sub>O<sub>6</sub>

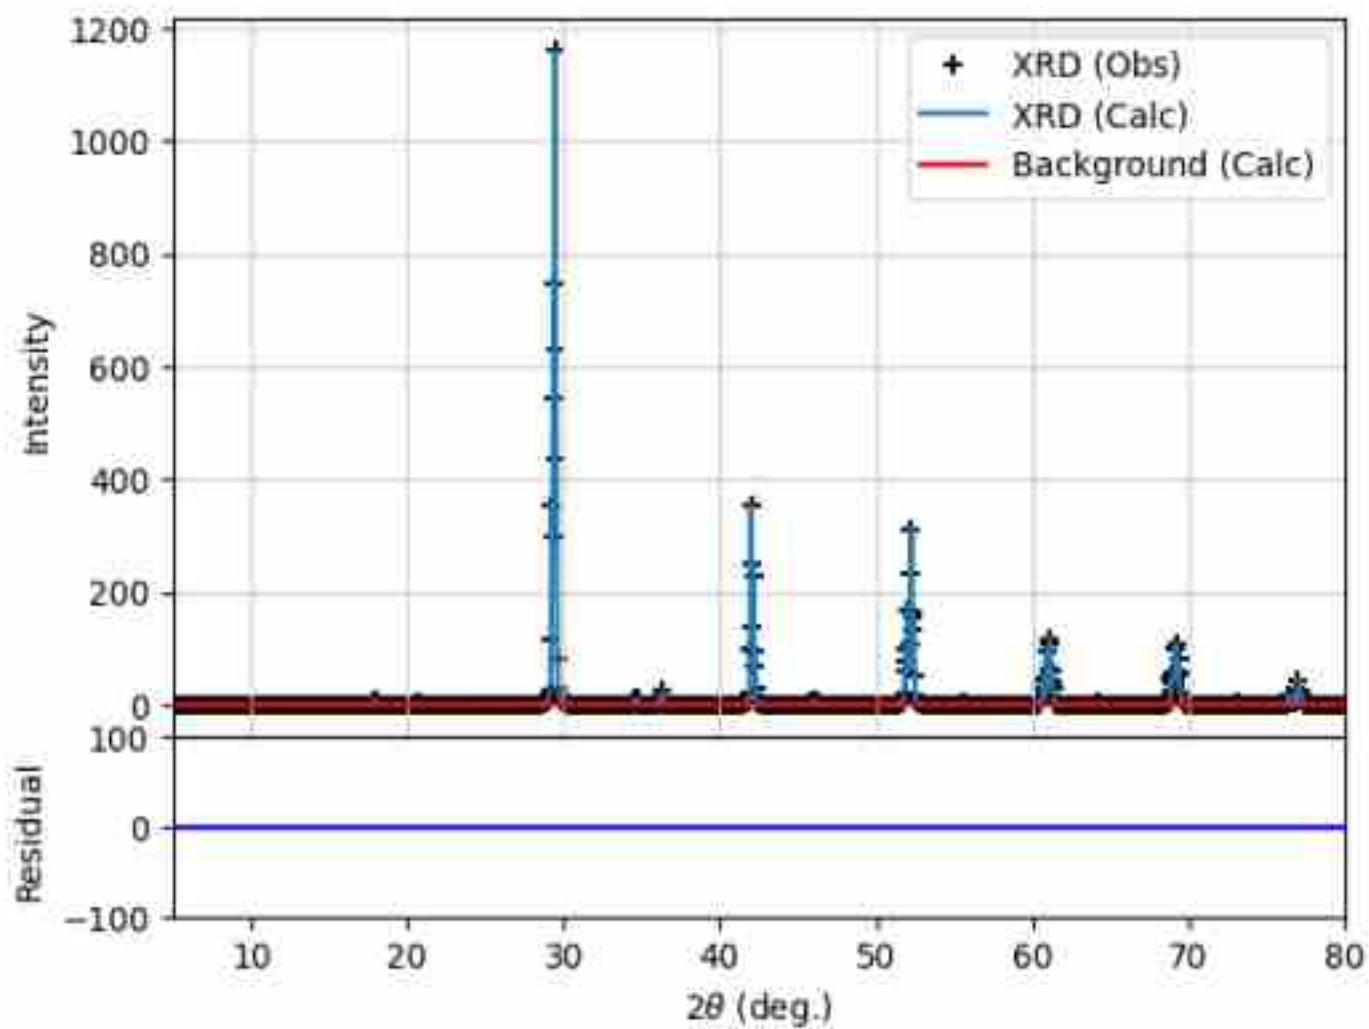

| RMSE before RR | Rwp     | RMSE after RR |
|----------------|---------|---------------|
| 0.064          | 0.00227 | 0.00091       |



# Cu<sub>4</sub>Cl<sub>4</sub>O<sub>4</sub>

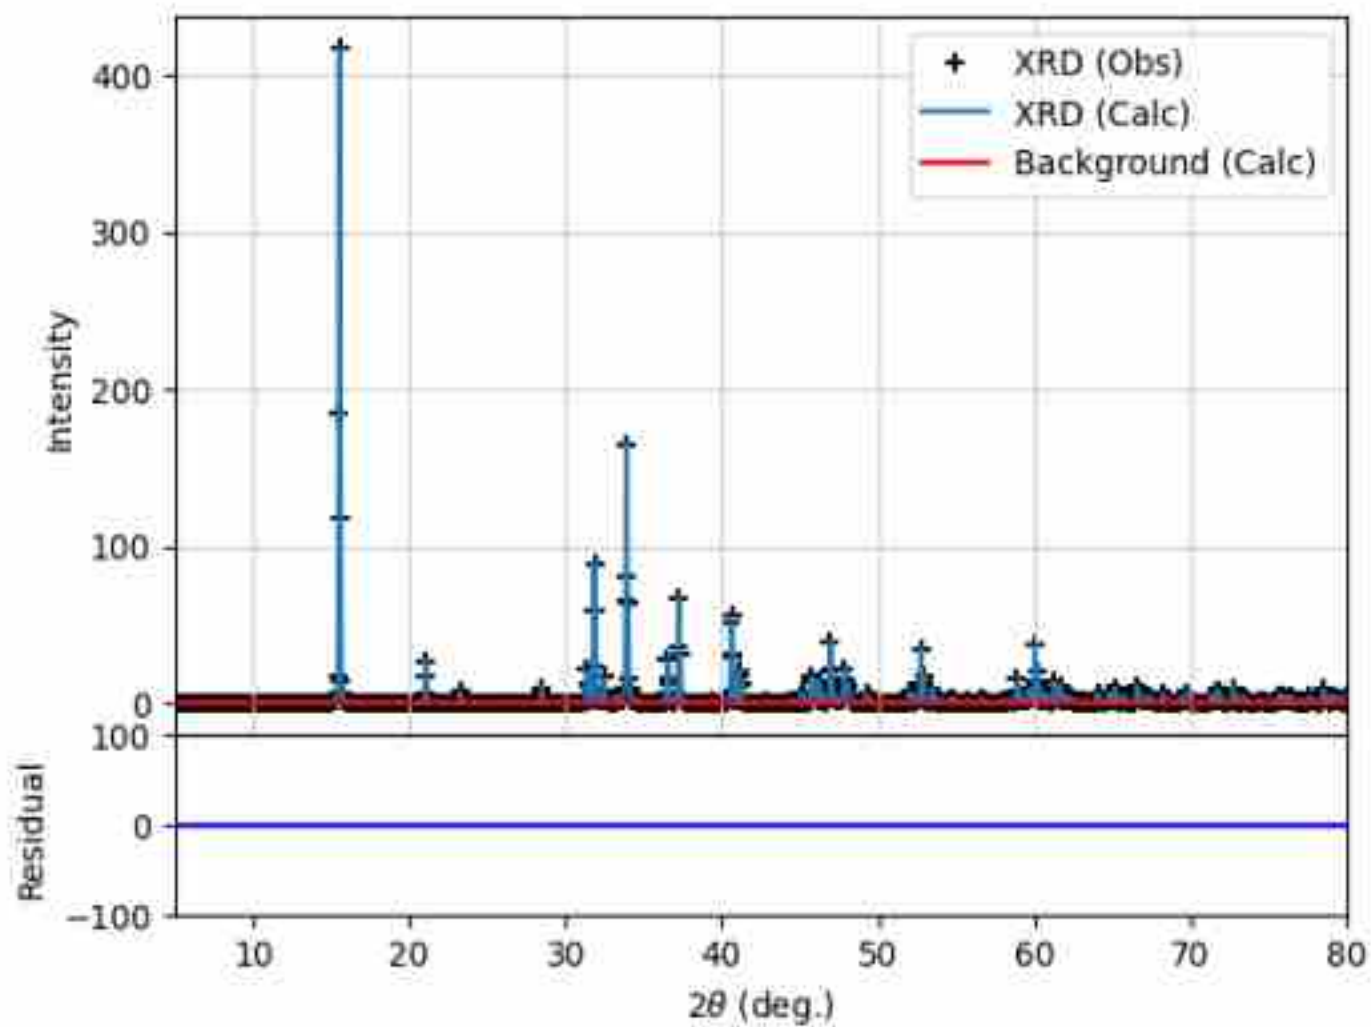

| RMSE before RR | Rwp     | RMSE after RR |
|----------------|---------|---------------|
| 0.064          | 0.00306 | 0.00033       |

# Fe<sub>3</sub>Pb<sub>4</sub>Cl<sub>11</sub>O<sub>8</sub>

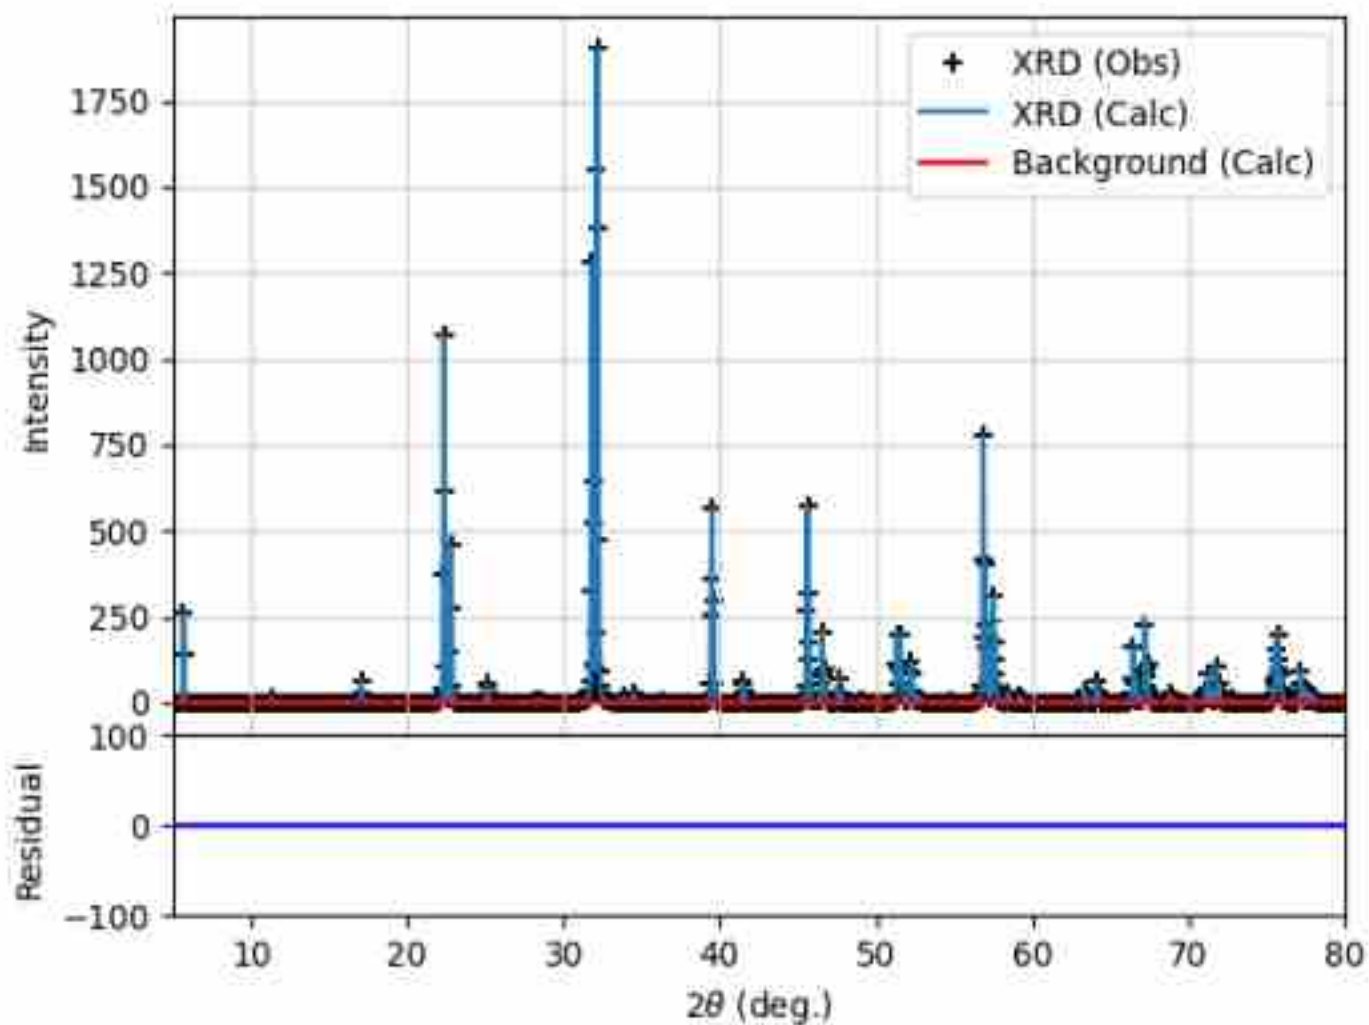

| RMSE before RR | Rwp     | RMSE after RR |
|----------------|---------|---------------|
| 0.064          | 0.00625 | 0.0019        |

# La1Nb2Cu1Cl1O7

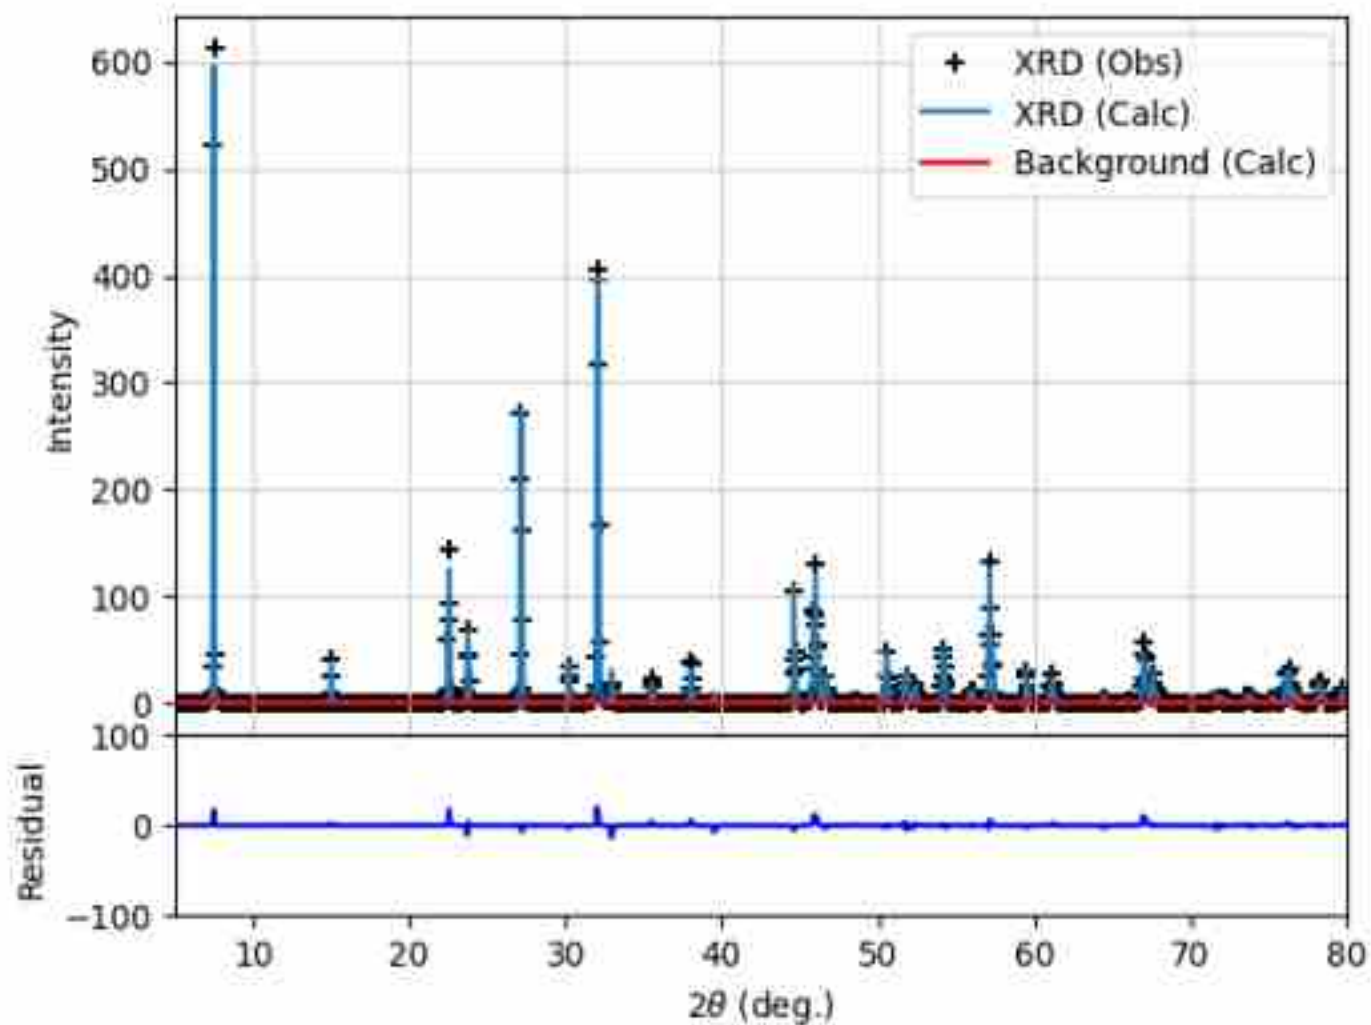

| RMSE before RR | Rwp      | RMSE after RR |
|----------------|----------|---------------|
| 0.064          | 13.05412 | 0.06477       |

# Mo2P2O10

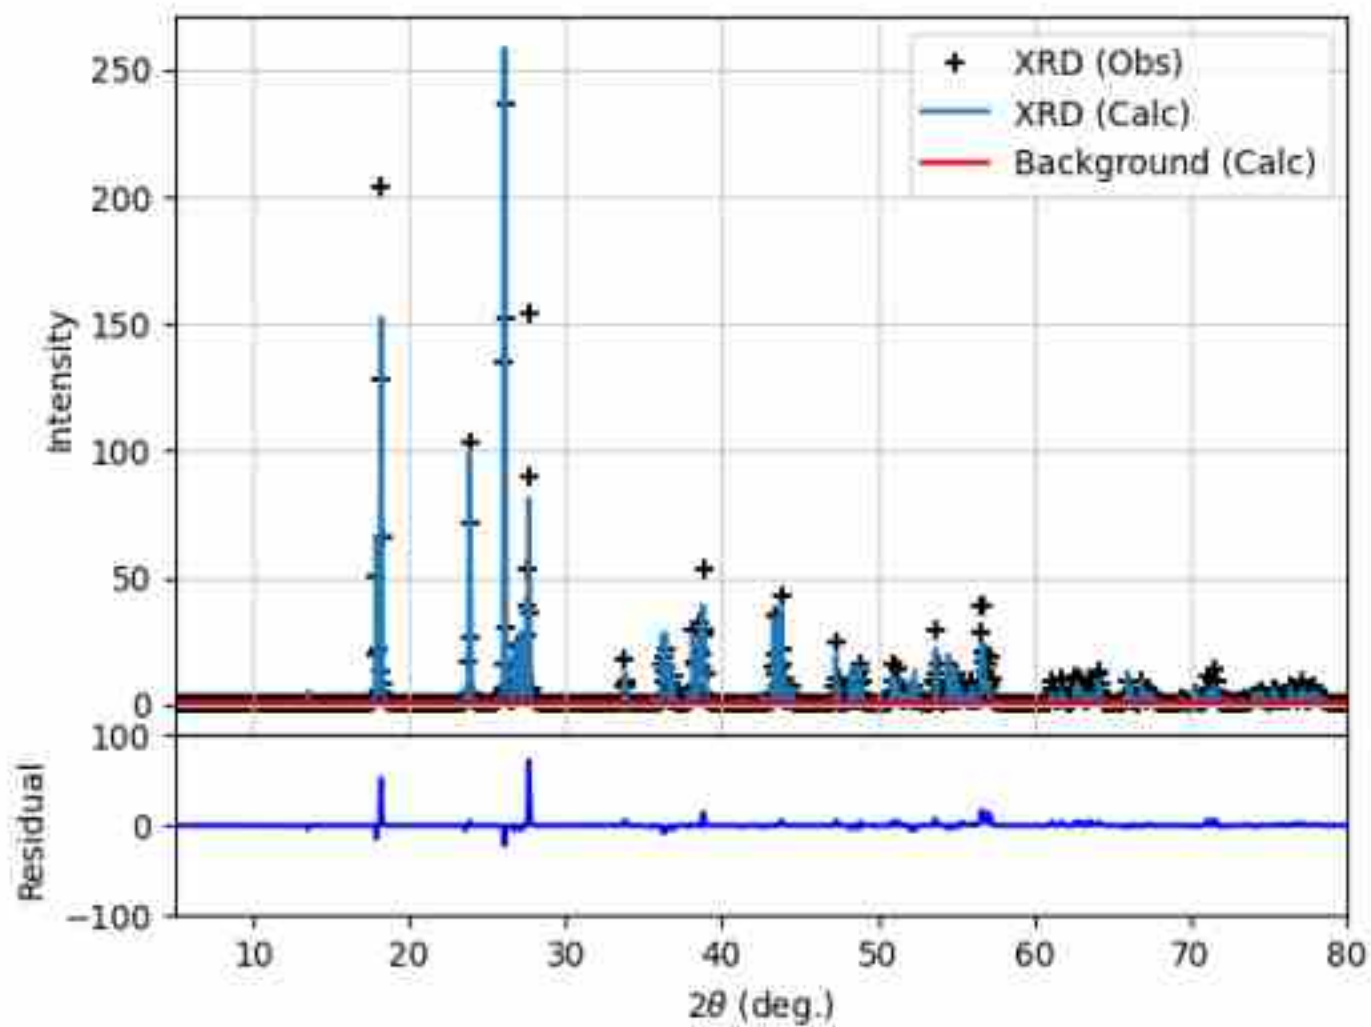

| RMSE before RR | Rwp      | RMSE after RR |
|----------------|----------|---------------|
| 0.064          | 27.50024 | None          |

# Na<sub>4</sub>C<sub>2</sub>O<sub>6</sub>

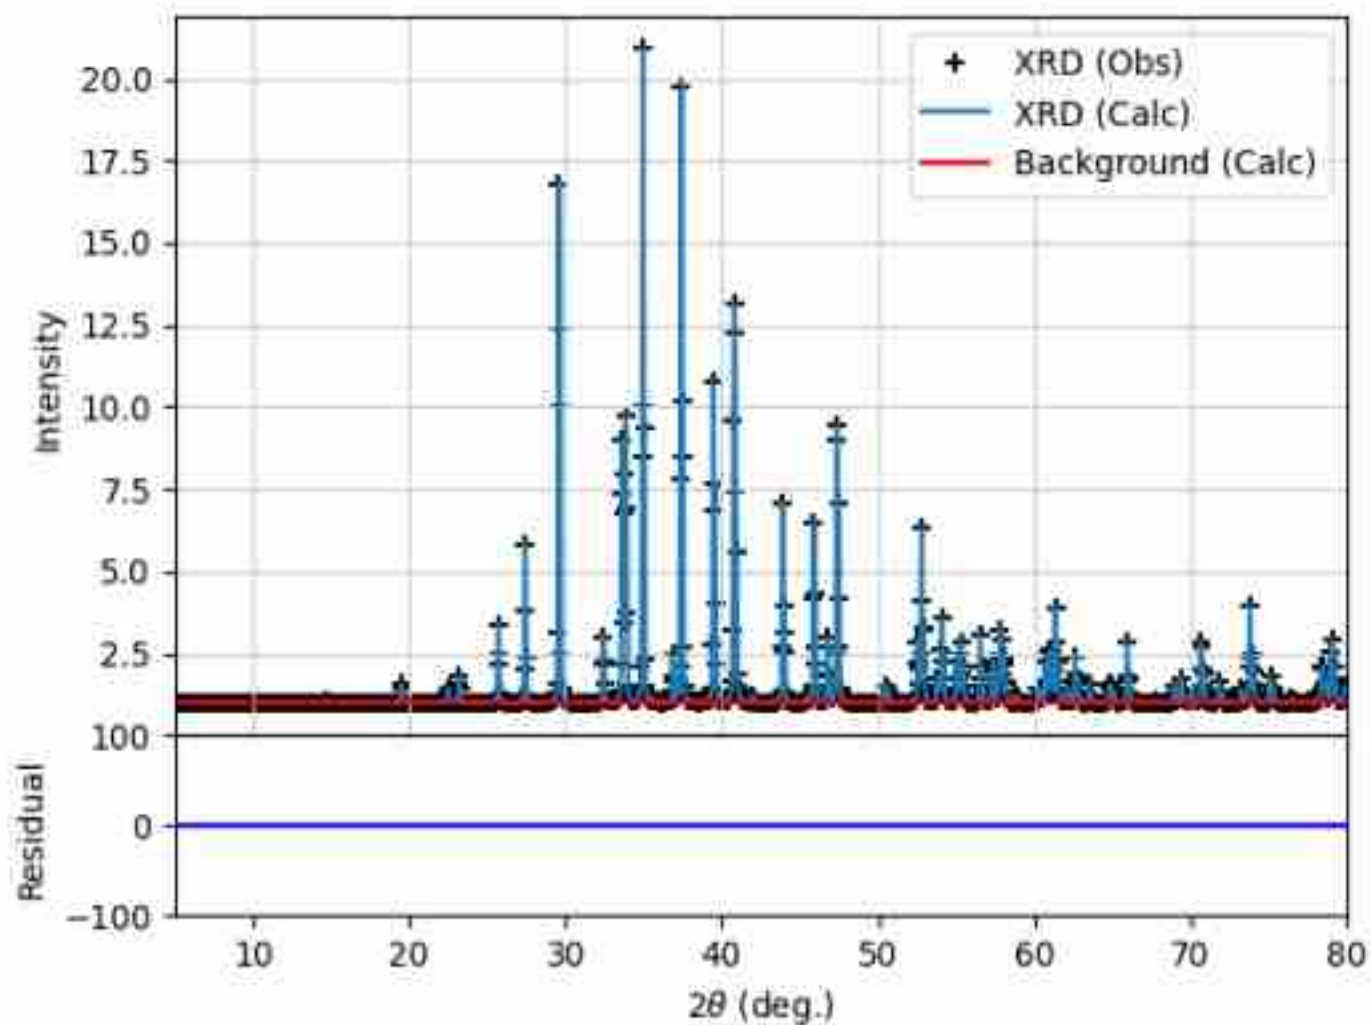

| RMSE before RR | Rwp     | RMSE after RR |
|----------------|---------|---------------|
| 0.064          | 0.00182 | 0.00033       |

# U<sub>3</sub>Cu<sub>10</sub>O<sub>10</sub>

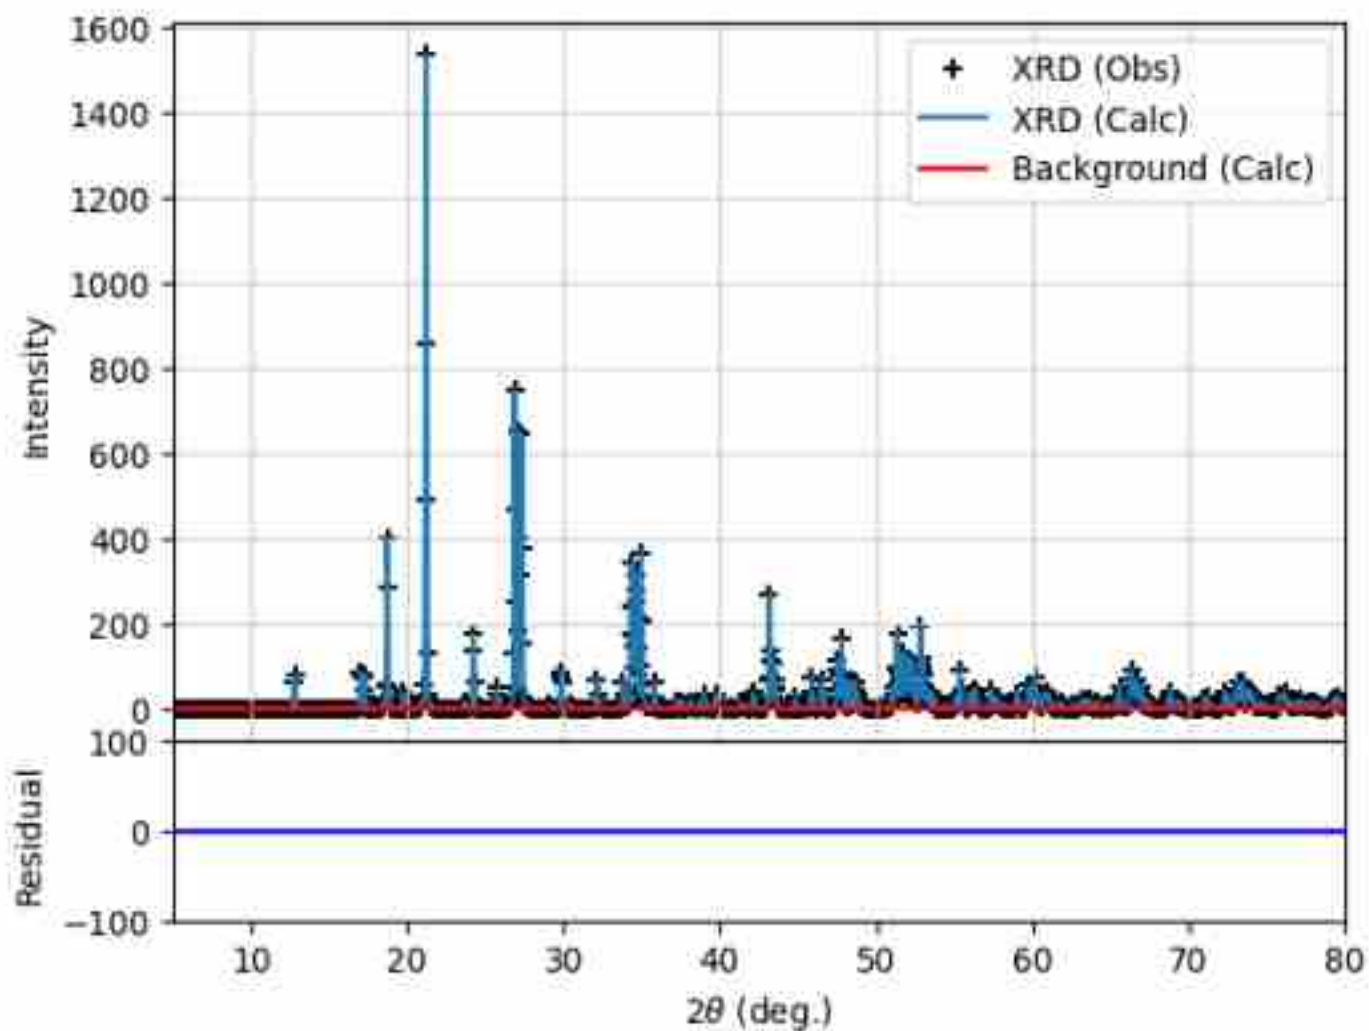

| RMSE before RR | Rwp     | RMSE after RR |
|----------------|---------|---------------|
| 0.064          | 0.00011 | 0.00018       |

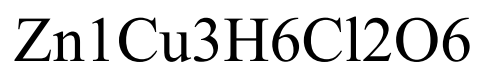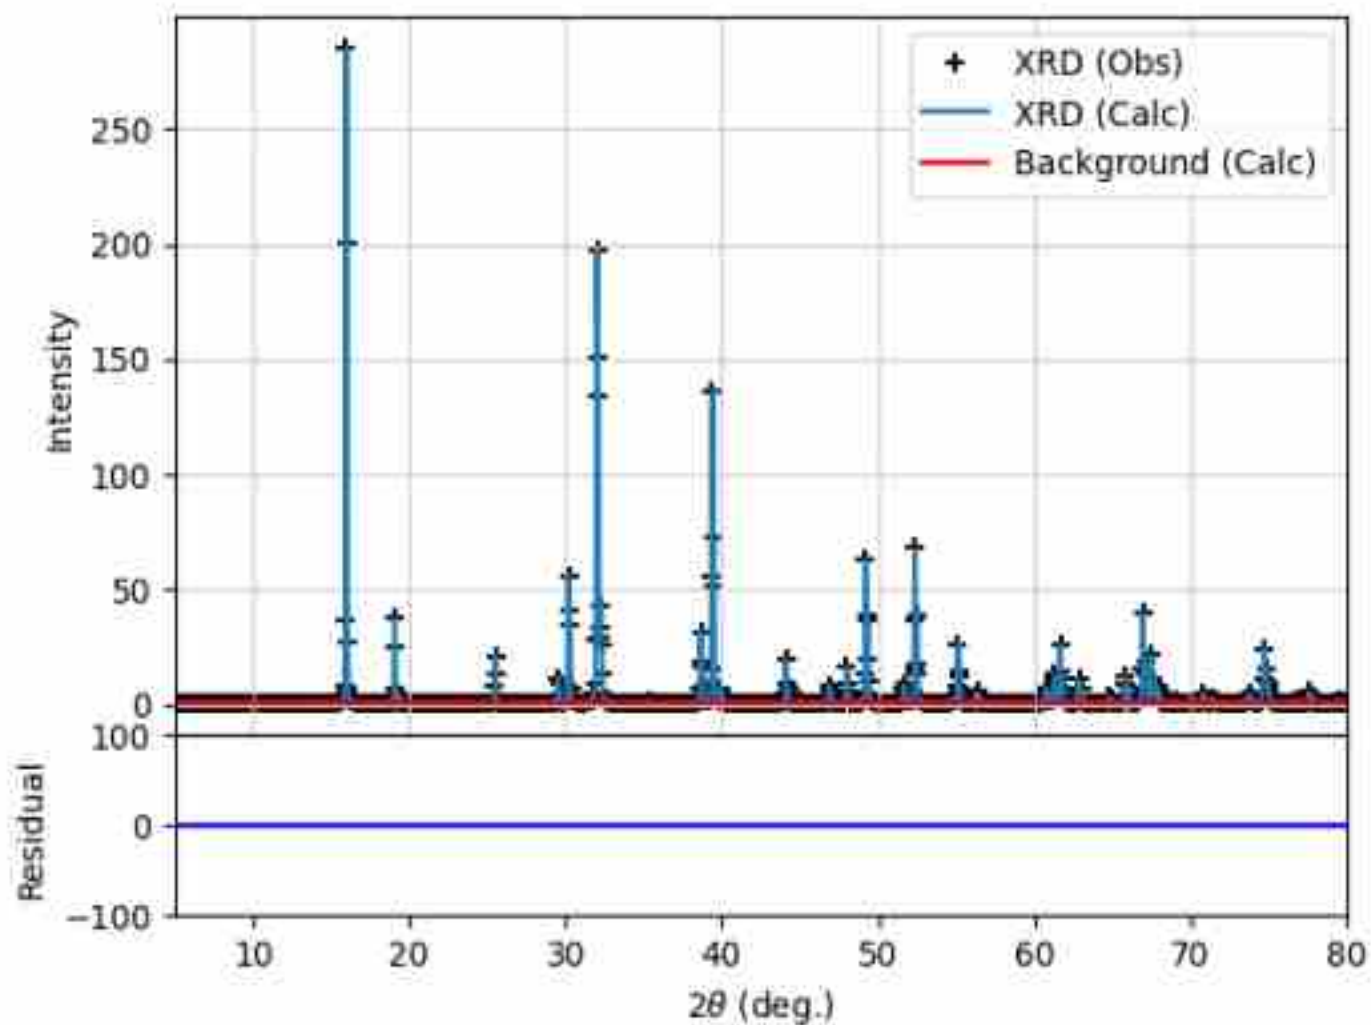

| RMSE before RR | Rwp     | RMSE after RR |
|----------------|---------|---------------|
| 0.064          | 0.25158 | 0.40834       |

# Ba<sub>2</sub>Yb<sub>1</sub>Bi<sub>1</sub>O<sub>6</sub>

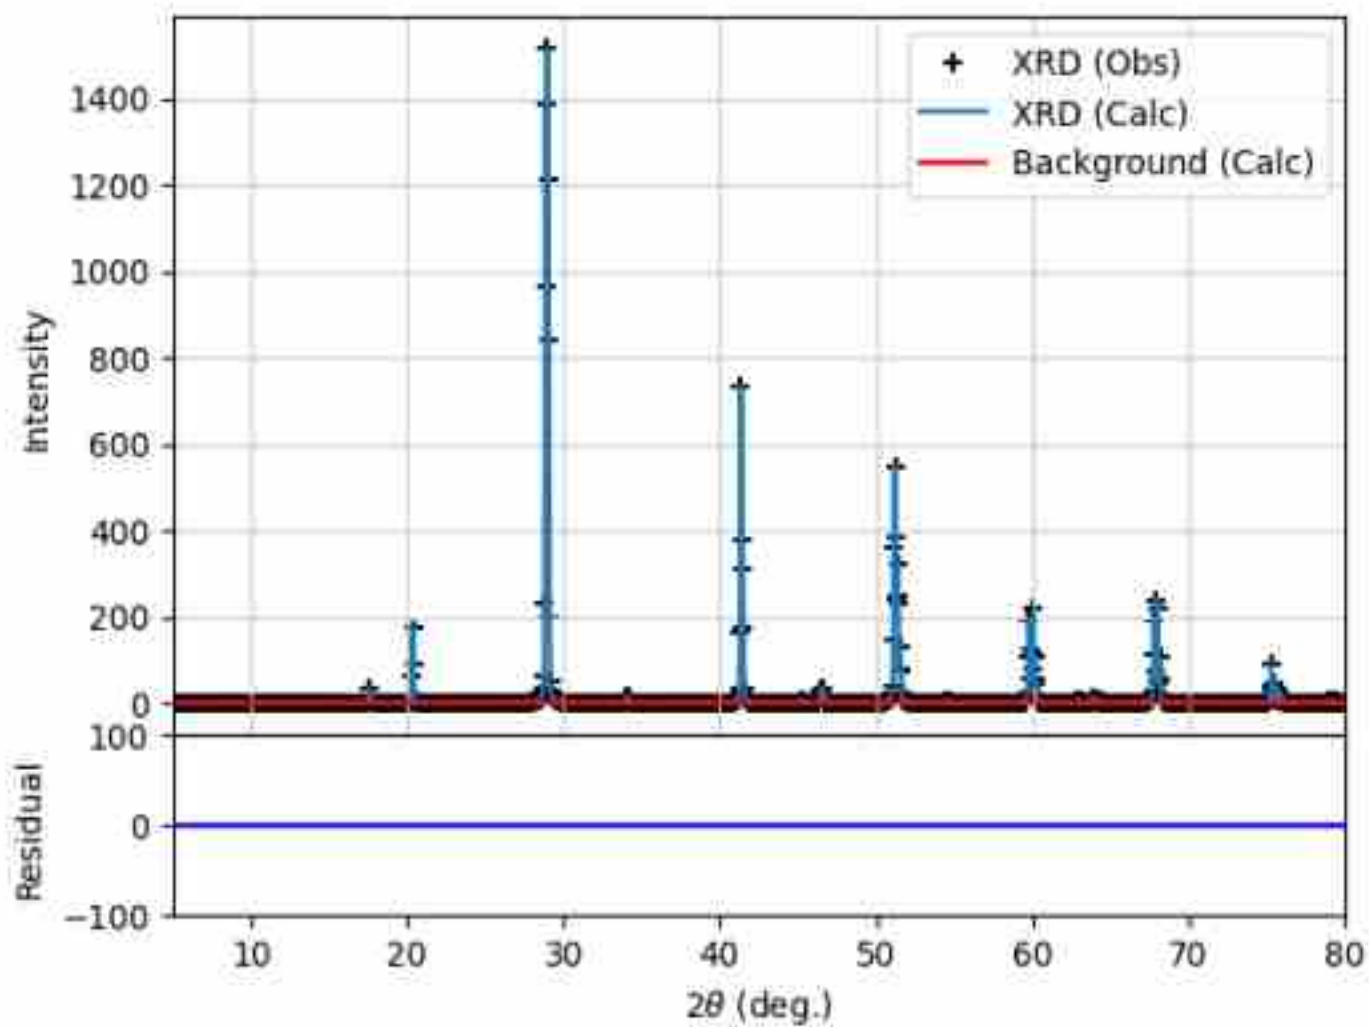

| RMSE before RR | Rwp     | RMSE after RR |
|----------------|---------|---------------|
| 0.065          | 0.00308 | 0.00111       |



# Ba<sub>4</sub>Ag<sub>8</sub>Te<sub>8</sub>

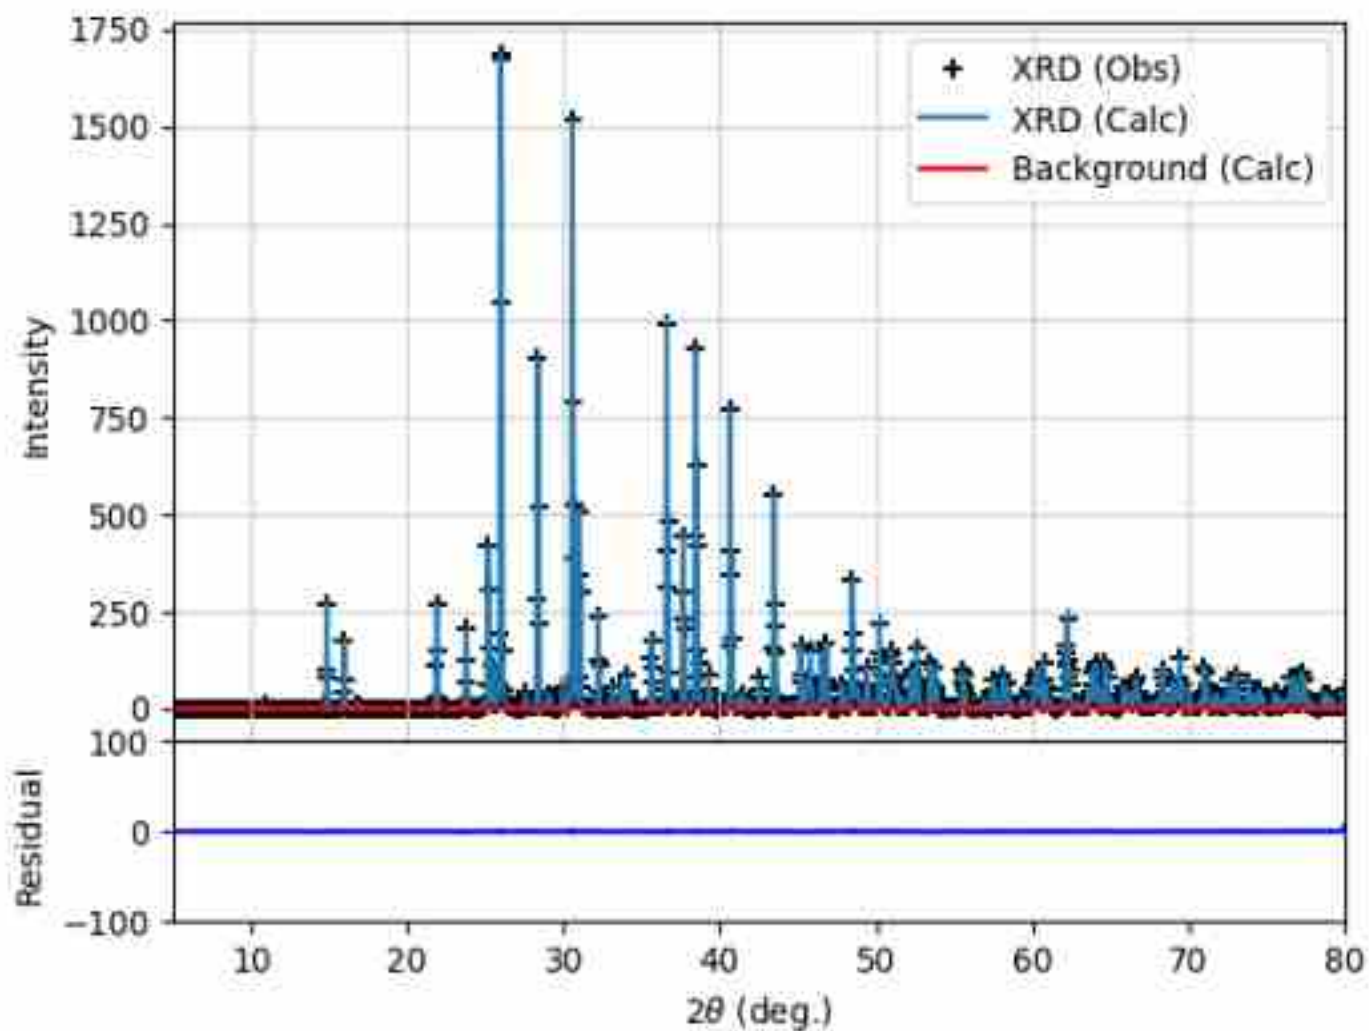

| RMSE before RR | Rwp     | RMSE after RR |
|----------------|---------|---------------|
| 0.065          | 0.72619 | 0.00822       |

# Li<sub>2</sub>ZnGe<sub>3</sub>

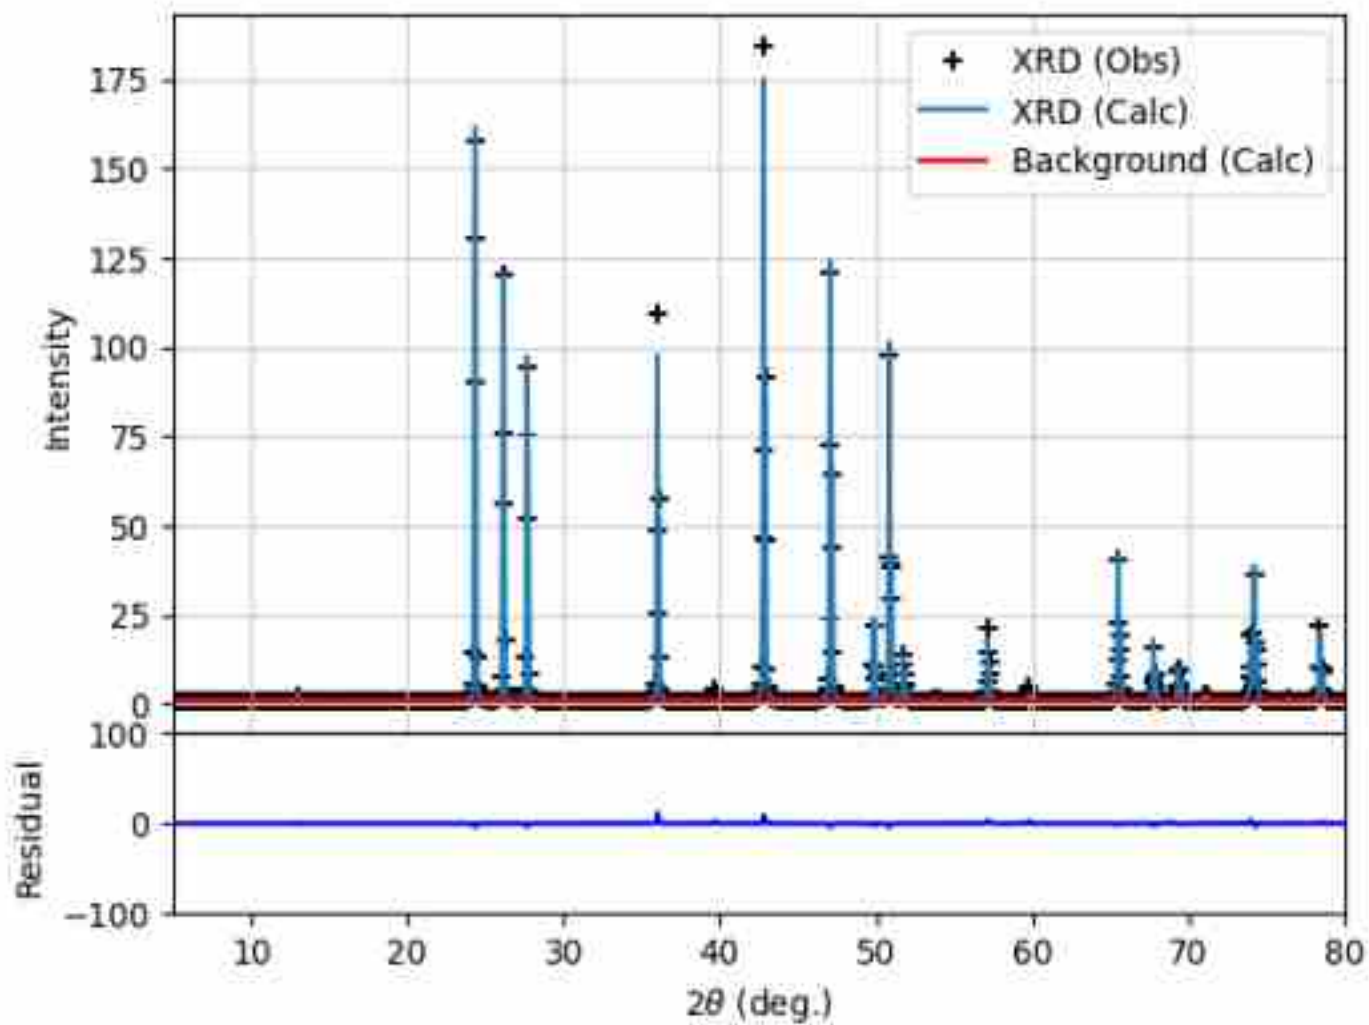

| RMSE before RR | Rwp     | RMSE after RR |
|----------------|---------|---------------|
| 0.065          | 6.92742 | 0.0719        |

# Li10Ge2P6

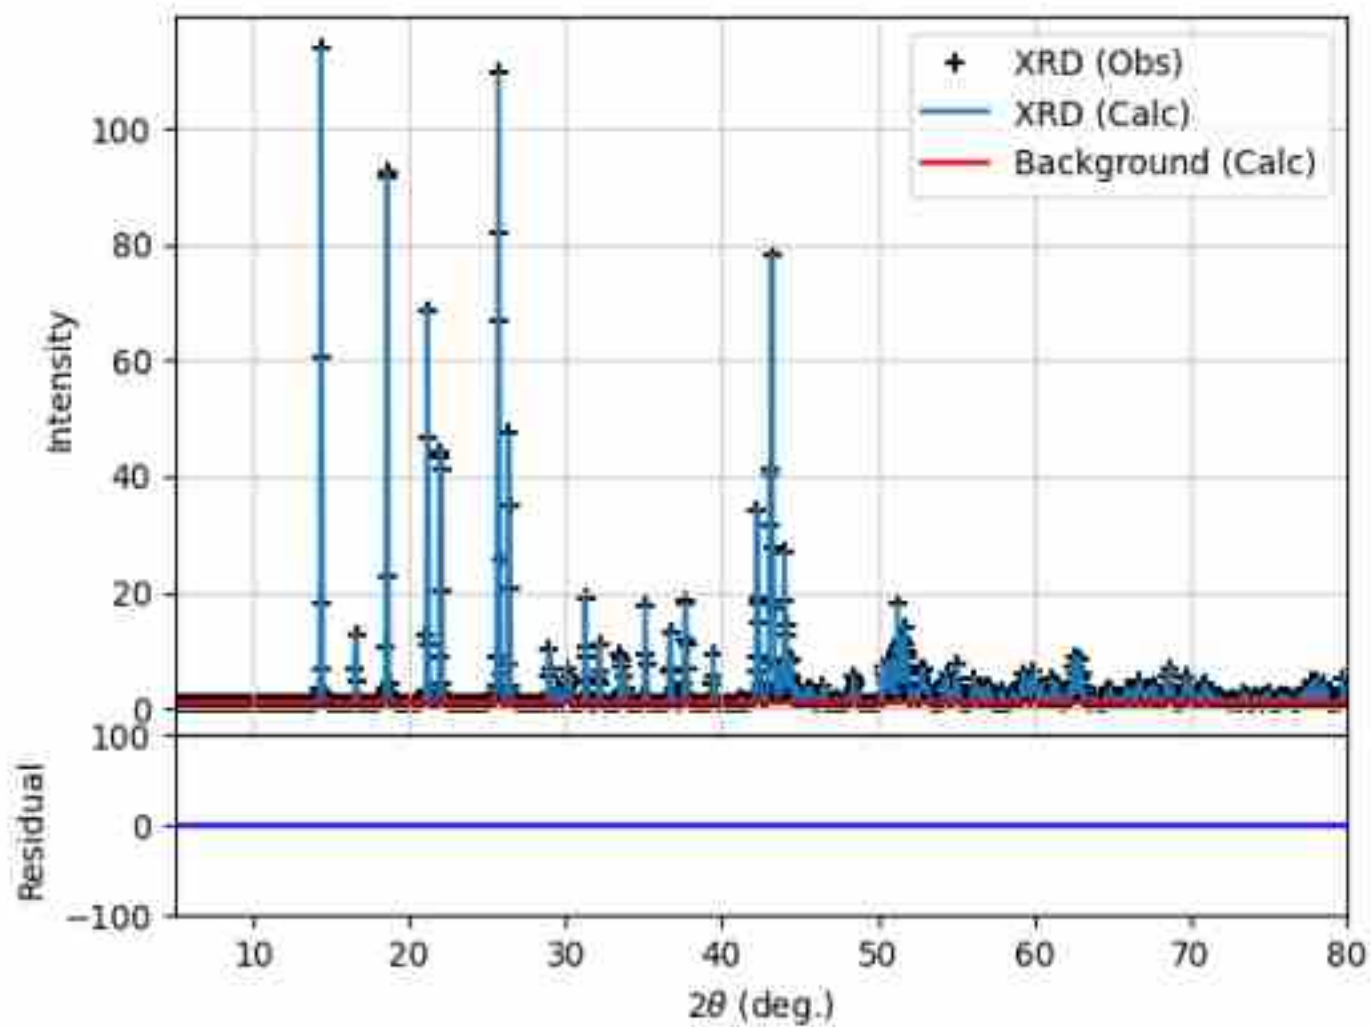

| RMSE before RR | Rwp     | RMSE after RR |
|----------------|---------|---------------|
| 0.065          | 0.00224 | 0.00105       |

# Pb4S1Br6

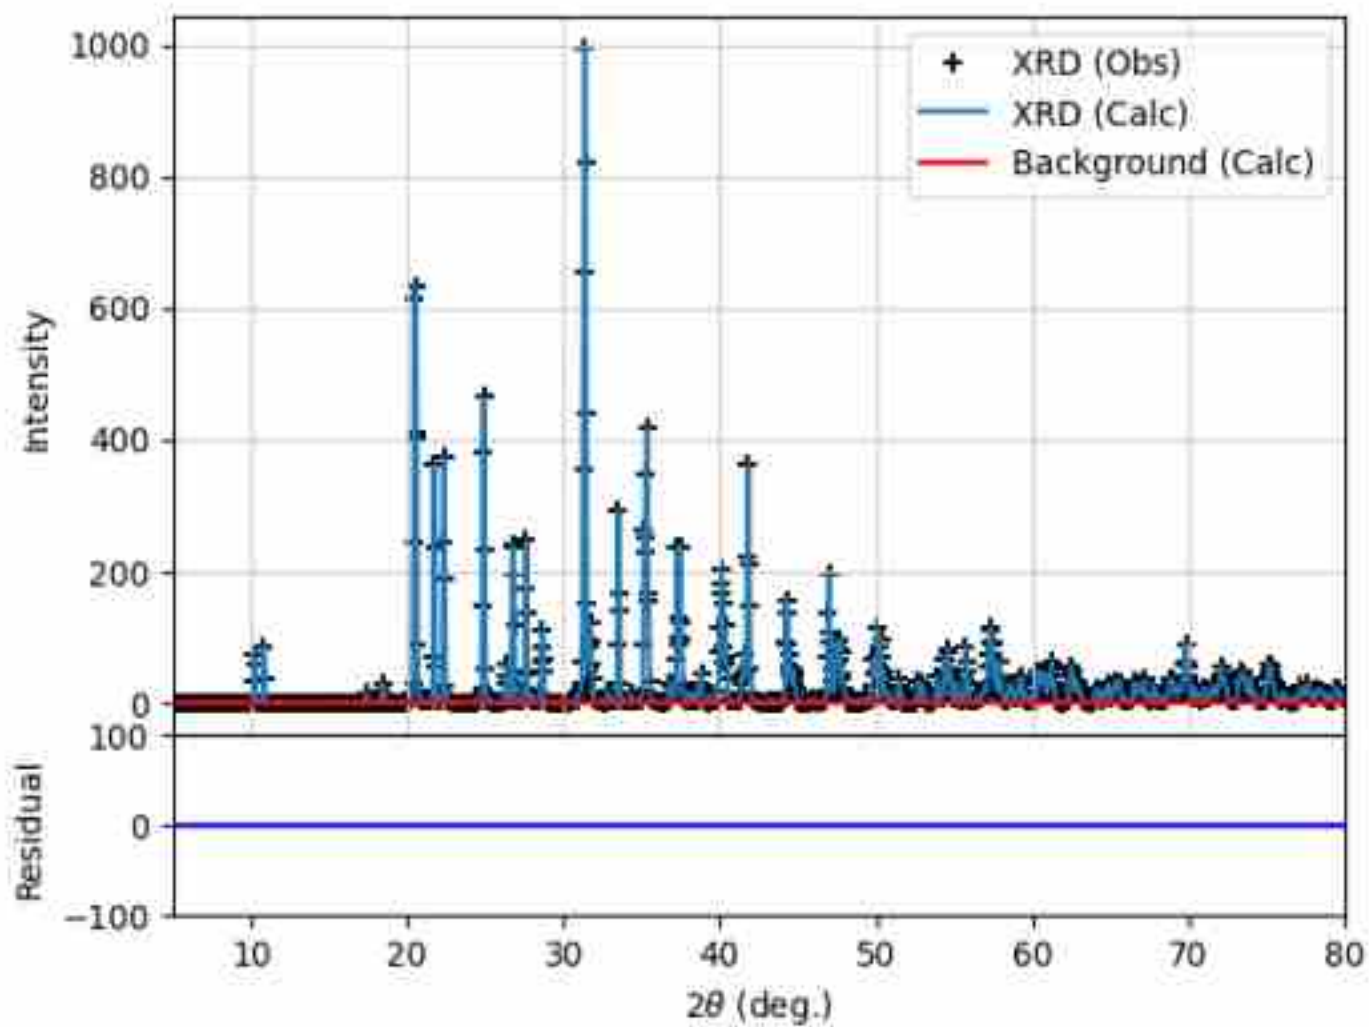

| RMSE before RR | Rwp     | RMSE after RR |
|----------------|---------|---------------|
| 0.065          | 0.00043 | 0.0           |

# Rb<sub>2</sub>Au<sub>2</sub>I<sub>6</sub>

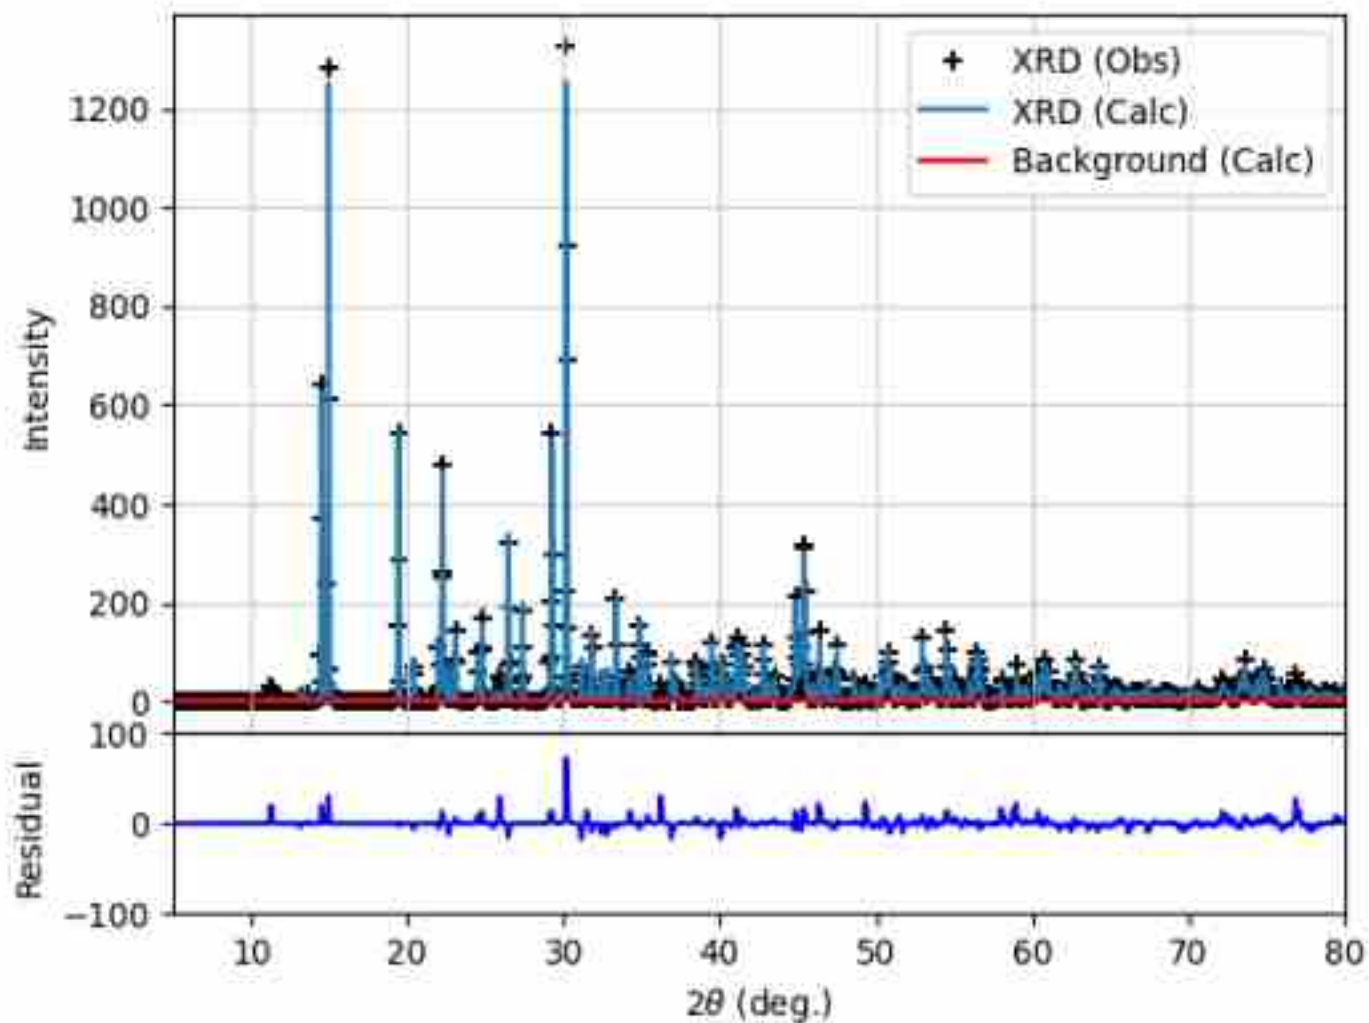

| RMSE before RR | Rwp      | RMSE after RR |
|----------------|----------|---------------|
| 0.065          | 16.43235 | 0.09738       |

# Ba<sub>2</sub>FeMoO<sub>6</sub>

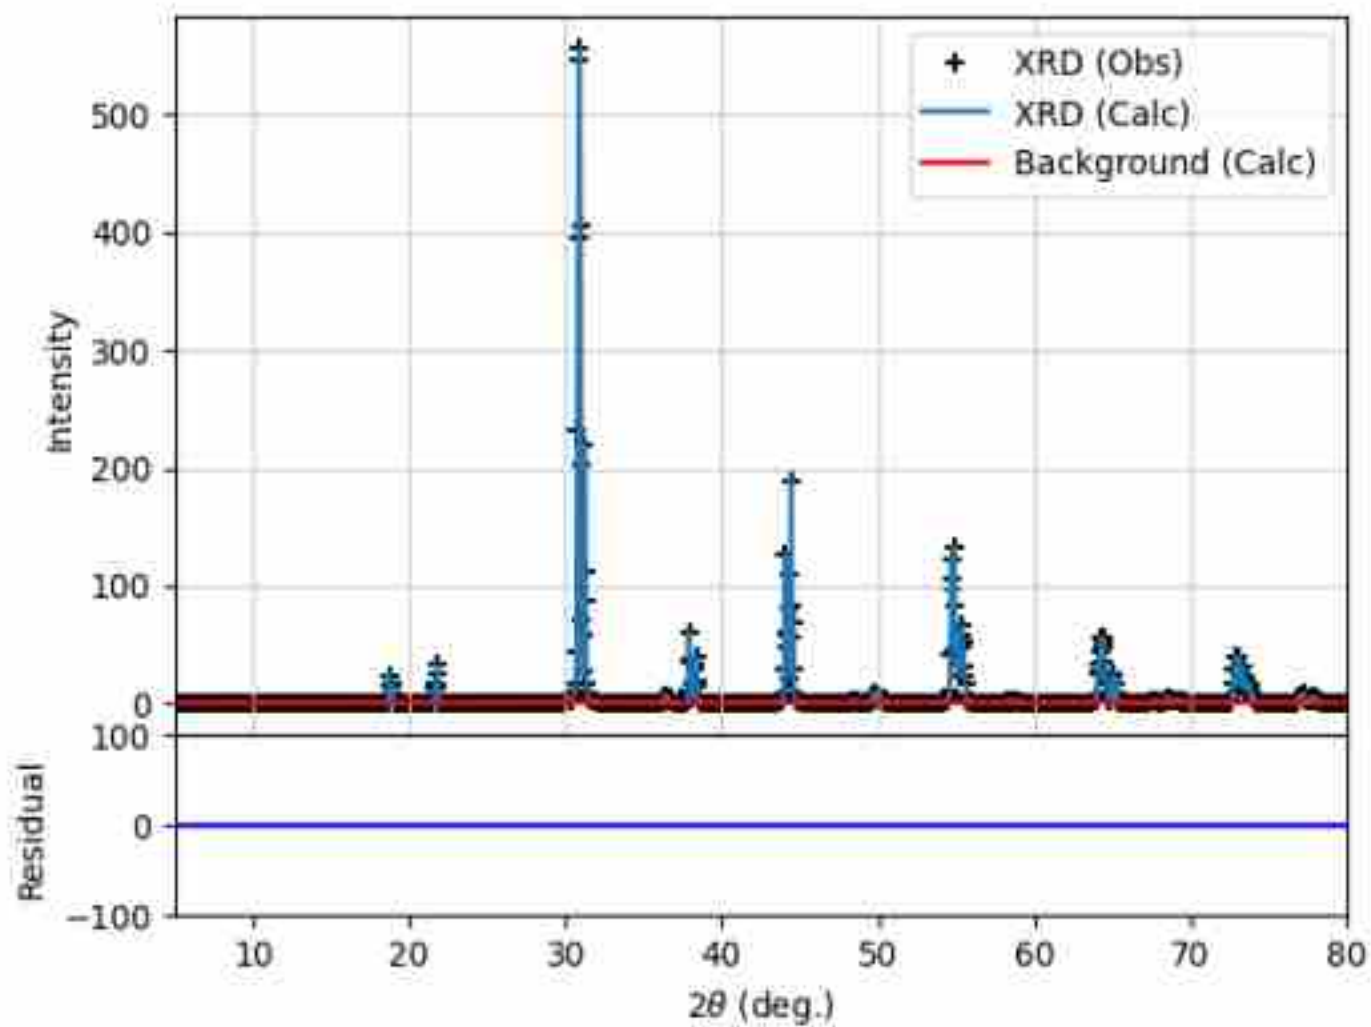

| RMSE before RR | Rwp     | RMSE after RR |
|----------------|---------|---------------|
| 0.066          | 0.00119 | 0.0003        |

# Ba<sub>2</sub>Sr<sub>2</sub>In<sub>2</sub>W<sub>2</sub>O<sub>12</sub>

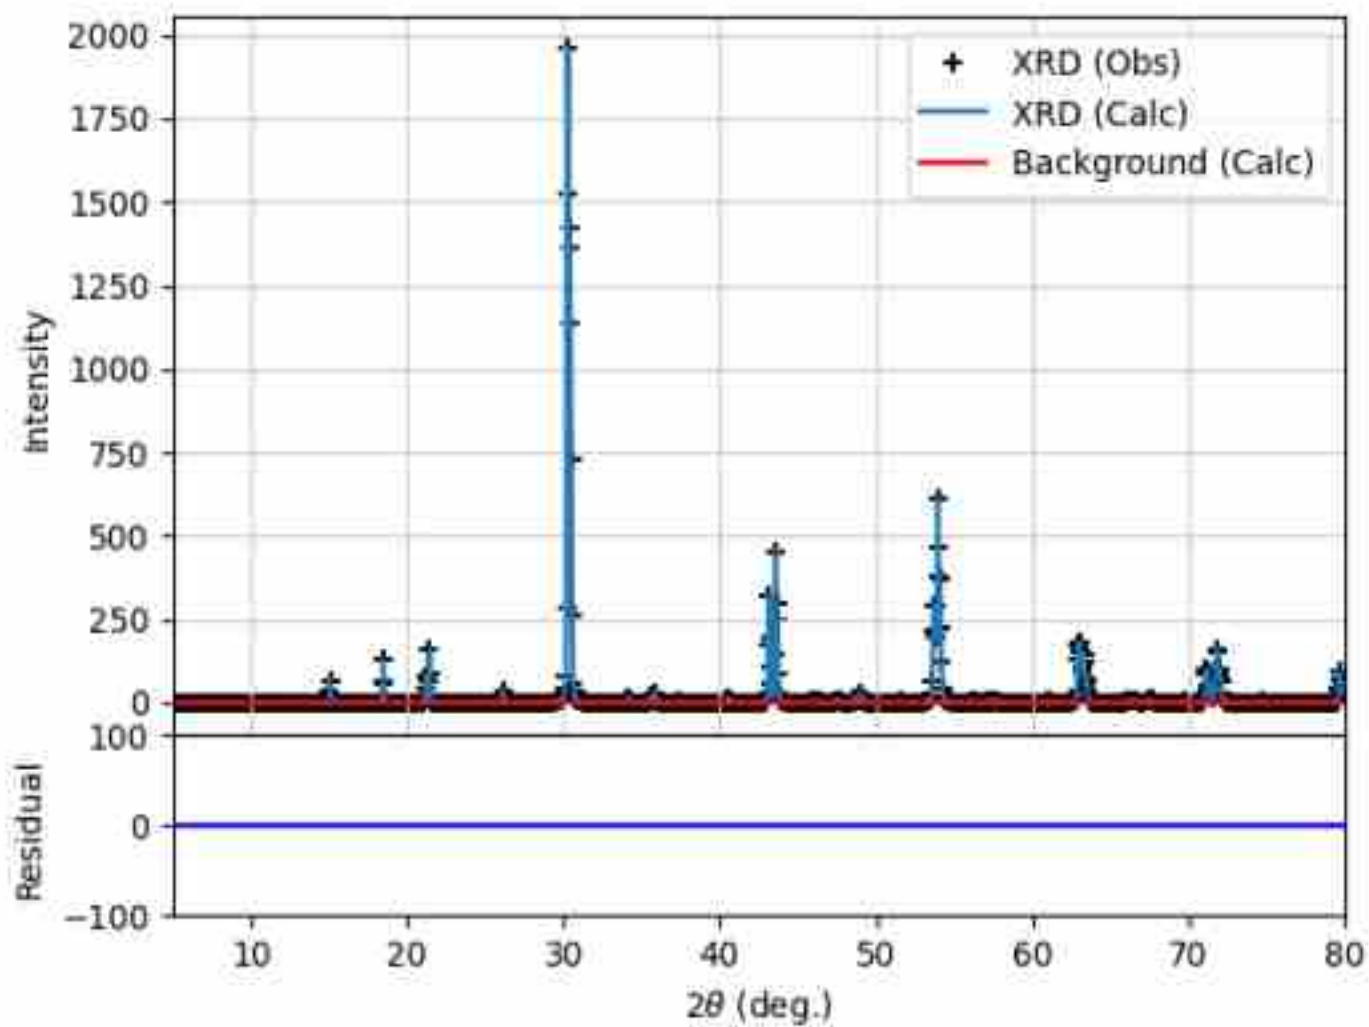

| RMSE before RR | Rwp    | RMSE after RR |
|----------------|--------|---------------|
| 0.066          | 0.0014 | 0.00086       |

# Ga<sub>2</sub>H<sub>2</sub>O<sub>4</sub>

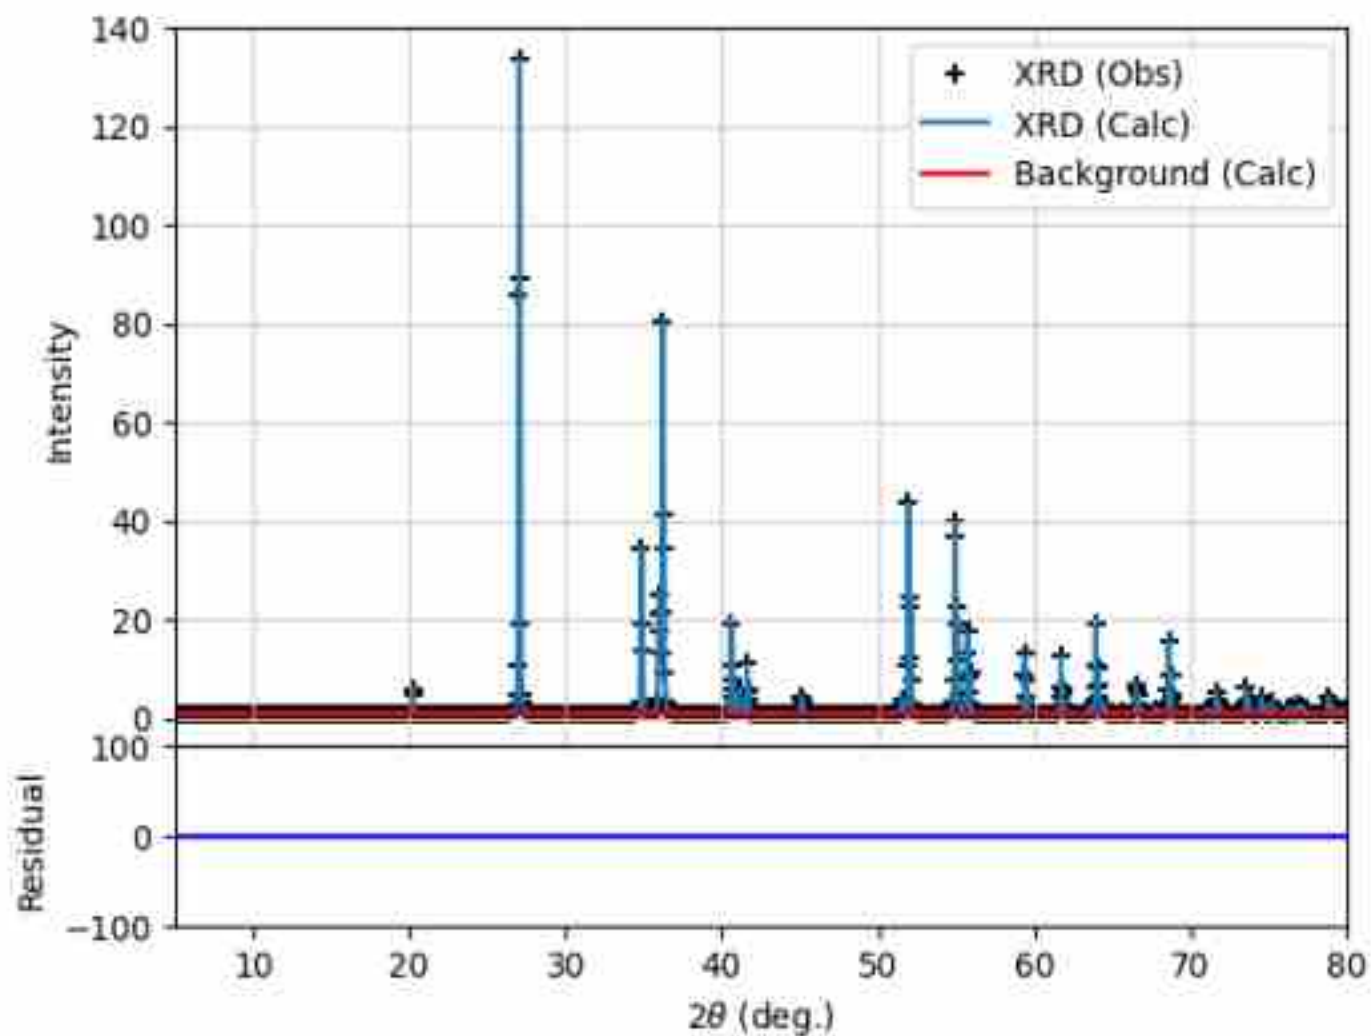

| RMSE before RR | Rwp     | RMSE after RR |
|----------------|---------|---------------|
| 0.066          | 0.00253 | 0.00251       |



# Ga<sub>4</sub>Te<sub>4</sub>

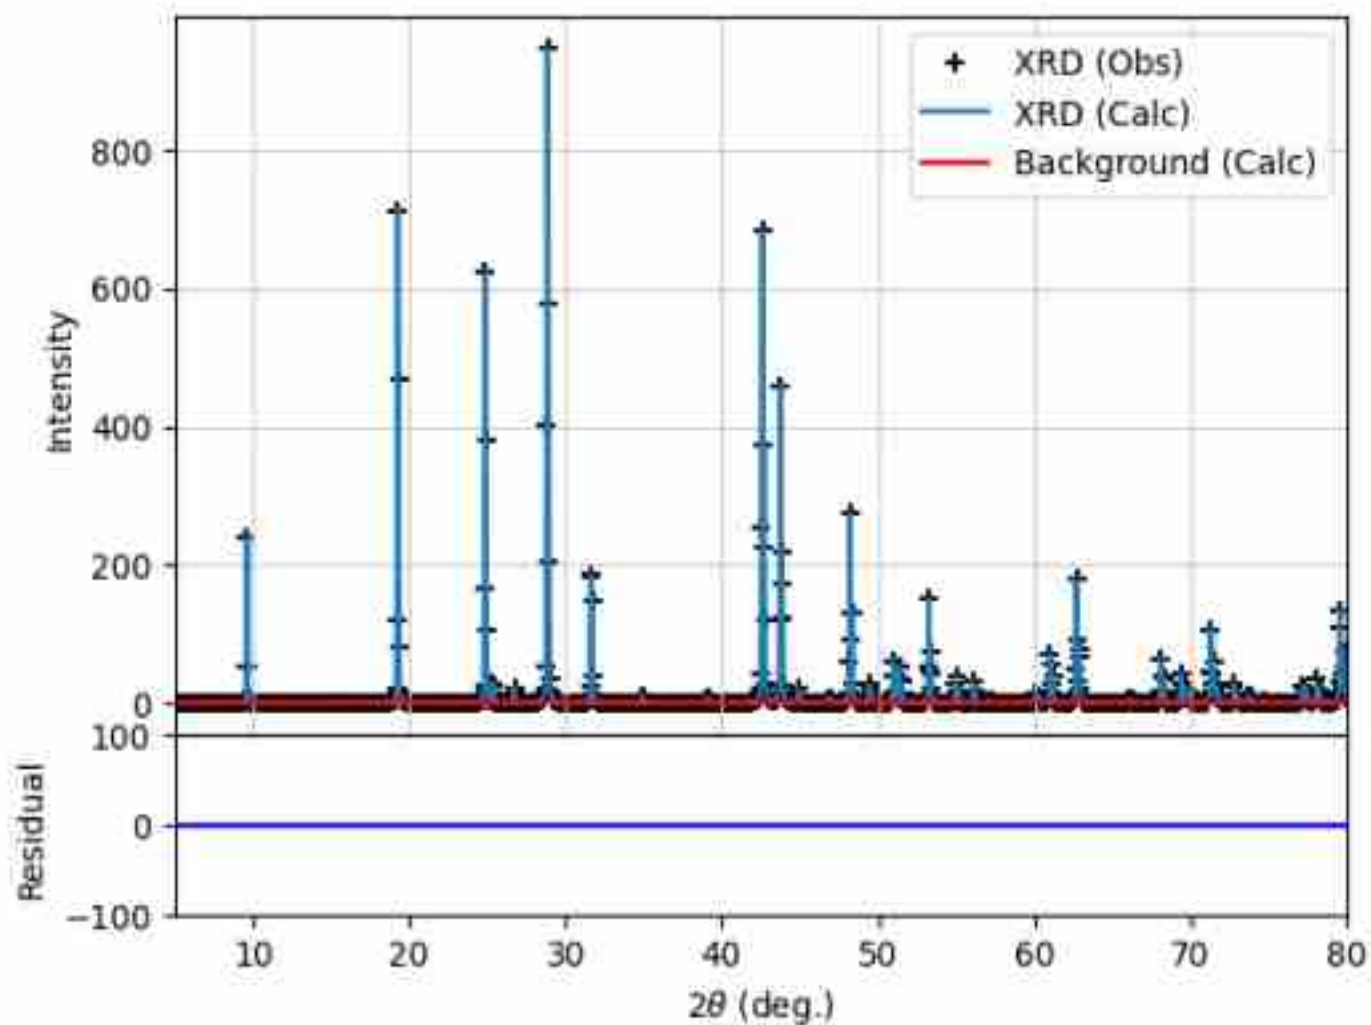

| RMSE before RR | Rwp     | RMSE after RR |
|----------------|---------|---------------|
| 0.066          | 0.00332 | 0.00047       |

# K4S2O8

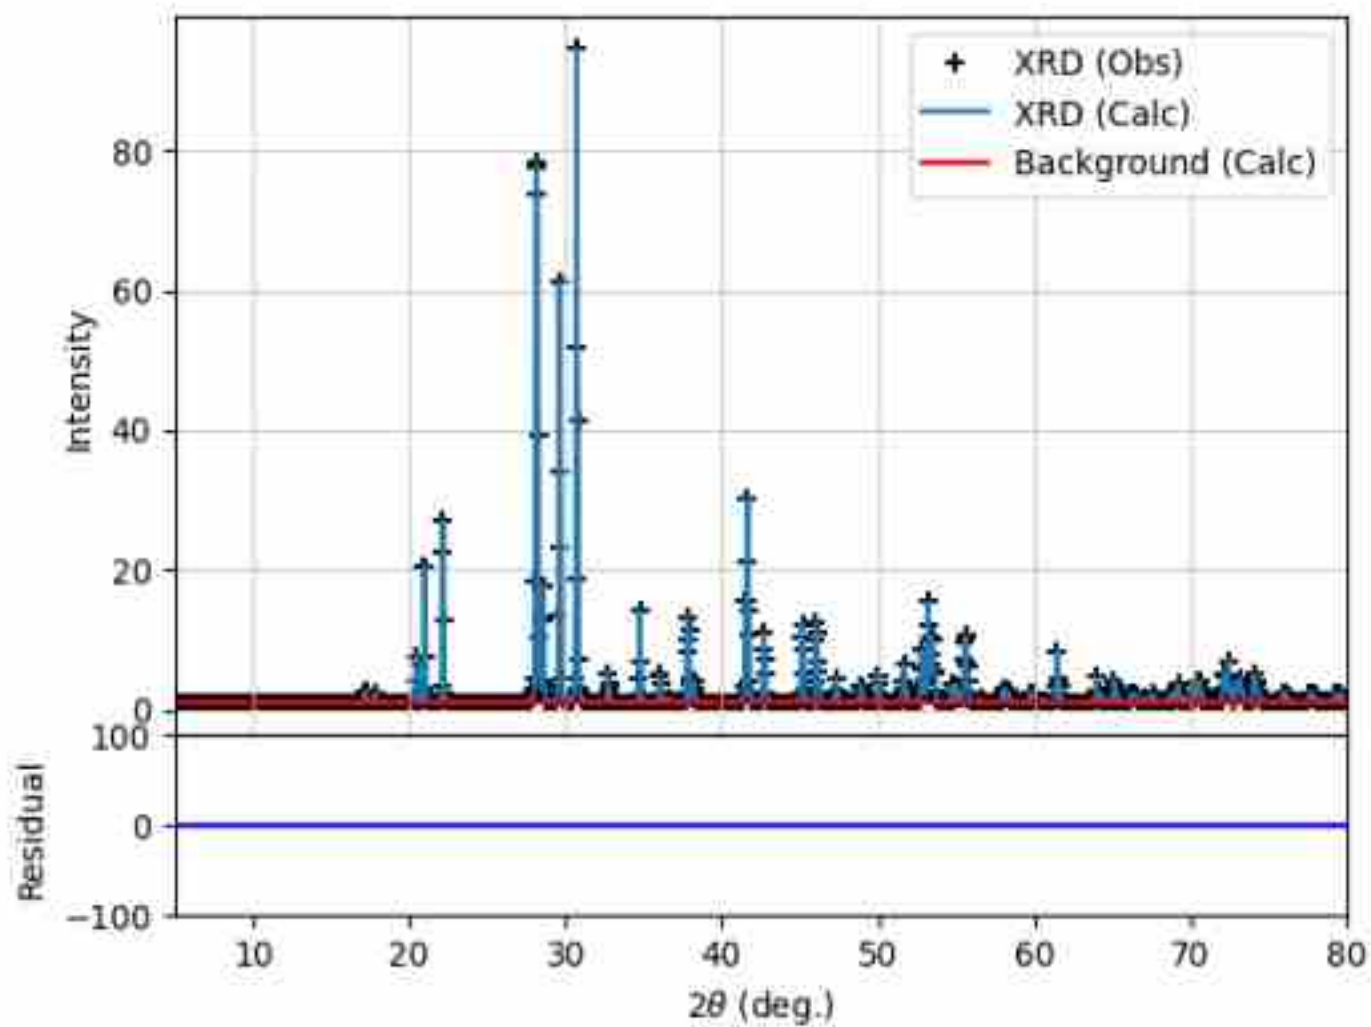

| RMSE before RR | Rwp     | RMSE after RR |
|----------------|---------|---------------|
| 0.066          | 0.00276 | 0.00061       |

# Mg<sub>2</sub>U<sub>2</sub>Pb<sub>4</sub>O<sub>12</sub>

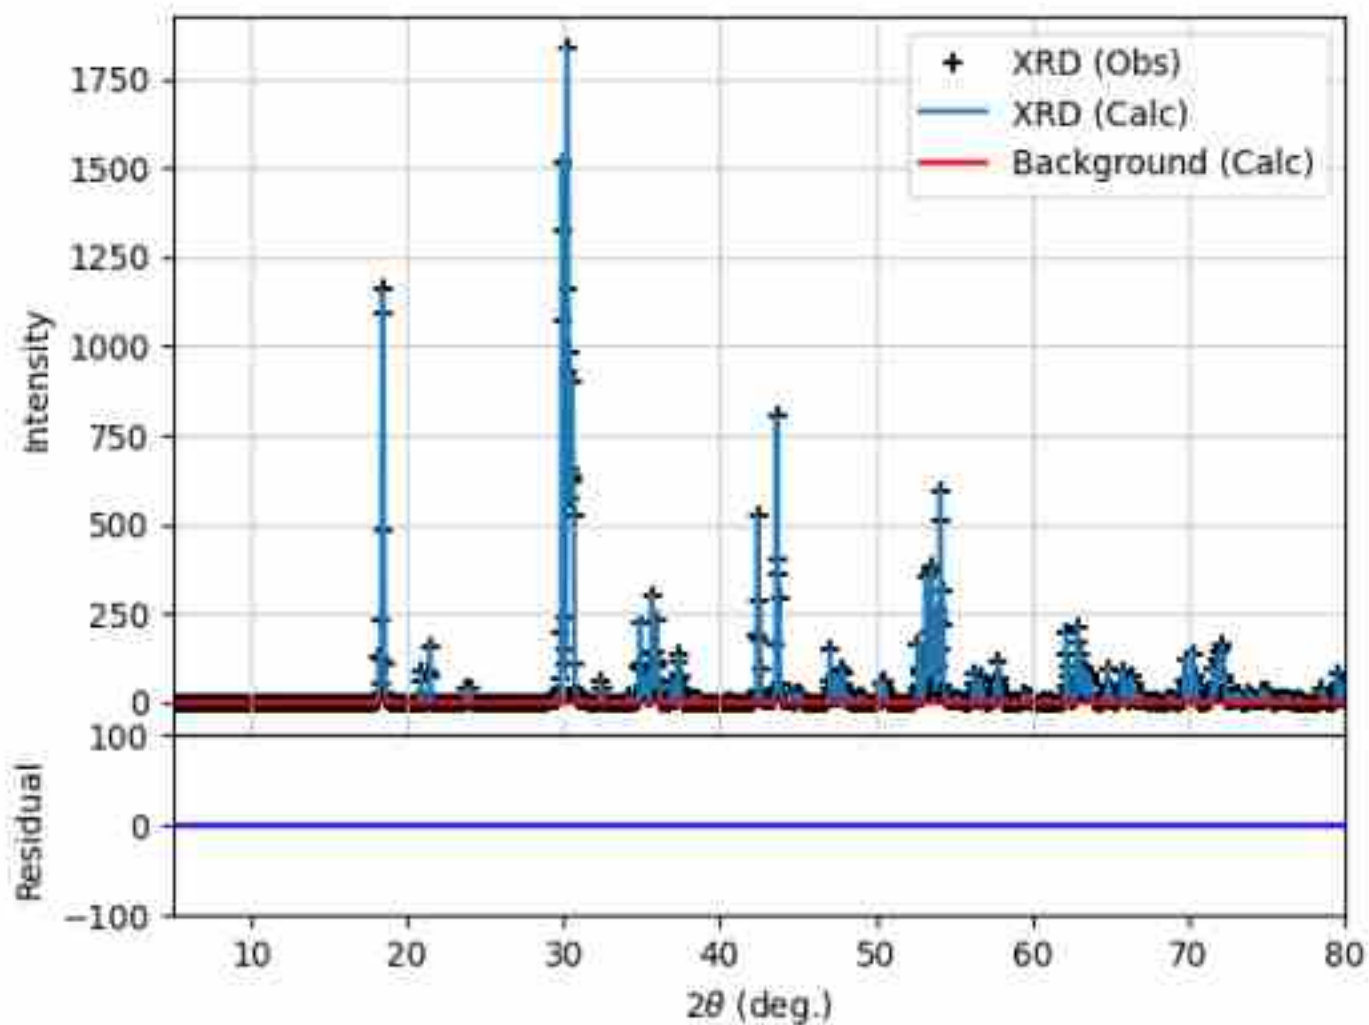

| RMSE before RR | Rwp     | RMSE after RR |
|----------------|---------|---------------|
| 0.066          | 0.00356 | 0.00115       |

# W4Se2S6

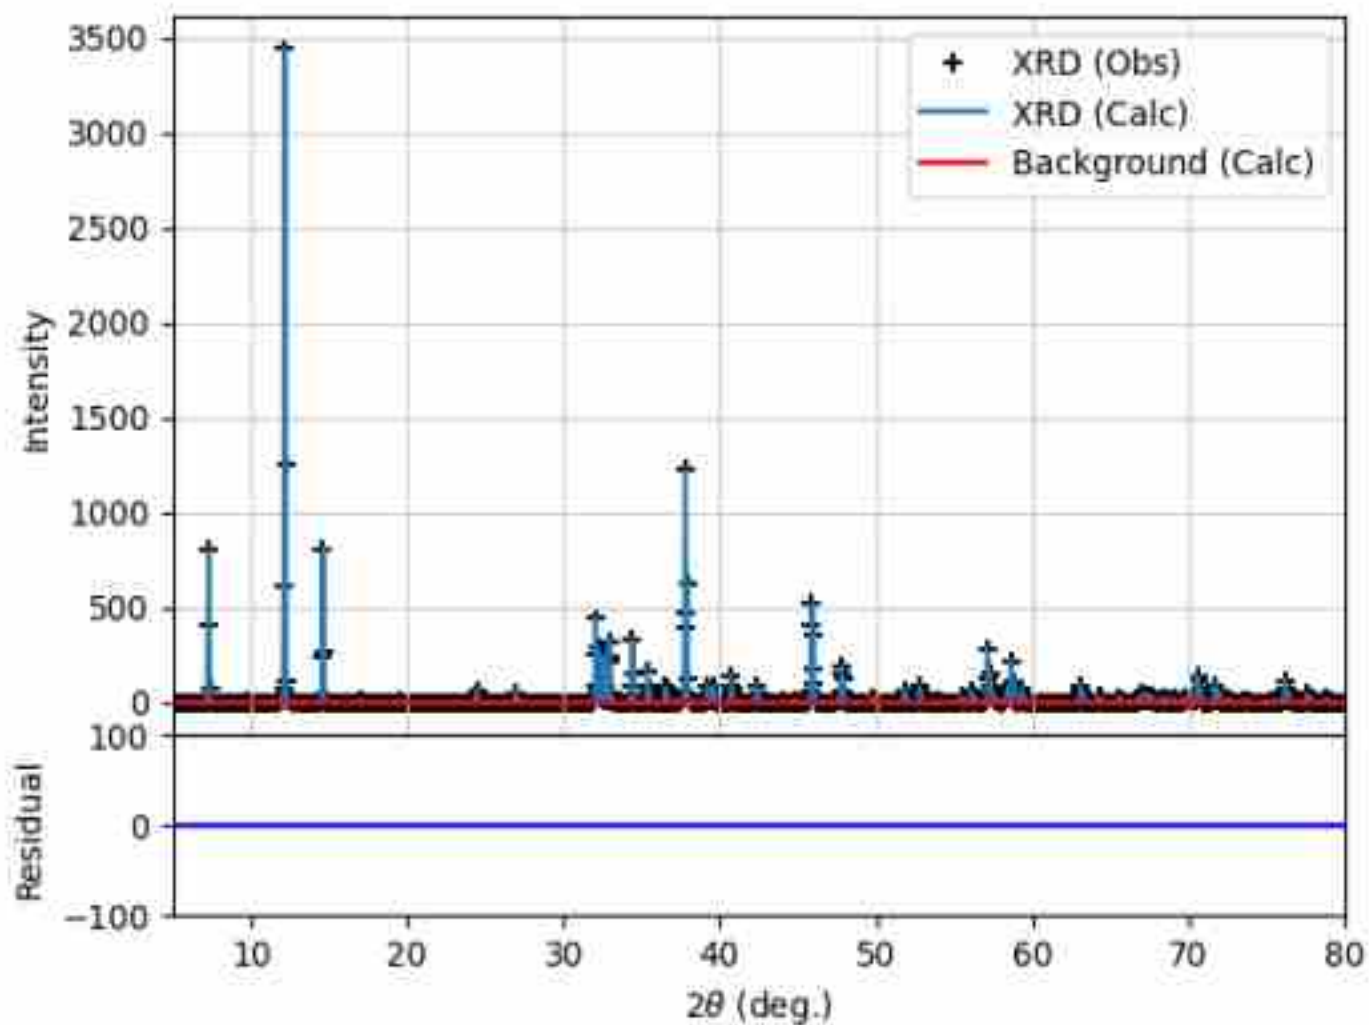

| RMSE before RR | Rwp     | RMSE after RR |
|----------------|---------|---------------|
| 0.066          | 0.00299 | 0.00056       |

# Ba<sub>3</sub>Dy<sub>4</sub>O<sub>9</sub>

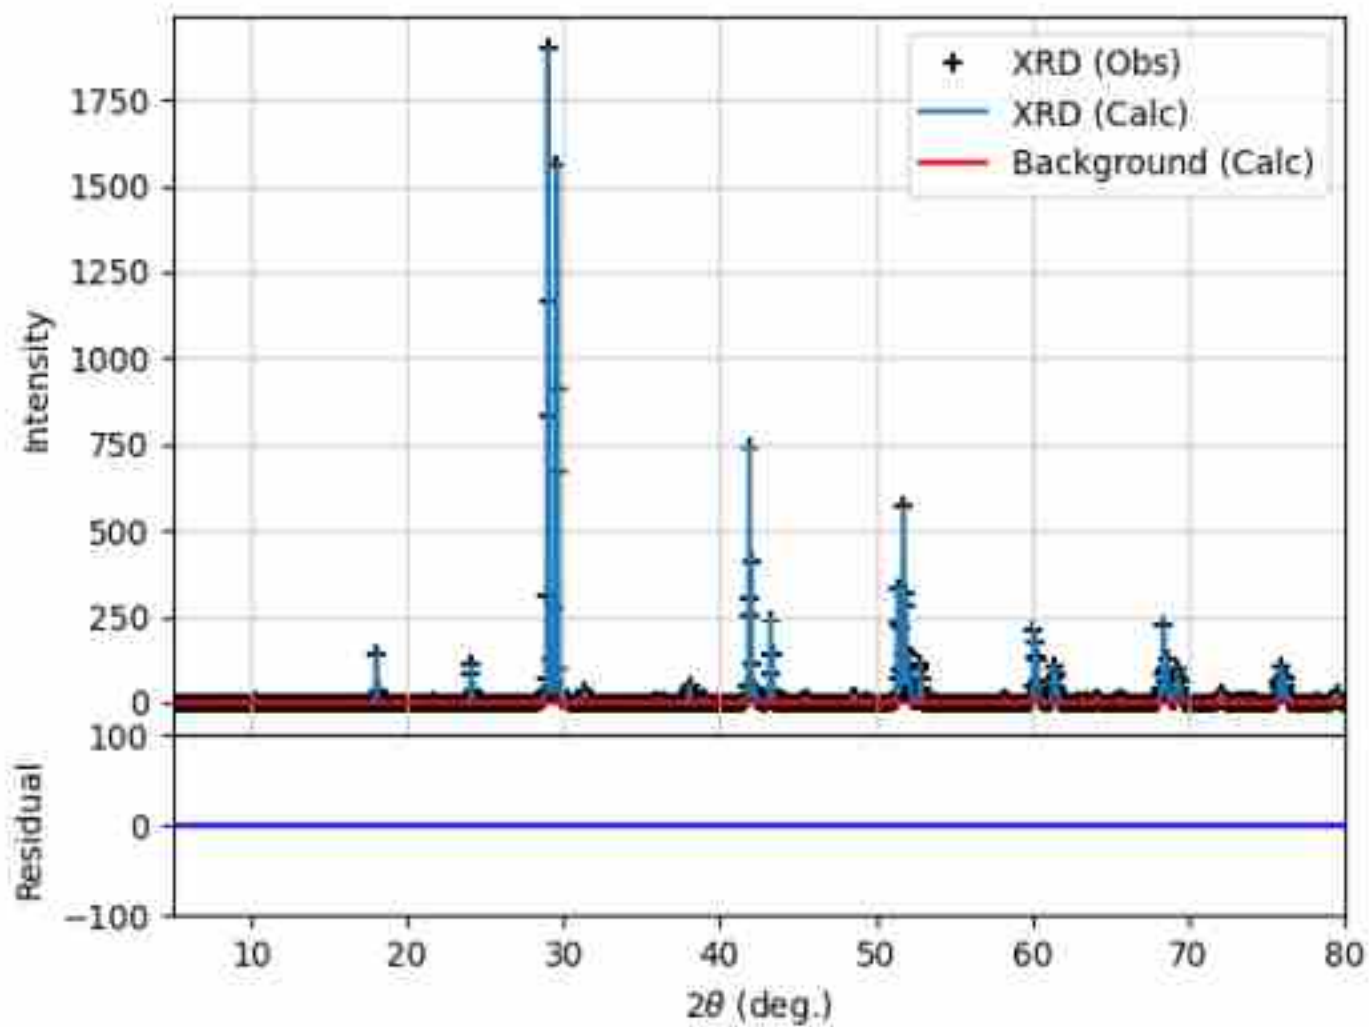

| RMSE before RR | Rwp    | RMSE after RR |
|----------------|--------|---------------|
| 0.067          | 0.0028 | 0.00148       |

# Ba<sub>4</sub>Zn<sub>8</sub>Sb<sub>8</sub>

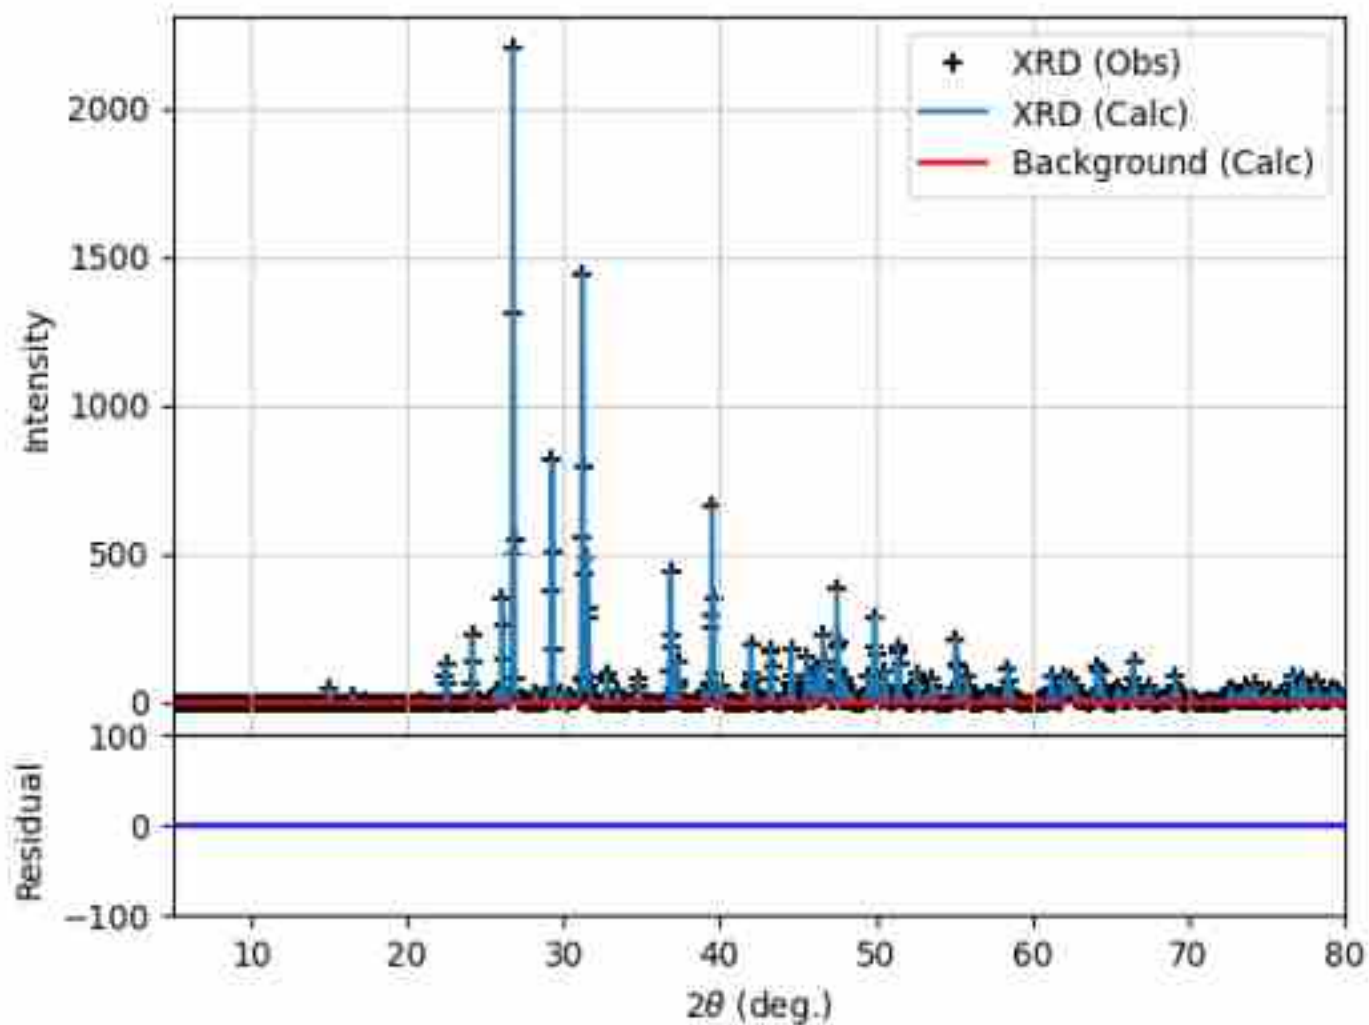

| RMSE before RR | Rwp     | RMSE after RR |
|----------------|---------|---------------|
| 0.067          | 0.00421 | 0.00031       |

# Er<sub>2</sub>Nb<sub>2</sub>O<sub>8</sub>

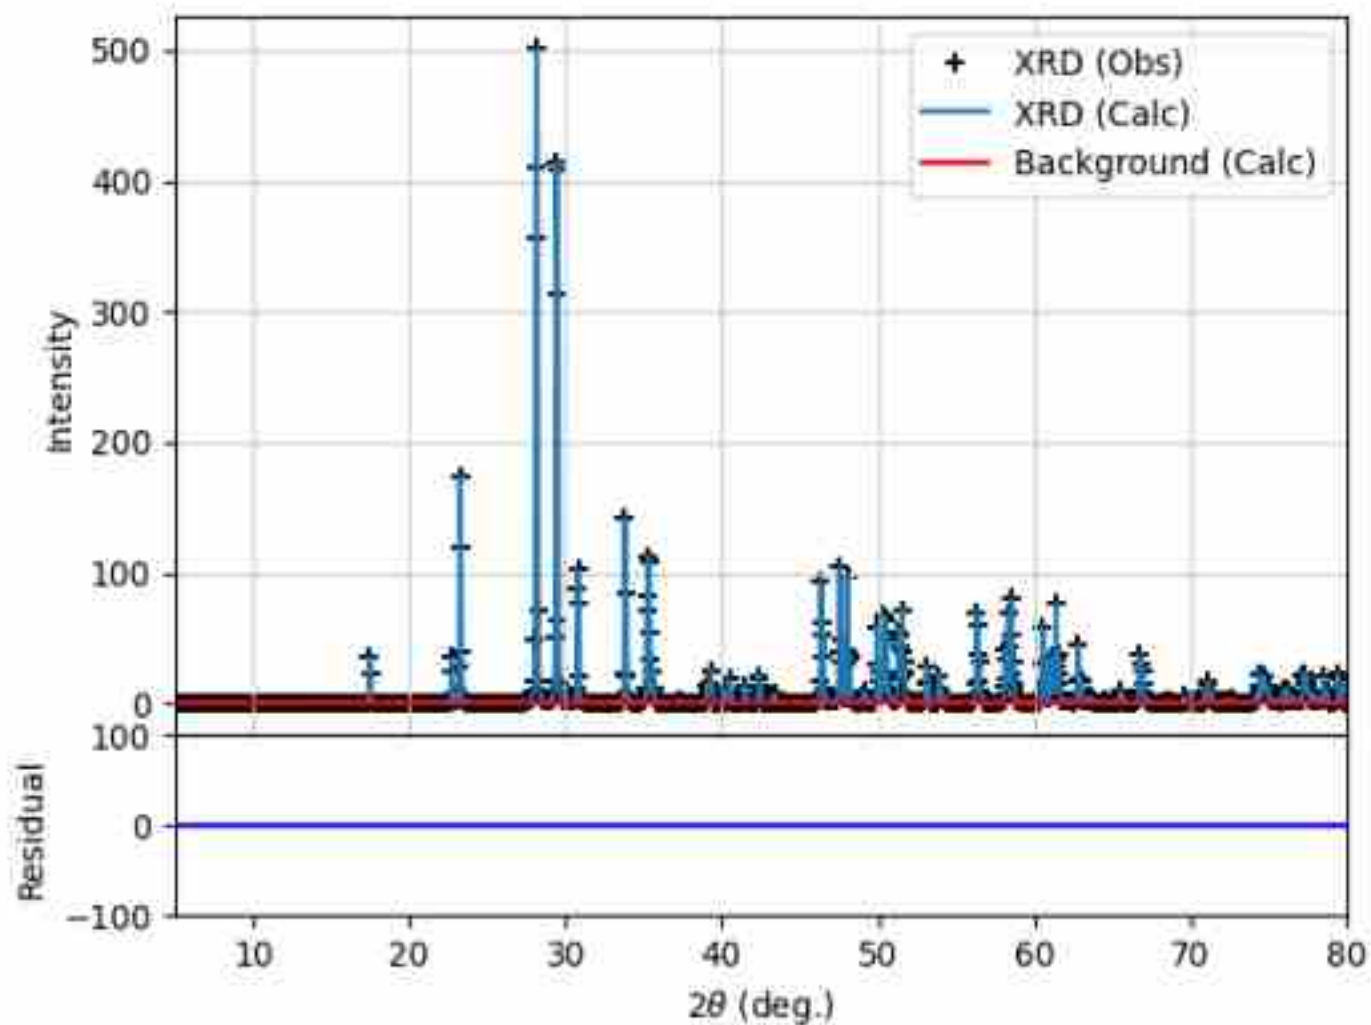

| RMSE before RR | Rwp     | RMSE after RR |
|----------------|---------|---------------|
| 0.067          | 0.00395 | 0.00149       |

# K6Al2H12

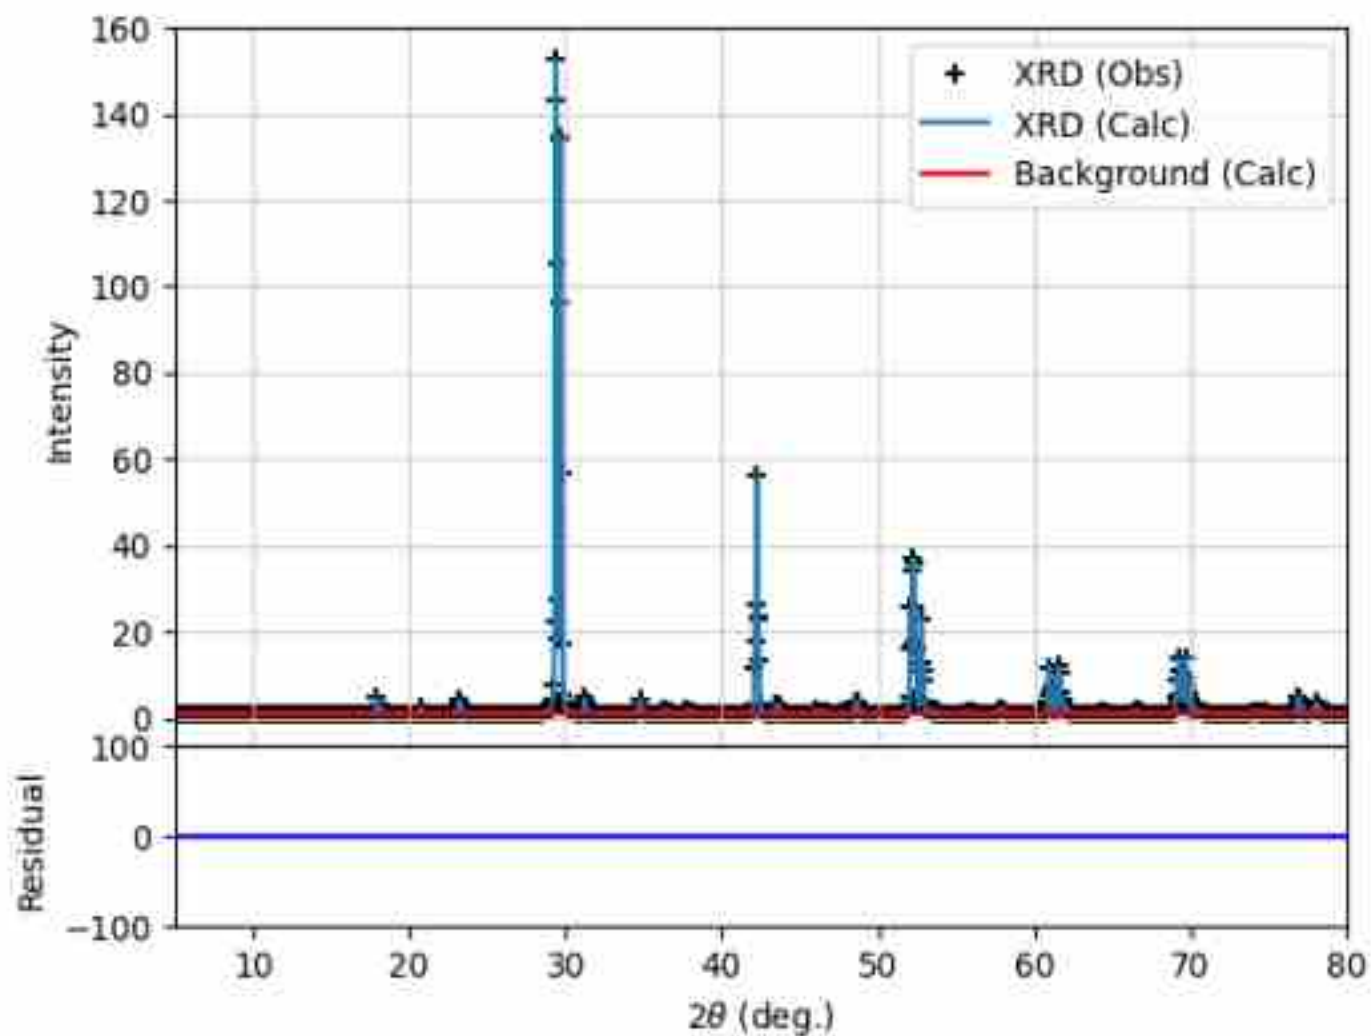

| RMSE before RR | Rwp     | RMSE after RR |
|----------------|---------|---------------|
| 0.067          | 0.00225 | 0.00403       |



# Mg<sub>2</sub>V<sub>2</sub>Si<sub>2</sub>O<sub>10</sub>

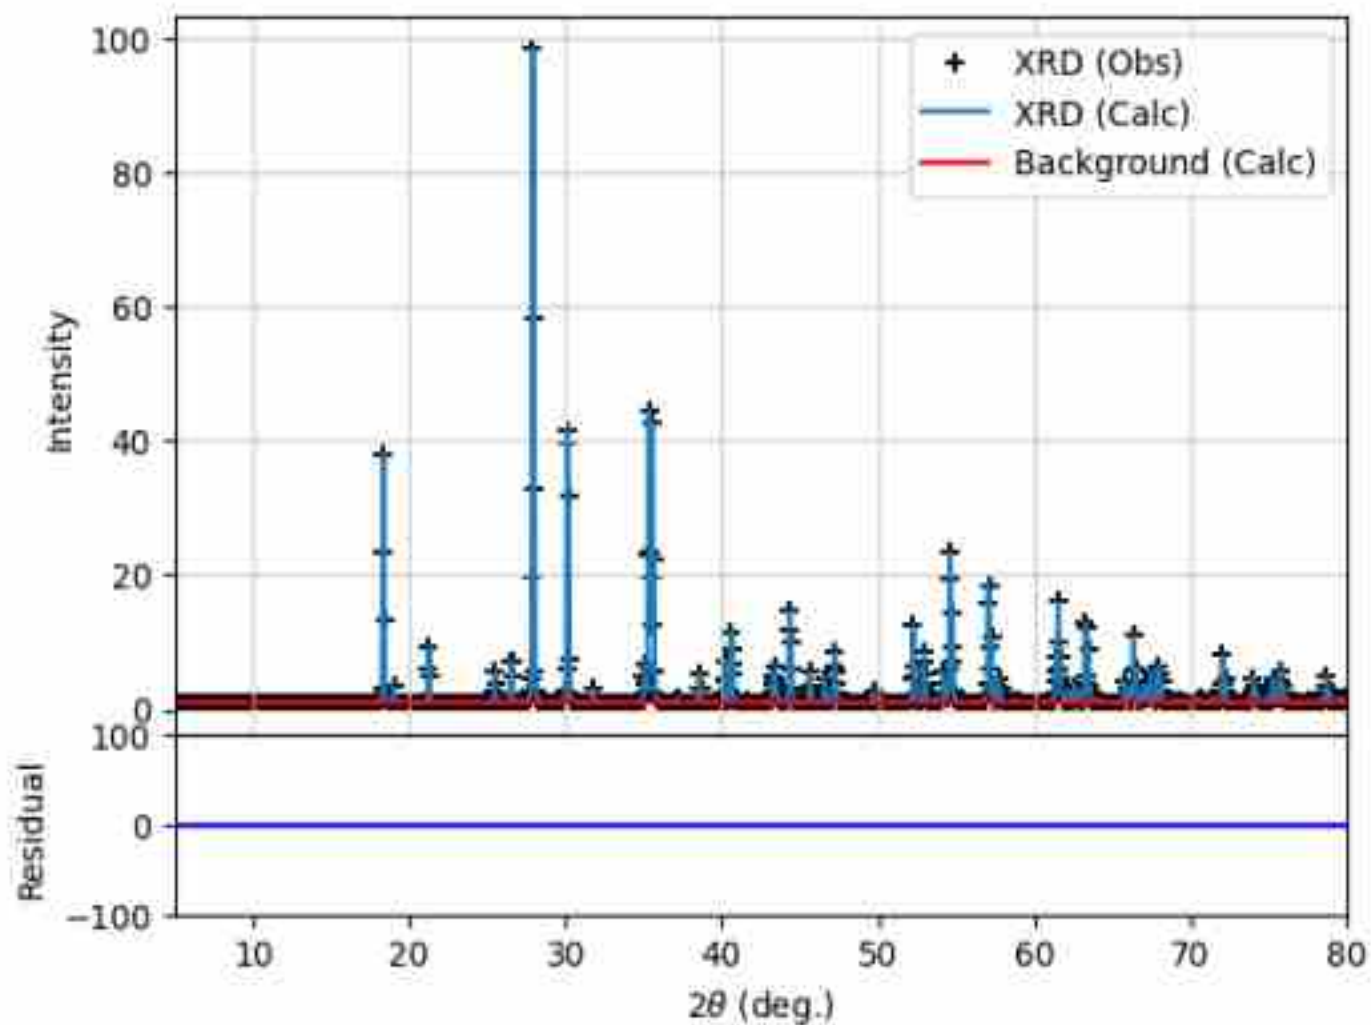

| RMSE before RR | Rwp    | RMSE after RR |
|----------------|--------|---------------|
| 0.067          | 0.0024 | 0.00077       |

# Mo<sub>4</sub>Br<sub>12</sub>O<sub>4</sub>

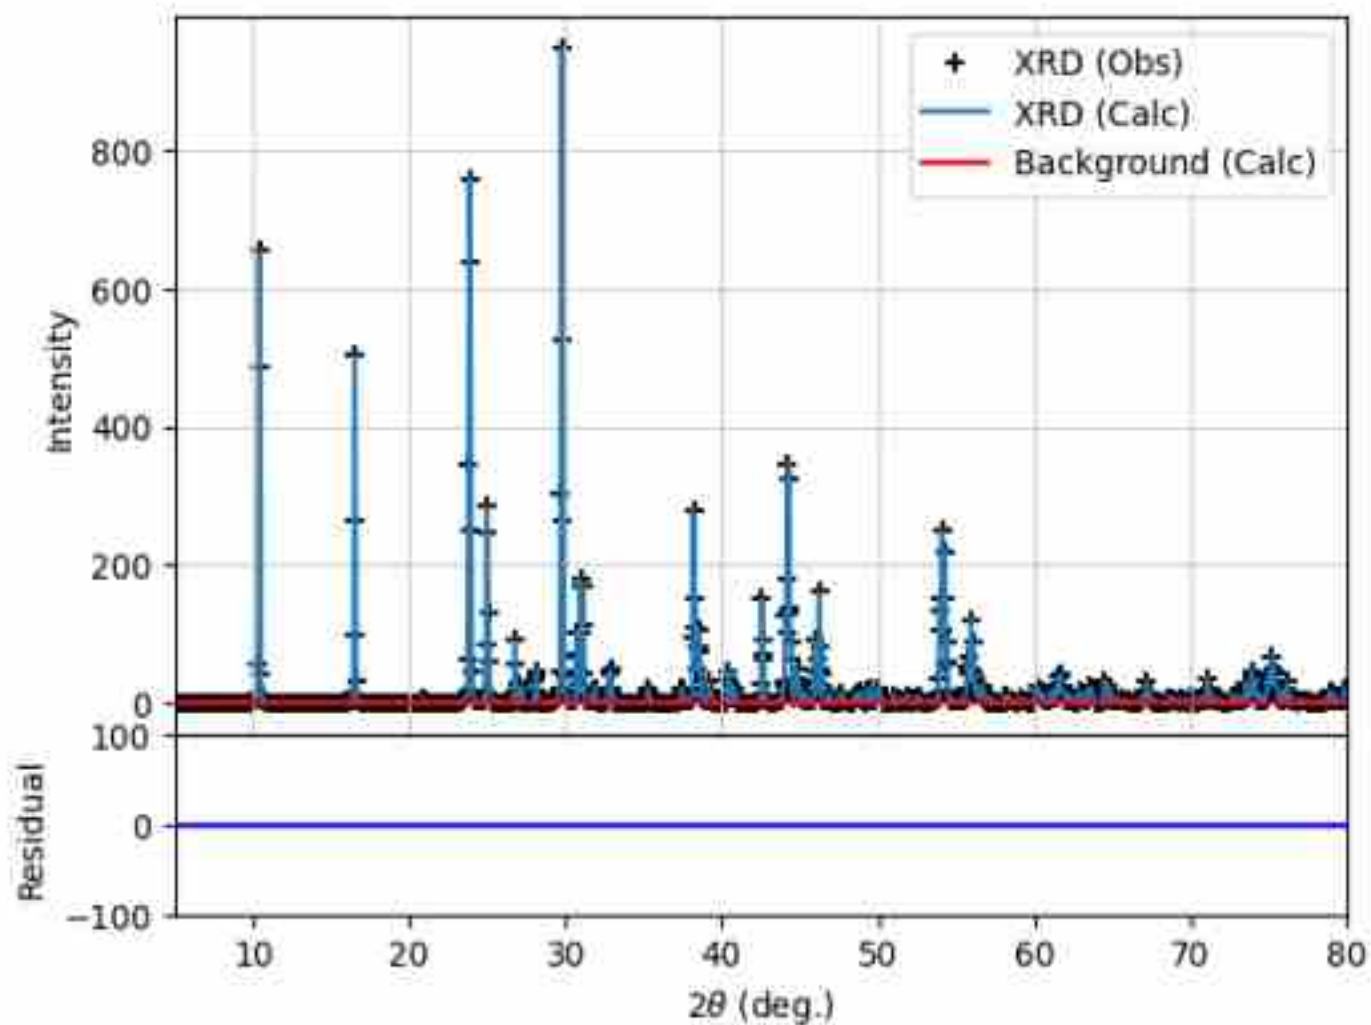

| RMSE before RR | Rwp     | RMSE after RR |
|----------------|---------|---------------|
| 0.067          | 0.00375 | 0.00045       |

# Na<sub>2</sub>U<sub>2</sub>O<sub>7</sub>

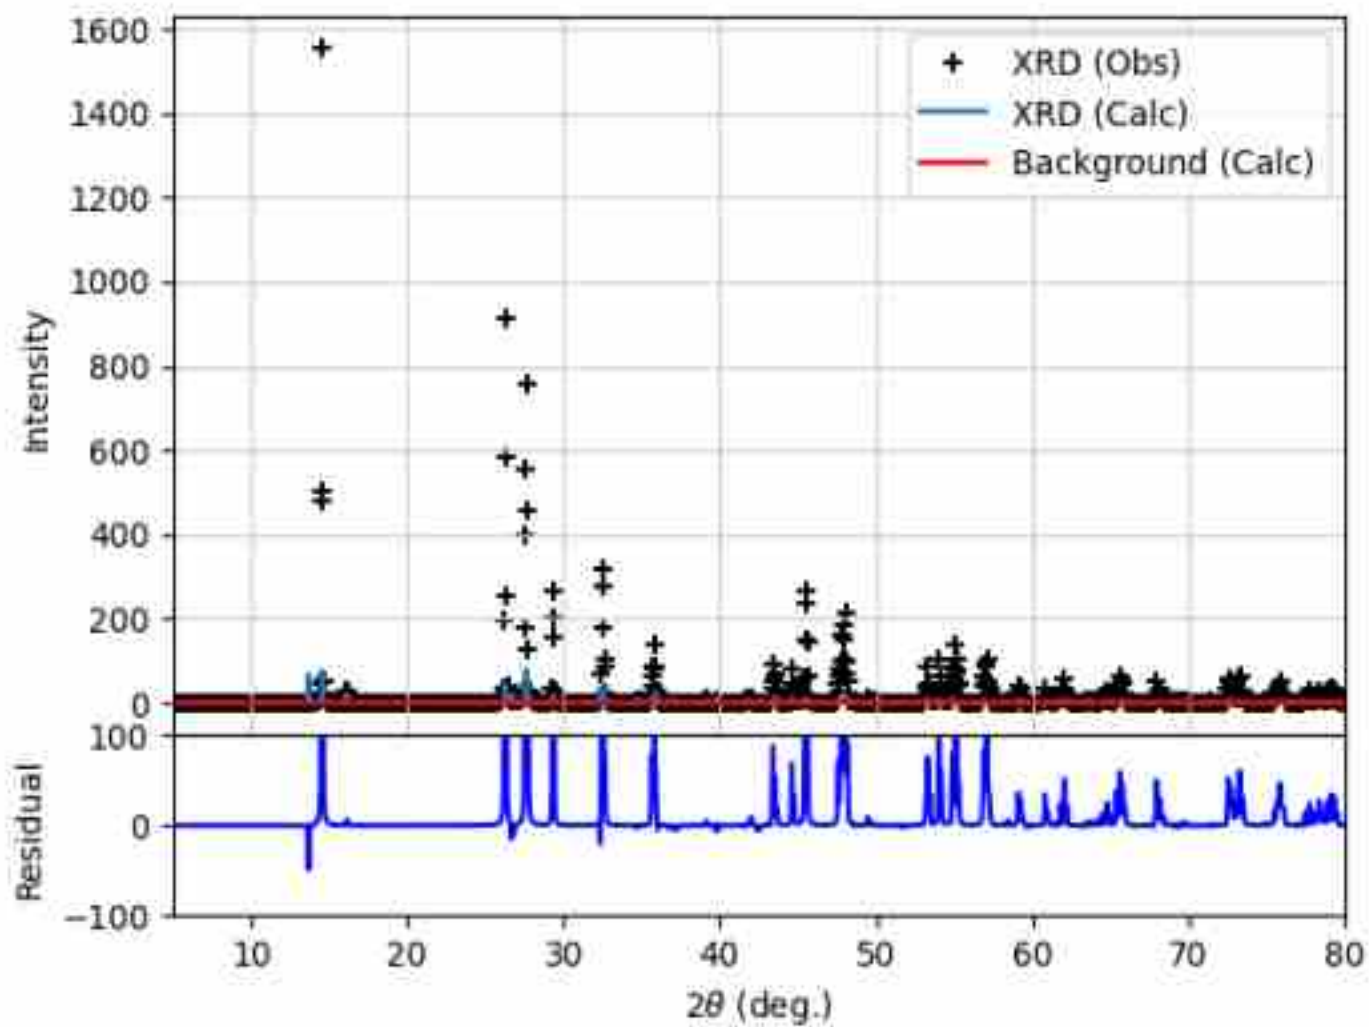

| RMSE before RR | Rwp      | RMSE after RR |
|----------------|----------|---------------|
| 0.067          | 87.36742 | None          |

# Nb1Bi1O4

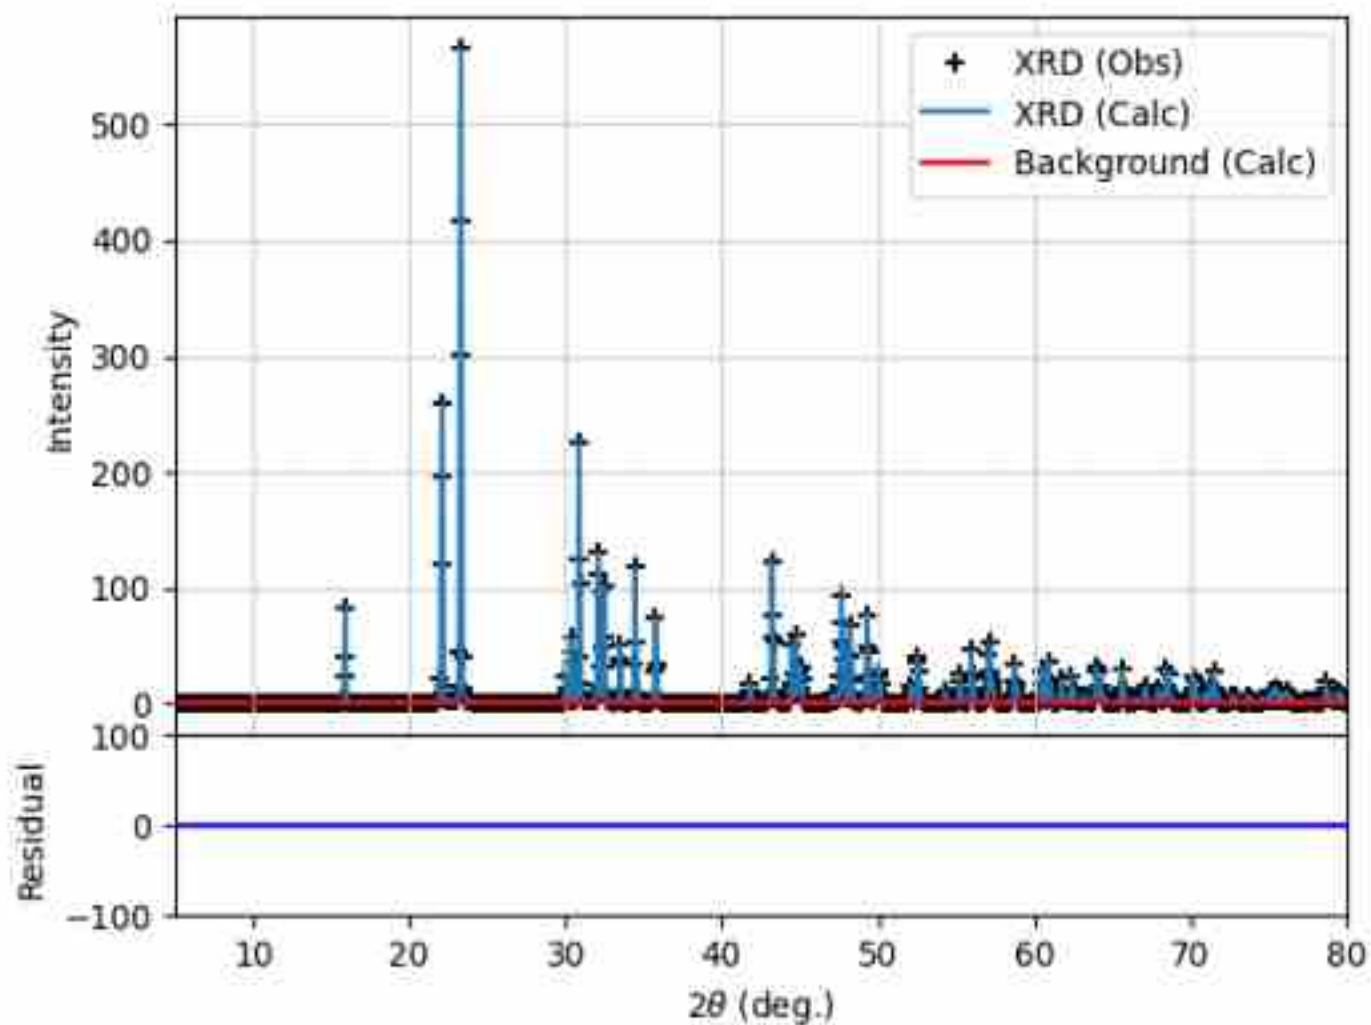

| RMSE before RR | Rwp     | RMSE after RR |
|----------------|---------|---------------|
| 0.067          | 0.00336 | 0.00068       |

# Rb<sub>2</sub>P<sub>2</sub>H<sub>4</sub>O<sub>8</sub>

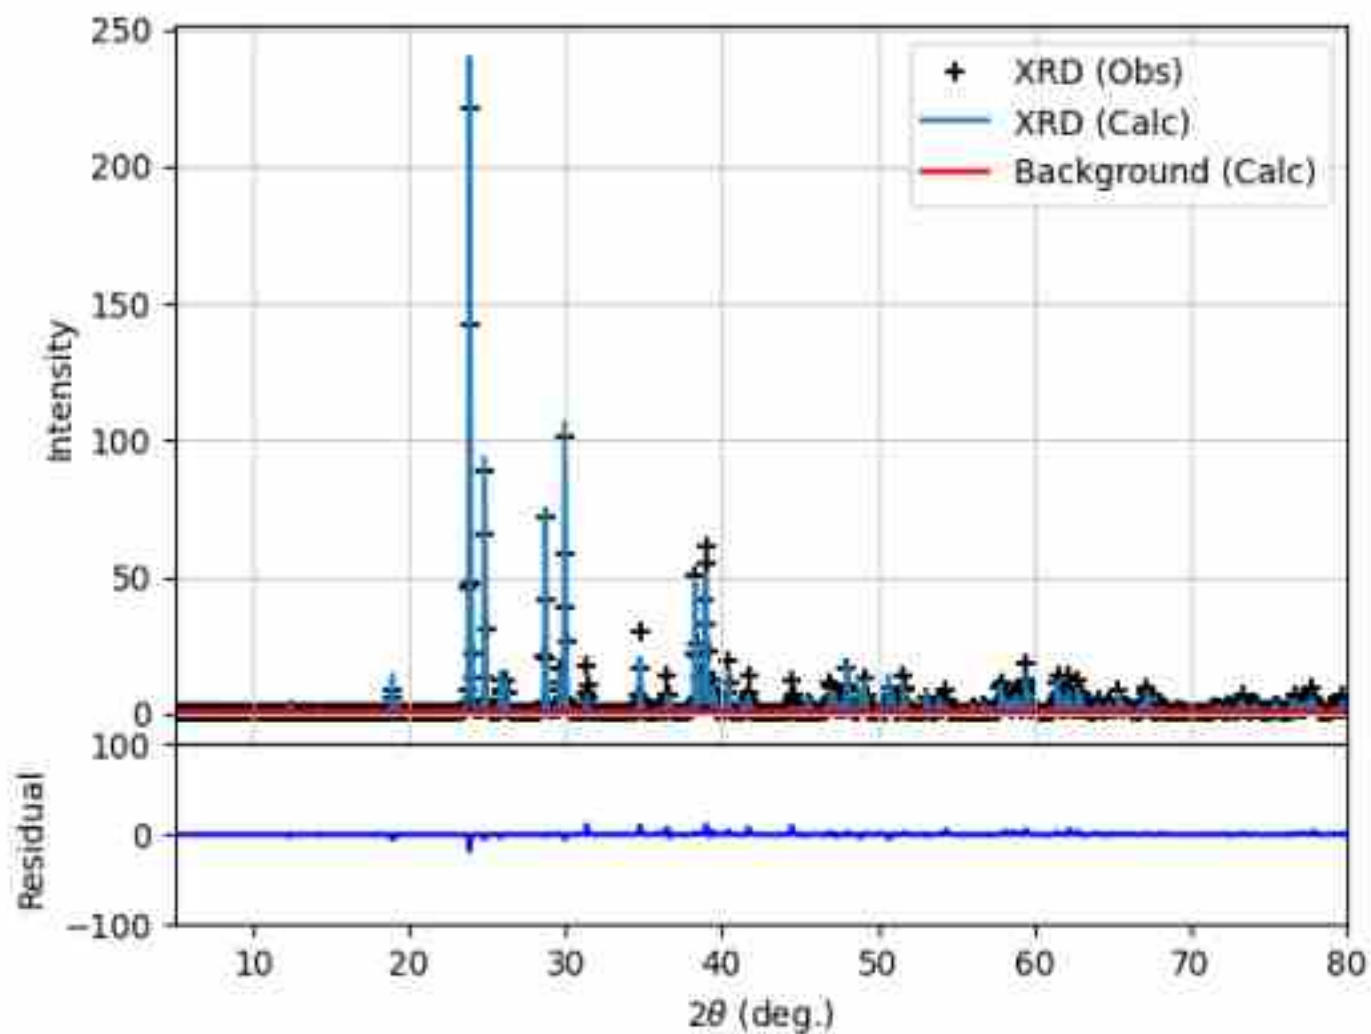

| RMSE before RR | Rwp      | RMSE after RR |
|----------------|----------|---------------|
| 0.067          | 20.60557 | None          |

# V4O10

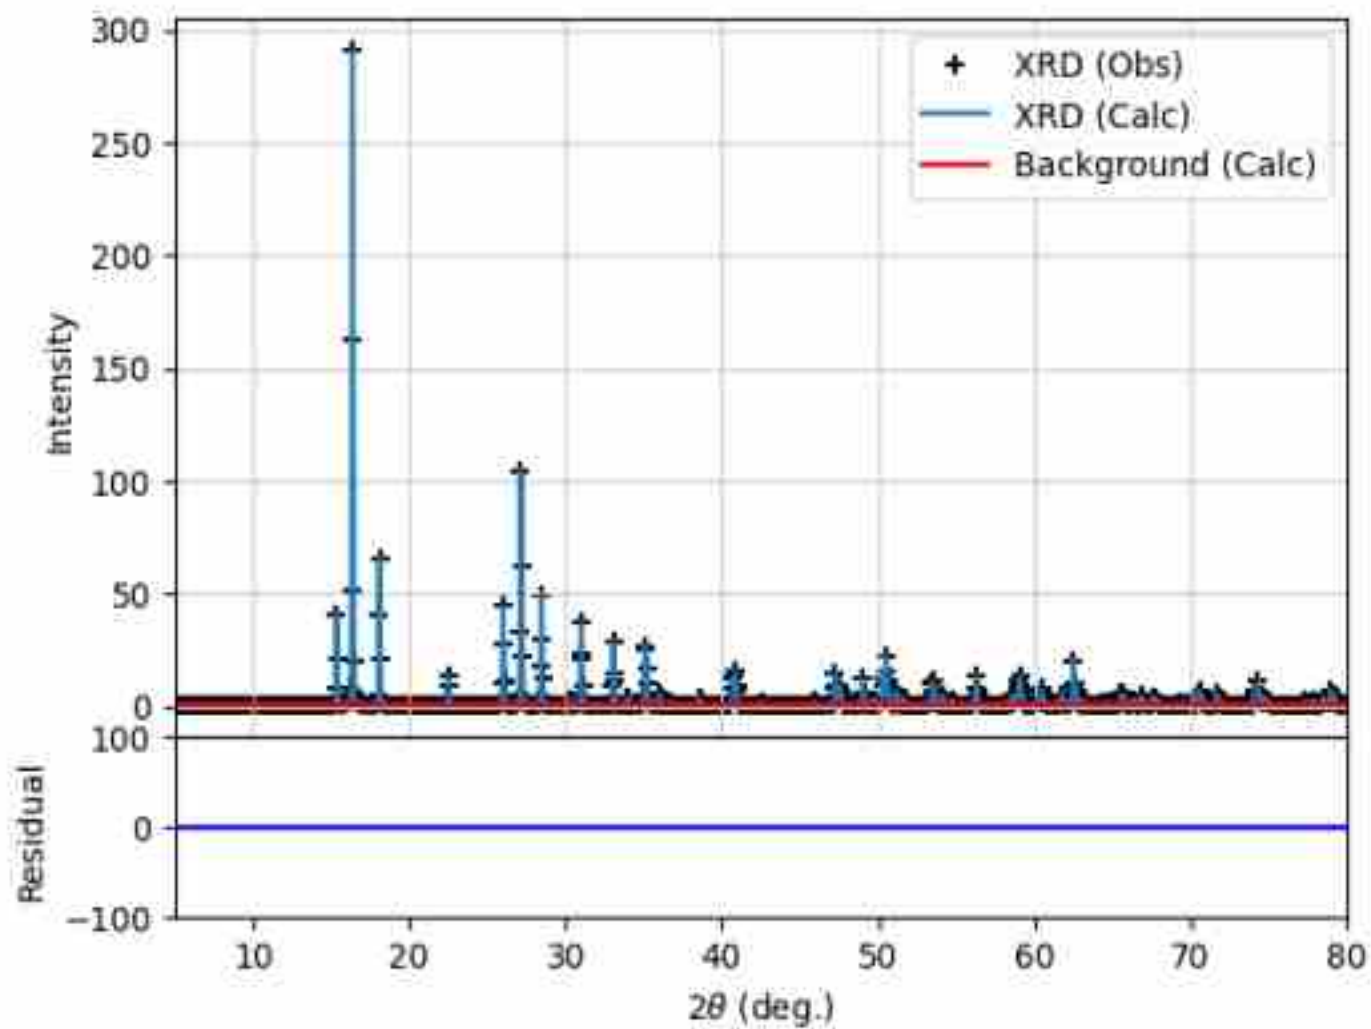

| RMSE before RR | Rwp     | RMSE after RR |
|----------------|---------|---------------|
| 0.067          | 0.00318 | 0.00113       |

# Zn<sub>2</sub>Sn<sub>2</sub>Ge<sub>4</sub>O<sub>12</sub>

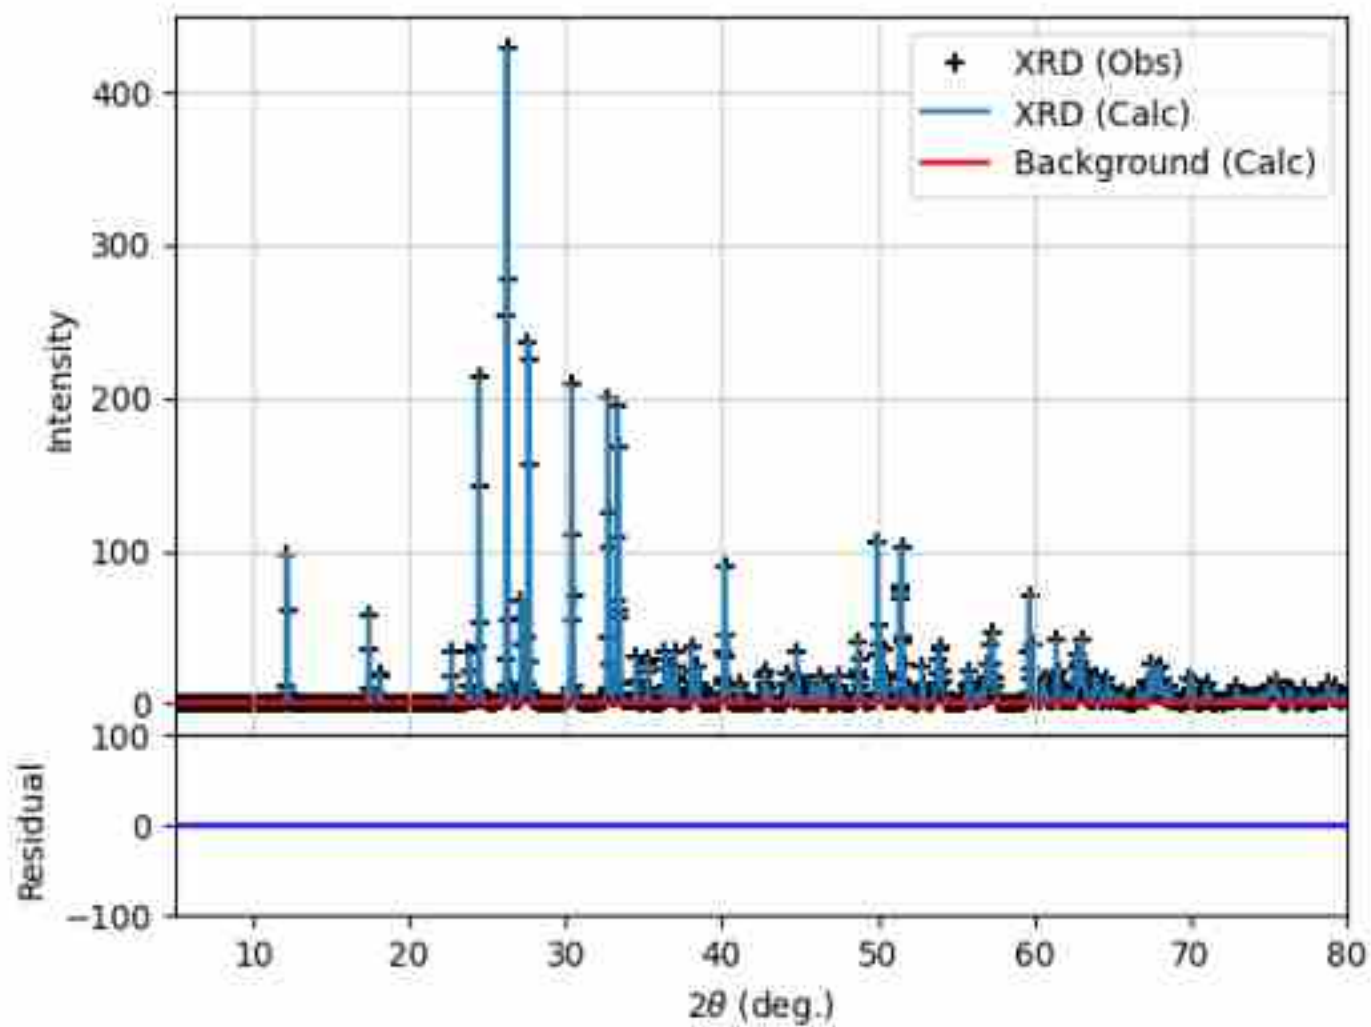

| RMSE before RR | Rwp     | RMSE after RR |
|----------------|---------|---------------|
| 0.067          | 0.00337 | 0.00127       |

# Al<sub>2</sub>H<sub>2</sub>O<sub>4</sub>

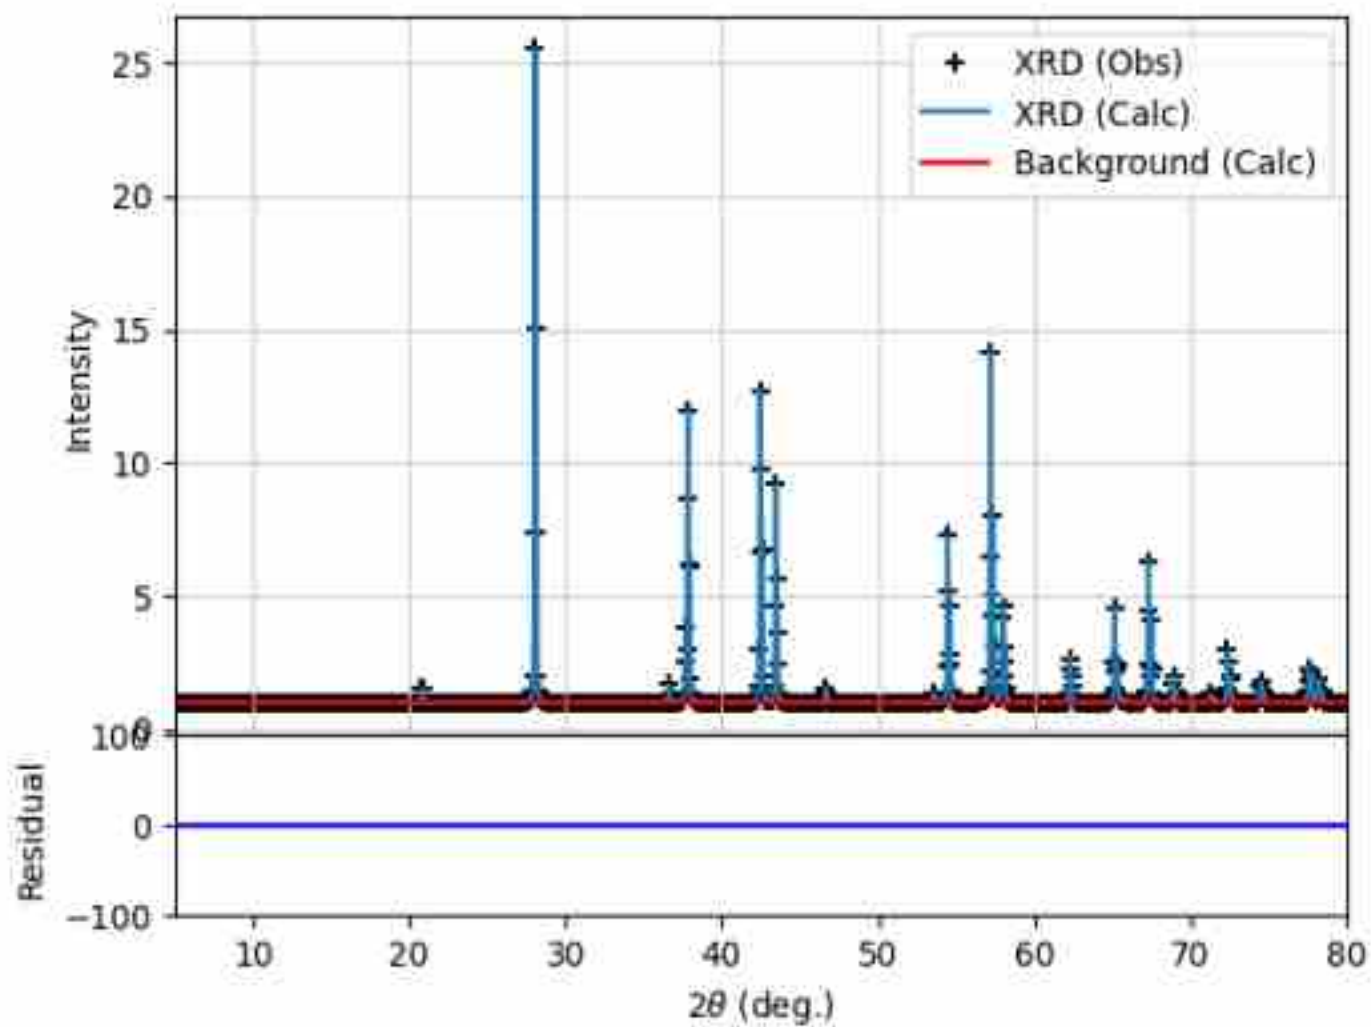

| RMSE before RR | Rwp     | RMSE after RR |
|----------------|---------|---------------|
| 0.068          | 0.00152 | 0.00366       |



# K<sub>2</sub>C12O<sub>6</sub>

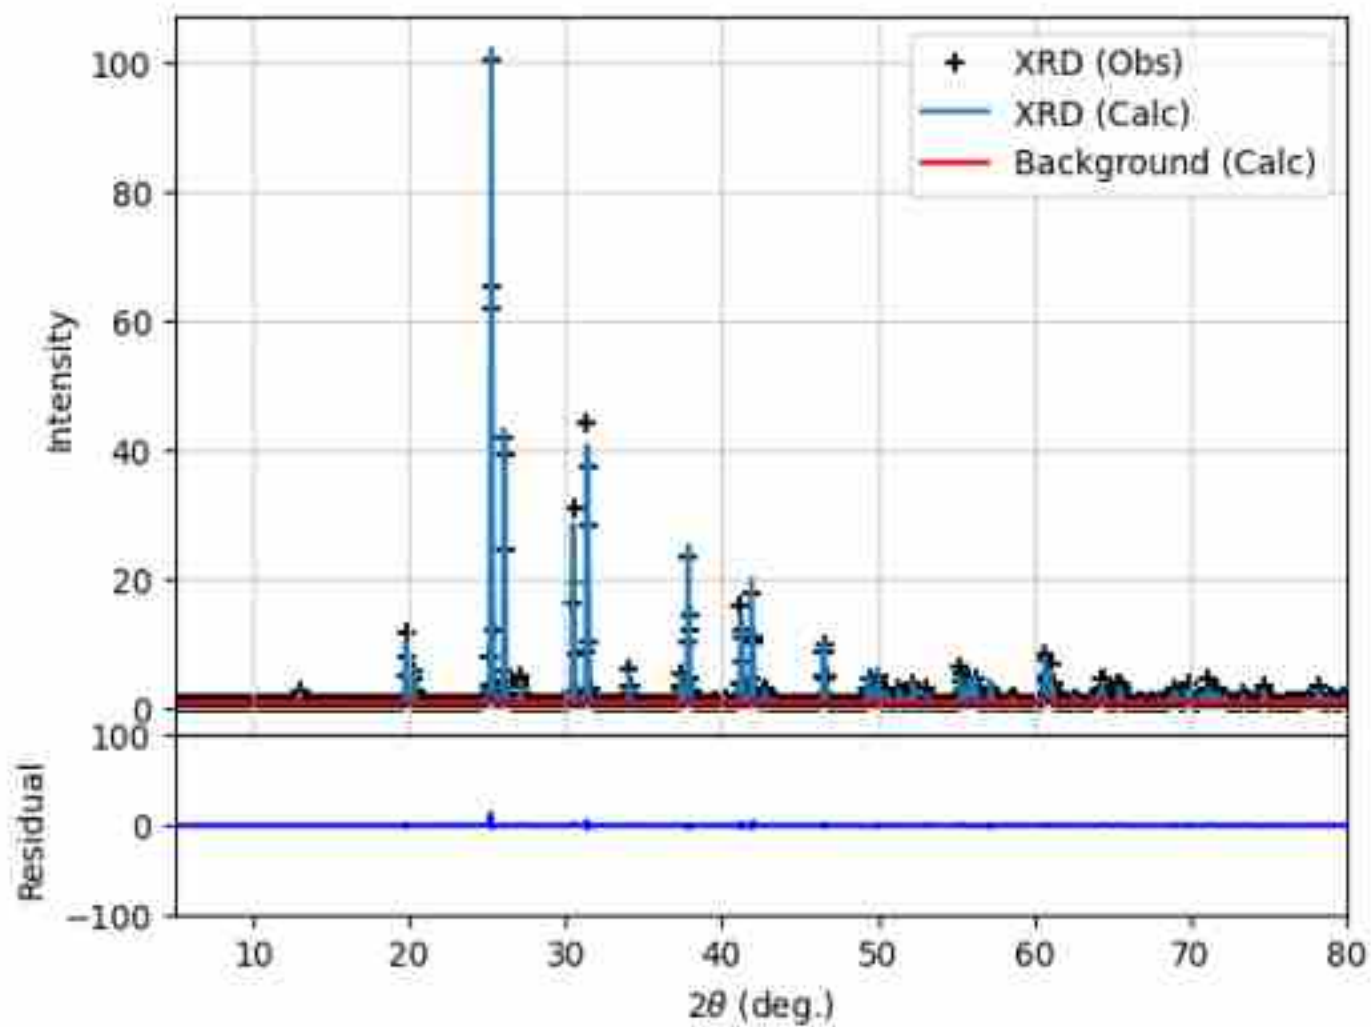

| RMSE before RR | Rwp     | RMSE after RR |
|----------------|---------|---------------|
| 0.068          | 9.94405 | 0.10446       |

# Tc2C16

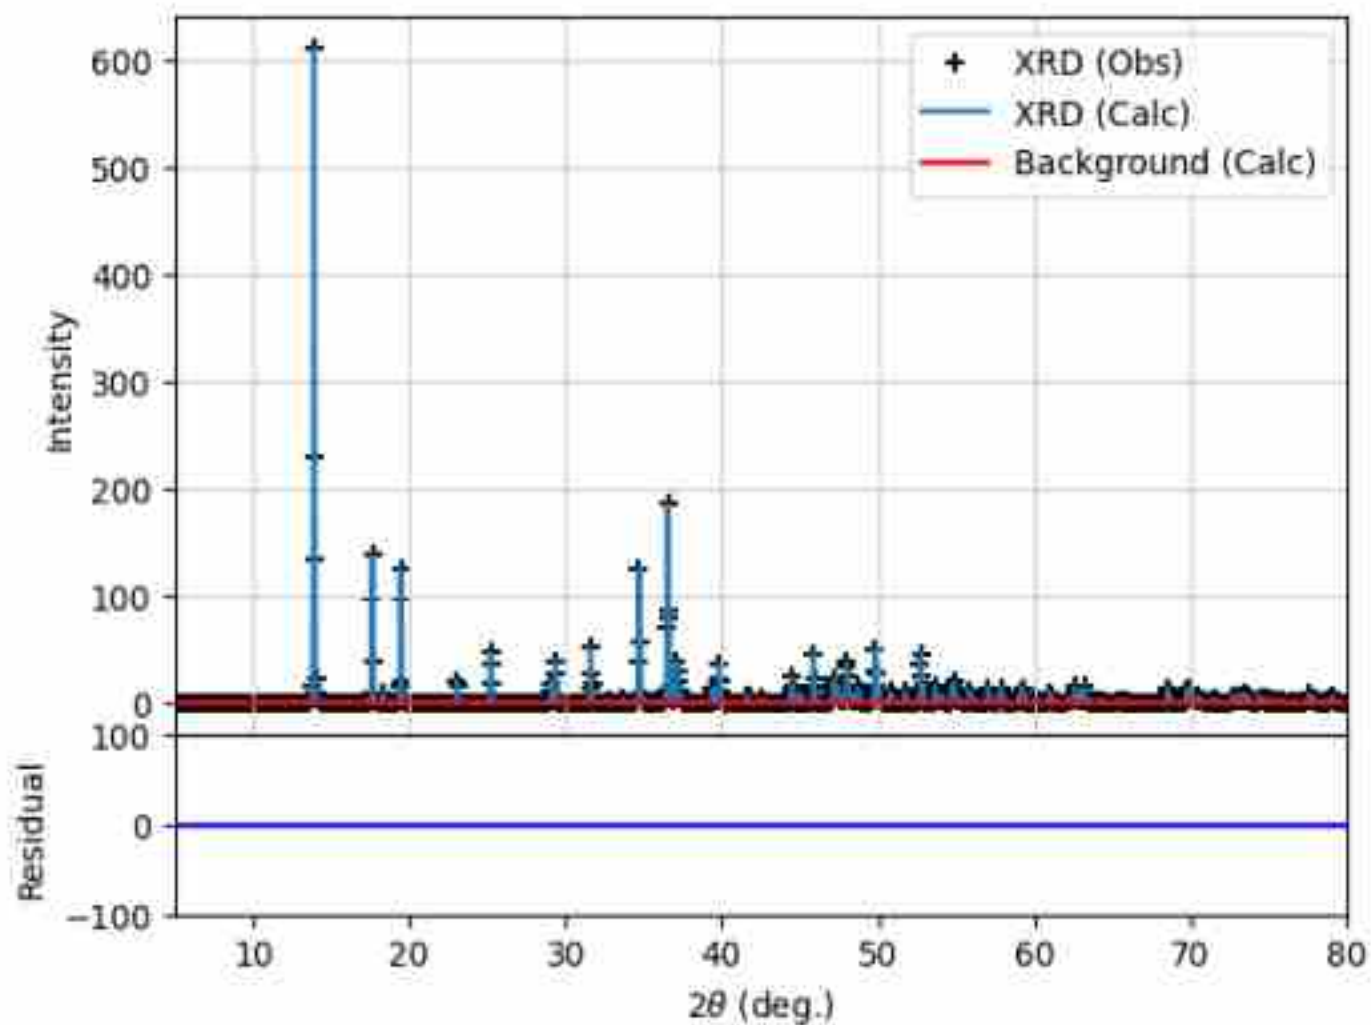

| RMSE before RR | Rwp     | RMSE after RR |
|----------------|---------|---------------|
| 0.068          | 0.00361 | 0.00044       |

# Ag<sub>2</sub>Bi<sub>2</sub>O<sub>6</sub>

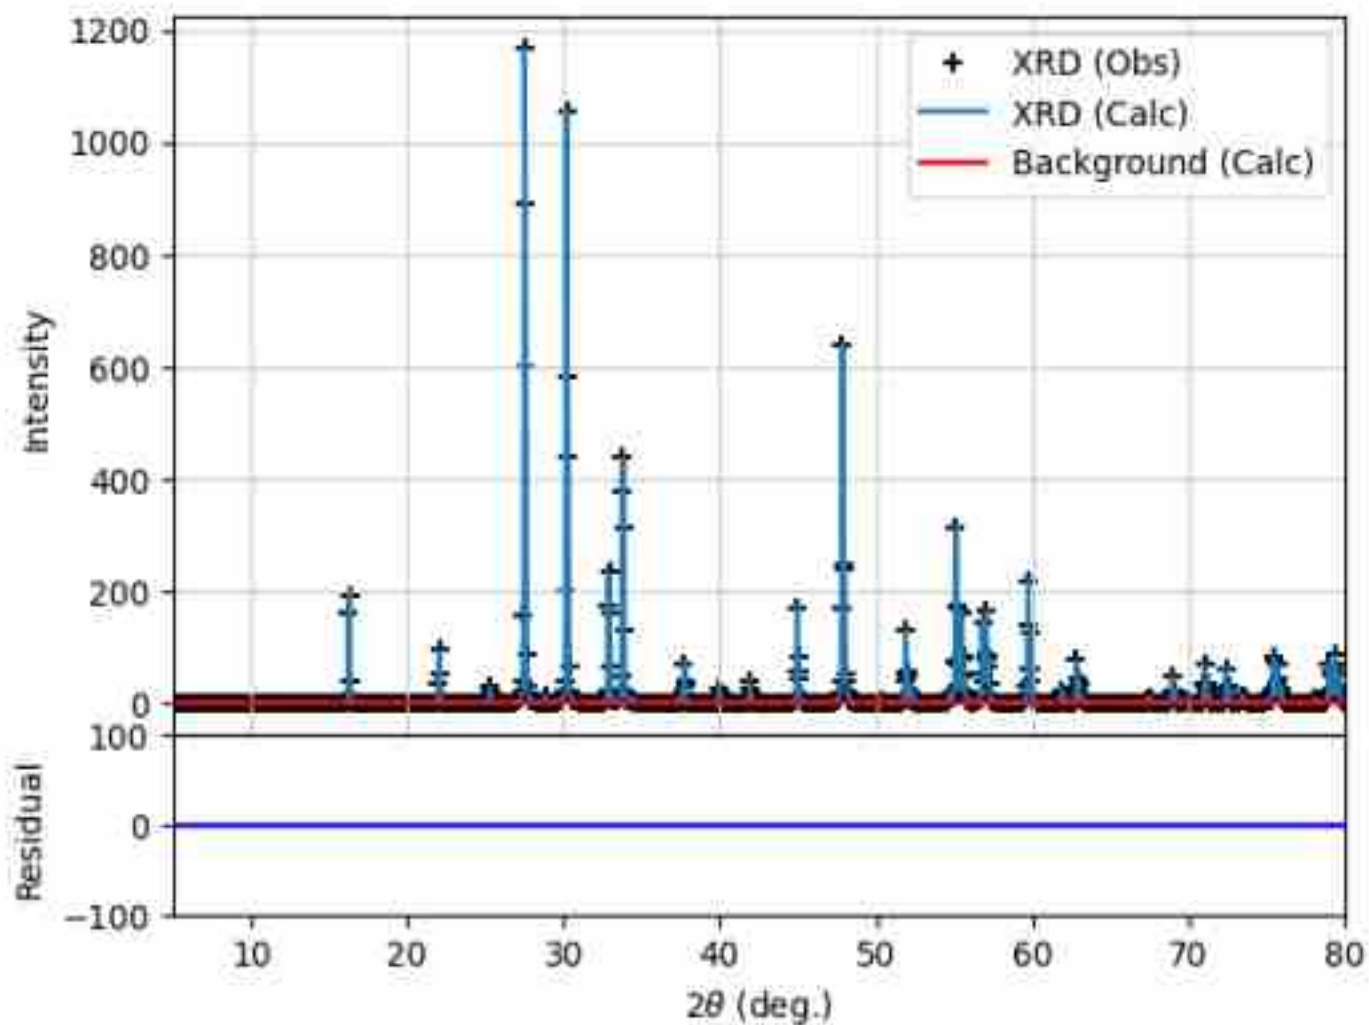

| RMSE before RR | Rwp     | RMSE after RR |
|----------------|---------|---------------|
| 0.069          | 0.00386 | 0.00119       |

# Na<sub>3</sub>LaTi<sub>2</sub>Nb<sub>2</sub>O<sub>12</sub>

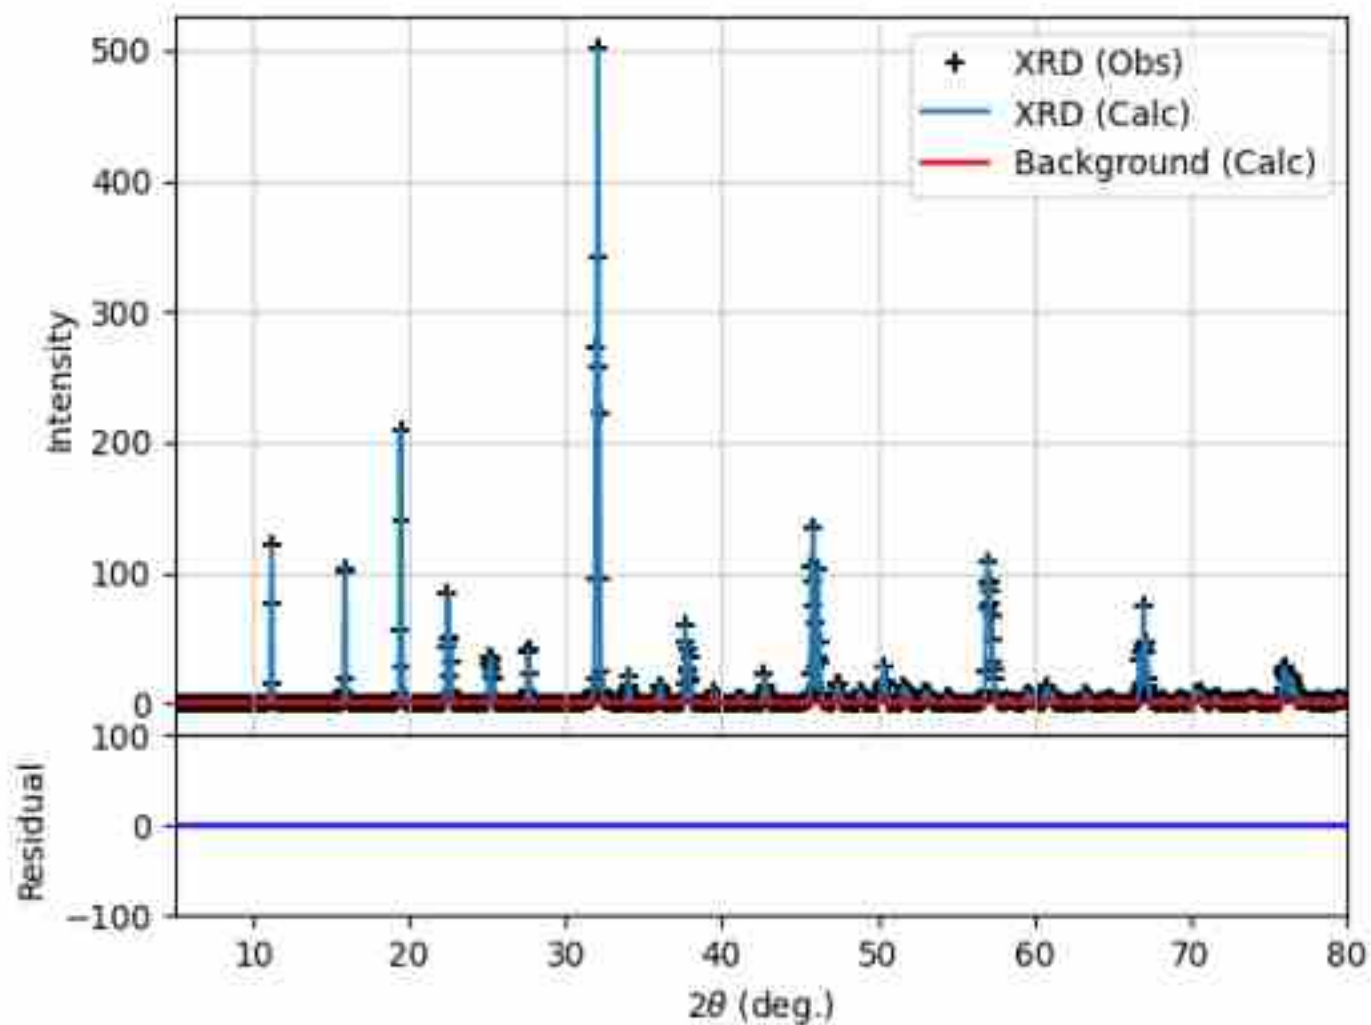

| RMSE before RR | Rwp     | RMSE after RR |
|----------------|---------|---------------|
| 0.069          | 0.00262 | 0.00139       |

# Ce<sub>2</sub>Ag<sub>2</sub>P<sub>4</sub>Se<sub>12</sub>

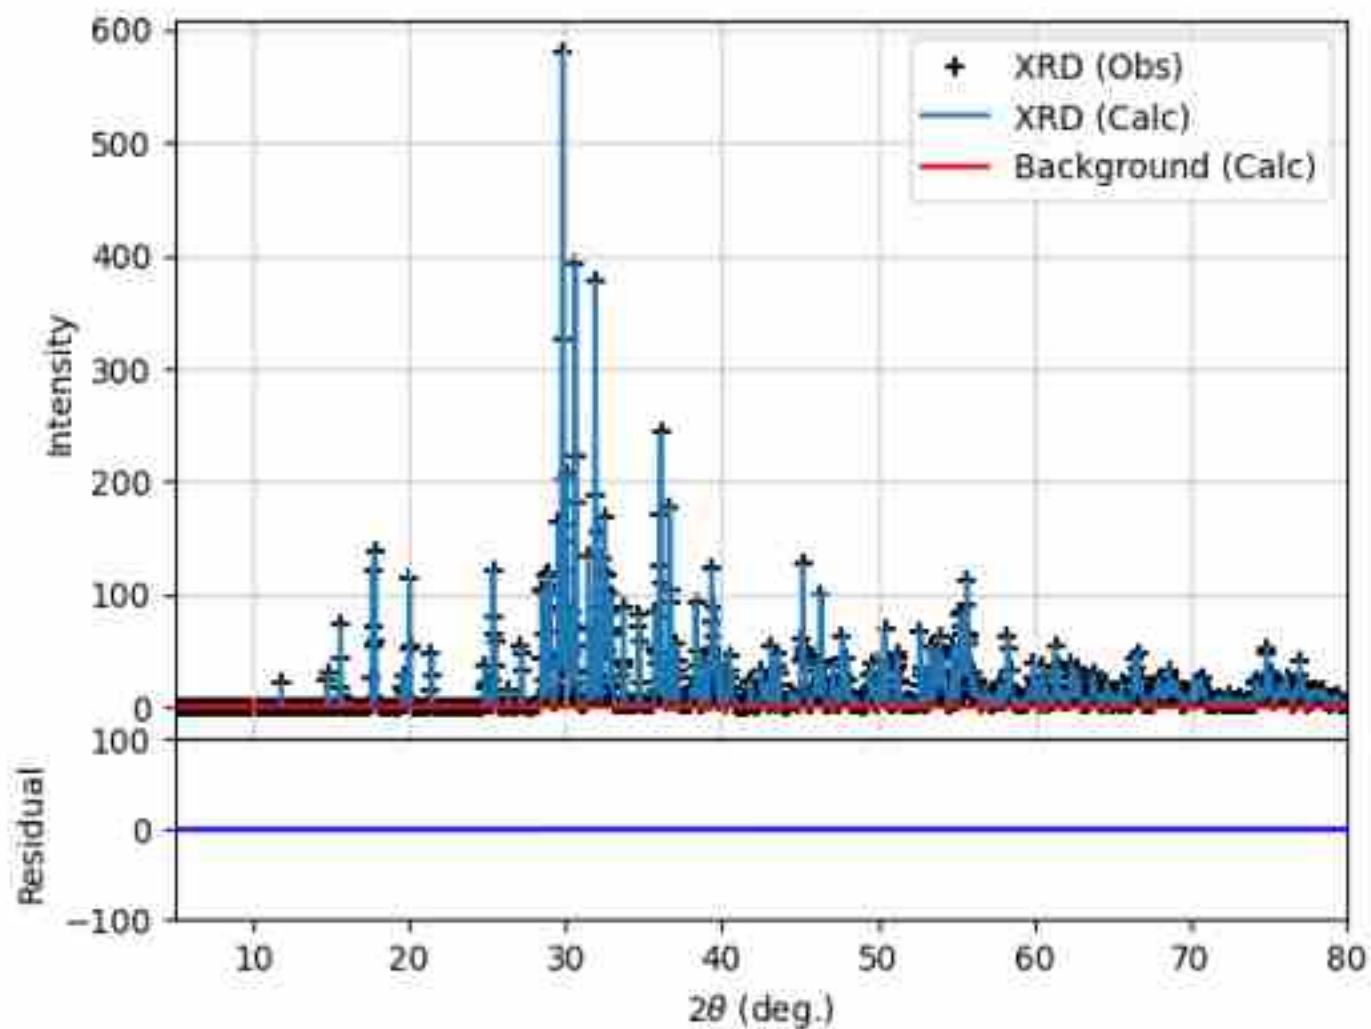

| RMSE before RR | Rwp    | RMSE after RR |
|----------------|--------|---------------|
| 0.071          | 0.1212 | 0.0052        |

# Ga<sub>2</sub>Fe<sub>1</sub>P<sub>3</sub>O<sub>12</sub>

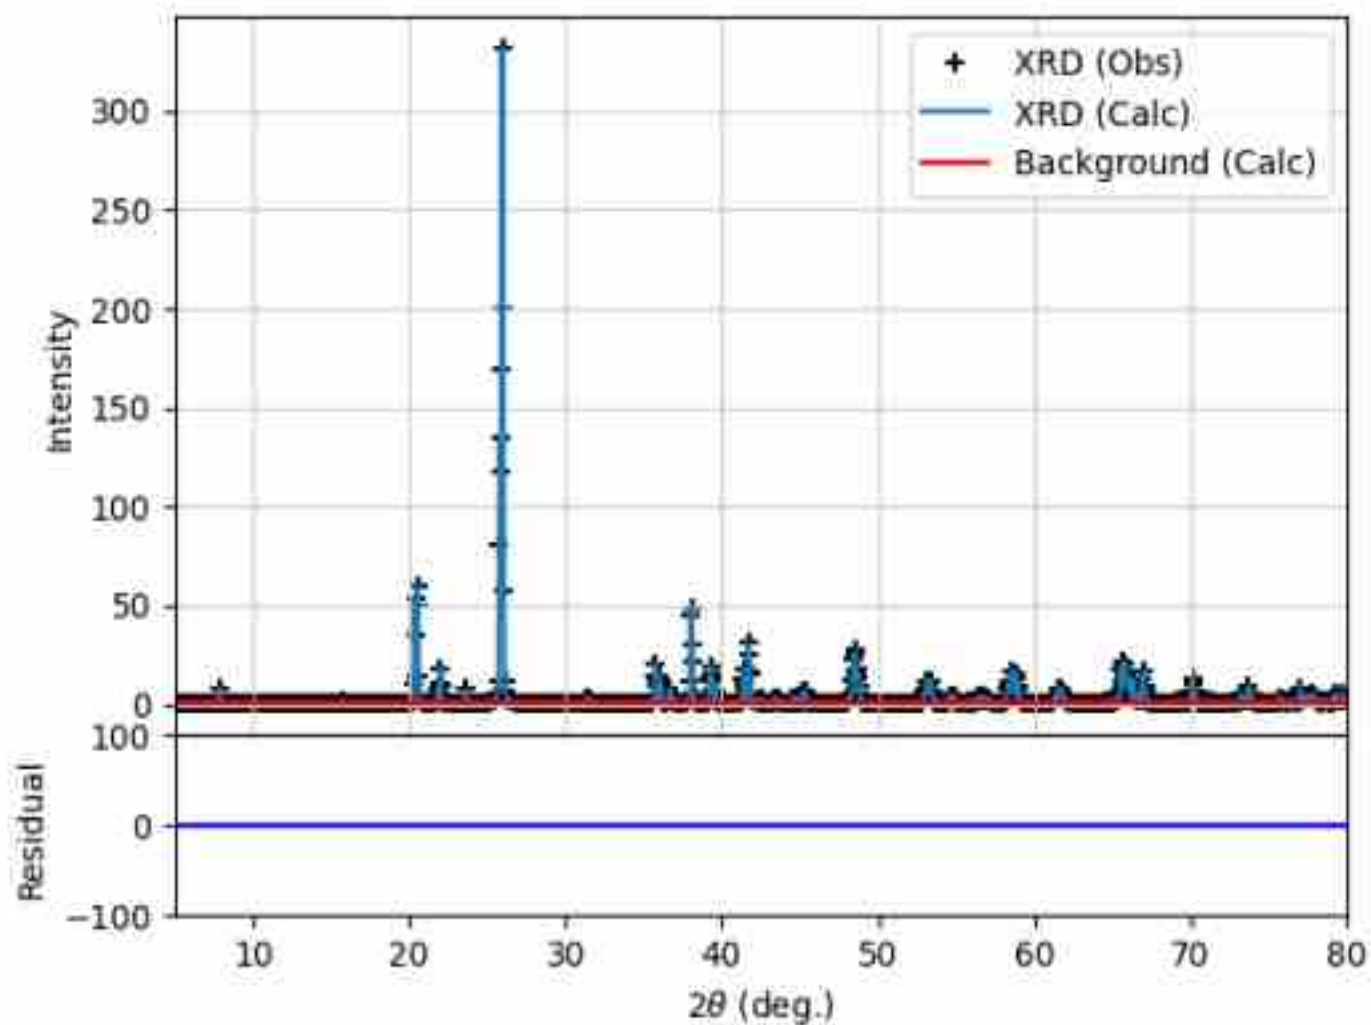

| RMSE before RR | Rwp    | RMSE after RR |
|----------------|--------|---------------|
| 0.071          | 0.0023 | 0.00081       |

# Hg<sub>2</sub>Bi<sub>2</sub>O<sub>6</sub>

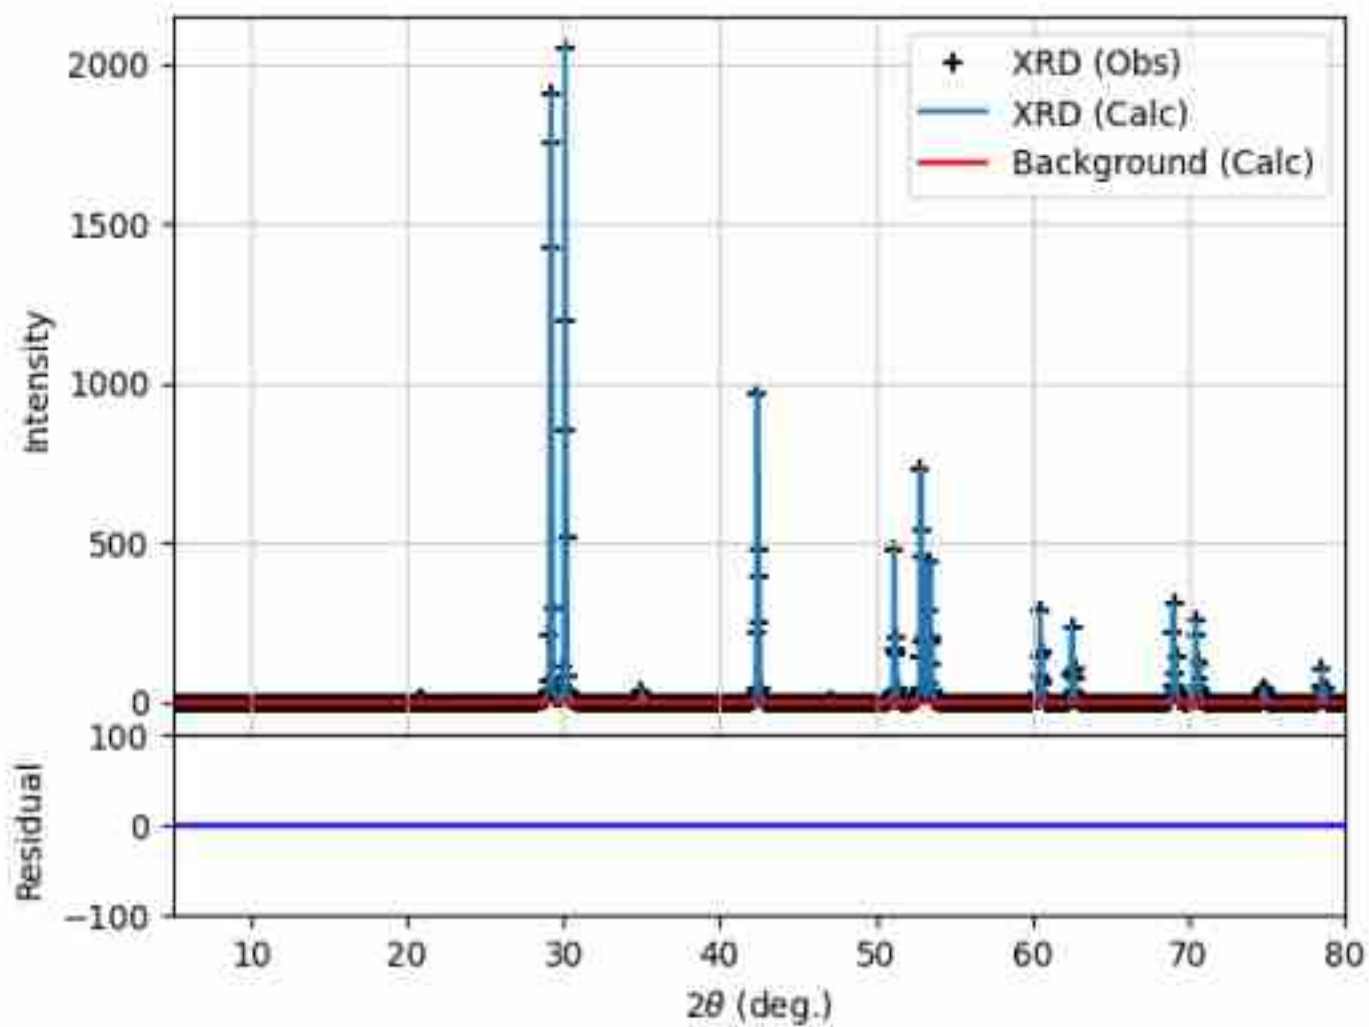

| RMSE before RR | Rwp     | RMSE after RR |
|----------------|---------|---------------|
| 0.071          | 0.00428 | 0.00137       |

# Li<sub>2</sub>Ni<sub>2</sub>P<sub>2</sub>O<sub>8</sub>

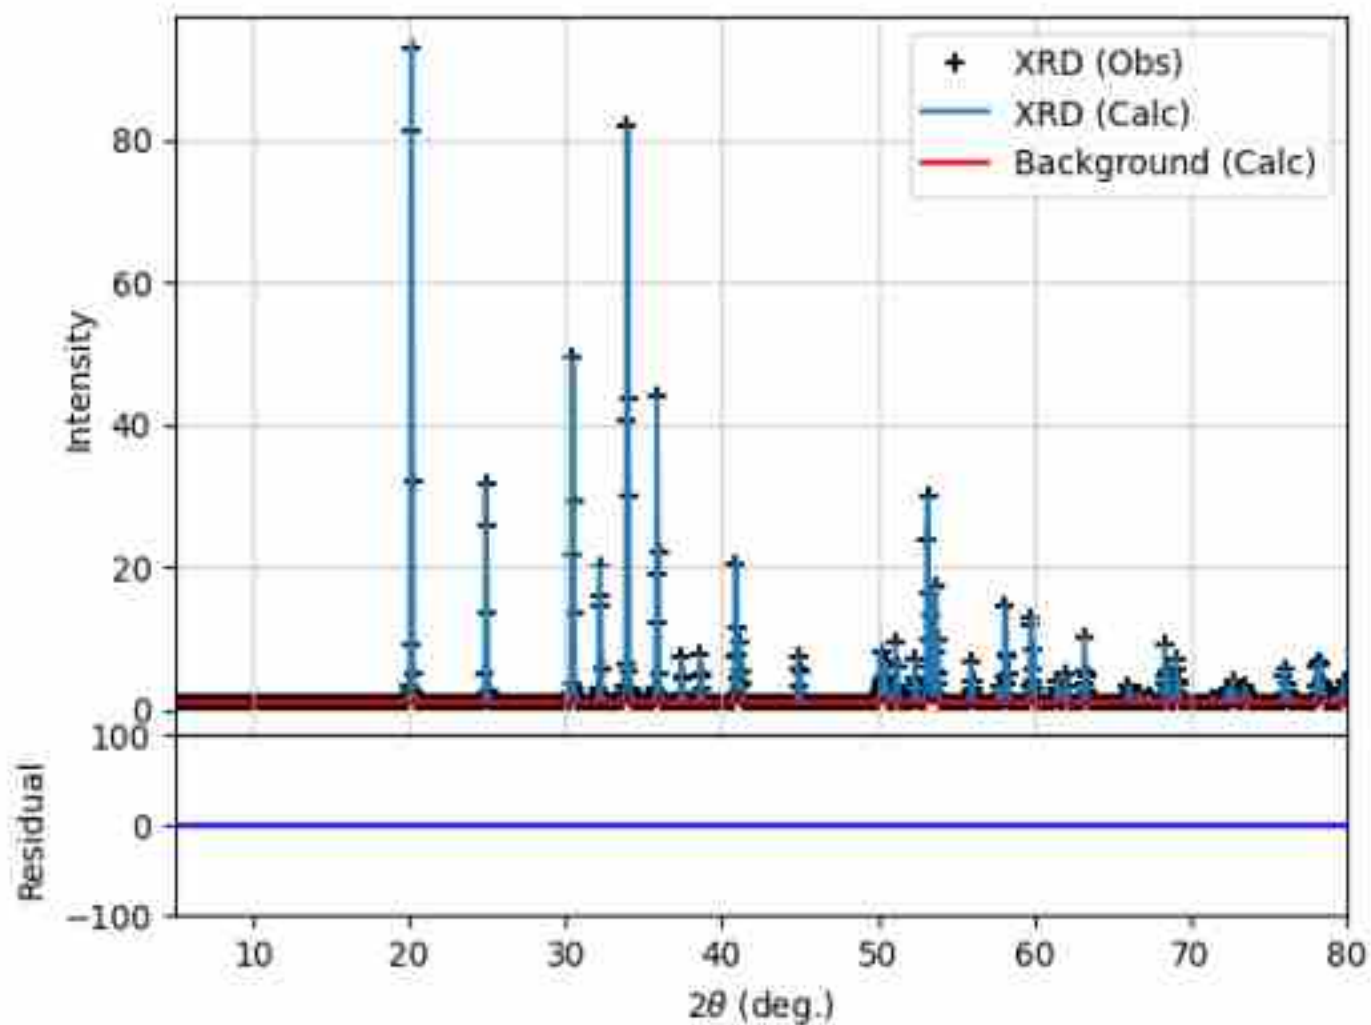

| RMSE before RR | Rwp     | RMSE after RR |
|----------------|---------|---------------|
| 0.071          | 0.00178 | 0.00073       |



# Nb<sub>2</sub>Ag<sub>1</sub>S<sub>4</sub>

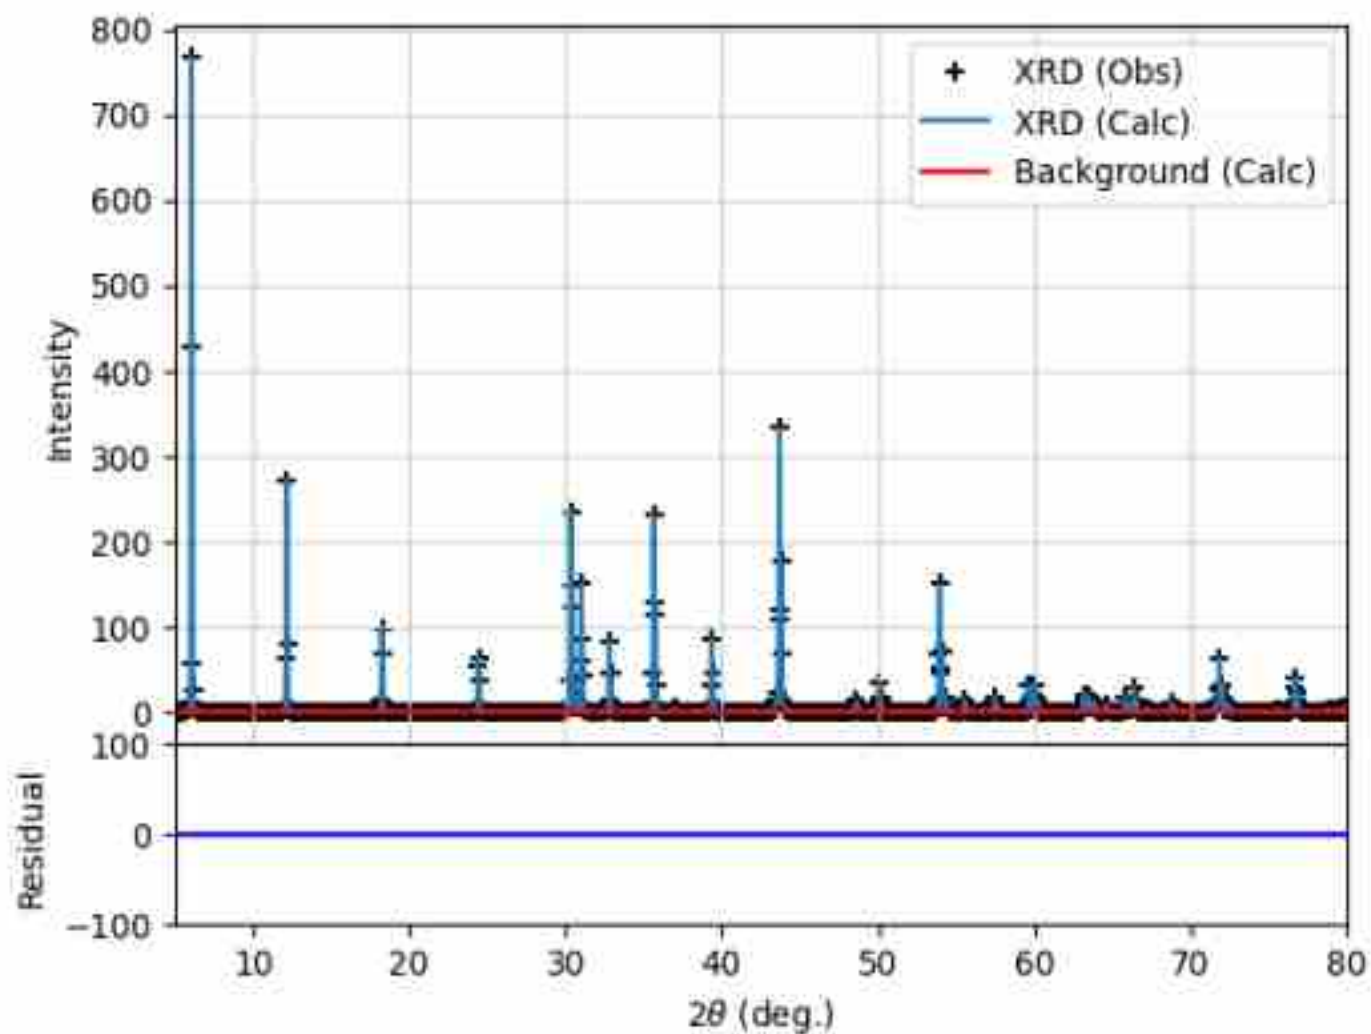

| RMSE before RR | Rwp     | RMSE after RR |
|----------------|---------|---------------|
| 0.071          | 0.00296 | 0.00064       |

# Si<sub>2</sub>Ge<sub>2</sub>N<sub>4</sub>O<sub>2</sub>

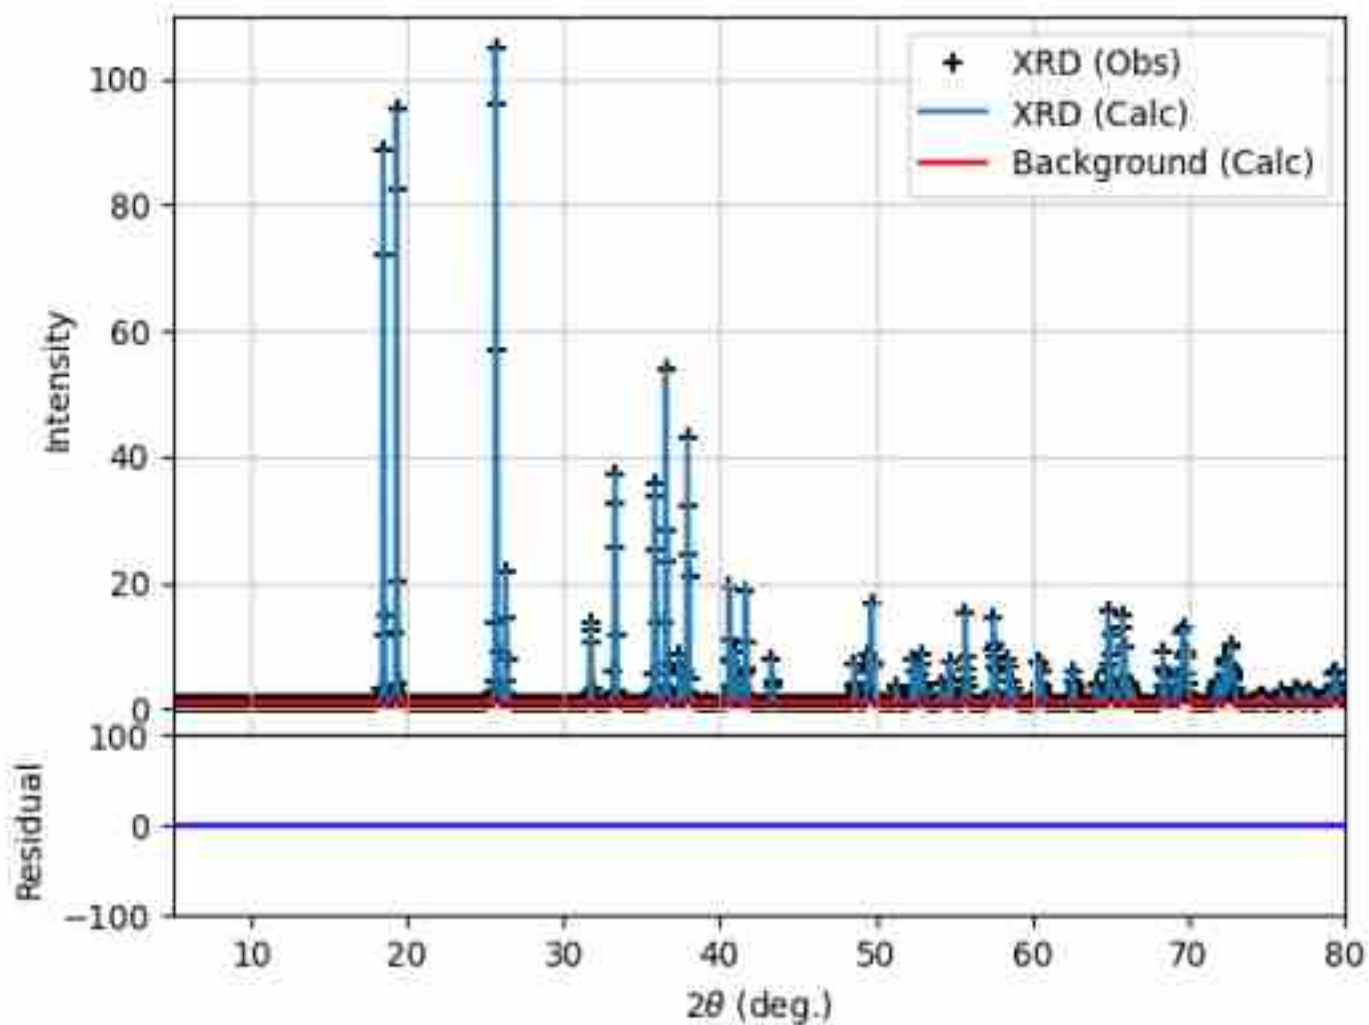

| RMSE before RR | Rwp     | RMSE after RR |
|----------------|---------|---------------|
| 0.071          | 0.00236 | 0.0008        |

# Ca<sub>1</sub>Ti<sub>2</sub>Pb<sub>1</sub>O<sub>6</sub>

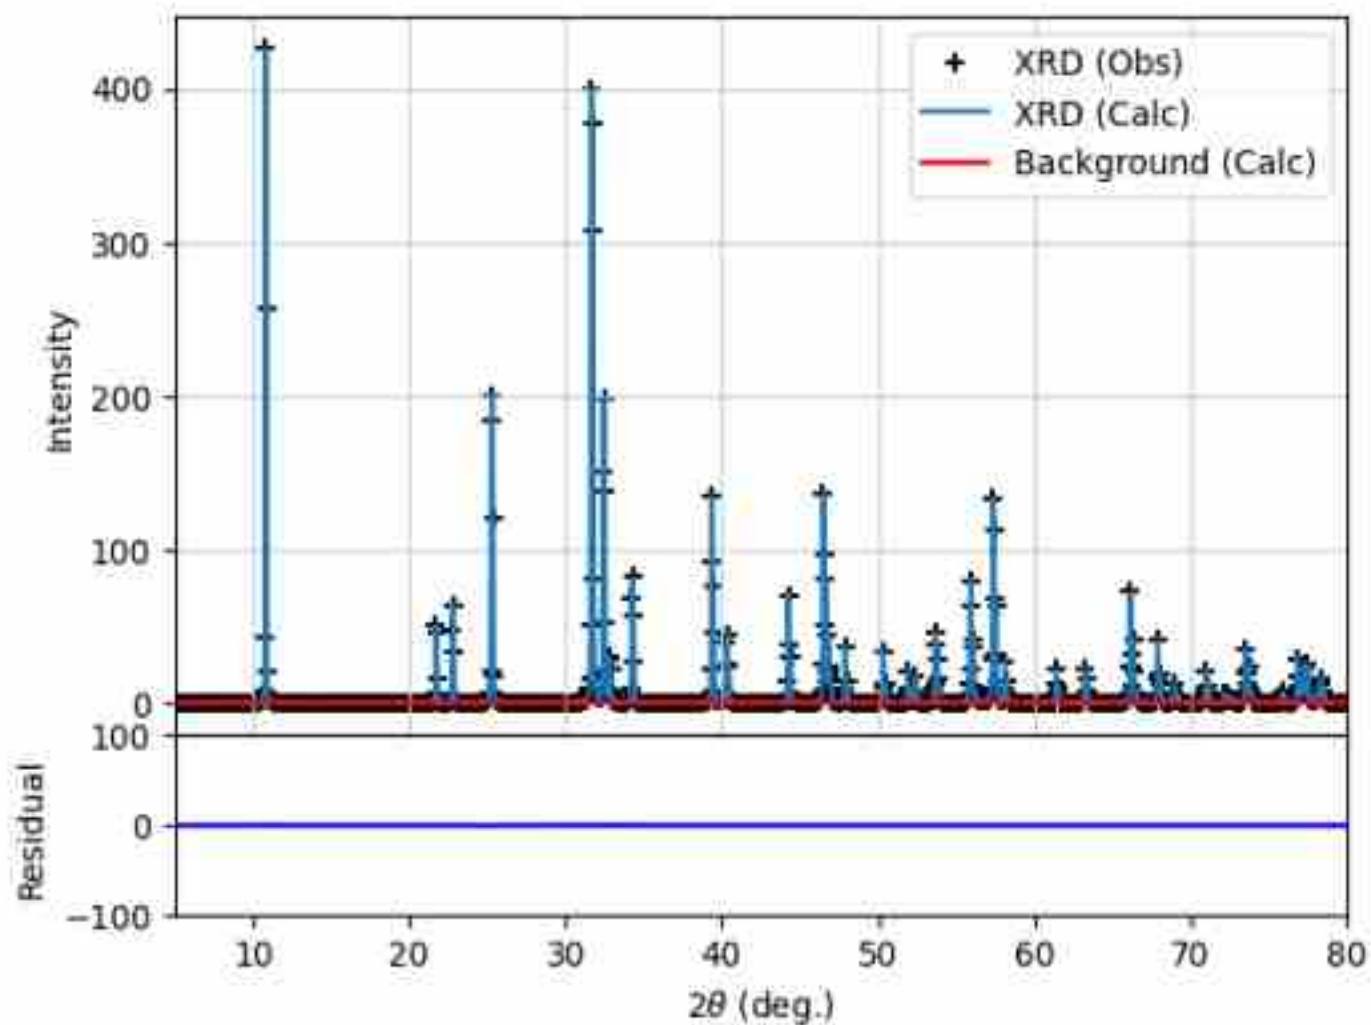

| RMSE before RR | Rwp    | RMSE after RR |
|----------------|--------|---------------|
| 0.072          | 0.2261 | 0.03377       |

# La<sub>2</sub>Ga<sub>2</sub>O<sub>6</sub>

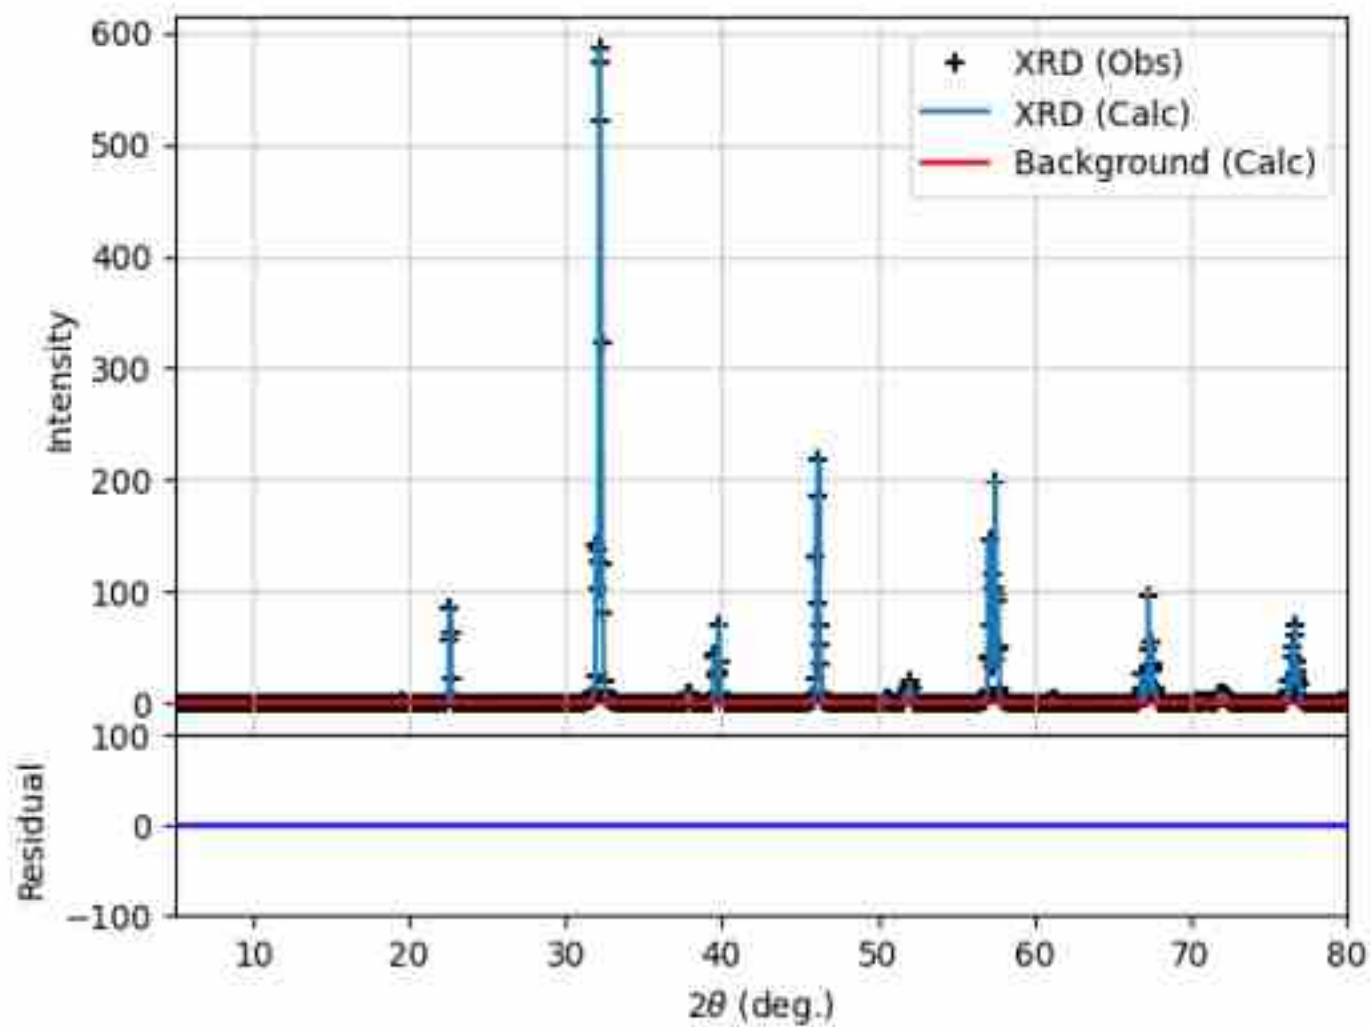

| RMSE before RR | Rwp     | RMSE after RR |
|----------------|---------|---------------|
| 0.072          | 0.00292 | 0.00123       |

# Li1H1F2

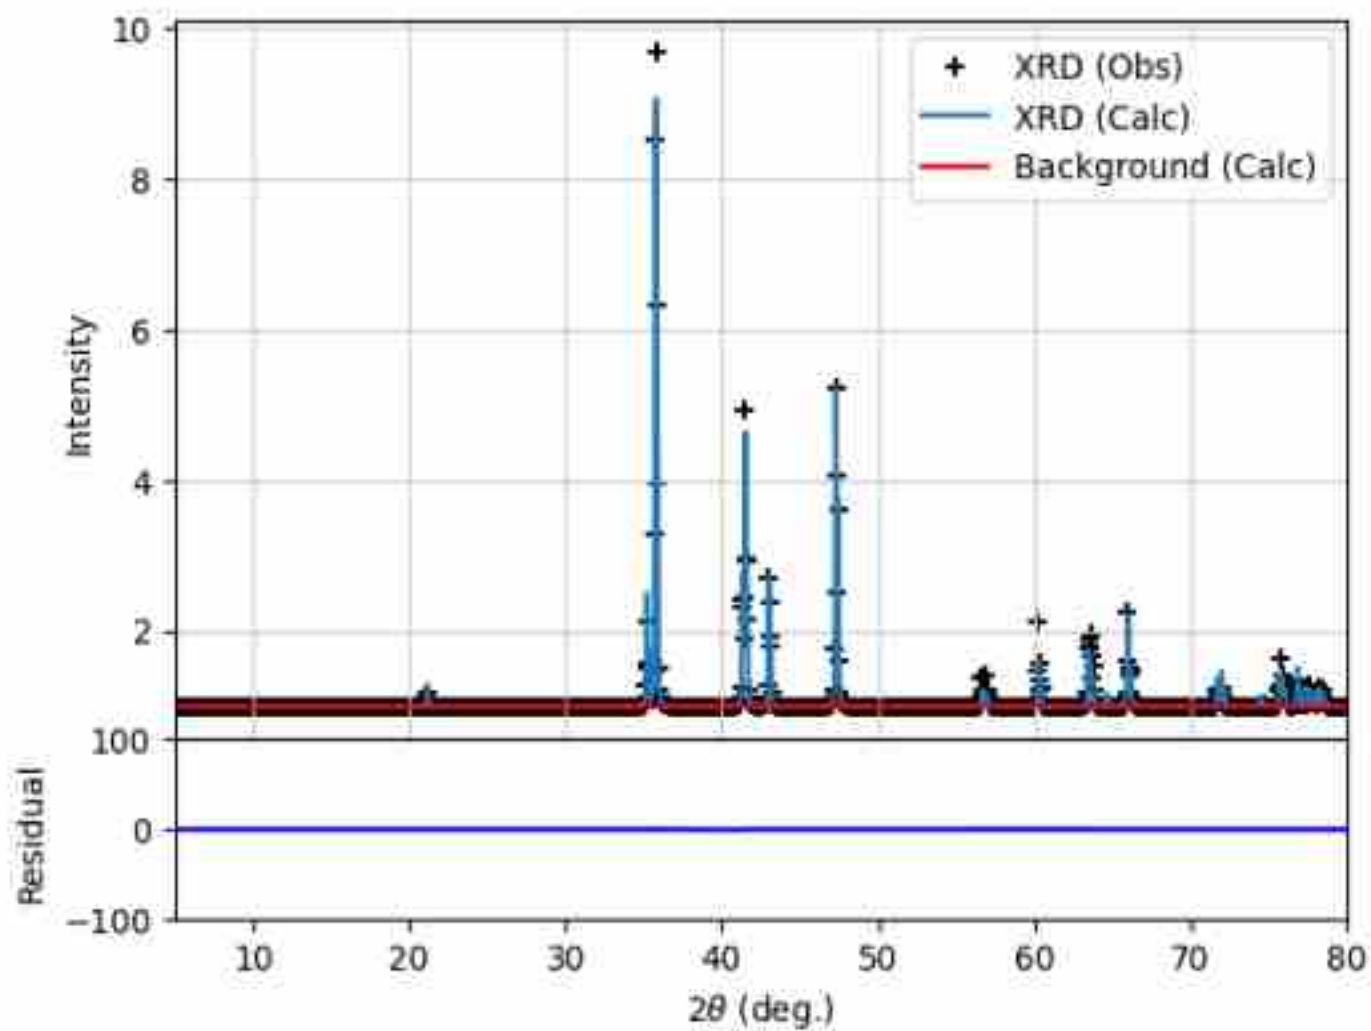

| RMSE before RR | Rwp     | RMSE after RR |
|----------------|---------|---------------|
| 0.072          | 2.80141 | 0.32739       |

# Na<sub>4</sub>Cu<sub>2</sub>F<sub>8</sub>

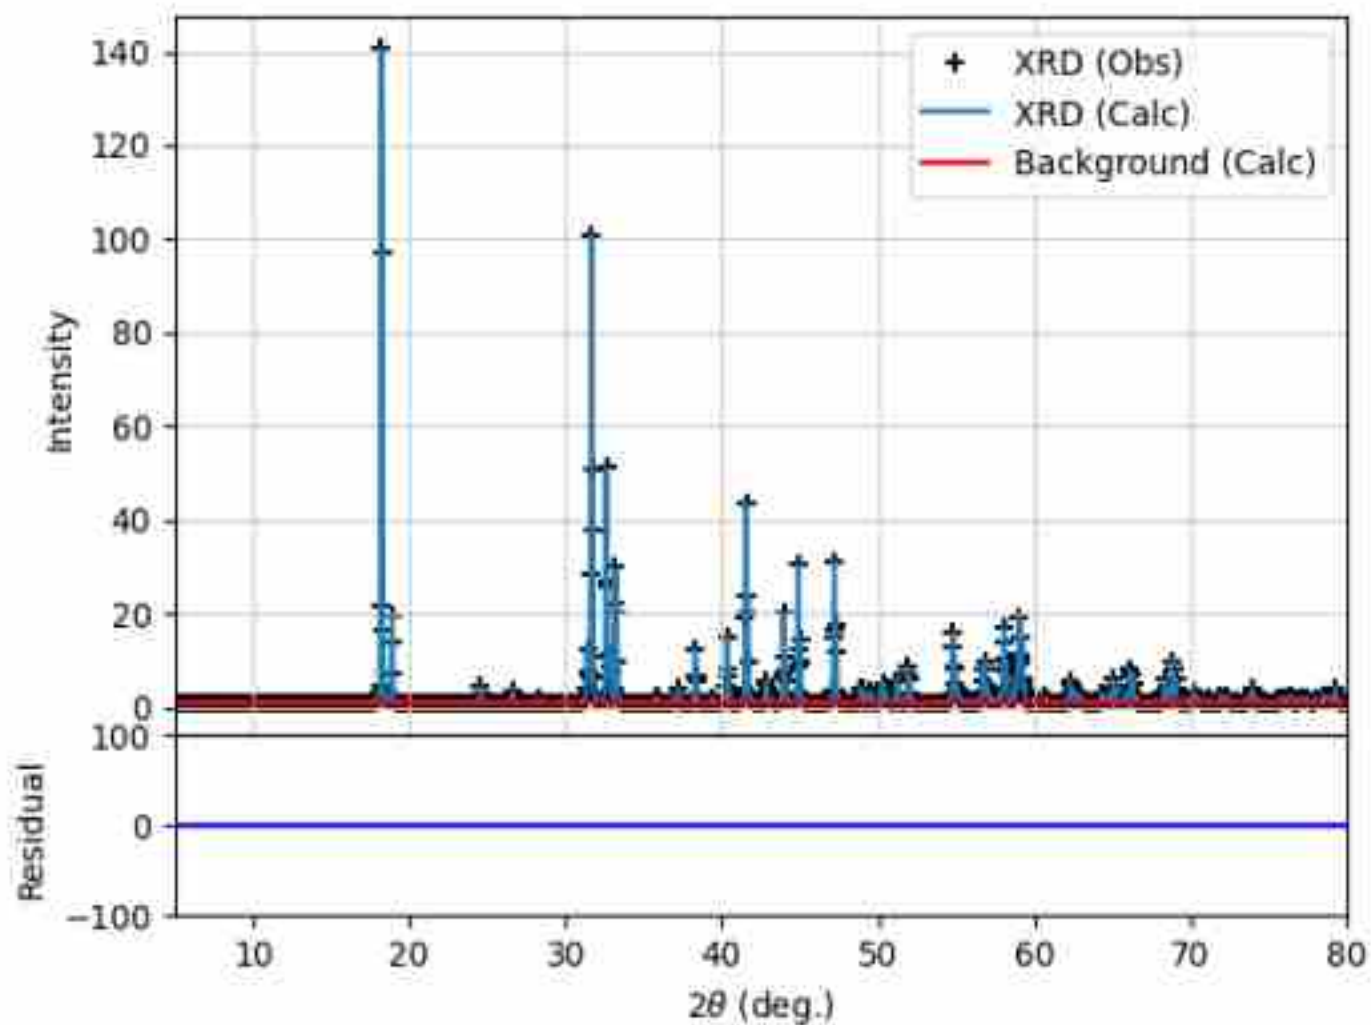

| RMSE before RR | Rwp     | RMSE after RR |
|----------------|---------|---------------|
| 0.072          | 0.00299 | 0.00057       |

# Rb<sub>4</sub>Zr<sub>2</sub>O<sub>6</sub>

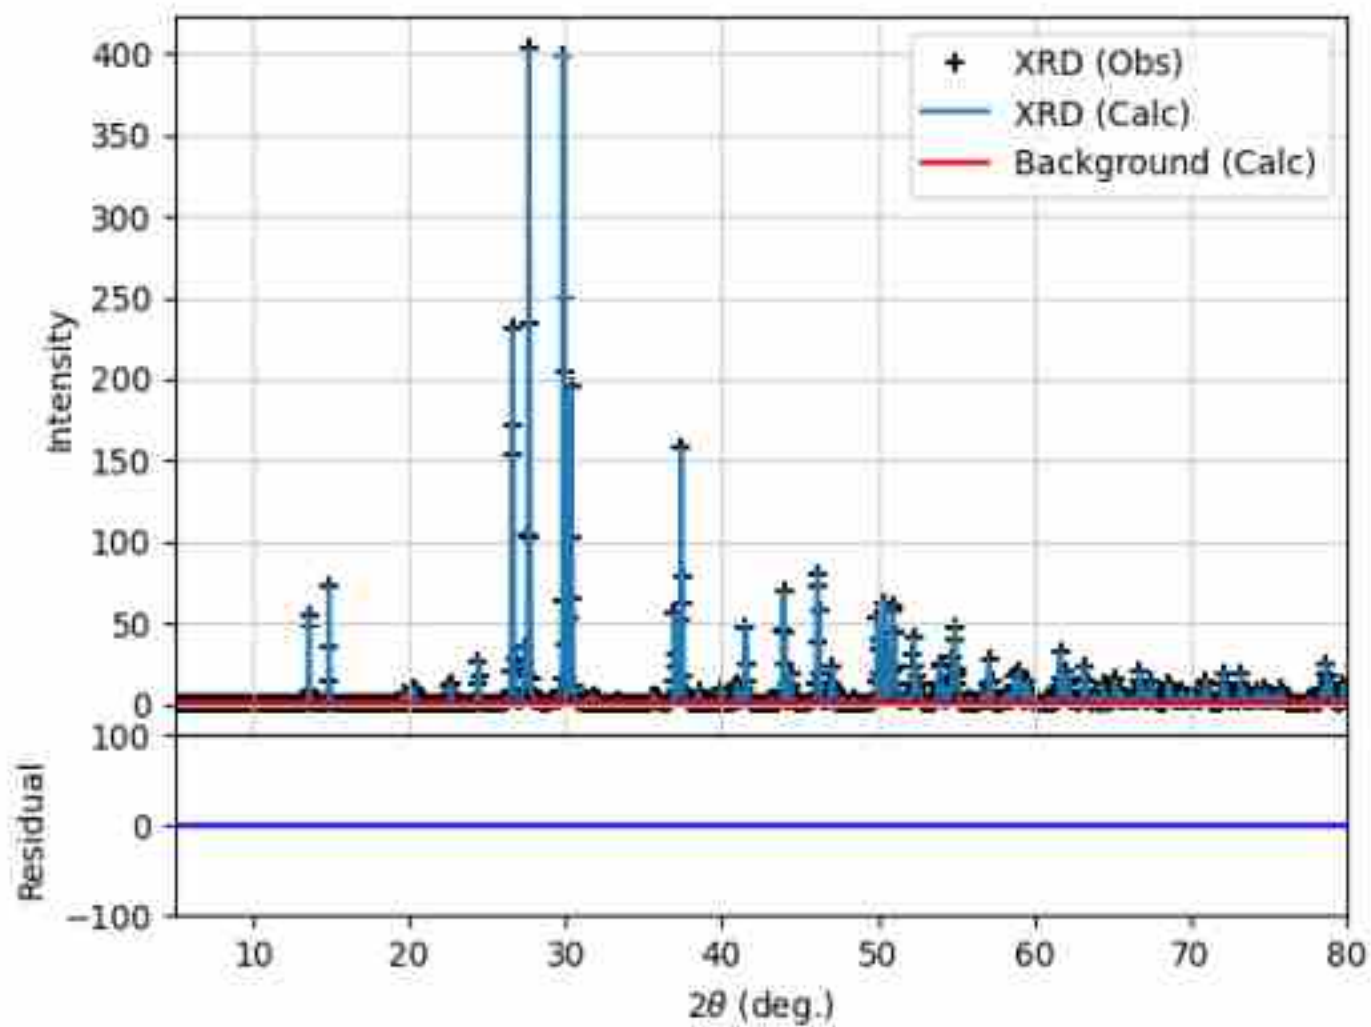

| RMSE before RR | Rwp   | RMSE after RR |
|----------------|-------|---------------|
| 0.072          | 0.003 | 0.00058       |

# Sr<sub>4</sub>Fe<sub>2</sub>W<sub>2</sub>O<sub>12</sub>

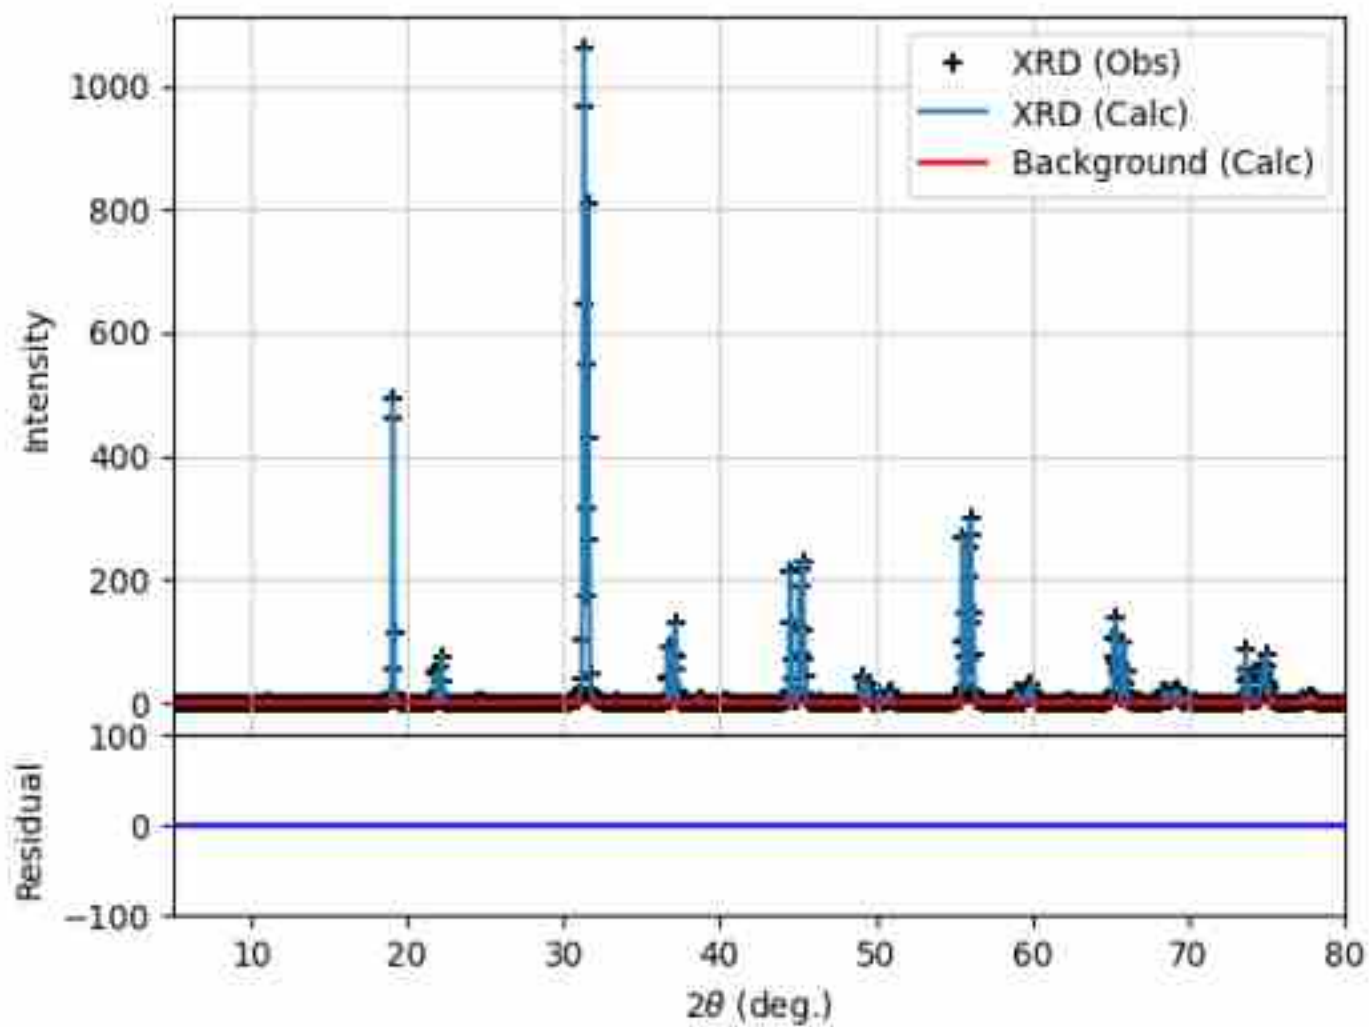

| RMSE before RR | Rwp     | RMSE after RR |
|----------------|---------|---------------|
| 0.072          | 0.00129 | 0.00065       |



# Te<sub>2</sub>Mo<sub>4</sub>S<sub>6</sub>

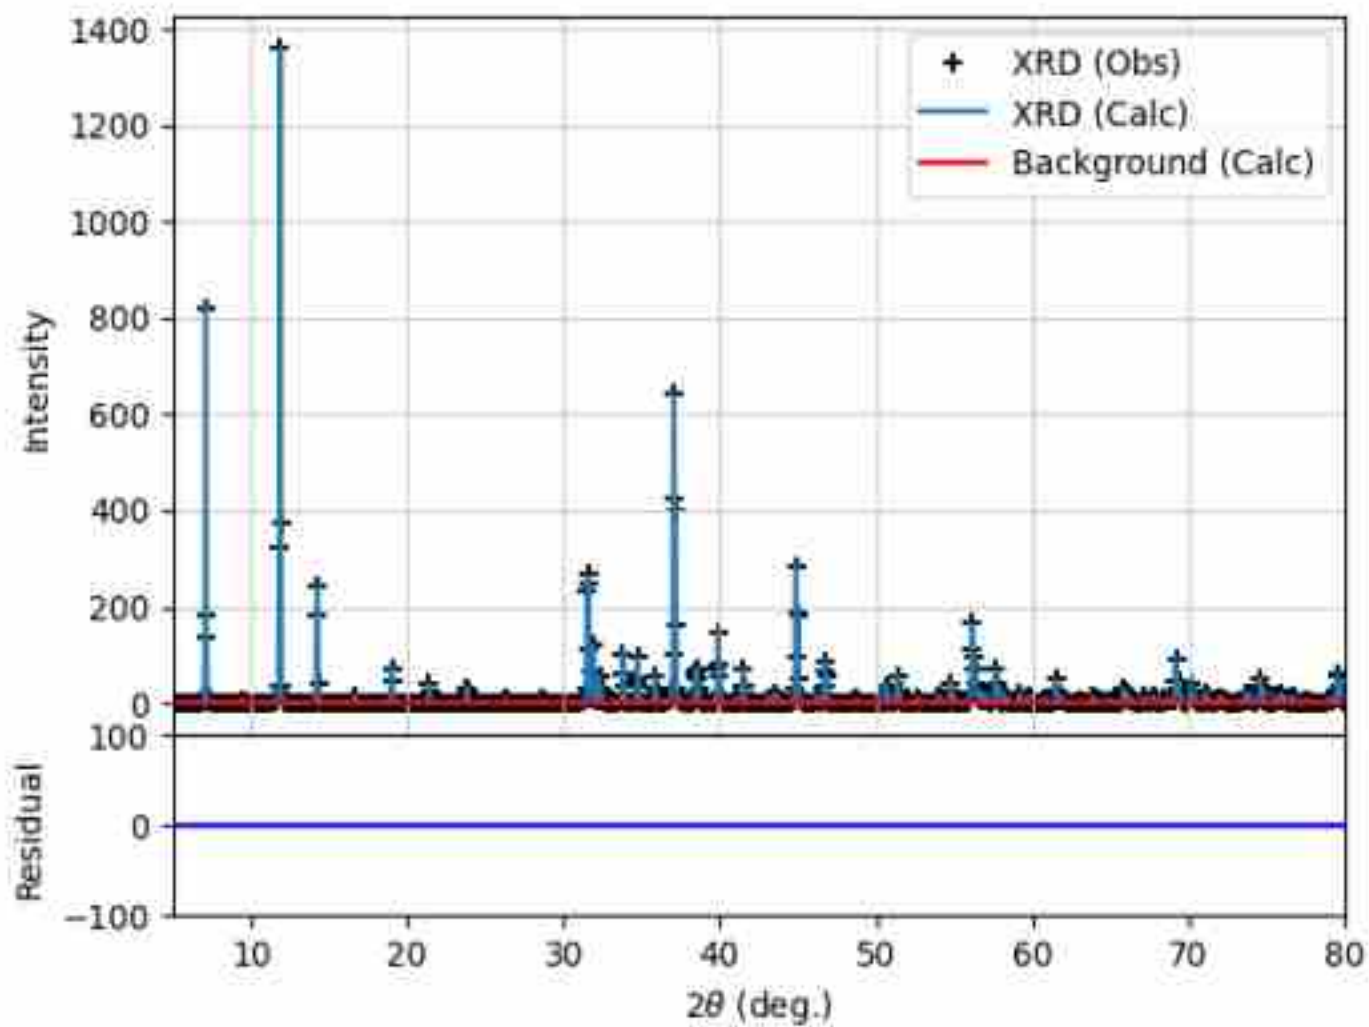

| RMSE before RR | Rwp     | RMSE after RR |
|----------------|---------|---------------|
| 0.072          | 0.00326 | 0.0005        |

# U6Al4Ge6

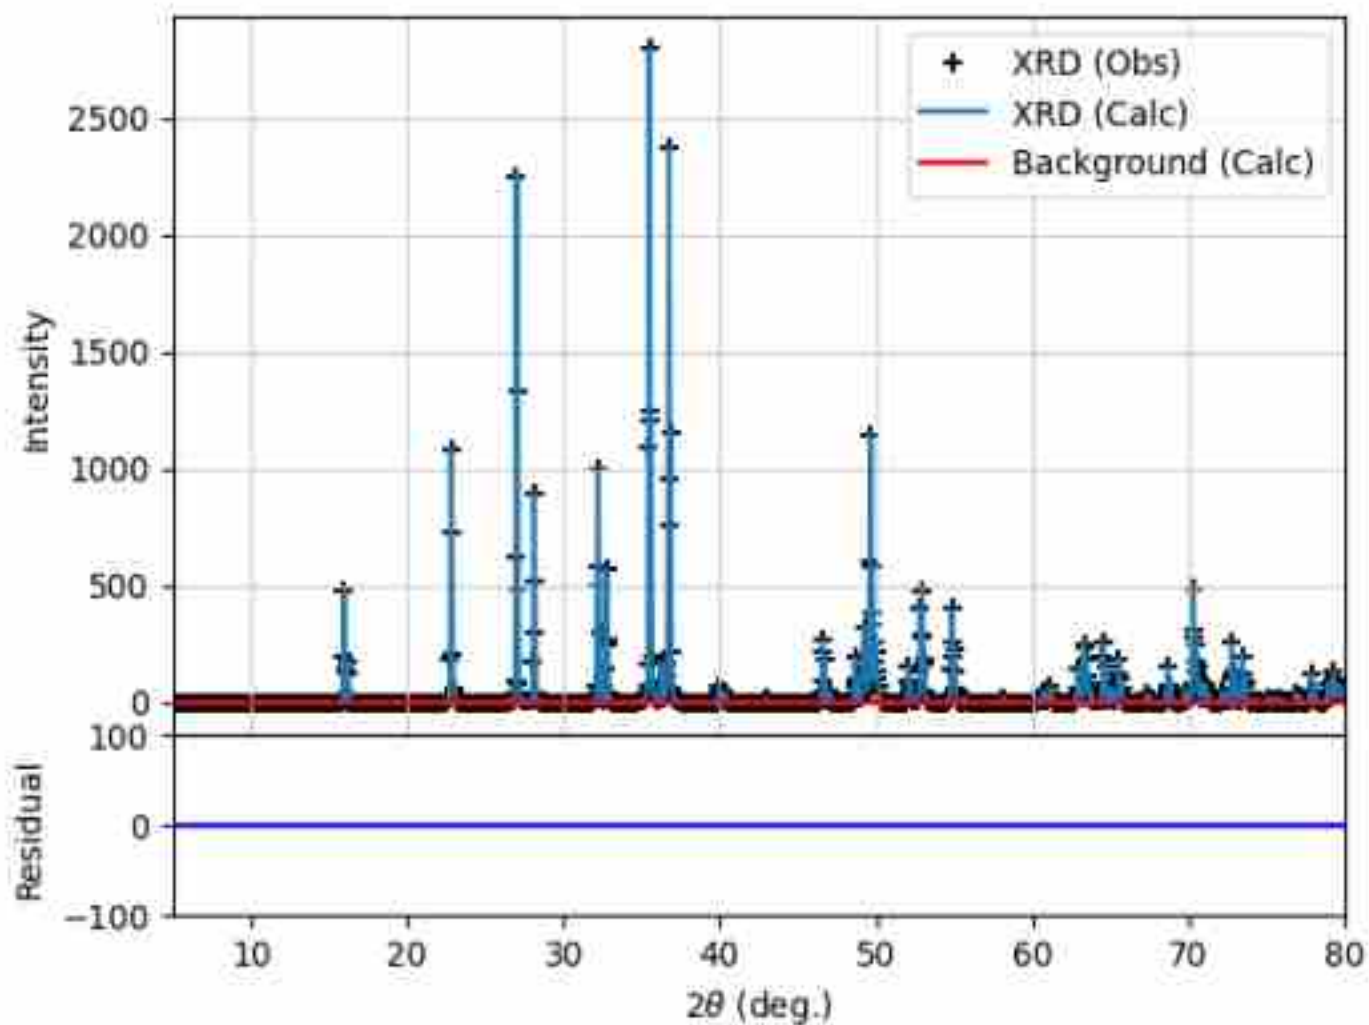

| RMSE before RR | Rwp     | RMSE after RR |
|----------------|---------|---------------|
| 0.072          | 0.00309 | 0.00064       |

# A12T12F8

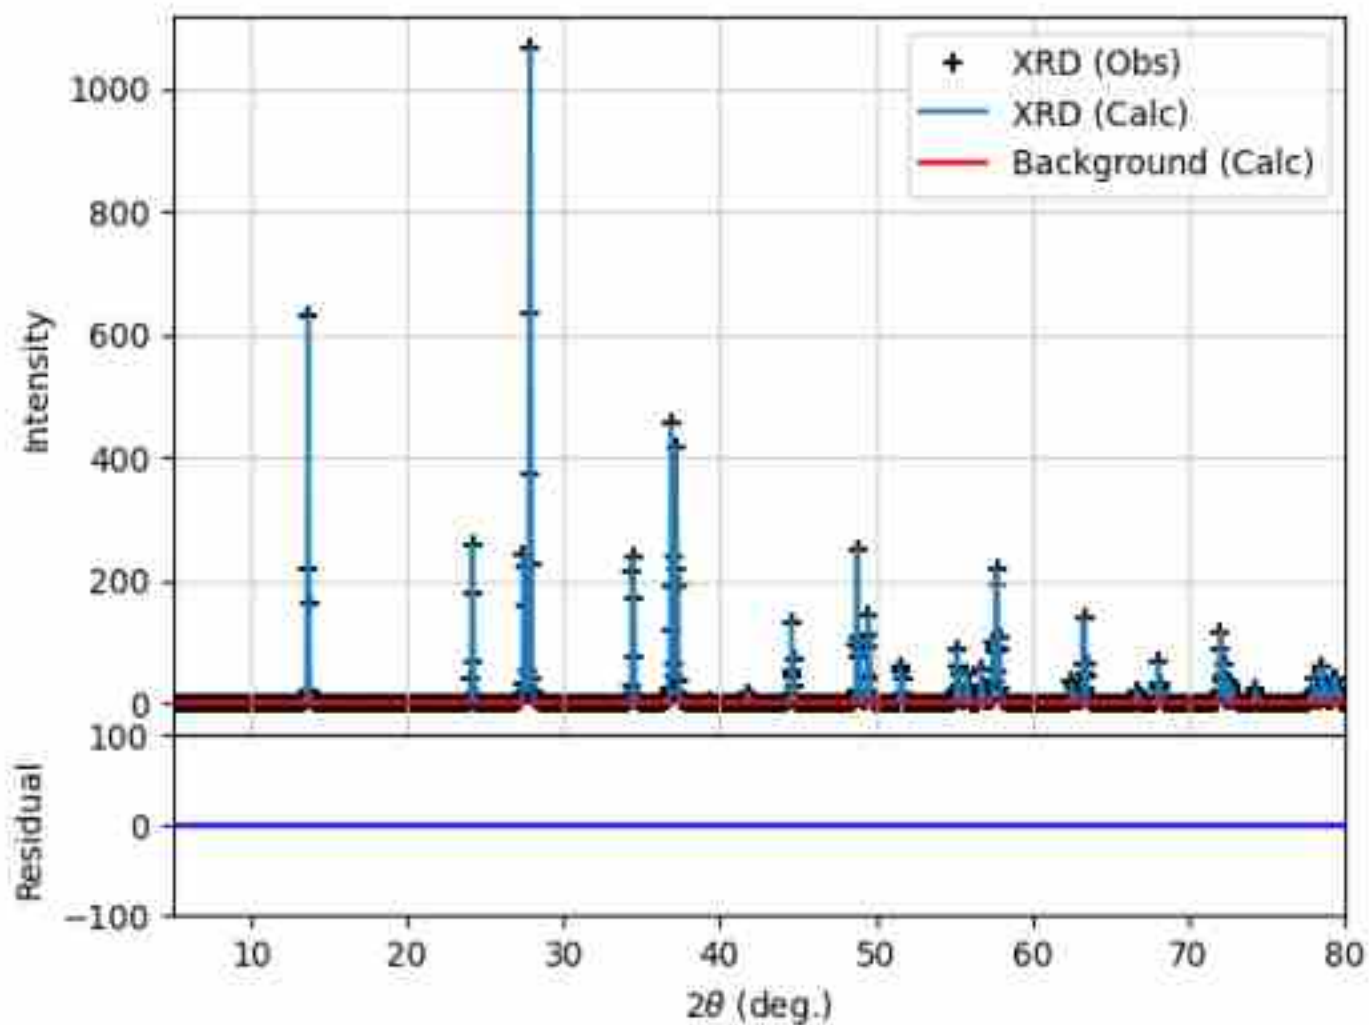

| RMSE before RR | Rwp     | RMSE after RR |
|----------------|---------|---------------|
| 0.073          | 0.00347 | 0.00083       |

# Ba1Ag2Ge1Se4

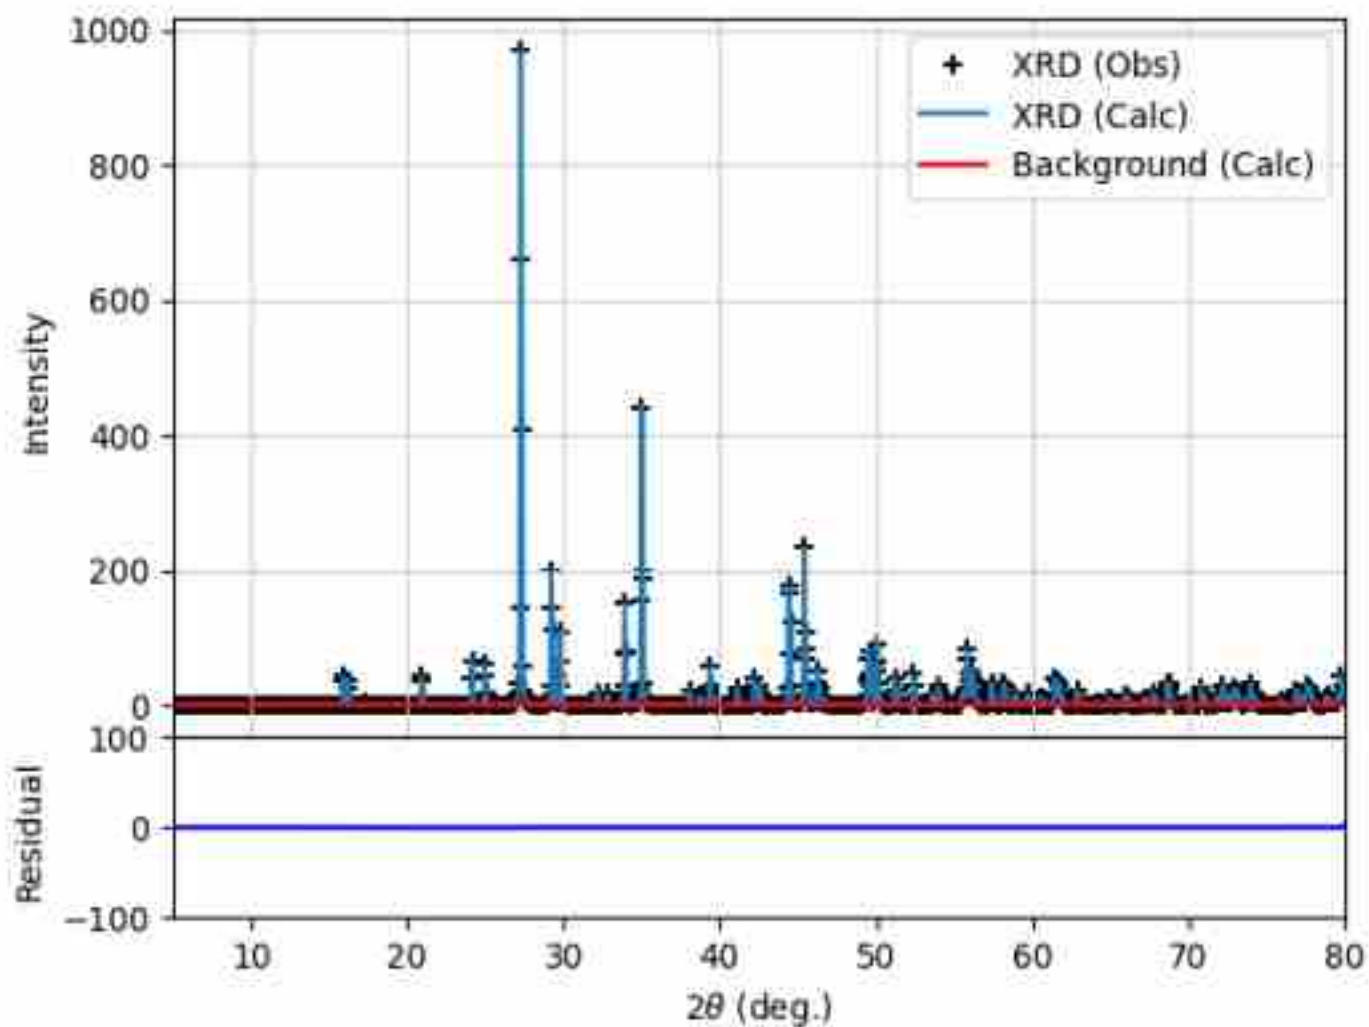

| RMSE before RR | Rwp     | RMSE after RR |
|----------------|---------|---------------|
| 0.073          | 0.98702 | 0.00696       |

# Ba<sub>4</sub>Ge<sub>4</sub>O<sub>12</sub>

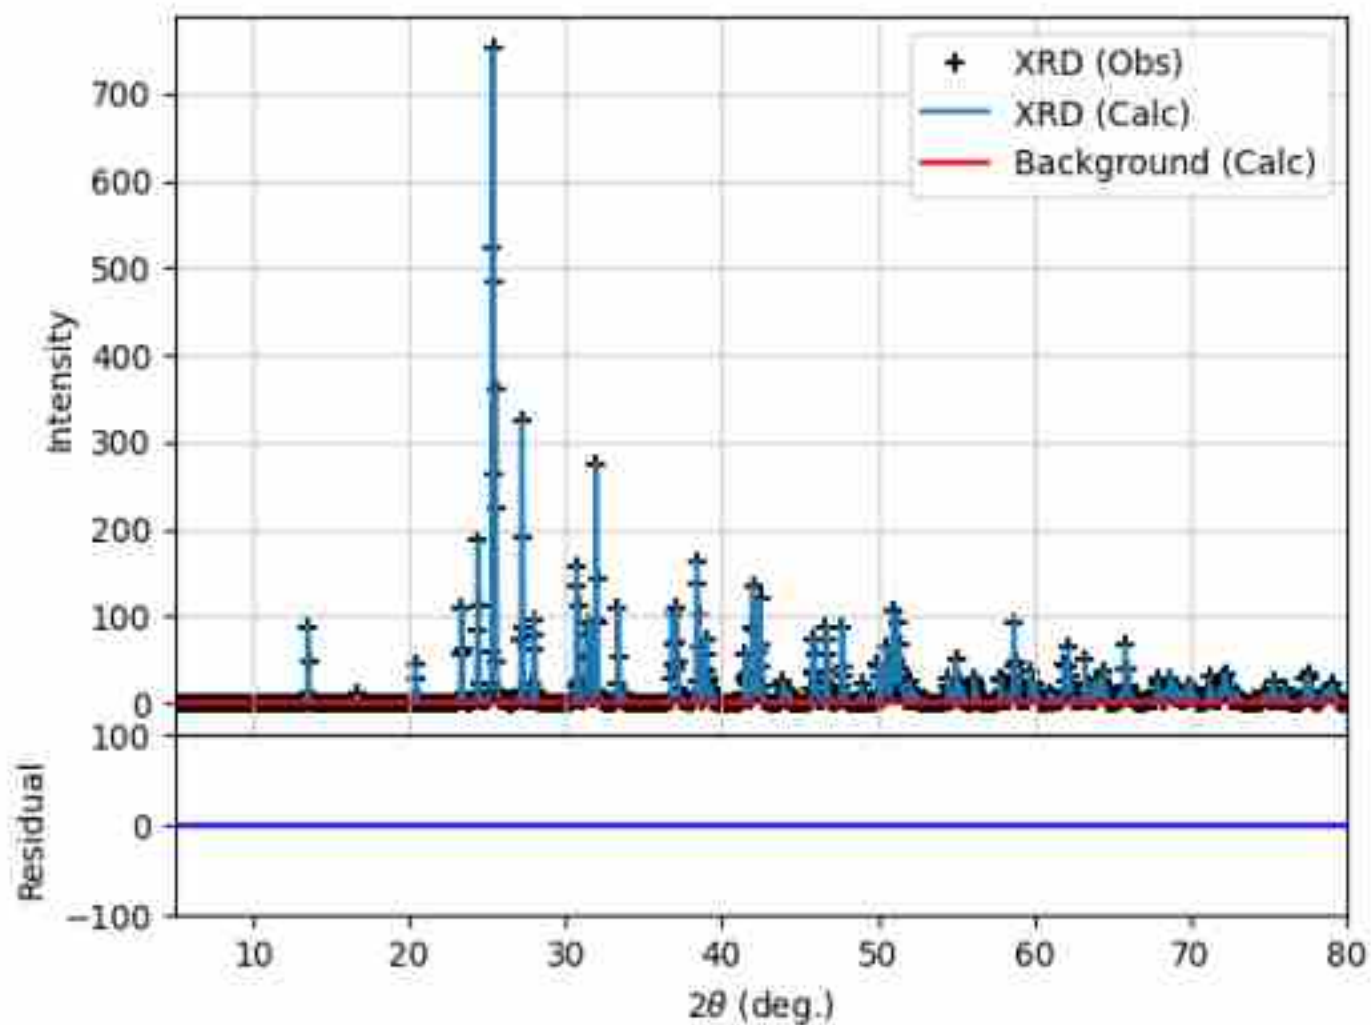

| RMSE before RR | Rwp     | RMSE after RR |
|----------------|---------|---------------|
| 0.073          | 0.00416 | 0.00093       |

# Ce<sub>2</sub>In<sub>4</sub>Ru<sub>2</sub>

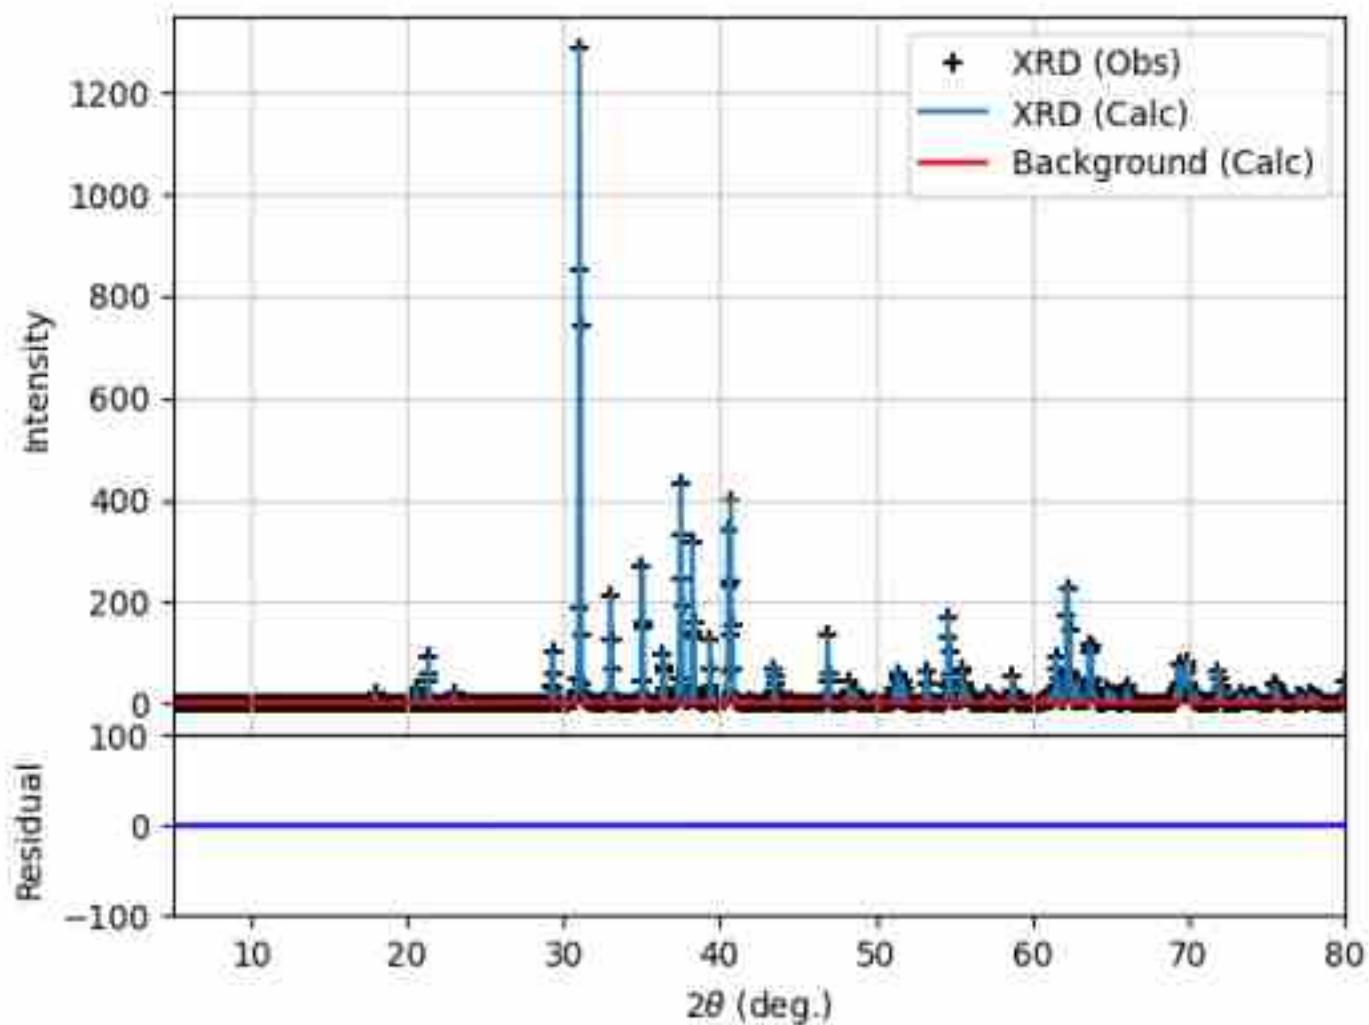

| RMSE before RR | Rwp     | RMSE after RR |
|----------------|---------|---------------|
| 0.073          | 0.16521 | 0.00312       |

# In<sub>2</sub>P<sub>2</sub>H<sub>4</sub>O<sub>10</sub>

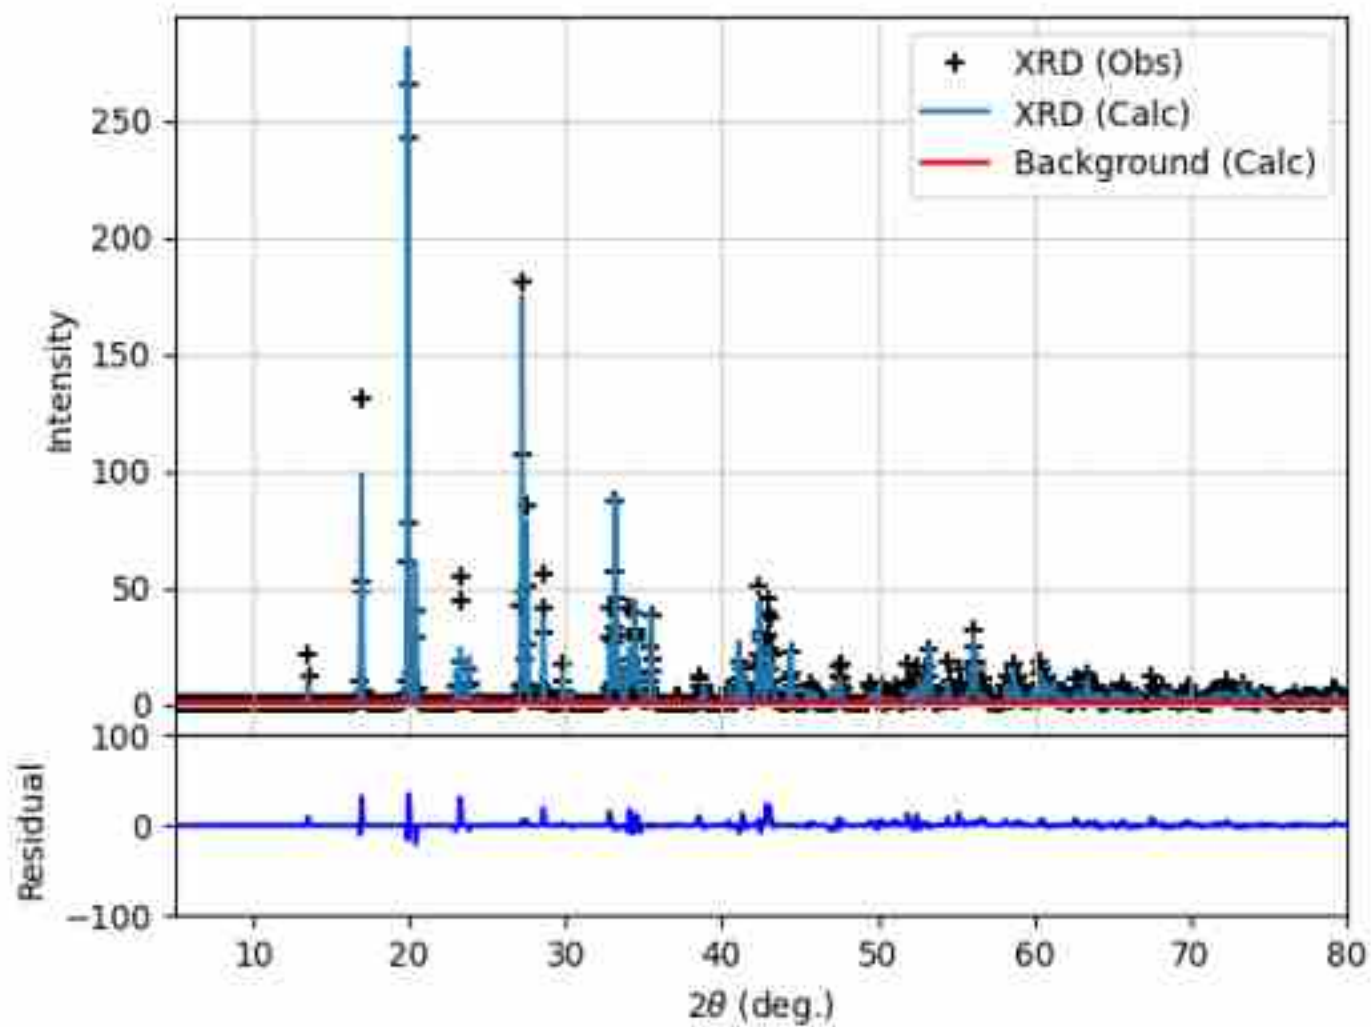

| RMSE before RR | Rwp     | RMSE after RR |
|----------------|---------|---------------|
| 0.073          | 34.6193 | None          |

# K4Au4I12

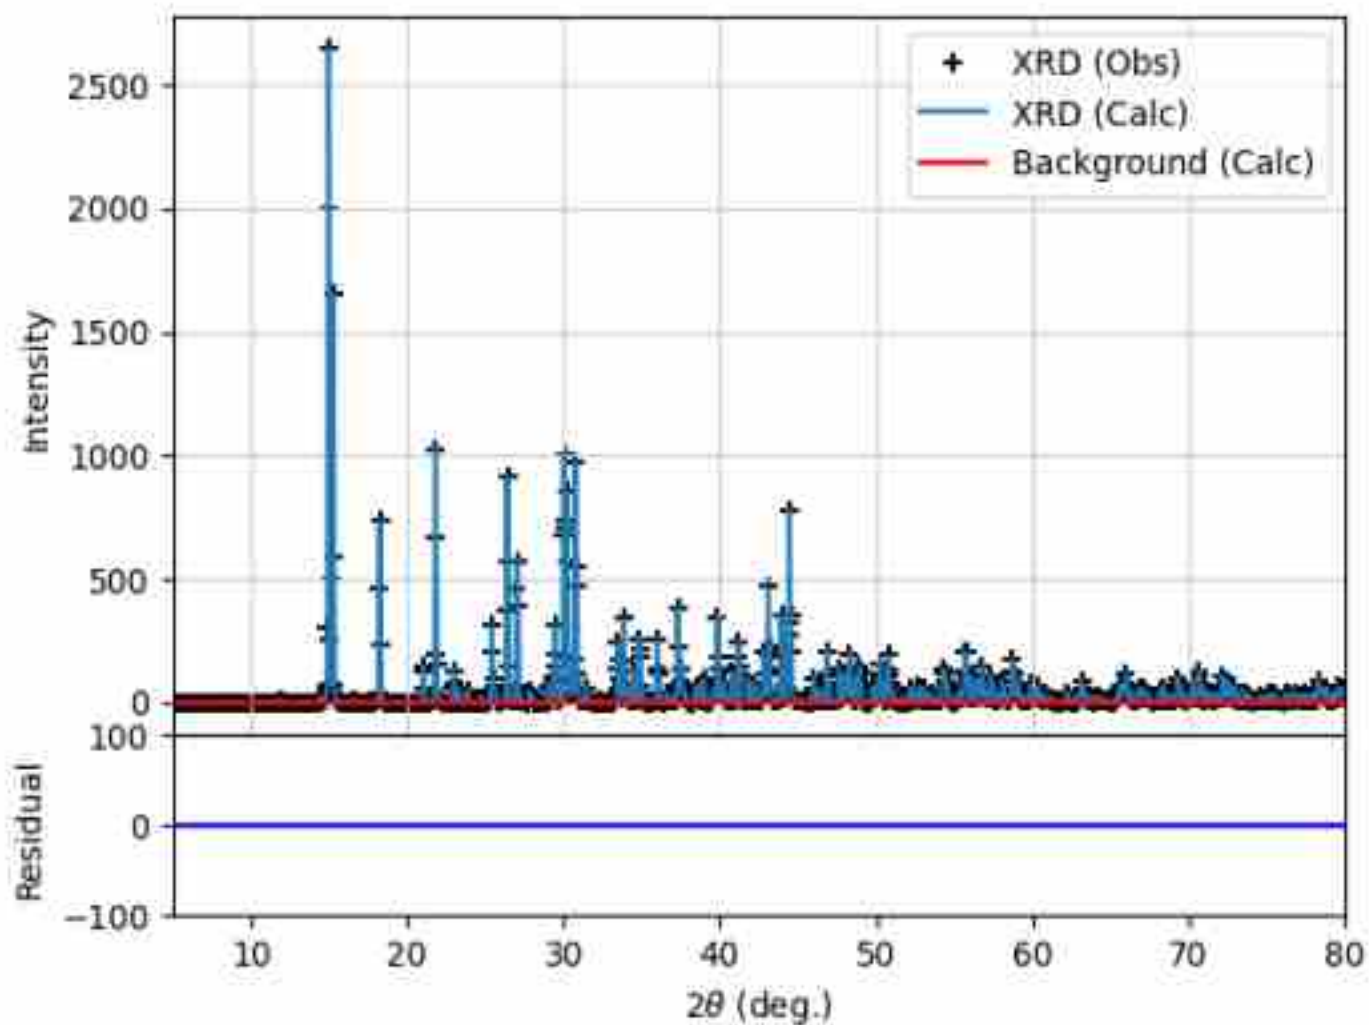

| RMSE before RR | Rwp   | RMSE after RR |
|----------------|-------|---------------|
| 0.073          | 0.004 | 0.0004        |



# Sr1Eu1Nb4O12

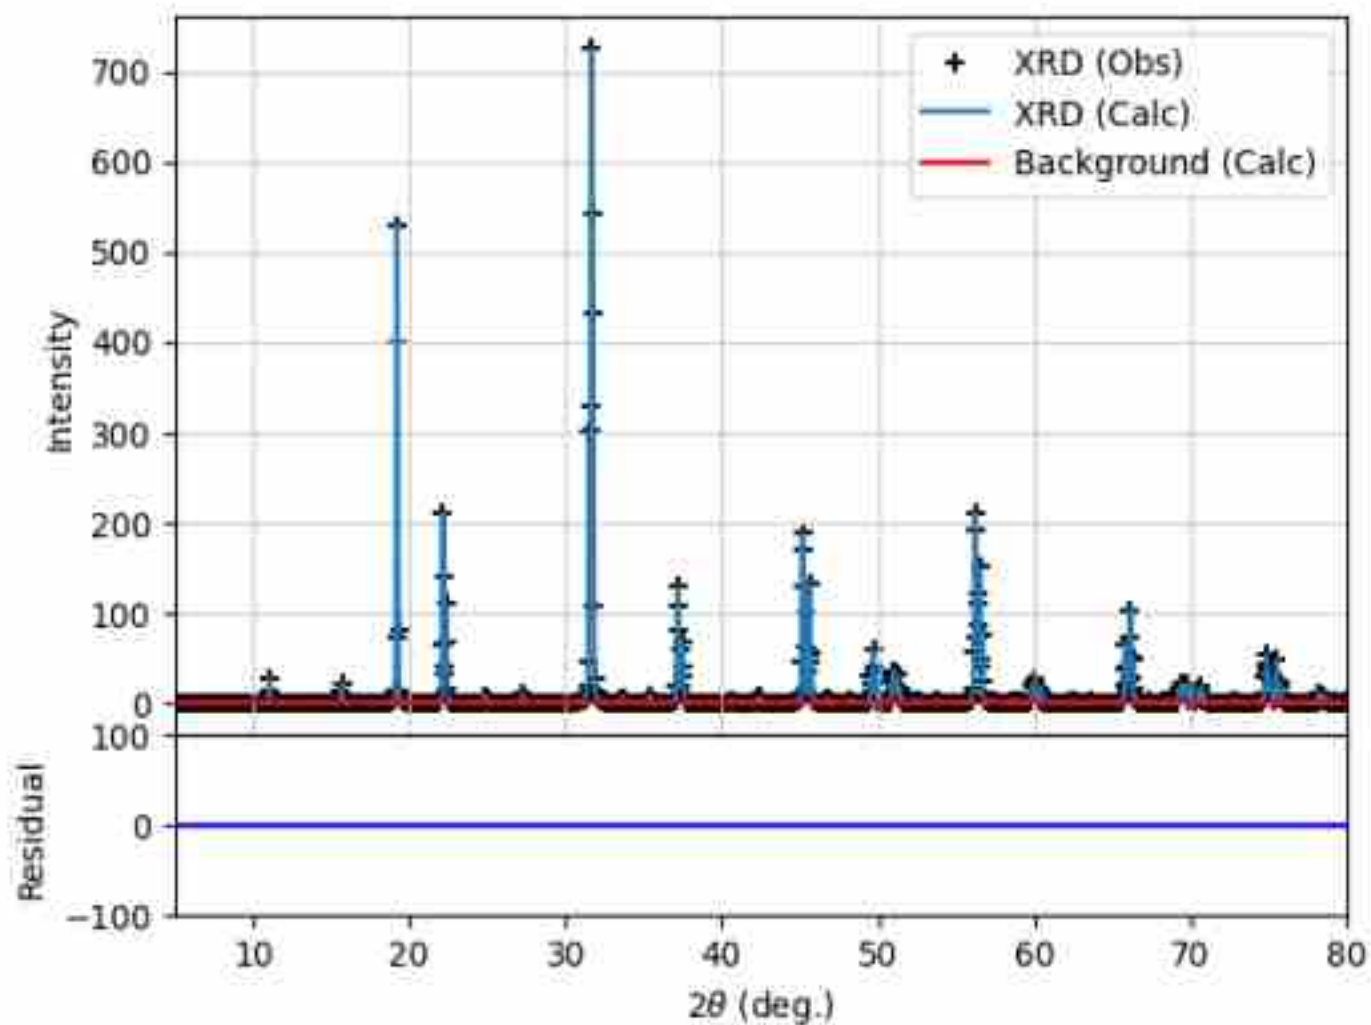

| RMSE before RR | Rwp     | RMSE after RR |
|----------------|---------|---------------|
| 0.073          | 0.00308 | 0.00166       |

# Sr<sub>2</sub>Cr<sub>1</sub>Sb<sub>1</sub>O<sub>6</sub>

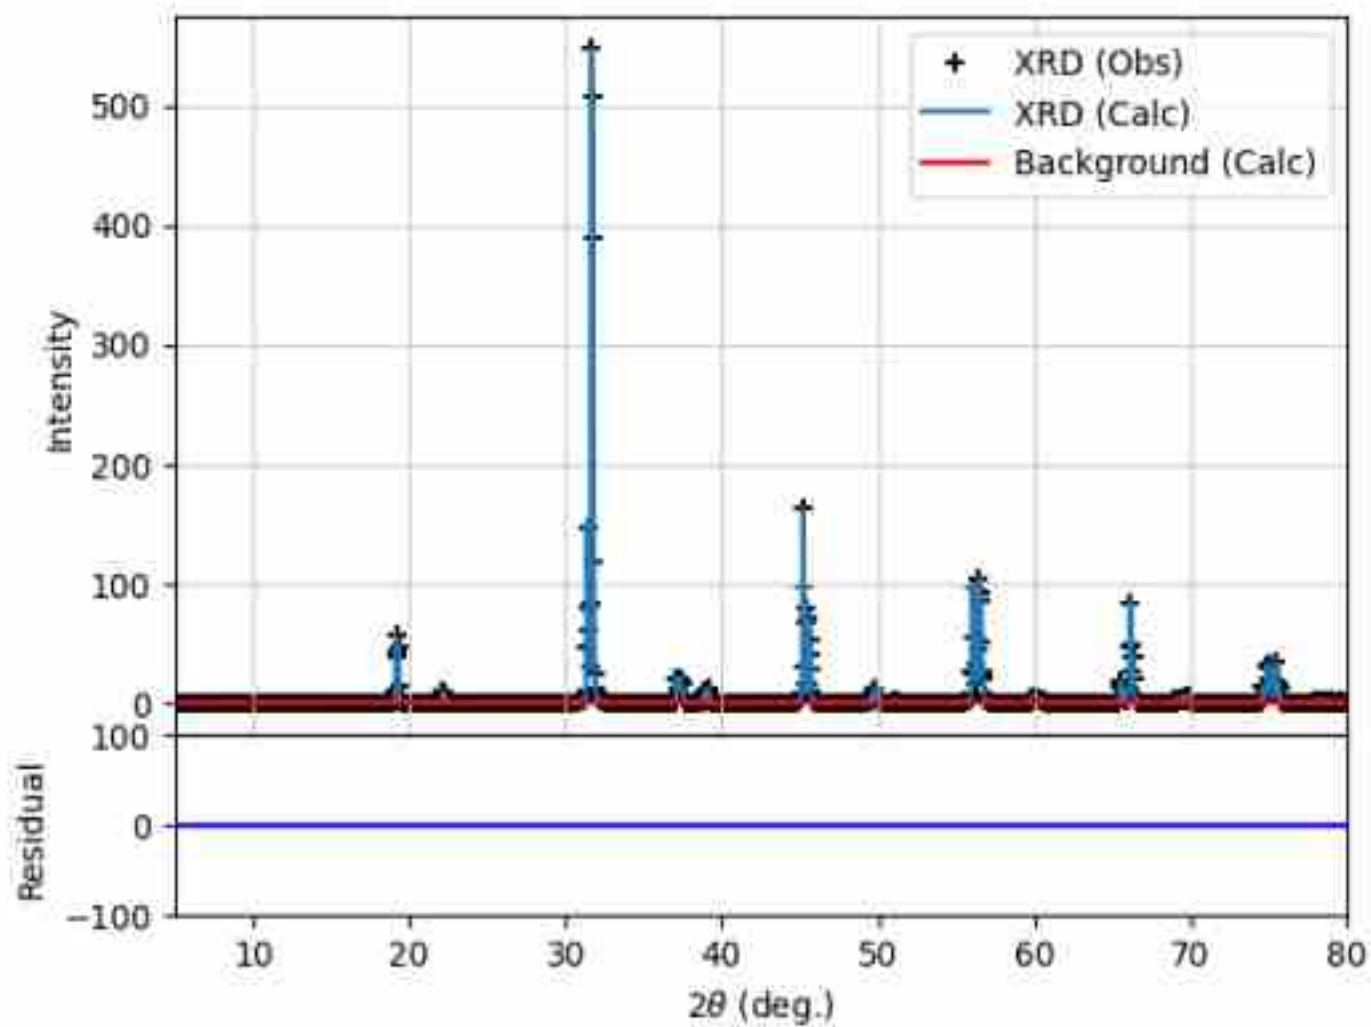

| RMSE before RR | Rwp     | RMSE after RR |
|----------------|---------|---------------|
| 0.073          | 0.00172 | 0.00073       |

# Zr<sub>2</sub>C16

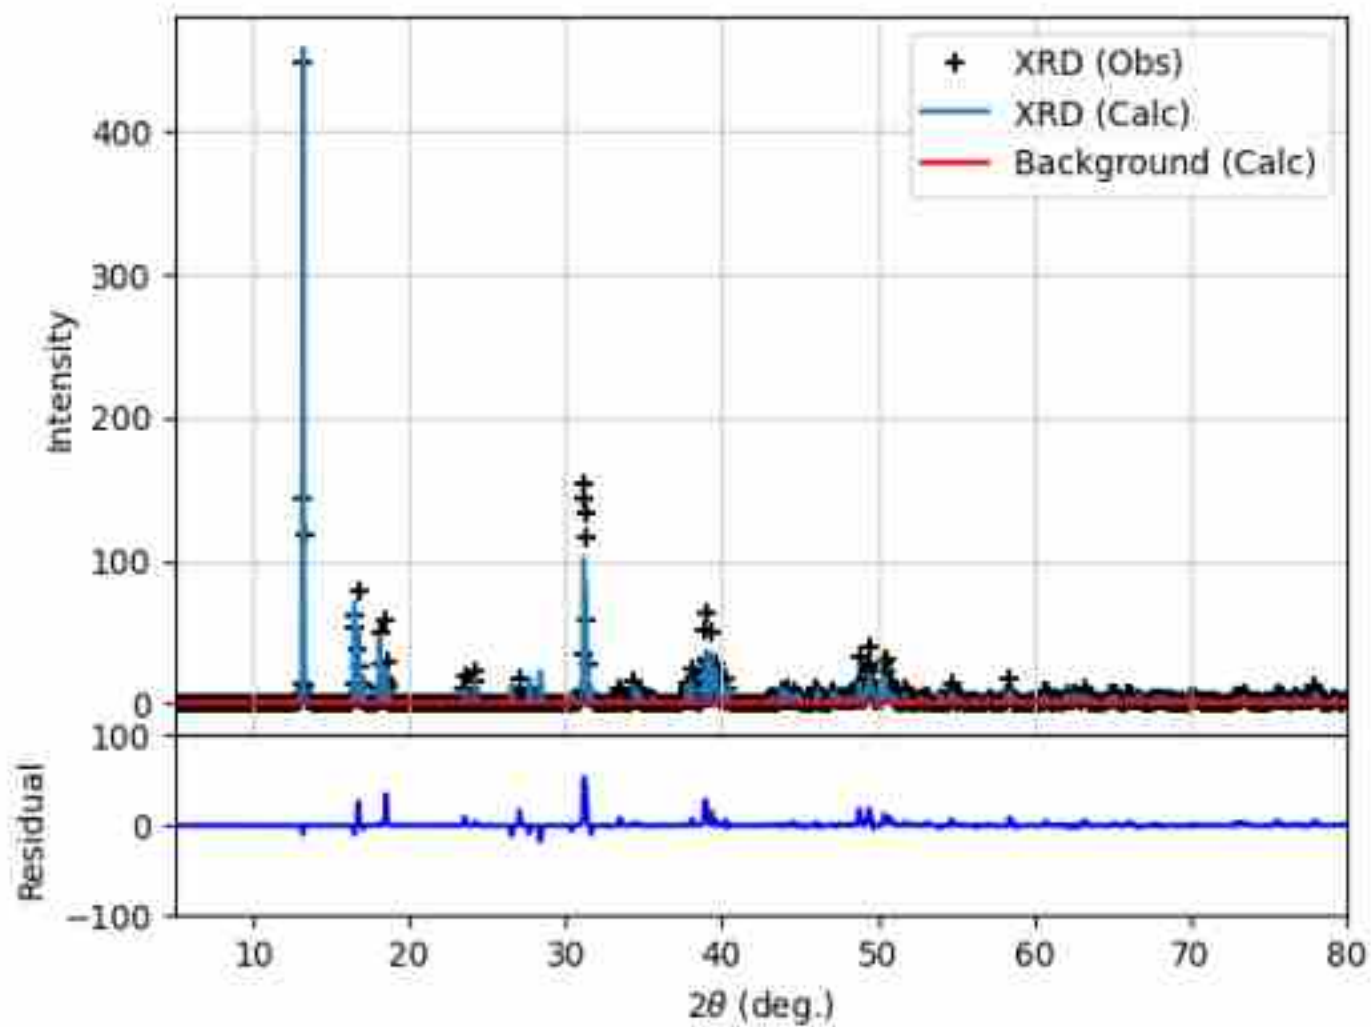

| RMSE before RR | Rwp      | RMSE after RR |
|----------------|----------|---------------|
| 0.073          | 39.14222 | 0.4746        |

# La<sub>1</sub>Pr<sub>3</sub>Al<sub>4</sub>O<sub>12</sub>

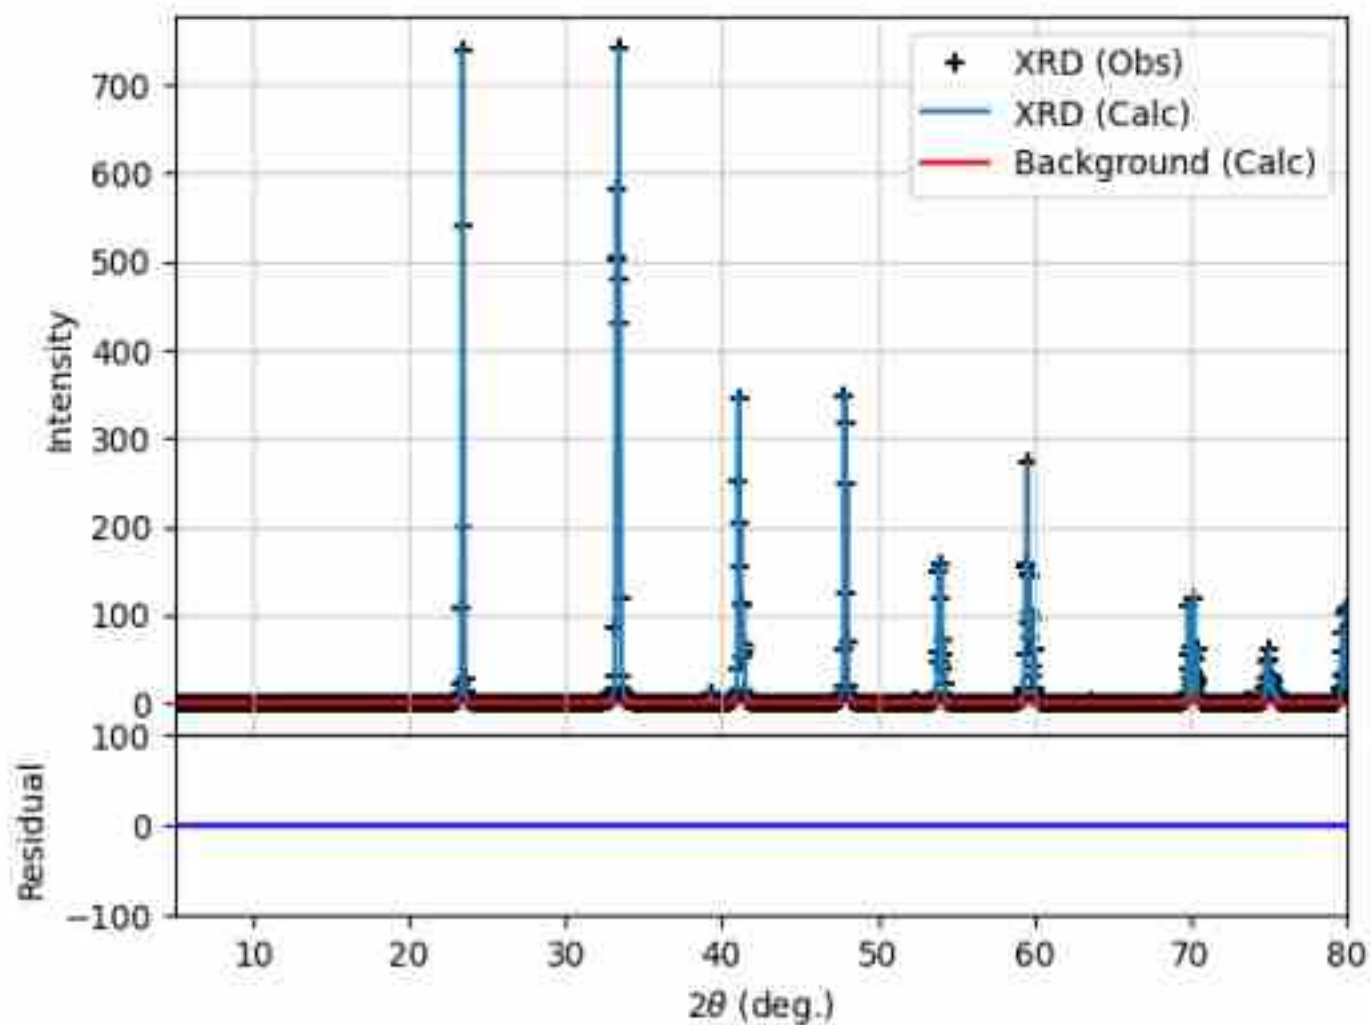

| RMSE before RR | Rwp     | RMSE after RR |
|----------------|---------|---------------|
| 0.074          | 0.00553 | 0.00292       |

# Na<sub>4</sub>V<sub>4</sub>O<sub>12</sub>

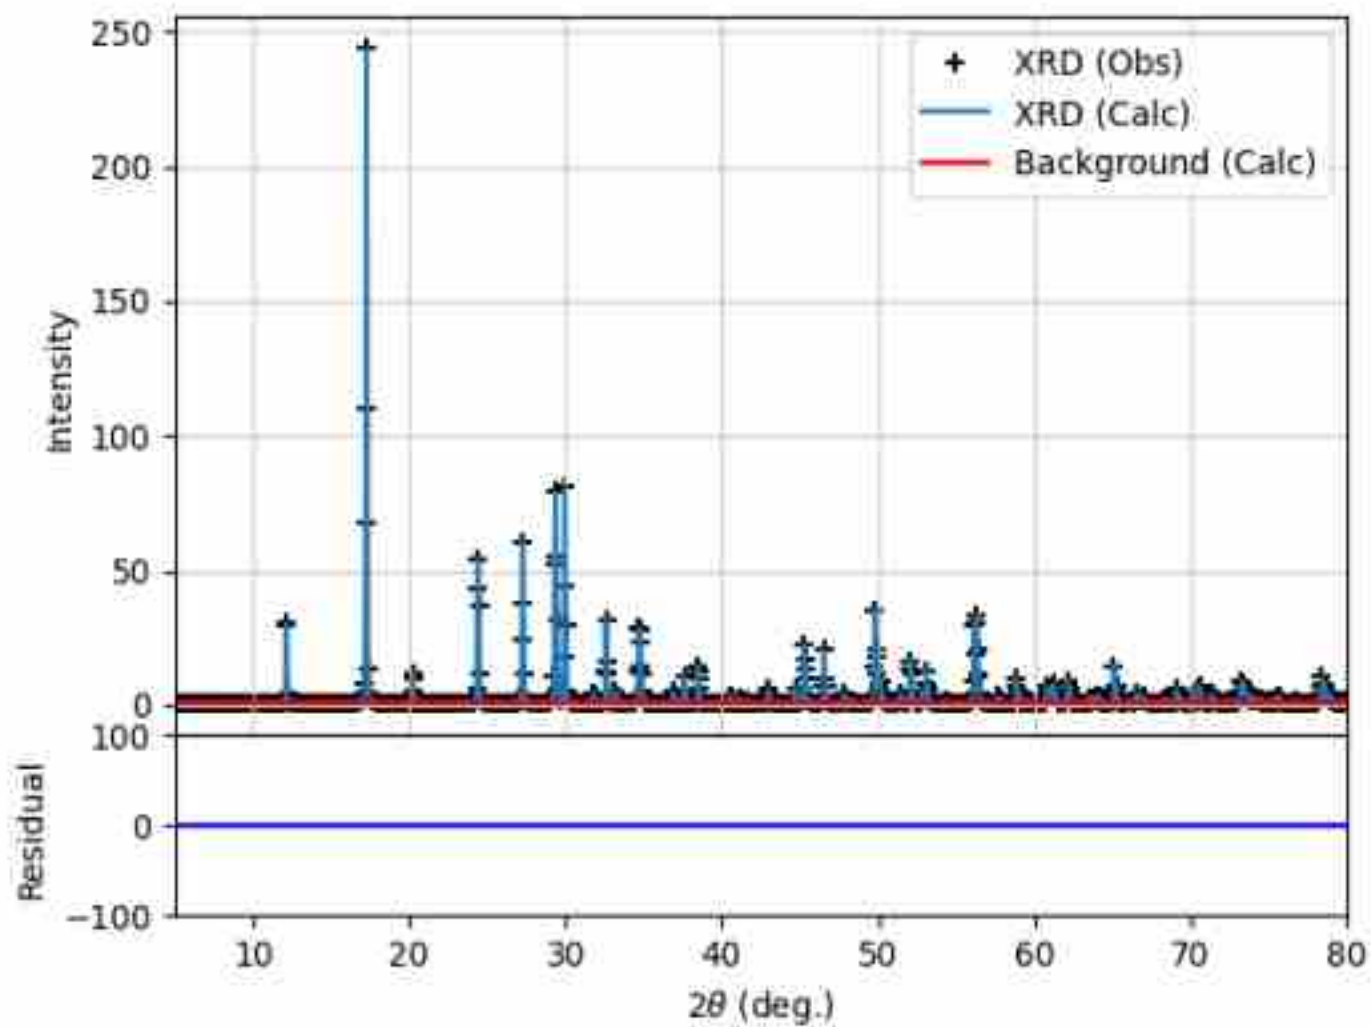

| RMSE before RR | Rwp     | RMSE after RR |
|----------------|---------|---------------|
| 0.074          | 0.00262 | 0.00085       |

# Pr1Nb4O12

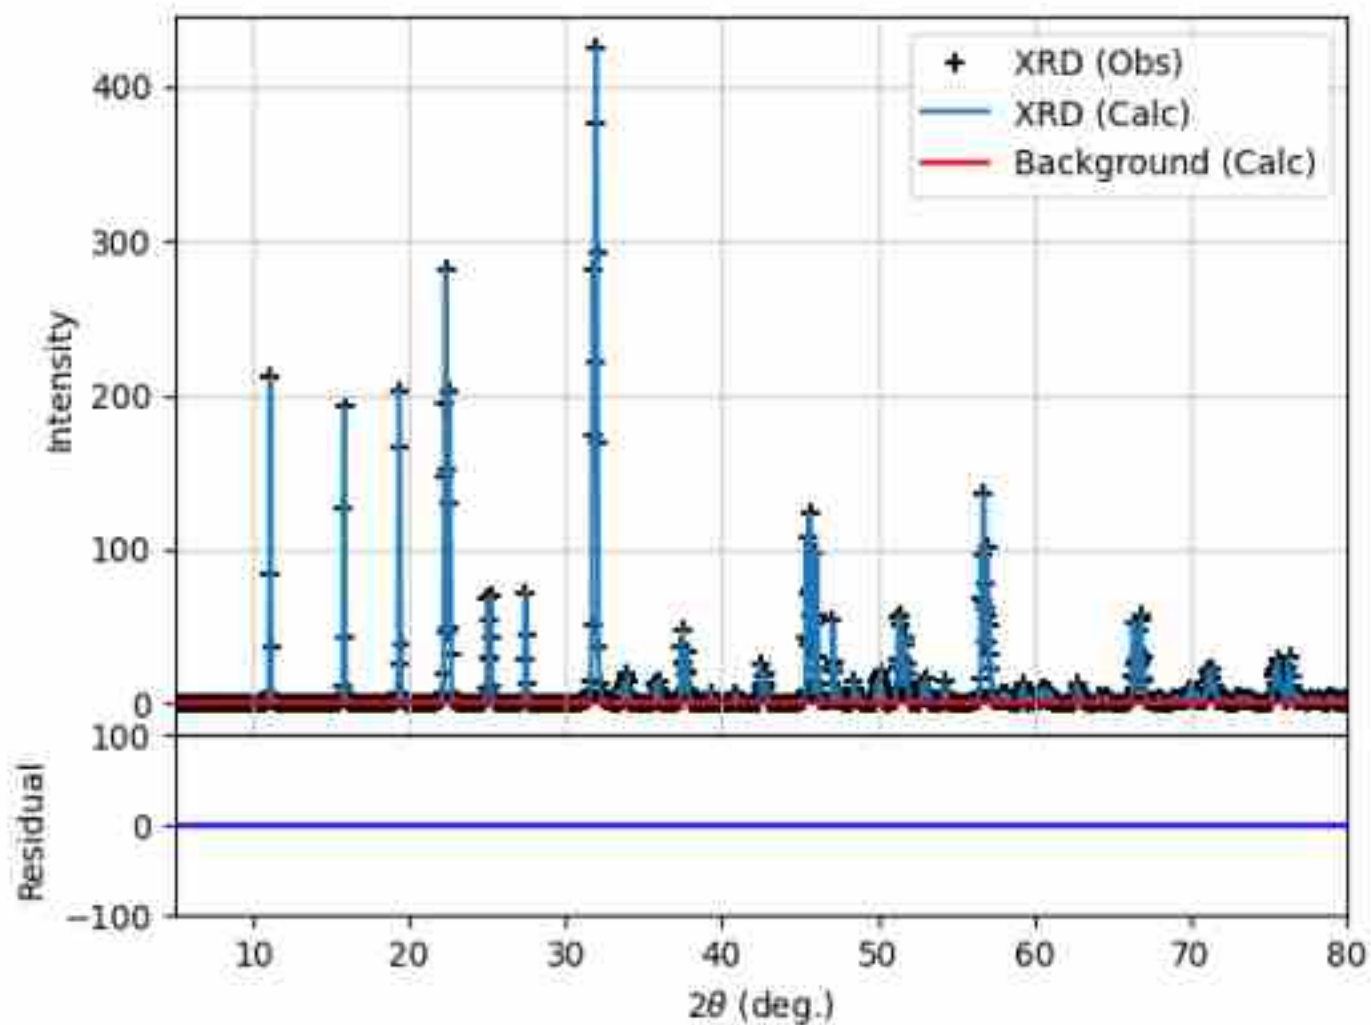

| RMSE before RR | Rwp     | RMSE after RR |
|----------------|---------|---------------|
| 0.074          | 0.00346 | 0.00115       |

# Sr1O2

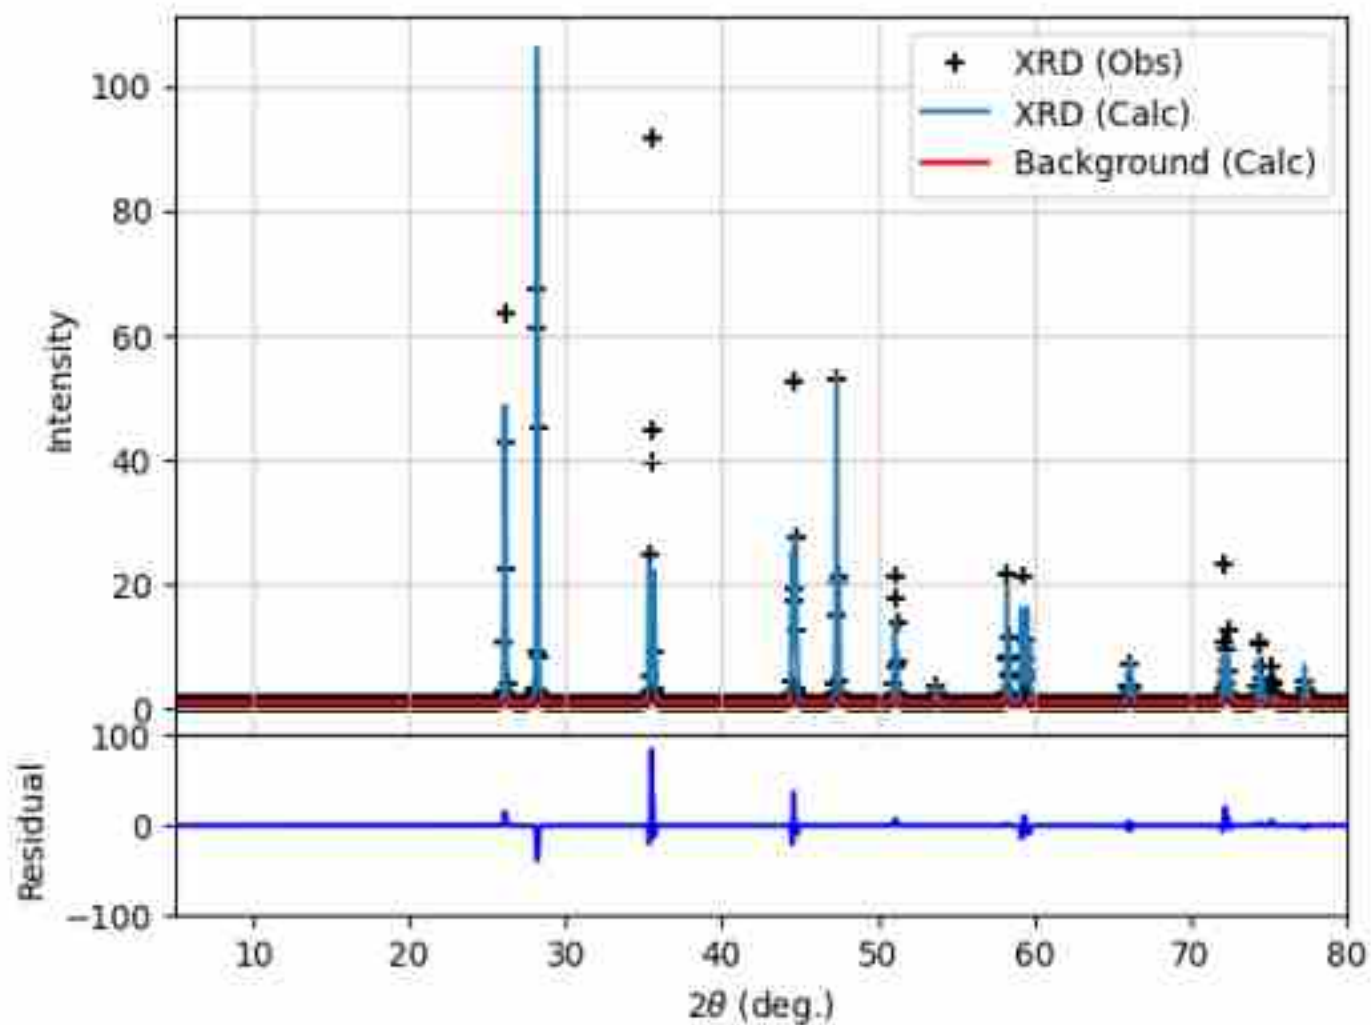

| RMSE before RR | Rwp      | RMSE after RR |
|----------------|----------|---------------|
| 0.074          | 67.26979 | 0.43457       |

# Ta<sub>2</sub>Ni<sub>4</sub>Te<sub>6</sub>

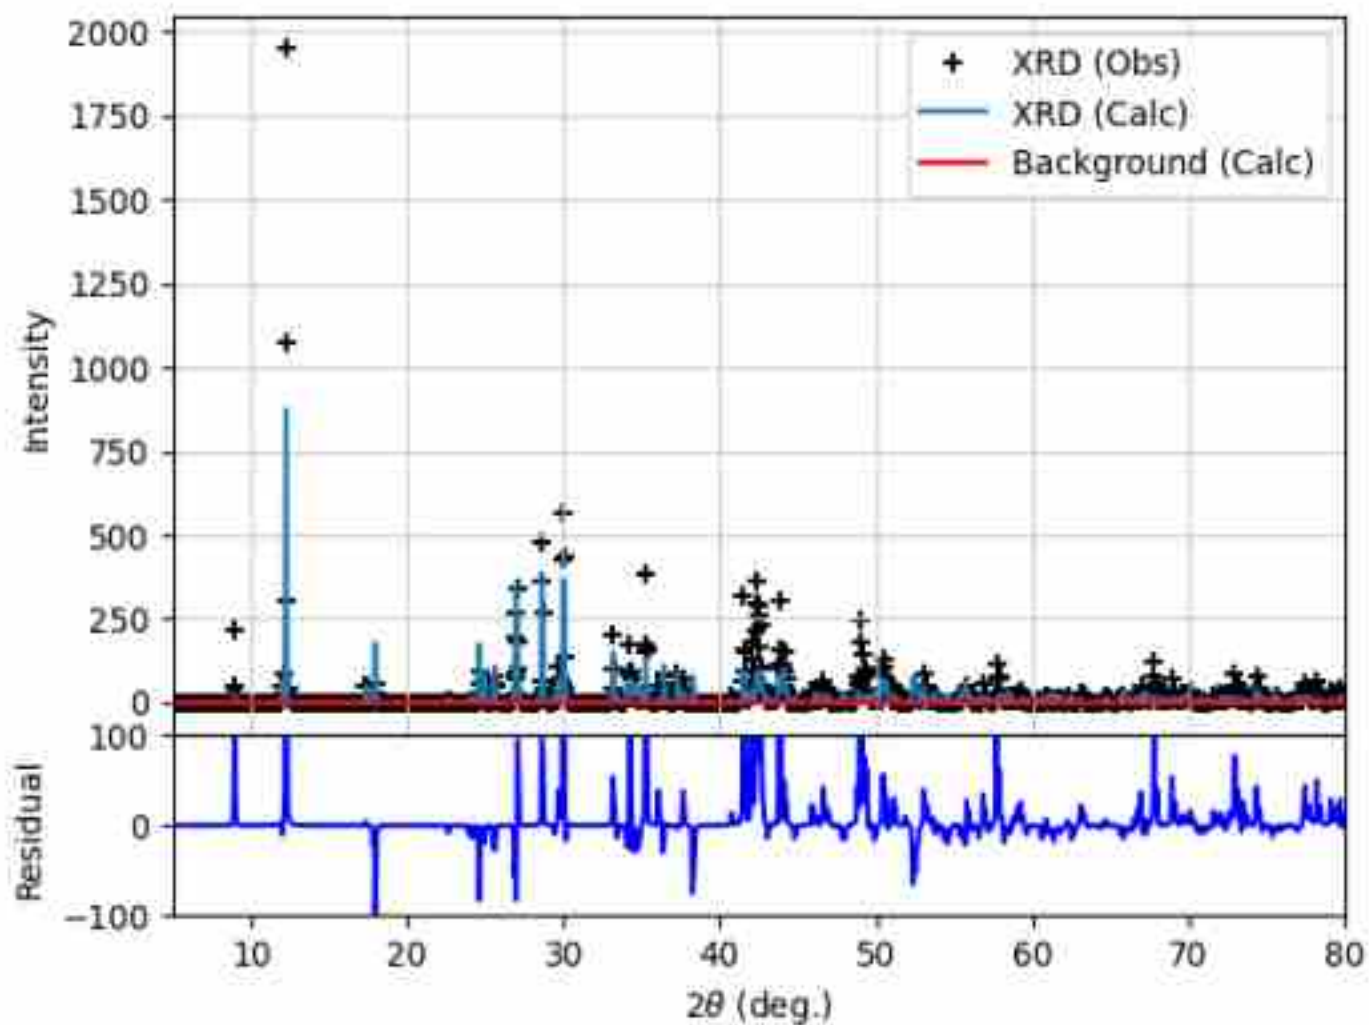

| RMSE before RR | Rwp     | RMSE after RR |
|----------------|---------|---------------|
| 0.074          | 72.7452 | None          |



# Tl2Bi2F8

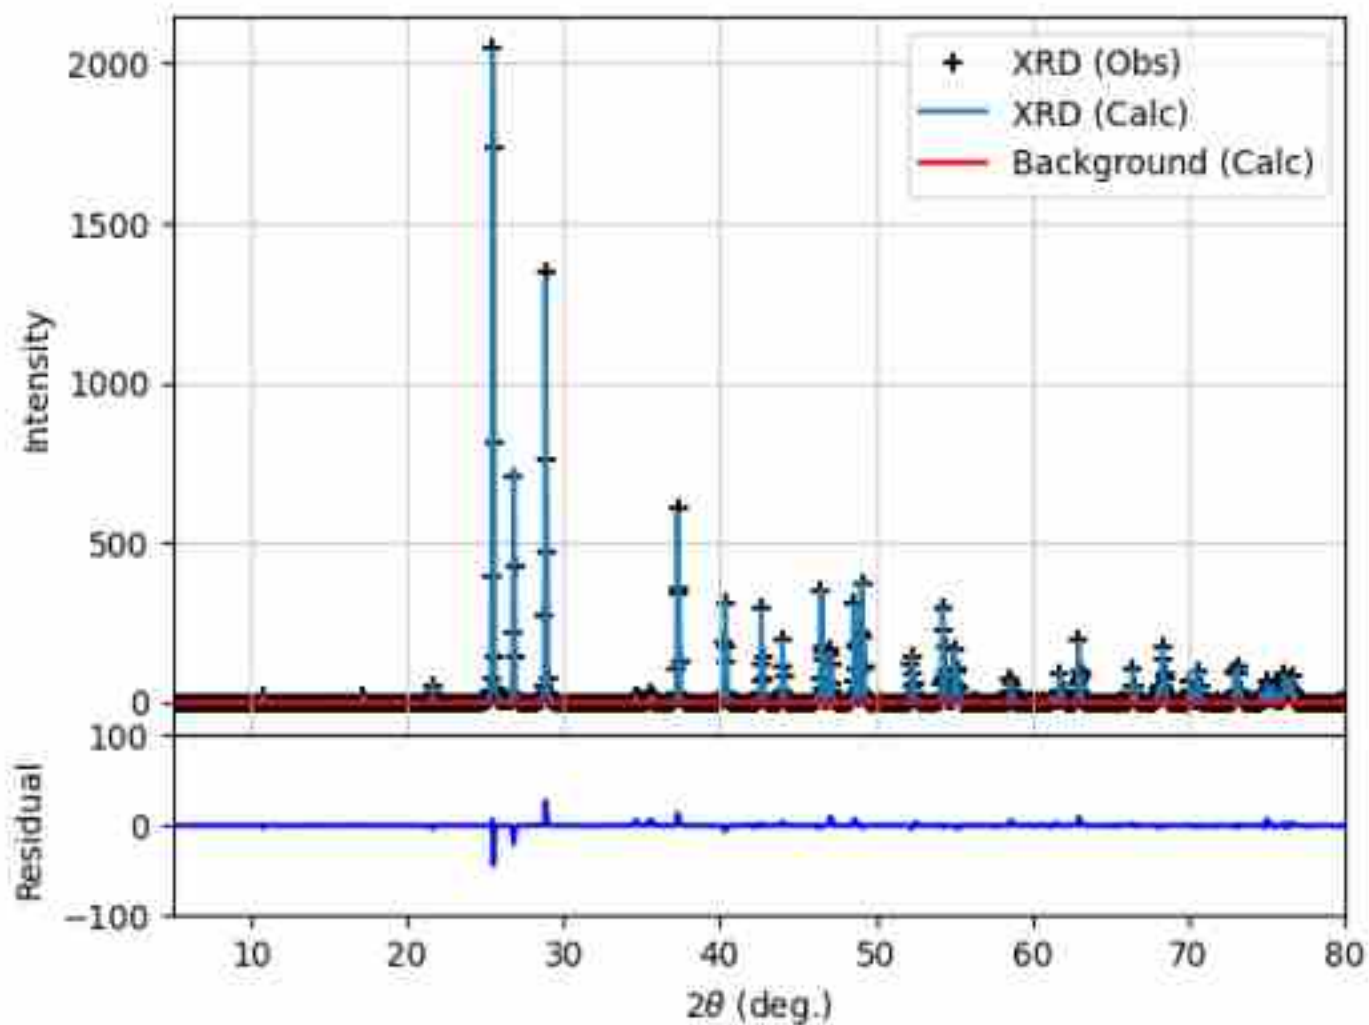

| RMSE before RR | Rwp     | RMSE after RR |
|----------------|---------|---------------|
| 0.074          | 4.15183 | 0.35572       |

# Tl8Ge2S8

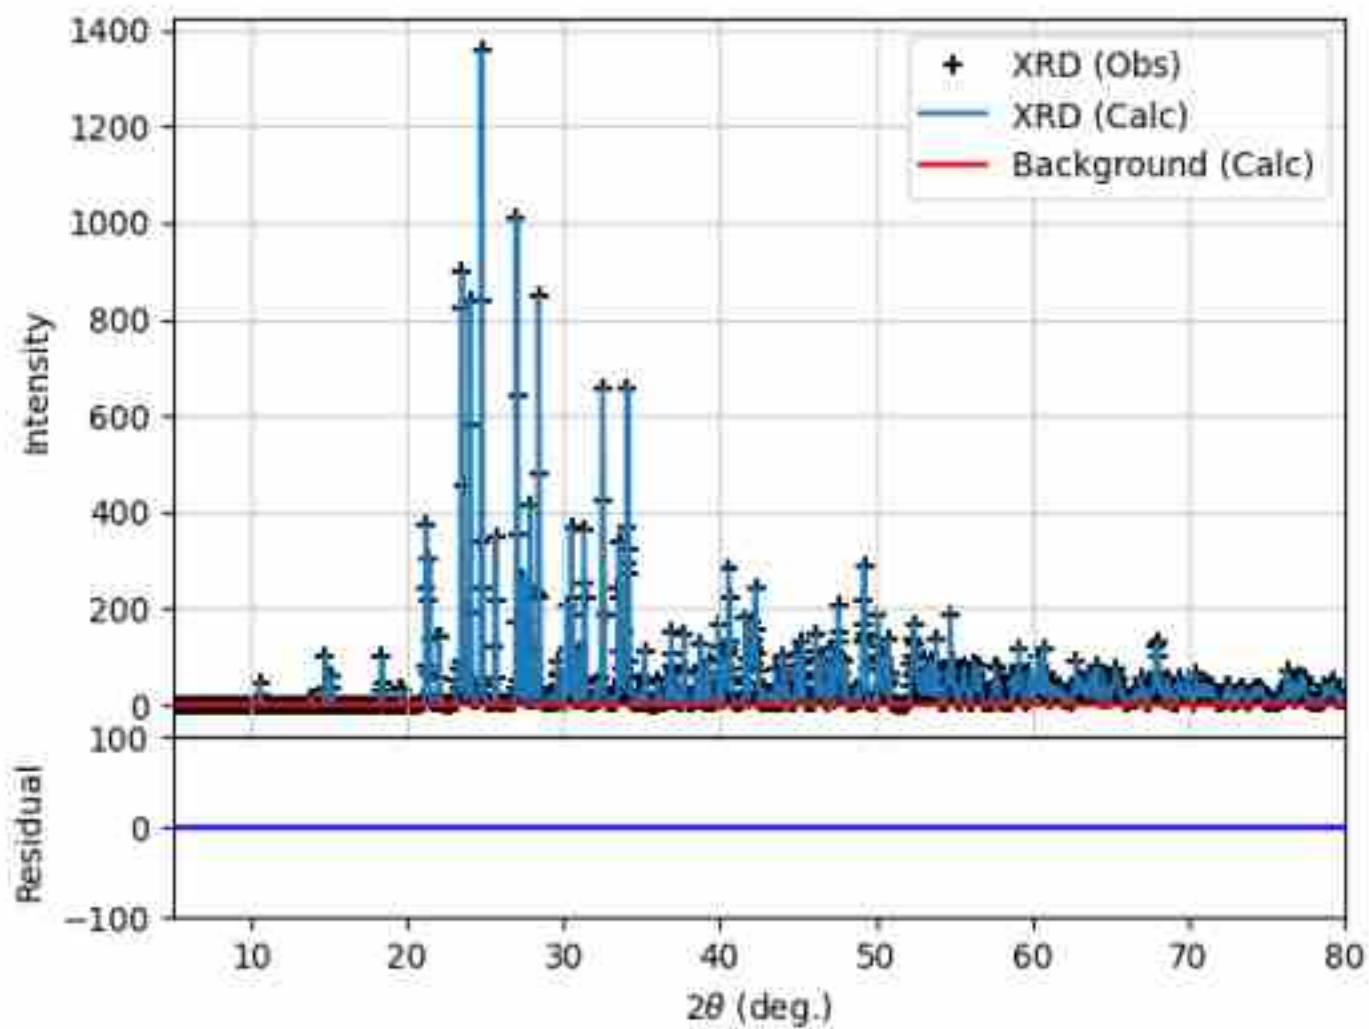

| RMSE before RR | Rwp    | RMSE after RR |
|----------------|--------|---------------|
| 0.074          | 0.0011 | 0.00036       |

# Hf4Fe4Sb4

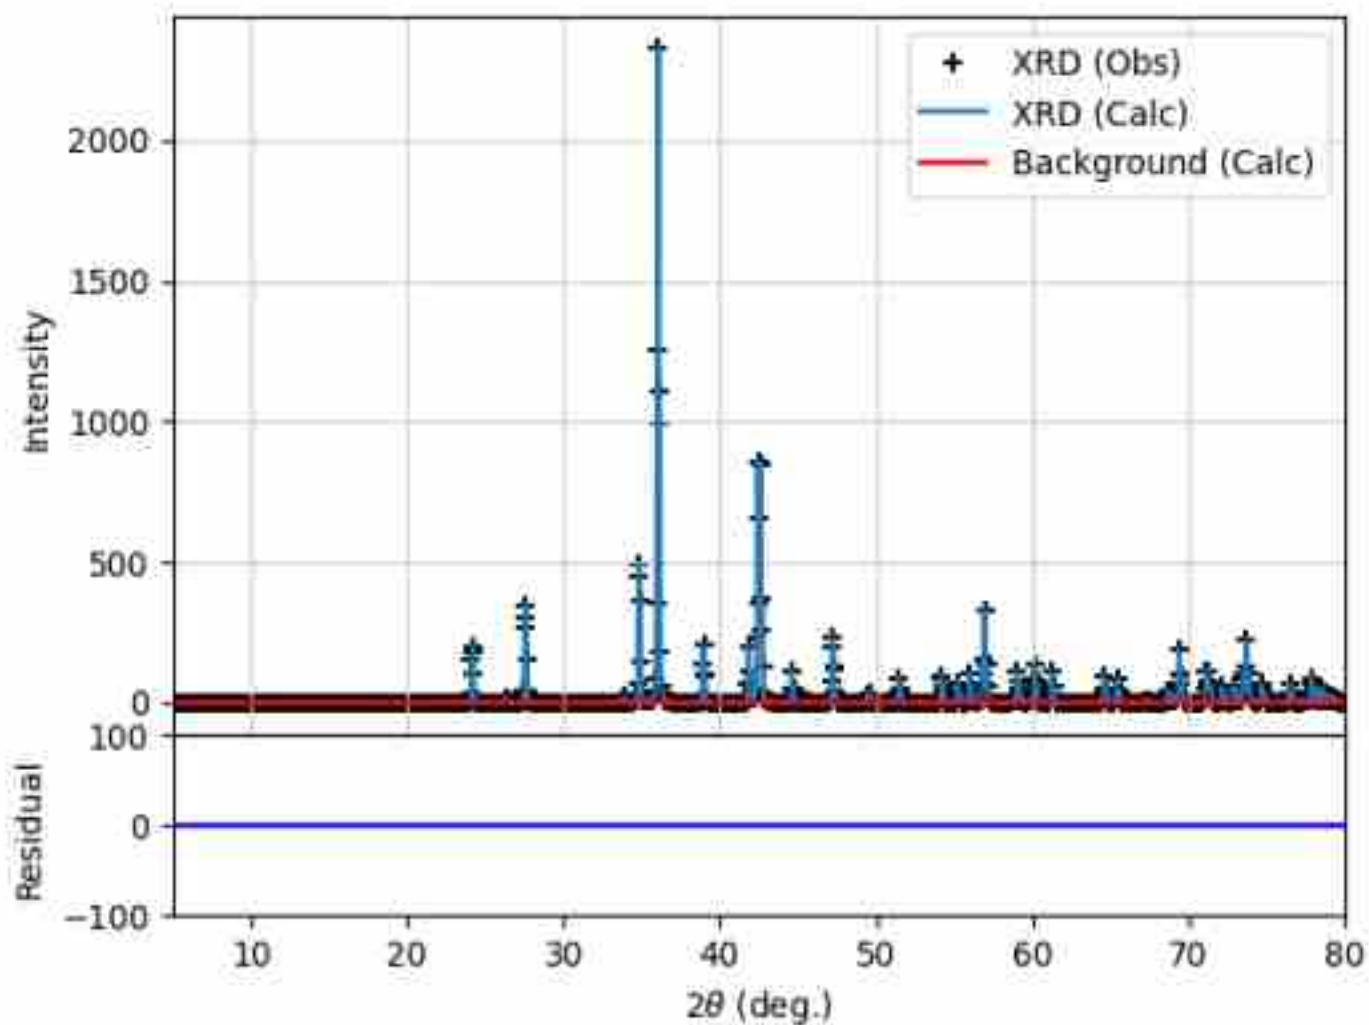

| RMSE before RR | Rwp     | RMSE after RR |
|----------------|---------|---------------|
| 0.075          | 0.00439 | 0.00057       |

# Na<sub>2</sub>H<sub>2</sub>O<sub>2</sub>

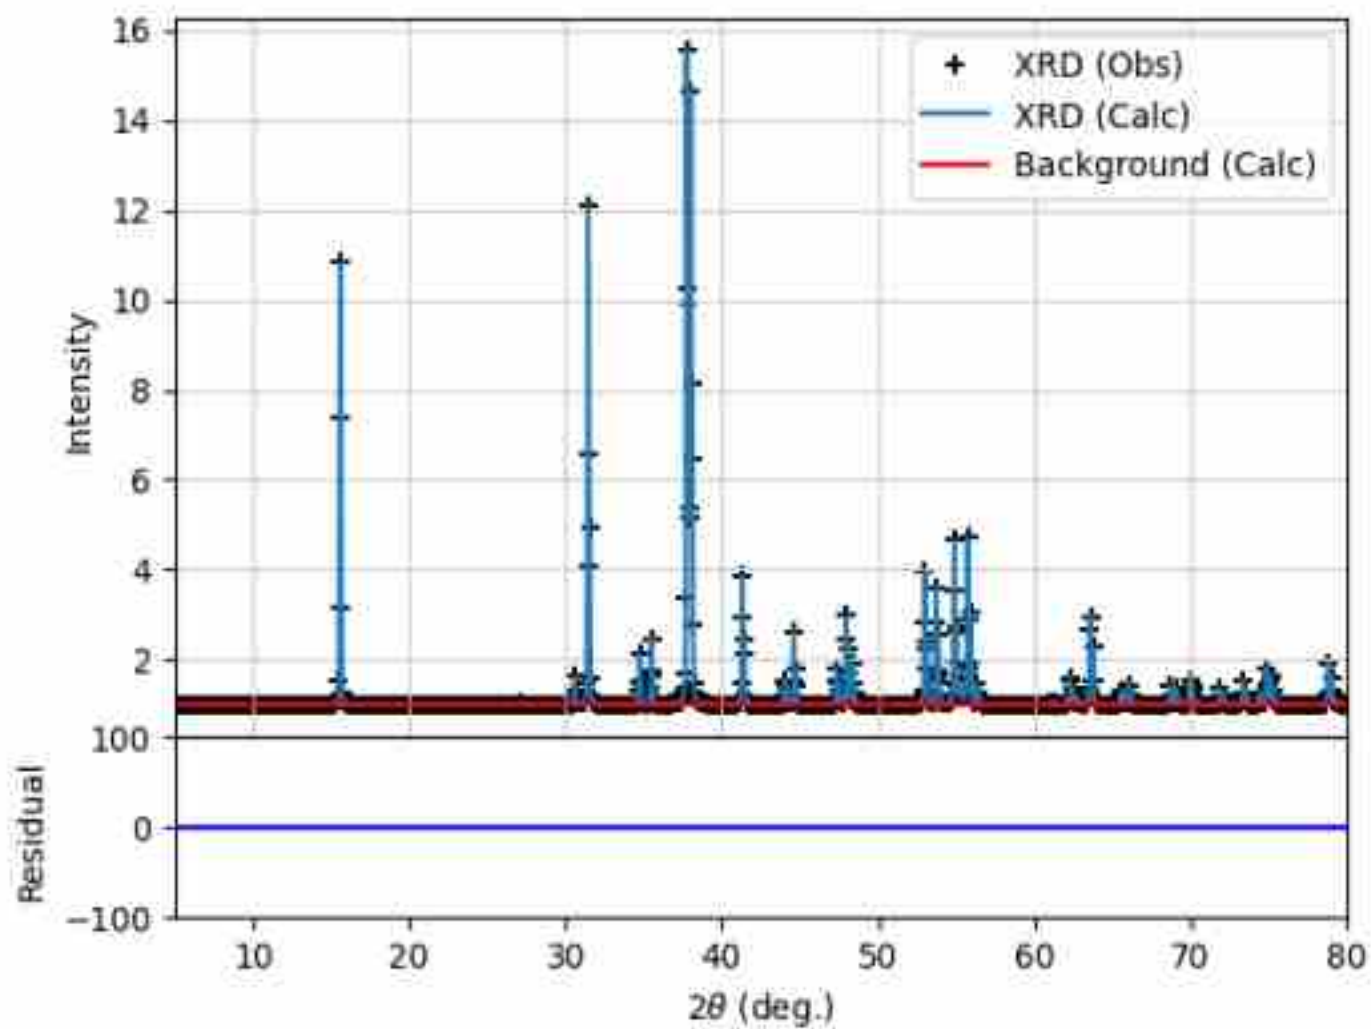

| RMSE before RR | Rwp     | RMSE after RR |
|----------------|---------|---------------|
| 0.075          | 0.00136 | 0.00334       |

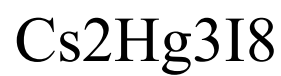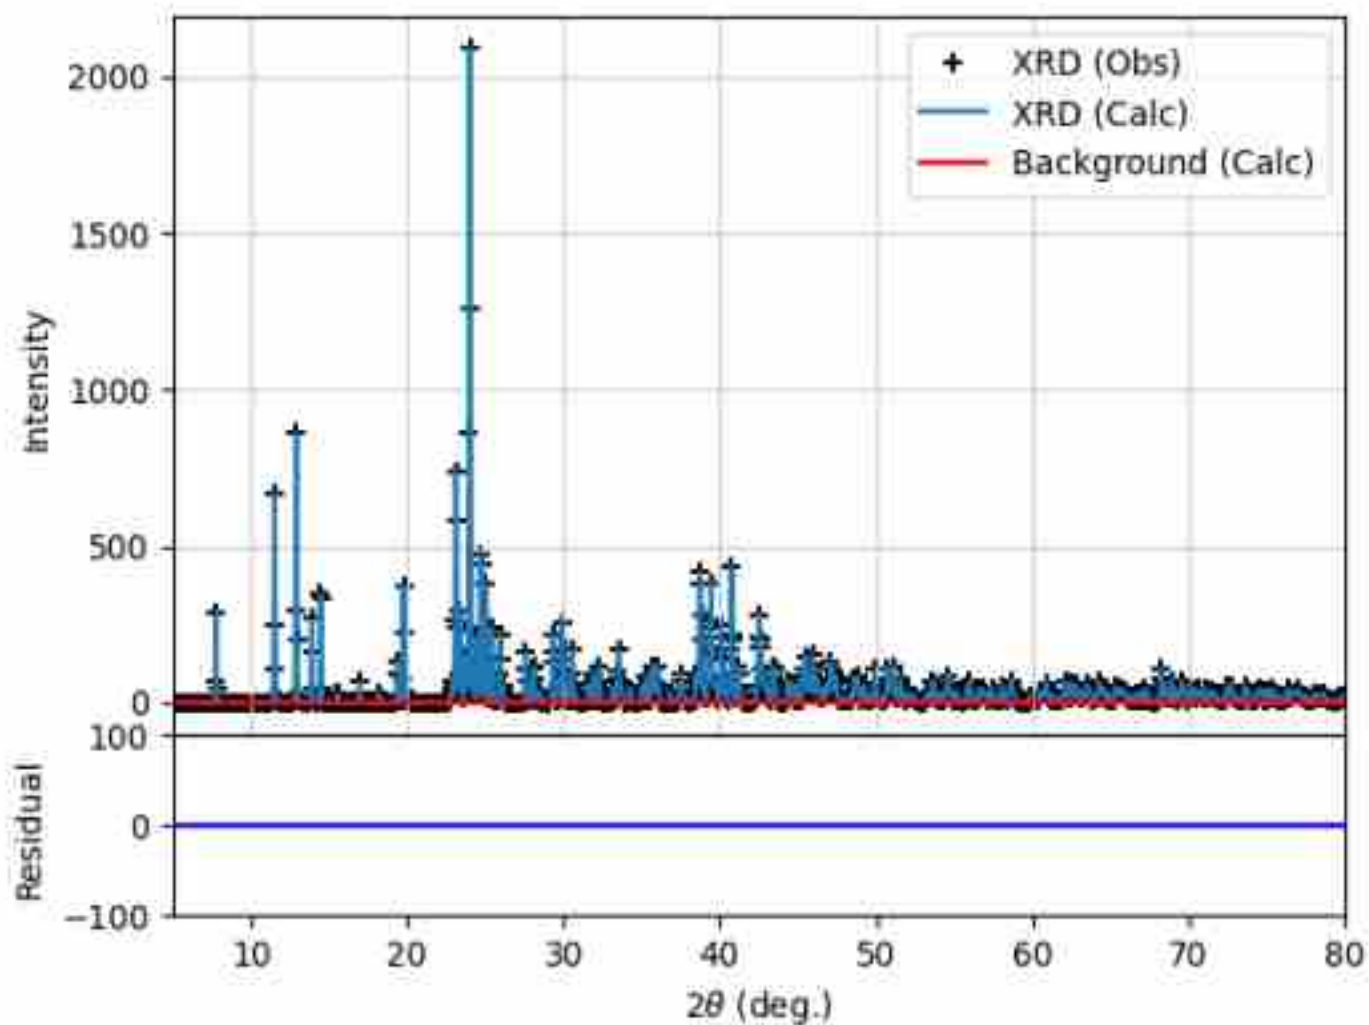

| RMSE before RR | Rwp     | RMSE after RR |
|----------------|---------|---------------|
| 0.076          | 0.00341 | 0.00025       |

# Cs<sub>10</sub>Y<sub>2</sub>O<sub>8</sub>

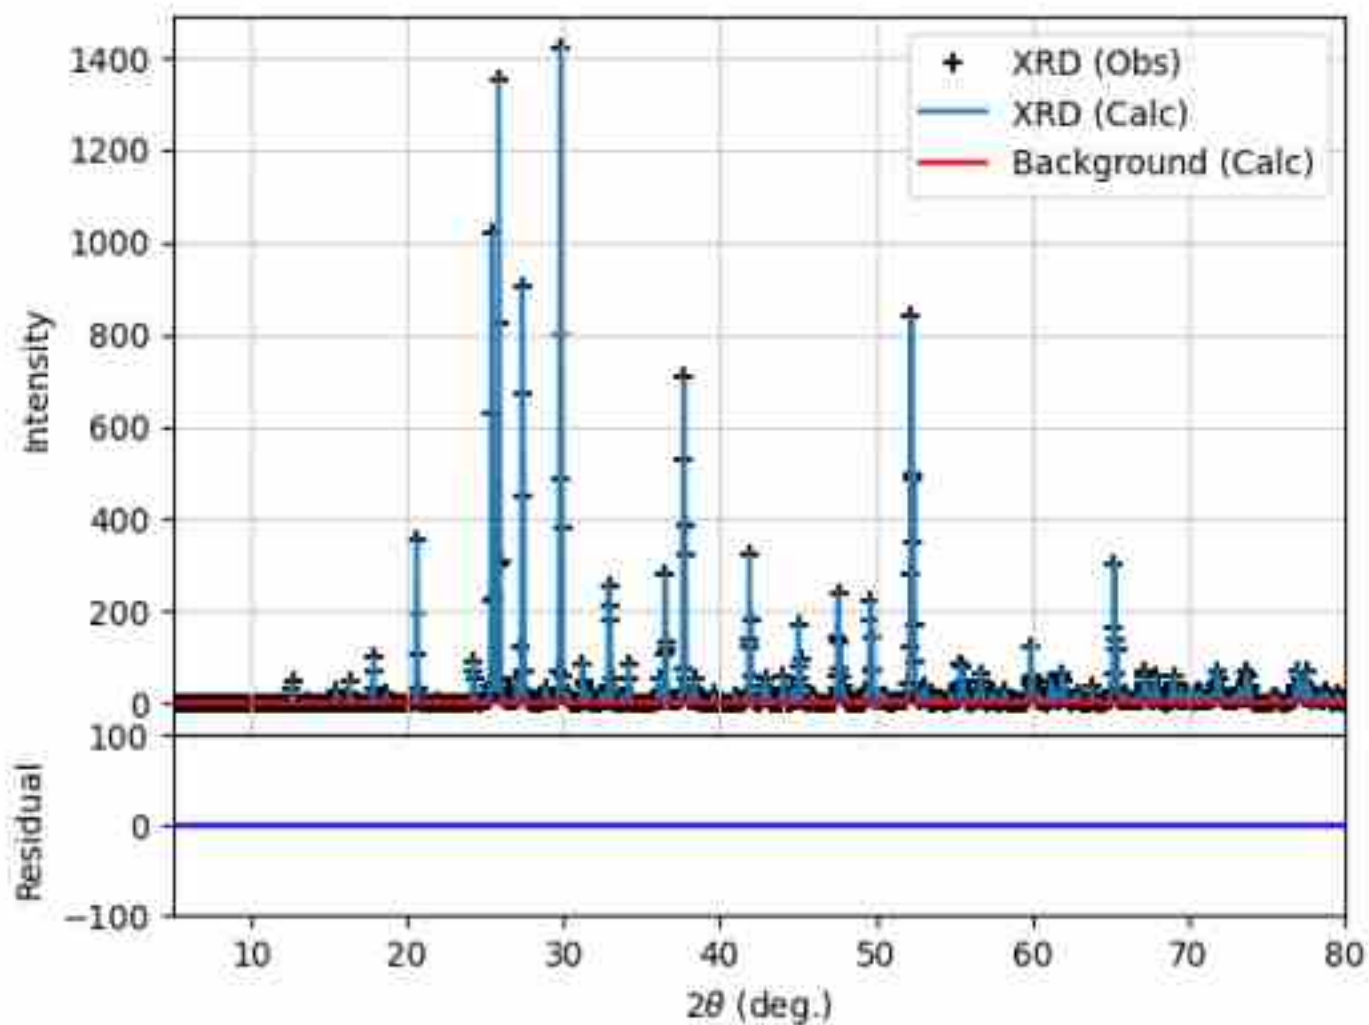

| RMSE before RR | Rwp     | RMSE after RR |
|----------------|---------|---------------|
| 0.076          | 0.00416 | 0.00088       |

# Sr<sub>2</sub>Ca<sub>2</sub>Mn<sub>4</sub>O<sub>12</sub>

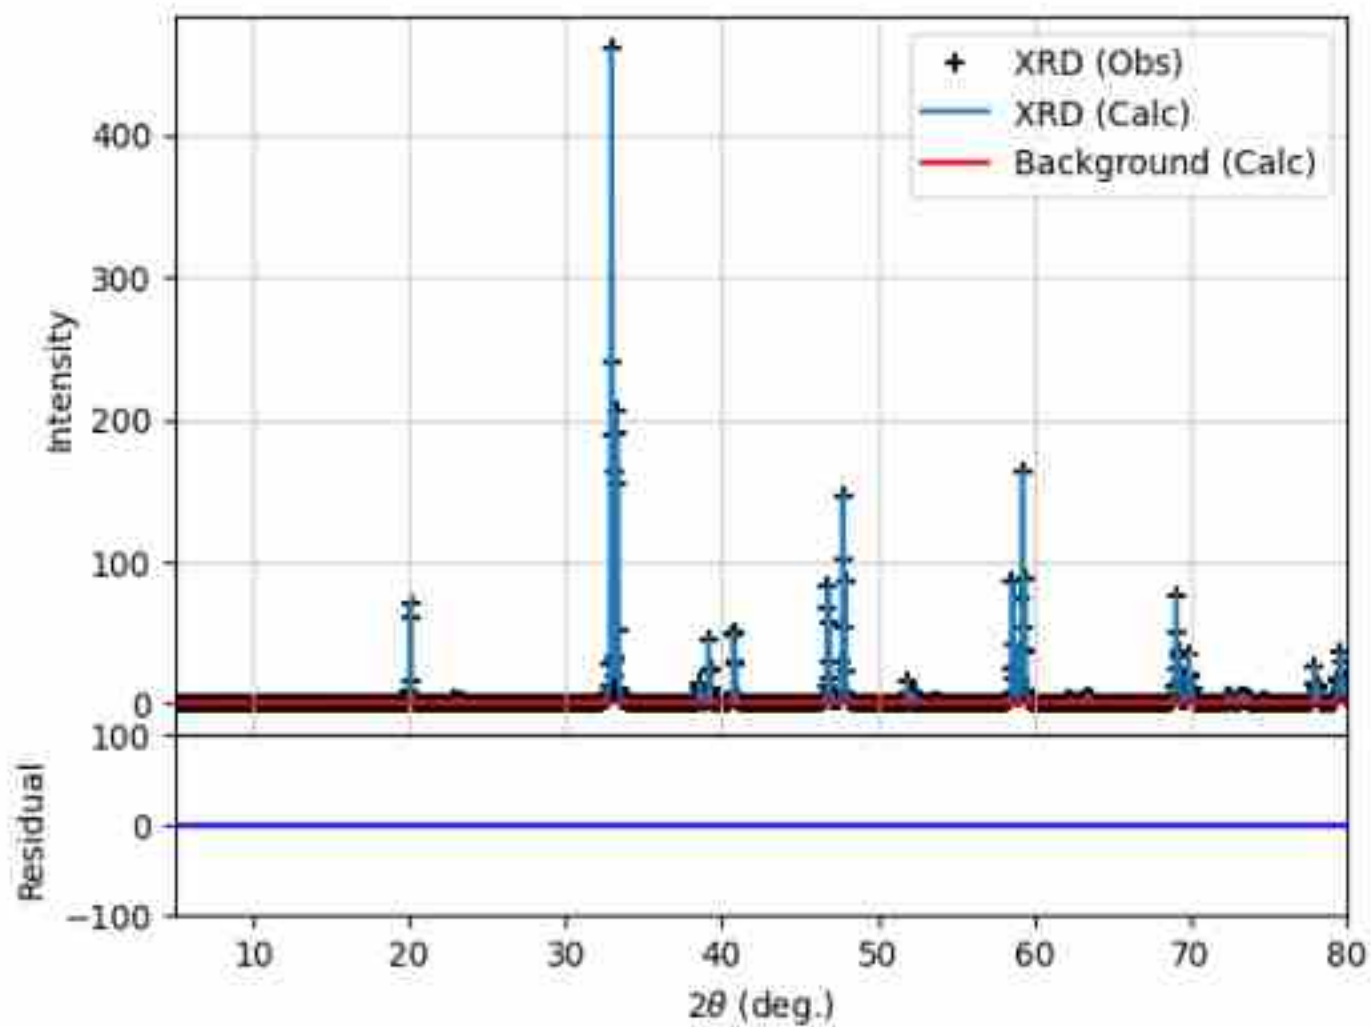

| RMSE before RR | Rwp     | RMSE after RR |
|----------------|---------|---------------|
| 0.076          | 0.00342 | 0.00118       |

# V3Co108

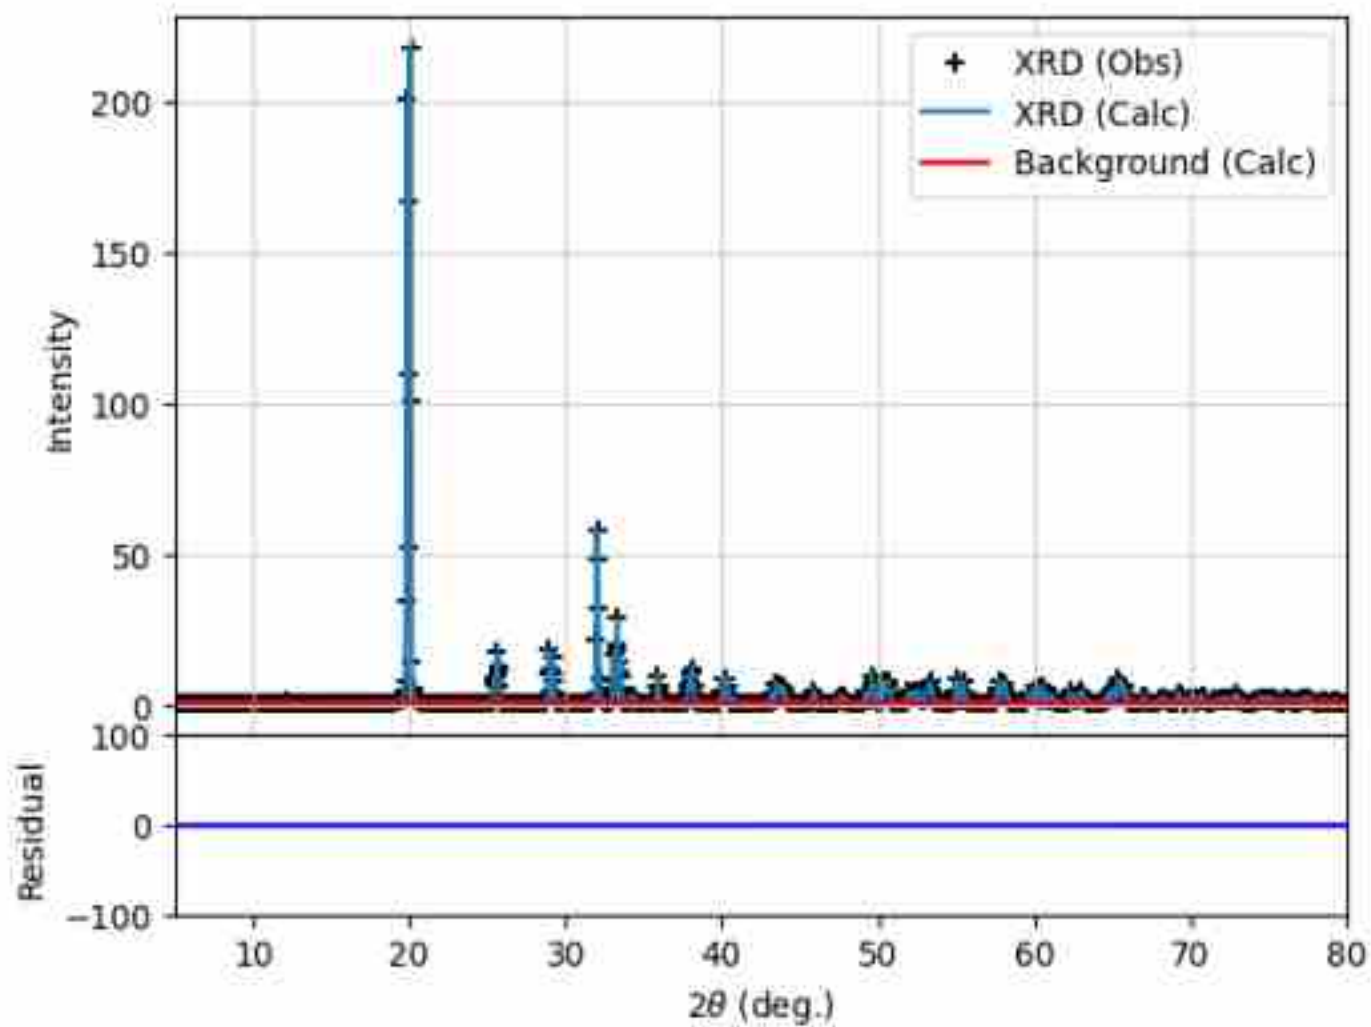

| RMSE before RR | Rwp     | RMSE after RR |
|----------------|---------|---------------|
| 0.076          | 0.25912 | 2e-05         |



# V4O5F7

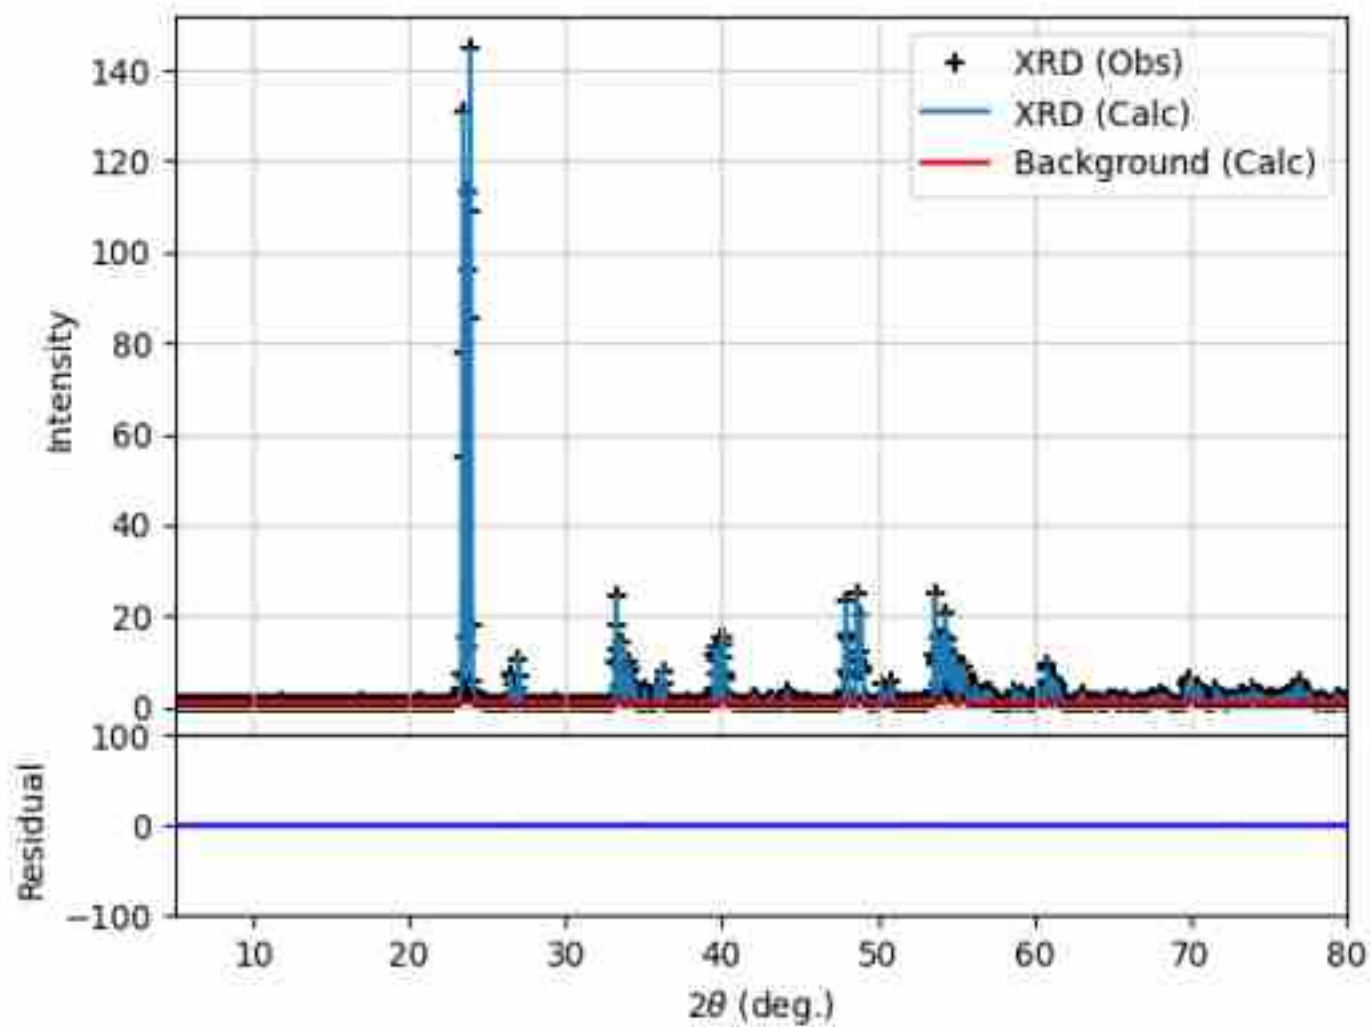

| RMSE before RR | Rwp     | RMSE after RR |
|----------------|---------|---------------|
| 0.076          | 1.58511 | 0.11053       |

# A12H6O6

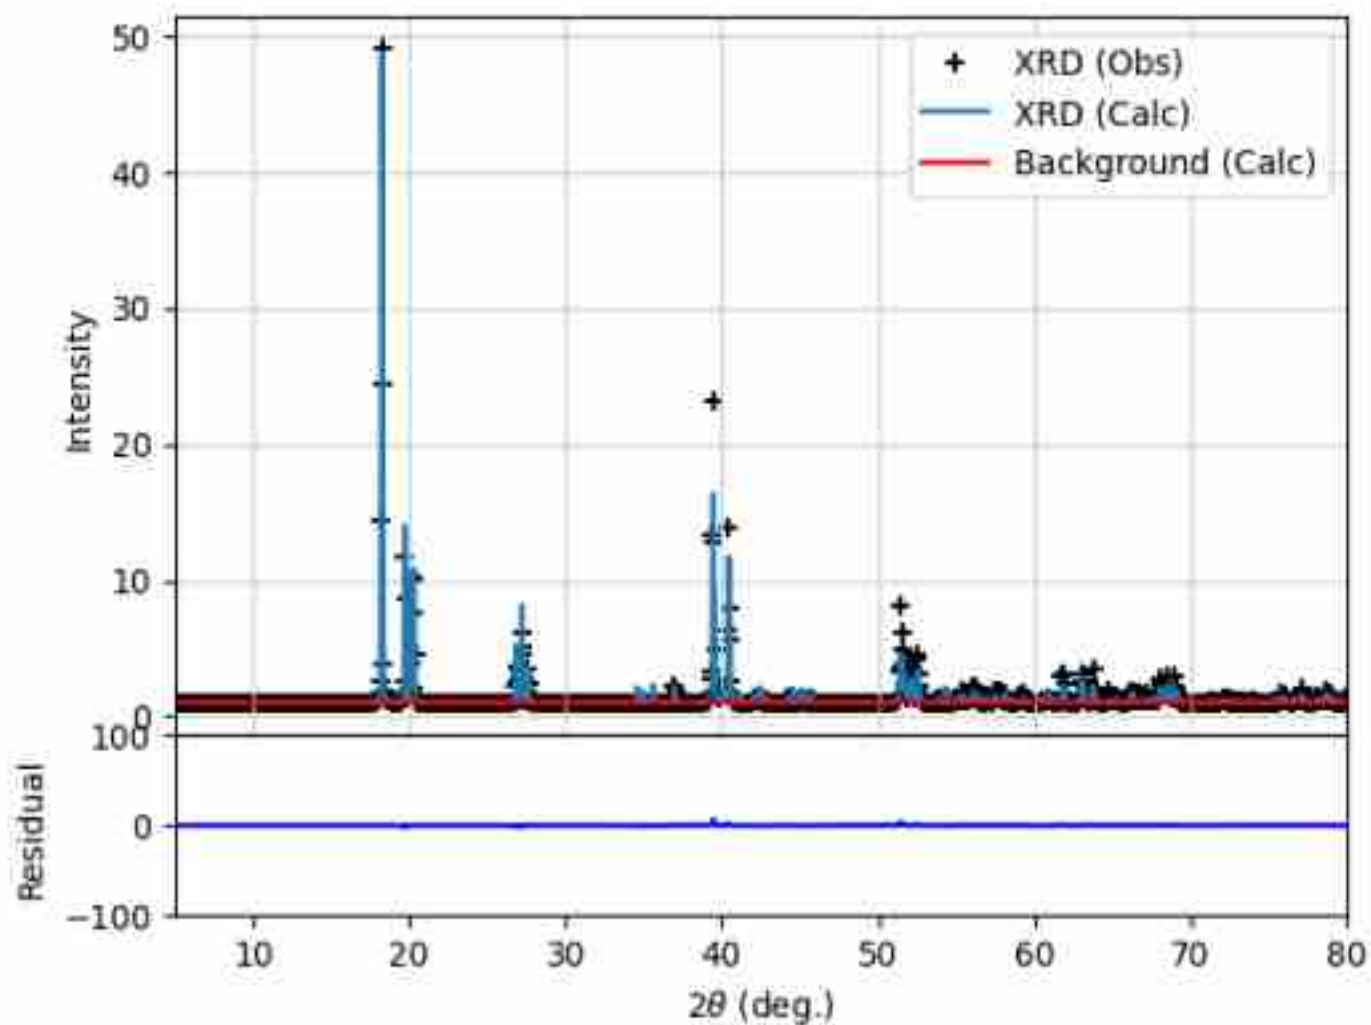

| RMSE before RR | Rwp      | RMSE after RR |
|----------------|----------|---------------|
| 0.077          | 13.24586 | None          |

# Tm10Ga6

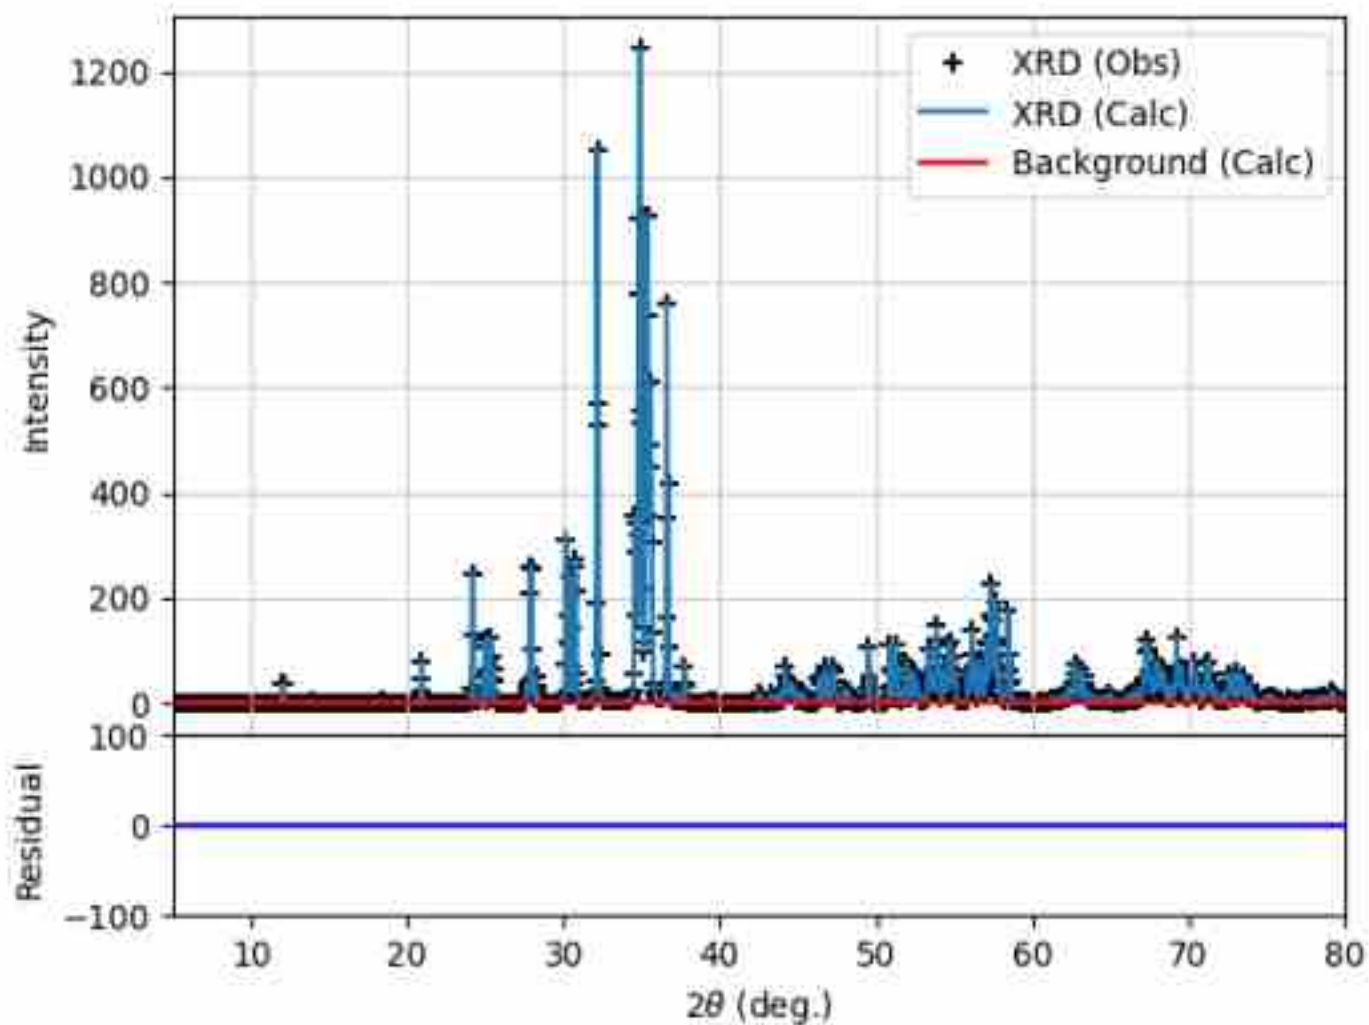

| RMSE before RR | Rwp     | RMSE after RR |
|----------------|---------|---------------|
| 0.077          | 0.00321 | 0.00027       |

# Al11Cr4

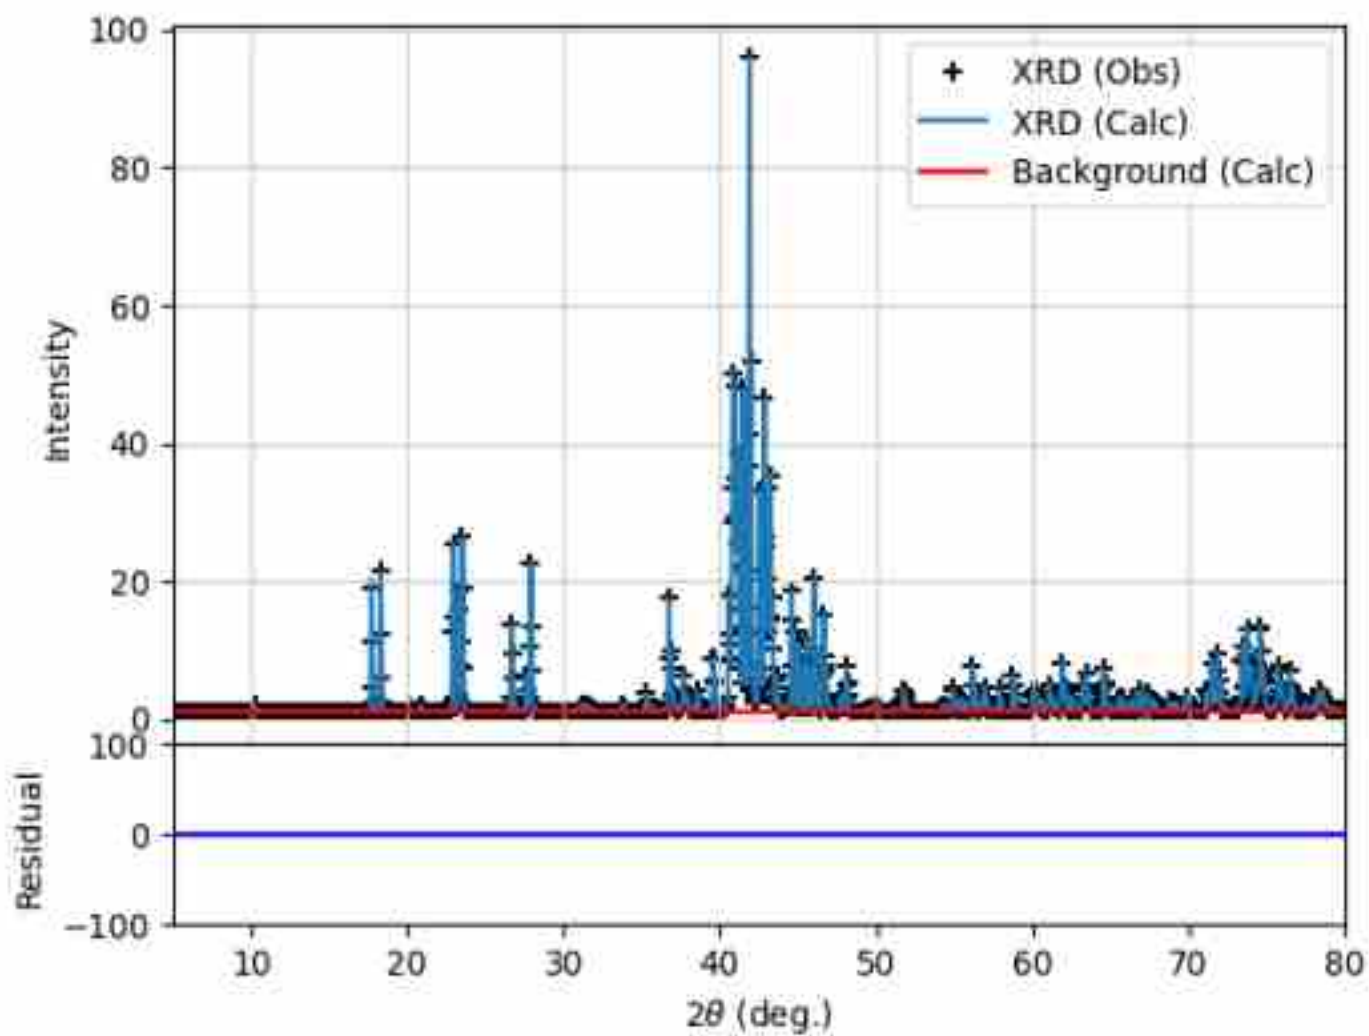

| RMSE before RR | Rwp     | RMSE after RR |
|----------------|---------|---------------|
| 0.078          | 0.00017 | 8e-05         |

# La<sub>2</sub>Cu<sub>2</sub>Pb<sub>2</sub>

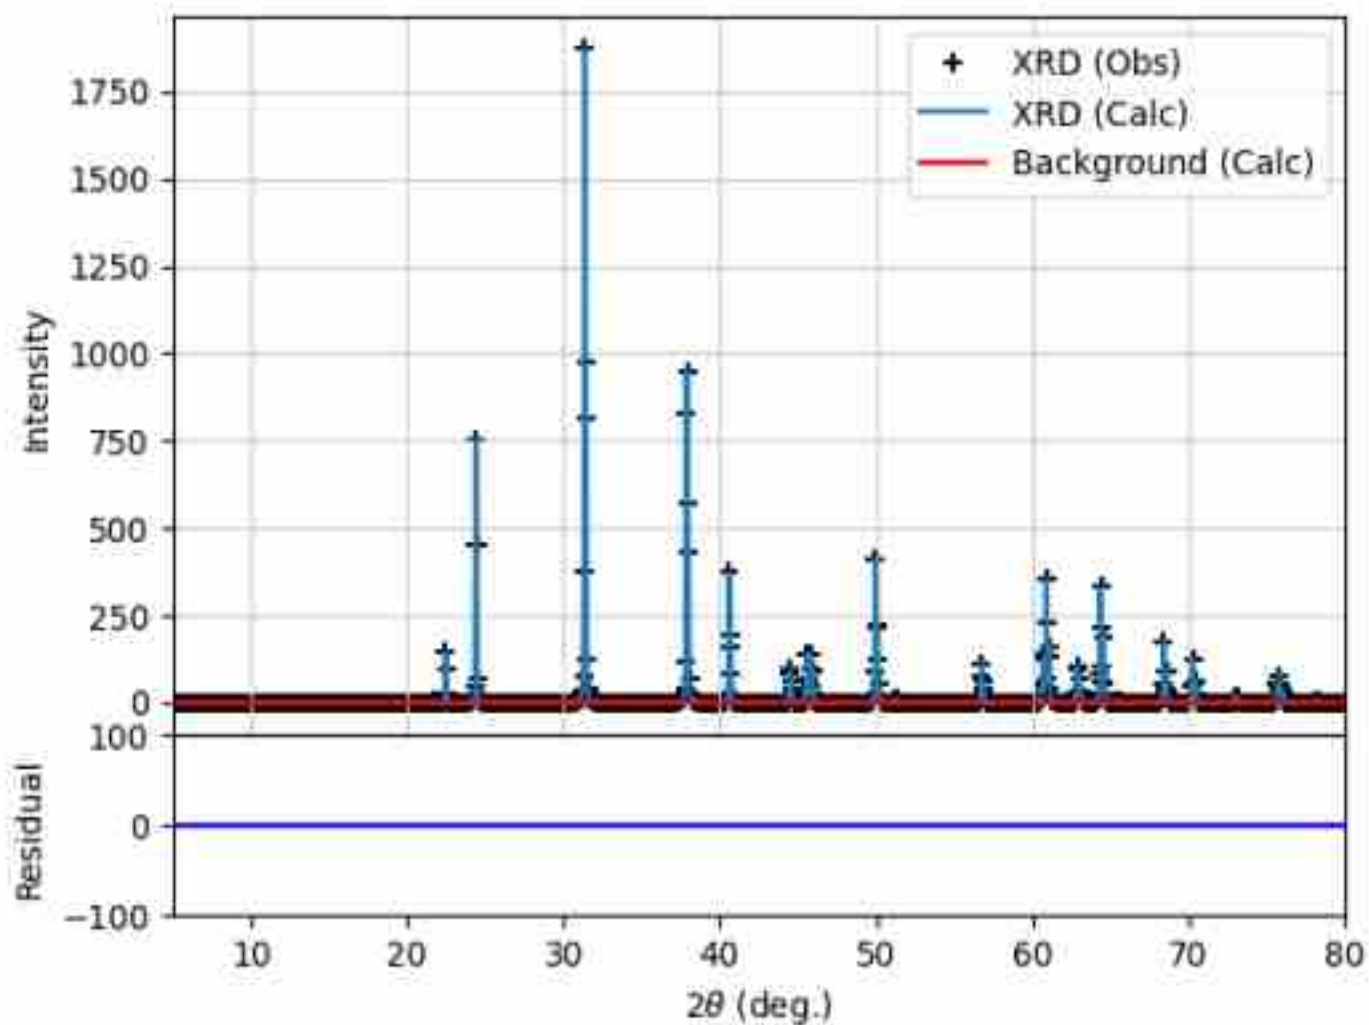

| RMSE before RR | Rwp     | RMSE after RR |
|----------------|---------|---------------|
| 0.078          | 0.00518 | 0.00055       |

# Mg<sub>4</sub>Cu<sub>2</sub>W<sub>2</sub>O<sub>12</sub>

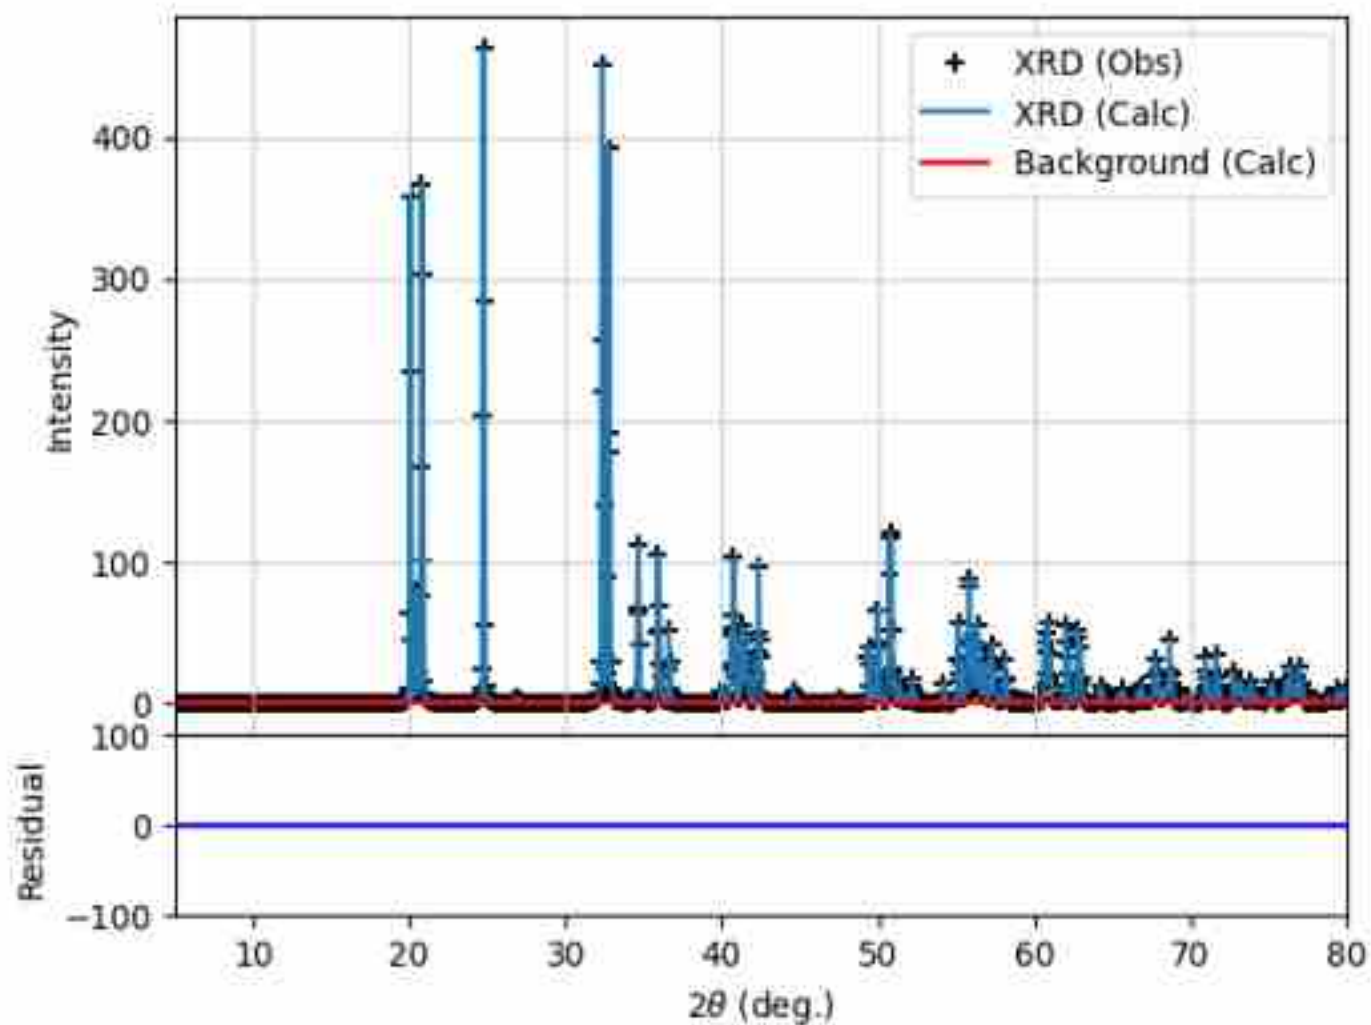

| RMSE before RR | Rwp     | RMSE after RR |
|----------------|---------|---------------|
| 0.078          | 0.00458 | 0.00093       |

# Mo<sub>2</sub>H<sub>4</sub>O<sub>8</sub>

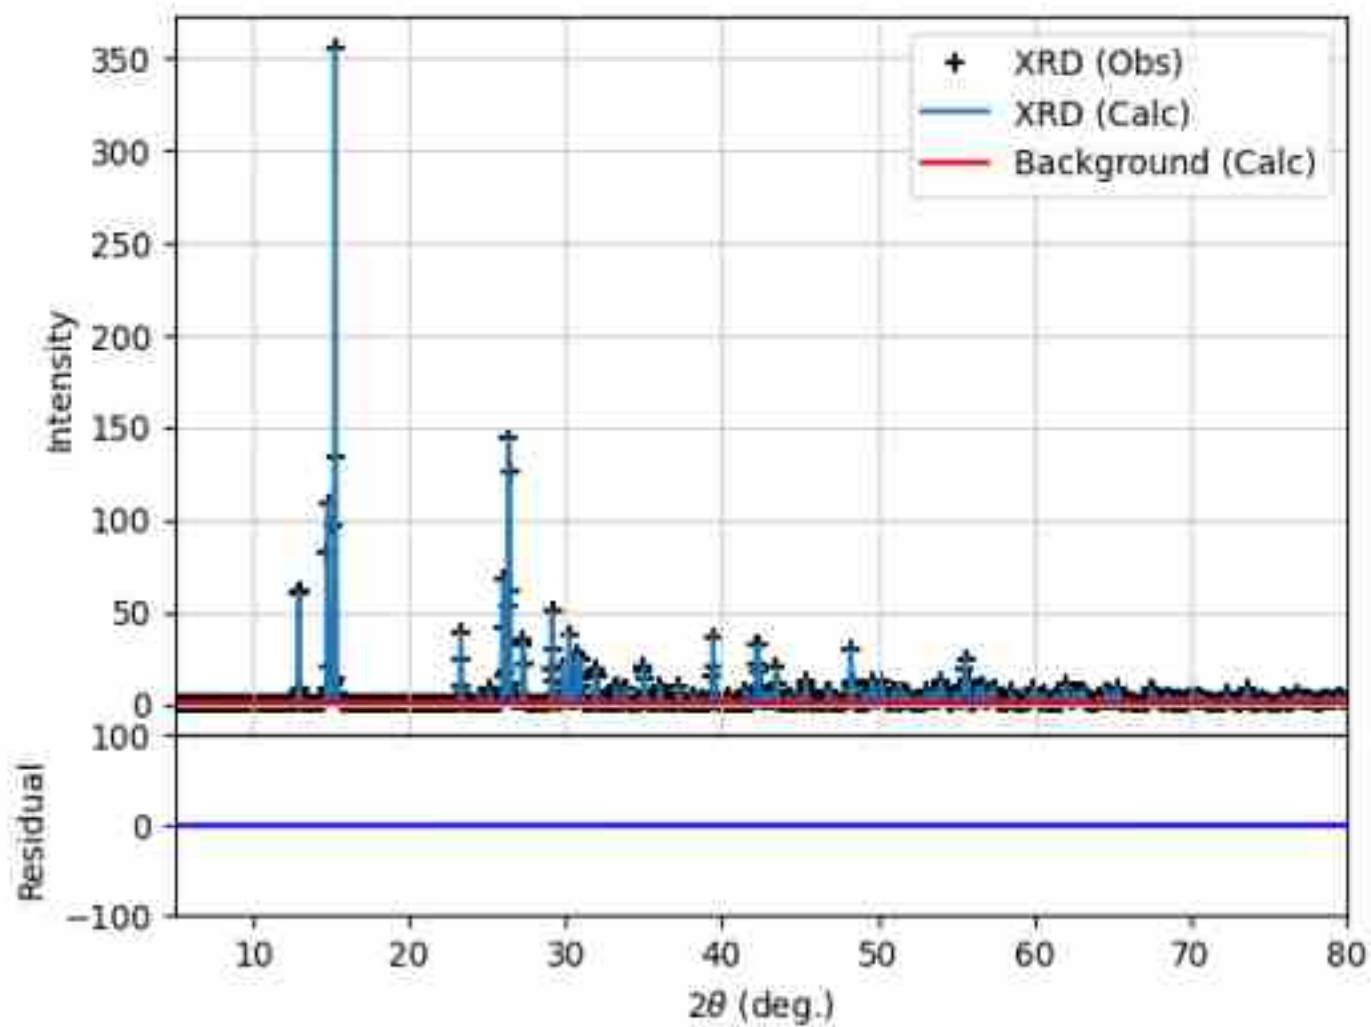

| RMSE before RR | Rwp     | RMSE after RR |
|----------------|---------|---------------|
| 0.078          | 0.39648 | 0.01849       |

# Si4O8

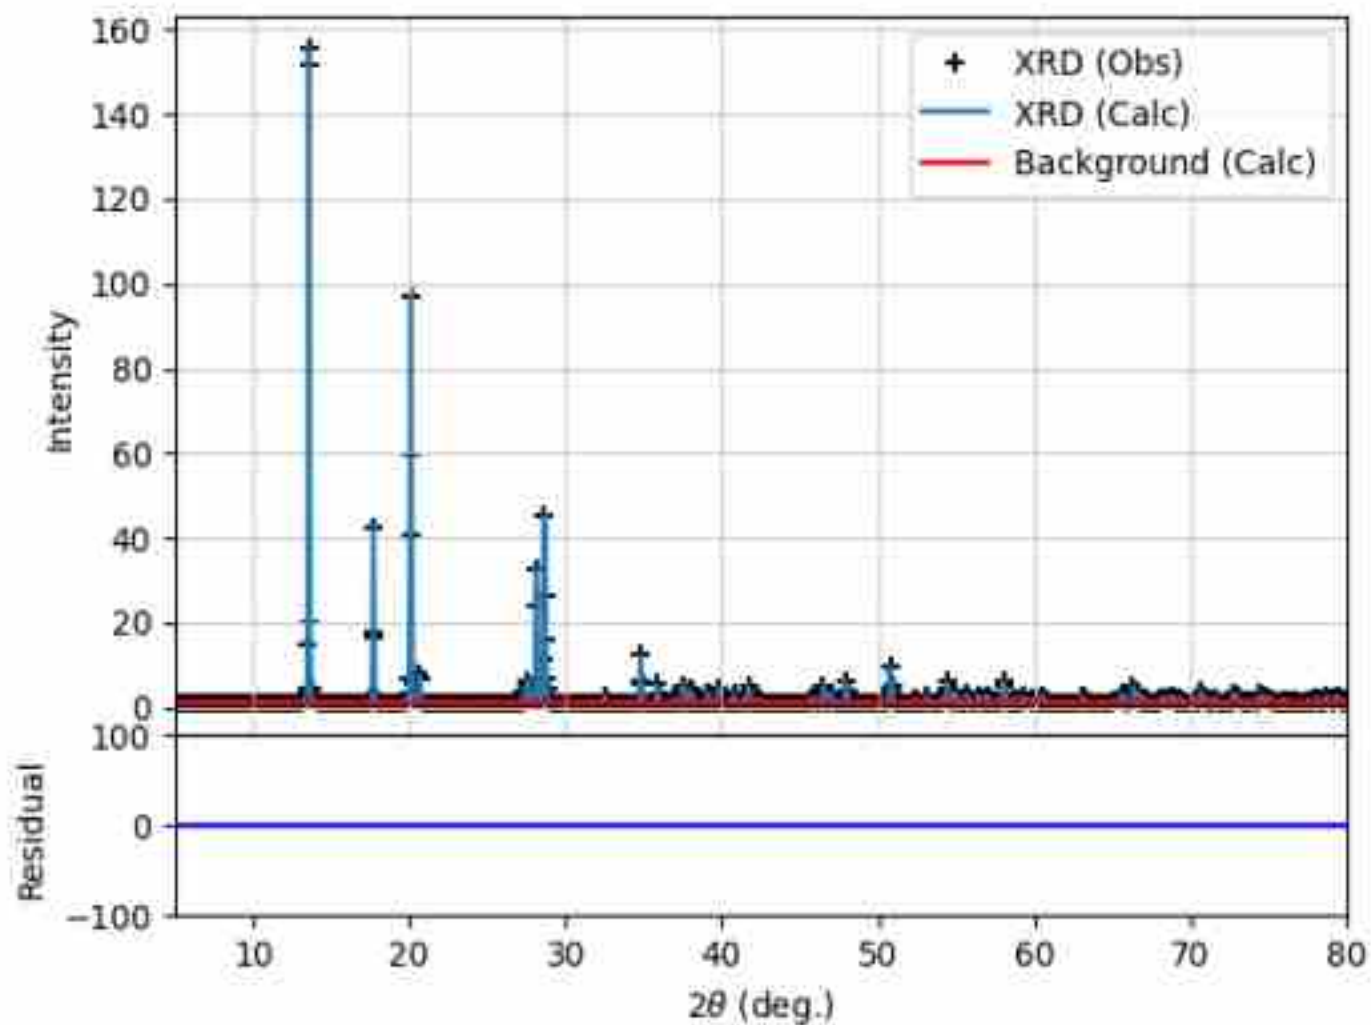

| RMSE before RR | Rwp     | RMSE after RR |
|----------------|---------|---------------|
| 0.078          | 0.00161 | 0.00049       |



# Ag<sub>4</sub>P<sub>8</sub>

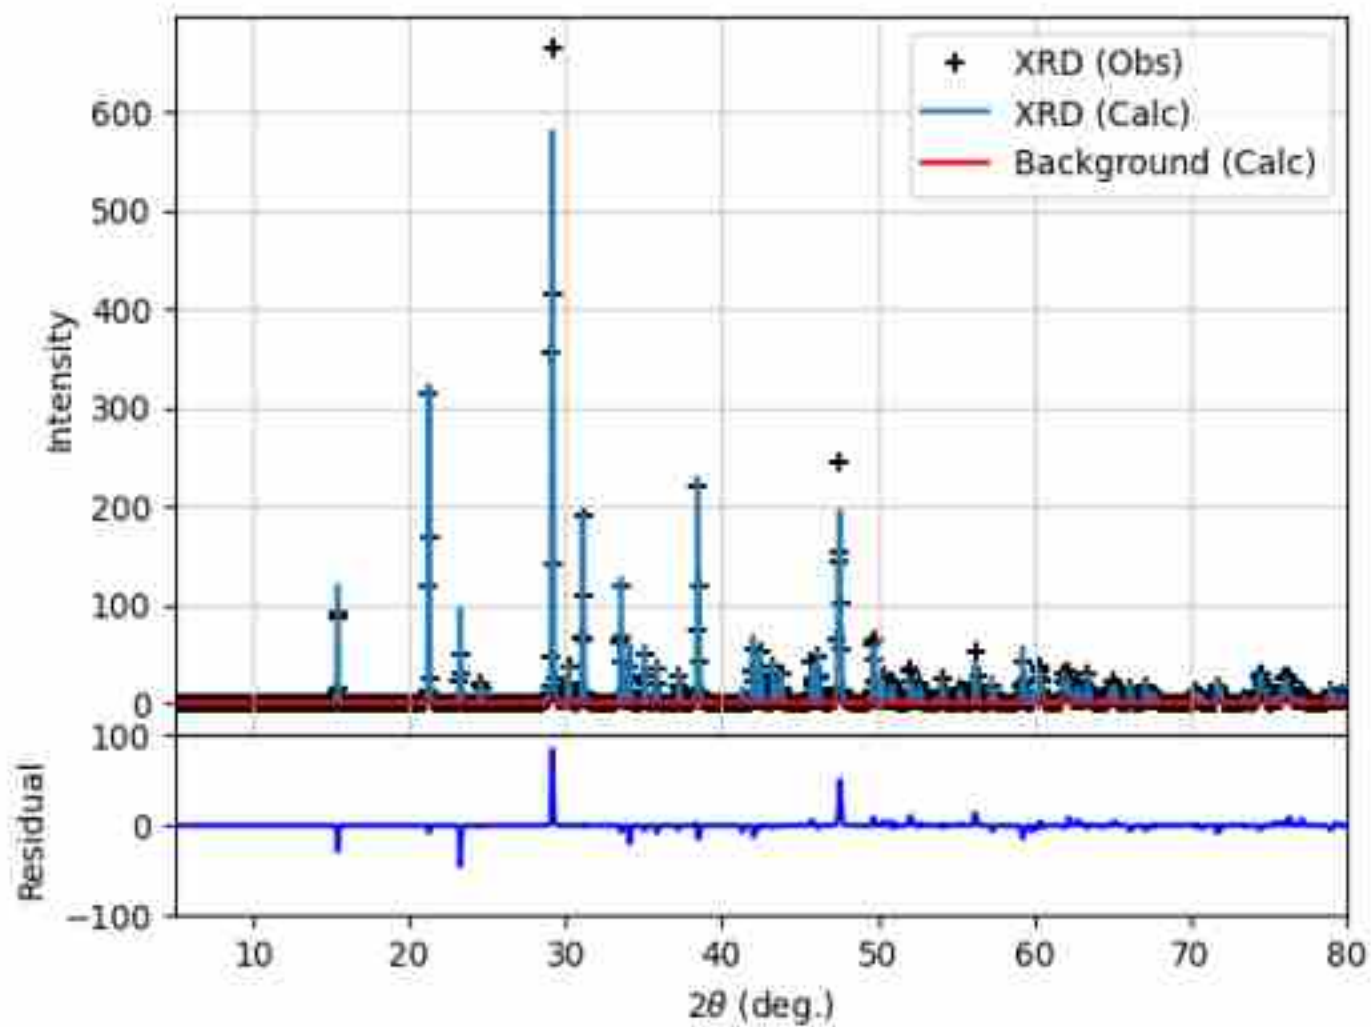

| RMSE before RR | Rwp      | RMSE after RR |
|----------------|----------|---------------|
| 0.079          | 20.37084 | 0.13261       |

# Ca2C4

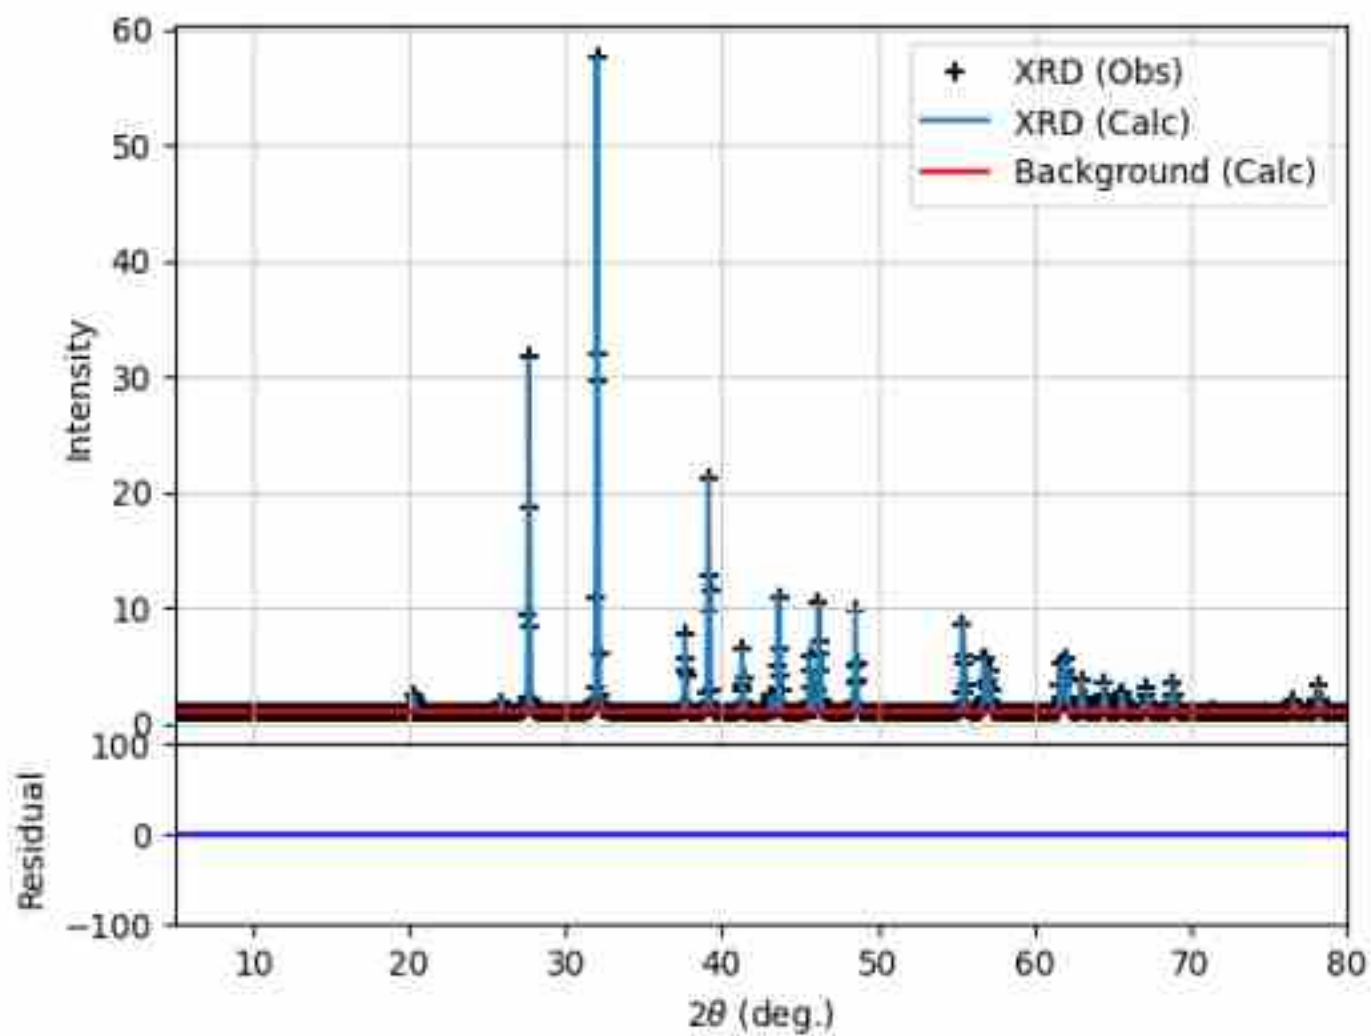

| RMSE before RR | Rwp     | RMSE after RR |
|----------------|---------|---------------|
| 0.079          | 0.00242 | 0.00121       |

# Cd<sub>4</sub>Co<sub>4</sub>O<sub>12</sub>

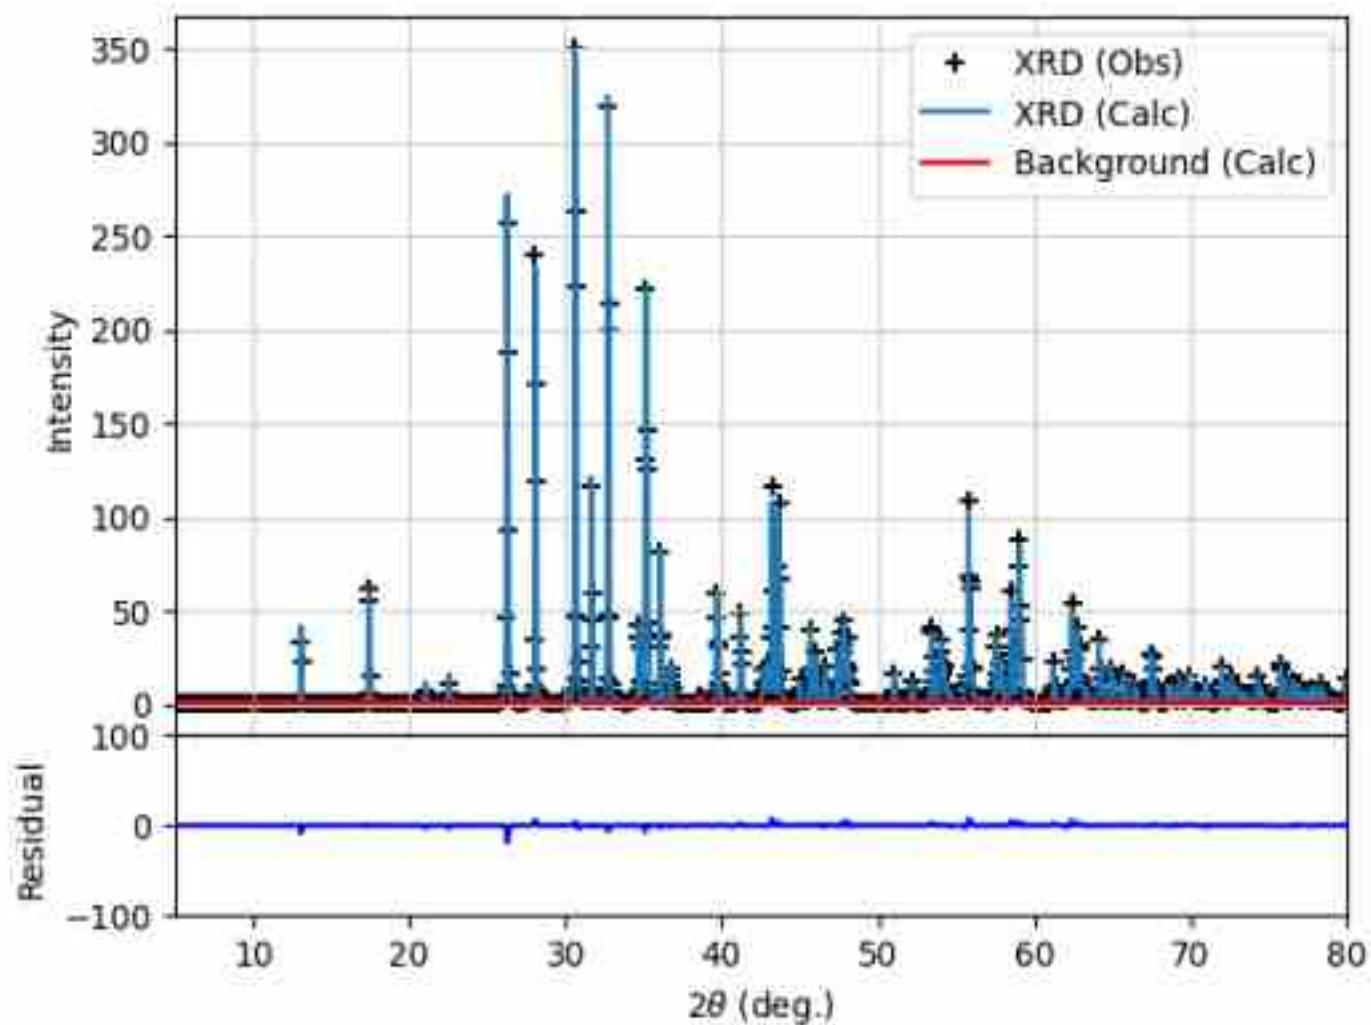

| RMSE before RR | Rwp     | RMSE after RR |
|----------------|---------|---------------|
| 0.079          | 6.24752 | 0.43403       |

# Mg<sub>2</sub>S<sub>4</sub>O<sub>14</sub>

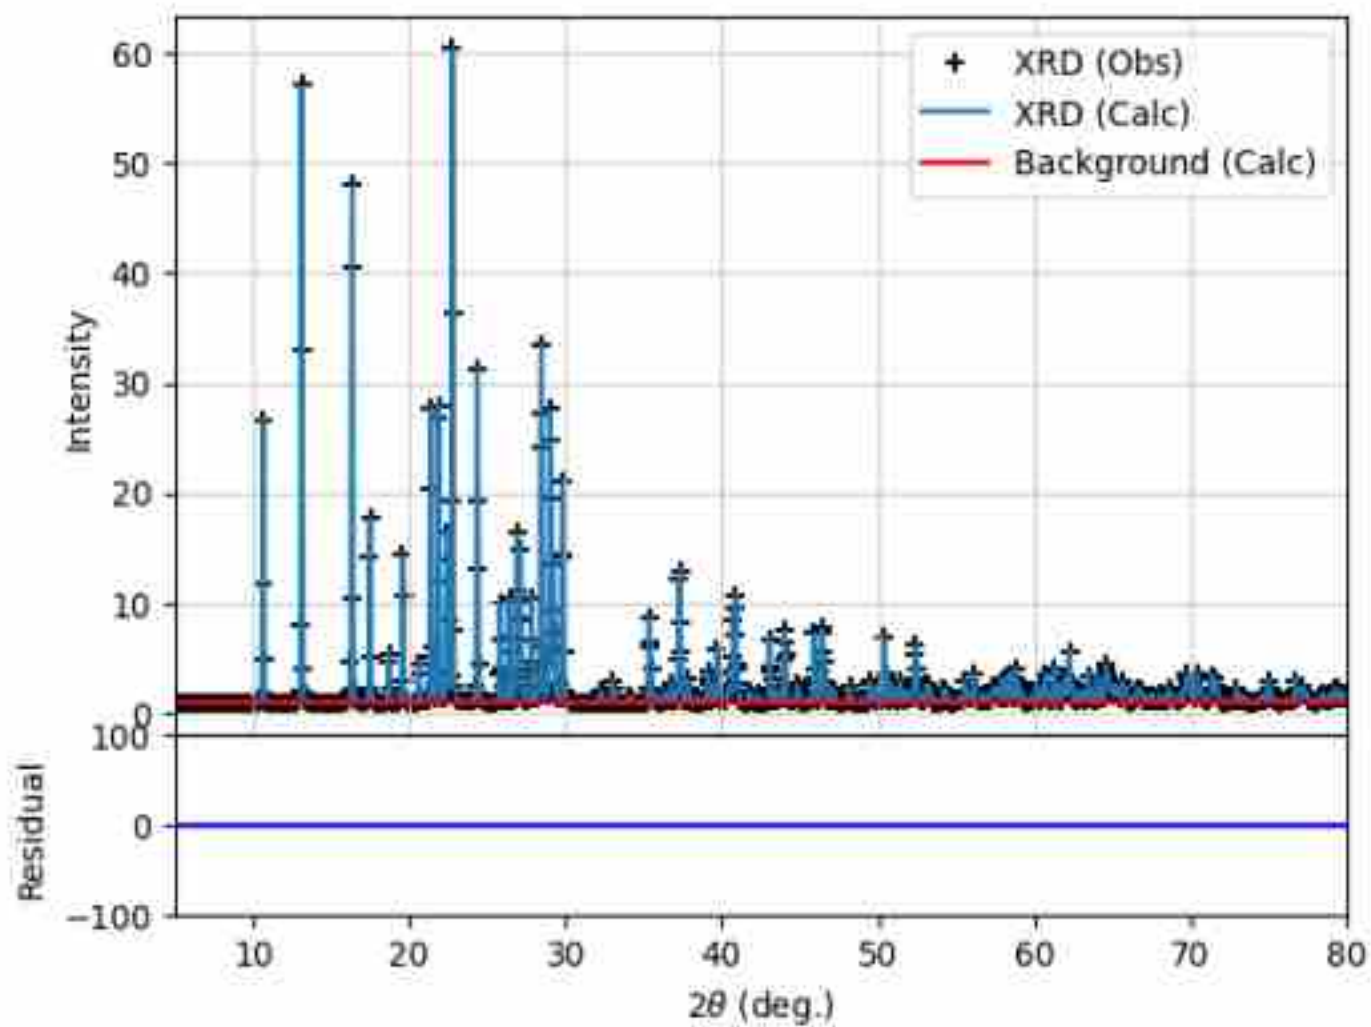

| RMSE before RR | Rwp     | RMSE after RR |
|----------------|---------|---------------|
| 0.079          | 0.00174 | 0.00065       |

# Sb4O4F12

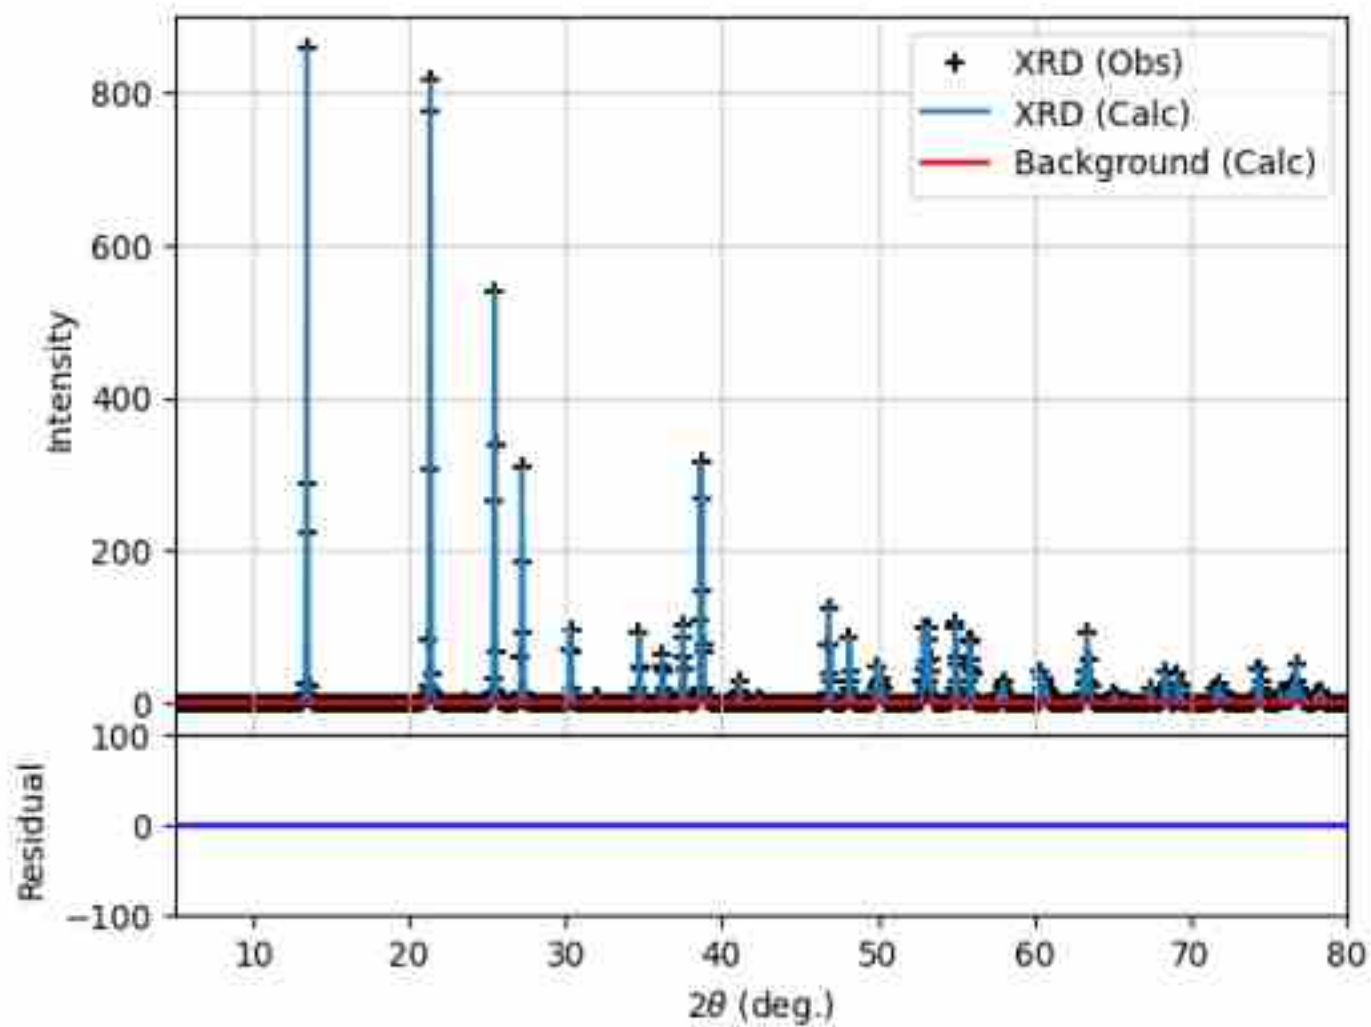

| RMSE before RR | Rwp     | RMSE after RR |
|----------------|---------|---------------|
| 0.079          | 0.00426 | 0.00106       |

# Sm4Ge4Rh4

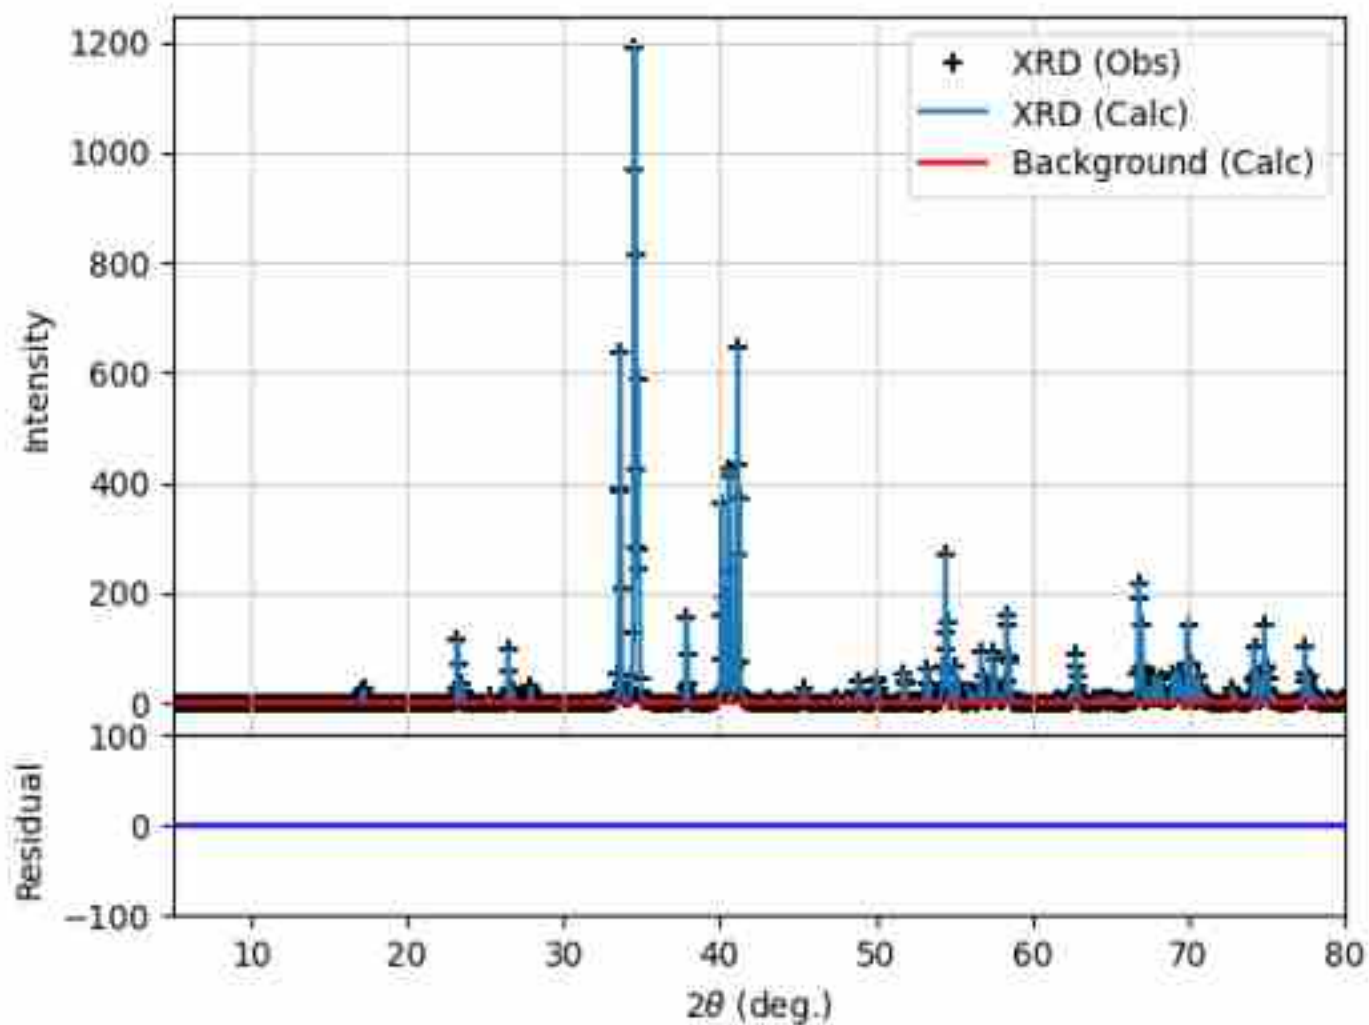

| RMSE before RR | Rwp     | RMSE after RR |
|----------------|---------|---------------|
| 0.079          | 0.00505 | 0.00055       |

# V4O7F5

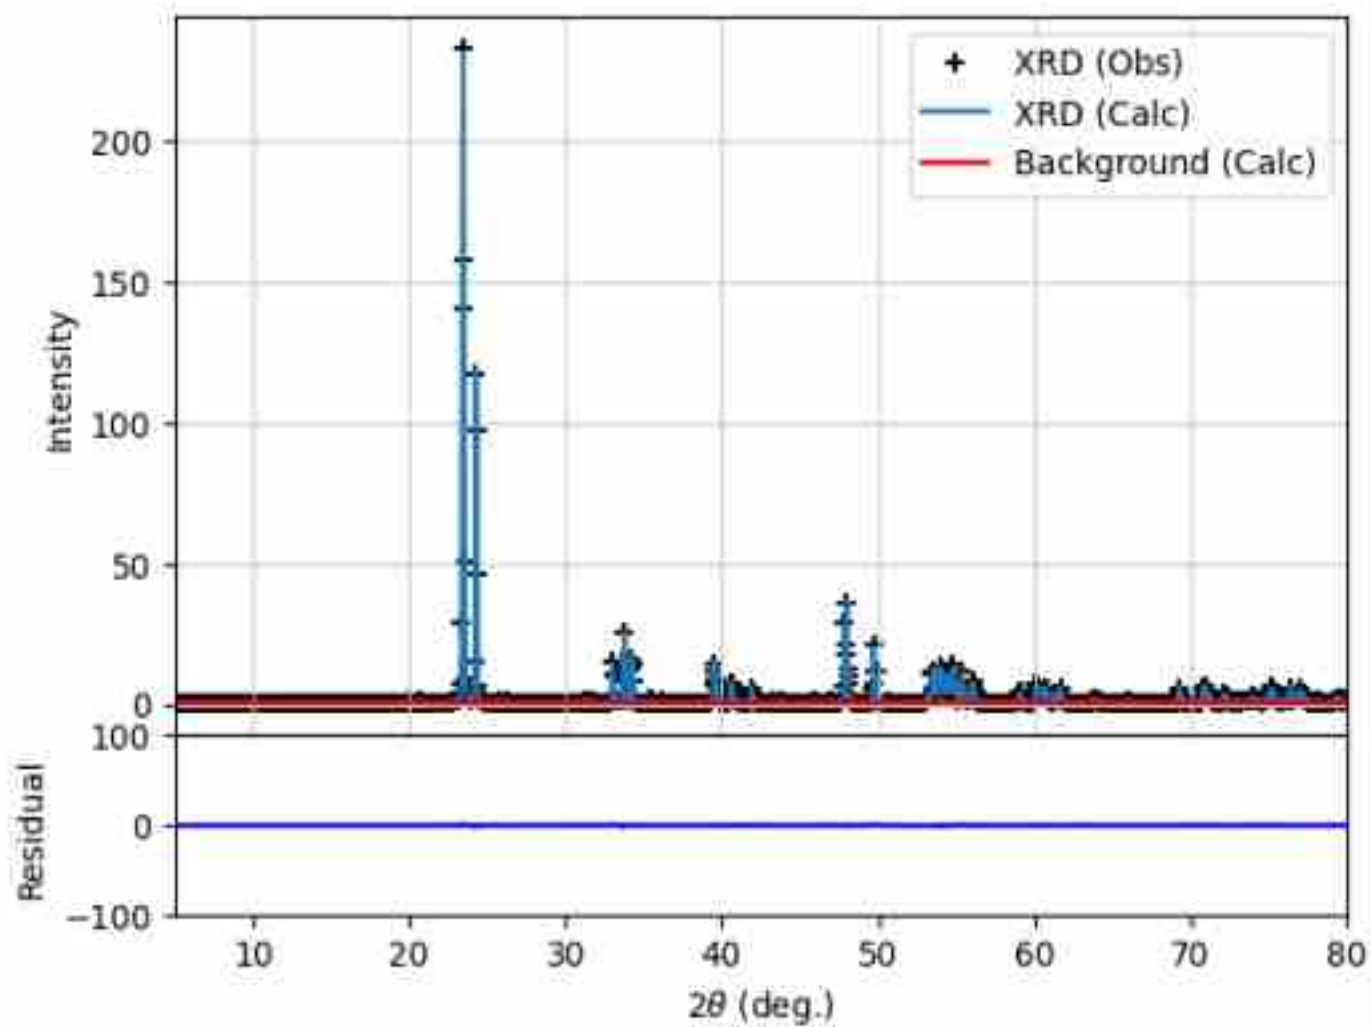

| RMSE before RR | Rwp     | RMSE after RR |
|----------------|---------|---------------|
| 0.079          | 3.92284 | 0.11566       |

# Au<sub>2</sub>Se<sub>2</sub>

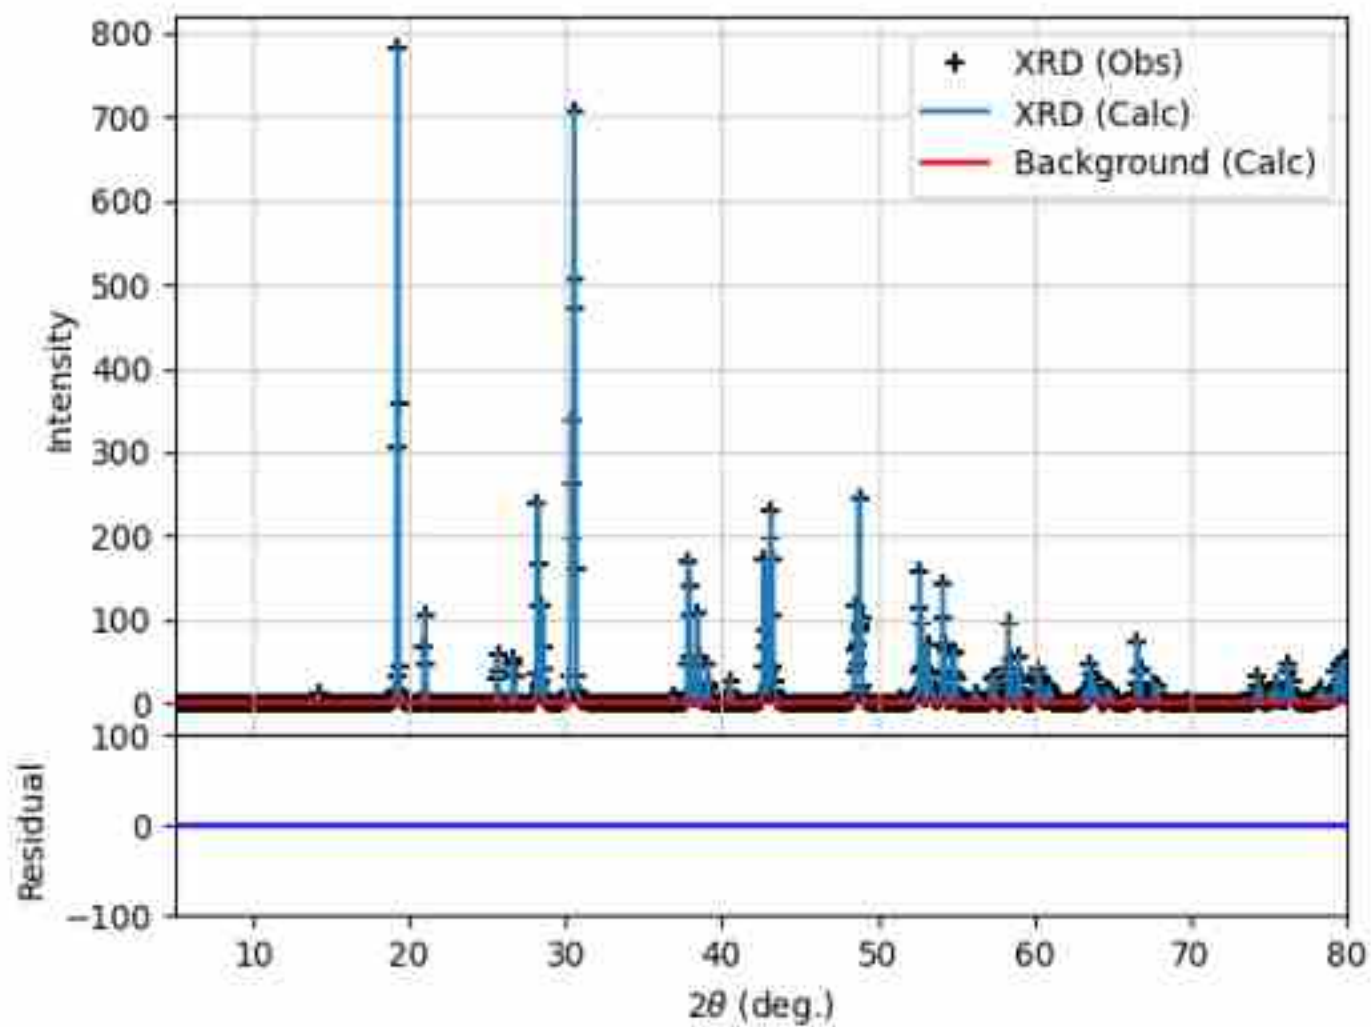

| RMSE before RR | Rwp     | RMSE after RR |
|----------------|---------|---------------|
| 0.081          | 0.00271 | 0.00021       |



# Hg<sub>2</sub>Mo<sub>2</sub>O<sub>8</sub>

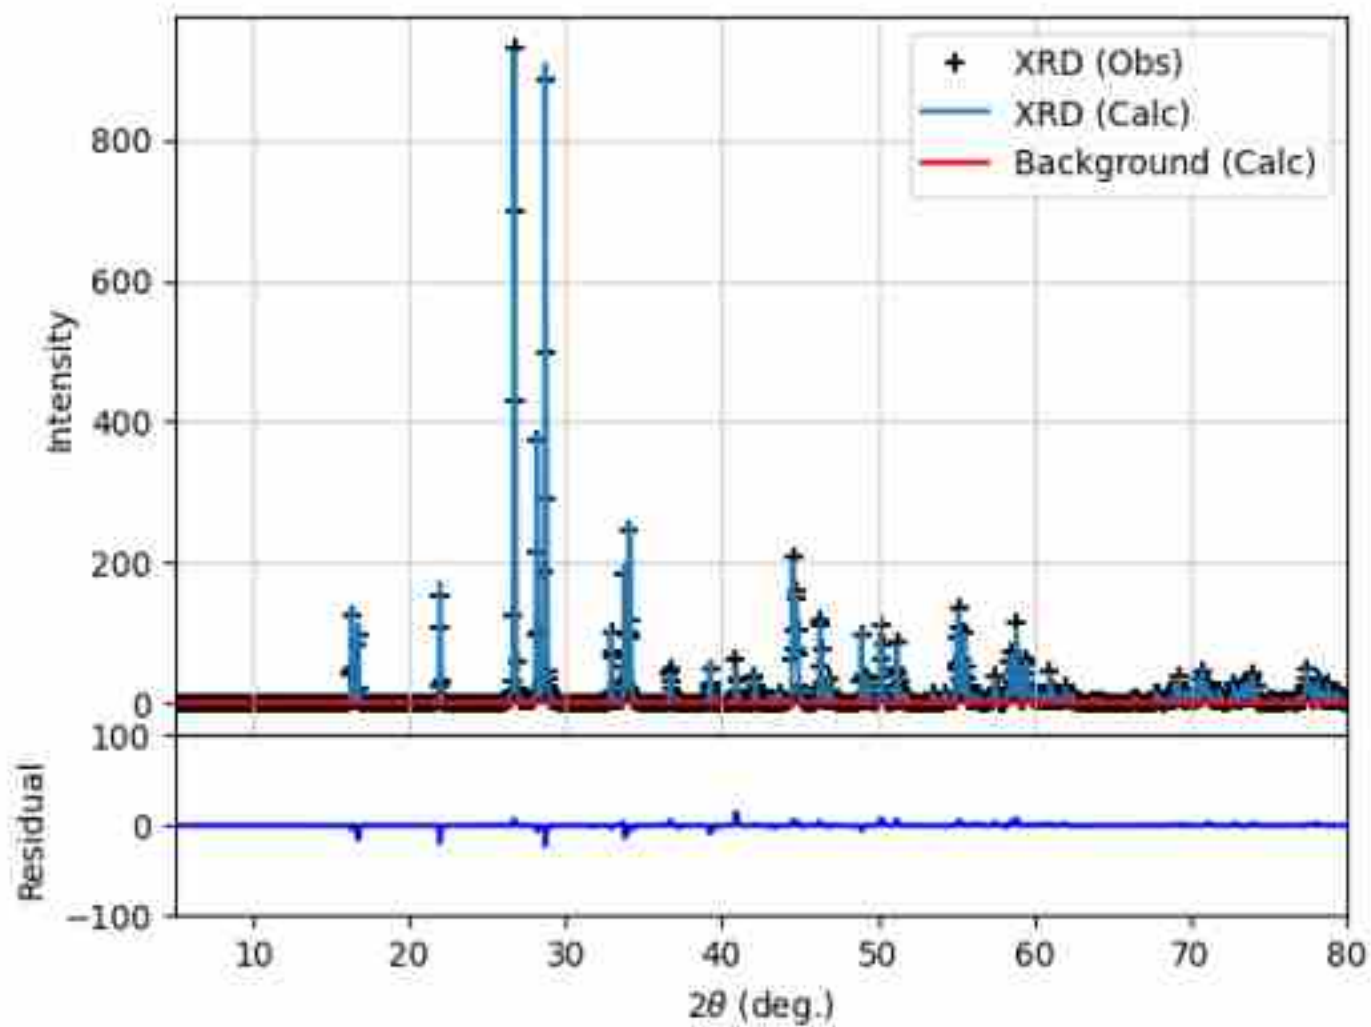

| RMSE before RR | Rwp     | RMSE after RR |
|----------------|---------|---------------|
| 0.081          | 6.41194 | 0.48748       |

# Mg<sub>1</sub>Ti<sub>1</sub>Nb<sub>2</sub>Pb<sub>4</sub>O<sub>12</sub>

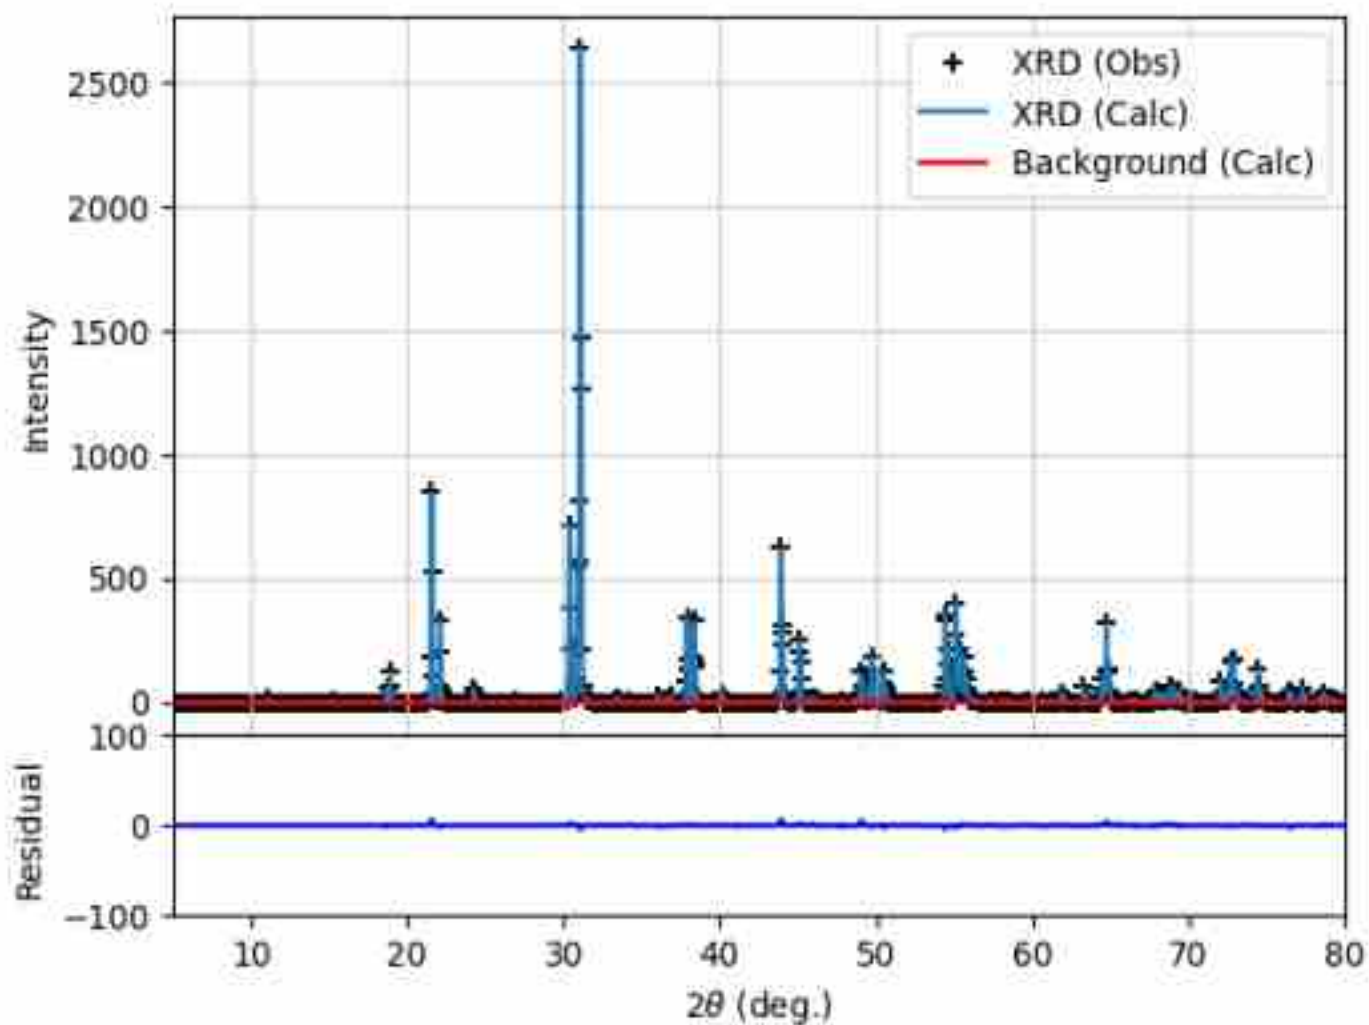

| RMSE before RR | Rwp     | RMSE after RR |
|----------------|---------|---------------|
| 0.081          | 2.31331 | 0.09145       |

# Cs<sub>2</sub>K<sub>1</sub>Ti<sub>1</sub>O<sub>2</sub>F<sub>3</sub>

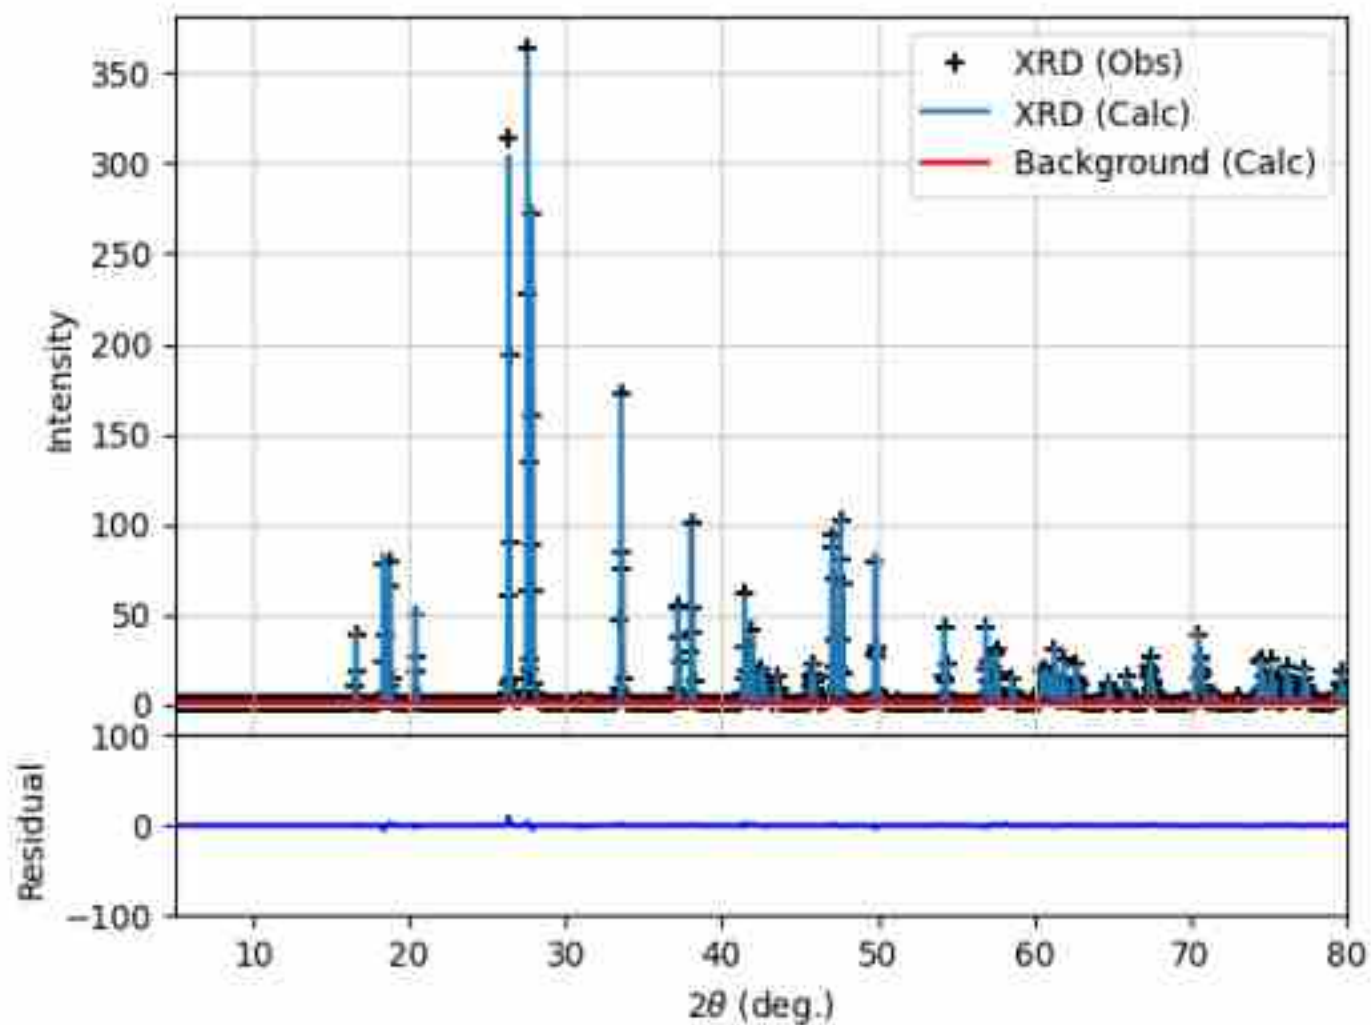

| RMSE before RR | Rwp    | RMSE after RR |
|----------------|--------|---------------|
| 0.082          | 4.7133 | 0.32939       |

# Li<sub>2</sub>Mn<sub>2</sub>O<sub>4</sub>

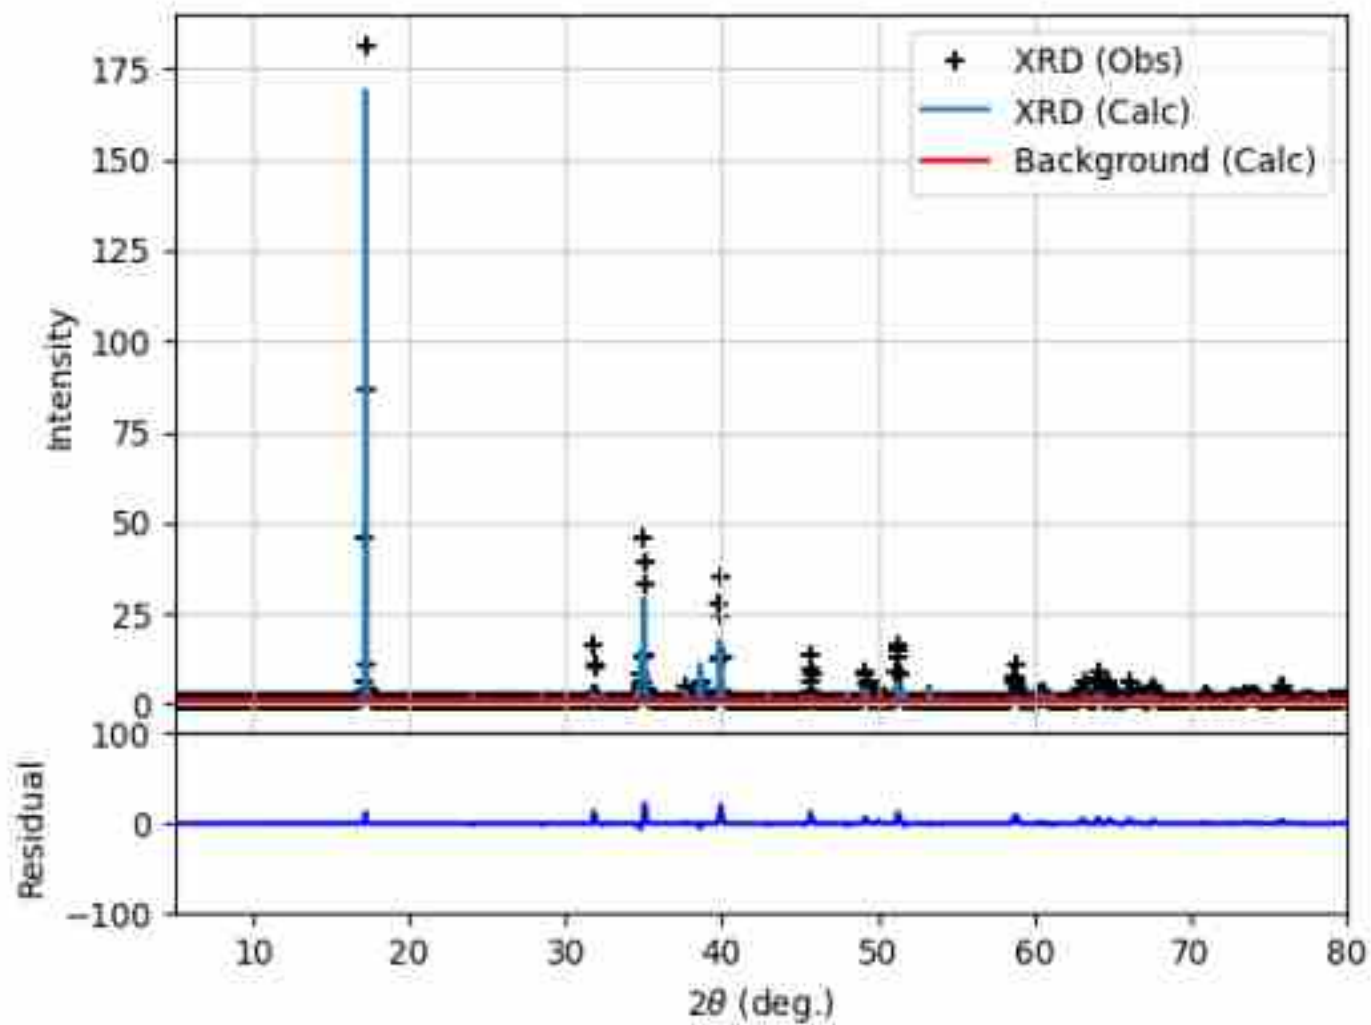

| RMSE before RR | Rwp      | RMSE after RR |
|----------------|----------|---------------|
| 0.082          | 37.75919 | None          |

# V2P2O10

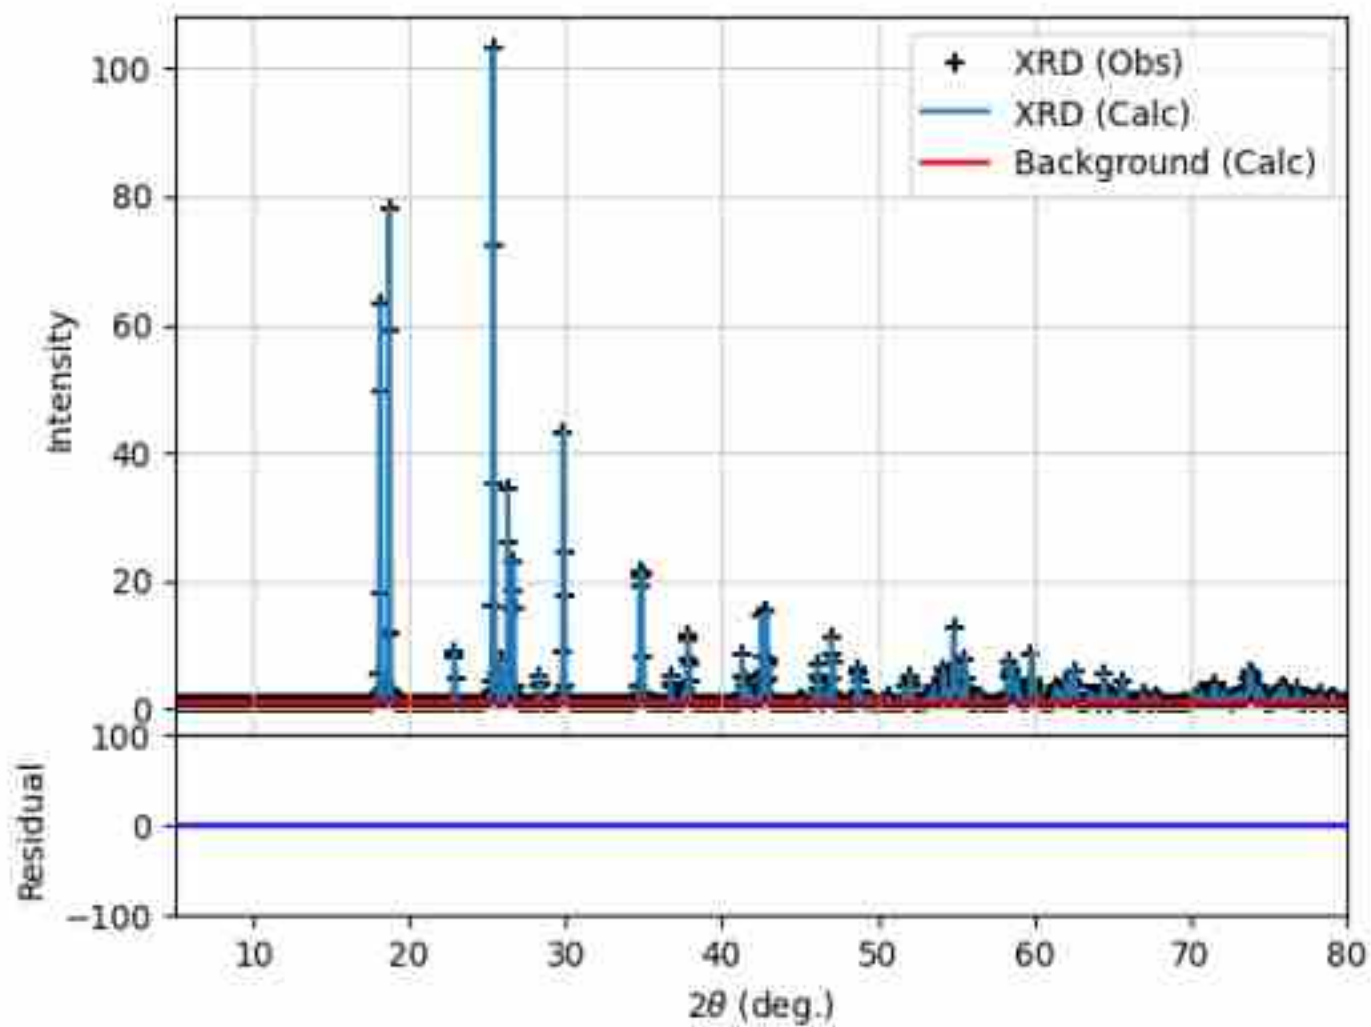

| RMSE before RR | Rwp    | RMSE after RR |
|----------------|--------|---------------|
| 0.082          | 0.0023 | 0.00048       |

# Zr<sub>4</sub>Sb<sub>4</sub>Pd<sub>4</sub>

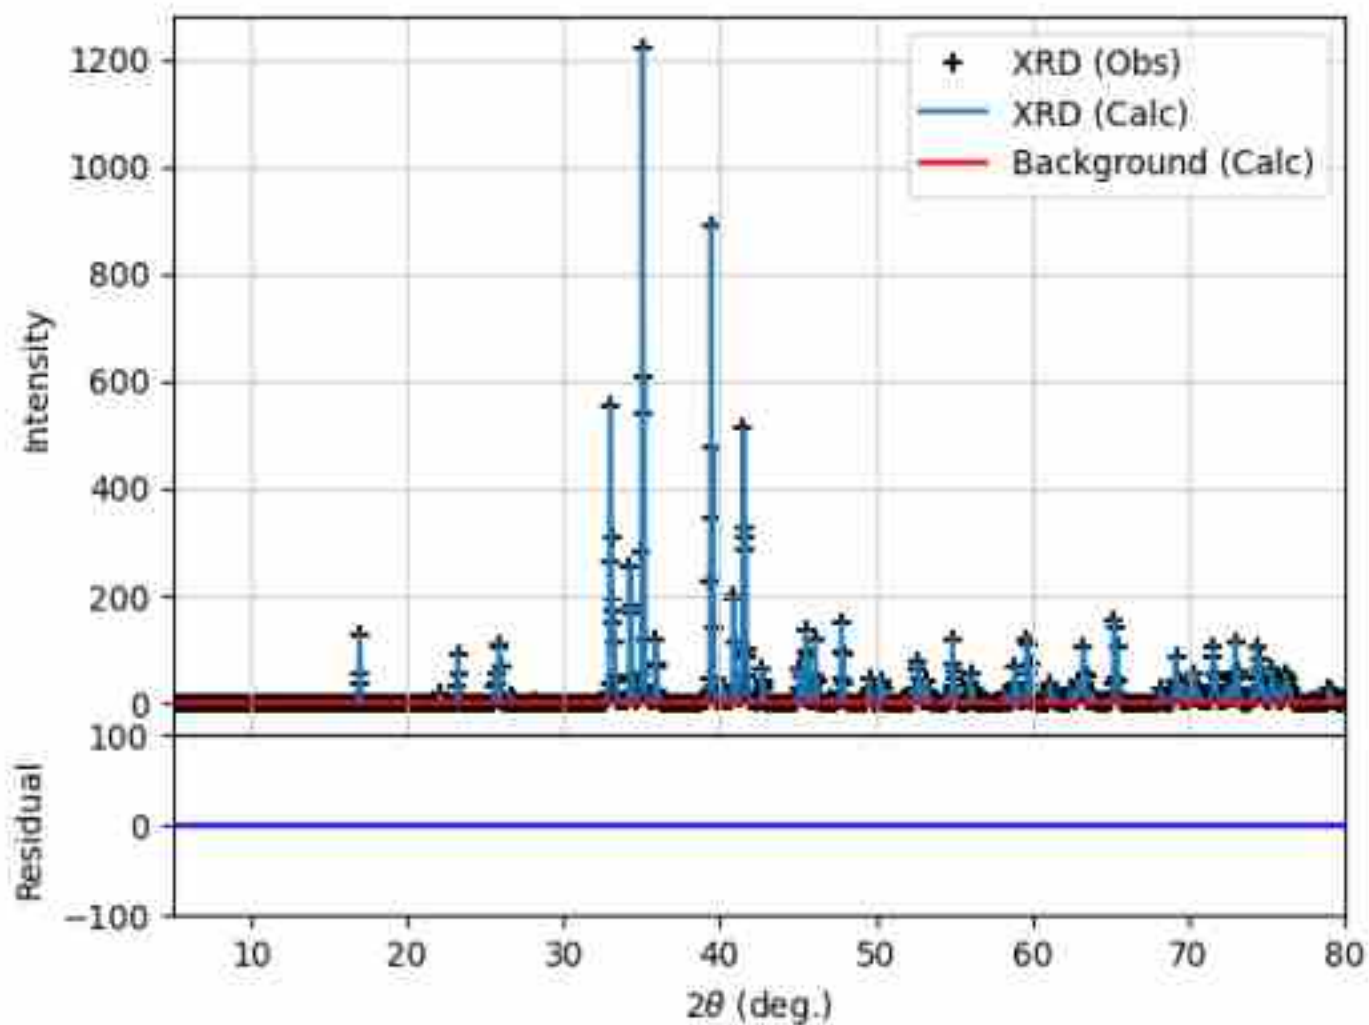

| RMSE before RR | Rwp     | RMSE after RR |
|----------------|---------|---------------|
| 0.082          | 0.00491 | 0.00037       |

# Ca4Ti12C1O9

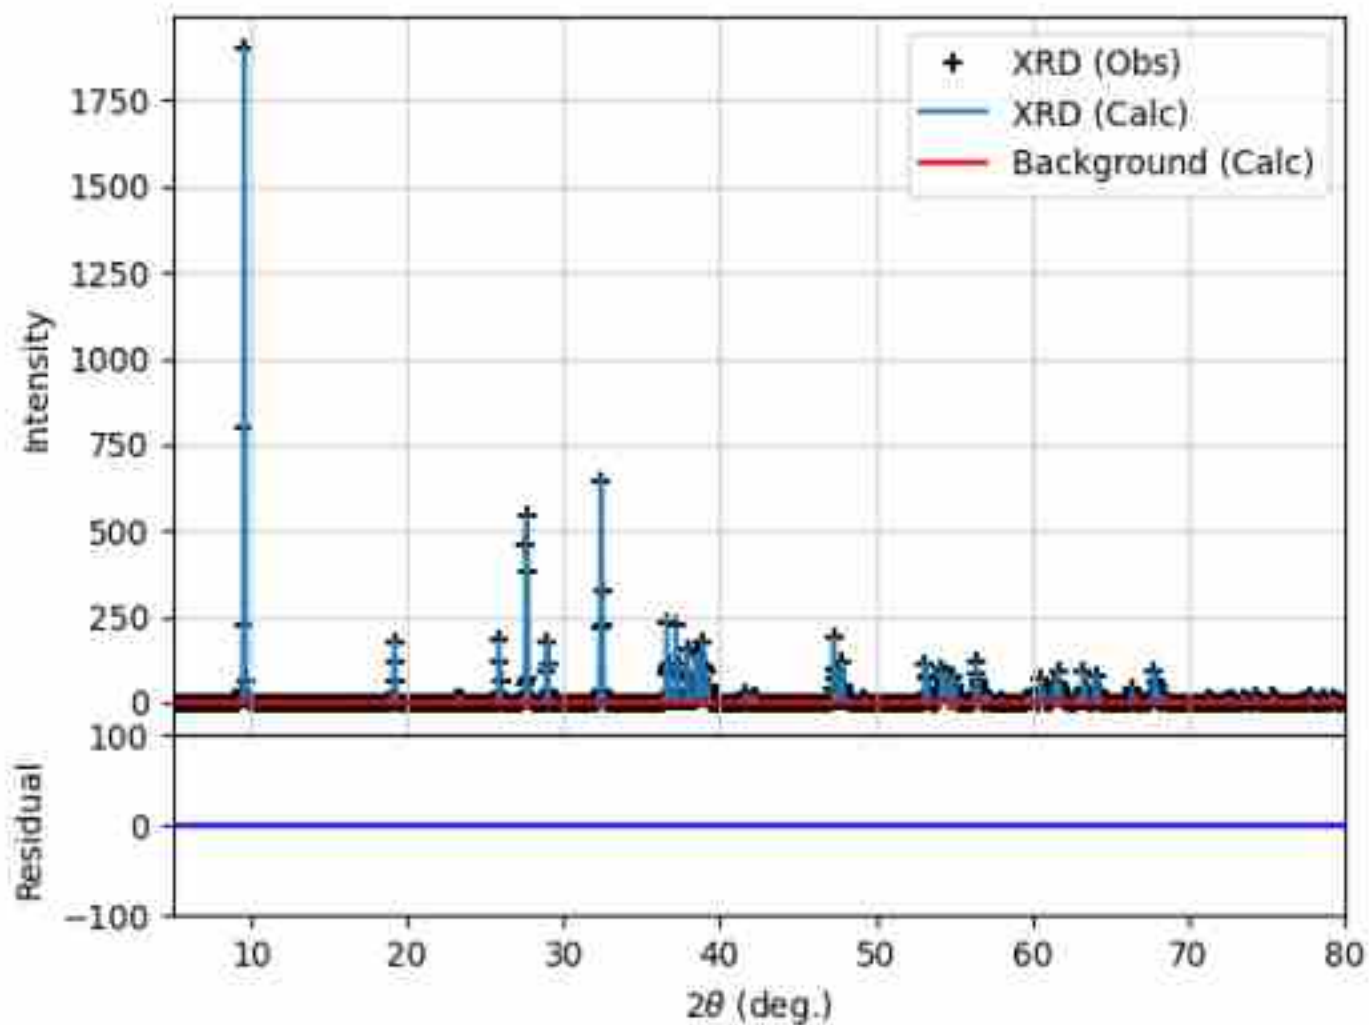

| RMSE before RR | Rwp     | RMSE after RR |
|----------------|---------|---------------|
| 0.083          | 0.00342 | 0.00095       |

# Ce1Sn6Ru4

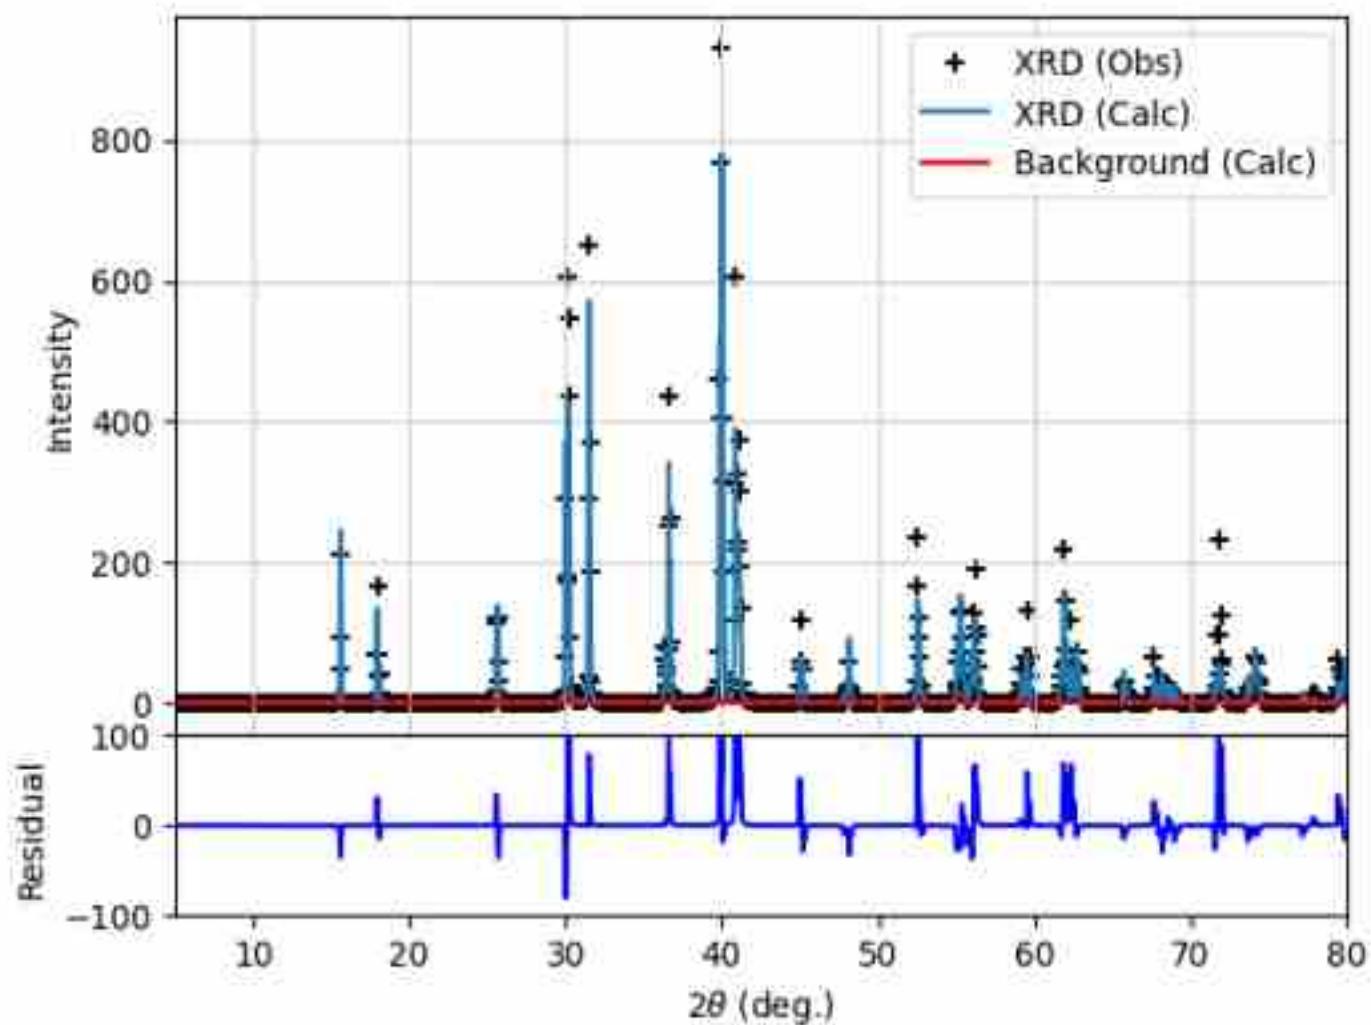

| RMSE before RR | Rwp      | RMSE after RR |
|----------------|----------|---------------|
| 0.083          | 36.38136 | 0.14254       |



# Li1Ag1F4

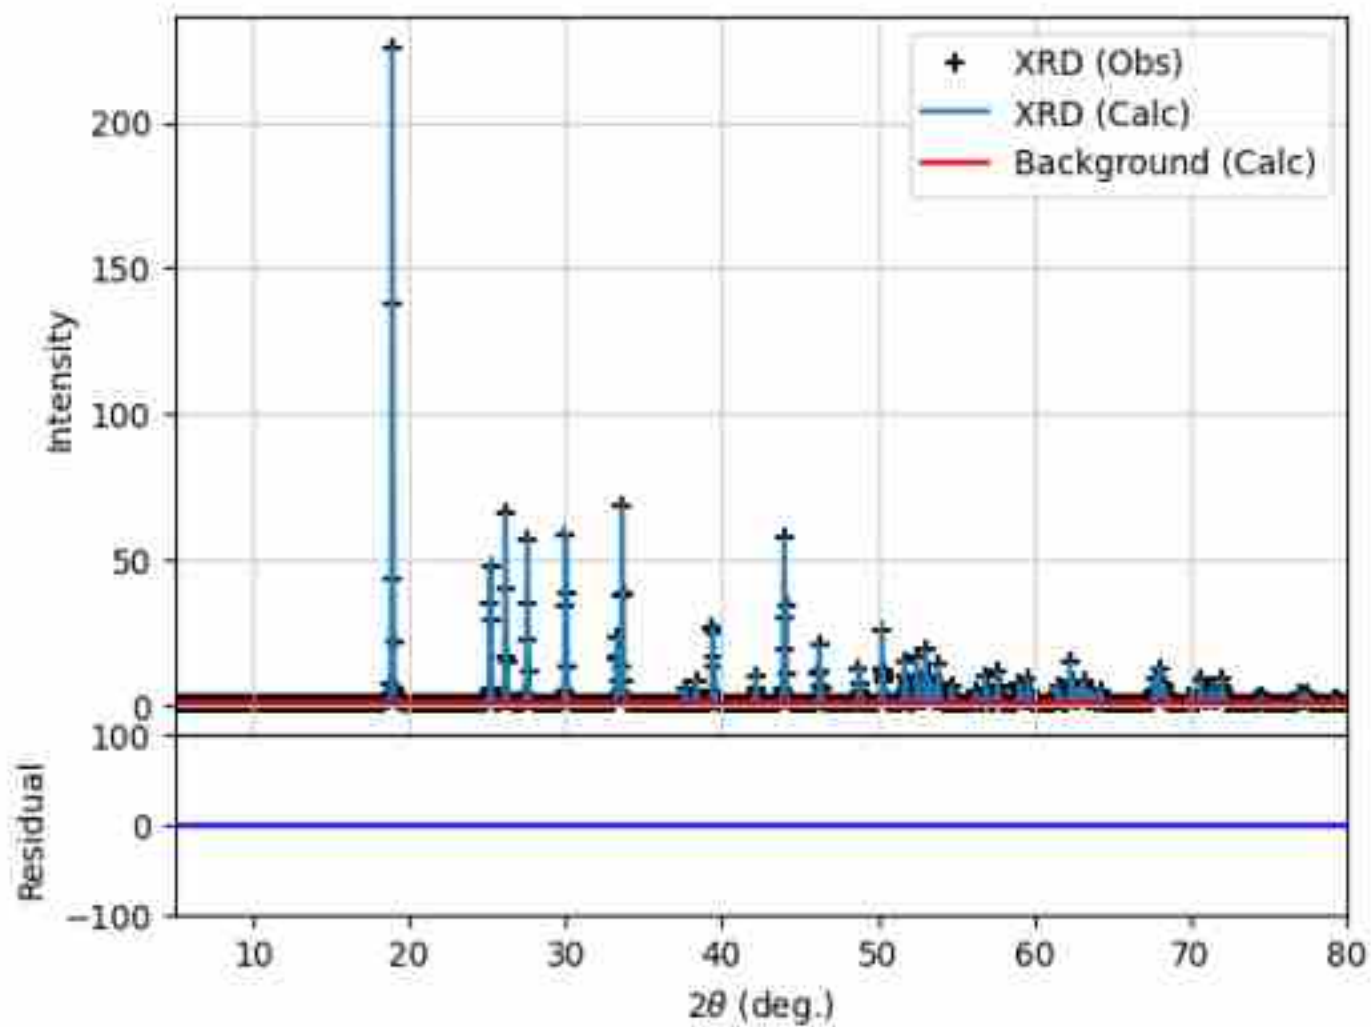

| RMSE before RR | Rwp   | RMSE after RR |
|----------------|-------|---------------|
| 0.083          | 0.003 | 0.00067       |

# Nd<sub>2</sub>Cu<sub>2</sub>Sn<sub>2</sub>

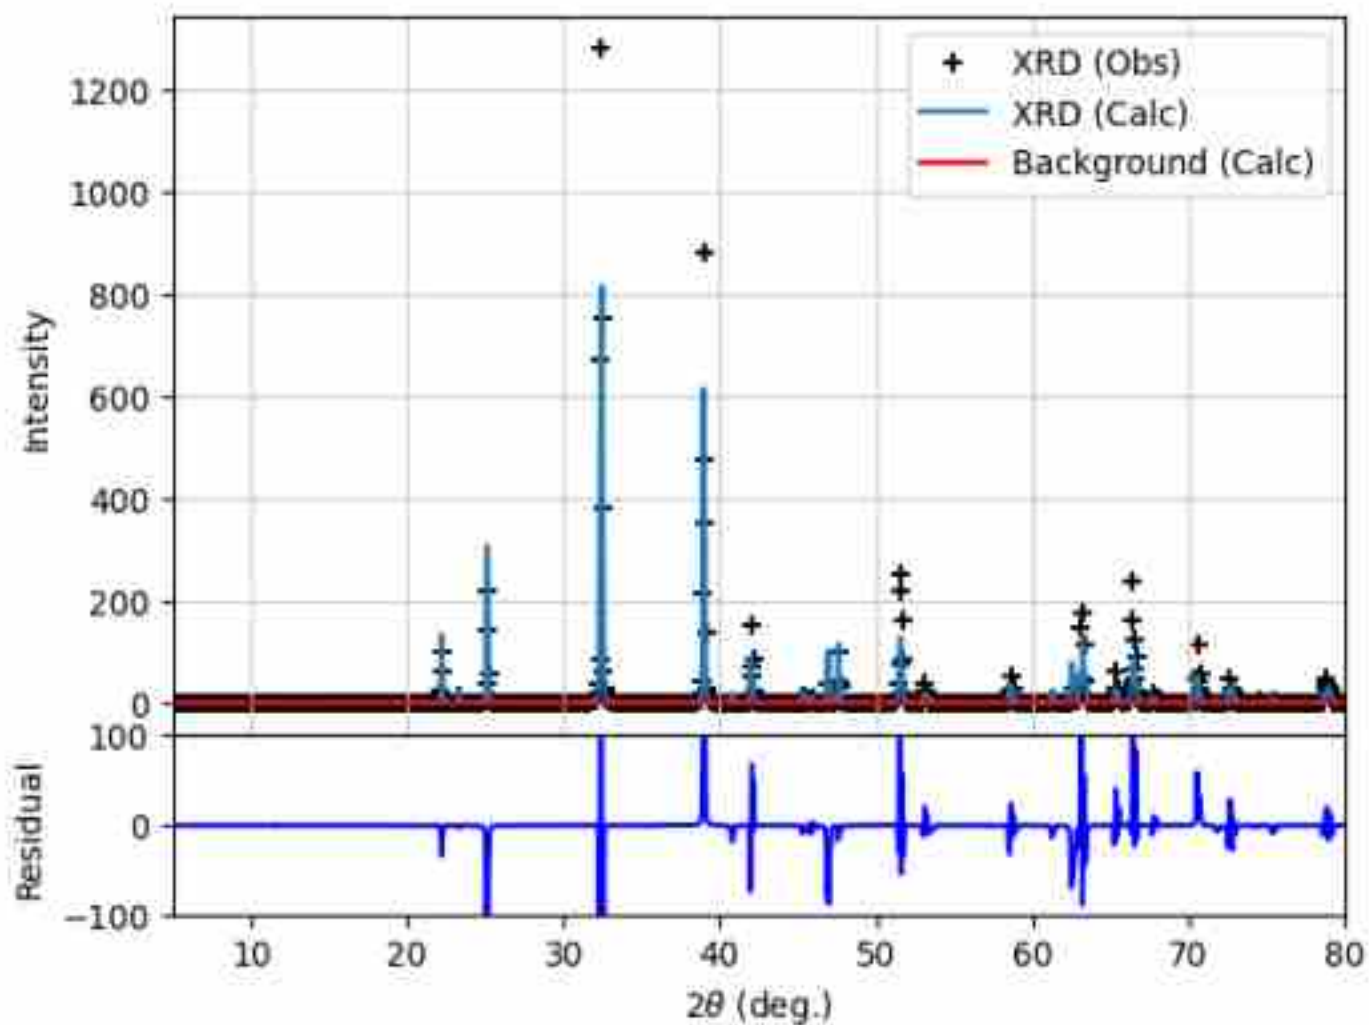

| RMSE before RR | Rwp      | RMSE after RR |
|----------------|----------|---------------|
| 0.083          | 91.57737 | 0.30493       |

# U<sub>4</sub>Si<sub>4</sub>Rh<sub>4</sub>

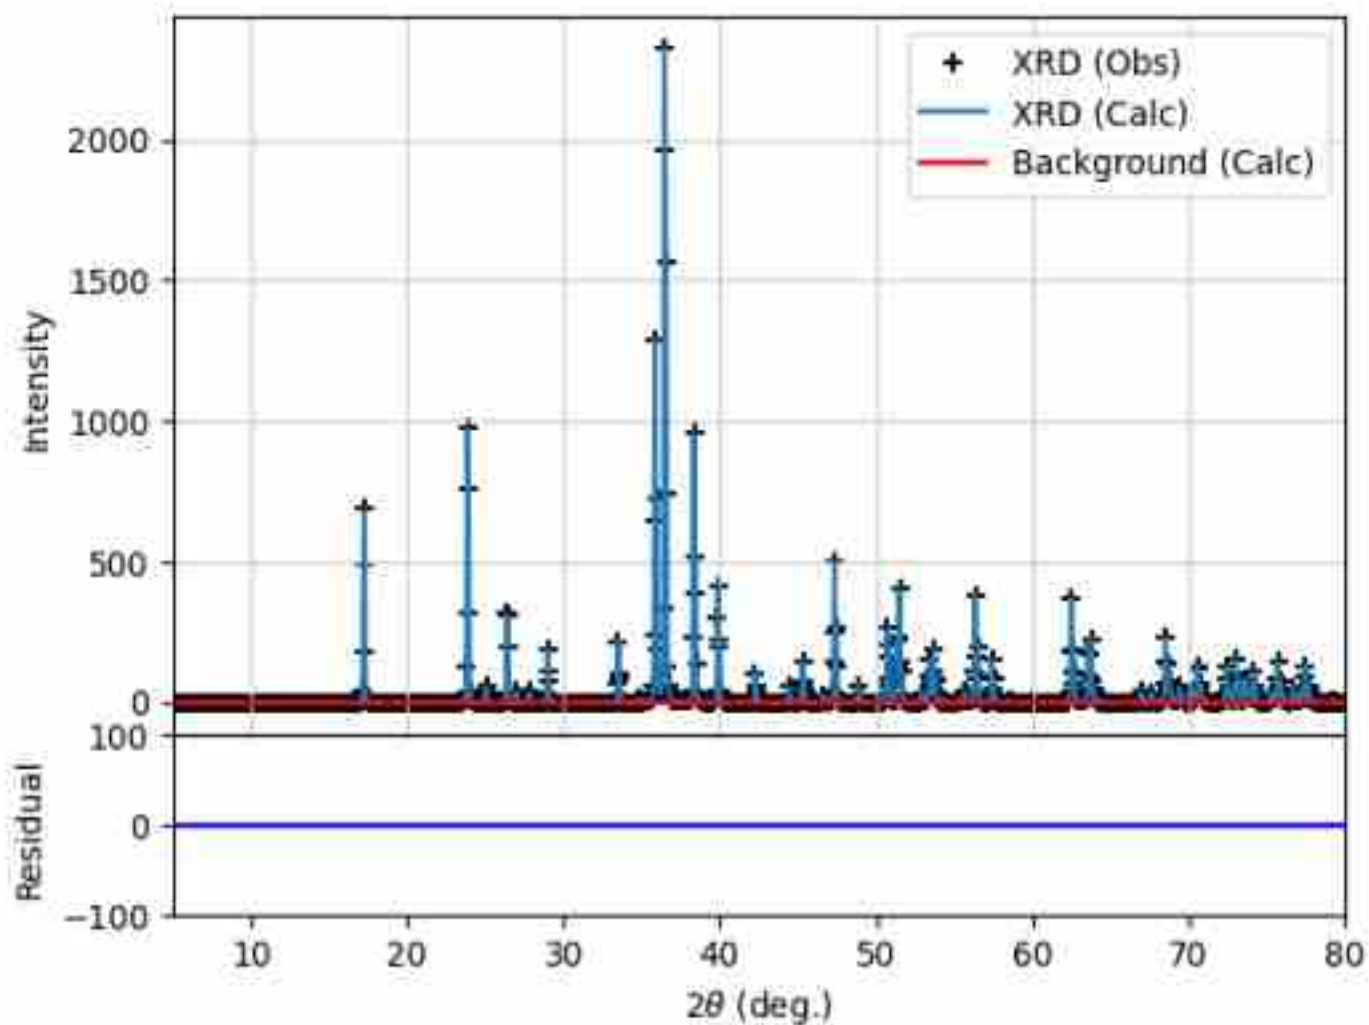

| RMSE before RR | Rwp     | RMSE after RR |
|----------------|---------|---------------|
| 0.083          | 0.07519 | 0.00586       |

# Ba<sub>2</sub>Ca<sub>4</sub>I<sub>12</sub>

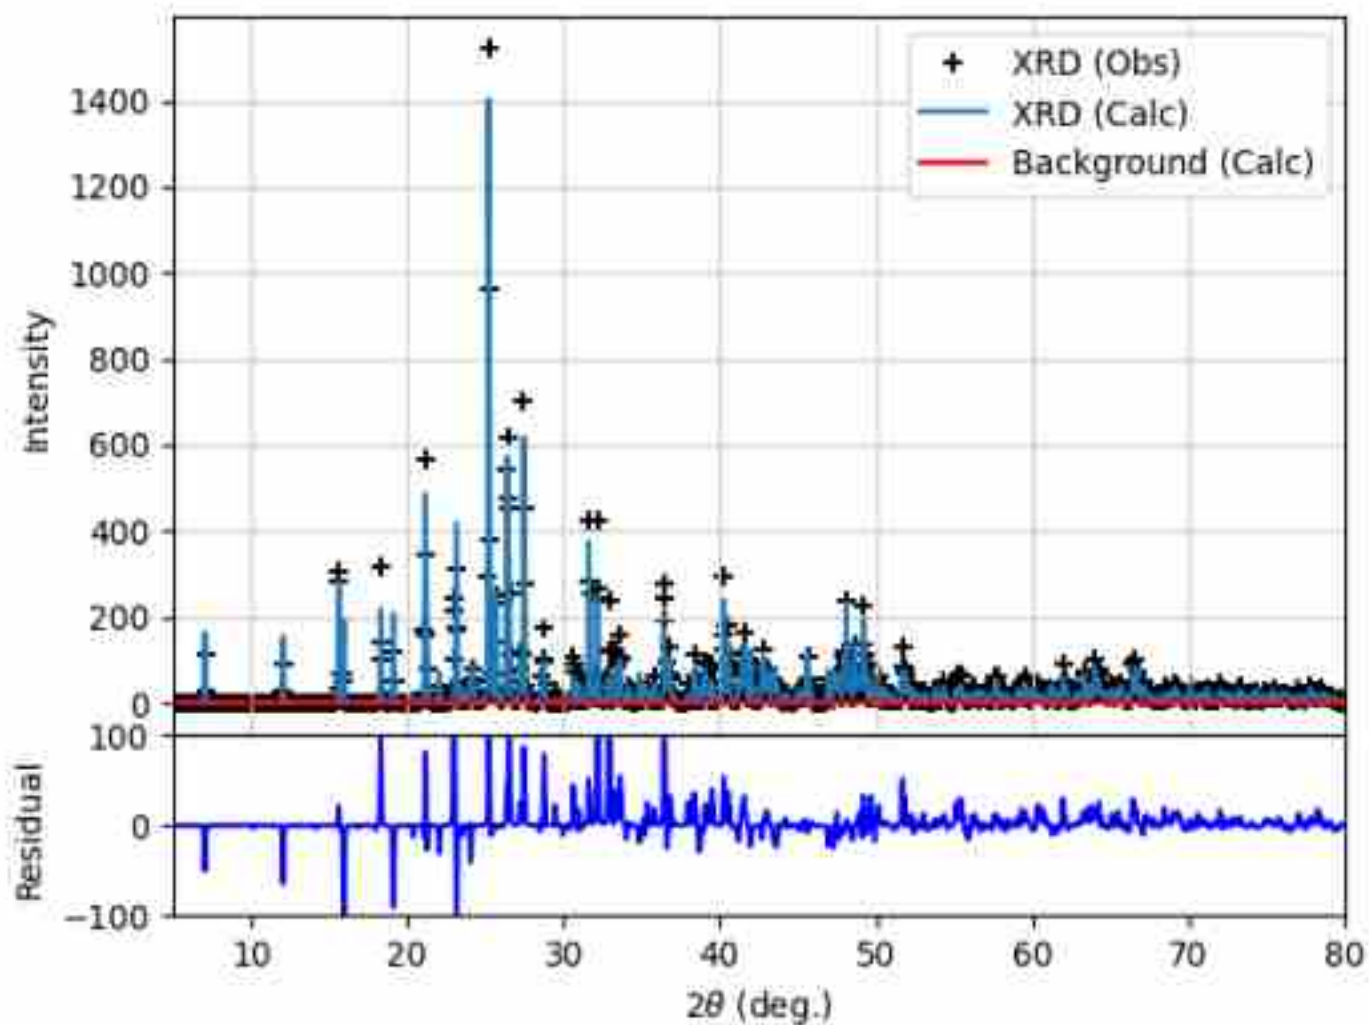

| RMSE before RR | Rwp      | RMSE after RR |
|----------------|----------|---------------|
| 0.084          | 33.19626 | 0.41058       |

# Cs1Fe1Mo2O8

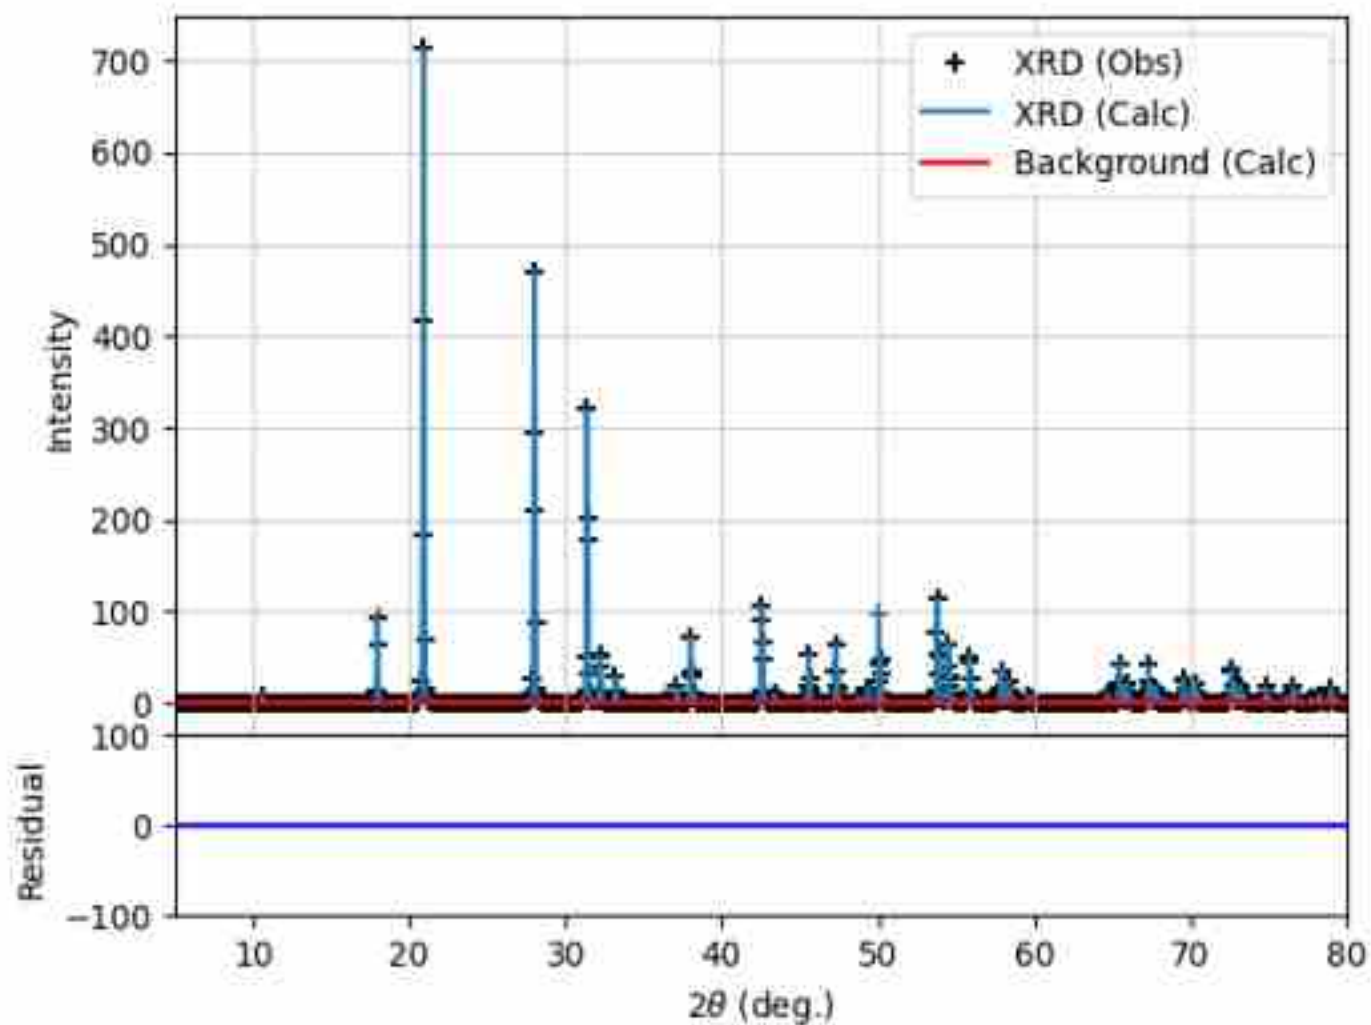

| RMSE before RR | Rwp     | RMSE after RR |
|----------------|---------|---------------|
| 0.084          | 0.00203 | 0.00073       |

# Na<sub>2</sub>Cl<sub>2</sub>O<sub>8</sub>

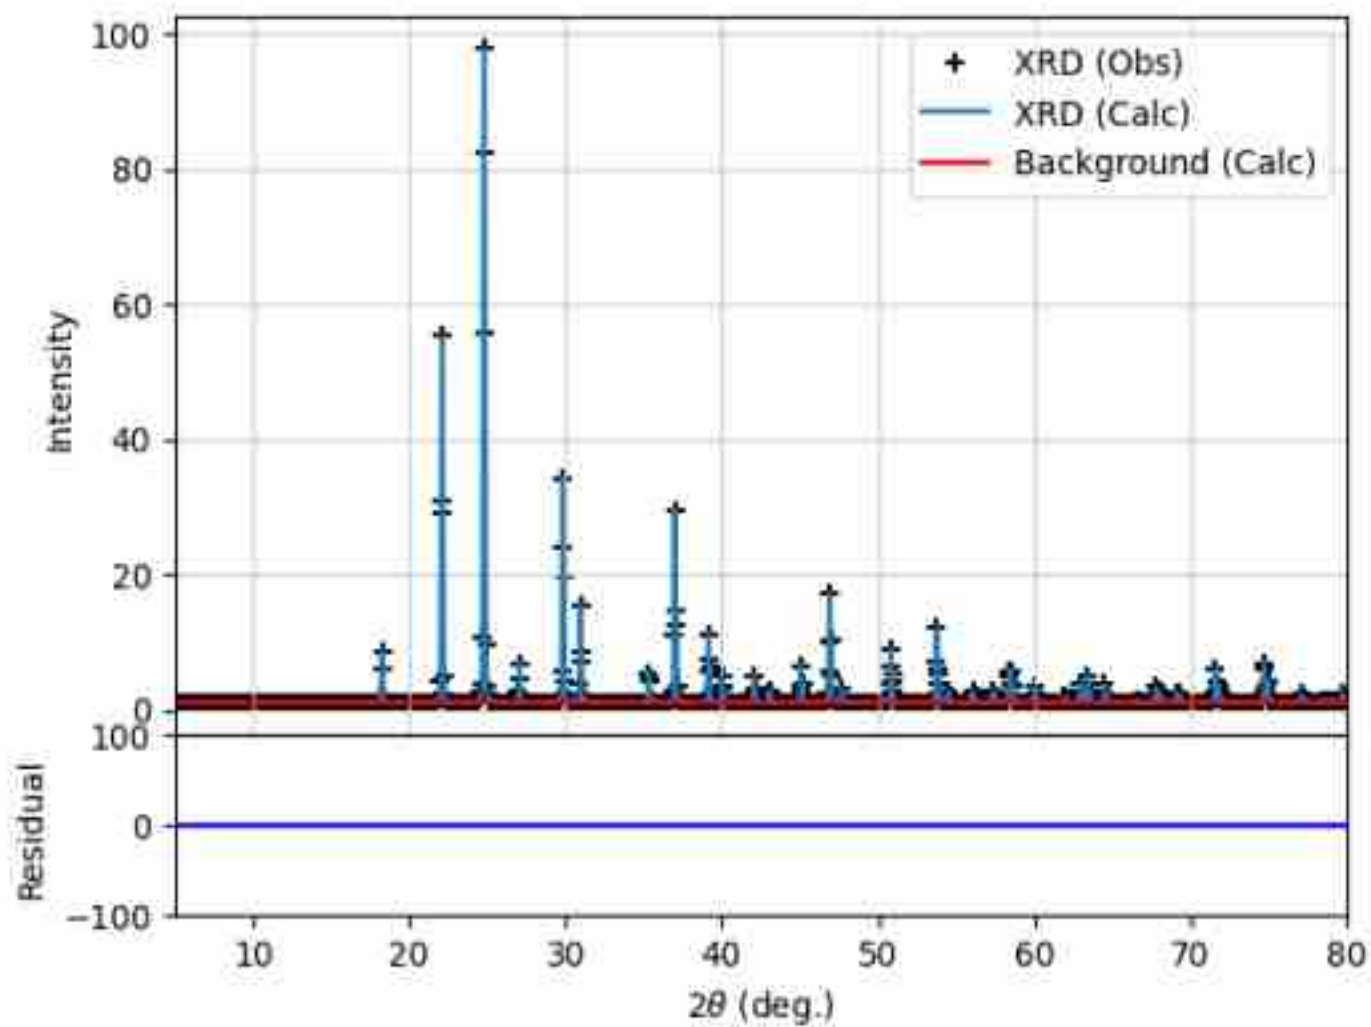

| RMSE before RR | Rwp     | RMSE after RR |
|----------------|---------|---------------|
| 0.084          | 0.00297 | 0.00107       |

# Zr1Ti1Pb2O6

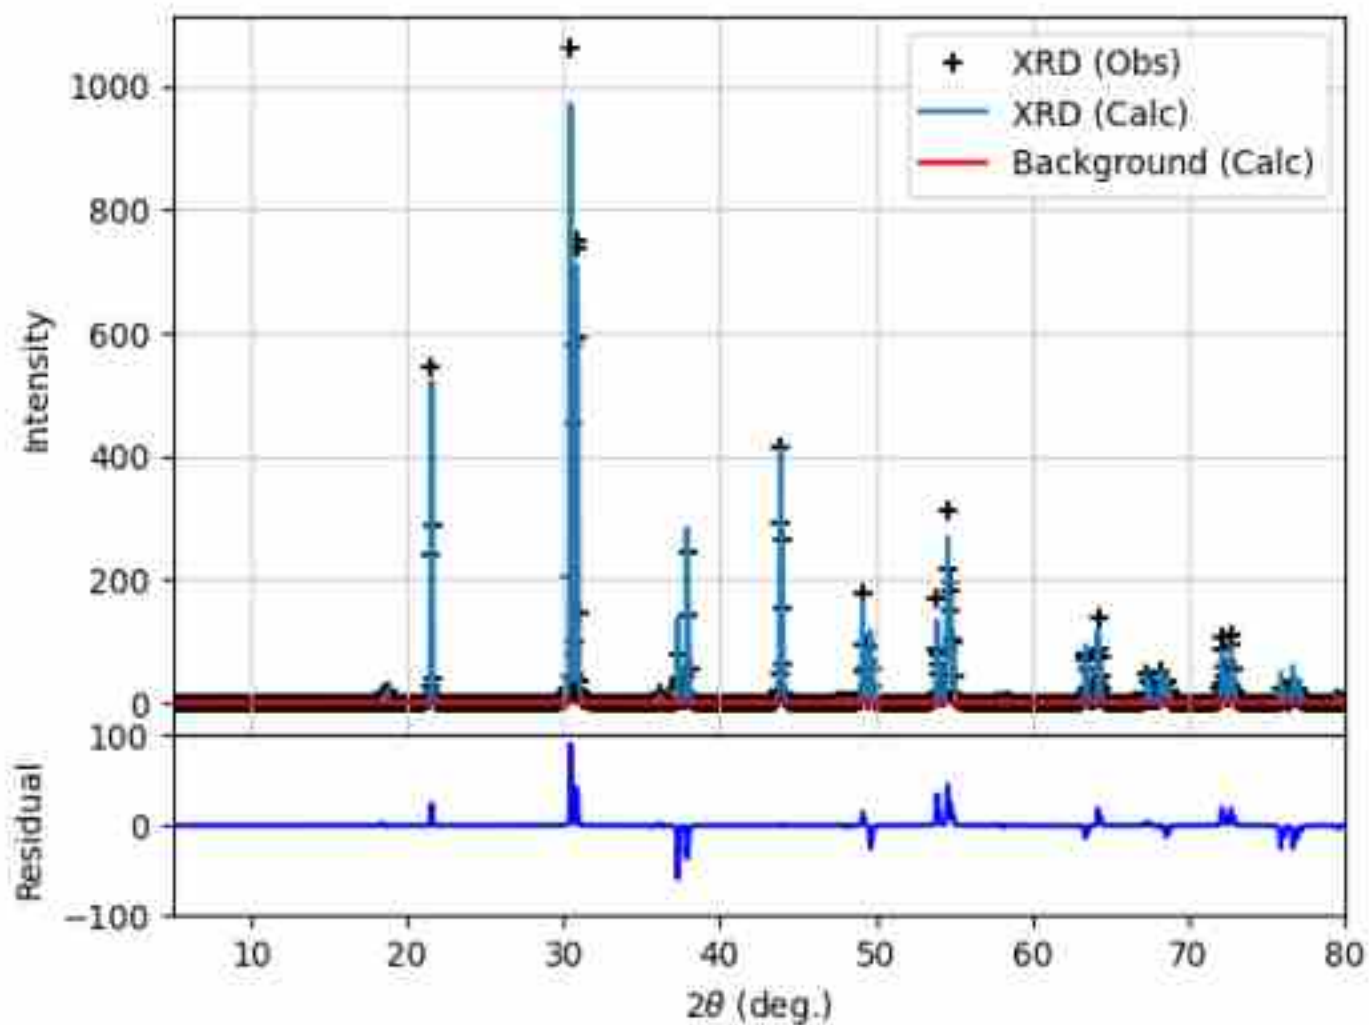

| RMSE before RR | Rwp      | RMSE after RR |
|----------------|----------|---------------|
| 0.084          | 17.25526 | 0.06221       |

# In5Pt11

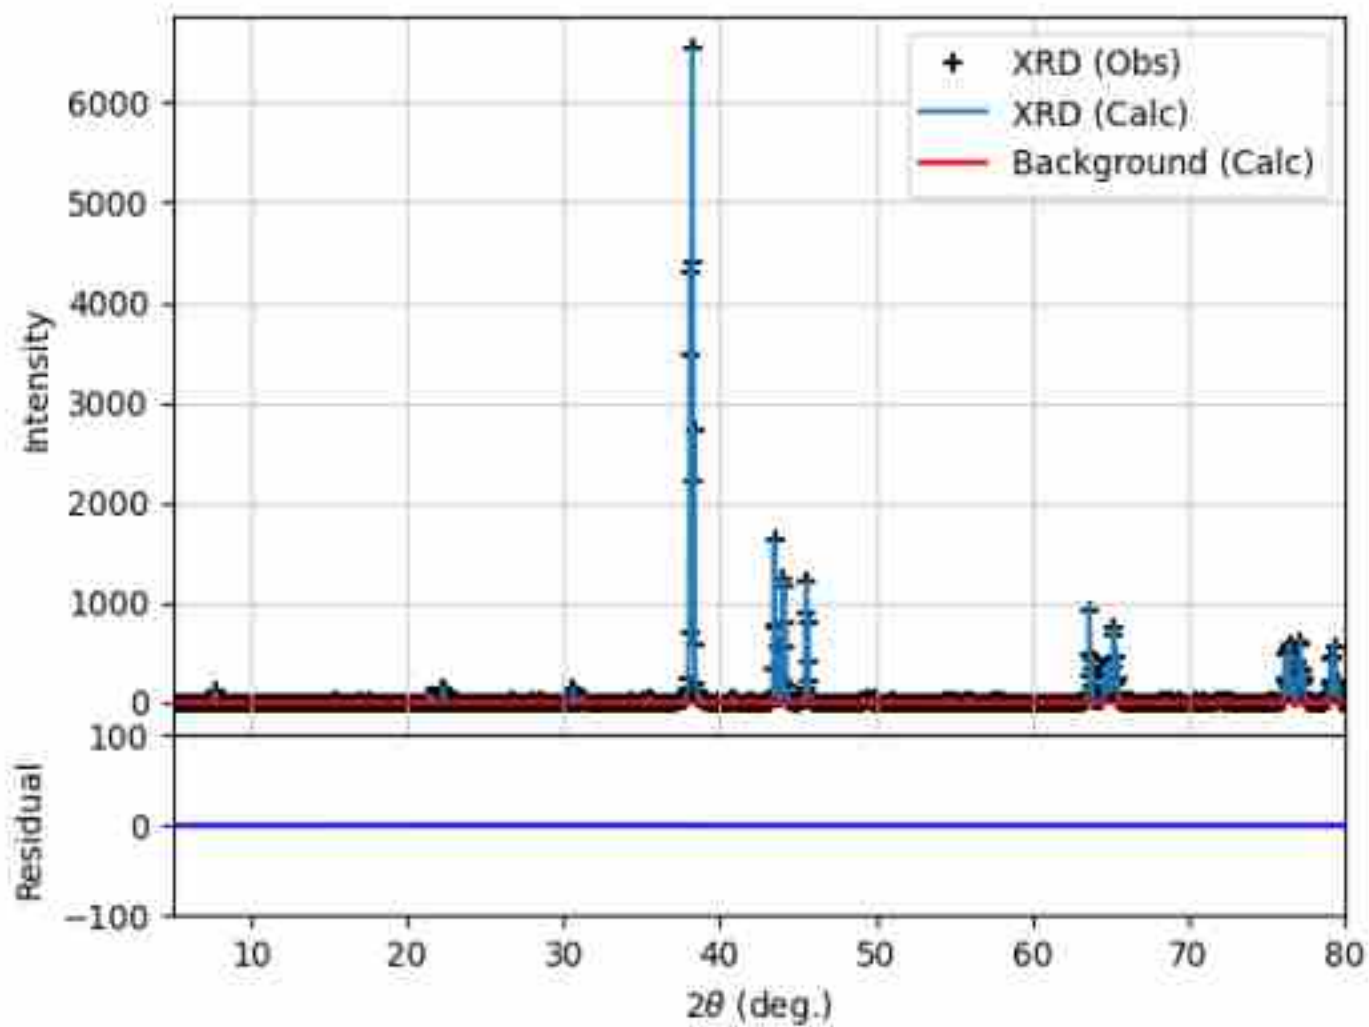

| RMSE before RR | Rwp     | RMSE after RR |
|----------------|---------|---------------|
| 0.085          | 0.00531 | 0.0002        |



# K<sub>2</sub>Li<sub>4</sub>H<sub>6</sub>O<sub>6</sub>

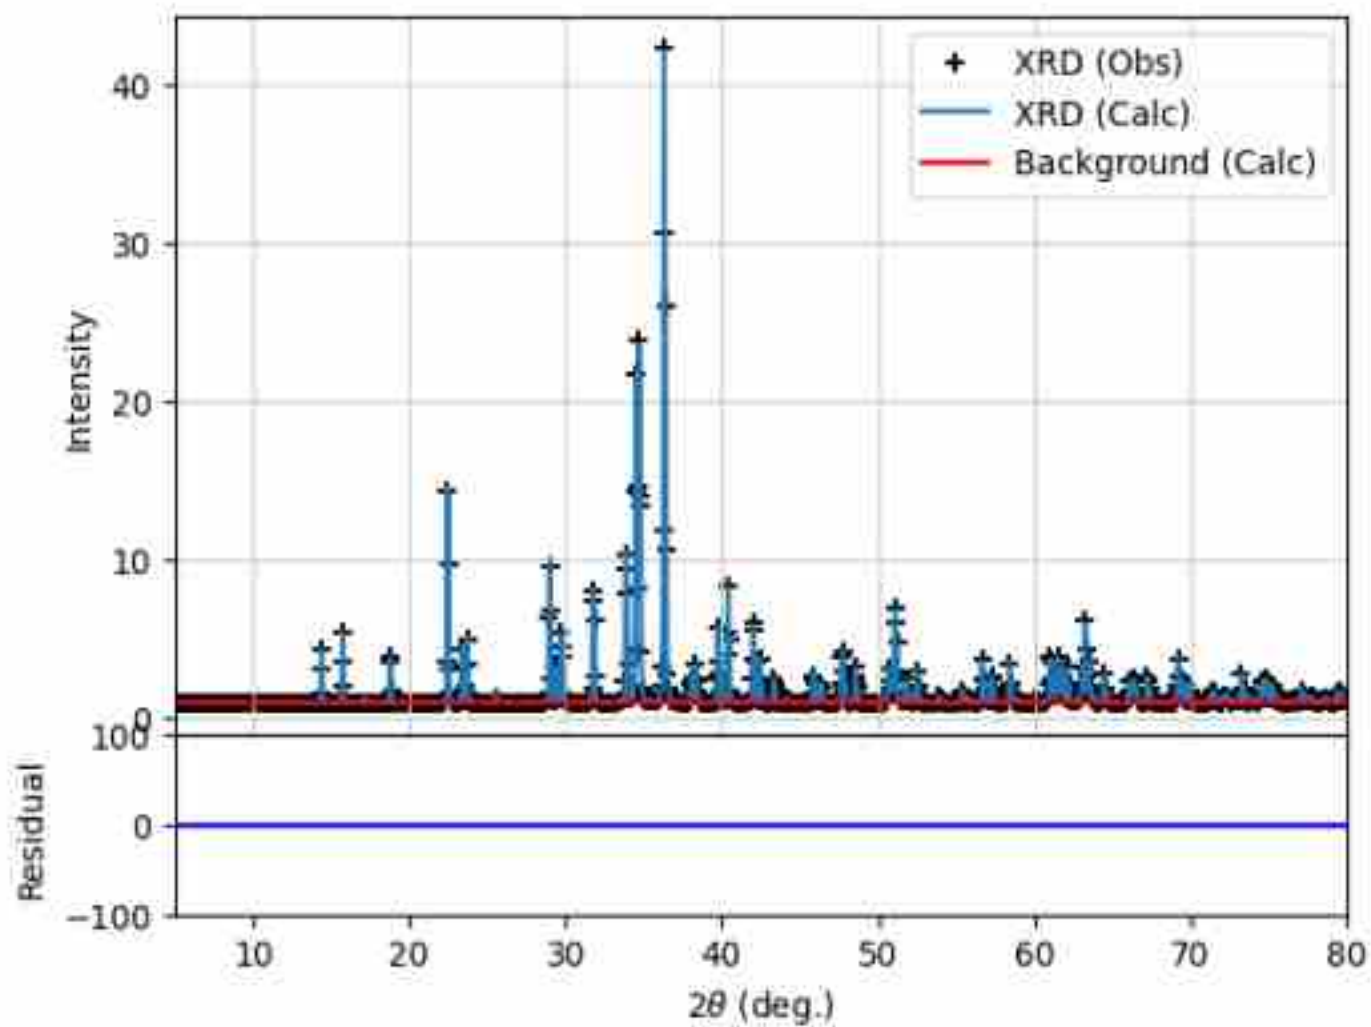

| RMSE before RR | Rwp    | RMSE after RR |
|----------------|--------|---------------|
| 0.085          | 1.1448 | None          |

# Sr<sub>4</sub>Ni<sub>2</sub>Mo<sub>2</sub>O<sub>12</sub>

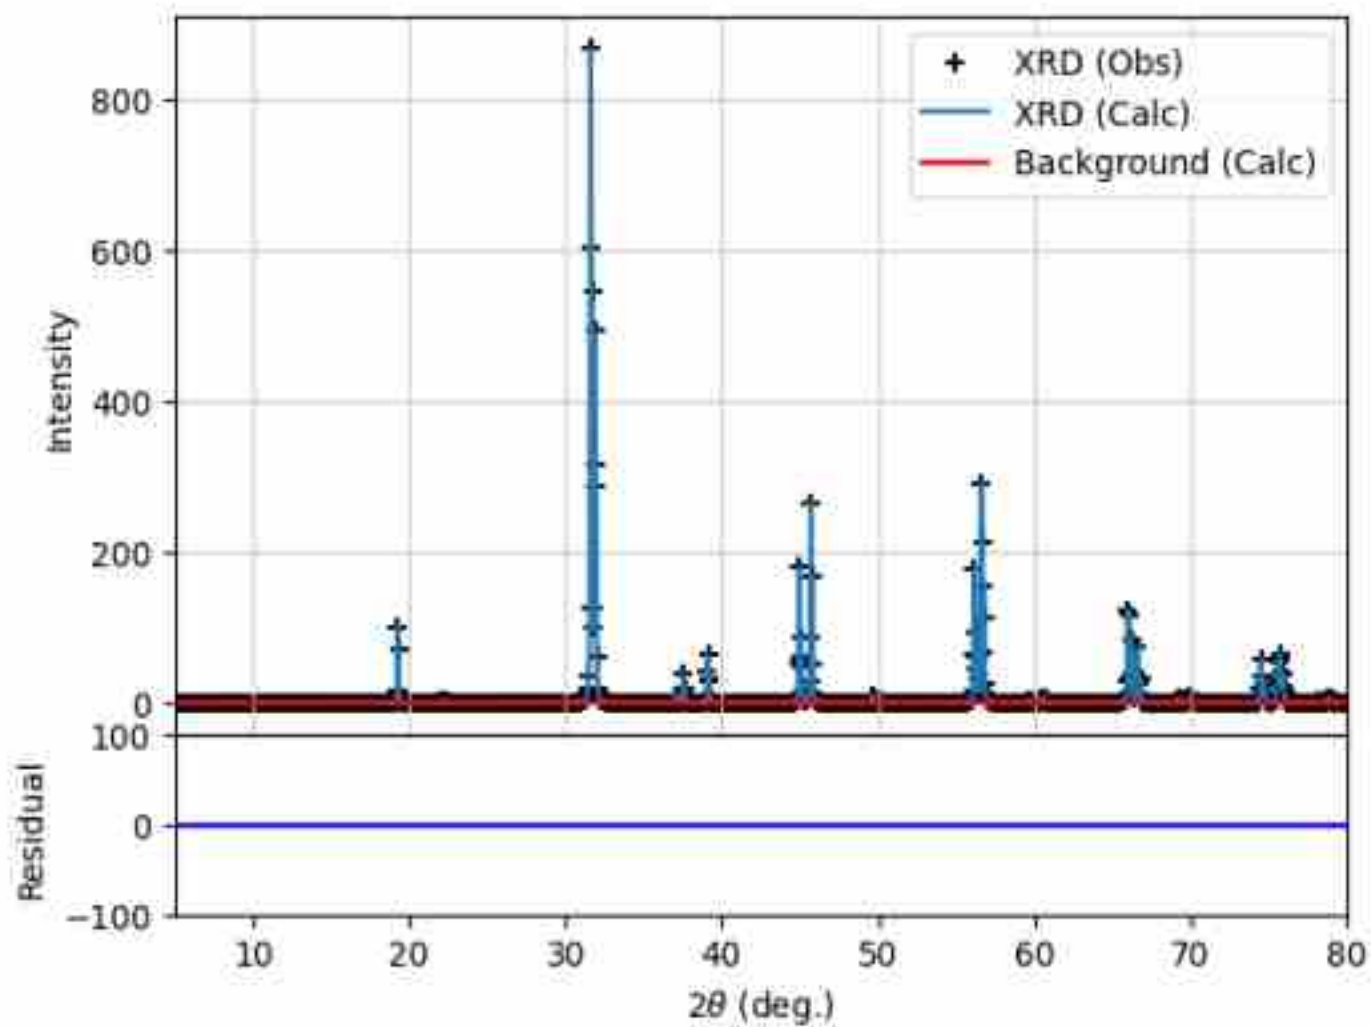

| RMSE before RR | Rwp     | RMSE after RR |
|----------------|---------|---------------|
| 0.085          | 0.00275 | 0.00087       |

# Sr6Nb2N6

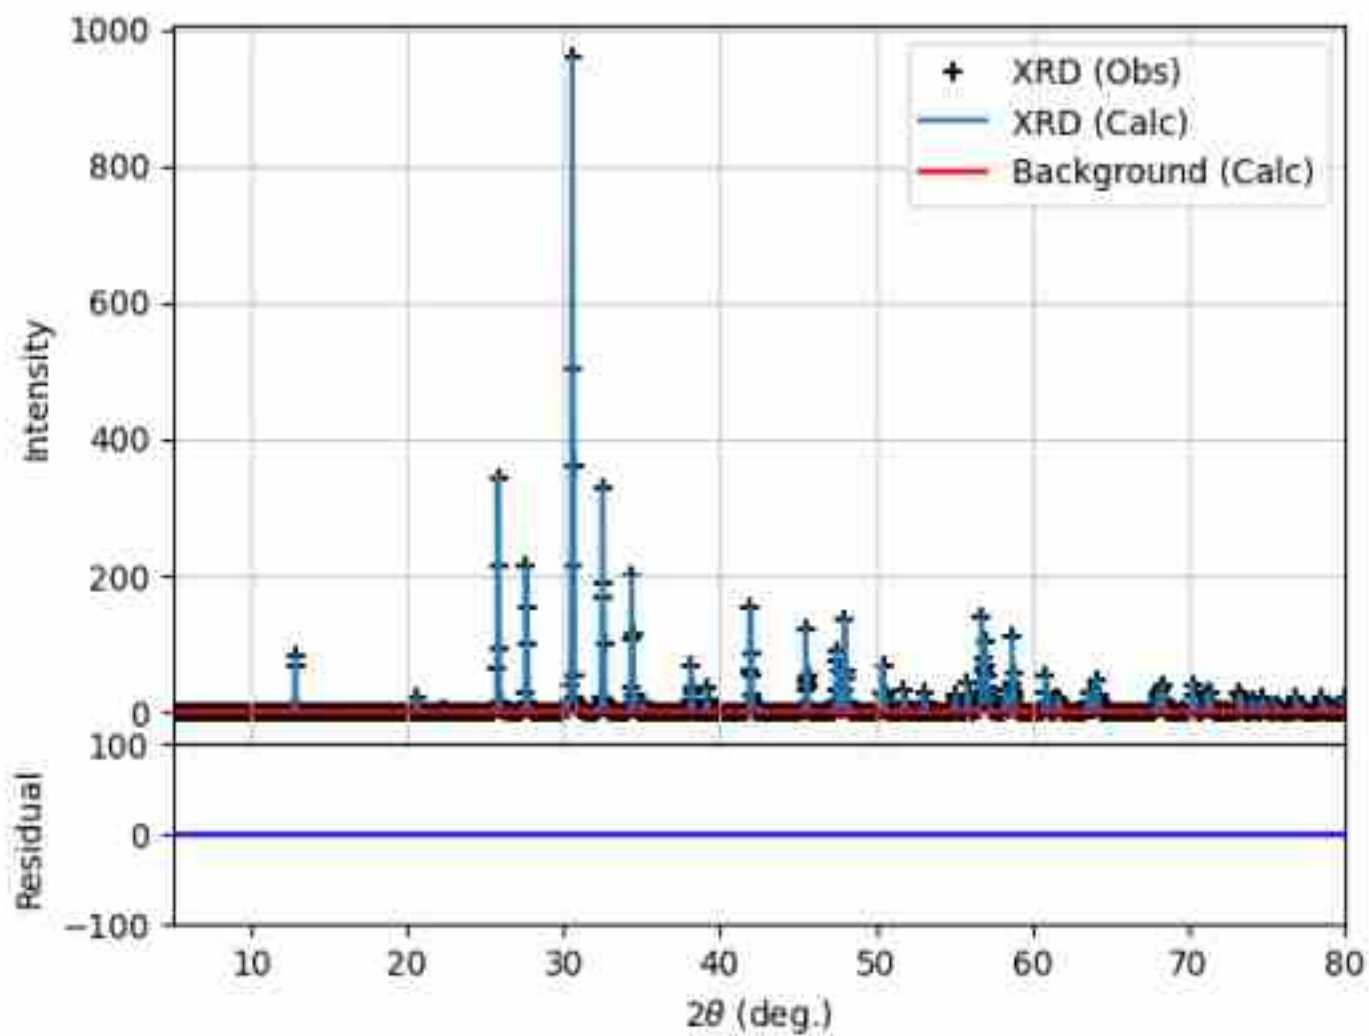

| RMSE before RR | Rwp     | RMSE after RR |
|----------------|---------|---------------|
| 0.085          | 0.00246 | 0.00112       |

# Ce4Mg2

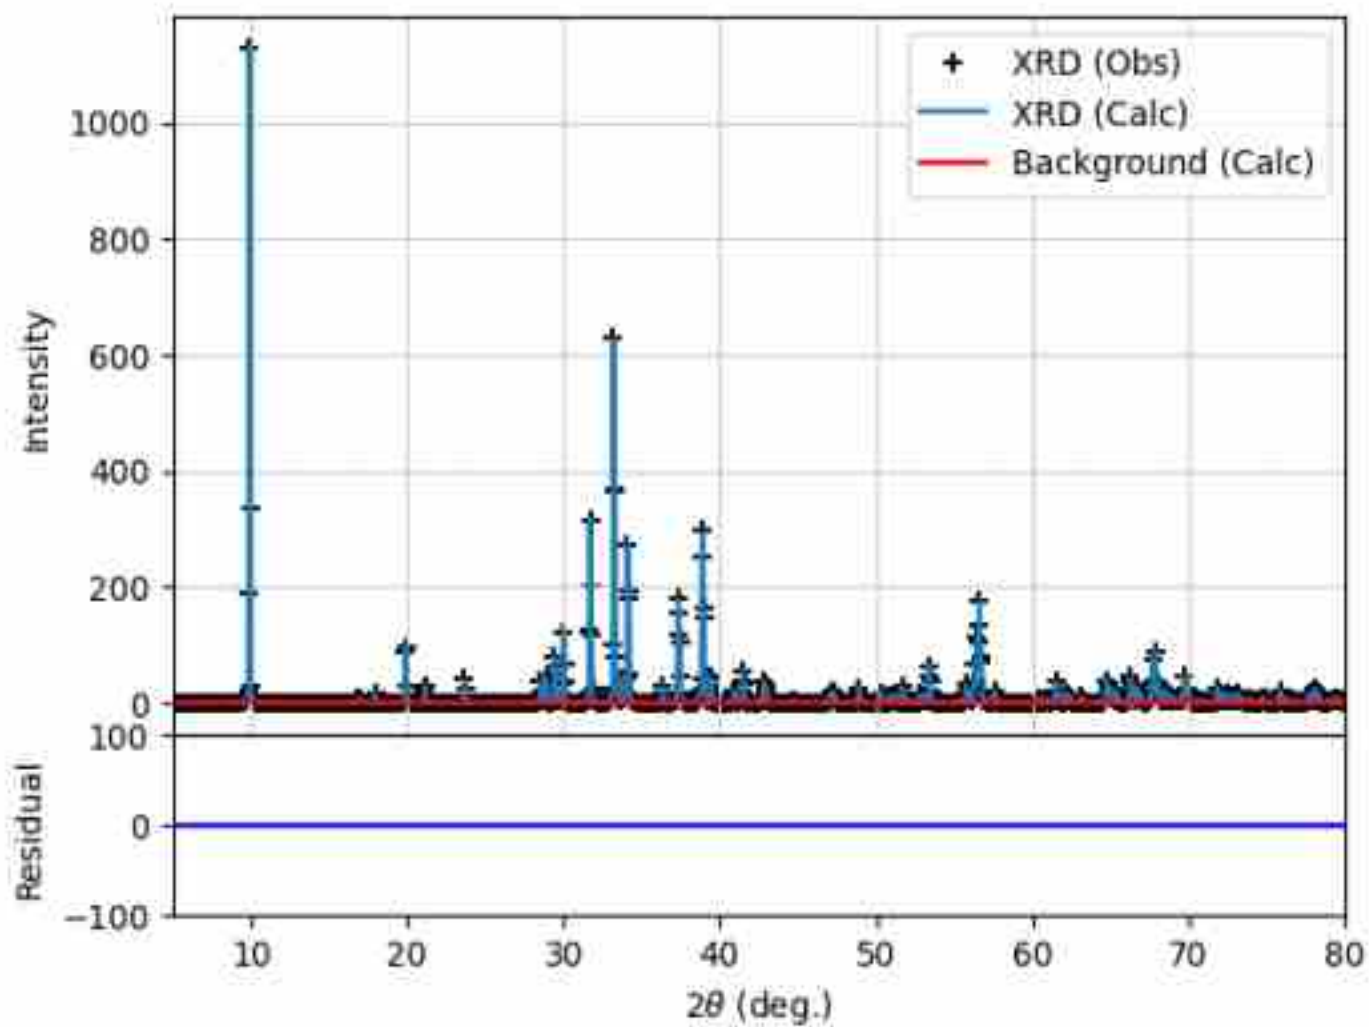

| RMSE before RR | Rwp     | RMSE after RR |
|----------------|---------|---------------|
| 0.086          | 0.00301 | 0.0003        |

# Sn4P4S12

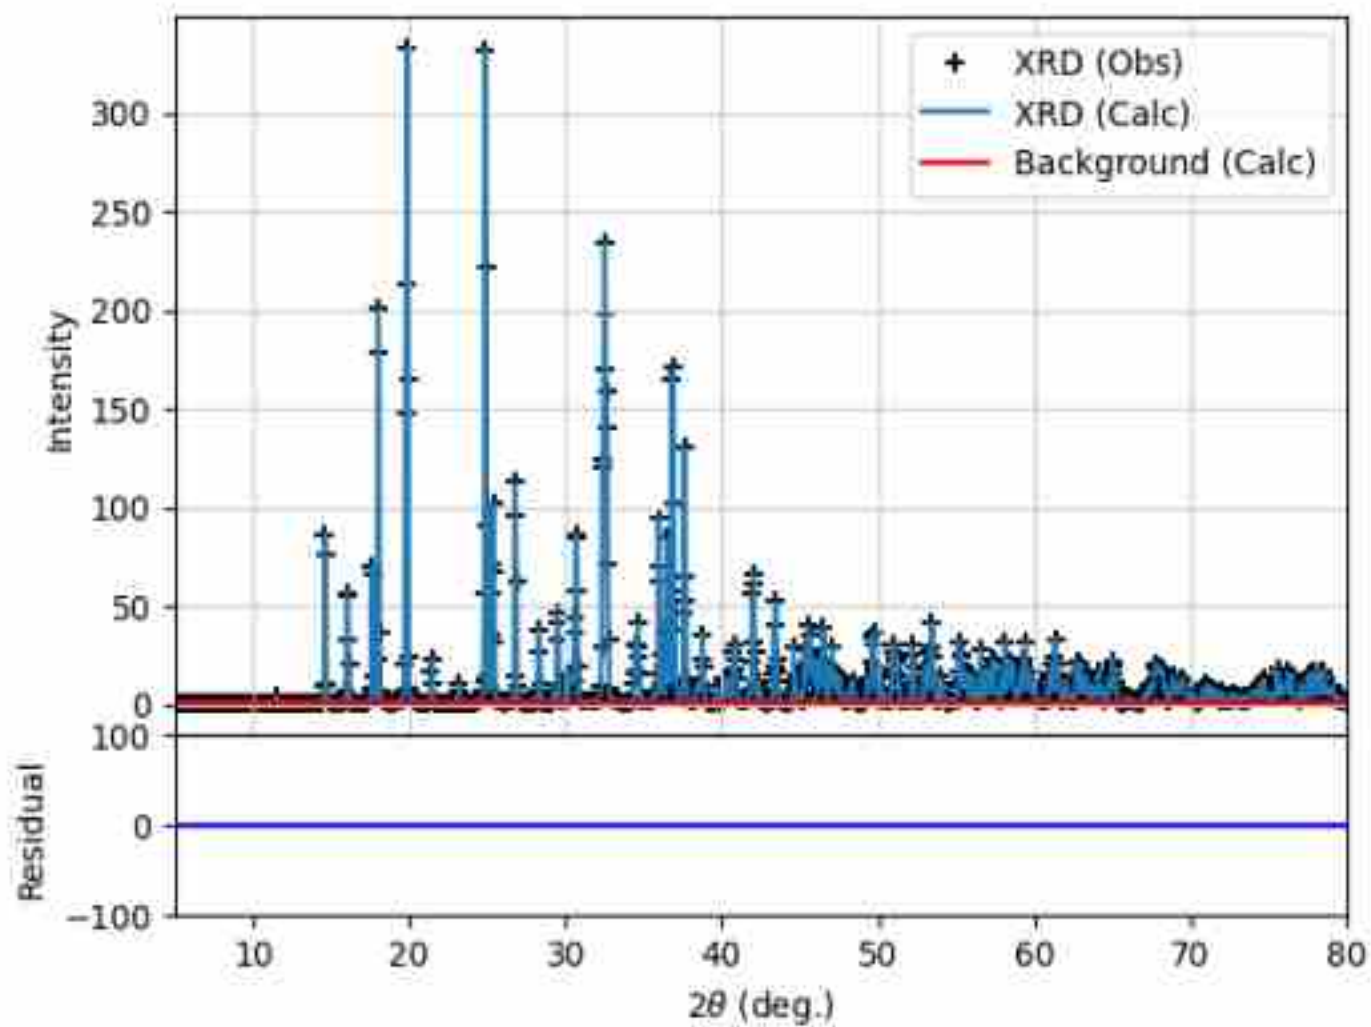

| RMSE before RR | Rwp     | RMSE after RR |
|----------------|---------|---------------|
| 0.086          | 0.00336 | 0.00046       |

# K<sub>2</sub>Nb<sub>2</sub>C112

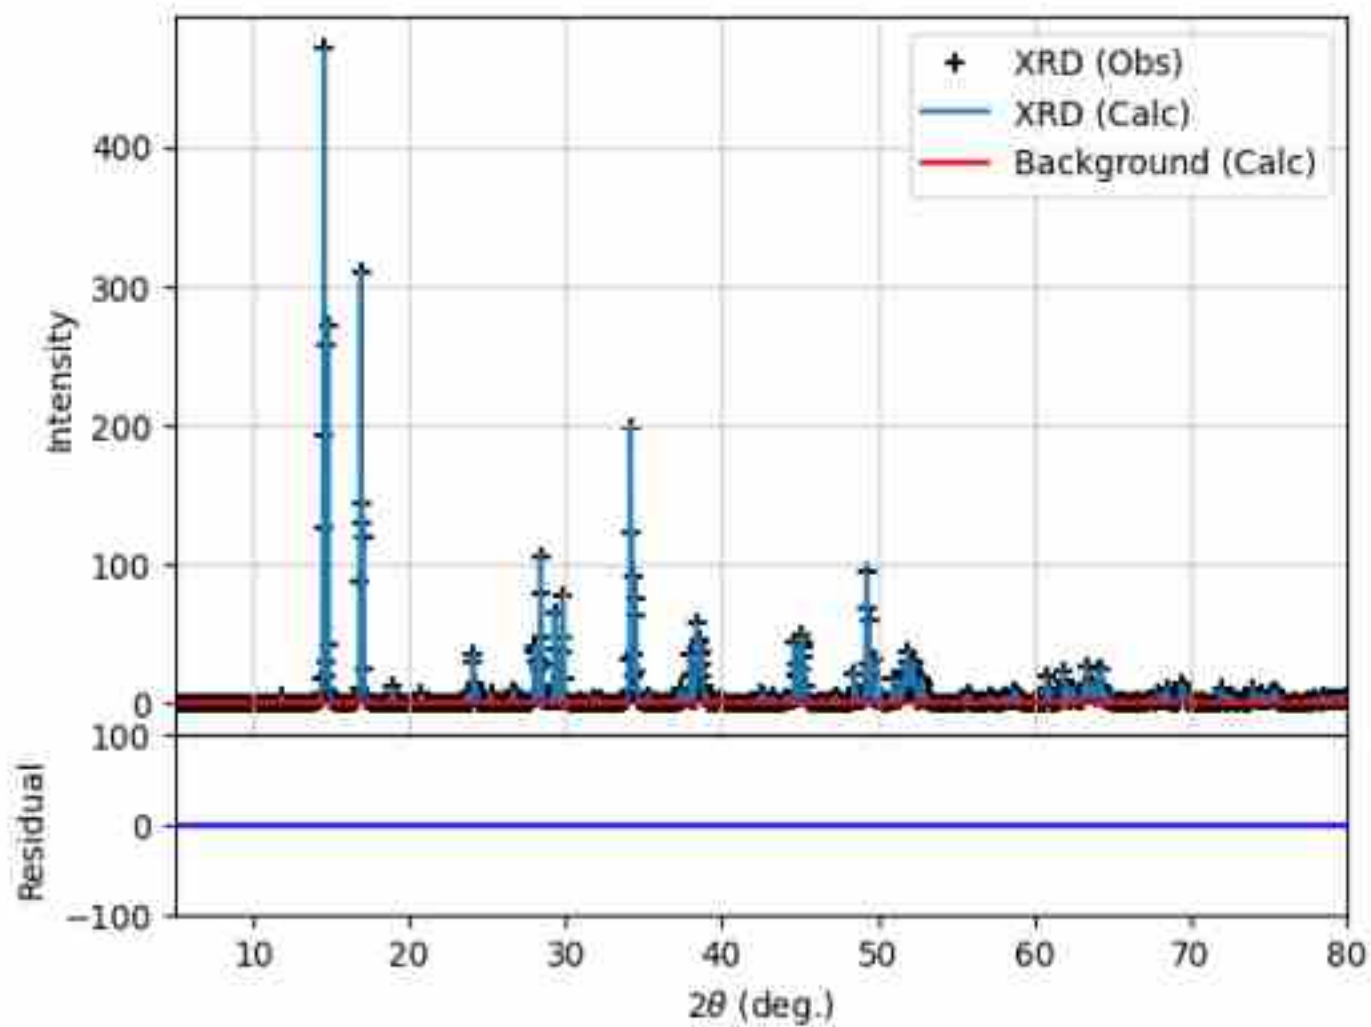

| RMSE before RR | Rwp     | RMSE after RR |
|----------------|---------|---------------|
| 0.087          | 0.00349 | 0.00032       |

# Li<sub>4</sub>Mn<sub>3</sub>Co<sub>1</sub>O<sub>8</sub>

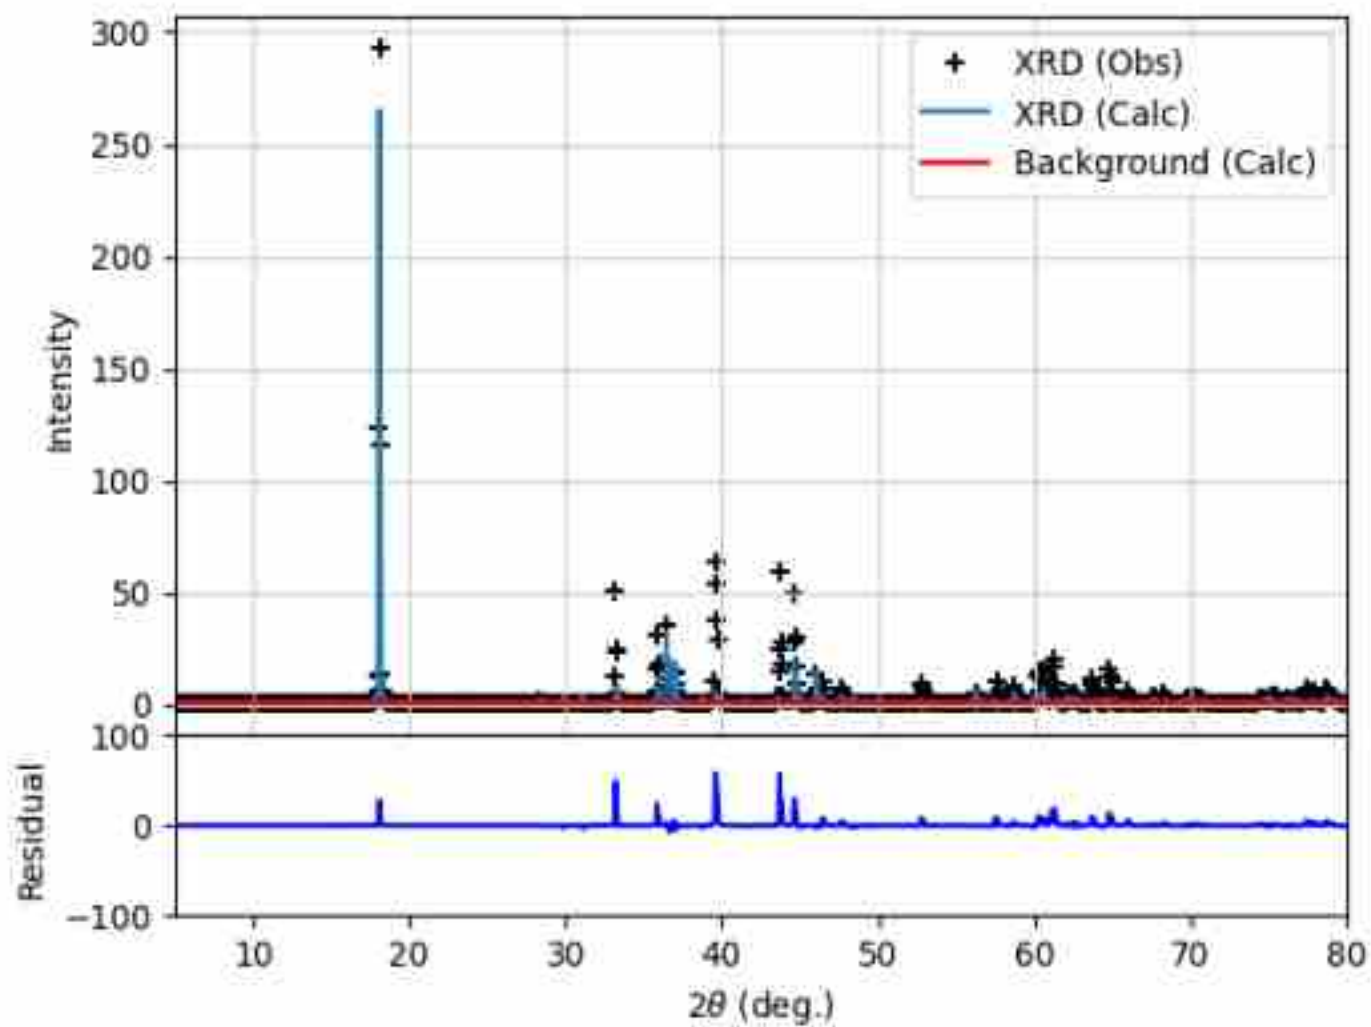

| RMSE before RR | Rwp      | RMSE after RR |
|----------------|----------|---------------|
| 0.087          | 50.26638 | None          |

# Ni<sub>4</sub>Bi<sub>4</sub>O<sub>12</sub>

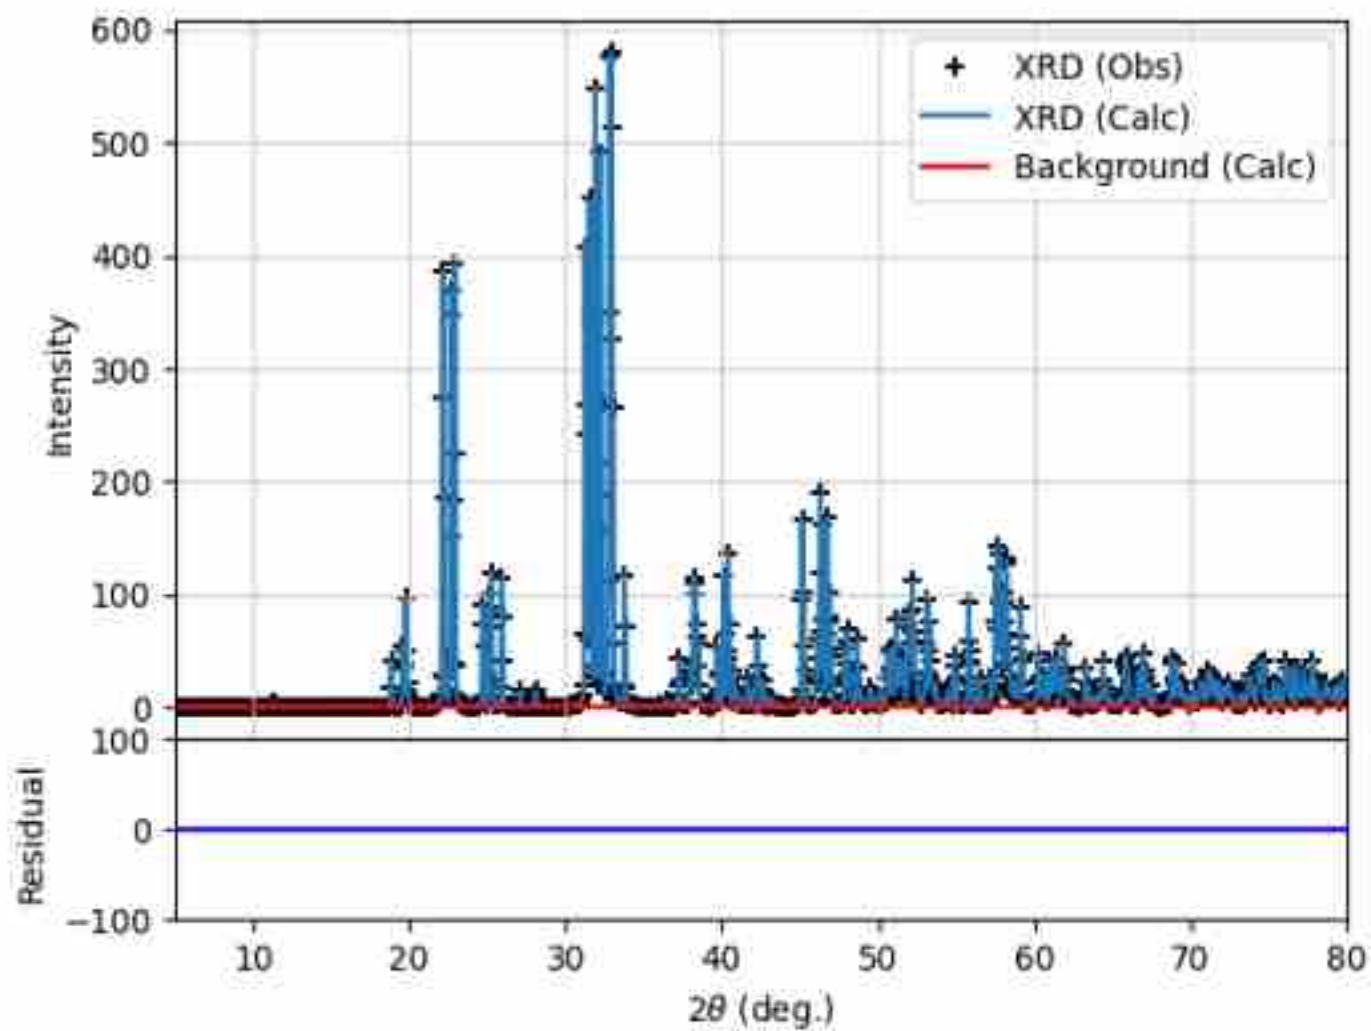

| RMSE before RR | Rwp     | RMSE after RR |
|----------------|---------|---------------|
| 0.087          | 0.00097 | 0.00048       |



# V2P2O10

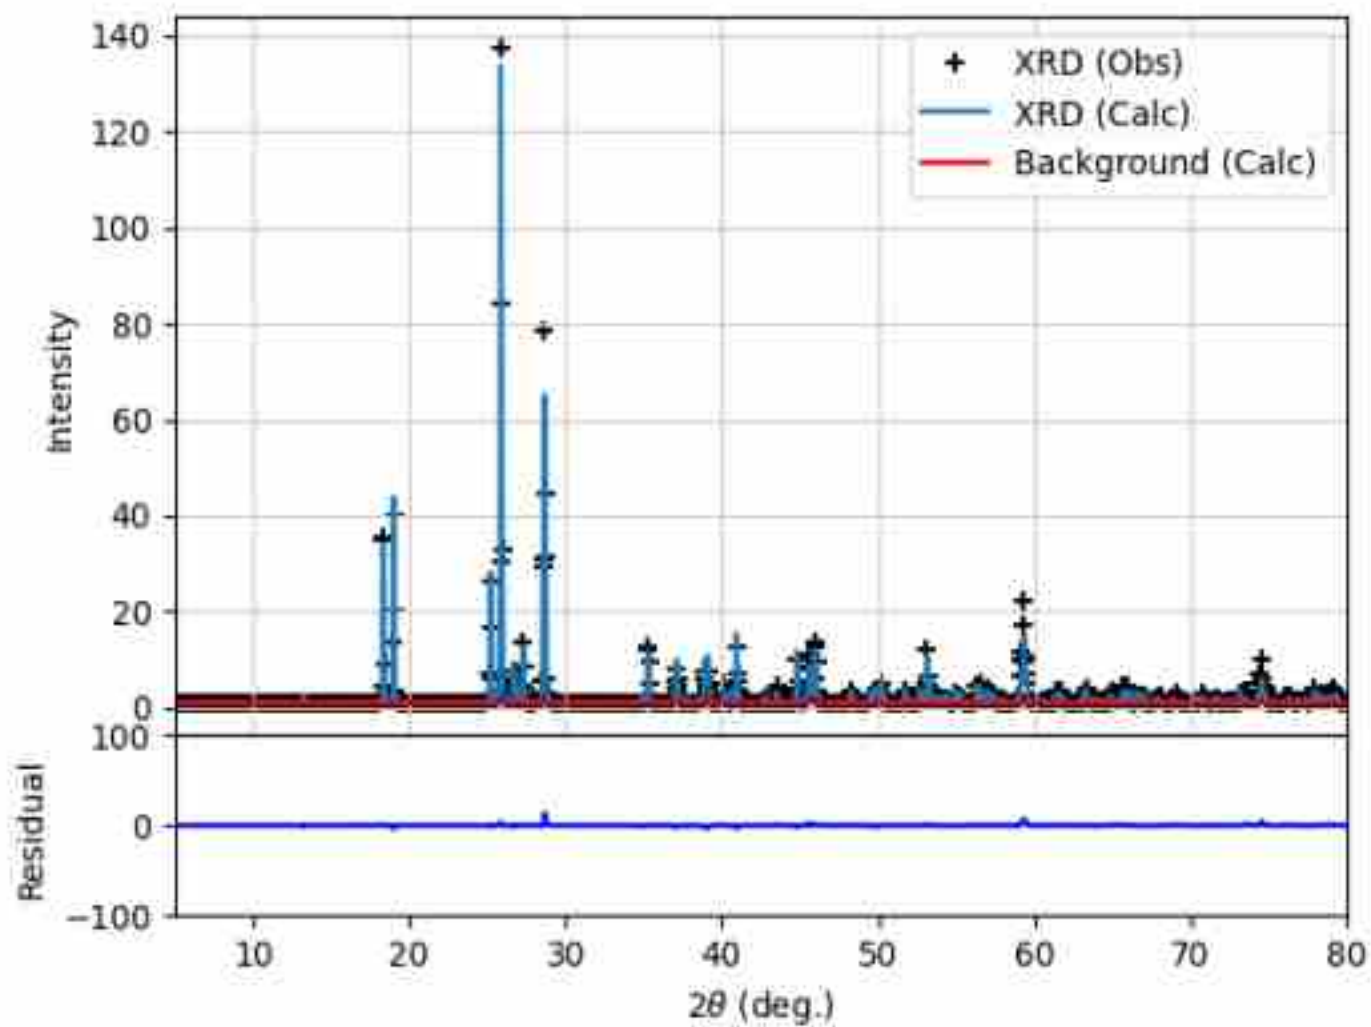

| RMSE before RR | Rwp      | RMSE after RR |
|----------------|----------|---------------|
| 0.087          | 15.20959 | None          |

# Bi<sub>4</sub>W<sub>2</sub>O<sub>12</sub>

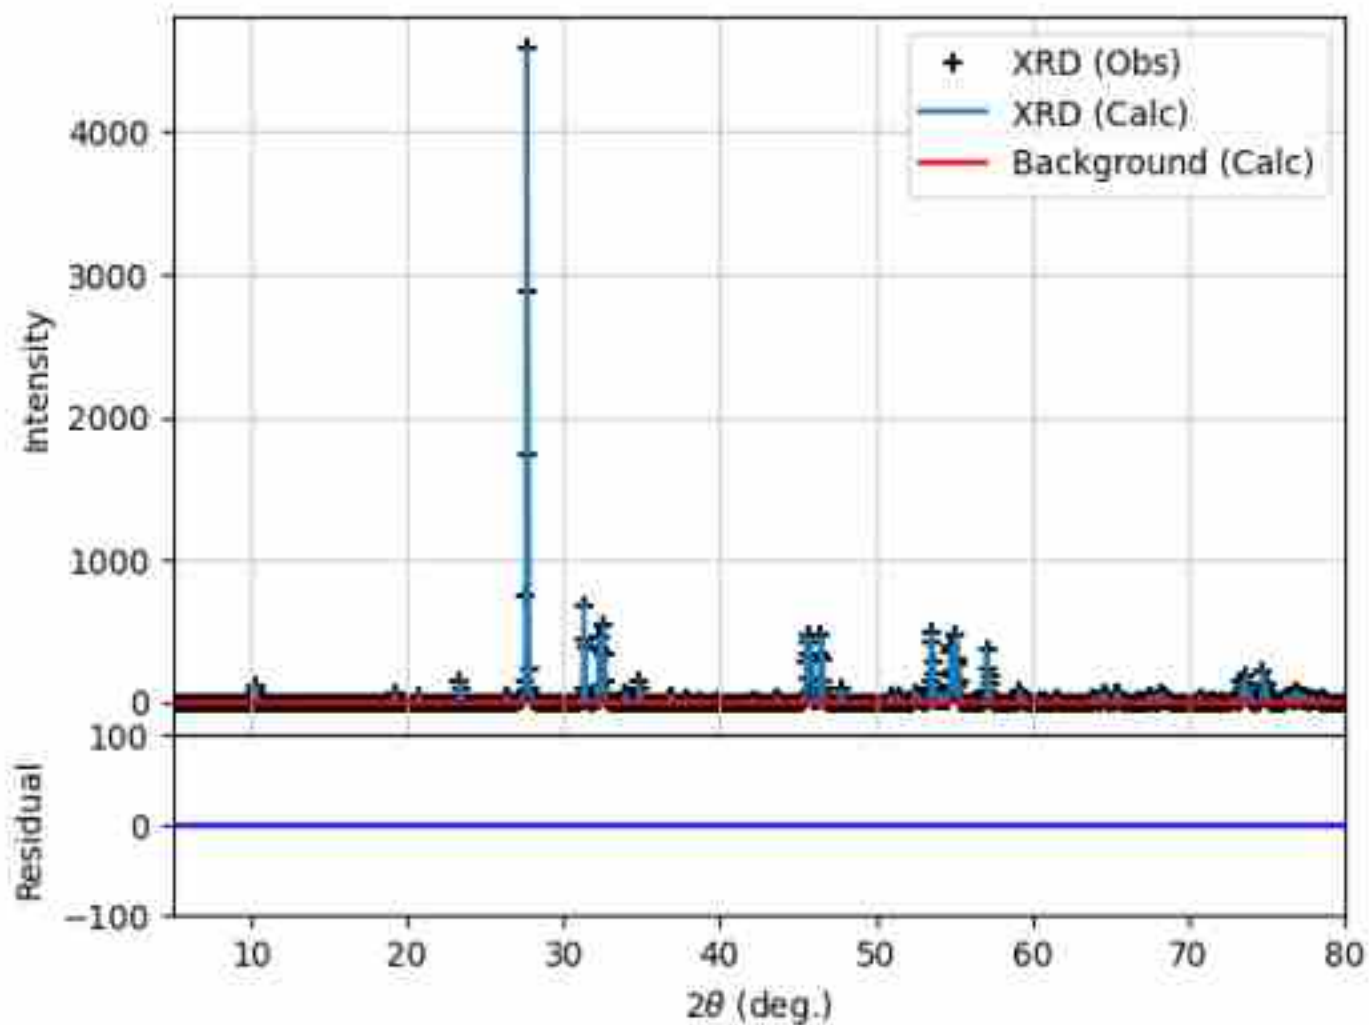

| RMSE before RR | Rwp     | RMSE after RR |
|----------------|---------|---------------|
| 0.088          | 0.00377 | 0.0016        |

# Cs<sub>2</sub>Li<sub>4</sub>H<sub>6</sub>O<sub>6</sub>

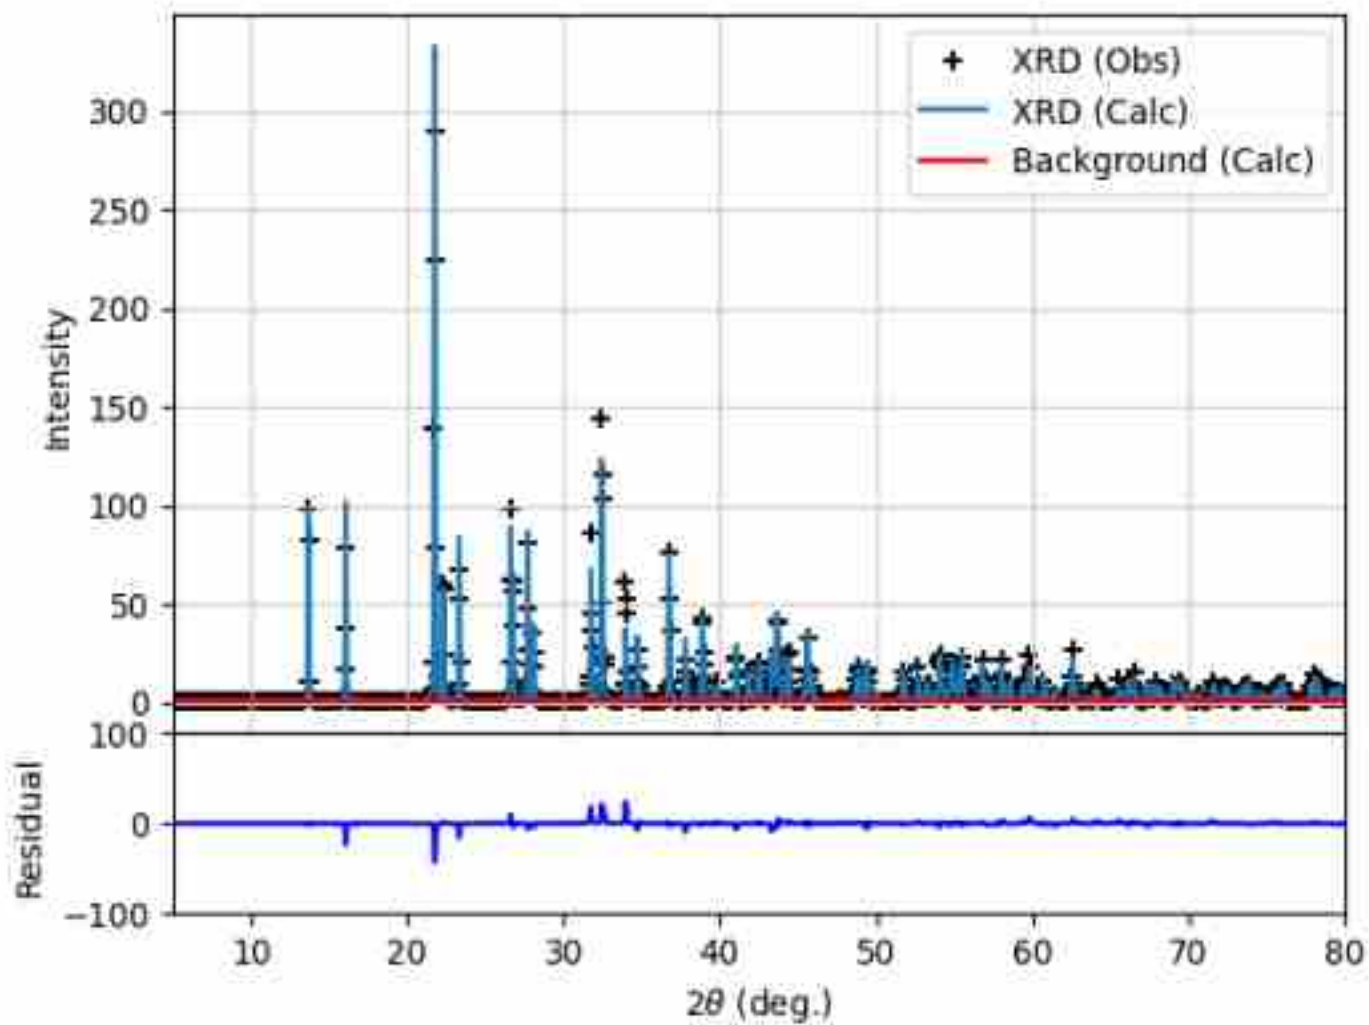

| RMSE before RR | Rwp      | RMSE after RR |
|----------------|----------|---------------|
| 0.088          | 16.57052 | None          |

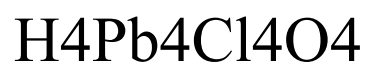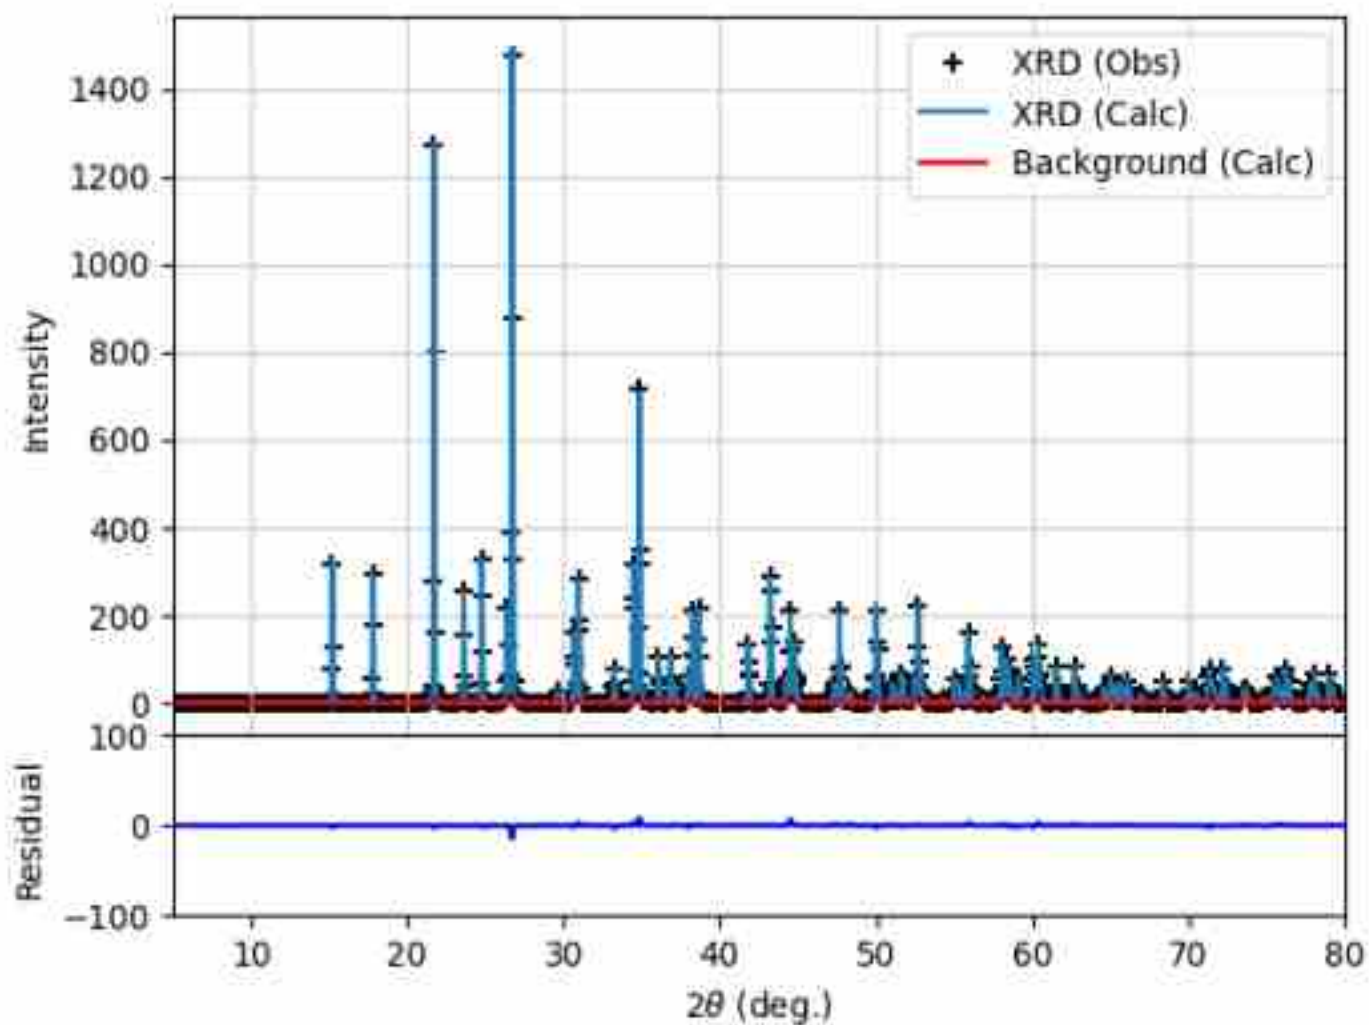

| RMSE before RR | Rwp     | RMSE after RR |
|----------------|---------|---------------|
| 0.088          | 1.87703 | None          |

# Li<sub>4</sub>Cr<sub>2</sub>P<sub>2</sub>O<sub>8</sub>F<sub>2</sub>

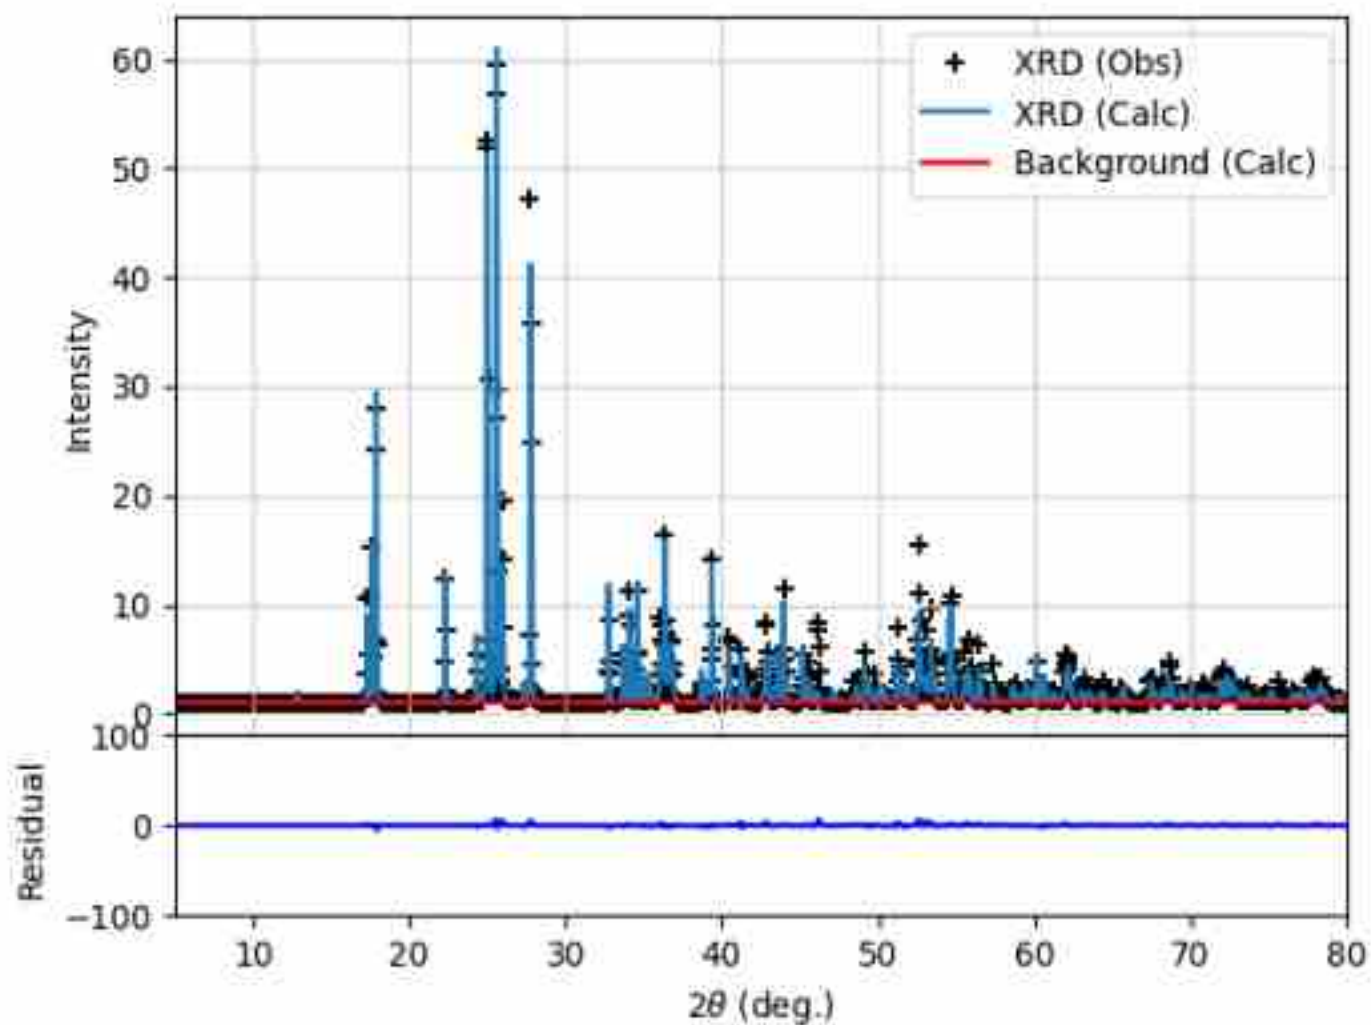

| RMSE before RR | Rwp      | RMSE after RR |
|----------------|----------|---------------|
| 0.088          | 22.23743 | None          |

# Th<sub>2</sub>In<sub>4</sub>Br<sub>12</sub>

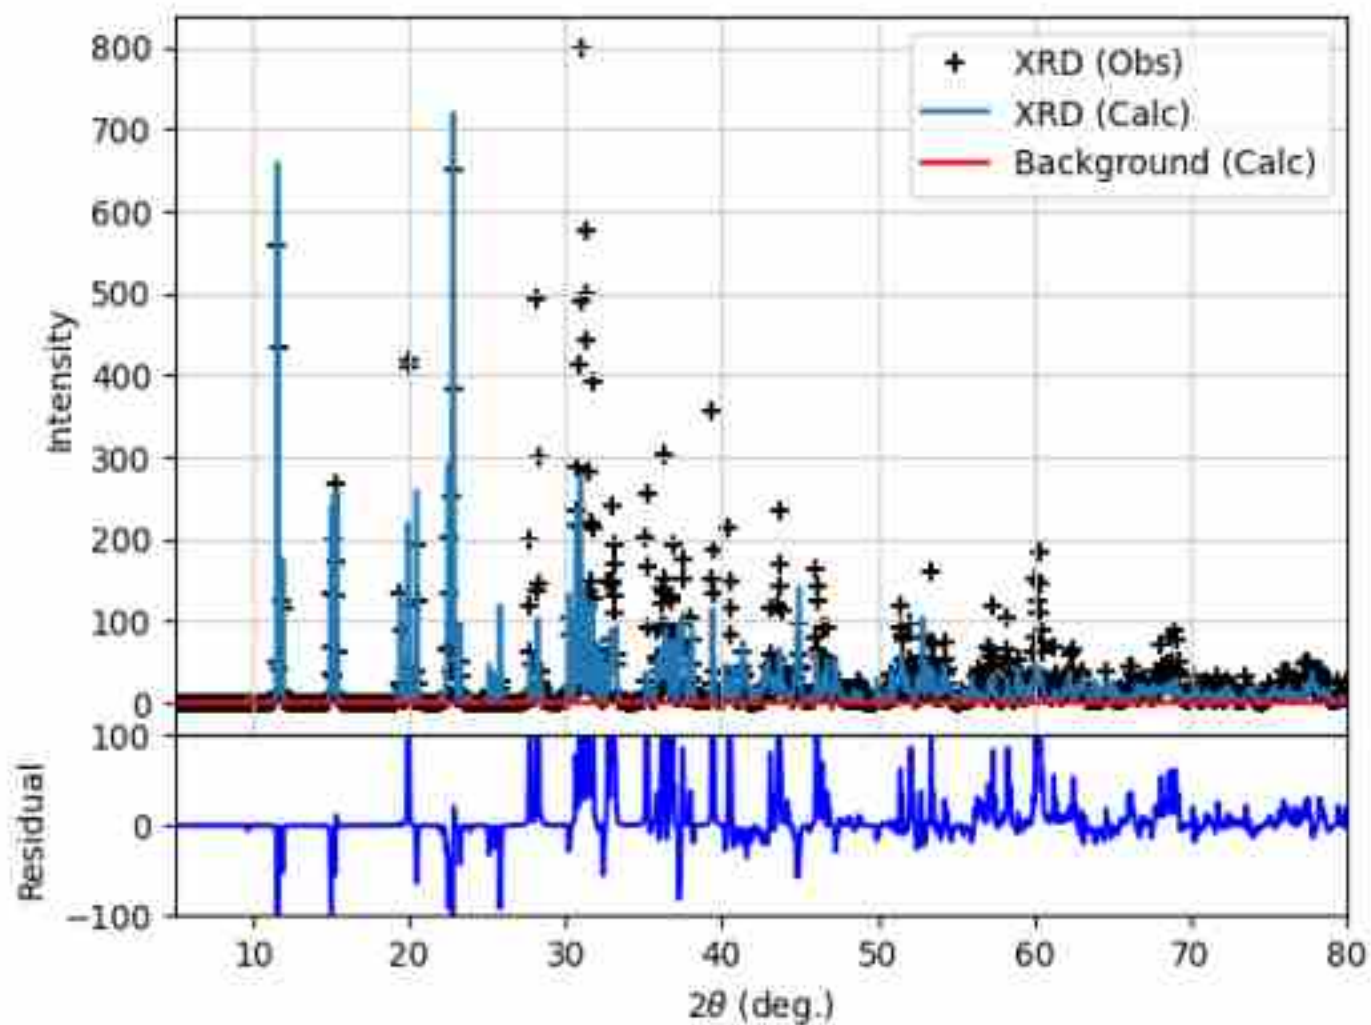

| RMSE before RR | Rwp      | RMSE after RR |
|----------------|----------|---------------|
| 0.088          | 68.18866 | 0.34998       |

# V<sub>2</sub>Cu<sub>10</sub>O<sub>6</sub>

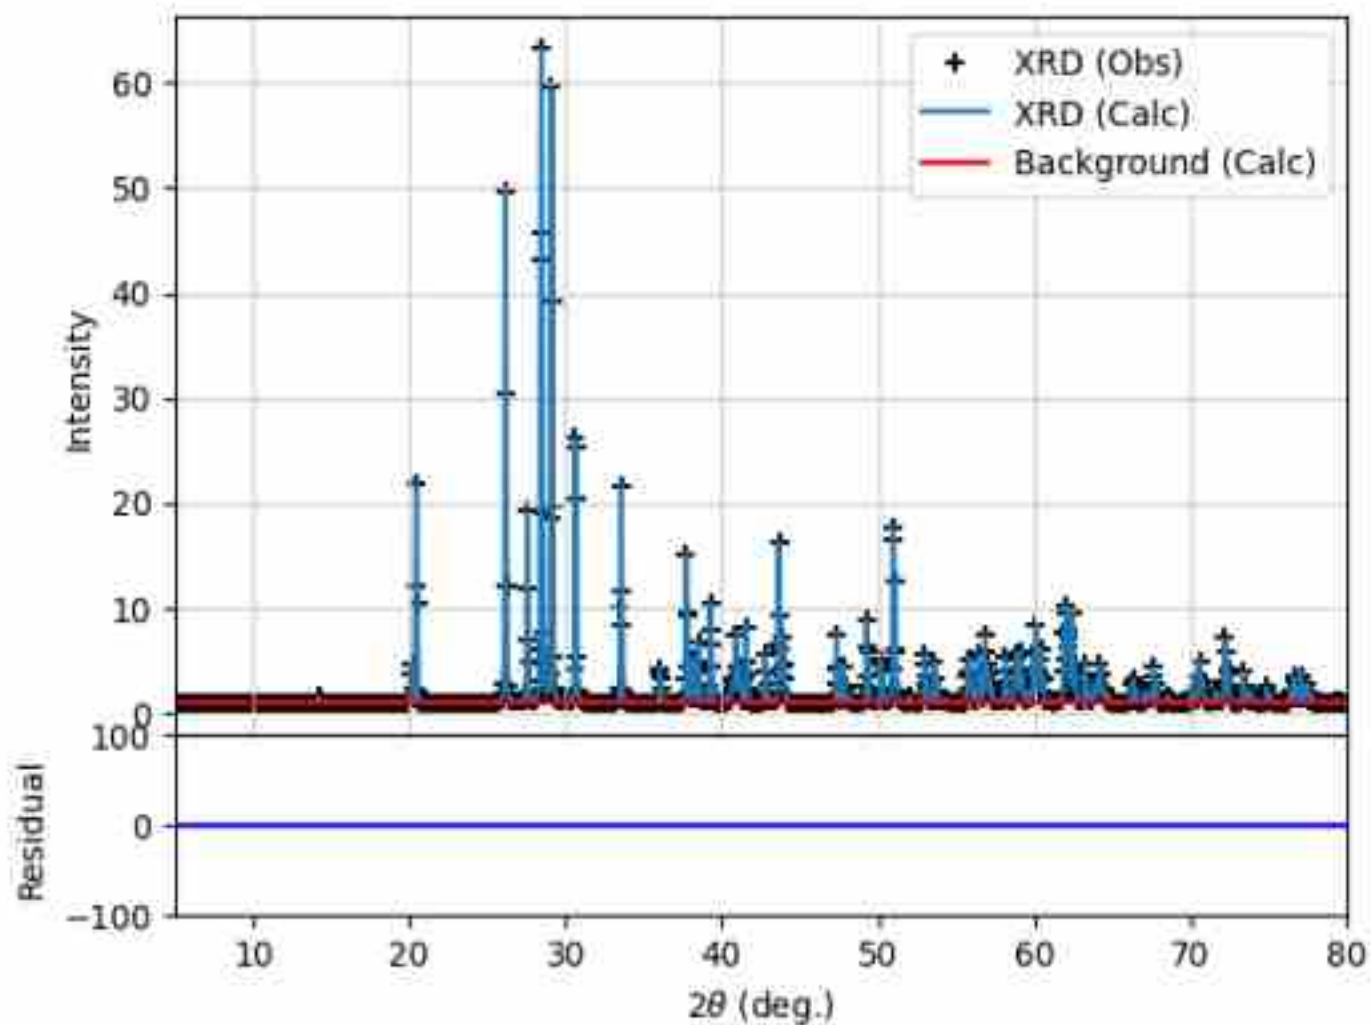

| RMSE before RR | Rwp     | RMSE after RR |
|----------------|---------|---------------|
| 0.088          | 0.00088 | 0.00033       |

# Ba1Ag2Sn1Se4

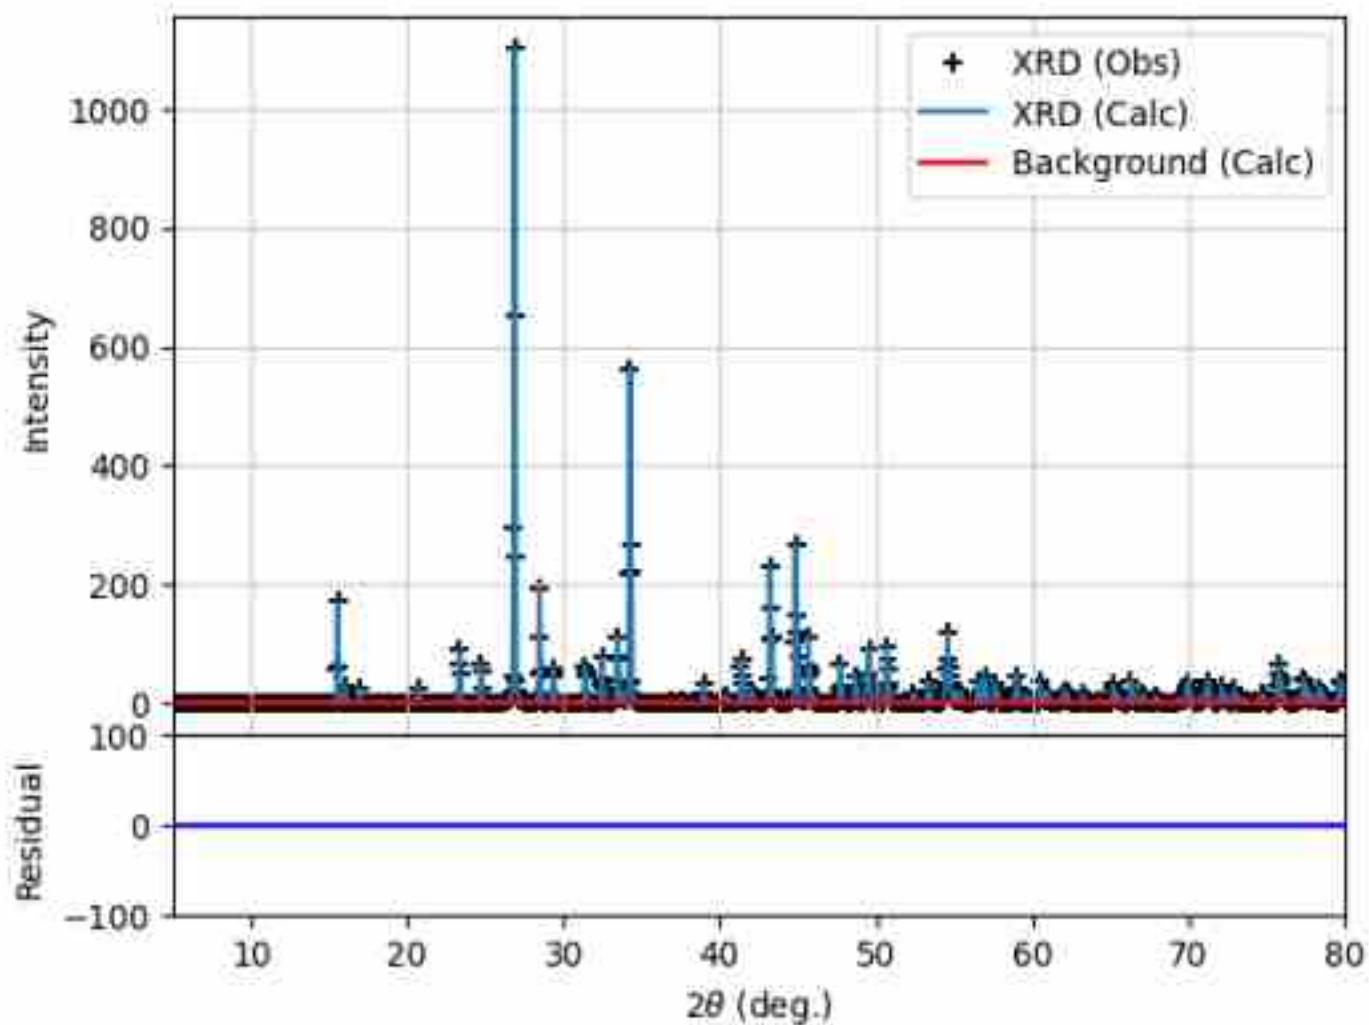

| RMSE before RR | Rwp     | RMSE after RR |
|----------------|---------|---------------|
| 0.089          | 0.00302 | 0.00025       |



# Be<sub>2</sub>Al<sub>2</sub>H<sub>10</sub>

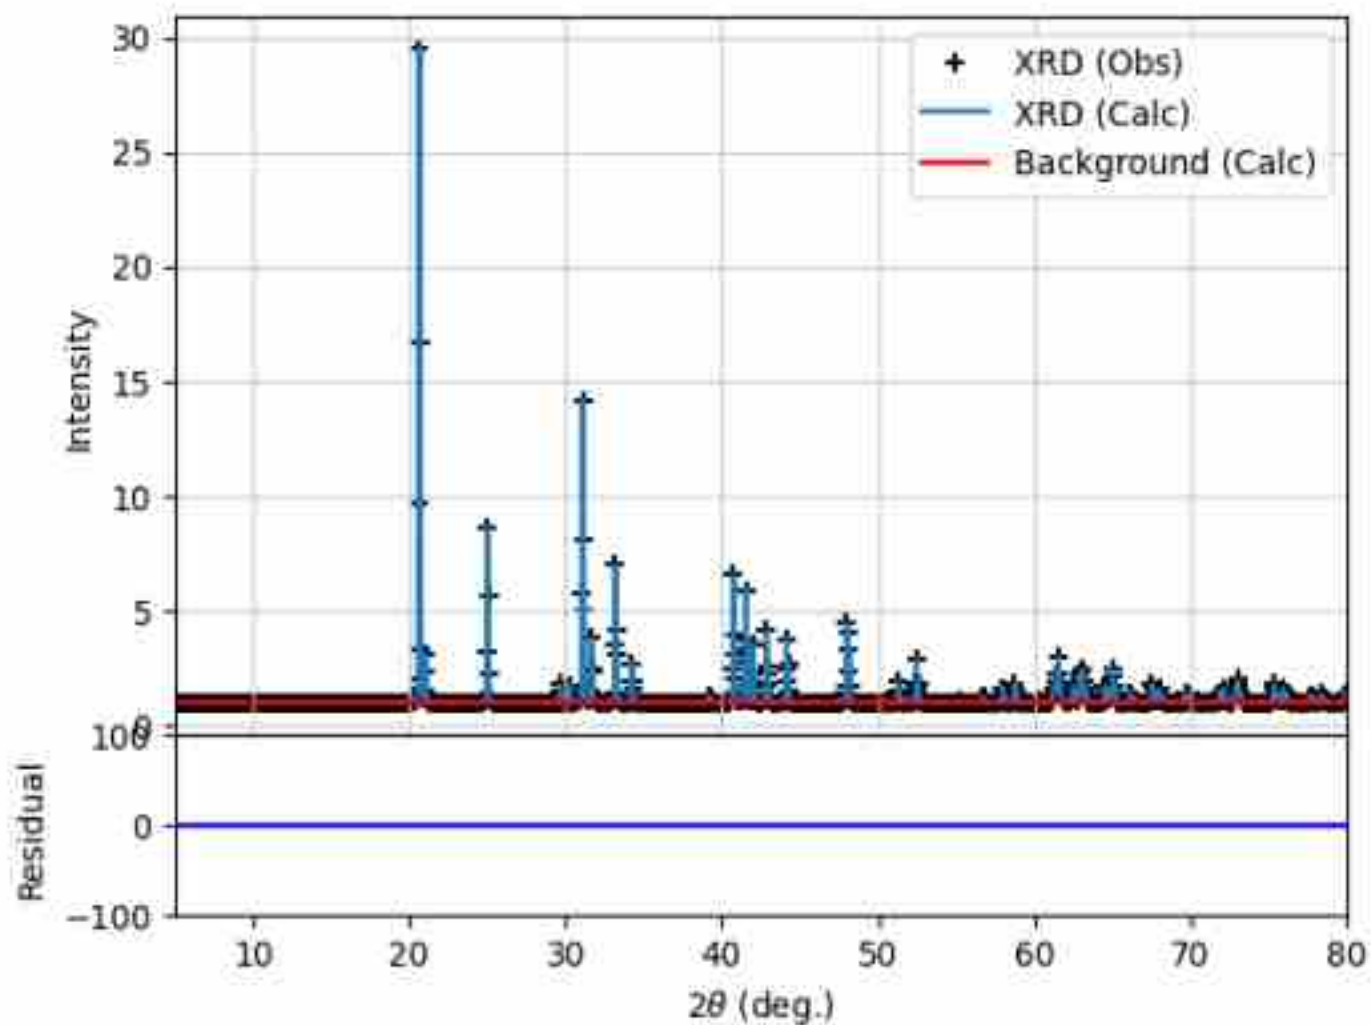

| RMSE before RR | Rwp     | RMSE after RR |
|----------------|---------|---------------|
| 0.089          | 0.00103 | 0.00172       |

# U8Ir8

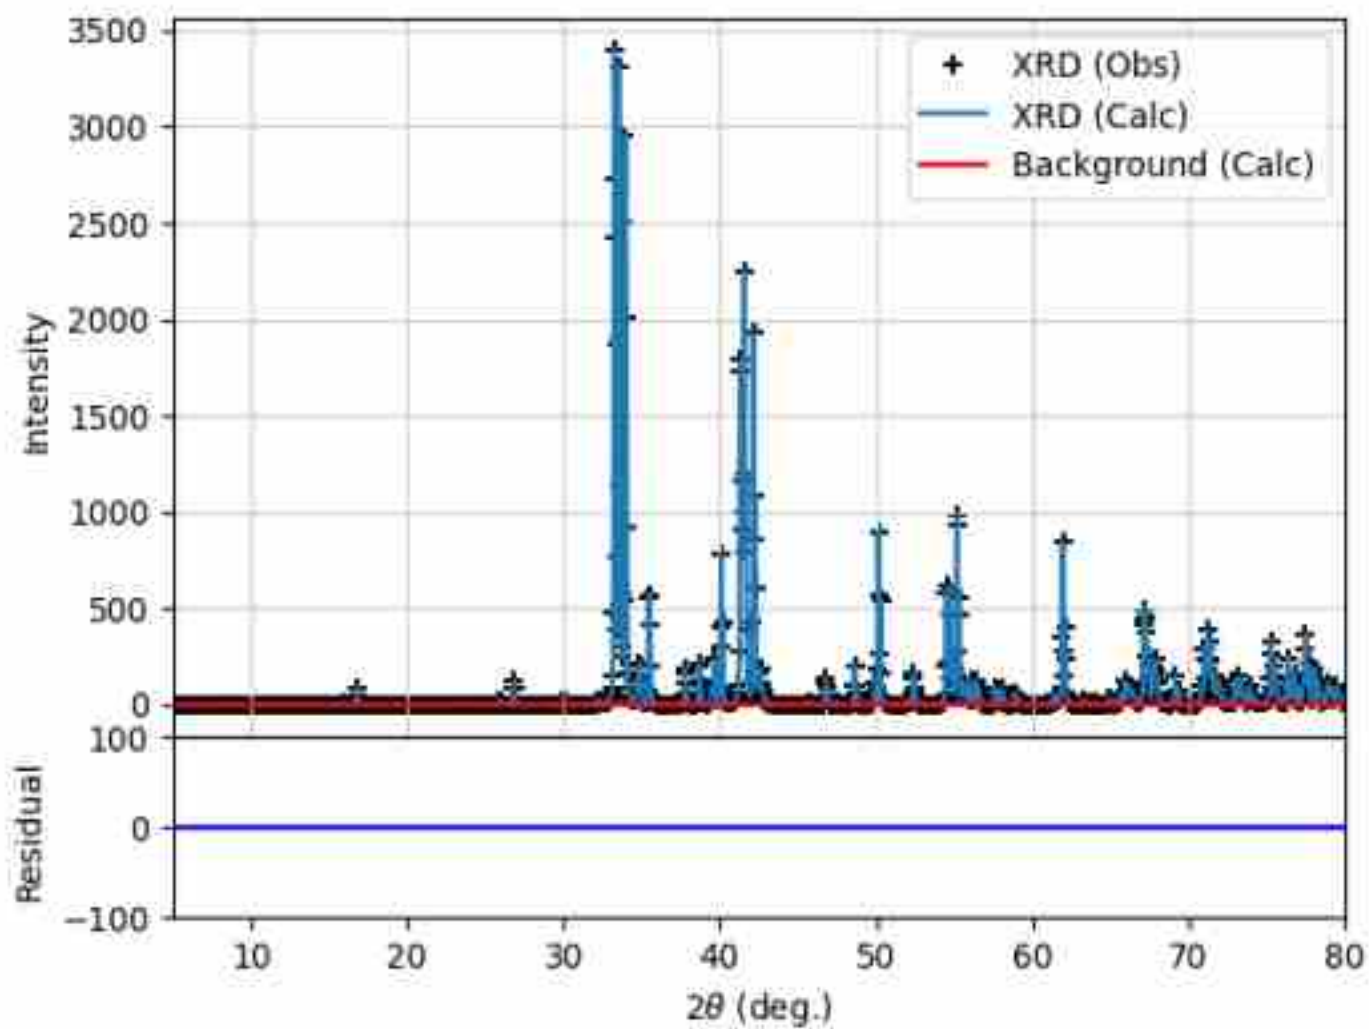

| RMSE before RR | Rwp     | RMSE after RR |
|----------------|---------|---------------|
| 0.089          | 0.00452 | 0.00021       |

# V2Pb2O6

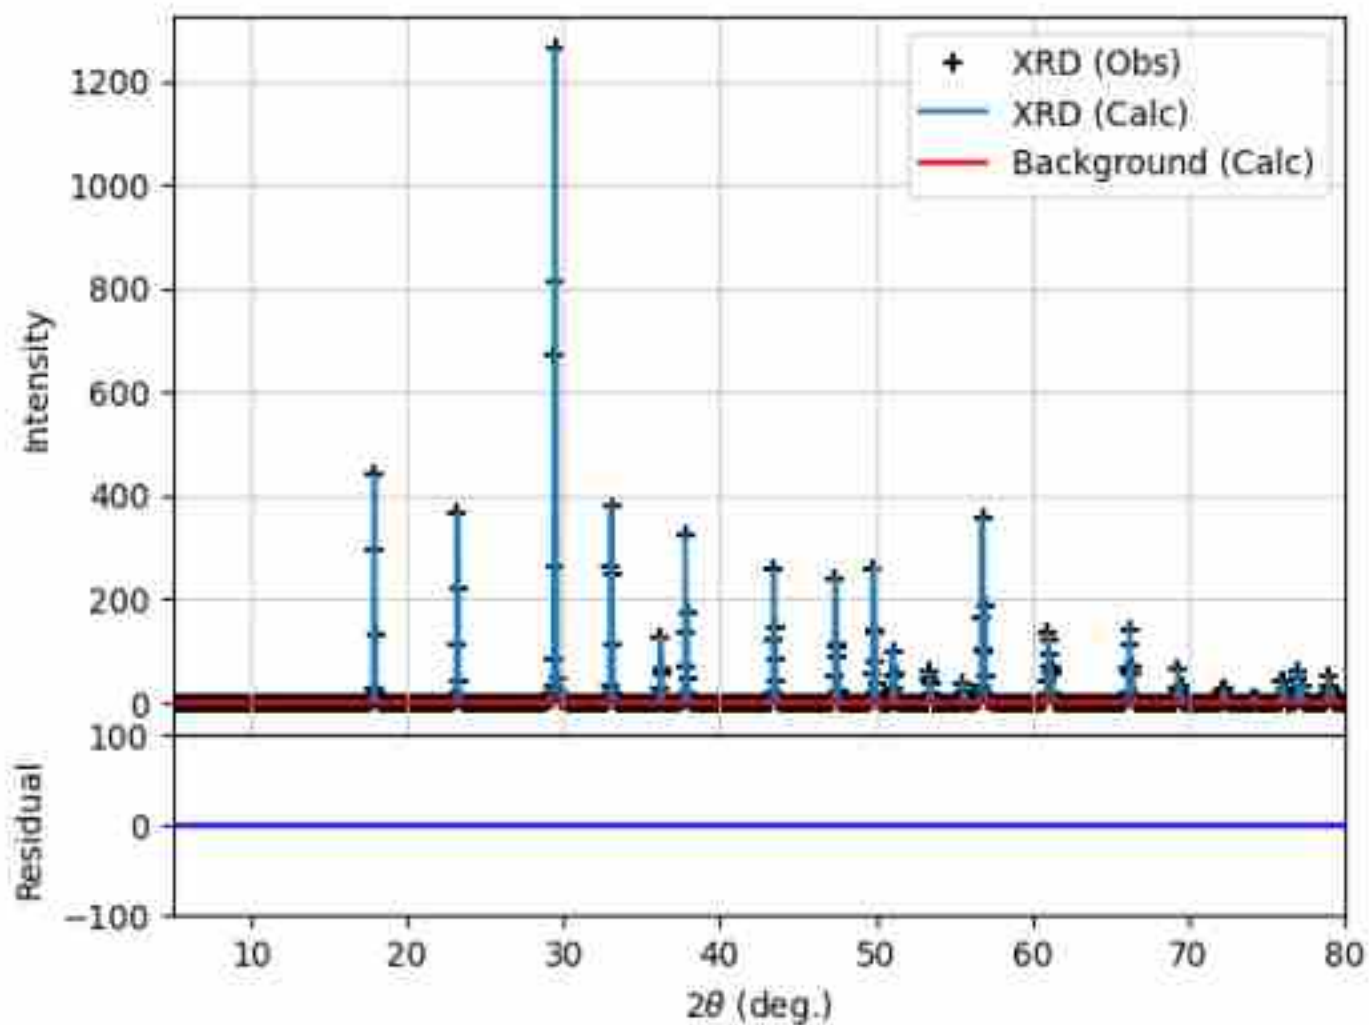

| RMSE before RR | Rwp     | RMSE after RR |
|----------------|---------|---------------|
| 0.089          | 0.00465 | 0.00057       |

# Al<sub>2</sub>F<sub>6</sub>

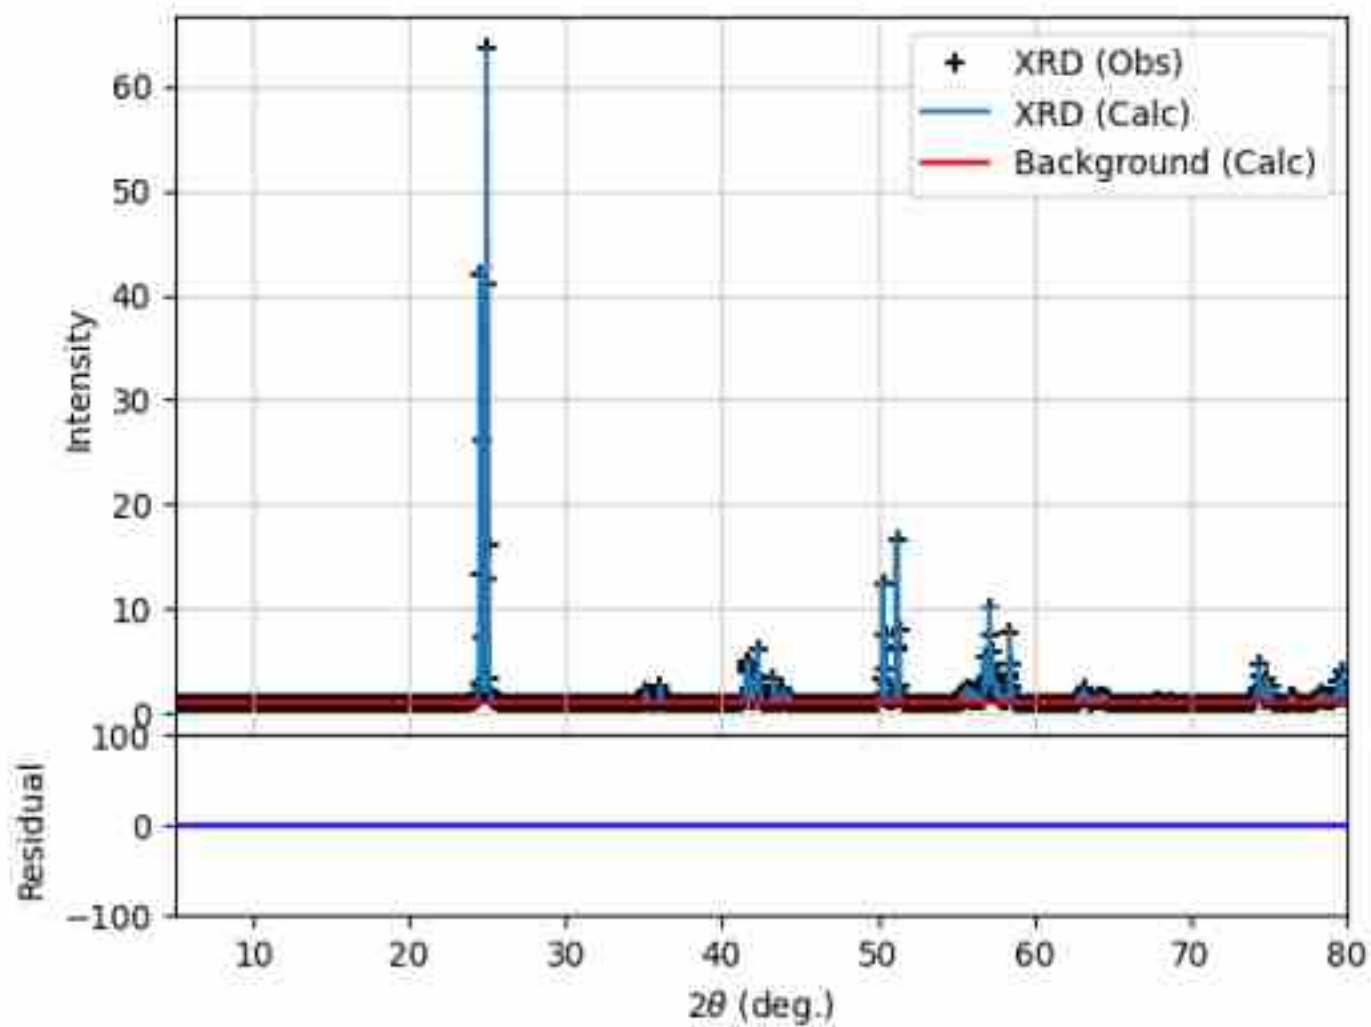

| RMSE before RR | Rwp     | RMSE after RR |
|----------------|---------|---------------|
| 0.091          | 0.00118 | 0.00024       |

# Ca<sub>2</sub>Mo<sub>2</sub>N<sub>6</sub>

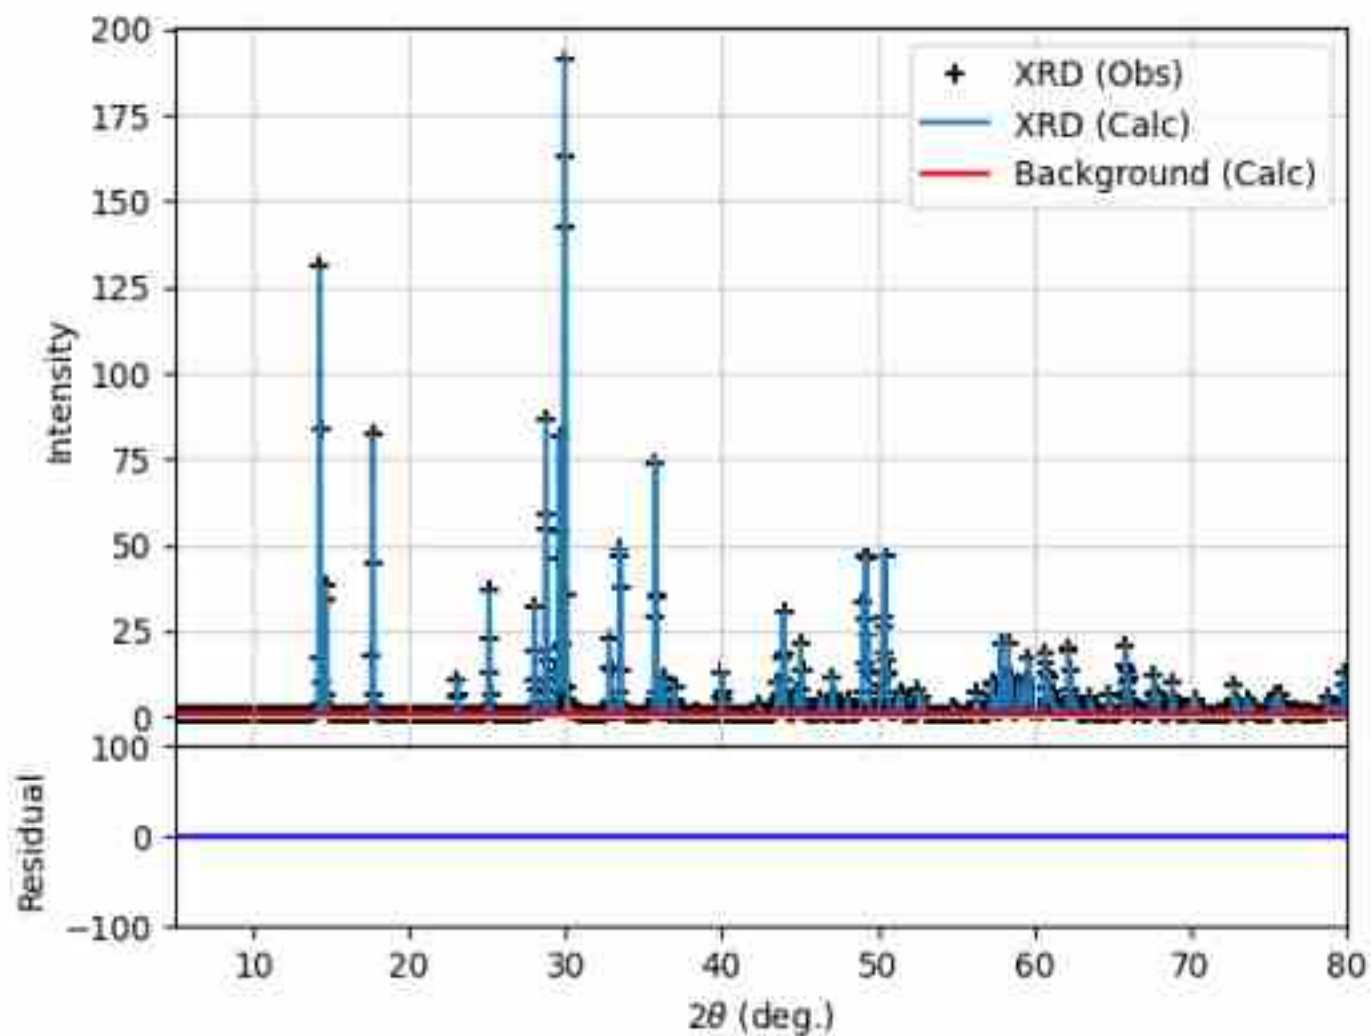

| RMSE before RR | Rwp     | RMSE after RR |
|----------------|---------|---------------|
| 0.091          | 0.00232 | 0.00072       |

# B2Sb2Pb2S8

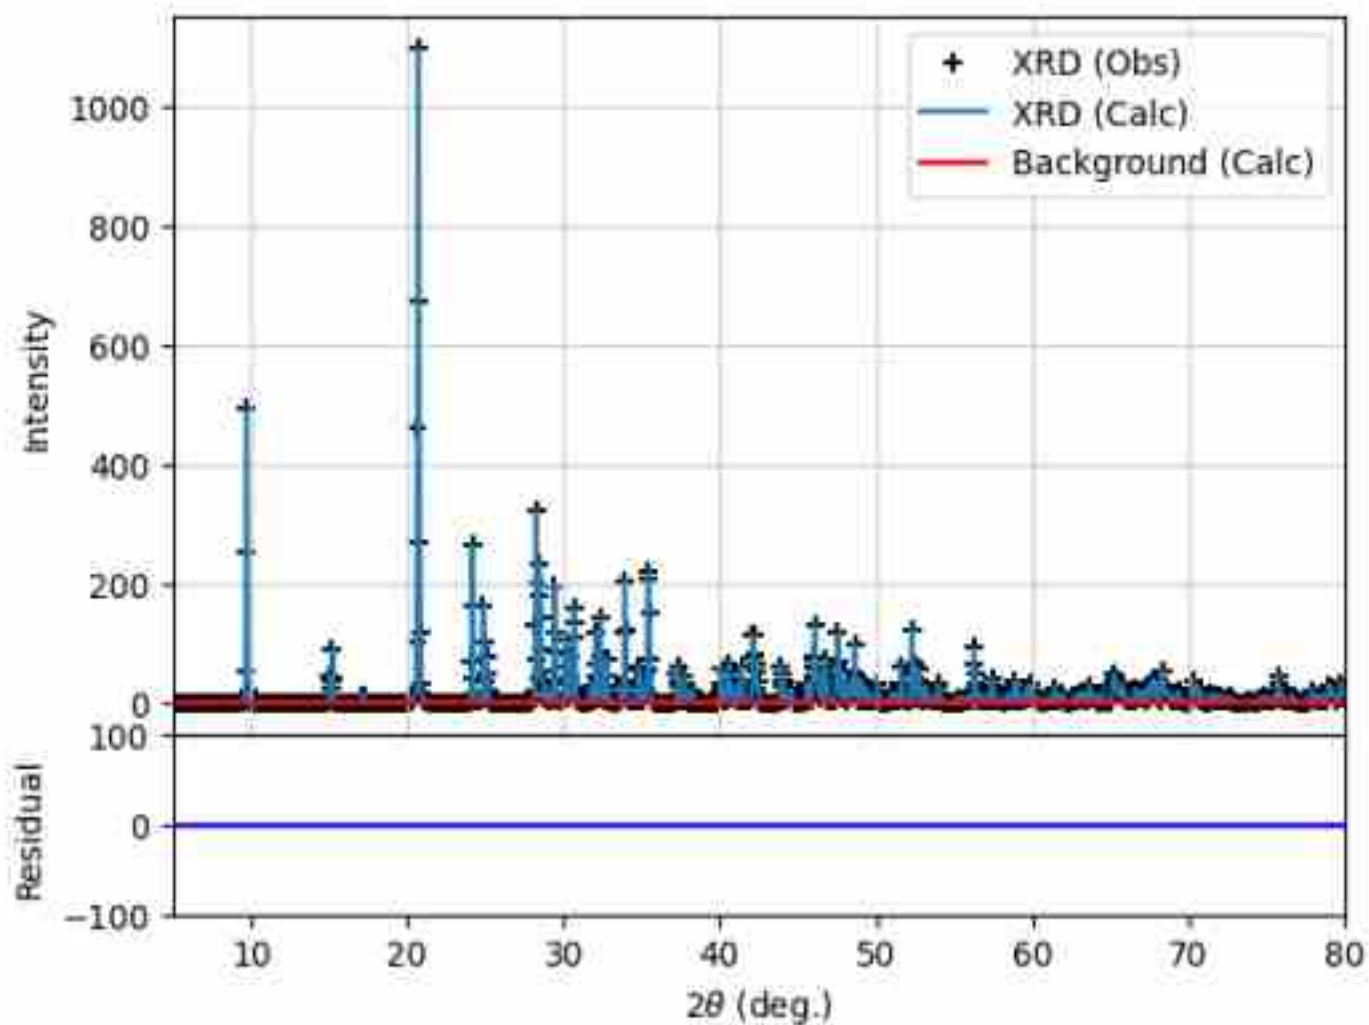

| RMSE before RR | Rwp     | RMSE after RR |
|----------------|---------|---------------|
| 0.092          | 0.00356 | 0.00062       |

# NaLi5N2

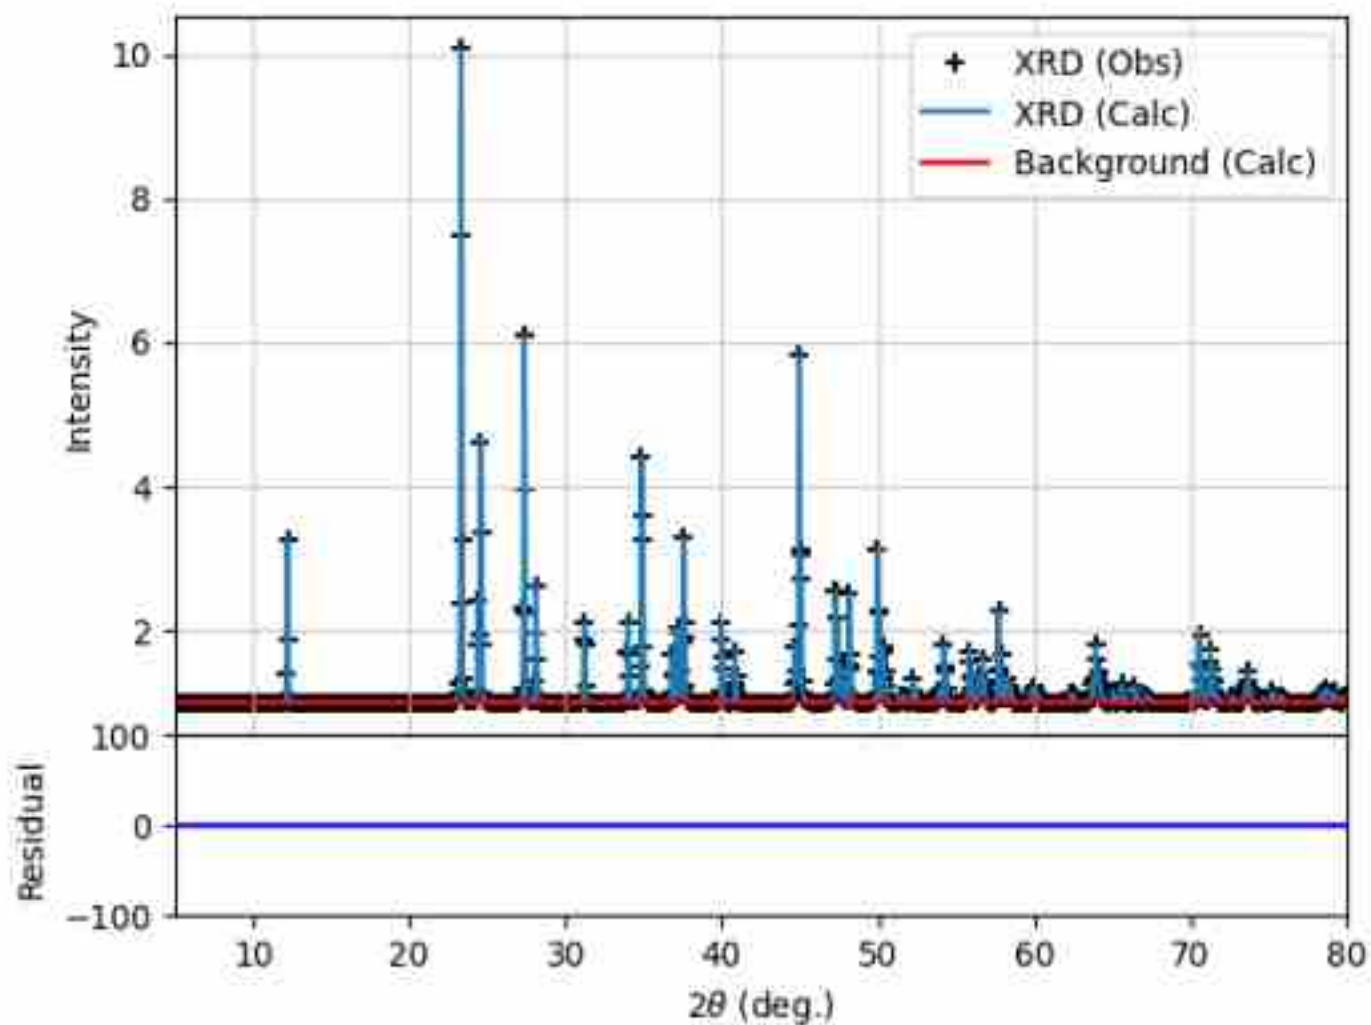

| RMSE before RR | Rwp     | RMSE after RR |
|----------------|---------|---------------|
| 0.092          | 0.00066 | 0.00065       |

# Re4S8

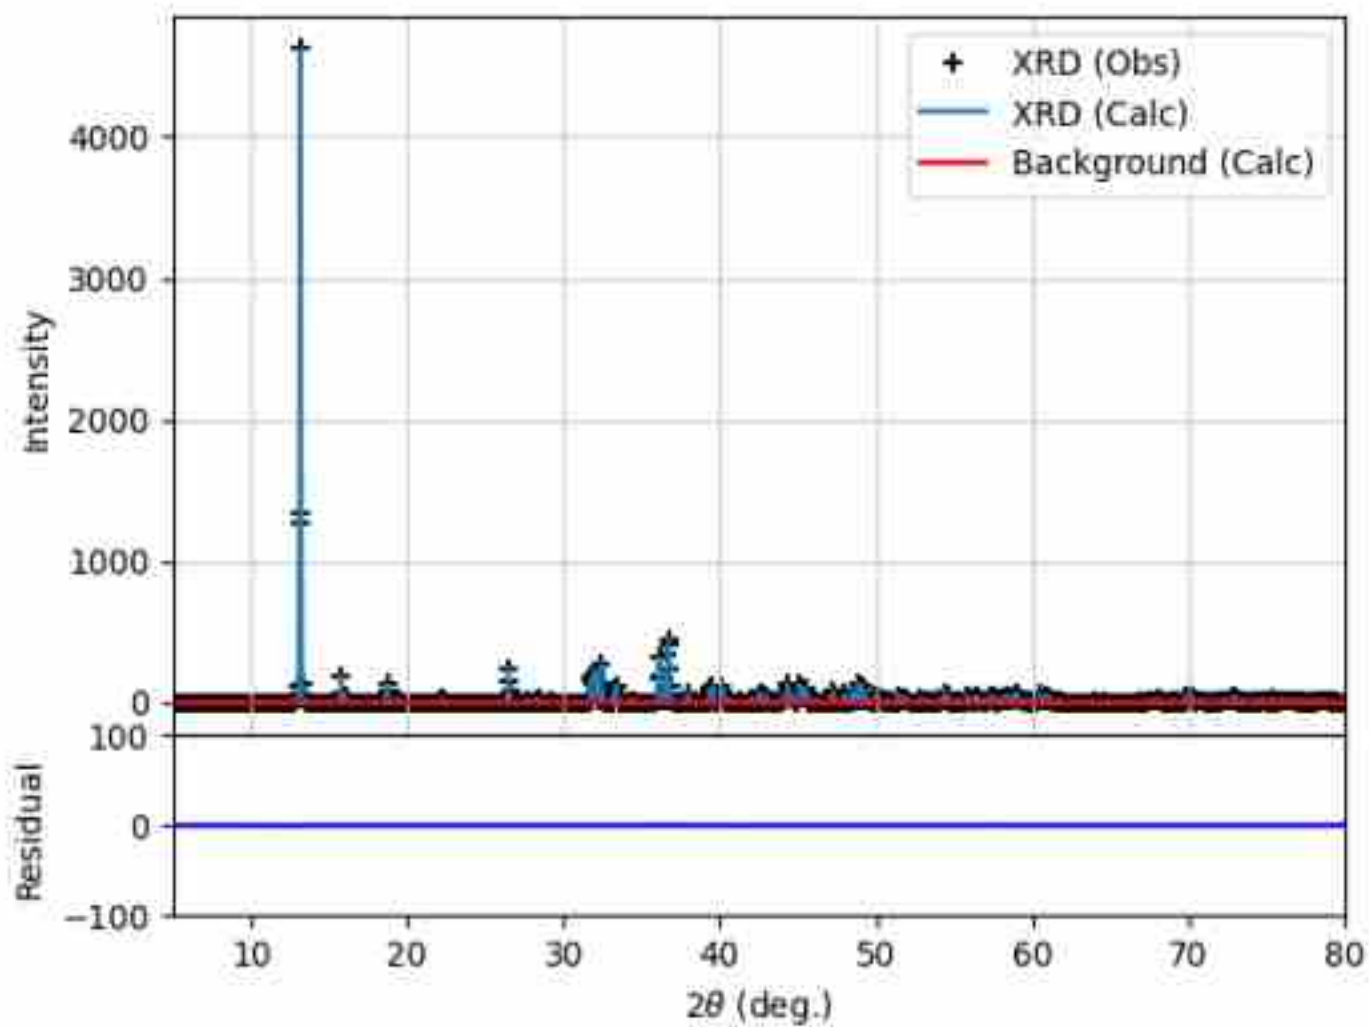

| RMSE before RR | Rwp     | RMSE after RR |
|----------------|---------|---------------|
| 0.092          | 0.78497 | 0.01257       |



# Sr<sub>4</sub>Ni<sub>4</sub>Ge<sub>4</sub>

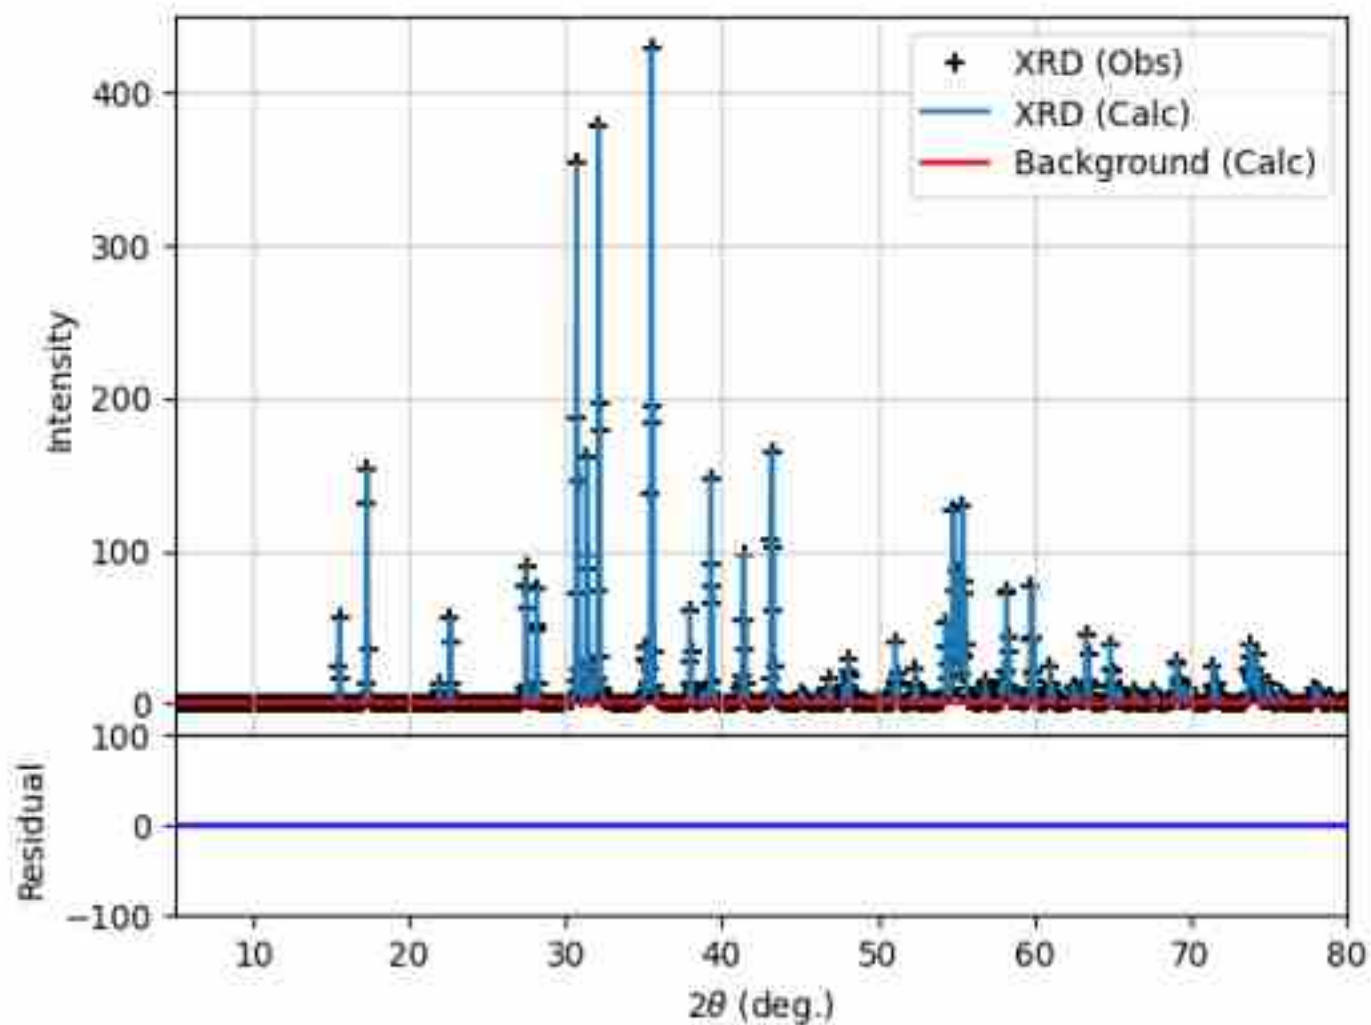

| RMSE before RR | Rwp     | RMSE after RR |
|----------------|---------|---------------|
| 0.092          | 0.00397 | 0.00035       |

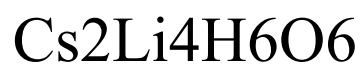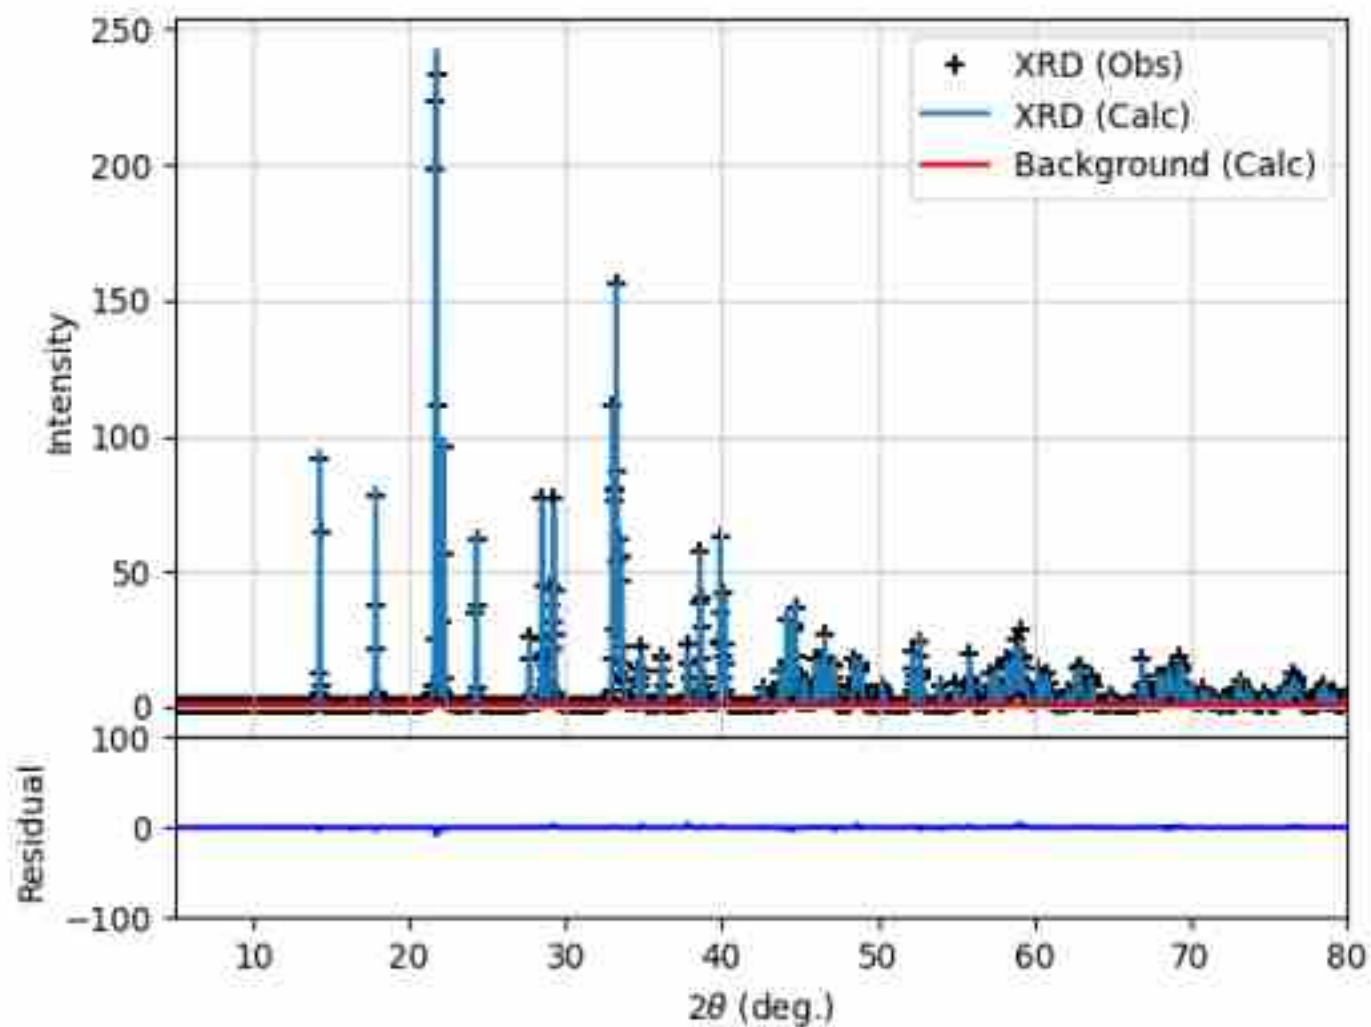

| RMSE before RR | Rwp     | RMSE after RR |
|----------------|---------|---------------|
| 0.093          | 6.14484 | None          |

# Ba<sub>3</sub>Y<sub>4</sub>O<sub>9</sub>

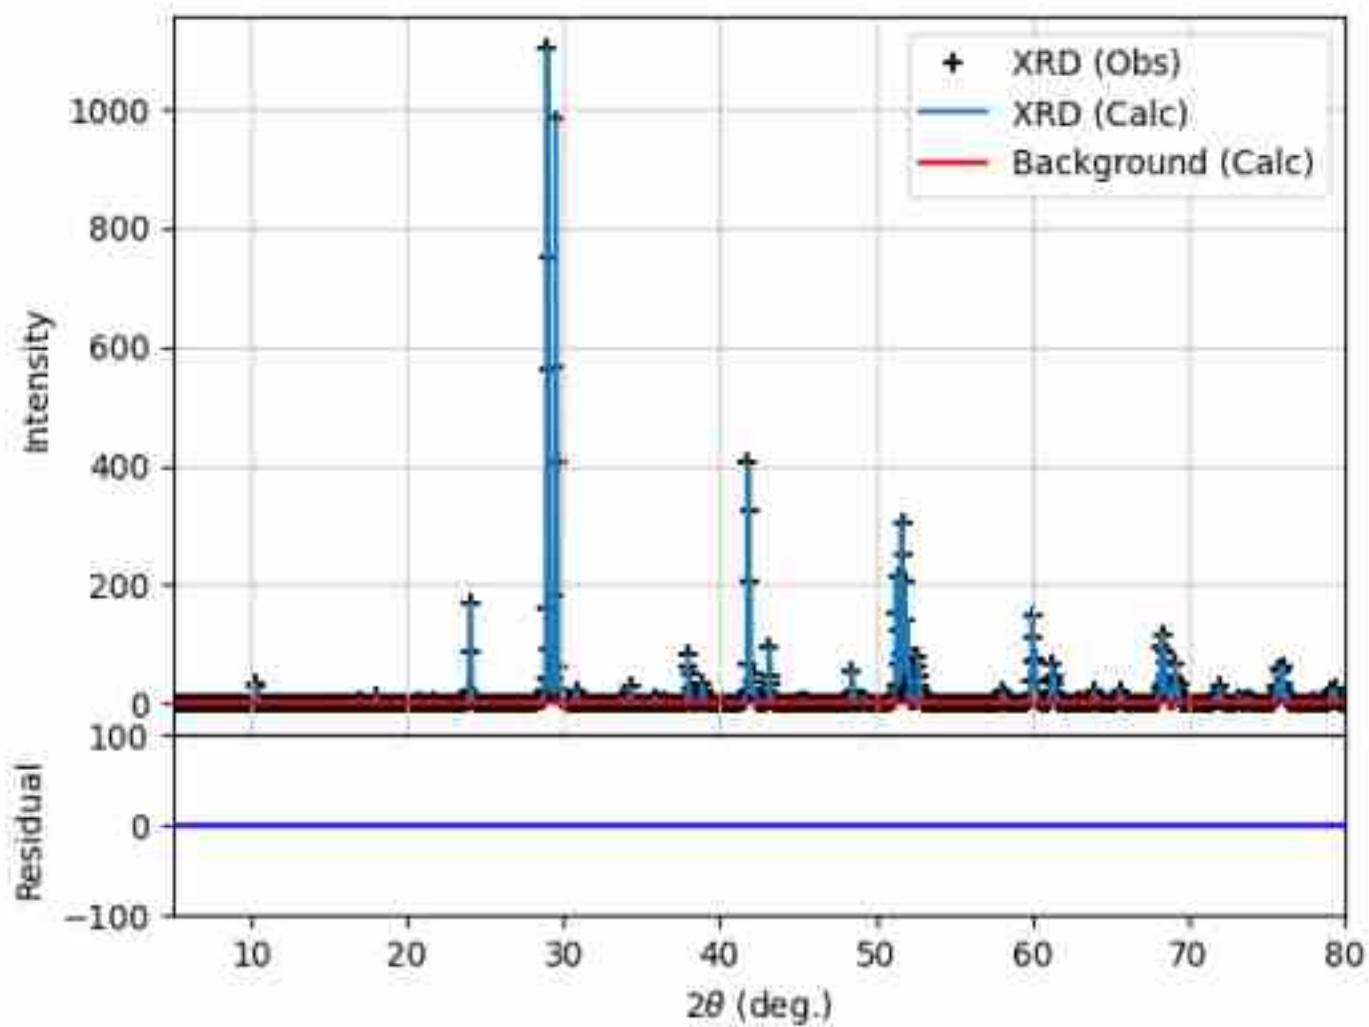

| RMSE before RR | Rwp     | RMSE after RR |
|----------------|---------|---------------|
| 0.094          | 0.00296 | 0.00091       |

# La4Re2O10

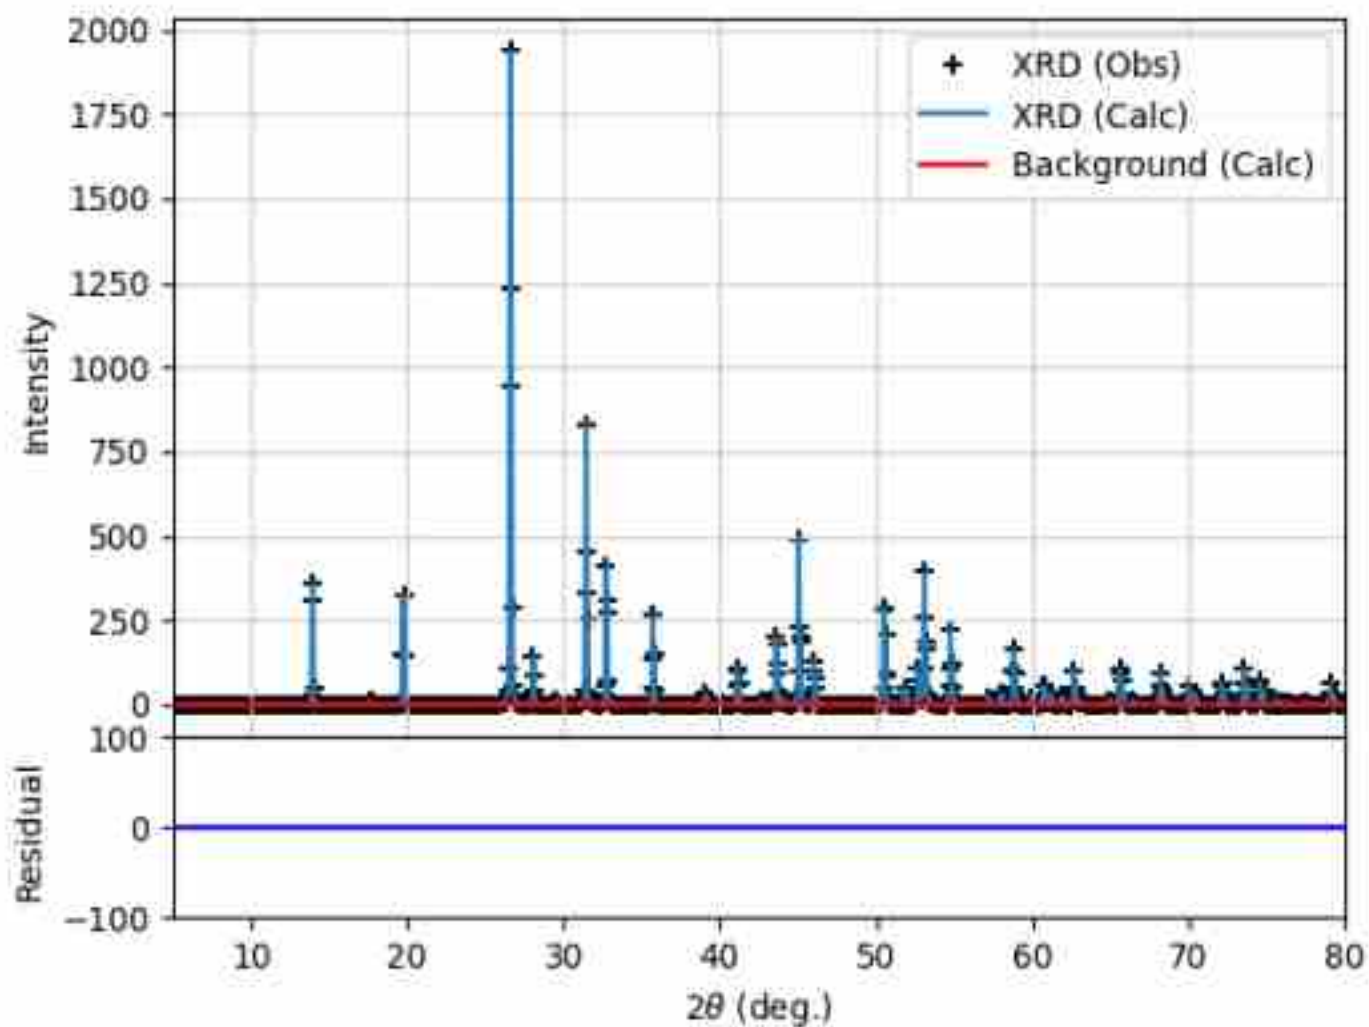

| RMSE before RR | Rwp     | RMSE after RR |
|----------------|---------|---------------|
| 0.094          | 0.00347 | 0.00168       |

# Li1Ta2Cu1O6

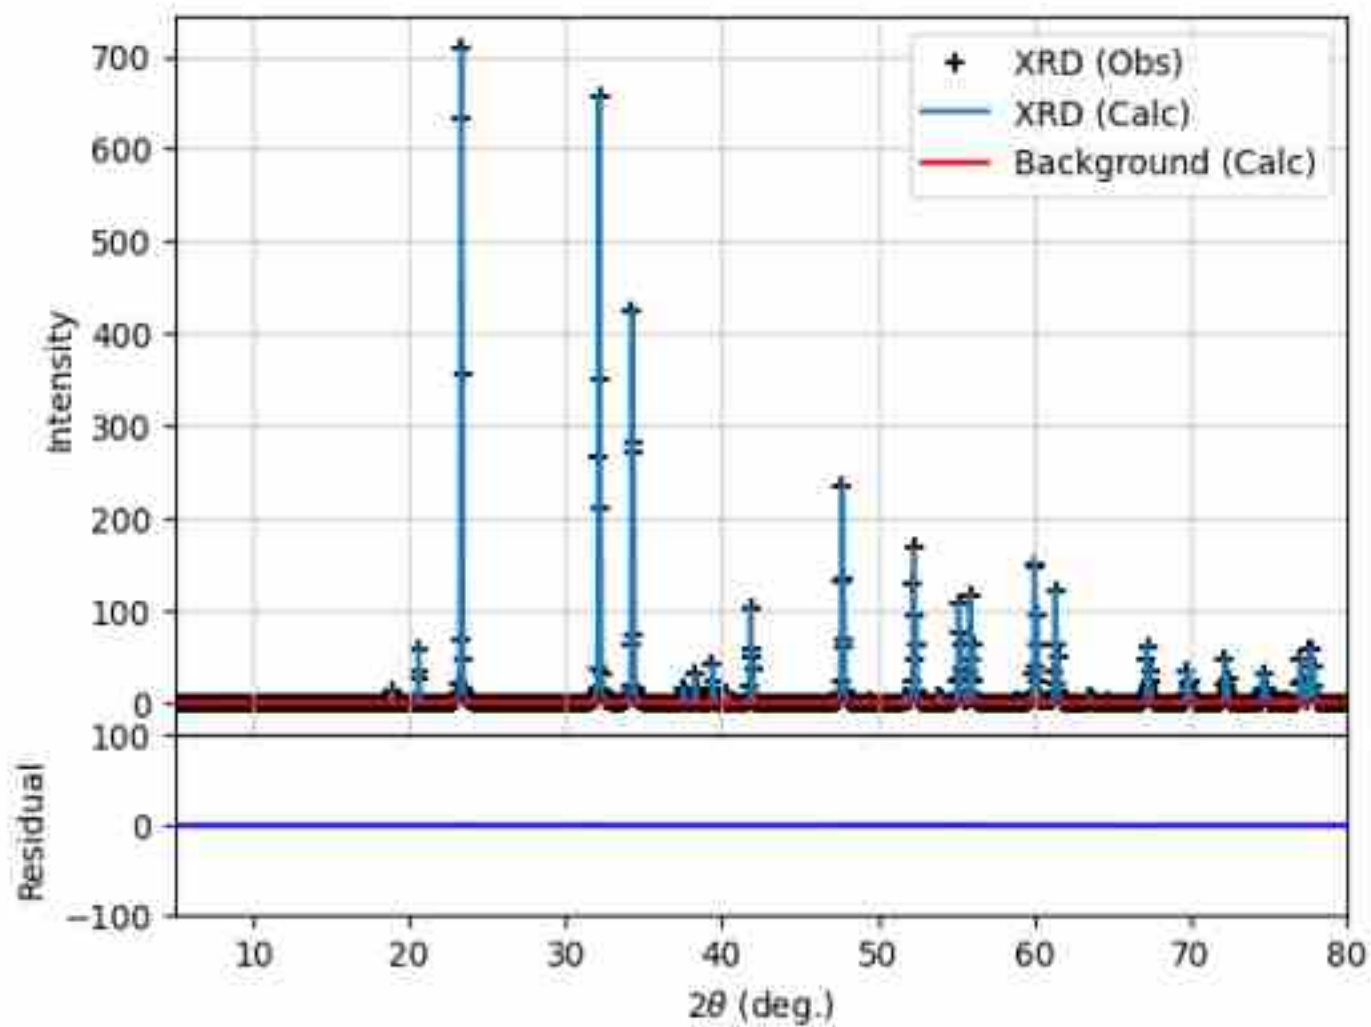

| RMSE before RR | Rwp     | RMSE after RR |
|----------------|---------|---------------|
| 0.094          | 0.26114 | 0.04783       |

# Ti5Mn1S10

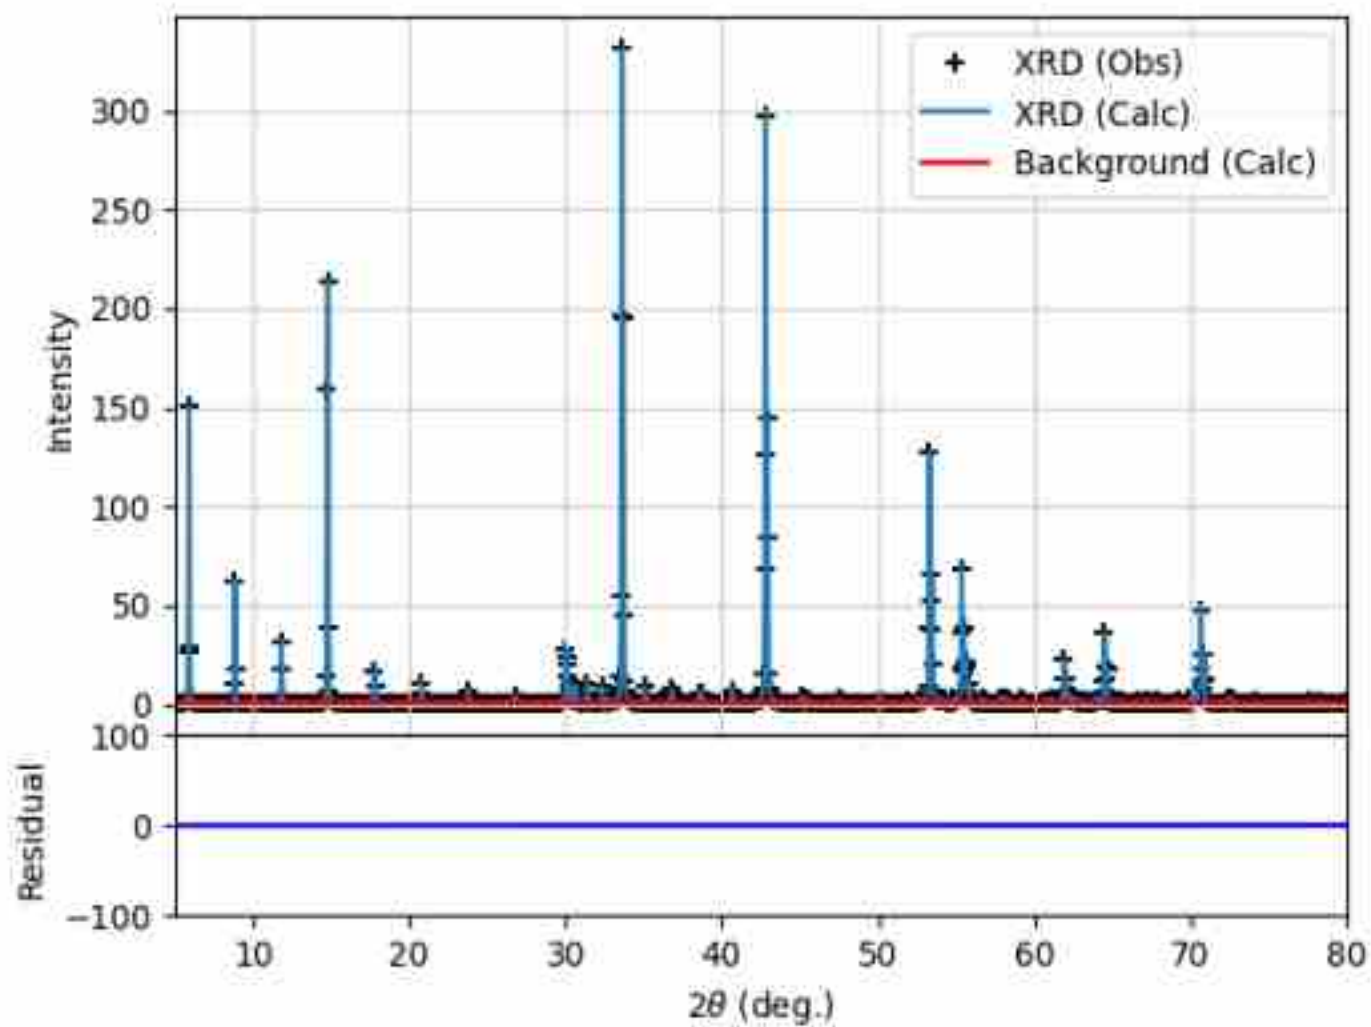

| RMSE before RR | Rwp     | RMSE after RR |
|----------------|---------|---------------|
| 0.094          | 1.45114 | 0.00451       |

# Ca1O2

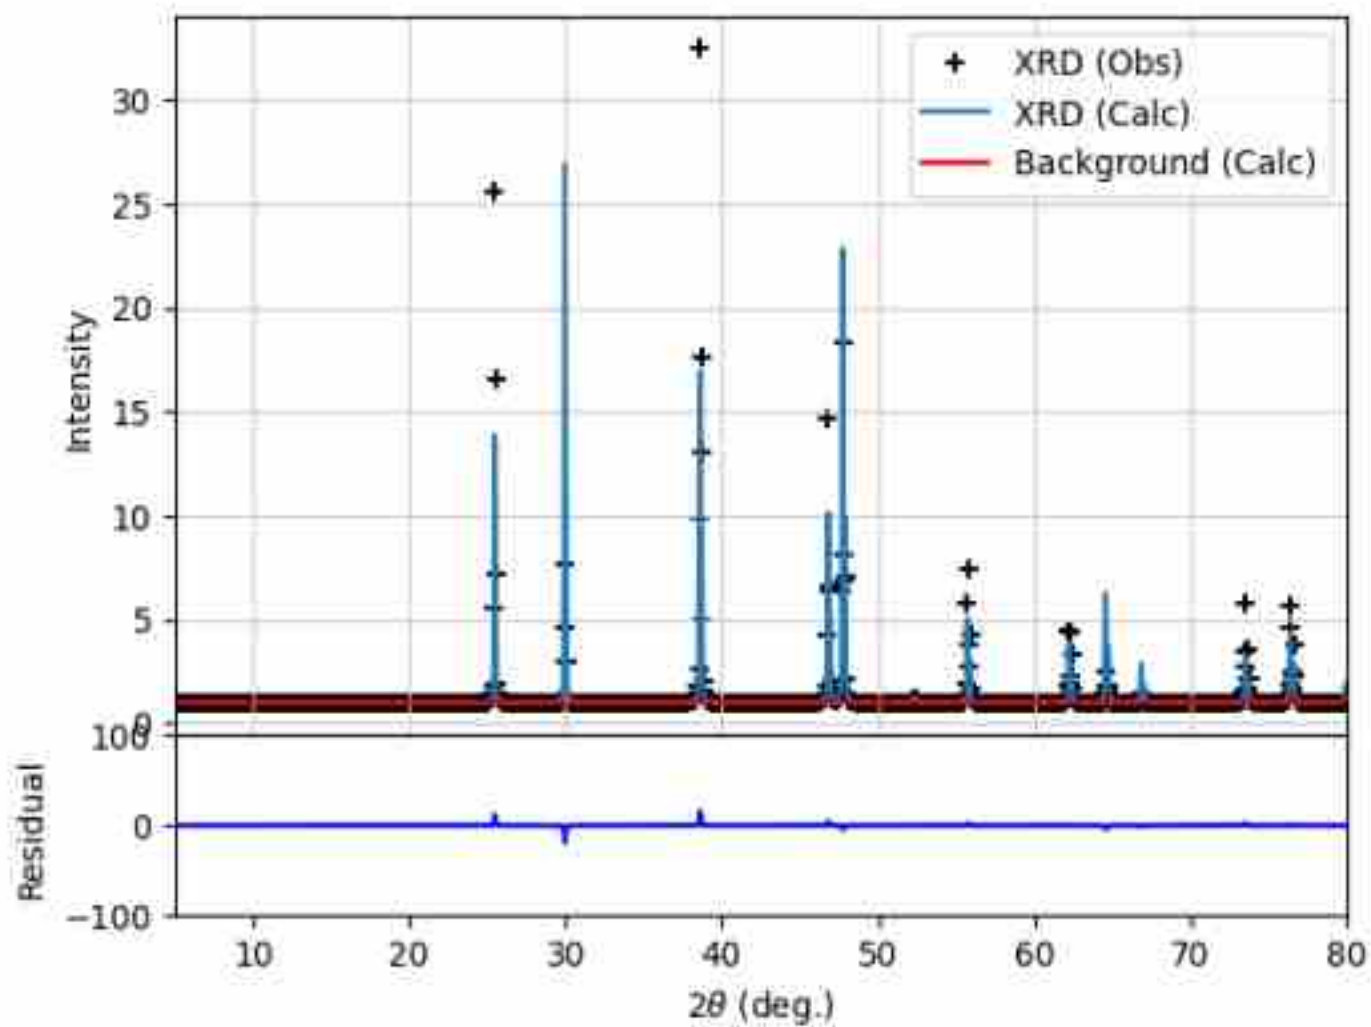

| RMSE before RR | Rwp      | RMSE after RR |
|----------------|----------|---------------|
| 0.095          | 28.83185 | 0.10054       |

Ca<sub>2</sub>Zn<sub>2</sub>Sn<sub>2</sub>

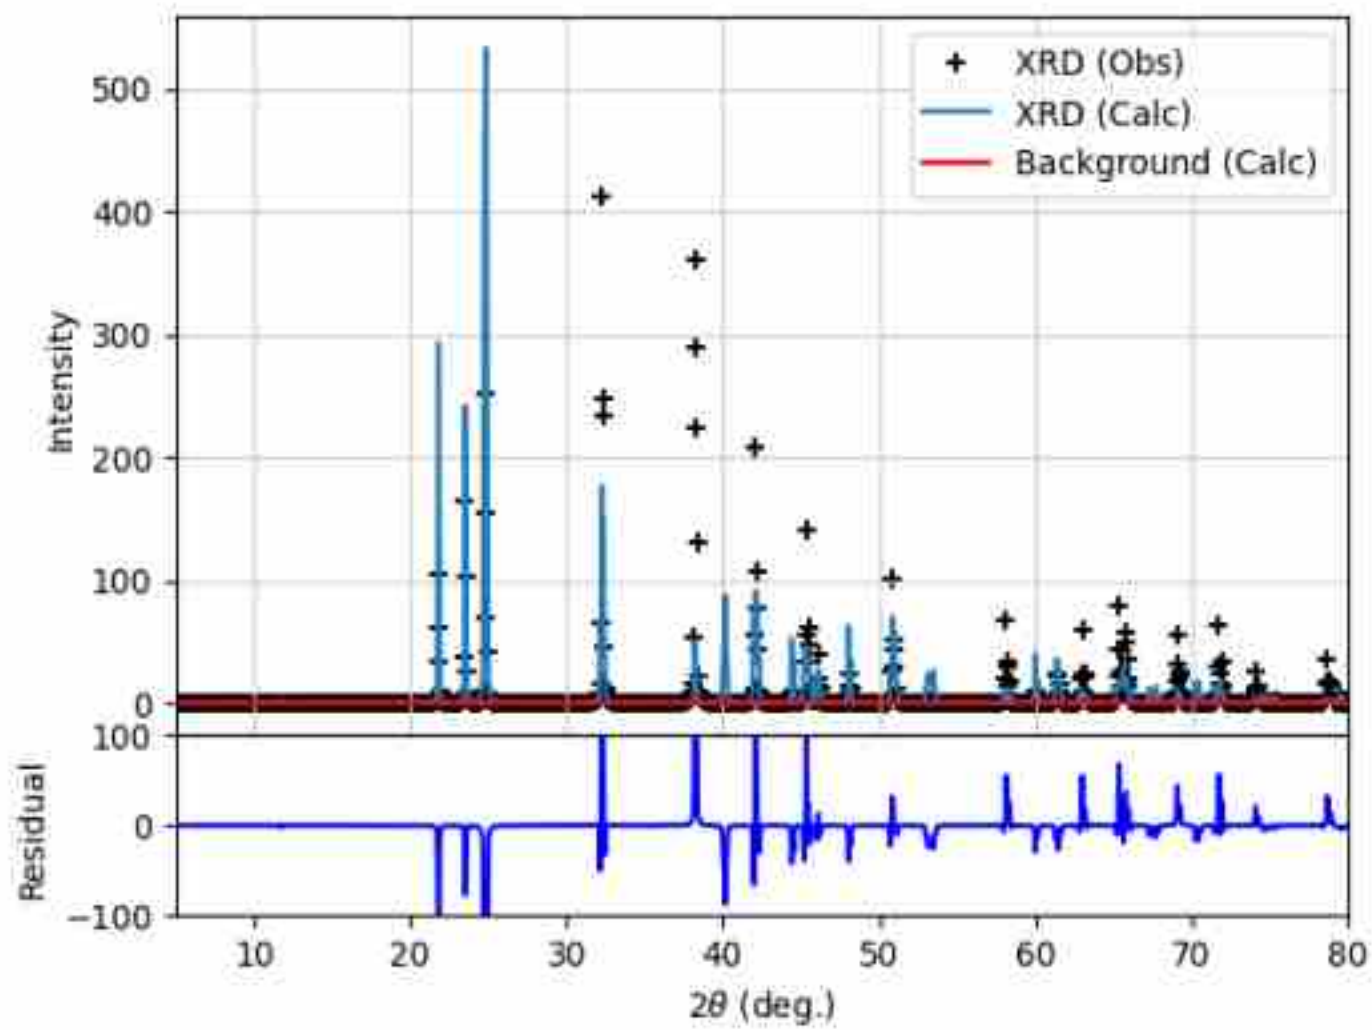

| RMSE before RR | Rwp   | RMSE after RR |
|----------------|-------|---------------|
| 0.095          | 100.0 | None          |



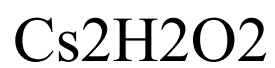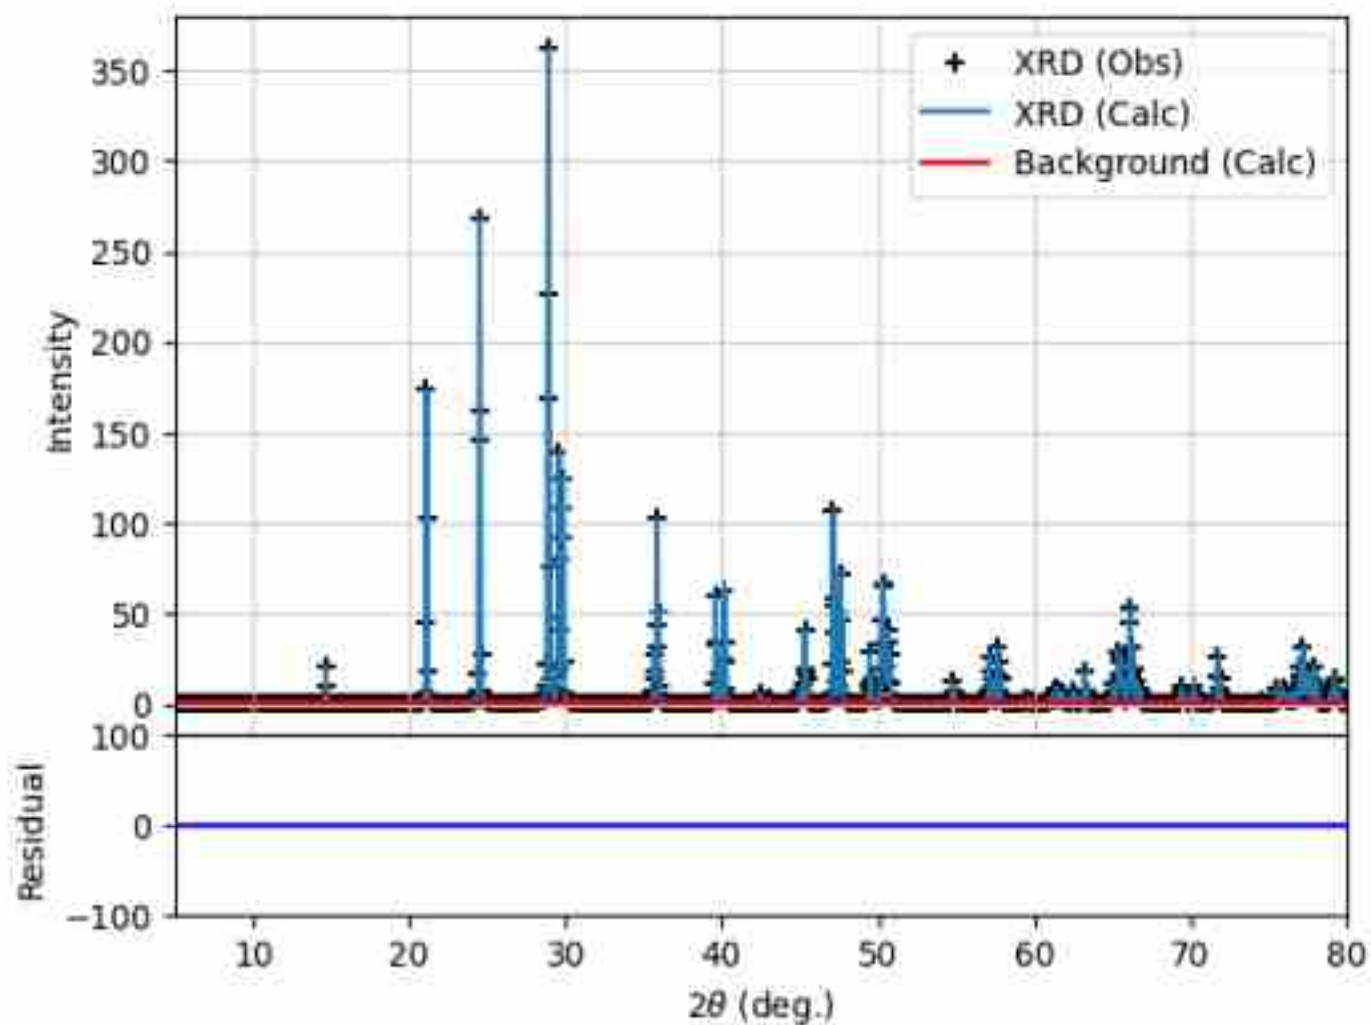

| RMSE before RR | Rwp     | RMSE after RR |
|----------------|---------|---------------|
| 0.095          | 0.07692 | 0.21438       |

# Cs<sub>3</sub>Al<sub>3</sub>F<sub>12</sub>

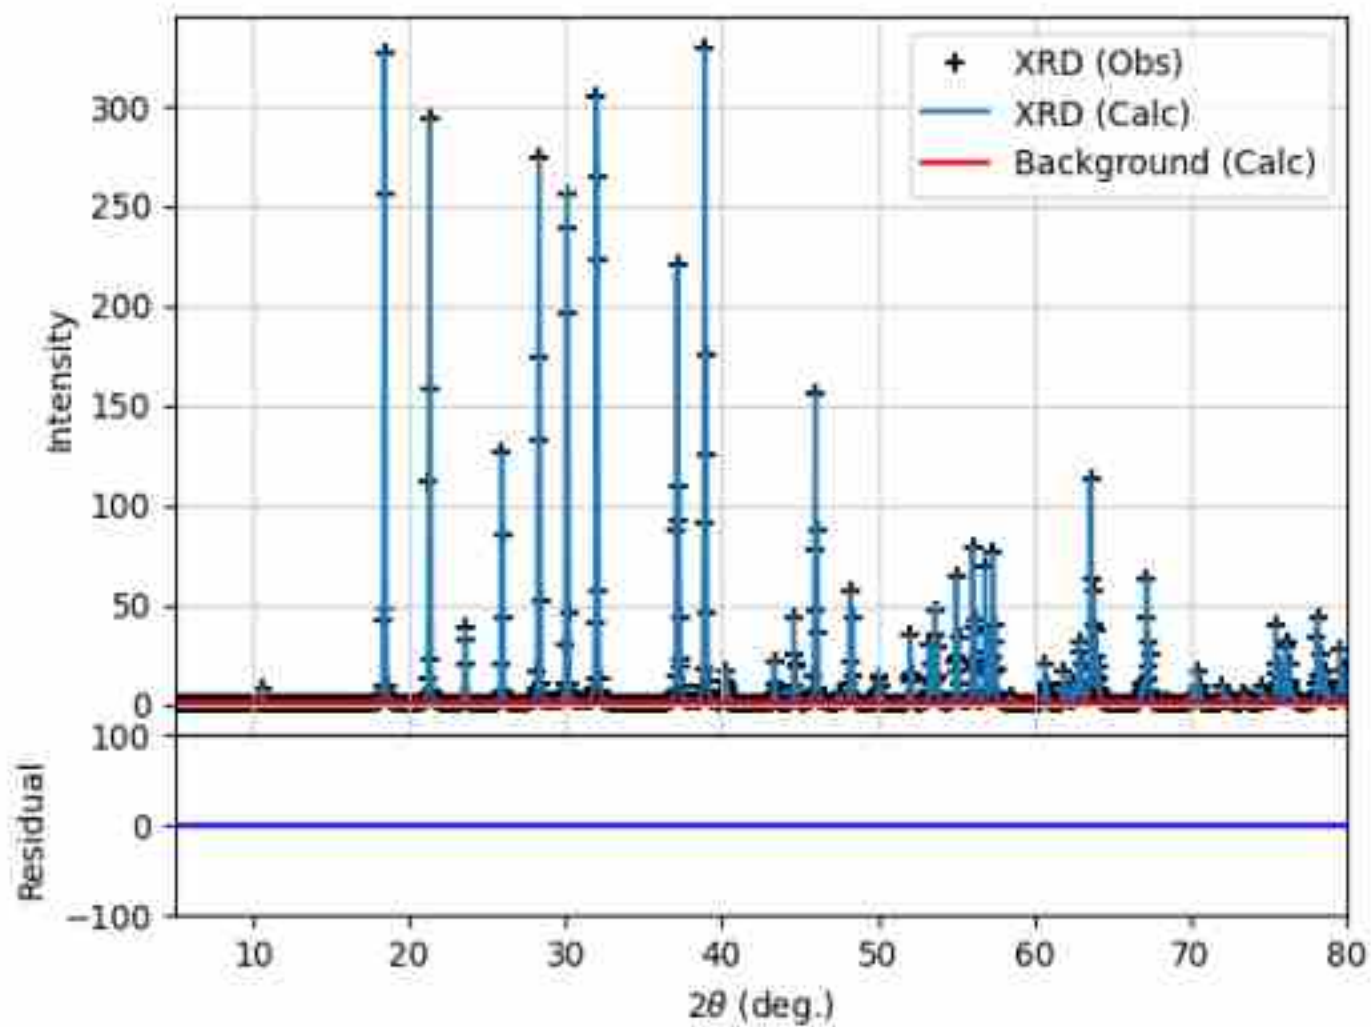

| RMSE before RR | Rwp     | RMSE after RR |
|----------------|---------|---------------|
| 0.095          | 0.00646 | 0.00189       |

# K<sub>4</sub>Sn<sub>2</sub>Se<sub>6</sub>

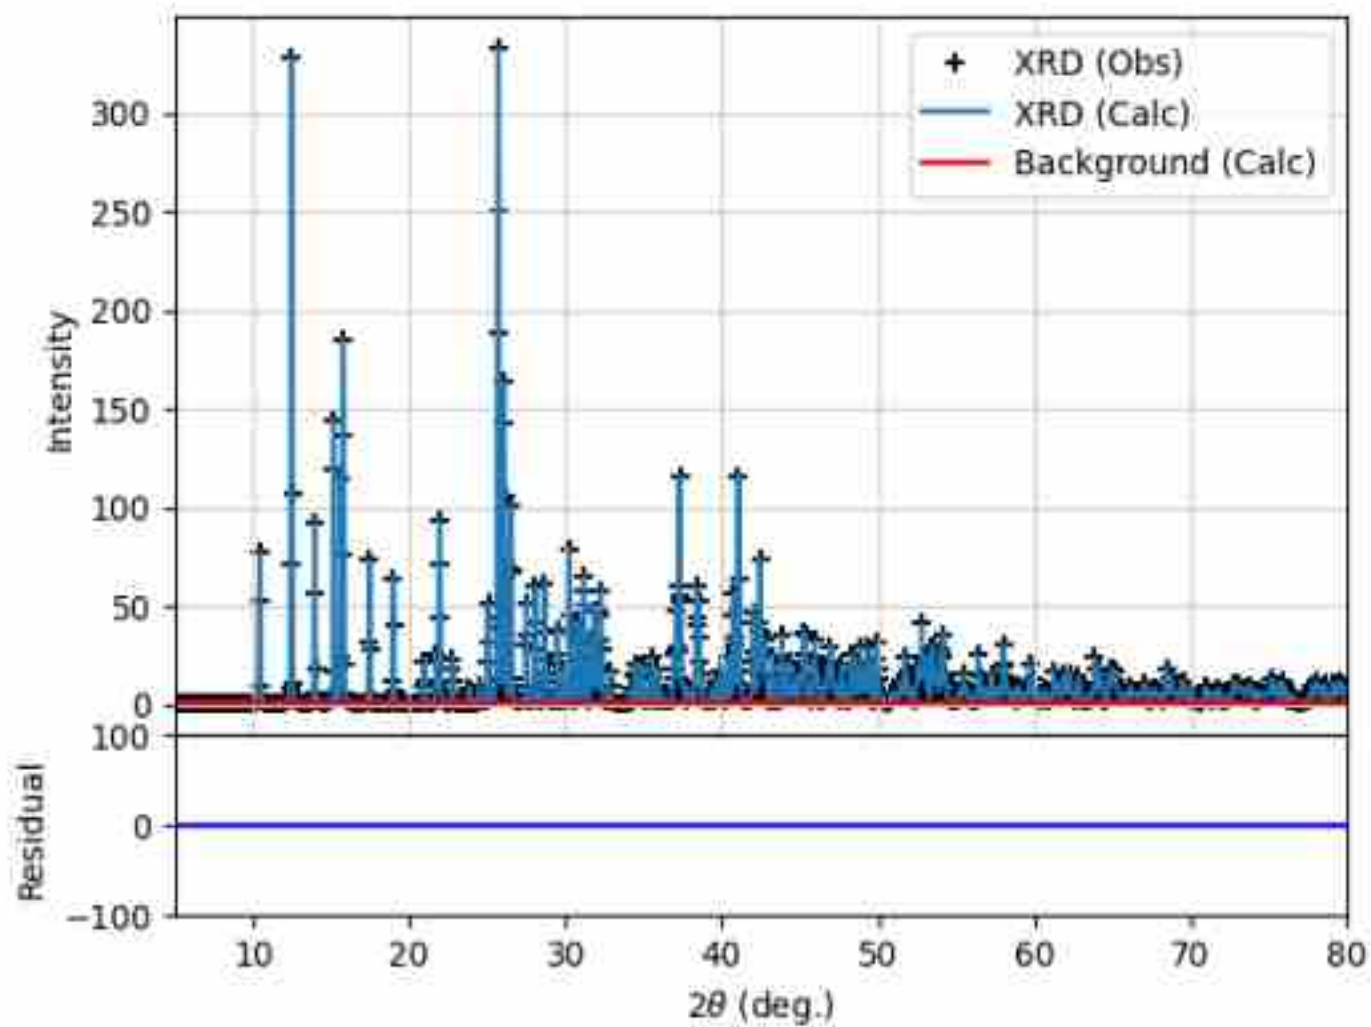

| RMSE before RR | Rwp     | RMSE after RR |
|----------------|---------|---------------|
| 0.095          | 0.00129 | 0.0002        |

# Ba<sub>2</sub>Nb<sub>4</sub>O<sub>12</sub>

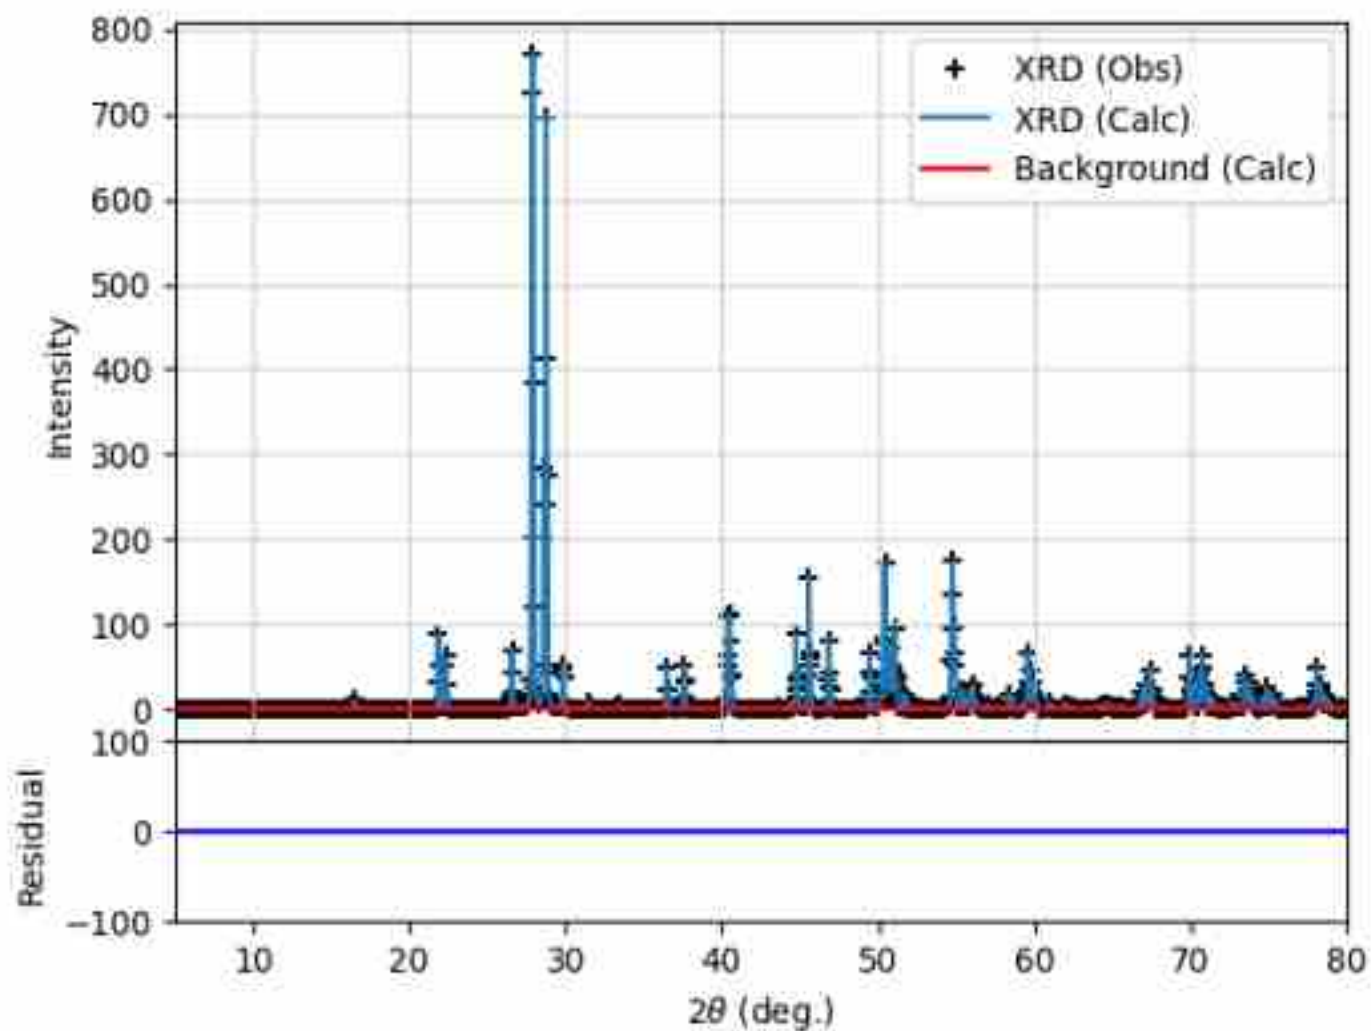

| RMSE before RR | Rwp     | RMSE after RR |
|----------------|---------|---------------|
| 0.096          | 0.00391 | 0.00135       |

# Ba<sub>4</sub>LiCuC<sub>2</sub>O<sub>10</sub>

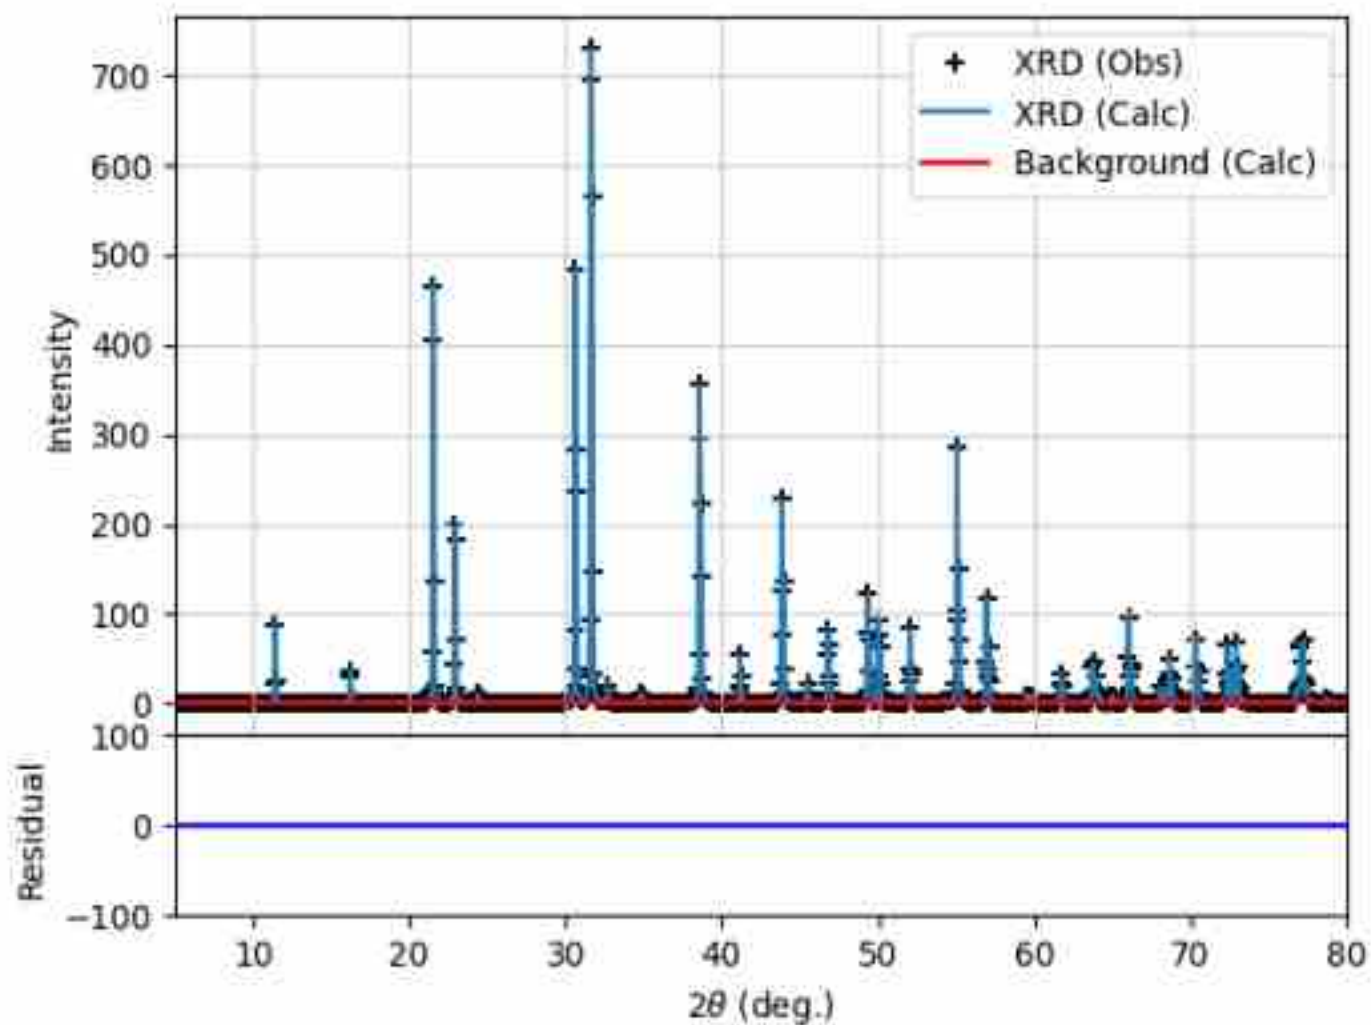

| RMSE before RR | Rwp     | RMSE after RR |
|----------------|---------|---------------|
| 0.096          | 0.00856 | 0.00389       |

# Ce<sub>2</sub>Sn<sub>2</sub>Au<sub>2</sub>

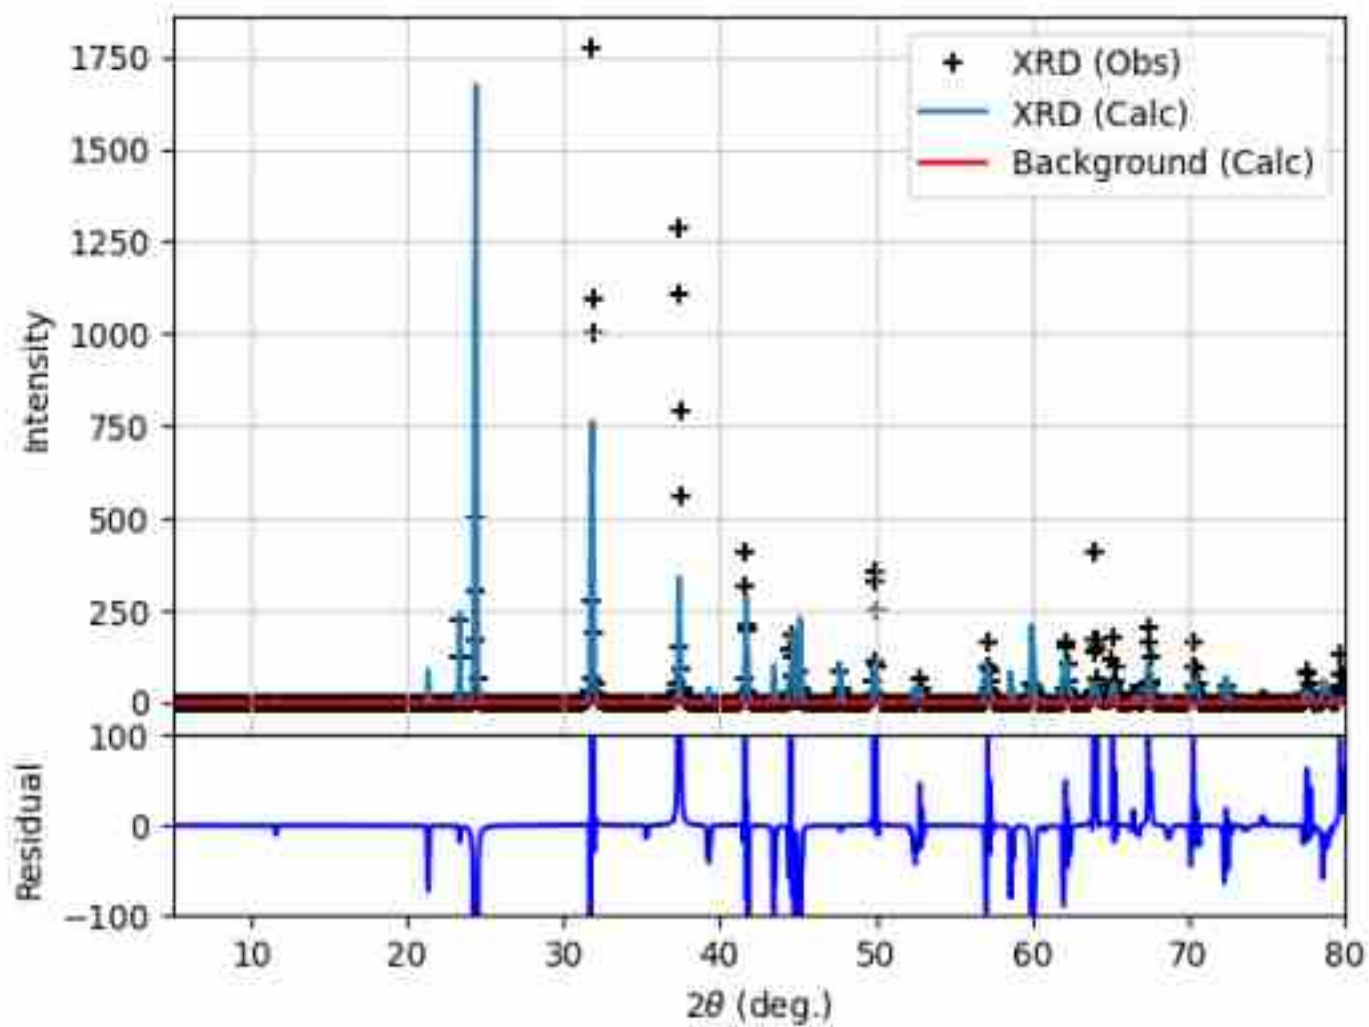

| RMSE before RR | Rwp   | RMSE after RR |
|----------------|-------|---------------|
| 0.096          | 100.0 | 0.48472       |

# Hg<sub>4</sub>S<sub>2</sub>O<sub>8</sub>

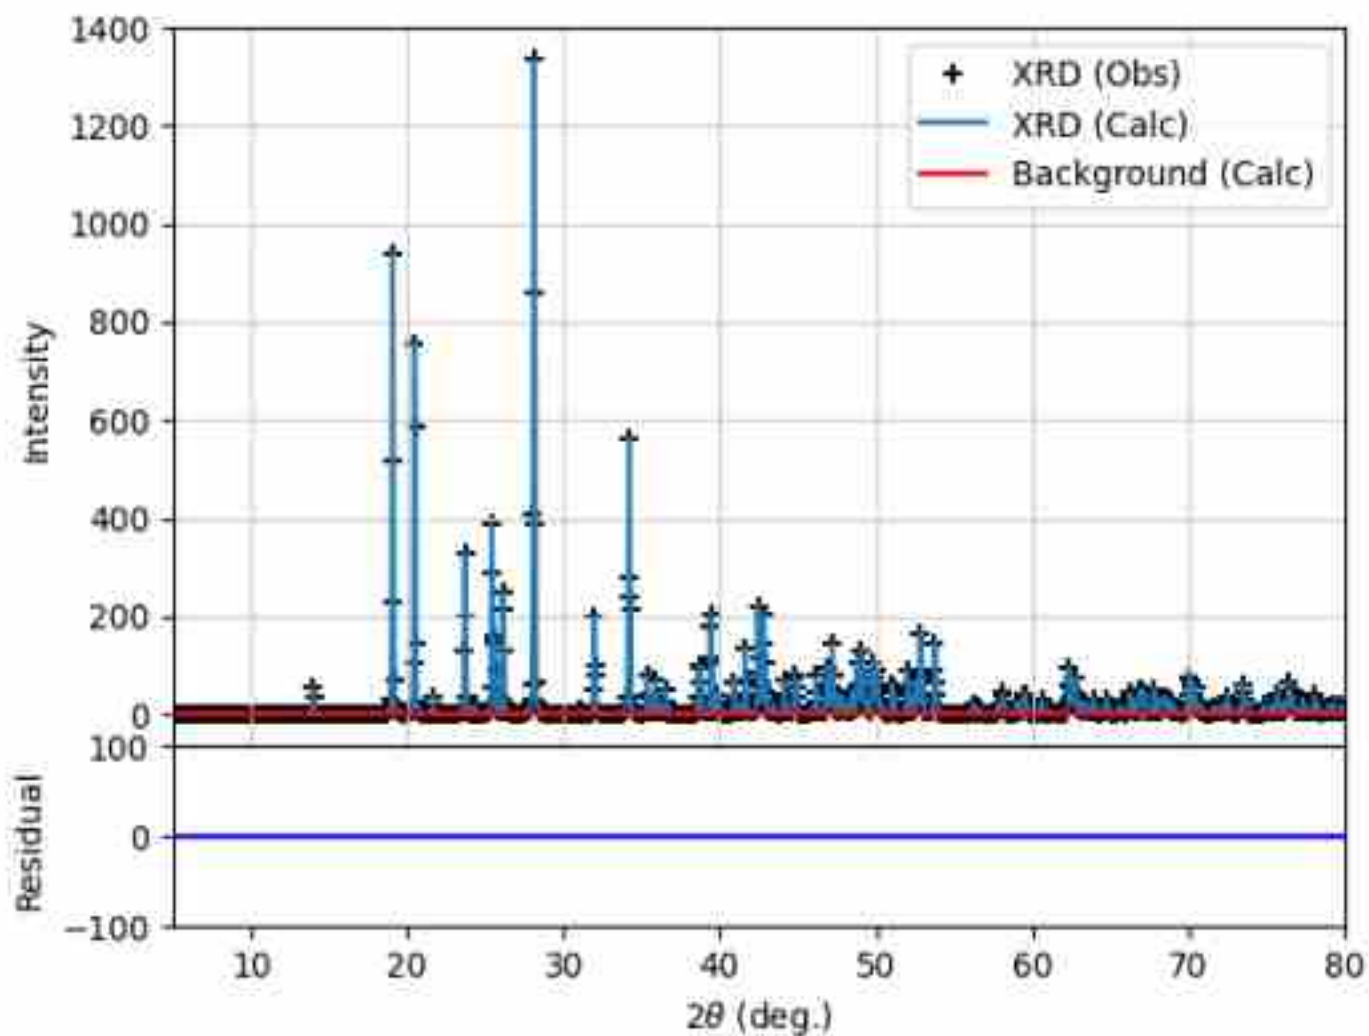

| RMSE before RR | Rwp     | RMSE after RR |
|----------------|---------|---------------|
| 0.096          | 0.00454 | 0.00221       |

# K1Mg1Mn2Al1Ge3O10F2

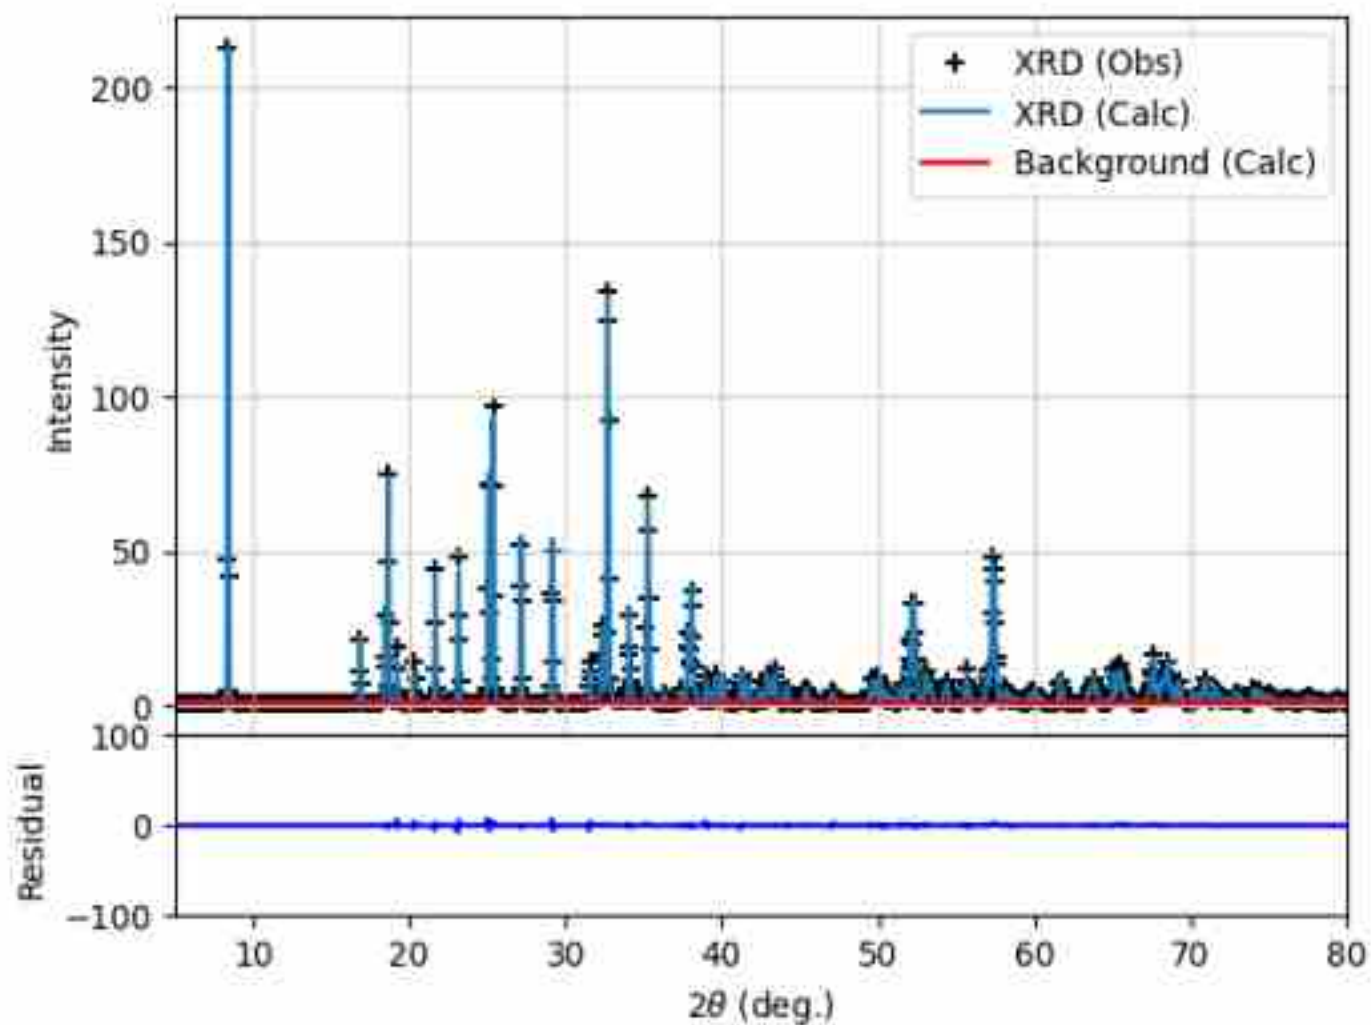

| RMSE before RR | Rwp      | RMSE after RR |
|----------------|----------|---------------|
| 0.096          | 10.78047 | 0.07647       |



# Li1V4O1F11

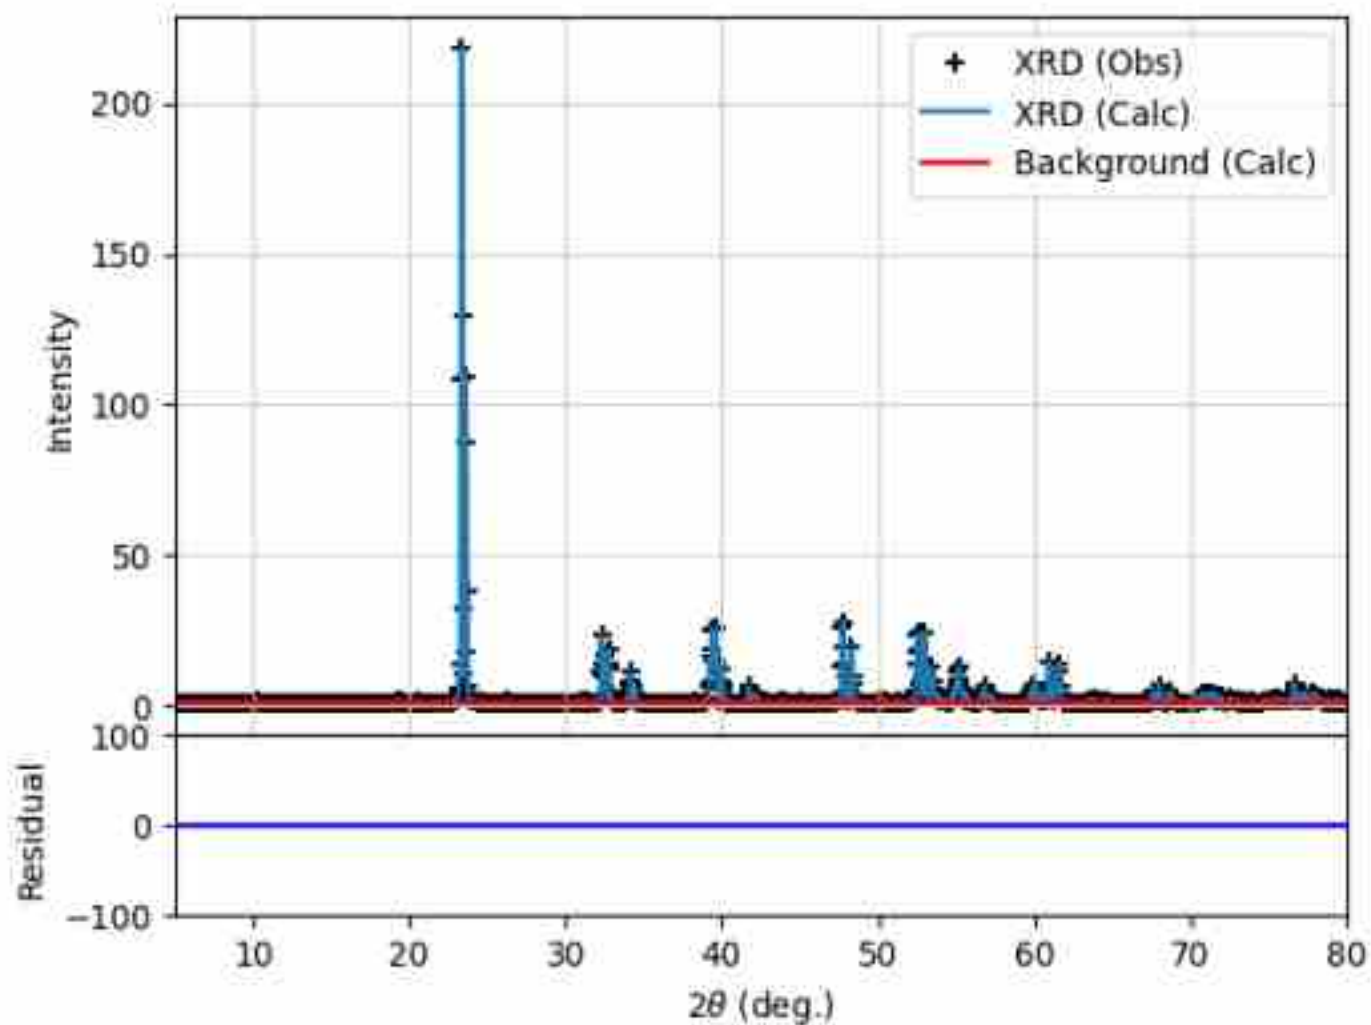

| RMSE before RR | Rwp     | RMSE after RR |
|----------------|---------|---------------|
| 0.096          | 0.03952 | 0.00011       |

# Zr1Ti1Pb2O6

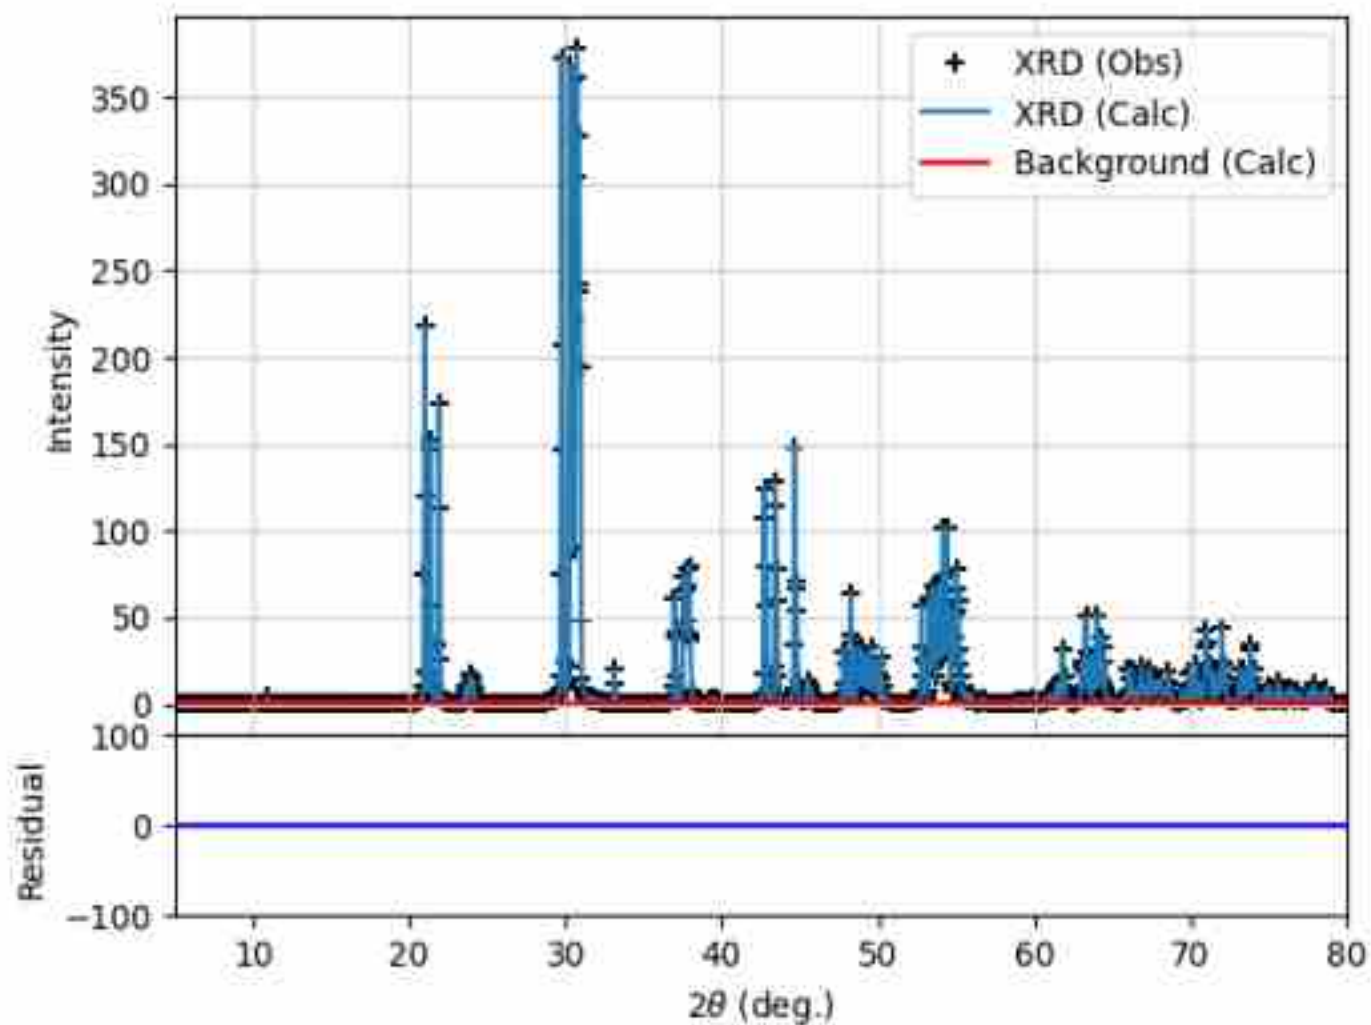

| RMSE before RR | Rwp     | RMSE after RR |
|----------------|---------|---------------|
| 0.096          | 0.00177 | 0.0           |

# Ba<sub>4</sub>Na<sub>1</sub>Cu<sub>1</sub>C<sub>2</sub>O<sub>10</sub>

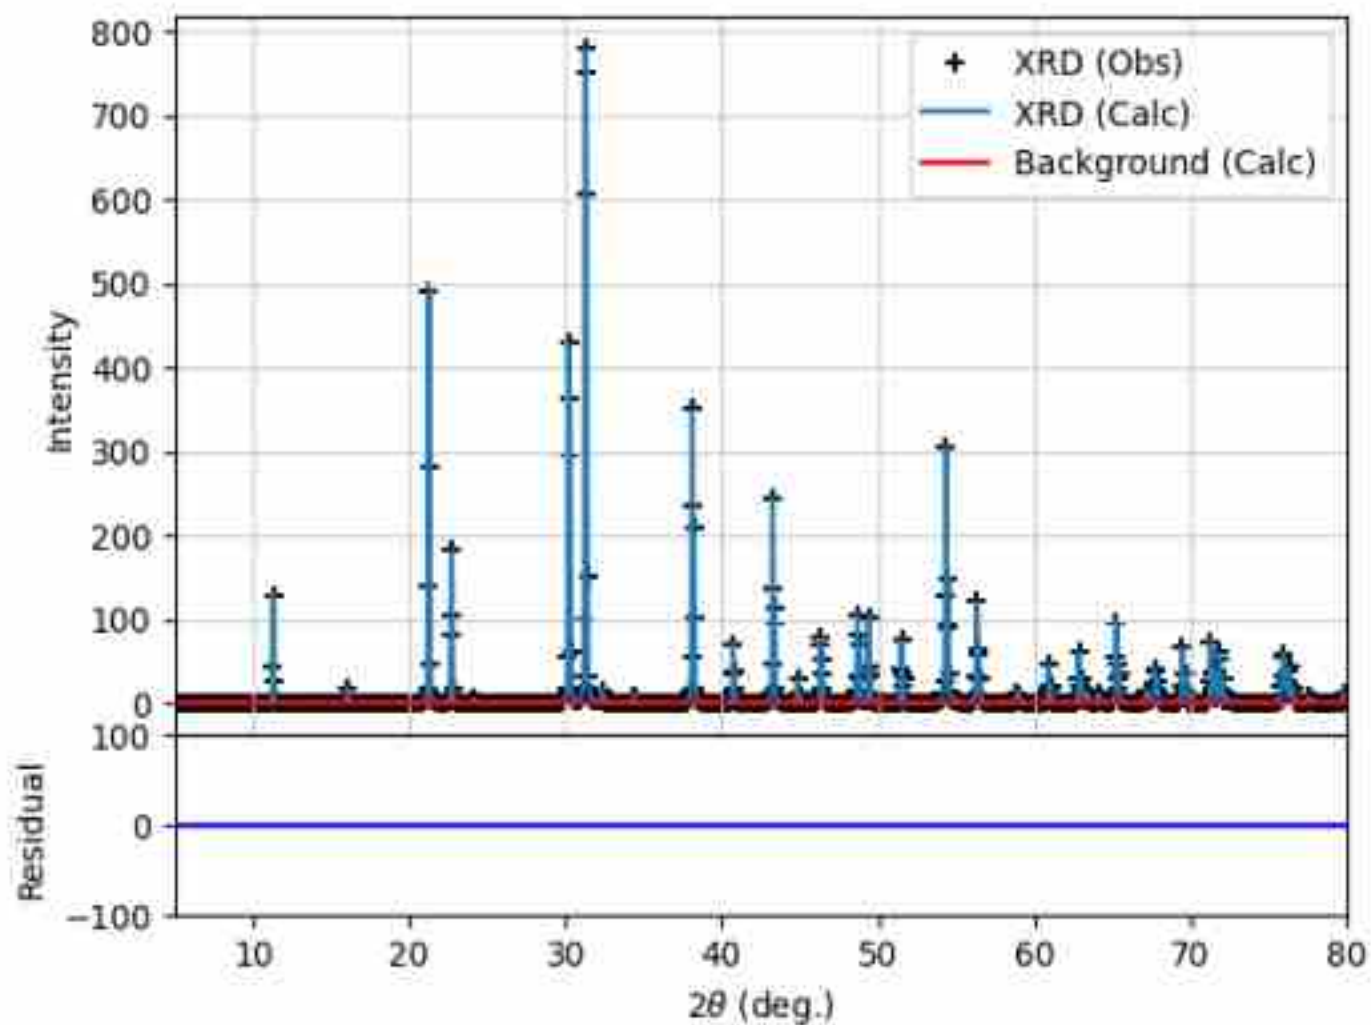

| RMSE before RR | Rwp     | RMSE after RR |
|----------------|---------|---------------|
| 0.098          | 0.00379 | 0.00165       |

# Y<sub>2</sub>Cu<sub>2</sub>Sn<sub>2</sub>

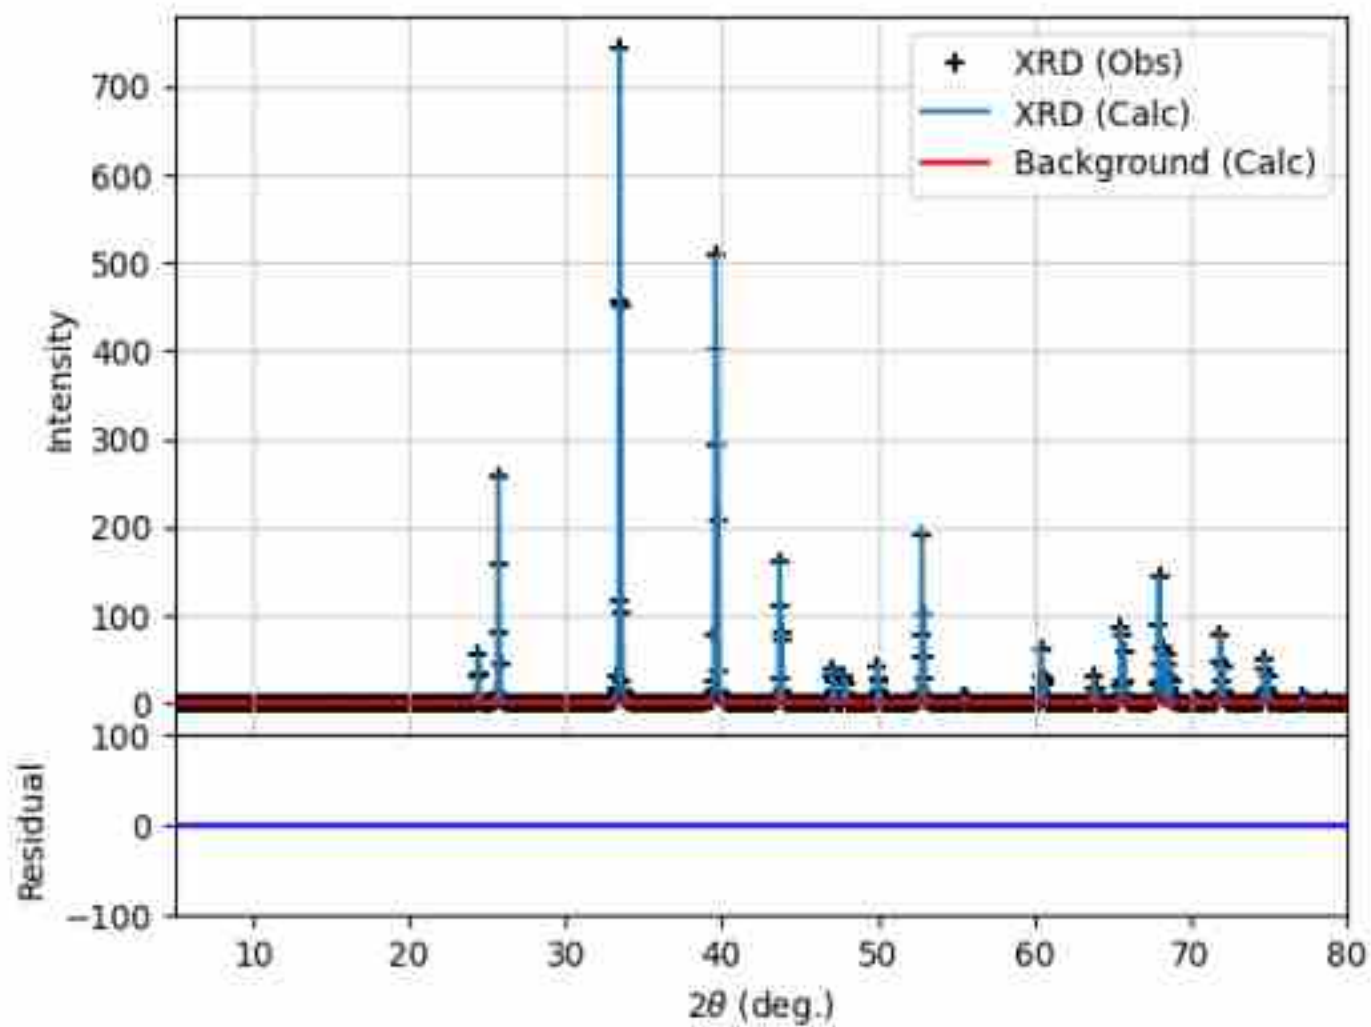

| RMSE before RR | Rwp     | RMSE after RR |
|----------------|---------|---------------|
| 0.098          | 0.00387 | 0.00017       |

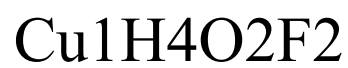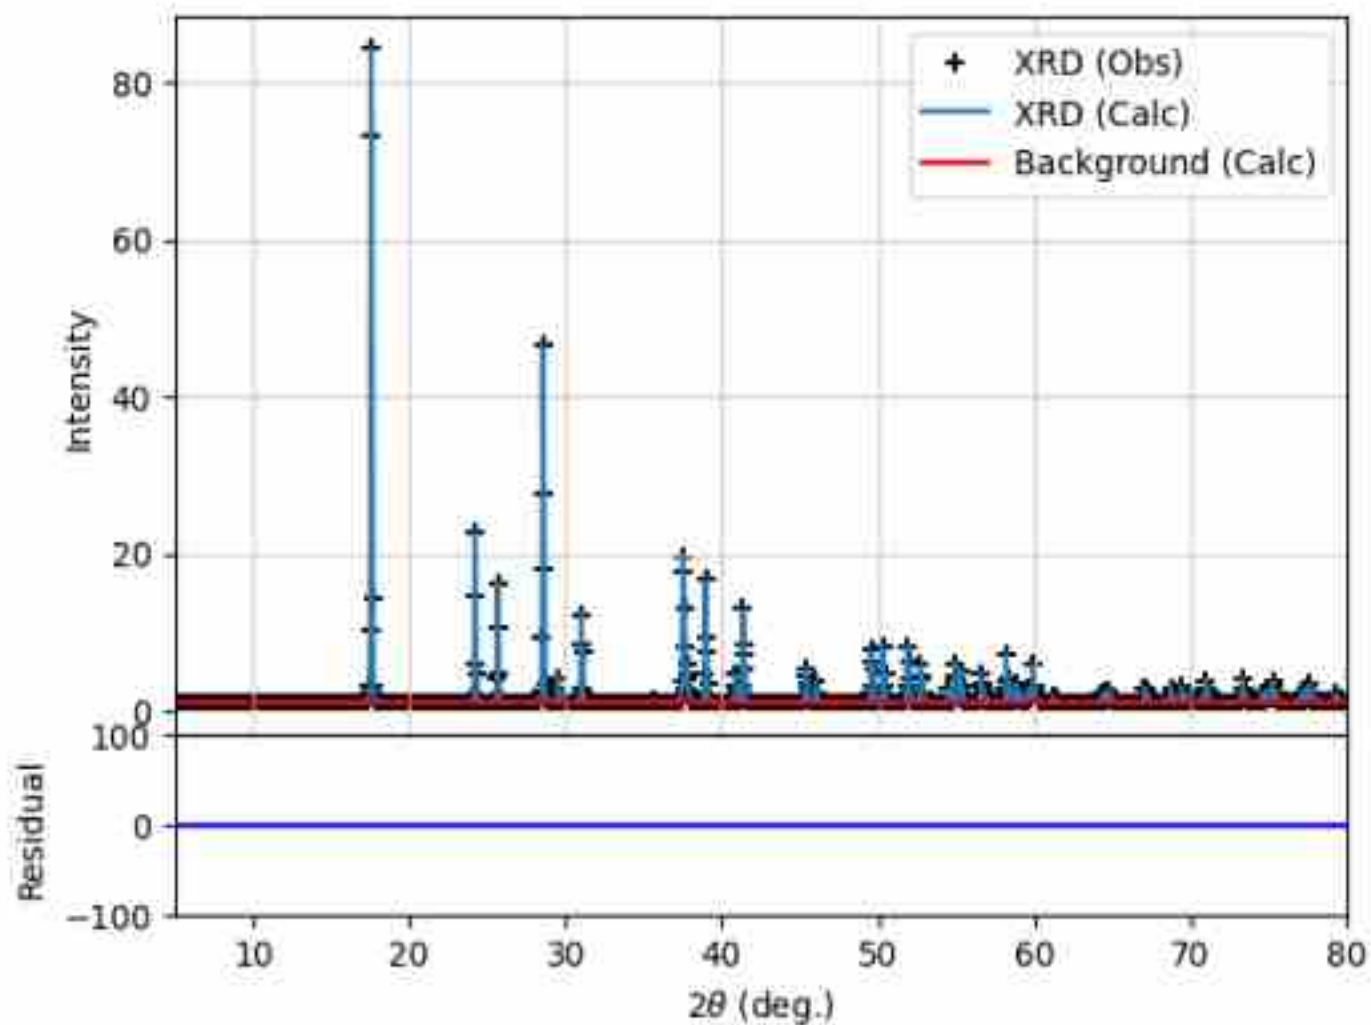

| RMSE before RR | Rwp     | RMSE after RR |
|----------------|---------|---------------|
| 0.099          | 0.00173 | 0.00186       |

# Li<sub>4</sub>Cu<sub>8</sub>S<sub>6</sub>

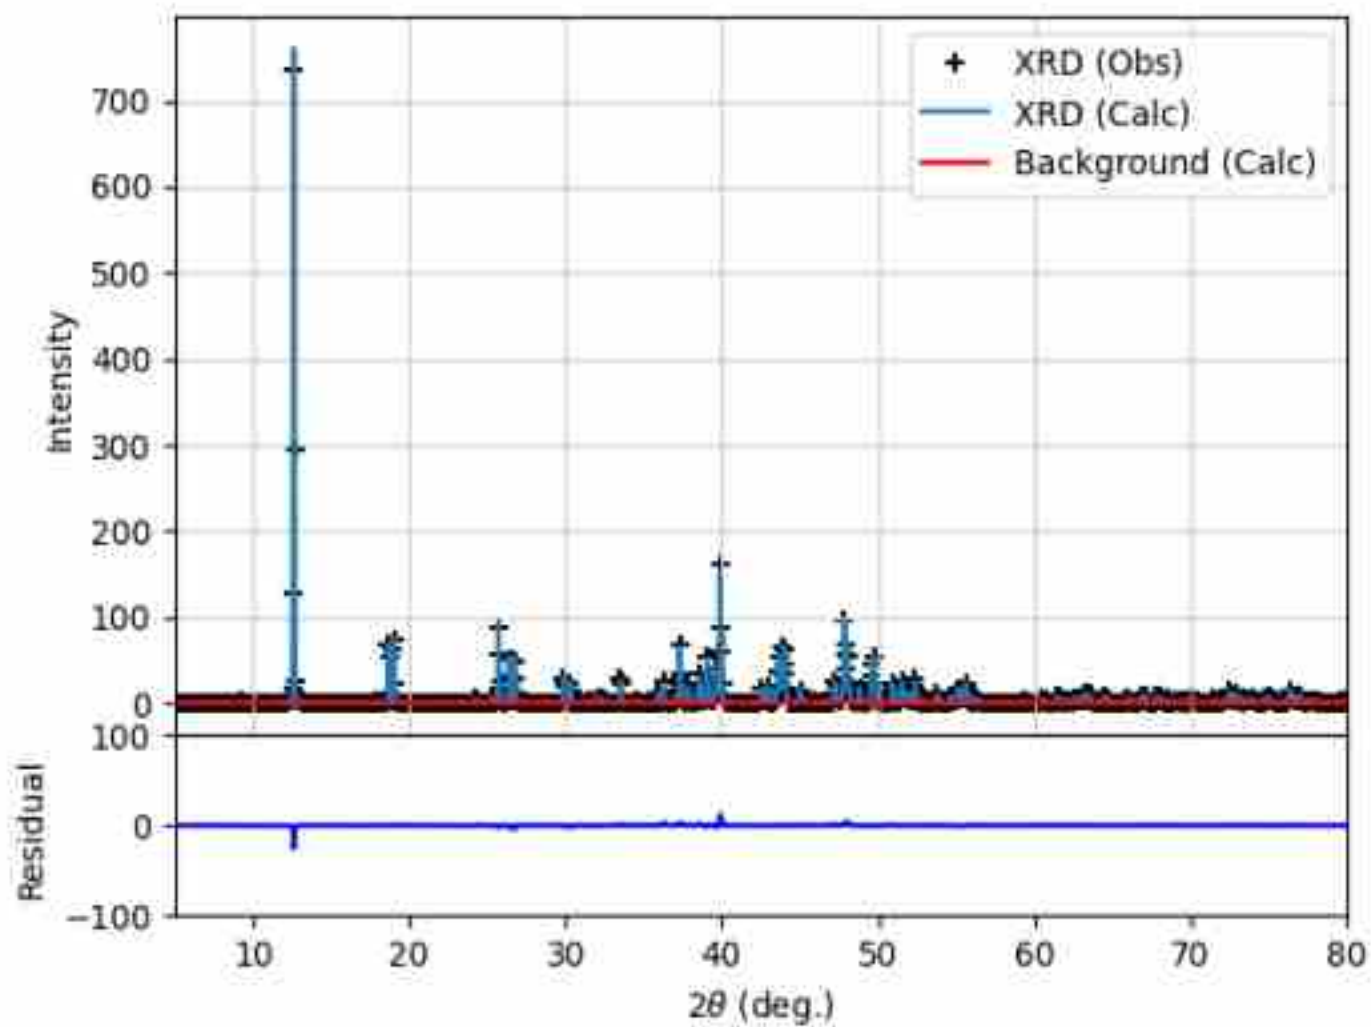

| RMSE before RR | Rwp     | RMSE after RR |
|----------------|---------|---------------|
| 0.2            | 4.57412 | None          |

# Ag<sub>4</sub>Hg<sub>10</sub>

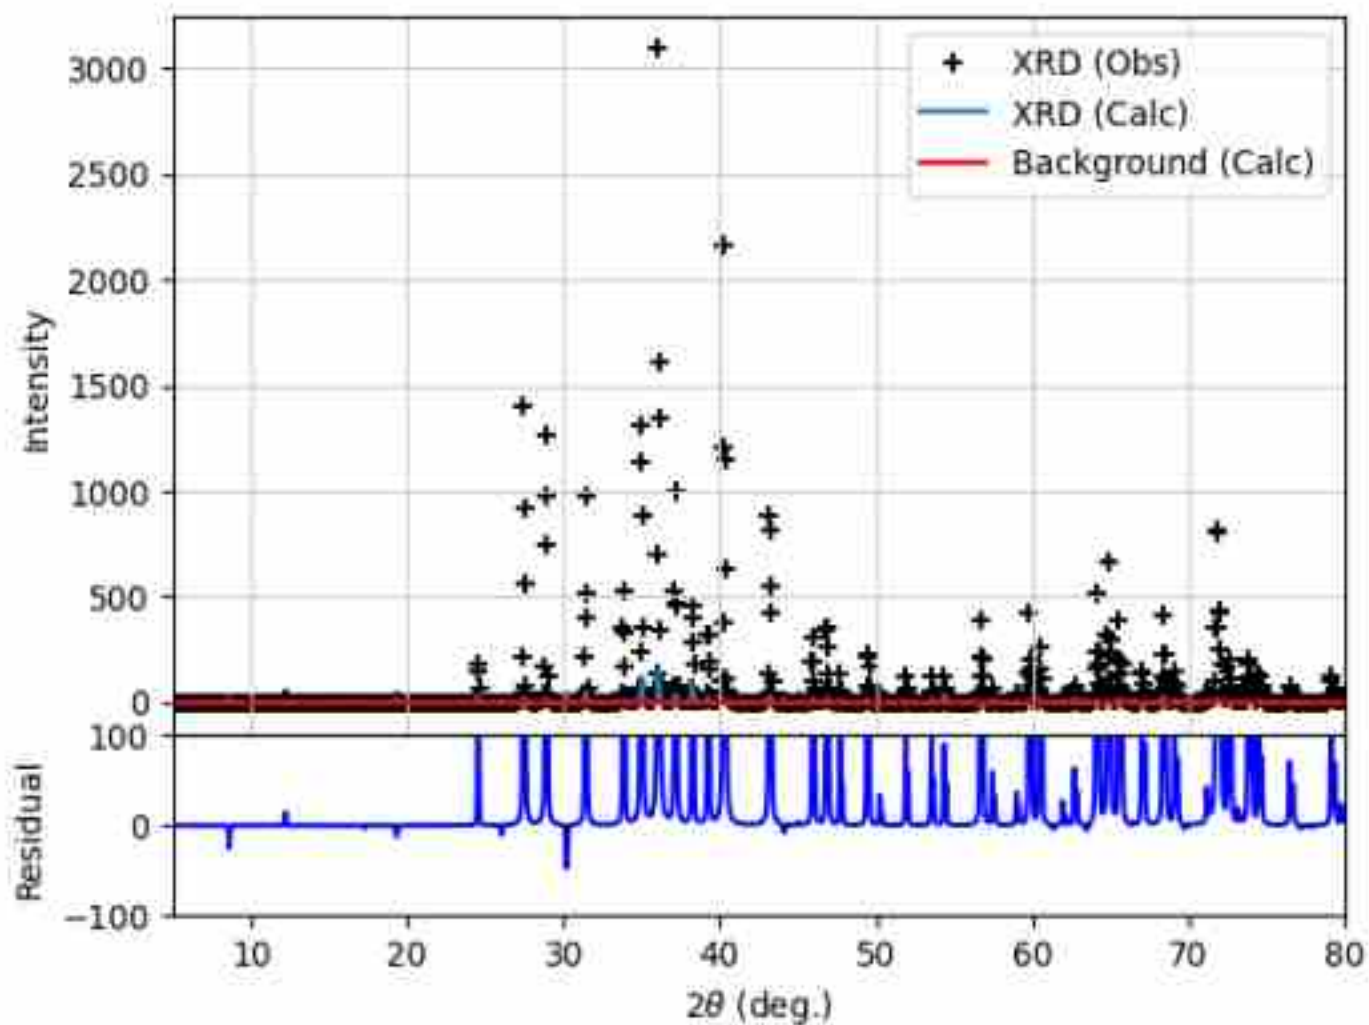

| RMSE before RR | Rwp      | RMSE after RR |
|----------------|----------|---------------|
| 0.3            | 96.41224 | 0.31876       |

# Ca<sub>4</sub>W<sub>2</sub>N<sub>4</sub>

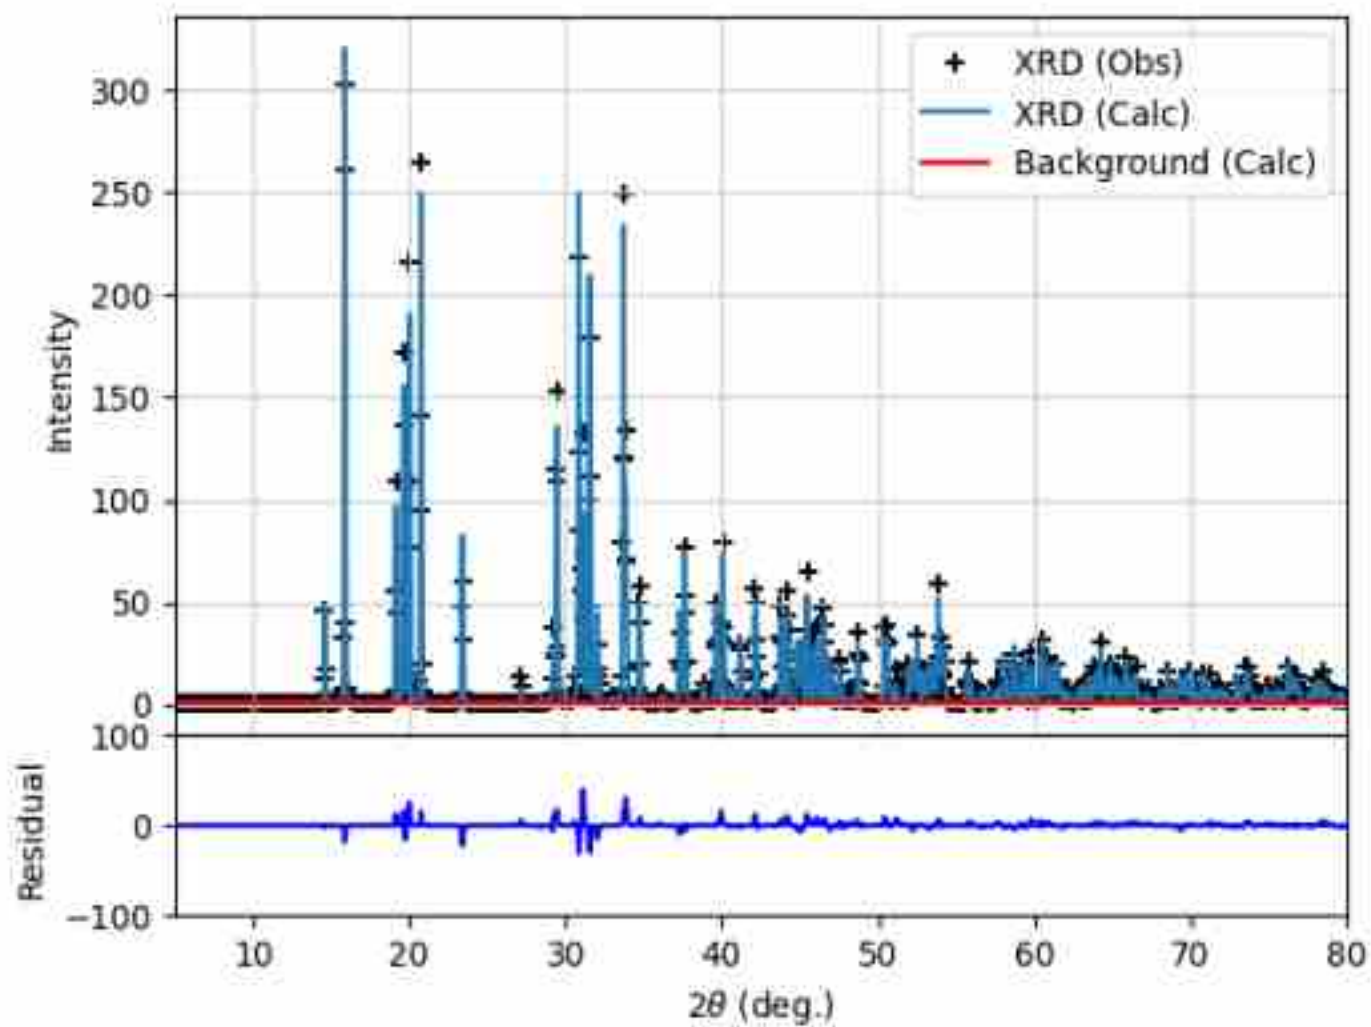

| RMSE before RR | Rwp      | RMSE after RR |
|----------------|----------|---------------|
| 0.3            | 17.76018 | None          |



# V2P4O14

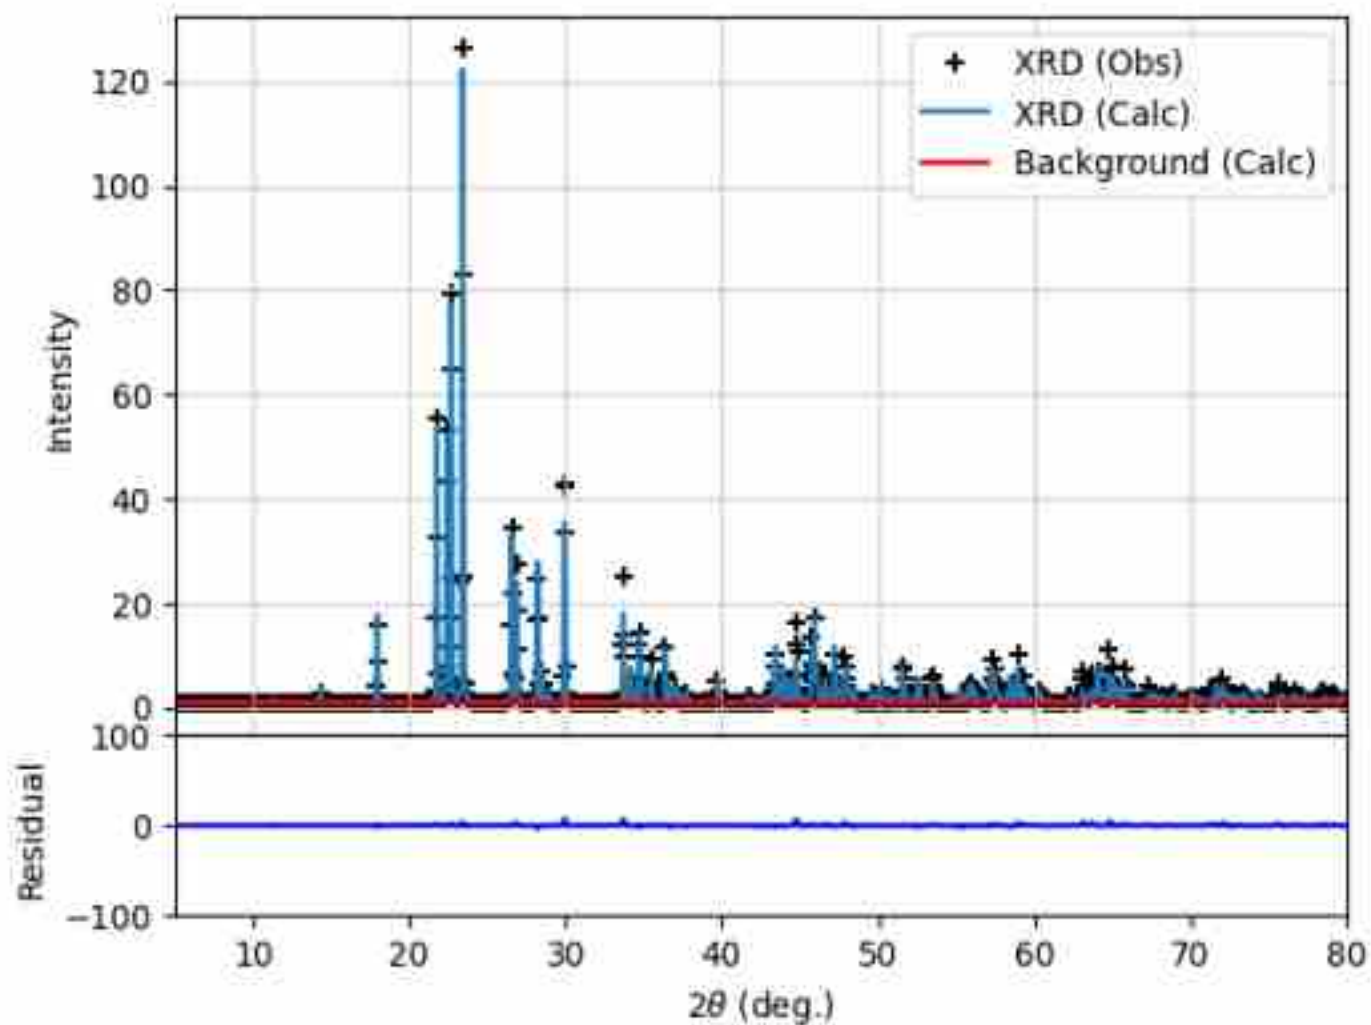

| RMSE before RR | Rwp     | RMSE after RR |
|----------------|---------|---------------|
| 0.3            | 18.0303 | None          |

# Al<sub>2</sub>Ni<sub>4</sub>

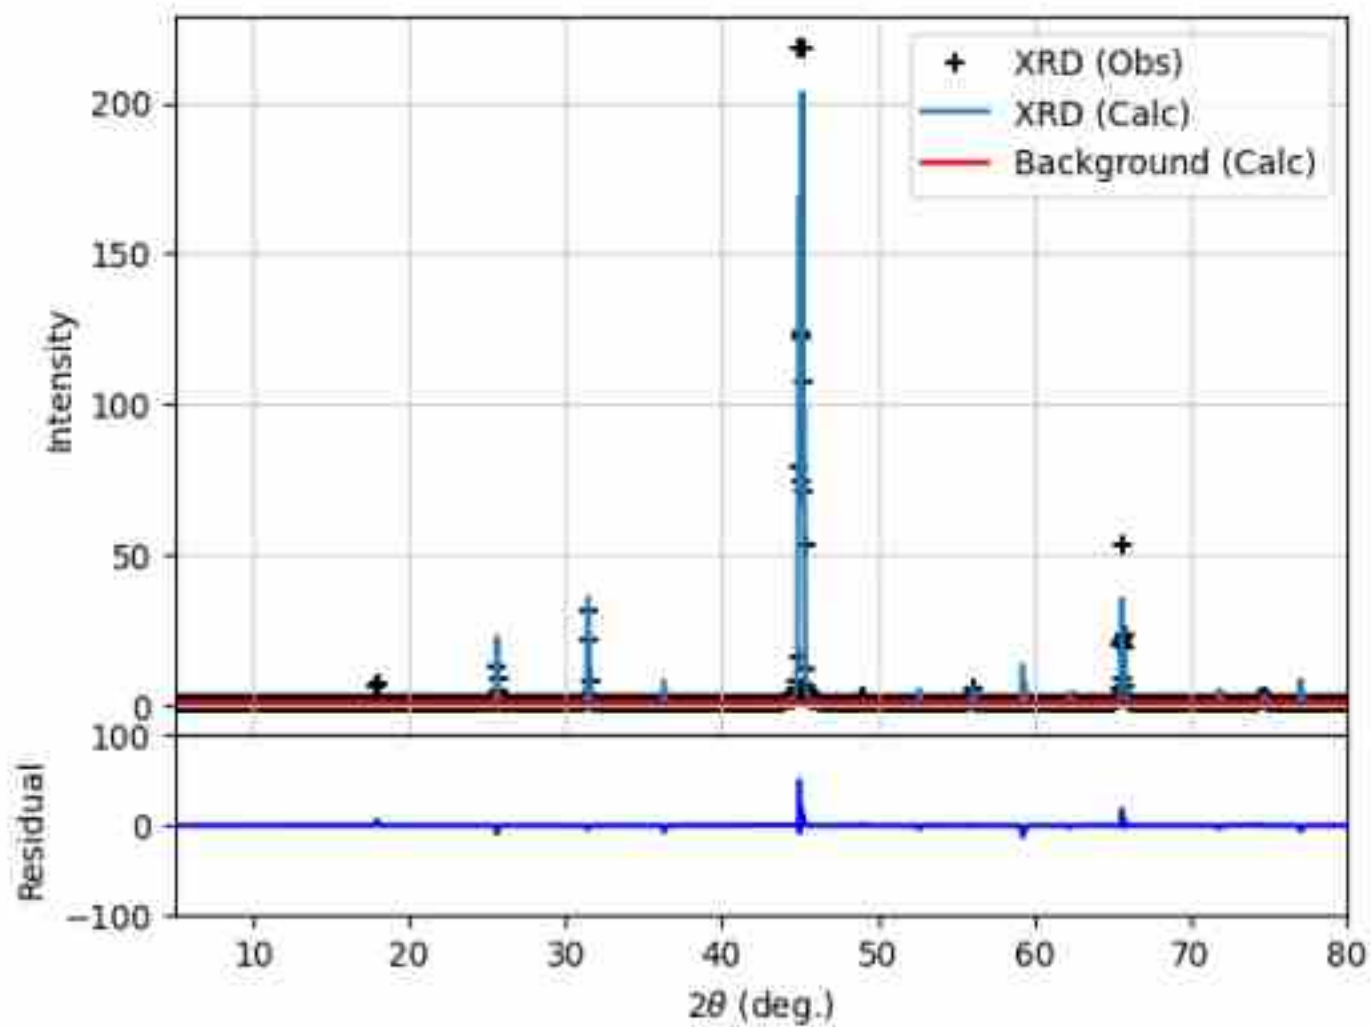

| RMSE before RR | Rwp      | RMSE after RR |
|----------------|----------|---------------|
| 0.11           | 40.29119 | 0.1111        |

# La<sub>4</sub>Ti<sub>2</sub>Cr<sub>2</sub>O<sub>12</sub>

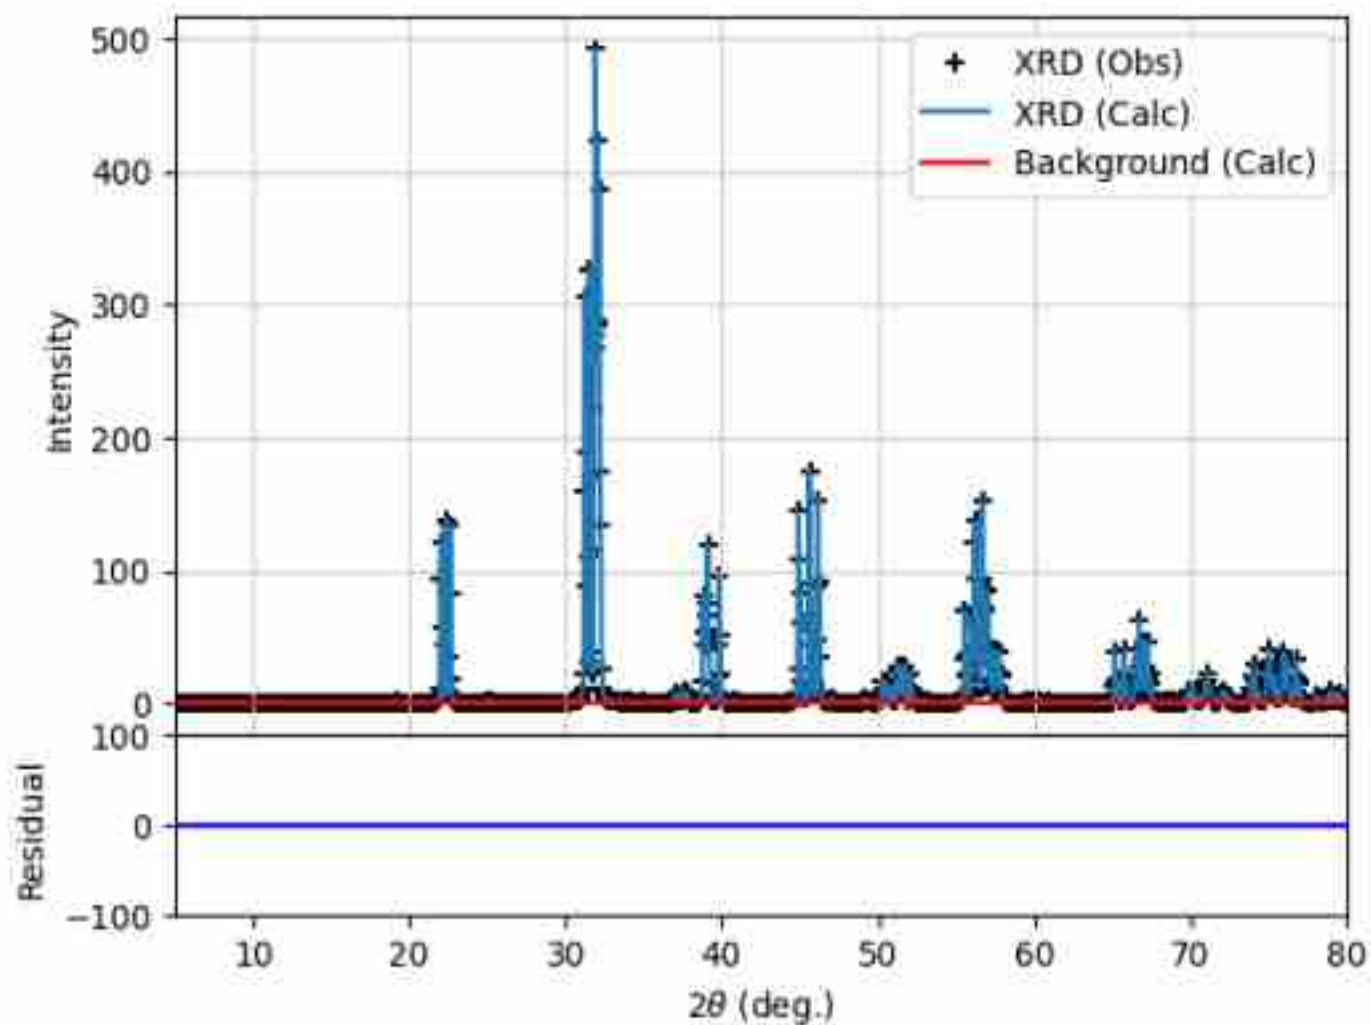

| RMSE before RR | Rwp     | RMSE after RR |
|----------------|---------|---------------|
| 0.11           | 0.00241 | 0.0005        |

# Te<sub>4</sub>As<sub>4</sub>Ru<sub>4</sub>

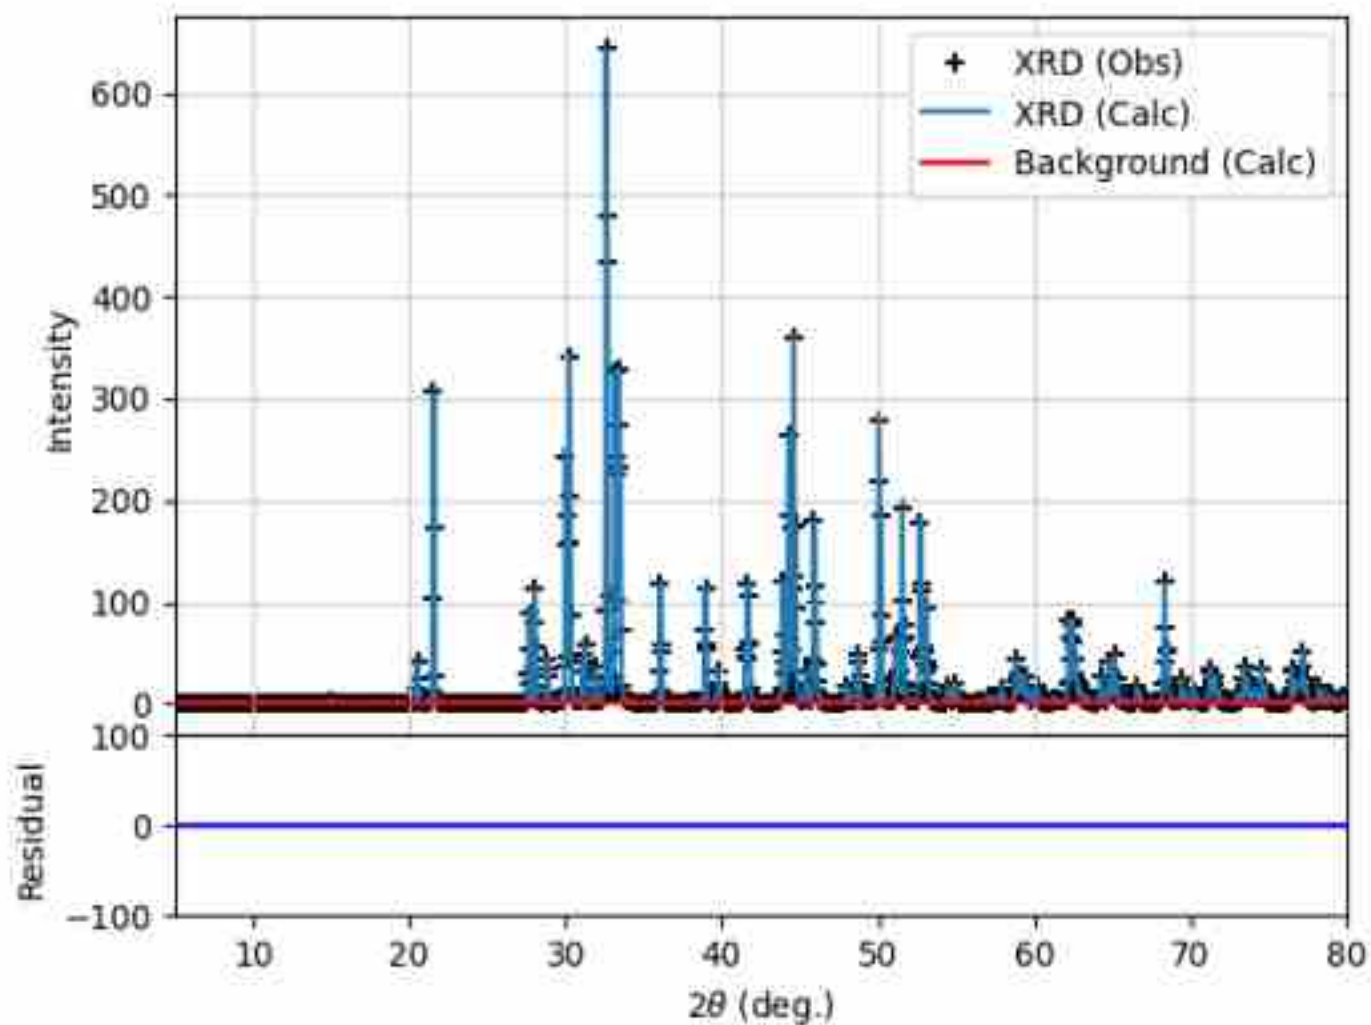

| RMSE before RR | Rwp     | RMSE after RR |
|----------------|---------|---------------|
| 0.12           | 0.00538 | 0.00036       |

# Eu<sub>2</sub>Zn<sub>2</sub>Ge<sub>2</sub>

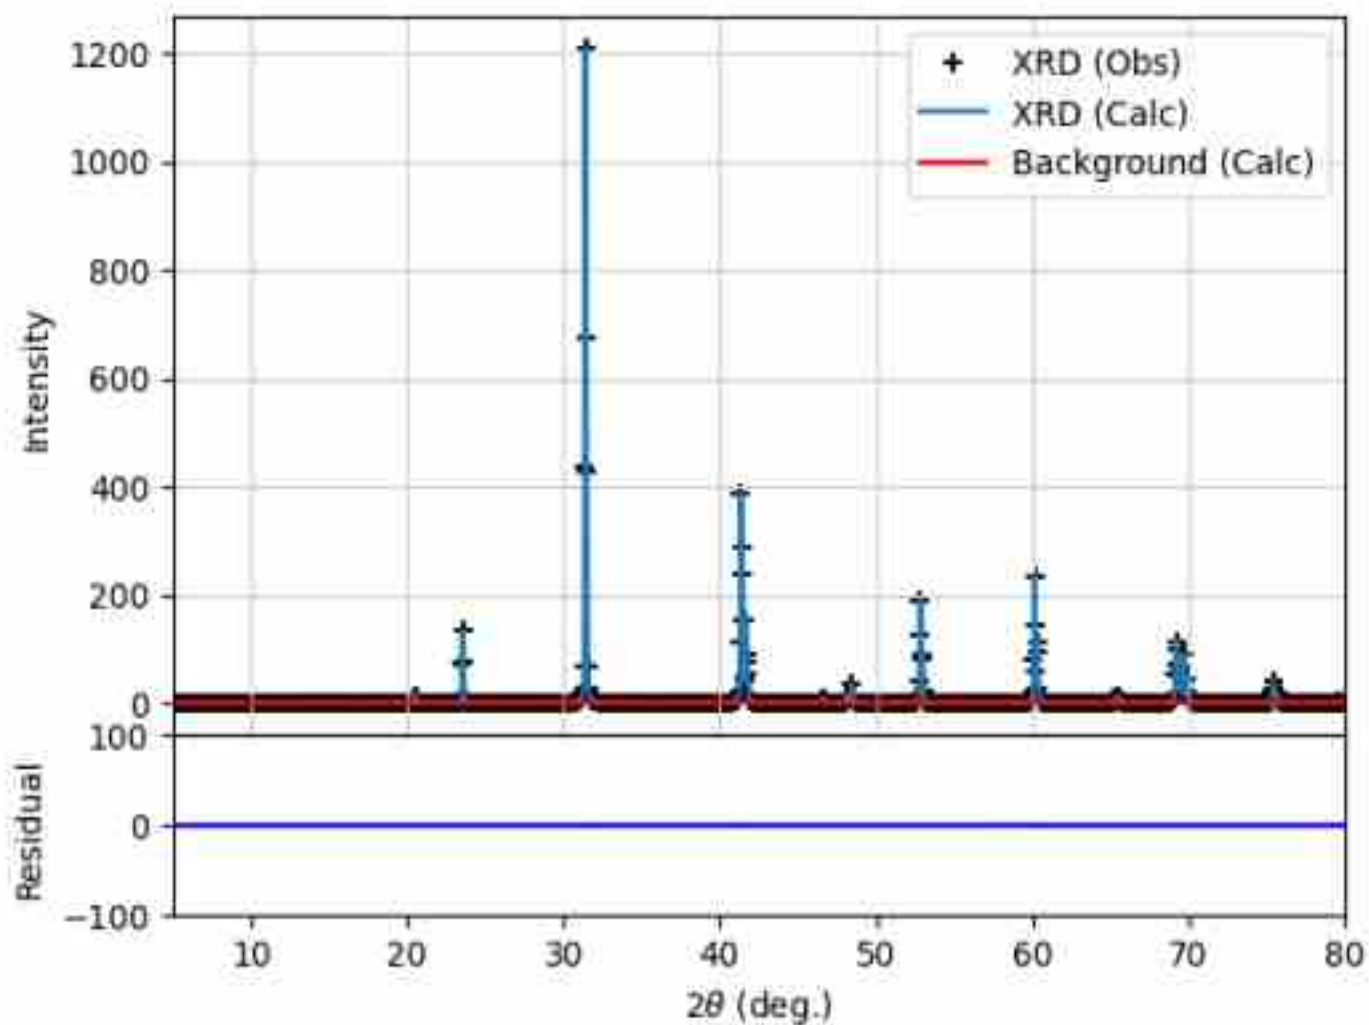

| RMSE before RR | Rwp    | RMSE after RR |
|----------------|--------|---------------|
| 0.13           | 0.4783 | 0.006         |

# S2O4

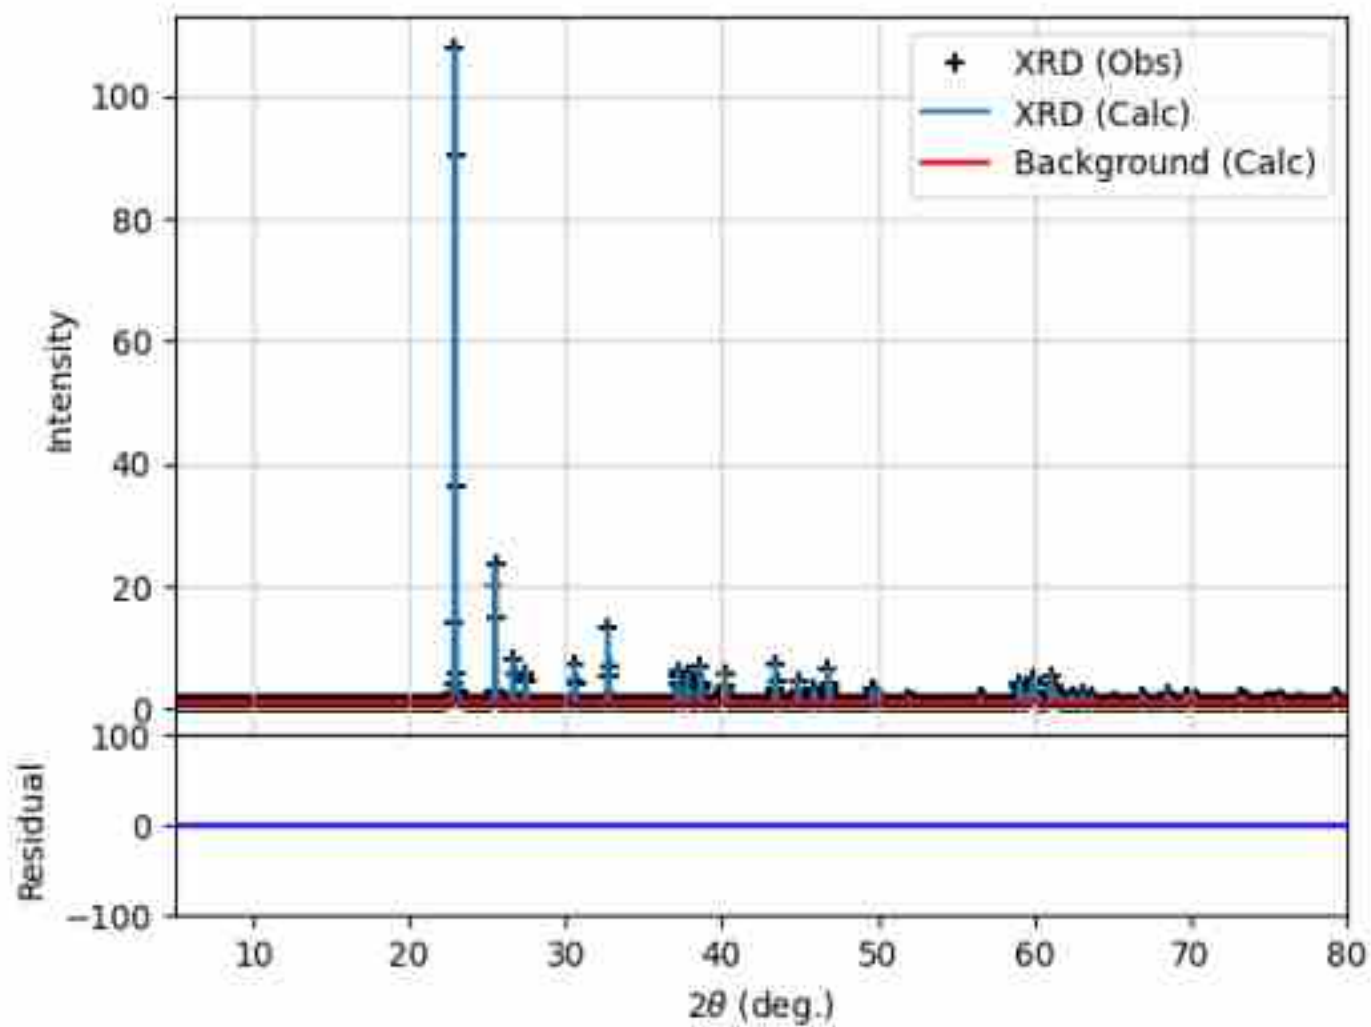

| RMSE before RR | Rwp     | RMSE after RR |
|----------------|---------|---------------|
| 0.13           | 0.00142 | 0.00038       |

# Re2H8N2O8

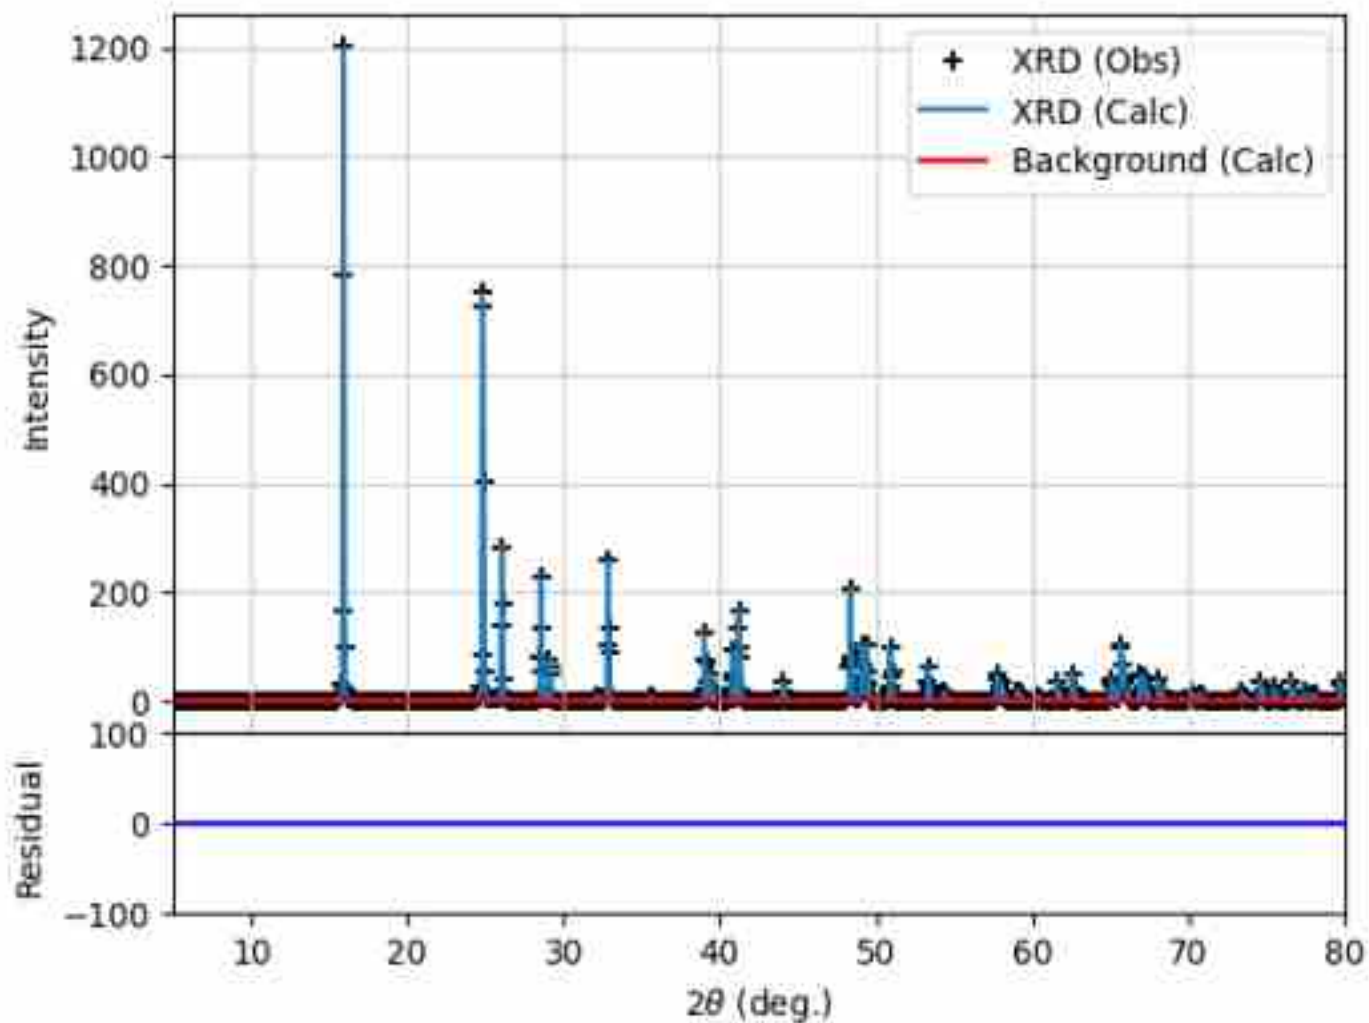

| RMSE before RR | Rwp     | RMSE after RR |
|----------------|---------|---------------|
| 0.14           | 0.01797 | 0.15754       |

# Sn<sub>2</sub>Se<sub>4</sub>O<sub>12</sub>

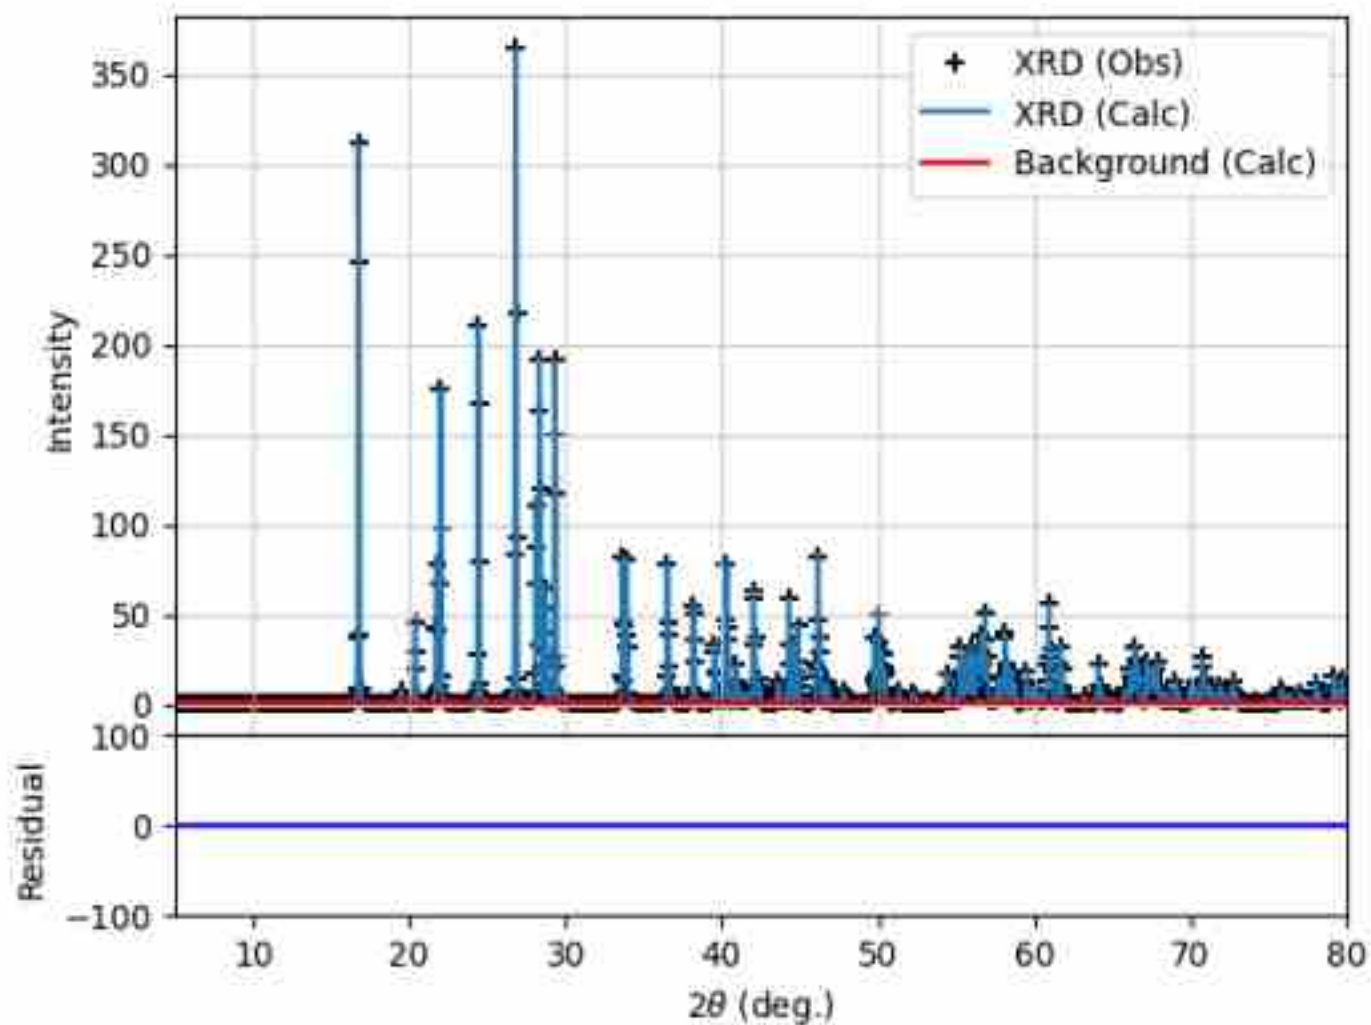

| RMSE before RR | Rwp     | RMSE after RR |
|----------------|---------|---------------|
| 0.14           | 0.00418 | 0.00101       |



# Zn<sub>2</sub>Sb<sub>4</sub>

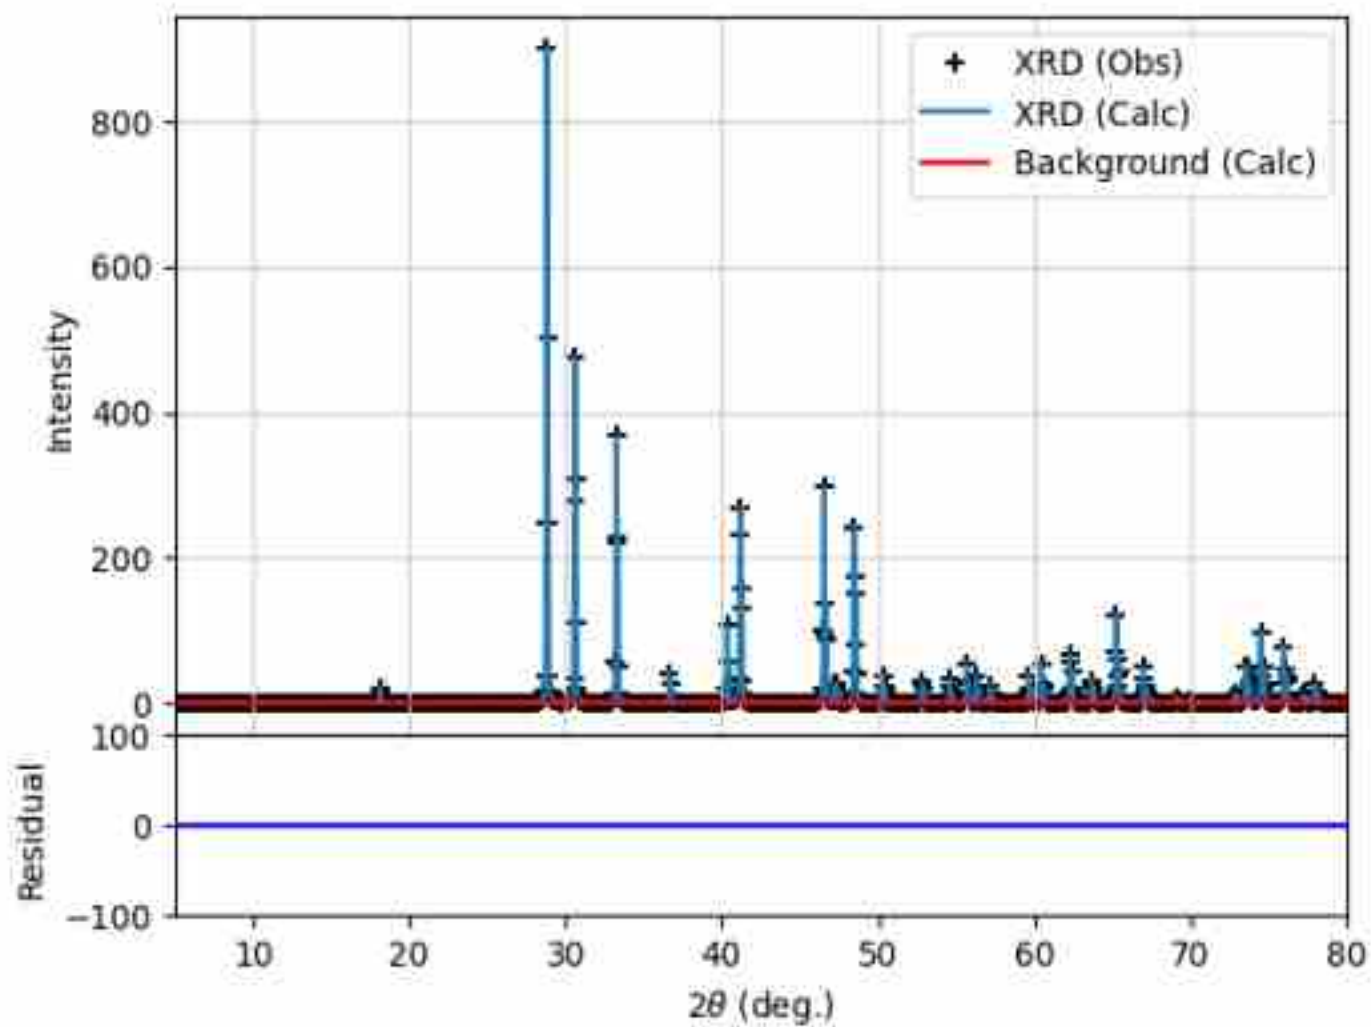

| RMSE before RR | Rwp     | RMSE after RR |
|----------------|---------|---------------|
| 0.14           | 0.00513 | 0.00038       |

# Mn1V3O8

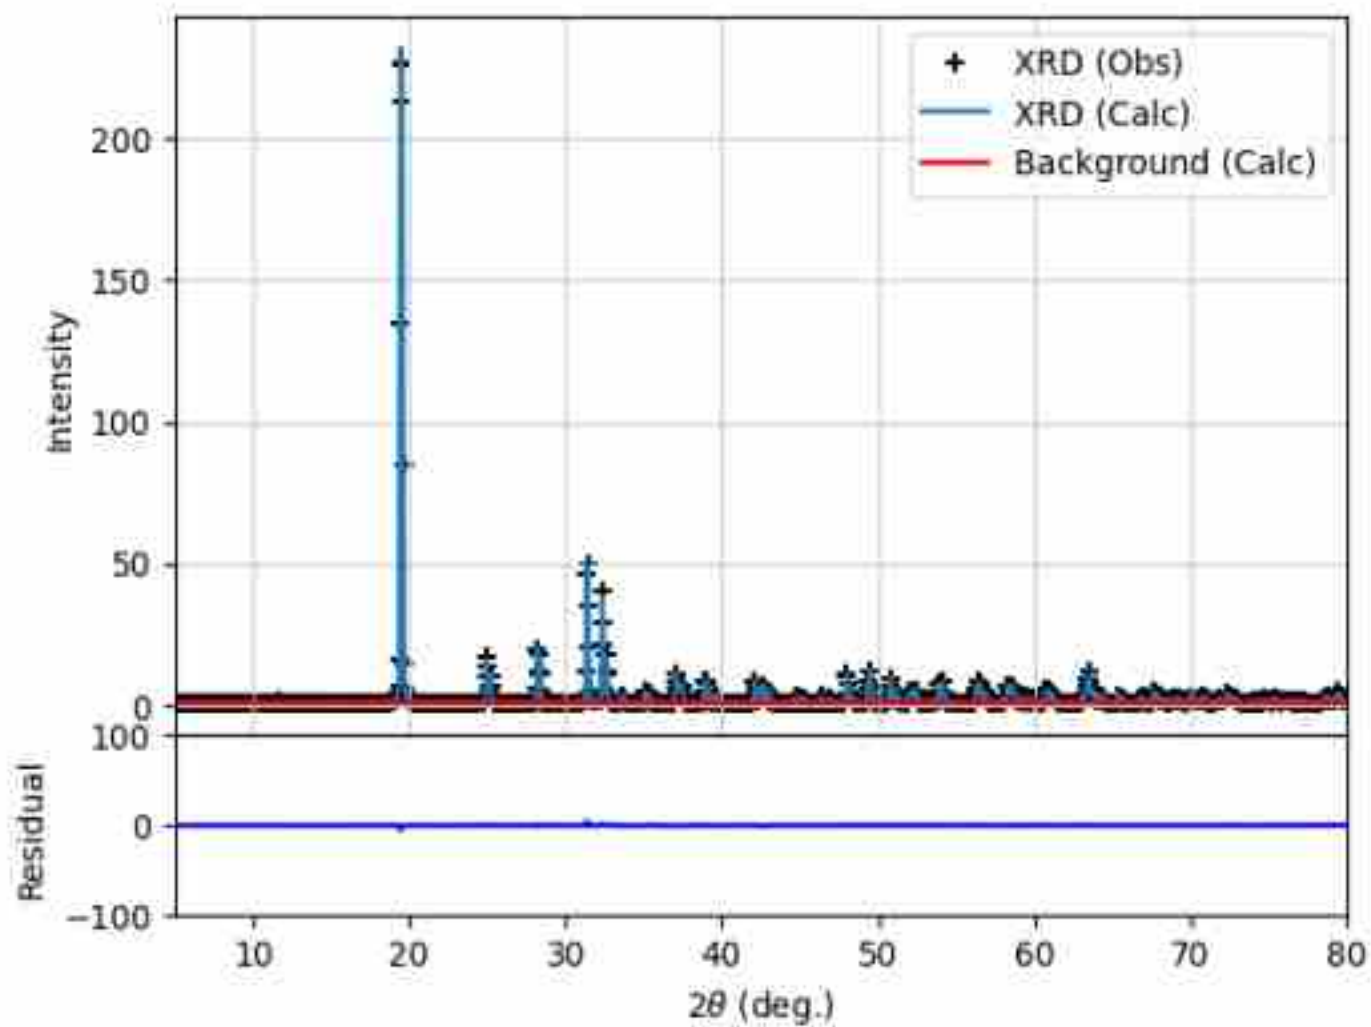

| RMSE before RR | Rwp     | RMSE after RR |
|----------------|---------|---------------|
| 0.15           | 4.29689 | 0.1716        |

# Sr<sub>2</sub>Ca<sub>2</sub>Nd<sub>2</sub>Sb<sub>2</sub>O<sub>12</sub>

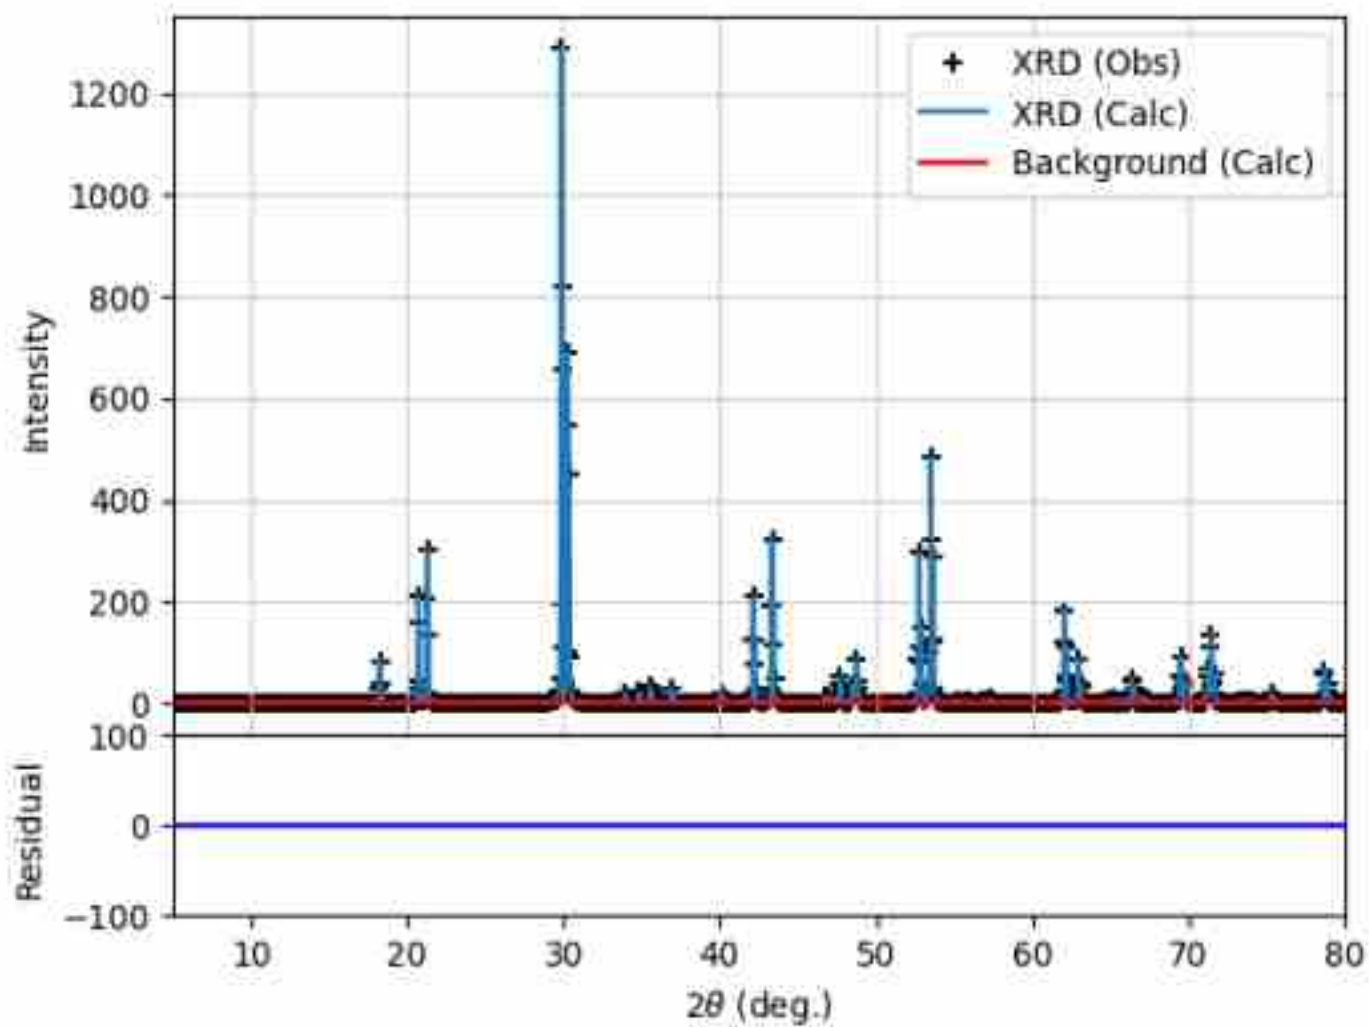

| RMSE before RR | Rwp     | RMSE after RR |
|----------------|---------|---------------|
| 0.17           | 0.00402 | 0.00164       |

# V4O7F5

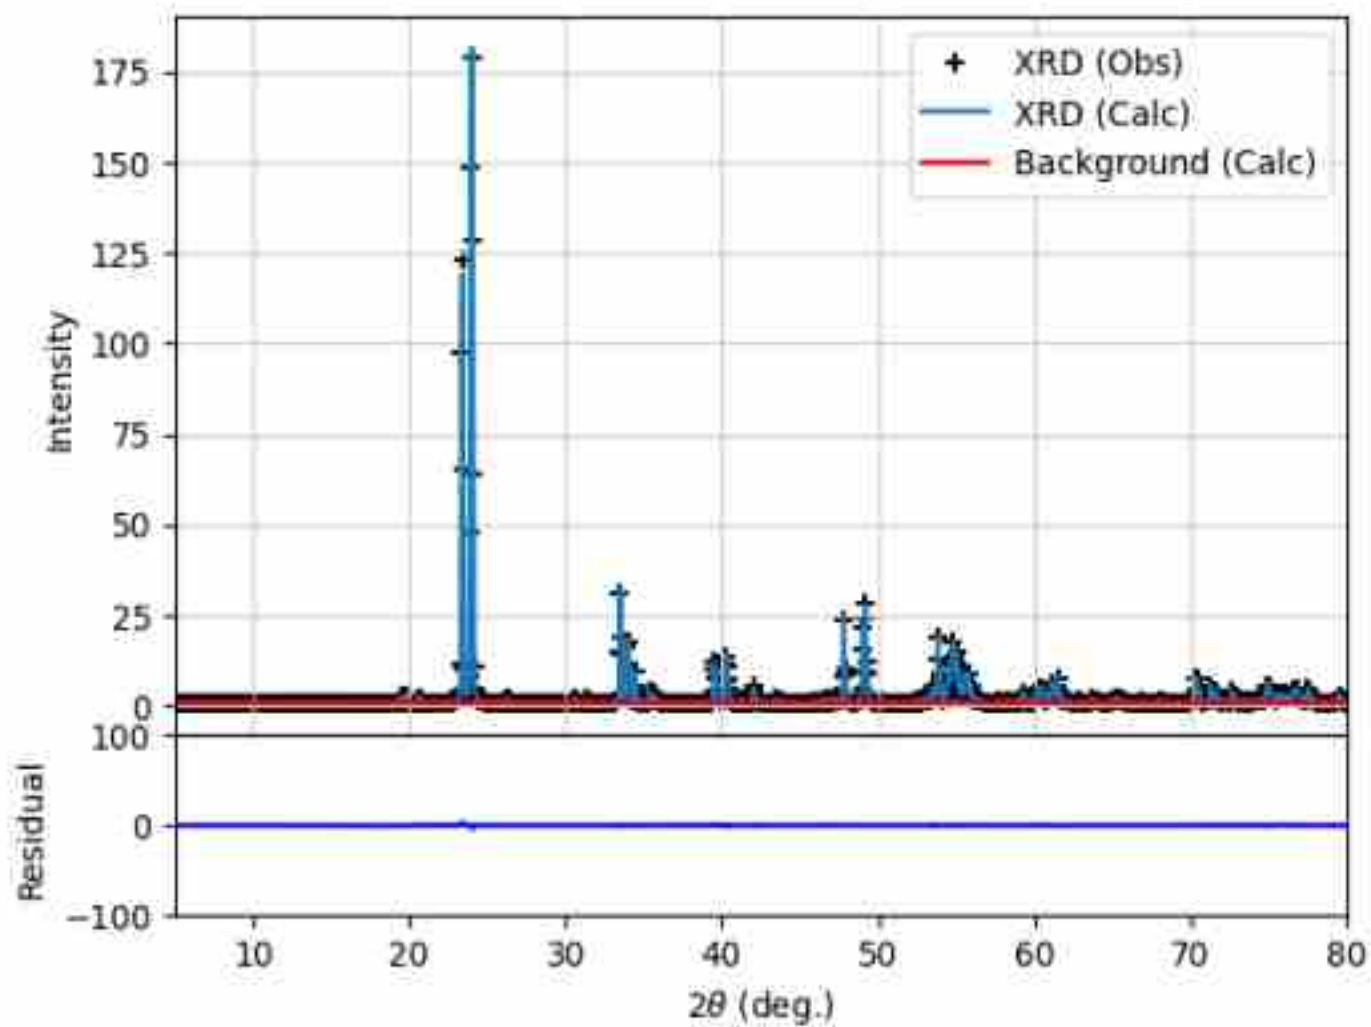

| RMSE before RR | Rwp     | RMSE after RR |
|----------------|---------|---------------|
| 0.17           | 4.02633 | 0.17672       |

# Ag<sub>8</sub>S<sub>4</sub>

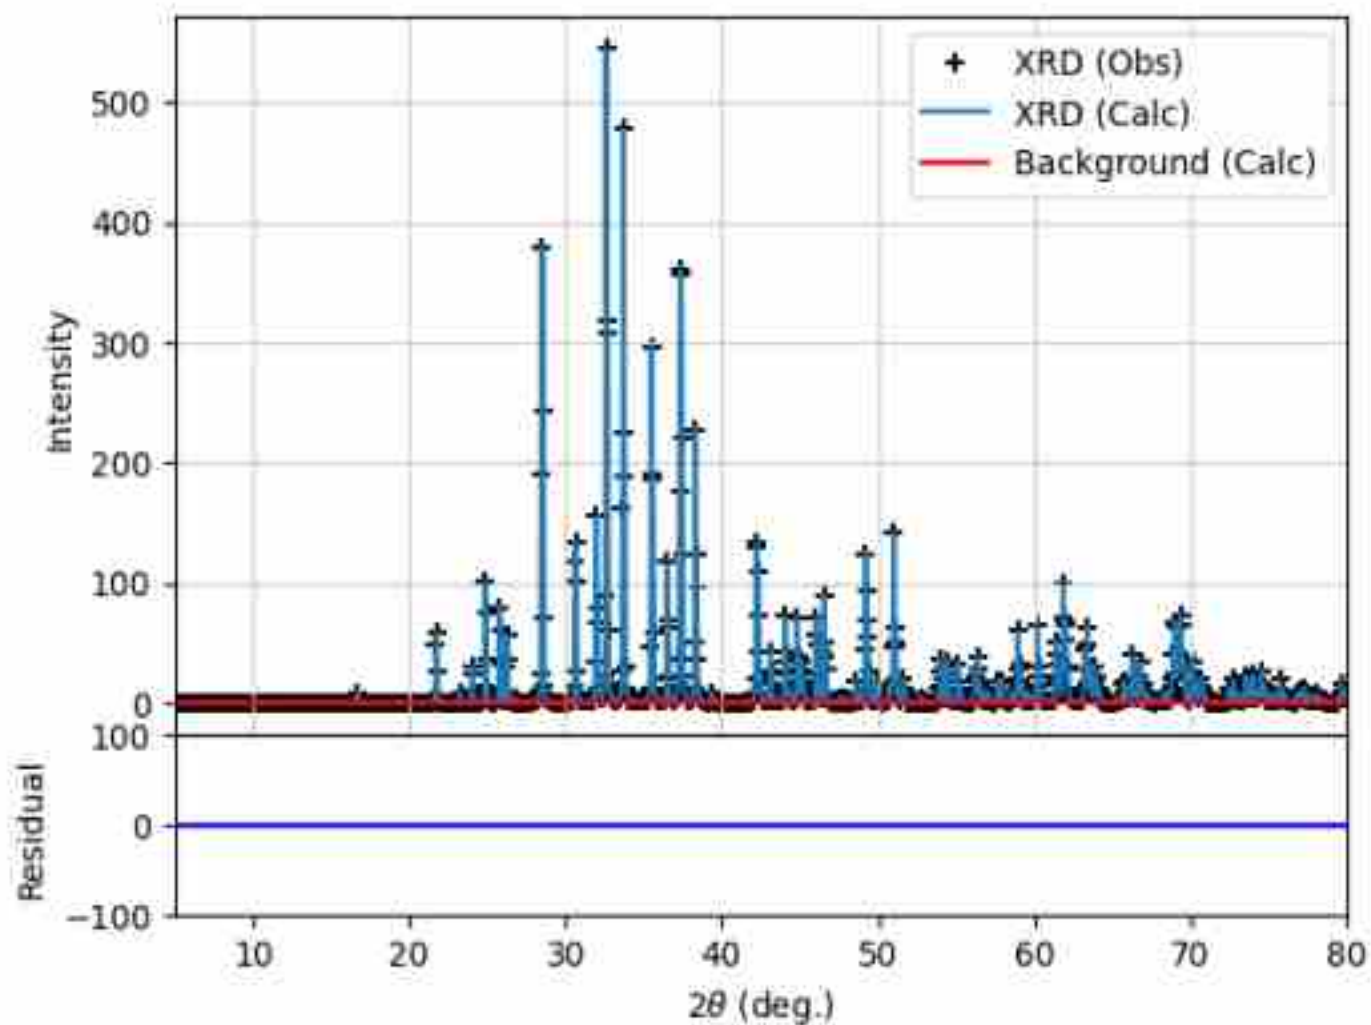

| RMSE before RR | Rwp     | RMSE after RR |
|----------------|---------|---------------|
| 0.18           | 0.00439 | 0.00059       |

# K4As4O12

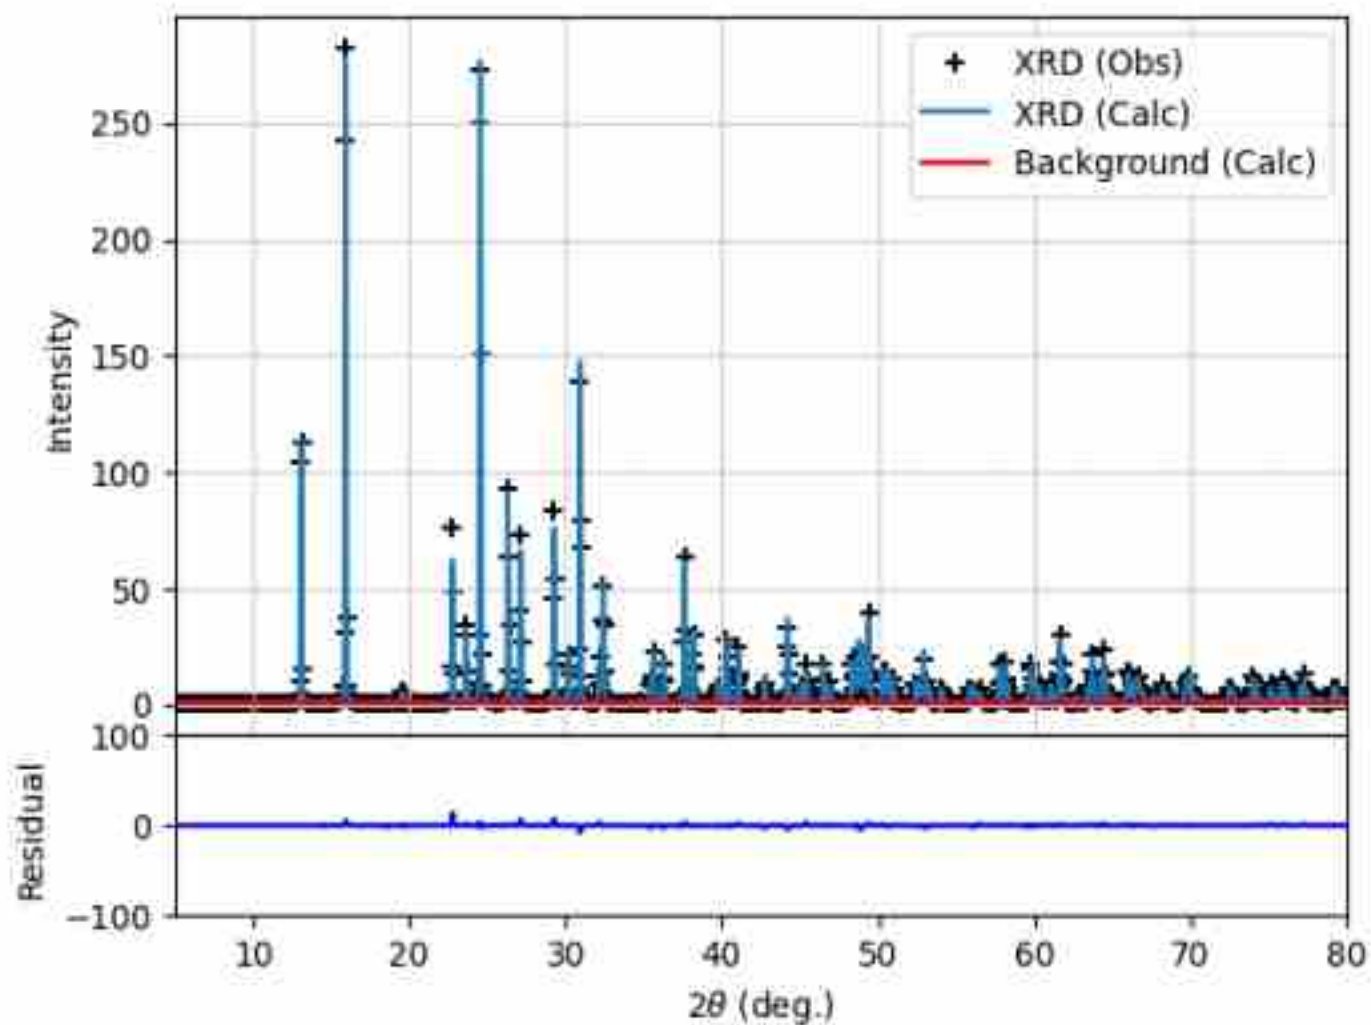

| RMSE before RR | Rwp     | RMSE after RR |
|----------------|---------|---------------|
| 0.18           | 8.53787 | 0.3022        |

# Tl4I12

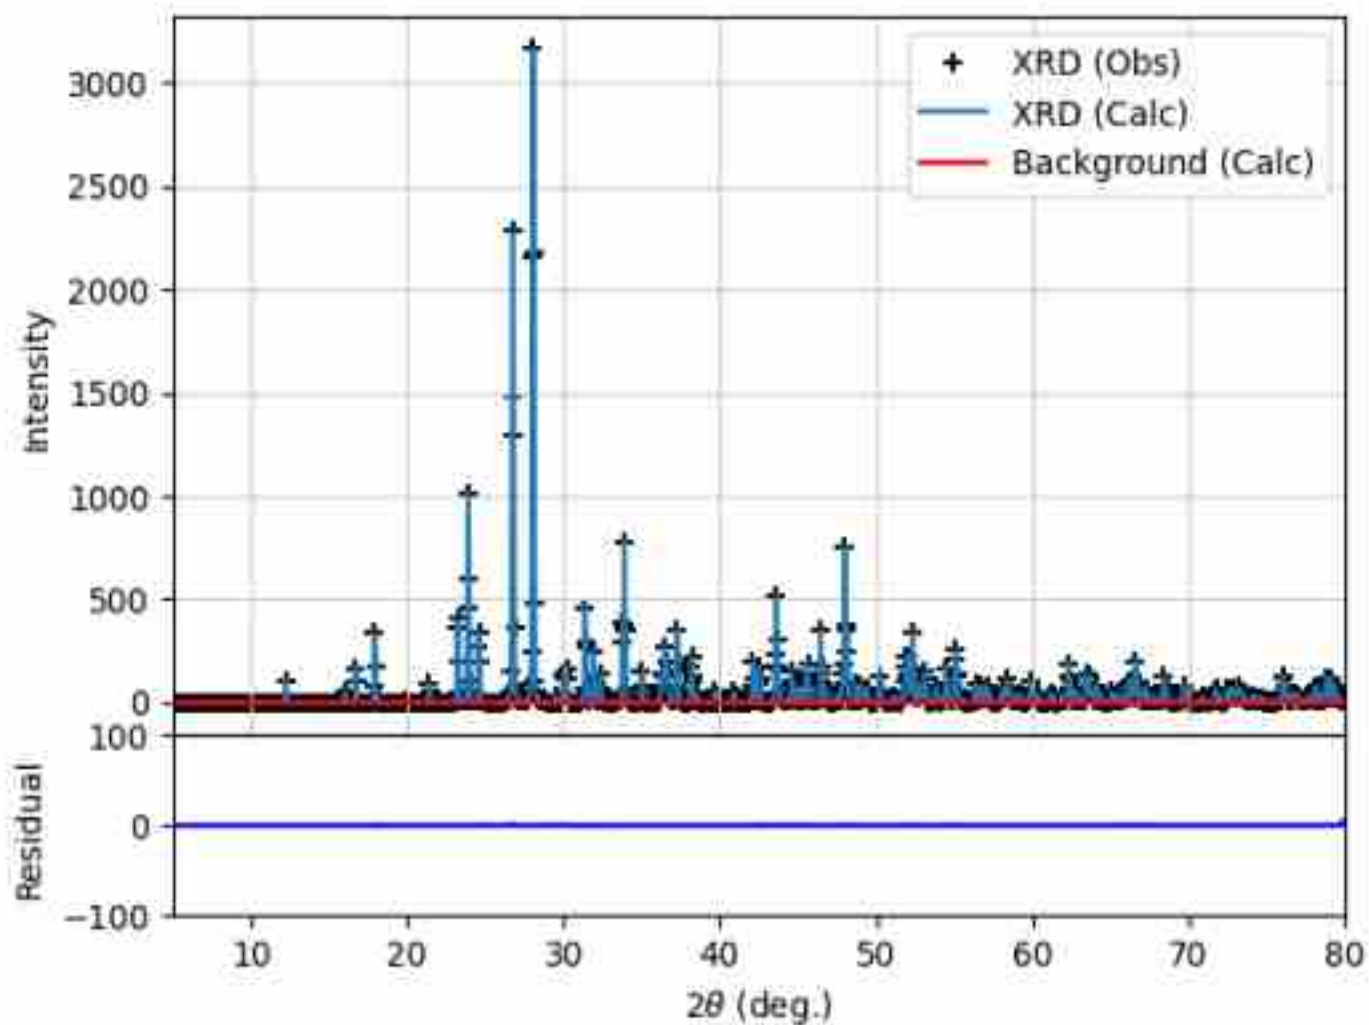

| RMSE before RR | Rwp    | RMSE after RR |
|----------------|--------|---------------|
| 0.18           | 0.8024 | 0.00653       |

# Dy<sub>4</sub>Sn<sub>2</sub>S<sub>10</sub>

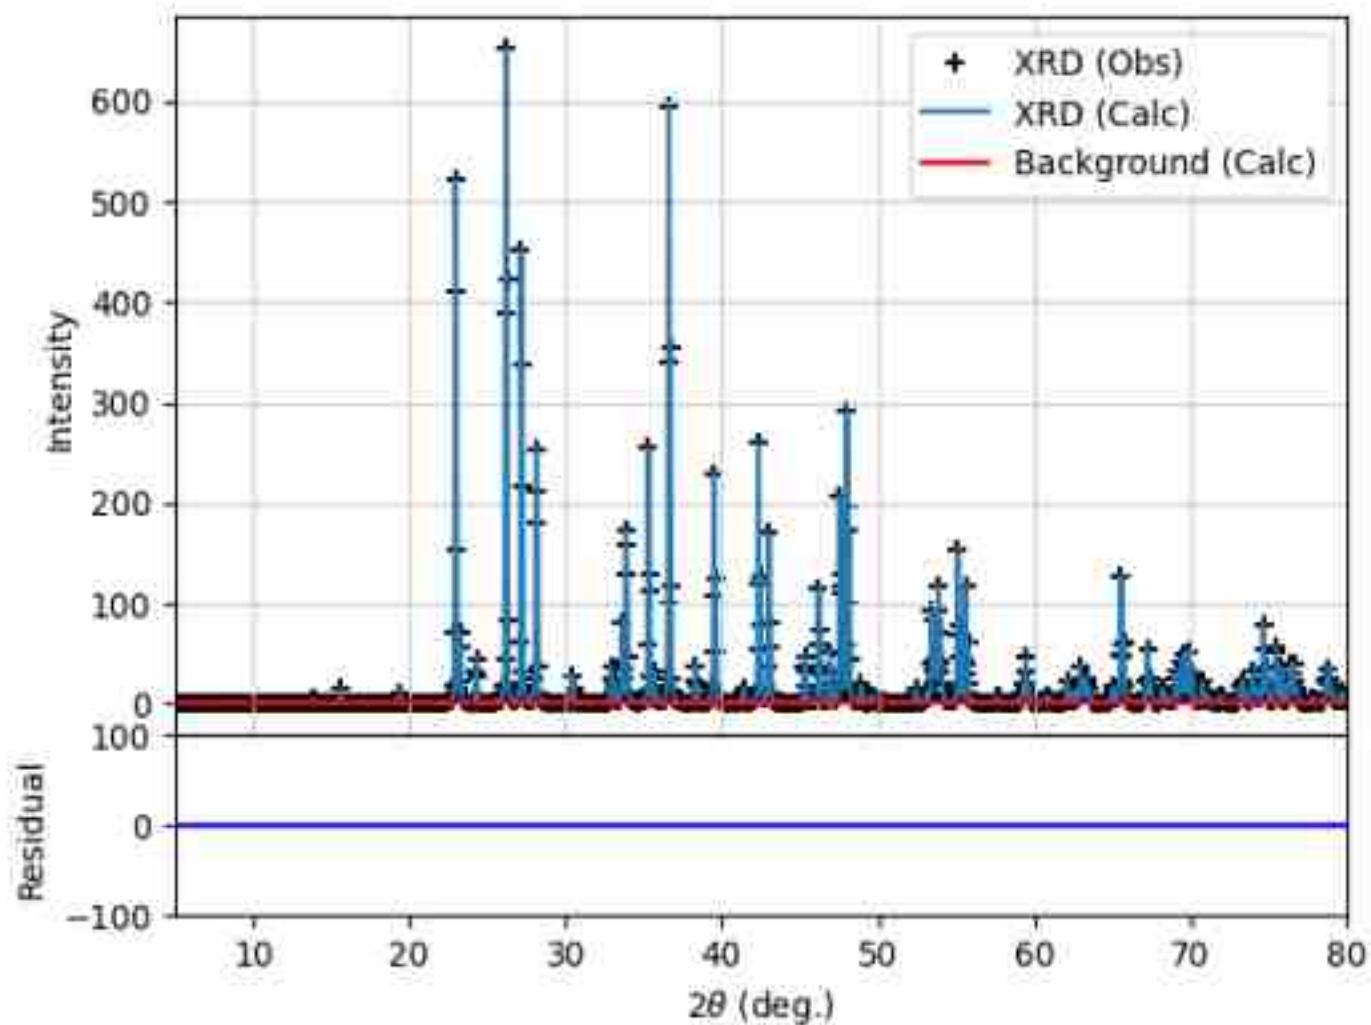

| RMSE before RR | Rwp     | RMSE after RR |
|----------------|---------|---------------|
| 0.19           | 0.04602 | 0.00246       |



# Na<sub>1</sub>Li<sub>1</sub>La<sub>2</sub>Ti<sub>4</sub>O<sub>12</sub>

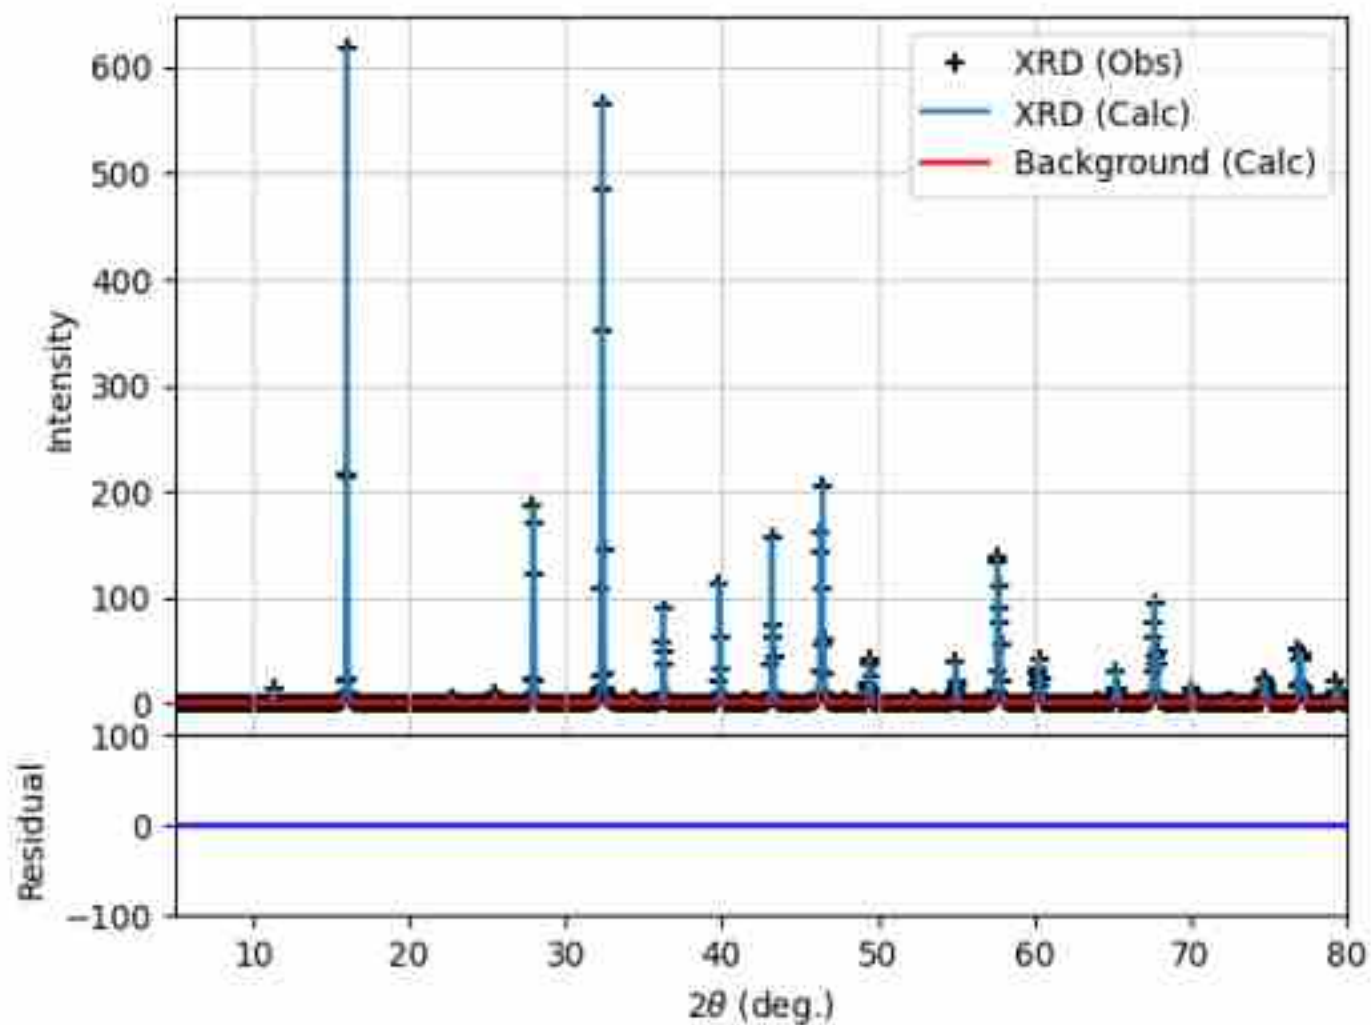

| RMSE before RR | Rwp     | RMSE after RR |
|----------------|---------|---------------|
| 0.19           | 0.01598 | 0.00378       |

# Cs12Ga2Sb6

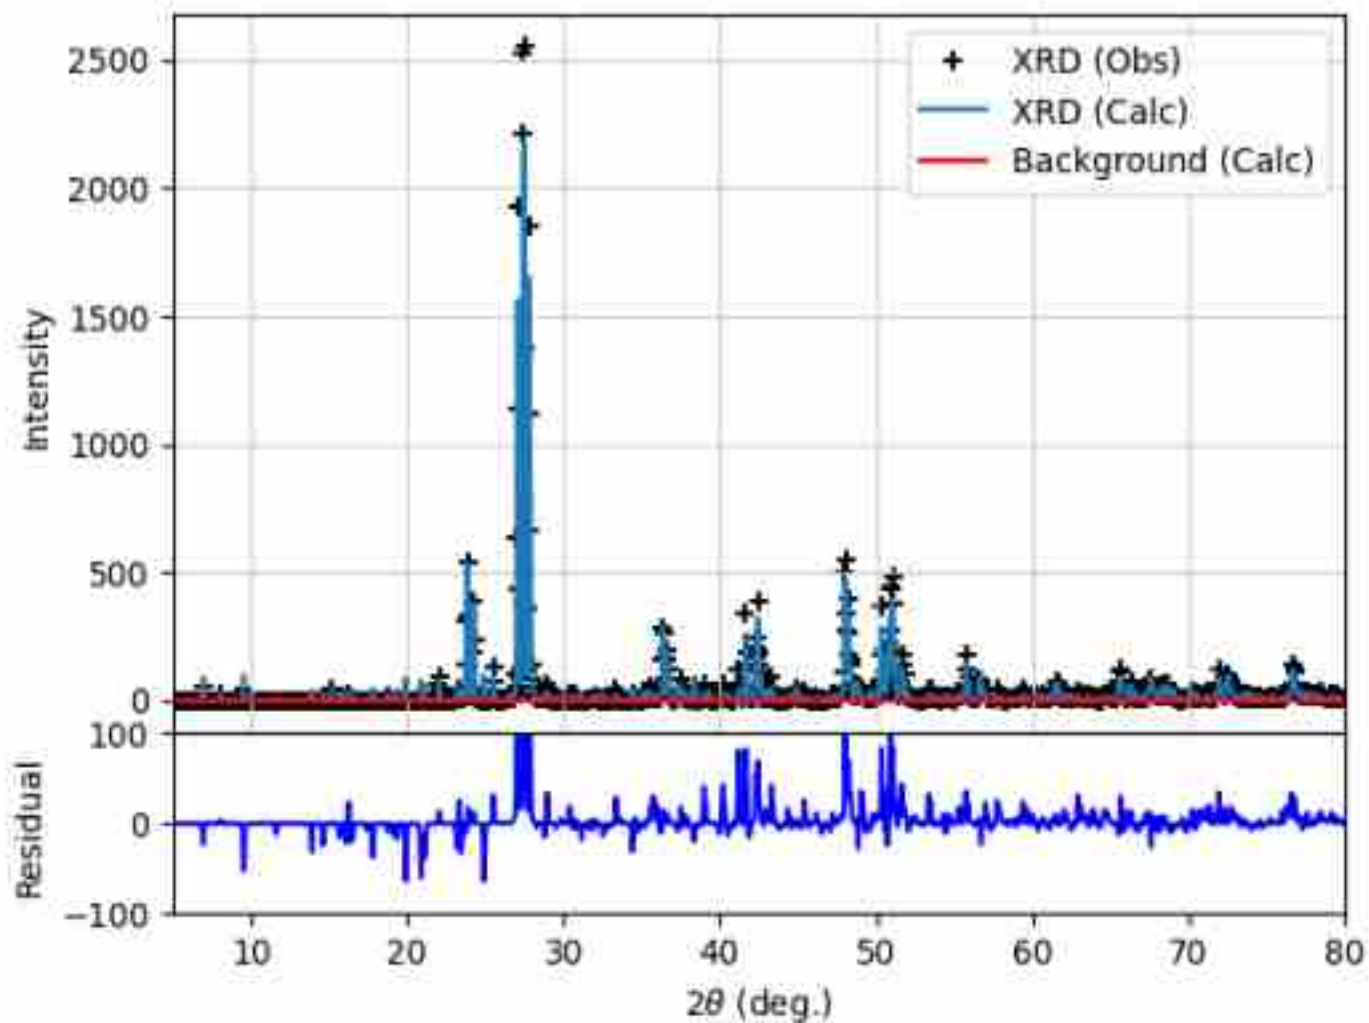

| RMSE before RR | Rwp      | RMSE after RR |
|----------------|----------|---------------|
| 0.21           | 34.72102 | 0.46013       |

# Li14Ge4

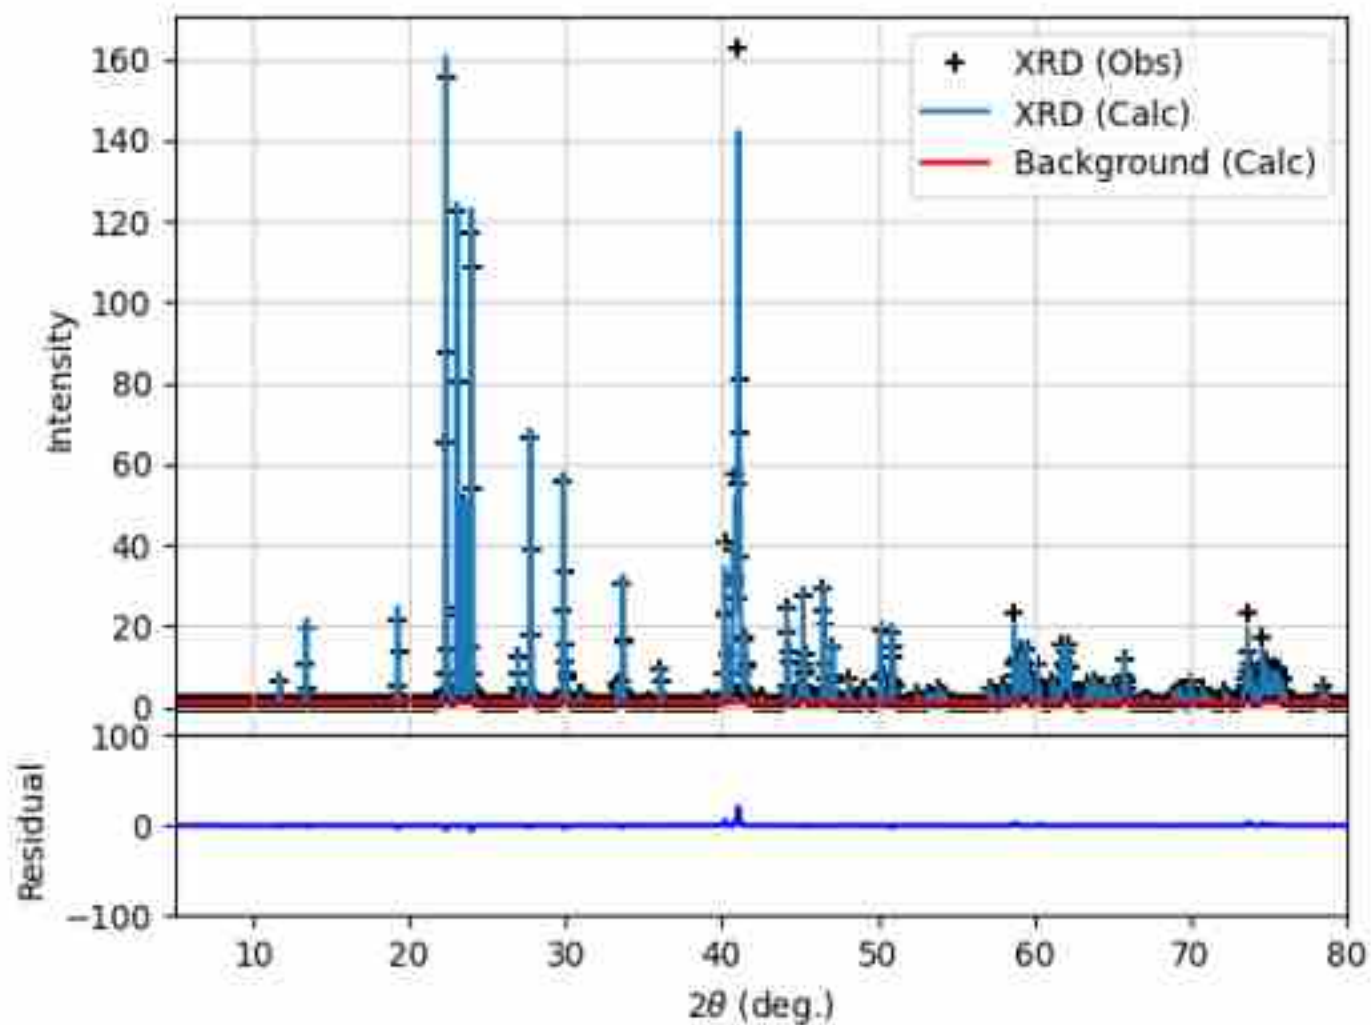

| RMSE before RR | Rwp     | RMSE after RR |
|----------------|---------|---------------|
| 0.21           | 6.78921 | None          |

# As<sub>4</sub>C112O<sub>4</sub>

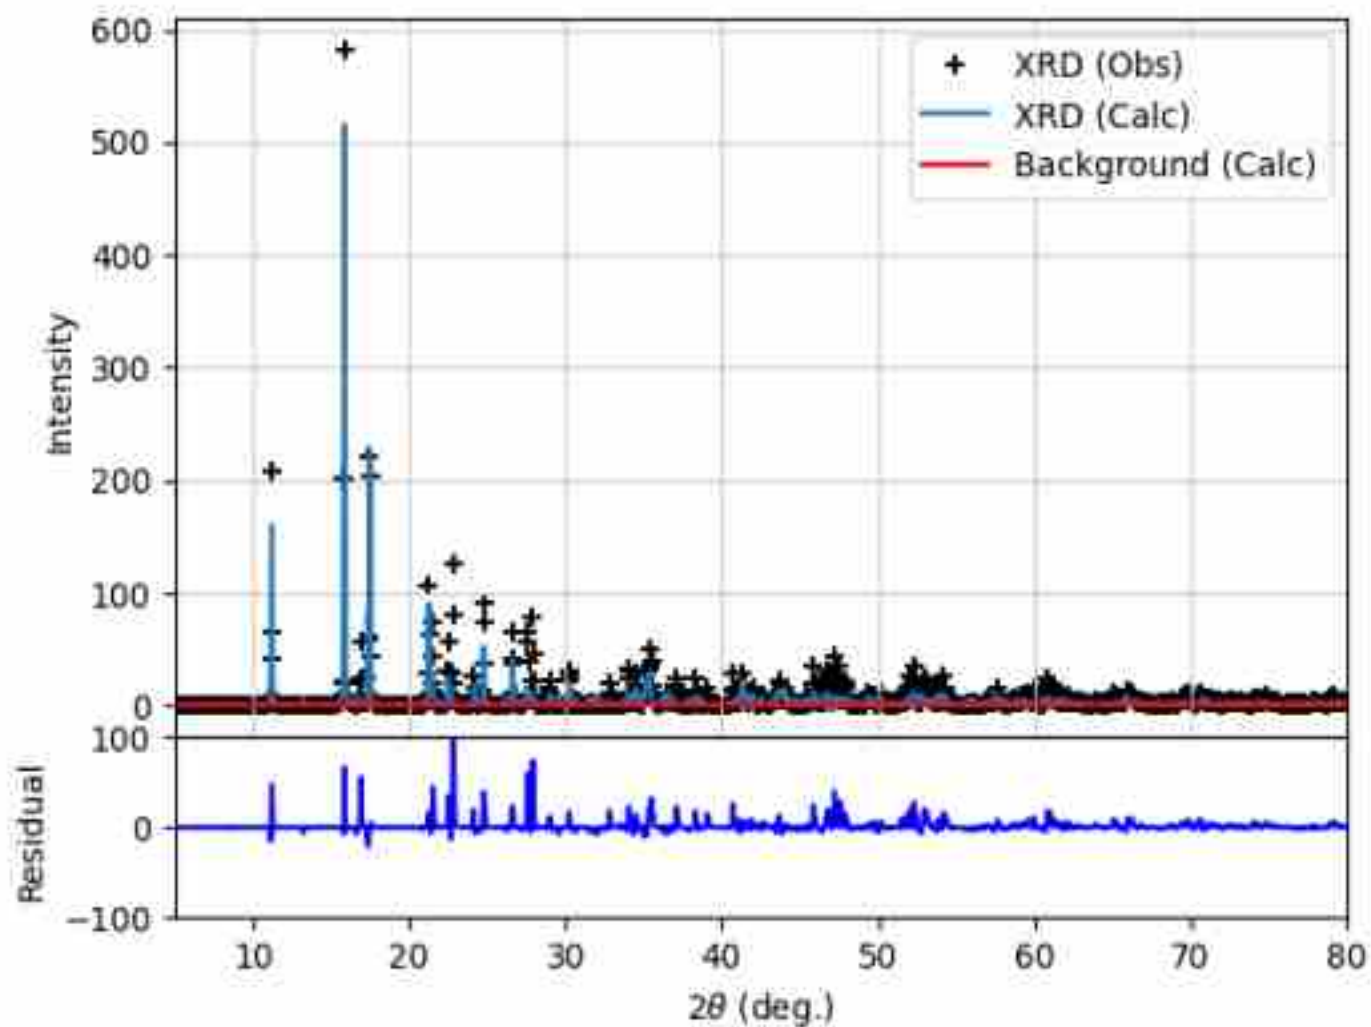

| RMSE before RR | Rwp      | RMSE after RR |
|----------------|----------|---------------|
| 0.22           | 58.38508 | 0.39053       |

# Ni10Ge6

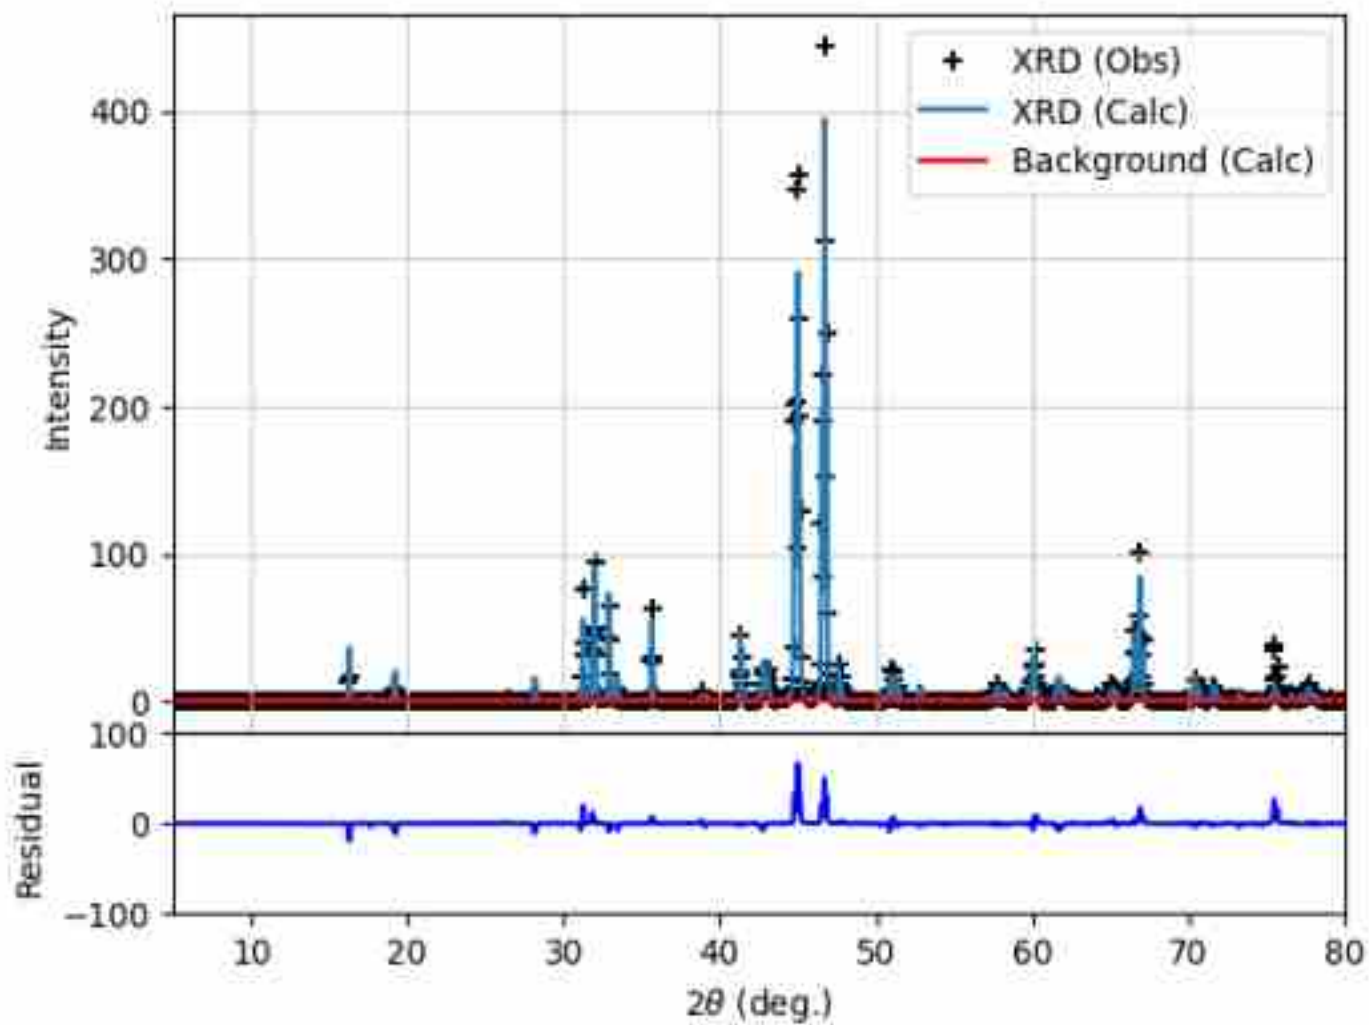

| RMSE before RR | Rwp      | RMSE after RR |
|----------------|----------|---------------|
| 0.22           | 26.50394 | 0.45716       |

# Nb<sub>3</sub>W<sub>1</sub>Se<sub>8</sub>

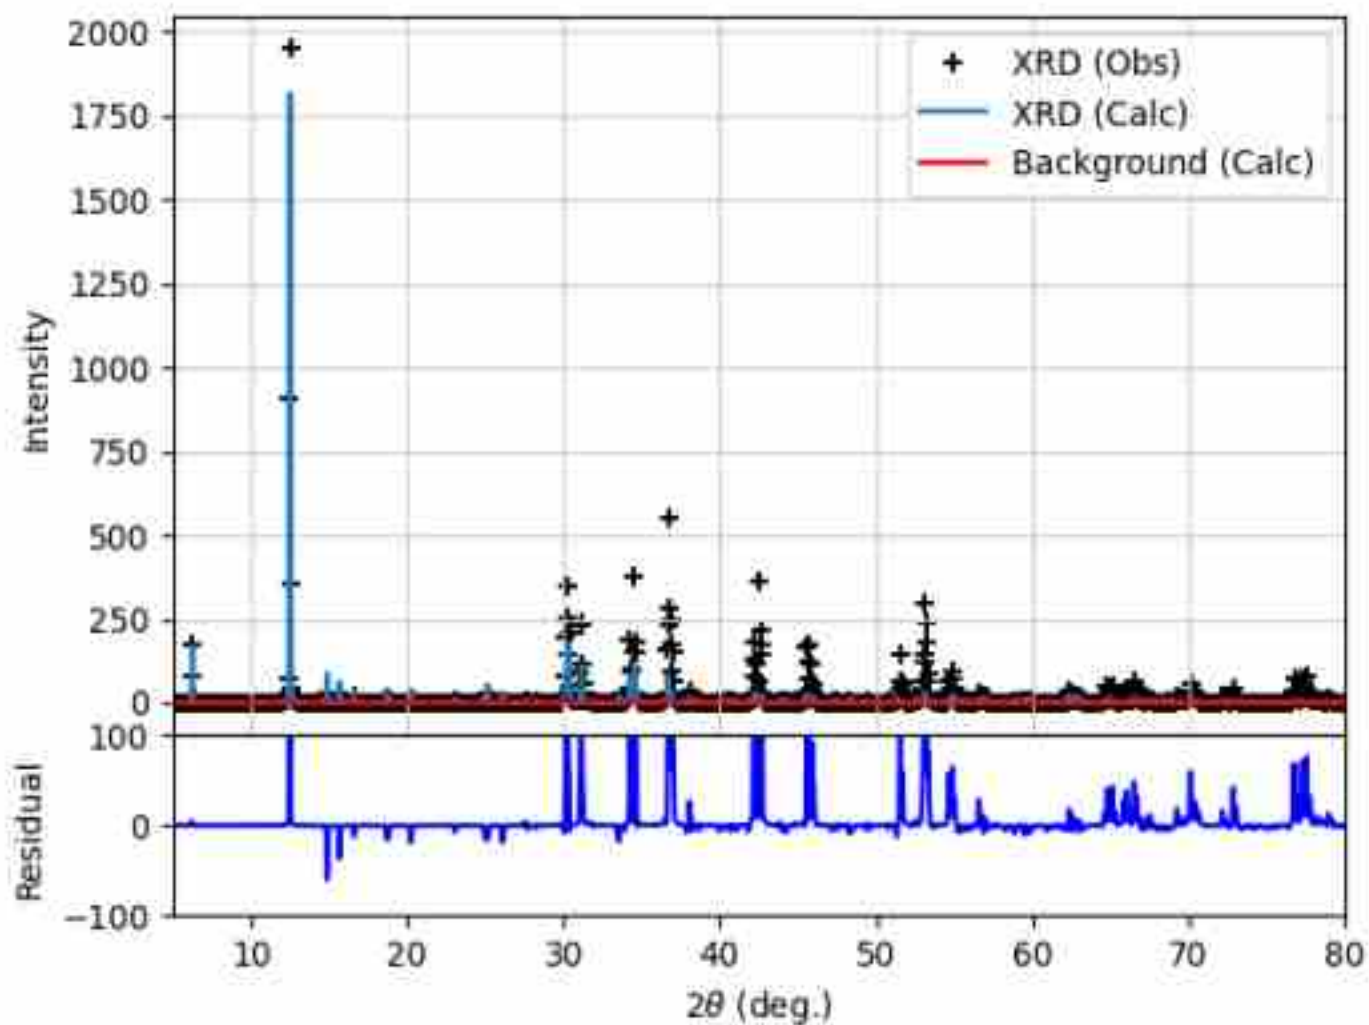

| RMSE before RR | Rwp      | RMSE after RR |
|----------------|----------|---------------|
| 0.23           | 70.51303 | None          |

# Tb4Sm2S8

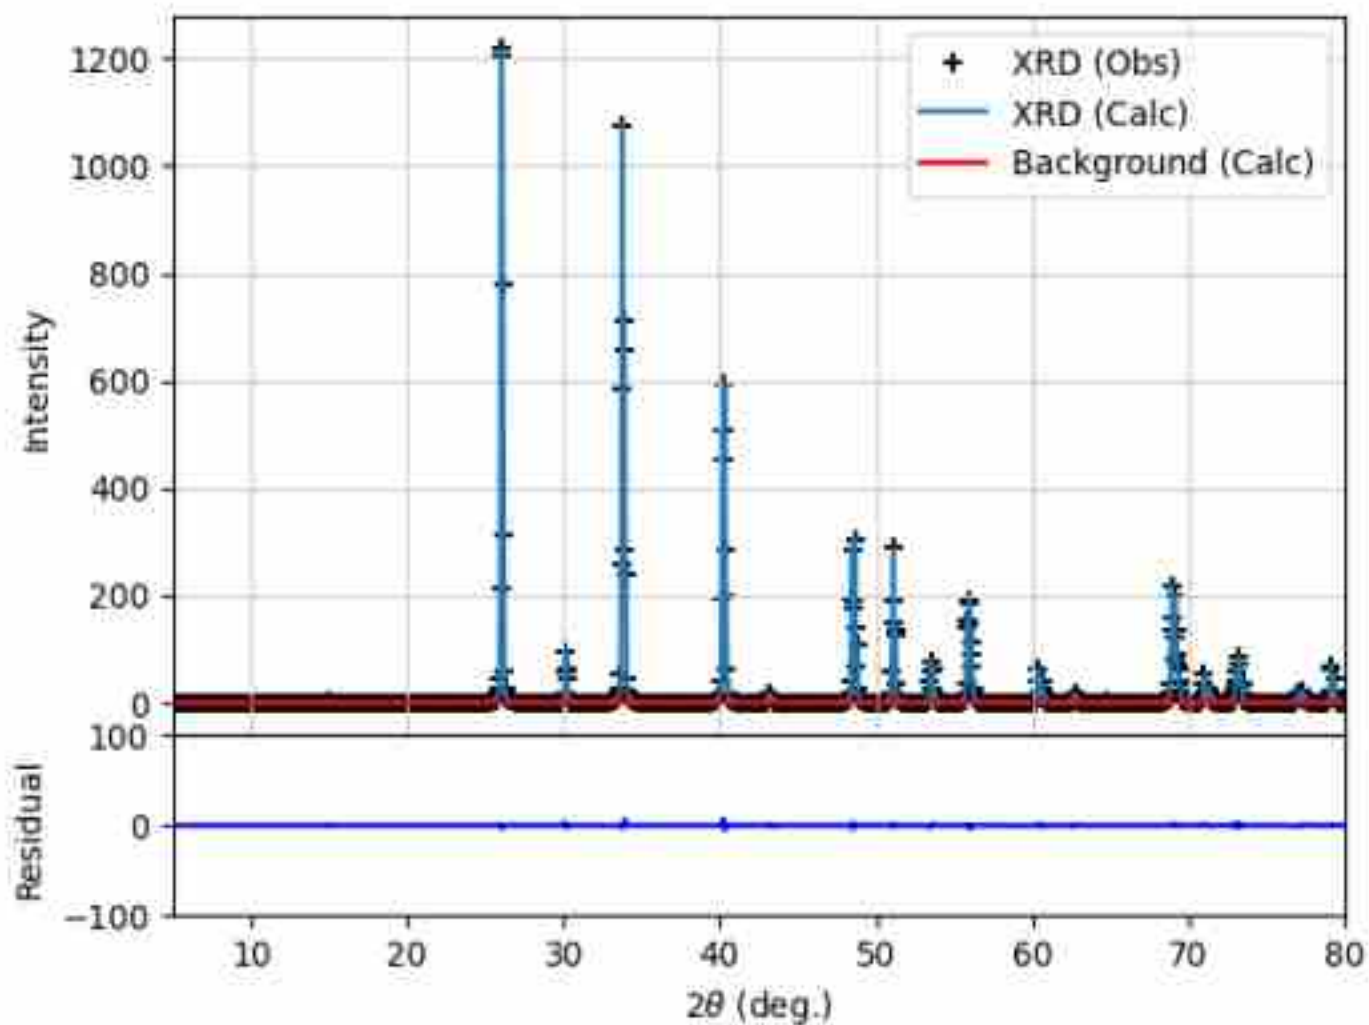

| RMSE before RR | Rwp     | RMSE after RR |
|----------------|---------|---------------|
| 0.23           | 1.75366 | 0.01811       |

# Li<sub>2</sub>Cu<sub>2</sub>C<sub>2</sub>O<sub>6</sub>

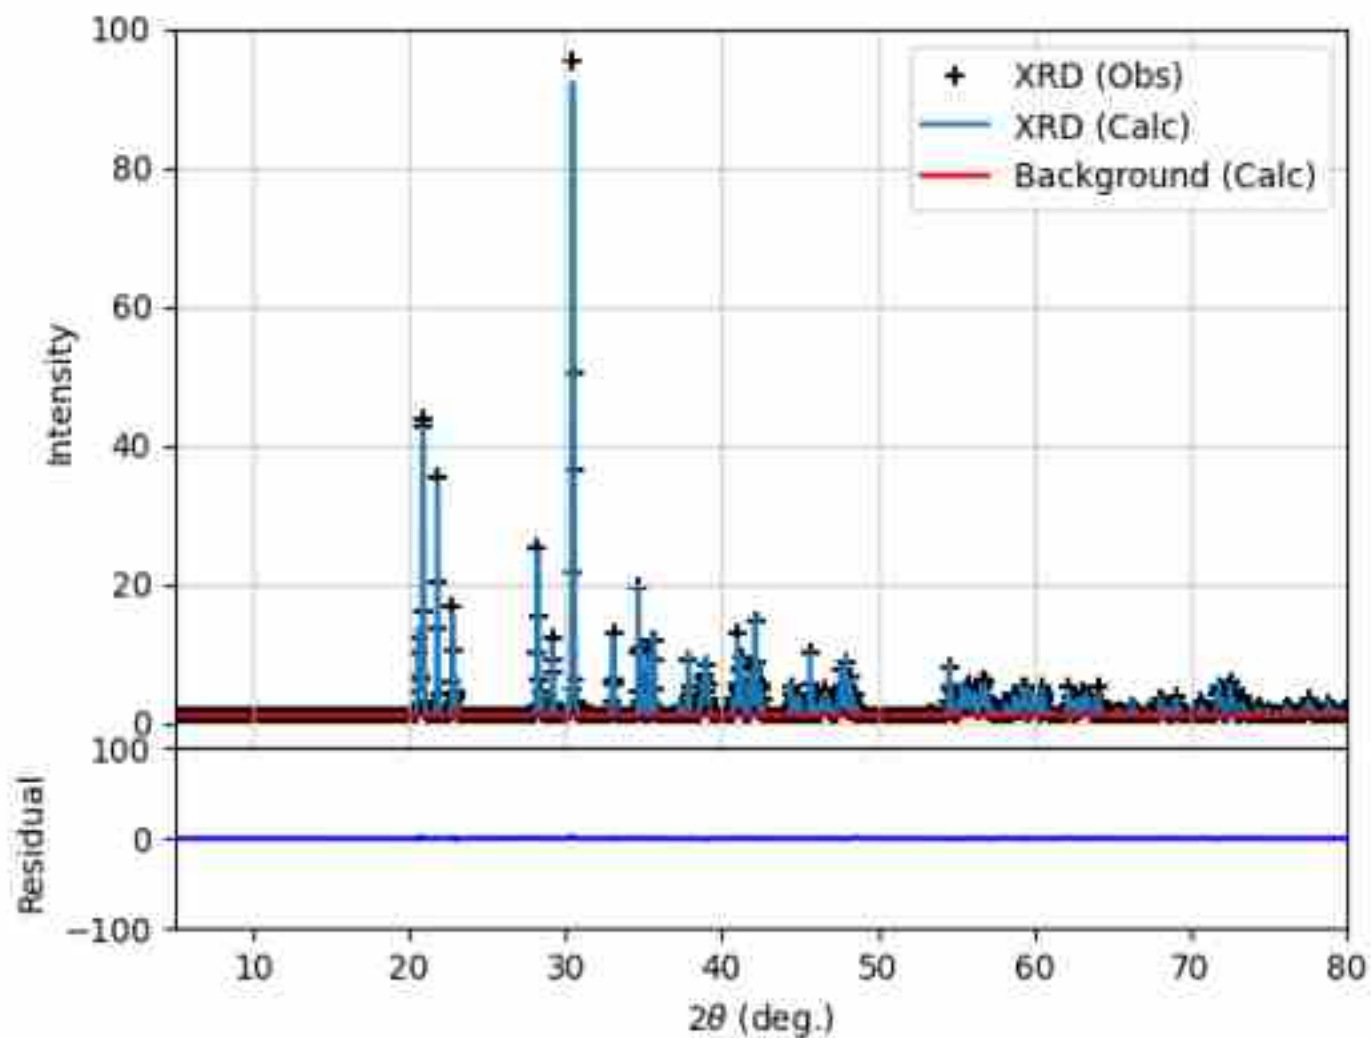

| RMSE before RR | Rwp     | RMSE after RR |
|----------------|---------|---------------|
| 0.24           | 7.01347 | None          |



# Pb<sub>2</sub>Au<sub>2</sub>O<sub>4</sub>

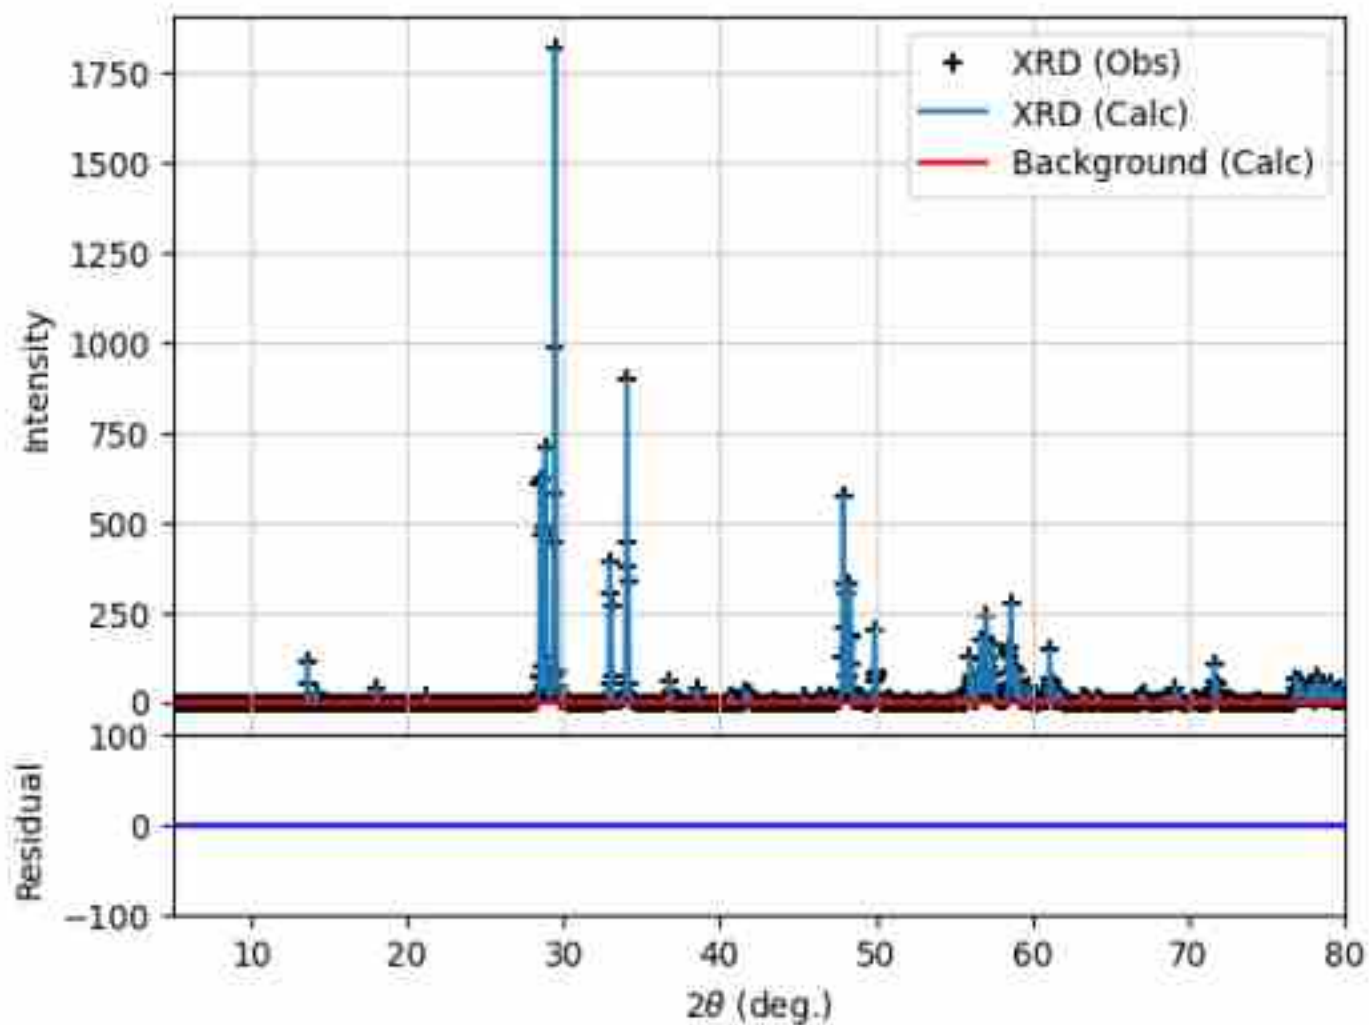

| RMSE before RR | Rwp     | RMSE after RR |
|----------------|---------|---------------|
| 0.24           | 0.00309 | 0.00098       |

# Co4P8

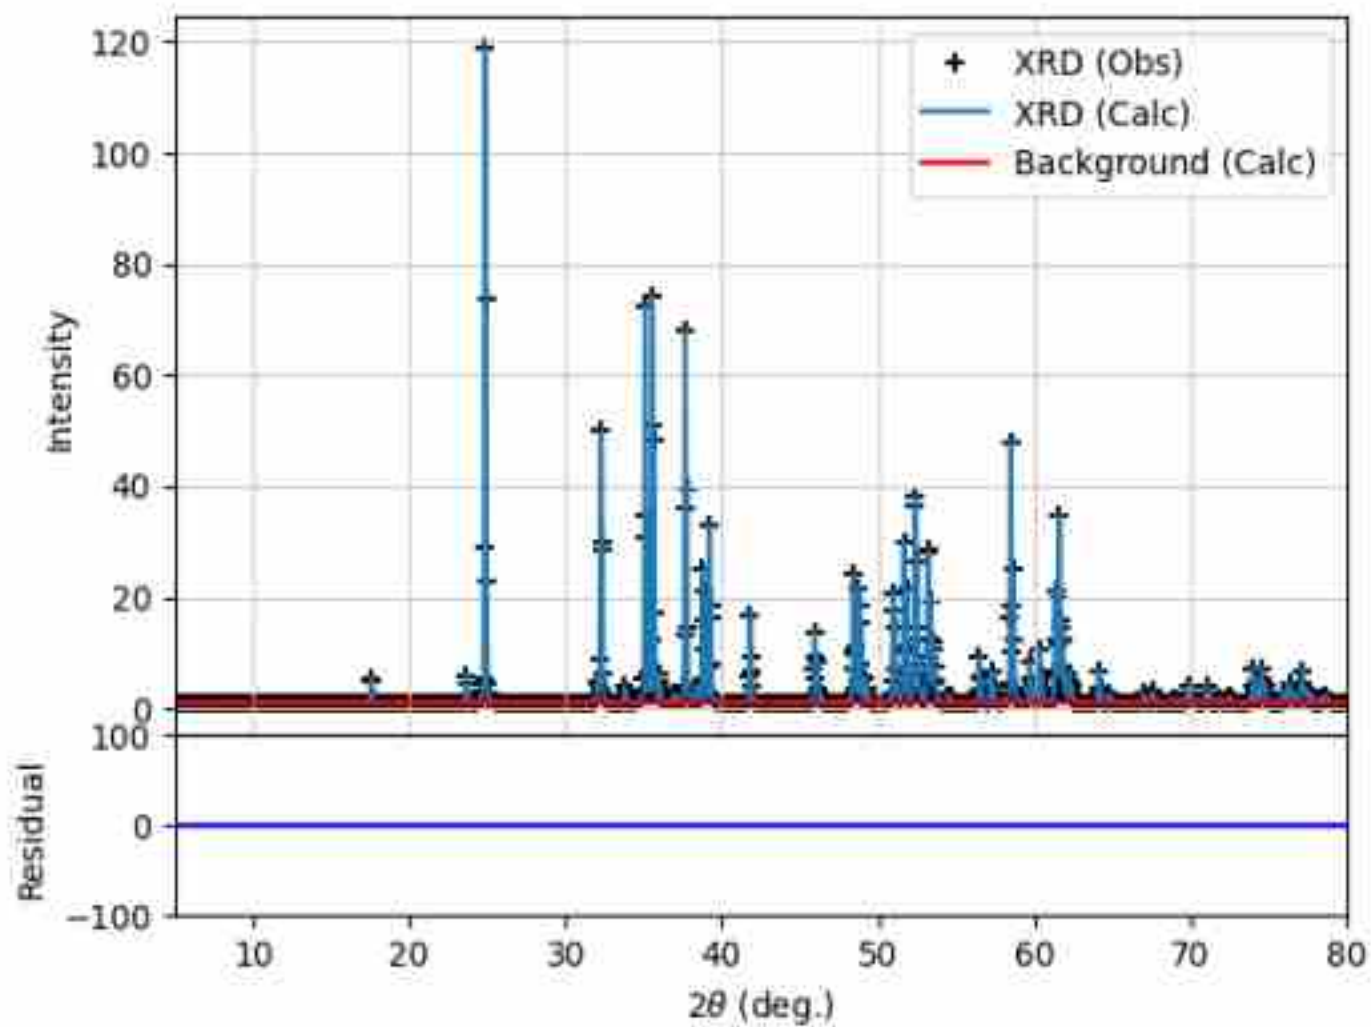

| RMSE before RR | Rwp    | RMSE after RR |
|----------------|--------|---------------|
| 0.25           | 0.0029 | 0.00033       |

# Zr<sub>2</sub>U<sub>6</sub>S<sub>12</sub>

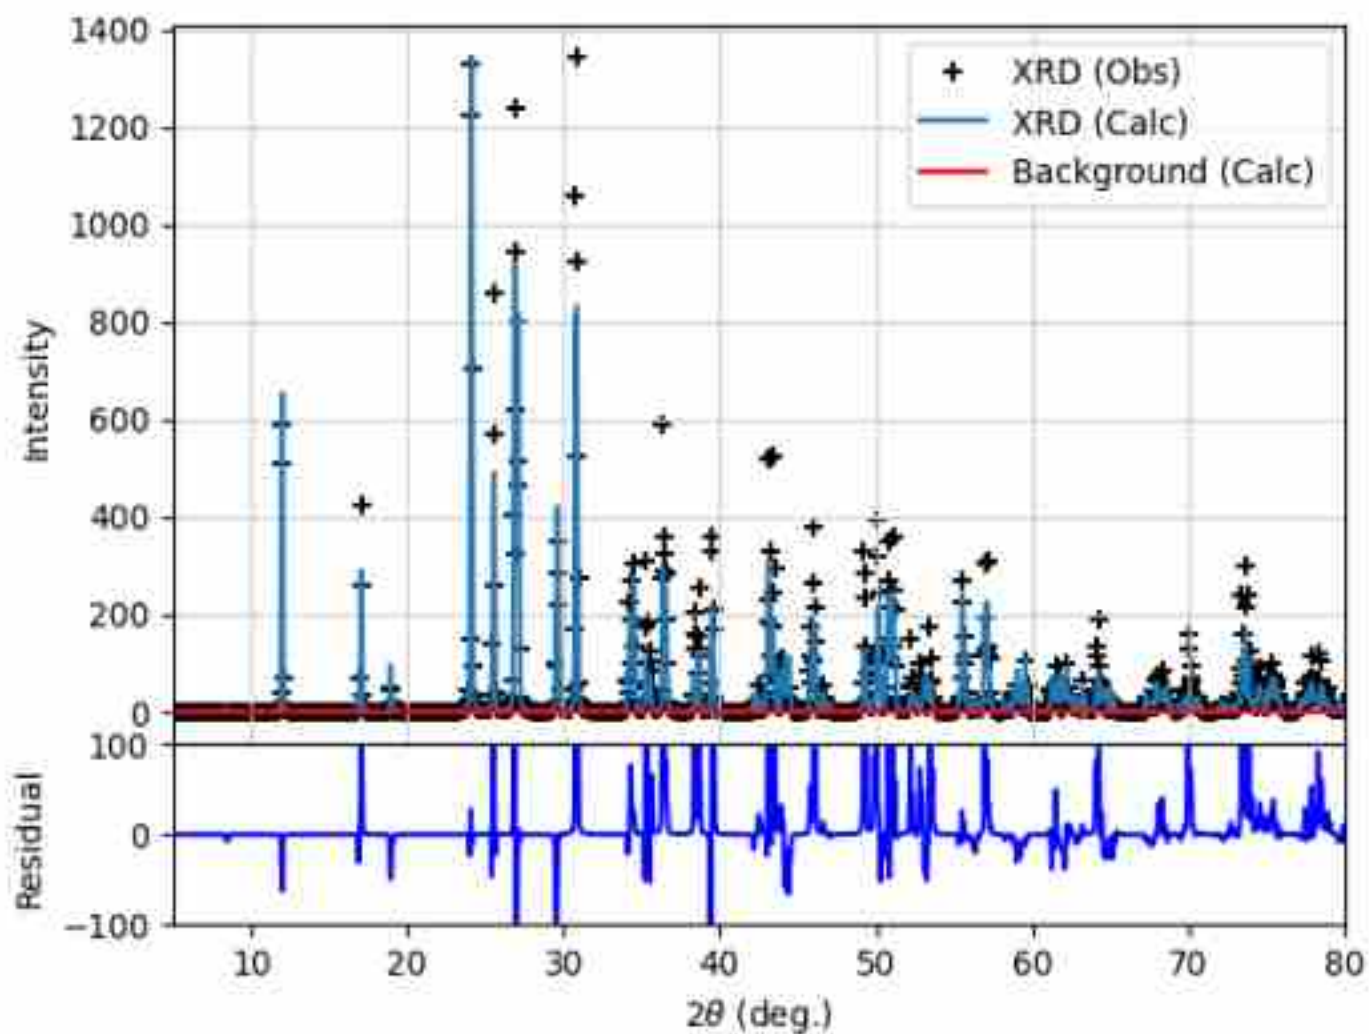

| RMSE before RR | Rwp      | RMSE after RR |
|----------------|----------|---------------|
| 0.25           | 44.45681 | None          |

# Cr<sub>2</sub>Fe<sub>2</sub>Co<sub>2</sub>Ni<sub>2</sub>

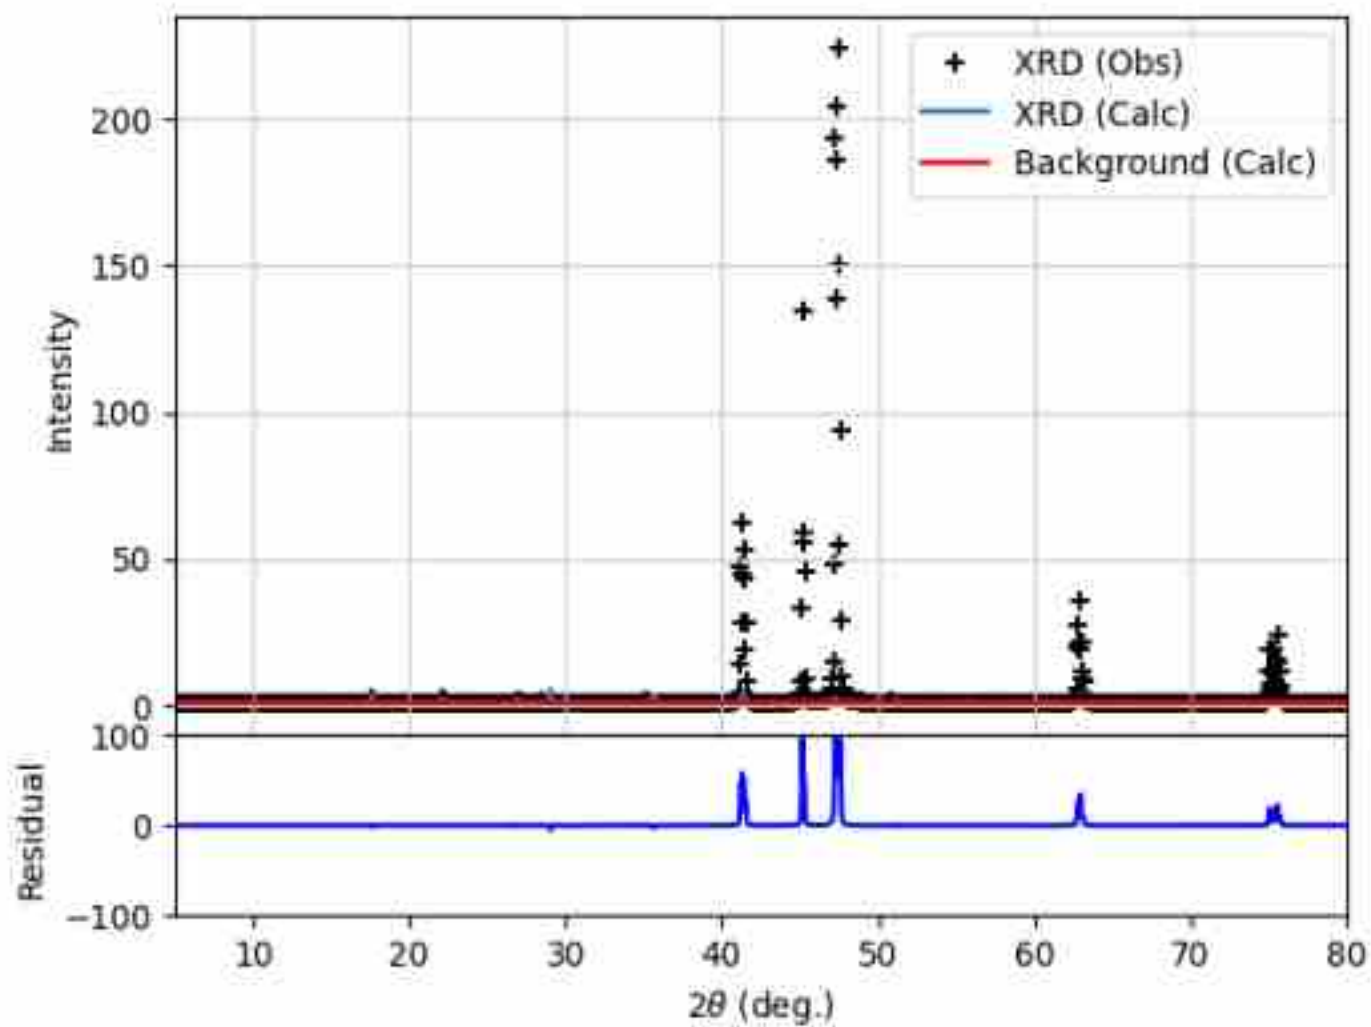

| RMSE before RR | Rwp      | RMSE after RR |
|----------------|----------|---------------|
| 0.27           | 76.91589 | 0.32234       |

# Na<sub>3</sub>Mo<sub>10</sub>F<sub>3</sub>

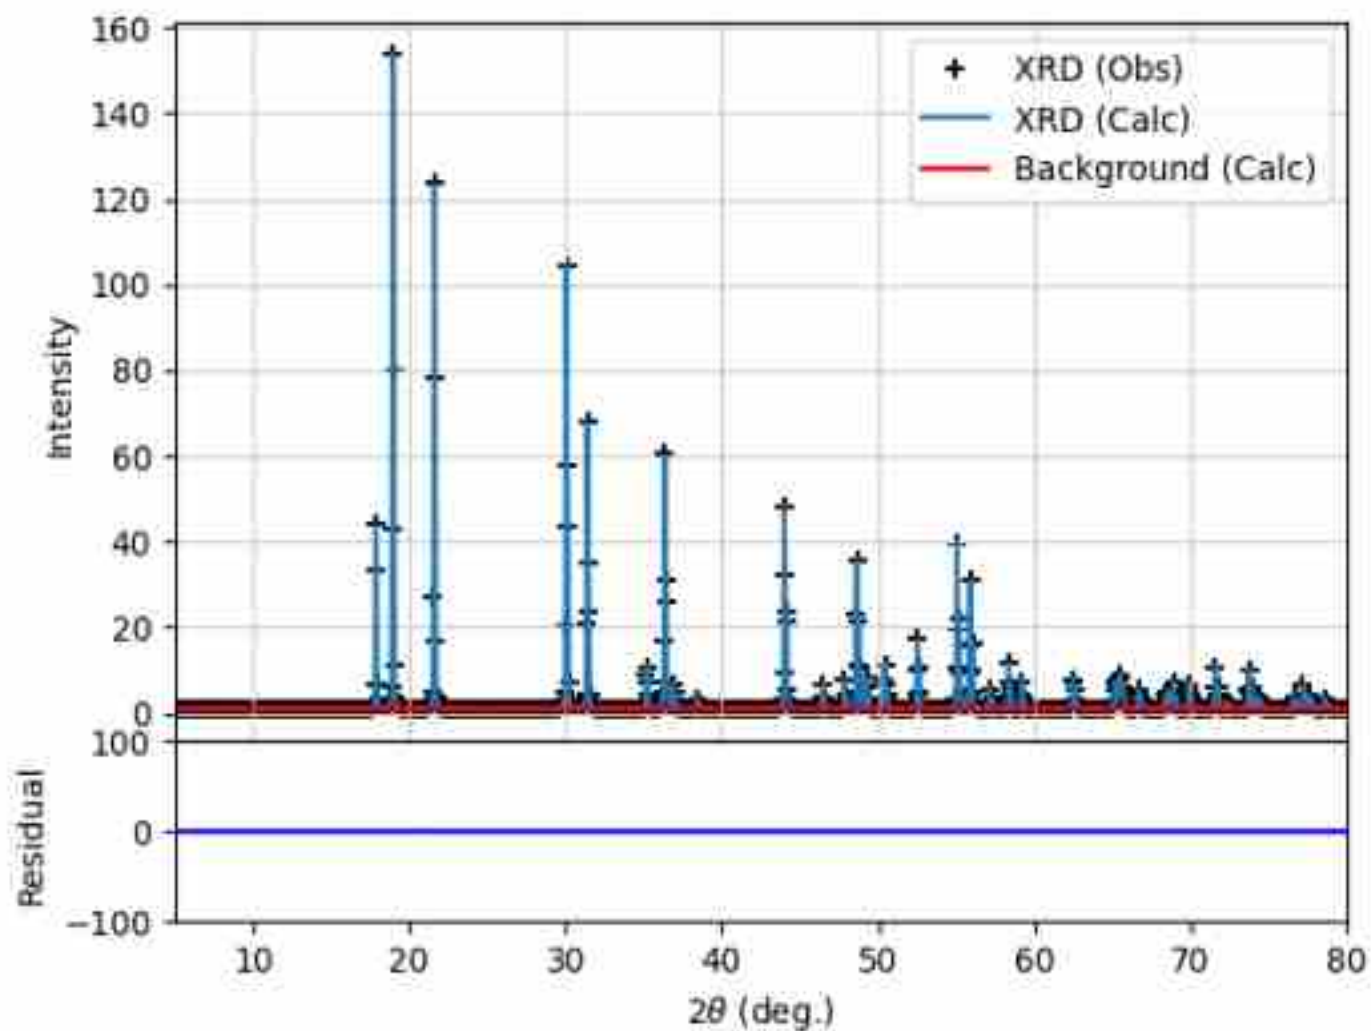

| RMSE before RR | Rwp    | RMSE after RR |
|----------------|--------|---------------|
| 0.27           | 0.5761 | 0.28799       |

# Hf6N4O6

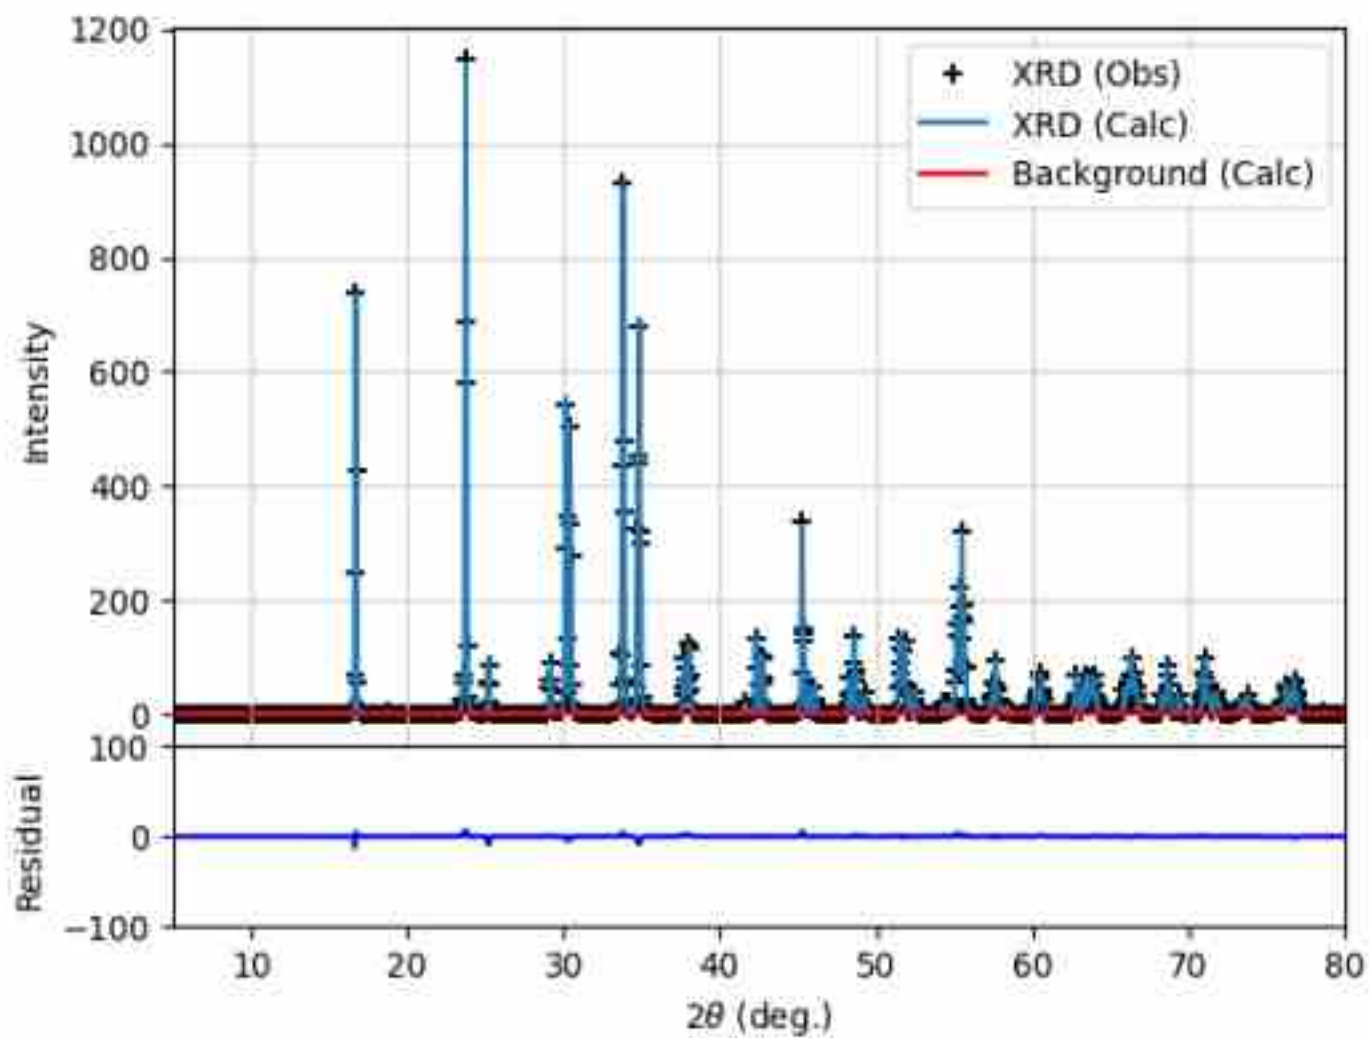

| RMSE before RR | Rwp     | RMSE after RR |
|----------------|---------|---------------|
| 0.28           | 1.76487 | 0.27694       |

# Li6Cr2O8

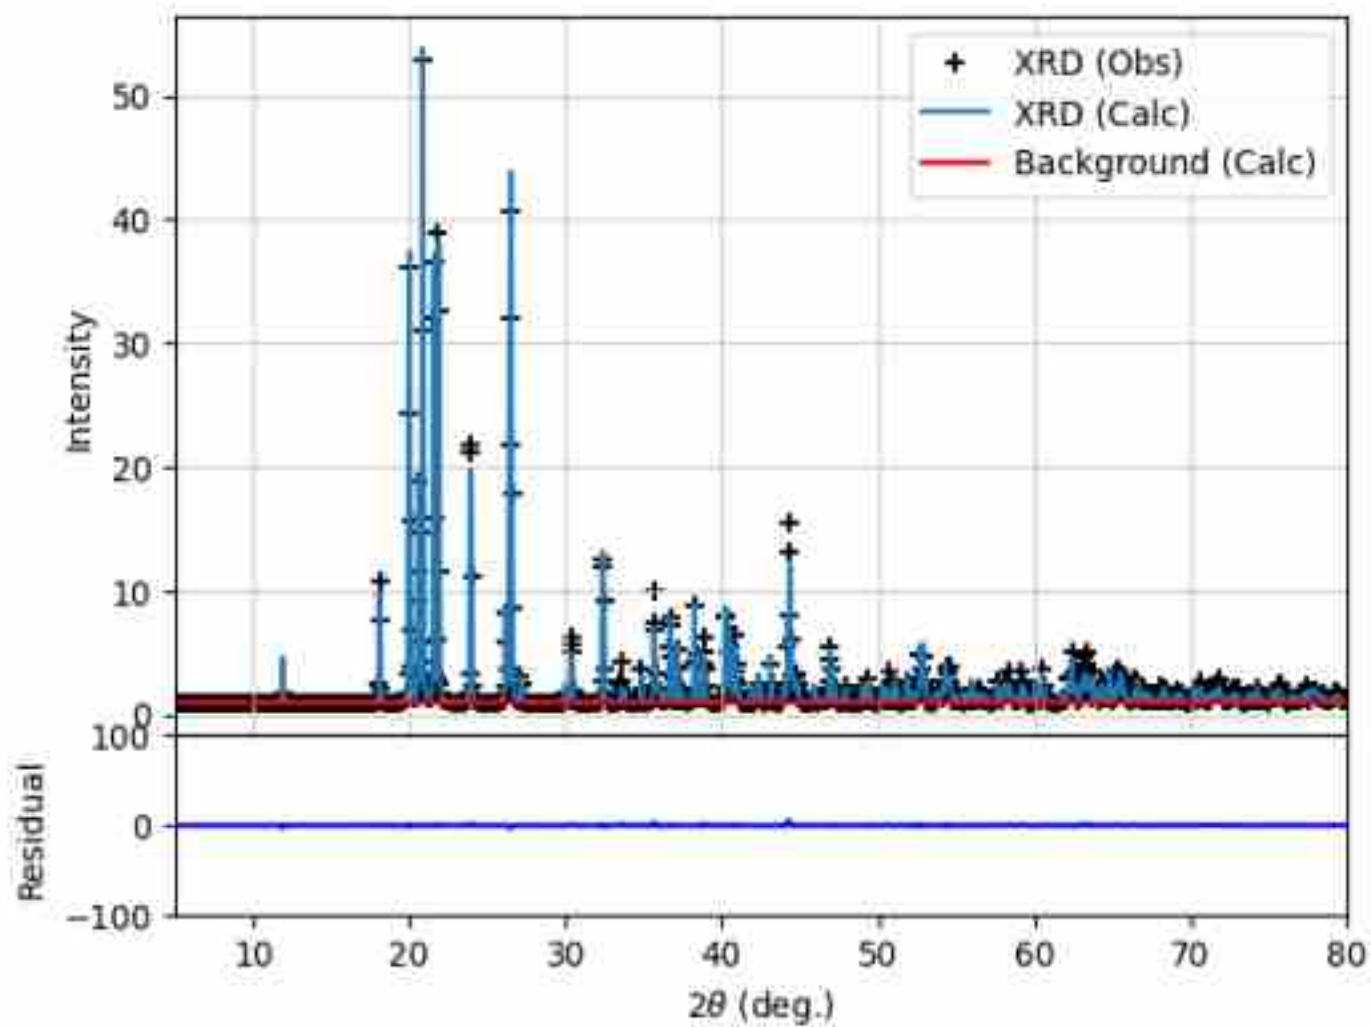

| RMSE before RR | Rwp      | RMSE after RR |
|----------------|----------|---------------|
| 0.28           | 12.91841 | None          |

# Ni<sub>3</sub>P<sub>3</sub>Rh<sub>3</sub>

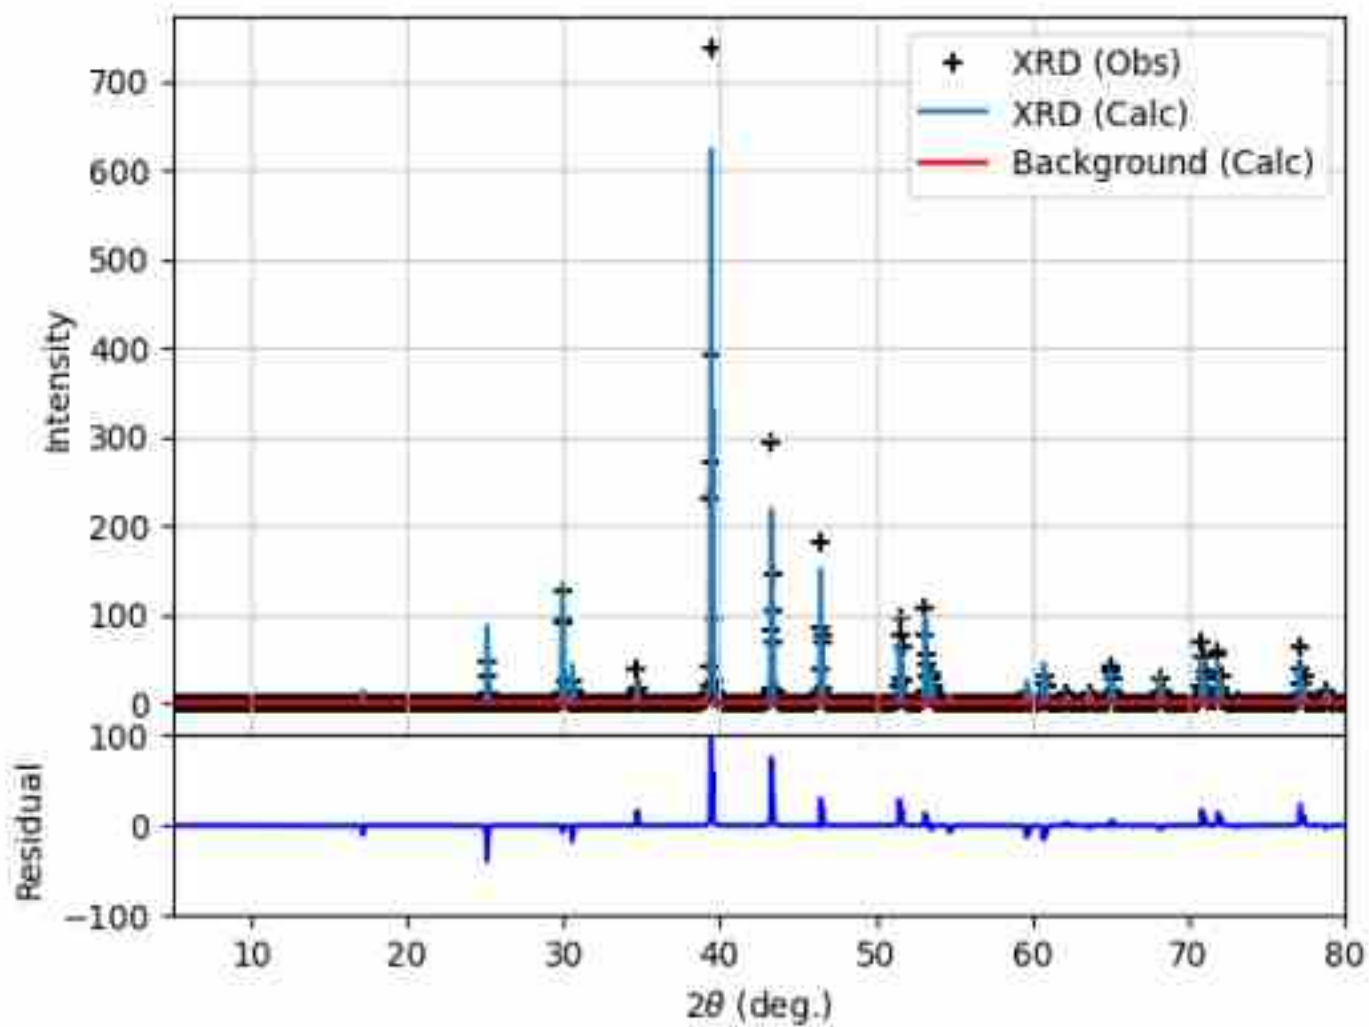

| RMSE before RR | Rwp     | RMSE after RR |
|----------------|---------|---------------|
| 0.28           | 25.7713 | 0.19993       |



# Br2F10

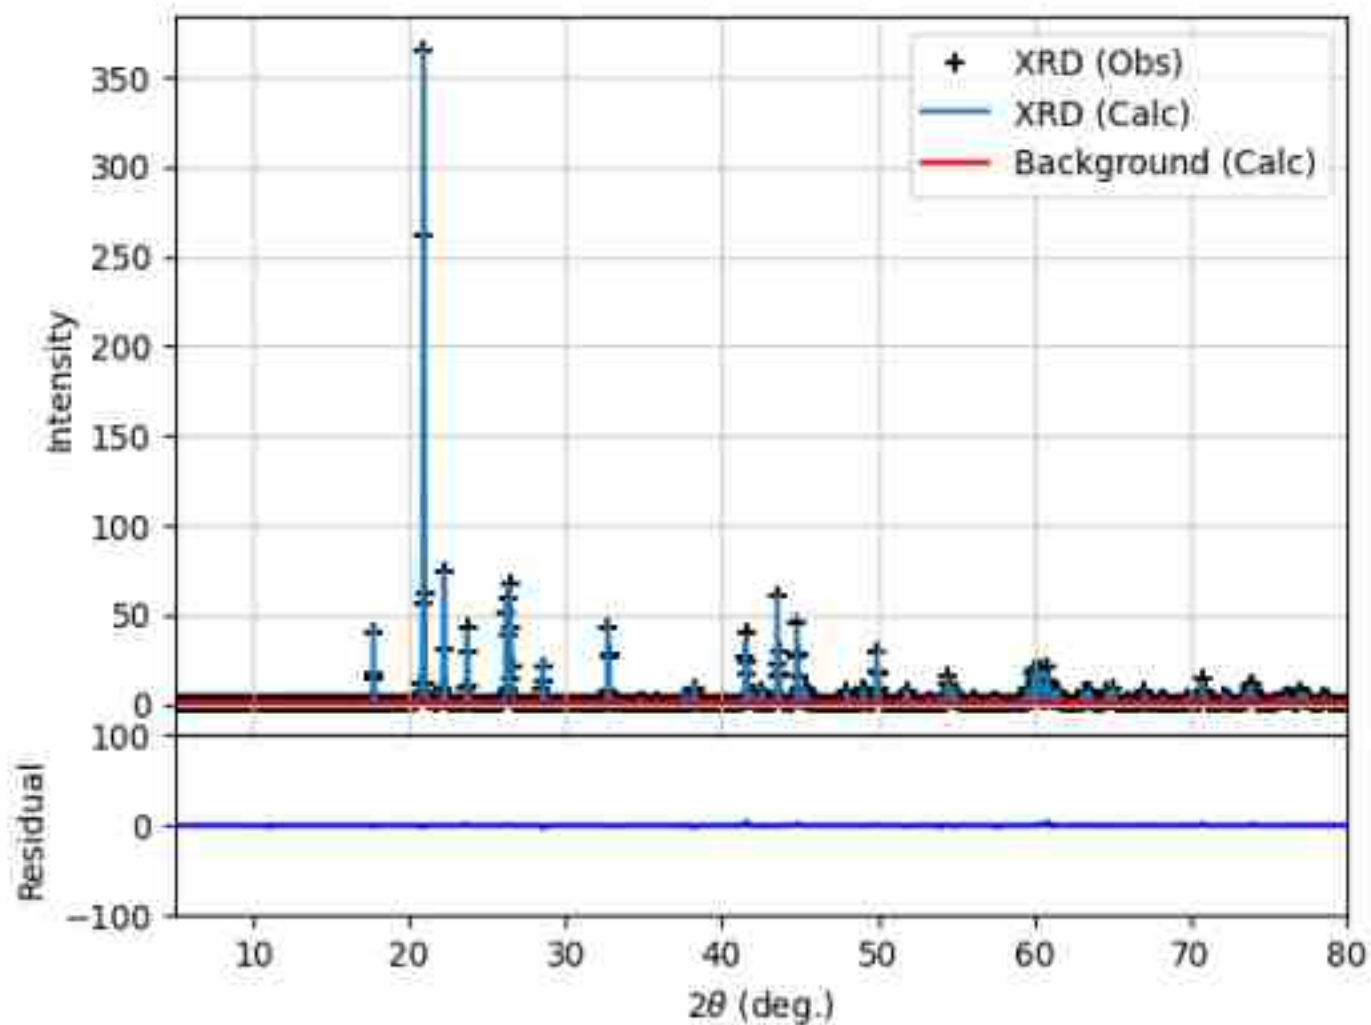

| RMSE before RR | Rwp     | RMSE after RR |
|----------------|---------|---------------|
| 0.29           | 7.98309 | 0.21537       |

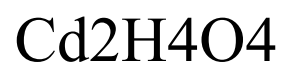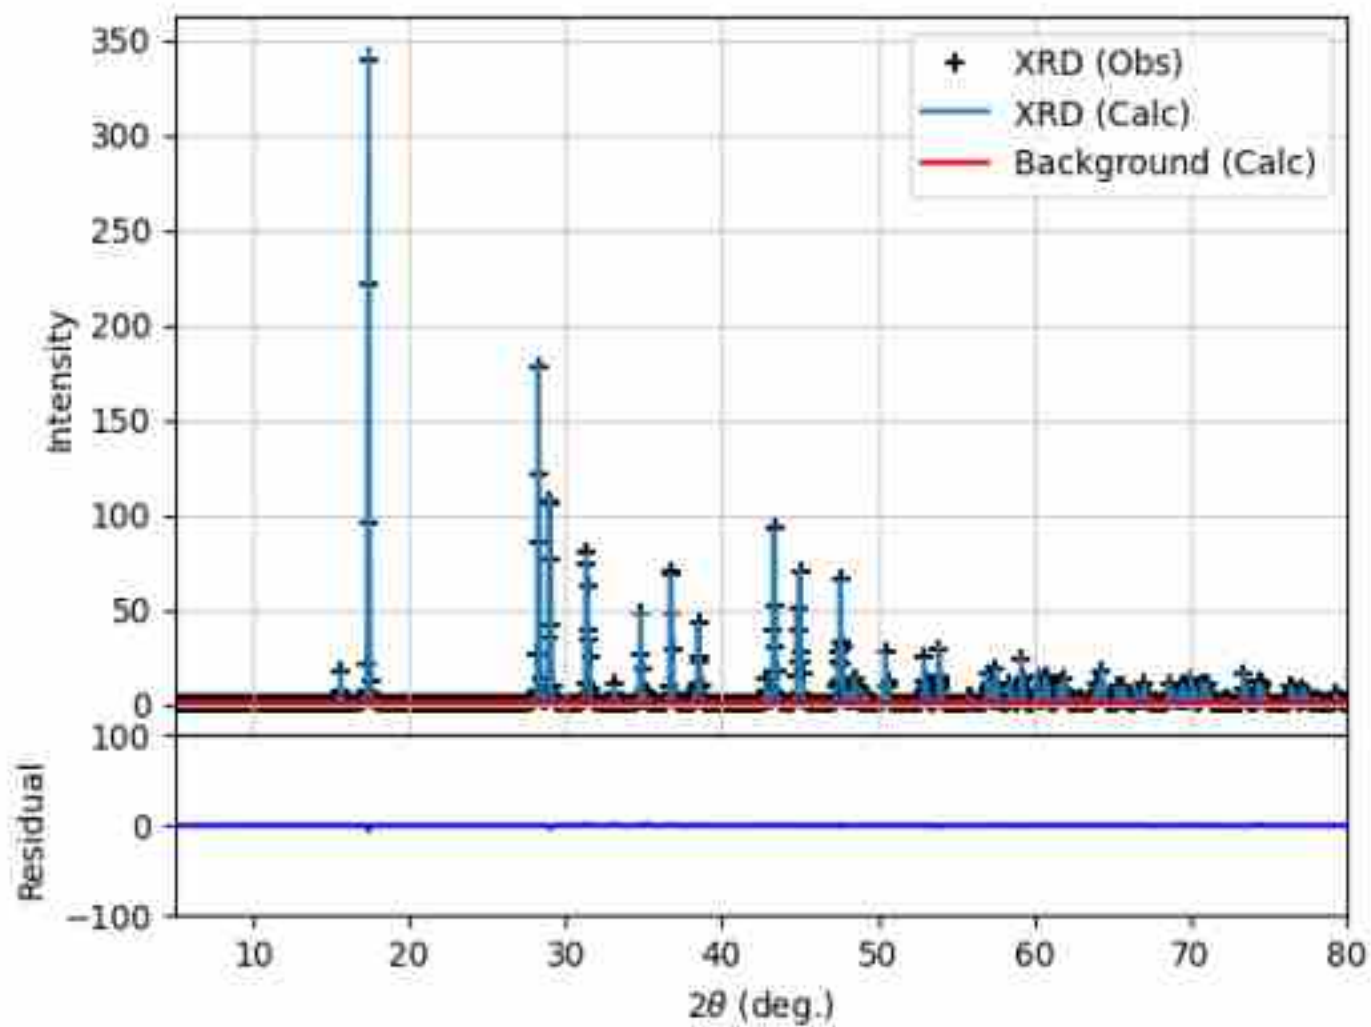

| RMSE before RR | Rwp     | RMSE after RR |
|----------------|---------|---------------|
| 0.29           | 3.15203 | 0.41943       |

# K4N4O12

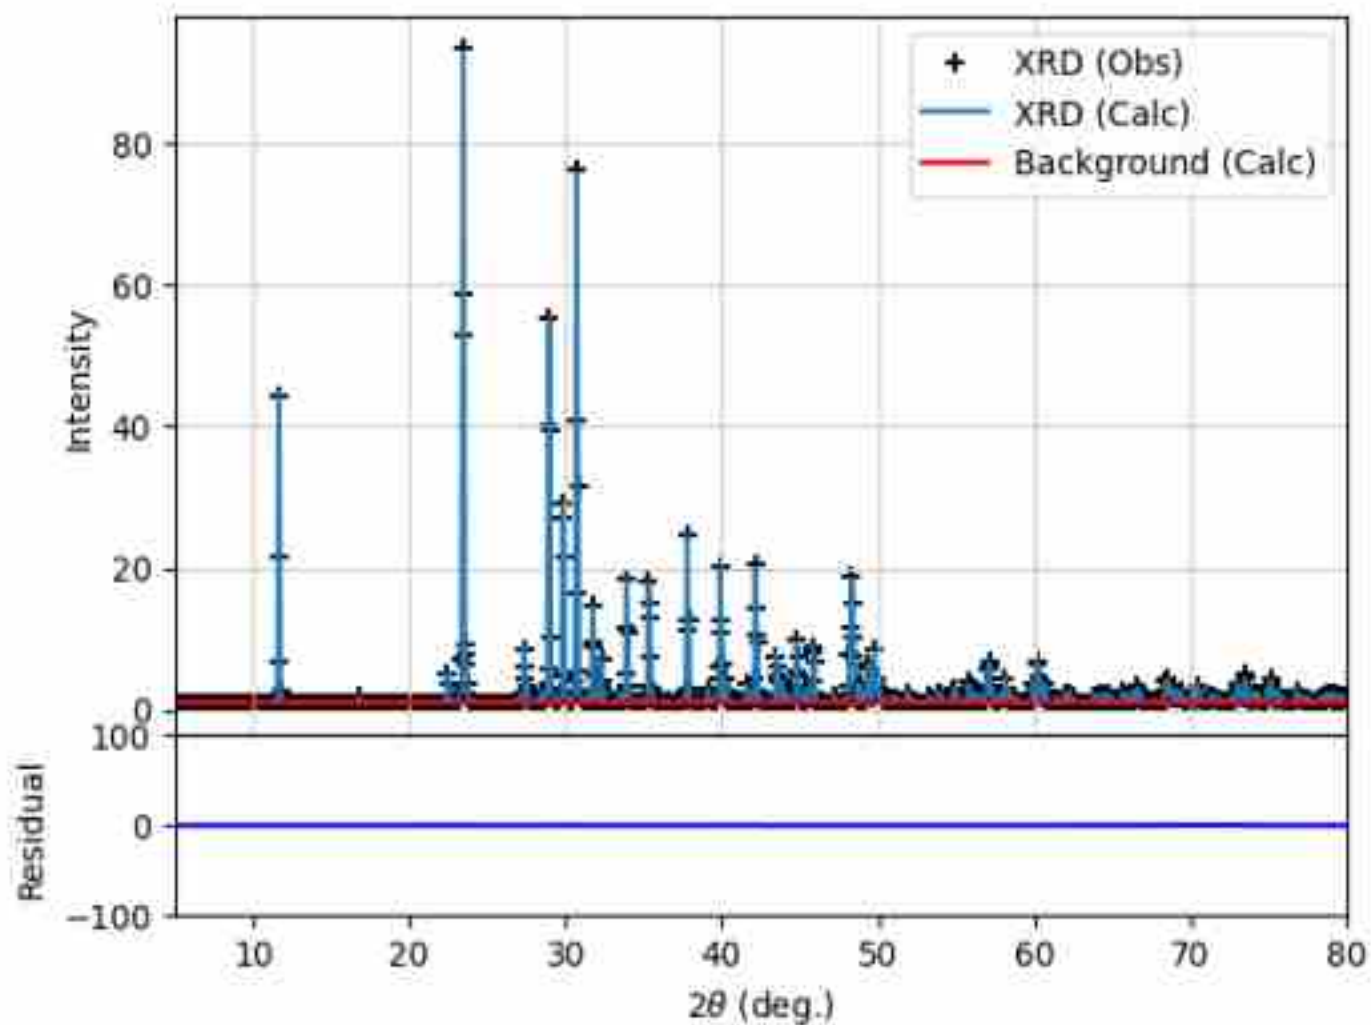

| RMSE before RR | Rwp     | RMSE after RR |
|----------------|---------|---------------|
| 0.29           | 2.47893 | 0.30186       |

# Li<sub>2</sub>Co<sub>2</sub>Sn<sub>2</sub>O<sub>8</sub>

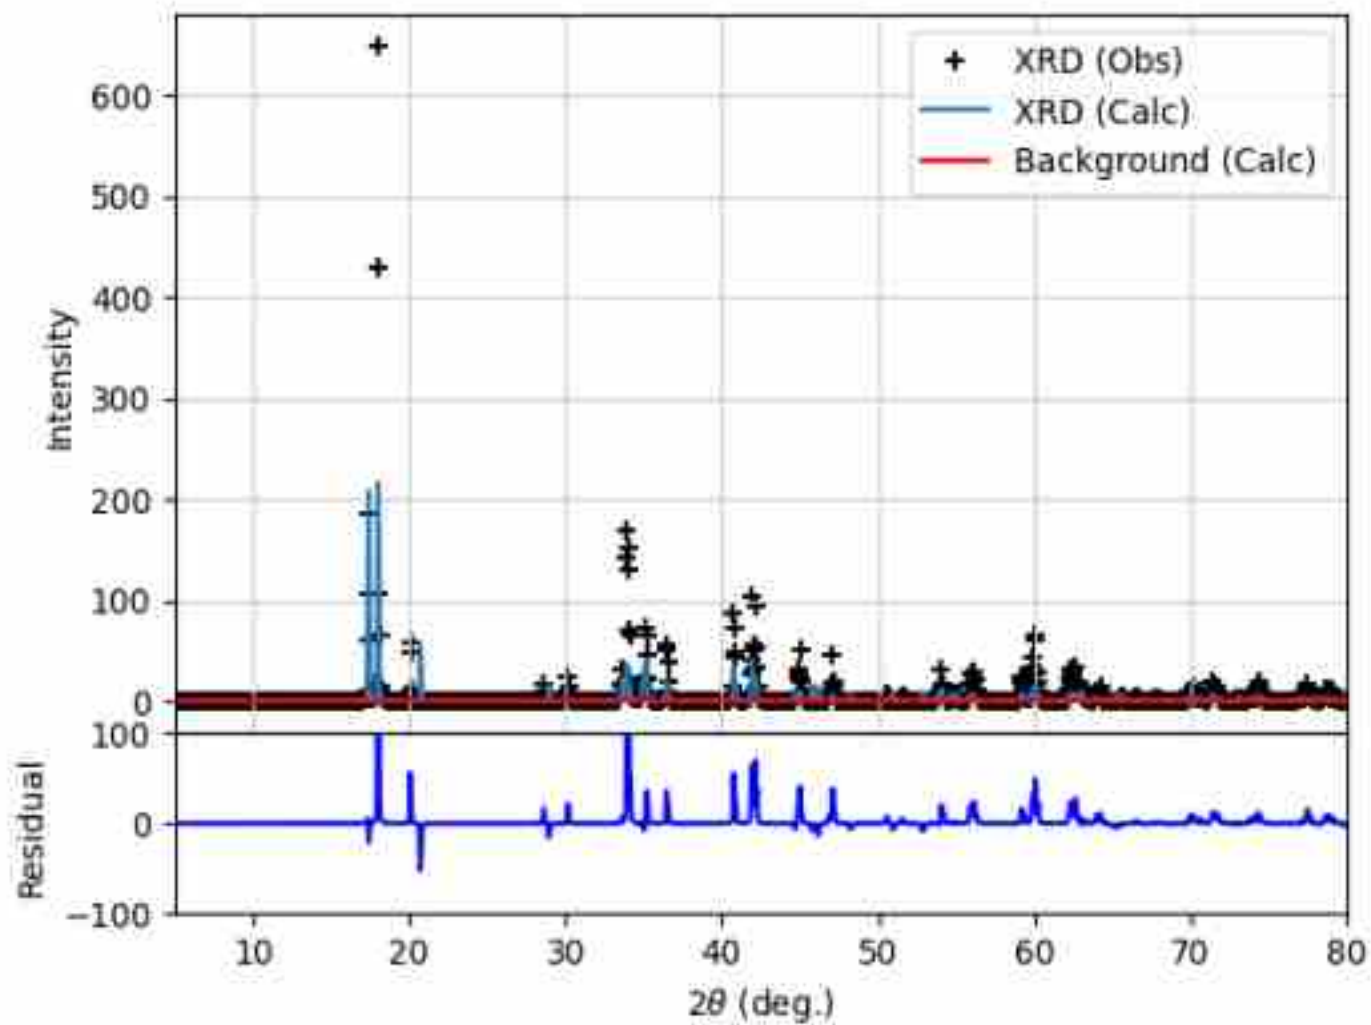

| RMSE before RR | Rwp      | RMSE after RR |
|----------------|----------|---------------|
| 0.29           | 98.34581 | None          |

# Li<sub>2</sub>S<sub>2</sub>O<sub>6</sub>F<sub>2</sub>

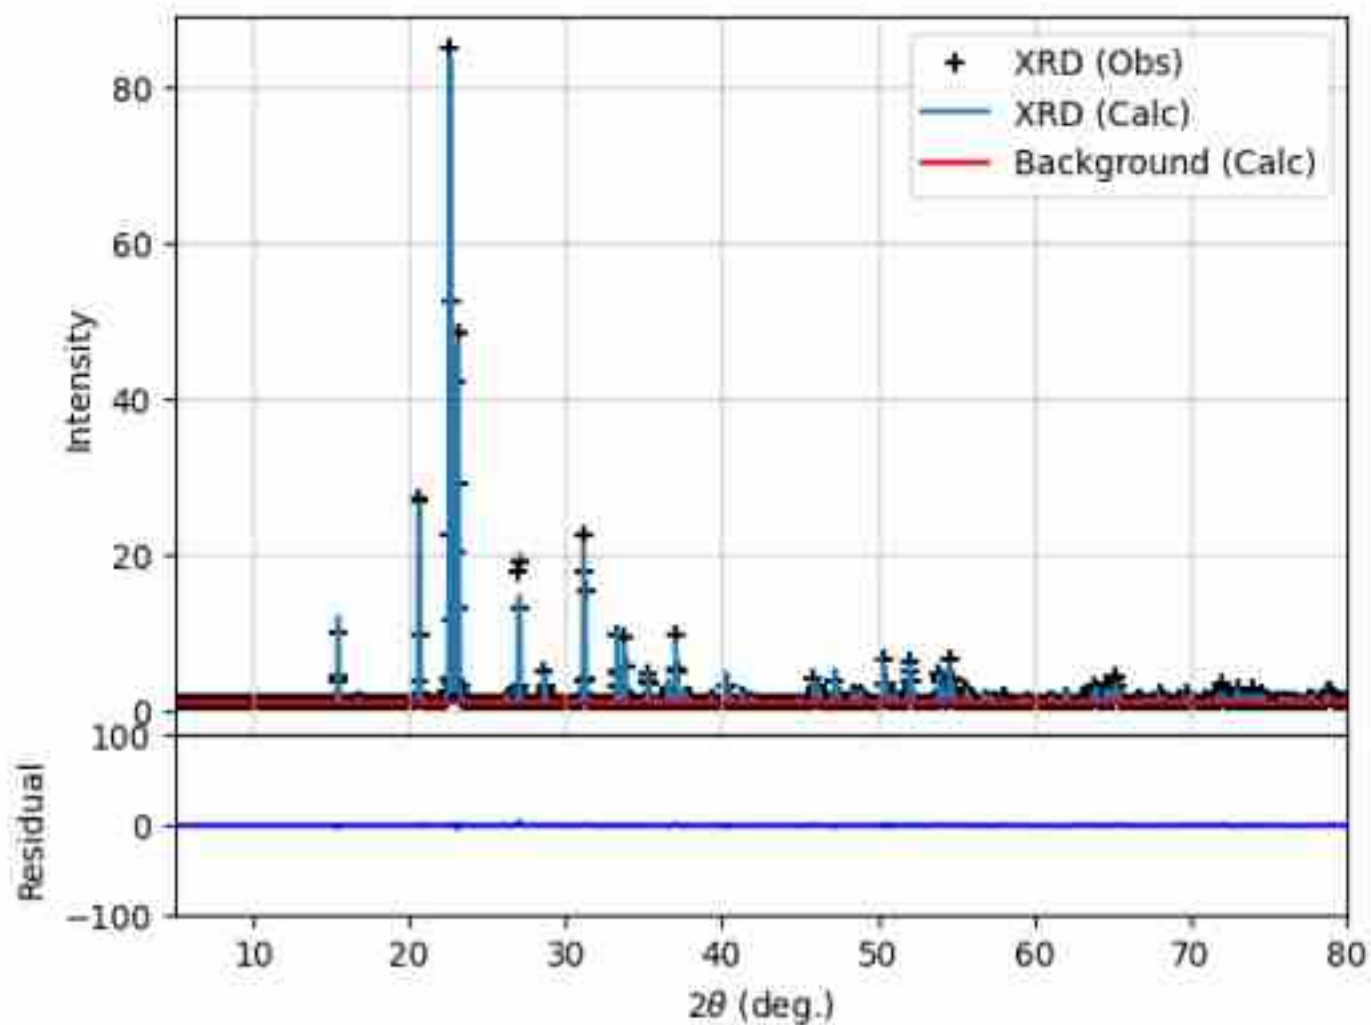

| RMSE before RR | Rwp      | RMSE after RR |
|----------------|----------|---------------|
| 0.31           | 10.86302 | None          |

# Nb<sub>5</sub>Pb<sub>1</sub>Se<sub>8</sub>

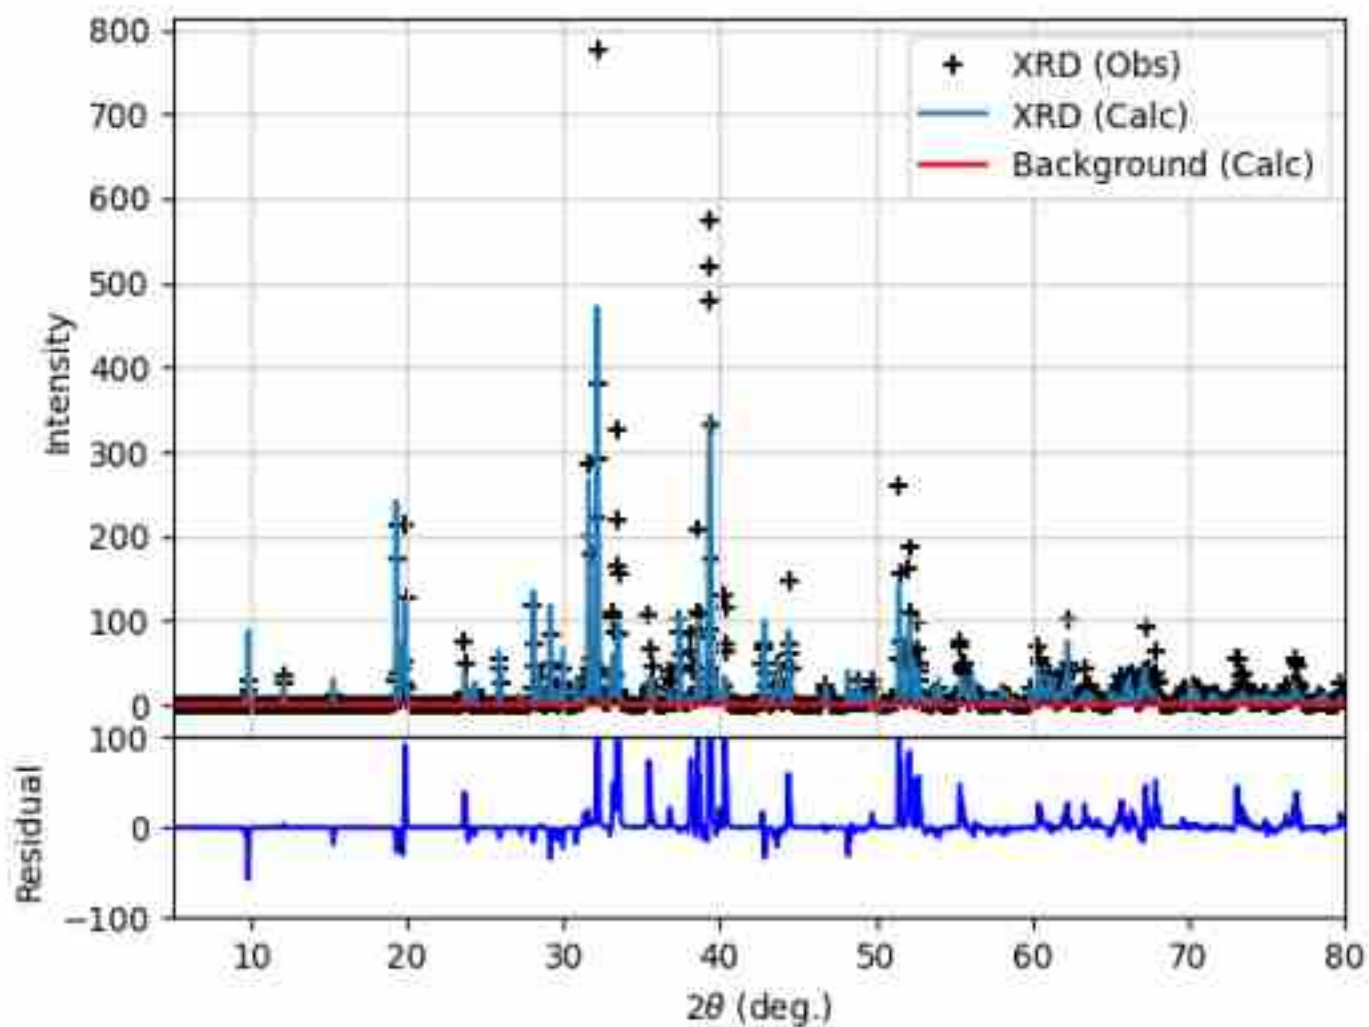

| RMSE before RR | Rwp      | RMSE after RR |
|----------------|----------|---------------|
| 0.31           | 50.19665 | 0.28607       |

# $\text{Cd}_2\text{Hg}_4\text{S}_2\text{O}_{12}$

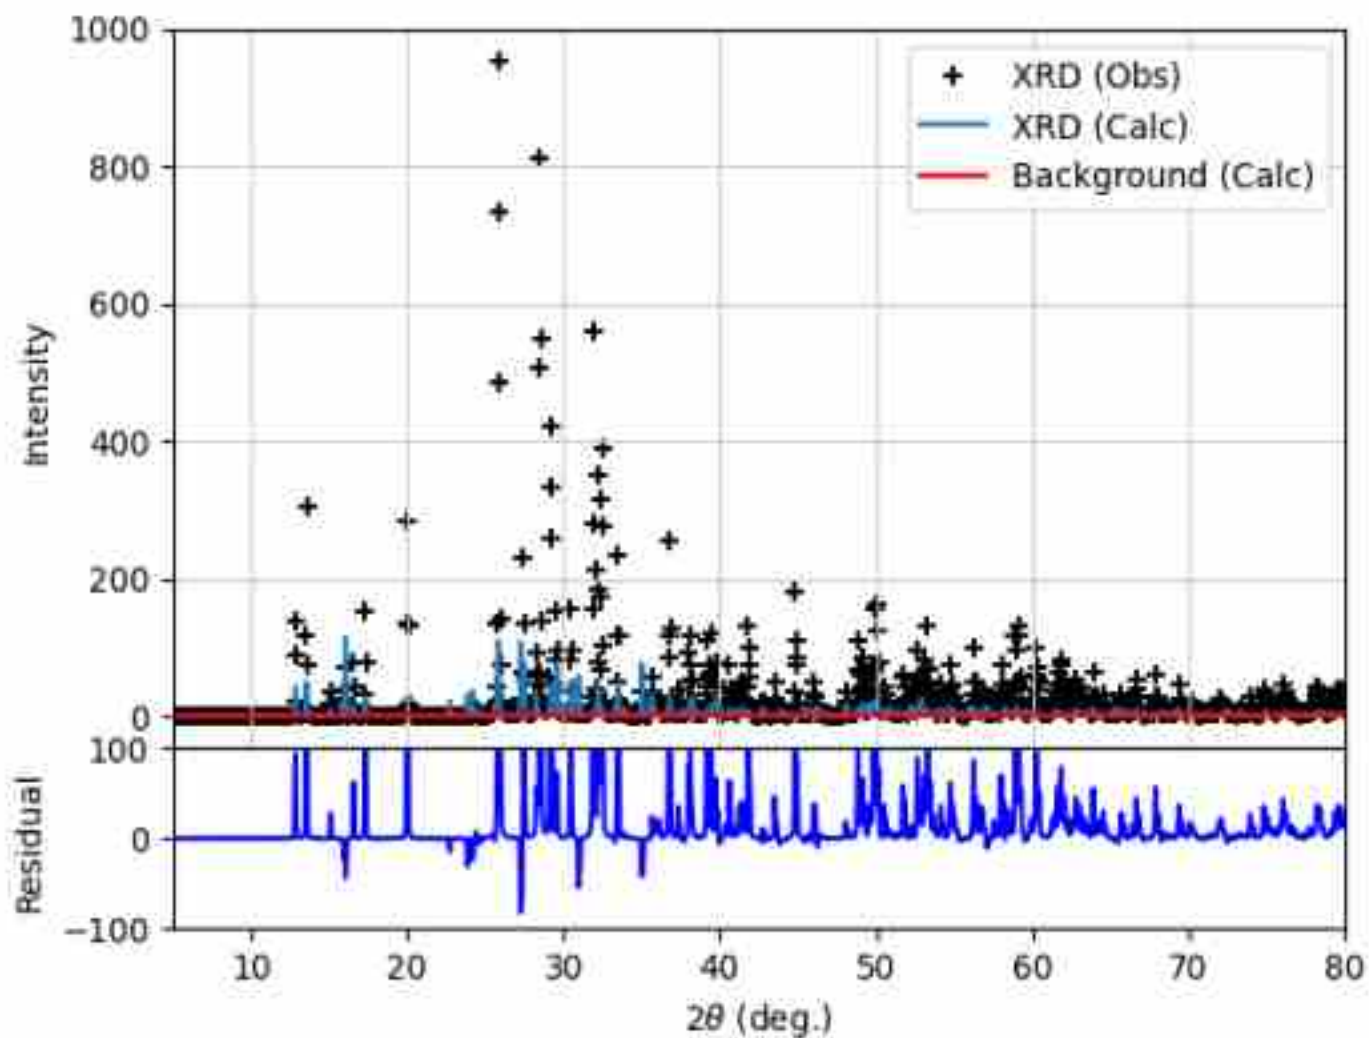

| RMSE before RR | Rwp      | RMSE after RR |
|----------------|----------|---------------|
| 0.33           | 89.32435 | None          |

# H8C2N4O2

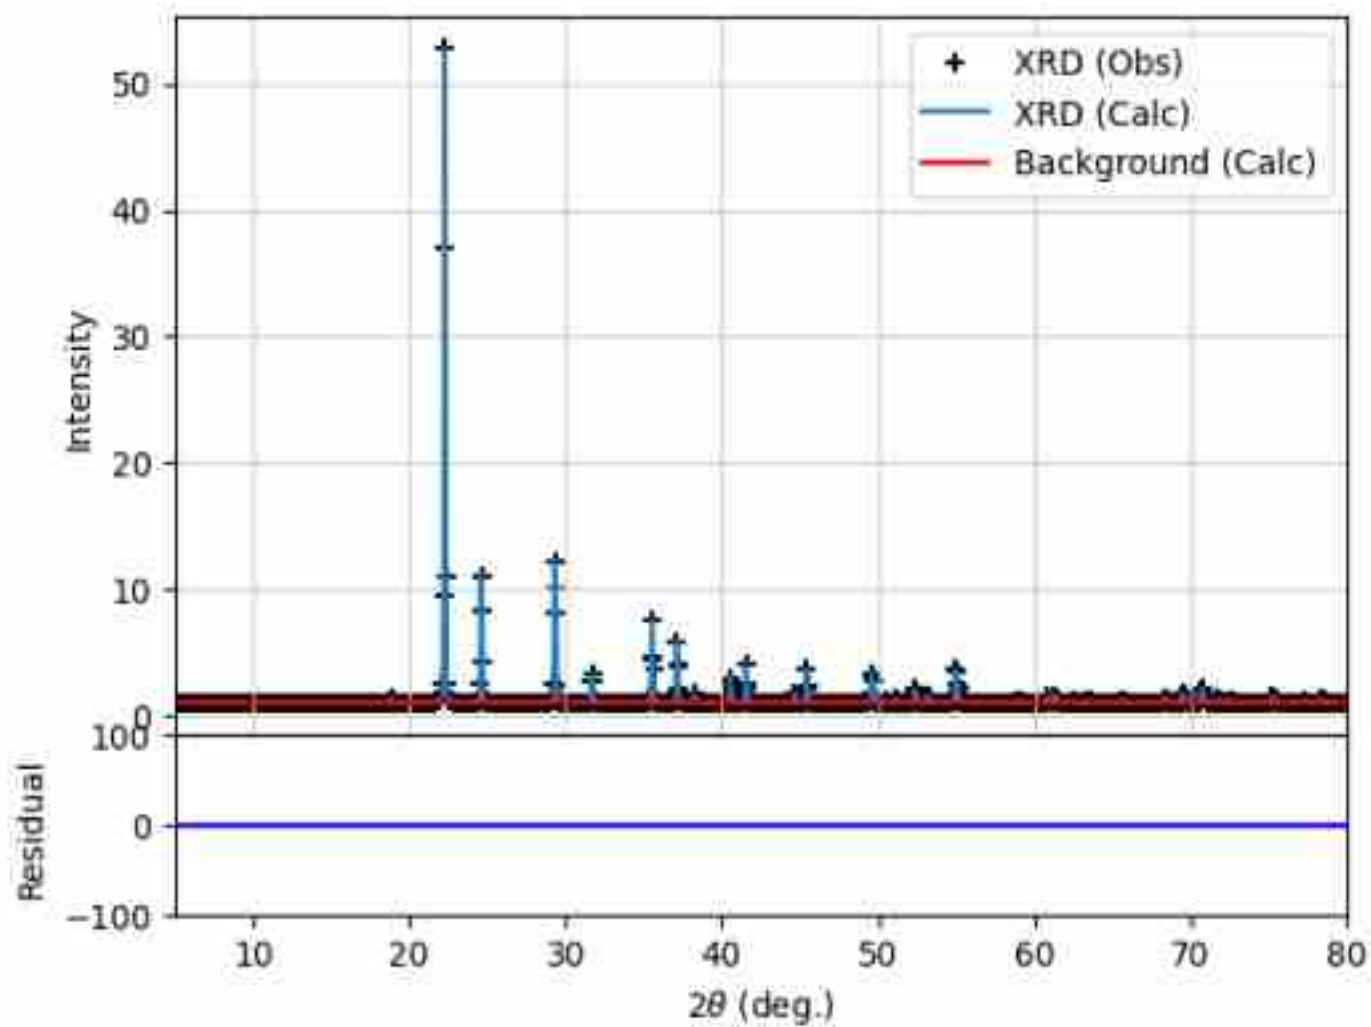

| RMSE before RR | Rwp     | RMSE after RR |
|----------------|---------|---------------|
| 0.33           | 0.13628 | None          |



# H8C4

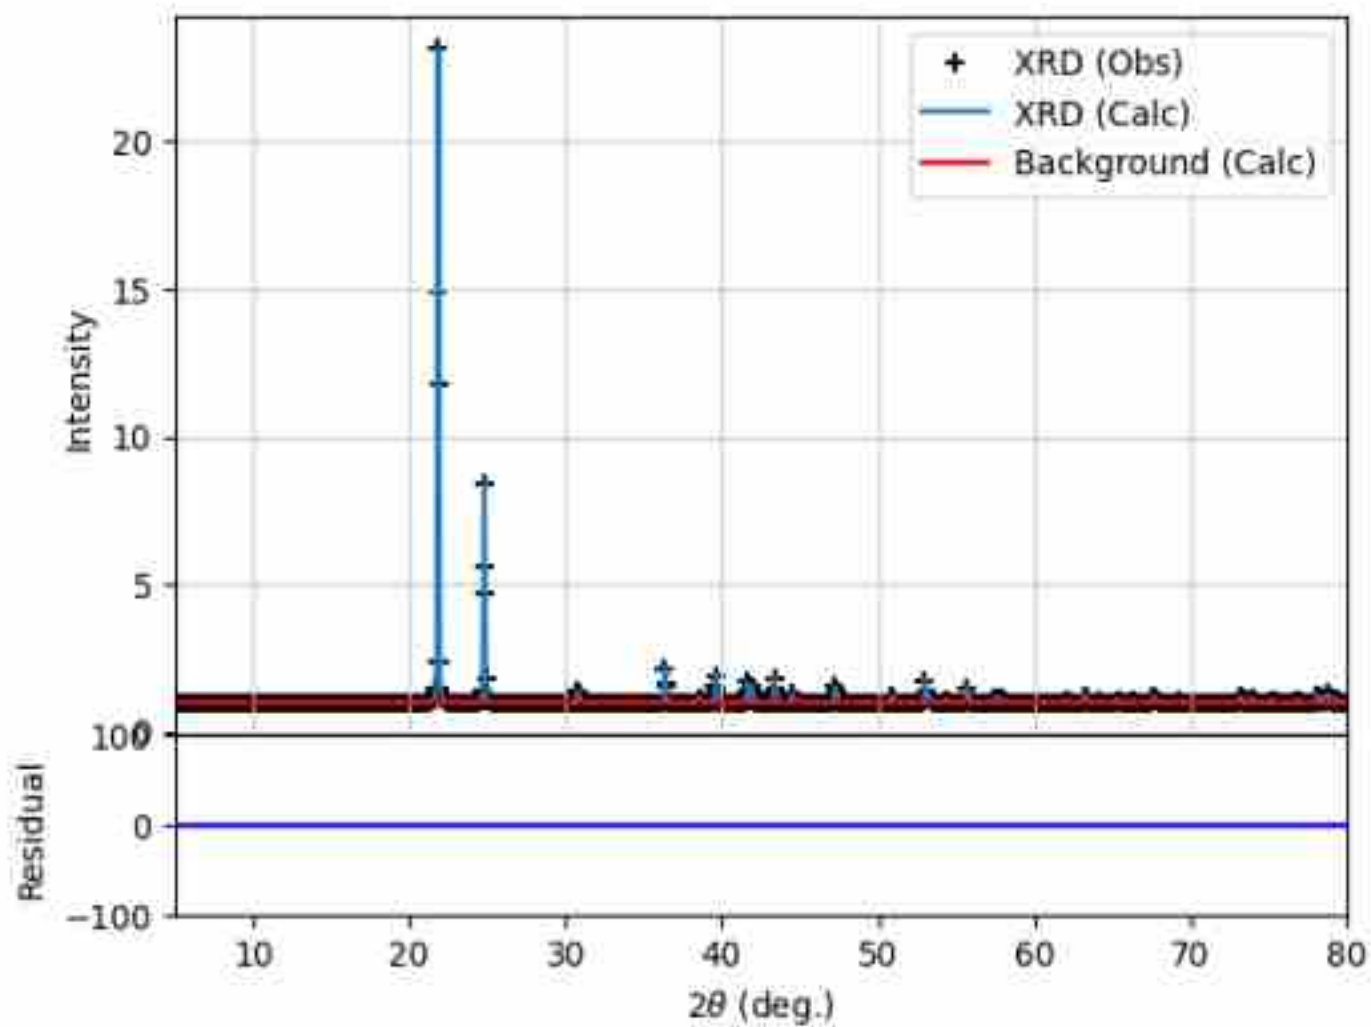

| RMSE before RR | Rwp     | RMSE after RR |
|----------------|---------|---------------|
| 0.34           | 0.14384 | 0.40312       |

# Li<sub>2</sub>B<sub>2</sub>H<sub>8</sub>

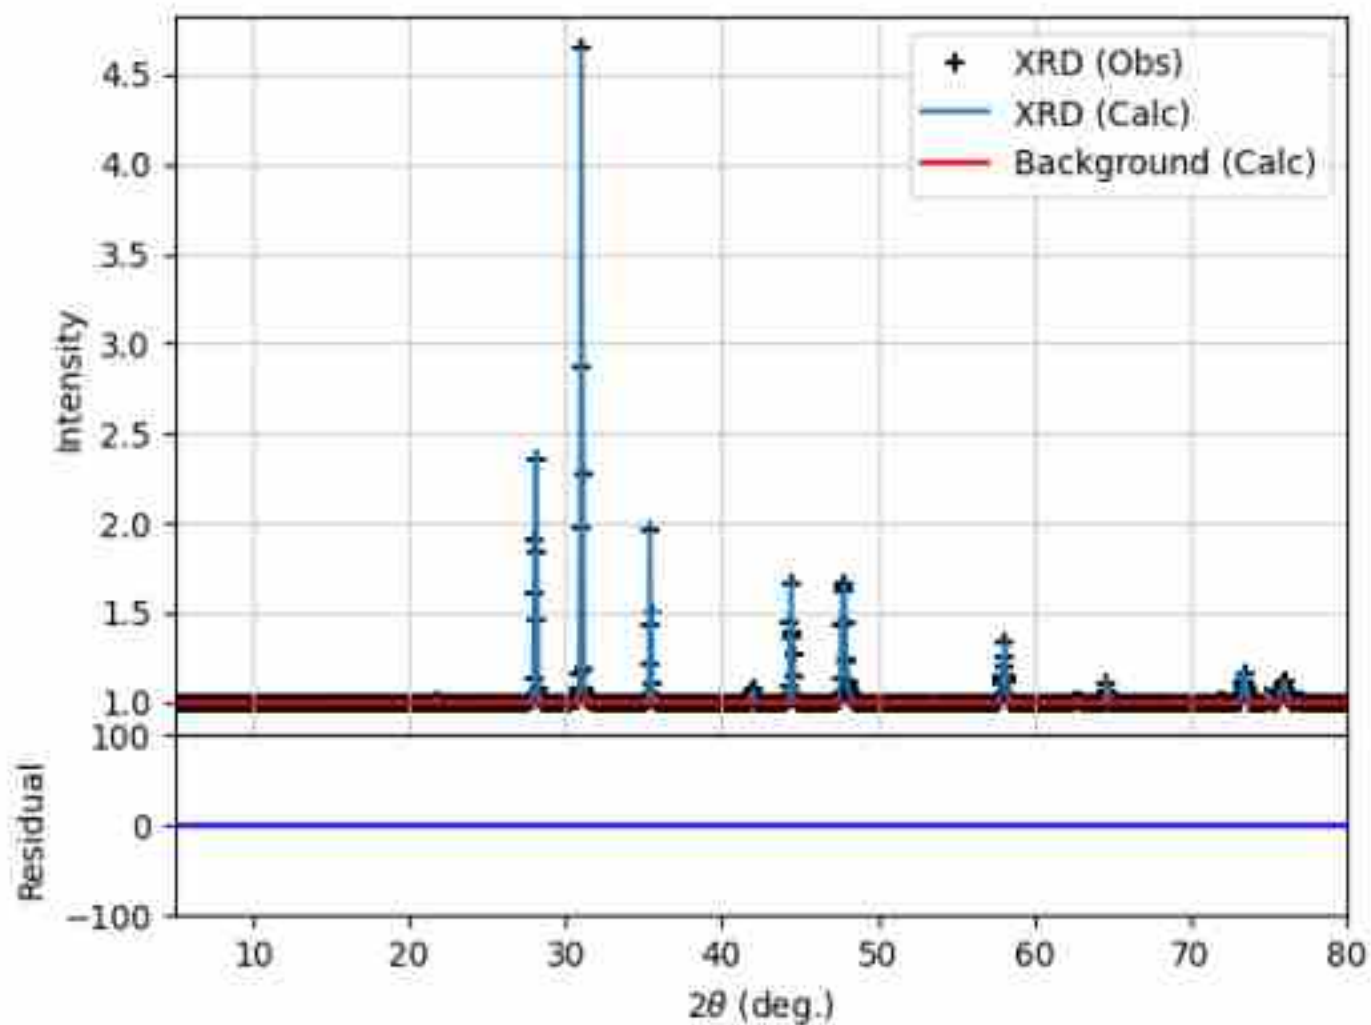

| RMSE before RR | Rwp     | RMSE after RR |
|----------------|---------|---------------|
| 0.34           | 0.20217 | 0.41262       |

# Sb4O4F4

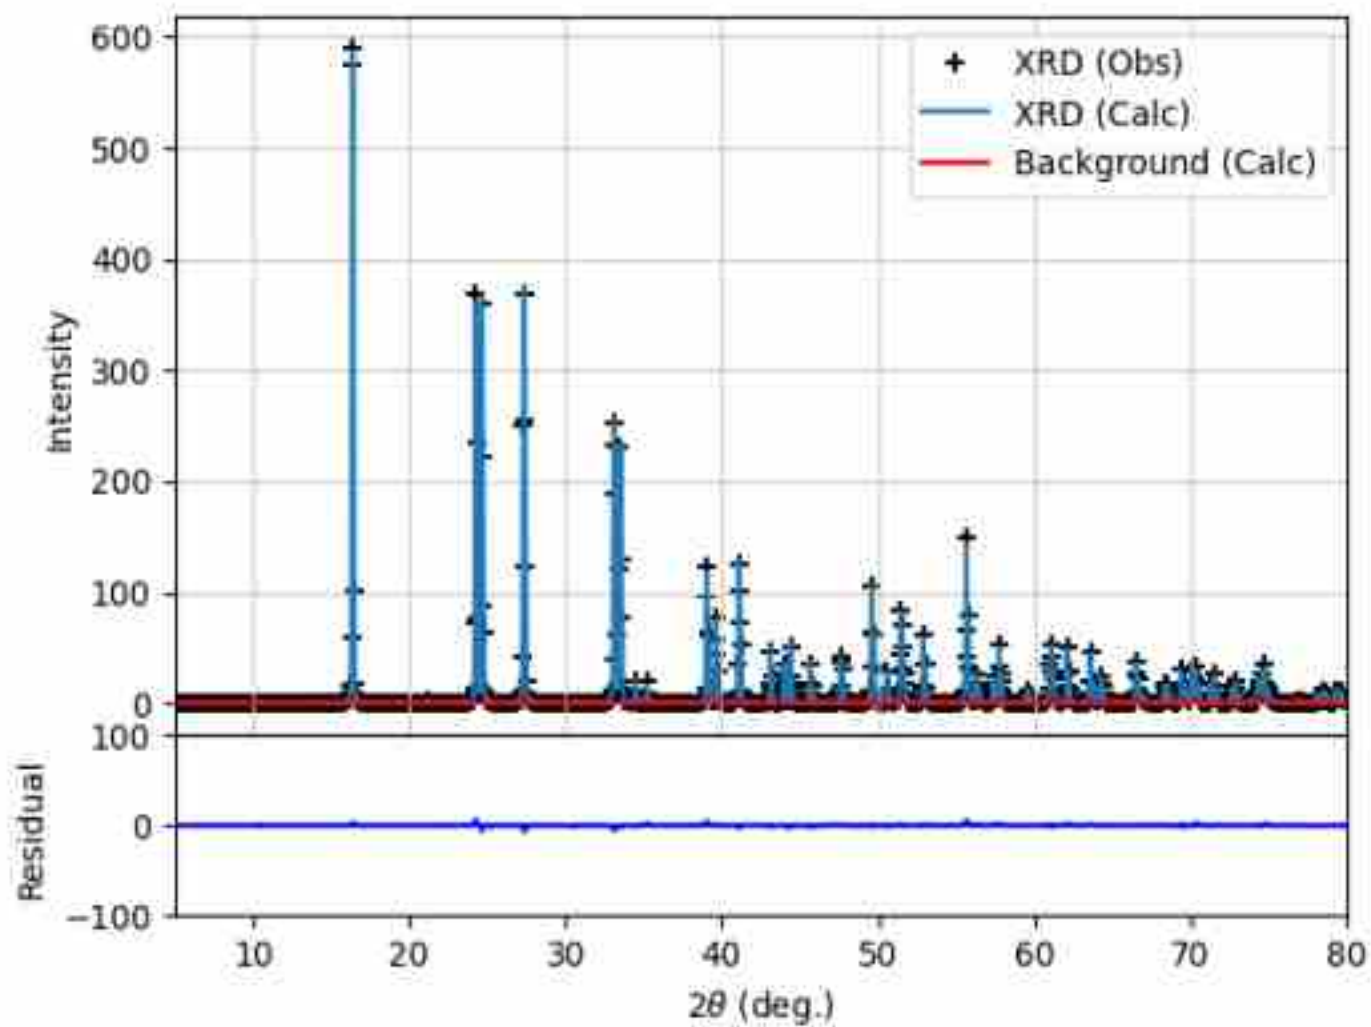

| RMSE before RR | Rwp     | RMSE after RR |
|----------------|---------|---------------|
| 0.34           | 4.53418 | 0.28582       |

# Ca<sub>4</sub>Ta<sub>4</sub>N<sub>4</sub>O<sub>8</sub>

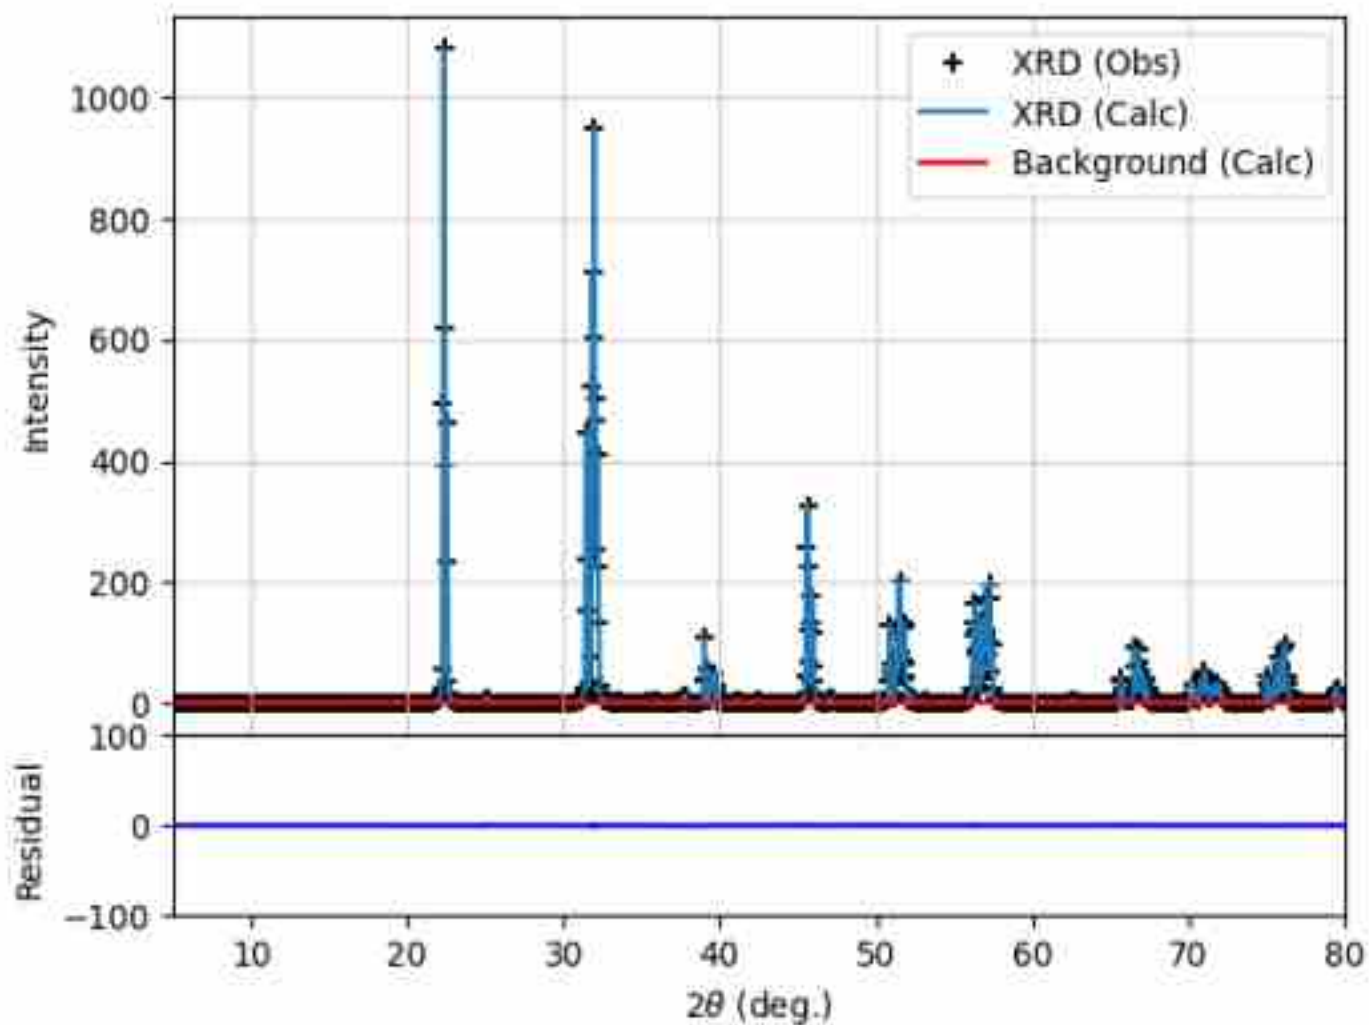

| RMSE before RR | Rwp     | RMSE after RR |
|----------------|---------|---------------|
| 0.35           | 0.45874 | None          |

# Na<sub>4</sub>As<sub>4</sub>S<sub>8</sub>

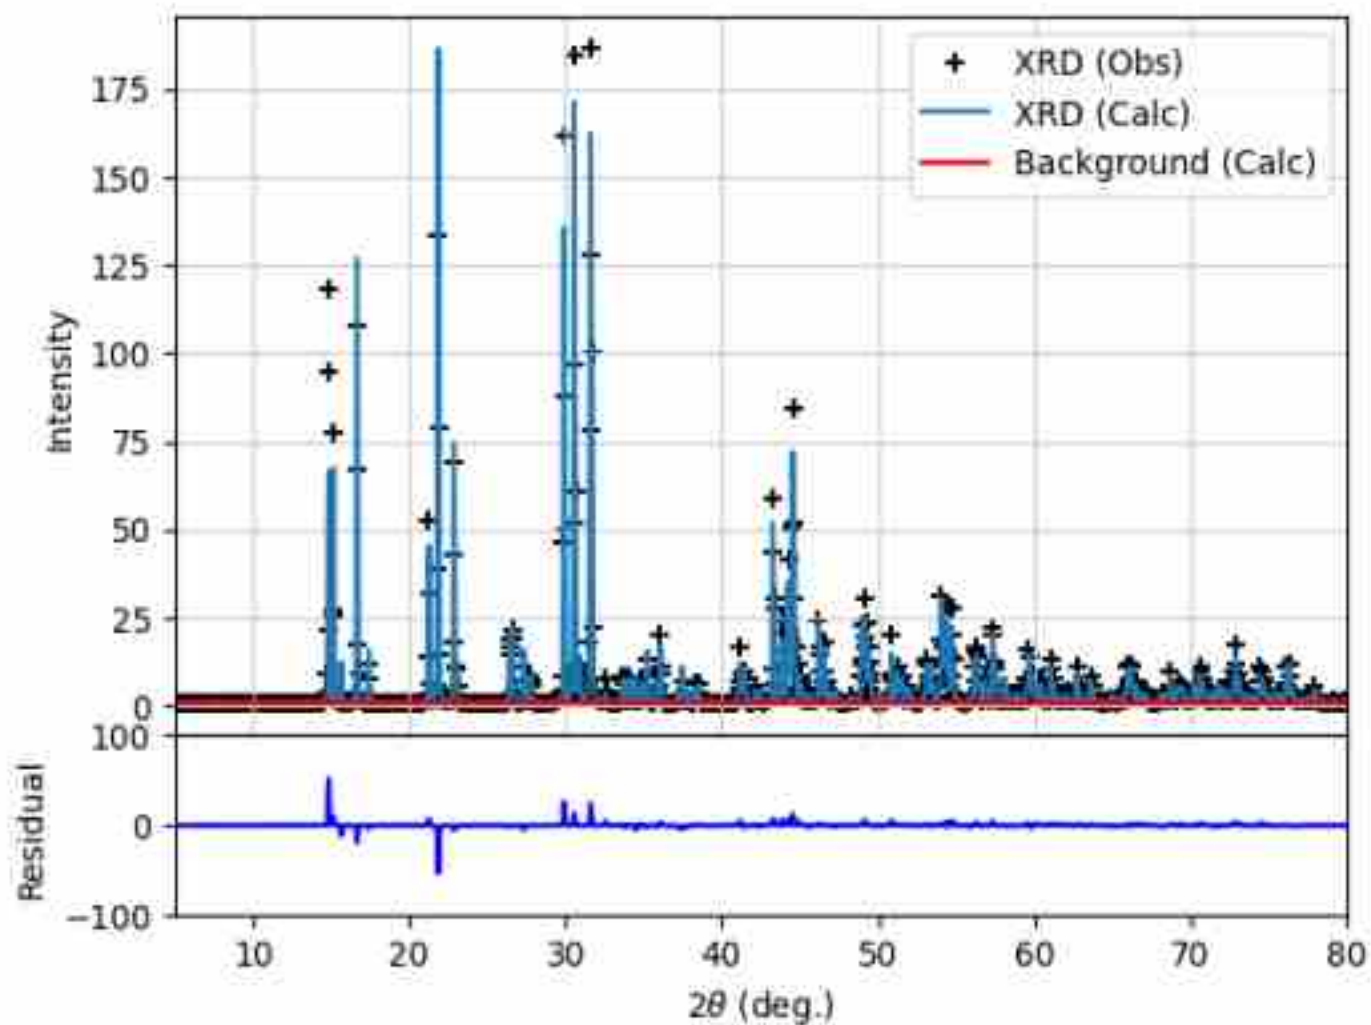

| RMSE before RR | Rwp      | RMSE after RR |
|----------------|----------|---------------|
| 0.35           | 24.05819 | 0.26912       |

# Te<sub>2</sub>Se<sub>2</sub>O<sub>8</sub>

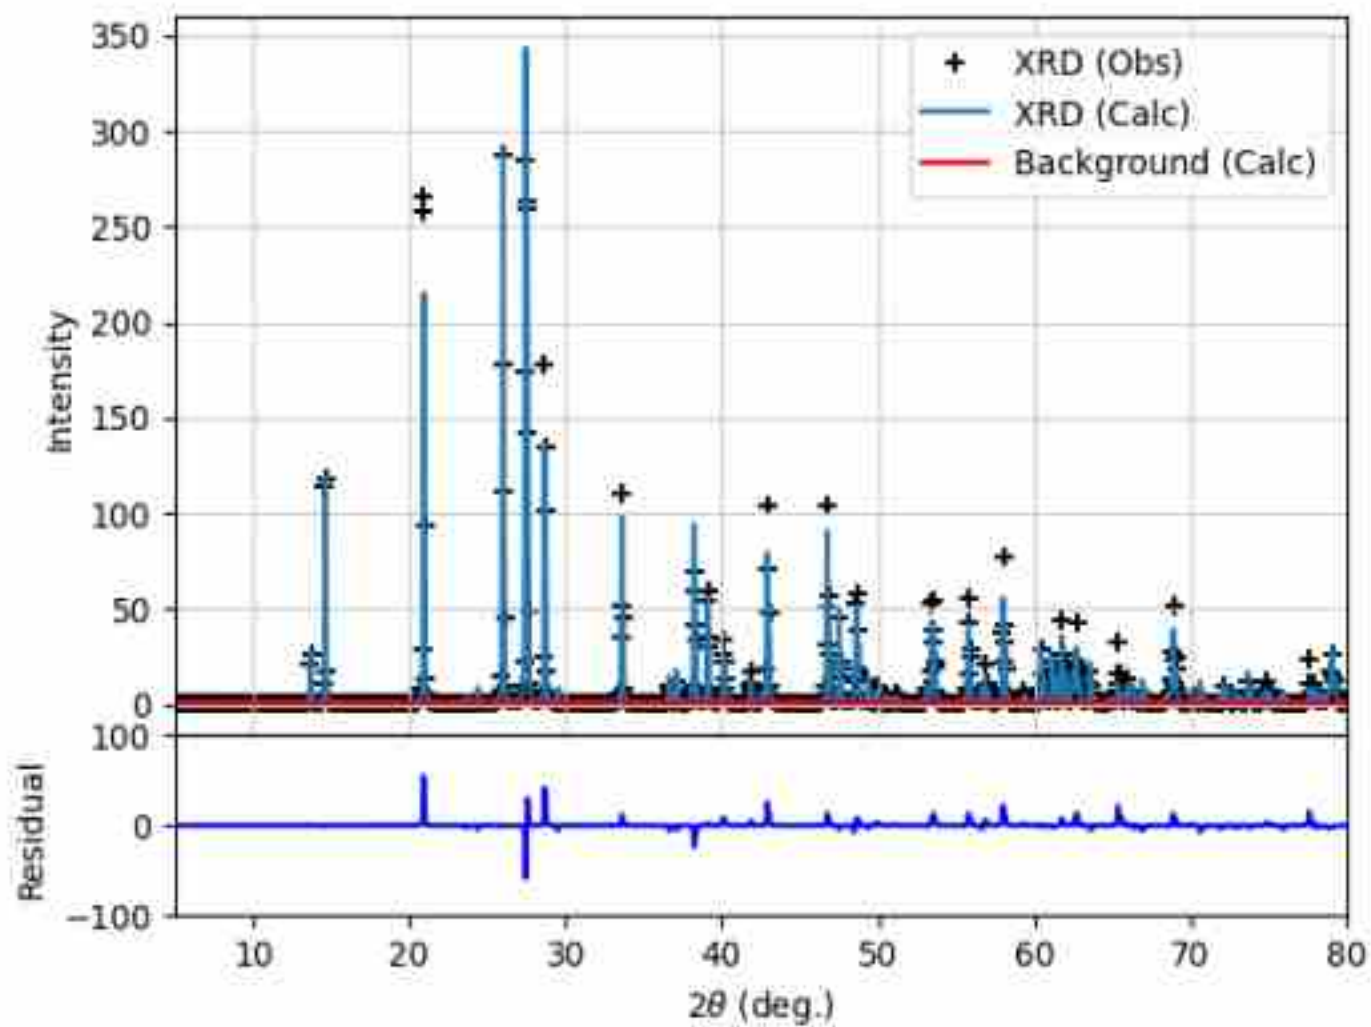

| RMSE before RR | Rwp      | RMSE after RR |
|----------------|----------|---------------|
| 0.35           | 23.02502 | None          |

# U<sub>2</sub>Nb<sub>2</sub>O<sub>10</sub>

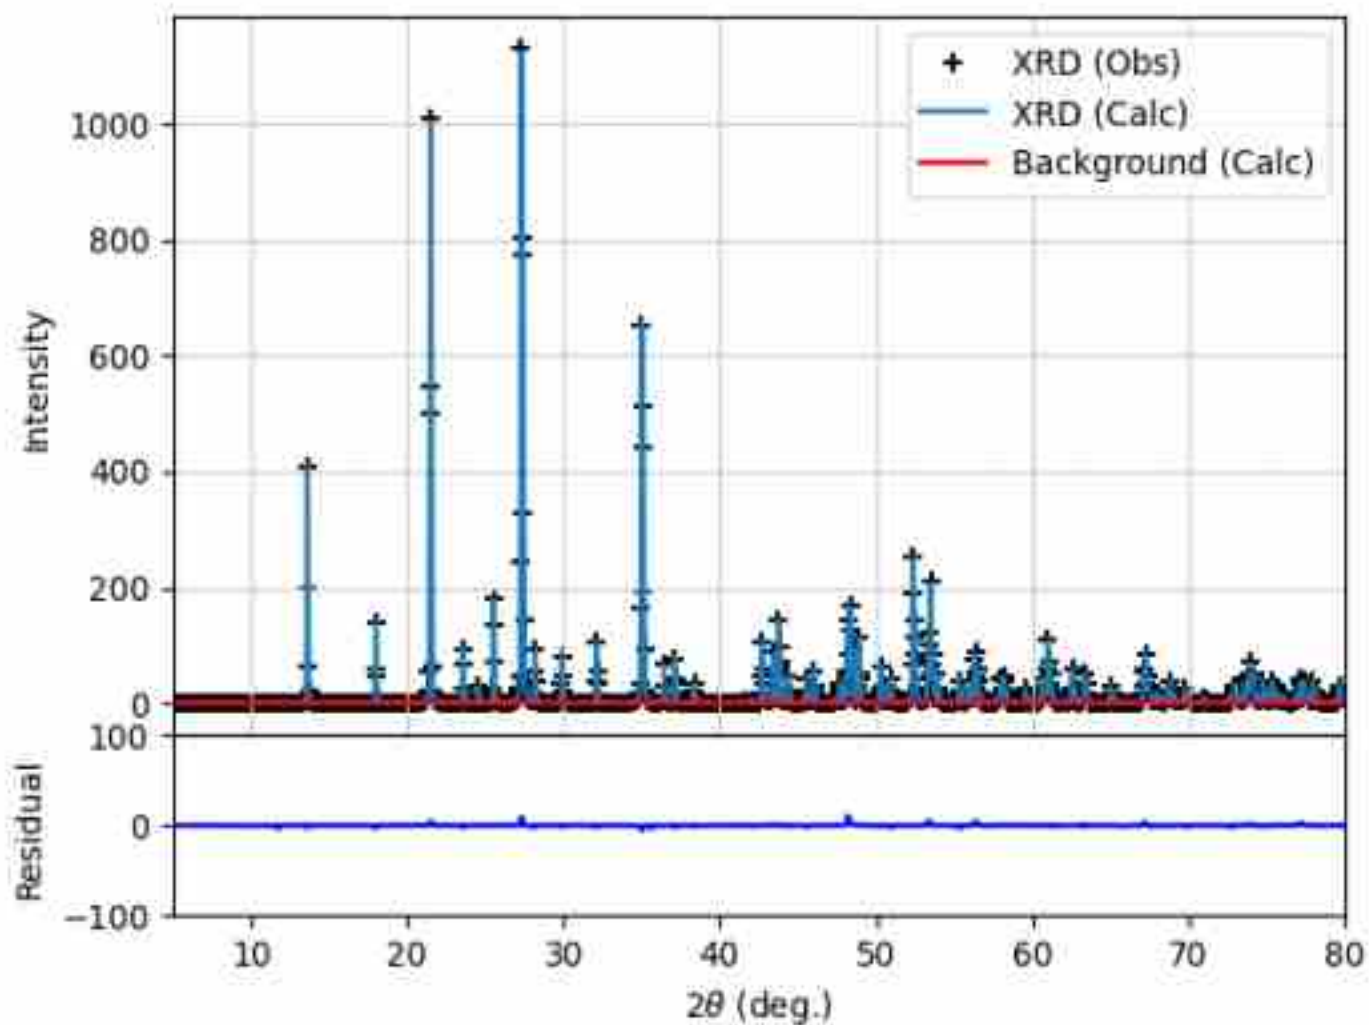

| RMSE before RR | Rwp     | RMSE after RR |
|----------------|---------|---------------|
| 0.35           | 4.43719 | 0.37527       |

Ca10Cu10

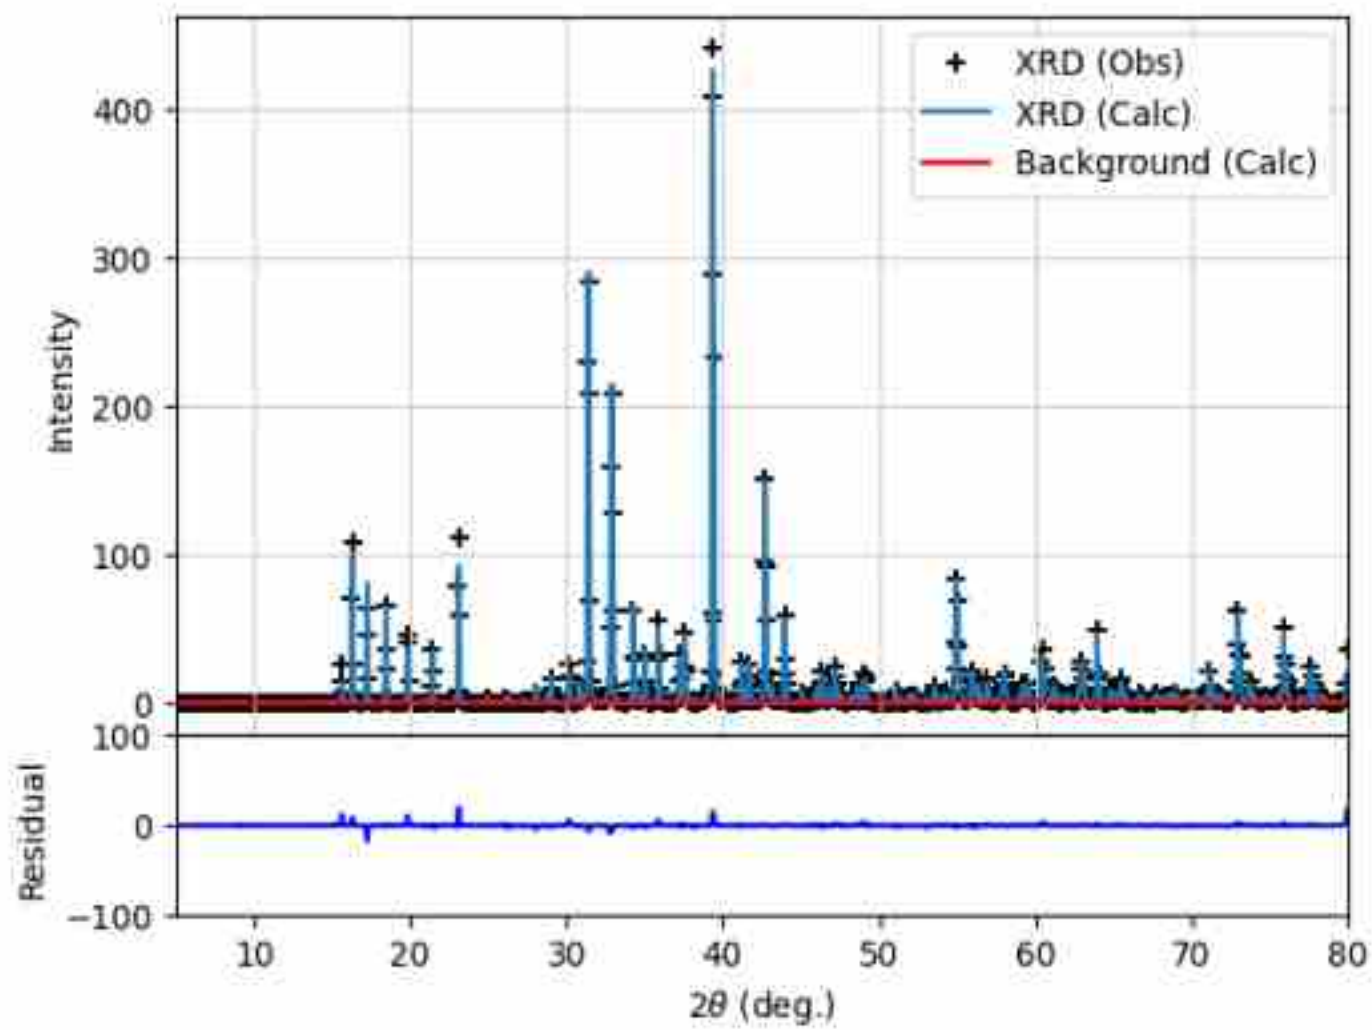

| RMSE before RR | Rwp      | RMSE after RR |
|----------------|----------|---------------|
| 0.36           | 11.01999 | 0.34818       |



# Si<sub>4</sub>Cl<sub>8</sub>

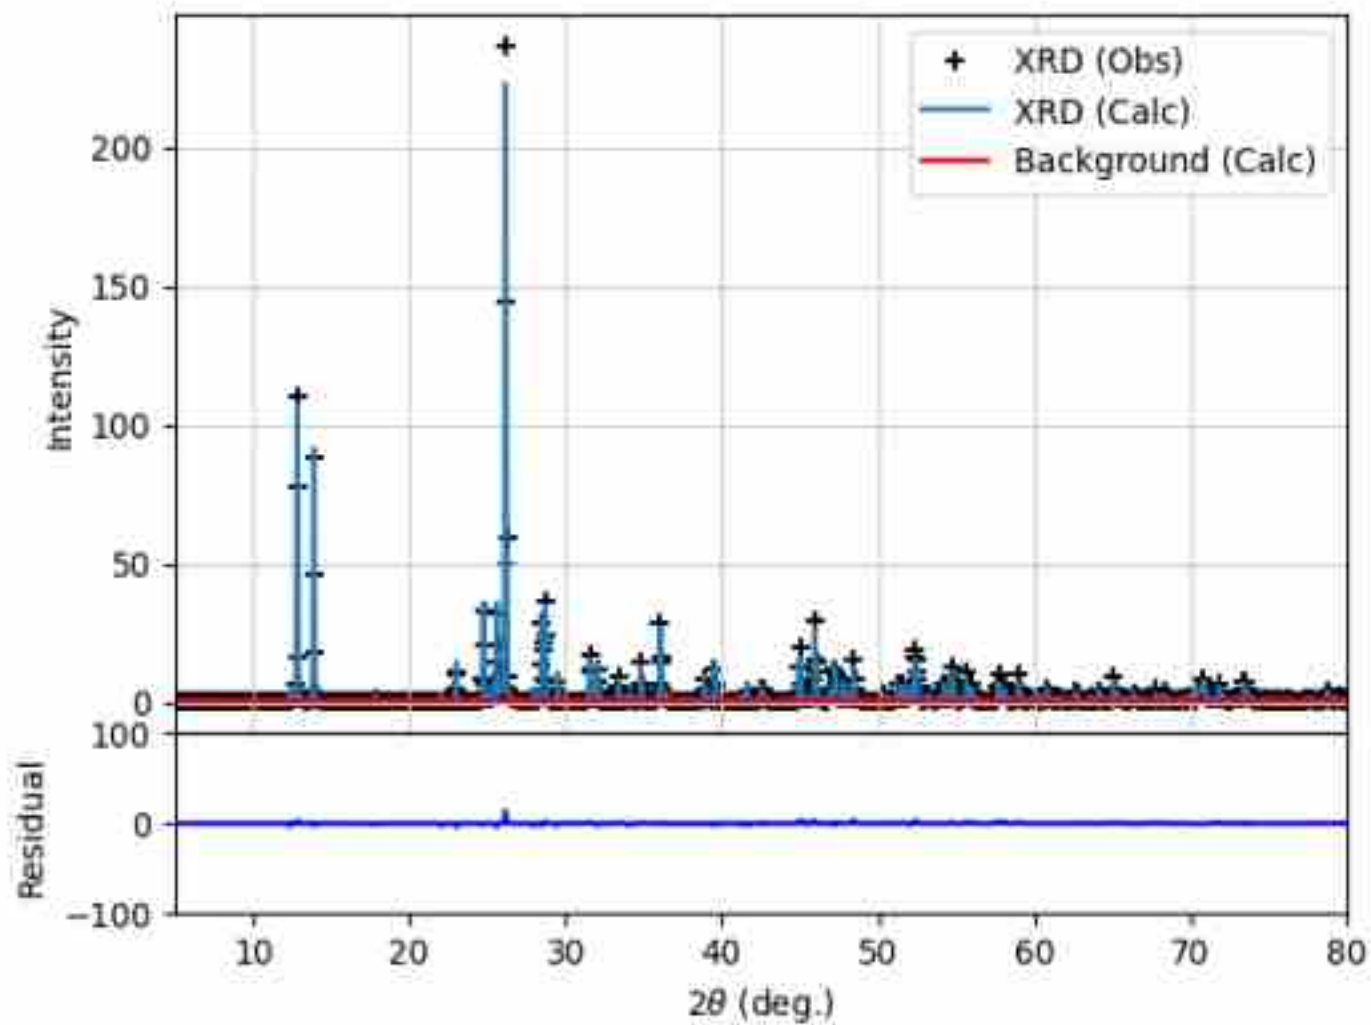

| RMSE before RR | Rwp      | RMSE after RR |
|----------------|----------|---------------|
| 0.36           | 13.91232 | 0.16025       |

# K<sub>4</sub>Mn<sub>4</sub>O<sub>6</sub>

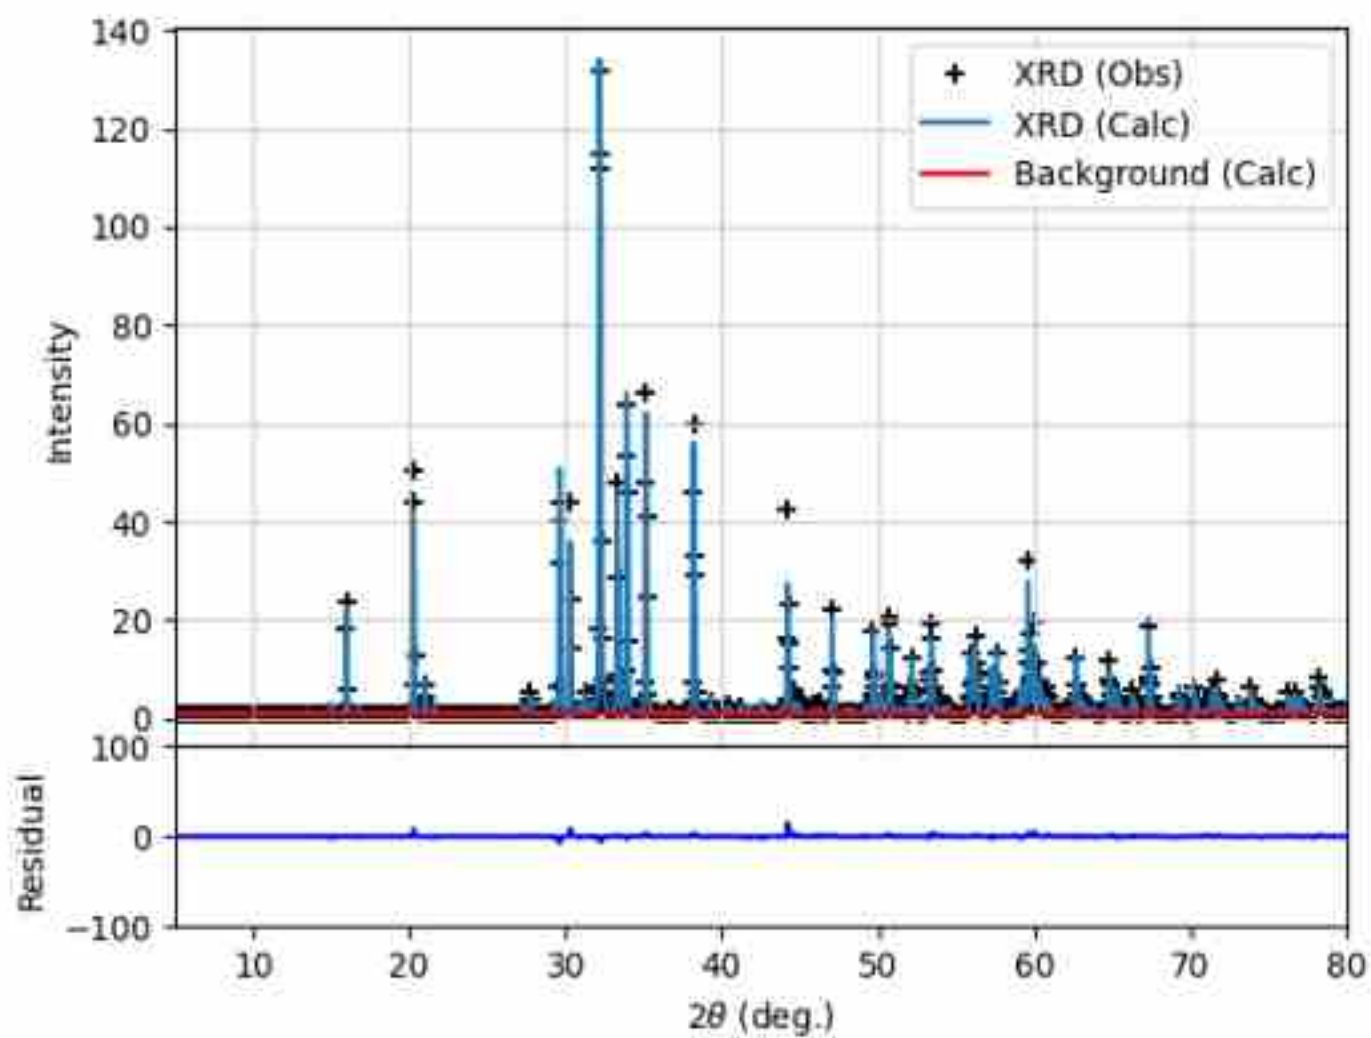

| RMSE before RR | Rwp      | RMSE after RR |
|----------------|----------|---------------|
| 0.37           | 16.85915 | 0.46108       |

# Mn<sub>6</sub>O<sub>6</sub>F<sub>6</sub>

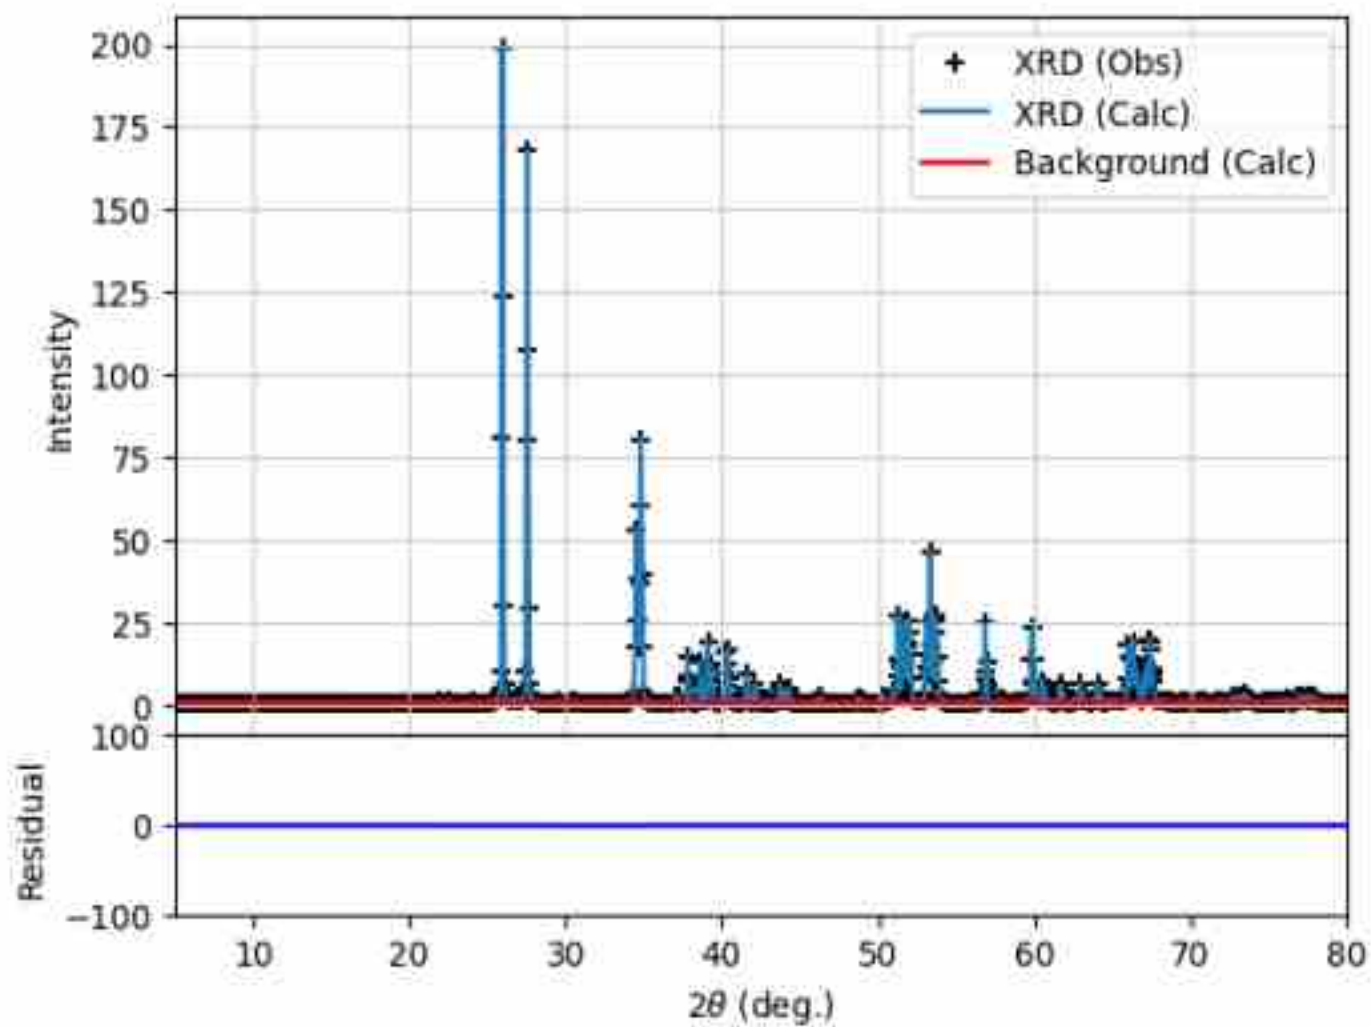

| RMSE before RR | Rwp     | RMSE after RR |
|----------------|---------|---------------|
| 0.37           | 0.97775 | 0.36372       |

# Te<sub>4</sub>O<sub>4</sub>F<sub>8</sub>

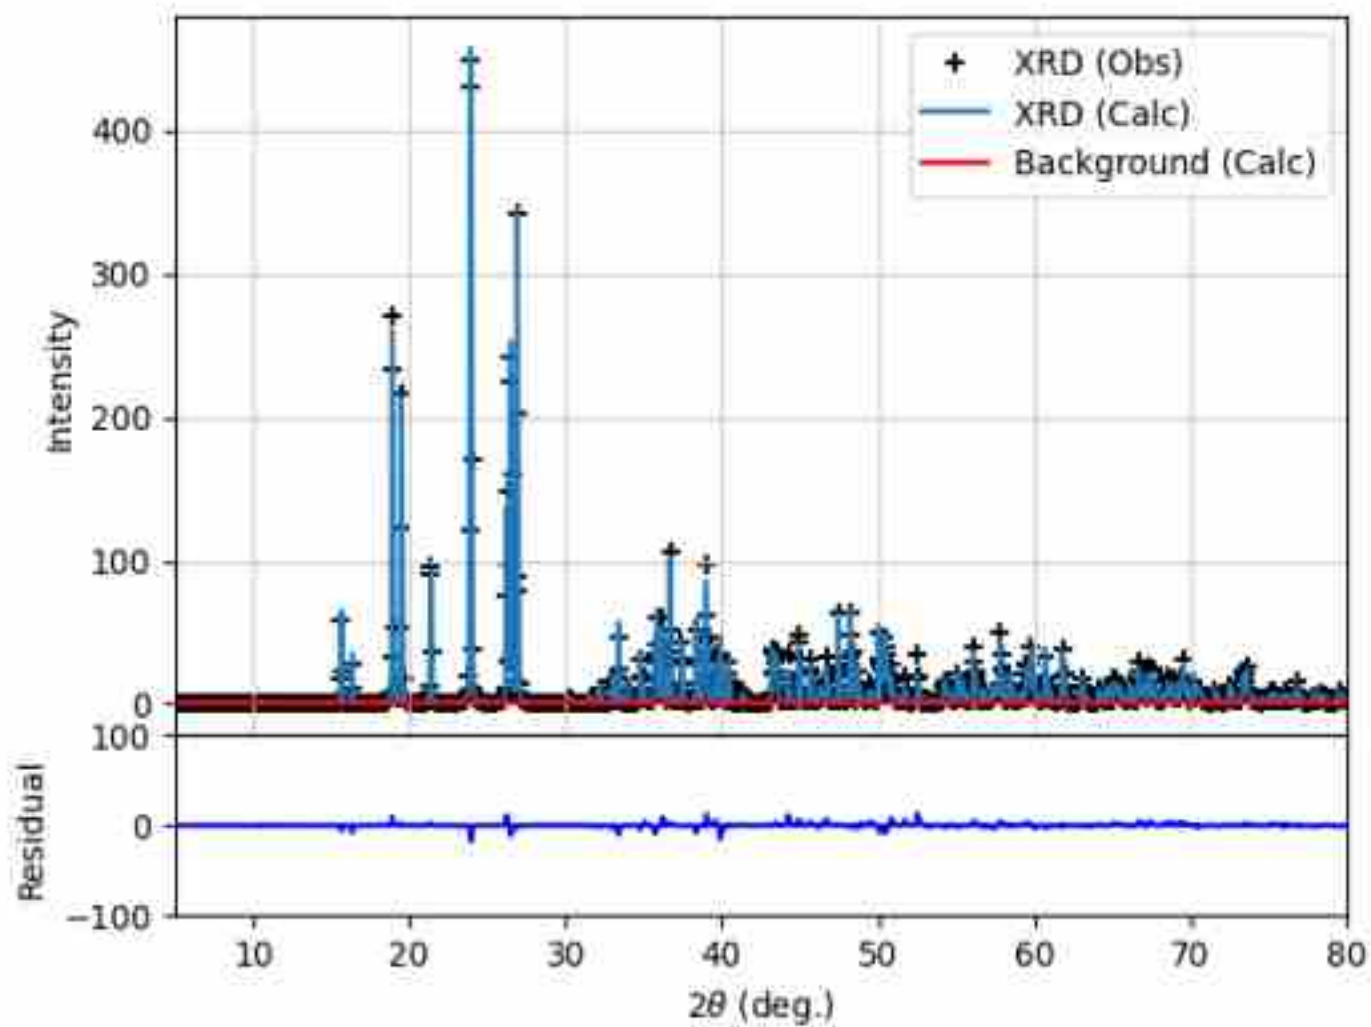

| RMSE before RR | Rwp      | RMSE after RR |
|----------------|----------|---------------|
| 0.37           | 11.58248 | None          |

# Y<sub>3</sub>Si<sub>2</sub>Ni<sub>2</sub>

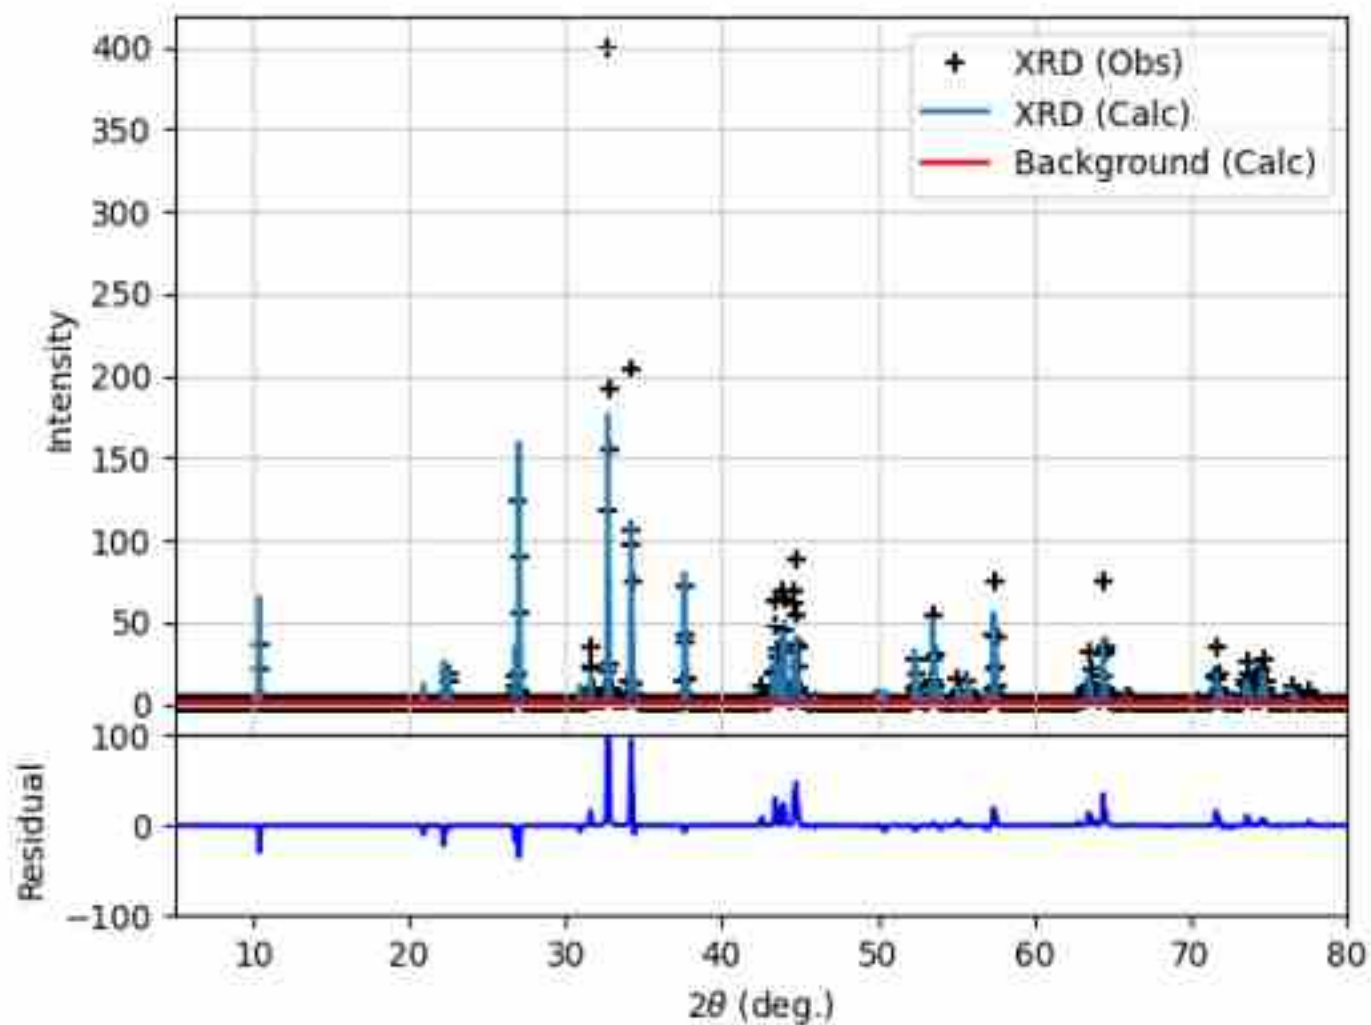

| RMSE before RR | Rwp      | RMSE after RR |
|----------------|----------|---------------|
| 0.37           | 45.99671 | None          |

# Sb<sub>2</sub>N<sub>2</sub>O<sub>2</sub>

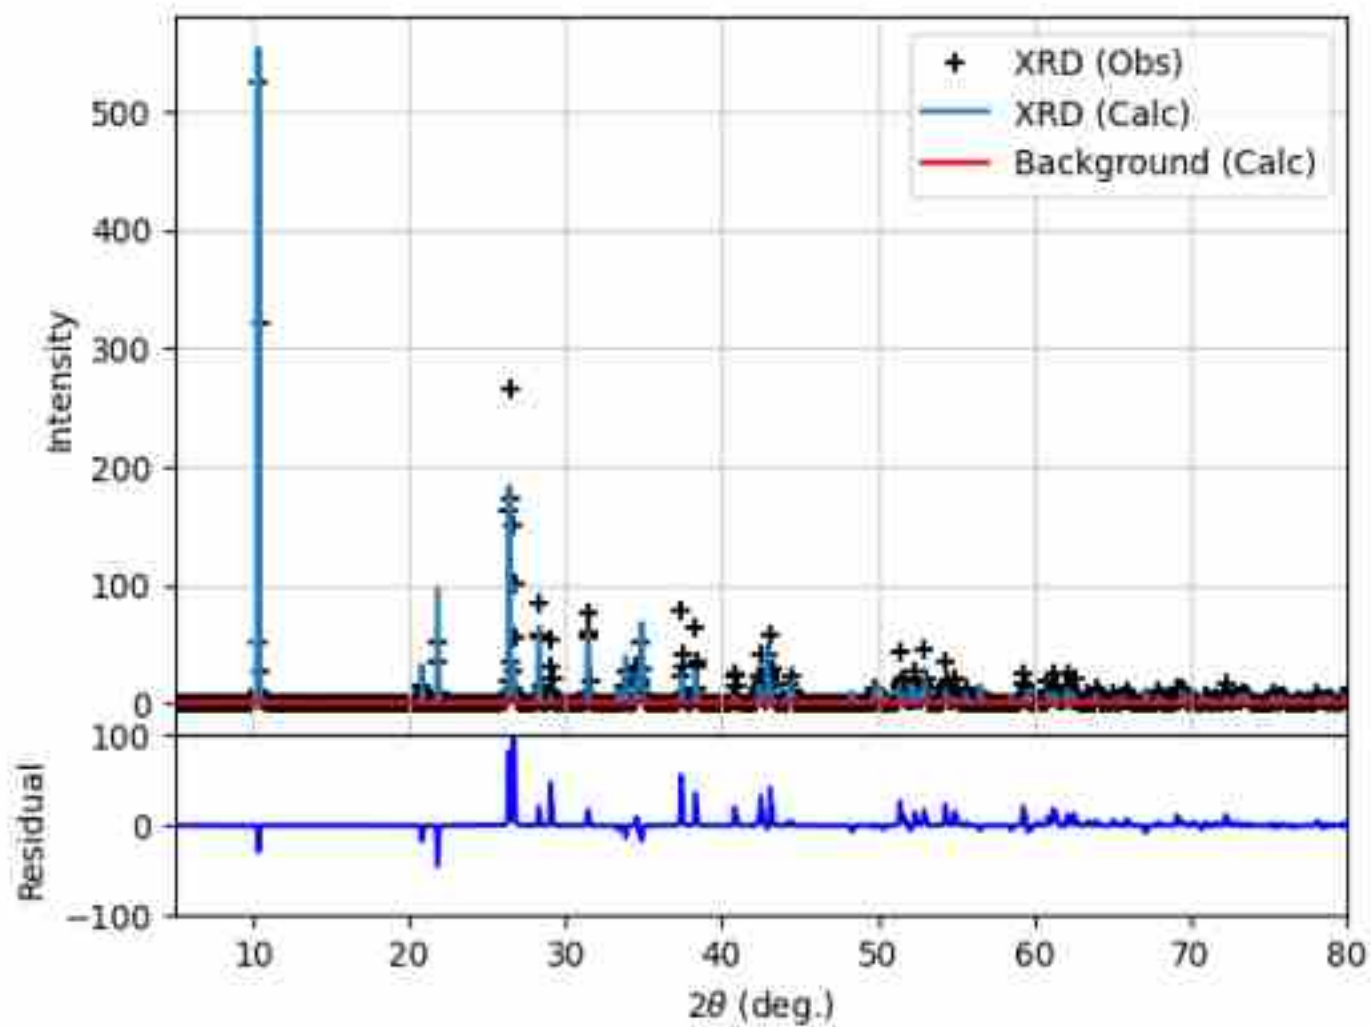

| RMSE before RR | Rwp      | RMSE after RR |
|----------------|----------|---------------|
| 0.39           | 46.31793 | None          |

# Sb8O12

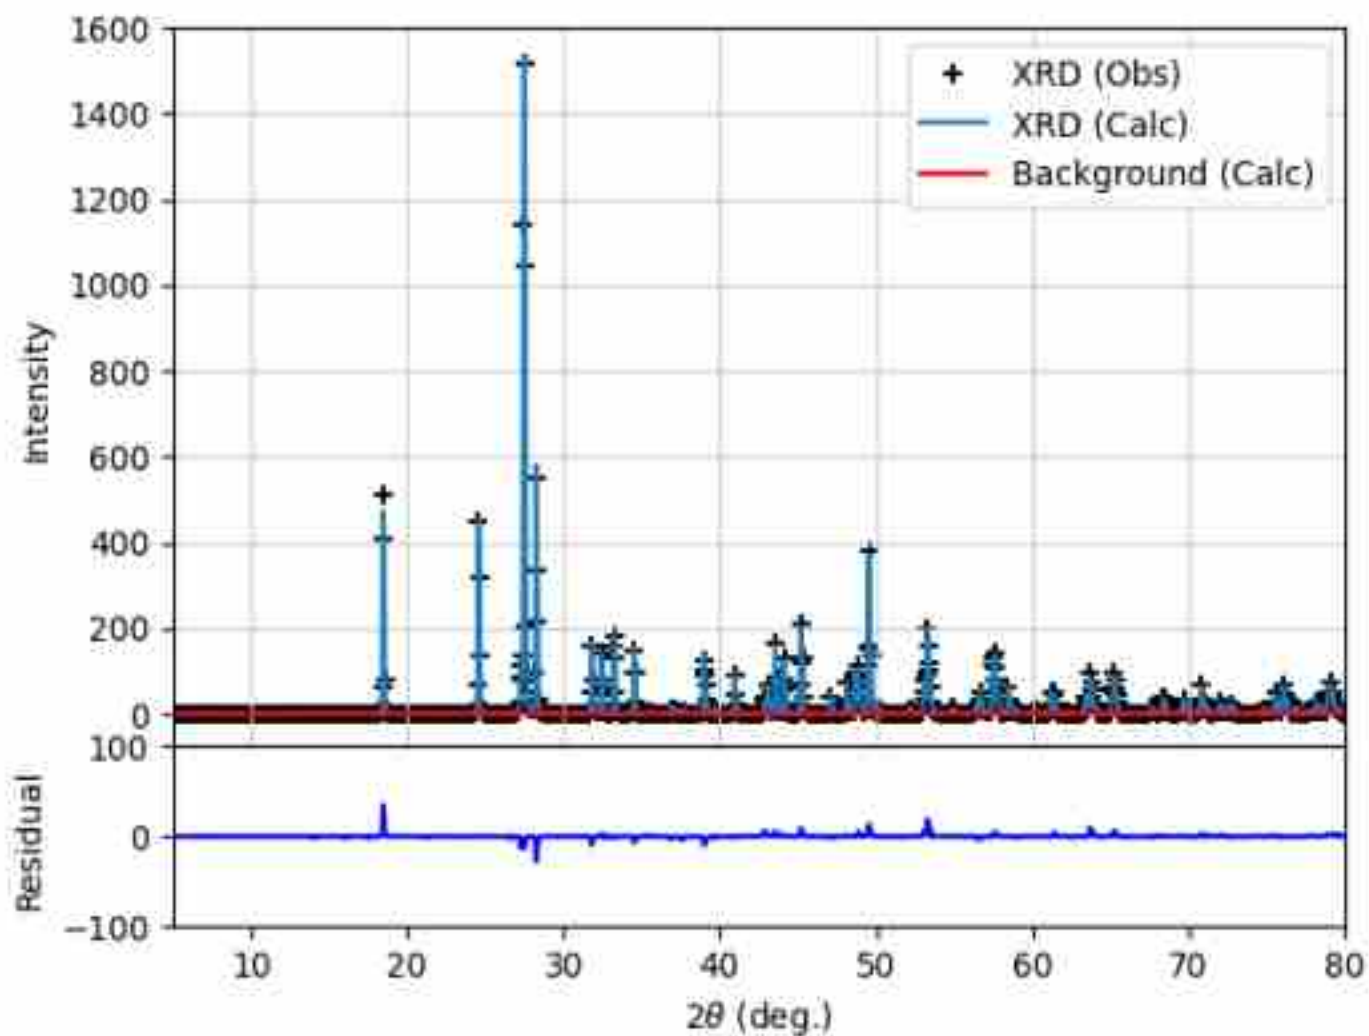

| RMSE before RR | Rwp     | RMSE after RR |
|----------------|---------|---------------|
| 0.39           | 6.40504 | 0.32359       |

# Ti4Pd6

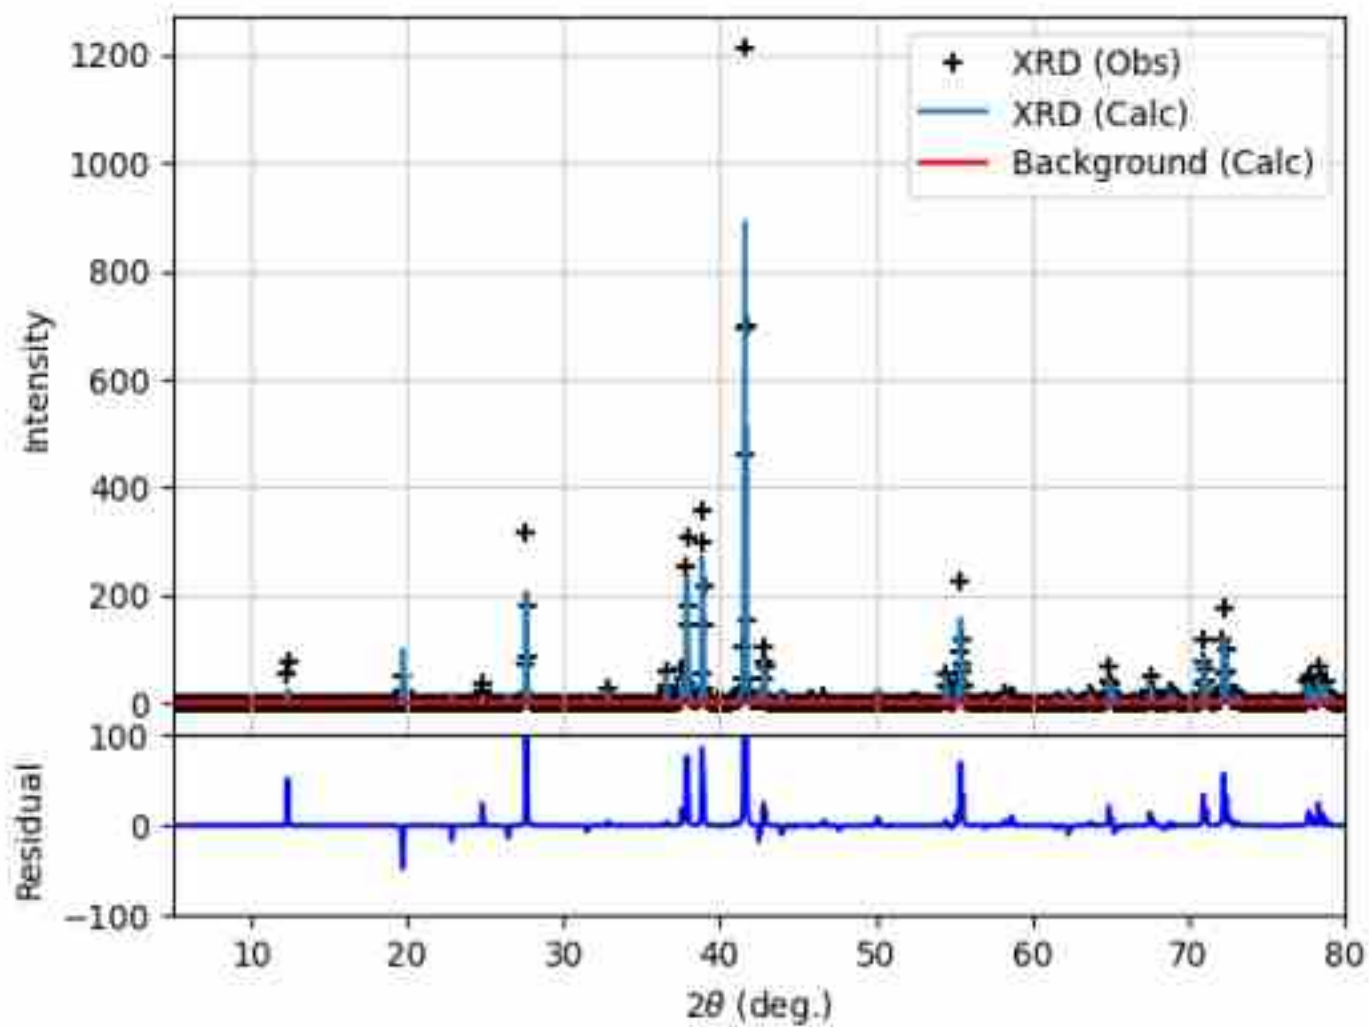

| RMSE before RR | Rwp      | RMSE after RR |
|----------------|----------|---------------|
| 0.39           | 39.79917 | 0.40127       |



# V4O3F9

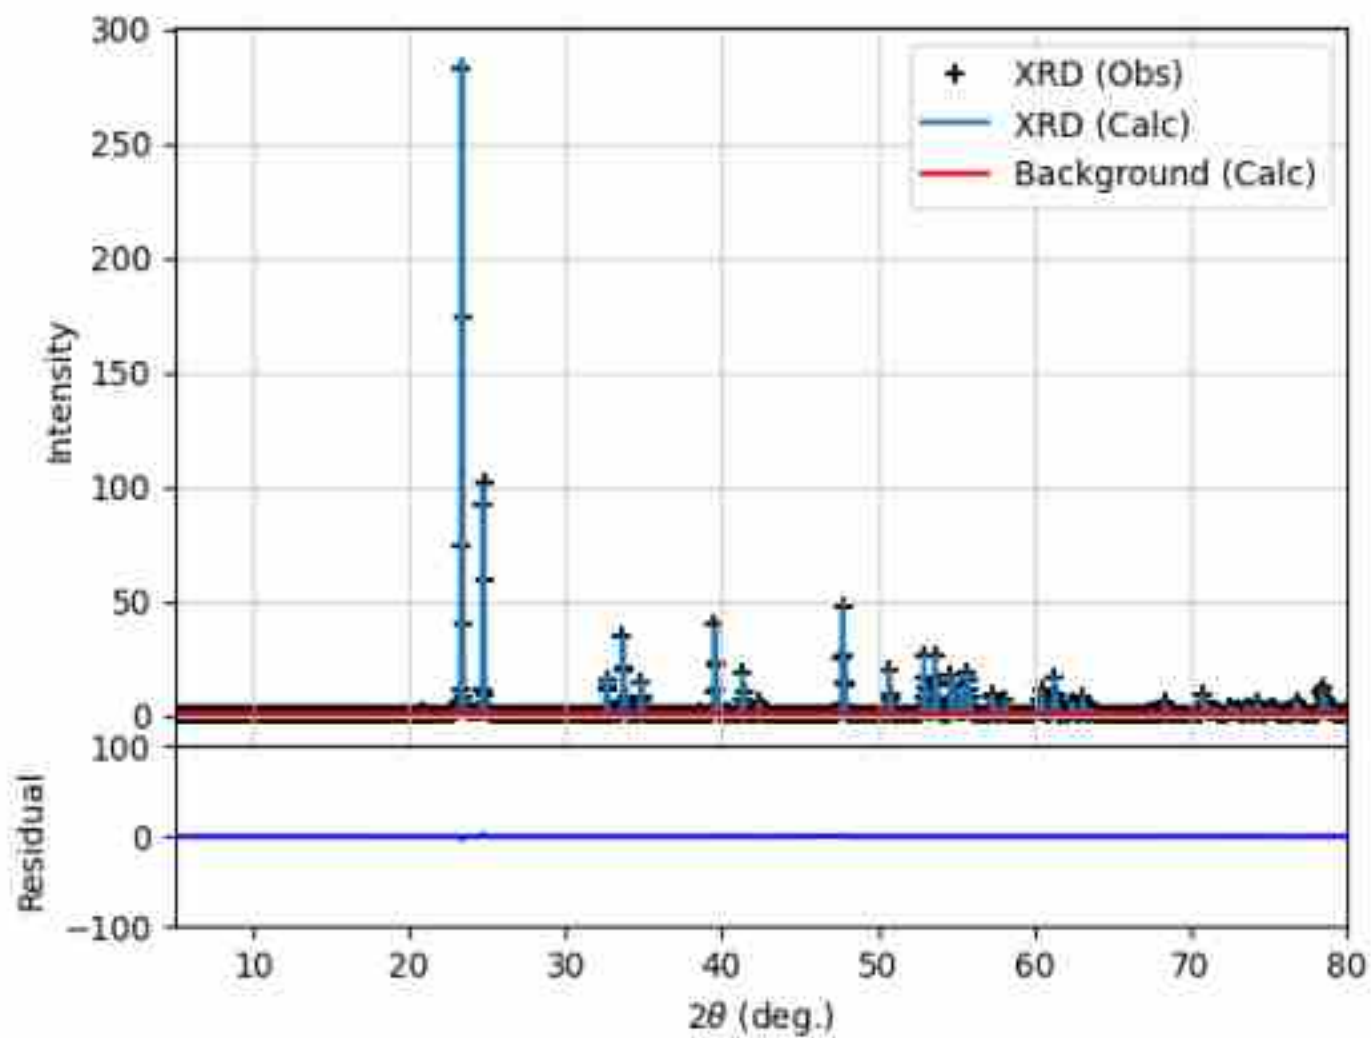

| RMSE before RR | Rwp     | RMSE after RR |
|----------------|---------|---------------|
| 0.39           | 1.38479 | 0.39772       |

# Ni<sub>4</sub>S<sub>8</sub>

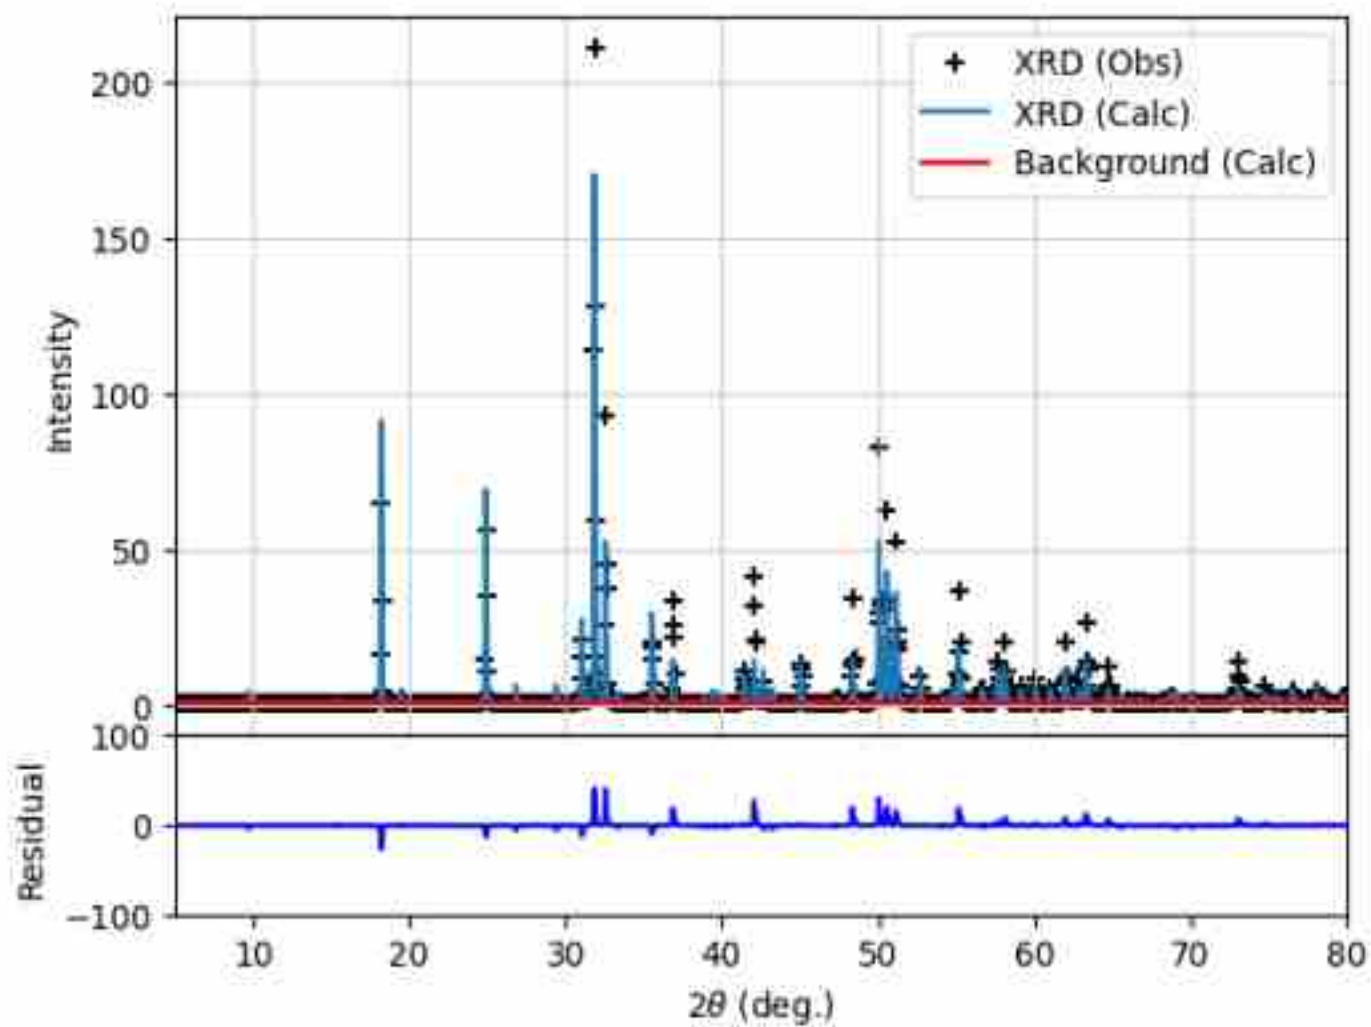

| RMSE before RR | Rwp      | RMSE after RR |
|----------------|----------|---------------|
| 0.41           | 36.62006 | None          |

# V4S16

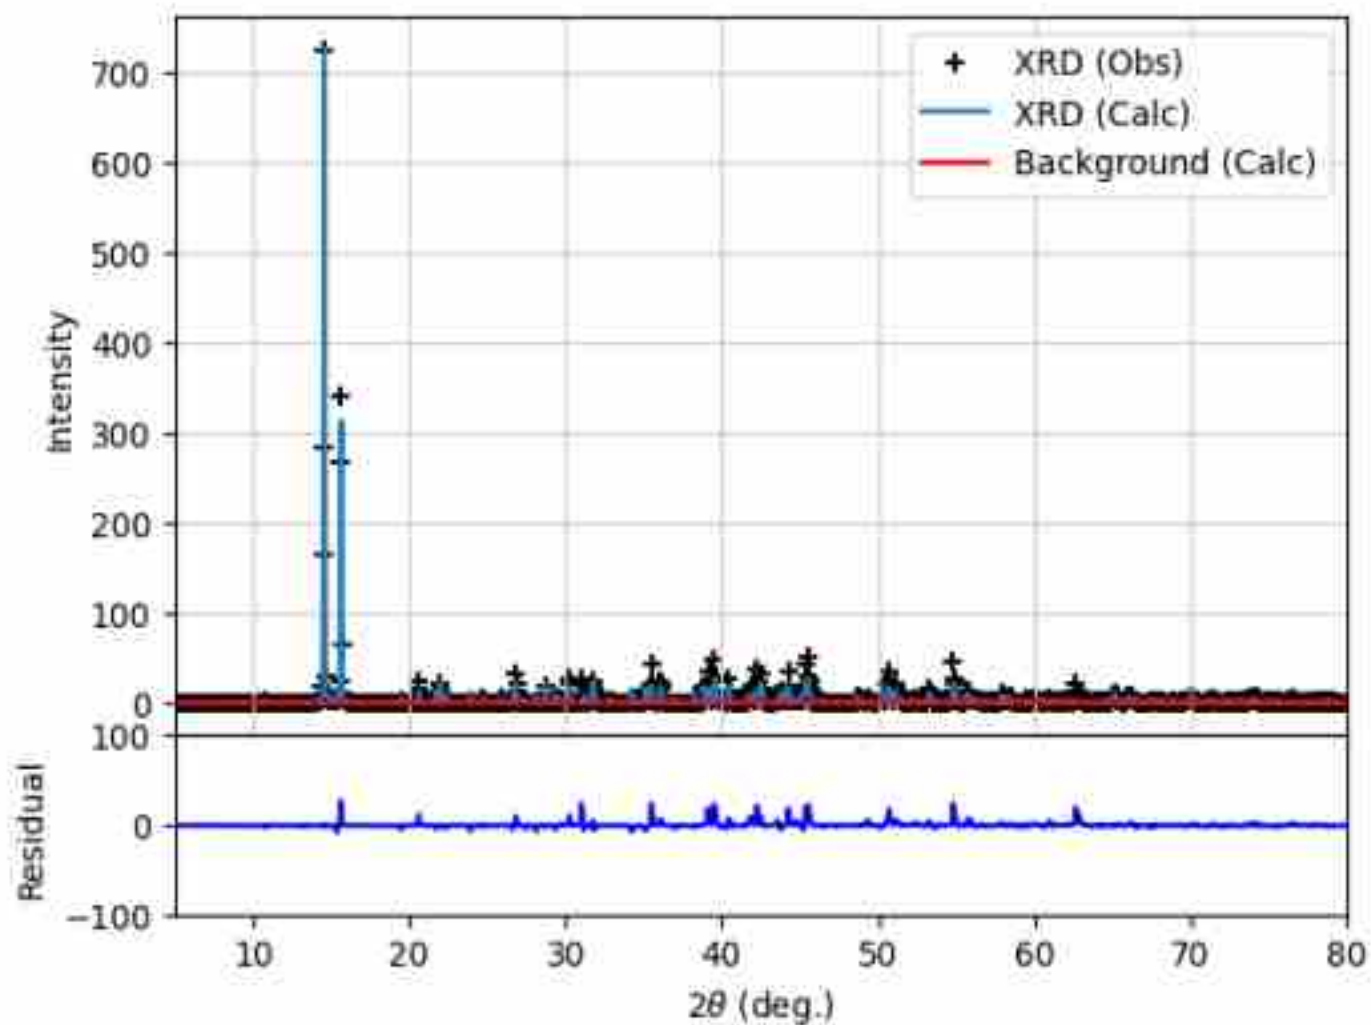

| RMSE before RR | Rwp      | RMSE after RR |
|----------------|----------|---------------|
| 0.41           | 34.51688 | 0.46939       |

# Ga<sub>2</sub>Hg<sub>5</sub>Se<sub>8</sub>

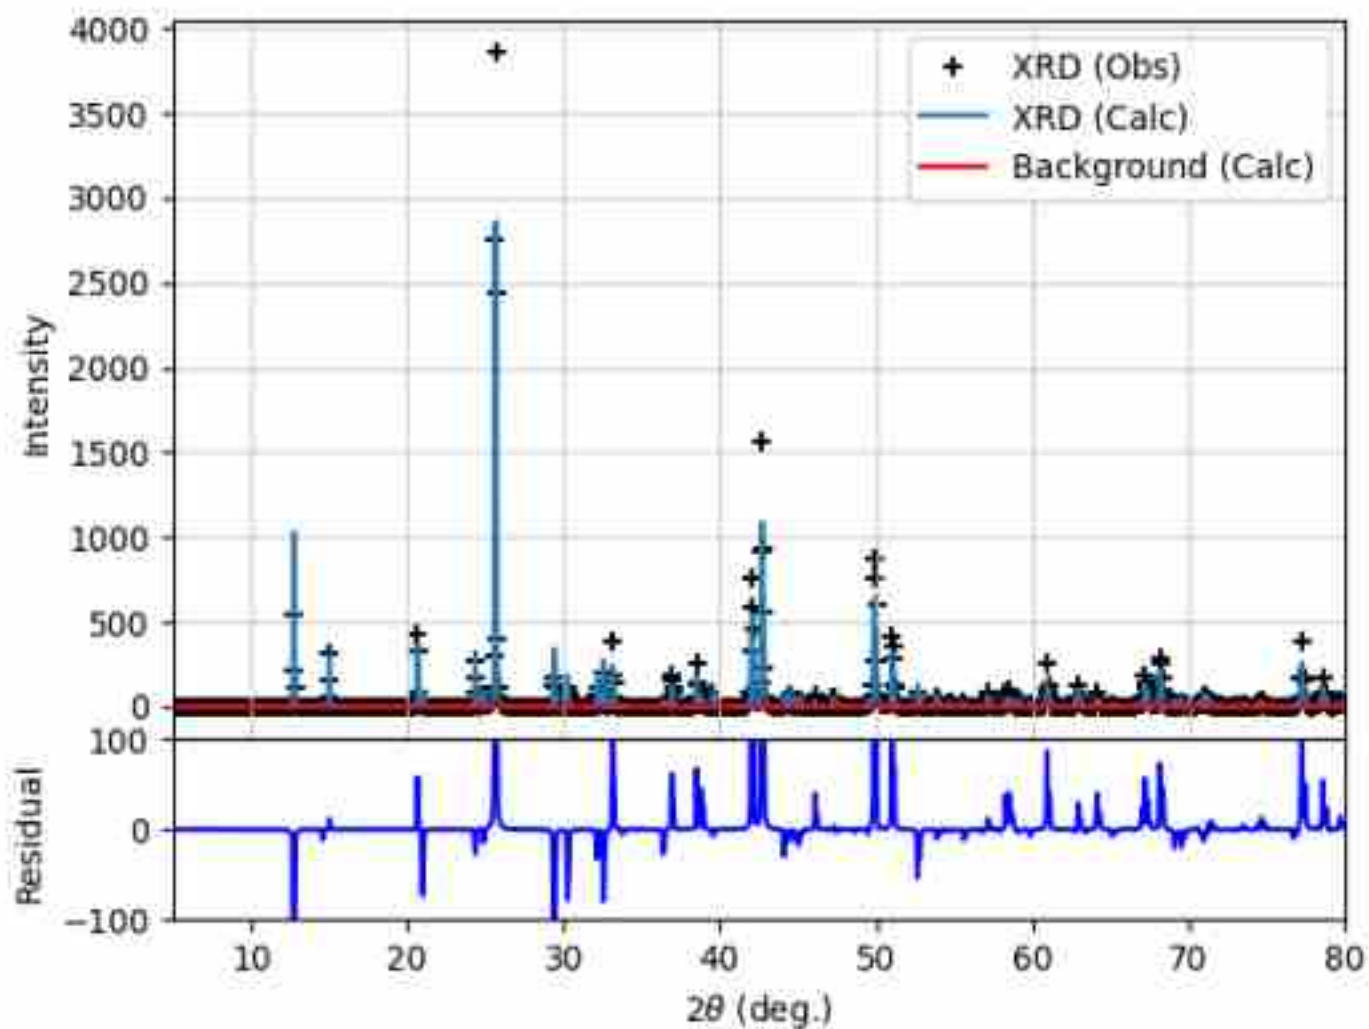

| RMSE before RR | Rwp      | RMSE after RR |
|----------------|----------|---------------|
| 0.42           | 36.50138 | 0.49529       |

# Nb<sub>6</sub>Te<sub>6</sub>As<sub>2</sub>

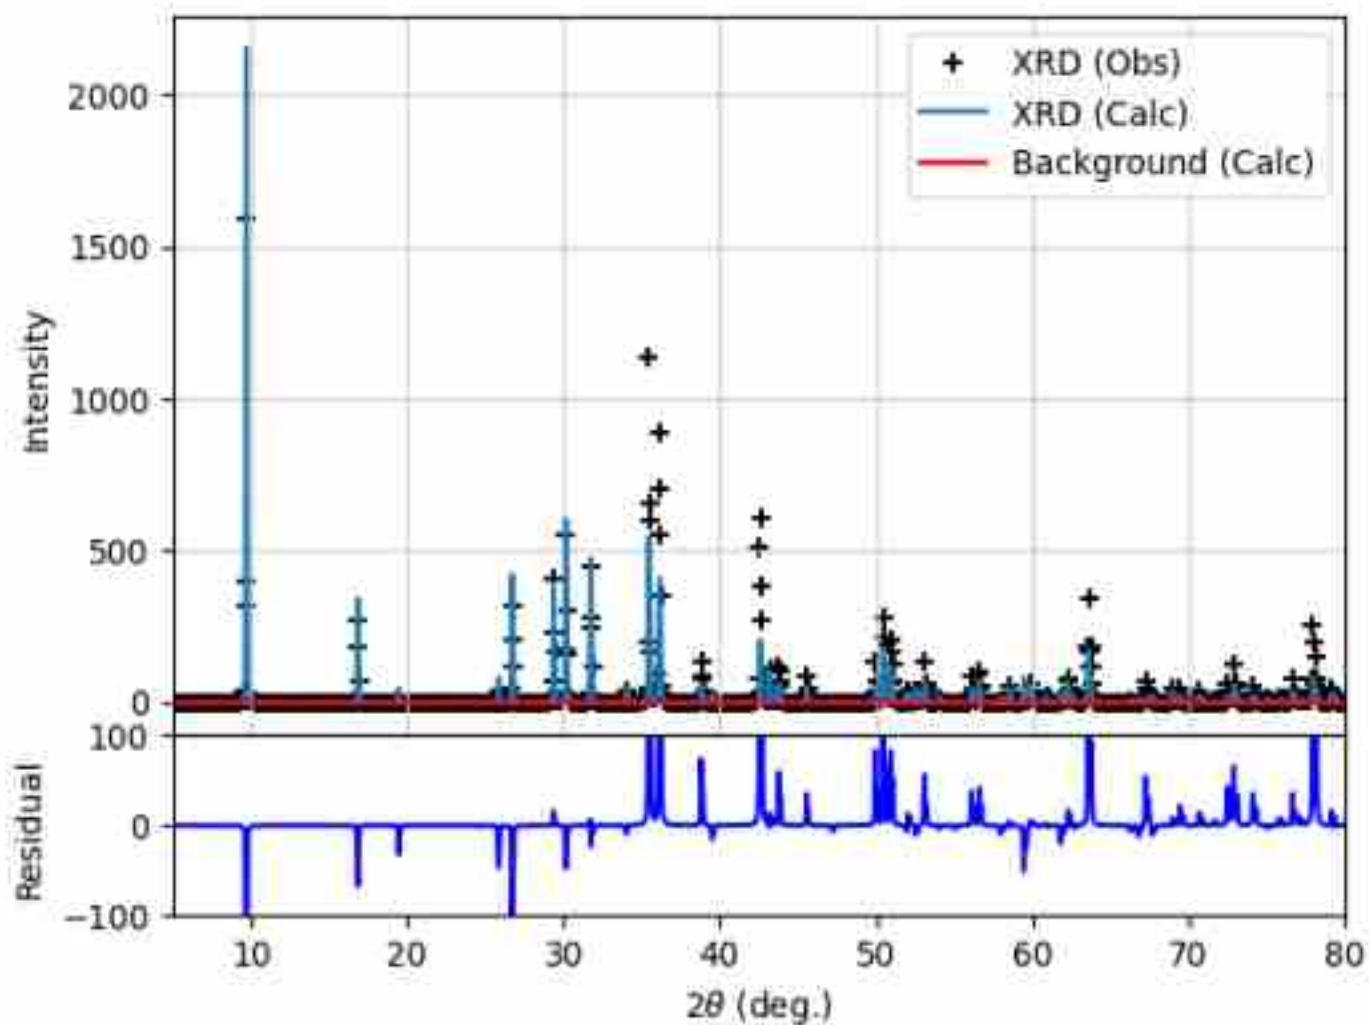

| RMSE before RR | Rwp      | RMSE after RR |
|----------------|----------|---------------|
| 0.42           | 45.73419 | None          |

# Ca<sub>2</sub>Ga<sub>4</sub>P<sub>4</sub>

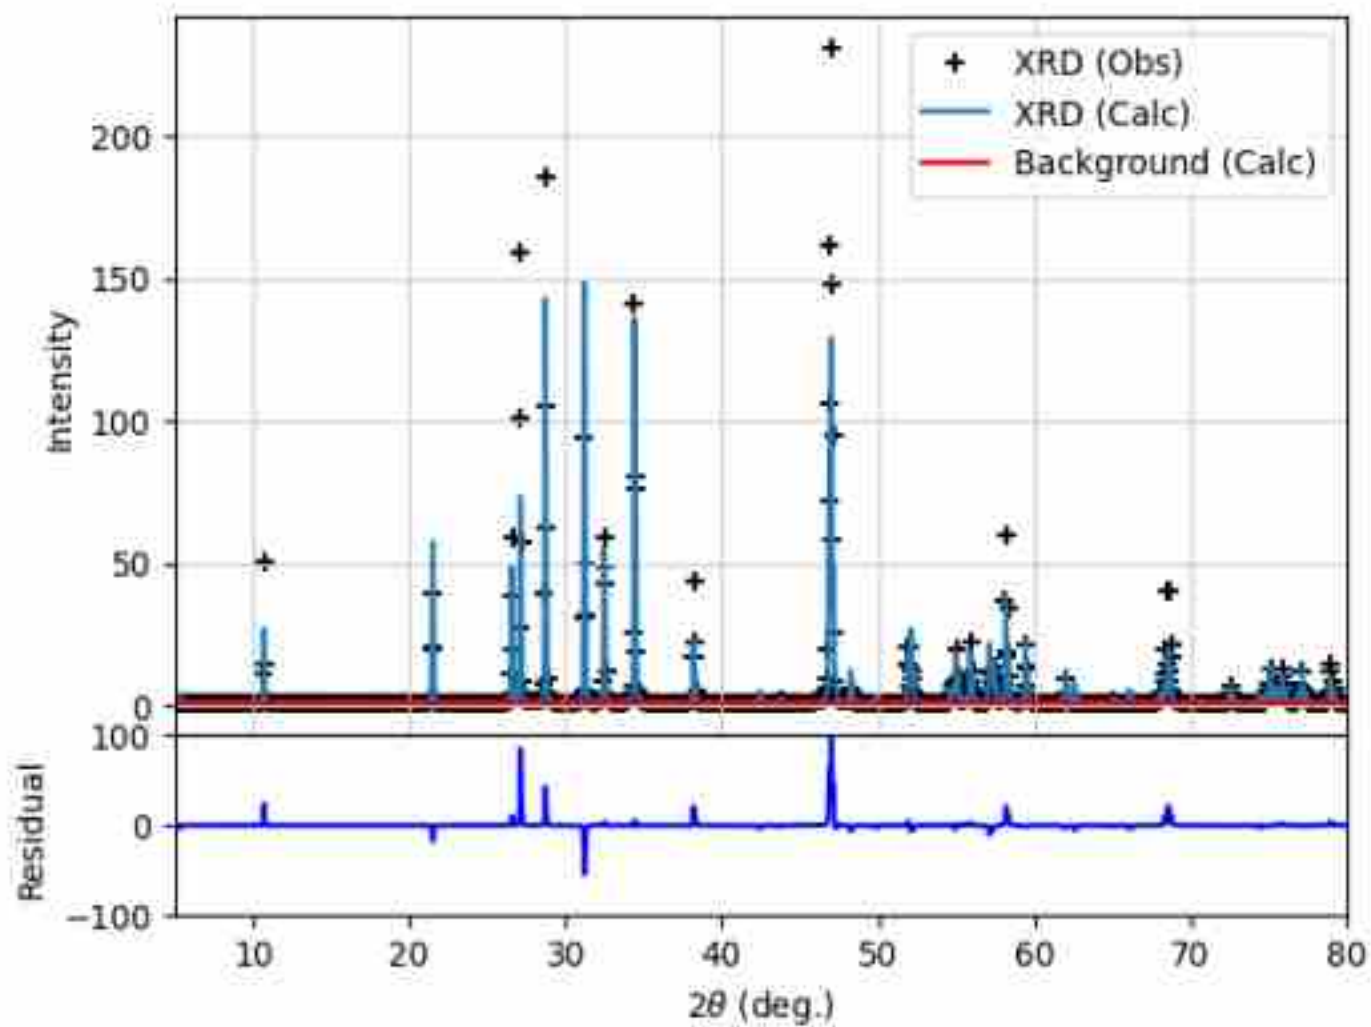

| RMSE before RR | Rwp     | RMSE after RR |
|----------------|---------|---------------|
| 0.43           | 36.1089 | 0.49355       |

# Cu<sub>2</sub>Br<sub>2</sub>

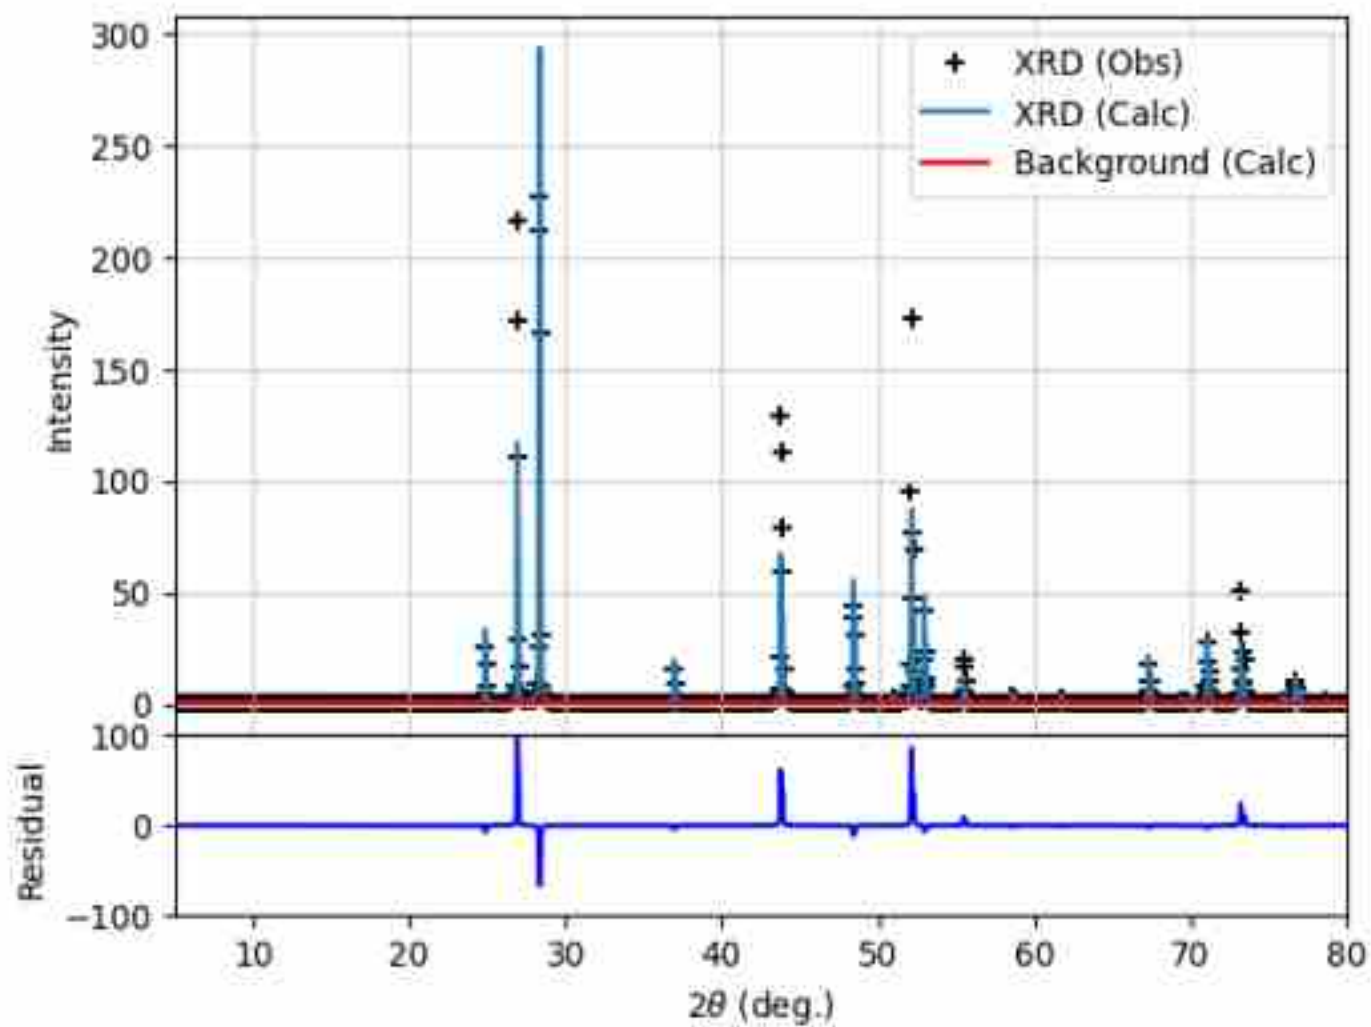

| RMSE before RR | Rwp      | RMSE after RR |
|----------------|----------|---------------|
| 0.43           | 32.27241 | 0.34639       |

# Dy<sub>8</sub>Sn<sub>4</sub>Au<sub>8</sub>

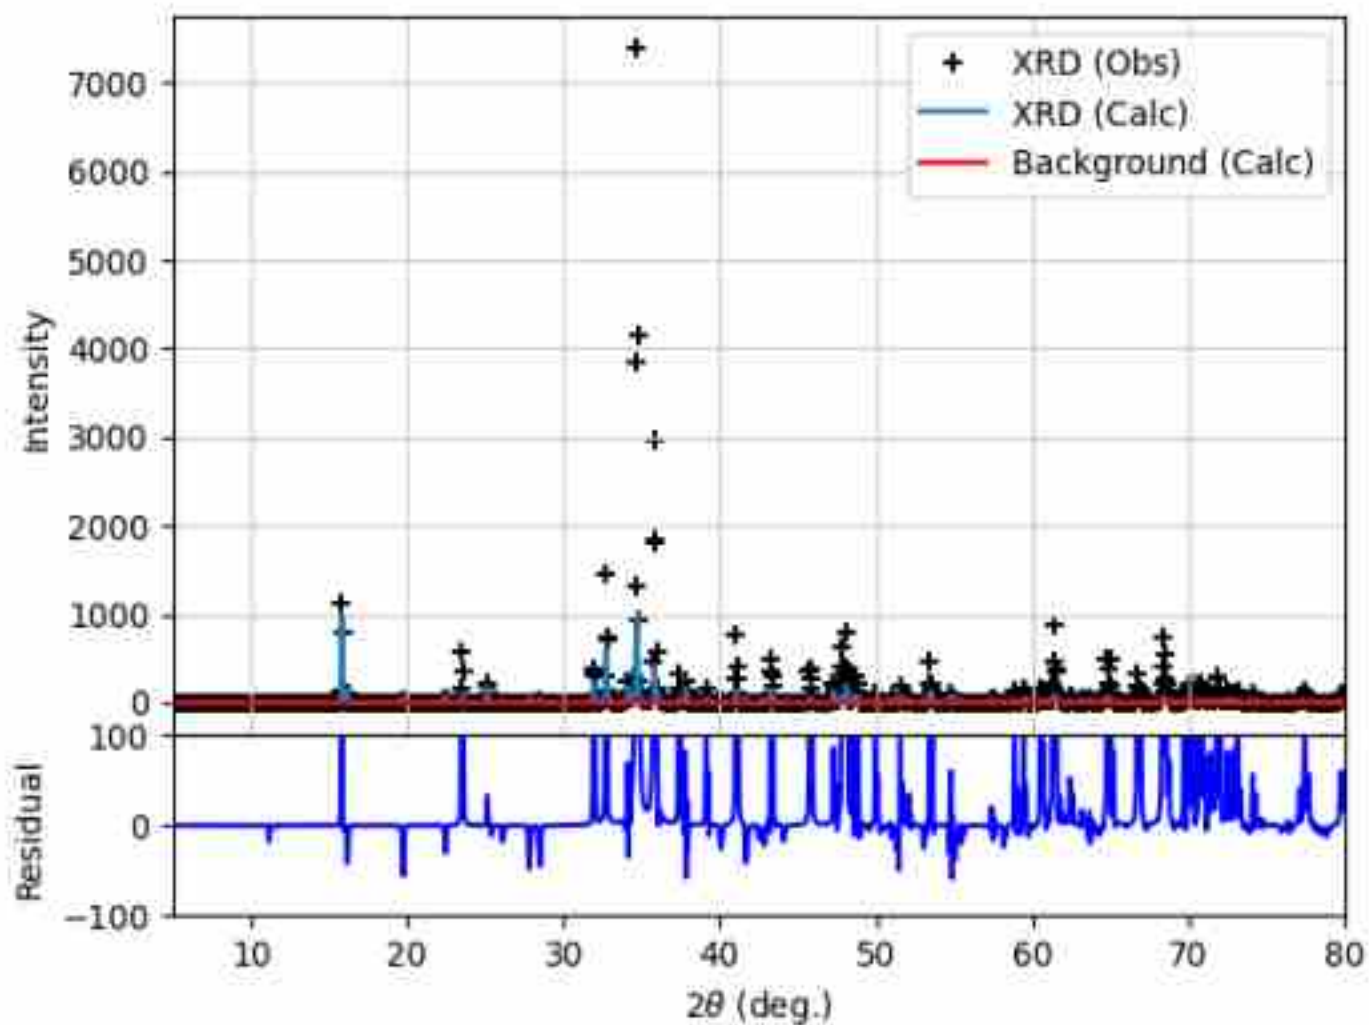

| RMSE before RR | Rwp      | RMSE after RR |
|----------------|----------|---------------|
| 0.43           | 80.62609 | 0.48761       |



# Ca<sub>2</sub>Bi<sub>4</sub>O<sub>8</sub>

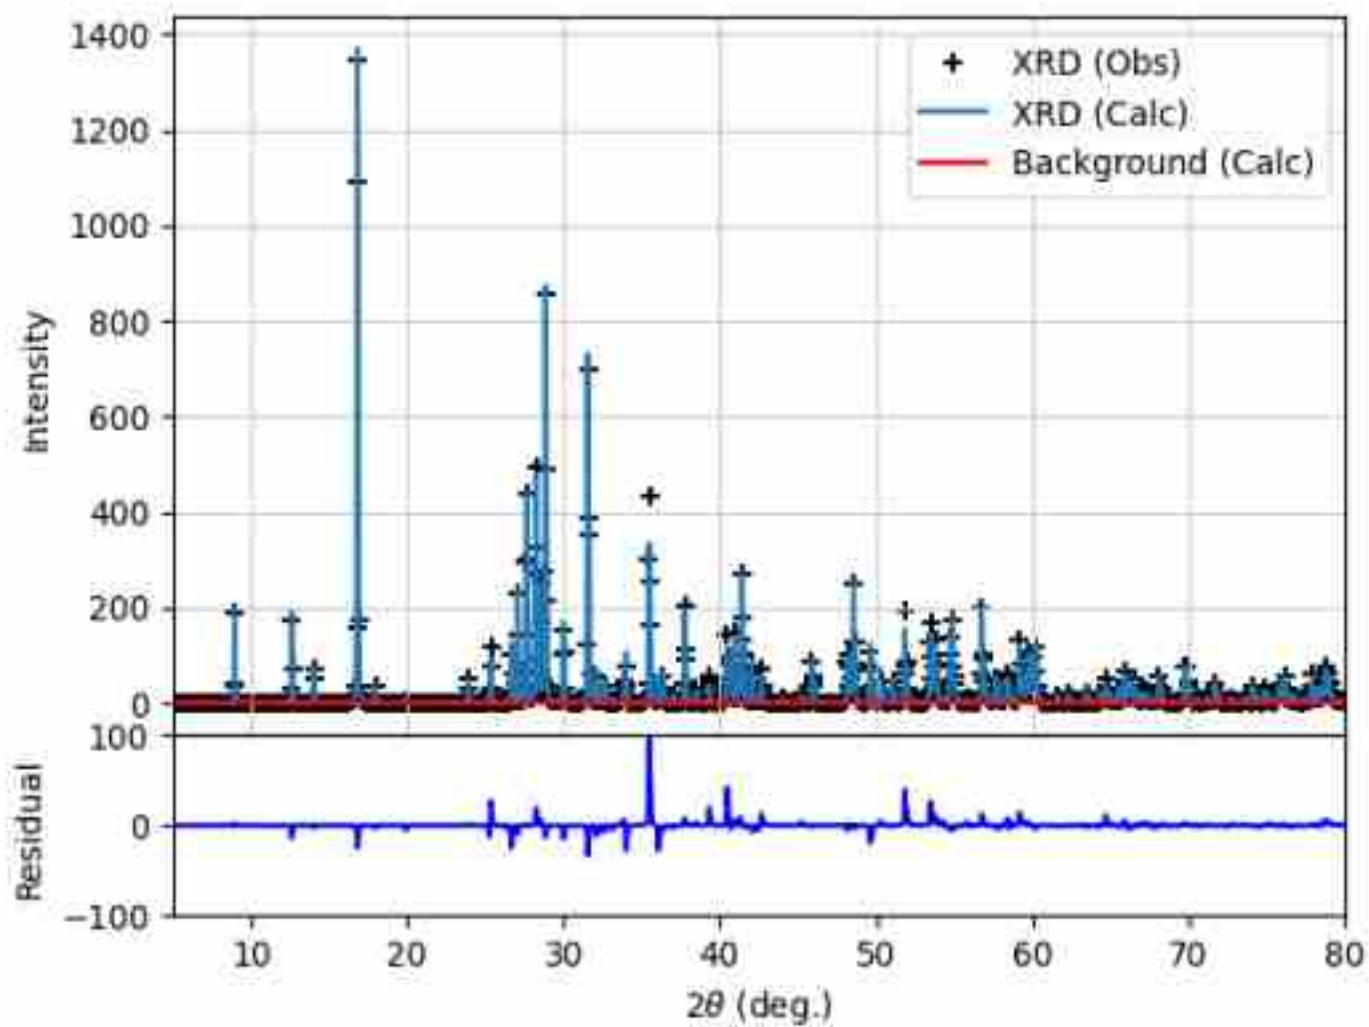

| RMSE before RR | Rwp      | RMSE after RR |
|----------------|----------|---------------|
| 0.45           | 11.80797 | None          |

# Hf6Nb4Ga6

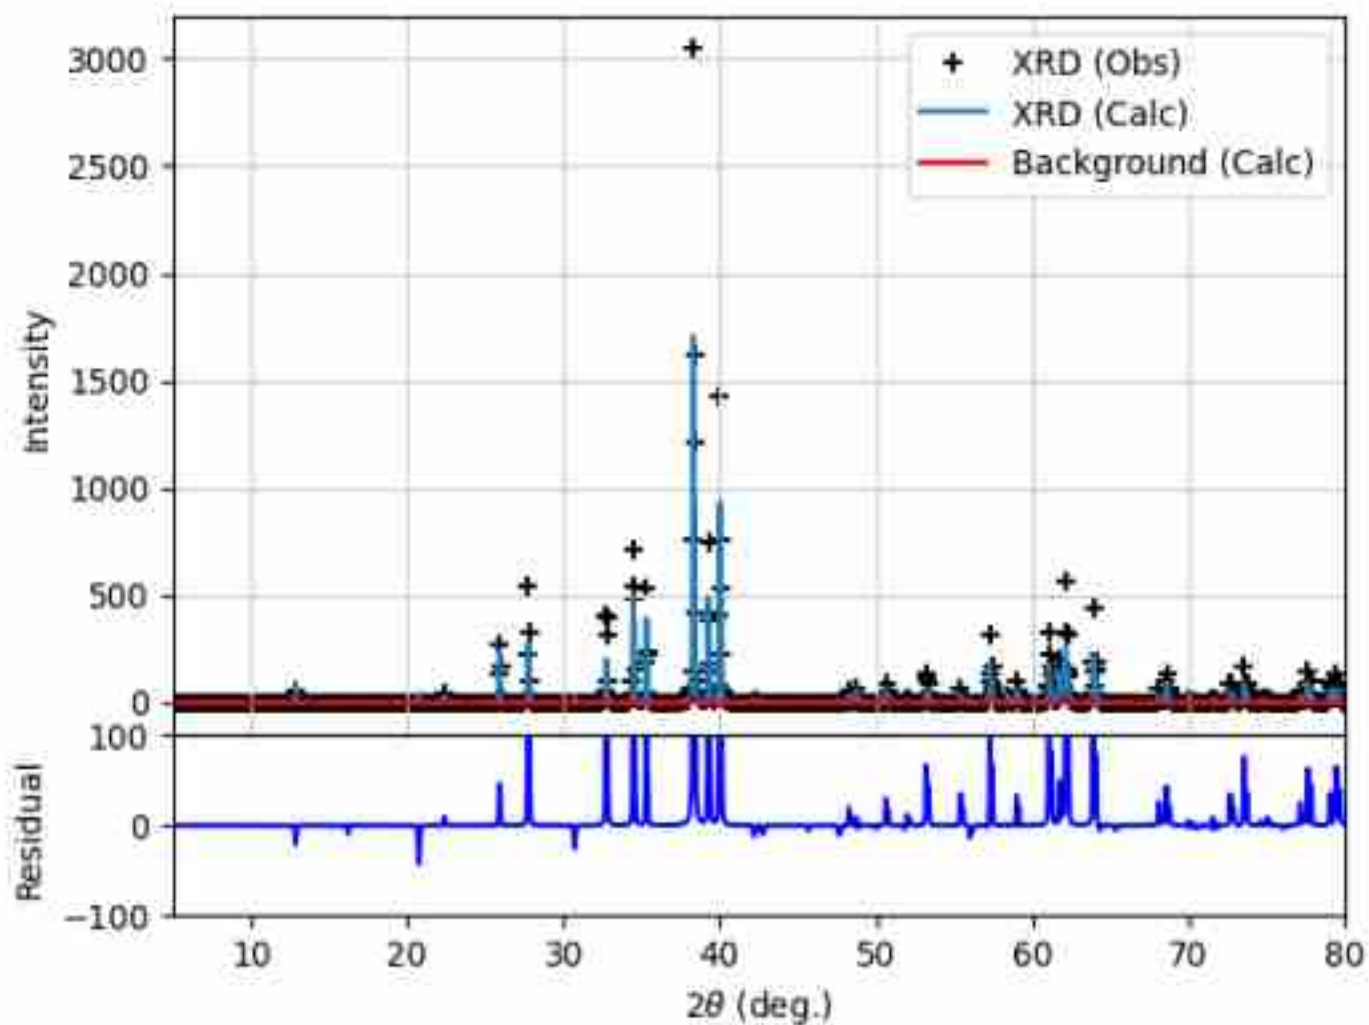

| RMSE before RR | Rwp      | RMSE after RR |
|----------------|----------|---------------|
| 0.45           | 50.79428 | None          |

# H4I4O12

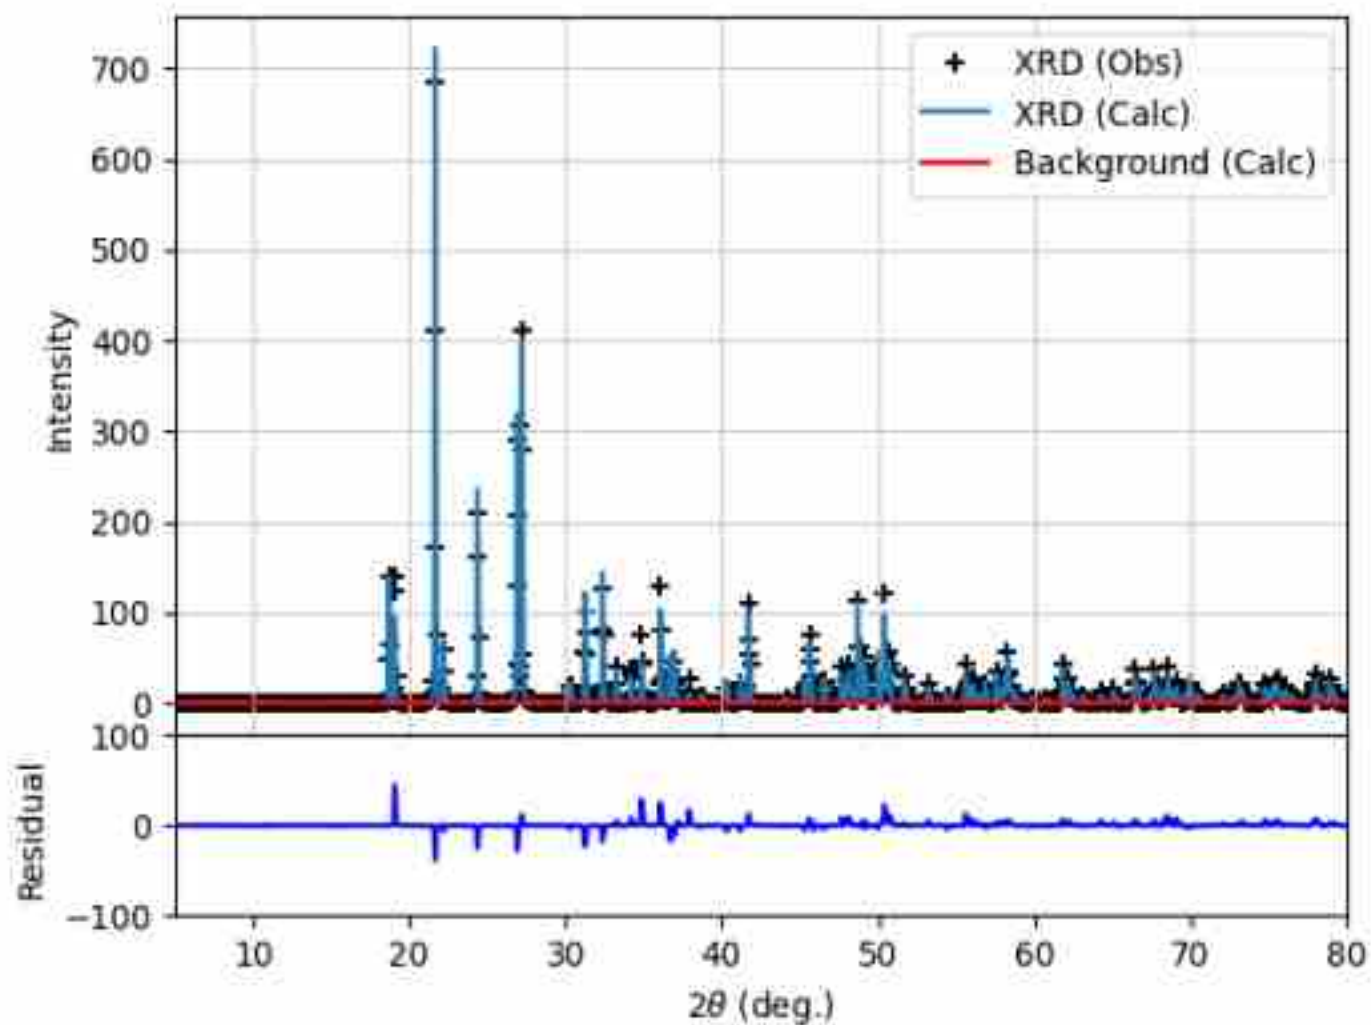

| RMSE before RR | Rwp     | RMSE after RR |
|----------------|---------|---------------|
| 0.46           | 16.6057 | None          |

# As<sub>8</sub>S<sub>8</sub>

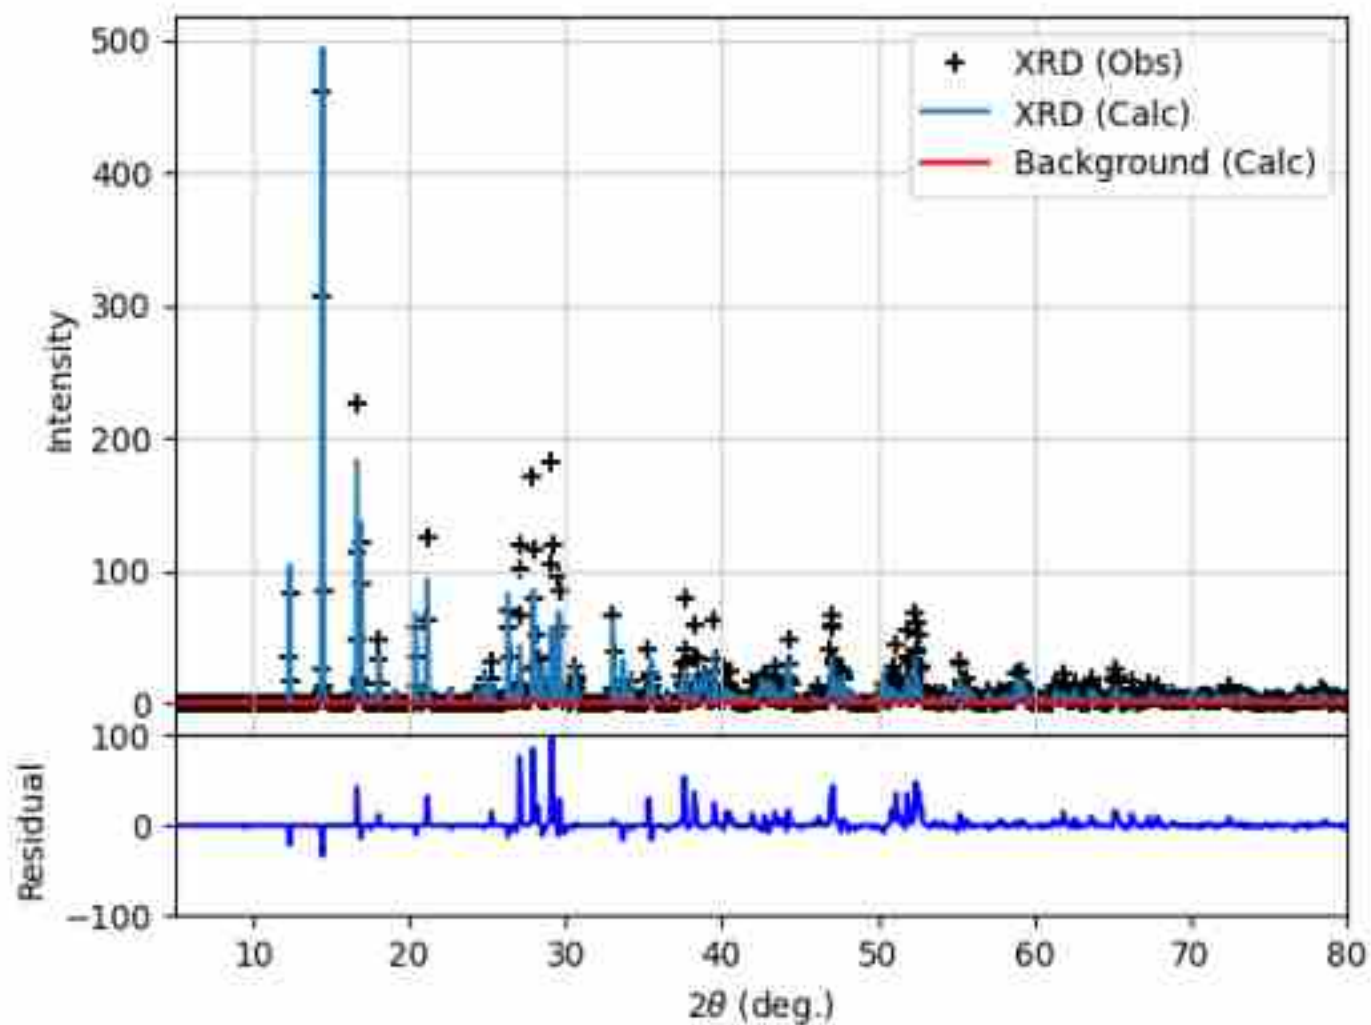

| RMSE before RR | Rwp      | RMSE after RR |
|----------------|----------|---------------|
| 0.47           | 45.76127 | None          |

# Cu<sub>6</sub>P<sub>2</sub>Se<sub>4</sub>S<sub>4</sub>

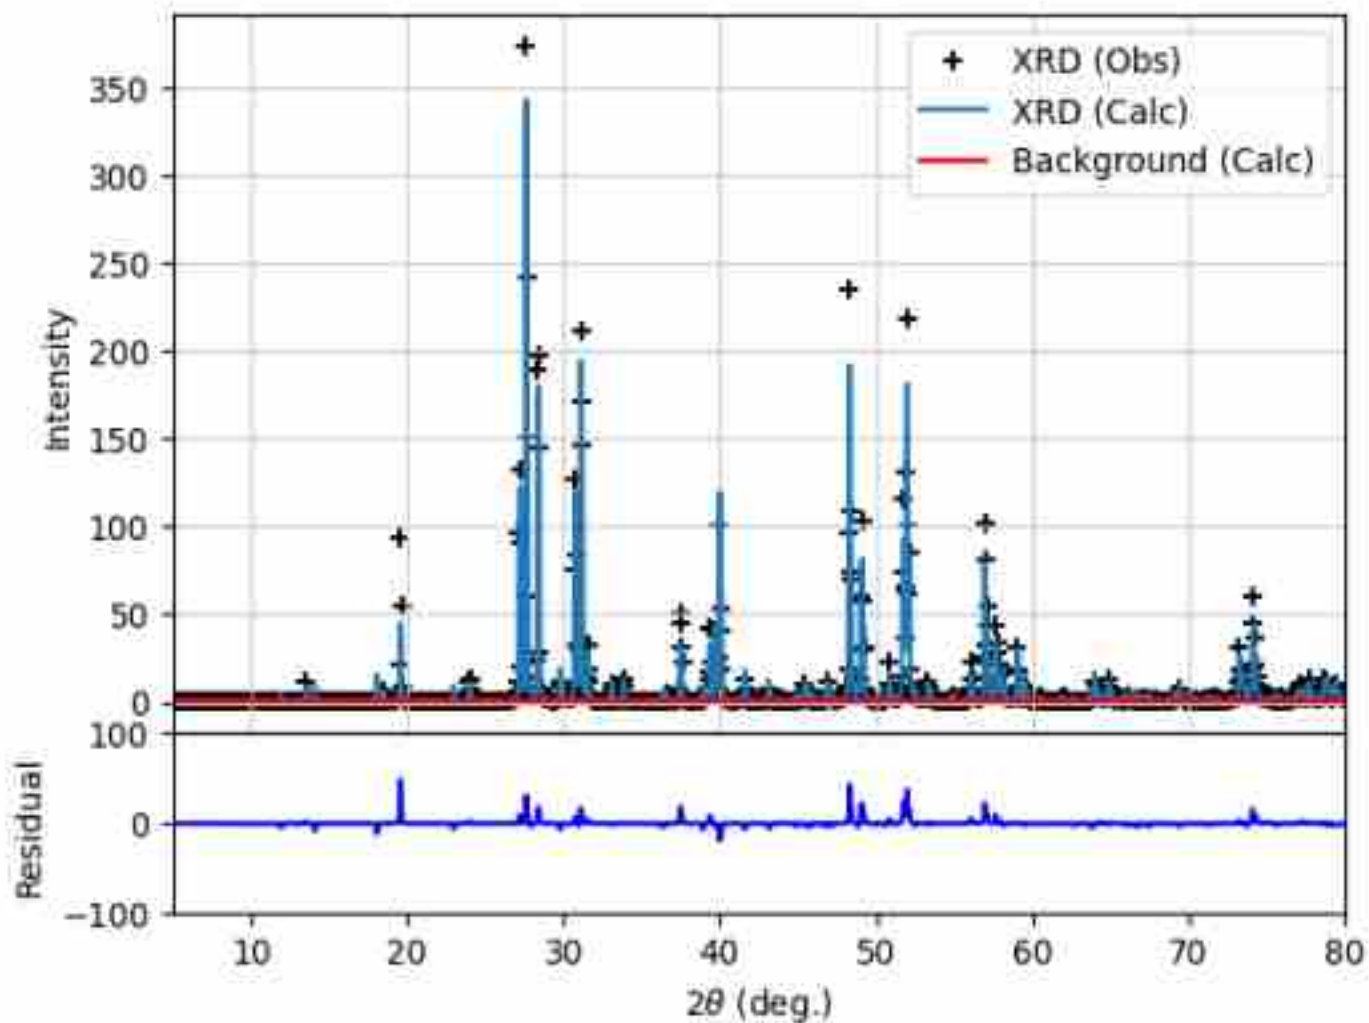

| RMSE before RR | Rwp     | RMSE after RR |
|----------------|---------|---------------|
| 0.47           | 26.8619 | 0.48487       |

# Li4V2F12

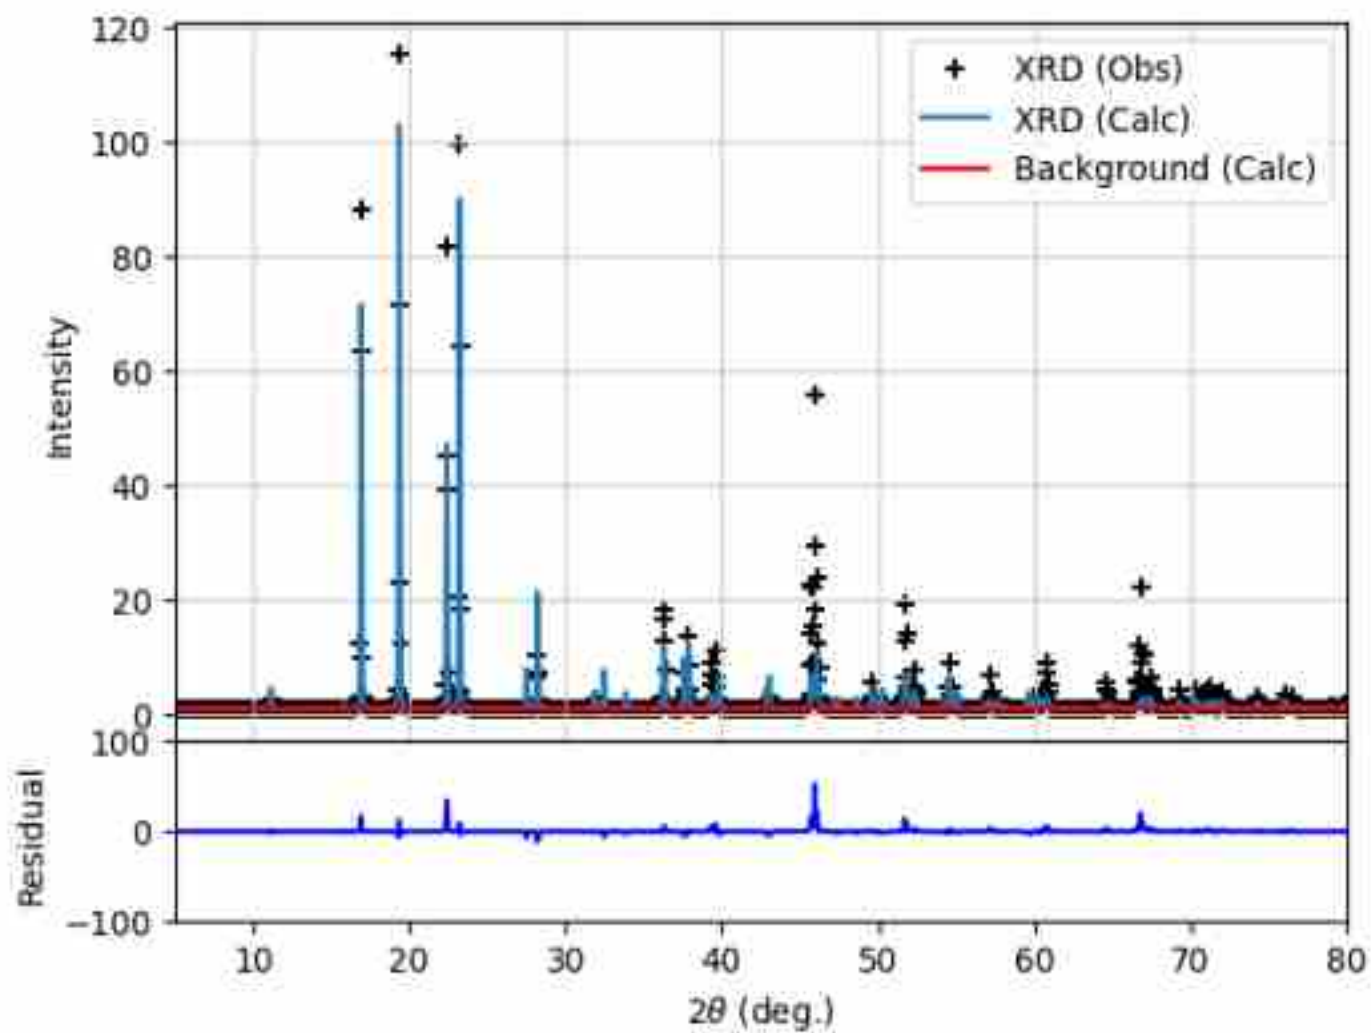

| RMSE before RR | Rwp      | RMSE after RR |
|----------------|----------|---------------|
| 0.47           | 45.19412 | None          |

# Mn<sub>4</sub>O<sub>4</sub>F<sub>4</sub>

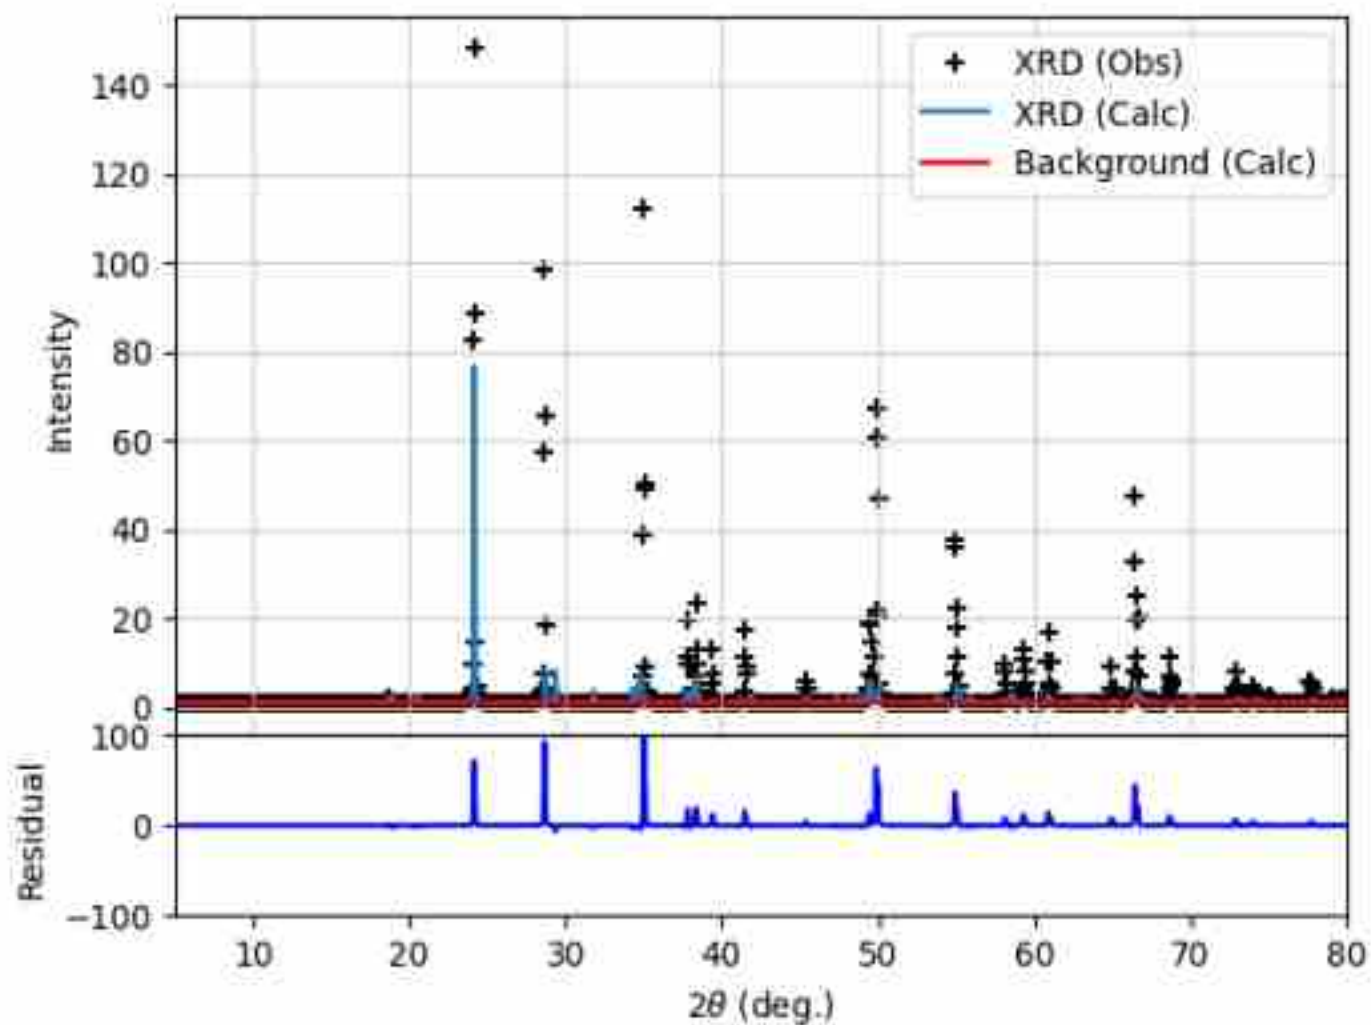

| RMSE before RR | Rwp      | RMSE after RR |
|----------------|----------|---------------|
| 0.48           | 64.49631 | None          |

# Al<sub>4</sub>Fe<sub>6</sub>Si<sub>6</sub>

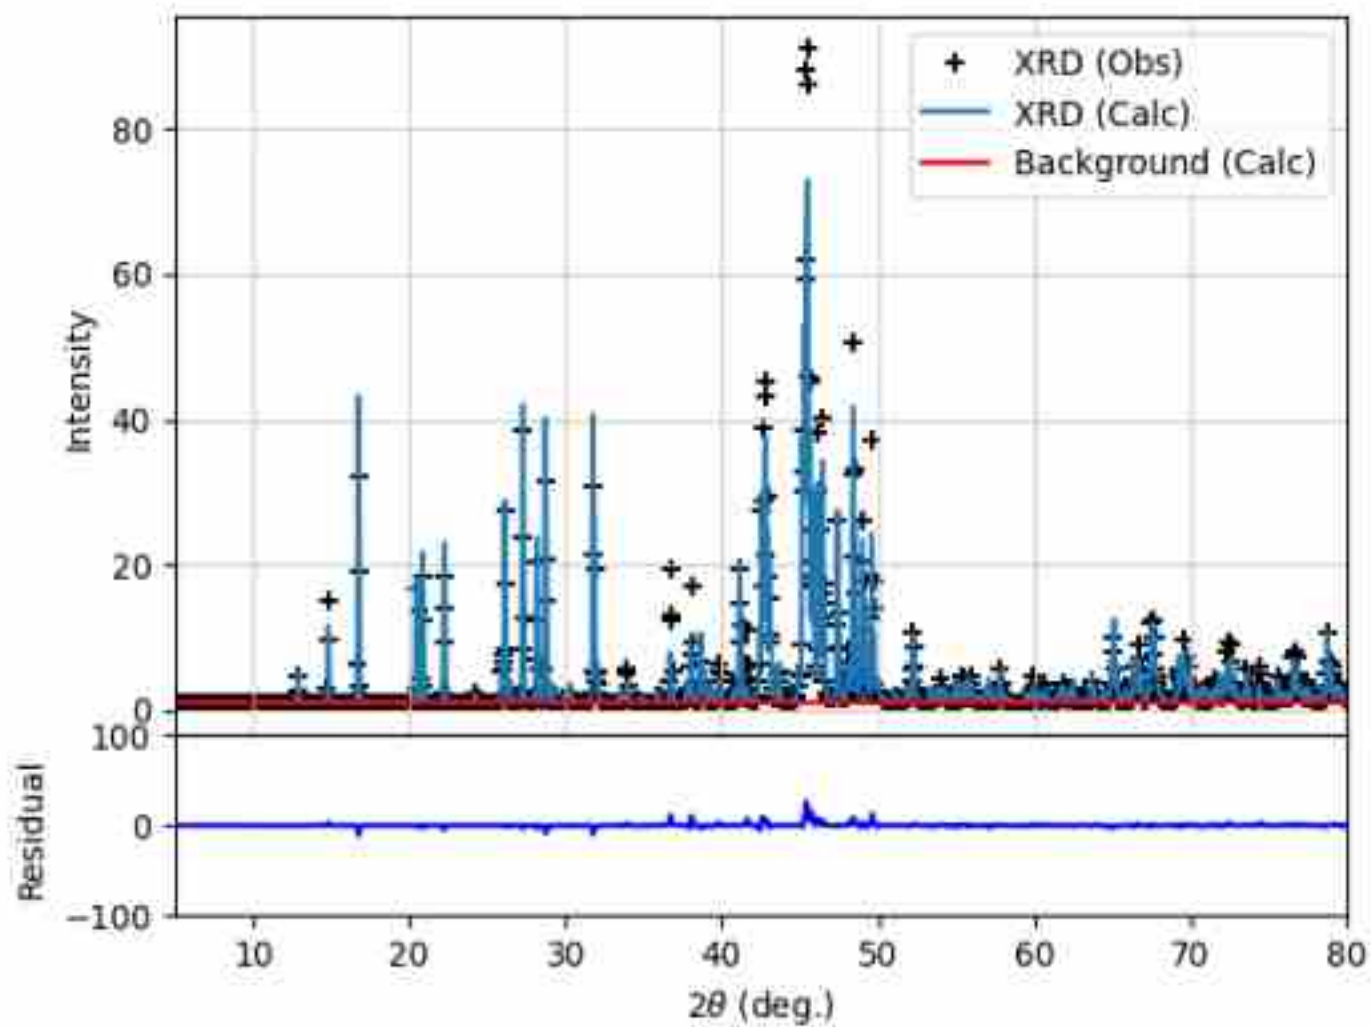

| RMSE before RR | Rwp      | RMSE after RR |
|----------------|----------|---------------|
| 0.49           | 23.69195 | None          |



# Pd1Se2Br6

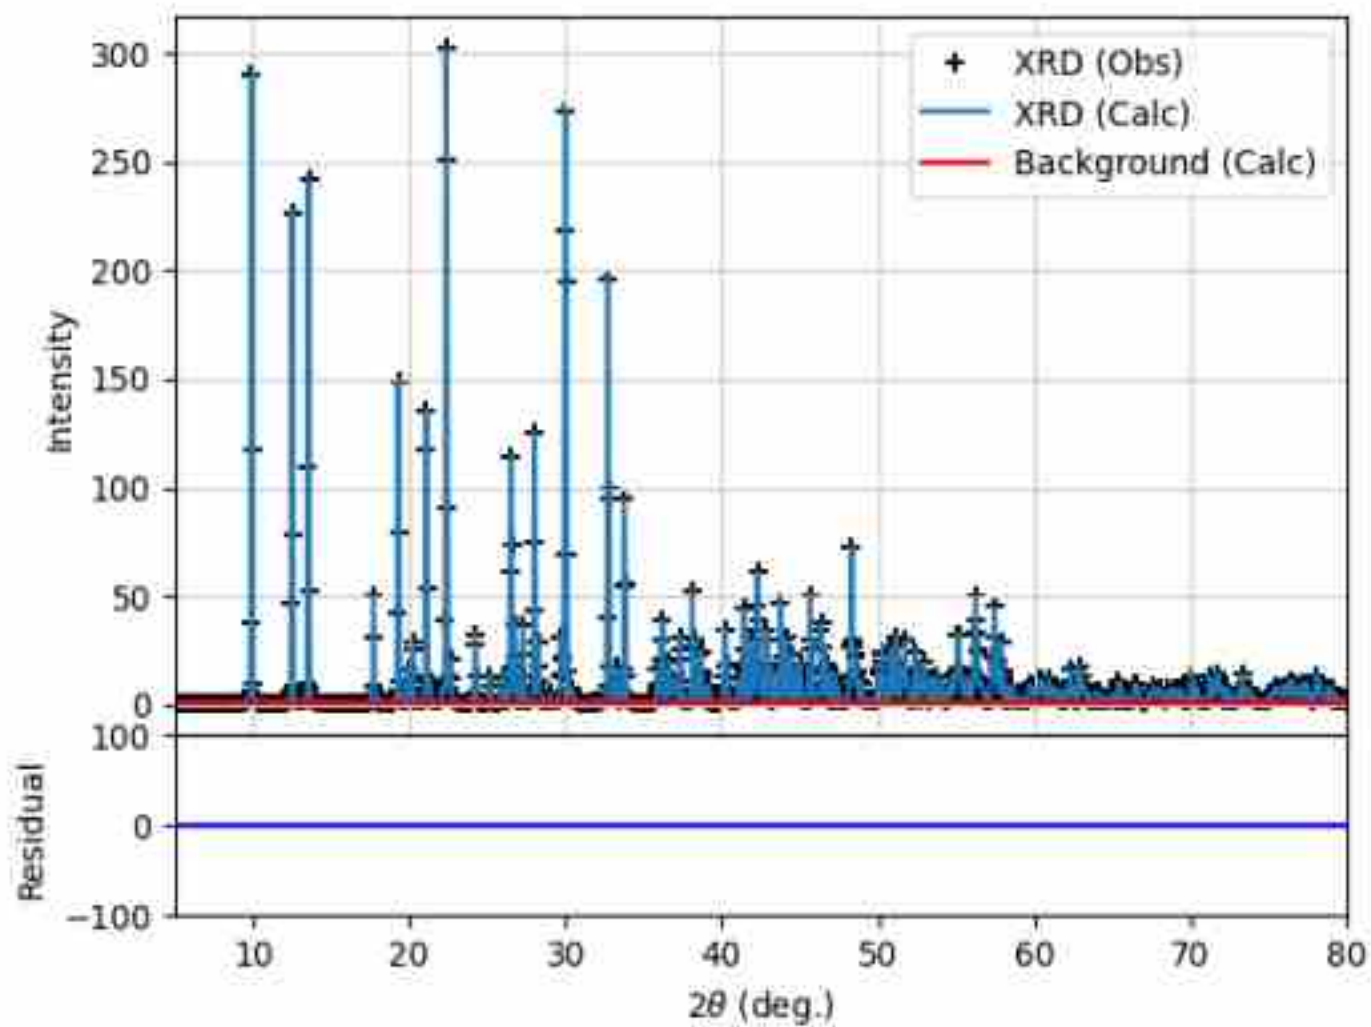

| RMSE before RR | Rwp     | RMSE after RR |
|----------------|---------|---------------|
| 0.101          | 0.00156 | 0.0002        |

# Rb<sub>2</sub>In<sub>1</sub>Ga<sub>1</sub>Cl<sub>6</sub>

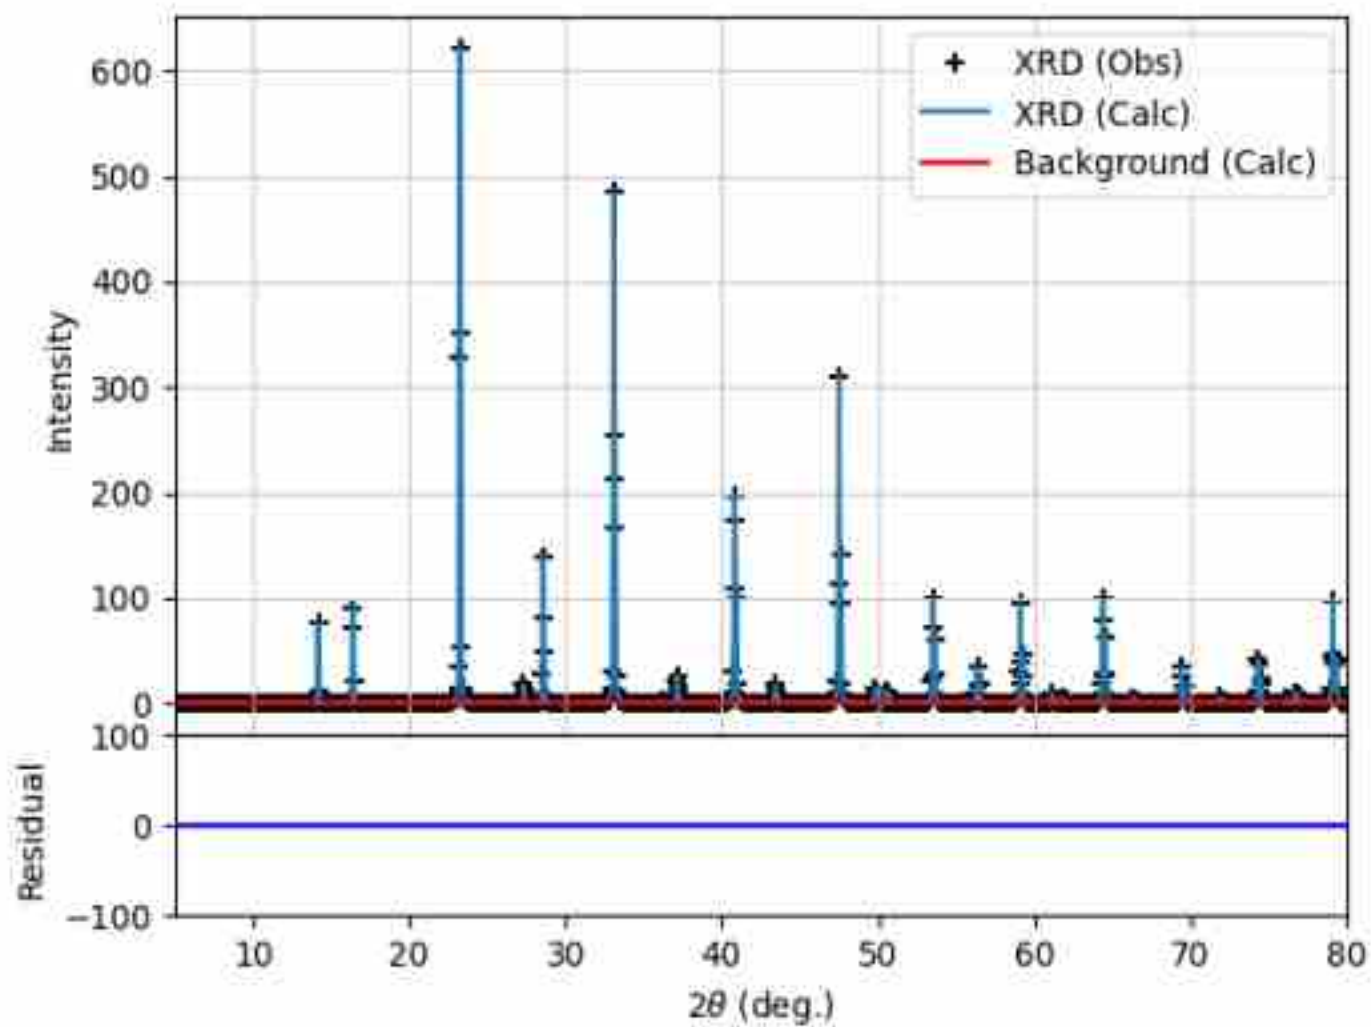

| RMSE before RR | Rwp     | RMSE after RR |
|----------------|---------|---------------|
| 0.101          | 0.02976 | 0.00271       |

# Li<sub>2</sub>Fe<sub>4</sub>F<sub>10</sub>

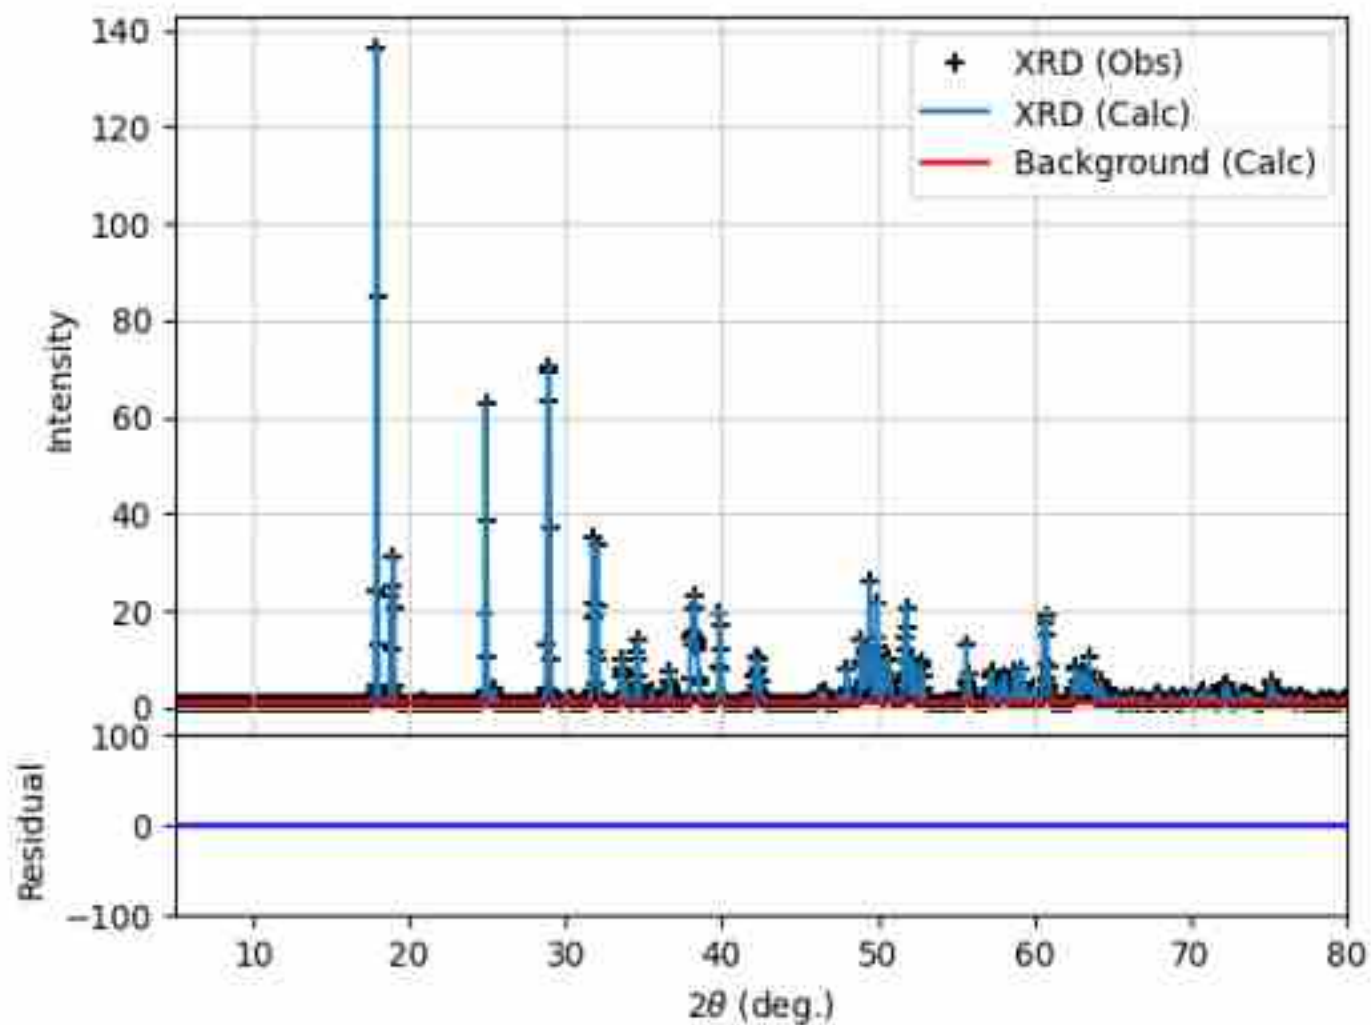

| RMSE before RR | Rwp     | RMSE after RR |
|----------------|---------|---------------|
| 0.102          | 0.00061 | 0.0           |

# Li<sub>4</sub>Cu<sub>2</sub>Ni<sub>2</sub>O<sub>8</sub>

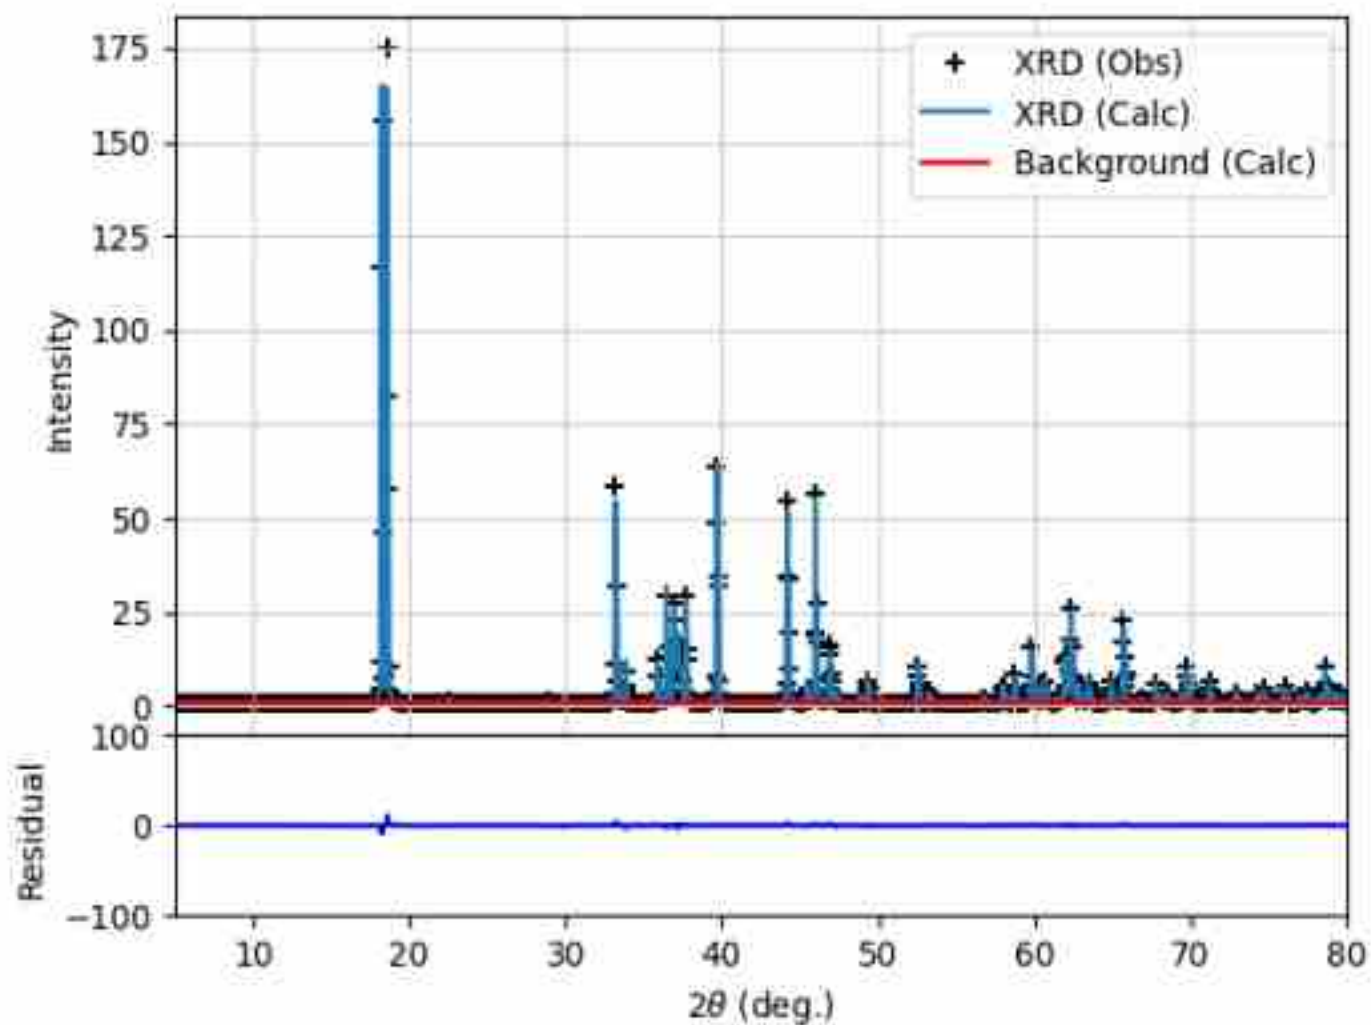

| RMSE before RR | Rwp     | RMSE after RR |
|----------------|---------|---------------|
| 0.102          | 7.07451 | None          |

# Li1Ag3Ir2O6

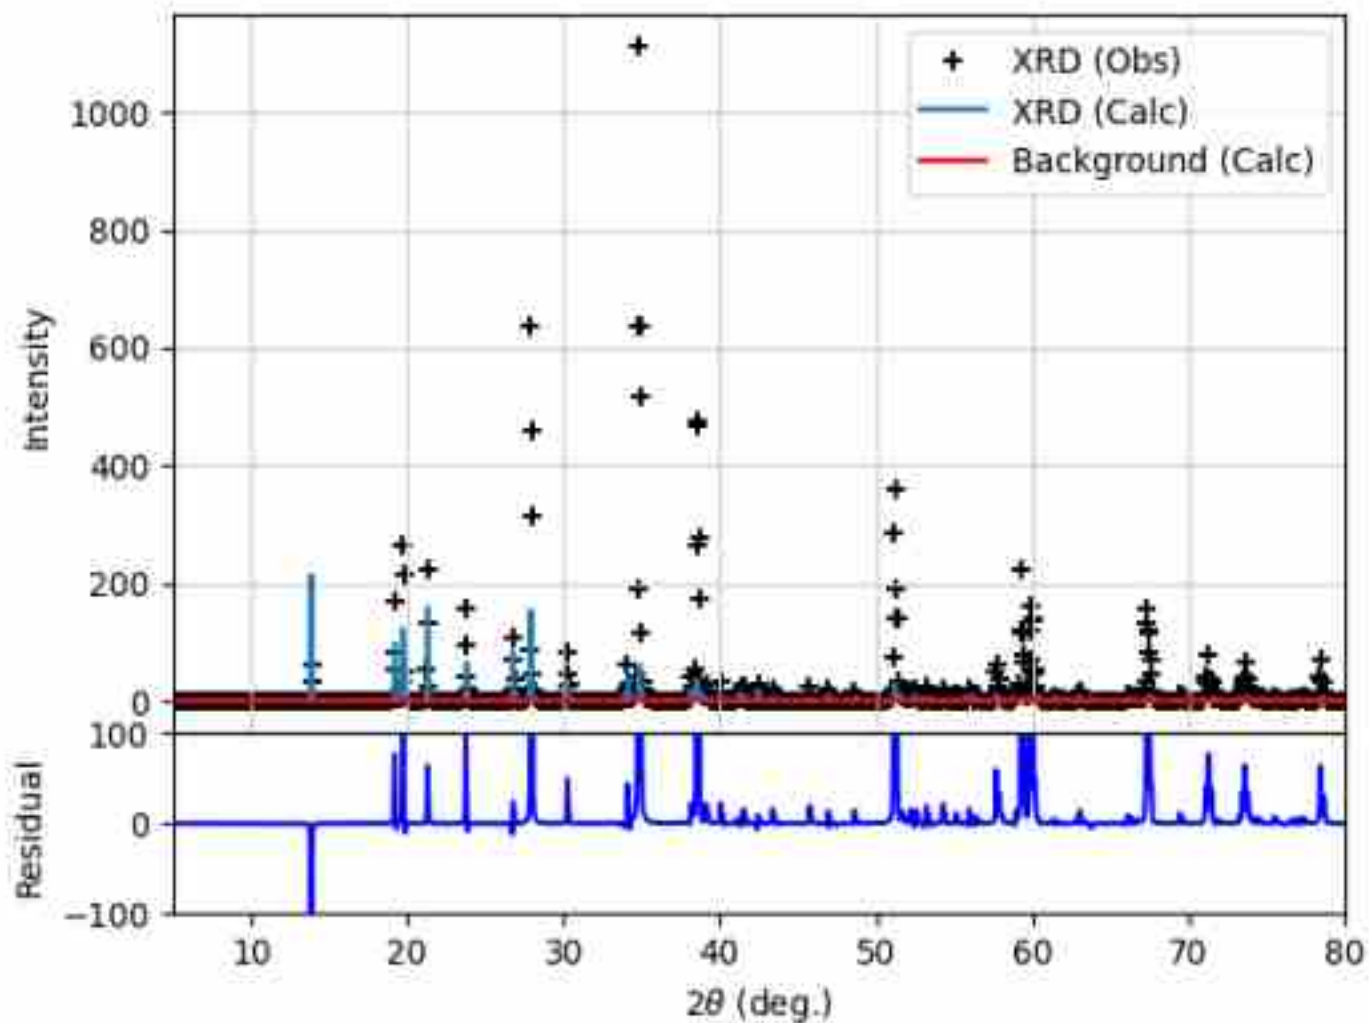

| RMSE before RR | Rwp      | RMSE after RR |
|----------------|----------|---------------|
| 0.103          | 81.26447 | None          |

# Li<sub>4</sub>Sm<sub>4</sub>O<sub>8</sub>

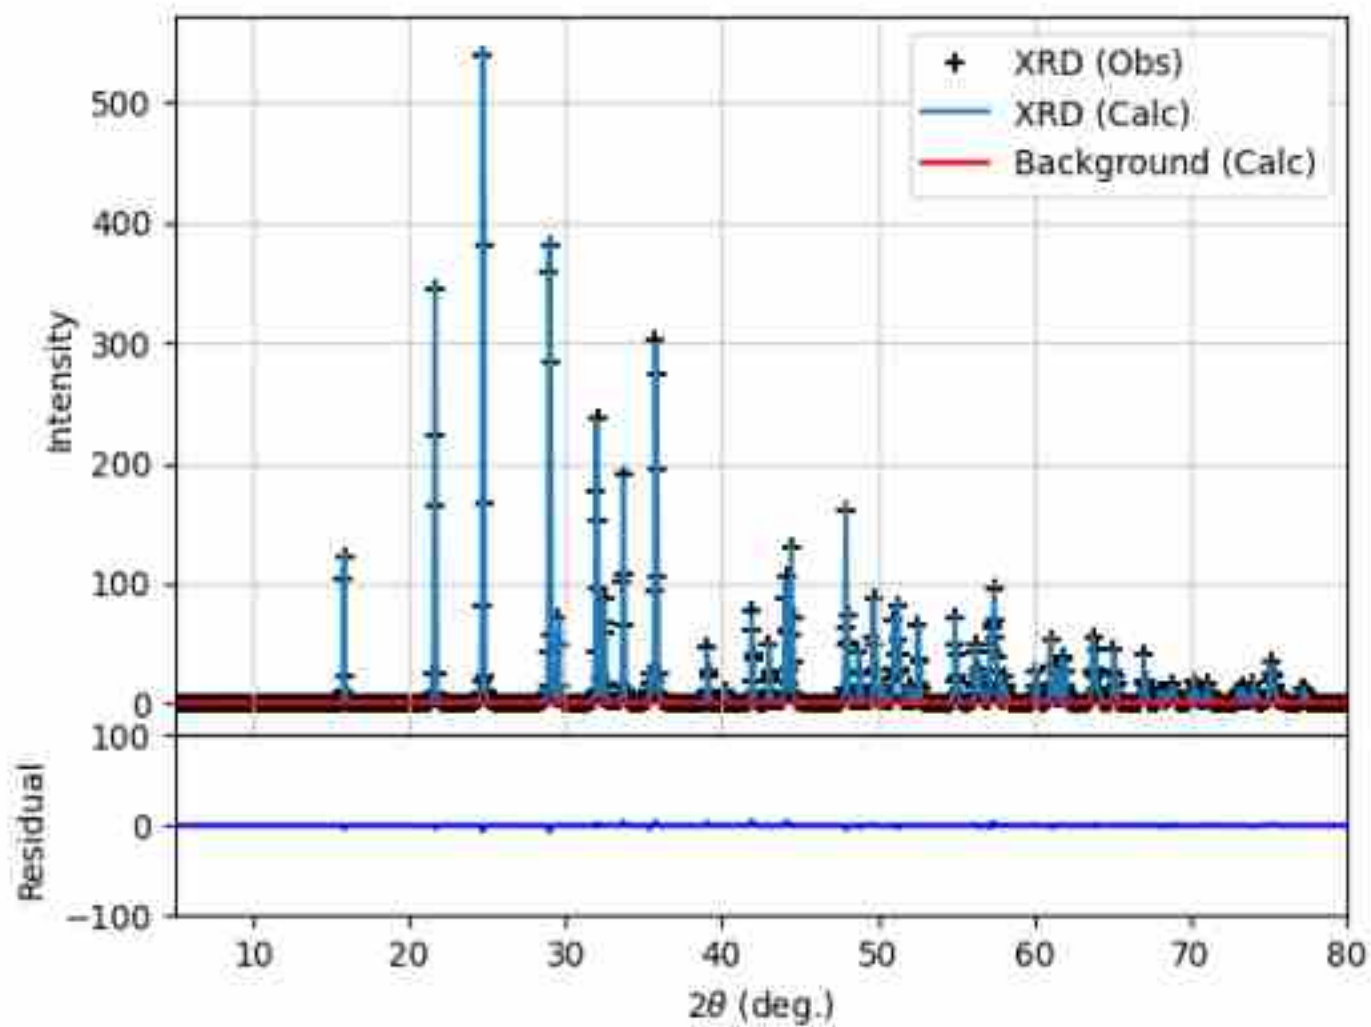

| RMSE before RR | Rwp     | RMSE after RR |
|----------------|---------|---------------|
| 0.103          | 2.53191 | 0.13775       |

# Na<sub>1</sub>Li<sub>1</sub>La<sub>2</sub>Ti<sub>4</sub>O<sub>12</sub>

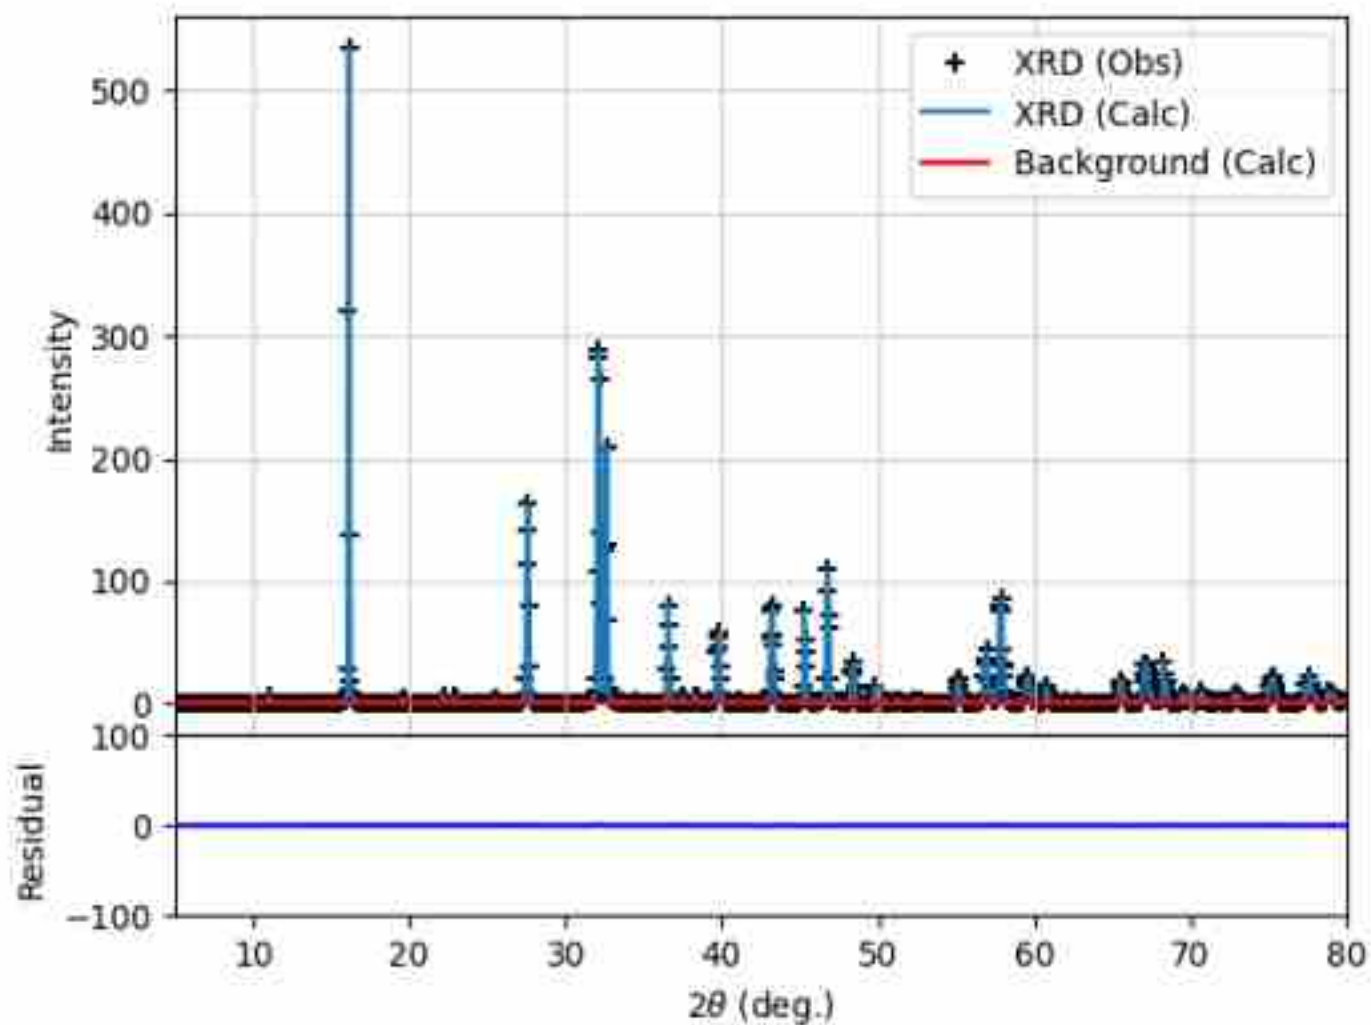

| RMSE before RR | Rwp     | RMSE after RR |
|----------------|---------|---------------|
| 0.103          | 0.91019 | 0.08921       |

# K<sub>2</sub>Nb<sub>2</sub>B<sub>4</sub>O<sub>12</sub>

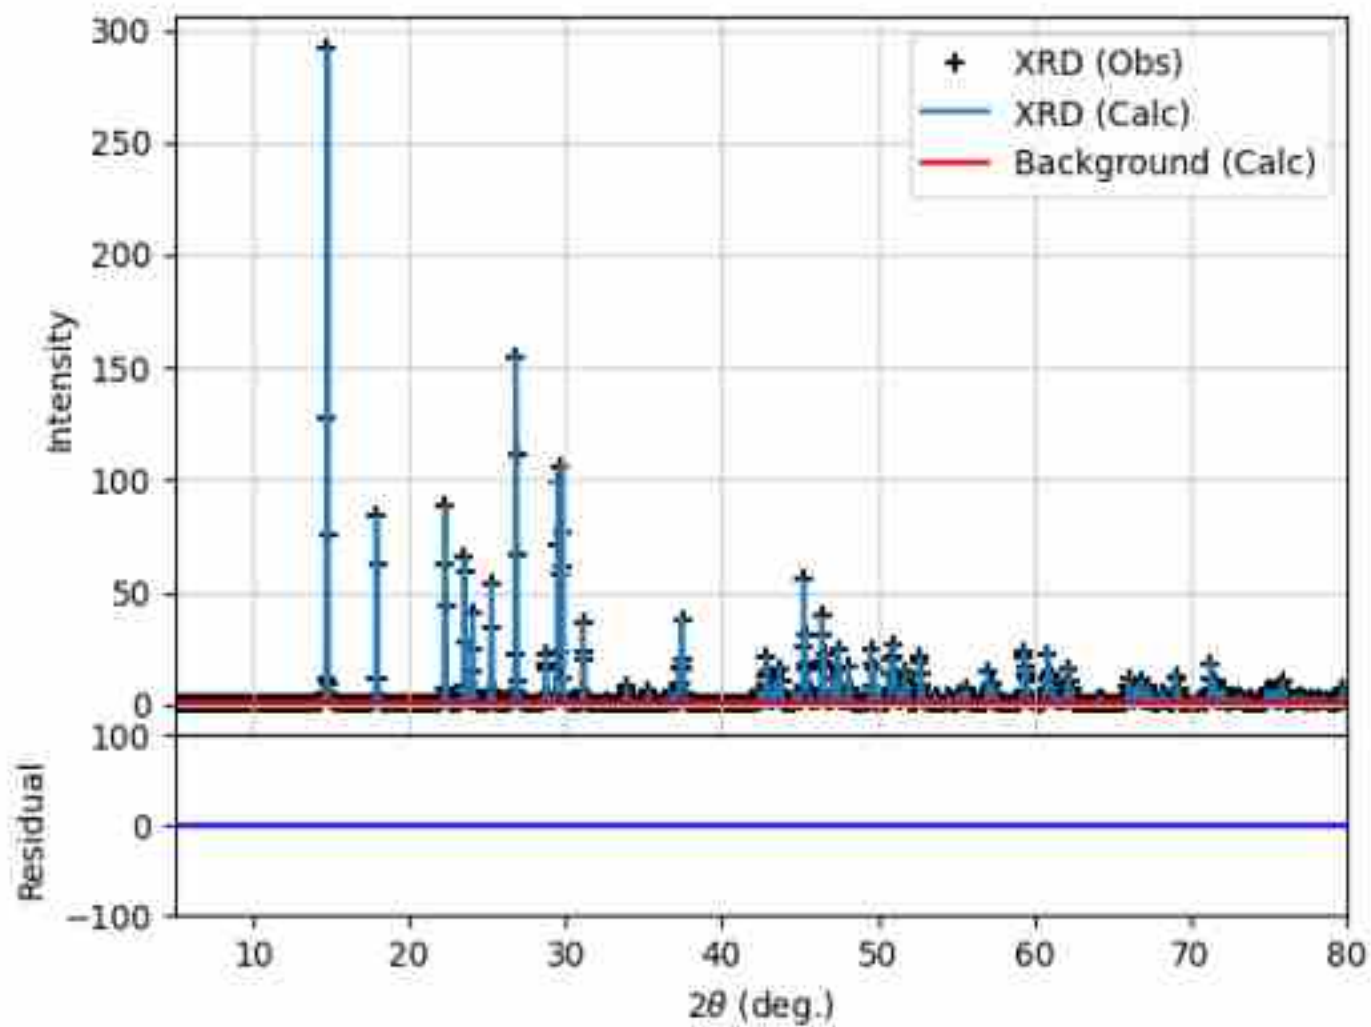

| RMSE before RR | Rwp     | RMSE after RR |
|----------------|---------|---------------|
| 0.104          | 0.00403 | 0.00161       |



# Te1Se2

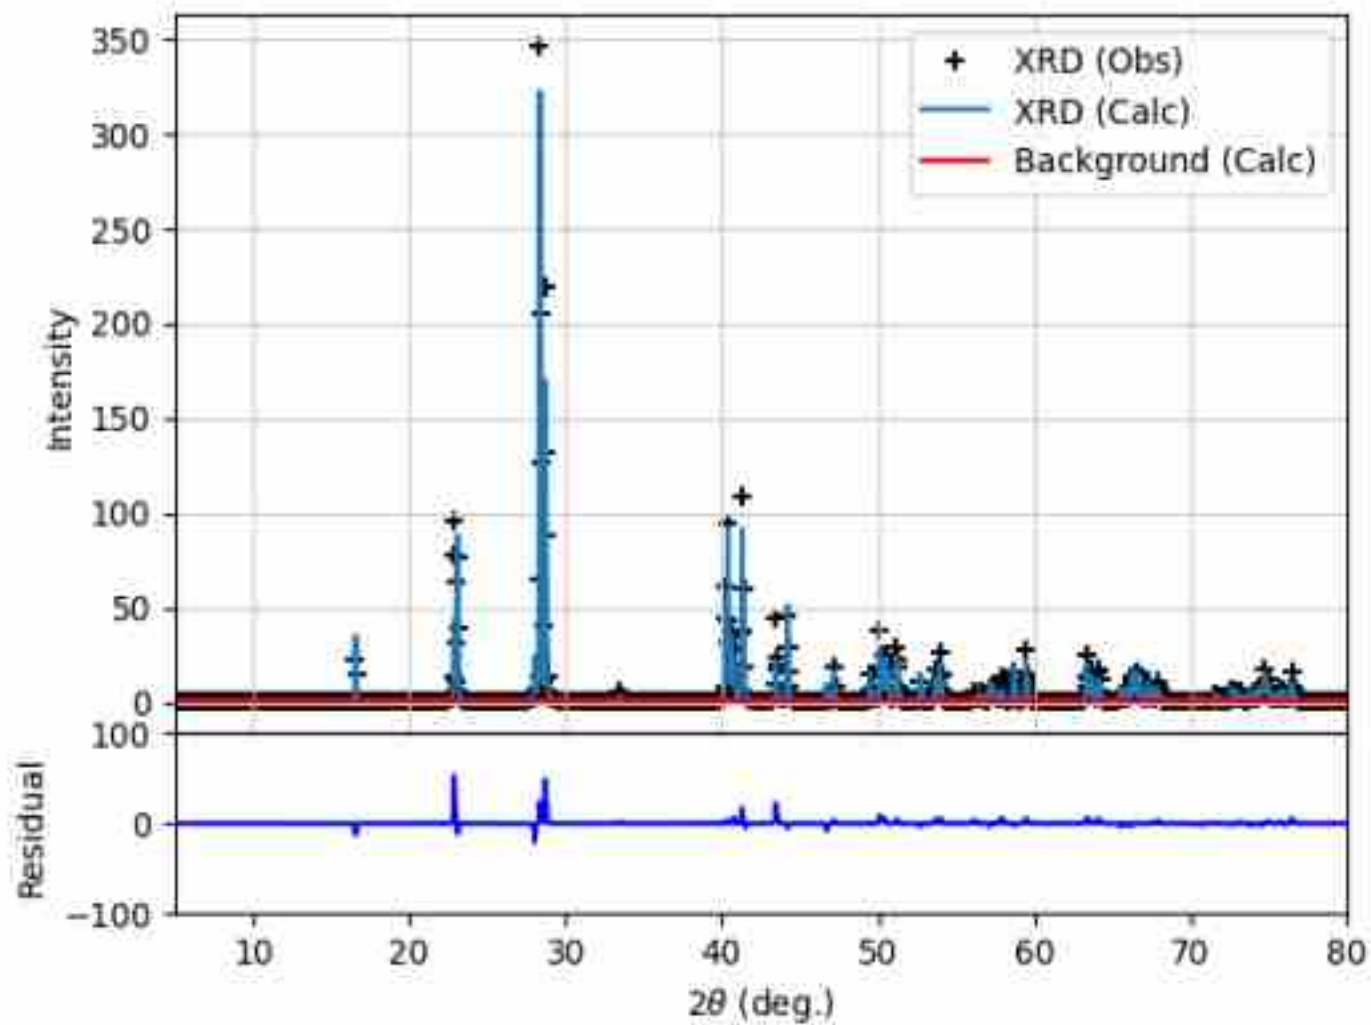

| RMSE before RR | Rwp      | RMSE after RR |
|----------------|----------|---------------|
| 0.104          | 28.02797 | 0.06309       |

# Ba2Pr1F7

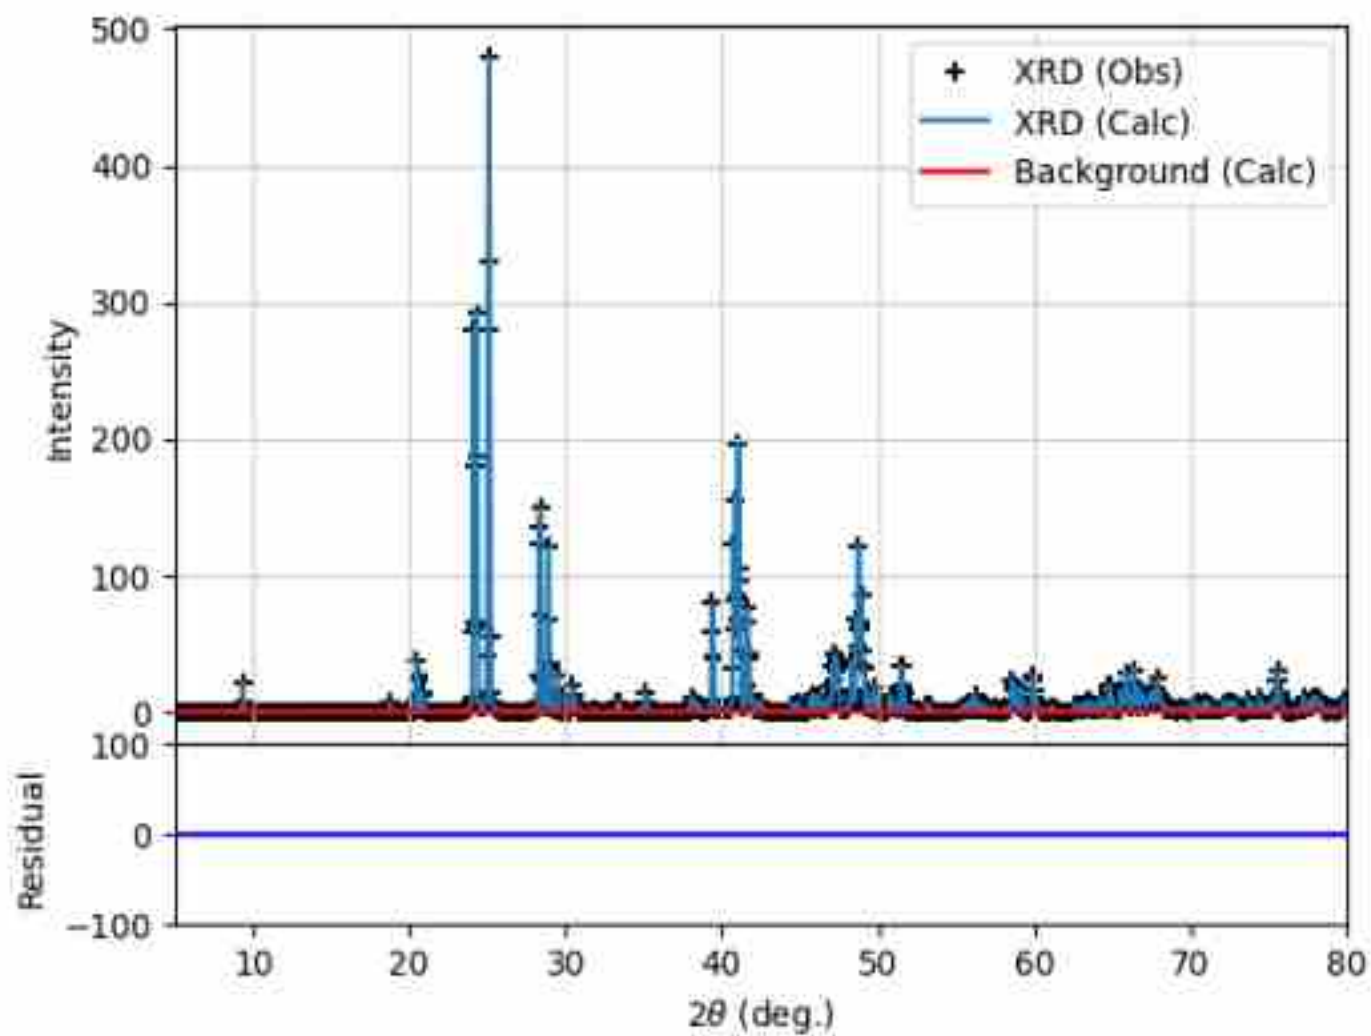

| RMSE before RR | Rwp    | RMSE after RR |
|----------------|--------|---------------|
| 0.105          | 0.0011 | 0.0           |

# Bi<sub>8</sub>Ru<sub>2</sub>Br<sub>4</sub>

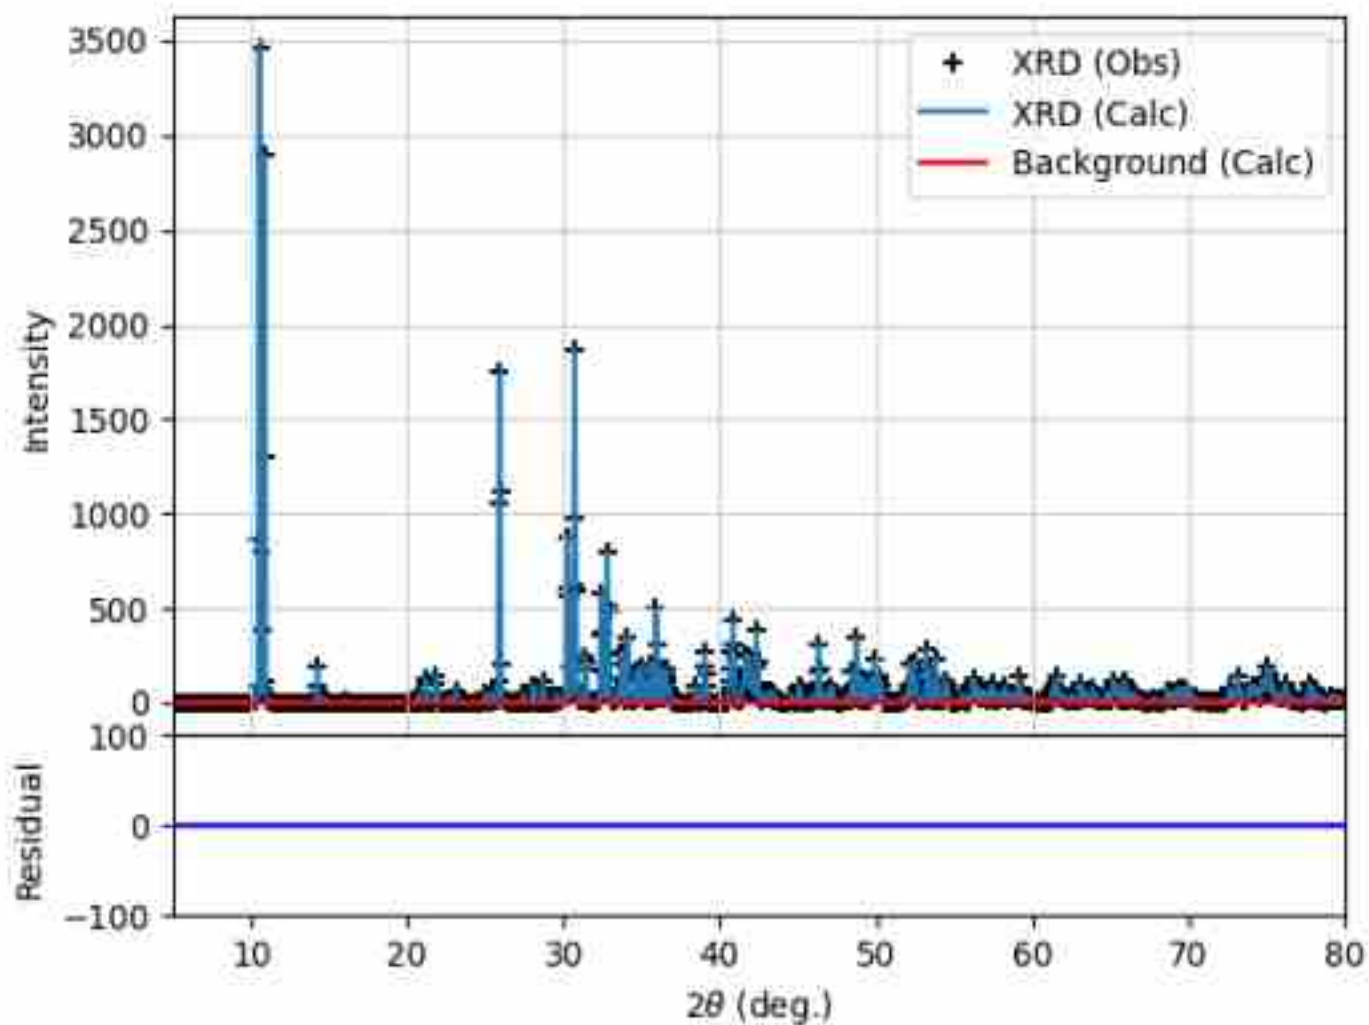

| RMSE before RR | Rwp    | RMSE after RR |
|----------------|--------|---------------|
| 0.105          | 0.0029 | 0.00022       |

# Eu<sub>2</sub>In<sub>8</sub>

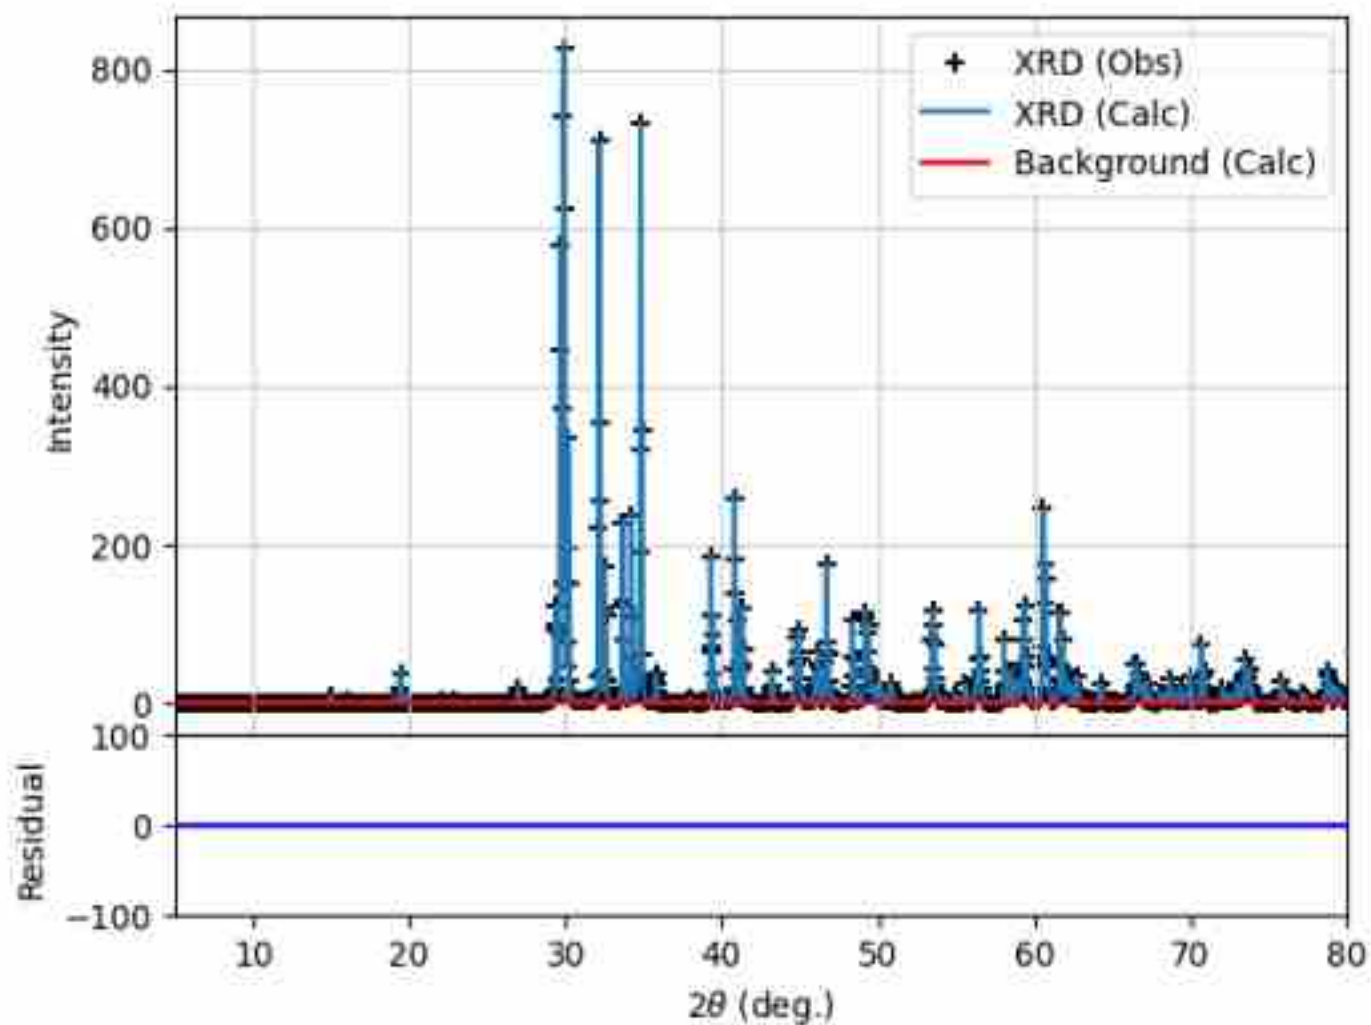

| RMSE before RR | Rwp     | RMSE after RR |
|----------------|---------|---------------|
| 0.105          | 0.00358 | 0.00023       |

# Hg<sub>2</sub>Pt<sub>1</sub>

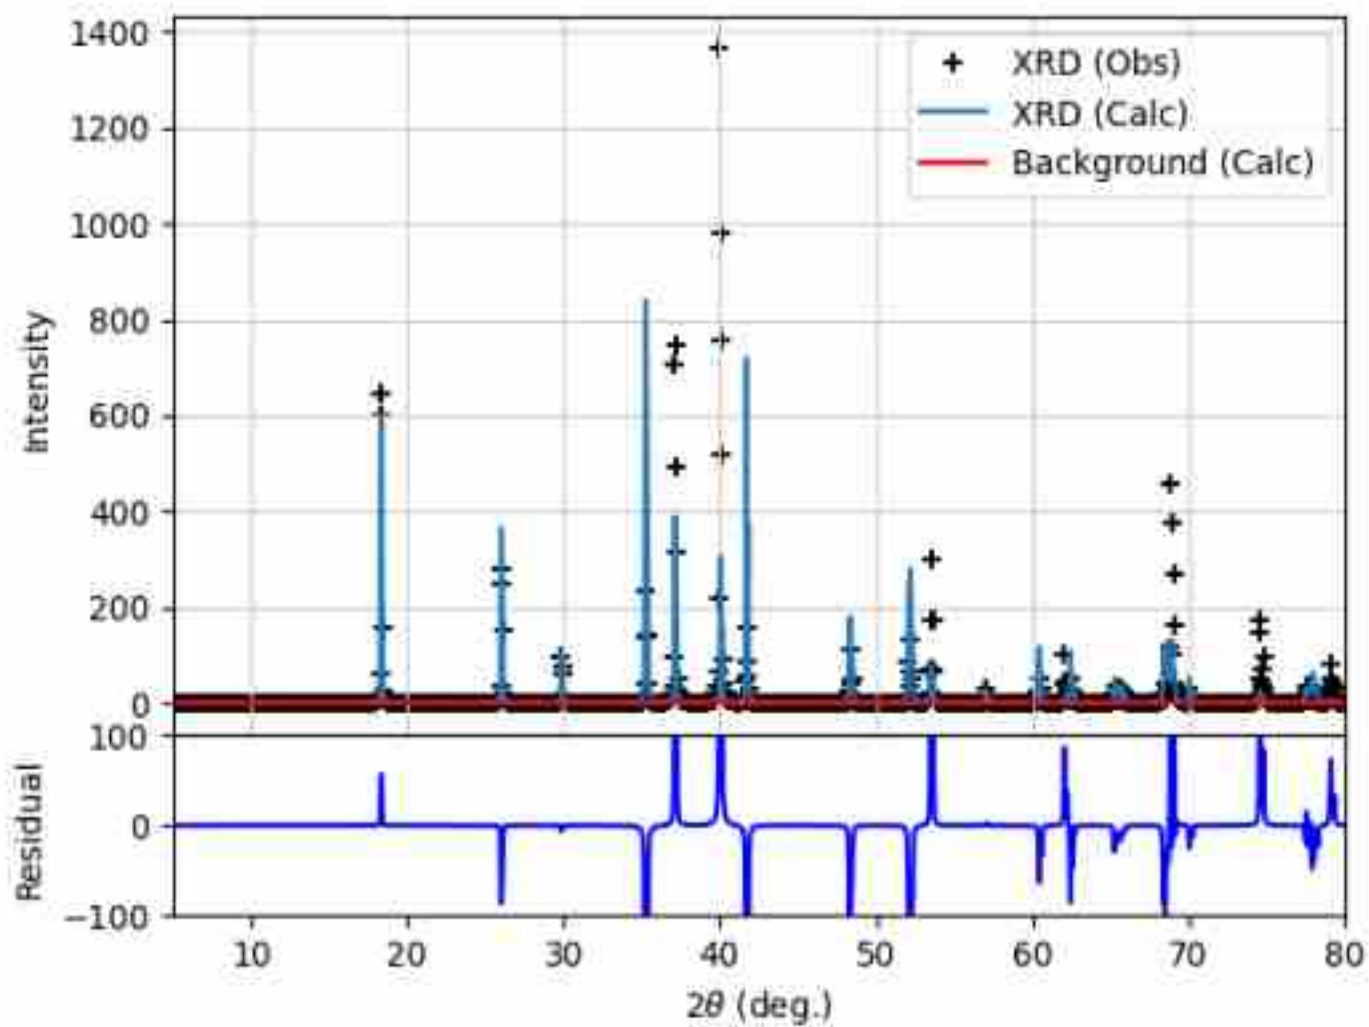

| RMSE before RR | Rwp   | RMSE after RR |
|----------------|-------|---------------|
| 0.105          | 100.0 | 0.10528       |

# Li1Mo1P2O8

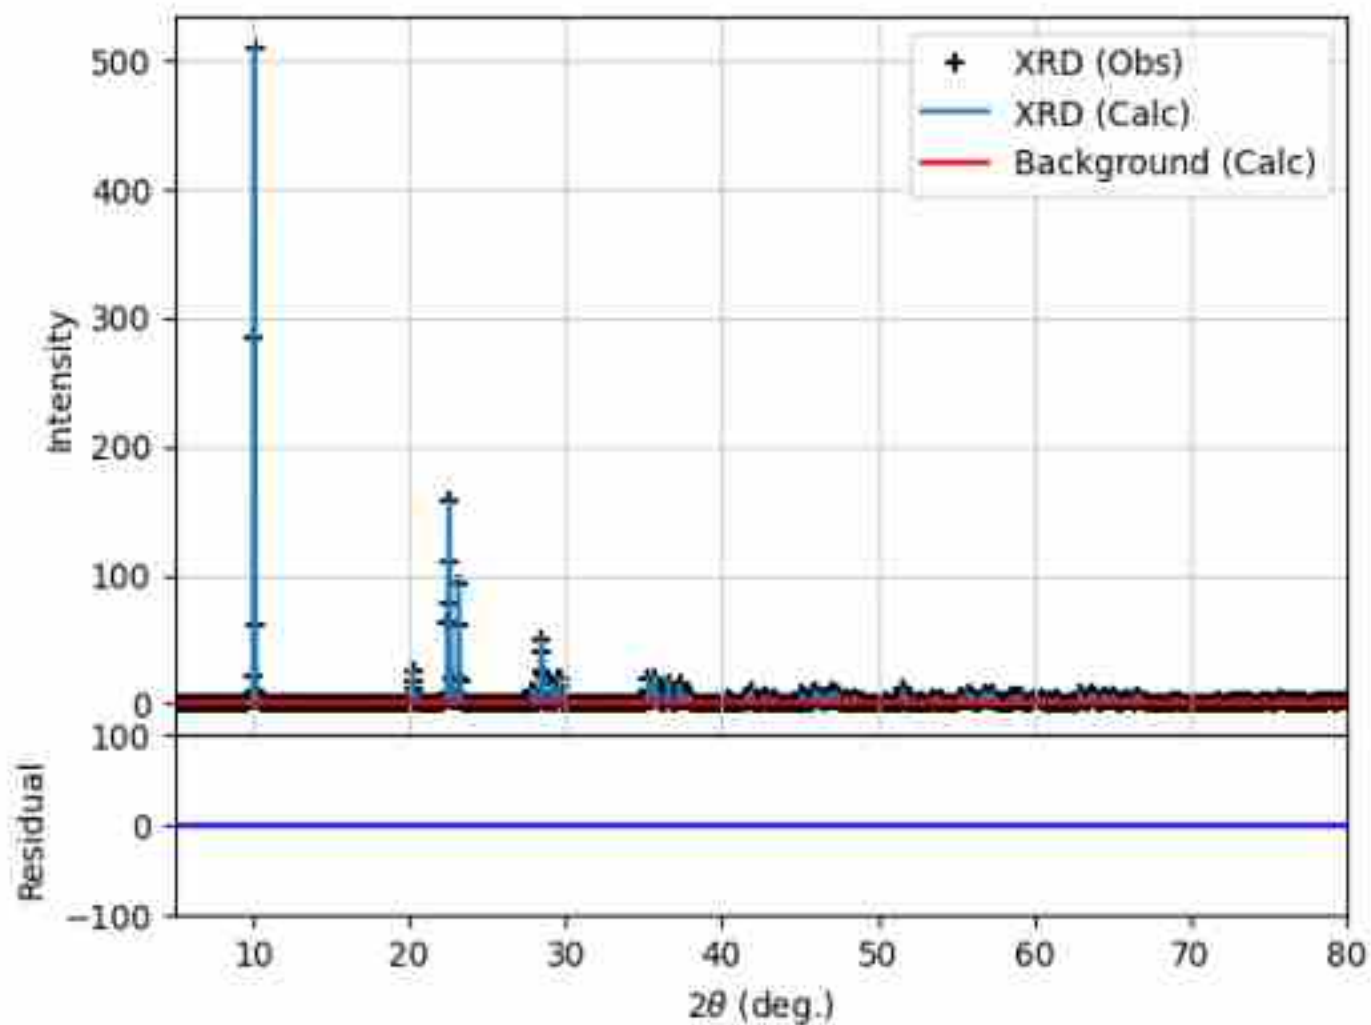

| RMSE before RR | Rwp     | RMSE after RR |
|----------------|---------|---------------|
| 0.105          | 0.00166 | 1e-05         |

# Ti12Ge4

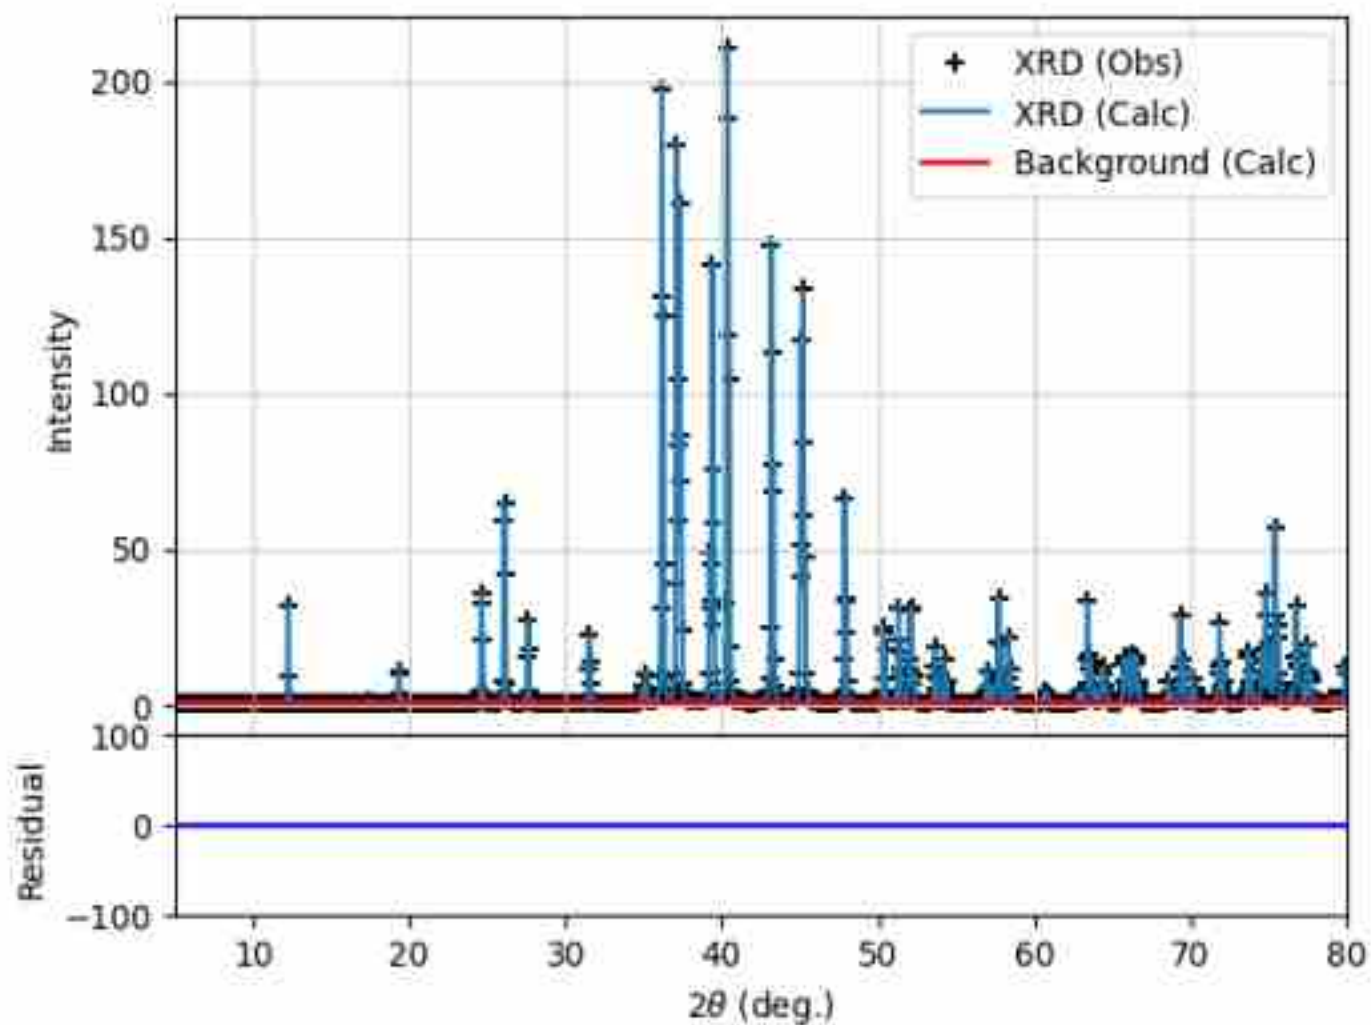

| RMSE before RR | Rwp     | RMSE after RR |
|----------------|---------|---------------|
| 0.105          | 0.00345 | 0.00049       |

# Tl1Ga1F6

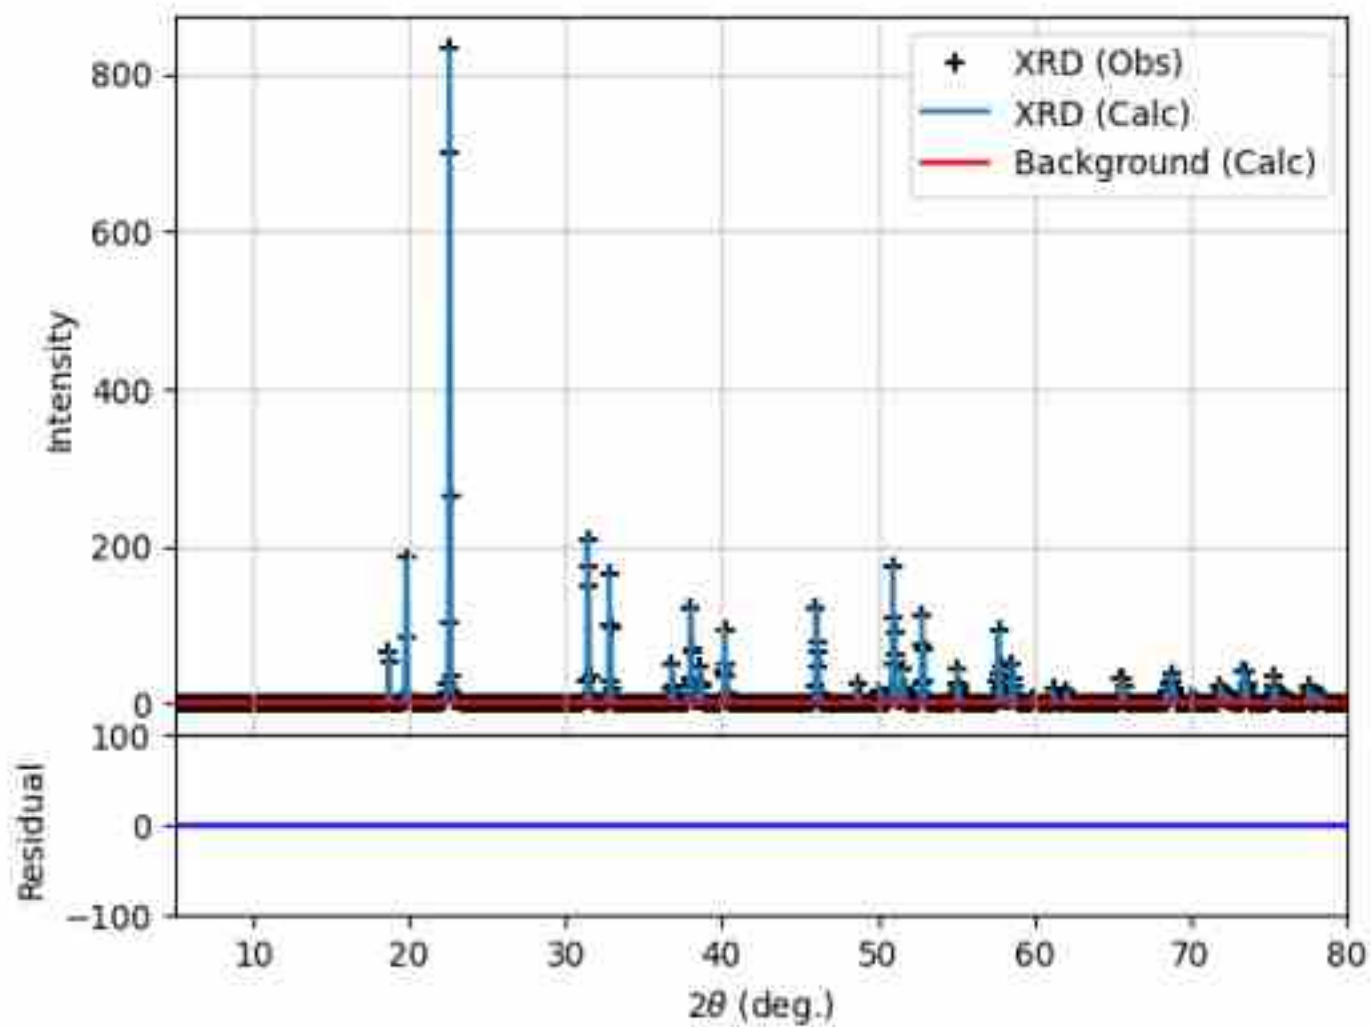

| RMSE before RR | Rwp     | RMSE after RR |
|----------------|---------|---------------|
| 0.105          | 0.00669 | 0.00201       |



# Tl6As2O8

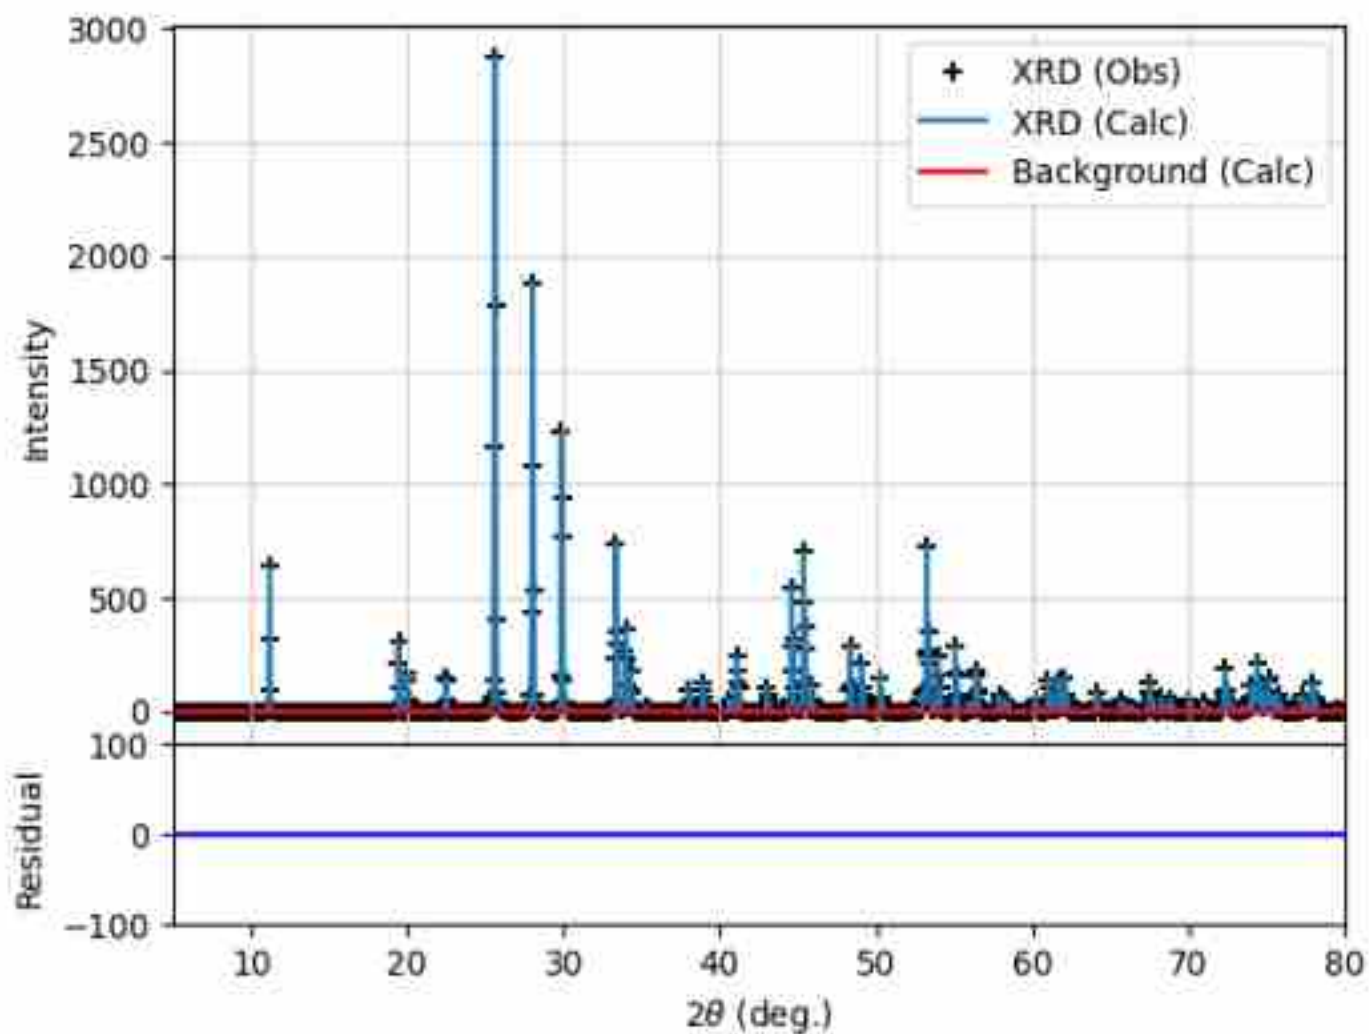

| RMSE before RR | Rwp     | RMSE after RR |
|----------------|---------|---------------|
| 0.105          | 0.00464 | 0.00259       |

# Cs<sub>4</sub>Cu<sub>4</sub>Br<sub>12</sub>

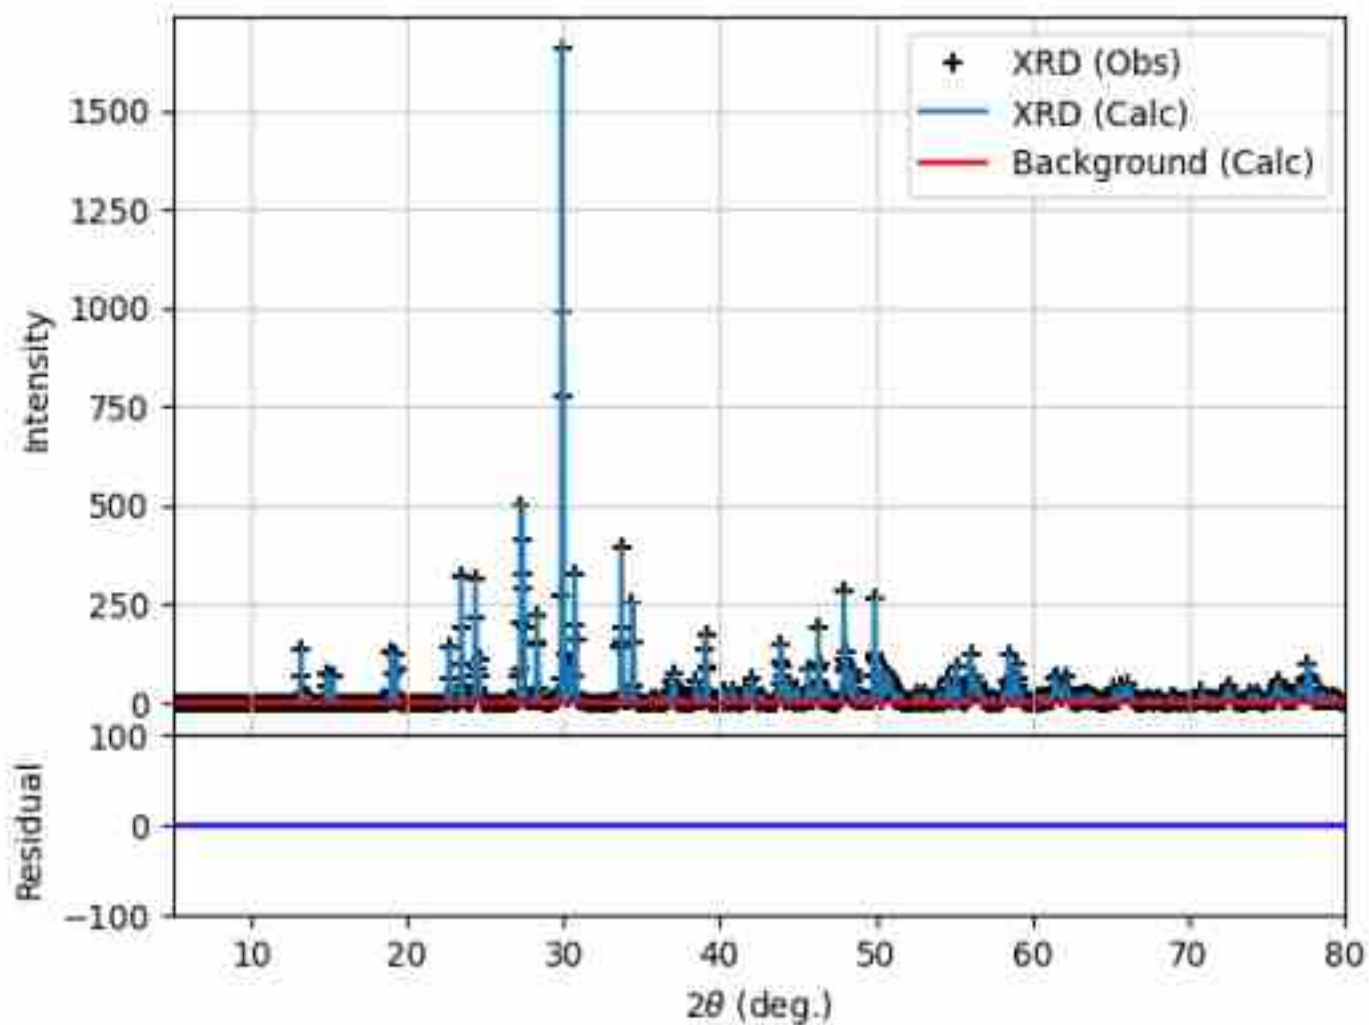

| RMSE before RR | Rwp     | RMSE after RR |
|----------------|---------|---------------|
| 0.106          | 0.00349 | 0.00041       |

# Mo4O12

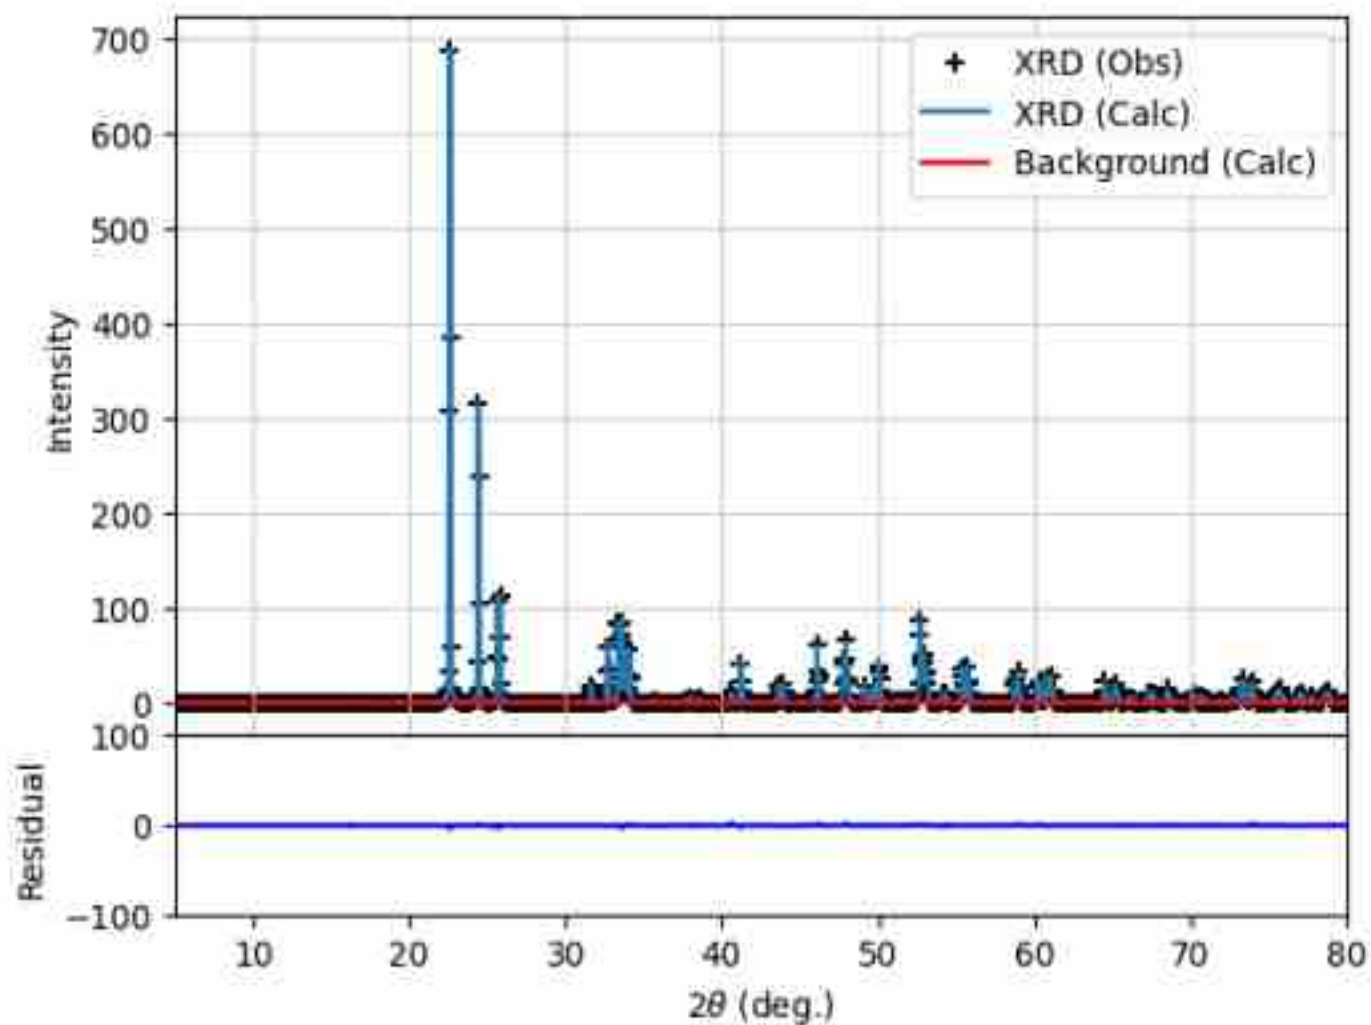

| RMSE before RR | Rwp     | RMSE after RR |
|----------------|---------|---------------|
| 0.106          | 3.68926 | 0.22669       |

# Ba6W2O12

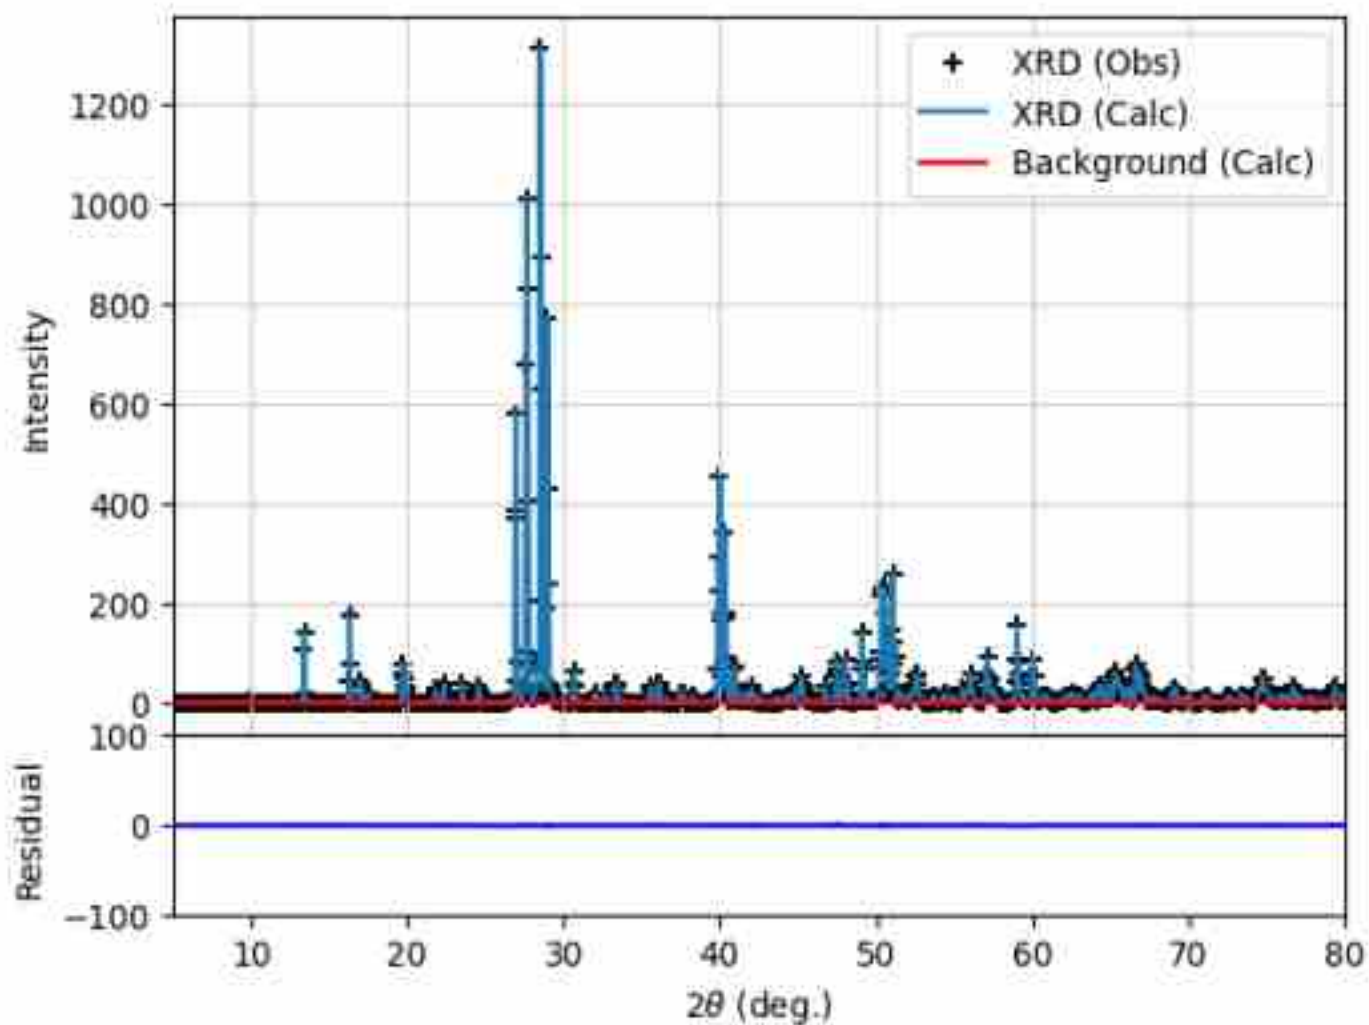

| RMSE before RR | Rwp     | RMSE after RR |
|----------------|---------|---------------|
| 0.107          | 0.67294 | 0.02175       |

# Eu<sub>4</sub>Al<sub>8</sub>Ge<sub>4</sub>

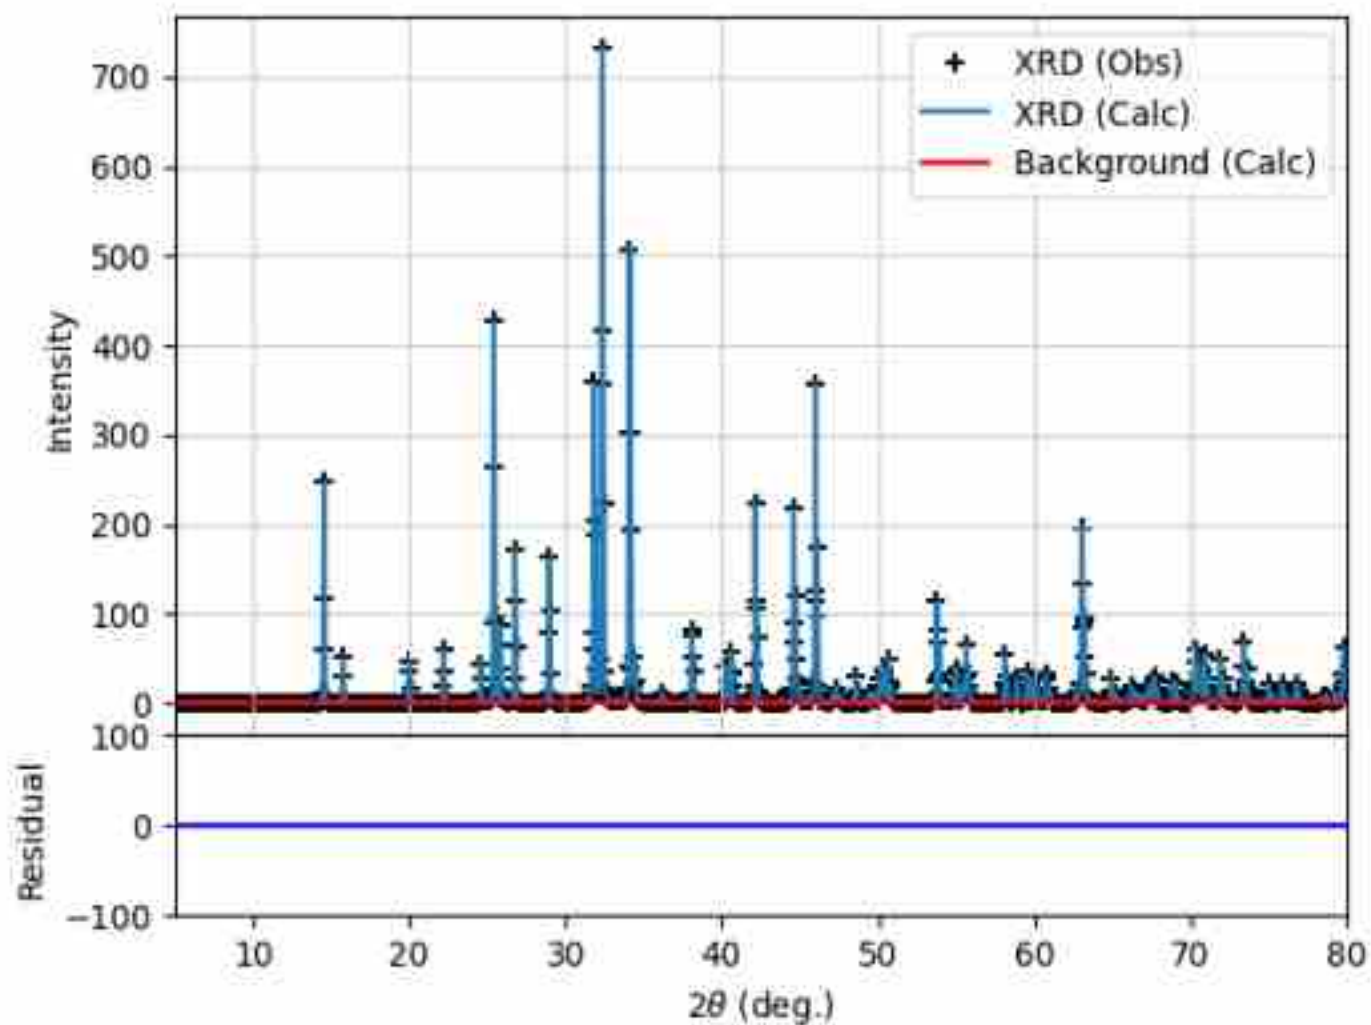

| RMSE before RR | Rwp    | RMSE after RR |
|----------------|--------|---------------|
| 0.107          | 0.0053 | 0.00053       |

# Li<sub>6</sub>Bi<sub>2</sub>S<sub>6</sub>

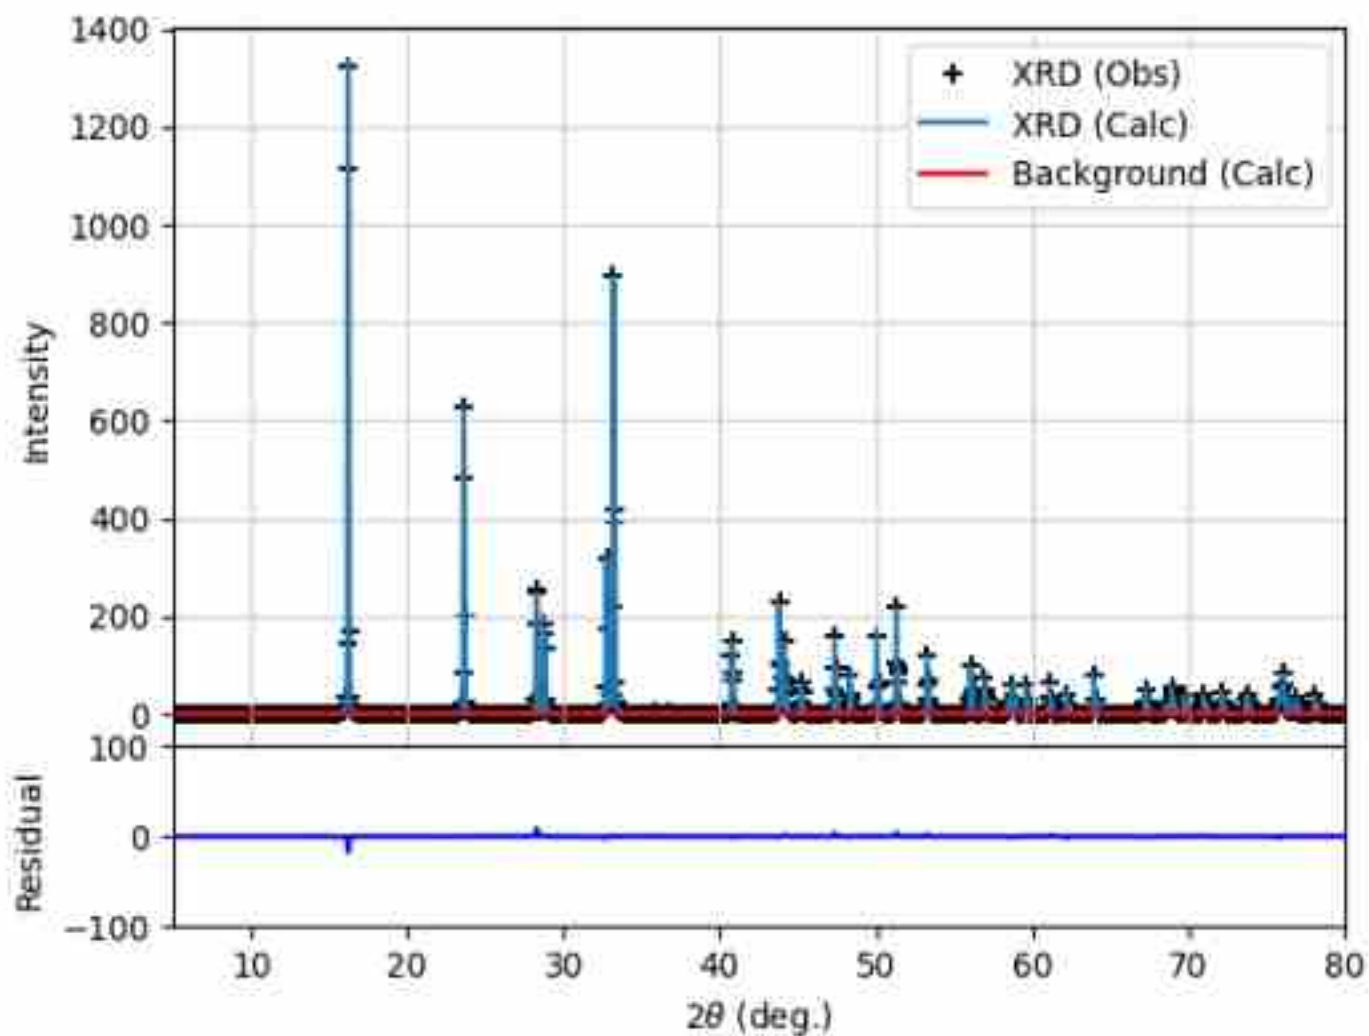

| RMSE before RR | Rwp    | RMSE after RR |
|----------------|--------|---------------|
| 0.107          | 1.7804 | 0.31862       |

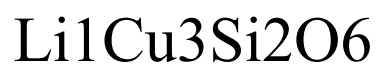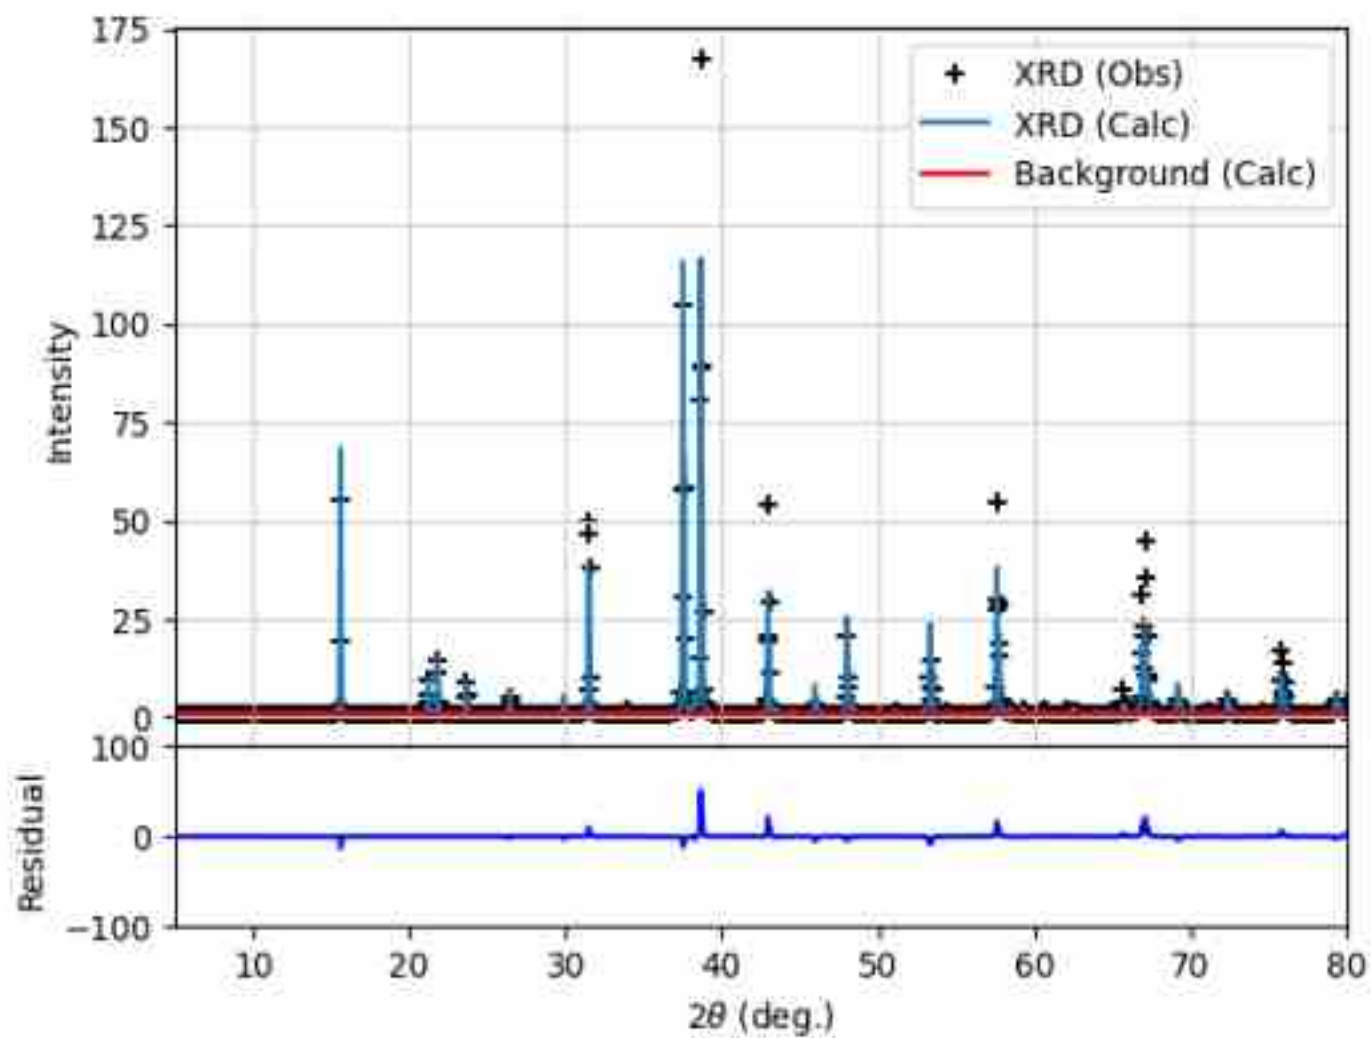

| RMSE before RR | Rwp      | RMSE after RR |
|----------------|----------|---------------|
| 0.108          | 26.57895 | None          |

# Li<sub>10</sub>Si<sub>2</sub>P<sub>6</sub>

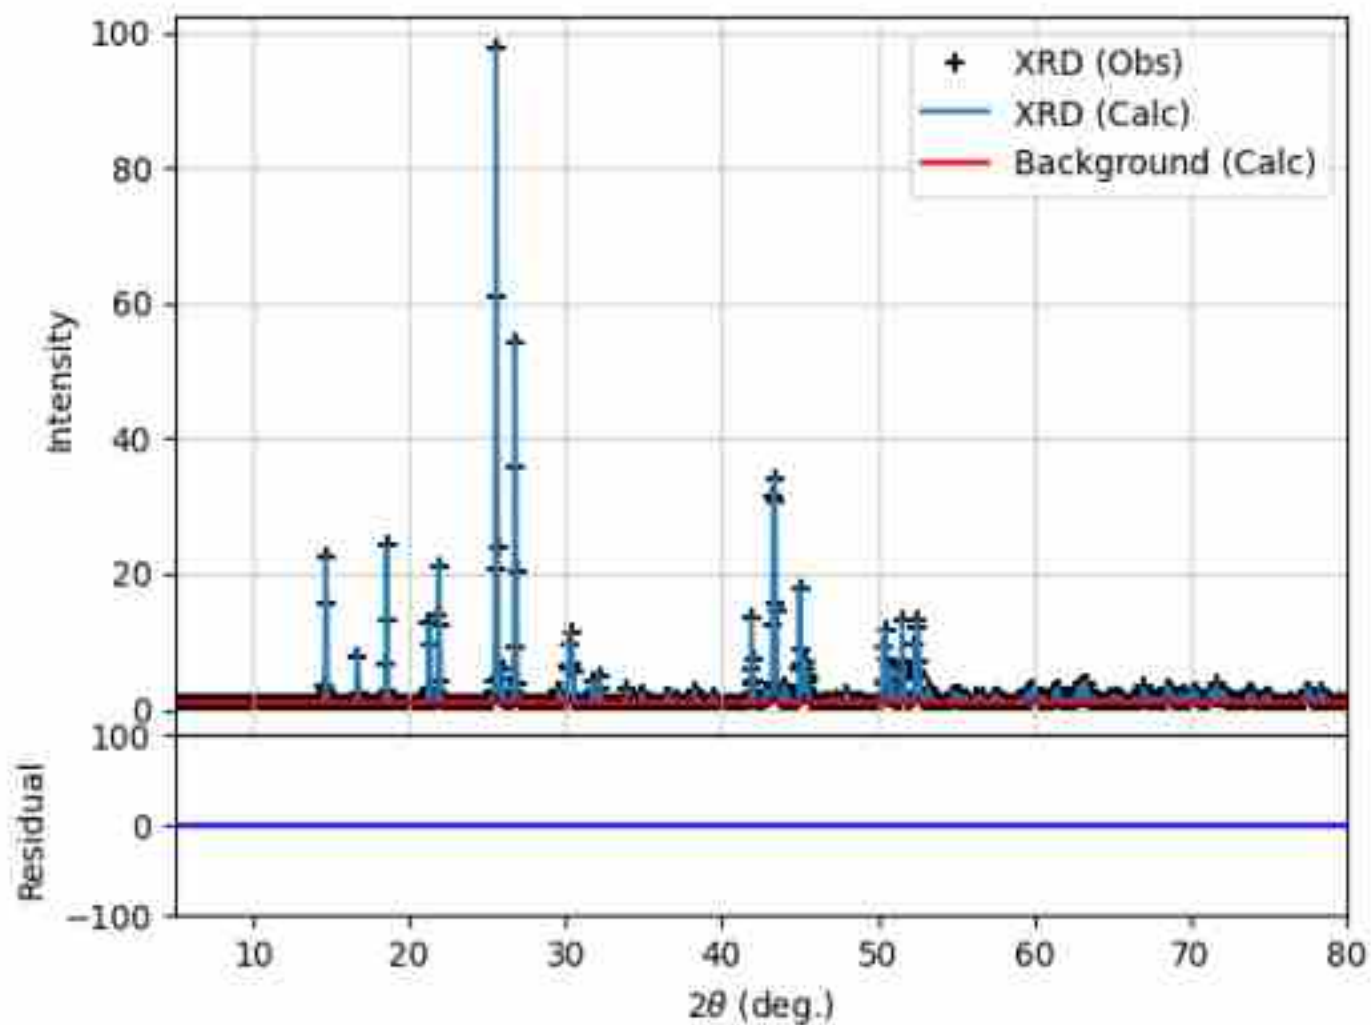

| RMSE before RR | Rwp     | RMSE after RR |
|----------------|---------|---------------|
| 0.108          | 0.00215 | 0.00073       |



# Be<sub>4</sub>Tl<sub>2</sub>F<sub>10</sub>

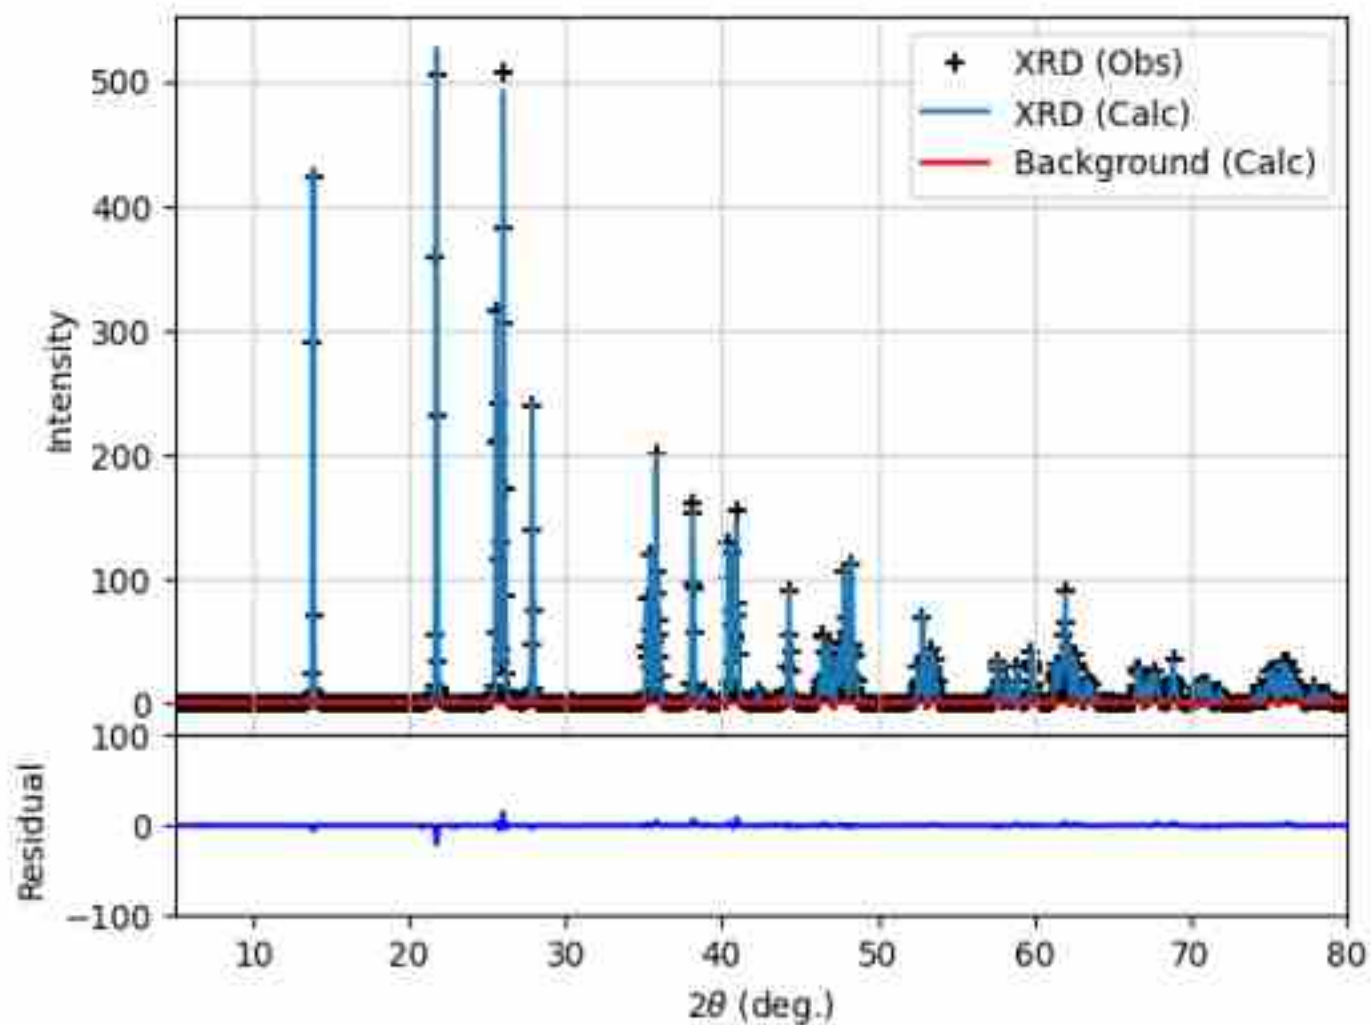

| RMSE before RR | Rwp     | RMSE after RR |
|----------------|---------|---------------|
| 0.109          | 5.01813 | 0.42214       |

# Co<sub>4</sub>H<sub>8</sub>O<sub>8</sub>

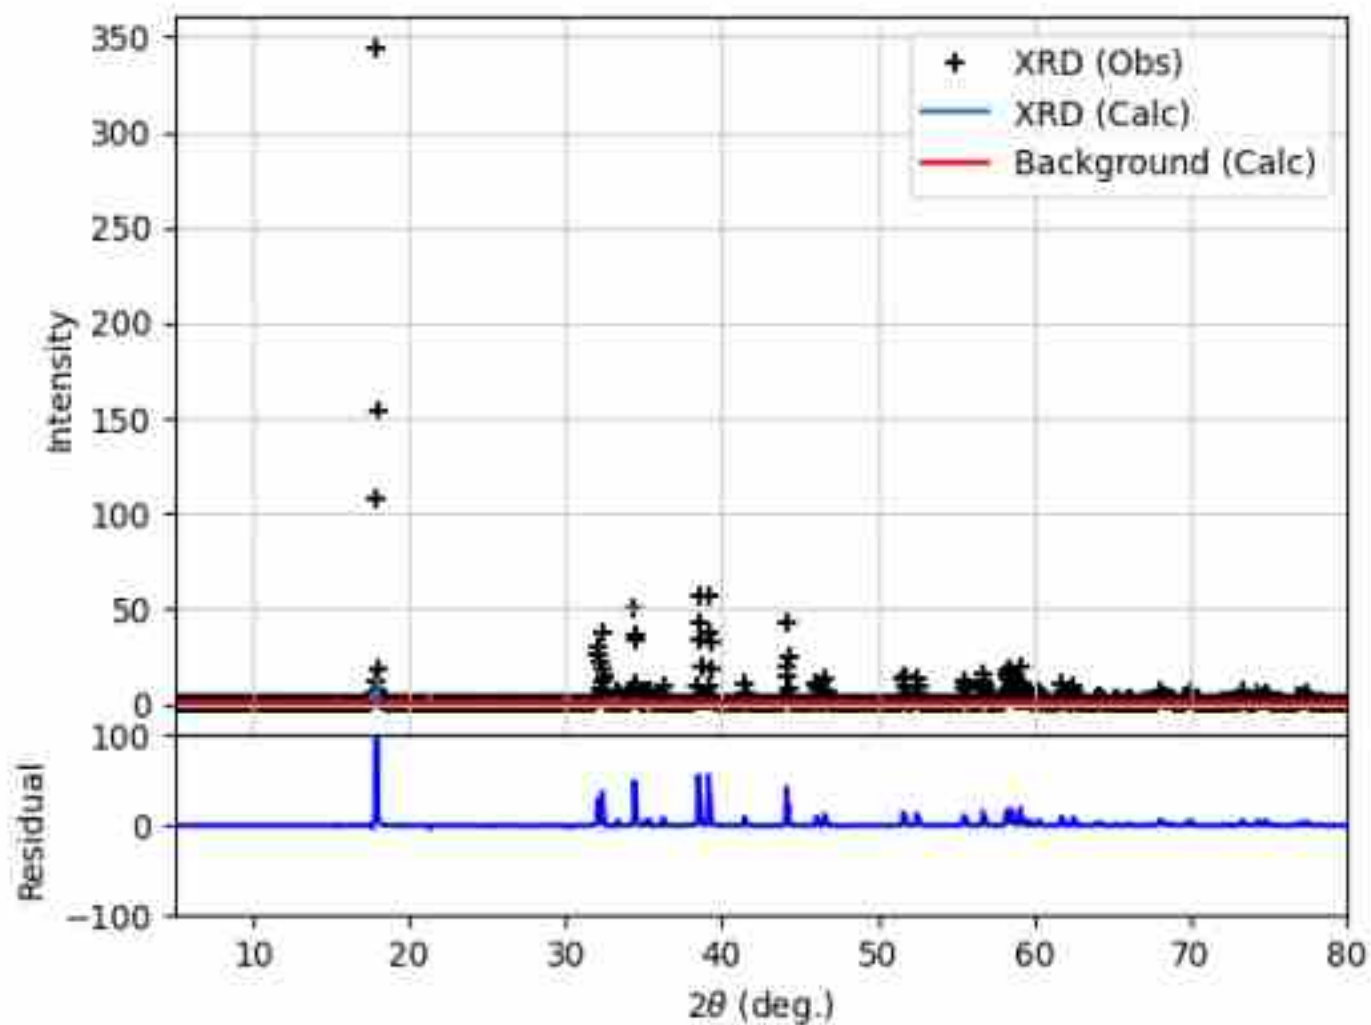

| RMSE before RR | Rwp      | RMSE after RR |
|----------------|----------|---------------|
| 0.109          | 72.24796 | None          |

# Cs<sub>2</sub>In<sub>1</sub>Ga<sub>1</sub>Cl<sub>6</sub>

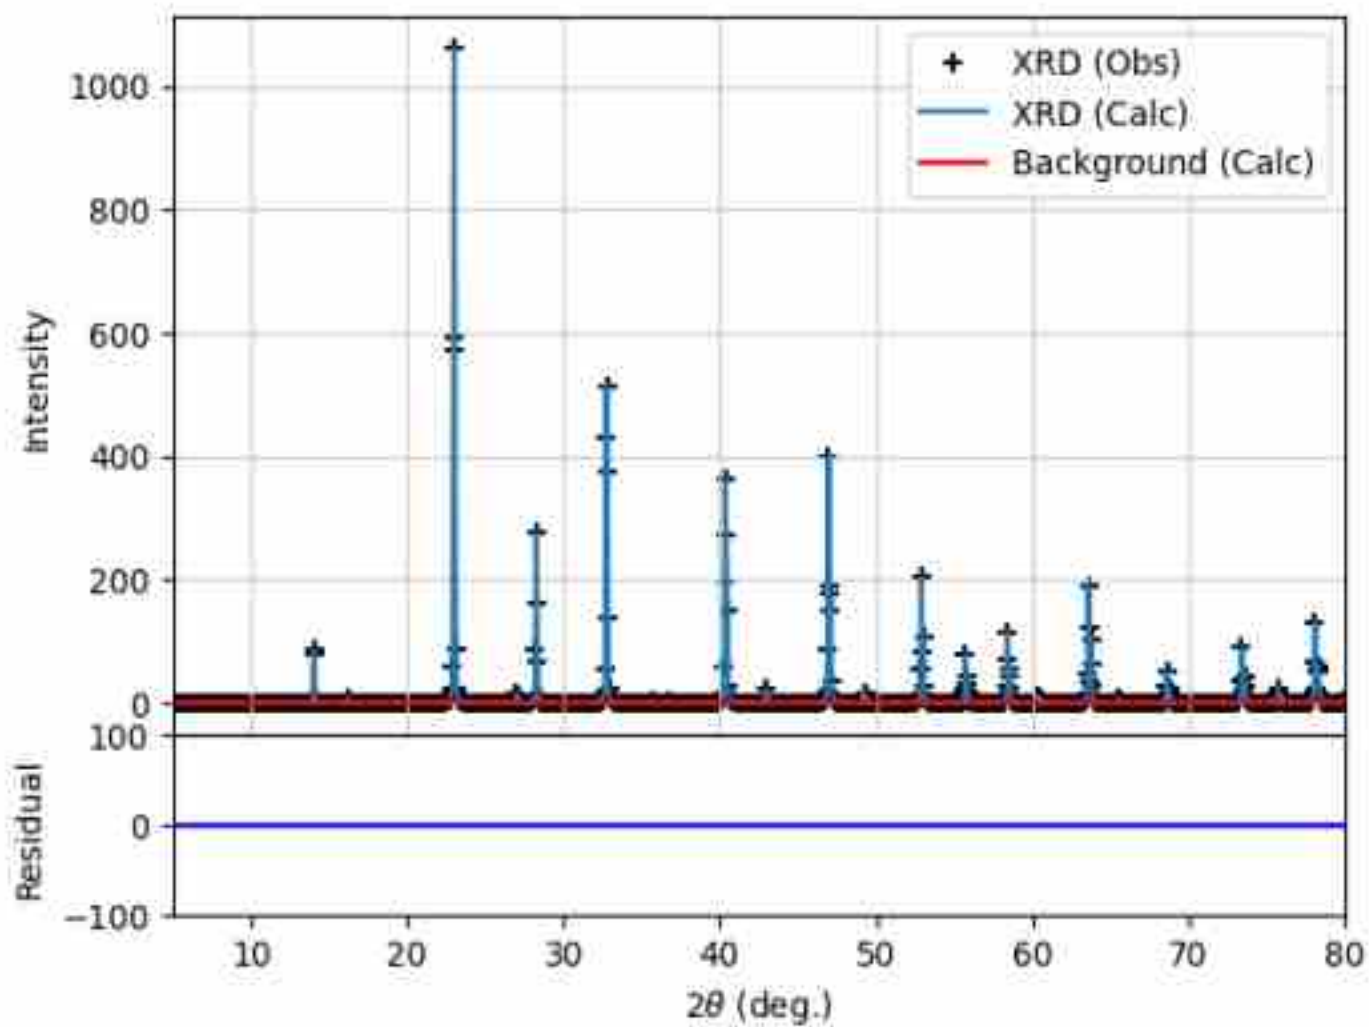

| RMSE before RR | Rwp     | RMSE after RR |
|----------------|---------|---------------|
| 0.109          | 0.16503 | 0.0059        |

# Mg<sub>4</sub>Fe<sub>2</sub>N<sub>4</sub>

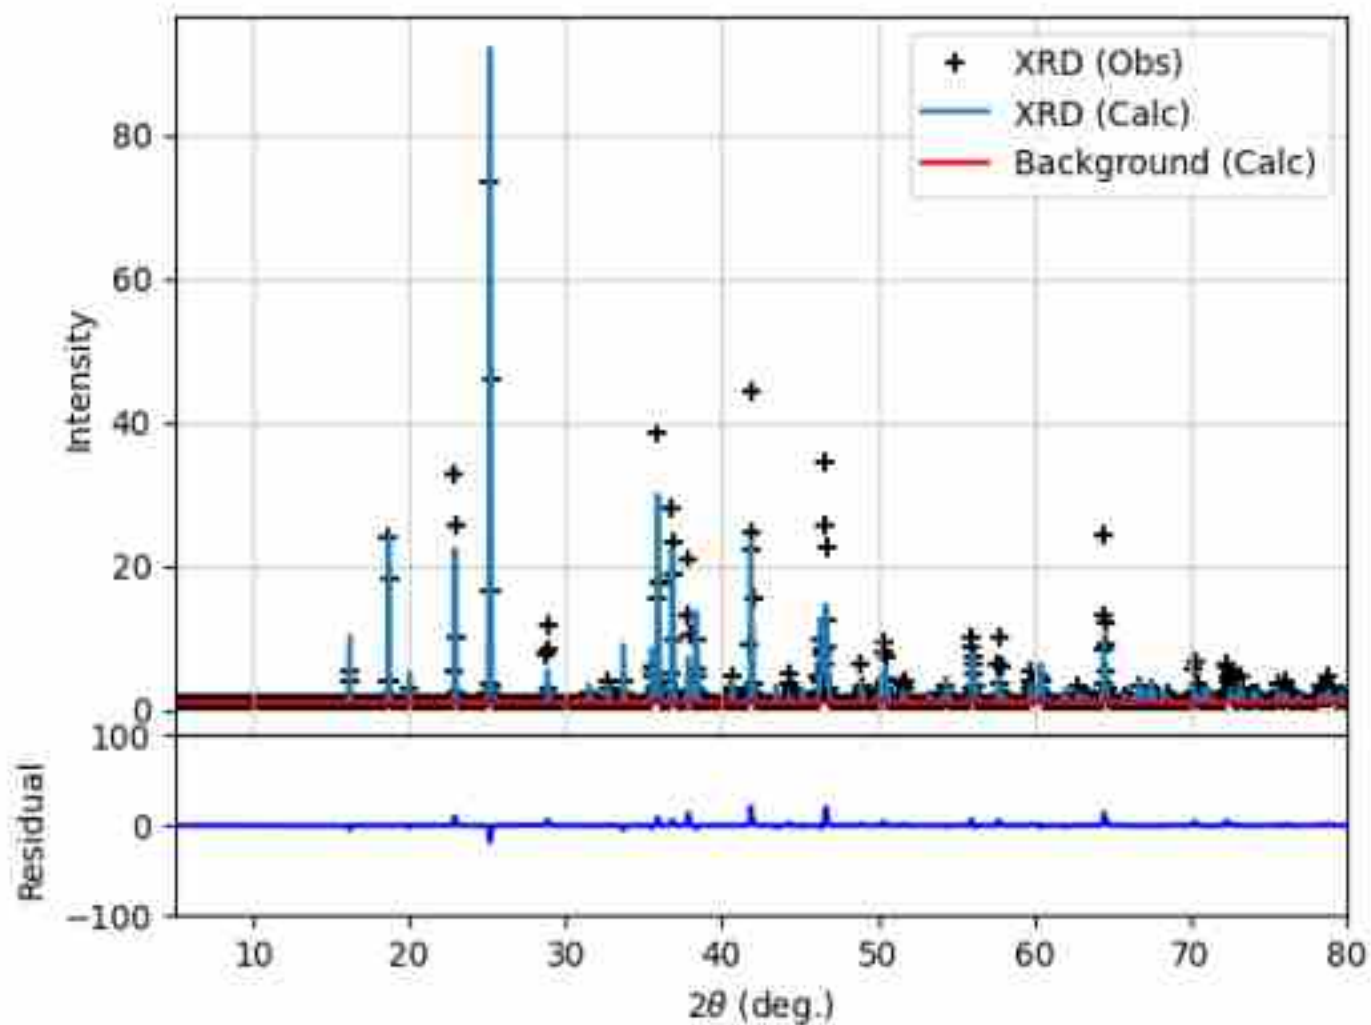

| RMSE before RR | Rwp     | RMSE after RR |
|----------------|---------|---------------|
| 0.109          | 29.3643 | None          |

# Sm<sub>2</sub>Sb<sub>2</sub>Pd<sub>2</sub>

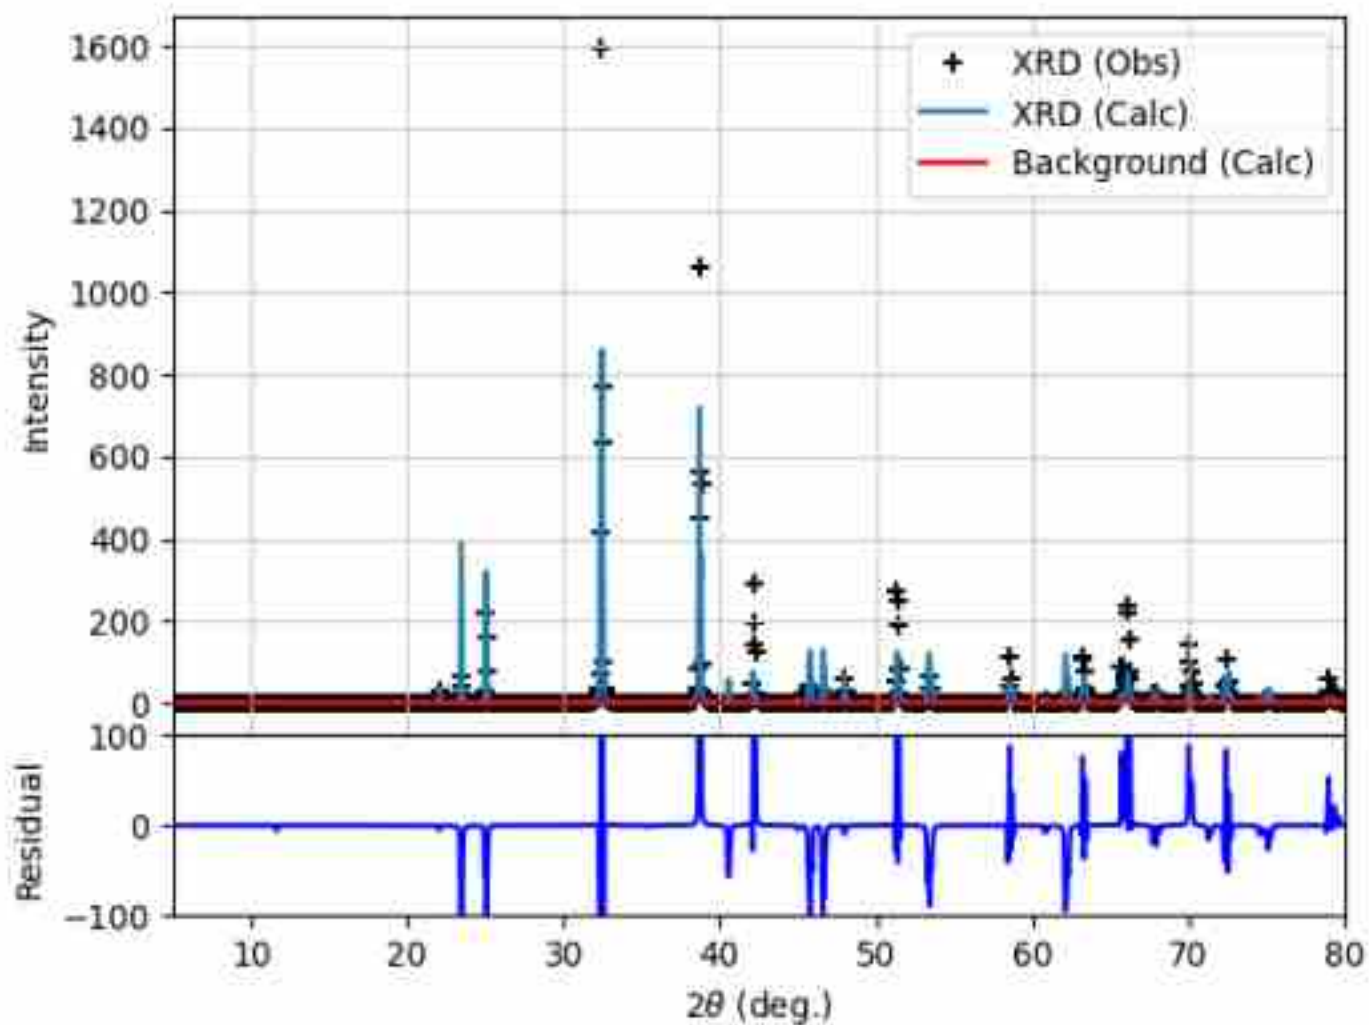

| RMSE before RR | Rwp   | RMSE after RR |
|----------------|-------|---------------|
| 0.109          | 100.0 | None          |

# Zr4O8

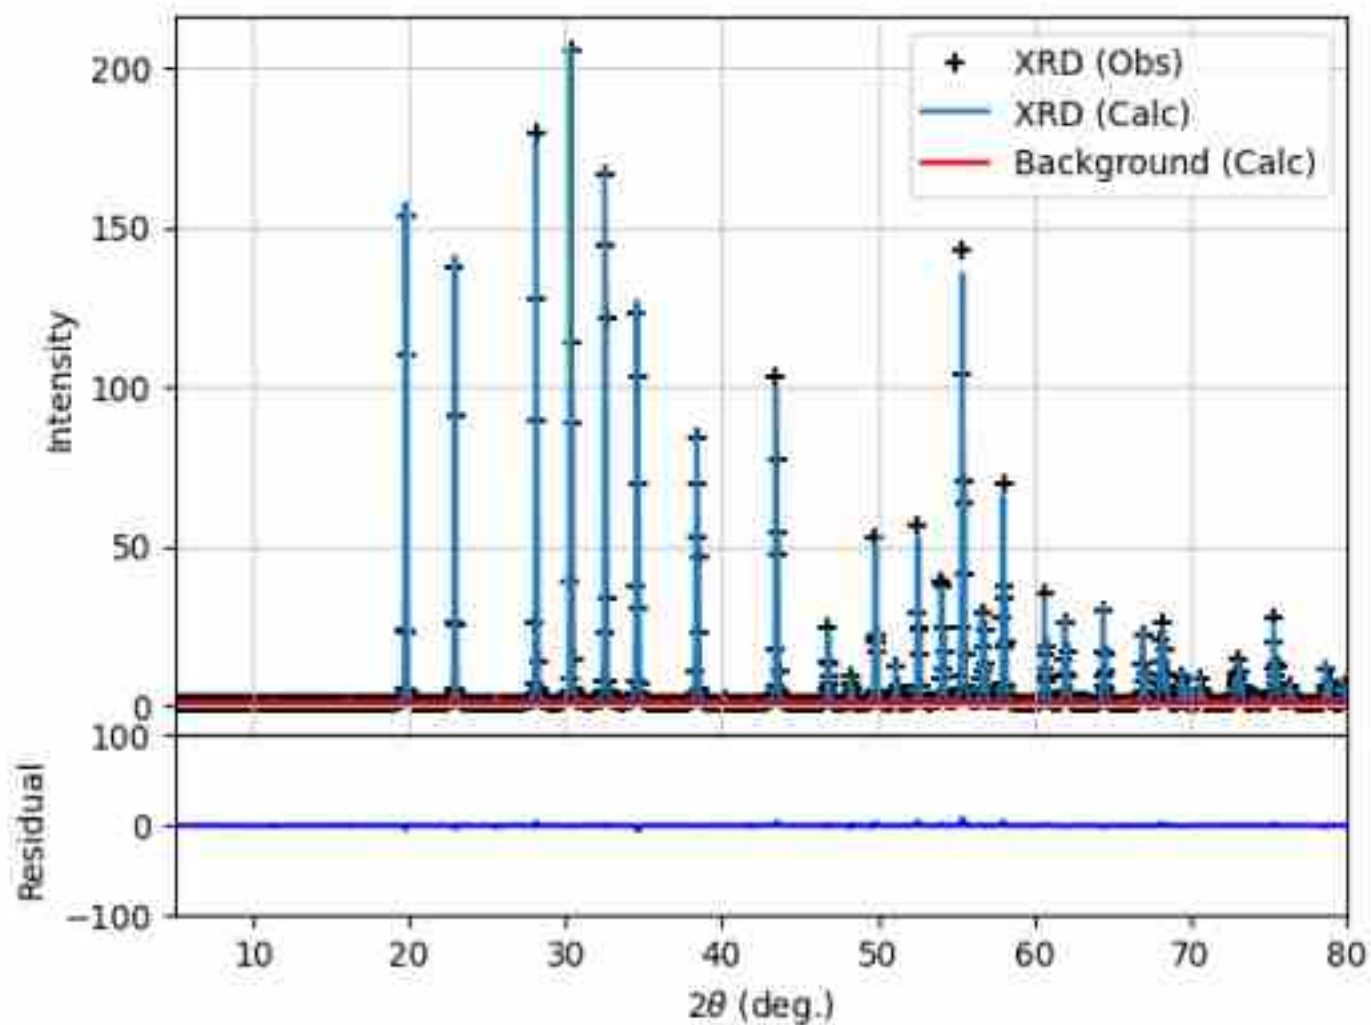

| RMSE before RR | Rwp     | RMSE after RR |
|----------------|---------|---------------|
| 0.109          | 6.75532 | None          |

# Al<sub>2</sub>Ga<sub>1</sub>P<sub>3</sub>O<sub>12</sub>

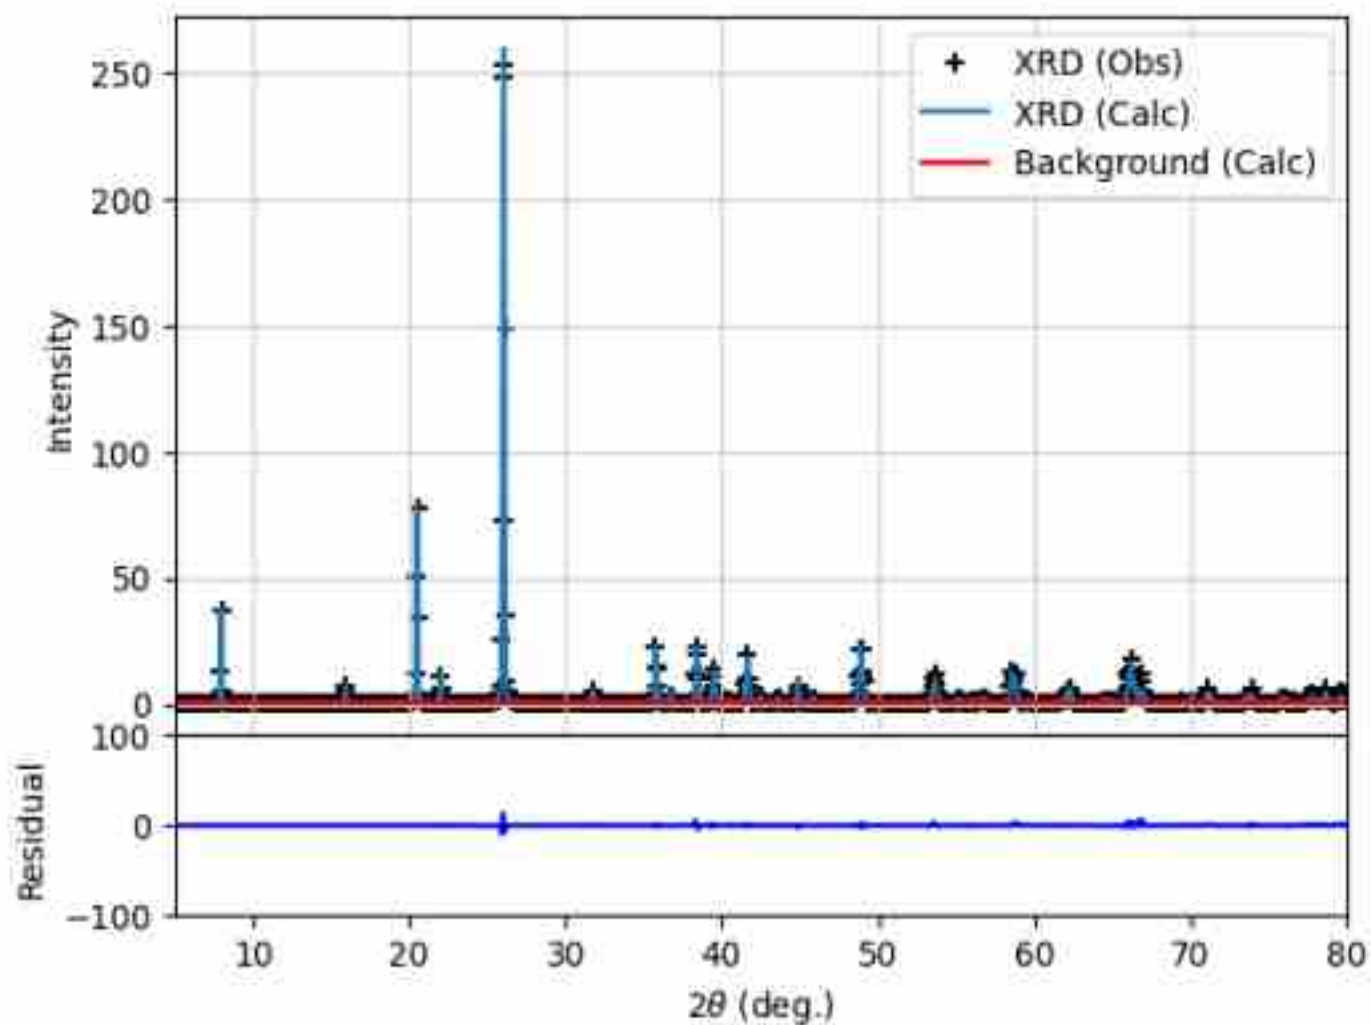

| RMSE before RR | Rwp      | RMSE after RR |
|----------------|----------|---------------|
| 0.111          | 12.15821 | 0.25006       |

# Hg<sub>6</sub>Te<sub>4</sub>Cl<sub>4</sub>

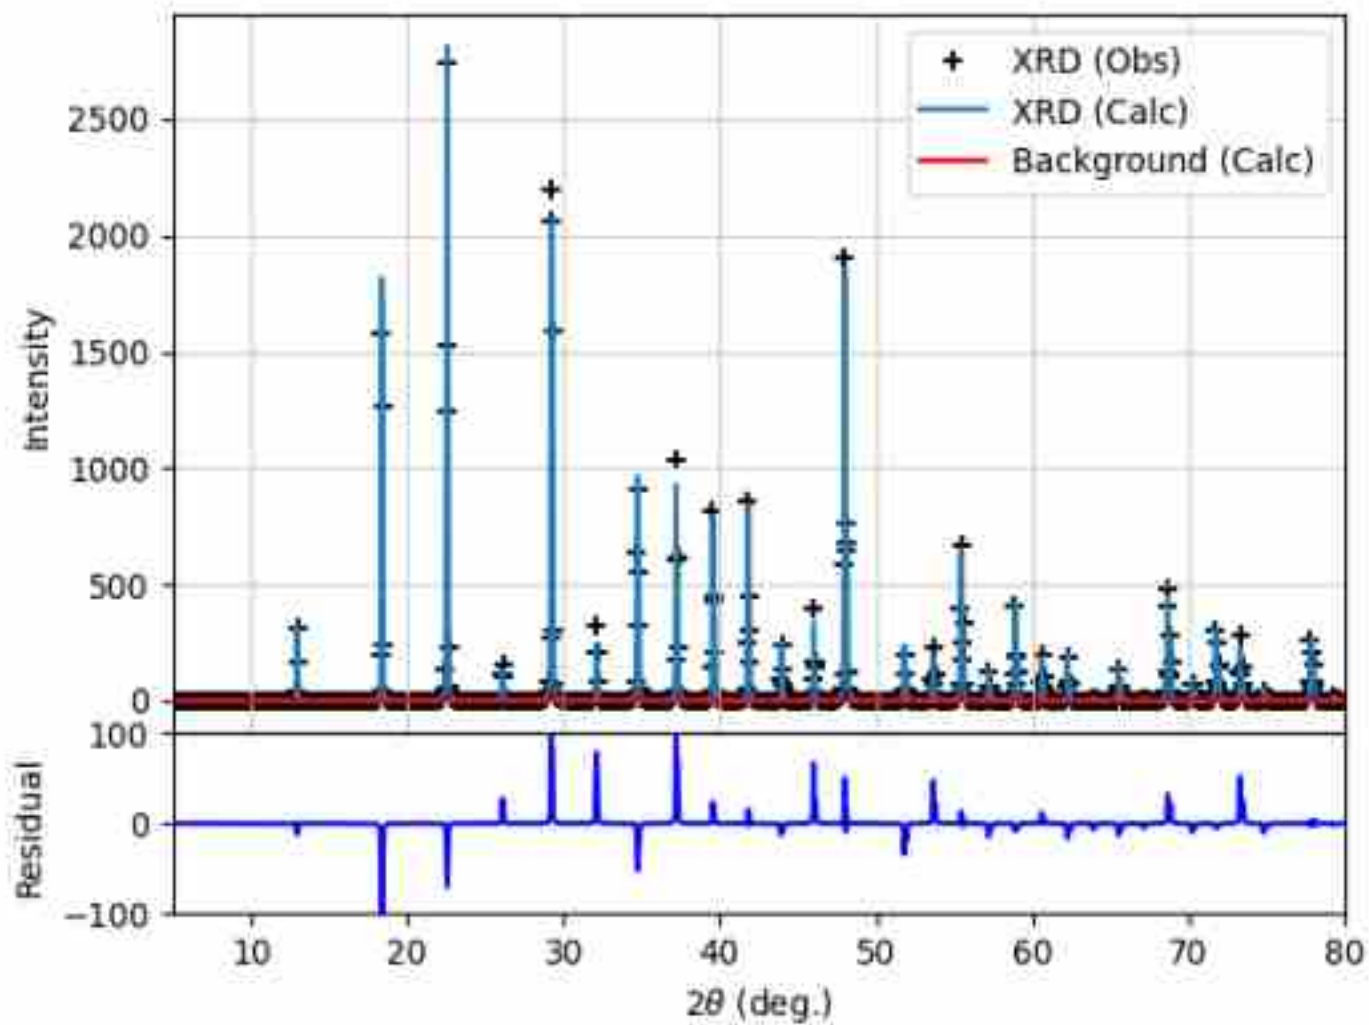

| RMSE before RR | Rwp    | RMSE after RR |
|----------------|--------|---------------|
| 0.111          | 8.7192 | None          |



# Ag<sub>2</sub>N<sub>2</sub>O<sub>6</sub>

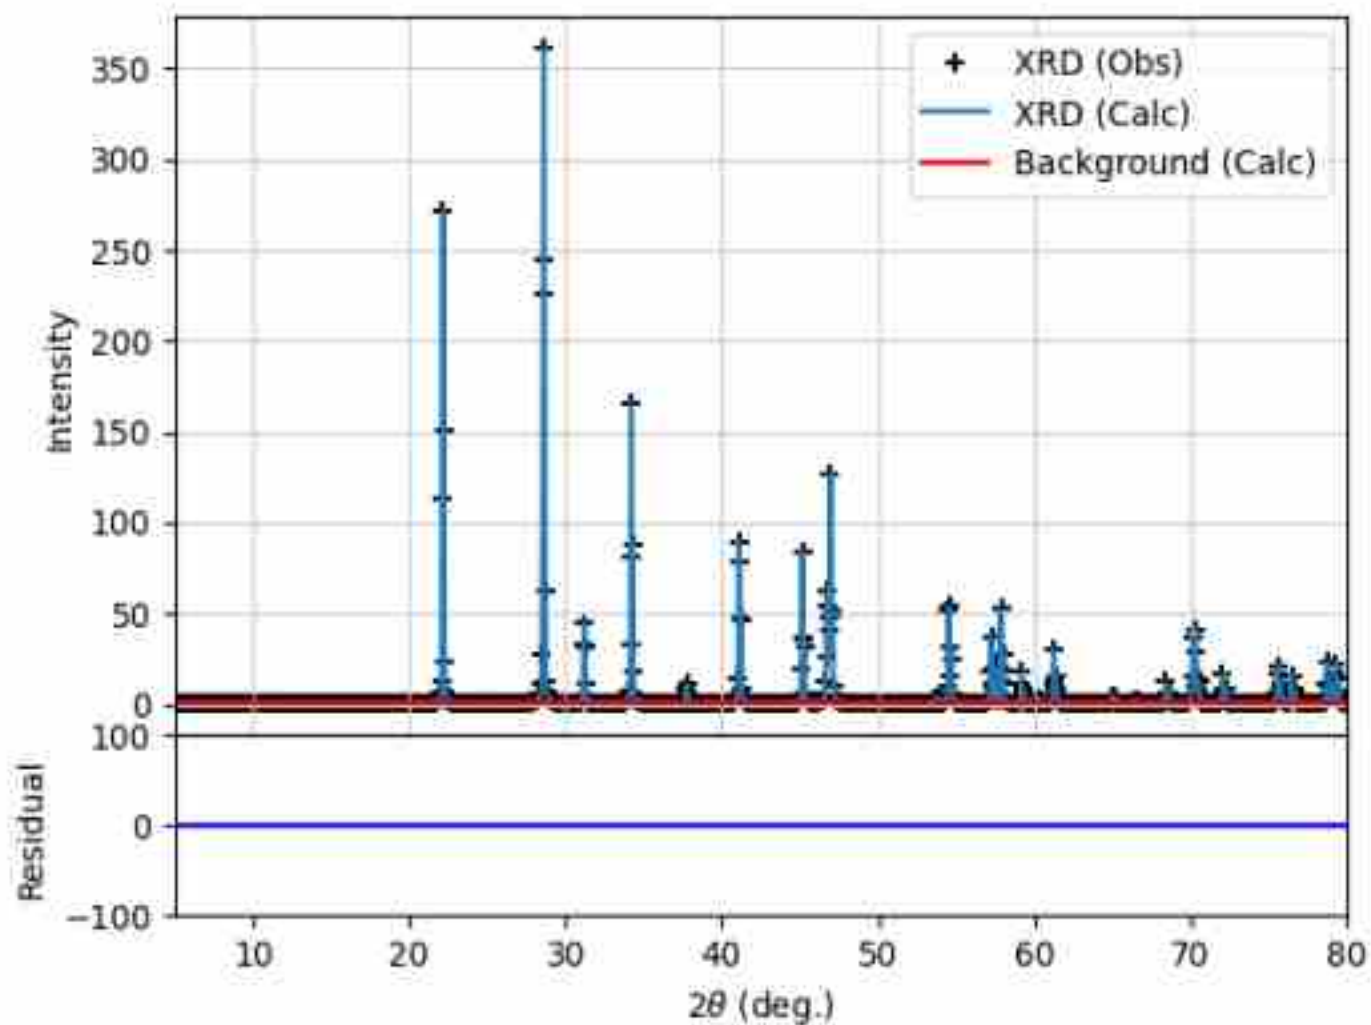

| RMSE before RR | Rwp     | RMSE after RR |
|----------------|---------|---------------|
| 0.112          | 0.00376 | 0.00141       |

# Co1H2O2

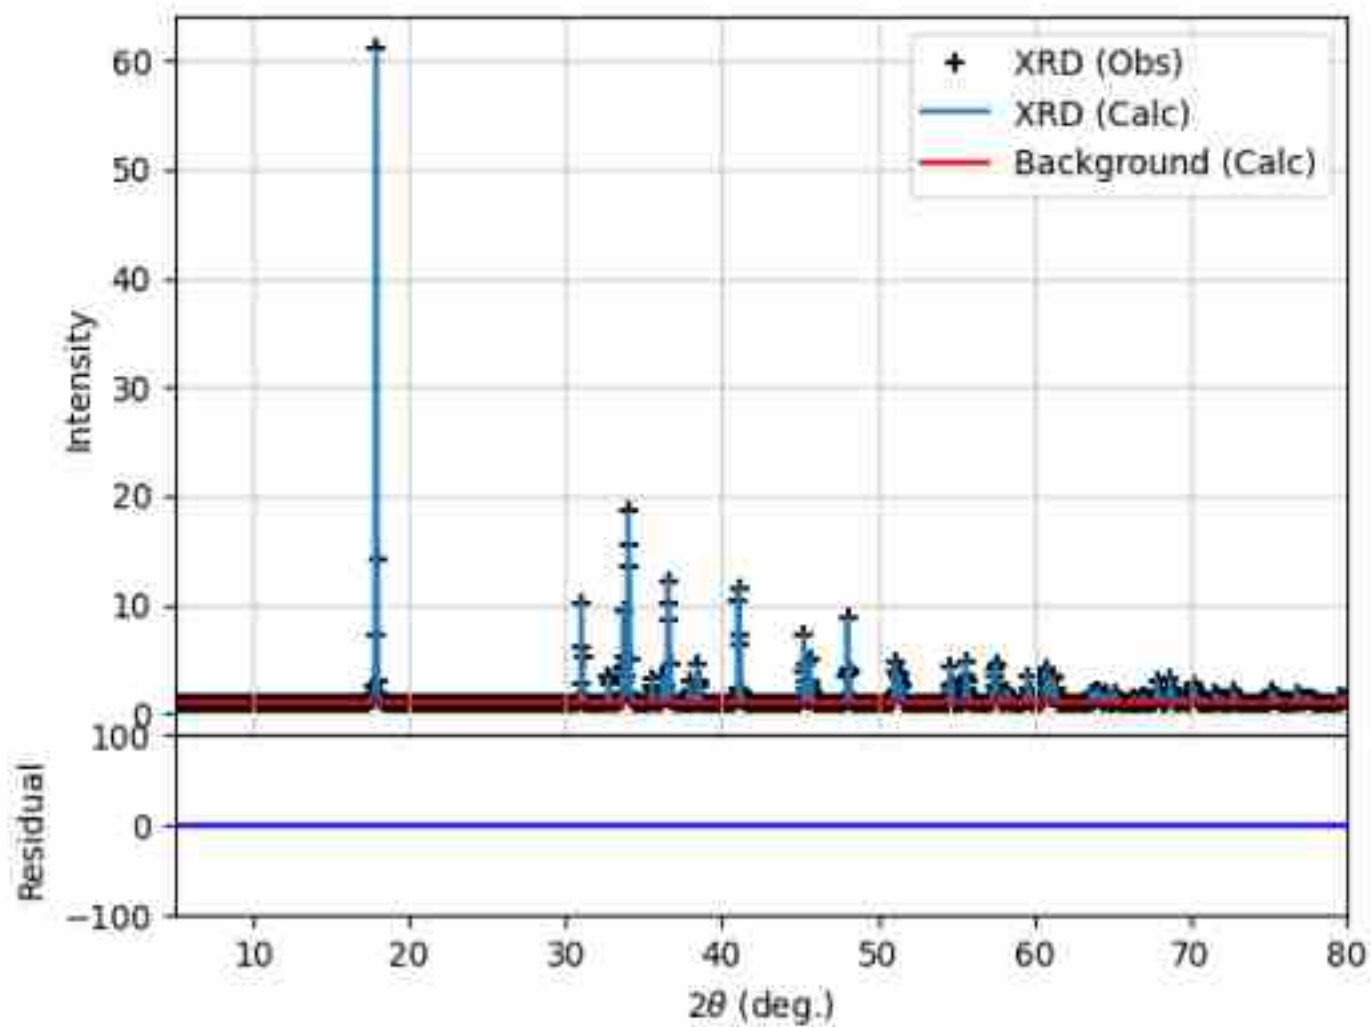

| RMSE before RR | Rwp     | RMSE after RR |
|----------------|---------|---------------|
| 0.112          | 0.41425 | 0.24247       |

# Si4O8

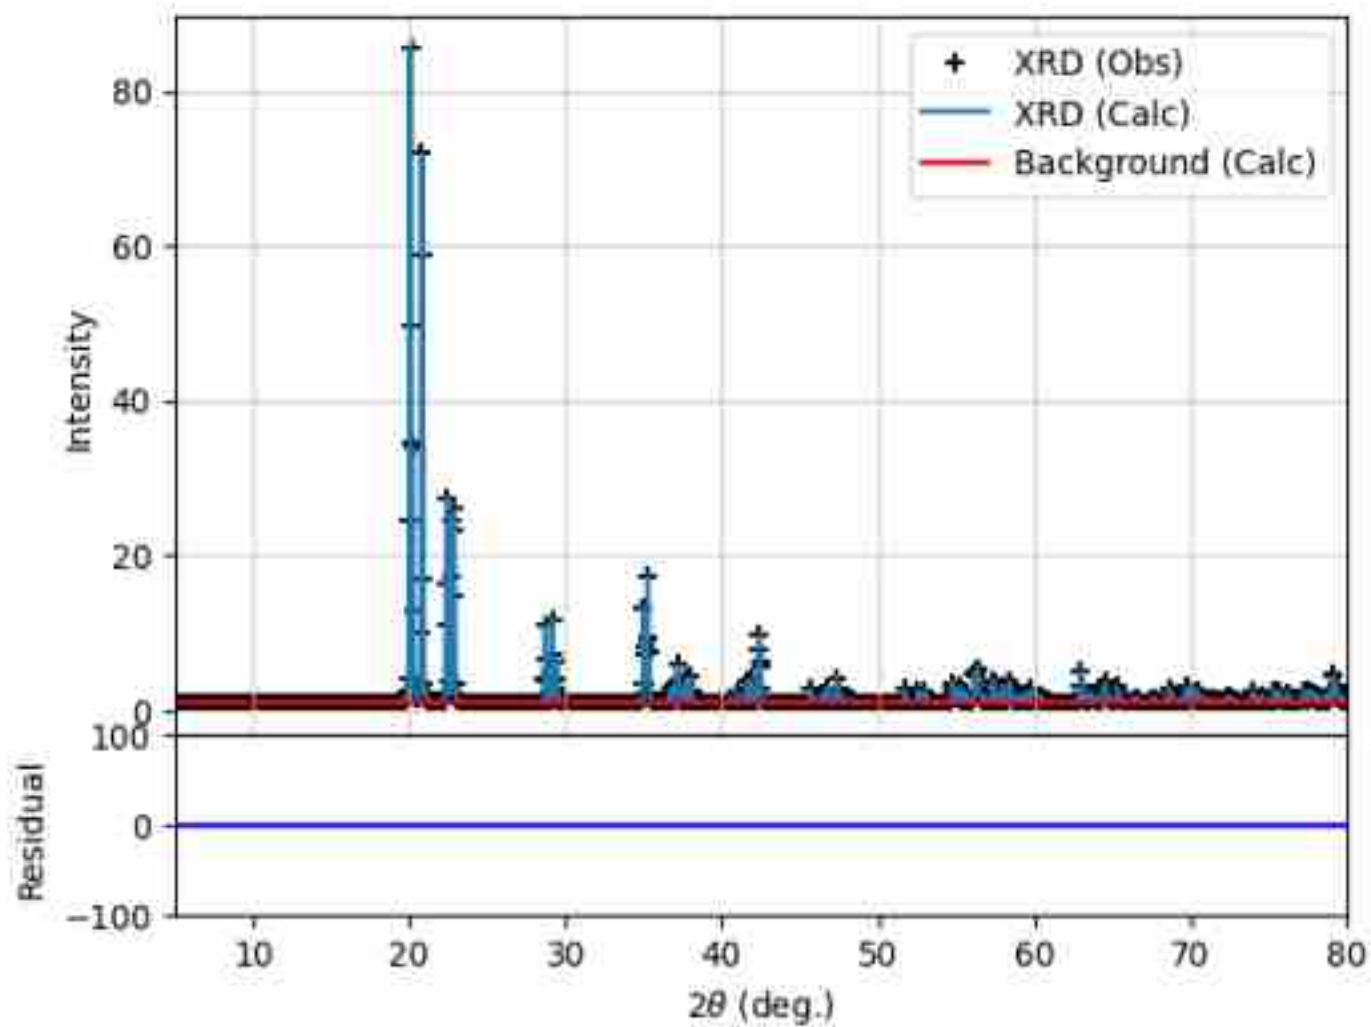

| RMSE before RR | Rwp     | RMSE after RR |
|----------------|---------|---------------|
| 0.112          | 0.00225 | 0.00106       |

# Yb<sub>2</sub>Cu<sub>2</sub>Bi<sub>2</sub>

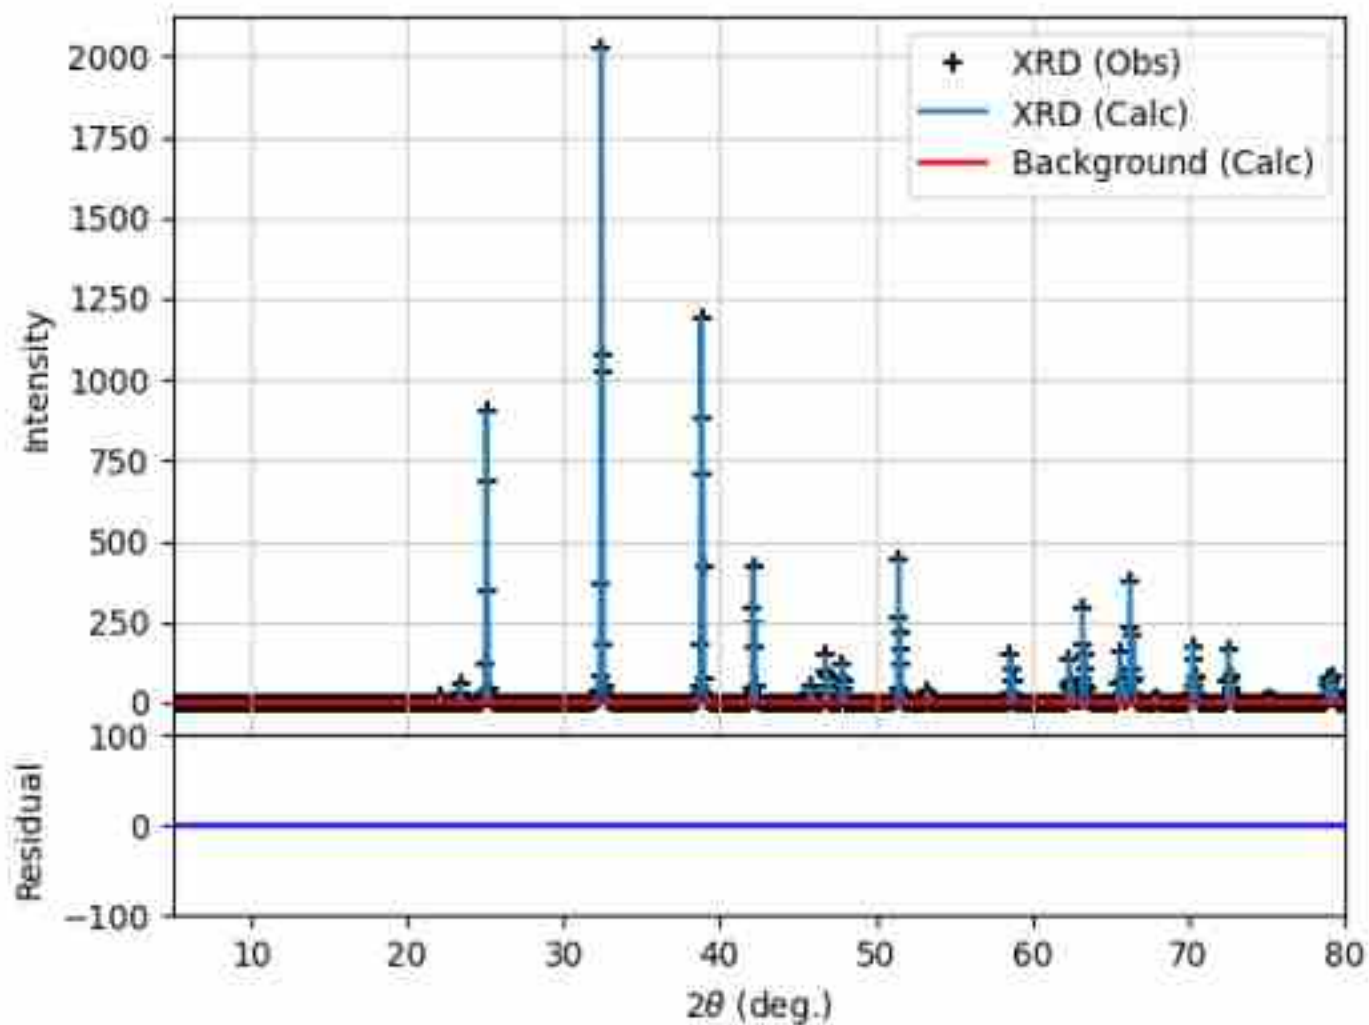

| RMSE before RR | Rwp     | RMSE after RR |
|----------------|---------|---------------|
| 0.112          | 0.00612 | 0.00066       |

# Pb2S4

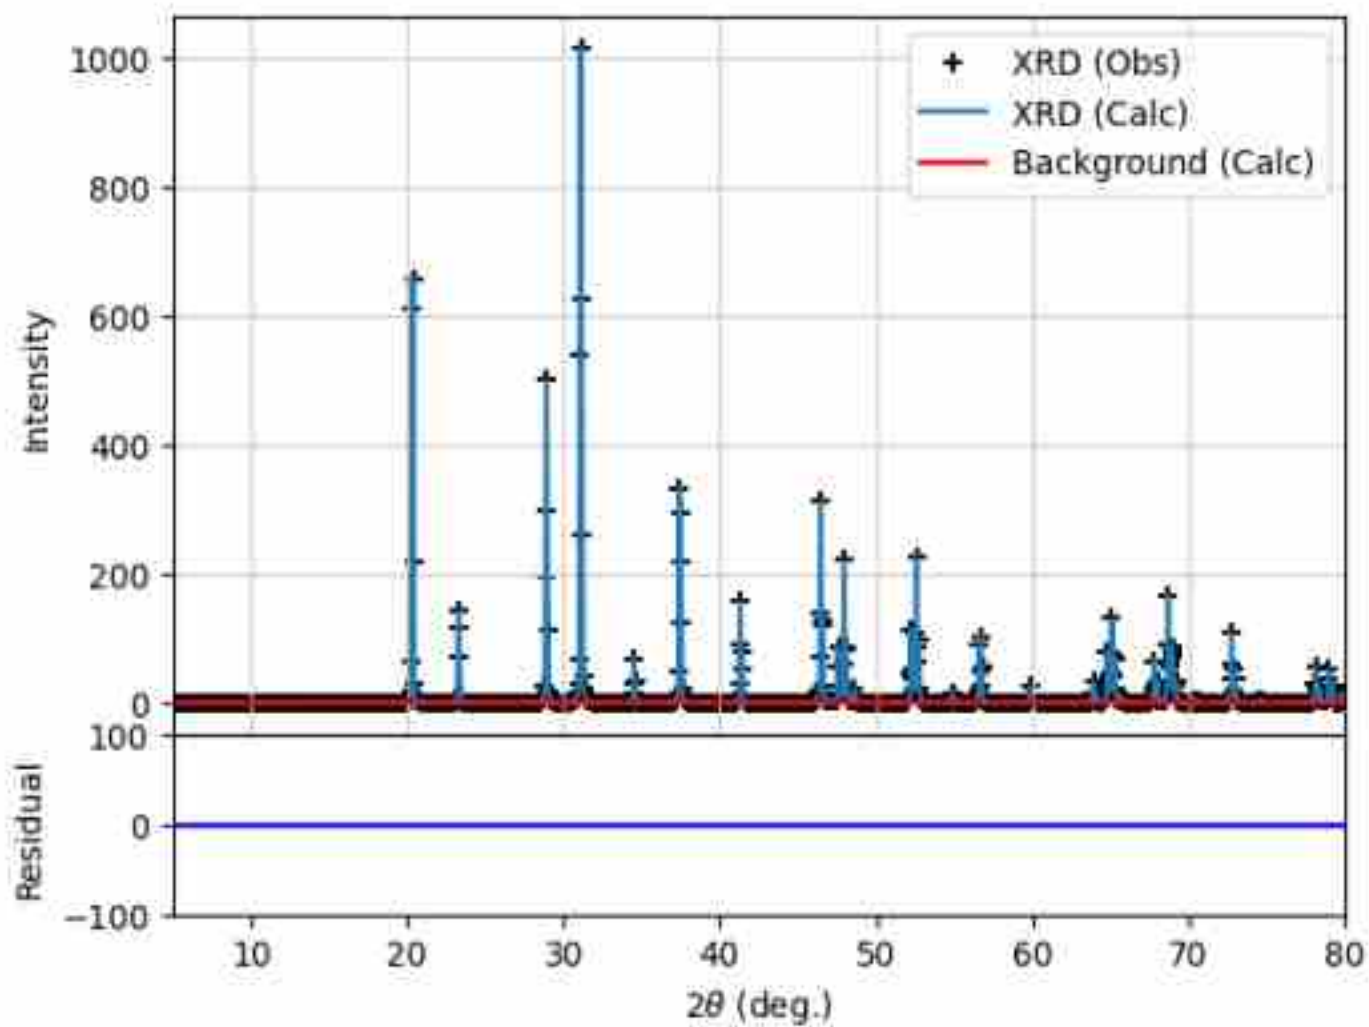

| RMSE before RR | Rwp     | RMSE after RR |
|----------------|---------|---------------|
| 0.113          | 0.00525 | 0.00125       |

# Li<sub>4</sub>Mo<sub>6</sub>S<sub>8</sub>

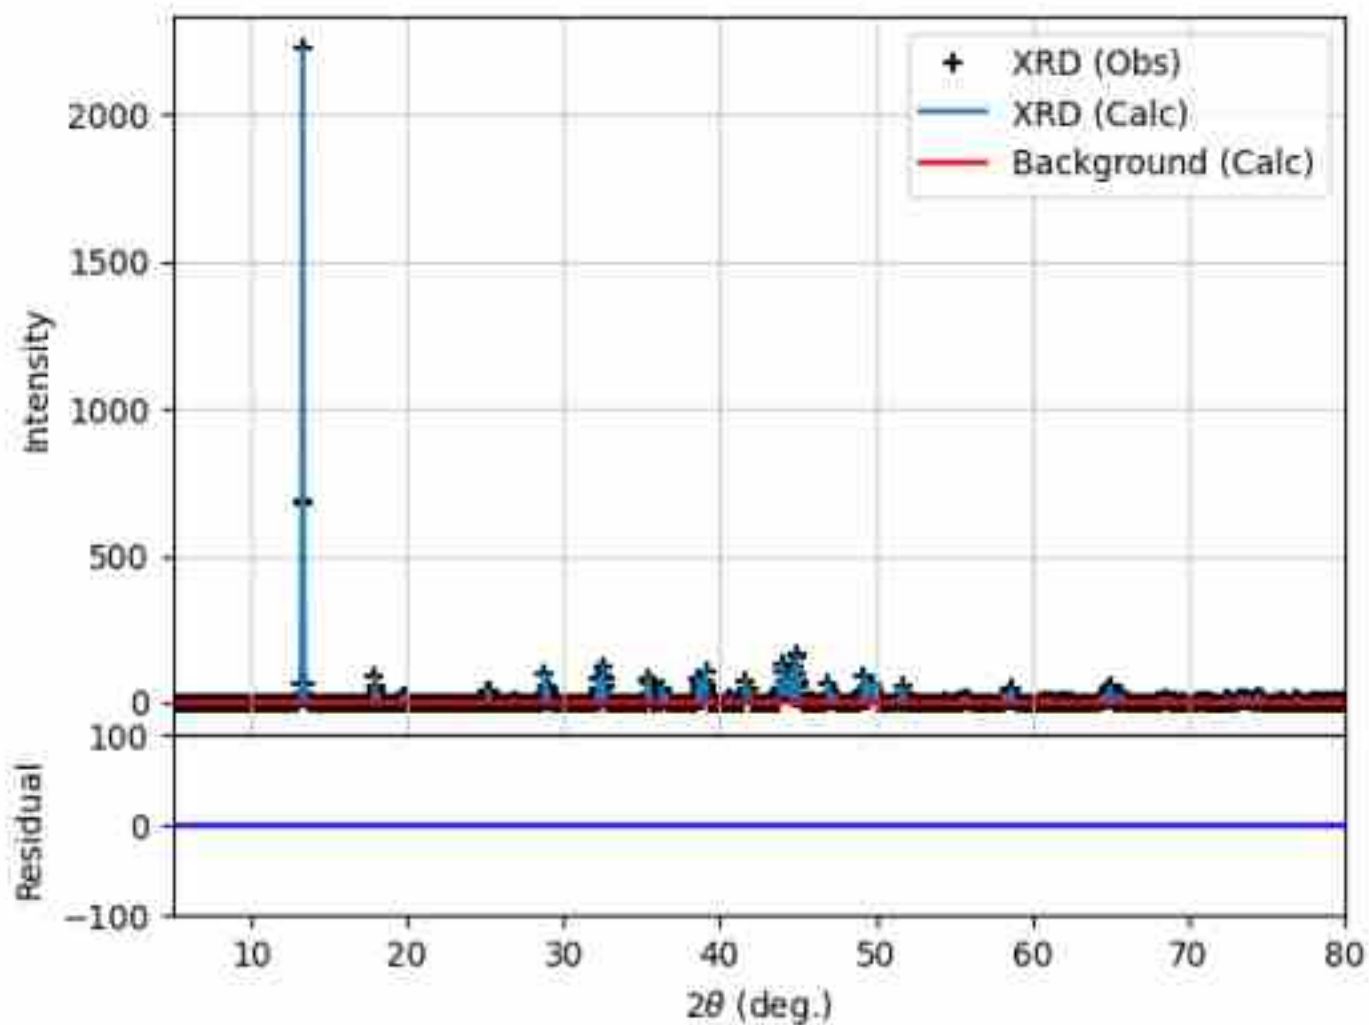

| RMSE before RR | Rwp     | RMSE after RR |
|----------------|---------|---------------|
| 0.114          | 0.07425 | 0.08638       |

# Hg<sub>3</sub>Te<sub>3</sub>

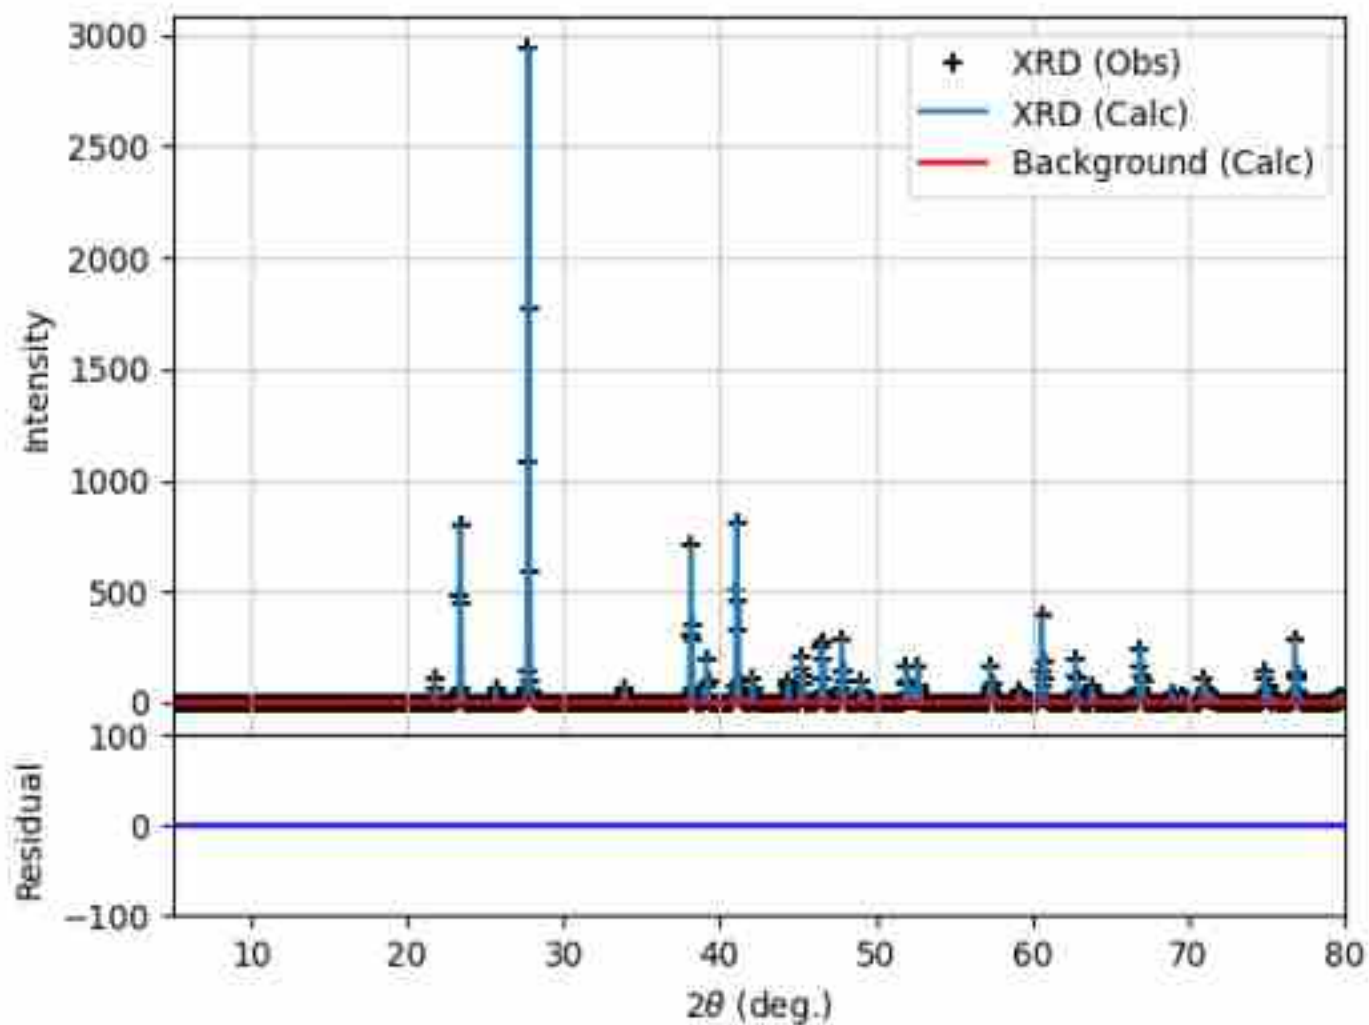

| RMSE before RR | Rwp     | RMSE after RR |
|----------------|---------|---------------|
| 0.115          | 0.00495 | 0.00042       |

# Sm8Se8O4

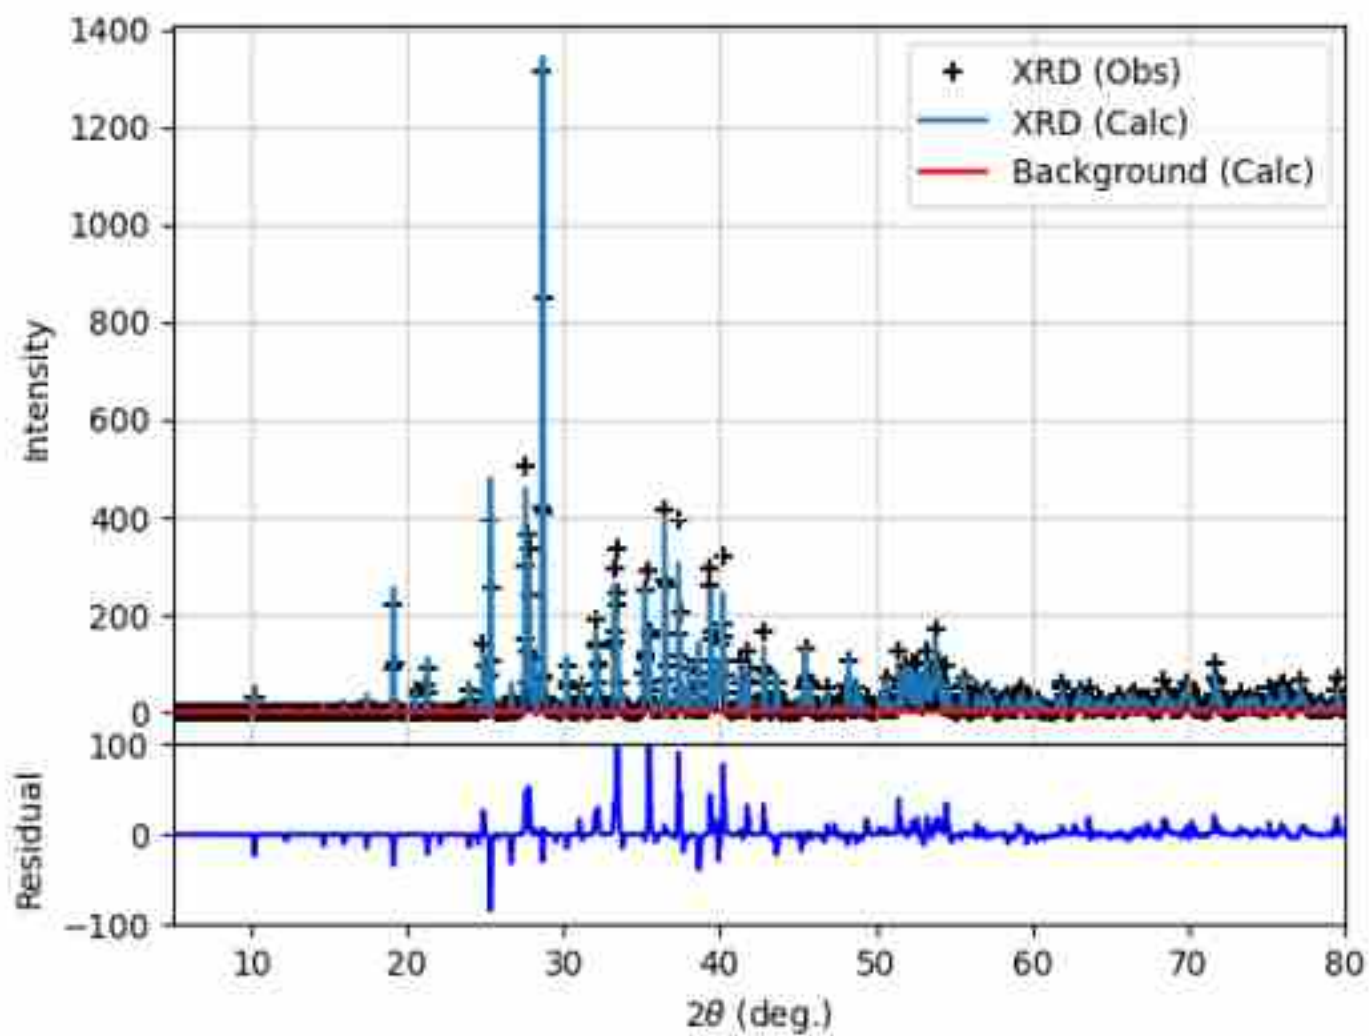

| RMSE before RR | Rwp      | RMSE after RR |
|----------------|----------|---------------|
| 0.115          | 25.27755 | None          |



# Sn3As4

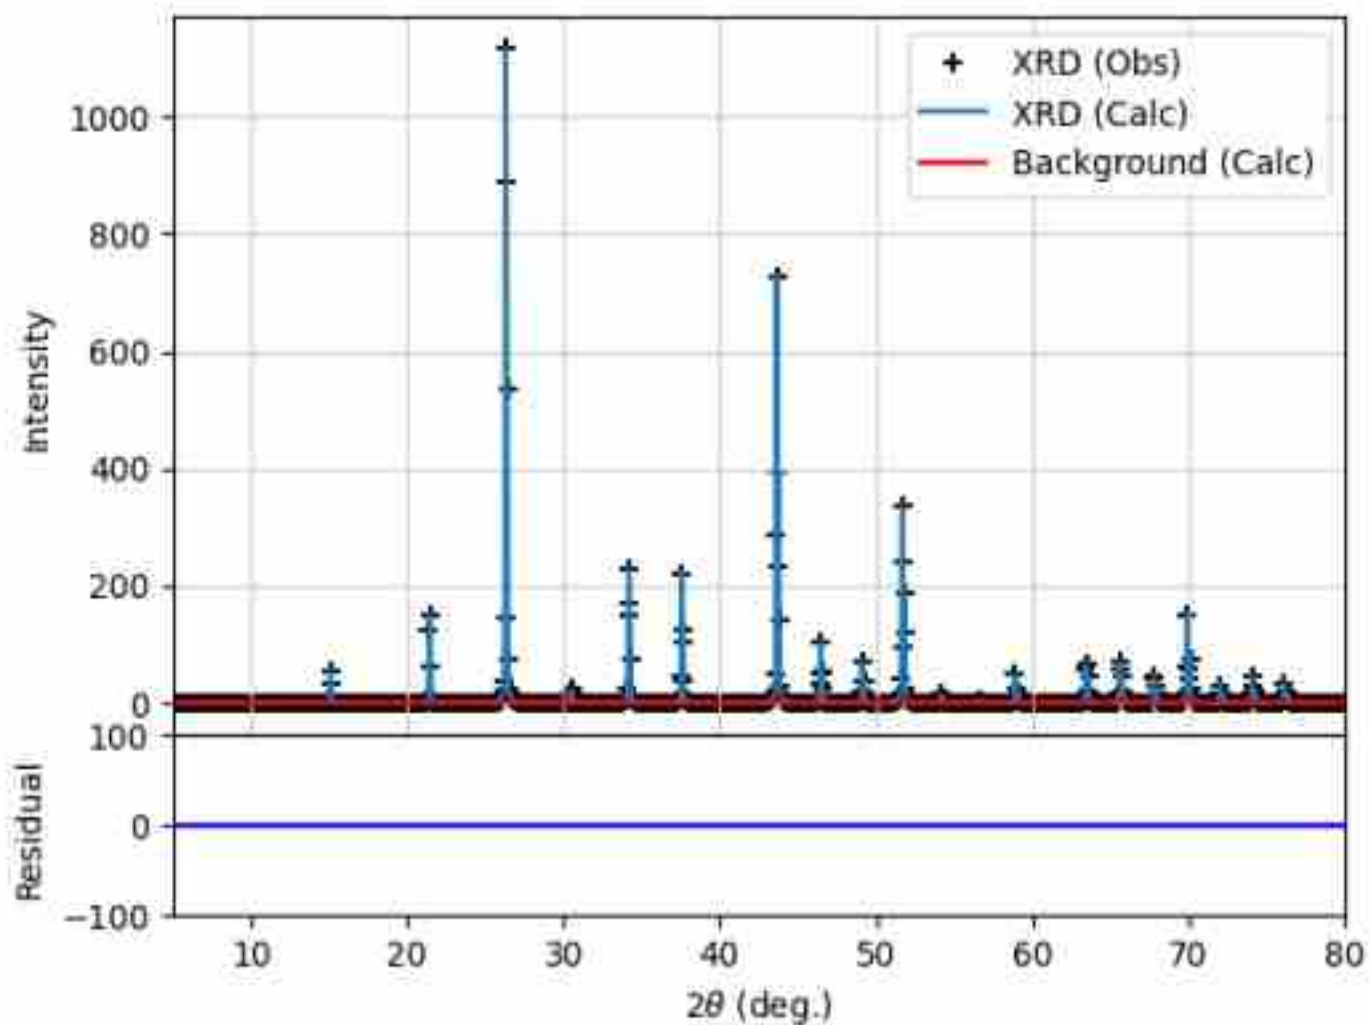

| RMSE before RR | Rwp     | RMSE after RR |
|----------------|---------|---------------|
| 0.115          | 0.00638 | 0.00125       |

# K1Rb2Sc1F6

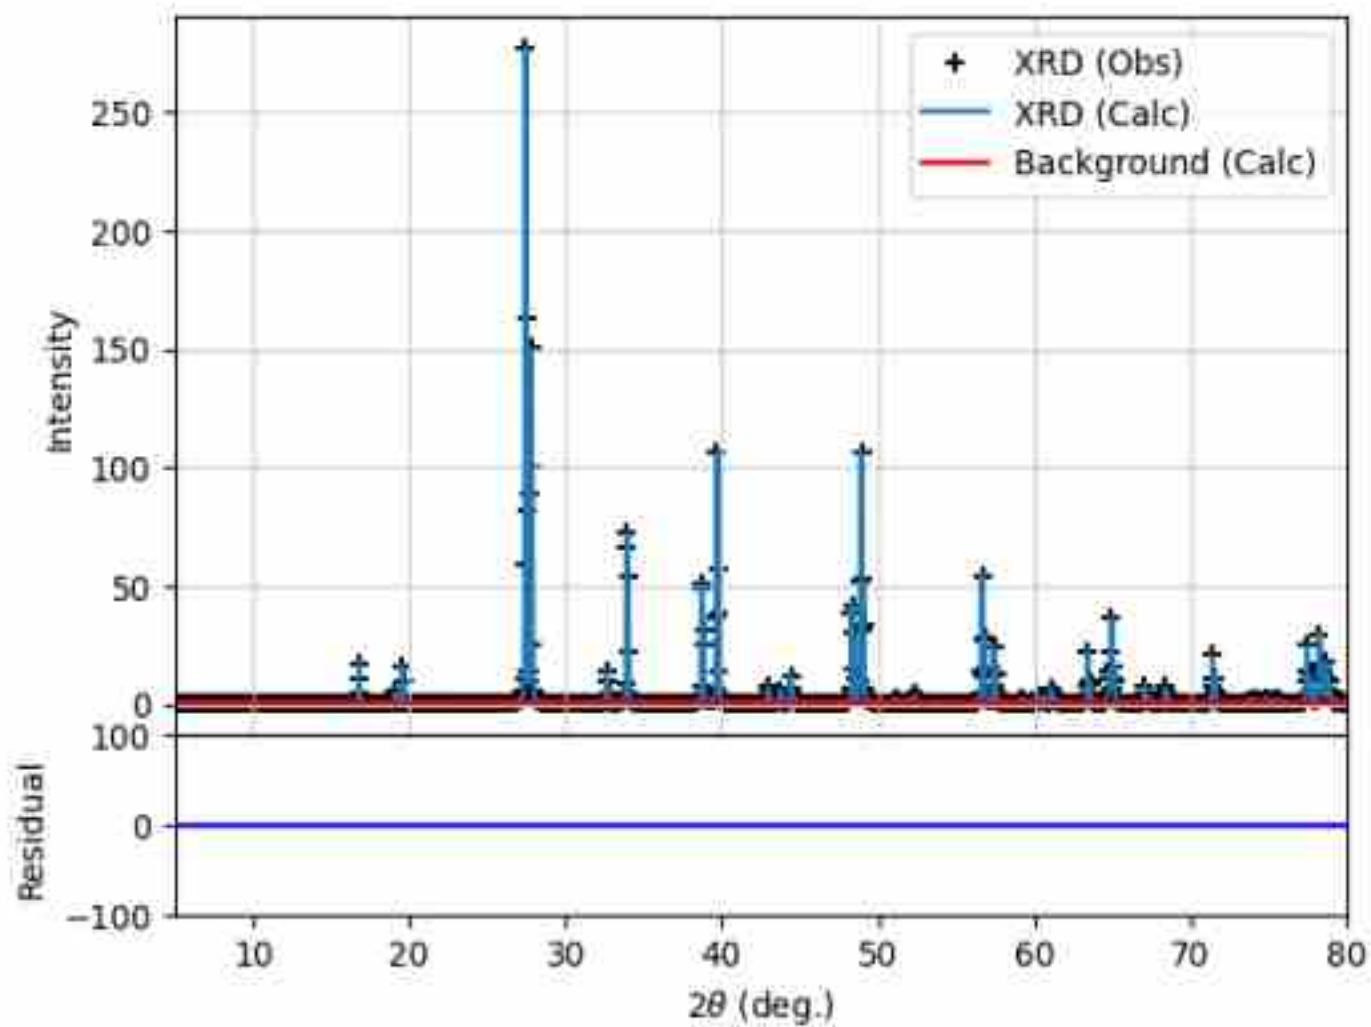

| RMSE before RR | Rwp     | RMSE after RR |
|----------------|---------|---------------|
| 0.116          | 0.00299 | 0.00061       |

# Na<sub>2</sub>Al<sub>2</sub>F<sub>8</sub>

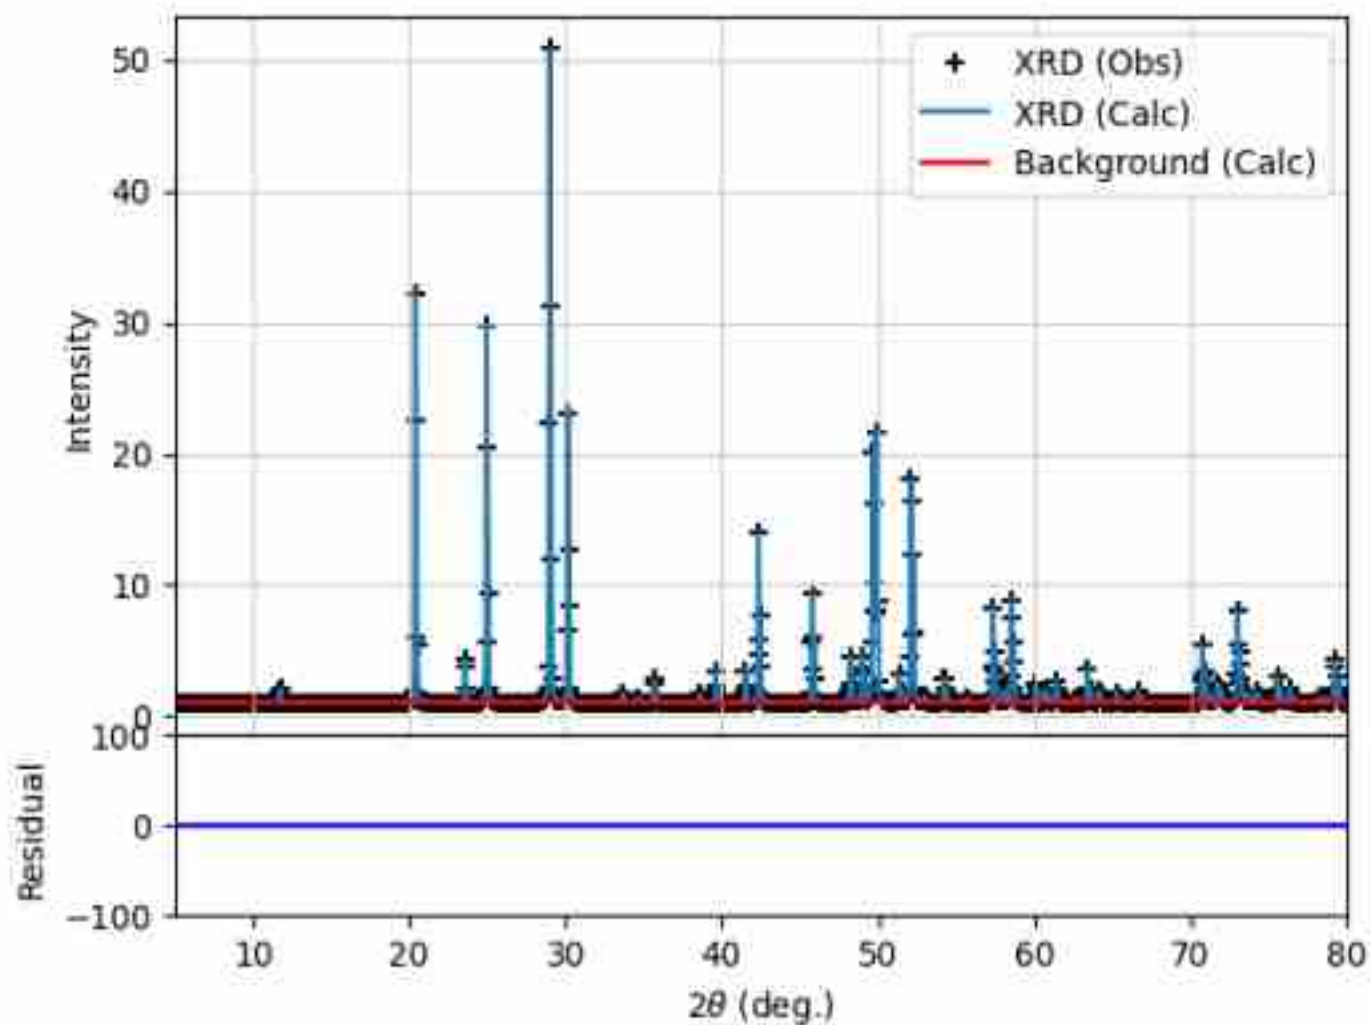

| RMSE before RR | Rwp     | RMSE after RR |
|----------------|---------|---------------|
| 0.116          | 0.00207 | 0.00071       |

# Sm4Y4O12

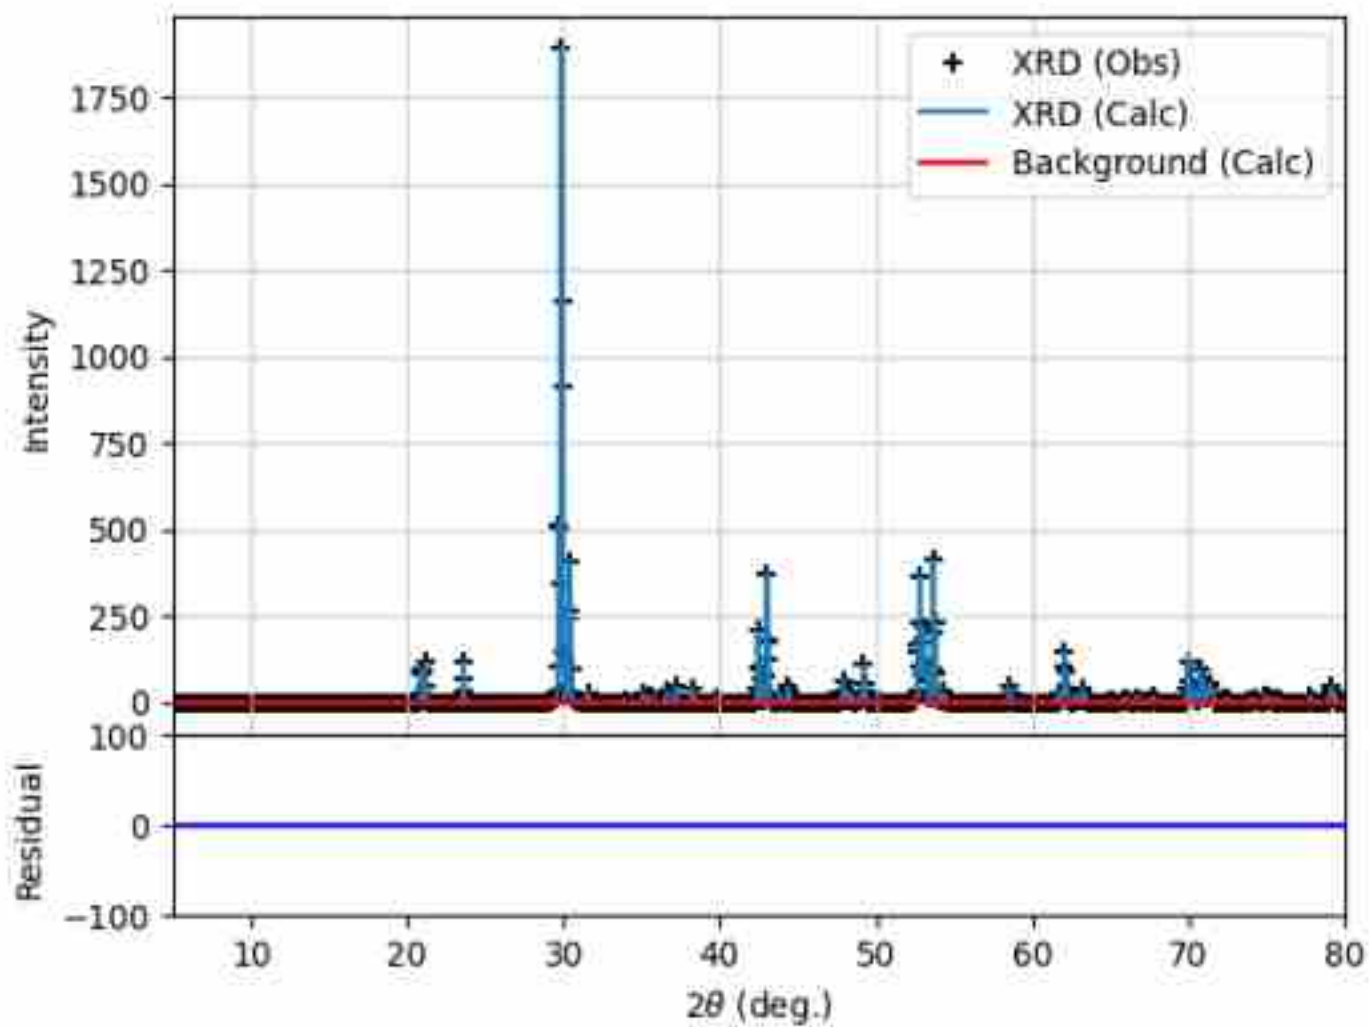

| RMSE before RR | Rwp     | RMSE after RR |
|----------------|---------|---------------|
| 0.116          | 0.00331 | 0.00087       |

# Sr<sub>4</sub>Ta<sub>4</sub>N<sub>4</sub>O<sub>8</sub>

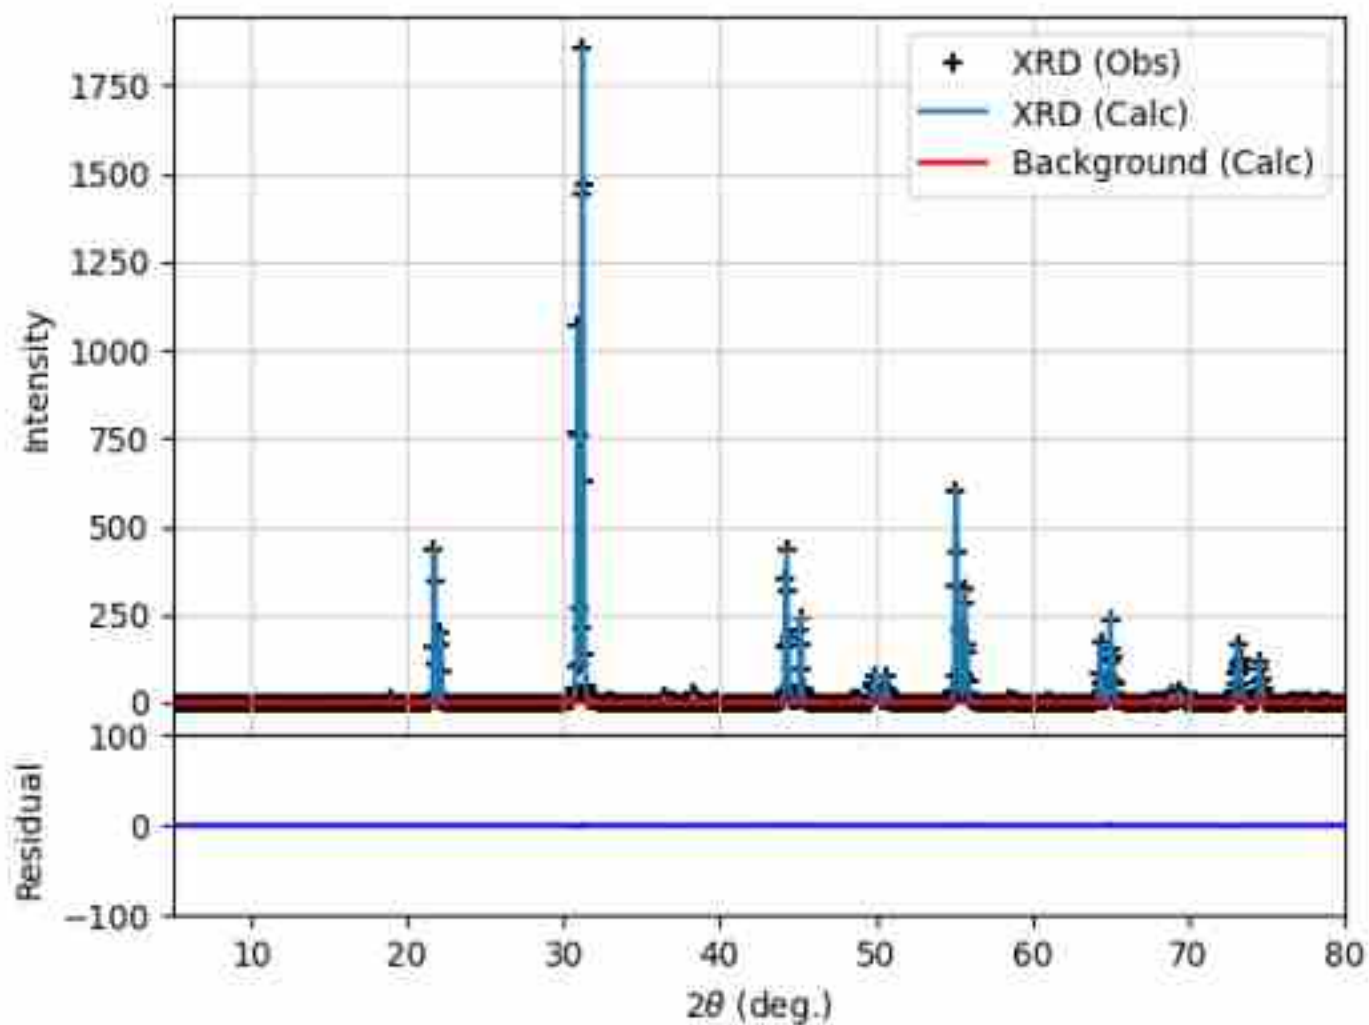

| RMSE before RR | Rwp     | RMSE after RR |
|----------------|---------|---------------|
| 0.116          | 0.45337 | 0.04829       |

# Ta<sub>2</sub>Te<sub>4</sub>C<sub>11</sub>2

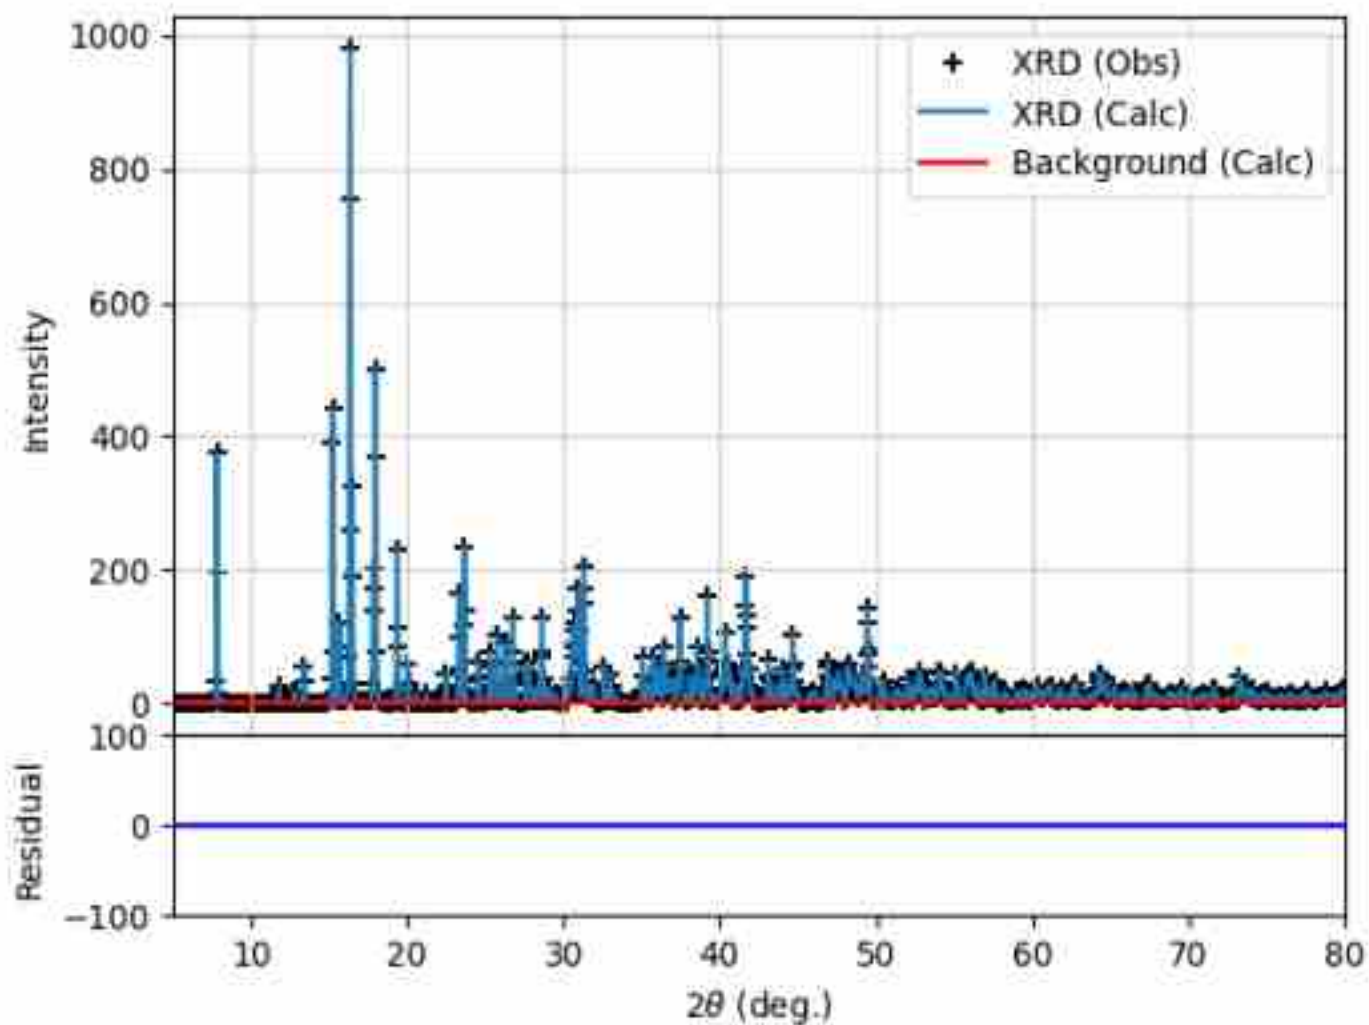

| RMSE before RR | Rwp     | RMSE after RR |
|----------------|---------|---------------|
| 0.116          | 0.00014 | 0.0001        |

# Sr<sub>2</sub>Gd<sub>1</sub>Ru<sub>1</sub>O<sub>6</sub>

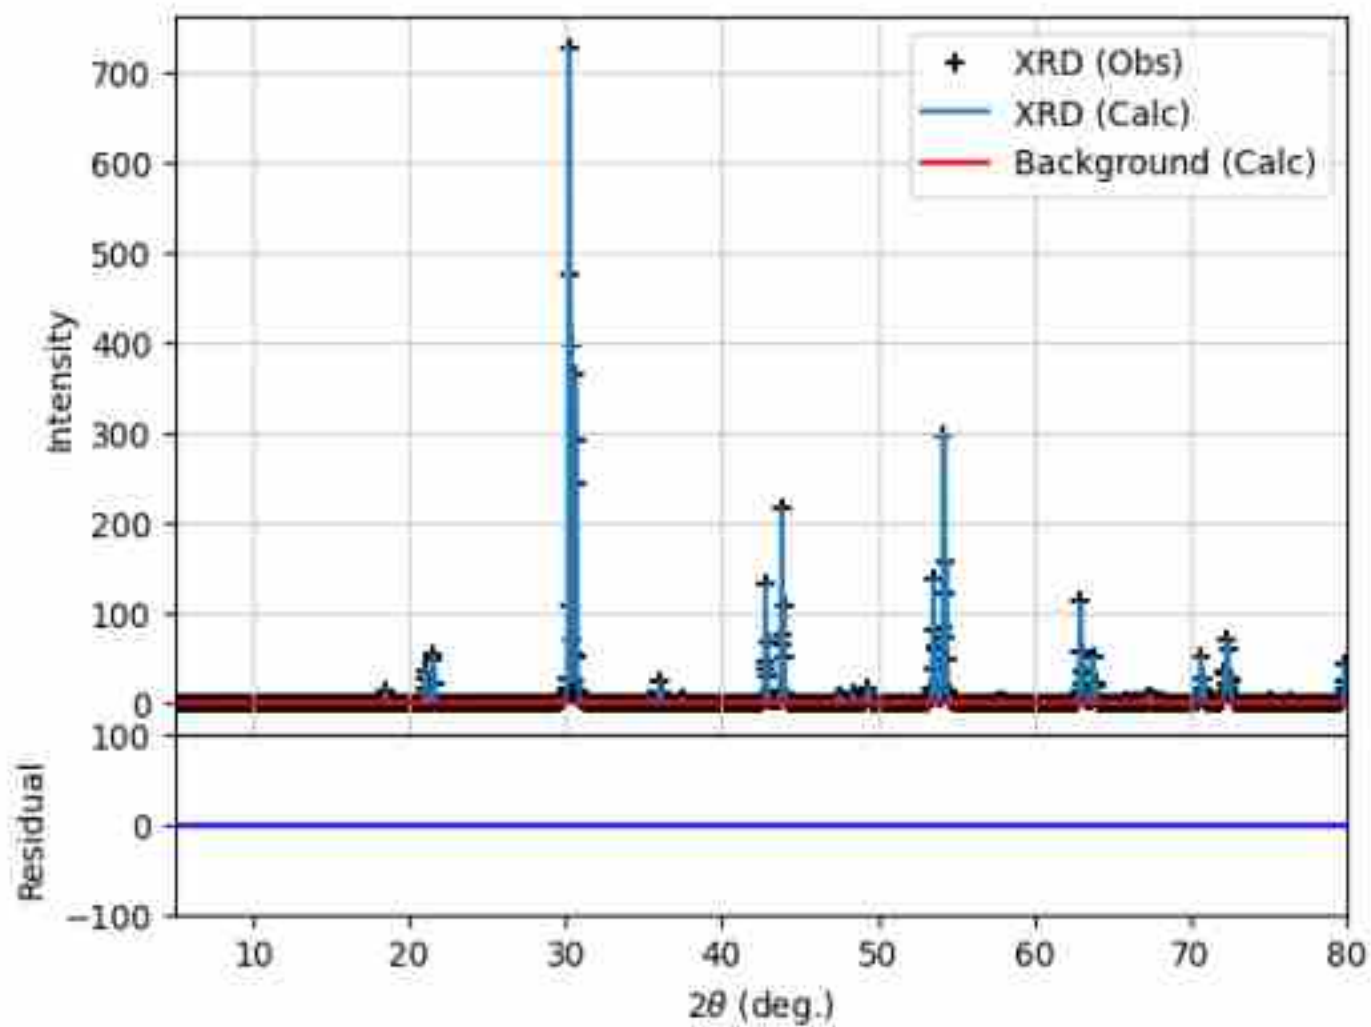

| RMSE before RR | Rwp     | RMSE after RR |
|----------------|---------|---------------|
| 0.117          | 0.00261 | 0.00129       |

# Li4Ge4N4

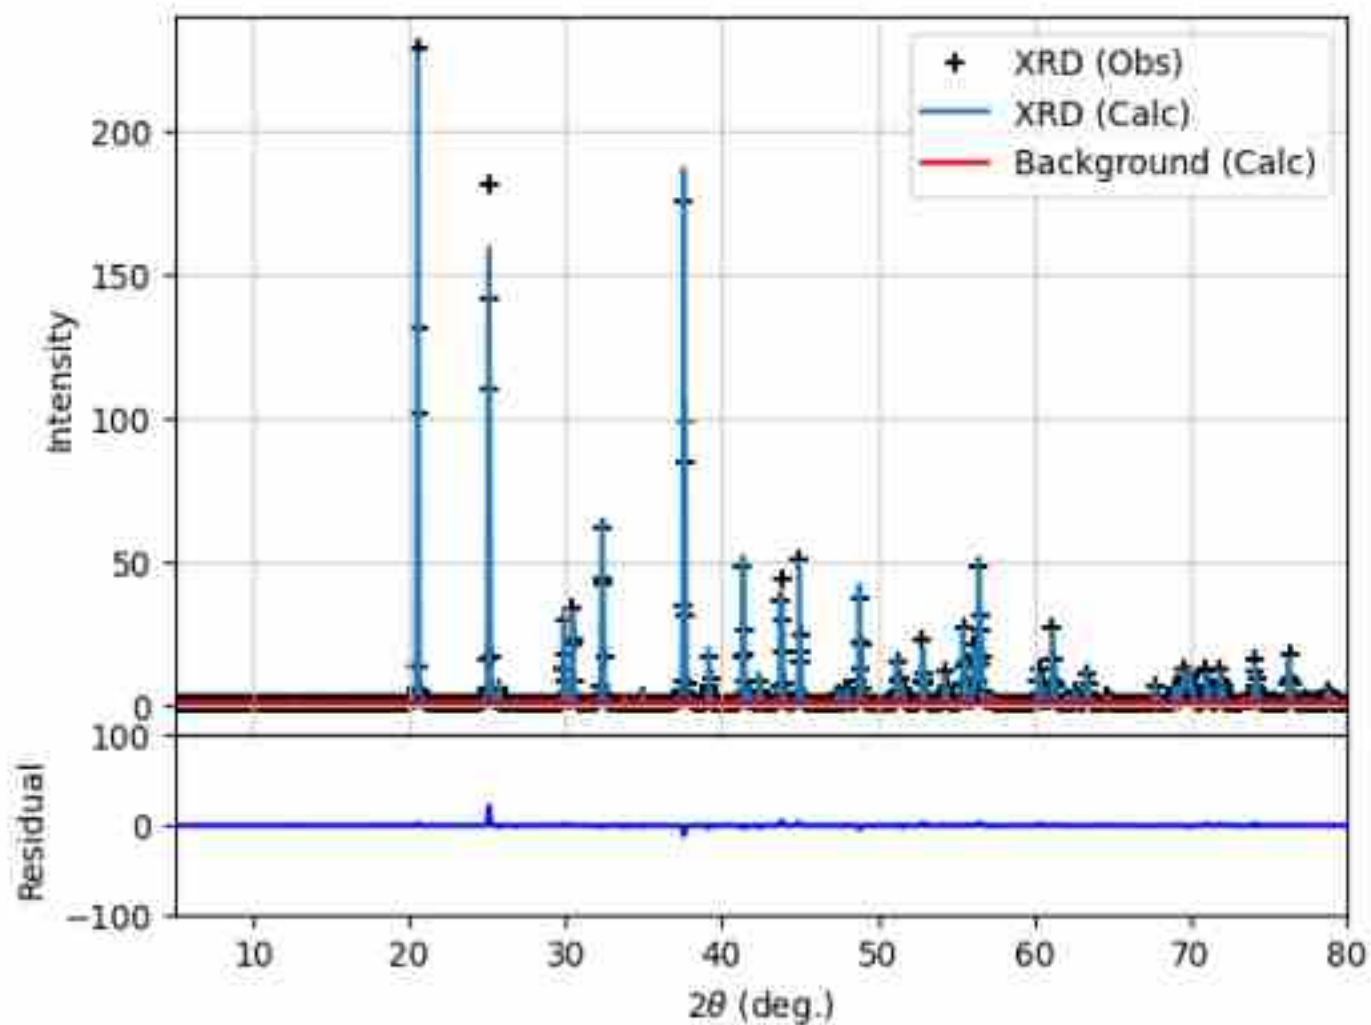

| RMSE before RR | Rwp     | RMSE after RR |
|----------------|---------|---------------|
| 0.118          | 8.48797 | None          |



# Rb4Sb4S8

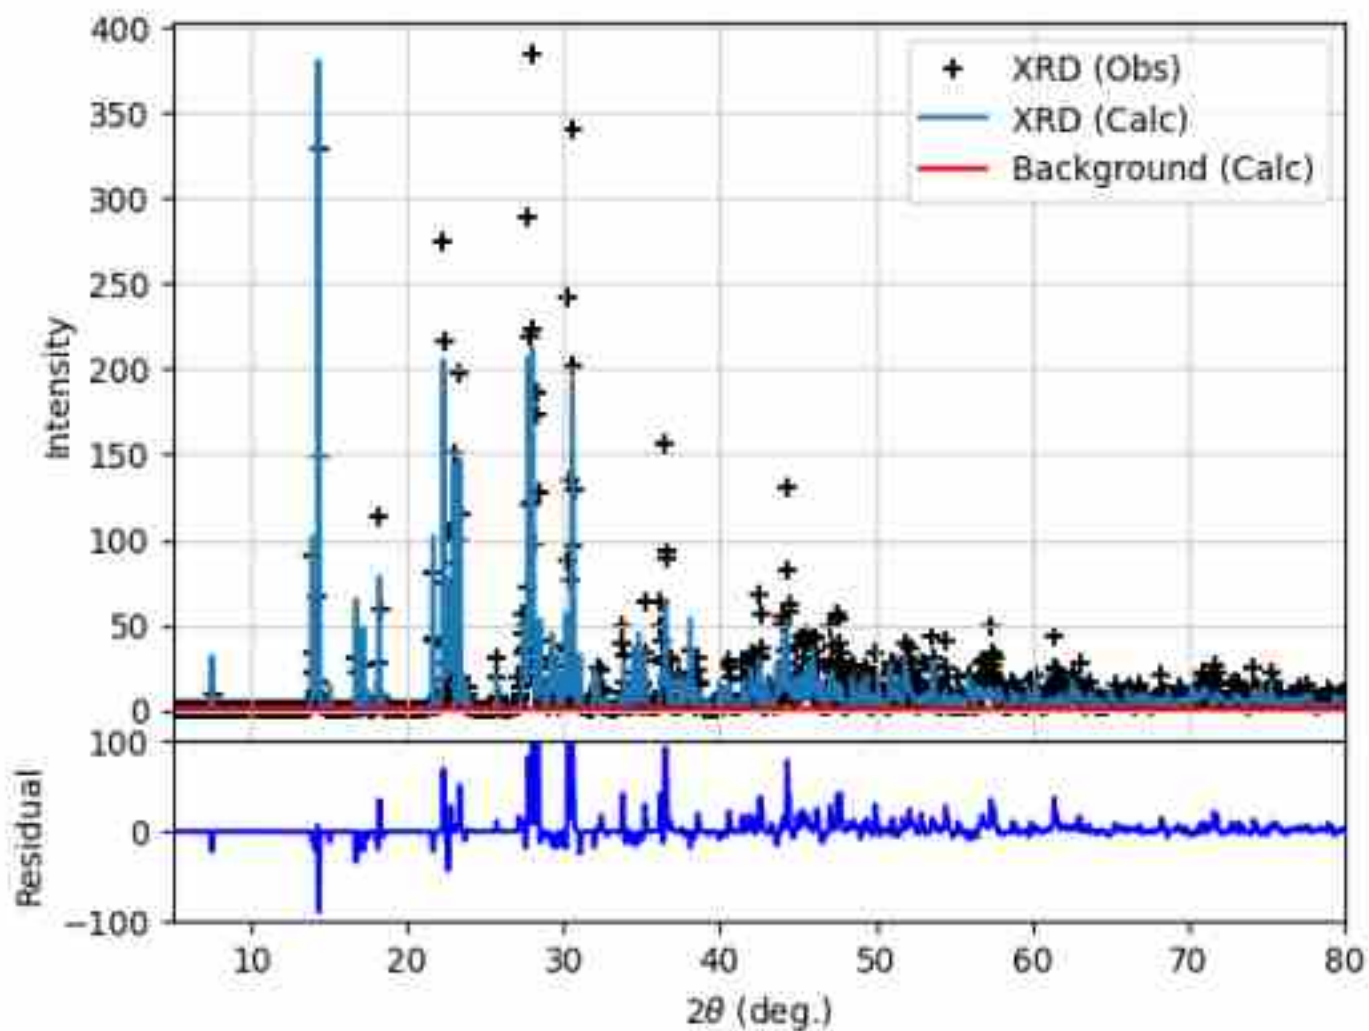

| RMSE before RR | Rwp      | RMSE after RR |
|----------------|----------|---------------|
| 0.118          | 53.89529 | None          |

# K<sub>2</sub>Ge<sub>2</sub>C16

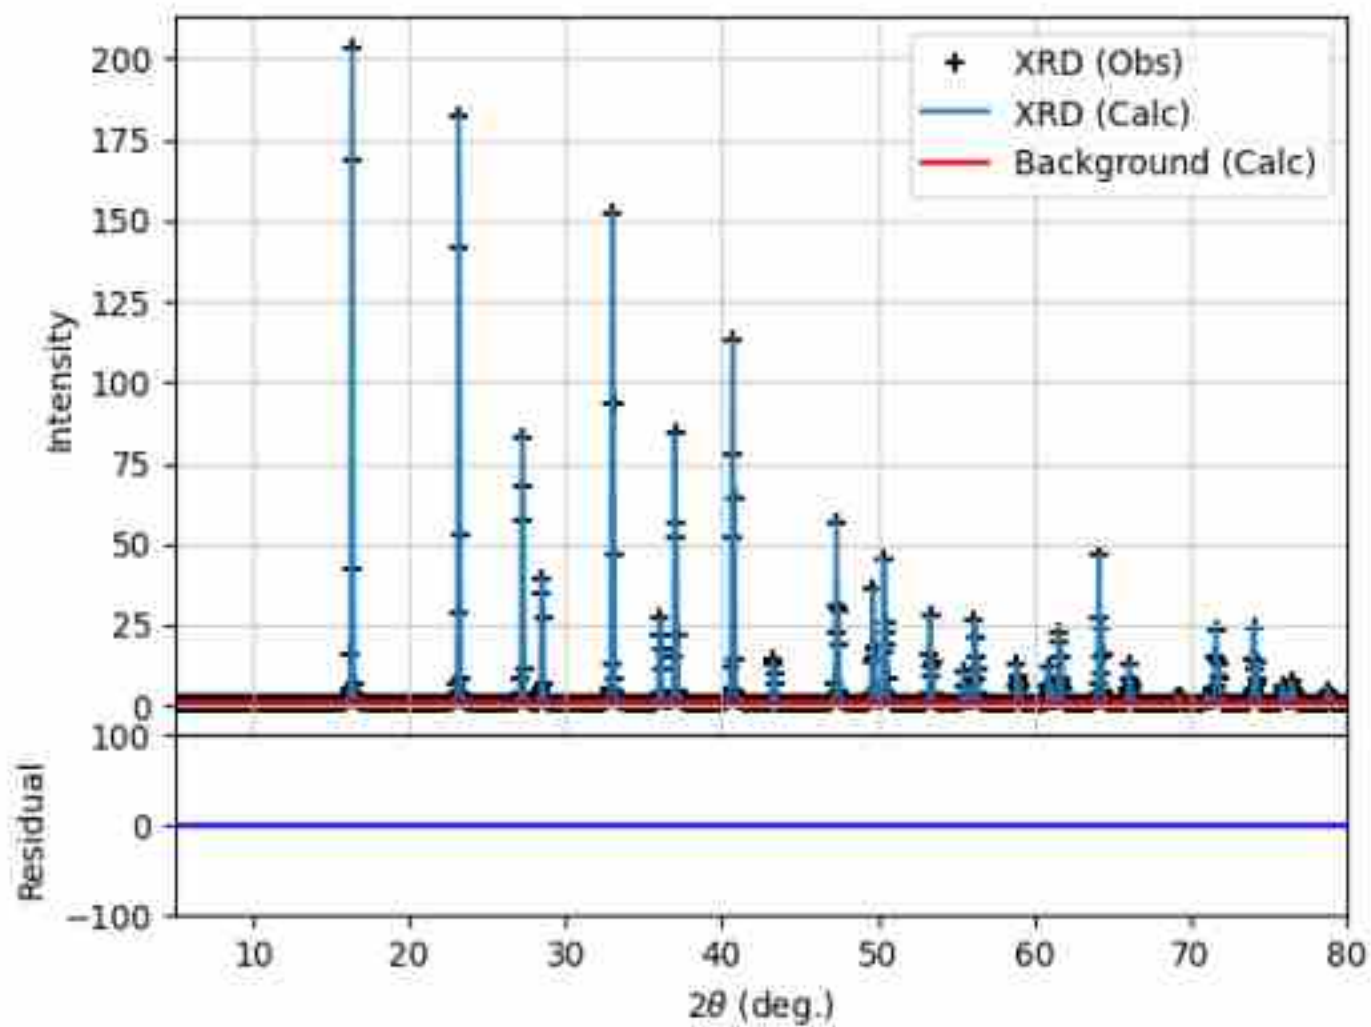

| RMSE before RR | Rwp     | RMSE after RR |
|----------------|---------|---------------|
| 0.119          | 0.00256 | 0.0006        |

Sr1Ca1Dy1Bi1O6

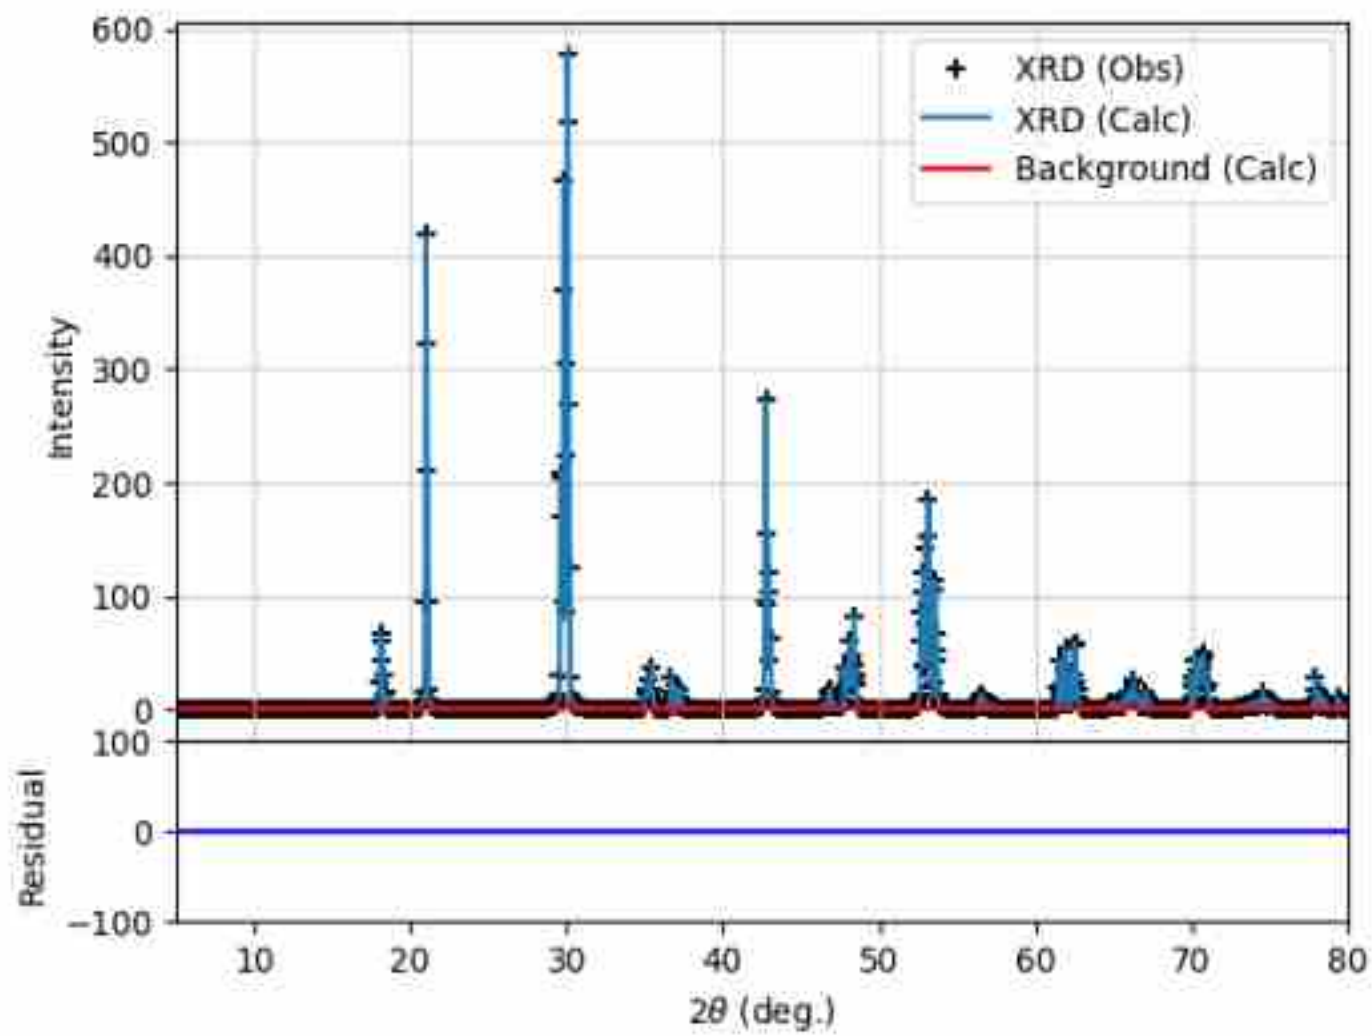

| RMSE before RR | Rwp     | RMSE after RR |
|----------------|---------|---------------|
| 0.119          | 0.00294 | 0.00087       |

# Cd<sub>2</sub>As<sub>2</sub>P<sub>2</sub>

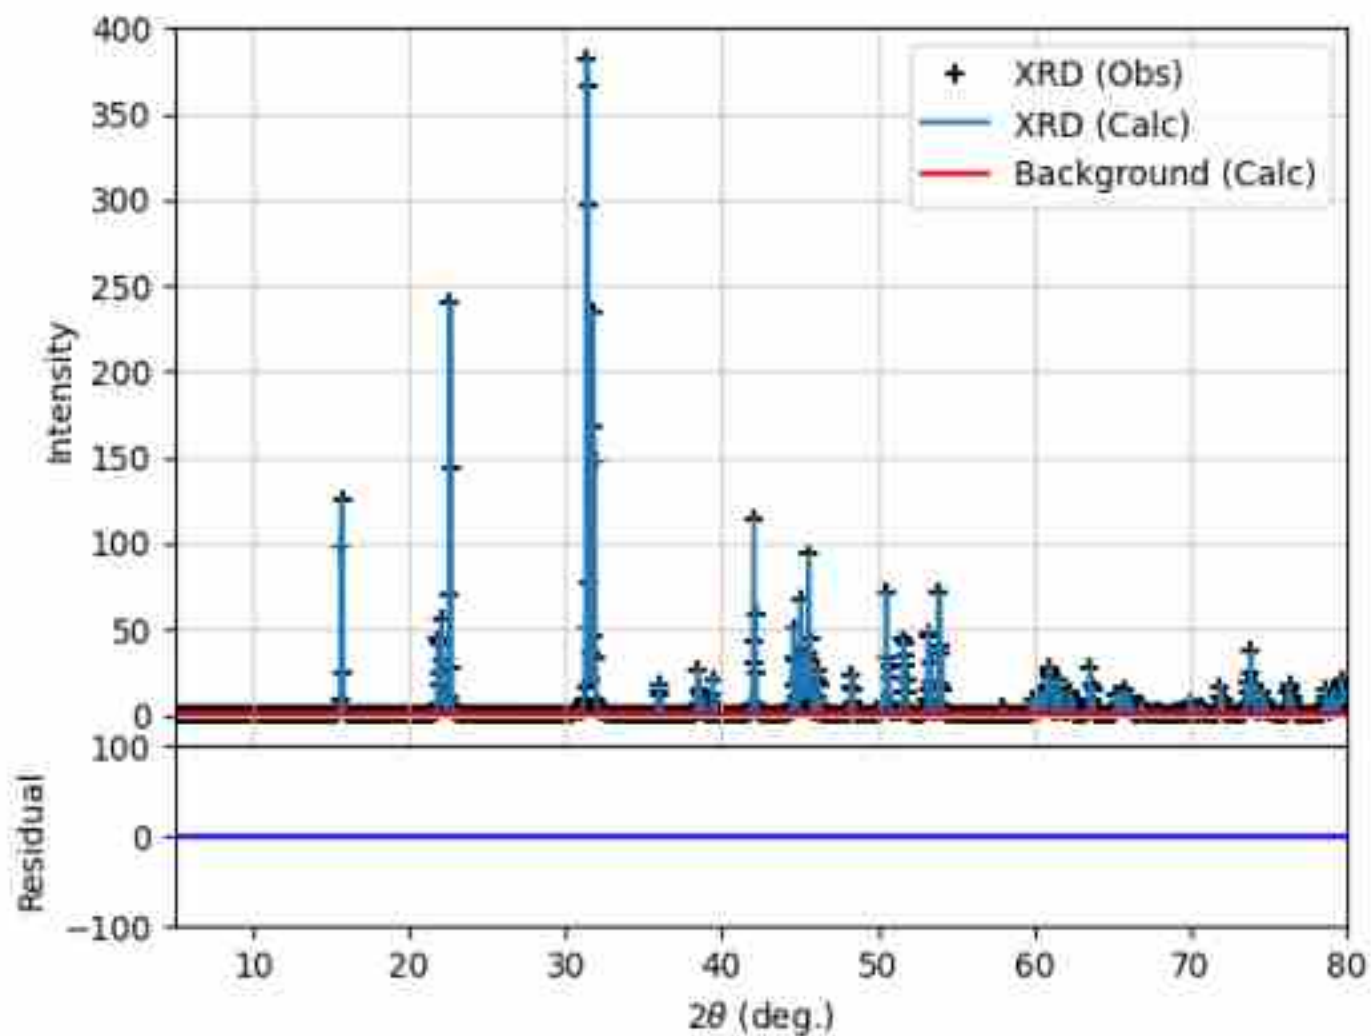

| RMSE before RR | Rwp     | RMSE after RR |
|----------------|---------|---------------|
| 0.121          | 0.00265 | 0.00041       |

# K3Ta1O8

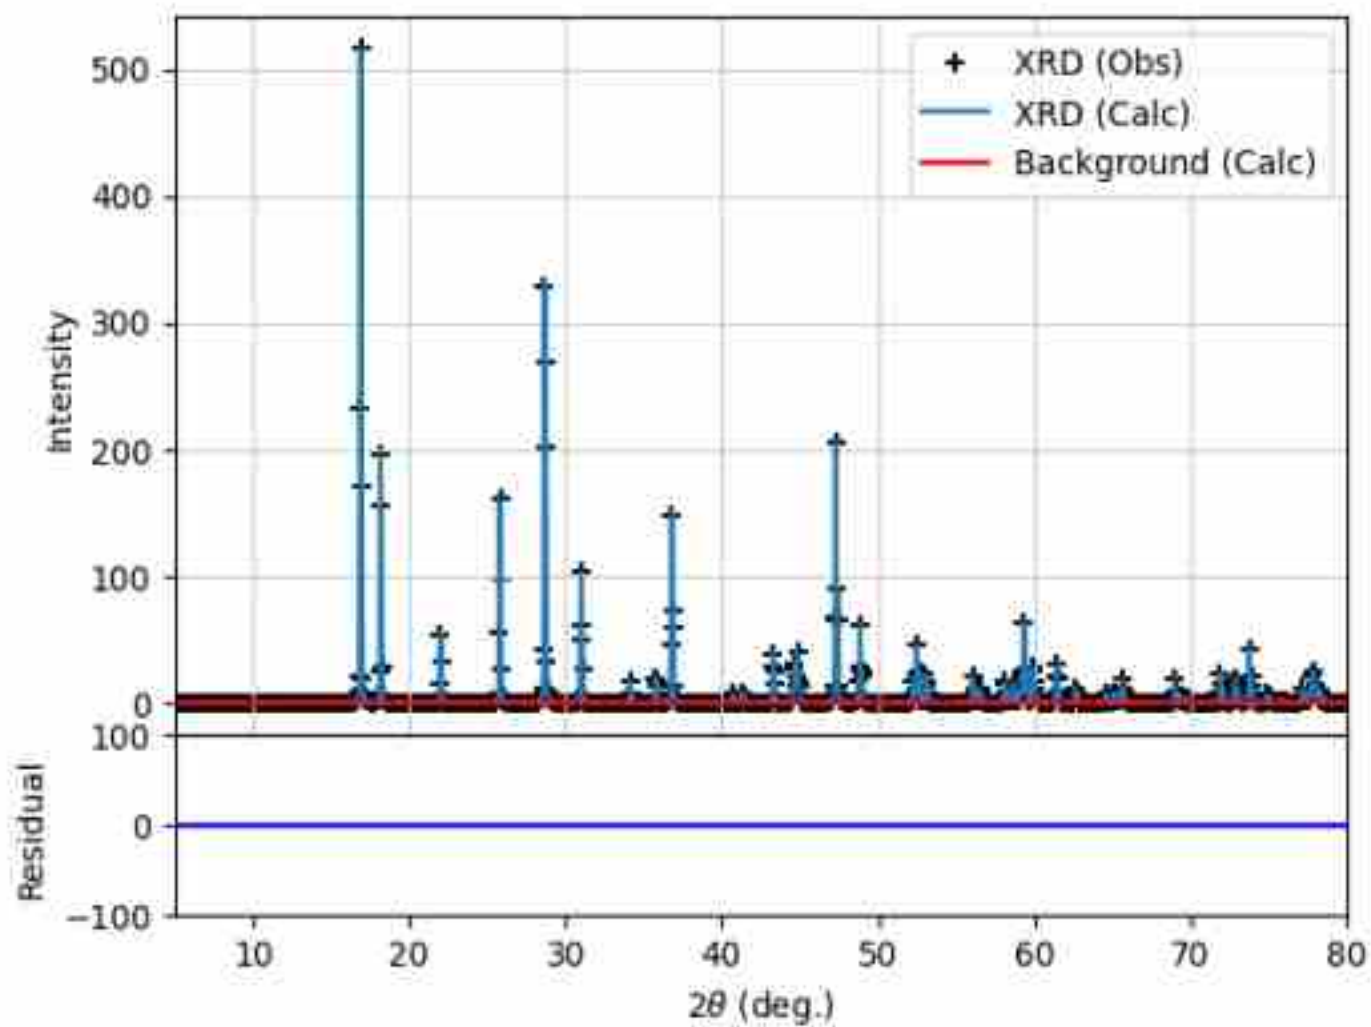

| RMSE before RR | Rwp     | RMSE after RR |
|----------------|---------|---------------|
| 0.121          | 0.00426 | 0.00196       |

# Rb<sub>2</sub>Al<sub>2</sub>H<sub>8</sub>

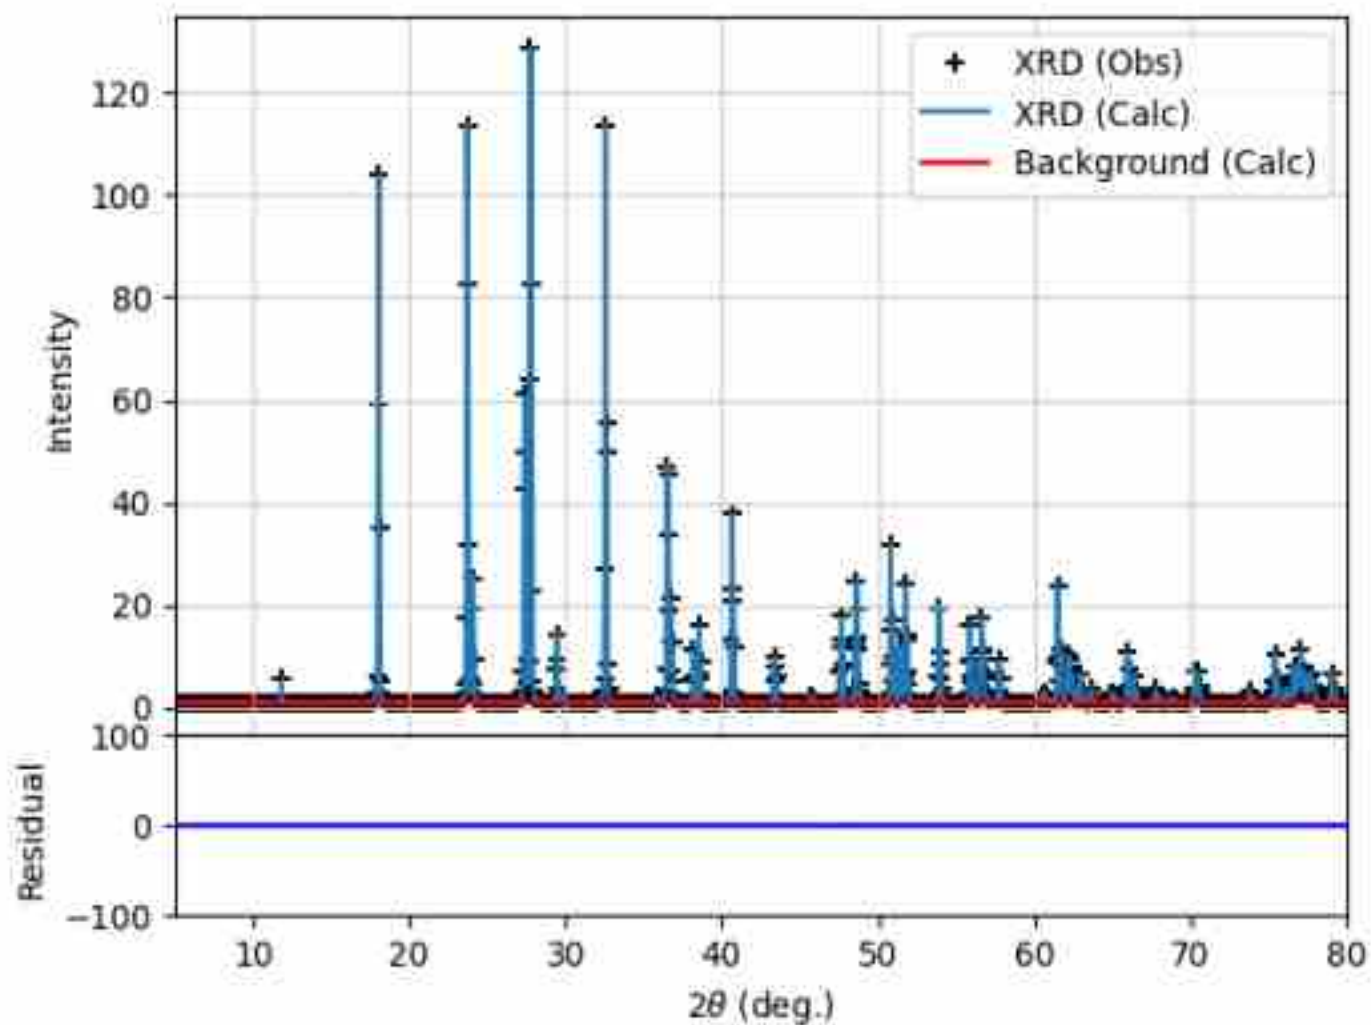

| RMSE before RR | Rwp    | RMSE after RR |
|----------------|--------|---------------|
| 0.122          | 0.5239 | 0.43647       |

# Tm<sub>8</sub>S<sub>8</sub>O<sub>4</sub>

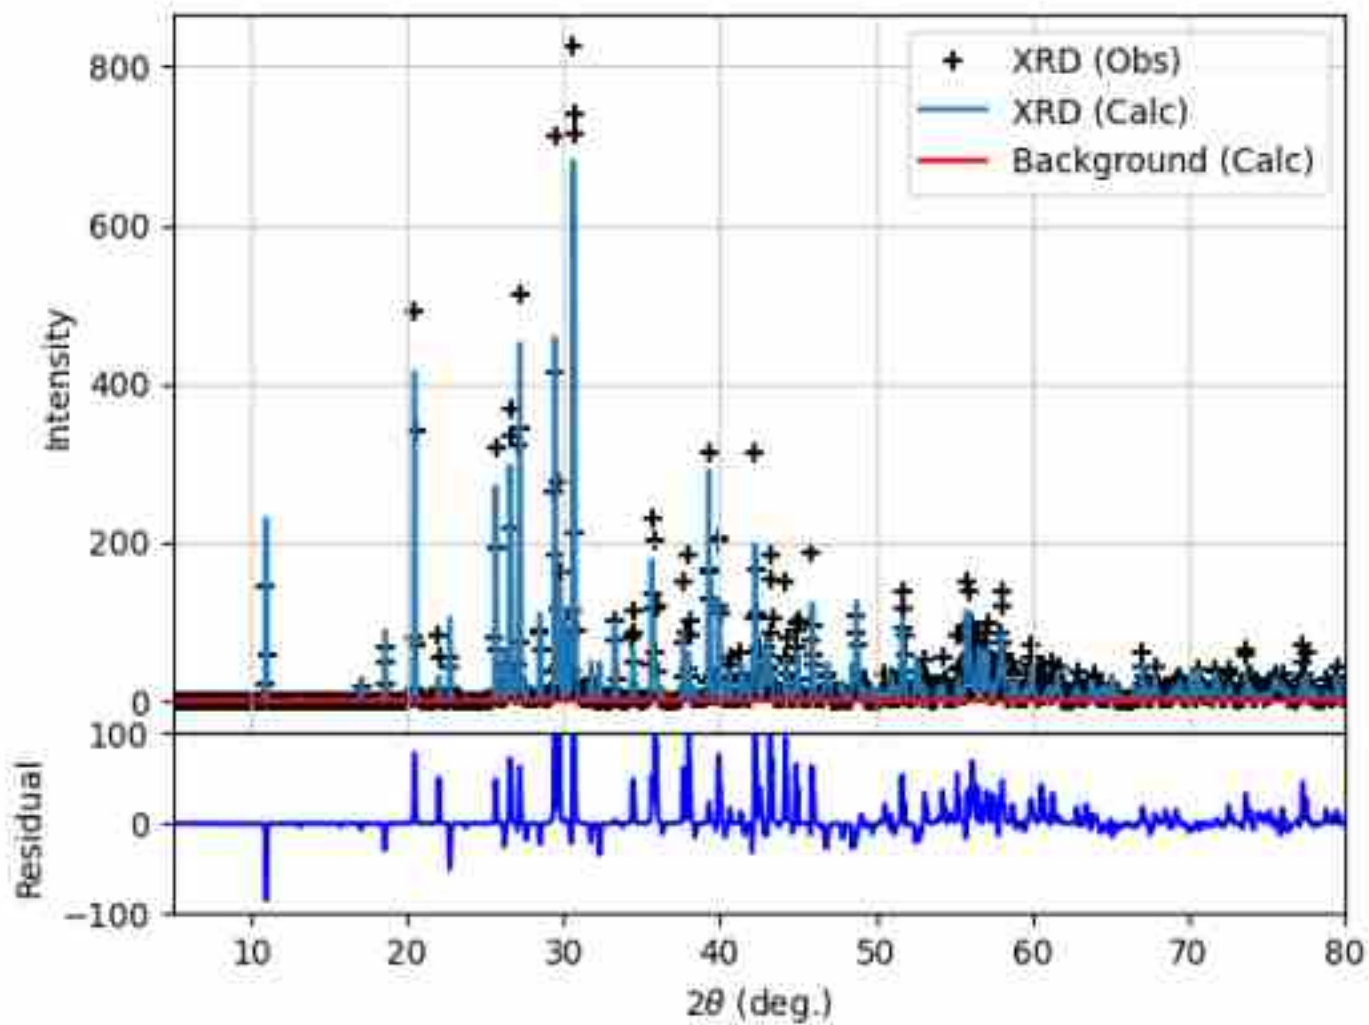

| RMSE before RR | Rwp      | RMSE after RR |
|----------------|----------|---------------|
| 0.122          | 44.23067 | None          |

# Re2F14

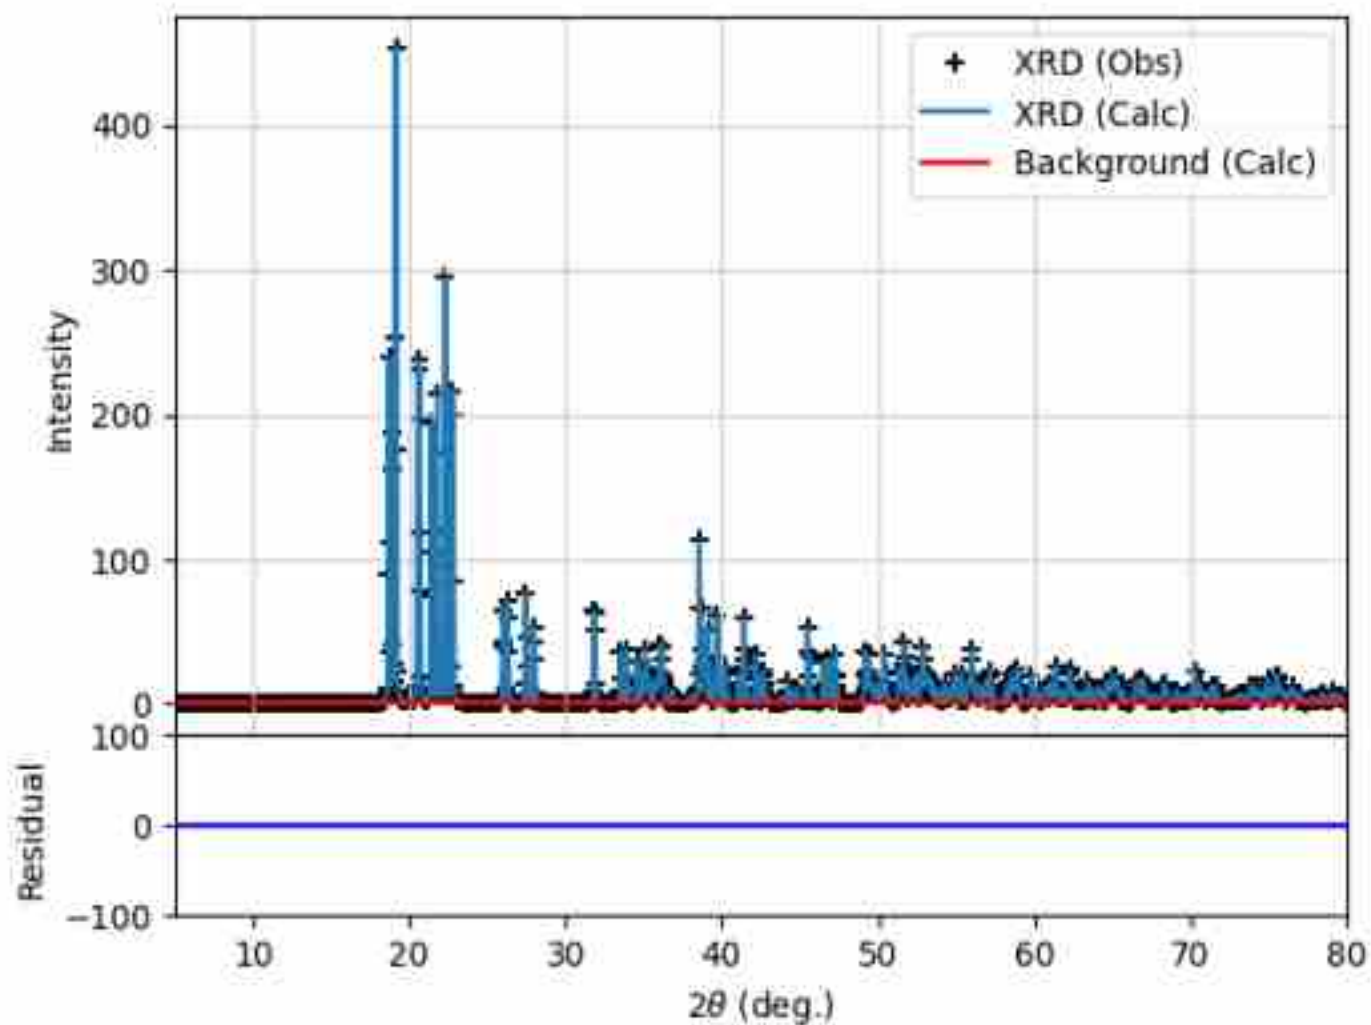

| RMSE before RR | Rwp     | RMSE after RR |
|----------------|---------|---------------|
| 0.123          | 0.00049 | 0.0003        |



# Y2W2N6

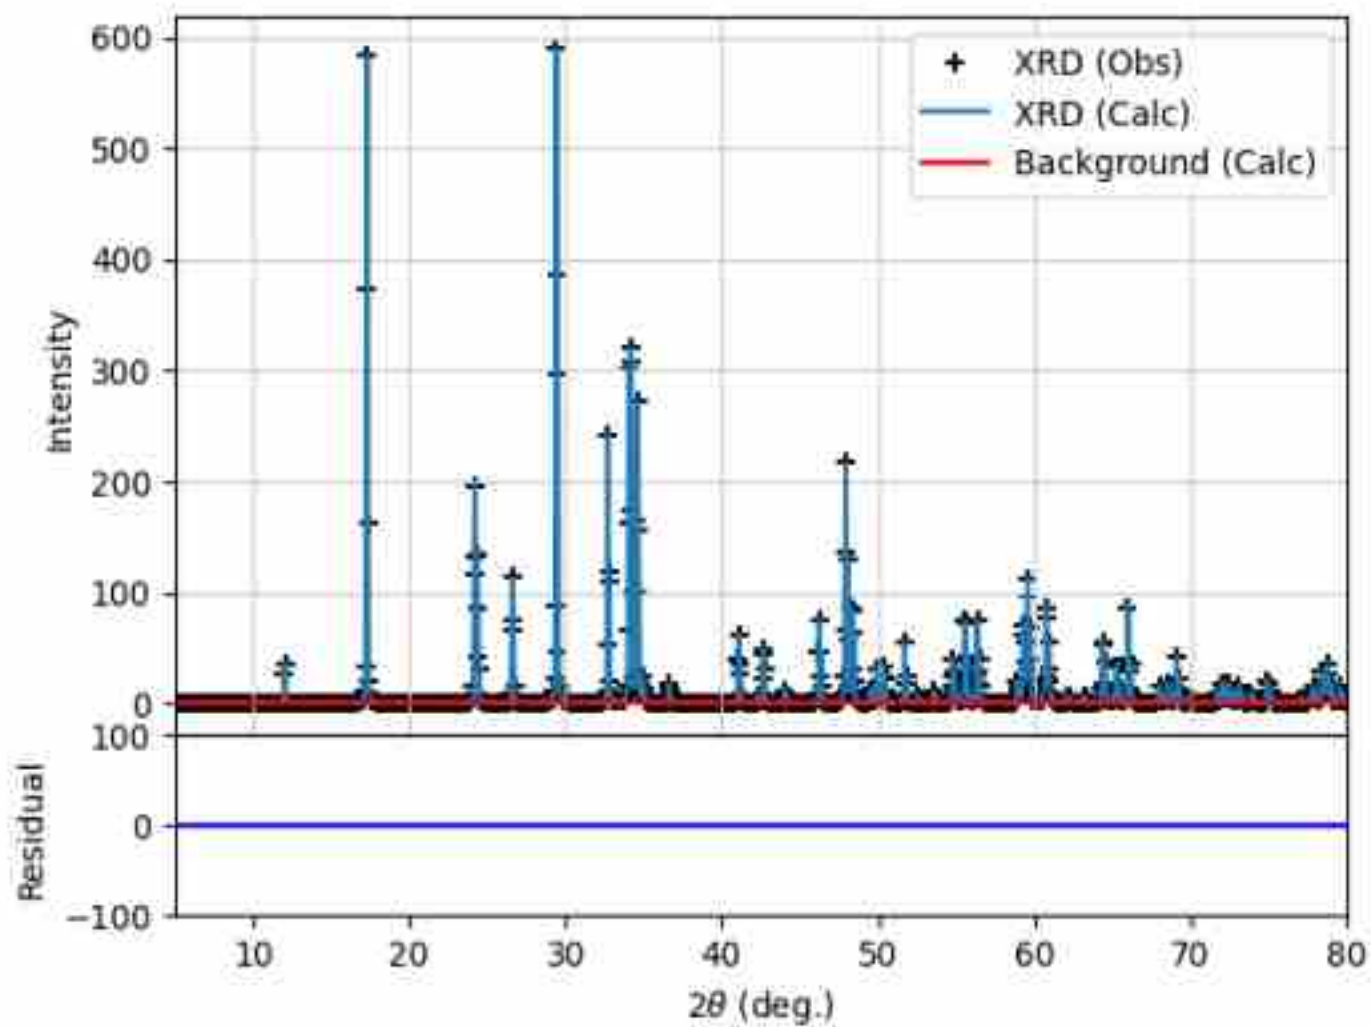

| RMSE before RR | Rwp     | RMSE after RR |
|----------------|---------|---------------|
| 0.123          | 0.00336 | 0.00195       |

# Cu<sub>2</sub>As<sub>2</sub>F<sub>14</sub>

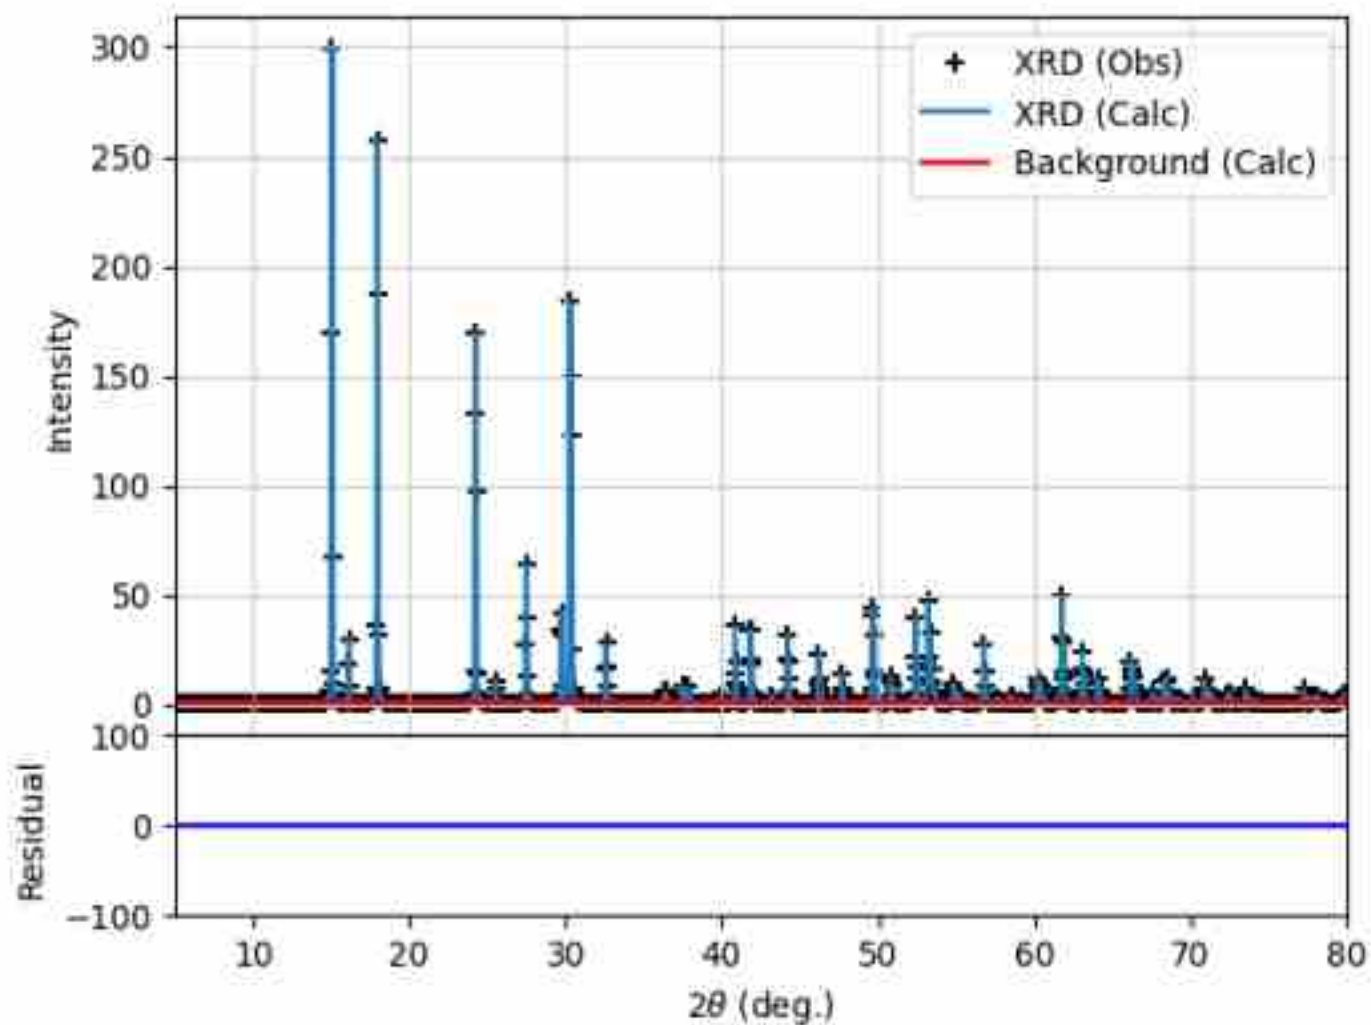

| RMSE before RR | Rwp     | RMSE after RR |
|----------------|---------|---------------|
| 0.124          | 0.00257 | 0.0008        |

# Co<sub>4</sub>H<sub>8</sub>O<sub>8</sub>

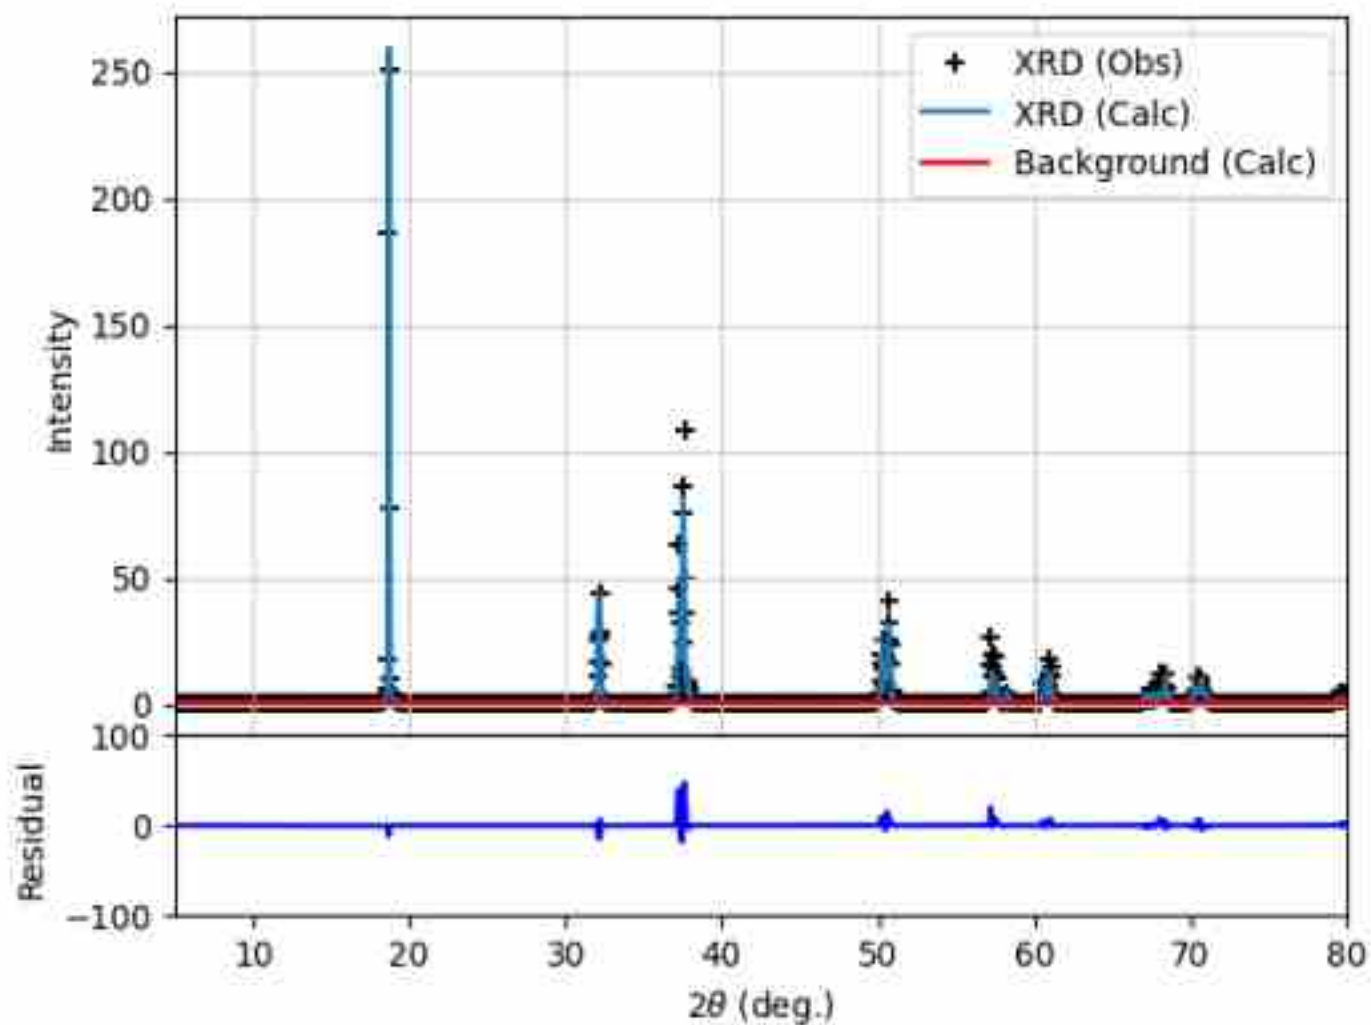

| RMSE before RR | Rwp      | RMSE after RR |
|----------------|----------|---------------|
| 0.125          | 29.53016 | None          |

# Tl3As1S3

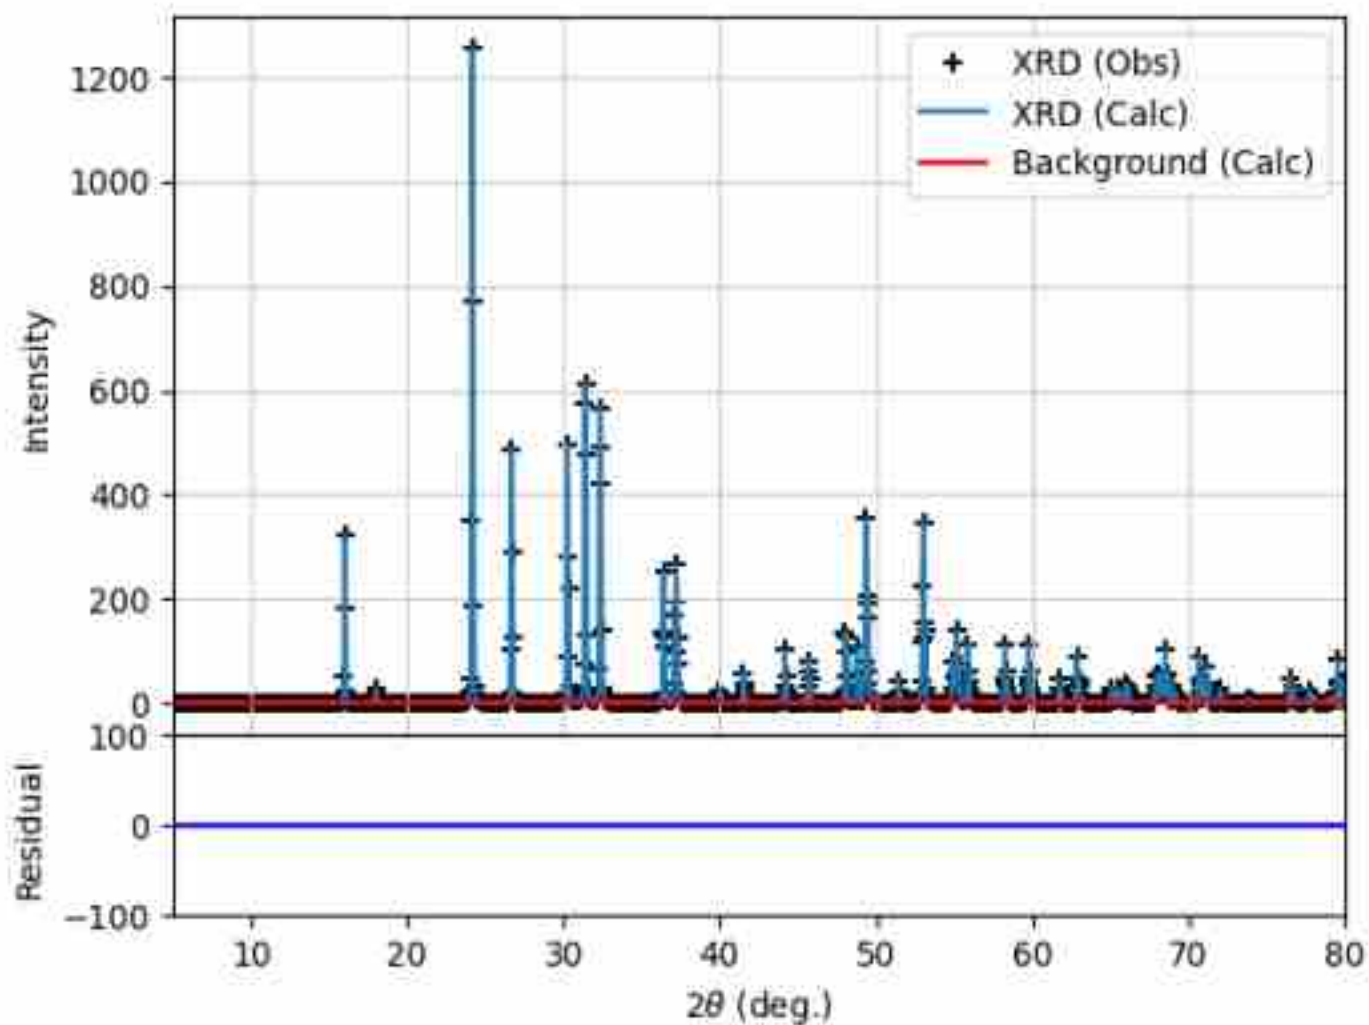

| RMSE before RR | Rwp     | RMSE after RR |
|----------------|---------|---------------|
| 0.125          | 0.00368 | 0.00067       |

# A11Ga1P2O8

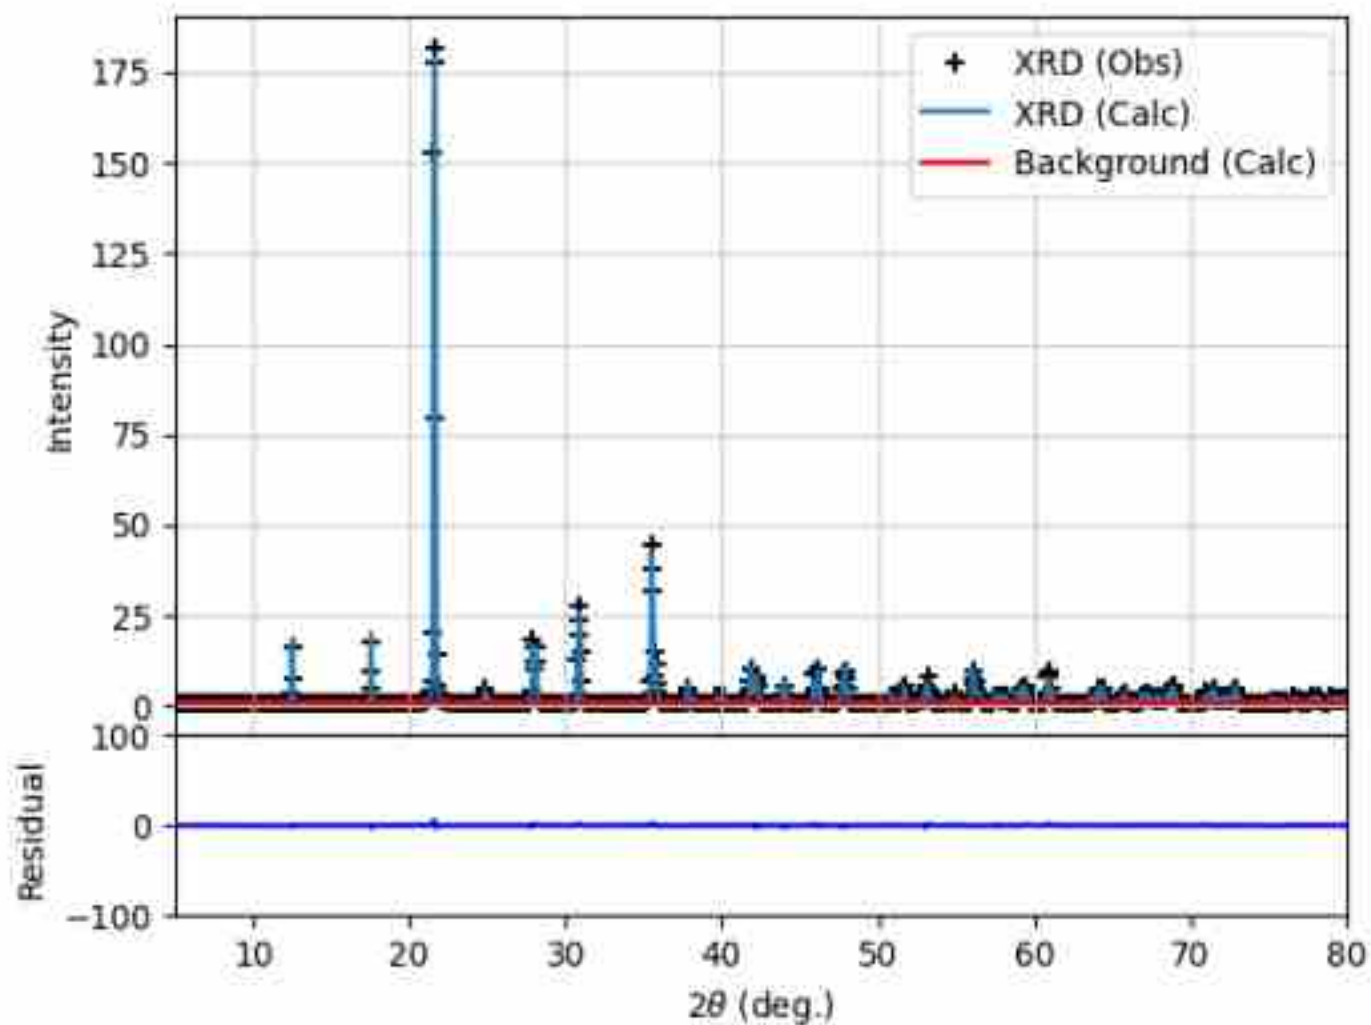

| RMSE before RR | Rwp    | RMSE after RR |
|----------------|--------|---------------|
| 0.126          | 8.6484 | 0.27842       |

# Mn<sub>2</sub>Au<sub>2</sub>O<sub>4</sub>

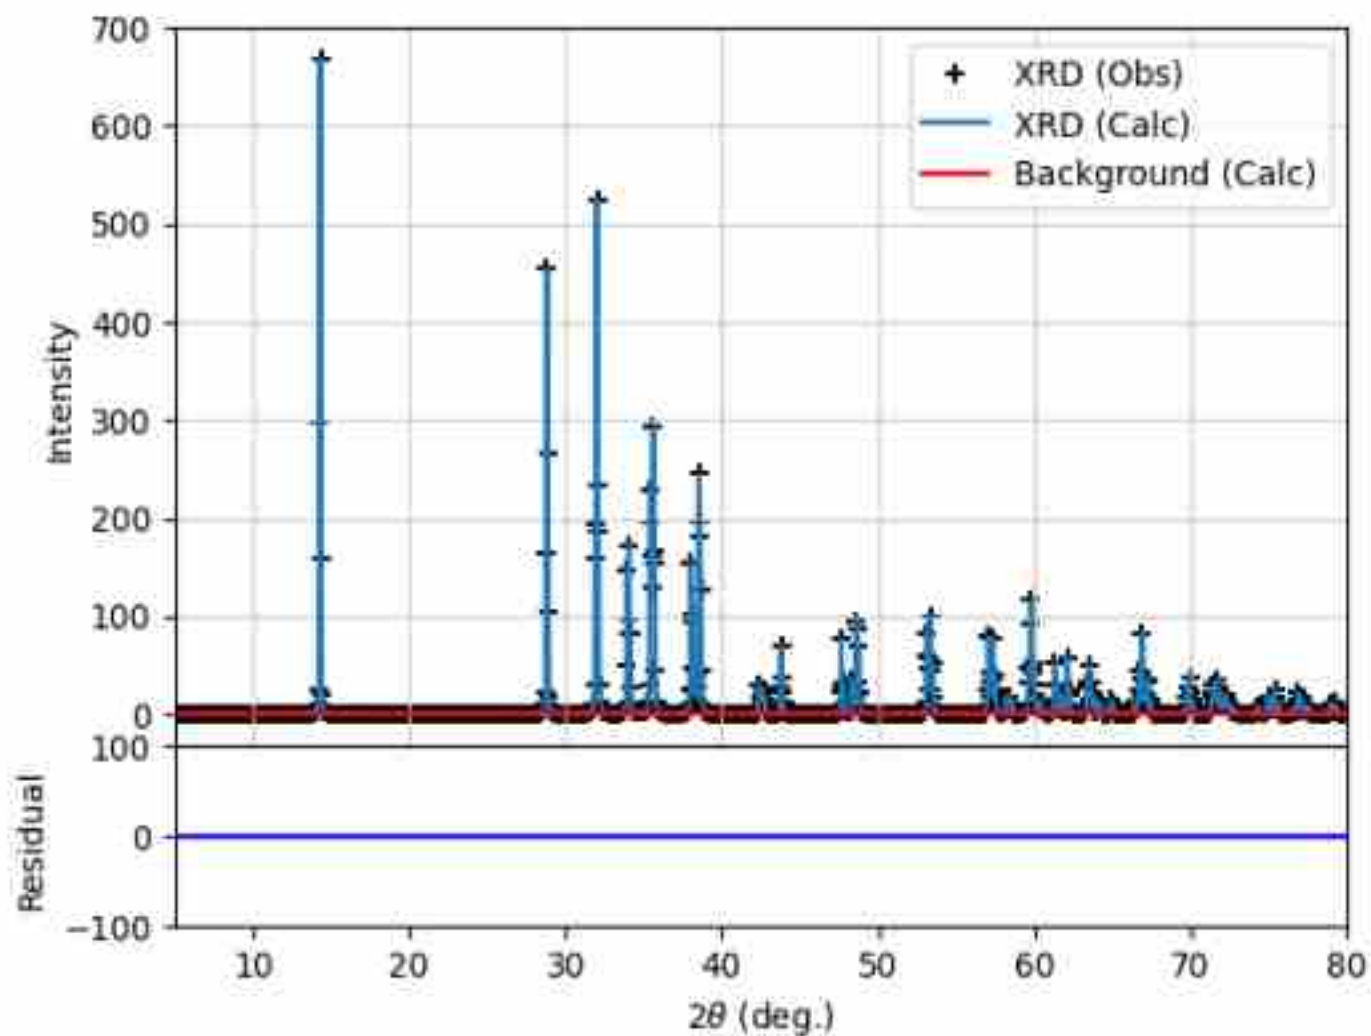

| RMSE before RR | Rwp     | RMSE after RR |
|----------------|---------|---------------|
| 0.126          | 0.00145 | 0.00015       |

# La<sub>4</sub>U<sub>2</sub>Te<sub>10</sub>

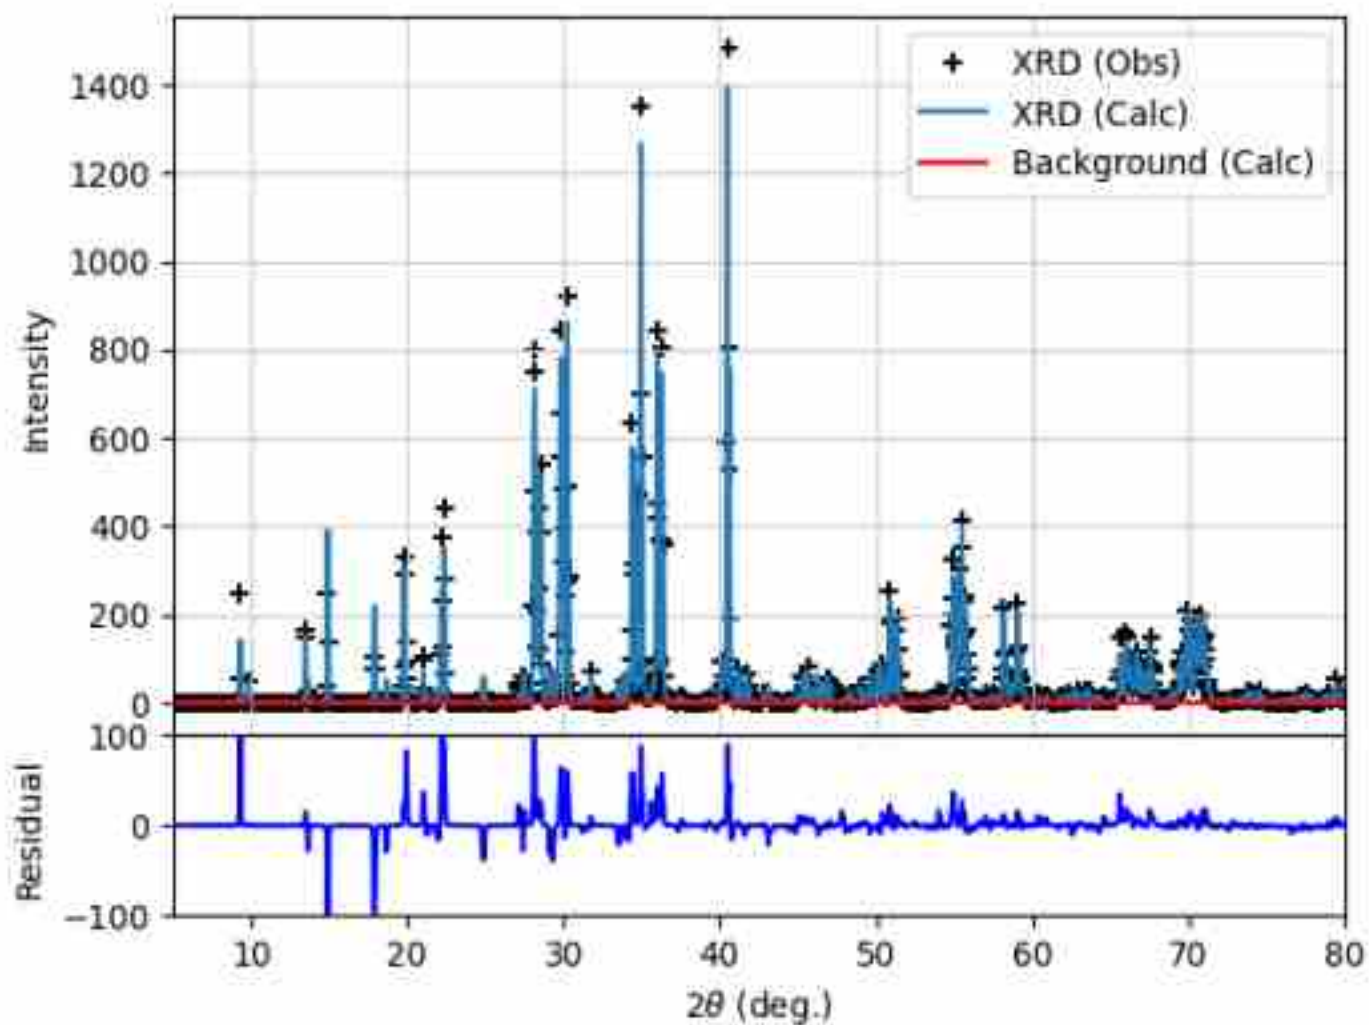

| RMSE before RR | Rwp      | RMSE after RR |
|----------------|----------|---------------|
| 0.127          | 21.36547 | 0.21789       |

# Ca<sub>2</sub>Mn<sub>2</sub>F<sub>8</sub>

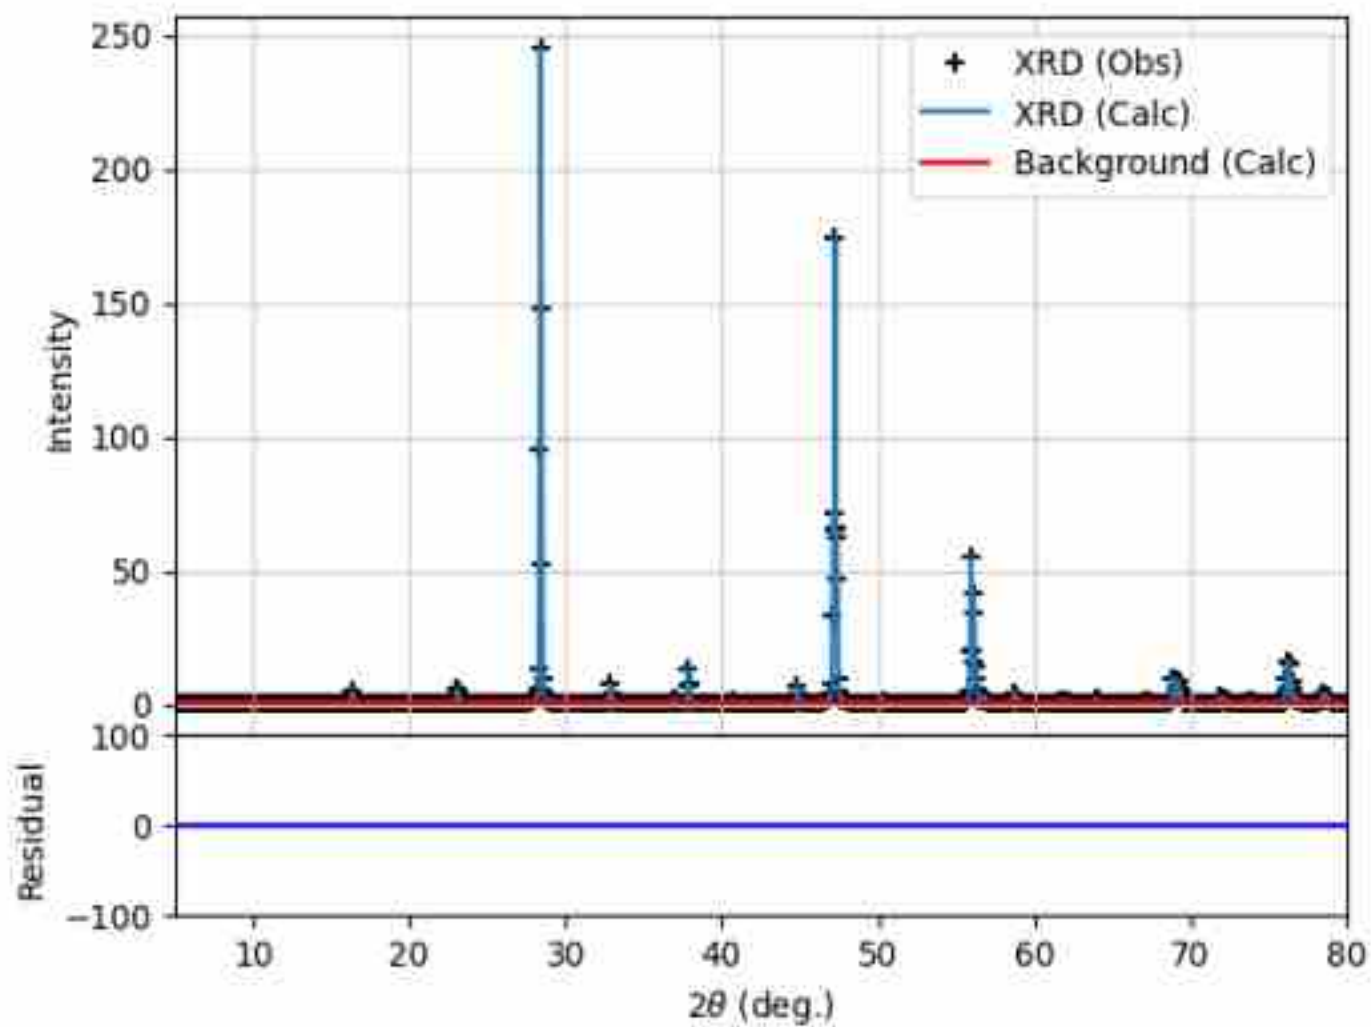

| RMSE before RR | Rwp     | RMSE after RR |
|----------------|---------|---------------|
| 0.128          | 0.46457 | 0.13564       |



# Ca<sub>4</sub>Fe<sub>4</sub>O<sub>10</sub>

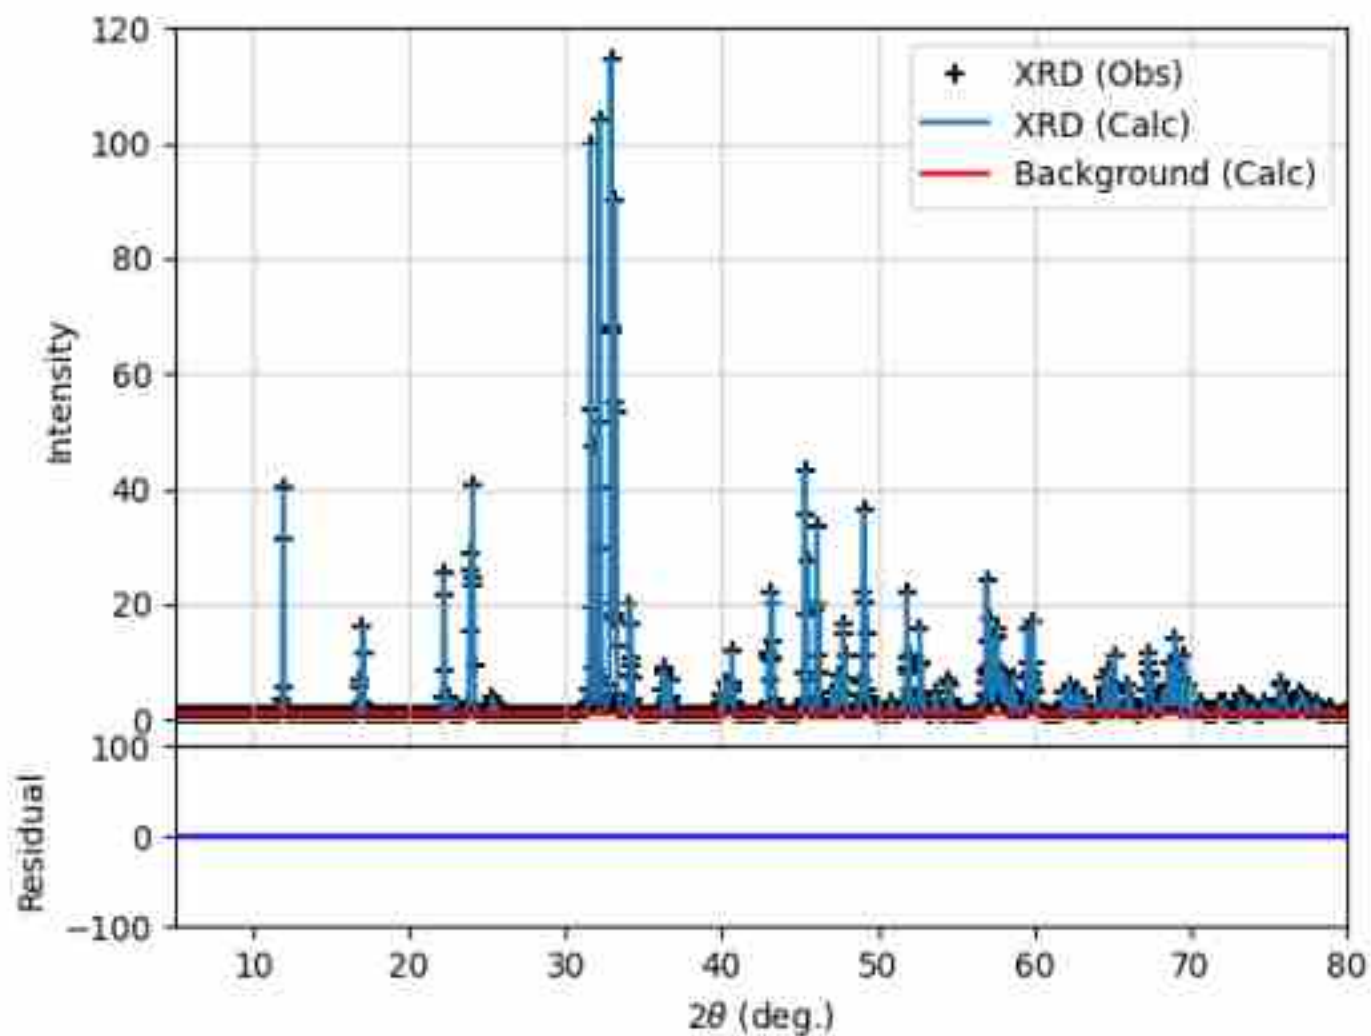

| RMSE before RR | Rwp     | RMSE after RR |
|----------------|---------|---------------|
| 0.128          | 0.00289 | 0.00066       |

# Cs1Br1F6

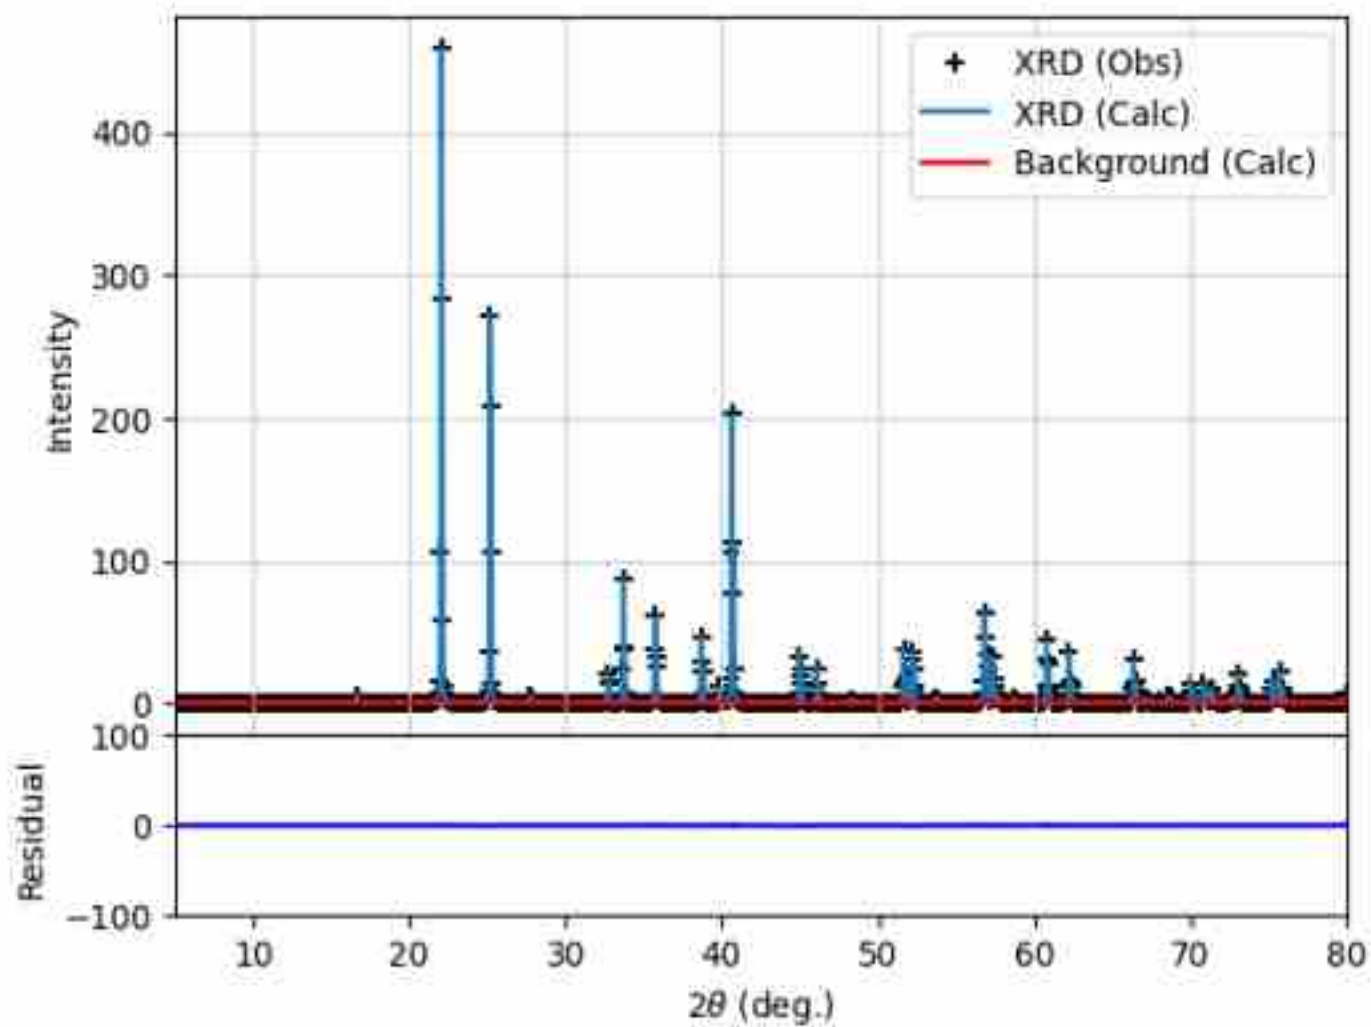

| RMSE before RR | Rwp     | RMSE after RR |
|----------------|---------|---------------|
| 0.128          | 1.88979 | 0.03423       |

# Sn1Bi1

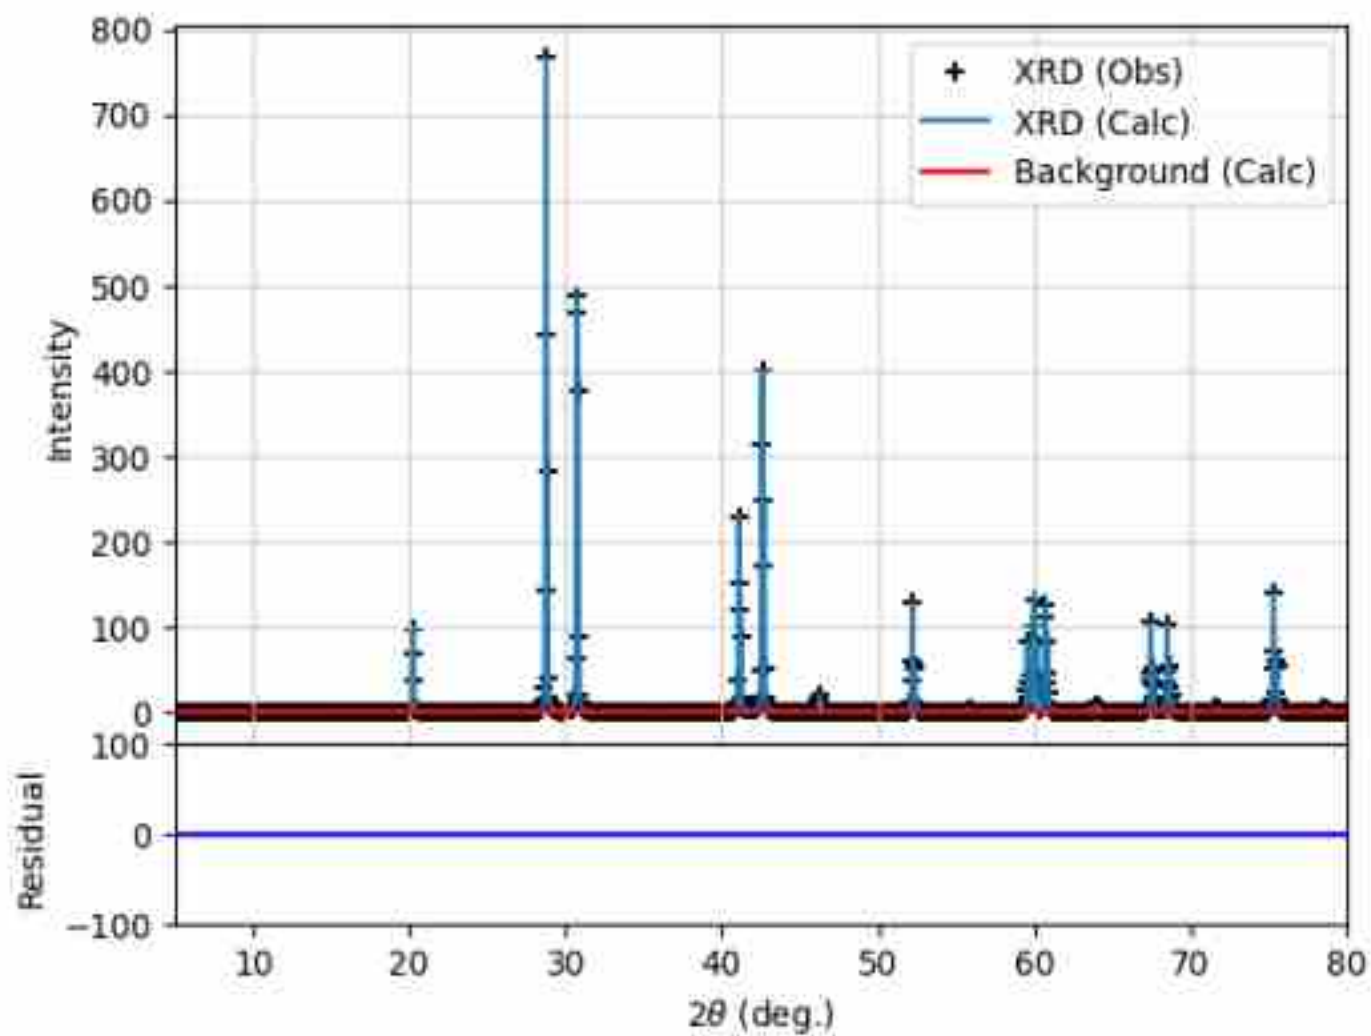

| RMSE before RR | Rwp    | RMSE after RR |
|----------------|--------|---------------|
| 0.128          | 0.0023 | 0.00011       |

# Ag<sub>2</sub>Pd<sub>2</sub>F<sub>12</sub>

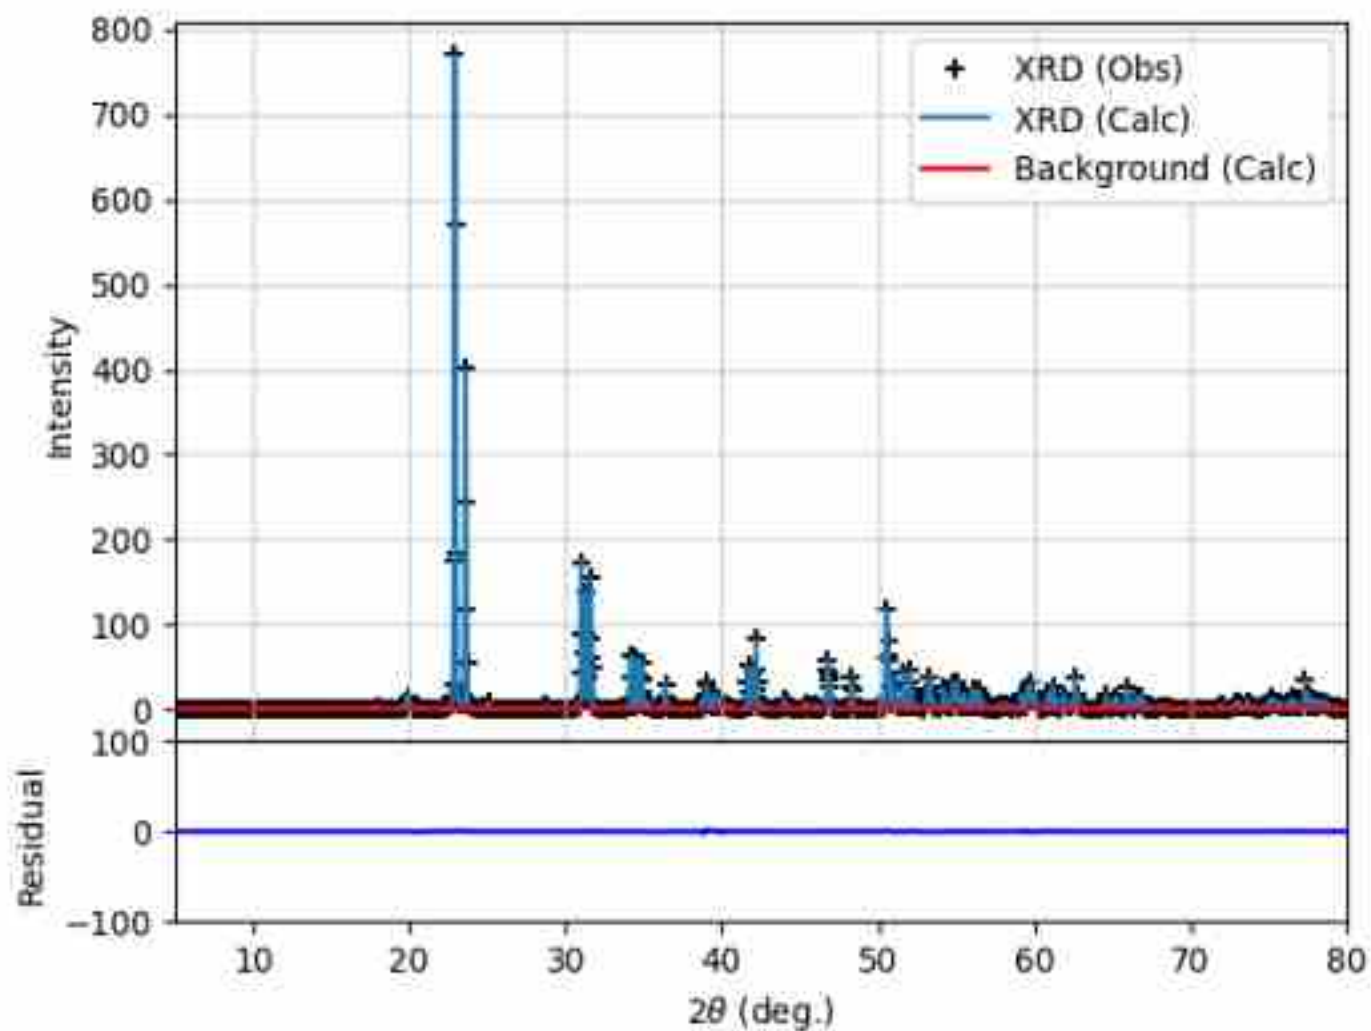

| RMSE before RR | Rwp     | RMSE after RR |
|----------------|---------|---------------|
| 0.129          | 2.33339 | 0.16102       |

# In<sub>2</sub>Ga<sub>2</sub>Se<sub>4</sub>

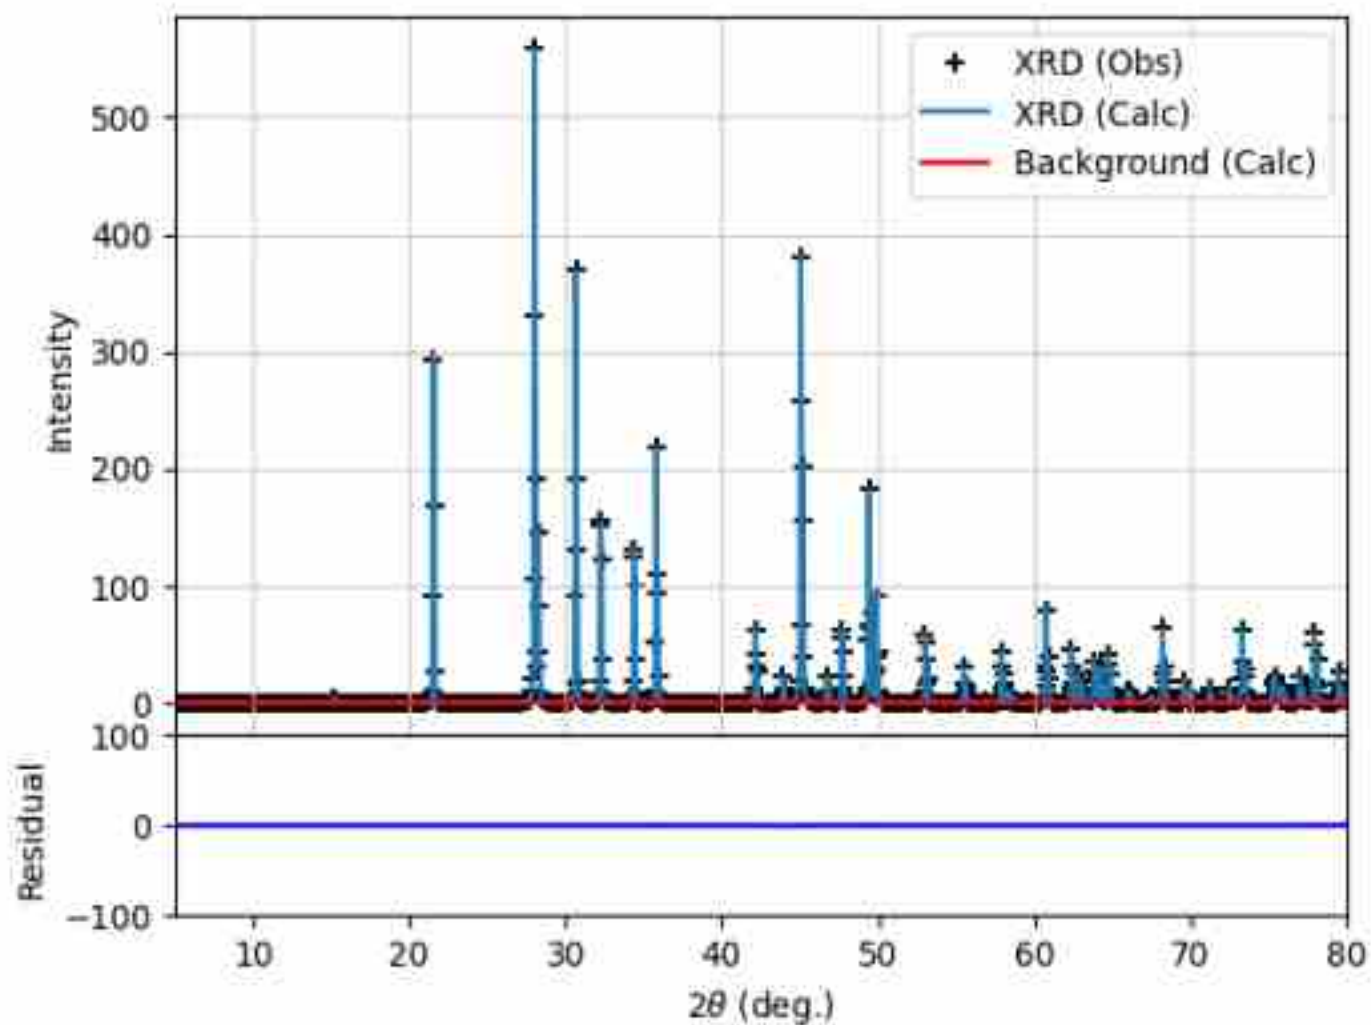

| RMSE before RR | Rwp     | RMSE after RR |
|----------------|---------|---------------|
| 0.129          | 0.70873 | 0.0066        |

# Mg4Ag2

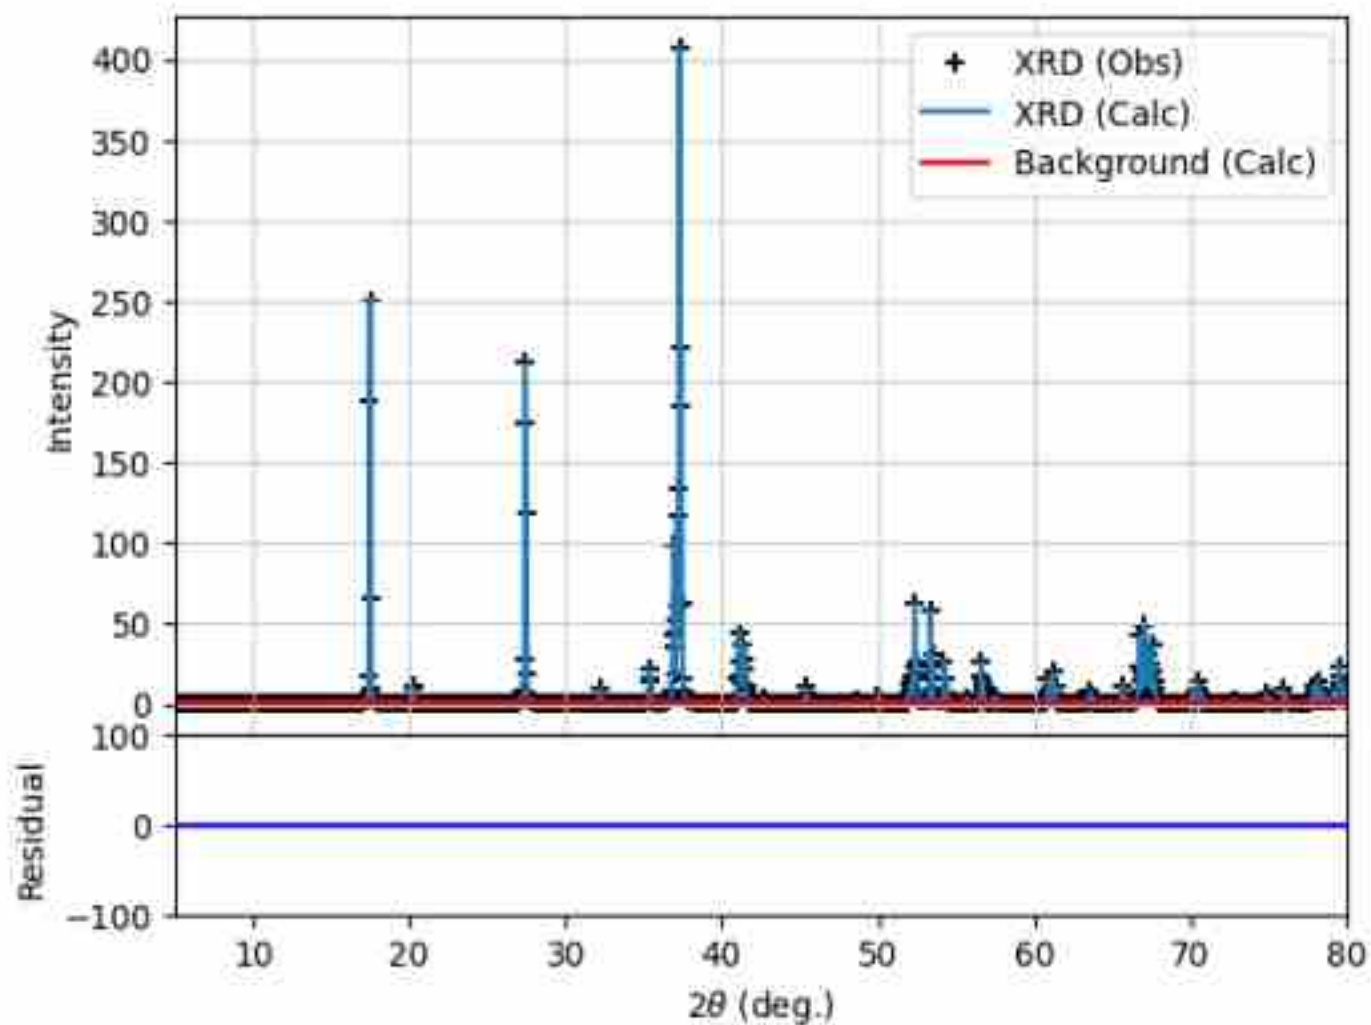

| RMSE before RR | Rwp    | RMSE after RR |
|----------------|--------|---------------|
| 0.131          | 0.0038 | 0.00125       |

# Sr<sub>4</sub>Tm<sub>2</sub>Nb<sub>2</sub>O<sub>12</sub>

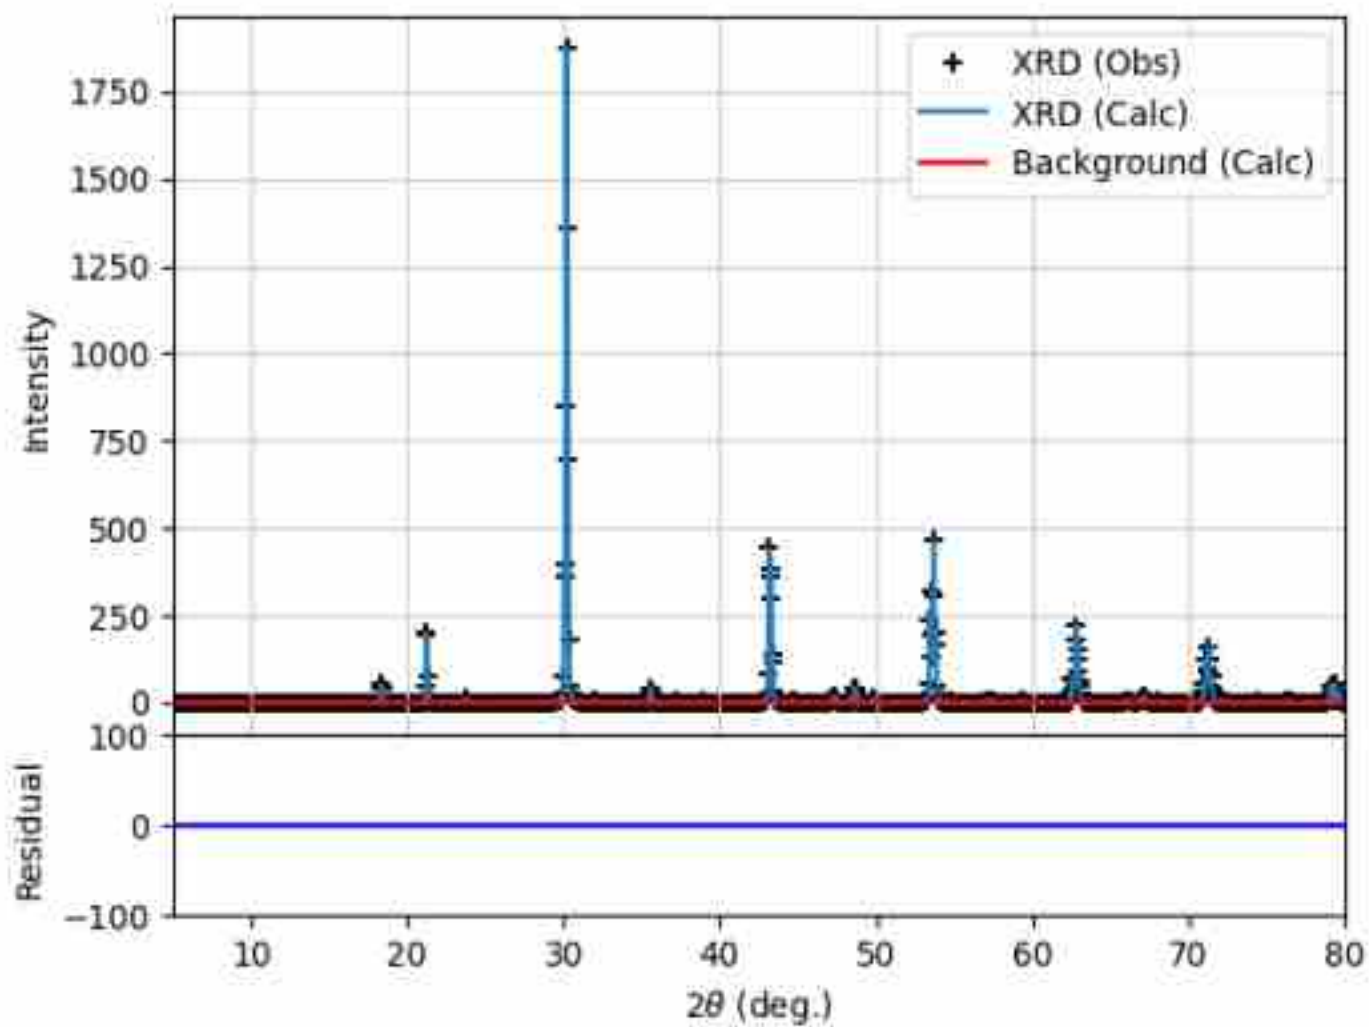

| RMSE before RR | Rwp     | RMSE after RR |
|----------------|---------|---------------|
| 0.131          | 0.00318 | 0.001         |

# Nb<sub>4</sub>H<sub>4</sub>O<sub>12</sub>

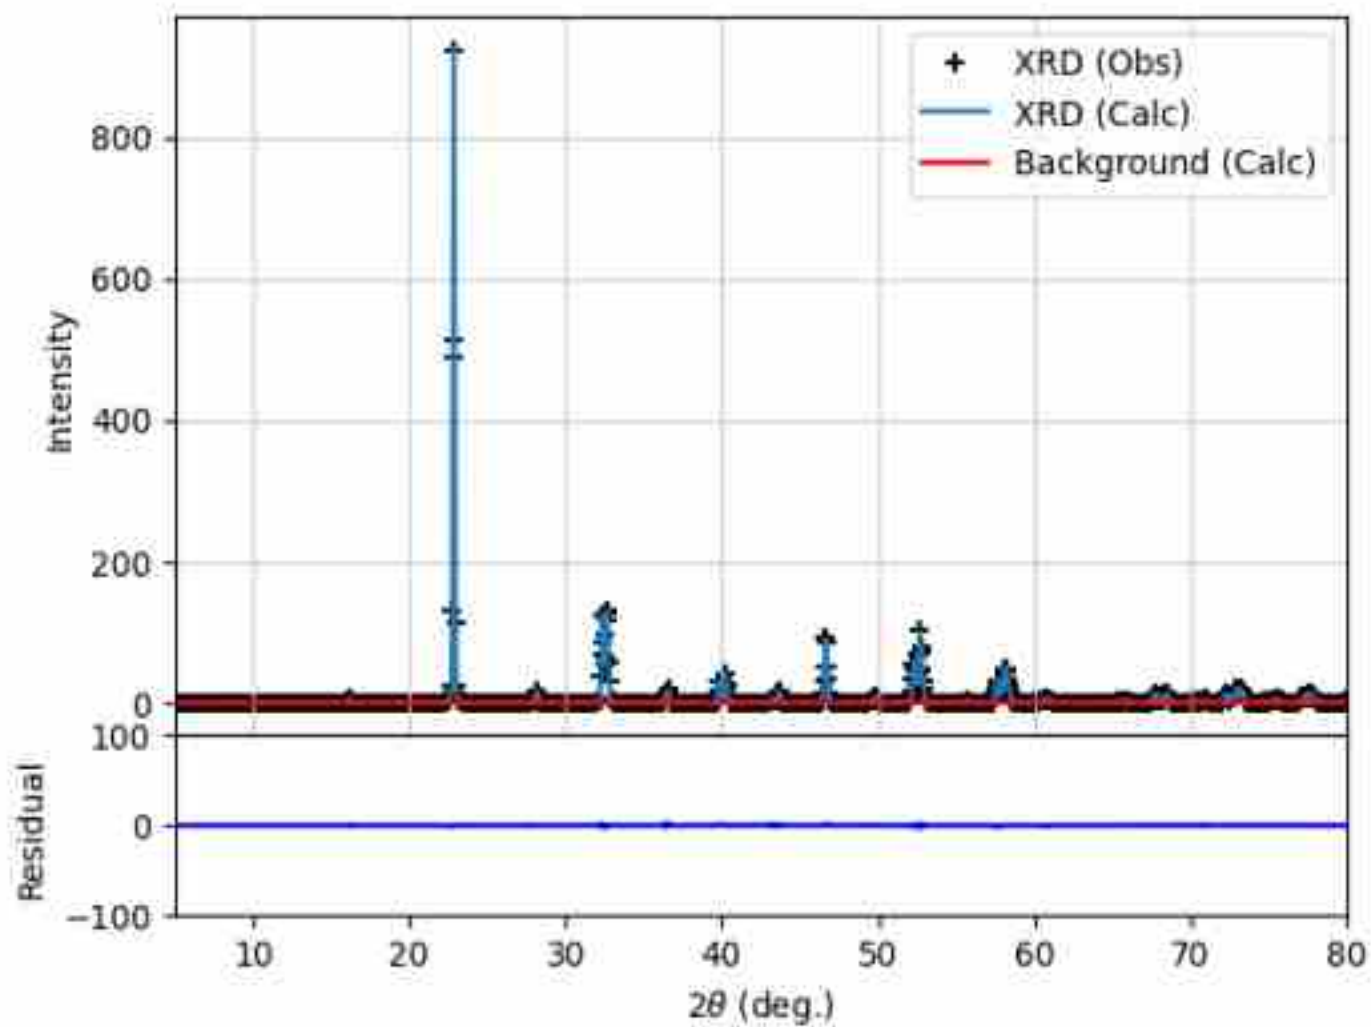

| RMSE before RR | Rwp     | RMSE after RR |
|----------------|---------|---------------|
| 0.132          | 3.23677 | 0.32518       |



# Li<sub>2</sub>Mn<sub>2</sub>F<sub>8</sub>

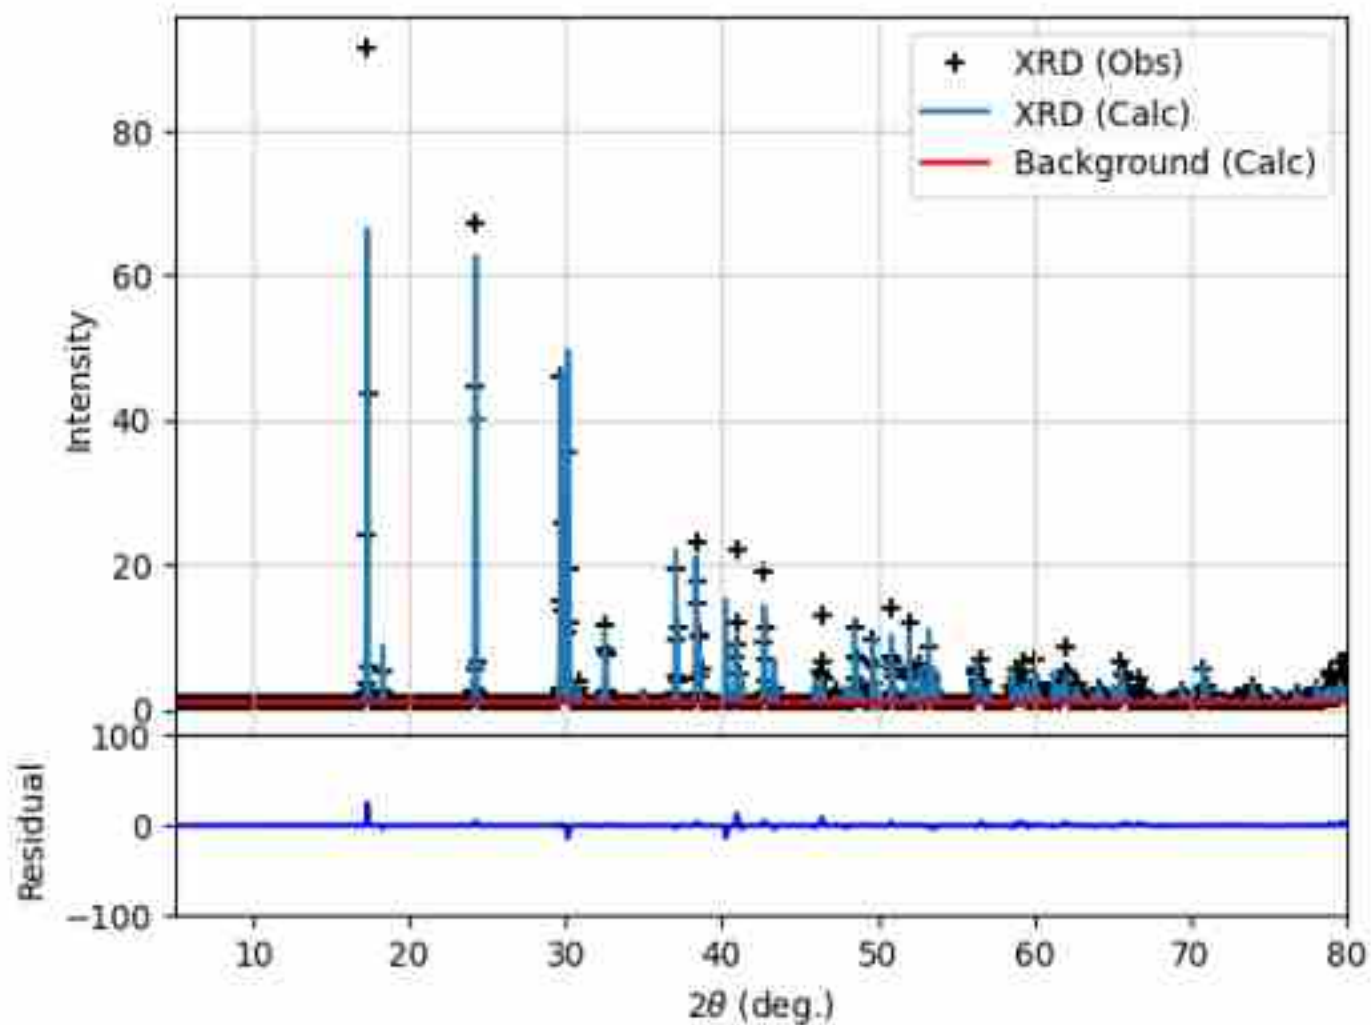

| RMSE before RR | Rwp      | RMSE after RR |
|----------------|----------|---------------|
| 0.133          | 38.09675 | 0.4671        |

Xe4

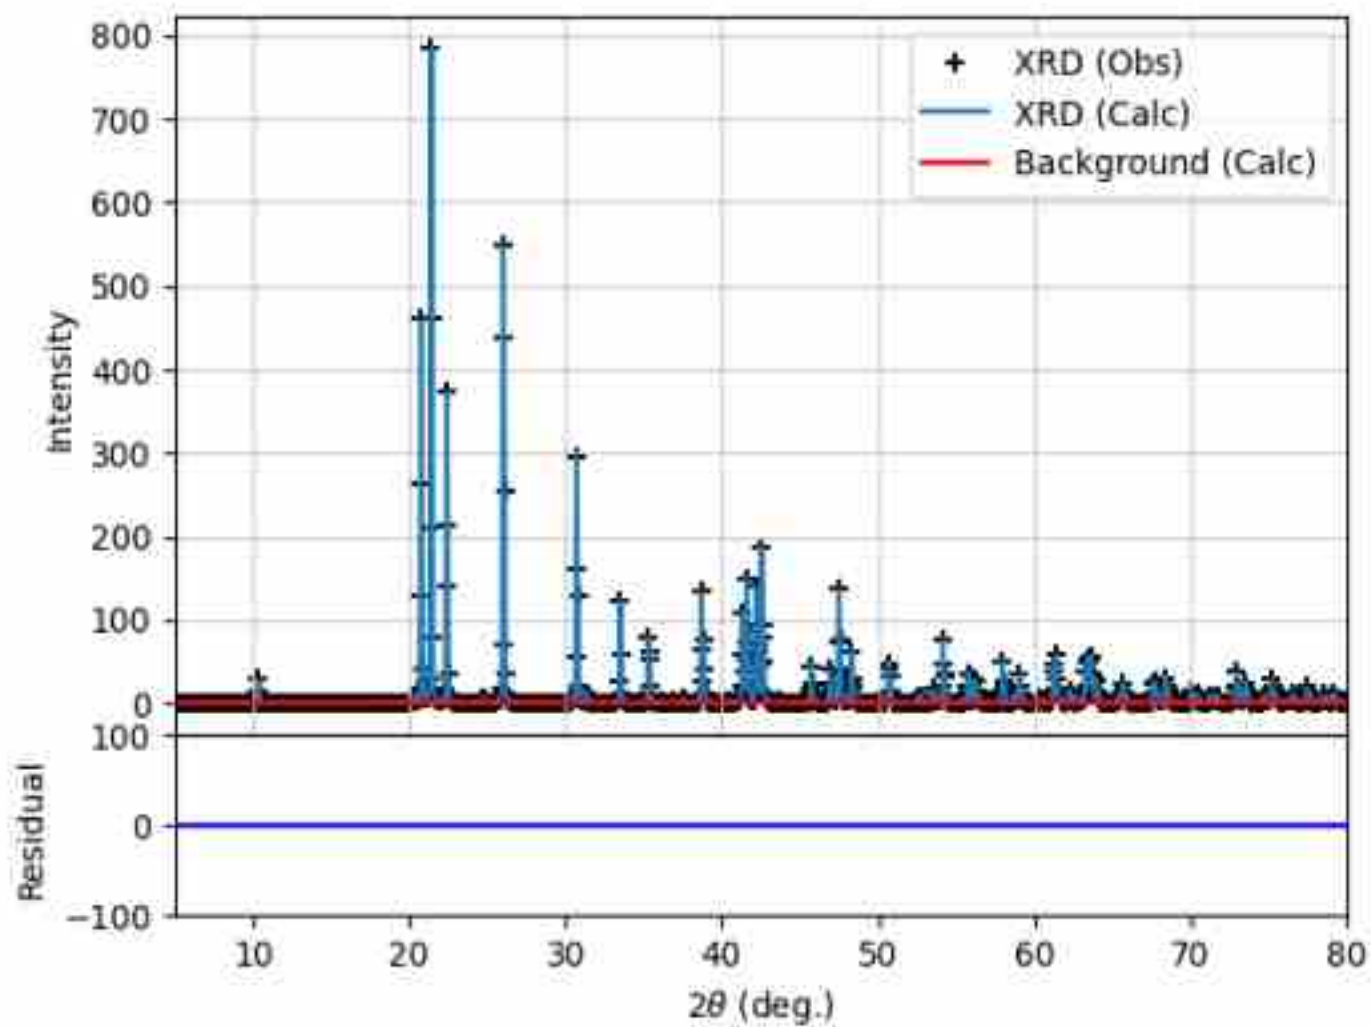

| RMSE before RR | Rwp     | RMSE after RR |
|----------------|---------|---------------|
| 0.134          | 0.00616 | 0.00034       |

# Yb<sub>2</sub>Mo<sub>2</sub>Cl<sub>2</sub>O<sub>8</sub>

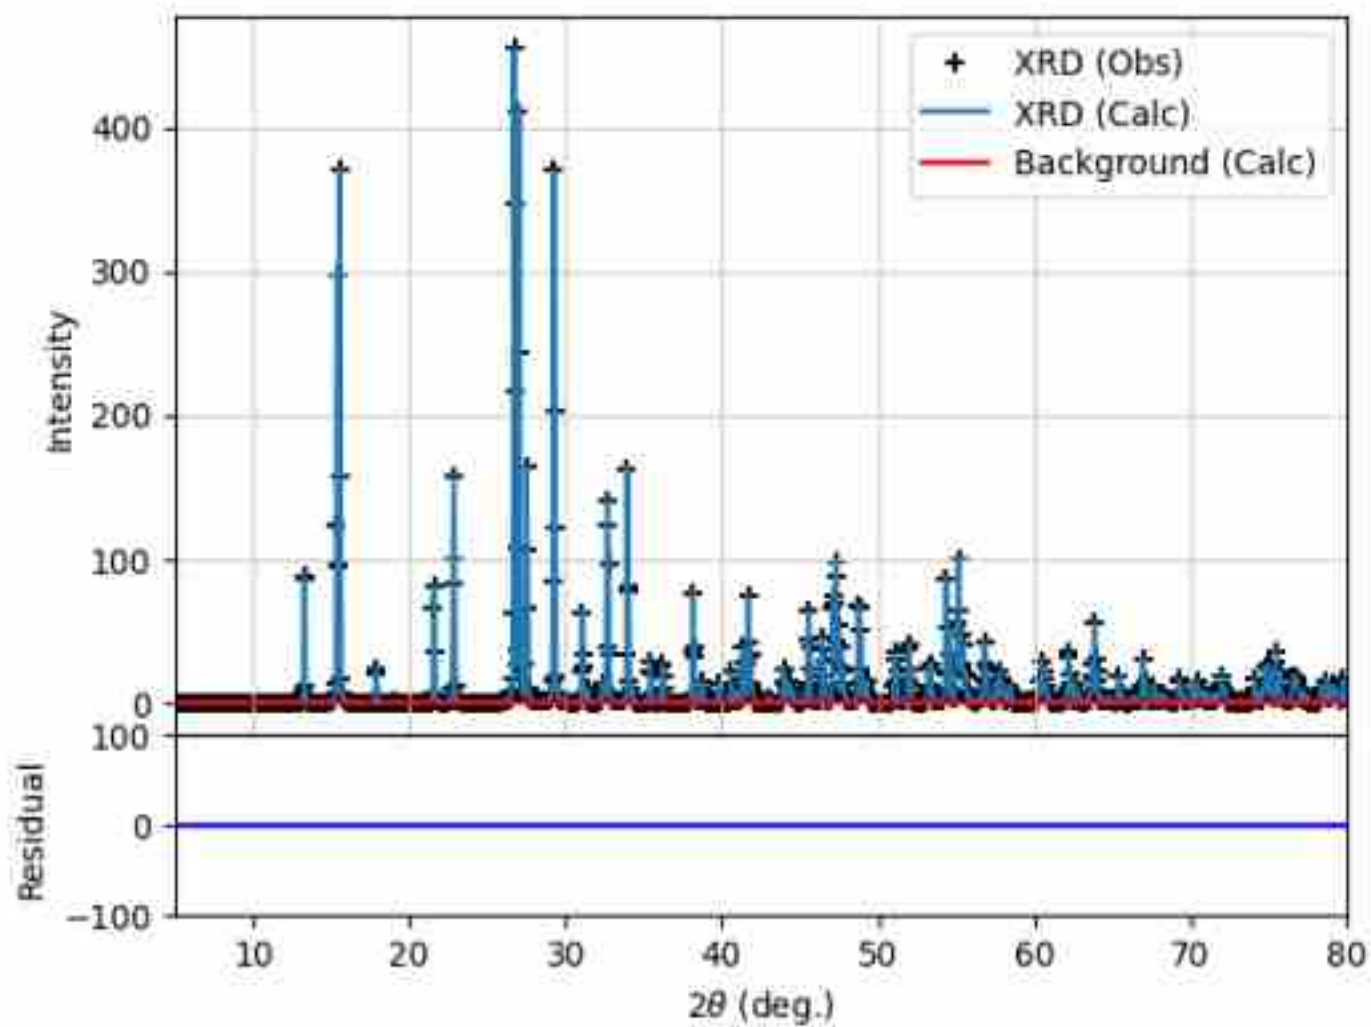

| RMSE before RR | Rwp     | RMSE after RR |
|----------------|---------|---------------|
| 0.134          | 0.00374 | 0.00066       |

# F4

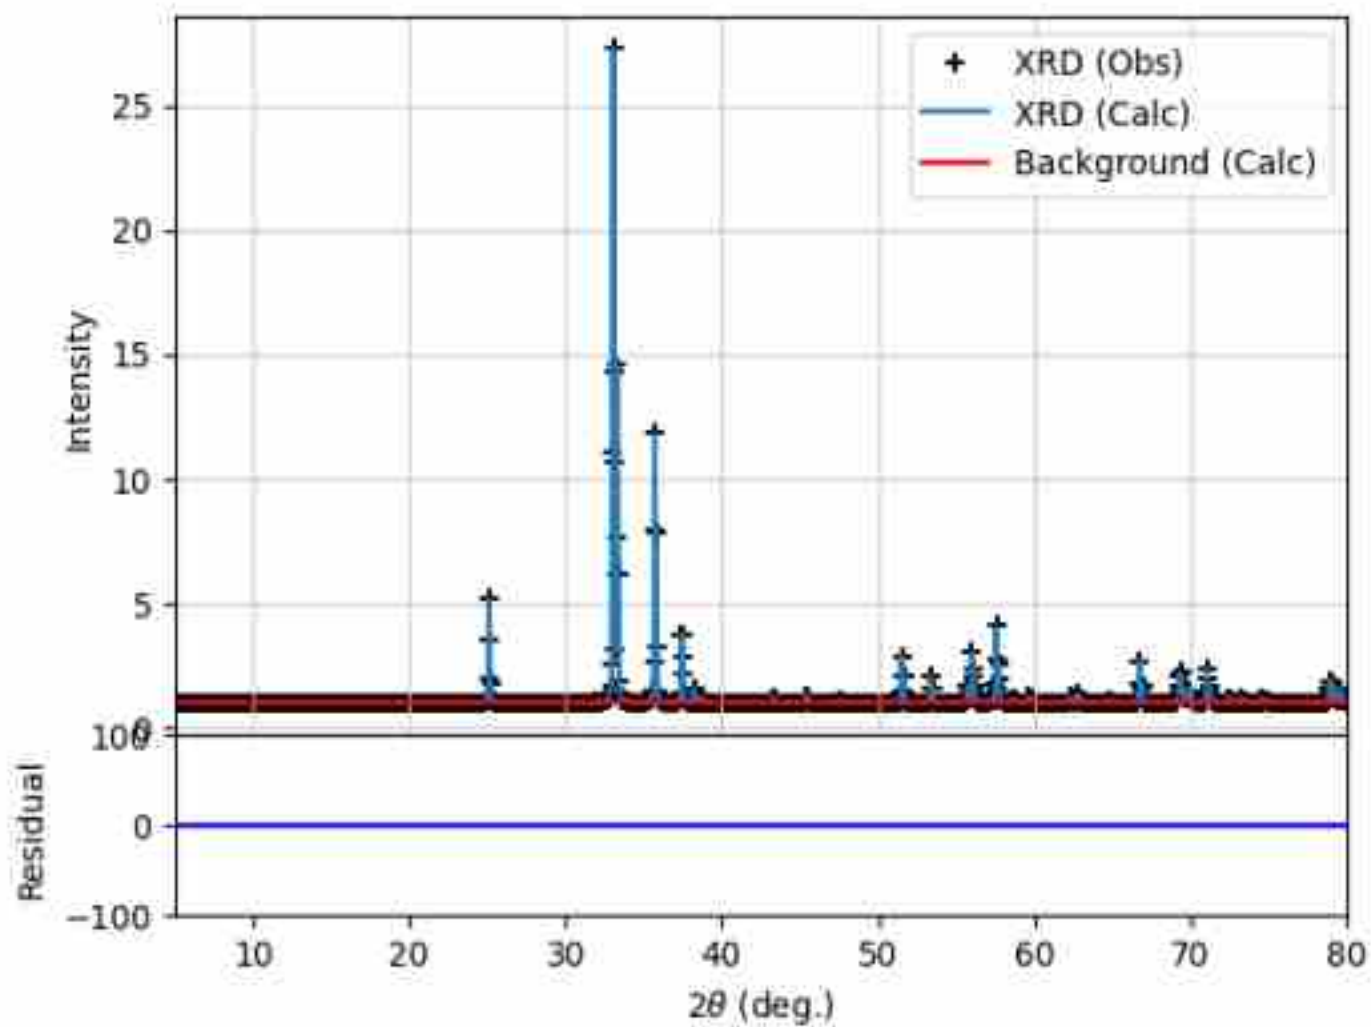

| RMSE before RR | Rwp     | RMSE after RR |
|----------------|---------|---------------|
| 0.135          | 0.00123 | 0.00045       |

# Mn<sub>4</sub>H<sub>8</sub>O<sub>8</sub>

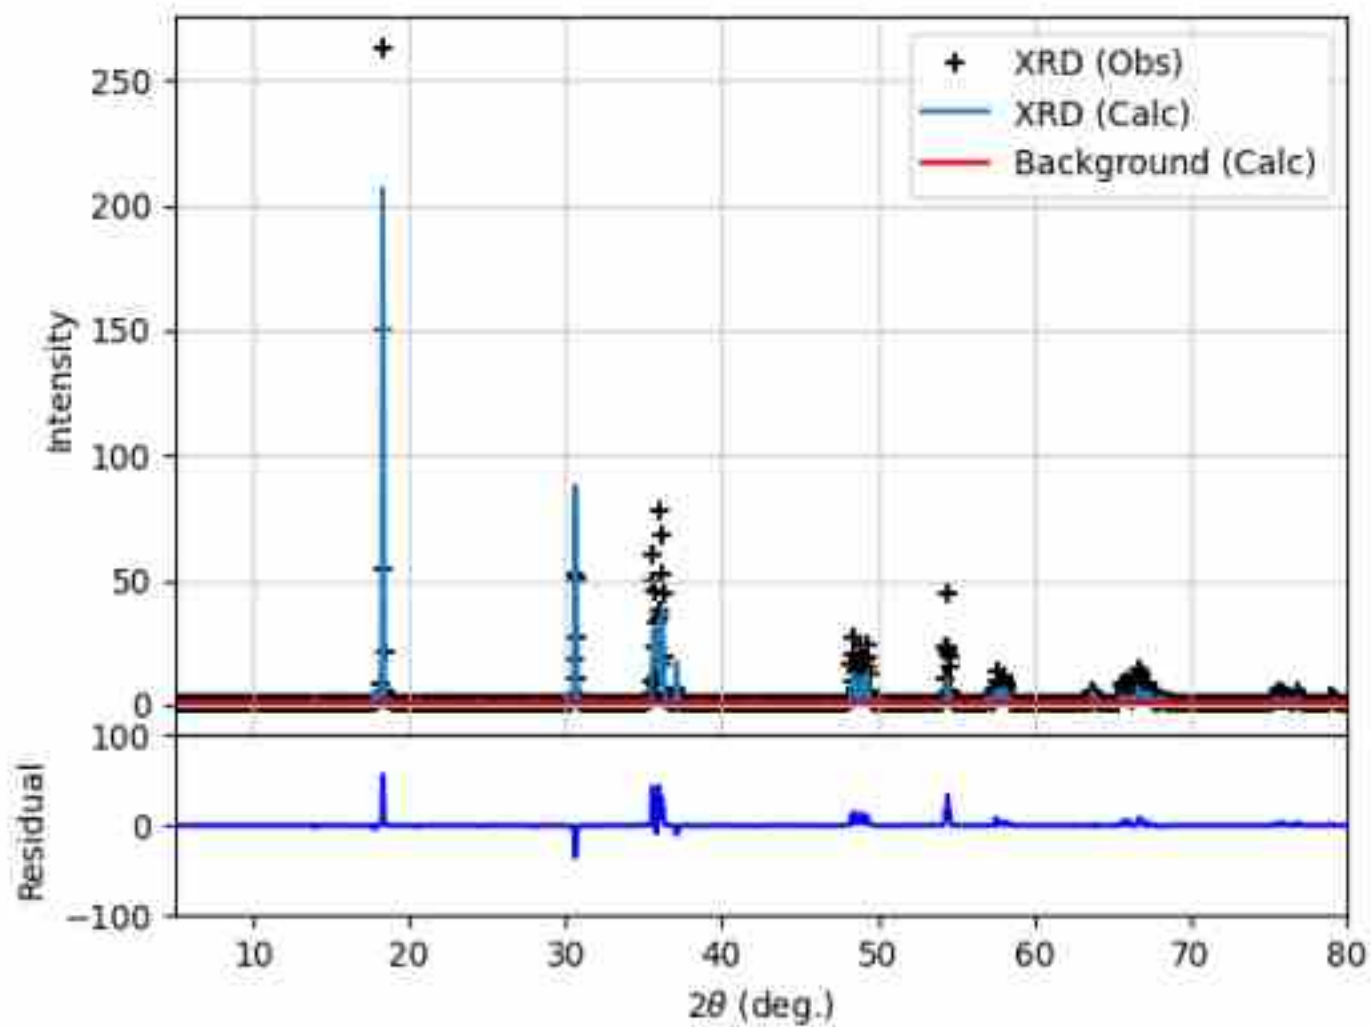

| RMSE before RR | Rwp      | RMSE after RR |
|----------------|----------|---------------|
| 0.135          | 40.01502 | None          |

# Rb<sub>4</sub>Cd<sub>4</sub>Ge<sub>4</sub>As<sub>8</sub>

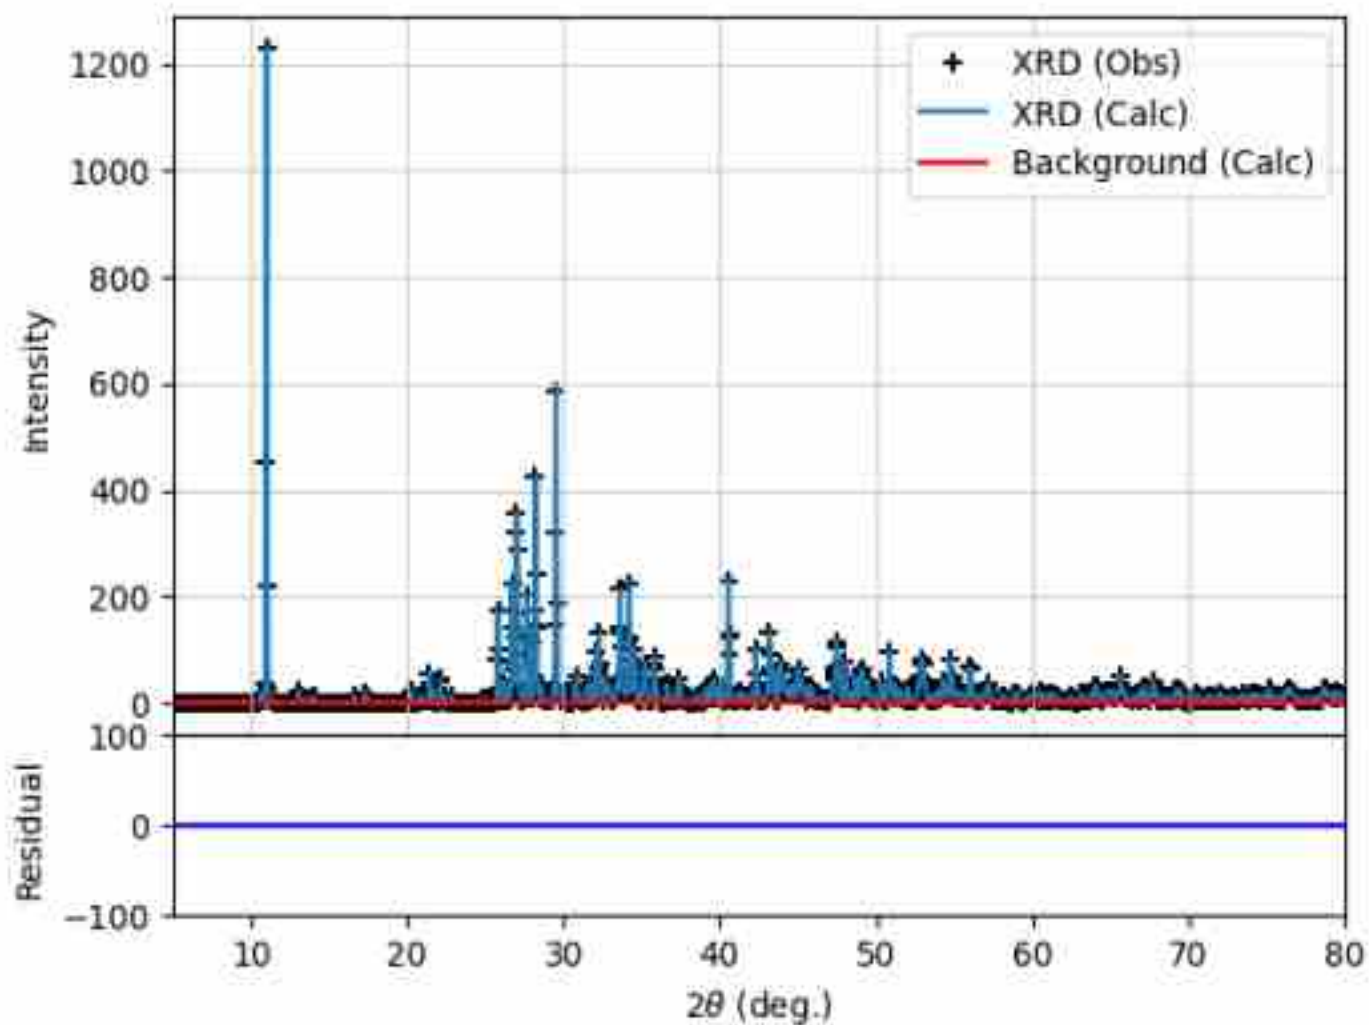

| RMSE before RR | Rwp     | RMSE after RR |
|----------------|---------|---------------|
| 0.135          | 0.00118 | 9e-05         |

# Sm6Ge10

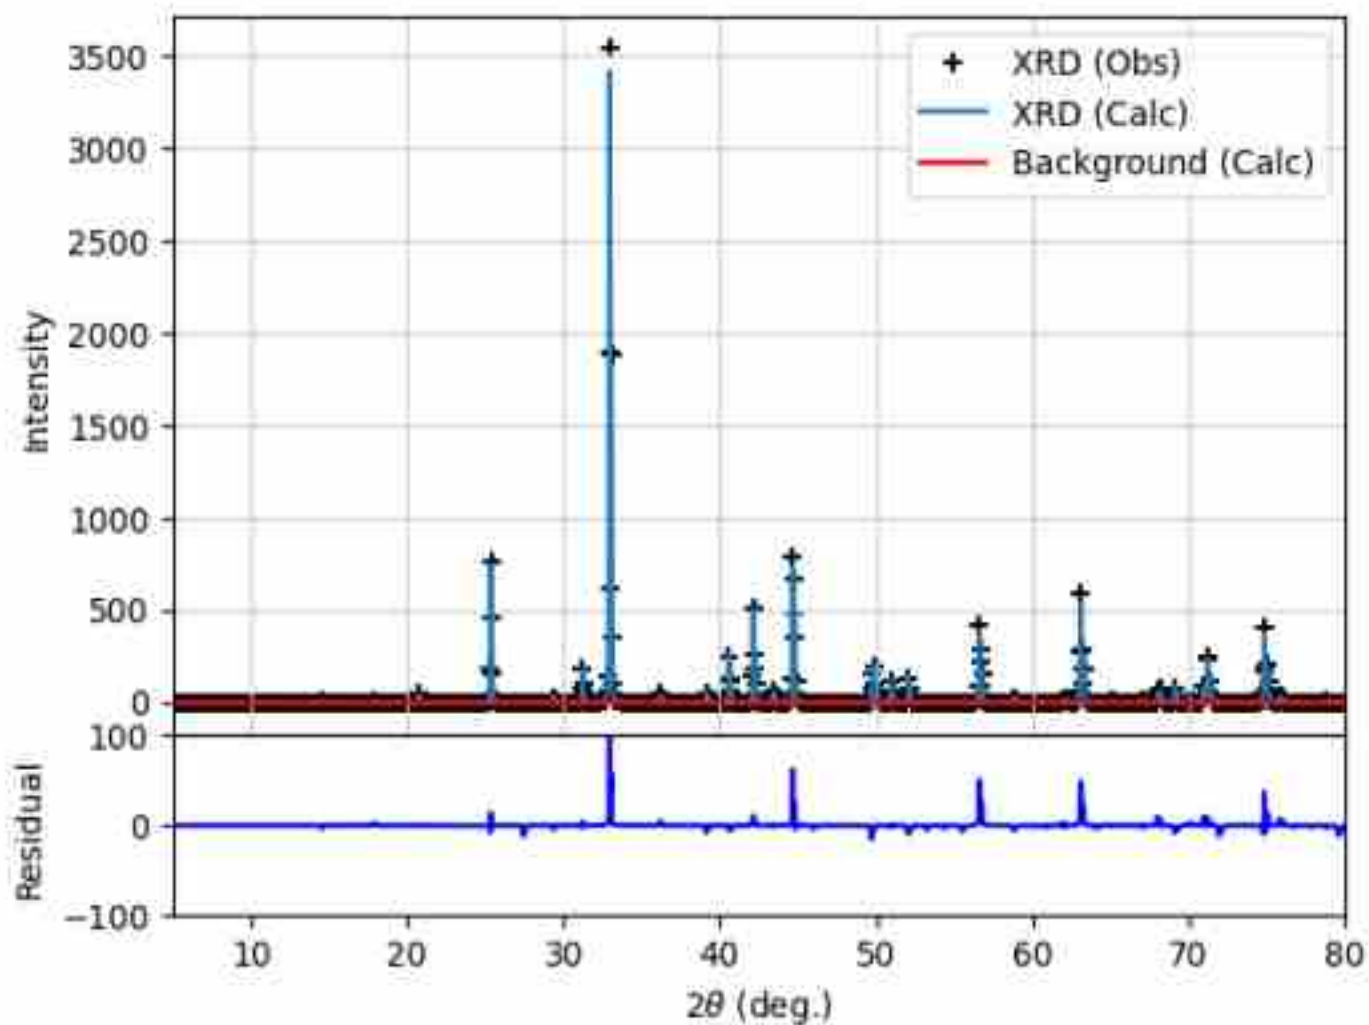

| RMSE before RR | Rwp      | RMSE after RR |
|----------------|----------|---------------|
| 0.136          | 16.60535 | 0.09799       |

# K<sub>2</sub>Hg<sub>3</sub>Ge<sub>2</sub>S<sub>8</sub>

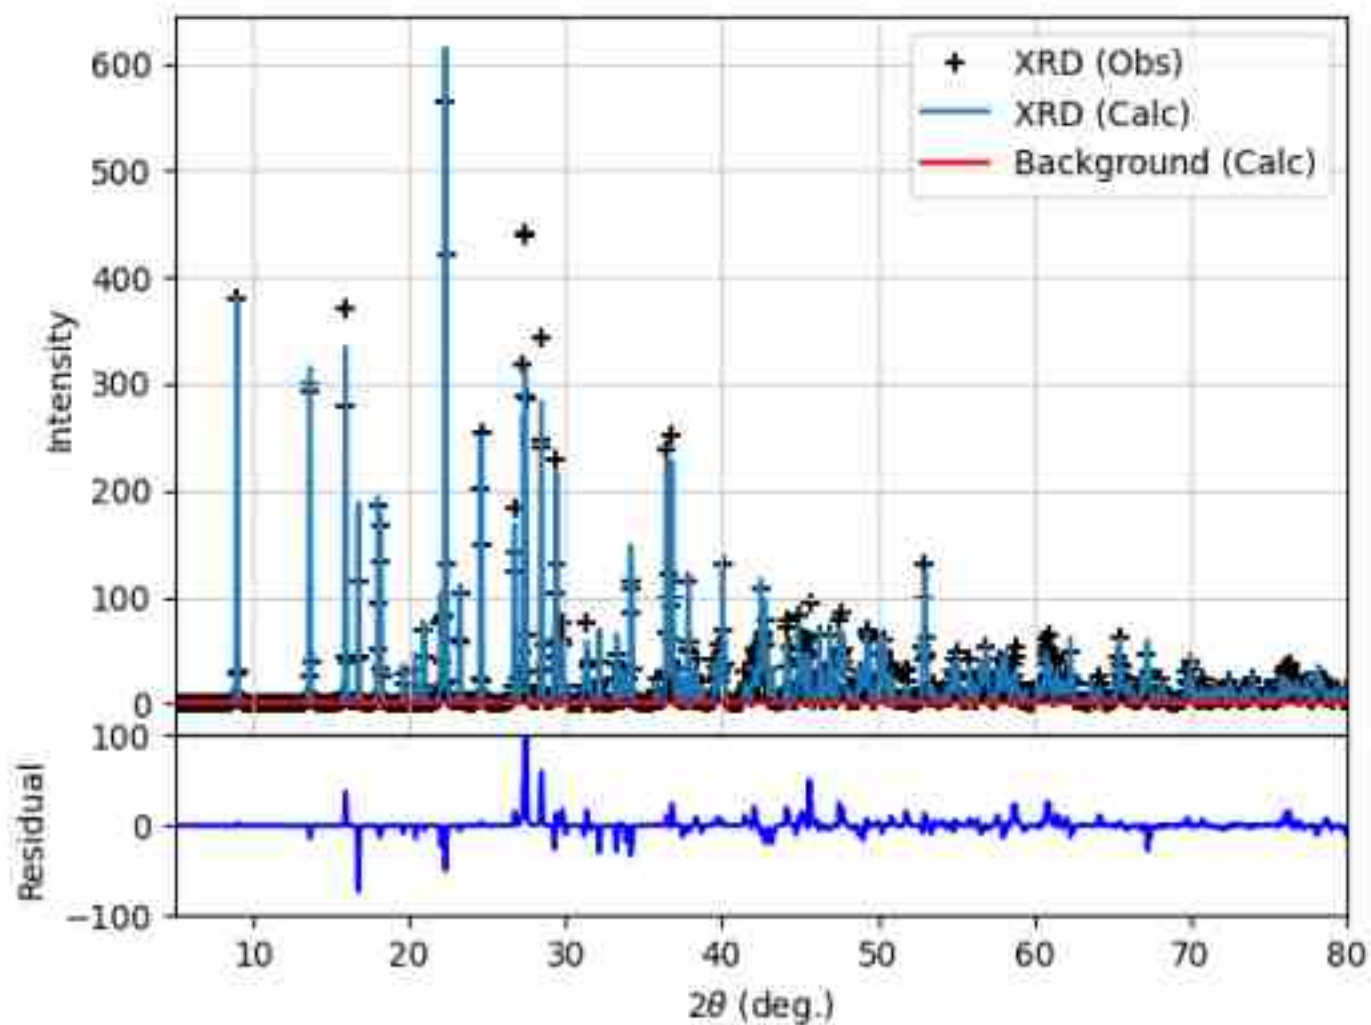

| RMSE before RR | Rwp      | RMSE after RR |
|----------------|----------|---------------|
| 0.137          | 25.70764 | 0.35807       |



# Li<sub>2</sub>Cu<sub>2</sub>S<sub>4</sub>

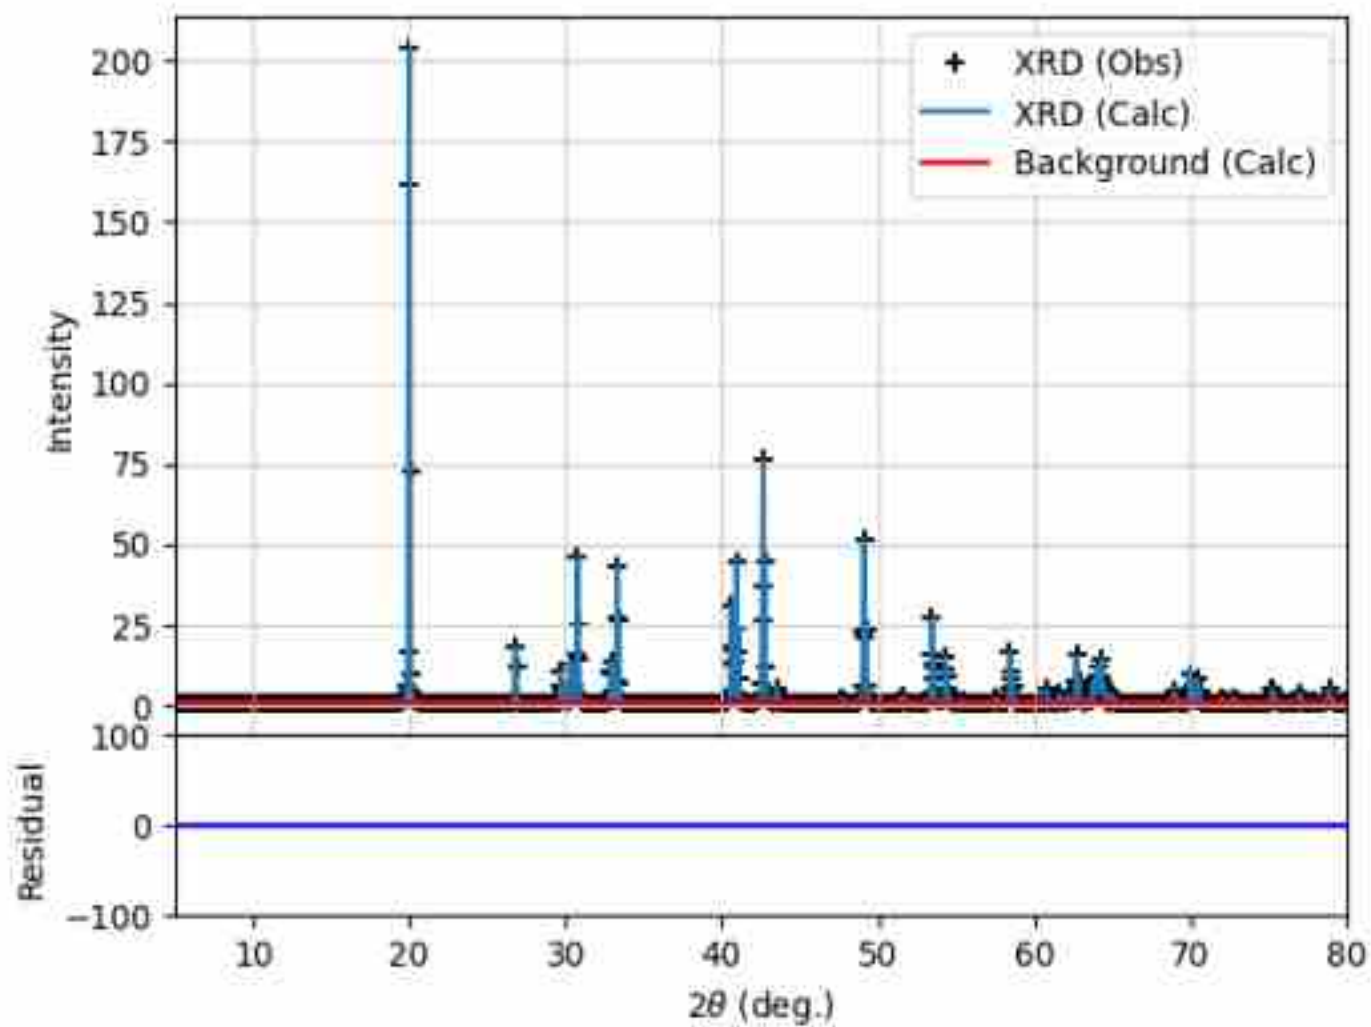

| RMSE before RR | Rwp     | RMSE after RR |
|----------------|---------|---------------|
| 0.137          | 0.00536 | 0.00167       |

# Li<sub>8</sub>Ti<sub>2</sub>S<sub>8</sub>

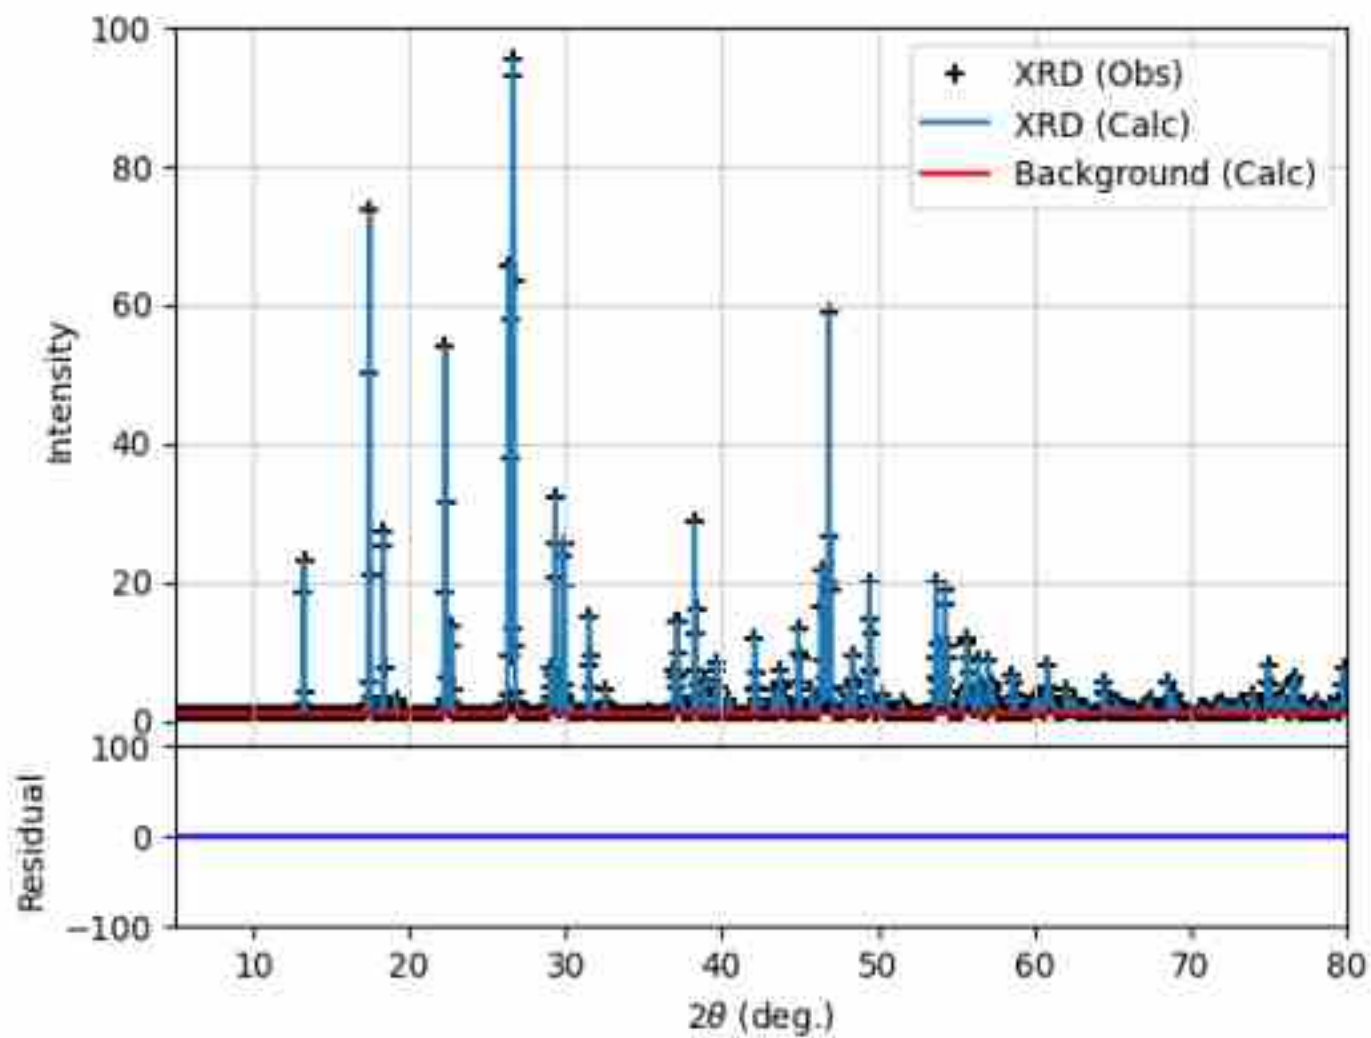

| RMSE before RR | Rwp     | RMSE after RR |
|----------------|---------|---------------|
| 0.137          | 0.00365 | 0.00166       |

# Tl1V1S2O8

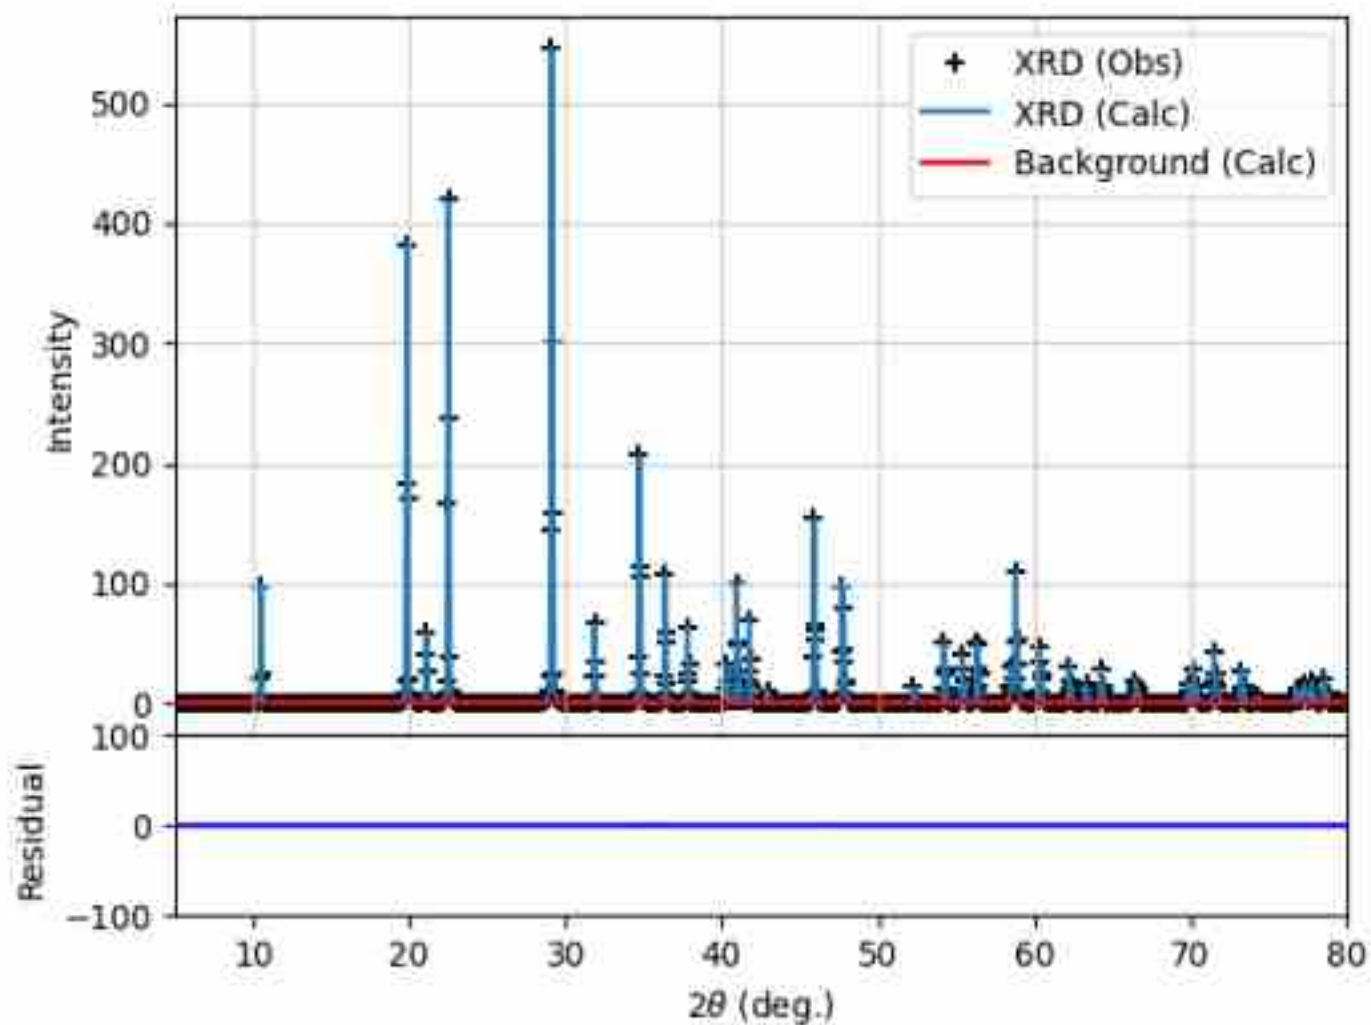

| RMSE before RR | Rwp     | RMSE after RR |
|----------------|---------|---------------|
| 0.137          | 0.17931 | 0.03564       |

# Ti2Re1

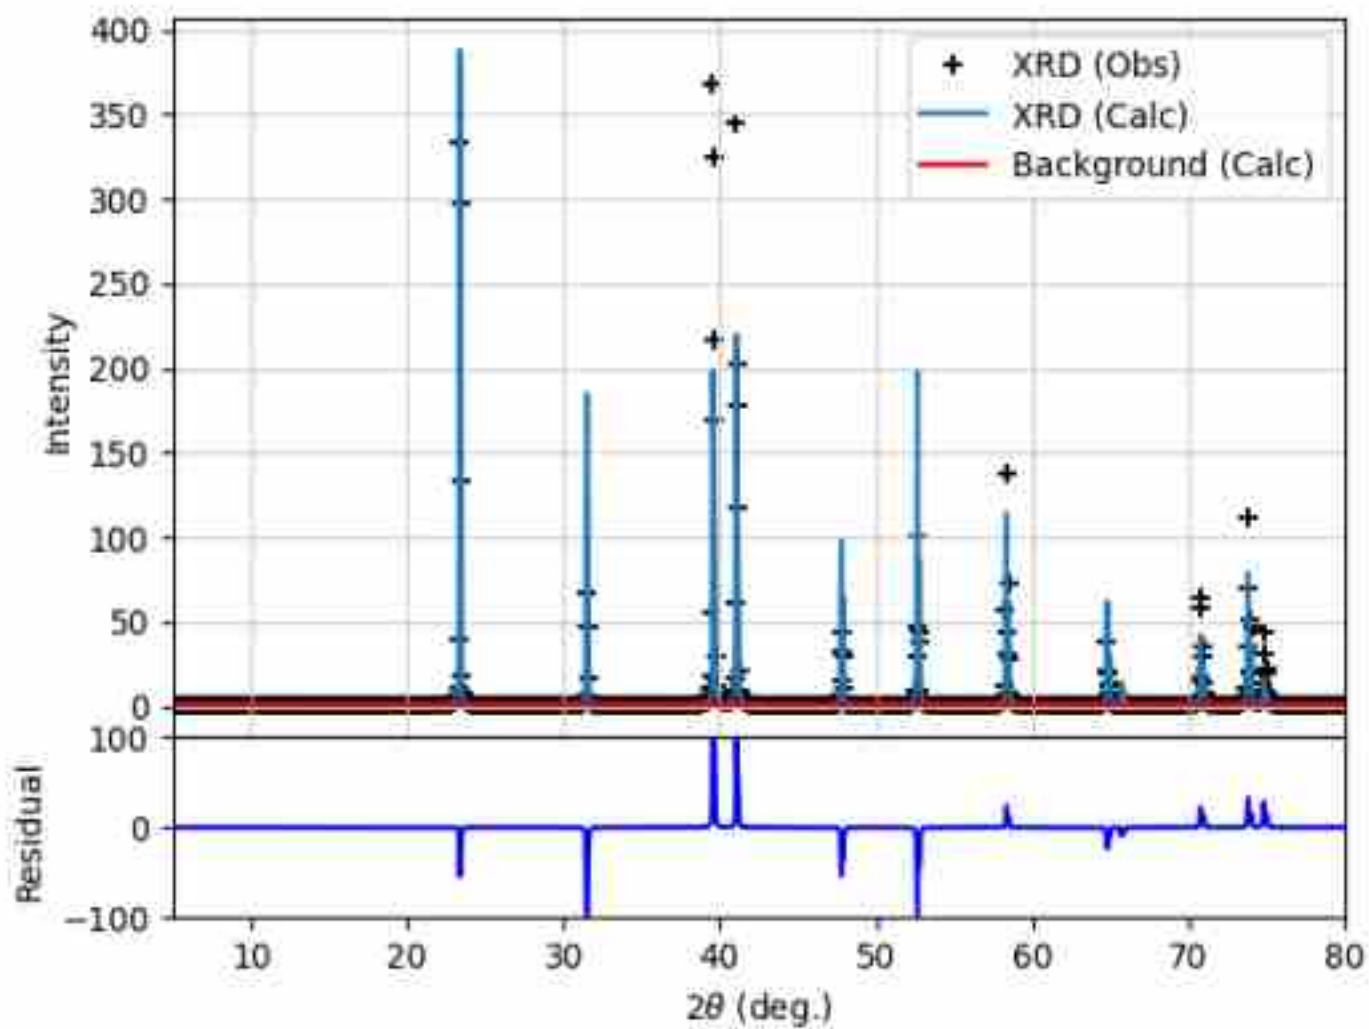

| RMSE before RR | Rwp      | RMSE after RR |
|----------------|----------|---------------|
| 0.139          | 50.73181 | 0.14025       |

# Mg<sub>2</sub>Mn<sub>2</sub>P<sub>2</sub>O<sub>10</sub>

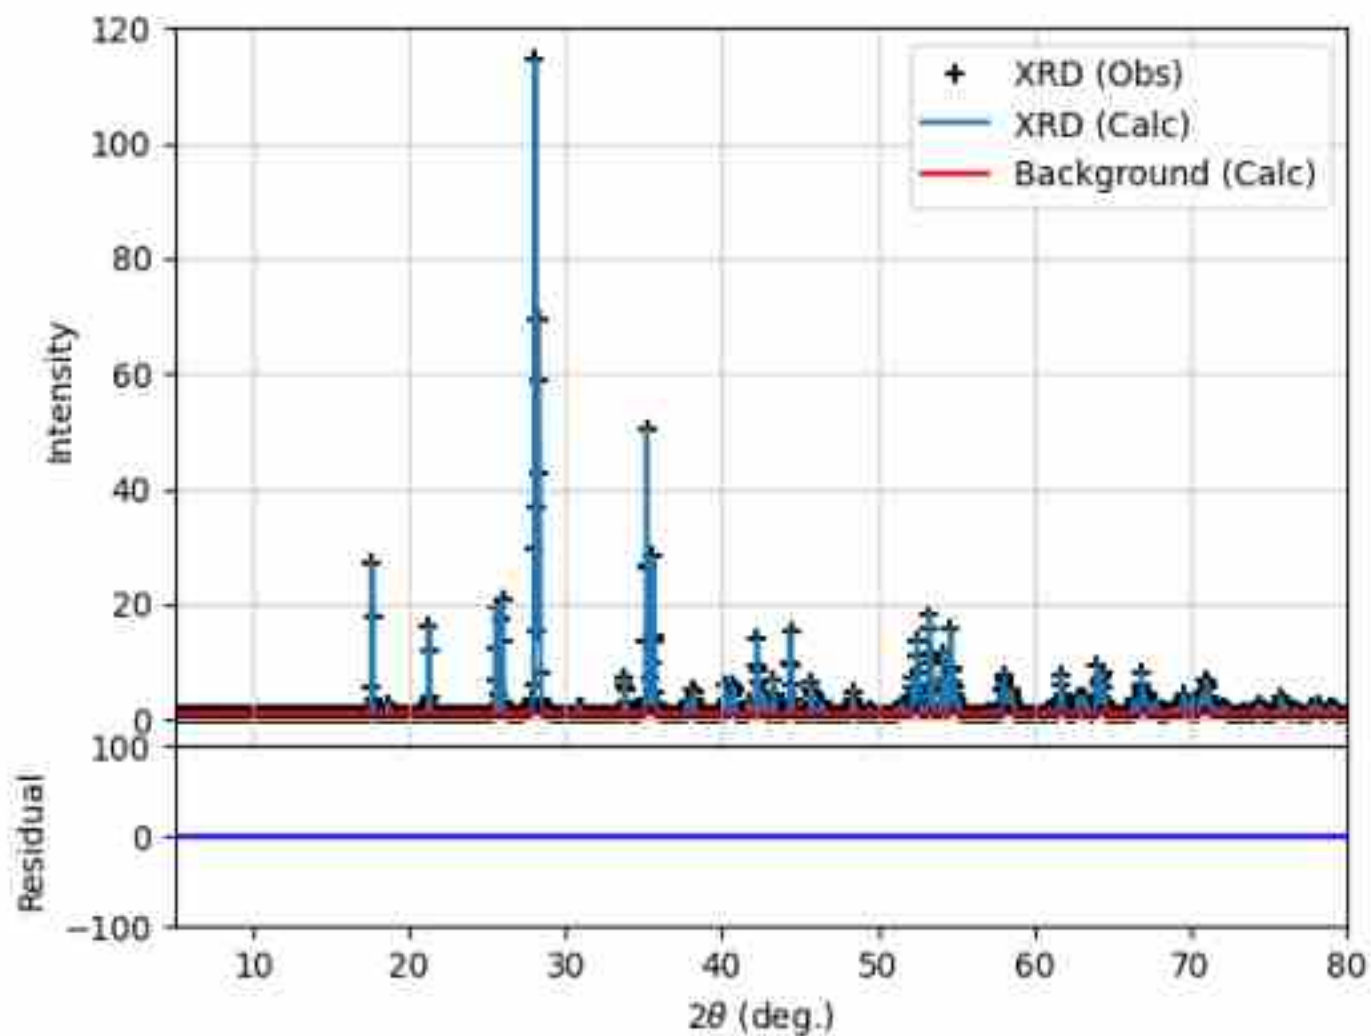

| RMSE before RR | Rwp     | RMSE after RR |
|----------------|---------|---------------|
| 0.141          | 0.00087 | 1e-05         |

# Ta<sub>2</sub>S<sub>4</sub>

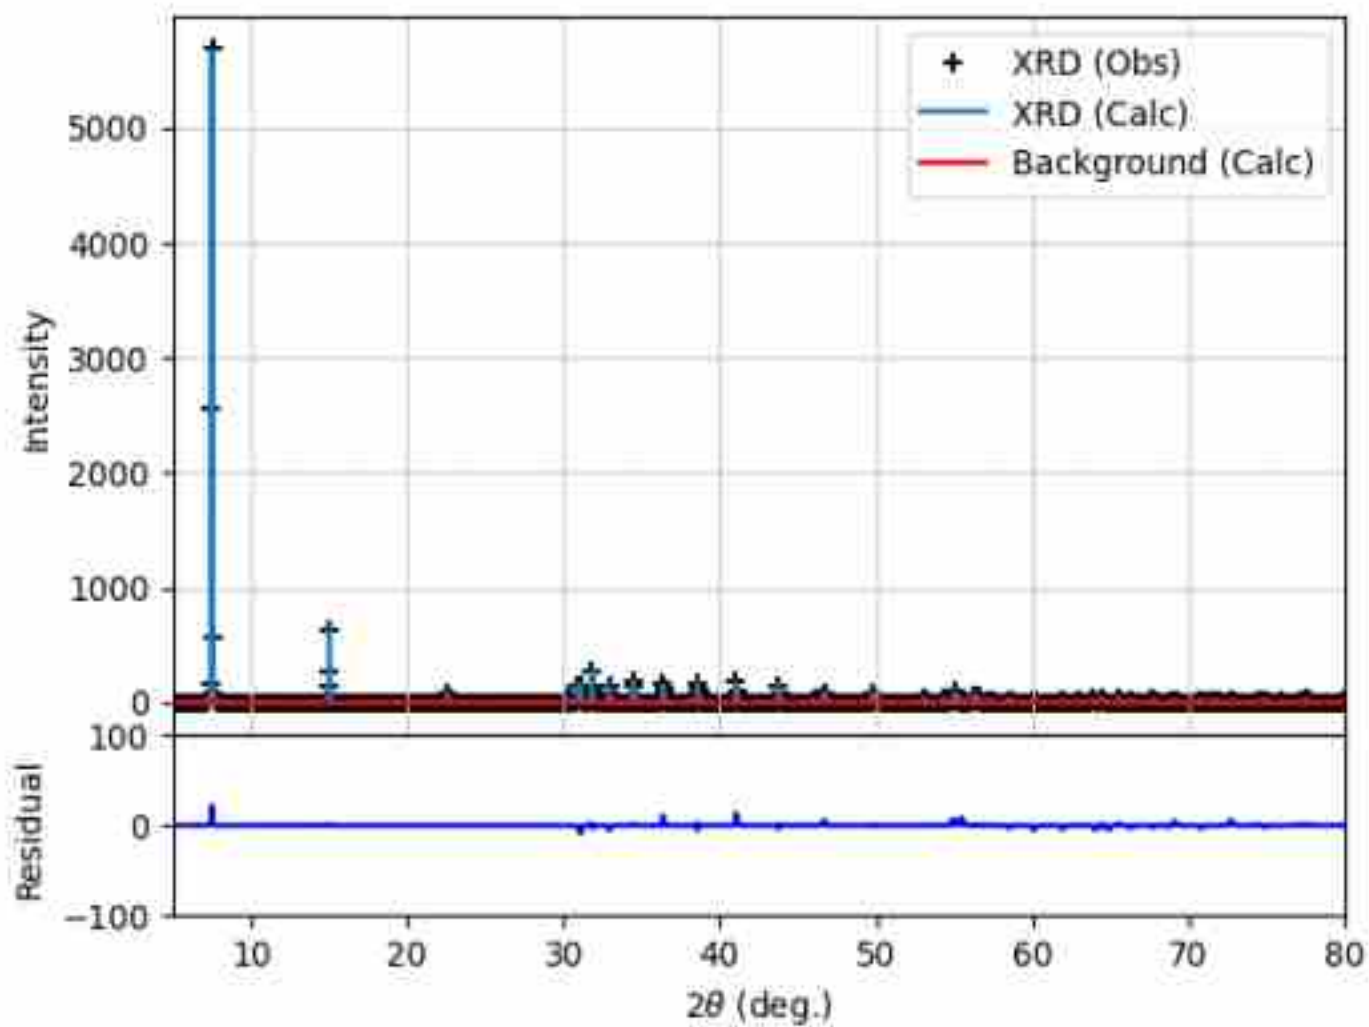

| RMSE before RR | Rwp     | RMSE after RR |
|----------------|---------|---------------|
| 0.142          | 5.52297 | 0.20367       |

# K<sub>2</sub>N<sub>2</sub>O<sub>6</sub>

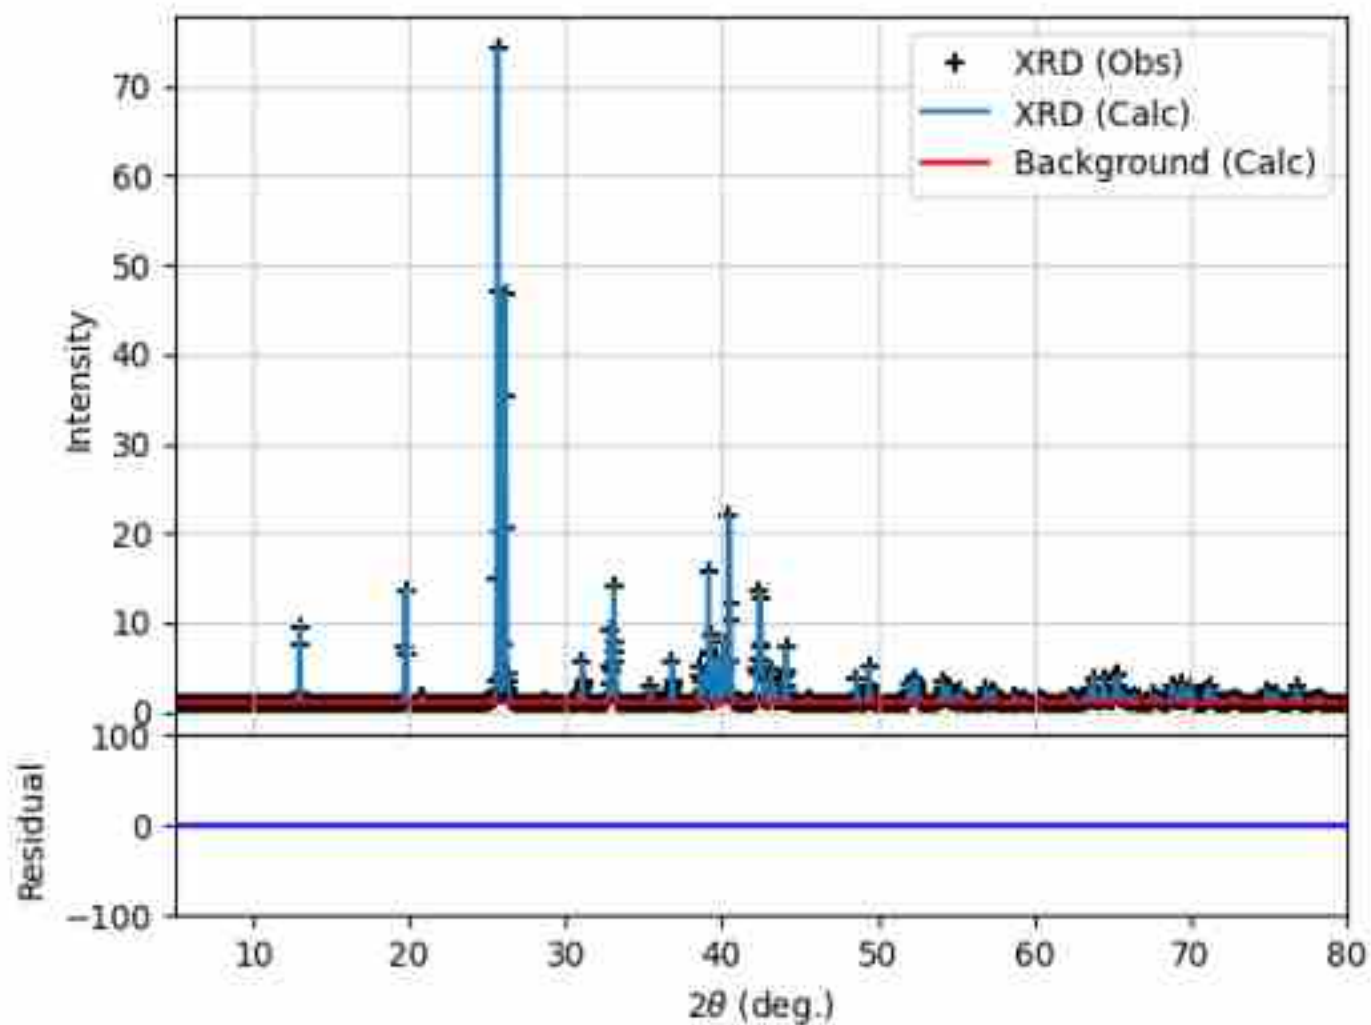

| RMSE before RR | Rwp     | RMSE after RR |
|----------------|---------|---------------|
| 0.143          | 0.00211 | 0.00045       |

# Na<sub>4</sub>Cu<sub>1</sub>As<sub>2</sub>O<sub>8</sub>

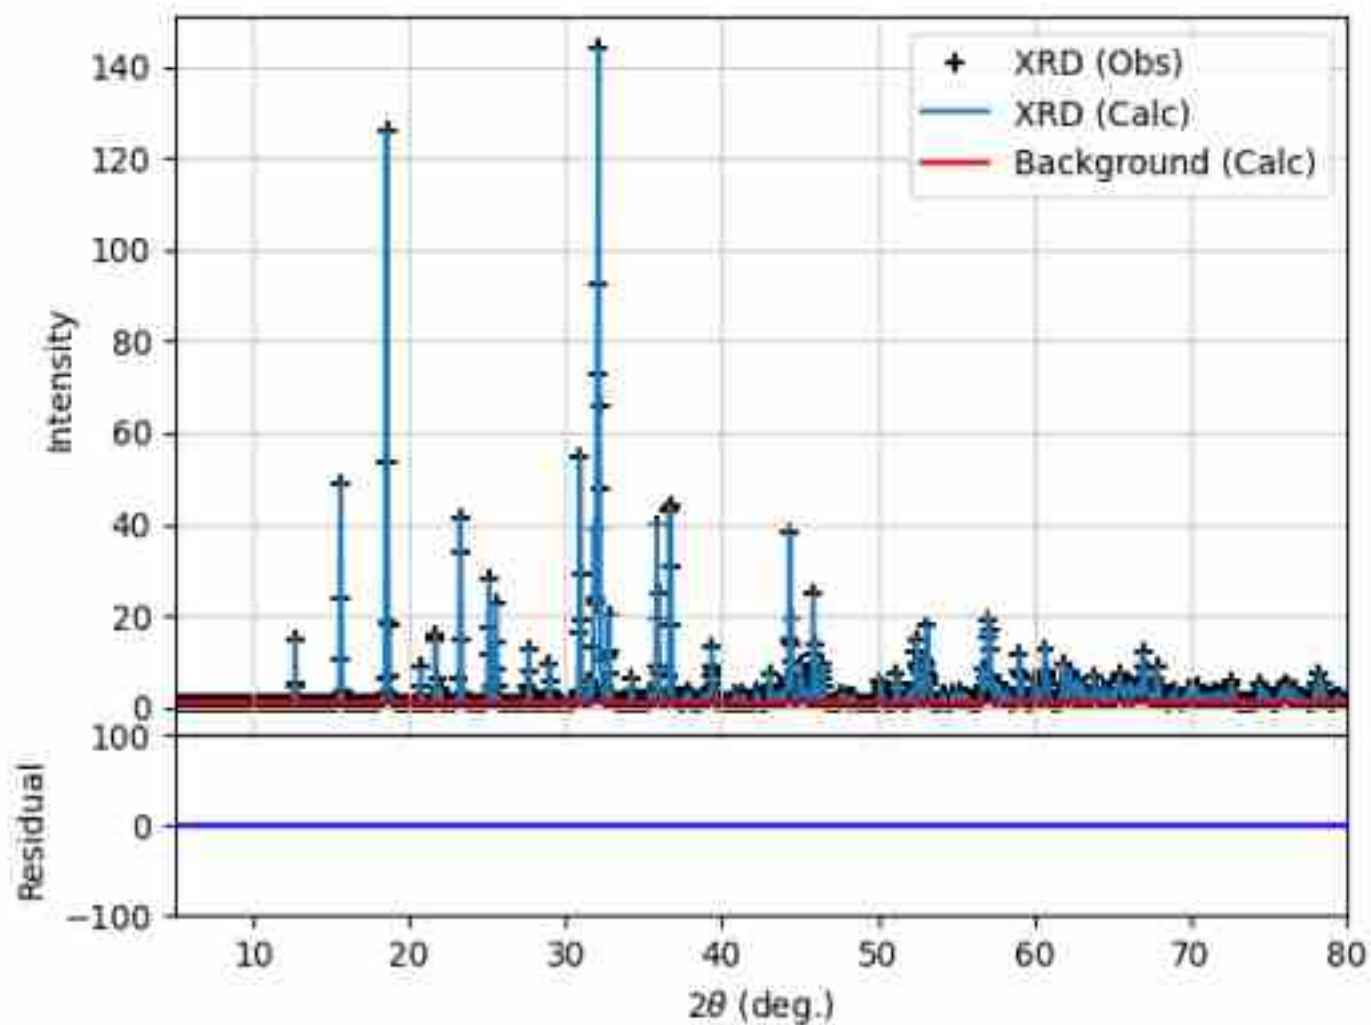

| RMSE before RR | Rwp     | RMSE after RR |
|----------------|---------|---------------|
| 0.143          | 0.00031 | 0.00018       |



# Ba1Co2P2O8

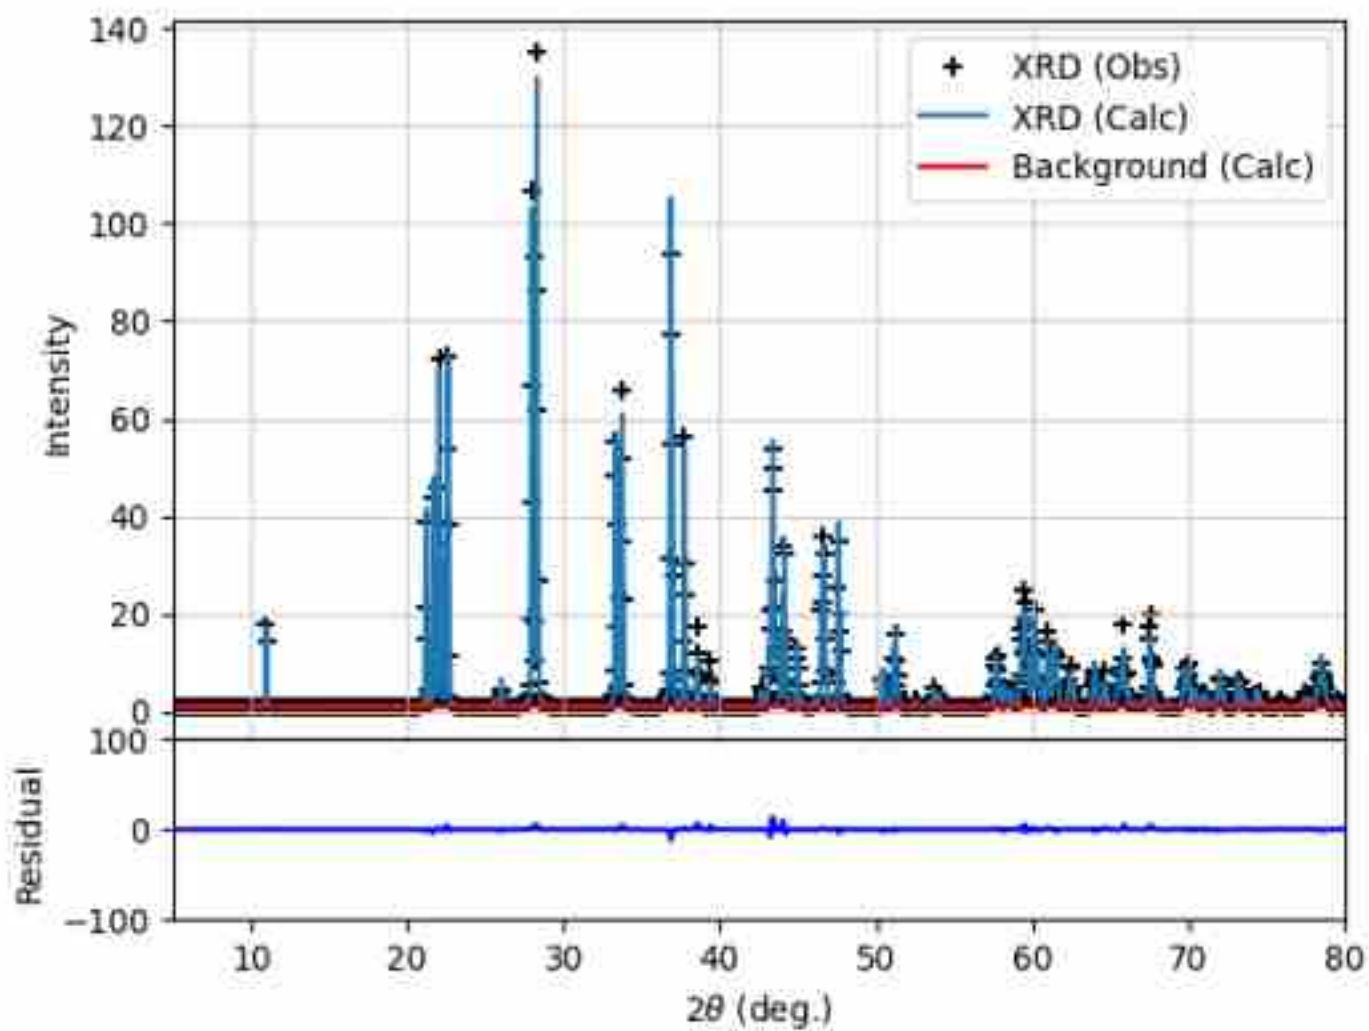

| RMSE before RR | Rwp      | RMSE after RR |
|----------------|----------|---------------|
| 0.145          | 12.02023 | 0.22755       |

# Ti4I12

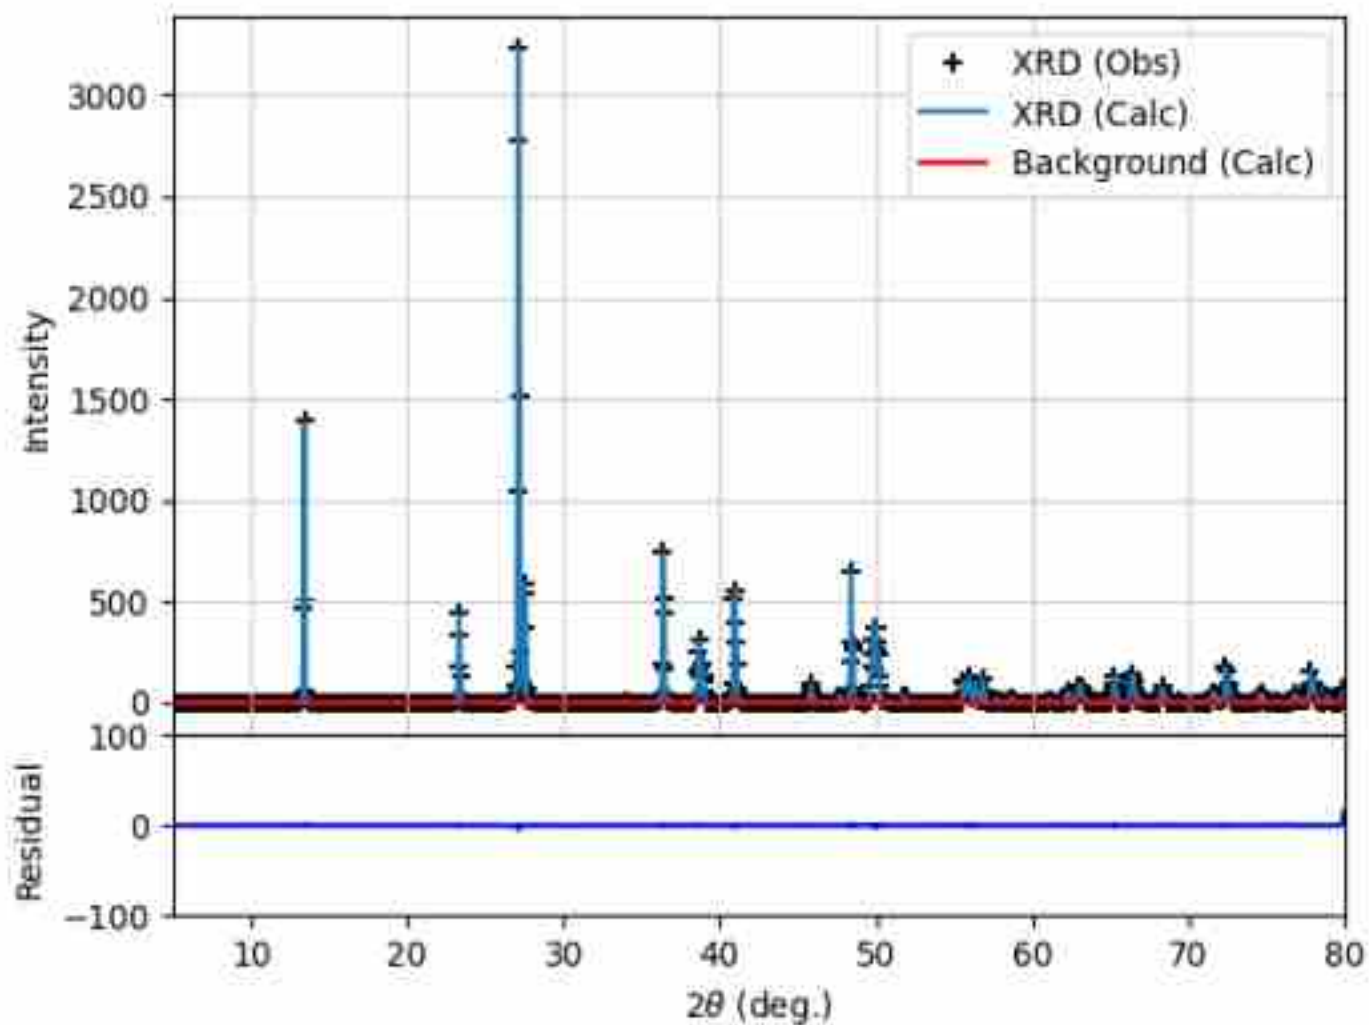

| RMSE before RR | Rwp     | RMSE after RR |
|----------------|---------|---------------|
| 0.145          | 1.45204 | 0.00624       |

# Tl4Mo2O8

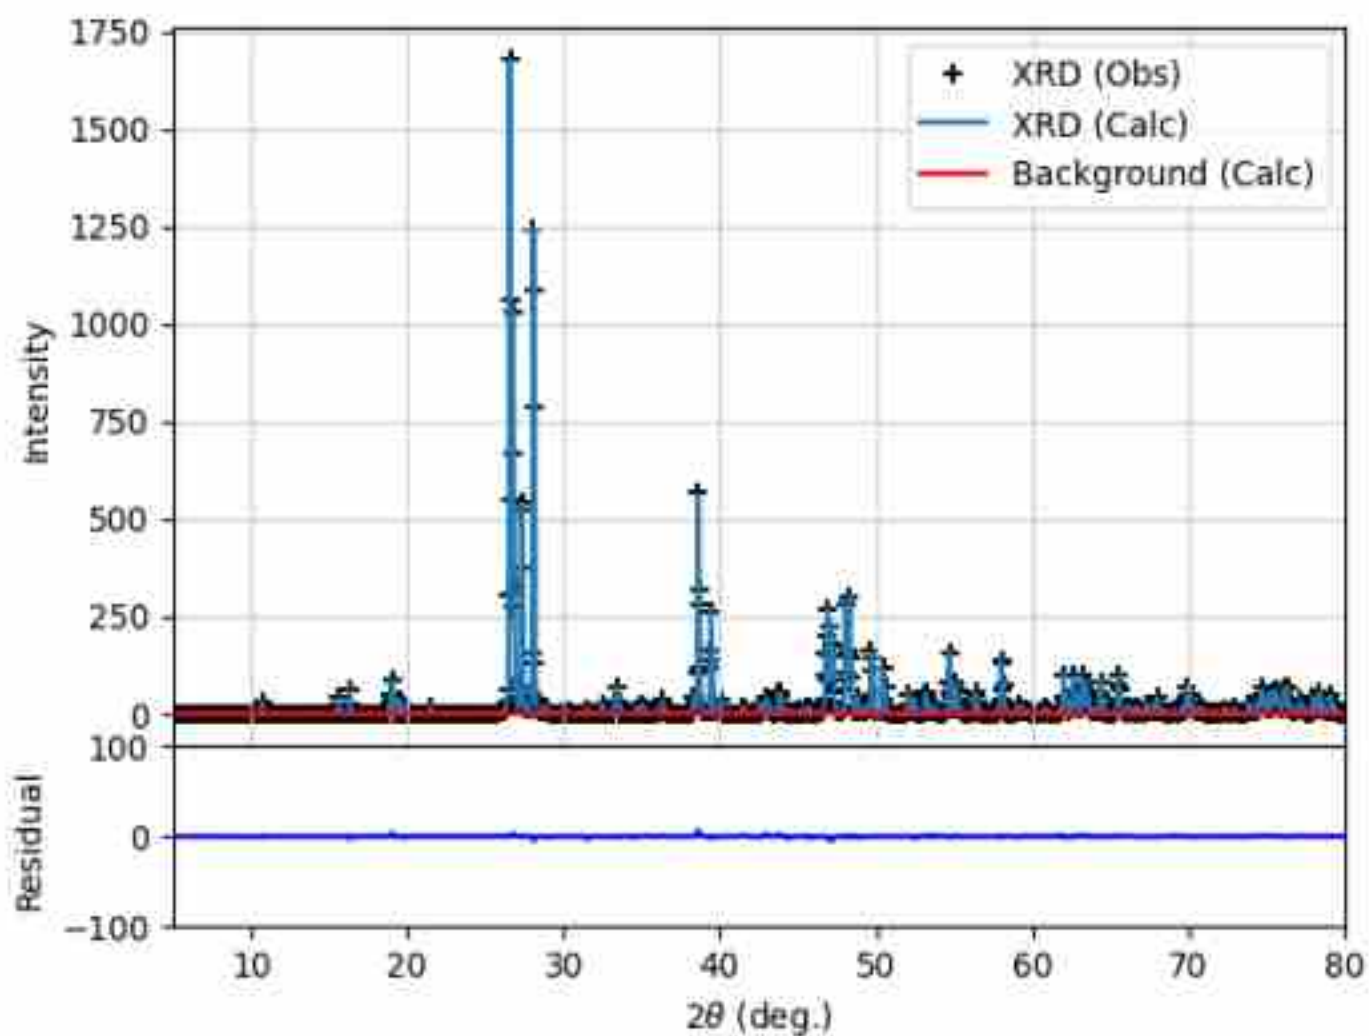

| RMSE before RR | Rwp     | RMSE after RR |
|----------------|---------|---------------|
| 0.145          | 2.14394 | 0.11507       |

# Ag<sub>6</sub>S<sub>2</sub>I<sub>1</sub>Br<sub>1</sub>

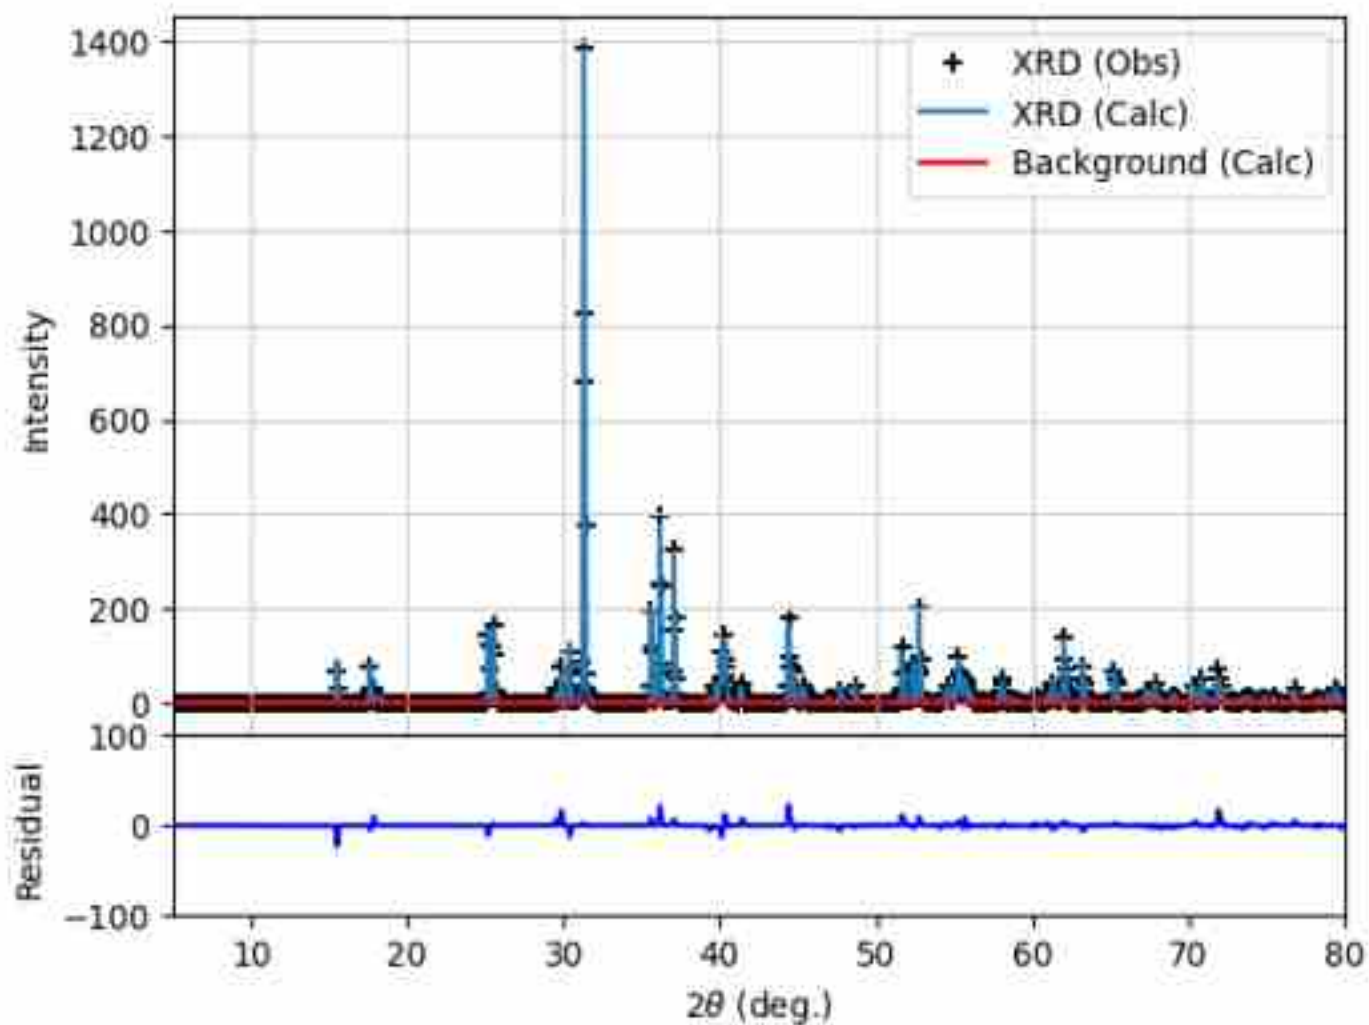

| RMSE before RR | Rwp      | RMSE after RR |
|----------------|----------|---------------|
| 0.146          | 10.20975 | 0.36557       |

# Ca<sub>4</sub>Al<sub>4</sub>O<sub>10</sub>

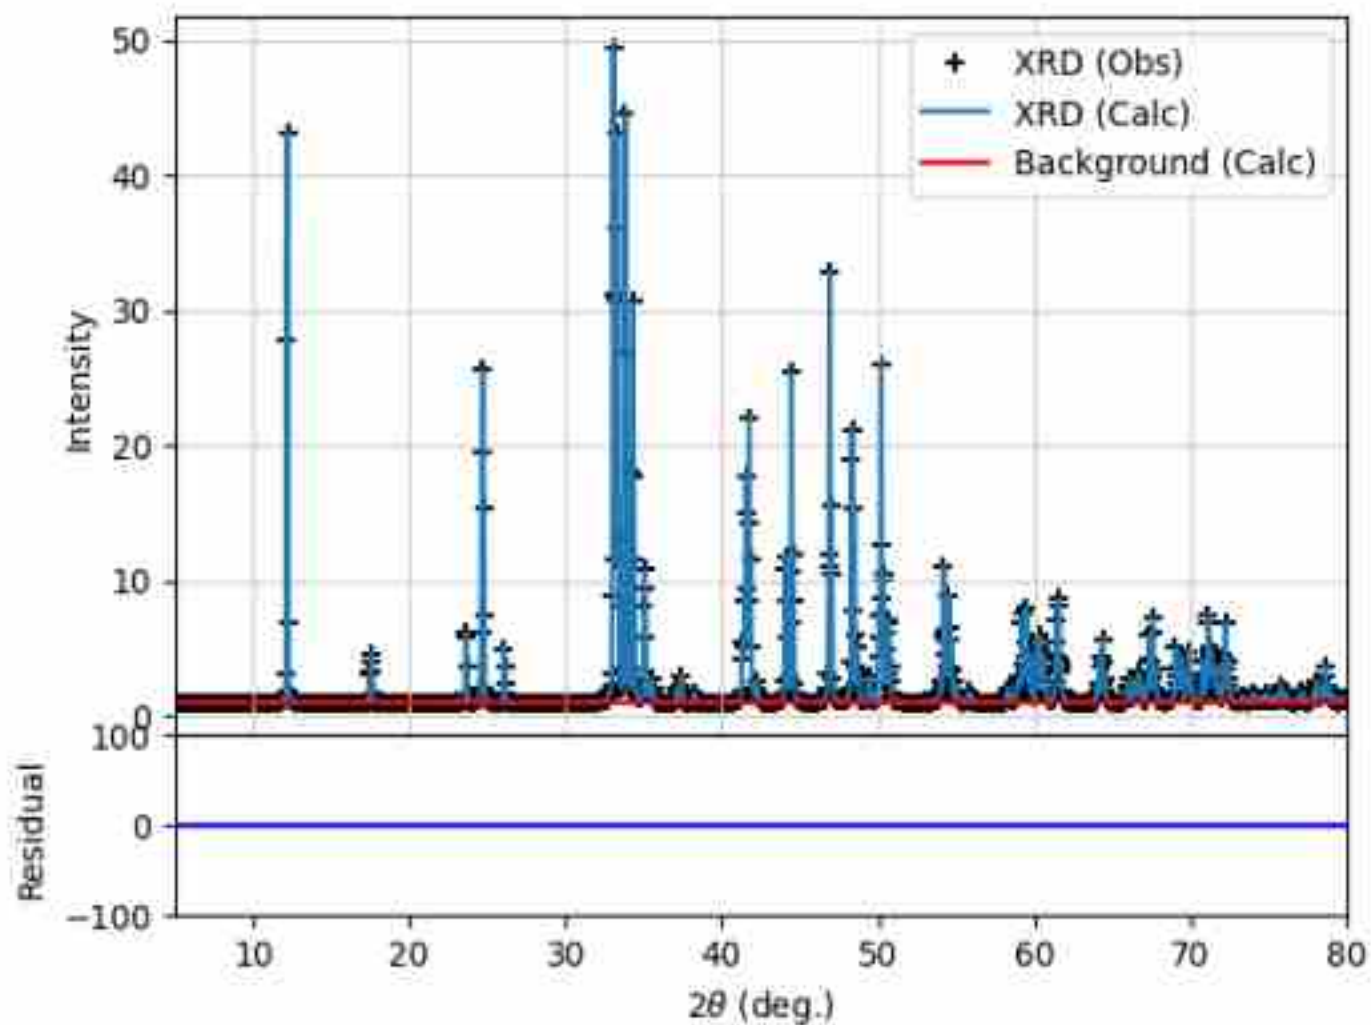

| RMSE before RR | Rwp     | RMSE after RR |
|----------------|---------|---------------|
| 0.146          | 0.00187 | 0.00053       |

# Li<sub>2</sub>Te<sub>2</sub>H<sub>2</sub>O<sub>8</sub>

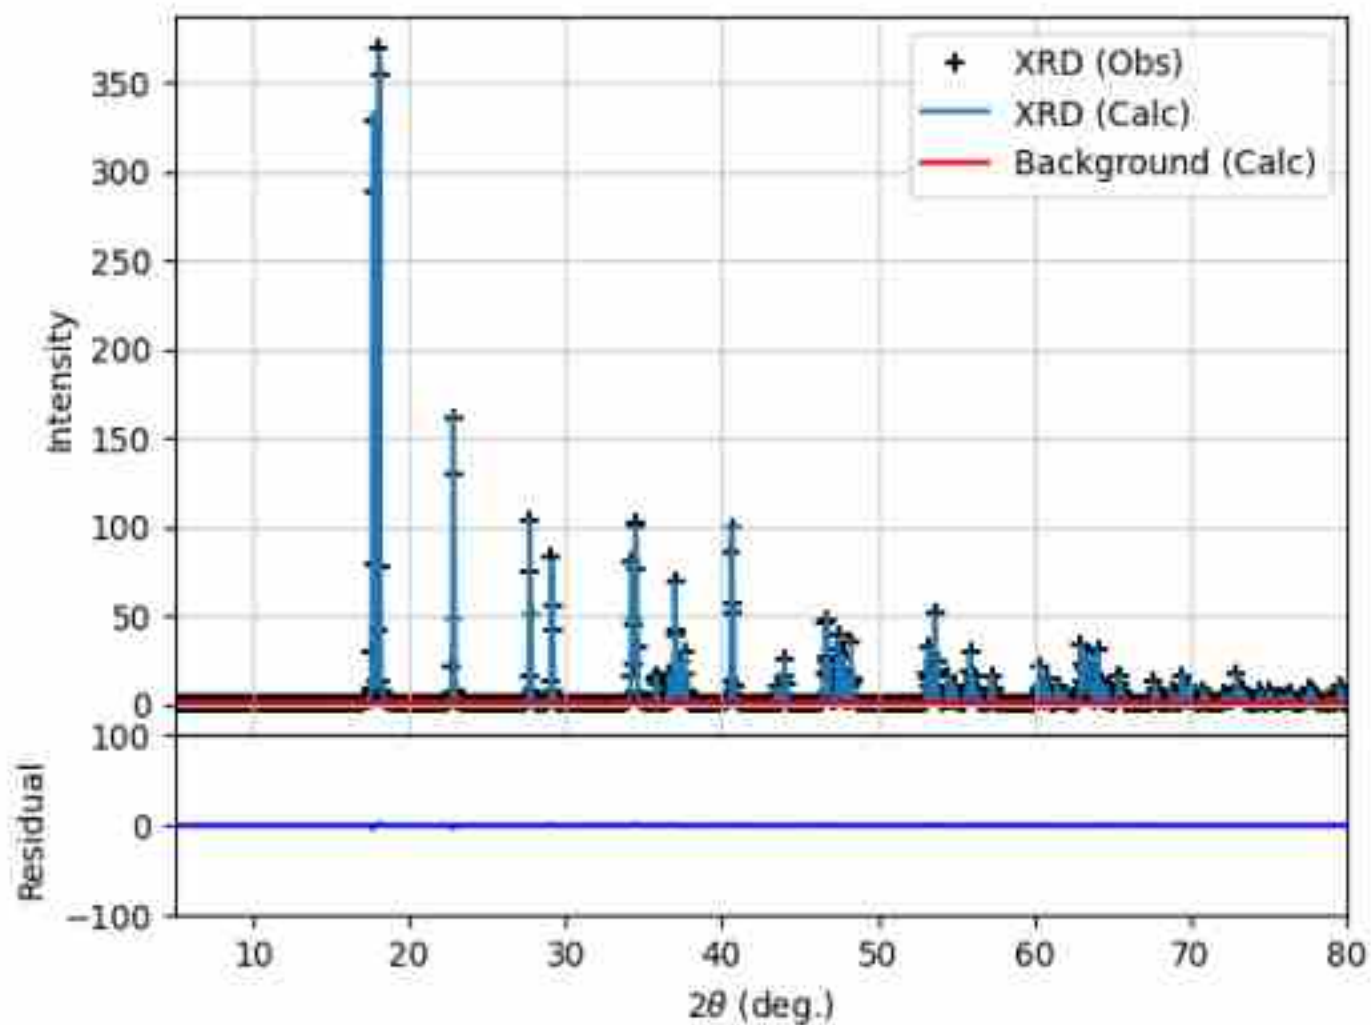

| RMSE before RR | Rwp     | RMSE after RR |
|----------------|---------|---------------|
| 0.147          | 1.30879 | None          |

# Li<sub>6</sub>Mn<sub>2</sub>F<sub>10</sub>

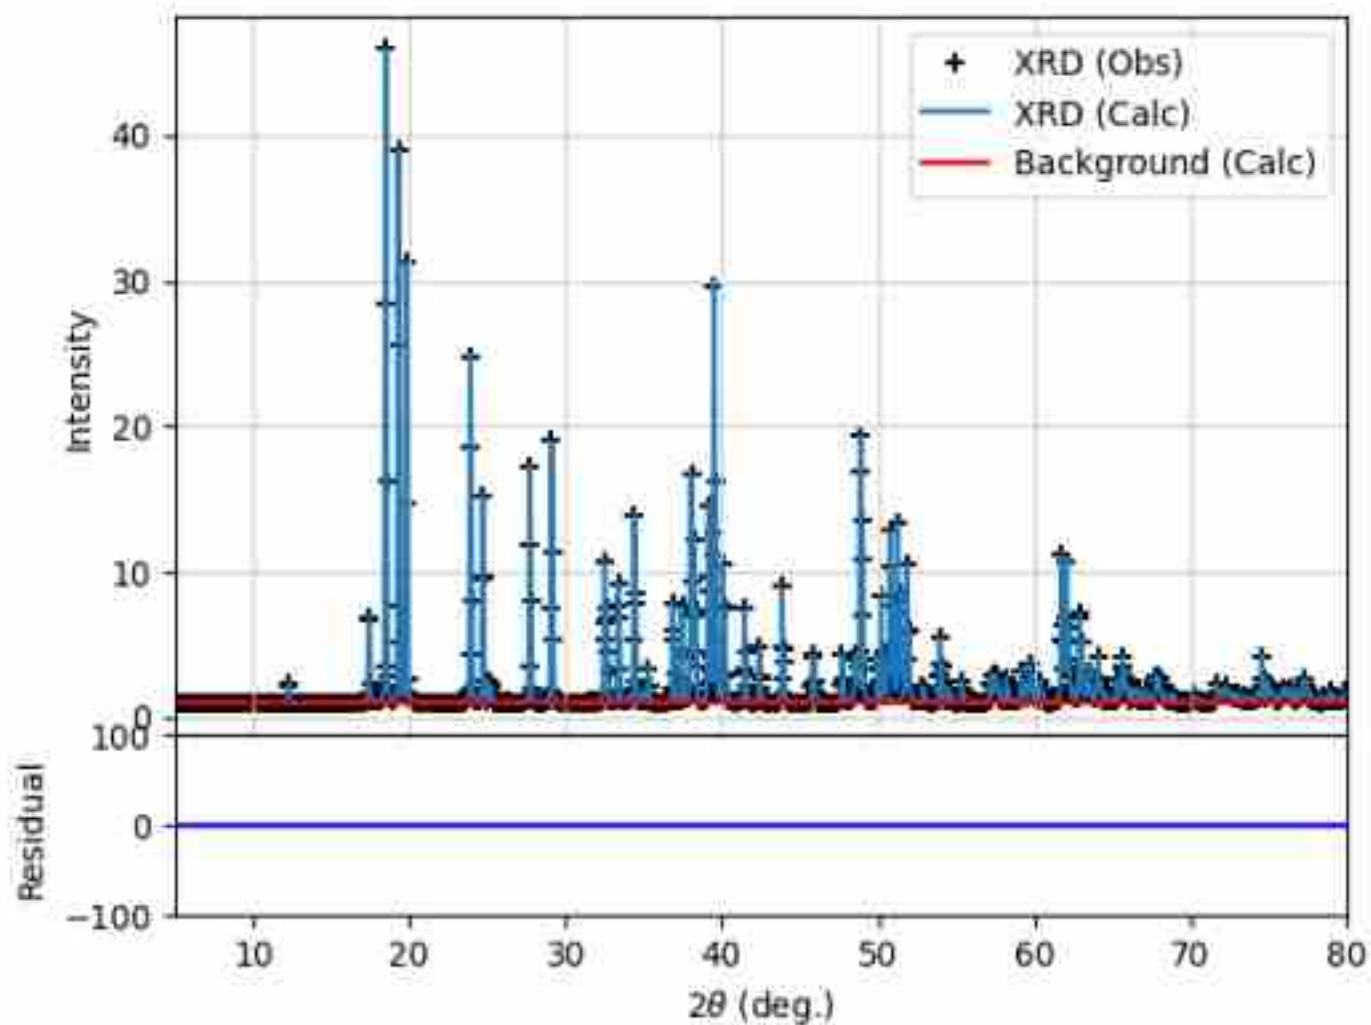

| RMSE before RR | Rwp     | RMSE after RR |
|----------------|---------|---------------|
| 0.147          | 0.00096 | 0.00049       |

# Na<sub>2</sub>Al<sub>2</sub>P<sub>4</sub>S<sub>12</sub>

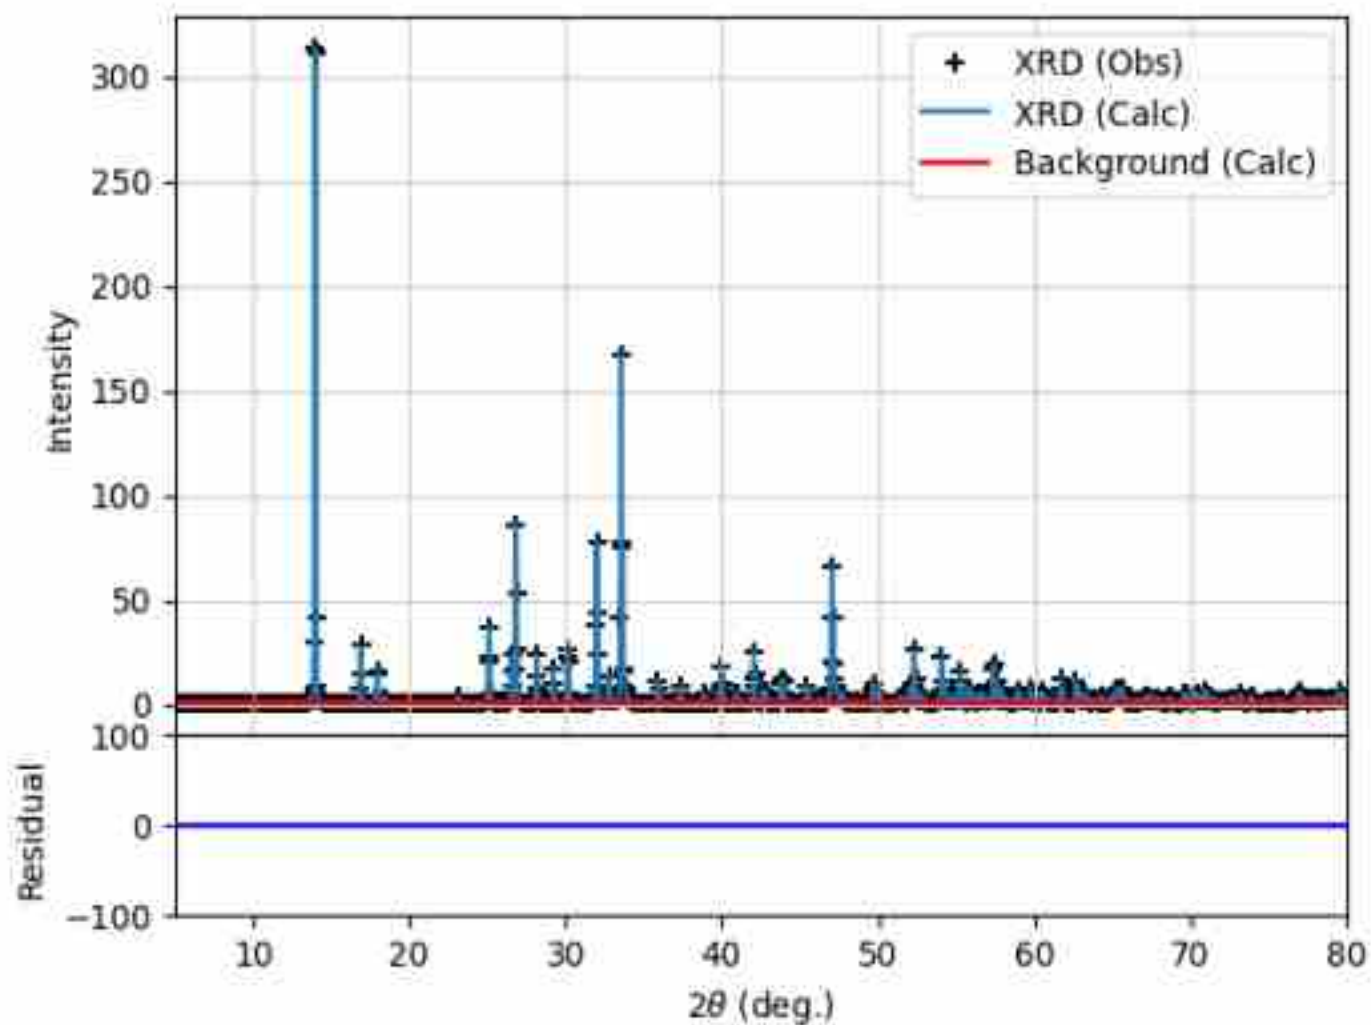

| RMSE before RR | Rwp     | RMSE after RR |
|----------------|---------|---------------|
| 0.147          | 0.00207 | 0.00036       |



# Y2W2N6

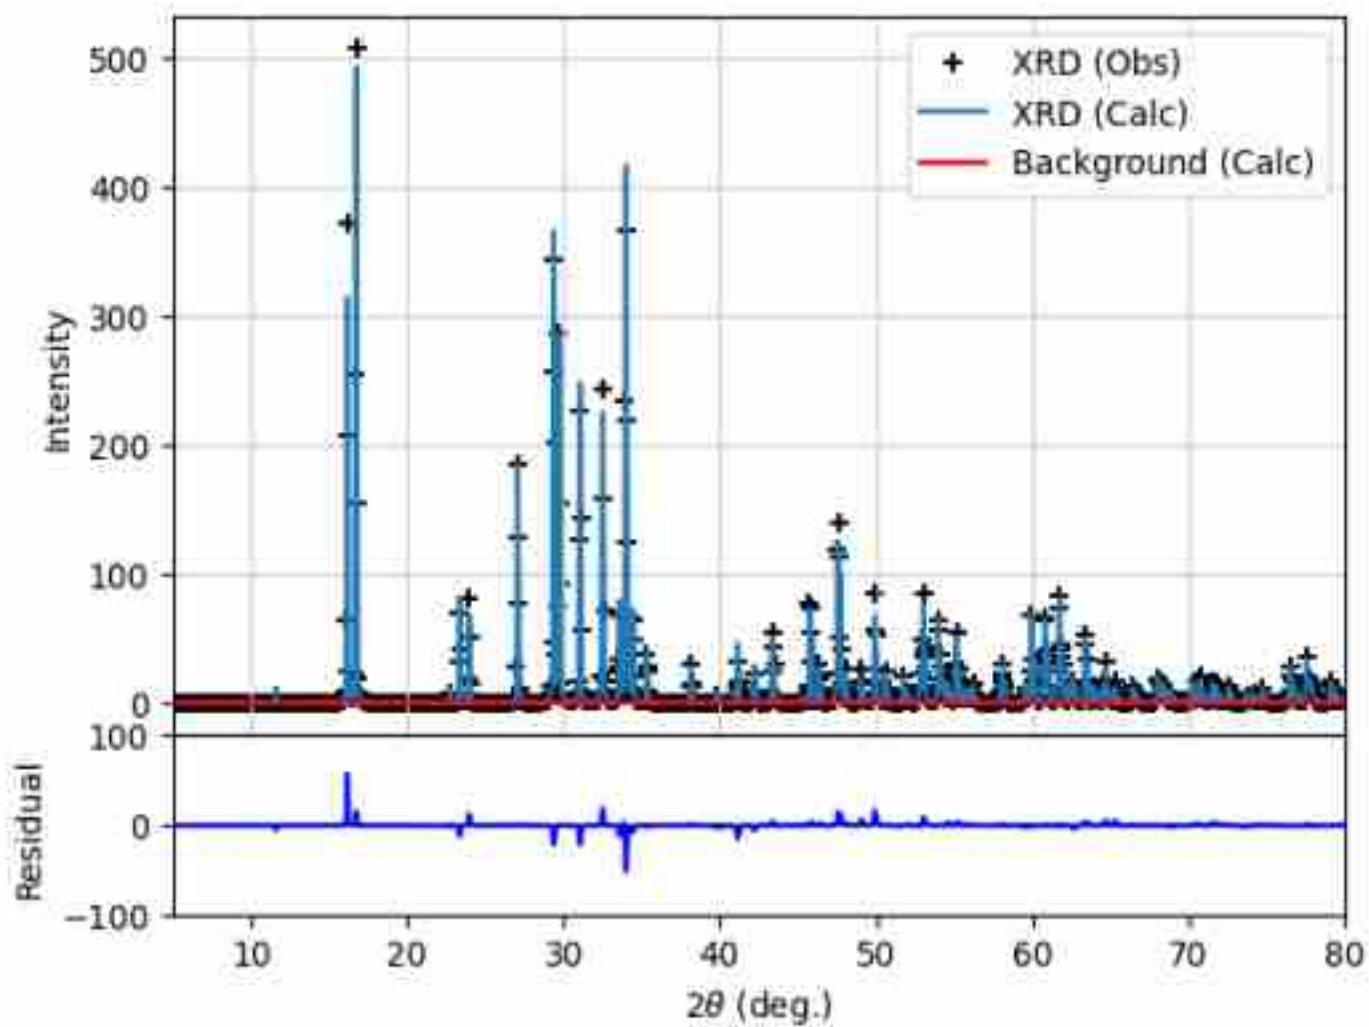

| RMSE before RR | Rwp      | RMSE after RR |
|----------------|----------|---------------|
| 0.147          | 10.54463 | 0.34785       |

# Li<sub>4</sub>Fe<sub>4</sub>F<sub>12</sub>

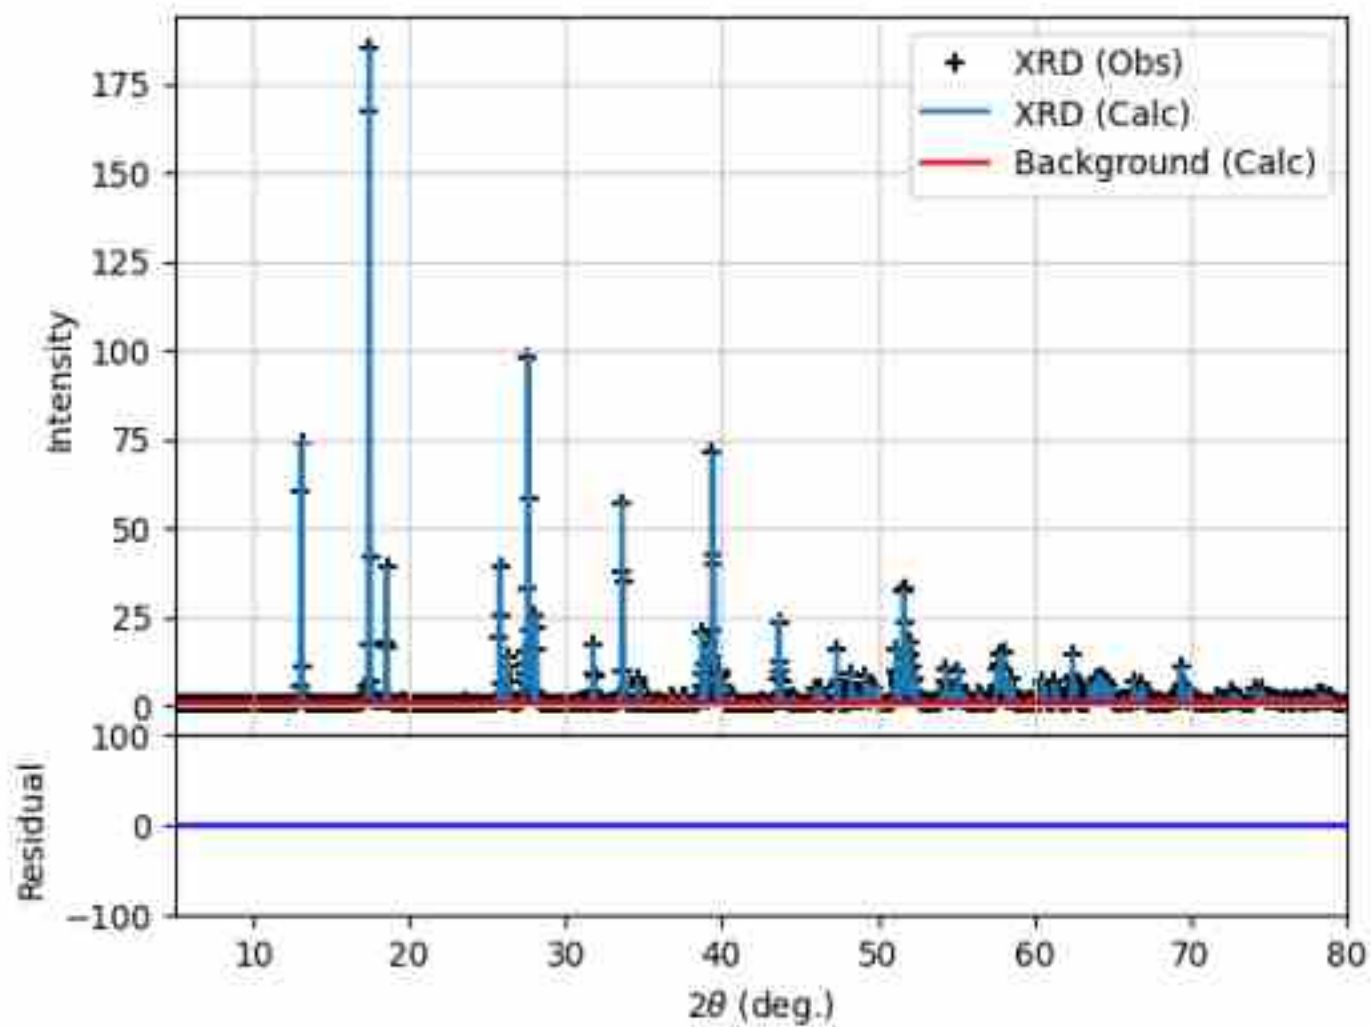

| RMSE before RR | Rwp     | RMSE after RR |
|----------------|---------|---------------|
| 0.151          | 0.00271 | 0.00077       |

# Ti<sub>2</sub>Zn<sub>2</sub>Si<sub>2</sub>O<sub>10</sub>

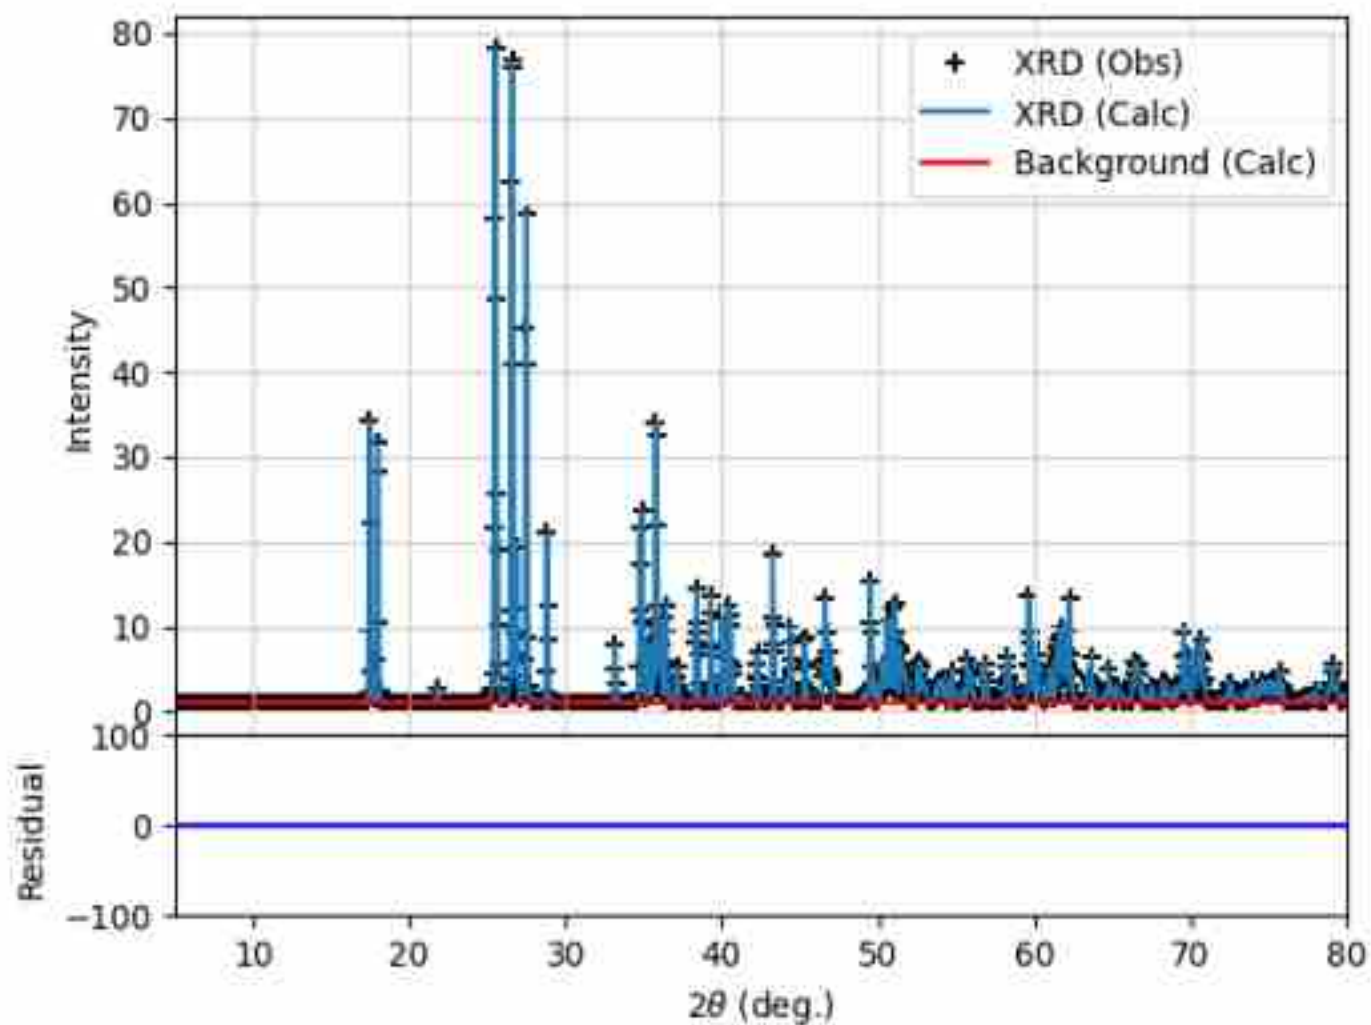

| RMSE before RR | Rwp     | RMSE after RR |
|----------------|---------|---------------|
| 0.151          | 0.00027 | 0.0           |

# Fe<sub>4</sub>H<sub>4</sub>O<sub>8</sub>

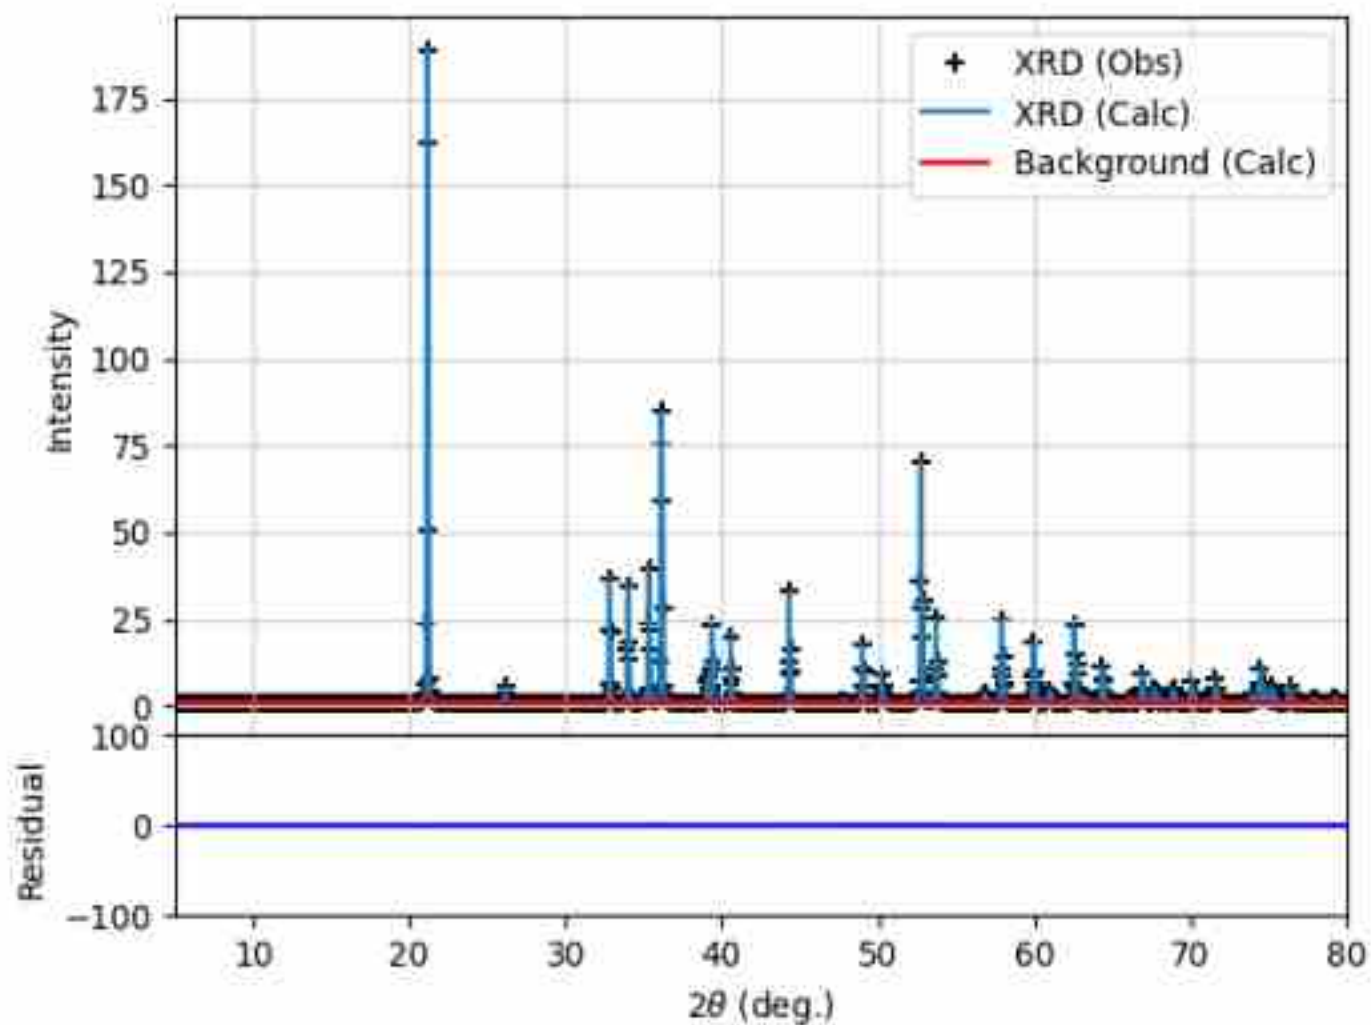

| RMSE before RR | Rwp    | RMSE after RR |
|----------------|--------|---------------|
| 0.153          | 0.6725 | None          |

# H4S2O8

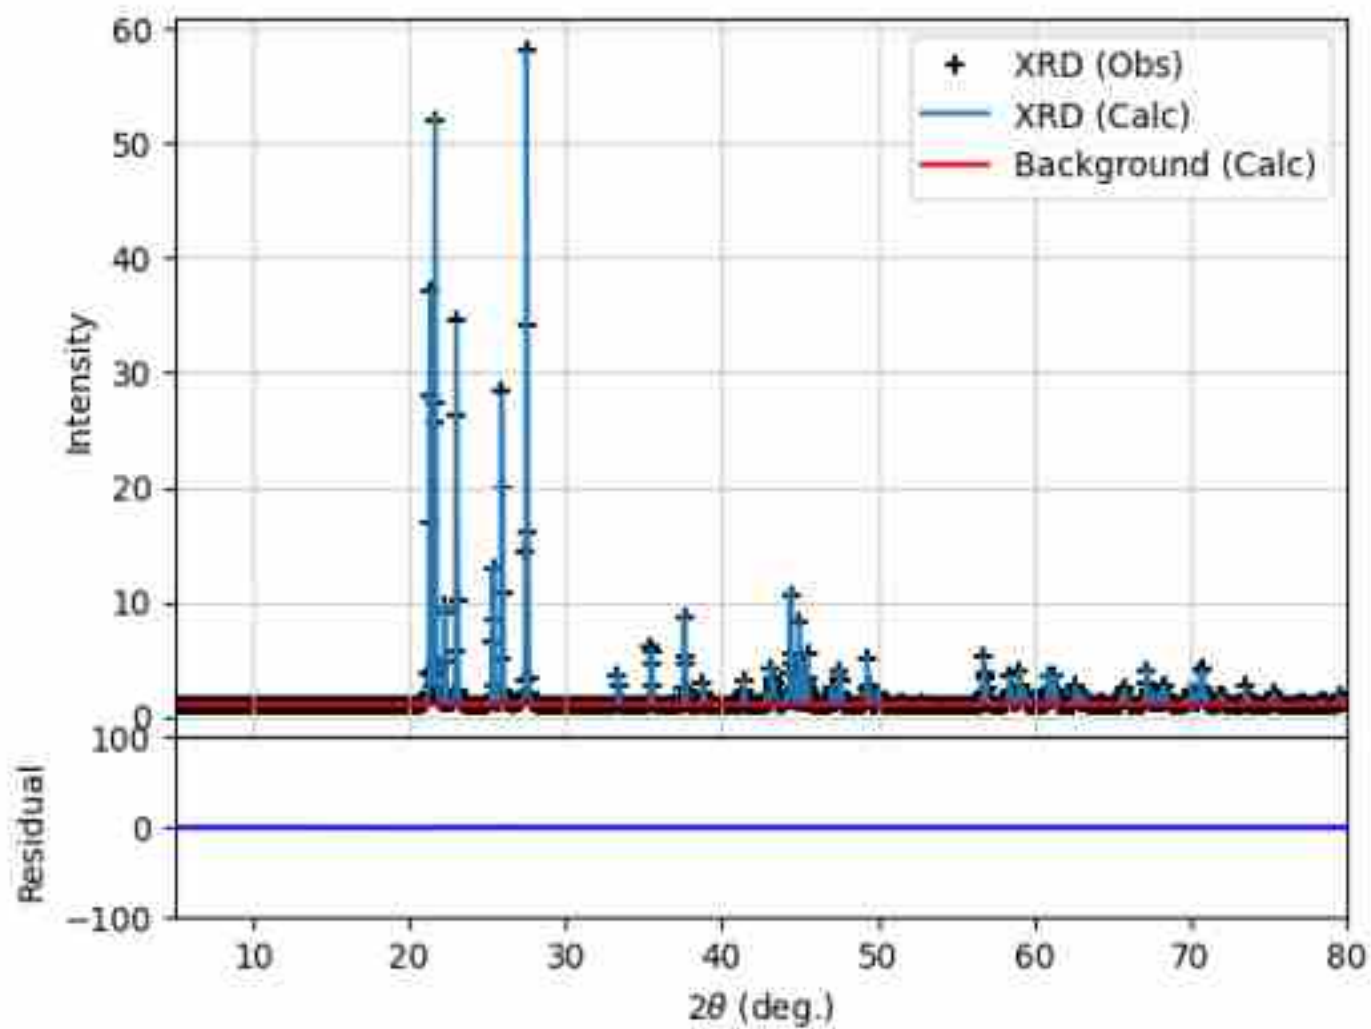

| RMSE before RR | Rwp     | RMSE after RR |
|----------------|---------|---------------|
| 0.153          | 0.81146 | 0.23192       |

# Rb12Al2Sb6

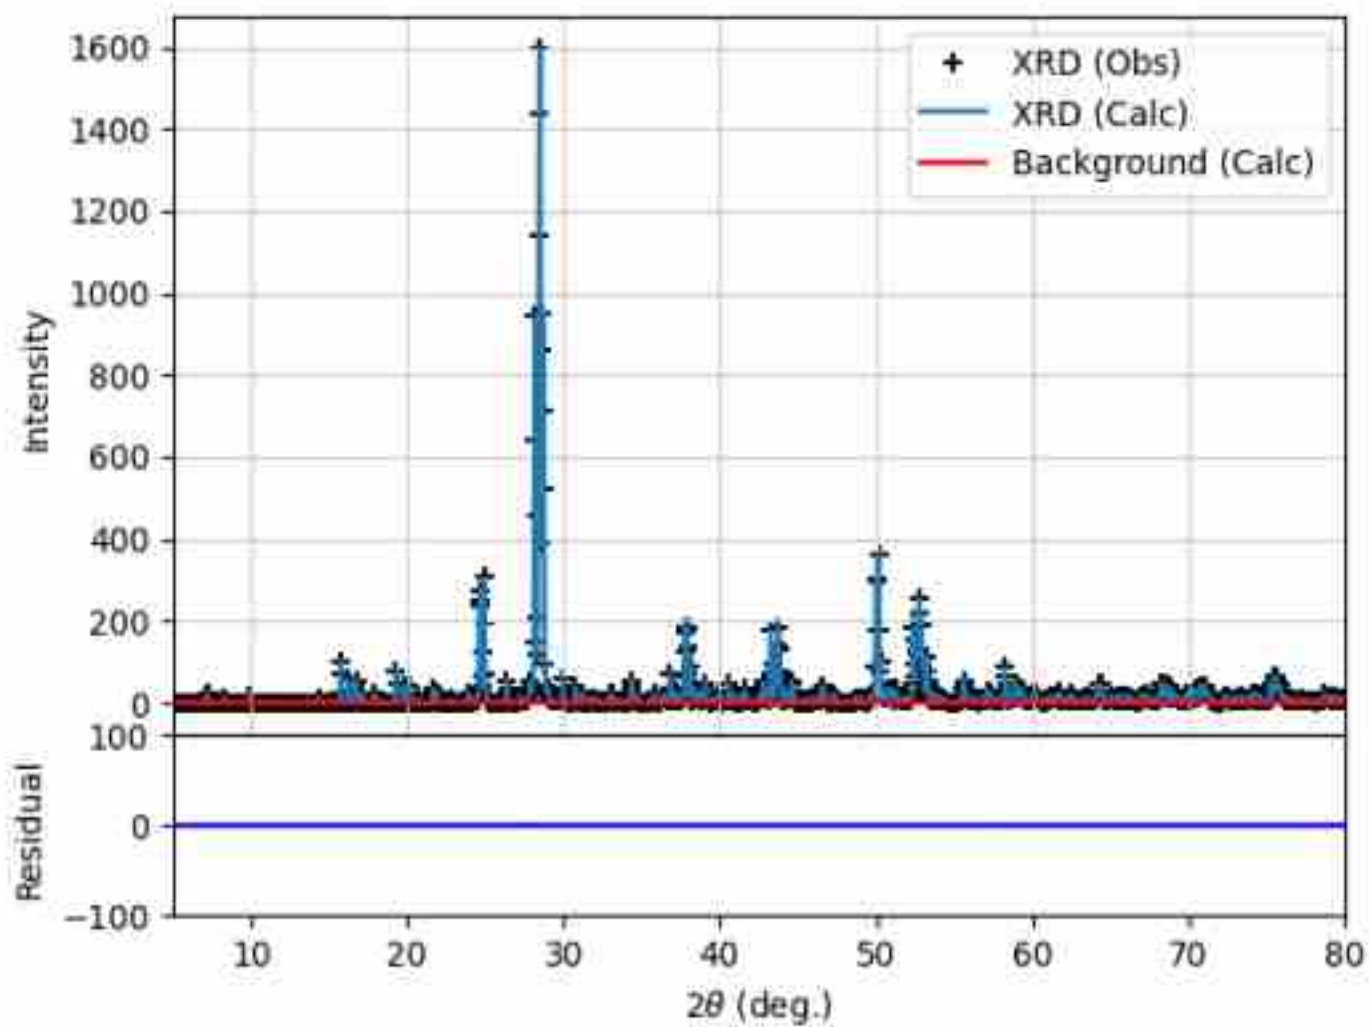

| RMSE before RR | Rwp     | RMSE after RR |
|----------------|---------|---------------|
| 0.153          | 0.13875 | 0.00436       |

# Ti<sub>2</sub>Fe<sub>4</sub>O<sub>8</sub>

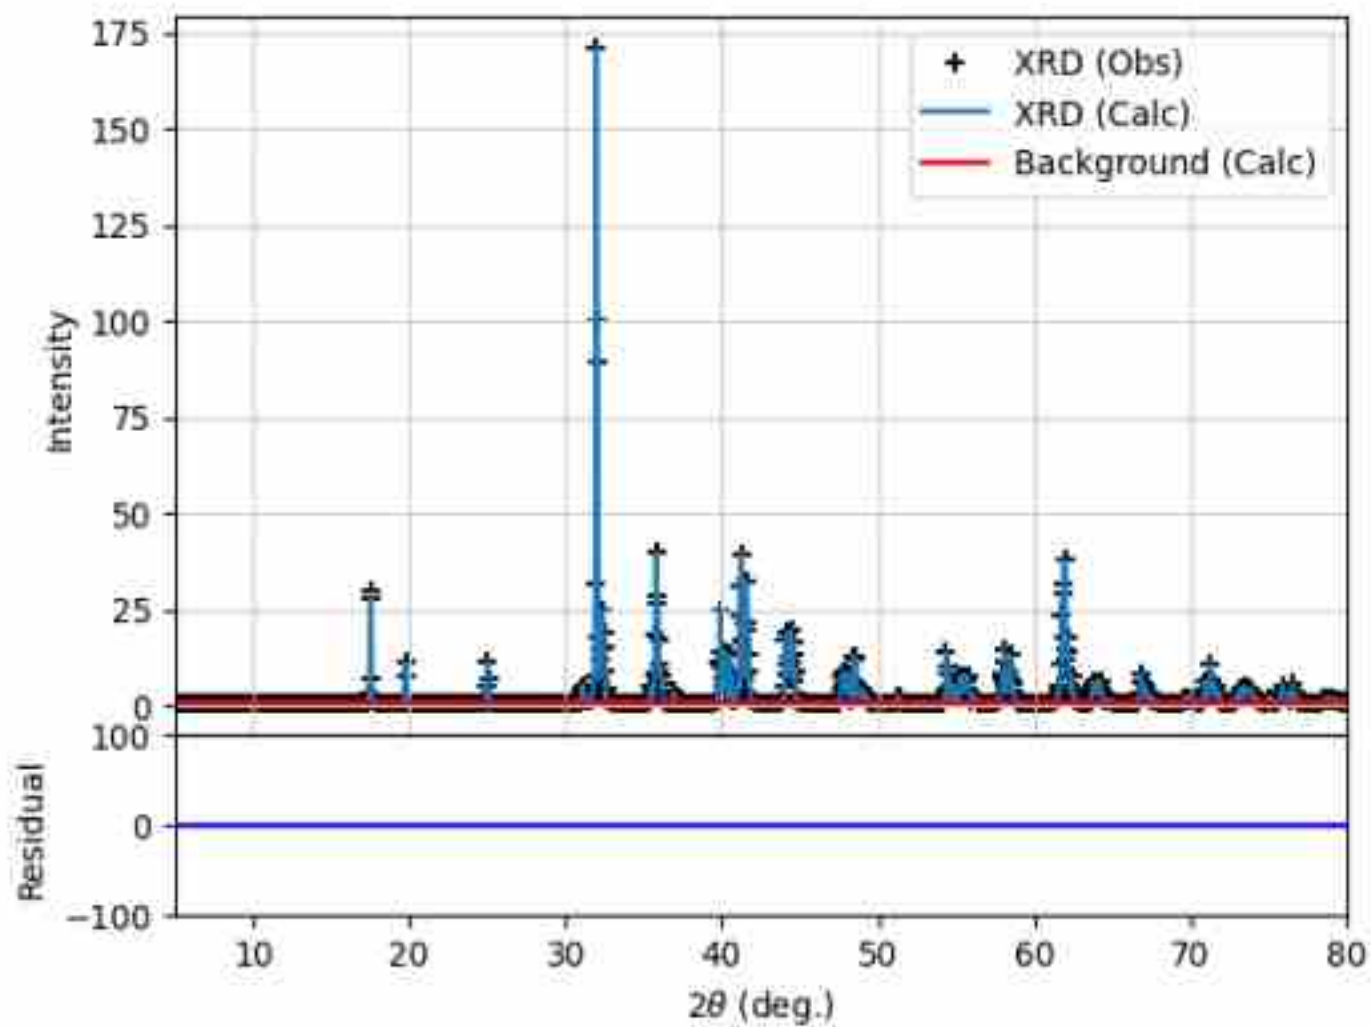

| RMSE before RR | Rwp     | RMSE after RR |
|----------------|---------|---------------|
| 0.154          | 0.00109 | 1e-05         |

# Sr1Ti1Fe3Bi3O12

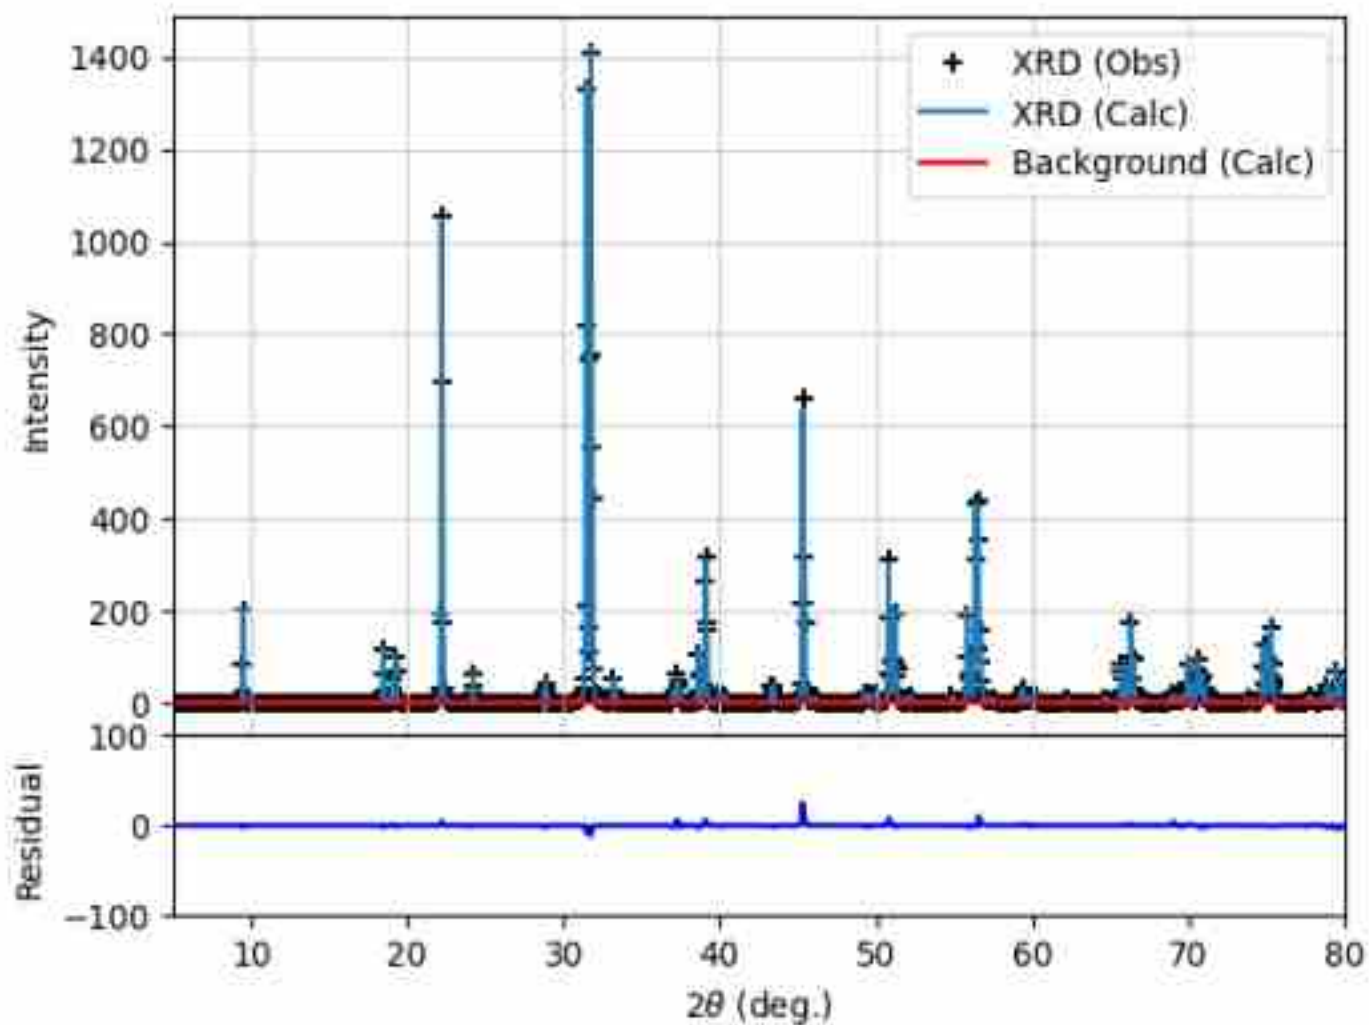

| RMSE before RR | Rwp     | RMSE after RR |
|----------------|---------|---------------|
| 0.156          | 2.60001 | 0.28899       |



# Sr<sub>4</sub>Cu<sub>2</sub>C<sub>2</sub>O<sub>10</sub>

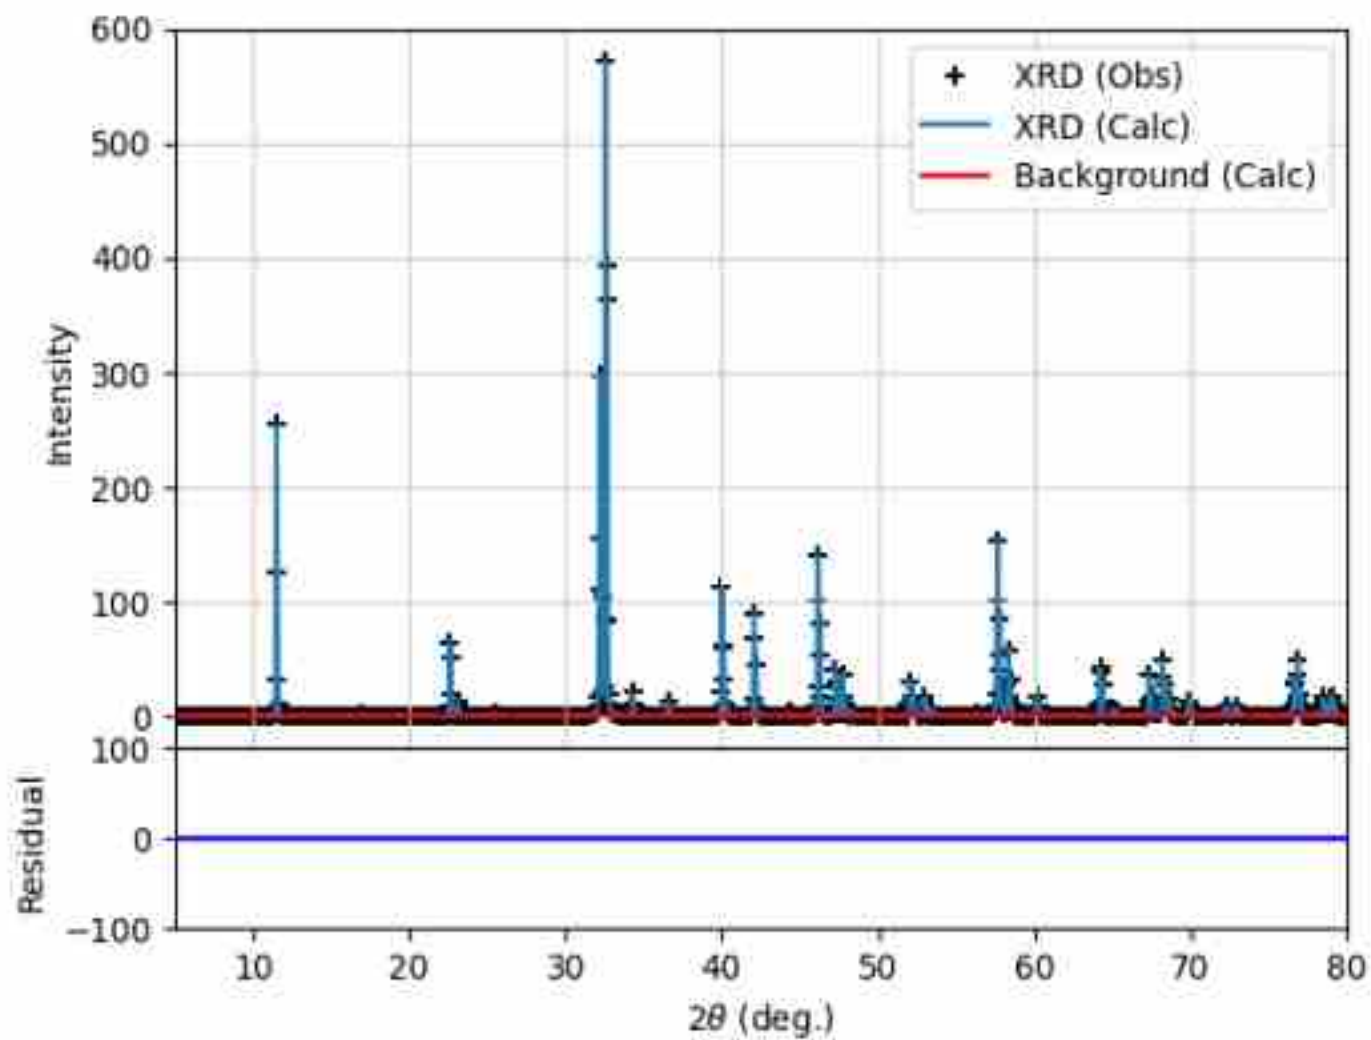

| RMSE before RR | Rwp     | RMSE after RR |
|----------------|---------|---------------|
| 0.156          | 0.00377 | 0.00184       |

# Tl1Sn1

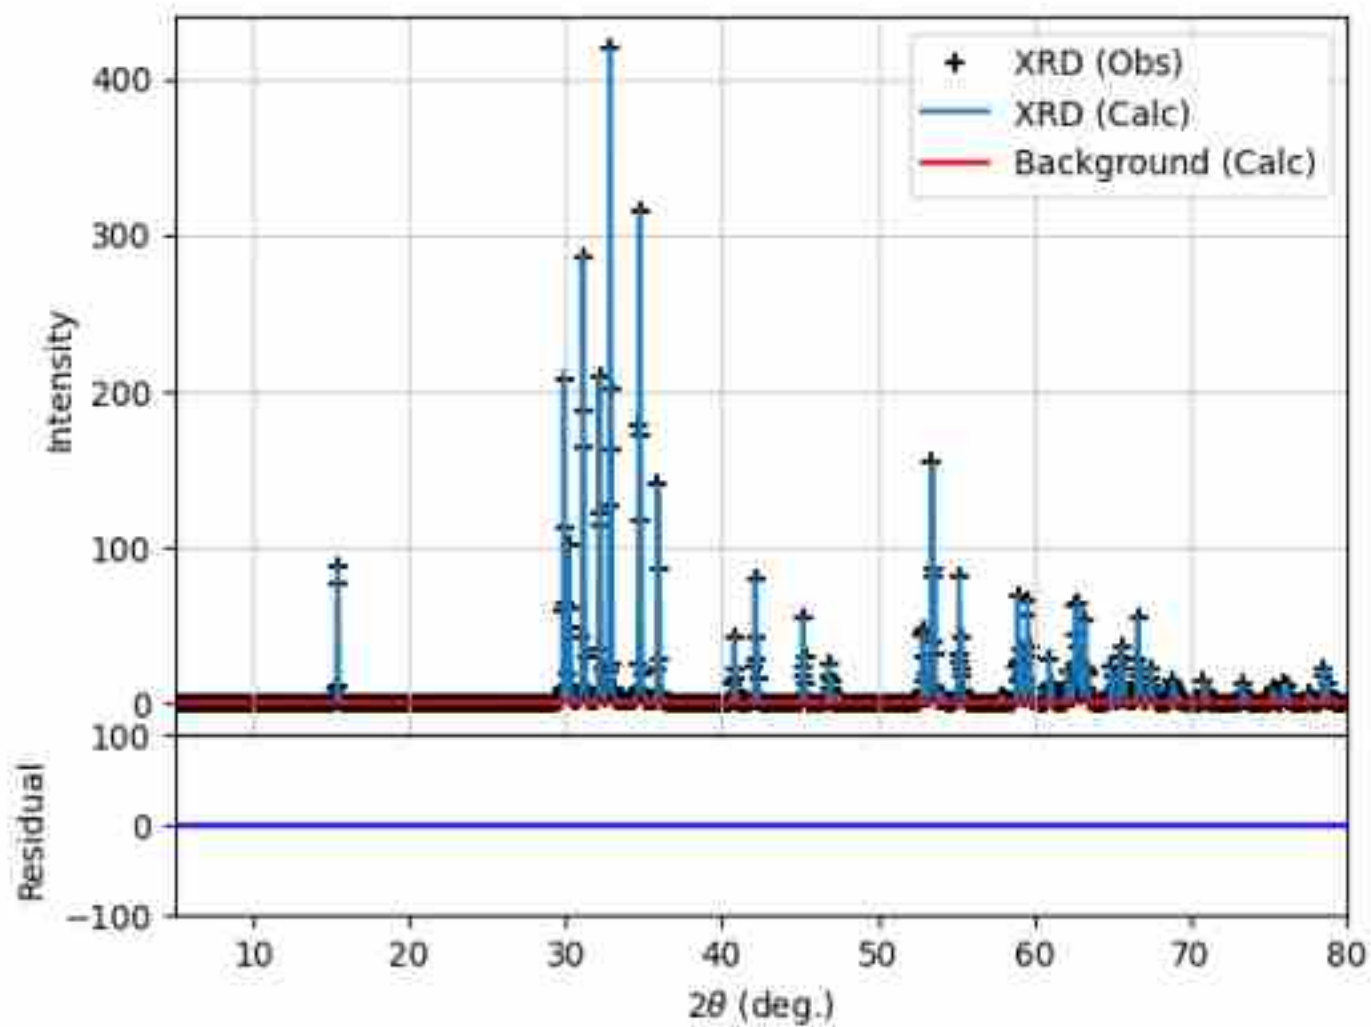

| RMSE before RR | Rwp     | RMSE after RR |
|----------------|---------|---------------|
| 0.156          | 0.00324 | 9e-05         |

# Ba<sub>2</sub>Ca<sub>2</sub>I<sub>8</sub>

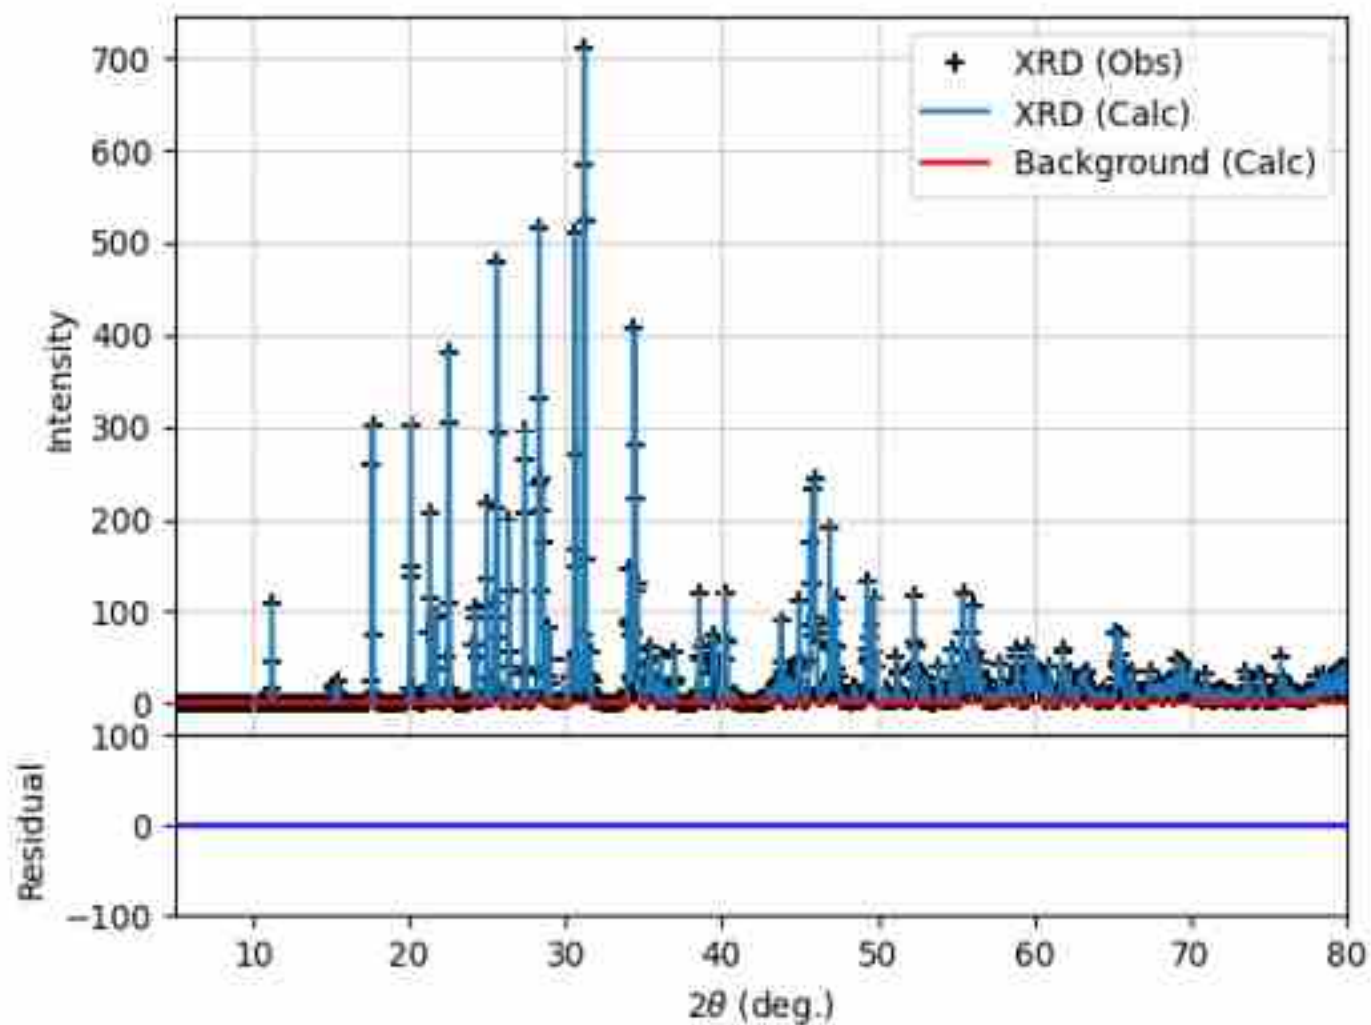

| RMSE before RR | Rwp     | RMSE after RR |
|----------------|---------|---------------|
| 0.157          | 0.00382 | 0.00021       |

# Ca<sub>2</sub>Sn<sub>1</sub>W<sub>1</sub>O<sub>6</sub>

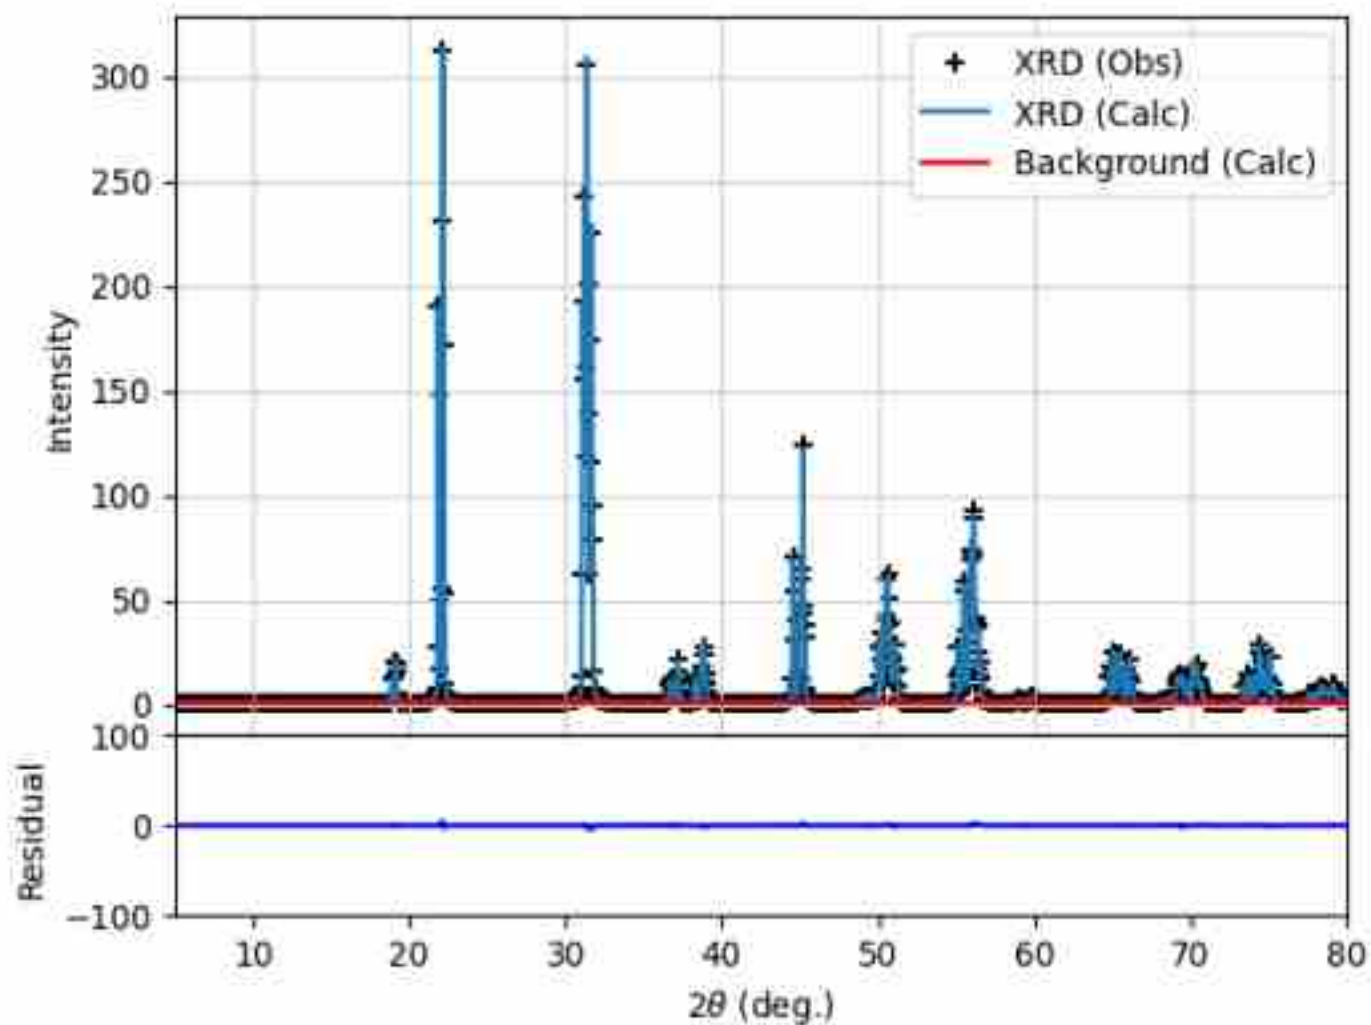

| RMSE before RR | Rwp     | RMSE after RR |
|----------------|---------|---------------|
| 0.157          | 2.58859 | 0.10951       |

# K<sub>4</sub>Fe<sub>4</sub>O<sub>8</sub>

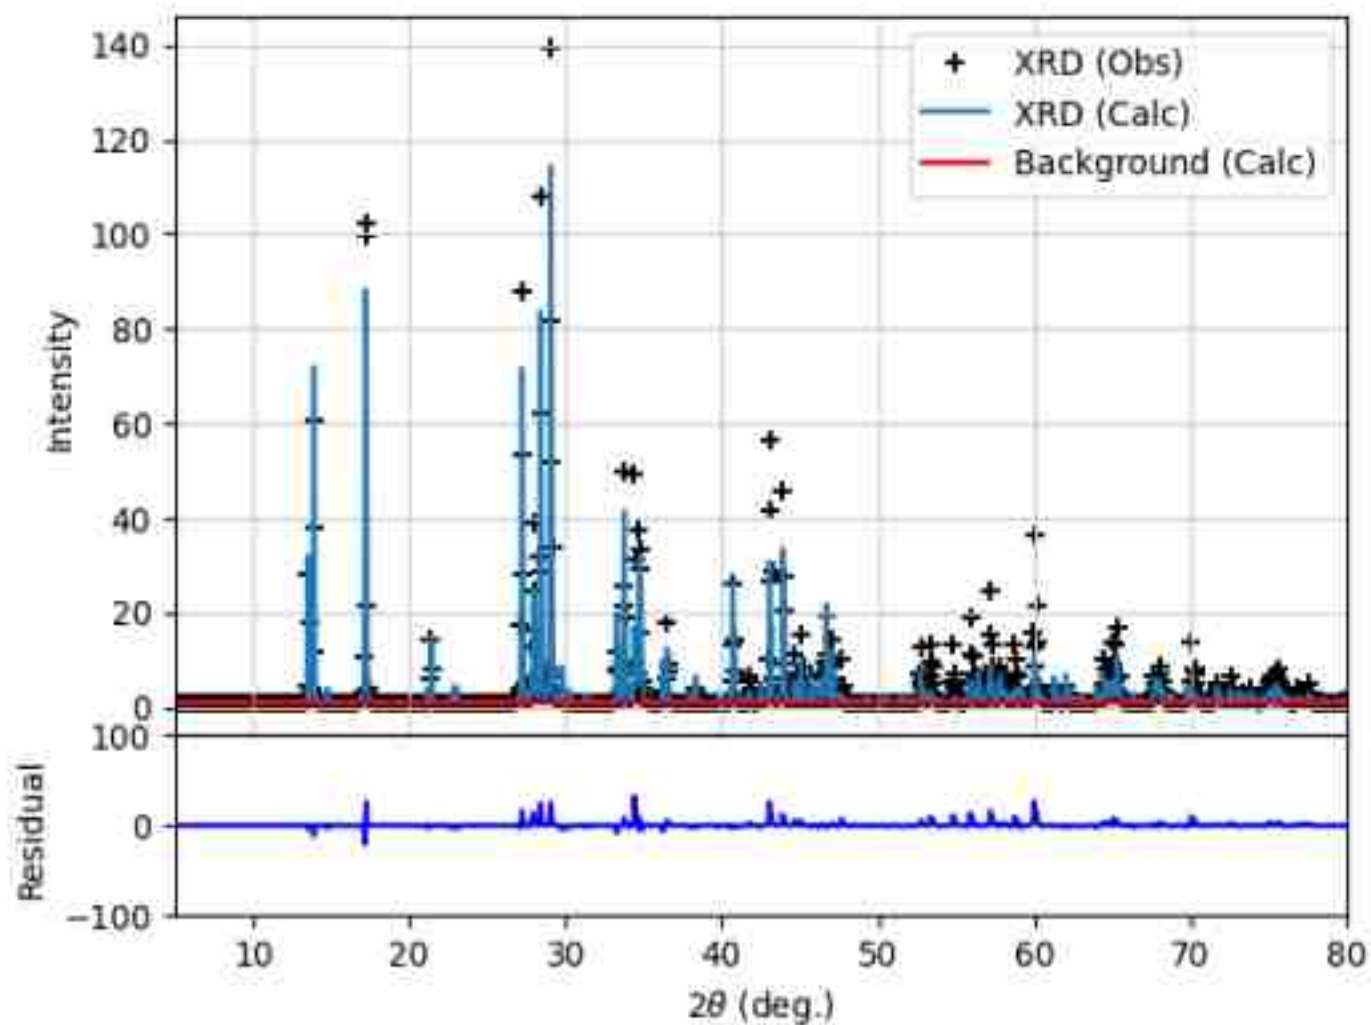

| RMSE before RR | Rwp      | RMSE after RR |
|----------------|----------|---------------|
| 0.158          | 38.04787 | None          |

# Zn<sub>2</sub>Ni<sub>8</sub>O<sub>10</sub>

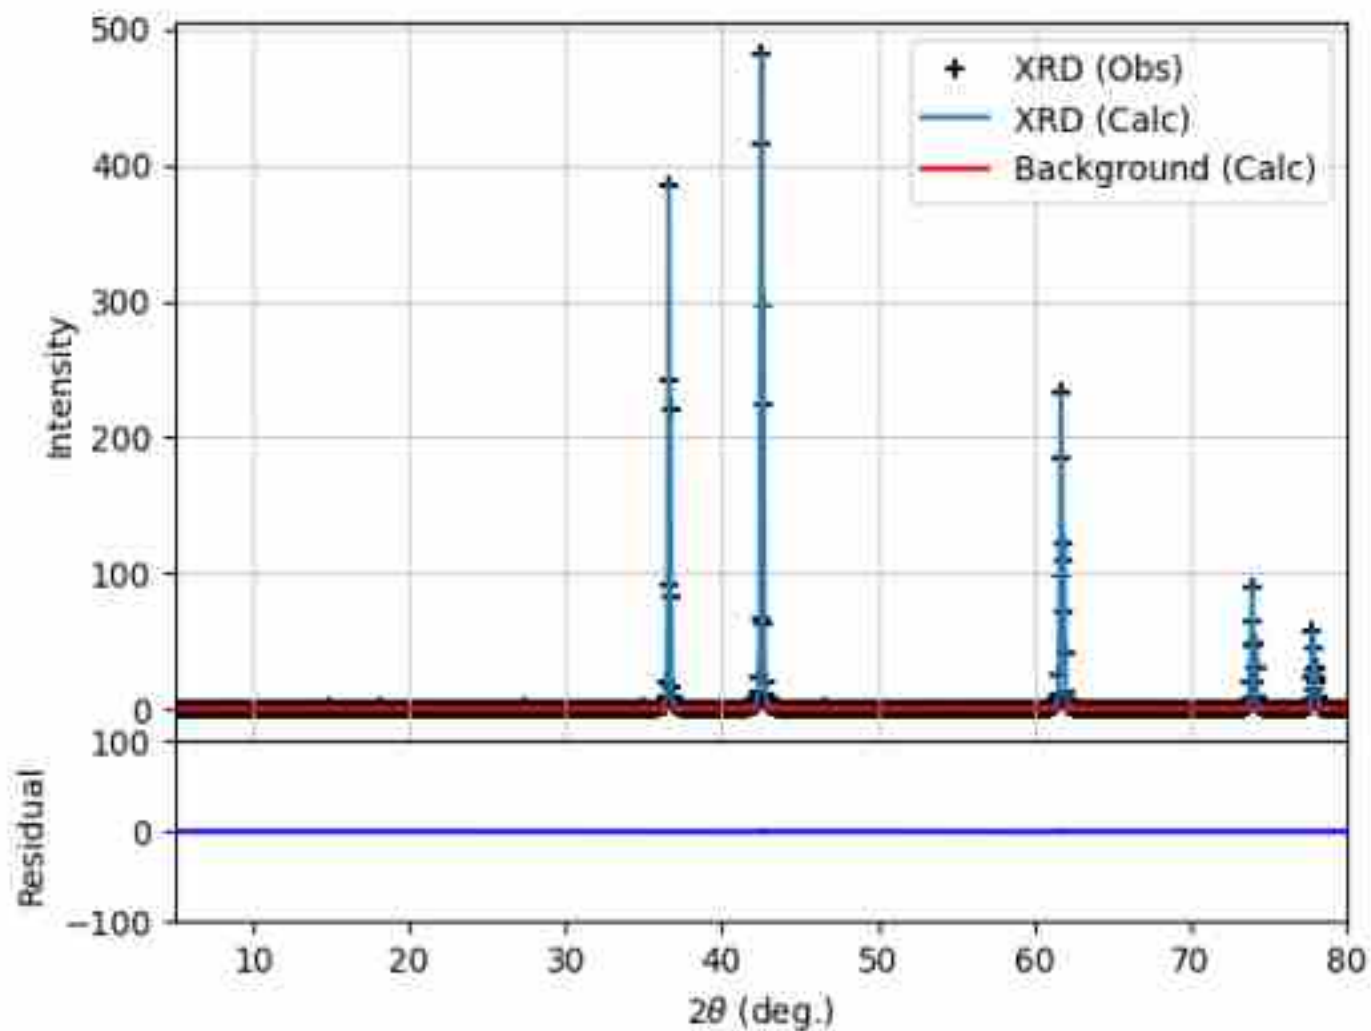

| RMSE before RR | Rwp     | RMSE after RR |
|----------------|---------|---------------|
| 0.158          | 0.36803 | 0.00544       |

# La<sub>2</sub>Mo<sub>2</sub>N<sub>6</sub>

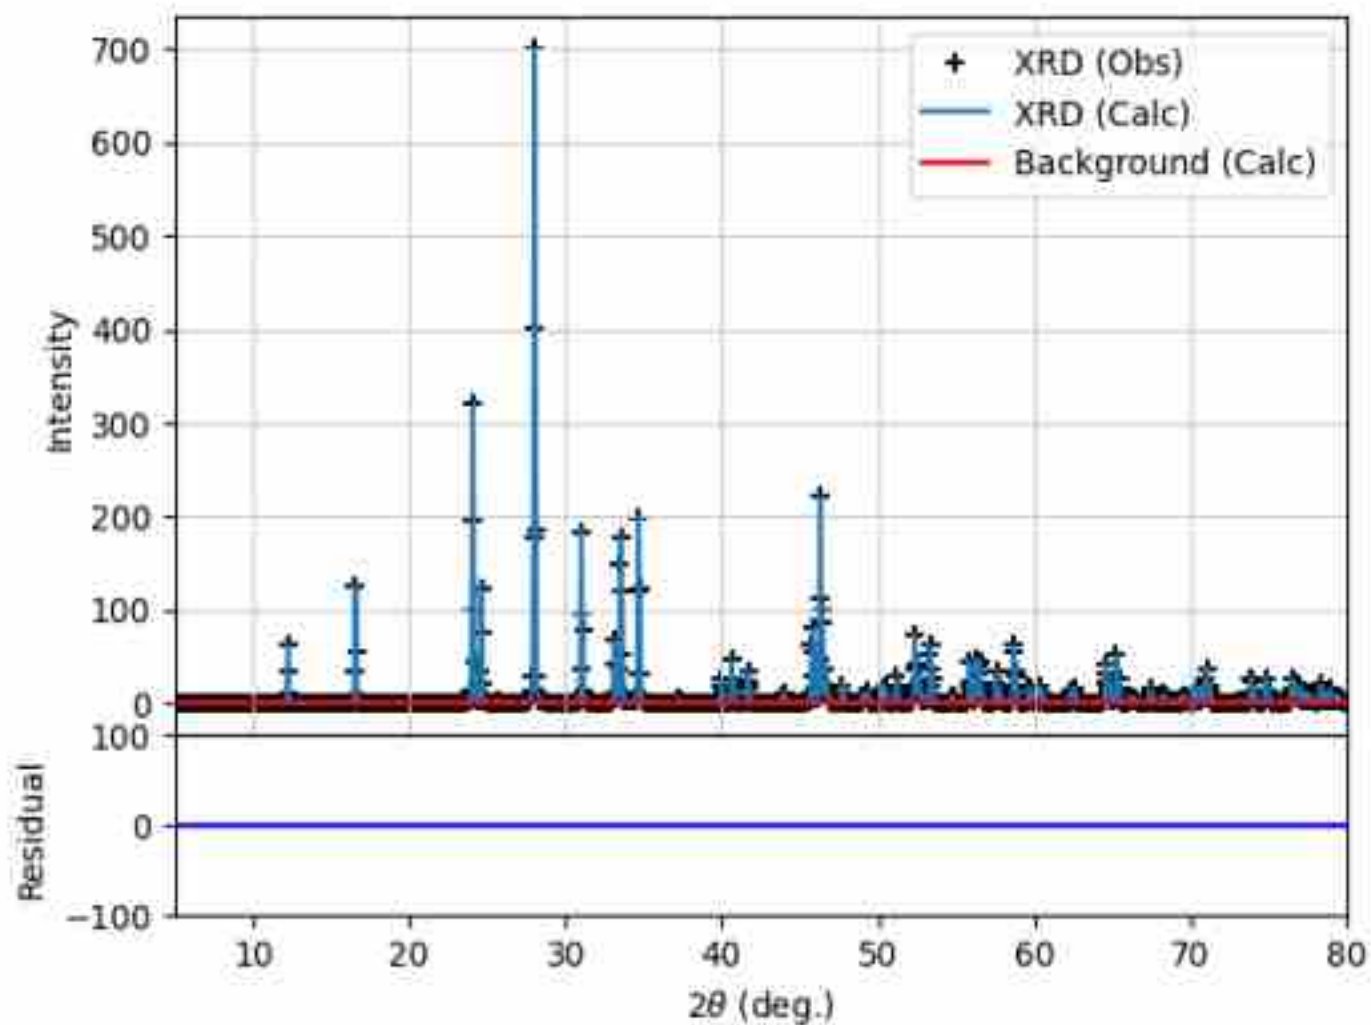

| RMSE before RR | Rwp     | RMSE after RR |
|----------------|---------|---------------|
| 0.159          | 0.00353 | 0.00189       |

# Al<sub>2</sub>H<sub>2</sub>O<sub>4</sub>

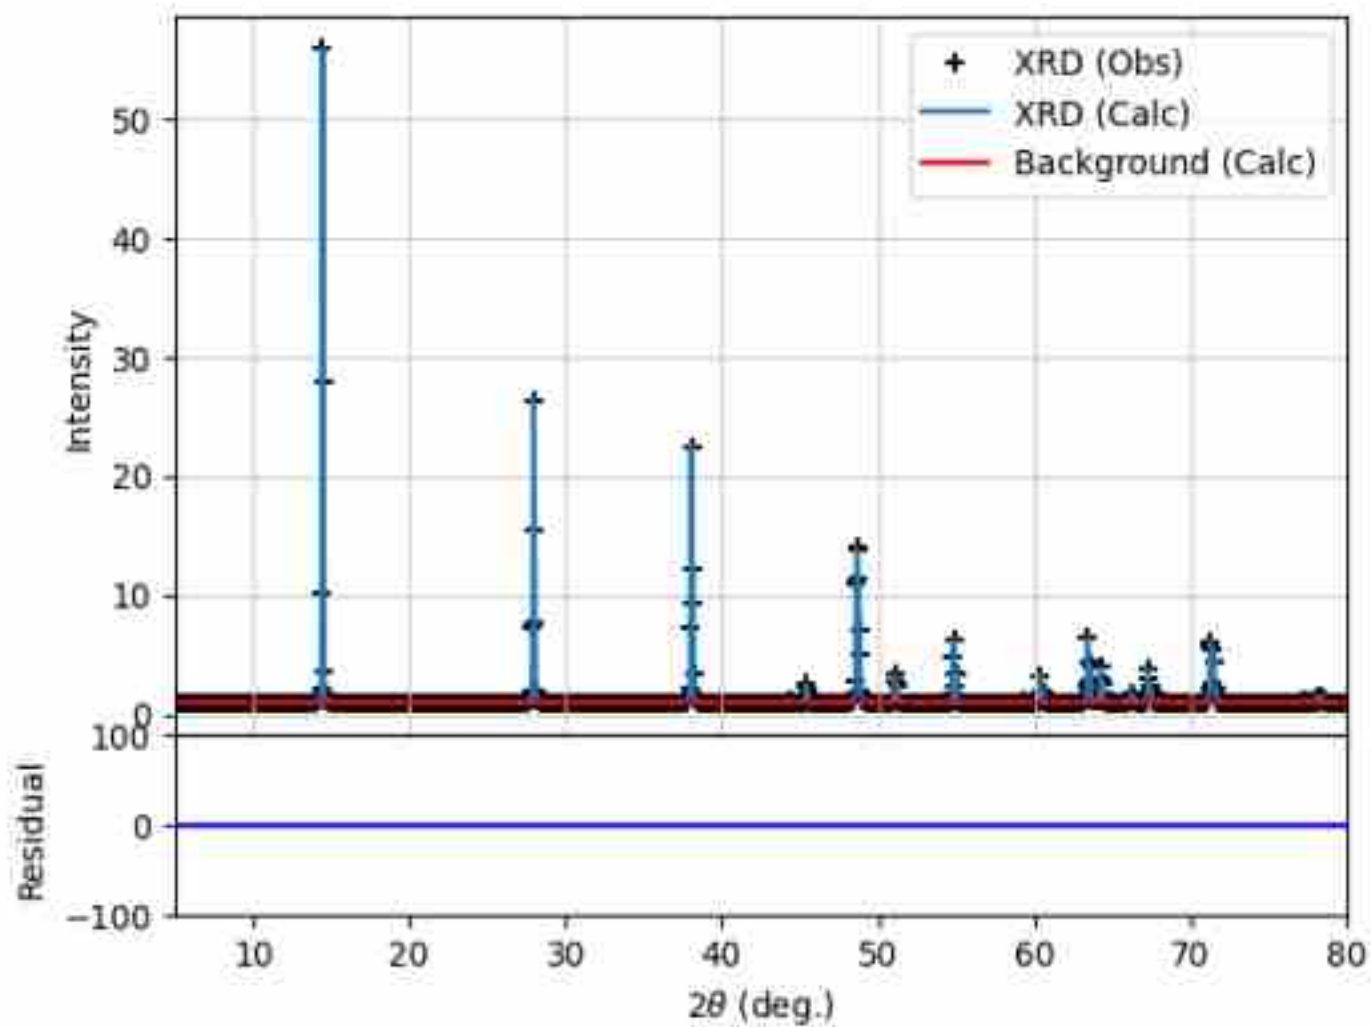

| RMSE before RR | Rwp     | RMSE after RR |
|----------------|---------|---------------|
| 0.161          | 0.10991 | 0.2263        |



# Li<sub>4</sub>H<sub>4</sub>Se<sub>2</sub>O<sub>10</sub>

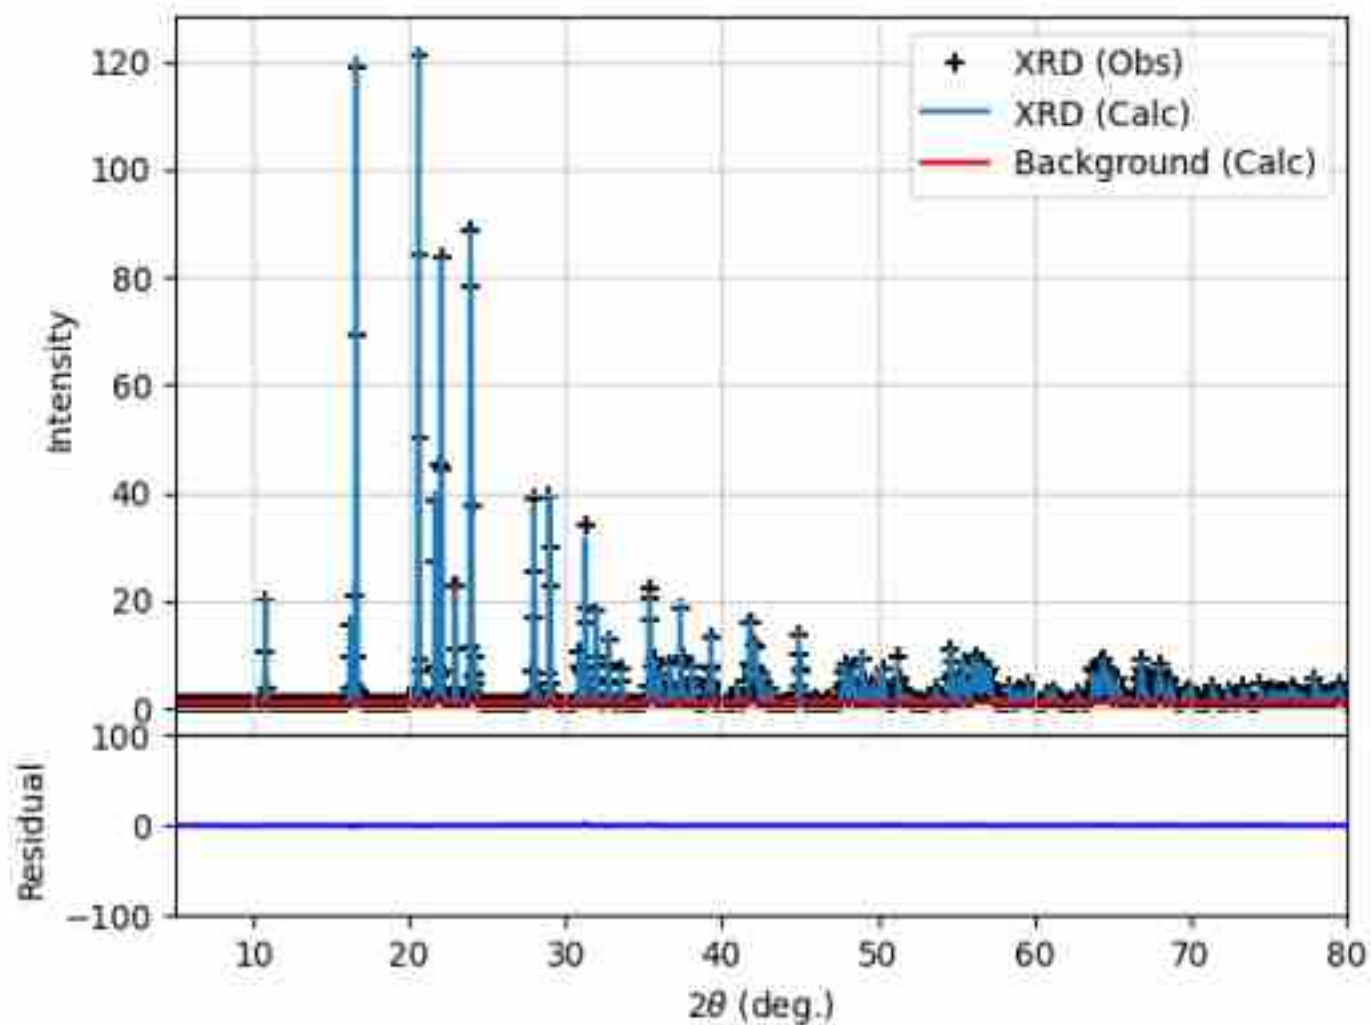

| RMSE before RR | Rwp     | RMSE after RR |
|----------------|---------|---------------|
| 0.162          | 3.21646 | None          |

# Li<sub>6</sub>Mn<sub>4</sub>O<sub>10</sub>

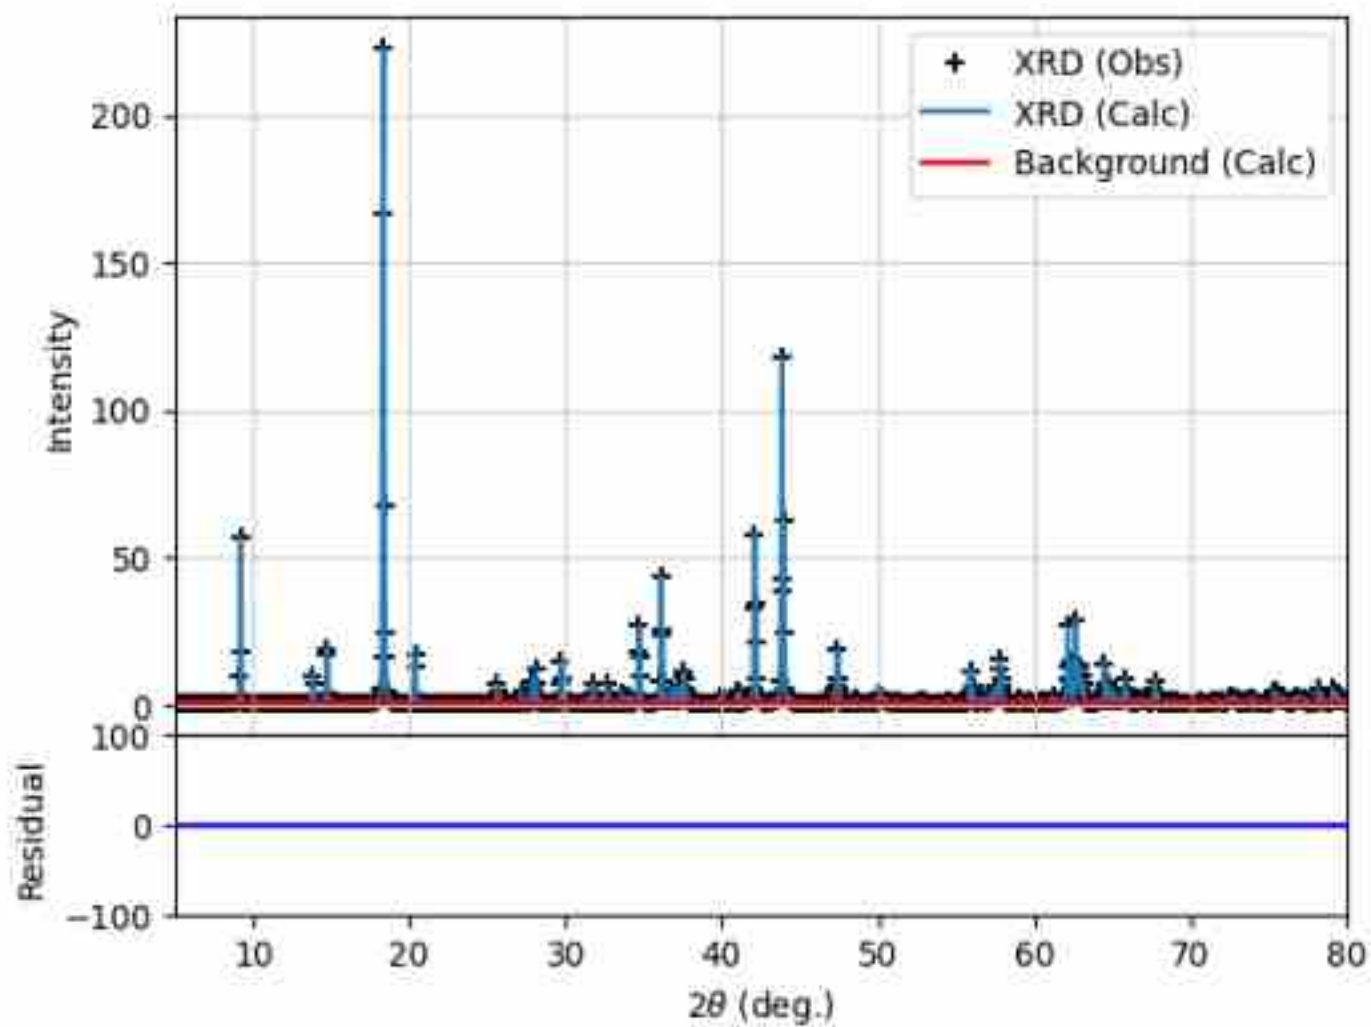

| RMSE before RR | Rwp     | RMSE after RR |
|----------------|---------|---------------|
| 0.162          | 0.00179 | 0.00081       |

# Li<sub>3</sub>N<sub>1</sub>

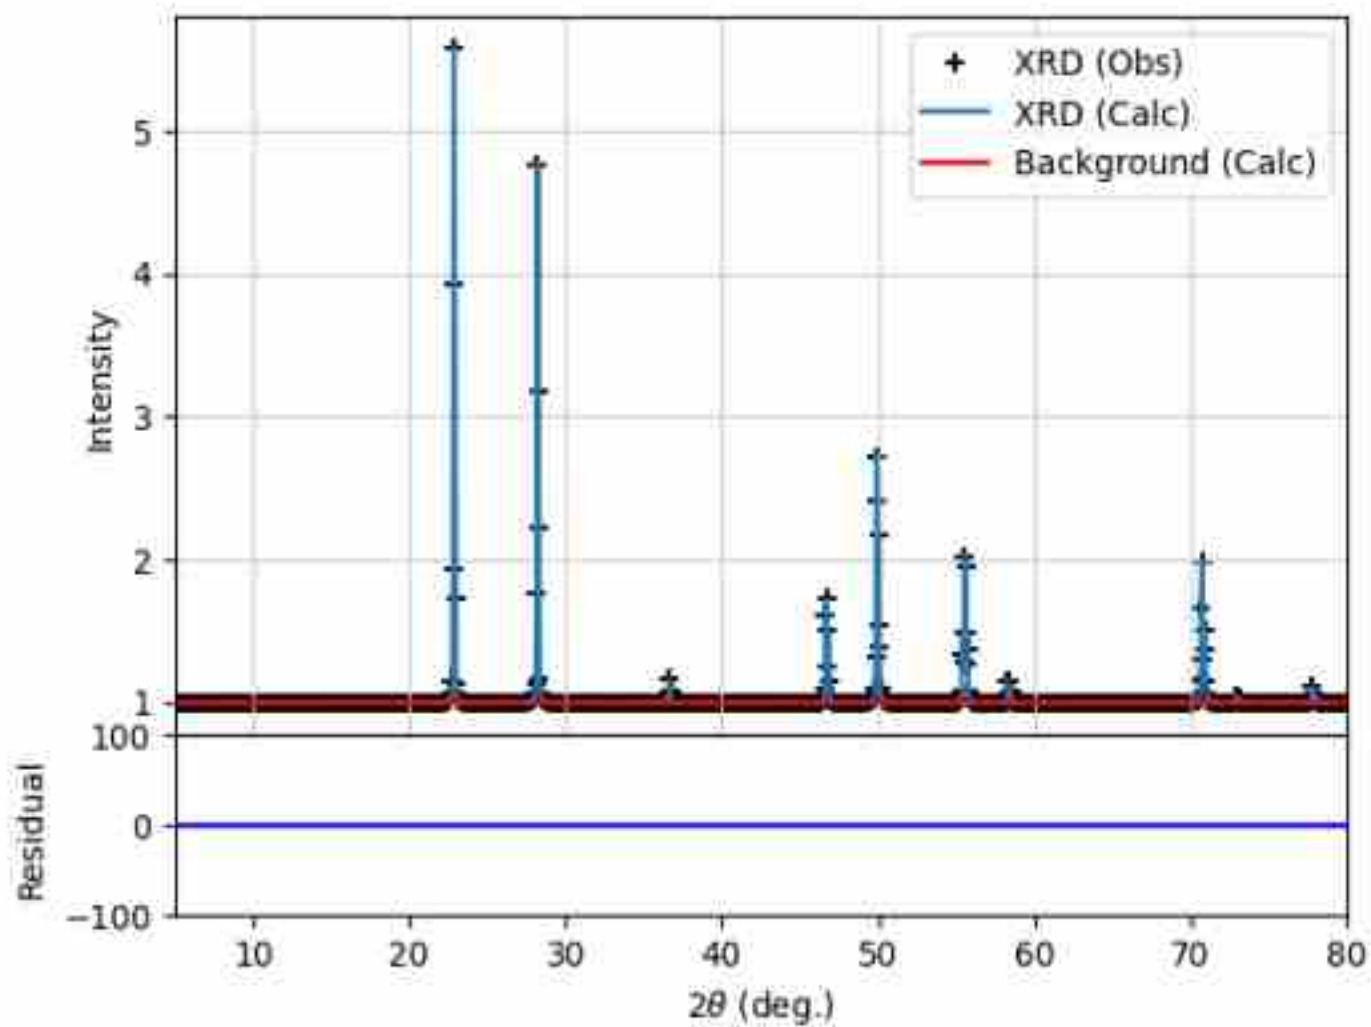

| RMSE before RR | Rwp     | RMSE after RR |
|----------------|---------|---------------|
| 0.163          | 0.00039 | 0.00119       |

# Mg<sub>1</sub>Al<sub>2</sub>H<sub>8</sub>

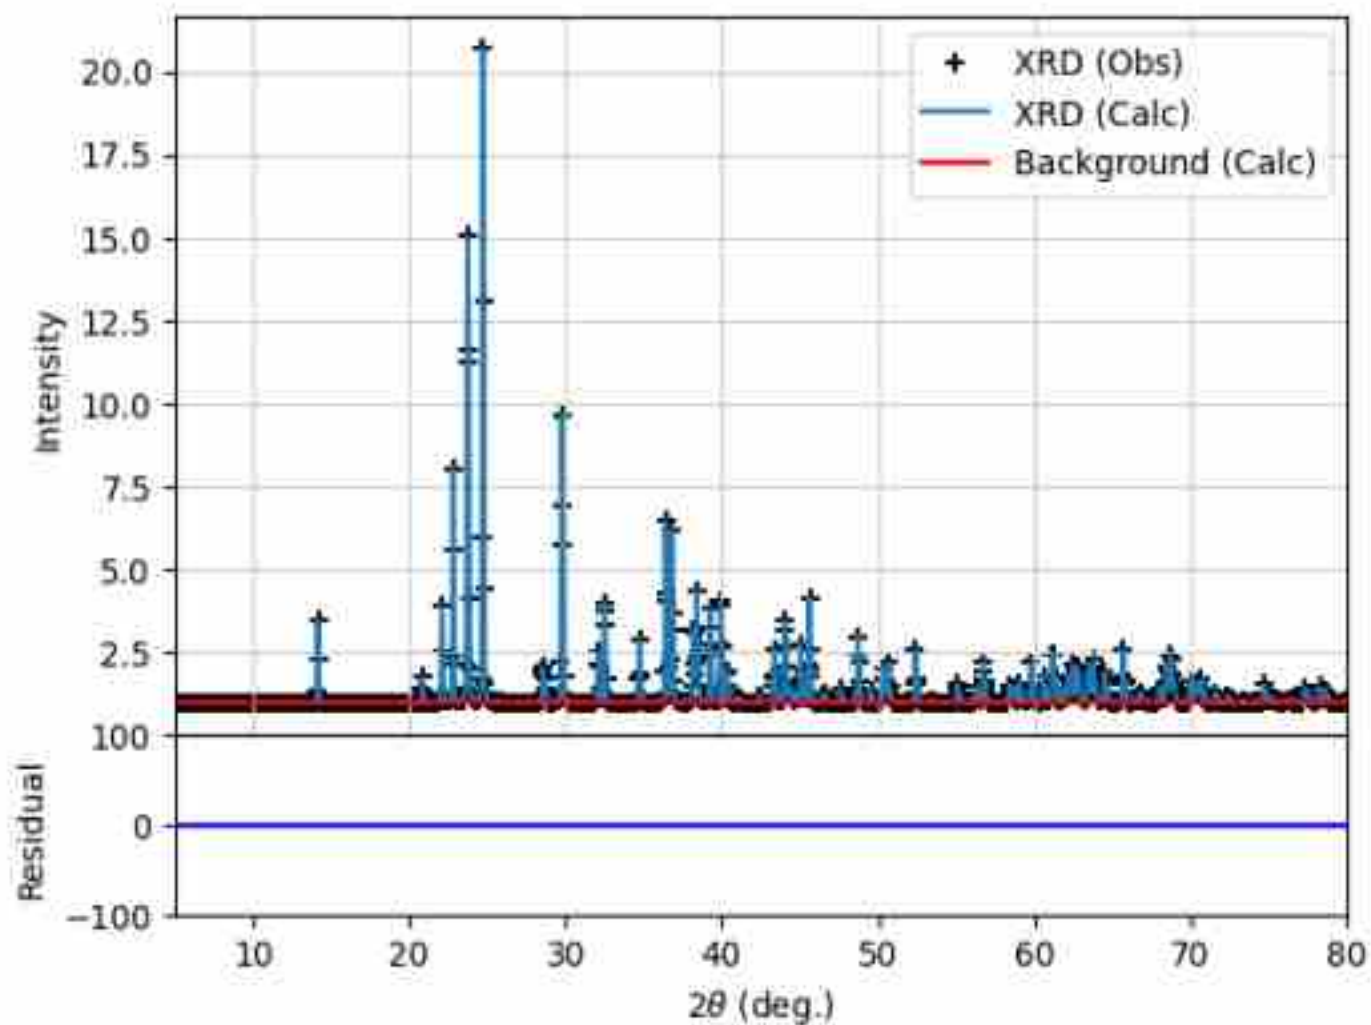

| RMSE before RR | Rwp    | RMSE after RR |
|----------------|--------|---------------|
| 0.164          | 0.0009 | 0.00198       |

# Ag<sub>4</sub>Te<sub>2</sub>S<sub>6</sub>

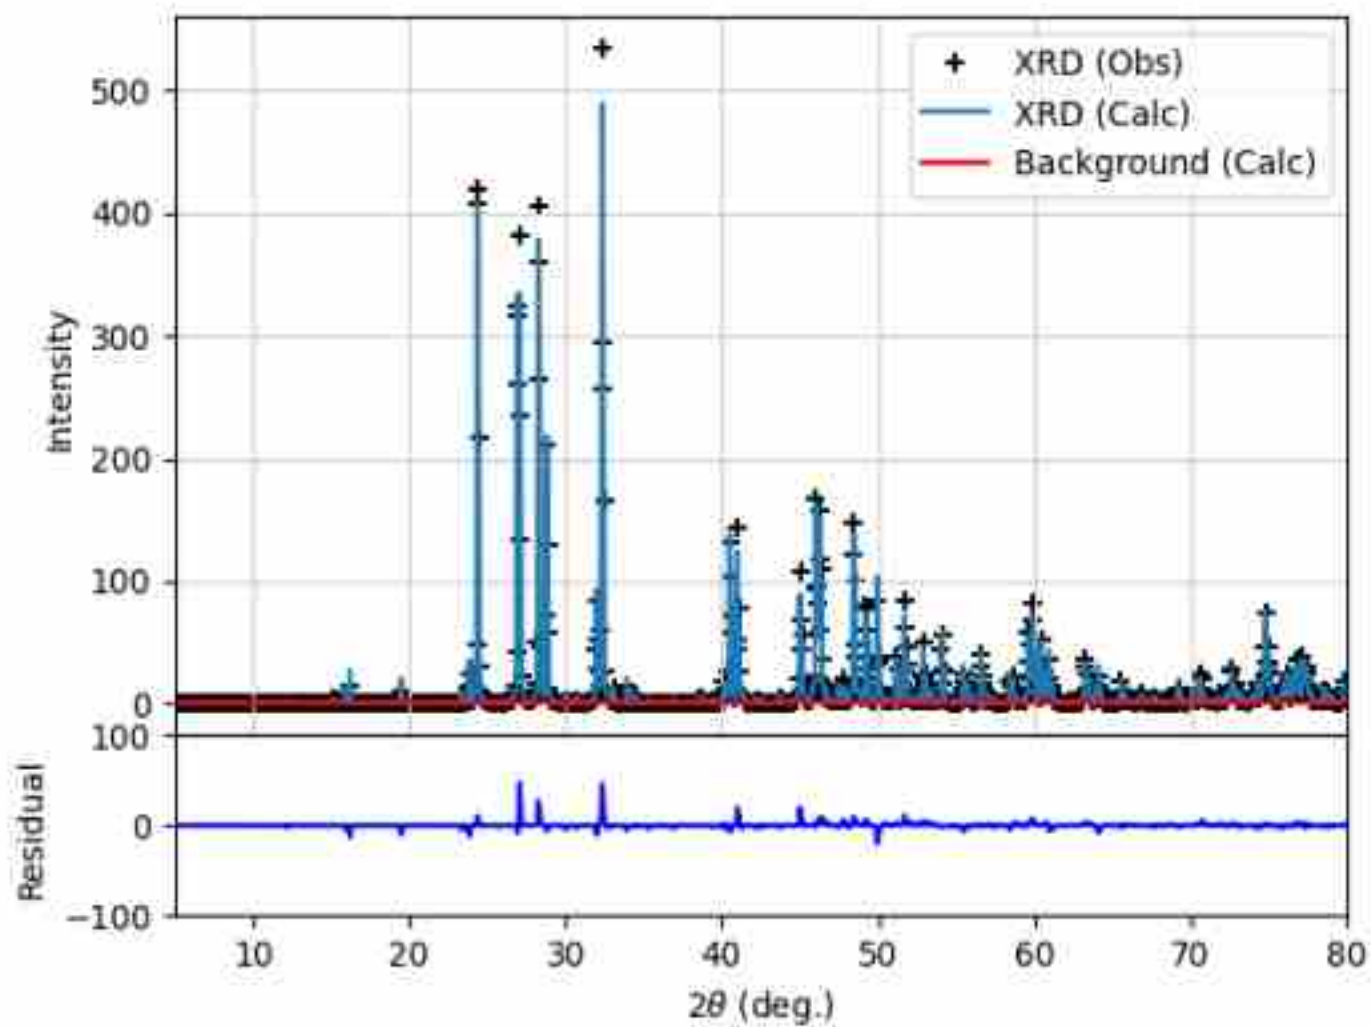

| RMSE before RR | Rwp      | RMSE after RR |
|----------------|----------|---------------|
| 0.165          | 14.89541 | None          |

# Cu<sub>4</sub>Si<sub>2</sub>S<sub>6</sub>

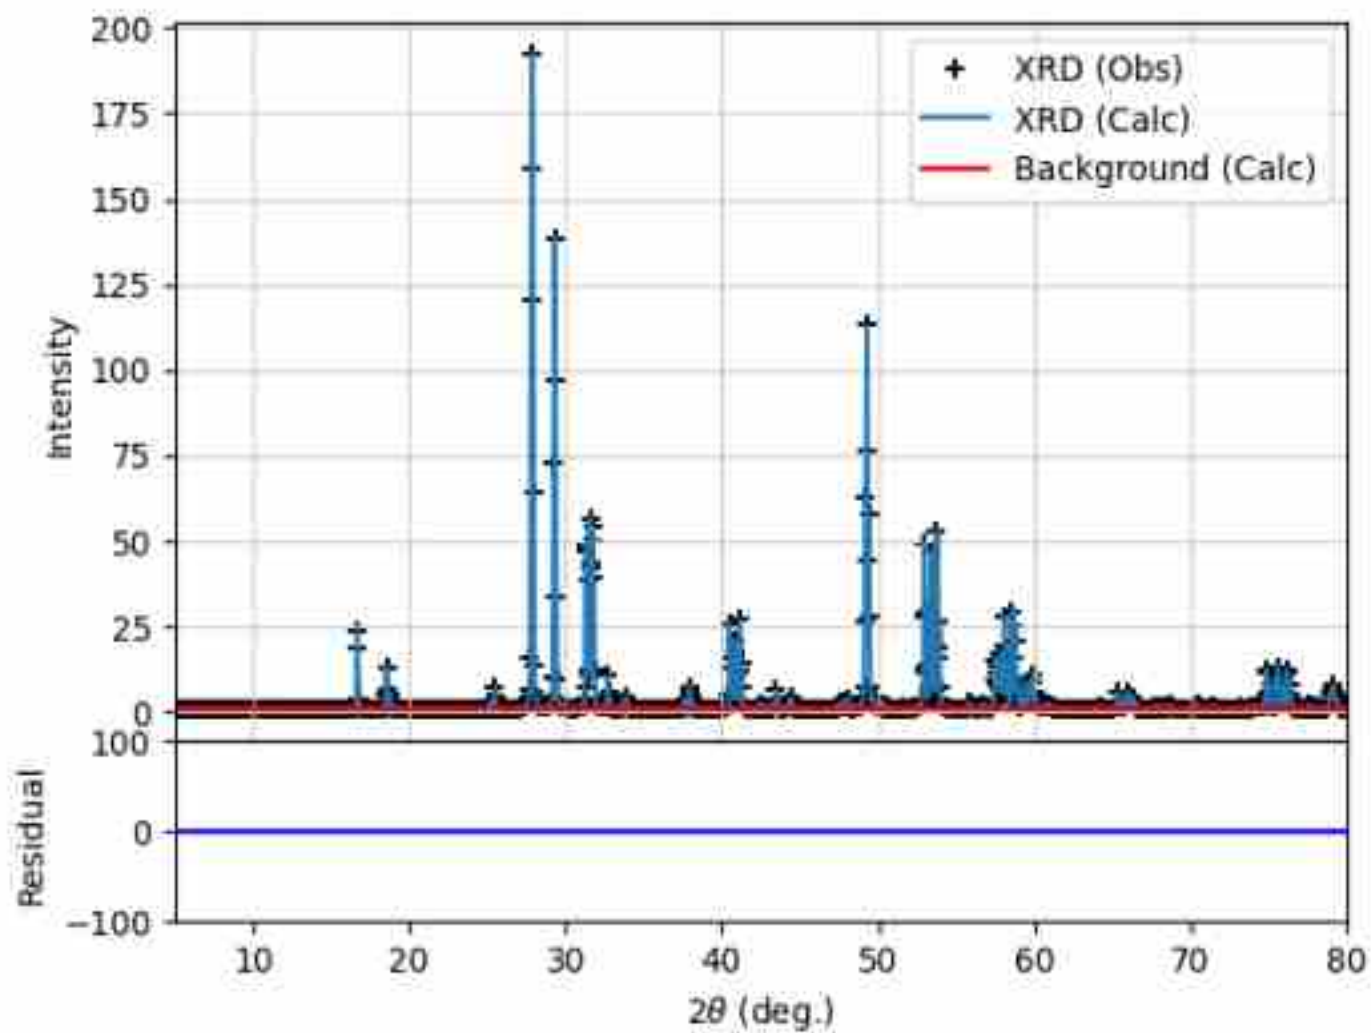

| RMSE before RR | Rwp     | RMSE after RR |
|----------------|---------|---------------|
| 0.165          | 0.00261 | 0.00029       |

# Hf4O8

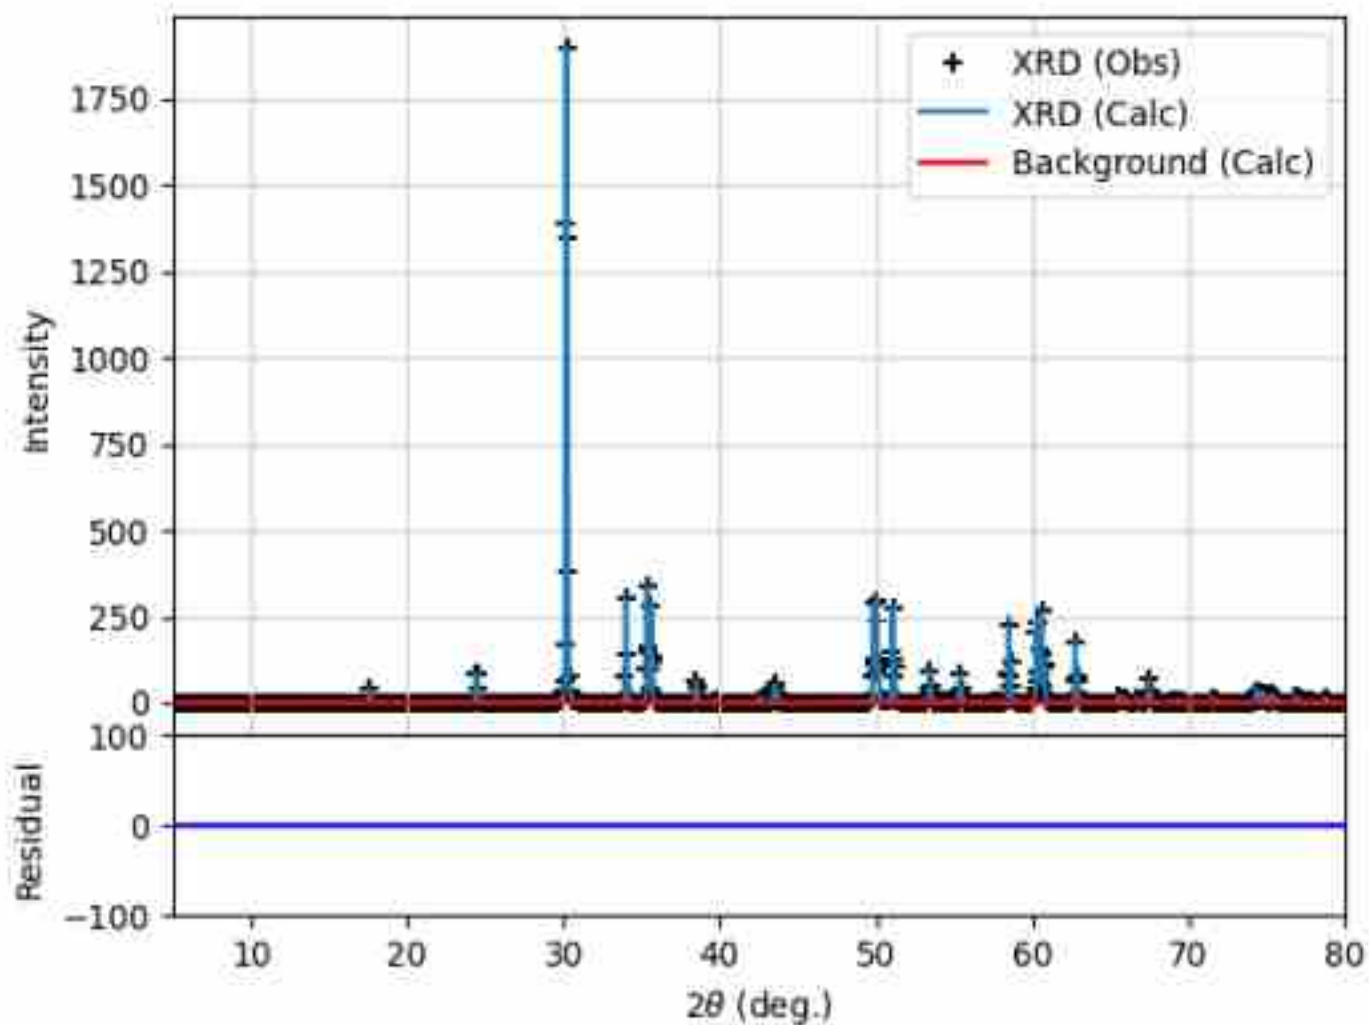

| RMSE before RR | Rwp     | RMSE after RR |
|----------------|---------|---------------|
| 0.165          | 0.00479 | 0.00191       |

# K<sub>2</sub>Zn<sub>1</sub>Si<sub>3</sub>O<sub>8</sub>

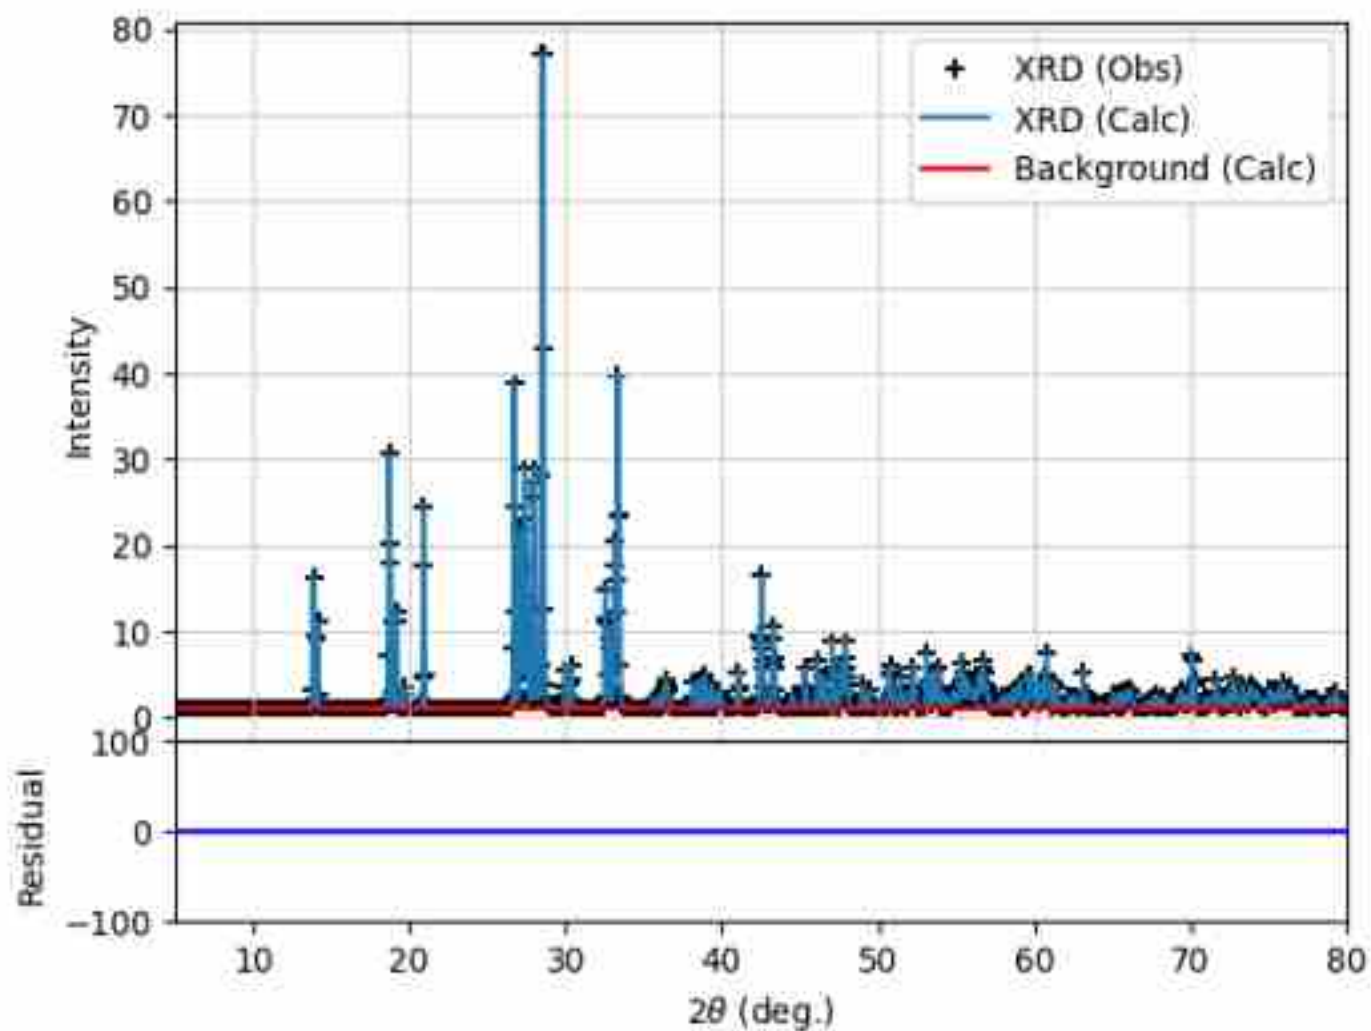

| RMSE before RR | Rwp     | RMSE after RR |
|----------------|---------|---------------|
| 0.166          | 0.00123 | 0.0           |



# Tl<sub>2</sub>B<sub>2</sub>Se<sub>6</sub>

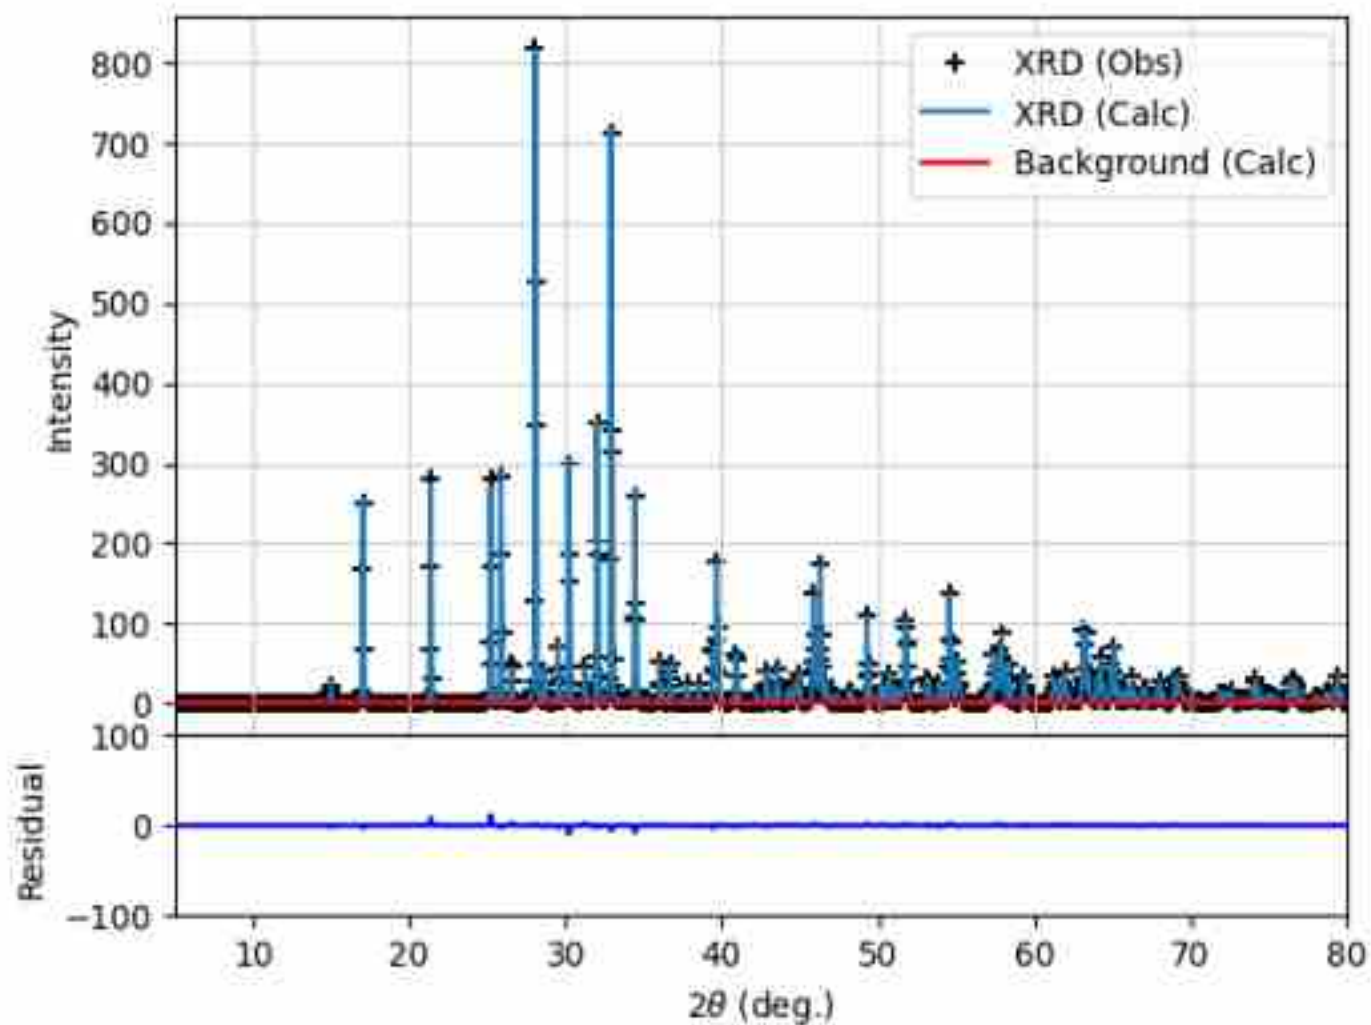

| RMSE before RR | Rwp     | RMSE after RR |
|----------------|---------|---------------|
| 0.166          | 2.19886 | 0.2247        |

# Sr<sub>4</sub>Ta<sub>2</sub>Mn<sub>2</sub>O<sub>12</sub>

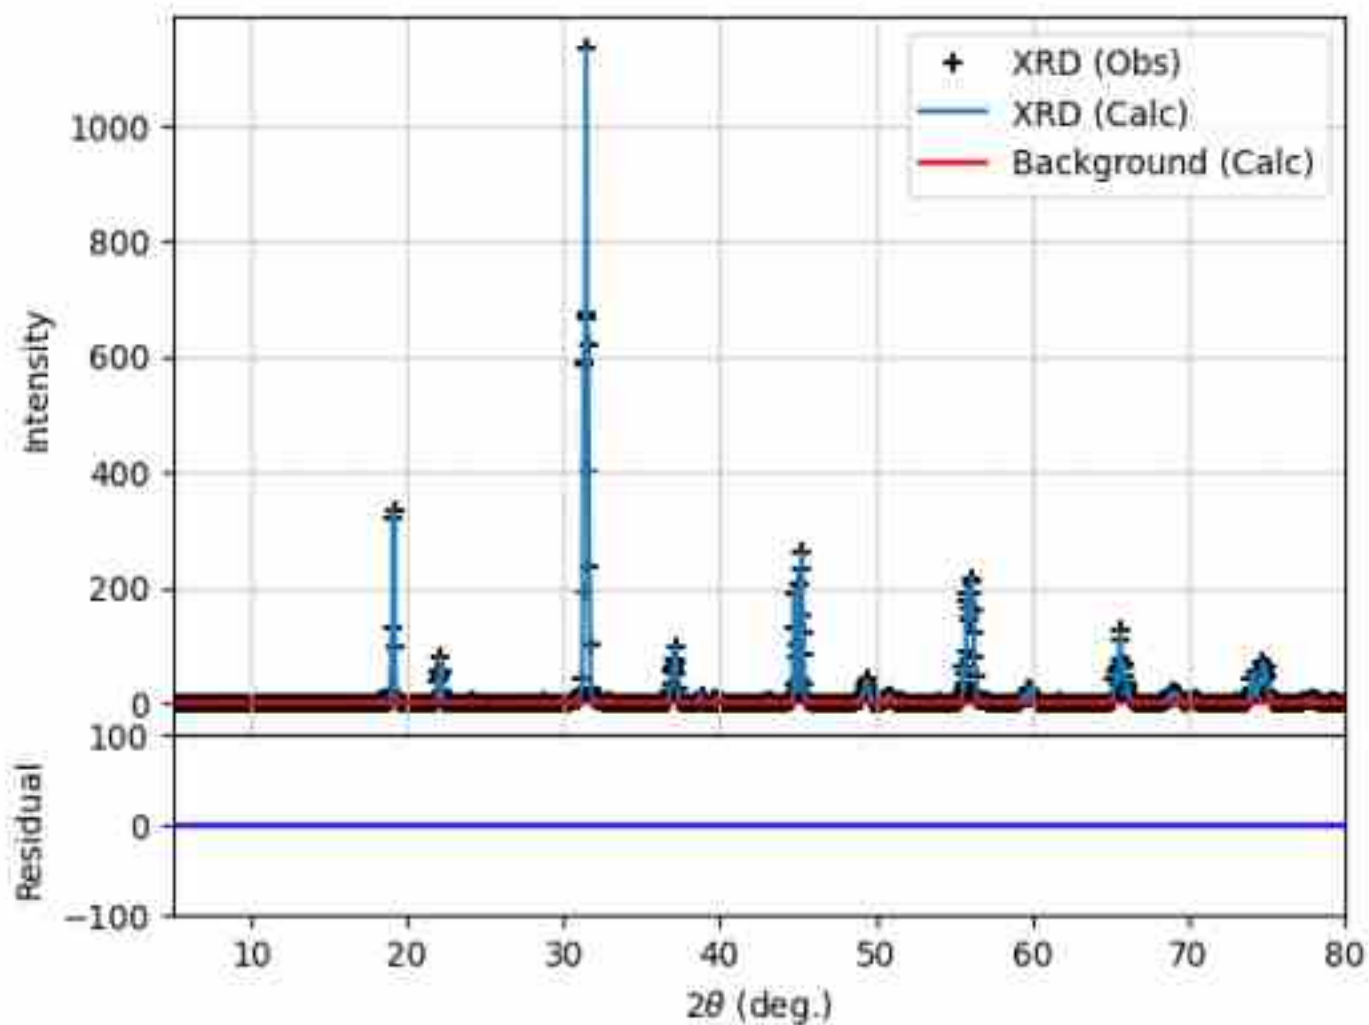

| RMSE before RR | Rwp     | RMSE after RR |
|----------------|---------|---------------|
| 0.167          | 0.00144 | 0.00066       |

# K<sub>2</sub>Ho<sub>4</sub>Cu<sub>4</sub>S<sub>9</sub>

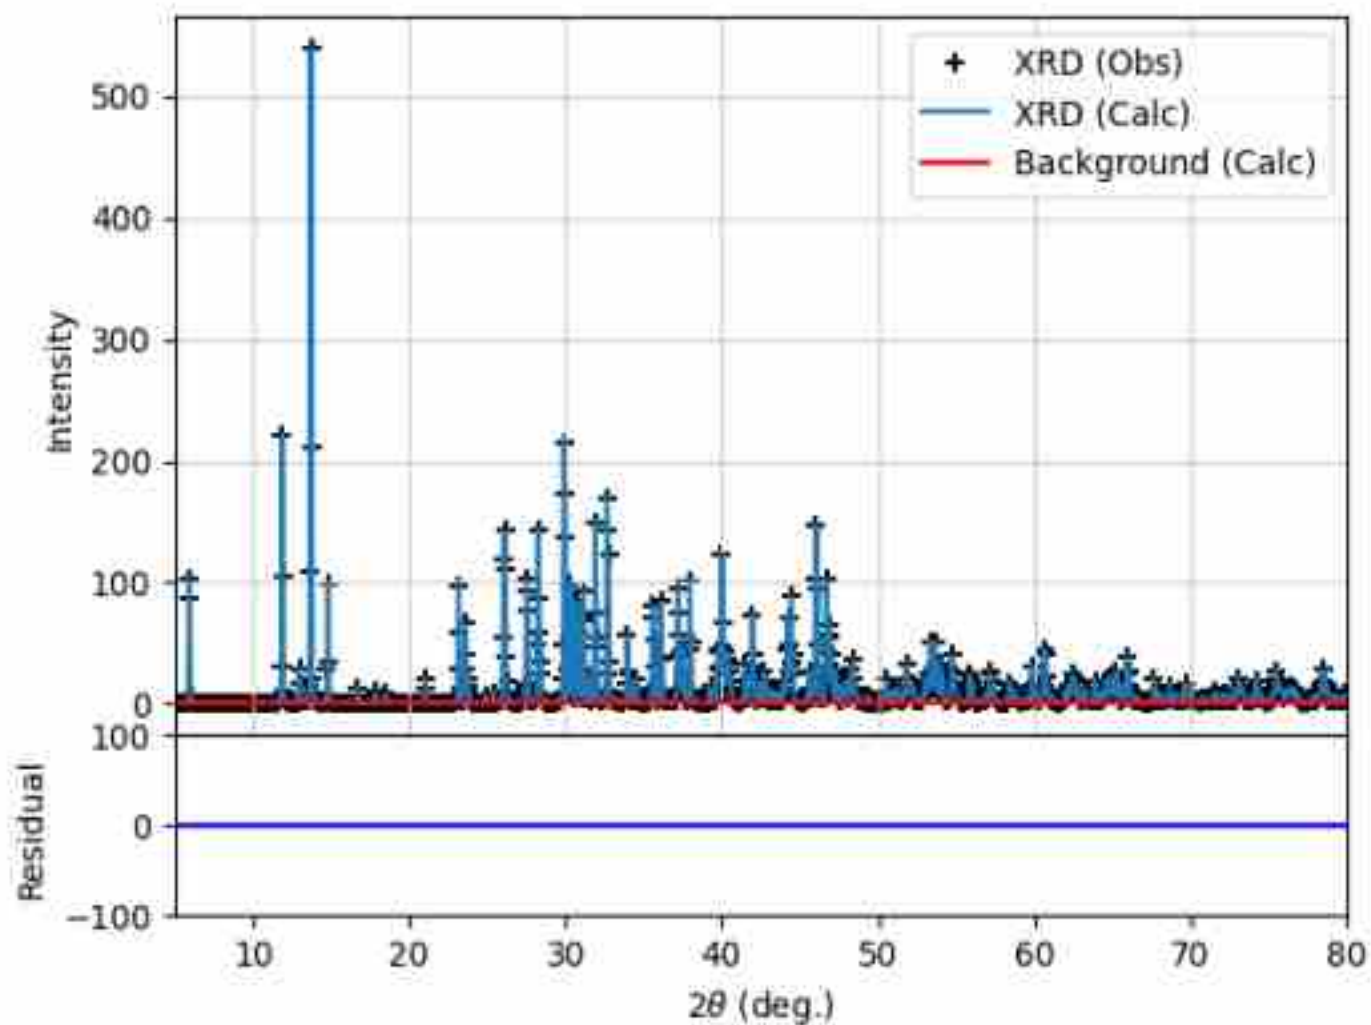

| RMSE before RR | Rwp     | RMSE after RR |
|----------------|---------|---------------|
| 0.169          | 0.00259 | 0.00033       |

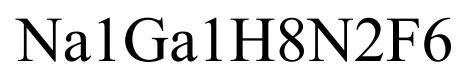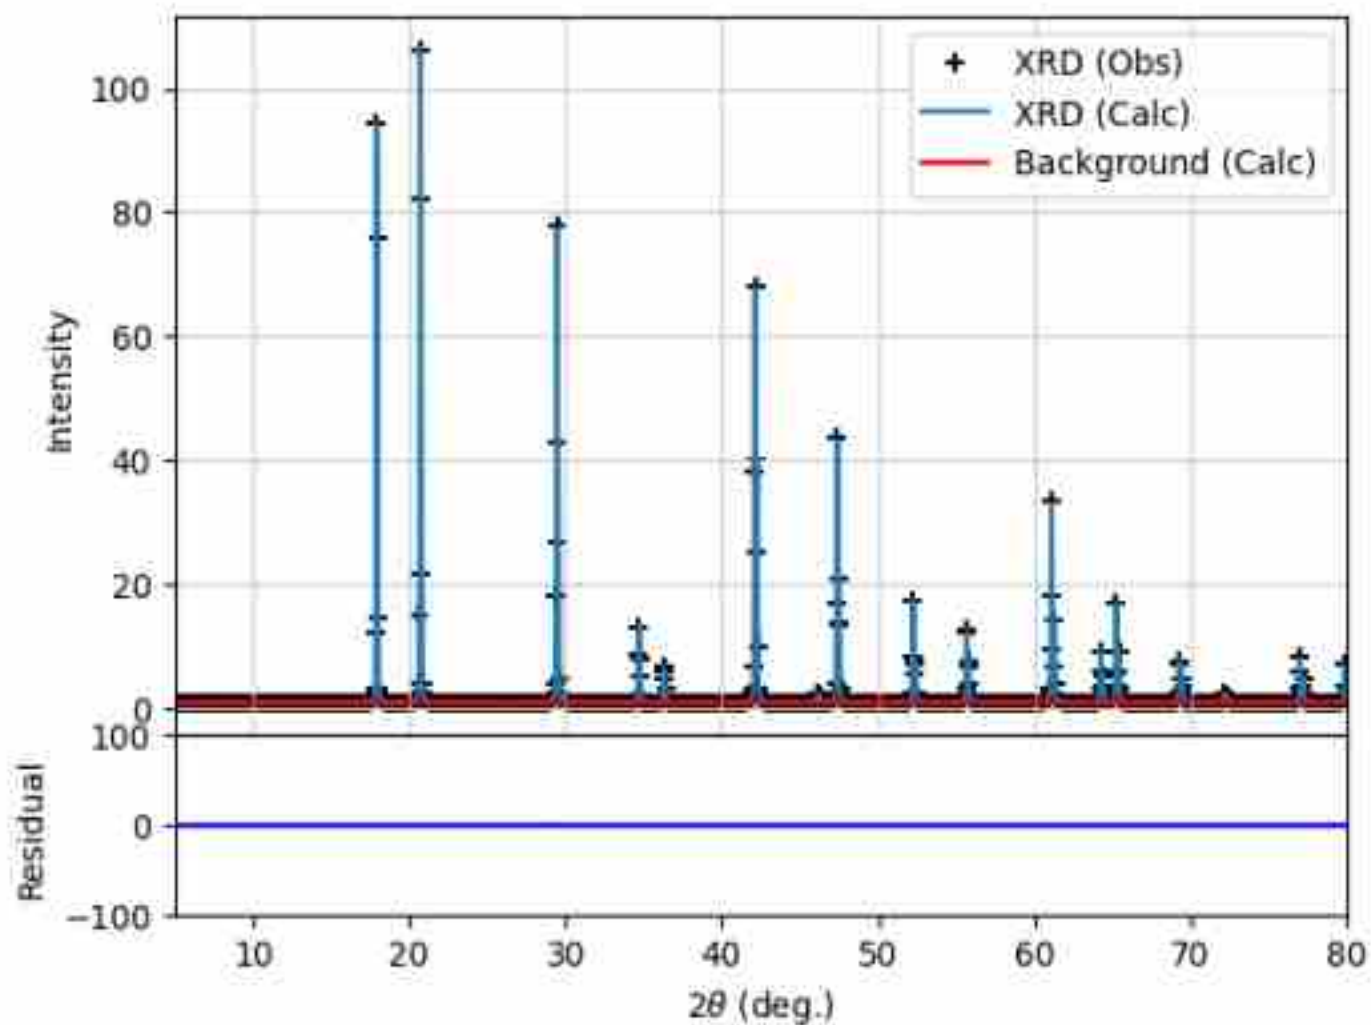

| RMSE before RR | Rwp     | RMSE after RR |
|----------------|---------|---------------|
| 0.169          | 0.54066 | 0.38883       |

# Ag<sub>4</sub>Cl<sub>4</sub>O<sub>12</sub>

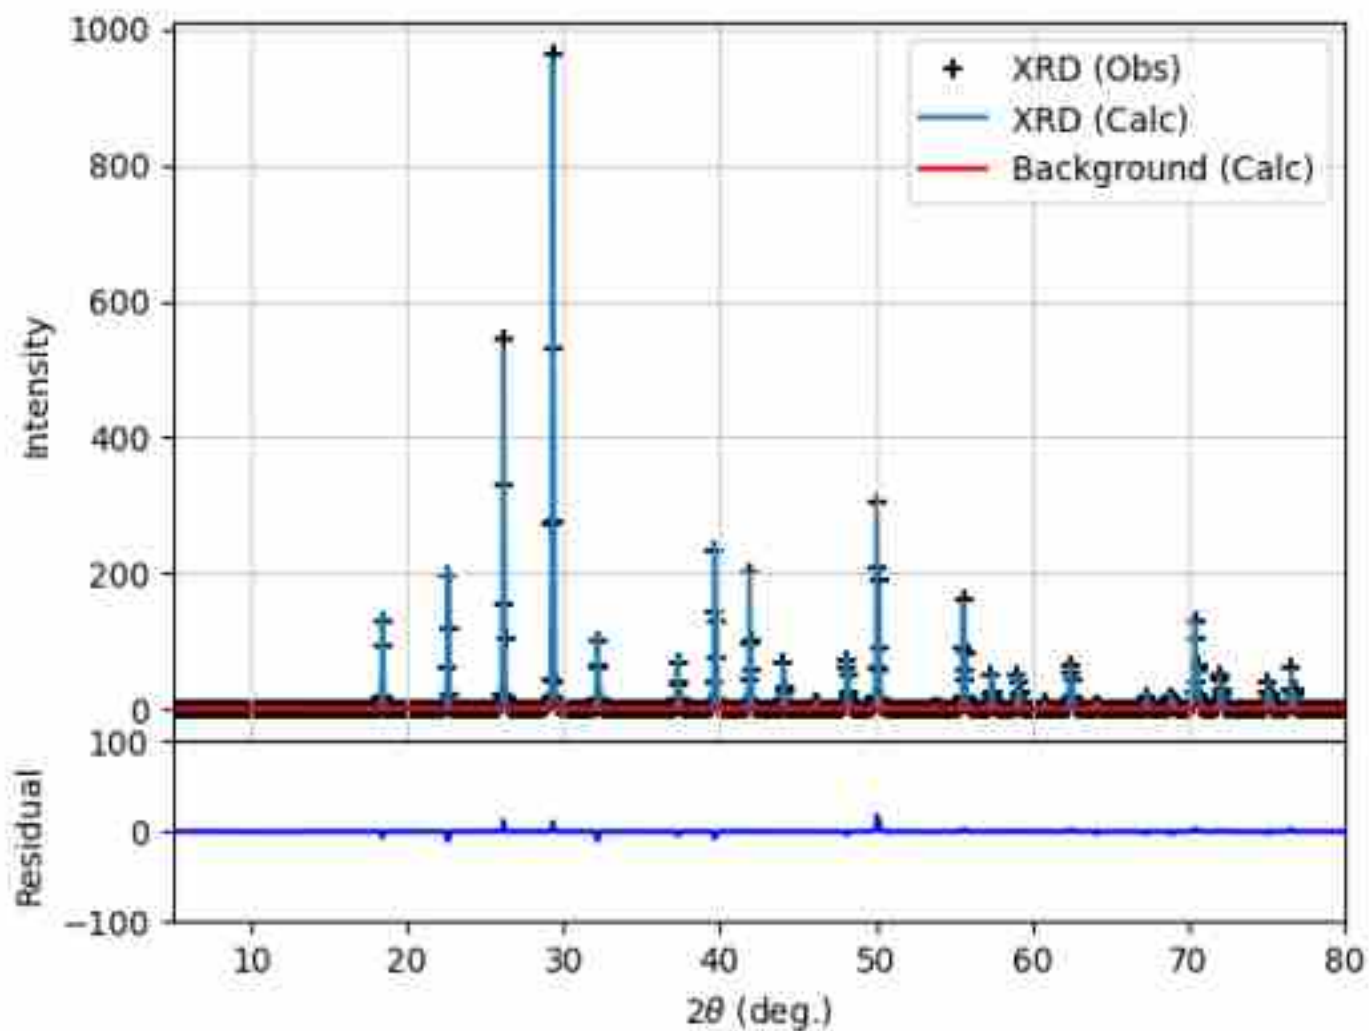

| RMSE before RR | Rwp     | RMSE after RR |
|----------------|---------|---------------|
| 0.171          | 4.18606 | None          |

# V4O5F7

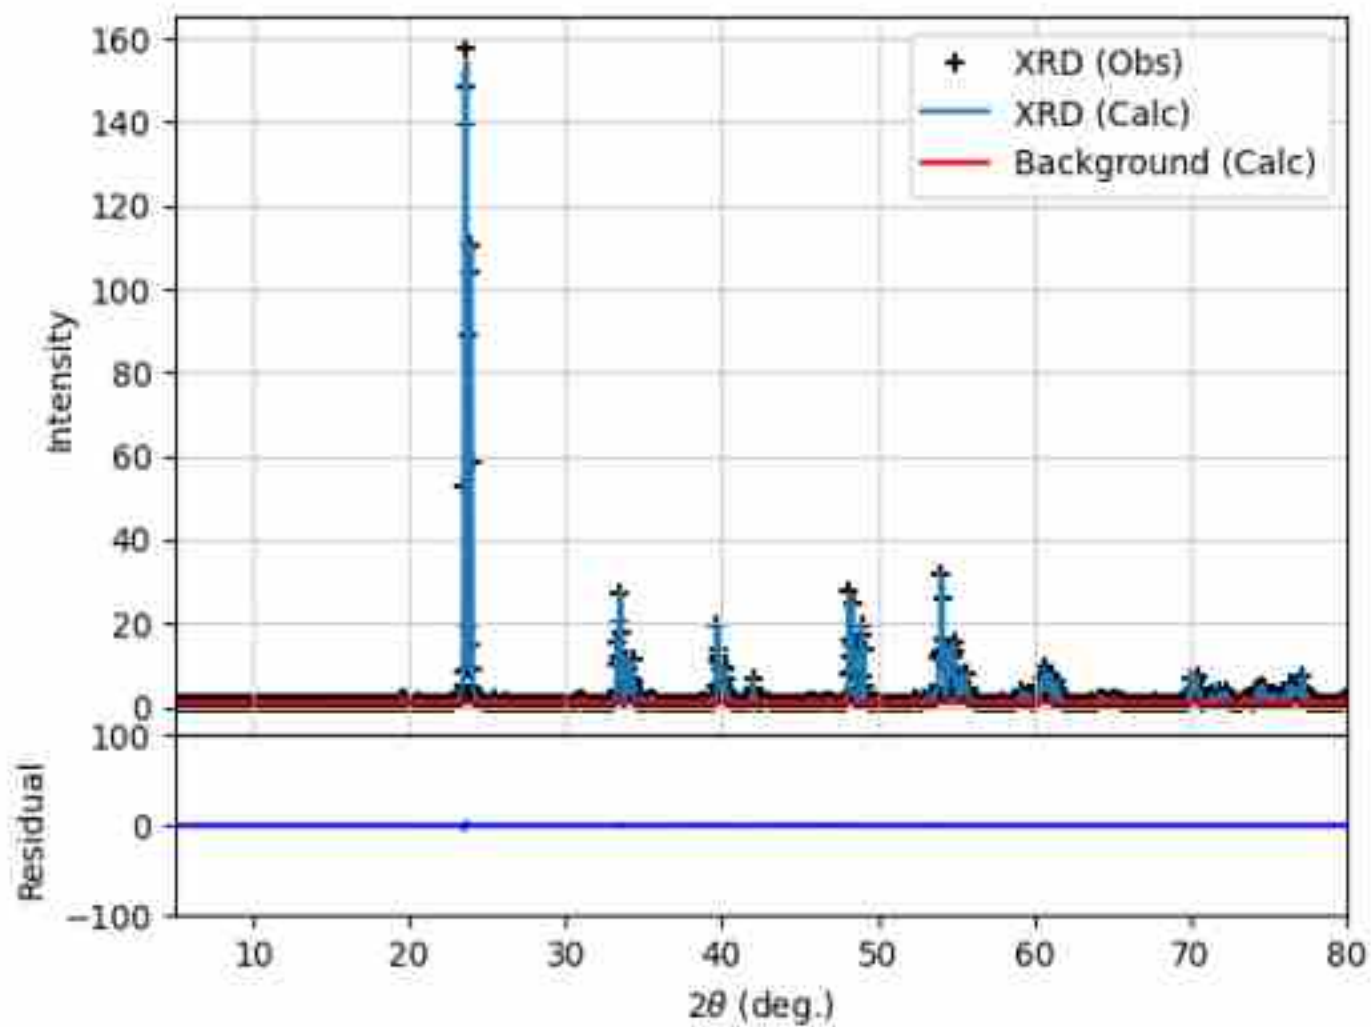

| RMSE before RR | Rwp     | RMSE after RR |
|----------------|---------|---------------|
| 0.171          | 2.20293 | 0.18285       |

# Mg<sub>2</sub>Cu<sub>4</sub>O<sub>8</sub>

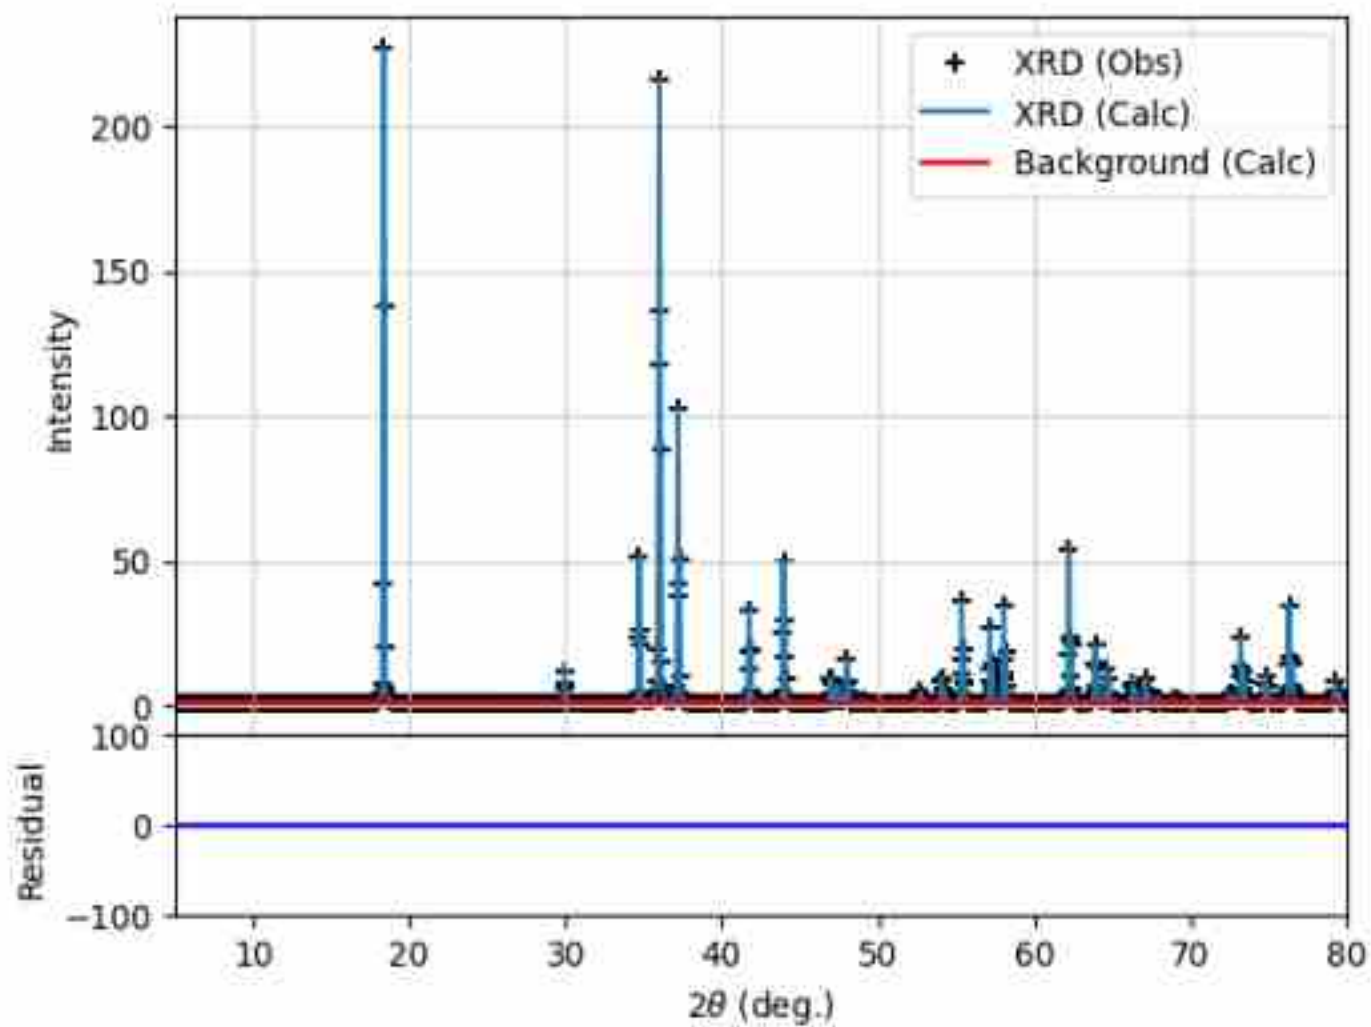

| RMSE before RR | Rwp     | RMSE after RR |
|----------------|---------|---------------|
| 0.172          | 0.00294 | 0.00126       |

# Ge4Pb1O9

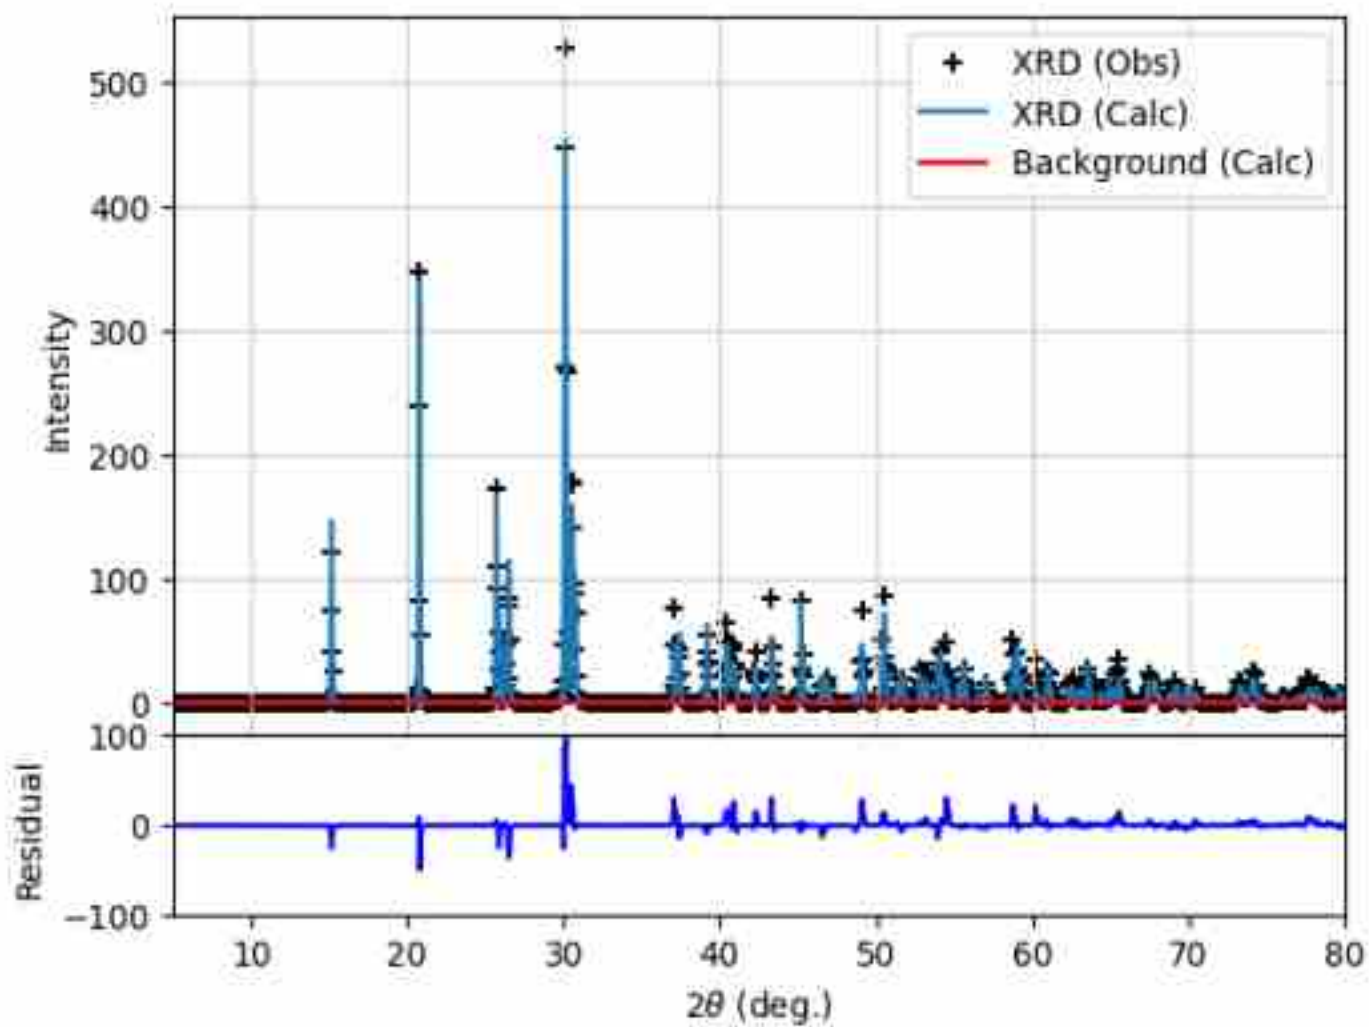

| RMSE before RR | Rwp      | RMSE after RR |
|----------------|----------|---------------|
| 0.173          | 26.42687 | None          |



# Hg1Pb2

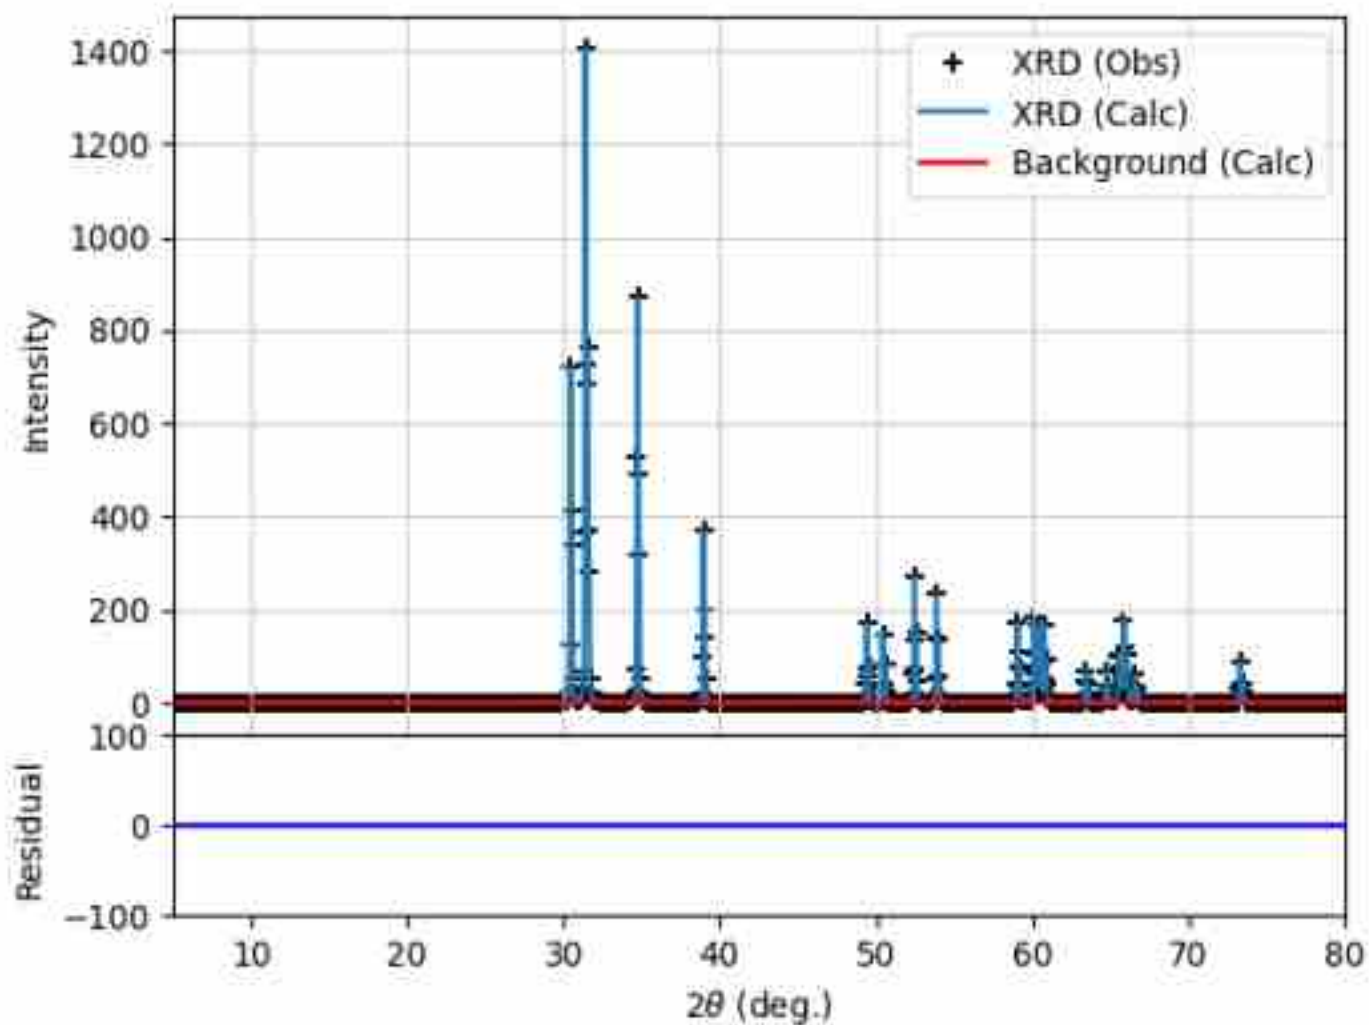

| RMSE before RR | Rwp    | RMSE after RR |
|----------------|--------|---------------|
| 0.173          | 0.0035 | 6e-05         |

# Rb3Ta1O8

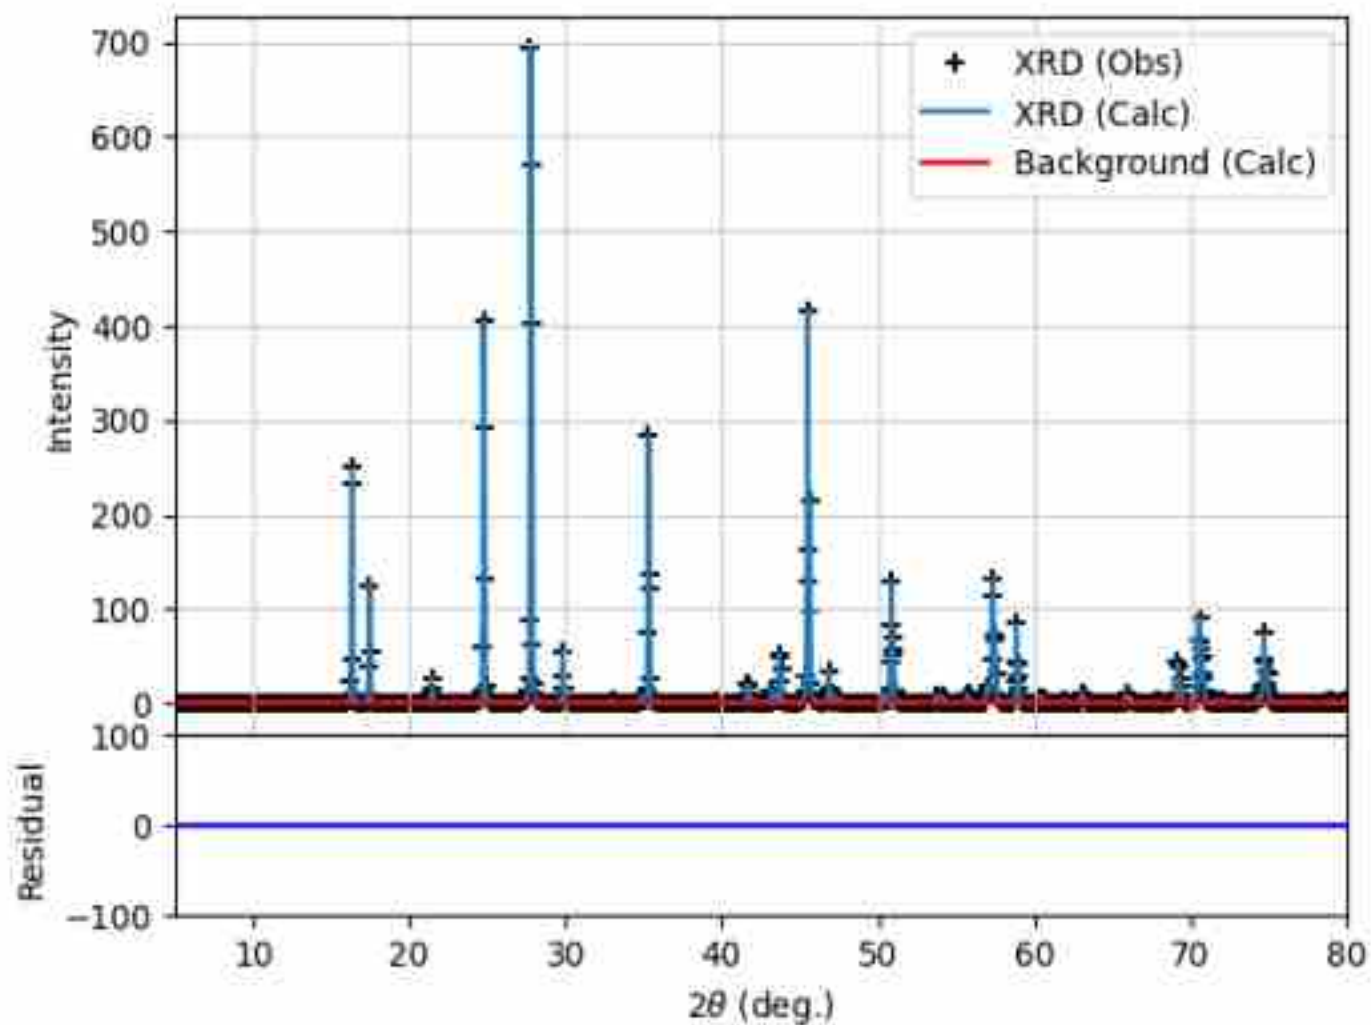

| RMSE before RR | Rwp     | RMSE after RR |
|----------------|---------|---------------|
| 0.173          | 0.00491 | 0.00158       |

# Sr<sub>2</sub>Ca<sub>2</sub>Pr<sub>2</sub>Sb<sub>2</sub>O<sub>12</sub>

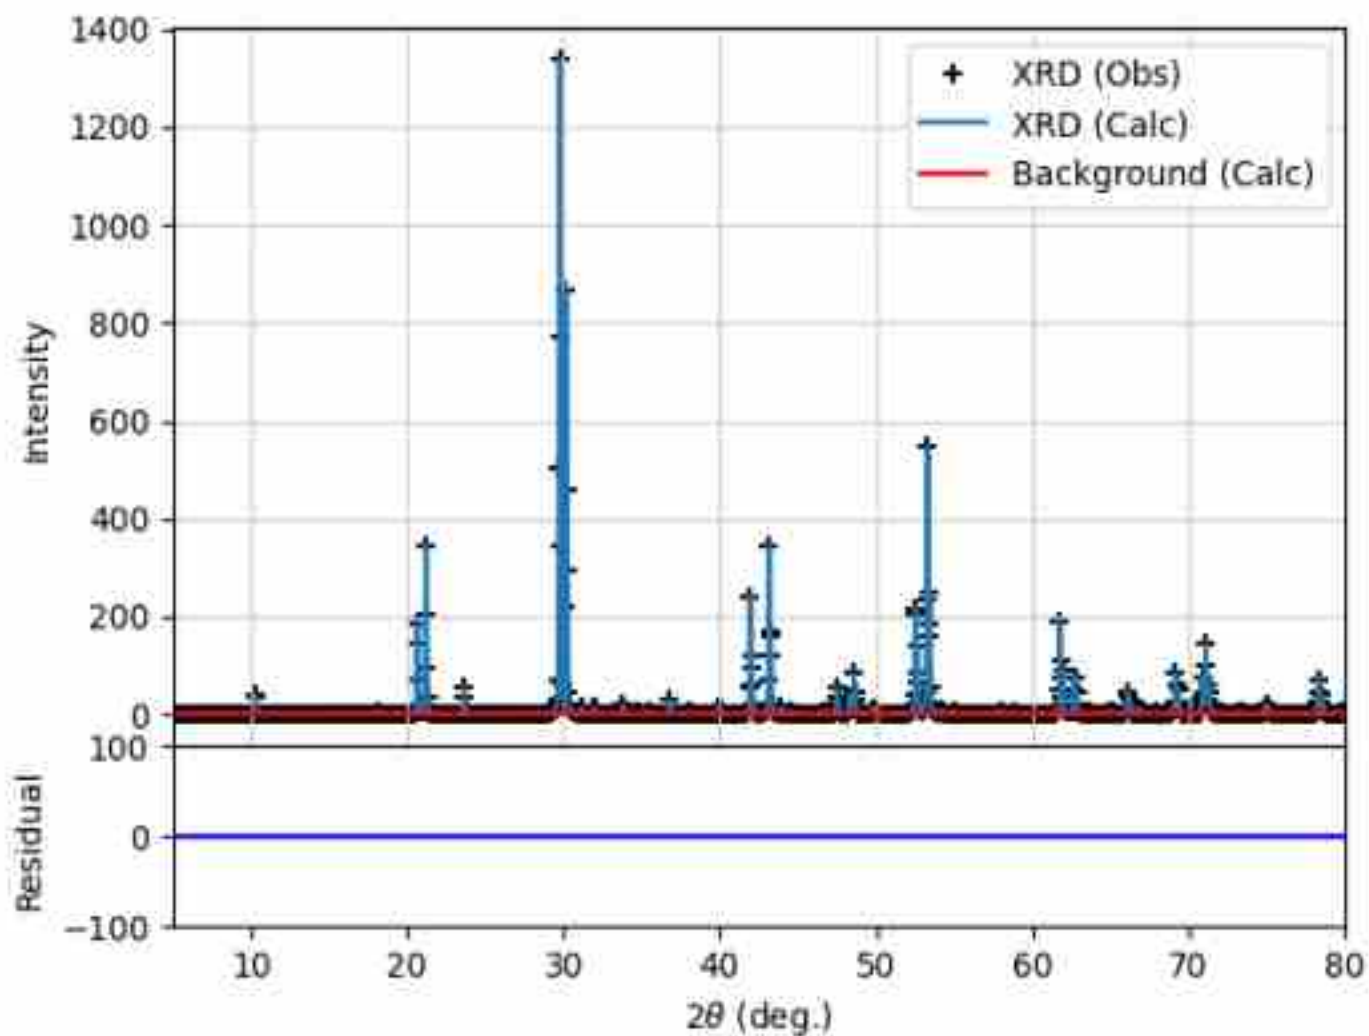

| RMSE before RR | Rwp     | RMSE after RR |
|----------------|---------|---------------|
| 0.174          | 0.00428 | 0.00141       |

# H12N4

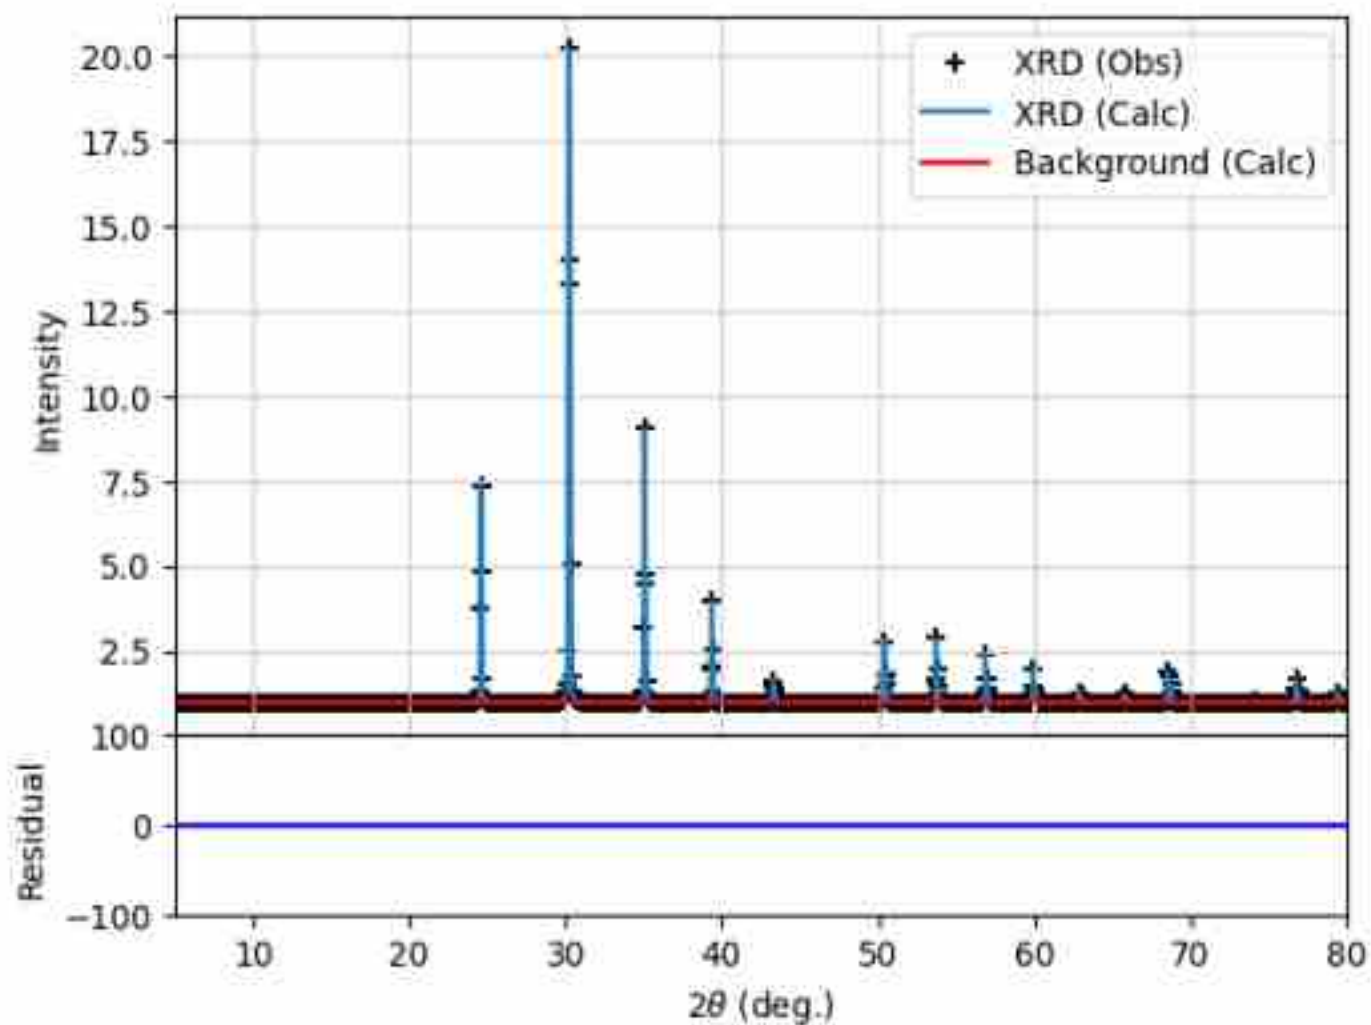

| RMSE before RR | Rwp     | RMSE after RR |
|----------------|---------|---------------|
| 0.179          | 0.21026 | 0.45061       |

# Na<sub>4</sub>Ag<sub>2</sub>F<sub>8</sub>

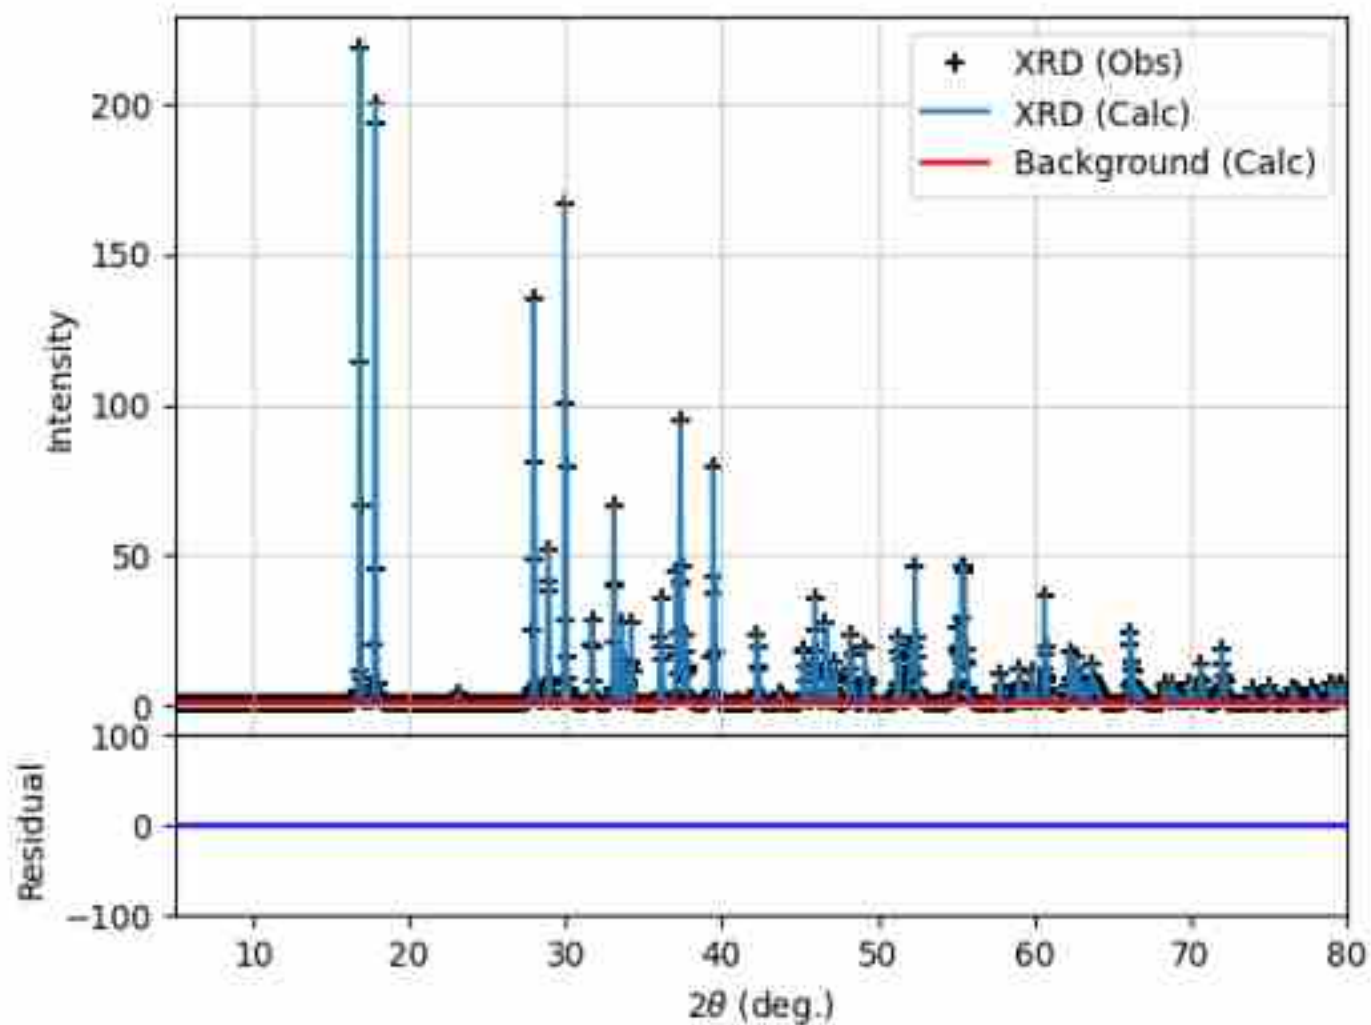

| RMSE before RR | Rwp     | RMSE after RR |
|----------------|---------|---------------|
| 0.179          | 0.00344 | 0.0008        |

# Rb<sub>2</sub>Au<sub>2</sub>Cl<sub>8</sub>

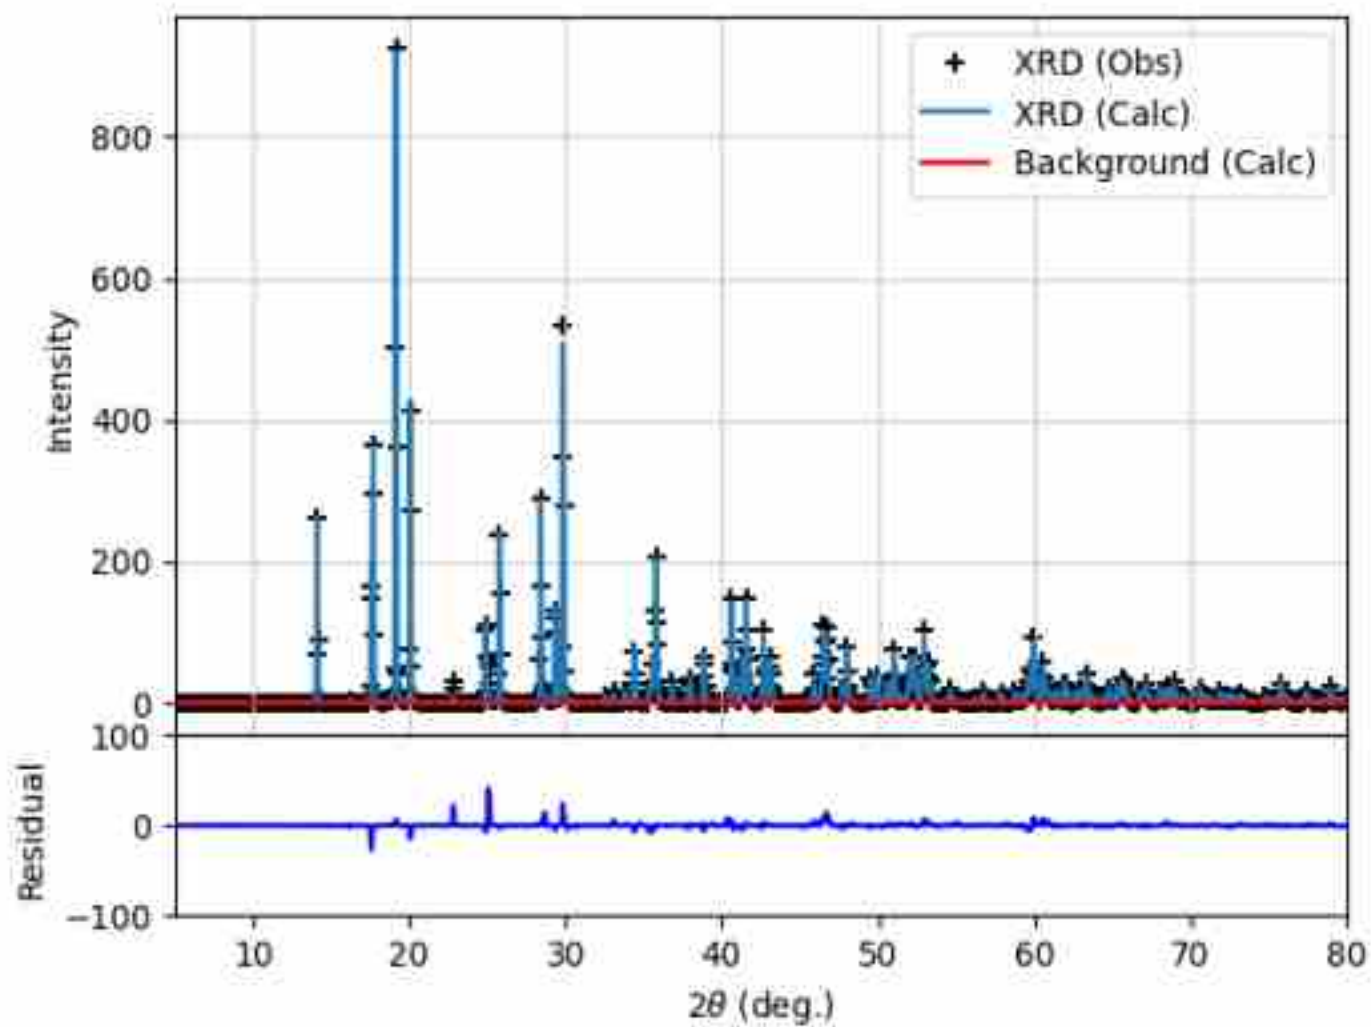

| RMSE before RR | Rwp      | RMSE after RR |
|----------------|----------|---------------|
| 0.179          | 11.59613 | 0.23001       |

# Al<sub>2</sub>H<sub>6</sub>O<sub>6</sub>

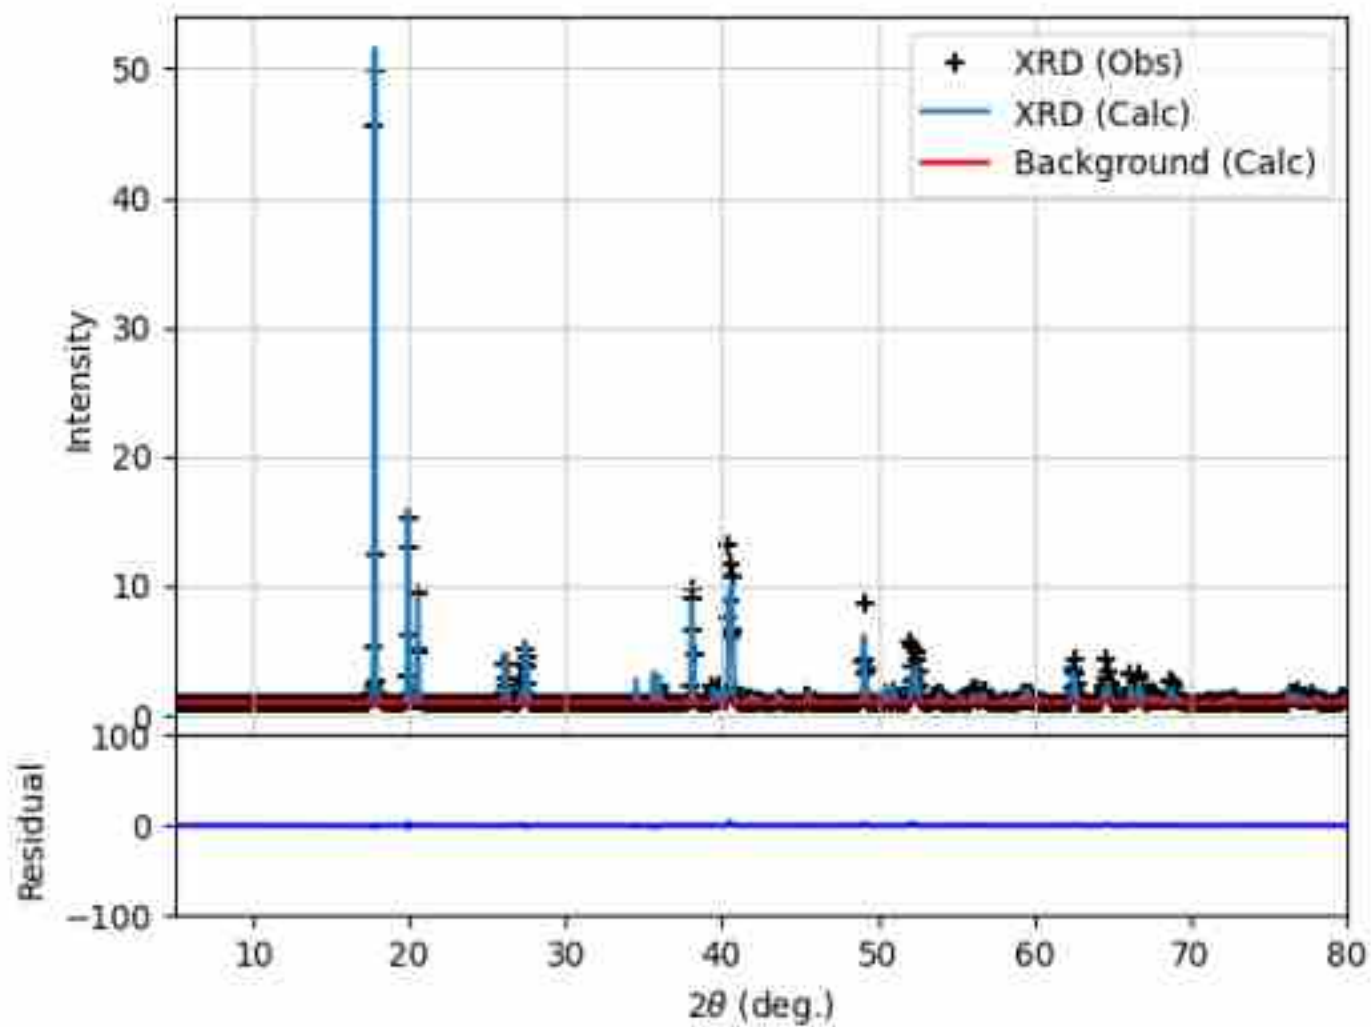

| RMSE before RR | Rwp      | RMSE after RR |
|----------------|----------|---------------|
| 0.181          | 13.06378 | None          |

# V4O5F7

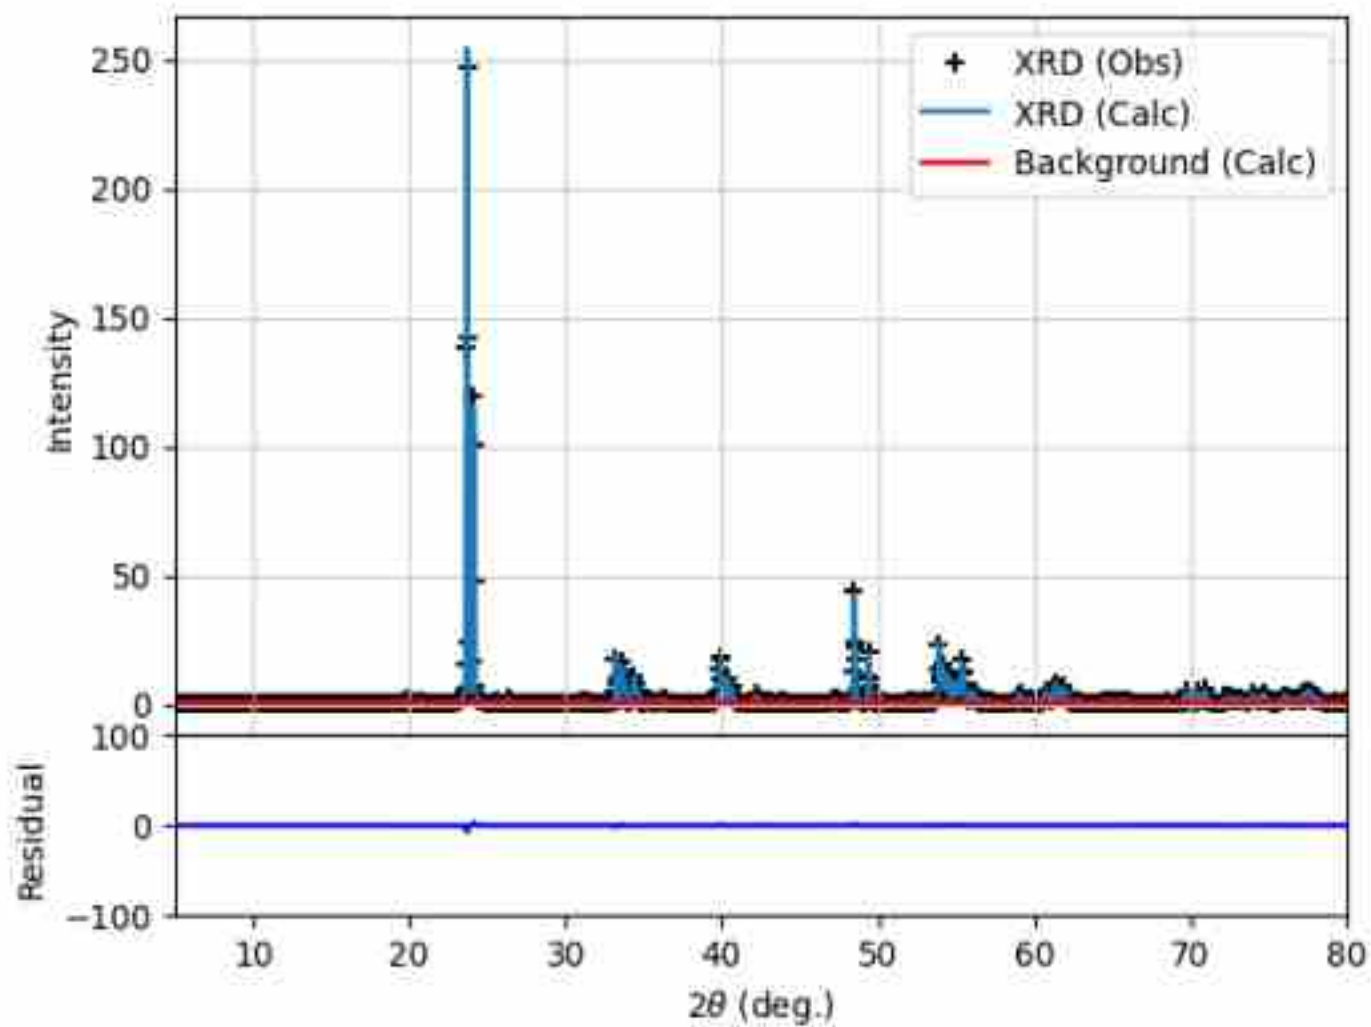

| RMSE before RR | Rwp    | RMSE after RR |
|----------------|--------|---------------|
| 0.181          | 3.4097 | 0.20492       |



# Rb8

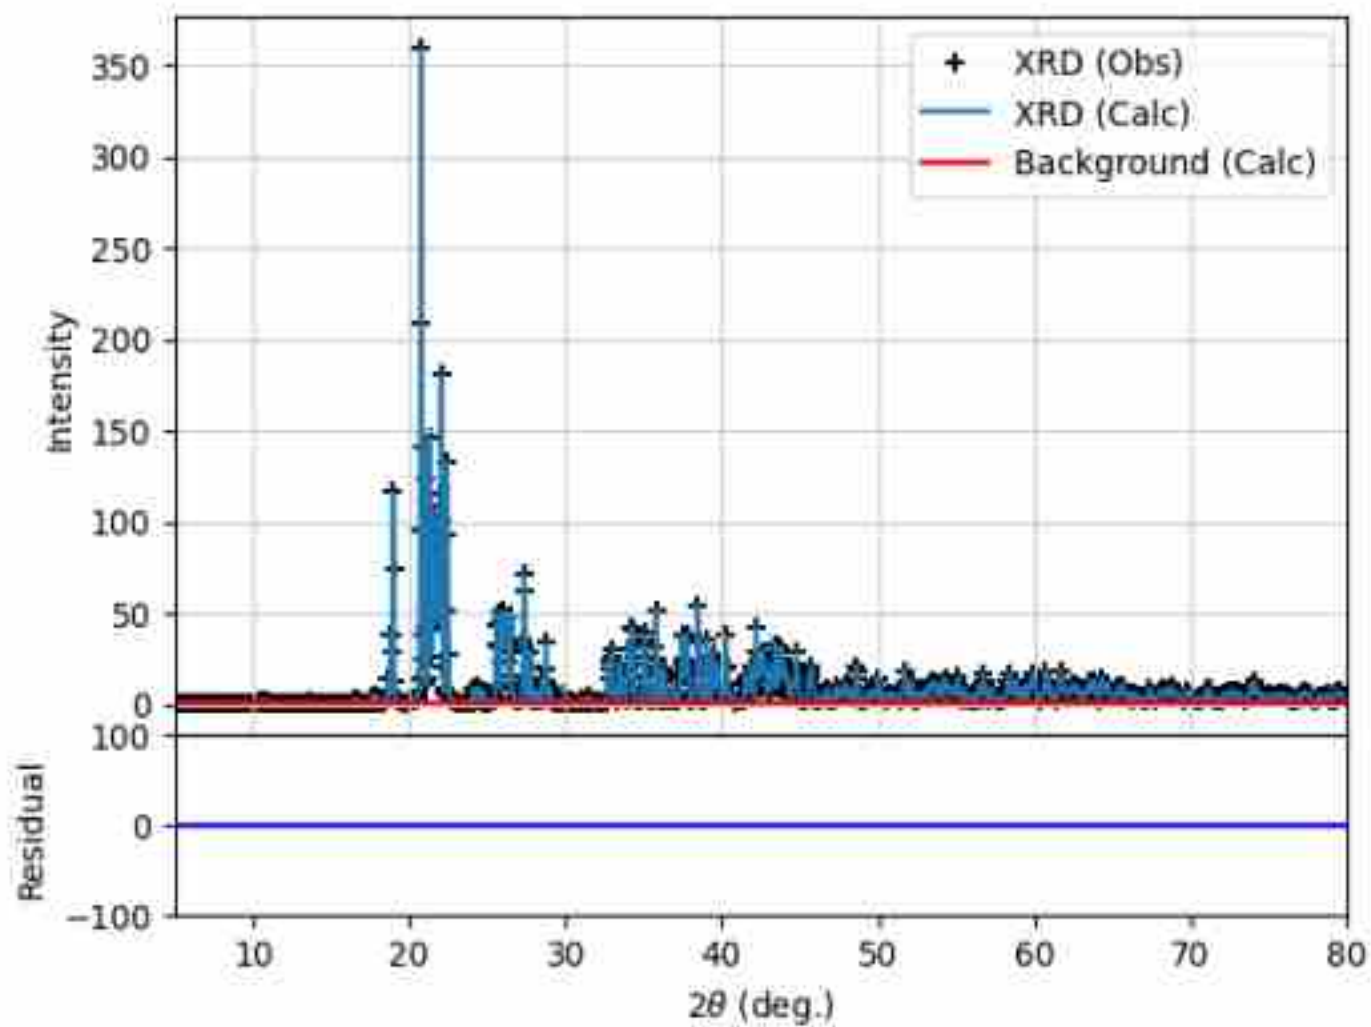

| RMSE before RR | Rwp     | RMSE after RR |
|----------------|---------|---------------|
| 0.182          | 0.00044 | 0.0           |

# Sr<sub>4</sub>Tl<sub>11</sub>Fe<sub>2</sub>O<sub>9</sub>

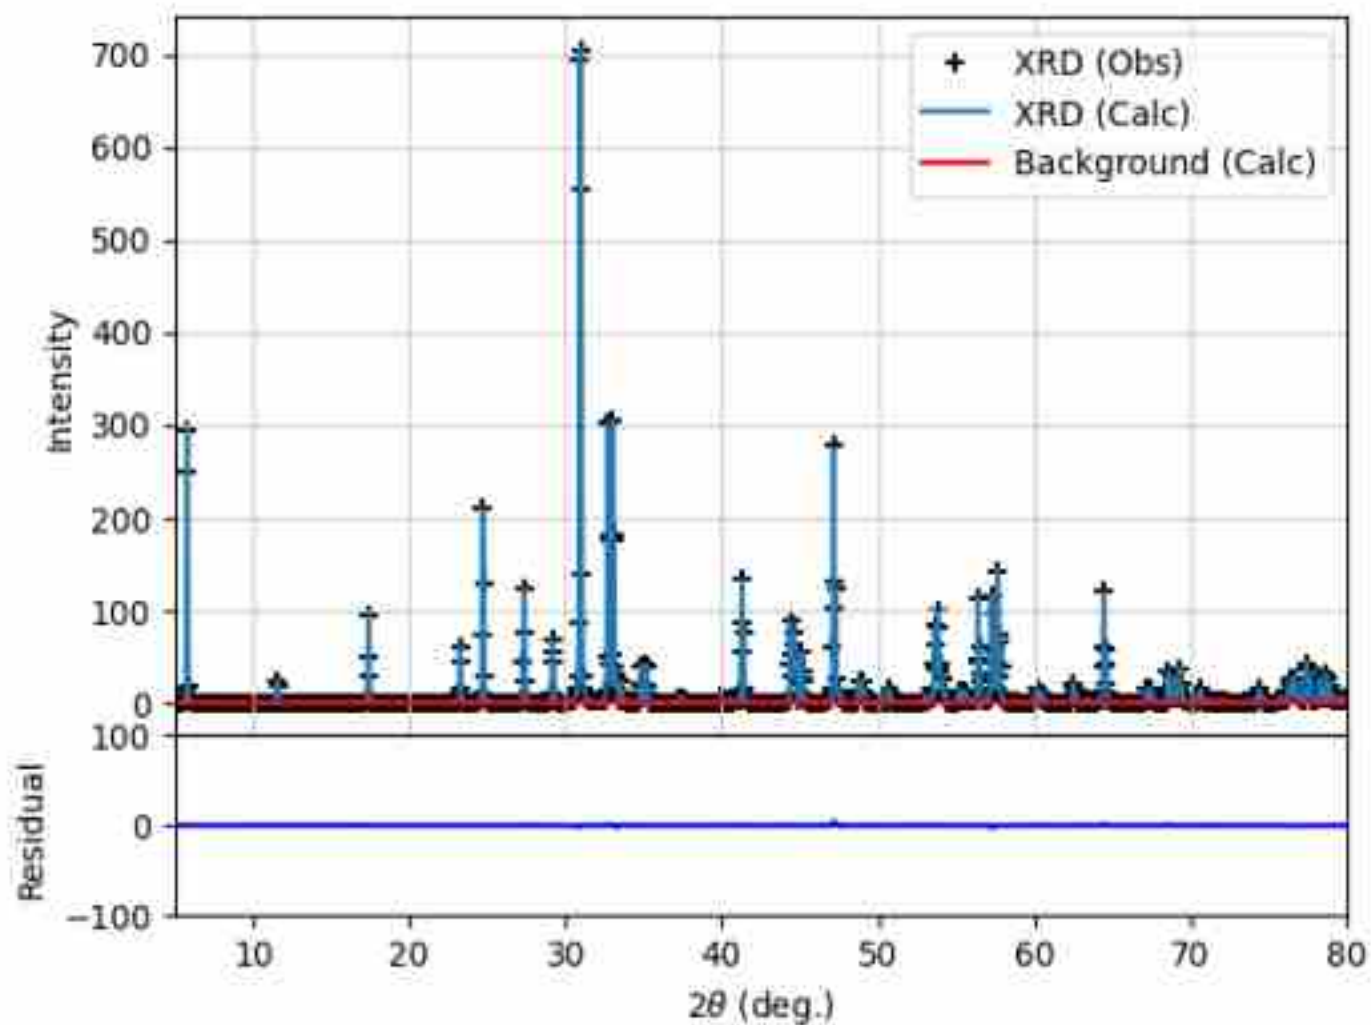

| RMSE before RR | Rwp     | RMSE after RR |
|----------------|---------|---------------|
| 0.182          | 1.58147 | 0.0477        |

# Fe6O4F4

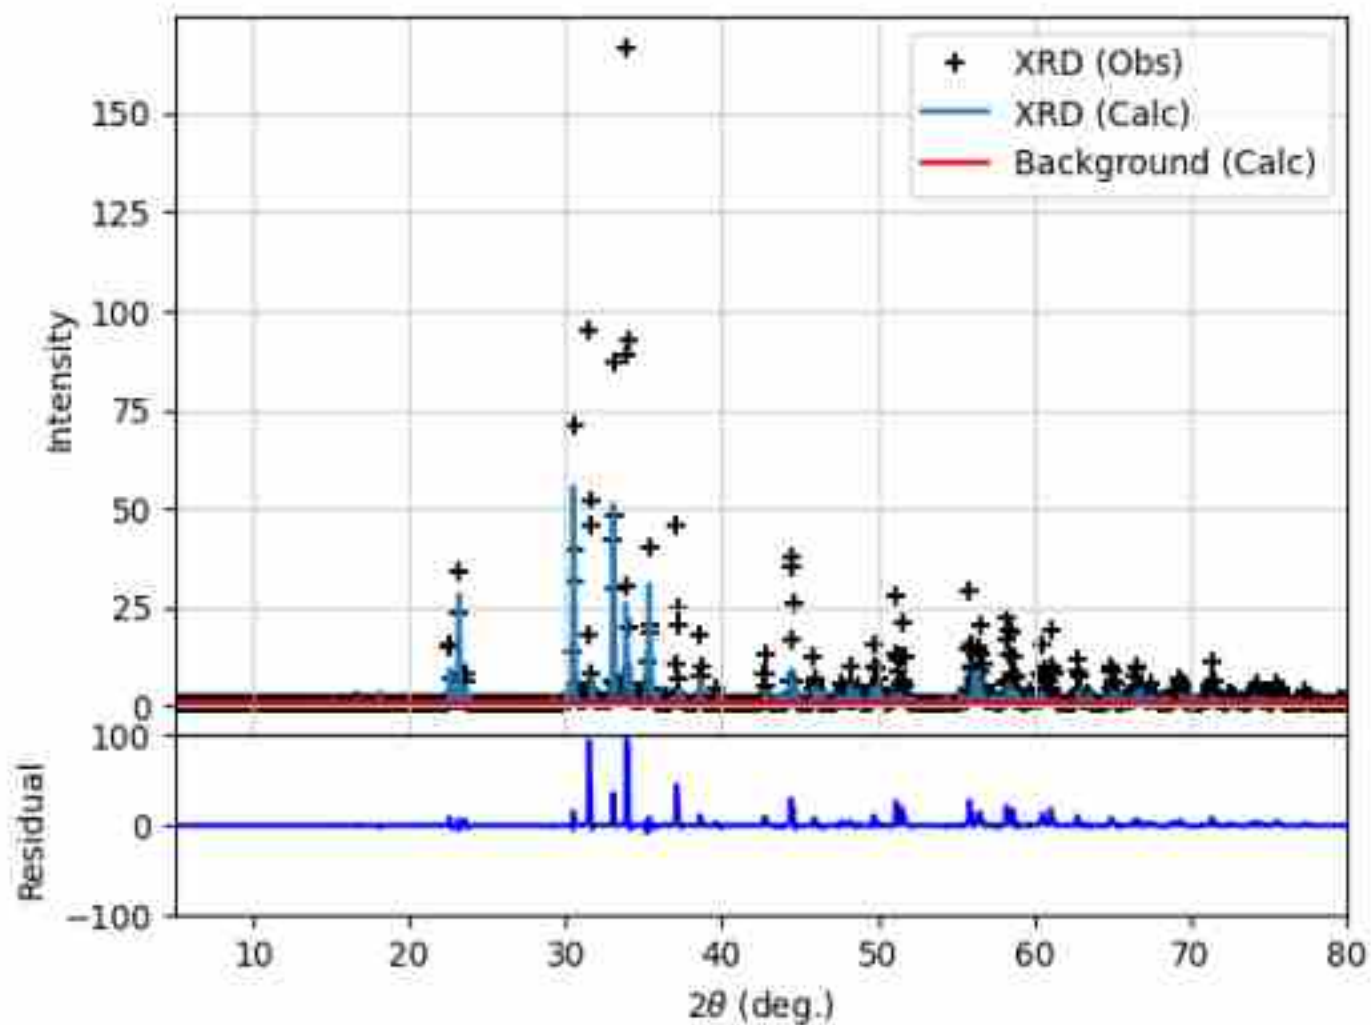

| RMSE before RR | Rwp      | RMSE after RR |
|----------------|----------|---------------|
| 0.183          | 59.43235 | None          |

# Er<sub>4</sub>Cu<sub>4</sub>P<sub>8</sub>

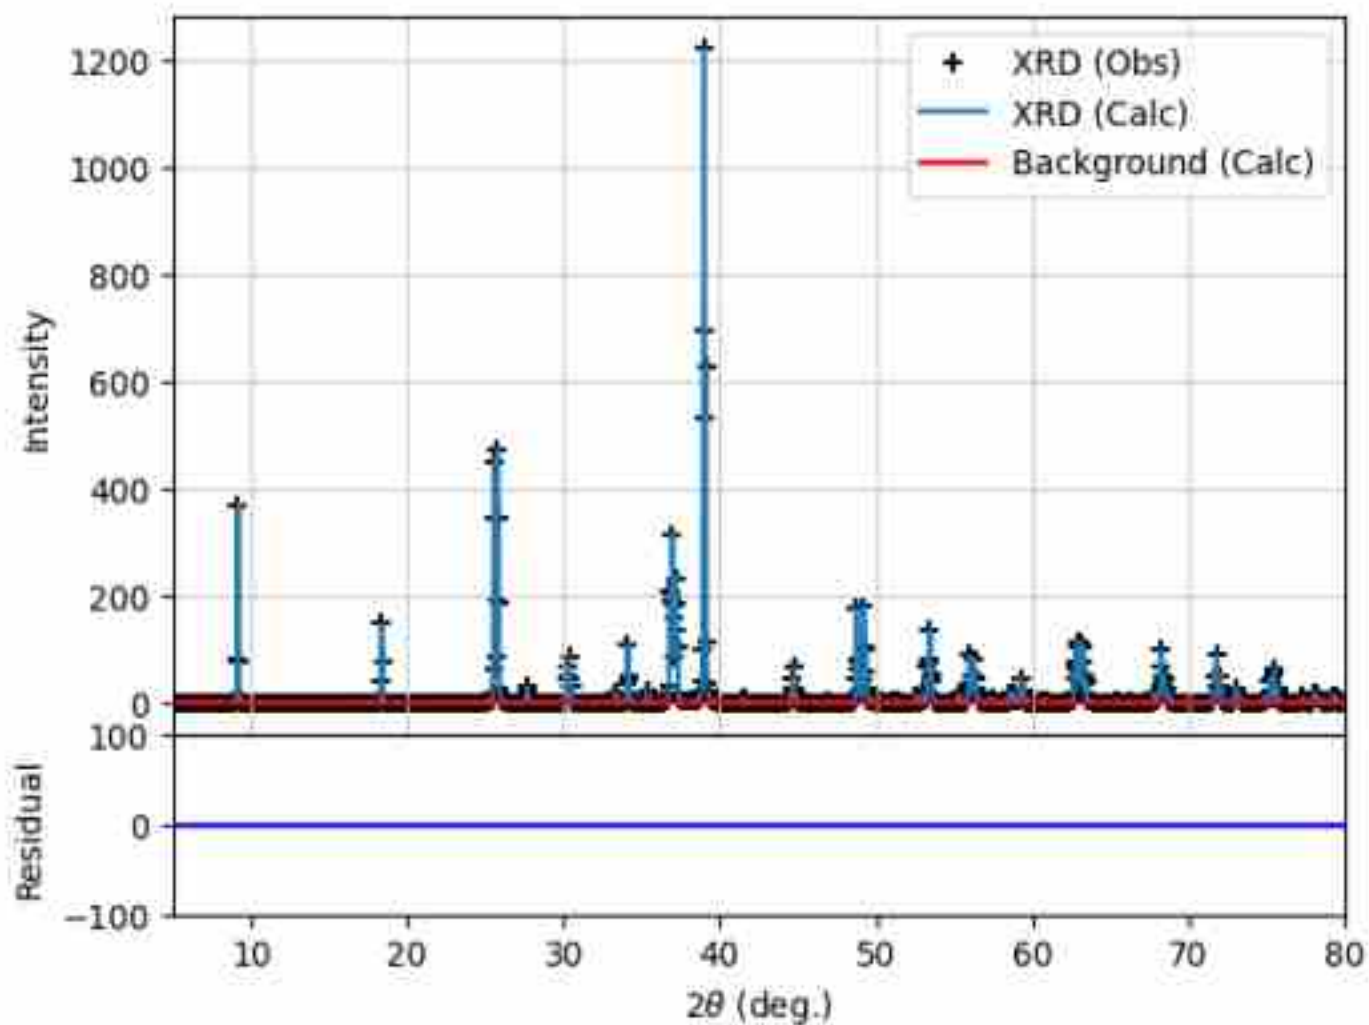

| RMSE before RR | Rwp     | RMSE after RR |
|----------------|---------|---------------|
| 0.184          | 0.00413 | 0.00113       |

# V2Bi4O11

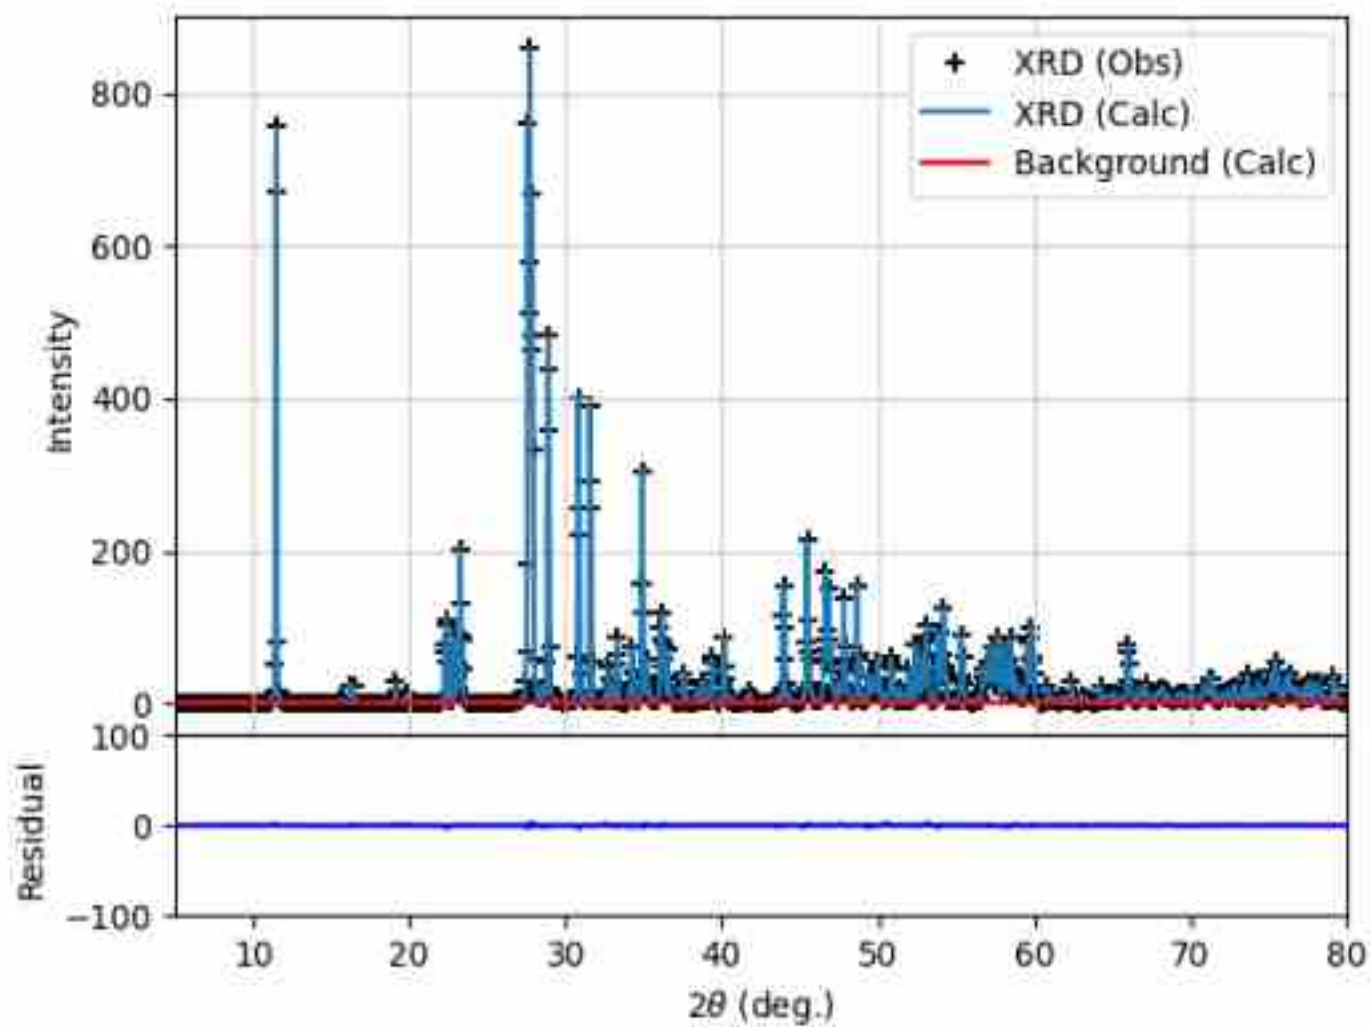

| RMSE before RR | Rwp     | RMSE after RR |
|----------------|---------|---------------|
| 0.184          | 1.90101 | 0.12037       |

# Sr<sub>2</sub>Eu<sub>2</sub>Tl<sub>11</sub>Ni<sub>2</sub>O<sub>9</sub>

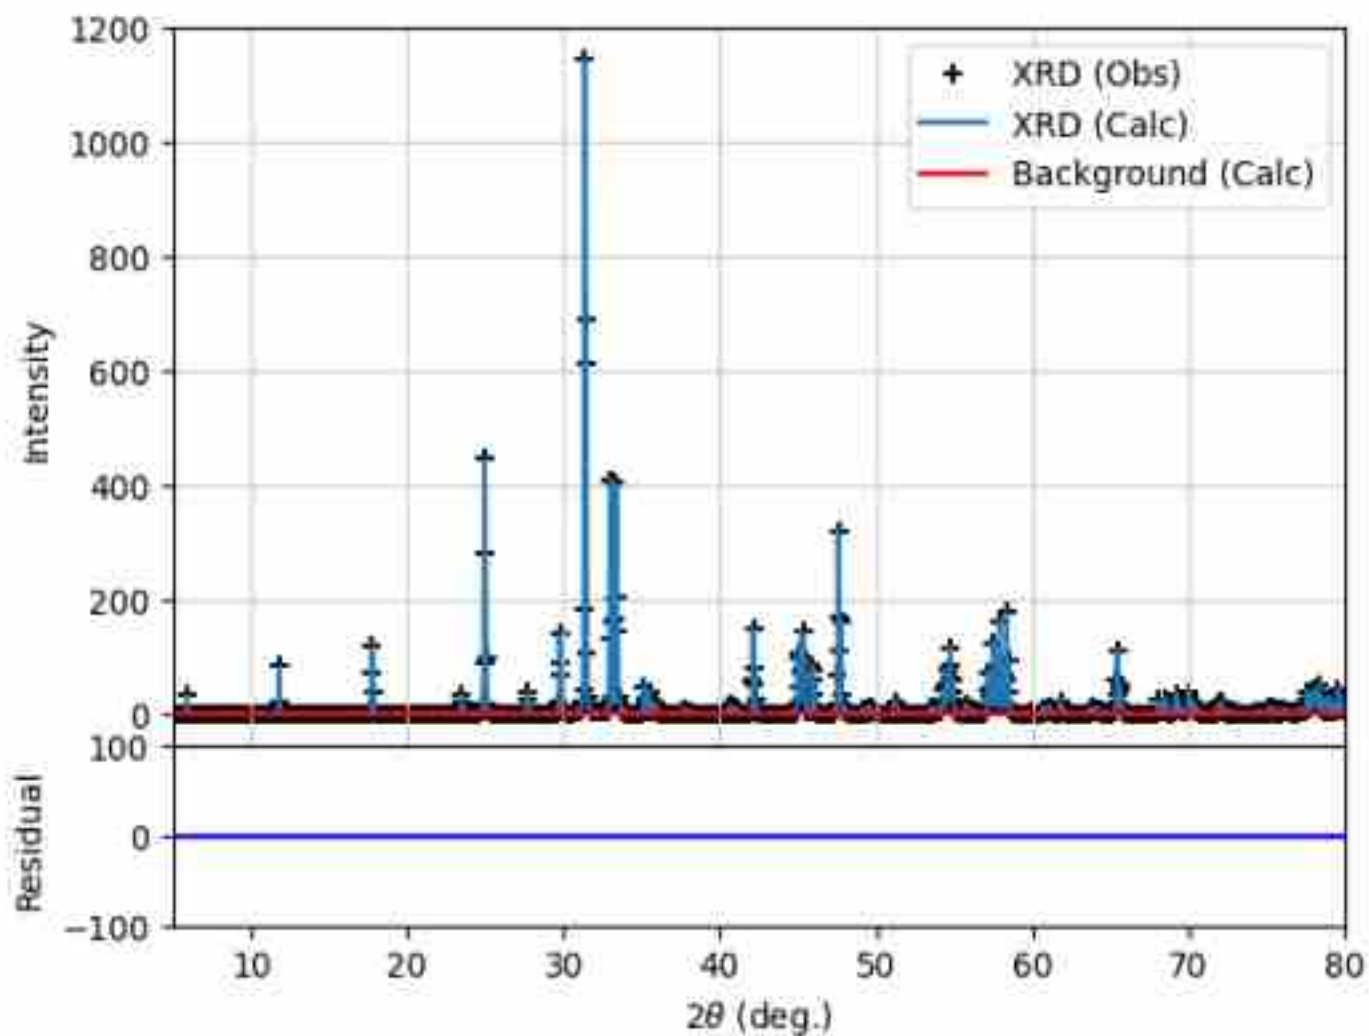

| RMSE before RR | Rwp     | RMSE after RR |
|----------------|---------|---------------|
| 0.186          | 0.00372 | 0.00141       |

# Li<sub>4</sub>Mn<sub>4</sub>O<sub>8</sub>

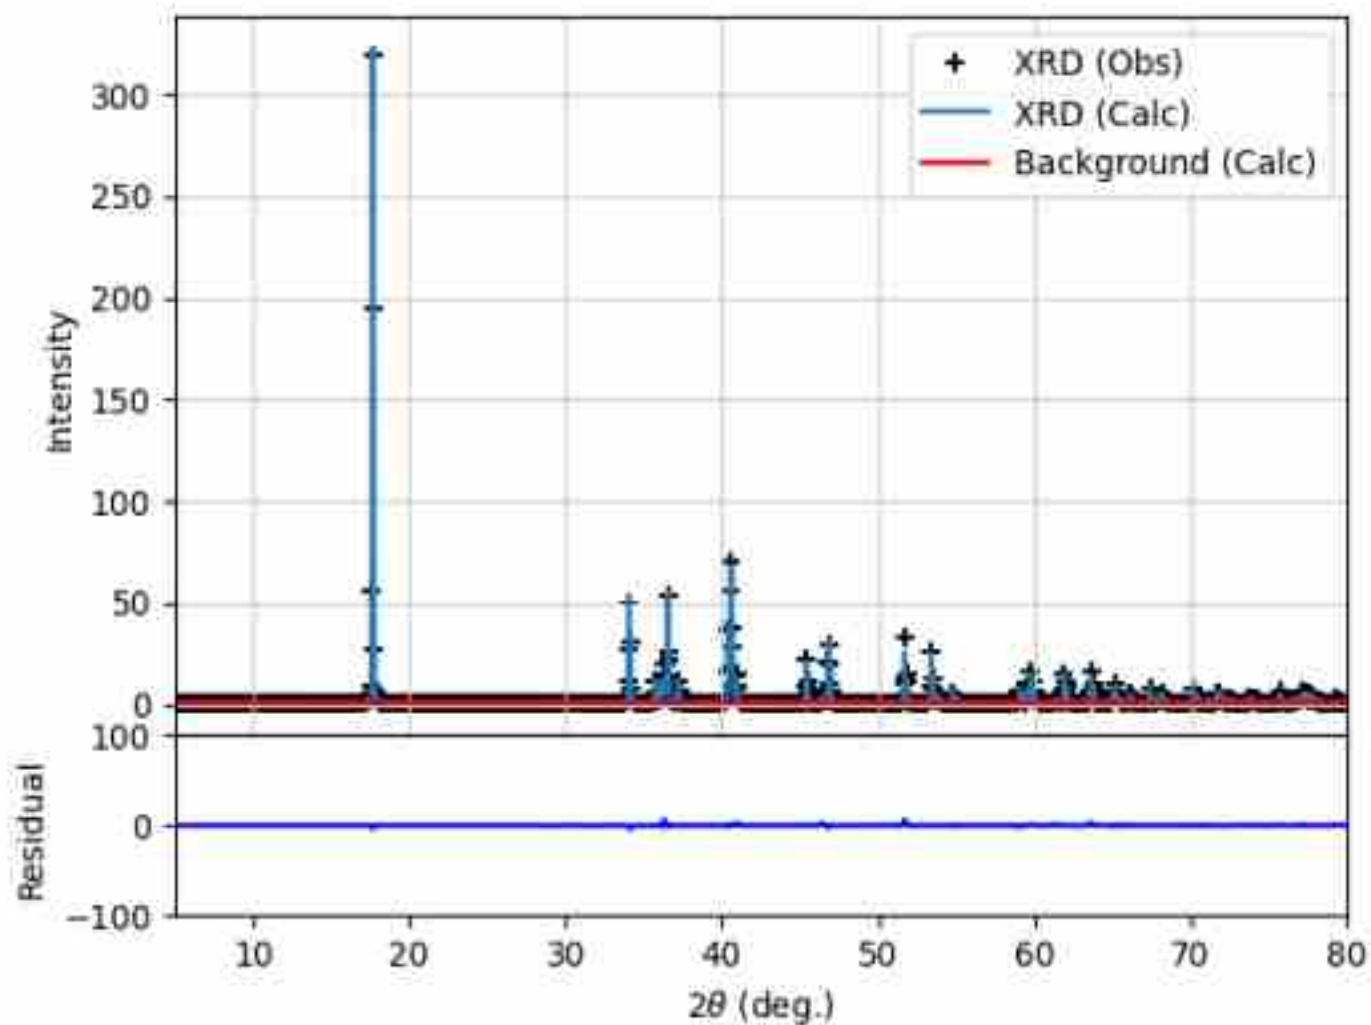

| RMSE before RR | Rwp     | RMSE after RR |
|----------------|---------|---------------|
| 0.187          | 9.86548 | None          |

# A14H4O8

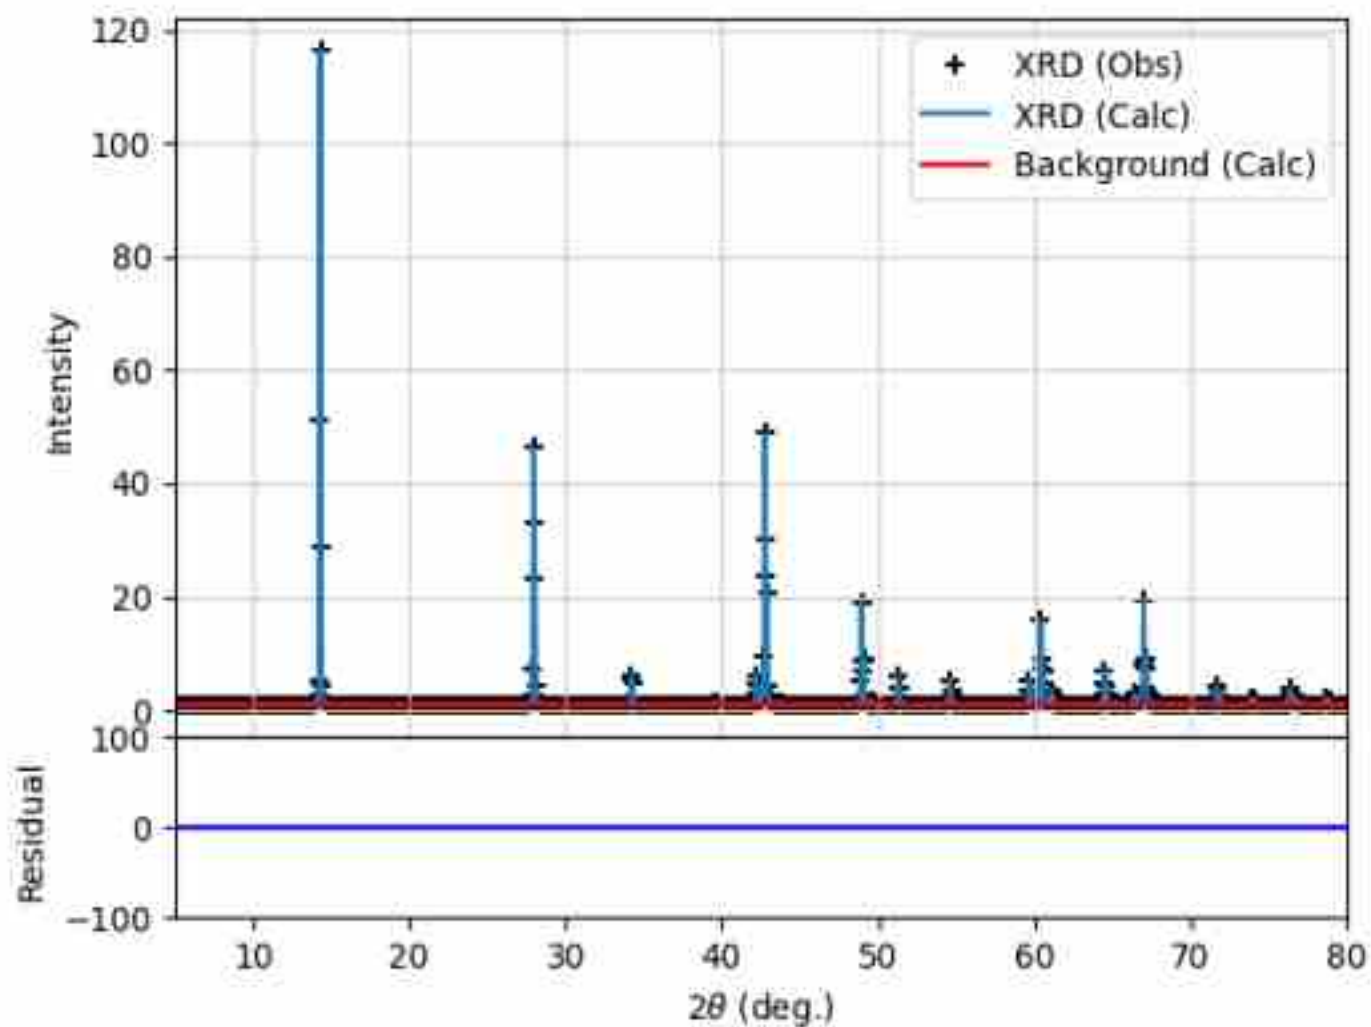

| RMSE before RR | Rwp     | RMSE after RR |
|----------------|---------|---------------|
| 0.188          | 0.23697 | 0.23305       |



# Tl4Sb4S8

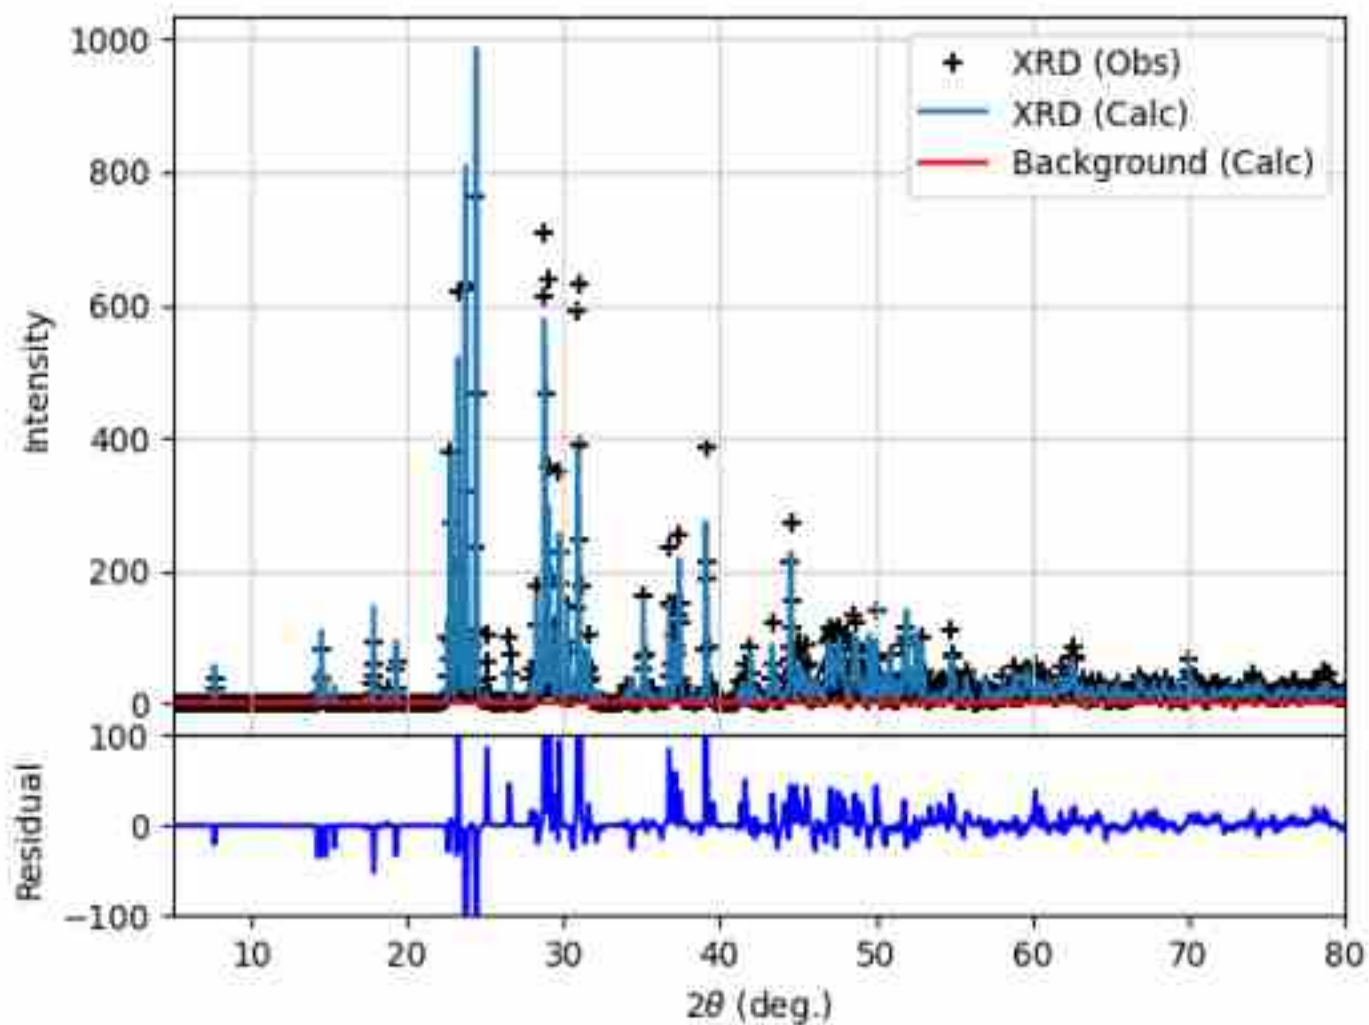

| RMSE before RR | Rwp     | RMSE after RR |
|----------------|---------|---------------|
| 0.188          | 40.4304 | None          |

# Sb<sub>4</sub>Pt<sub>6</sub>

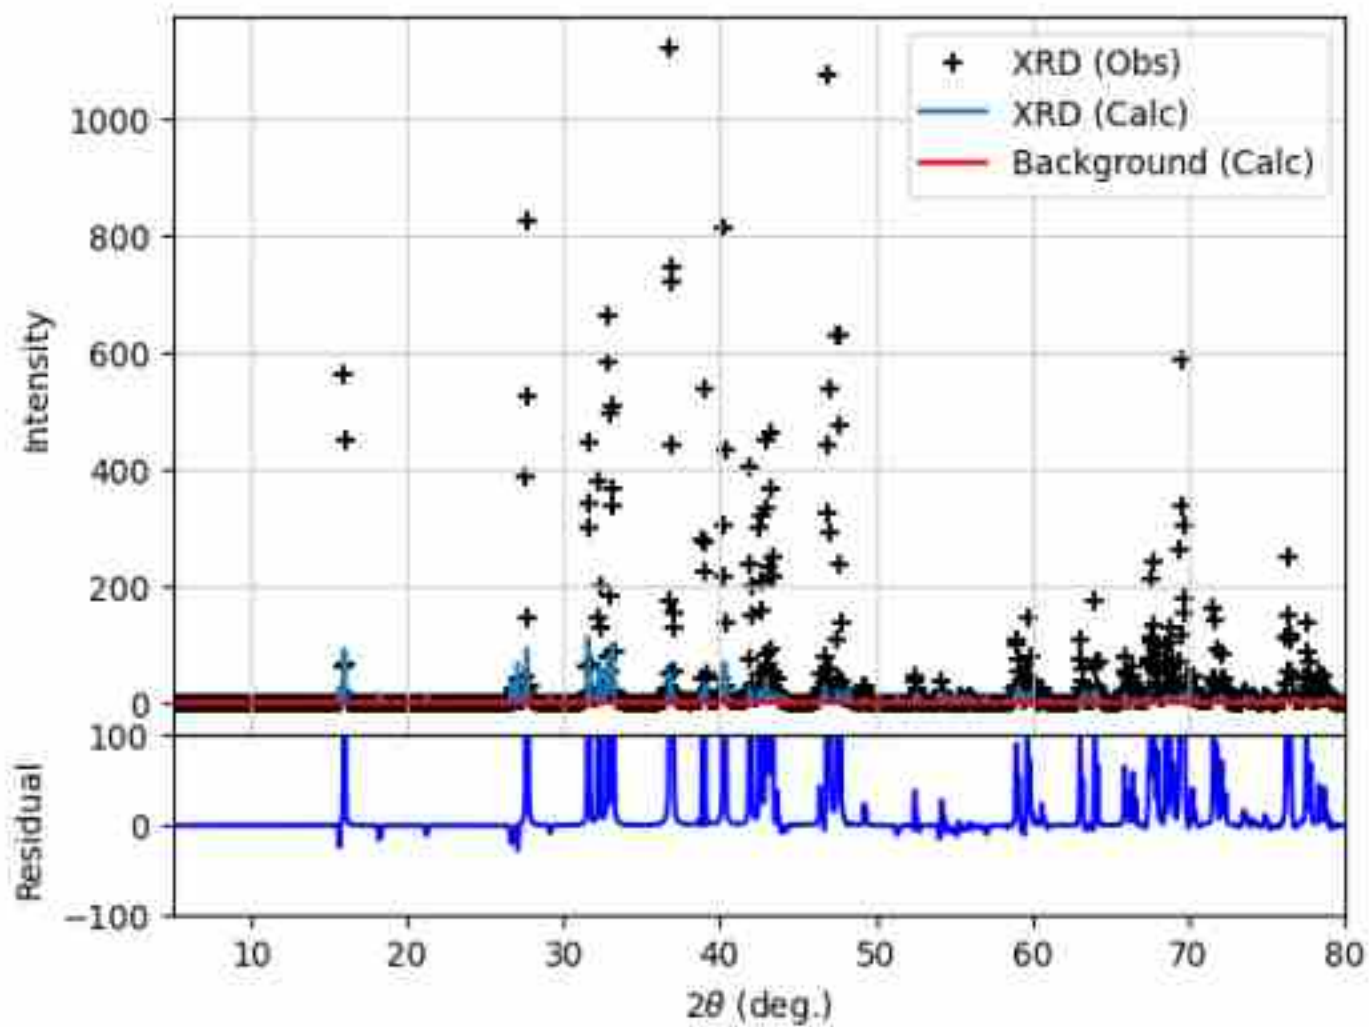

| RMSE before RR | Rwp      | RMSE after RR |
|----------------|----------|---------------|
| 0.189          | 90.69188 | 0.482         |

# Ce<sub>3</sub>In<sub>3</sub>Ru<sub>2</sub>

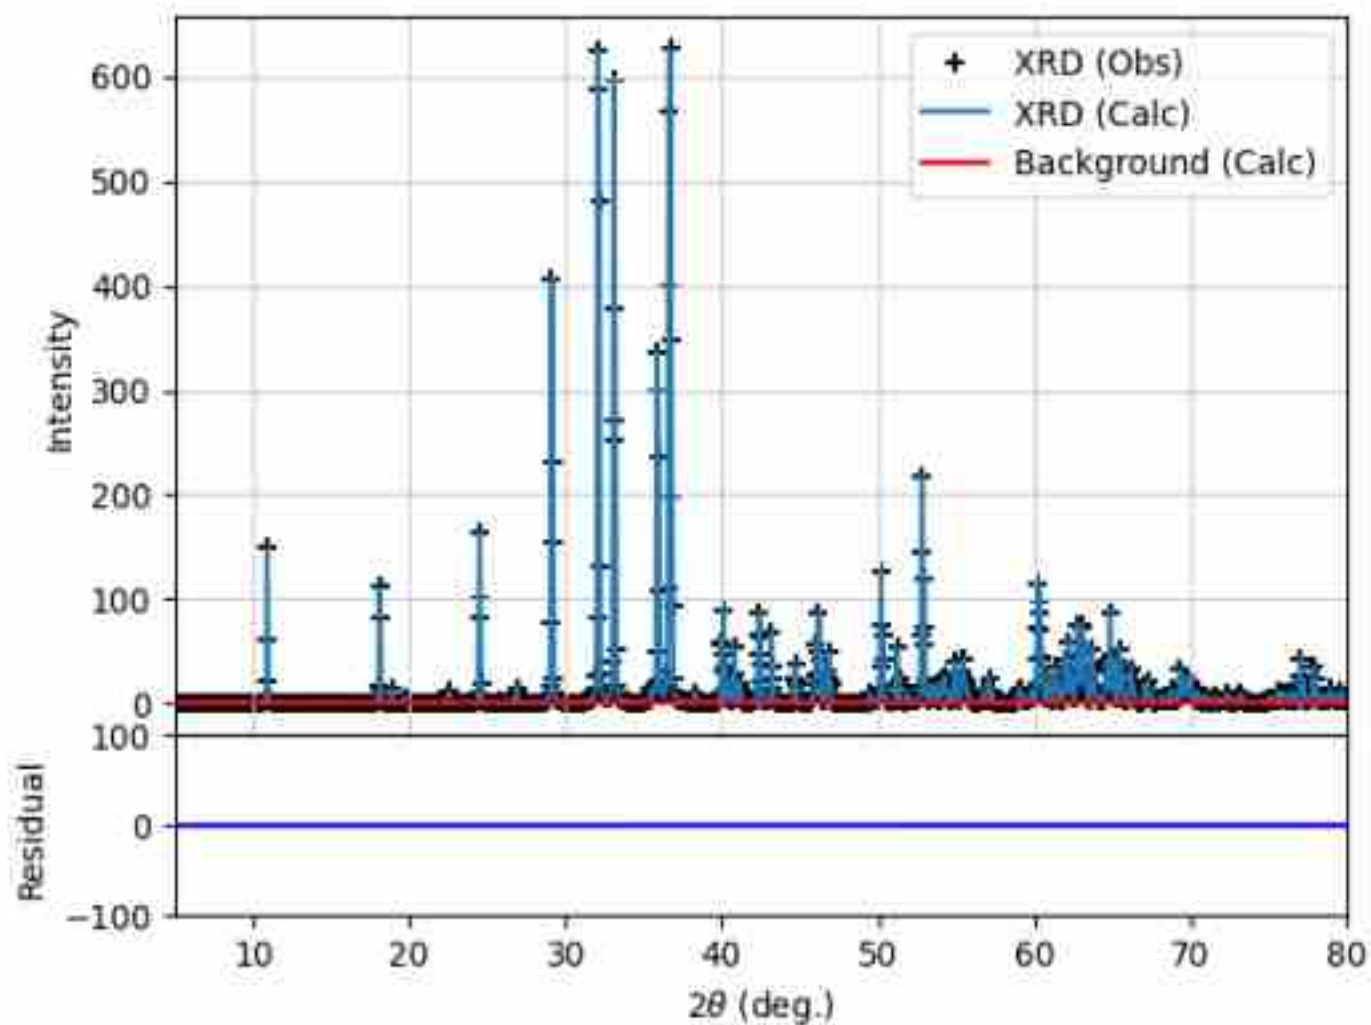

| RMSE before RR | Rwp     | RMSE after RR |
|----------------|---------|---------------|
| 0.191          | 0.15973 | 0.00383       |

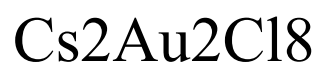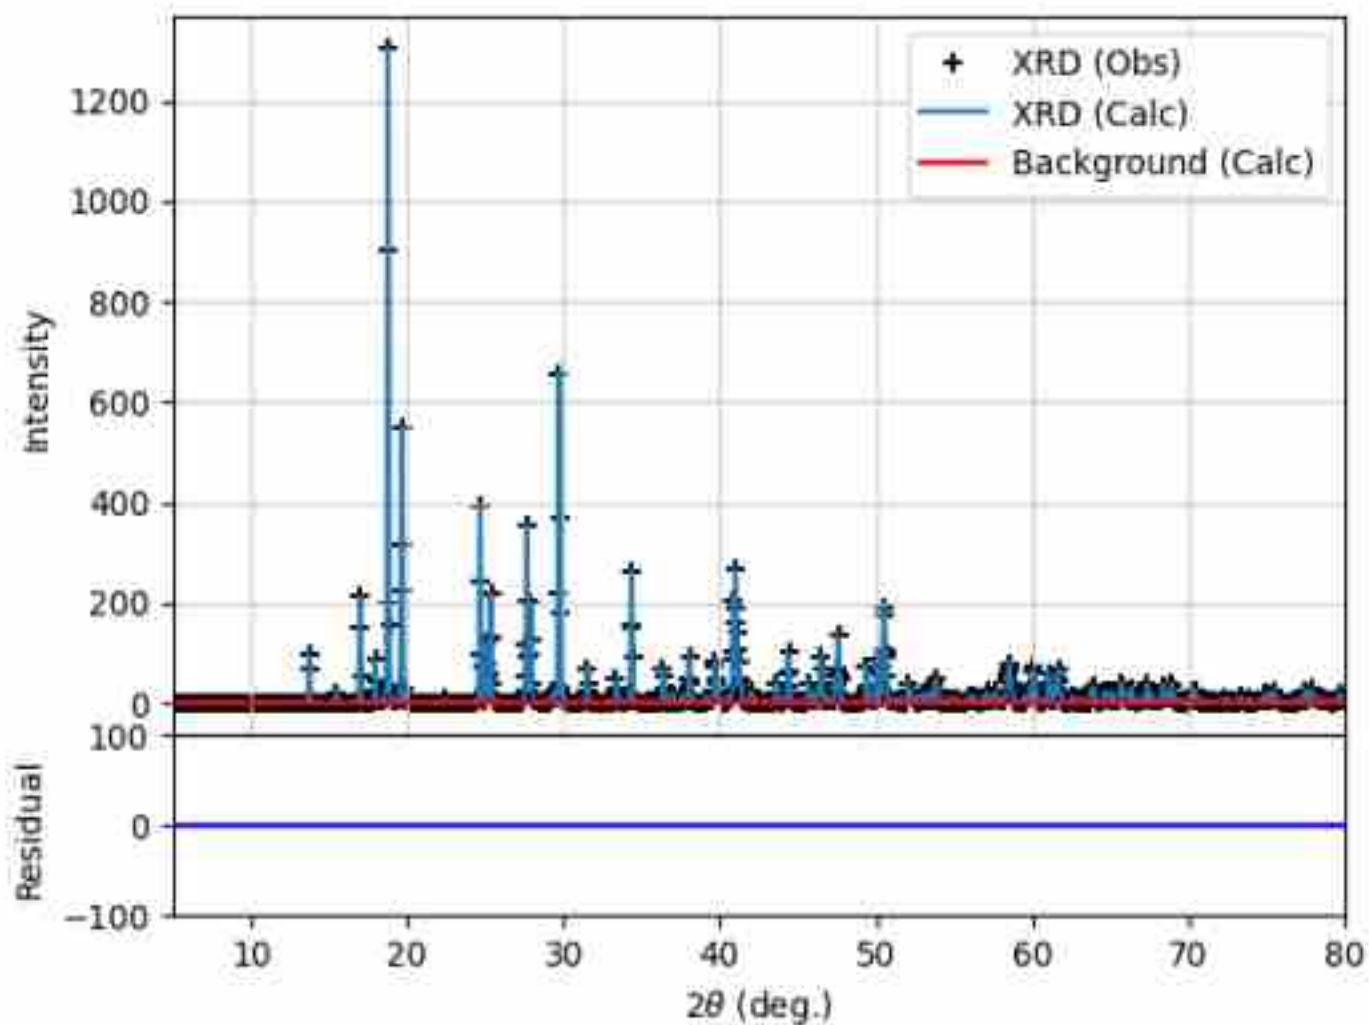

| RMSE before RR | Rwp     | RMSE after RR |
|----------------|---------|---------------|
| 0.191          | 0.00344 | 0.00042       |

# K4Cl4O12

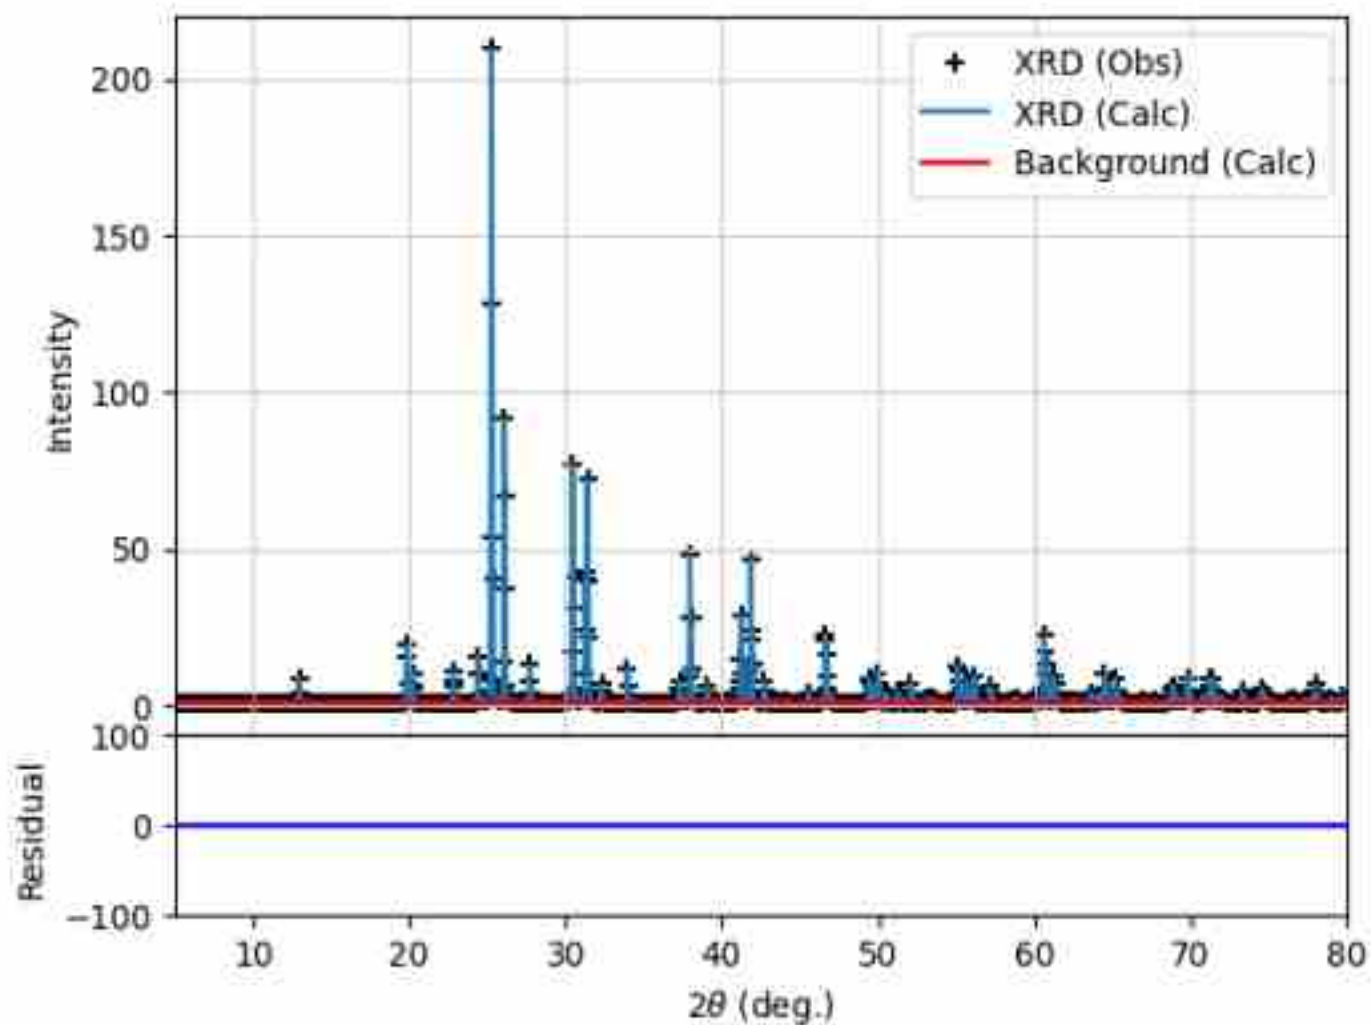

| RMSE before RR | Rwp     | RMSE after RR |
|----------------|---------|---------------|
| 0.191          | 0.00252 | 0.00079       |

# Li<sub>2</sub>Cd<sub>2</sub>B<sub>2</sub>O<sub>6</sub>

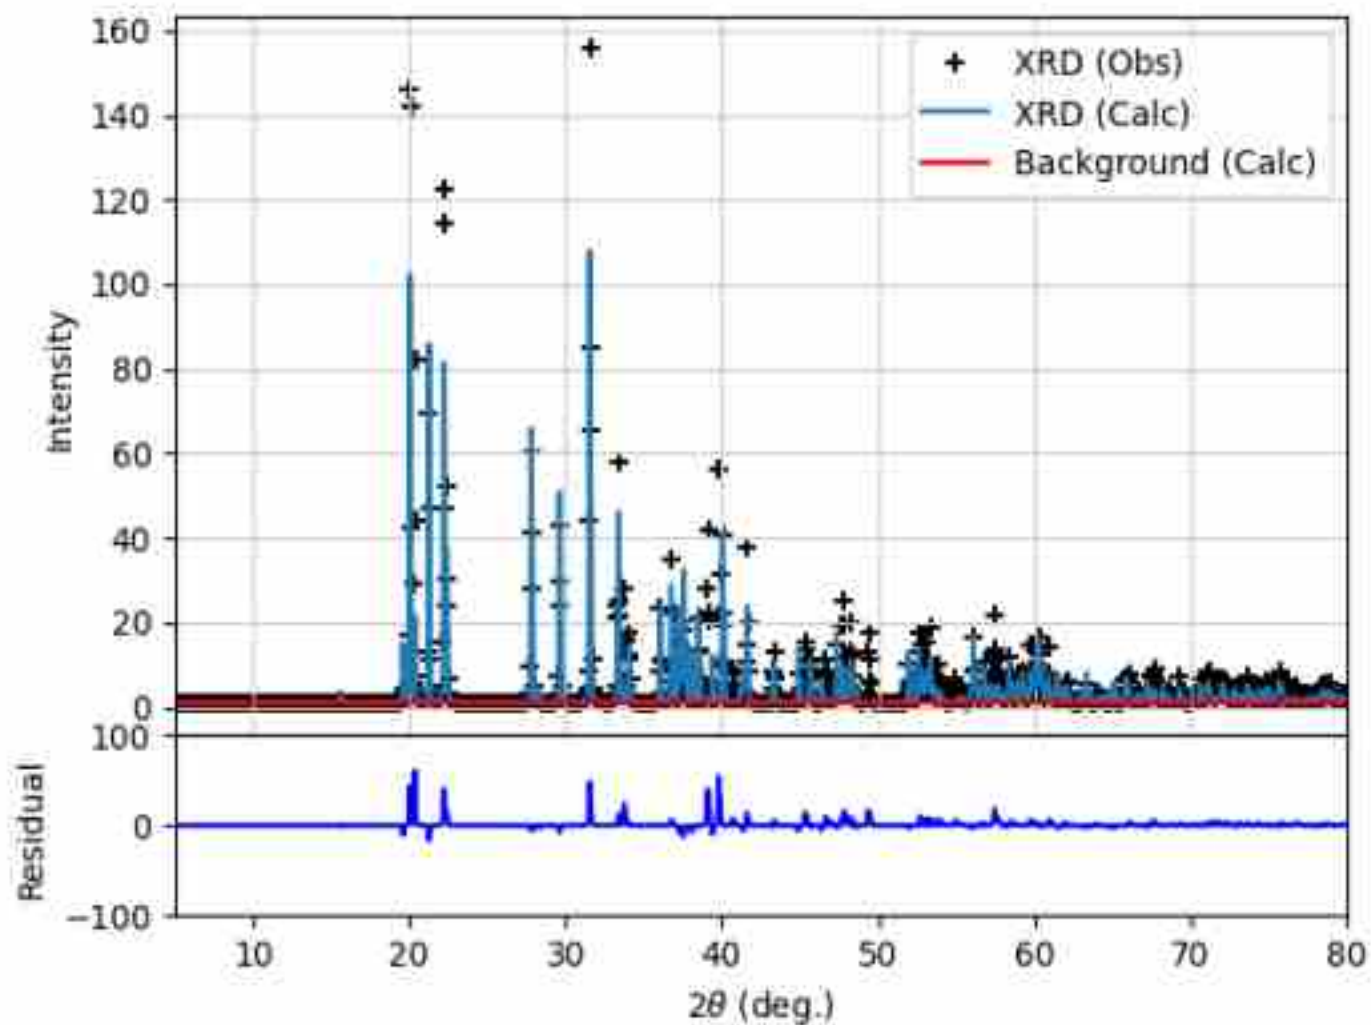

| RMSE before RR | Rwp      | RMSE after RR |
|----------------|----------|---------------|
| 0.192          | 43.97381 | None          |

# Sr<sub>2</sub>C<sub>4</sub>S<sub>4</sub>N<sub>4</sub>

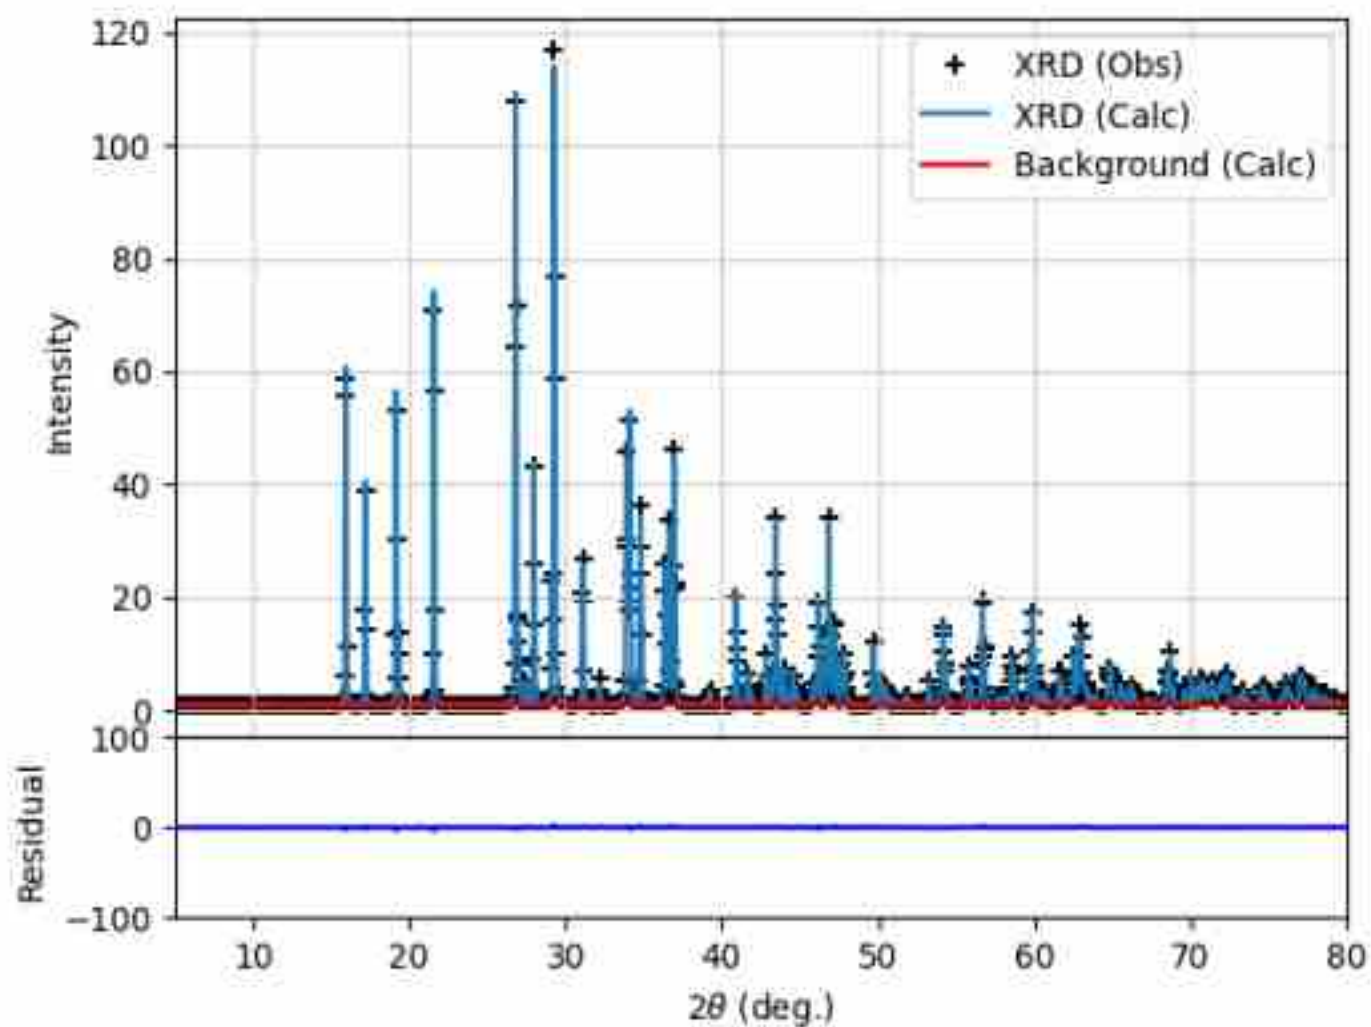

| RMSE before RR | Rwp     | RMSE after RR |
|----------------|---------|---------------|
| 0.192          | 4.34299 | 0.47061       |

# Al<sub>2</sub>P<sub>2</sub>O<sub>8</sub>

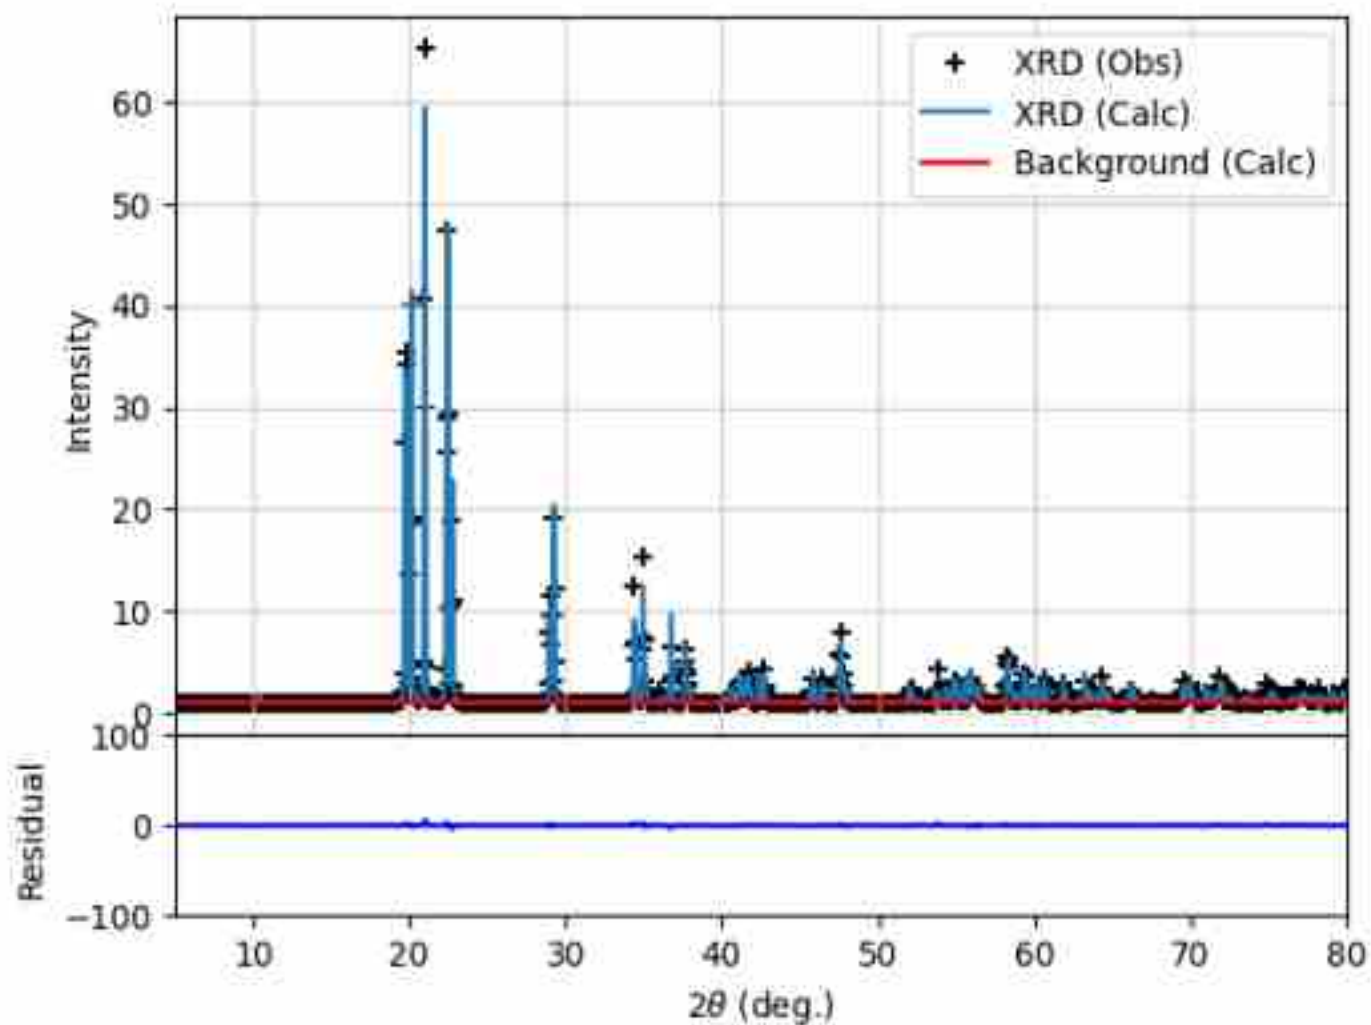

| RMSE before RR | Rwp      | RMSE after RR |
|----------------|----------|---------------|
| 0.193          | 12.81232 | 0.33482       |



# Ba<sub>4</sub>Li<sub>6</sub>Ta<sub>2</sub>N<sub>8</sub>

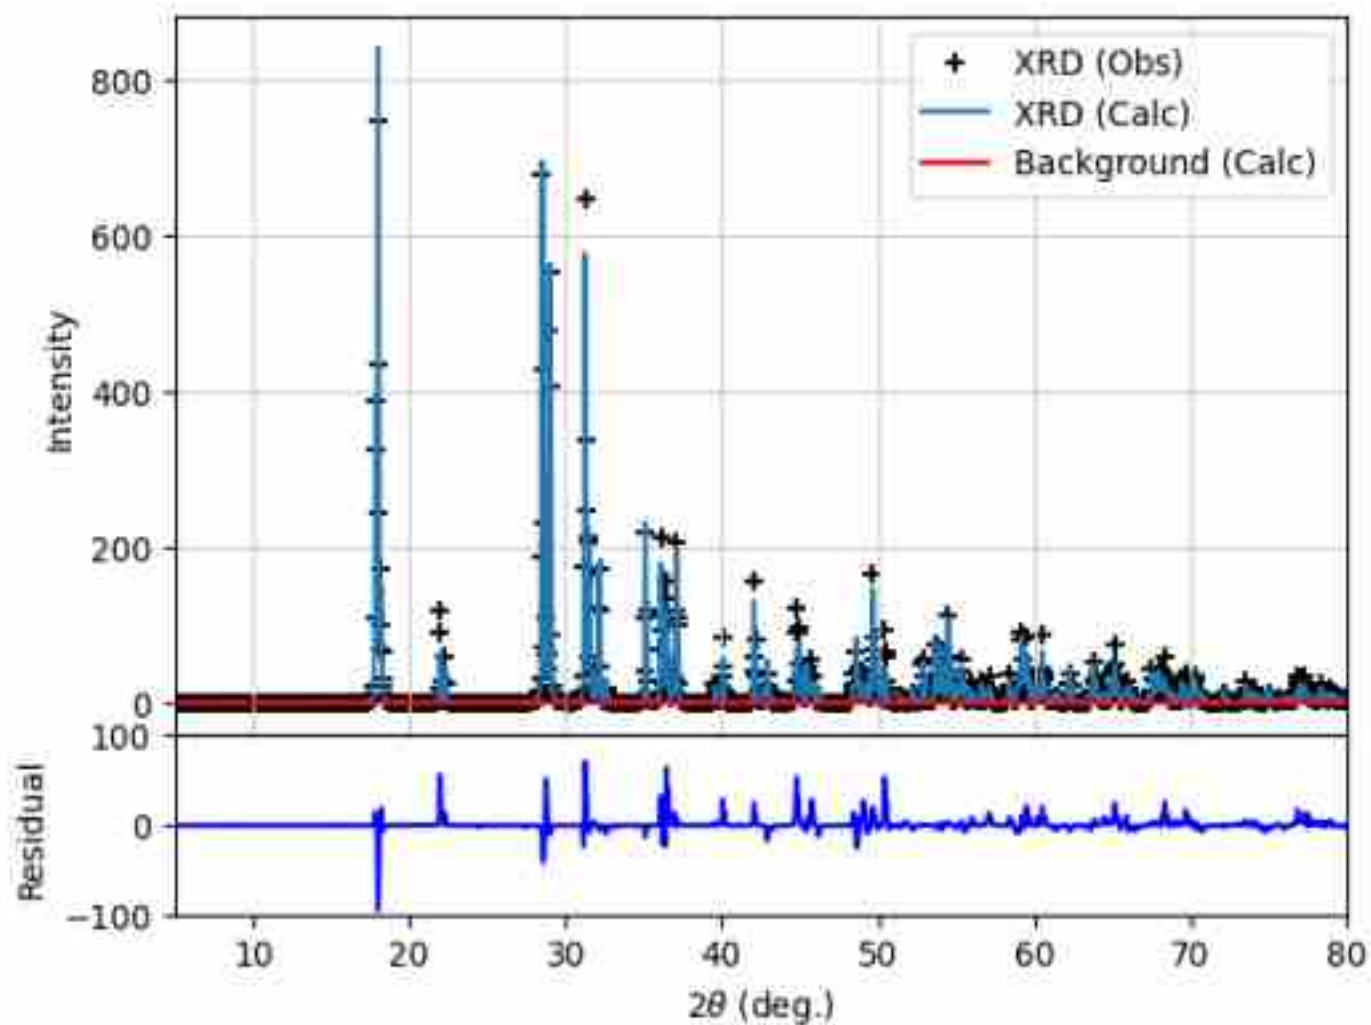

| RMSE before RR | Rwp      | RMSE after RR |
|----------------|----------|---------------|
| 0.193          | 23.65498 | None          |

# Li<sub>2</sub>Yb<sub>2</sub>F<sub>8</sub>

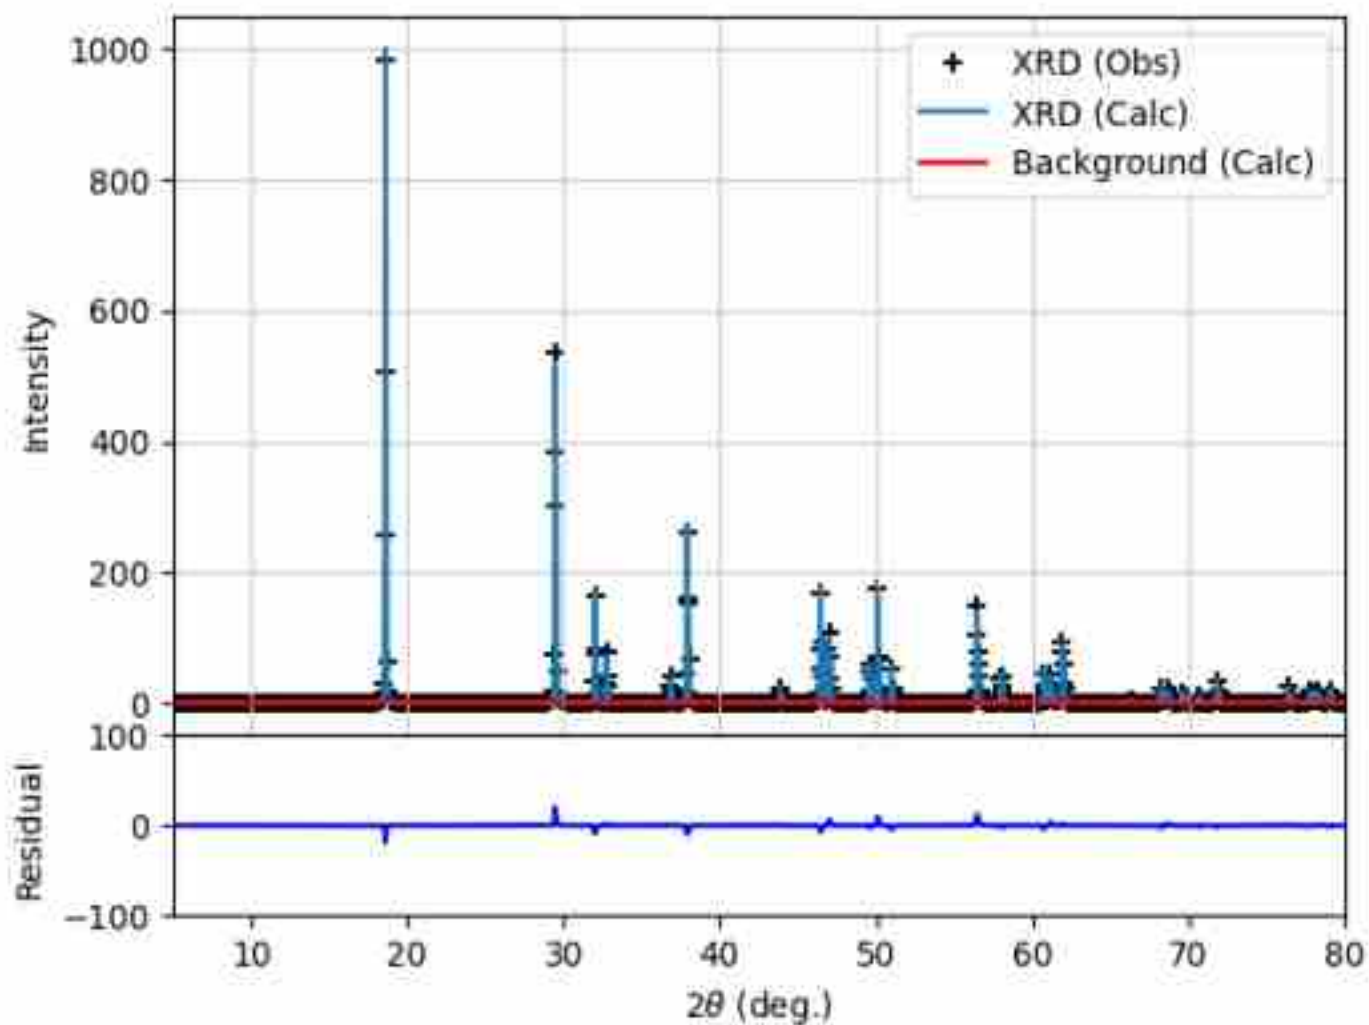

| RMSE before RR | Rwp     | RMSE after RR |
|----------------|---------|---------------|
| 0.193          | 4.55574 | 0.26614       |

# Cu<sub>4</sub>S<sub>2</sub>O<sub>8</sub>

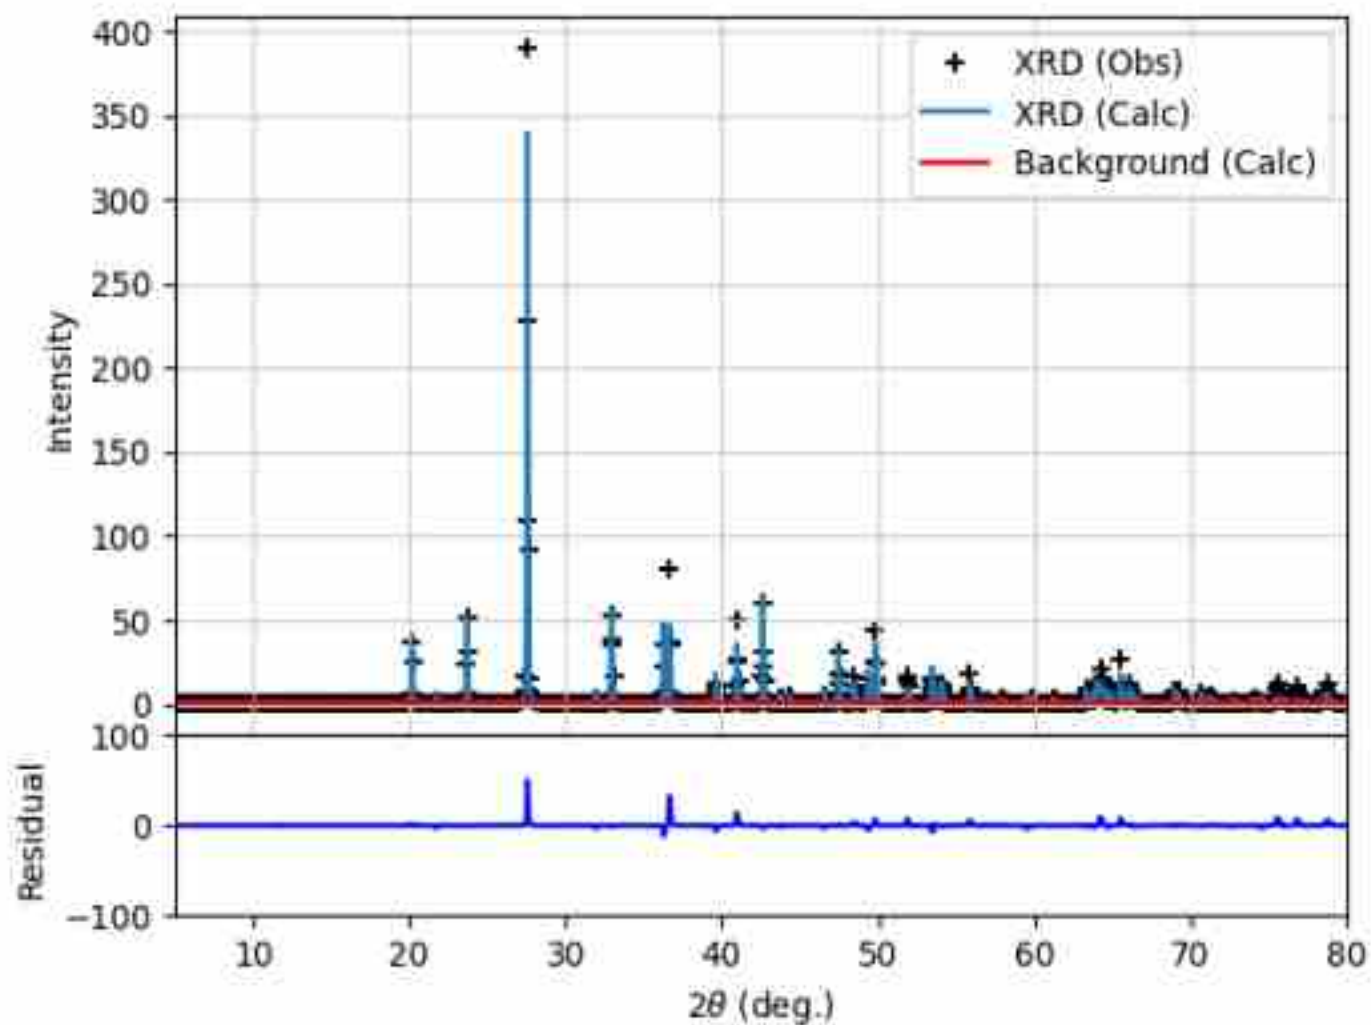

| RMSE before RR | Rwp      | RMSE after RR |
|----------------|----------|---------------|
| 0.195          | 23.17932 | 0.24501       |

# Ba<sub>4</sub>Si<sub>4</sub>O<sub>12</sub>

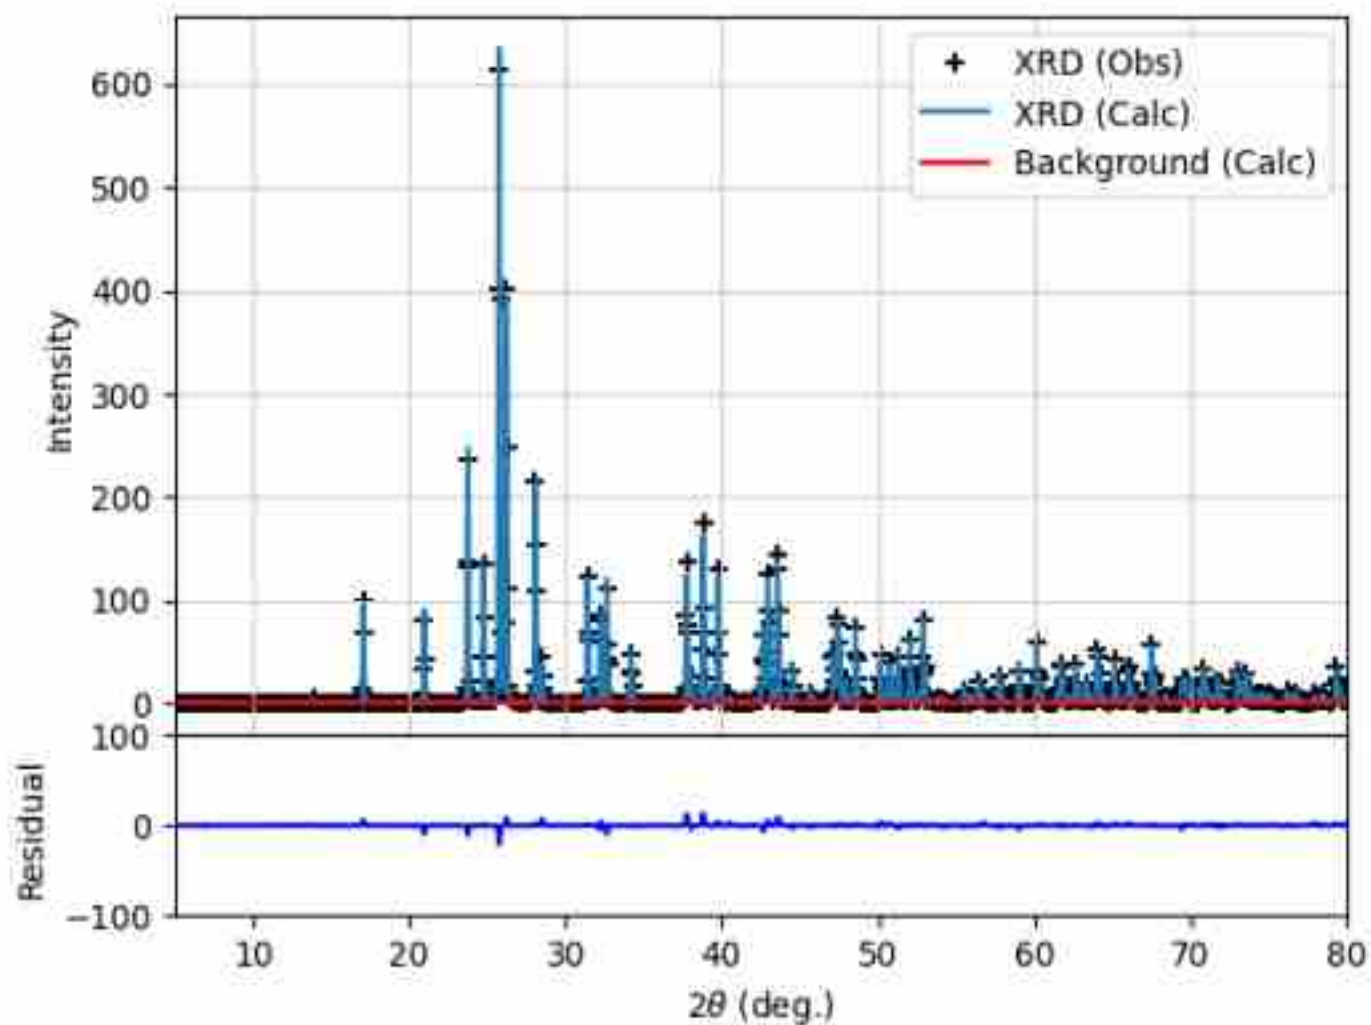

| RMSE before RR | Rwp     | RMSE after RR |
|----------------|---------|---------------|
| 0.196          | 6.81654 | 0.29613       |

# K<sub>2</sub>S<sub>2</sub>O<sub>4</sub>F<sub>2</sub>

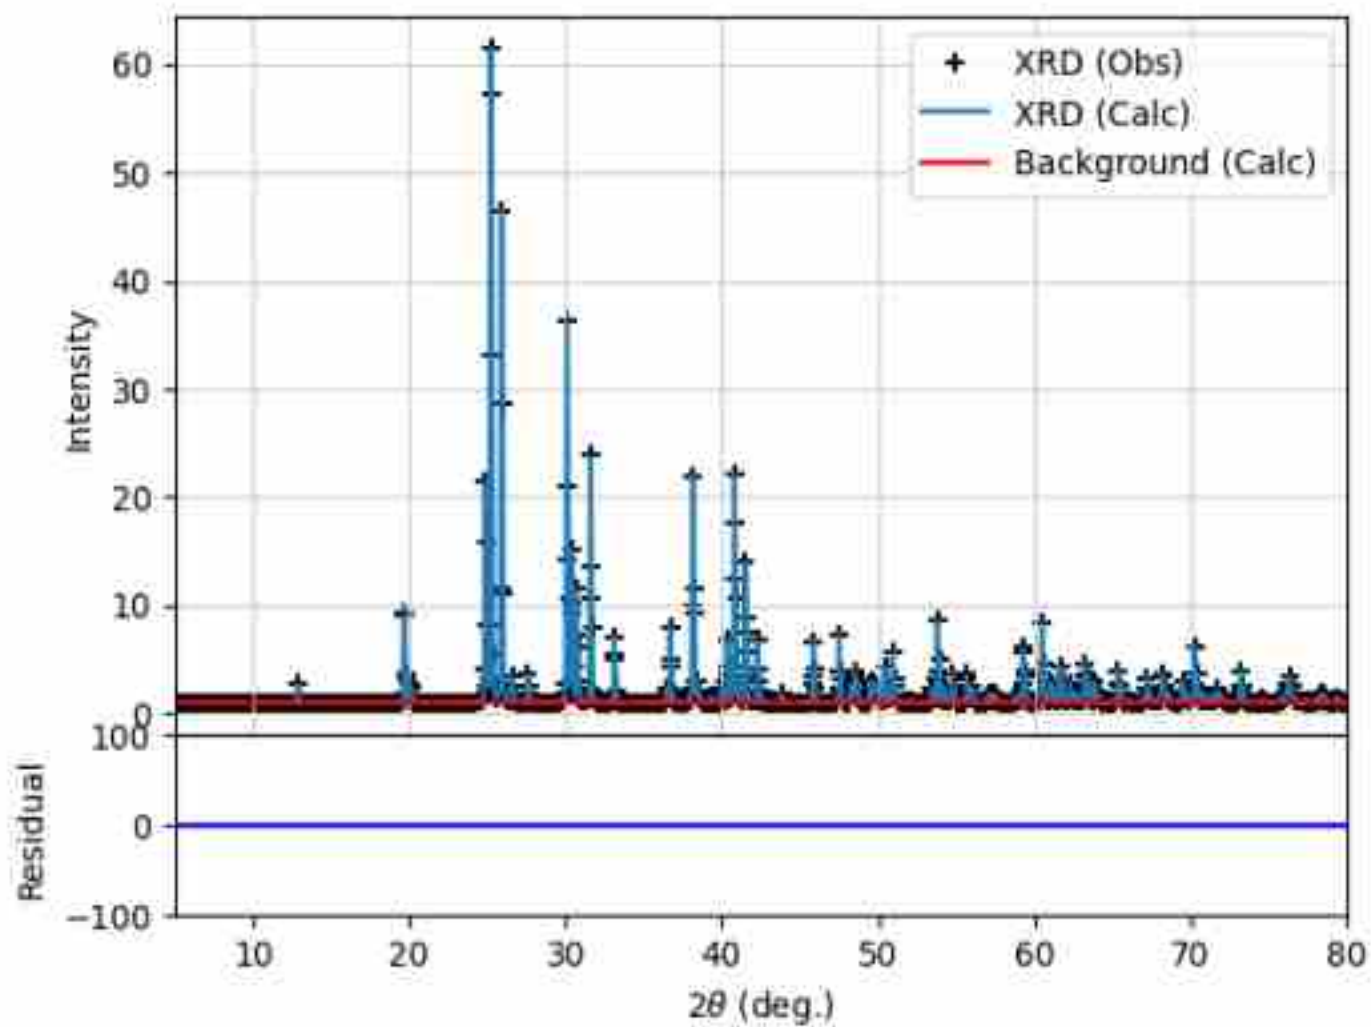

| RMSE before RR | Rwp    | RMSE after RR |
|----------------|--------|---------------|
| 0.197          | 0.0023 | 0.00035       |

# K3B6Br1O10

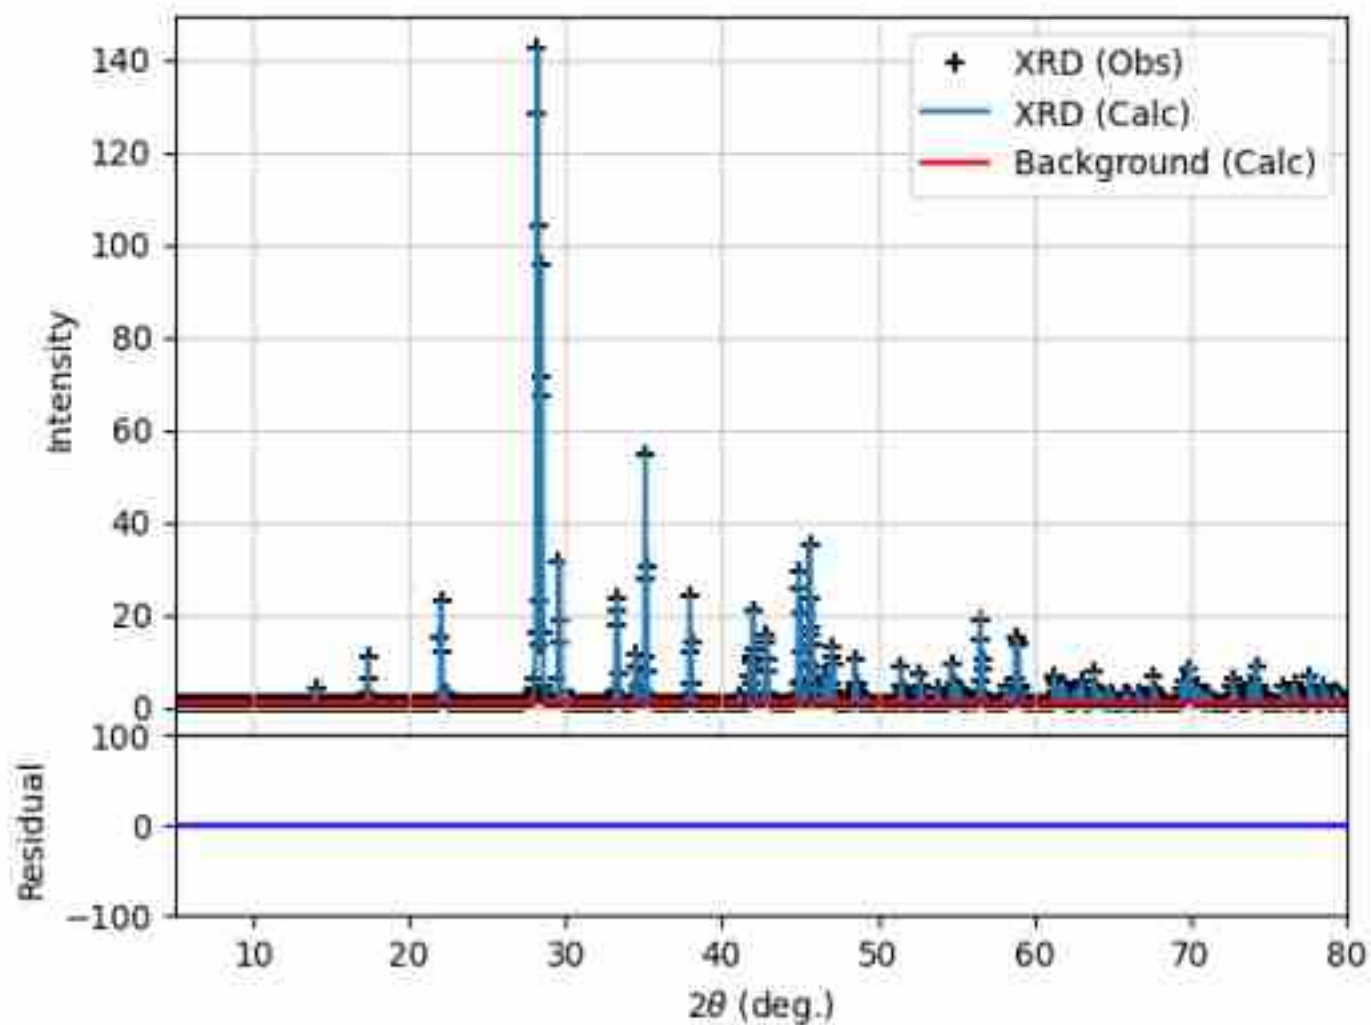

| RMSE before RR | Rwp    | RMSE after RR |
|----------------|--------|---------------|
| 0.197          | 0.0024 | 0.00099       |

# Na<sub>1</sub>V<sub>1</sub>H<sub>8</sub>N<sub>2</sub>F<sub>6</sub>

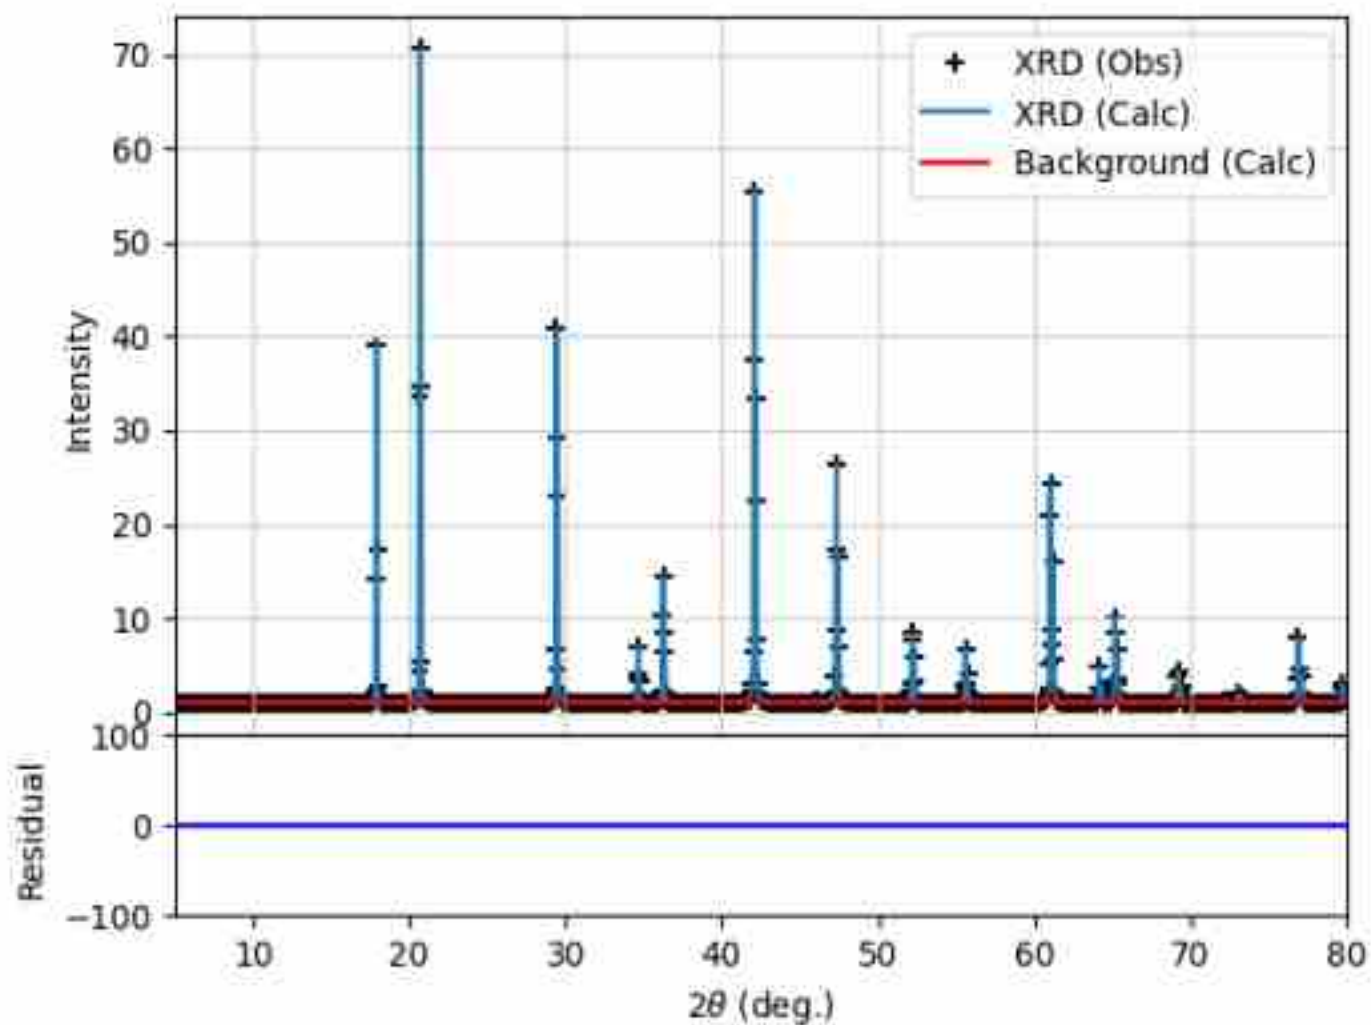

| RMSE before RR | Rwp     | RMSE after RR |
|----------------|---------|---------------|
| 0.197          | 0.29948 | 0.21131       |

# Fe<sub>2</sub>As<sub>2</sub>H<sub>2</sub>Pb<sub>1</sub>O<sub>10</sub>

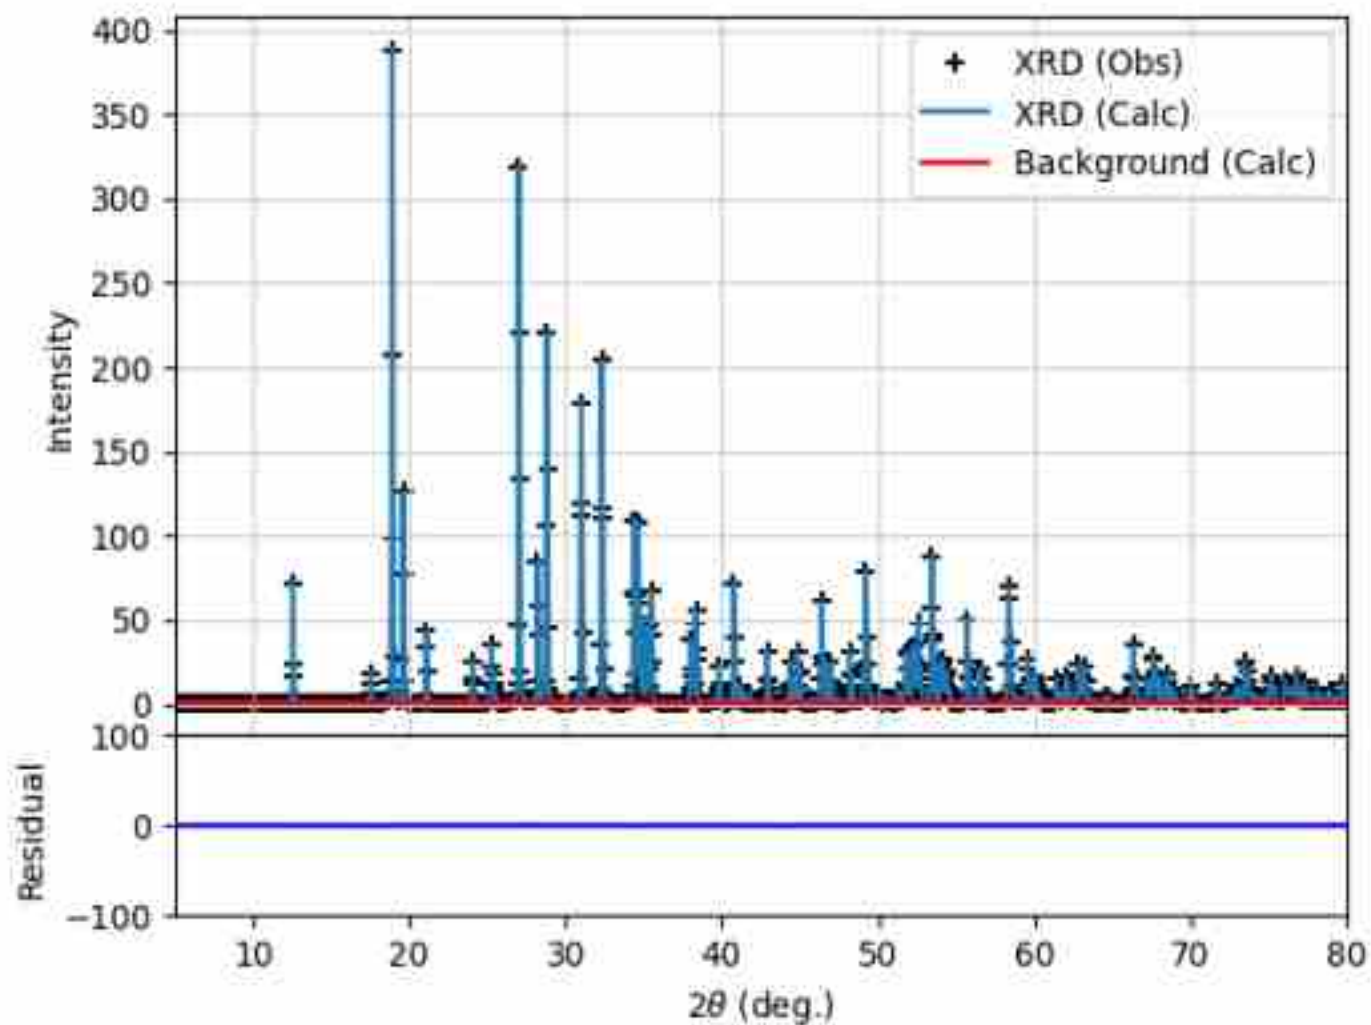

| RMSE before RR | Rwp     | RMSE after RR |
|----------------|---------|---------------|
| 0.198          | 0.20638 | None          |



# Li<sub>4</sub>Cu<sub>8</sub>S<sub>6</sub>

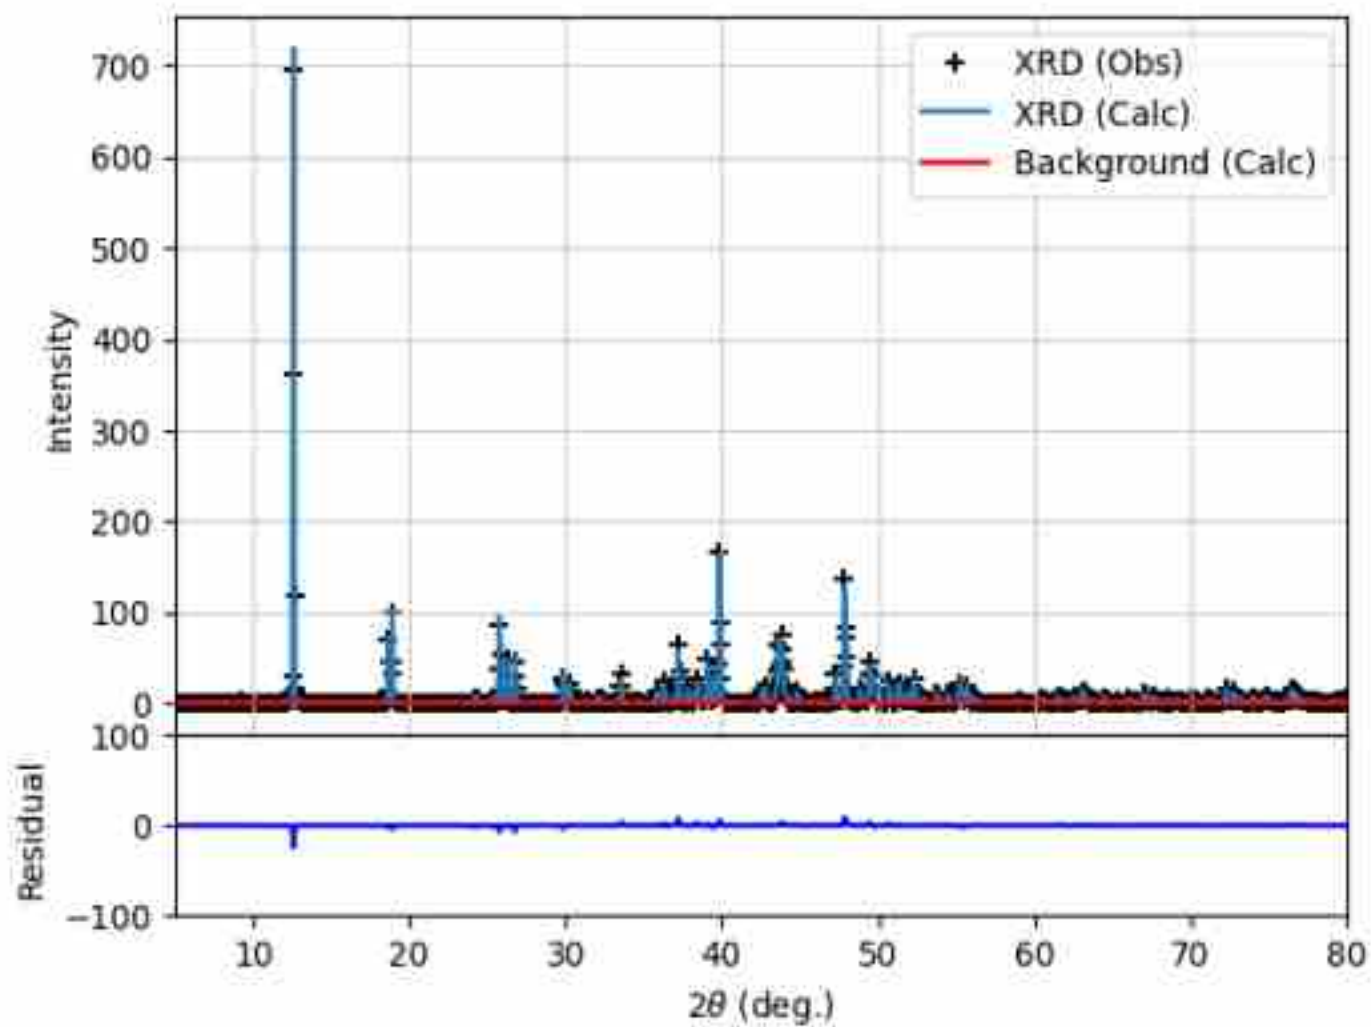

| RMSE before RR | Rwp     | RMSE after RR |
|----------------|---------|---------------|
| 0.198          | 6.20755 | None          |

# Sr<sub>2</sub>Ca<sub>2</sub>Eu<sub>2</sub>Bi<sub>2</sub>O<sub>12</sub>

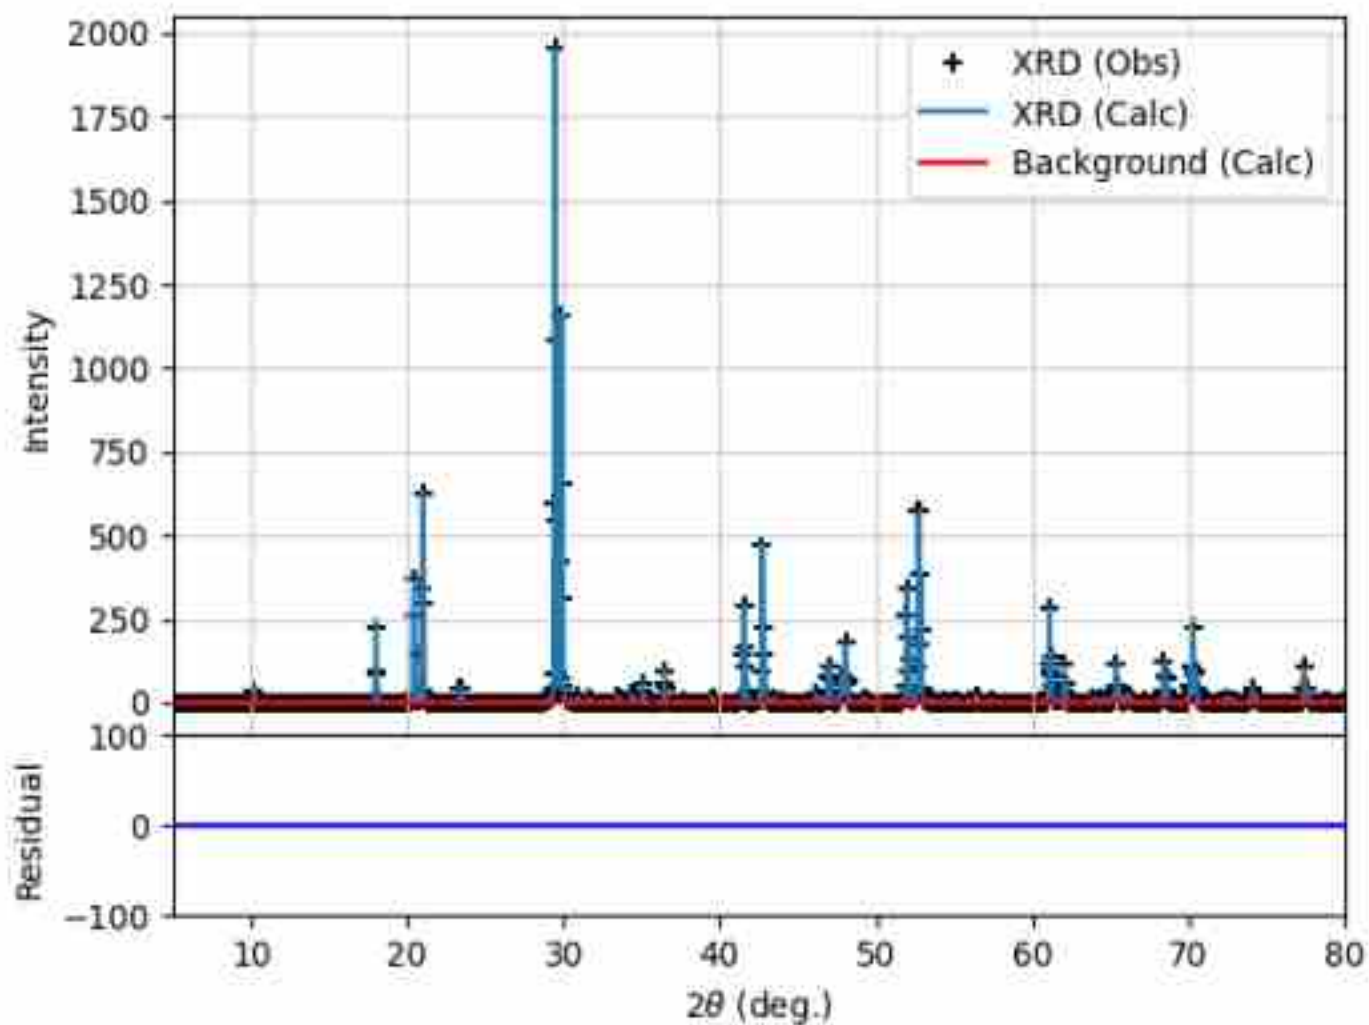

| RMSE before RR | Rwp     | RMSE after RR |
|----------------|---------|---------------|
| 0.198          | 0.00613 | 0.00195       |

# W4O12

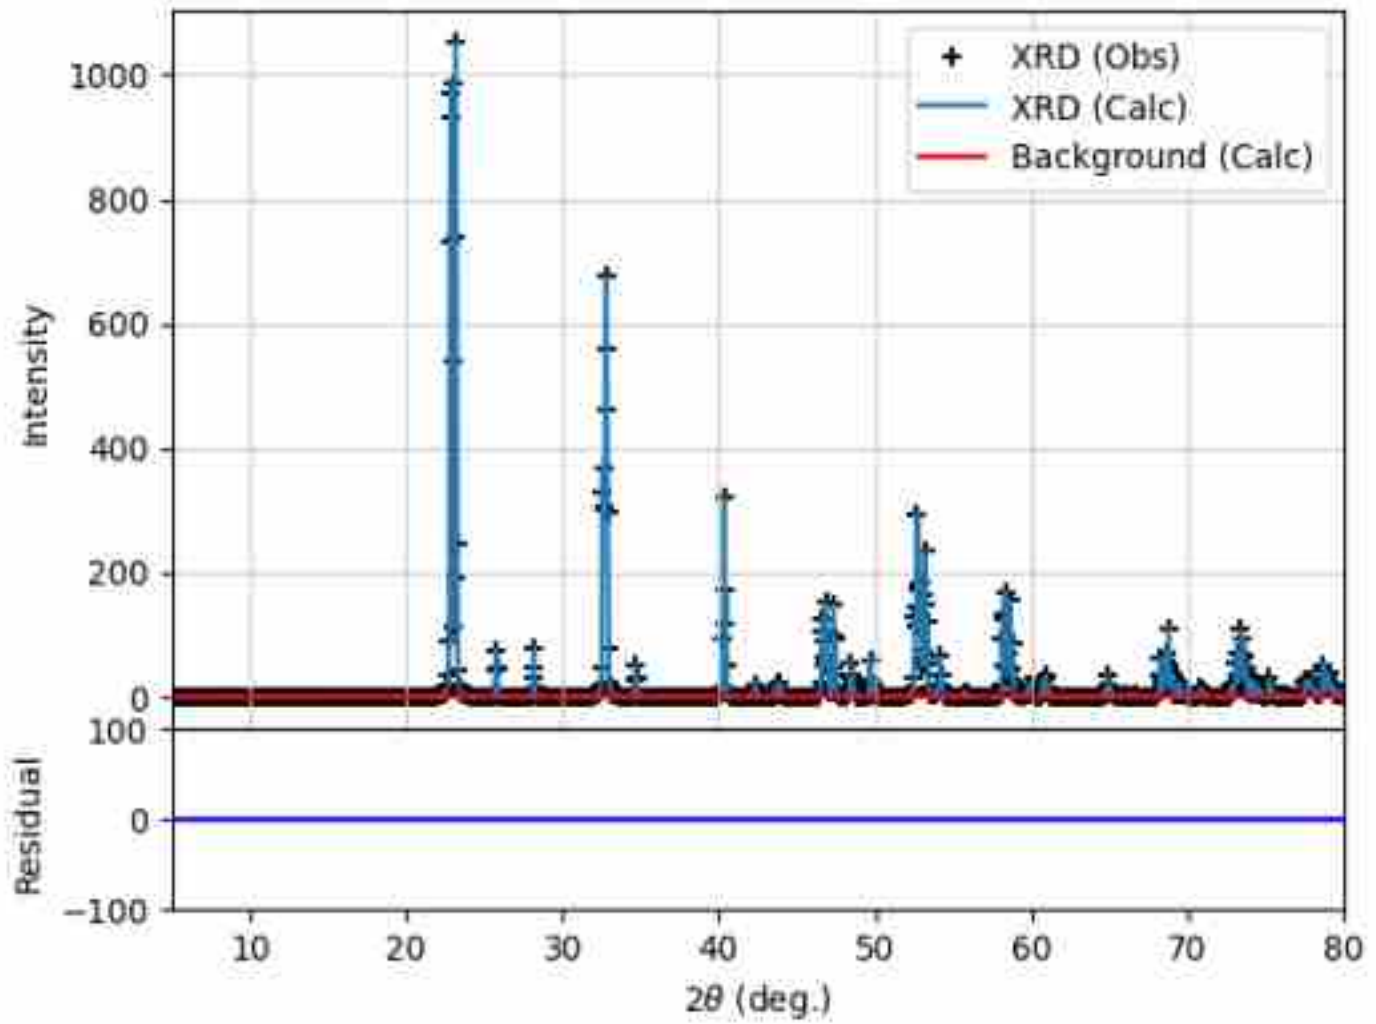

| RMSE before RR | Rwp     | RMSE after RR |
|----------------|---------|---------------|
| 0.199          | 0.00375 | 0.00135       |

# Ga<sub>4</sub>Si<sub>10</sub>O<sub>8</sub>

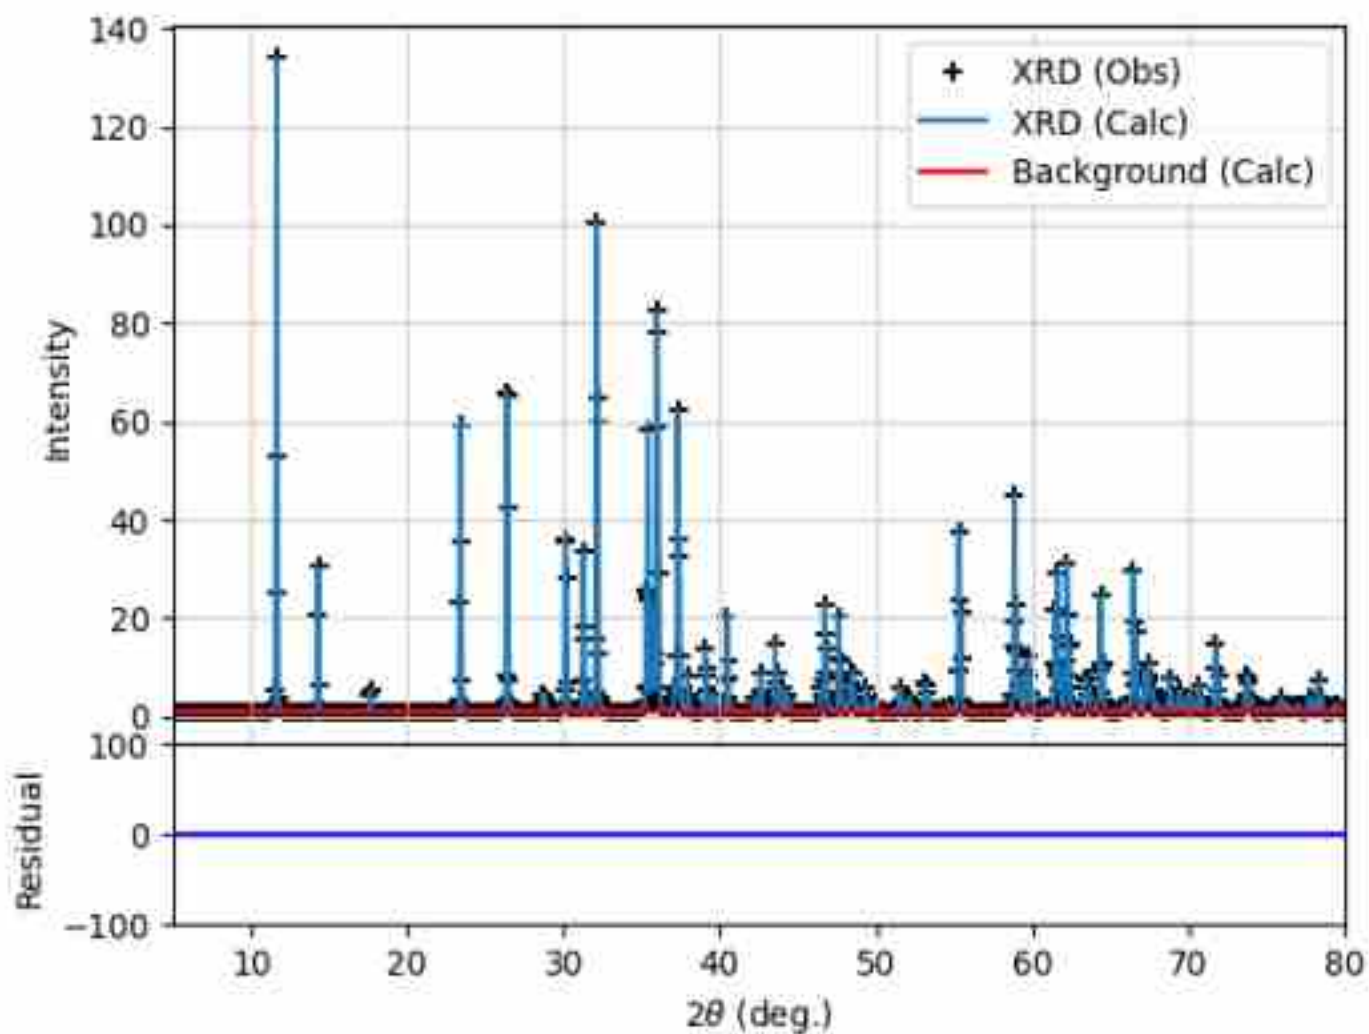

| RMSE before RR | Rwp     | RMSE after RR |
|----------------|---------|---------------|
| 0.201          | 0.00248 | 0.00076       |

# K1Au1I4O12

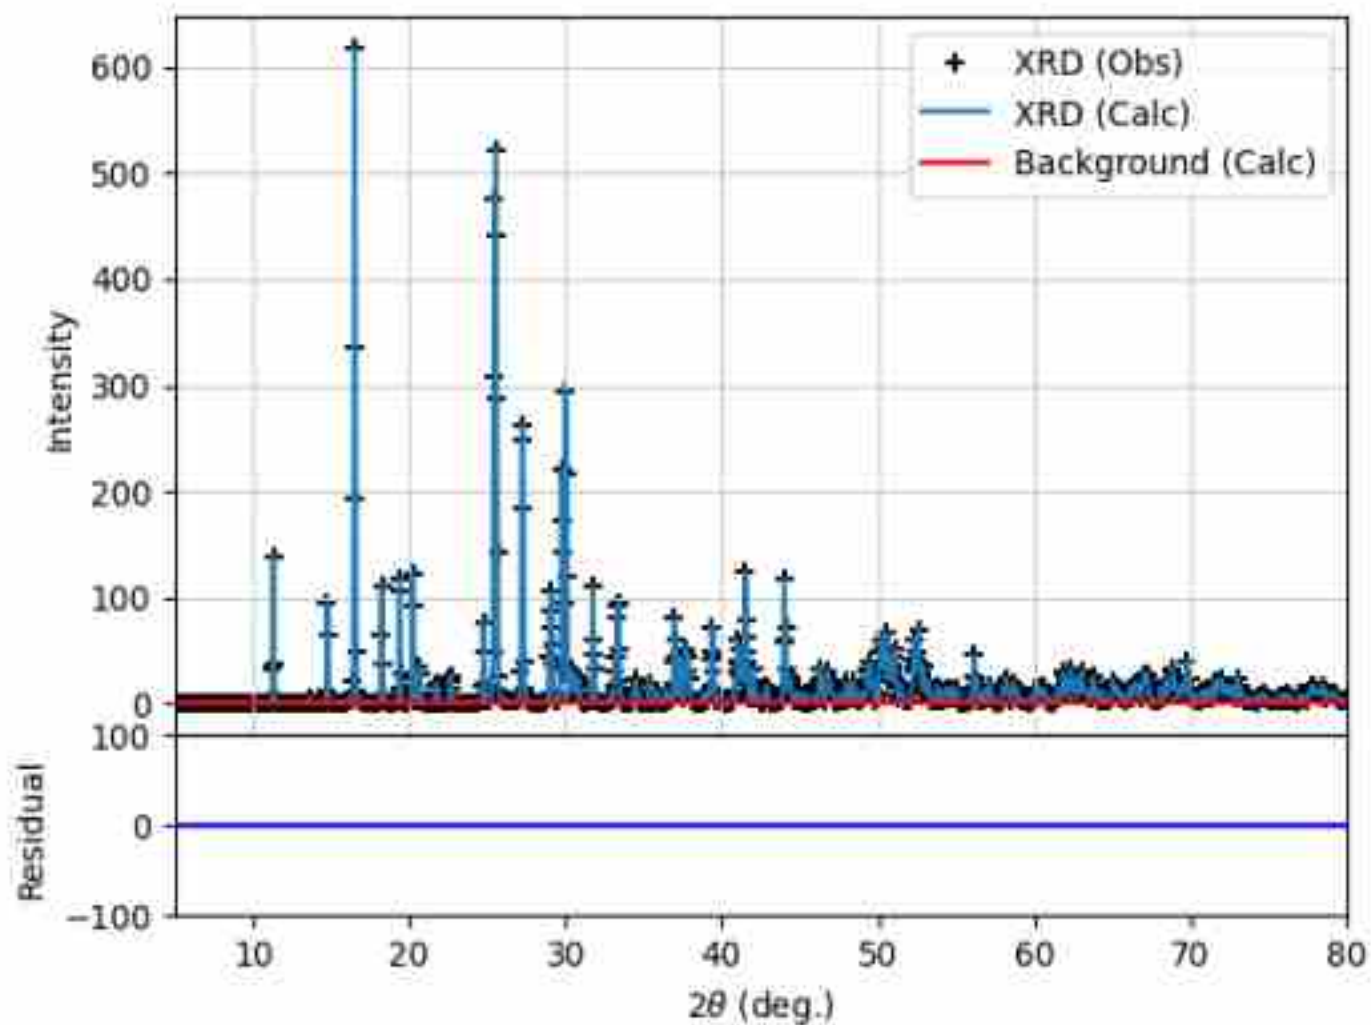

| RMSE before RR | Rwp     | RMSE after RR |
|----------------|---------|---------------|
| 0.201          | 0.00063 | 0.0           |

S6

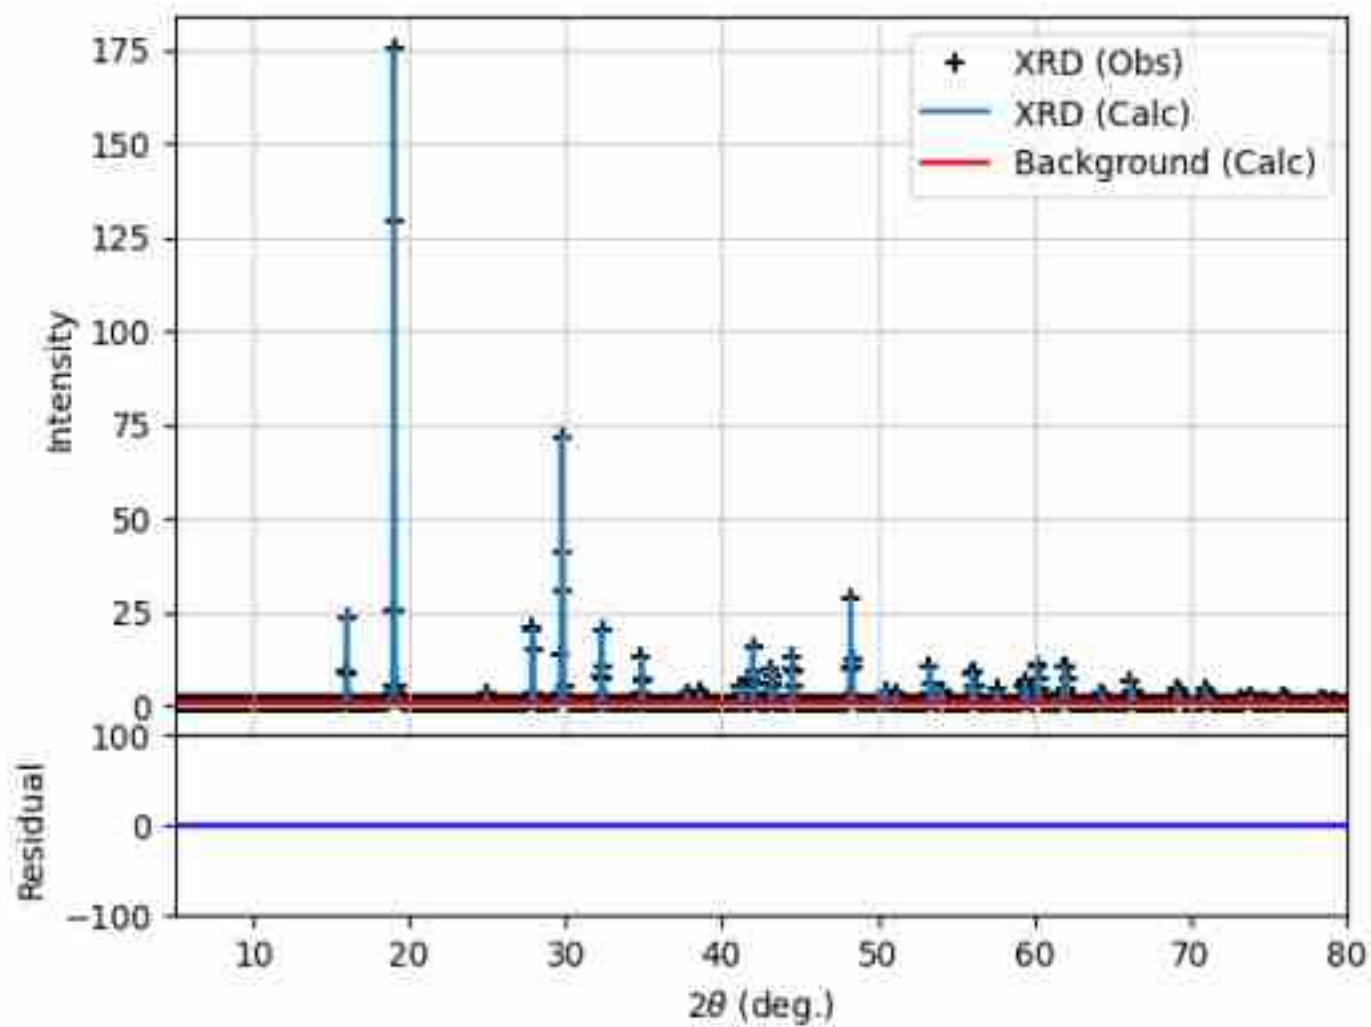

| RMSE before RR | Rwp     | RMSE after RR |
|----------------|---------|---------------|
| 0.201          | 0.00139 | 0.00037       |

# Cs<sub>3</sub>Eu<sub>1</sub>F<sub>6</sub>

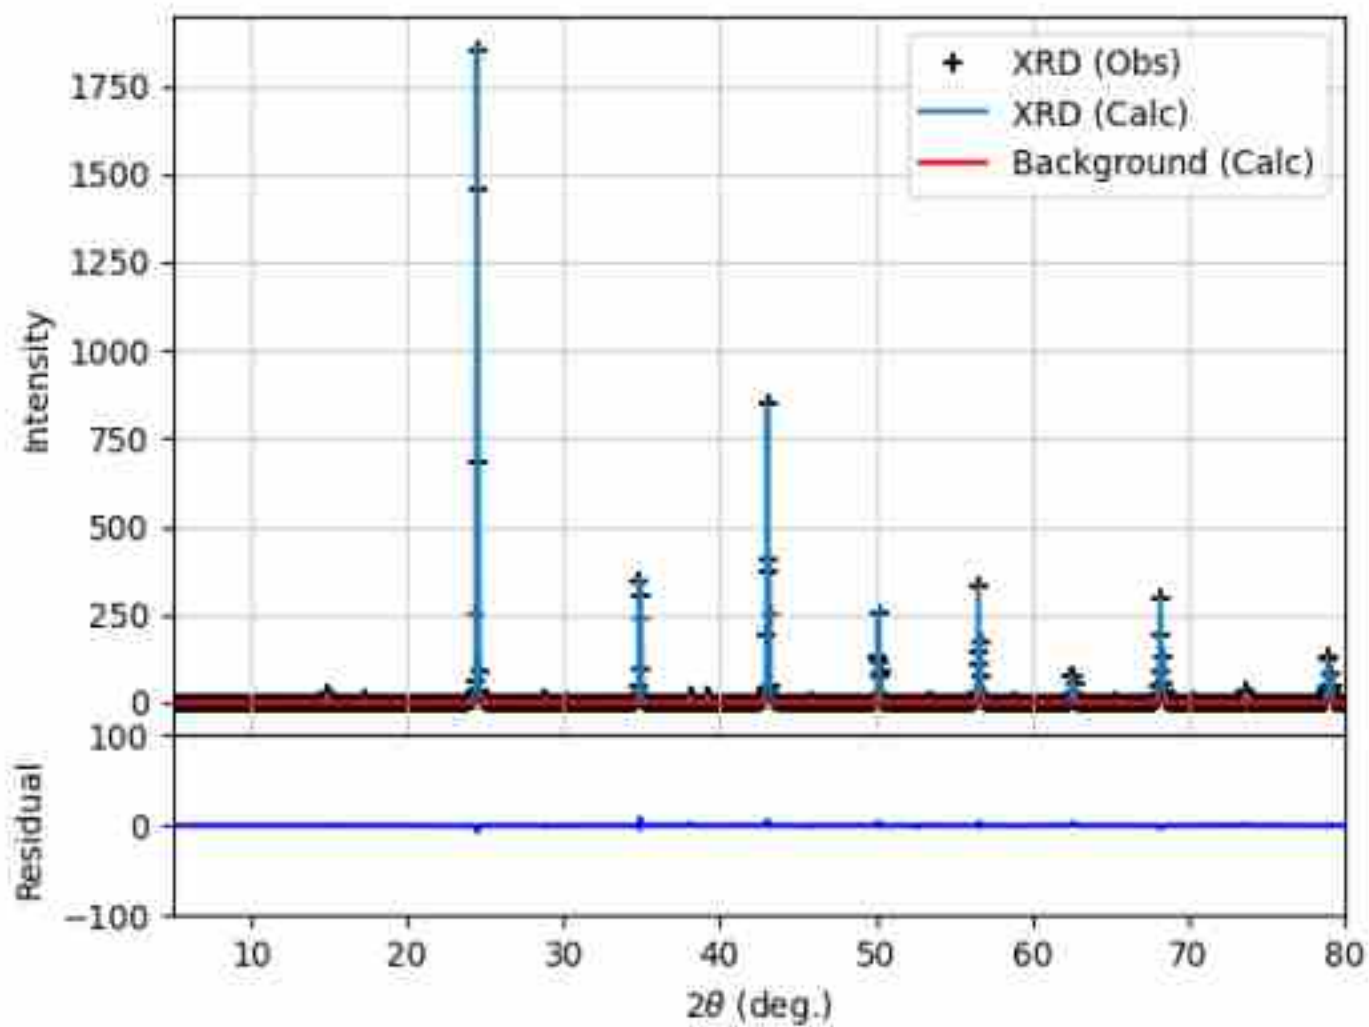

| RMSE before RR | Rwp     | RMSE after RR |
|----------------|---------|---------------|
| 0.202          | 2.50275 | 0.16082       |

# In<sub>2</sub>Se<sub>2</sub>

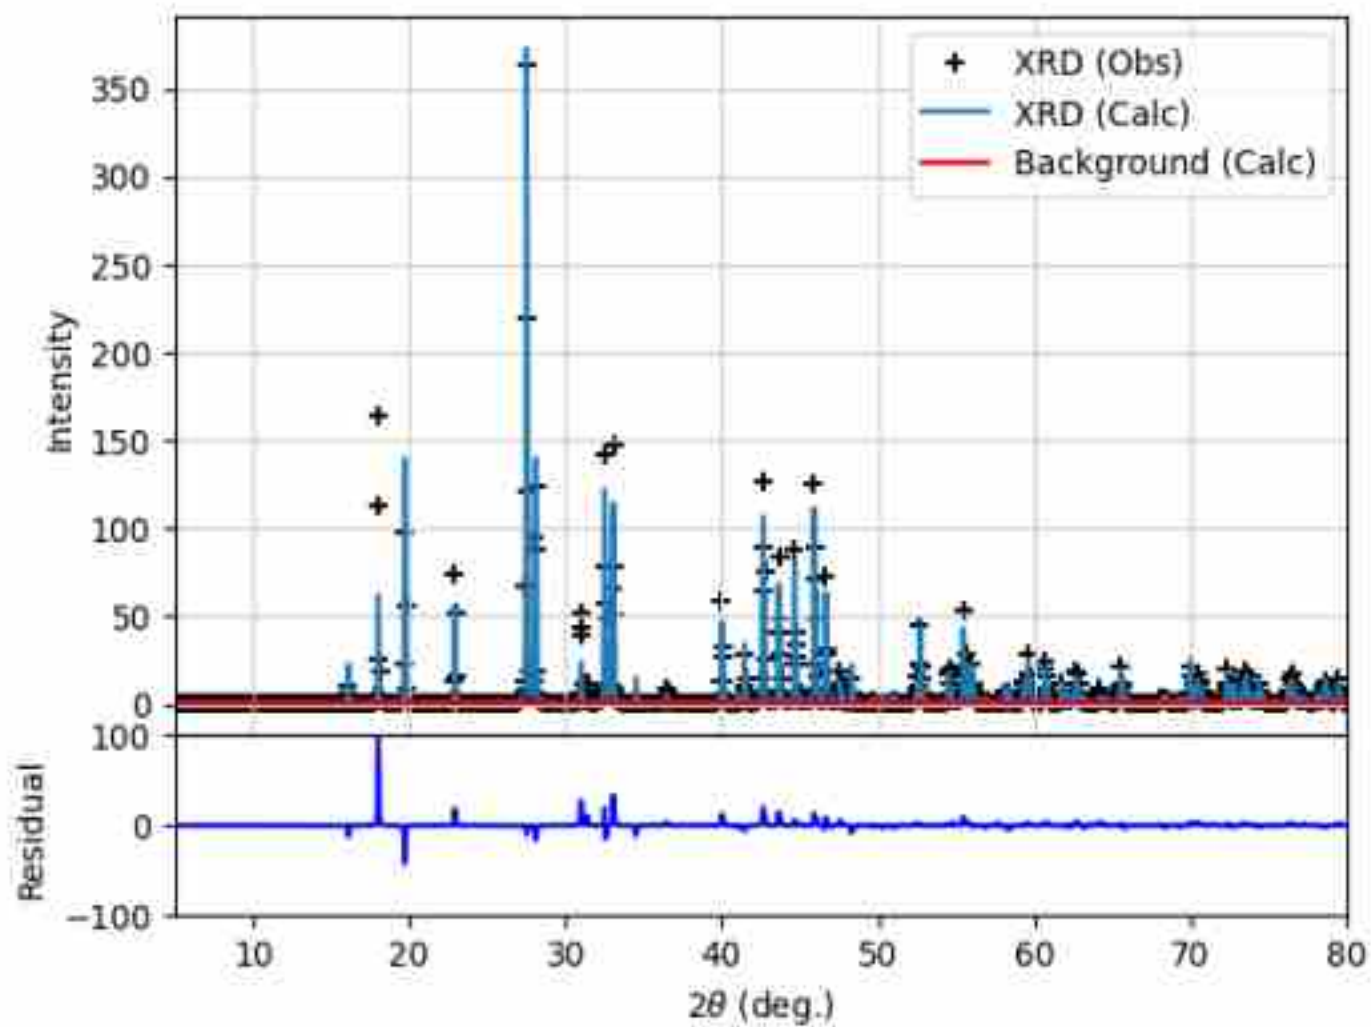

| RMSE before RR | Rwp      | RMSE after RR |
|----------------|----------|---------------|
| 0.202          | 26.43231 | 0.28354       |



# Sn4Bi4

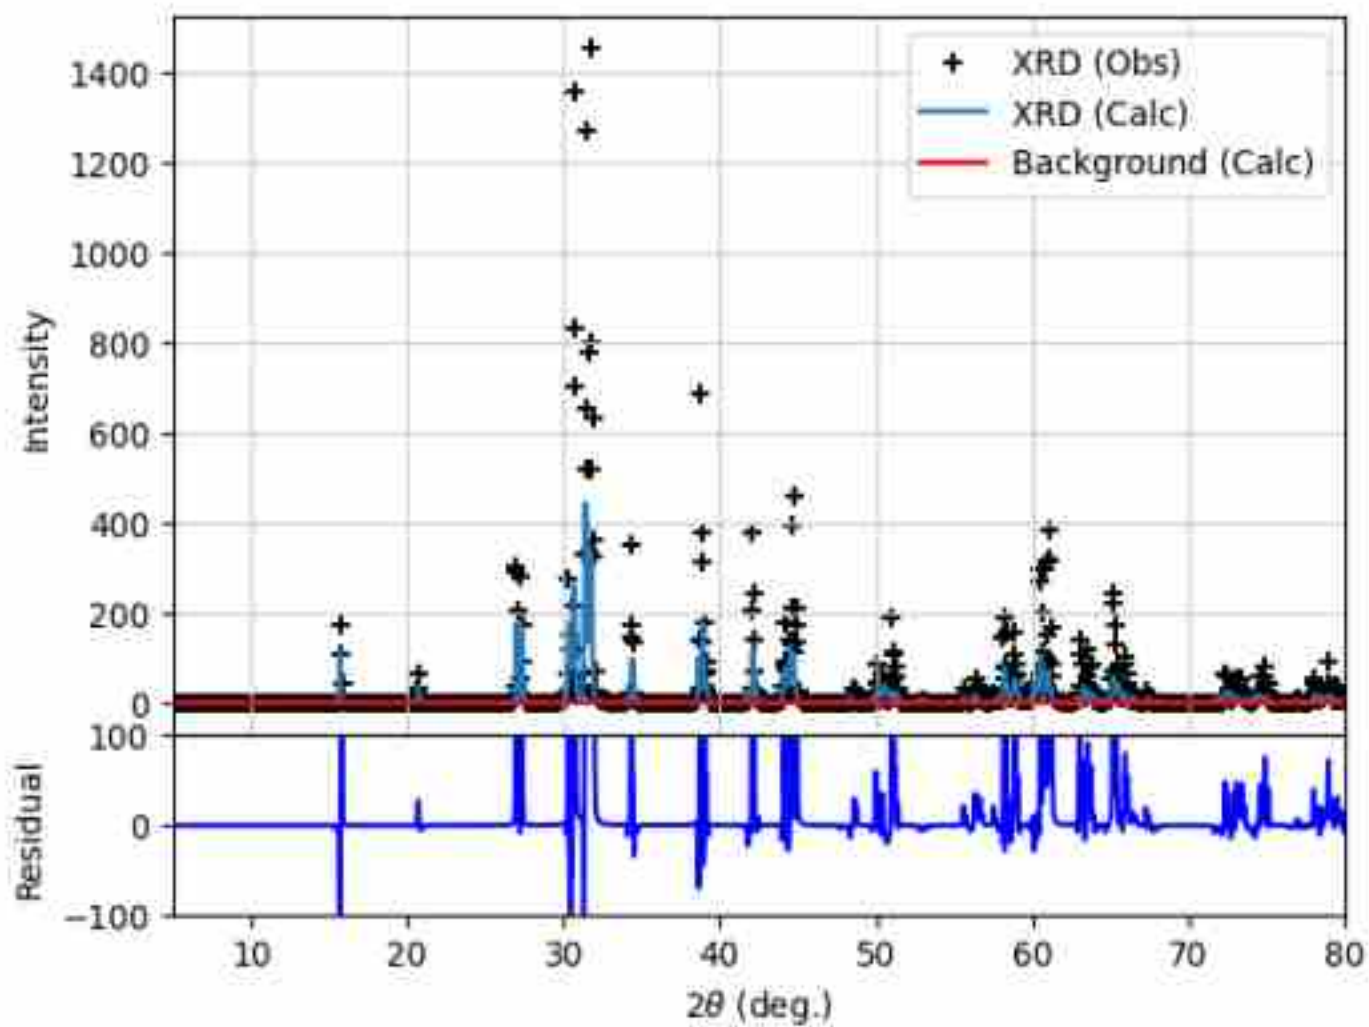

| RMSE before RR | Rwp      | RMSE after RR |
|----------------|----------|---------------|
| 0.202          | 74.85267 | 0.10318       |

# K4I4O12

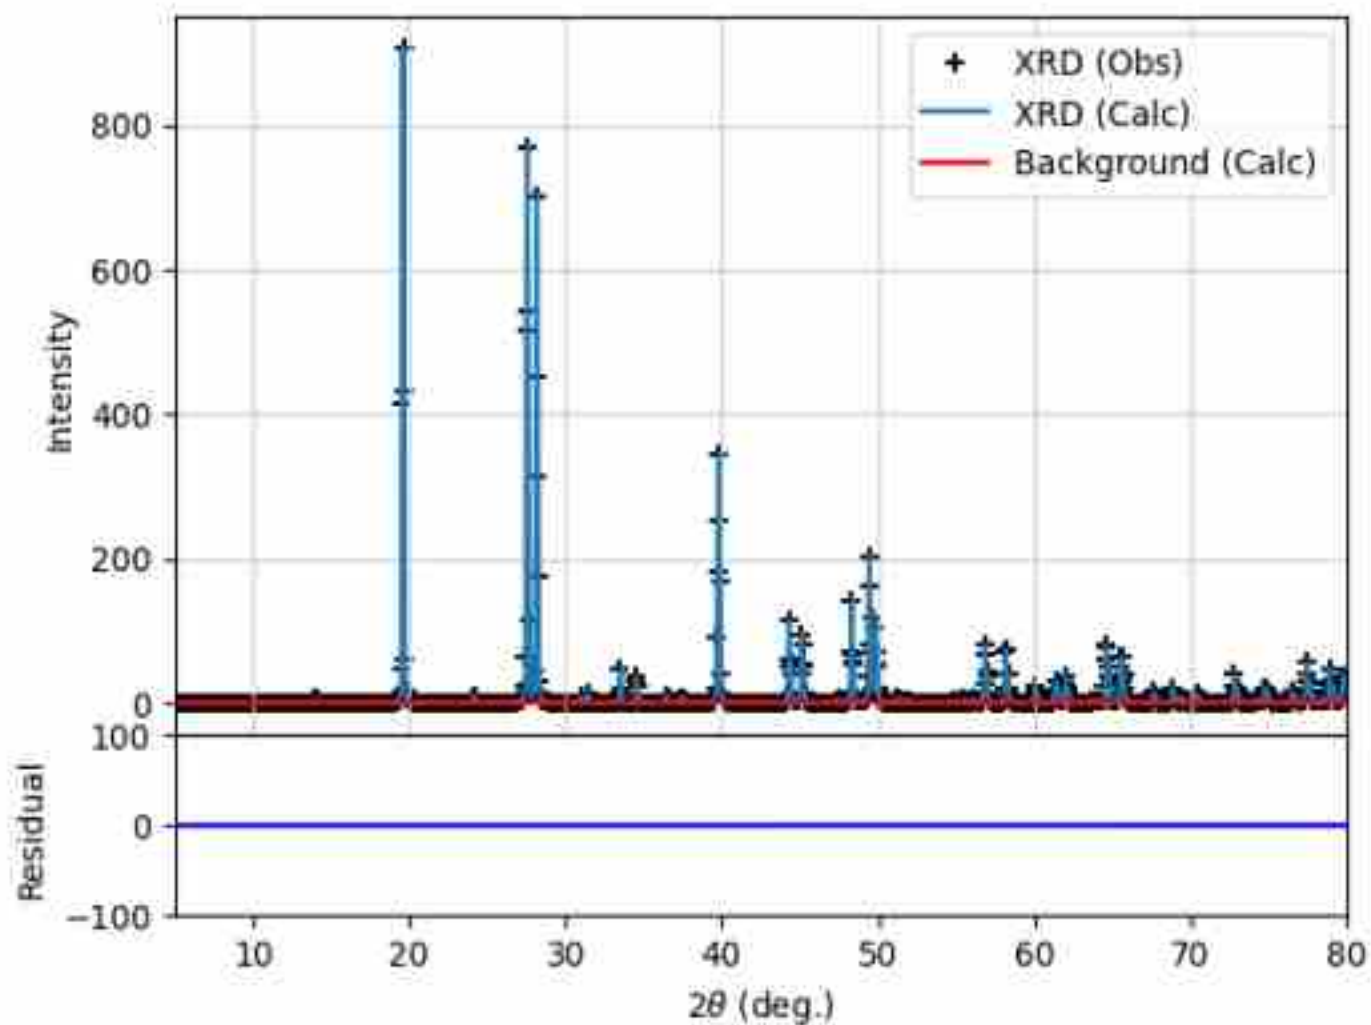

| RMSE before RR | Rwp     | RMSE after RR |
|----------------|---------|---------------|
| 0.203          | 0.19261 | 0.01858       |

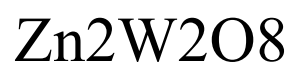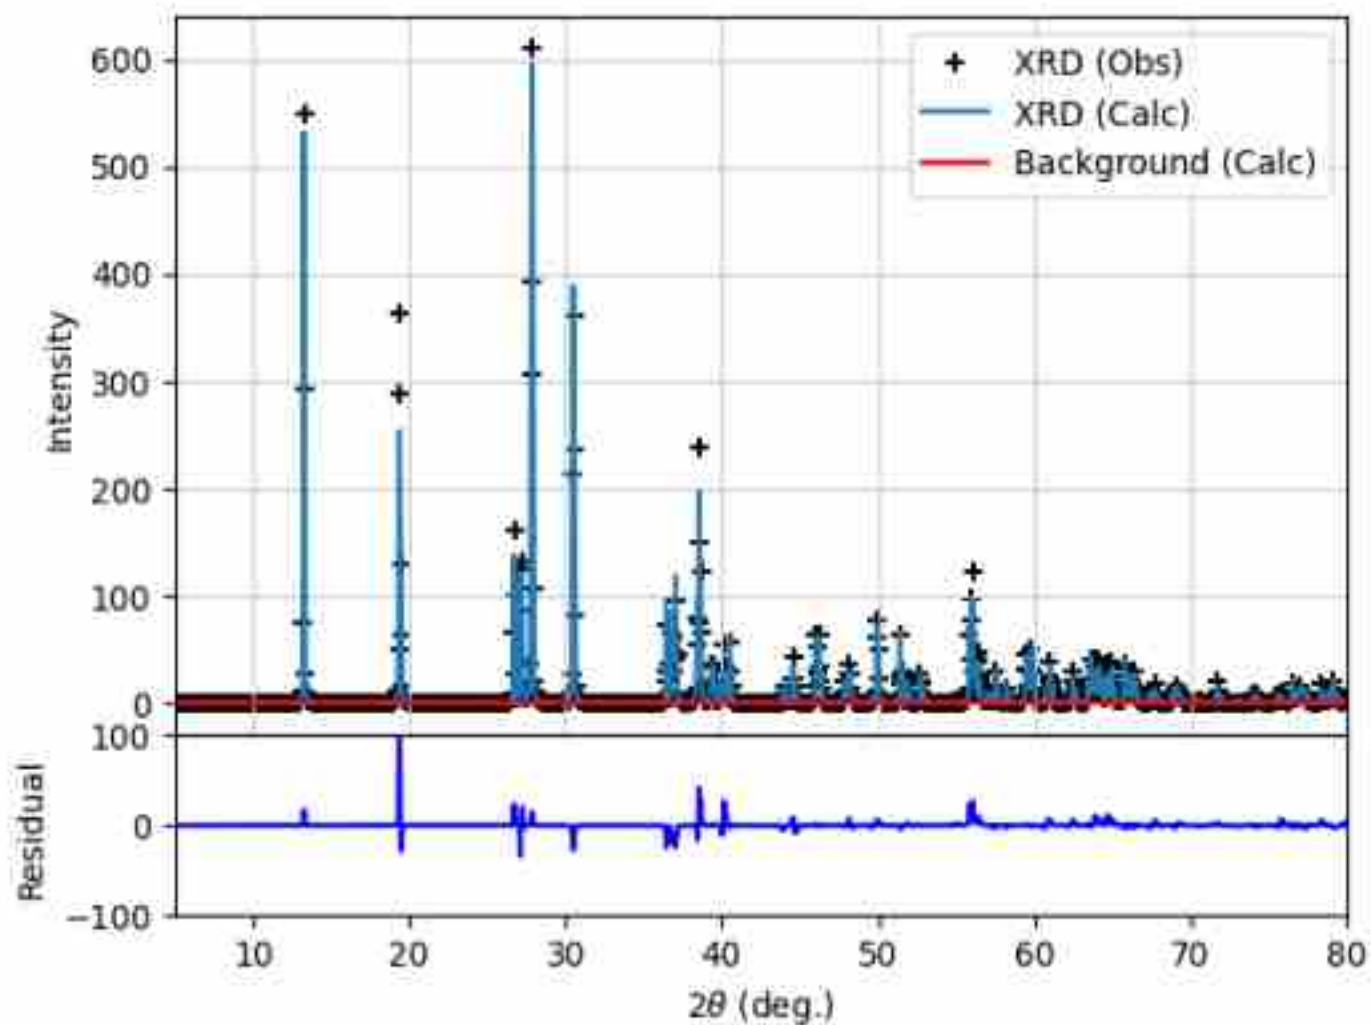

| RMSE before RR | Rwp     | RMSE after RR |
|----------------|---------|---------------|
| 0.203          | 18.7288 | 0.45327       |

# Dy<sub>3</sub>Sc<sub>2</sub>S<sub>7</sub>

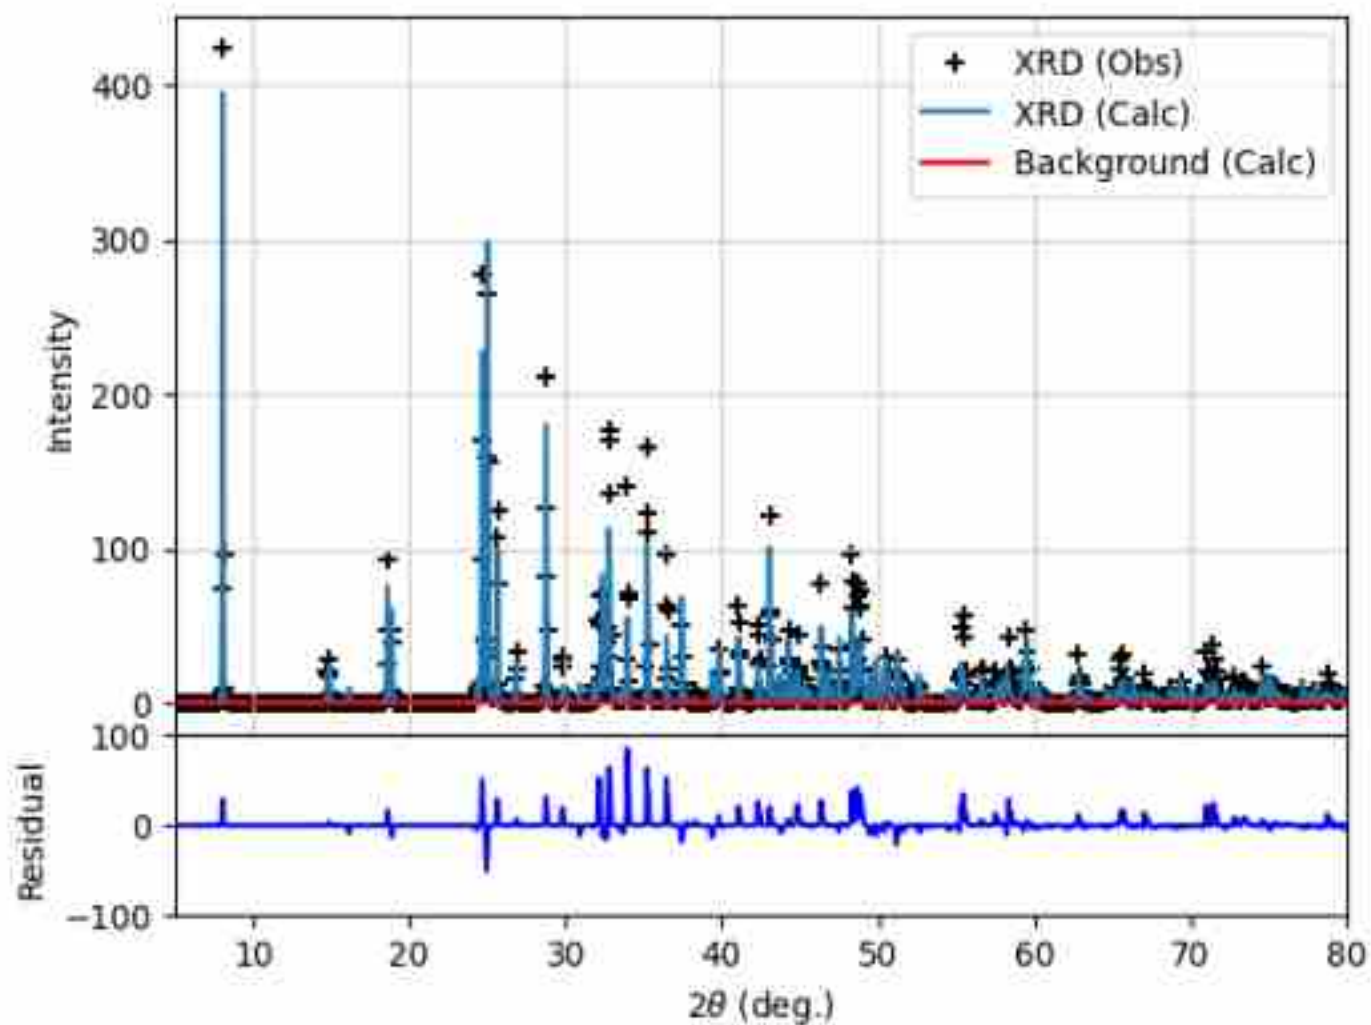

| RMSE before RR | Rwp      | RMSE after RR |
|----------------|----------|---------------|
| 0.206          | 39.43334 | 0.33427       |

# Ga<sub>4</sub>Ni<sub>2</sub>O<sub>8</sub>

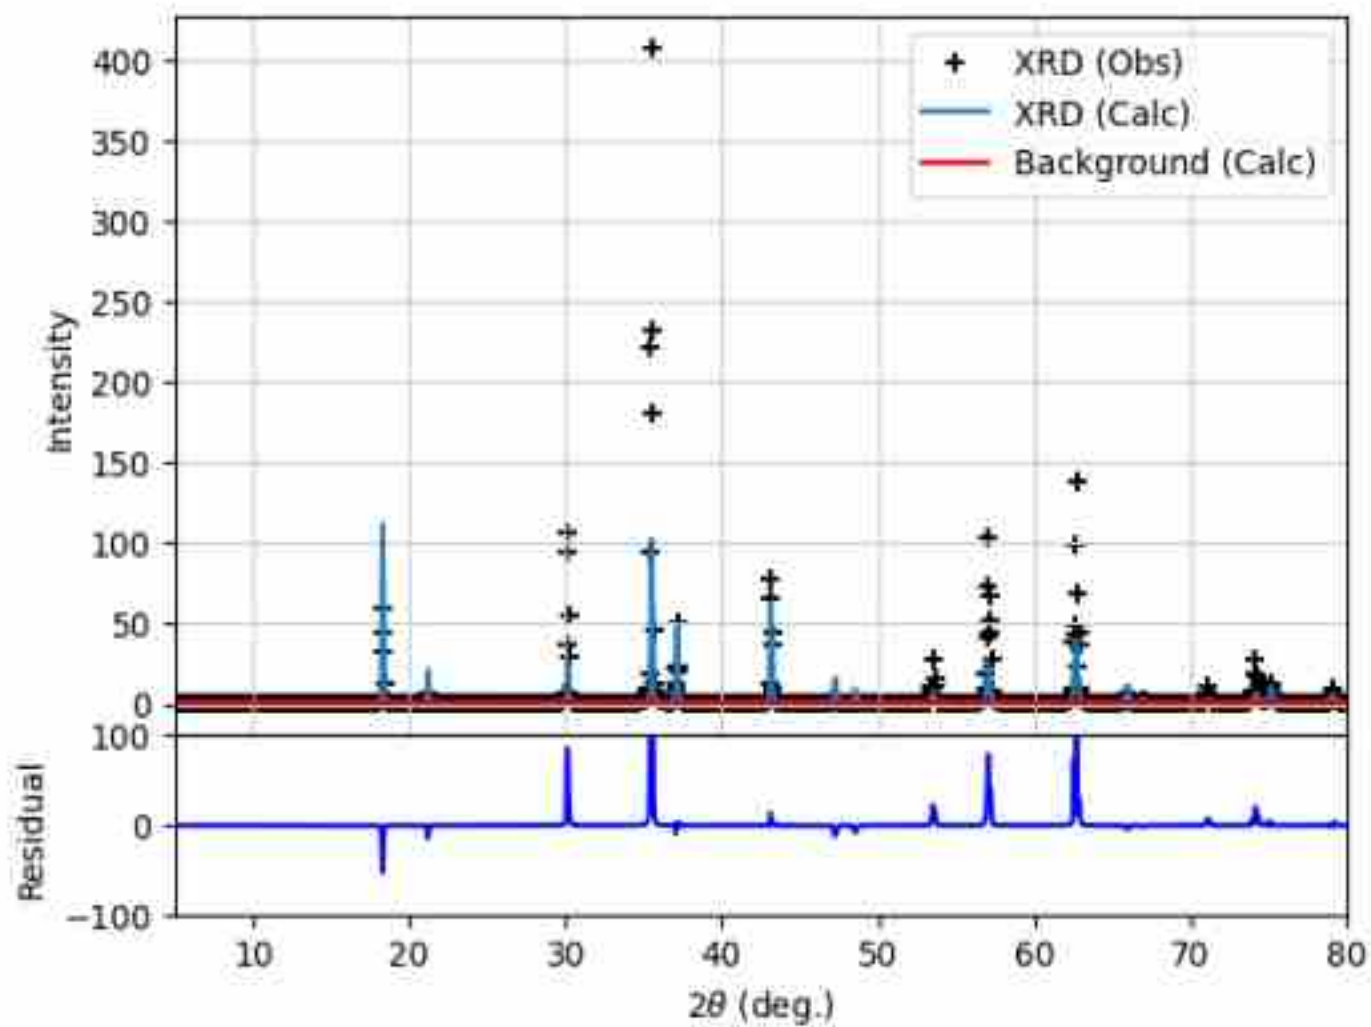

| RMSE before RR | Rwp      | RMSE after RR |
|----------------|----------|---------------|
| 0.206          | 61.32995 | 0.23823       |

# Li<sub>6</sub>Mn<sub>2</sub>F<sub>12</sub>

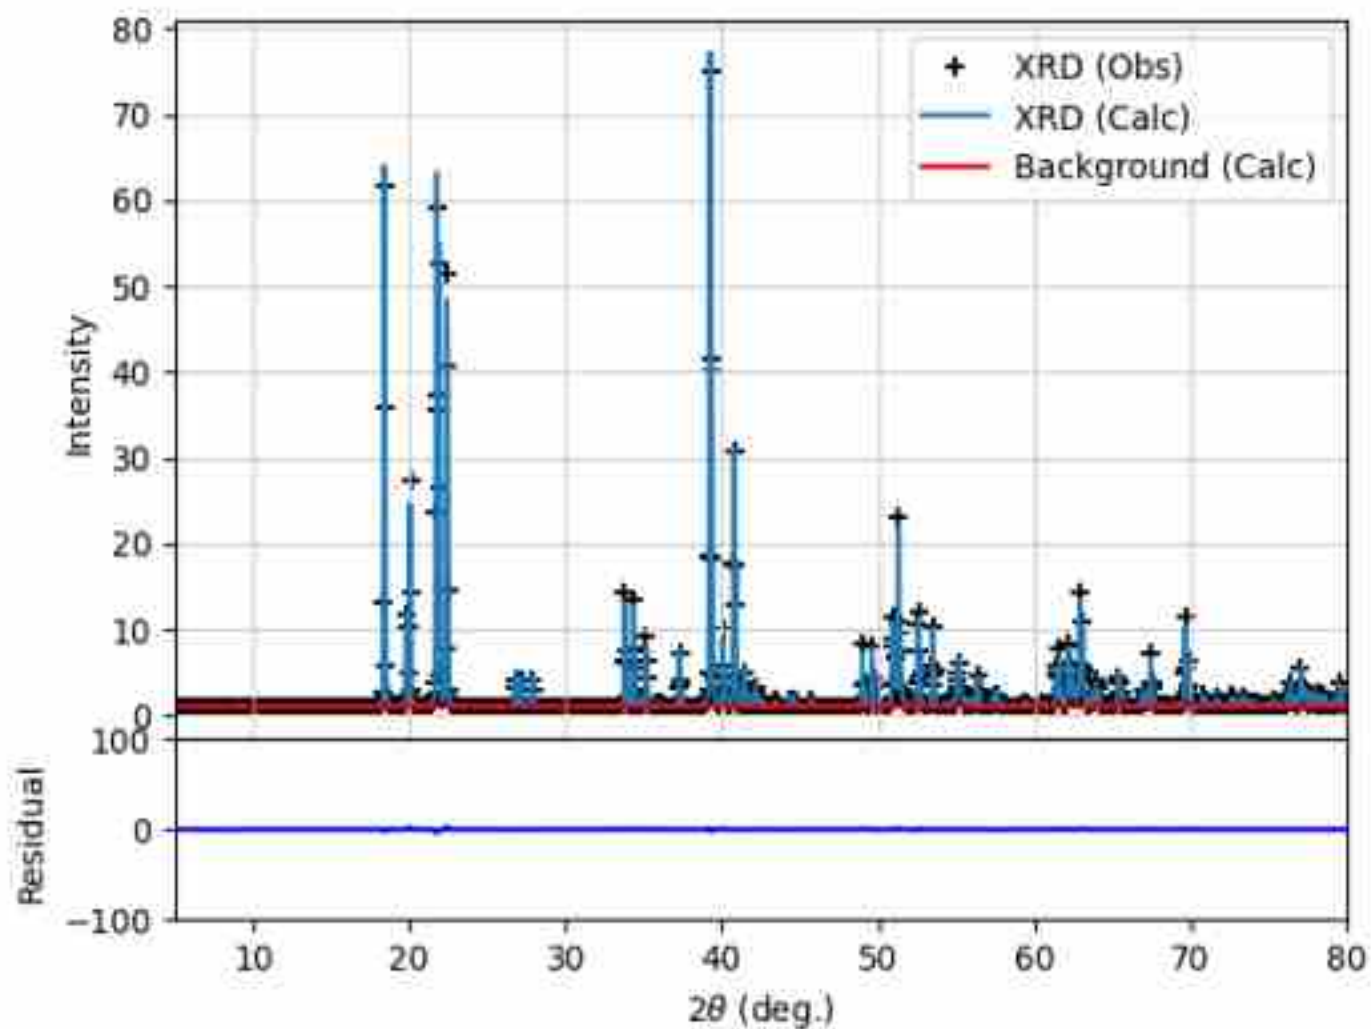

| RMSE before RR | Rwp     | RMSE after RR |
|----------------|---------|---------------|
| 0.206          | 5.36603 | 0.4367        |

# Ca<sub>2</sub>Be<sub>4</sub>N<sub>4</sub>

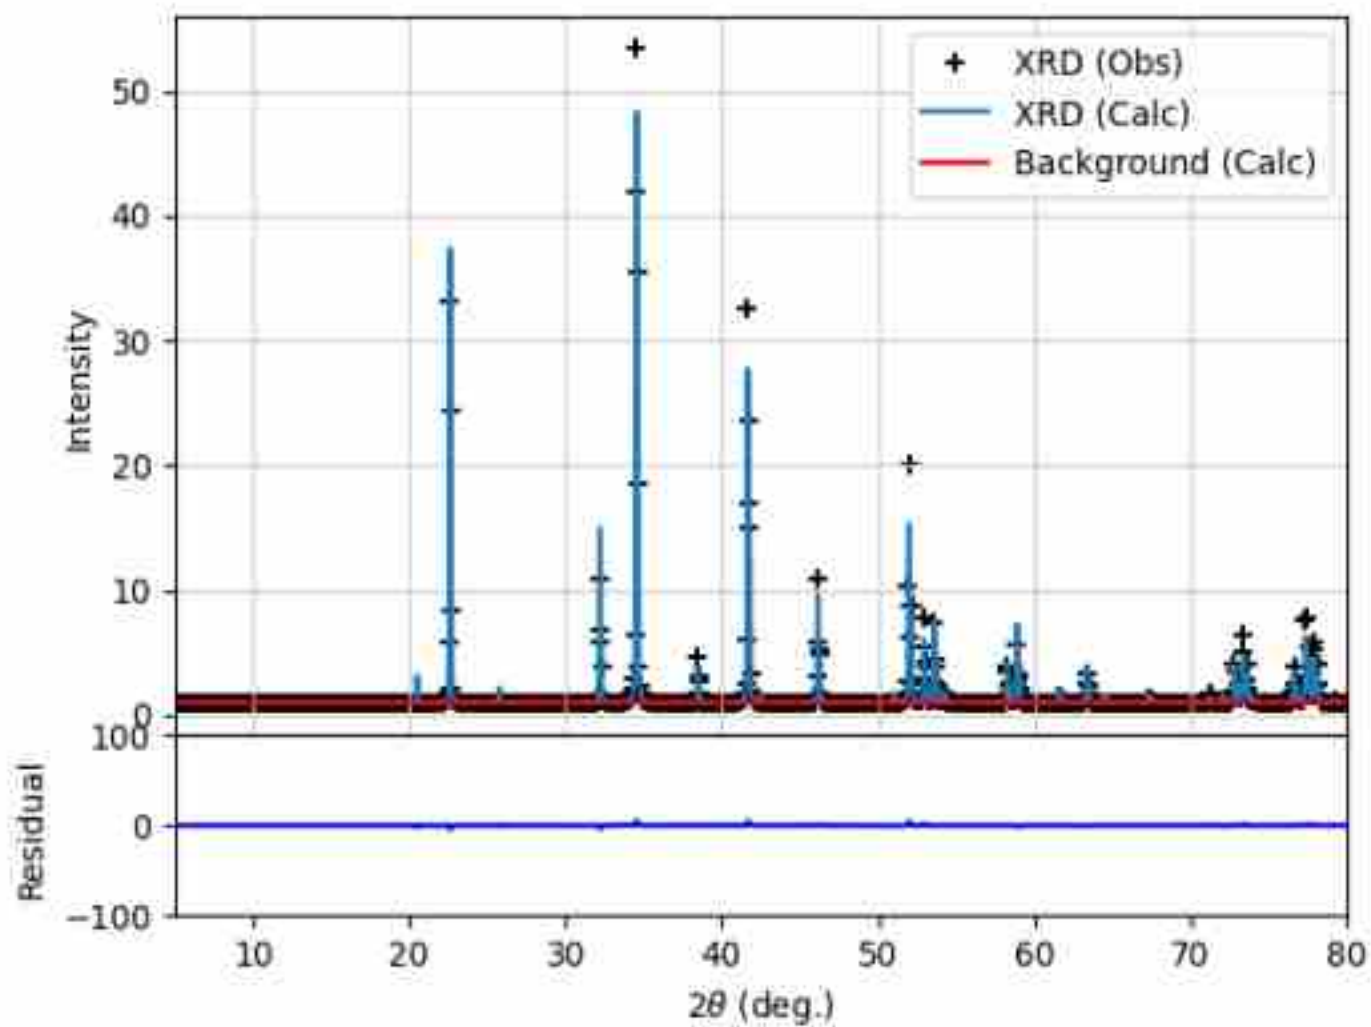

| RMSE before RR | Rwp      | RMSE after RR |
|----------------|----------|---------------|
| 0.207          | 11.26788 | 0.46451       |

# Ag<sub>6</sub>As<sub>2</sub>S<sub>6</sub>

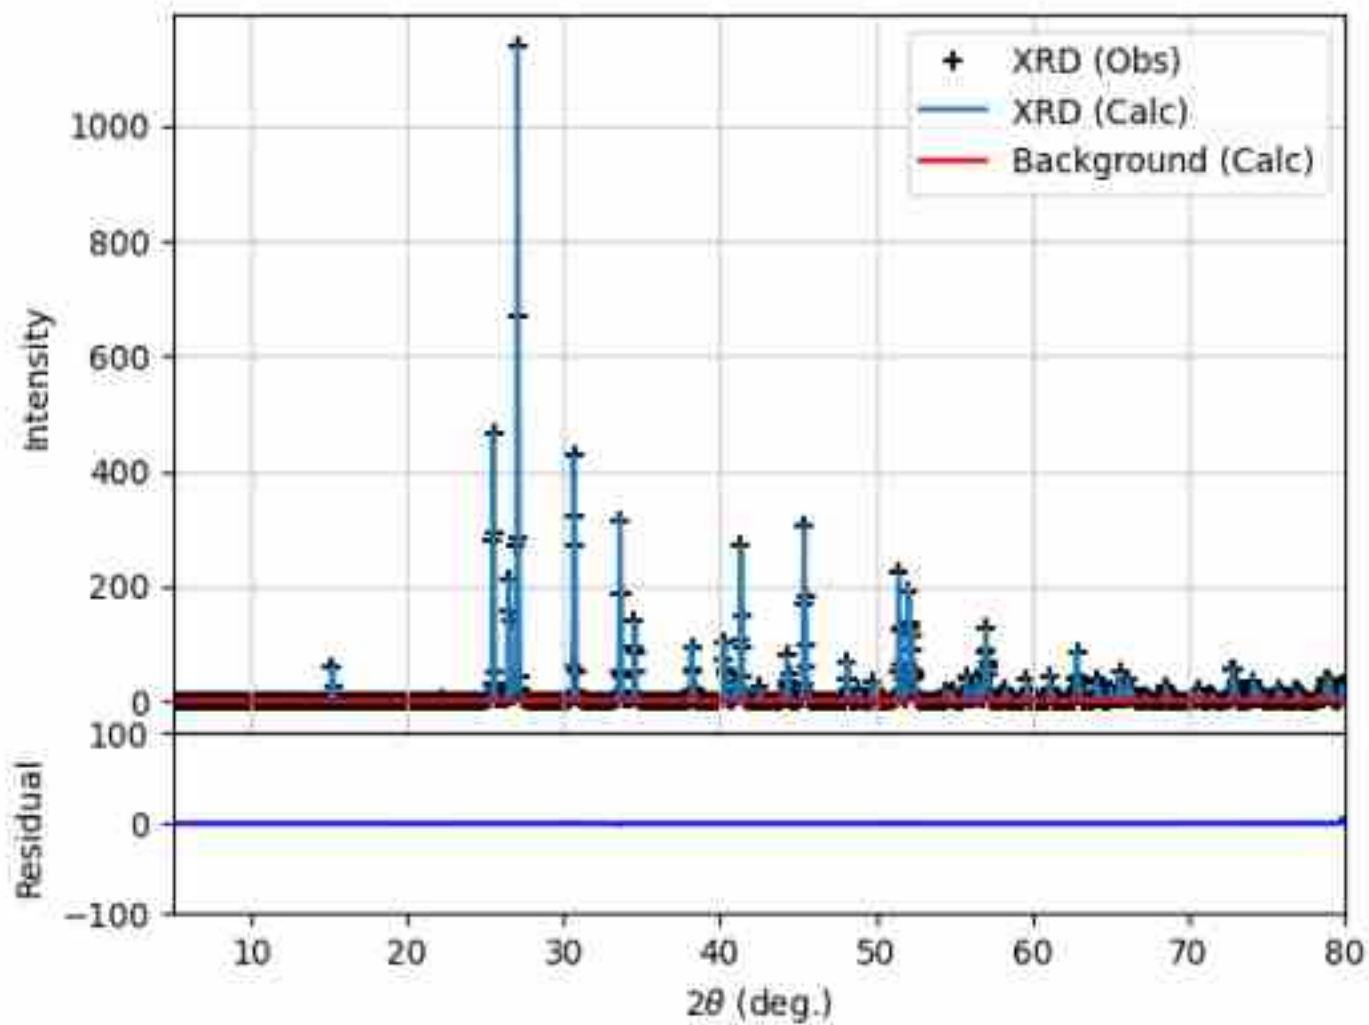

| RMSE before RR | Rwp     | RMSE after RR |
|----------------|---------|---------------|
| 0.208          | 1.48819 | 0.01129       |



# Ce1Ho4S7

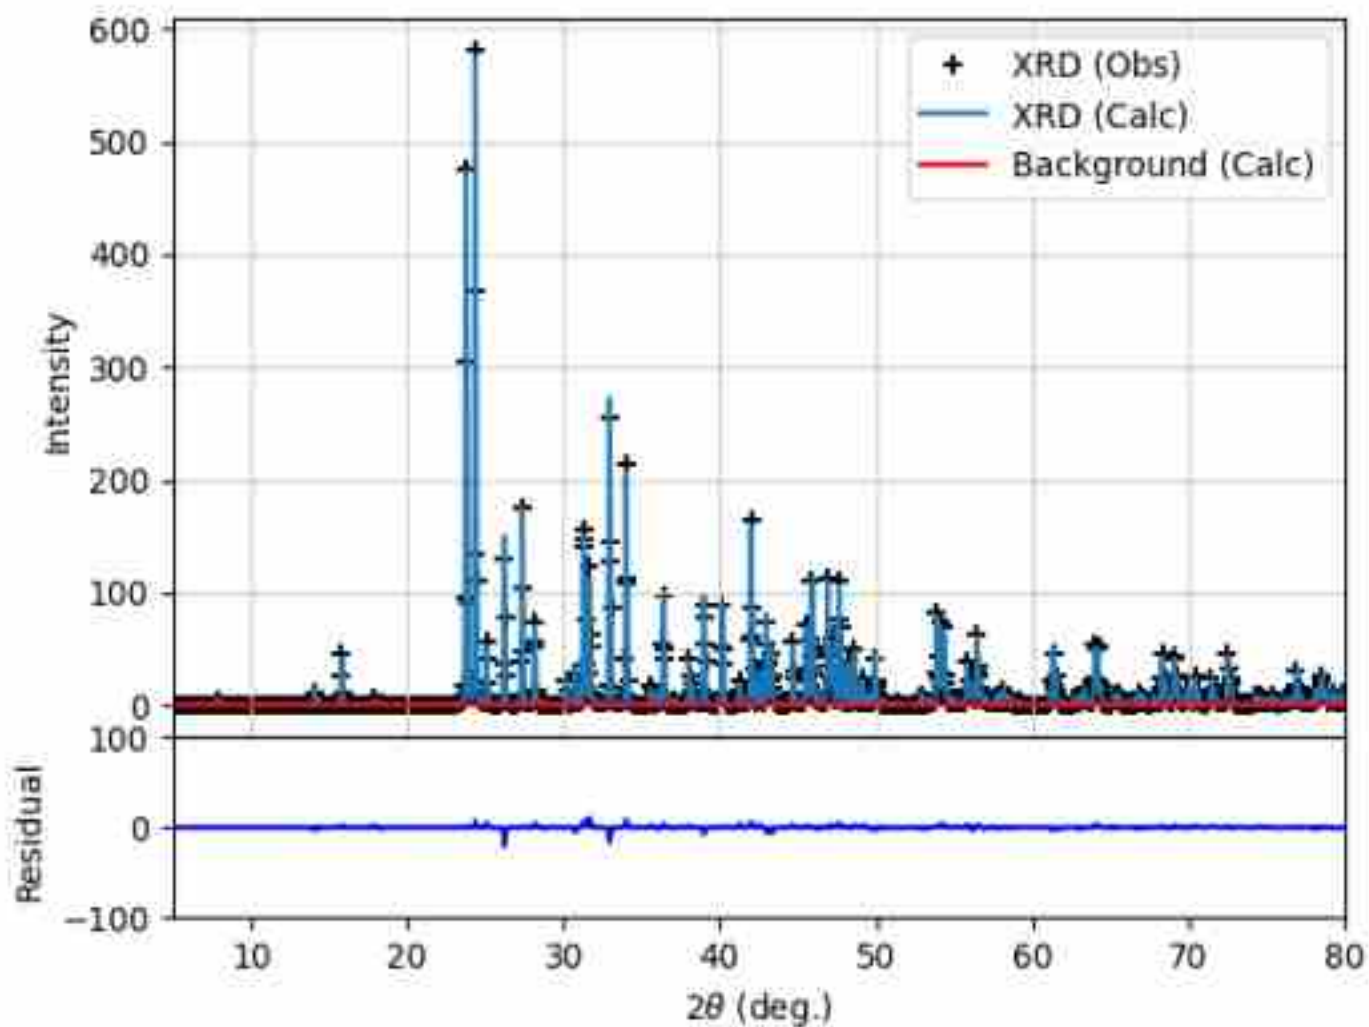

| RMSE before RR | Rwp     | RMSE after RR |
|----------------|---------|---------------|
| 0.208          | 7.10837 | 0.21377       |

# Ce<sub>3</sub>Y<sub>1</sub>

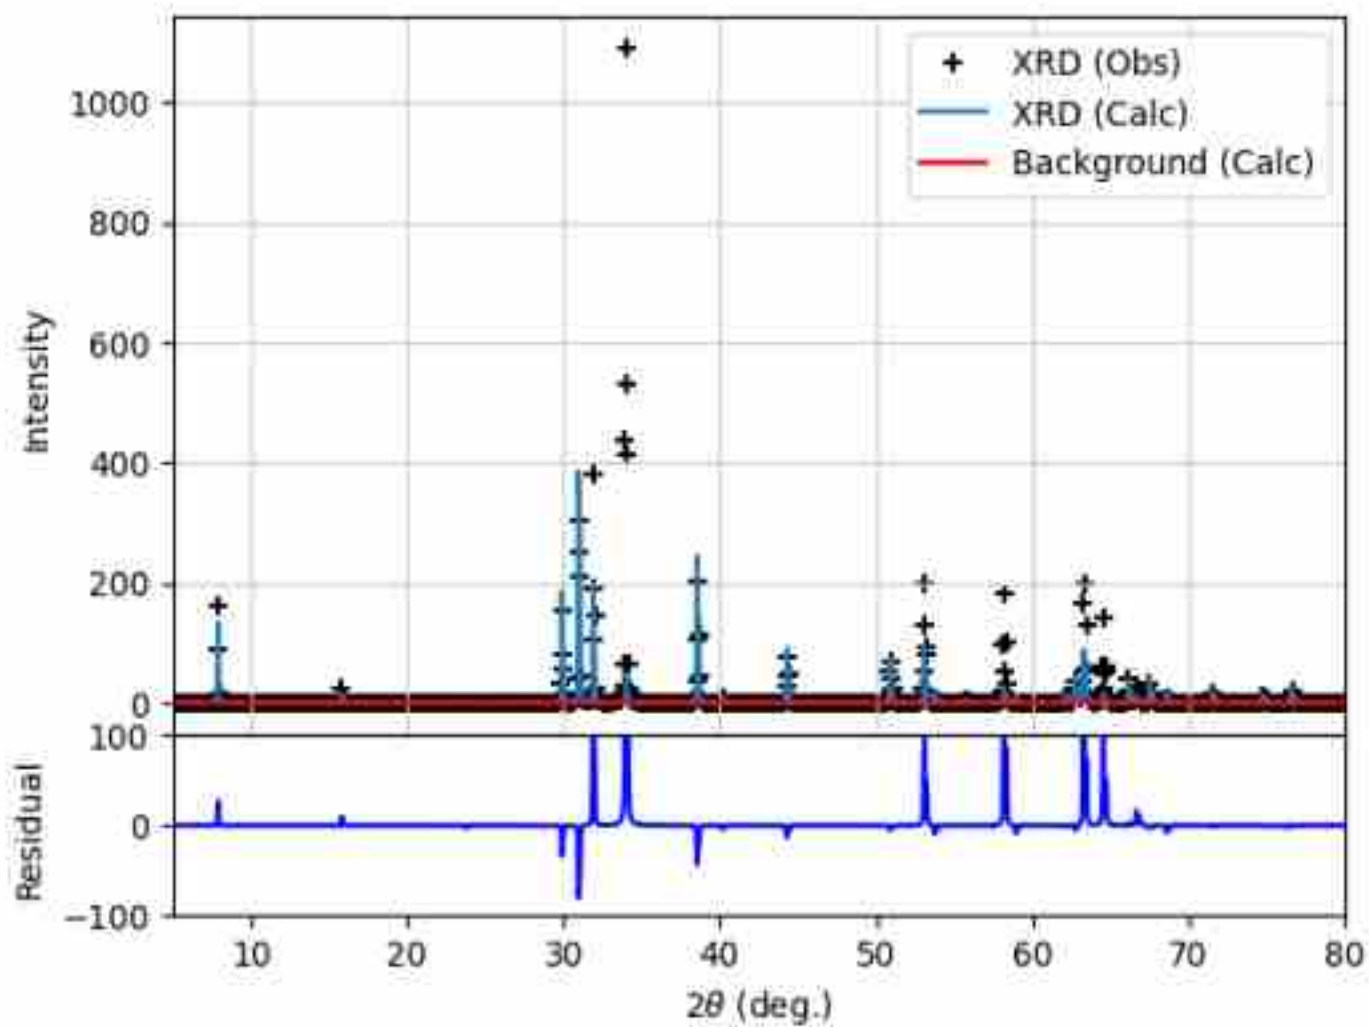

| RMSE before RR | Rwp      | RMSE after RR |
|----------------|----------|---------------|
| 0.208          | 61.16012 | 0.19483       |

# Hg<sub>2</sub>I<sub>4</sub>

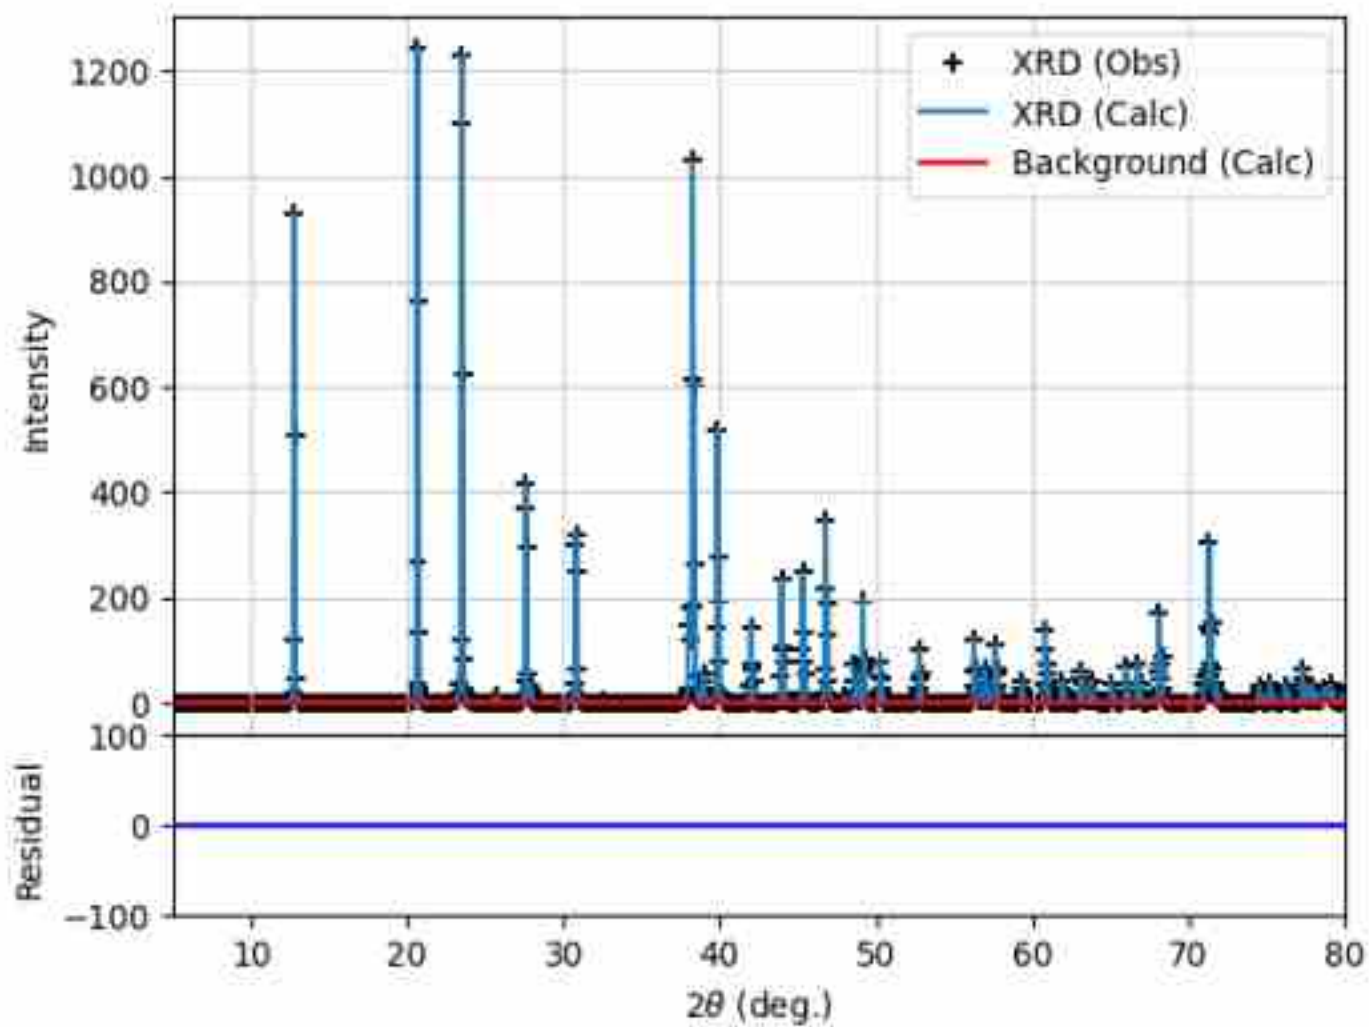

| RMSE before RR | Rwp    | RMSE after RR |
|----------------|--------|---------------|
| 0.208          | 0.0098 | 0.00028       |

# Li<sub>2</sub>V<sub>1</sub>F<sub>6</sub>

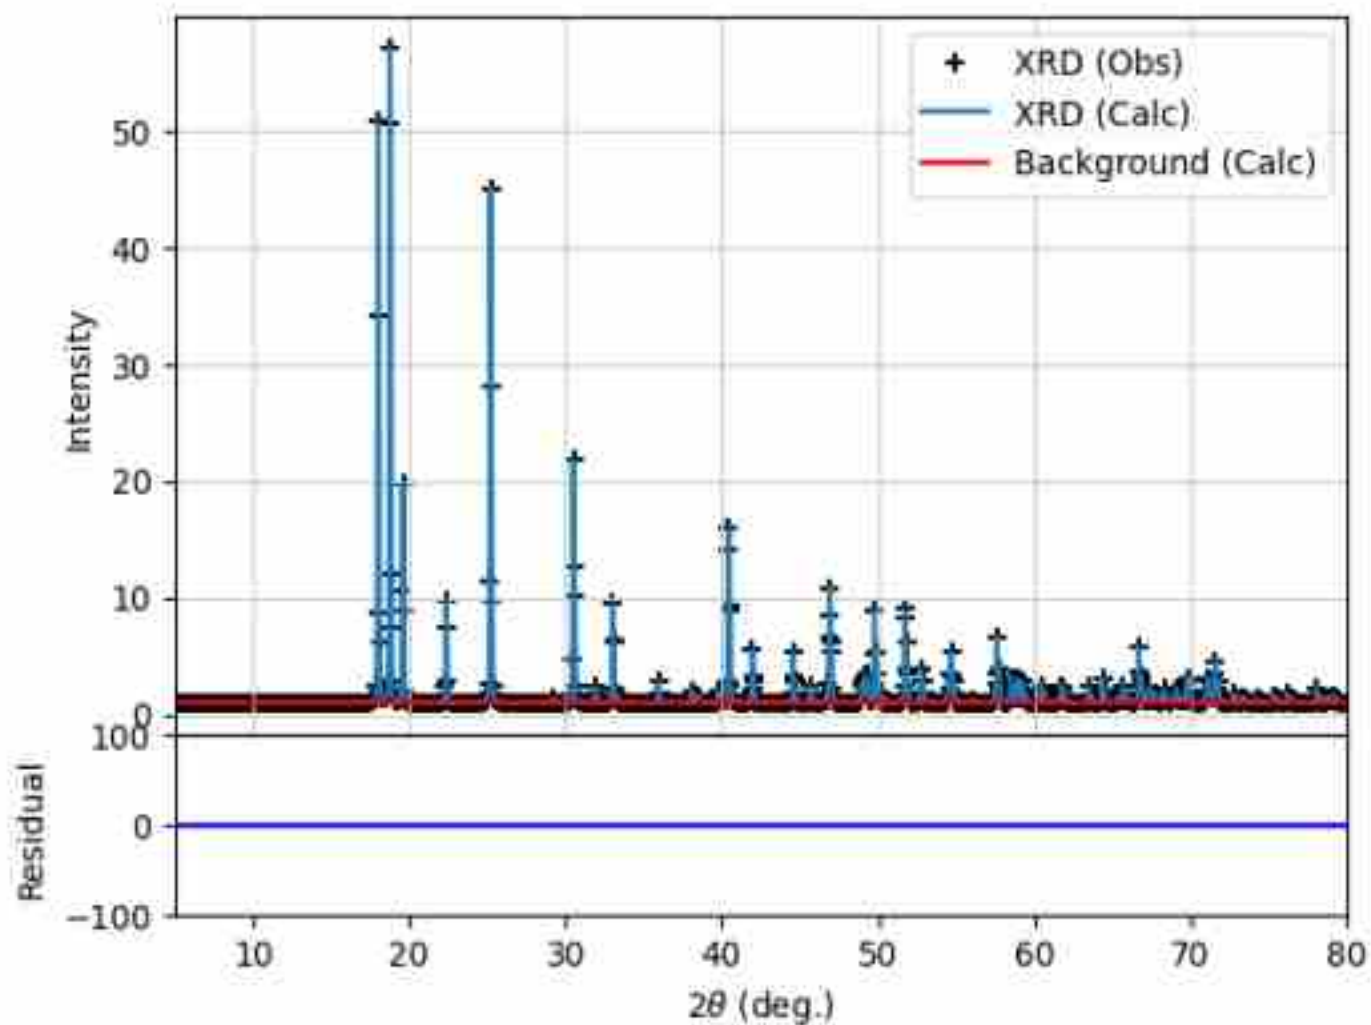

| RMSE before RR | Rwp     | RMSE after RR |
|----------------|---------|---------------|
| 0.208          | 0.00185 | 0.00075       |

# Na<sub>2</sub>Ga<sub>2</sub>Te<sub>4</sub>

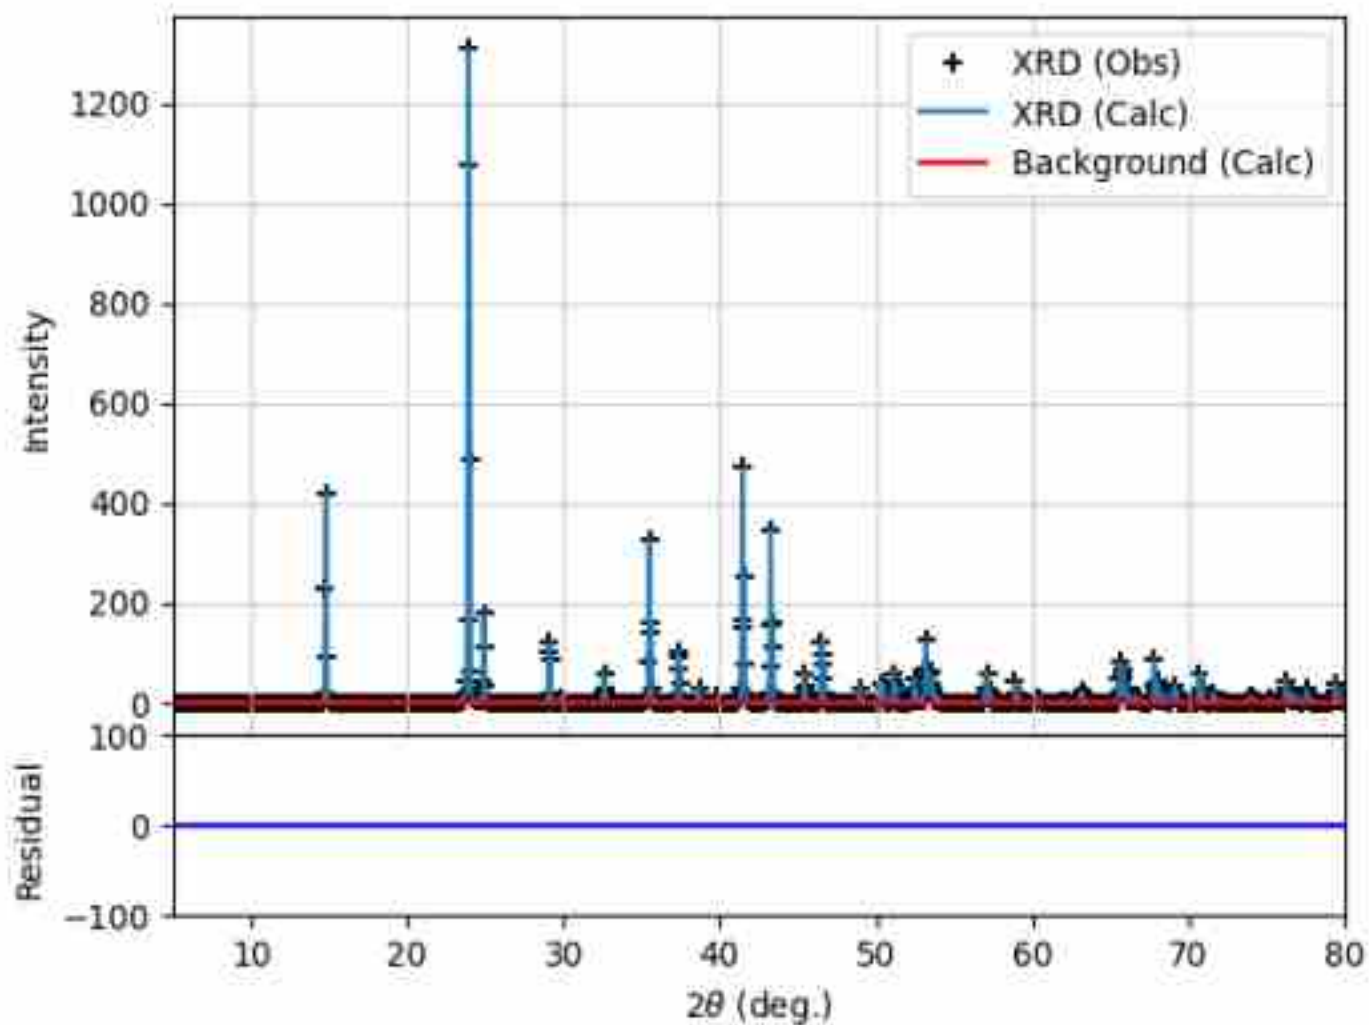

| RMSE before RR | Rwp     | RMSE after RR |
|----------------|---------|---------------|
| 0.208          | 0.00441 | 0.00075       |

# Li<sub>2</sub>Cu<sub>2</sub>H<sub>2</sub>S<sub>2</sub>O<sub>10</sub>

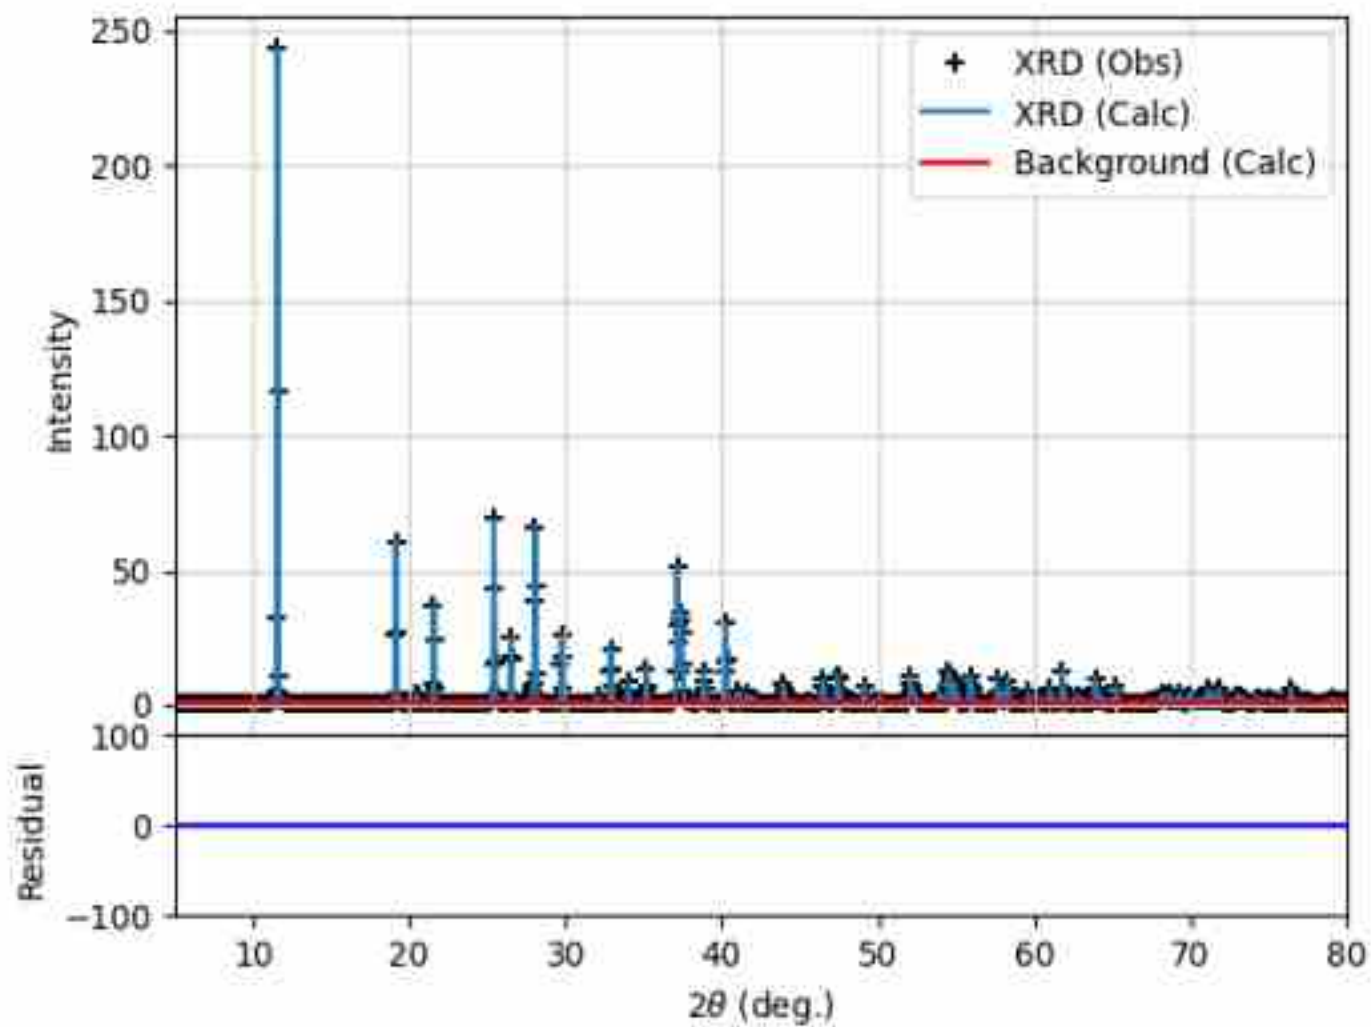

| RMSE before RR | Rwp     | RMSE after RR |
|----------------|---------|---------------|
| 0.209          | 0.00539 | 0.00593       |

# Ag<sub>8</sub>Se<sub>4</sub>

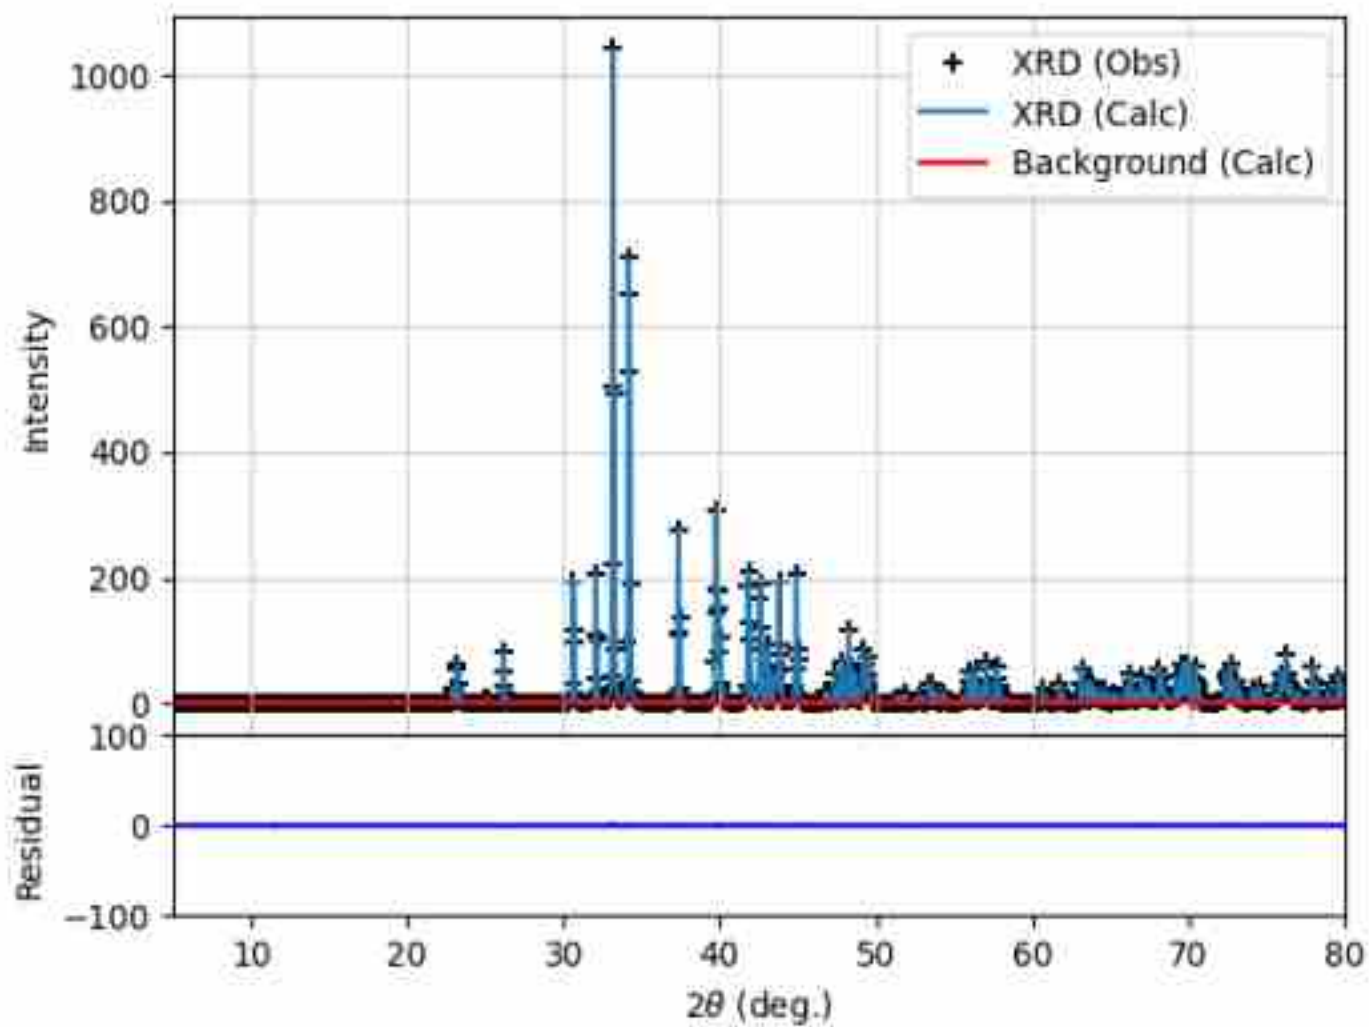

| RMSE before RR | Rwp     | RMSE after RR |
|----------------|---------|---------------|
| 0.211          | 1.40019 | 0.01188       |

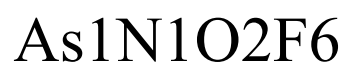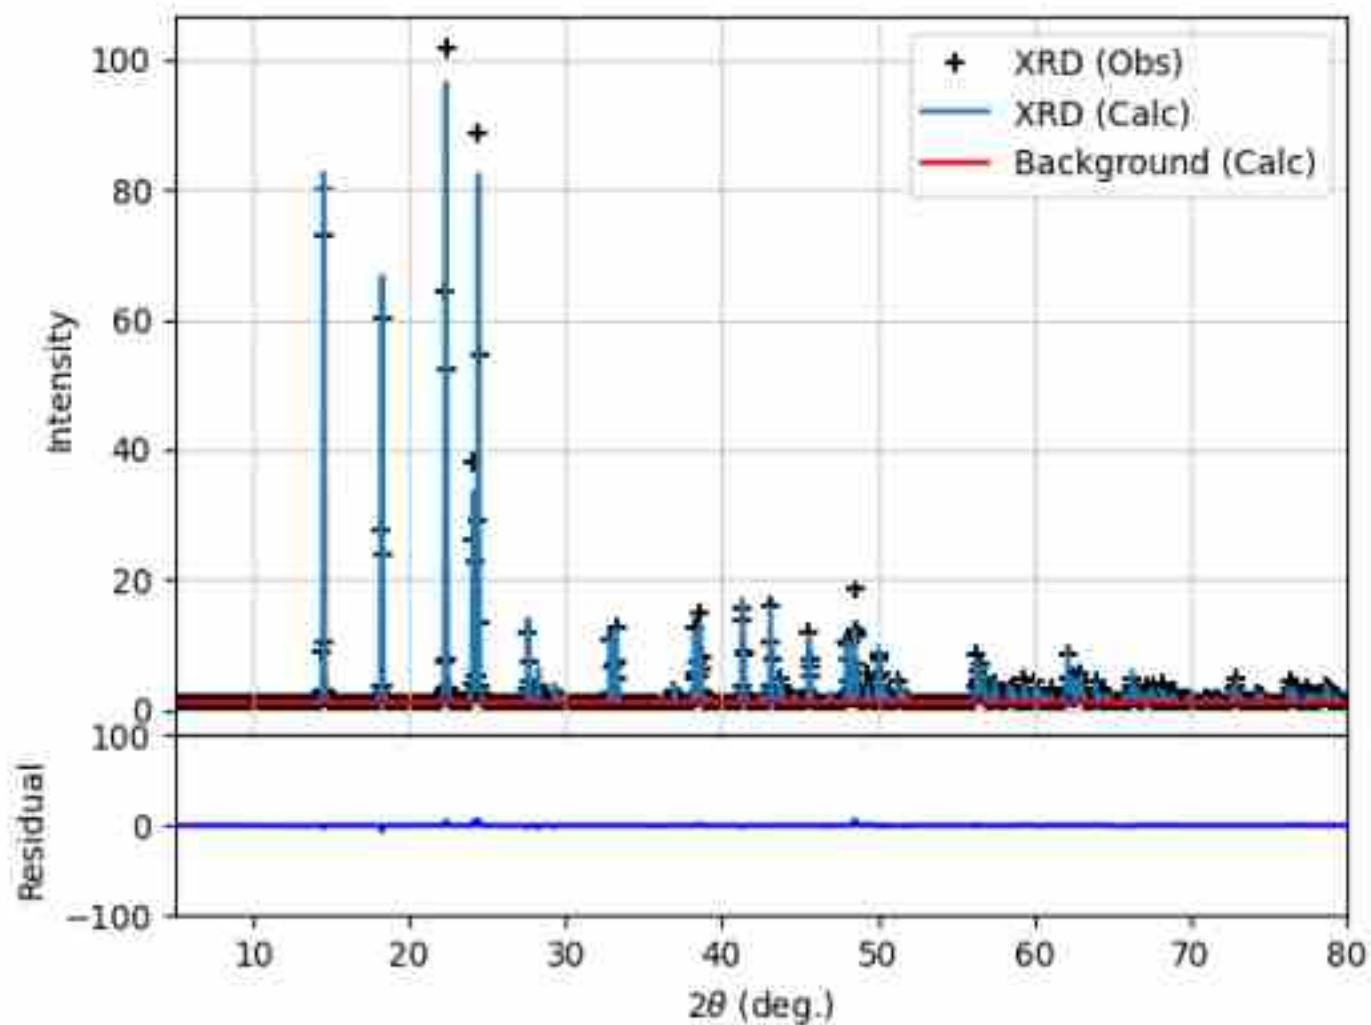

| RMSE before RR | Rwp      | RMSE after RR |
|----------------|----------|---------------|
| 0.211          | 11.42629 | 0.35931       |



# In4S6

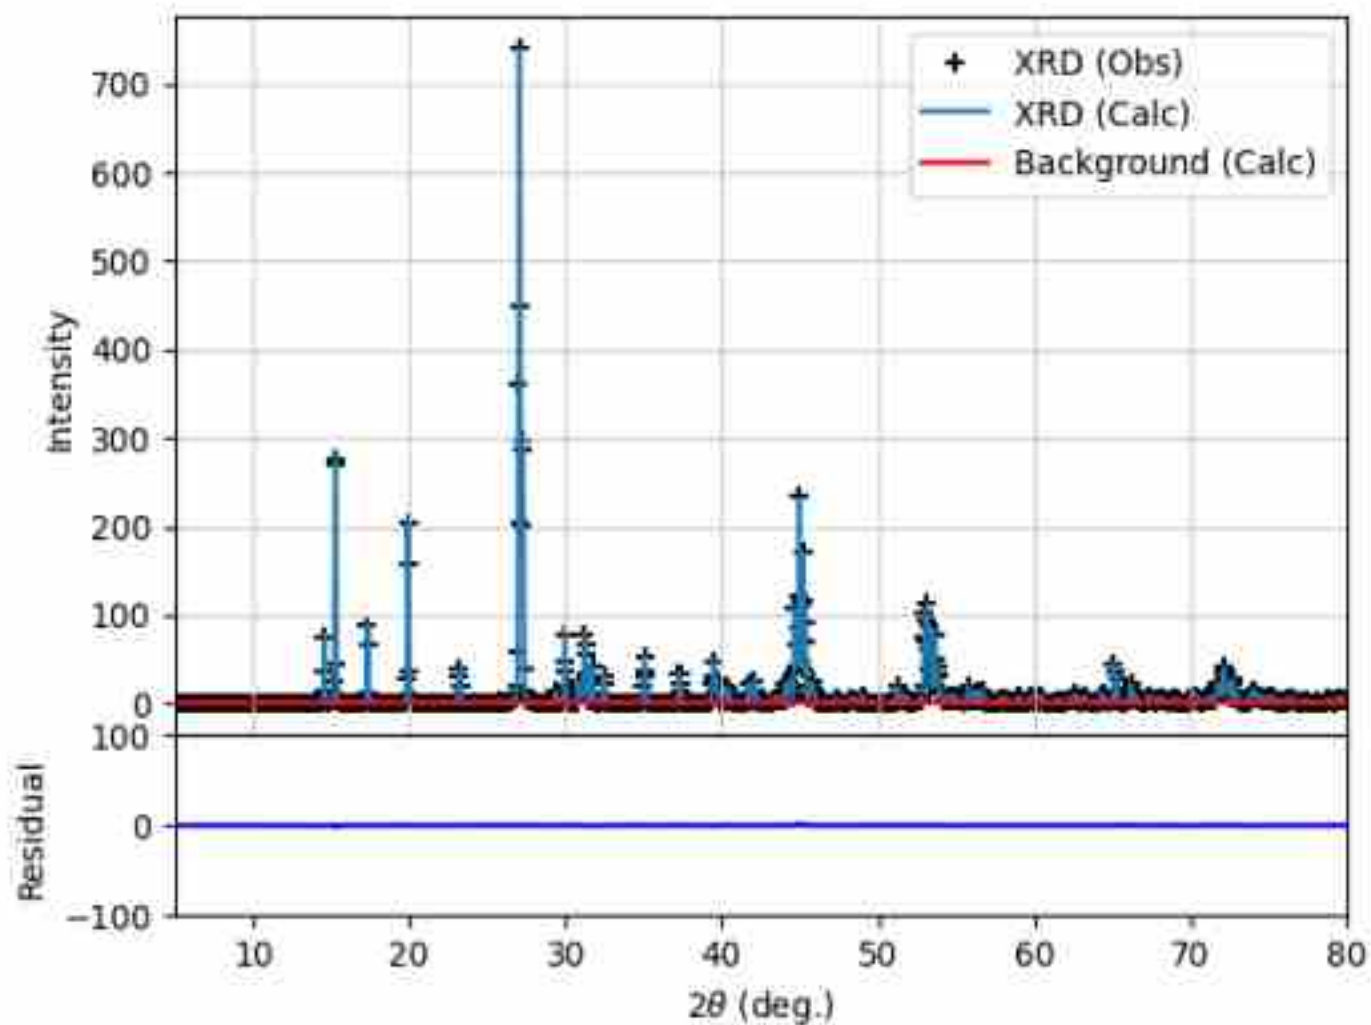

| RMSE before RR | Rwp     | RMSE after RR |
|----------------|---------|---------------|
| 0.211          | 1.41891 | 0.03974       |

# Co4Sn12

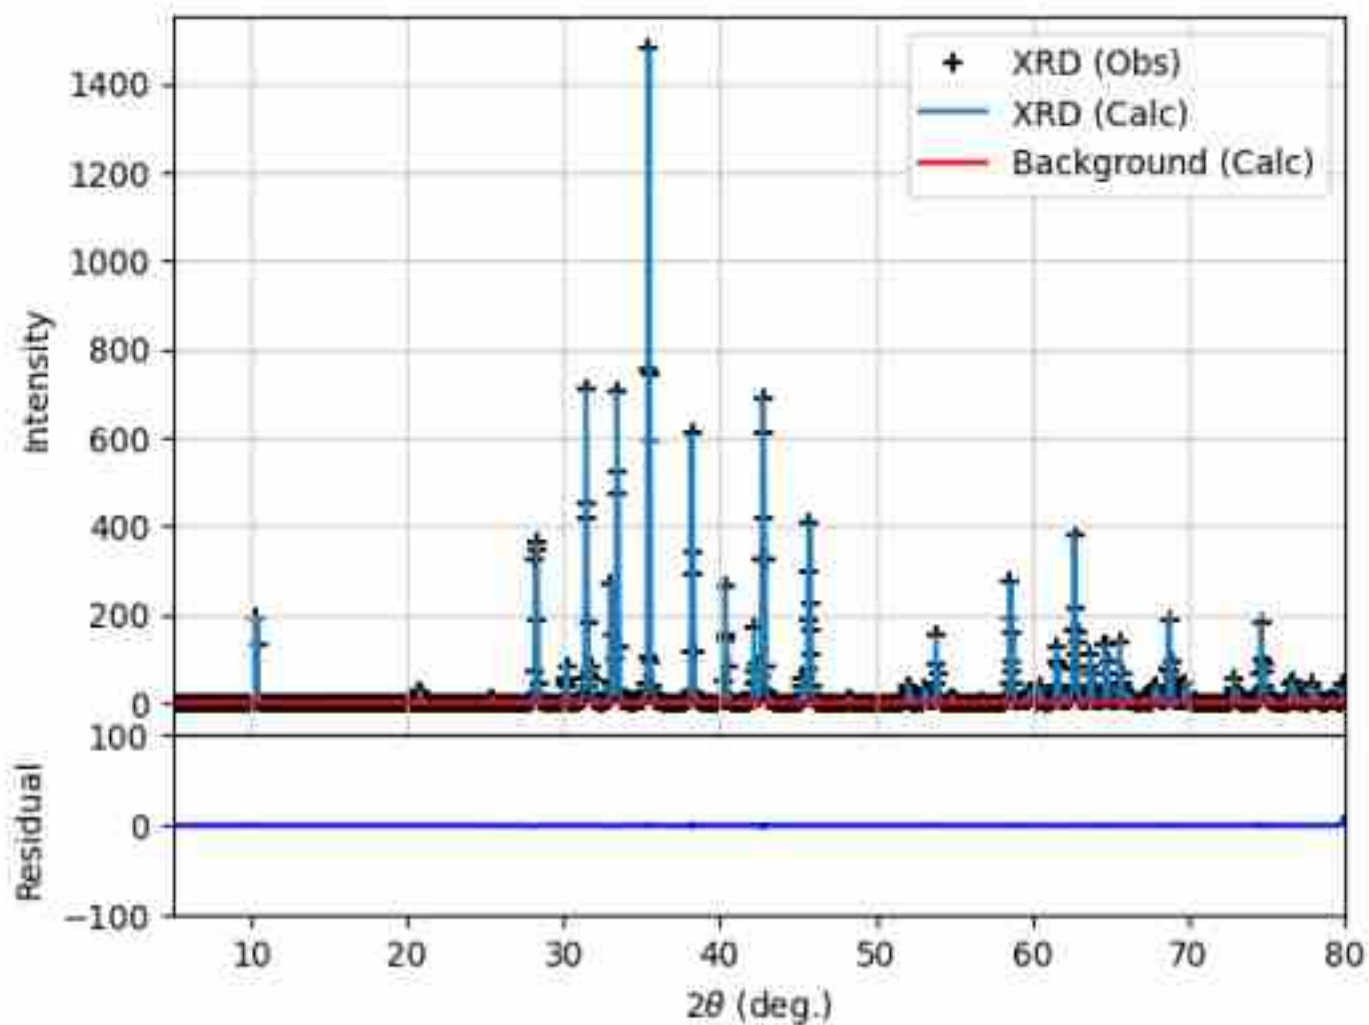

| RMSE before RR | Rwp     | RMSE after RR |
|----------------|---------|---------------|
| 0.213          | 1.30199 | 0.00681       |

# V2P2O10

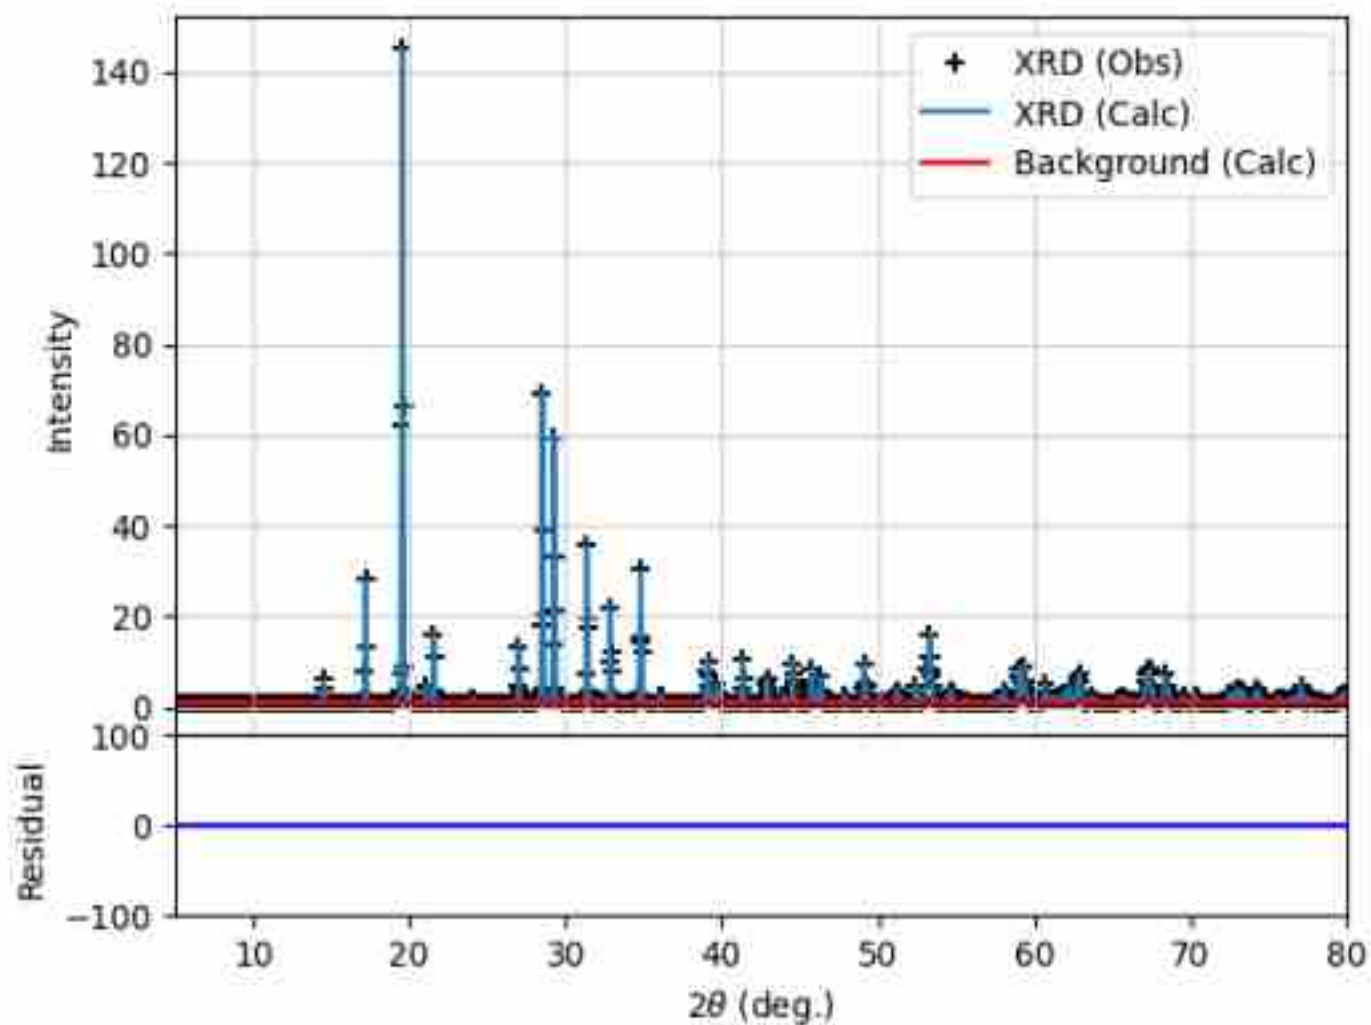

| RMSE before RR | Rwp     | RMSE after RR |
|----------------|---------|---------------|
| 0.213          | 0.00156 | 0.00034       |

# Cu<sub>2</sub>Ag<sub>2</sub>S<sub>2</sub>

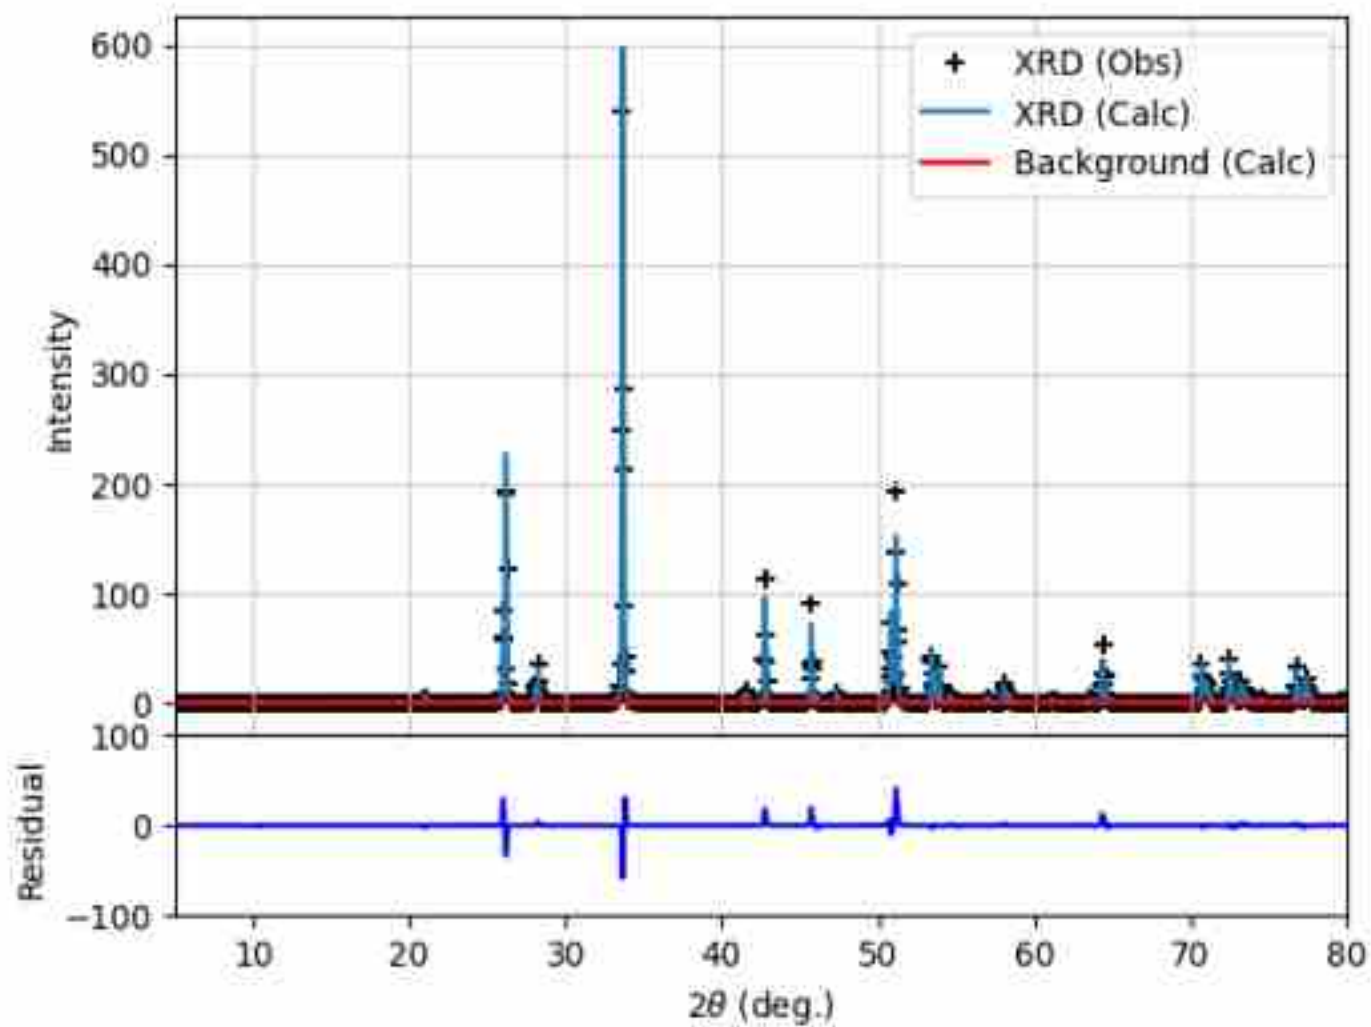

| RMSE before RR | Rwp      | RMSE after RR |
|----------------|----------|---------------|
| 0.214          | 14.92579 | 0.30785       |

# Tb3Pr1

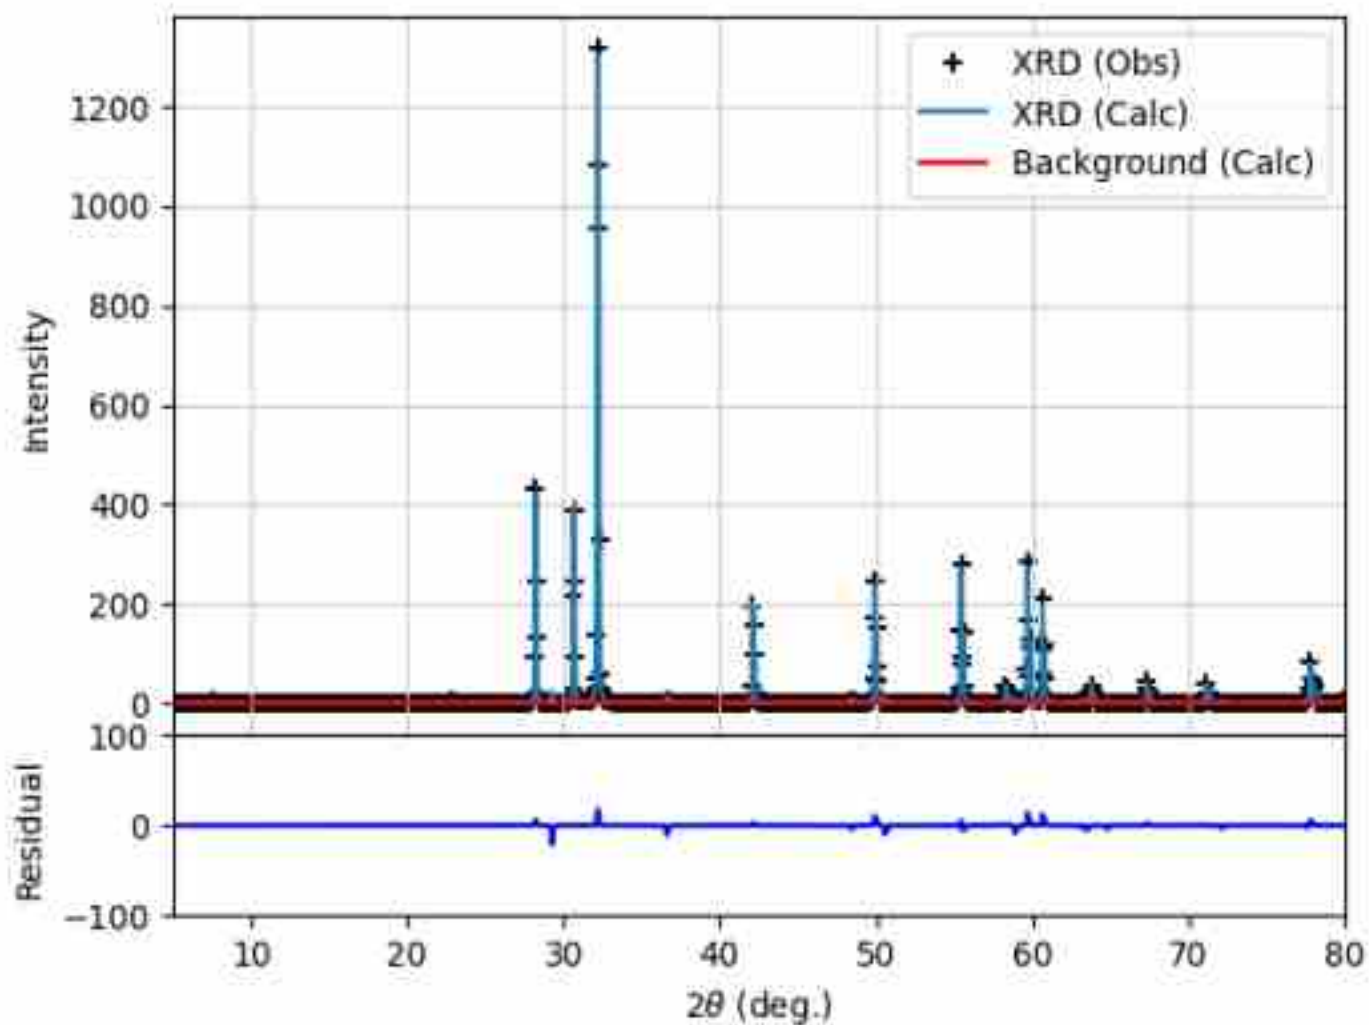

| RMSE before RR | Rwp     | RMSE after RR |
|----------------|---------|---------------|
| 0.214          | 21.5486 | 0.02525       |

# Al13Os4

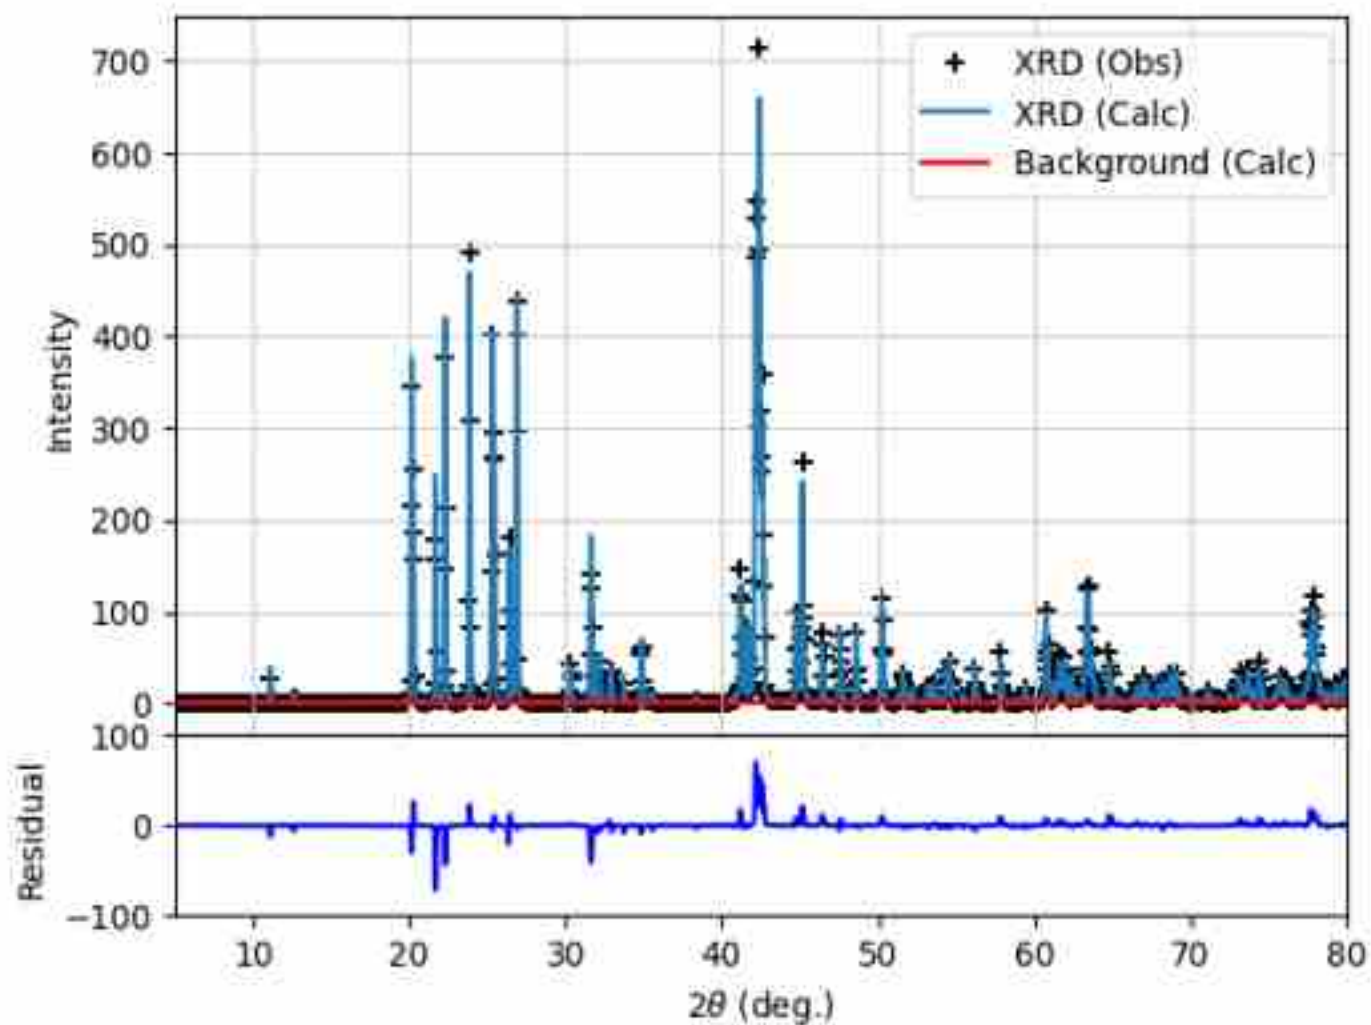

| RMSE before RR | Rwp      | RMSE after RR |
|----------------|----------|---------------|
| 0.215          | 12.73386 | 0.29274       |

# Cd<sub>1</sub>Cu<sub>6</sub>O<sub>8</sub>

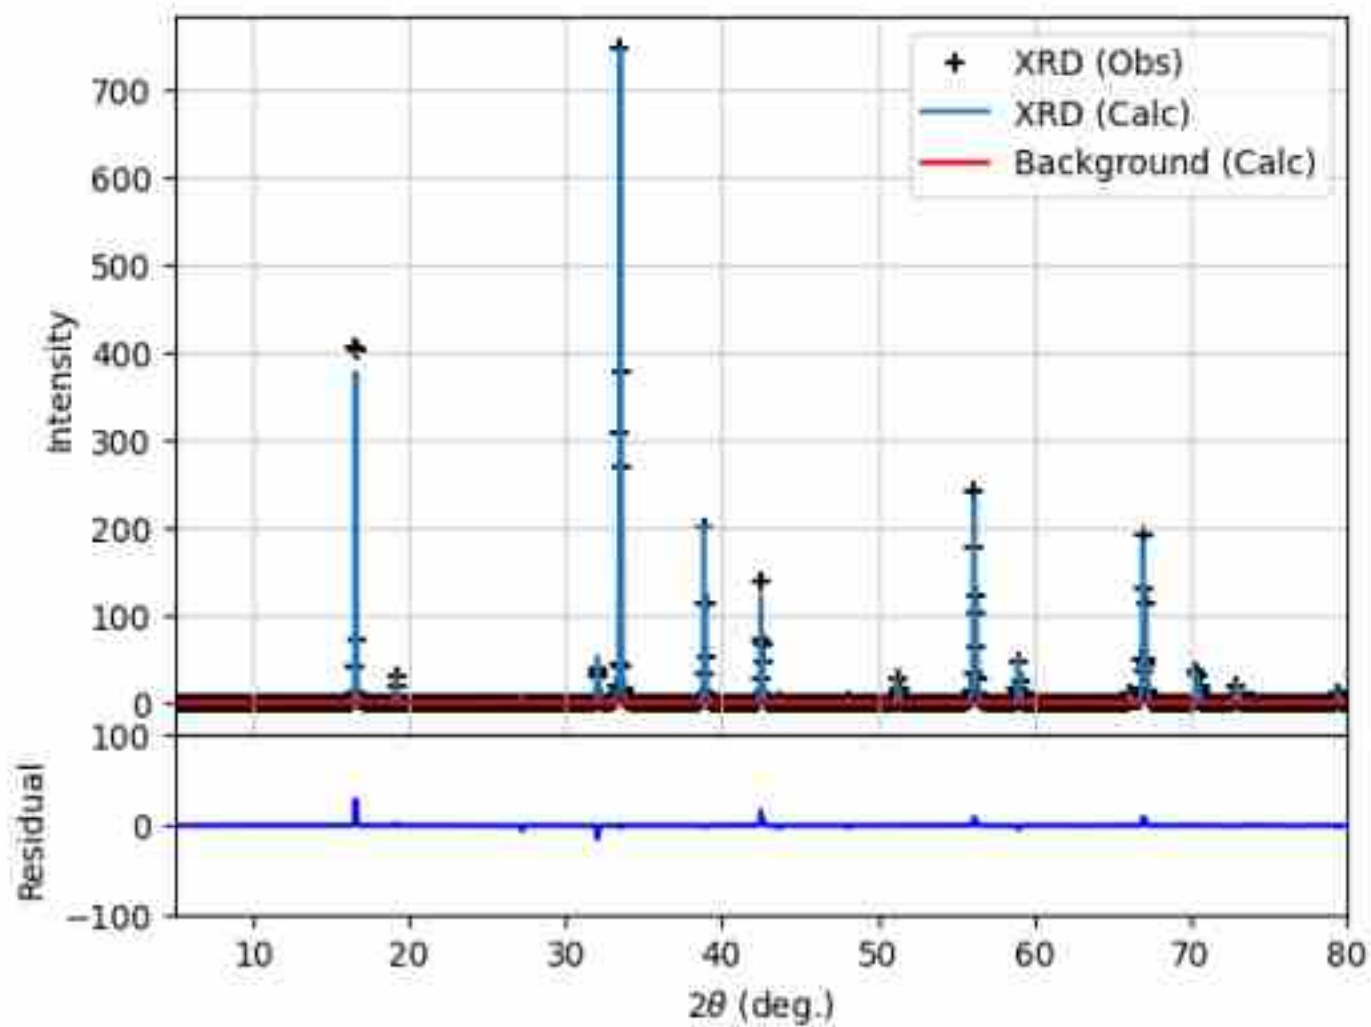

| RMSE before RR | Rwp      | RMSE after RR |
|----------------|----------|---------------|
| 0.216          | 10.32944 | 0.19514       |

# Cu<sub>1</sub>Ni<sub>3</sub>Sn<sub>2</sub>S<sub>8</sub>

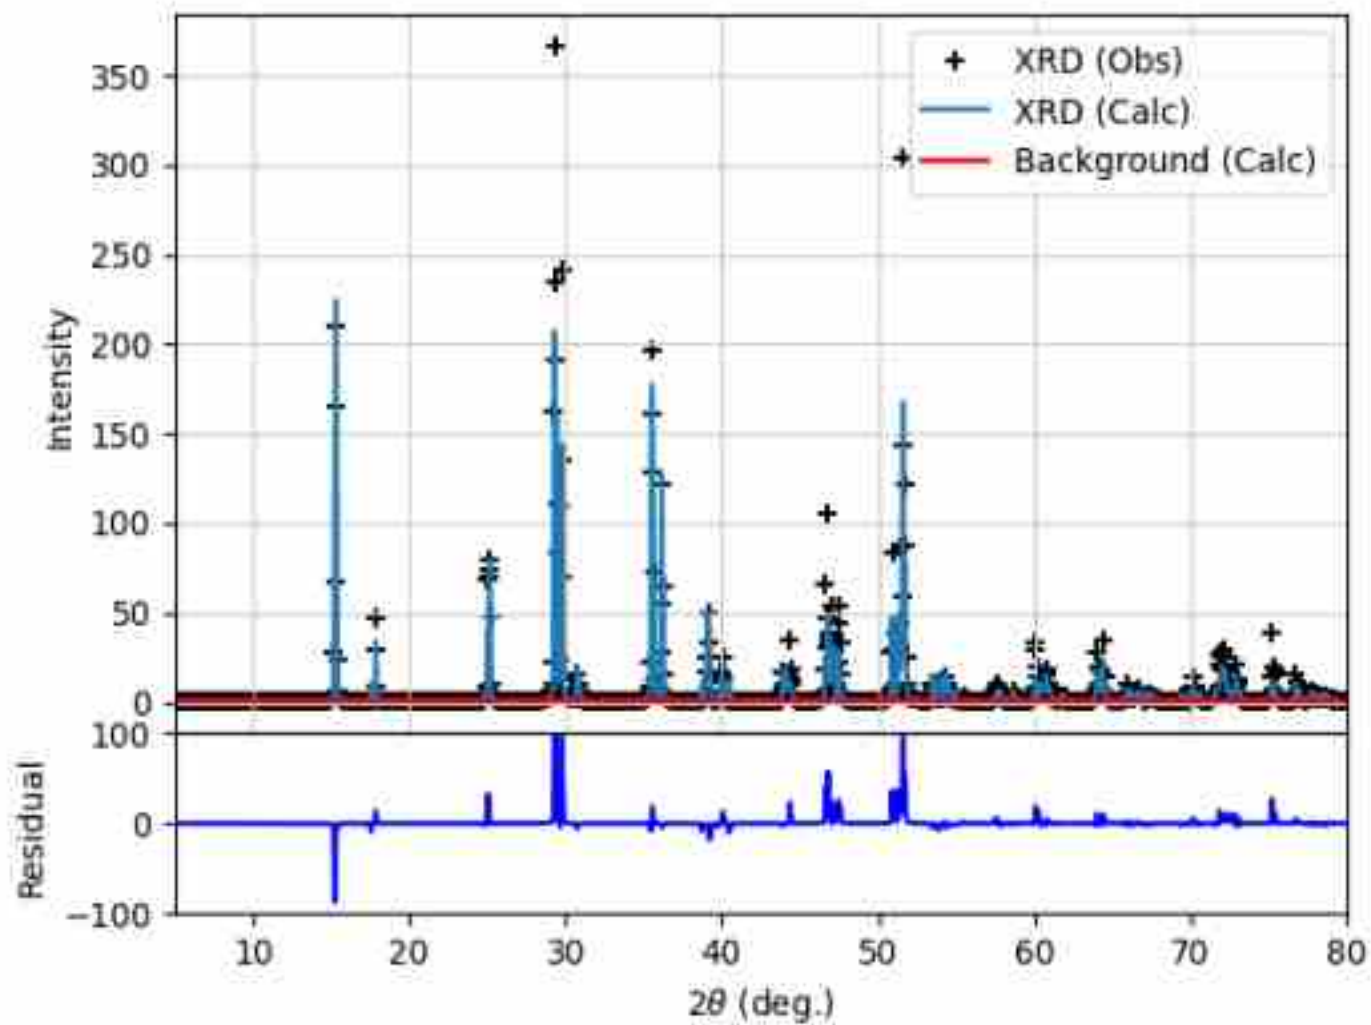

| RMSE before RR | Rwp      | RMSE after RR |
|----------------|----------|---------------|
| 0.217          | 39.97885 | None          |



# Mn<sub>2</sub>Ge<sub>4</sub>

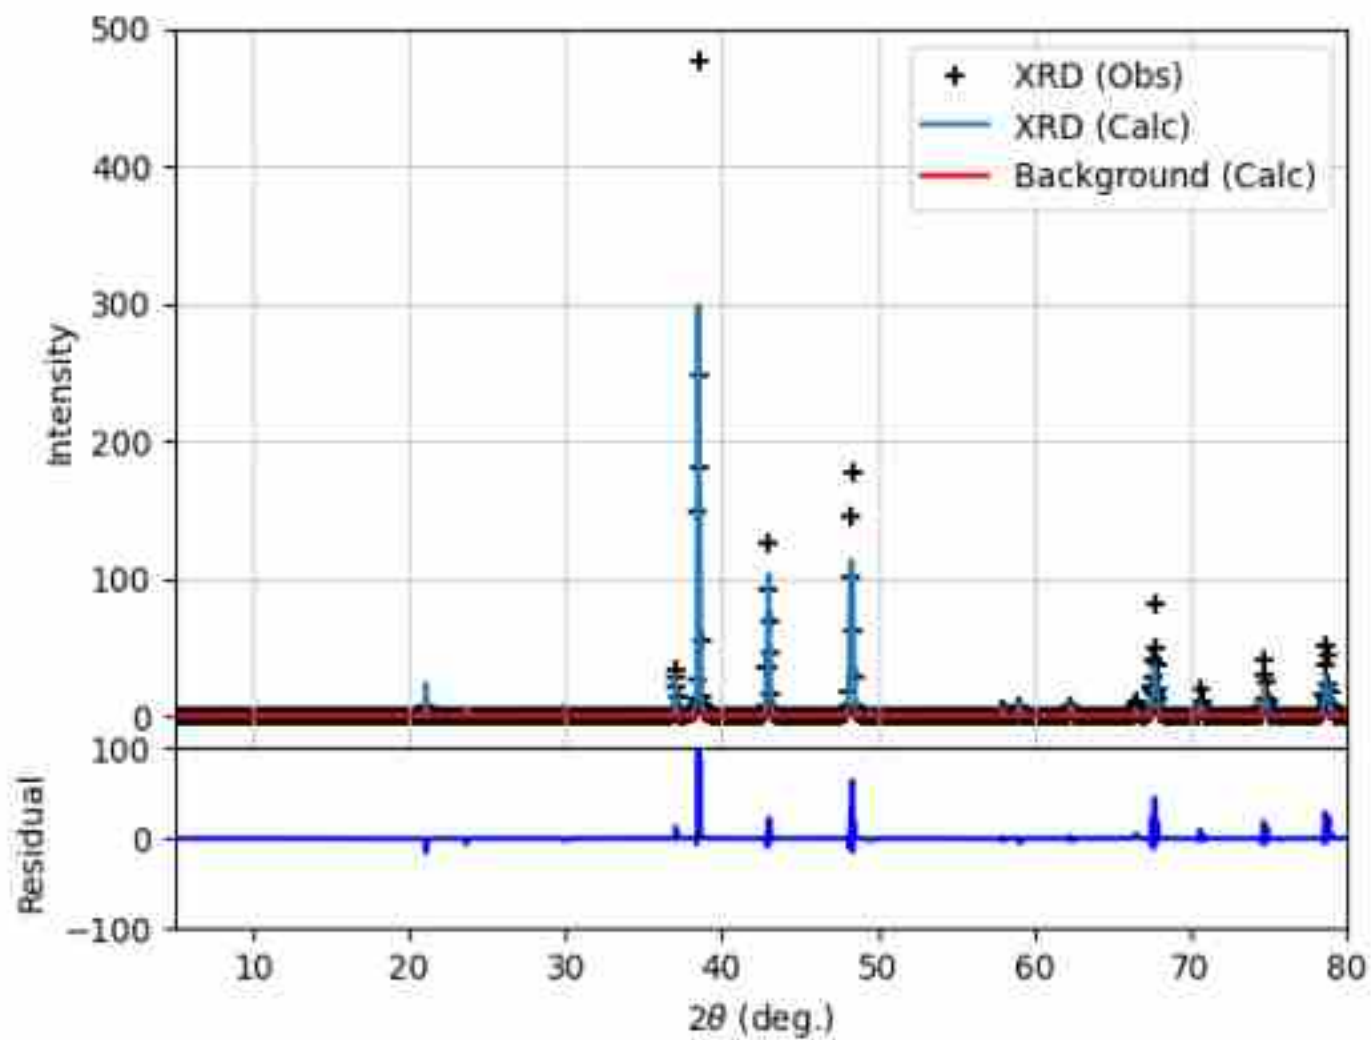

| RMSE before RR | Rwp      | RMSE after RR |
|----------------|----------|---------------|
| 0.217          | 32.86096 | 0.40178       |

# Sn2Pb2S4

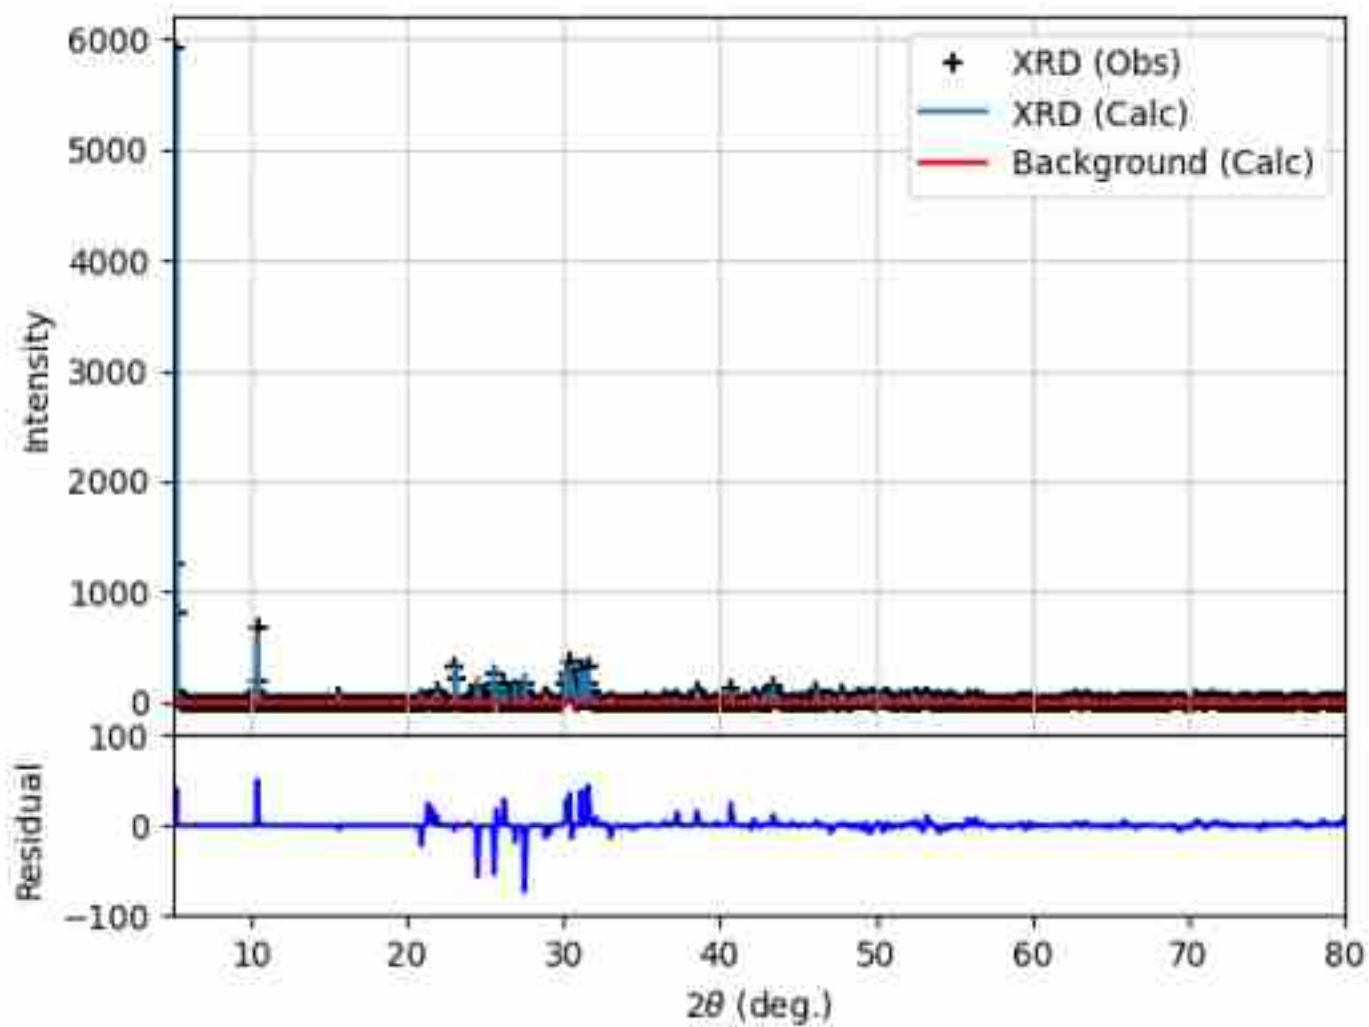

| RMSE before RR | Rwp      | RMSE after RR |
|----------------|----------|---------------|
| 0.217          | 13.68977 | 0.2058        |

# Li<sub>2</sub>Fe<sub>4</sub>O<sub>4</sub>F<sub>6</sub>

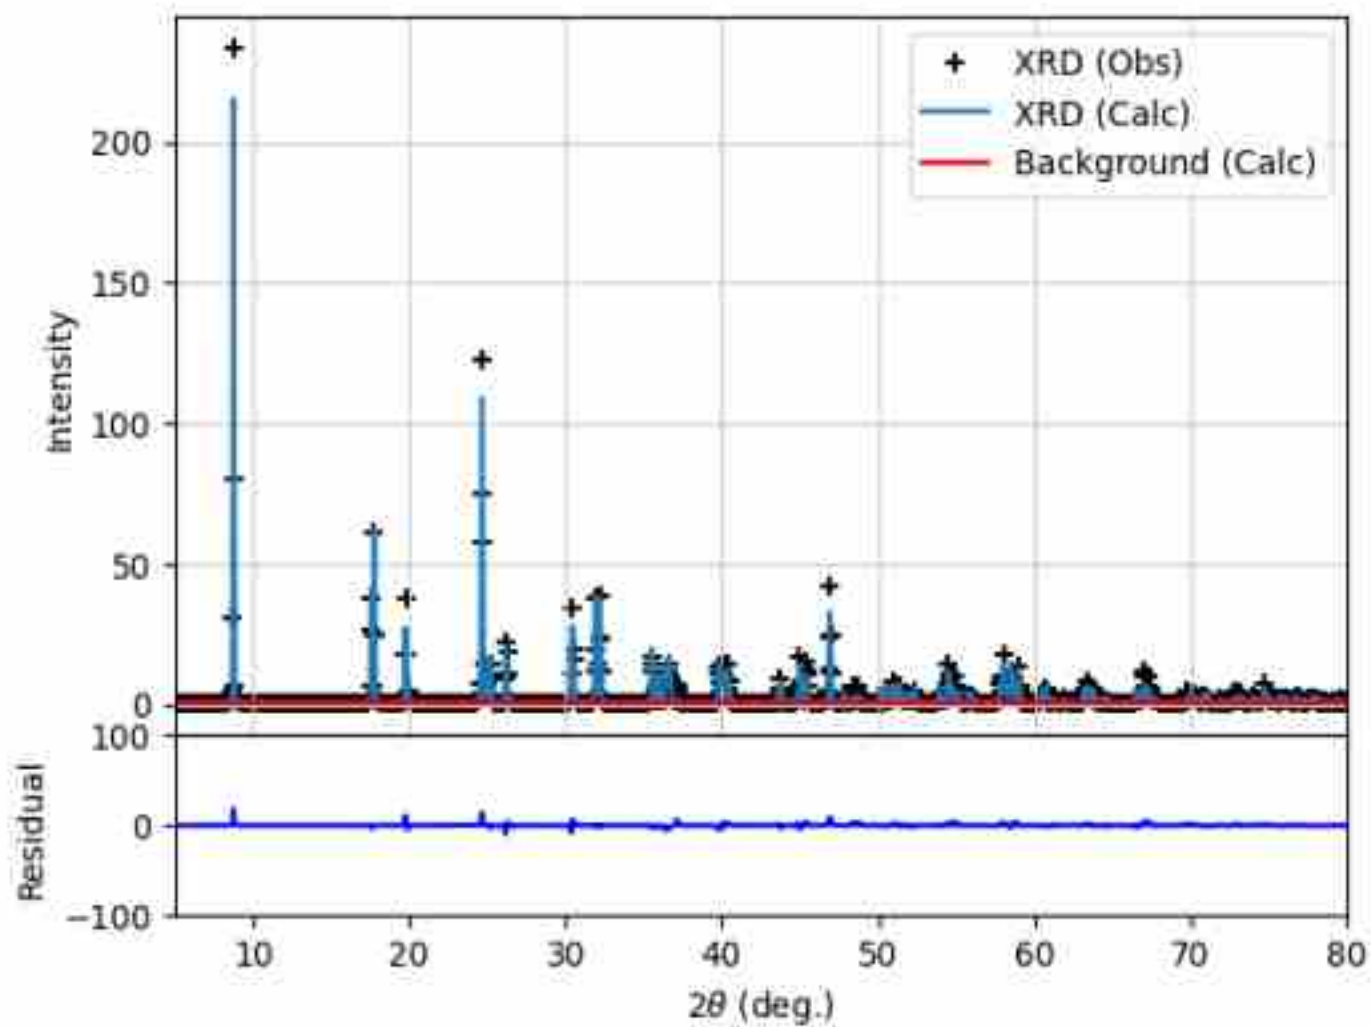

| RMSE before RR | Rwp      | RMSE after RR |
|----------------|----------|---------------|
| 0.218          | 20.39502 | None          |

# Li<sub>3</sub>Mn<sub>2</sub>Co<sub>1</sub>O<sub>6</sub>

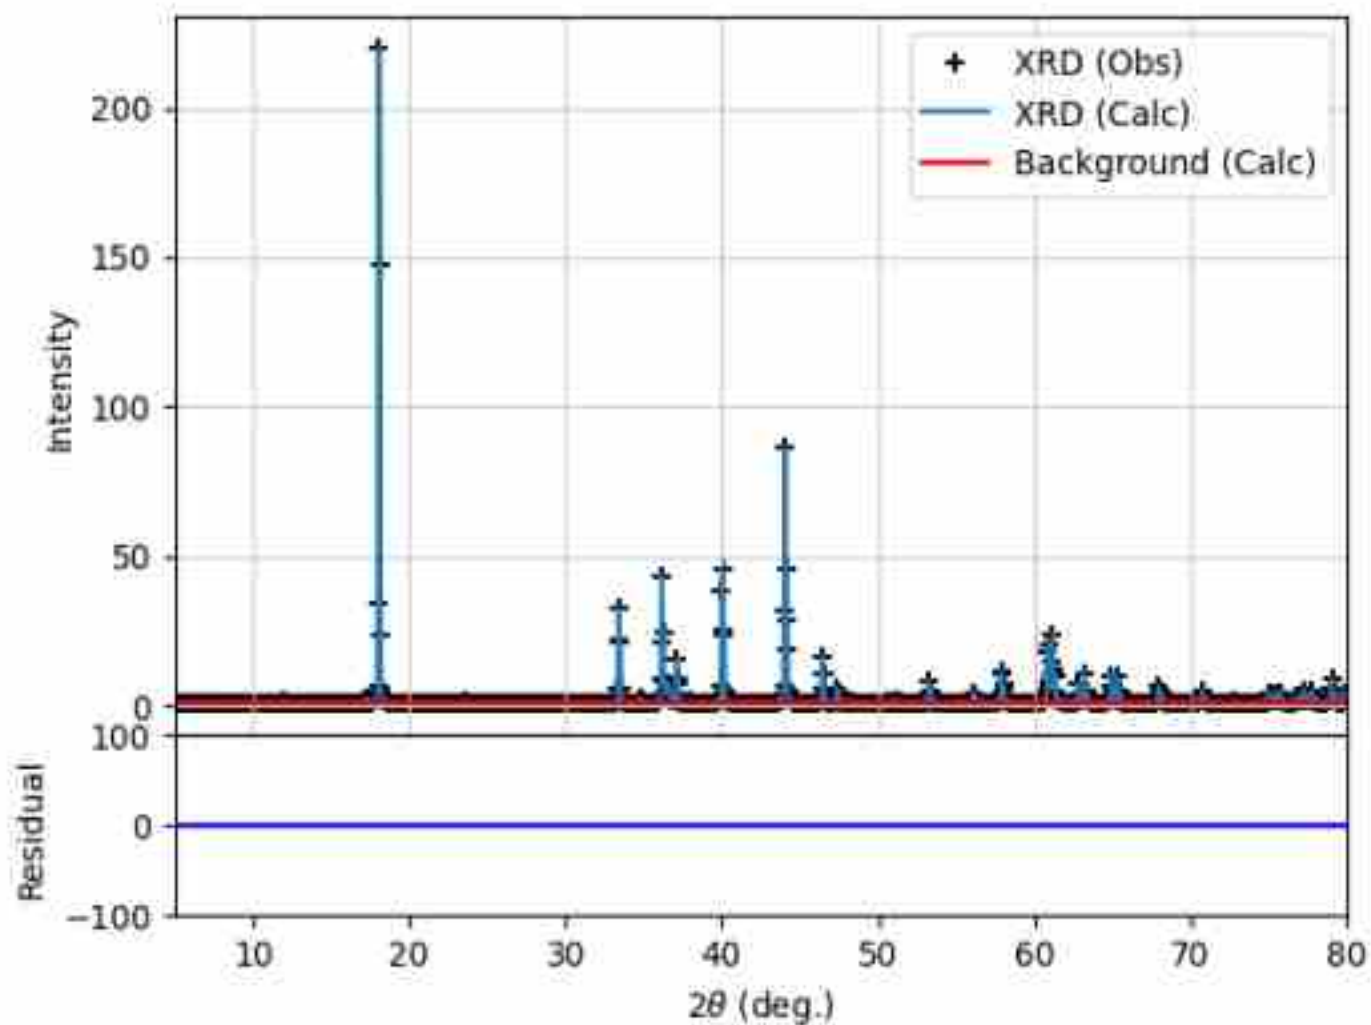

| RMSE before RR | Rwp     | RMSE after RR |
|----------------|---------|---------------|
| 0.218          | 0.48132 | 0.05381       |

# Rb<sub>2</sub>Au<sub>2</sub>Br<sub>8</sub>

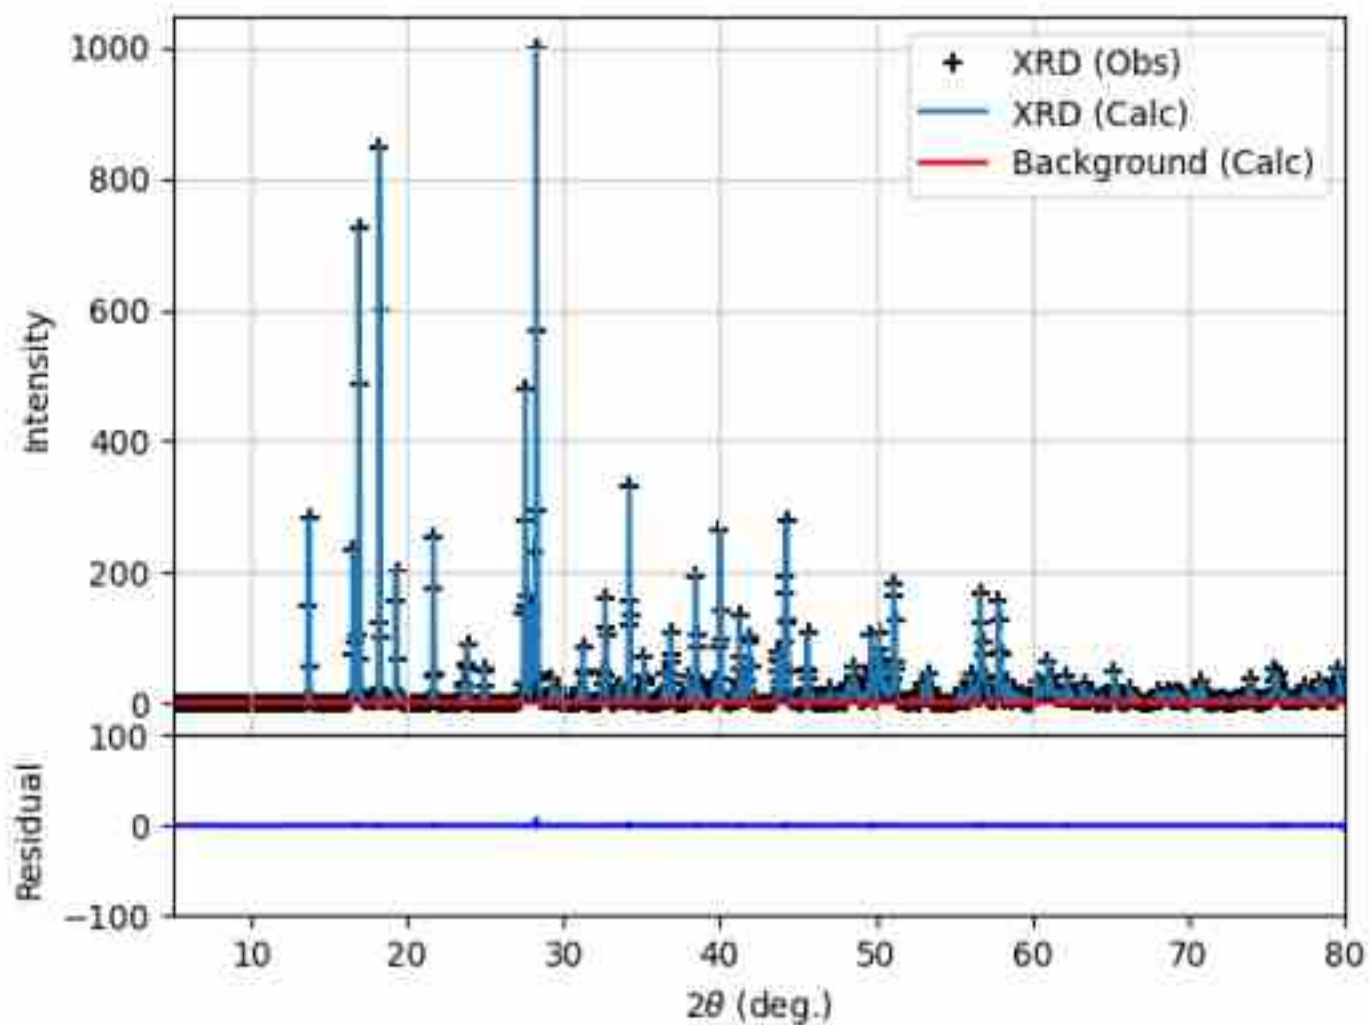

| RMSE before RR | Rwp     | RMSE after RR |
|----------------|---------|---------------|
| 0.218          | 1.44673 | 0.00896       |

# Th4Pd2

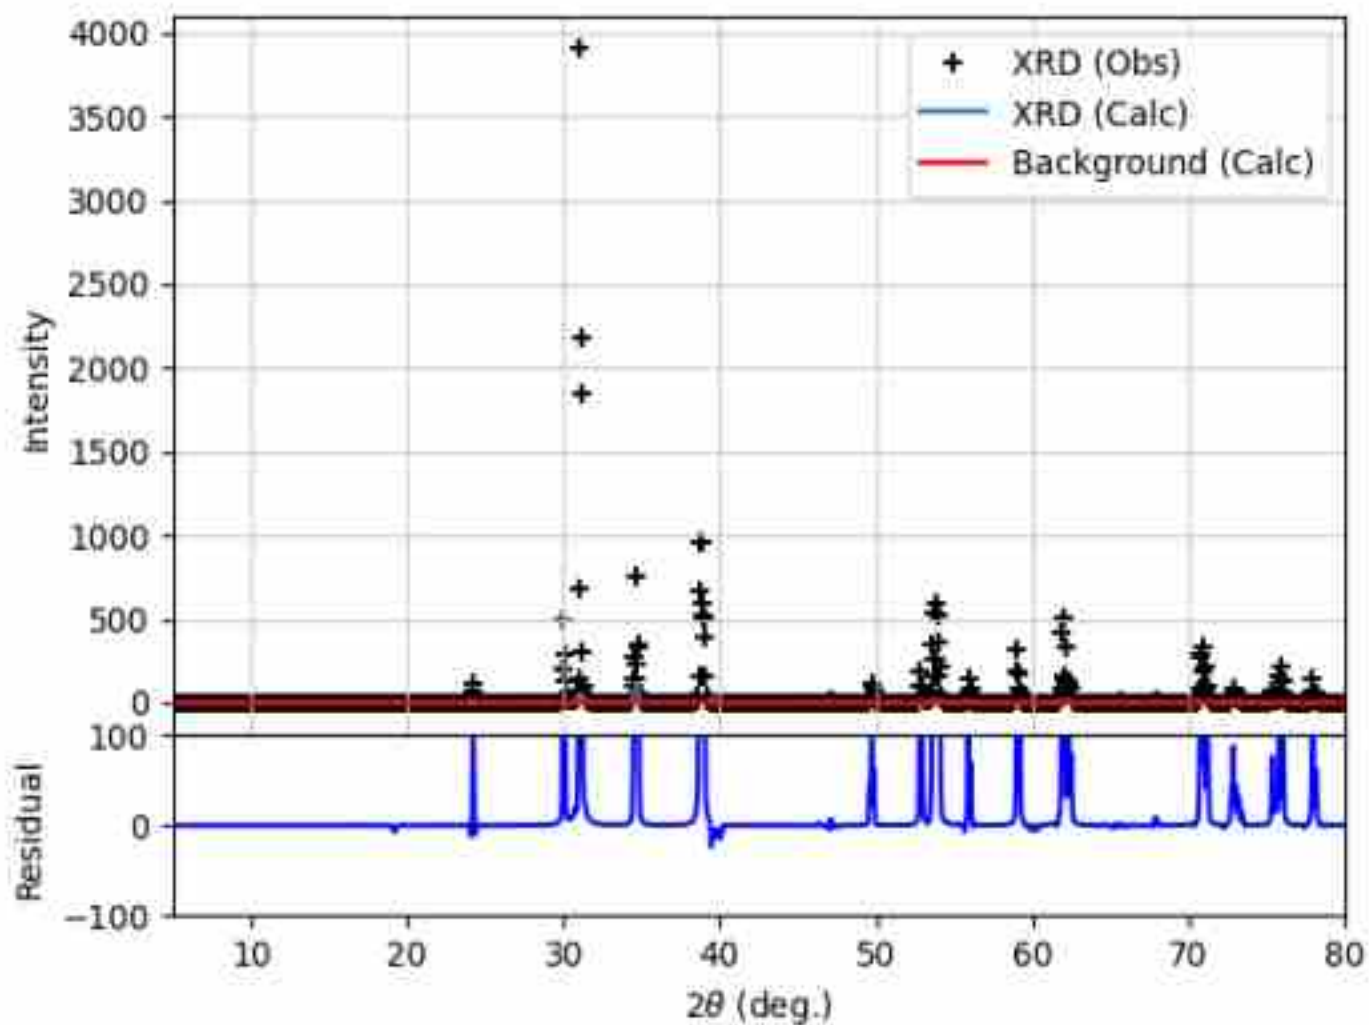

| RMSE before RR | Rwp      | RMSE after RR |
|----------------|----------|---------------|
| 0.218          | 94.16866 | 0.21837       |

# V4P2O13

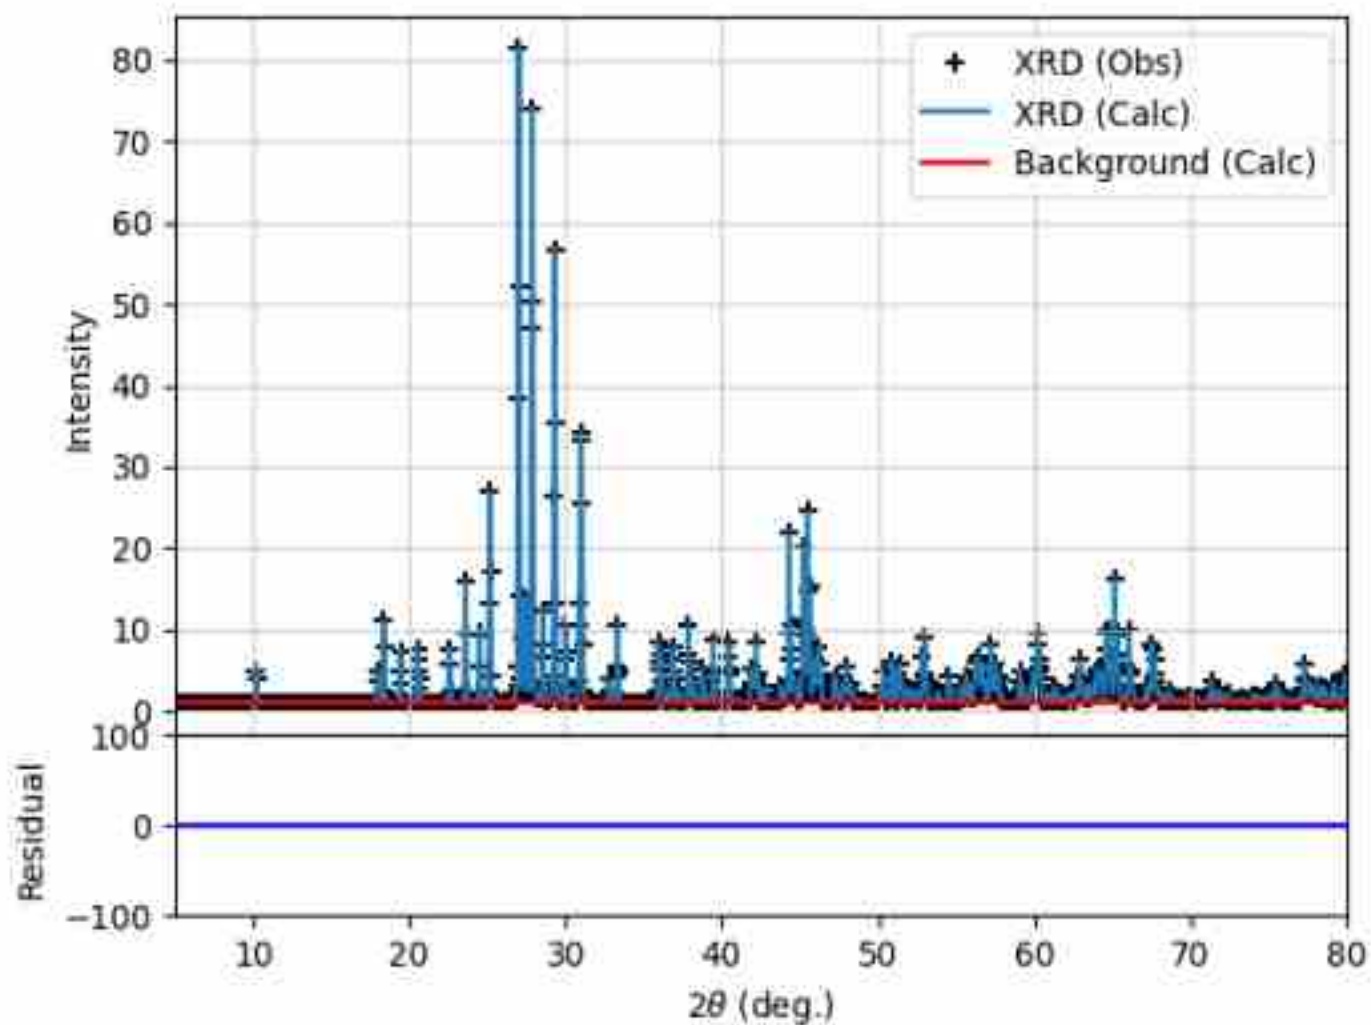

| RMSE before RR | Rwp     | RMSE after RR |
|----------------|---------|---------------|
| 0.218          | 0.00156 | 0.0           |

# Y4N2C16

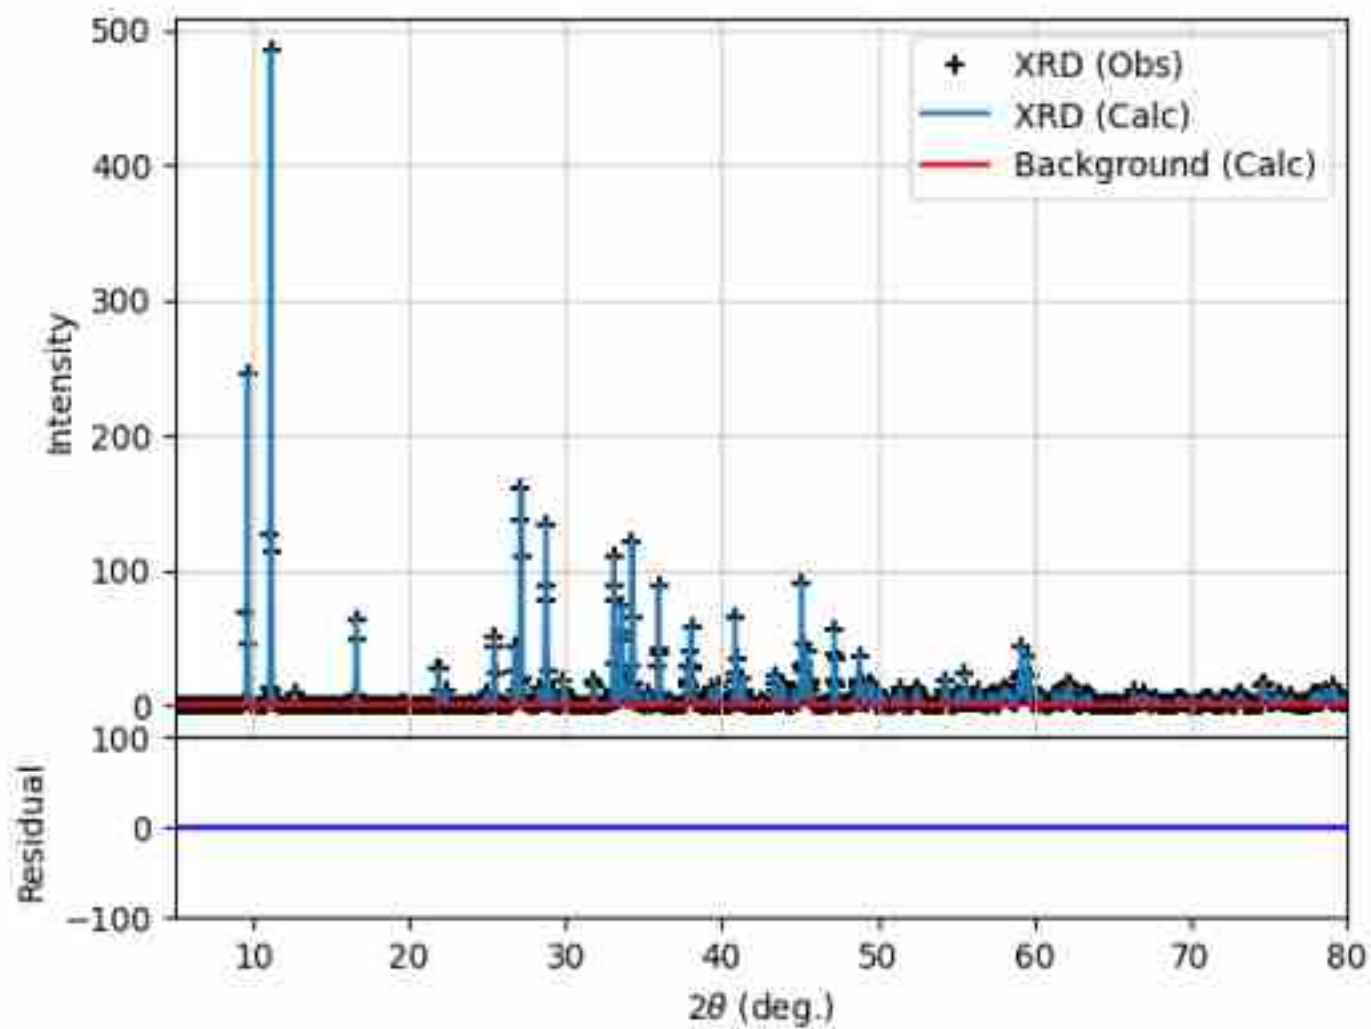

| RMSE before RR | Rwp     | RMSE after RR |
|----------------|---------|---------------|
| 0.218          | 0.00293 | 0.00047       |



# Li<sub>2</sub>Eu<sub>2</sub>P<sub>2</sub>Se<sub>8</sub>

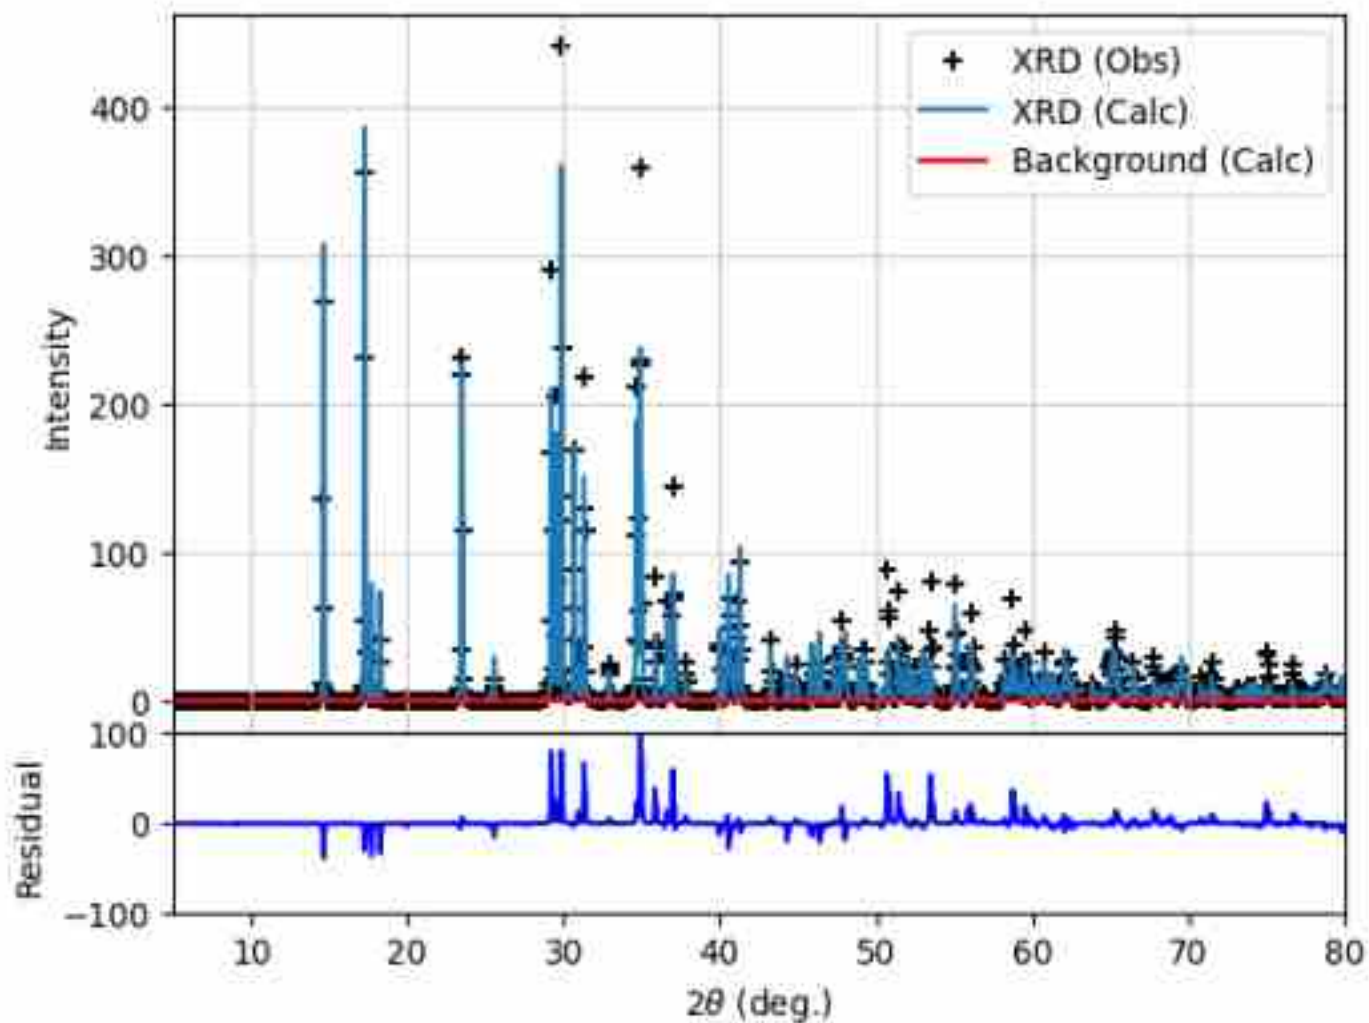

| RMSE before RR | Rwp    | RMSE after RR |
|----------------|--------|---------------|
| 0.221          | 31.994 | None          |

# Ca<sub>2</sub>W<sub>2</sub>N<sub>6</sub>

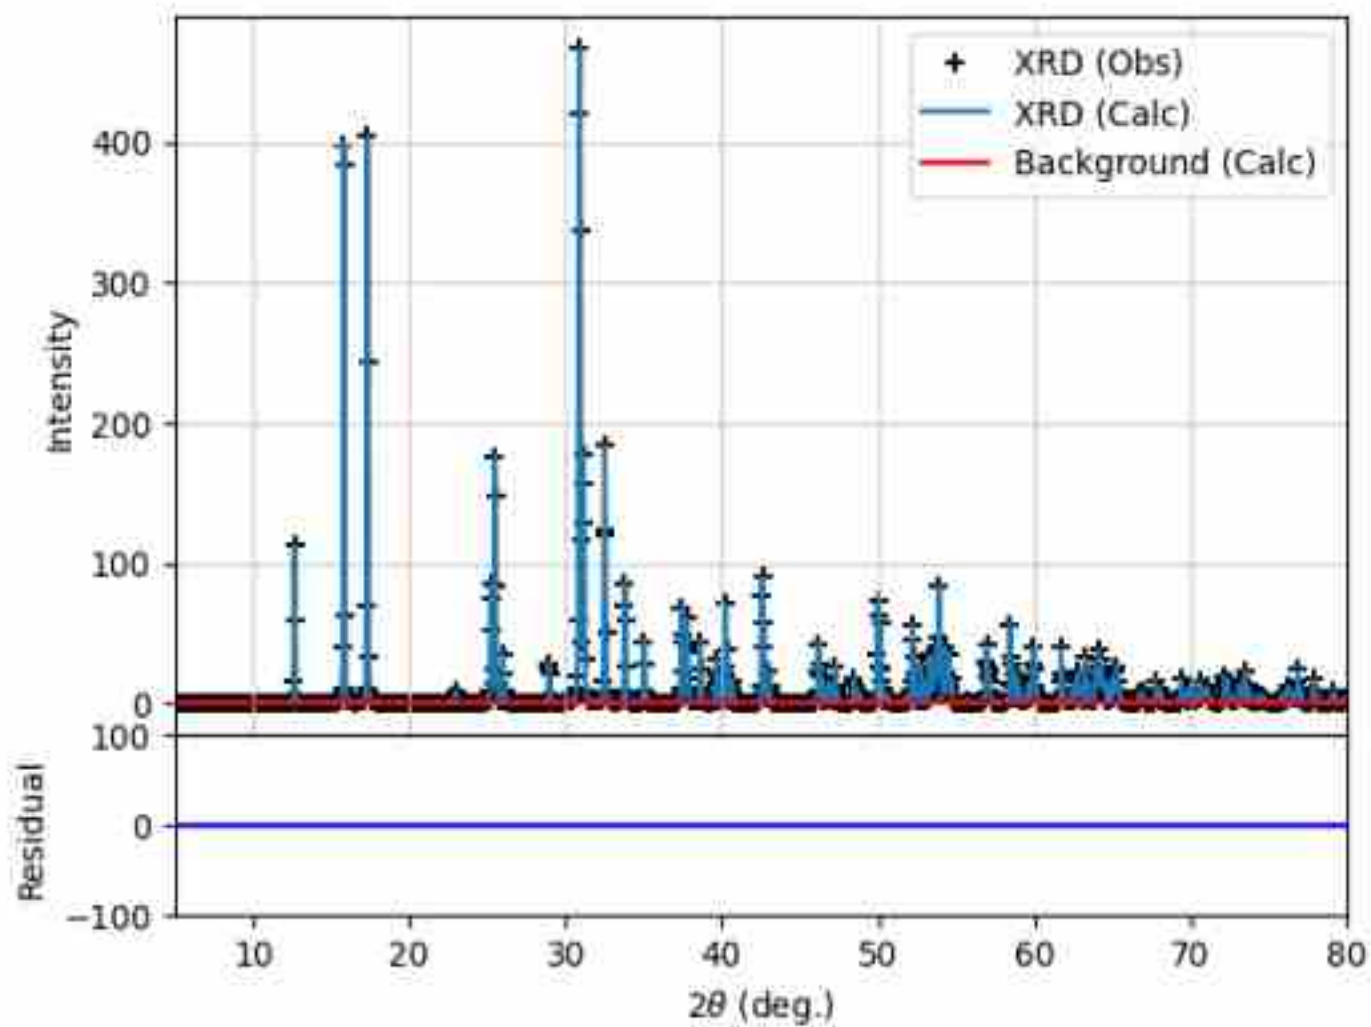

| RMSE before RR | Rwp     | RMSE after RR |
|----------------|---------|---------------|
| 0.222          | 0.00299 | 0.00111       |

# Ce<sub>2</sub>Tm<sub>6</sub>S<sub>12</sub>

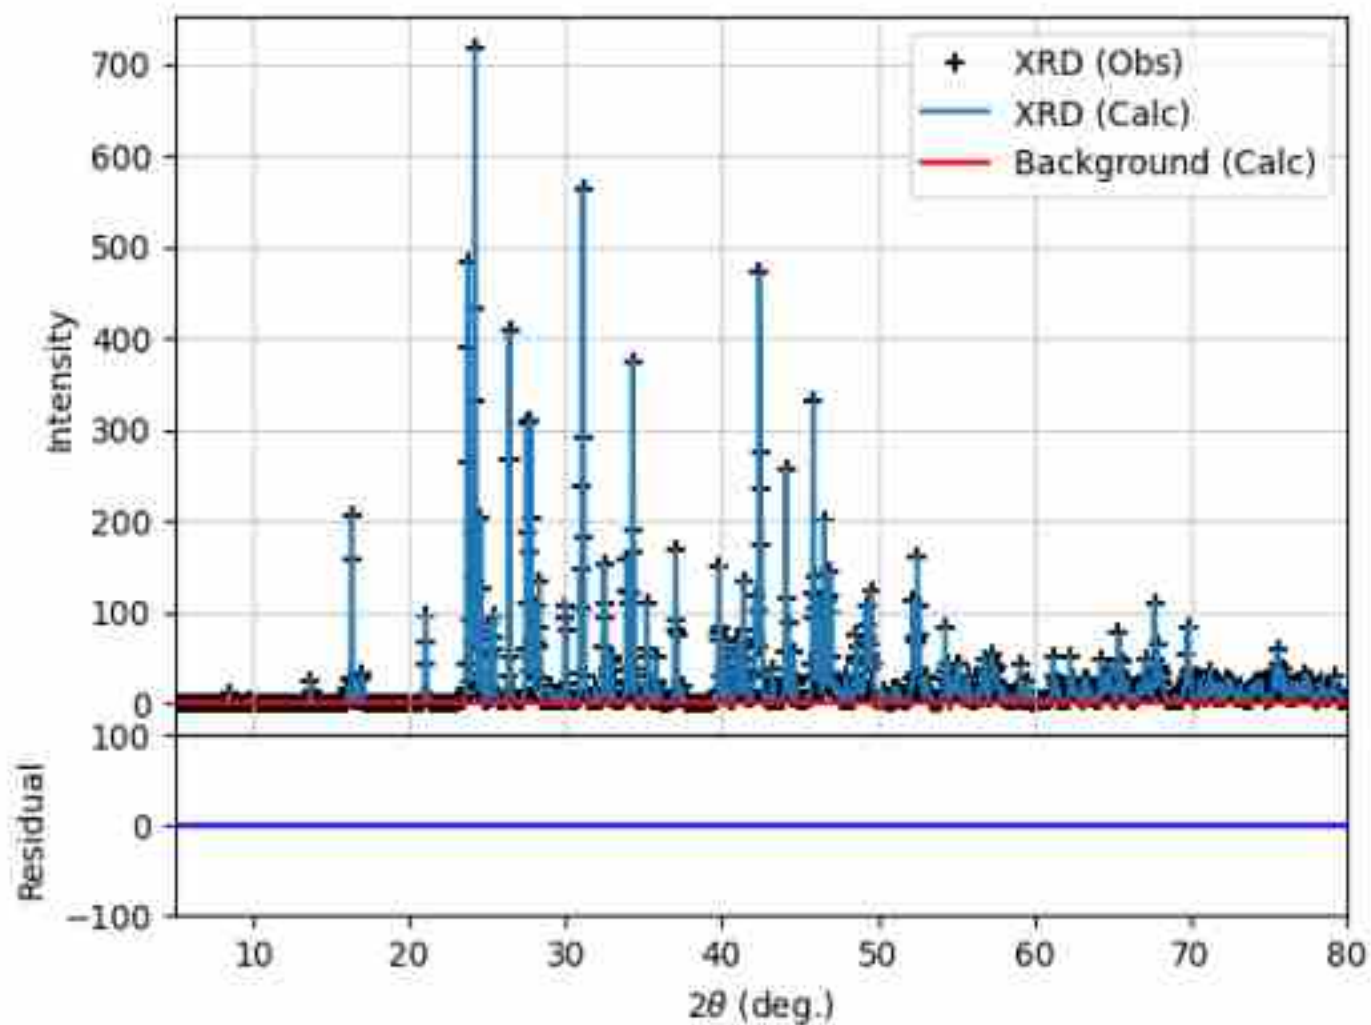

| RMSE before RR | Rwp     | RMSE after RR |
|----------------|---------|---------------|
| 0.222          | 0.00389 | 0.00048       |

# Li<sub>4</sub>Er<sub>4</sub>O<sub>8</sub>

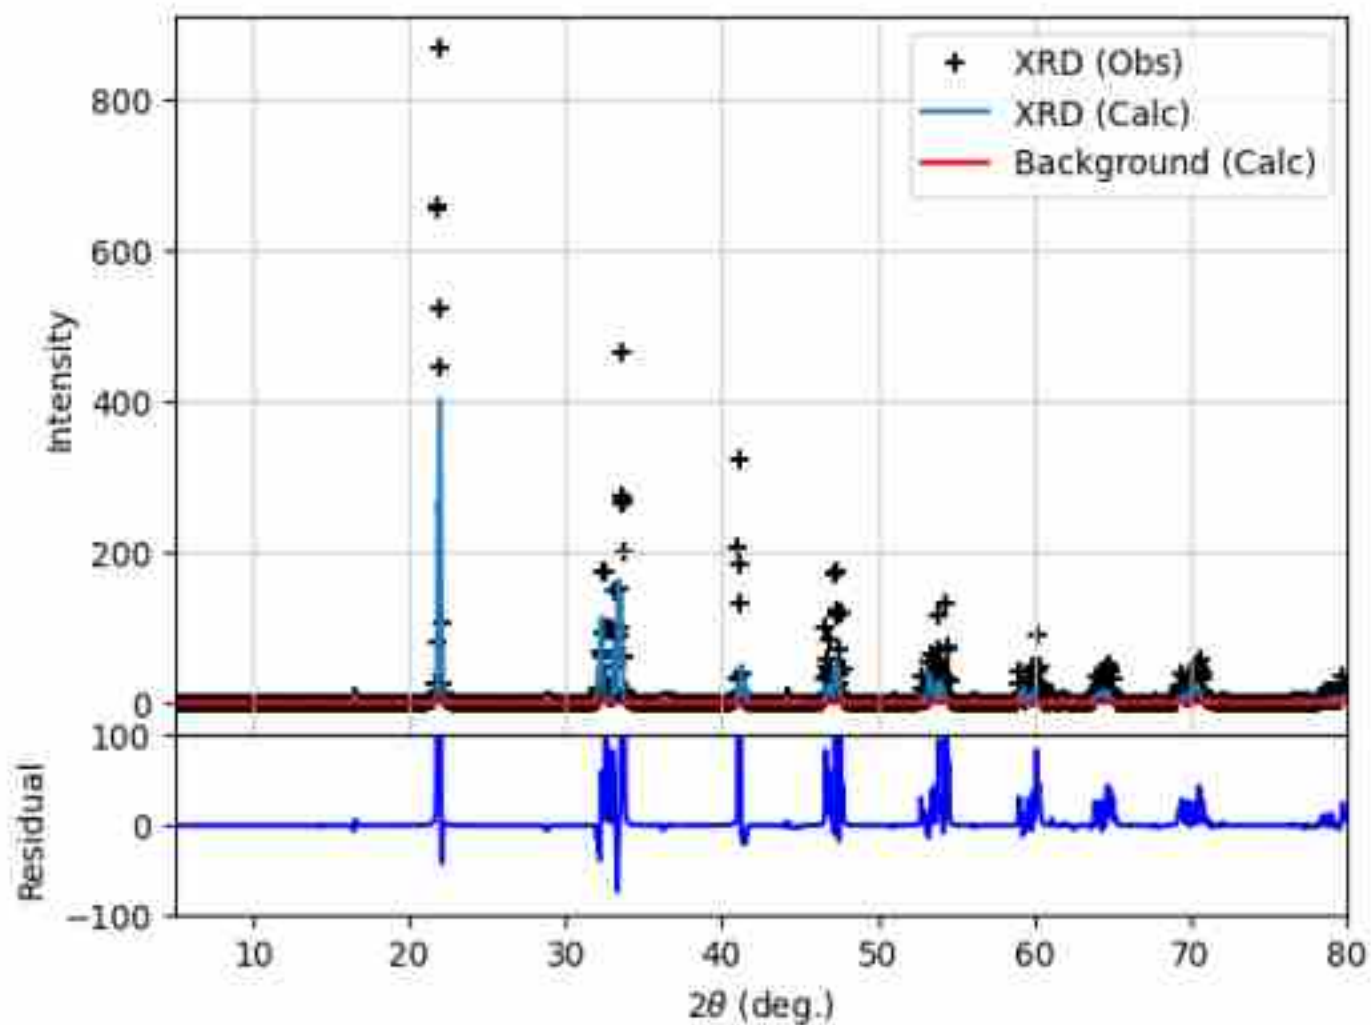

| RMSE before RR | Rwp      | RMSE after RR |
|----------------|----------|---------------|
| 0.222          | 71.27275 | None          |

# Ba2La2Br10

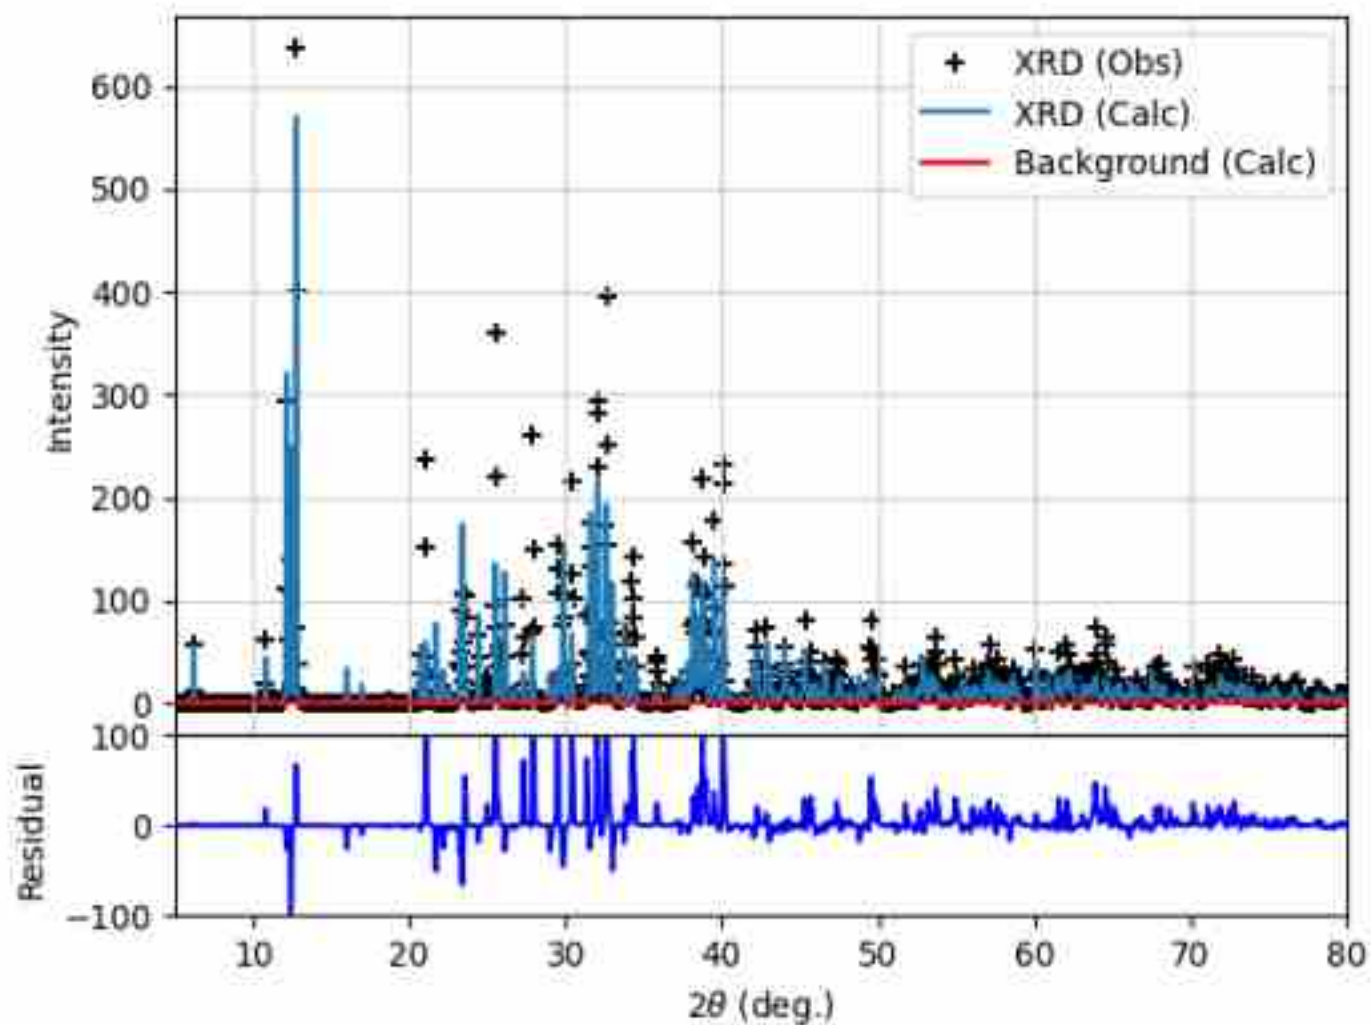

| RMSE before RR | Rwp      | RMSE after RR |
|----------------|----------|---------------|
| 0.223          | 52.40177 | 0.29878       |

# La<sub>4</sub>Au<sub>4</sub>O<sub>12</sub>

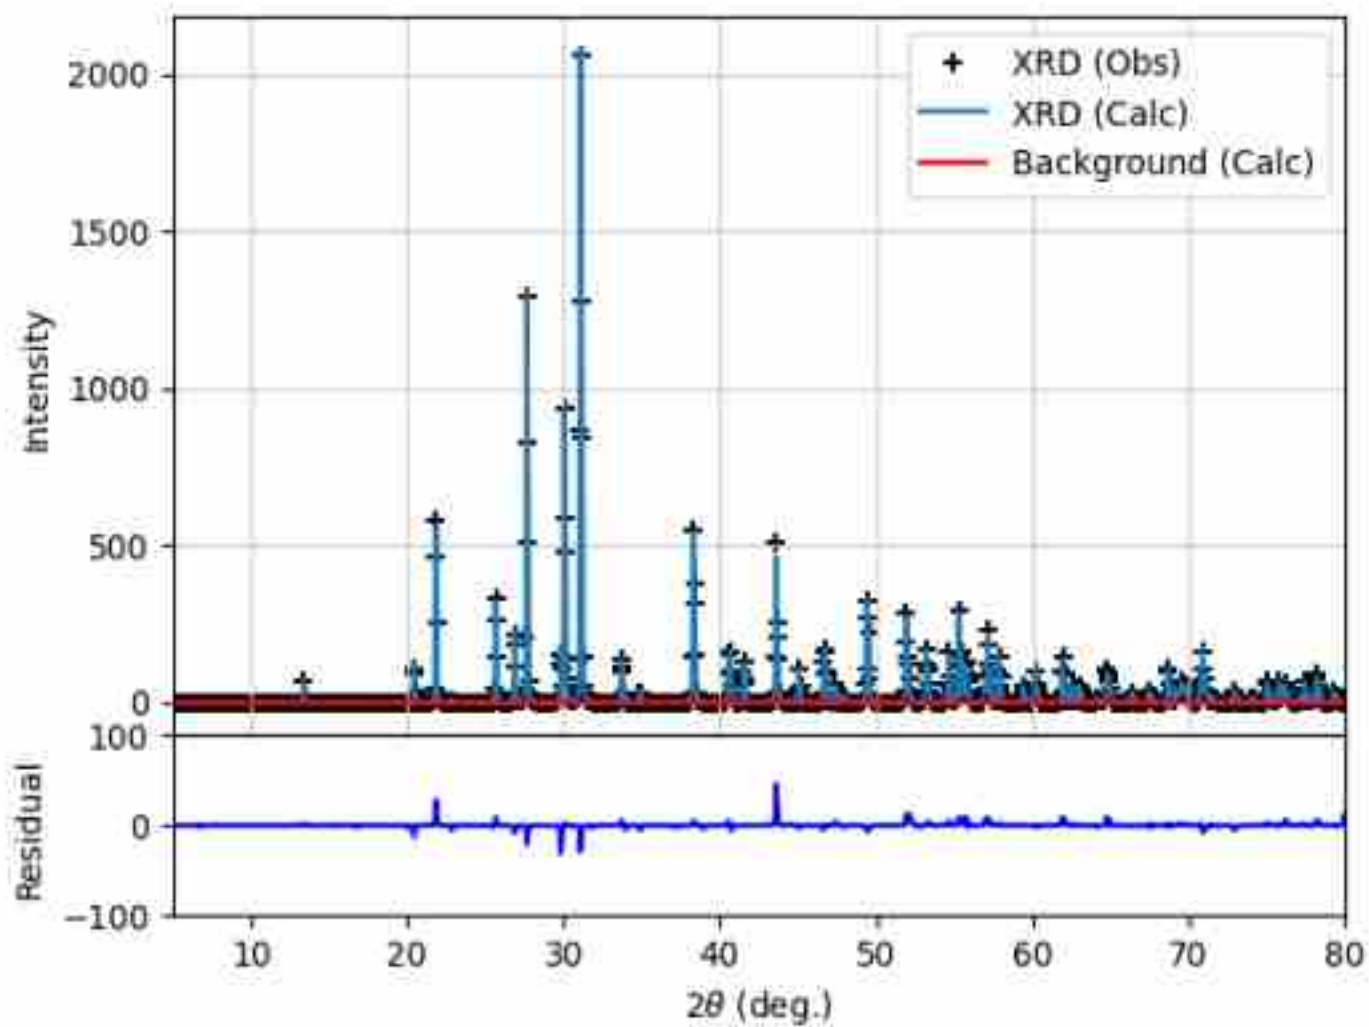

| RMSE before RR | Rwp     | RMSE after RR |
|----------------|---------|---------------|
| 0.223          | 6.47498 | None          |

# W4O12

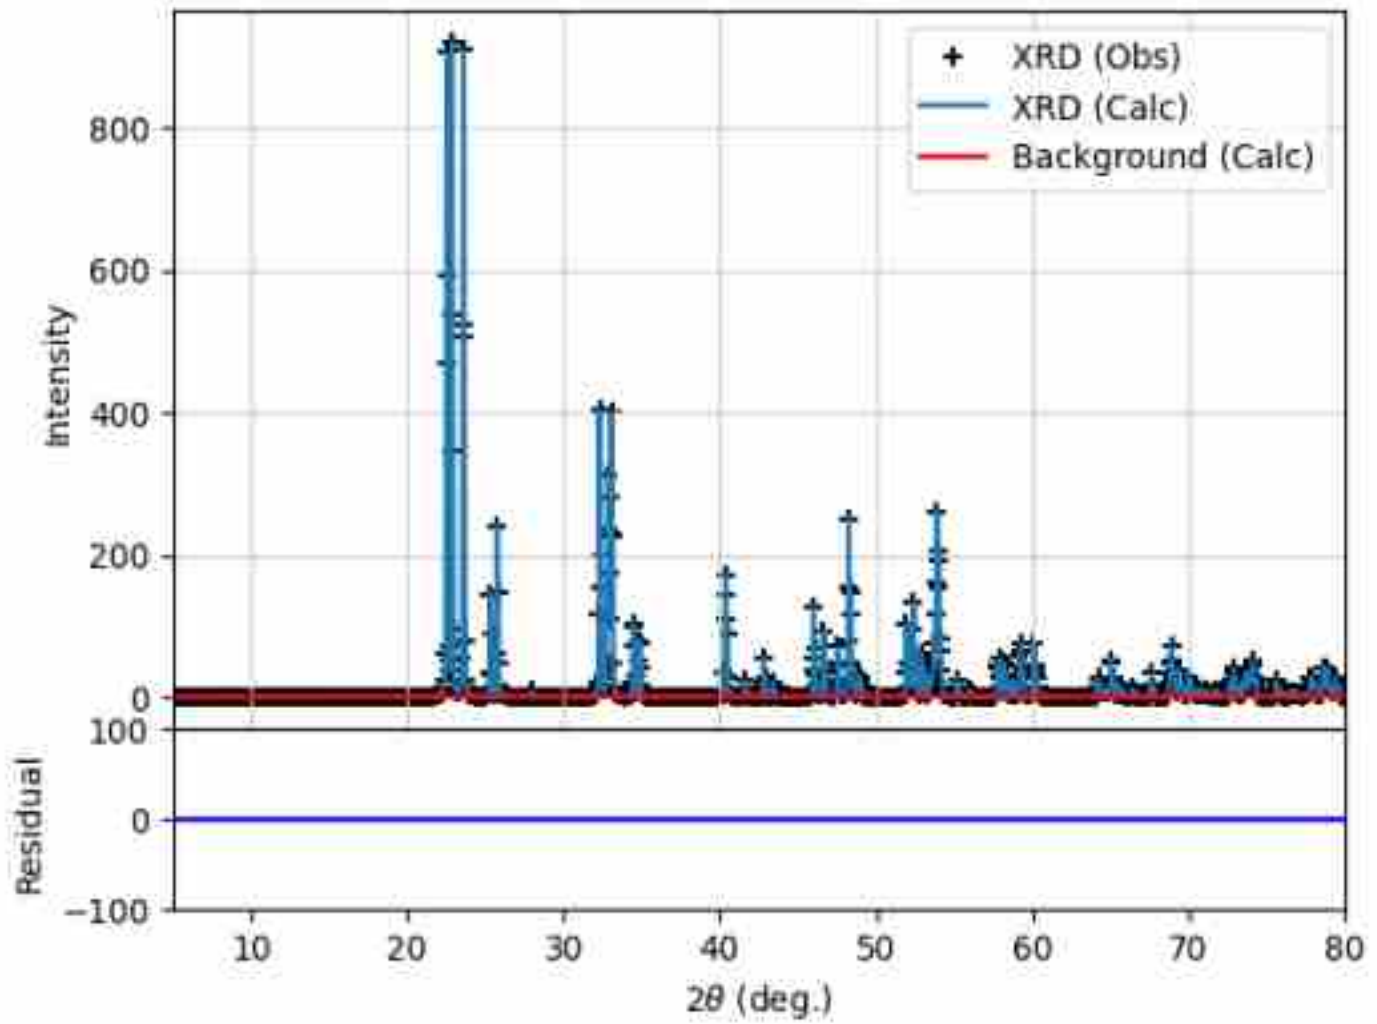

| RMSE before RR | Rwp    | RMSE after RR |
|----------------|--------|---------------|
| 0.223          | 0.0032 | 0.00083       |

# Ca<sub>3</sub>C<sub>3</sub>O<sub>9</sub>

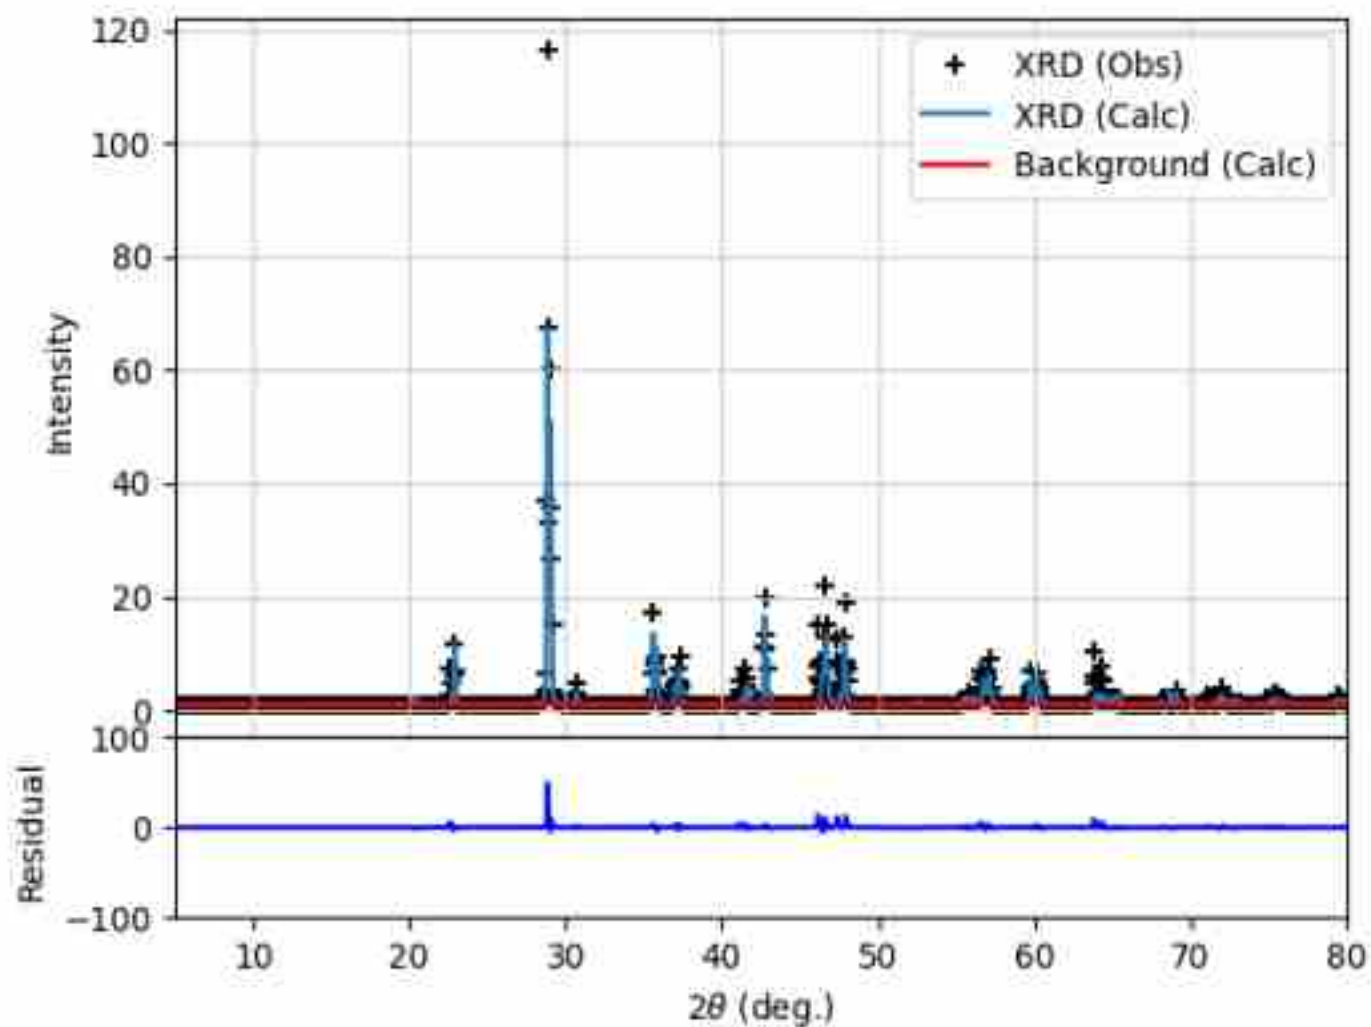

| RMSE before RR | Rwp      | RMSE after RR |
|----------------|----------|---------------|
| 0.225          | 32.65564 | 0.36229       |



# Ce<sub>6</sub>Al<sub>3</sub>Ga<sub>3</sub>Ni<sub>6</sub>

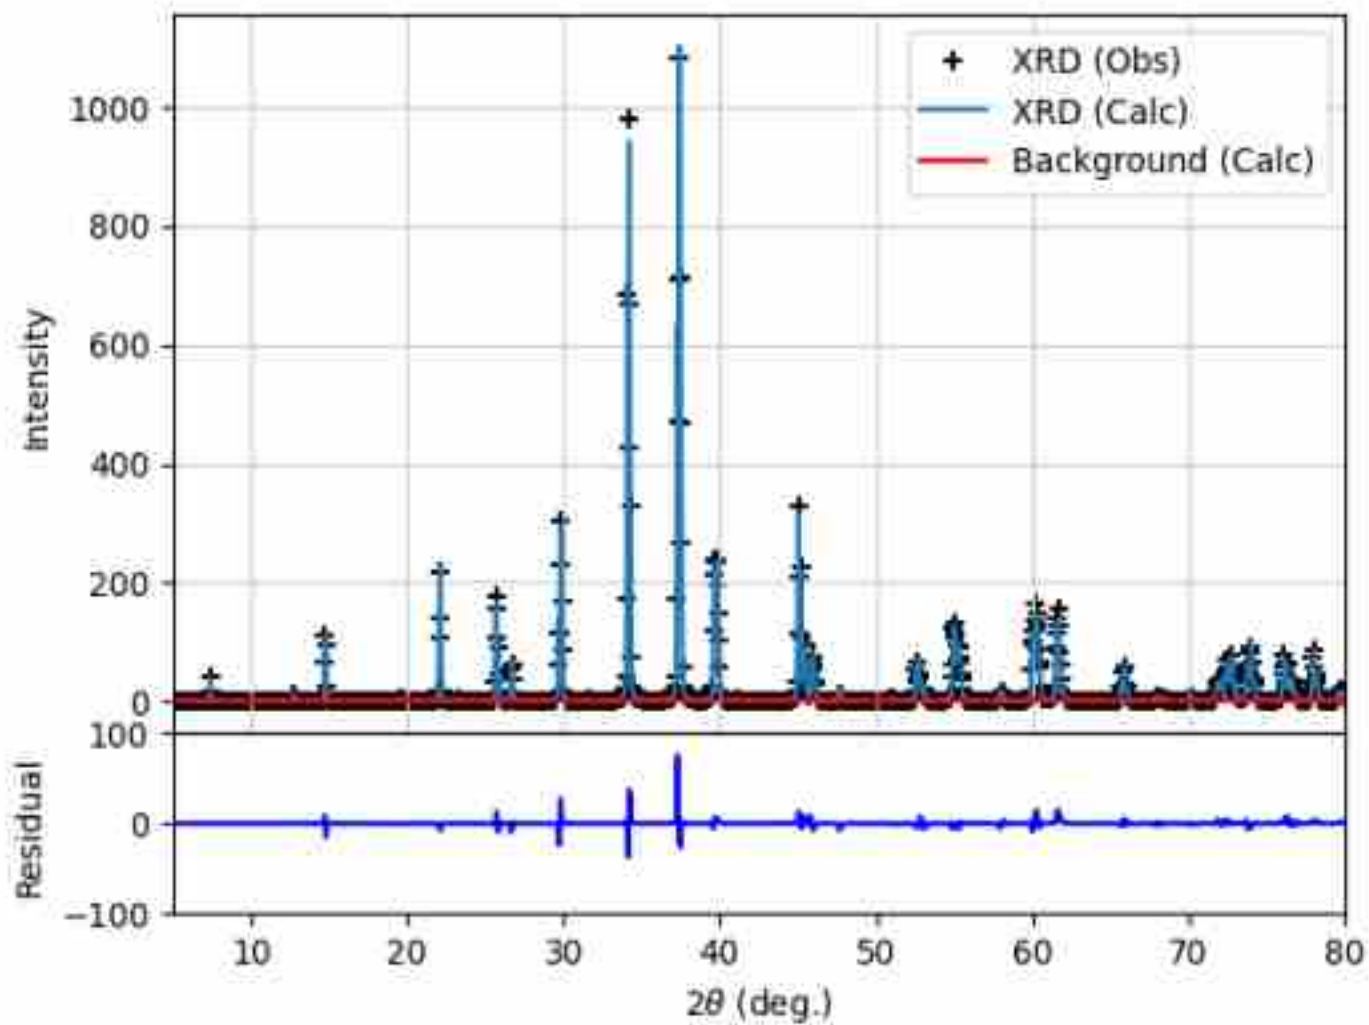

| RMSE before RR | Rwp     | RMSE after RR |
|----------------|---------|---------------|
| 0.225          | 7.42177 | 0.0414        |

# K2Ti2C18

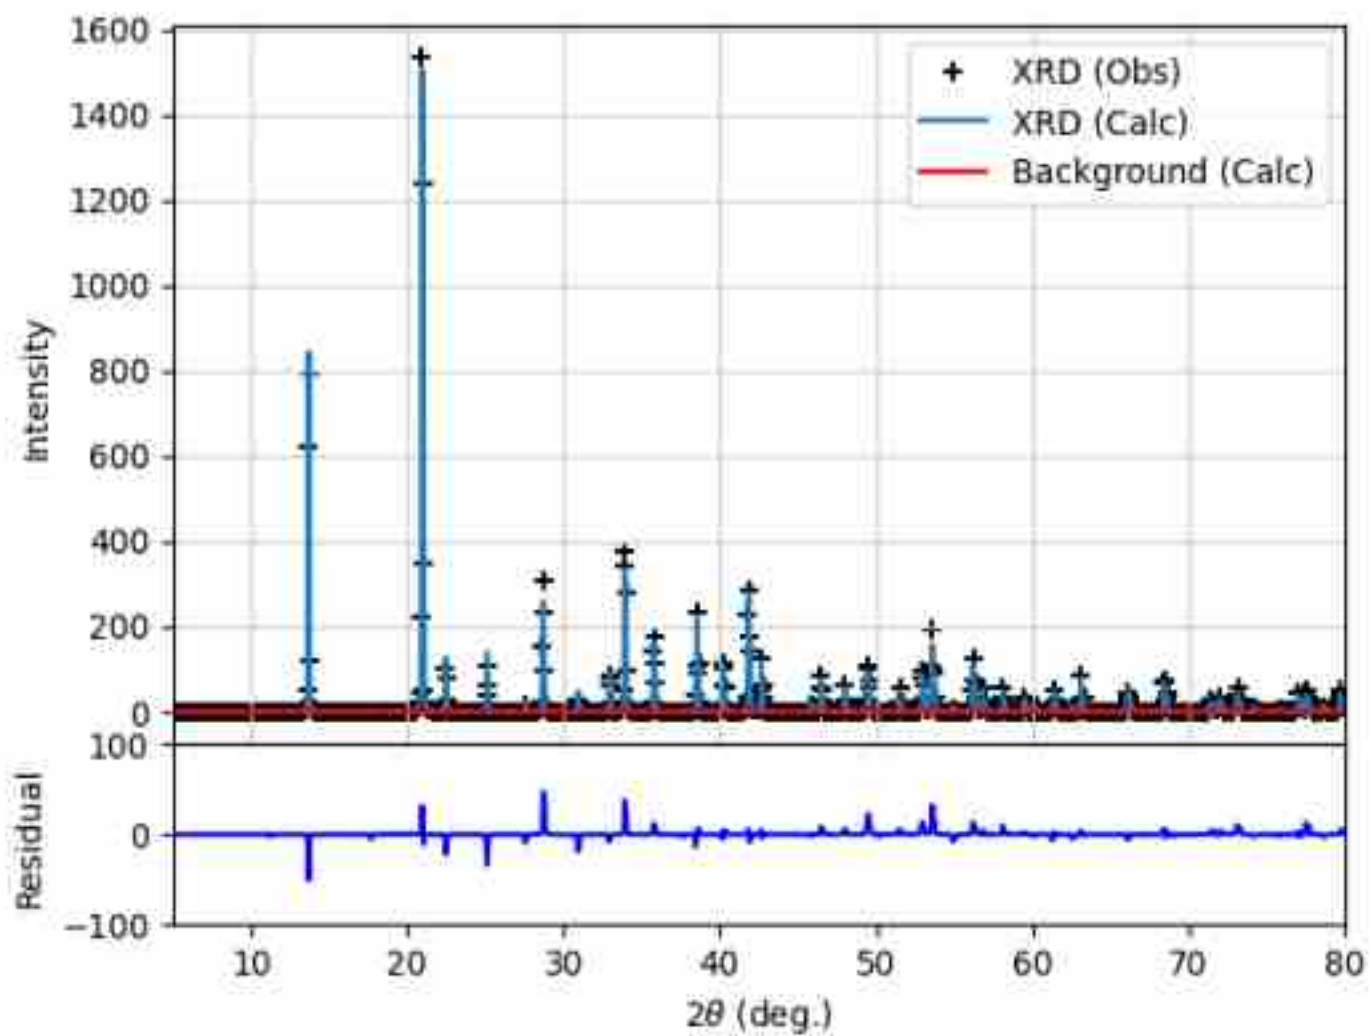

| RMSE before RR | Rwp      | RMSE after RR |
|----------------|----------|---------------|
| 0.225          | 14.10755 | 0.27437       |

# Sr4N4

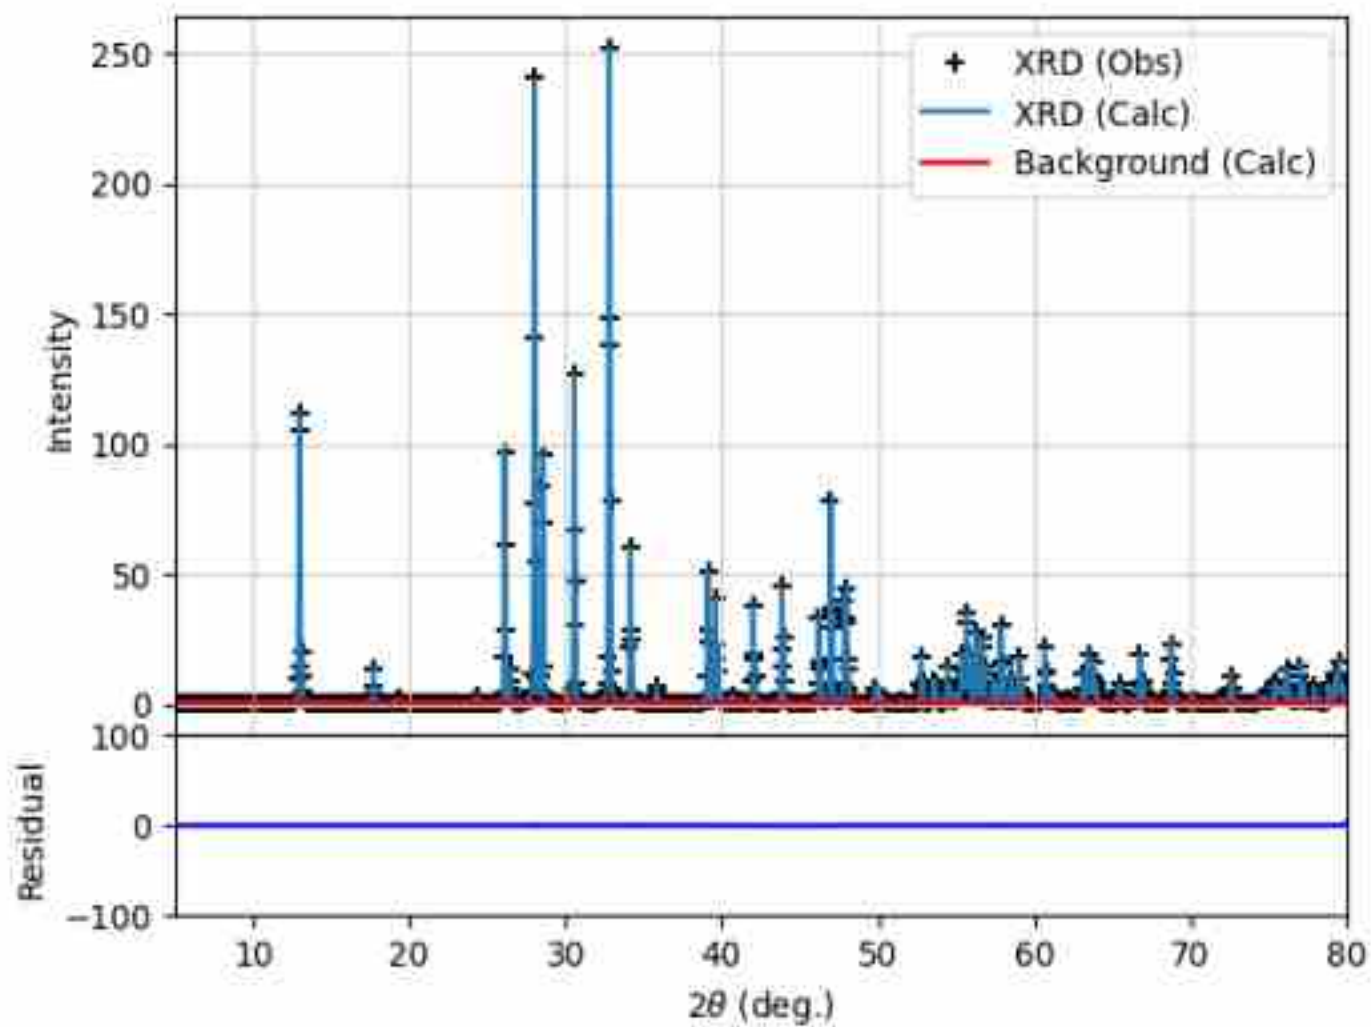

| RMSE before RR | Rwp     | RMSE after RR |
|----------------|---------|---------------|
| 0.225          | 2.04759 | 0.01512       |

# La<sub>4</sub>Y<sub>1</sub>C<sub>10</sub>

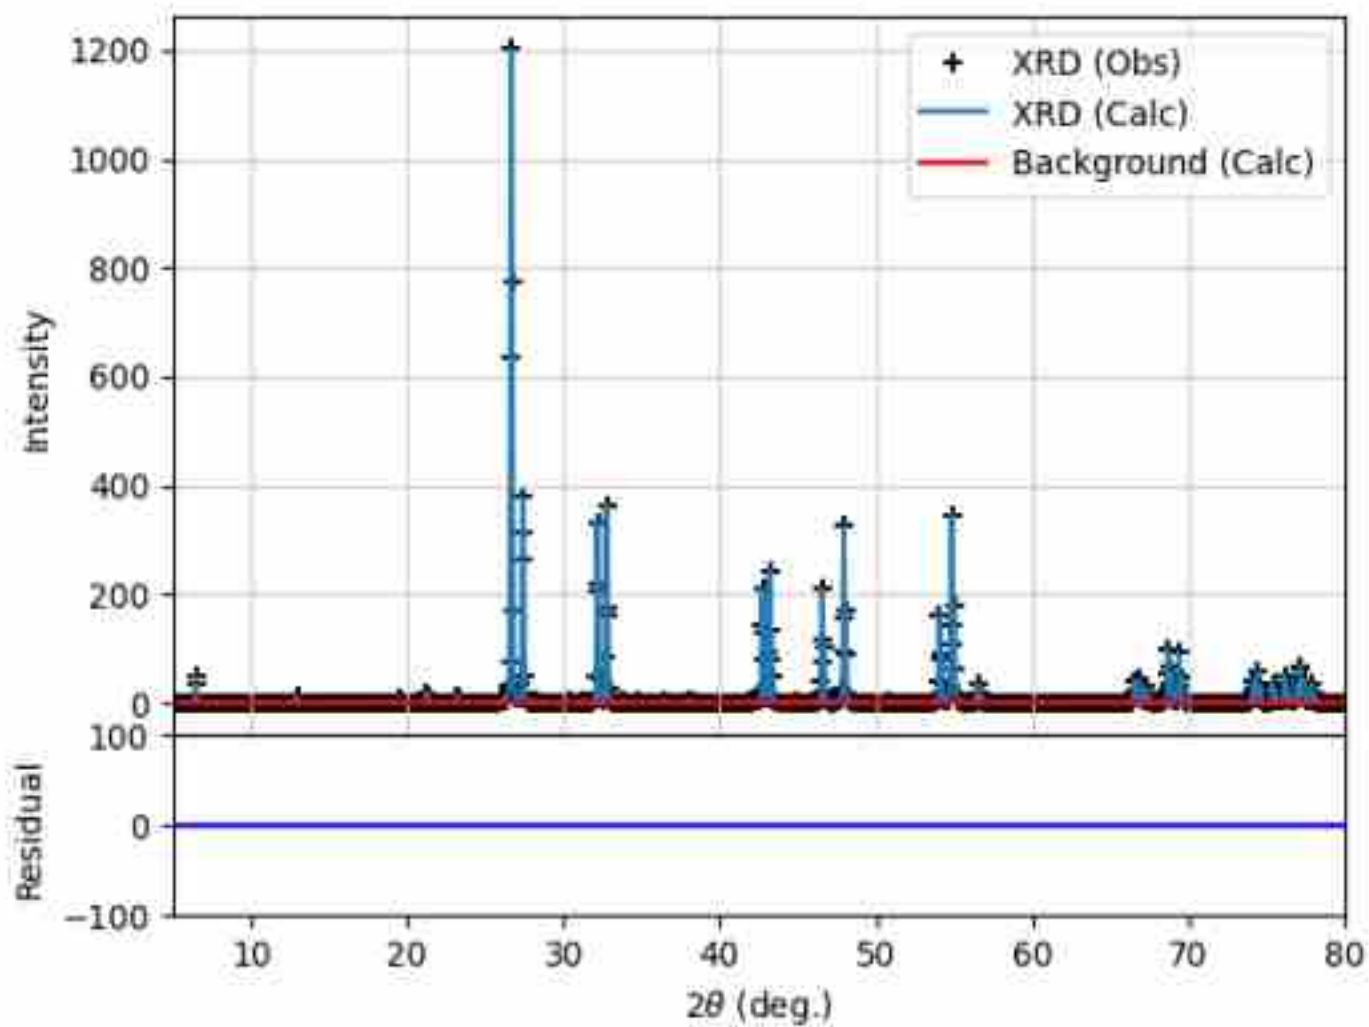

| RMSE before RR | Rwp     | RMSE after RR |
|----------------|---------|---------------|
| 0.226          | 0.00435 | 0.00275       |

# Si4O8

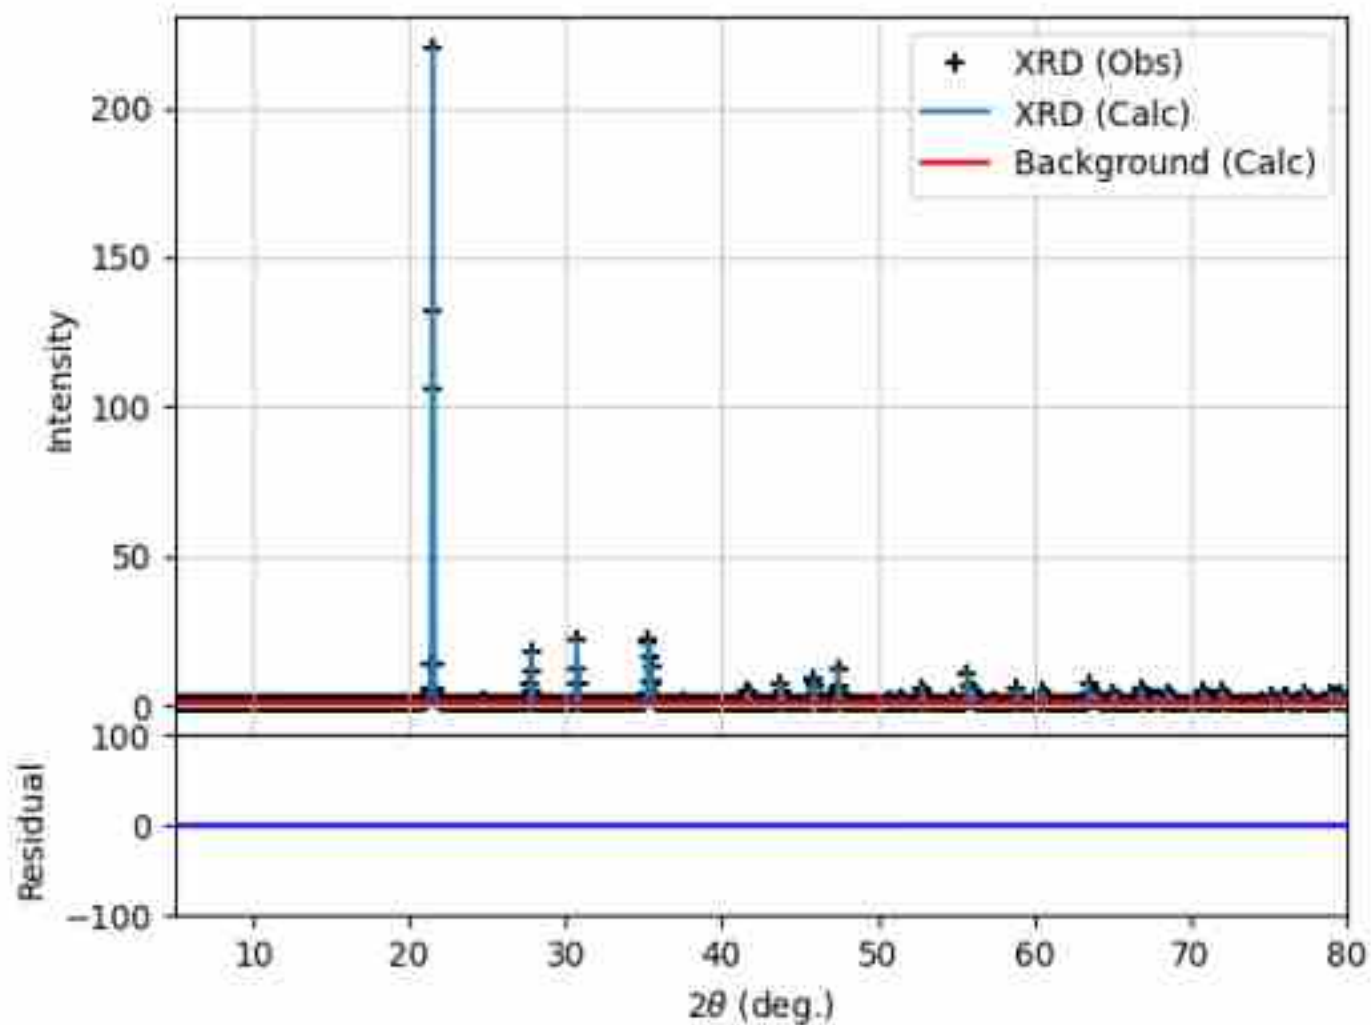

| RMSE before RR | Rwp     | RMSE after RR |
|----------------|---------|---------------|
| 0.226          | 0.25862 | 0.01108       |

# Ba1Sr1Y1Cu4O8

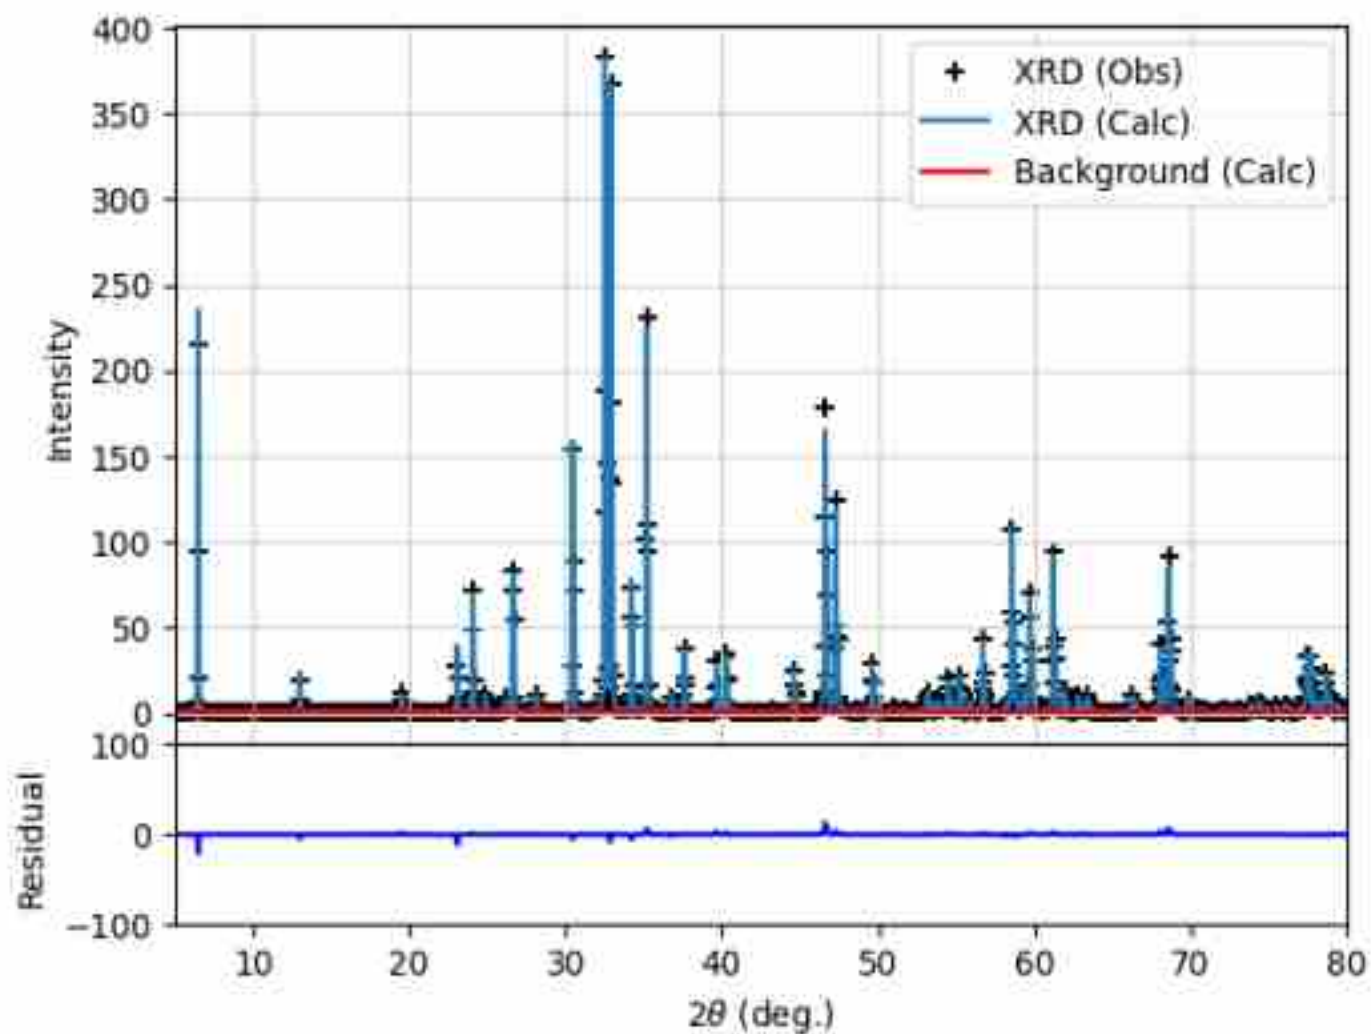

| RMSE before RR | Rwp     | RMSE after RR |
|----------------|---------|---------------|
| 0.227          | 6.05009 | 0.22715       |

# Sr<sub>2</sub>Br<sub>4</sub>O<sub>12</sub>

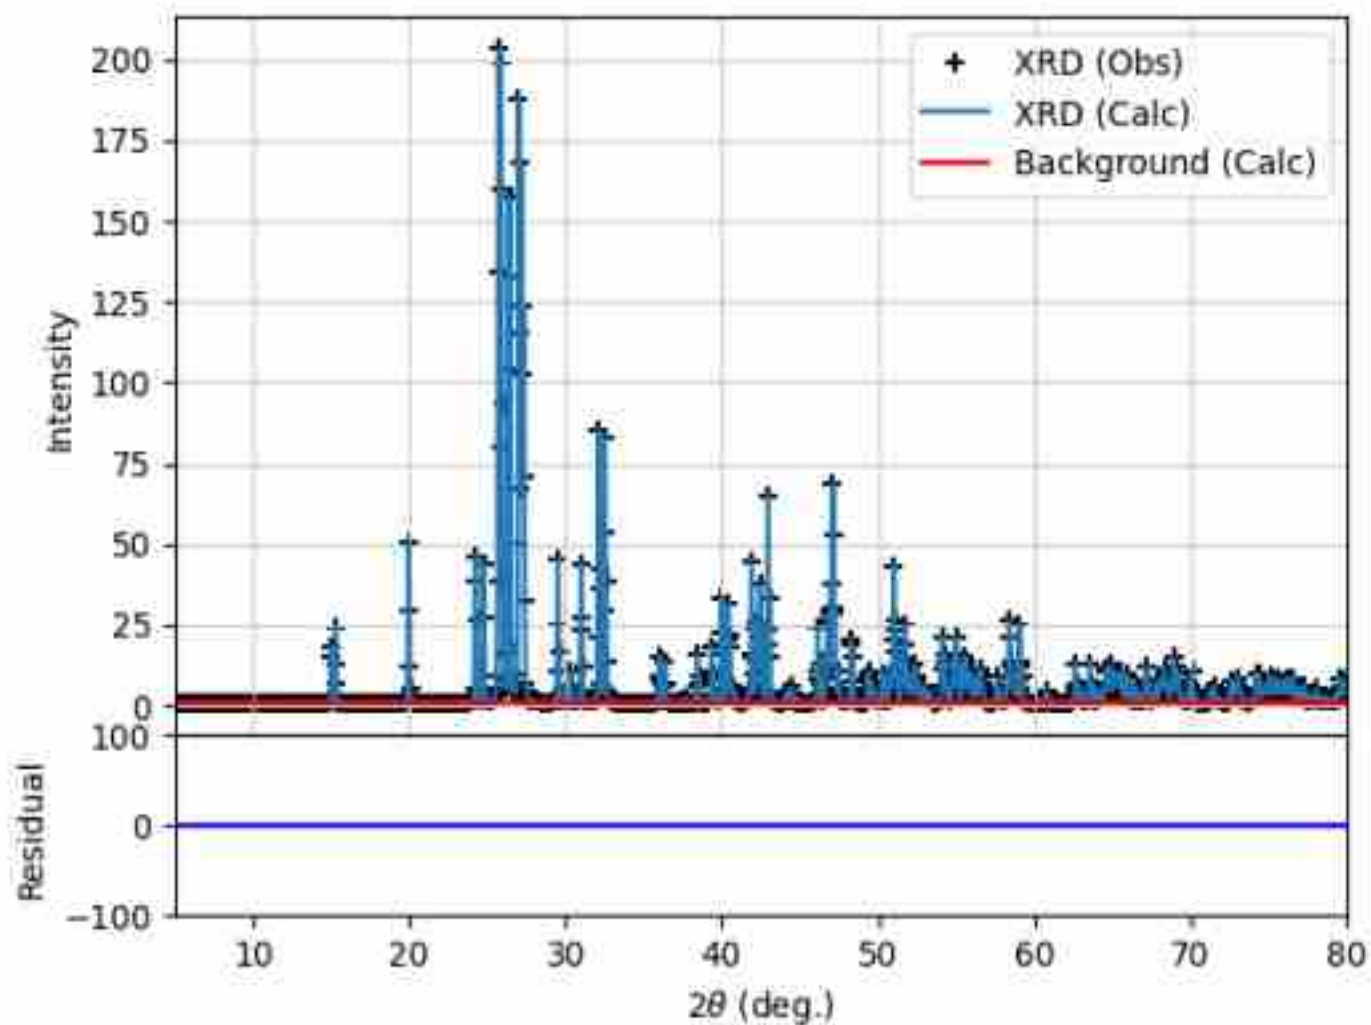

| RMSE before RR | Rwp     | RMSE after RR |
|----------------|---------|---------------|
| 0.227          | 0.00336 | 0.00064       |

# Cs<sub>6</sub>Li<sub>2</sub>F<sub>8</sub>

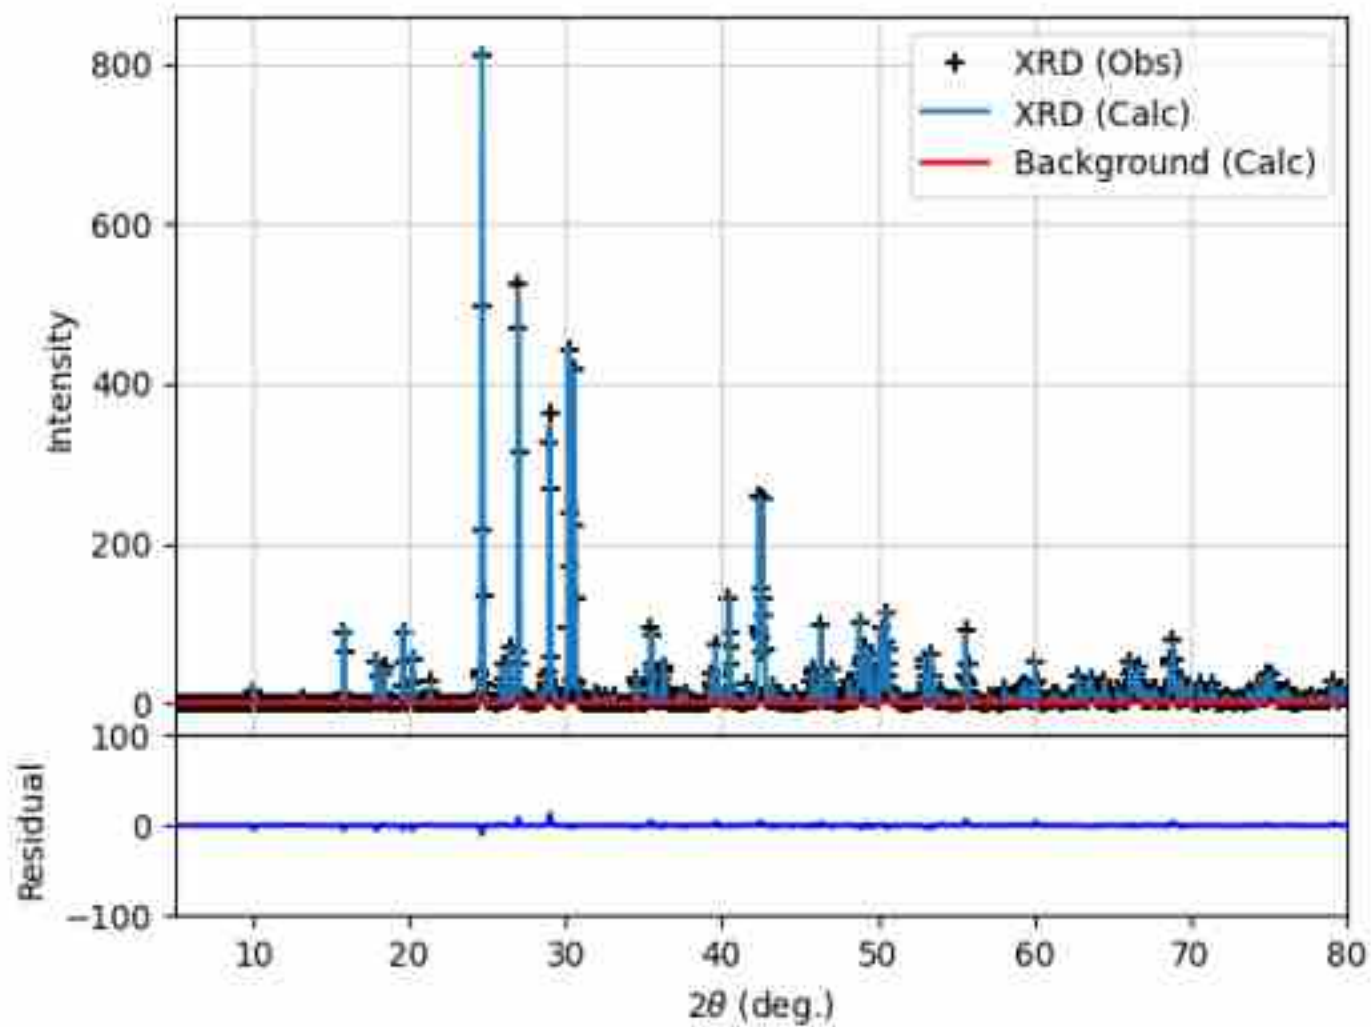

| RMSE before RR | Rwp    | RMSE after RR |
|----------------|--------|---------------|
| 0.228          | 3.5675 | None          |



# Zr<sub>4</sub>Si<sub>3</sub>Sb<sub>5</sub>

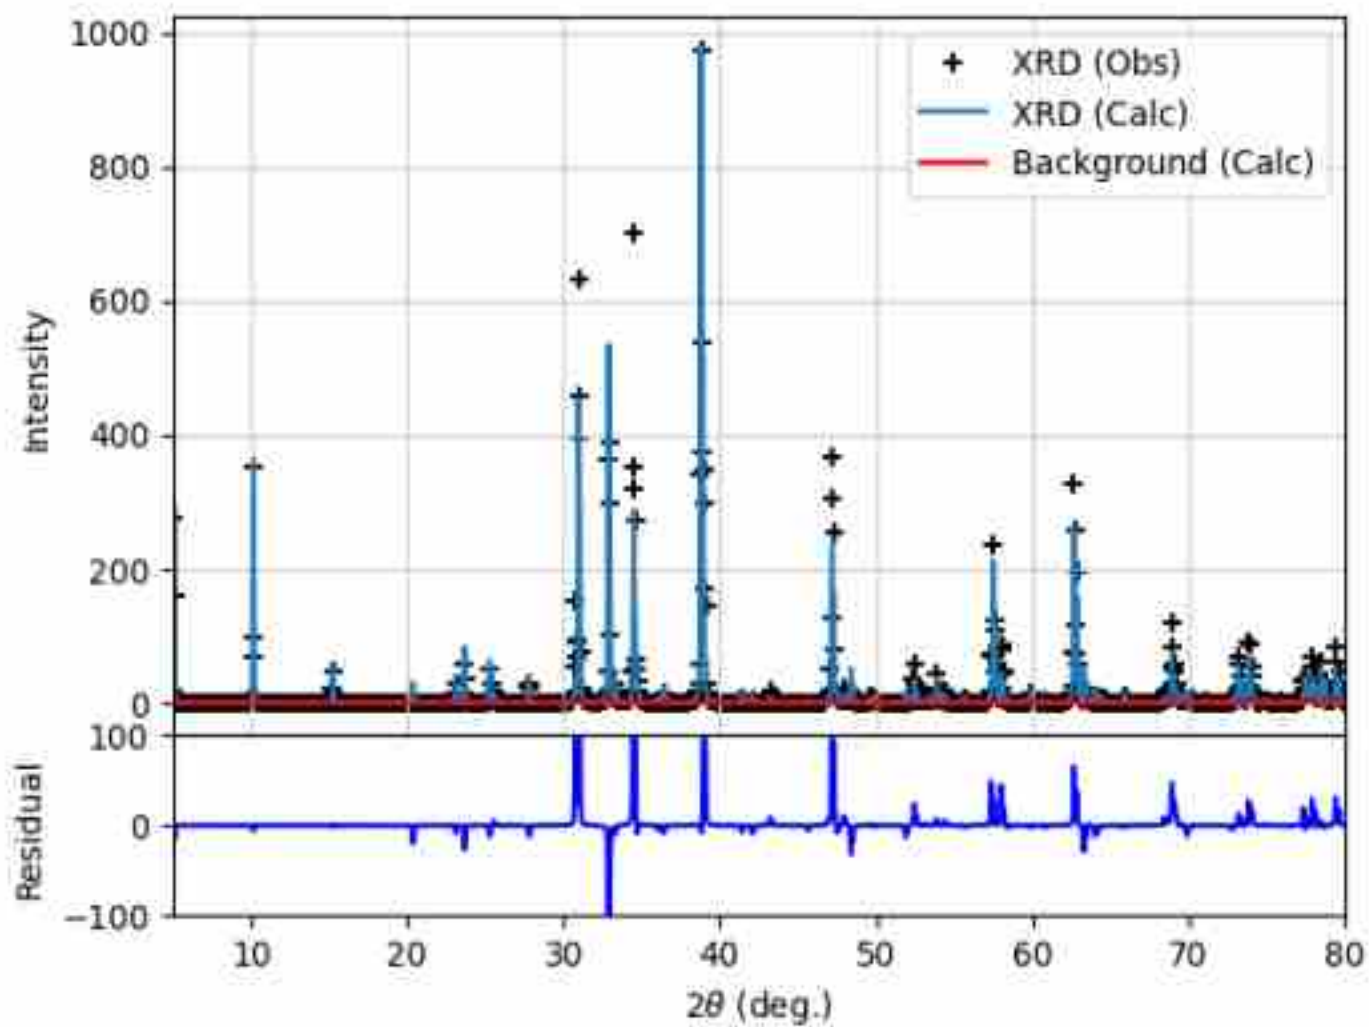

| RMSE before RR | Rwp      | RMSE after RR |
|----------------|----------|---------------|
| 0.228          | 37.84562 | 0.18699       |

# Cs<sub>6</sub>Li<sub>2</sub>I<sub>8</sub>

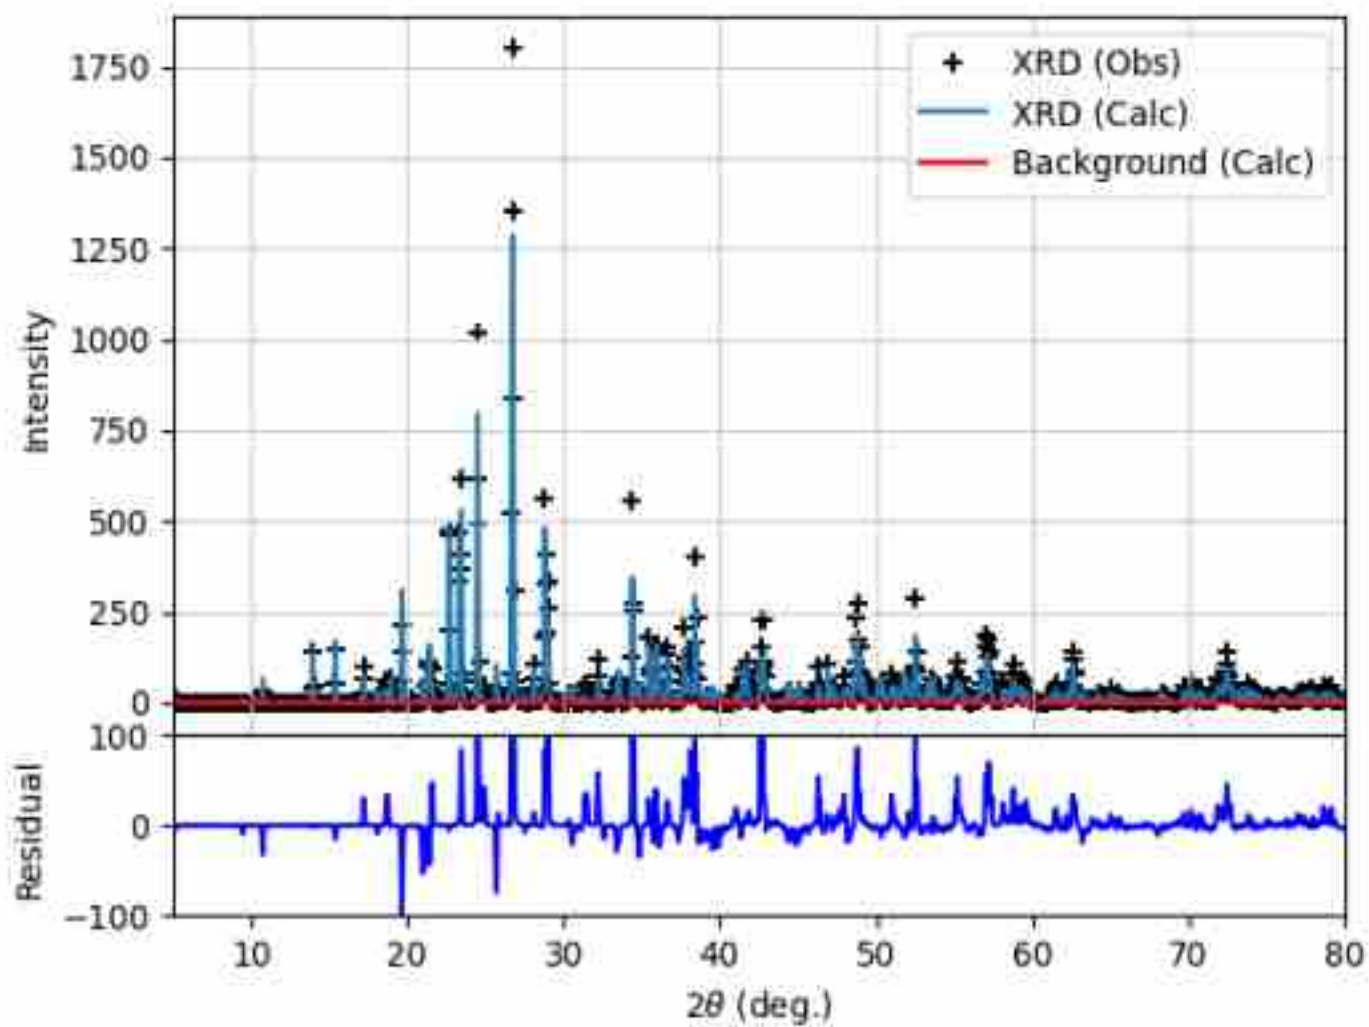

| RMSE before RR | Rwp    | RMSE after RR |
|----------------|--------|---------------|
| 0.229          | 40.277 | None          |

# Mg<sub>4</sub>Sn<sub>2</sub>O<sub>8</sub>

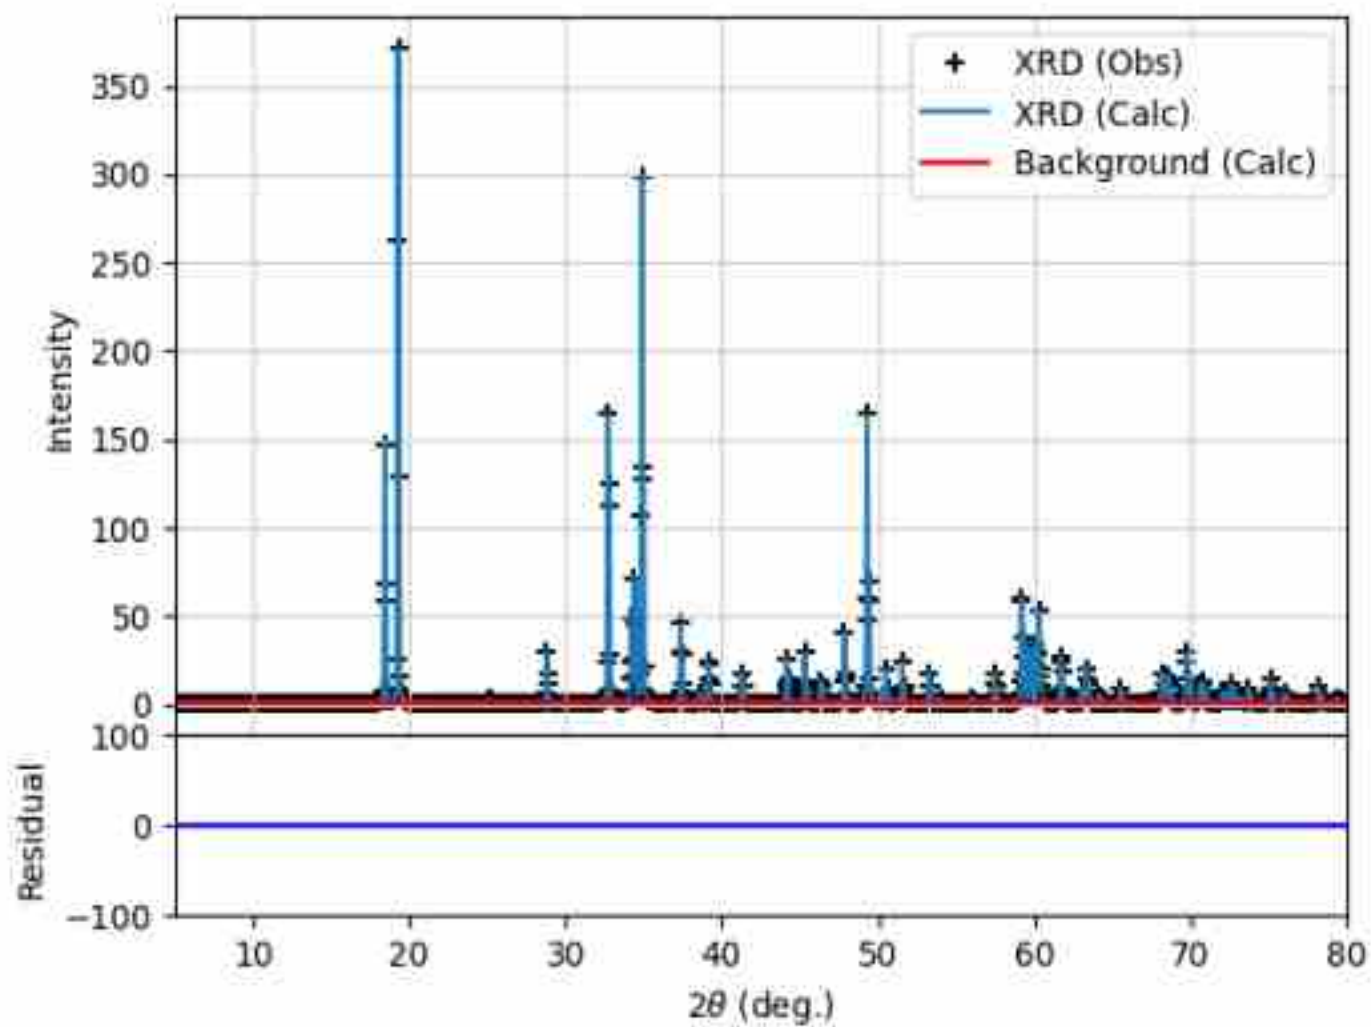

| RMSE before RR | Rwp     | RMSE after RR |
|----------------|---------|---------------|
| 0.229          | 0.00394 | 0.00115       |

# Nb<sub>4</sub>Cu<sub>4</sub>O<sub>12</sub>

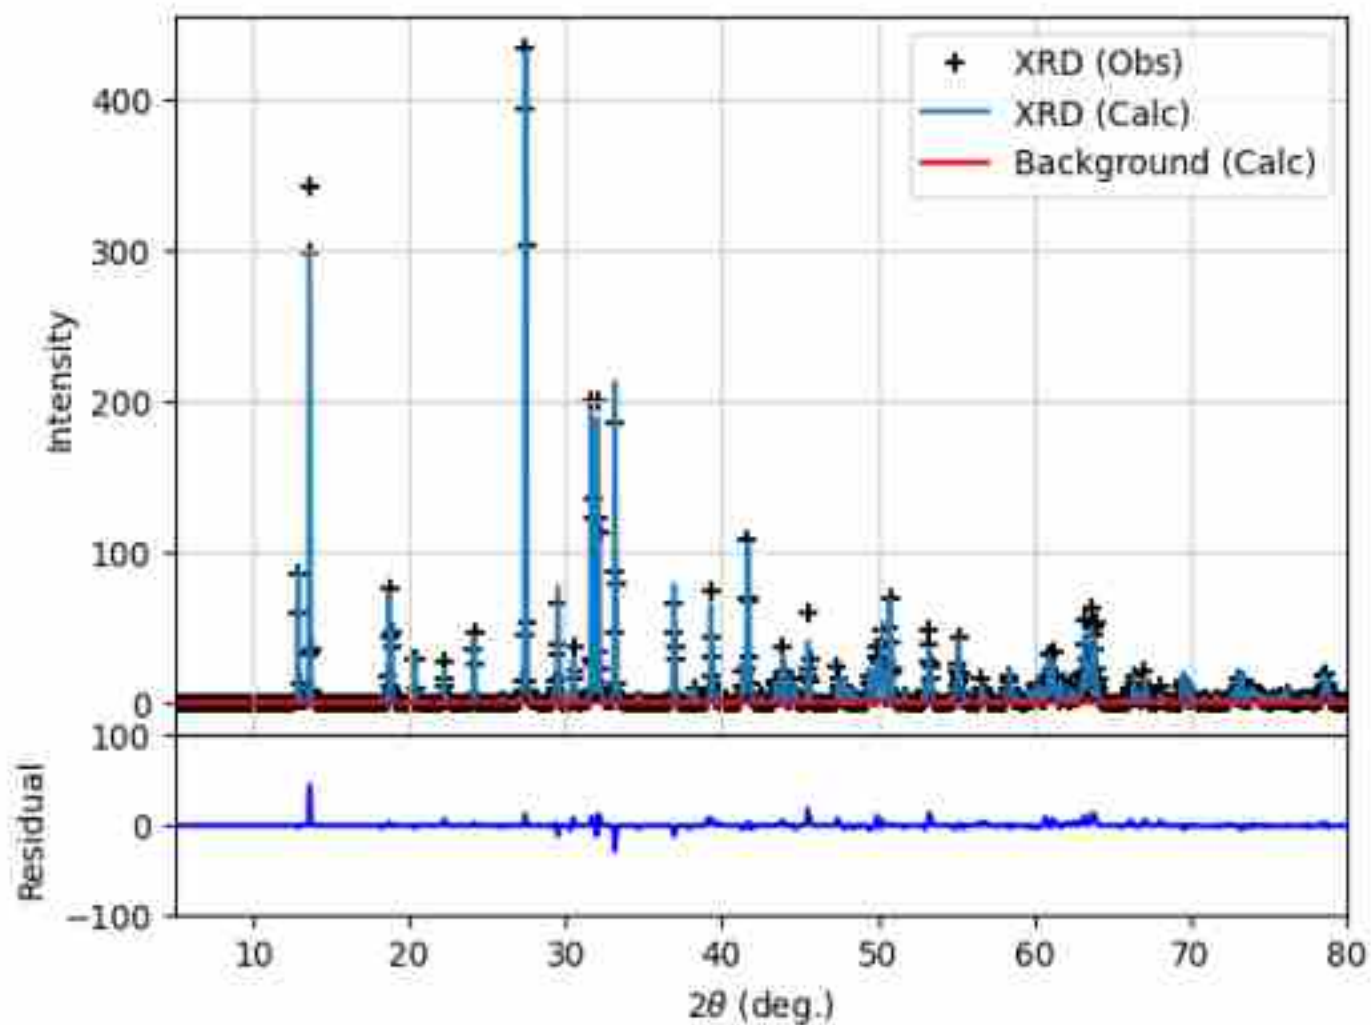

| RMSE before RR | Rwp      | RMSE after RR |
|----------------|----------|---------------|
| 0.229          | 17.67243 | 0.36701       |

# Ag<sub>3</sub>Au<sub>1</sub>S<sub>2</sub>

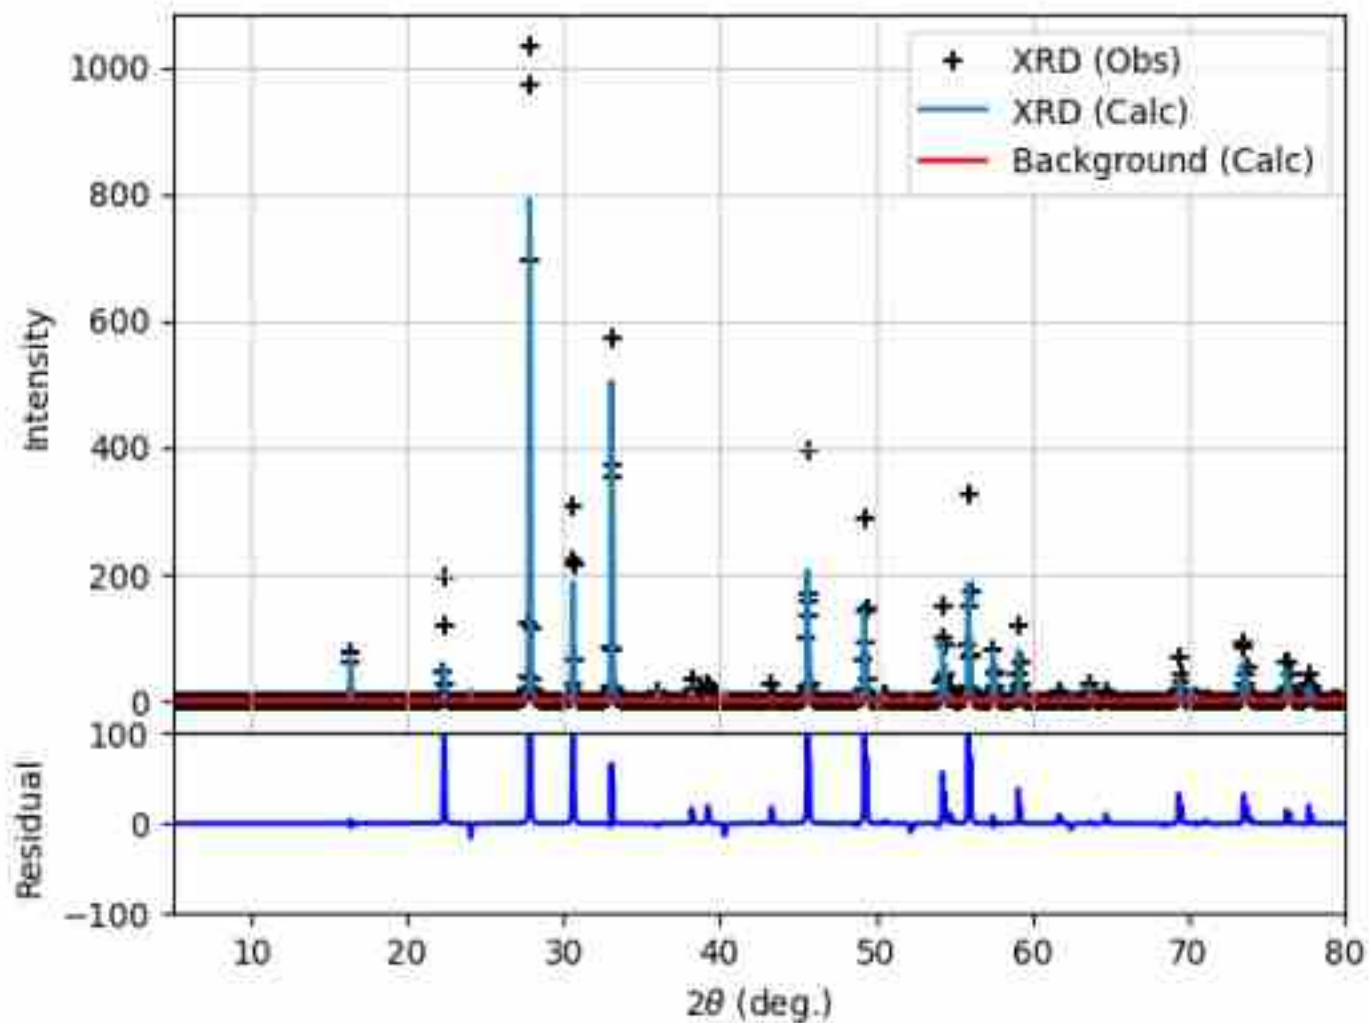

| RMSE before RR | Rwp     | RMSE after RR |
|----------------|---------|---------------|
| 0.231          | 40.5369 | 0.33408       |

# Cs<sub>2</sub>Cd<sub>2</sub>Au<sub>2</sub>S<sub>4</sub>

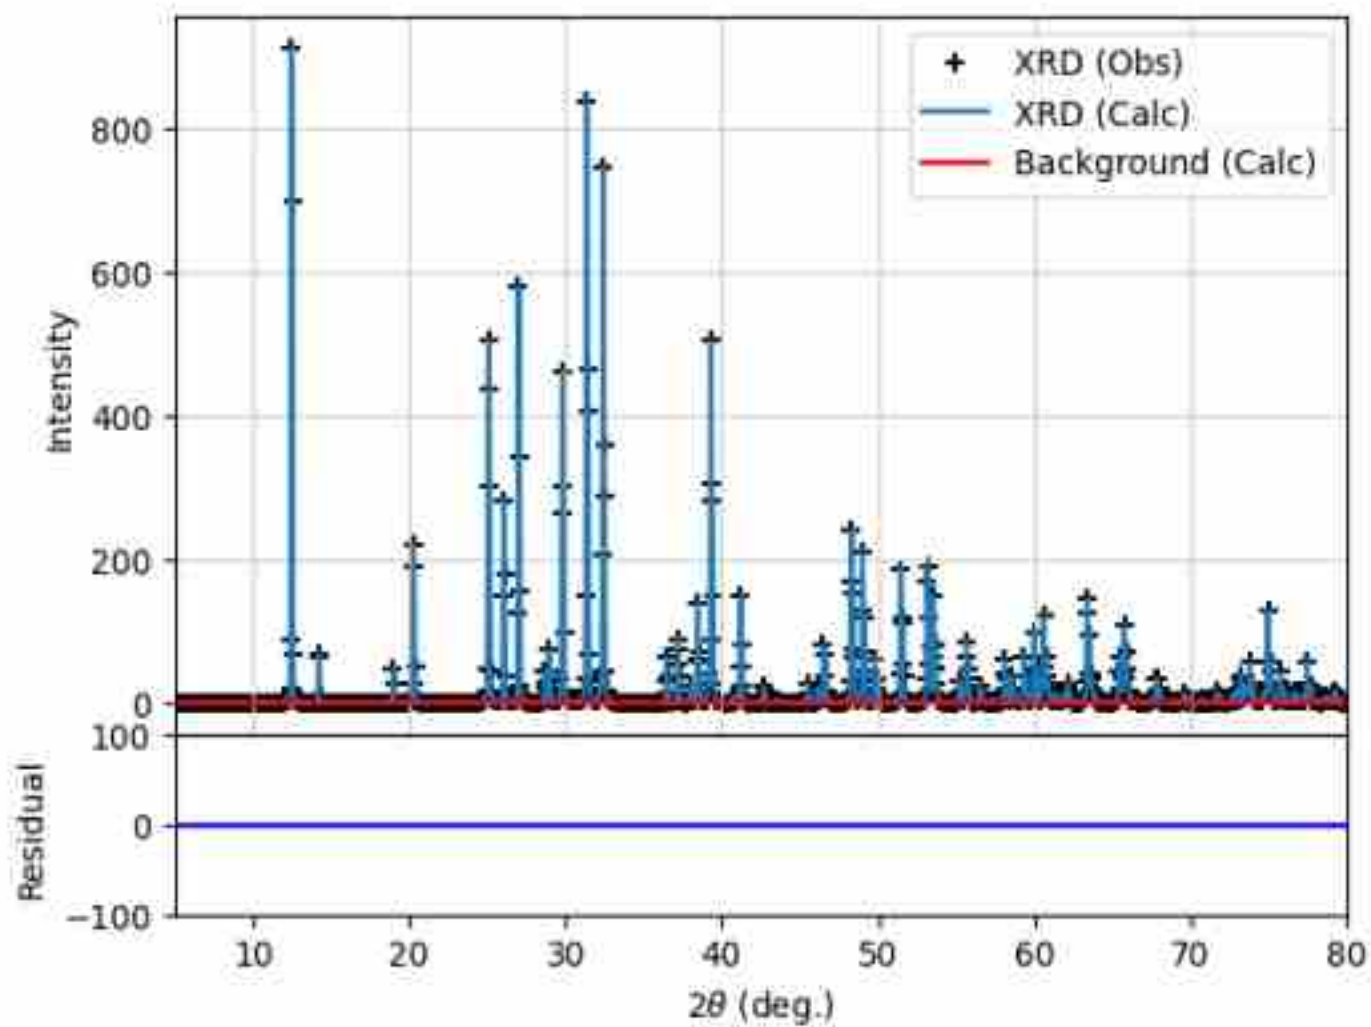

| RMSE before RR | Rwp     | RMSE after RR |
|----------------|---------|---------------|
| 0.231          | 0.00852 | 0.00115       |

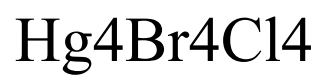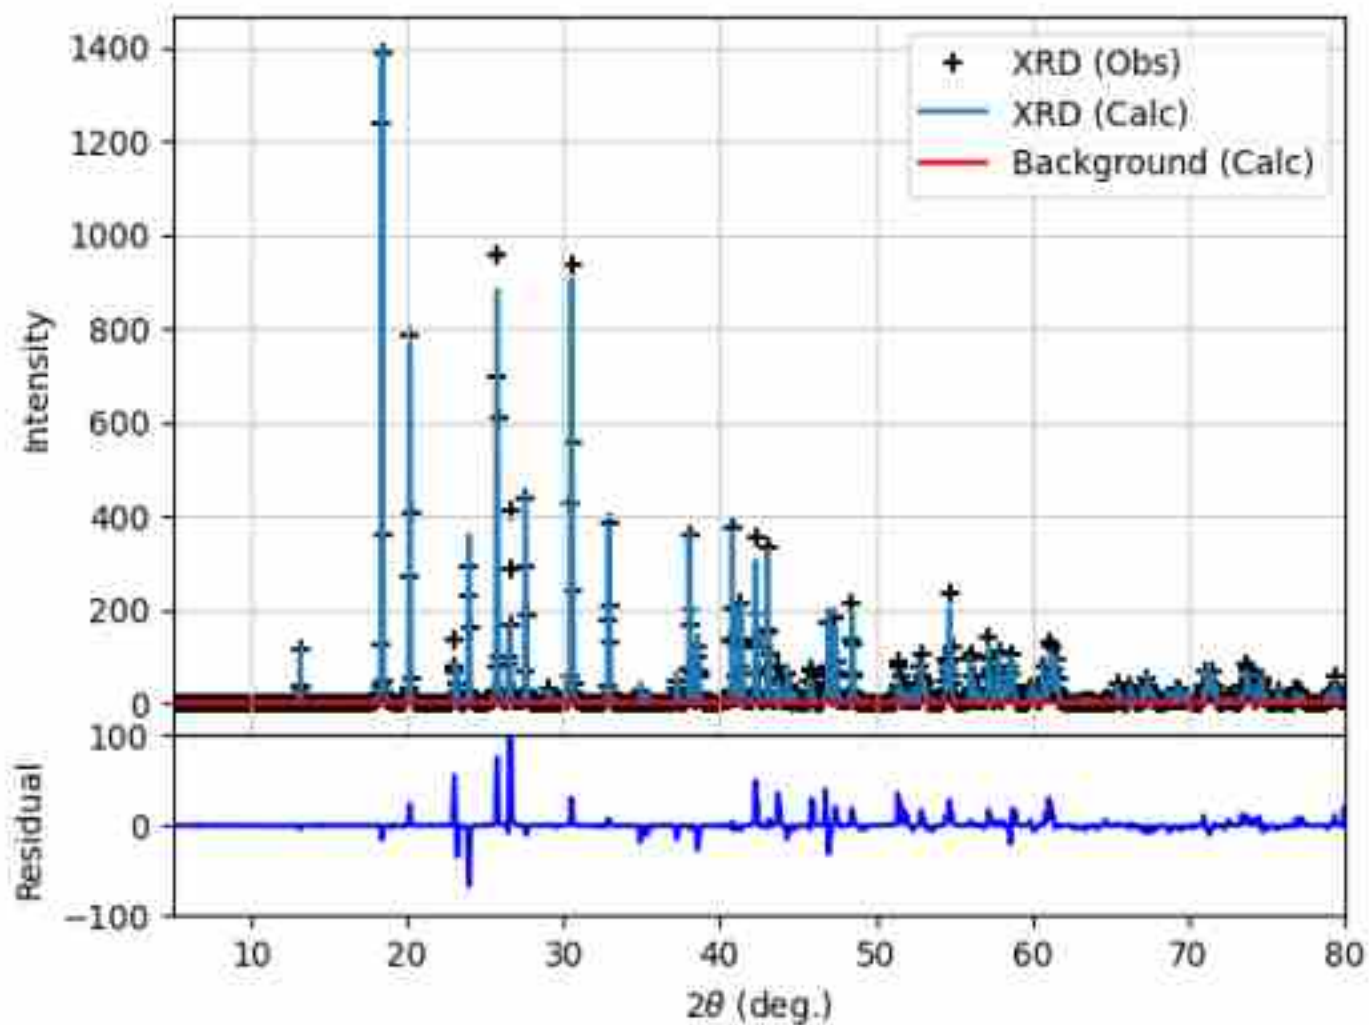

| RMSE before RR | Rwp      | RMSE after RR |
|----------------|----------|---------------|
| 0.231          | 20.04918 | 0.18329       |

# Ba<sub>2</sub>Pr<sub>4</sub>S<sub>8</sub>

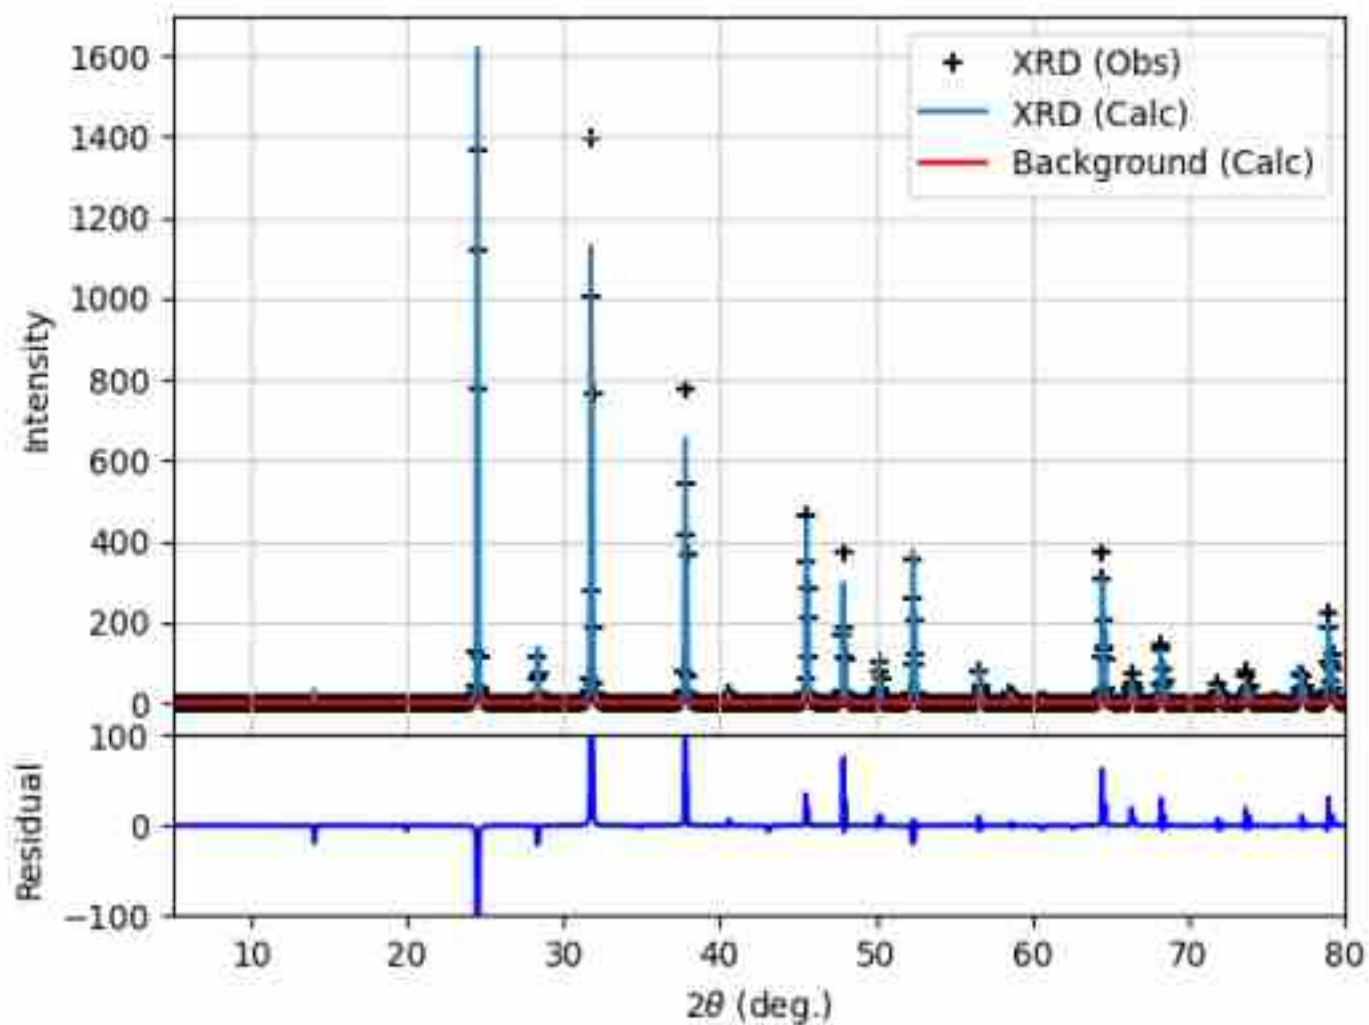

| RMSE before RR | Rwp      | RMSE after RR |
|----------------|----------|---------------|
| 0.232          | 16.97628 | 0.49675       |



# Ge6N8

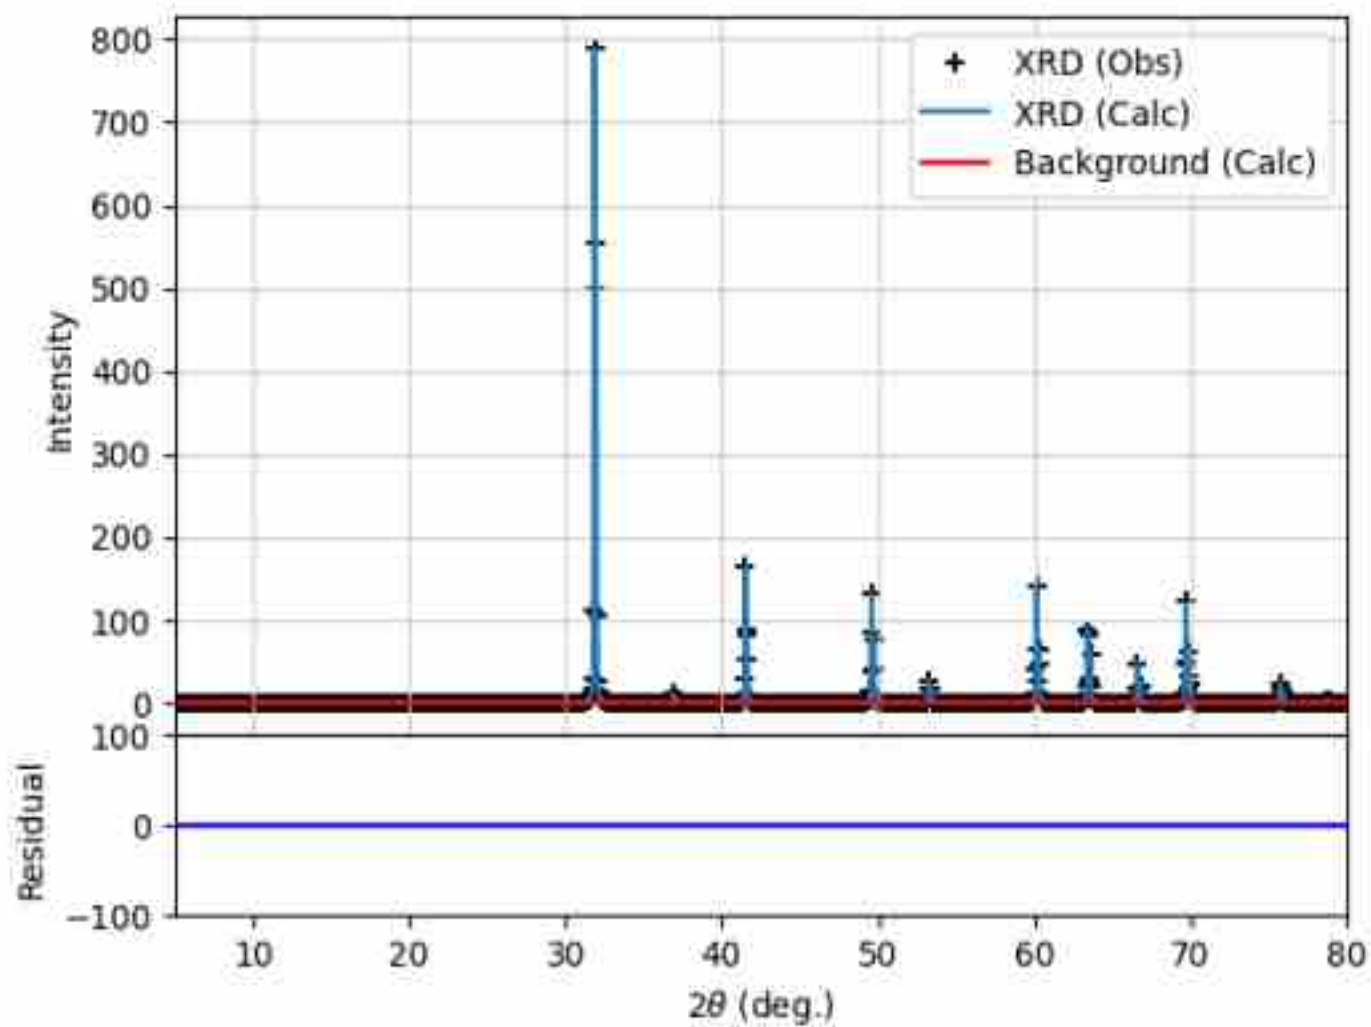

| RMSE before RR | Rwp     | RMSE after RR |
|----------------|---------|---------------|
| 0.232          | 0.00807 | 0.00323       |

# La<sub>4</sub>Ce<sub>2</sub>S<sub>8</sub>

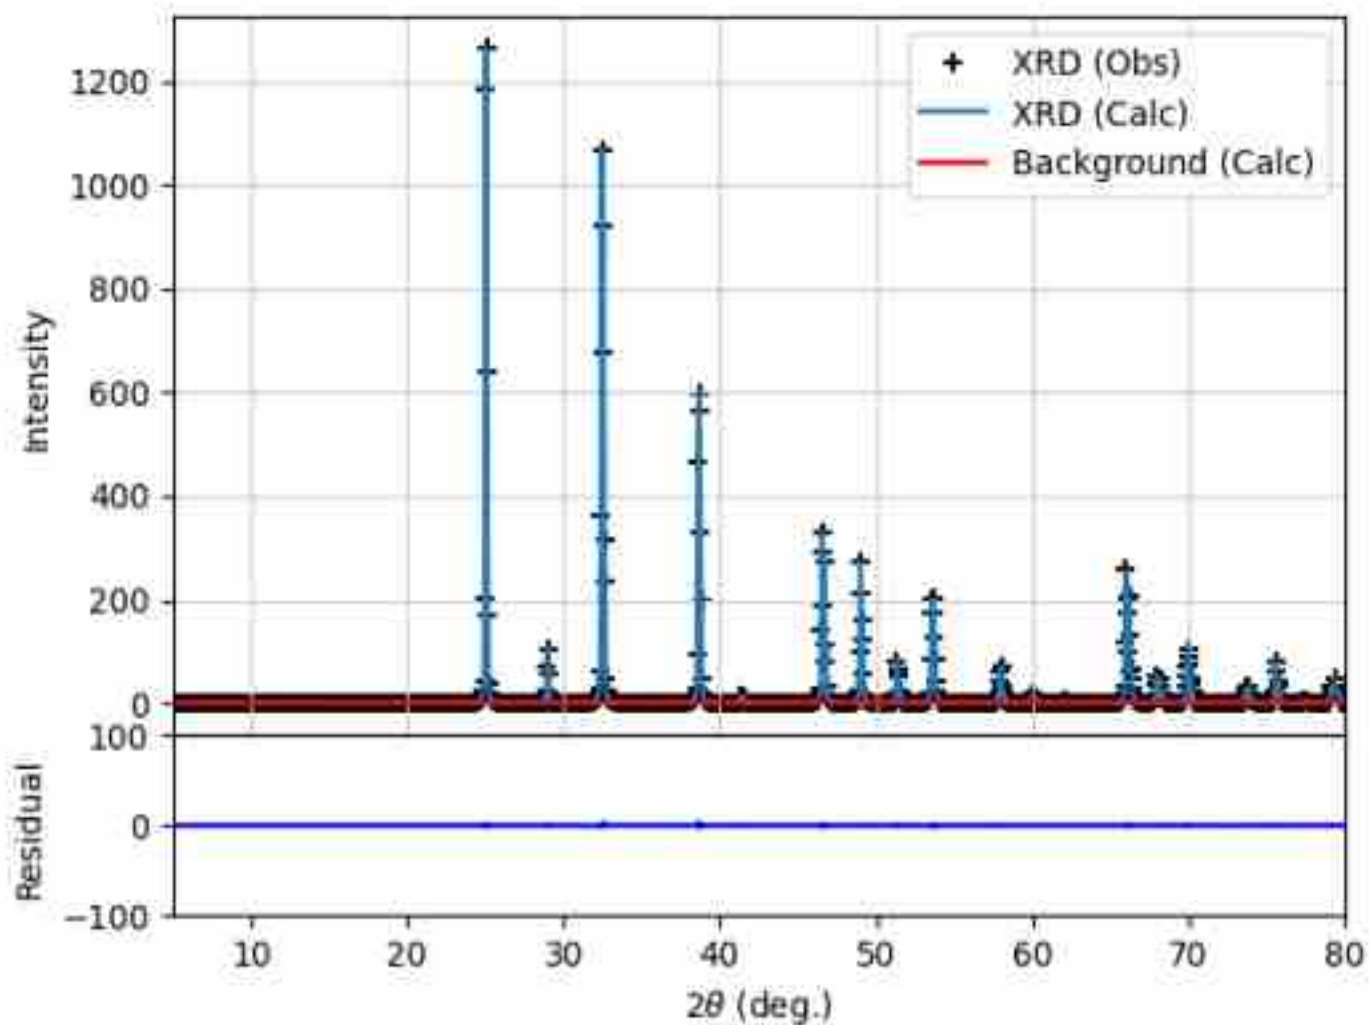

| RMSE before RR | Rwp     | RMSE after RR |
|----------------|---------|---------------|
| 0.232          | 0.56497 | 0.01213       |

# Ag<sub>1</sub>Bi<sub>6</sub>S<sub>9</sub>

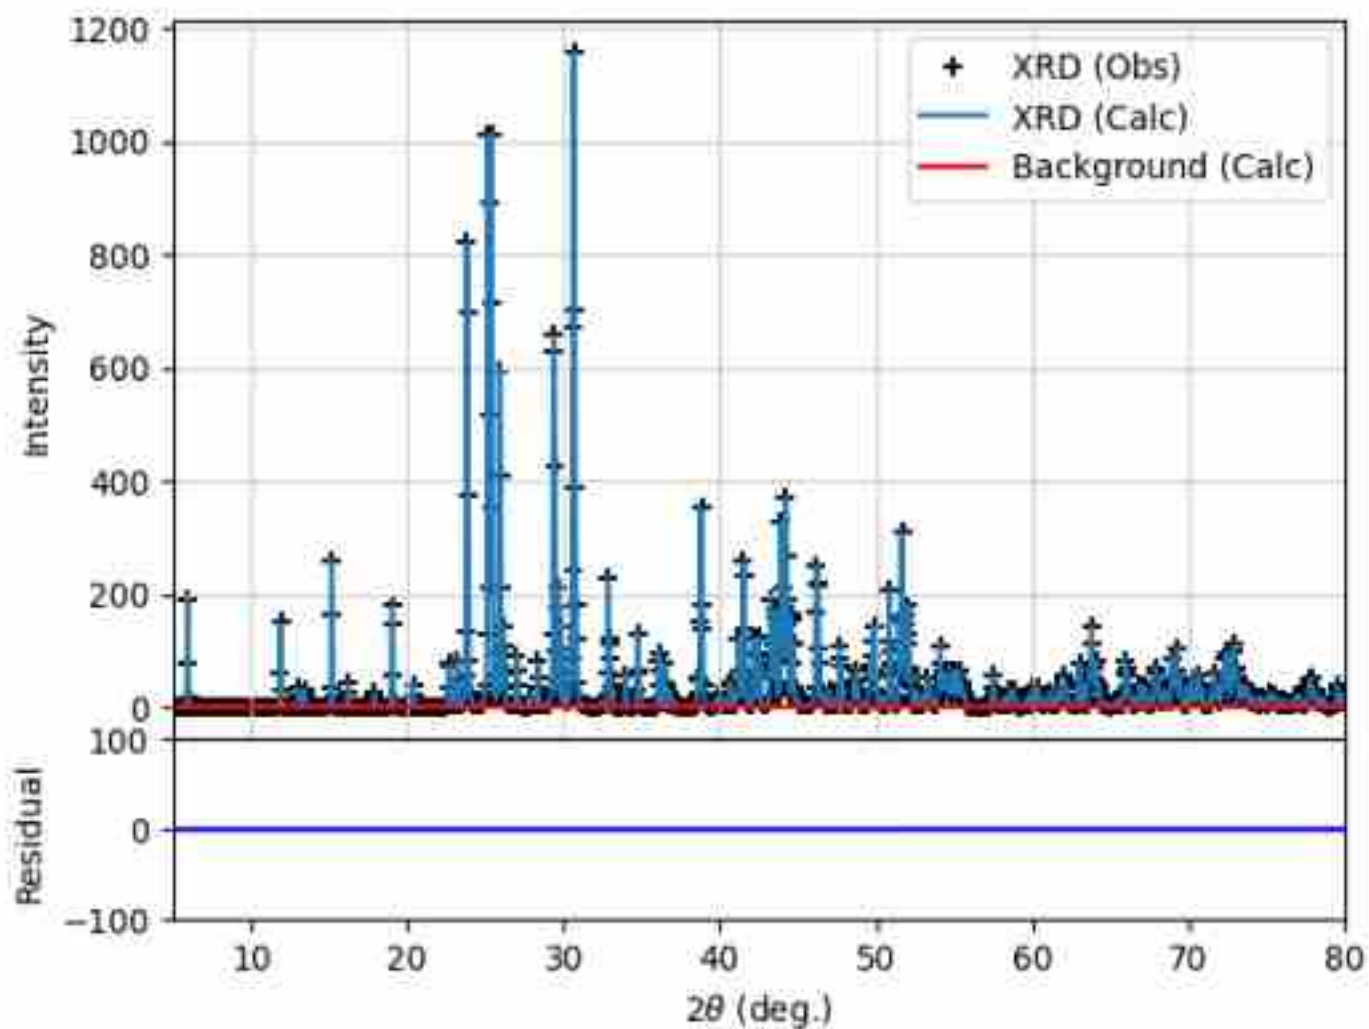

| RMSE before RR | Rwp     | RMSE after RR |
|----------------|---------|---------------|
| 0.234          | 0.02735 | 0.00395       |

# Na<sub>8</sub>Zn<sub>4</sub>O<sub>8</sub>

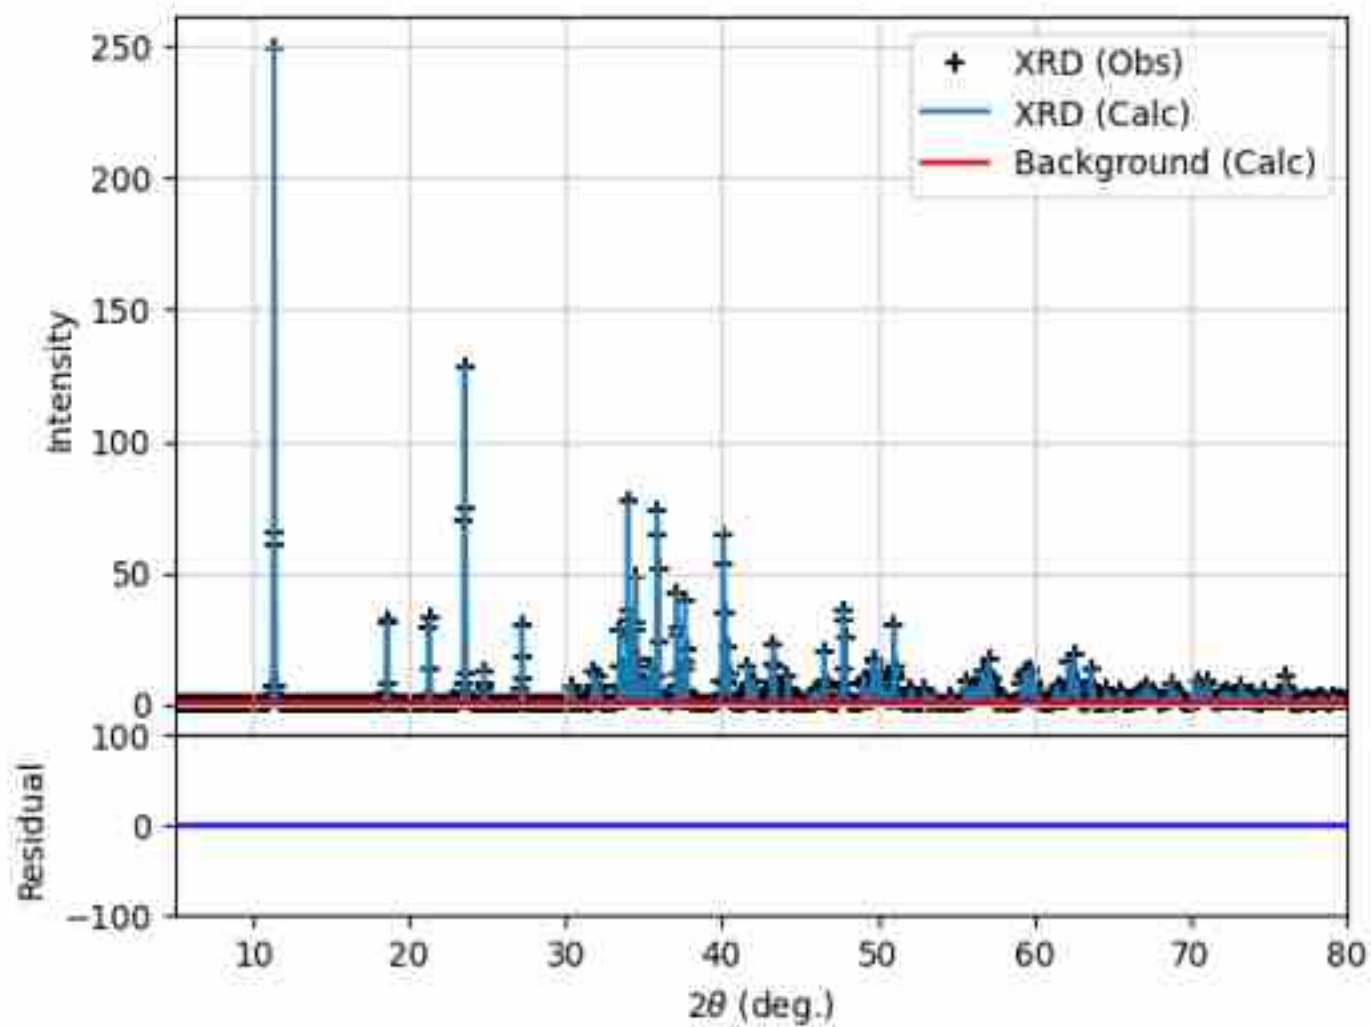

| RMSE before RR | Rwp     | RMSE after RR |
|----------------|---------|---------------|
| 0.235          | 0.00299 | 0.00044       |

# U2W8C8

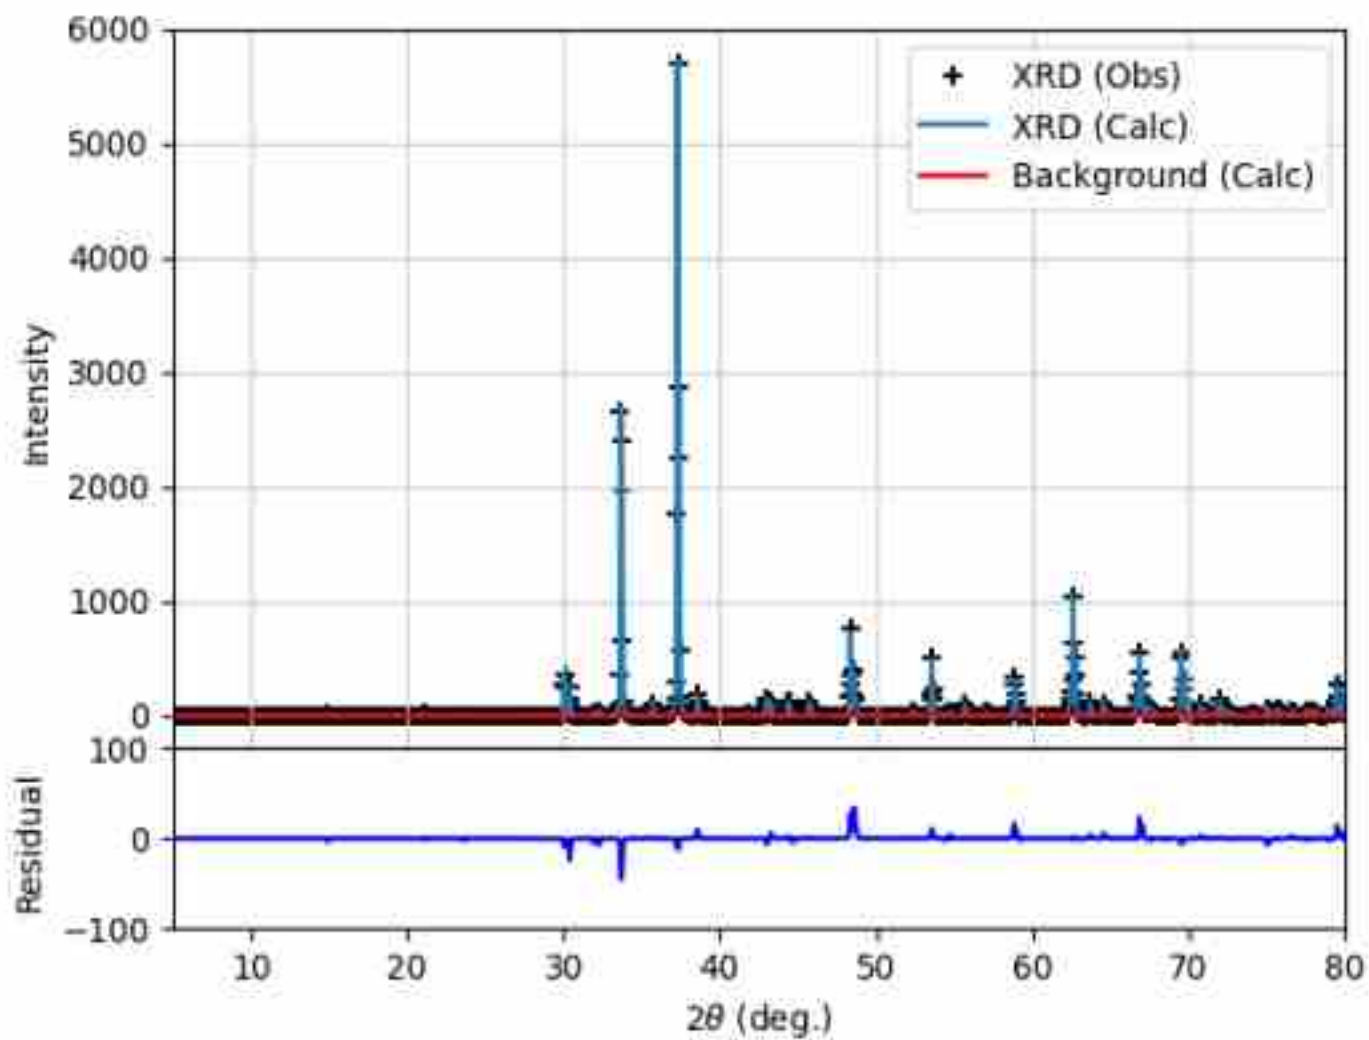

| RMSE before RR | Rwp     | RMSE after RR |
|----------------|---------|---------------|
| 0.235          | 3.45936 | 0.36719       |

# Cd4P8

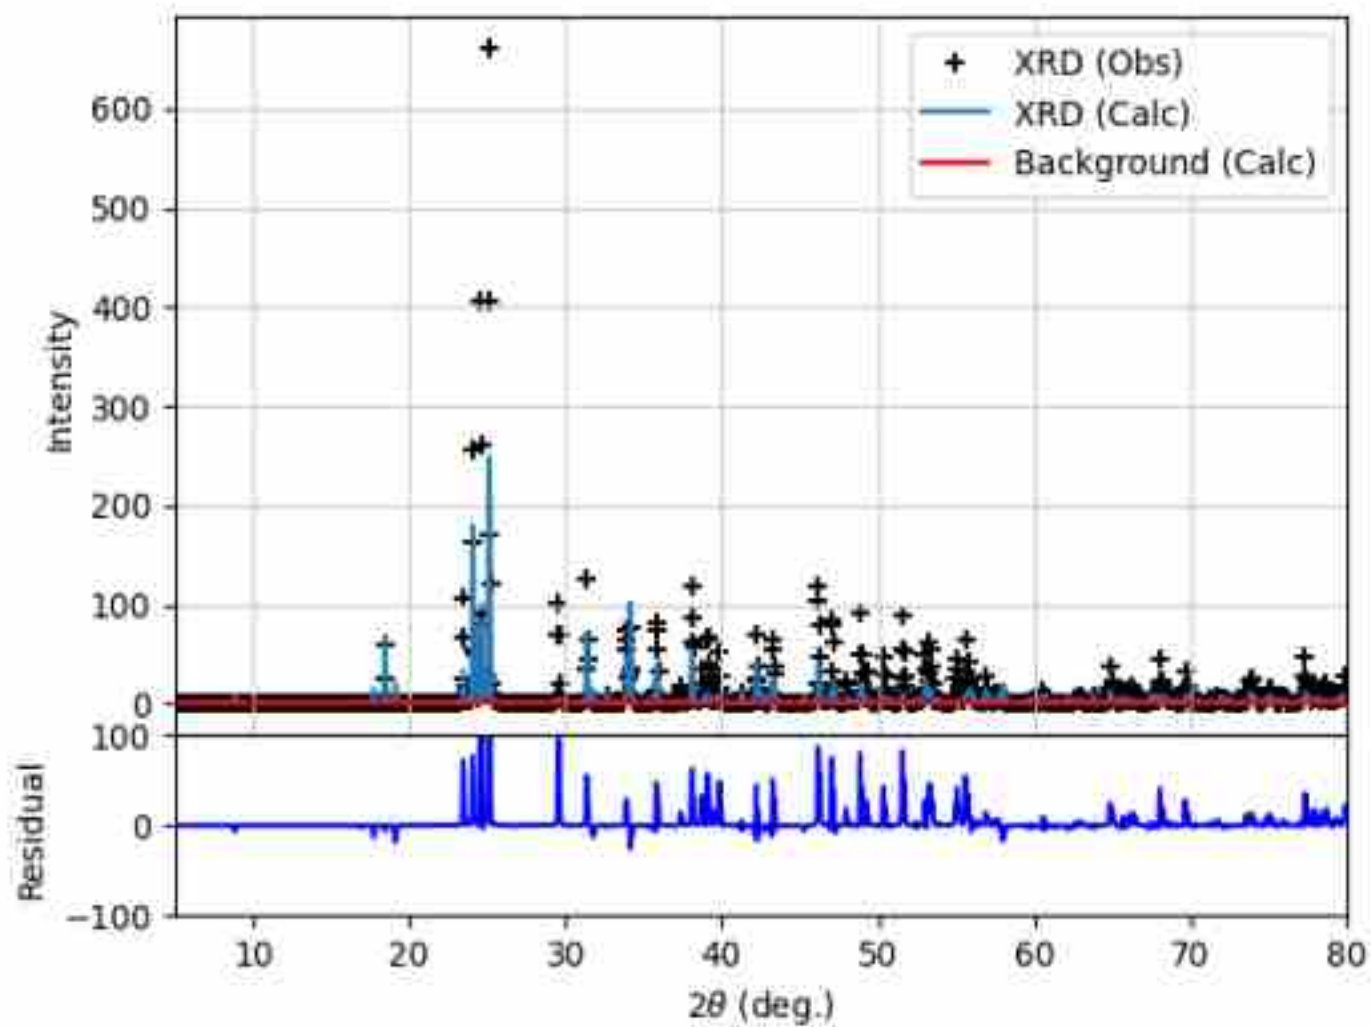

| RMSE before RR | Rwp     | RMSE after RR |
|----------------|---------|---------------|
| 0.236          | 68.7811 | 0.42674       |

# Sr4Co2O8

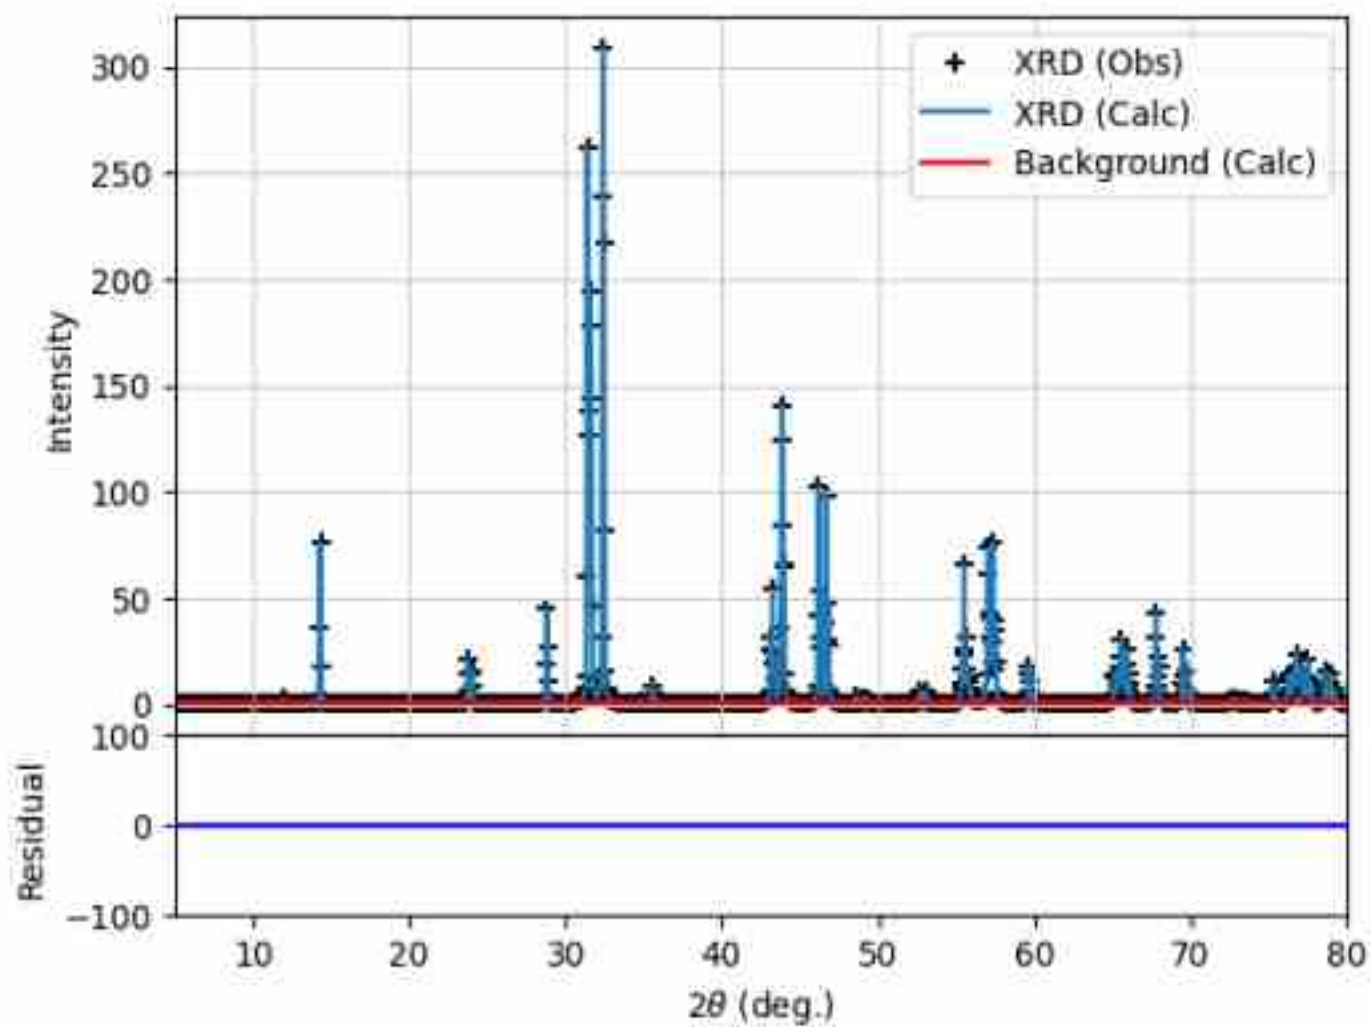

| RMSE before RR | Rwp     | RMSE after RR |
|----------------|---------|---------------|
| 0.236          | 0.03393 | None          |

# Sn2O2

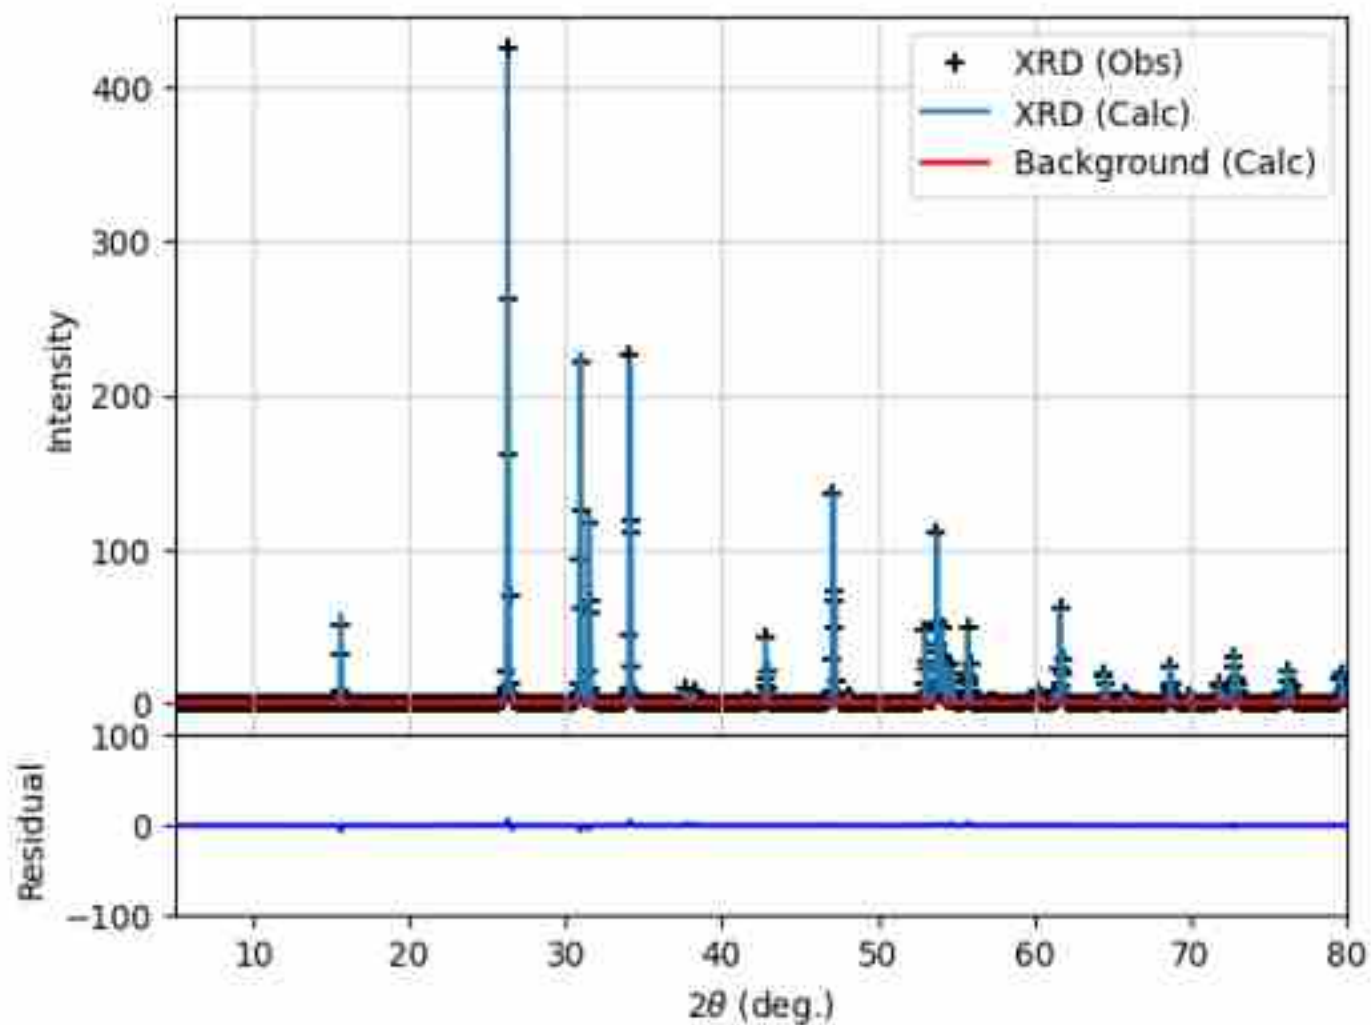

| RMSE before RR | Rwp     | RMSE after RR |
|----------------|---------|---------------|
| 0.237          | 4.54748 | 0.28362       |



# La<sub>8</sub>Sn<sub>2</sub>Sb<sub>4</sub>

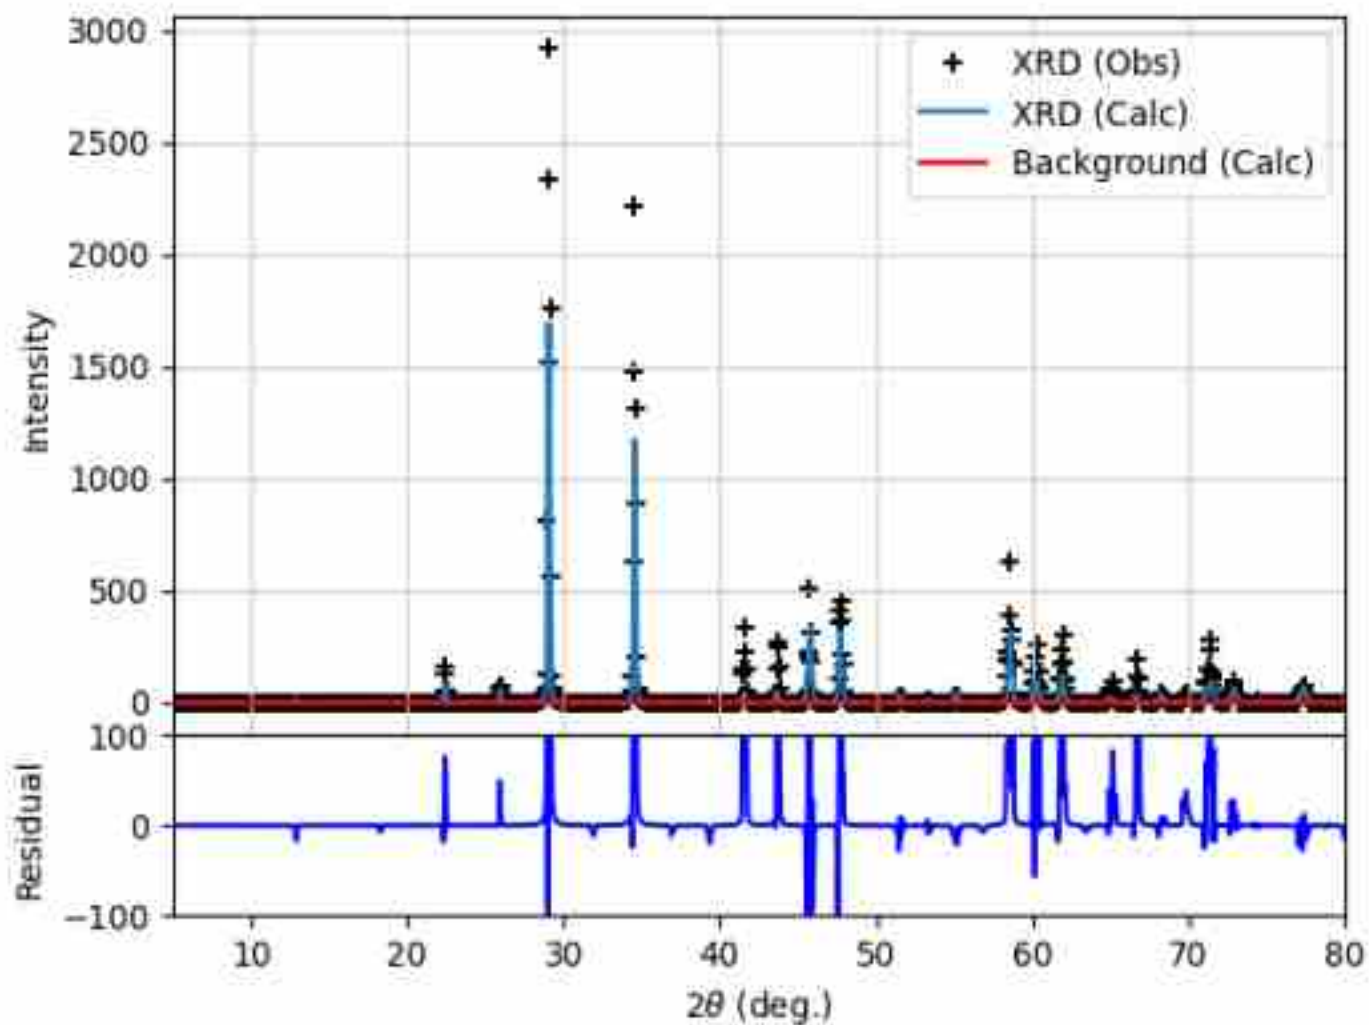

| RMSE before RR | Rwp      | RMSE after RR |
|----------------|----------|---------------|
| 0.239          | 60.41474 | 0.36784       |

# Nb<sub>3</sub>Fe<sub>1</sub>Se<sub>10</sub>

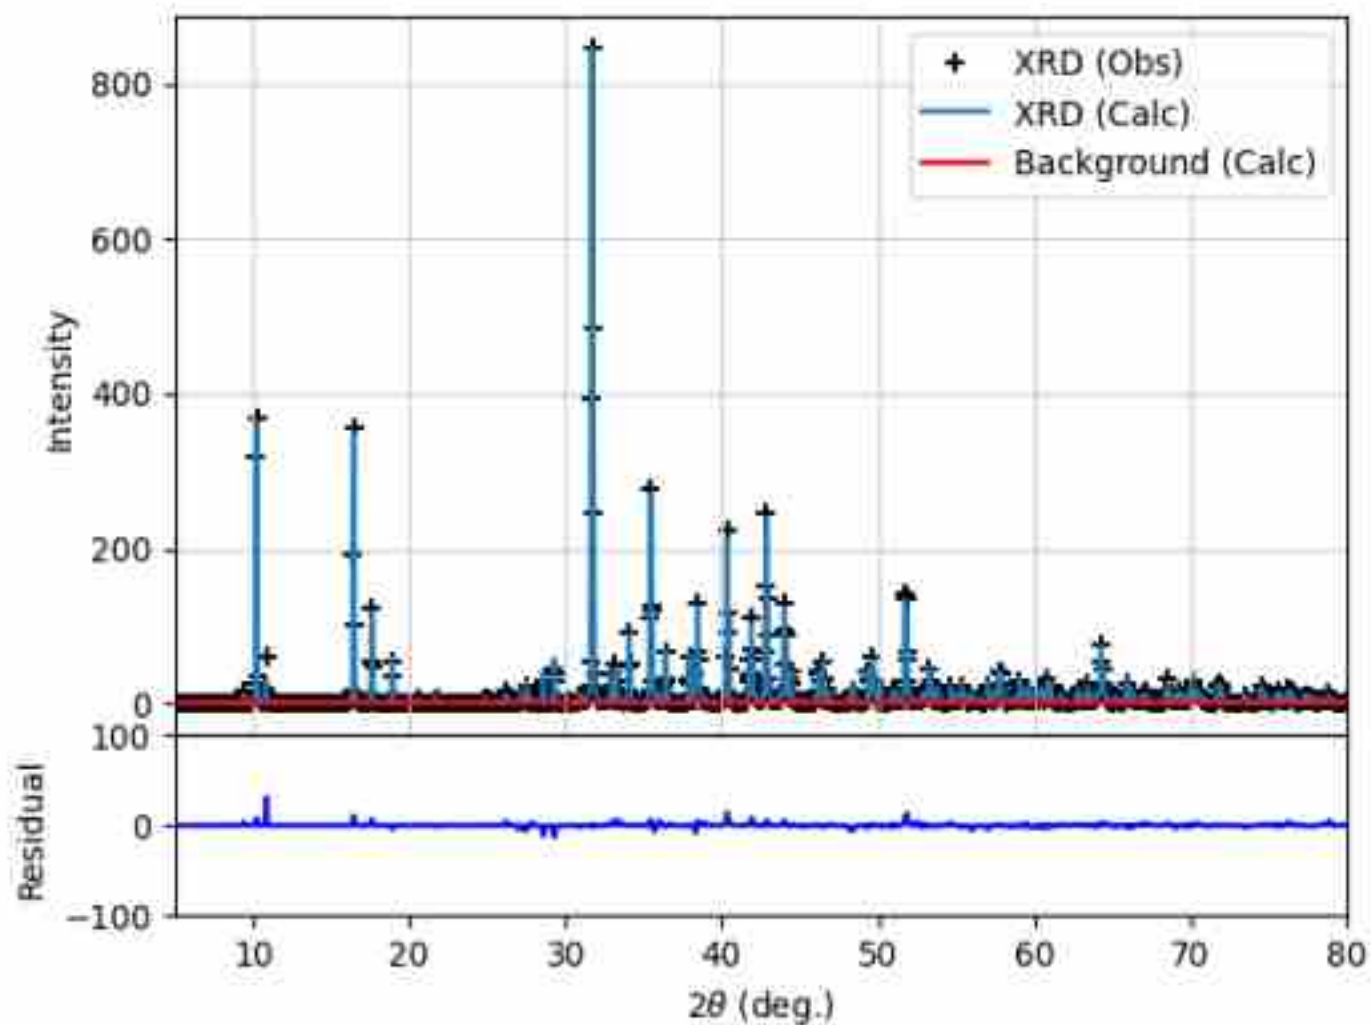

| RMSE before RR | Rwp      | RMSE after RR |
|----------------|----------|---------------|
| 0.239          | 11.90352 | 0.17582       |

# Tl3Bi1

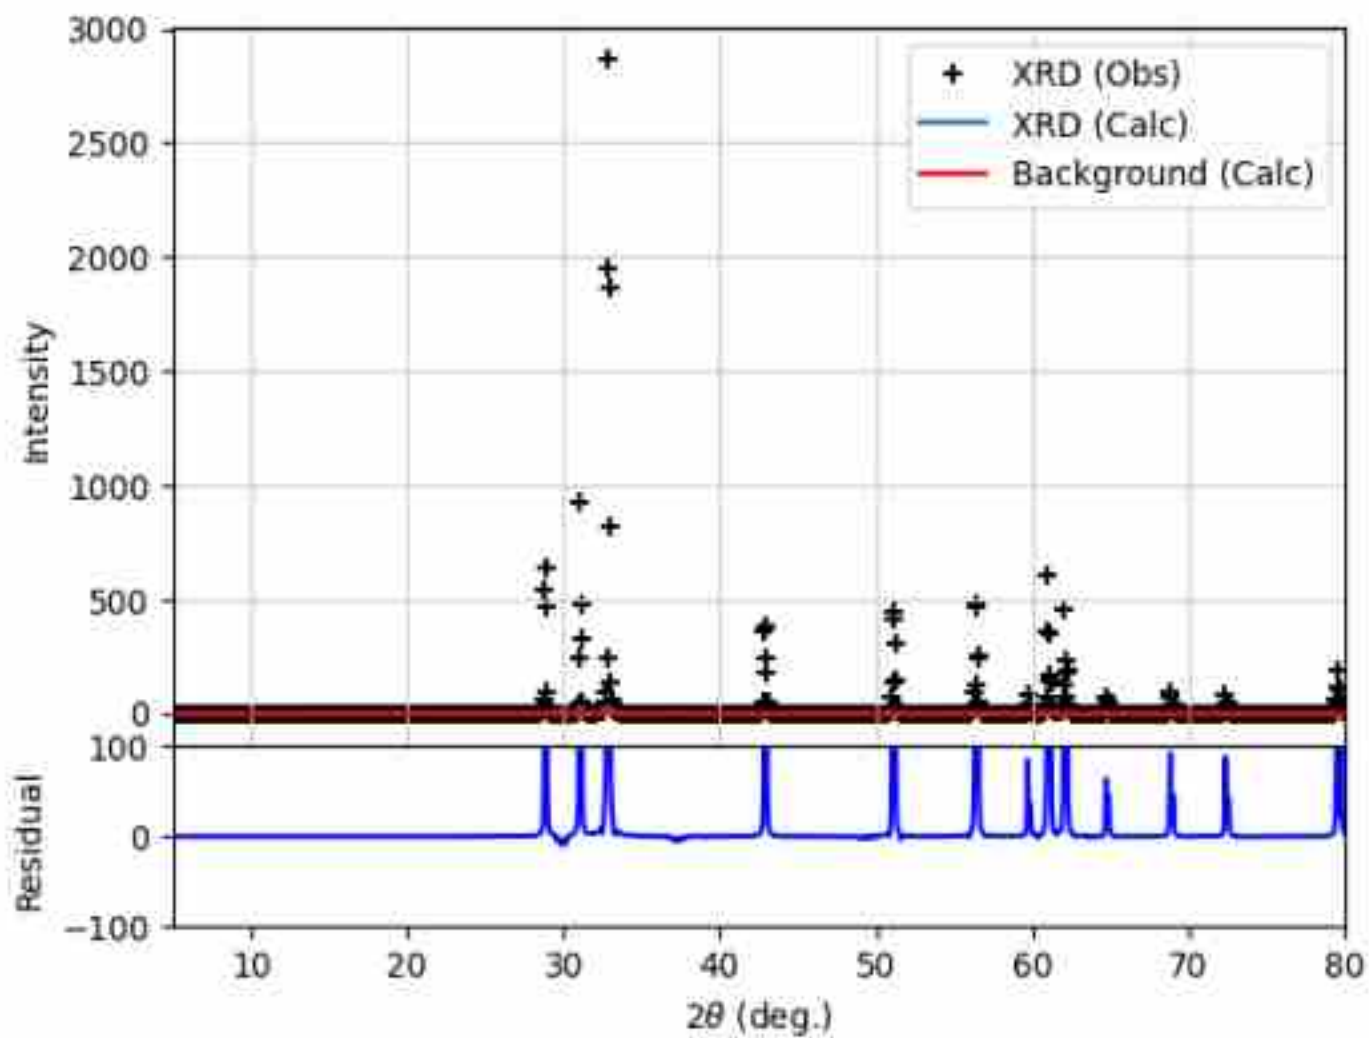

| RMSE before RR | Rwp      | RMSE after RR |
|----------------|----------|---------------|
| 0.241          | 94.81551 | 0.24259       |

# V4Cl4O4

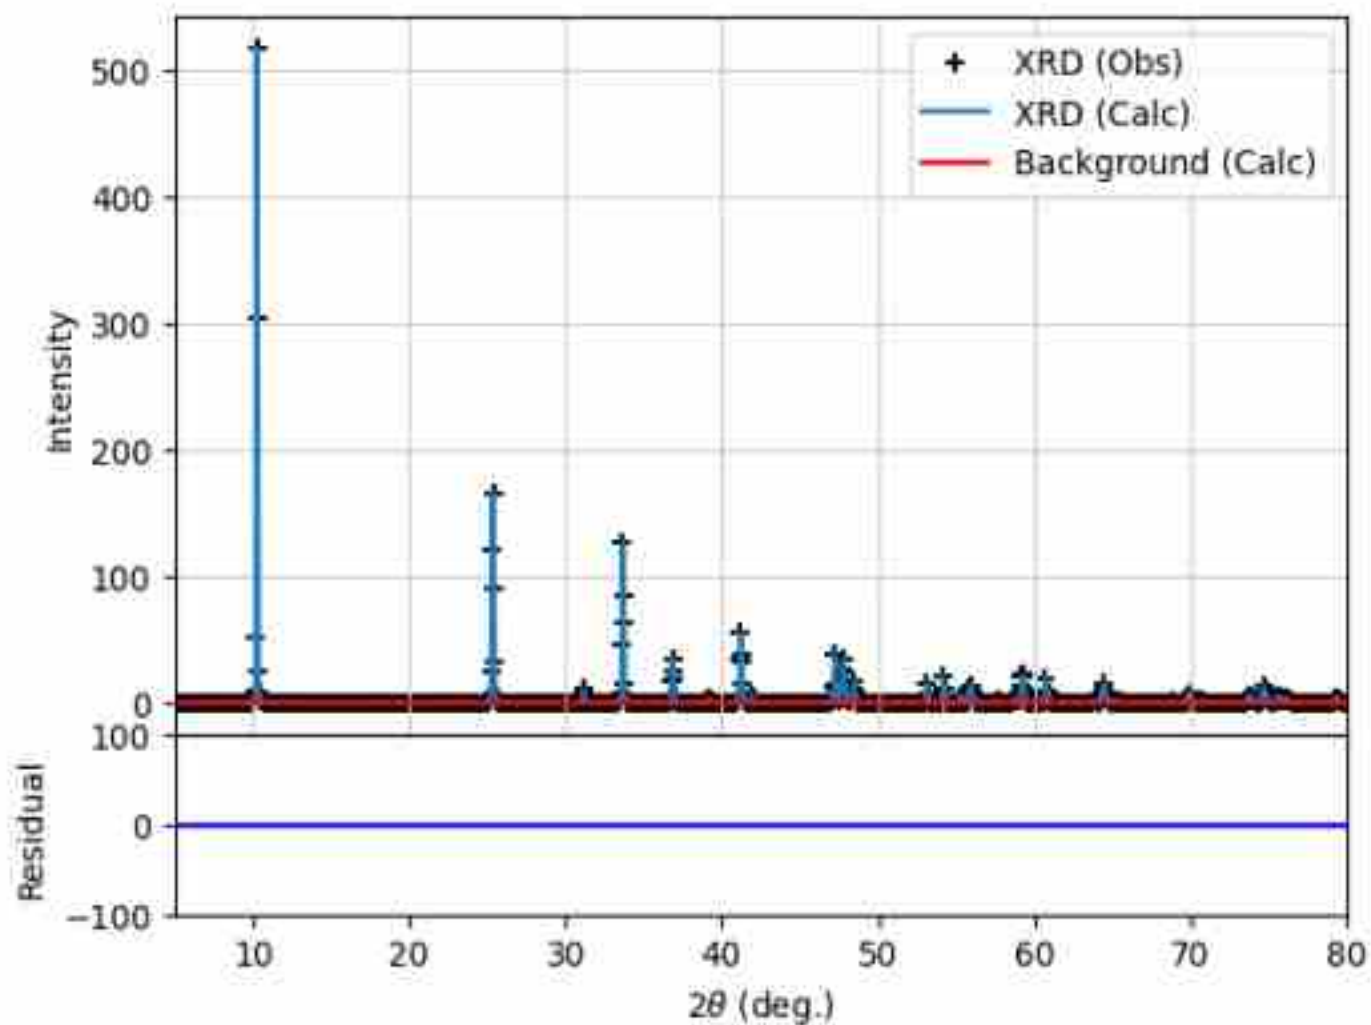

| RMSE before RR | Rwp     | RMSE after RR |
|----------------|---------|---------------|
| 0.241          | 0.00036 | 8e-05         |

# H6Pb1C1I3N1

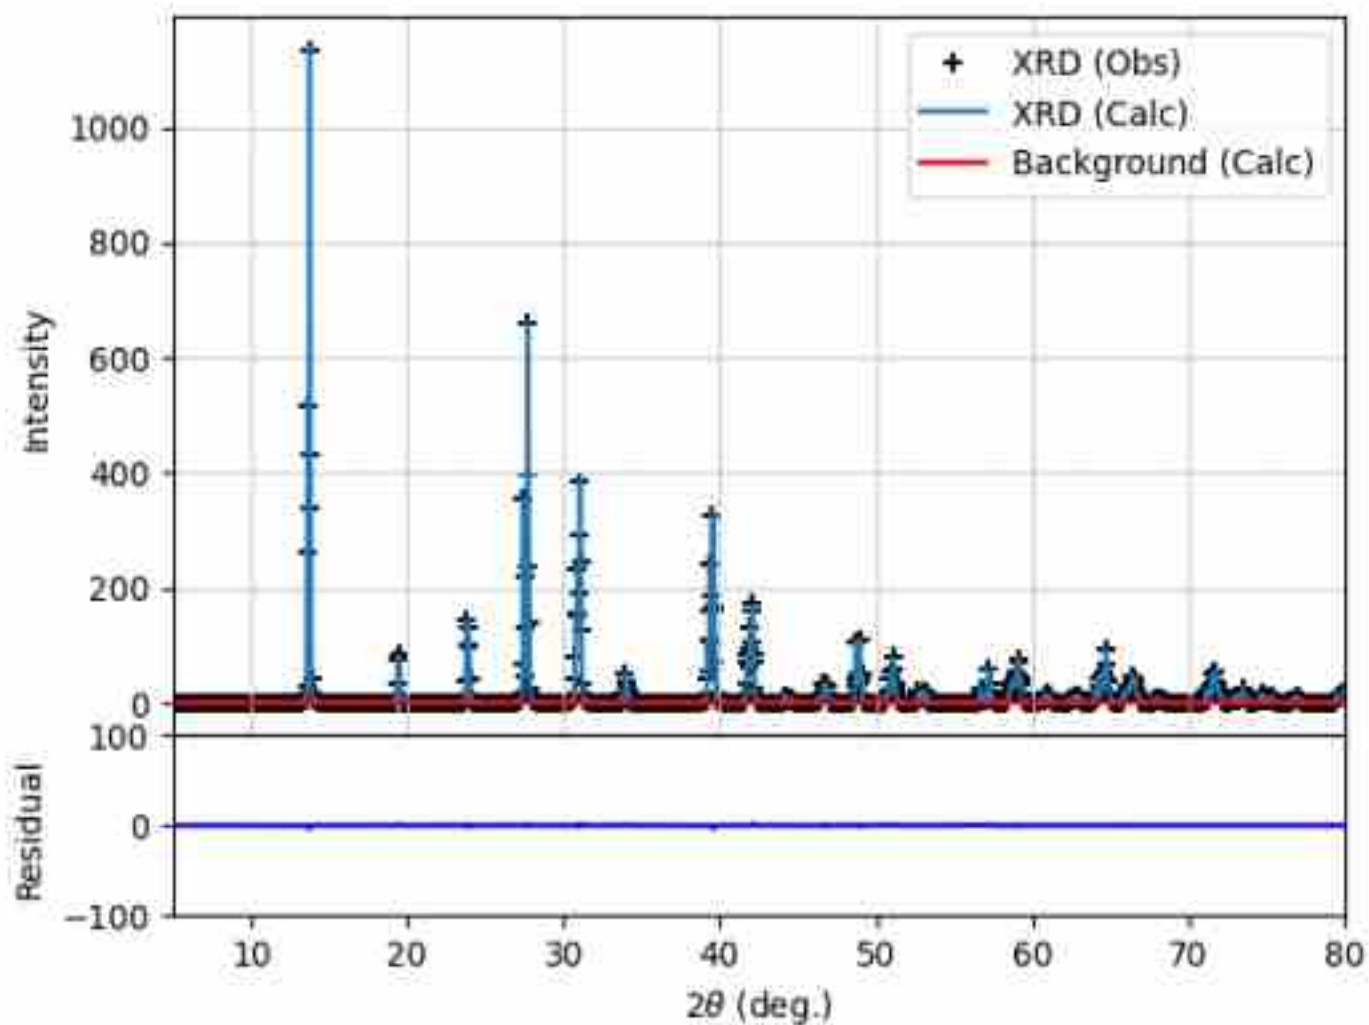

| RMSE before RR | Rwp     | RMSE after RR |
|----------------|---------|---------------|
| 0.242          | 0.67976 | 0.32465       |

# Cs<sub>3</sub>LiCl<sub>4</sub>

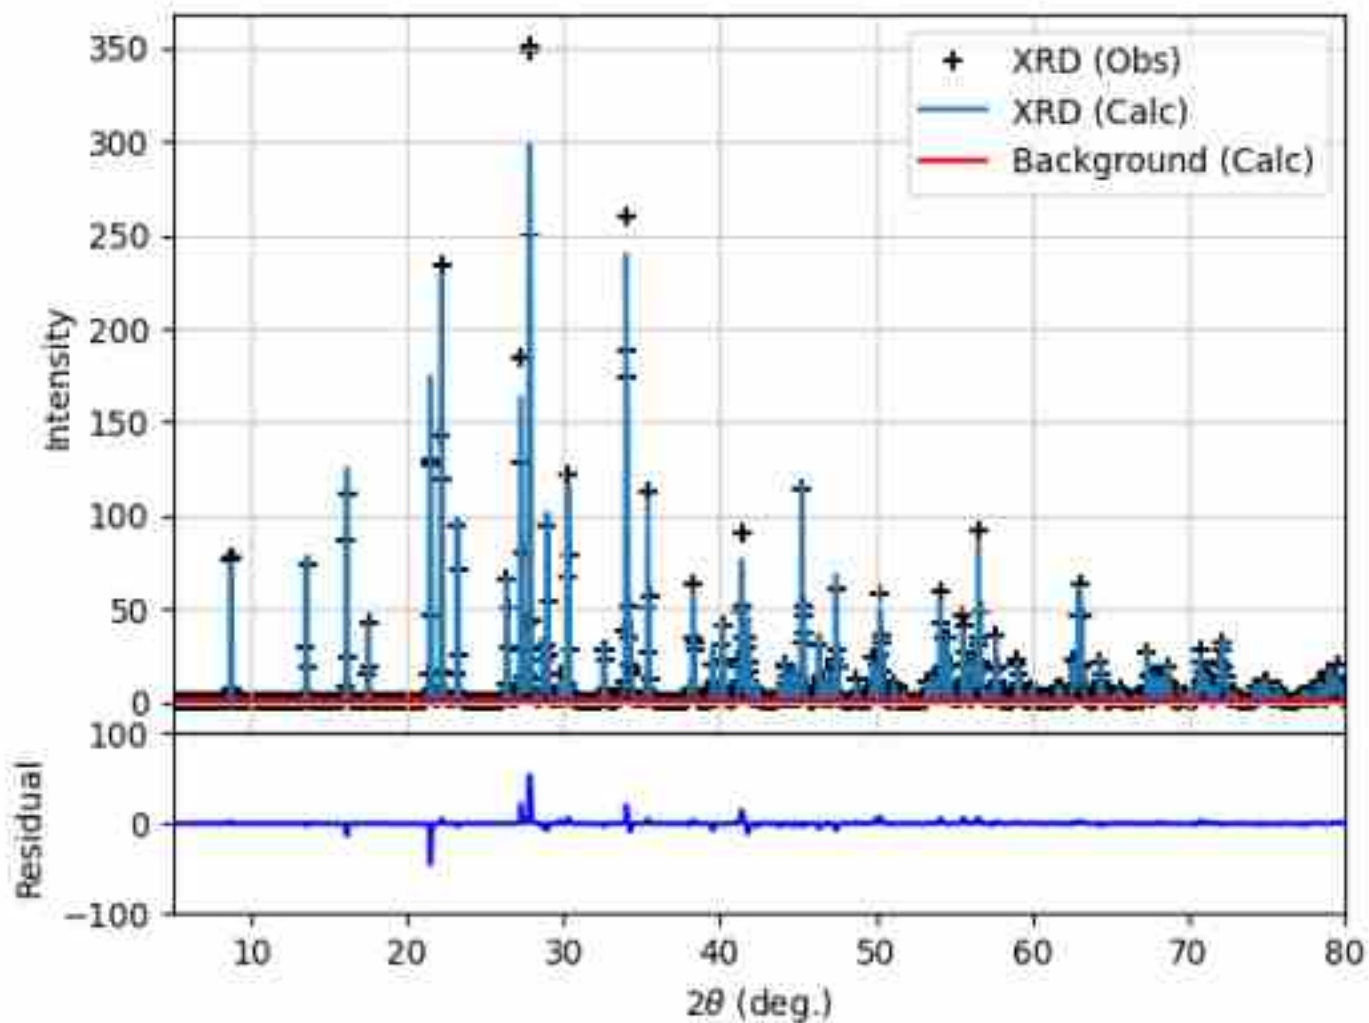

| RMSE before RR | Rwp      | RMSE after RR |
|----------------|----------|---------------|
| 0.243          | 11.69229 | 0.34494       |

# K6V2S2O6

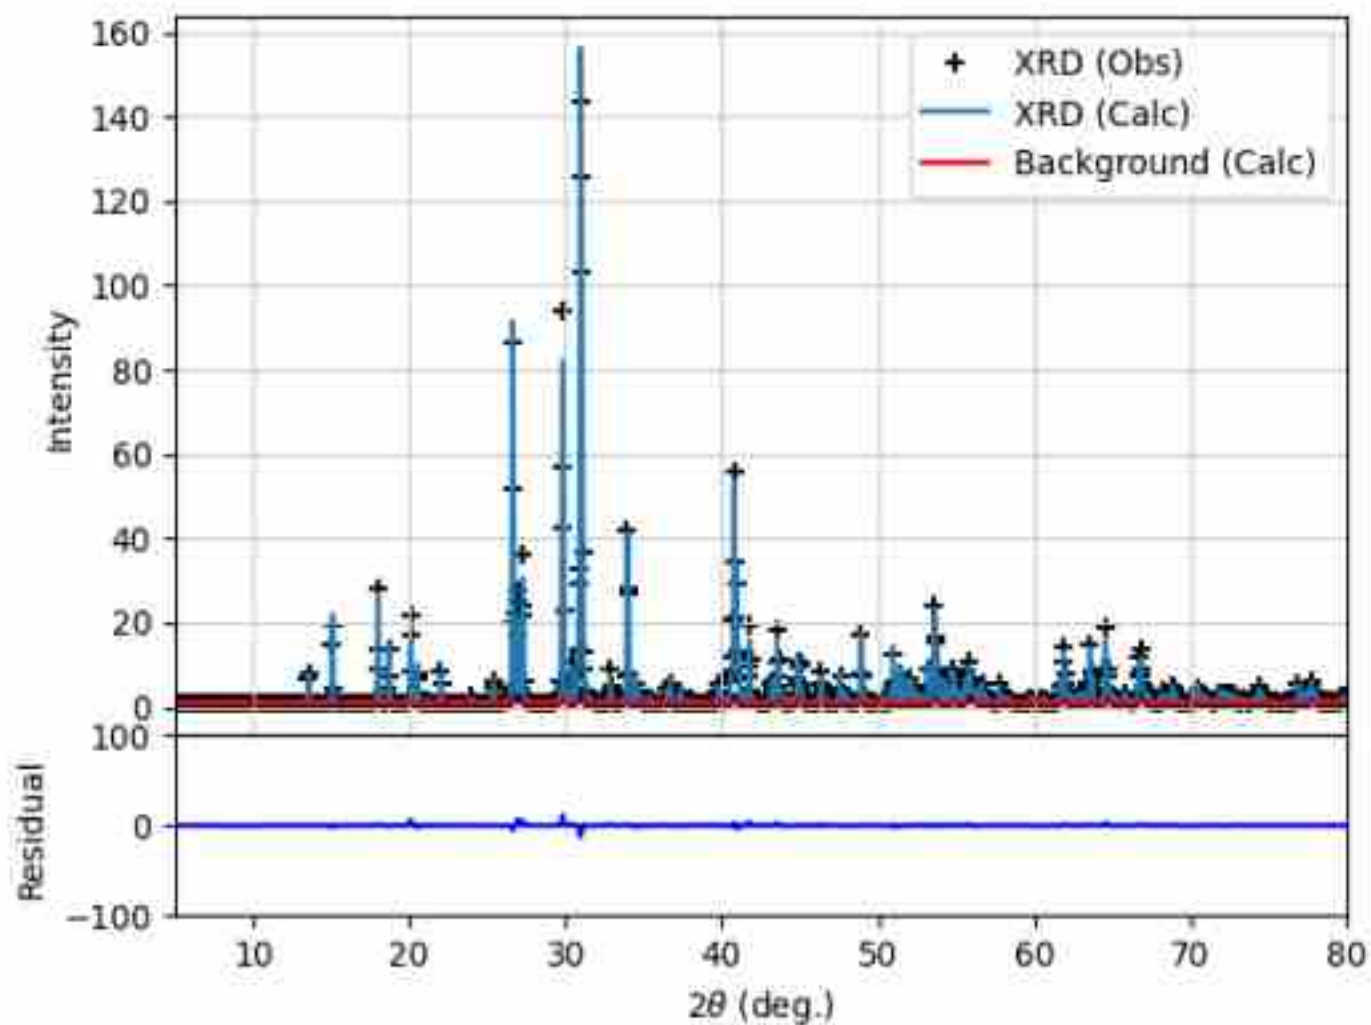

| RMSE before RR | Rwp      | RMSE after RR |
|----------------|----------|---------------|
| 0.243          | 10.25815 | 0.18431       |

# Li2V2F12

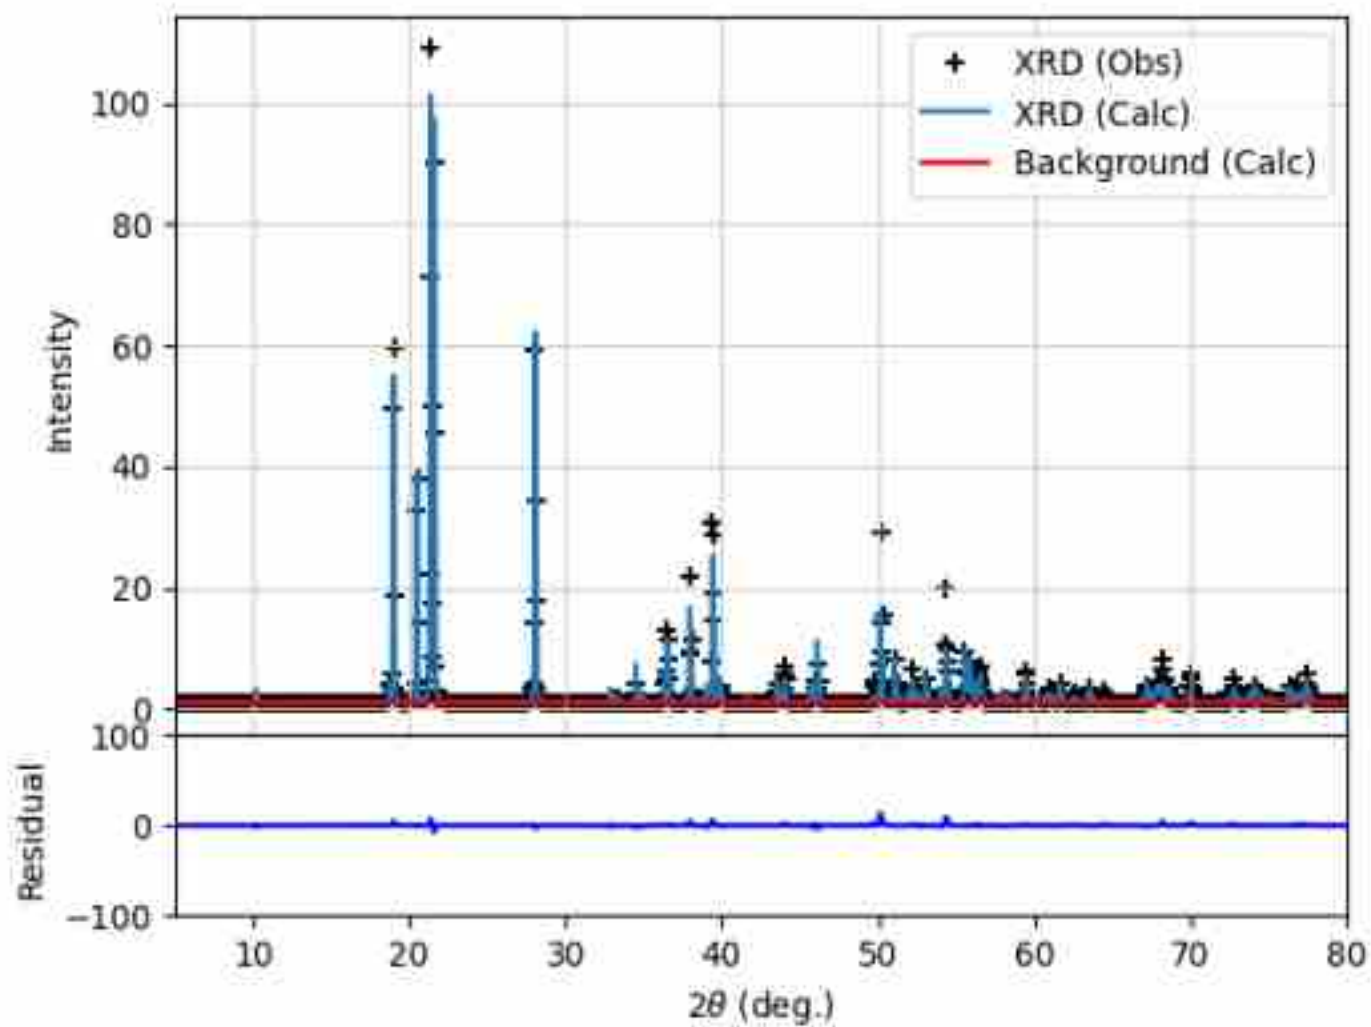

| RMSE before RR | Rwp      | RMSE after RR |
|----------------|----------|---------------|
| 0.243          | 18.99961 | None          |



# Li6U1O6

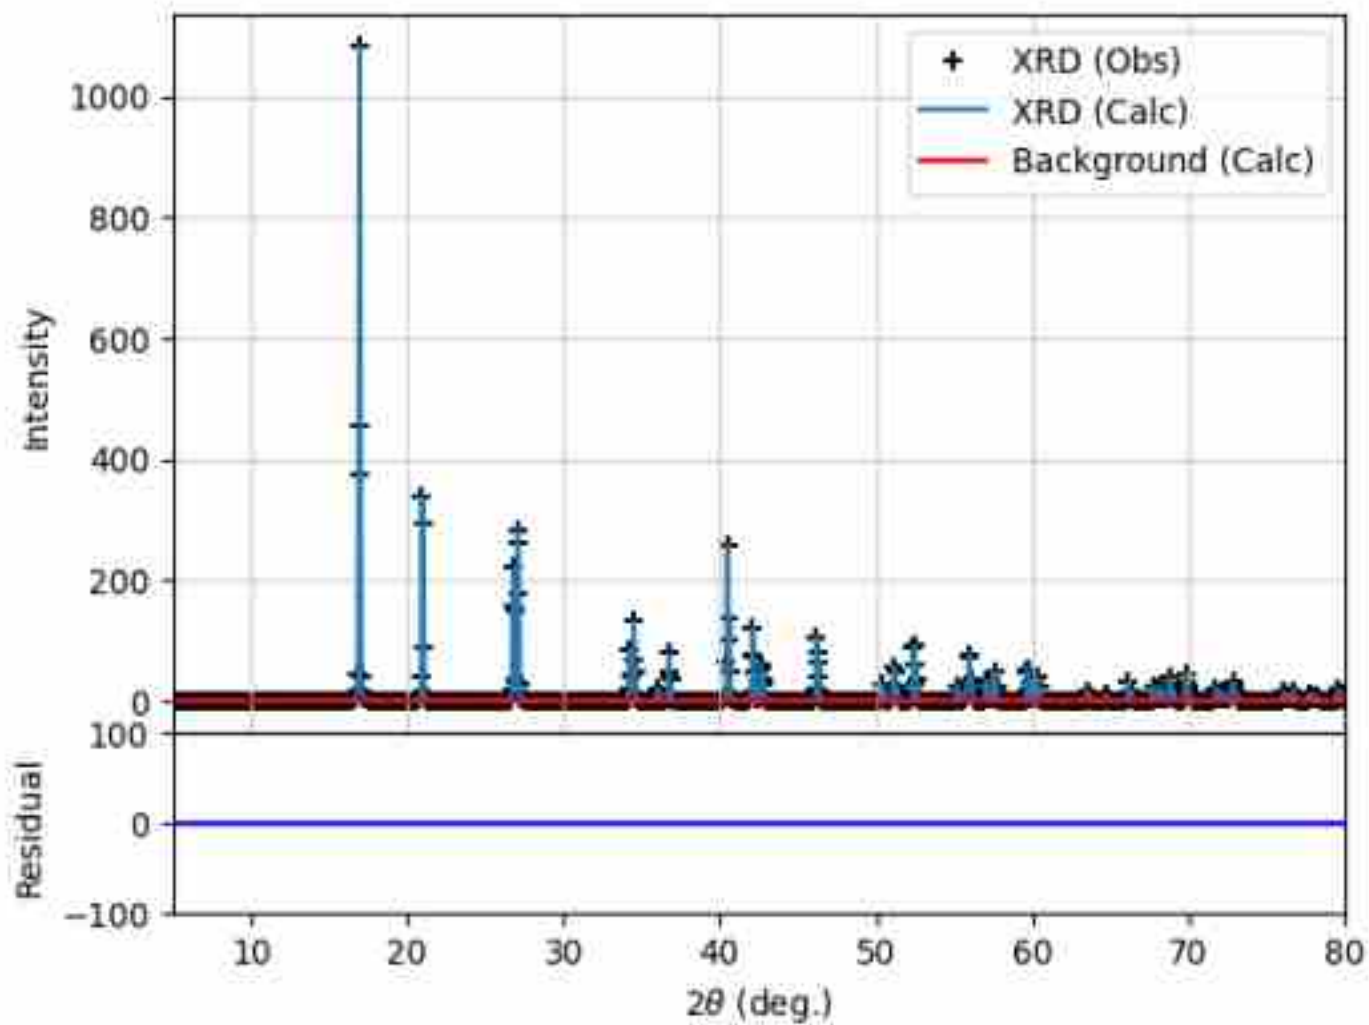

| RMSE before RR | Rwp     | RMSE after RR |
|----------------|---------|---------------|
| 0.243          | 0.00655 | 0.00373       |

# Ta<sub>3</sub>MoS<sub>8</sub>

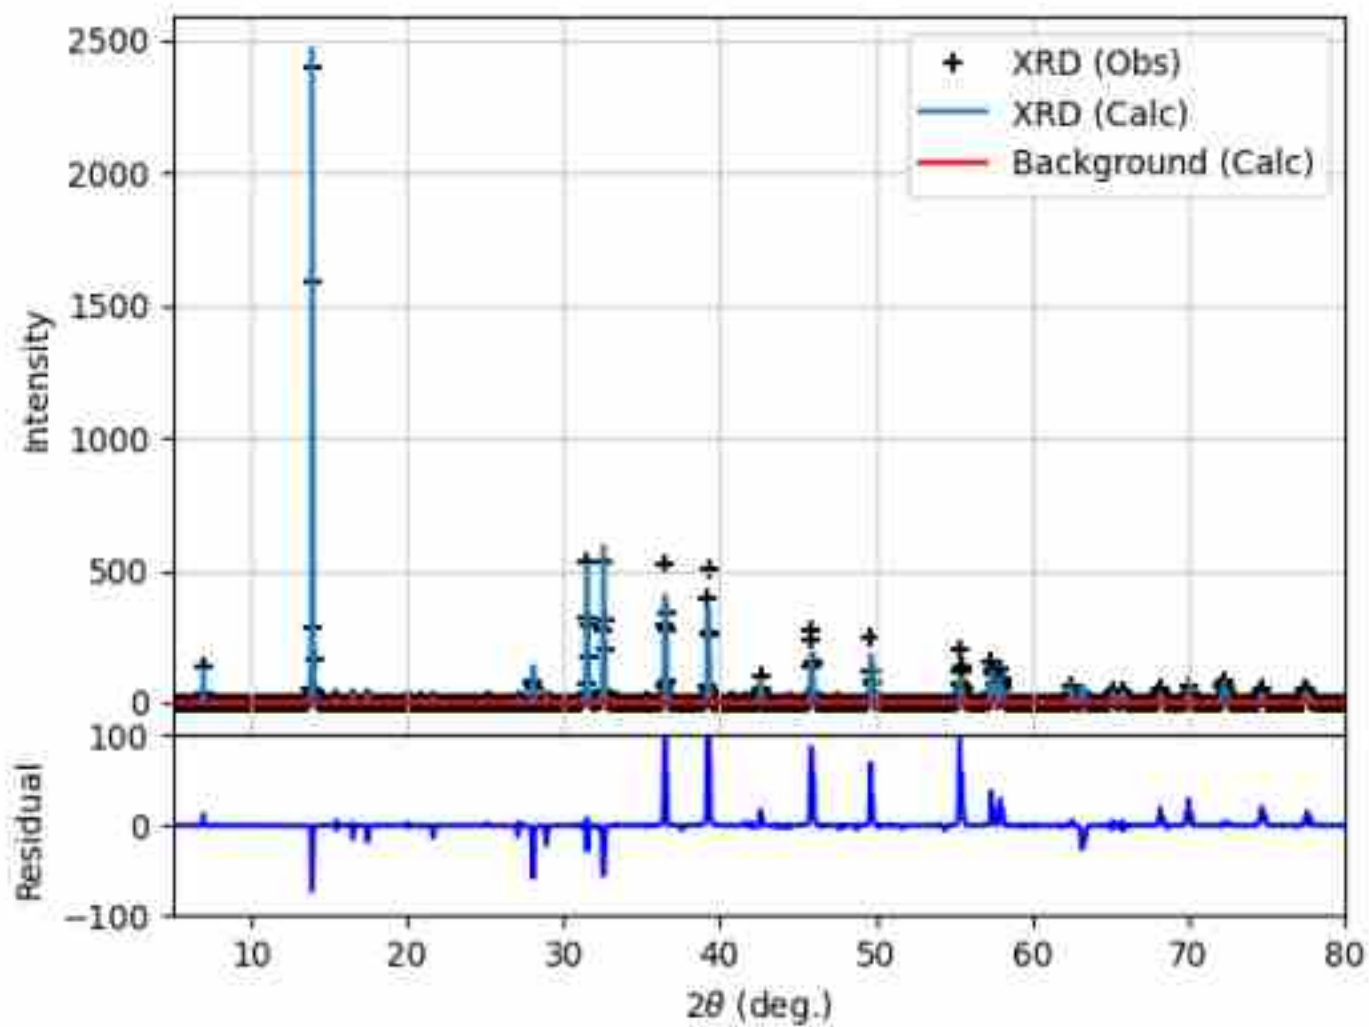

| RMSE before RR | Rwp      | RMSE after RR |
|----------------|----------|---------------|
| 0.243          | 26.15482 | 0.48401       |

# Ta4O10

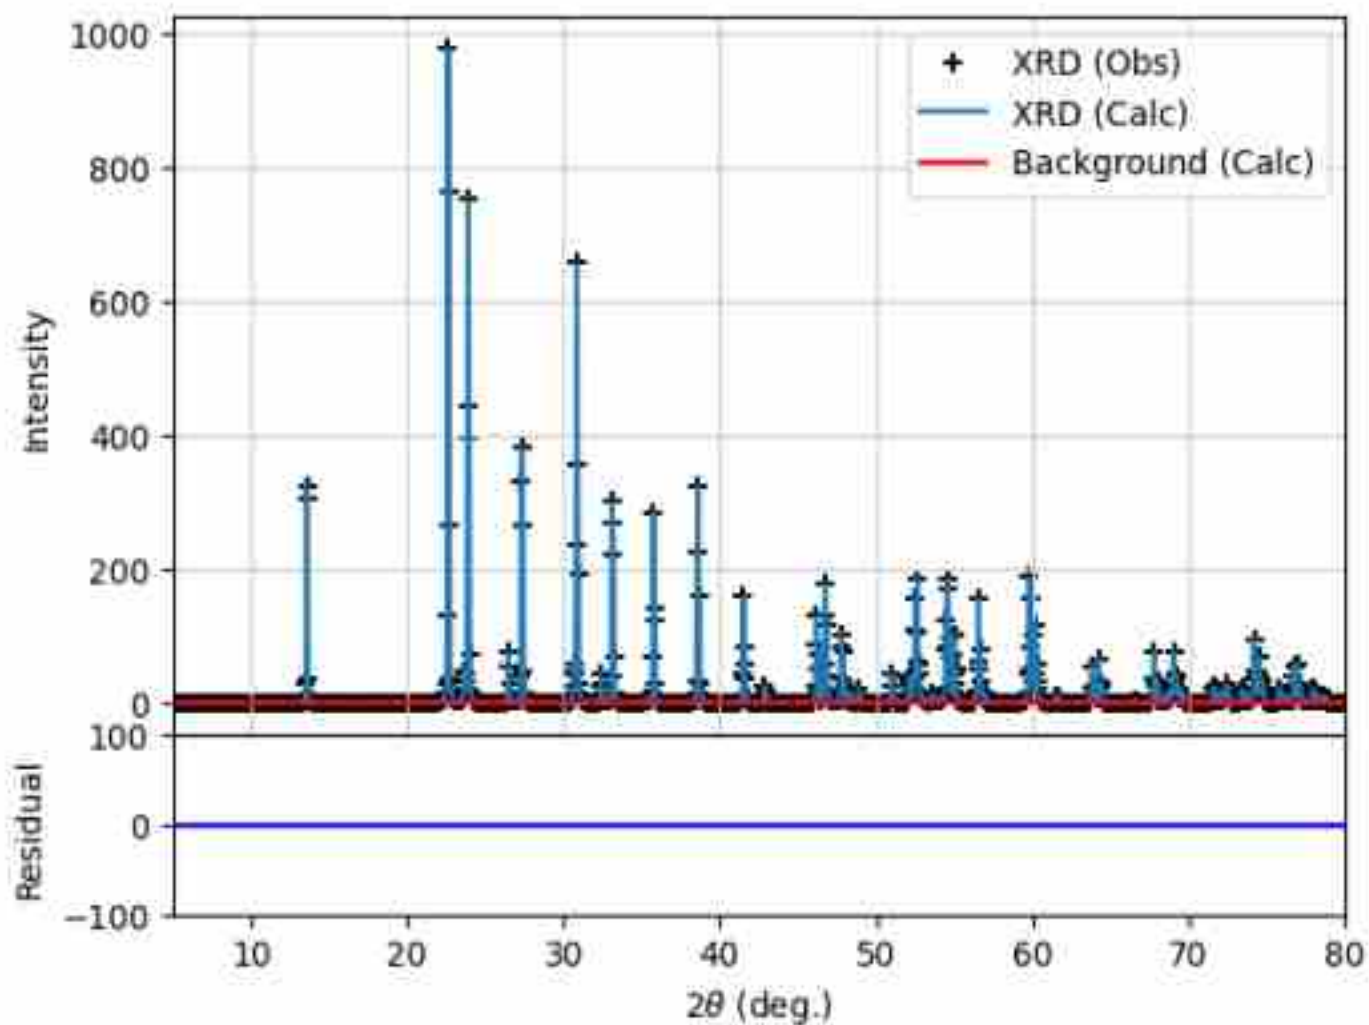

| RMSE before RR | Rwp     | RMSE after RR |
|----------------|---------|---------------|
| 0.244          | 0.00376 | 0.00177       |

# Bi4

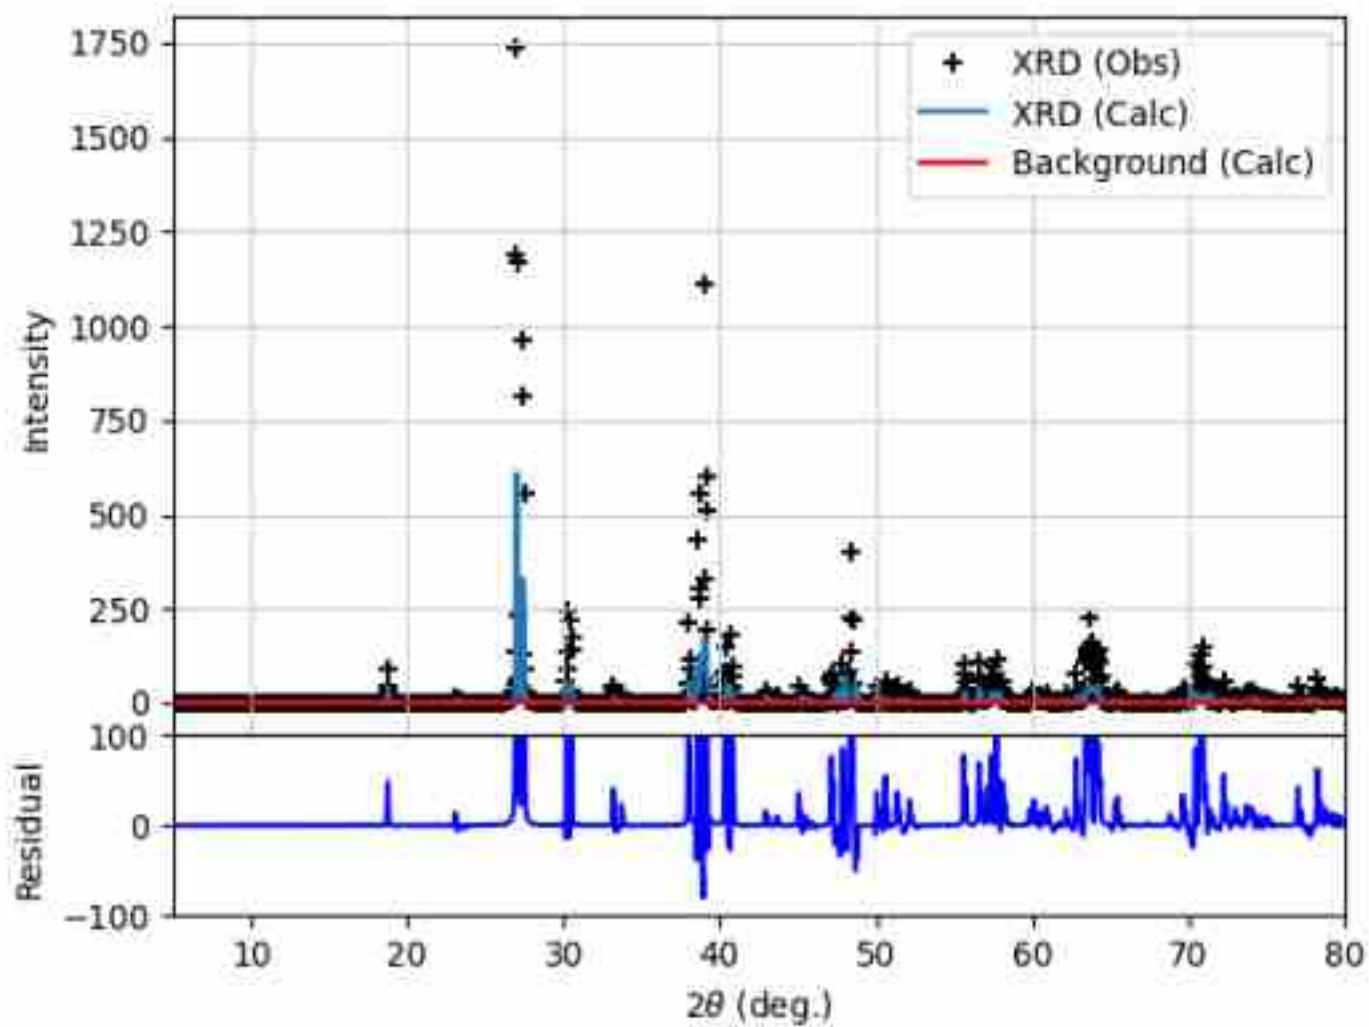

| RMSE before RR | Rwp      | RMSE after RR |
|----------------|----------|---------------|
| 0.246          | 78.19102 | 0.02907       |

# Tl2N6

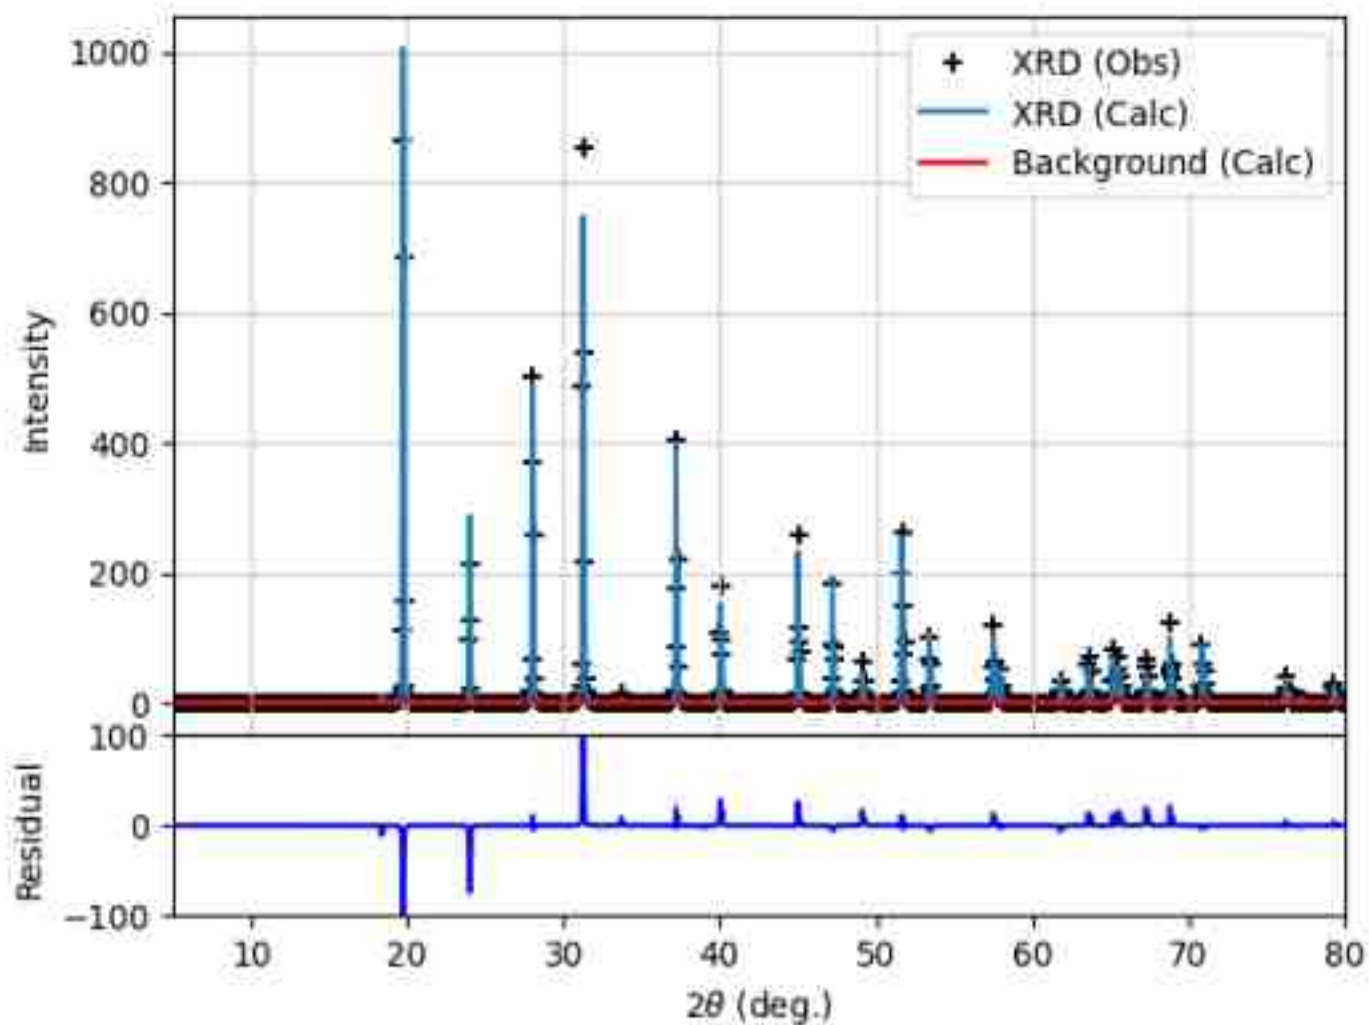

| RMSE before RR | Rwp      | RMSE after RR |
|----------------|----------|---------------|
| 0.246          | 16.32048 | None          |

# Fe<sub>4</sub>F<sub>12</sub>

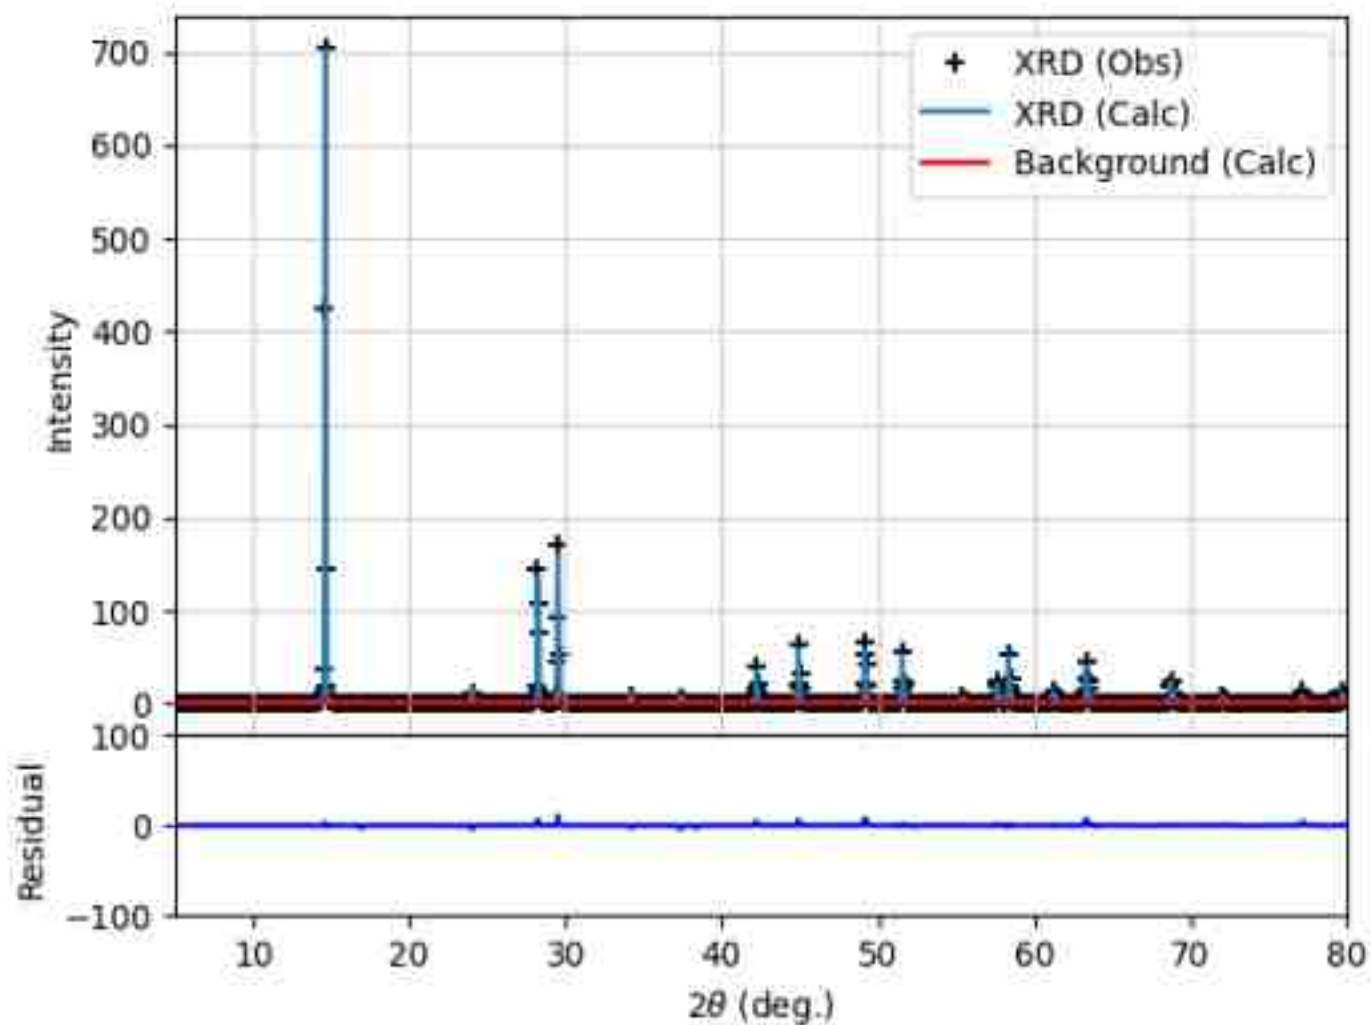

| RMSE before RR | Rwp     | RMSE after RR |
|----------------|---------|---------------|
| 0.247          | 11.2829 | 0.25885       |

# Li<sub>4</sub>Ag<sub>2</sub>F<sub>10</sub>

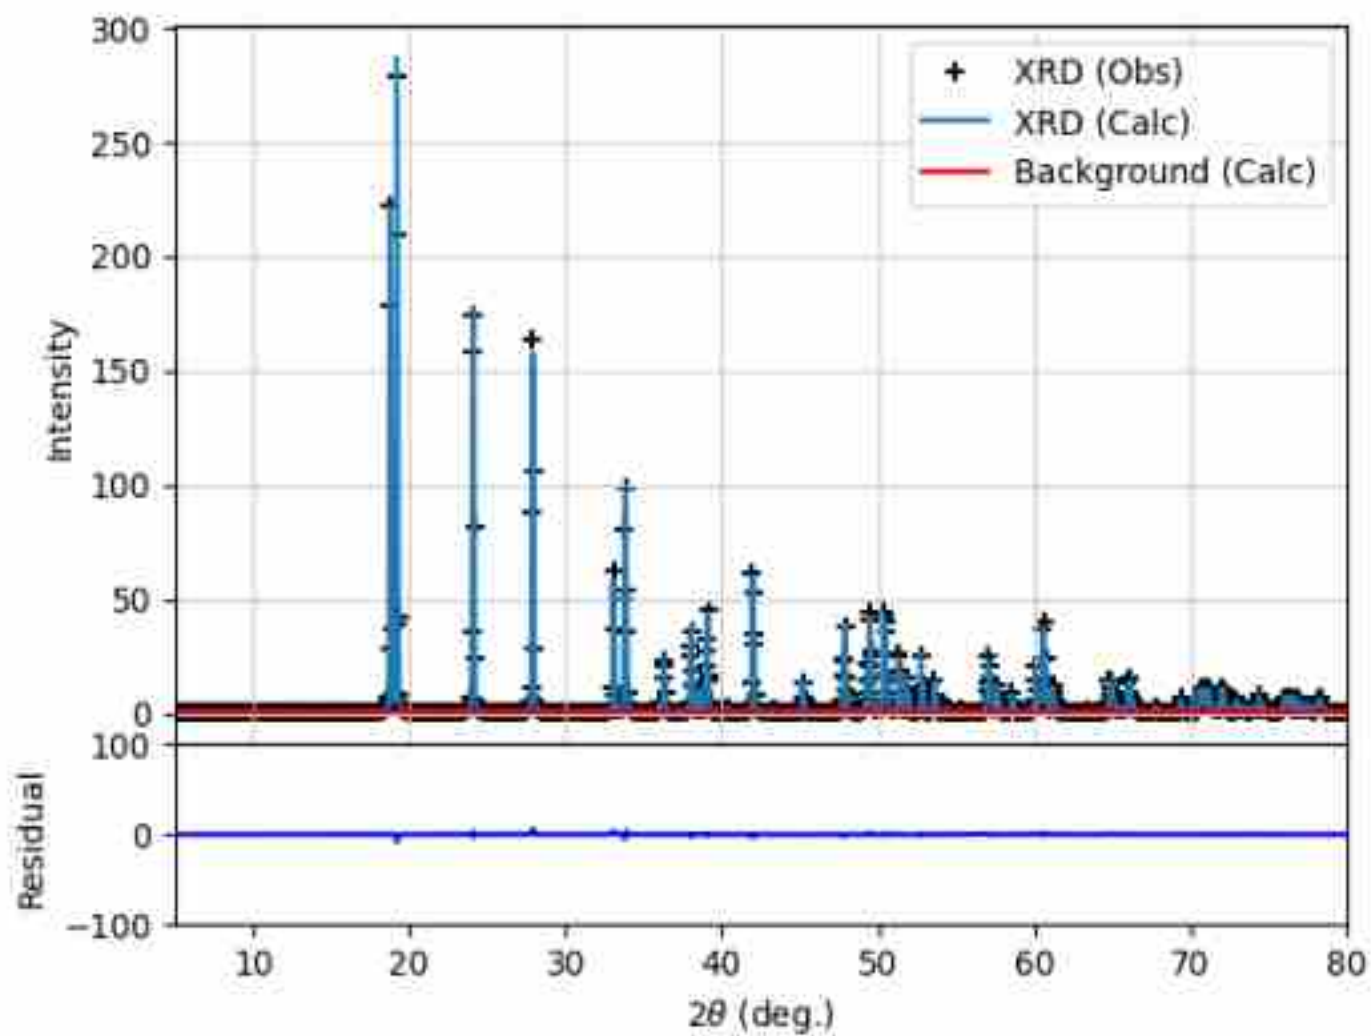

| RMSE before RR | Rwp     | RMSE after RR |
|----------------|---------|---------------|
| 0.248          | 3.37605 | 0.29016       |

# Ca<sub>4</sub>Co<sub>2</sub>Sb<sub>2</sub>O<sub>12</sub>

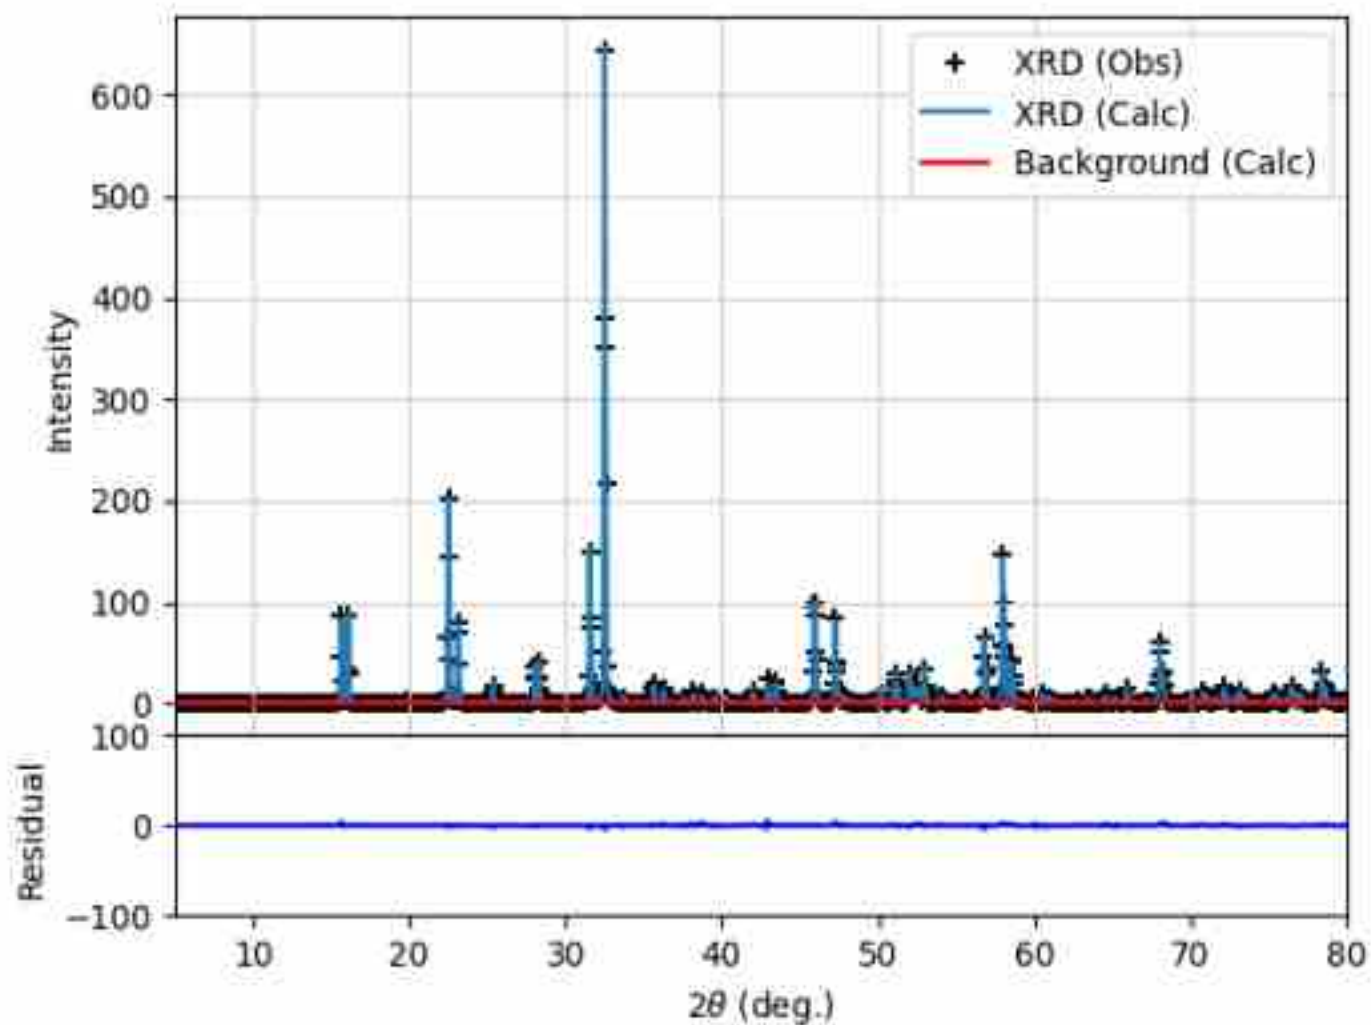

| RMSE before RR | Rwp     | RMSE after RR |
|----------------|---------|---------------|
| 0.249          | 6.67057 | 0.21414       |



# Cs1P1F6

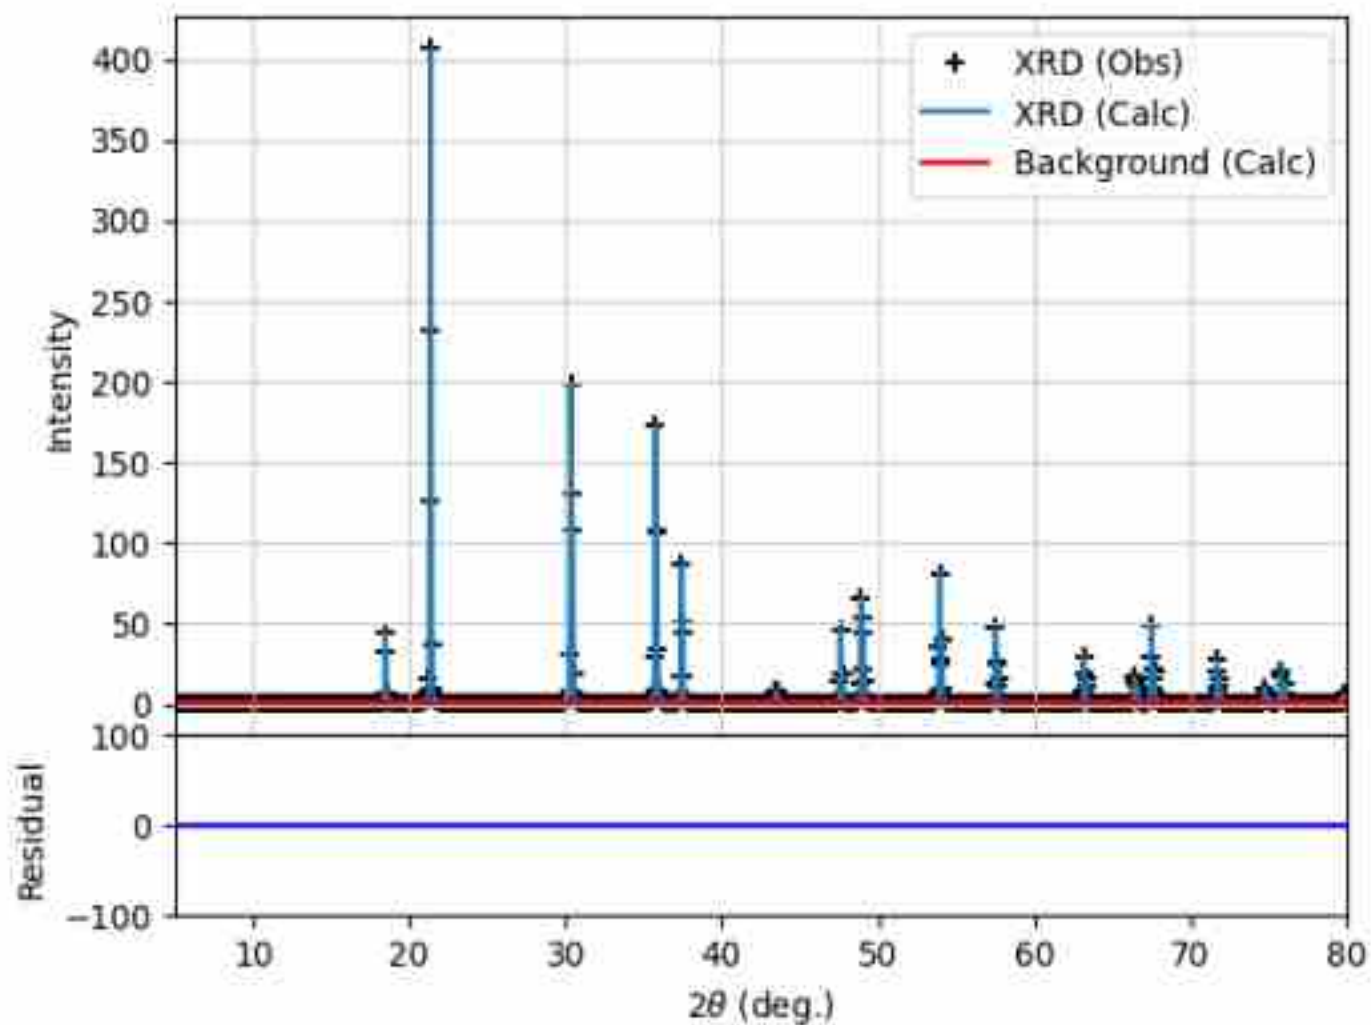

| RMSE before RR | Rwp     | RMSE after RR |
|----------------|---------|---------------|
| 0.249          | 0.00516 | 0.00305       |

# Ti6C4

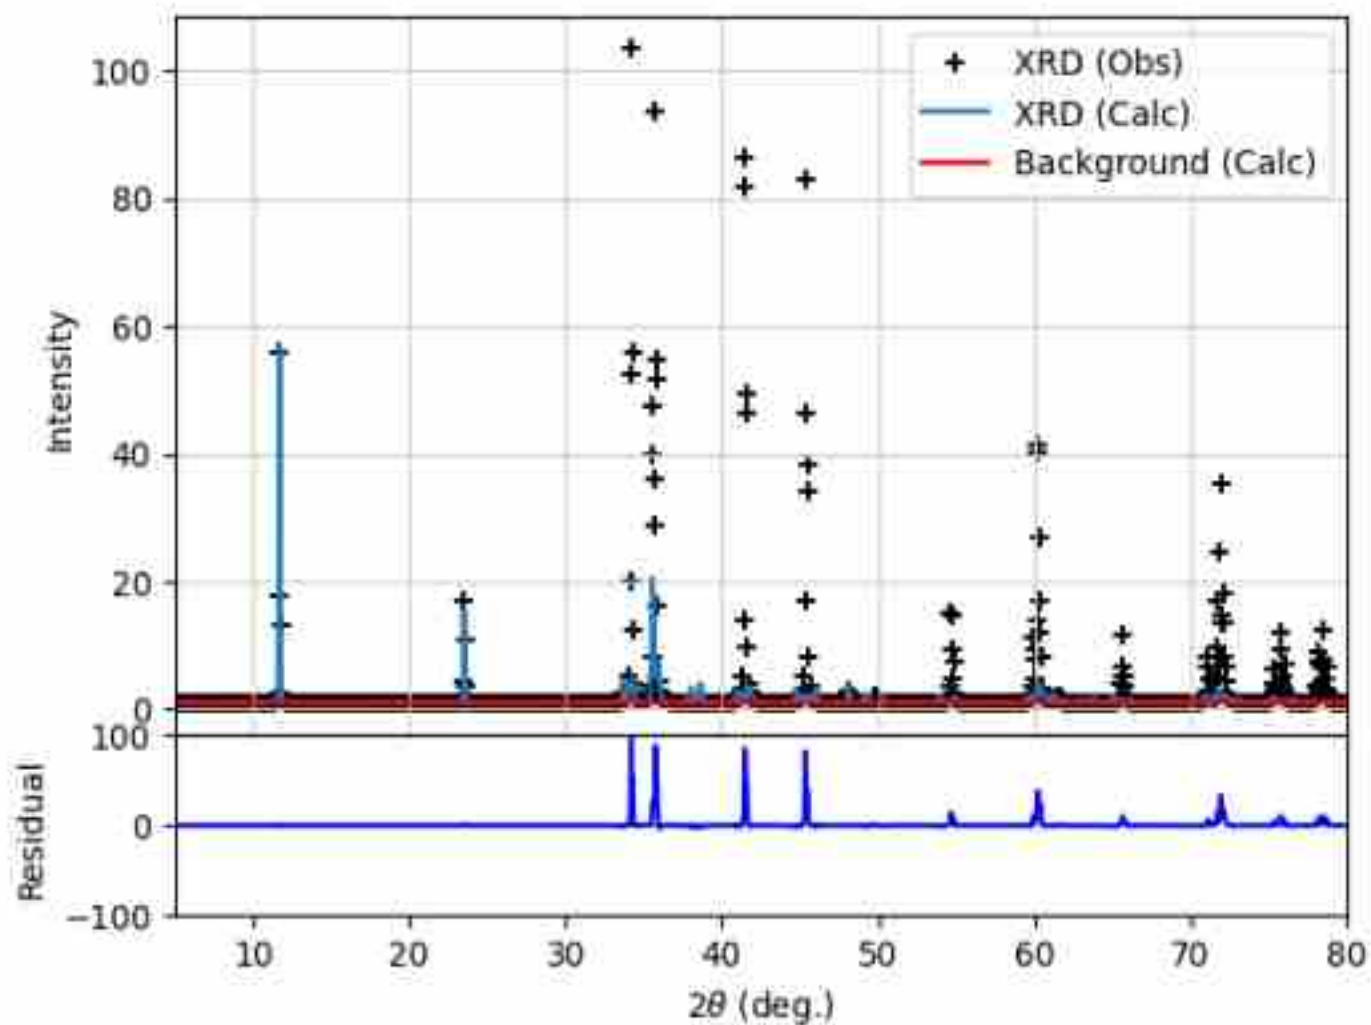

| RMSE before RR | Rwp      | RMSE after RR |
|----------------|----------|---------------|
| 0.249          | 64.70073 | 0.47716       |

# V4O5F7

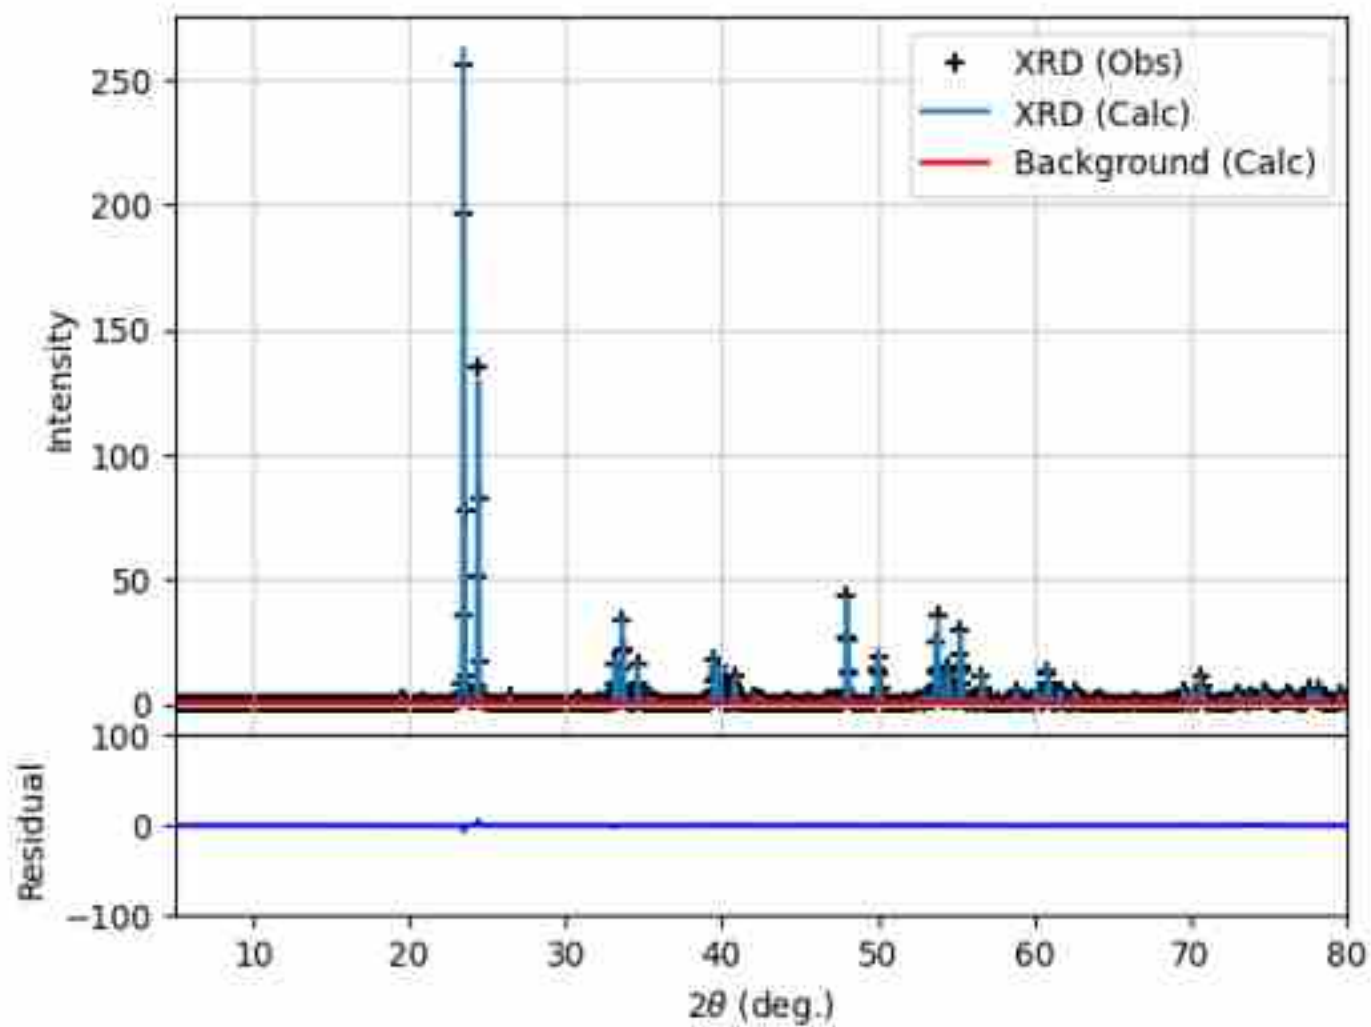

| RMSE before RR | Rwp     | RMSE after RR |
|----------------|---------|---------------|
| 0.249          | 2.82026 | 0.28268       |

# Ce<sub>4</sub>Sn<sub>8</sub>Rh<sub>4</sub>

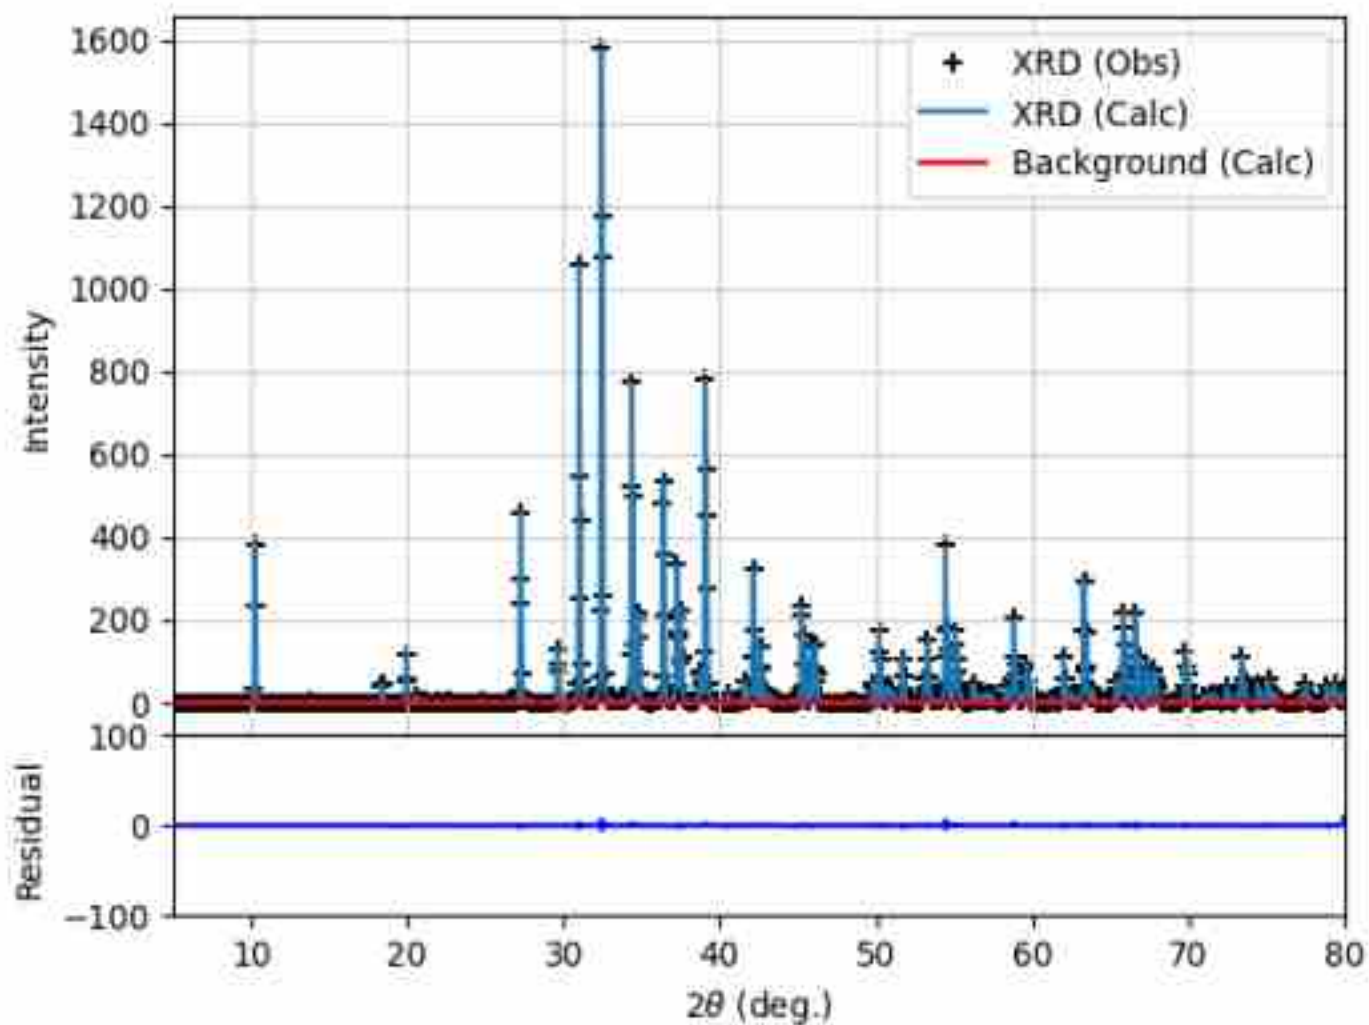

| RMSE before RR | Rwp     | RMSE after RR |
|----------------|---------|---------------|
| 0.251          | 1.44554 | 0.00897       |

# Cs<sub>4</sub>Pb<sub>4</sub>O<sub>6</sub>

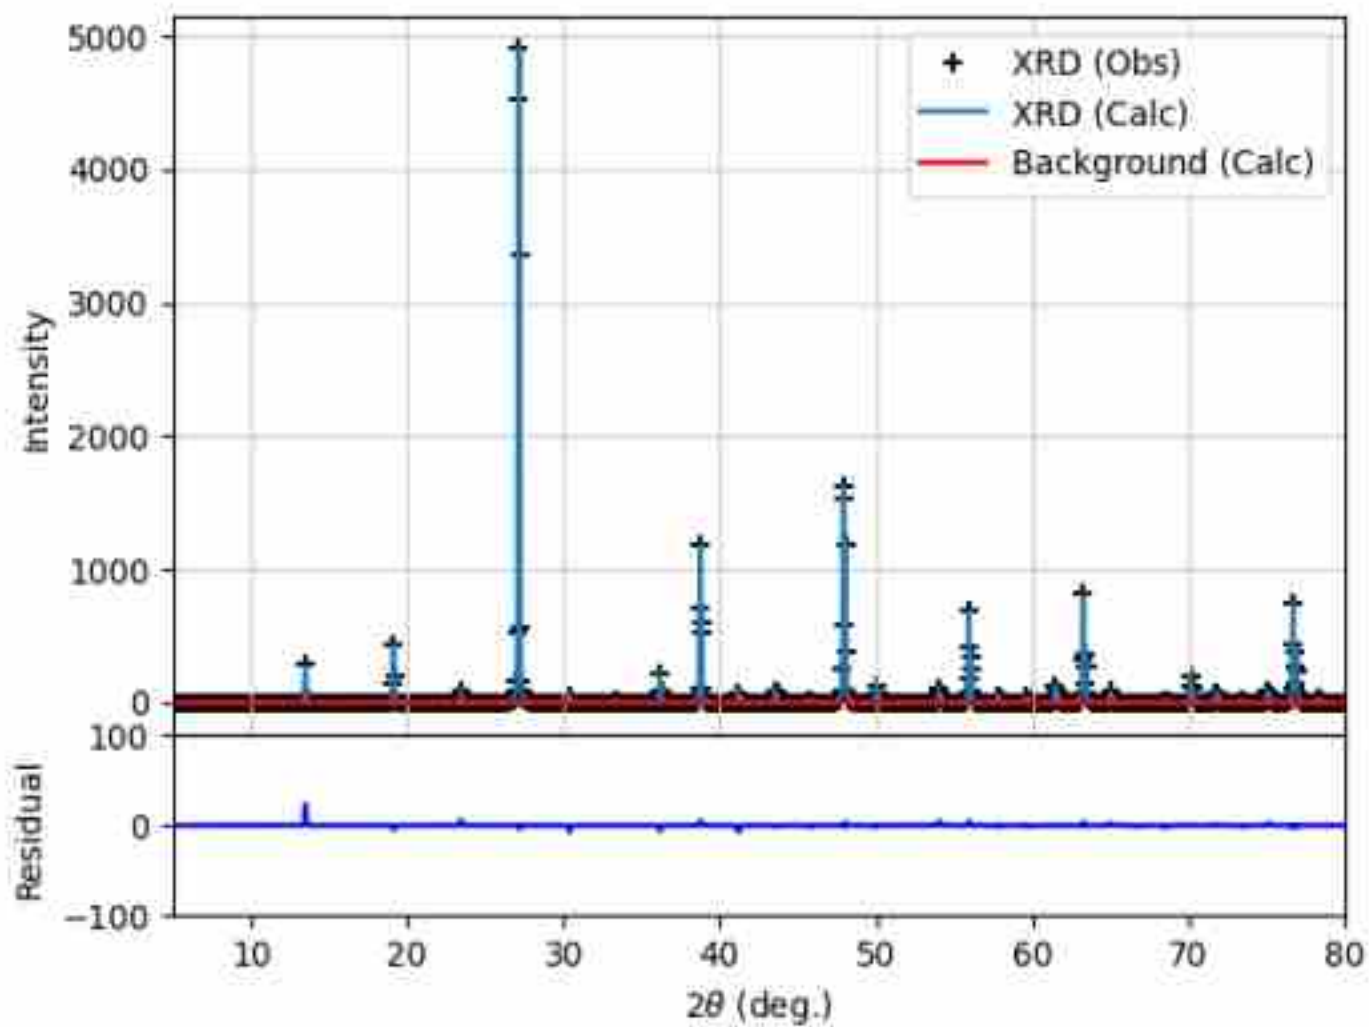

| RMSE before RR | Rwp     | RMSE after RR |
|----------------|---------|---------------|
| 0.252          | 1.91988 | 0.37441       |

# Li1V1F6

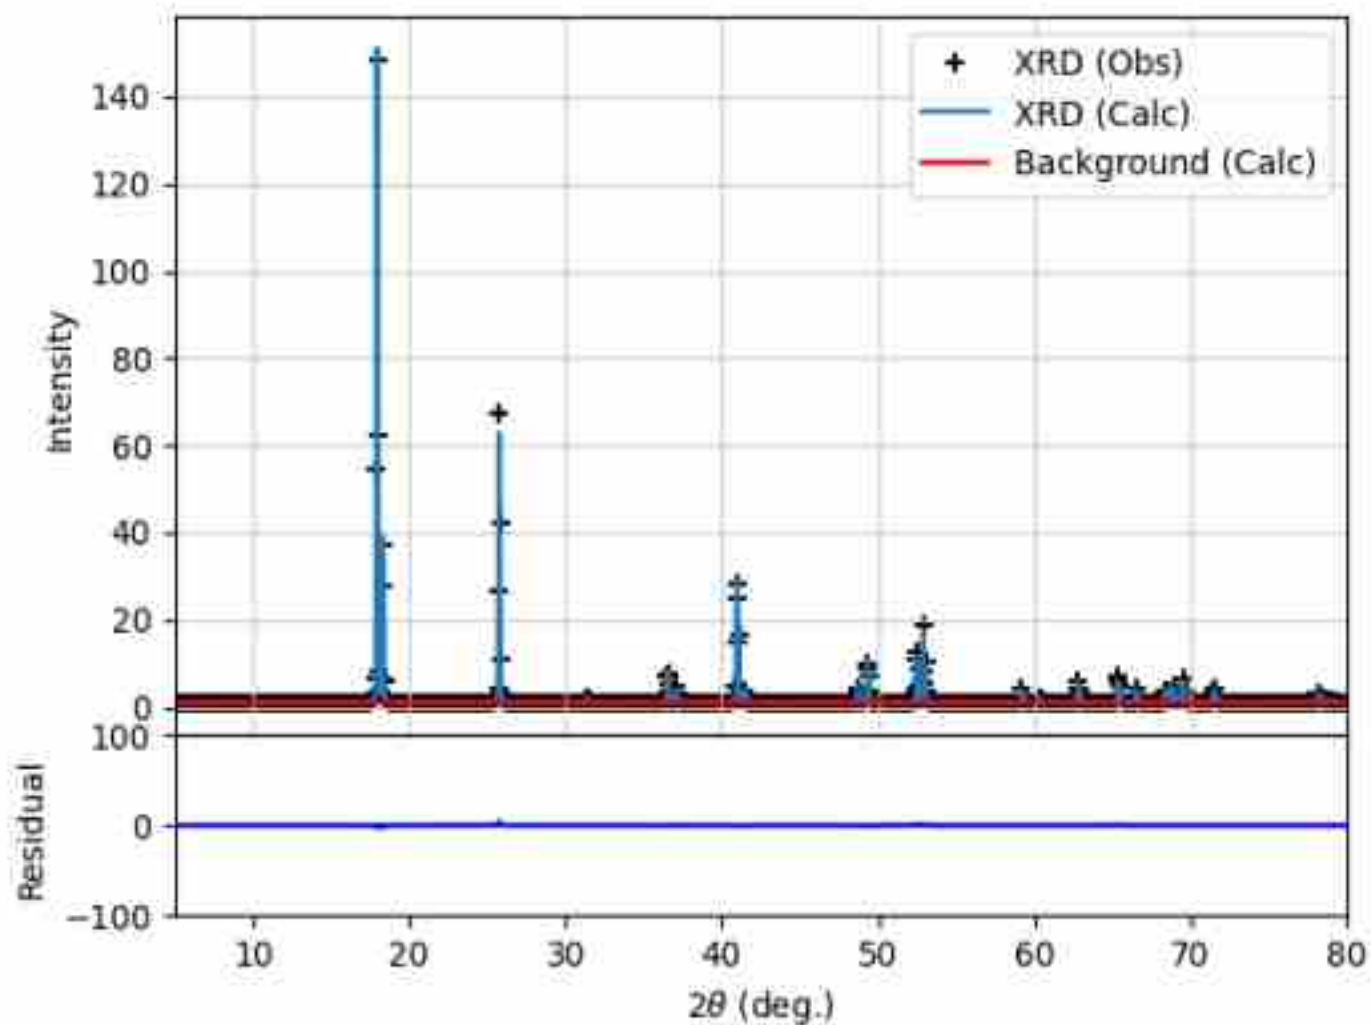

| RMSE before RR | Rwp     | RMSE after RR |
|----------------|---------|---------------|
| 0.252          | 3.81553 | None          |

# Ag<sub>4</sub>P<sub>4</sub>O<sub>12</sub>

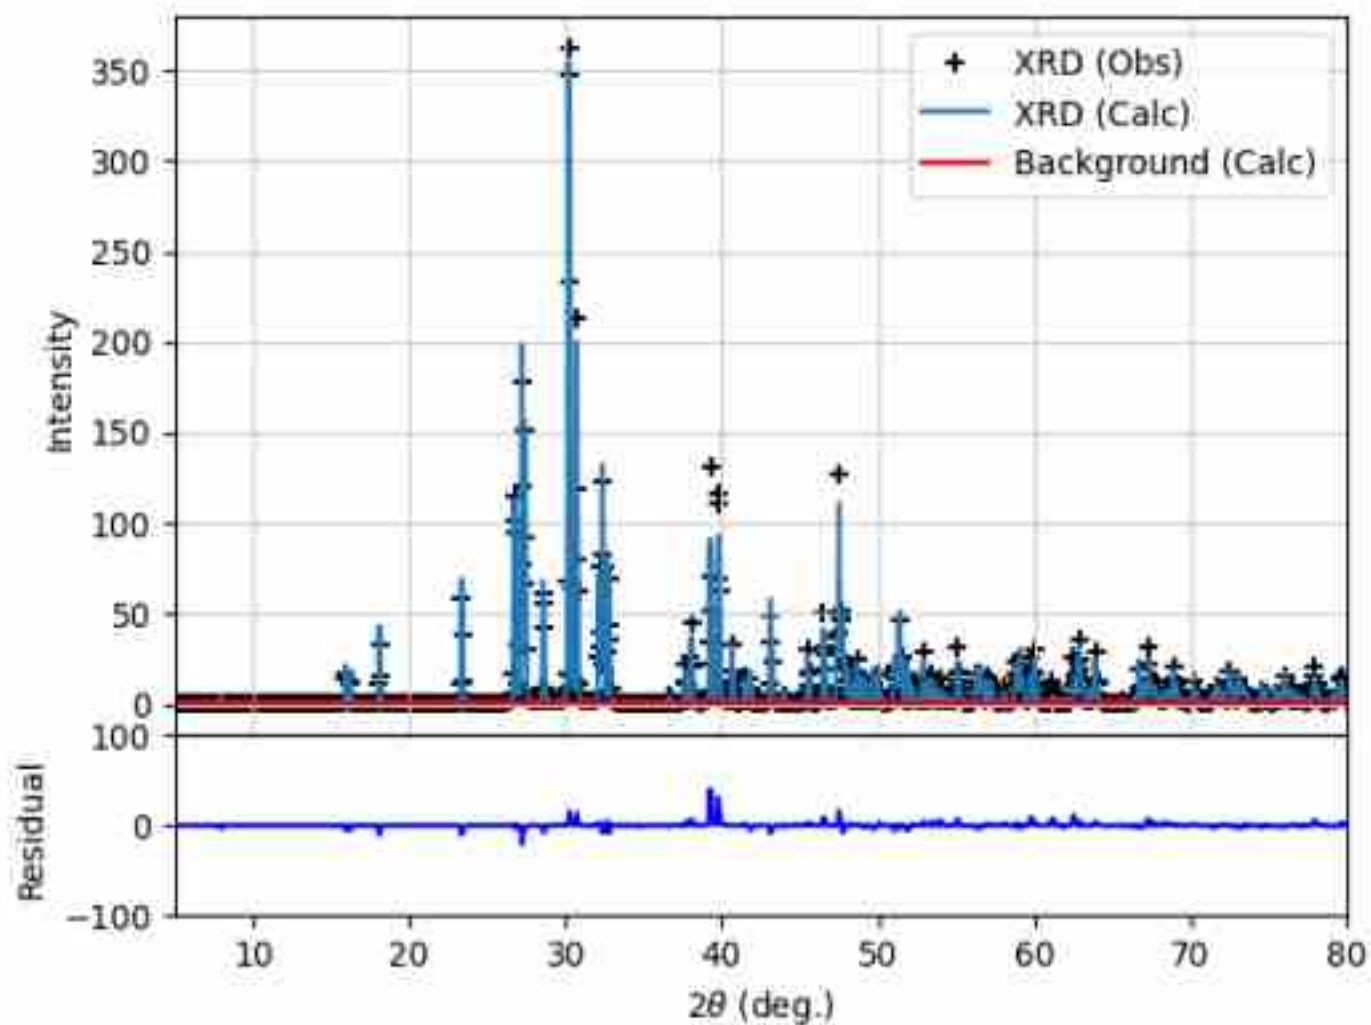

| RMSE before RR | Rwp      | RMSE after RR |
|----------------|----------|---------------|
| 0.253          | 16.72618 | 0.31166       |

# Ba6Sb12

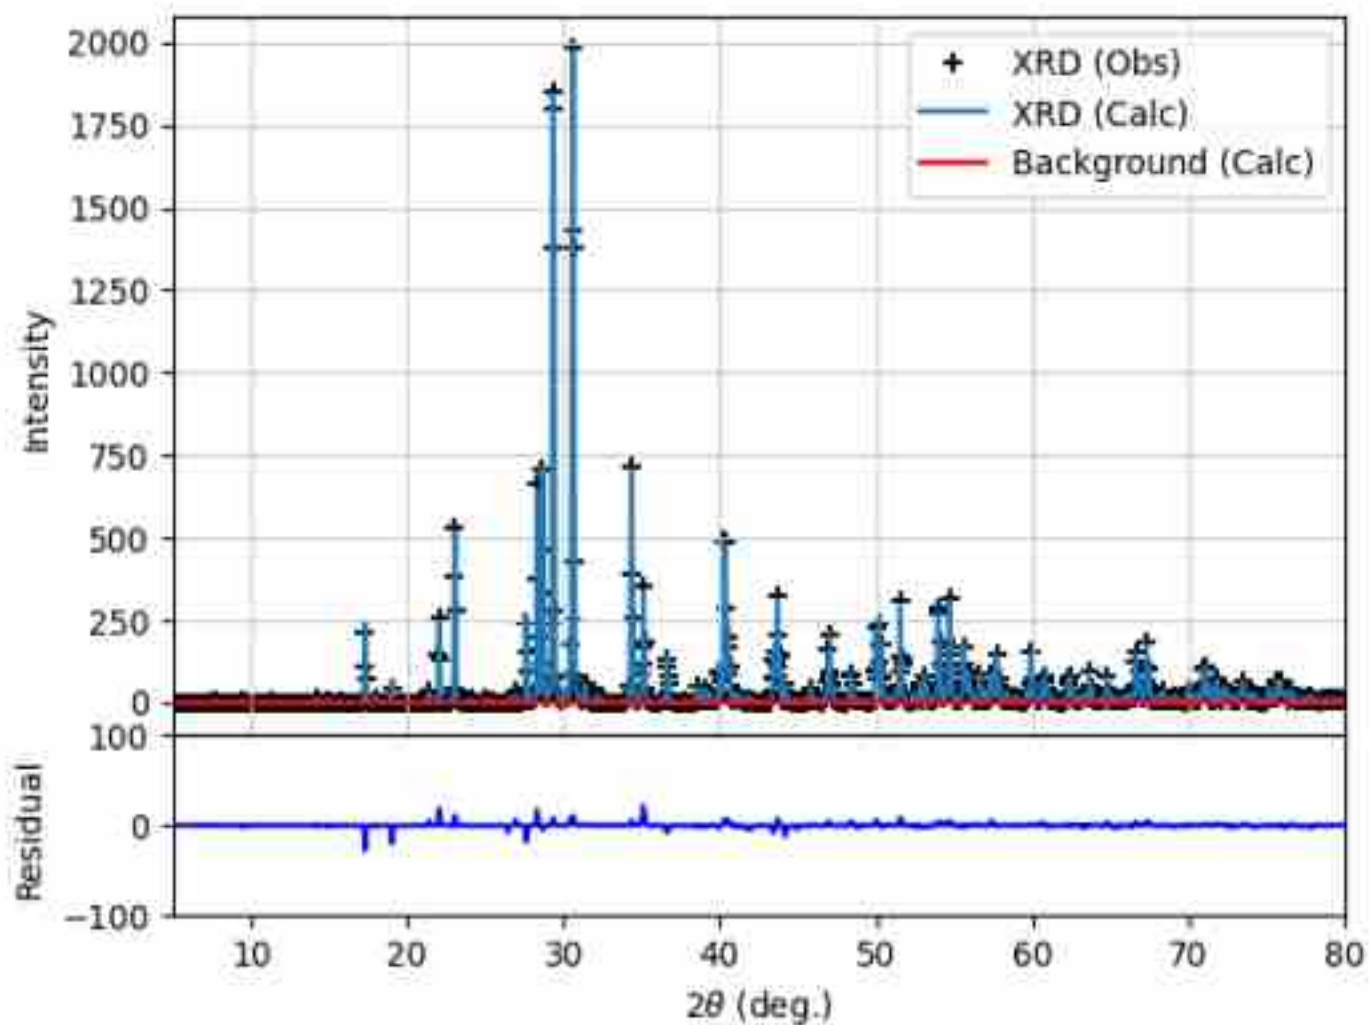

| RMSE before RR | Rwp     | RMSE after RR |
|----------------|---------|---------------|
| 0.253          | 4.95495 | 0.22033       |



# In14Pd6

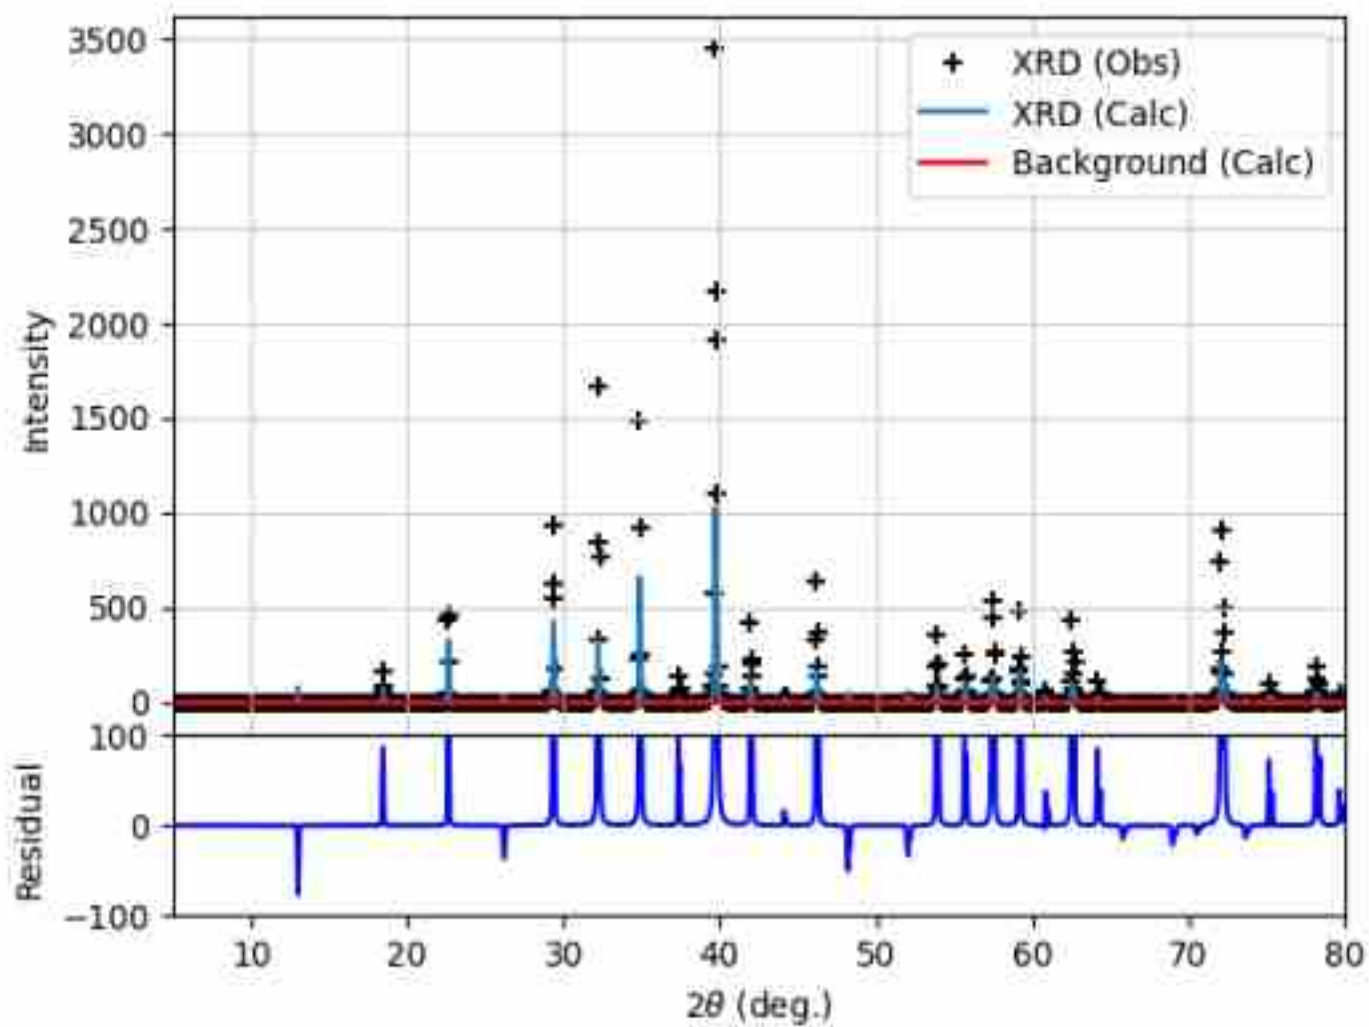

| RMSE before RR | Rwp      | RMSE after RR |
|----------------|----------|---------------|
| 0.253          | 74.31293 | 0.23658       |

# Na<sub>2</sub>Pd<sub>3</sub>O<sub>4</sub>

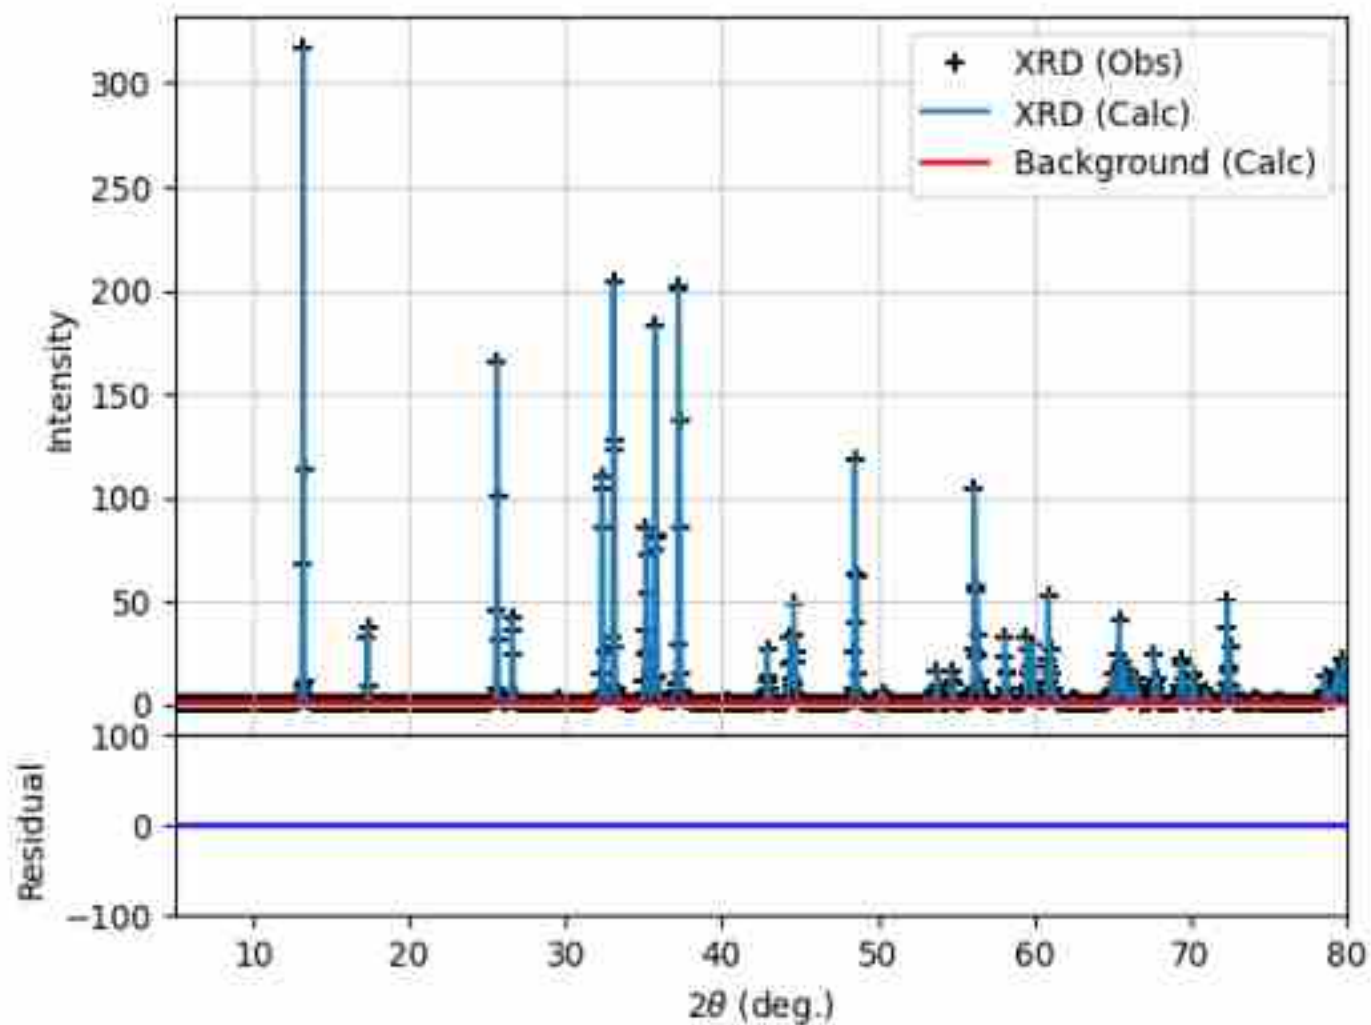

| RMSE before RR | Rwp     | RMSE after RR |
|----------------|---------|---------------|
| 0.253          | 0.00408 | 0.00147       |

# Nb<sub>3</sub>Mo<sub>1</sub>Se<sub>8</sub>

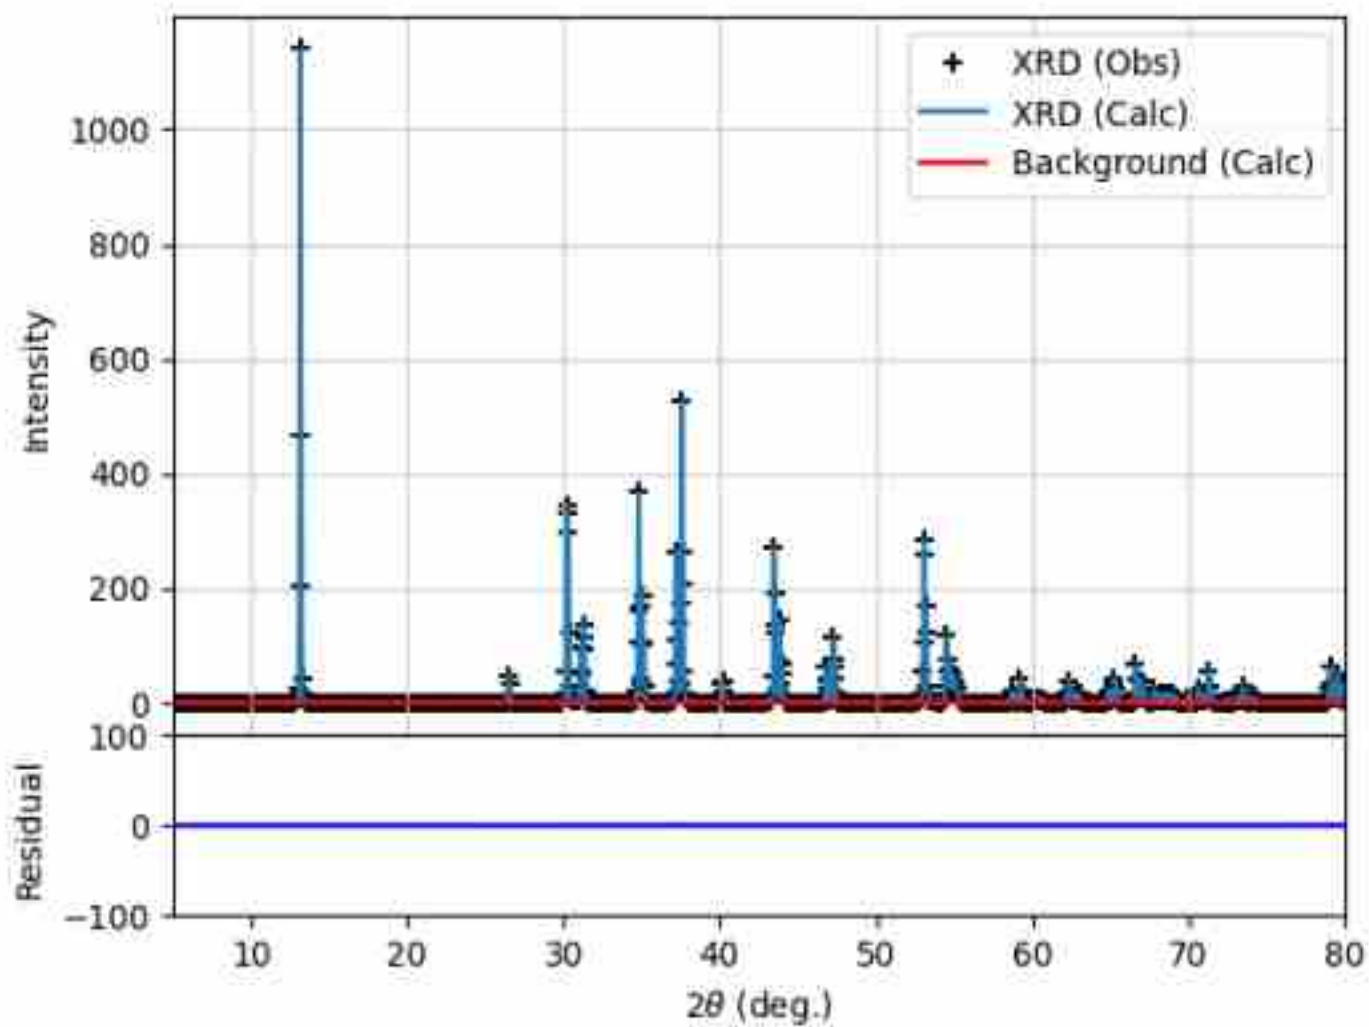

| RMSE before RR | Rwp     | RMSE after RR |
|----------------|---------|---------------|
| 0.253          | 0.60346 | 0.00851       |

# Pb4I8

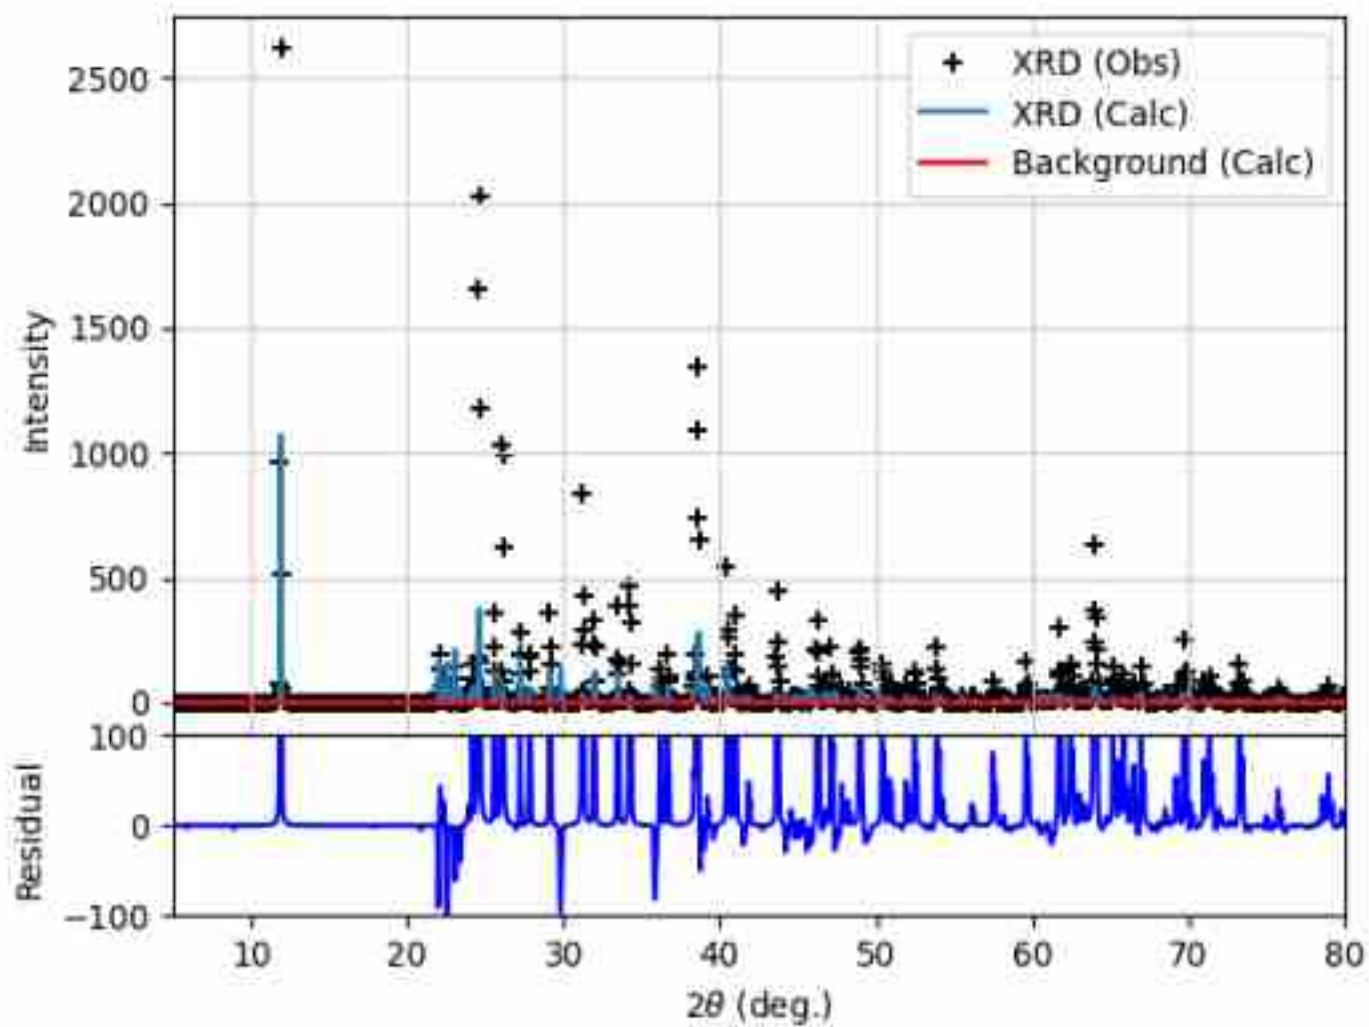

| RMSE before RR | Rwp      | RMSE after RR |
|----------------|----------|---------------|
| 0.254          | 80.77627 | 0.31128       |

# Se4Br4

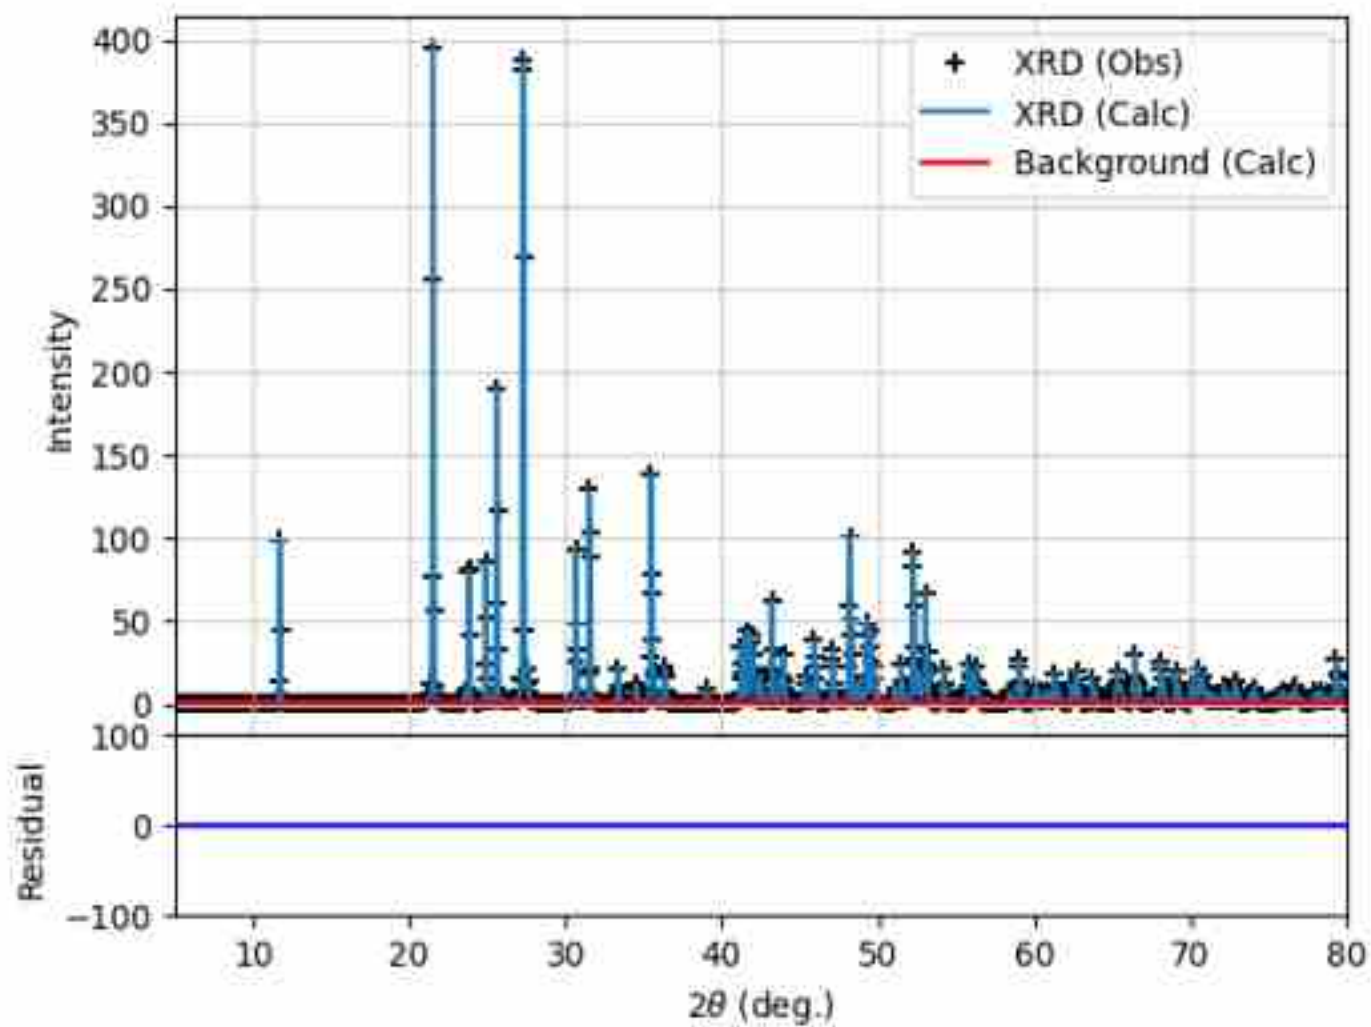

| RMSE before RR | Rwp     | RMSE after RR |
|----------------|---------|---------------|
| 0.254          | 0.00417 | 0.00032       |

# W<sub>3</sub>Se<sub>4</sub>S<sub>2</sub>

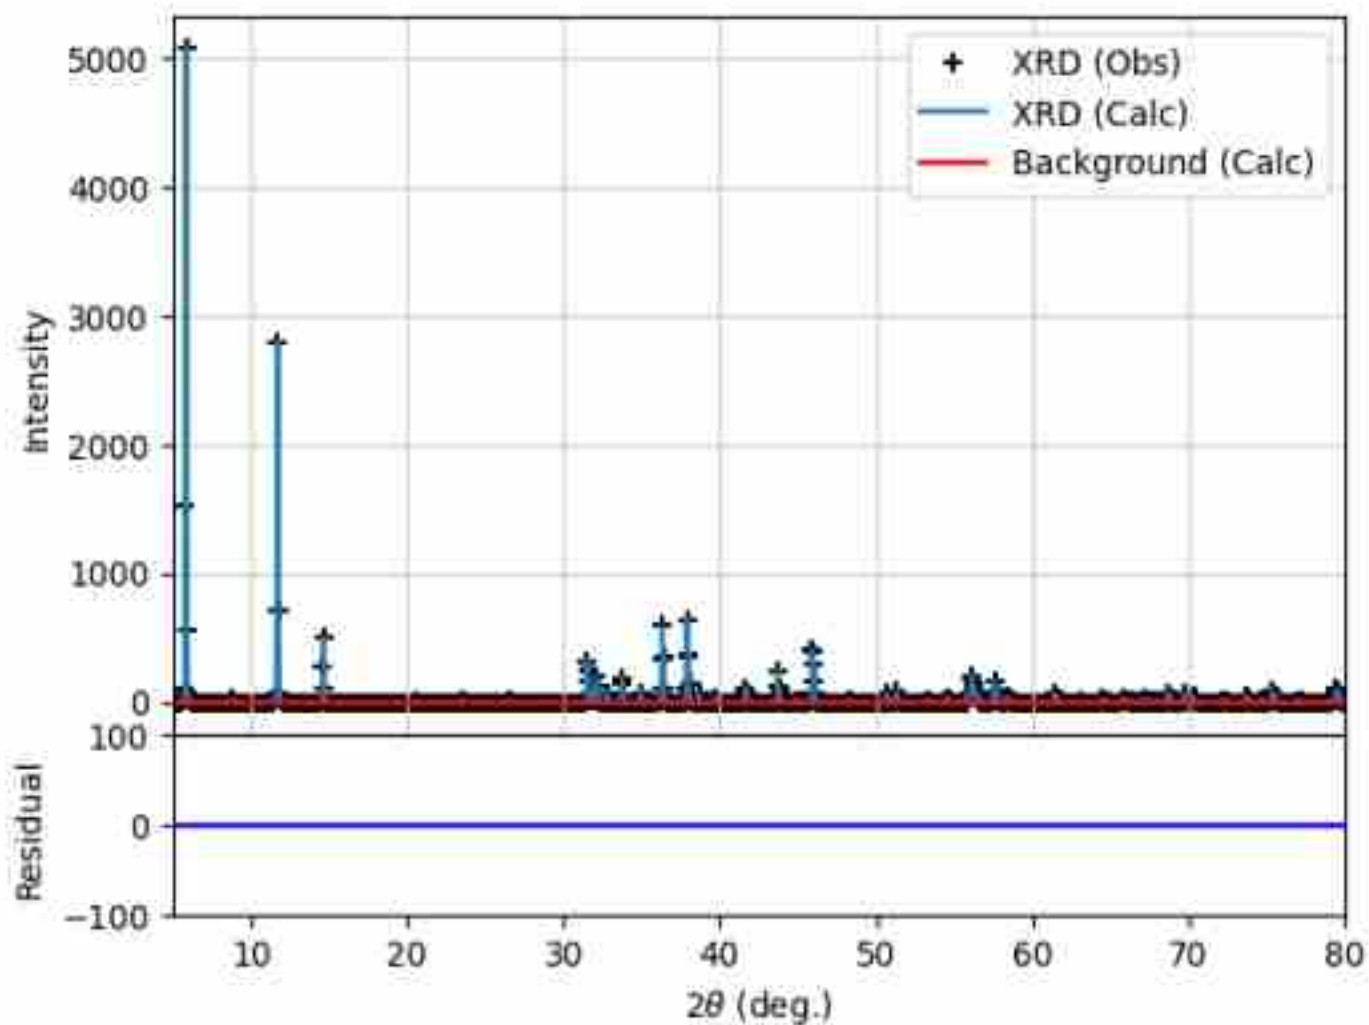

| RMSE before RR | Rwp     | RMSE after RR |
|----------------|---------|---------------|
| 0.254          | 0.00248 | 0.00066       |

# Ca<sub>4</sub>Fe<sub>4</sub>O<sub>8</sub>

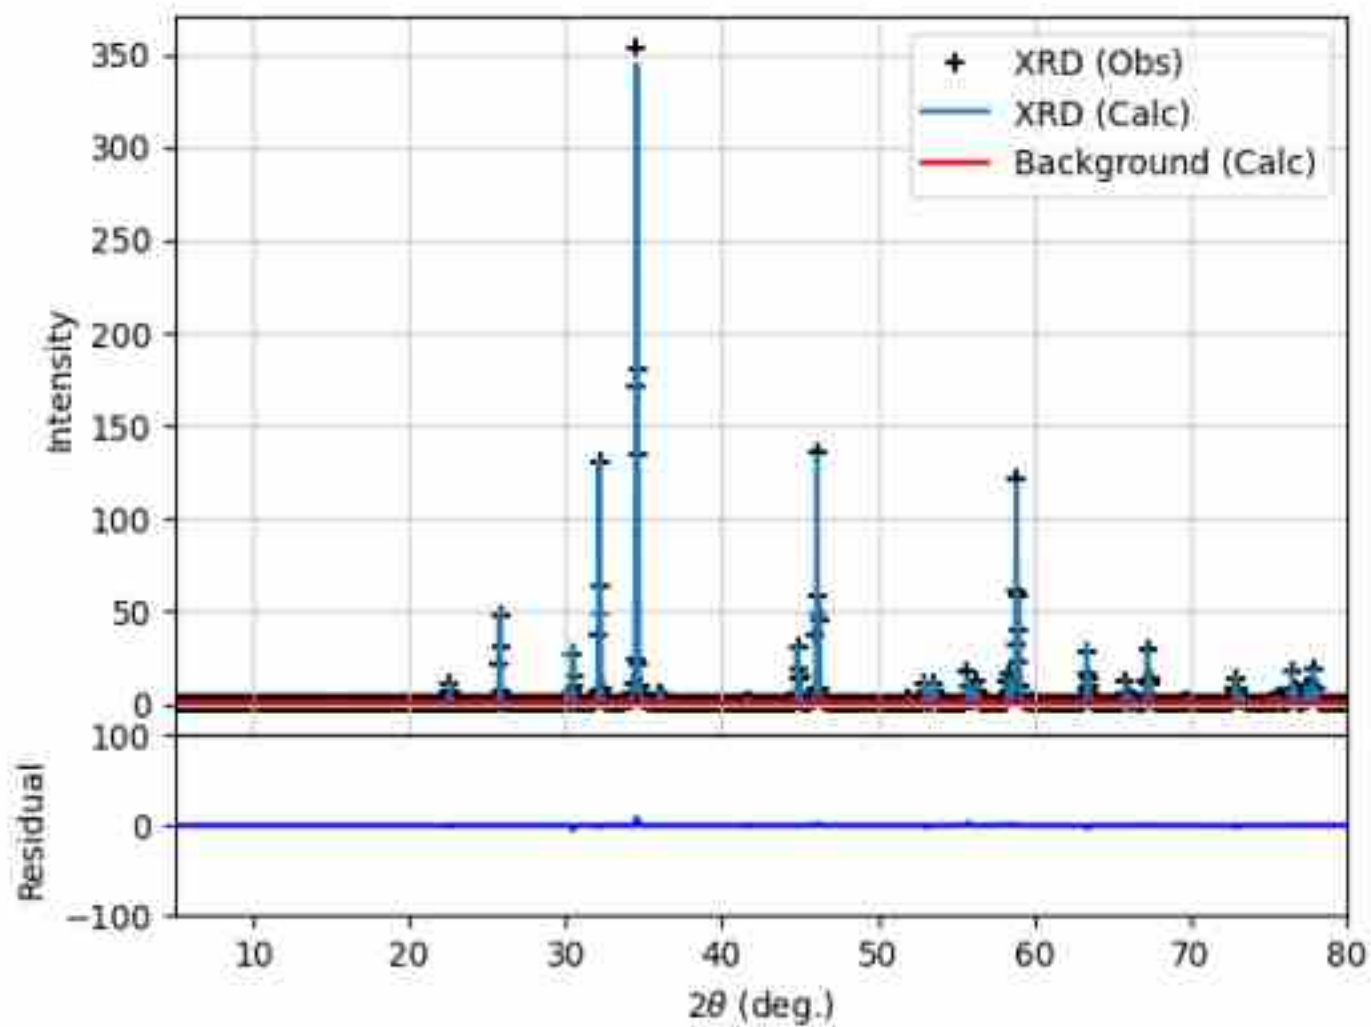

| RMSE before RR | Rwp    | RMSE after RR |
|----------------|--------|---------------|
| 0.255          | 4.9055 | 0.23546       |

# Sm4Lu4Se12

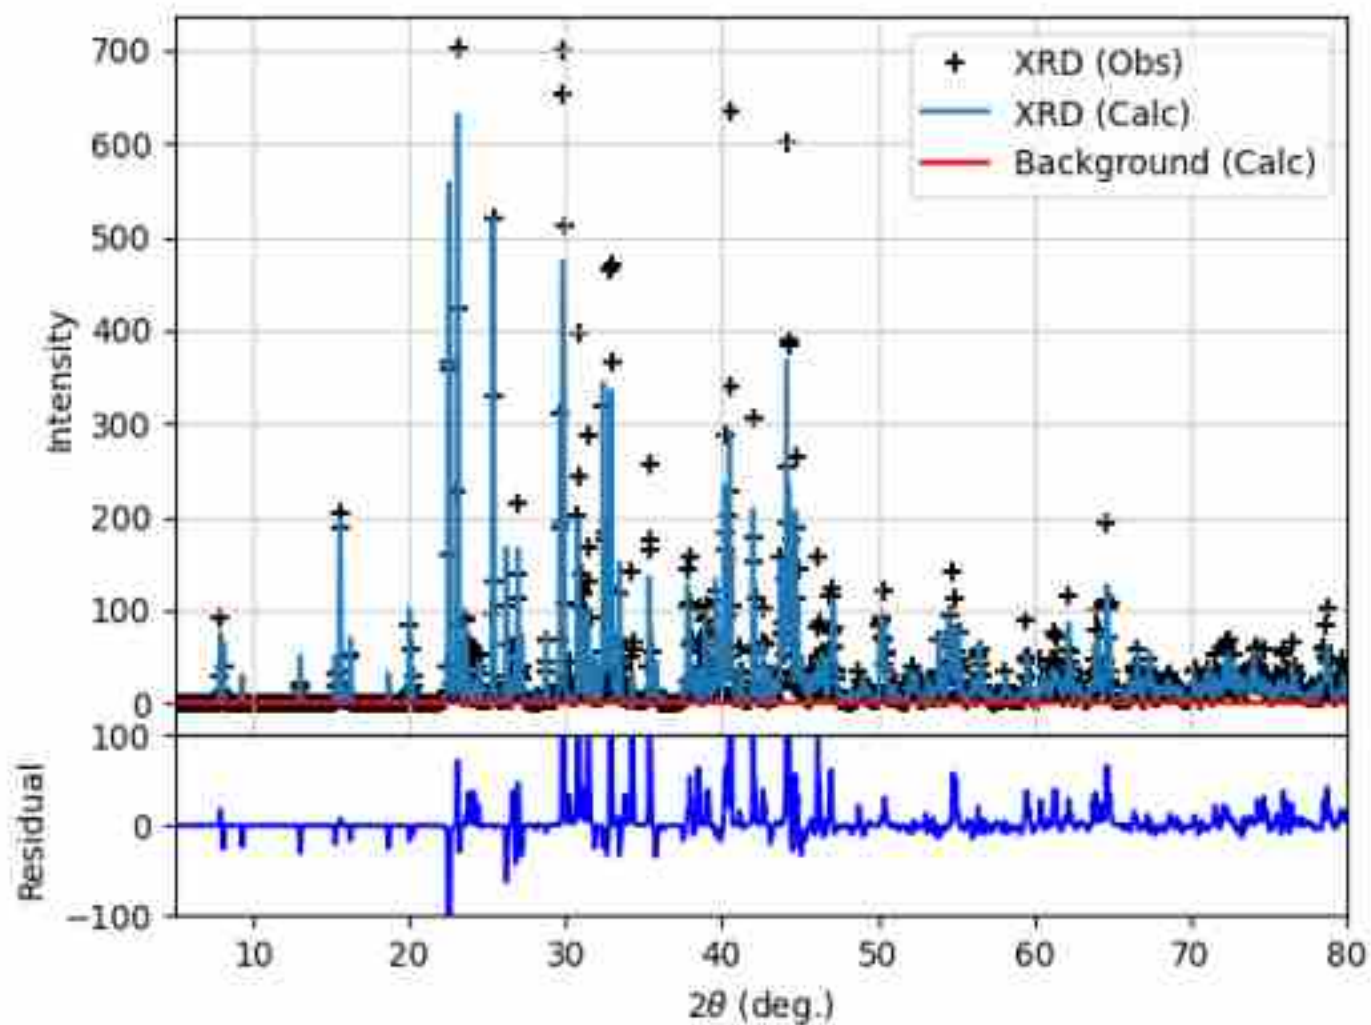

| RMSE before RR | Rwp      | RMSE after RR |
|----------------|----------|---------------|
| 0.255          | 40.49946 | 0.32663       |



# Ba6P12

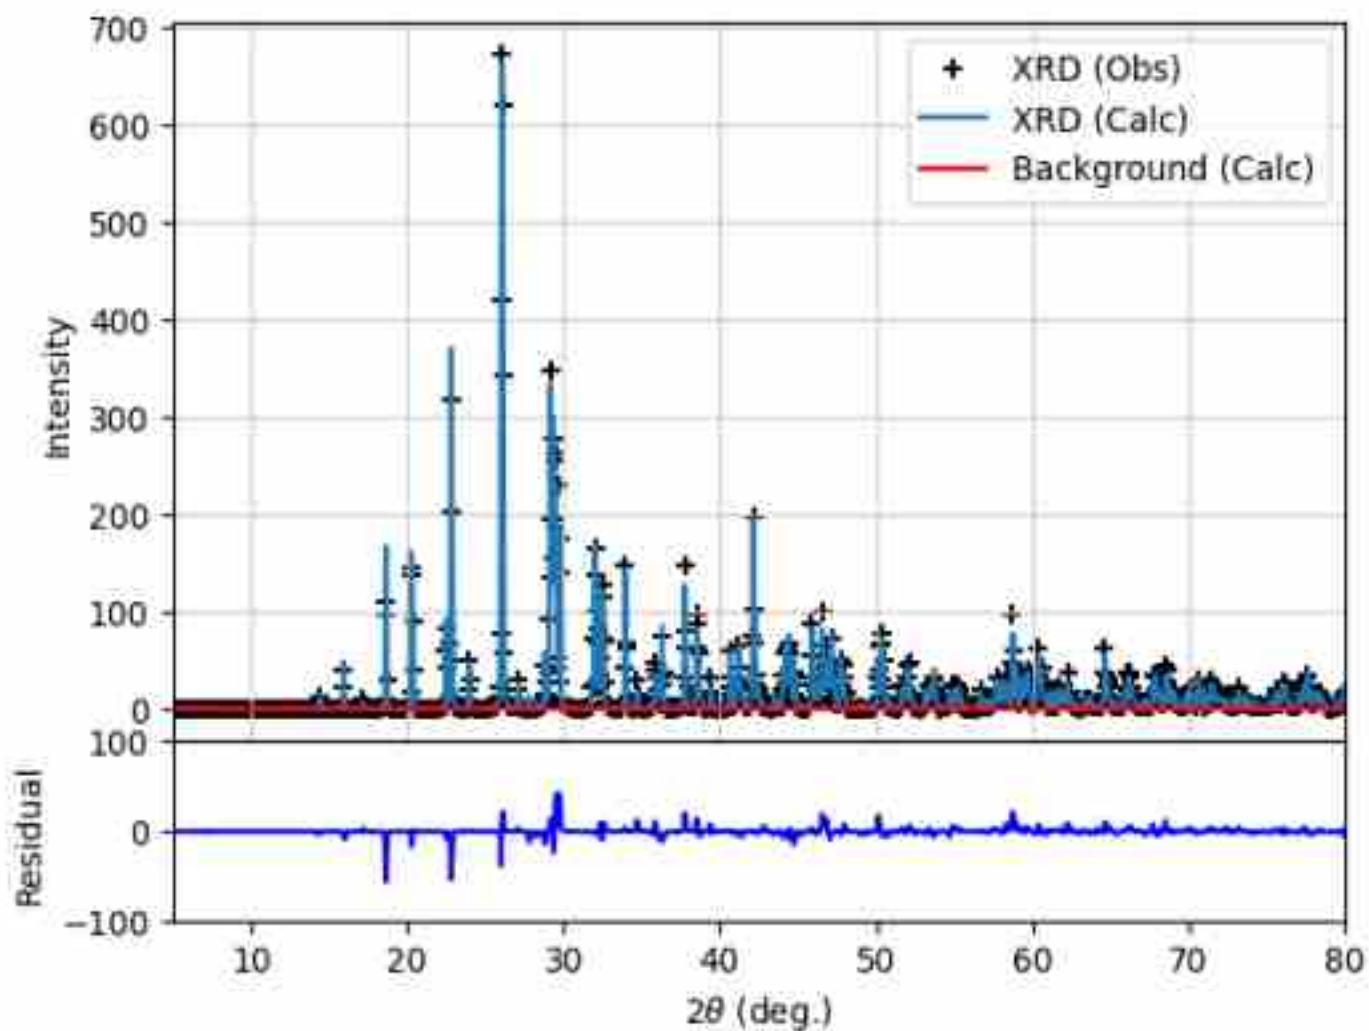

| RMSE before RR | Rwp      | RMSE after RR |
|----------------|----------|---------------|
| 0.256          | 19.26856 | 0.27669       |

# Cs<sub>1</sub>Mn<sub>1</sub>P<sub>3</sub>H<sub>1</sub>O<sub>10</sub>

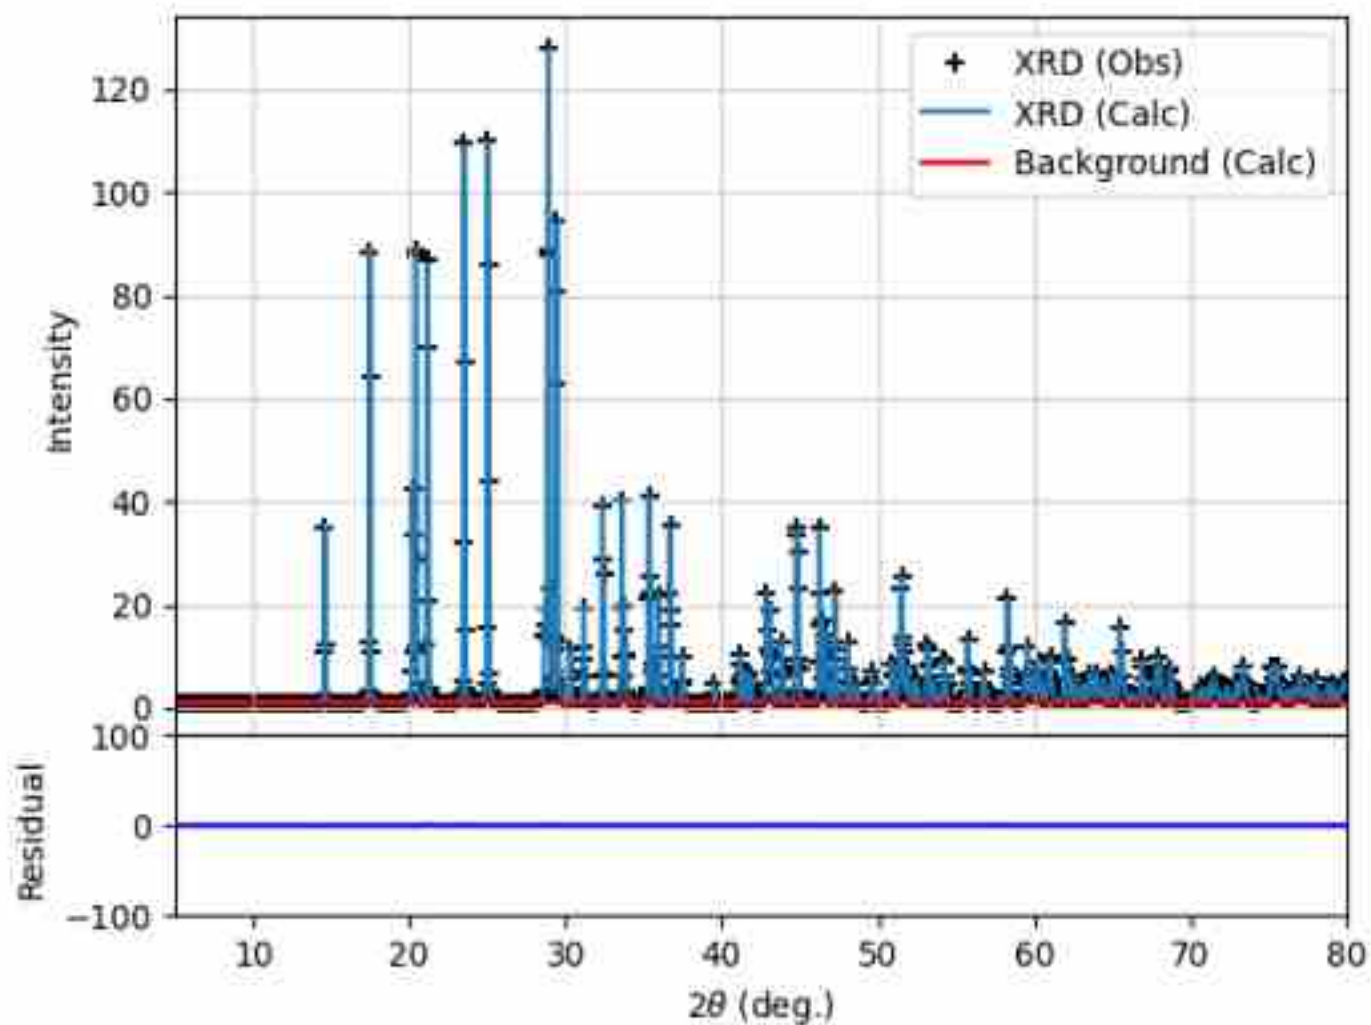

| RMSE before RR | Rwp     | RMSE after RR |
|----------------|---------|---------------|
| 0.256          | 0.70429 | 0.35975       |

# Hg<sub>2</sub>S<sub>2</sub>

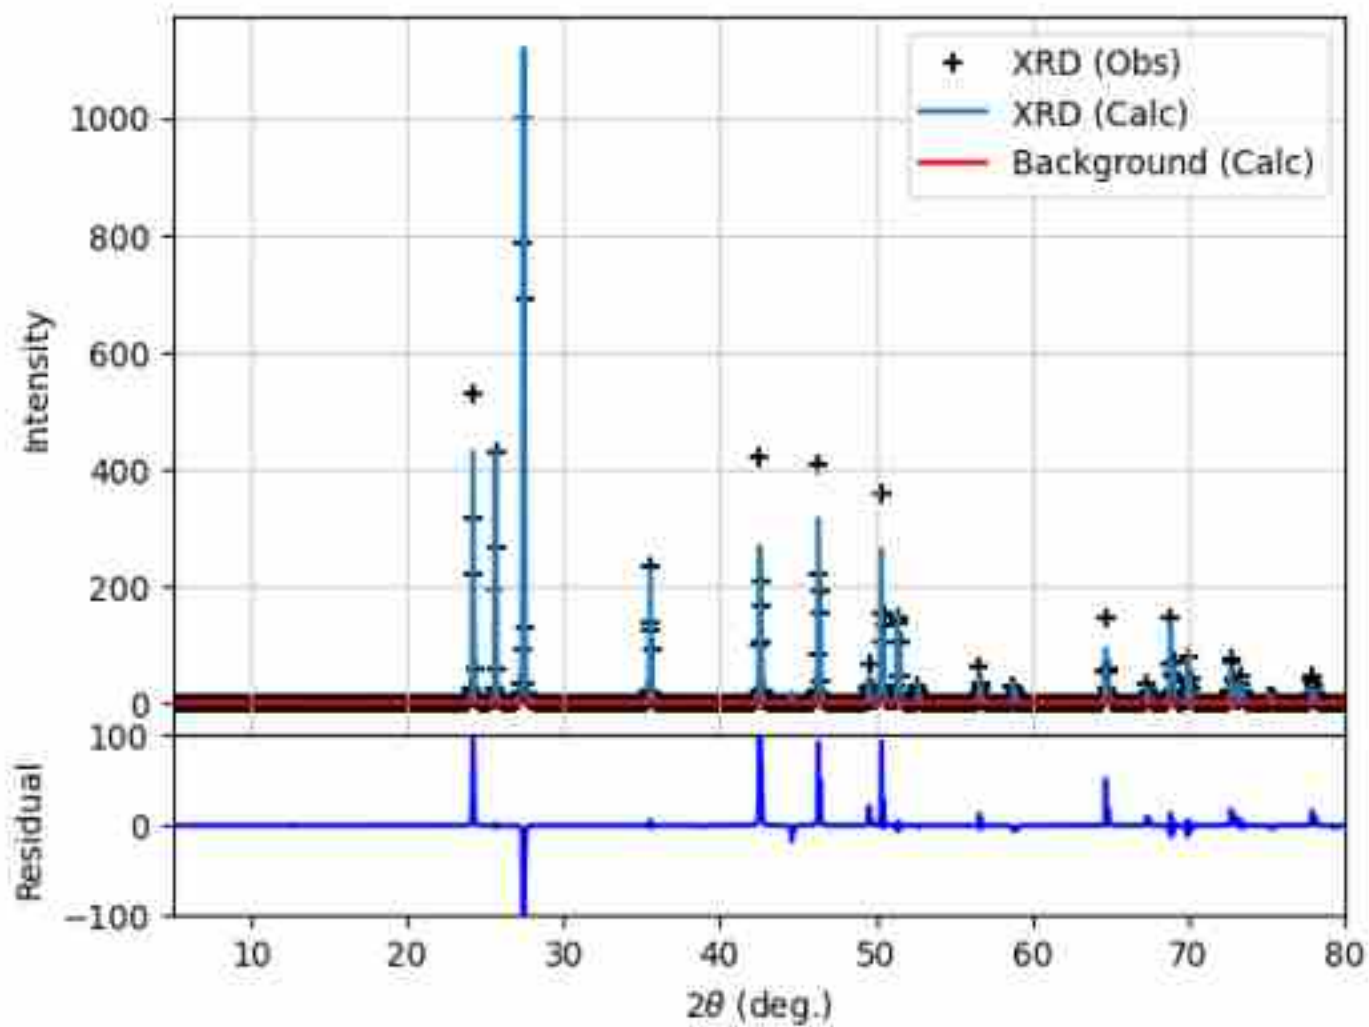

| RMSE before RR | Rwp      | RMSE after RR |
|----------------|----------|---------------|
| 0.256          | 24.97066 | 0.24577       |

# Sn2Br2Cl2

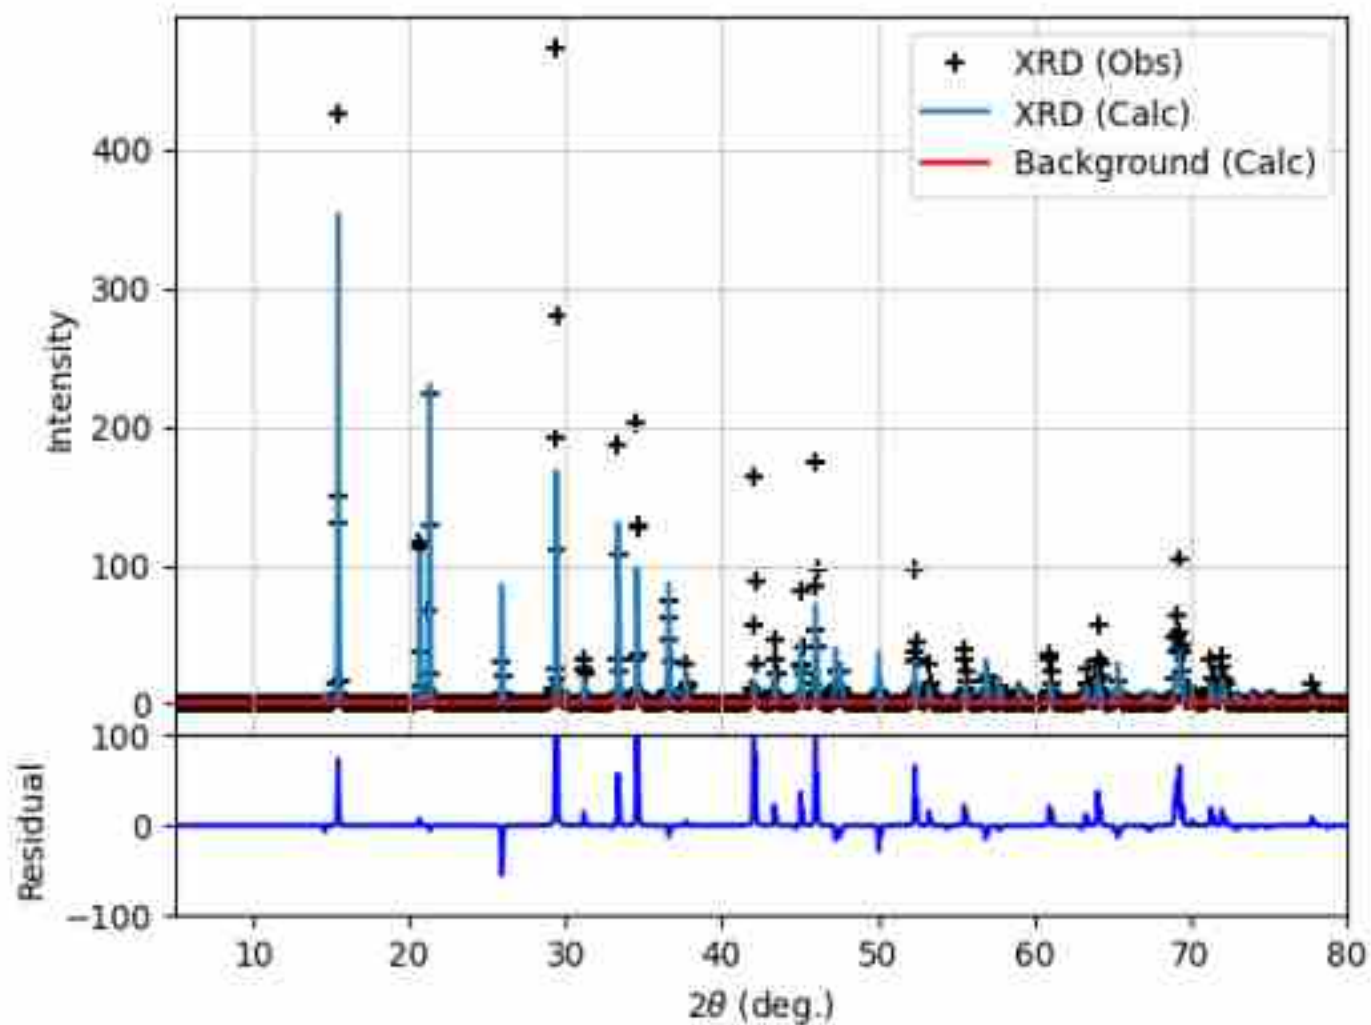

| RMSE before RR | Rwp      | RMSE after RR |
|----------------|----------|---------------|
| 0.256          | 53.95181 | None          |

# Ta<sub>2</sub>Ni<sub>1</sub>S<sub>4</sub>

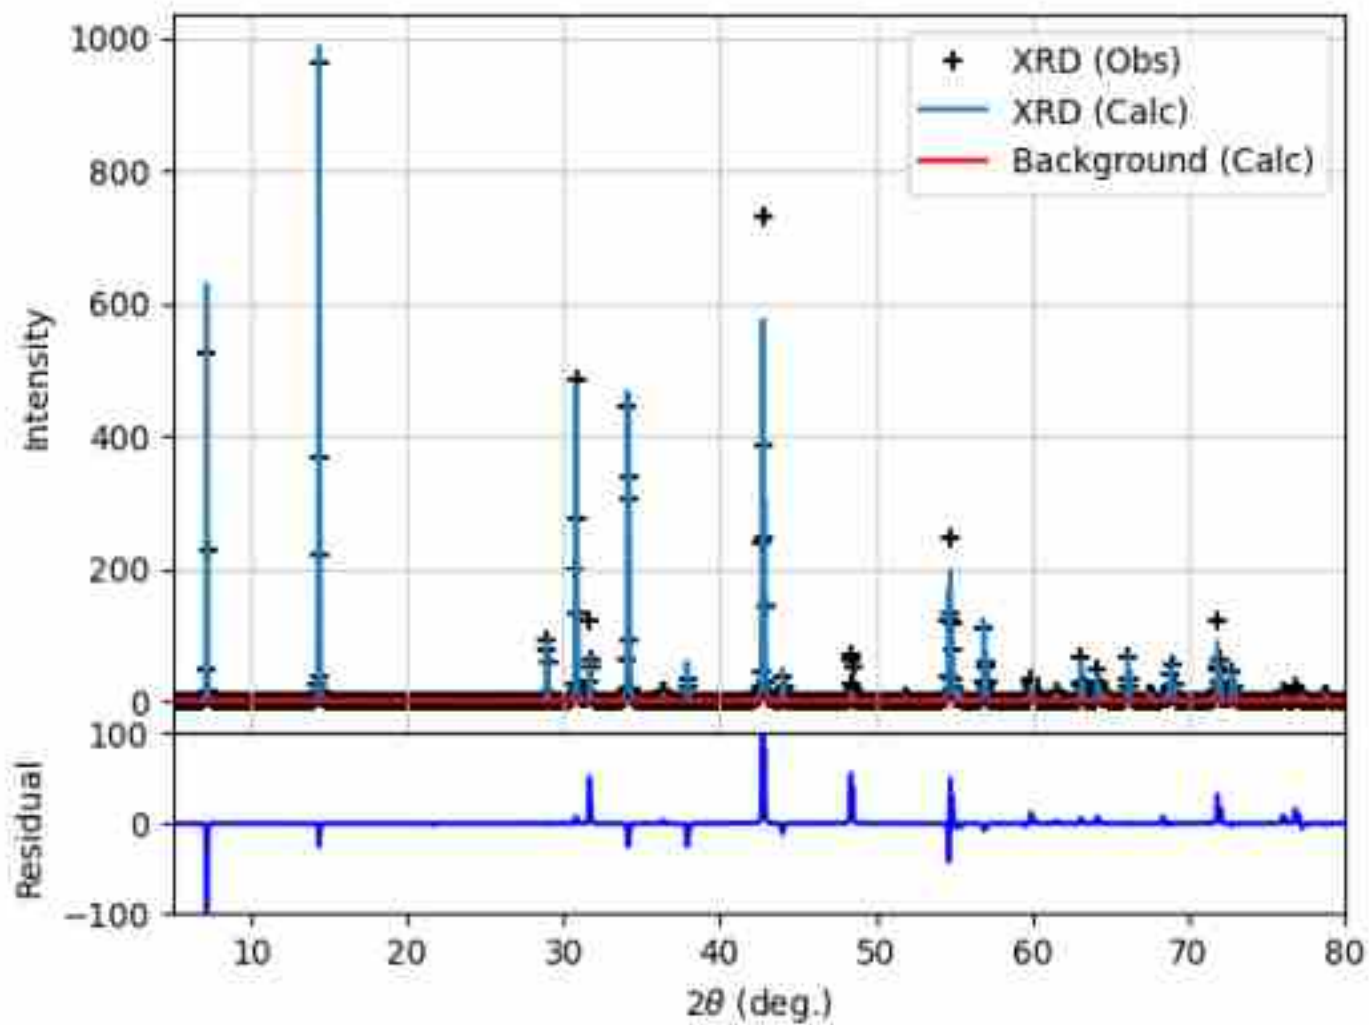

| RMSE before RR | Rwp      | RMSE after RR |
|----------------|----------|---------------|
| 0.256          | 21.03306 | None          |

# La<sub>4</sub>Sb<sub>4</sub>Se<sub>12</sub>

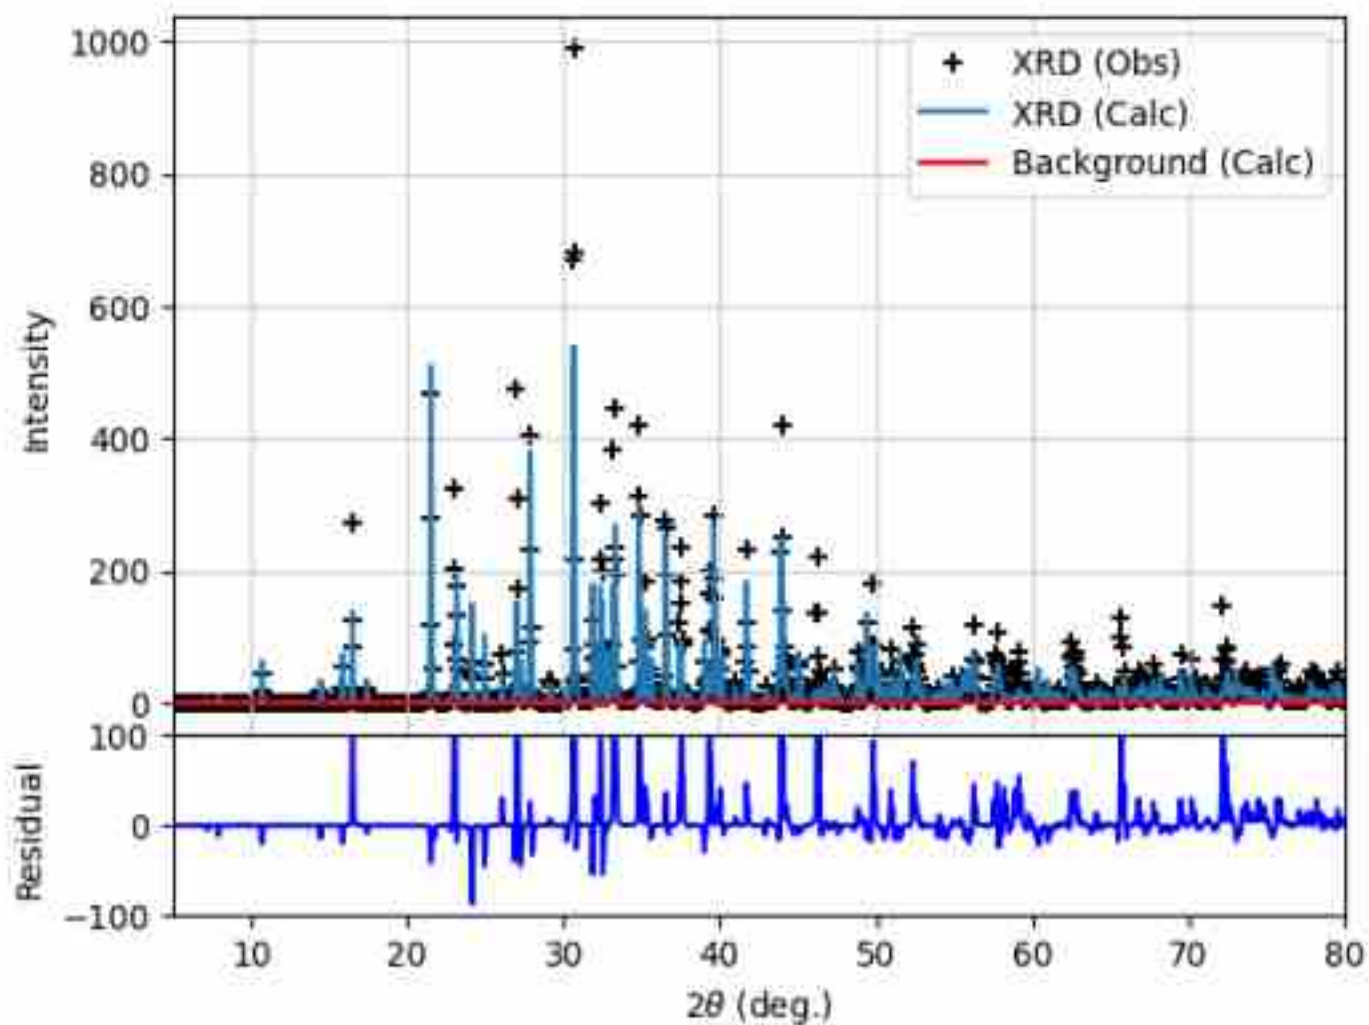

| RMSE before RR | Rwp      | RMSE after RR |
|----------------|----------|---------------|
| 0.257          | 49.03835 | 0.38765       |

# Be<sub>6</sub>H<sub>12</sub>

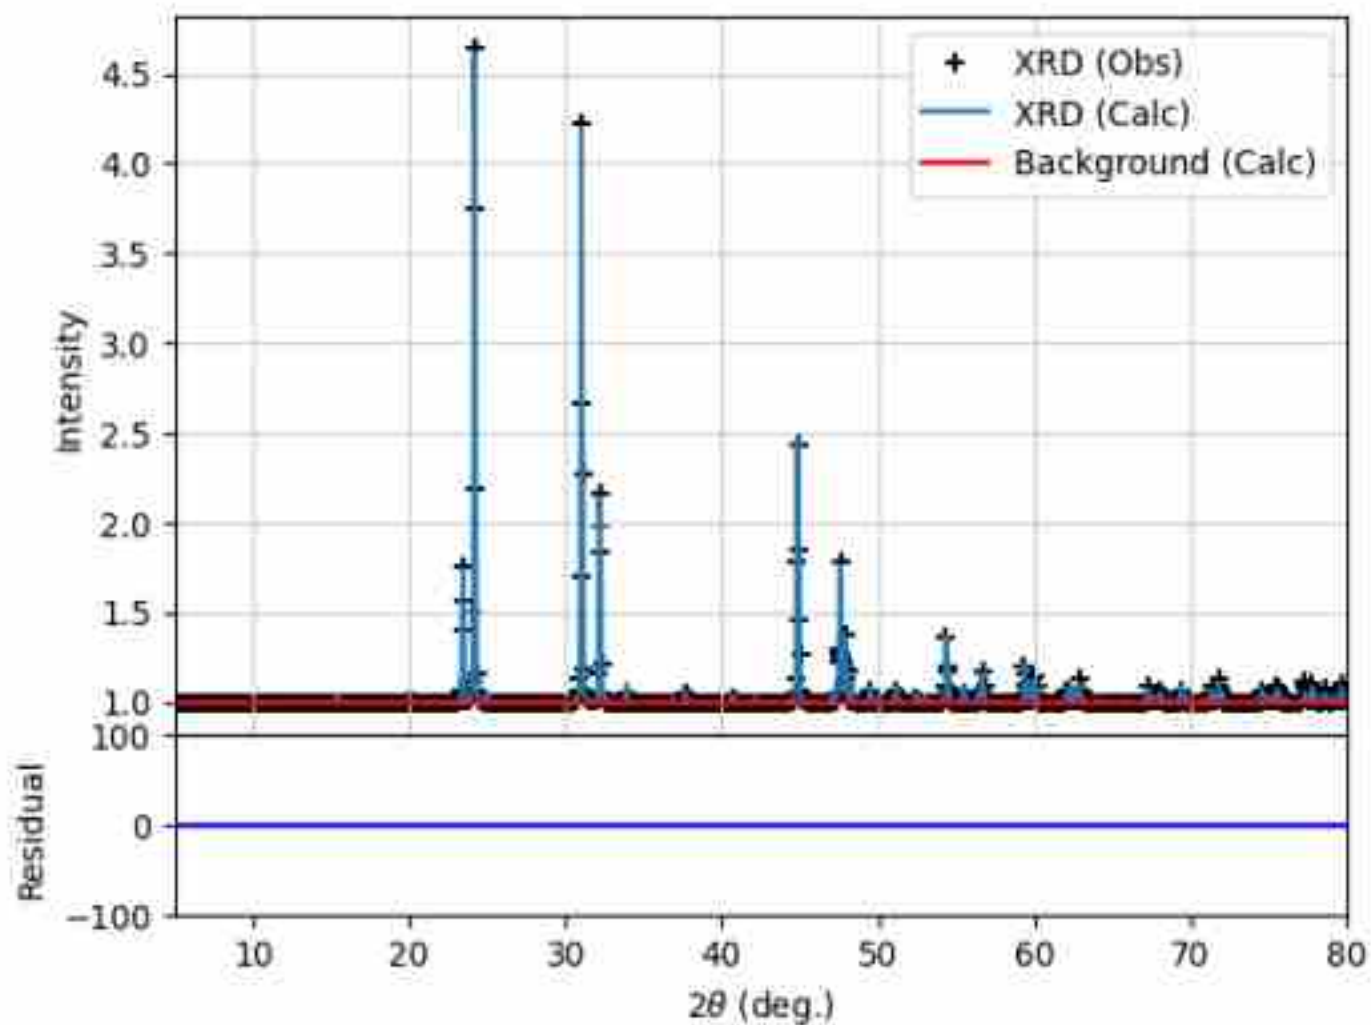

| RMSE before RR | Rwp     | RMSE after RR |
|----------------|---------|---------------|
| 0.258          | 0.73984 | None          |

# Na<sub>2</sub>H<sub>2</sub>Se<sub>2</sub>O<sub>8</sub>

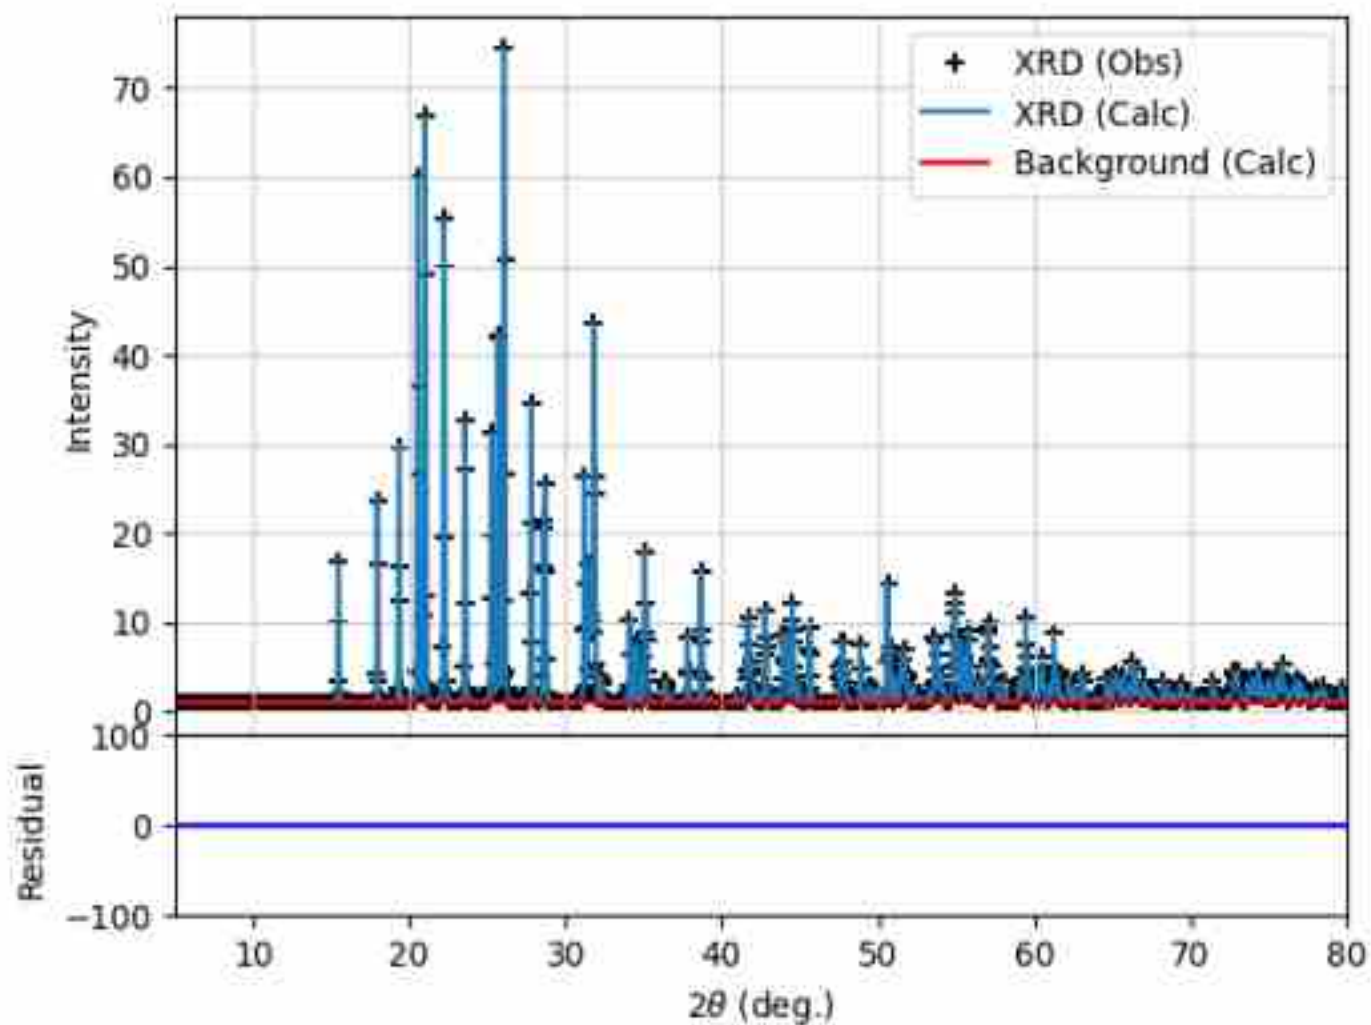

| RMSE before RR | Rwp     | RMSE after RR |
|----------------|---------|---------------|
| 0.259          | 0.00133 | 1e-05         |



# Nb<sub>3</sub>W<sub>1</sub>Se<sub>8</sub>

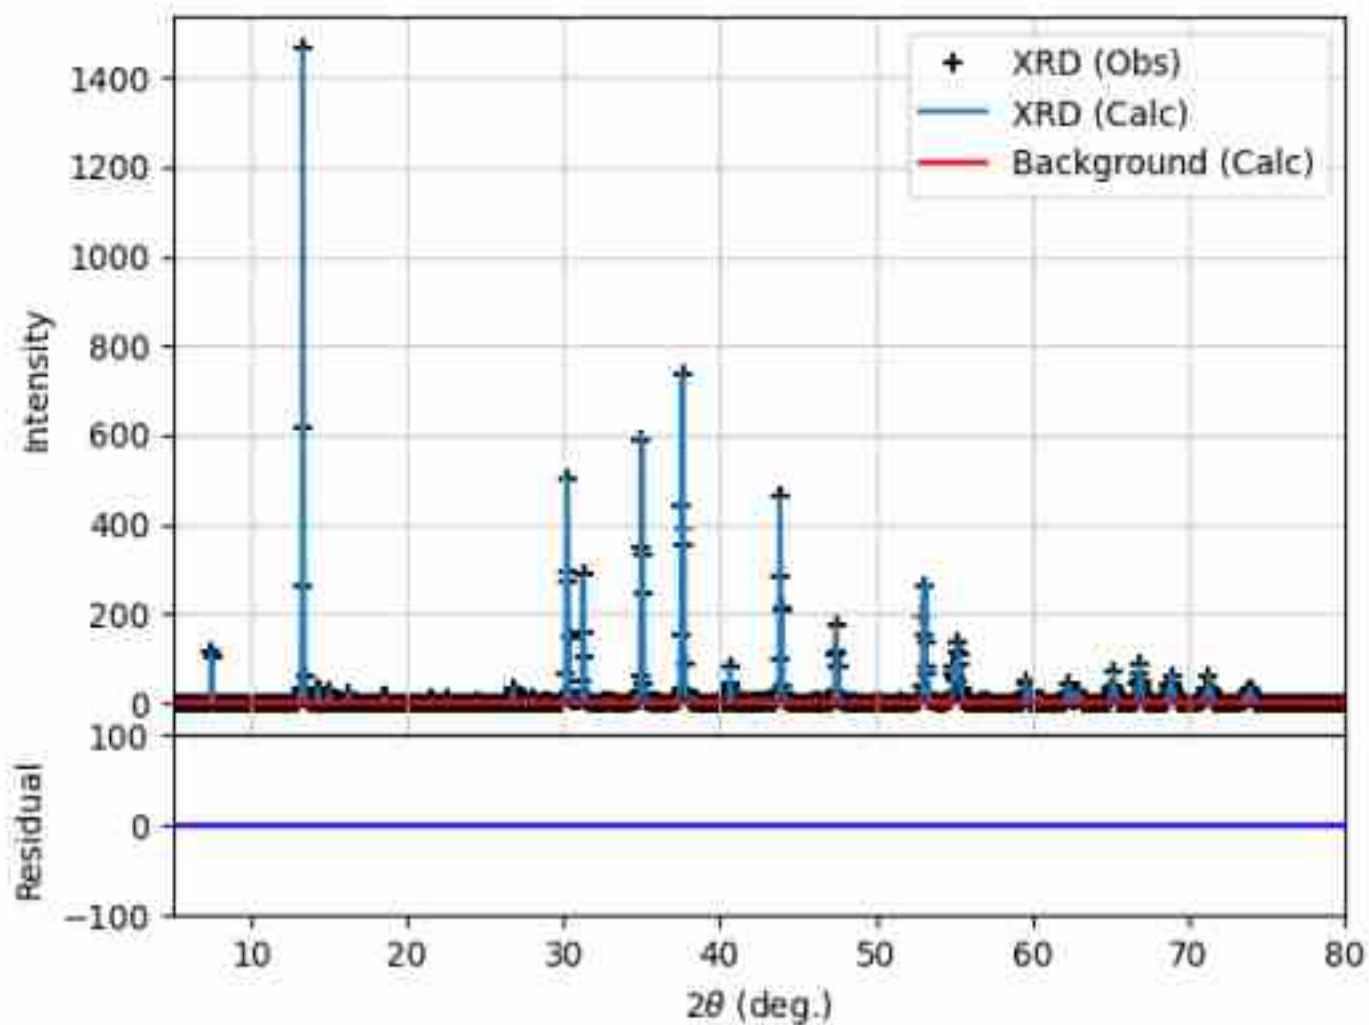

| RMSE before RR | Rwp     | RMSE after RR |
|----------------|---------|---------------|
| 0.259          | 0.00293 | 0.00019       |

# U<sub>3</sub>H<sub>2</sub>O<sub>10</sub>

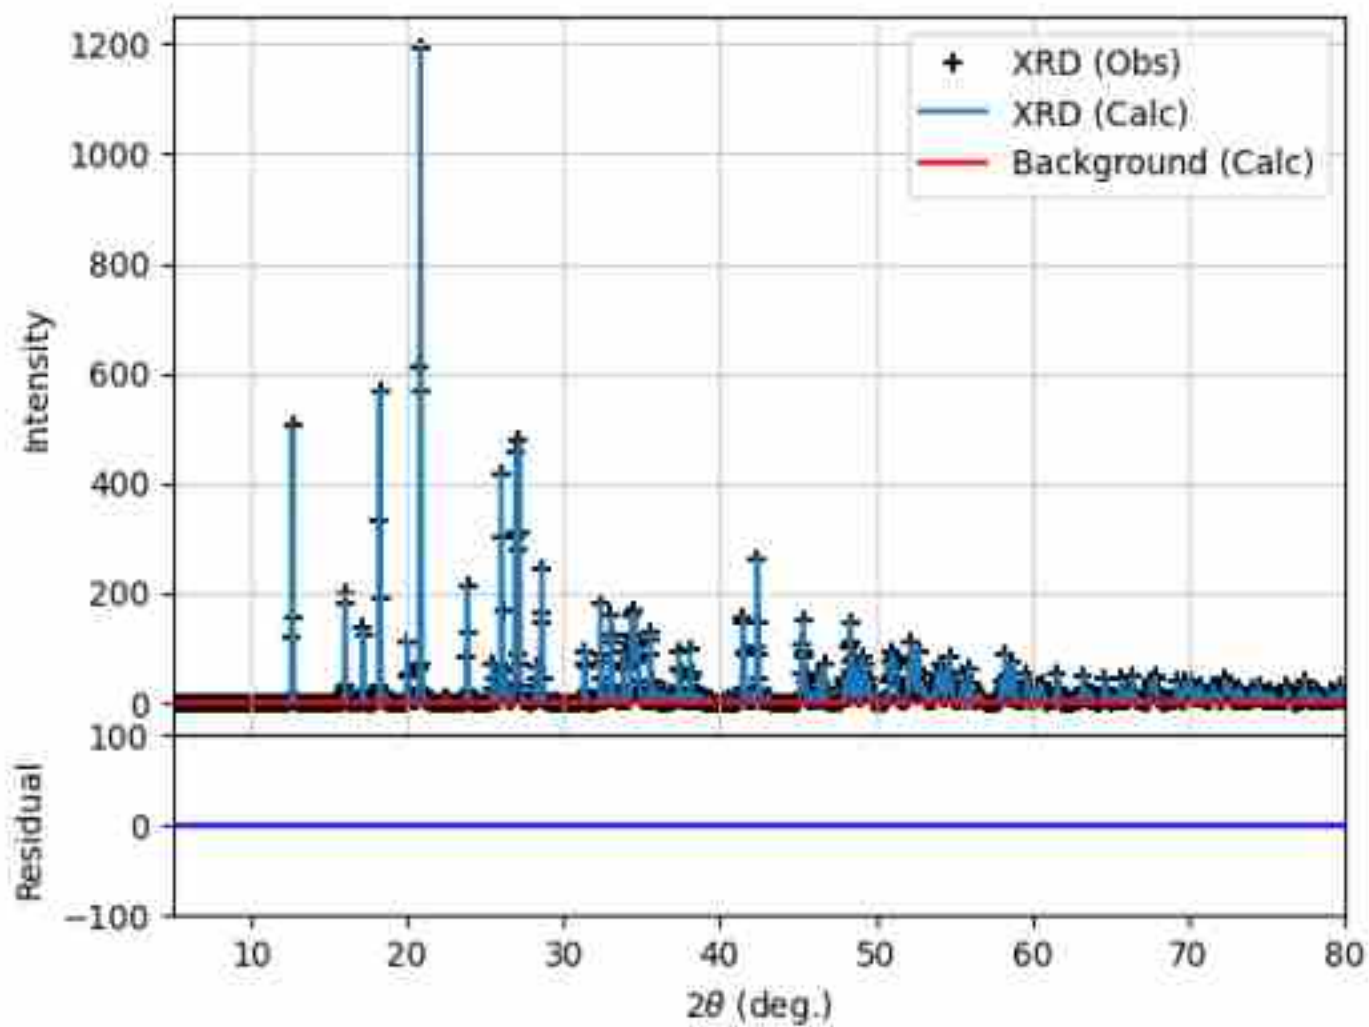

| RMSE before RR | Rwp    | RMSE after RR |
|----------------|--------|---------------|
| 0.259          | 0.0069 | 0.3599        |

# Ga4

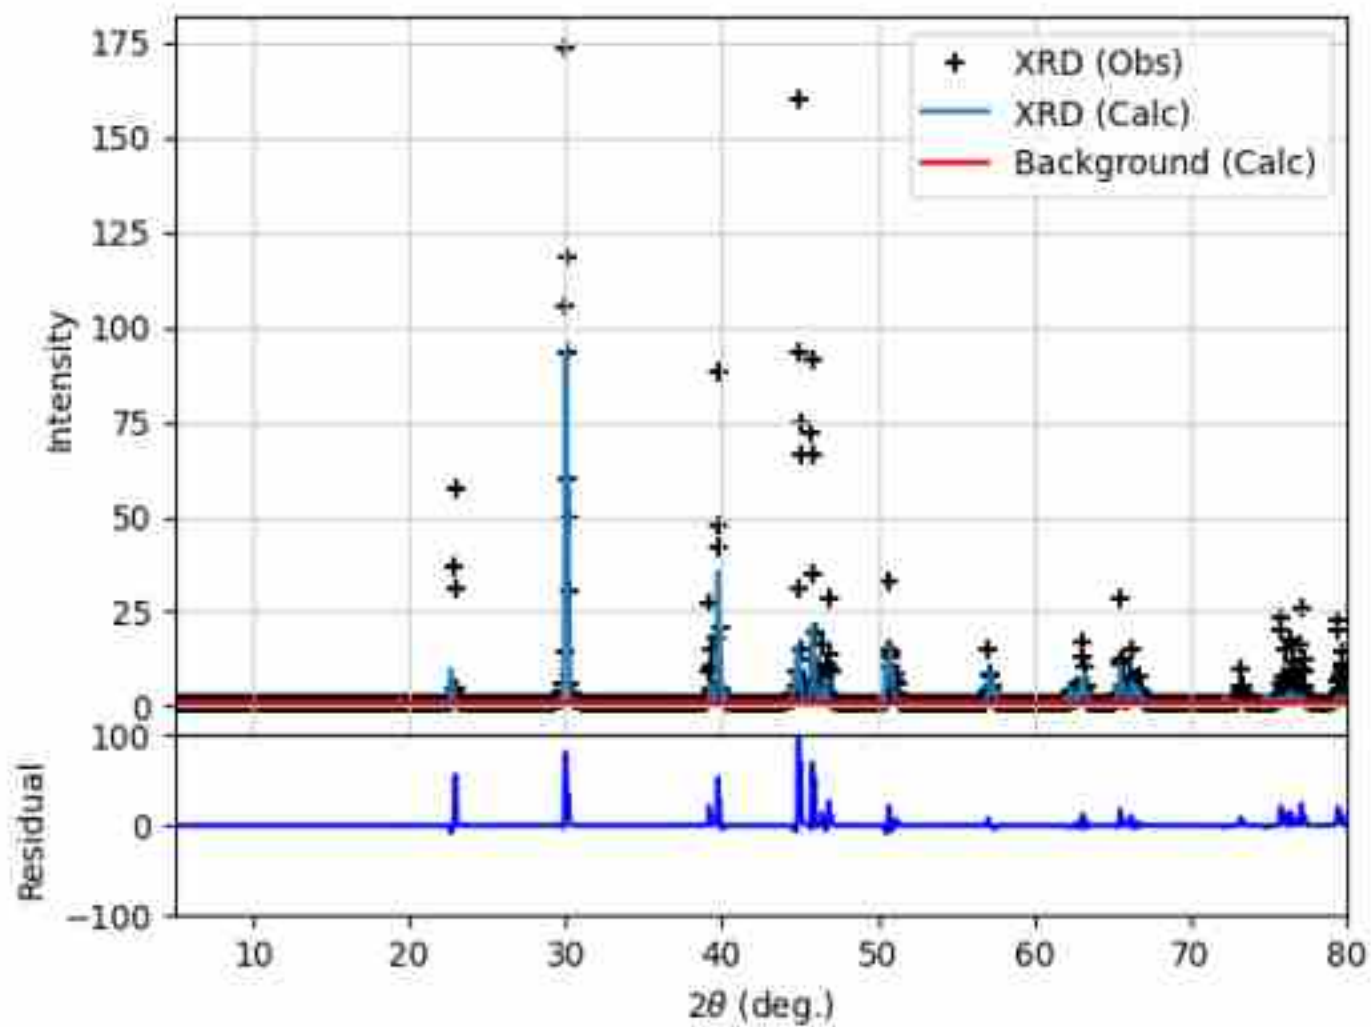

| RMSE before RR | Rwp      | RMSE after RR |
|----------------|----------|---------------|
| 0.261          | 62.05677 | 0.21334       |

# Li<sub>3</sub>Ni<sub>5</sub>O<sub>1</sub>F<sub>11</sub>

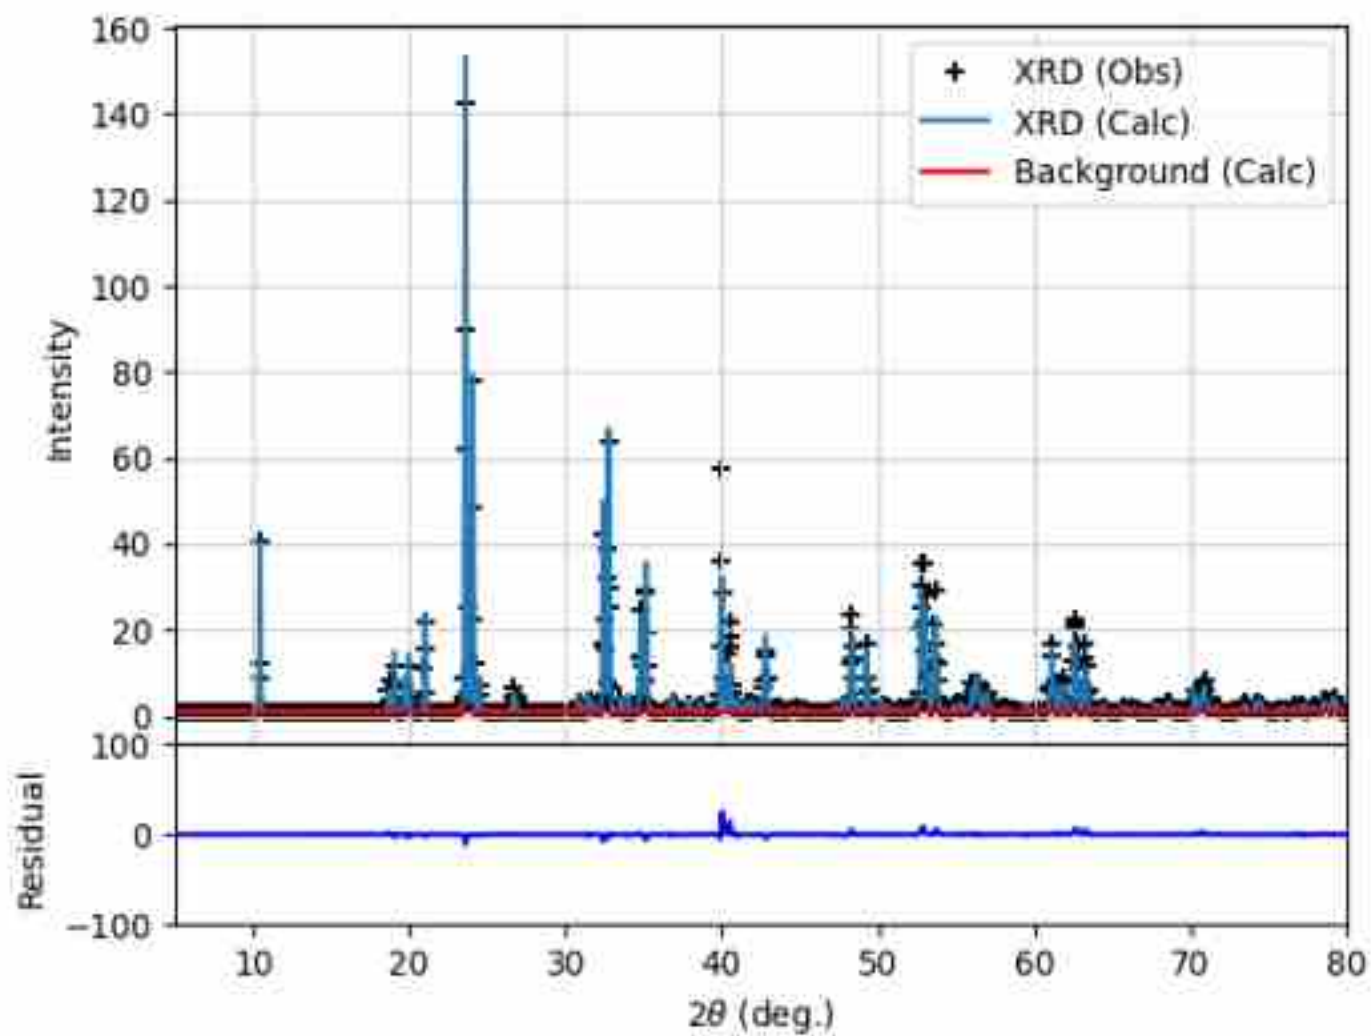

| RMSE before RR | Rwp     | RMSE after RR |
|----------------|---------|---------------|
| 0.261          | 17.9832 | 0.36056       |

# Li4V2O2F8

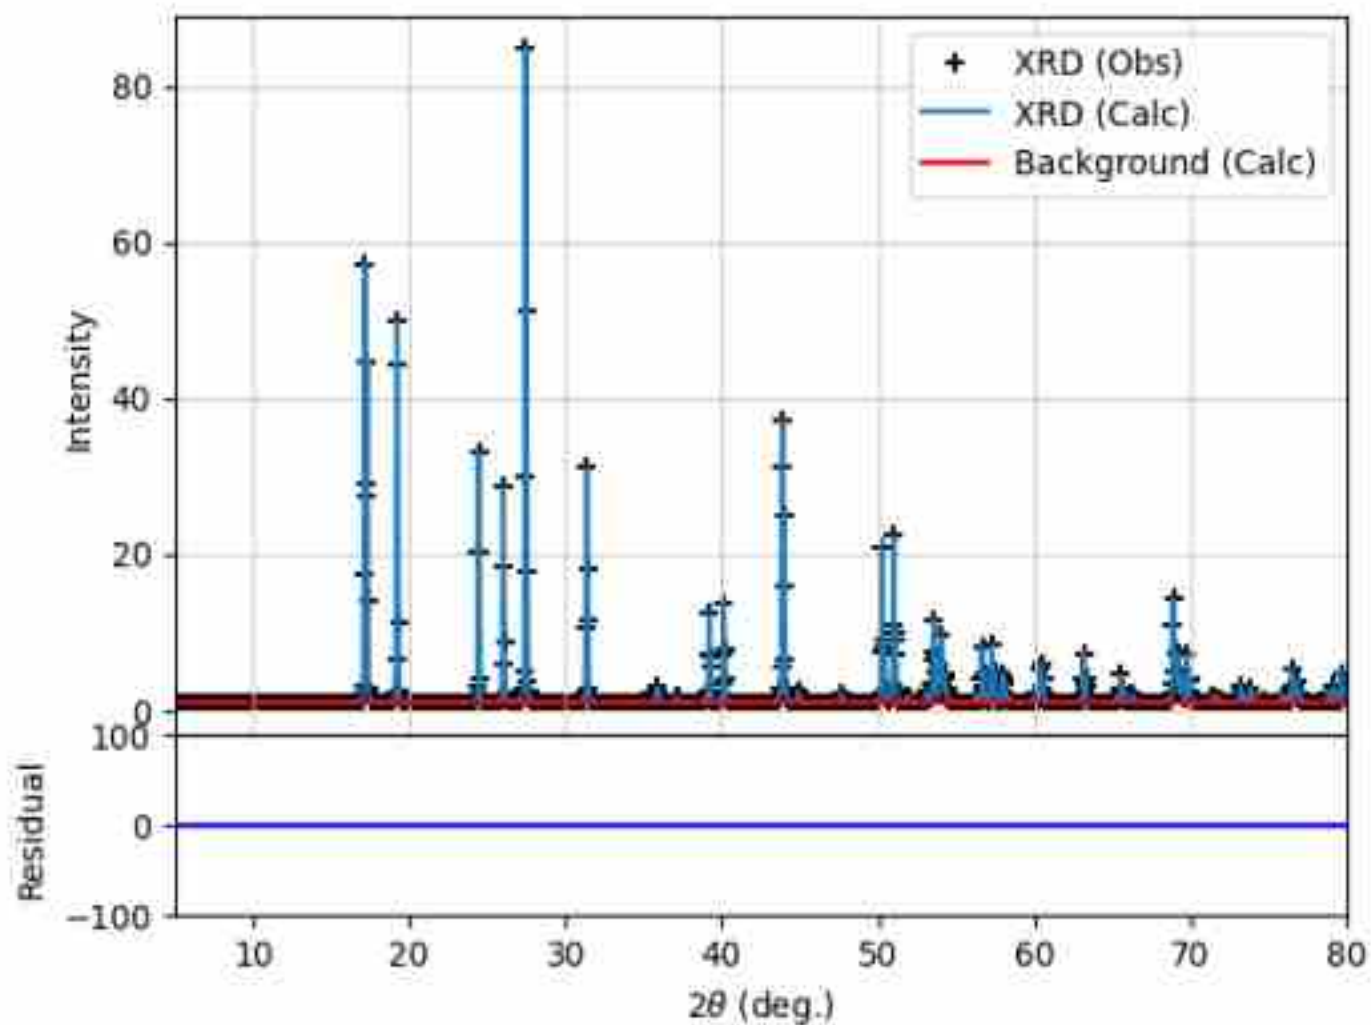

| RMSE before RR | Rwp     | RMSE after RR |
|----------------|---------|---------------|
| 0.261          | 0.00183 | 0.00129       |

# Na1Ho2F7

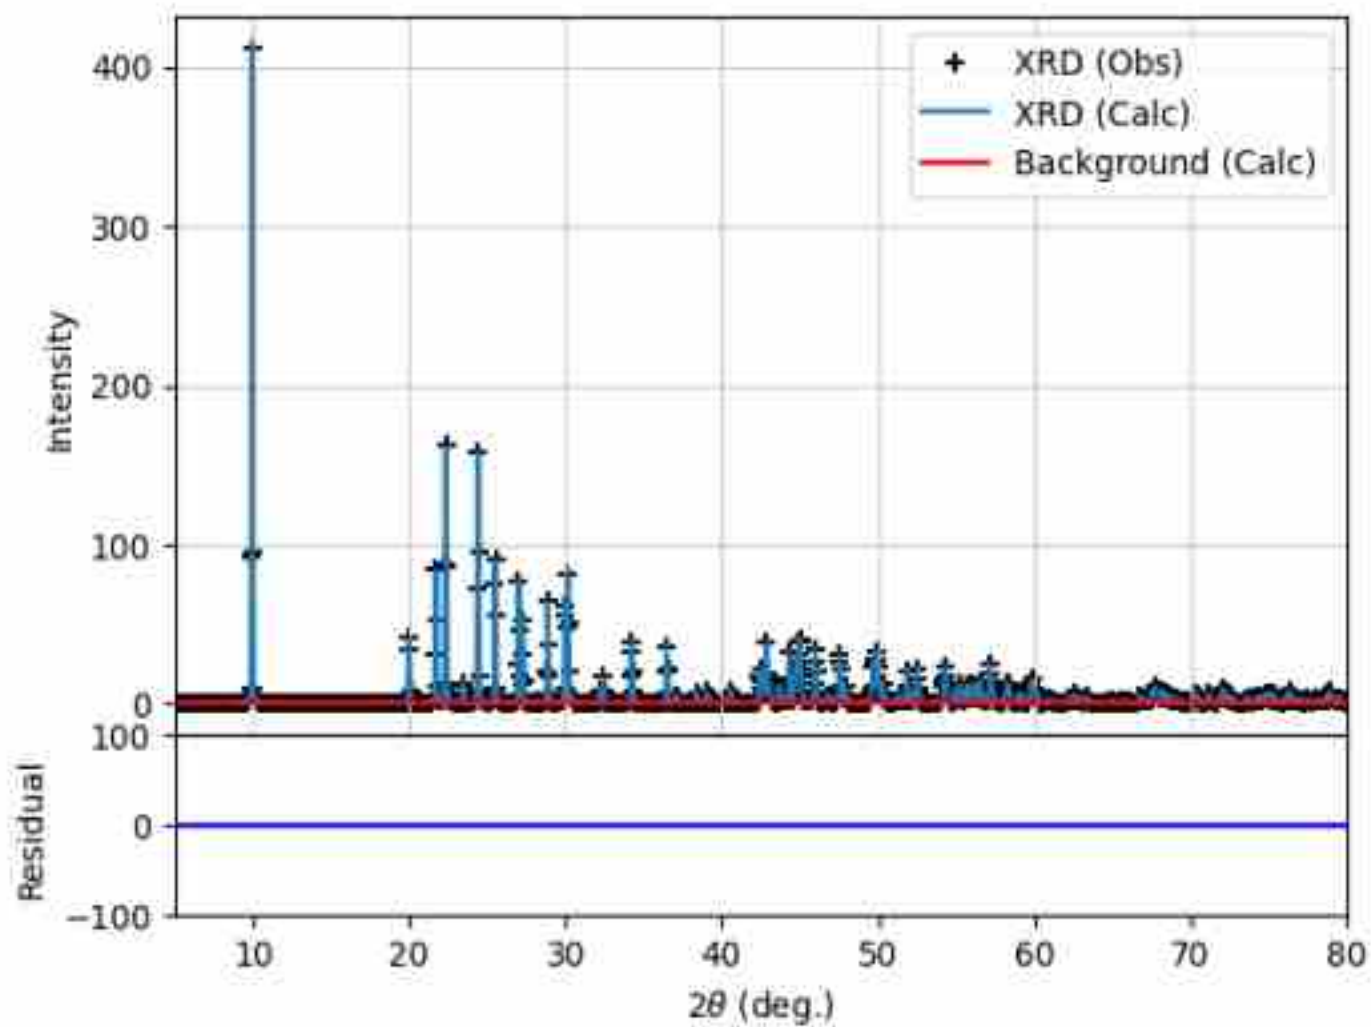

| RMSE before RR | Rwp     | RMSE after RR |
|----------------|---------|---------------|
| 0.261          | 0.00018 | 0.0           |

# Sr<sub>4</sub>Hf<sub>2</sub>Fe<sub>2</sub>O<sub>12</sub>

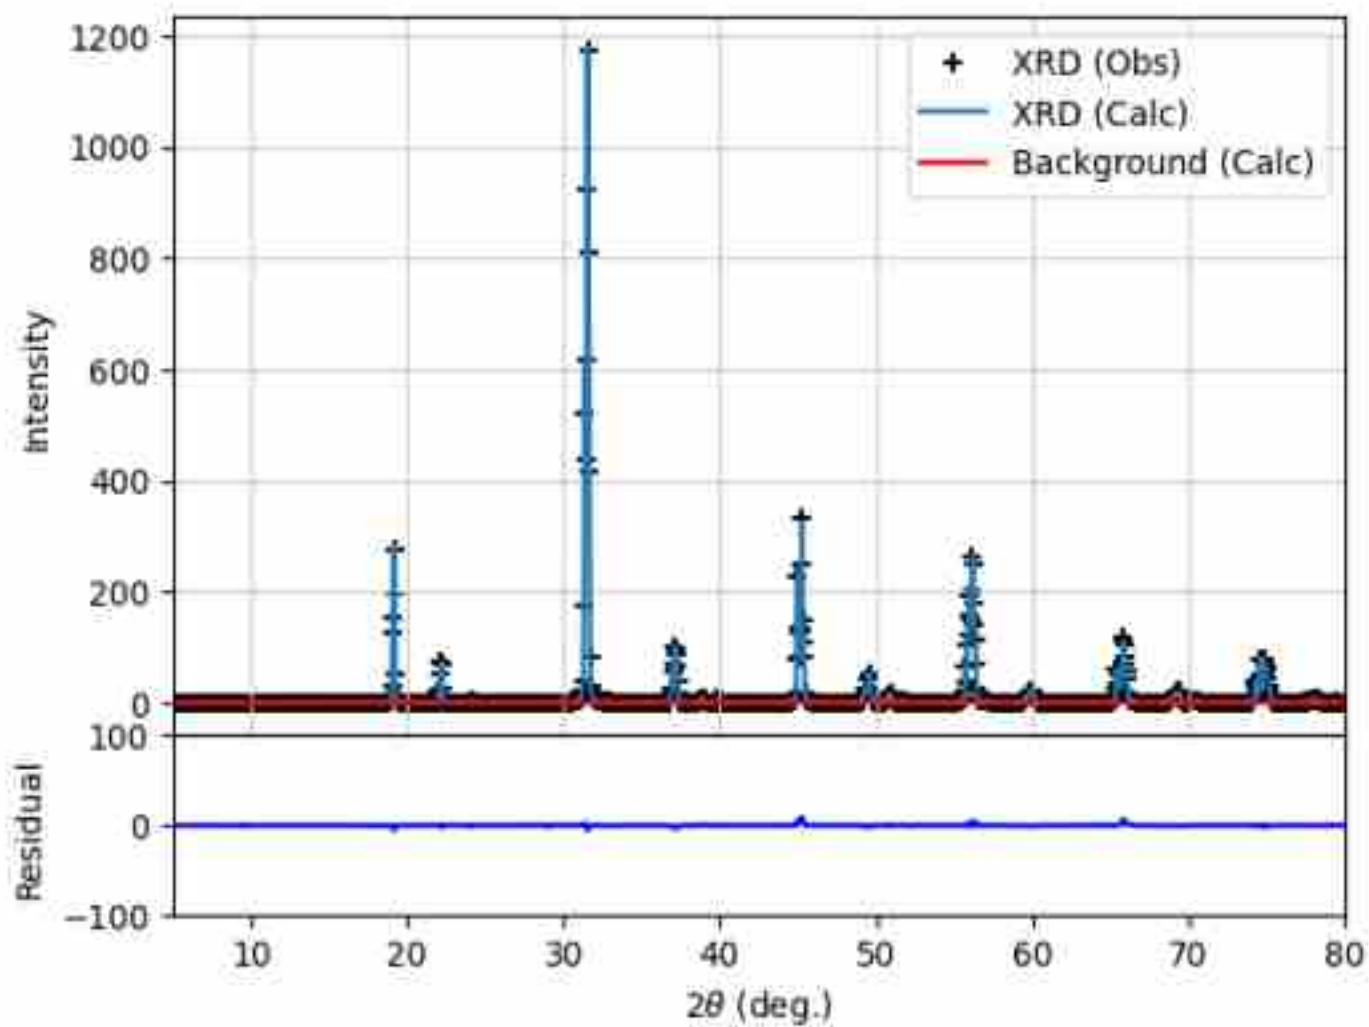

| RMSE before RR | Rwp     | RMSE after RR |
|----------------|---------|---------------|
| 0.261          | 3.38687 | 0.31661       |

# Te<sub>2</sub>Se<sub>2</sub>O<sub>8</sub>

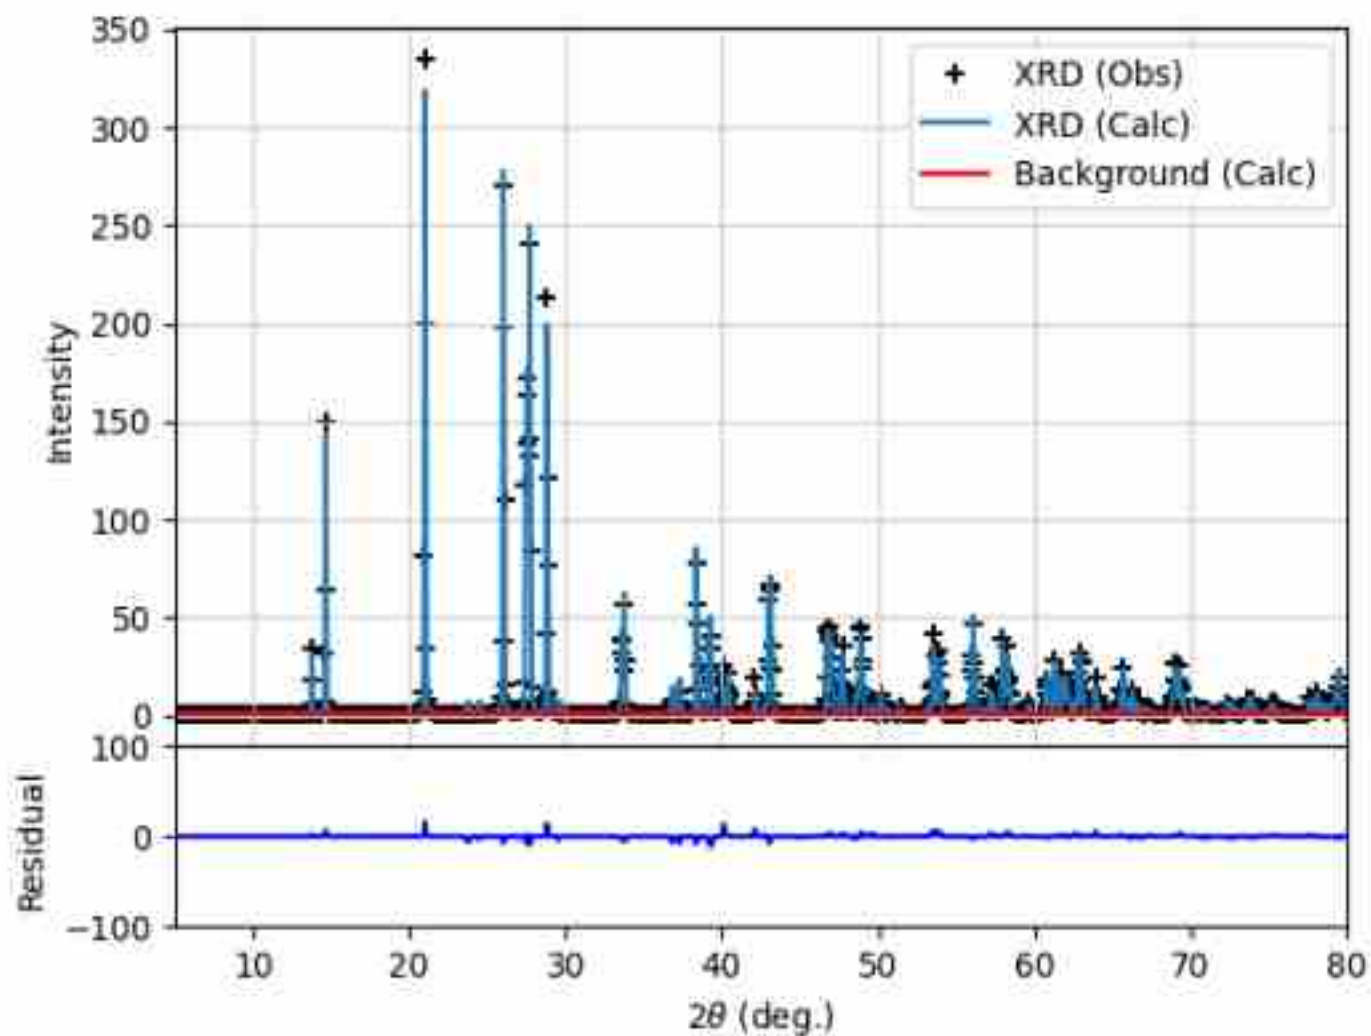

| RMSE before RR | Rwp      | RMSE after RR |
|----------------|----------|---------------|
| 0.261          | 16.68083 | 0.49862       |



# Pt2Pb8

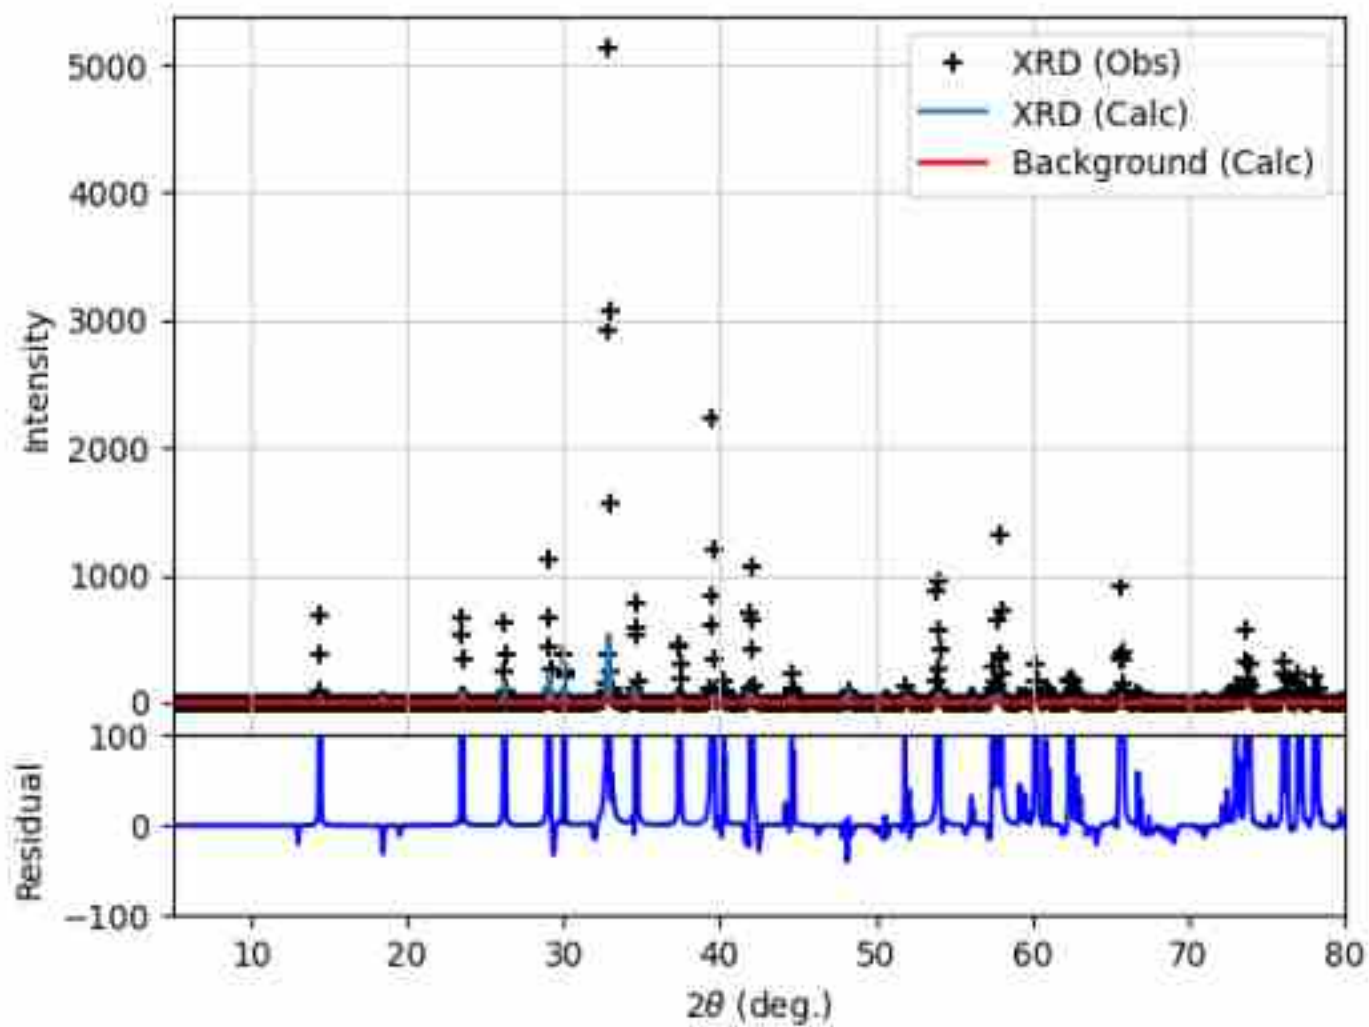

| RMSE before RR | Rwp      | RMSE after RR |
|----------------|----------|---------------|
| 0.262          | 89.56311 | 0.31463       |

# Sr1V4O10

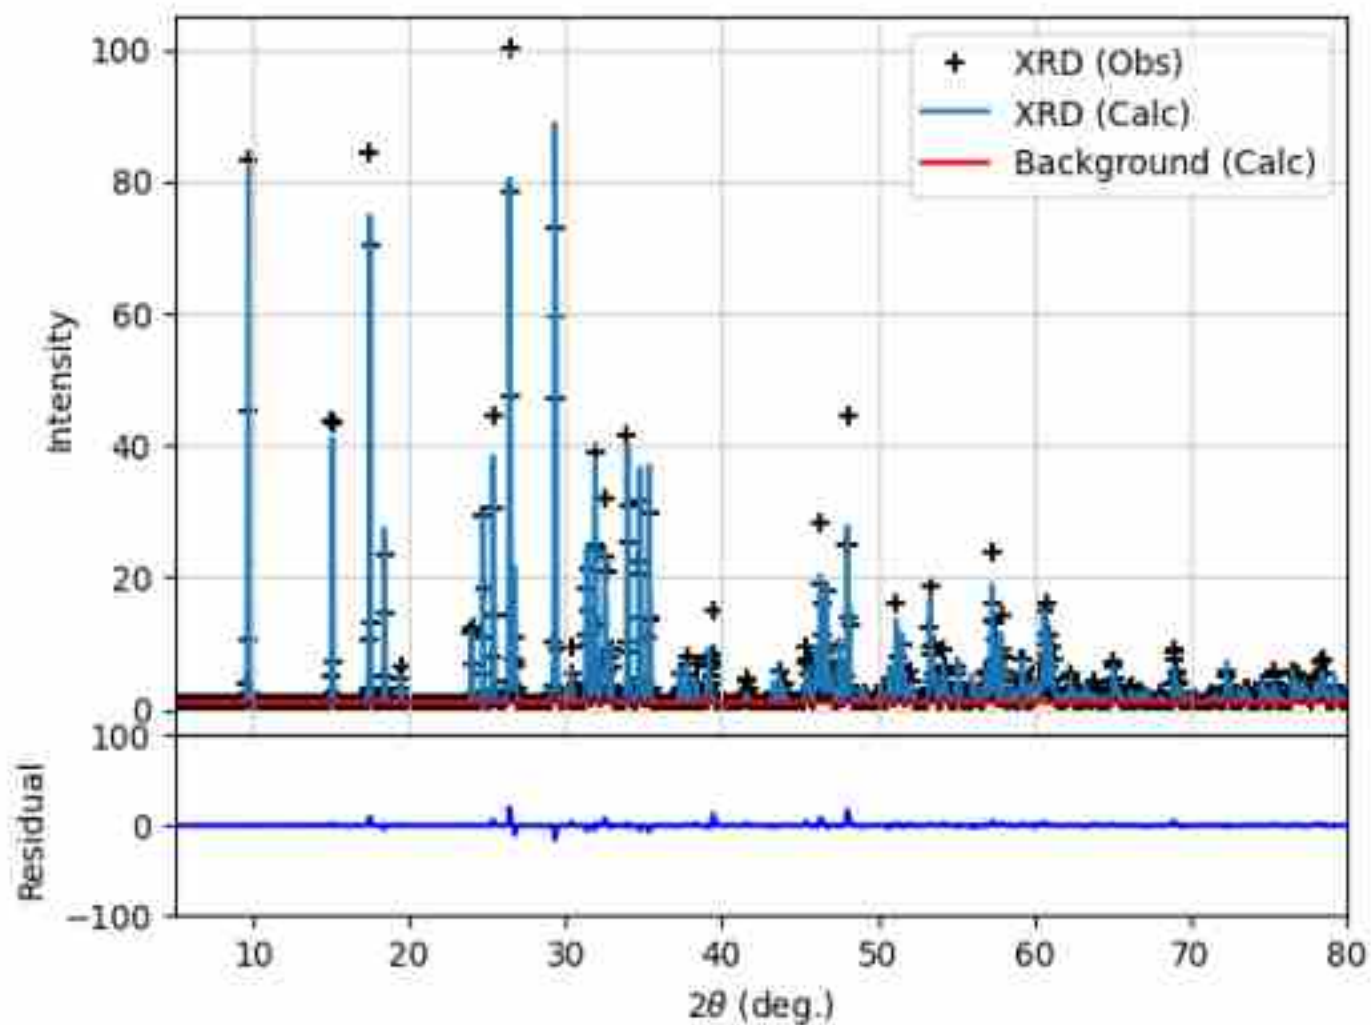

| RMSE before RR | Rwp      | RMSE after RR |
|----------------|----------|---------------|
| 0.262          | 20.47551 | None          |

# V4Ag2O11

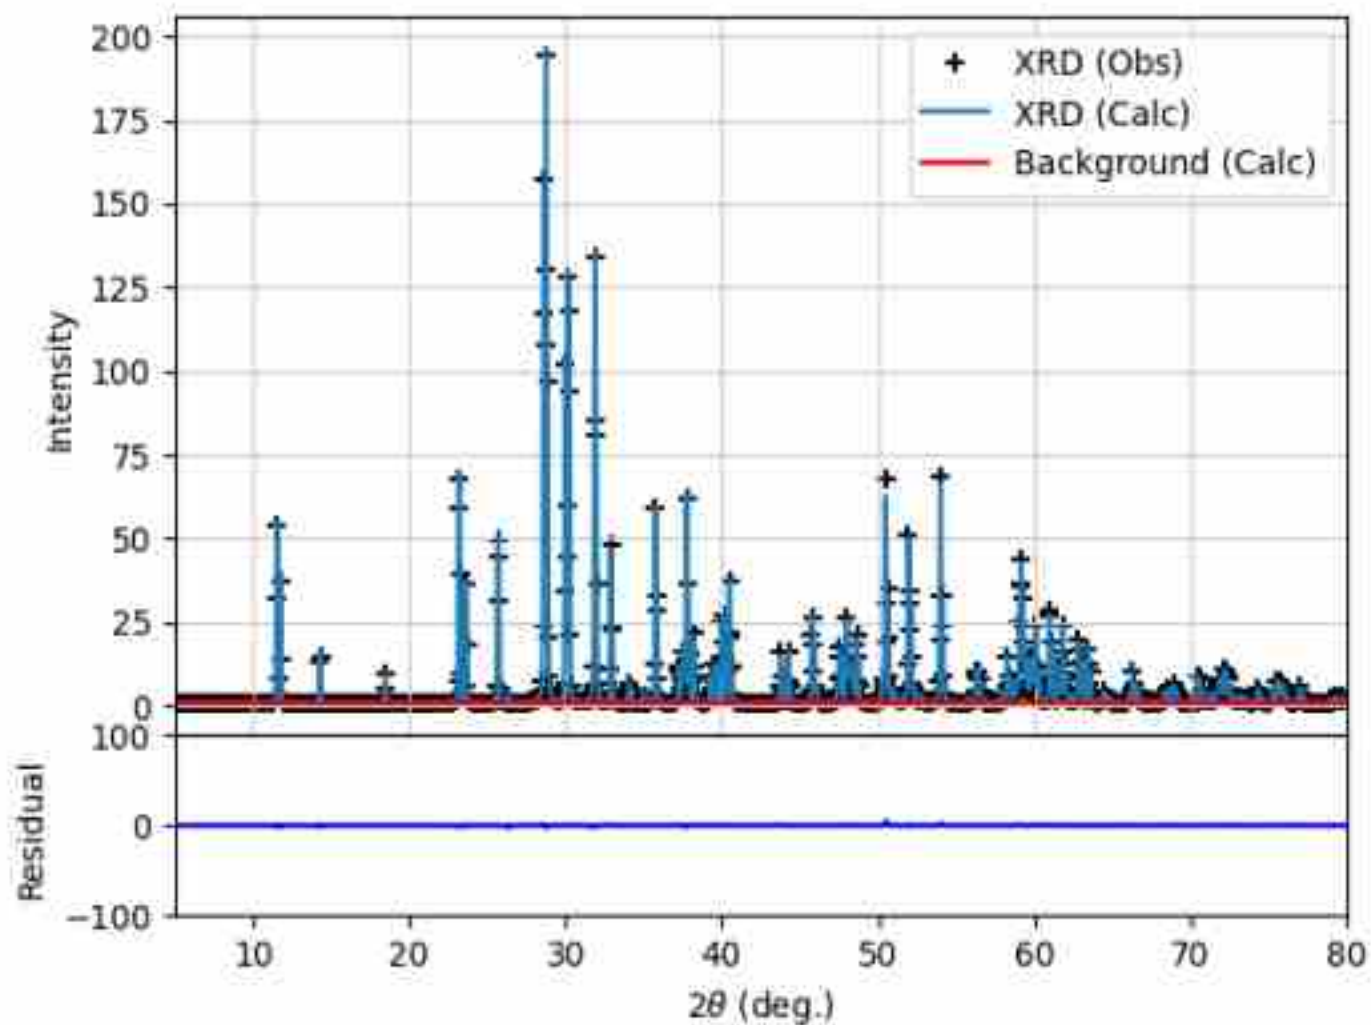

| RMSE before RR | Rwp     | RMSE after RR |
|----------------|---------|---------------|
| 0.262          | 4.69884 | 0.27298       |

# A12H6O6

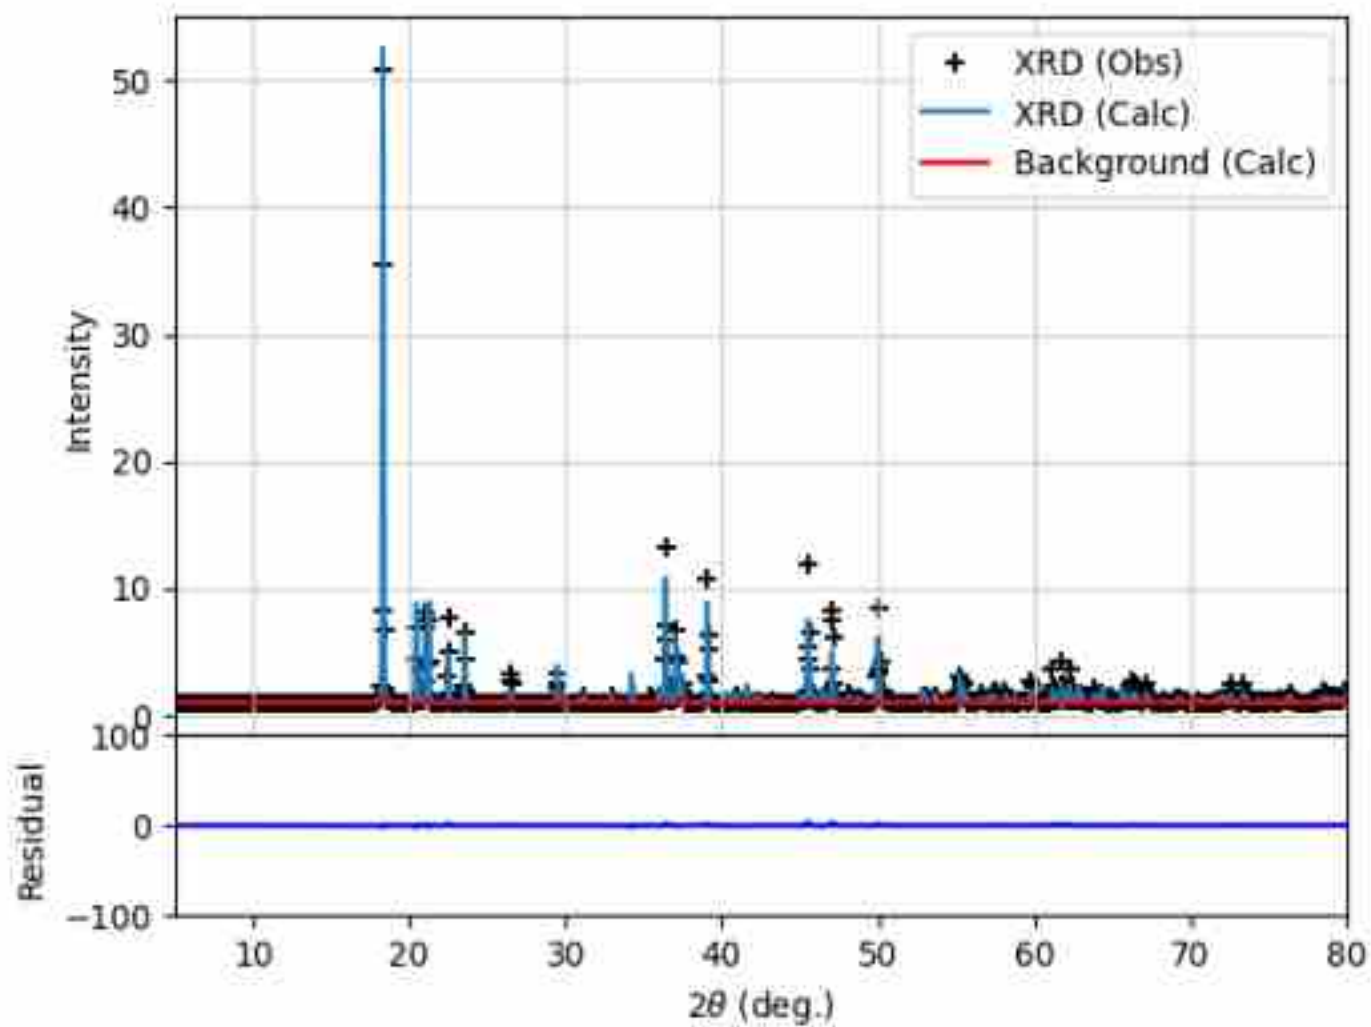

| RMSE before RR | Rwp      | RMSE after RR |
|----------------|----------|---------------|
| 0.264          | 14.28874 | None          |

# Hf6Ni14

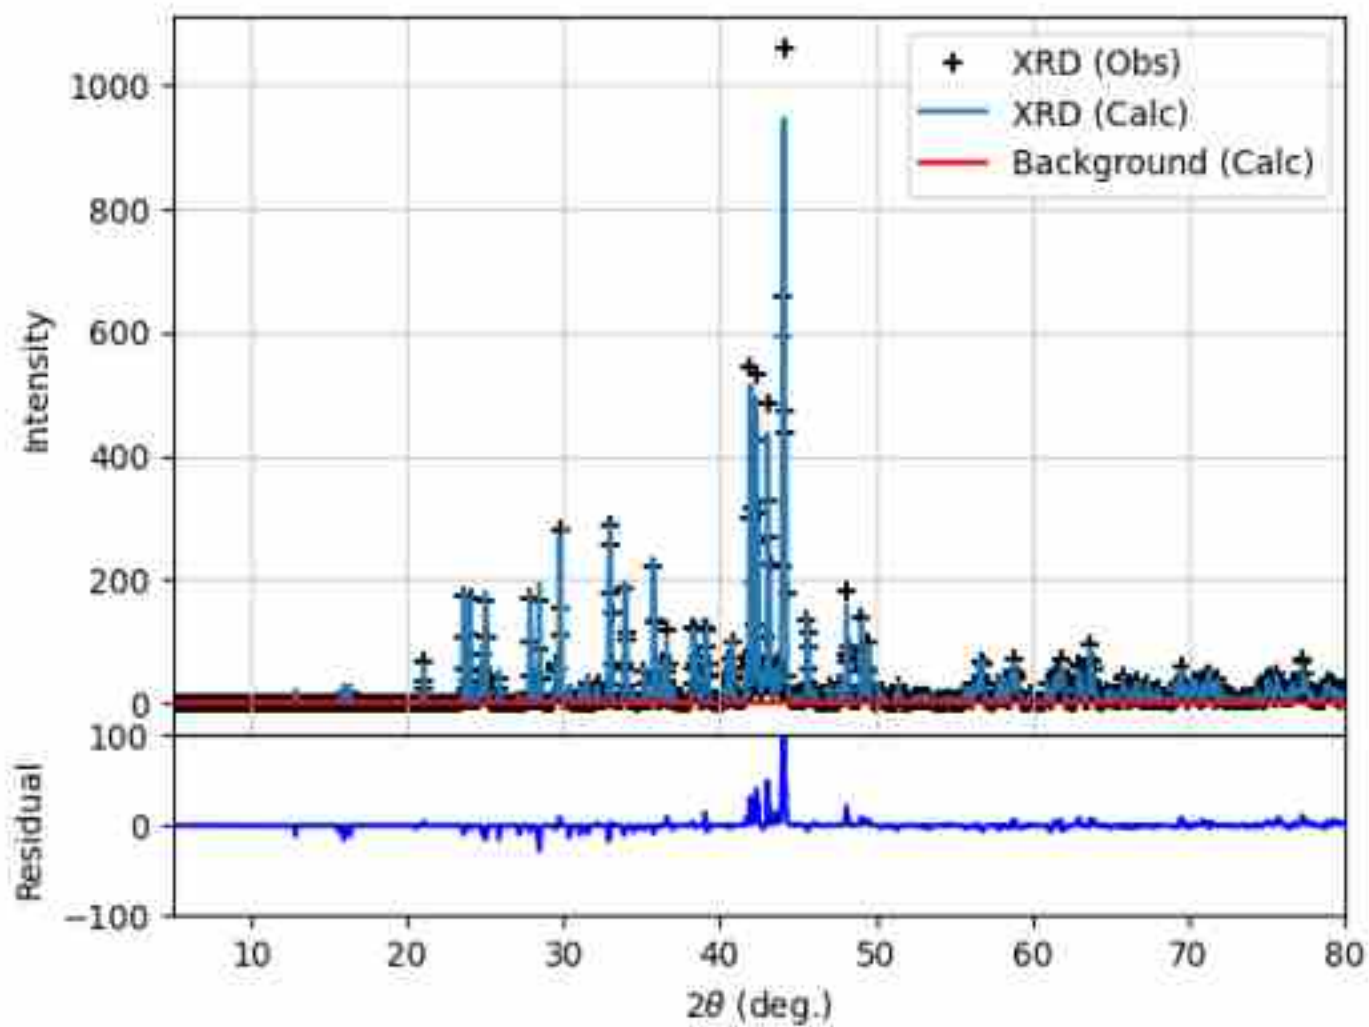

| RMSE before RR | Rwp     | RMSE after RR |
|----------------|---------|---------------|
| 0.265          | 13.7406 | 0.29029       |

# Li6As1S5I1

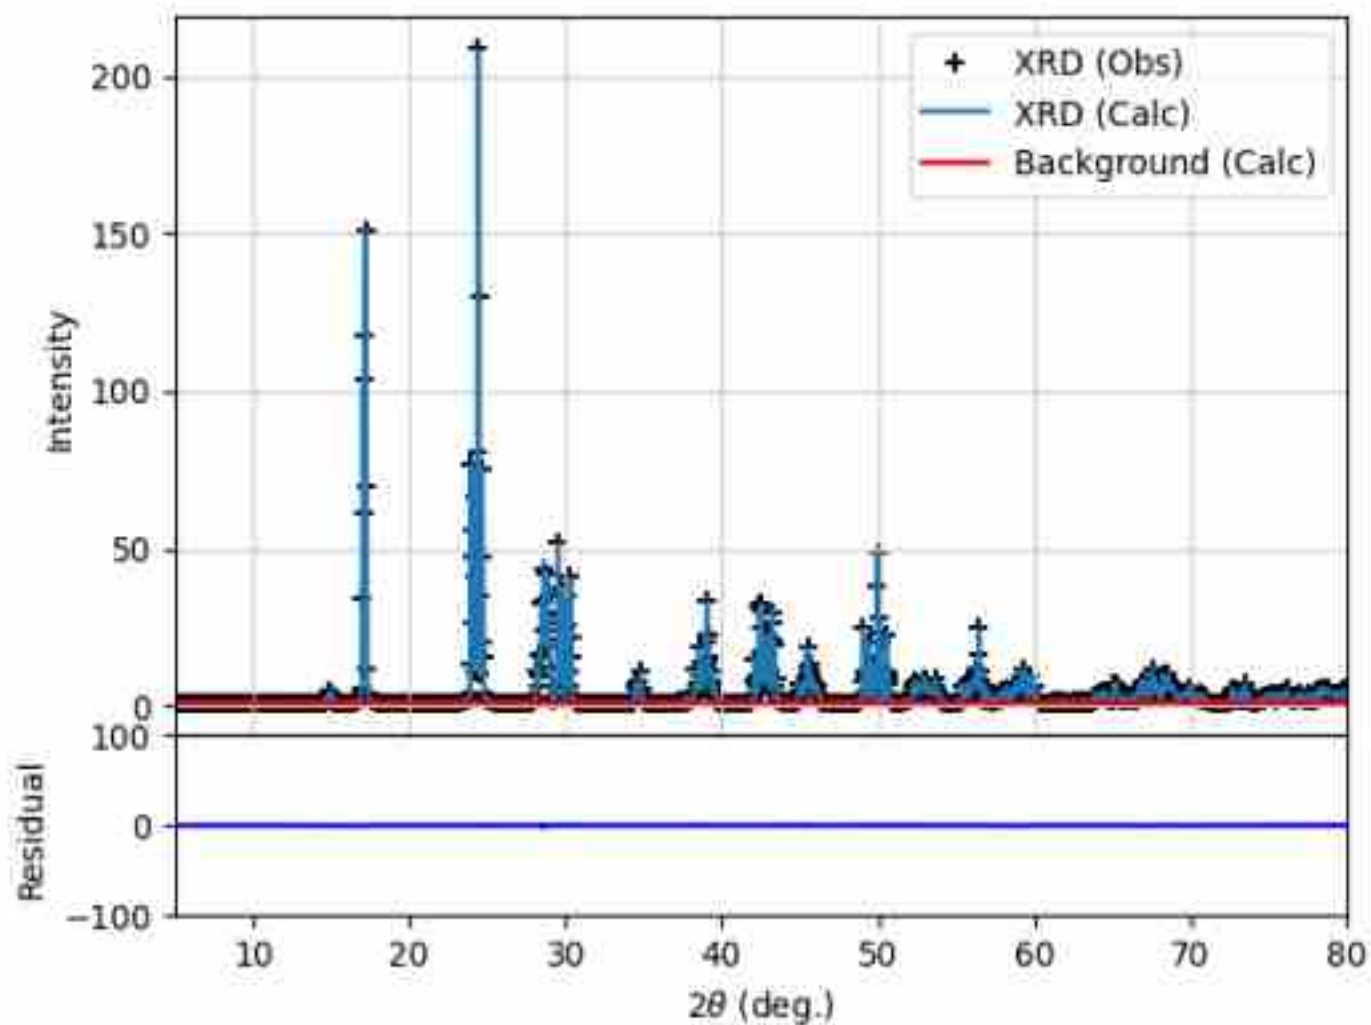

| RMSE before RR | Rwp     | RMSE after RR |
|----------------|---------|---------------|
| 0.265          | 1.78477 | 0.13559       |

# H4C1

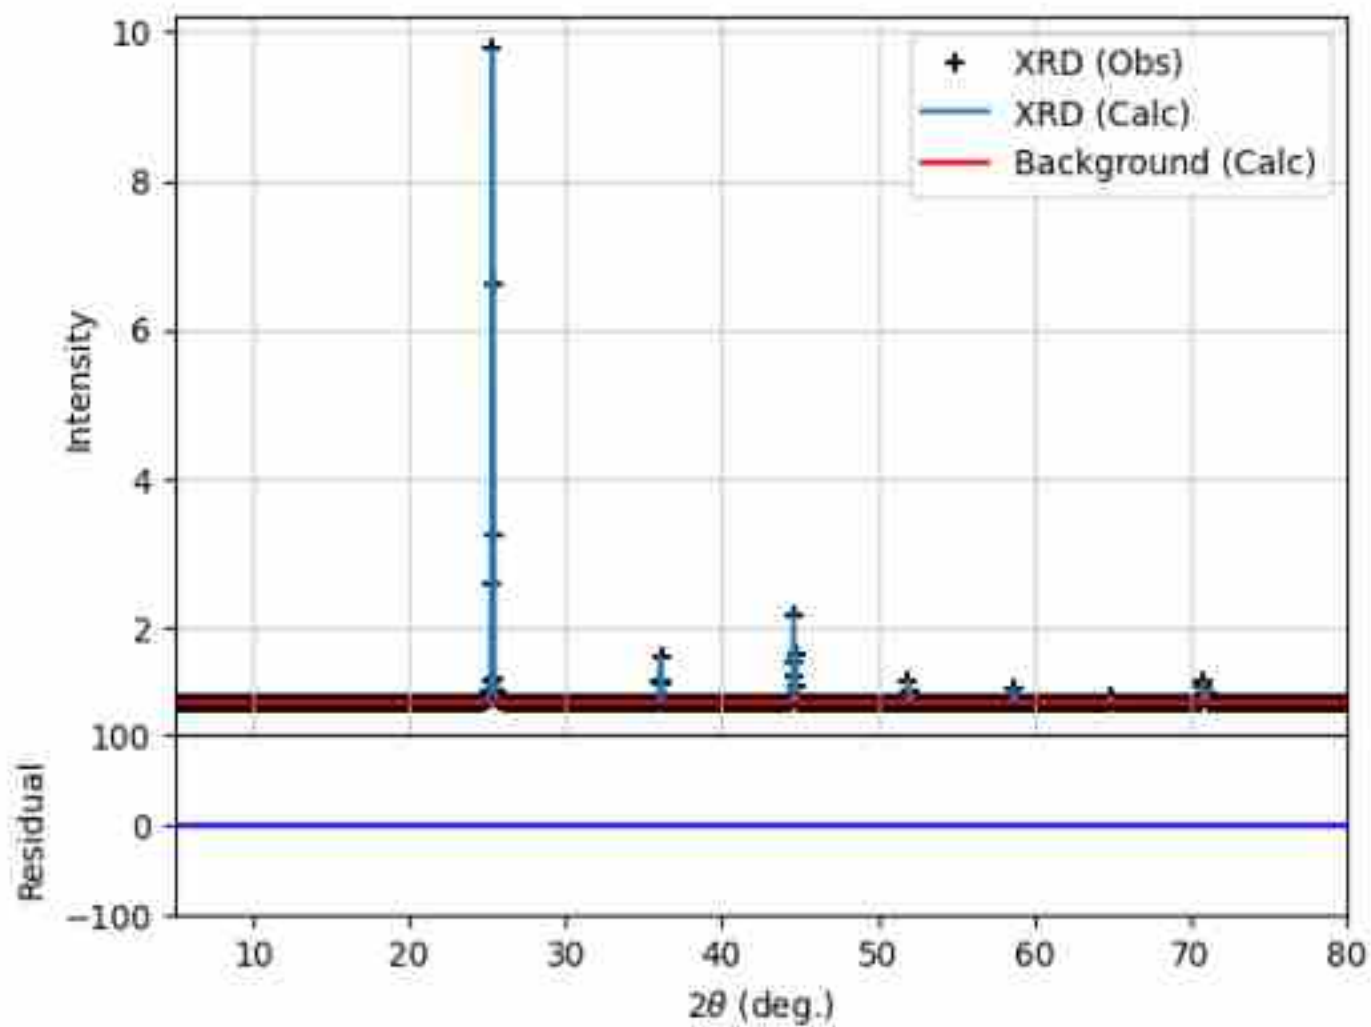

| RMSE before RR | Rwp     | RMSE after RR |
|----------------|---------|---------------|
| 0.266          | 0.03575 | 0.30786       |

# Ag<sub>2</sub>Bi<sub>2</sub>O<sub>4</sub>

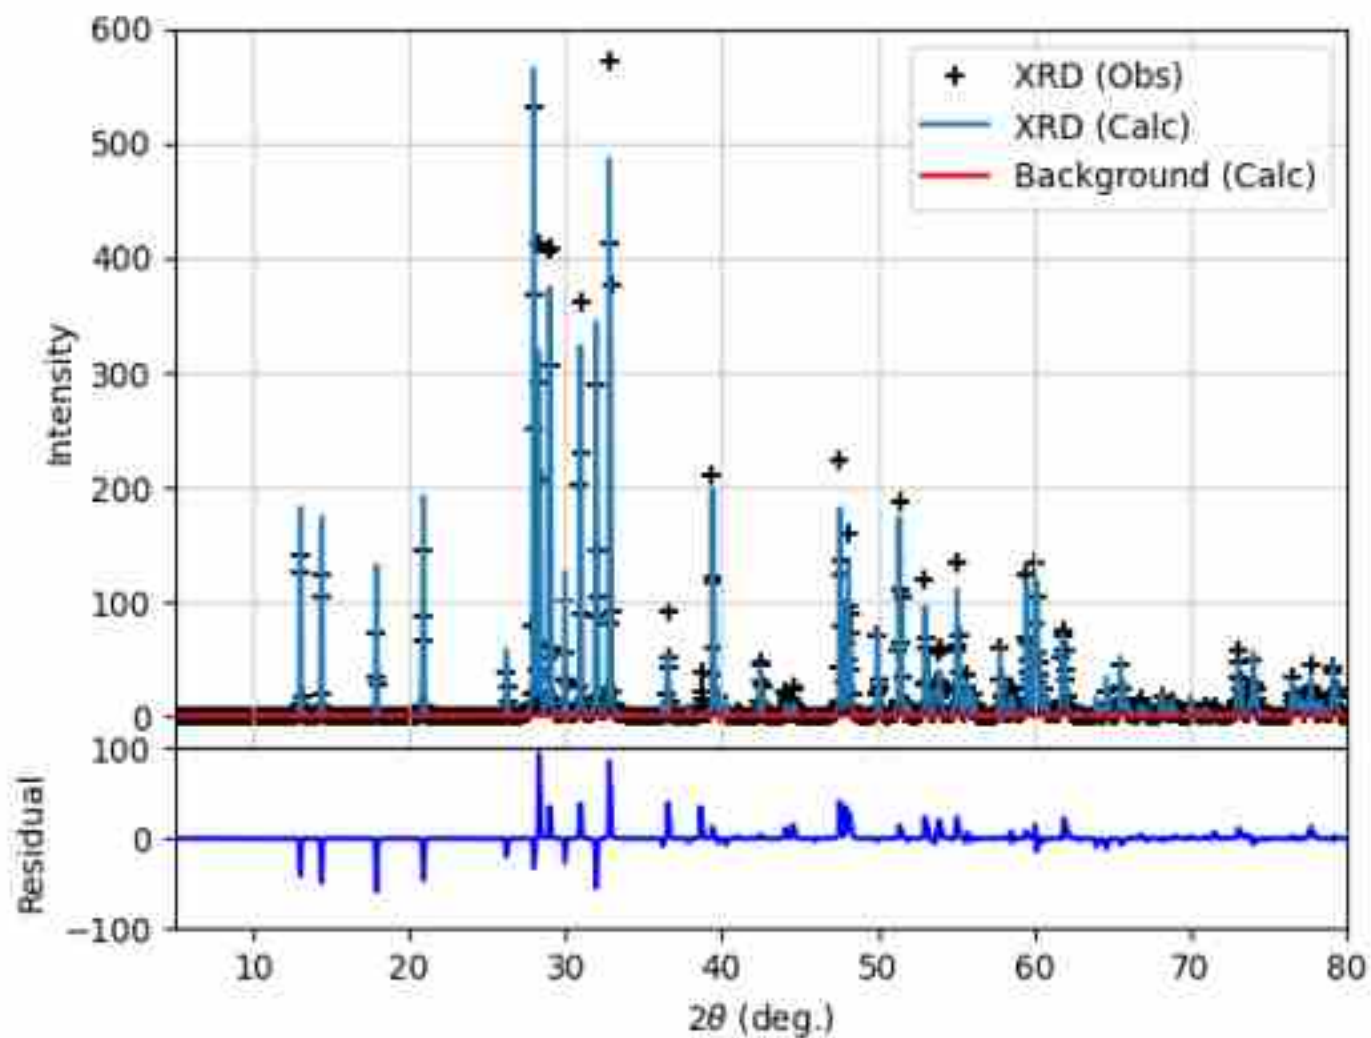

| RMSE before RR | Rwp      | RMSE after RR |
|----------------|----------|---------------|
| 0.267          | 23.39862 | None          |



# Sr9Au6

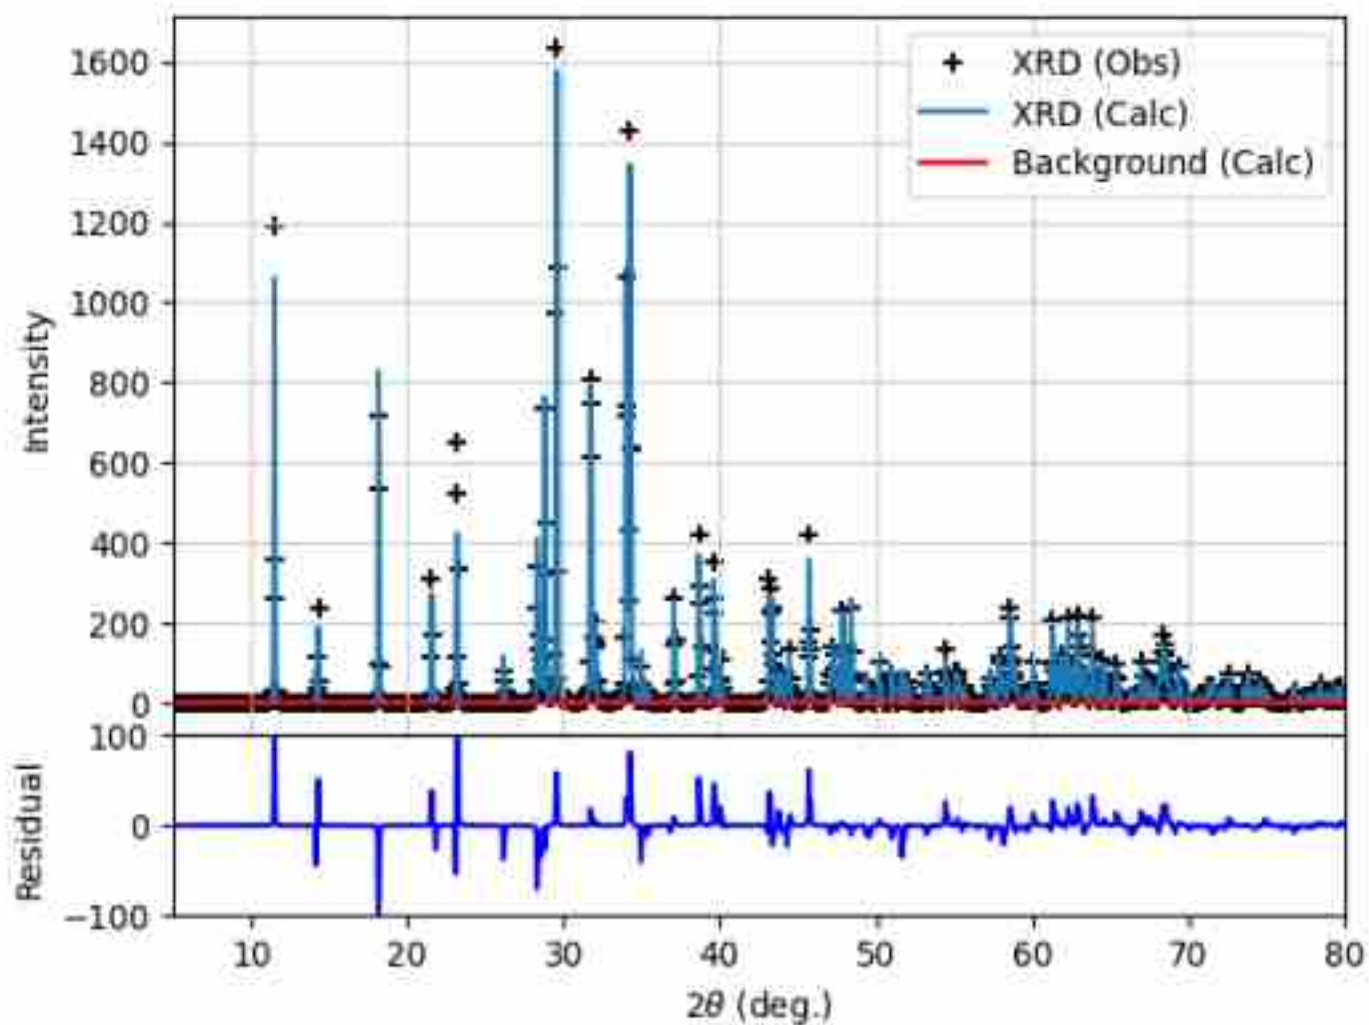

| RMSE before RR | Rwp      | RMSE after RR |
|----------------|----------|---------------|
| 0.267          | 15.66413 | 0.35689       |

# Zr<sub>8</sub>In<sub>4</sub>Au<sub>8</sub>

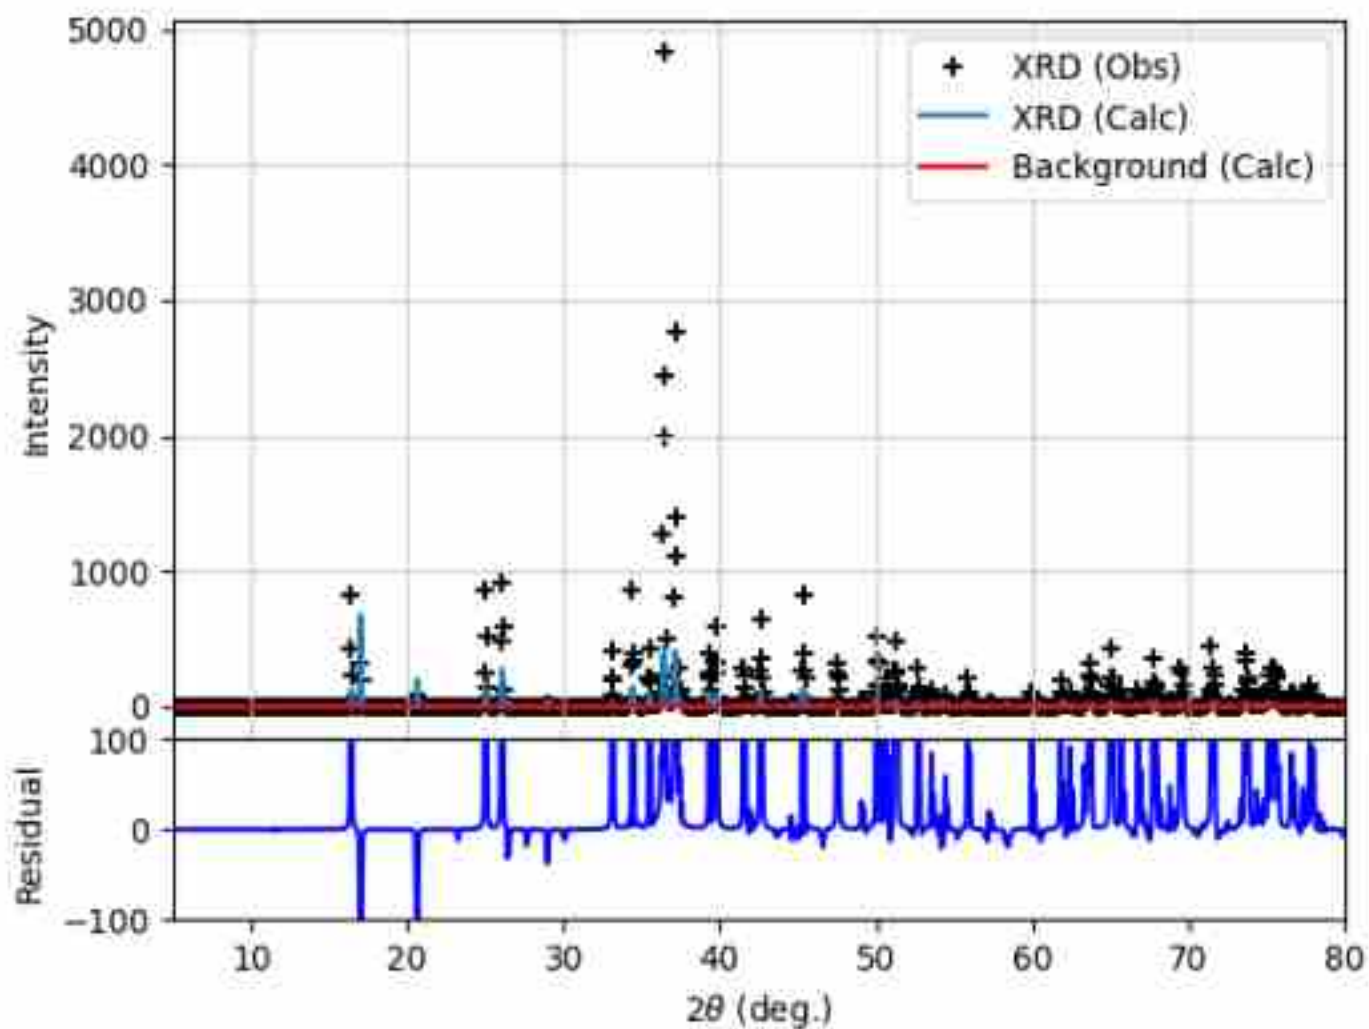

| RMSE before RR | Rwp      | RMSE after RR |
|----------------|----------|---------------|
| 0.267          | 85.00513 | 0.31692       |

# Cs<sub>3</sub>Li<sub>2</sub>F<sub>5</sub>

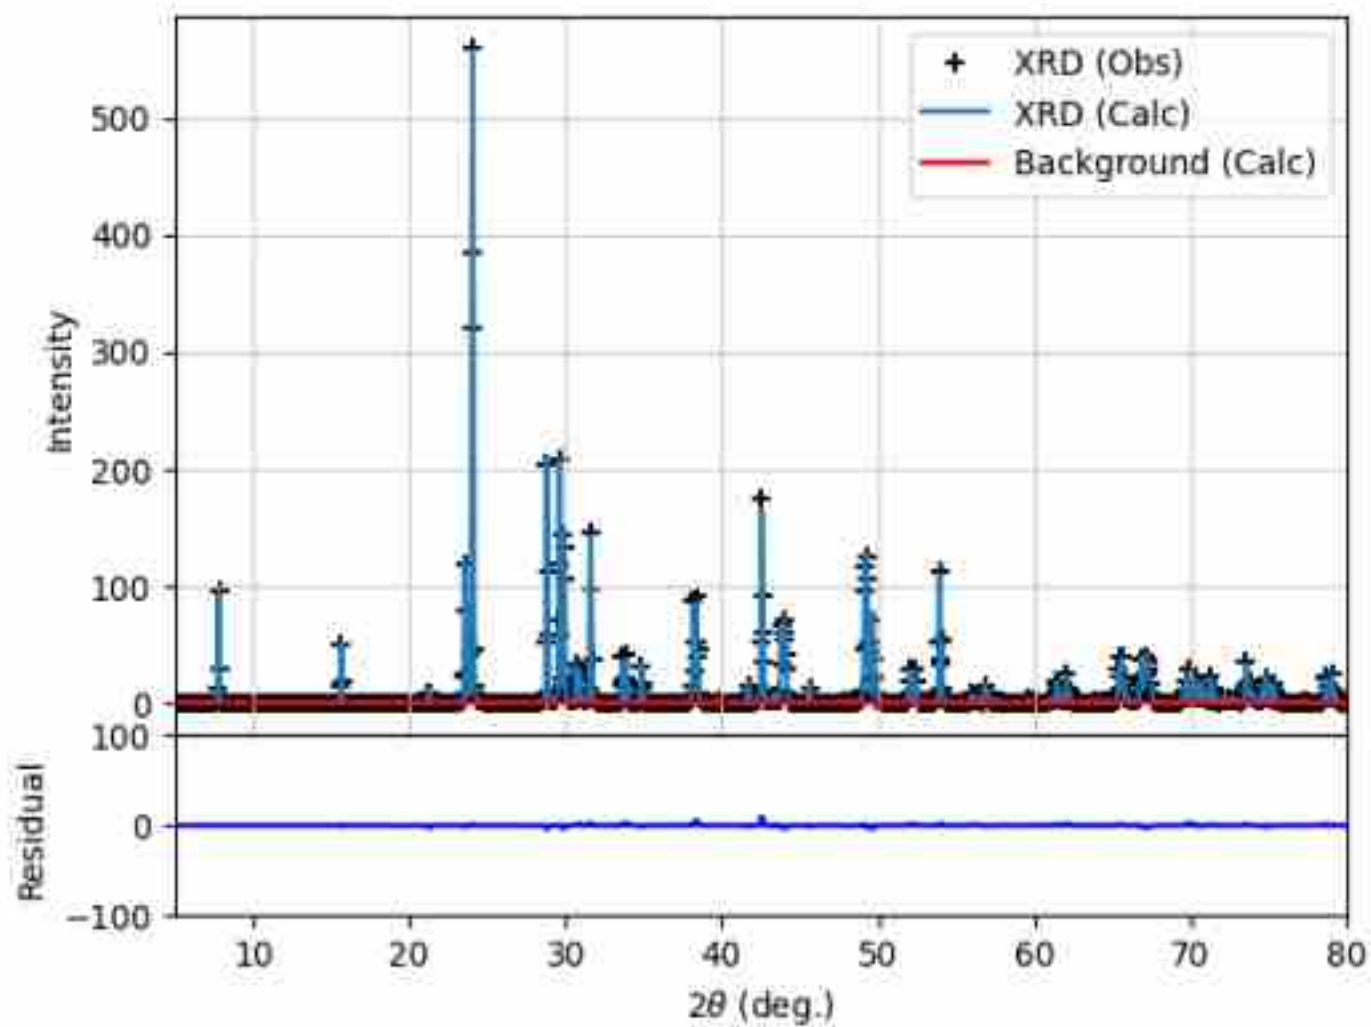

| RMSE before RR | Rwp     | RMSE after RR |
|----------------|---------|---------------|
| 0.269          | 4.55375 | 0.45017       |

# Ti<sub>3</sub>MoAs<sub>4</sub>

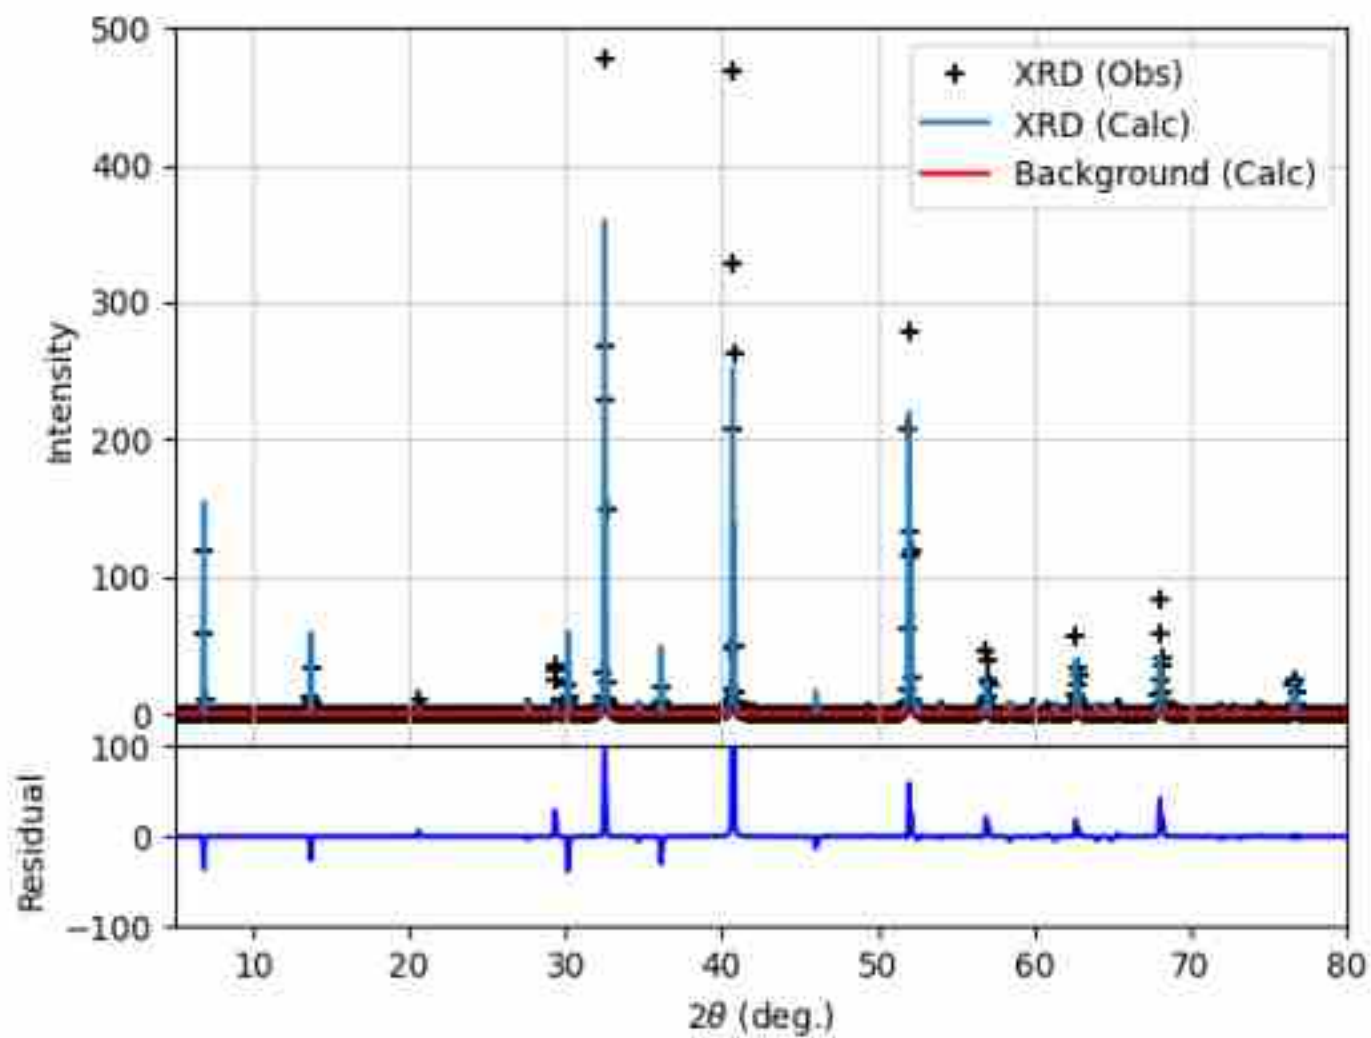

| RMSE before RR | Rwp      | RMSE after RR |
|----------------|----------|---------------|
| 0.269          | 41.62233 | 0.27008       |

# In1Ga3N4

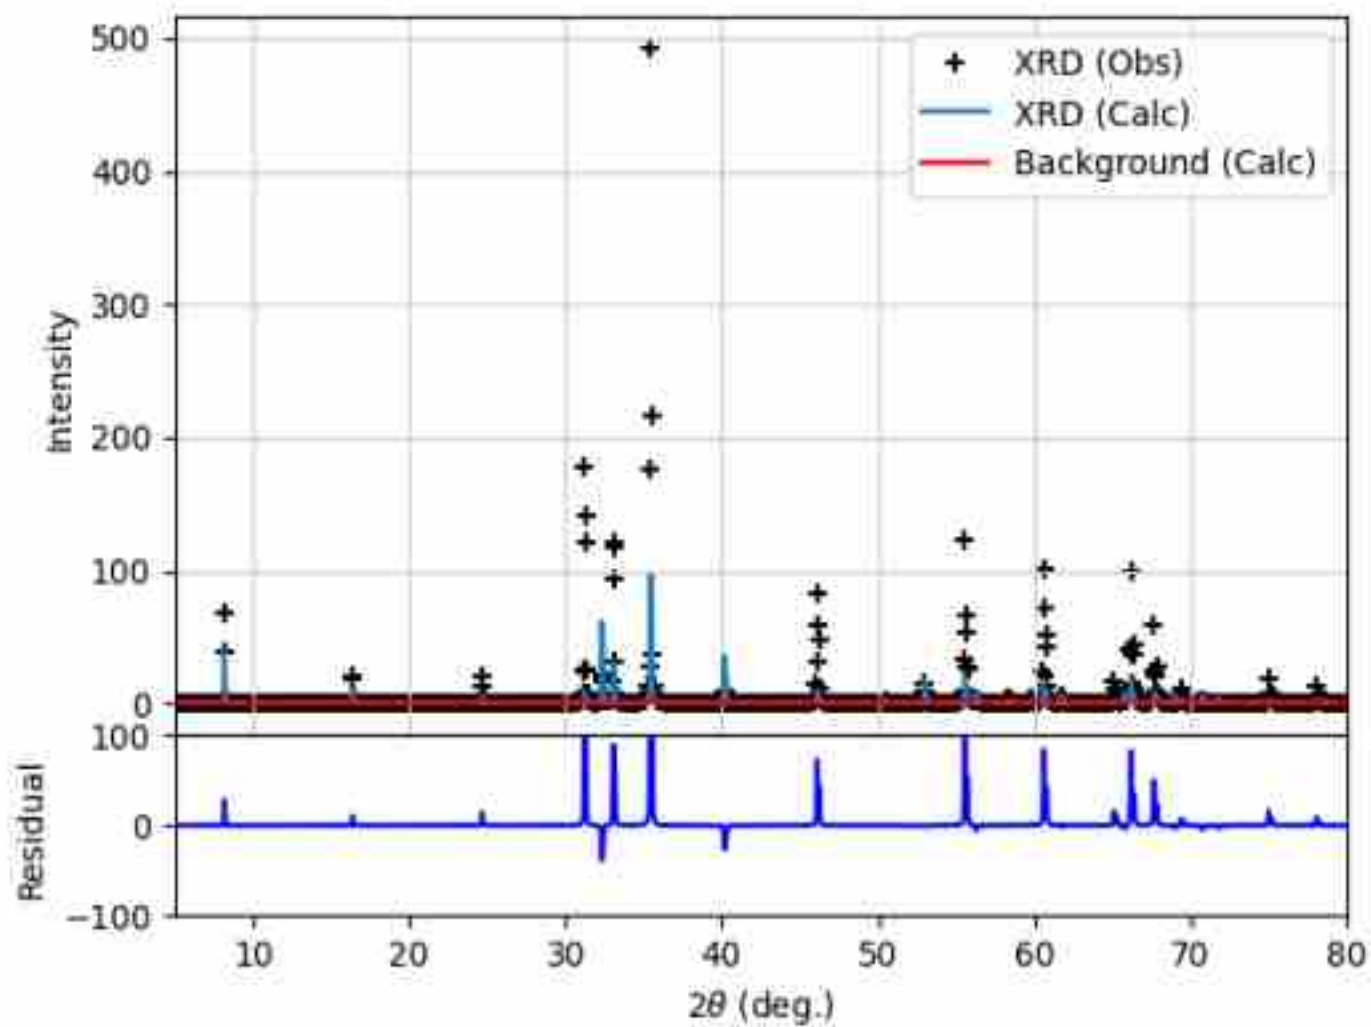

| RMSE before RR | Rwp      | RMSE after RR |
|----------------|----------|---------------|
| 0.271          | 72.89331 | 0.34547       |

# Ta<sub>4</sub>Mo<sub>1</sub>S<sub>8</sub>

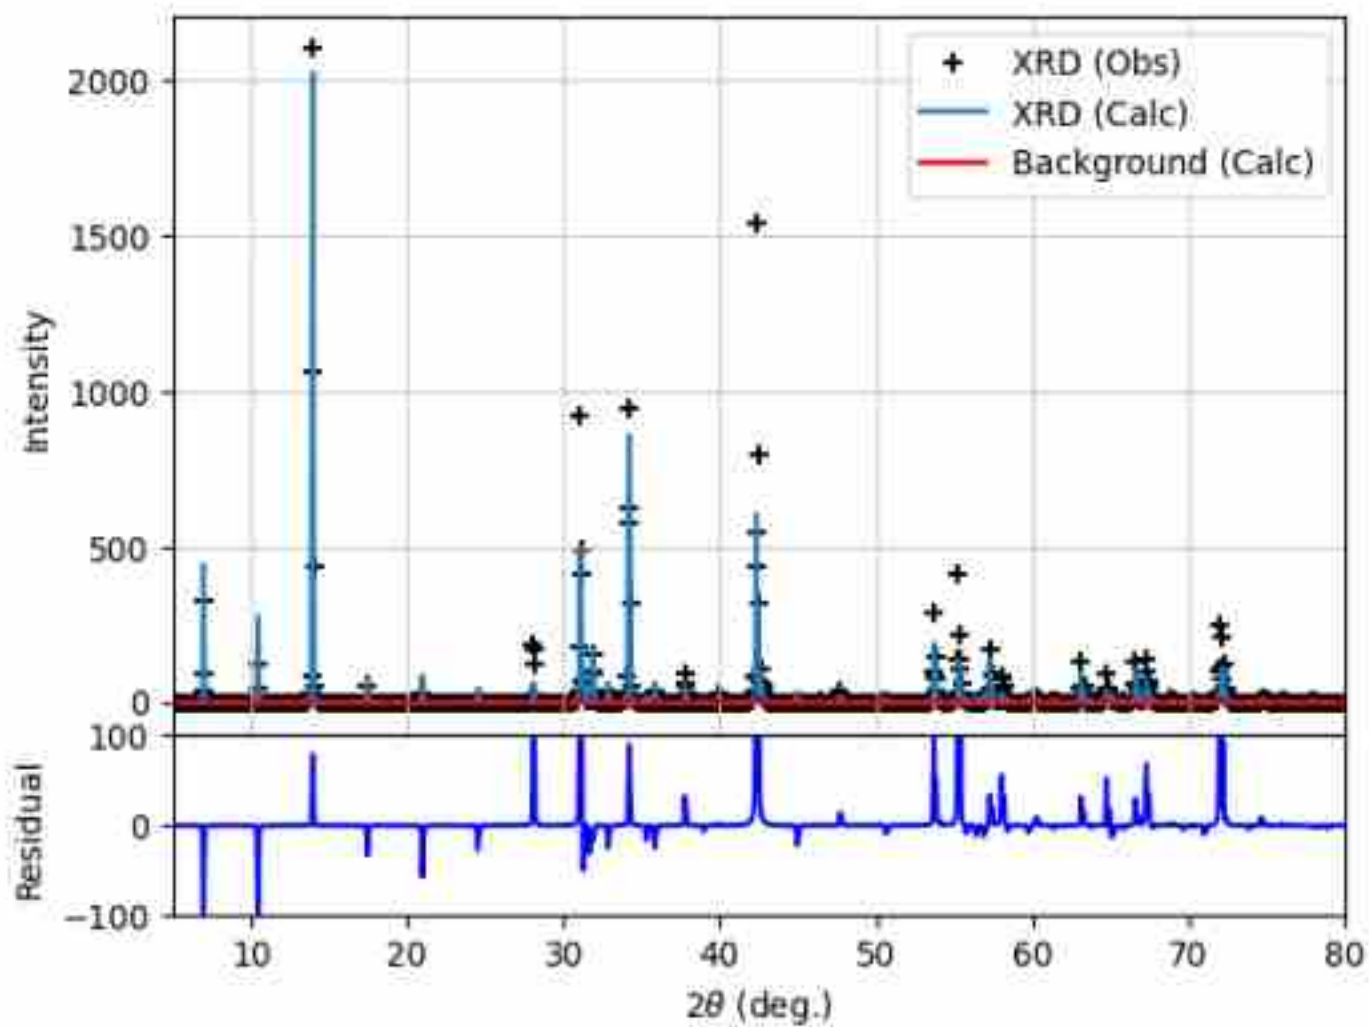

| RMSE before RR | Rwp      | RMSE after RR |
|----------------|----------|---------------|
| 0.271          | 45.30796 | None          |

# Li<sub>2</sub>Au<sub>2</sub>I<sub>8</sub>

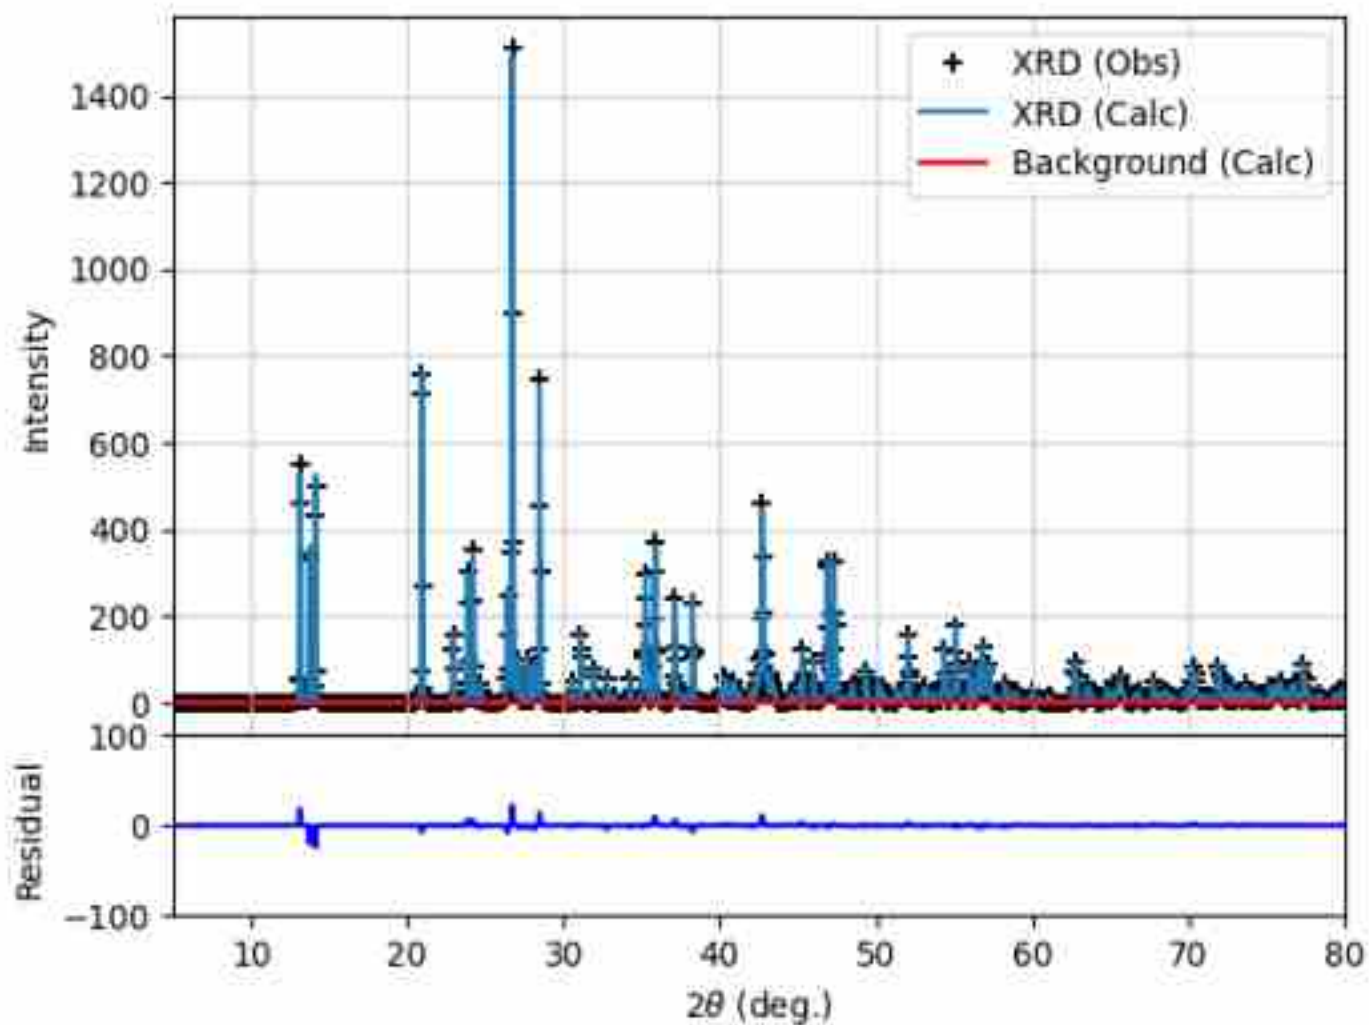

| RMSE before RR | Rwp     | RMSE after RR |
|----------------|---------|---------------|
| 0.272          | 2.48299 | None          |

# K4Ge2Au7

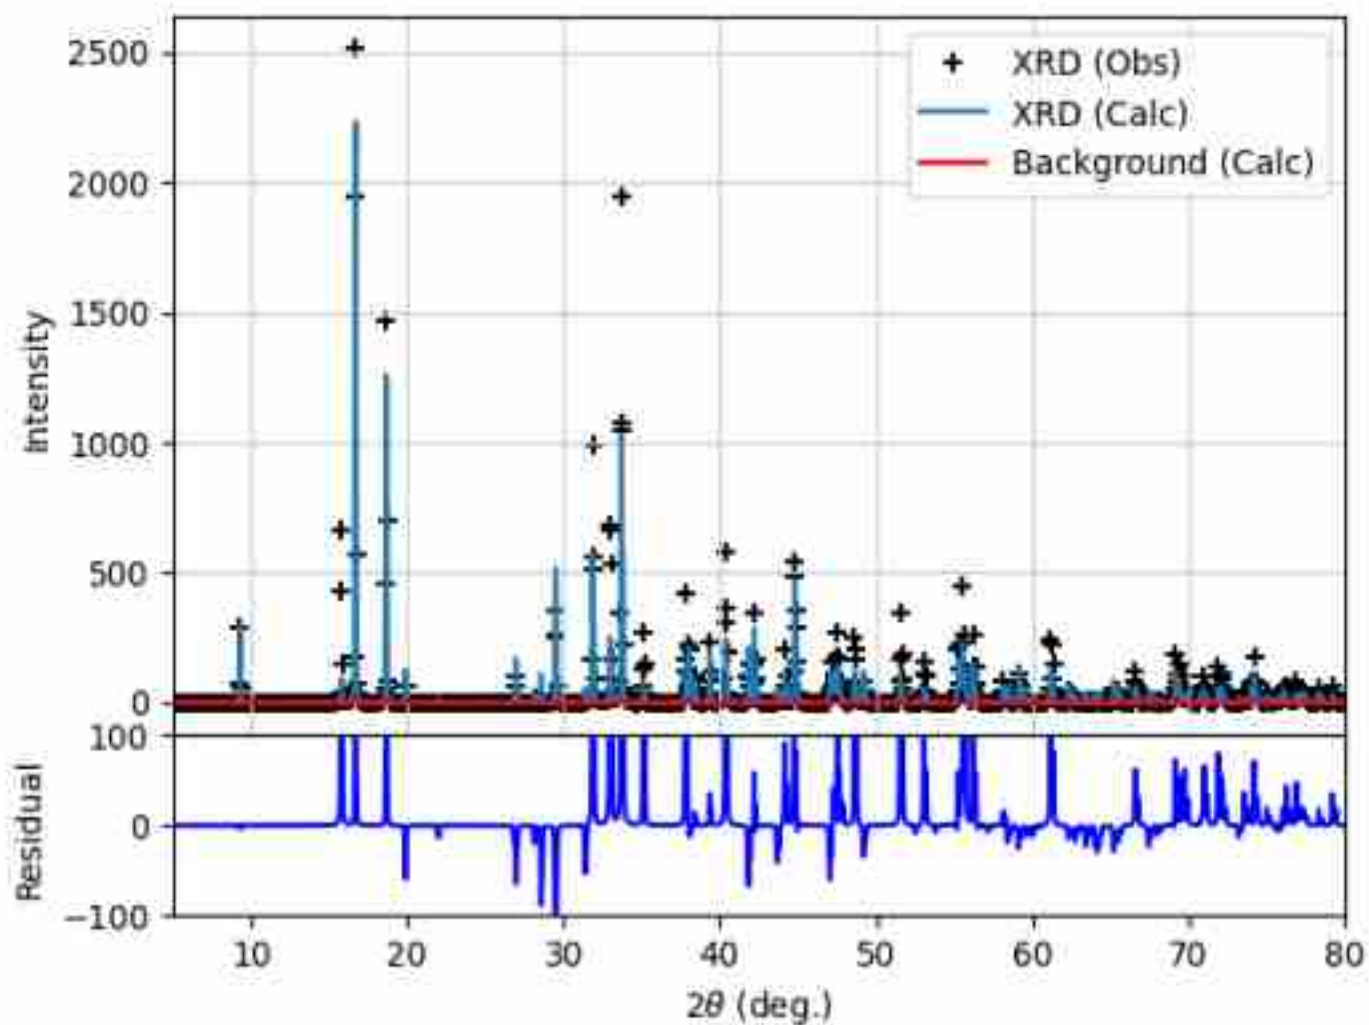

| RMSE before RR | Rwp      | RMSE after RR |
|----------------|----------|---------------|
| 0.273          | 51.51252 | 0.30995       |



# Nb<sub>4</sub>Se<sub>8</sub>

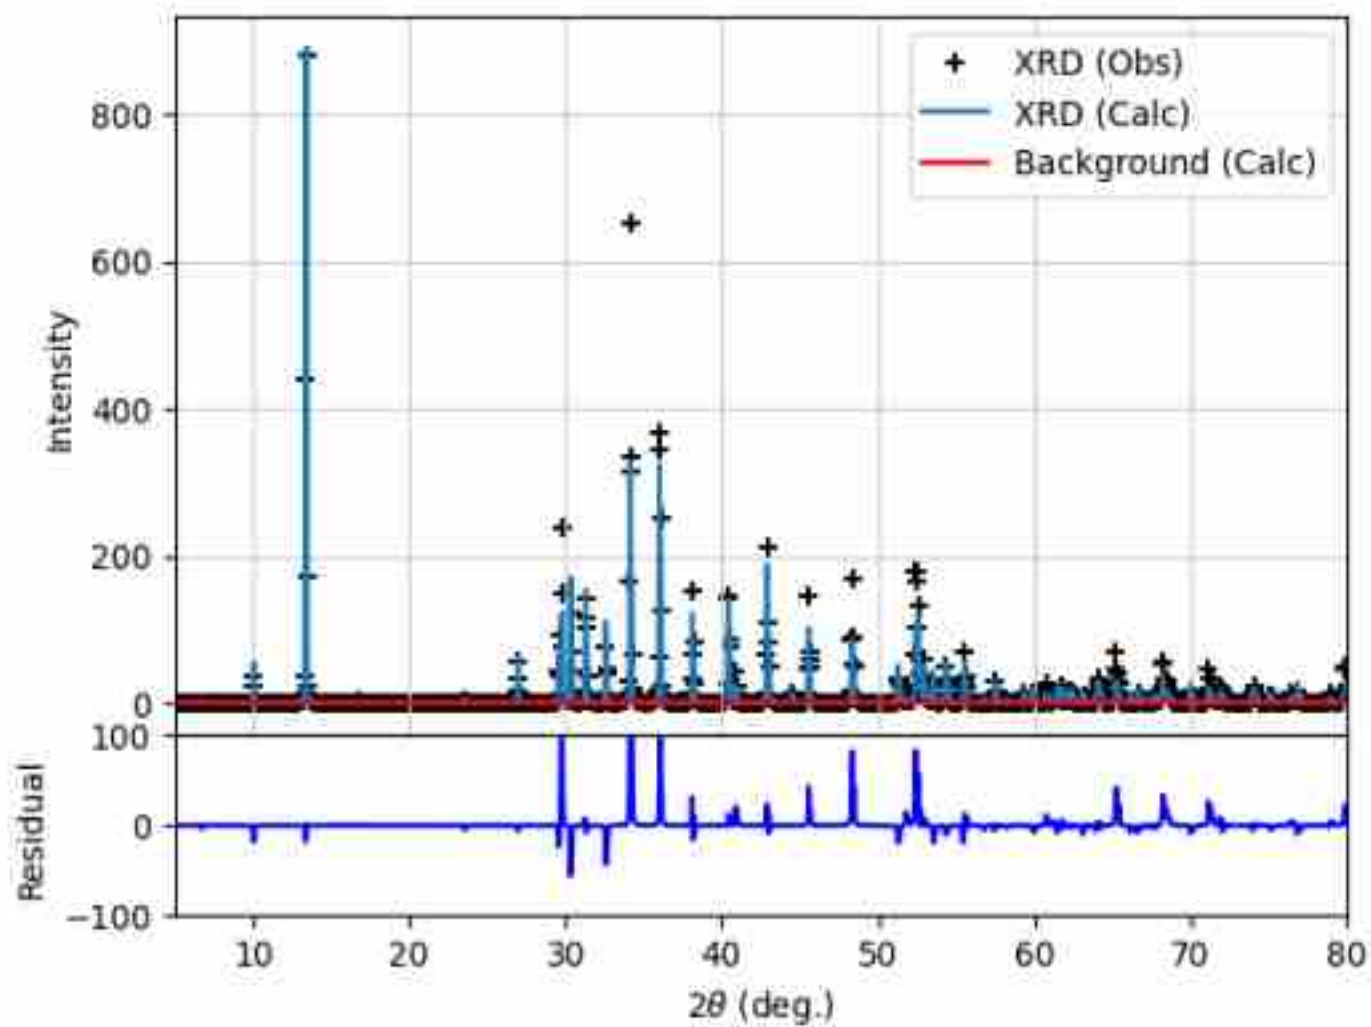

| RMSE before RR | Rwp     | RMSE after RR |
|----------------|---------|---------------|
| 0.273          | 36.6613 | 0.30947       |

# Rb8Mg4O8

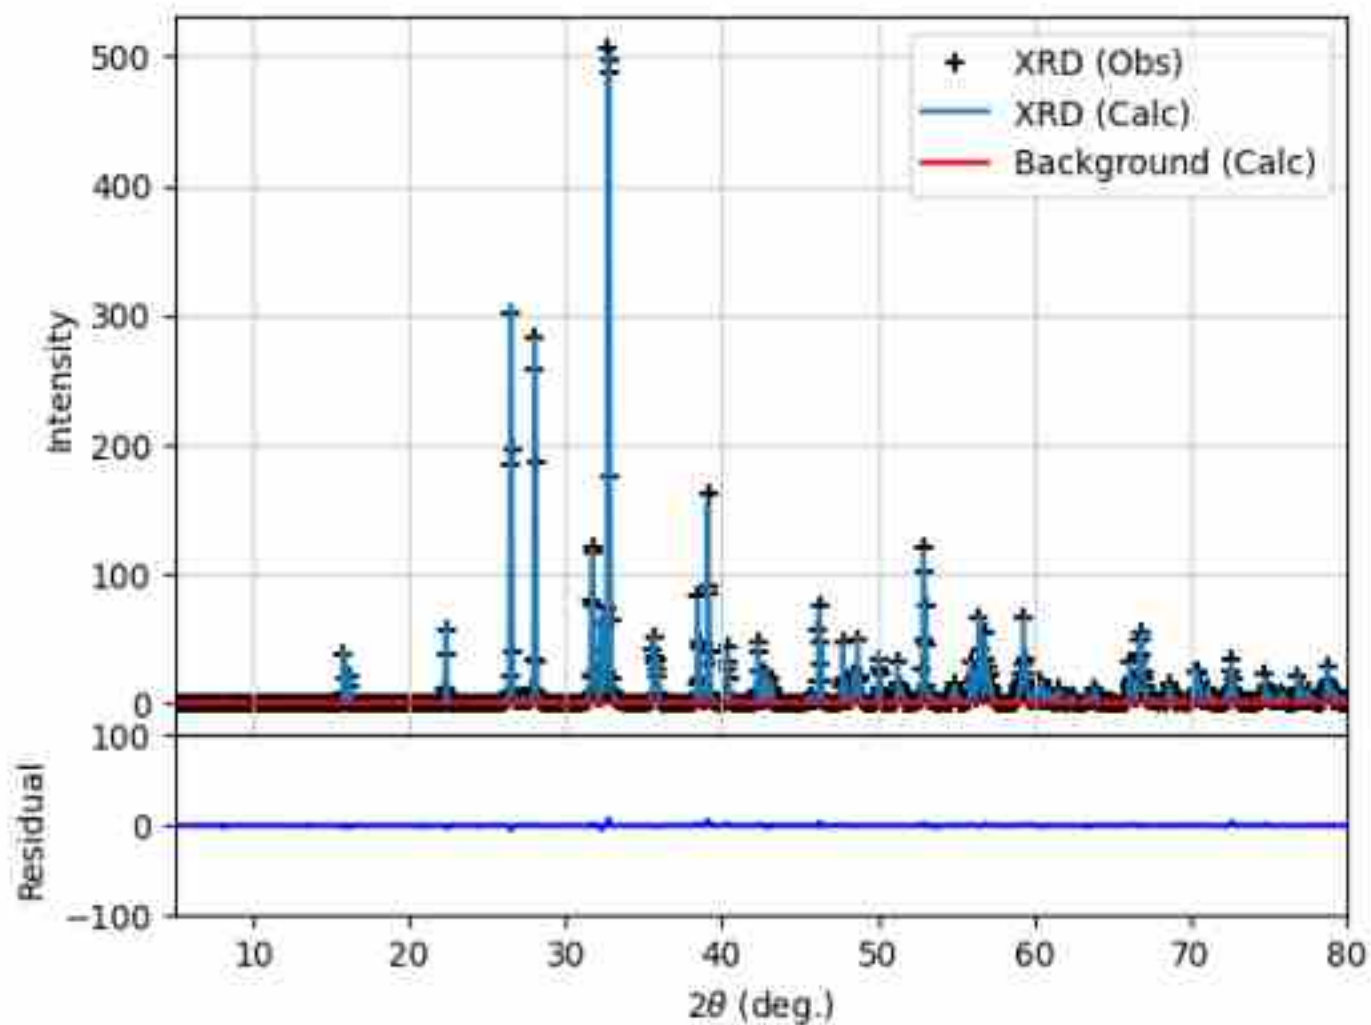

| RMSE before RR | Rwp     | RMSE after RR |
|----------------|---------|---------------|
| 0.273          | 5.81911 | None          |

# Eu9Pd6

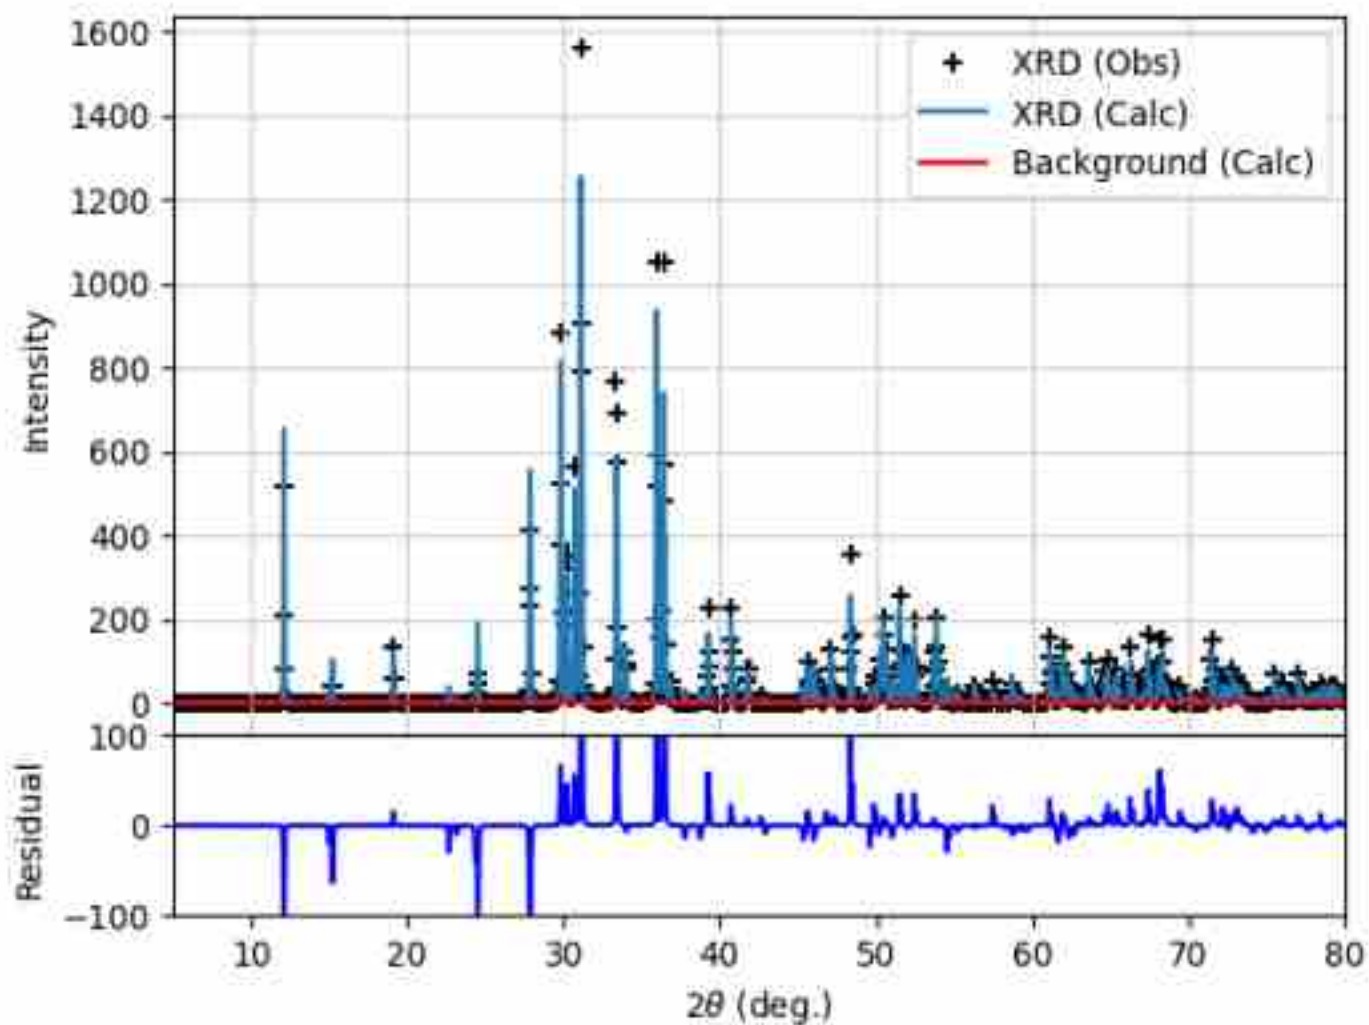

| RMSE before RR | Rwp      | RMSE after RR |
|----------------|----------|---------------|
| 0.276          | 29.63288 | 0.49594       |

# Li<sub>6</sub>Mn<sub>2</sub>Co<sub>2</sub>O<sub>10</sub>

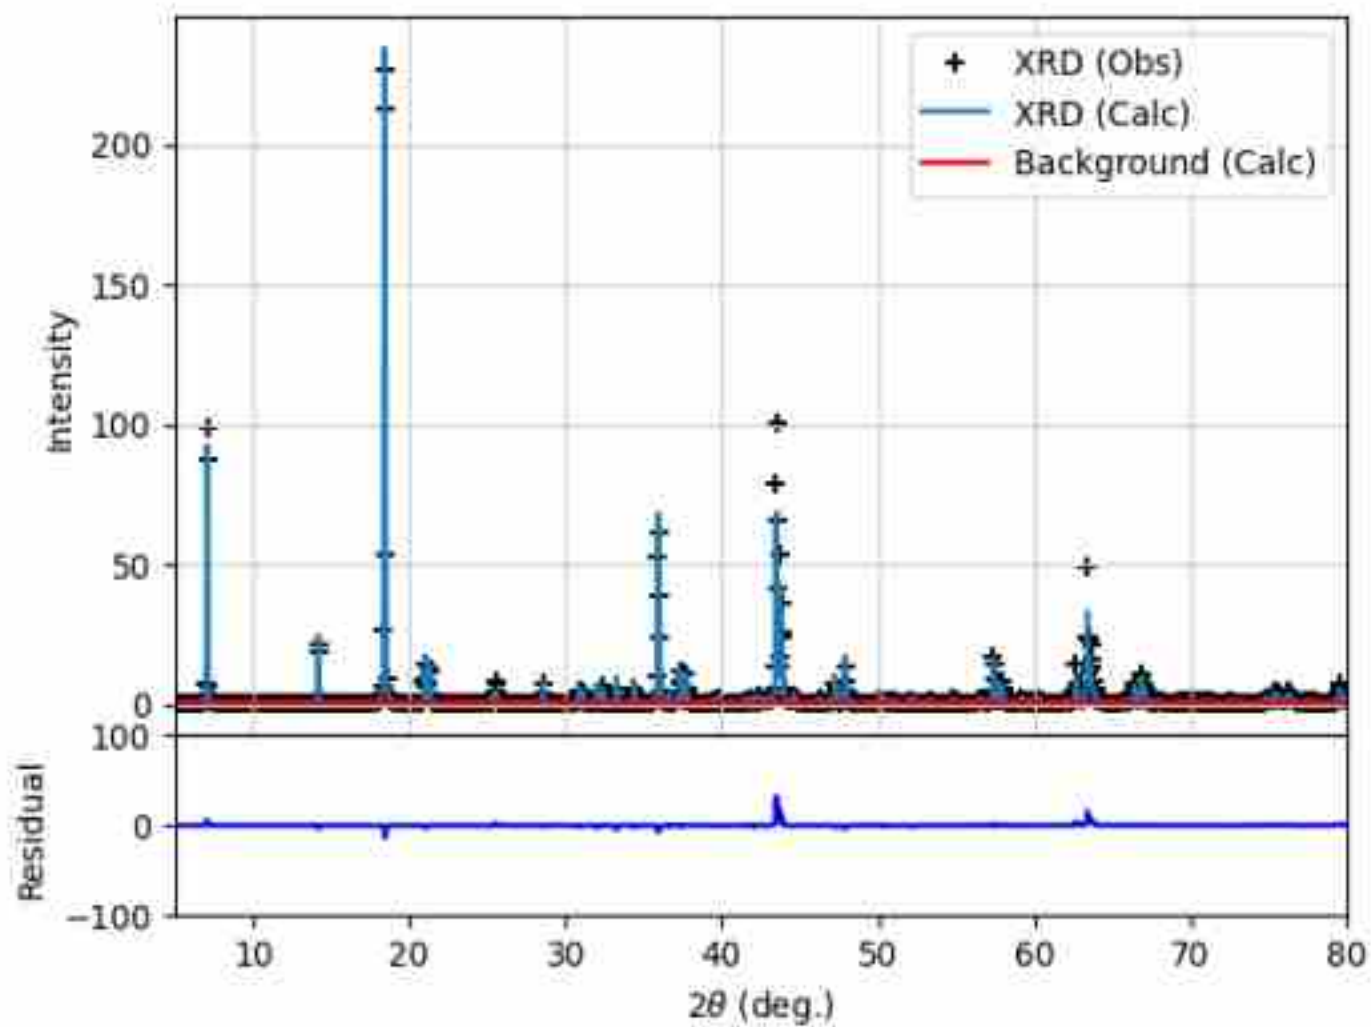

| RMSE before RR | Rwp      | RMSE after RR |
|----------------|----------|---------------|
| 0.276          | 17.97373 | None          |

# A12T14F10

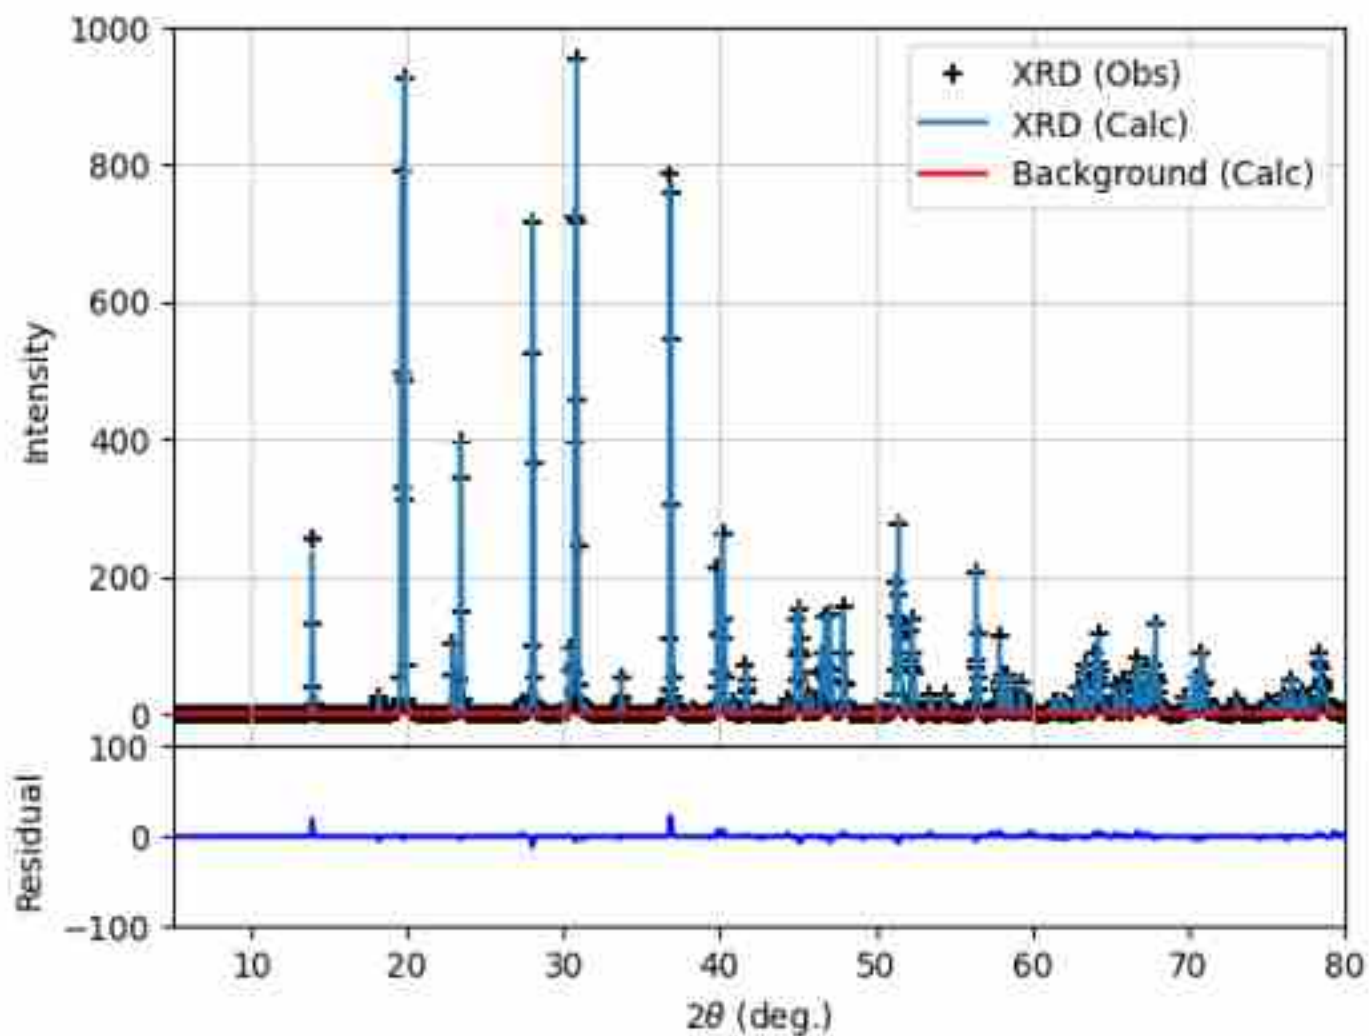

| RMSE before RR | Rwp     | RMSE after RR |
|----------------|---------|---------------|
| 0.277          | 5.50121 | 0.3089        |

# Pd<sub>2</sub>S<sub>2</sub>O<sub>8</sub>

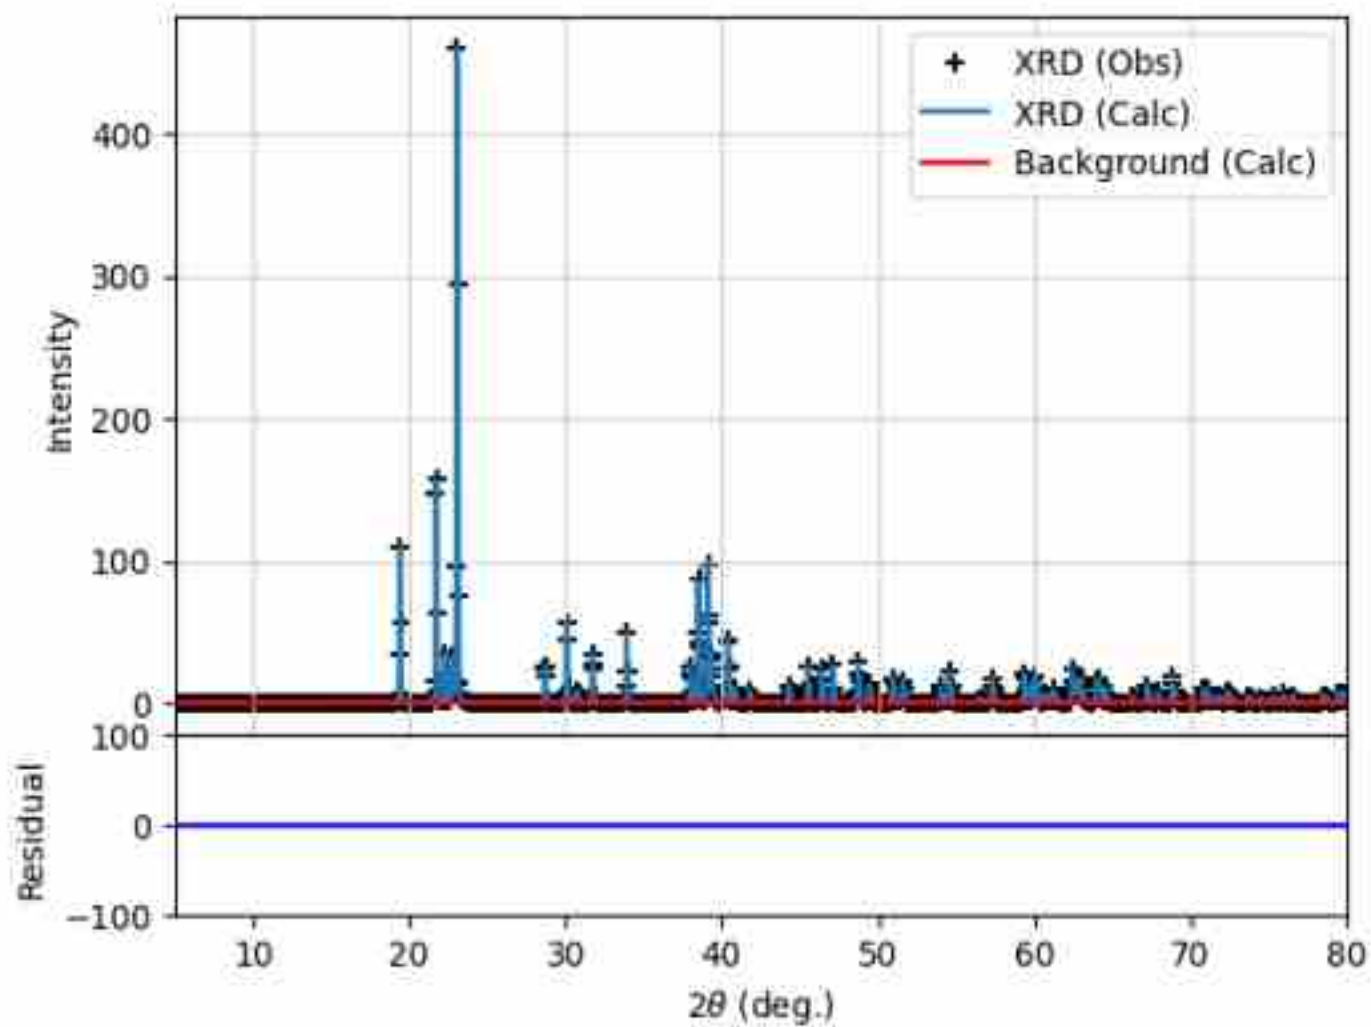

| RMSE before RR | Rwp     | RMSE after RR |
|----------------|---------|---------------|
| 0.277          | 0.00391 | 0.0008        |

# Li<sub>4</sub>Hf<sub>4</sub>O<sub>10</sub>

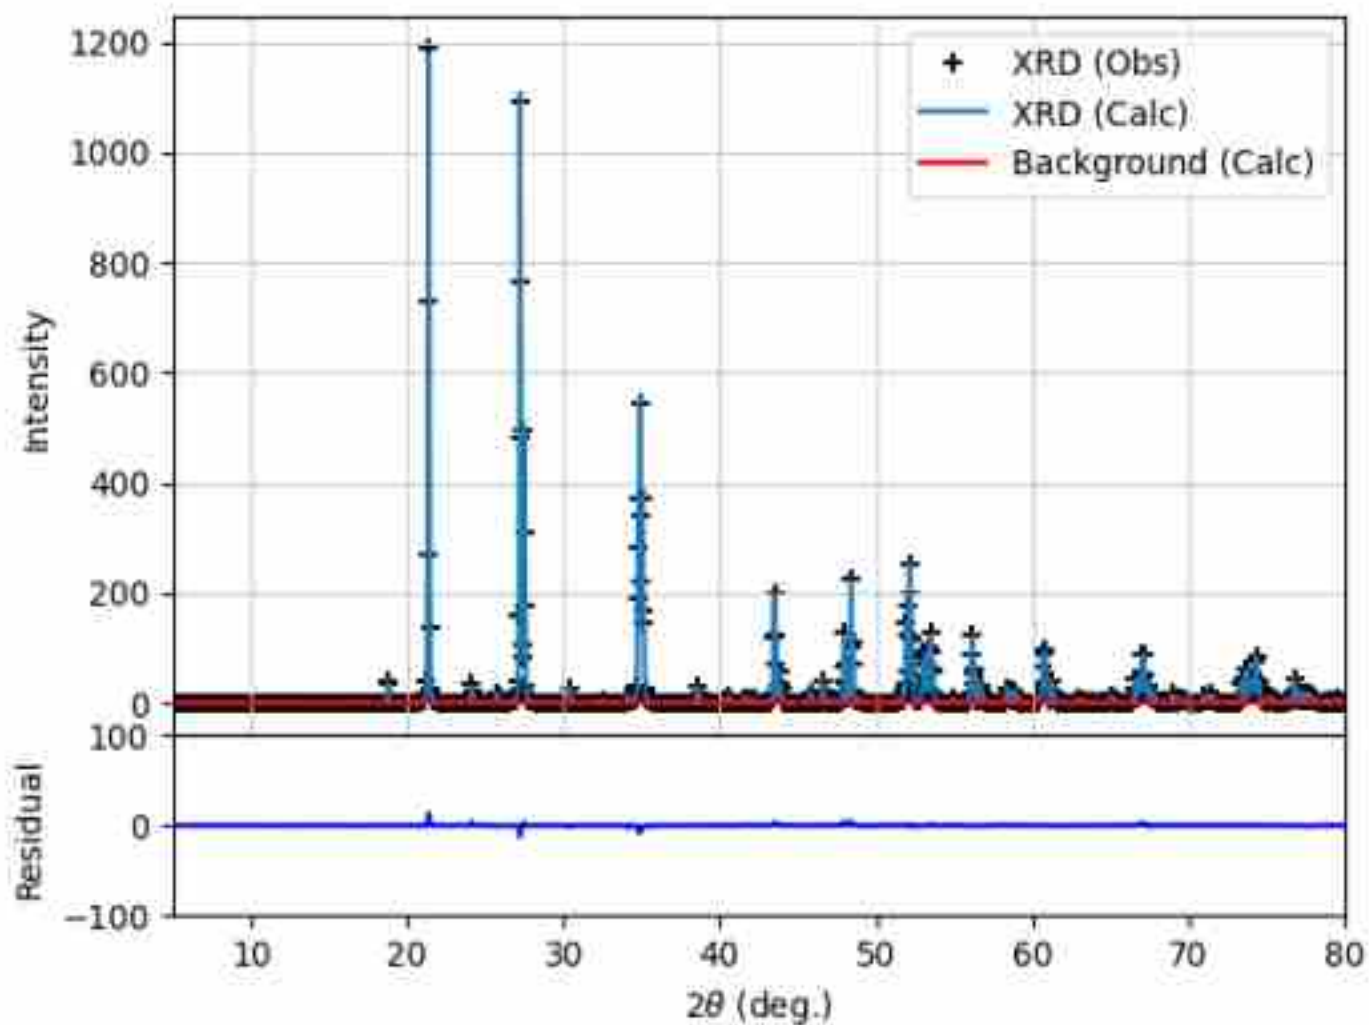

| RMSE before RR | Rwp     | RMSE after RR |
|----------------|---------|---------------|
| 0.278          | 2.40649 | None          |

# P4O10

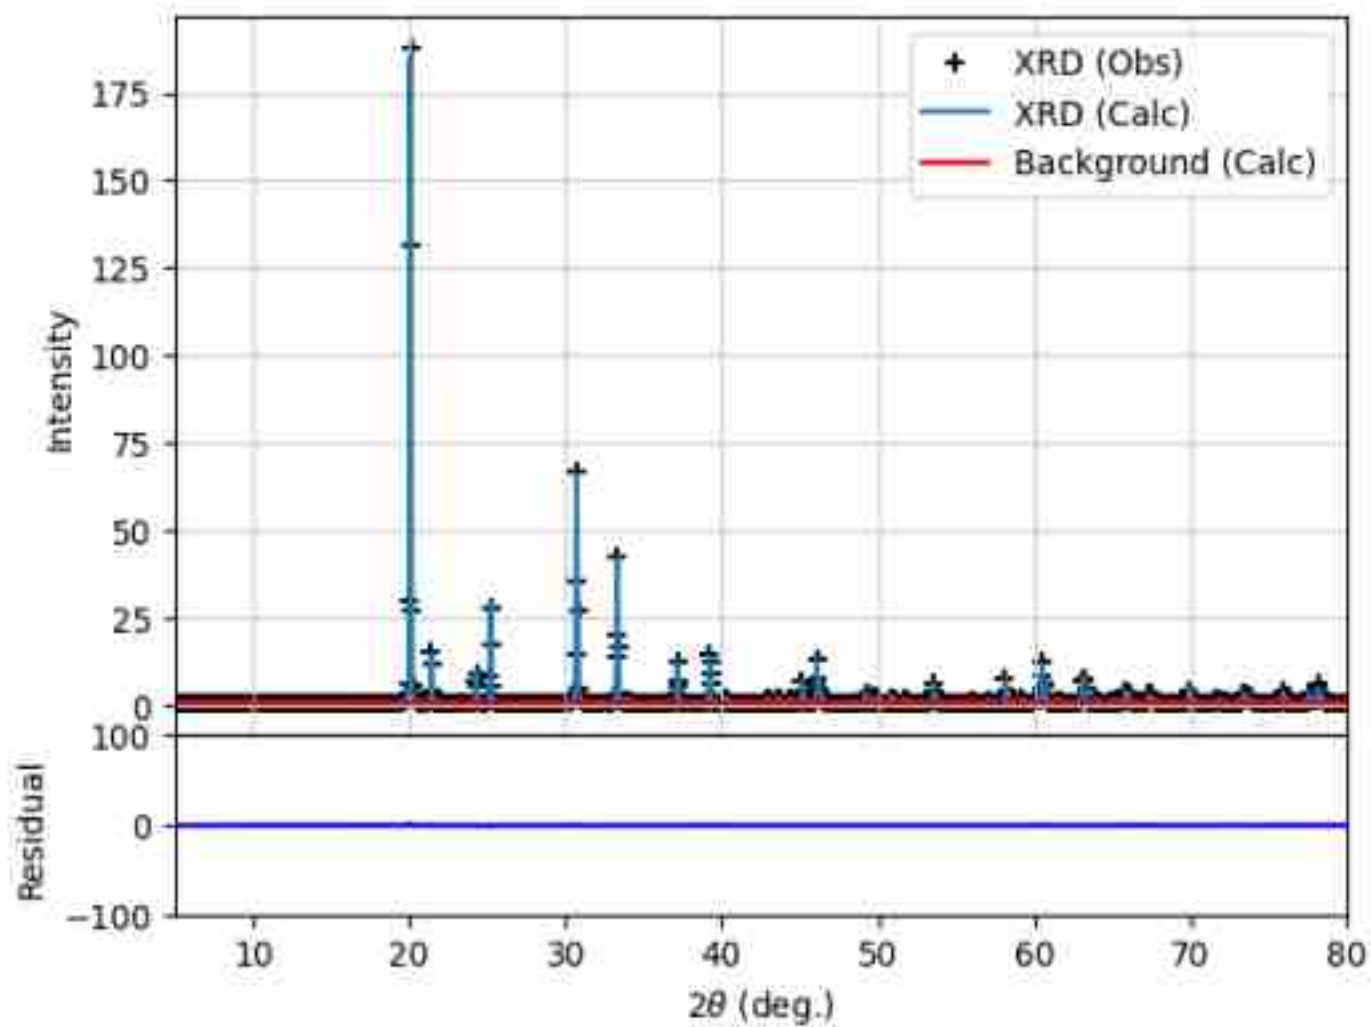

| RMSE before RR | Rwp     | RMSE after RR |
|----------------|---------|---------------|
| 0.278          | 4.58361 | 0.27217       |



# Rb<sub>4</sub>Cr<sub>4</sub>C<sub>11</sub>2

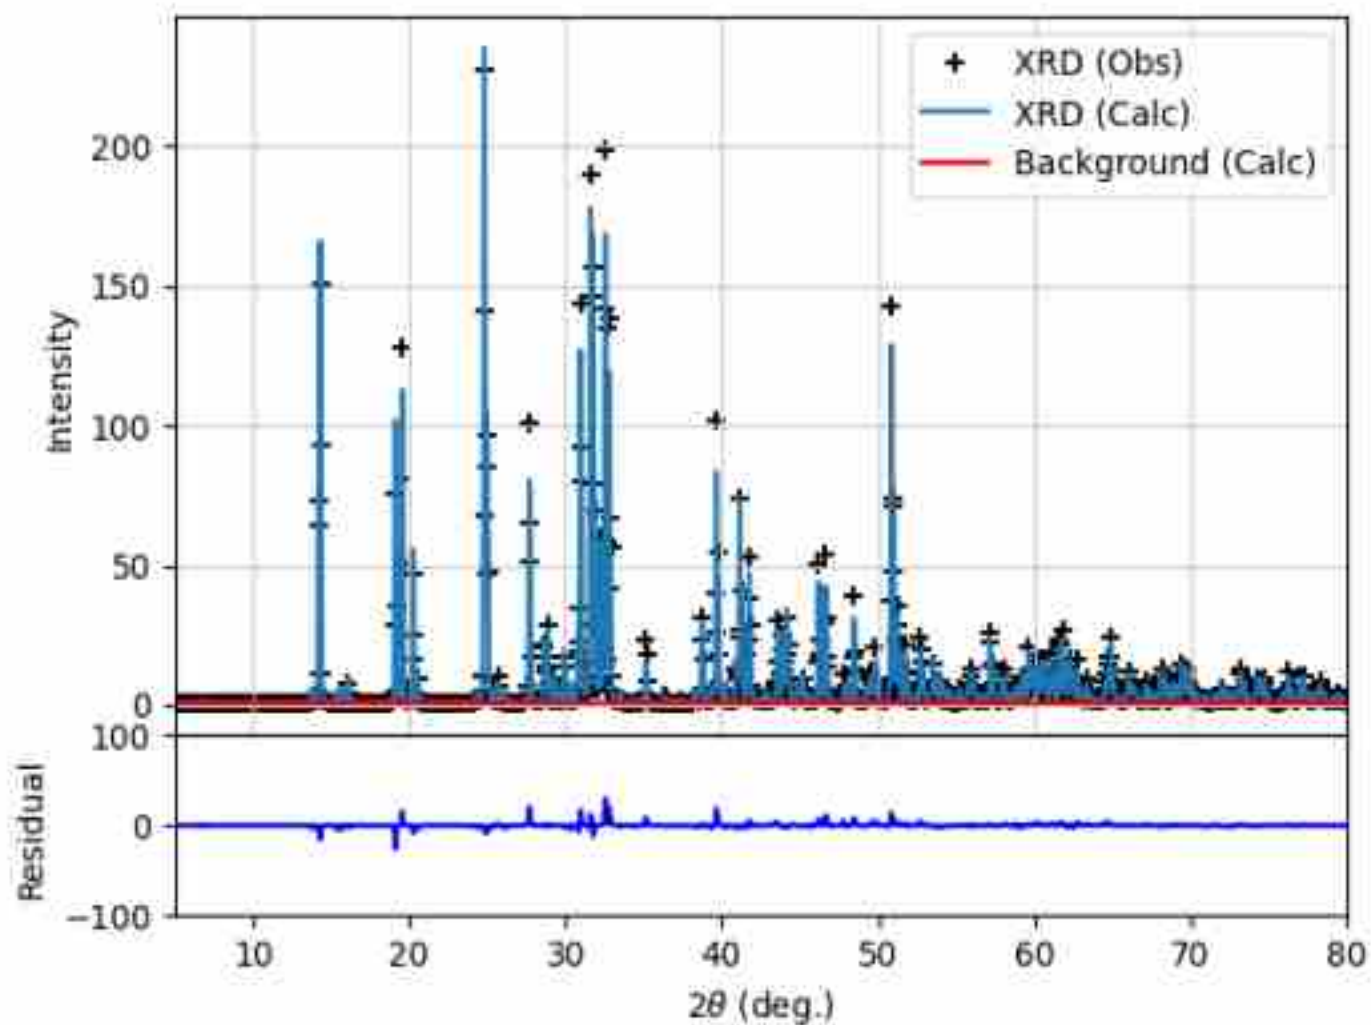

| RMSE before RR | Rwp      | RMSE after RR |
|----------------|----------|---------------|
| 0.279          | 17.14627 | 0.17374       |

# Ba<sub>2</sub>TlCu<sub>3</sub>O<sub>7</sub>

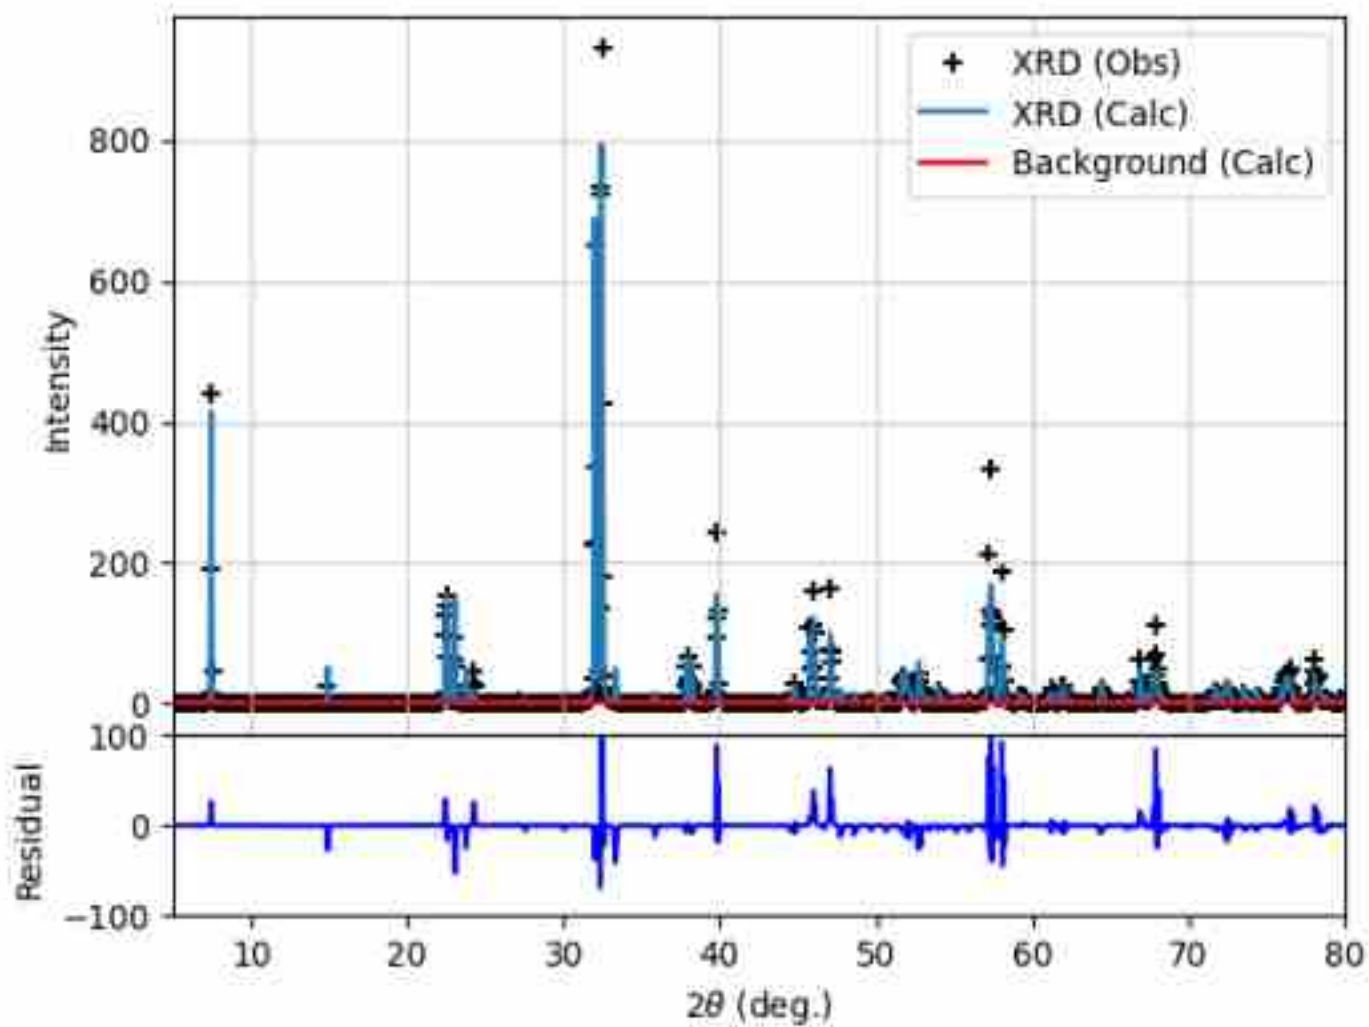

| RMSE before RR | Rwp      | RMSE after RR |
|----------------|----------|---------------|
| 0.281          | 42.99863 | 0.27809       |

# Nb<sub>2</sub>V<sub>2</sub>O<sub>10</sub>

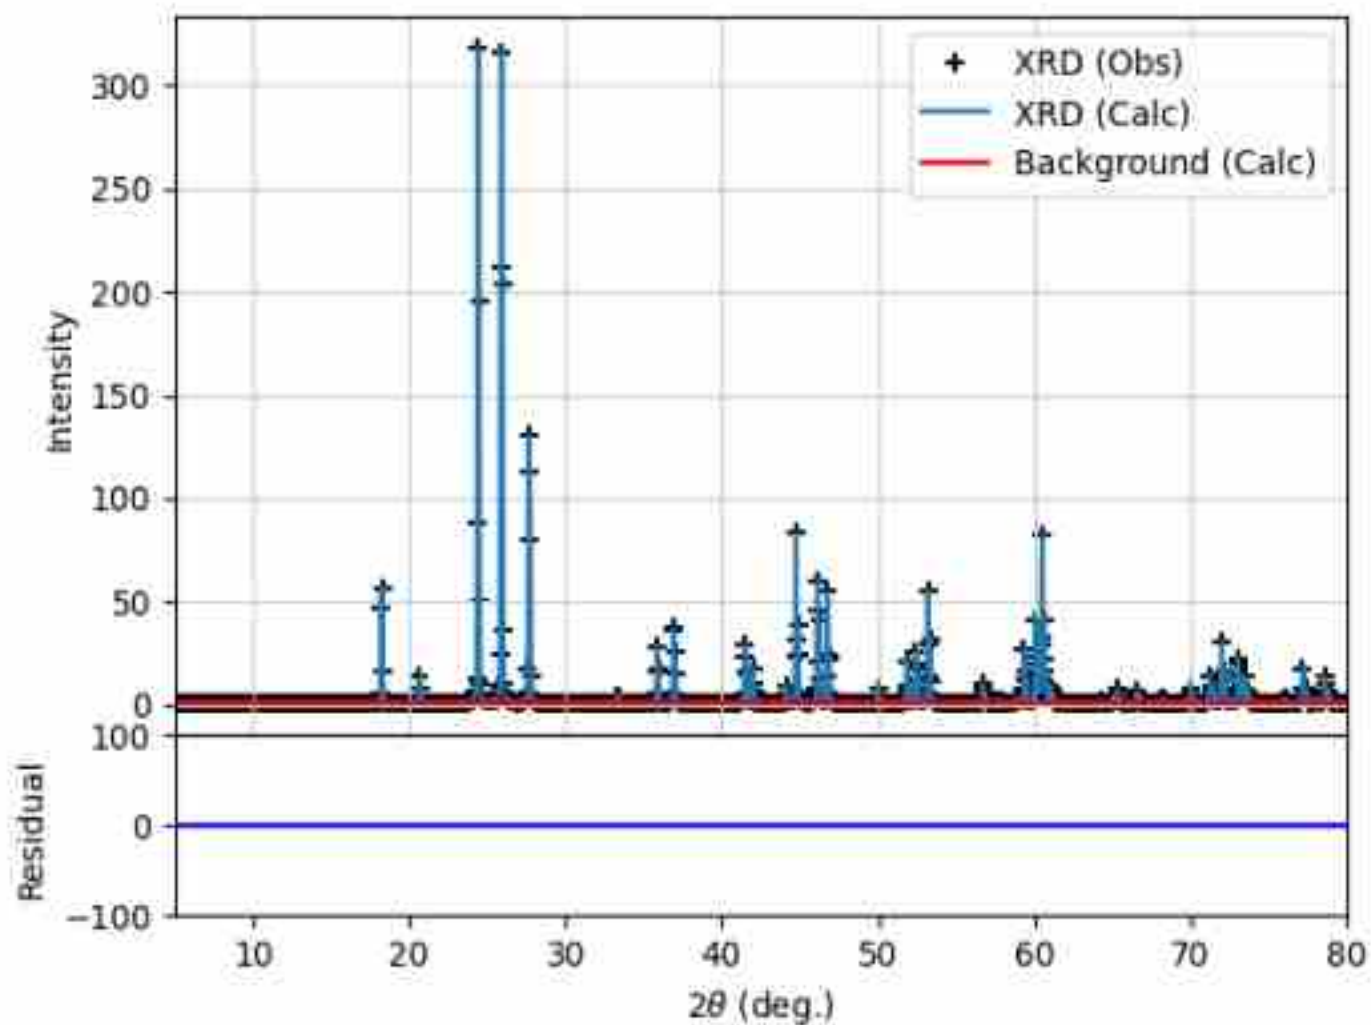

| RMSE before RR | Rwp     | RMSE after RR |
|----------------|---------|---------------|
| 0.281          | 0.00667 | 0.00181       |

# Li<sub>2</sub>I<sub>2</sub>O<sub>6</sub>

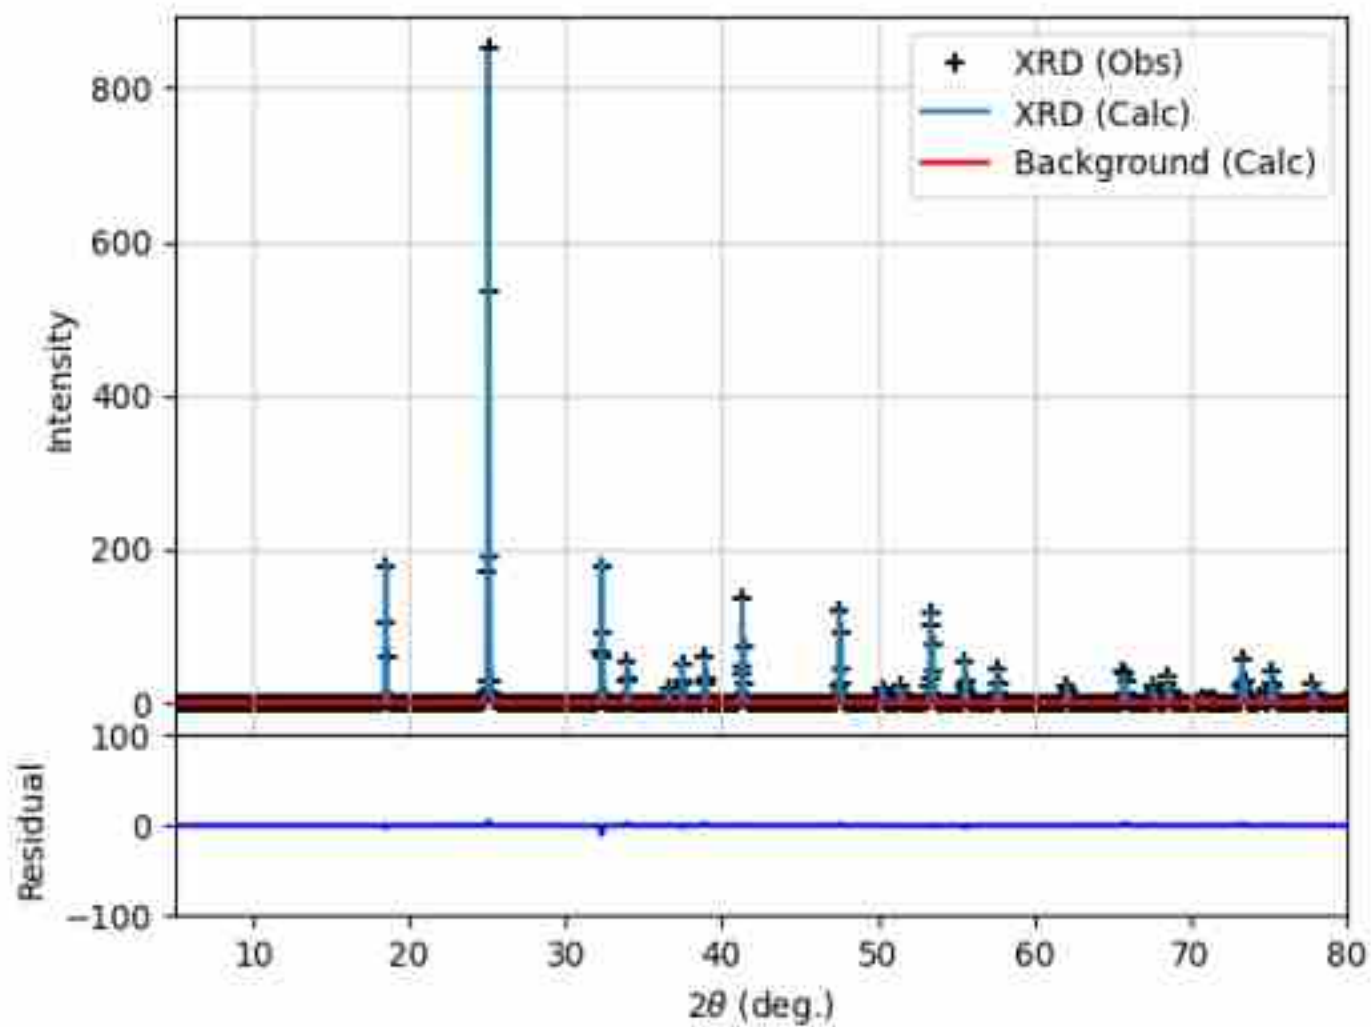

| RMSE before RR | Rwp     | RMSE after RR |
|----------------|---------|---------------|
| 0.282          | 2.94678 | None          |

# Li<sub>4</sub>Mo<sub>3</sub>O<sub>8</sub>

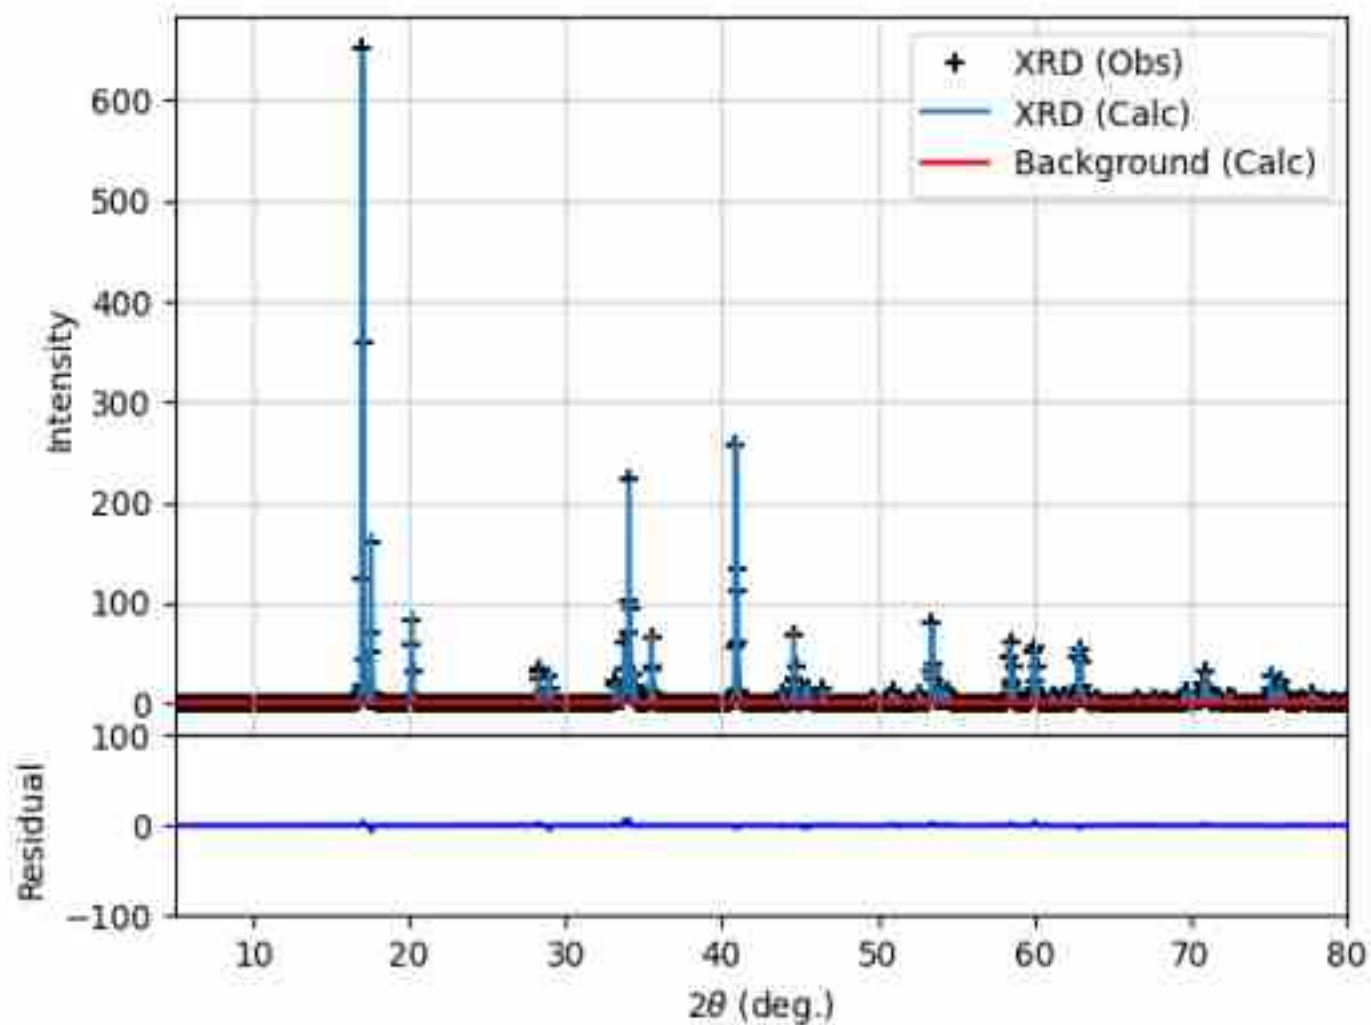

| RMSE before RR | Rwp     | RMSE after RR |
|----------------|---------|---------------|
| 0.282          | 4.47567 | 0.30611       |

# Sb4I12

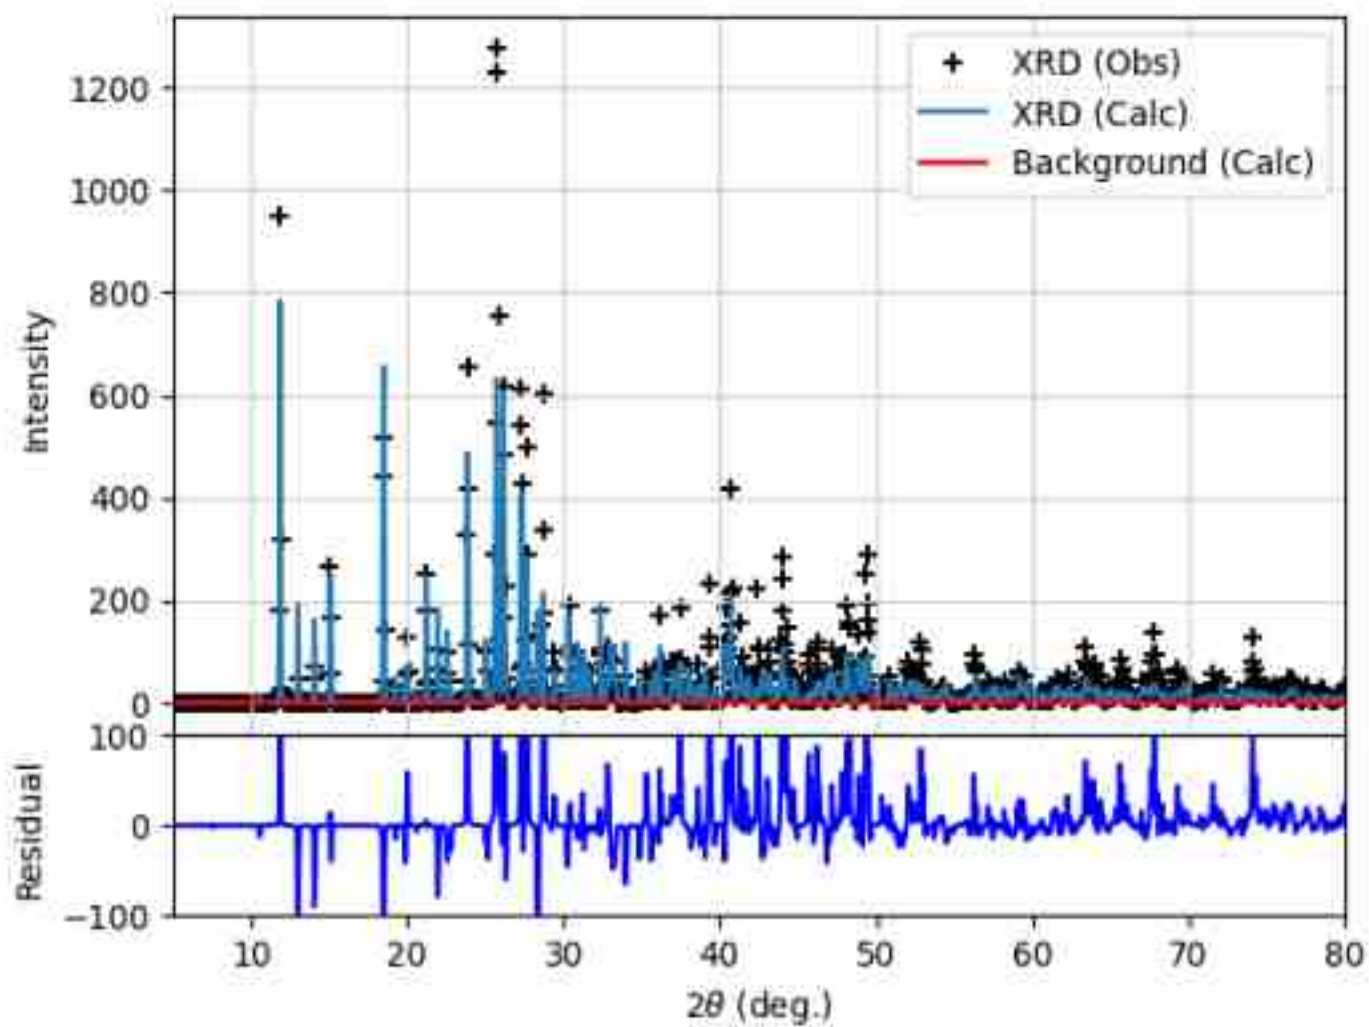

| RMSE before RR | Rwp      | RMSE after RR |
|----------------|----------|---------------|
| 0.283          | 60.54939 | None          |

# Hf6Al6Pt6

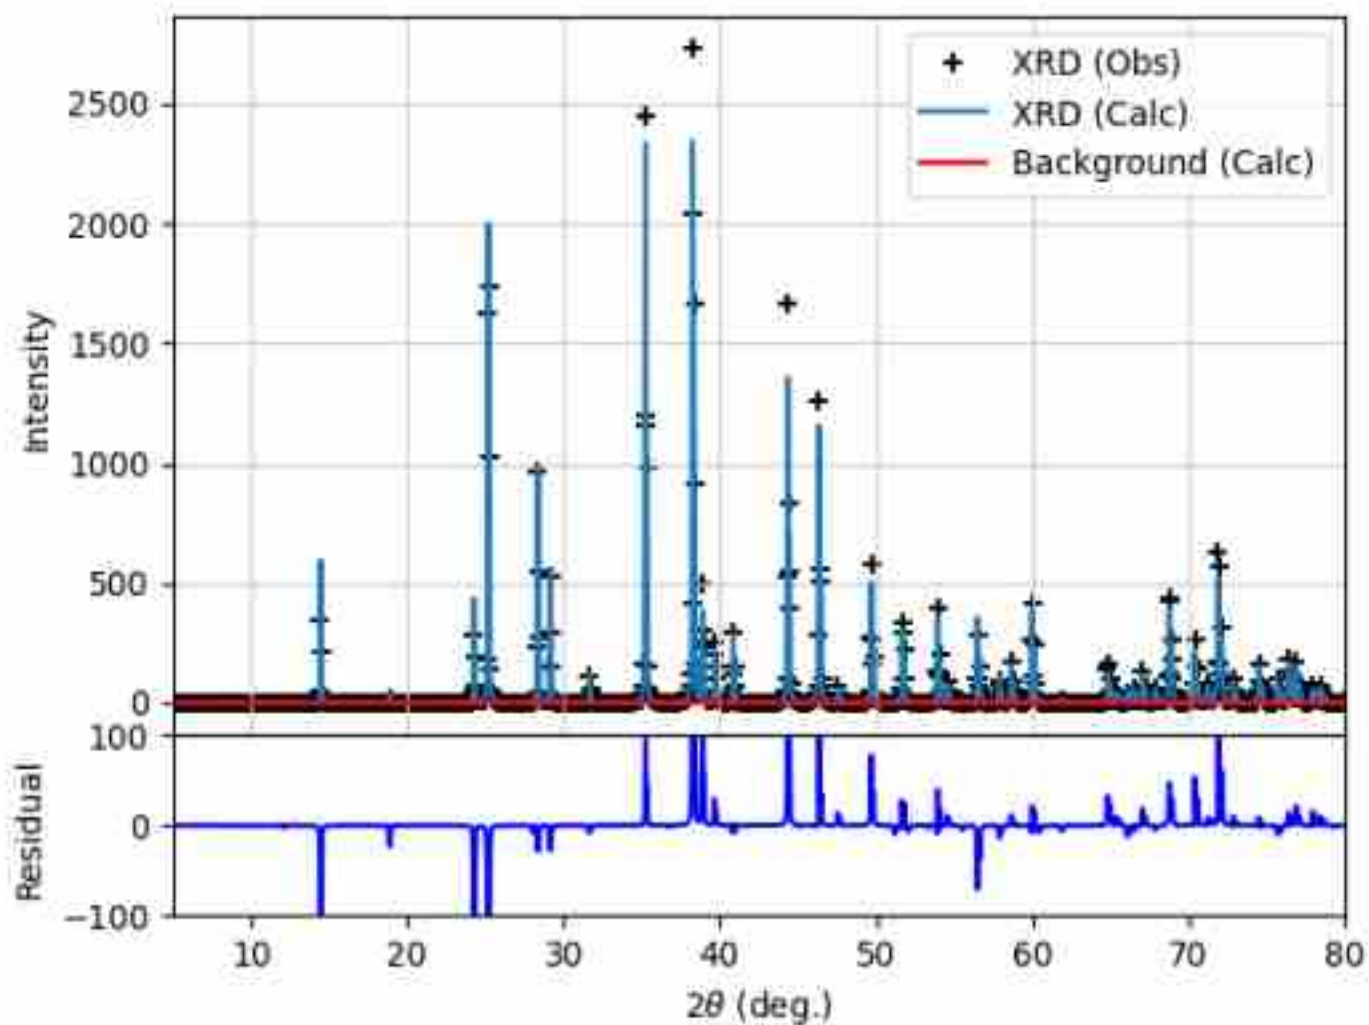

| RMSE before RR | Rwp      | RMSE after RR |
|----------------|----------|---------------|
| 0.284          | 16.40098 | 0.47725       |

# Nb<sub>2</sub>Si<sub>1</sub>Te<sub>4</sub>

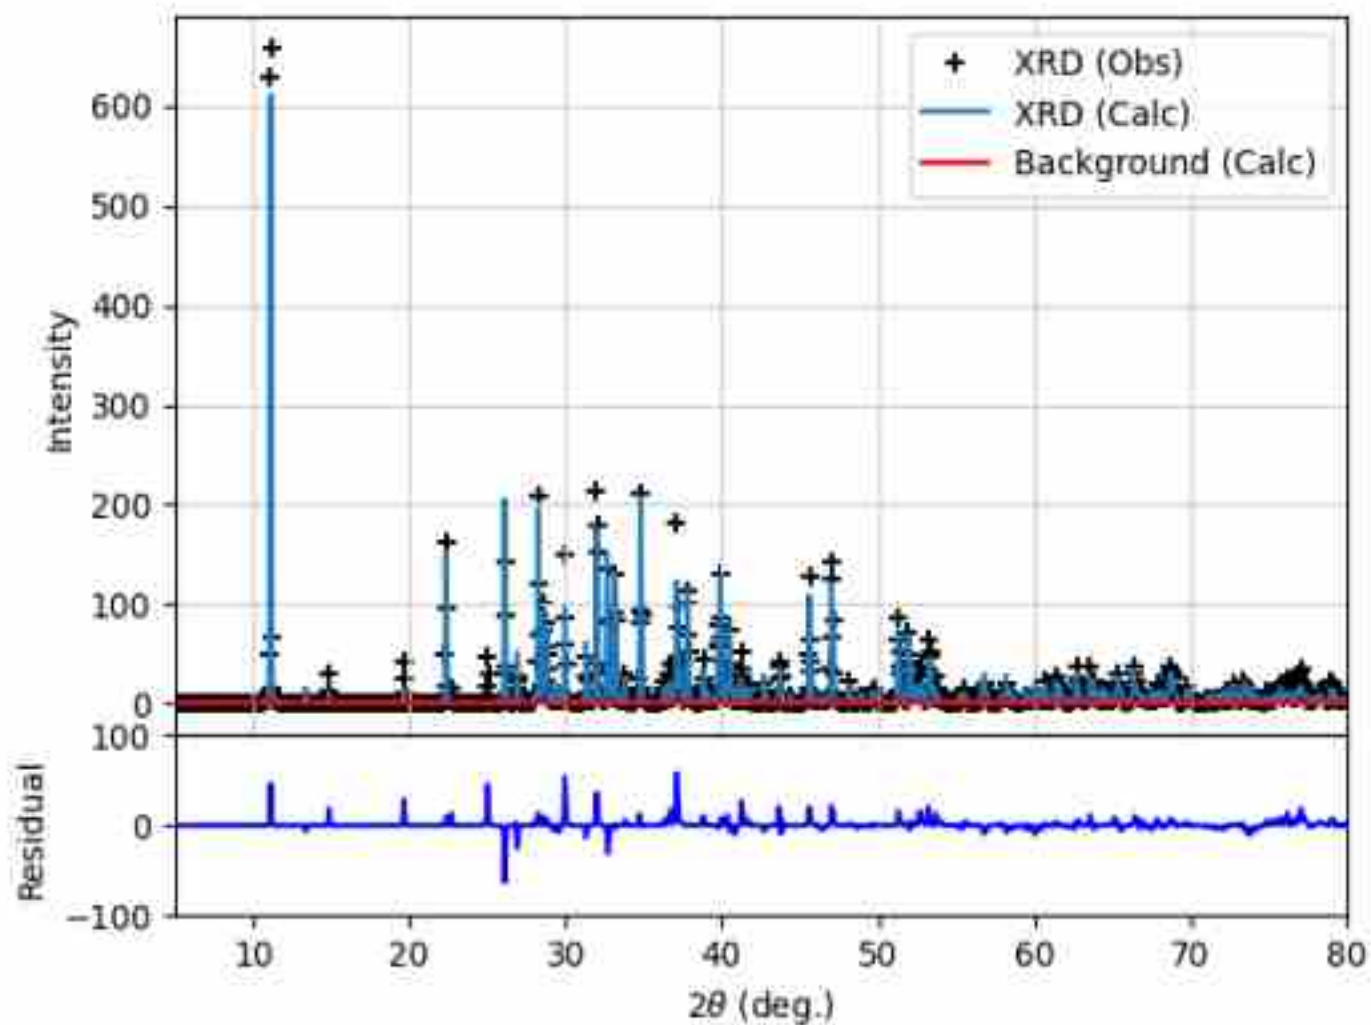

| RMSE before RR | Rwp      | RMSE after RR |
|----------------|----------|---------------|
| 0.284          | 28.83038 | 0.29062       |



# Ag<sub>4</sub>Hg<sub>4</sub>S<sub>4</sub>I<sub>4</sub>

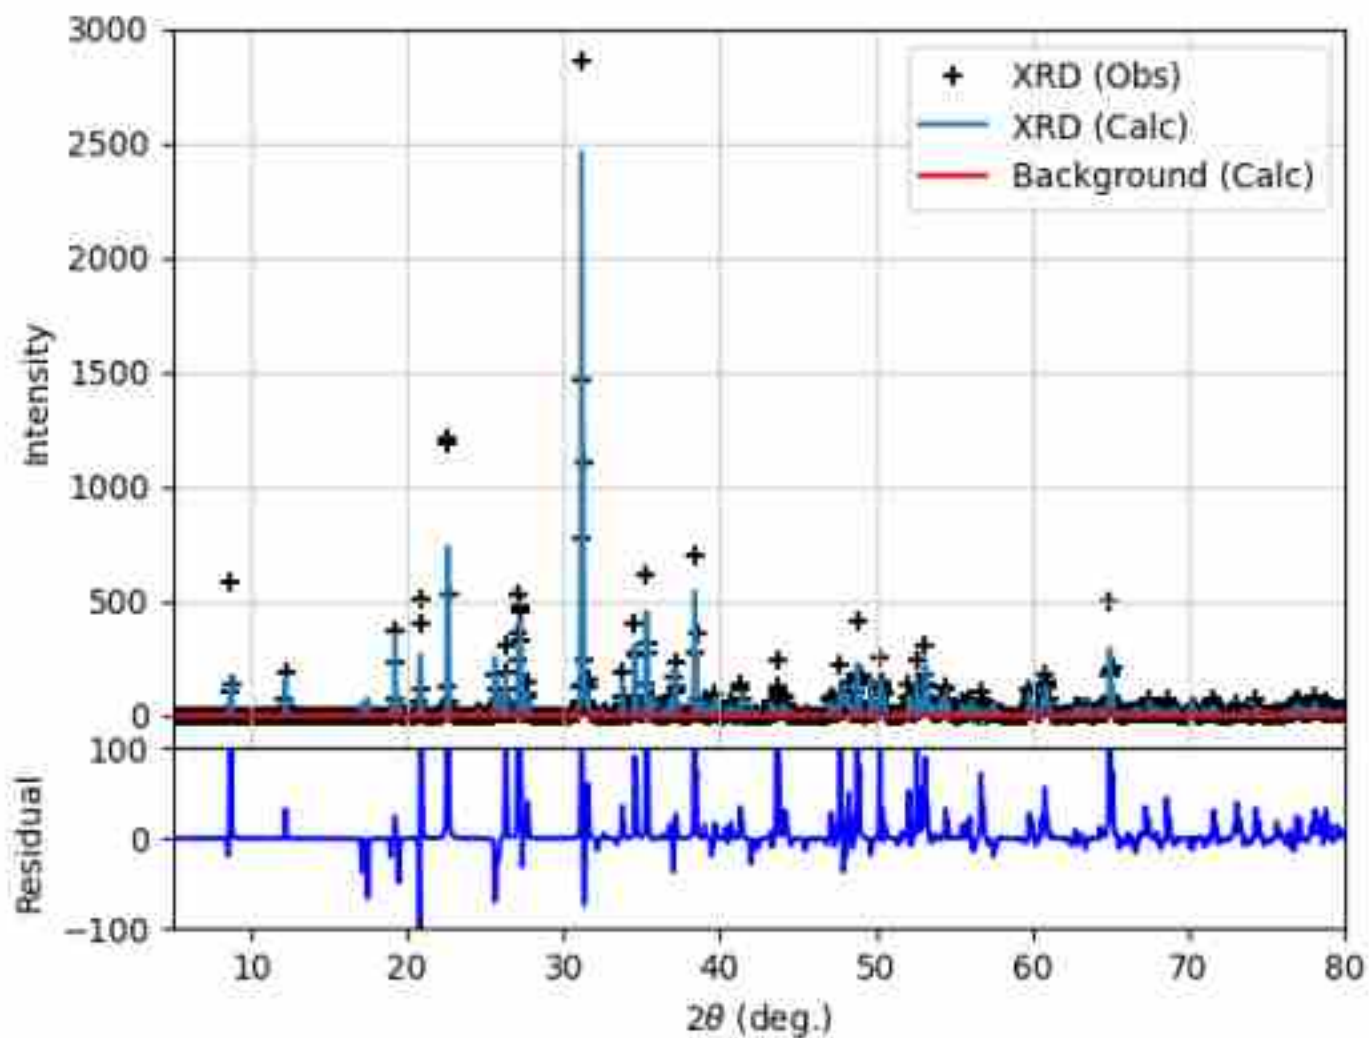

| RMSE before RR | Rwp      | RMSE after RR |
|----------------|----------|---------------|
| 0.285          | 42.32202 | 0.49441       |

# Cs<sub>6</sub>Ge<sub>8</sub>Au<sub>2</sub>

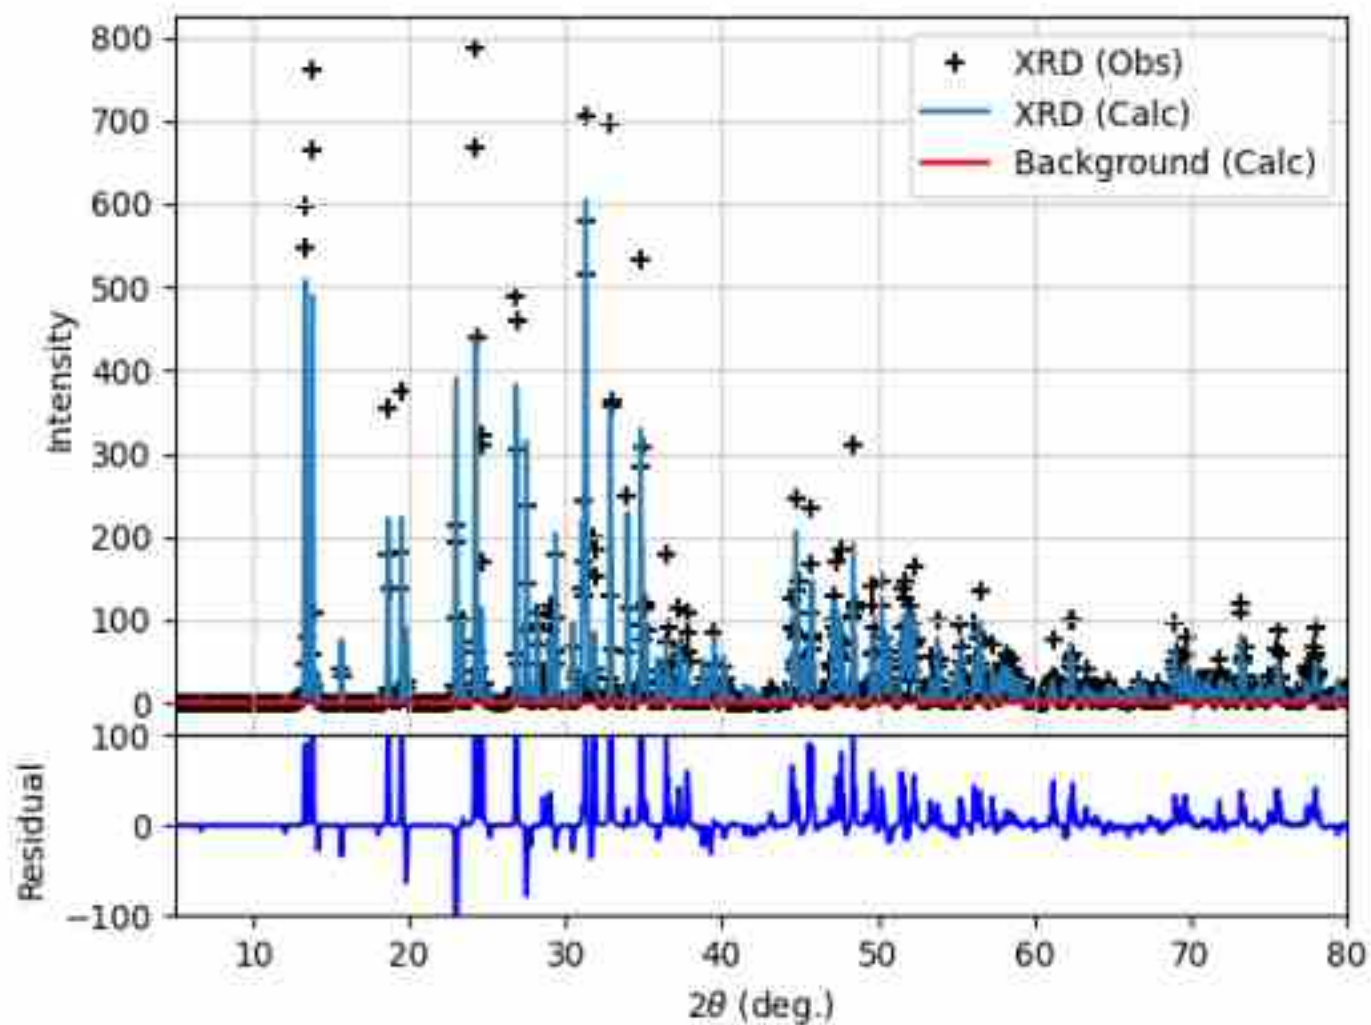

| RMSE before RR | Rwp      | RMSE after RR |
|----------------|----------|---------------|
| 0.285          | 41.58984 | 0.48177       |

# Li<sub>2</sub>Al<sub>2</sub>V<sub>2</sub>O<sub>8</sub>

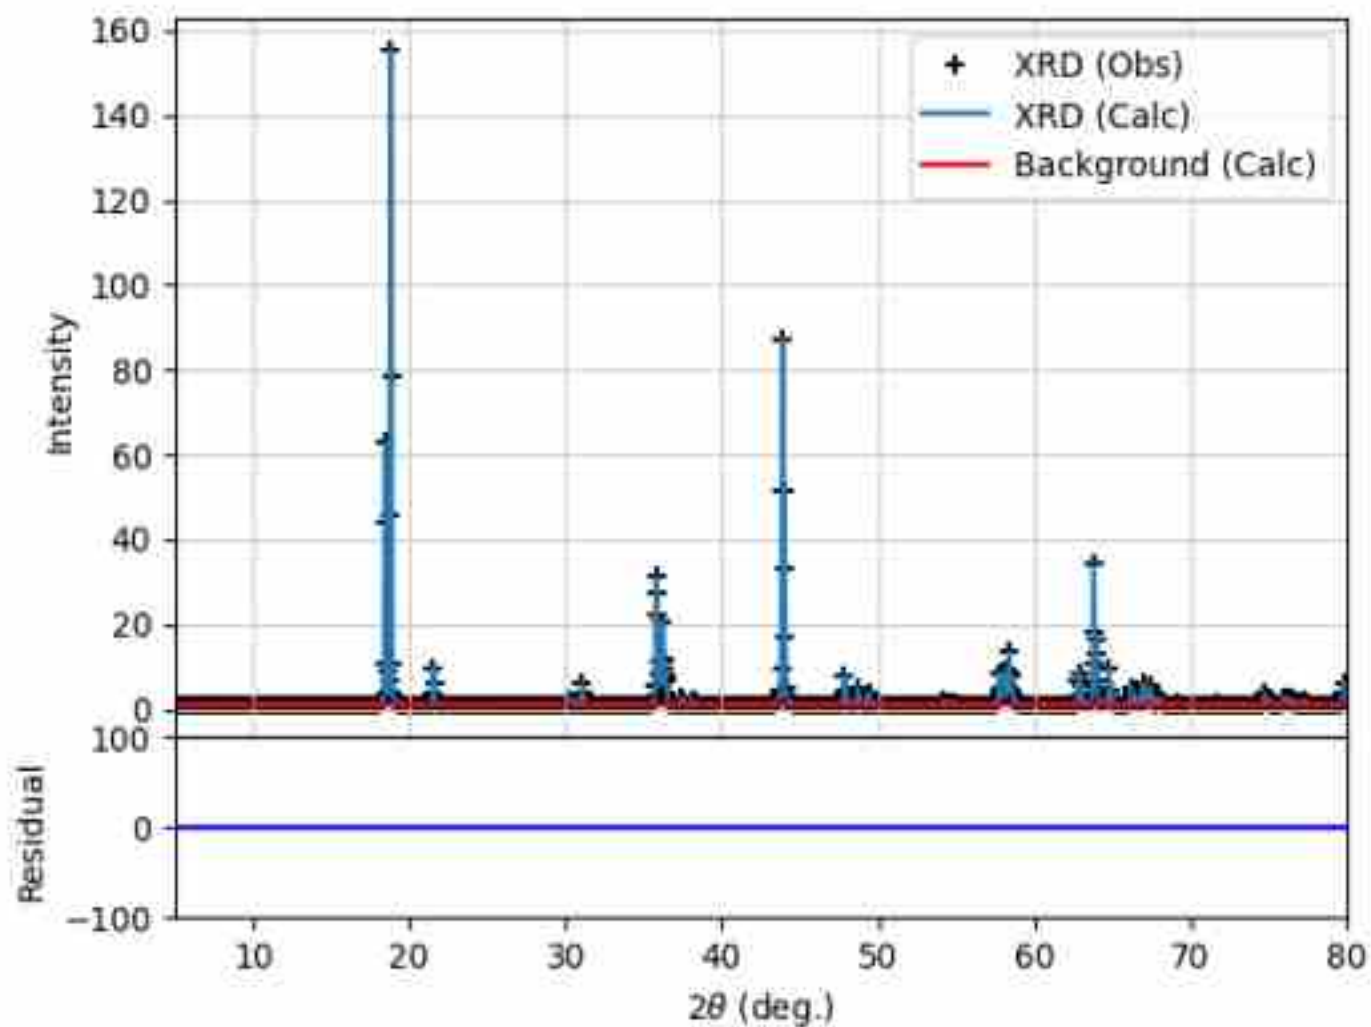

| RMSE before RR | Rwp     | RMSE after RR |
|----------------|---------|---------------|
| 0.285          | 0.00114 | 0.00029       |

# Te6O12

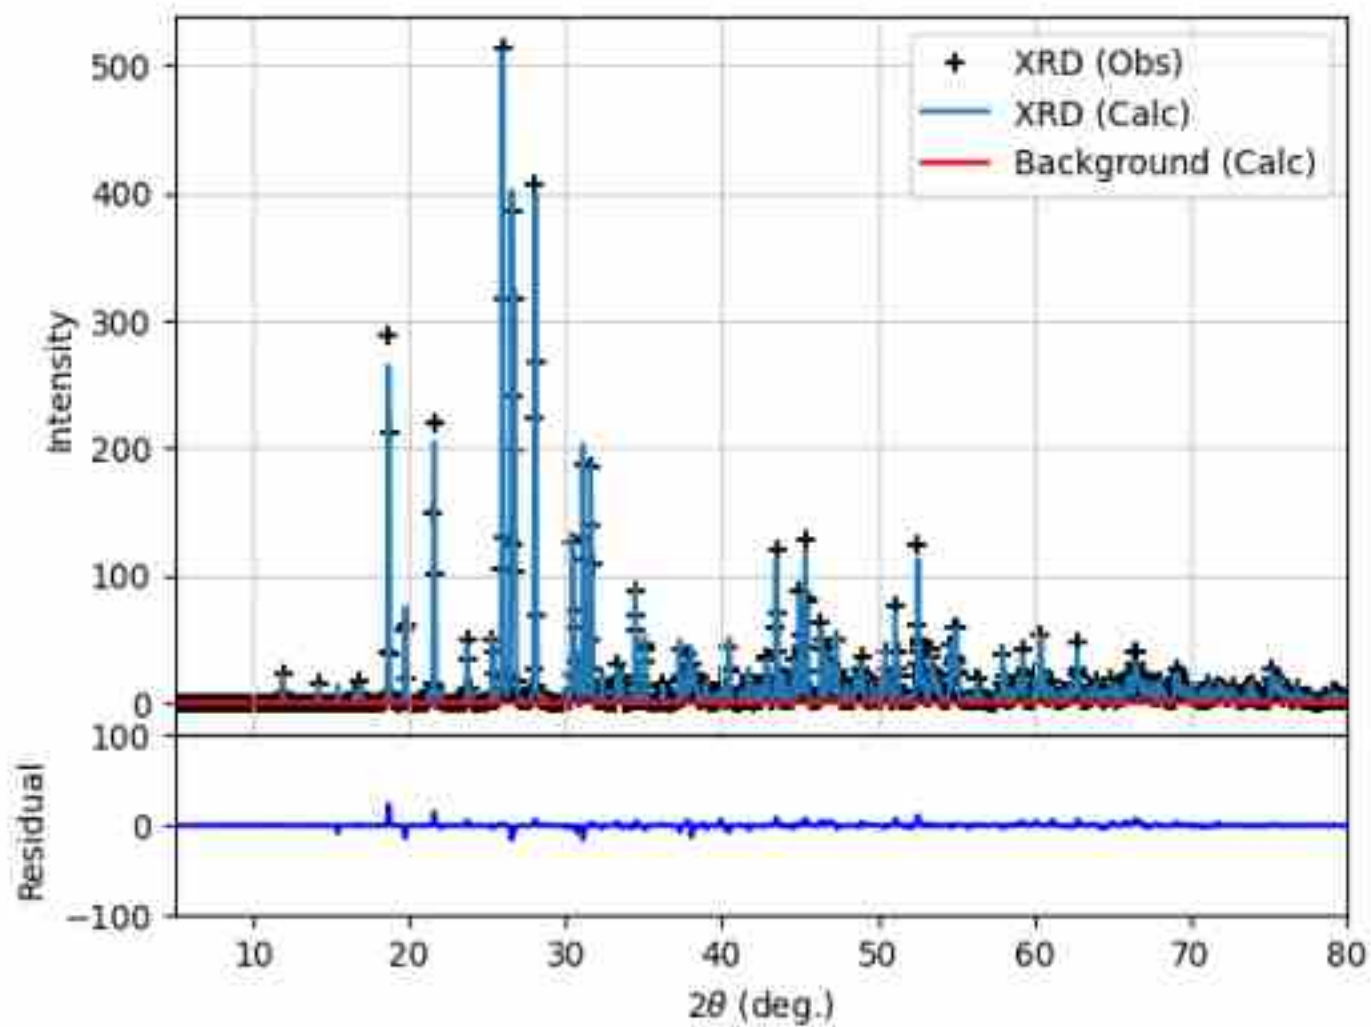

| RMSE before RR | Rwp      | RMSE after RR |
|----------------|----------|---------------|
| 0.285          | 10.41307 | 0.4888        |

# Cr1Co4Sb1O8

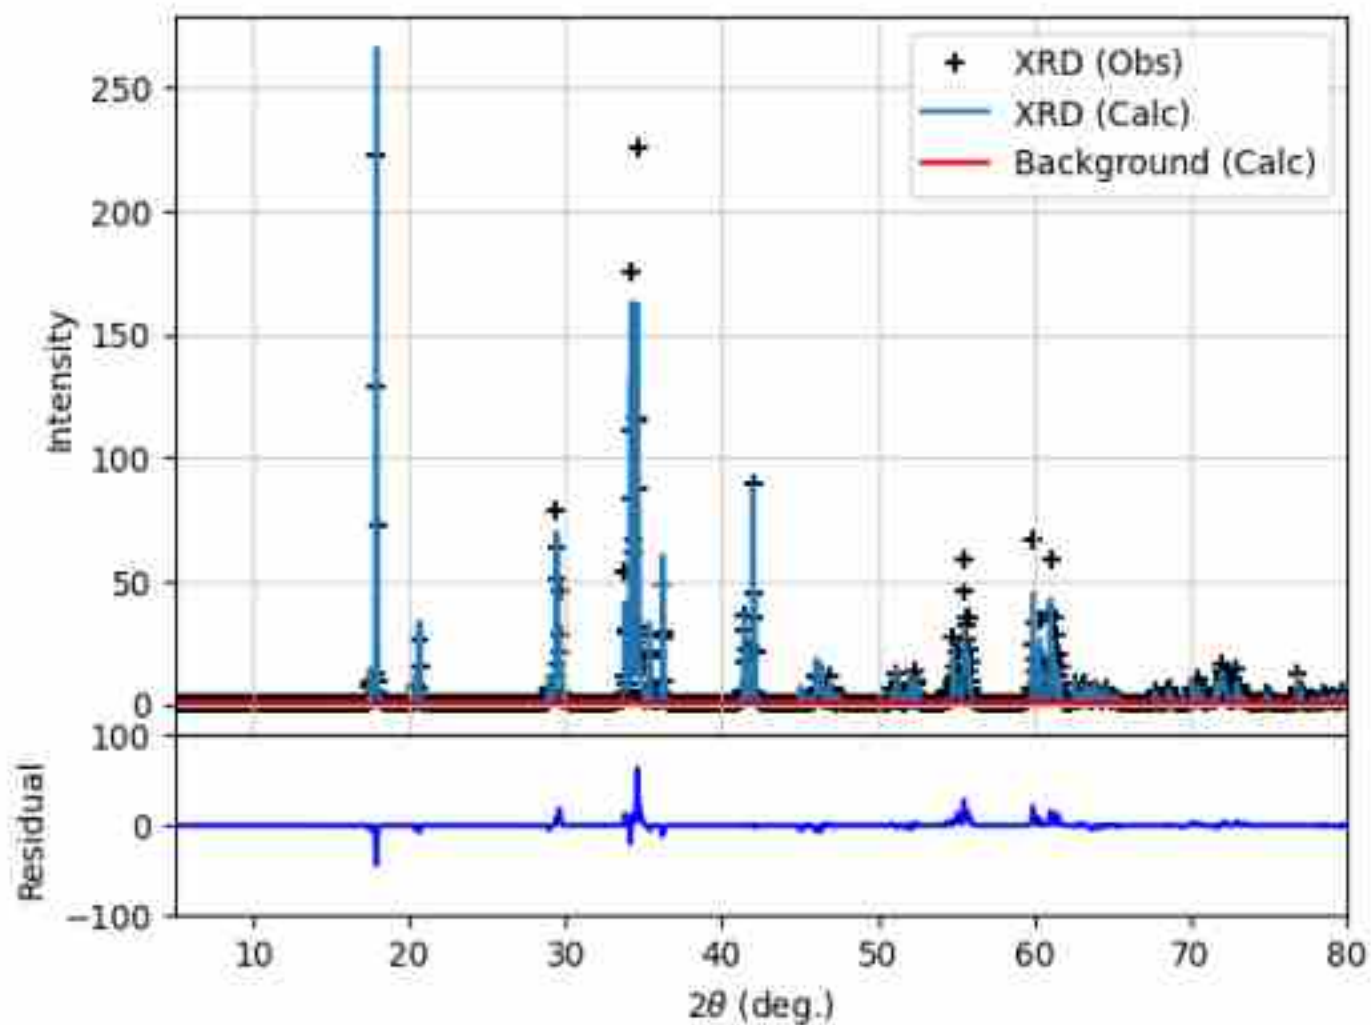

| RMSE before RR | Rwp      | RMSE after RR |
|----------------|----------|---------------|
| 0.287          | 27.58344 | None          |

# Mn<sub>2</sub>Ni<sub>2</sub>O<sub>6</sub>

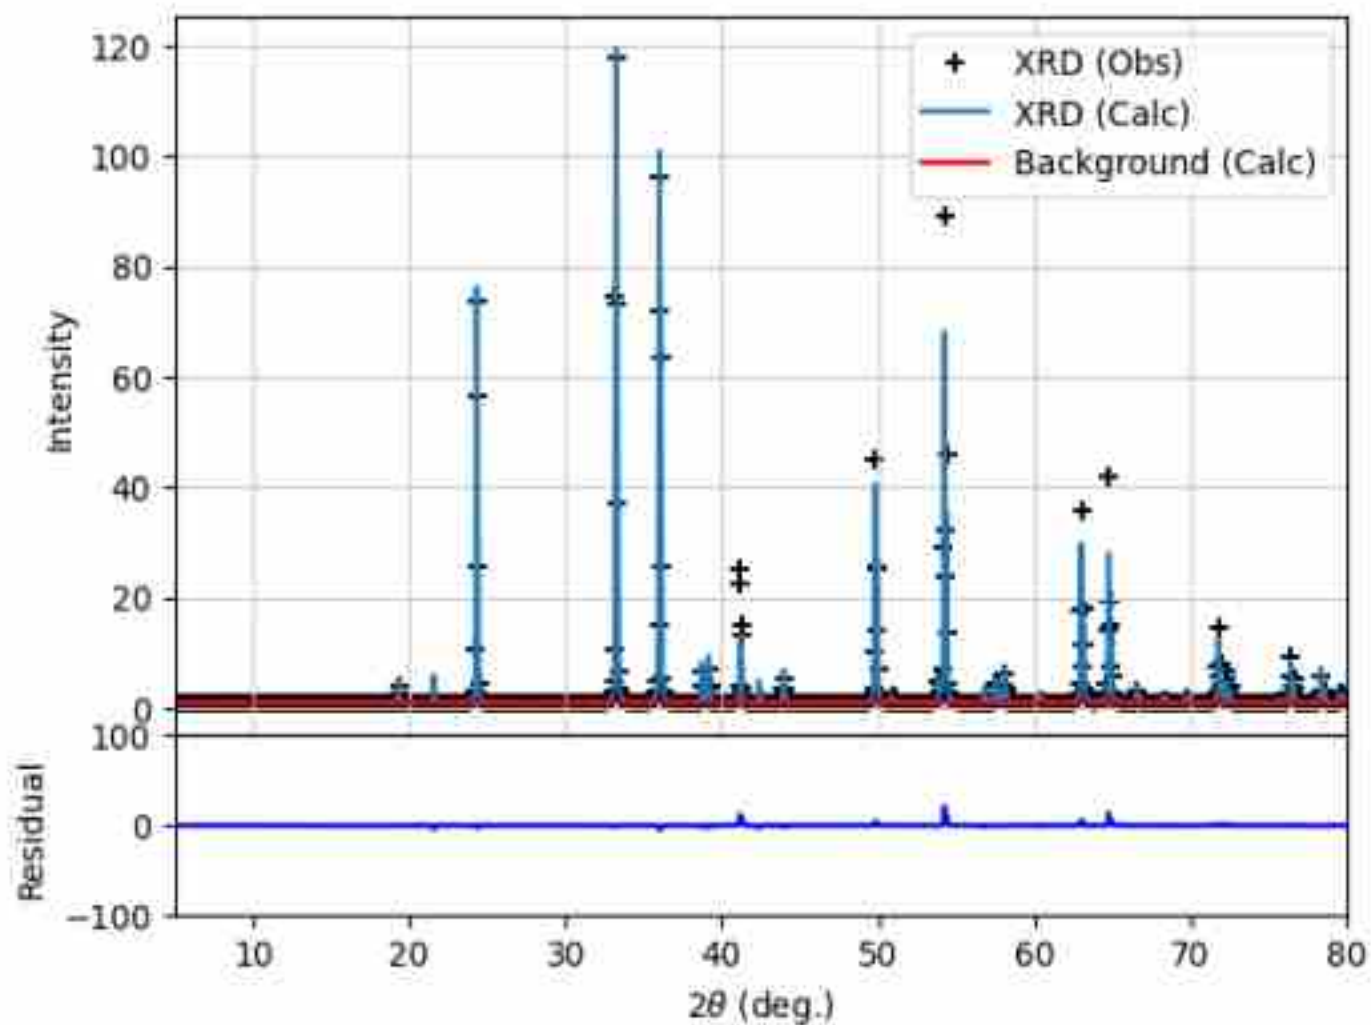

| RMSE before RR | Rwp      | RMSE after RR |
|----------------|----------|---------------|
| 0.287          | 15.67383 | 0.37968       |

# Tb<sub>4</sub>Hf<sub>1</sub>Al<sub>15</sub>

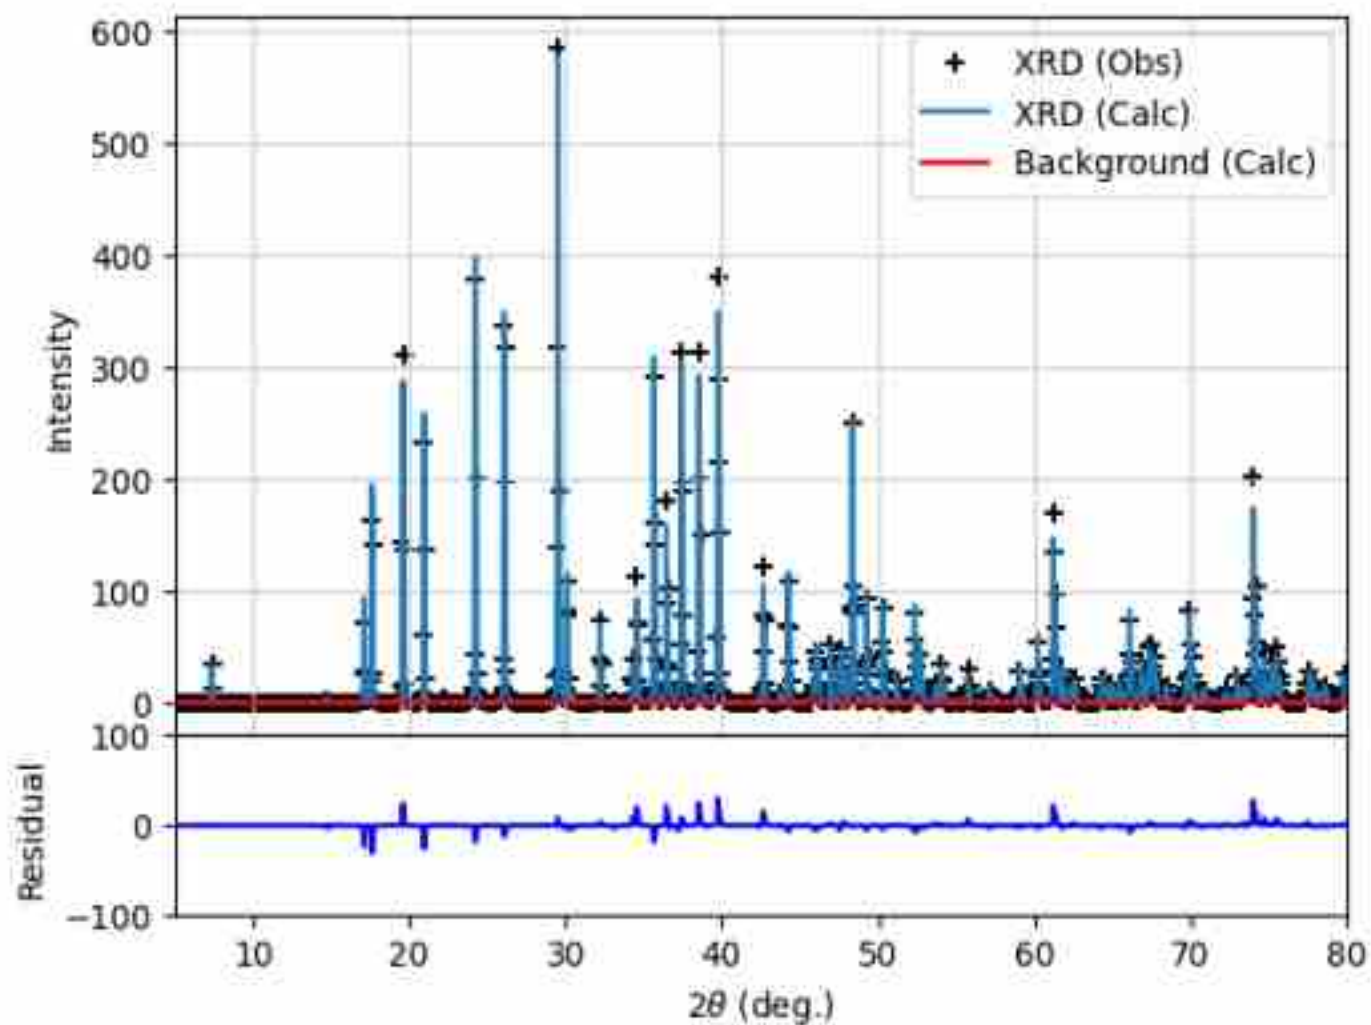

| RMSE before RR | Rwp     | RMSE after RR |
|----------------|---------|---------------|
| 0.287          | 9.81482 | 0.25184       |

# Y8Te12

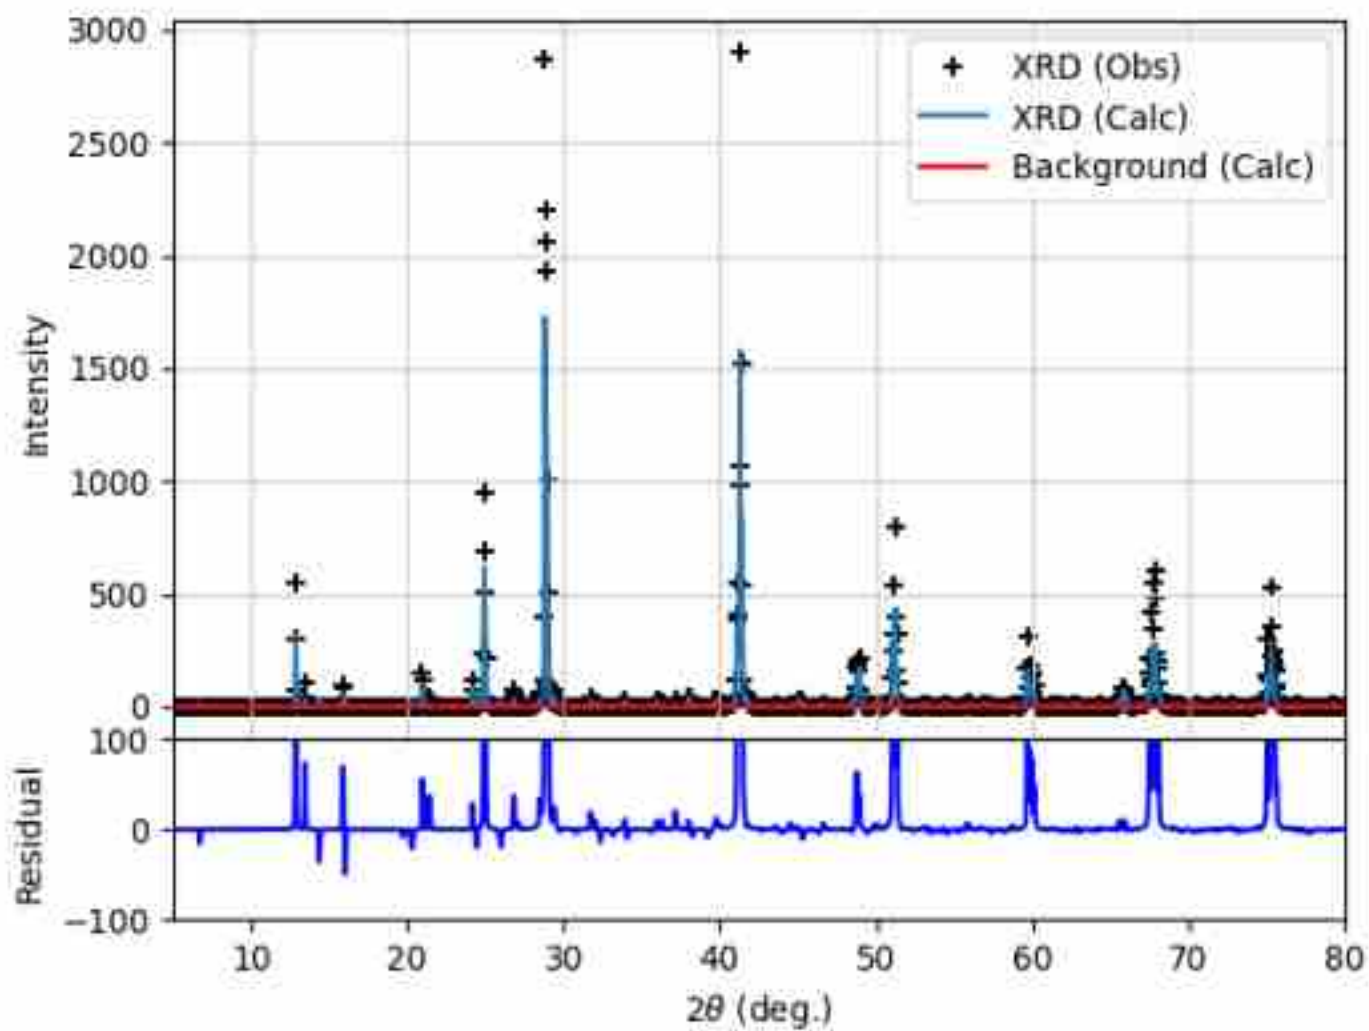

| RMSE before RR | Rwp      | RMSE after RR |
|----------------|----------|---------------|
| 0.287          | 54.45546 | 0.25983       |



# Al<sub>2</sub>Co<sub>4</sub>O<sub>8</sub>

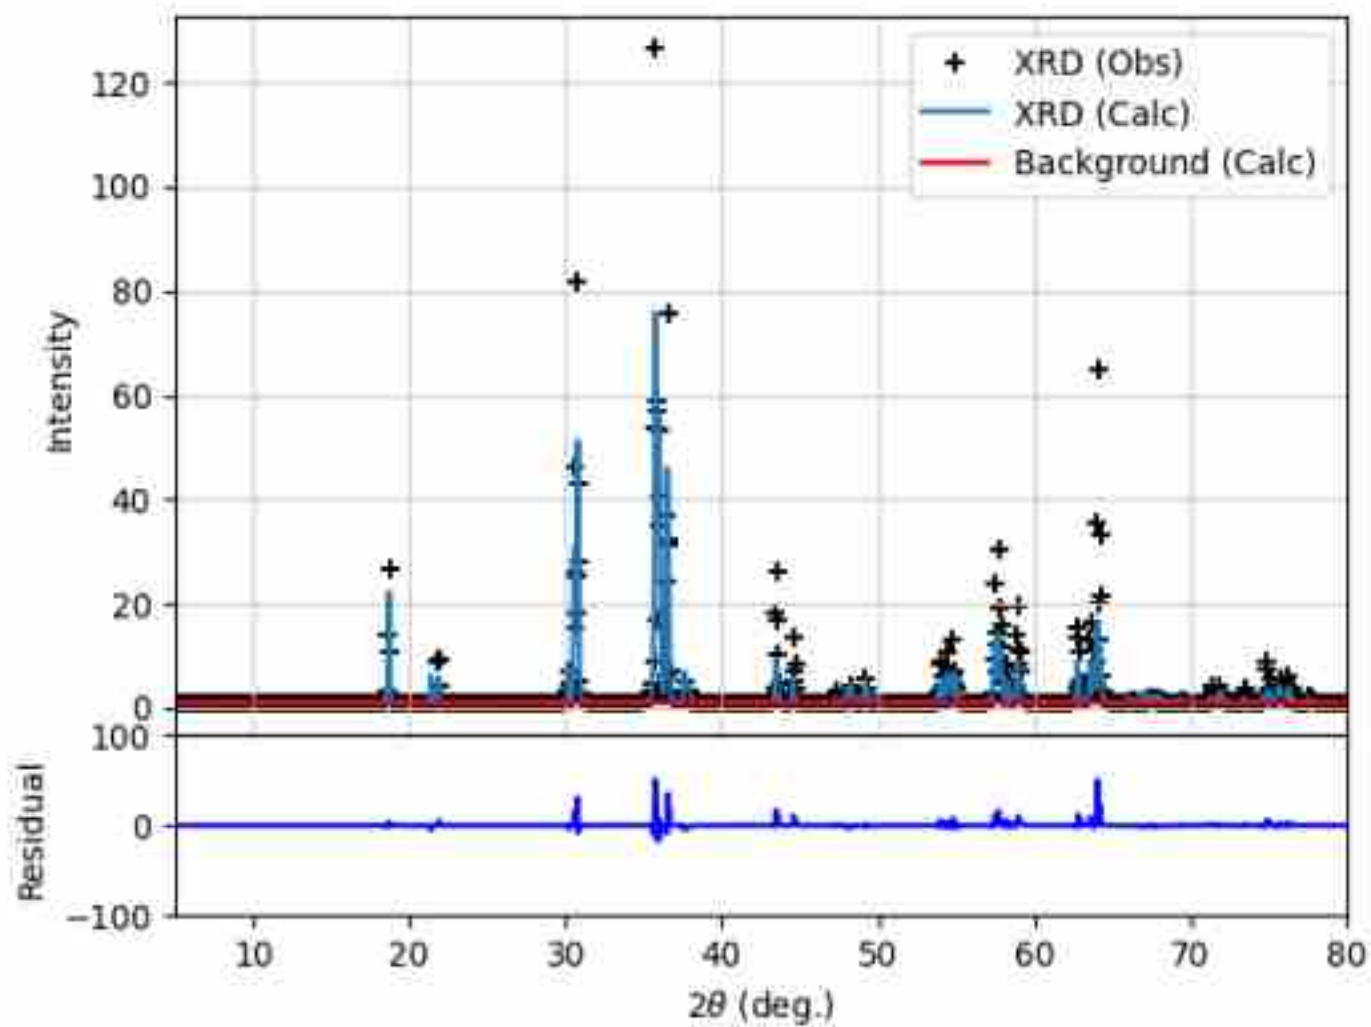

| RMSE before RR | Rwp      | RMSE after RR |
|----------------|----------|---------------|
| 0.288          | 39.40164 | 0.31776       |

# Mn<sub>4</sub>O<sub>2</sub>F<sub>6</sub>

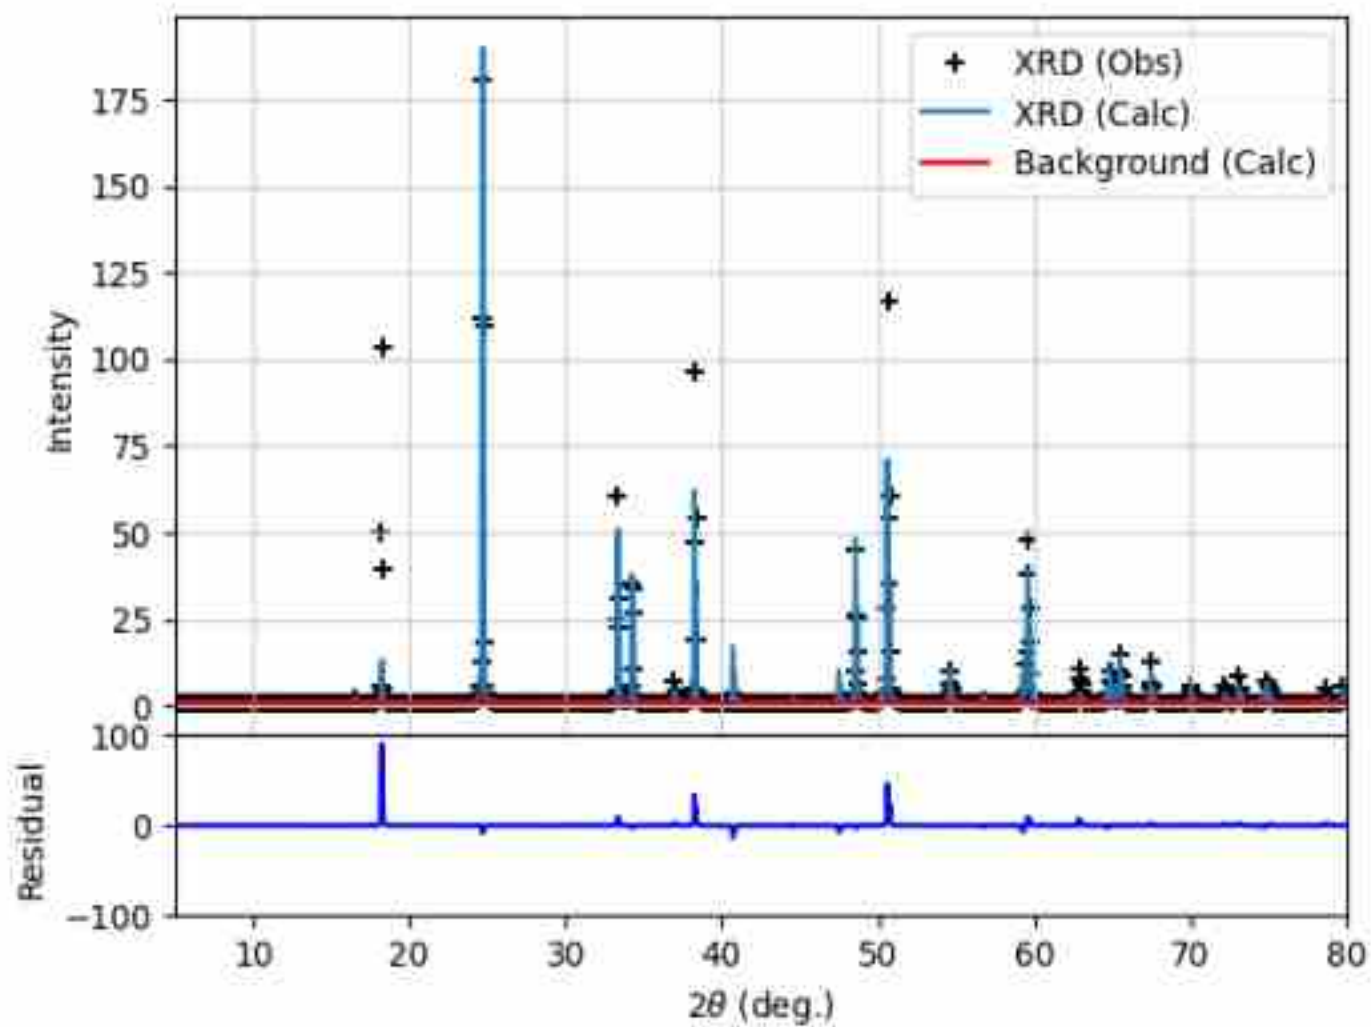

| RMSE before RR | Rwp      | RMSE after RR |
|----------------|----------|---------------|
| 0.288          | 36.66762 | 0.29072       |

# Nb<sub>6</sub>Fe<sub>6</sub>Ge<sub>6</sub>

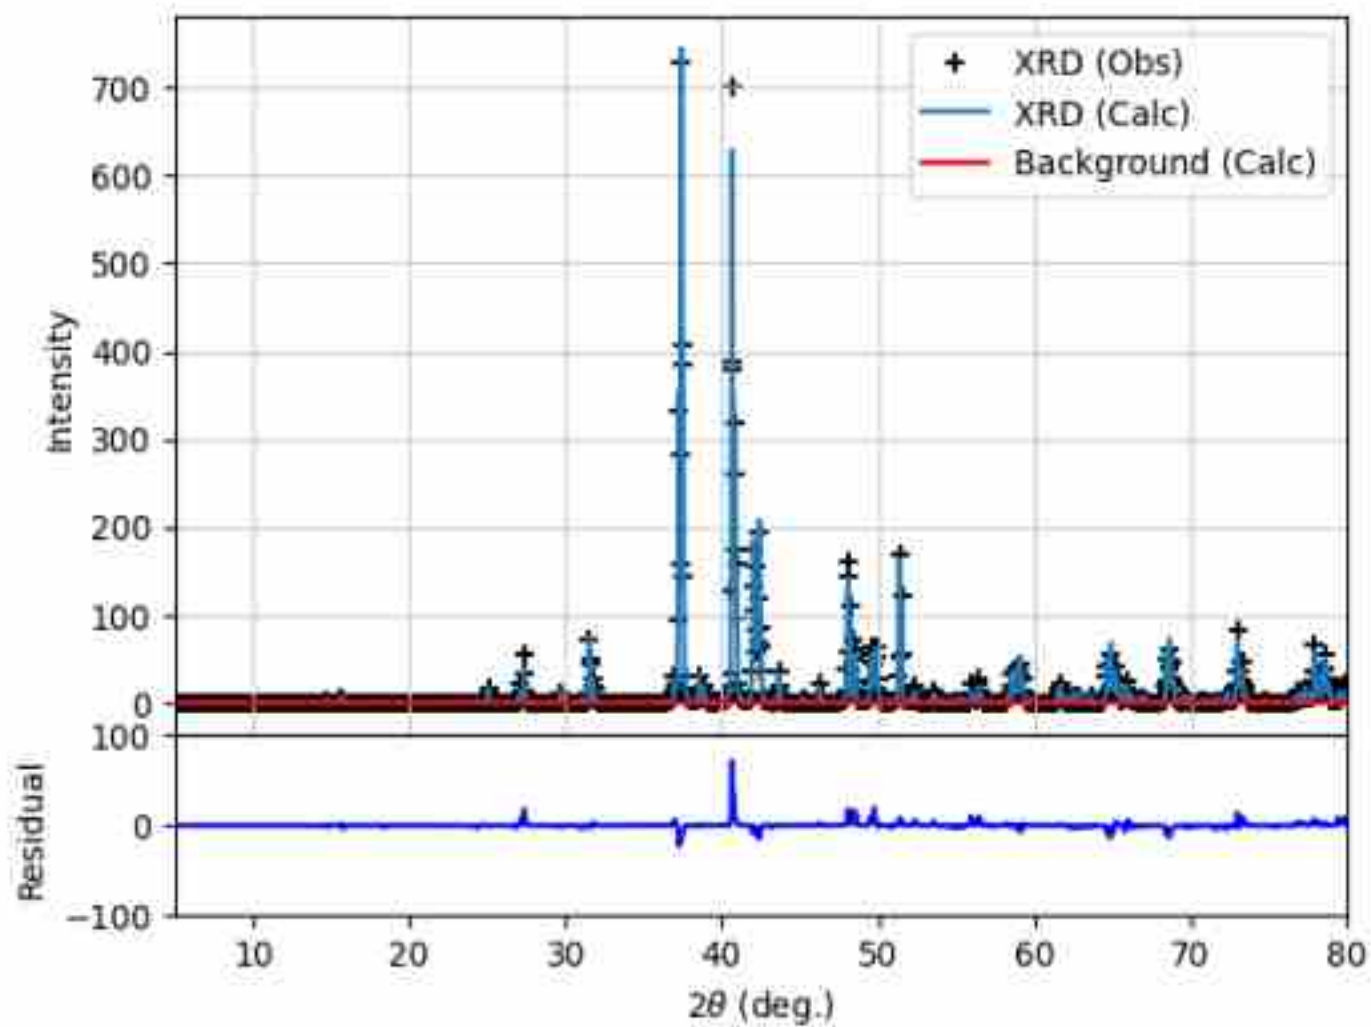

| RMSE before RR | Rwp      | RMSE after RR |
|----------------|----------|---------------|
| 0.288          | 15.70923 | 0.41101       |

# Li<sub>4</sub>V<sub>2</sub>F<sub>12</sub>

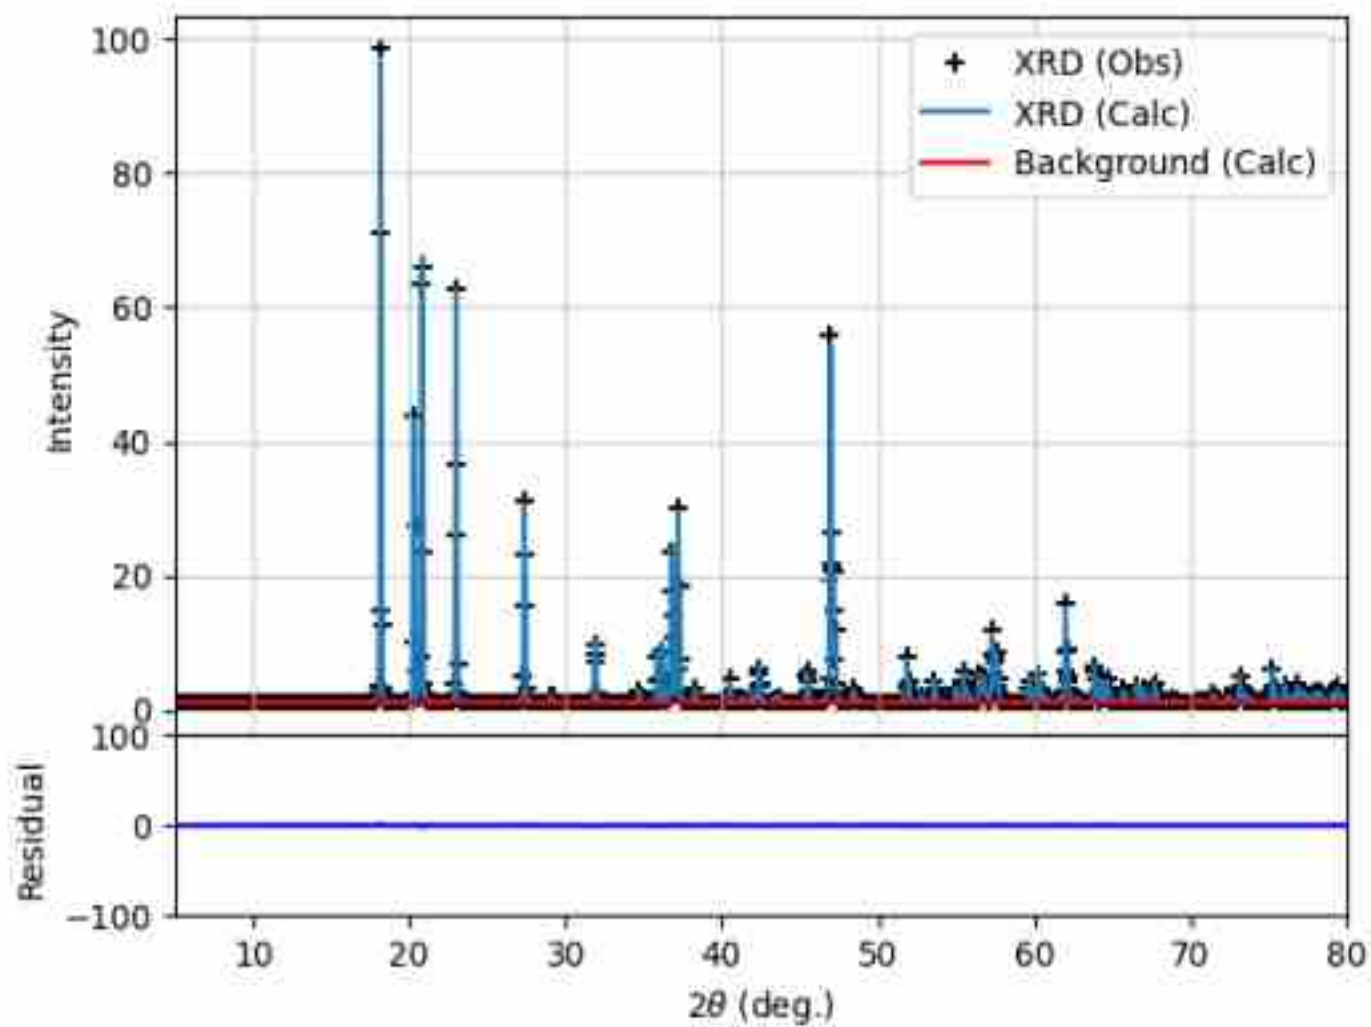

| RMSE before RR | Rwp    | RMSE after RR |
|----------------|--------|---------------|
| 0.289          | 2.9595 | 0.31584       |

# Mn<sub>6</sub>Bi<sub>1</sub>P<sub>1</sub>O<sub>12</sub>

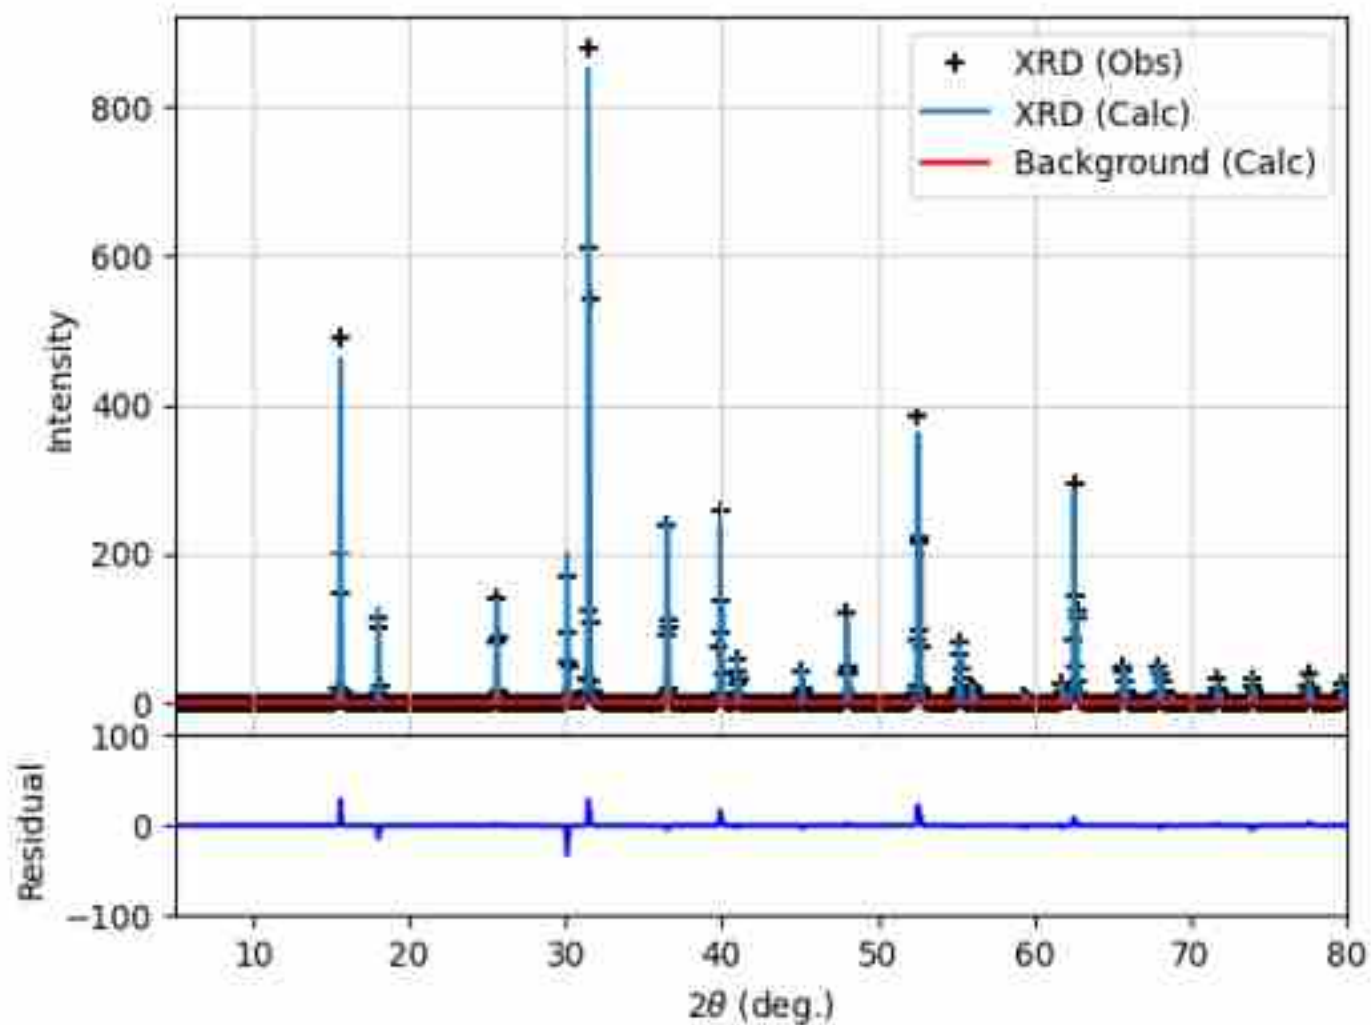

| RMSE before RR | Rwp     | RMSE after RR |
|----------------|---------|---------------|
| 0.289          | 5.77991 | 0.30066       |

# Fe1Ag3F6

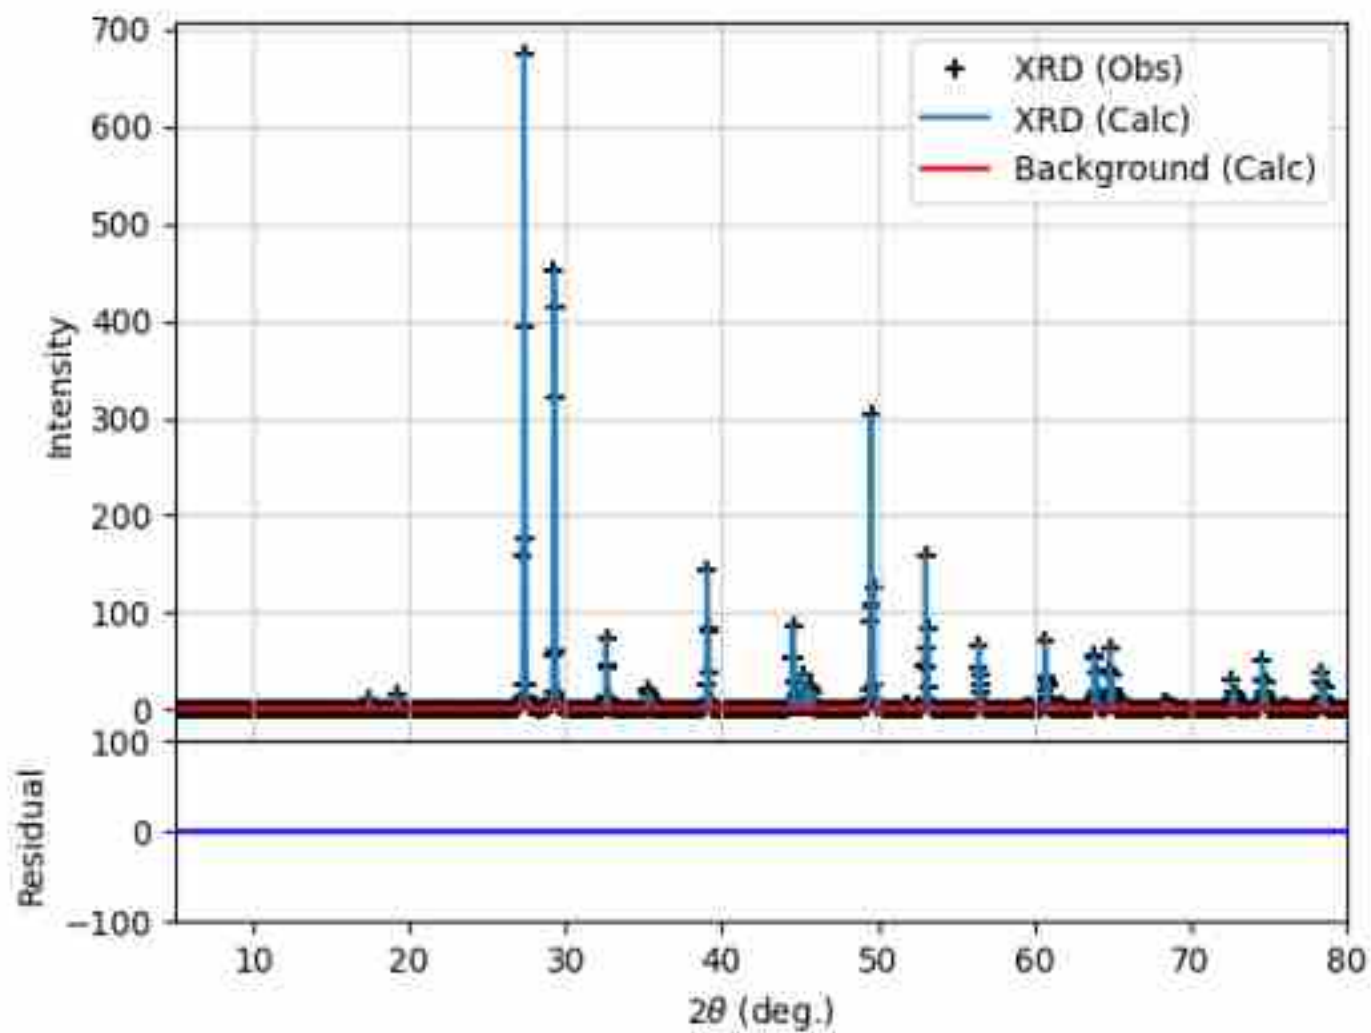

| RMSE before RR | Rwp     | RMSE after RR |
|----------------|---------|---------------|
| 0.291          | 0.00326 | 0.00081       |

# Pd<sub>2</sub>Se<sub>2</sub>O<sub>8</sub>

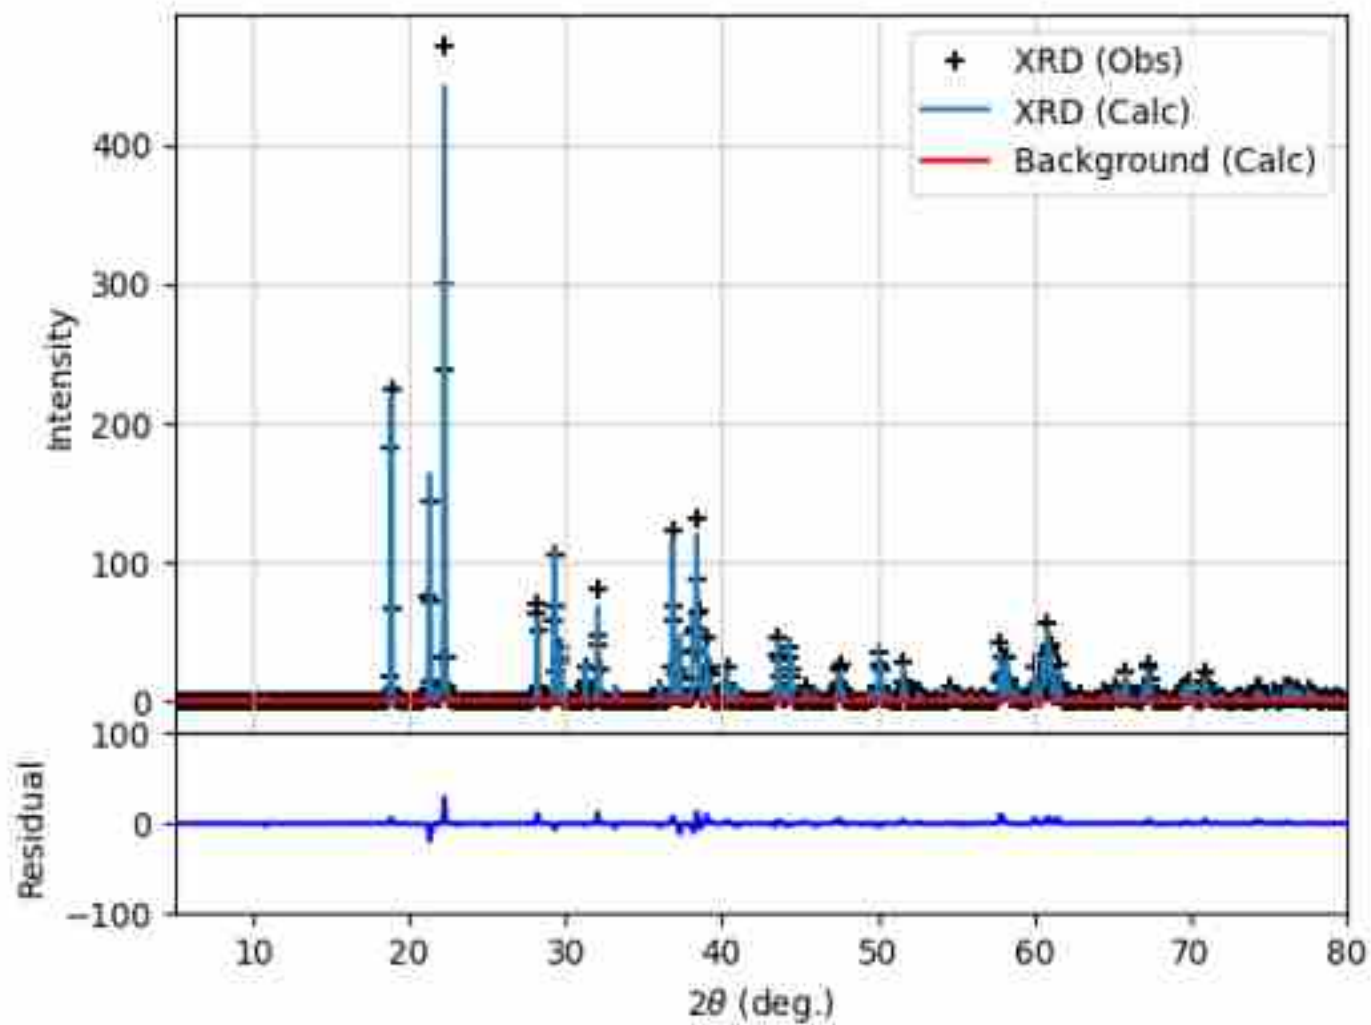

| RMSE before RR | Rwp      | RMSE after RR |
|----------------|----------|---------------|
| 0.291          | 15.31291 | None          |

# A12V4O8

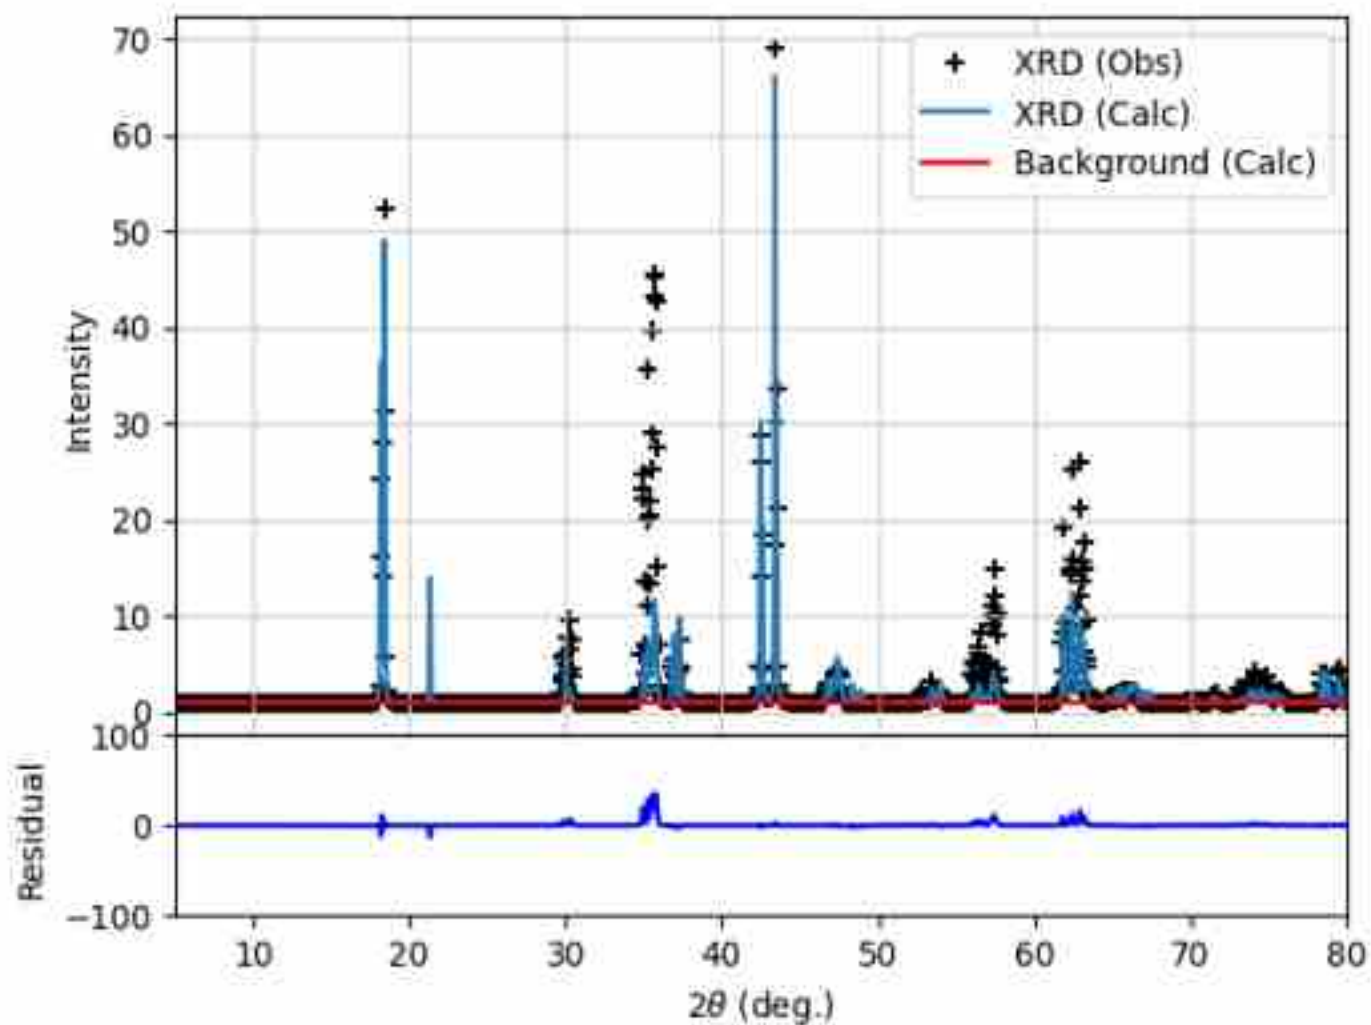

| RMSE before RR | Rwp      | RMSE after RR |
|----------------|----------|---------------|
| 0.293          | 50.51645 | None          |



# Ga<sub>4</sub>Se<sub>4</sub>

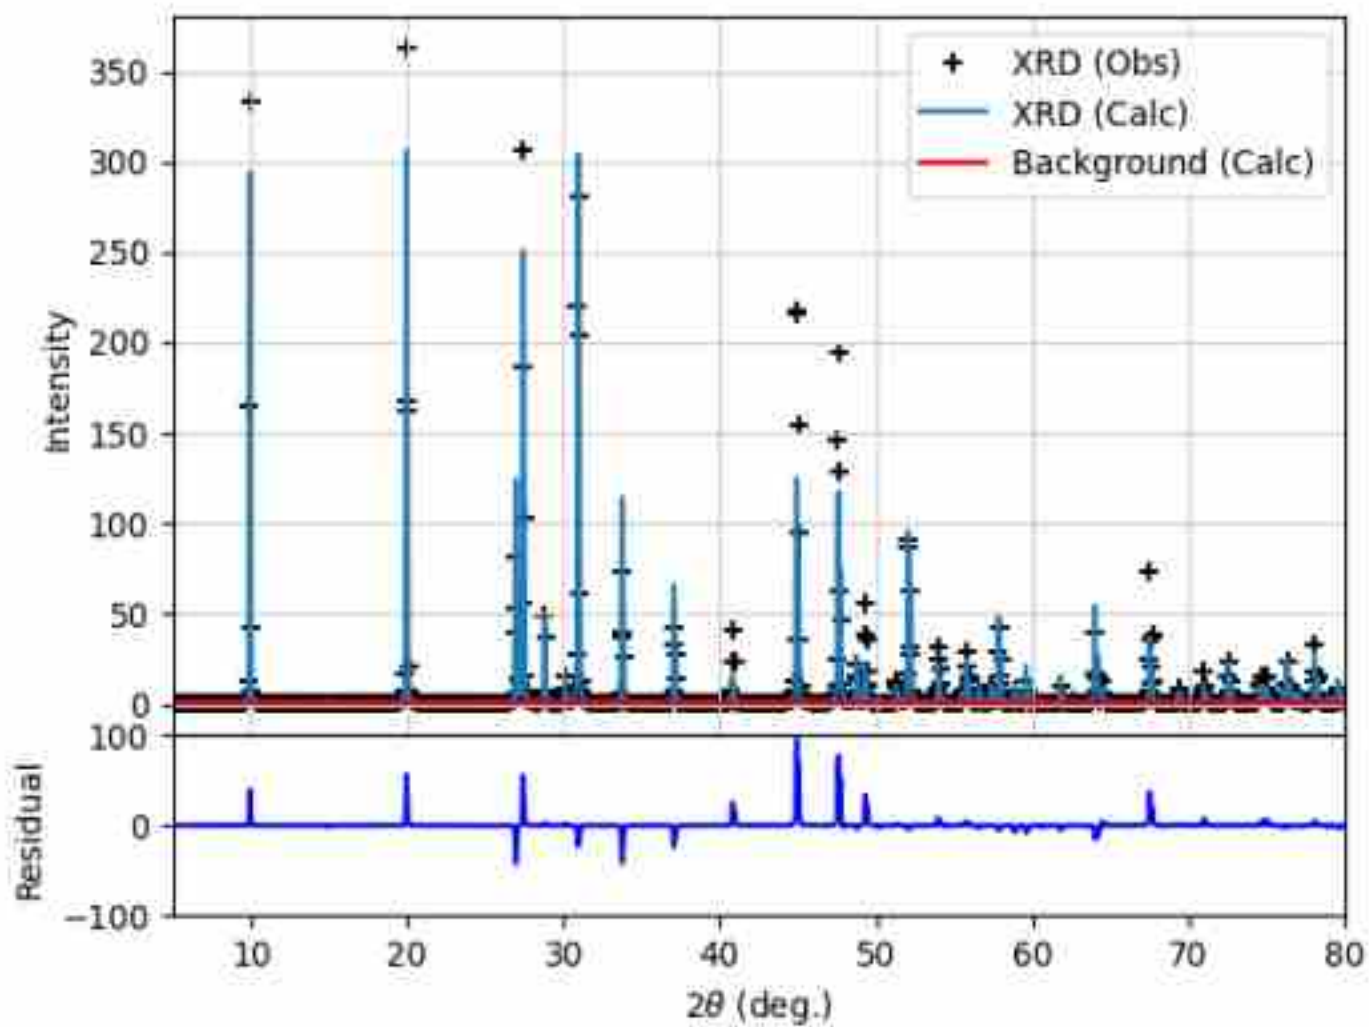

| RMSE before RR | Rwp      | RMSE after RR |
|----------------|----------|---------------|
| 0.293          | 30.00459 | 0.30024       |

# Li<sub>4</sub>Fe<sub>2</sub>C<sub>18</sub>

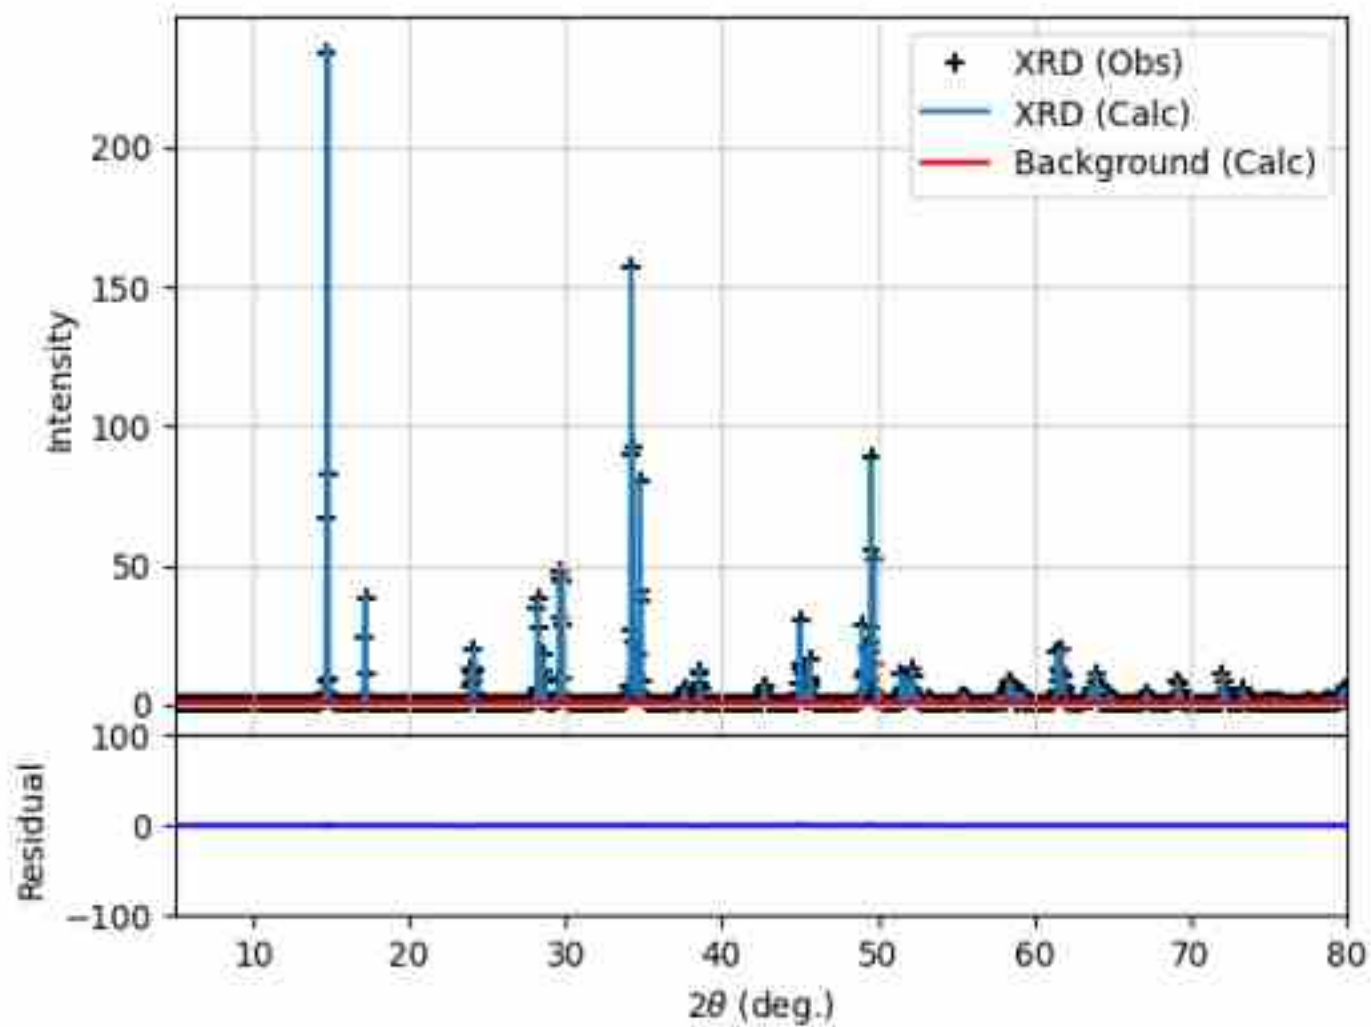

| RMSE before RR | Rwp     | RMSE after RR |
|----------------|---------|---------------|
| 0.293          | 2.49951 | 0.38258       |

# Li4I4O12

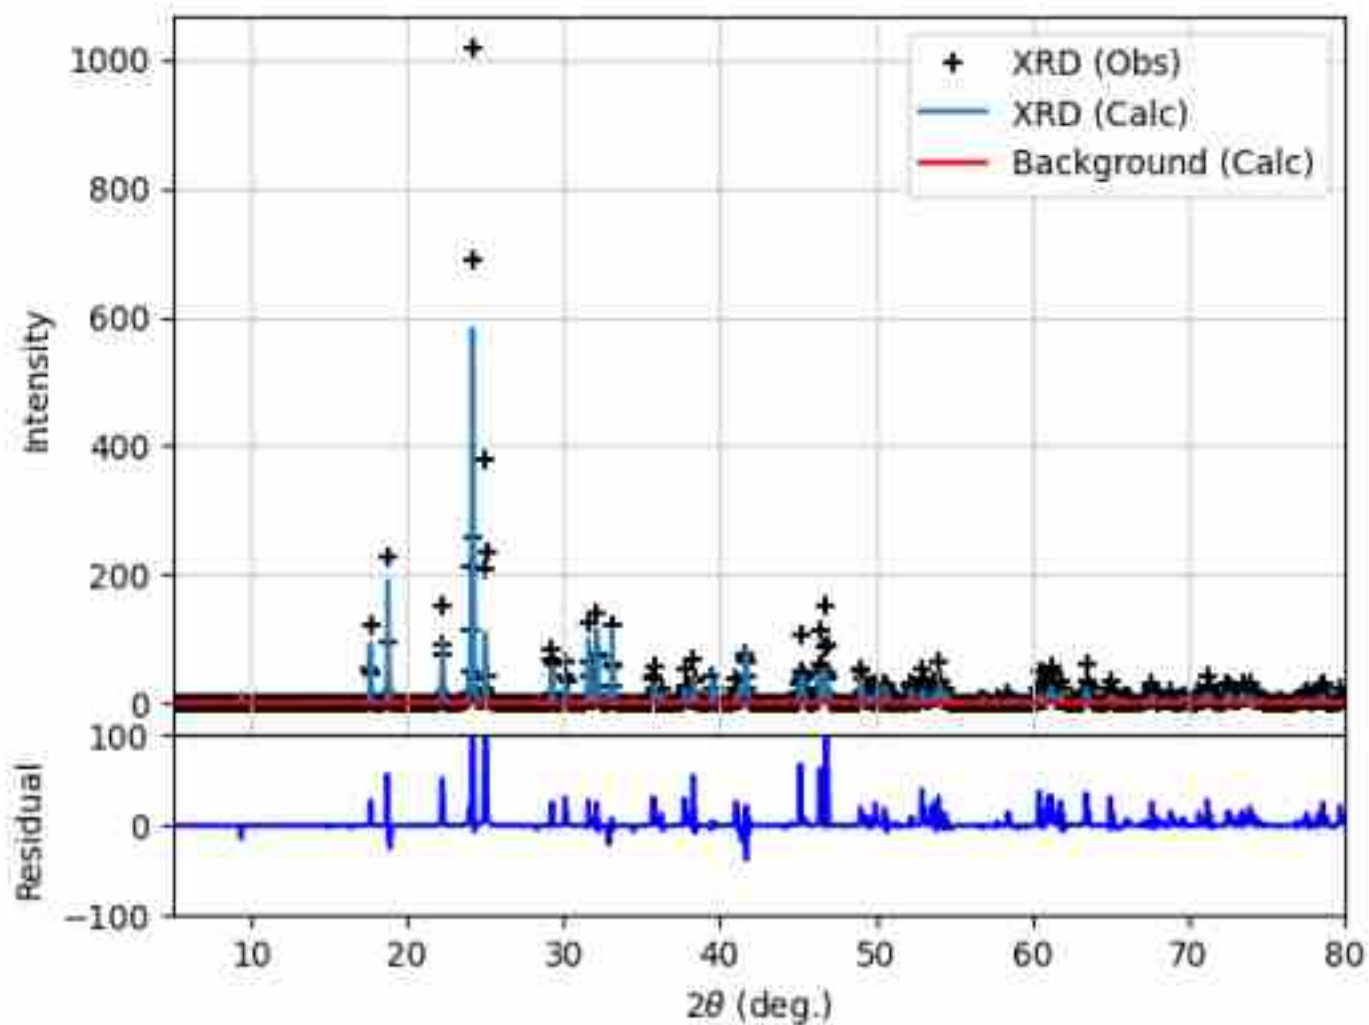

| RMSE before RR | Rwp      | RMSE after RR |
|----------------|----------|---------------|
| 0.293          | 50.75759 | None          |

# Mn<sub>2</sub>In<sub>2</sub>Se<sub>5</sub>

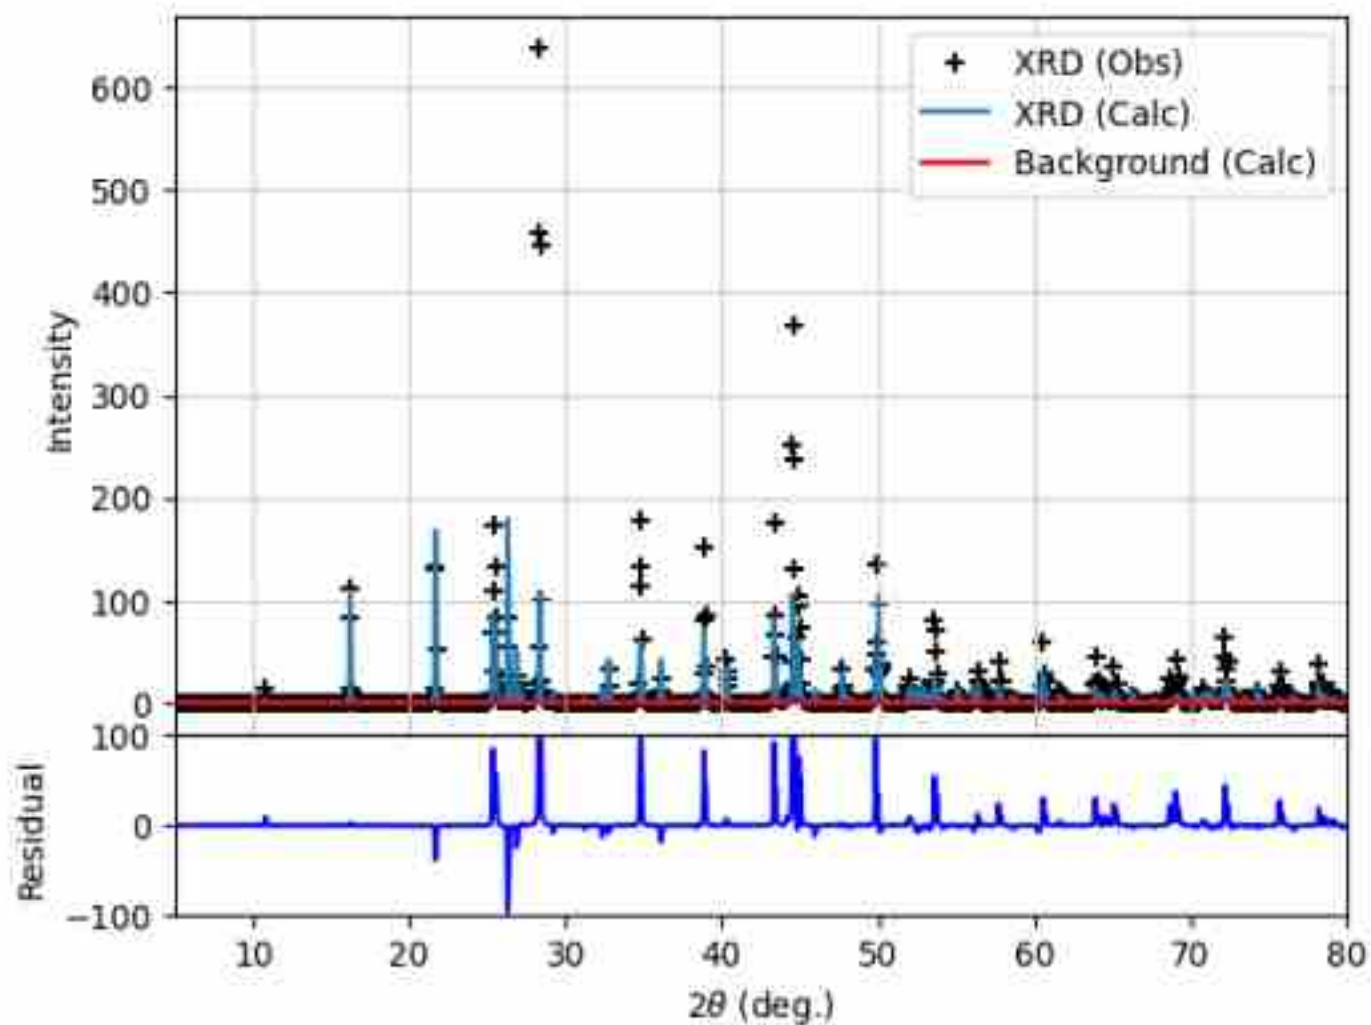

| RMSE before RR | Rwp      | RMSE after RR |
|----------------|----------|---------------|
| 0.293          | 61.46197 | 0.31166       |

# Na<sub>4</sub>Ir<sub>1</sub>O<sub>4</sub>

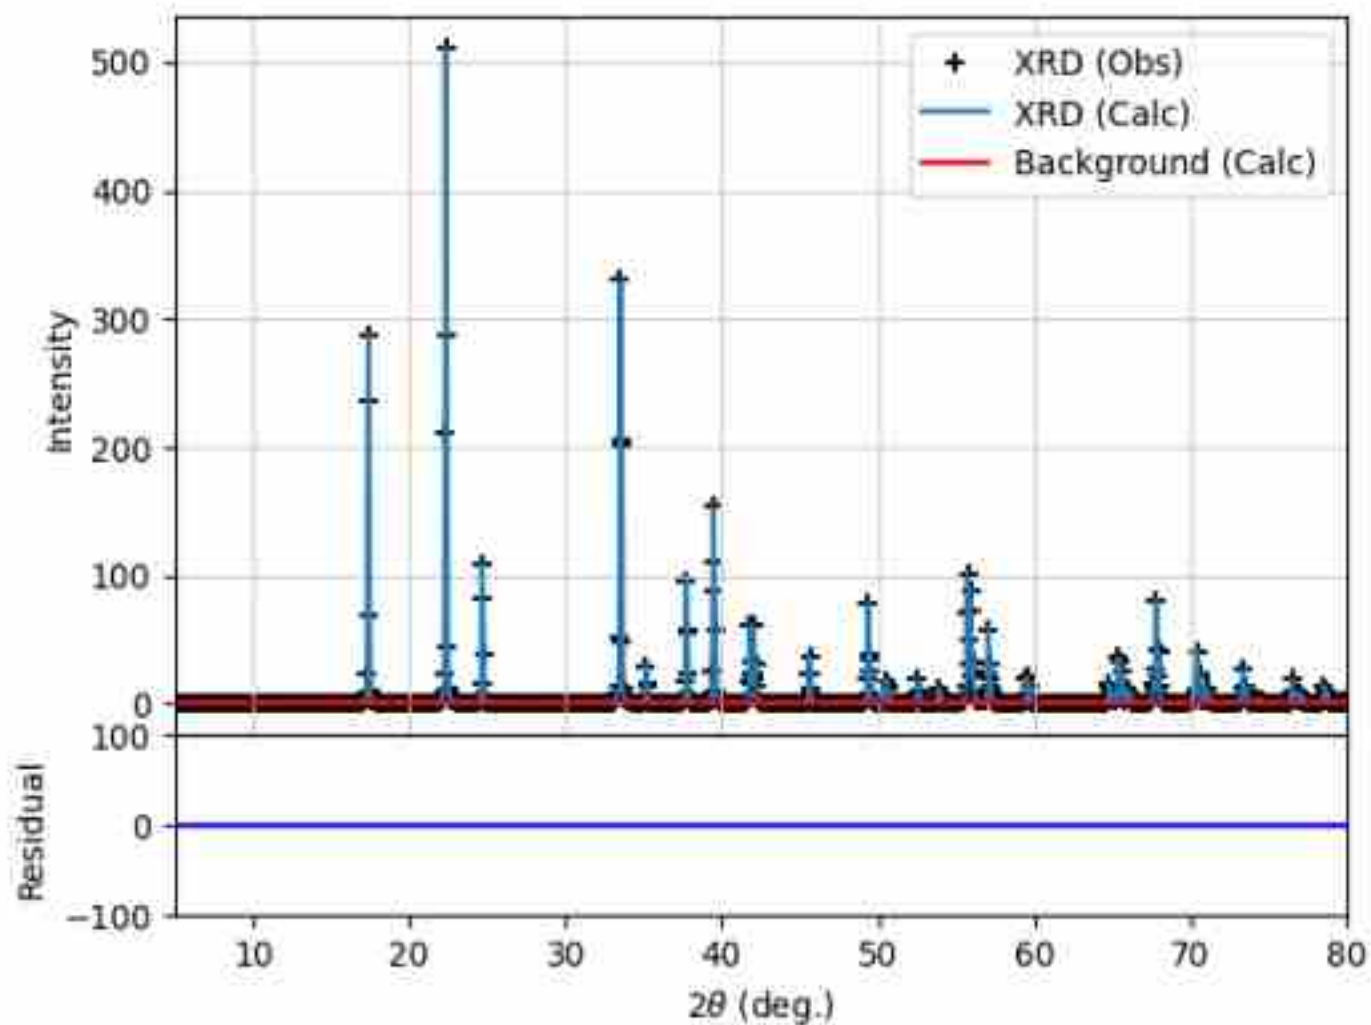

| RMSE before RR | Rwp     | RMSE after RR |
|----------------|---------|---------------|
| 0.293          | 0.00426 | 0.00146       |

# Ta<sub>4</sub>Bi<sub>2</sub>O<sub>12</sub>F<sub>2</sub>

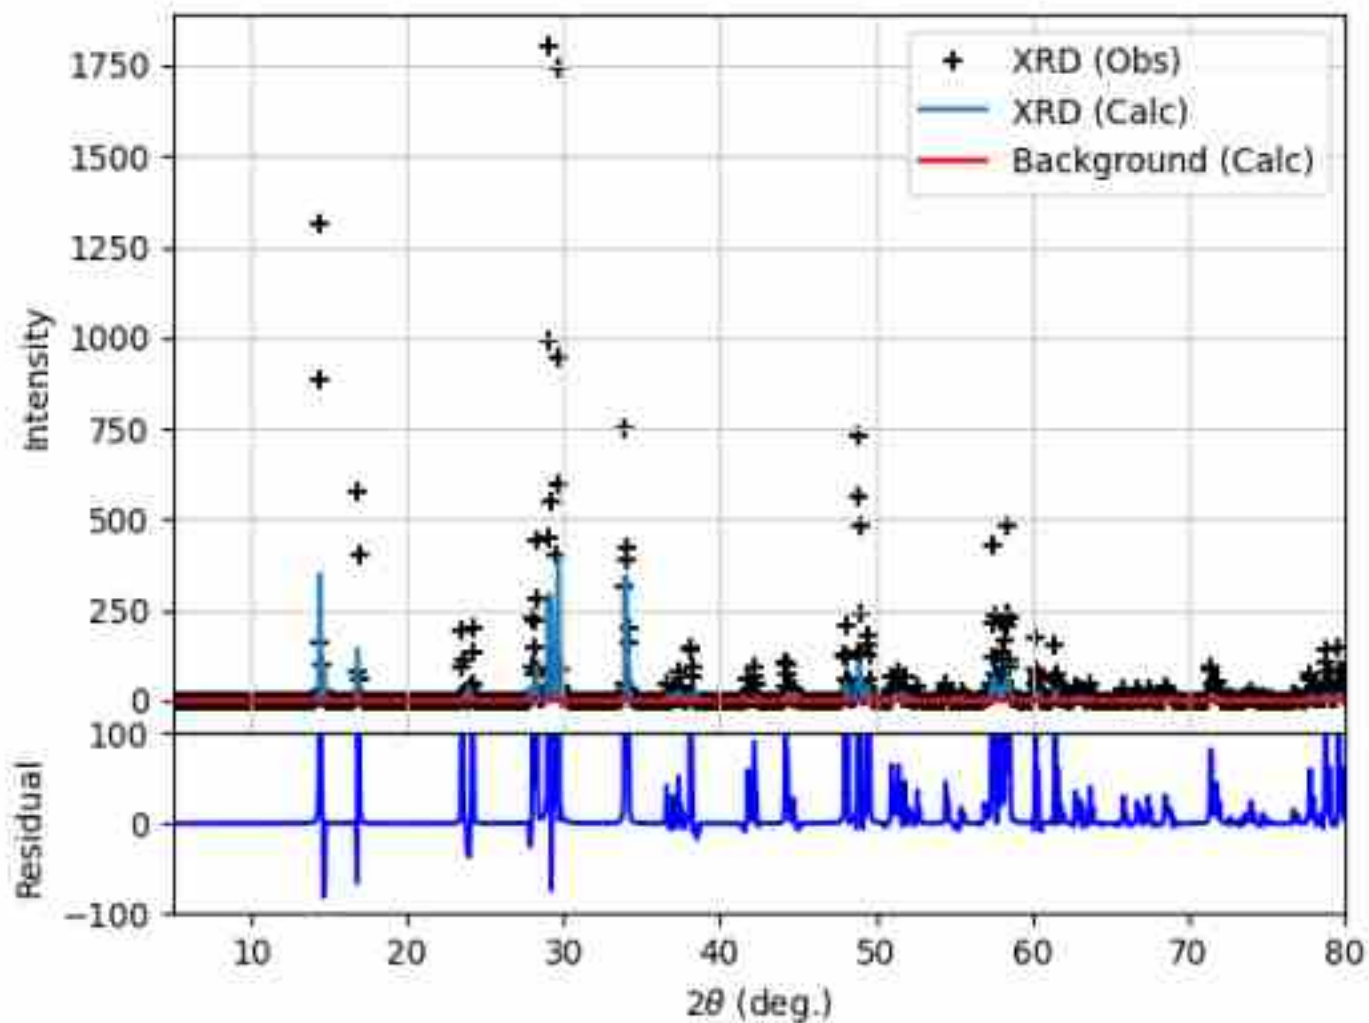

| RMSE before RR | Rwp      | RMSE after RR |
|----------------|----------|---------------|
| 0.293          | 77.42677 | None          |

# Ba<sub>8</sub>Ge<sub>4</sub>P<sub>8</sub>

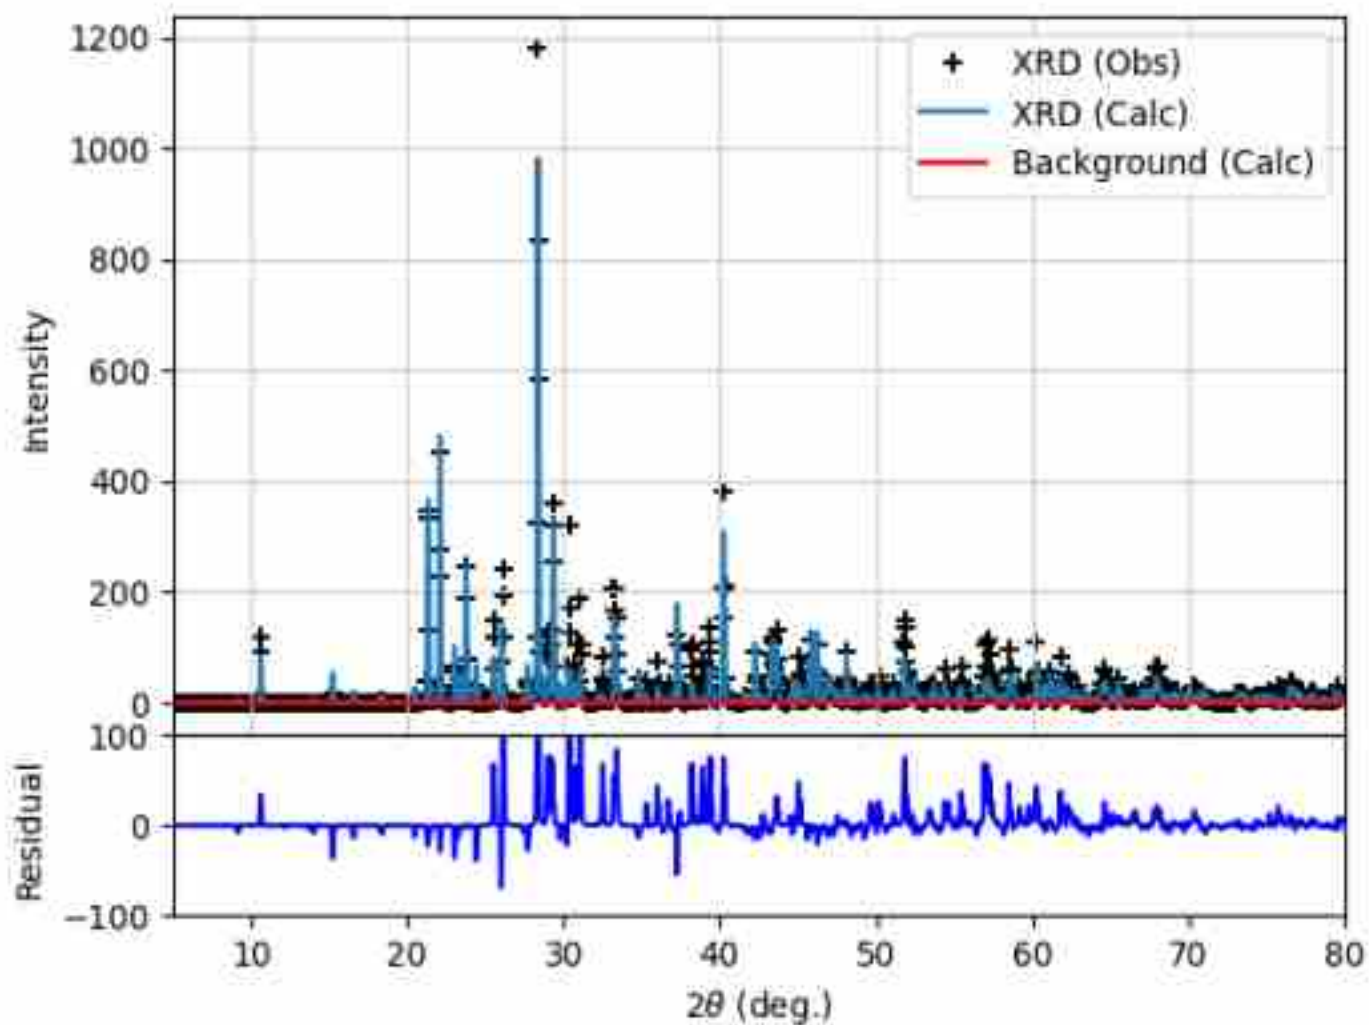

| RMSE before RR | Rwp      | RMSE after RR |
|----------------|----------|---------------|
| 0.294          | 44.73187 | 0.4873        |

# Ge<sub>4</sub>F<sub>8</sub>

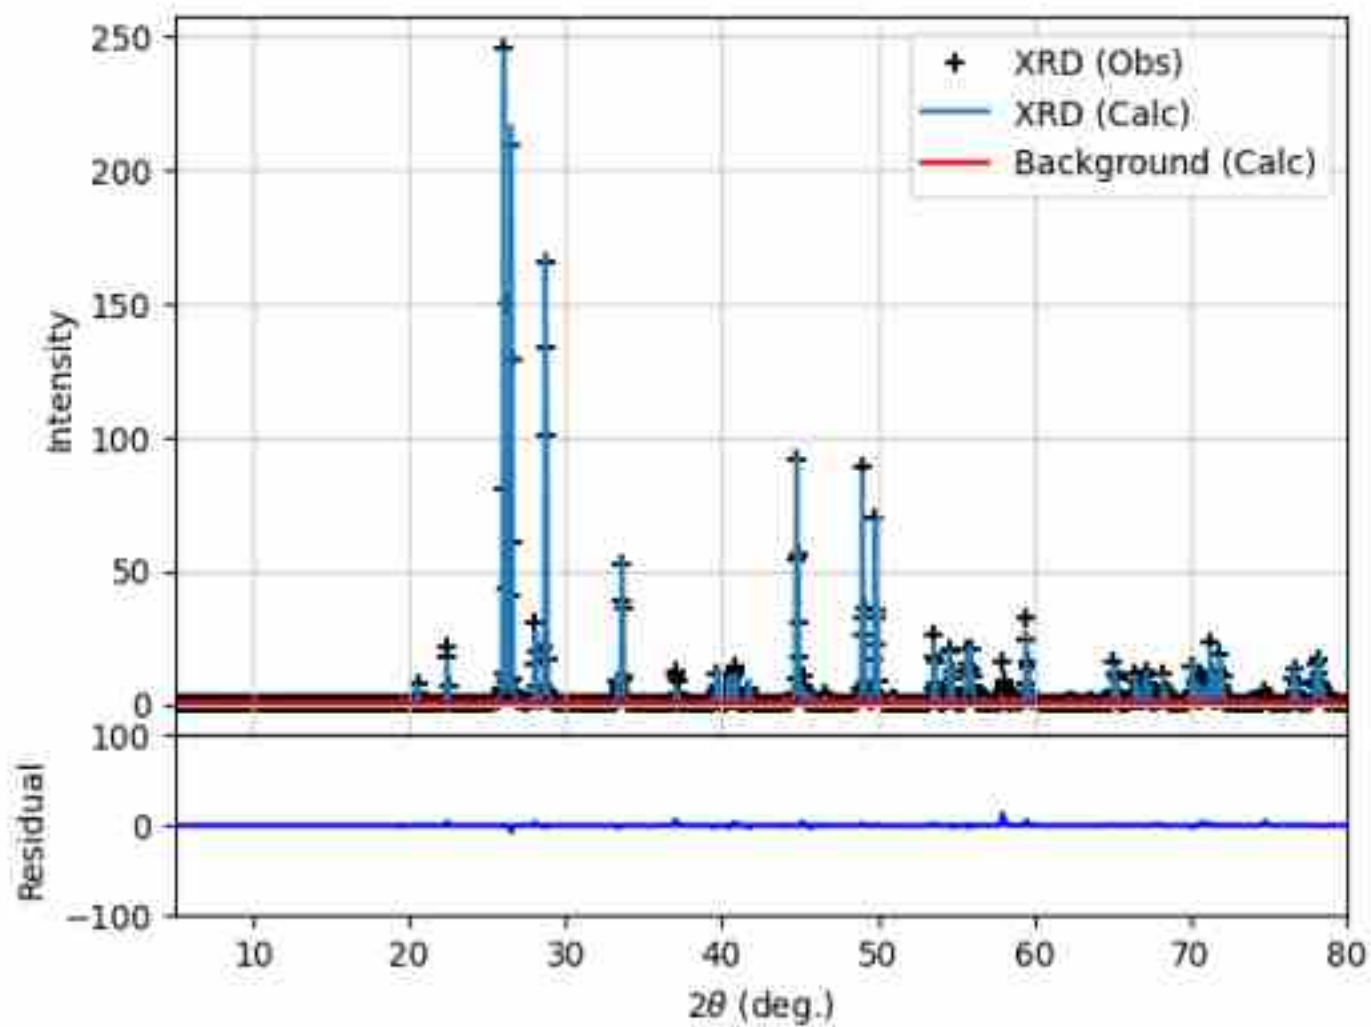

| RMSE before RR | Rwp      | RMSE after RR |
|----------------|----------|---------------|
| 0.294          | 13.69537 | 0.36517       |



# Ba4Re4N12

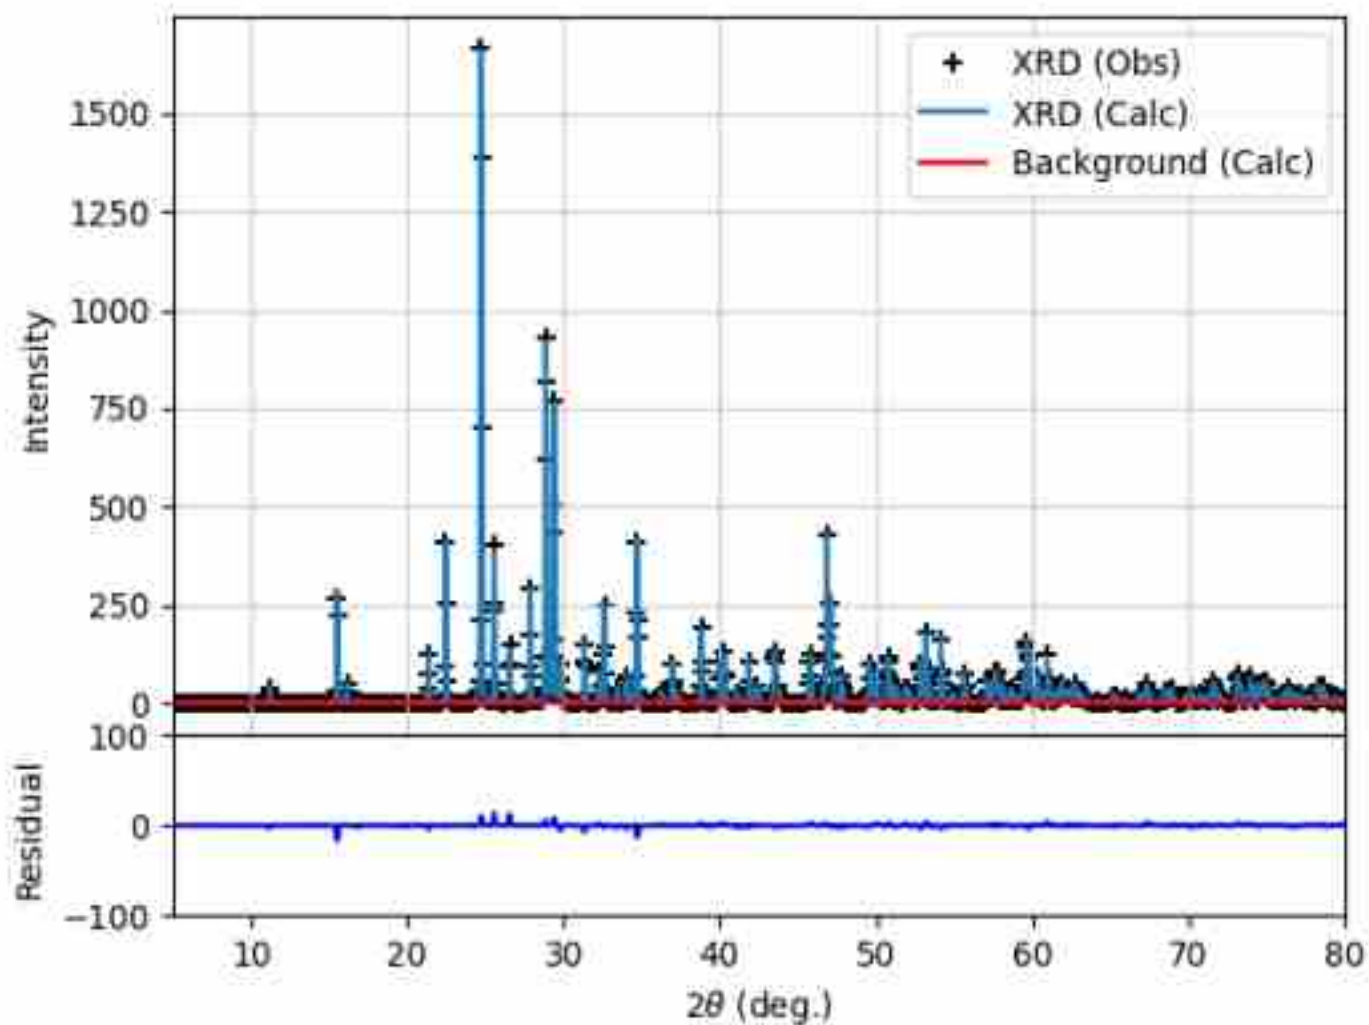

| RMSE before RR | Rwp     | RMSE after RR |
|----------------|---------|---------------|
| 0.295          | 3.44736 | None          |

# C14F12

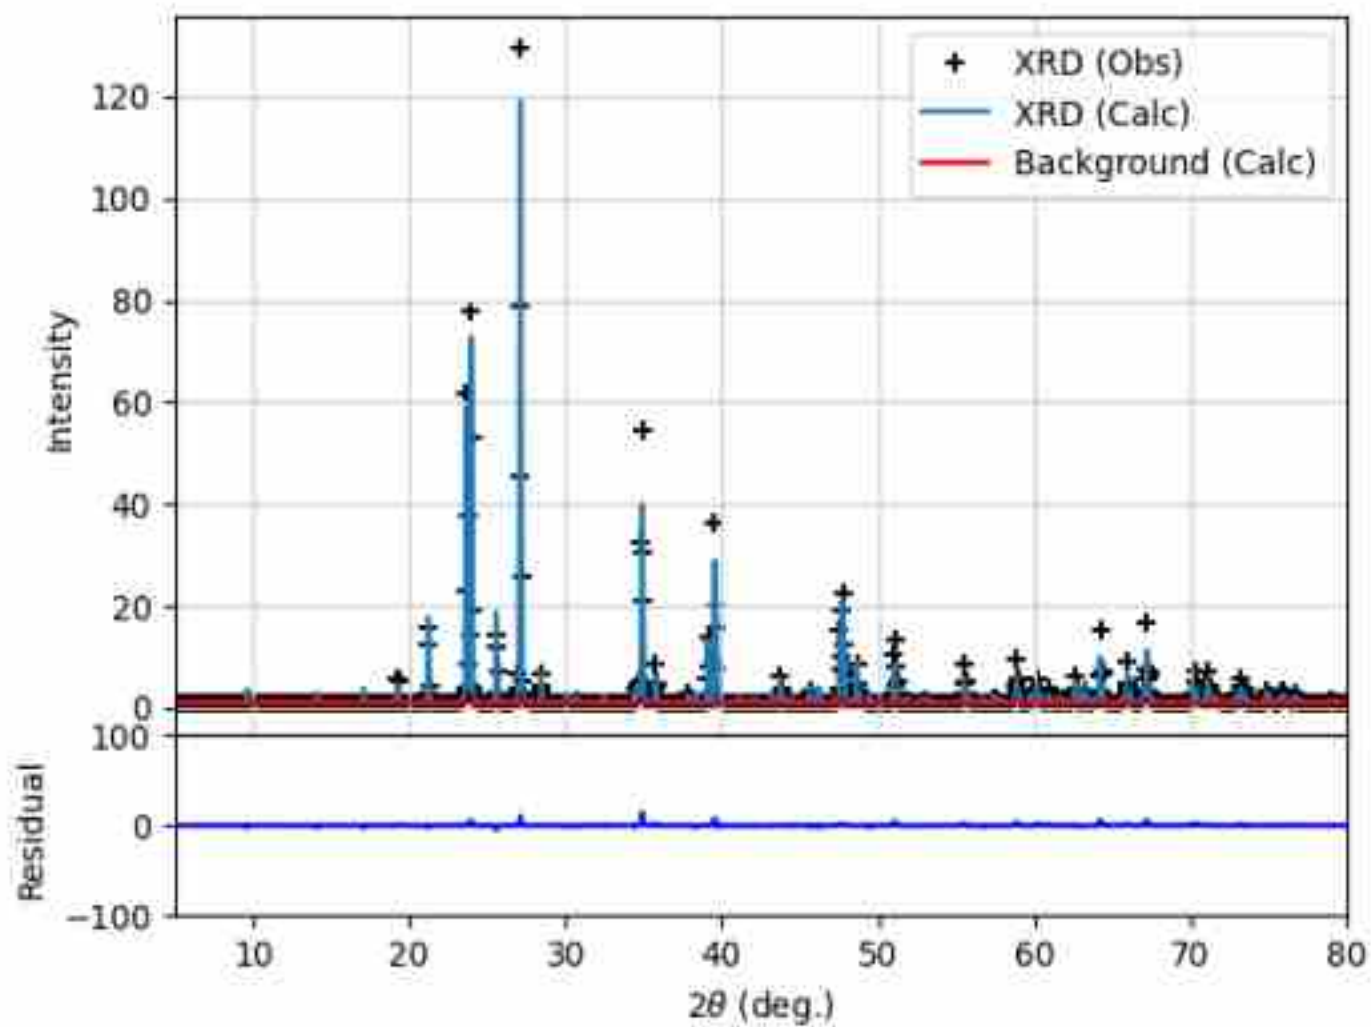

| RMSE before RR | Rwp      | RMSE after RR |
|----------------|----------|---------------|
| 0.295          | 21.40862 | 0.31705       |

# Fe<sub>2</sub>Te<sub>2</sub>Br<sub>14</sub>

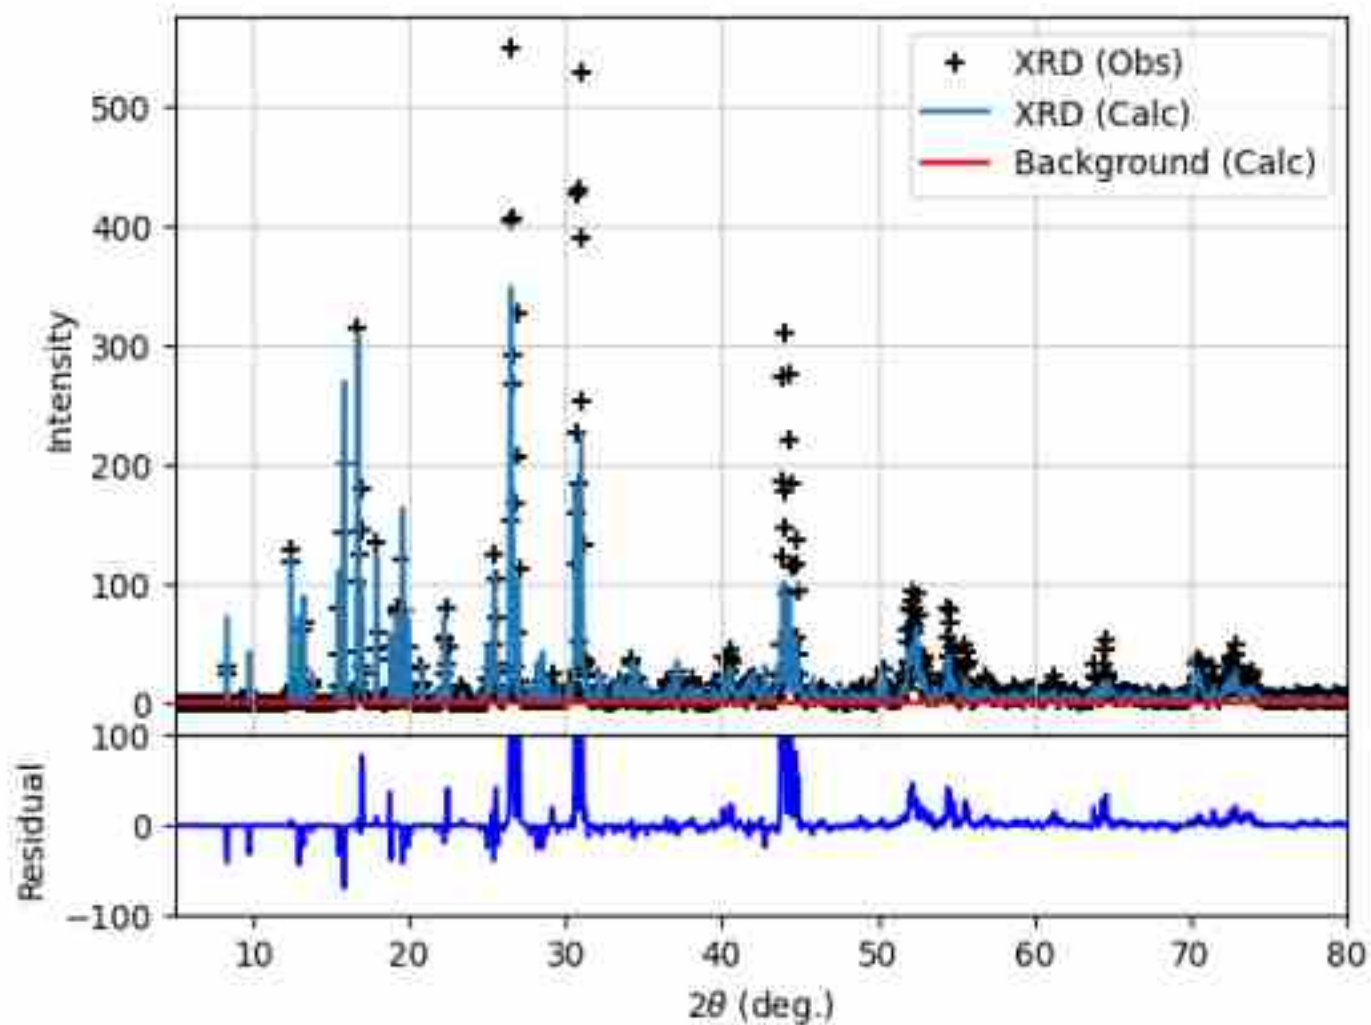

| RMSE before RR | Rwp      | RMSE after RR |
|----------------|----------|---------------|
| 0.295          | 51.11465 | None          |

# Sr1As2S4

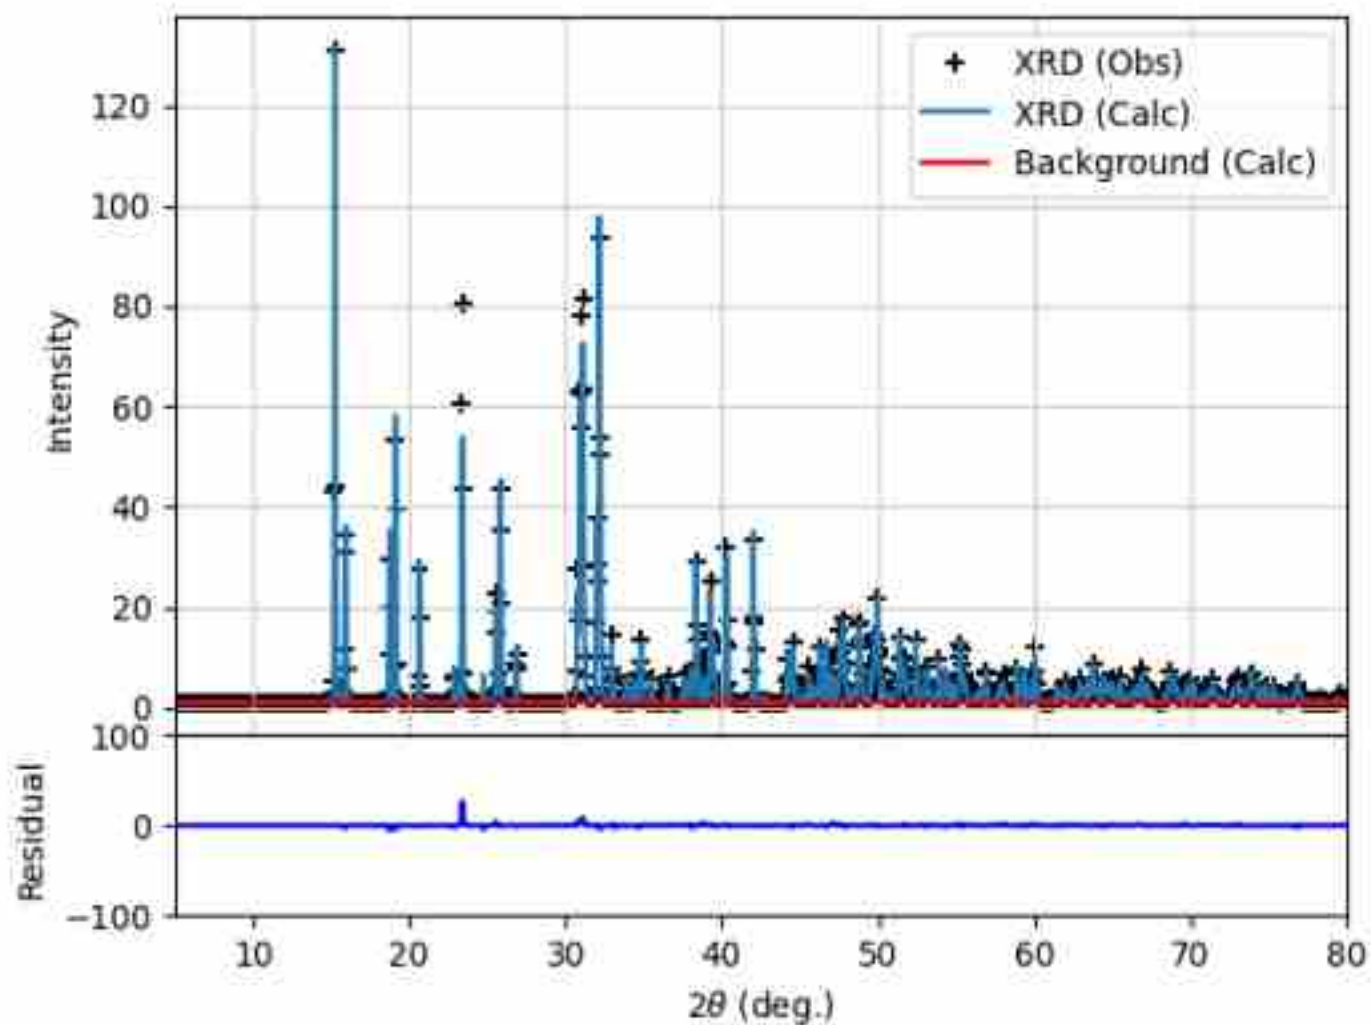

| RMSE before RR | Rwp      | RMSE after RR |
|----------------|----------|---------------|
| 0.295          | 14.59398 | 0.27498       |

# K4As4O8

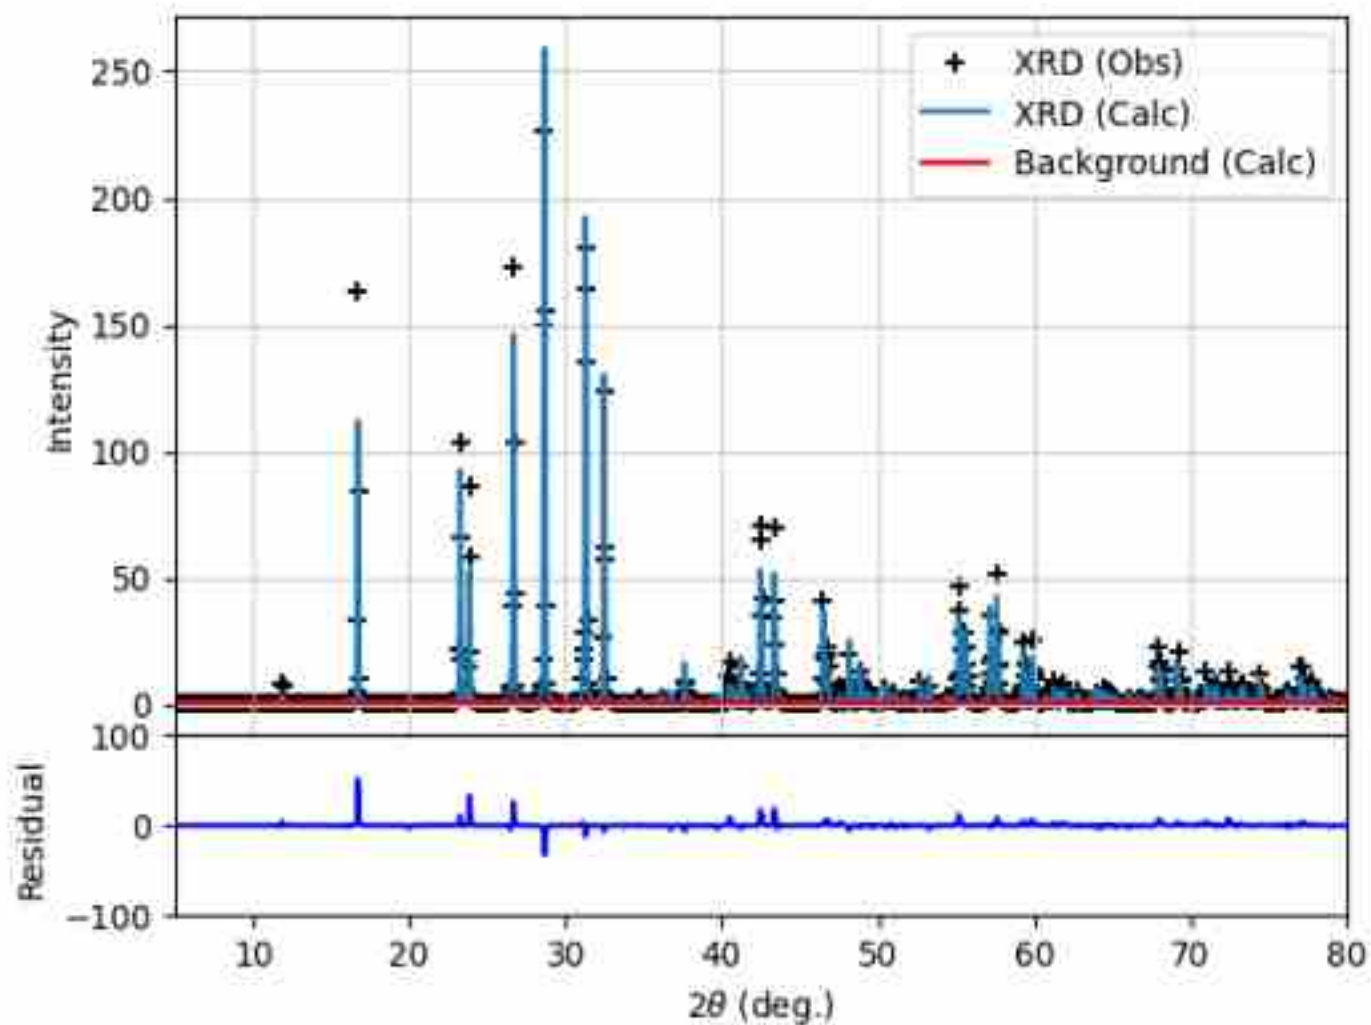

| RMSE before RR | Rwp      | RMSE after RR |
|----------------|----------|---------------|
| 0.296          | 23.87264 | 0.48156       |

# Ti5Al2C3

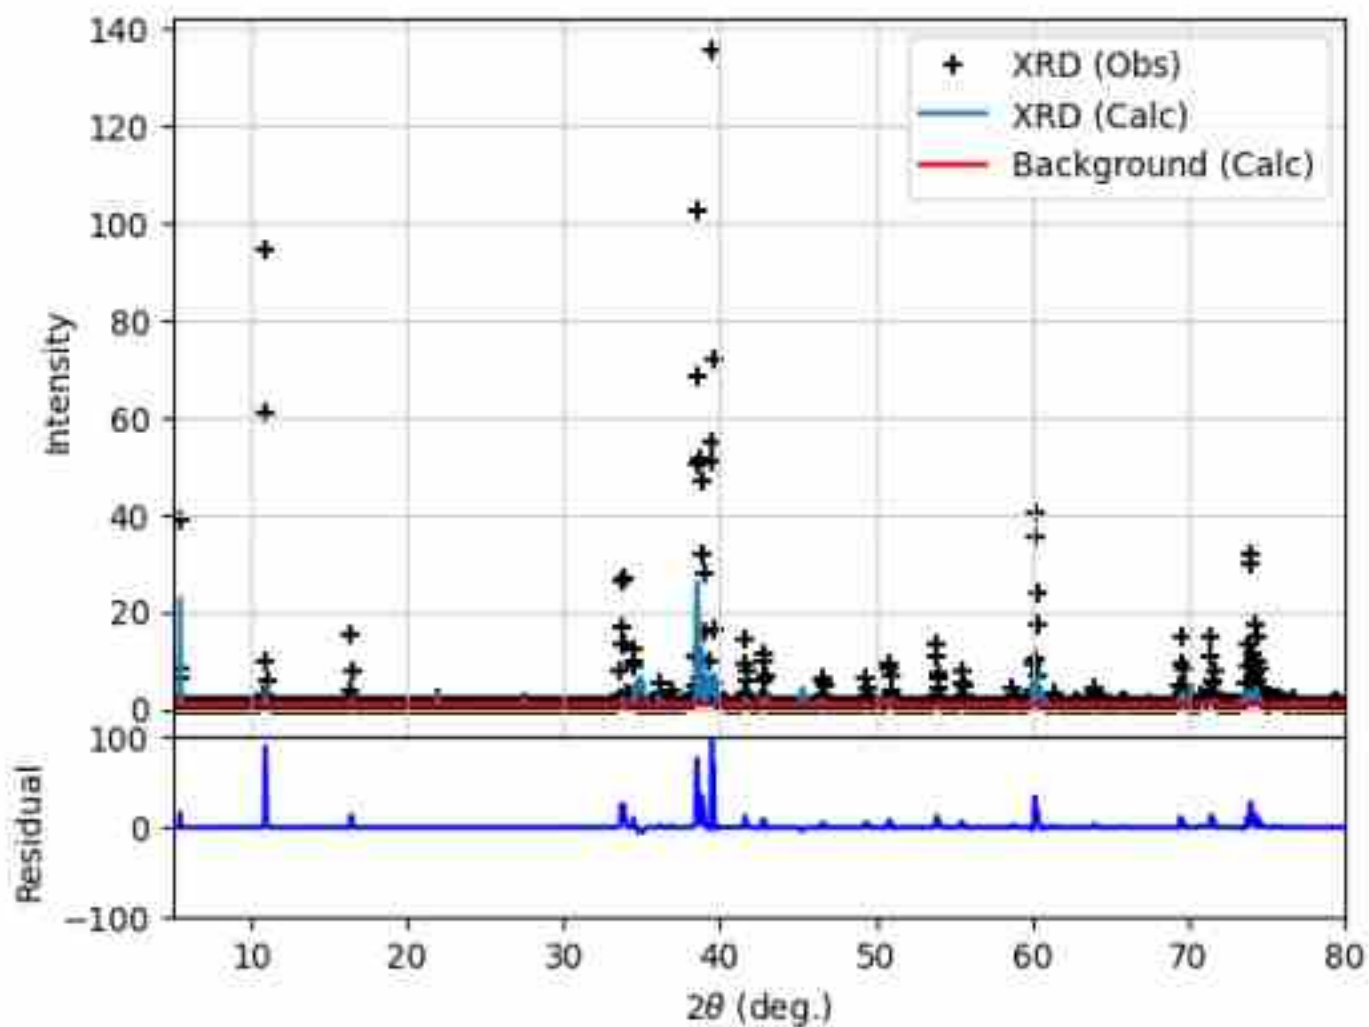

| RMSE before RR | Rwp      | RMSE after RR |
|----------------|----------|---------------|
| 0.297          | 64.83756 | None          |

# Zn8S8

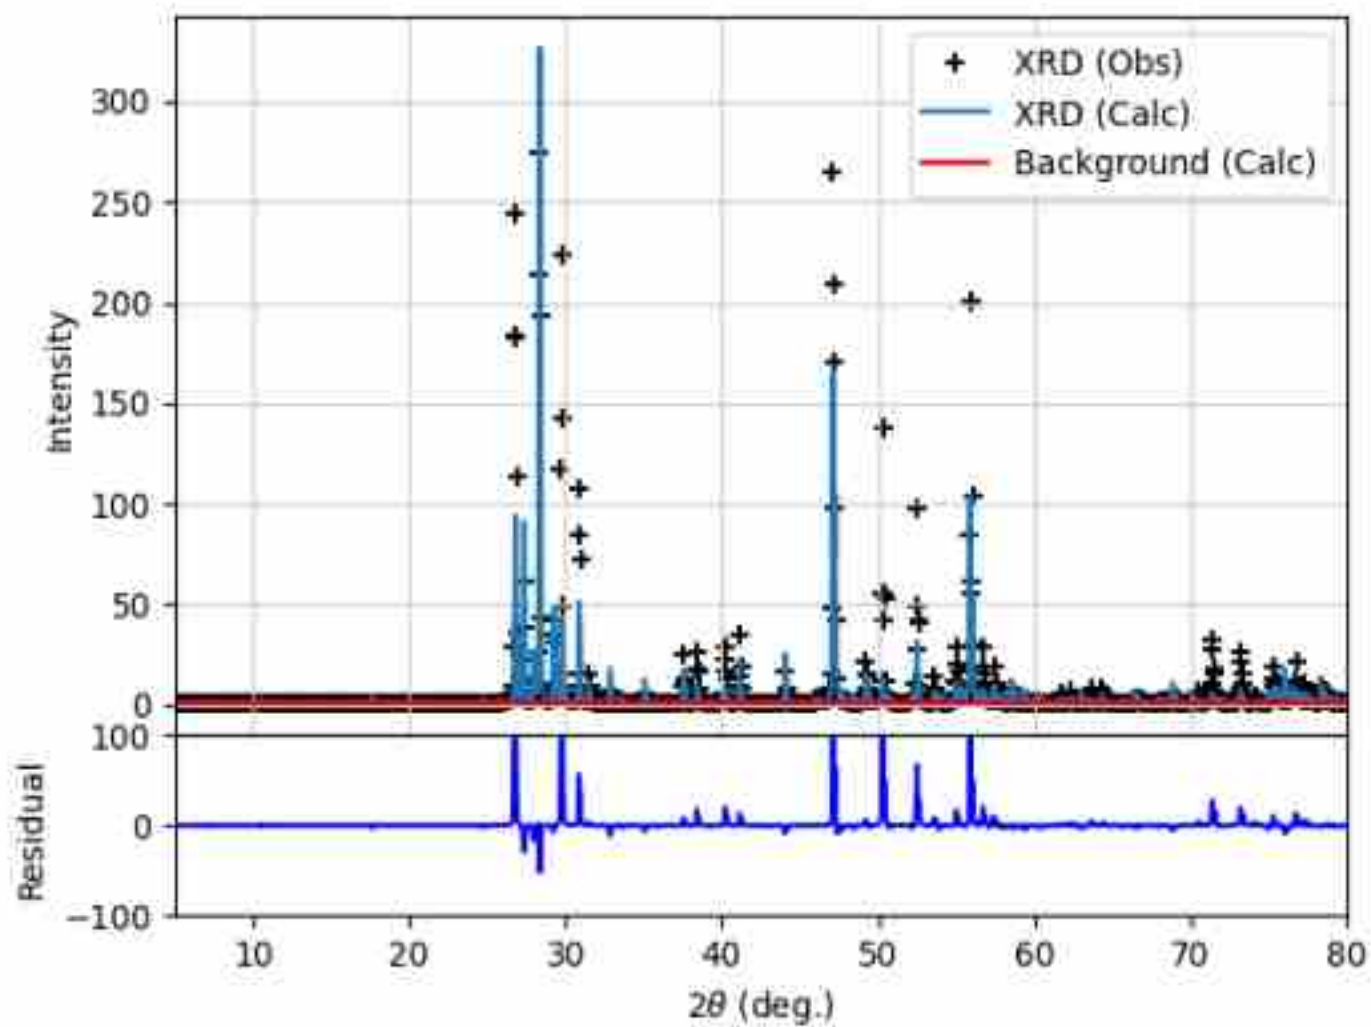

| RMSE before RR | Rwp      | RMSE after RR |
|----------------|----------|---------------|
| 0.297          | 54.13362 | 0.2682        |

# Li<sub>4</sub>V<sub>2</sub>F<sub>12</sub>

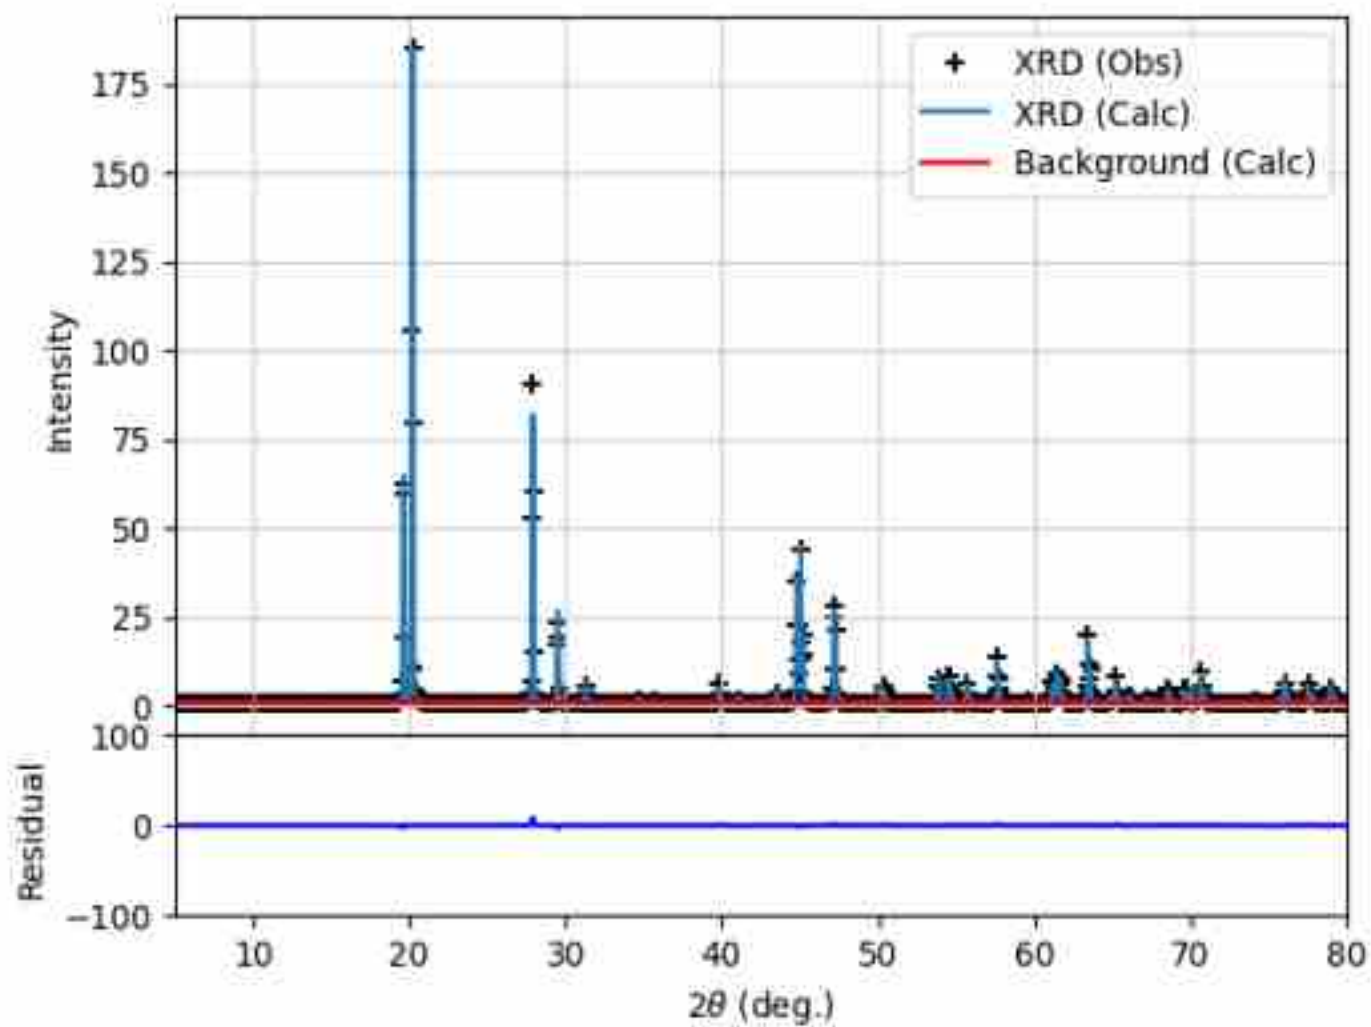

| RMSE before RR | Rwp     | RMSE after RR |
|----------------|---------|---------------|
| 0.298          | 6.20668 | 0.25173       |



# K<sub>4</sub>Sn<sub>4</sub>Se<sub>10</sub>

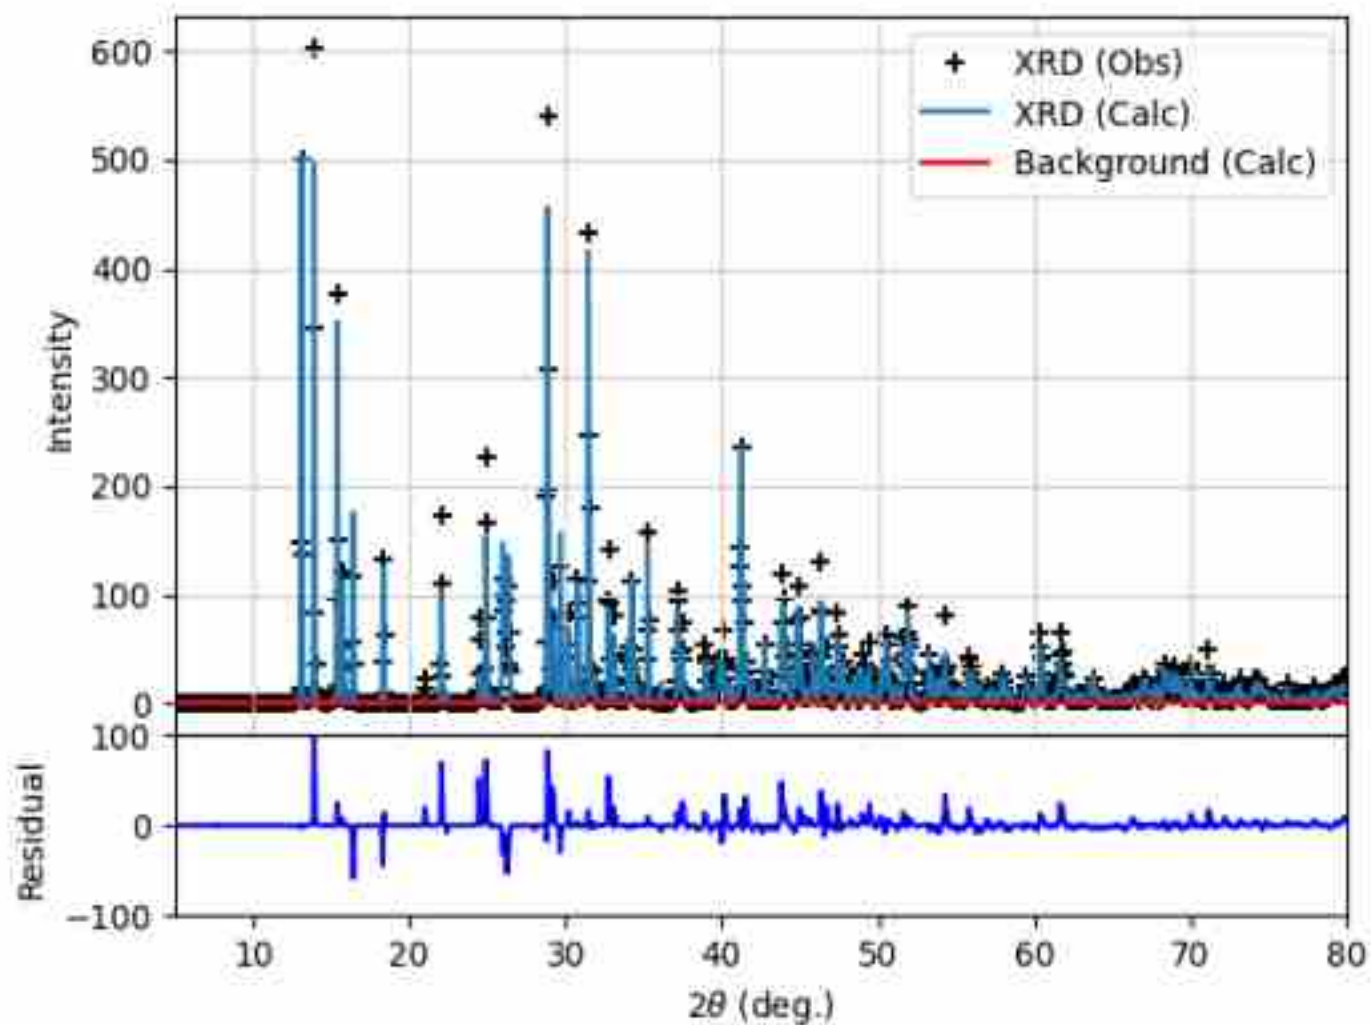

| RMSE before RR | Rwp      | RMSE after RR |
|----------------|----------|---------------|
| 0.299          | 28.07653 | None          |

# Al<sub>2</sub>S<sub>2</sub>C114

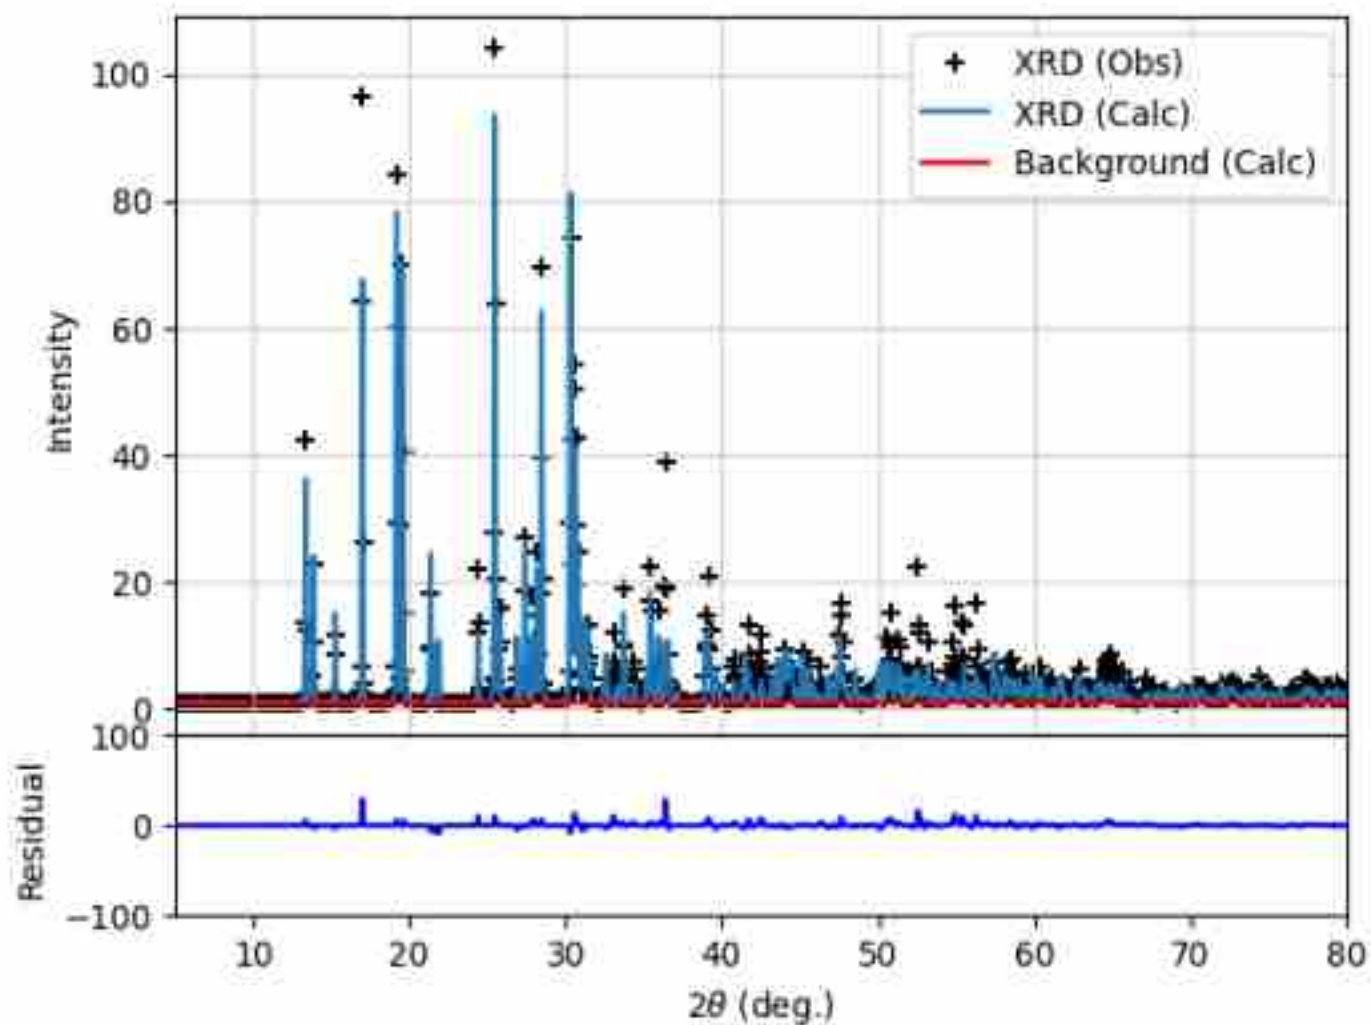

| RMSE before RR | Rwp      | RMSE after RR |
|----------------|----------|---------------|
| 0.301          | 36.97788 | 0.40605       |

# Bi4Br12

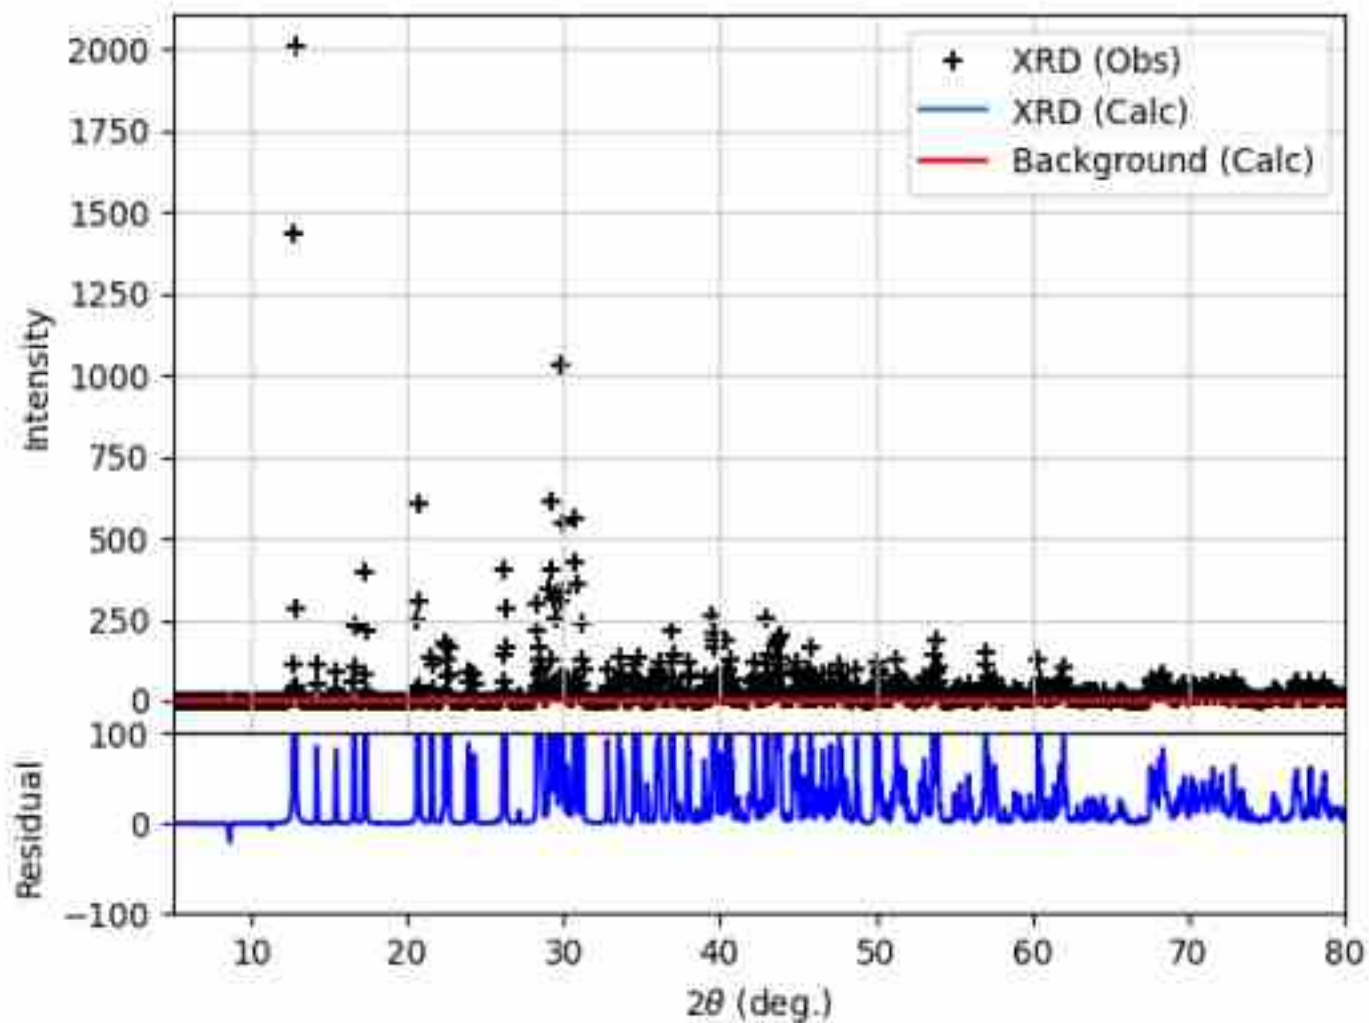

| RMSE before RR | Rwp      | RMSE after RR |
|----------------|----------|---------------|
| 0.301          | 96.56678 | None          |

# S2Cl4O4

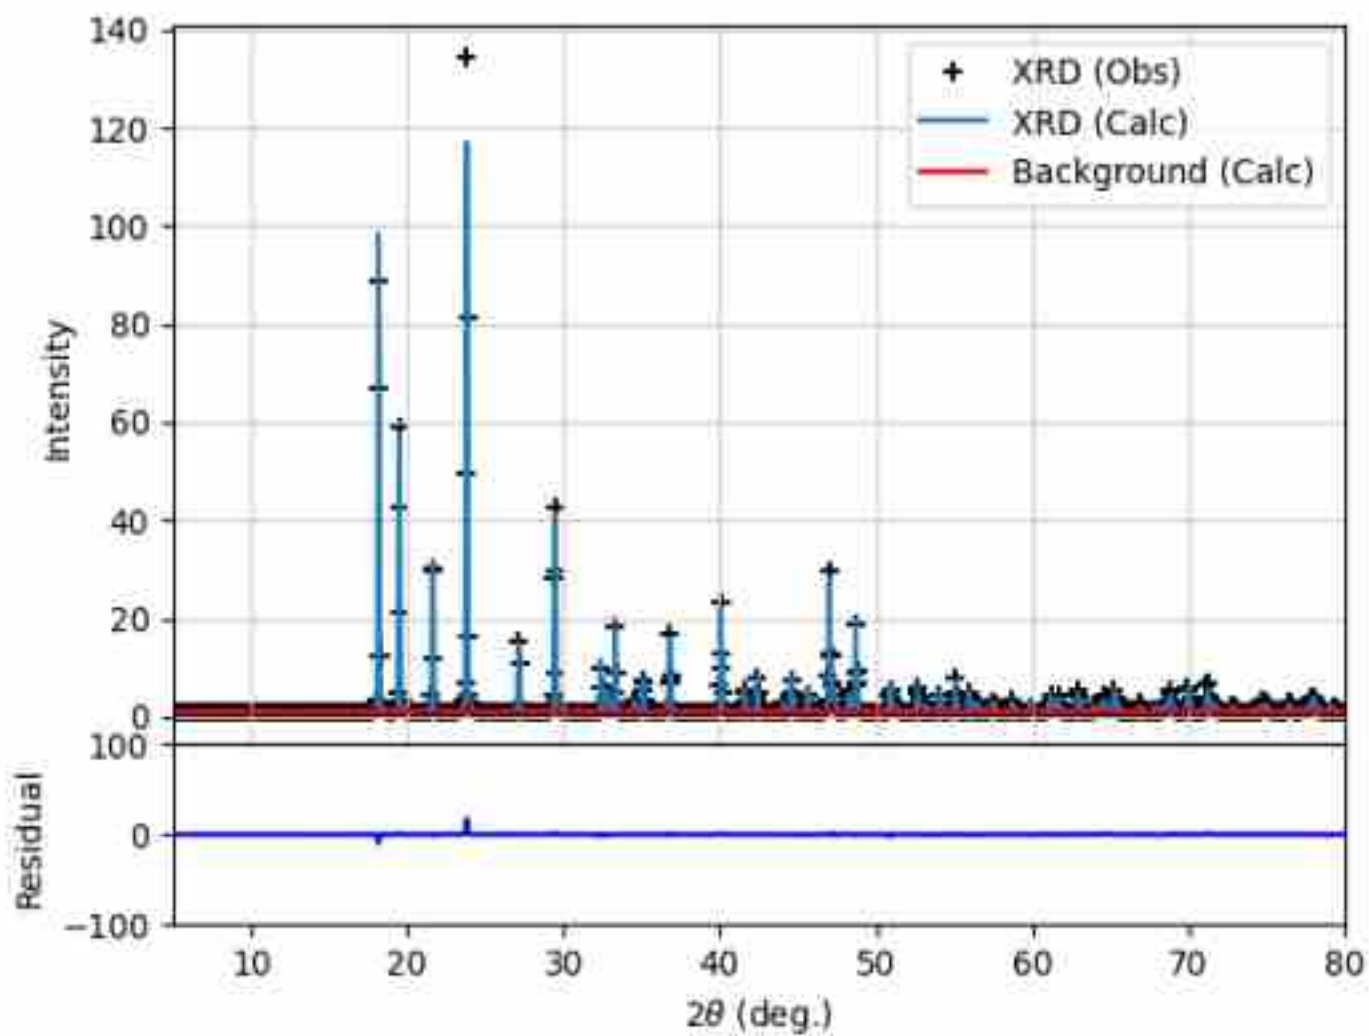

| RMSE before RR | Rwp     | RMSE after RR |
|----------------|---------|---------------|
| 0.301          | 9.44151 | 0.28168       |

# V2F8

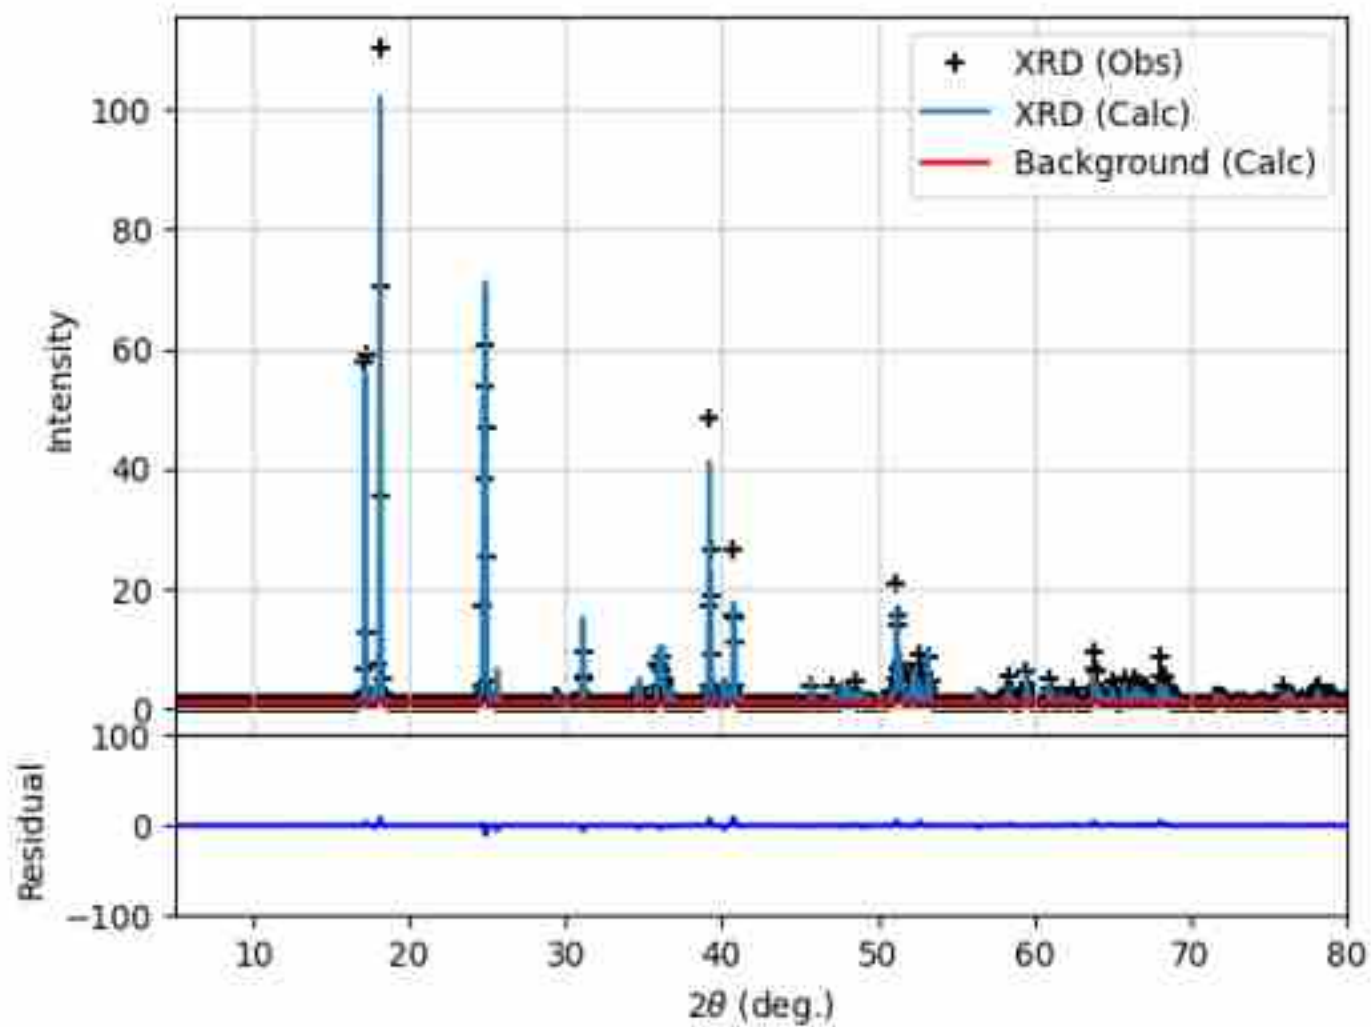

| RMSE before RR | Rwp      | RMSE after RR |
|----------------|----------|---------------|
| 0.301          | 23.25464 | 0.27558       |

# Ba<sub>2</sub>U<sub>4</sub>O<sub>14</sub>

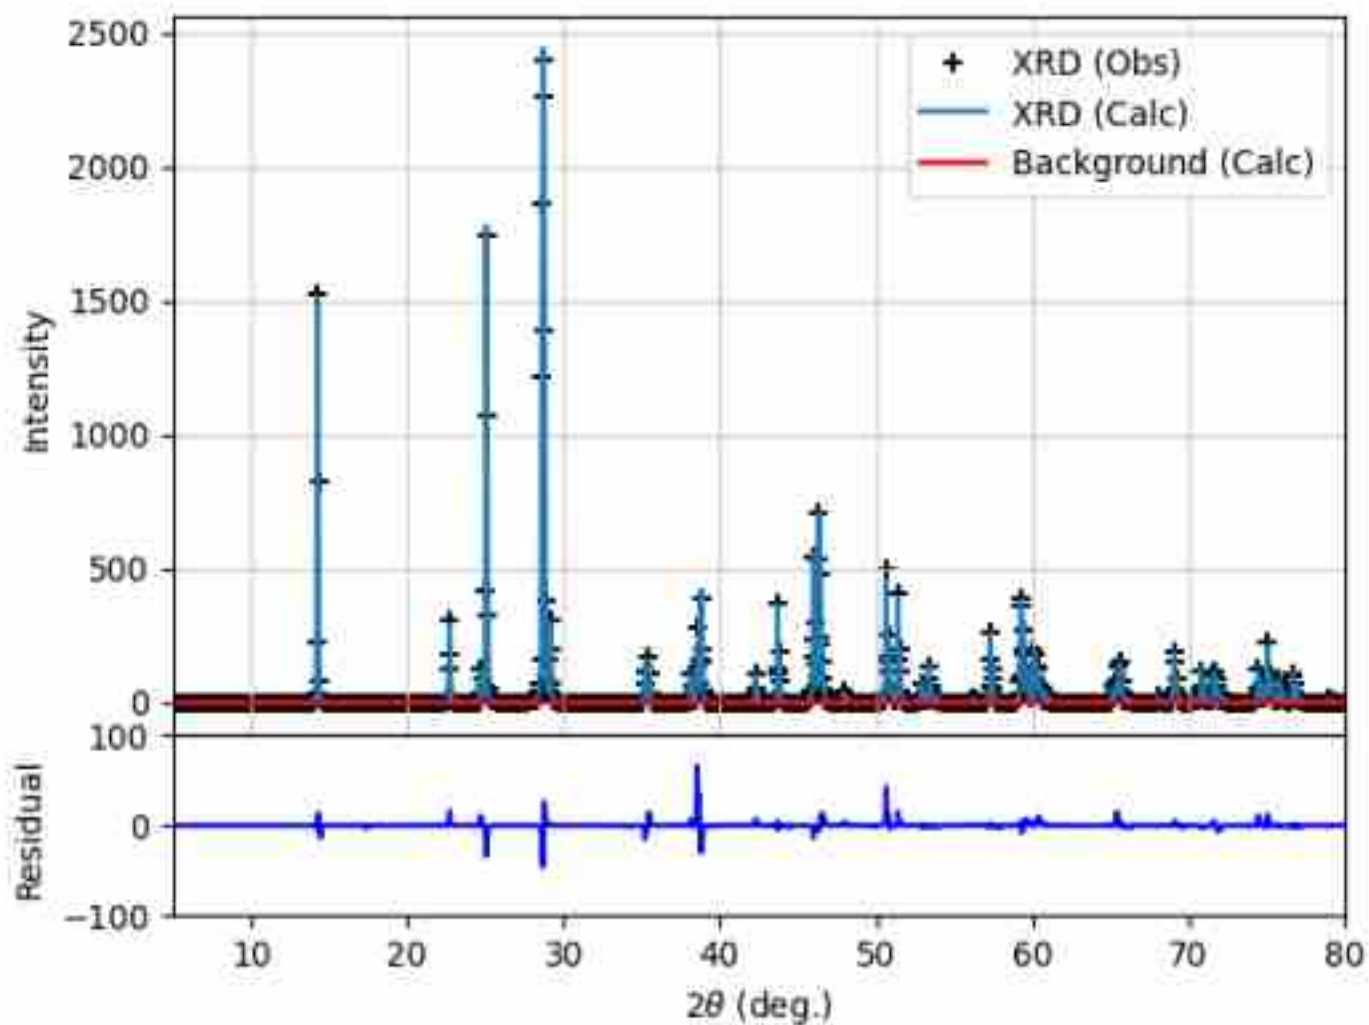

| RMSE before RR | Rwp     | RMSE after RR |
|----------------|---------|---------------|
| 0.302          | 6.03487 | None          |

# Bi8O12

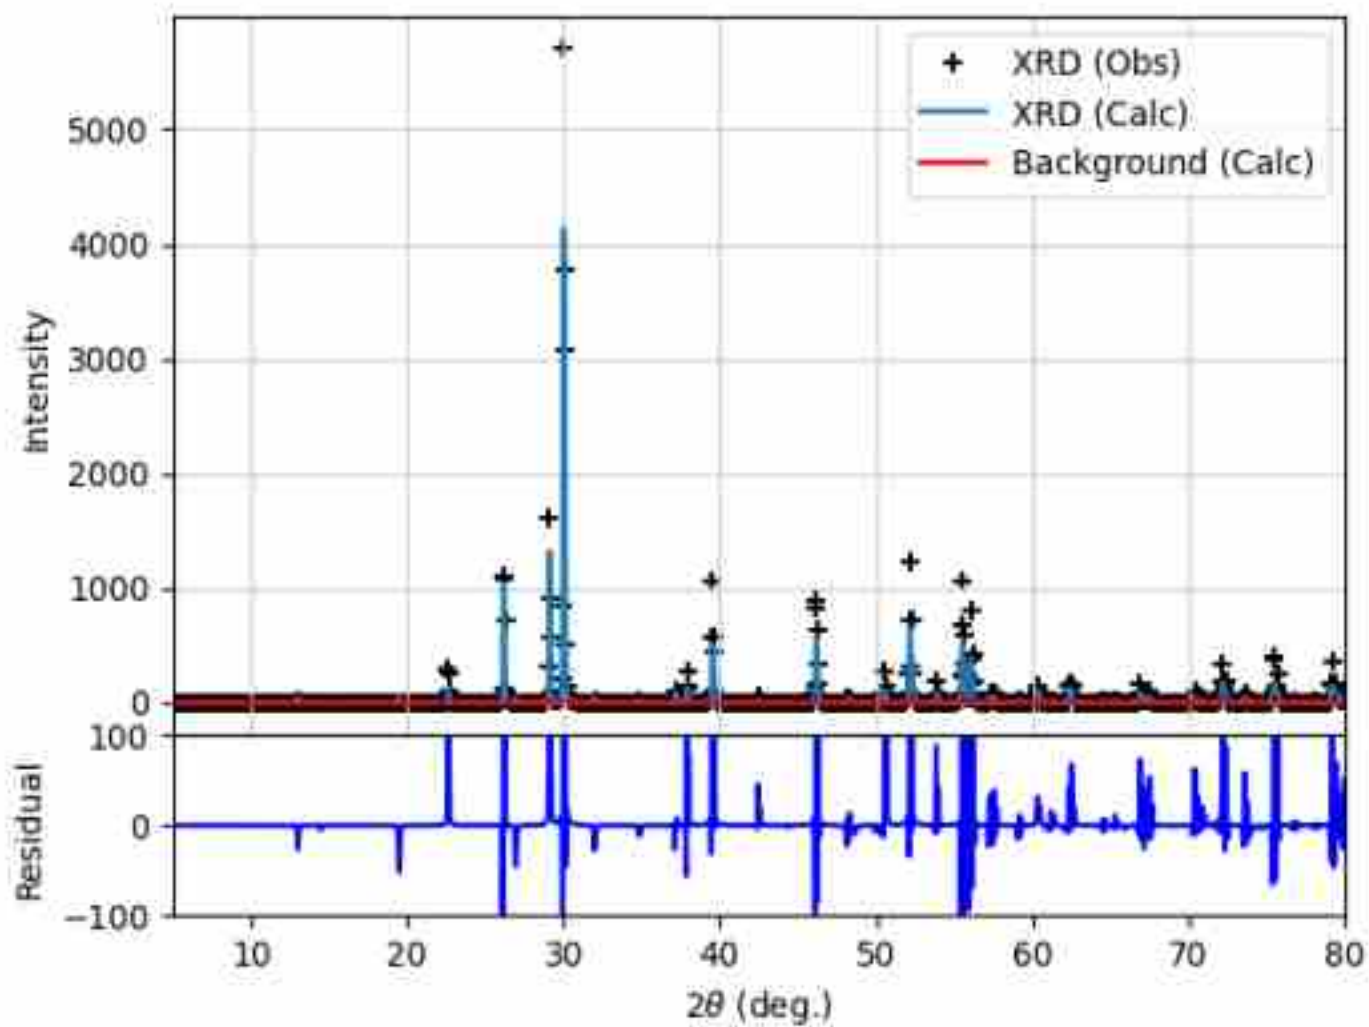

| RMSE before RR | Rwp      | RMSE after RR |
|----------------|----------|---------------|
| 0.302          | 45.47543 | None          |

# Fe<sub>2</sub>Ni<sub>4</sub>O<sub>8</sub>

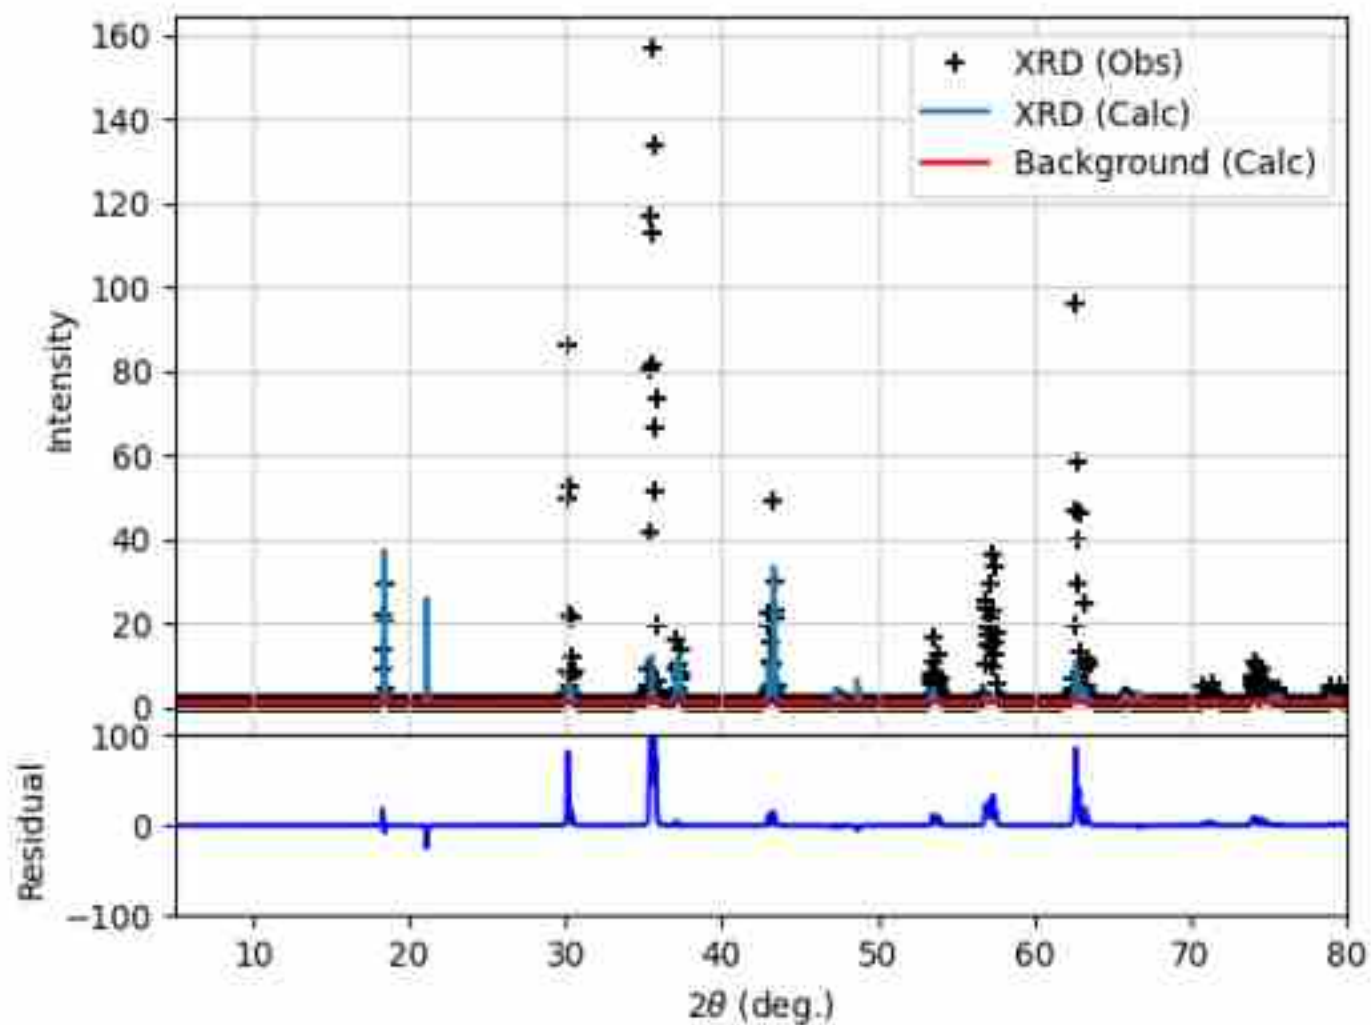

| RMSE before RR | Rwp     | RMSE after RR |
|----------------|---------|---------------|
| 0.302          | 80.7835 | 0.31388       |



# Li<sub>2</sub>Fe<sub>2</sub>Cu<sub>2</sub>O<sub>8</sub>

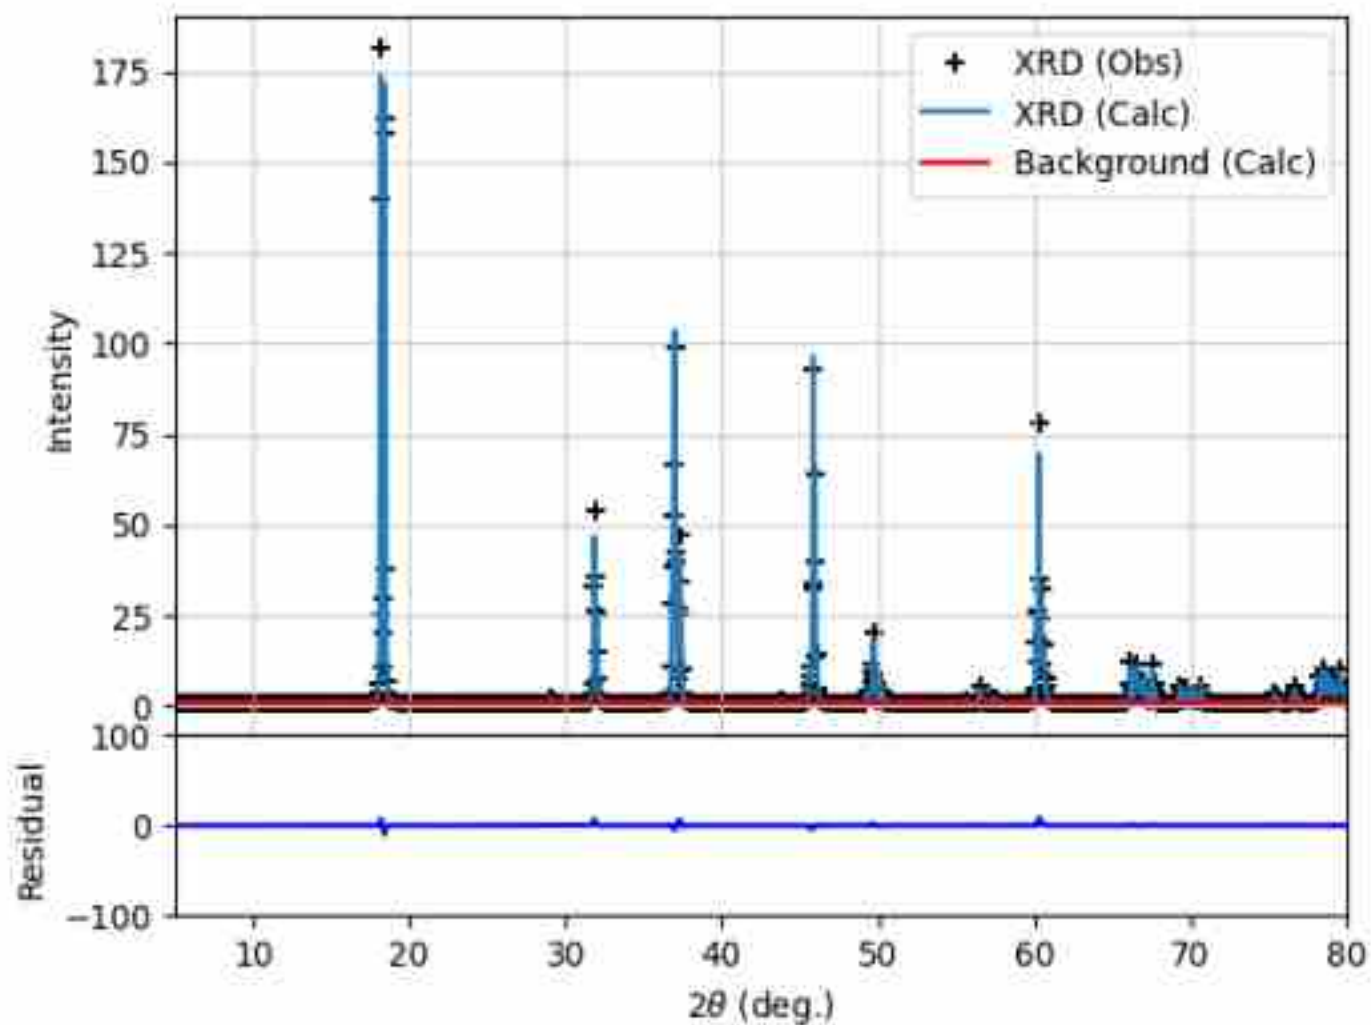

| RMSE before RR | Rwp     | RMSE after RR |
|----------------|---------|---------------|
| 0.303          | 7.17851 | 0.2969        |

# Pr<sub>4</sub>Al<sub>4</sub>Ge<sub>2</sub>

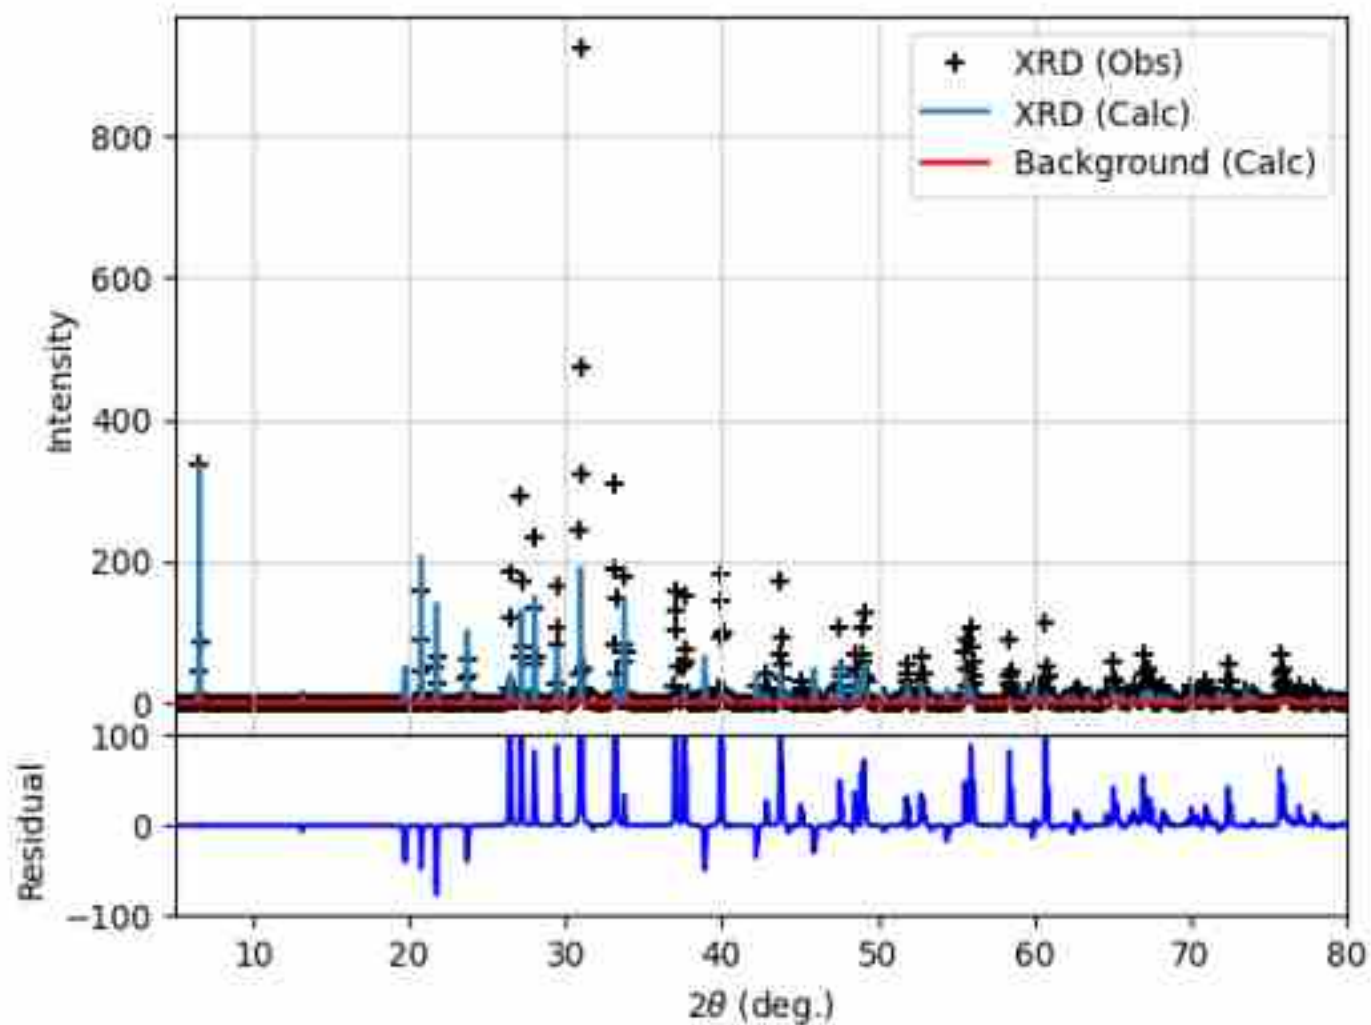

| RMSE before RR | Rwp      | RMSE after RR |
|----------------|----------|---------------|
| 0.303          | 75.05194 | None          |

# Rb1Ge4Pt4

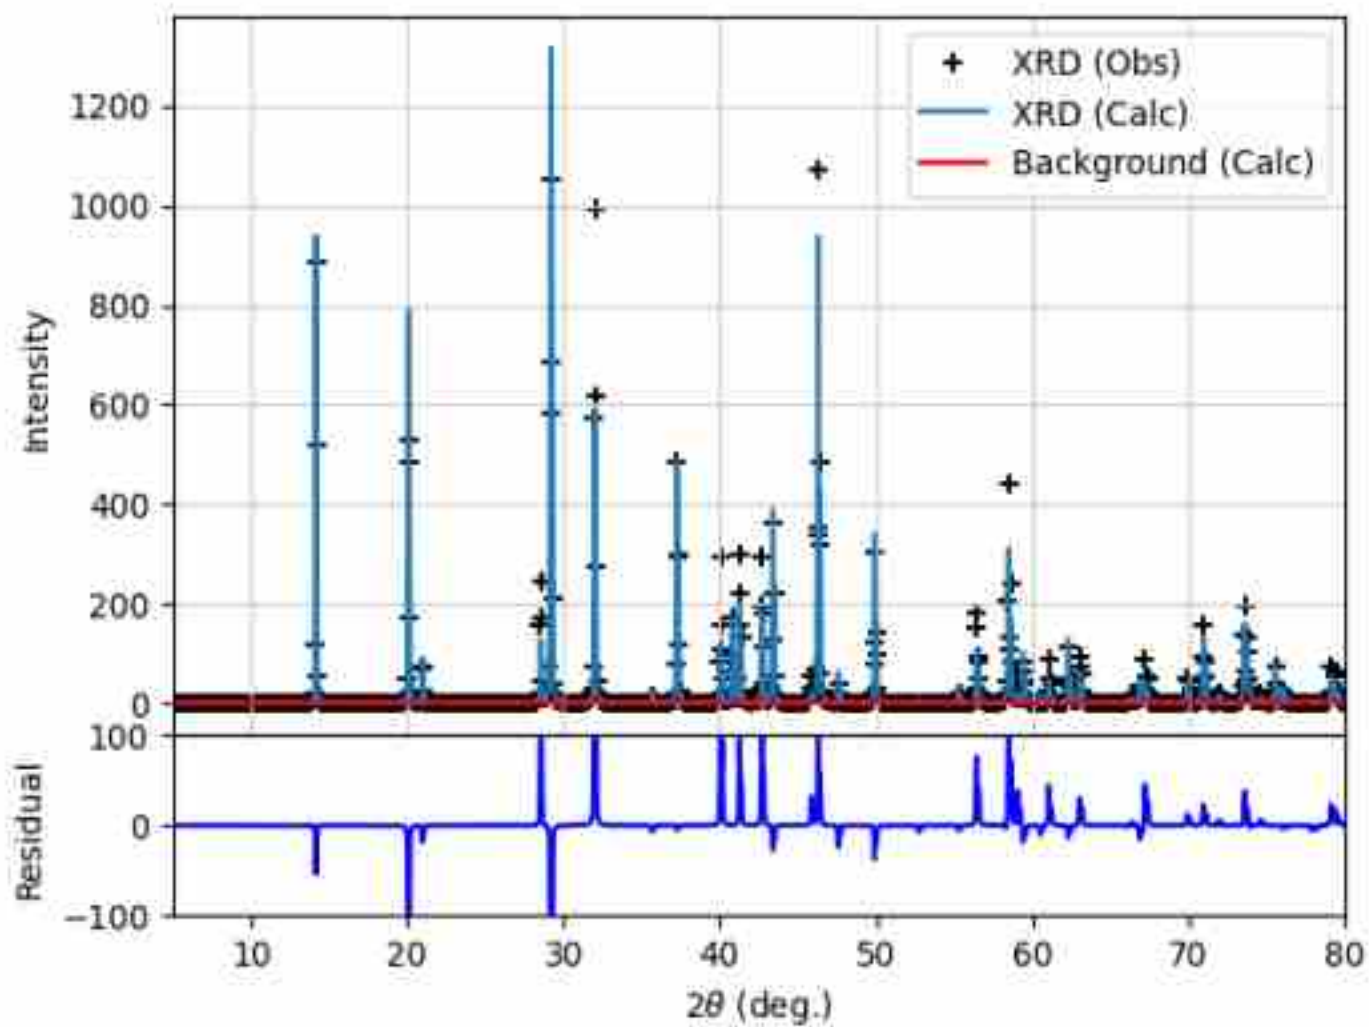

| RMSE before RR | Rwp      | RMSE after RR |
|----------------|----------|---------------|
| 0.303          | 29.87405 | None          |

# Eu9Pt6

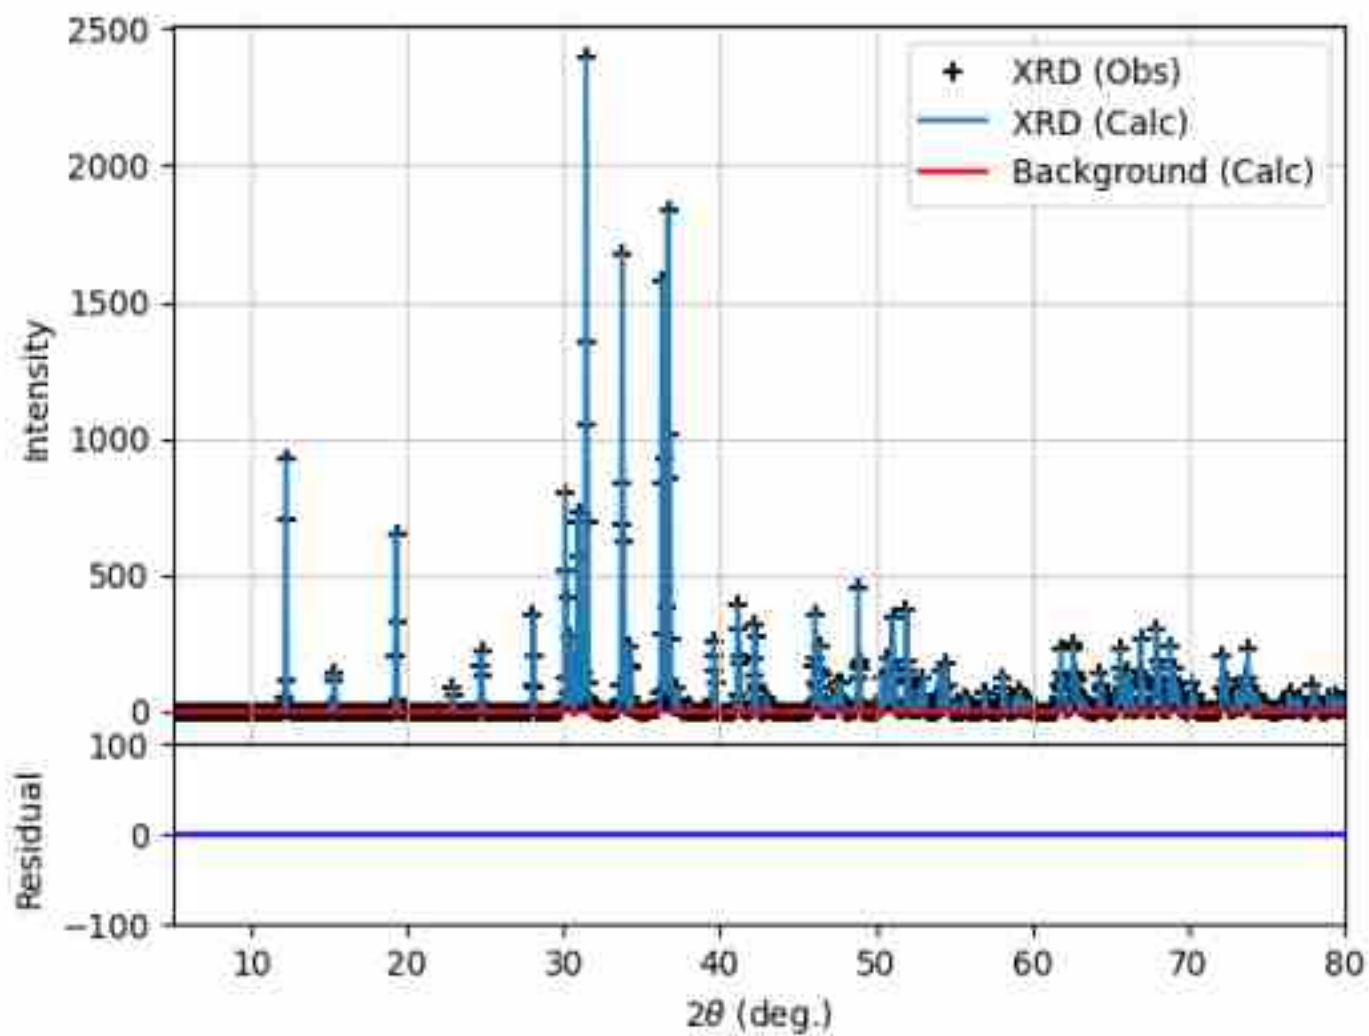

| RMSE before RR | Rwp     | RMSE after RR |
|----------------|---------|---------------|
| 0.304          | 0.00401 | 0.00033       |

# V3P4S12

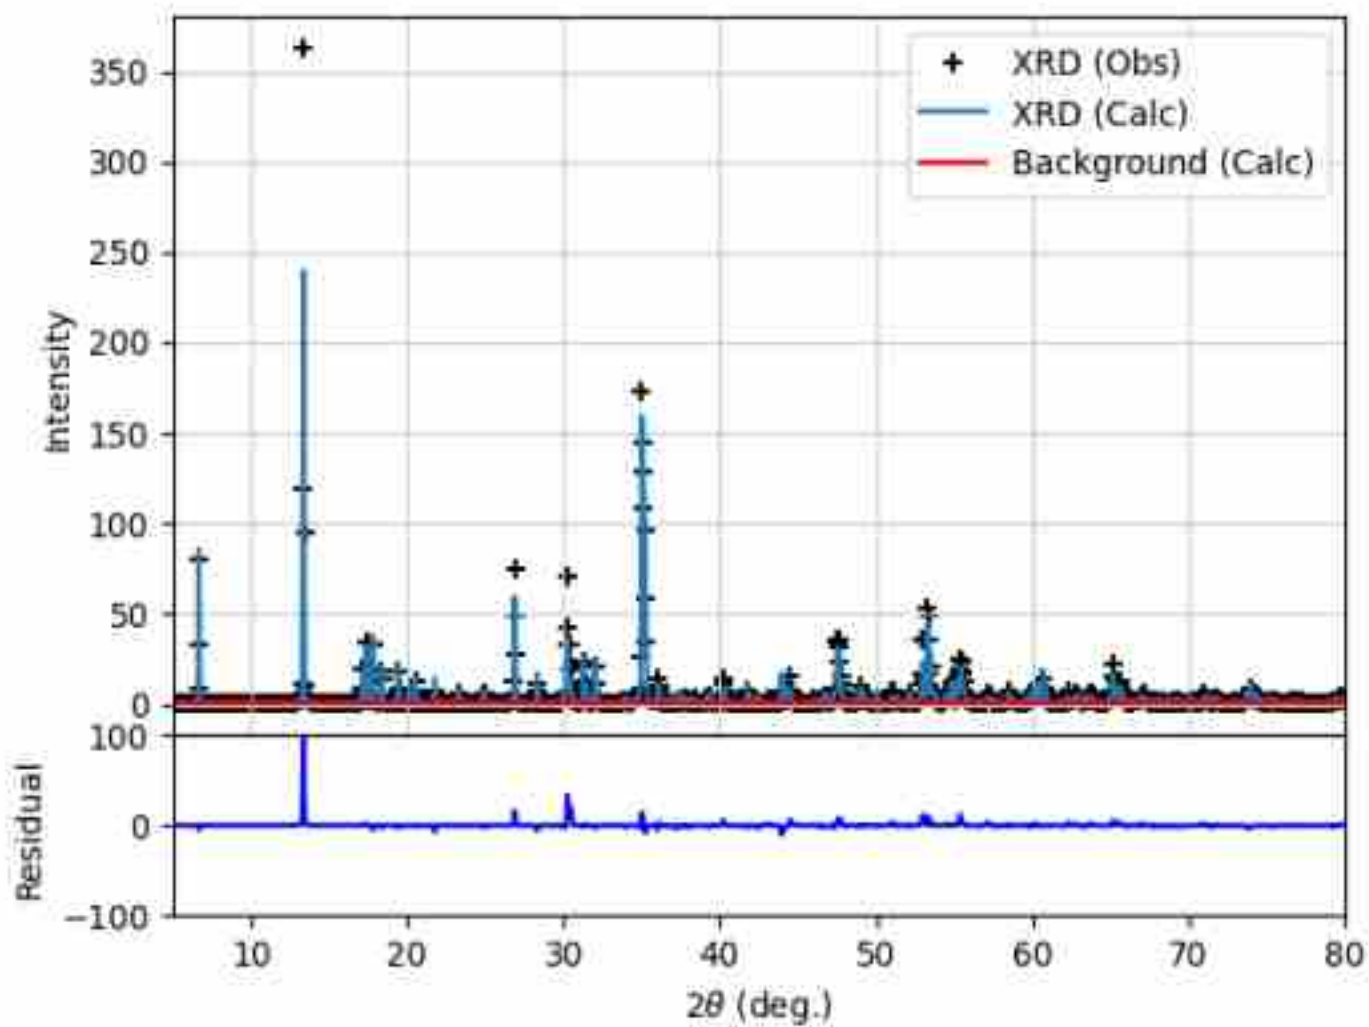

| RMSE before RR | Rwp      | RMSE after RR |
|----------------|----------|---------------|
| 0.304          | 27.02678 | 0.30739       |

# Y4Mg2

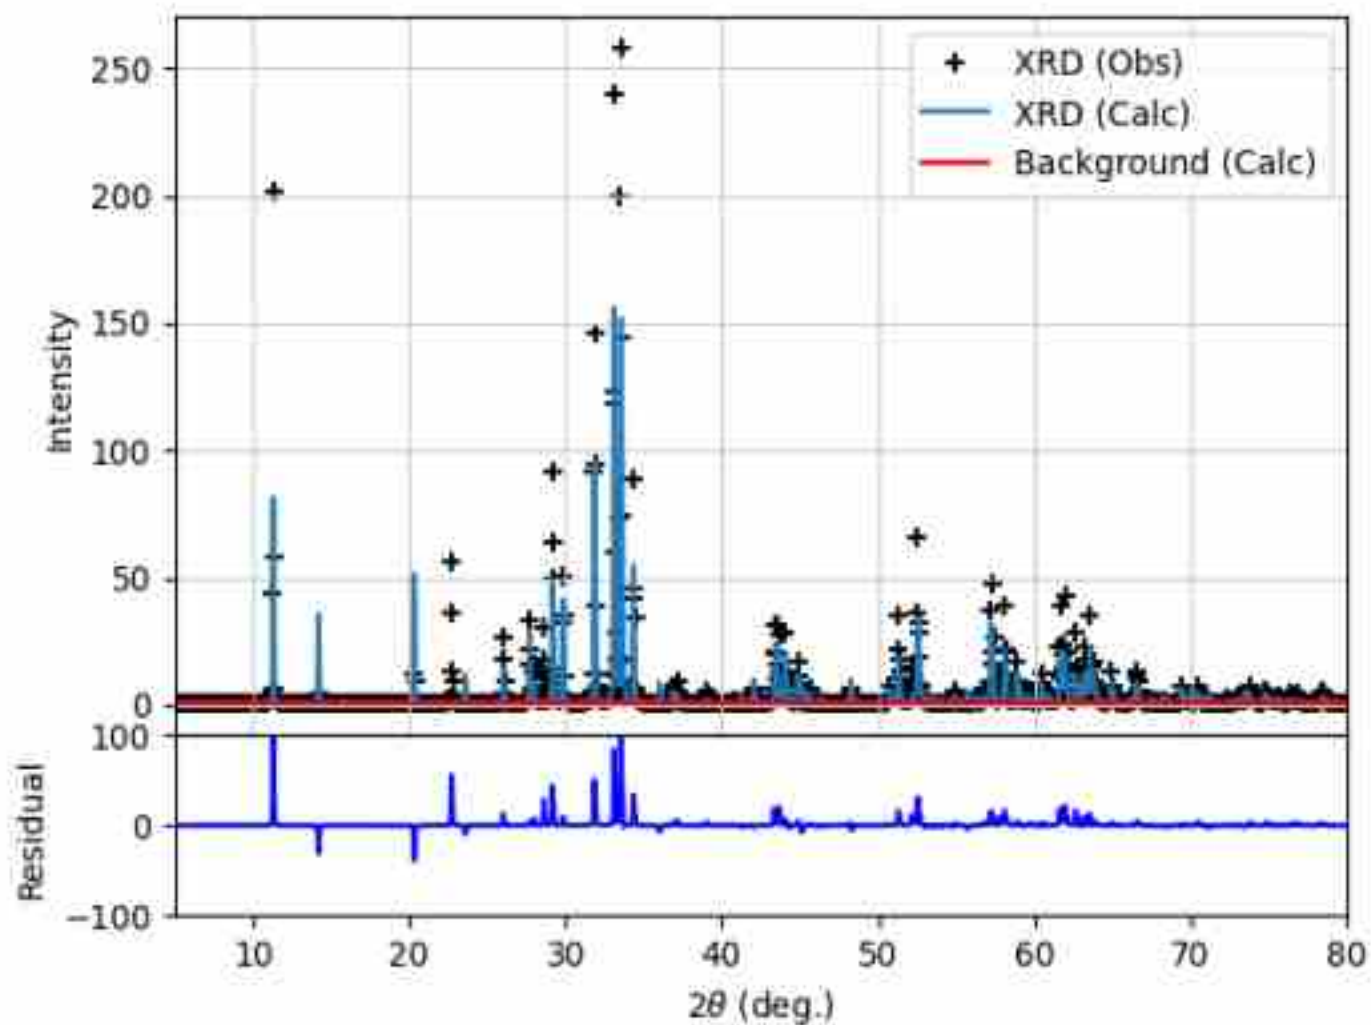

| RMSE before RR | Rwp      | RMSE after RR |
|----------------|----------|---------------|
| 0.304          | 50.93267 | 0.31481       |

# Ho6Ga8Cu4

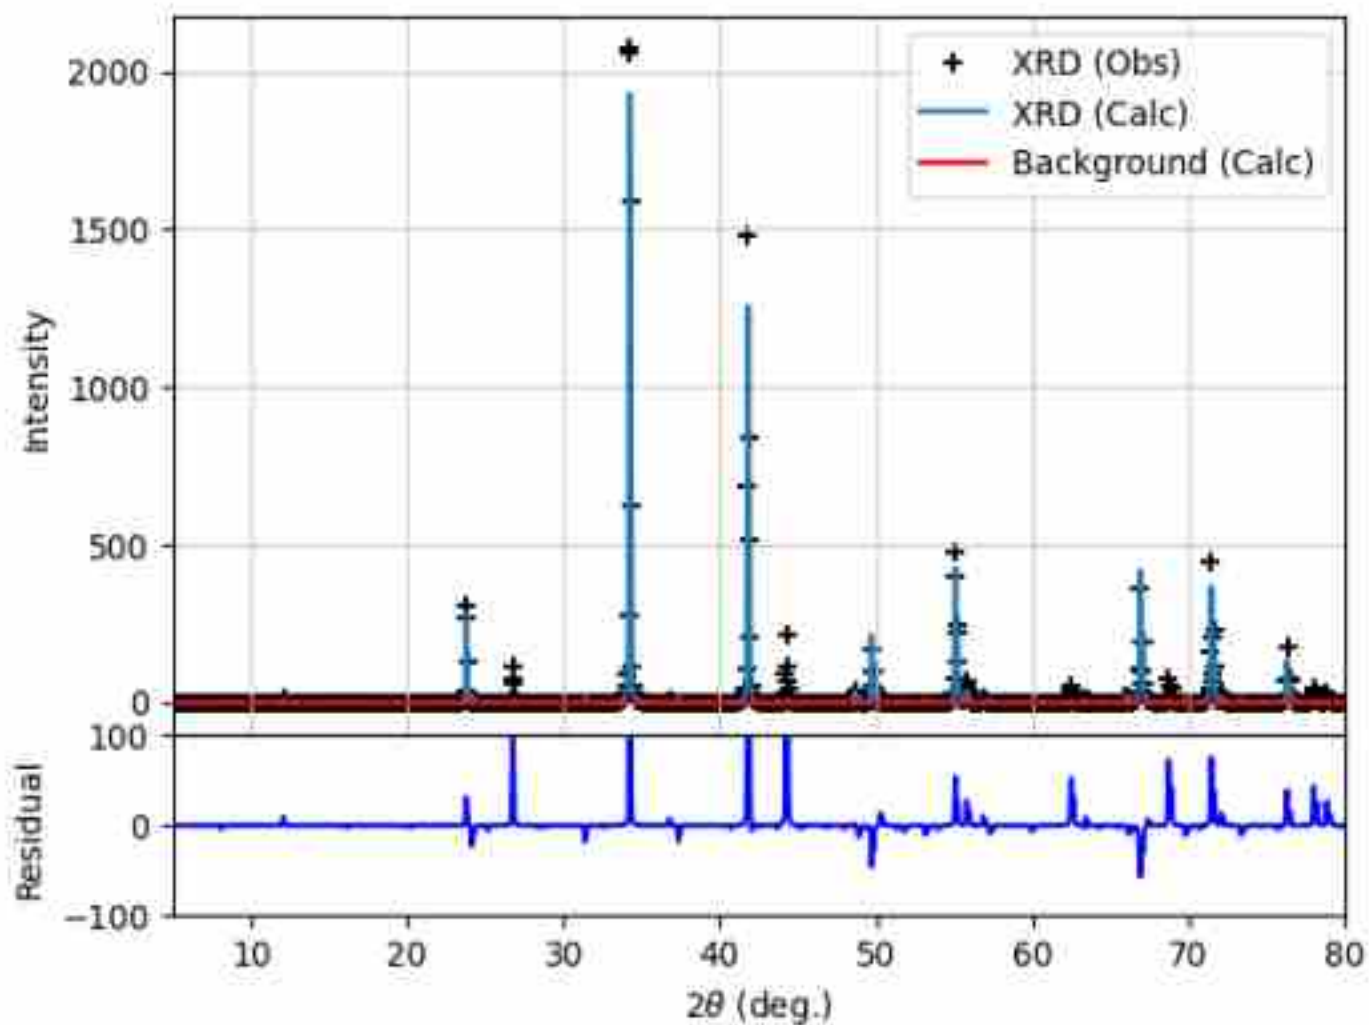

| RMSE before RR | Rwp      | RMSE after RR |
|----------------|----------|---------------|
| 0.305          | 43.99932 | 0.30882       |

# Mn12As8

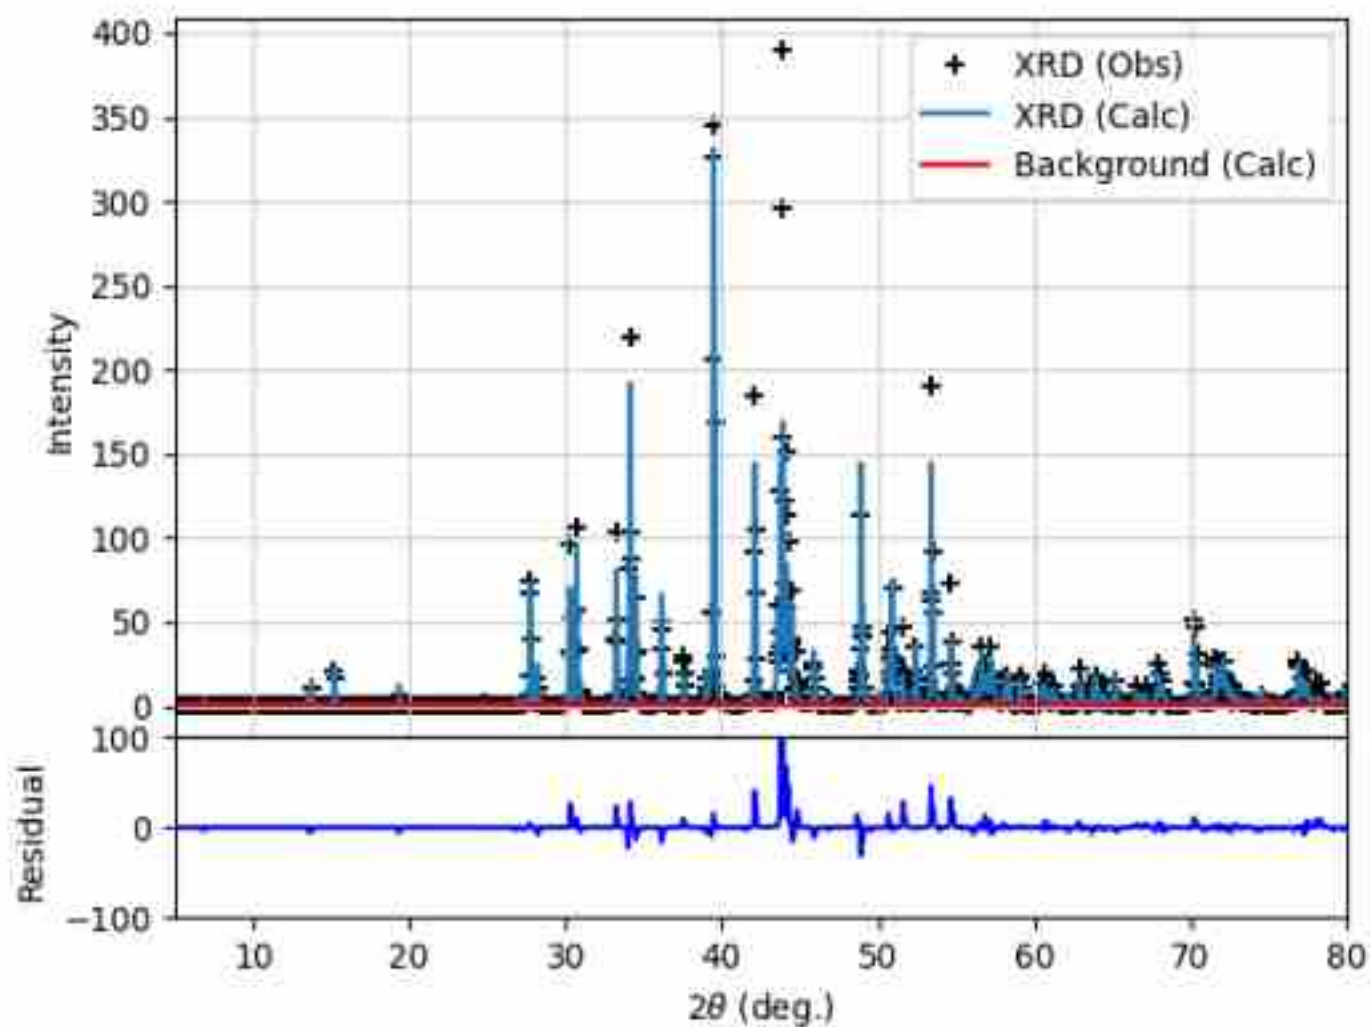

| RMSE before RR | Rwp      | RMSE after RR |
|----------------|----------|---------------|
| 0.305          | 33.05446 | 0.34956       |



# Si4O8

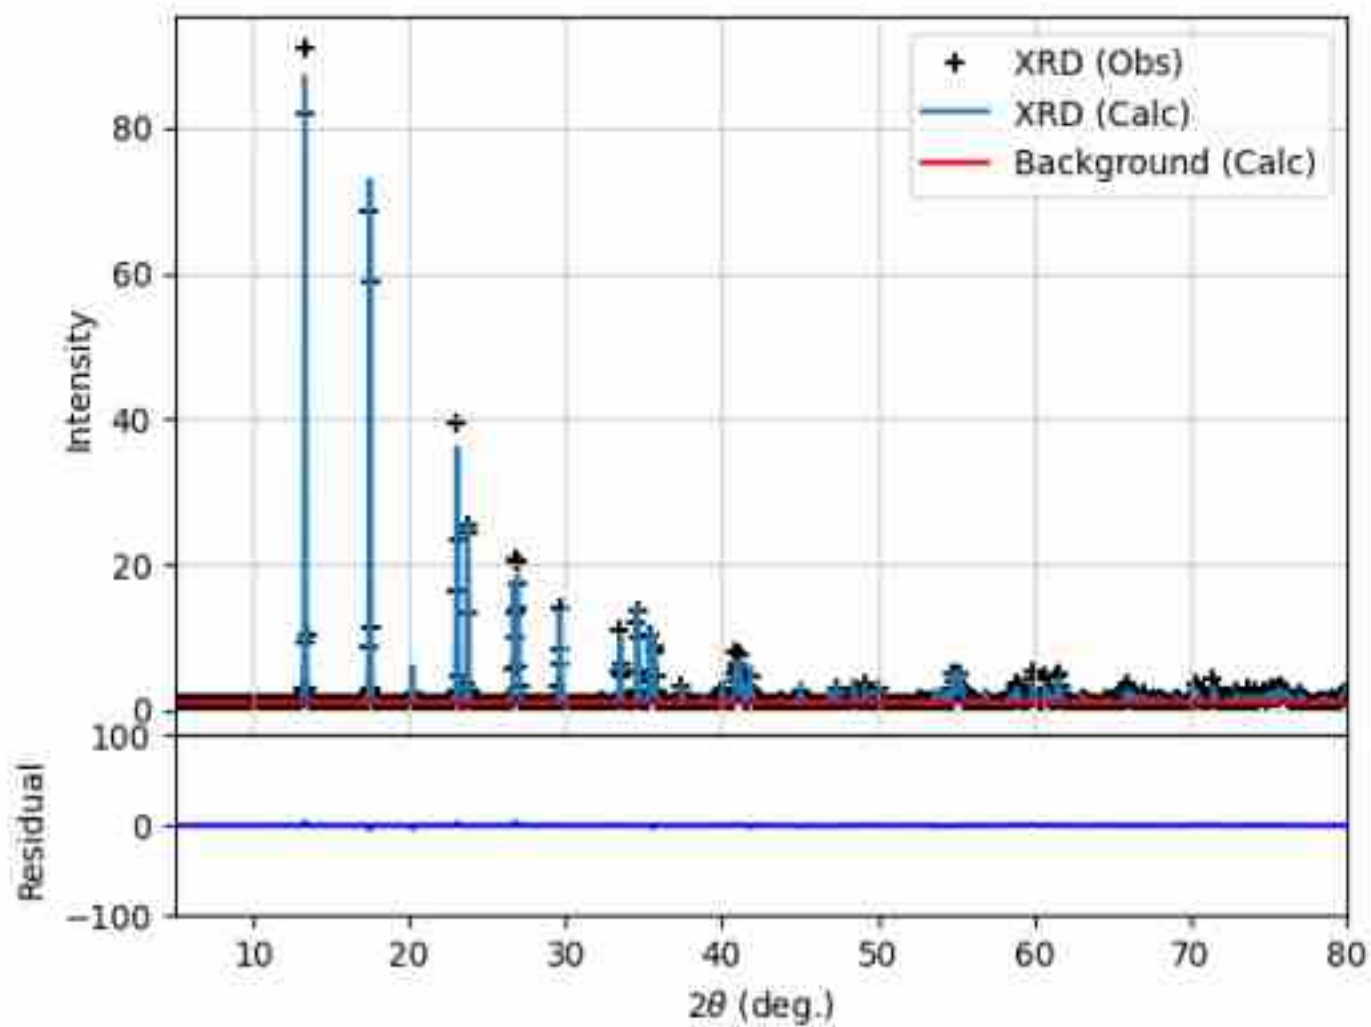

| RMSE before RR | Rwp      | RMSE after RR |
|----------------|----------|---------------|
| 0.305          | 11.18429 | 0.27411       |

# Li<sub>2</sub>V<sub>2</sub>F<sub>12</sub>

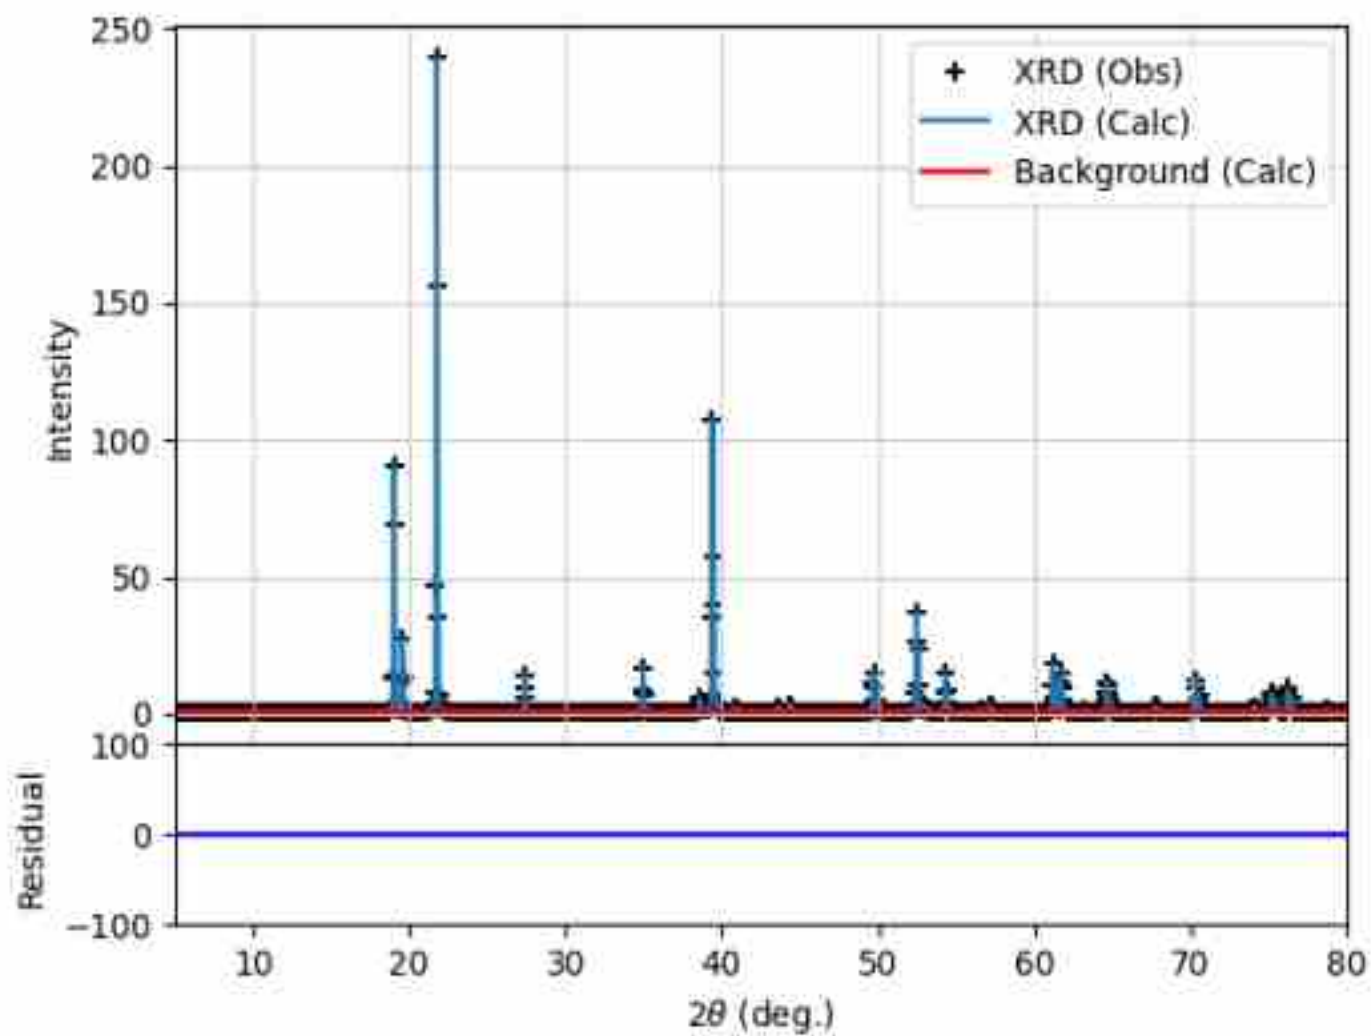

| RMSE before RR | Rwp     | RMSE after RR |
|----------------|---------|---------------|
| 0.306          | 0.00294 | 0.00125       |

# Nb<sub>4</sub>Ag<sub>4</sub>O<sub>12</sub>

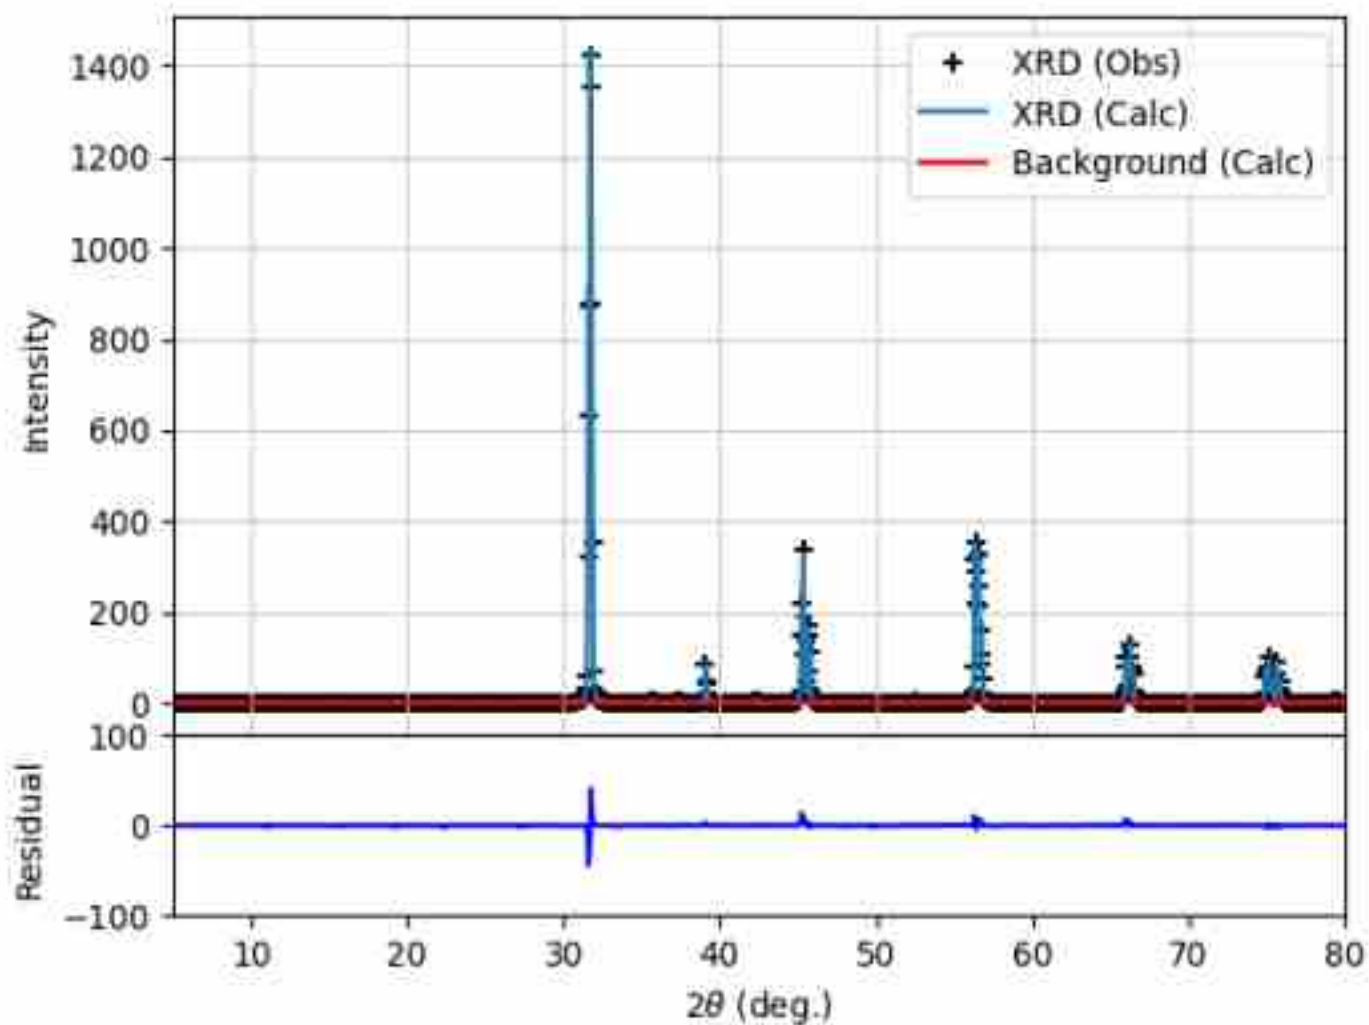

| RMSE before RR | Rwp   | RMSE after RR |
|----------------|-------|---------------|
| 0.309          | 6.185 | 0.24562       |

# Ag<sub>4</sub>S<sub>2</sub>

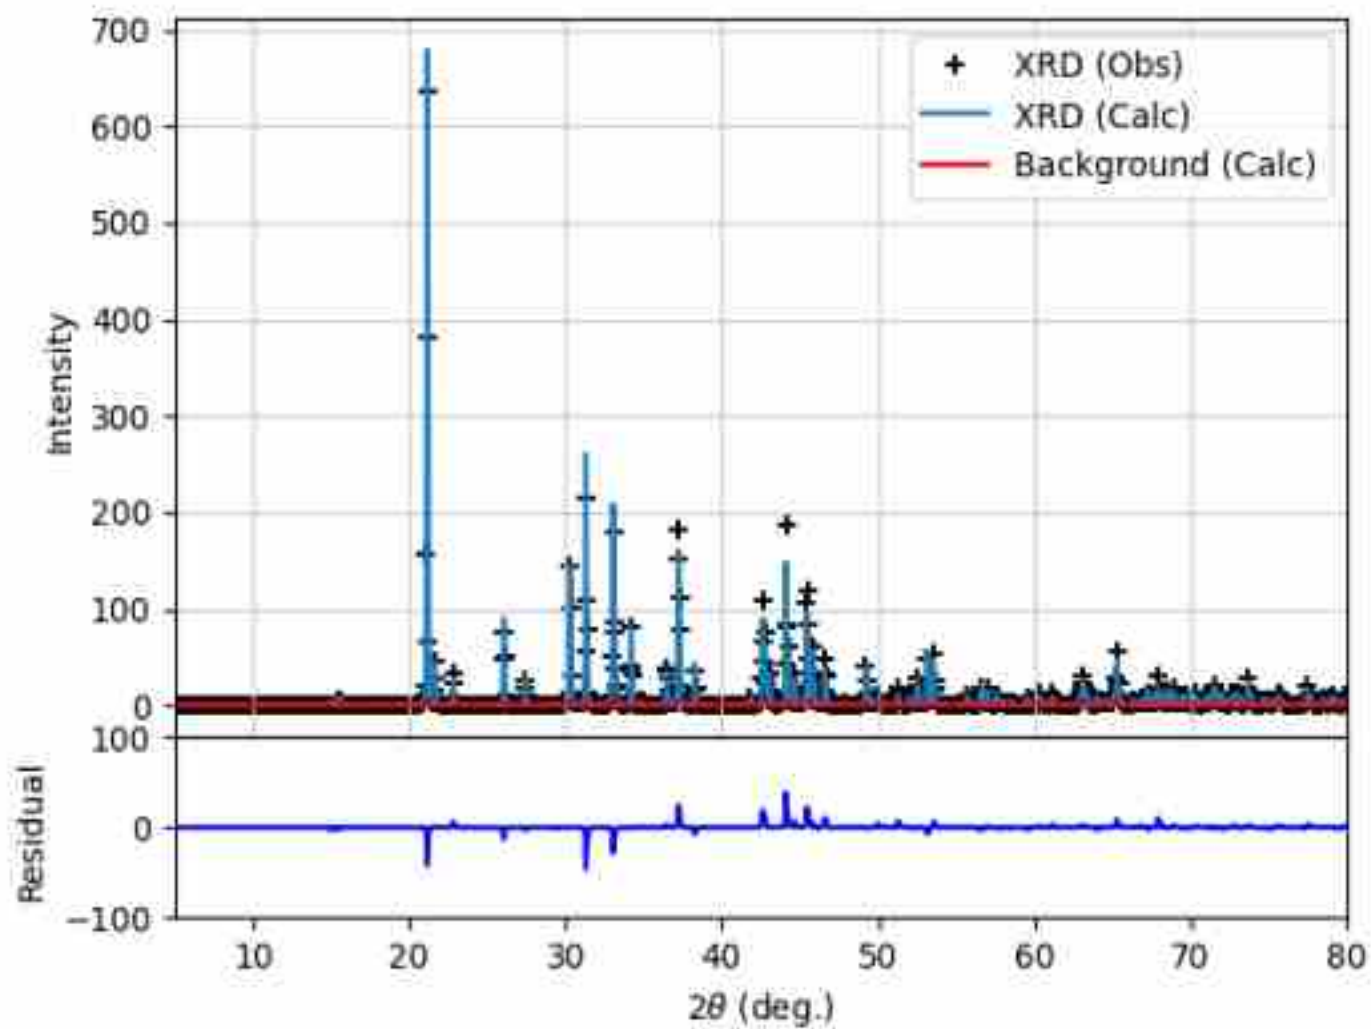

| RMSE before RR | Rwp      | RMSE after RR |
|----------------|----------|---------------|
| 0.311          | 14.83635 | 0.20088       |

# P3N3O3

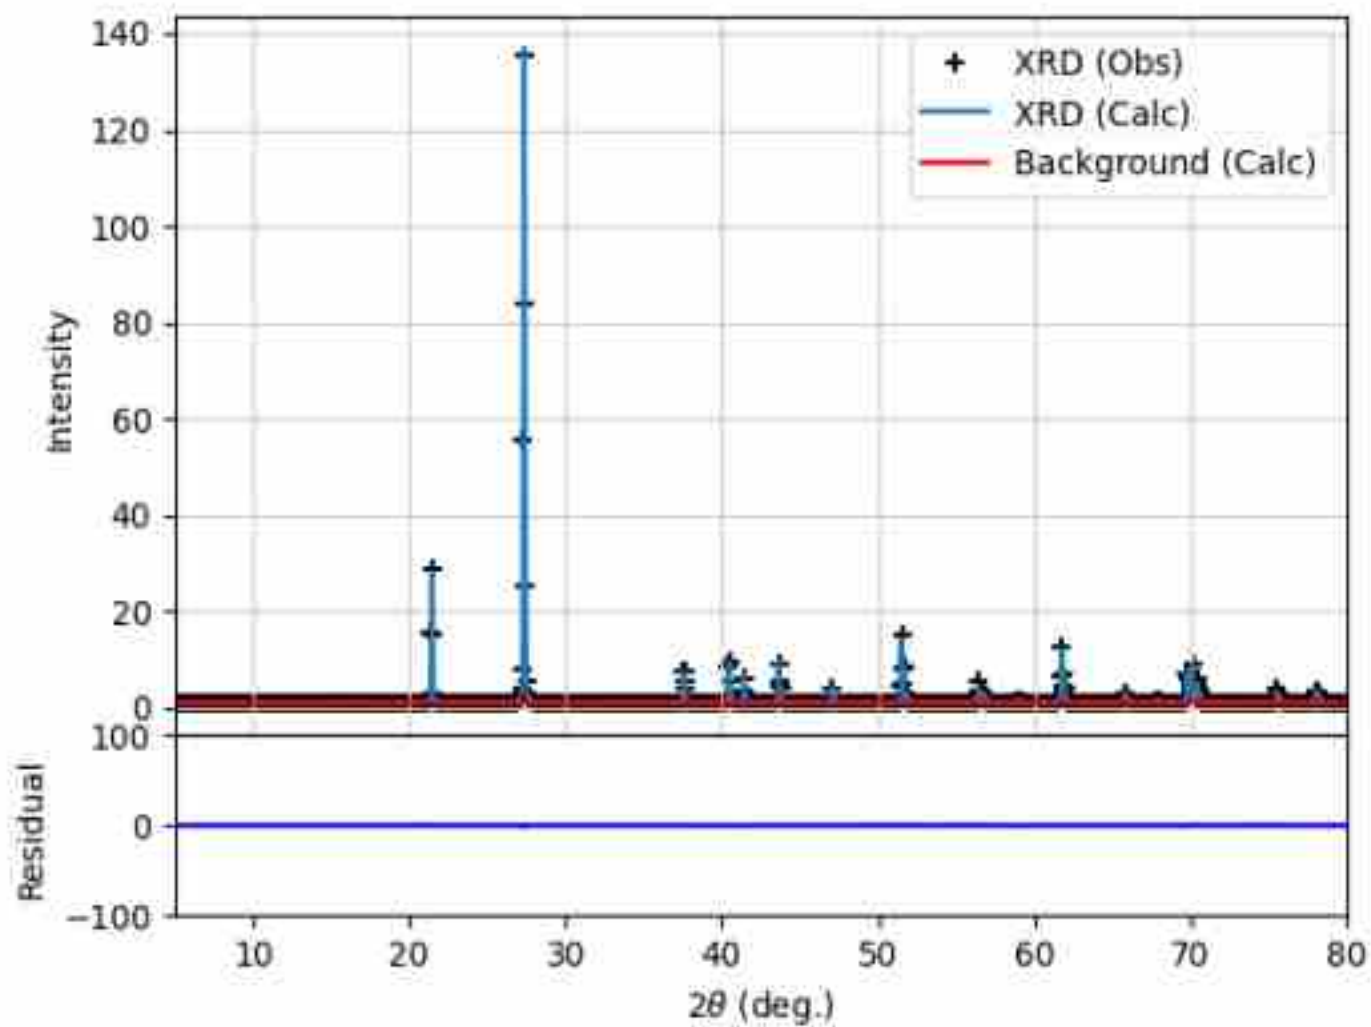

| RMSE before RR | Rwp     | RMSE after RR |
|----------------|---------|---------------|
| 0.311          | 3.02722 | None          |

# Li5Ag1F8

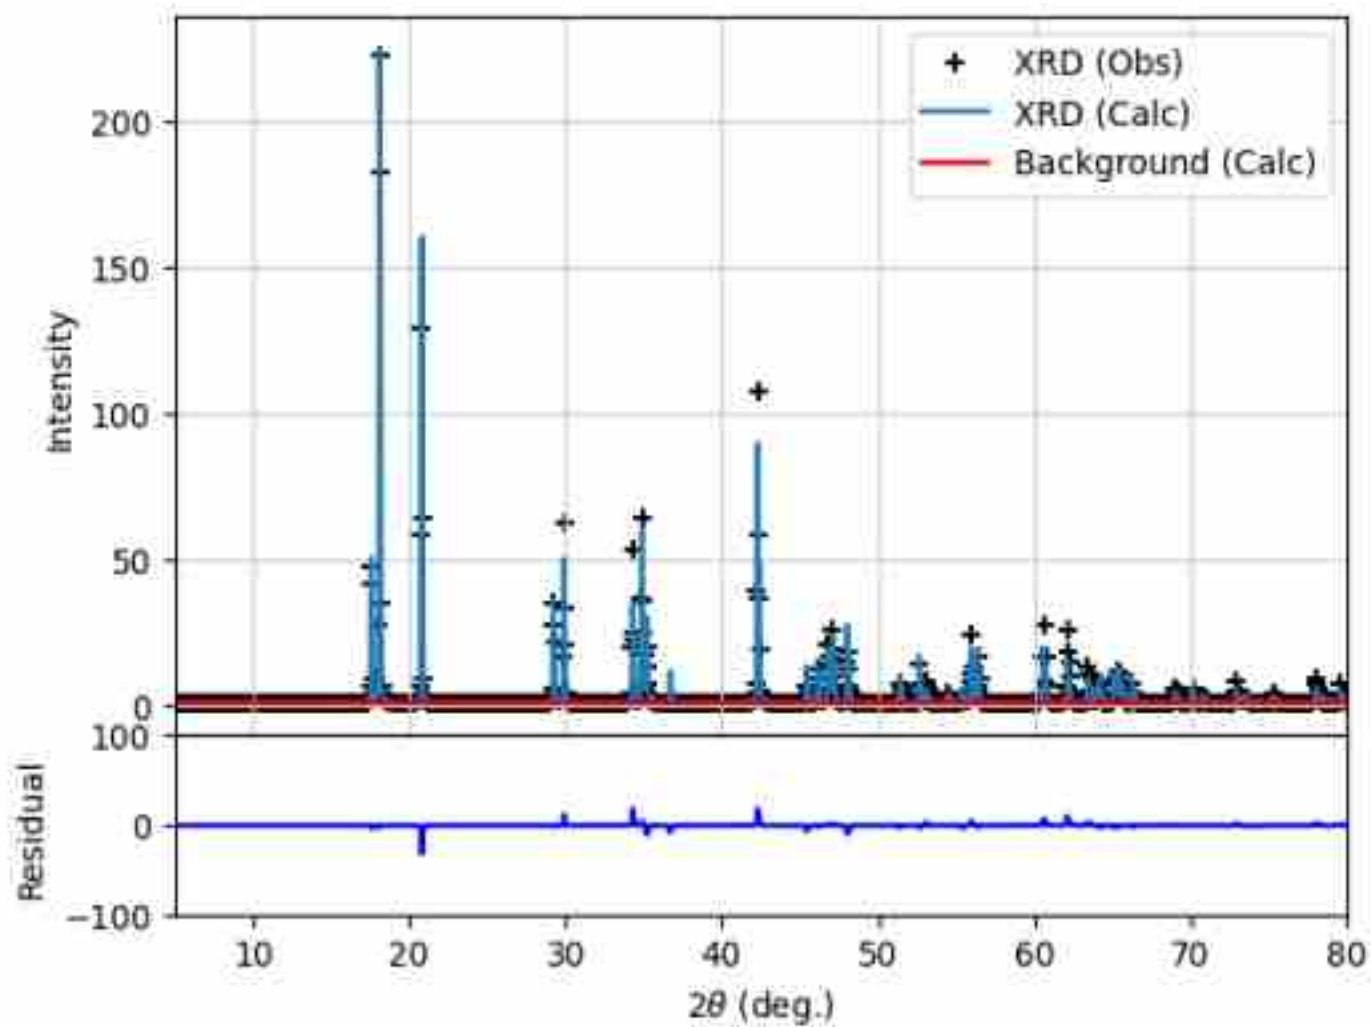

| RMSE before RR | Rwp      | RMSE after RR |
|----------------|----------|---------------|
| 0.312          | 20.80027 | 0.41287       |

# Nd4Ag4As8

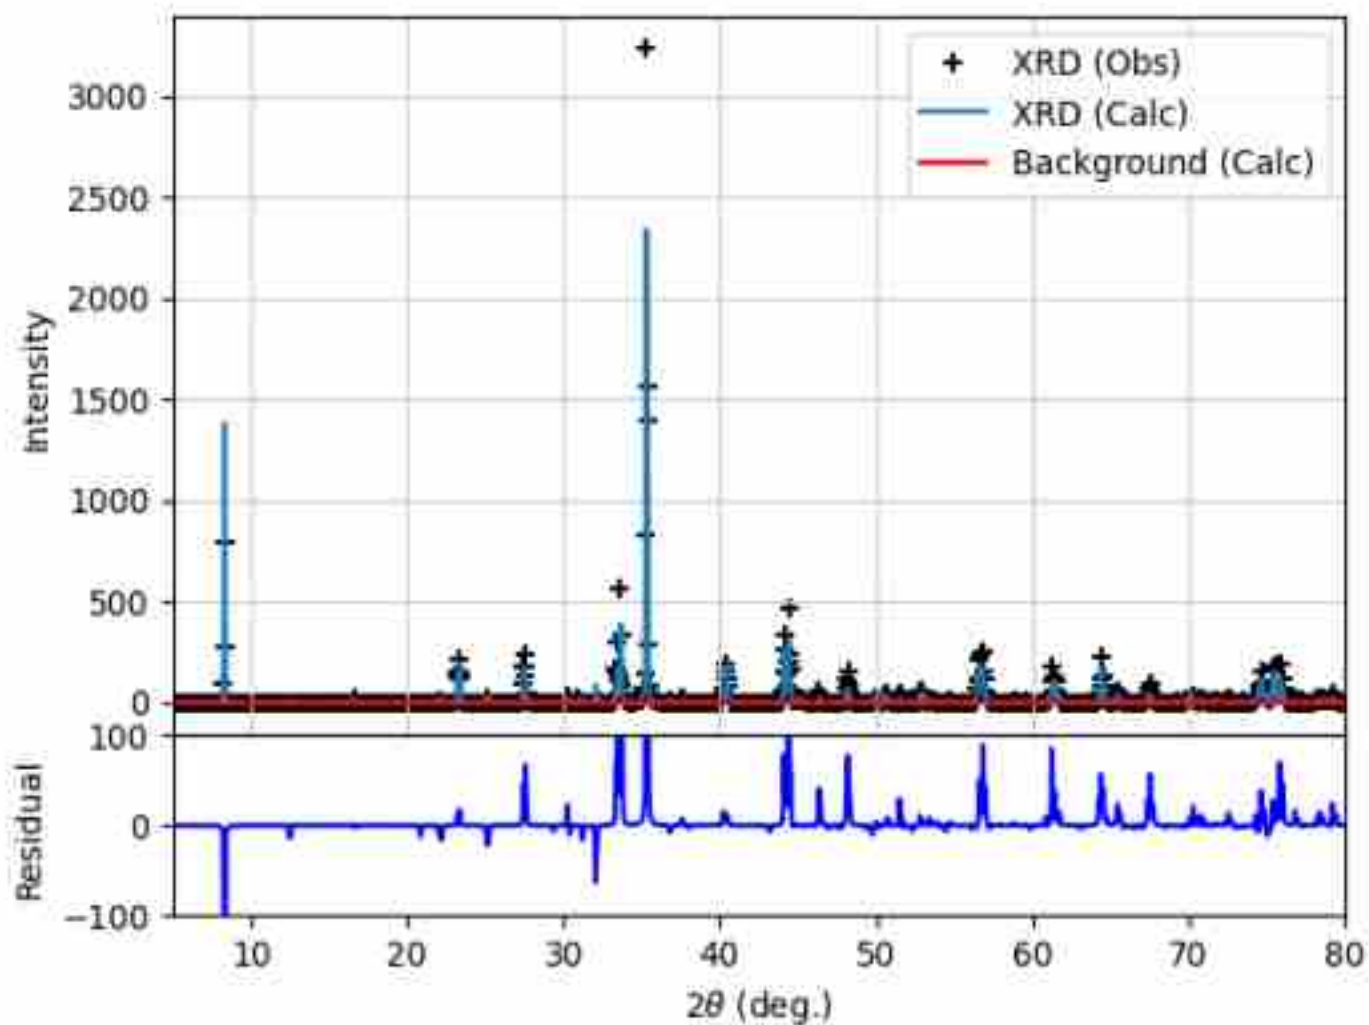

| RMSE before RR | Rwp     | RMSE after RR |
|----------------|---------|---------------|
| 0.312          | 42.2583 | None          |

# Sr<sub>4</sub>Sc<sub>2</sub>Sb<sub>2</sub>O<sub>12</sub>

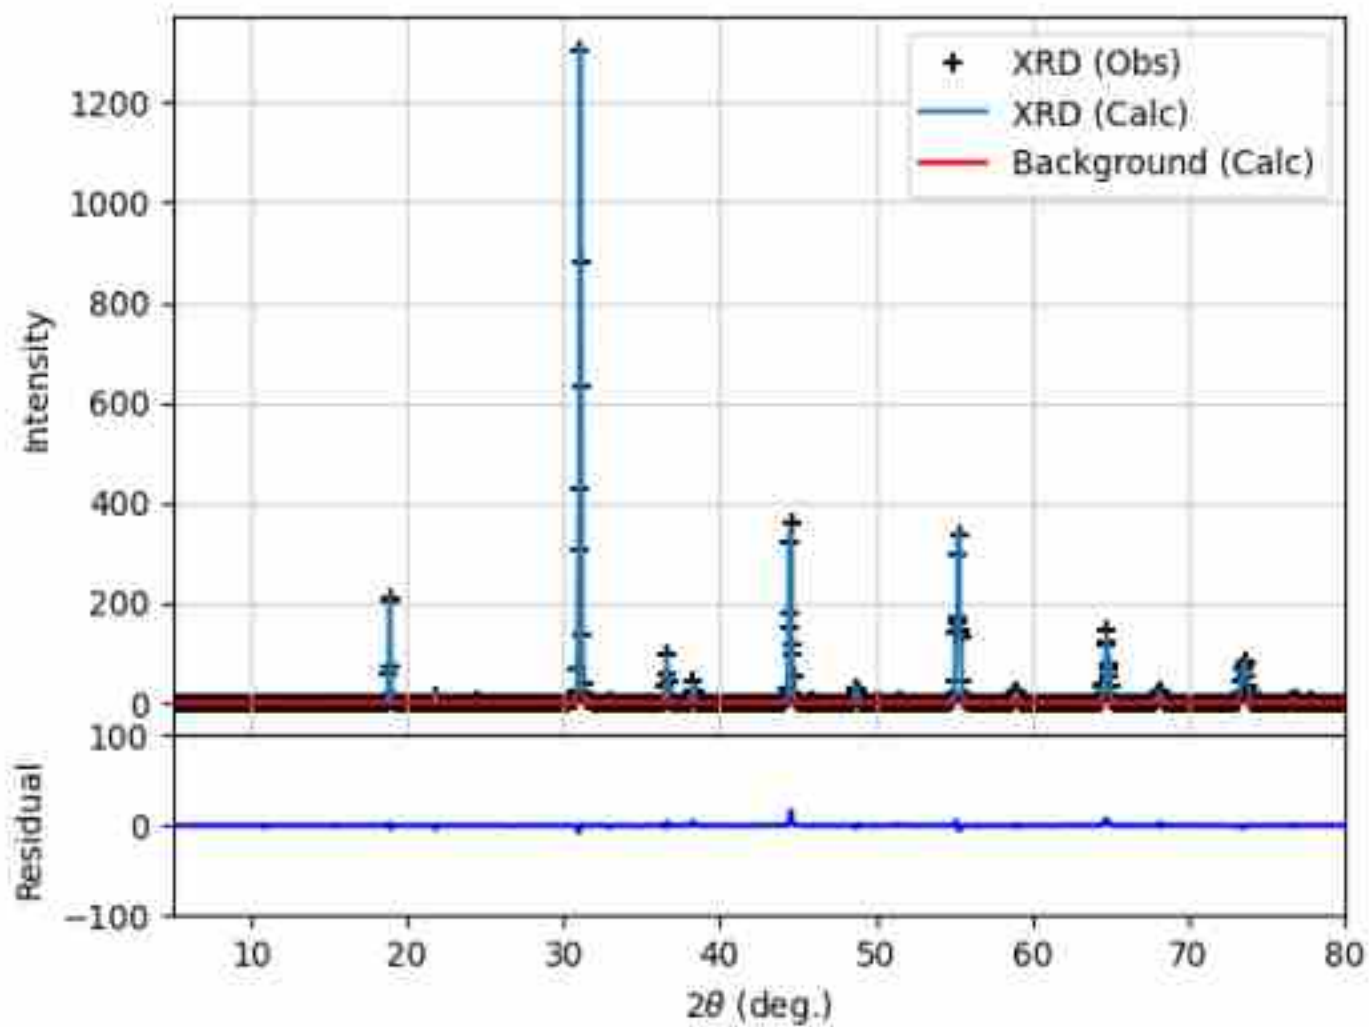

| RMSE before RR | Rwp     | RMSE after RR |
|----------------|---------|---------------|
| 0.312          | 6.00655 | 0.30217       |



# Cr<sub>2</sub>Fe<sub>4</sub>As<sub>12</sub>

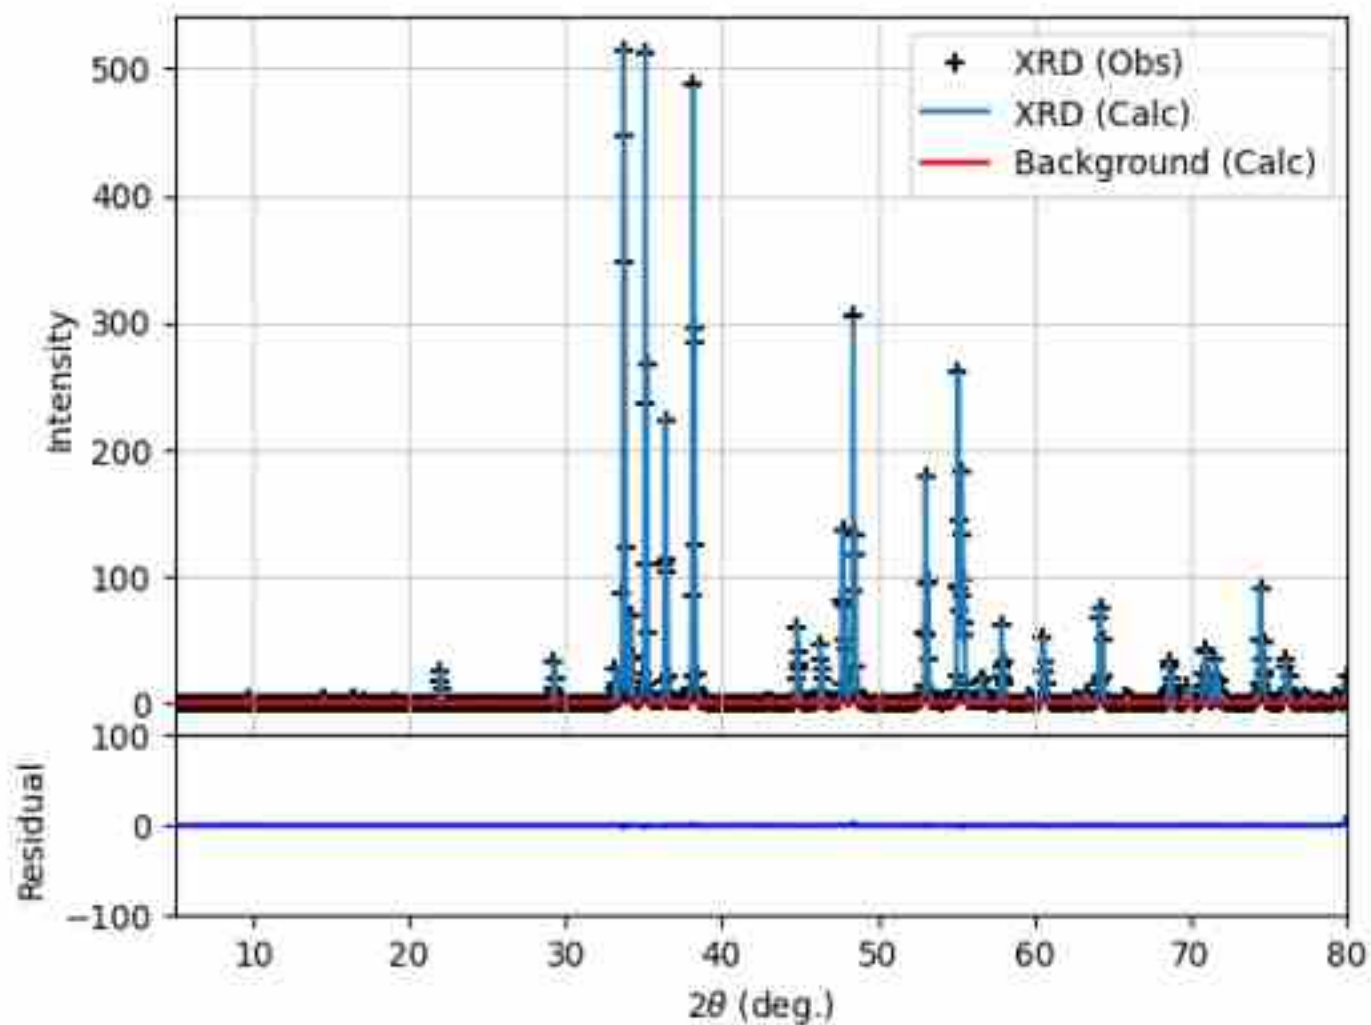

| RMSE before RR | Rwp     | RMSE after RR |
|----------------|---------|---------------|
| 0.313          | 2.63958 | 0.02697       |

# Er5Re2C7

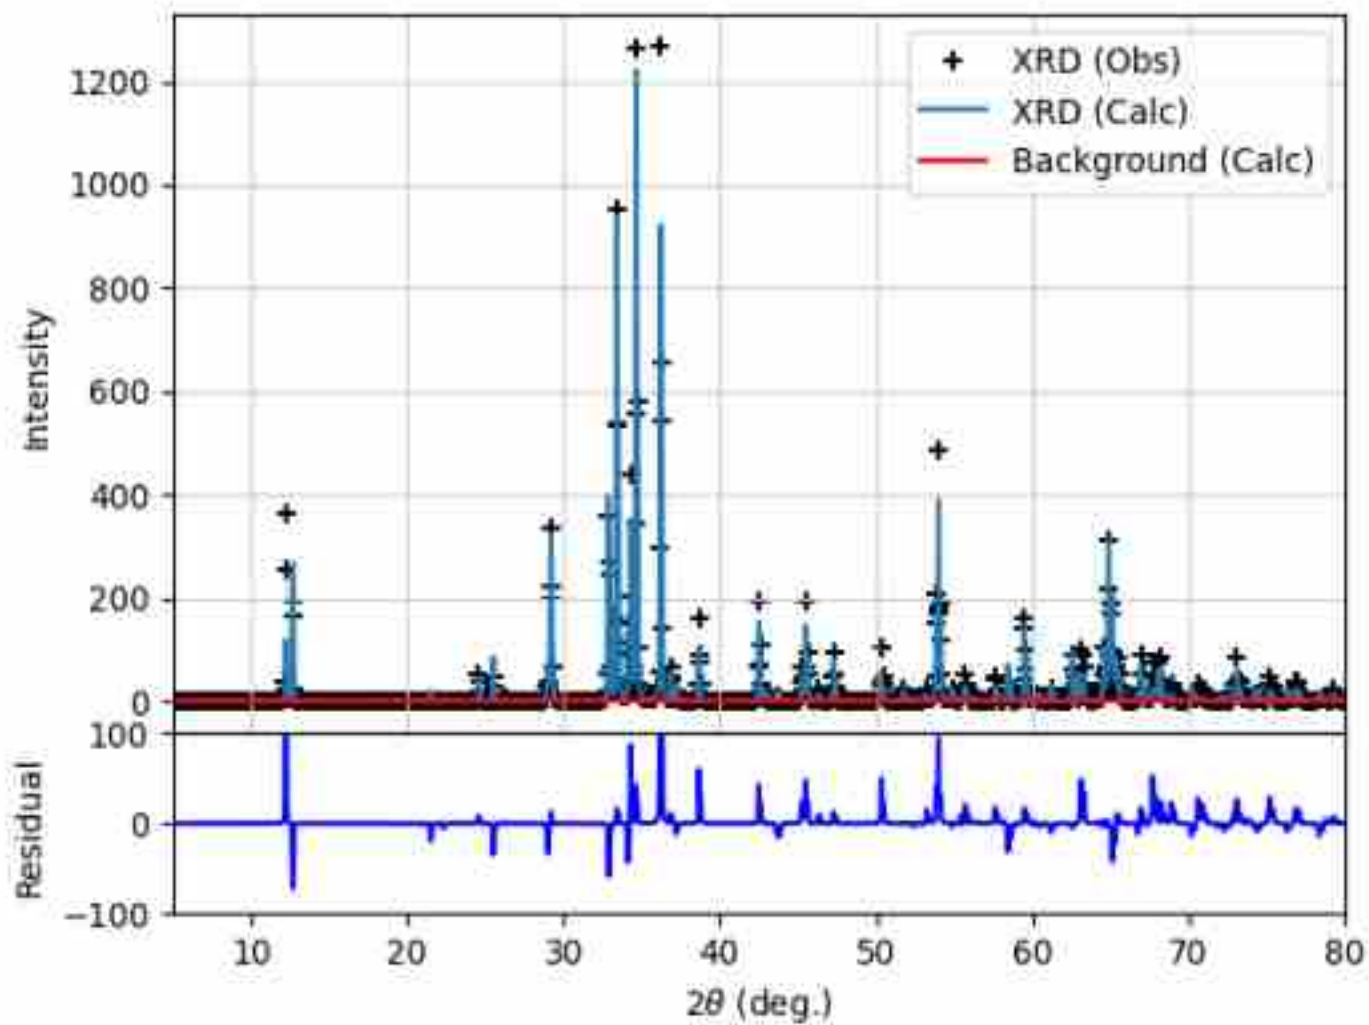

| RMSE before RR | Rwp     | RMSE after RR |
|----------------|---------|---------------|
| 0.314          | 33.5109 | None          |

# K<sub>2</sub>H<sub>6</sub>Pb<sub>10</sub>O<sub>6</sub>

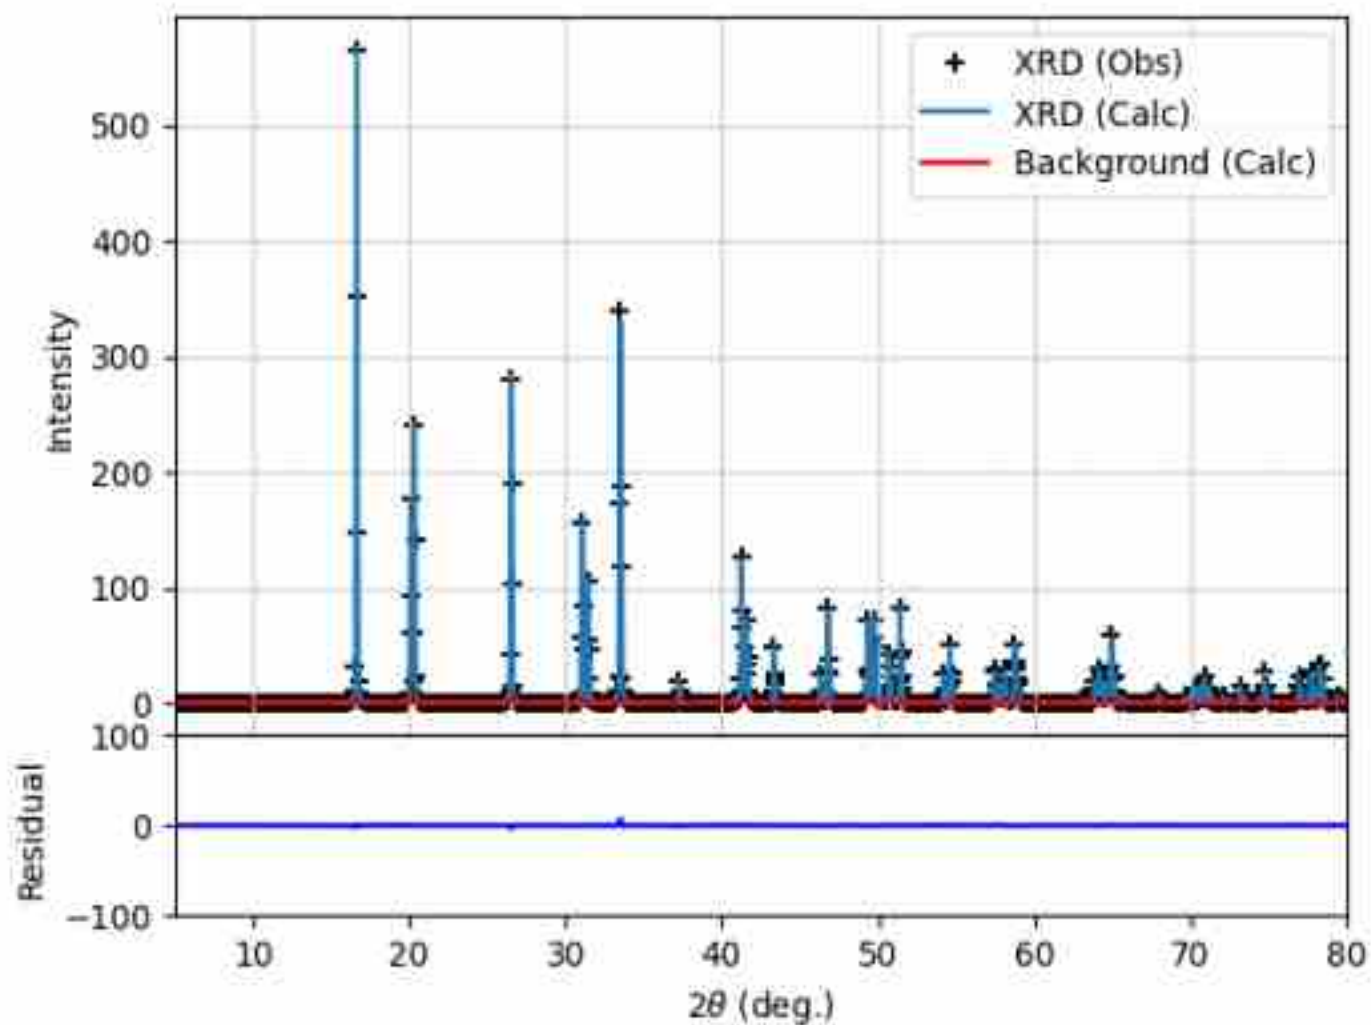

| RMSE before RR | Rwp     | RMSE after RR |
|----------------|---------|---------------|
| 0.314          | 1.25662 | 0.43251       |

# V4O3F9

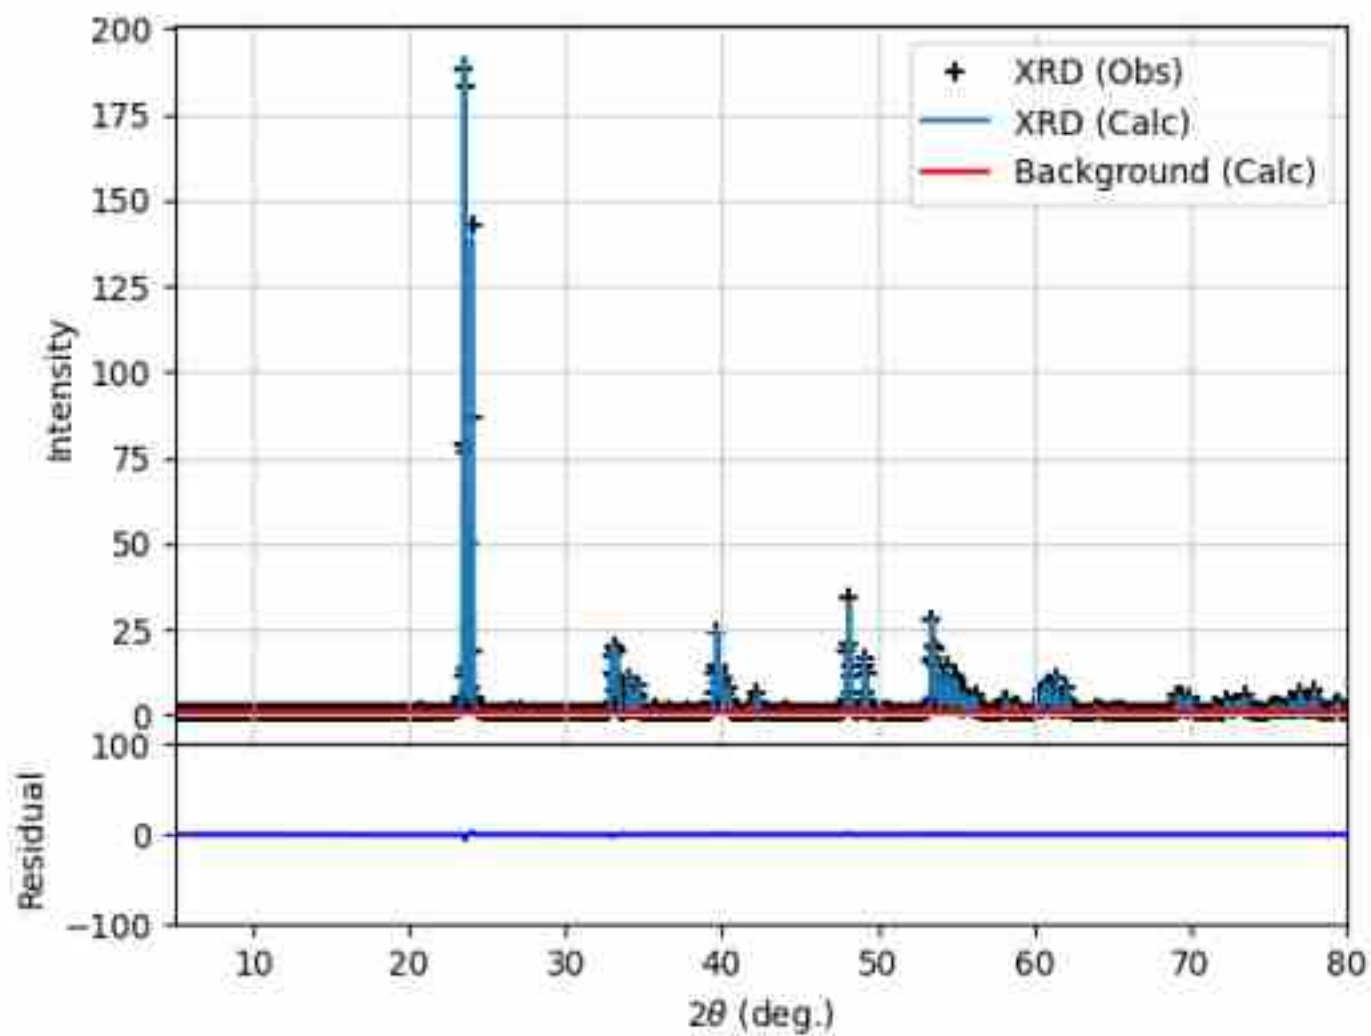

| RMSE before RR | Rwp     | RMSE after RR |
|----------------|---------|---------------|
| 0.314          | 2.68177 | 0.33176       |

# Cs<sub>2</sub>Ti<sub>4</sub>Cl<sub>14</sub>

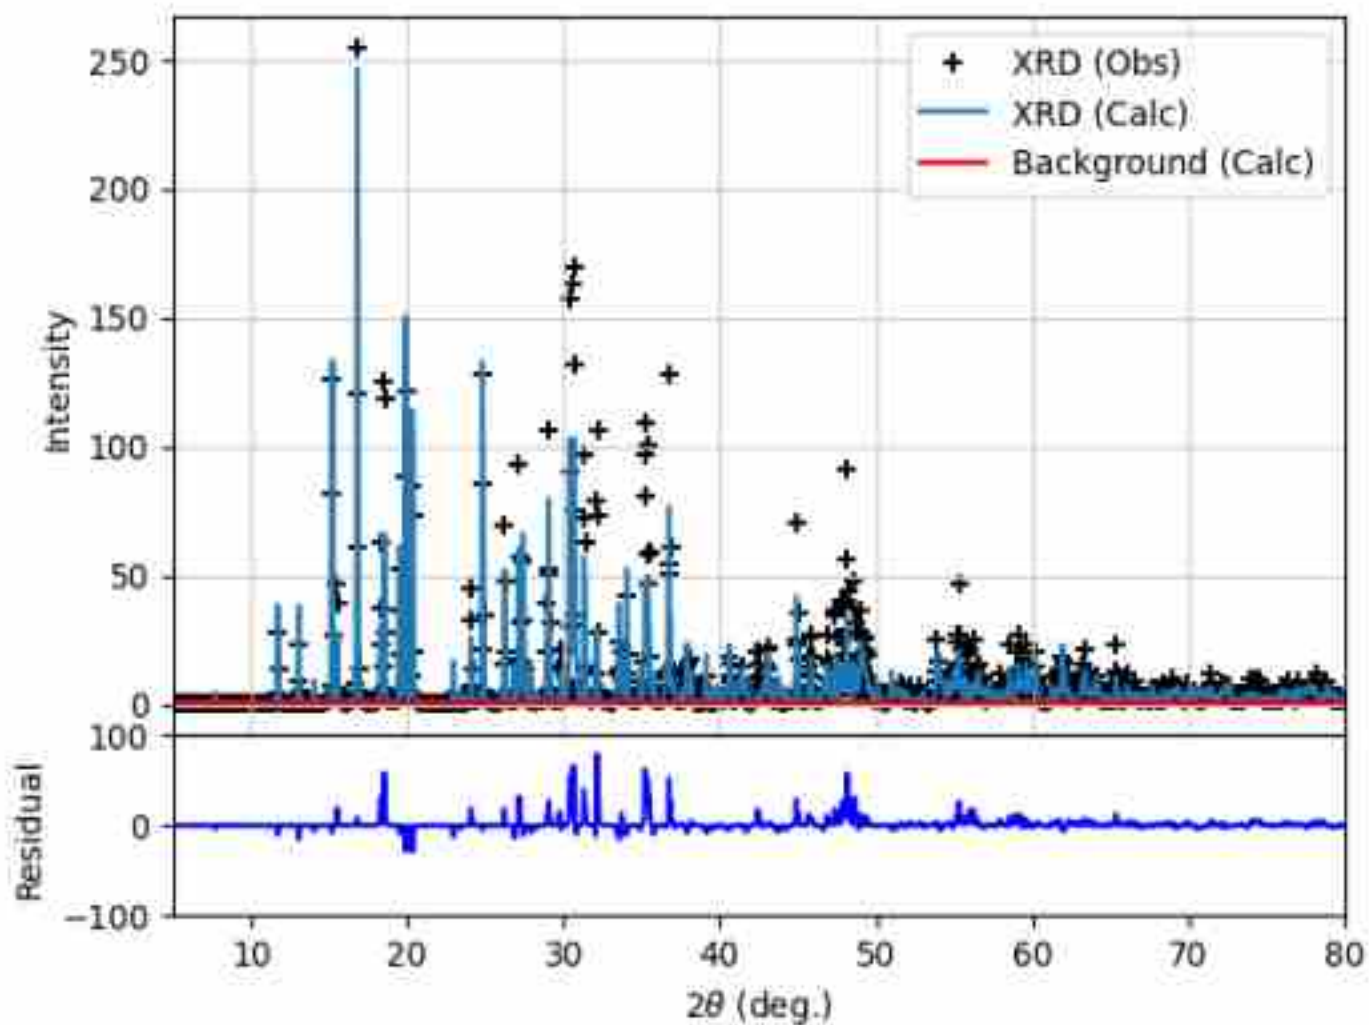

| RMSE before RR | Rwp      | RMSE after RR |
|----------------|----------|---------------|
| 0.315          | 43.93116 | 0.49247       |

# Li<sub>2</sub>Mn<sub>2</sub>P<sub>2</sub>O<sub>8</sub>

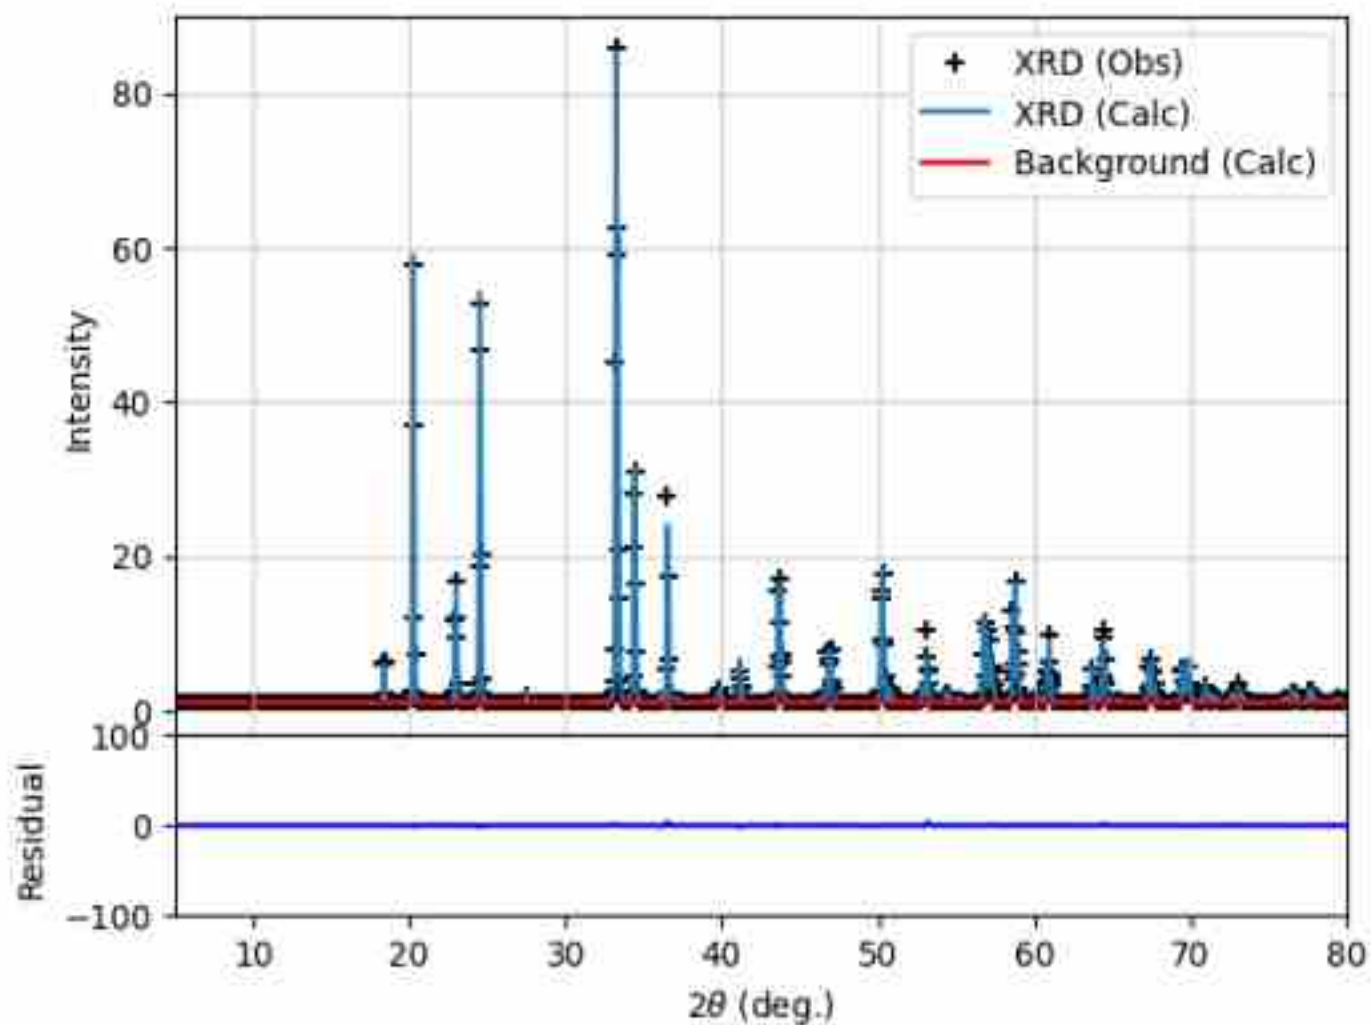

| RMSE before RR | Rwp     | RMSE after RR |
|----------------|---------|---------------|
| 0.315          | 6.68617 | 0.29992       |

# Rb4C4O8

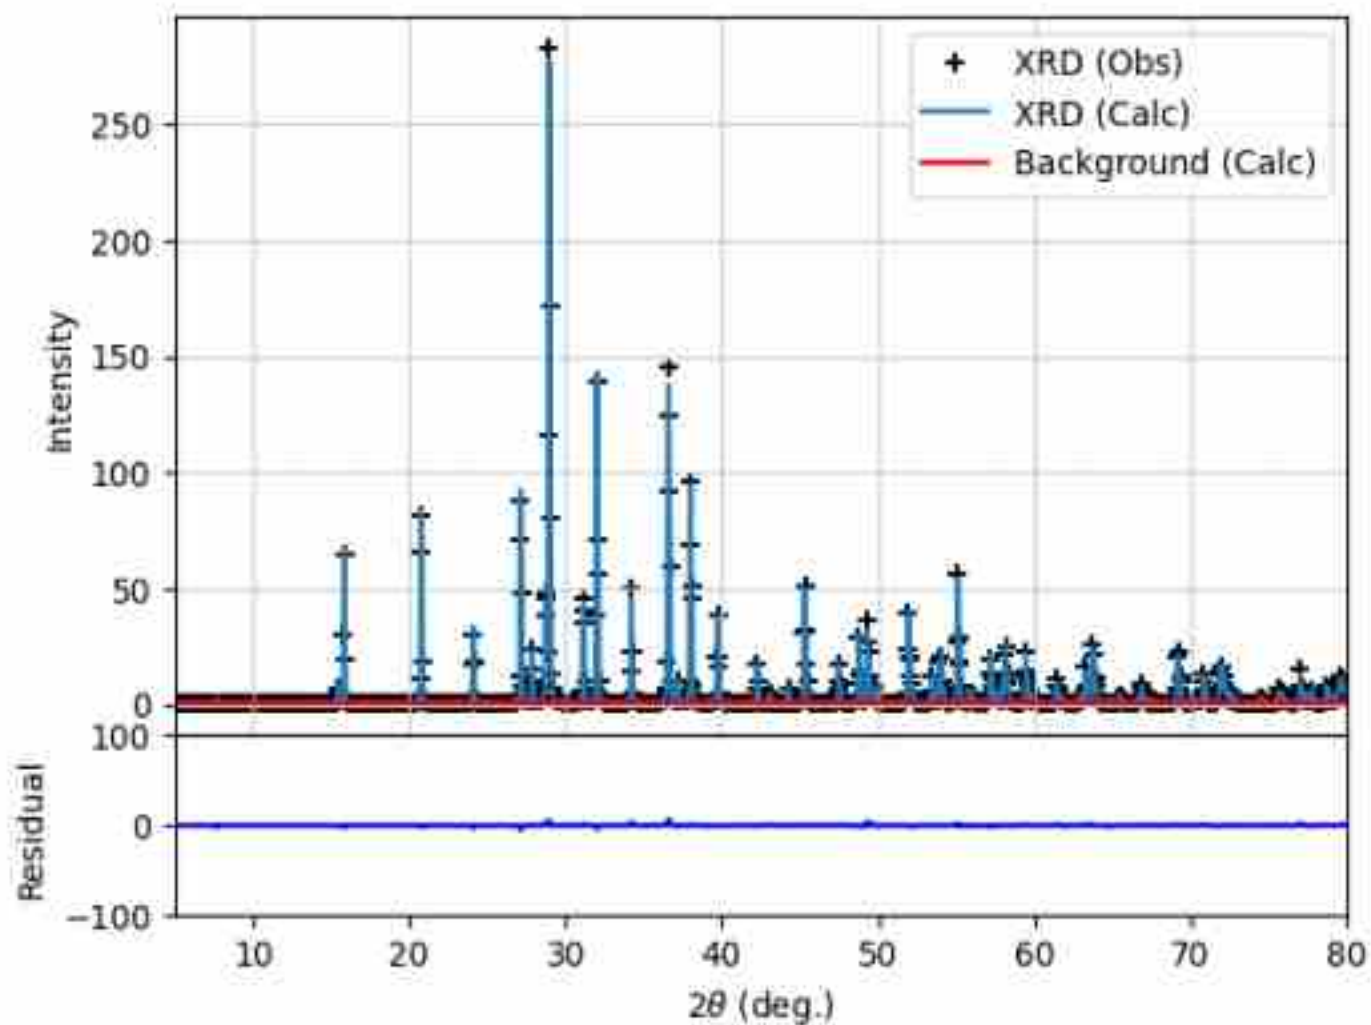

| RMSE before RR | Rwp     | RMSE after RR |
|----------------|---------|---------------|
| 0.315          | 7.27268 | None          |

# Ti6N4O6

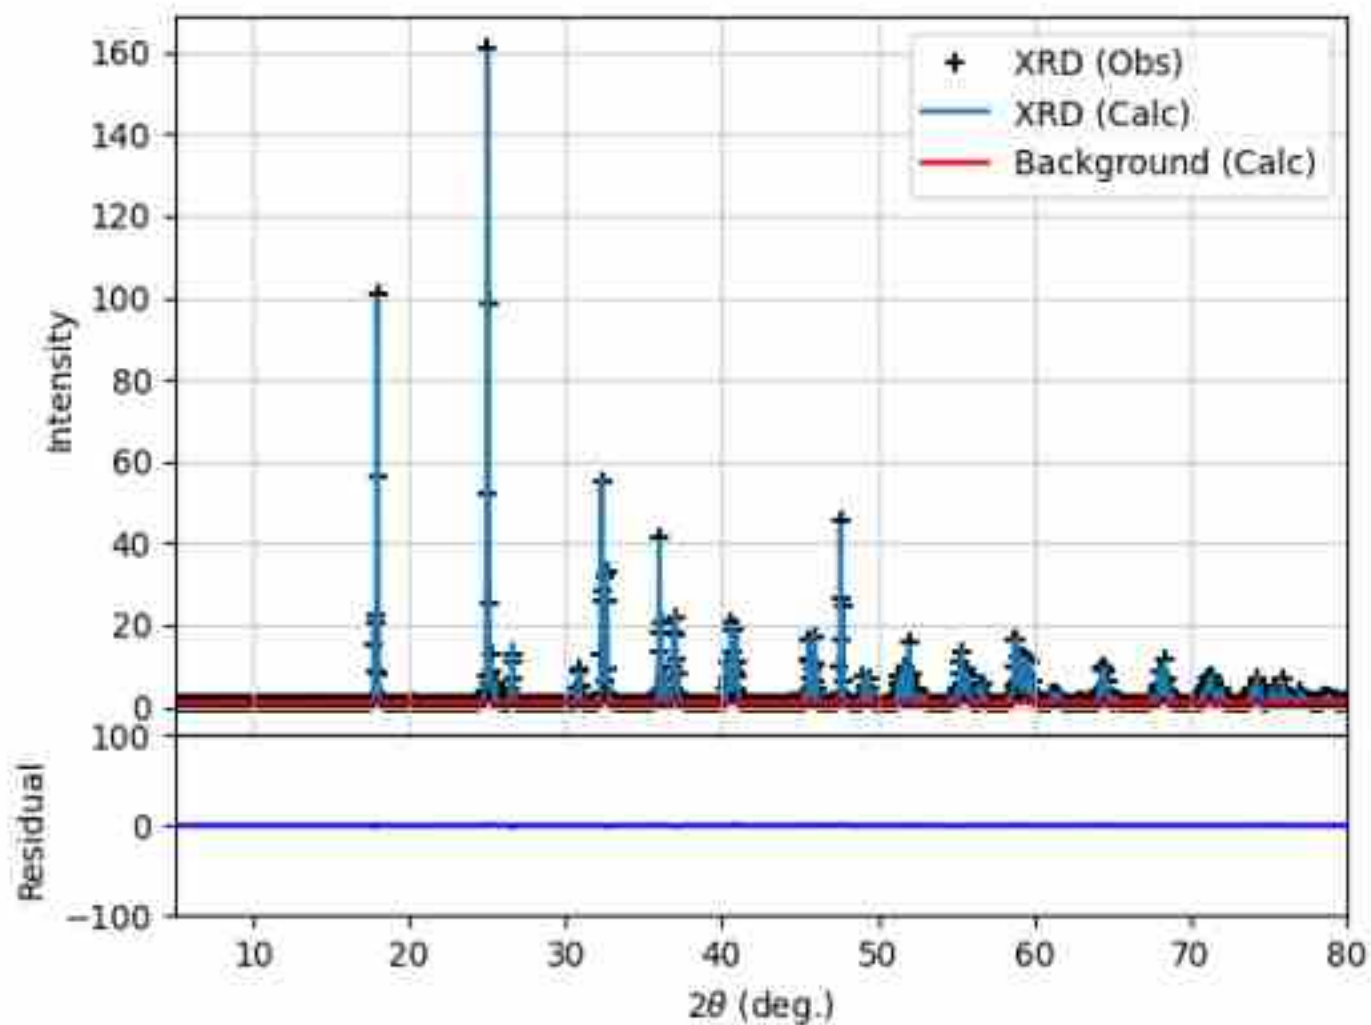

| RMSE before RR | Rwp     | RMSE after RR |
|----------------|---------|---------------|
| 0.315          | 3.08053 | 0.30653       |



# Cs<sub>6</sub>Zn<sub>2</sub>H<sub>10</sub>

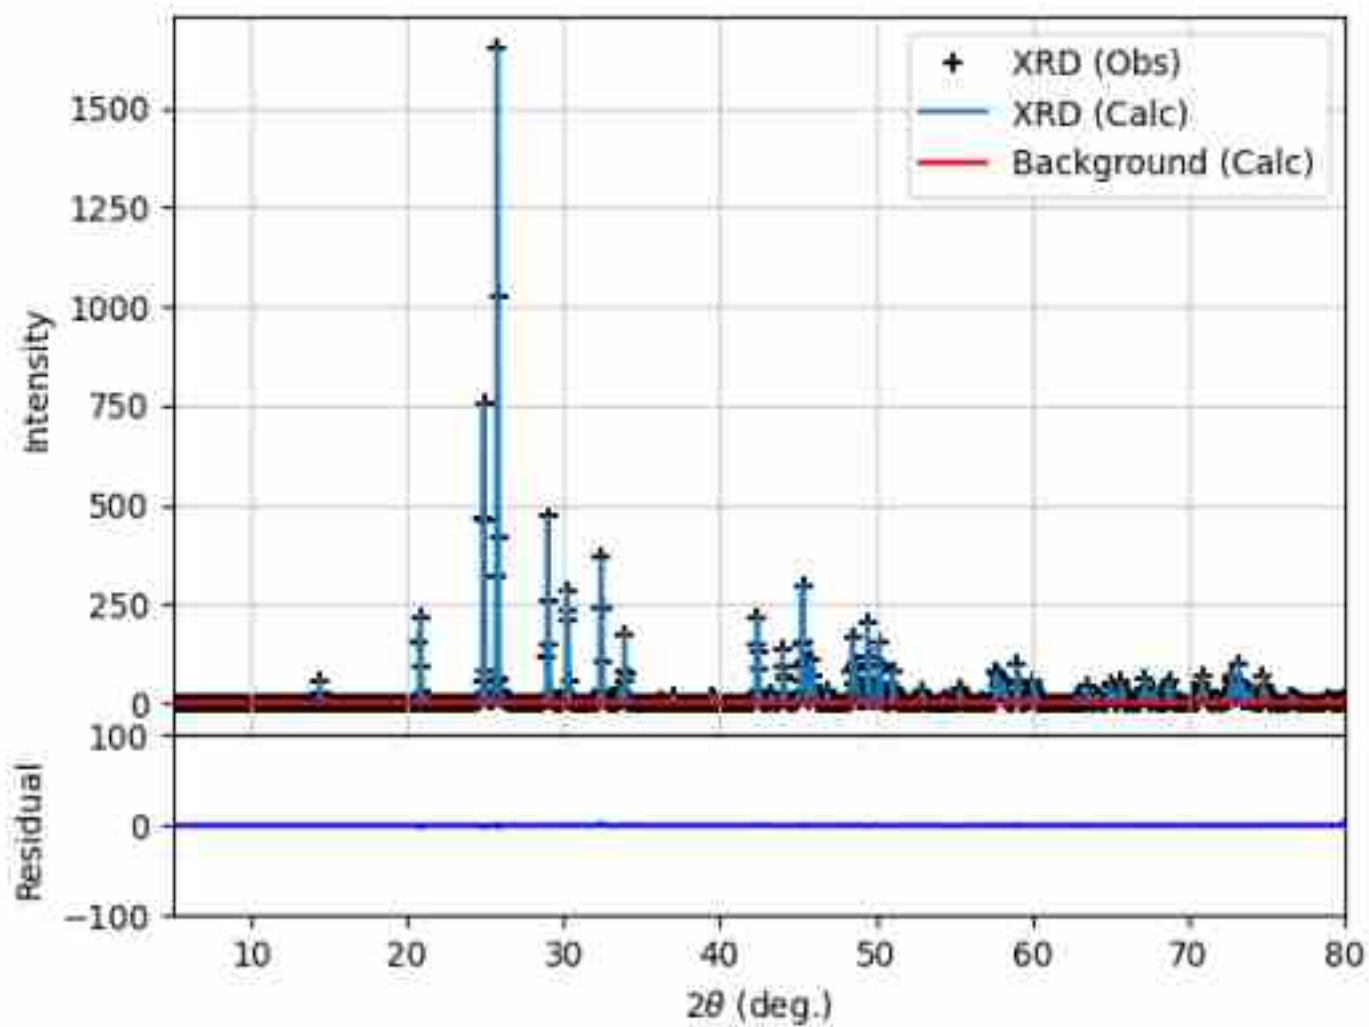

| RMSE before RR | Rwp    | RMSE after RR |
|----------------|--------|---------------|
| 0.316          | 1.1788 | None          |

# Nb<sub>4</sub>Ag<sub>1</sub>S<sub>8</sub>

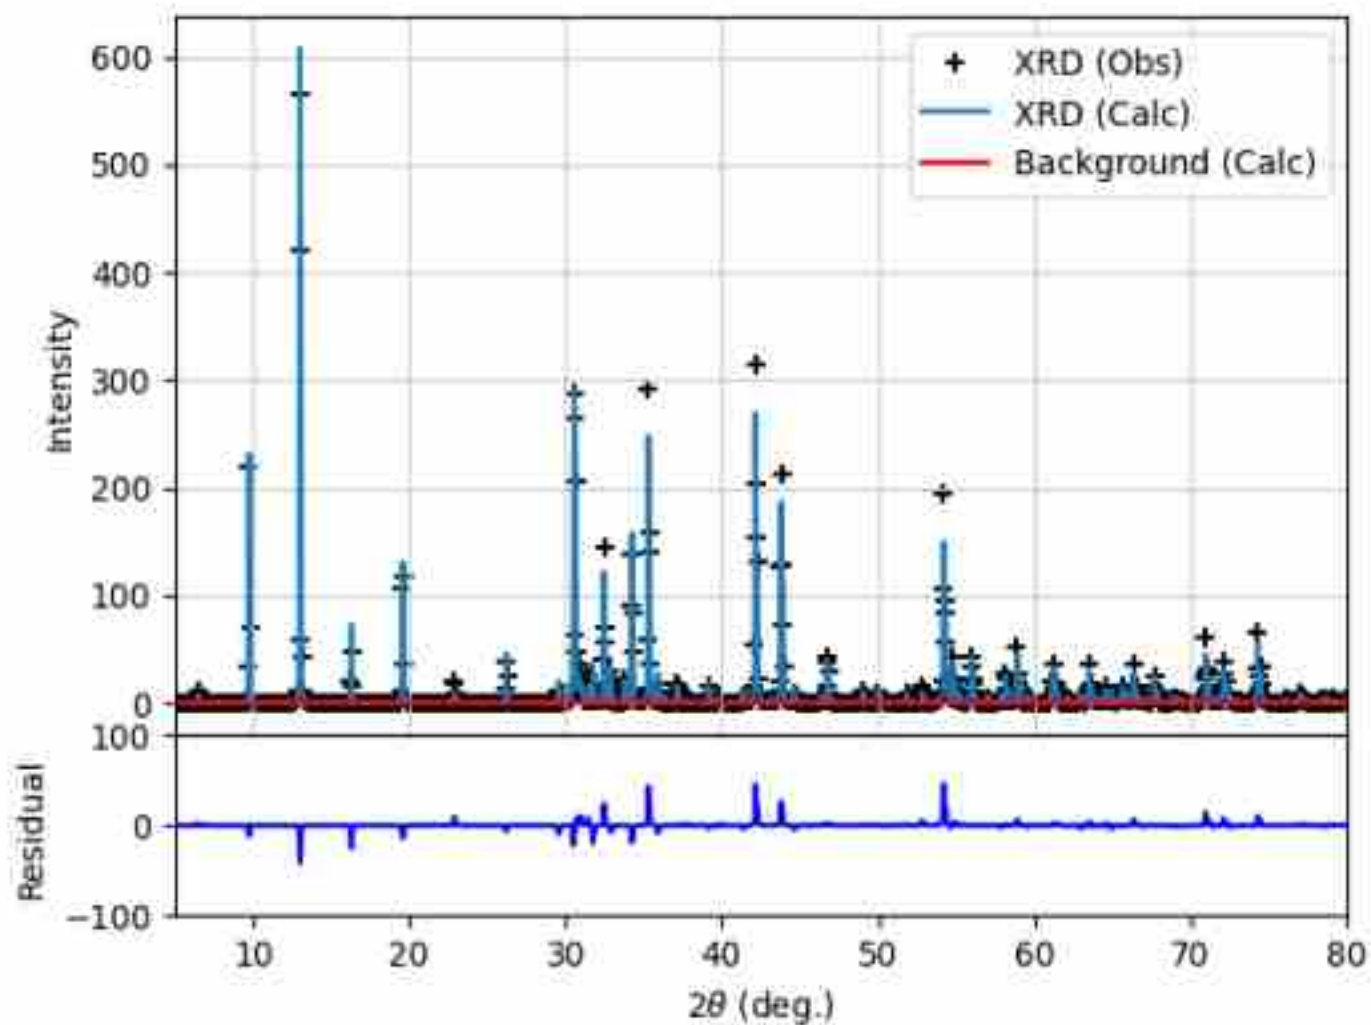

| RMSE before RR | Rwp      | RMSE after RR |
|----------------|----------|---------------|
| 0.317          | 16.77769 | 0.22139       |

# Sb4S4I4

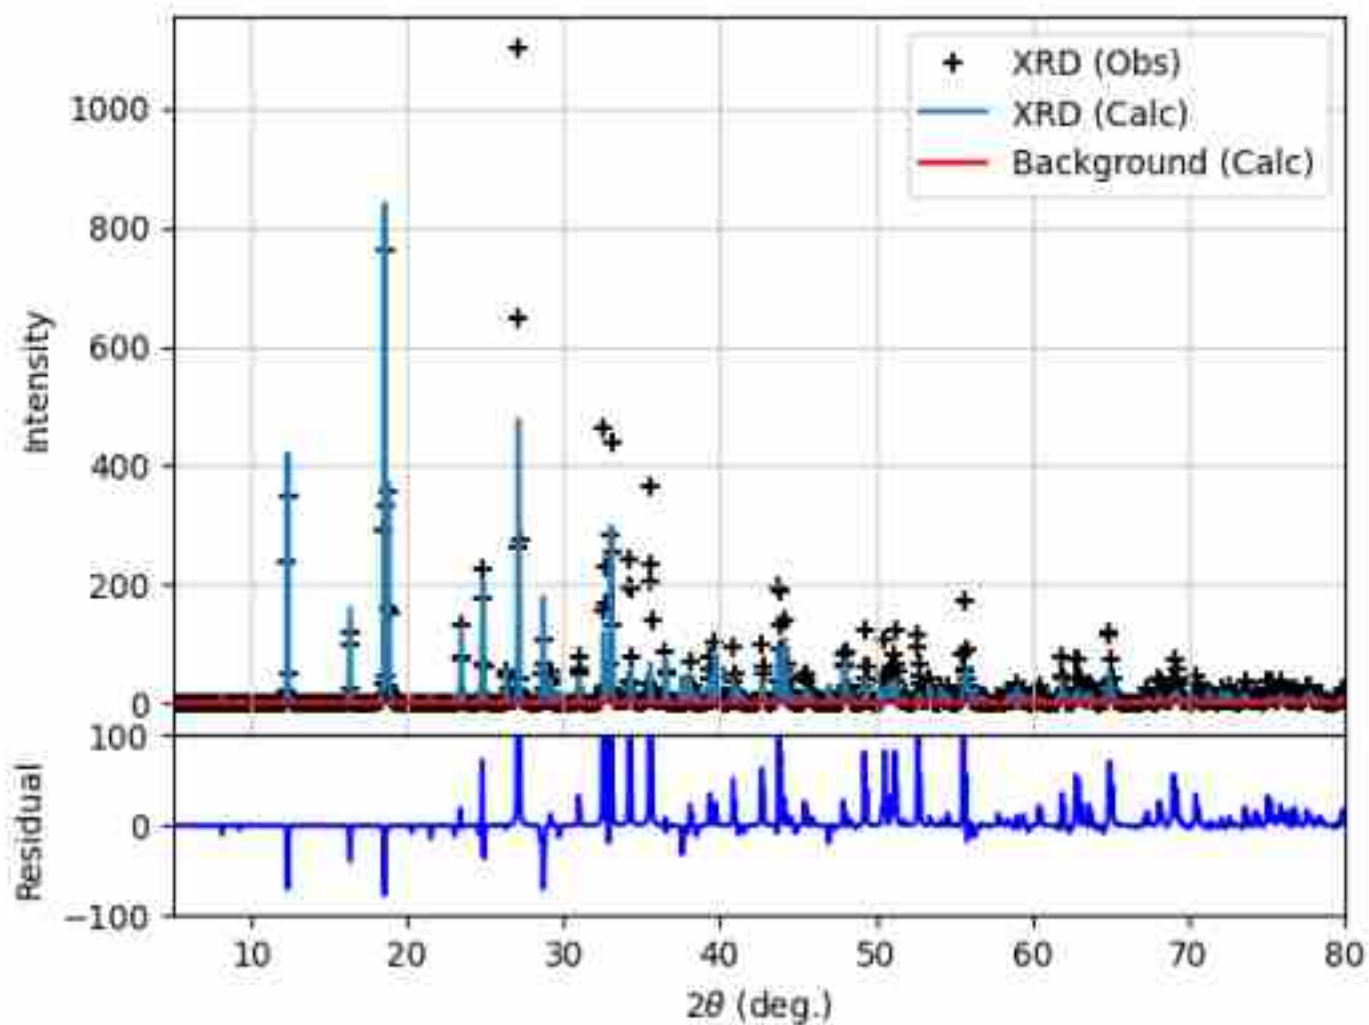

| RMSE before RR | Rwp      | RMSE after RR |
|----------------|----------|---------------|
| 0.317          | 56.21906 | 0.43266       |

# Tb<sub>4</sub>Sb<sub>6</sub>Rh<sub>7</sub>

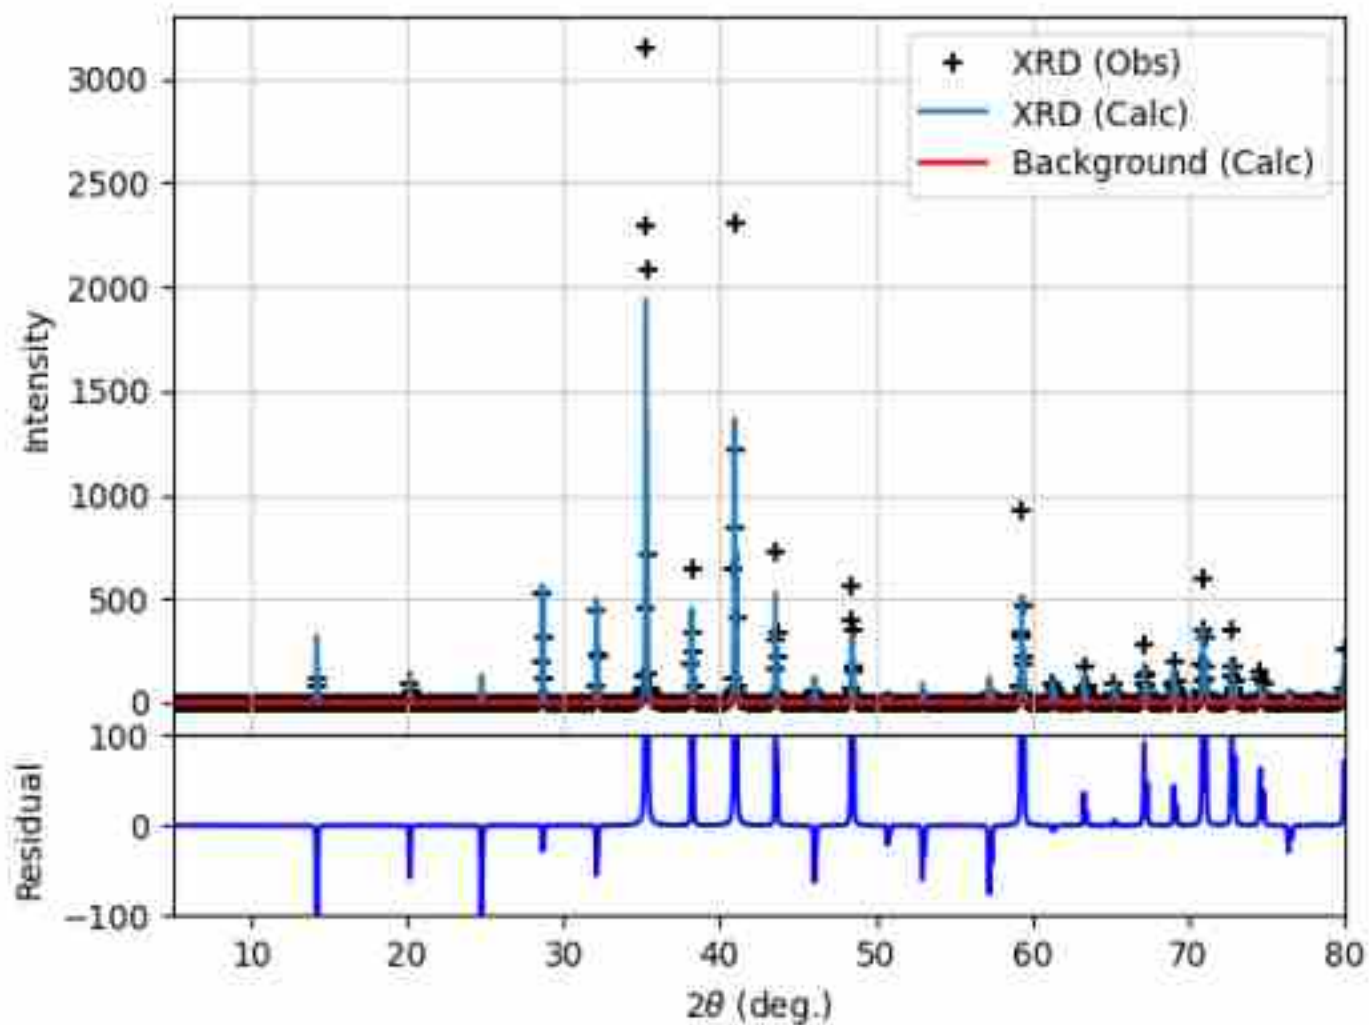

| RMSE before RR | Rwp      | RMSE after RR |
|----------------|----------|---------------|
| 0.317          | 45.18752 | 0.32343       |

Ti4Cd2O10

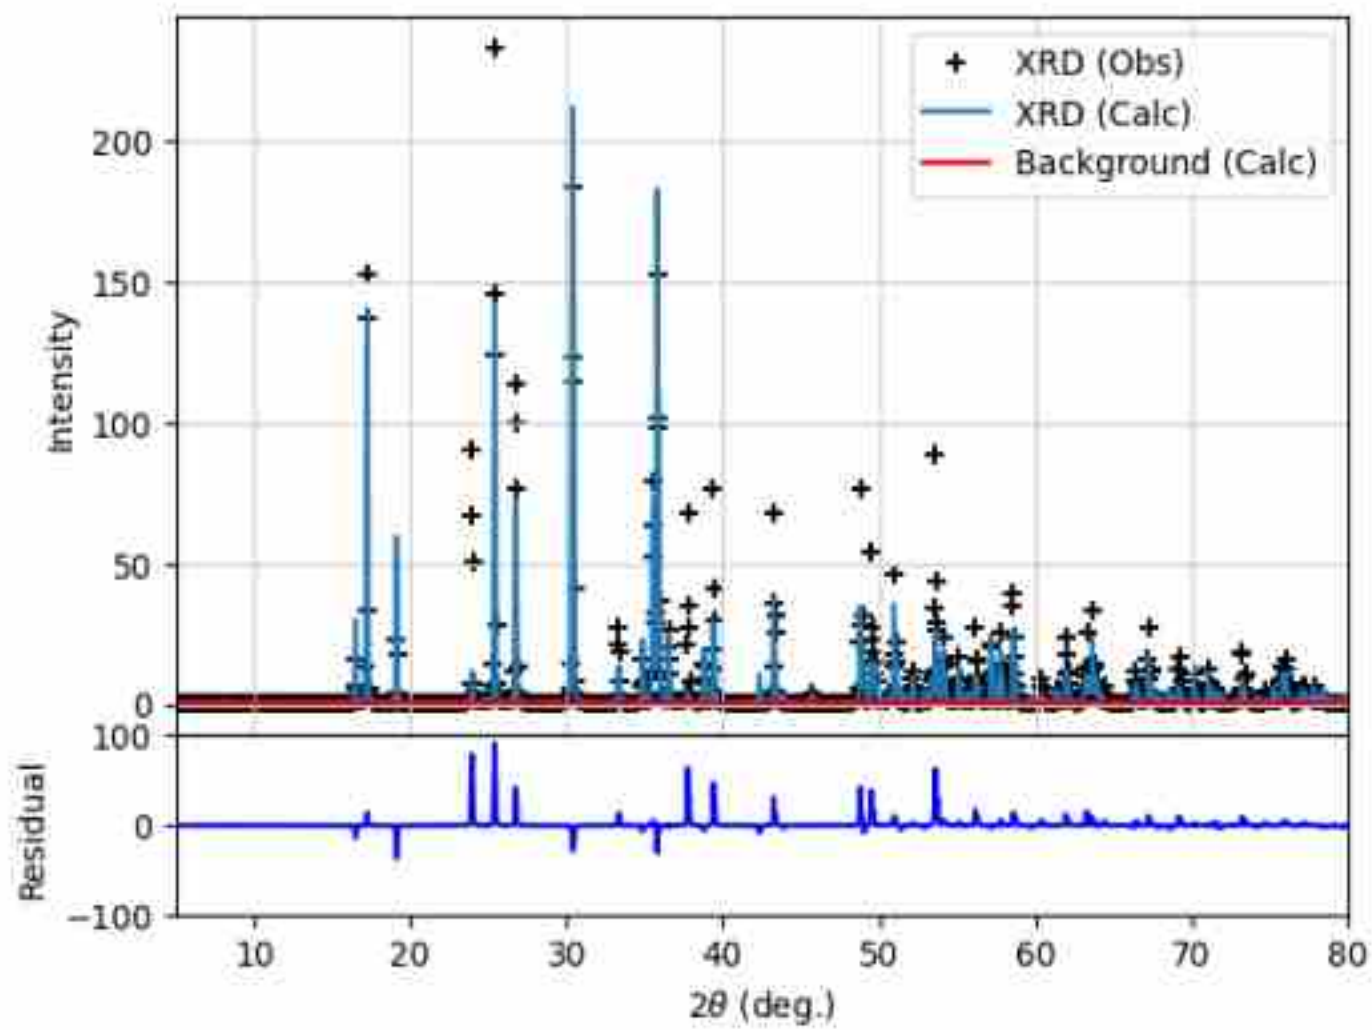

| RMSE before RR | Rwp      | RMSE after RR |
|----------------|----------|---------------|
| 0.317          | 43.31185 | None          |

# V4O8F4

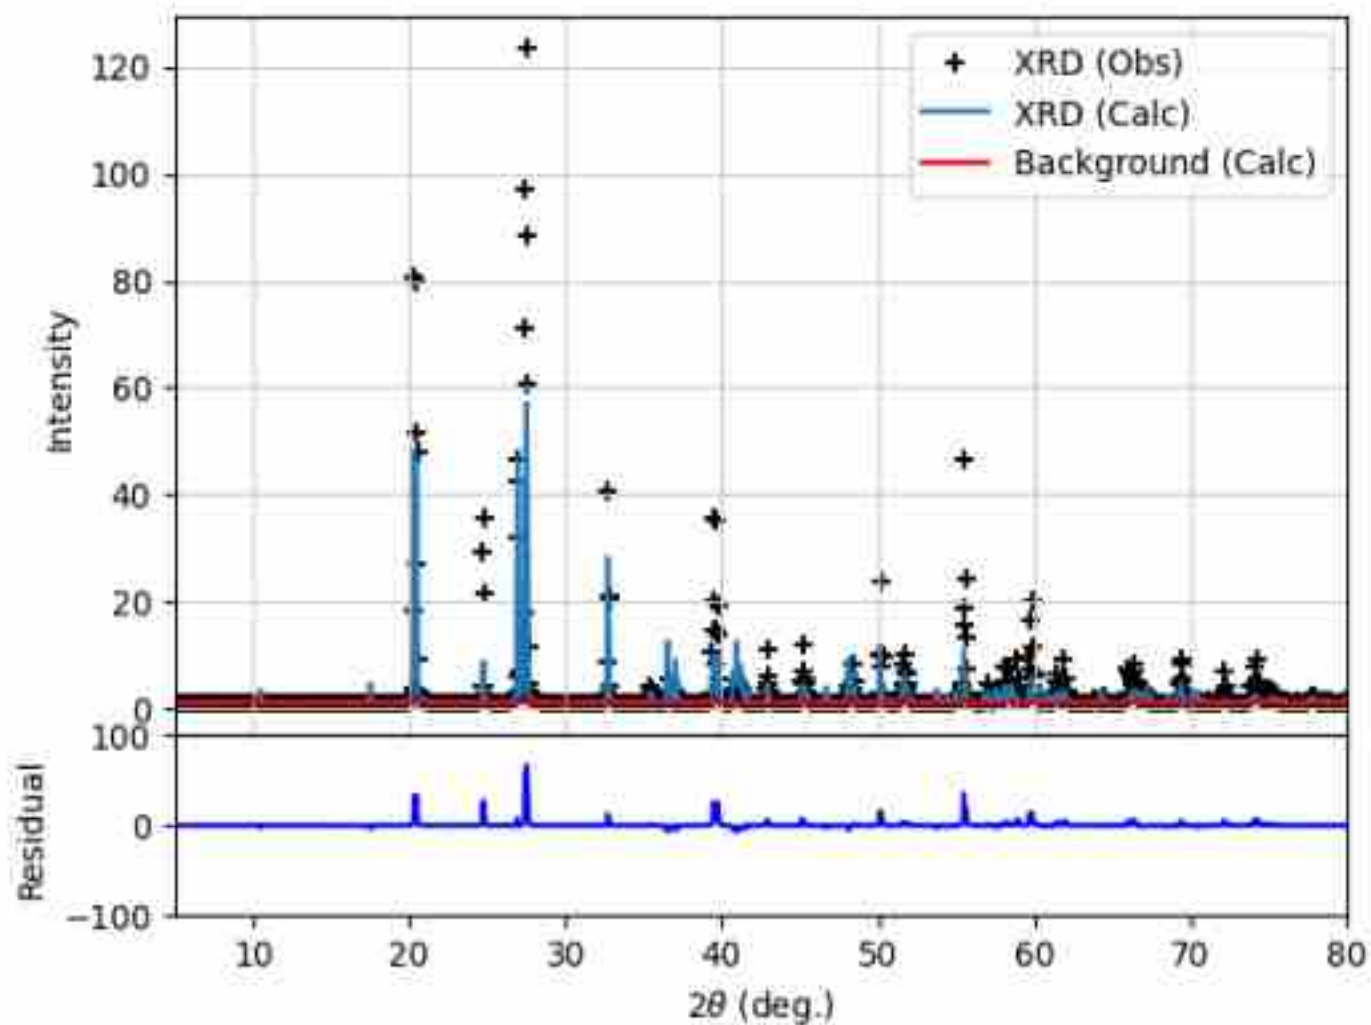

| RMSE before RR | Rwp      | RMSE after RR |
|----------------|----------|---------------|
| 0.317          | 46.93437 | None          |

# B6O9

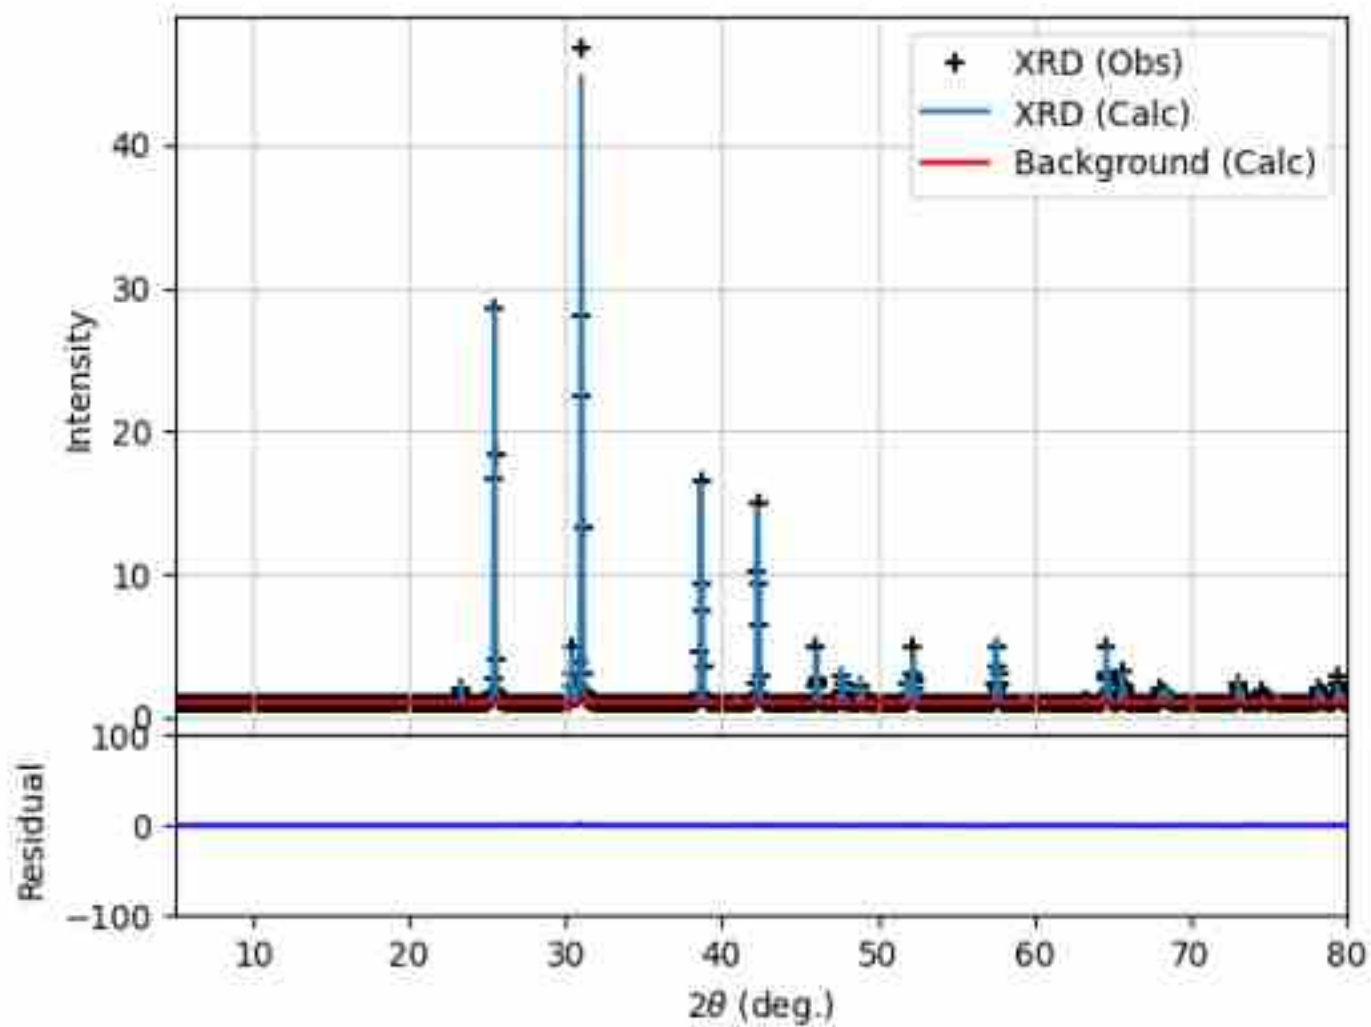

| RMSE before RR | Rwp     | RMSE after RR |
|----------------|---------|---------------|
| 0.319          | 4.56853 | 0.35258       |

# Bi<sub>4</sub>B<sub>2</sub>O<sub>10</sub>

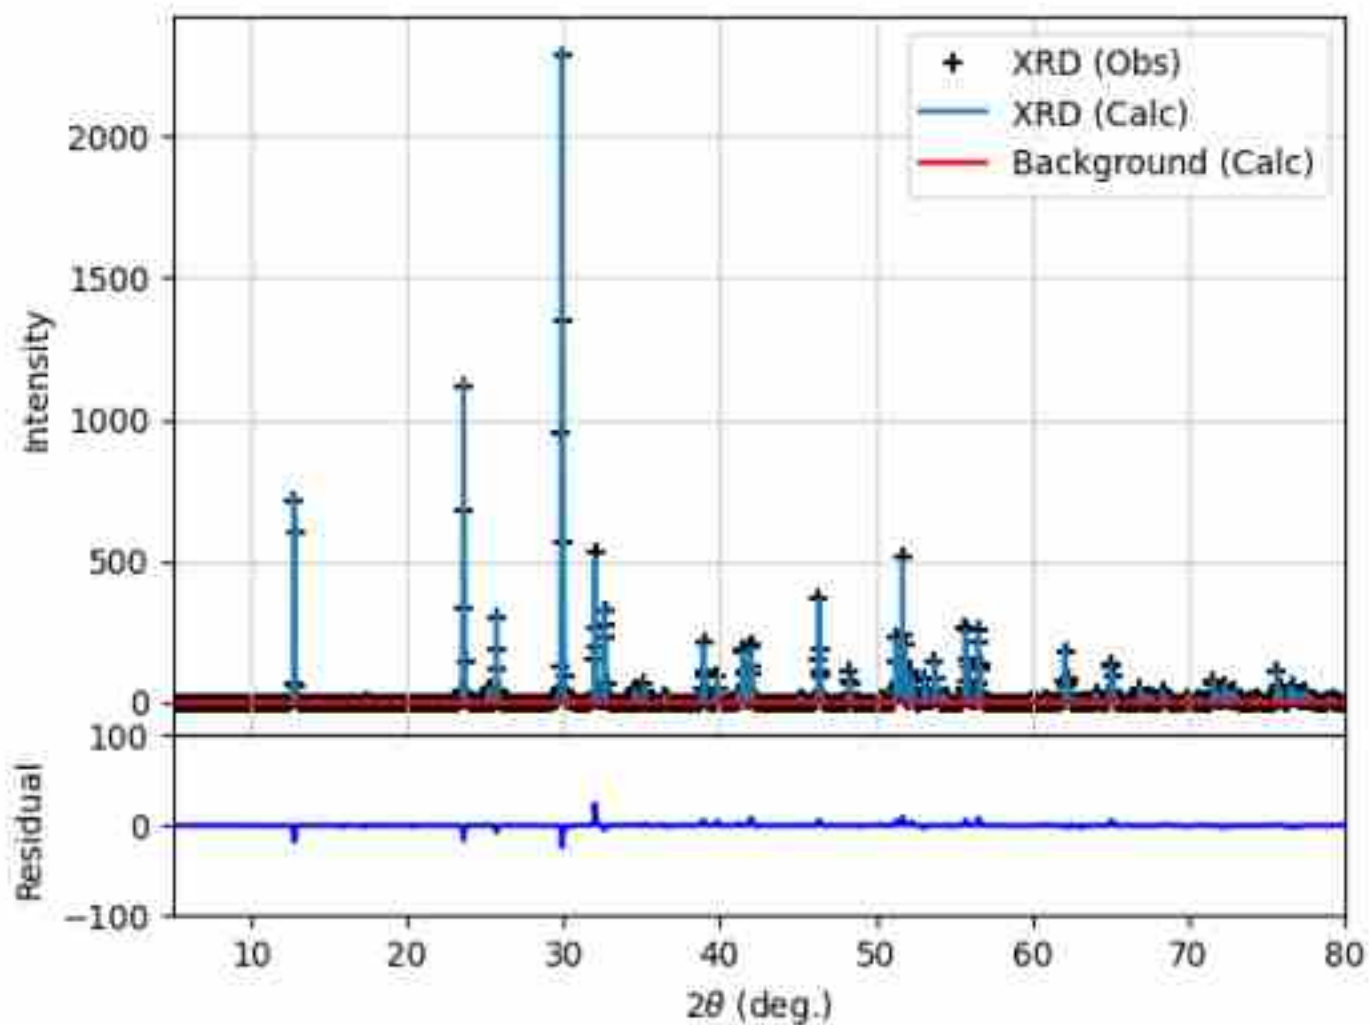

| RMSE before RR | Rwp    | RMSE after RR |
|----------------|--------|---------------|
| 0.319          | 3.4269 | None          |



# Ca<sub>5</sub>Ge<sub>6</sub>Pd<sub>6</sub>

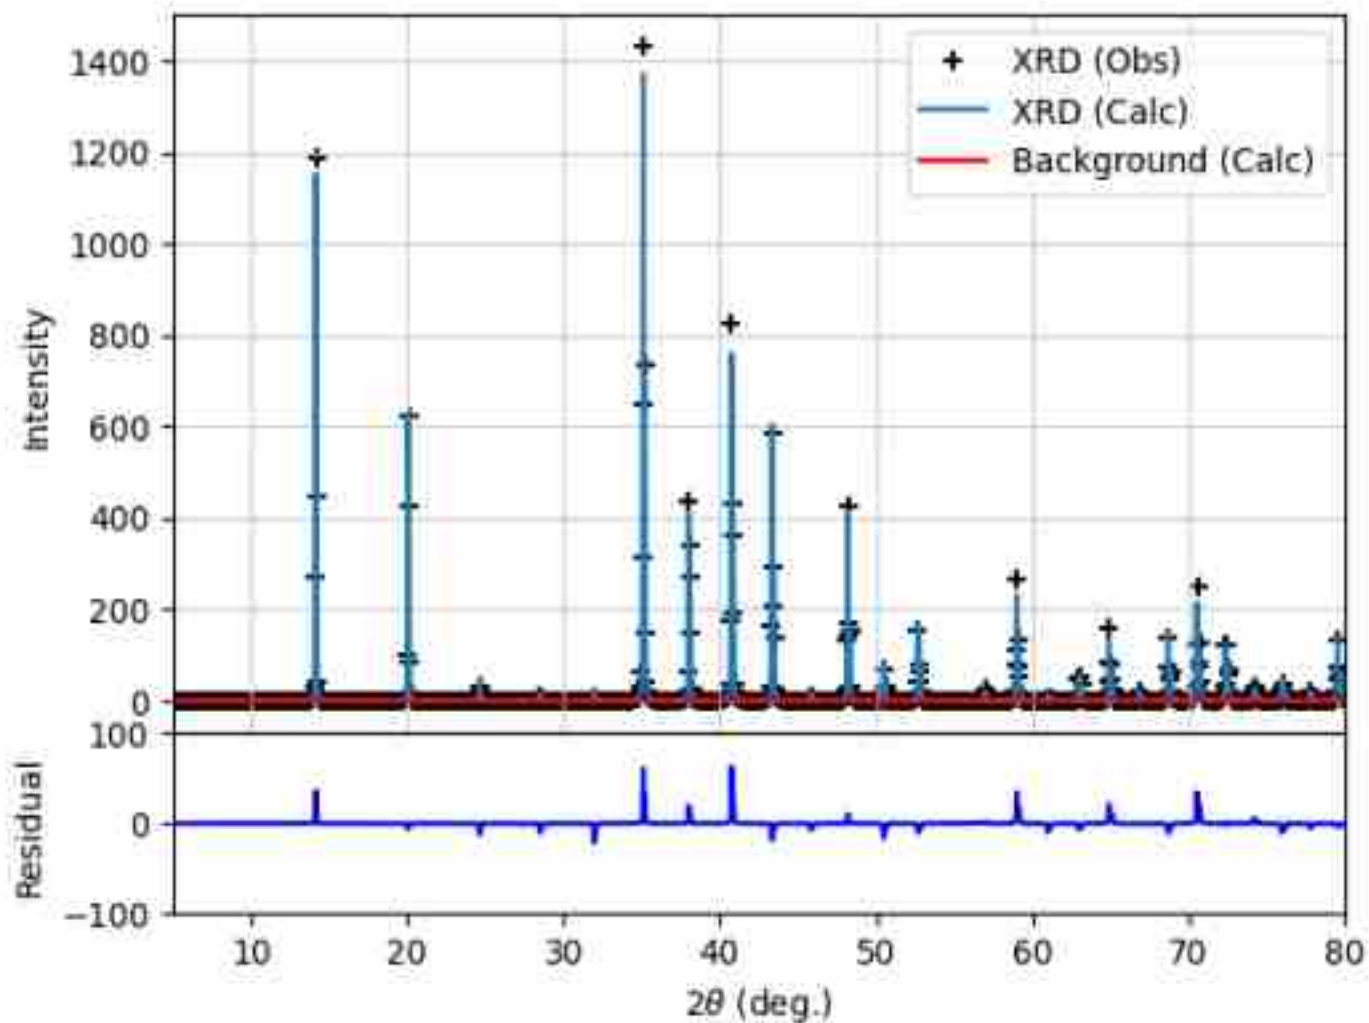

| RMSE before RR | Rwp     | RMSE after RR |
|----------------|---------|---------------|
| 0.319          | 13.3966 | 0.32782       |

# Ba<sub>2</sub>Al<sub>2</sub>Ga<sub>2</sub>O<sub>8</sub>

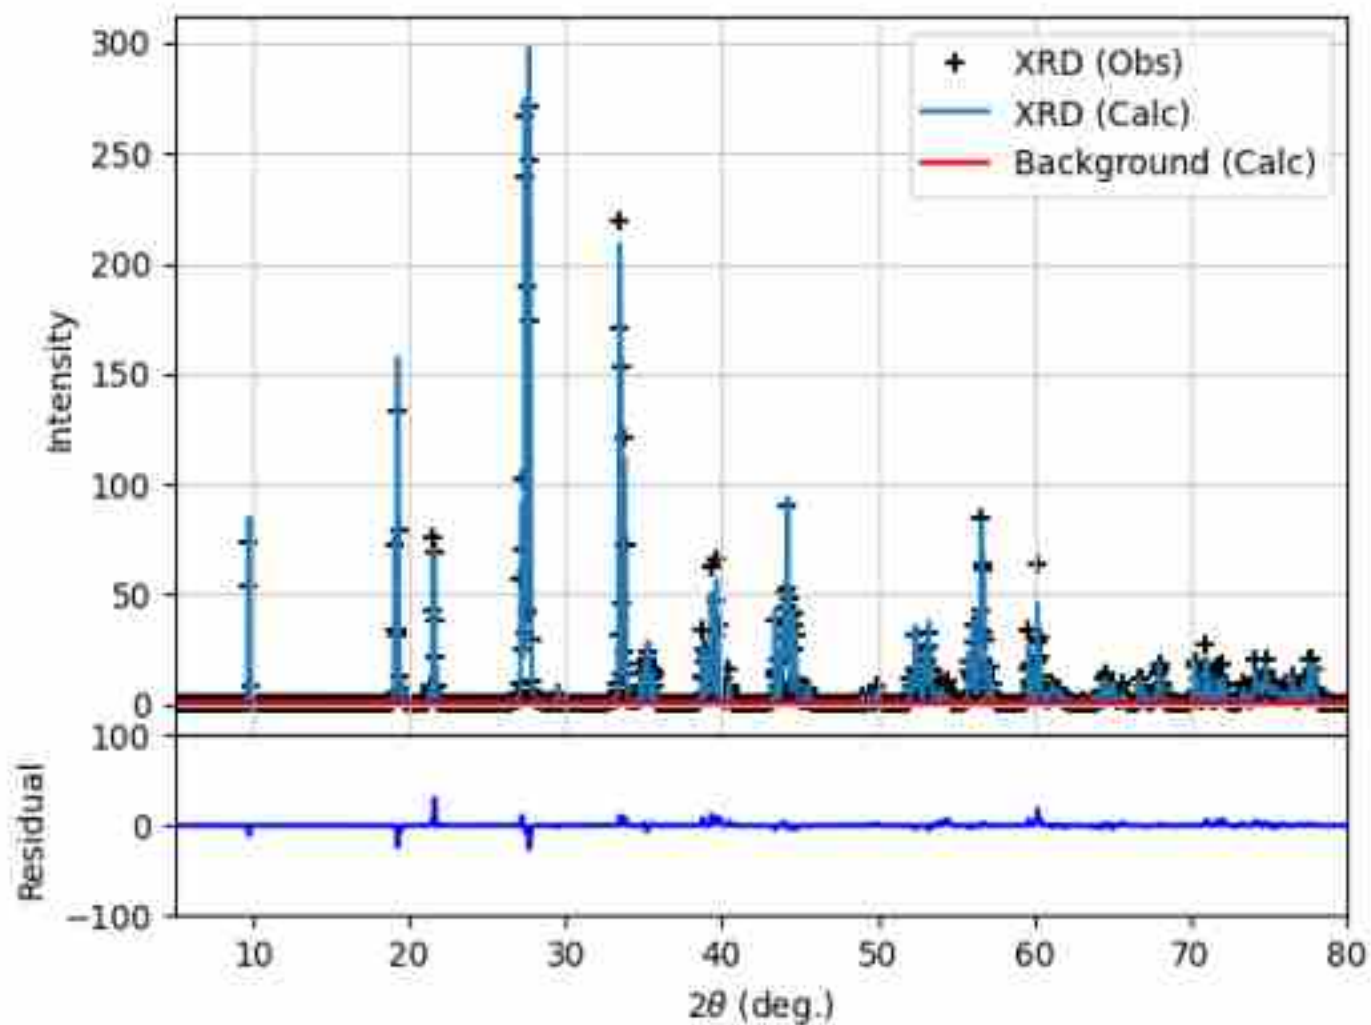

| RMSE before RR | Rwp      | RMSE after RR |
|----------------|----------|---------------|
| 0.321          | 15.33724 | 0.33139       |

# Ta1Se2

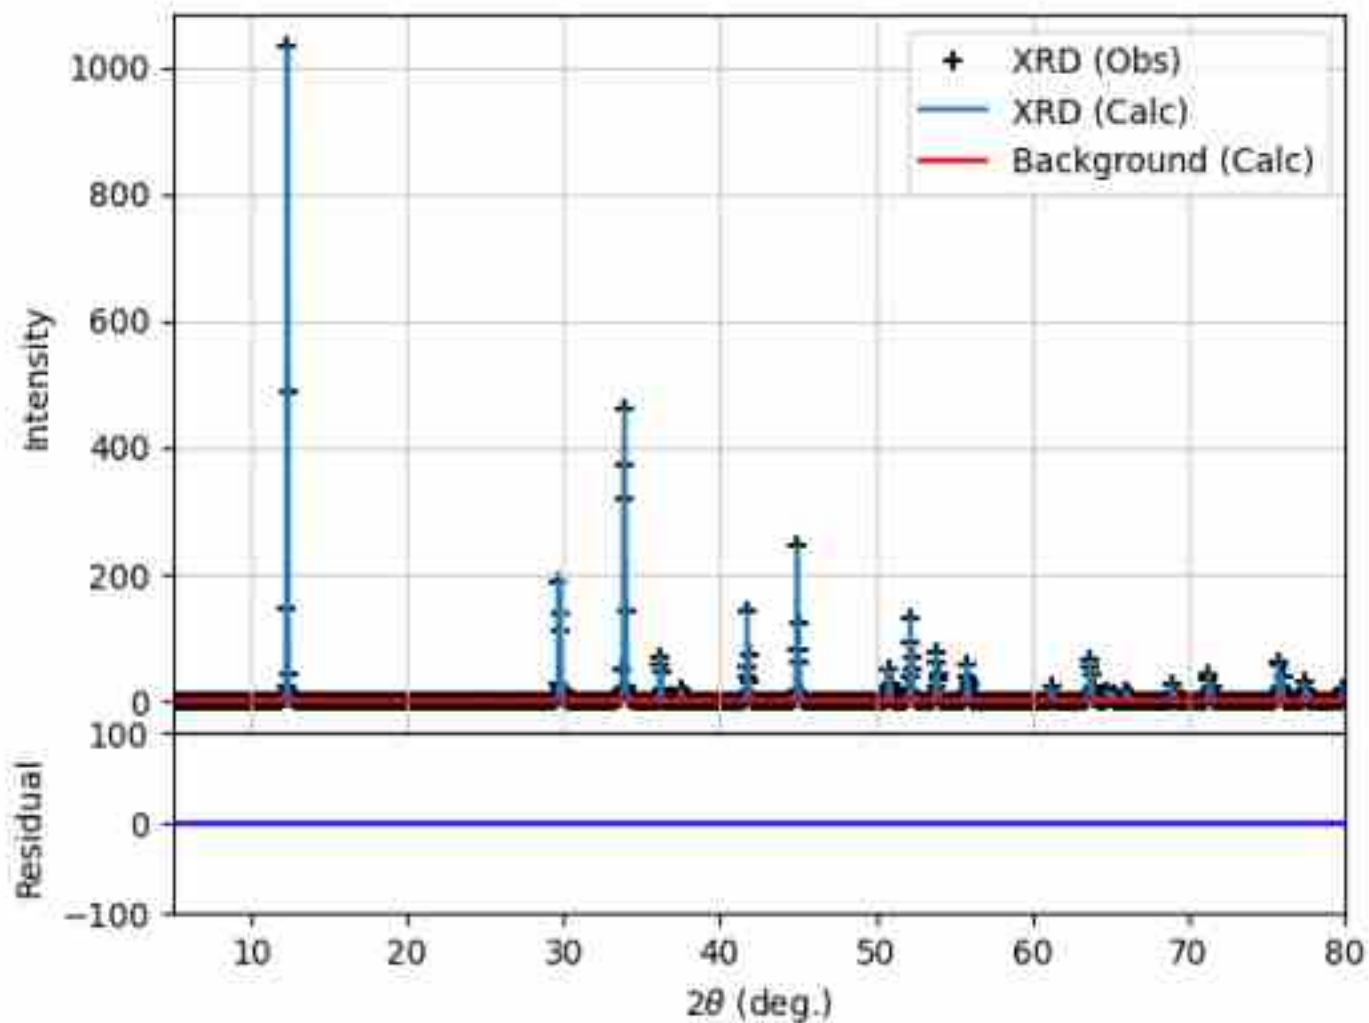

| RMSE before RR | Rwp     | RMSE after RR |
|----------------|---------|---------------|
| 0.321          | 0.00321 | 0.00021       |

# V6O6F6

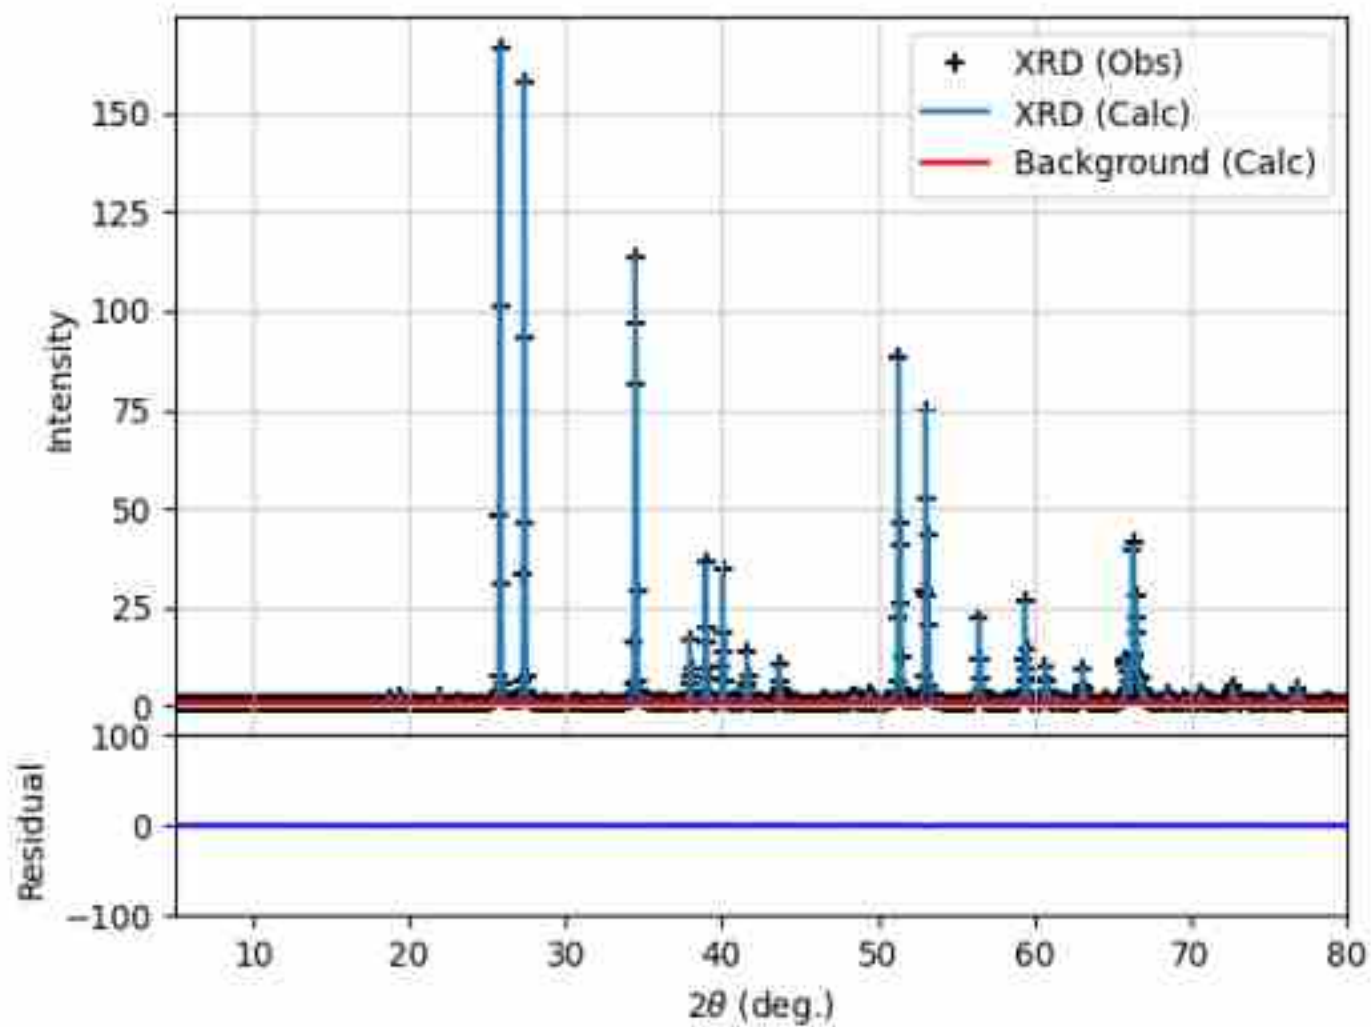

| RMSE before RR | Rwp     | RMSE after RR |
|----------------|---------|---------------|
| 0.322          | 2.40324 | 0.05985       |

# Ba<sub>2</sub>In<sub>2</sub>O<sub>5</sub>

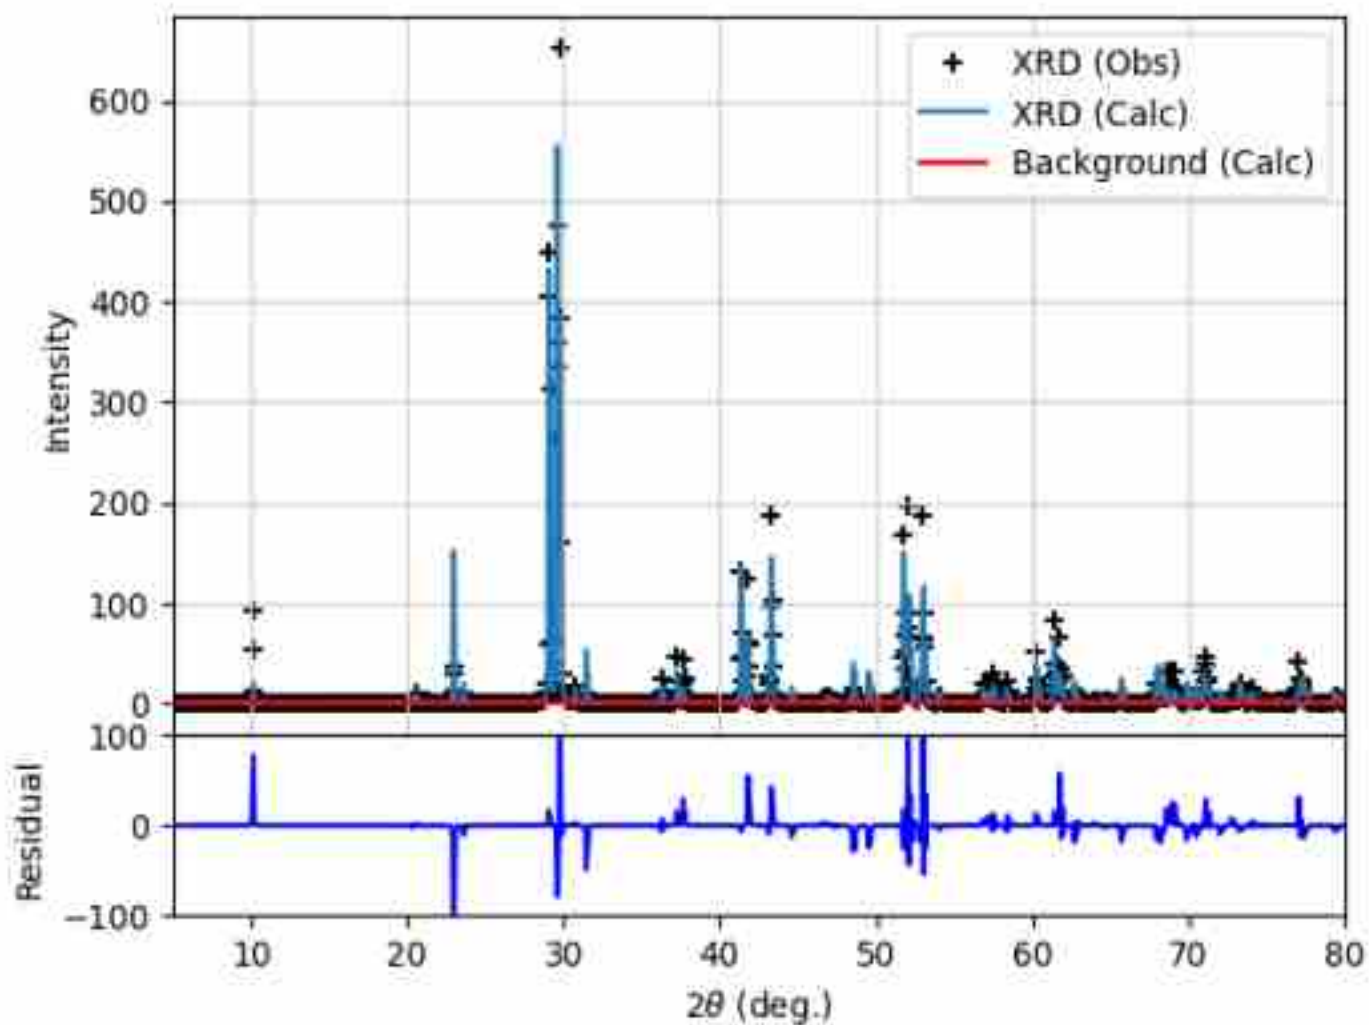

| RMSE before RR | Rwp      | RMSE after RR |
|----------------|----------|---------------|
| 0.323          | 62.75238 | 0.31918       |

# Na<sub>2</sub>H<sub>6</sub>S<sub>2</sub>O<sub>10</sub>

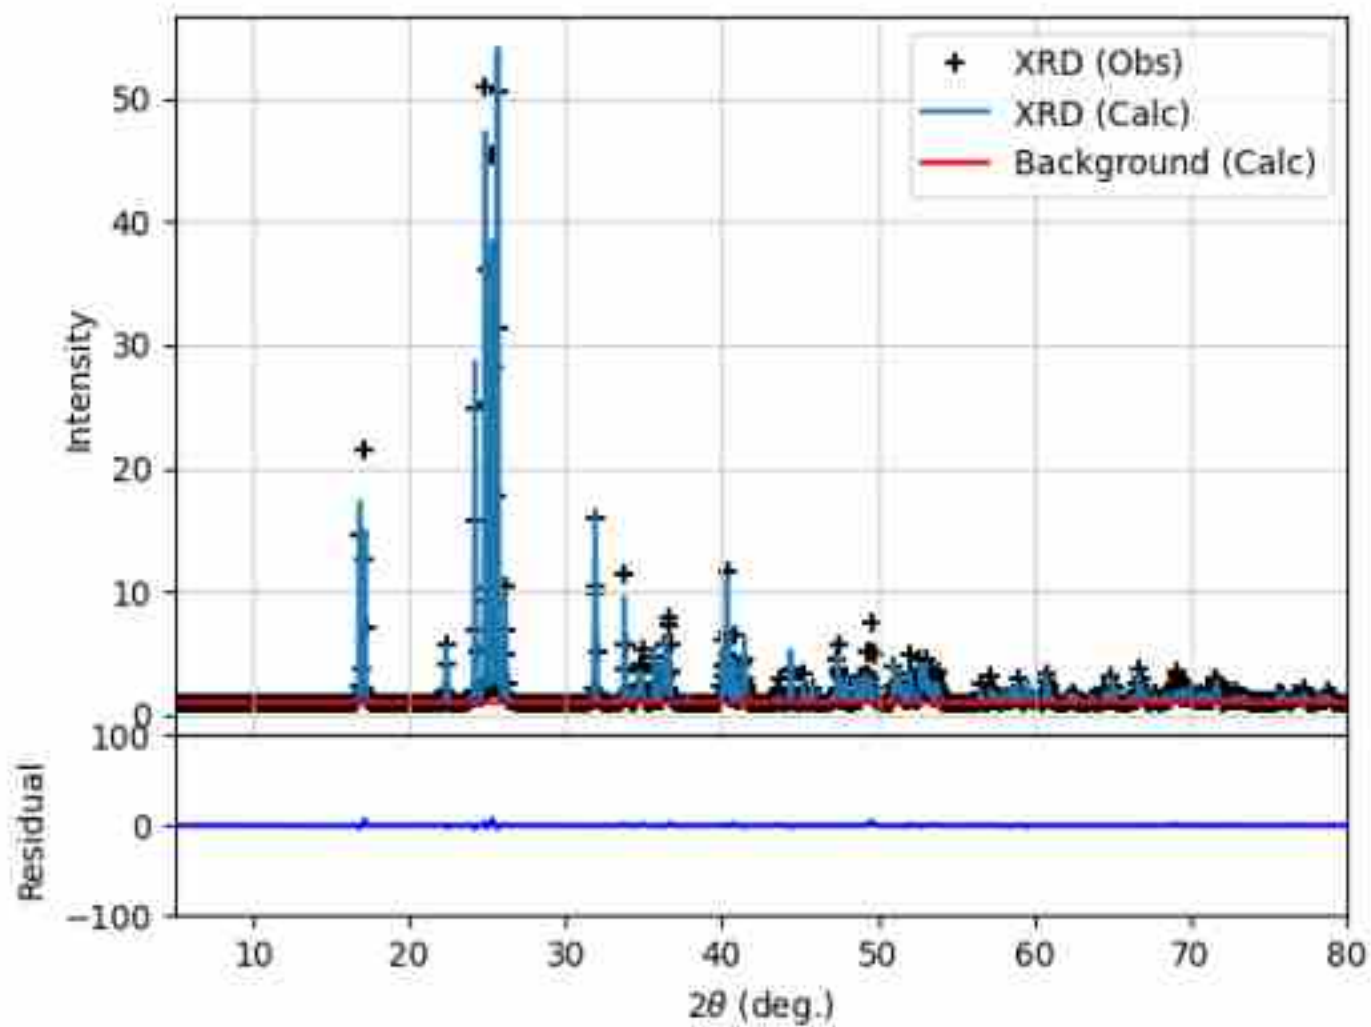

| RMSE before RR | Rwp      | RMSE after RR |
|----------------|----------|---------------|
| 0.324          | 14.96799 | None          |

# Re<sub>2</sub>Pb<sub>2</sub>Br<sub>2</sub>O<sub>8</sub>

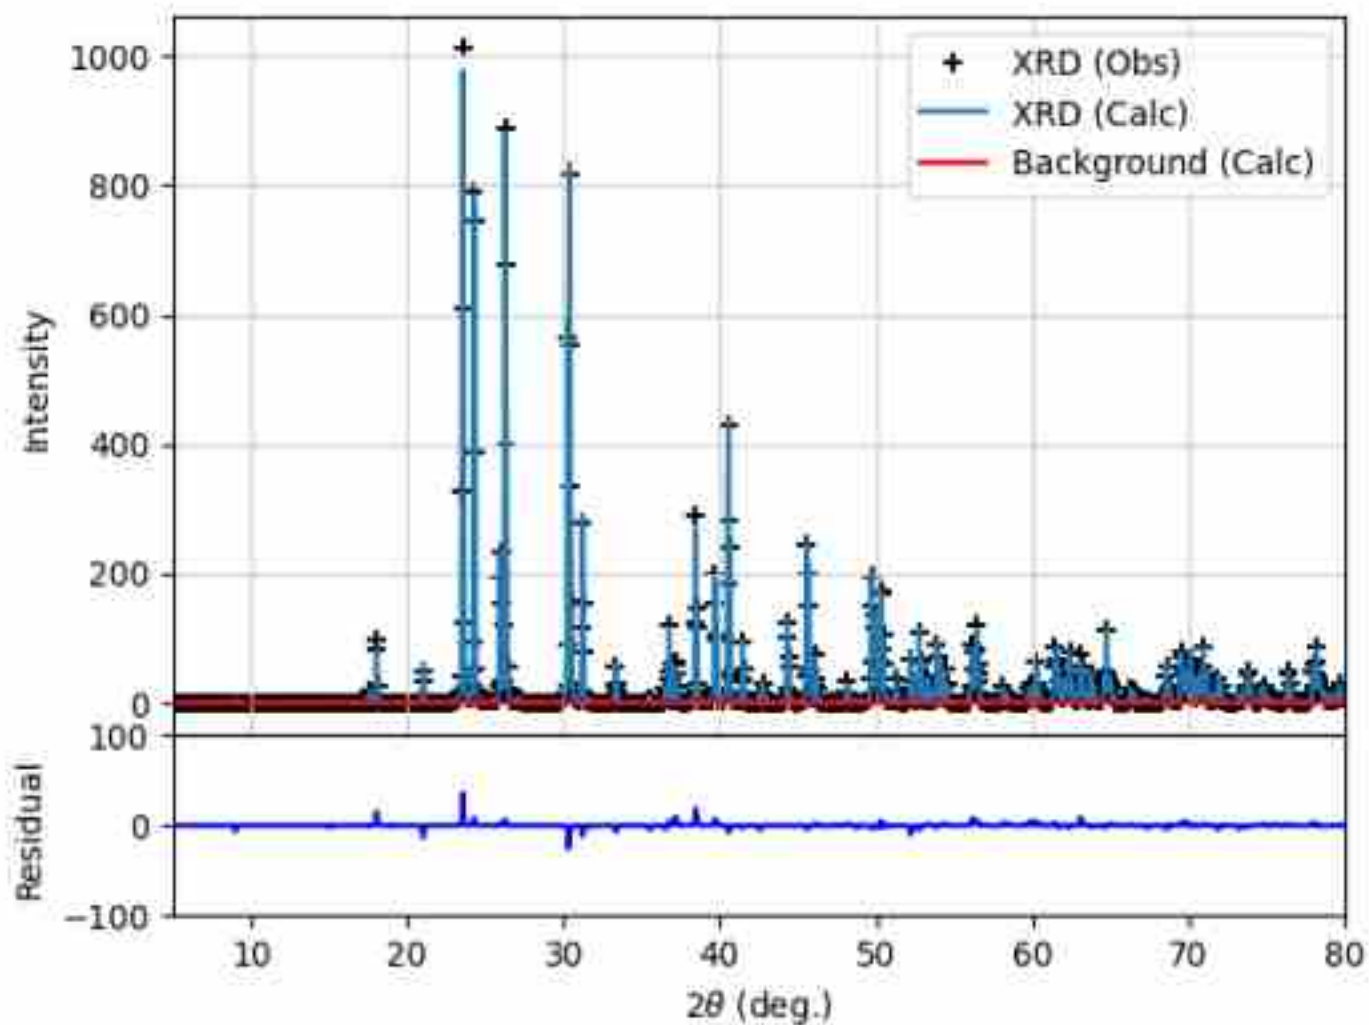

| RMSE before RR | Rwp    | RMSE after RR |
|----------------|--------|---------------|
| 0.324          | 7.4488 | 0.2907        |

# Sr<sub>2</sub>In<sub>3</sub>Rh<sub>2</sub>

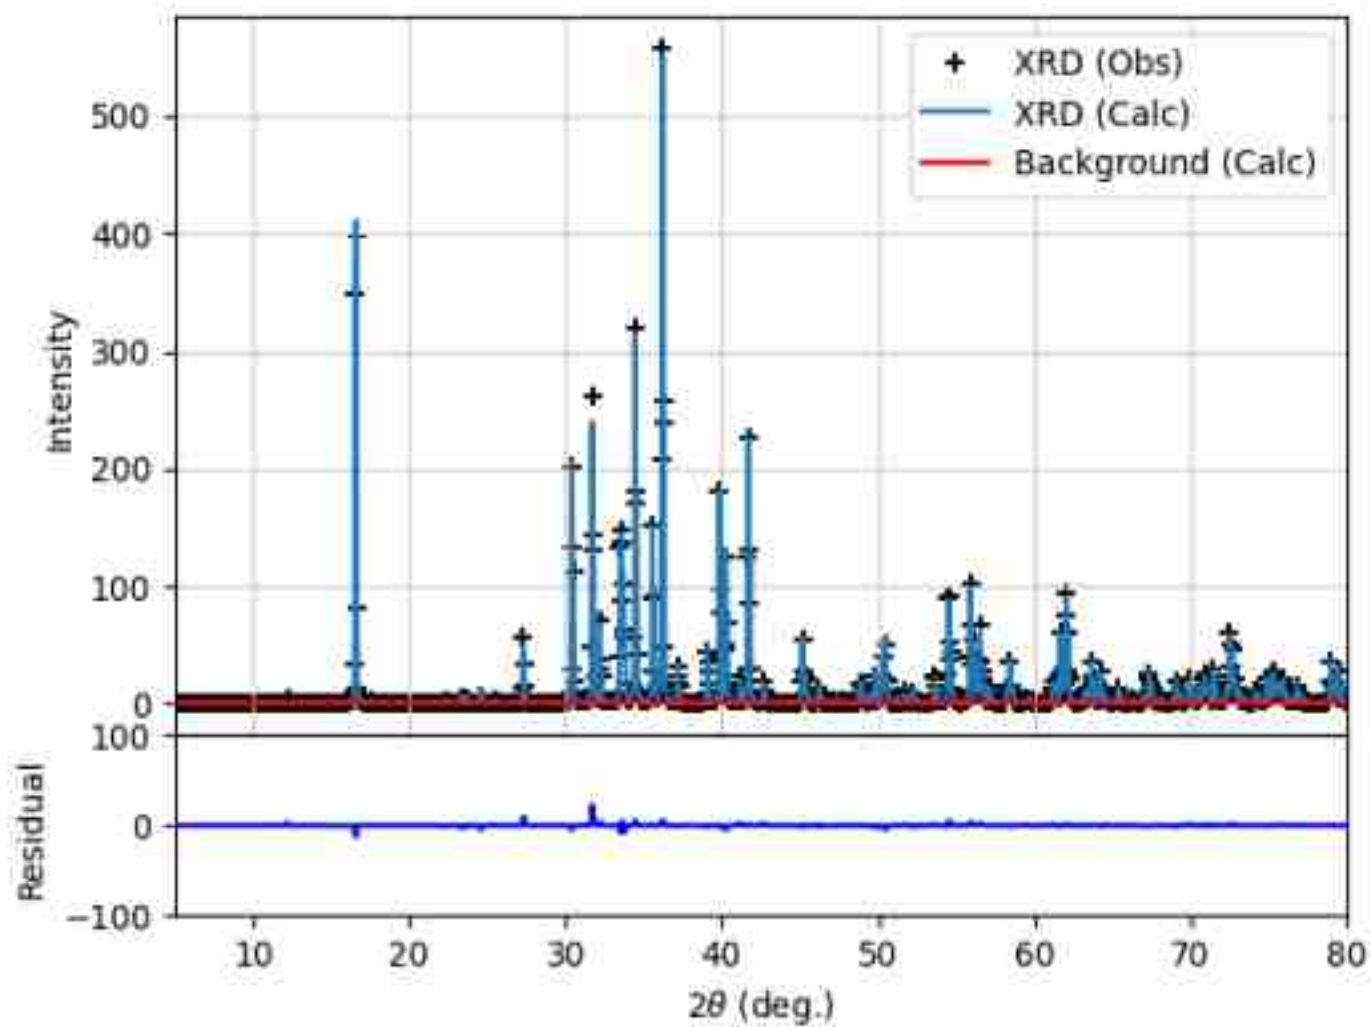

| RMSE before RR | Rwp    | RMSE after RR |
|----------------|--------|---------------|
| 0.324          | 5.6772 | 0.4746        |



# Ta8Al2C6

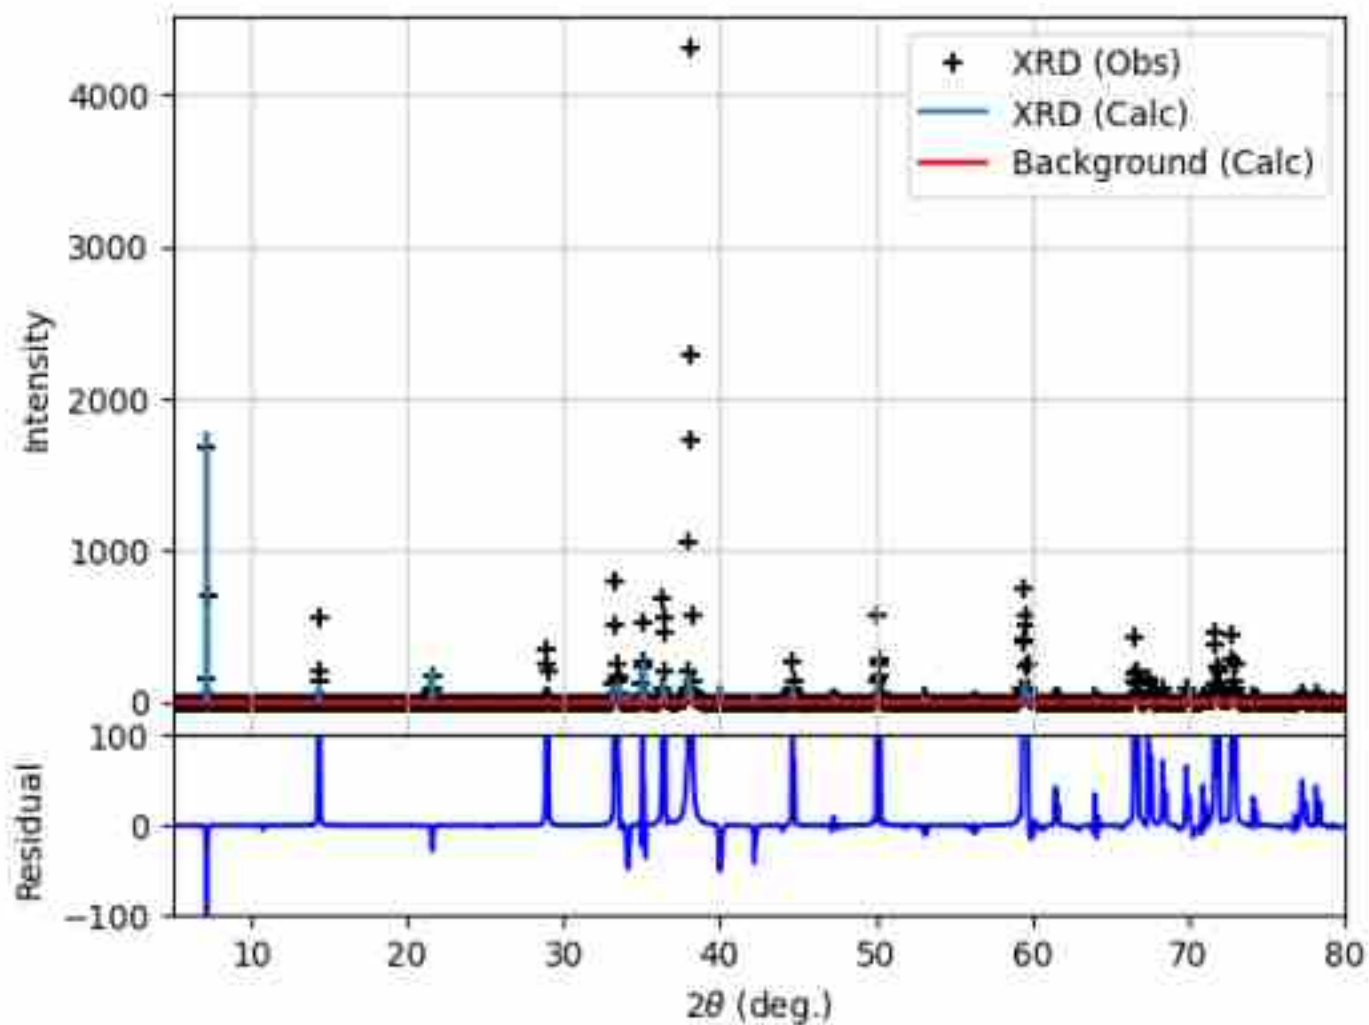

| RMSE before RR | Rwp      | RMSE after RR |
|----------------|----------|---------------|
| 0.324          | 81.44266 | None          |

# K4S4O10

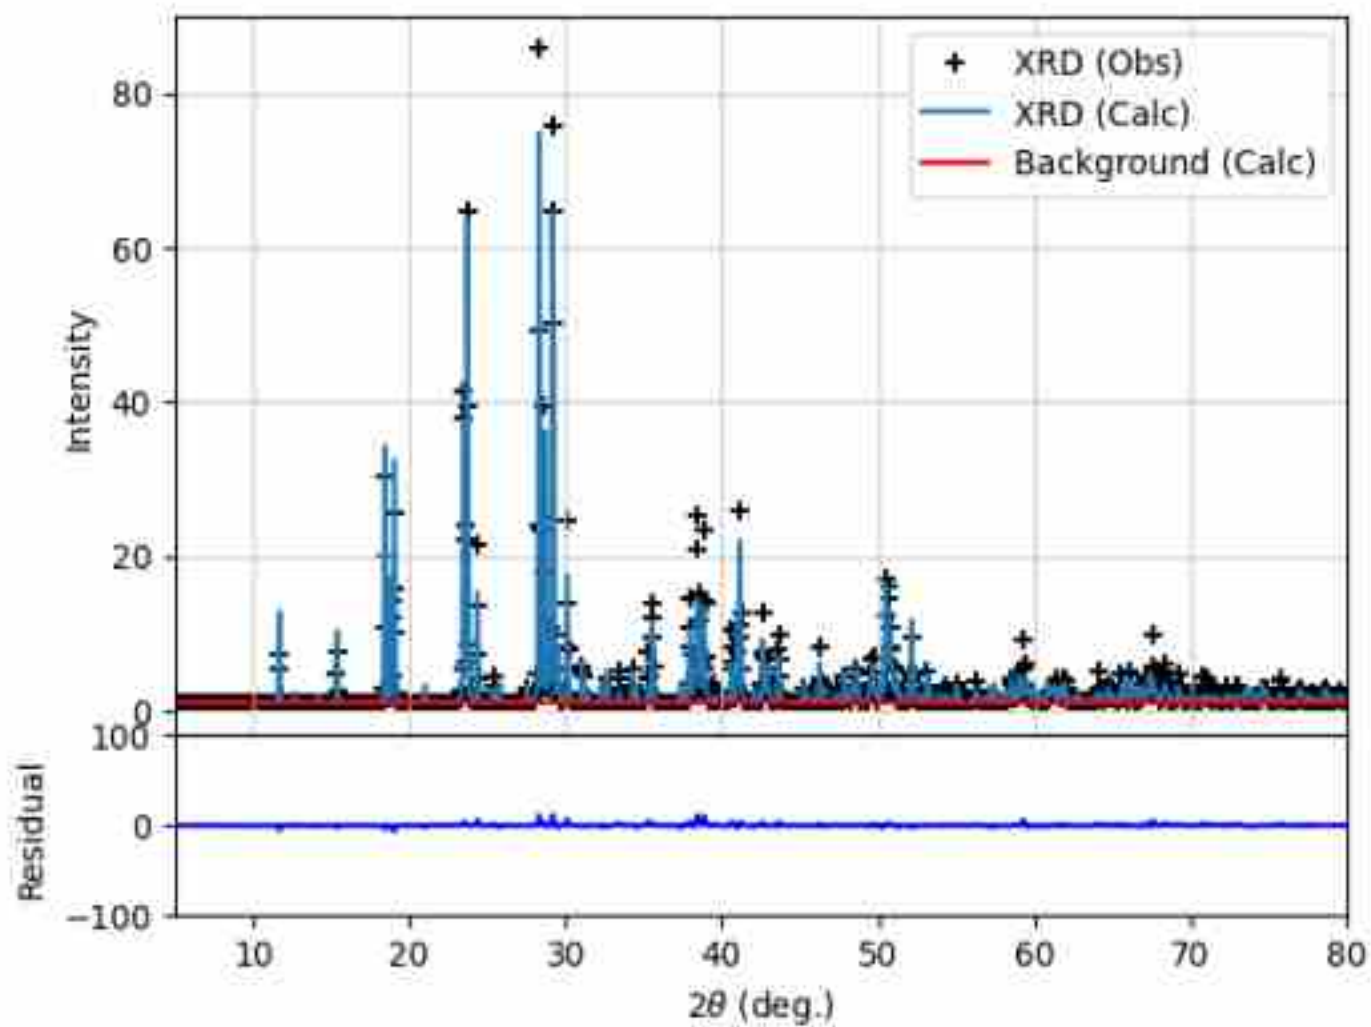

| RMSE before RR | Rwp      | RMSE after RR |
|----------------|----------|---------------|
| 0.325          | 25.20641 | None          |

# Sn4S1F6

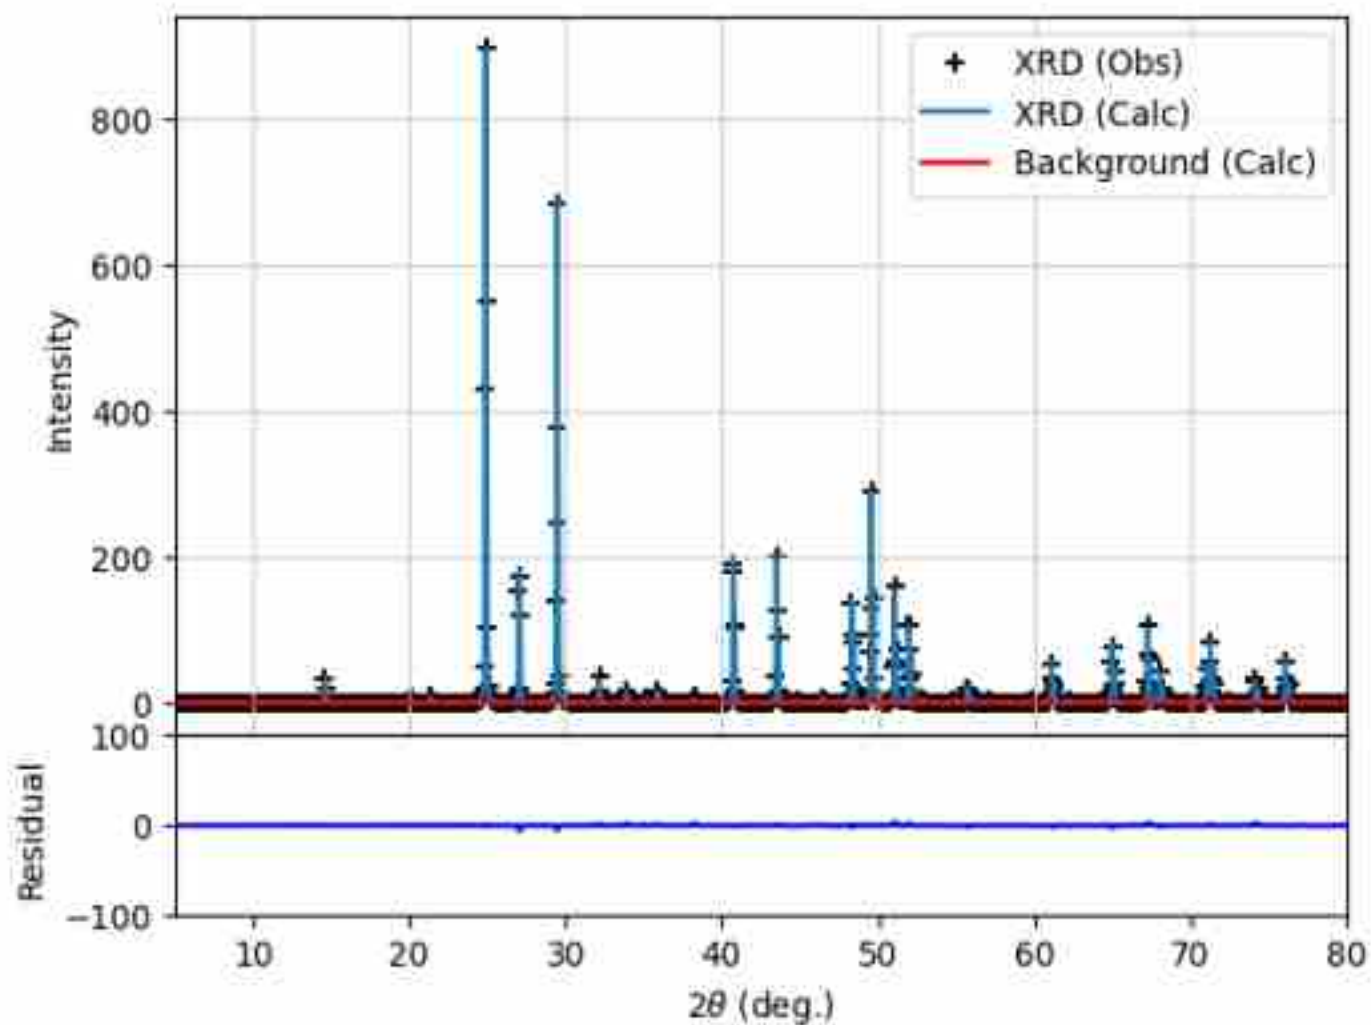

| RMSE before RR | Rwp     | RMSE after RR |
|----------------|---------|---------------|
| 0.325          | 3.36133 | 0.44192       |

# Ti<sub>4</sub>Ni<sub>4</sub>O<sub>12</sub>

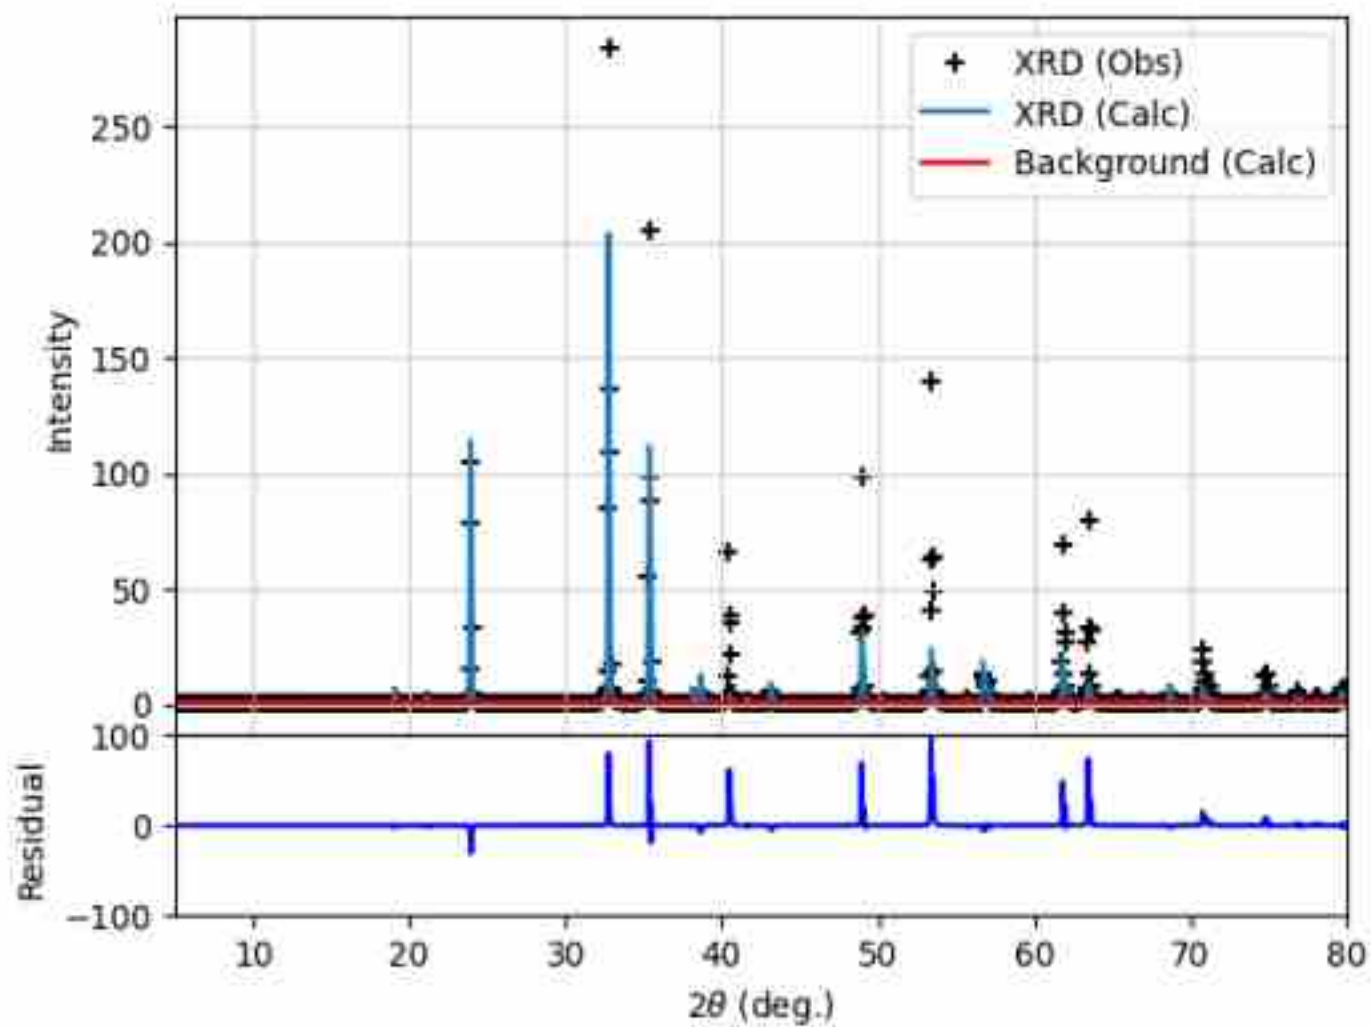

| RMSE before RR | Rwp      | RMSE after RR |
|----------------|----------|---------------|
| 0.325          | 45.76918 | None          |

# Y1Er4Al15

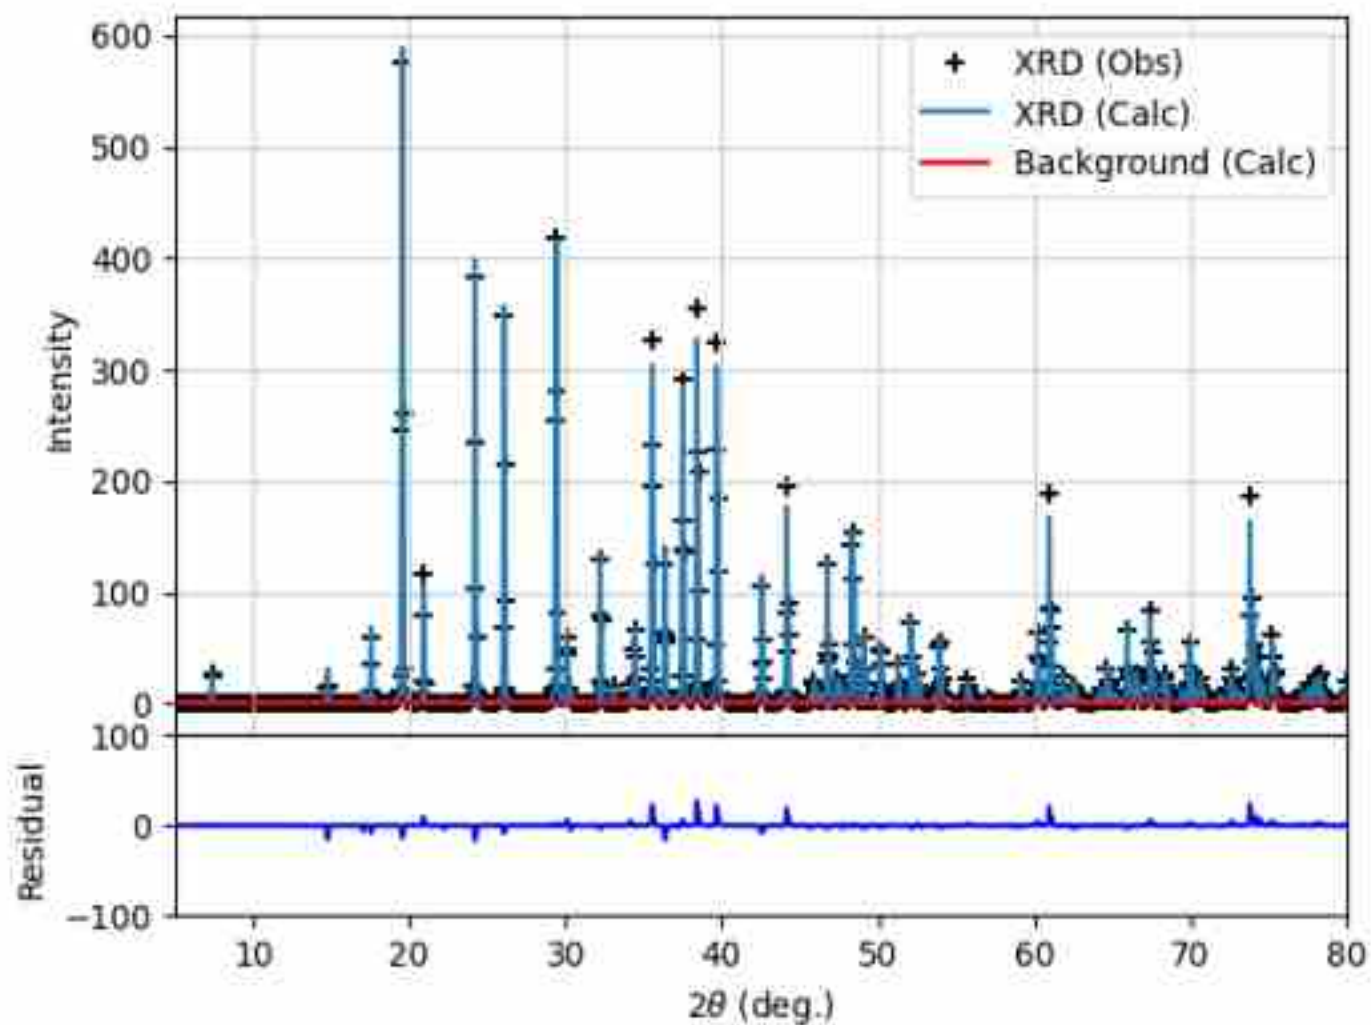

| RMSE before RR | Rwp     | RMSE after RR |
|----------------|---------|---------------|
| 0.326          | 9.37575 | 0.33495       |

# Cs<sub>2</sub>Au<sub>4</sub>F<sub>14</sub>

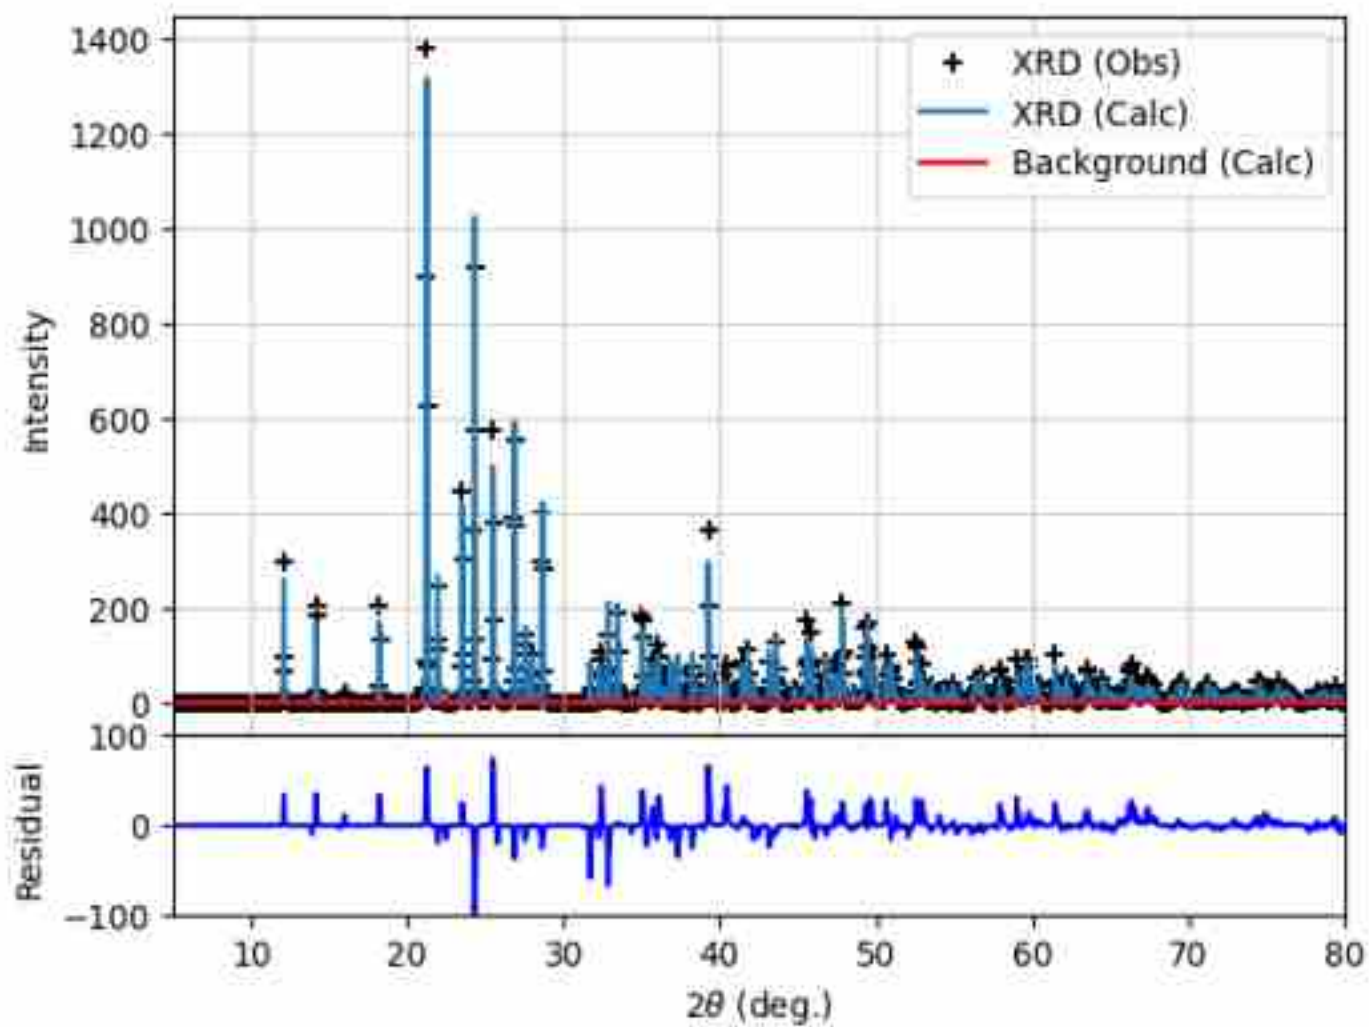

| RMSE before RR | Rwp      | RMSE after RR |
|----------------|----------|---------------|
| 0.327          | 24.12395 | None          |

# Mn<sub>2</sub>Cd<sub>8</sub>S<sub>10</sub>

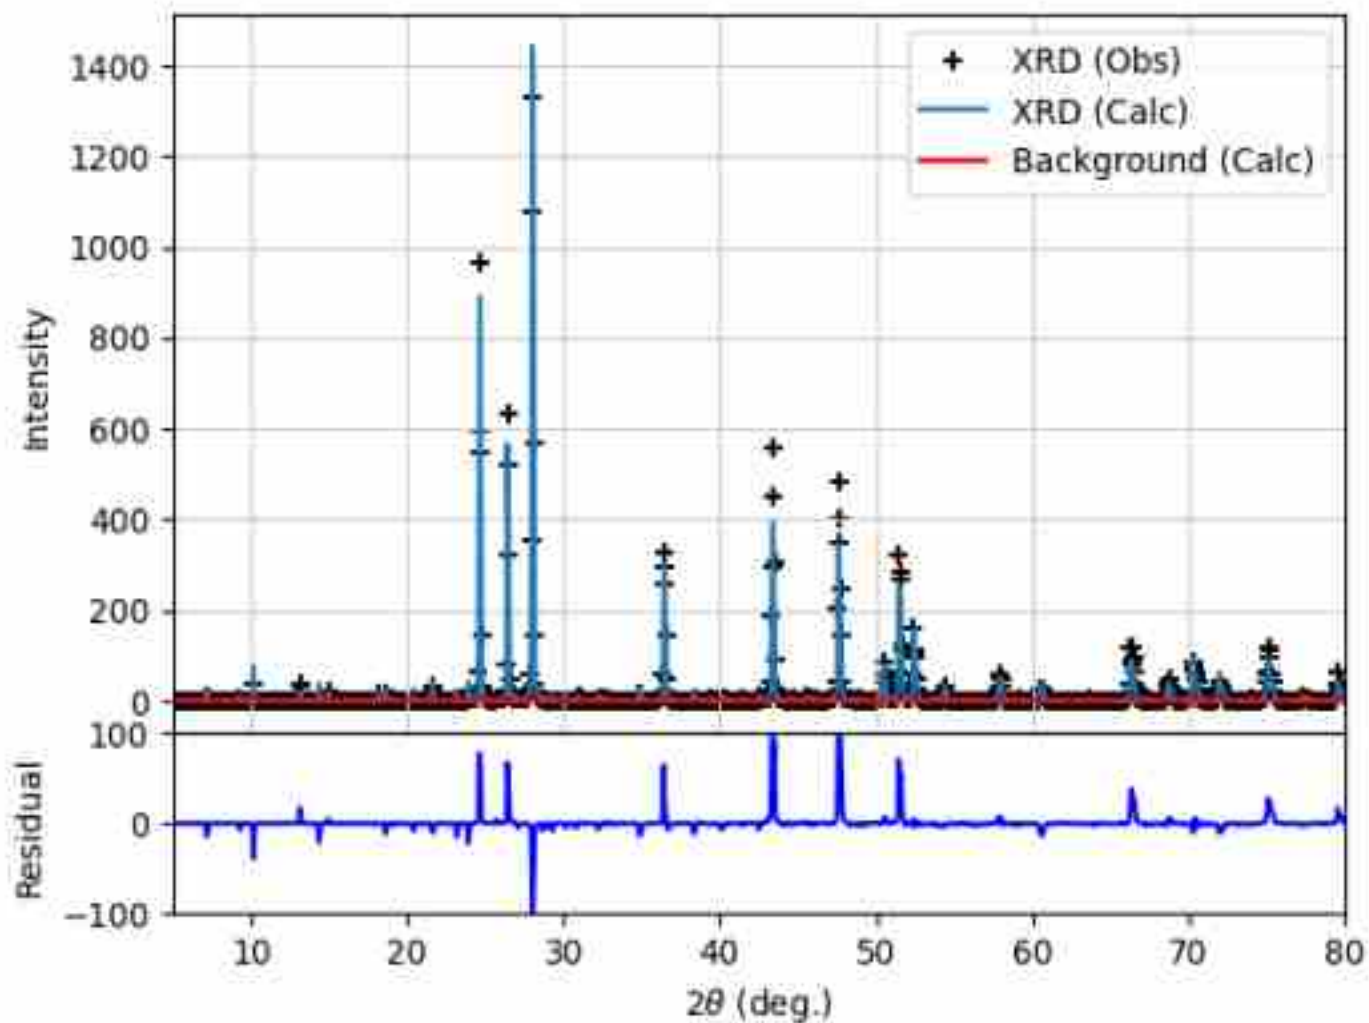

| RMSE before RR | Rwp      | RMSE after RR |
|----------------|----------|---------------|
| 0.327          | 25.89498 | None          |

# Bi<sub>2</sub>Pd<sub>4</sub>Pb<sub>2</sub>

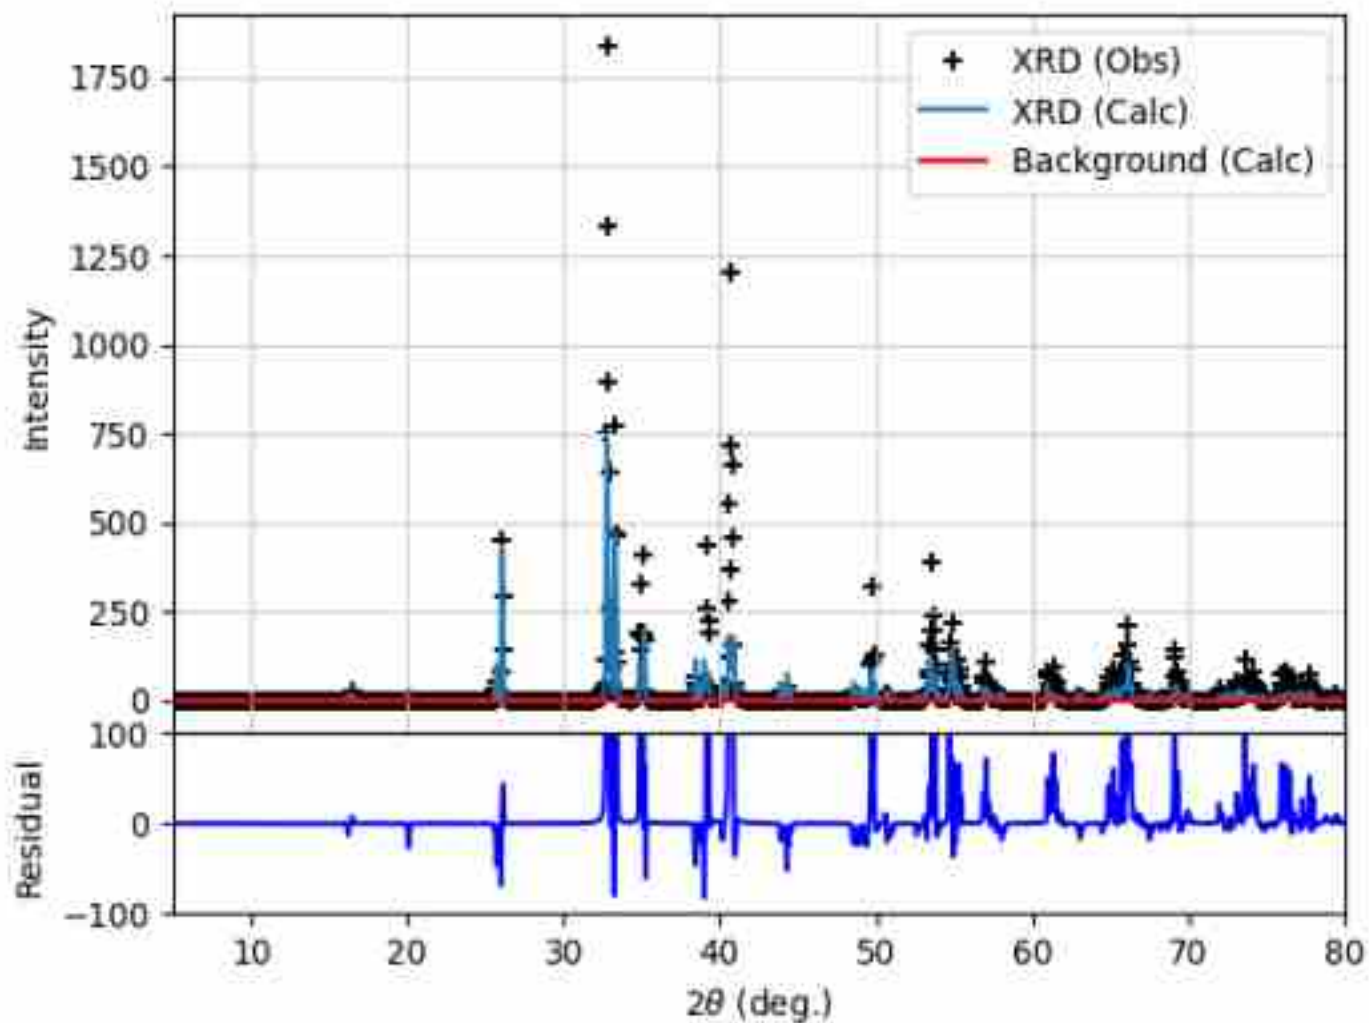

| RMSE before RR | Rwp      | RMSE after RR |
|----------------|----------|---------------|
| 0.328          | 67.08491 | 0.32188       |



# K3S1O4F1

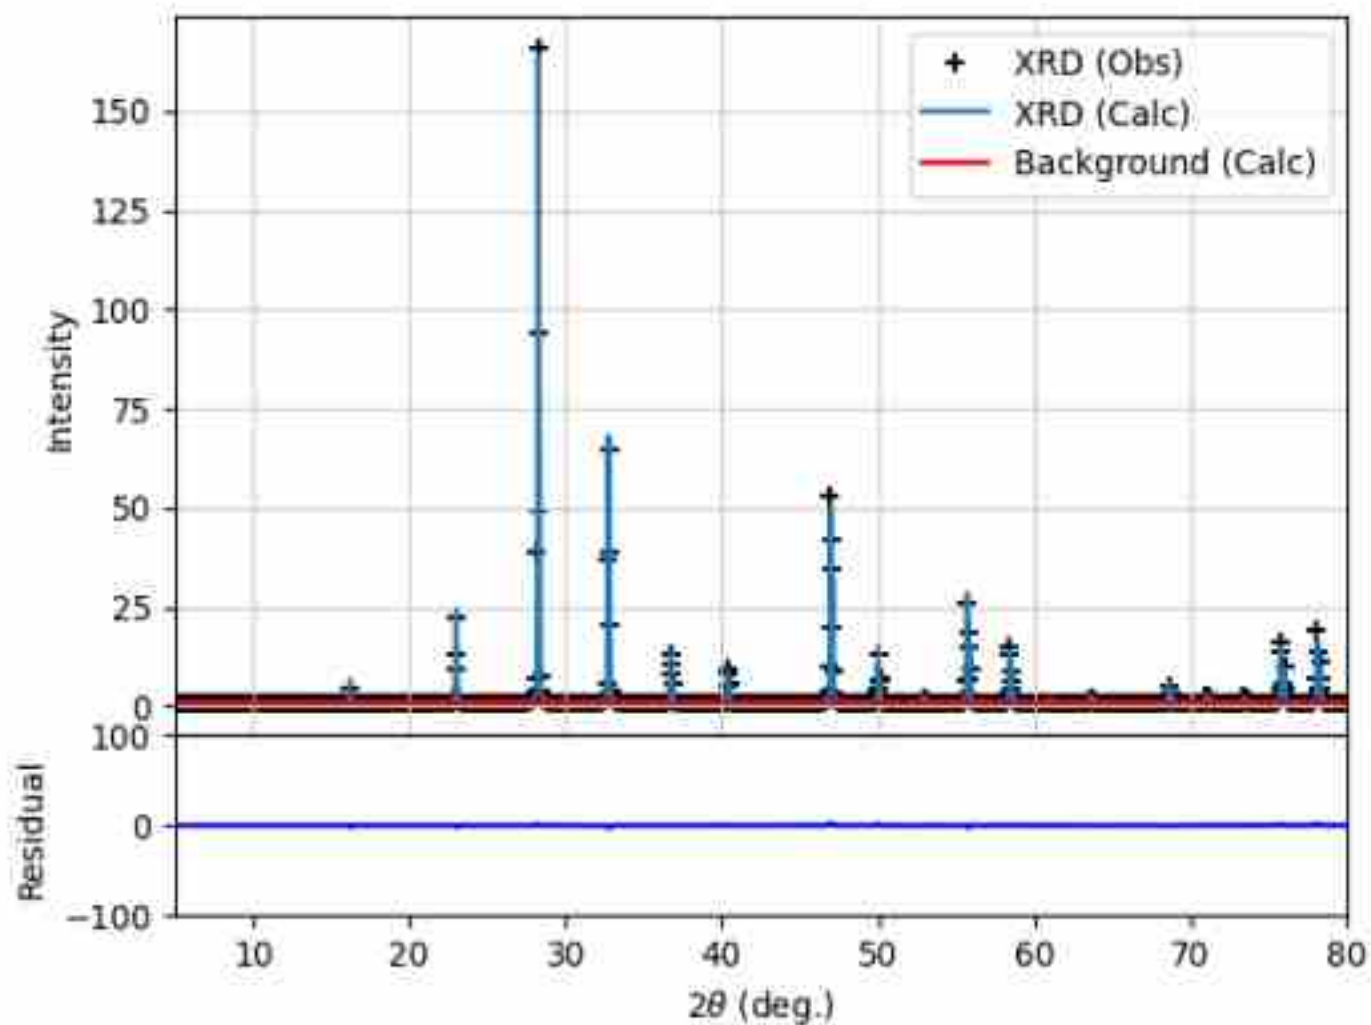

| RMSE before RR | Rwp     | RMSE after RR |
|----------------|---------|---------------|
| 0.328          | 6.15331 | 0.30908       |

# Li<sub>4</sub>Si<sub>4</sub>O<sub>10</sub>

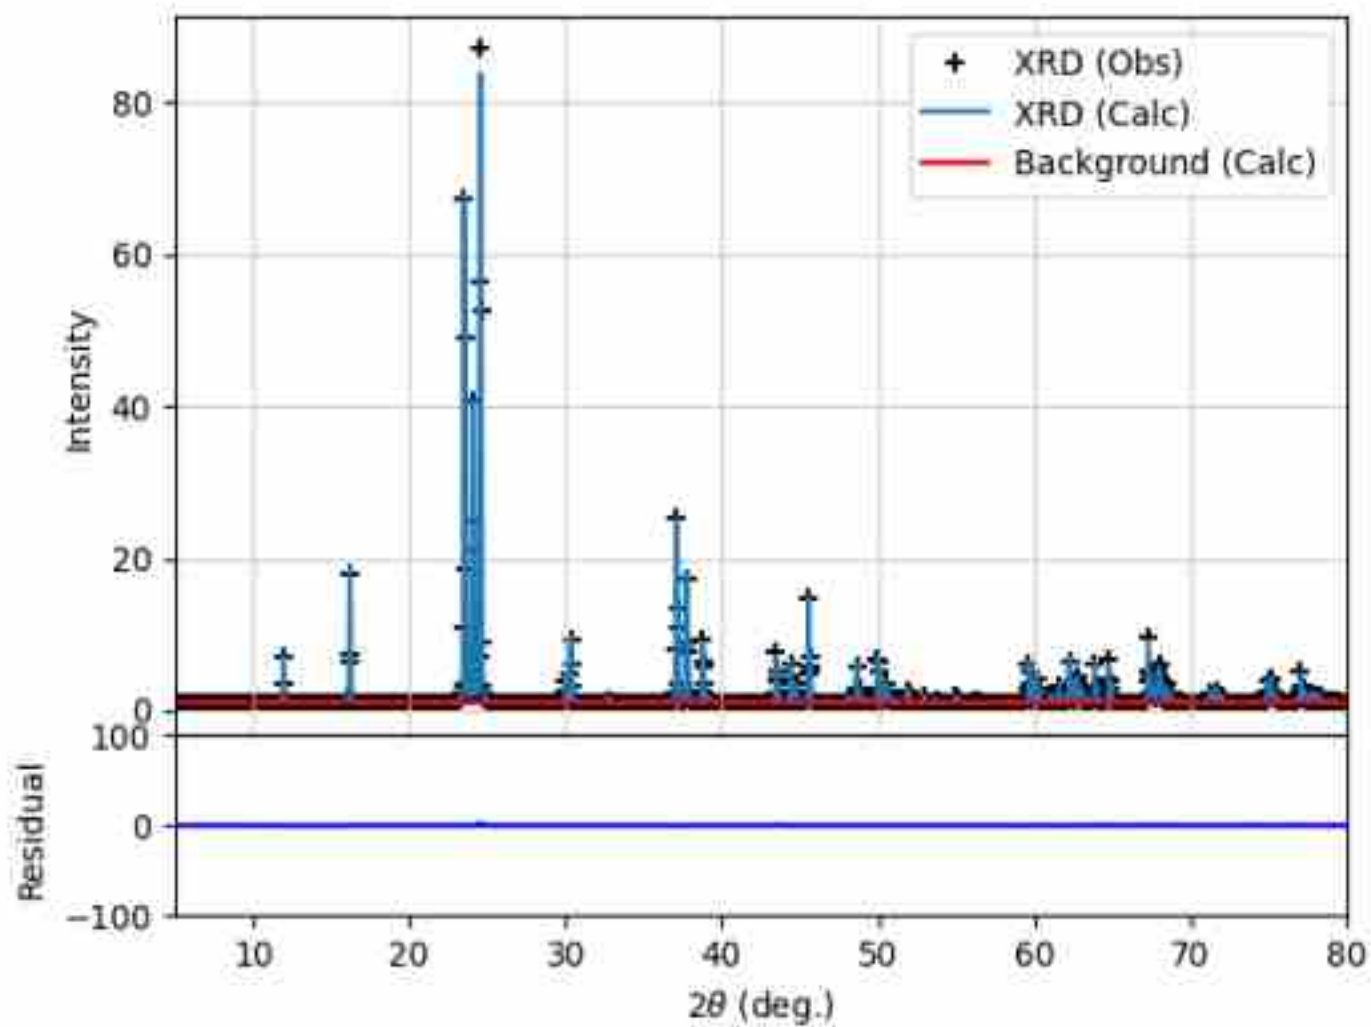

| RMSE before RR | Rwp     | RMSE after RR |
|----------------|---------|---------------|
| 0.328          | 3.93659 | None          |

# Rb<sub>4</sub>As<sub>4</sub>O<sub>8</sub>

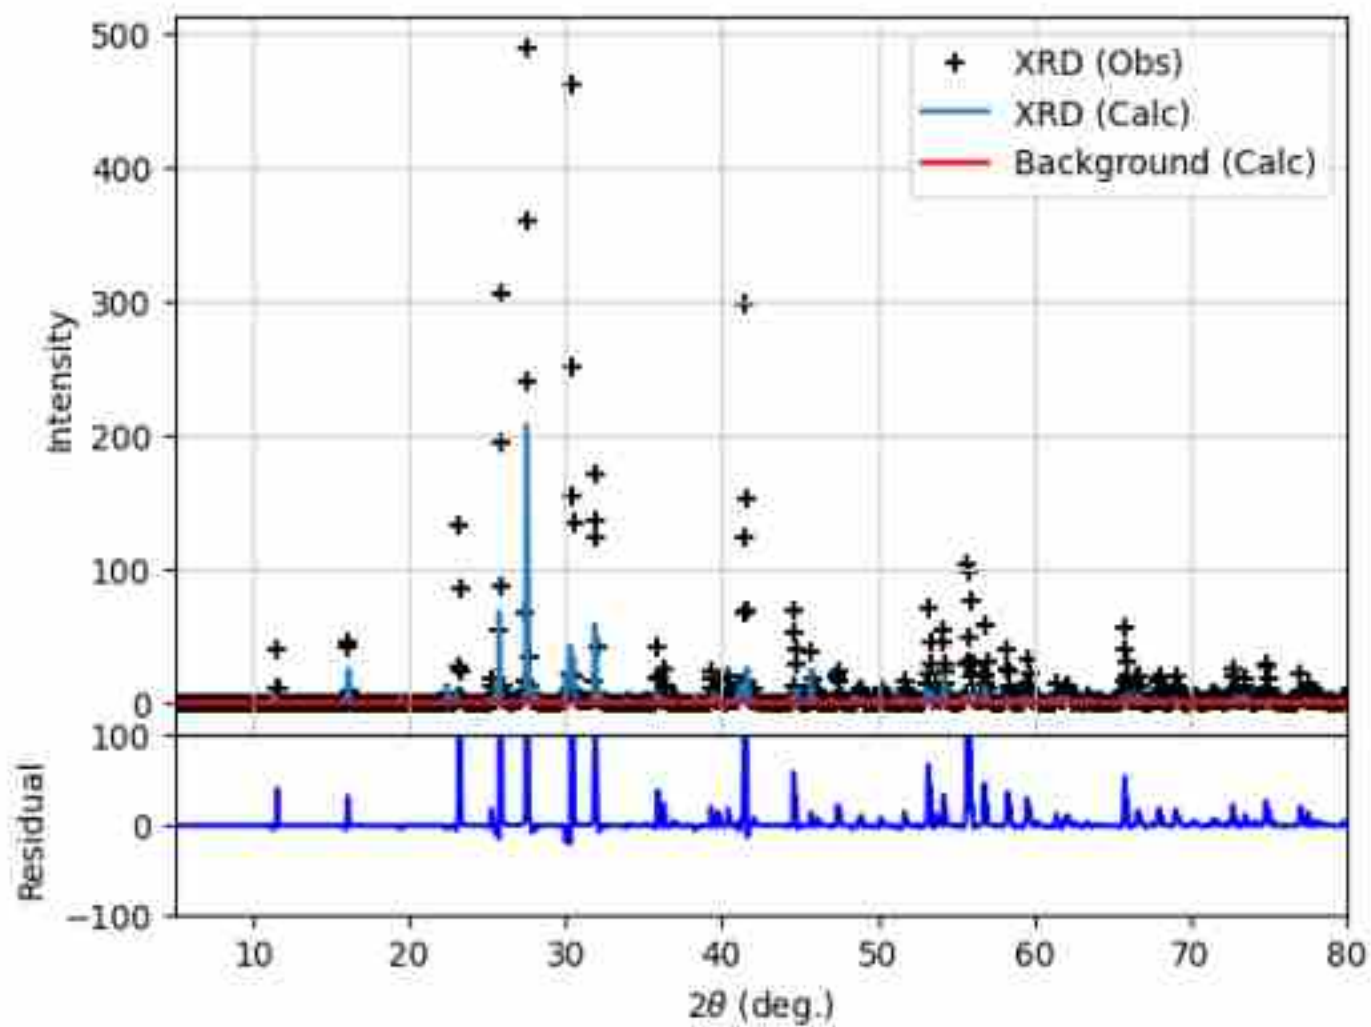

| RMSE before RR | Rwp     | RMSE after RR |
|----------------|---------|---------------|
| 0.328          | 74.7512 | None          |

# Cs1Bi1Se2

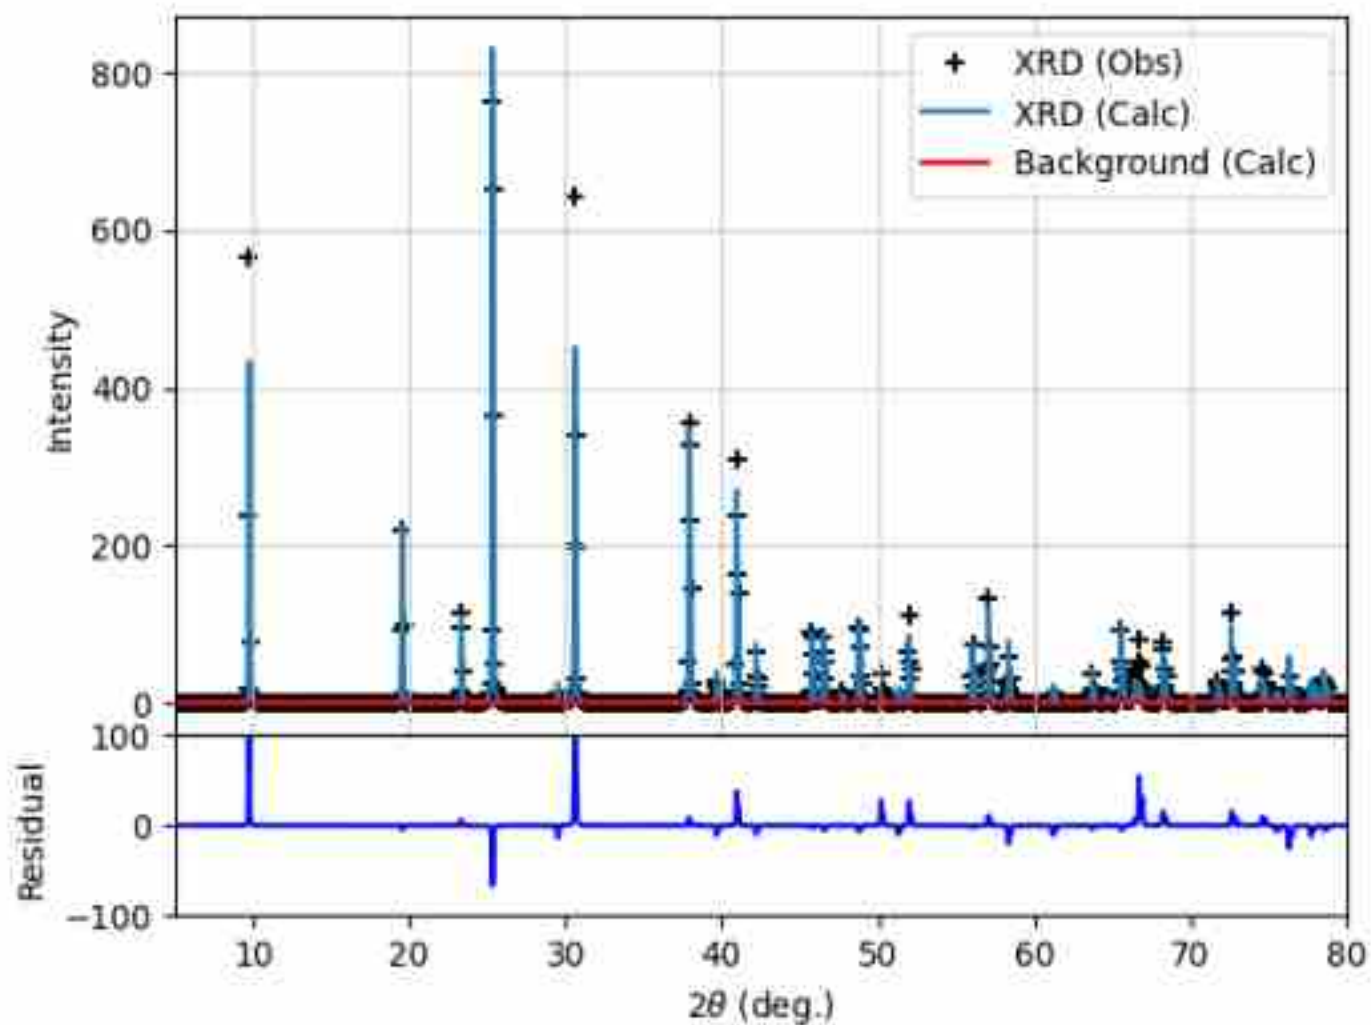

| RMSE before RR | Rwp     | RMSE after RR |
|----------------|---------|---------------|
| 0.329          | 22.2668 | 0.08697       |

# Th<sub>2</sub>Ge<sub>2</sub>I<sub>12</sub>

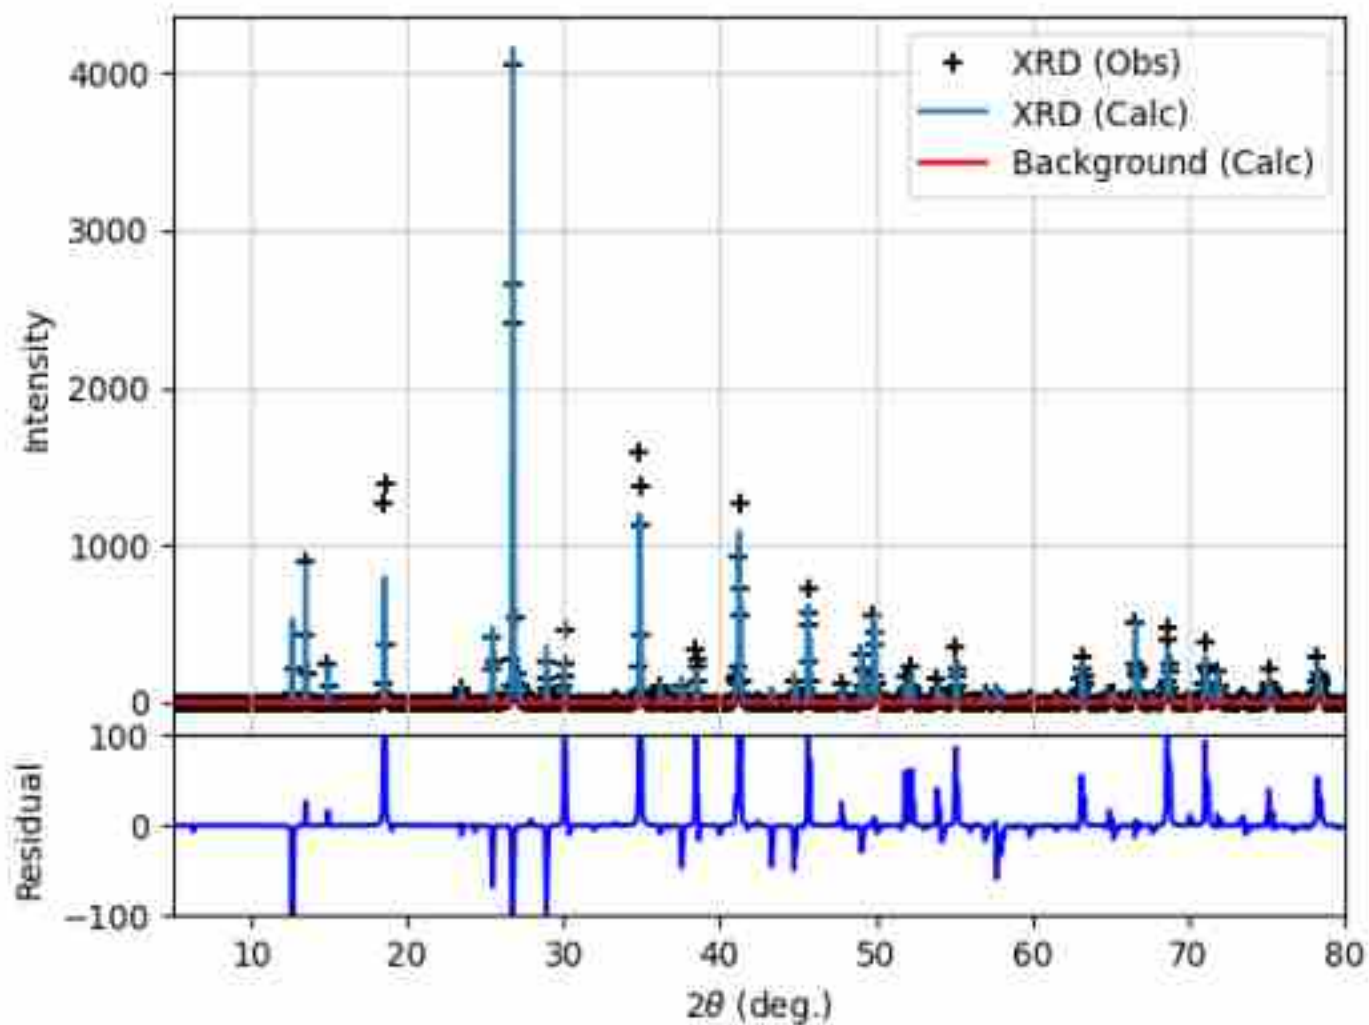

| RMSE before RR | Rwp      | RMSE after RR |
|----------------|----------|---------------|
| 0.329          | 27.69159 | 0.25783       |

# Bi<sub>2</sub>Te<sub>5</sub>Pb<sub>2</sub>

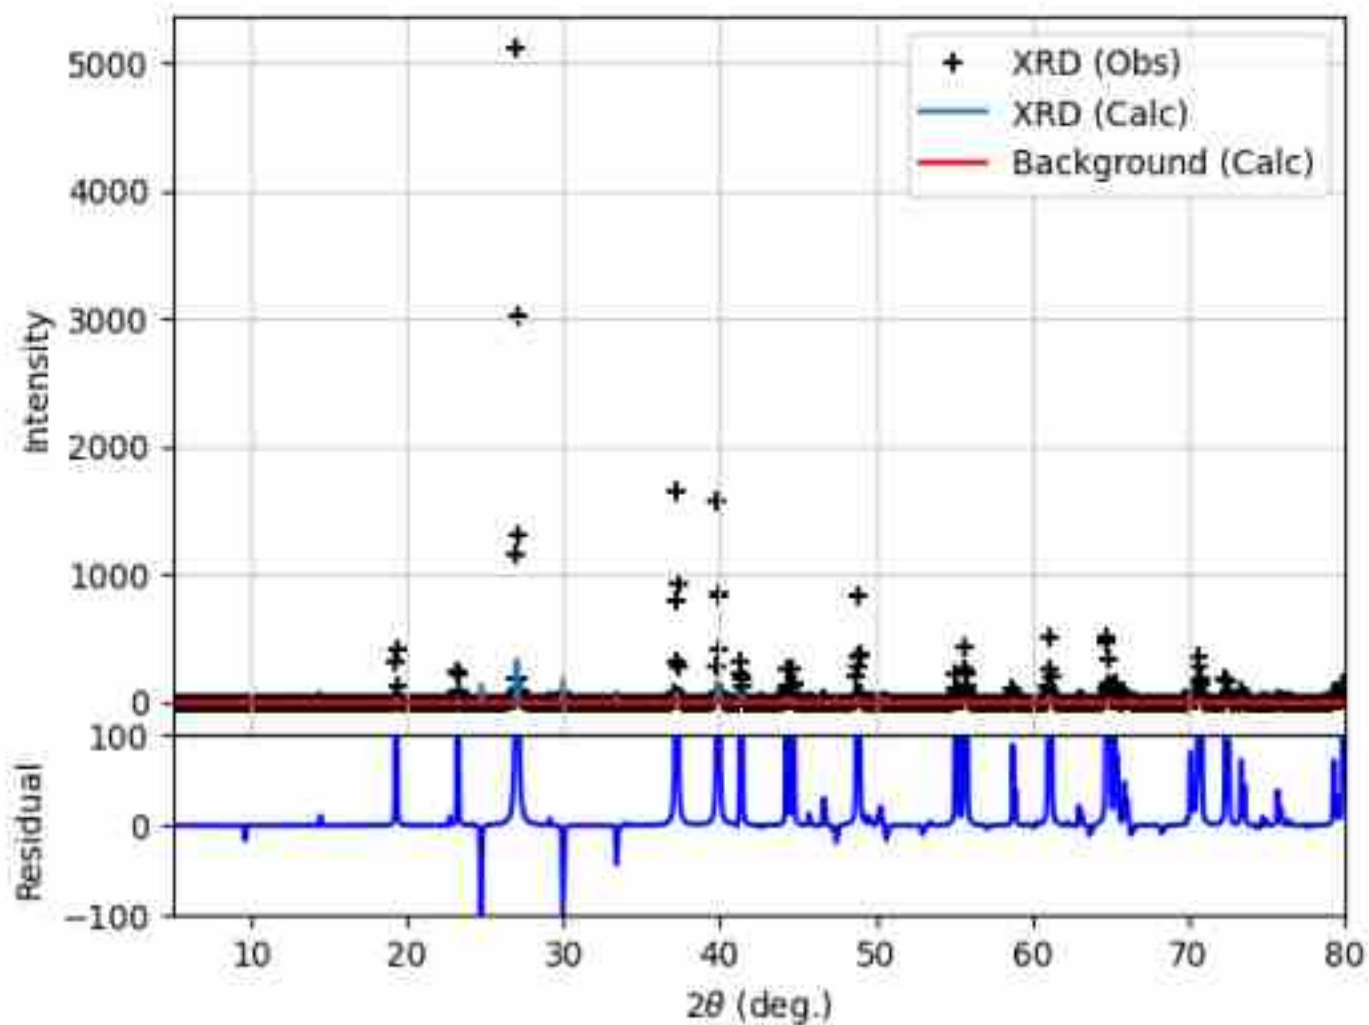

| RMSE before RR | Rwp      | RMSE after RR |
|----------------|----------|---------------|
| 0.331          | 92.29859 | 0.36163       |

# Ce<sub>3</sub>Ni<sub>4</sub>Ge<sub>4</sub>

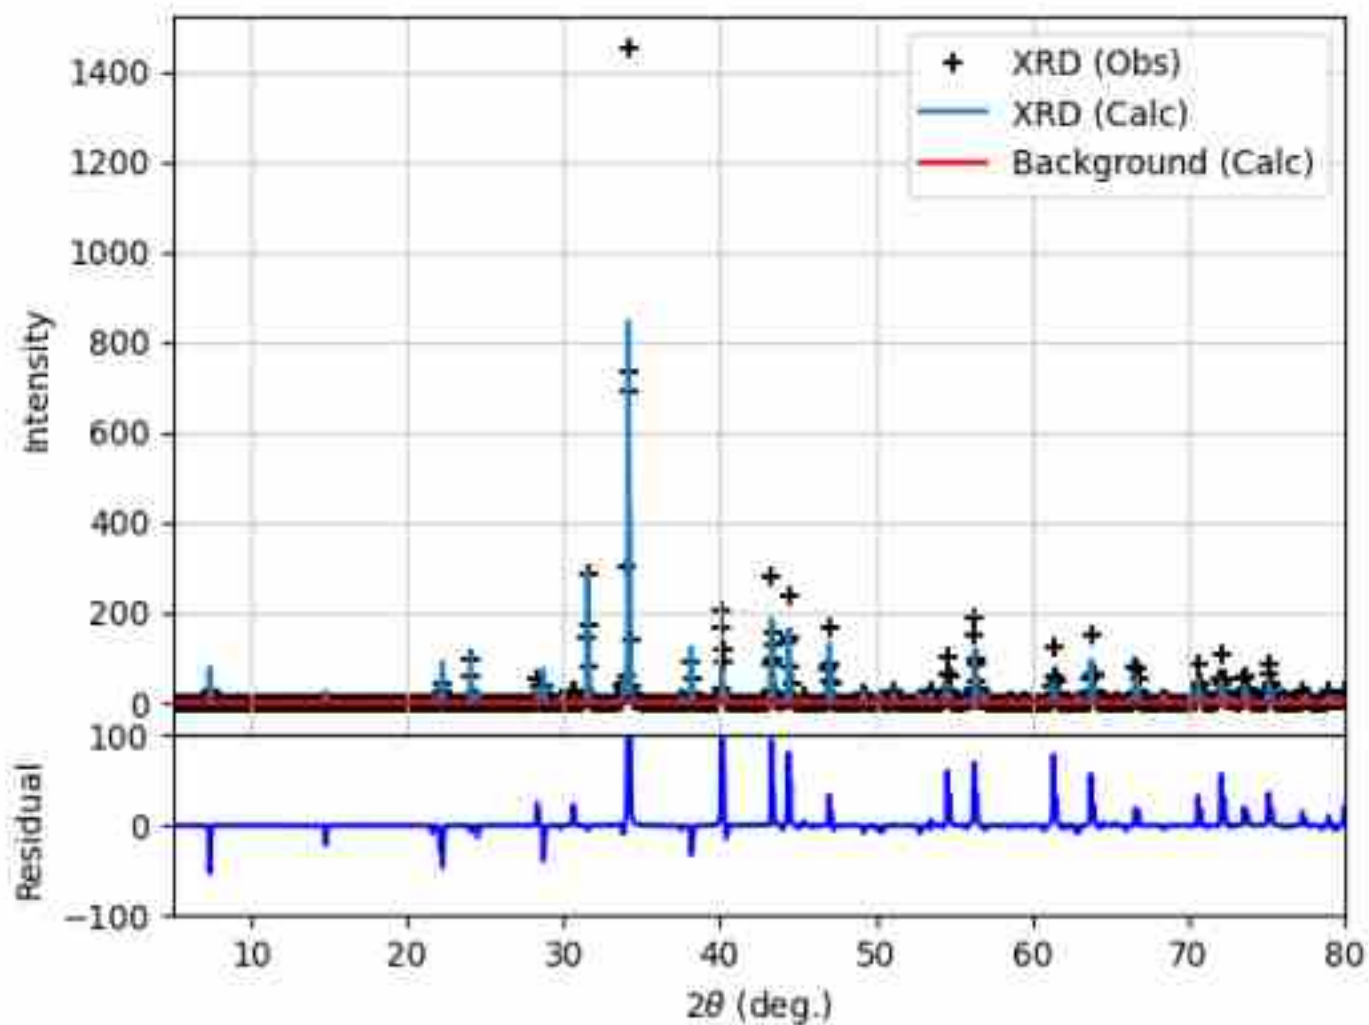

| RMSE before RR | Rwp      | RMSE after RR |
|----------------|----------|---------------|
| 0.331          | 45.35035 | None          |

# K4Sb4O12

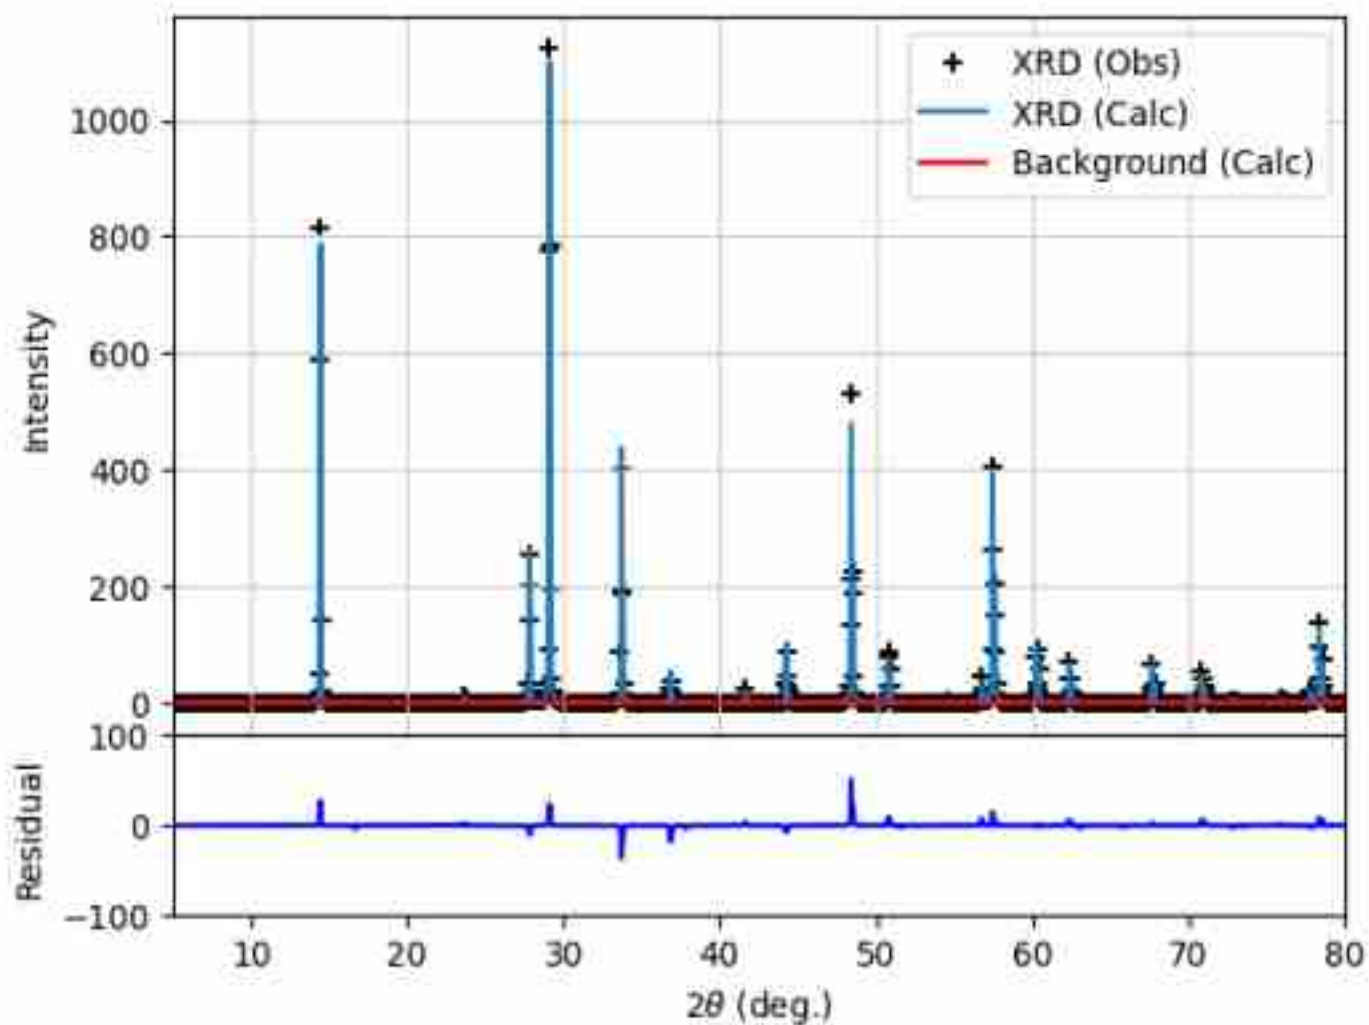

| RMSE before RR | Rwp      | RMSE after RR |
|----------------|----------|---------------|
| 0.331          | 10.71517 | 0.36485       |



# V4F16

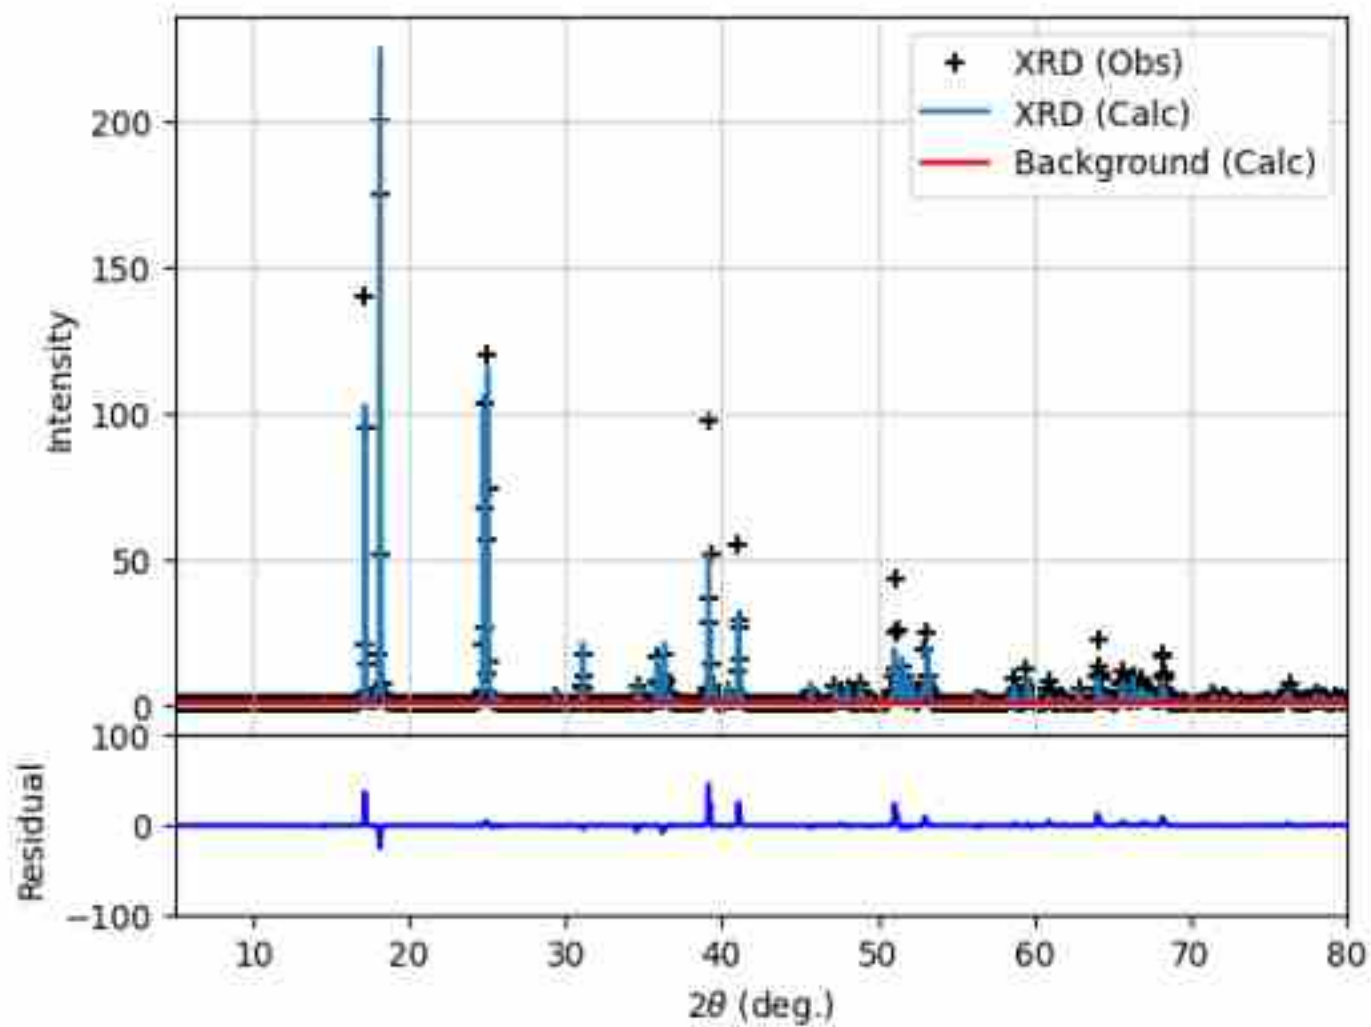

| RMSE before RR | Rwp      | RMSE after RR |
|----------------|----------|---------------|
| 0.331          | 28.51513 | None          |

# Ga4Bi1As3

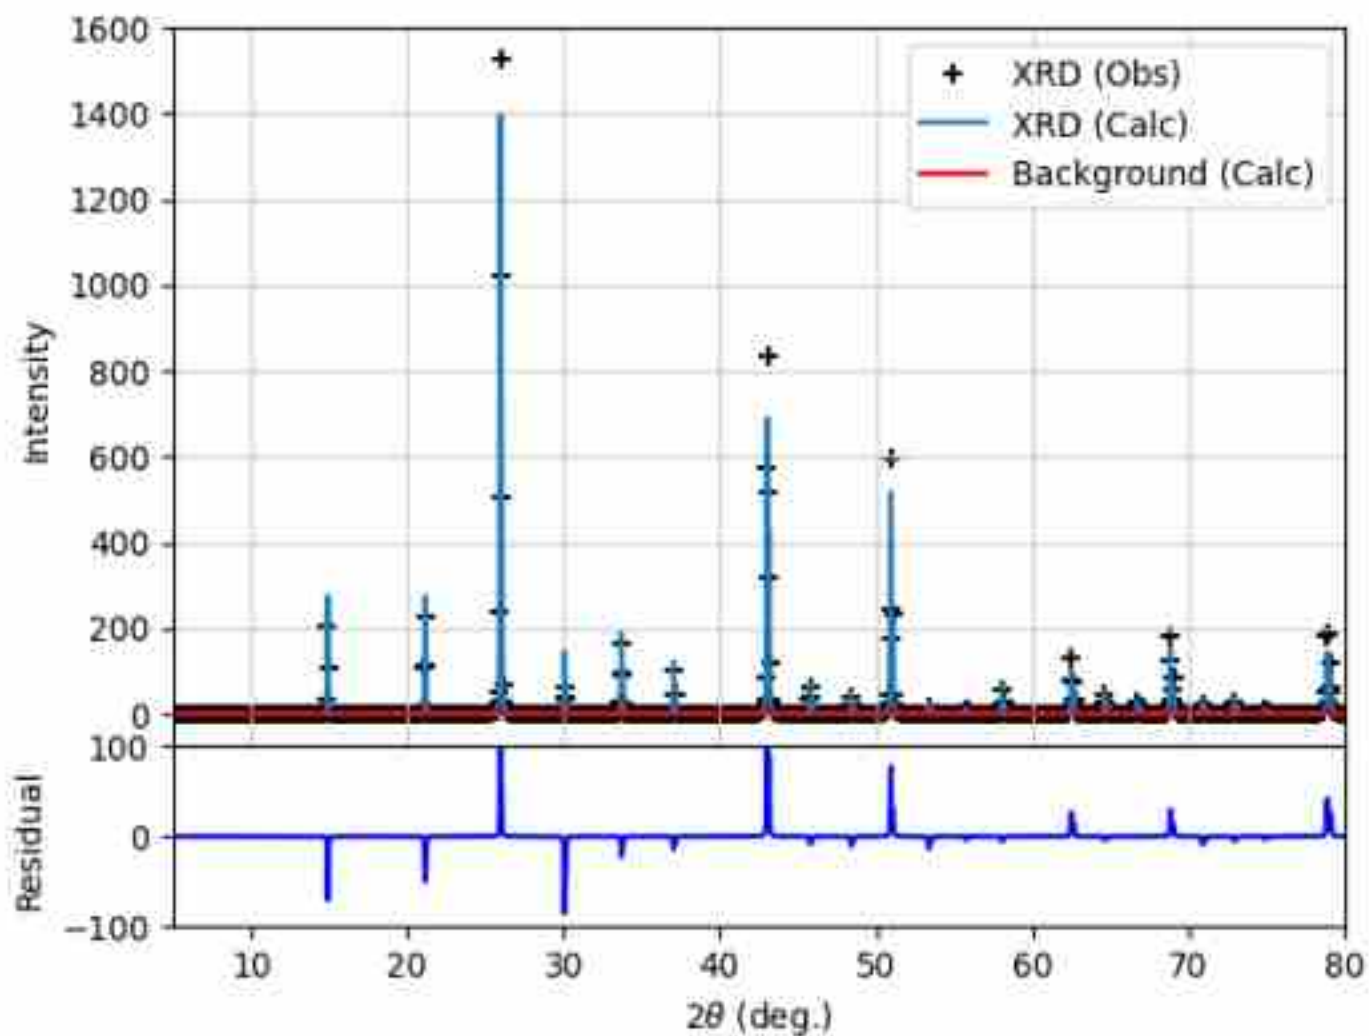

| RMSE before RR | Rwp      | RMSE after RR |
|----------------|----------|---------------|
| 0.332          | 21.51614 | None          |

# K3La3F12

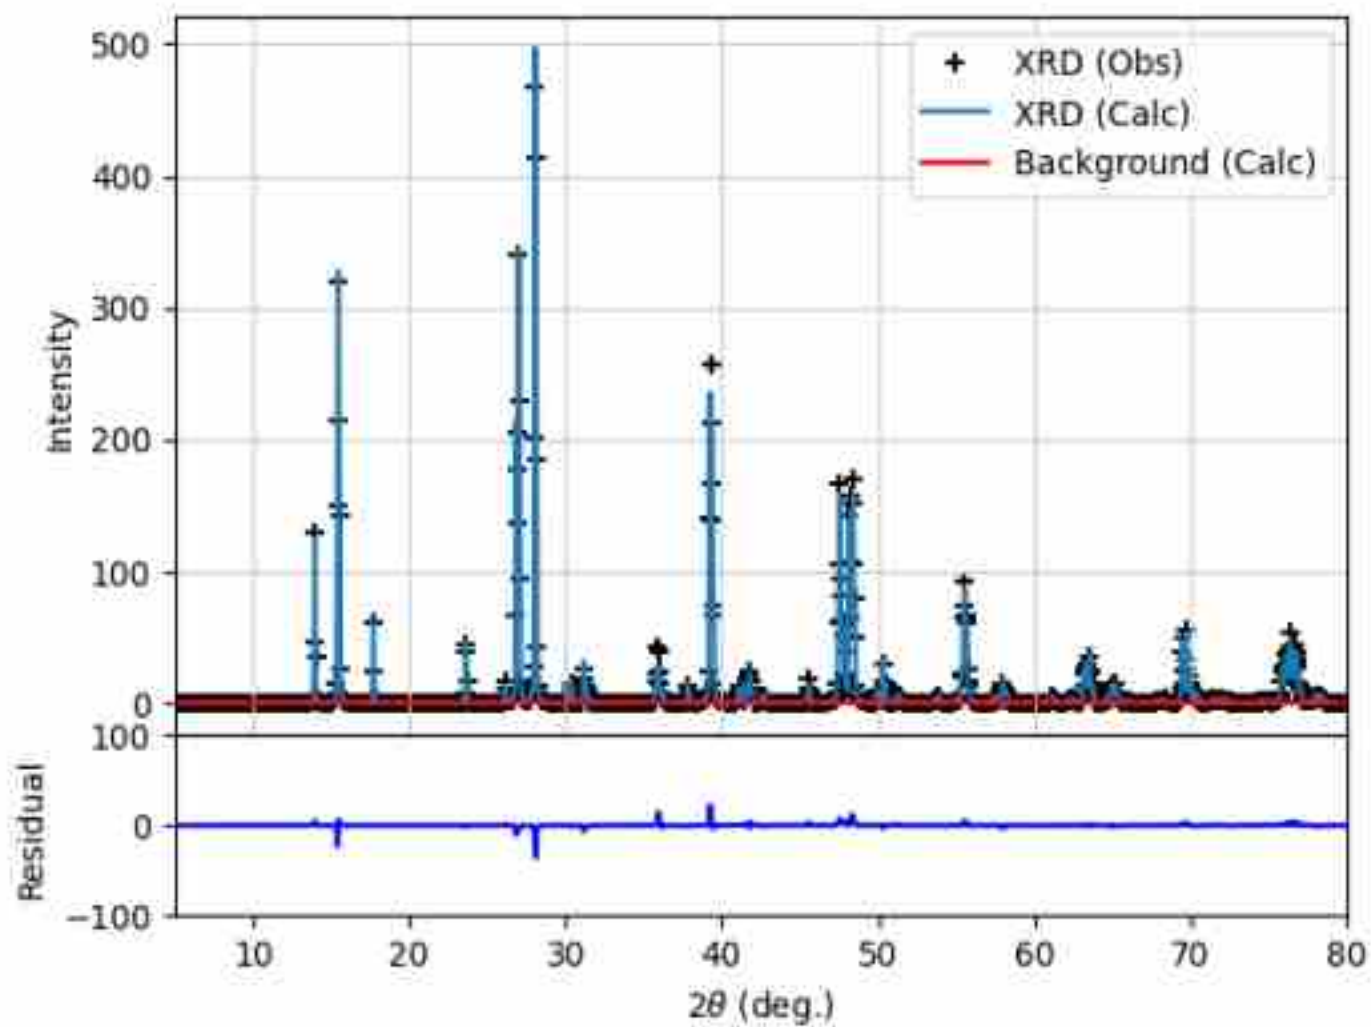

| RMSE before RR | Rwp    | RMSE after RR |
|----------------|--------|---------------|
| 0.332          | 7.2605 | 0.2734        |

# P4C112O4

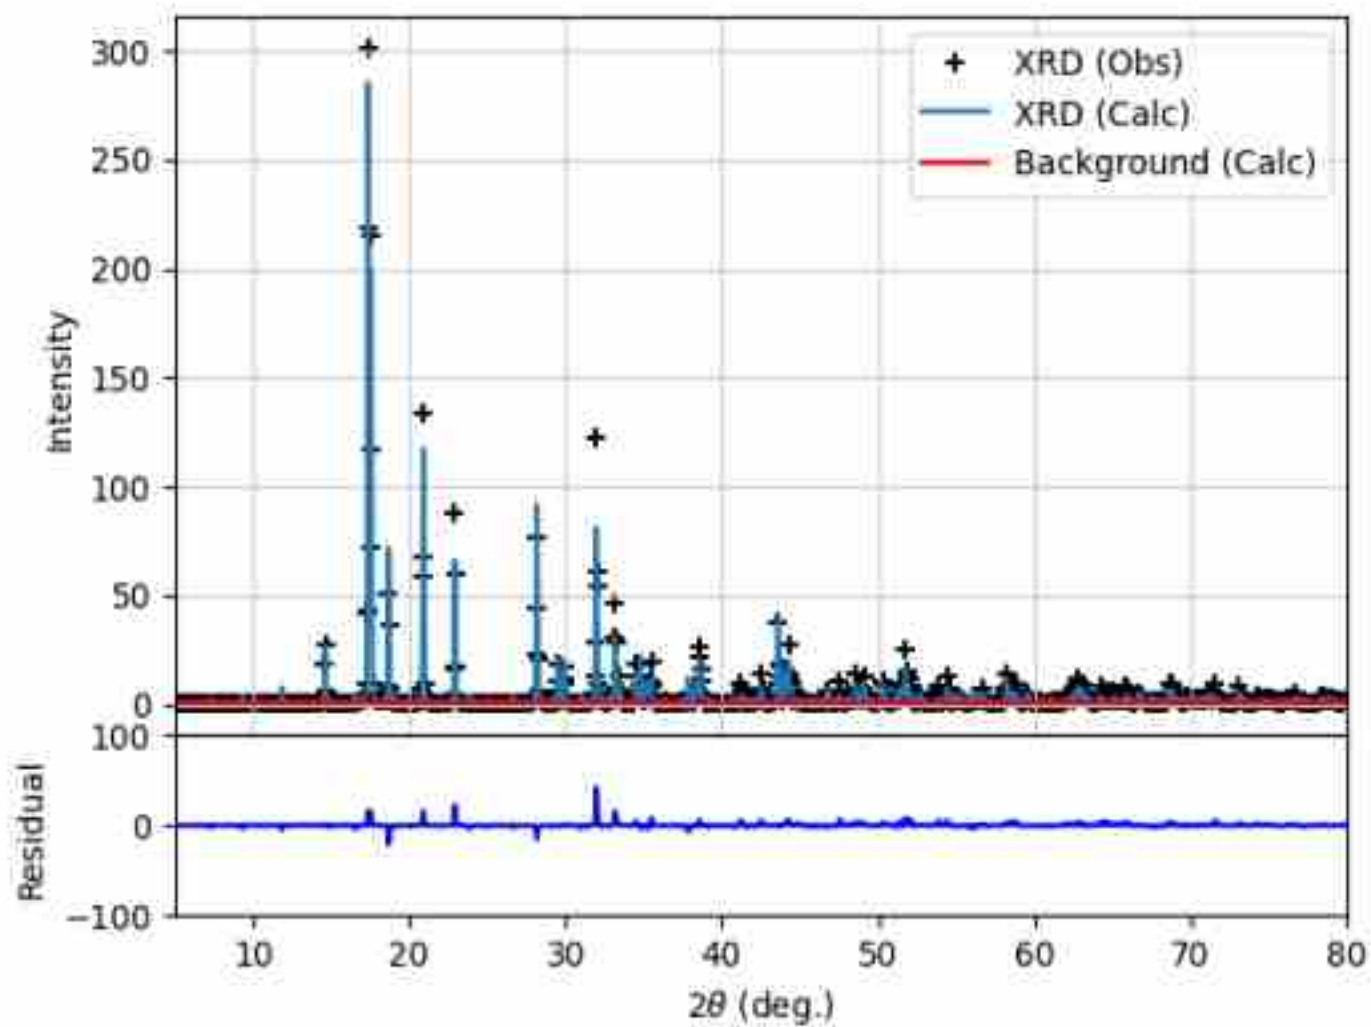

| RMSE before RR | Rwp      | RMSE after RR |
|----------------|----------|---------------|
| 0.332          | 29.49217 | None          |

# Fe7W6

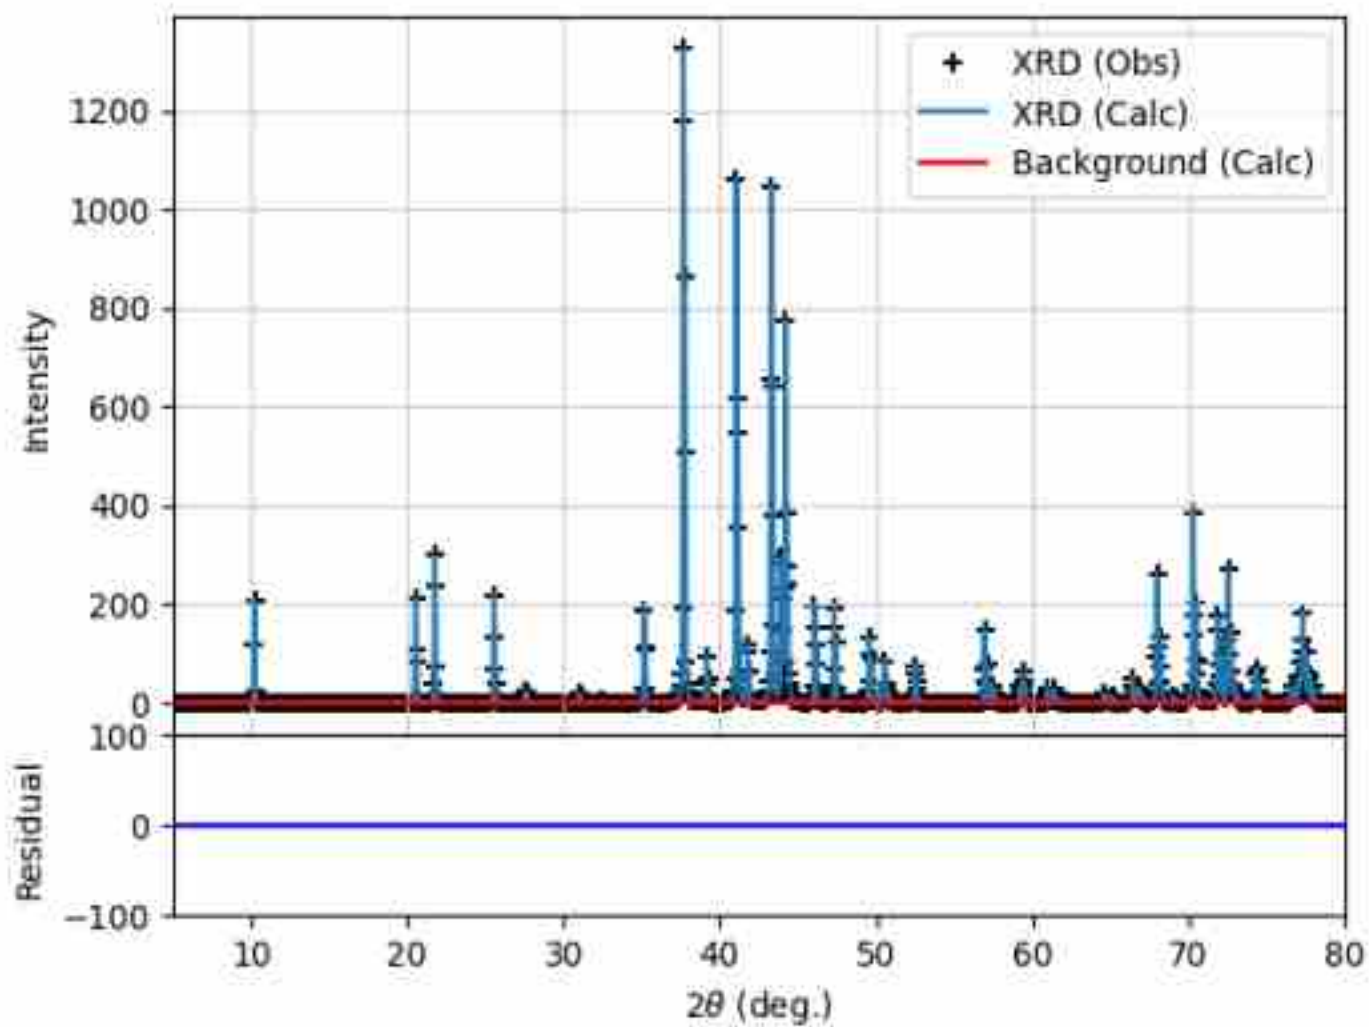

| RMSE before RR | Rwp     | RMSE after RR |
|----------------|---------|---------------|
| 0.333          | 0.00403 | 0.00061       |

# H4S2O8

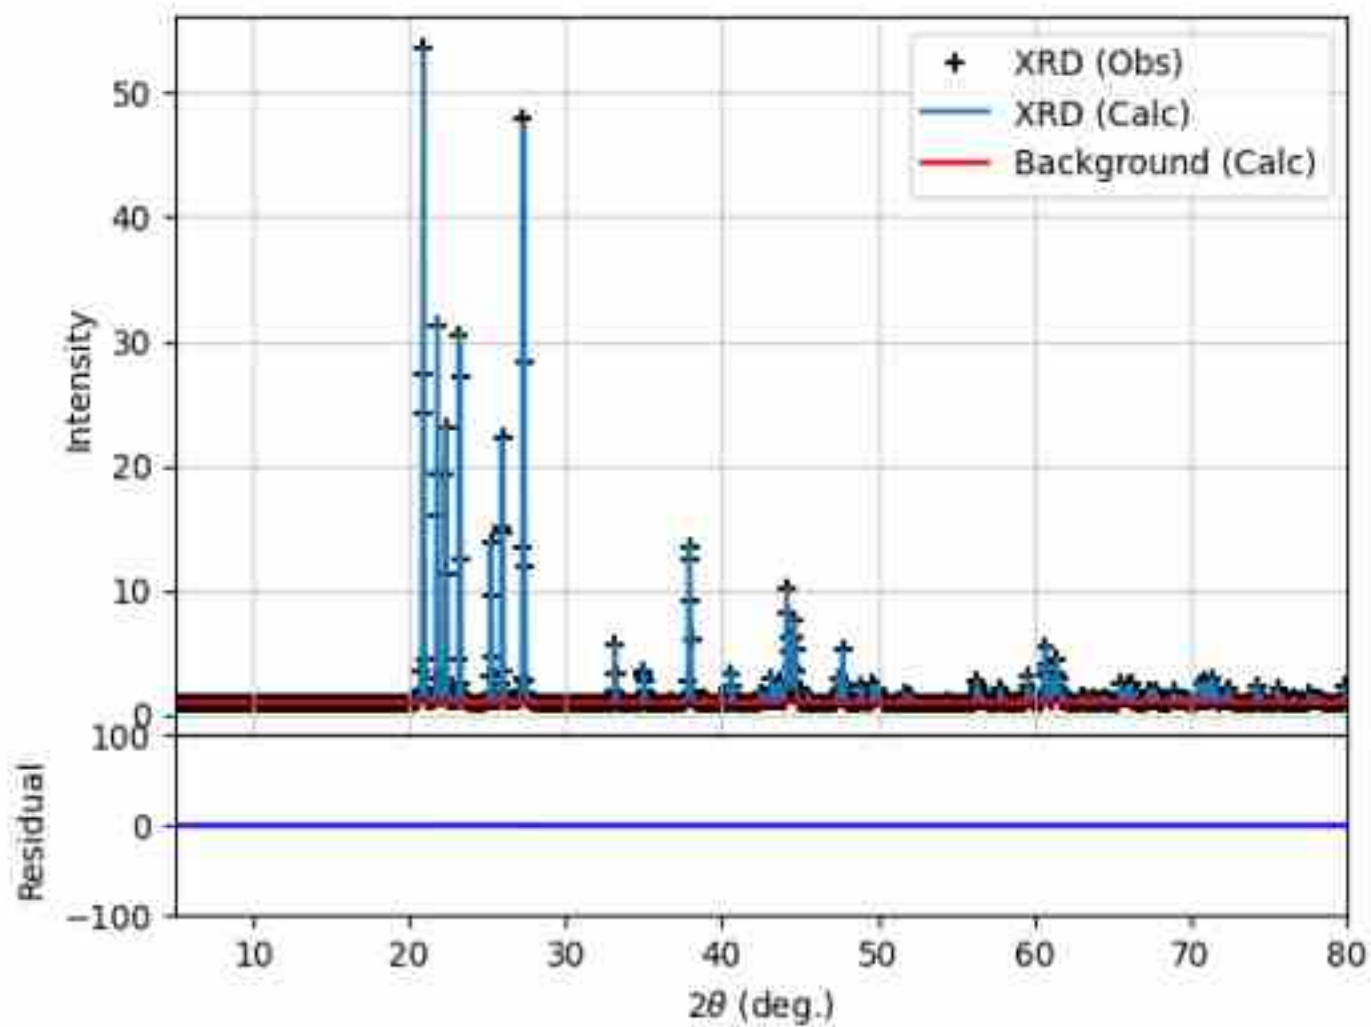

| RMSE before RR | Rwp     | RMSE after RR |
|----------------|---------|---------------|
| 0.333          | 0.73253 | 0.47011       |

# K<sub>2</sub>Zr<sub>1</sub>P<sub>2</sub>O<sub>8</sub>

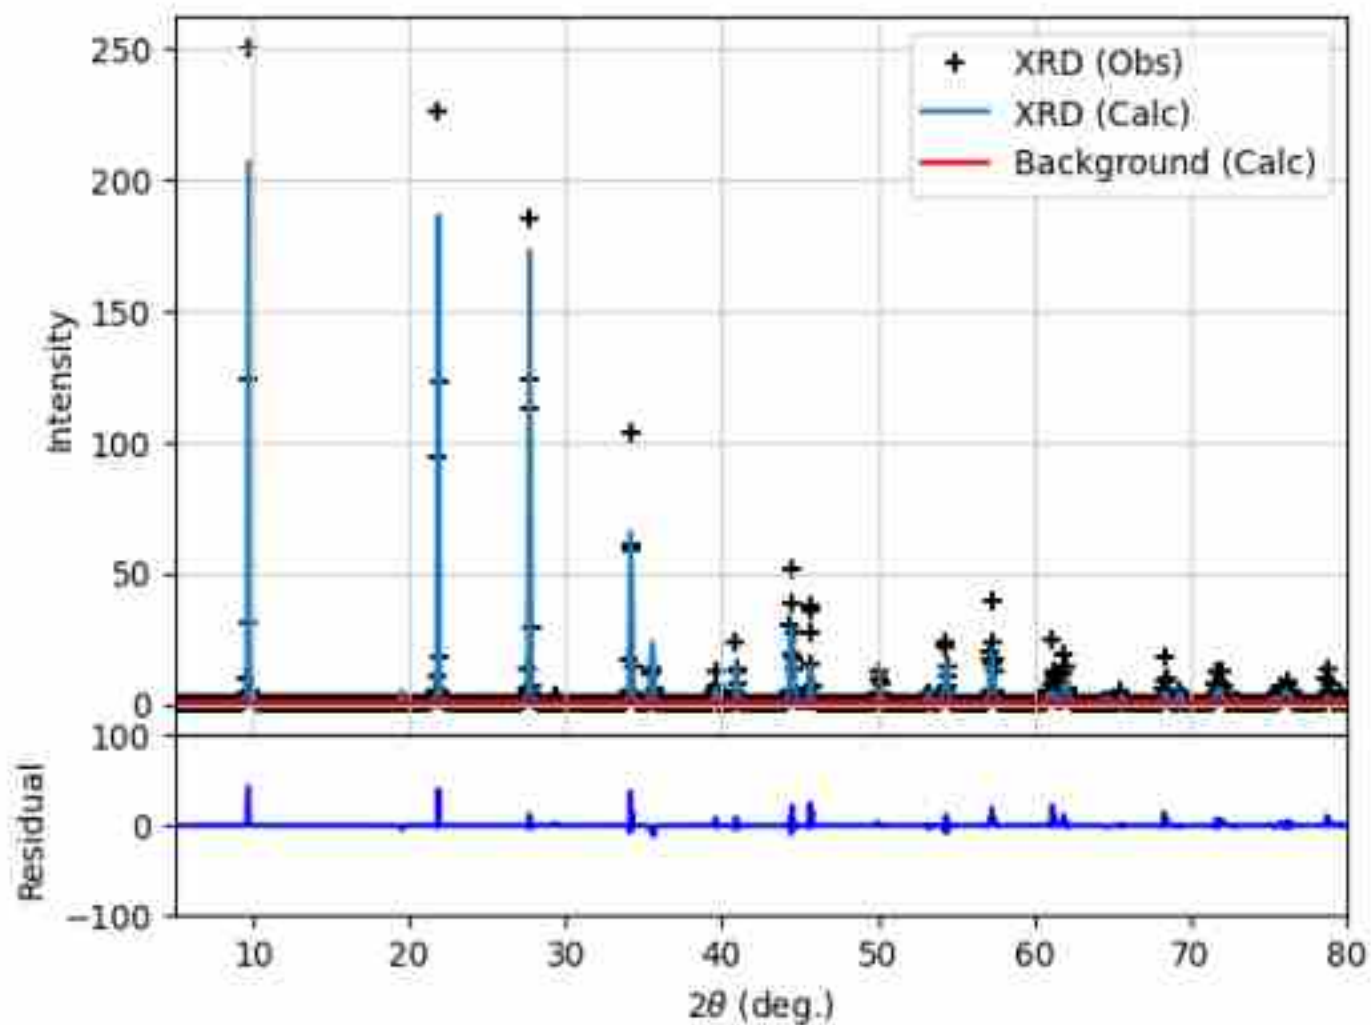

| RMSE before RR | Rwp      | RMSE after RR |
|----------------|----------|---------------|
| 0.333          | 32.51891 | None          |

# Ag<sub>2</sub>Pt<sub>2</sub>F<sub>12</sub>

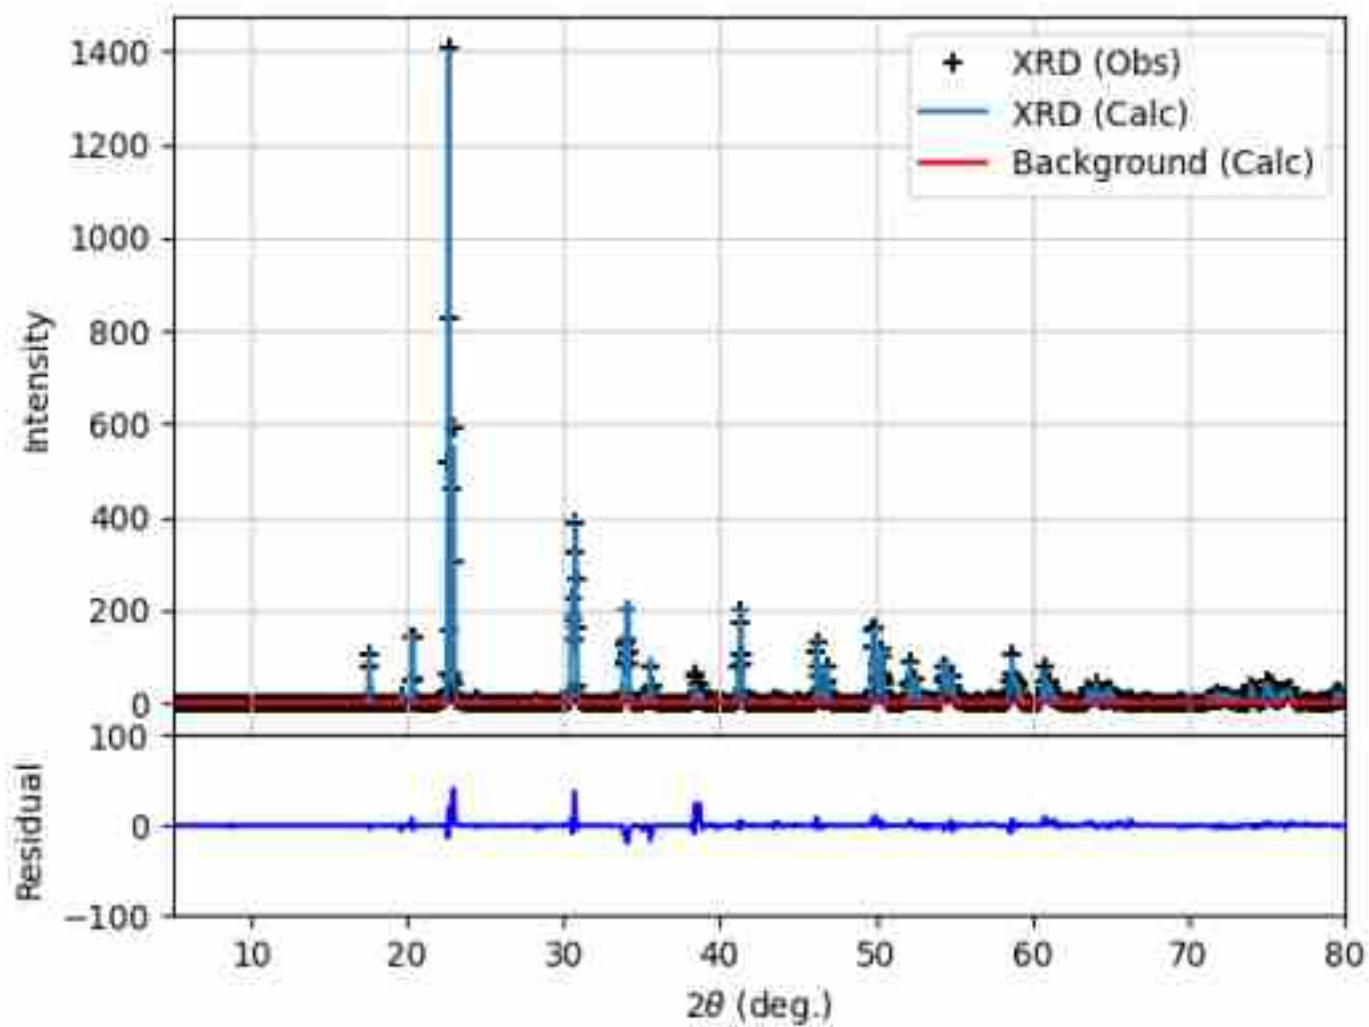

| RMSE before RR | Rwp      | RMSE after RR |
|----------------|----------|---------------|
| 0.335          | 11.18977 | 0.45537       |



# Ca6Cu2Sn7

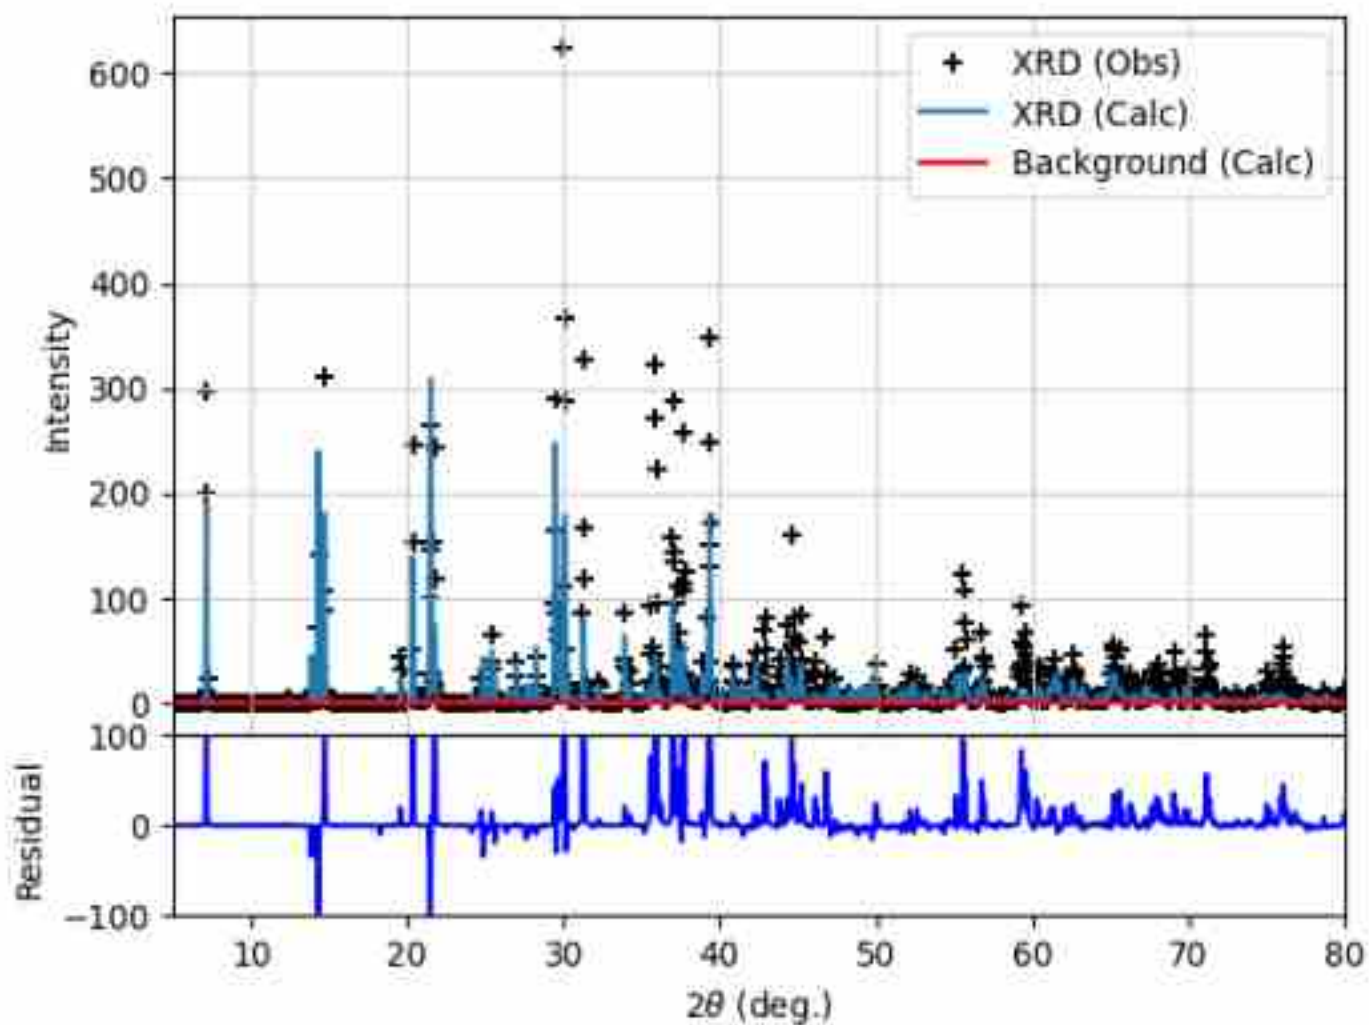

| RMSE before RR | Rwp      | RMSE after RR |
|----------------|----------|---------------|
| 0.335          | 64.01013 | None          |

# Yb<sub>2</sub>C16

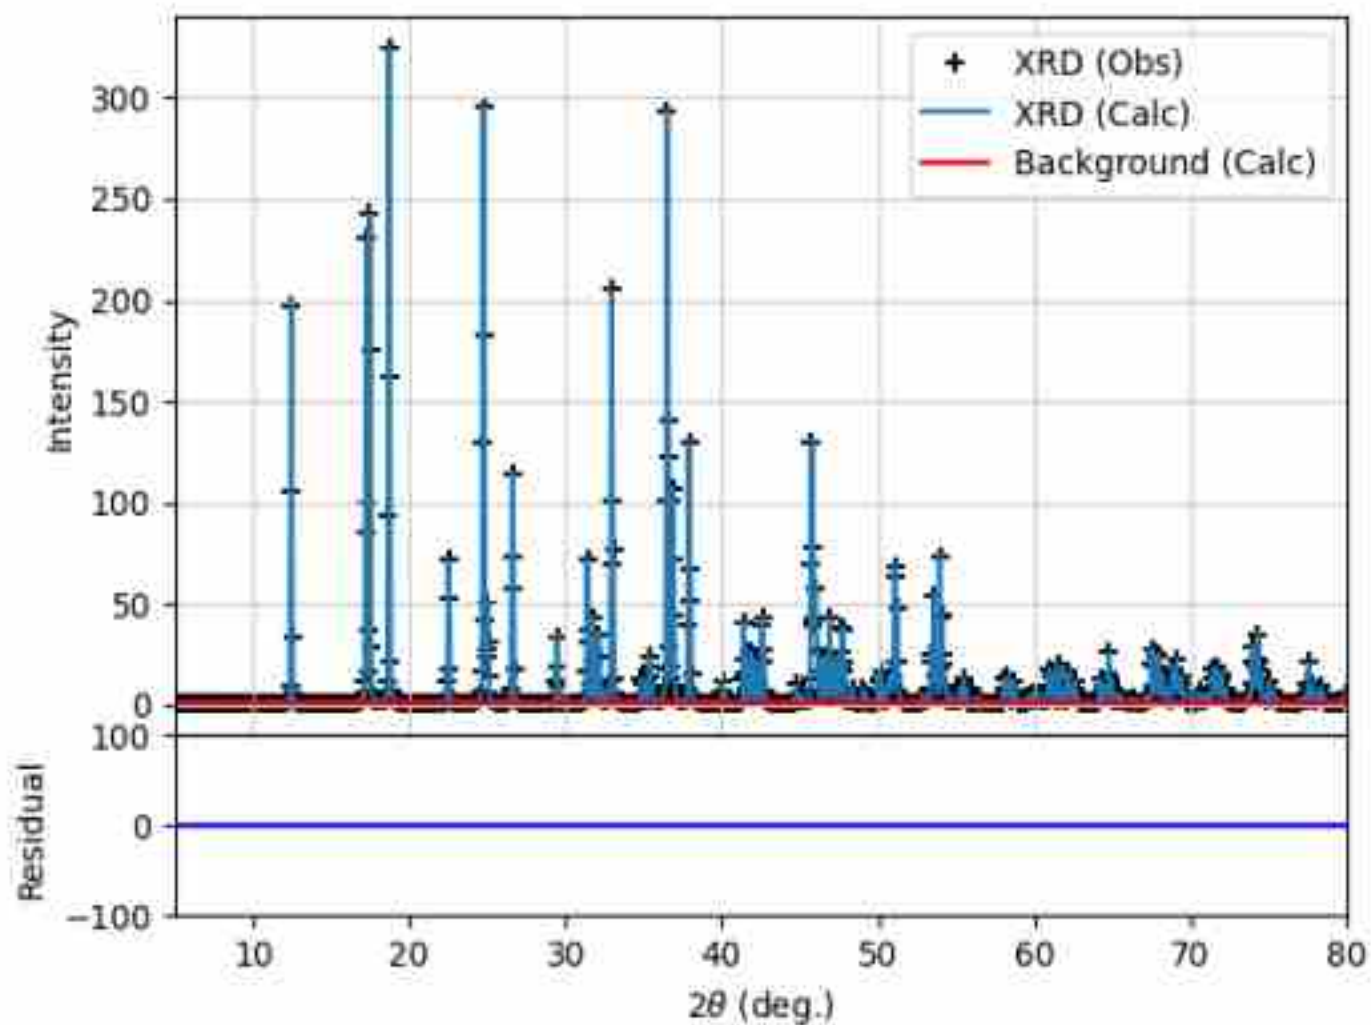

| RMSE before RR | Rwp     | RMSE after RR |
|----------------|---------|---------------|
| 0.335          | 0.00405 | 0.00032       |

# Cs<sub>4</sub>Rb<sub>4</sub>O<sub>4</sub>

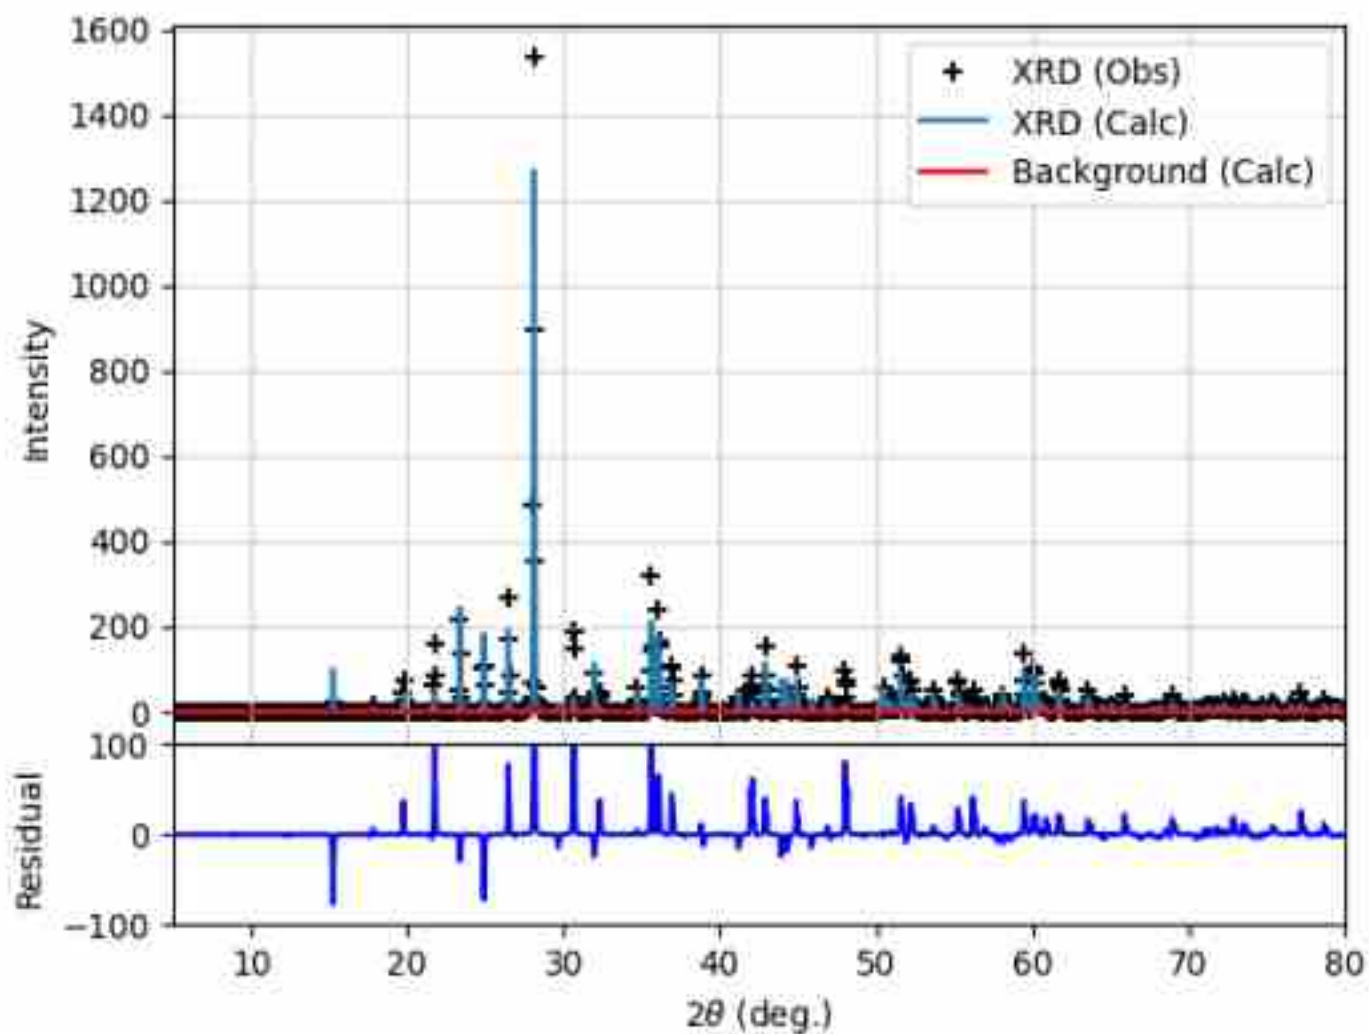

| RMSE before RR | Rwp      | RMSE after RR |
|----------------|----------|---------------|
| 0.336          | 43.48079 | 0.49387       |

# Li<sub>4</sub>Si<sub>1</sub>Ge<sub>3</sub>O<sub>10</sub>

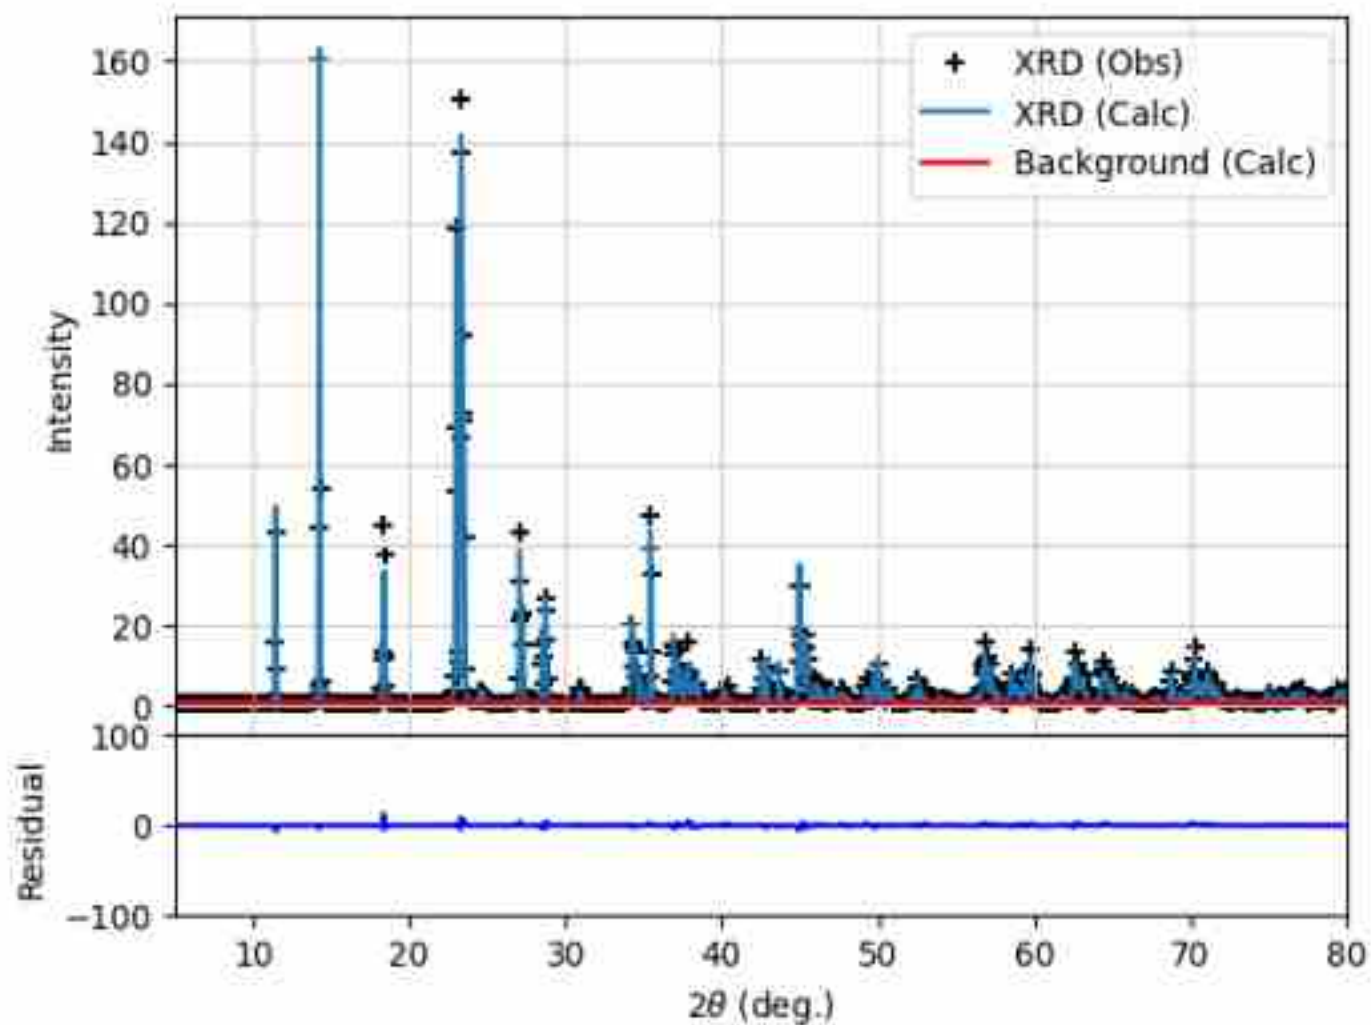

| RMSE before RR | Rwp      | RMSE after RR |
|----------------|----------|---------------|
| 0.336          | 12.81209 | 0.47415       |

# Sr2Cr2H2O4

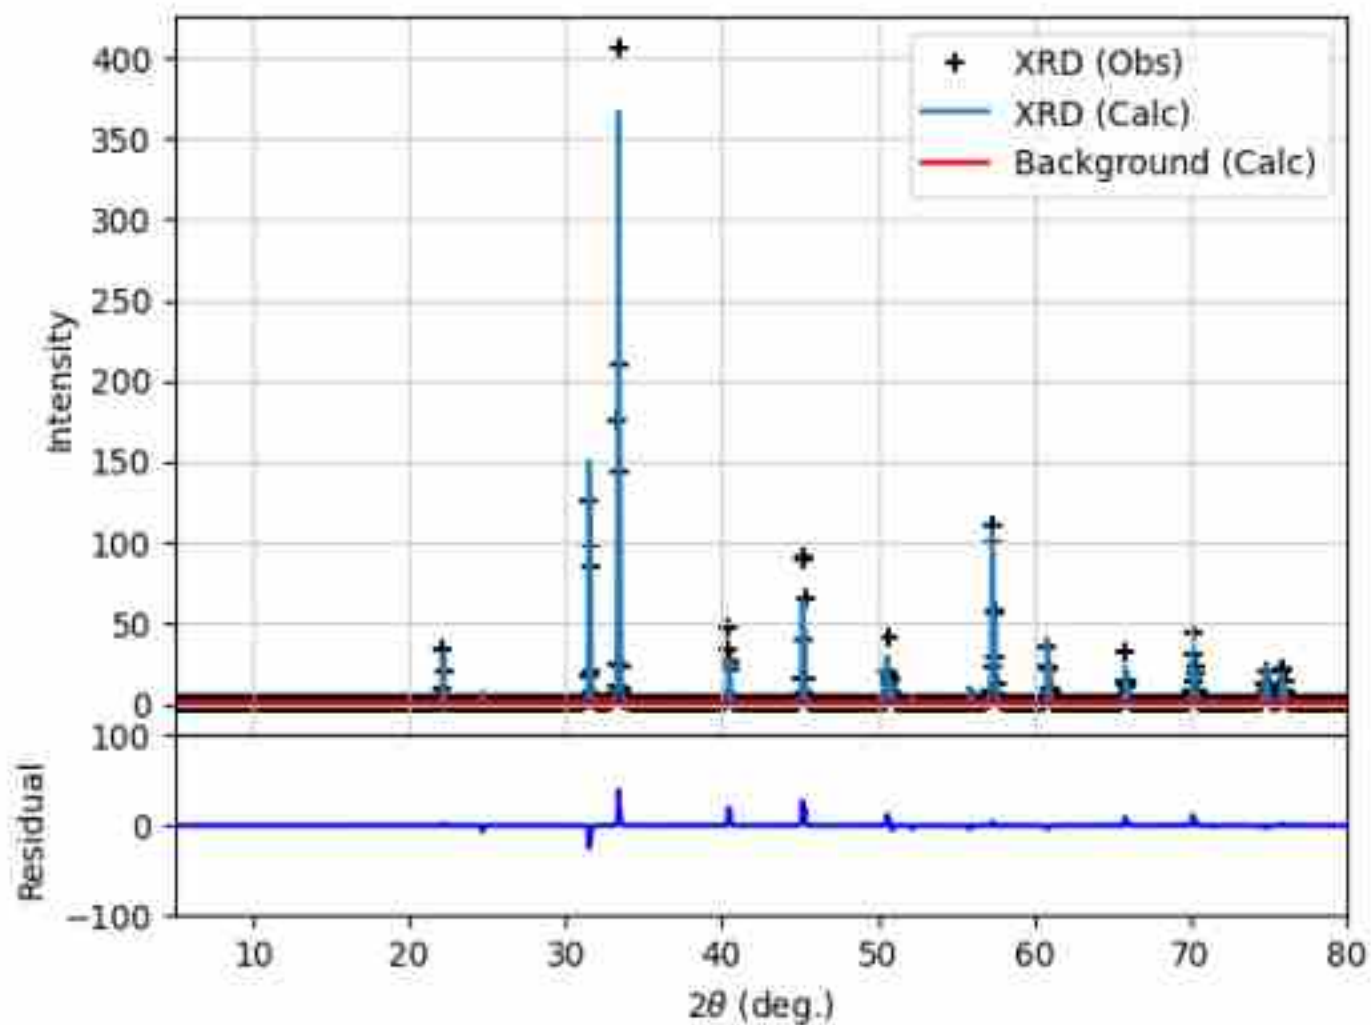

| RMSE before RR | Rwp      | RMSE after RR |
|----------------|----------|---------------|
| 0.336          | 22.78777 | None          |

# Ti<sub>2</sub>Al<sub>2</sub>O<sub>6</sub>

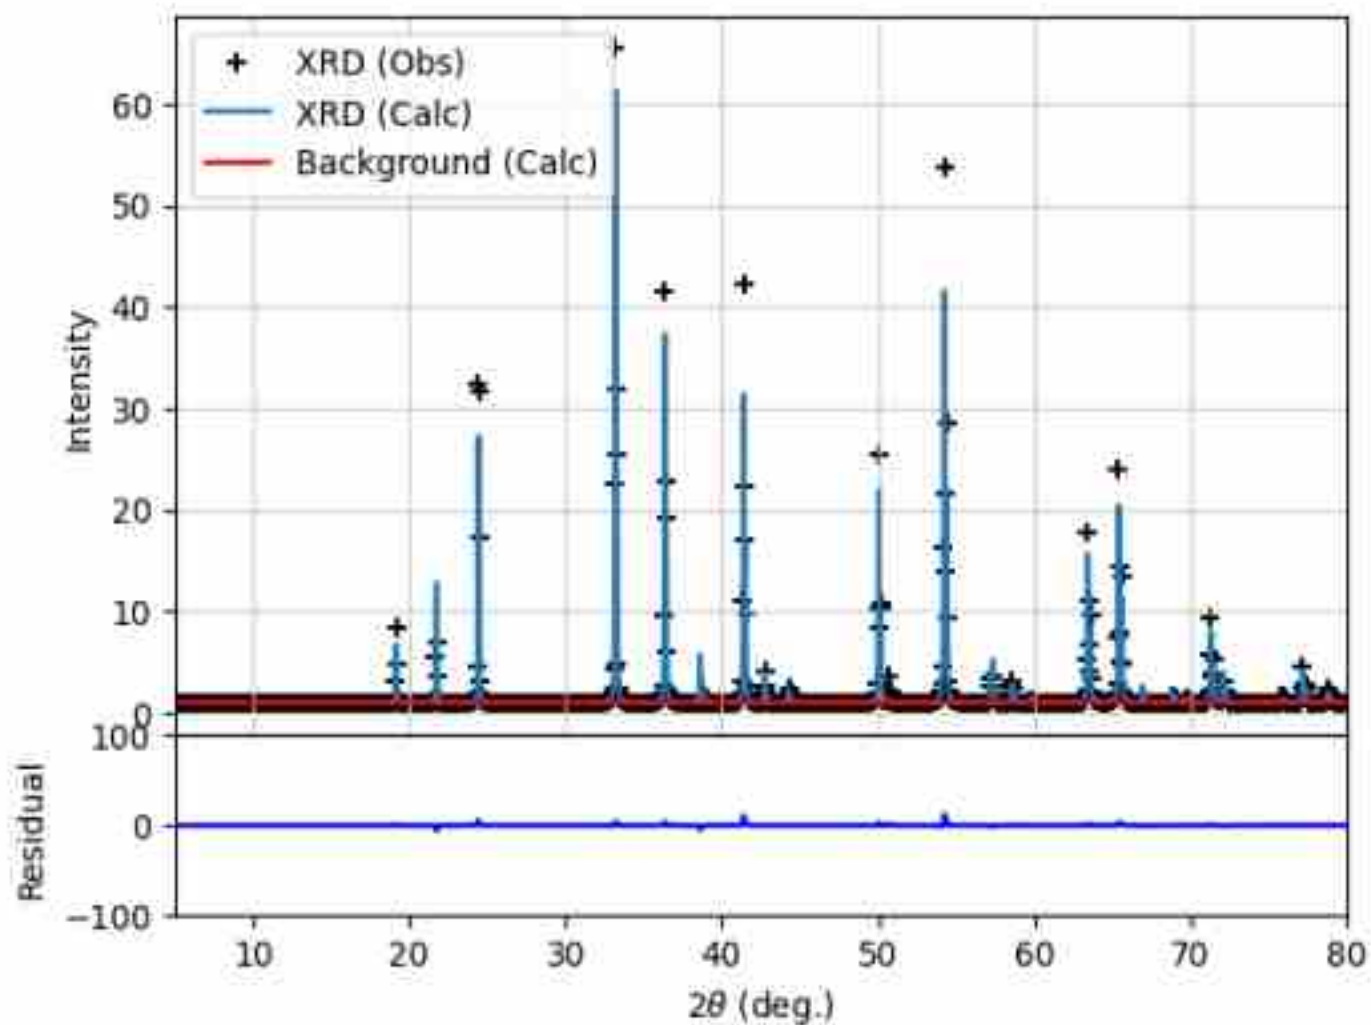

| RMSE before RR | Rwp     | RMSE after RR |
|----------------|---------|---------------|
| 0.336          | 17.0316 | 0.35147       |

# Ag<sub>8</sub>Ge<sub>1</sub>Te<sub>6</sub>

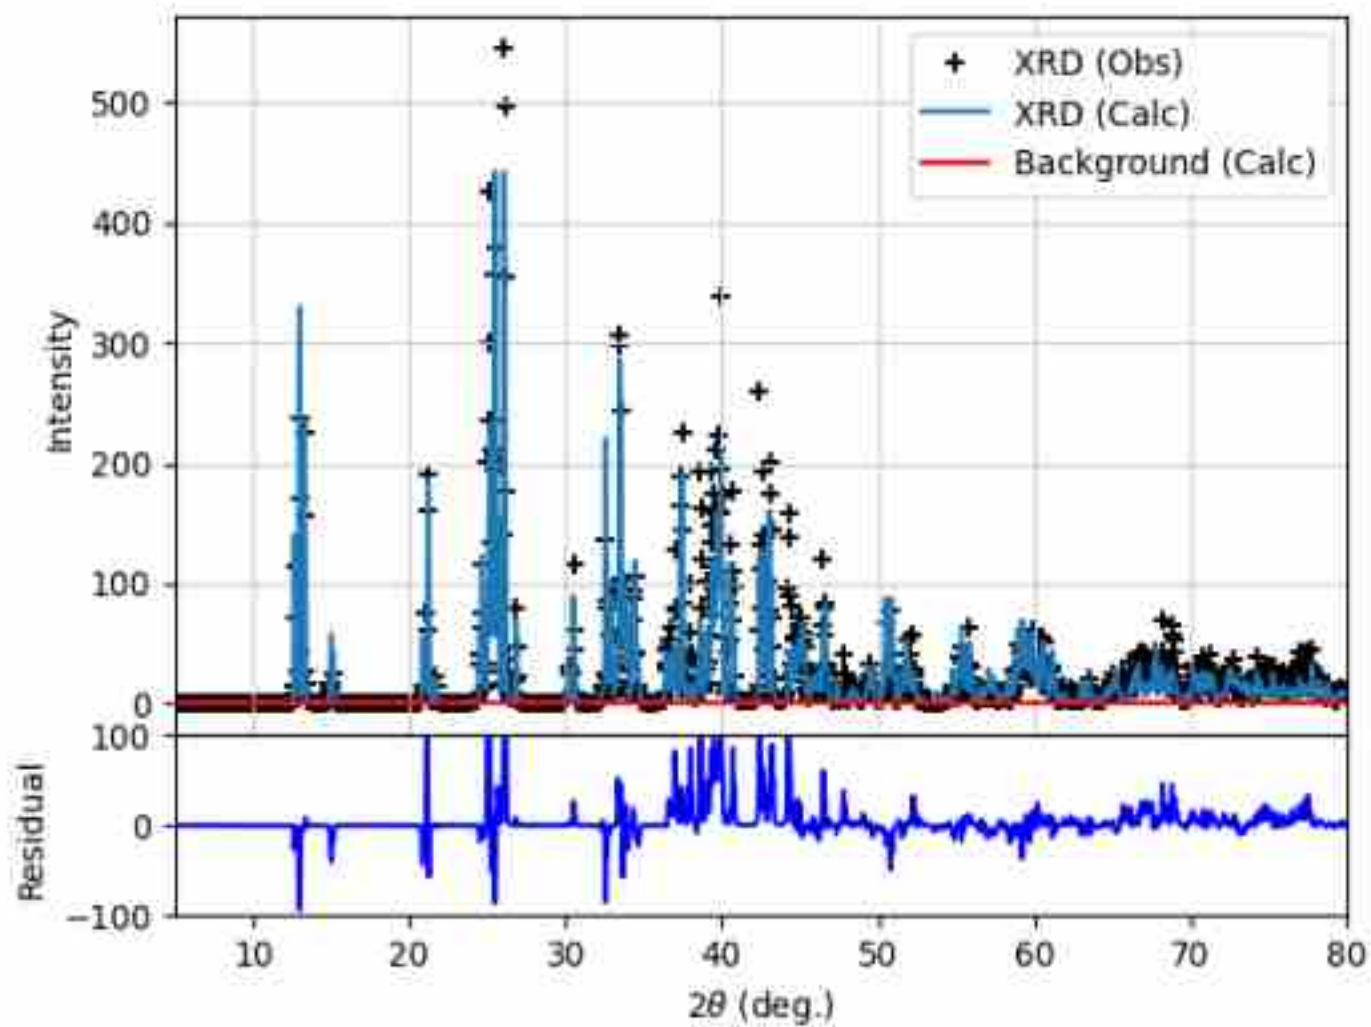

| RMSE before RR | Rwp      | RMSE after RR |
|----------------|----------|---------------|
| 0.337          | 45.19467 | 0.39875       |

# Li1Cu1P4O12

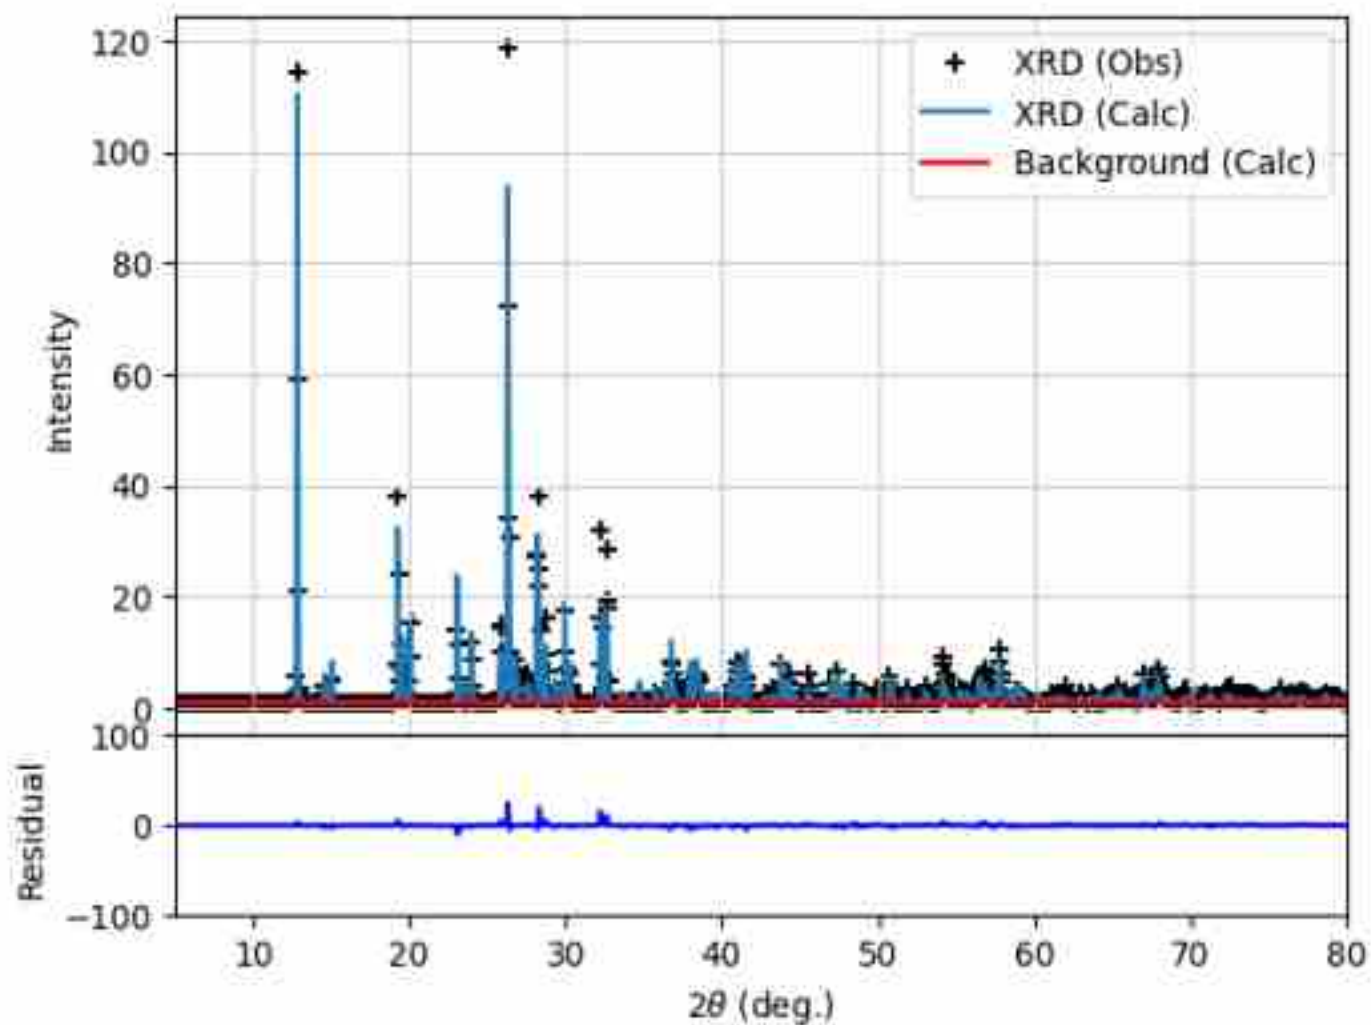

| RMSE before RR | Rwp      | RMSE after RR |
|----------------|----------|---------------|
| 0.337          | 28.13893 | None          |



# V4Cr4O12

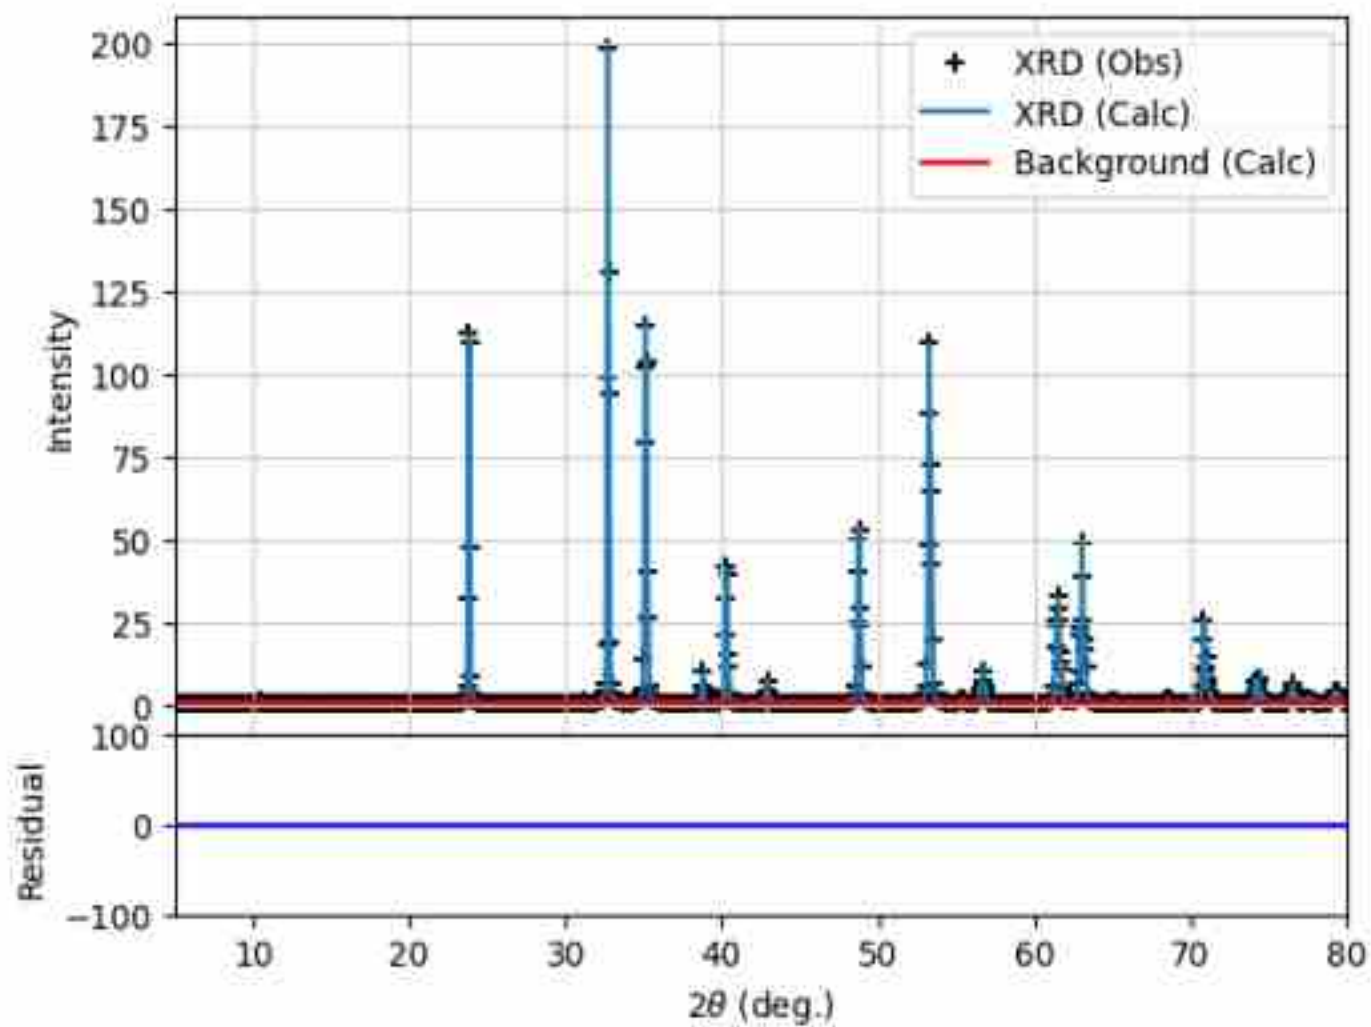

| RMSE before RR | Rwp     | RMSE after RR |
|----------------|---------|---------------|
| 0.337          | 0.33388 | 0.34435       |

# Hg<sub>2</sub>Cl<sub>4</sub>O<sub>12</sub>

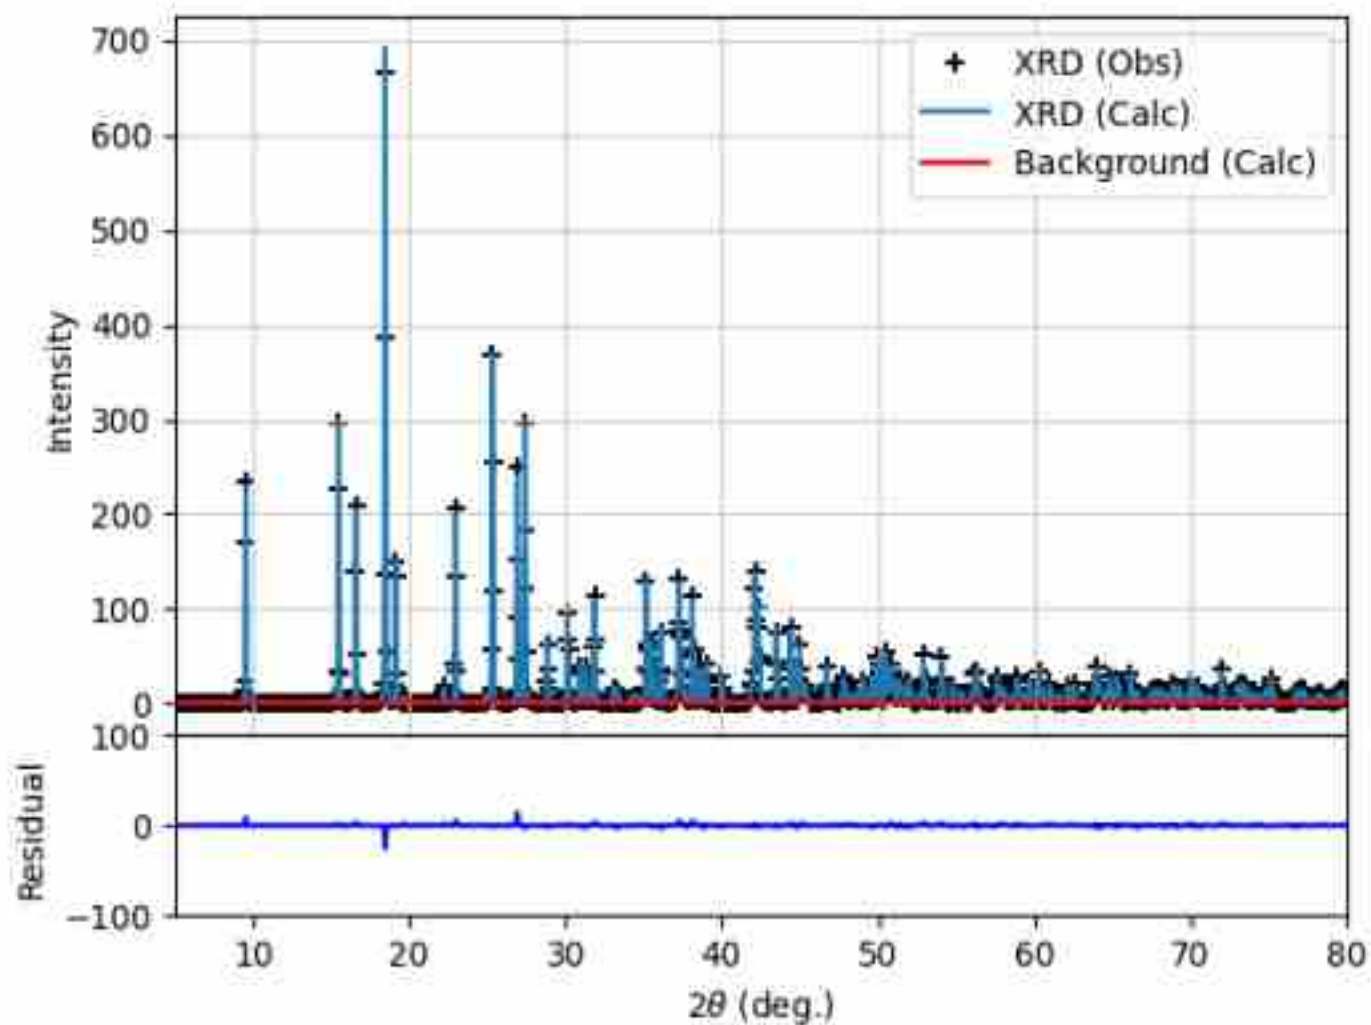

| RMSE before RR | Rwp     | RMSE after RR |
|----------------|---------|---------------|
| 0.338          | 4.89542 | 0.30928       |

# Mn<sub>4</sub>P<sub>2</sub>O<sub>10</sub>

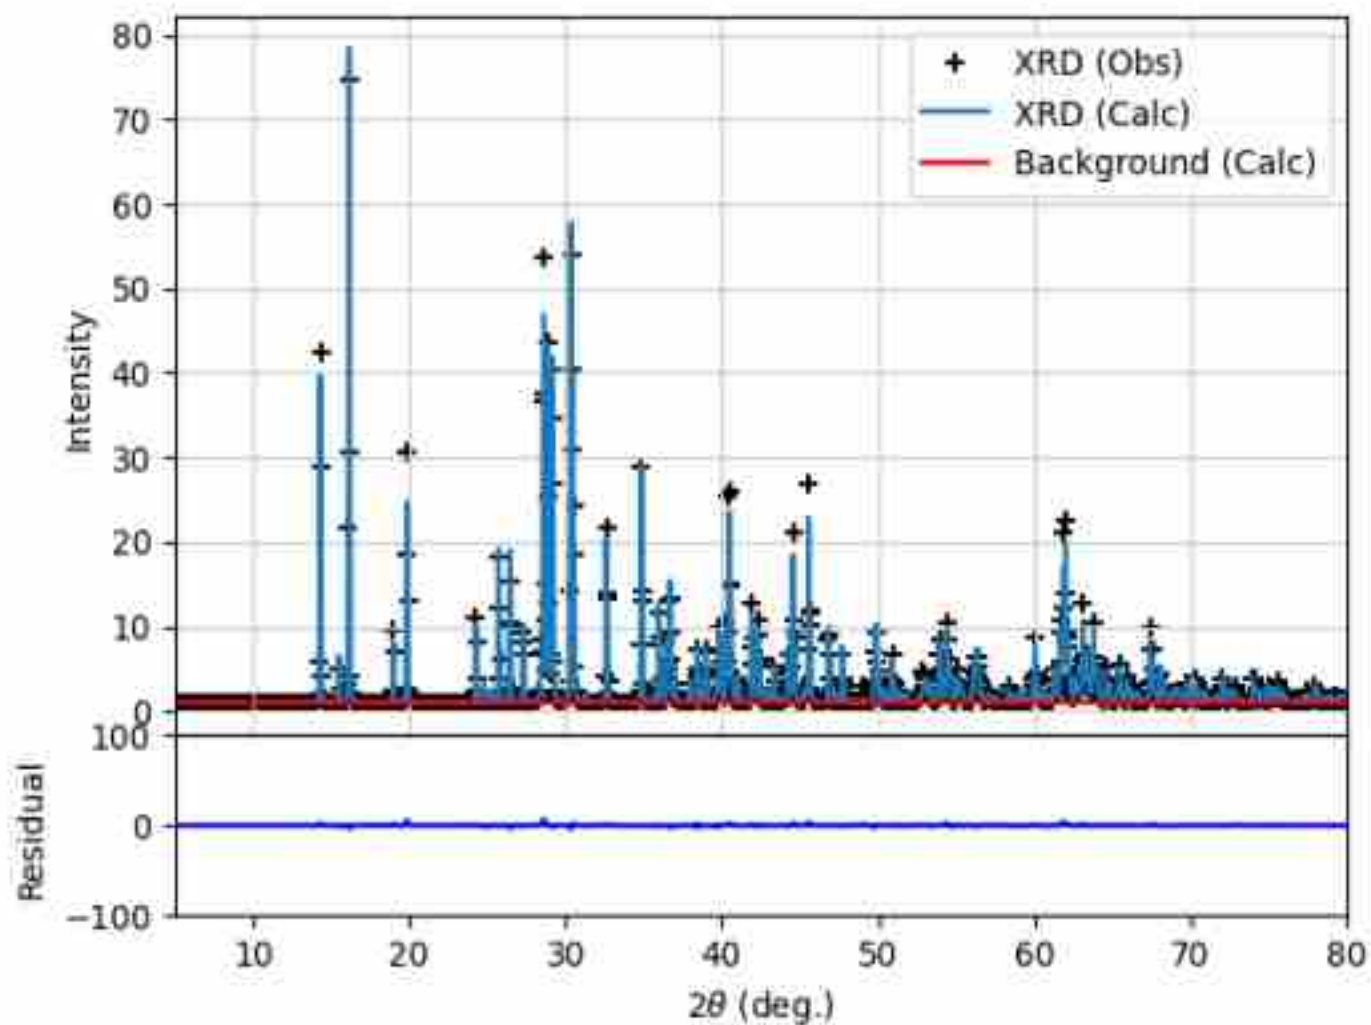

| RMSE before RR | Rwp      | RMSE after RR |
|----------------|----------|---------------|
| 0.341          | 11.67679 | None          |

# Mo2C1N1

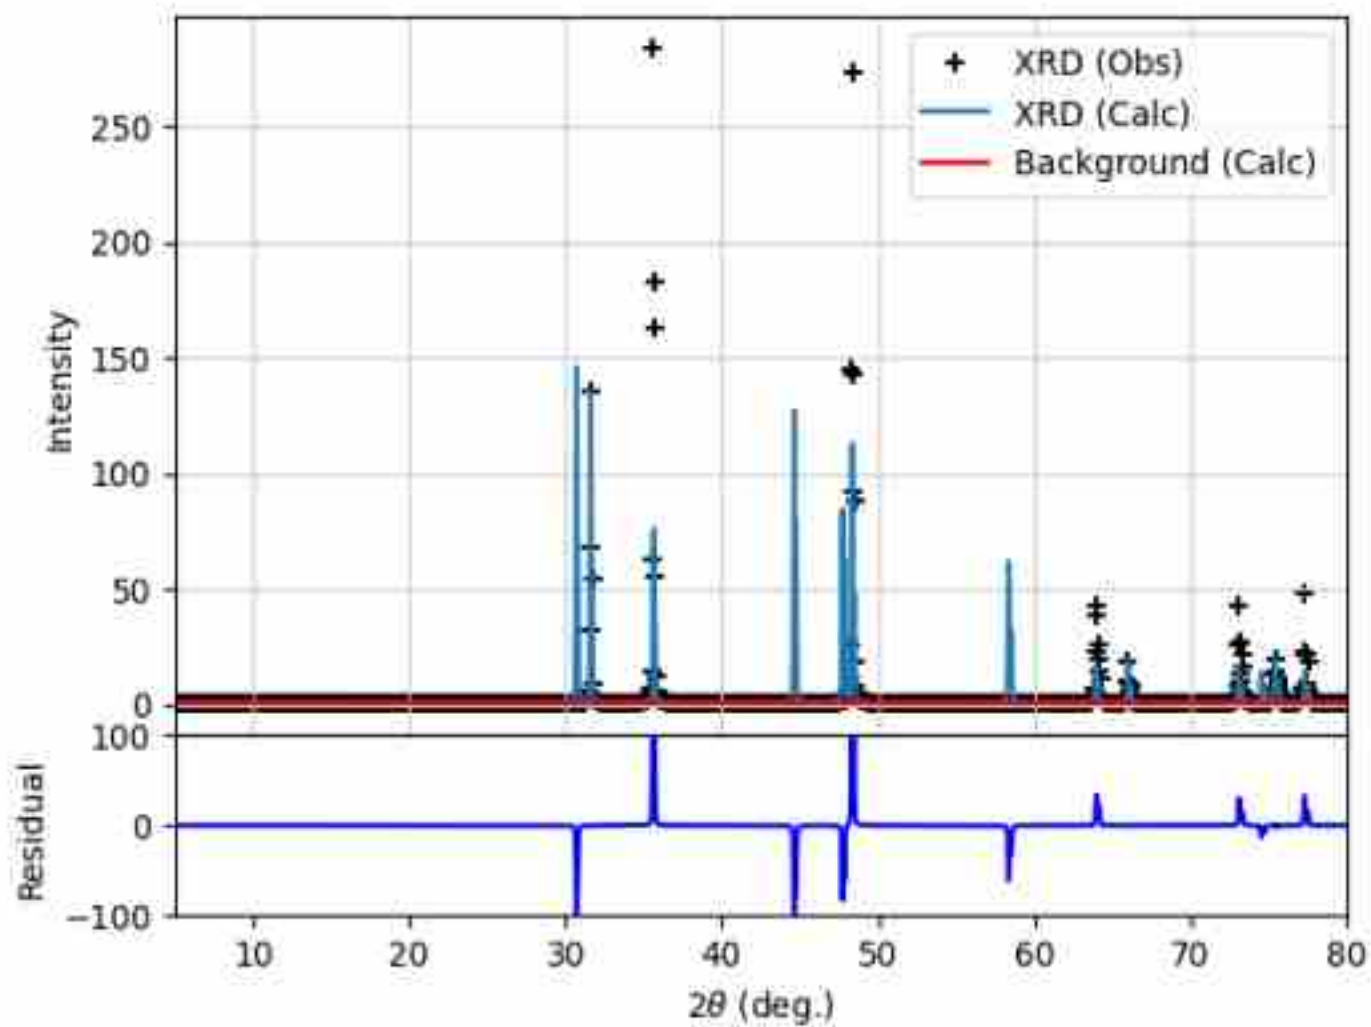

| RMSE before RR | Rwp   | RMSE after RR |
|----------------|-------|---------------|
| 0.342          | 100.0 | 0.34164       |

# V<sub>2</sub>Fe<sub>2</sub>O<sub>8</sub>

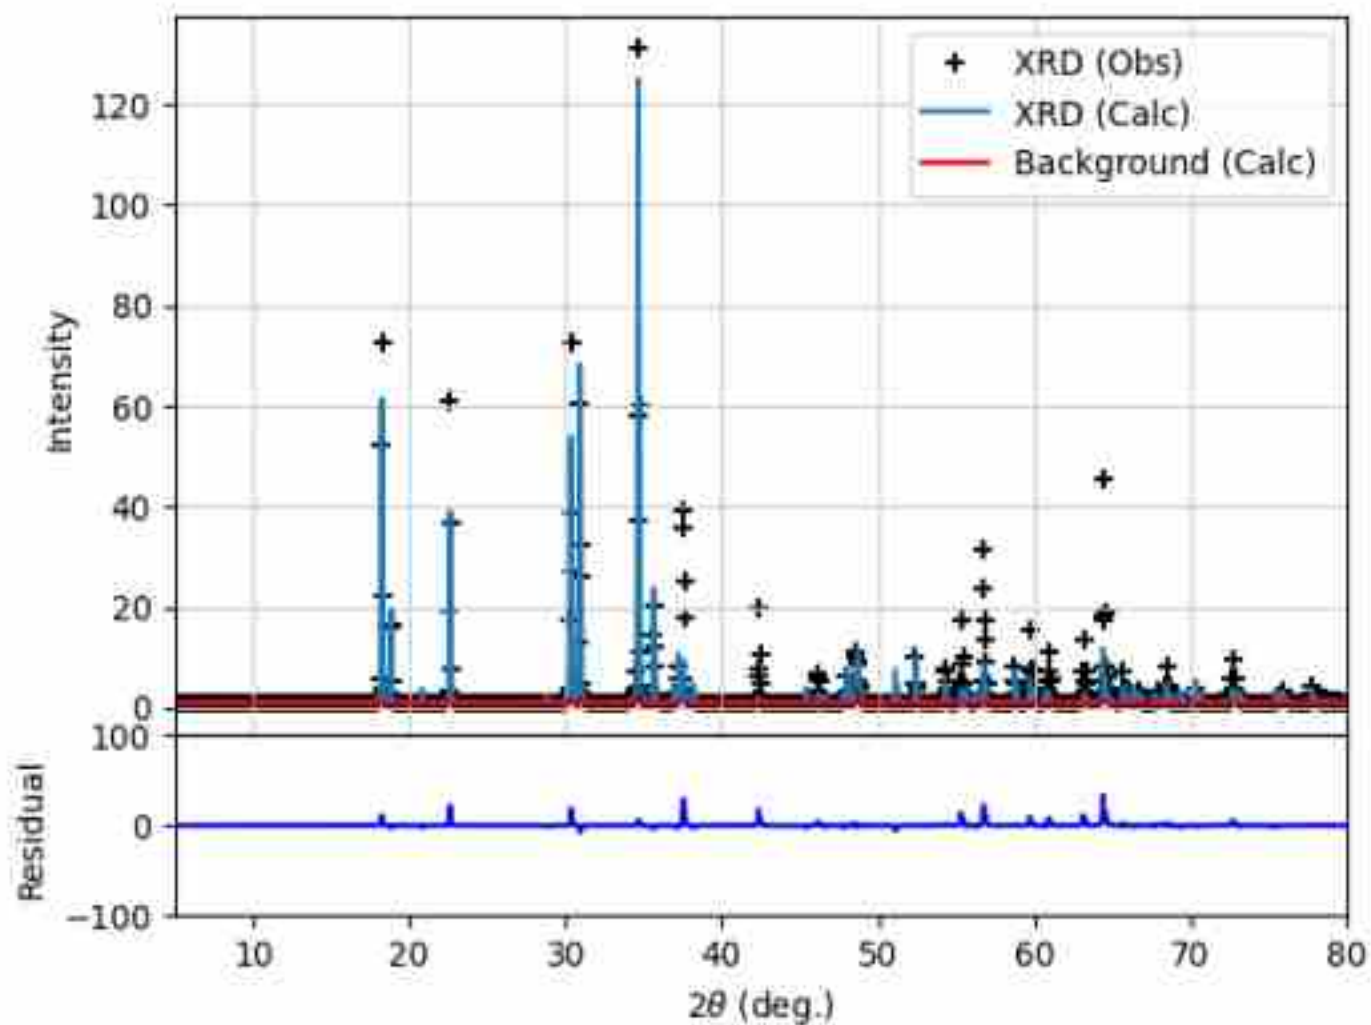

| RMSE before RR | Rwp      | RMSE after RR |
|----------------|----------|---------------|
| 0.342          | 37.61531 | None          |

# Sn2Se2

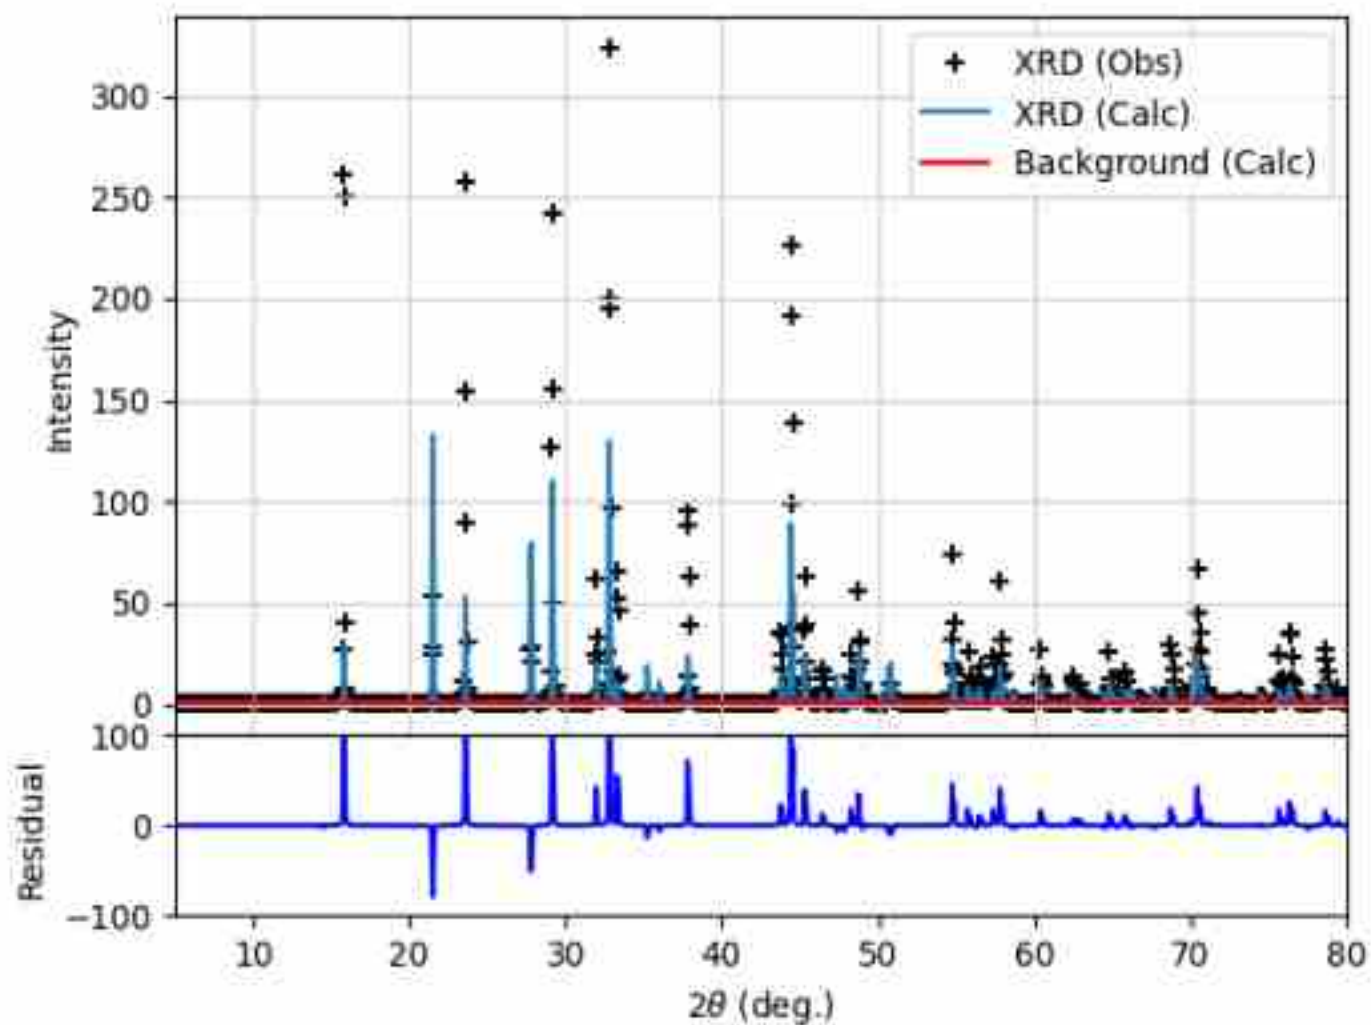

| RMSE before RR | Rwp      | RMSE after RR |
|----------------|----------|---------------|
| 0.343          | 65.36611 | 0.31971       |

# Pb2S2

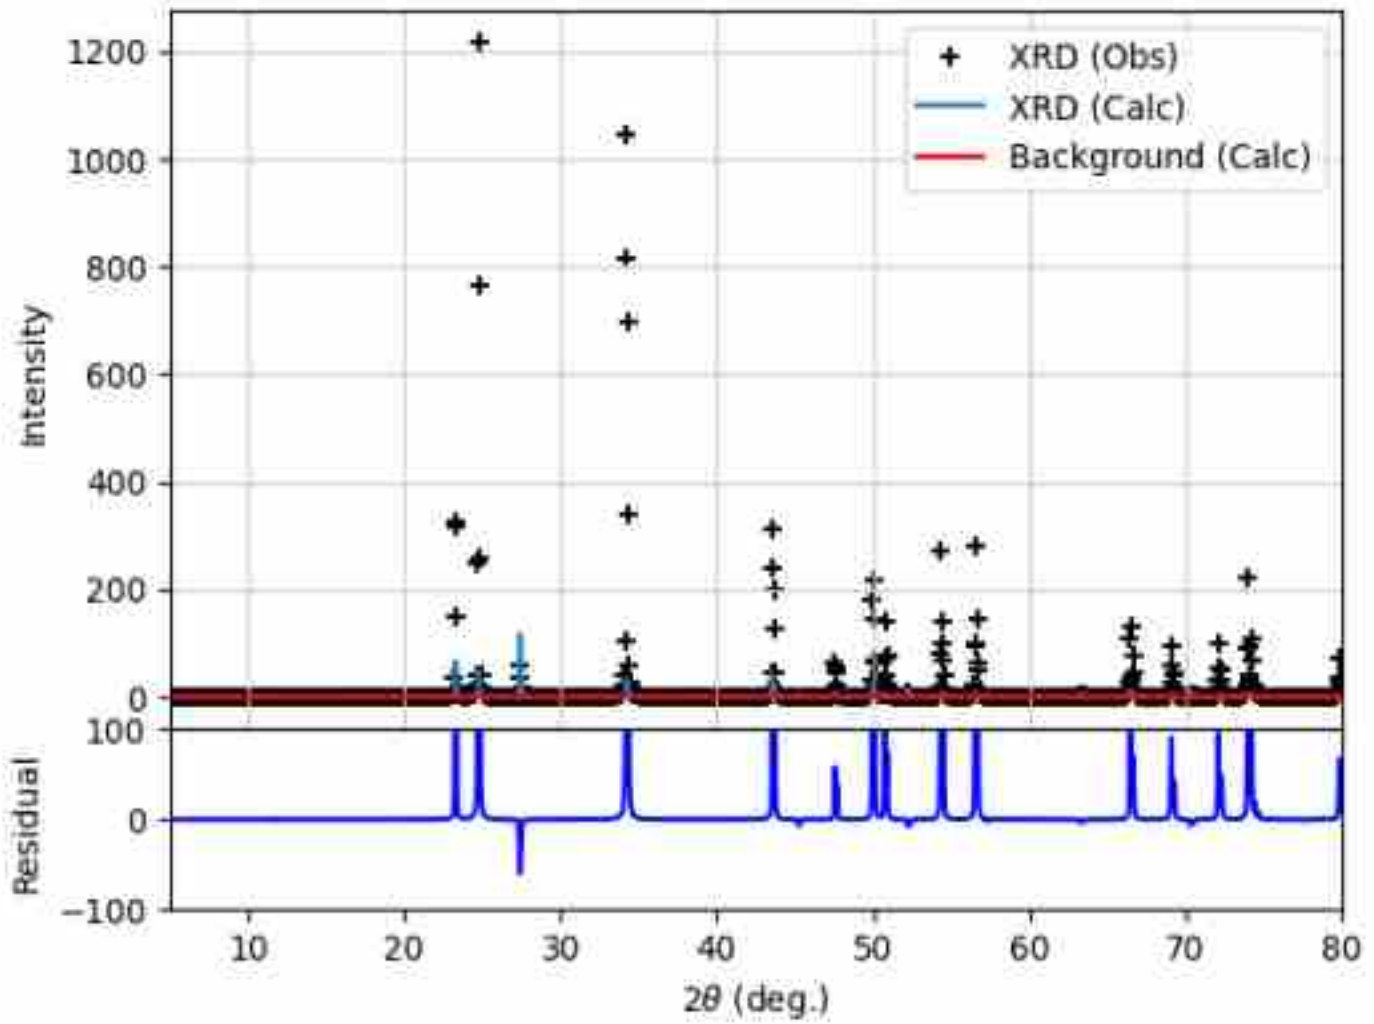

| RMSE before RR | Rwp      | RMSE after RR |
|----------------|----------|---------------|
| 0.344          | 88.04815 | None          |

# Zn<sub>6</sub>Sn<sub>4</sub>Pt<sub>4</sub>

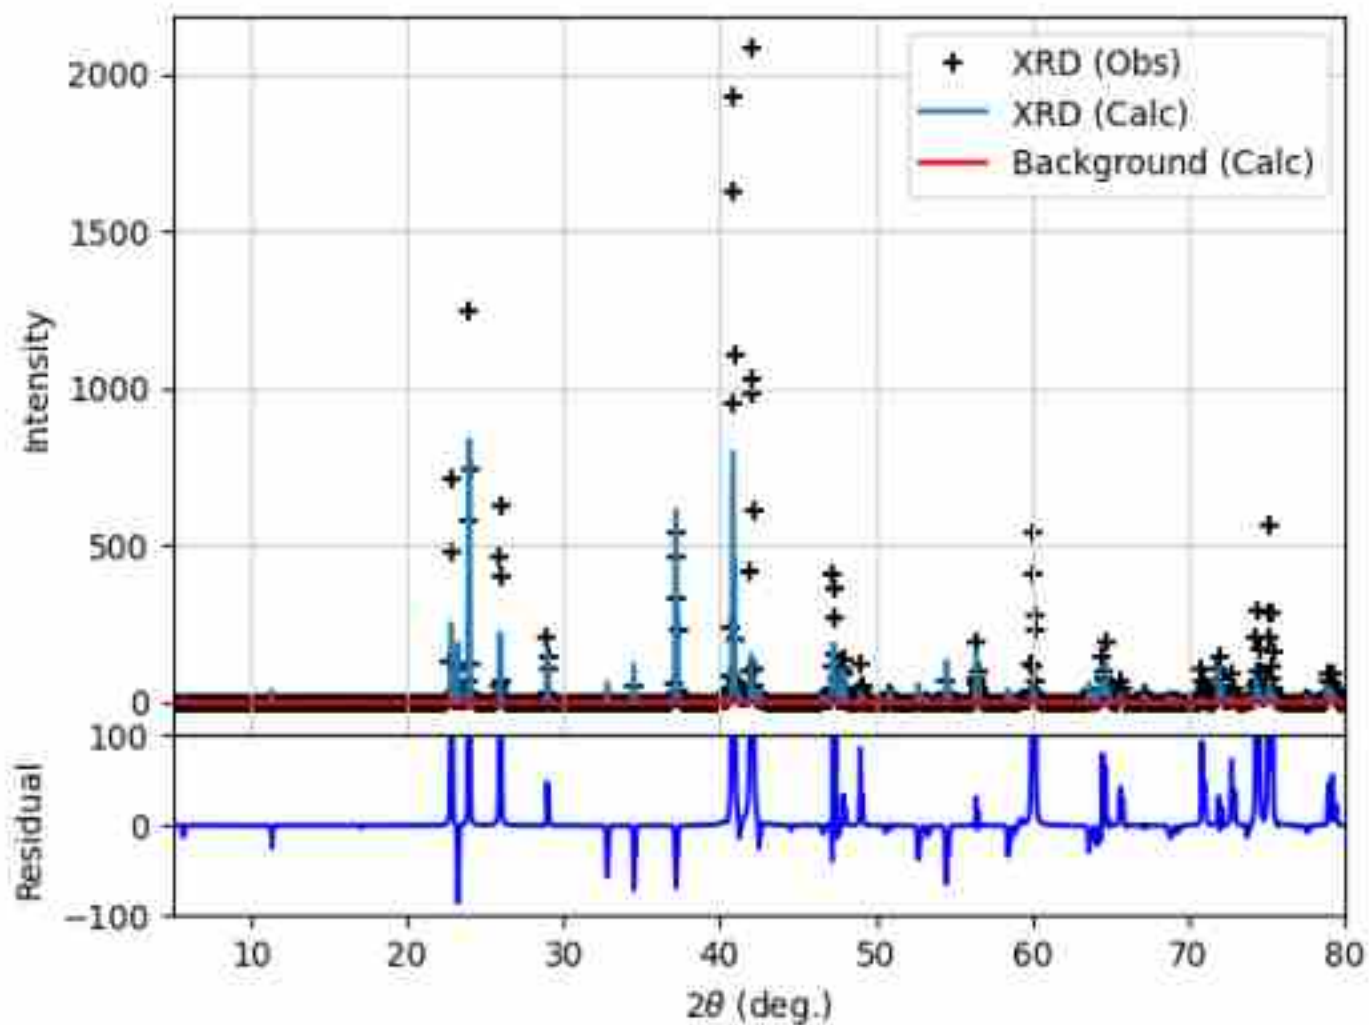

| RMSE before RR | Rwp      | RMSE after RR |
|----------------|----------|---------------|
| 0.344          | 69.12369 | 0.36938       |



# Si6Mo2Pt4

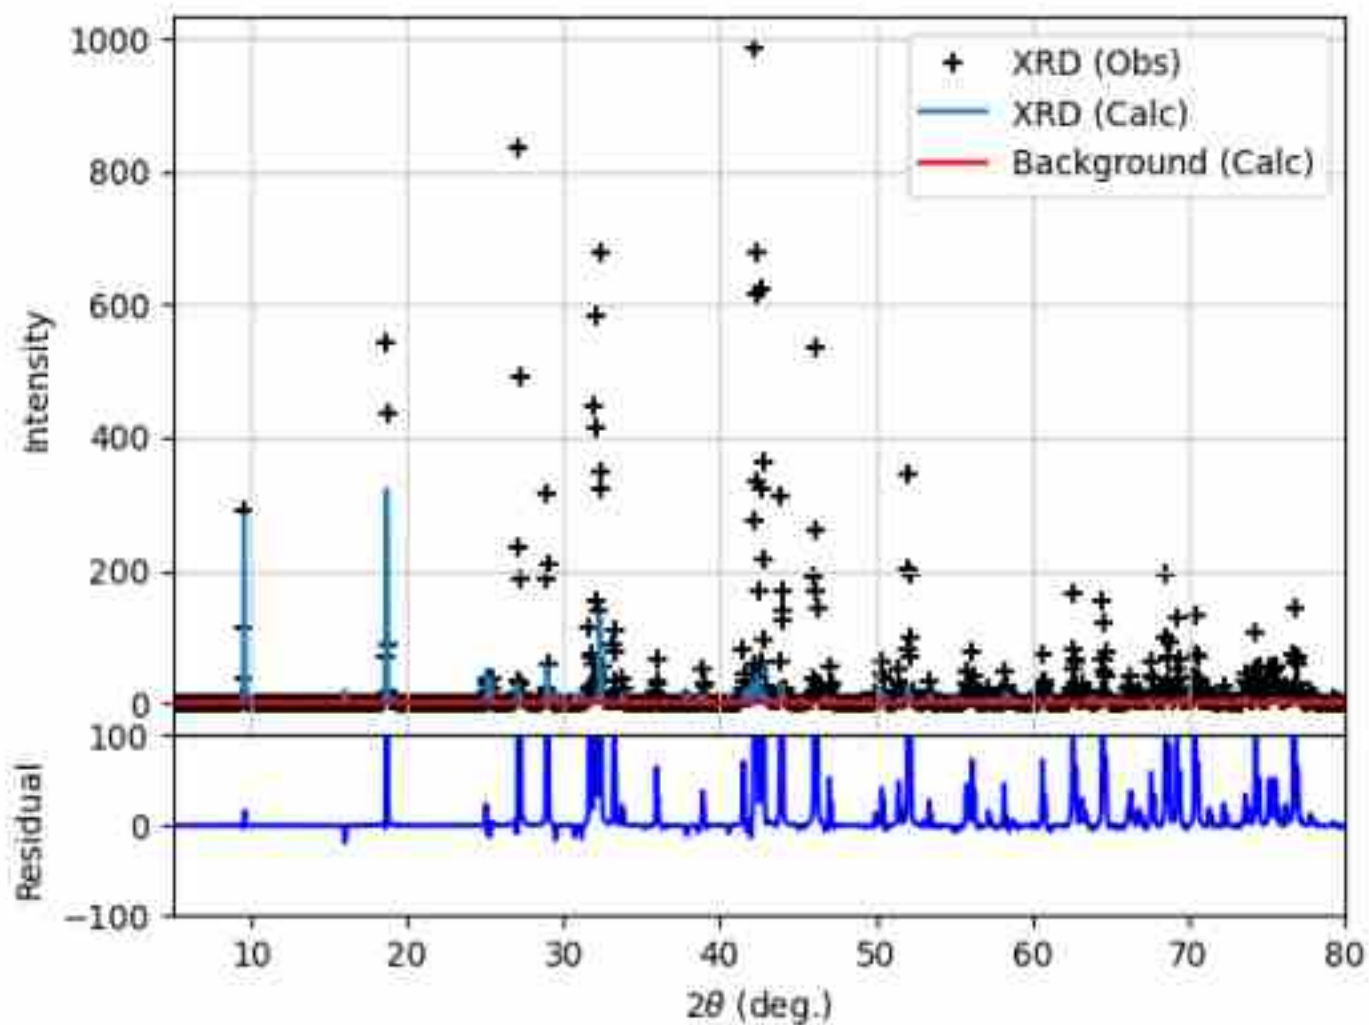

| RMSE before RR | Rwp      | RMSE after RR |
|----------------|----------|---------------|
| 0.345          | 88.94811 | None          |

# Li<sub>2</sub>Mn<sub>4</sub>Ni<sub>2</sub>O<sub>12</sub>

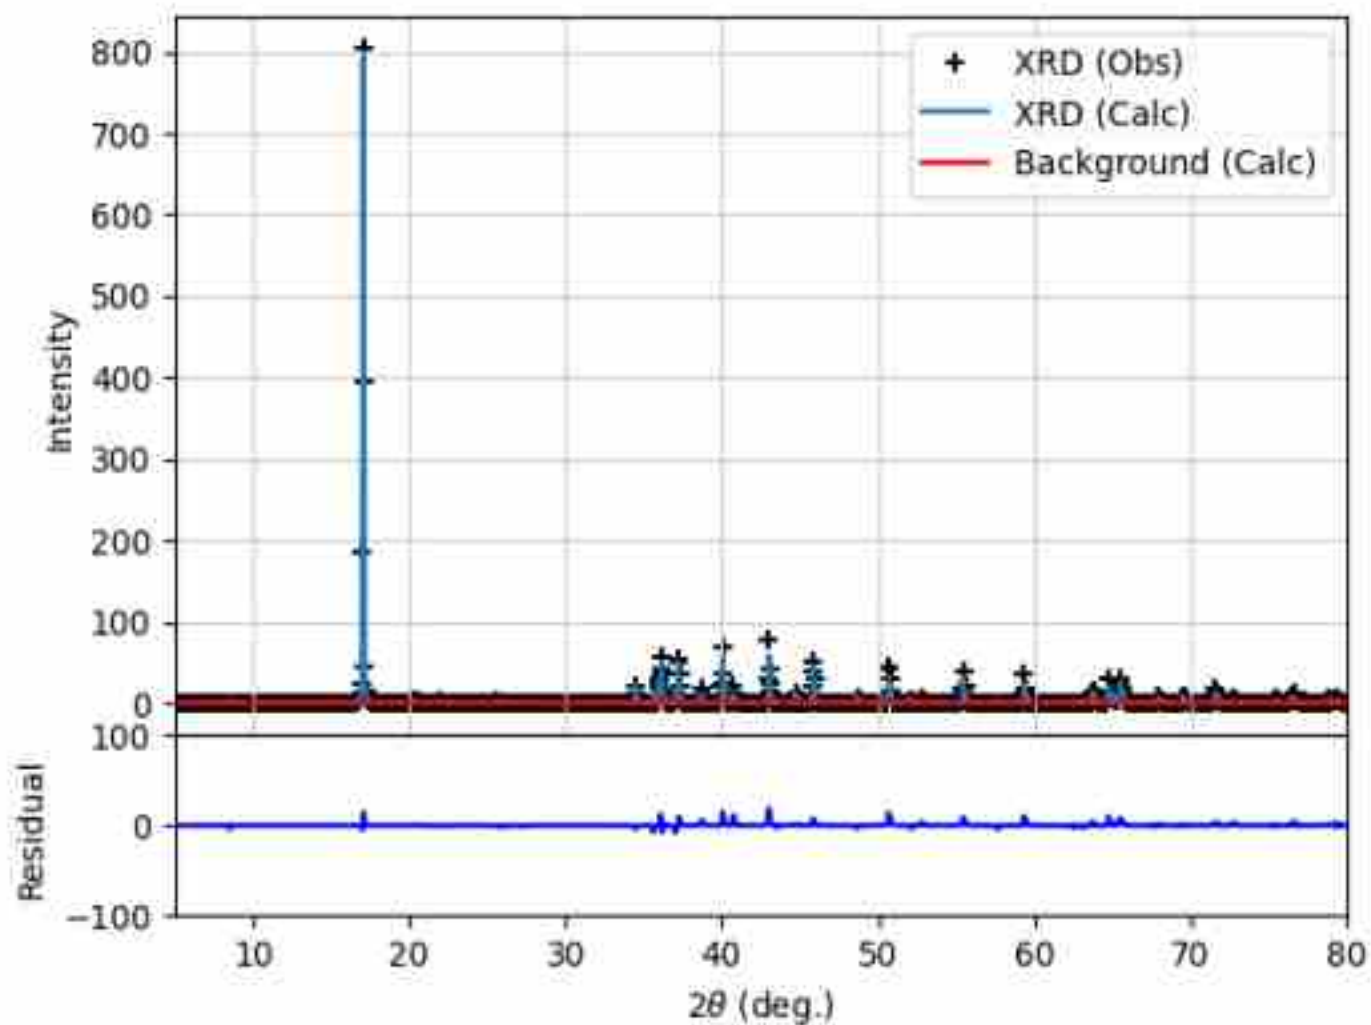

| RMSE before RR | Rwp      | RMSE after RR |
|----------------|----------|---------------|
| 0.346          | 24.69723 | None          |

# Al<sub>2</sub>B<sub>2</sub>Ru<sub>3</sub>

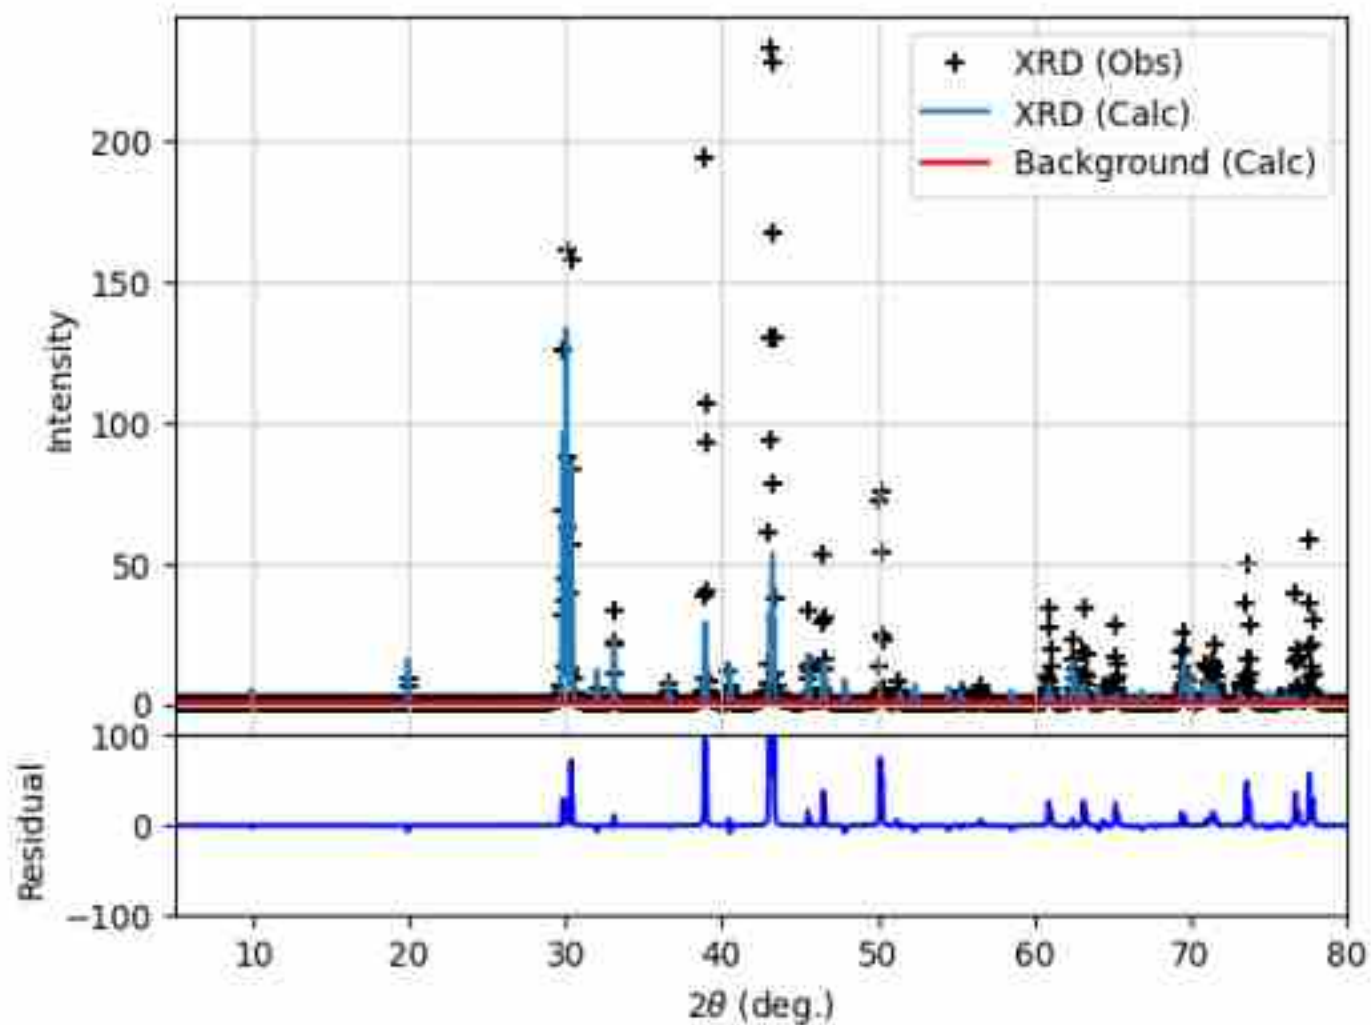

| RMSE before RR | Rwp     | RMSE after RR |
|----------------|---------|---------------|
| 0.347          | 67.5027 | None          |

# Al<sub>2</sub>Zn<sub>1</sub>Se<sub>4</sub>

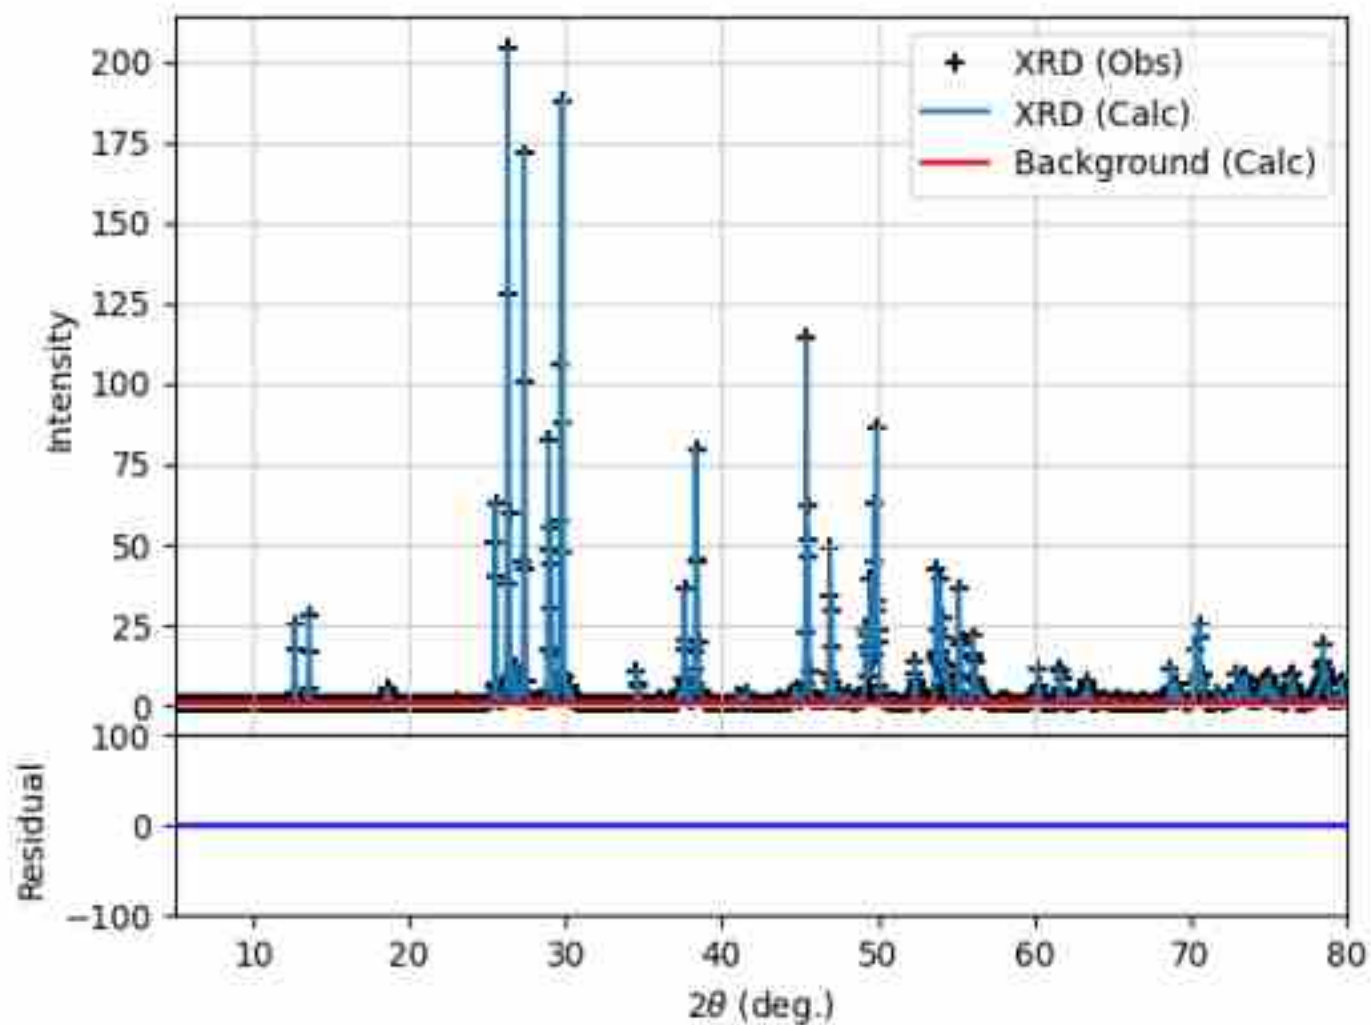

| RMSE before RR | Rwp     | RMSE after RR |
|----------------|---------|---------------|
| 0.347          | 0.00336 | 0.00037       |

# Hg<sub>2</sub>As<sub>2</sub>O<sub>6</sub>

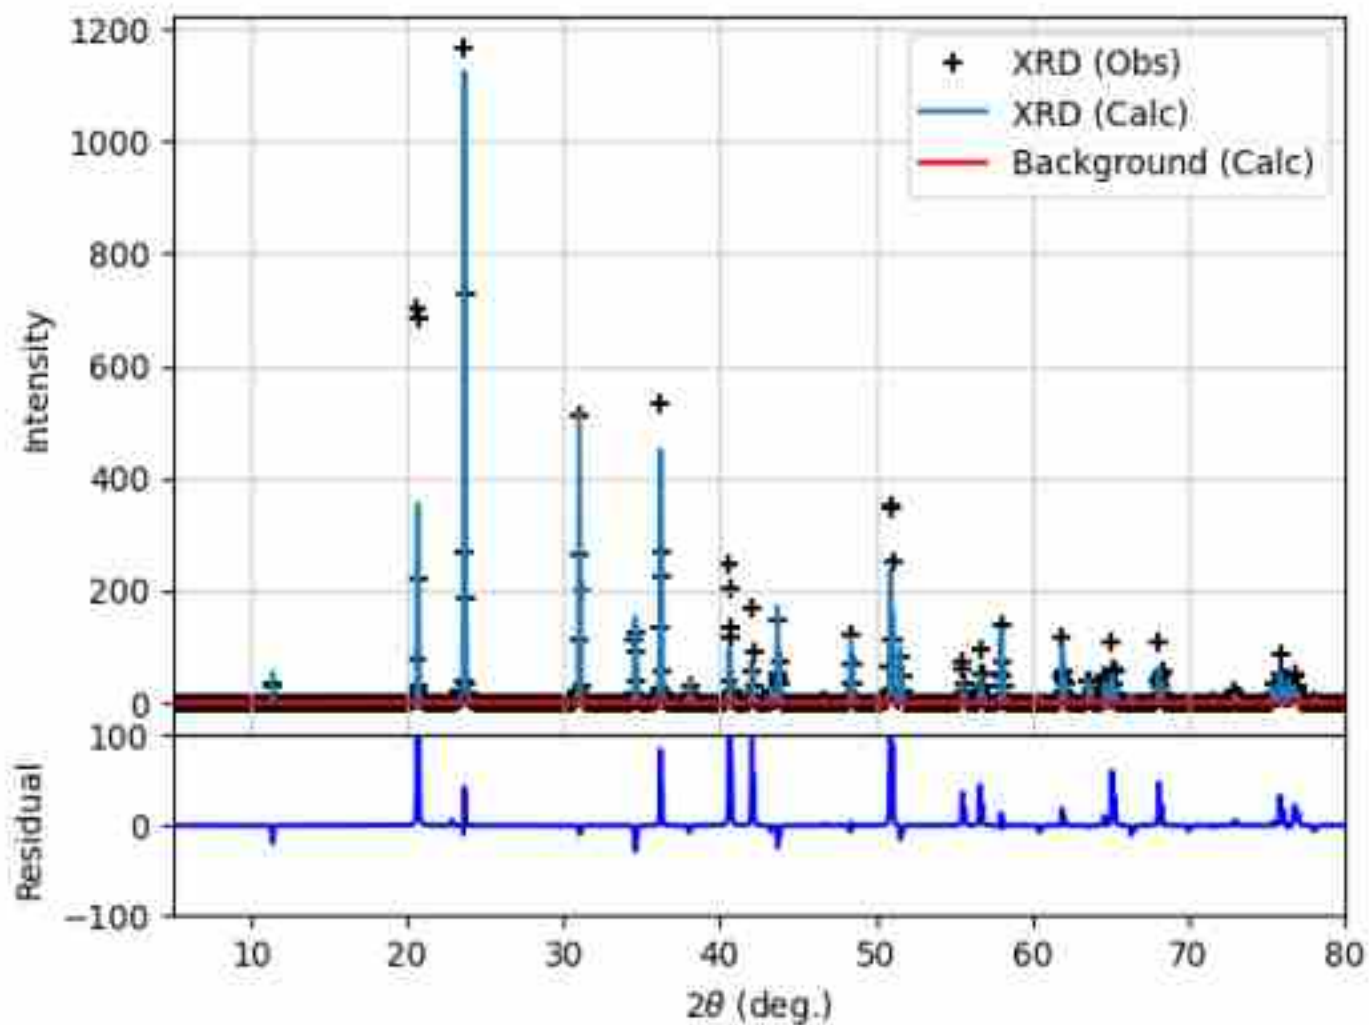

| RMSE before RR | Rwp      | RMSE after RR |
|----------------|----------|---------------|
| 0.347          | 33.84791 | None          |

# La<sub>3</sub>Ti<sub>2</sub>N<sub>3</sub>O<sub>4</sub>

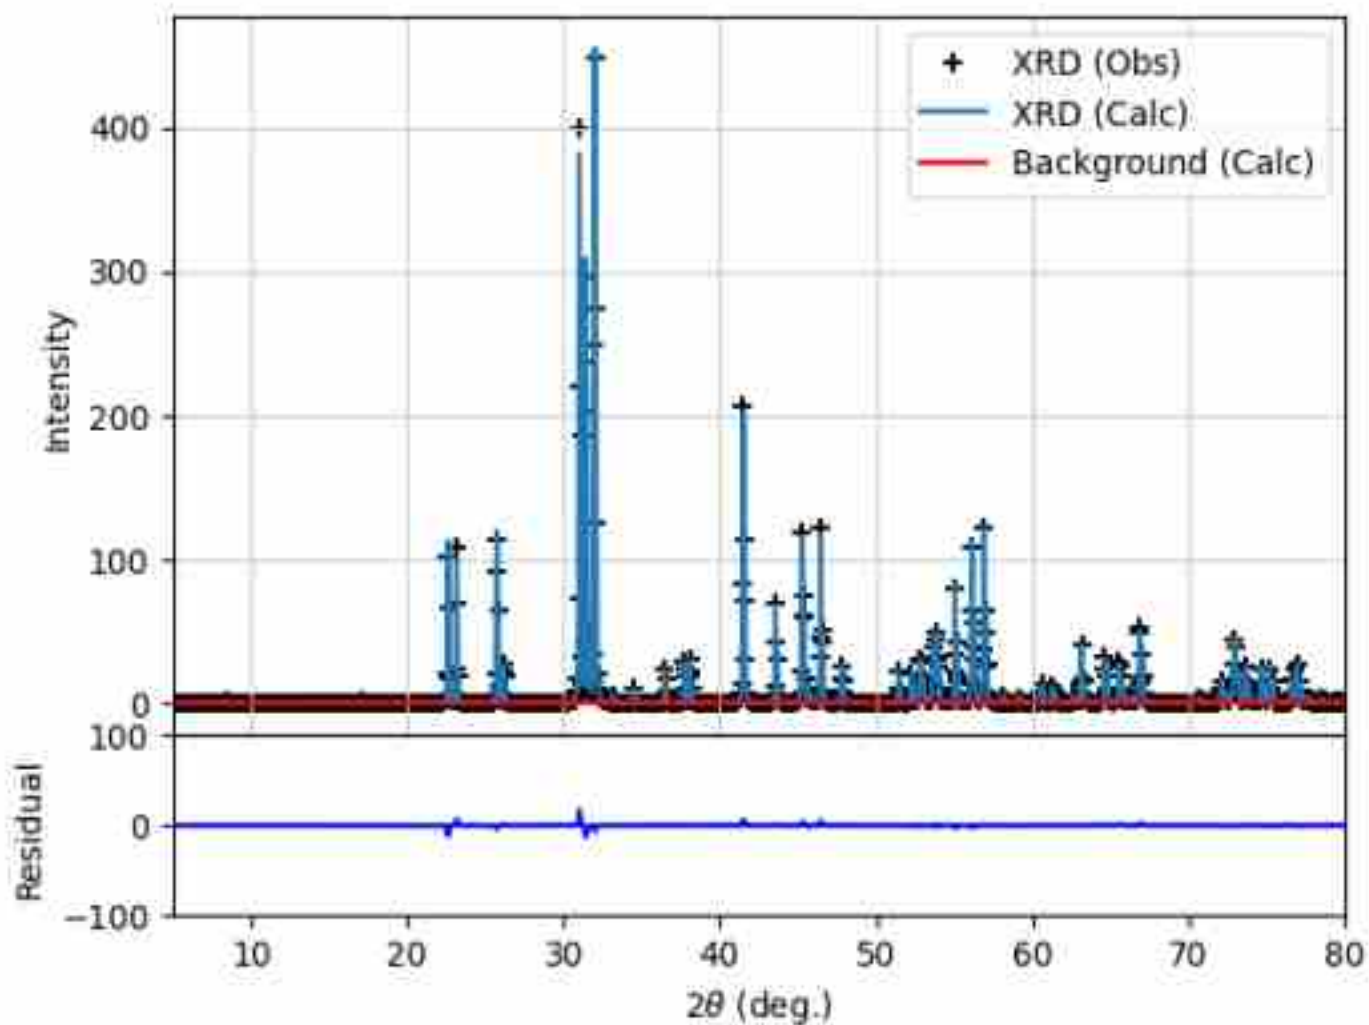

| RMSE before RR | Rwp     | RMSE after RR |
|----------------|---------|---------------|
| 0.347          | 3.45525 | 0.06136       |

# Li<sub>2</sub>Cr<sub>2</sub>Co<sub>4</sub>O<sub>12</sub>

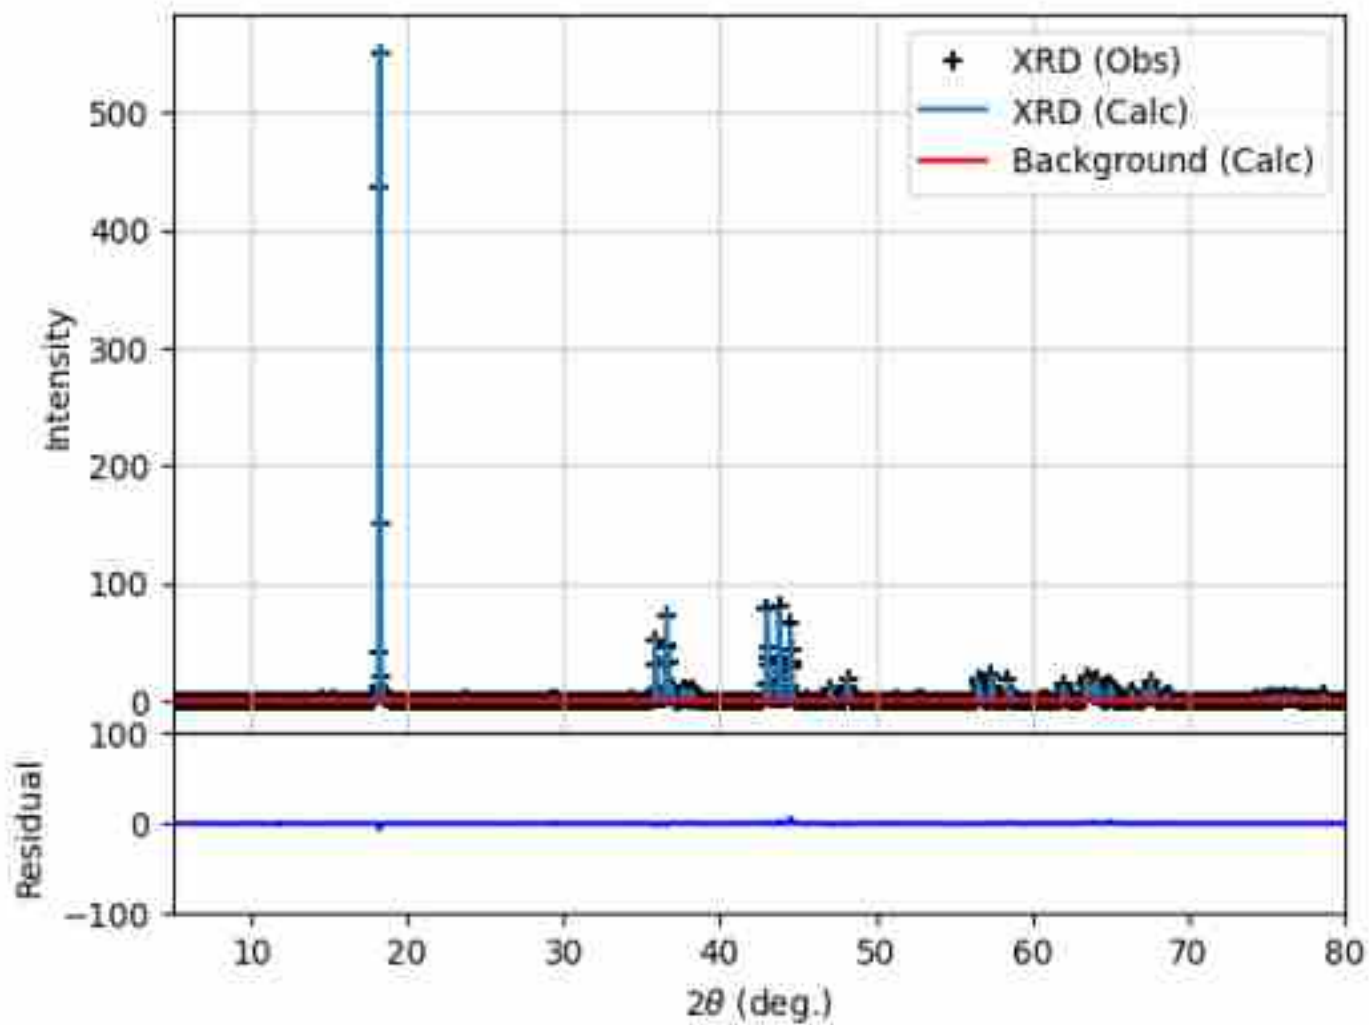

| RMSE before RR | Rwp     | RMSE after RR |
|----------------|---------|---------------|
| 0.347          | 5.91741 | None          |

# Li<sub>4</sub>Mn<sub>2</sub>Br<sub>8</sub>

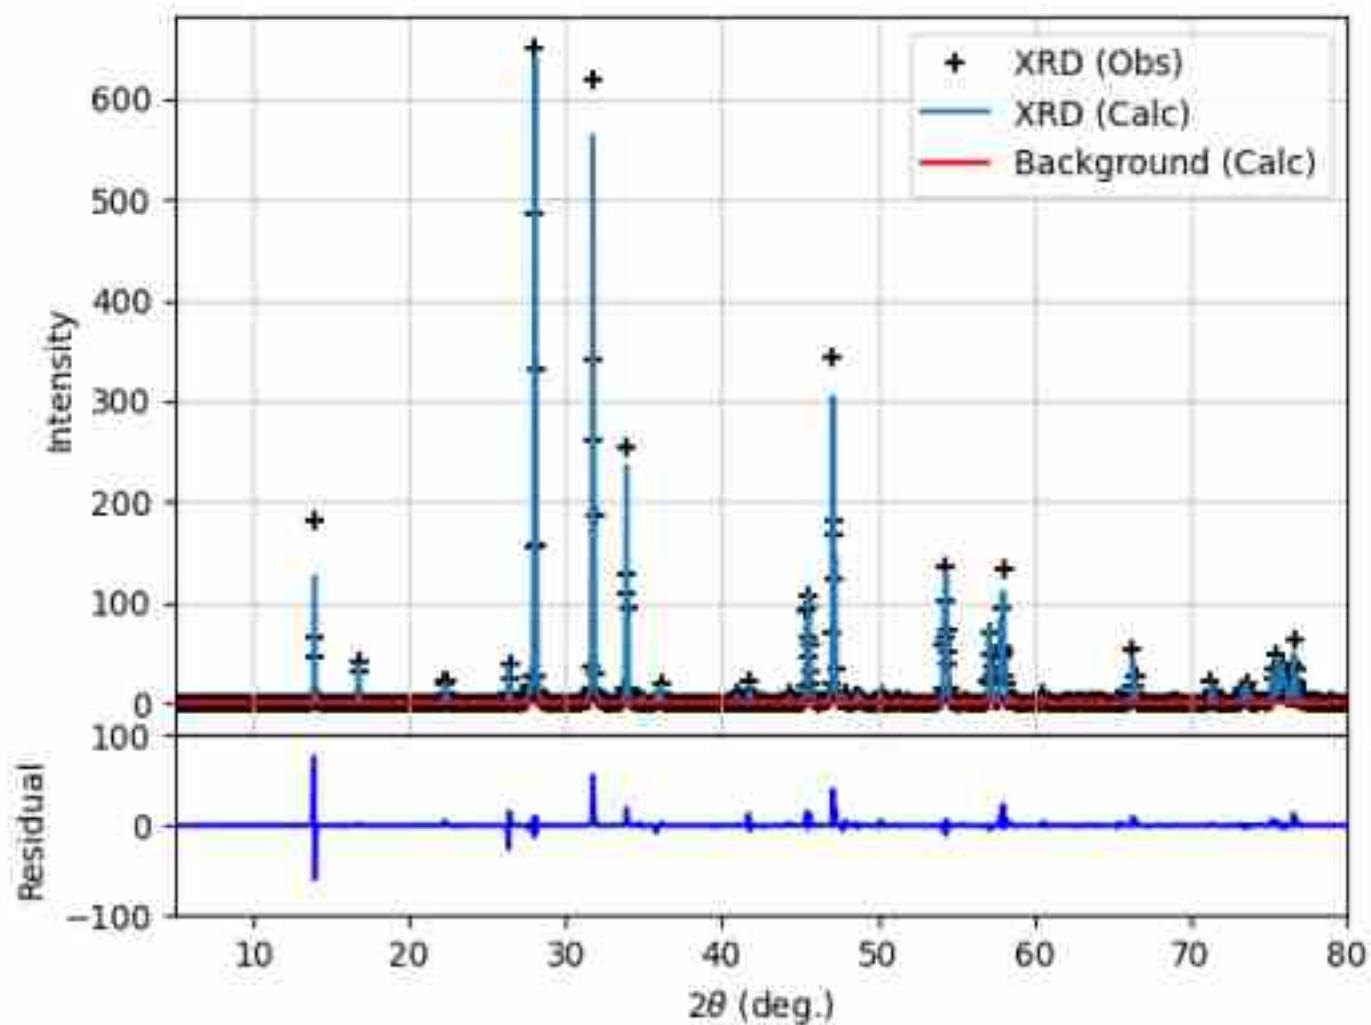

| RMSE before RR | Rwp      | RMSE after RR |
|----------------|----------|---------------|
| 0.347          | 19.61482 | 0.37551       |



# Mo<sub>4</sub>S<sub>4</sub>Br<sub>4</sub>

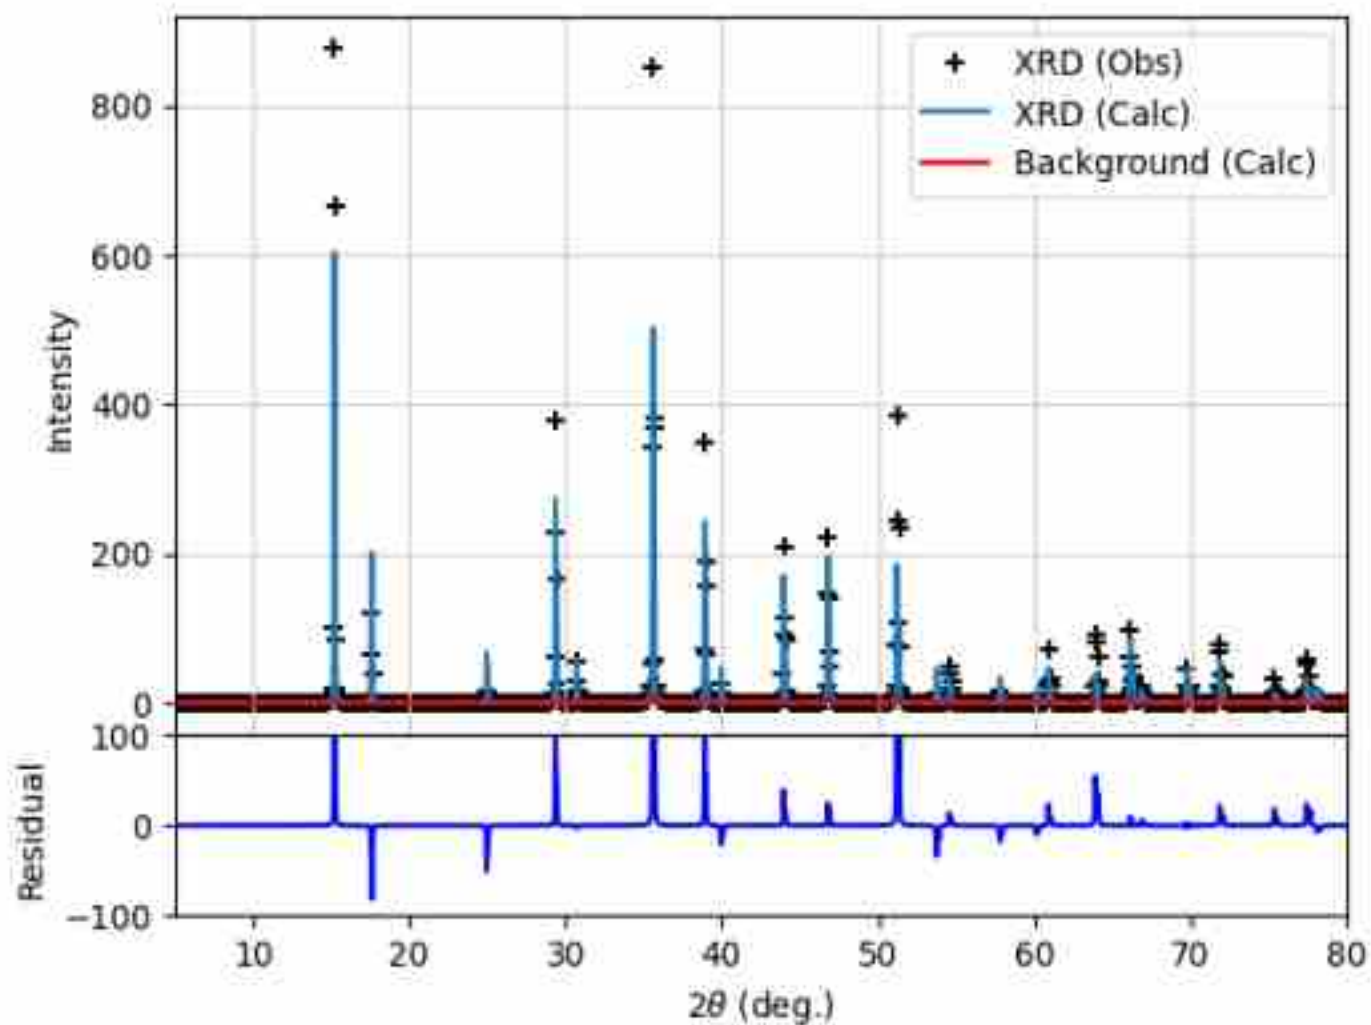

| RMSE before RR | Rwp      | RMSE after RR |
|----------------|----------|---------------|
| 0.347          | 41.06012 | 0.38294       |

# Tl9Sb1Se6

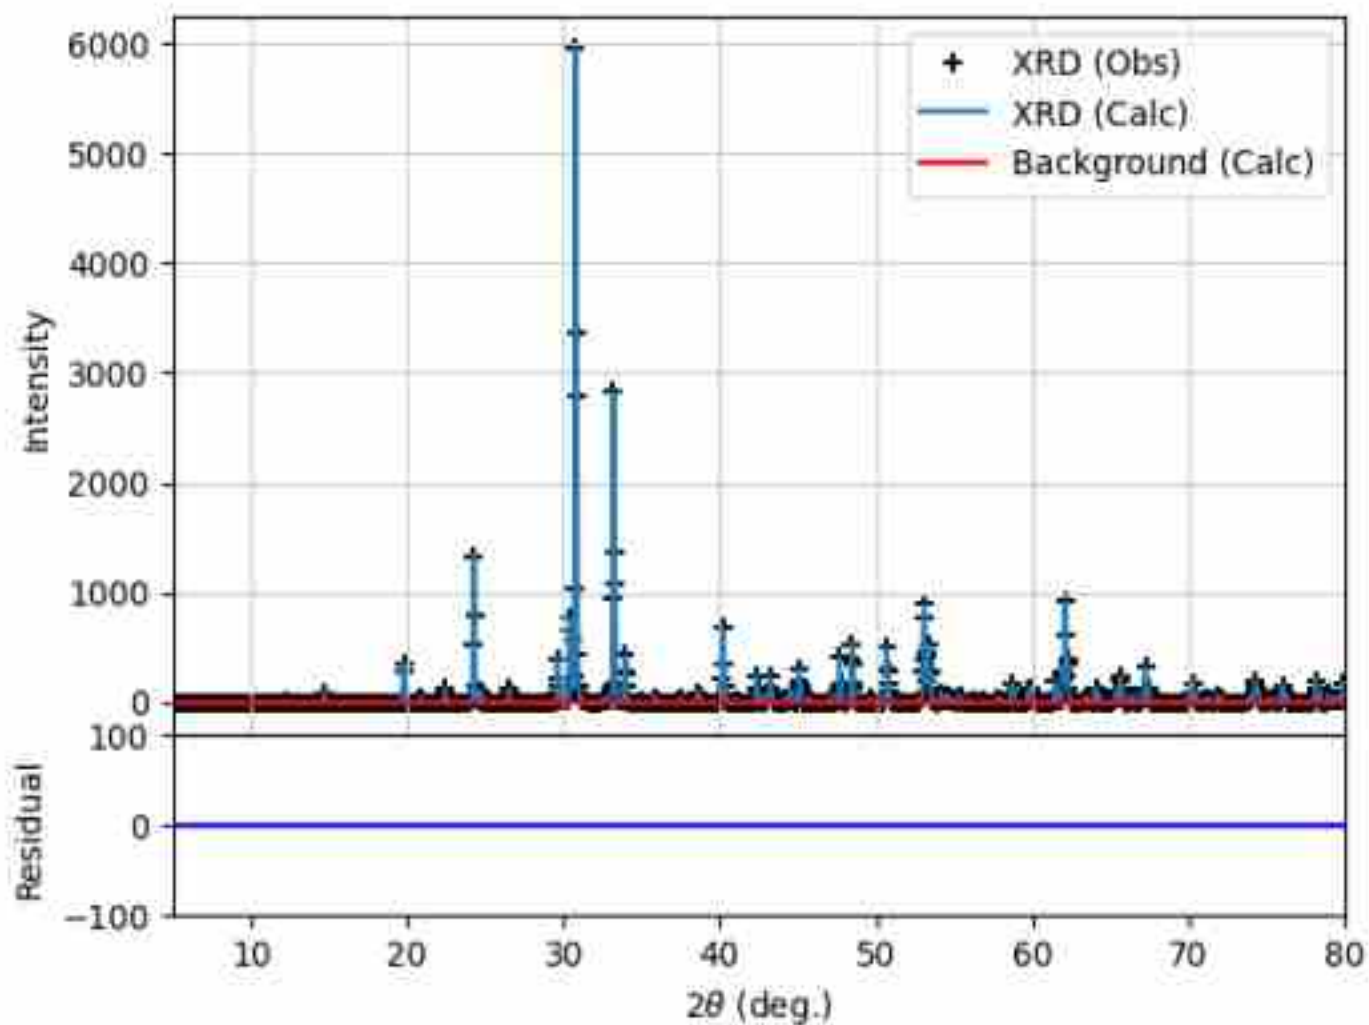

| RMSE before RR | Rwp    | RMSE after RR |
|----------------|--------|---------------|
| 0.347          | 0.0033 | 0.00049       |

# Ir2O6

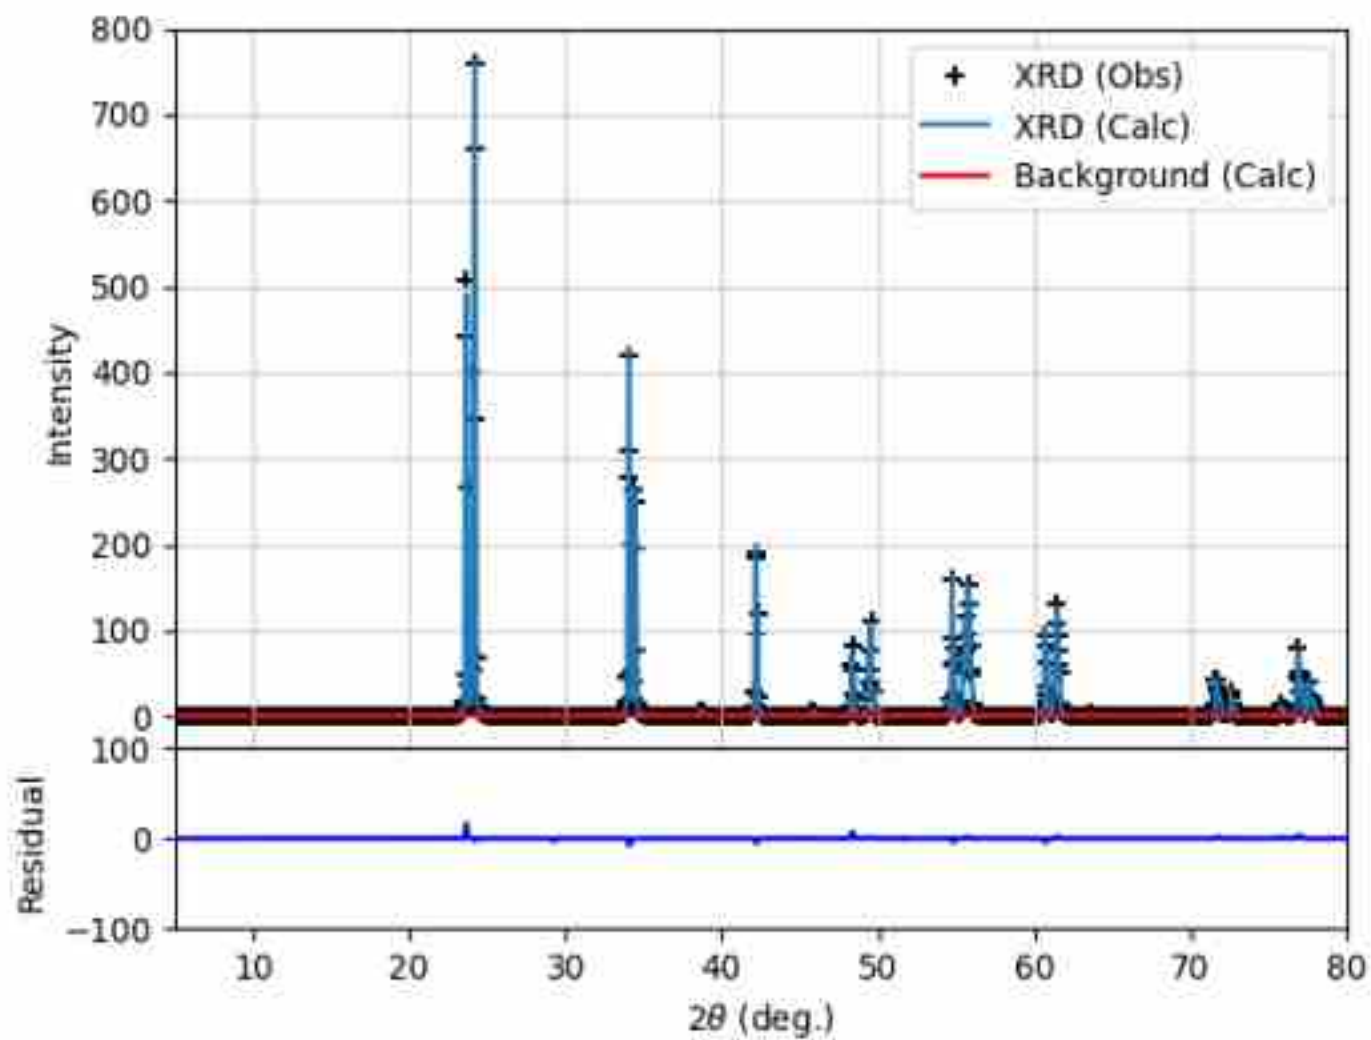

| RMSE before RR | Rwp     | RMSE after RR |
|----------------|---------|---------------|
| 0.348          | 4.67546 | 0.08545       |

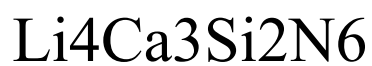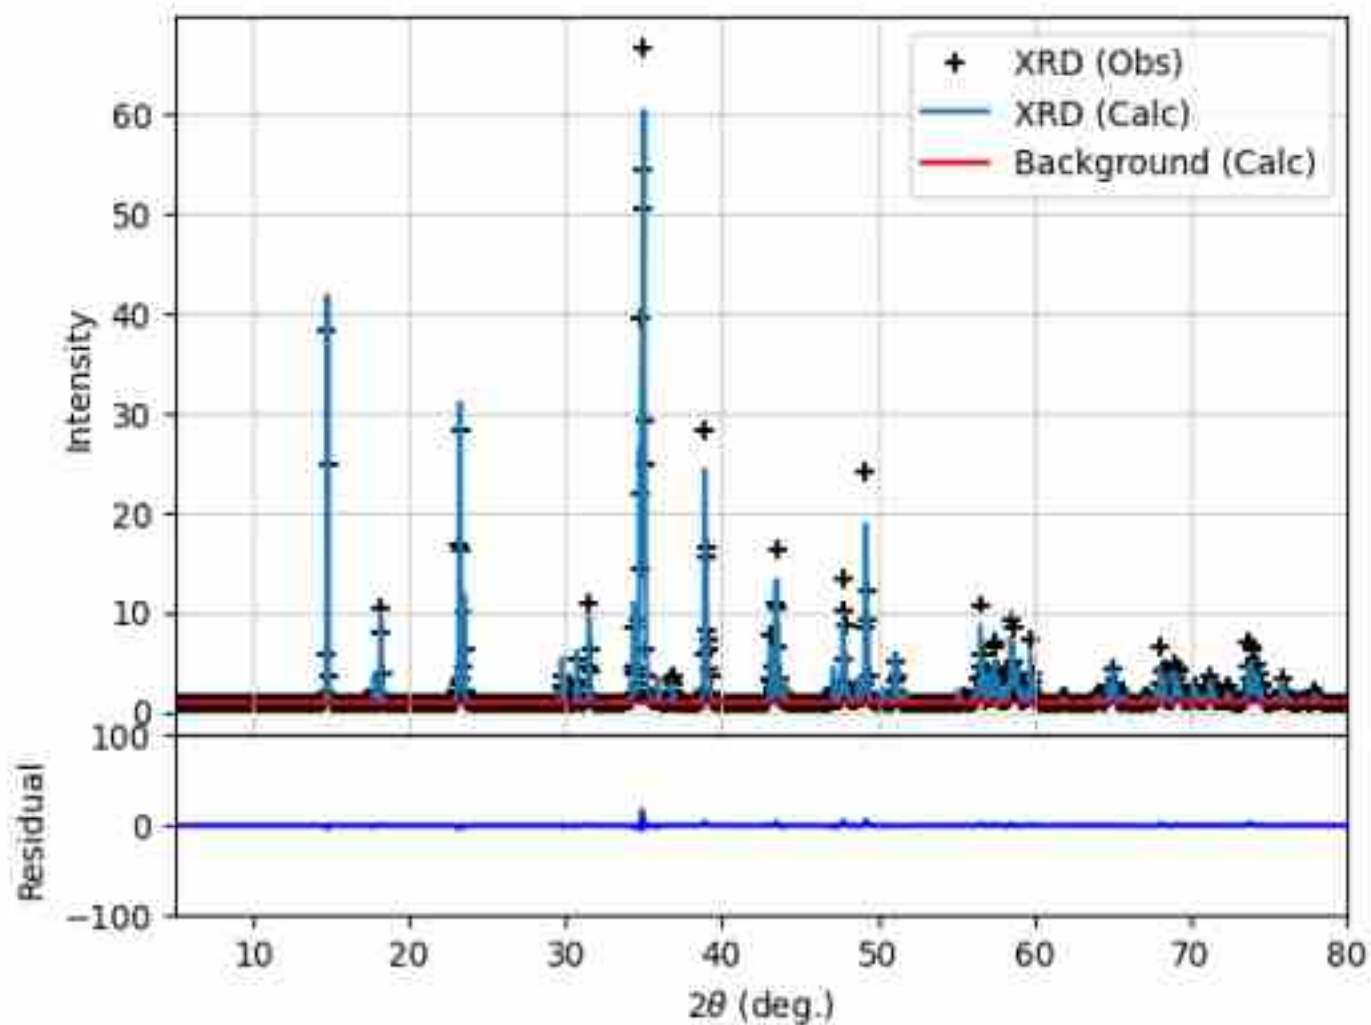

| RMSE before RR | Rwp      | RMSE after RR |
|----------------|----------|---------------|
| 0.348          | 16.45115 | None          |

# Fe<sub>12</sub>Ge<sub>3</sub>As<sub>2</sub>

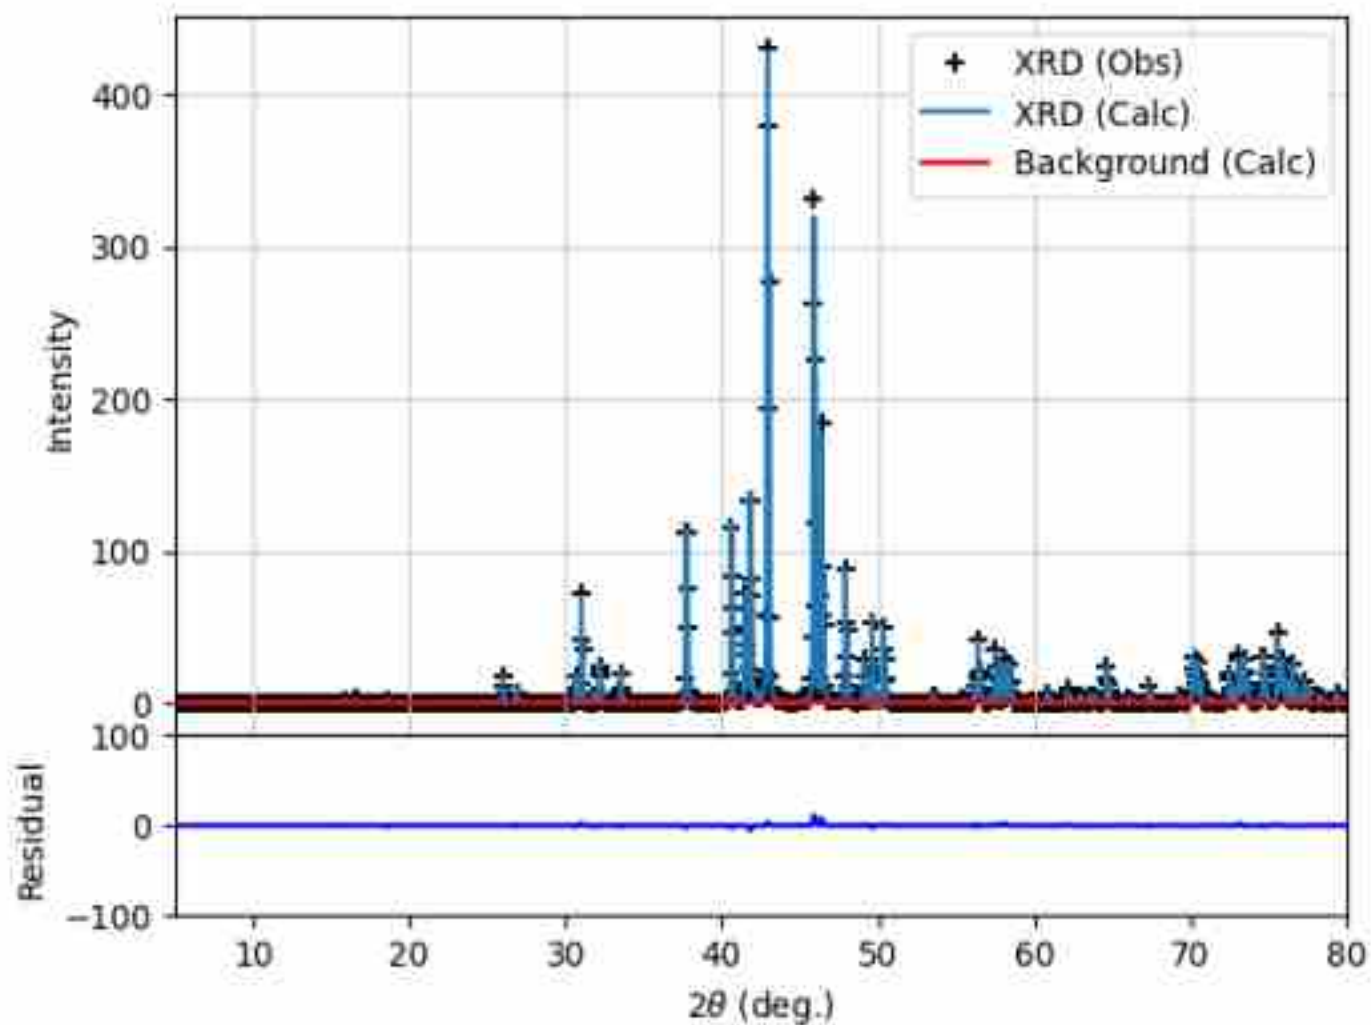

| RMSE before RR | Rwp     | RMSE after RR |
|----------------|---------|---------------|
| 0.349          | 3.94349 | 0.36895       |

# K8Be4O8

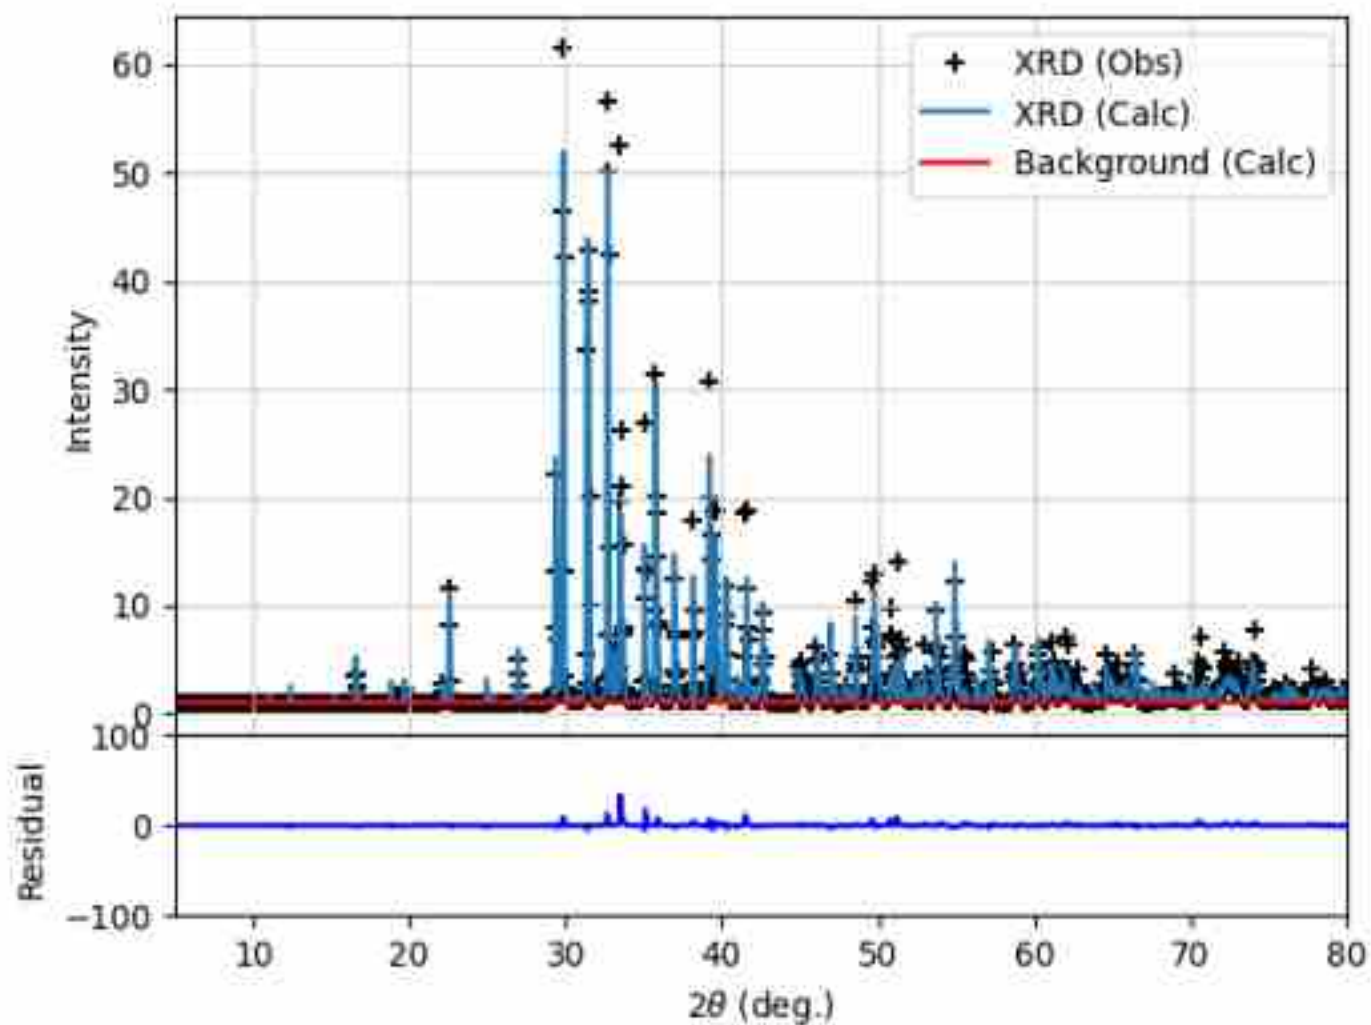

| RMSE before RR | Rwp      | RMSE after RR |
|----------------|----------|---------------|
| 0.349          | 29.11764 | 0.2977        |

# Mg<sub>3</sub>H<sub>4</sub>O<sub>5</sub>

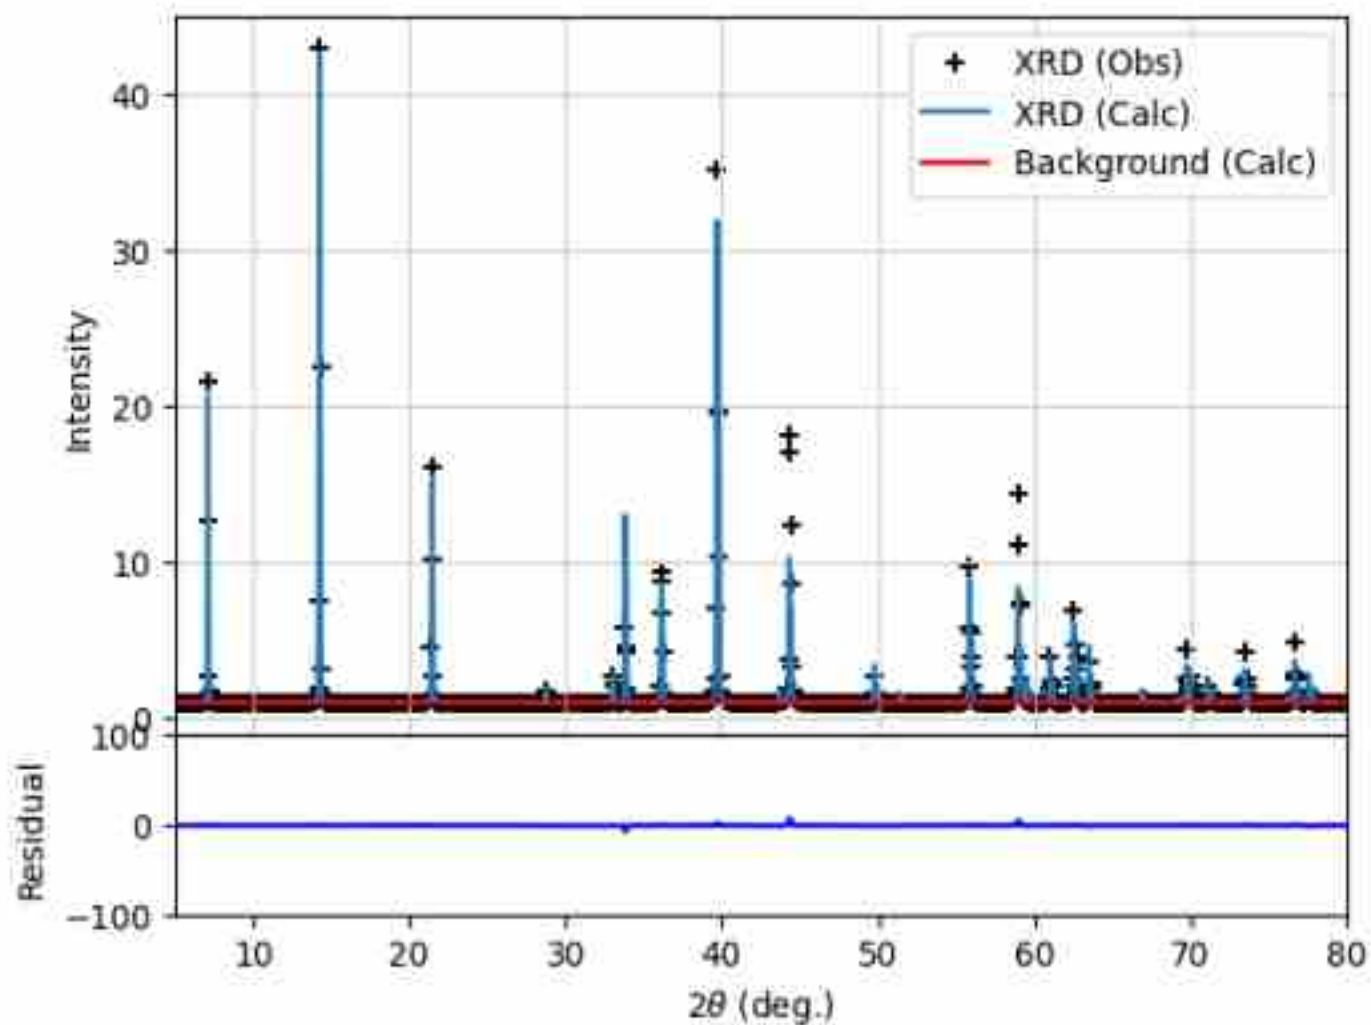

| RMSE before RR | Rwp      | RMSE after RR |
|----------------|----------|---------------|
| 0.349          | 15.94791 | None          |

# Eu<sub>4</sub>Zn<sub>4</sub>P<sub>6</sub>

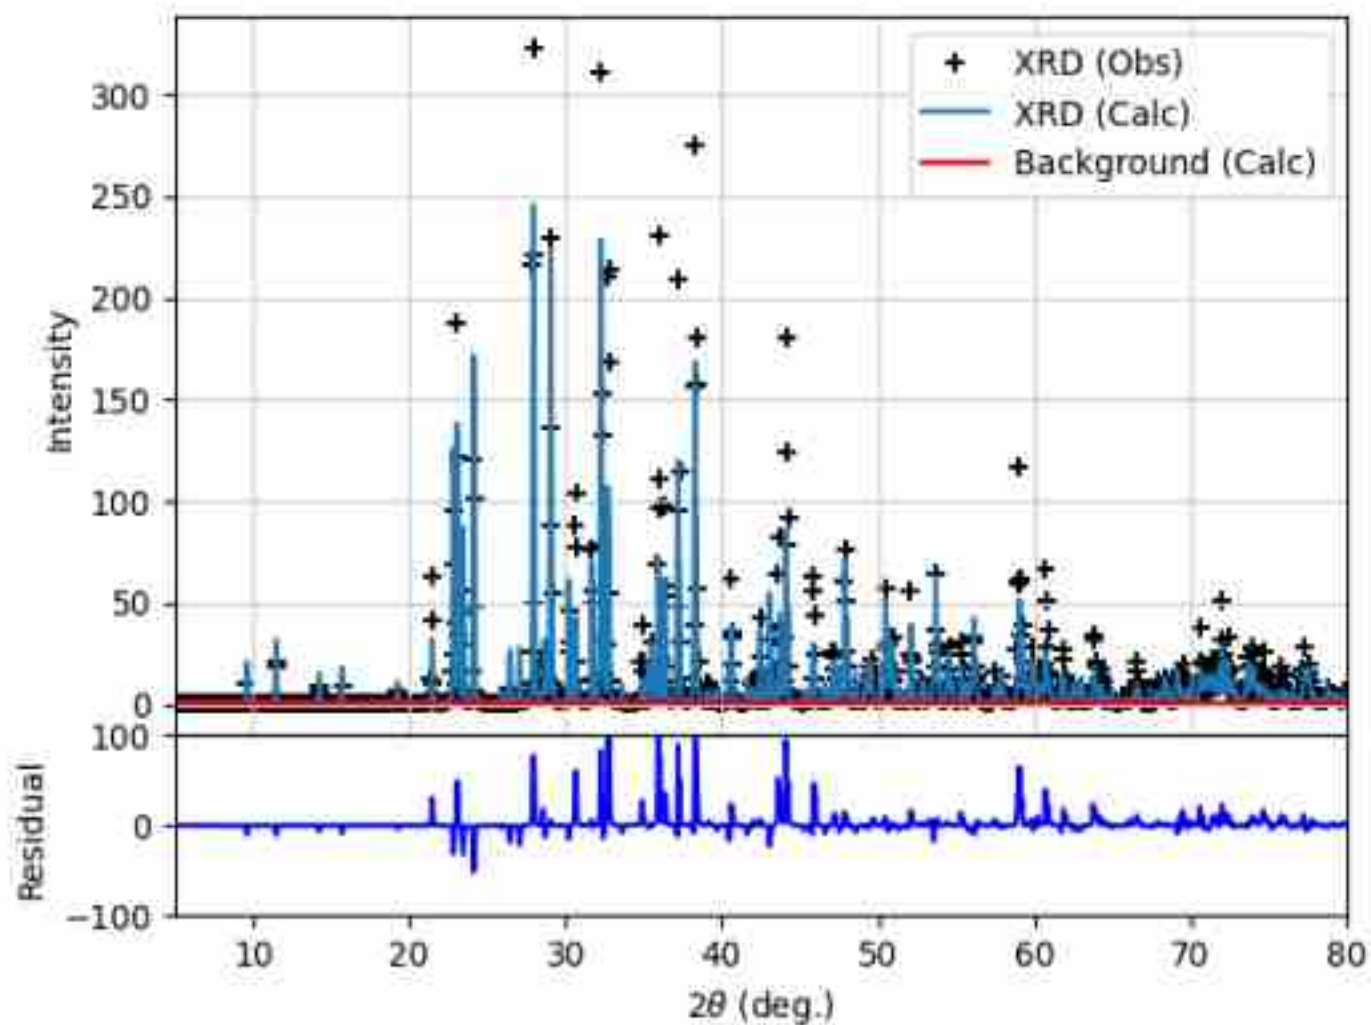

| RMSE before RR | Rwp      | RMSE after RR |
|----------------|----------|---------------|
| 0.351          | 46.39644 | None          |



# In<sub>2</sub>Hg<sub>3</sub>Te<sub>6</sub>

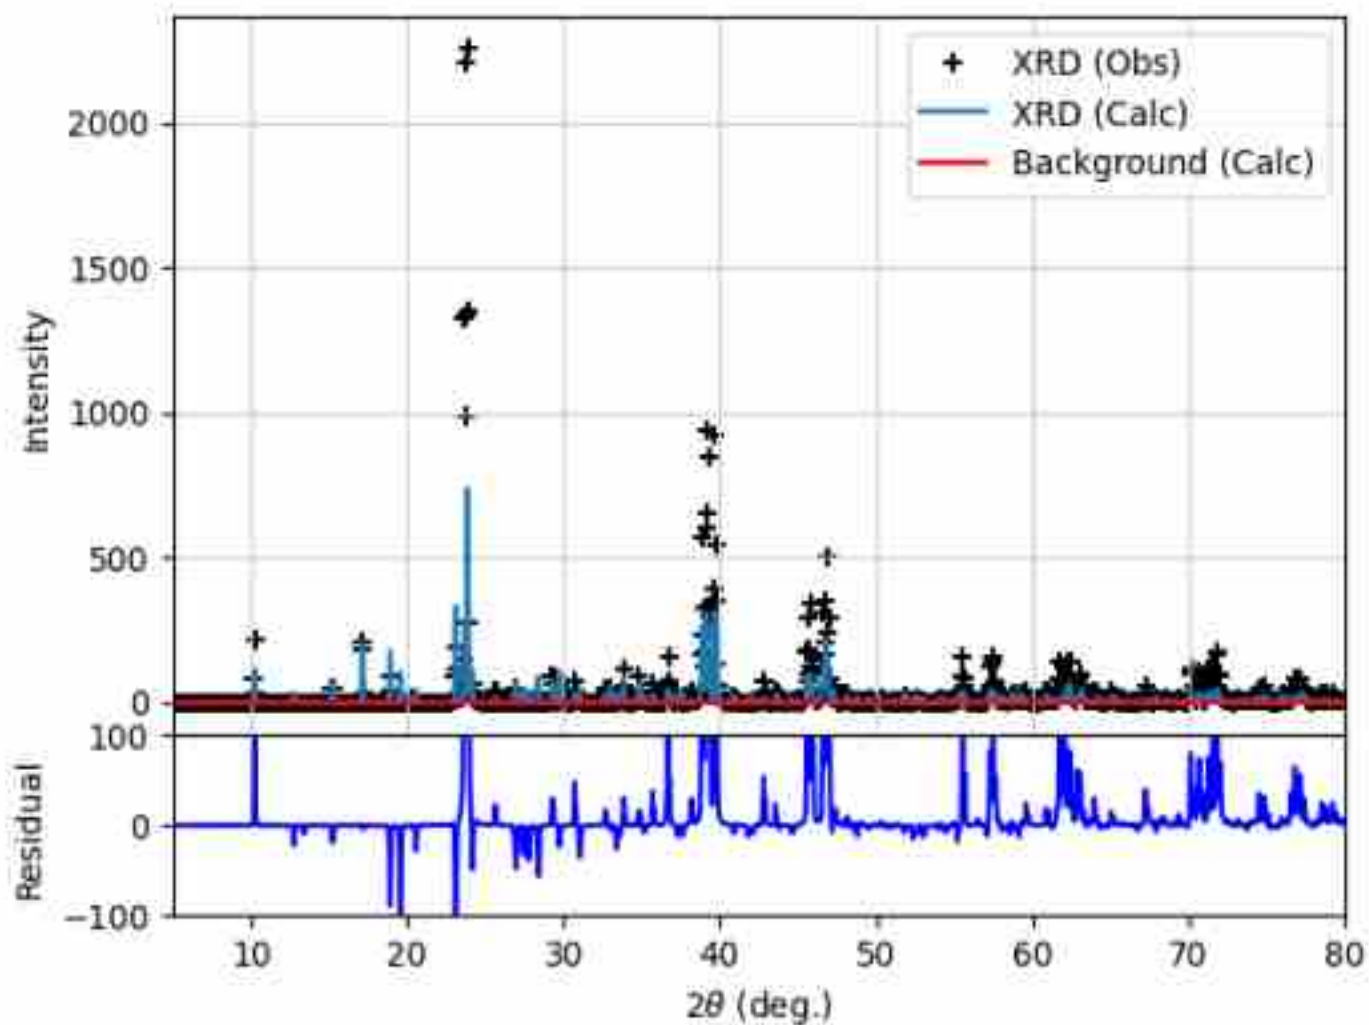

| RMSE before RR | Rwp      | RMSE after RR |
|----------------|----------|---------------|
| 0.351          | 72.31648 | 0.30048       |

# Bi6O8F2

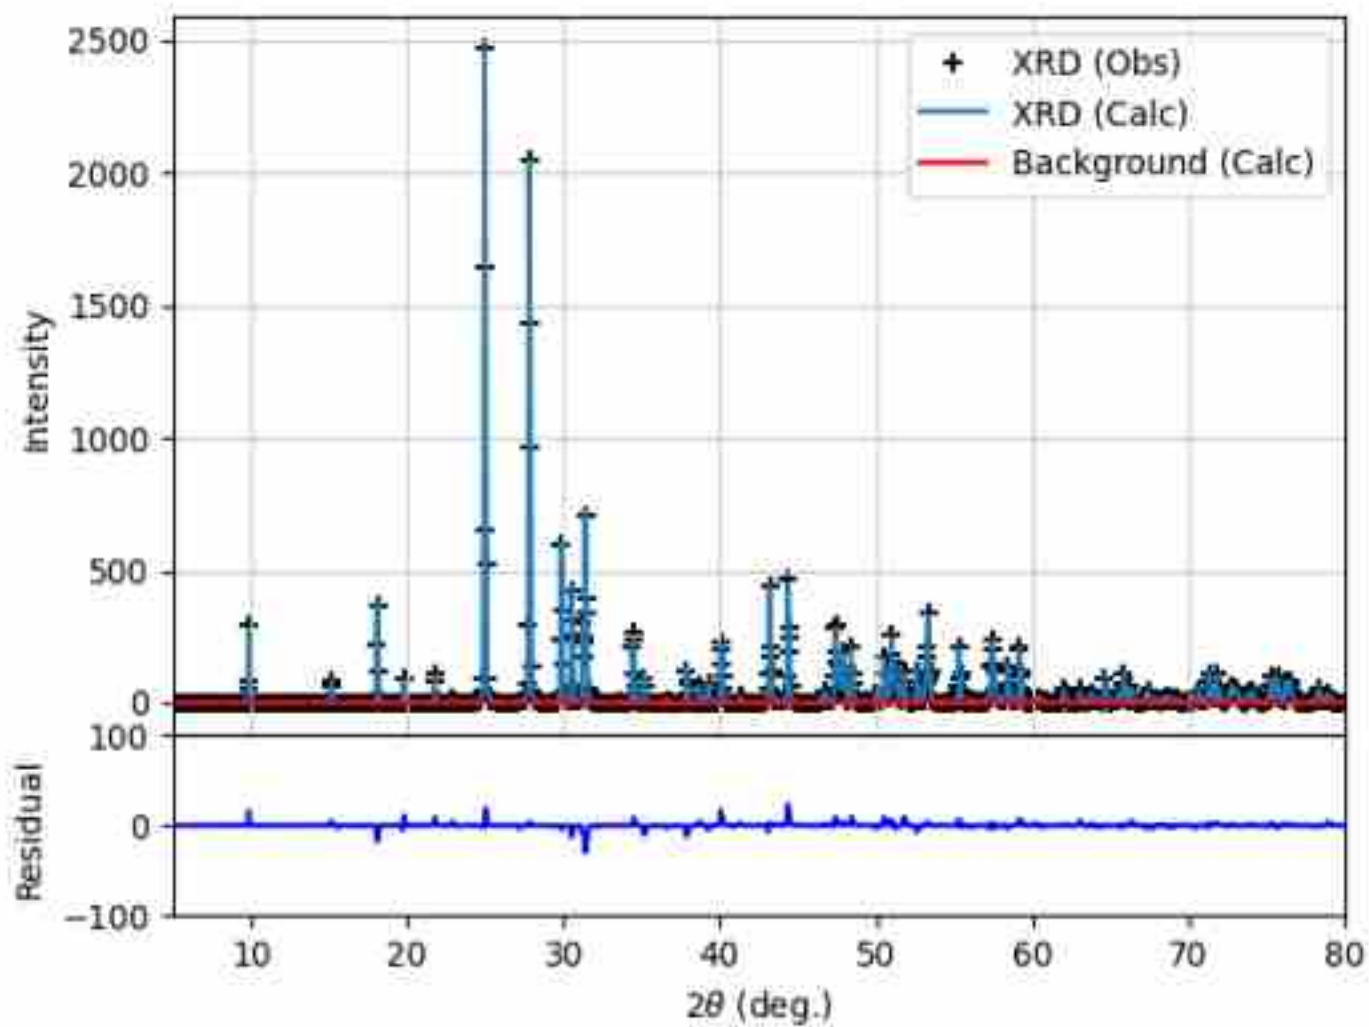

| RMSE before RR | Rwp     | RMSE after RR |
|----------------|---------|---------------|
| 0.352          | 4.60145 | None          |

# Pb2S2

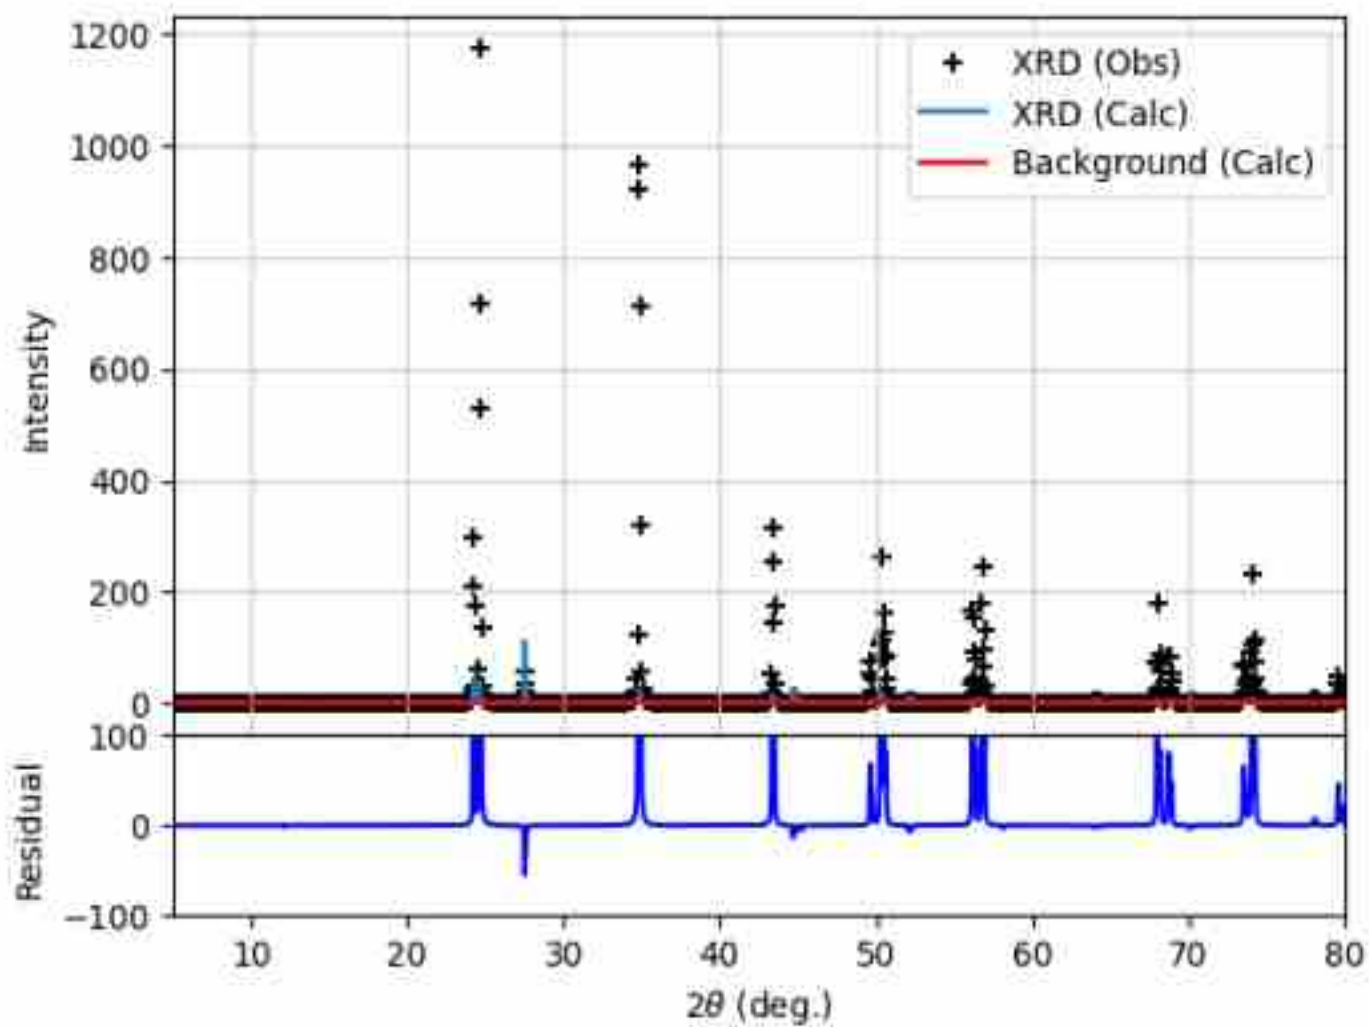

| RMSE before RR | Rwp     | RMSE after RR |
|----------------|---------|---------------|
| 0.352          | 90.1238 | None          |

# Pt4I8

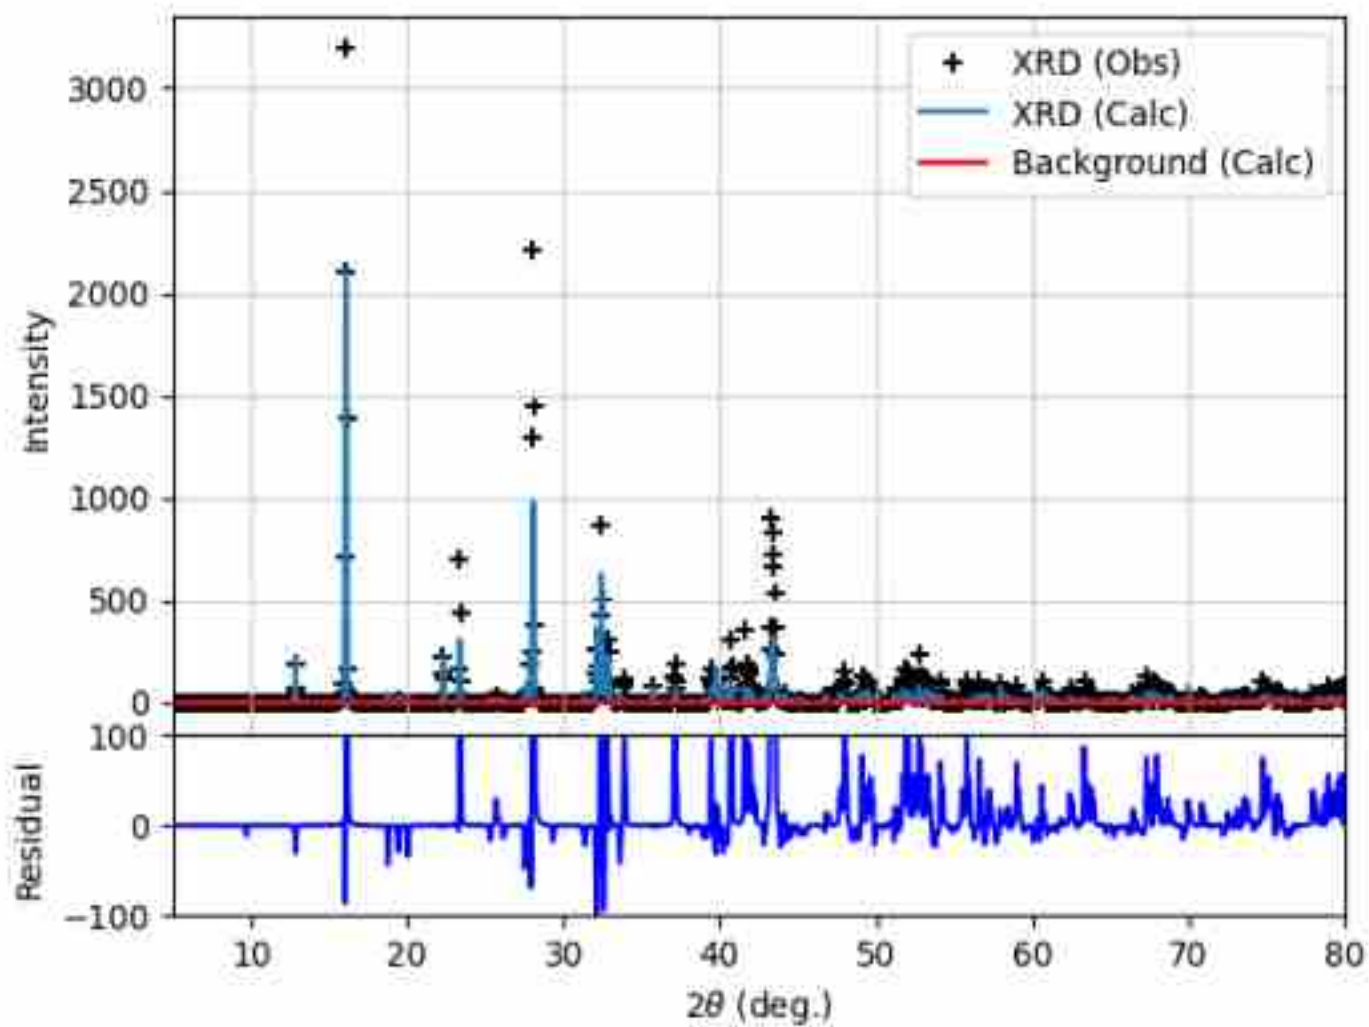

| RMSE before RR | Rwp      | RMSE after RR |
|----------------|----------|---------------|
| 0.352          | 62.42544 | 0.38854       |

# Si1P1Au1

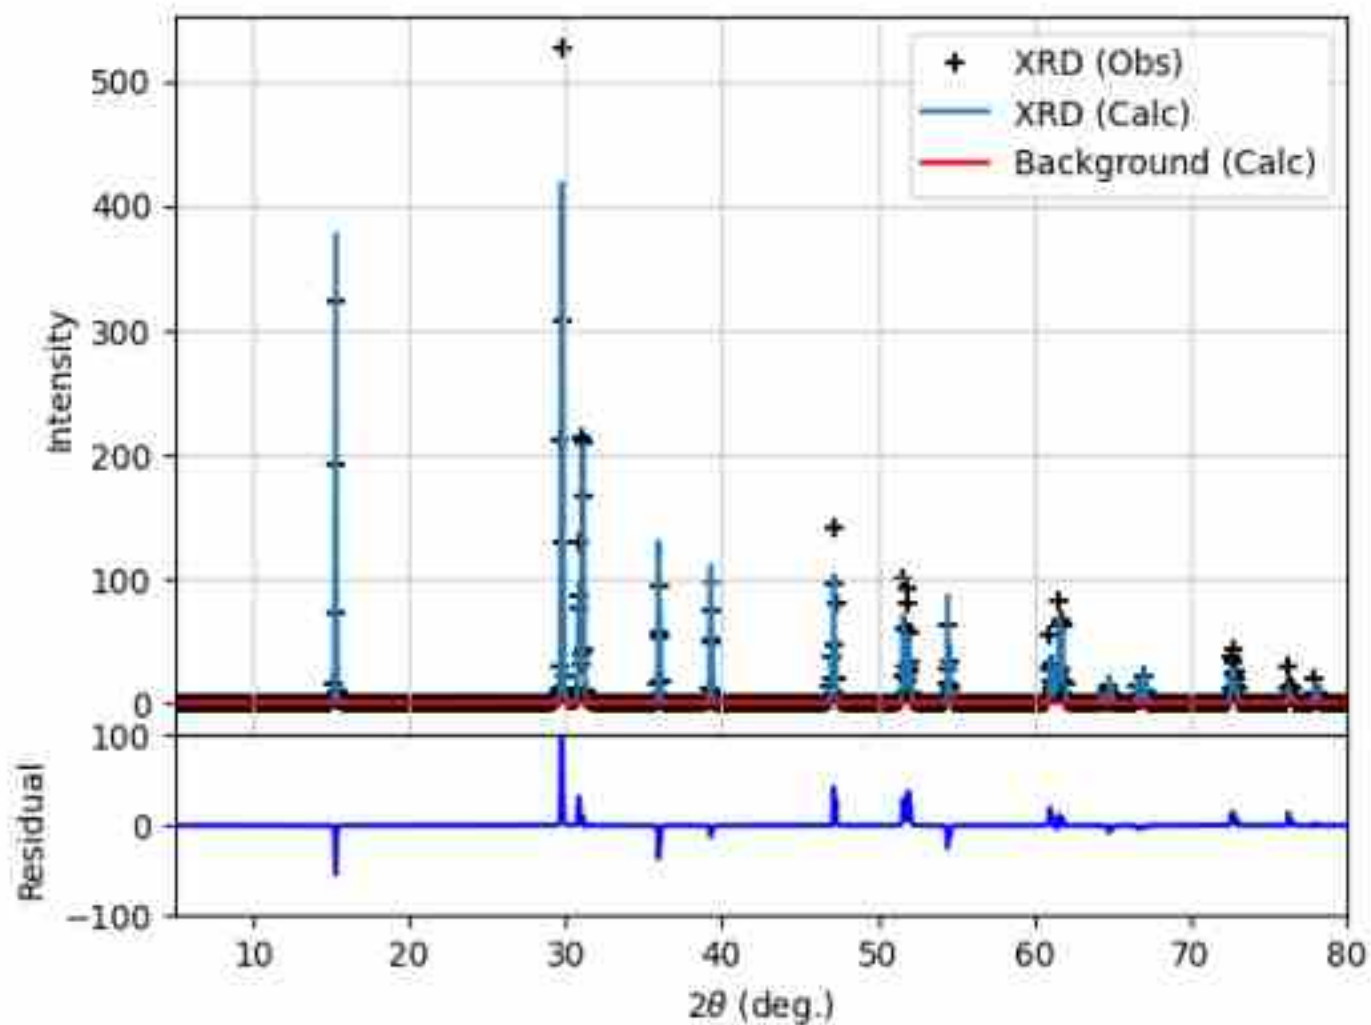

| RMSE before RR | Rwp      | RMSE after RR |
|----------------|----------|---------------|
| 0.352          | 22.11403 | 0.33941       |

# Ti4O4F8

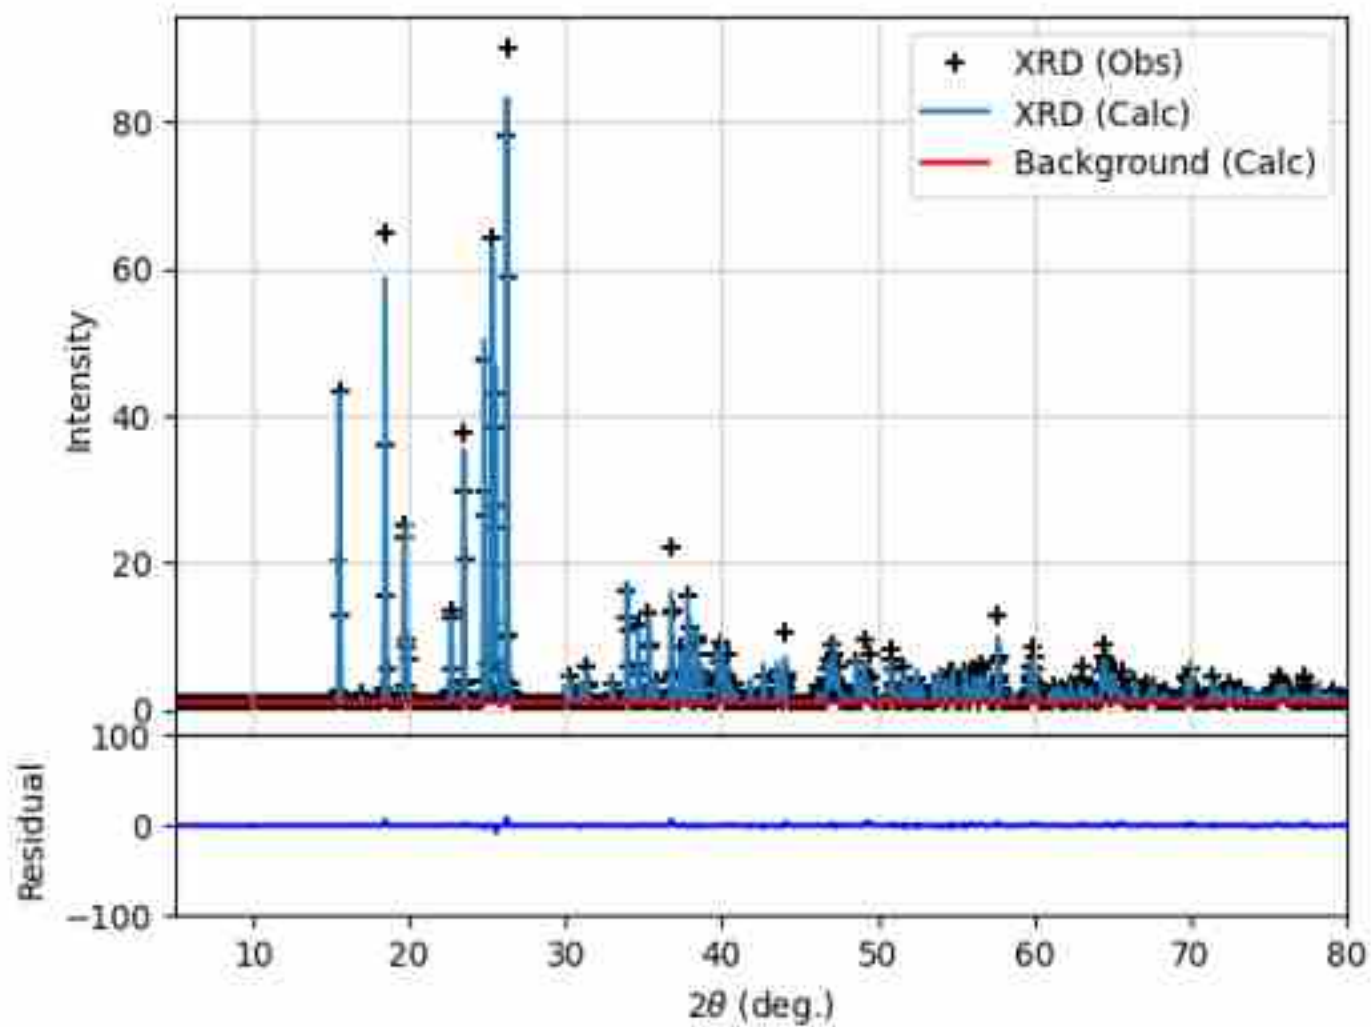

| RMSE before RR | Rwp      | RMSE after RR |
|----------------|----------|---------------|
| 0.353          | 17.37162 | None          |

# Nb<sub>2</sub>Cu<sub>2</sub>O<sub>6</sub>F<sub>2</sub>

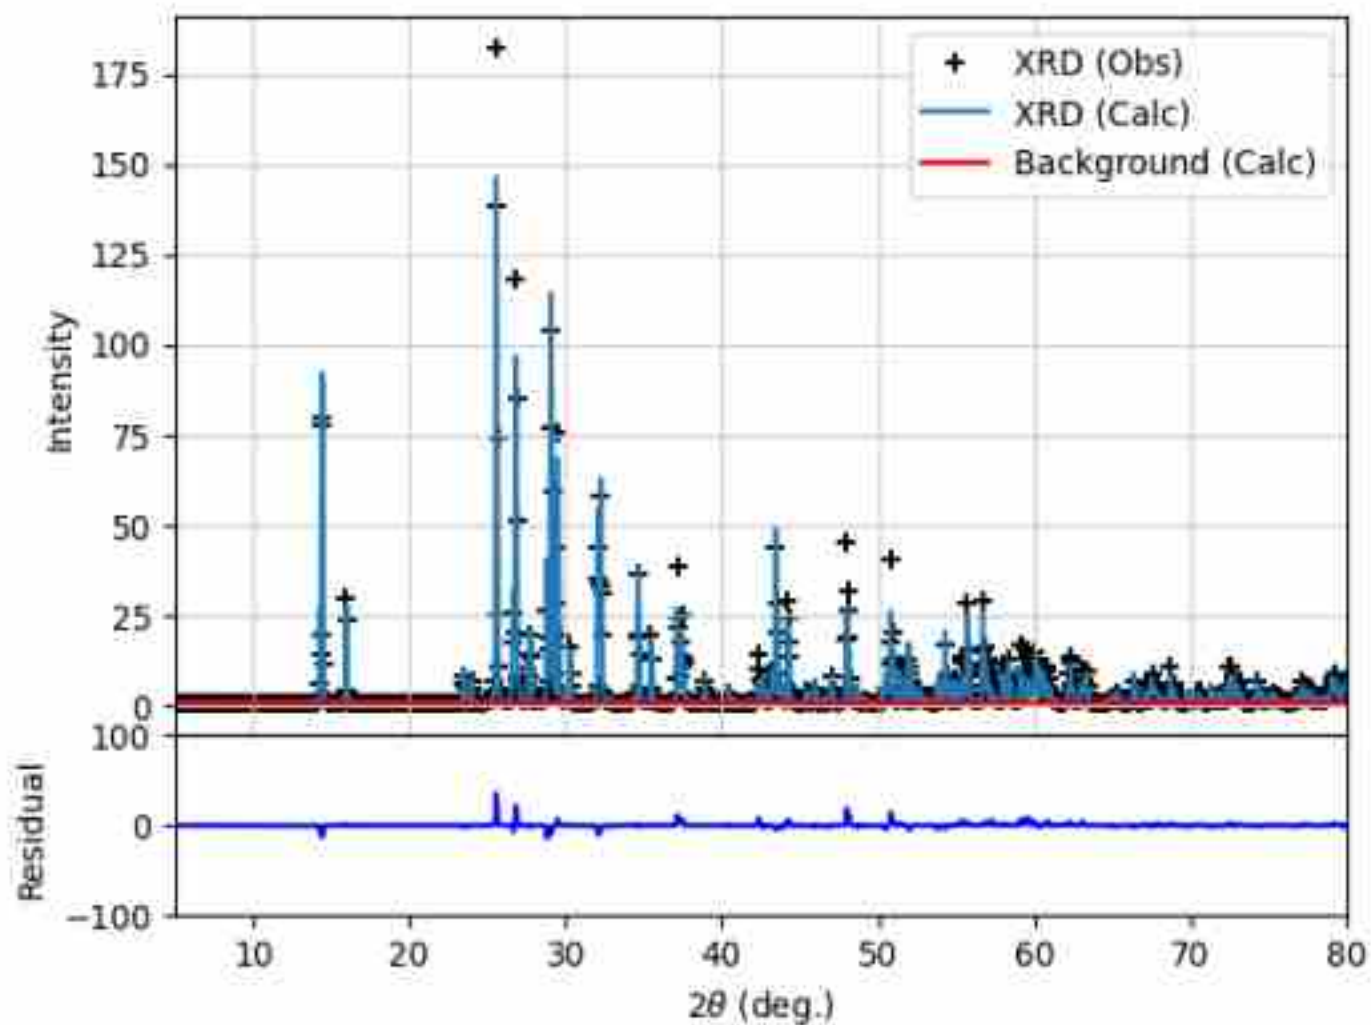

| RMSE before RR | Rwp      | RMSE after RR |
|----------------|----------|---------------|
| 0.354          | 22.39739 | None          |

# Pb6Se2O10

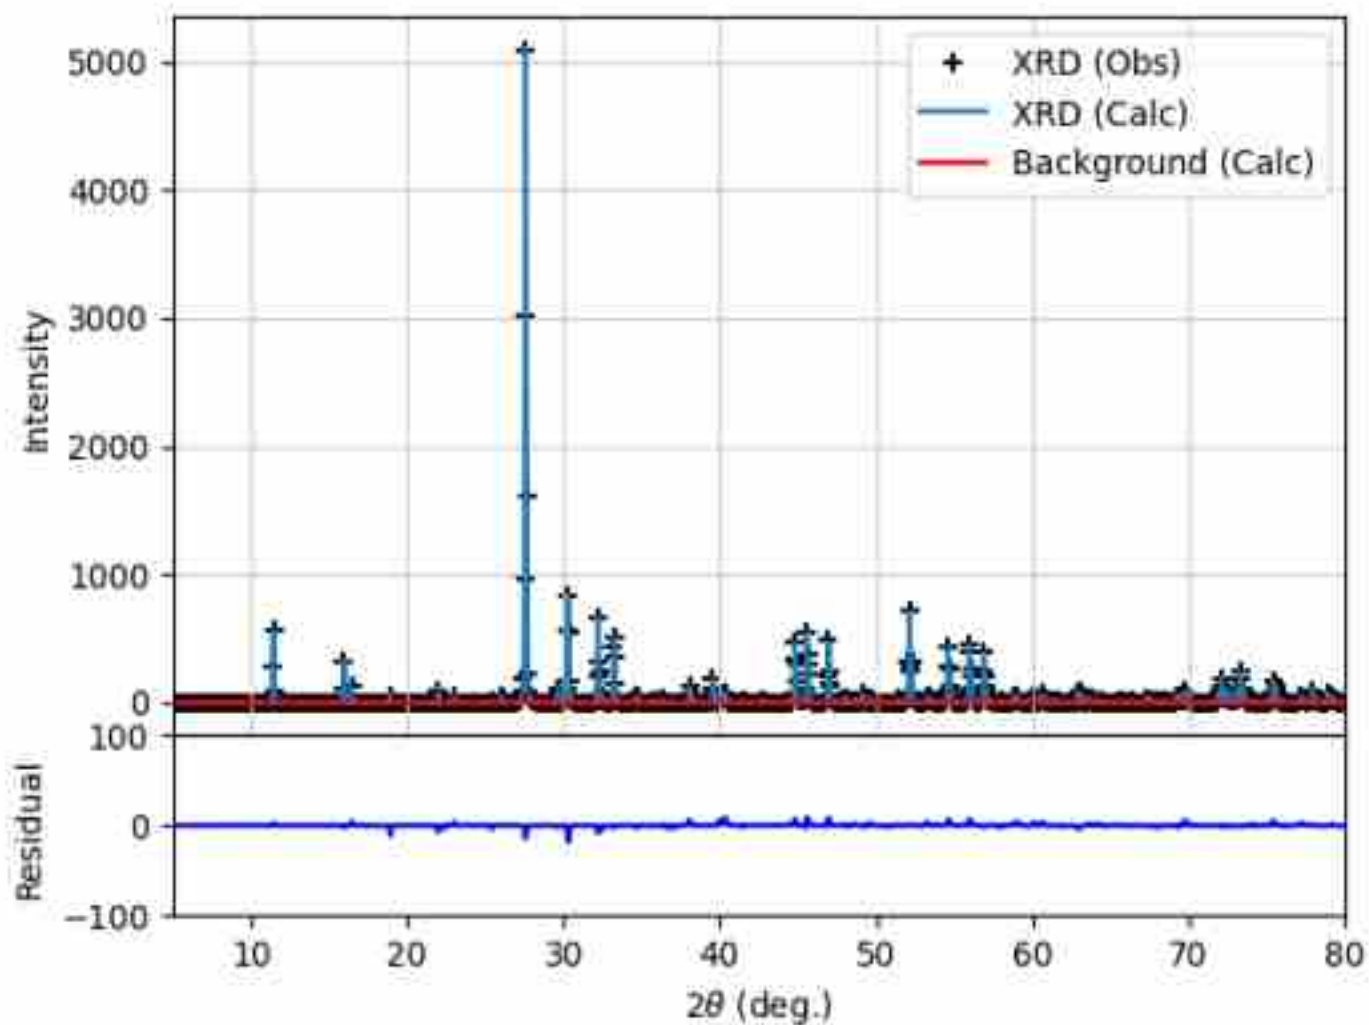

| RMSE before RR | Rwp     | RMSE after RR |
|----------------|---------|---------------|
| 0.354          | 3.90945 | 0.38818       |



# Be<sub>2</sub>B<sub>1</sub>H<sub>3</sub>O<sub>5</sub>

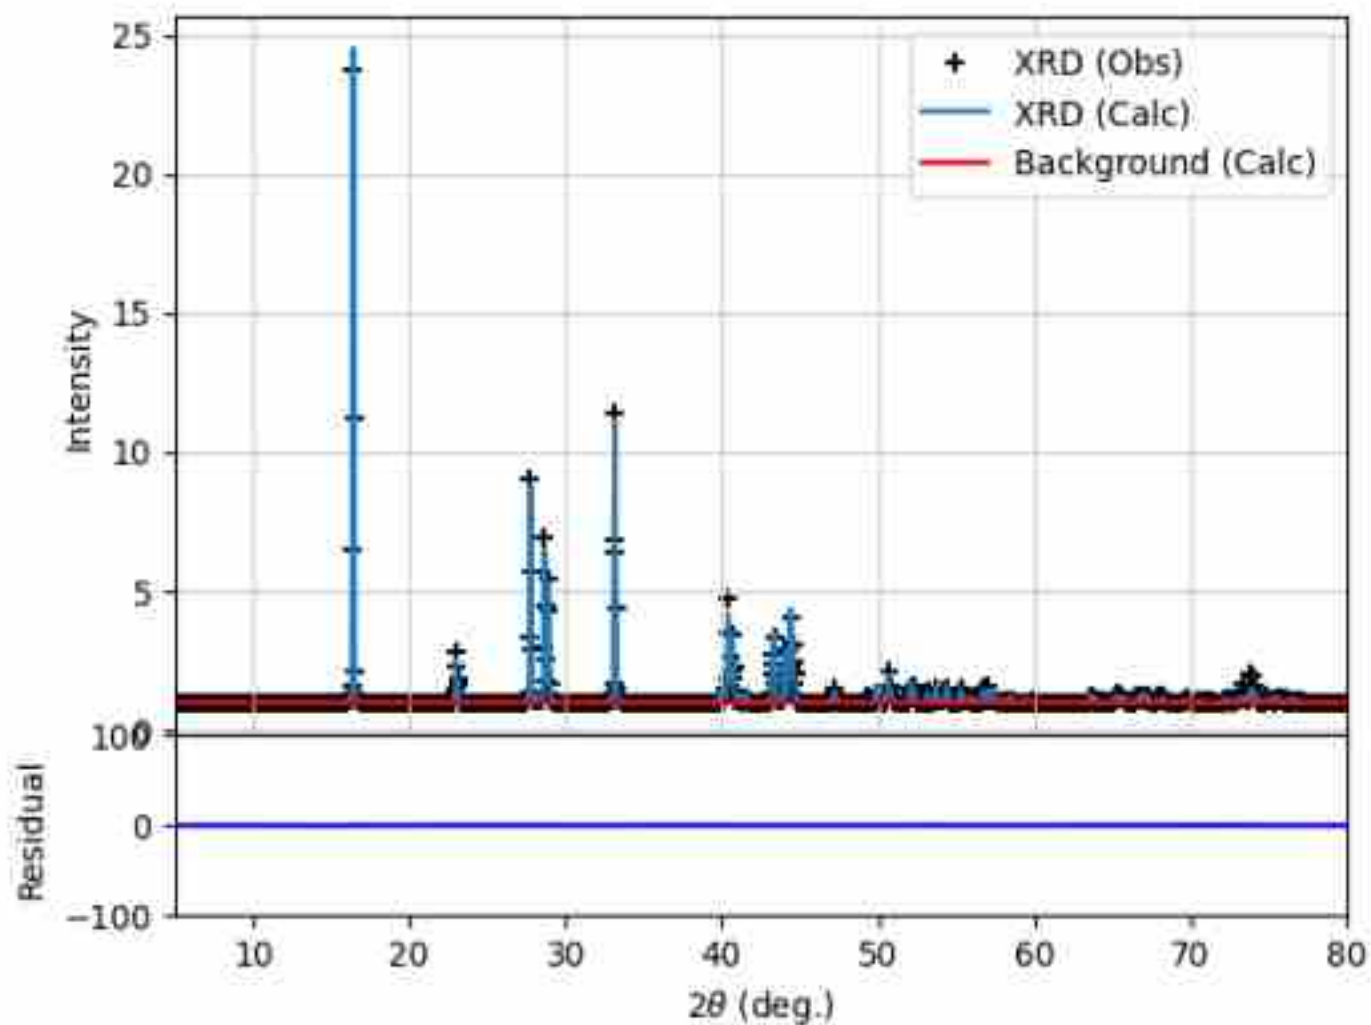

| RMSE before RR | Rwp     | RMSE after RR |
|----------------|---------|---------------|
| 0.355          | 4.14631 | None          |

# Li<sub>2</sub>V<sub>2</sub>F<sub>8</sub>

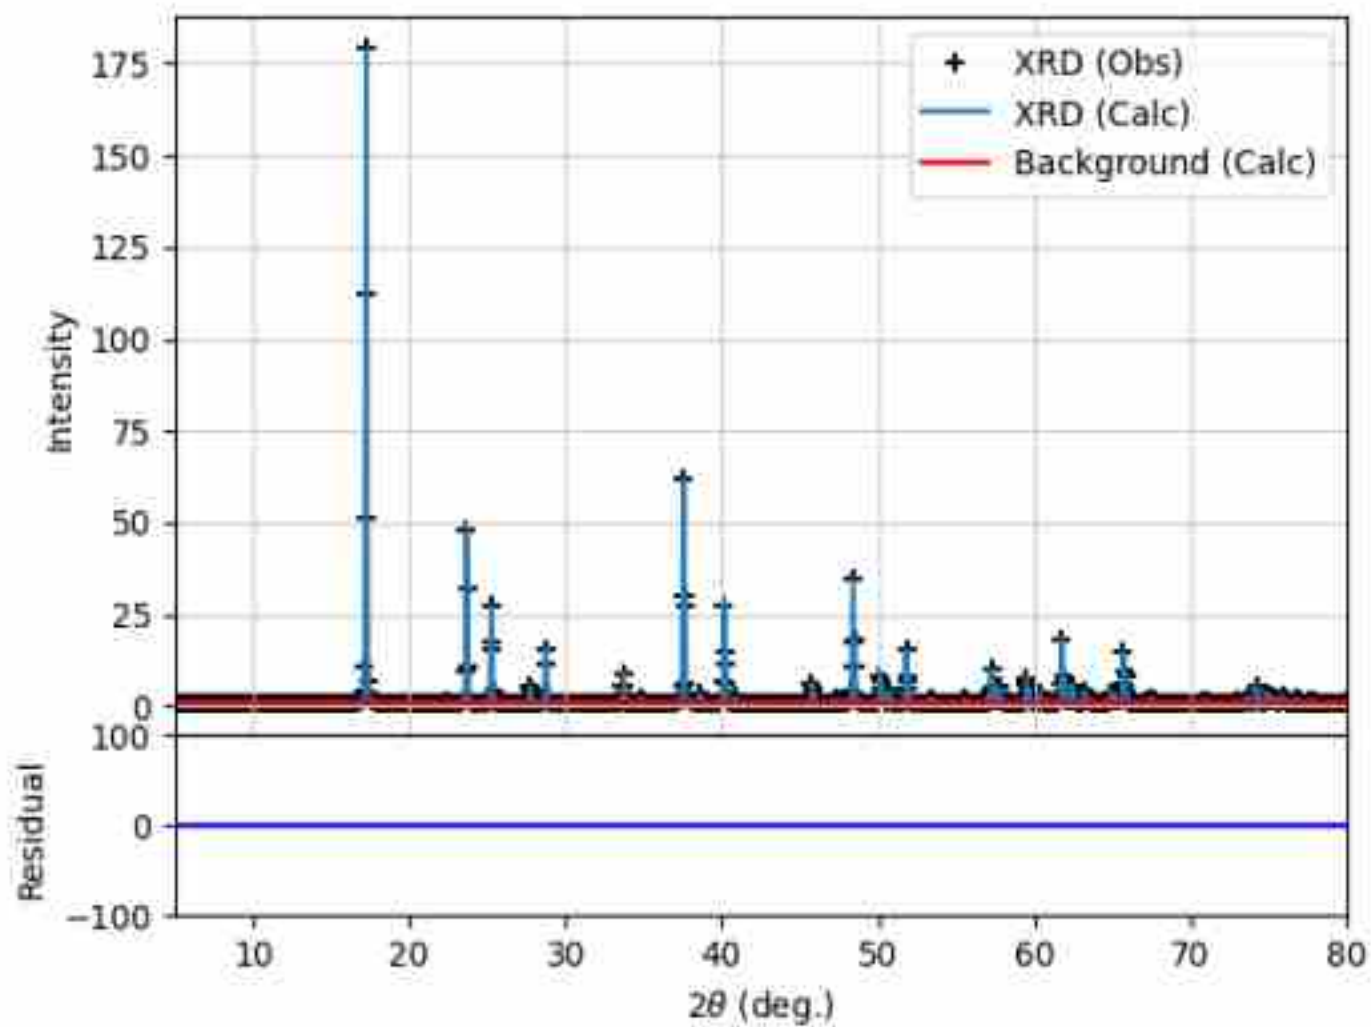

| RMSE before RR | Rwp     | RMSE after RR |
|----------------|---------|---------------|
| 0.355          | 0.00357 | 0.00168       |

# Cu<sub>8</sub>O<sub>12</sub>

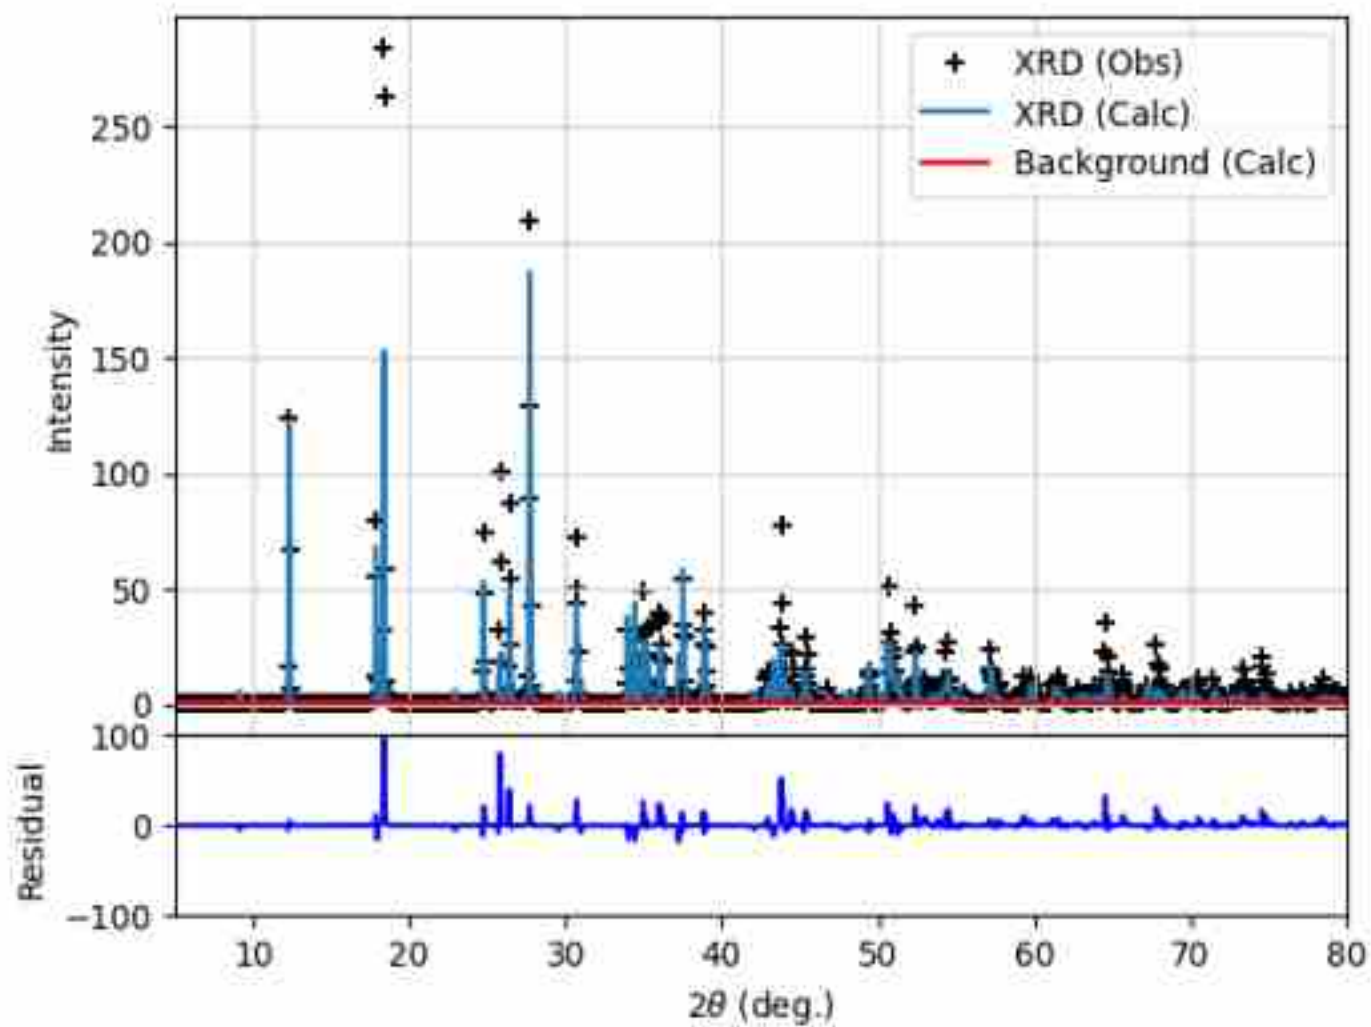

| RMSE before RR | Rwp     | RMSE after RR |
|----------------|---------|---------------|
| 0.356          | 53.1365 | None          |

# Er6Sc2S12

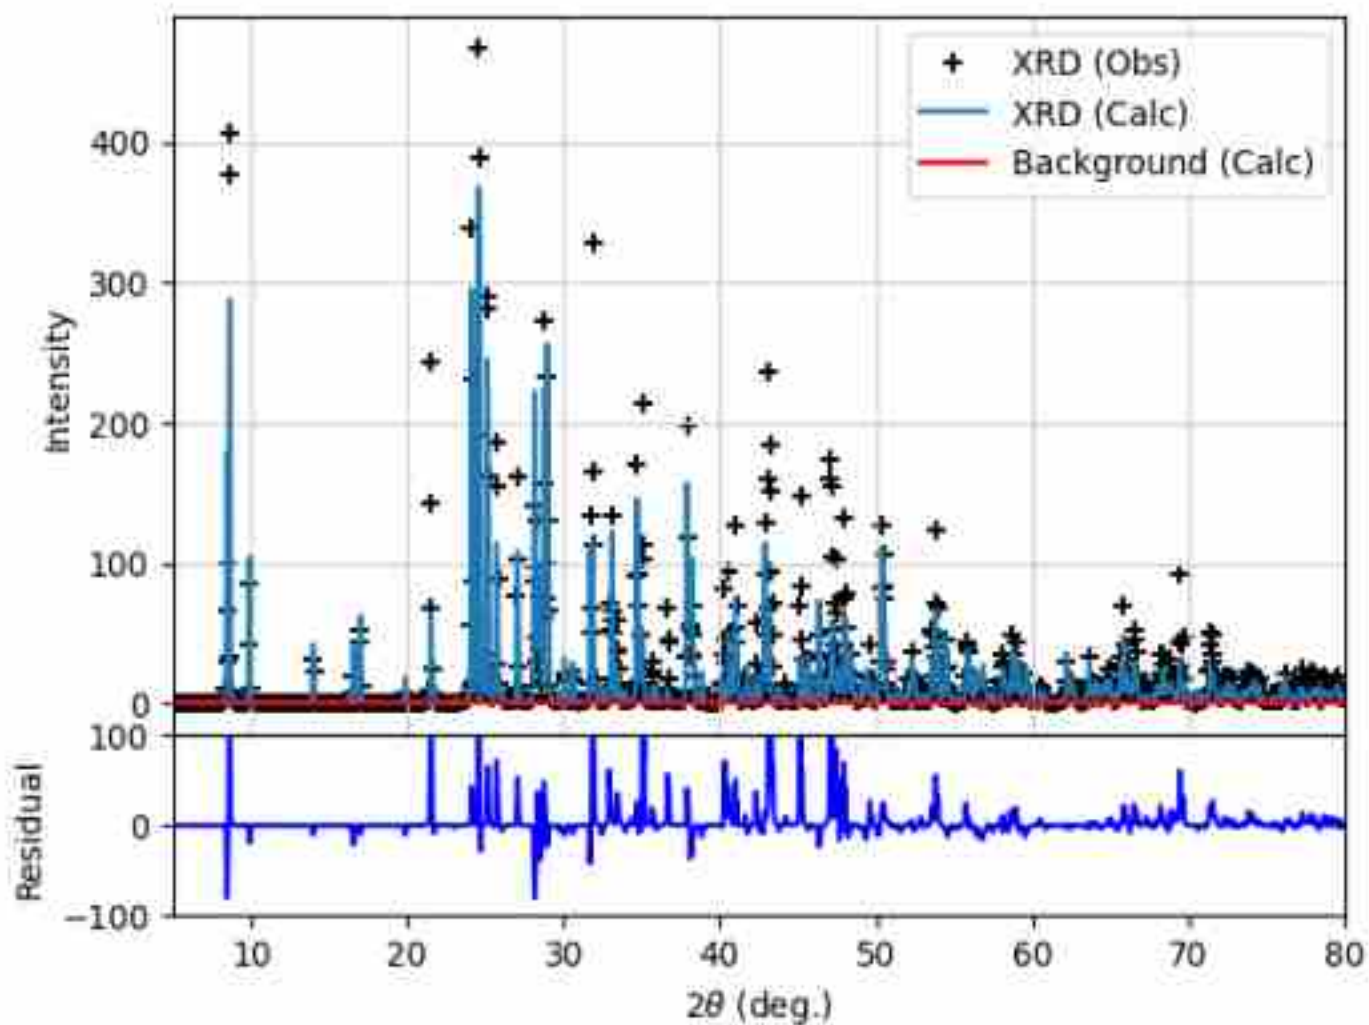

| RMSE before RR | Rwp     | RMSE after RR |
|----------------|---------|---------------|
| 0.357          | 48.8965 | None          |

# Ge6S12

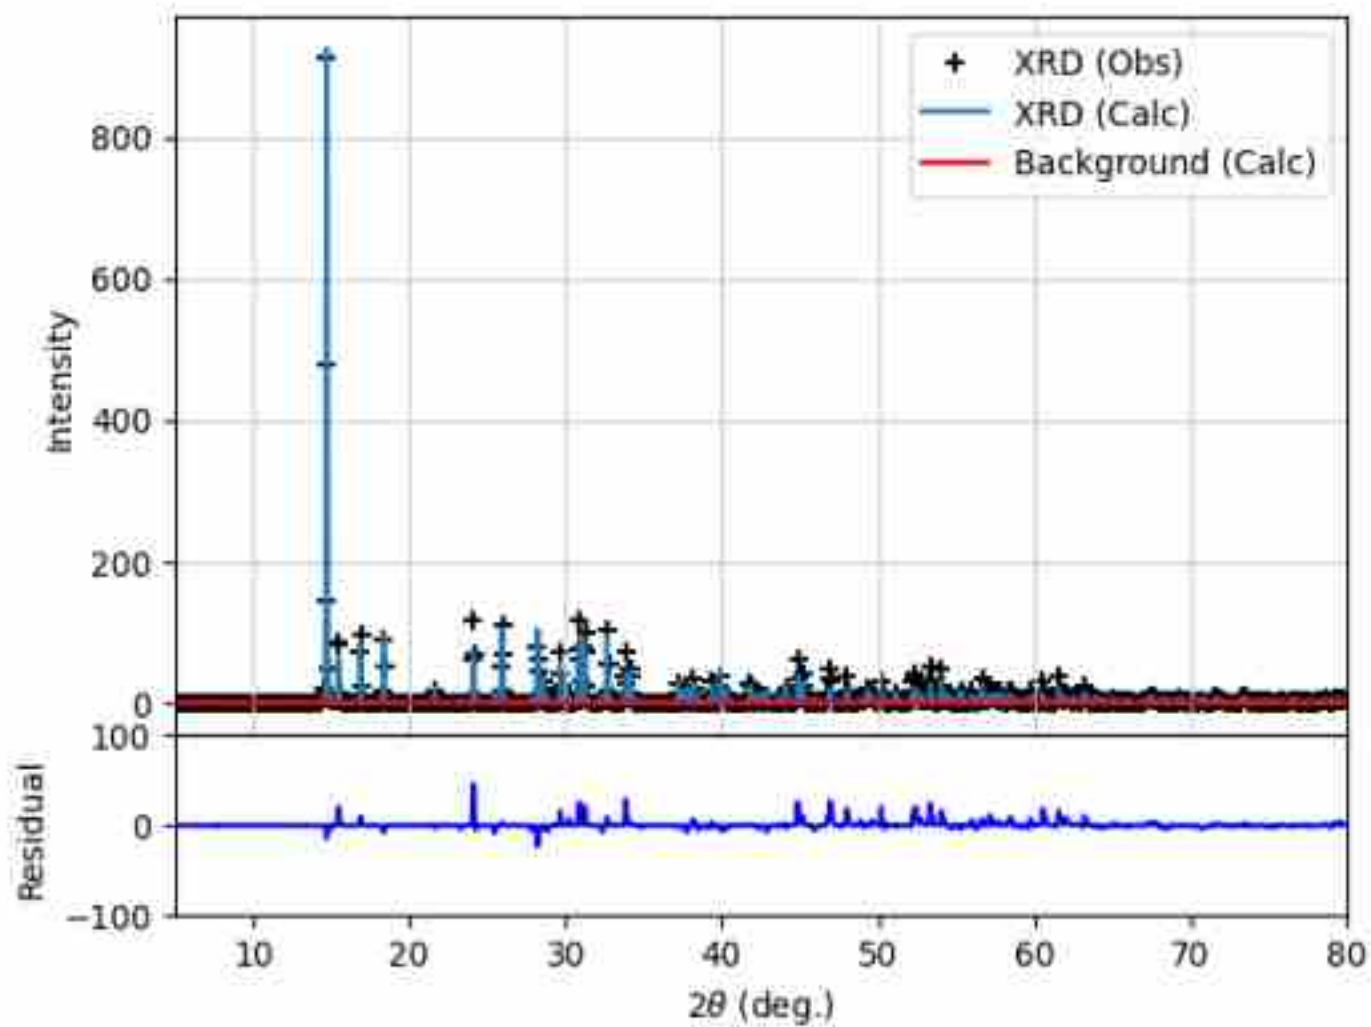

| RMSE before RR | Rwp      | RMSE after RR |
|----------------|----------|---------------|
| 0.357          | 30.75145 | None          |

# Nb4O8F4

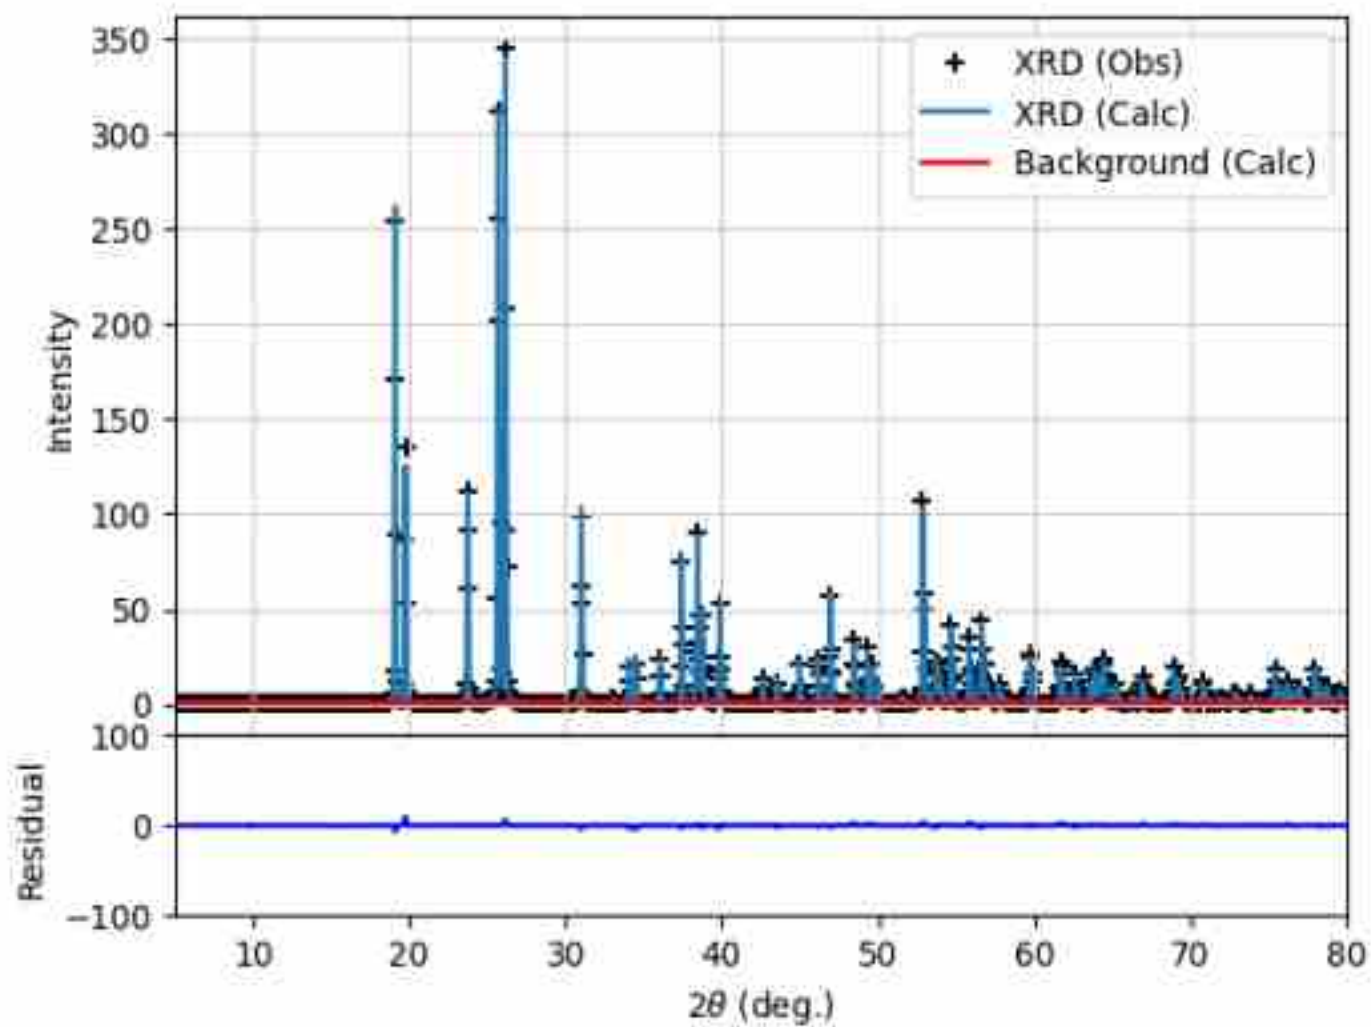

| RMSE before RR | Rwp     | RMSE after RR |
|----------------|---------|---------------|
| 0.357          | 5.78129 | None          |

# Tl6S3

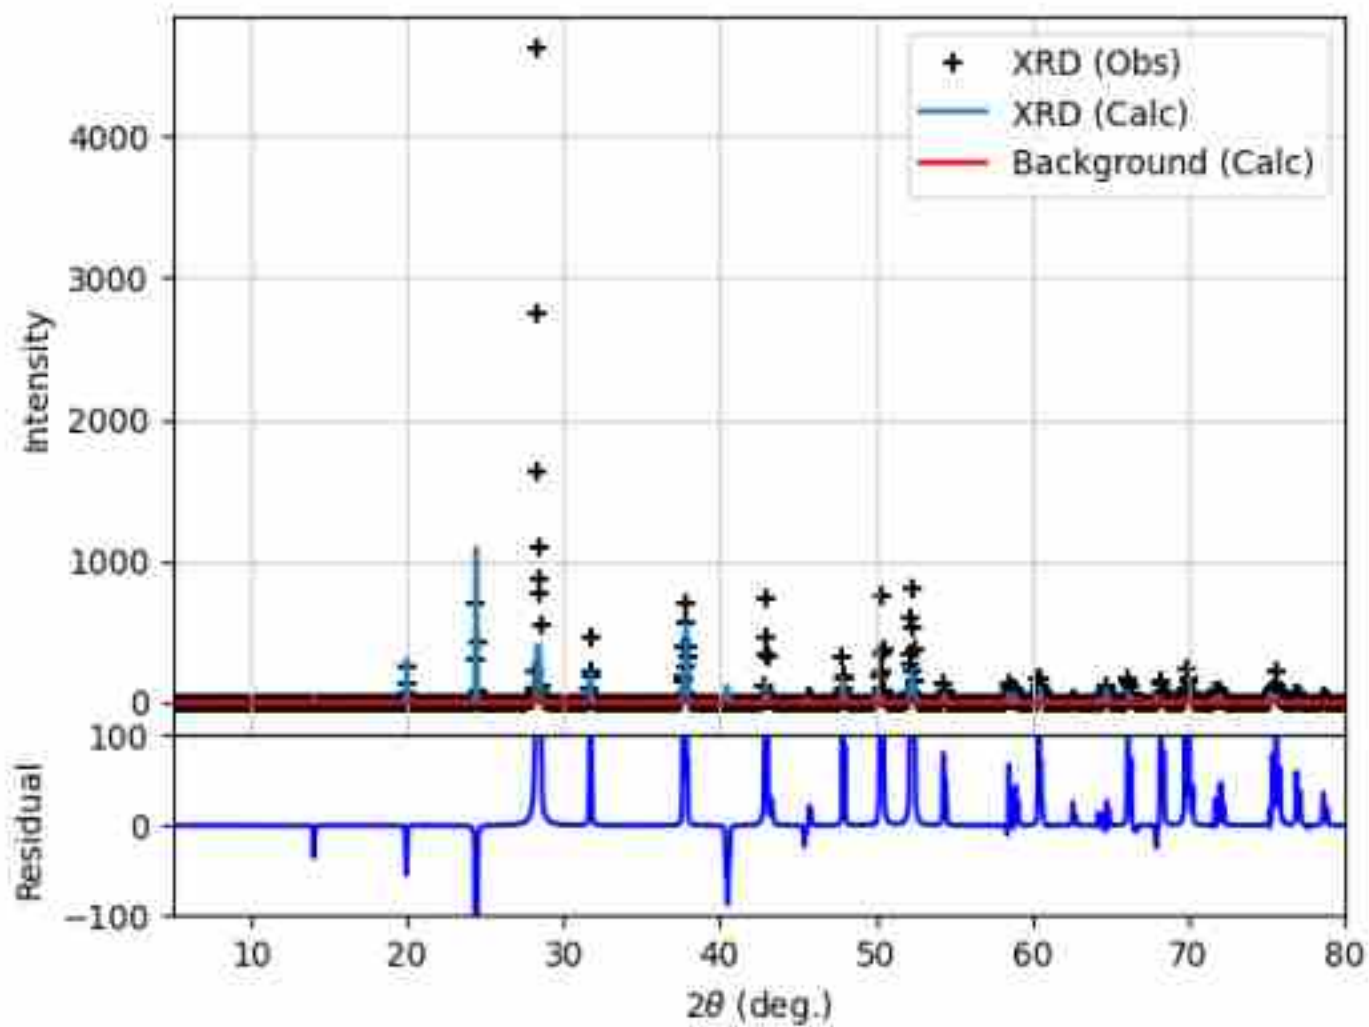

| RMSE before RR | Rwp     | RMSE after RR |
|----------------|---------|---------------|
| 0.358          | 73.0406 | 0.43604       |

# Cr<sub>8</sub>Se<sub>12</sub>

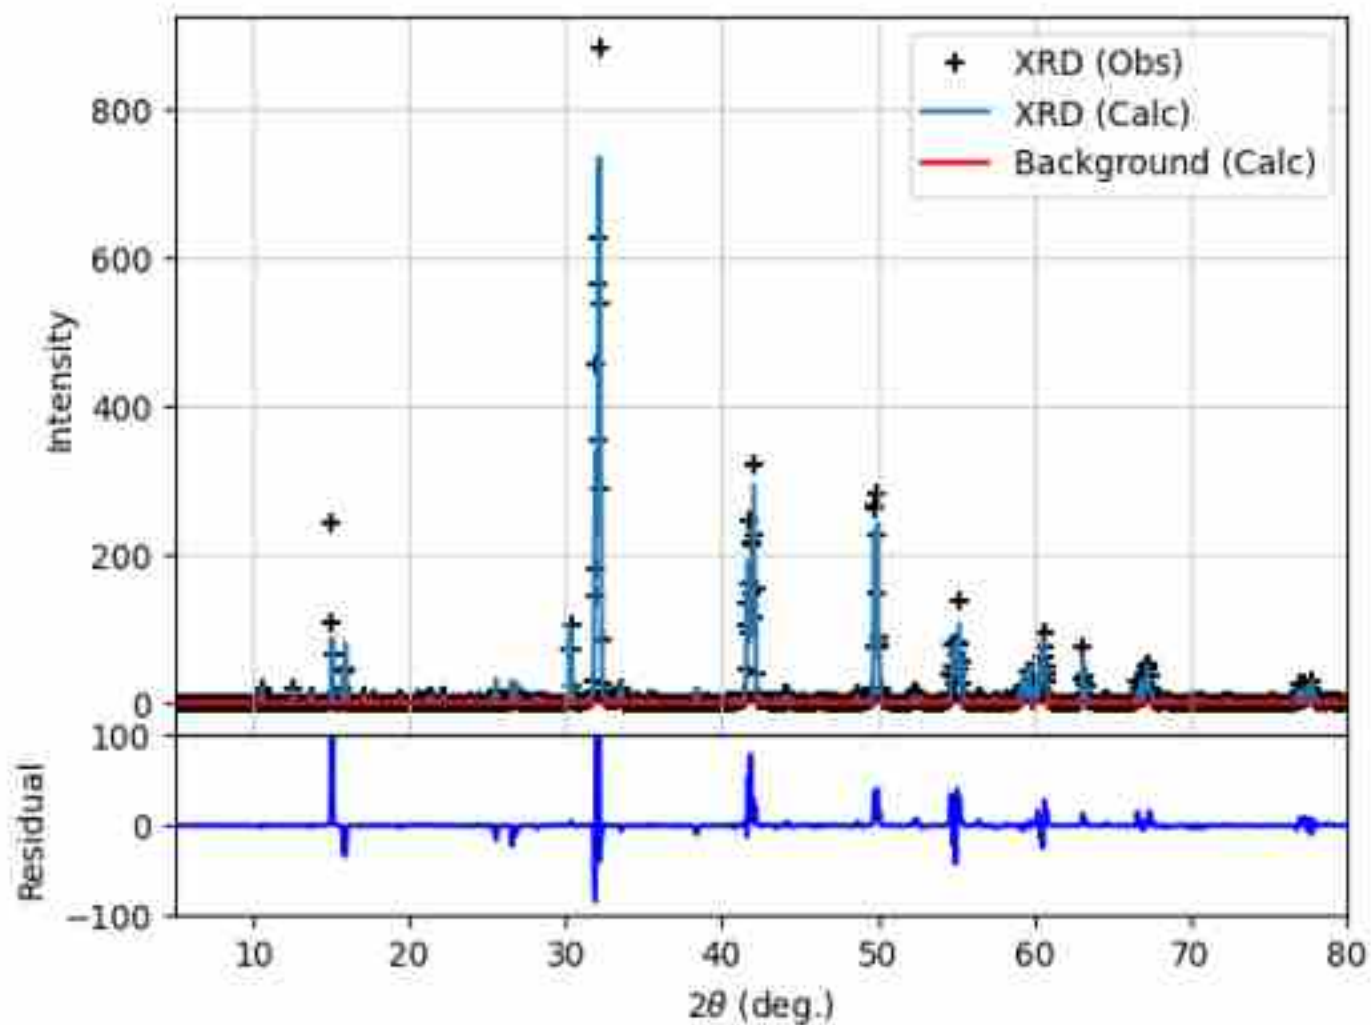

| RMSE before RR | Rwp      | RMSE after RR |
|----------------|----------|---------------|
| 0.359          | 30.09627 | 0.34853       |



# Te<sub>2</sub>Au<sub>2</sub>Br<sub>16</sub>

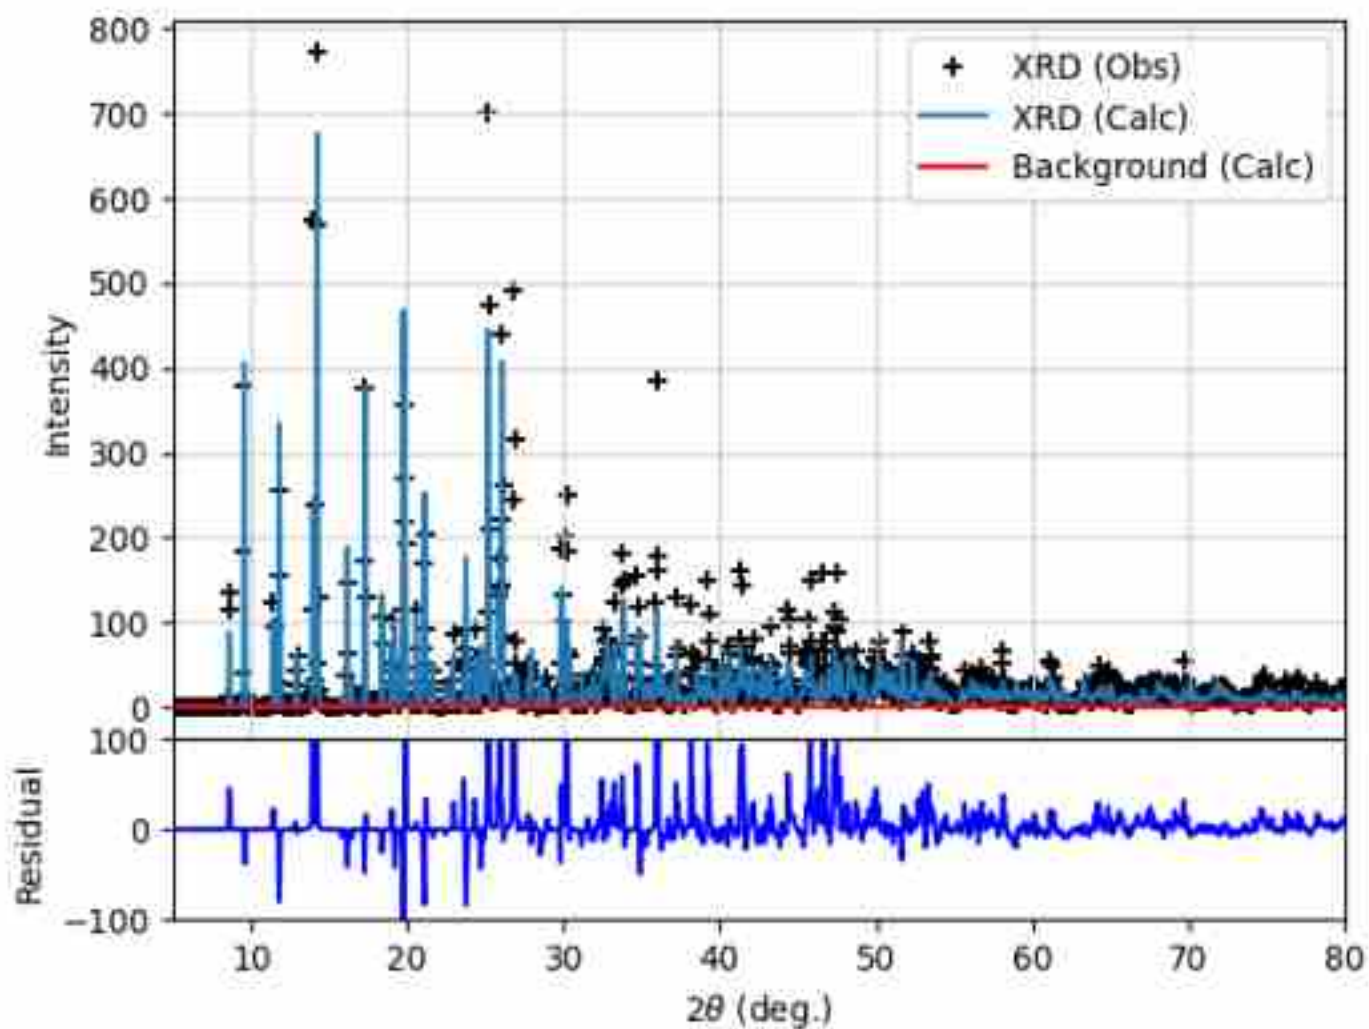

| RMSE before RR | Rwp      | RMSE after RR |
|----------------|----------|---------------|
| 0.359          | 49.27607 | None          |

# H8W2

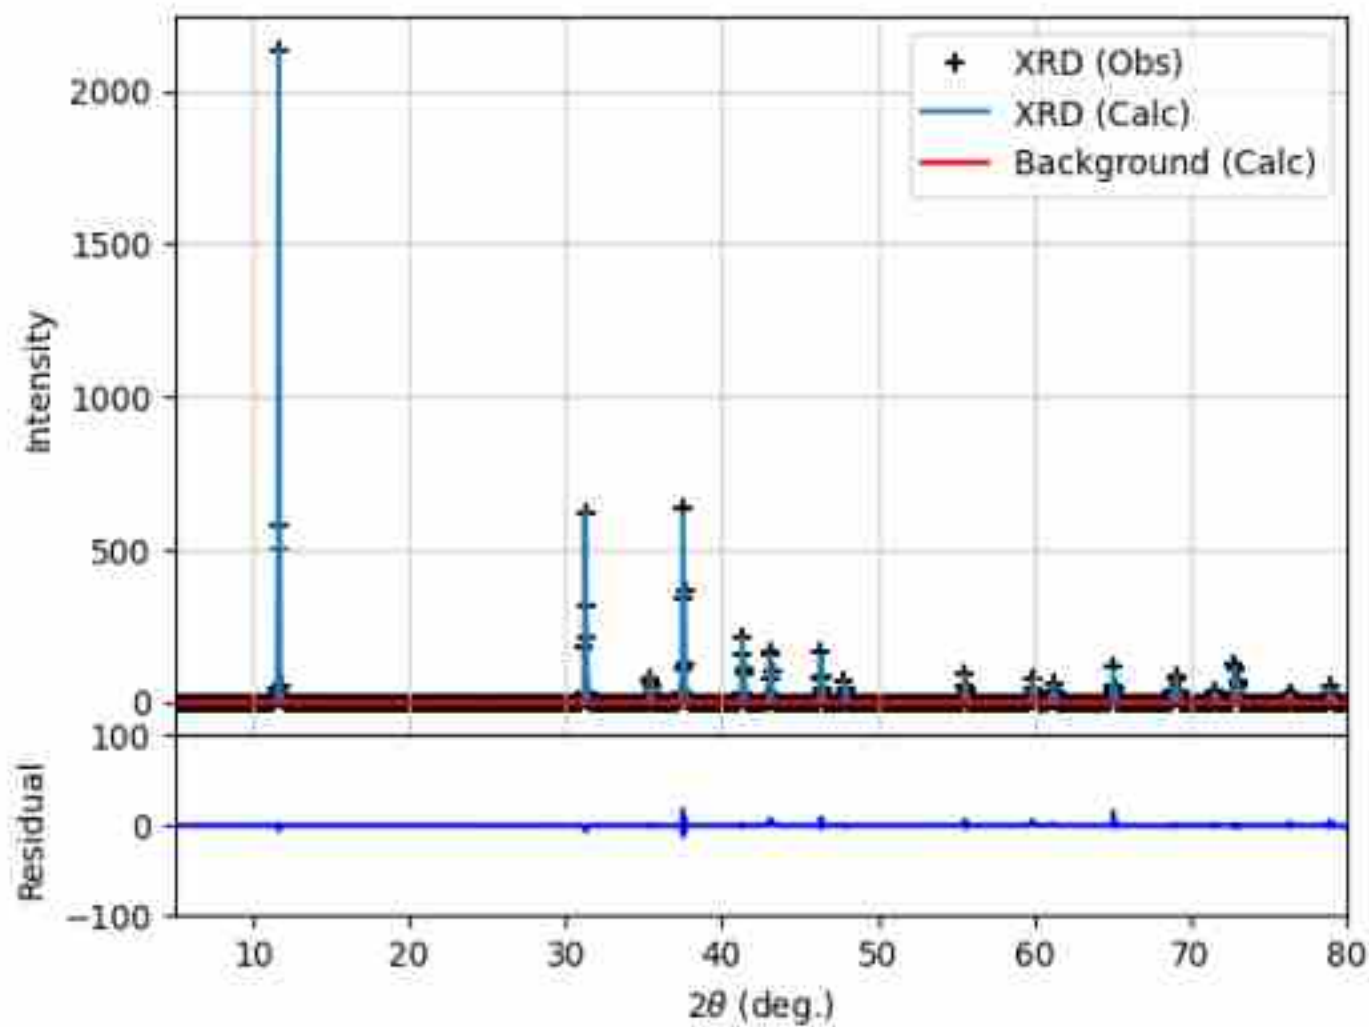

| RMSE before RR | Rwp     | RMSE after RR |
|----------------|---------|---------------|
| 0.361          | 5.35744 | None          |

# Li8H2N2

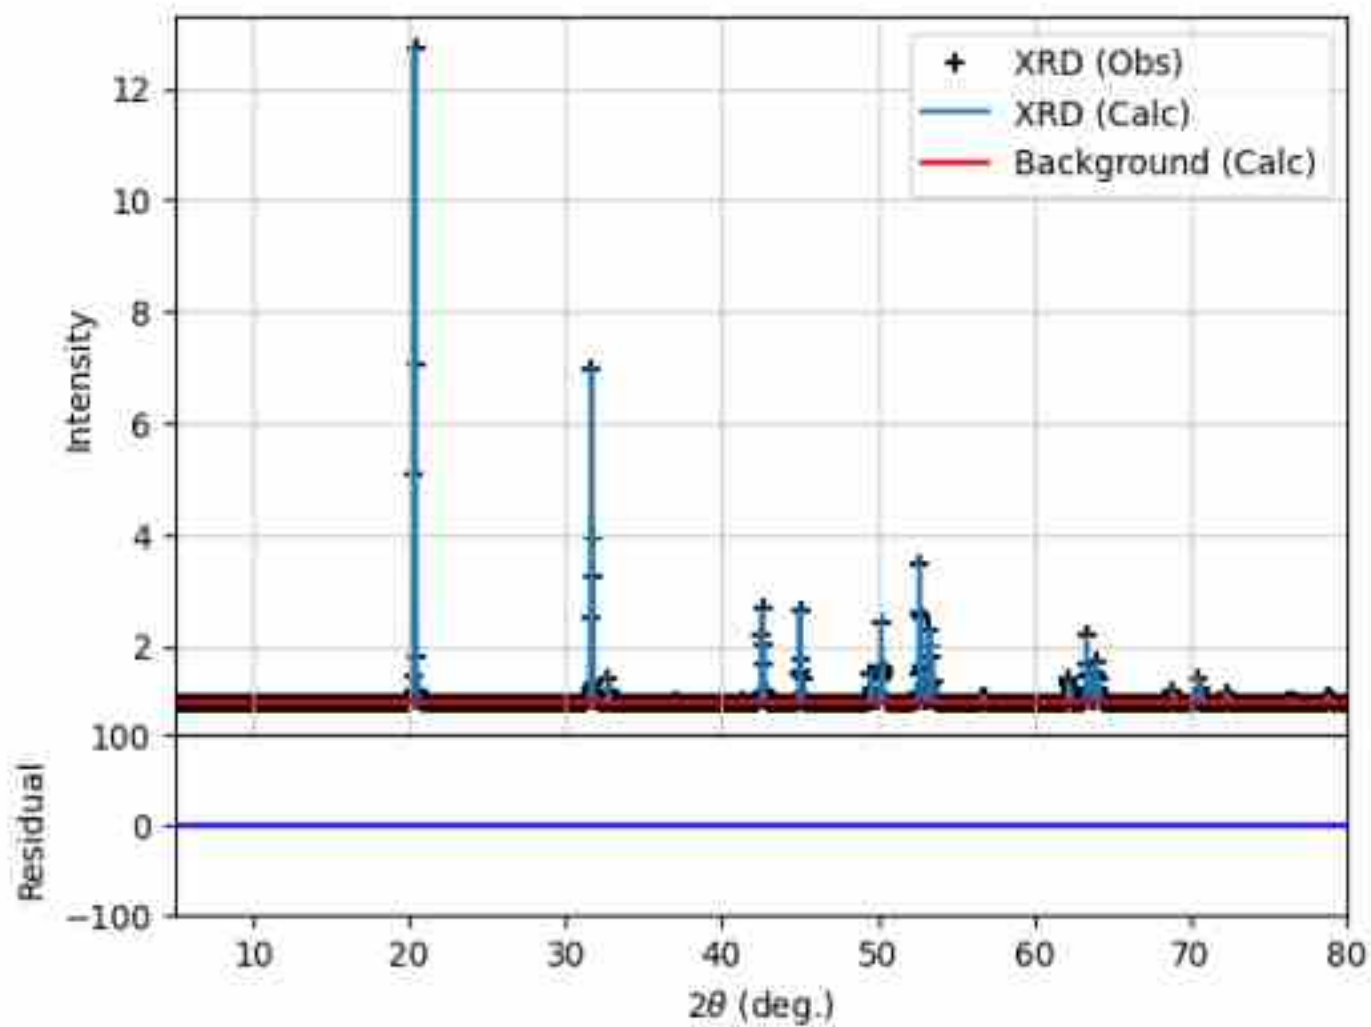

| RMSE before RR | Rwp     | RMSE after RR |
|----------------|---------|---------------|
| 0.361          | 0.00078 | 0.00204       |

# Pr<sub>8</sub>Se<sub>6</sub>N<sub>4</sub>

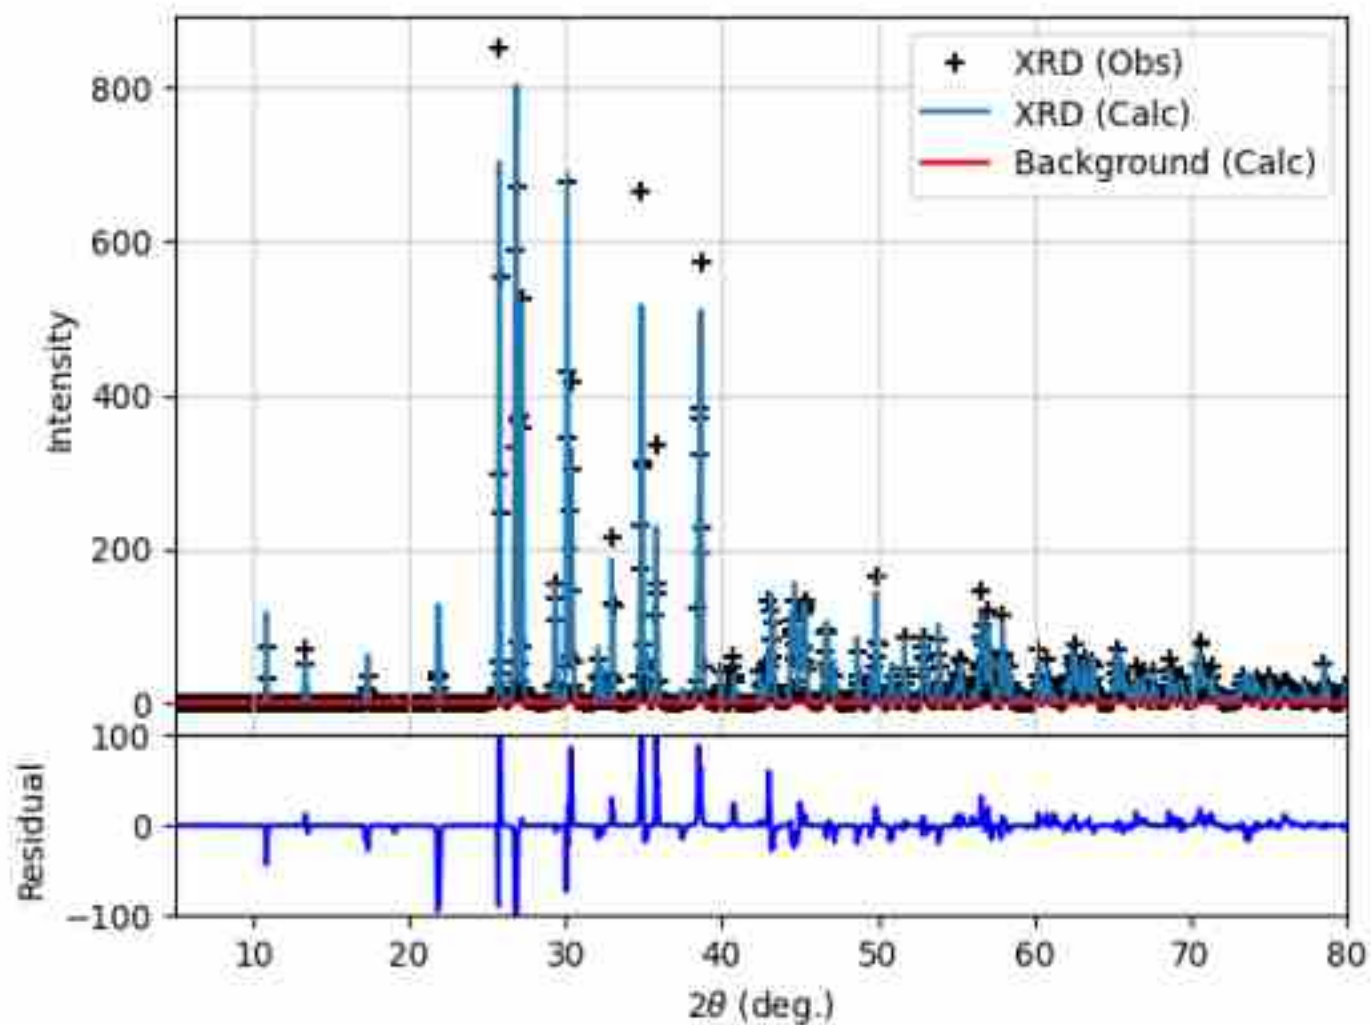

| RMSE before RR | Rwp      | RMSE after RR |
|----------------|----------|---------------|
| 0.362          | 29.21264 | None          |

Ca<sub>4</sub>Ni<sub>3</sub>C<sub>5</sub>

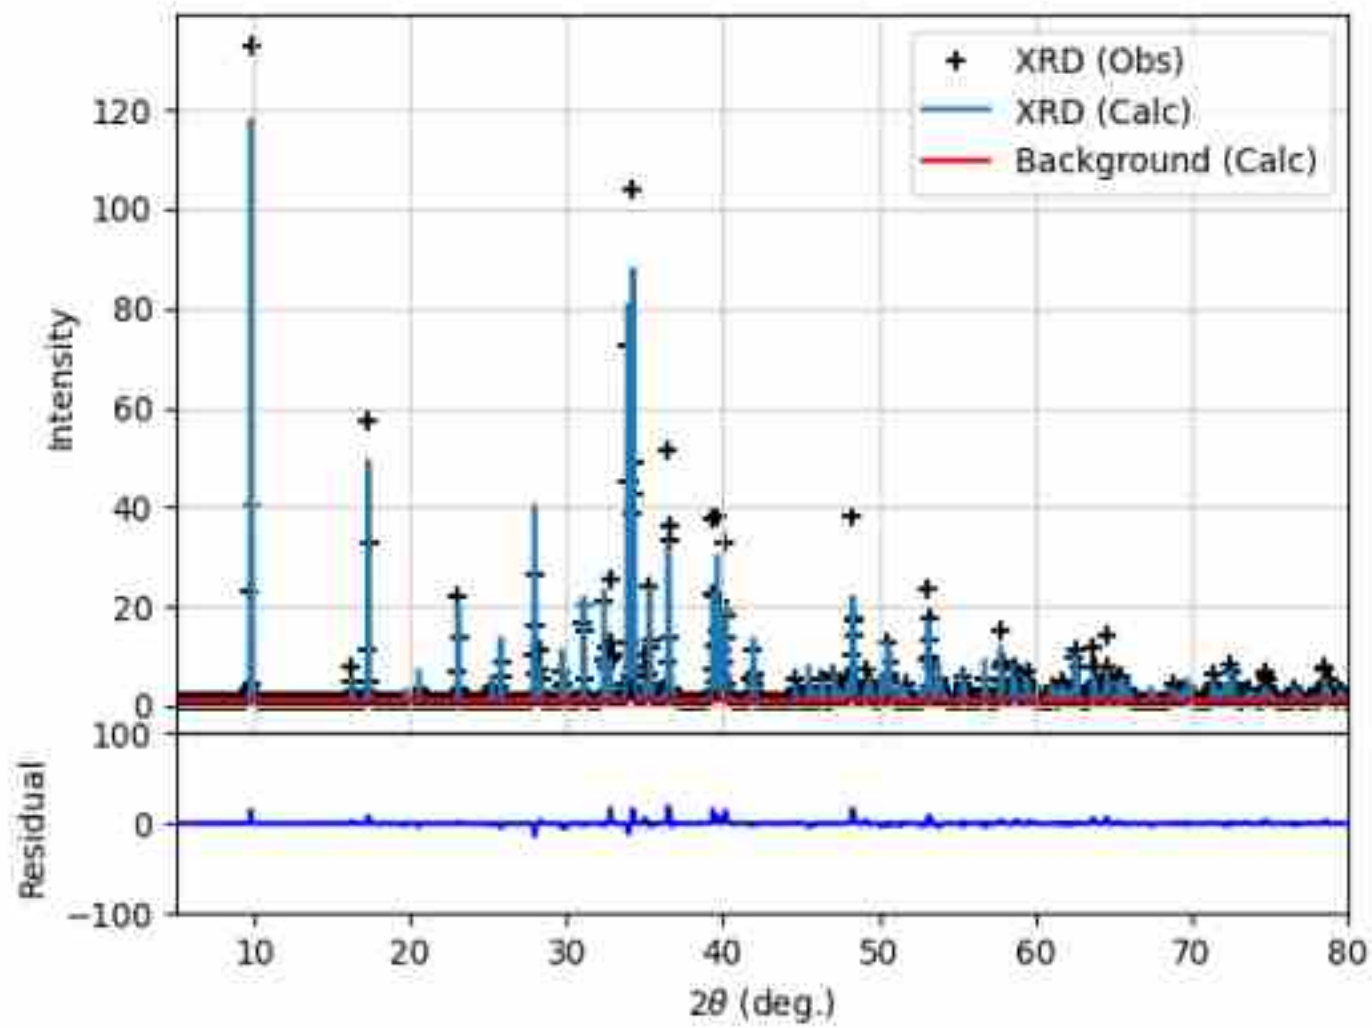

| RMSE before RR | Rwp      | RMSE after RR |
|----------------|----------|---------------|
| 0.363          | 30.85953 | 0.46322       |

# In4P2O10

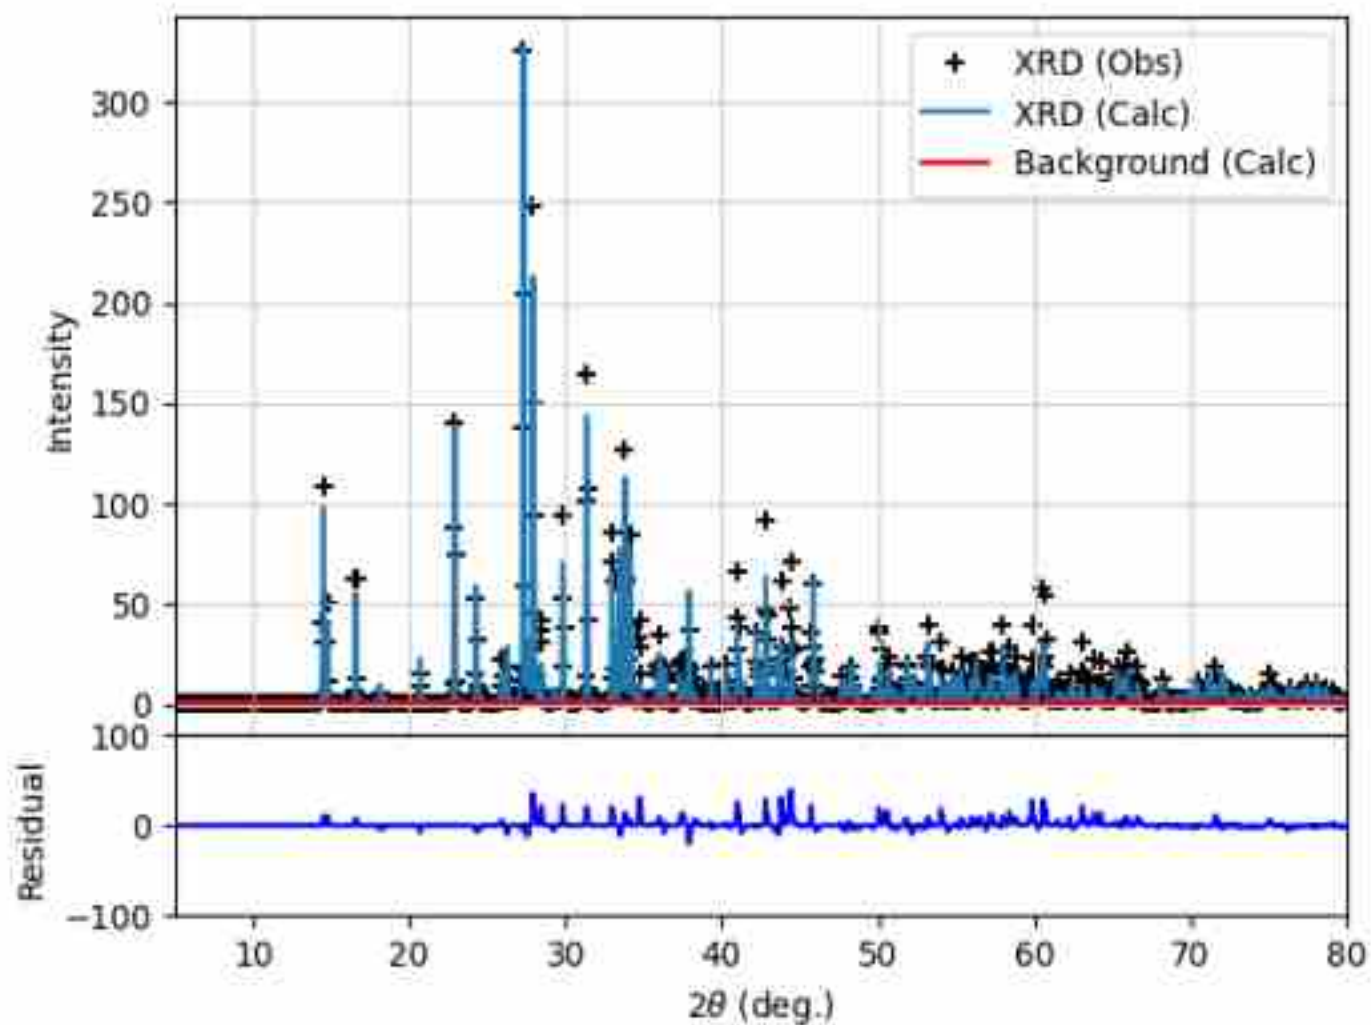

| RMSE before RR | Rwp      | RMSE after RR |
|----------------|----------|---------------|
| 0.363          | 36.71666 | None          |

# Li1V4O5F7

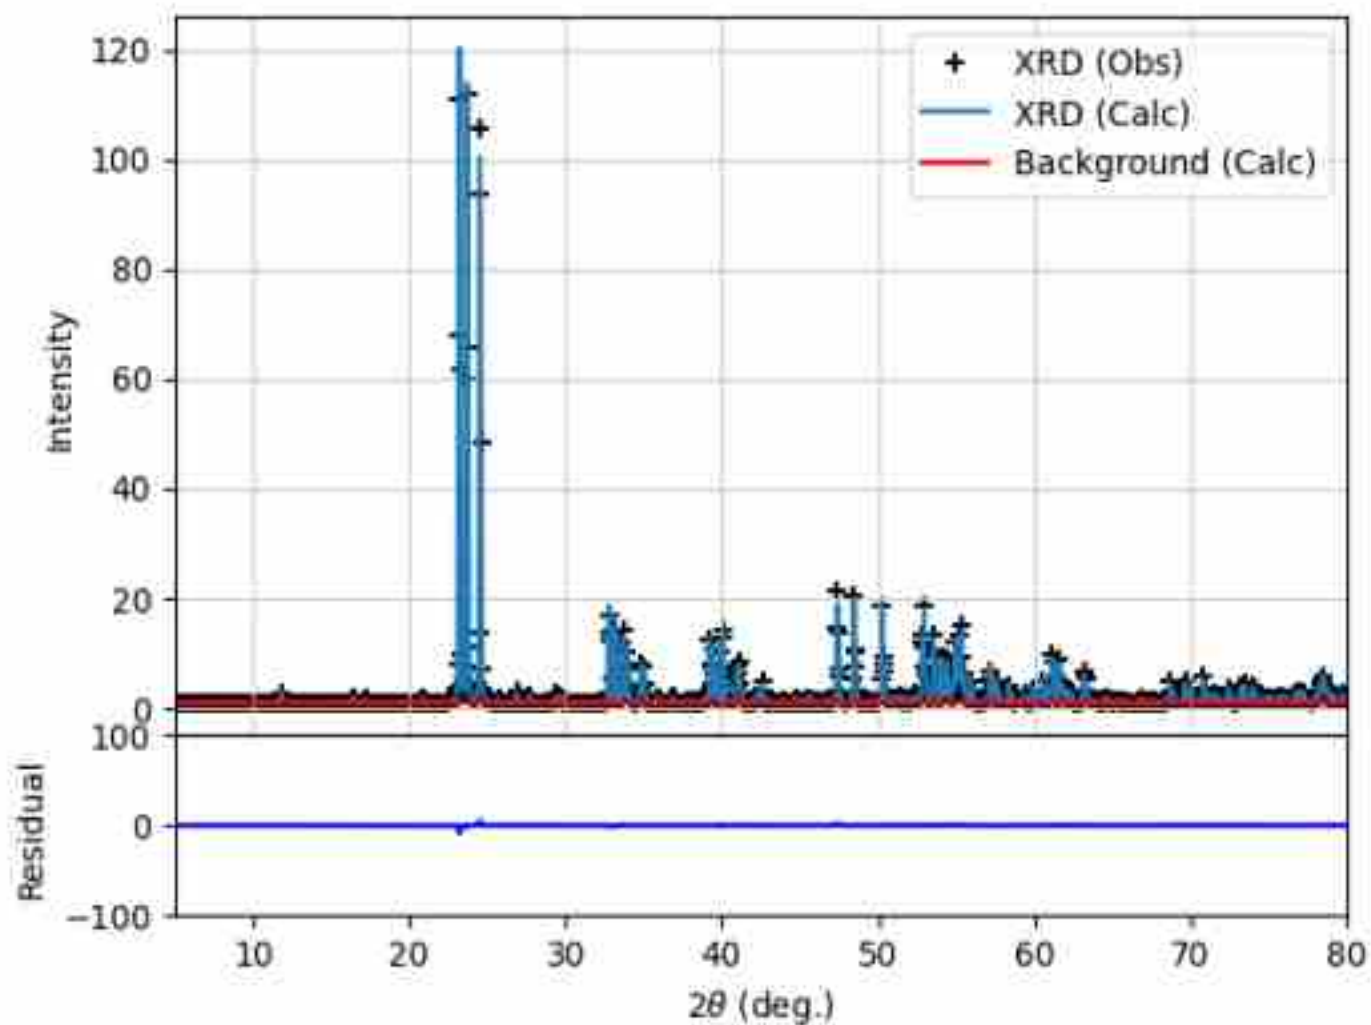

| RMSE before RR | Rwp     | RMSE after RR |
|----------------|---------|---------------|
| 0.363          | 5.18668 | 0.40968       |

# Mn1In2Se2S2

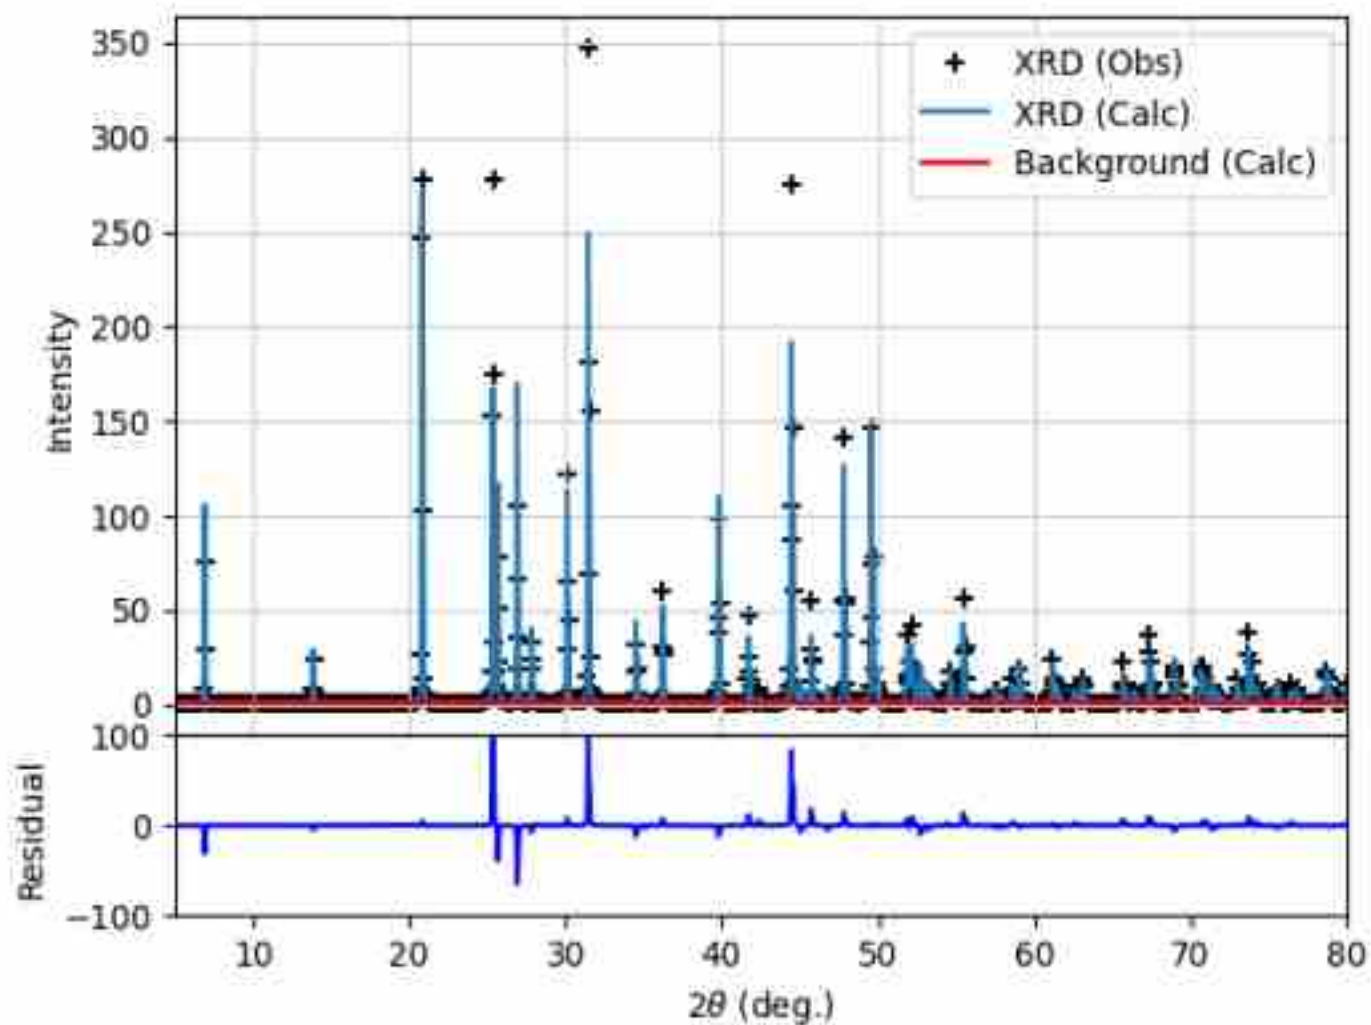

| RMSE before RR | Rwp      | RMSE after RR |
|----------------|----------|---------------|
| 0.363          | 25.91579 | 0.24272       |



# Ta<sub>2</sub>I<sub>4</sub>Cl<sub>4</sub>

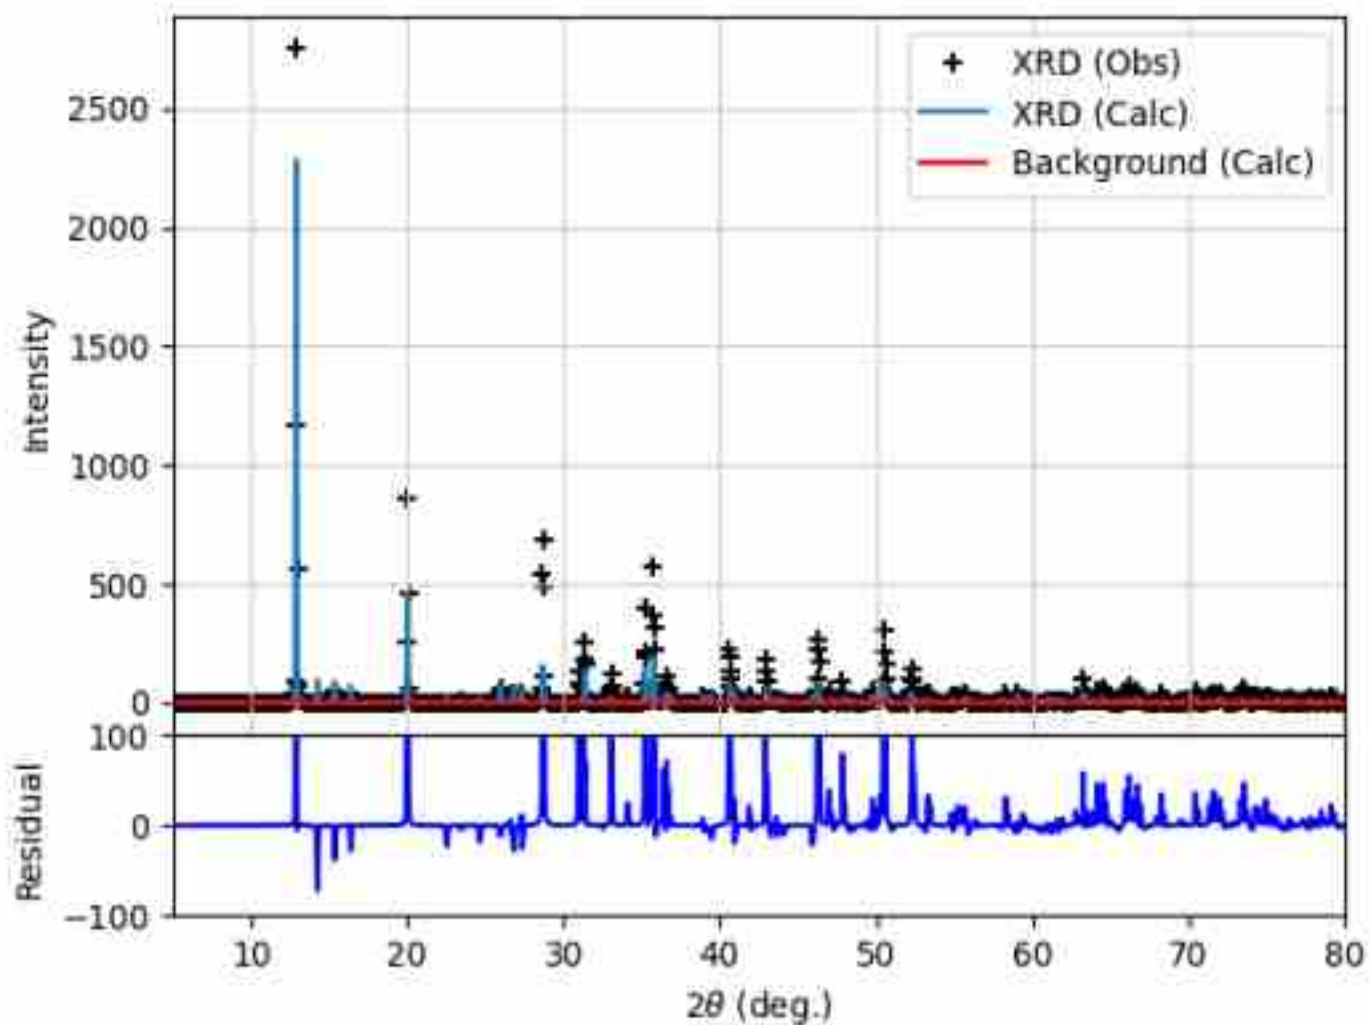

| RMSE before RR | Rwp      | RMSE after RR |
|----------------|----------|---------------|
| 0.363          | 62.23382 | None          |

# Ag<sub>2</sub>Rh<sub>2</sub>F<sub>12</sub>

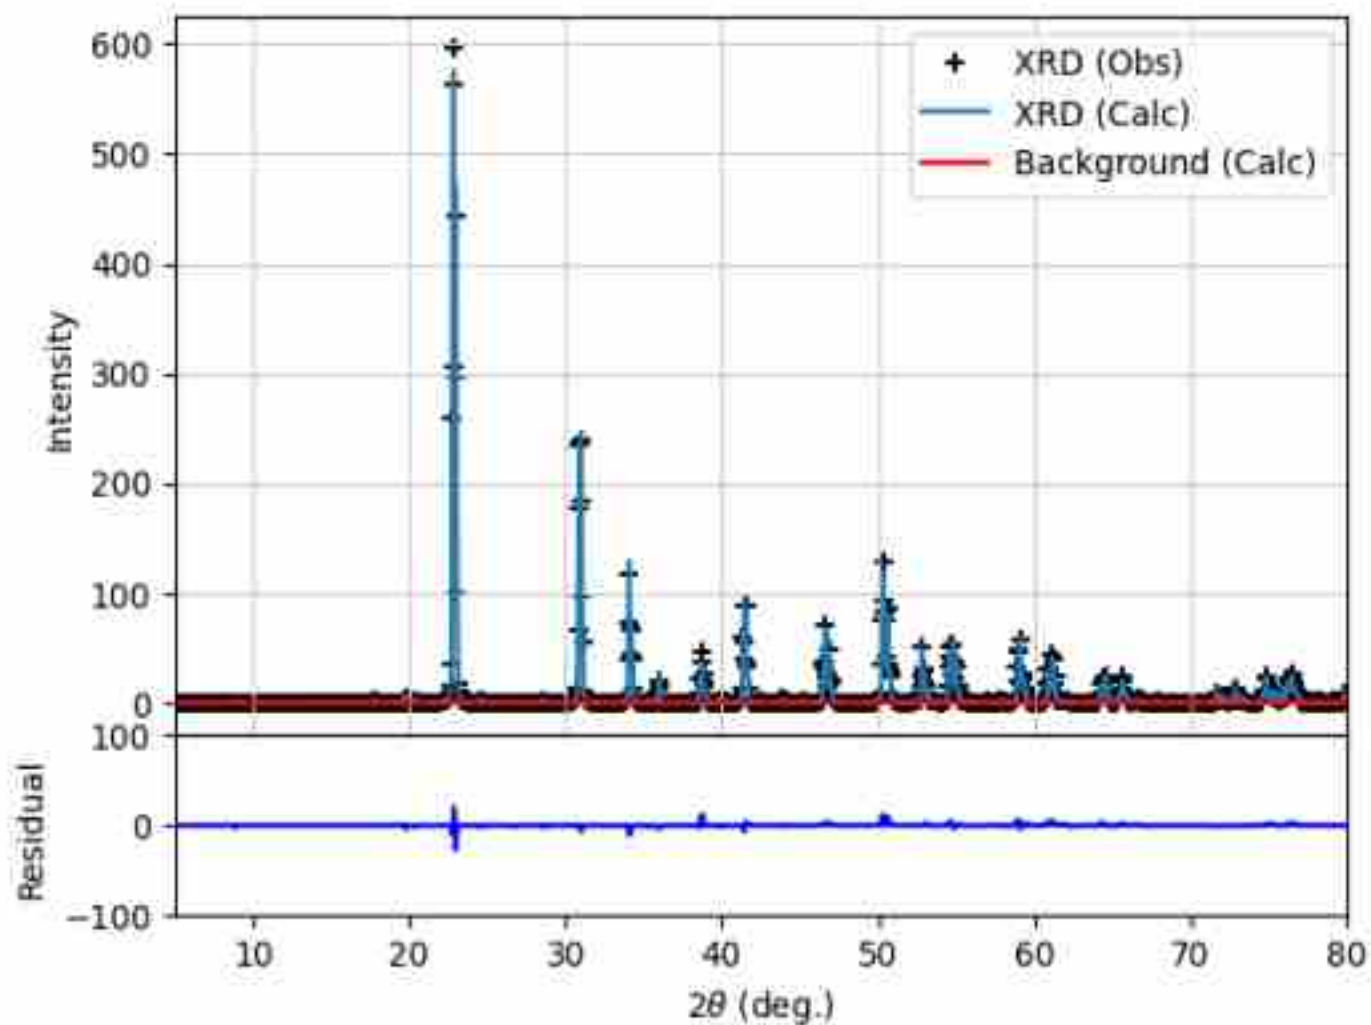

| RMSE before RR | Rwp      | RMSE after RR |
|----------------|----------|---------------|
| 0.364          | 10.17733 | 0.38308       |

# Zr6Ga6Pt6

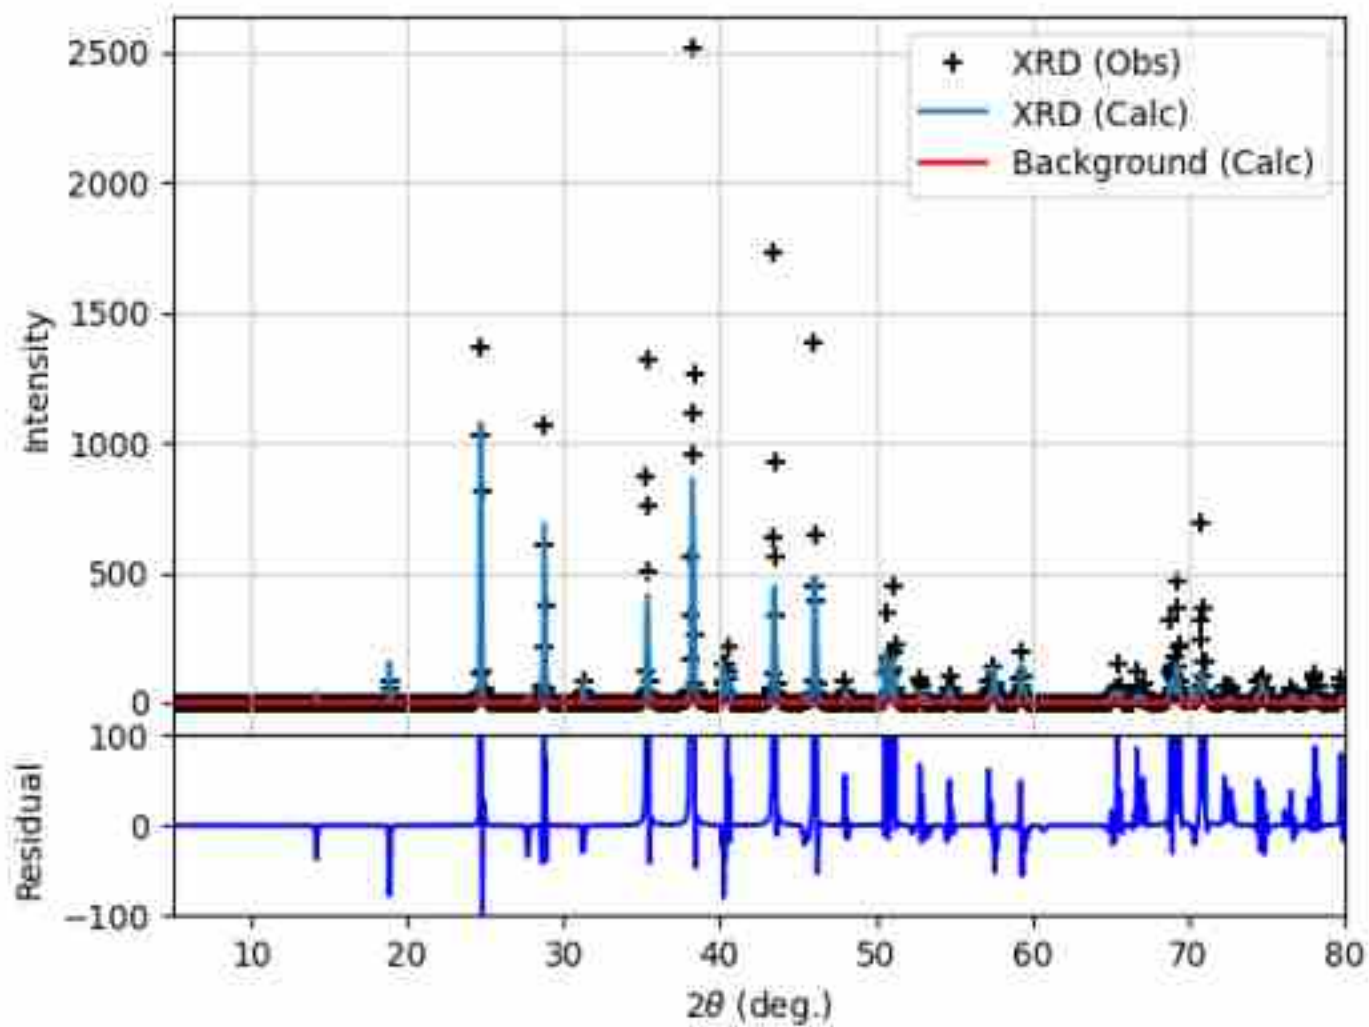

| RMSE before RR | Rwp      | RMSE after RR |
|----------------|----------|---------------|
| 0.364          | 62.05383 | 0.42611       |

# Ho<sub>3</sub>Er<sub>9</sub>Mn<sub>2</sub>Bi<sub>4</sub>

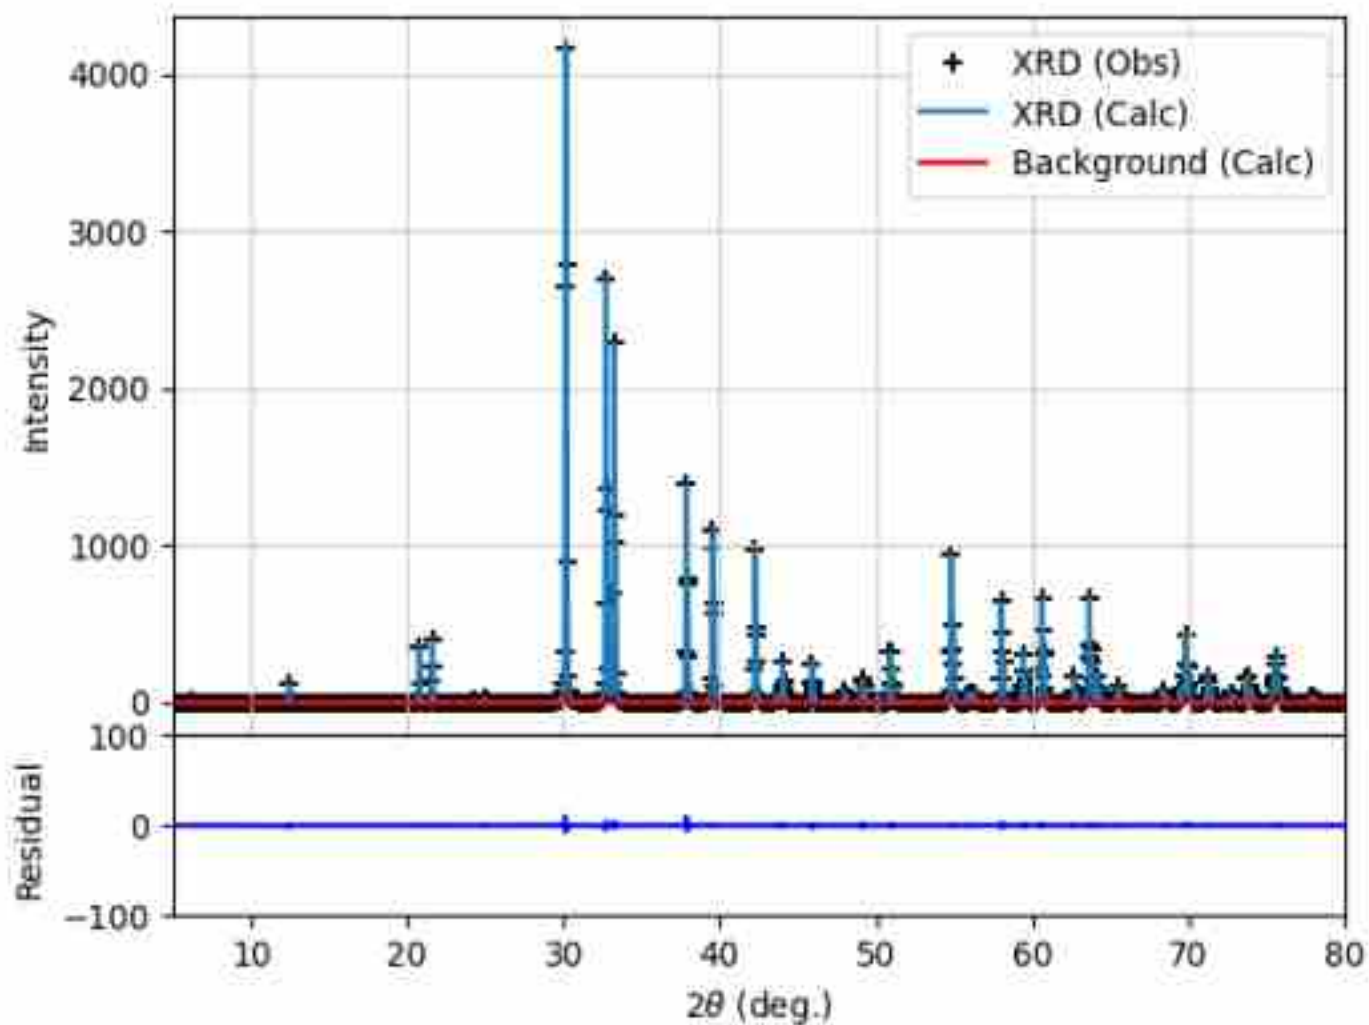

| RMSE before RR | Rwp     | RMSE after RR |
|----------------|---------|---------------|
| 0.366          | 0.39239 | 0.36529       |

# Al<sub>6</sub>Fe<sub>2</sub>Si<sub>4</sub>

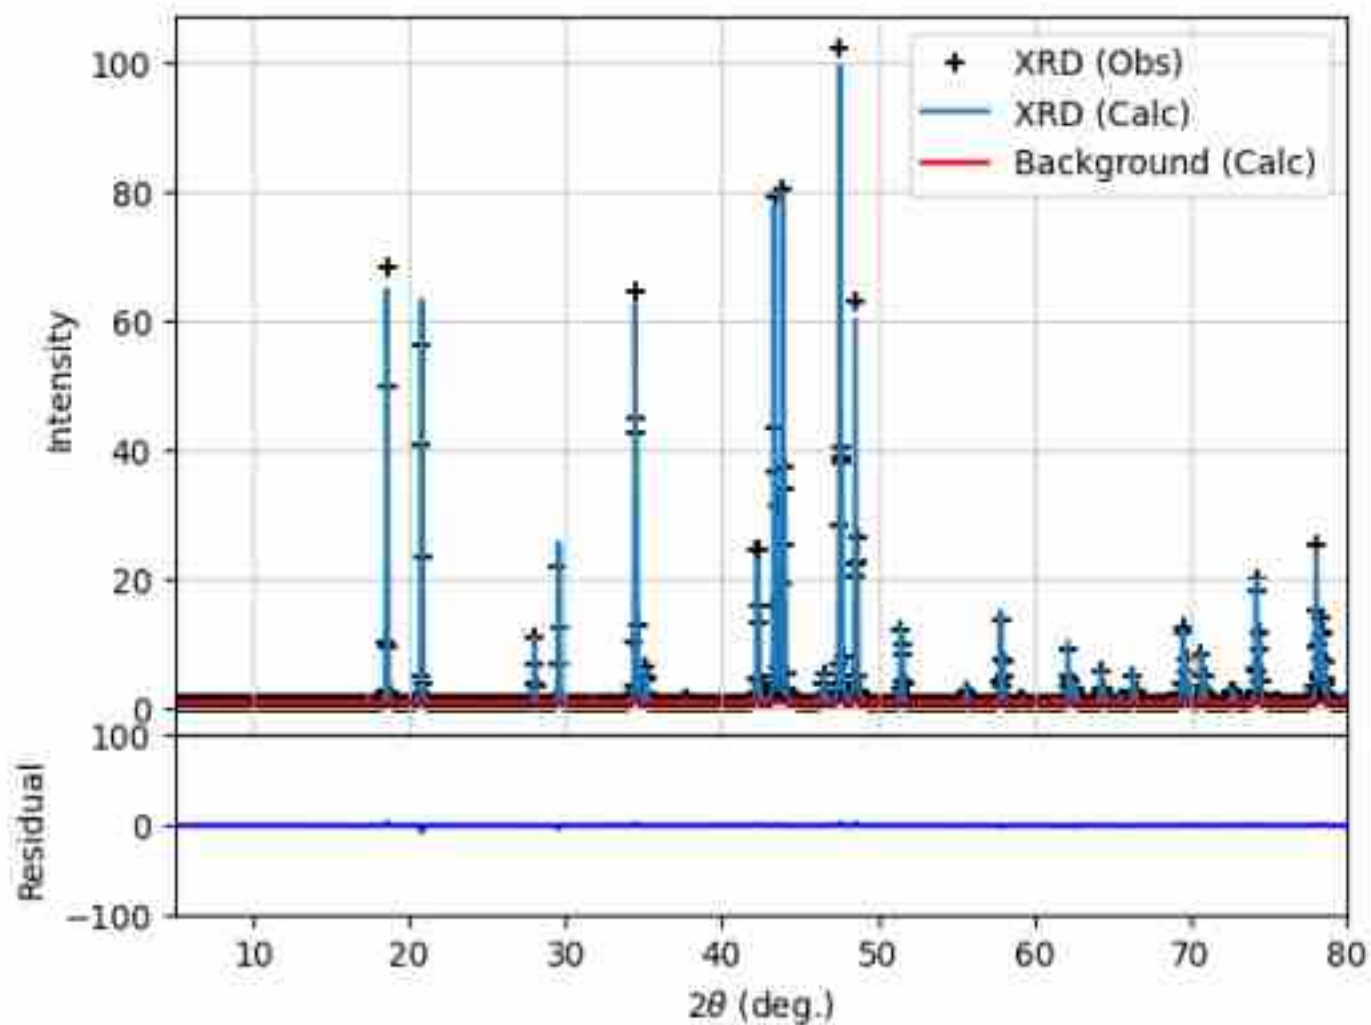

| RMSE before RR | Rwp     | RMSE after RR |
|----------------|---------|---------------|
| 0.367          | 5.84681 | 0.36511       |

# As2F10

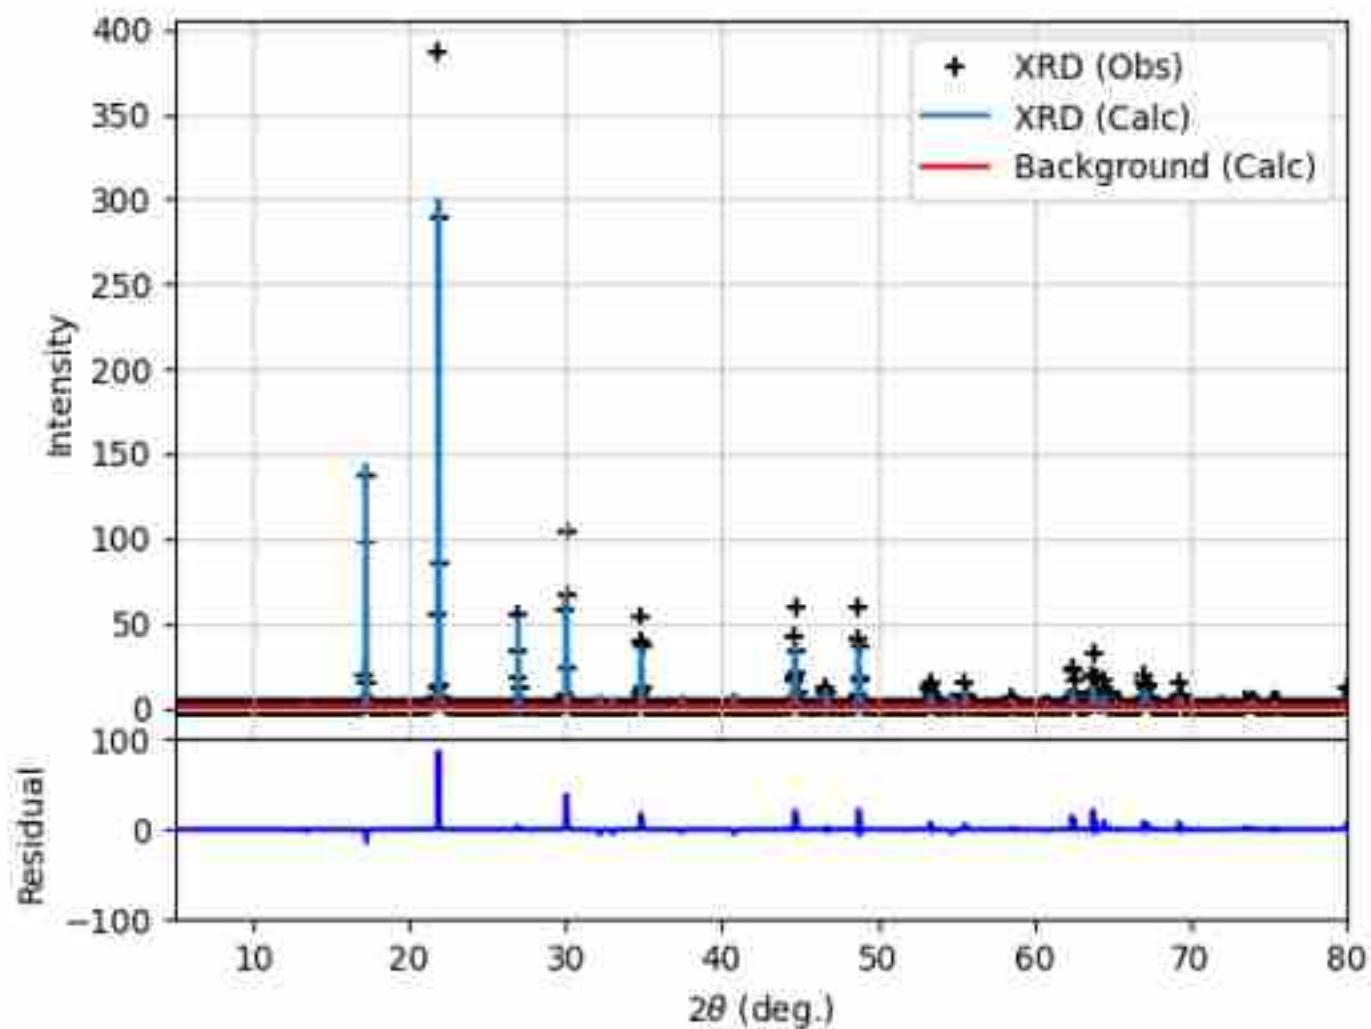

| RMSE before RR | Rwp      | RMSE after RR |
|----------------|----------|---------------|
| 0.367          | 29.58637 | None          |

# Ba<sub>2</sub>Y<sub>2</sub>Mn<sub>2</sub>Co<sub>2</sub>O<sub>10</sub>

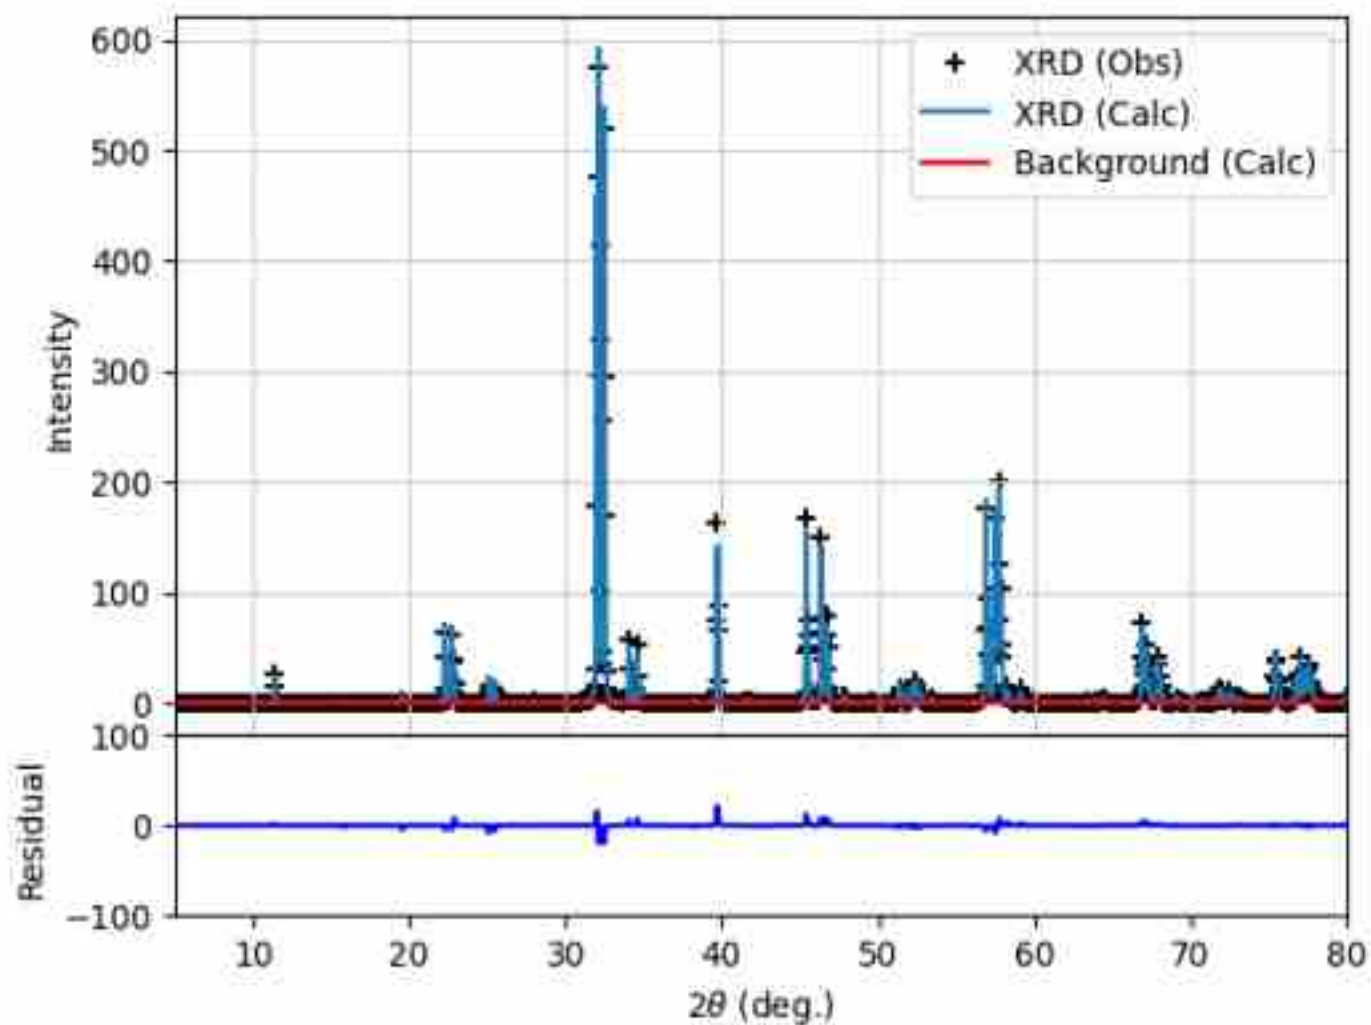

| RMSE before RR | Rwp     | RMSE after RR |
|----------------|---------|---------------|
| 0.367          | 9.09142 | 0.32691       |

# Ho<sub>3</sub>Ga<sub>8</sub>Rh<sub>3</sub>

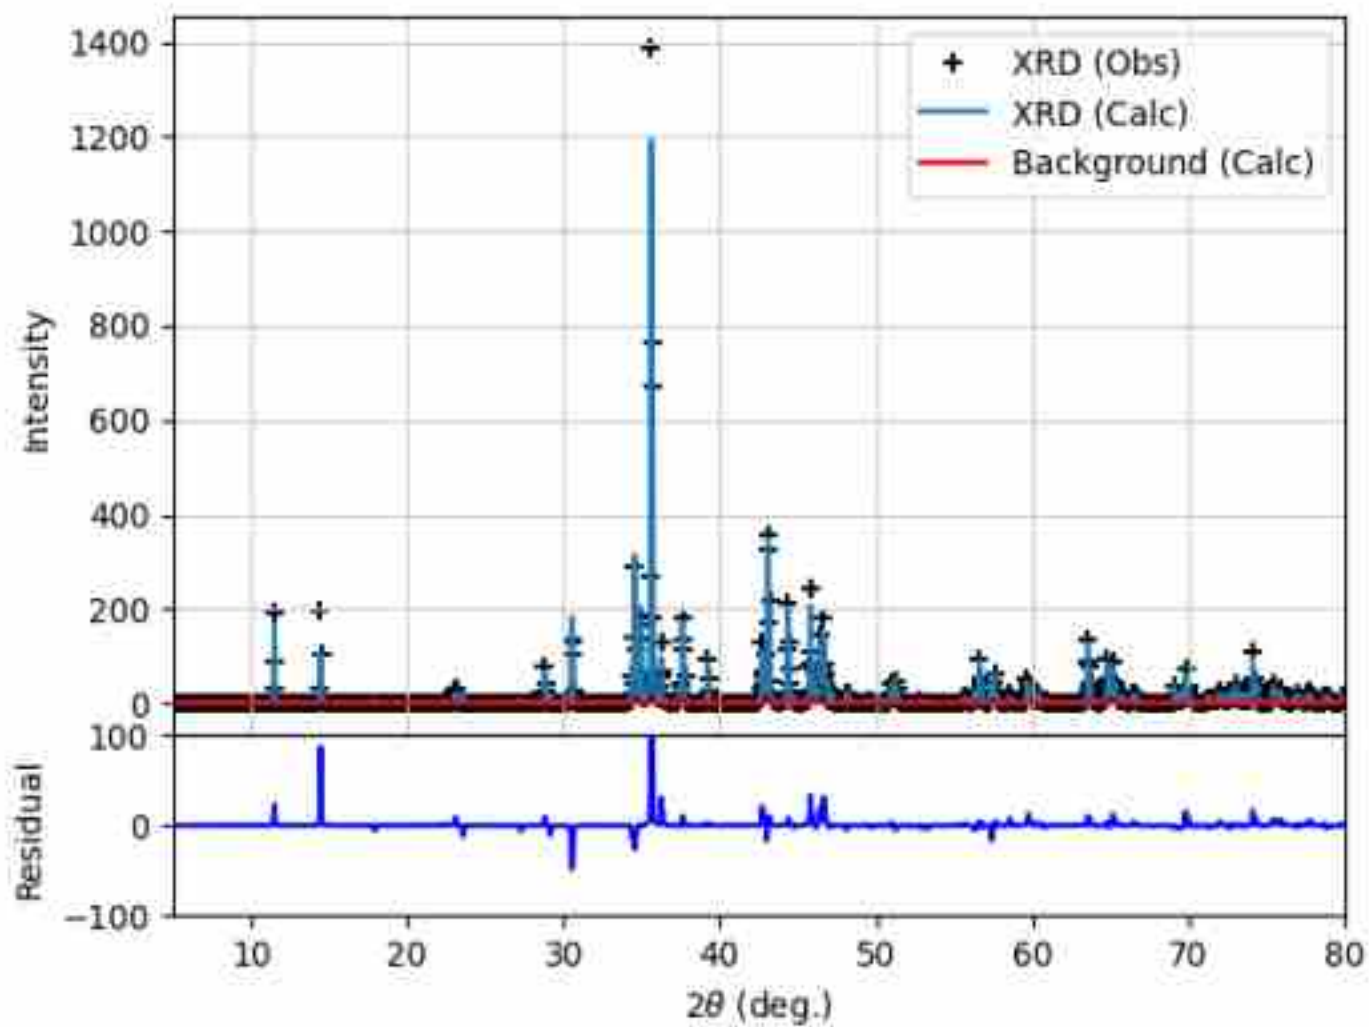

| RMSE before RR | Rwp      | RMSE after RR |
|----------------|----------|---------------|
| 0.367          | 17.01865 | 0.45614       |



# Li4V2F12

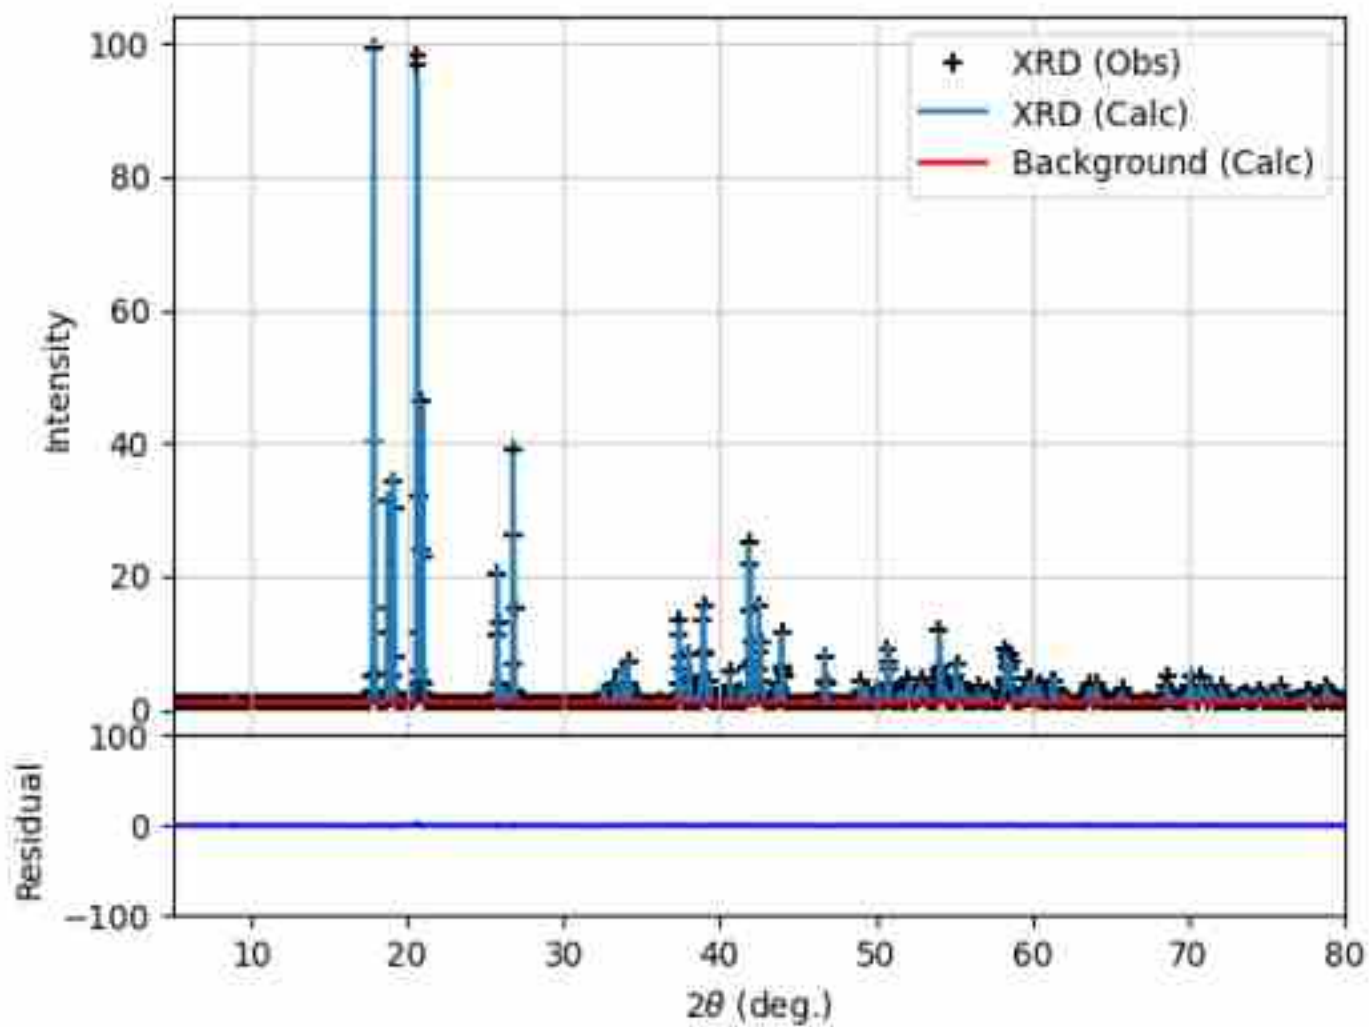

| RMSE before RR | Rwp     | RMSE after RR |
|----------------|---------|---------------|
| 0.367          | 6.29272 | 0.39188       |

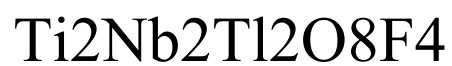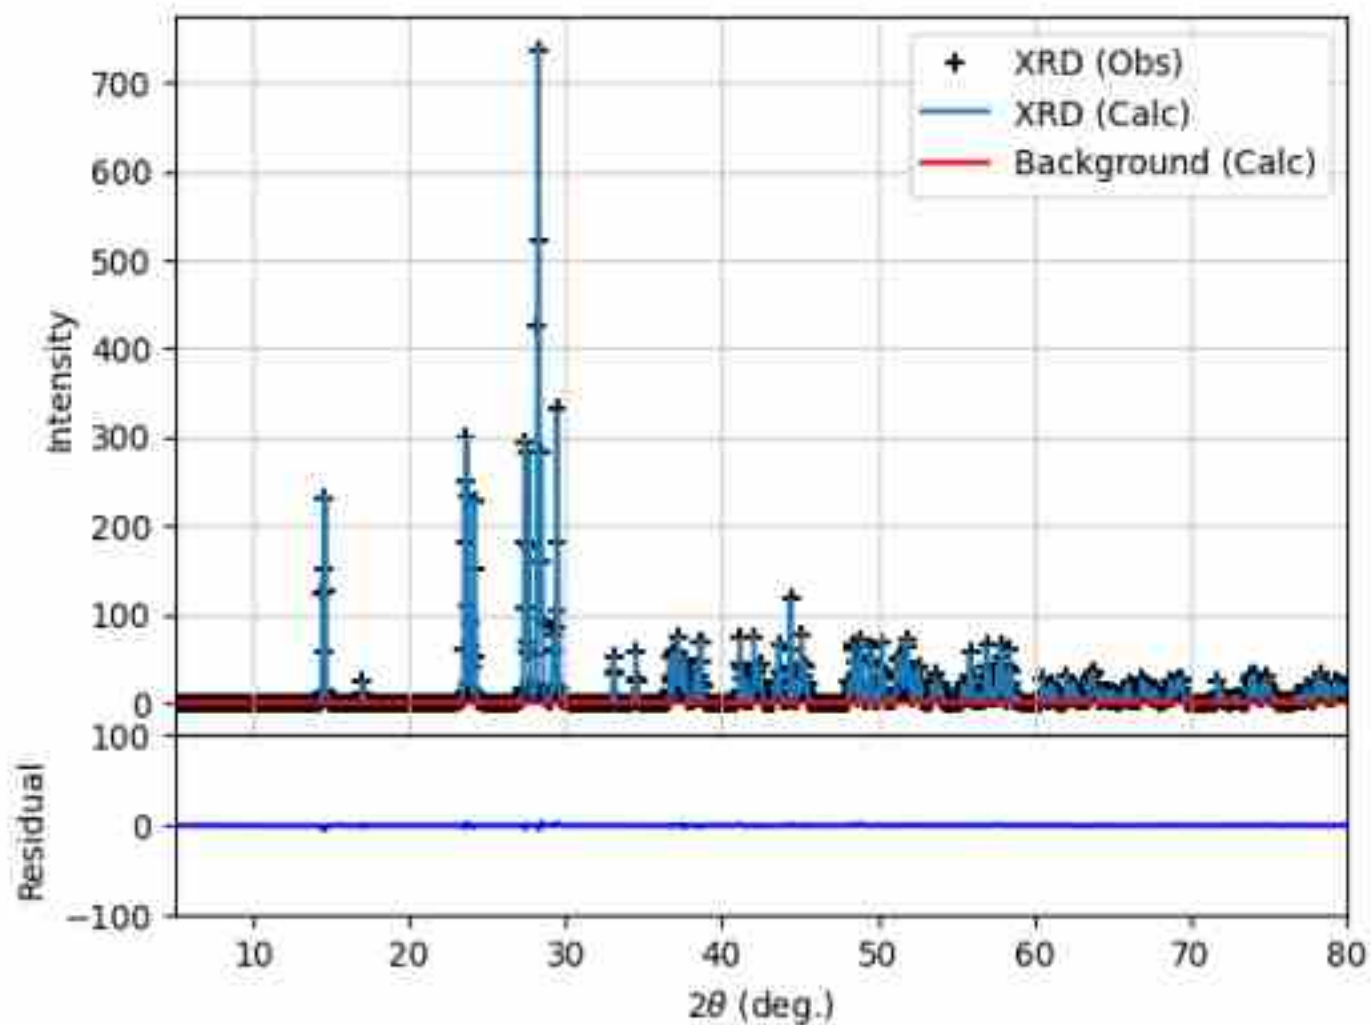

| RMSE before RR | Rwp     | RMSE after RR |
|----------------|---------|---------------|
| 0.367          | 1.58554 | 0.44259       |

# Ge4Pt4S4

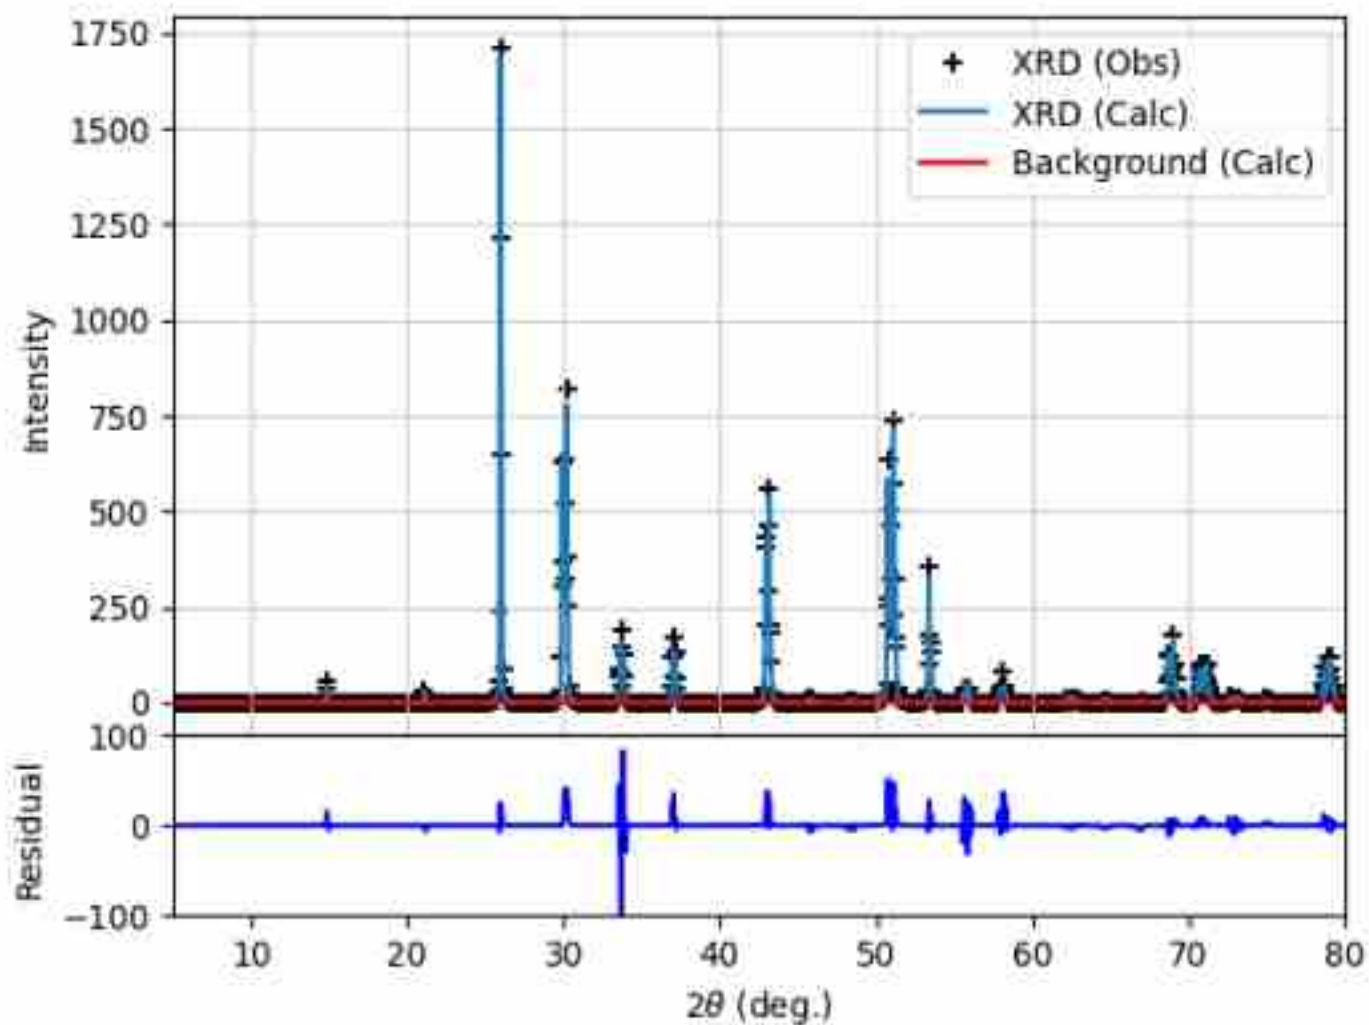

| RMSE before RR | Rwp      | RMSE after RR |
|----------------|----------|---------------|
| 0.368          | 18.42701 | 0.3599        |

# Sb4O4F4

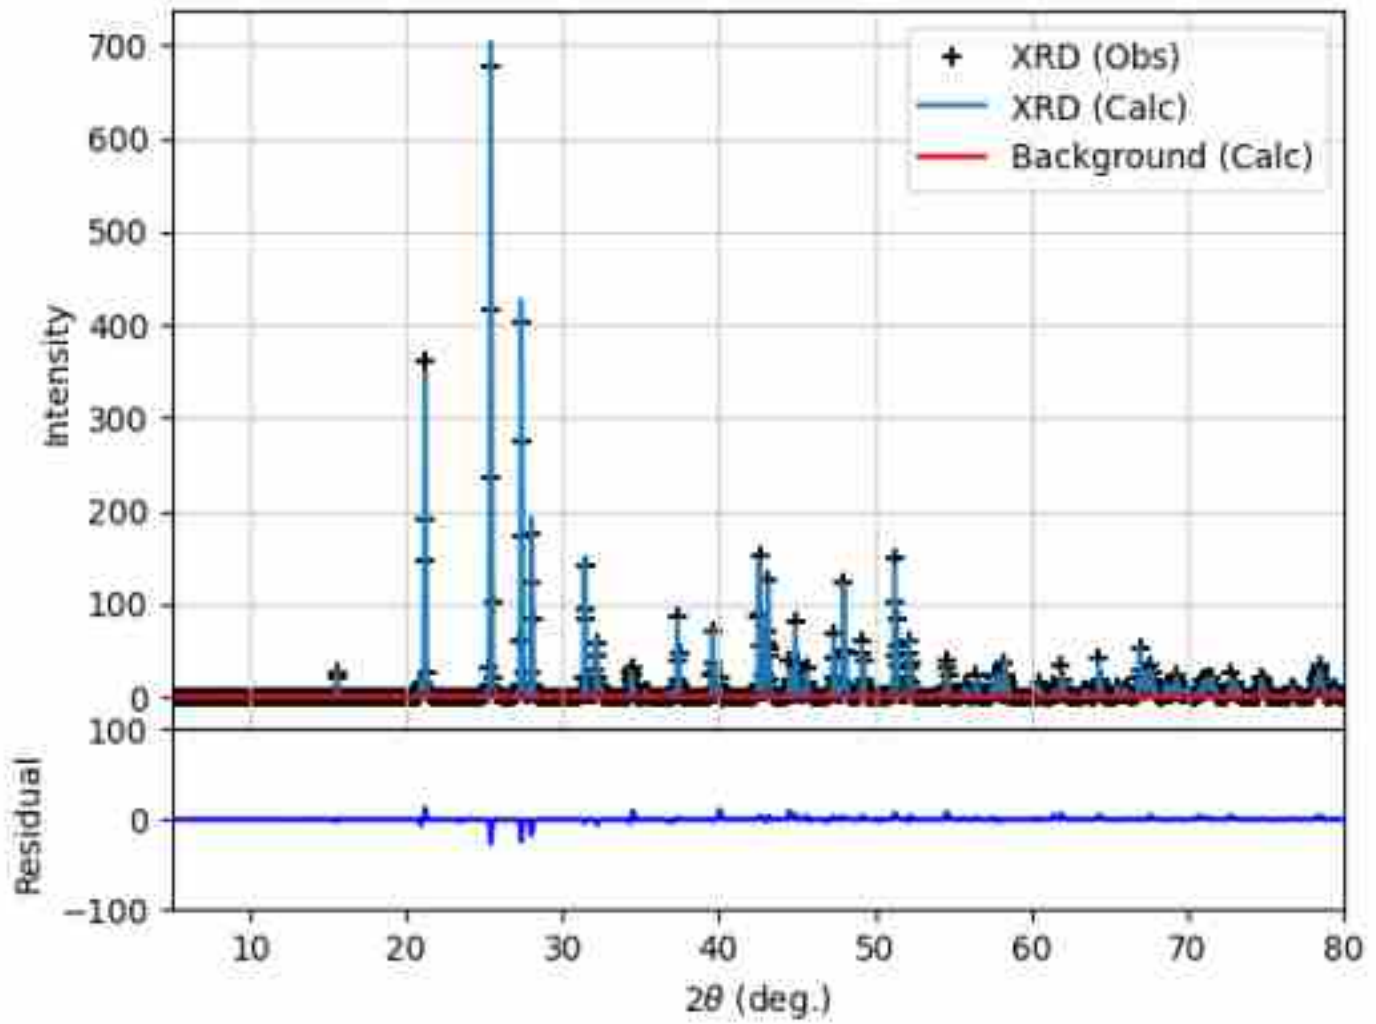

| RMSE before RR | Rwp     | RMSE after RR |
|----------------|---------|---------------|
| 0.368          | 9.50365 | None          |

# V6O6F6

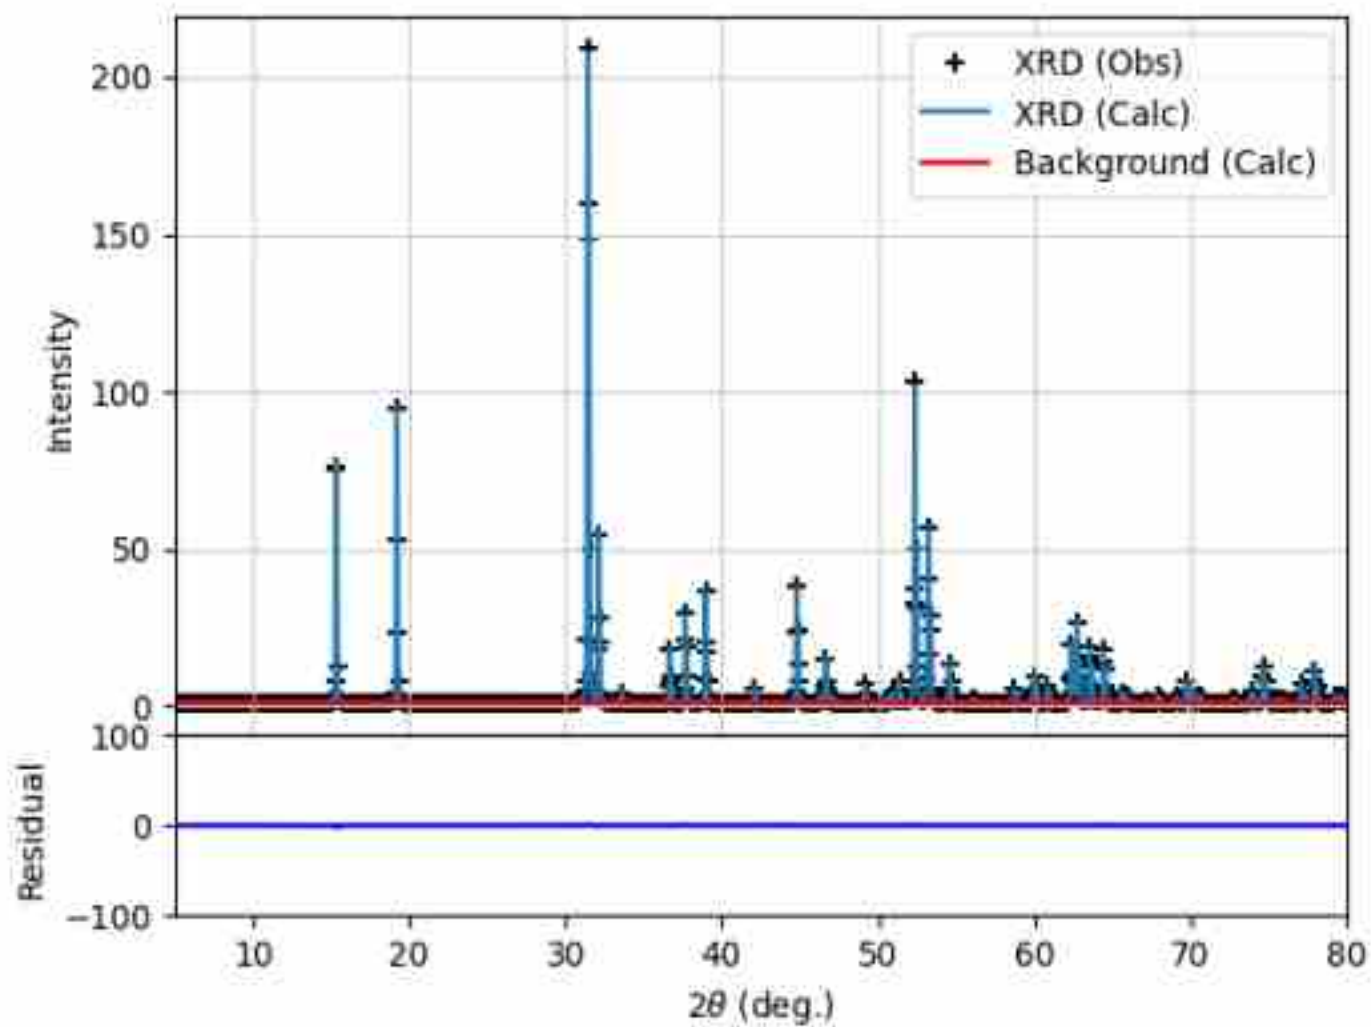

| RMSE before RR | Rwp     | RMSE after RR |
|----------------|---------|---------------|
| 0.368          | 1.22999 | 0.48912       |

# Ca2Ge4

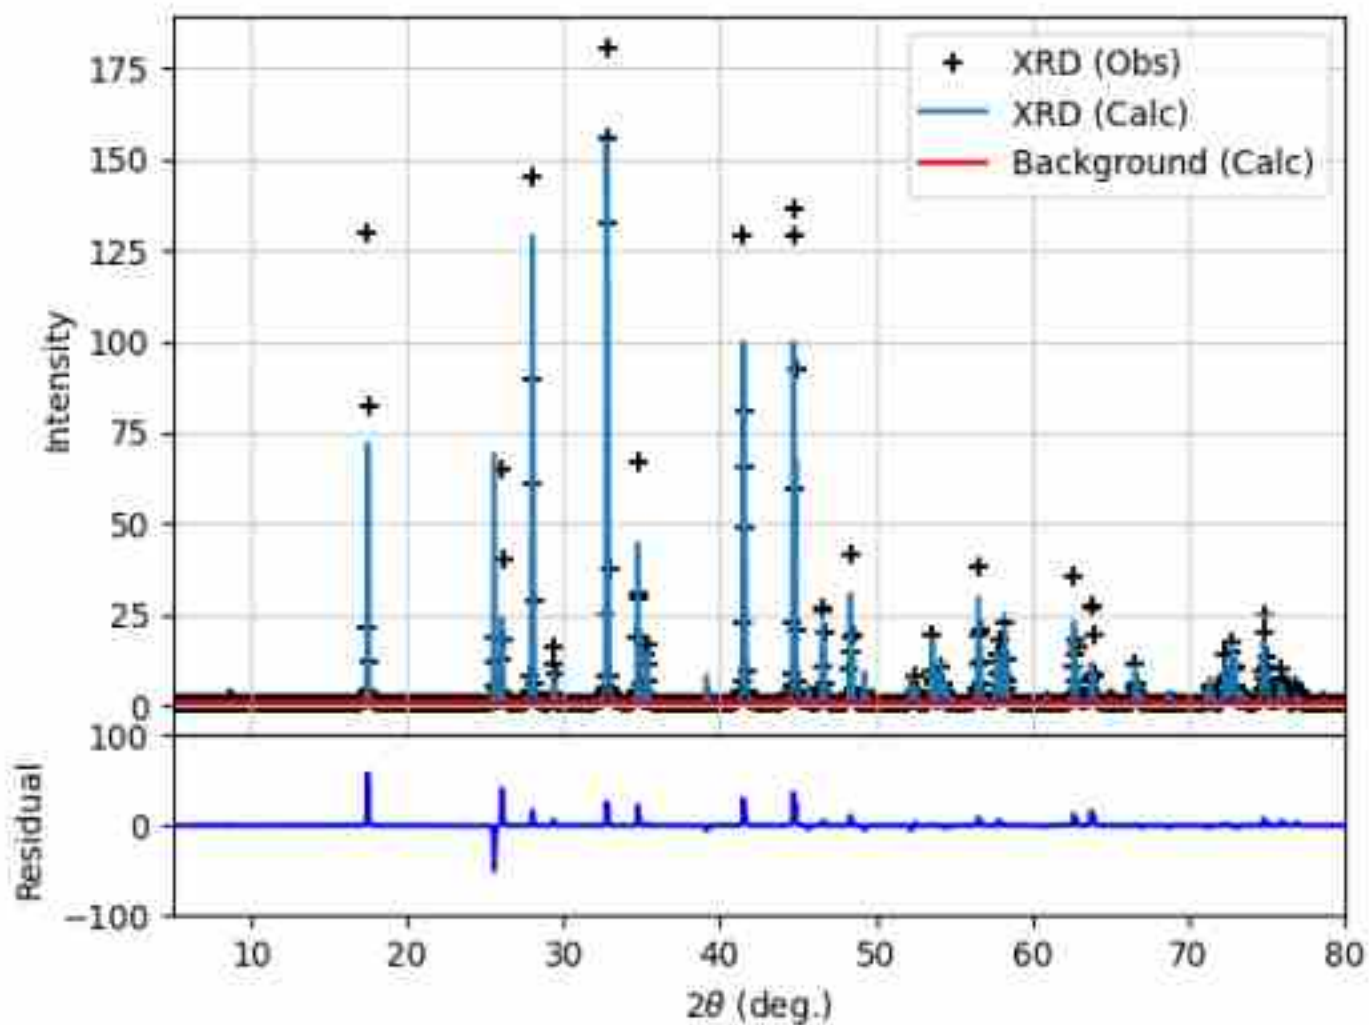

| RMSE before RR | Rwp      | RMSE after RR |
|----------------|----------|---------------|
| 0.369          | 35.23308 | 0.30438       |

# Li<sub>4</sub>Mn<sub>4</sub>O<sub>8</sub>

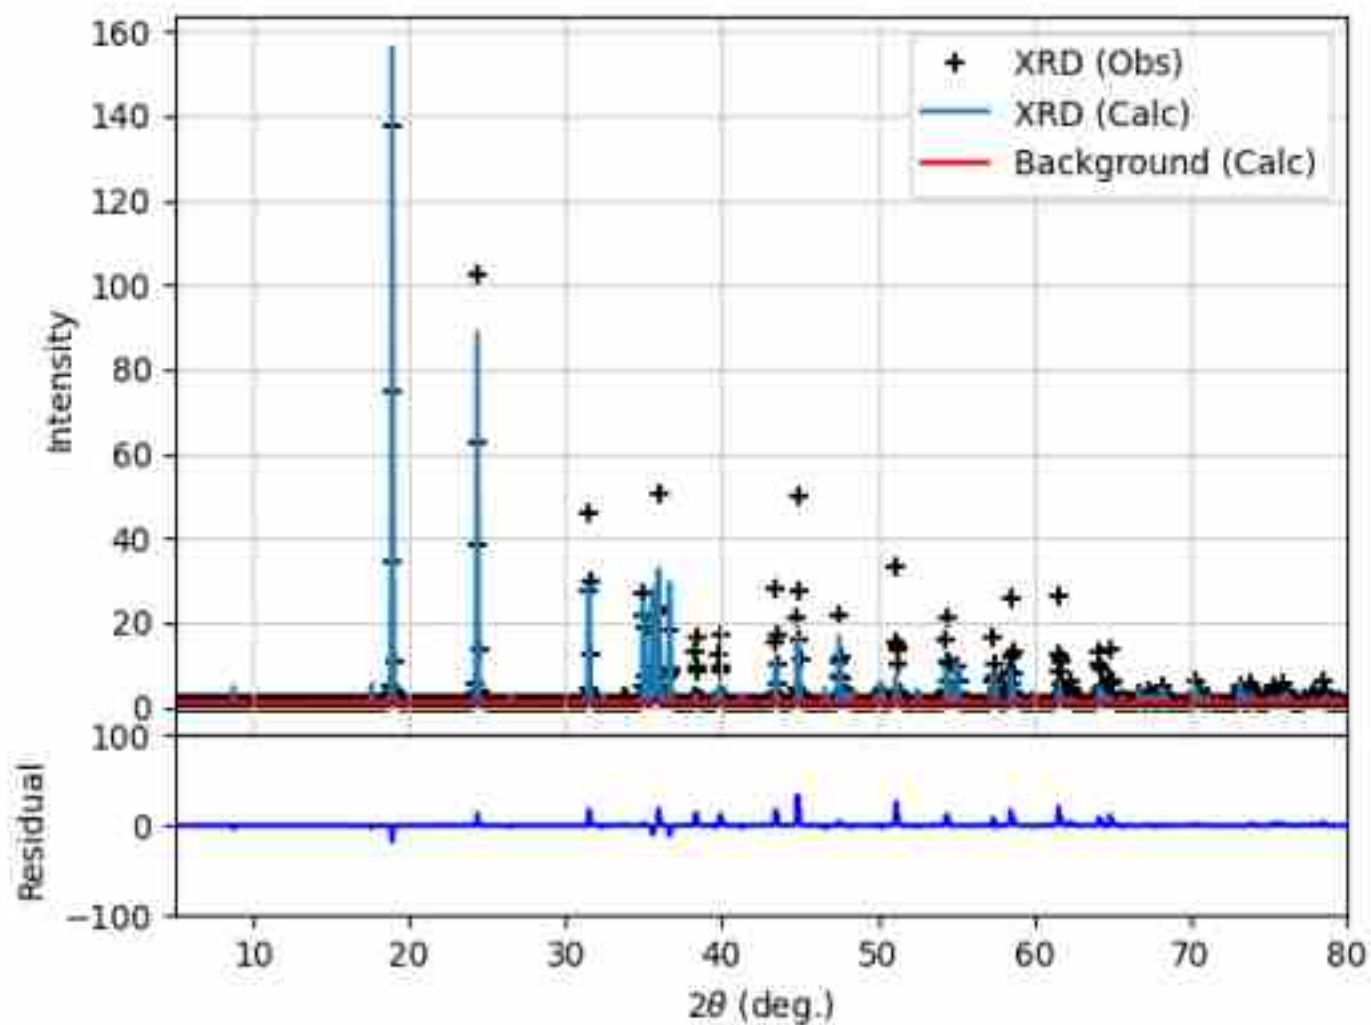

| RMSE before RR | Rwp      | RMSE after RR |
|----------------|----------|---------------|
| 0.369          | 37.91141 | None          |

# Li<sub>4</sub>Ti<sub>4</sub>O<sub>10</sub>

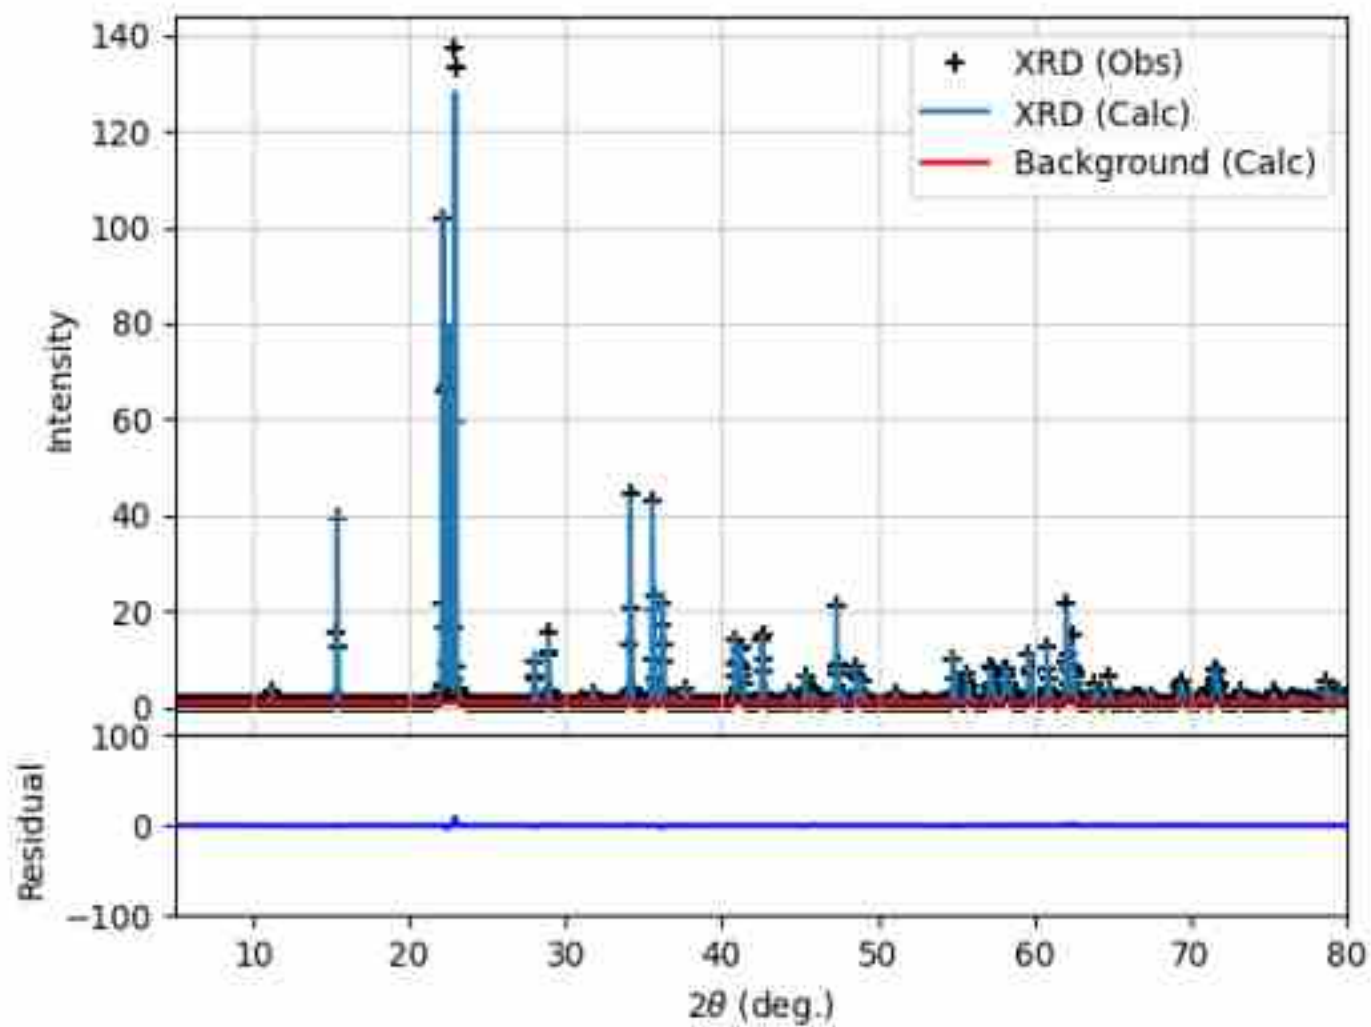

| RMSE before RR | Rwp     | RMSE after RR |
|----------------|---------|---------------|
| 0.371          | 5.65226 | None          |



# Si<sub>4</sub>Pt<sub>4</sub>Se<sub>4</sub>

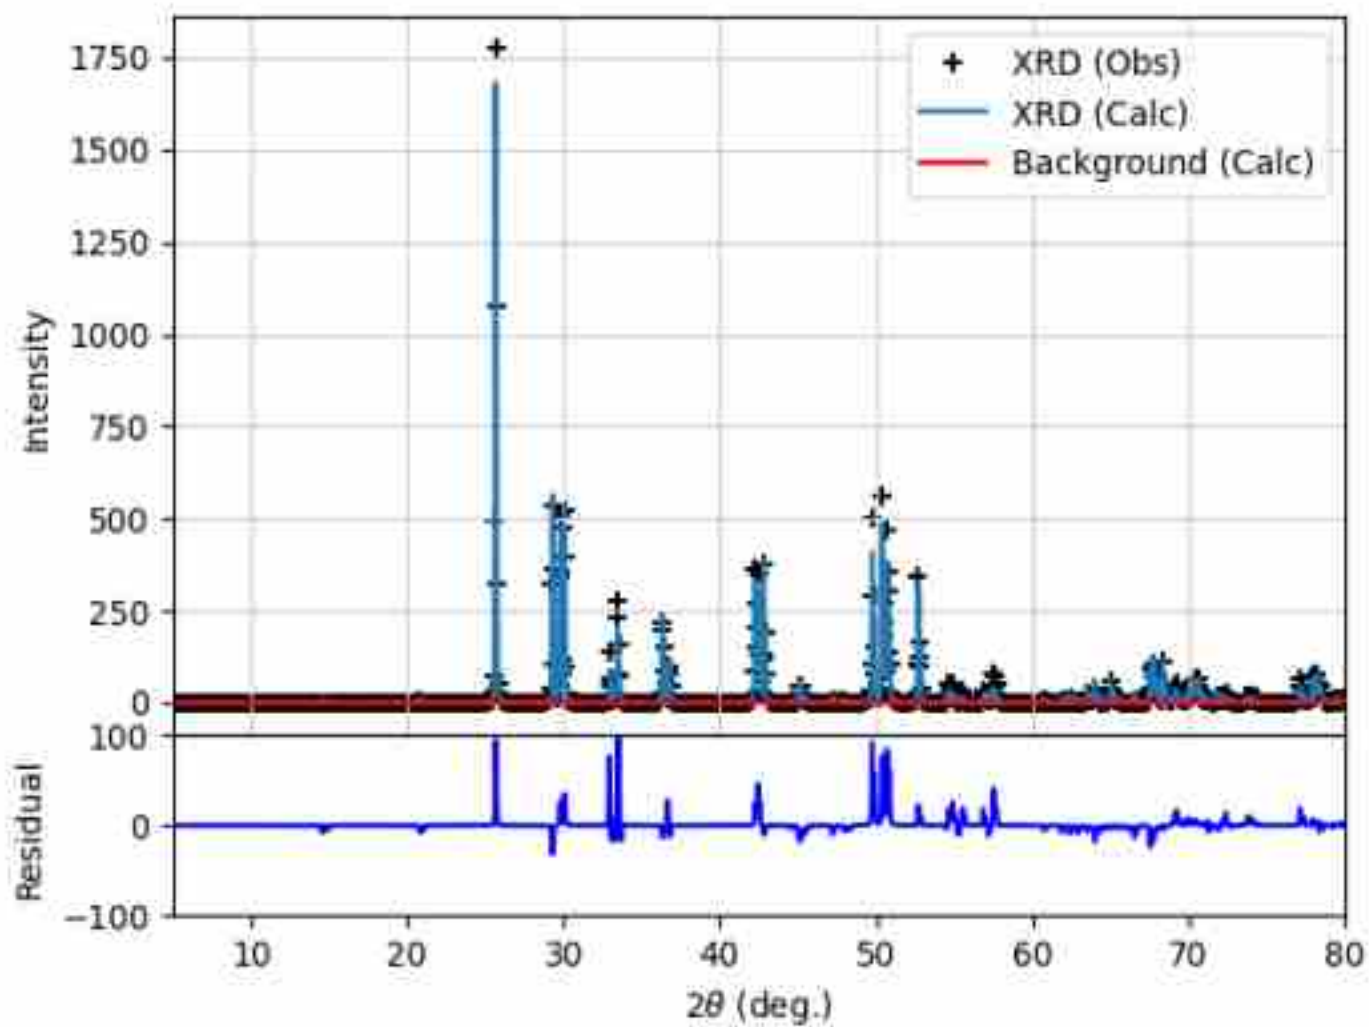

| RMSE before RR | Rwp      | RMSE after RR |
|----------------|----------|---------------|
| 0.371          | 24.87112 | 0.3813        |

# Nd<sub>2</sub>Zn<sub>15</sub>Ge<sub>2</sub>

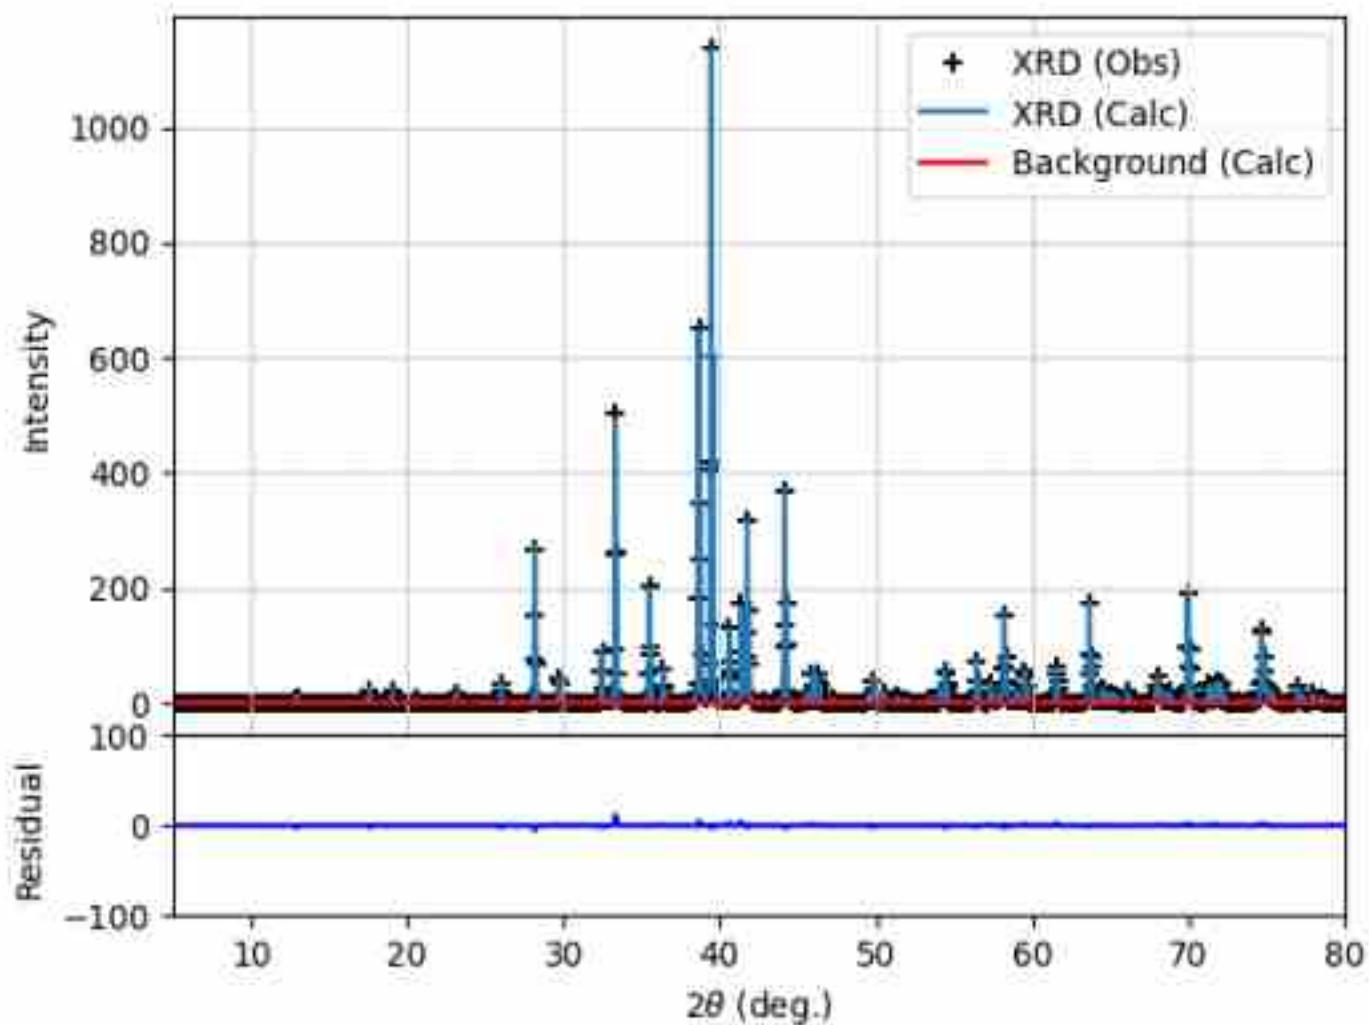

| RMSE before RR | Rwp     | RMSE after RR |
|----------------|---------|---------------|
| 0.372          | 2.04385 | 0.3779        |

# Ga<sub>1</sub>Si<sub>3</sub>C<sub>3</sub>N<sub>1</sub>

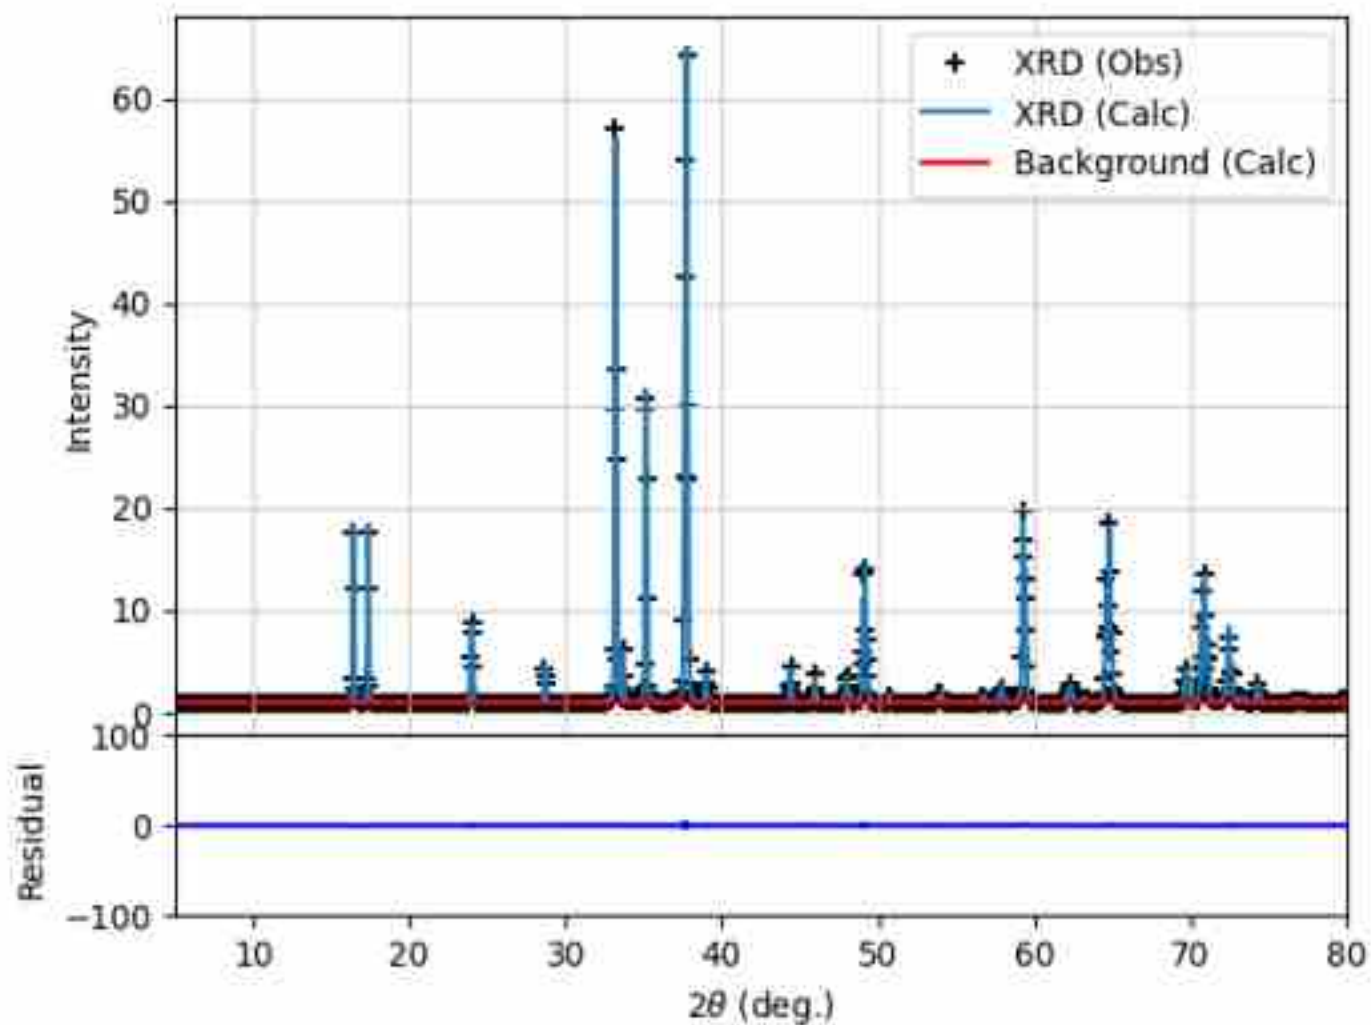

| RMSE before RR | Rwp     | RMSE after RR |
|----------------|---------|---------------|
| 0.373          | 4.05097 | 0.06601       |

# Mn<sub>6</sub>O<sub>7</sub>F<sub>5</sub>

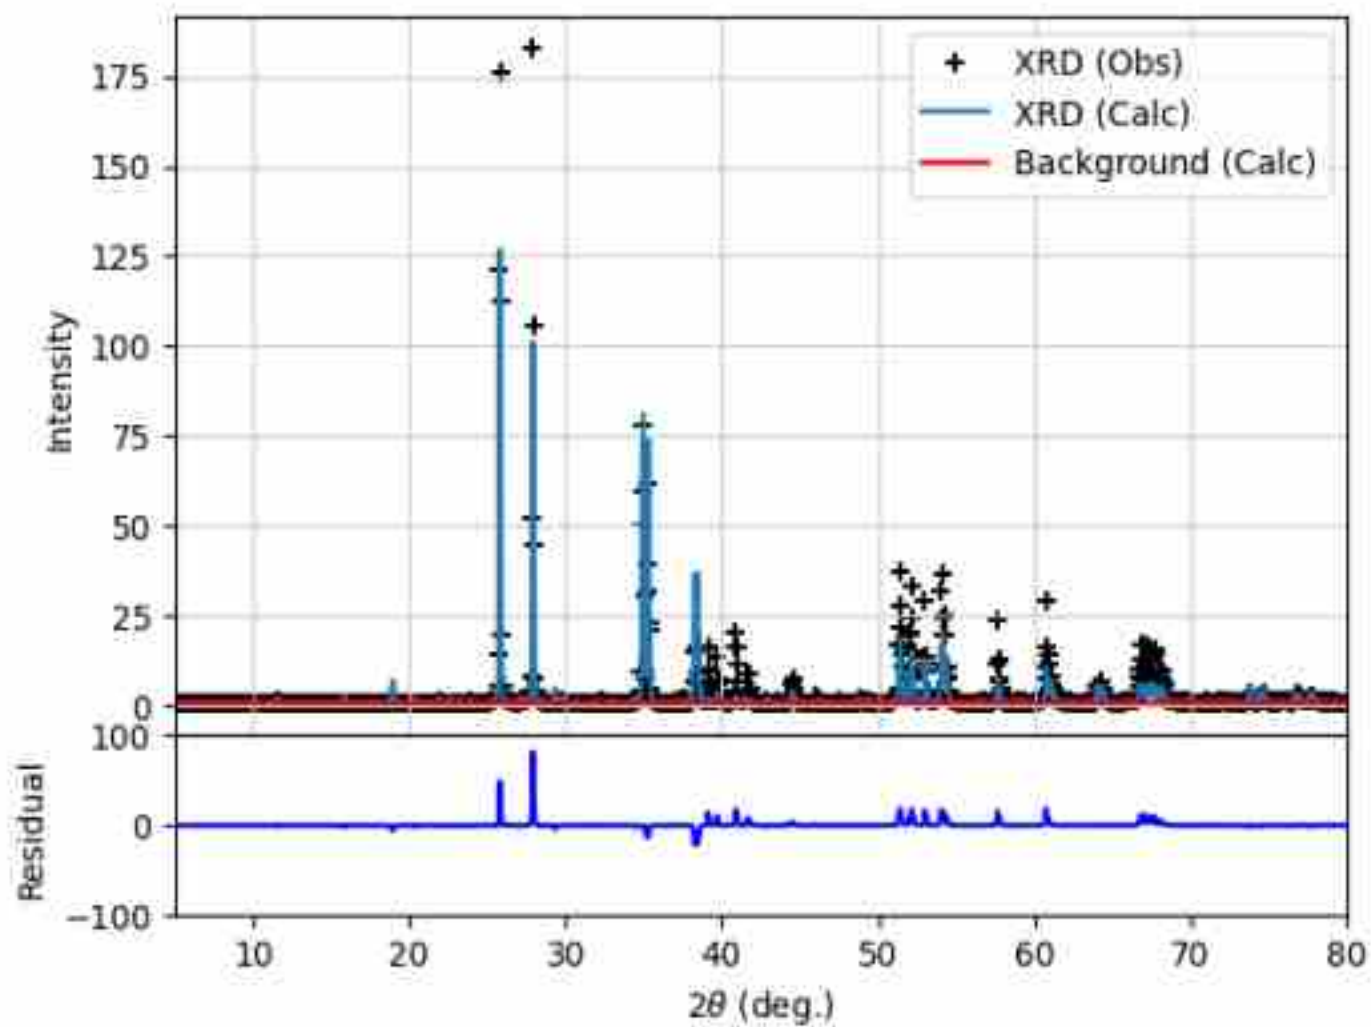

| RMSE before RR | Rwp      | RMSE after RR |
|----------------|----------|---------------|
| 0.373          | 42.83872 | None          |

# B2As1P1

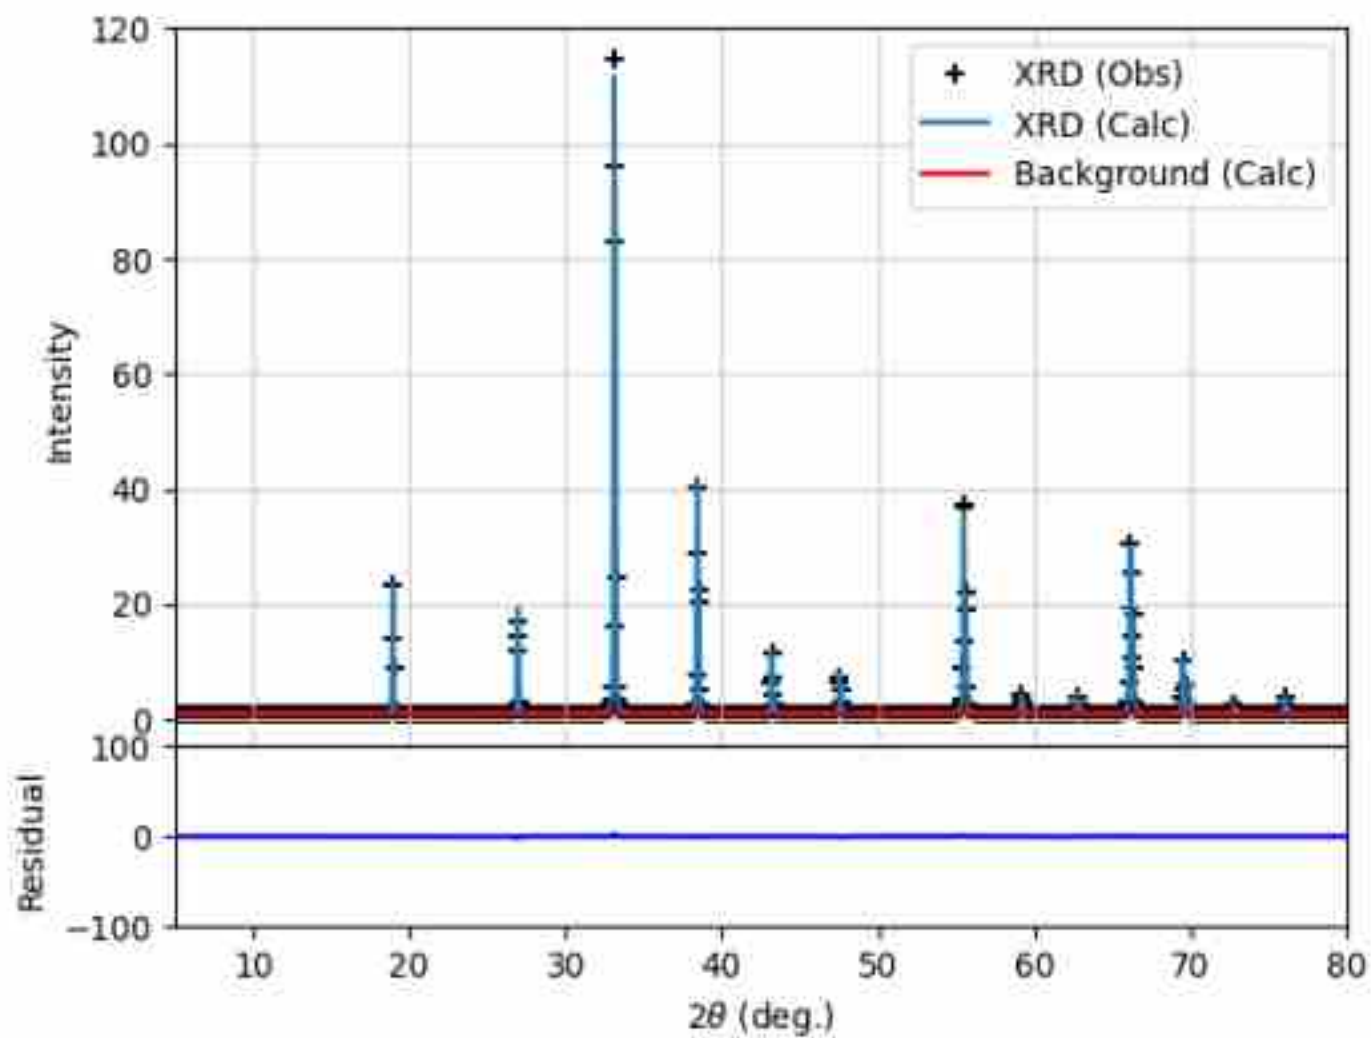

| RMSE before RR | Rwp     | RMSE after RR |
|----------------|---------|---------------|
| 0.374          | 2.75451 | 0.37818       |

# B12

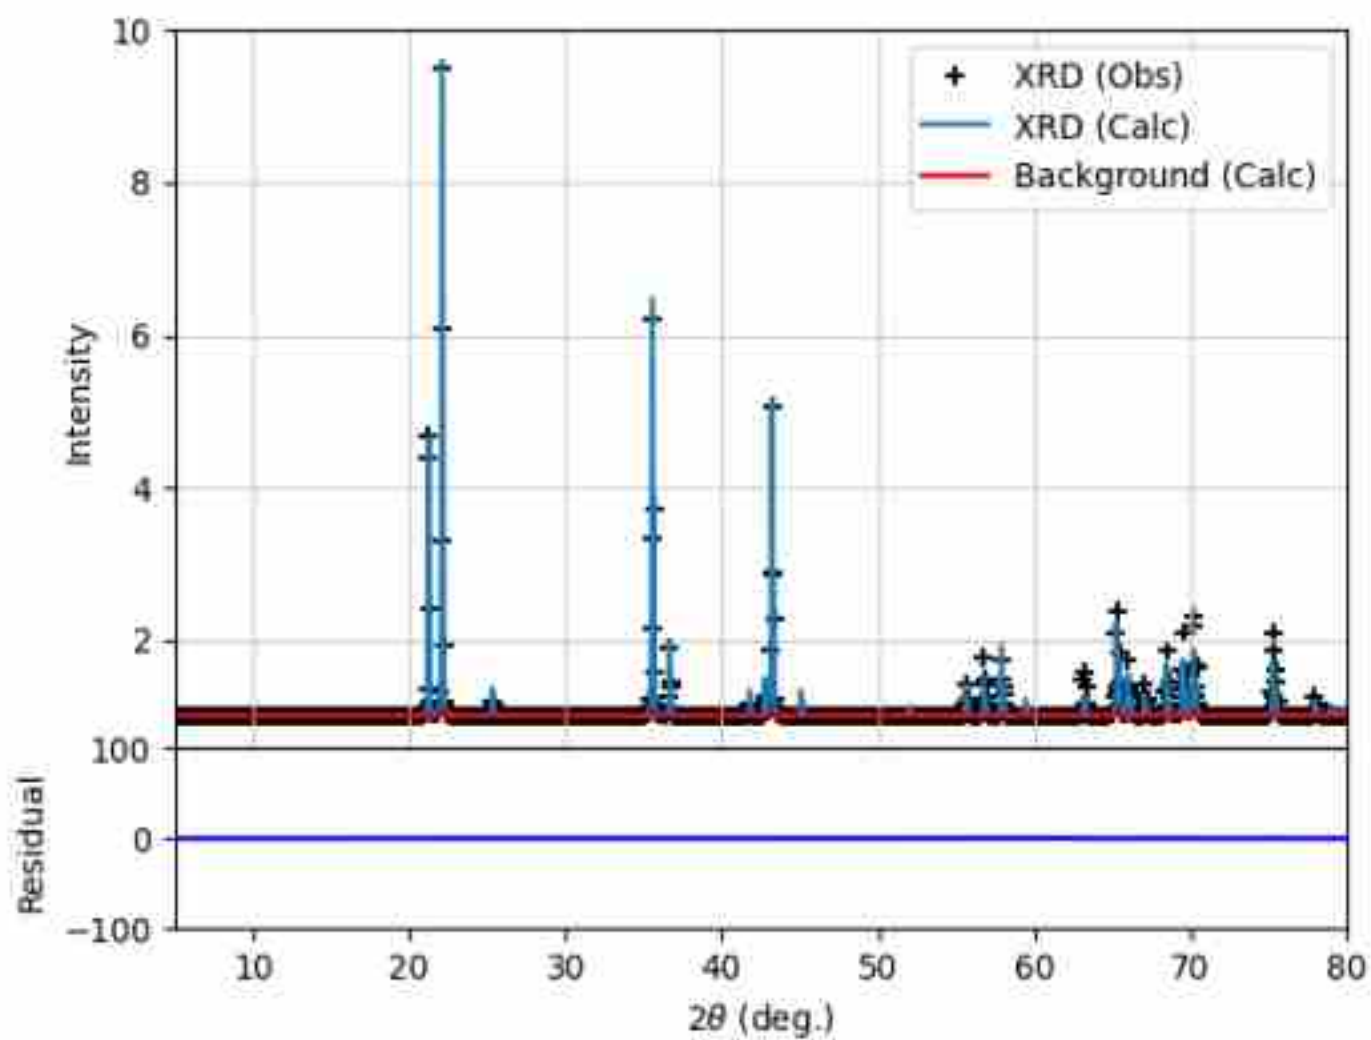

| RMSE before RR | Rwp     | RMSE after RR |
|----------------|---------|---------------|
| 0.374          | 3.16391 | None          |

# $\text{Cd}_2\text{Bi}_2\text{Cl}_2\text{O}_4$

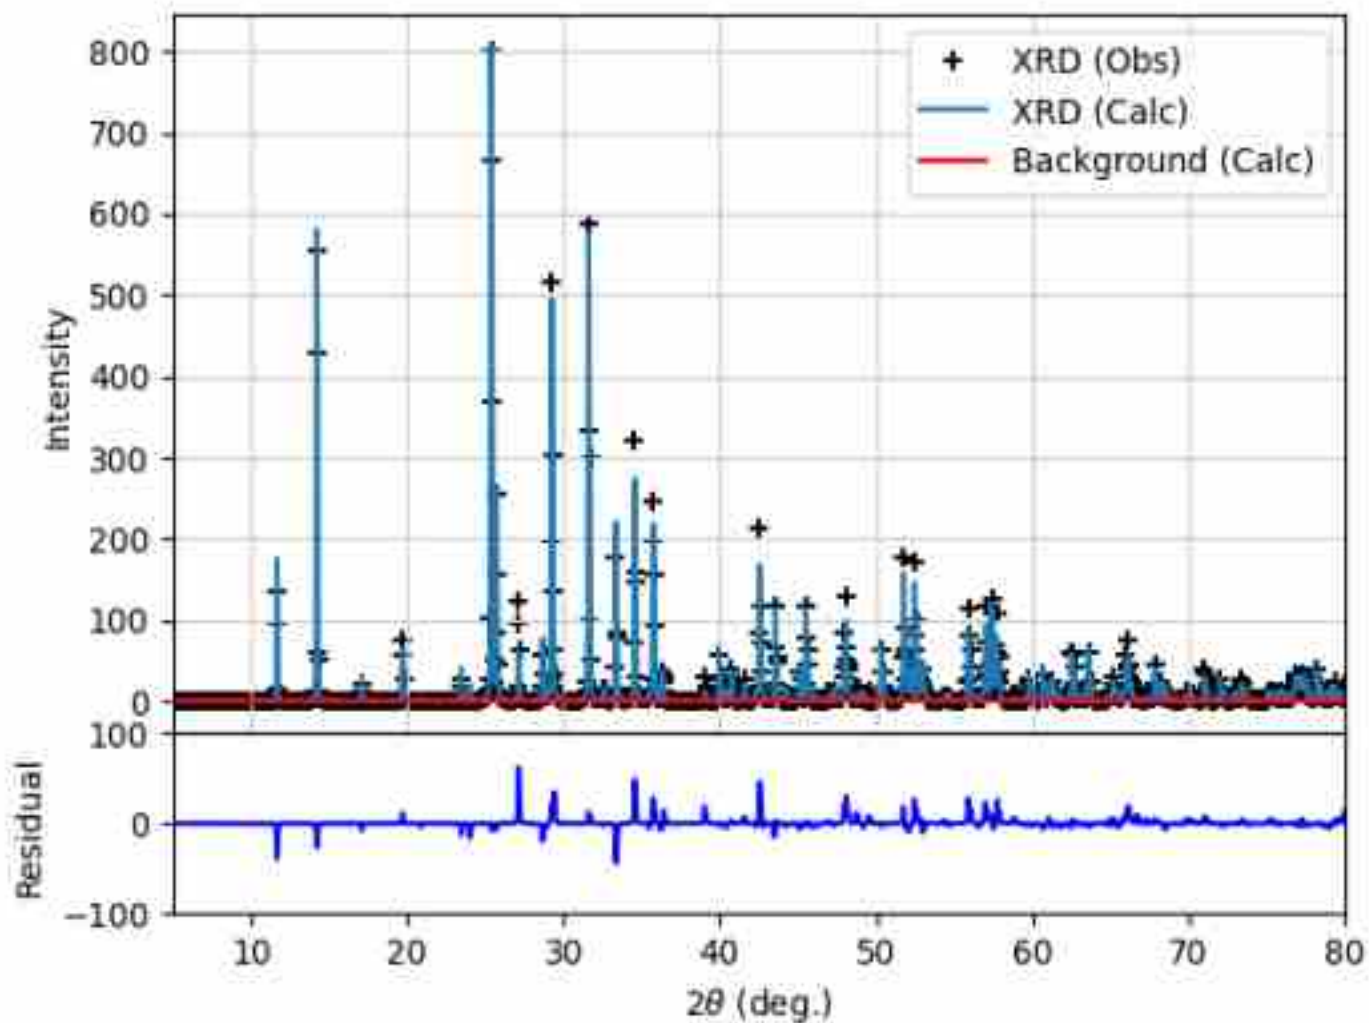

| RMSE before RR | Rwp      | RMSE after RR |
|----------------|----------|---------------|
| 0.374          | 21.15785 | None          |

# V4Cr4C4

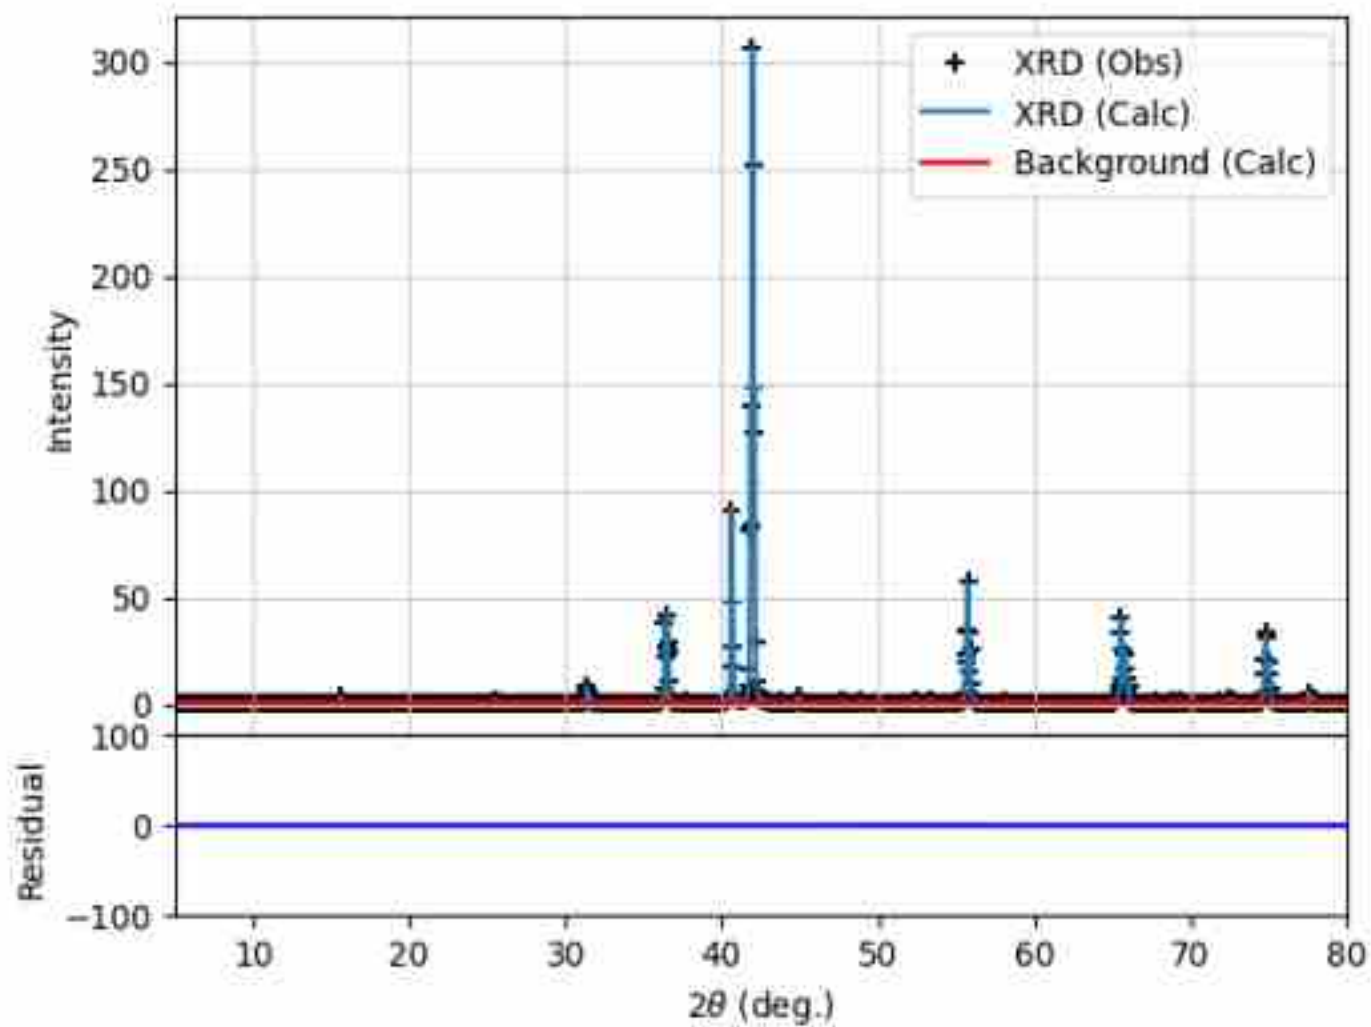

| RMSE before RR | Rwp     | RMSE after RR |
|----------------|---------|---------------|
| 0.374          | 0.94686 | 0.36398       |



# Li1V4O5F7

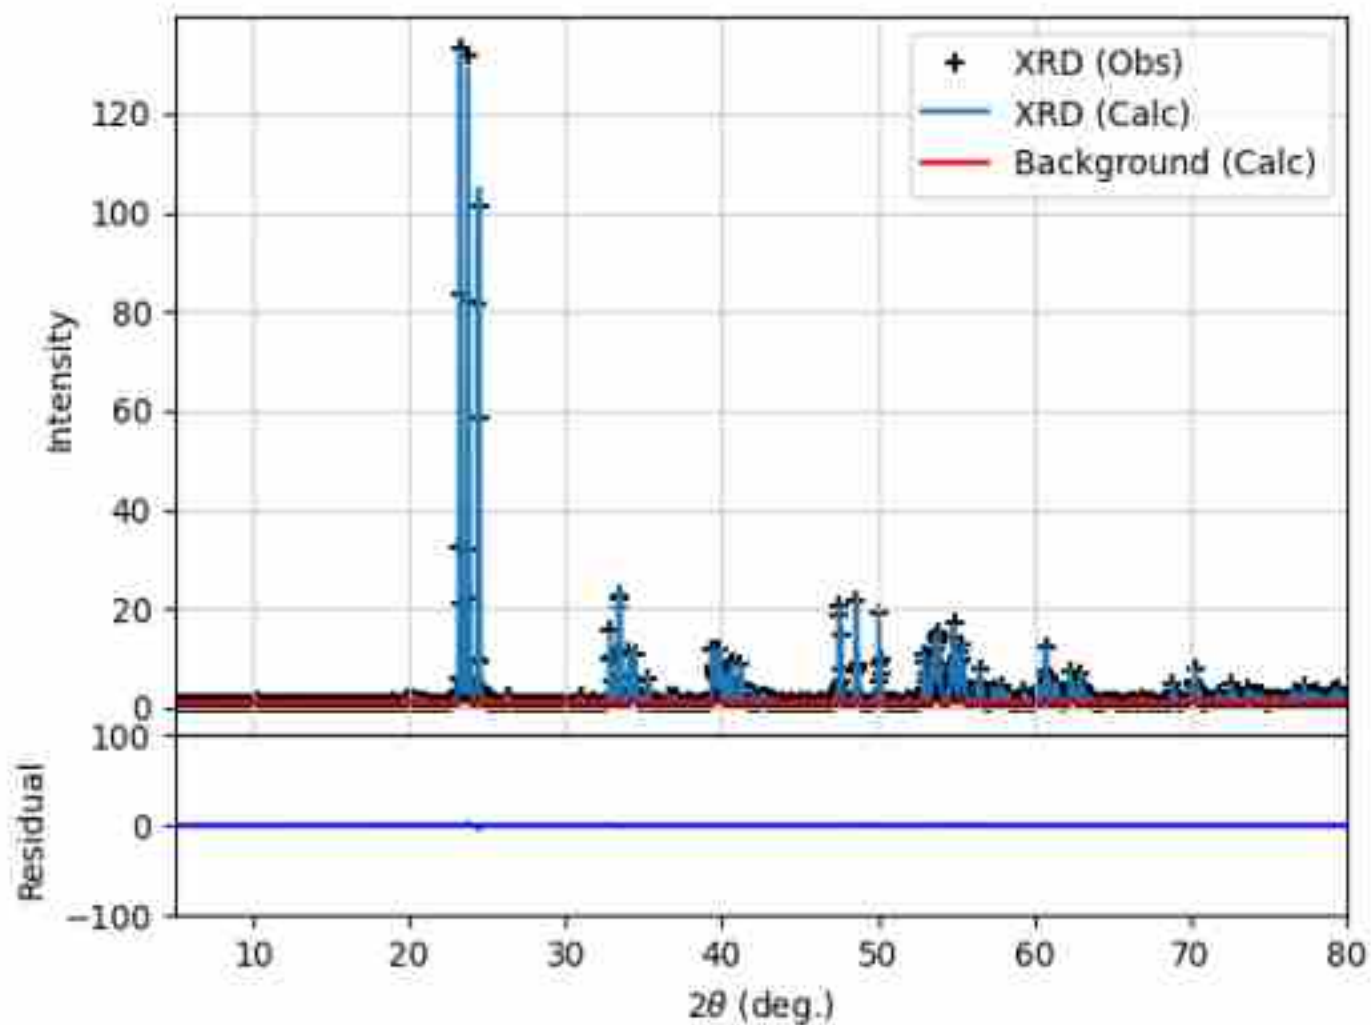

| RMSE before RR | Rwp     | RMSE after RR |
|----------------|---------|---------------|
| 0.376          | 2.37605 | 0.36866       |

# Li6Ge6

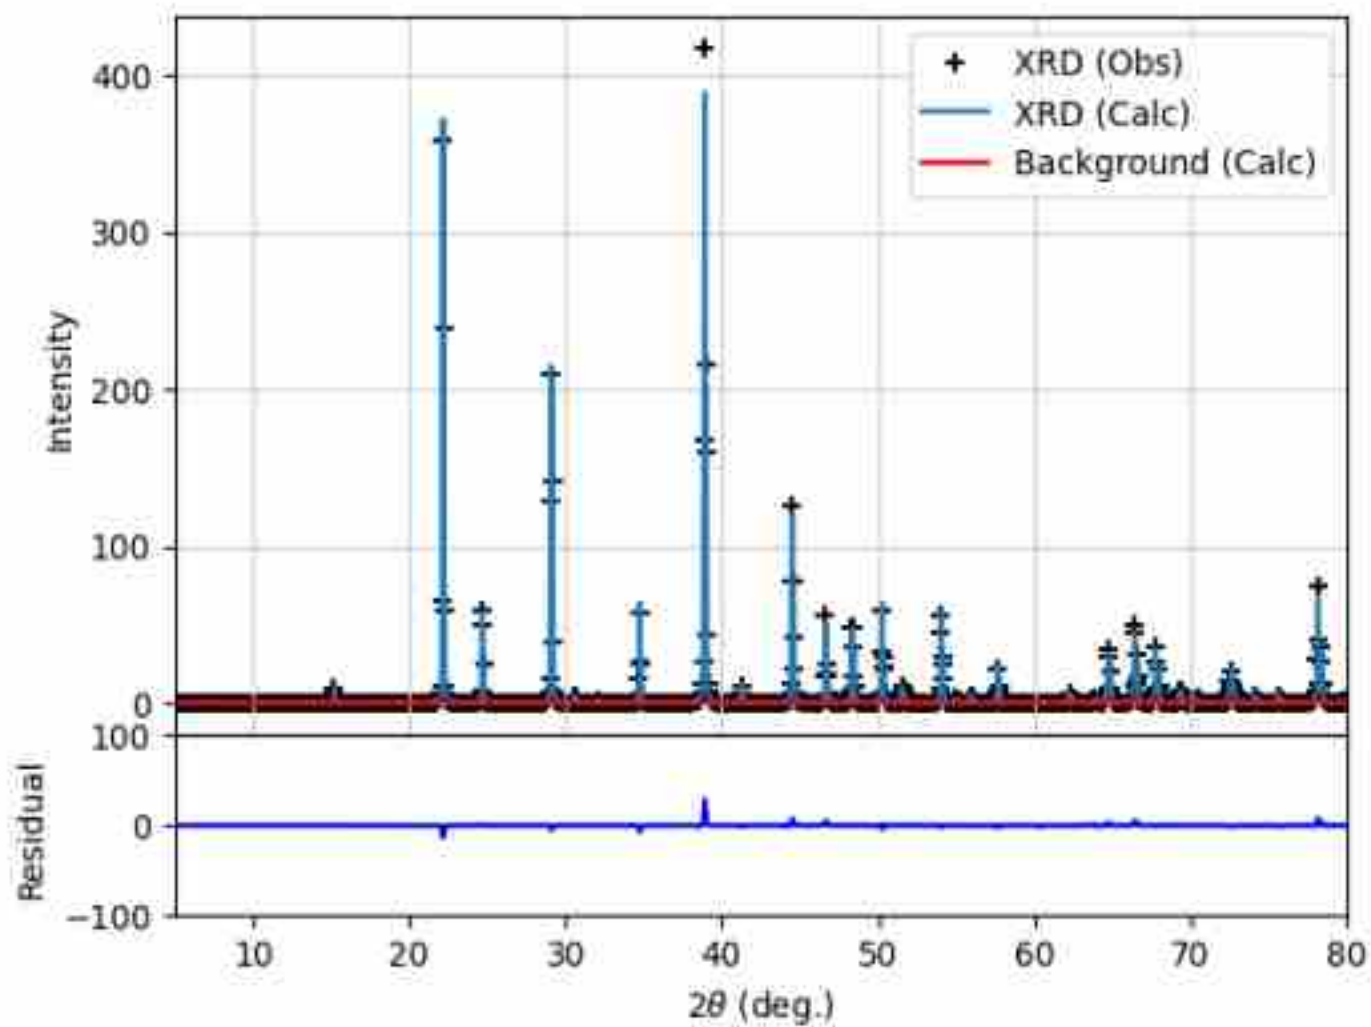

| RMSE before RR | Rwp     | RMSE after RR |
|----------------|---------|---------------|
| 0.376          | 6.94591 | None          |

# Ag<sub>2</sub>N<sub>2</sub>O<sub>4</sub>

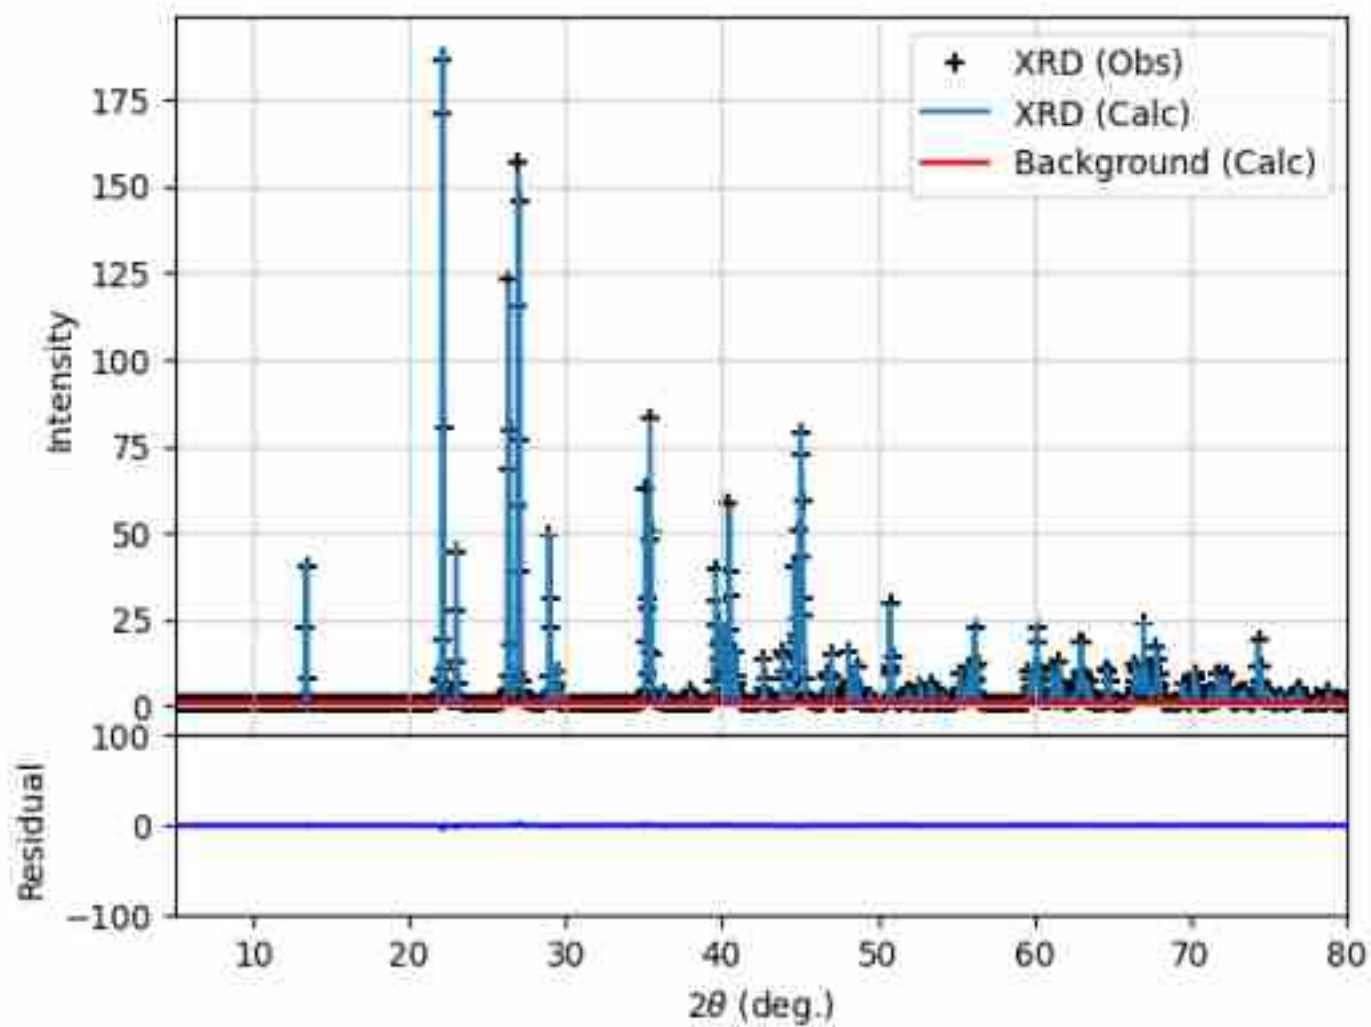

| RMSE before RR | Rwp     | RMSE after RR |
|----------------|---------|---------------|
| 0.377          | 2.51694 | 0.25402       |

# Tl1V2Cr3S8

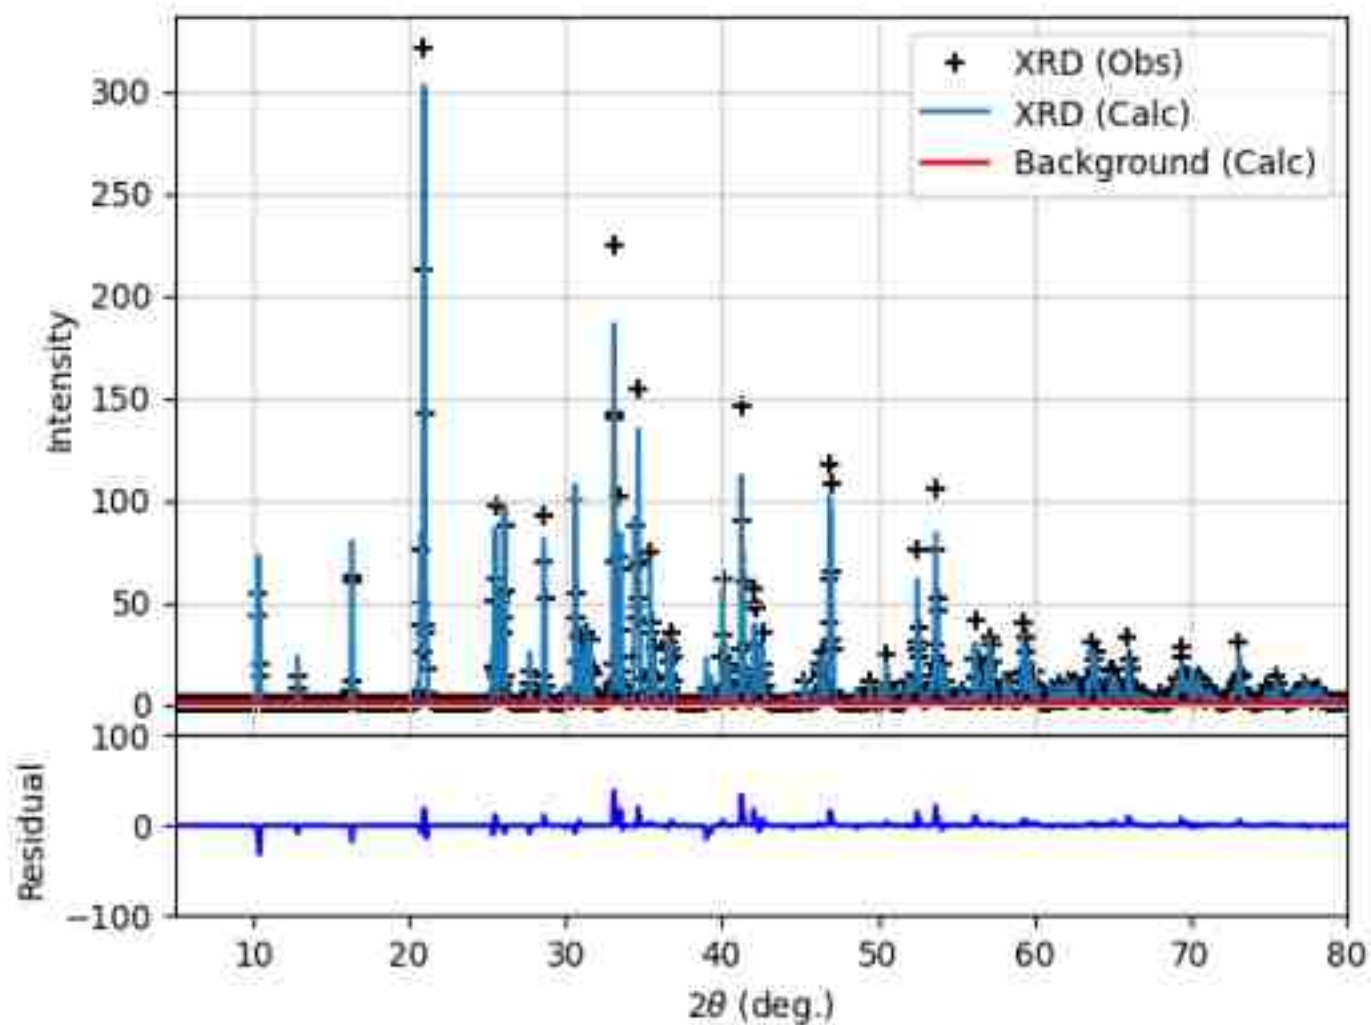

| RMSE before RR | Rwp      | RMSE after RR |
|----------------|----------|---------------|
| 0.377          | 21.41938 | None          |

# Mn<sub>6</sub>O<sub>7</sub>F<sub>5</sub>

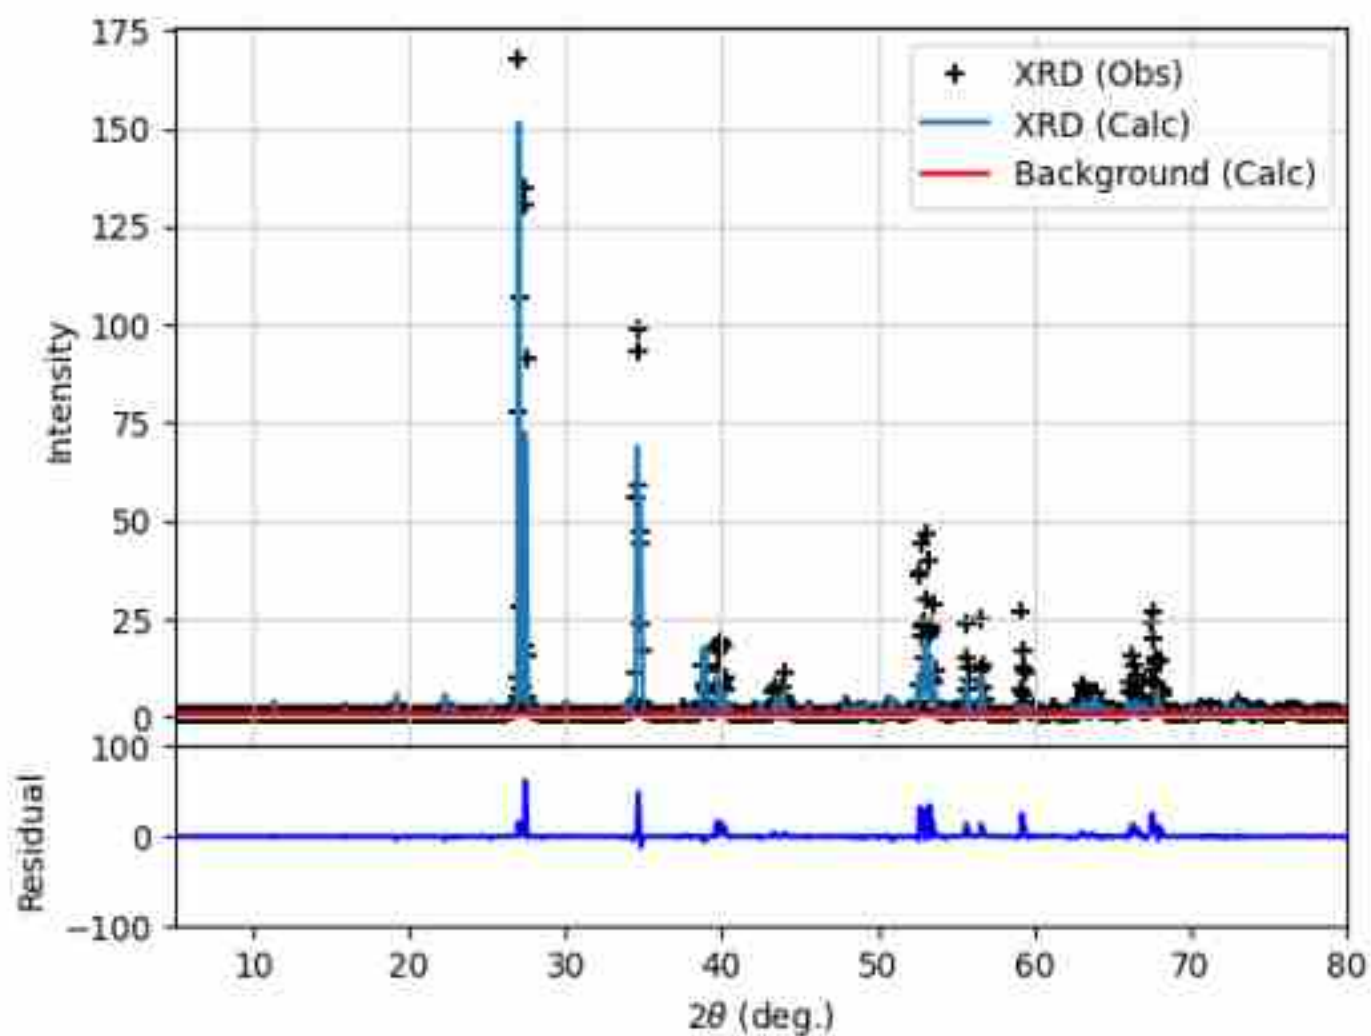

| RMSE before RR | Rwp      | RMSE after RR |
|----------------|----------|---------------|
| 0.378          | 47.31866 | None          |

# Ti<sub>3</sub>Mn<sub>3</sub>Sn<sub>12</sub>

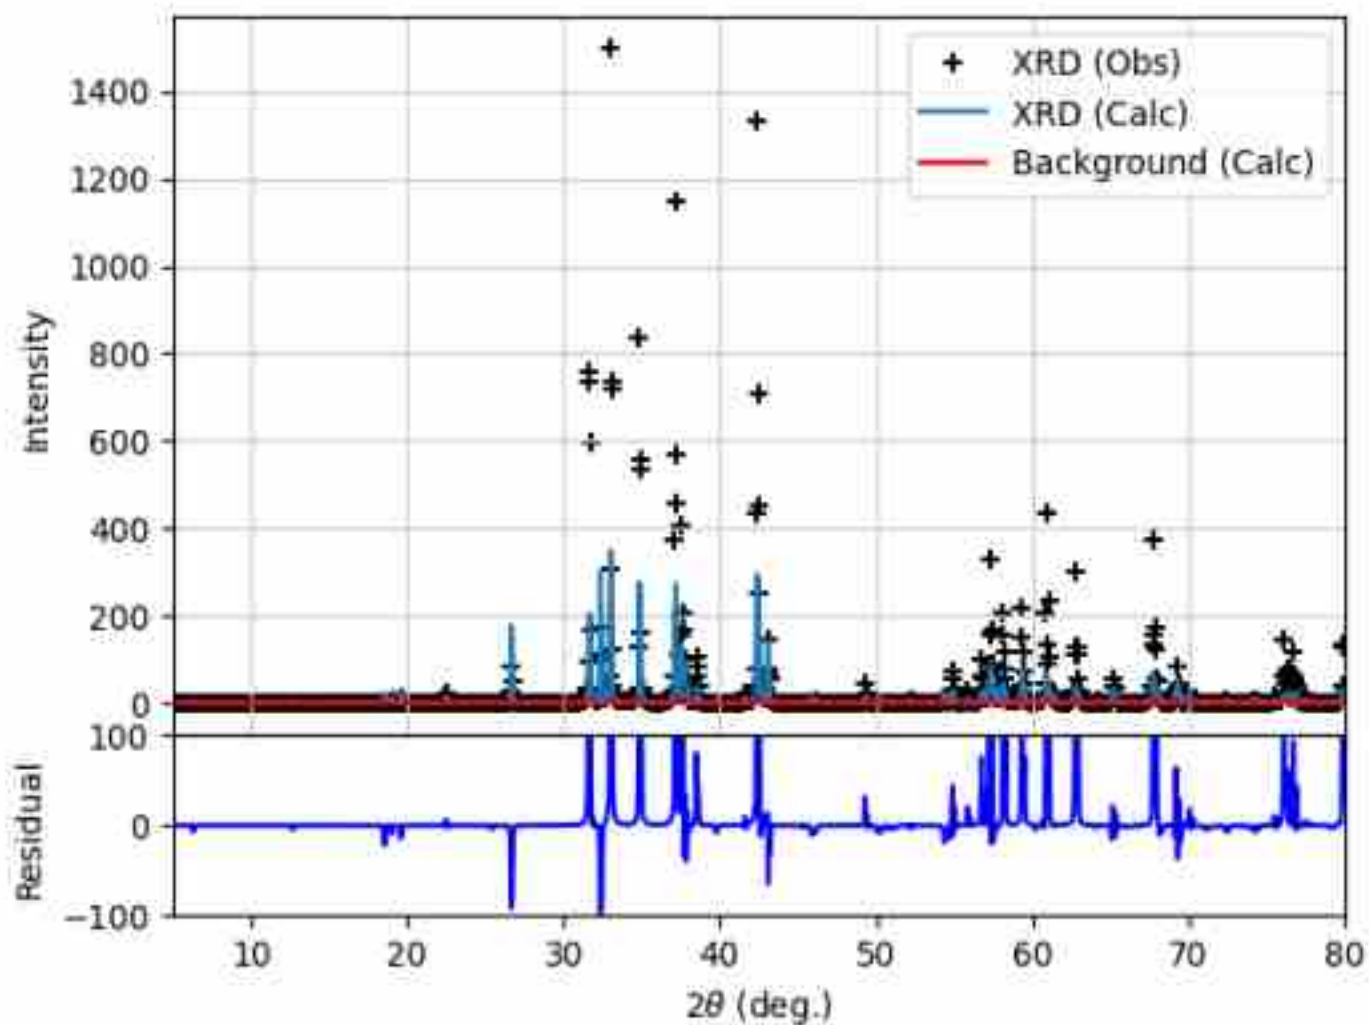

| RMSE before RR | Rwp      | RMSE after RR |
|----------------|----------|---------------|
| 0.378          | 70.79024 | 0.42726       |

# As<sub>8</sub>Se<sub>12</sub>

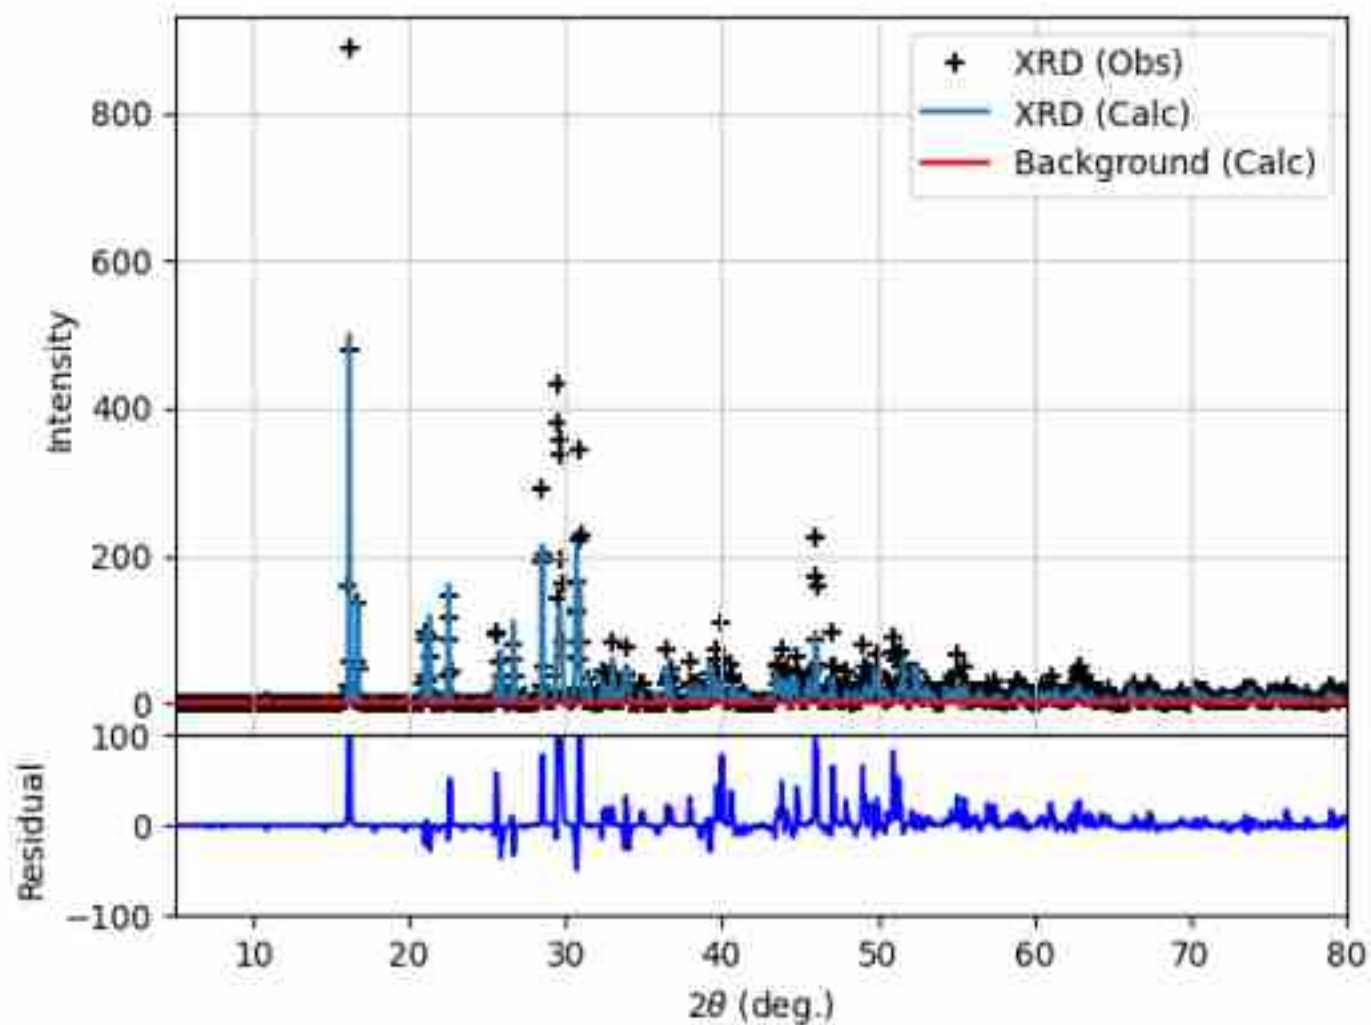

| RMSE before RR | Rwp      | RMSE after RR |
|----------------|----------|---------------|
| 0.379          | 53.40881 | 0.33001       |

# Cs<sub>2</sub>Co<sub>2</sub>W<sub>2</sub>O<sub>6</sub>F<sub>6</sub>

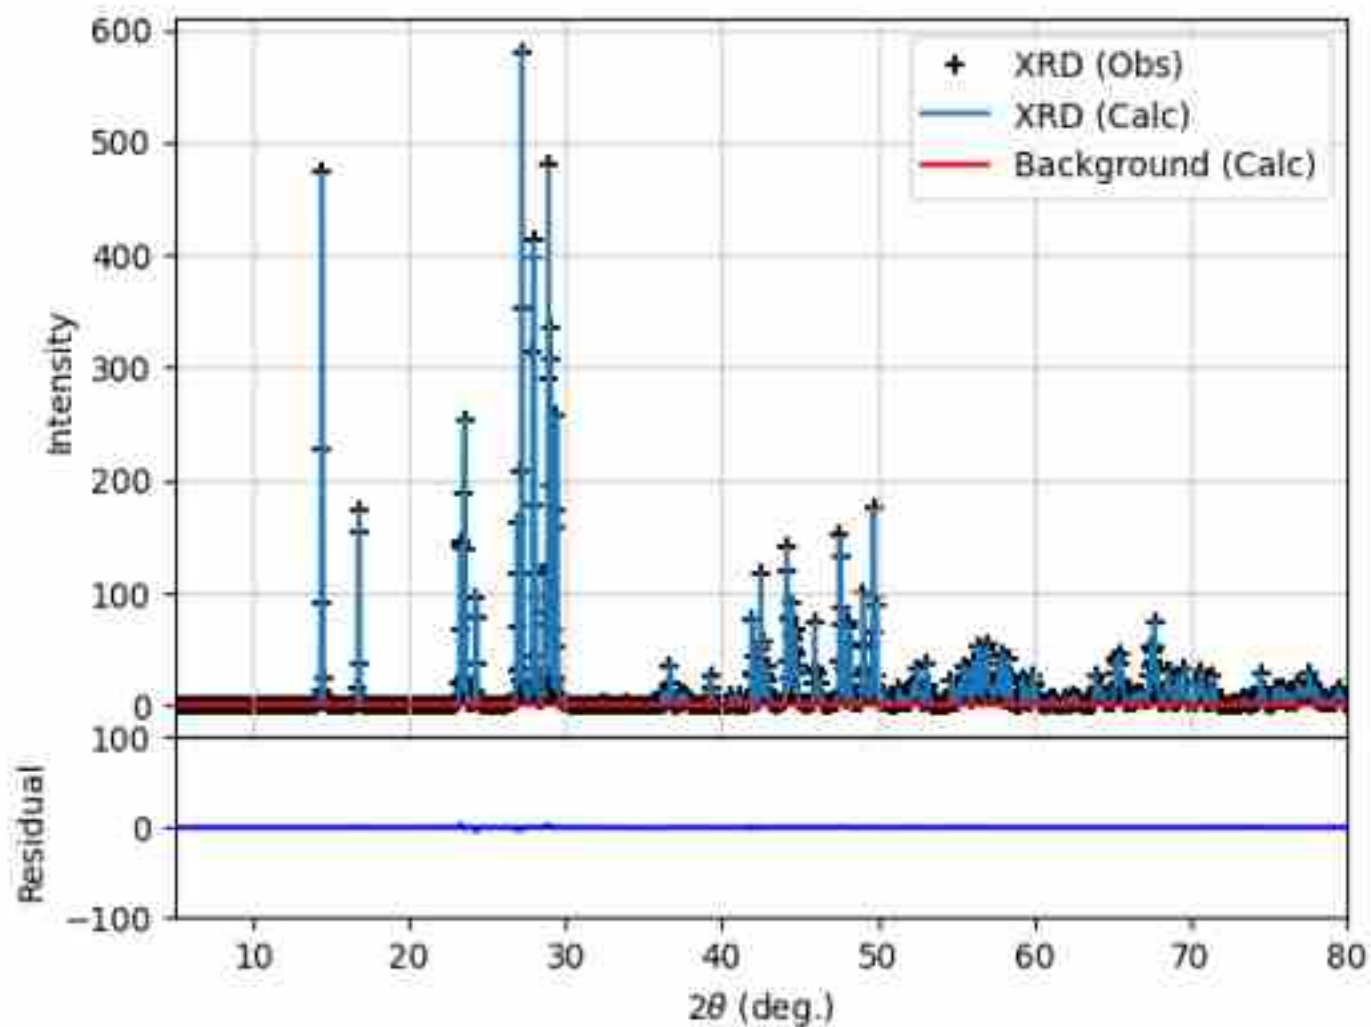

| RMSE before RR | Rwp     | RMSE after RR |
|----------------|---------|---------------|
| 0.379          | 0.95816 | 0.39764       |



# K<sub>2</sub>Ti<sub>2</sub>P<sub>2</sub>Se<sub>10</sub>

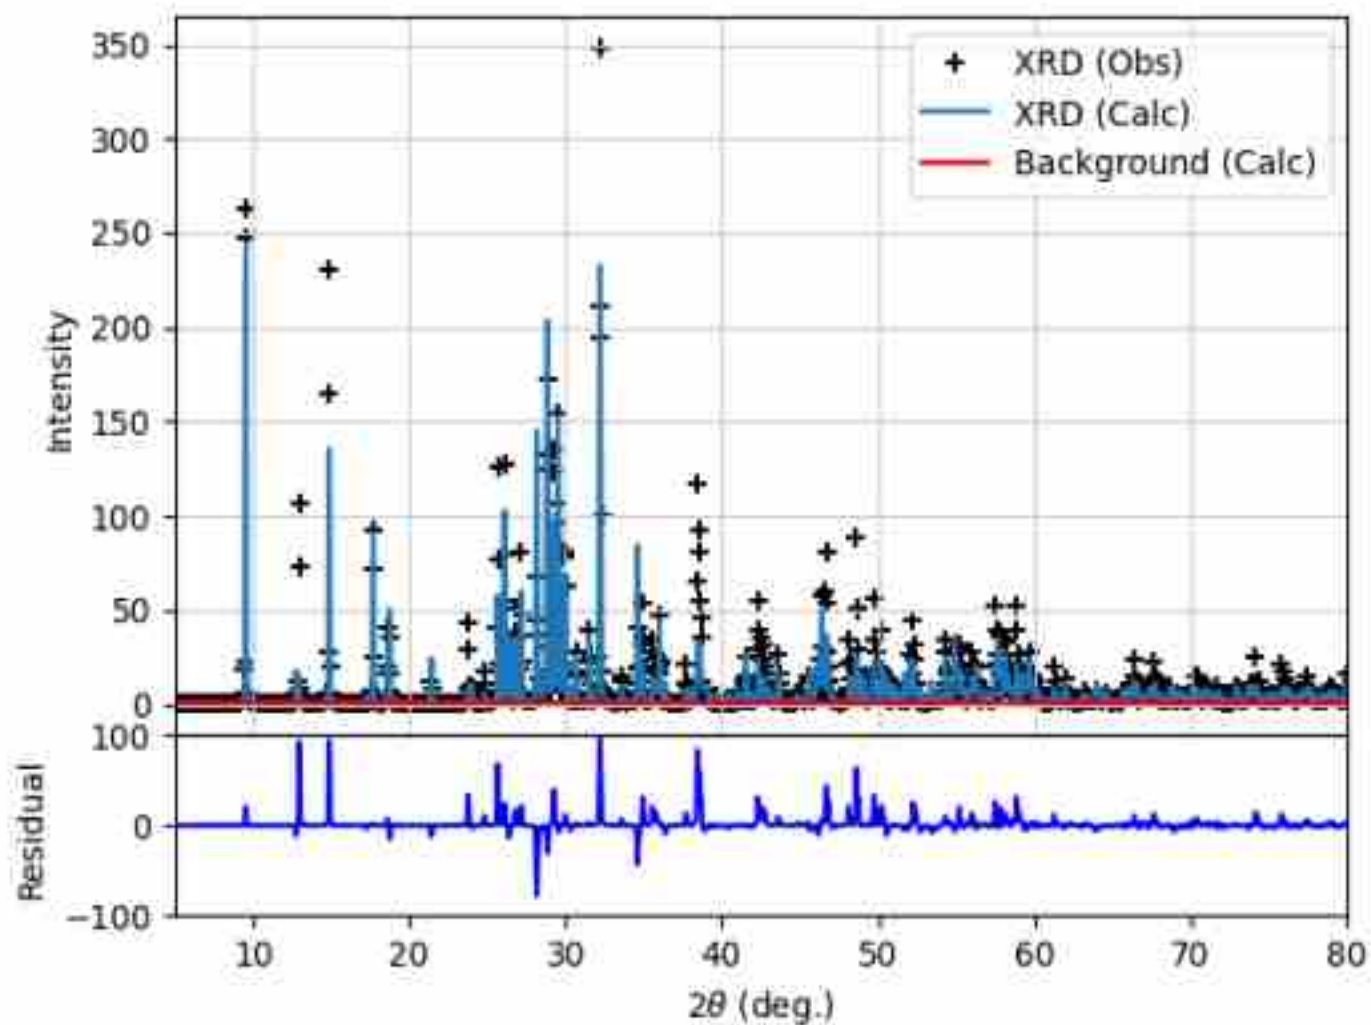

| RMSE before RR | Rwp      | RMSE after RR |
|----------------|----------|---------------|
| 0.379          | 44.37529 | 0.3857        |

# Mn<sub>6</sub>O<sub>5</sub>F<sub>7</sub>

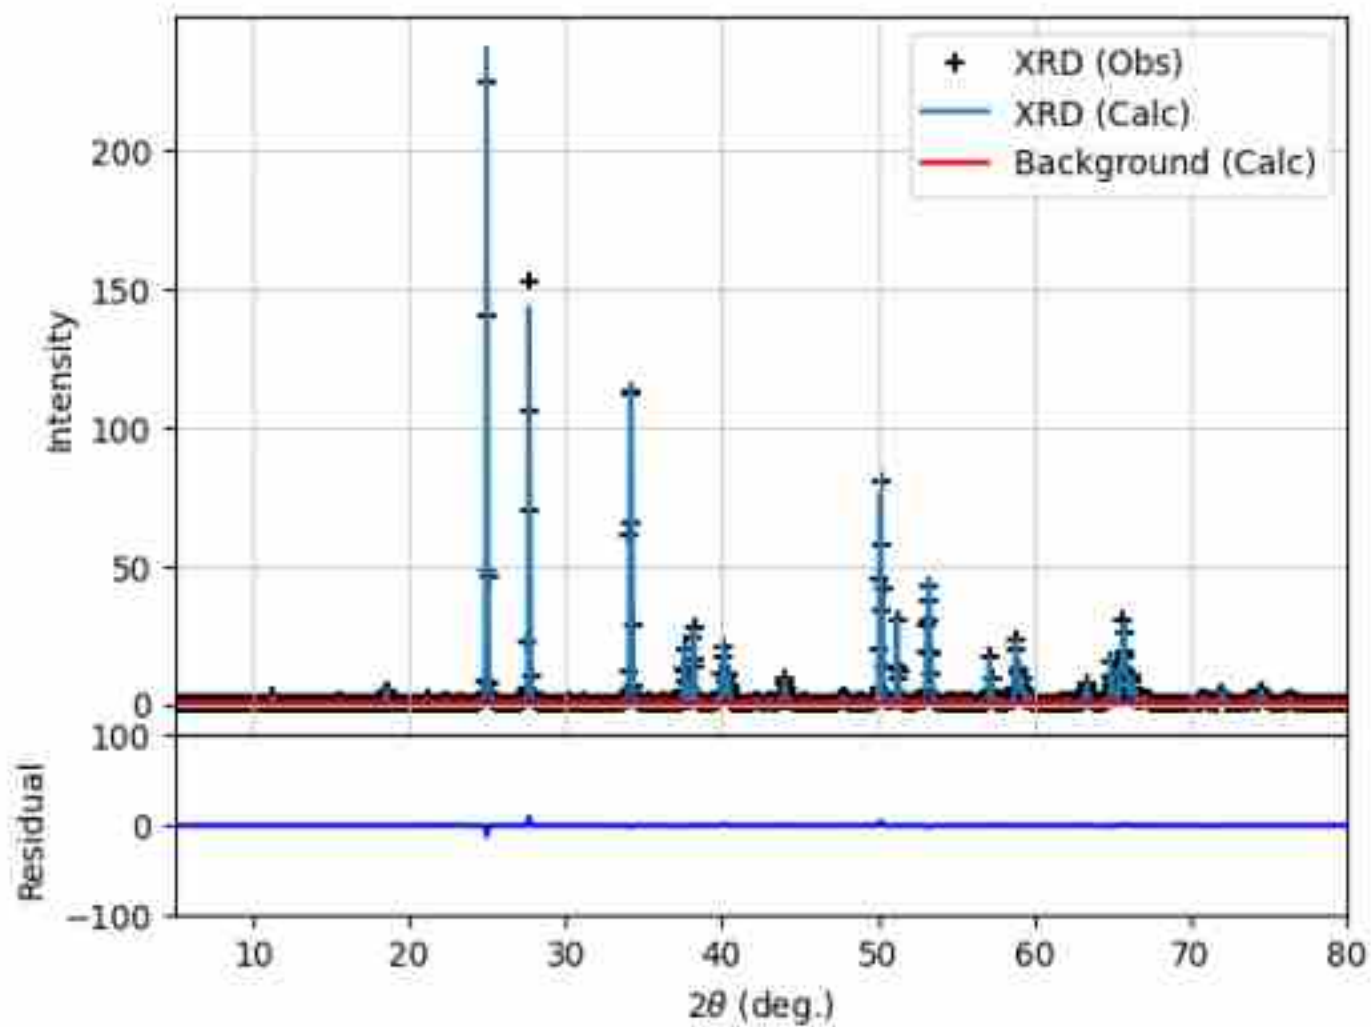

| RMSE before RR | Rwp     | RMSE after RR |
|----------------|---------|---------------|
| 0.379          | 4.39354 | 0.38345       |

# Bi4I12

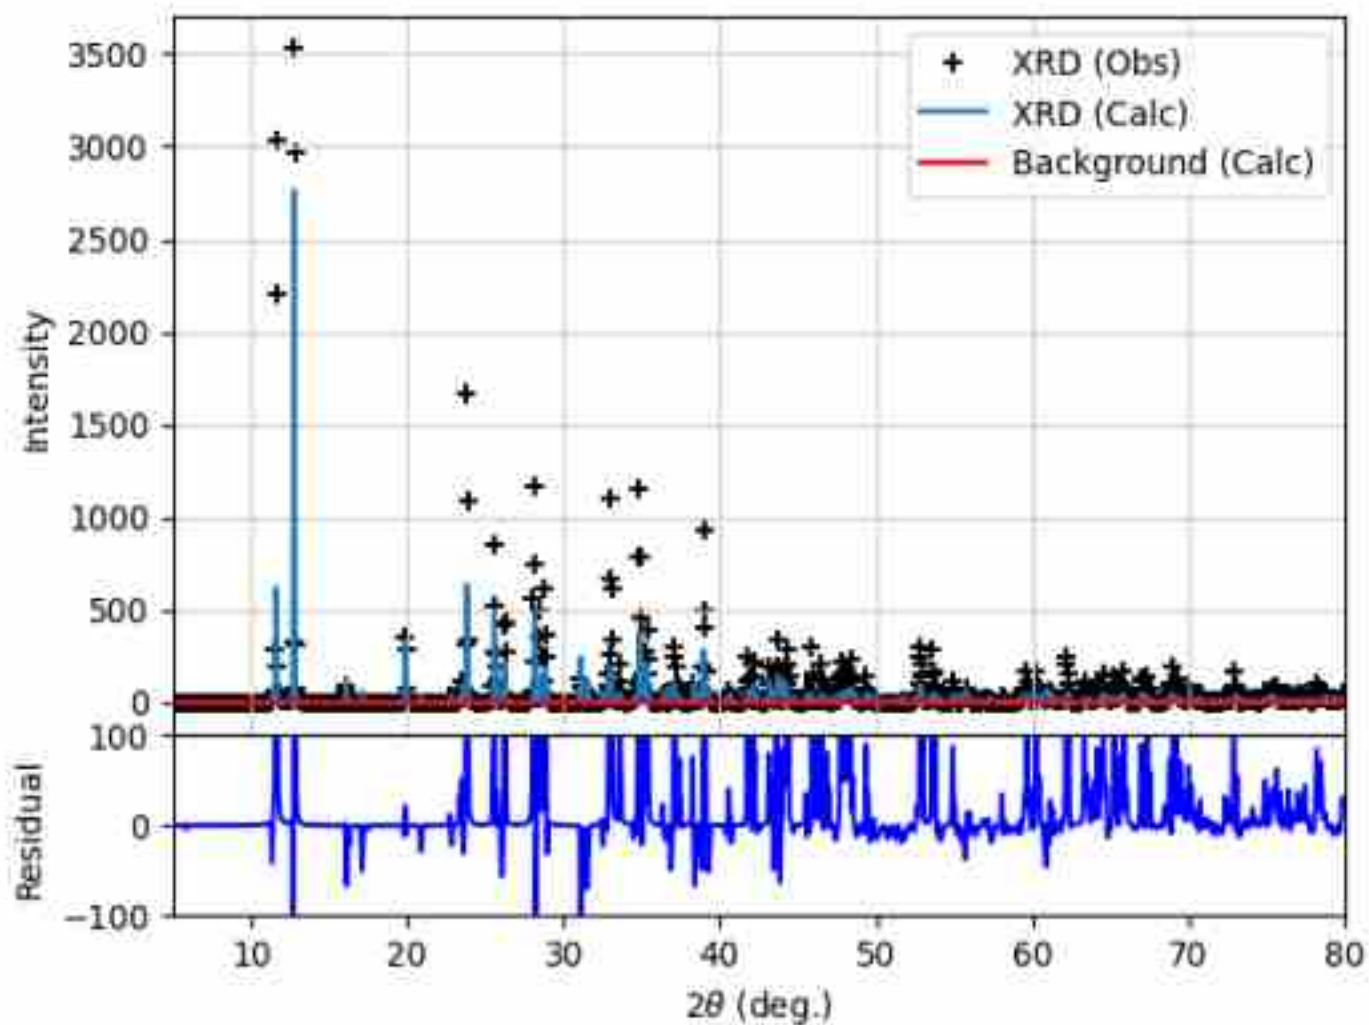

| RMSE before RR | Rwp      | RMSE after RR |
|----------------|----------|---------------|
| 0.381          | 68.77187 | 0.42791       |

# Hf5Zr5Ga6

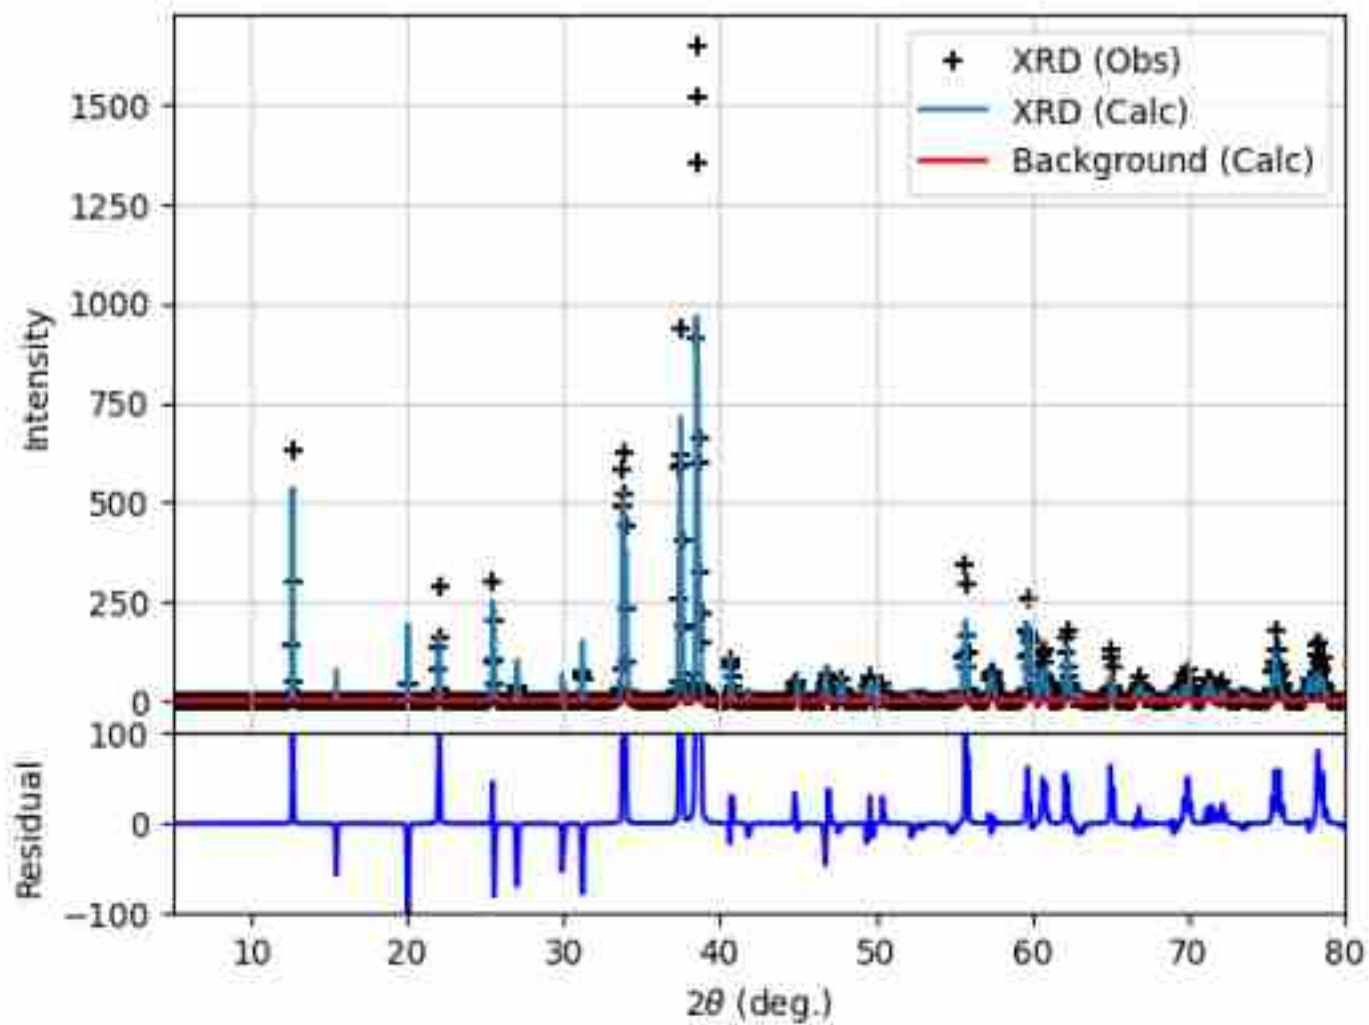

| RMSE before RR | Rwp      | RMSE after RR |
|----------------|----------|---------------|
| 0.381          | 46.81525 | 0.48106       |

# K<sub>3</sub>Na<sub>1</sub>P<sub>2</sub>O<sub>6</sub>F<sub>2</sub>

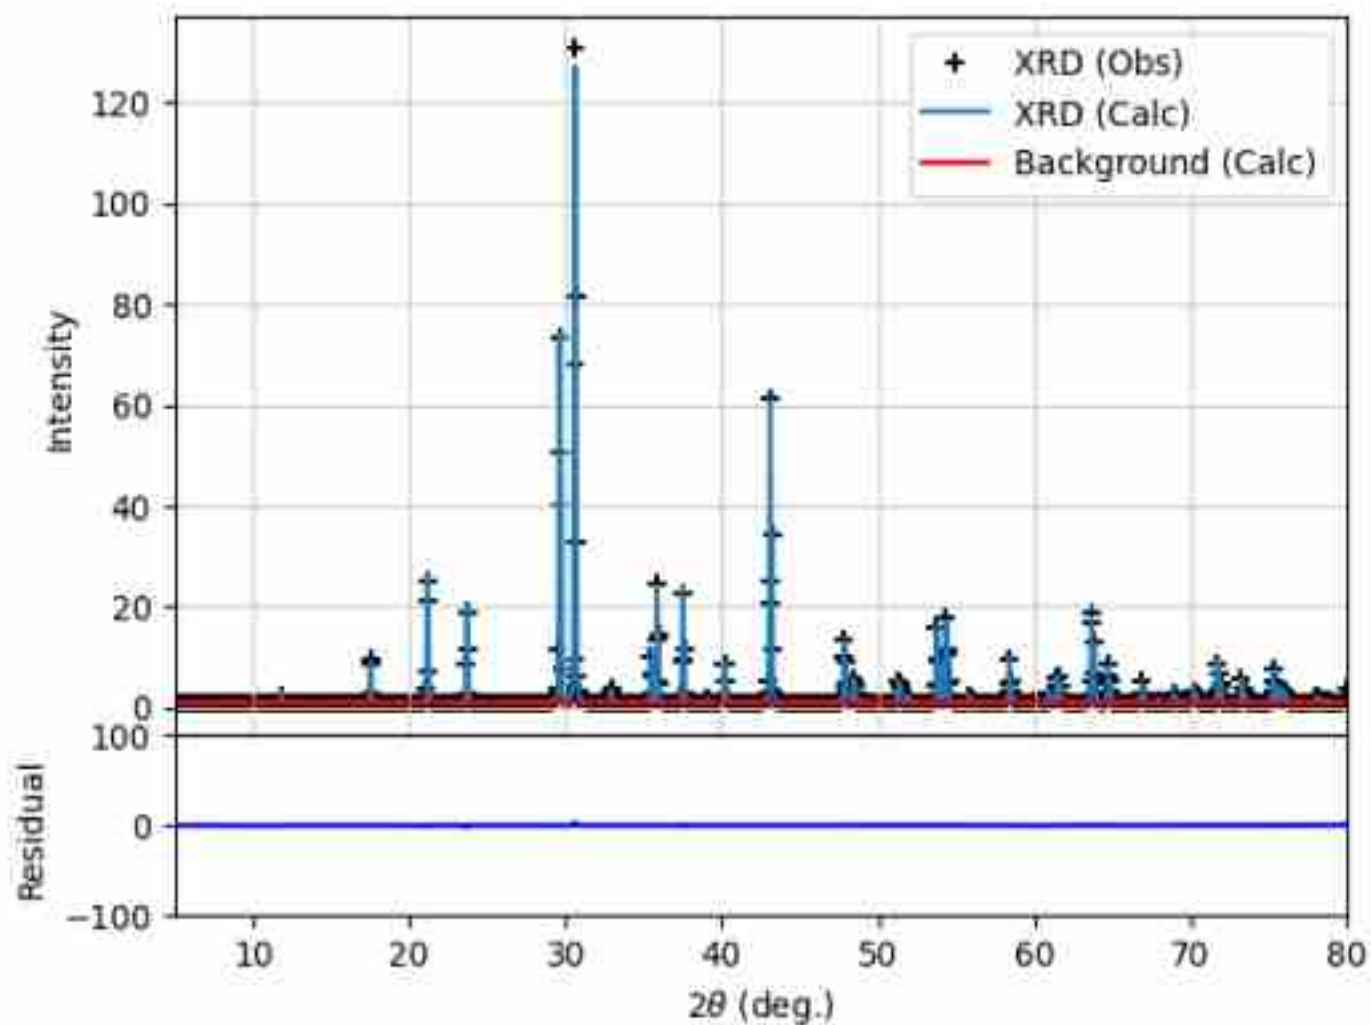

| RMSE before RR | Rwp     | RMSE after RR |
|----------------|---------|---------------|
| 0.381          | 4.45762 | 0.38932       |

# La7Os4C9

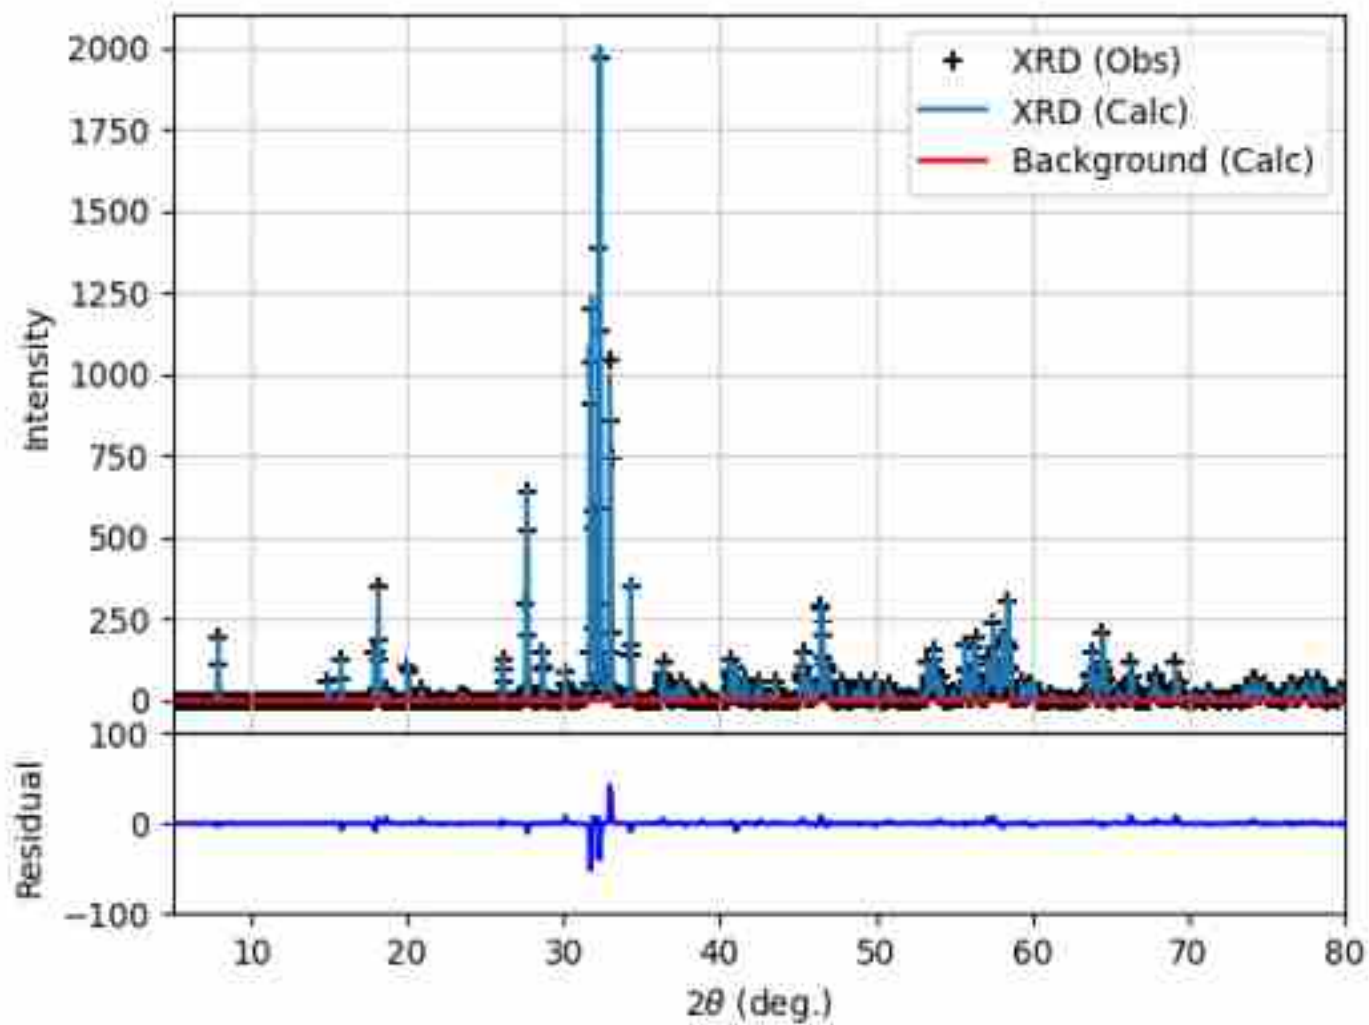

| RMSE before RR | Rwp    | RMSE after RR |
|----------------|--------|---------------|
| 0.381          | 3.4969 | 0.30785       |

# Ta1Si10W4

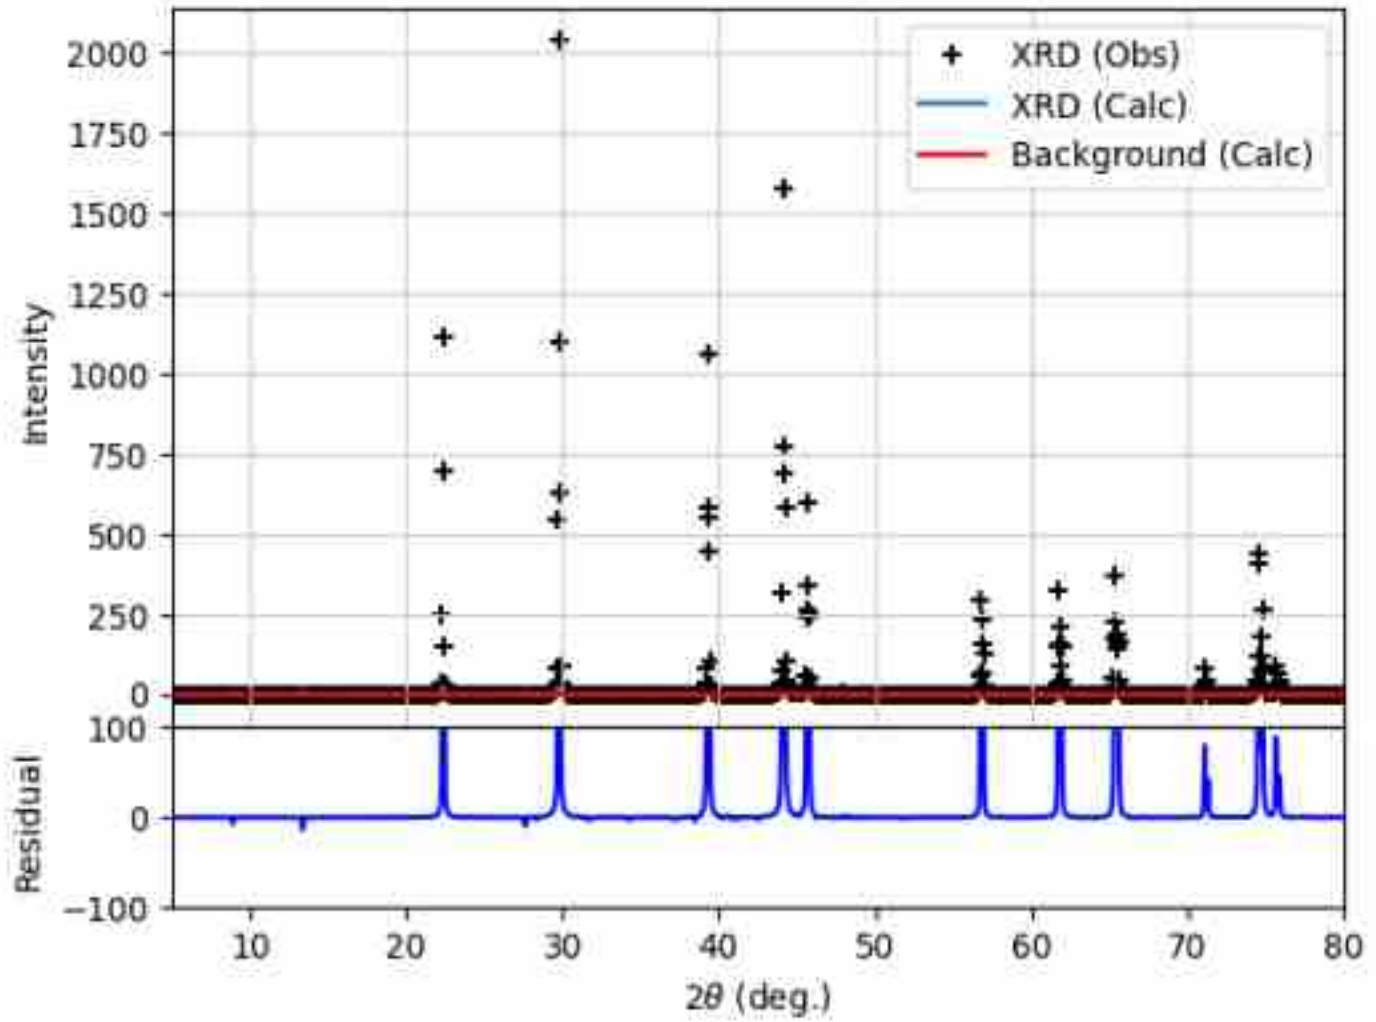

| RMSE before RR | Rwp      | RMSE after RR |
|----------------|----------|---------------|
| 0.381          | 95.52808 | 0.49587       |

# Ti9Ni9

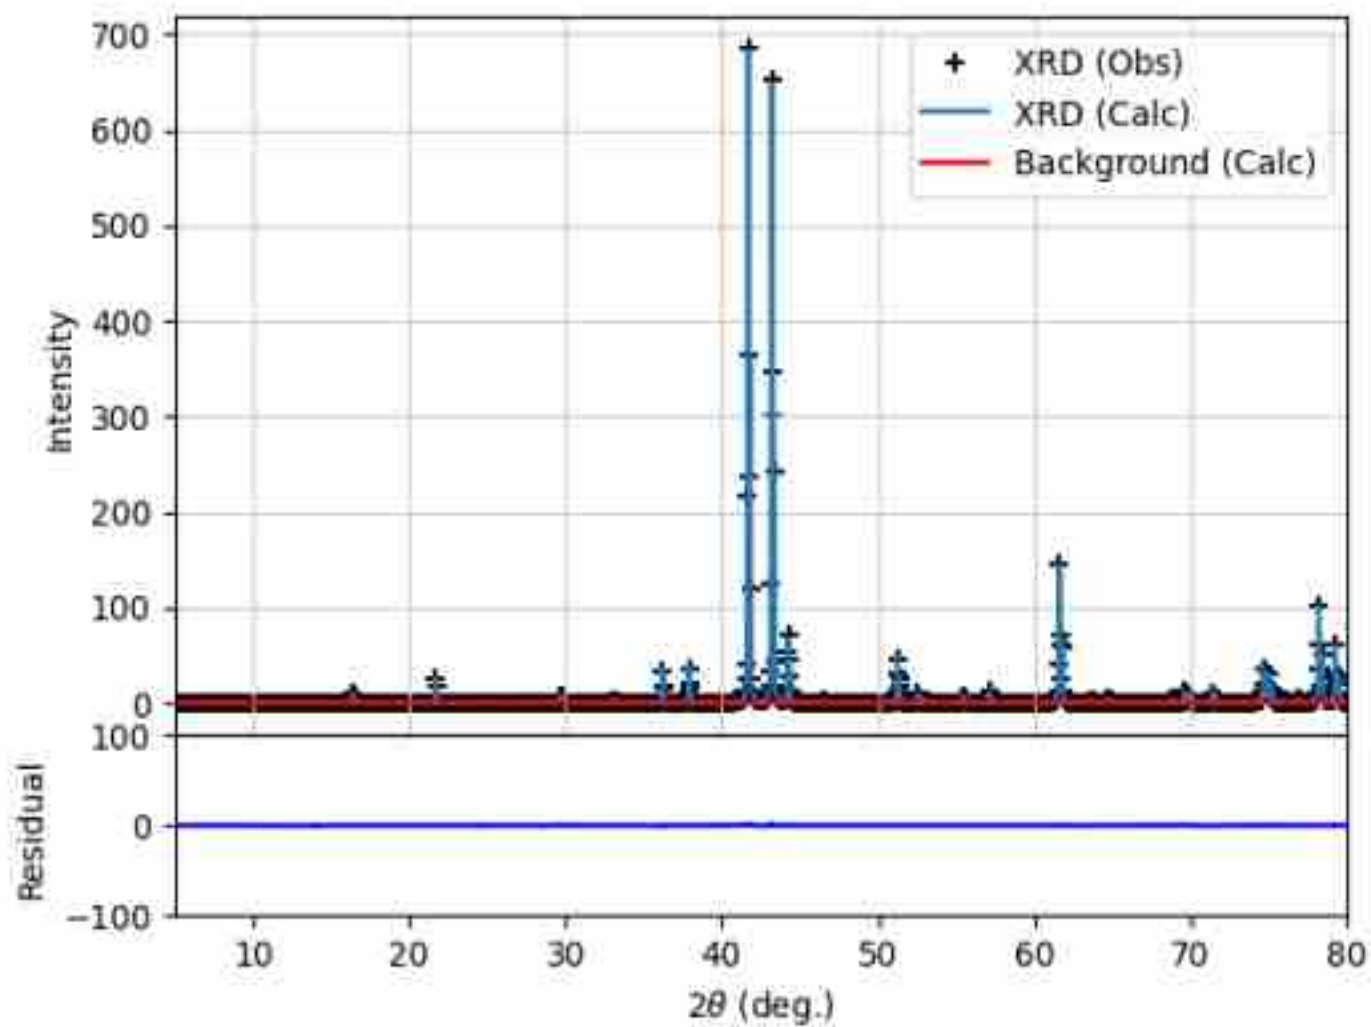

| RMSE before RR | Rwp     | RMSE after RR |
|----------------|---------|---------------|
| 0.381          | 3.28295 | 0.3737        |



# Li<sub>6</sub>Cu<sub>2</sub>S<sub>4</sub>

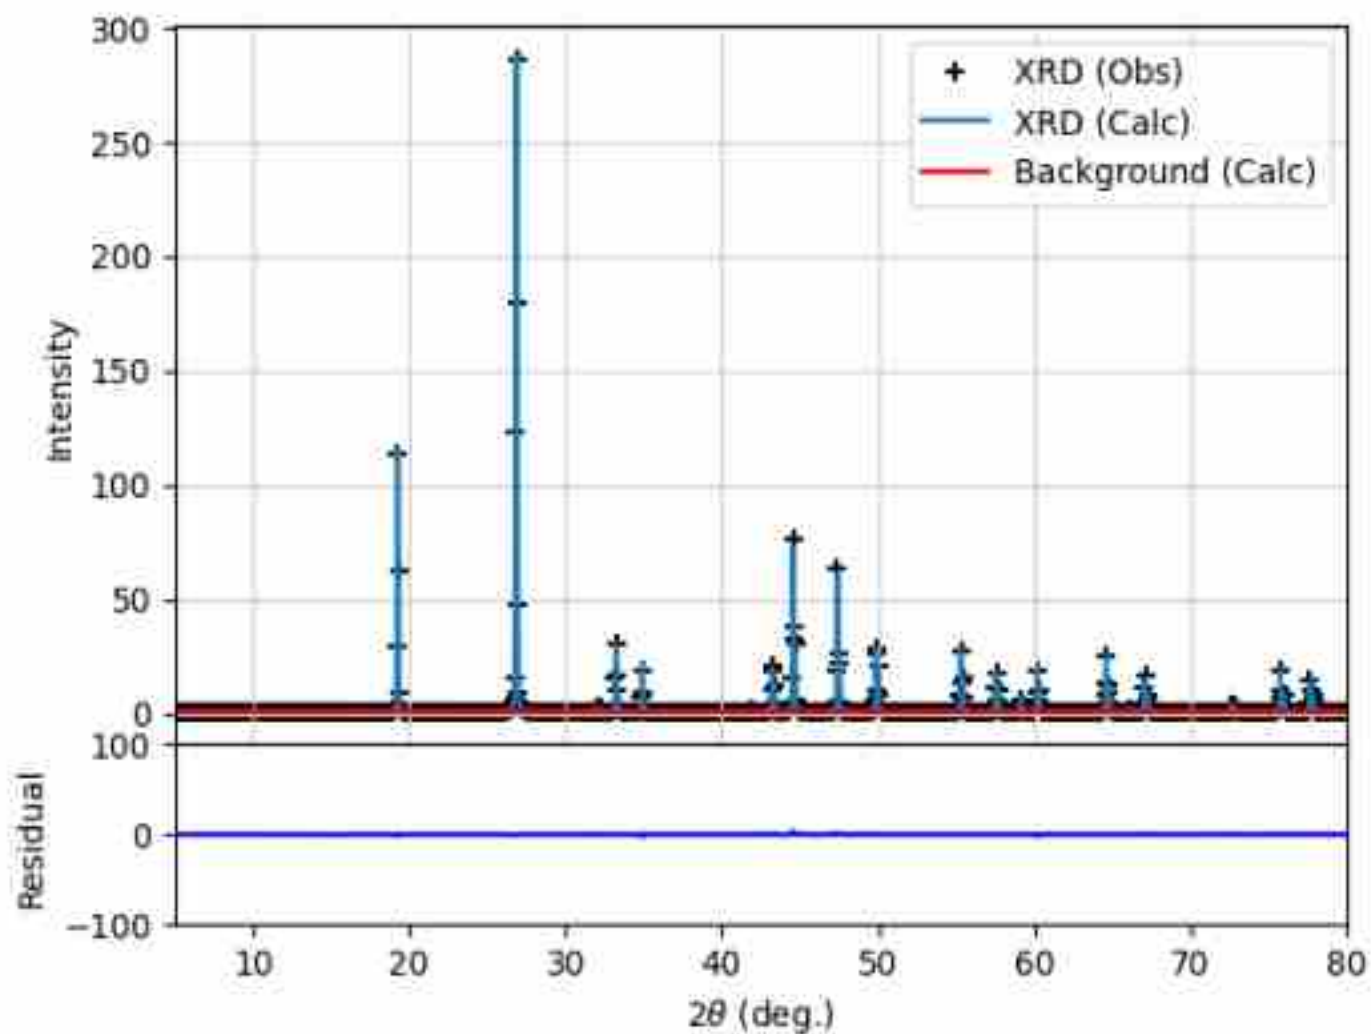

| RMSE before RR | Rwp     | RMSE after RR |
|----------------|---------|---------------|
| 0.383          | 3.58793 | 0.47156       |

# Sr6Al4P8

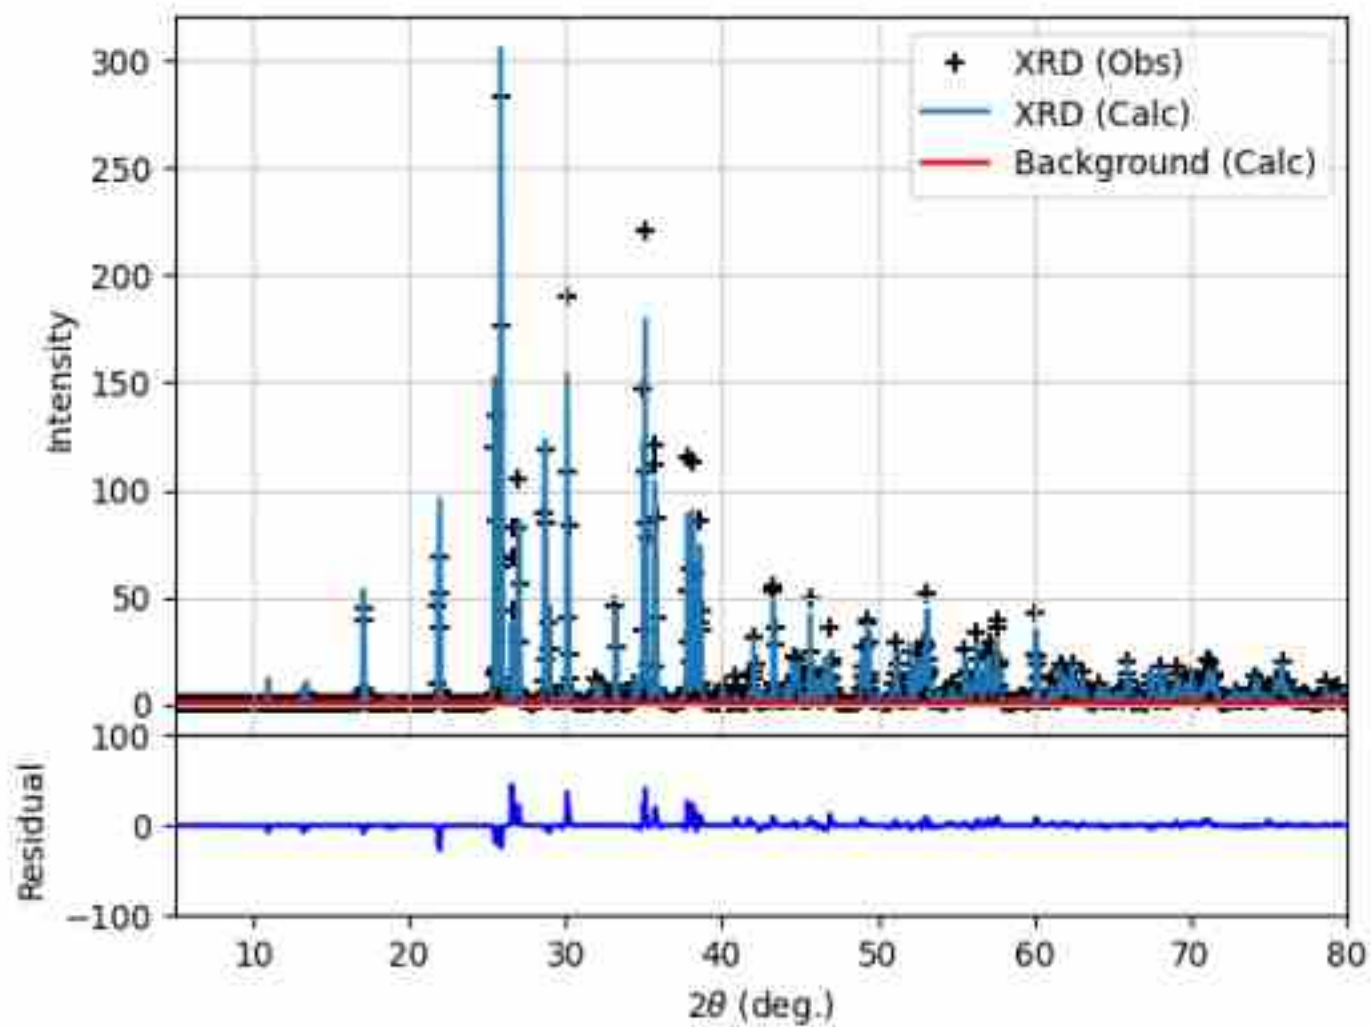

| RMSE before RR | Rwp      | RMSE after RR |
|----------------|----------|---------------|
| 0.383          | 23.74433 | 0.37989       |

# Ba<sub>2</sub>Cu<sub>2</sub>Si<sub>4</sub>O<sub>12</sub>

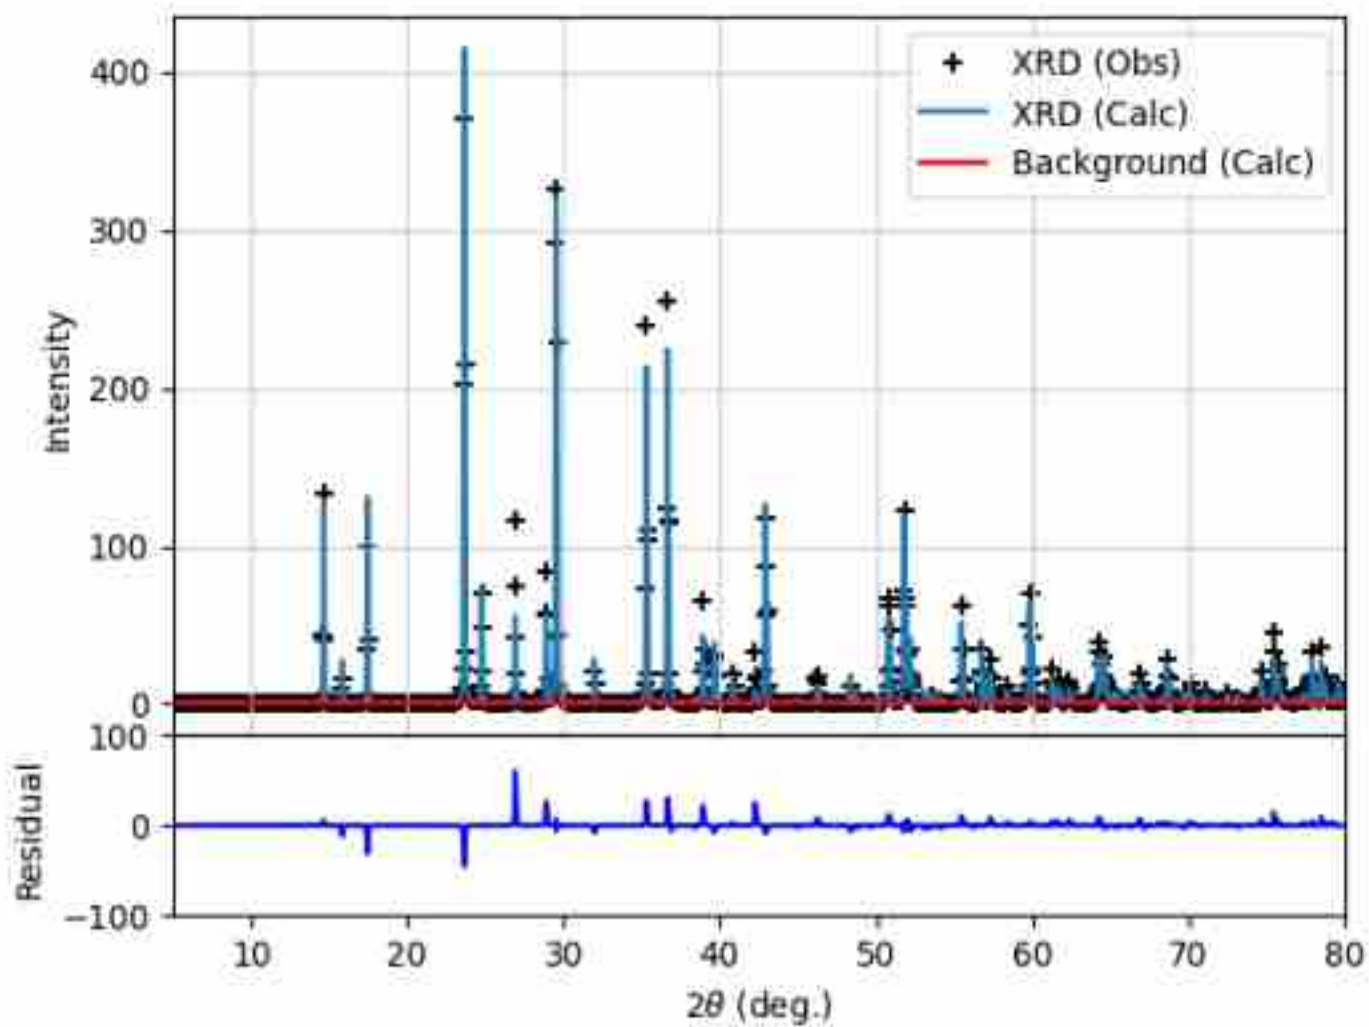

| RMSE before RR | Rwp      | RMSE after RR |
|----------------|----------|---------------|
| 0.384          | 20.93382 | None          |

# Li<sub>2</sub>V<sub>2</sub>O<sub>4</sub>F<sub>4</sub>

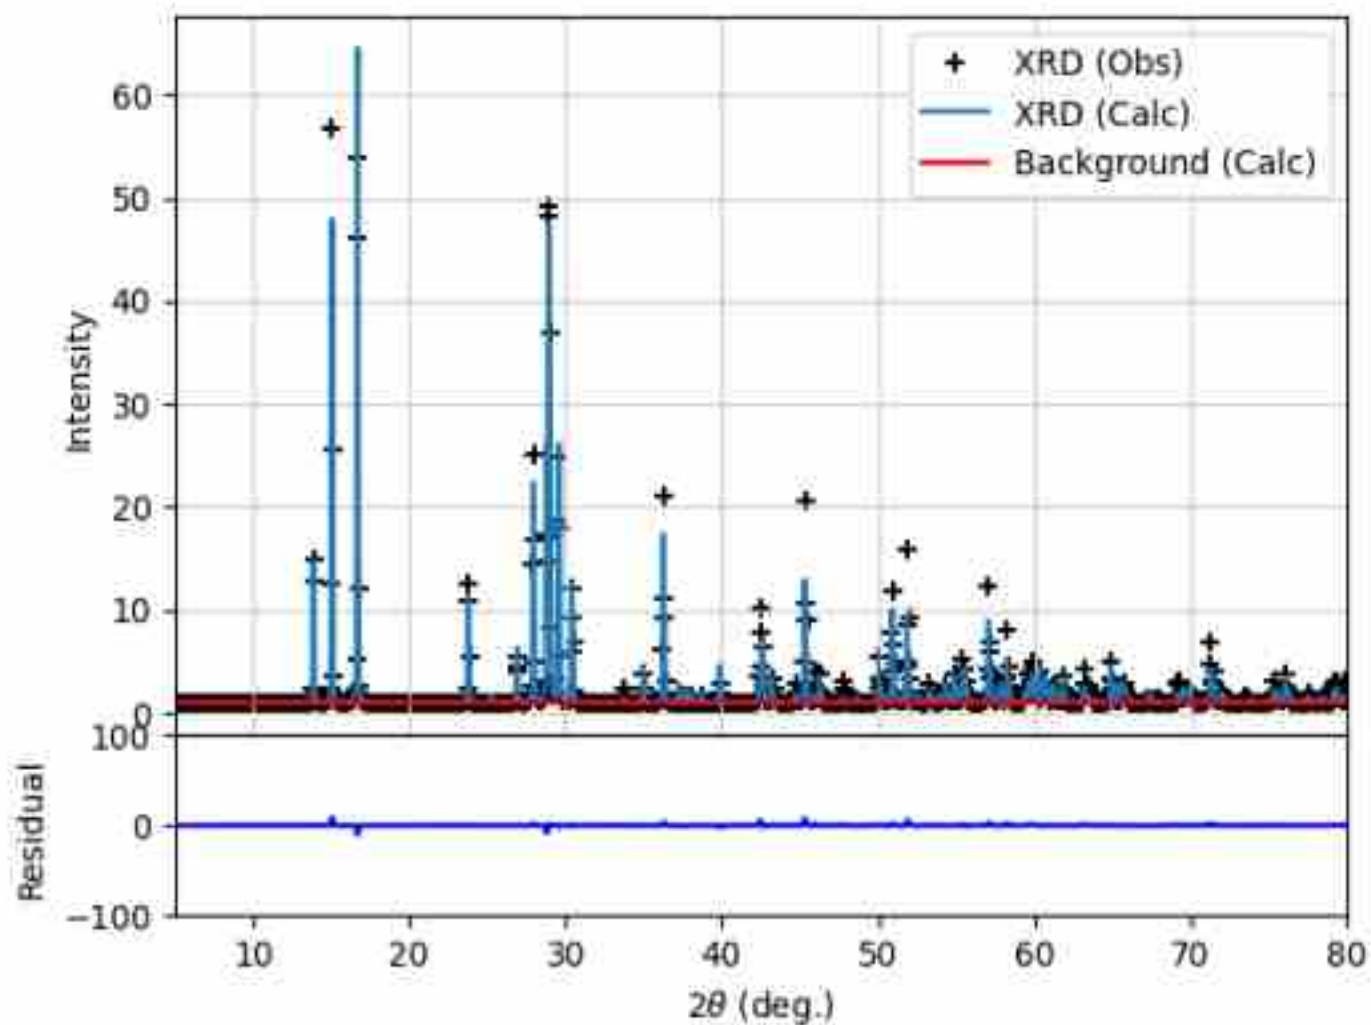

| RMSE before RR | Rwp      | RMSE after RR |
|----------------|----------|---------------|
| 0.384          | 16.82991 | None          |

# Ca<sub>2</sub>B<sub>5</sub>C<sub>11</sub>O<sub>10</sub>

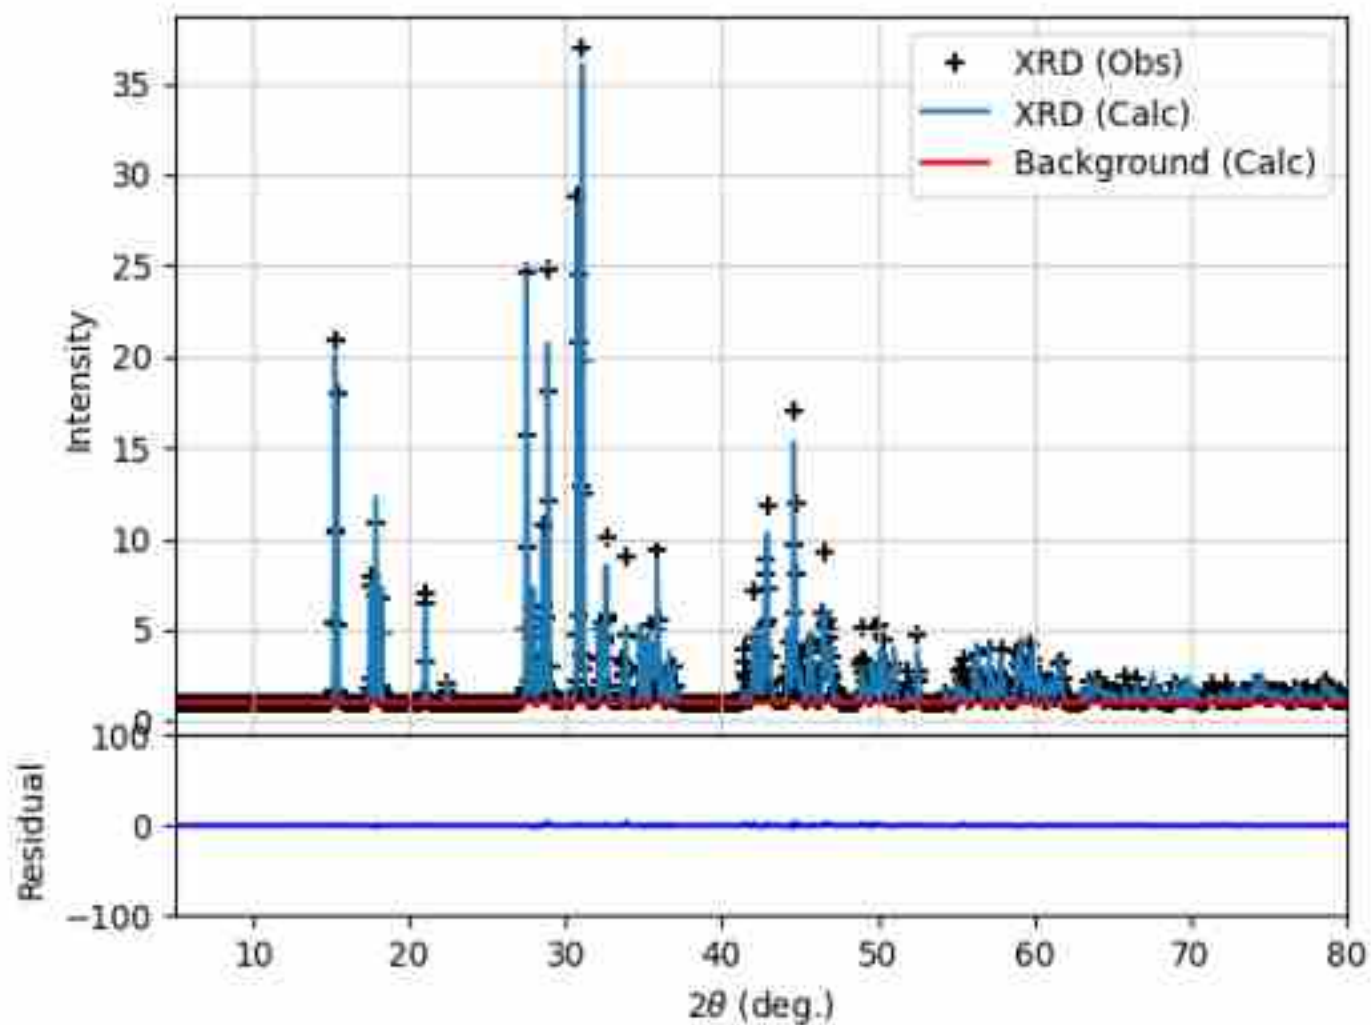

| RMSE before RR | Rwp      | RMSE after RR |
|----------------|----------|---------------|
| 0.385          | 14.66481 | 0.45692       |

# La<sub>2</sub>Os<sub>2</sub>N<sub>6</sub>

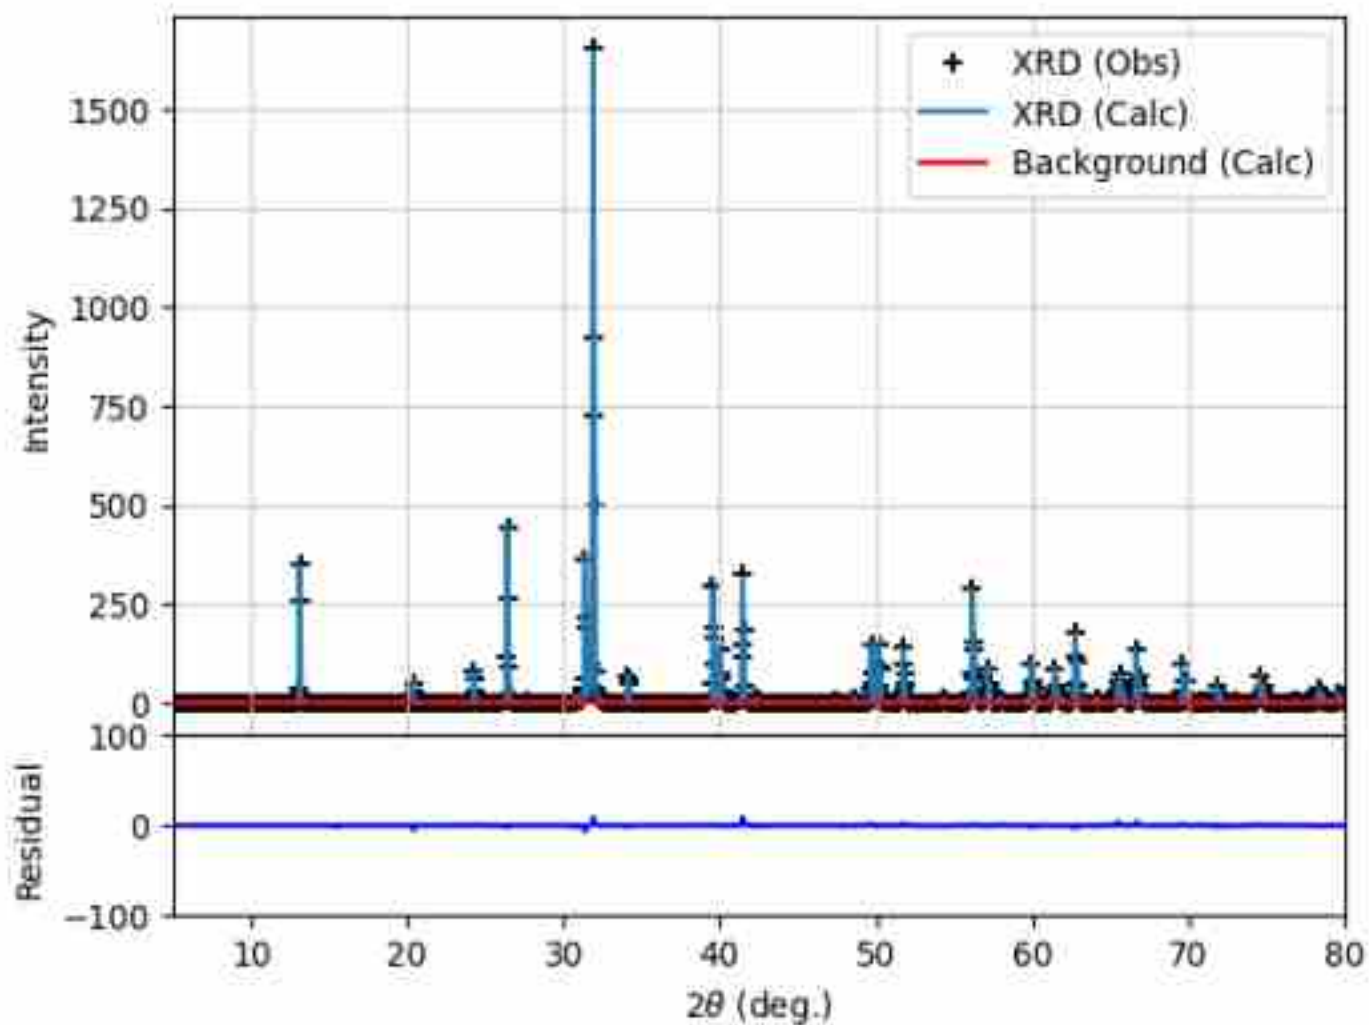

| RMSE before RR | Rwp     | RMSE after RR |
|----------------|---------|---------------|
| 0.385          | 3.20633 | 0.35509       |

# Li<sub>7</sub>Fe<sub>10</sub>O<sub>6</sub>

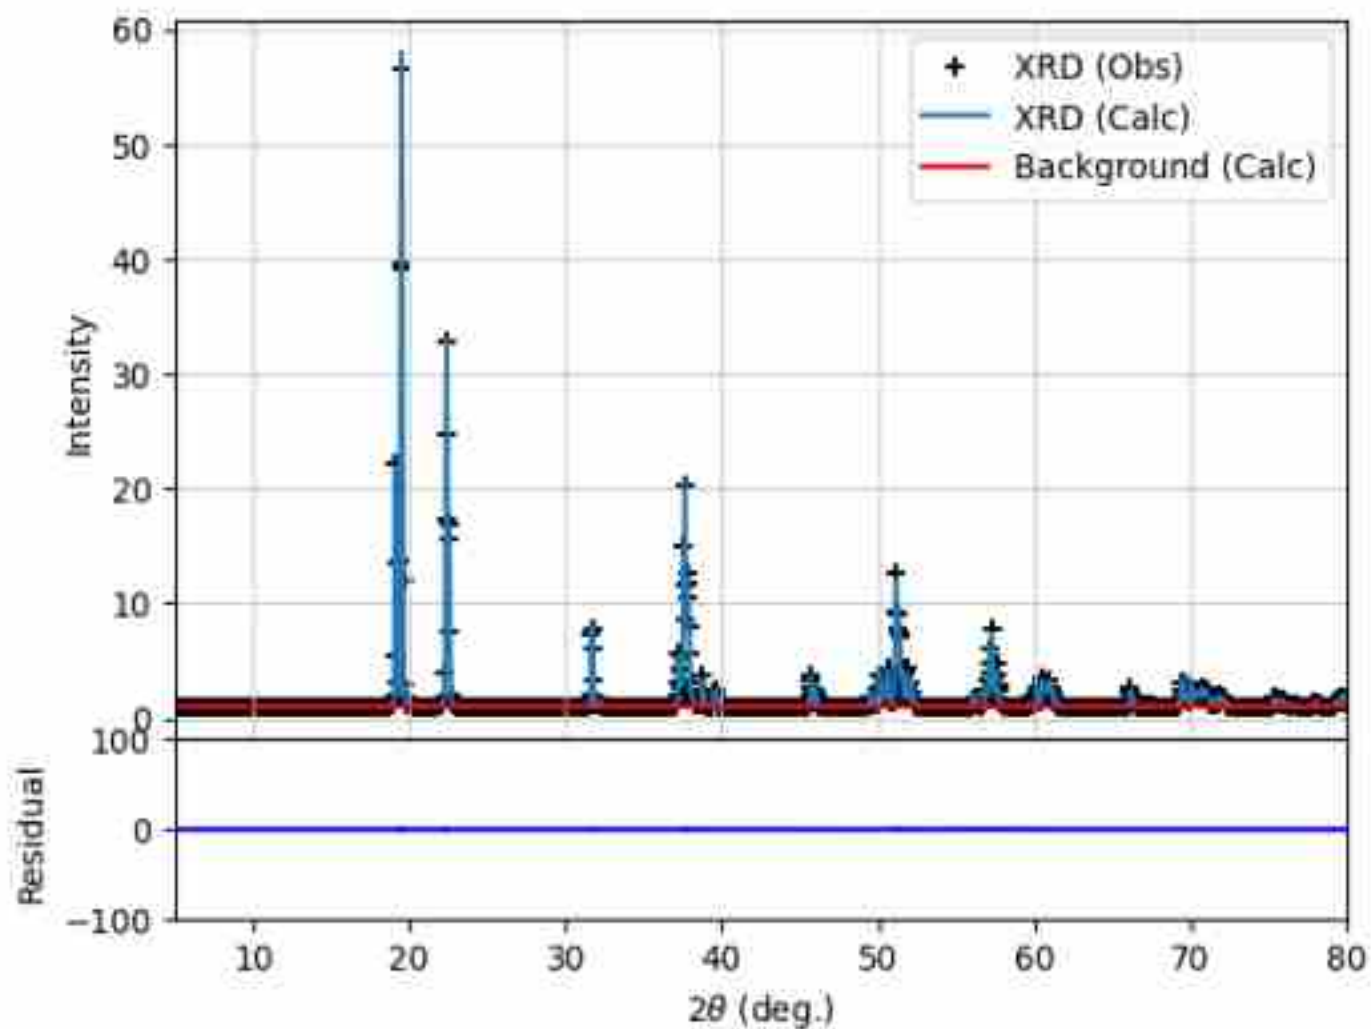

| RMSE before RR | Rwp     | RMSE after RR |
|----------------|---------|---------------|
| 0.385          | 4.11053 | 0.3801        |

# Mn<sub>6</sub>O<sub>5</sub>F<sub>7</sub>

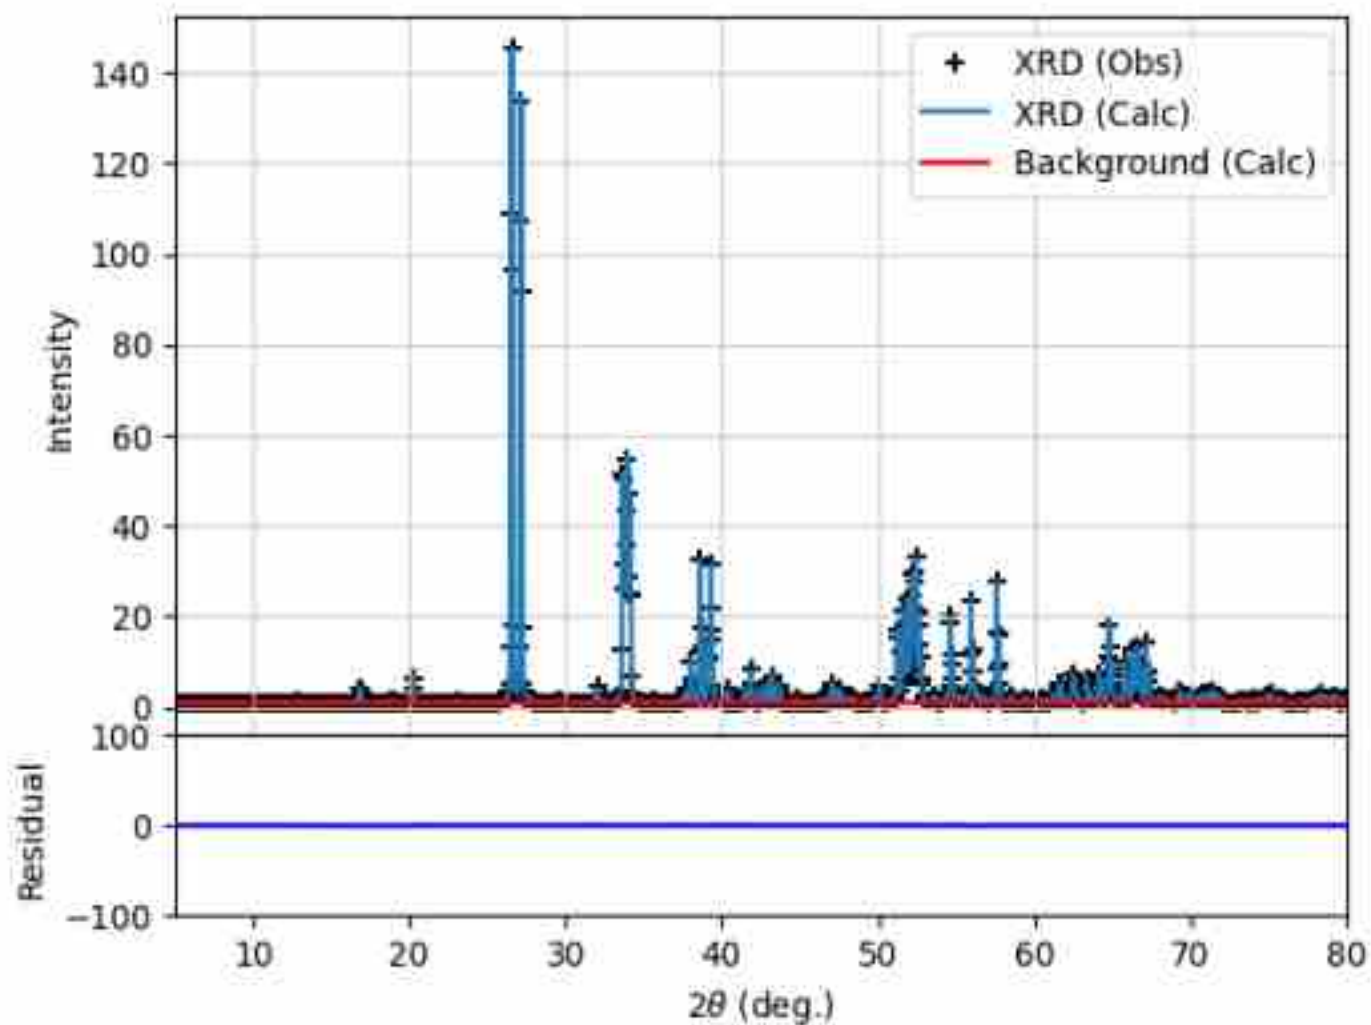

| RMSE before RR | Rwp     | RMSE after RR |
|----------------|---------|---------------|
| 0.385          | 2.24146 | 0.40971       |



# V6O7F5

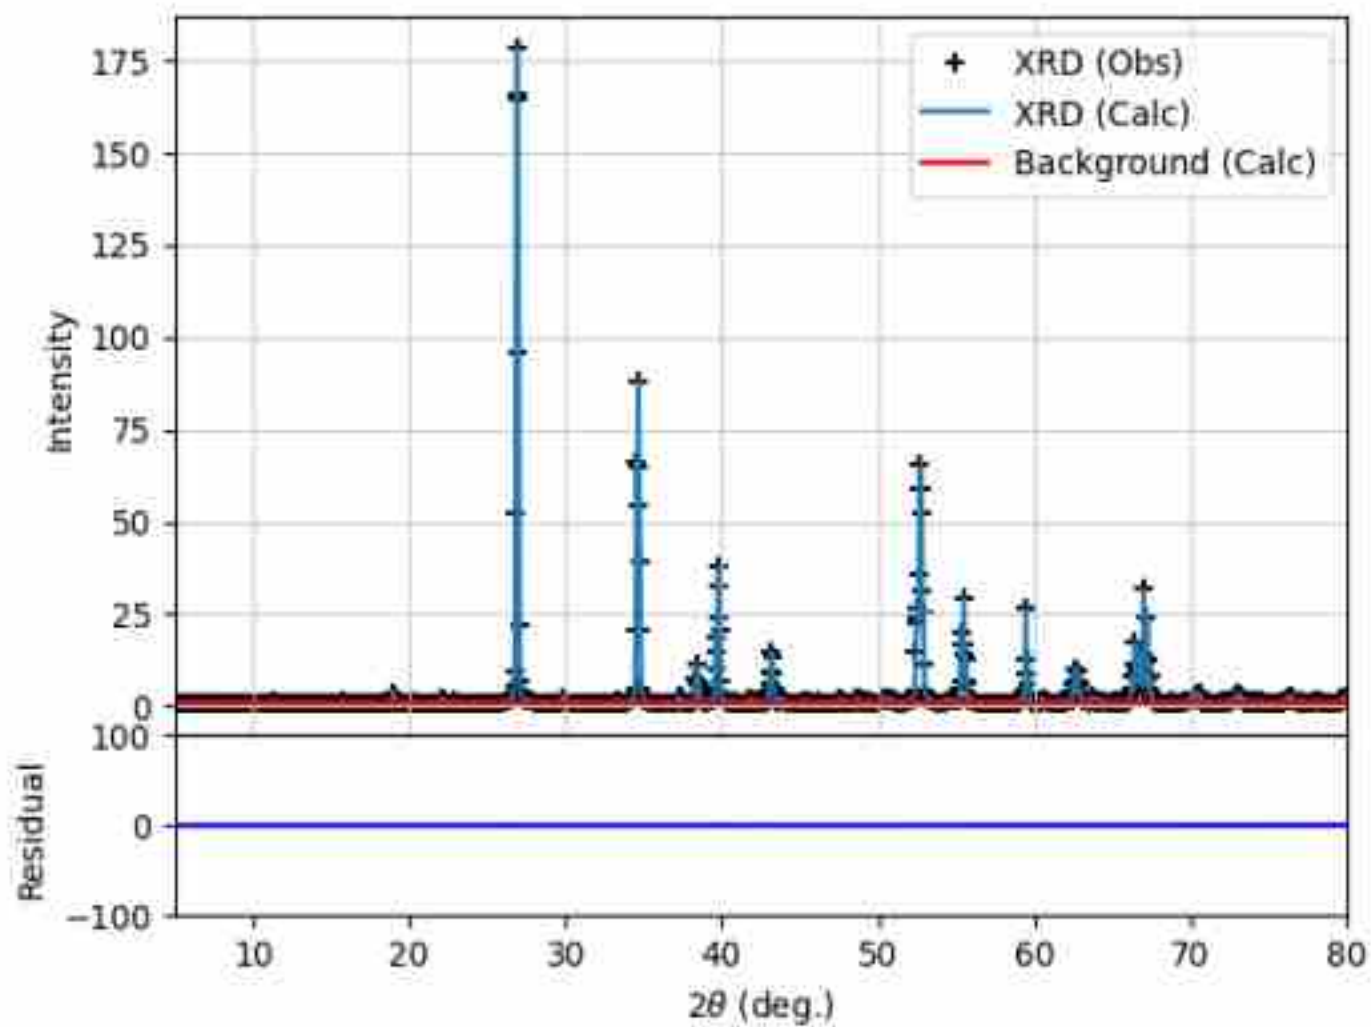

| RMSE before RR | Rwp     | RMSE after RR |
|----------------|---------|---------------|
| 0.385          | 1.20597 | 0.38081       |

# Mo2P8

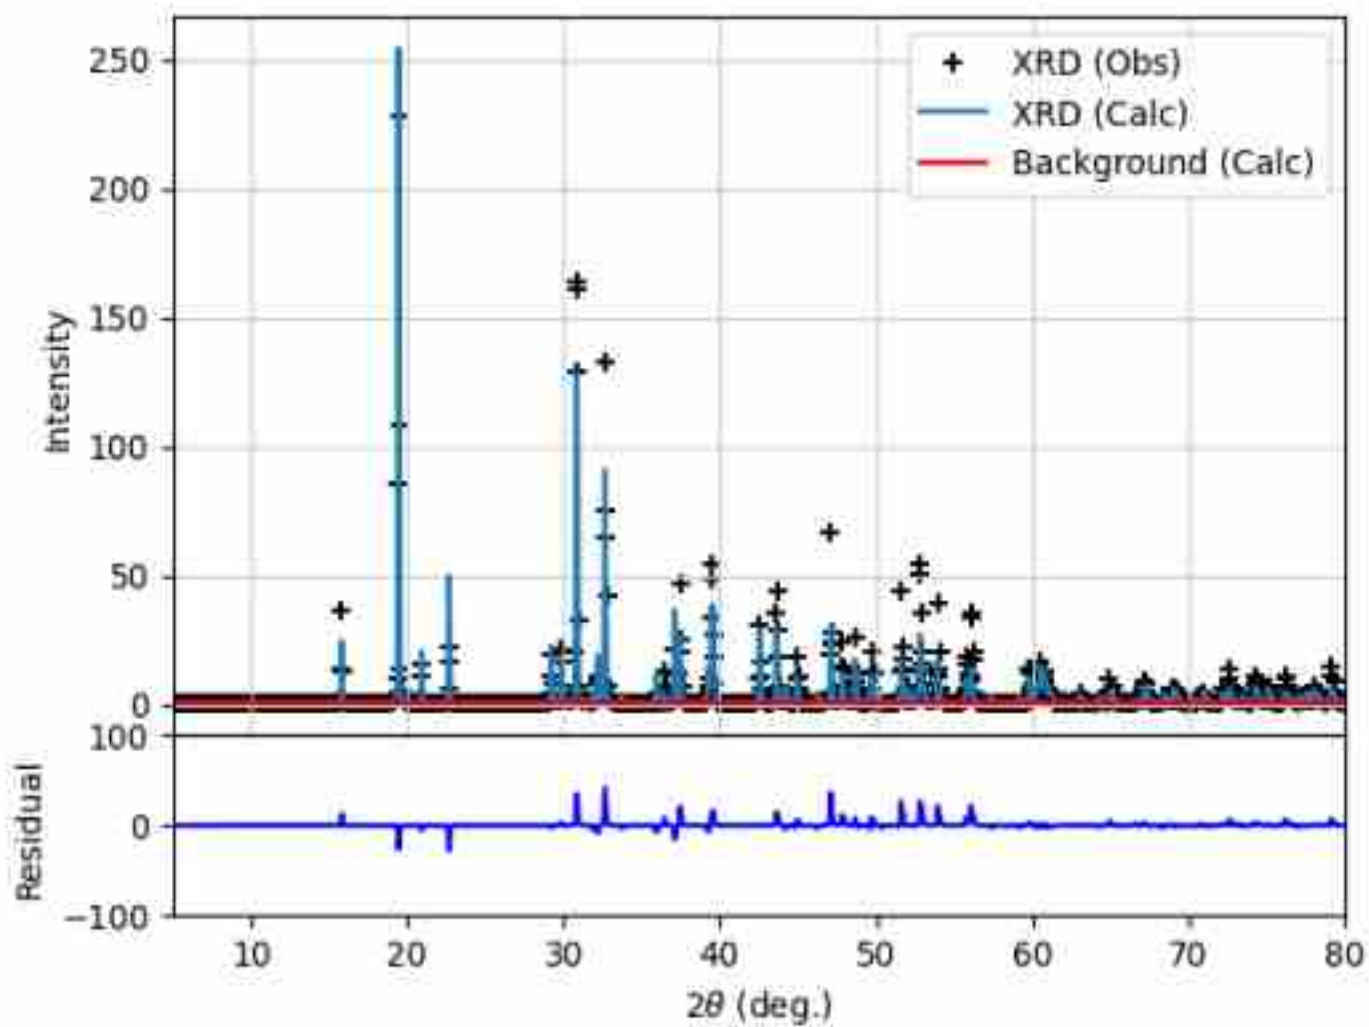

| RMSE before RR | Rwp      | RMSE after RR |
|----------------|----------|---------------|
| 0.386          | 36.56082 | 0.47208       |

# C4Br12F4

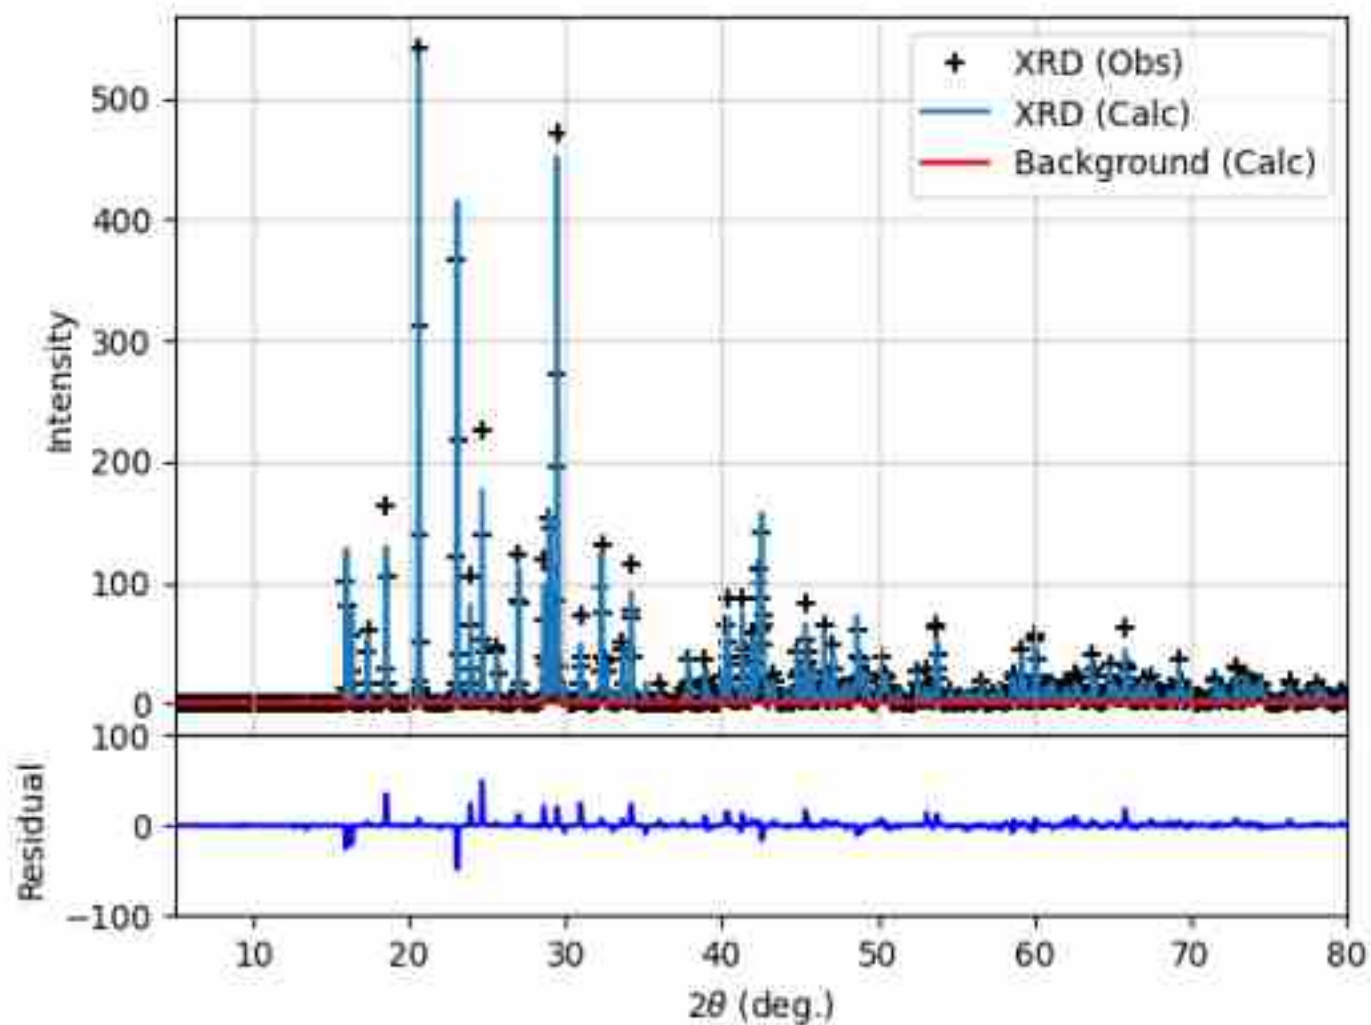

| RMSE before RR | Rwp      | RMSE after RR |
|----------------|----------|---------------|
| 0.389          | 20.03195 | None          |

# Li10Au2O8

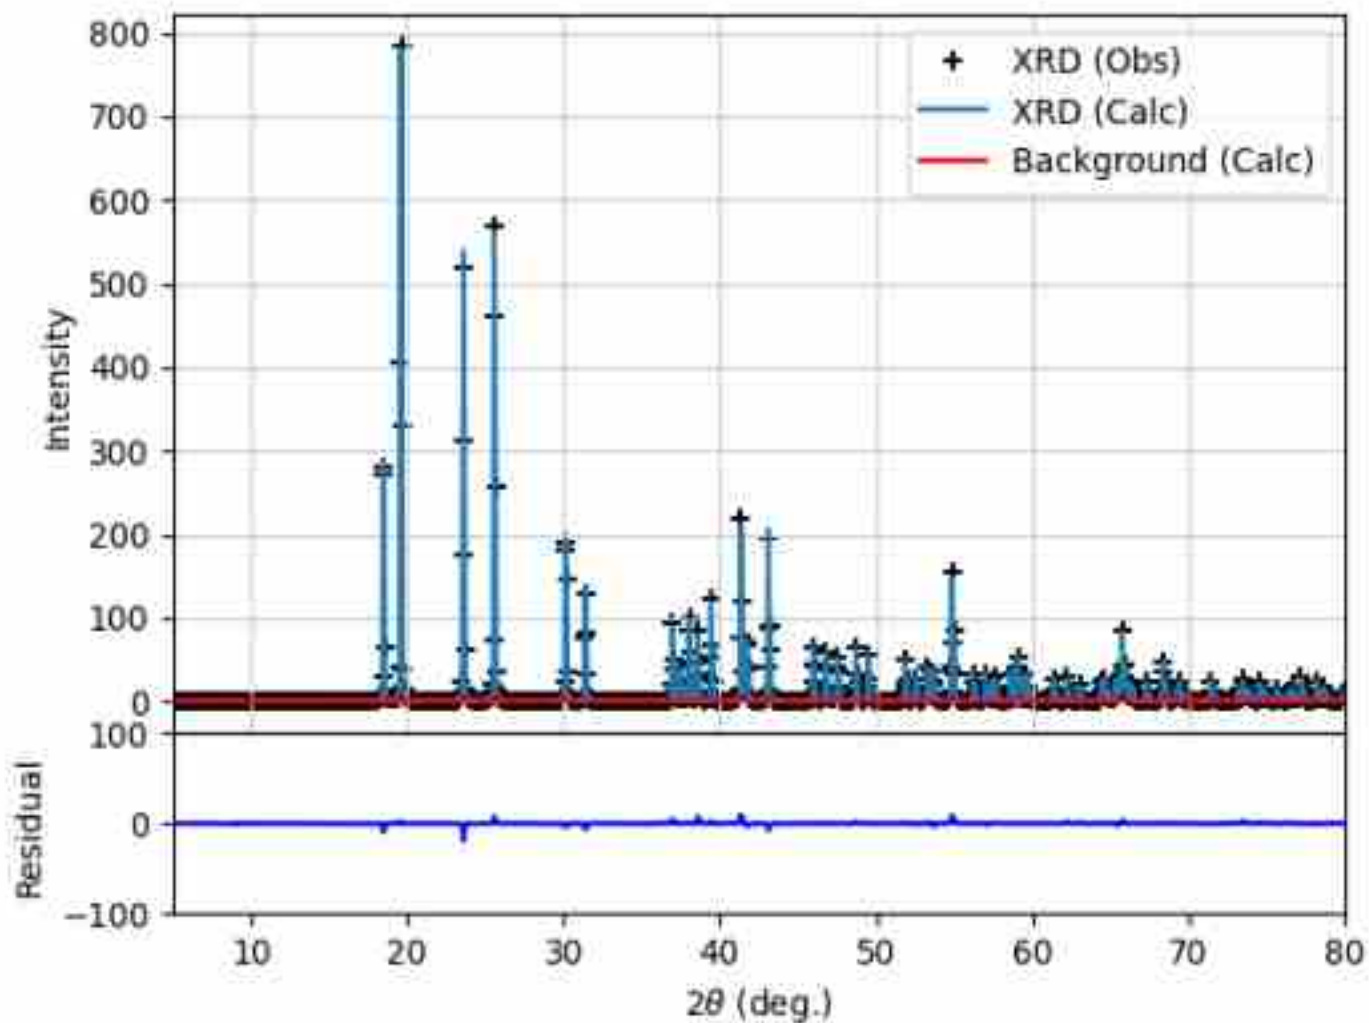

| RMSE before RR | Rwp     | RMSE after RR |
|----------------|---------|---------------|
| 0.389          | 3.55562 | None          |

# Ba2Sr2I8

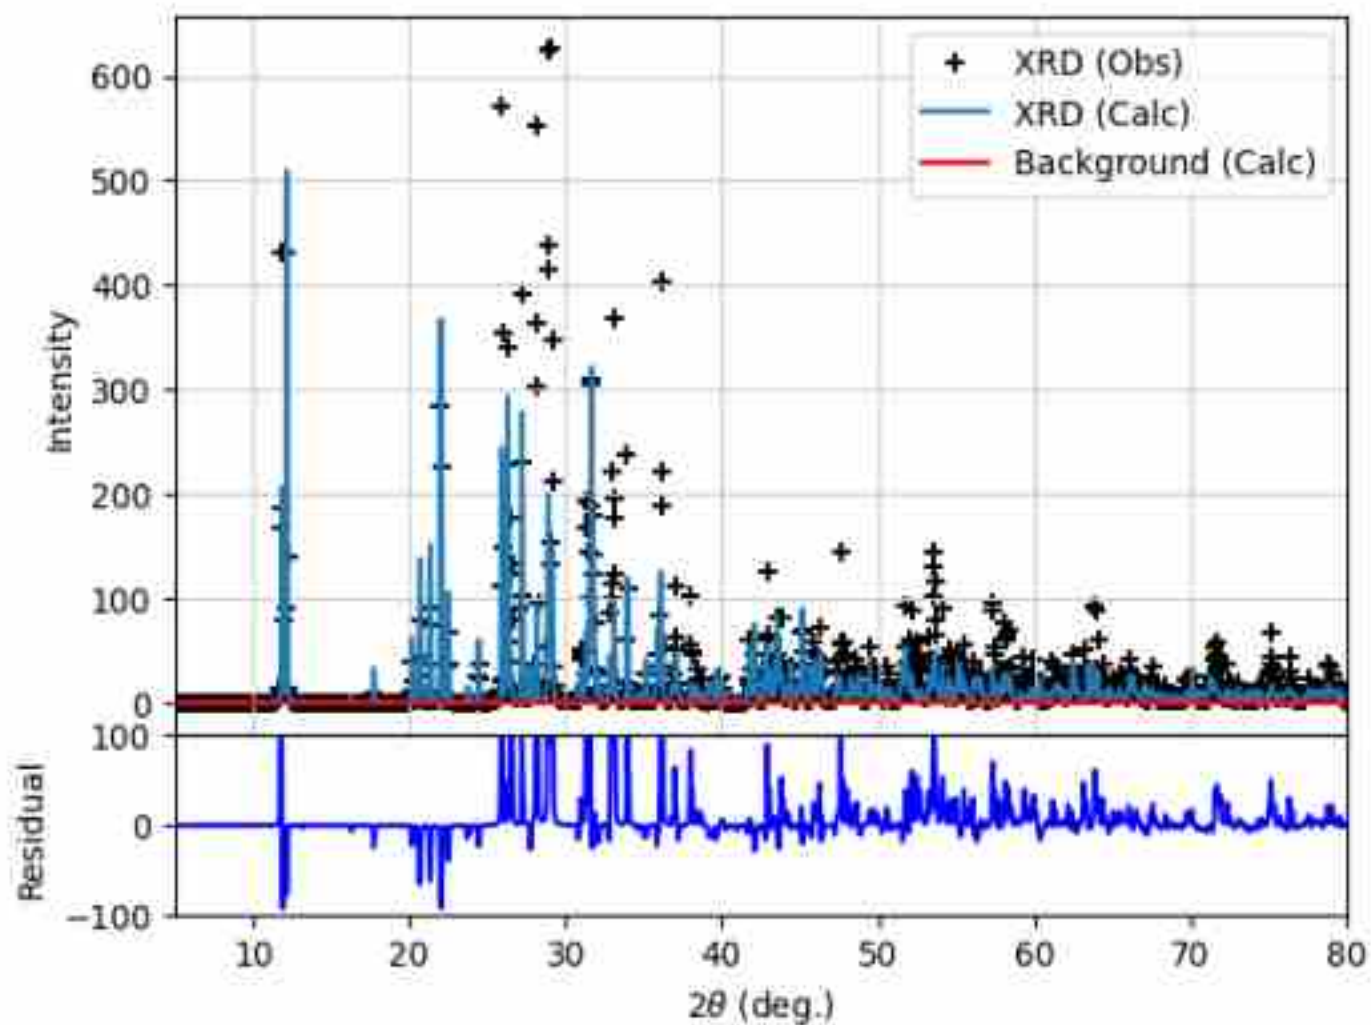

| RMSE before RR | Rwp      | RMSE after RR |
|----------------|----------|---------------|
| 0.391          | 61.87385 | 0.43538       |

# Cd<sub>2</sub>Se<sub>4</sub>O<sub>10</sub>

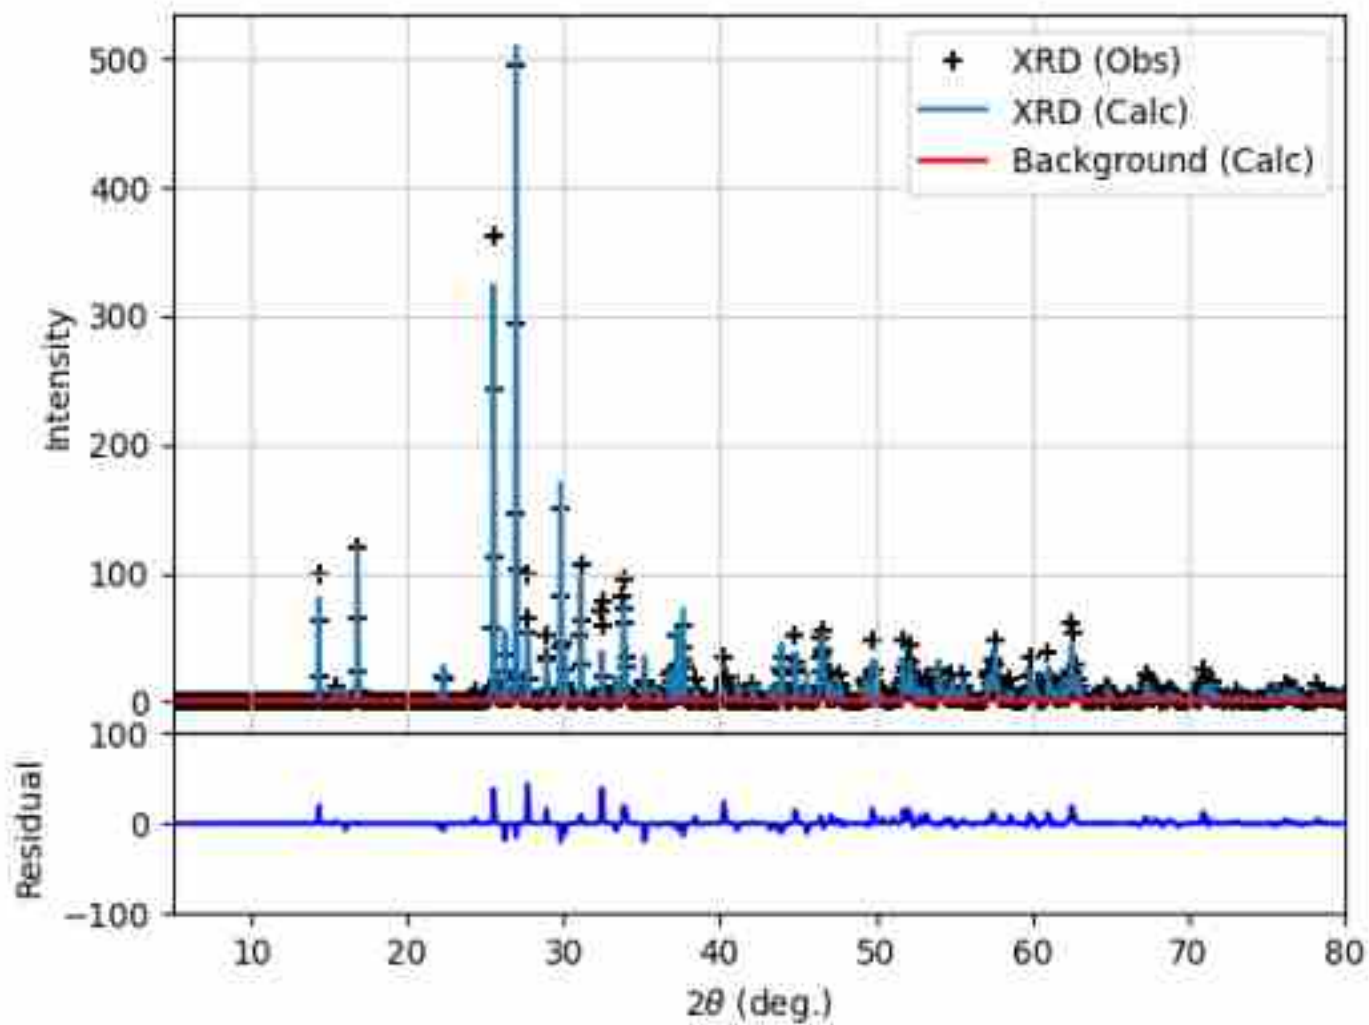

| RMSE before RR | Rwp      | RMSE after RR |
|----------------|----------|---------------|
| 0.391          | 29.75777 | None          |

# K4C4S4N4

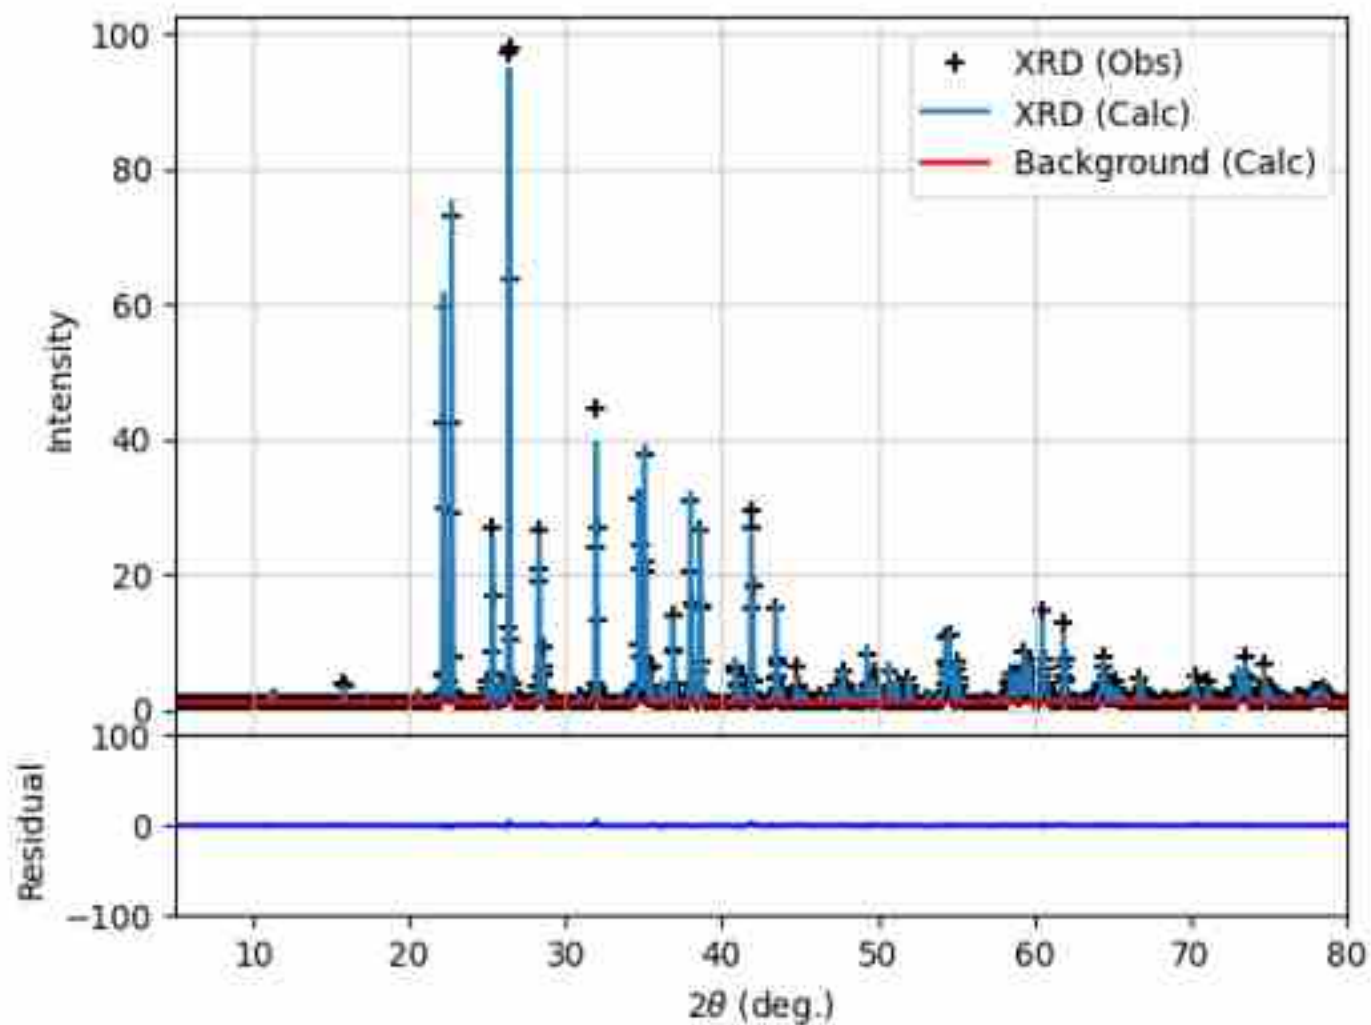

| RMSE before RR | Rwp     | RMSE after RR |
|----------------|---------|---------------|
| 0.391          | 9.46977 | 0.33691       |

# Sm4Al4Ni4

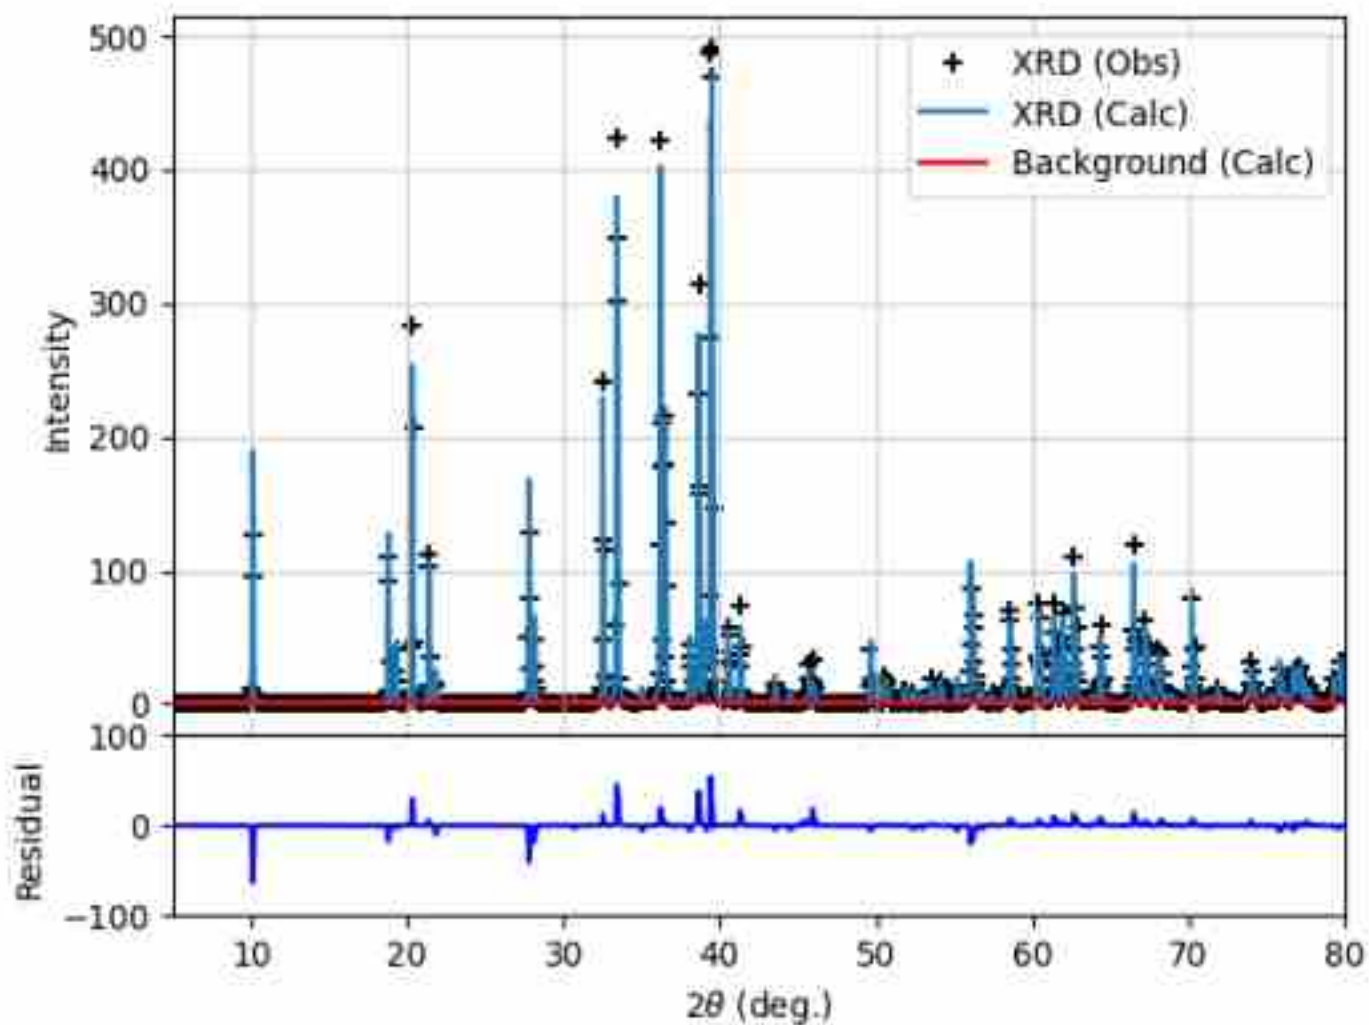

| RMSE before RR | Rwp      | RMSE after RR |
|----------------|----------|---------------|
| 0.391          | 15.67587 | 0.41638       |



# Cs<sub>4</sub>Sr<sub>1</sub>Sn<sub>3</sub>Se<sub>9</sub>

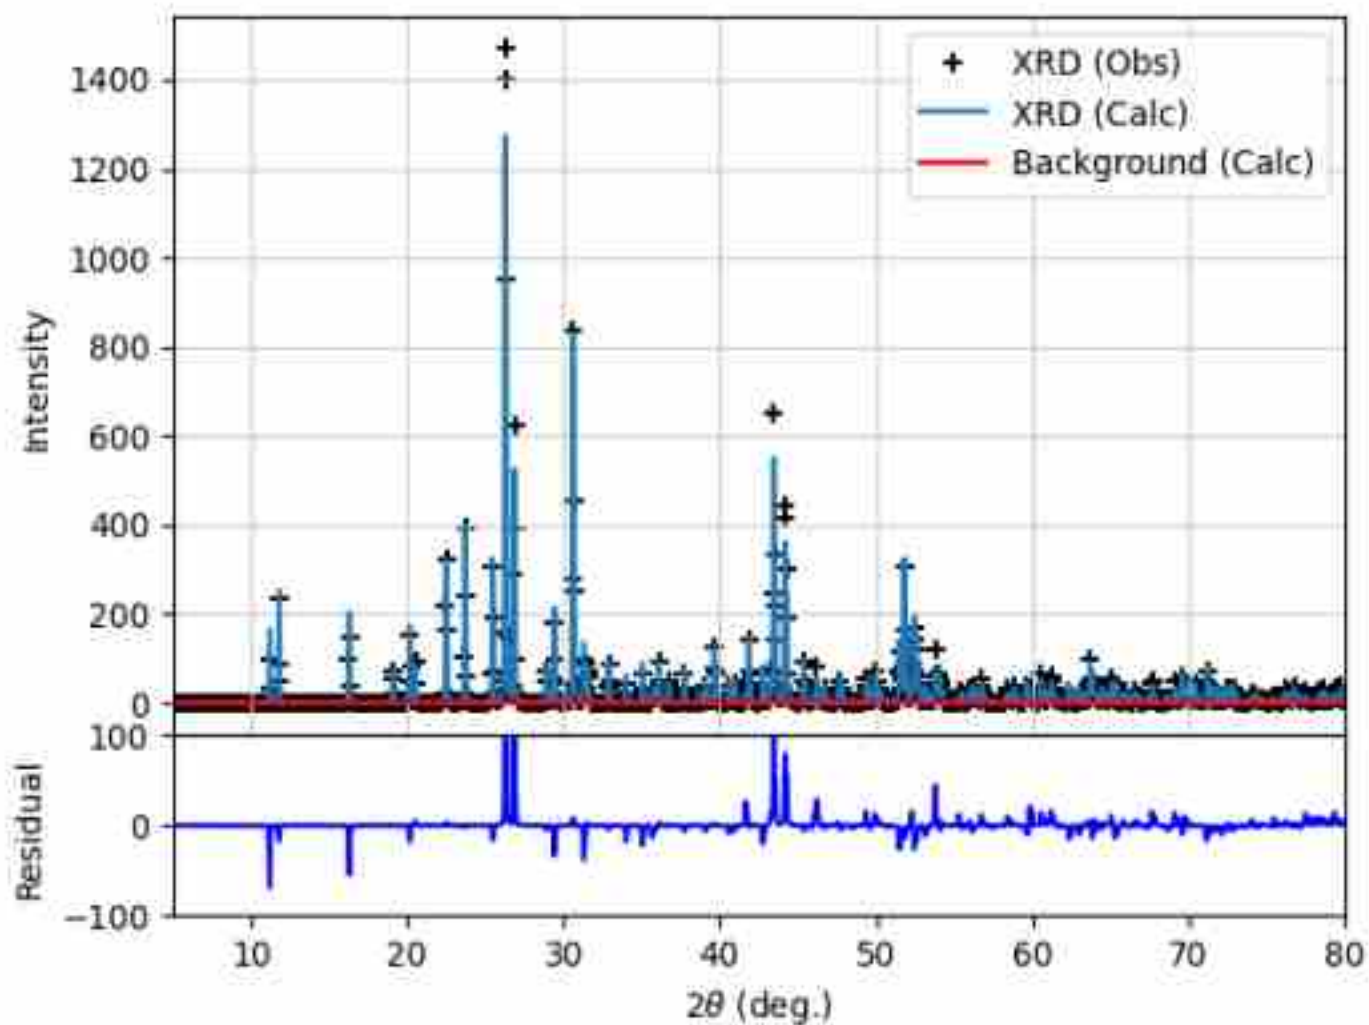

| RMSE before RR | Rwp      | RMSE after RR |
|----------------|----------|---------------|
| 0.392          | 18.23689 | 0.38795       |

# Ge4Pt4Se4

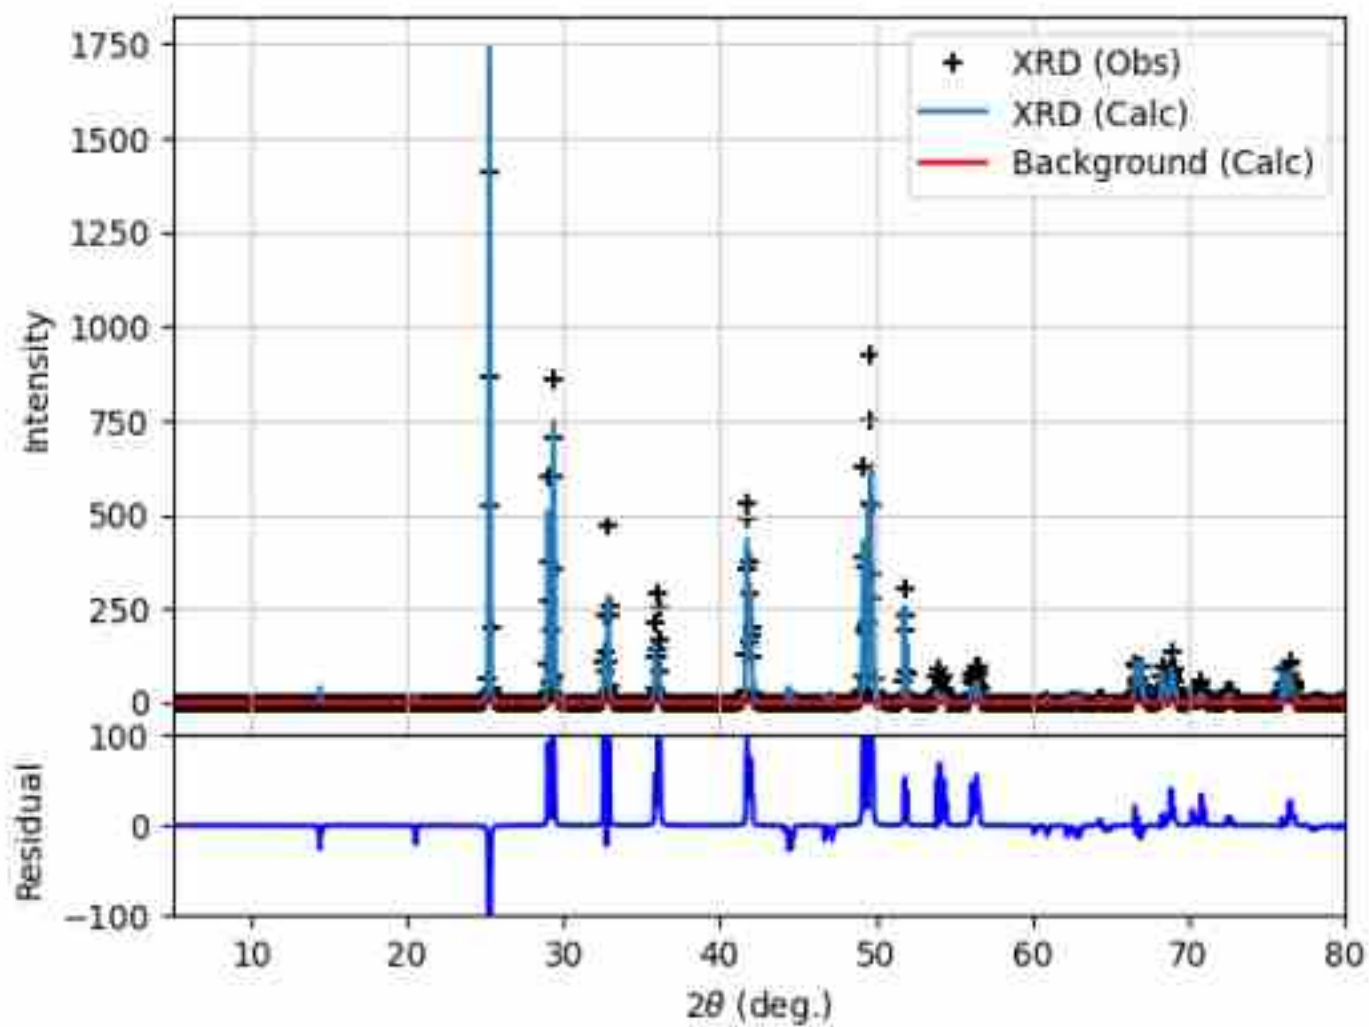

| RMSE before RR | Rwp      | RMSE after RR |
|----------------|----------|---------------|
| 0.393          | 41.06768 | 0.42236       |

# Ti<sub>4</sub>Co<sub>4</sub>Ni<sub>8</sub>

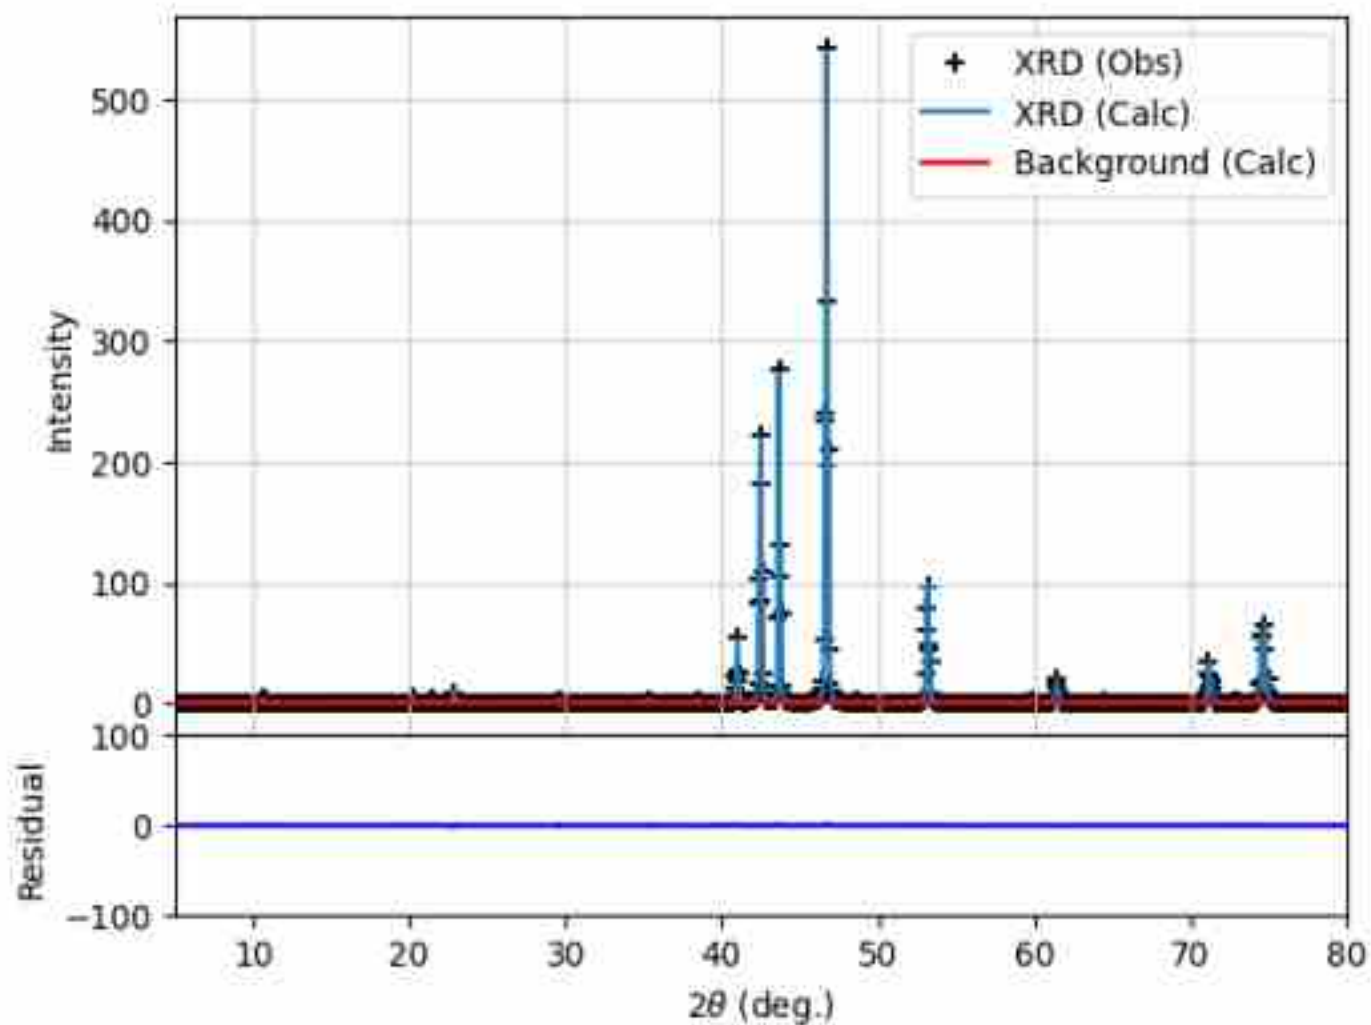

| RMSE before RR | Rwp     | RMSE after RR |
|----------------|---------|---------------|
| 0.393          | 2.86013 | 0.38984       |

# V2Sb4O10

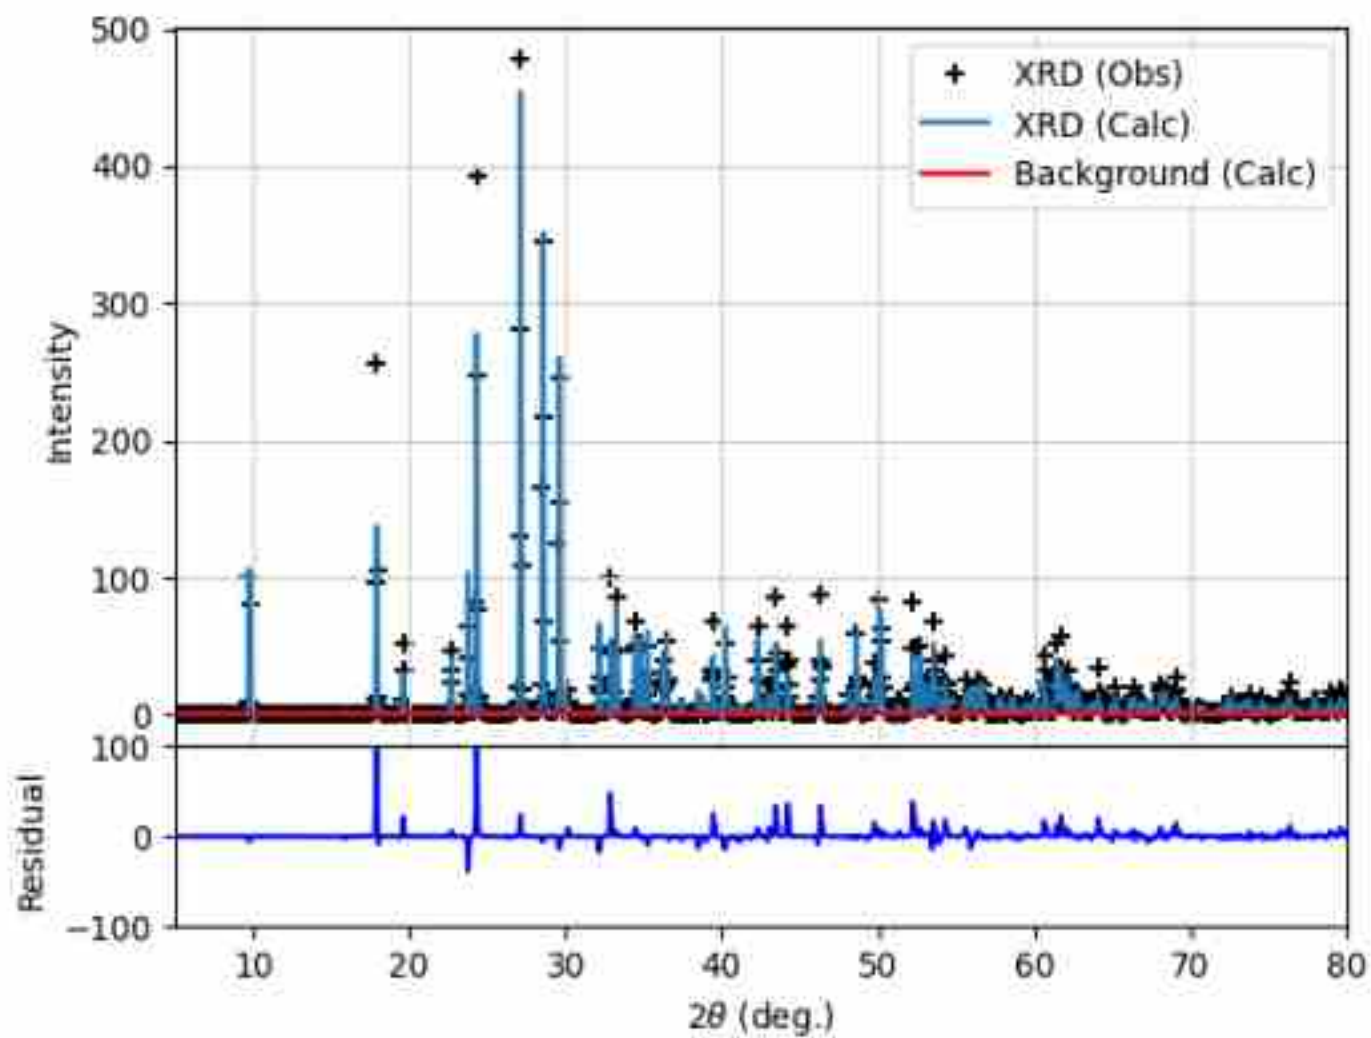

| RMSE before RR | Rwp      | RMSE after RR |
|----------------|----------|---------------|
| 0.394          | 33.48953 | None          |

# Li<sub>2</sub>Fe<sub>4</sub>O<sub>4</sub>F<sub>6</sub>

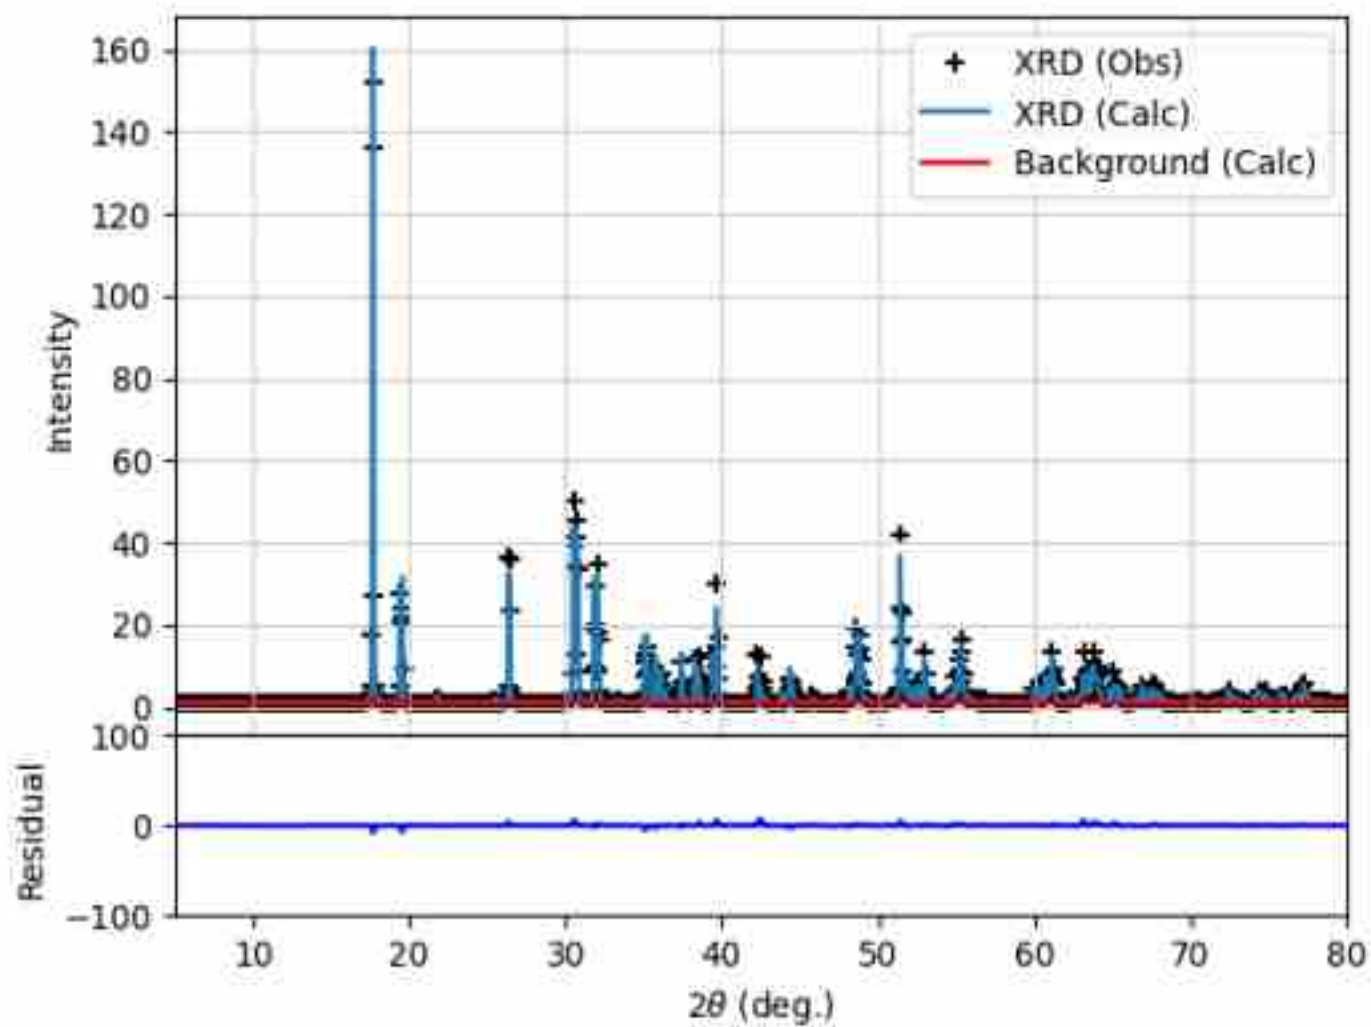

| RMSE before RR | Rwp      | RMSE after RR |
|----------------|----------|---------------|
| 0.395          | 14.46417 | None          |

# Ca<sub>4</sub>W<sub>2</sub>N<sub>4</sub>

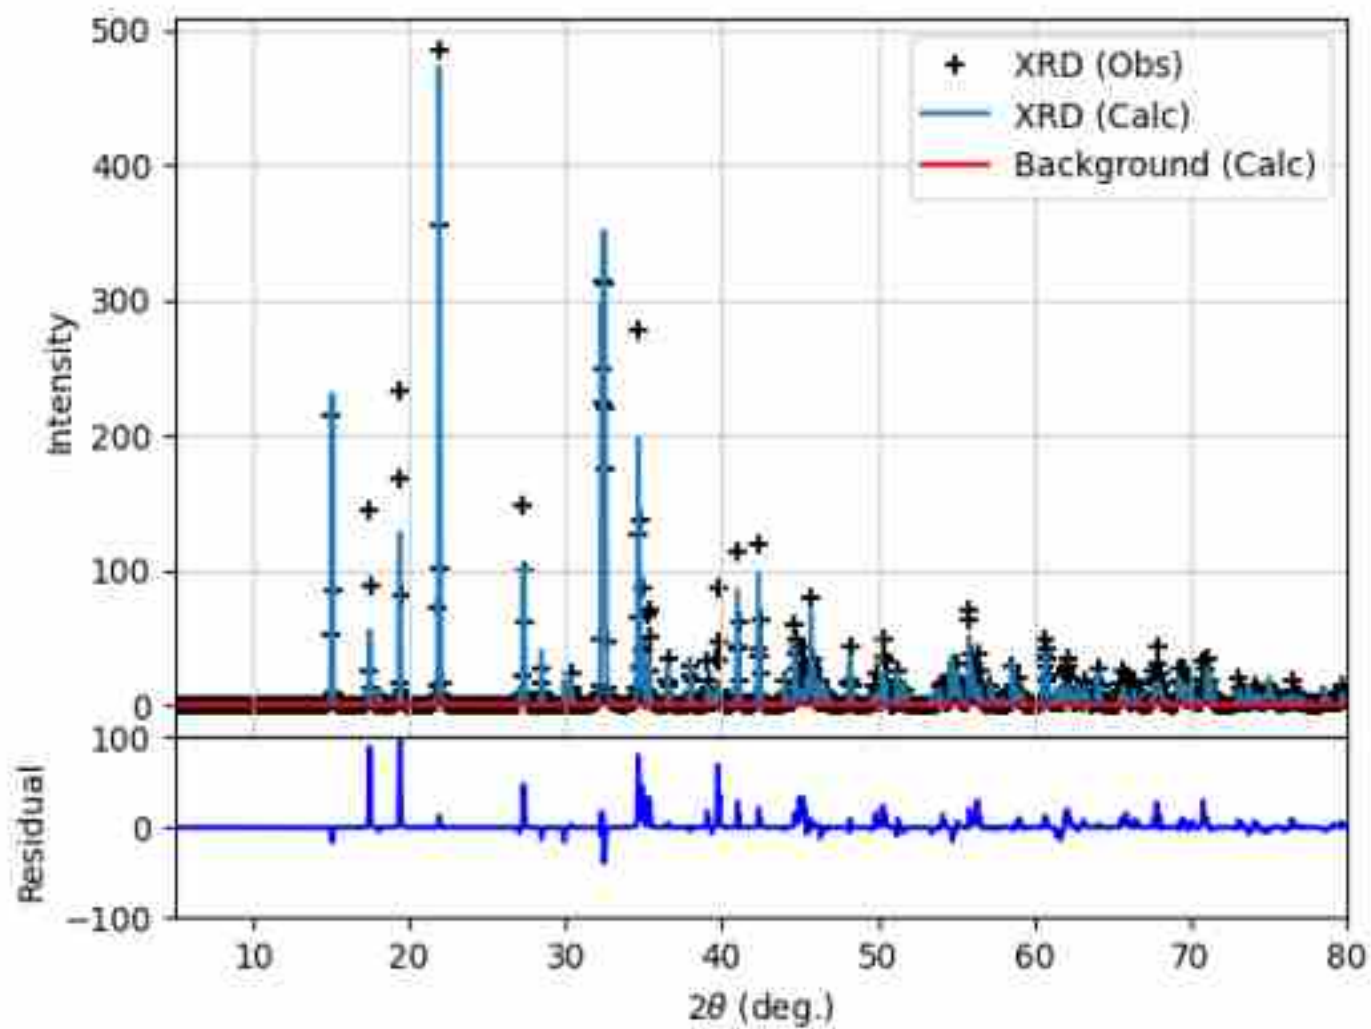

| RMSE before RR | Rwp      | RMSE after RR |
|----------------|----------|---------------|
| 0.396          | 39.22079 | 0.39416       |

# U<sub>3</sub>A112Co<sub>3</sub>

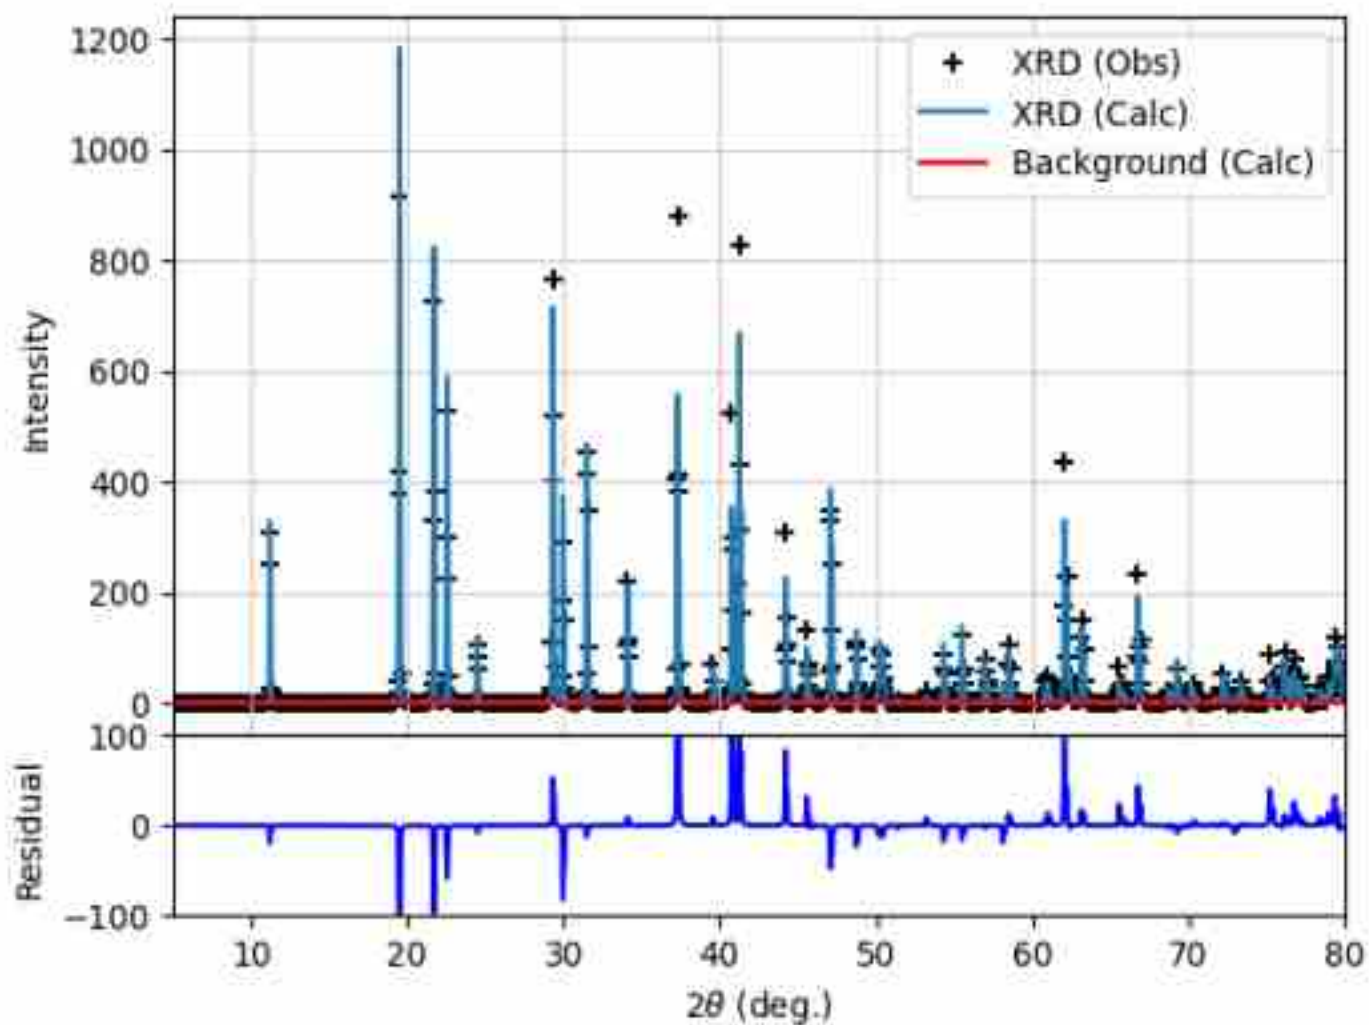

| RMSE before RR | Rwp      | RMSE after RR |
|----------------|----------|---------------|
| 0.396          | 21.17787 | None          |

# V6O7F5

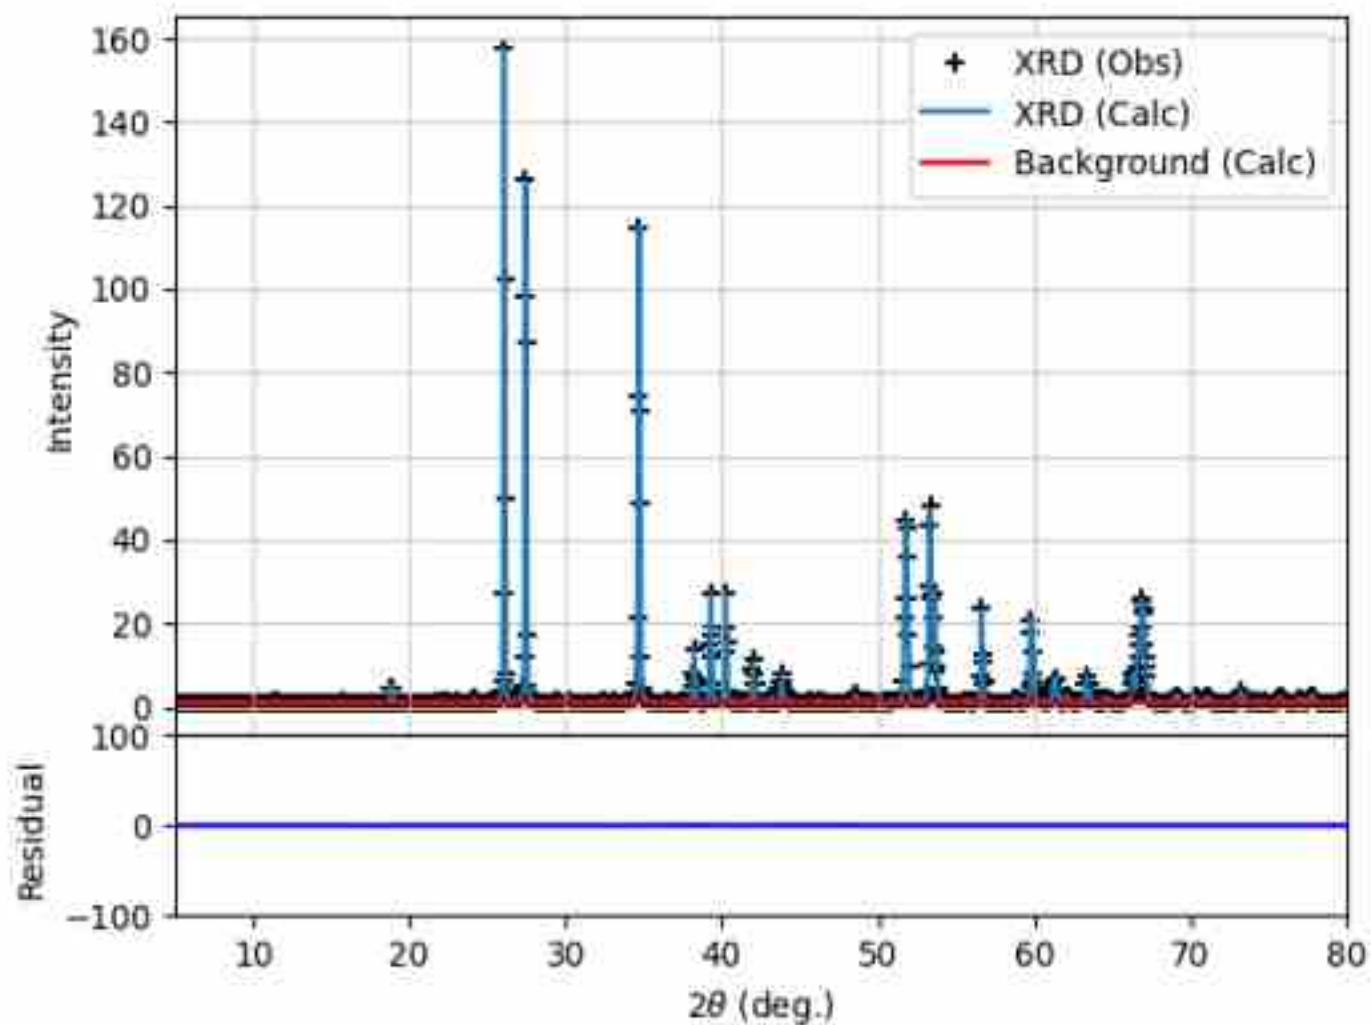

| RMSE before RR | Rwp     | RMSE after RR |
|----------------|---------|---------------|
| 0.397          | 1.60842 | 0.39574       |



# Zn<sub>4</sub>P<sub>2</sub>H<sub>2</sub>O<sub>10</sub>

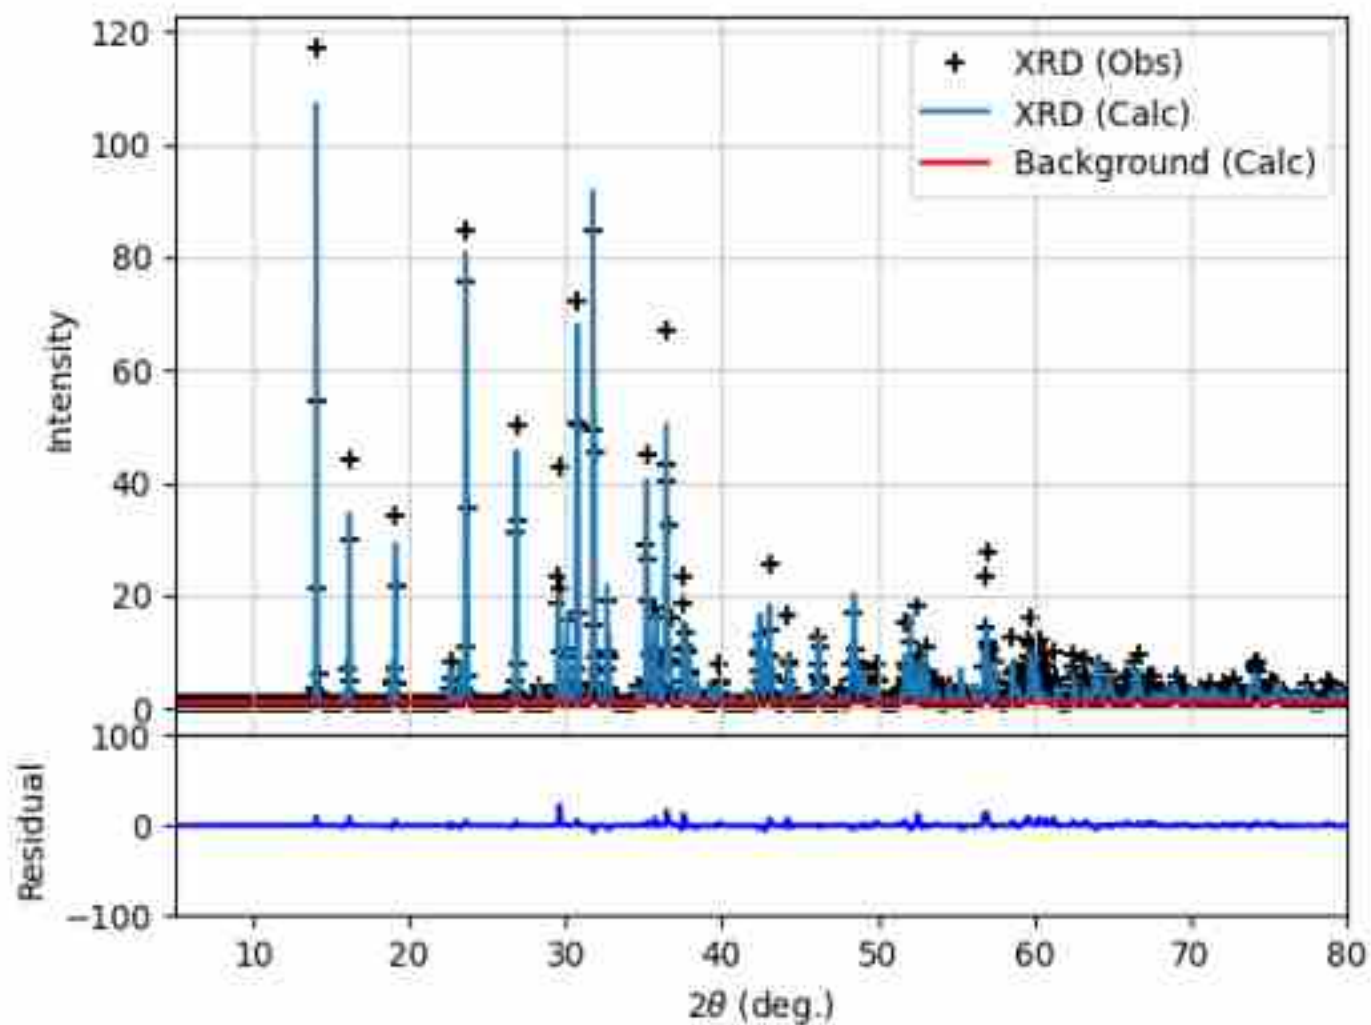

| RMSE before RR | Rwp      | RMSE after RR |
|----------------|----------|---------------|
| 0.399          | 30.54446 | None          |

# $\text{Cd}_2\text{GaAgSe}_4$

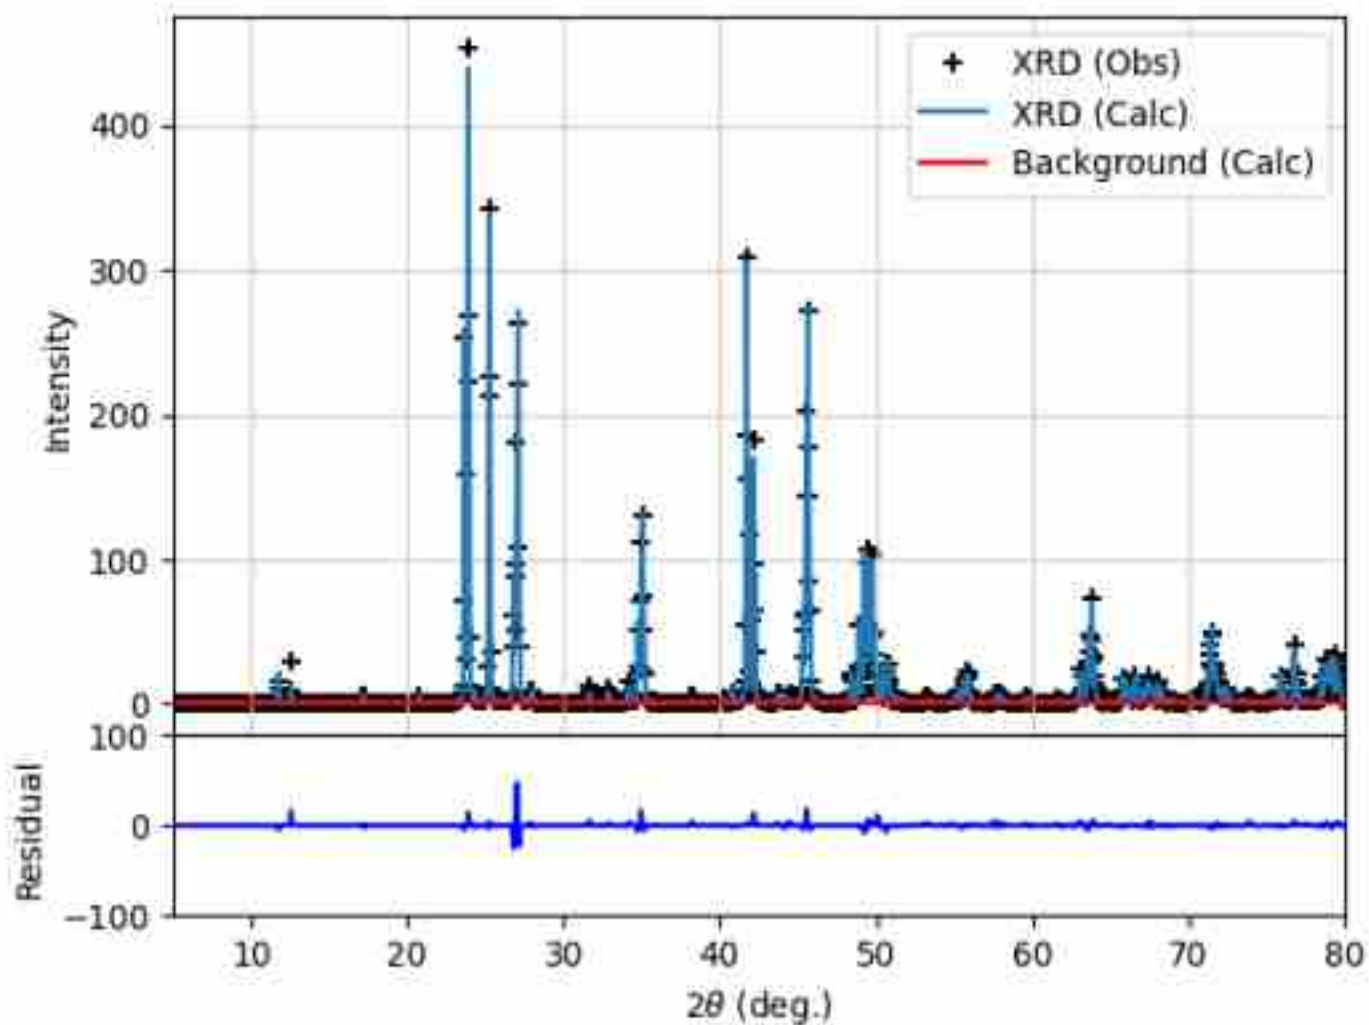

| RMSE before RR | Rwp      | RMSE after RR |
|----------------|----------|---------------|
| 0.401          | 12.84936 | 0.39416       |

# Co<sub>2</sub>Ni<sub>4</sub>S<sub>8</sub>

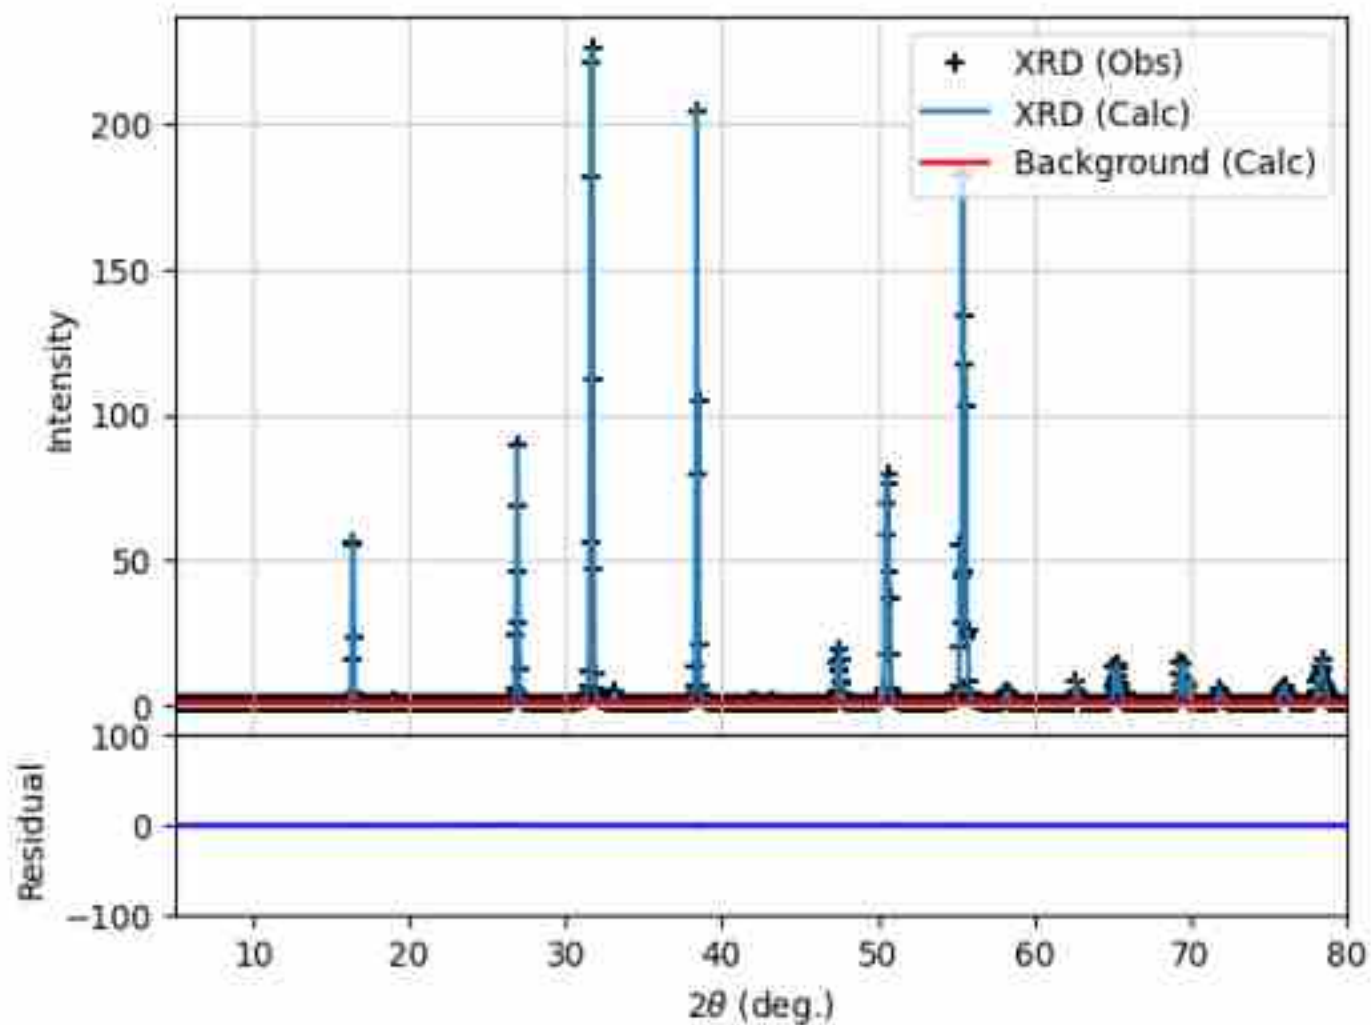

| RMSE before RR | Rwp    | RMSE after RR |
|----------------|--------|---------------|
| 0.401          | 0.9938 | None          |

# Mg<sub>4</sub>Sn<sub>2</sub>O<sub>8</sub>

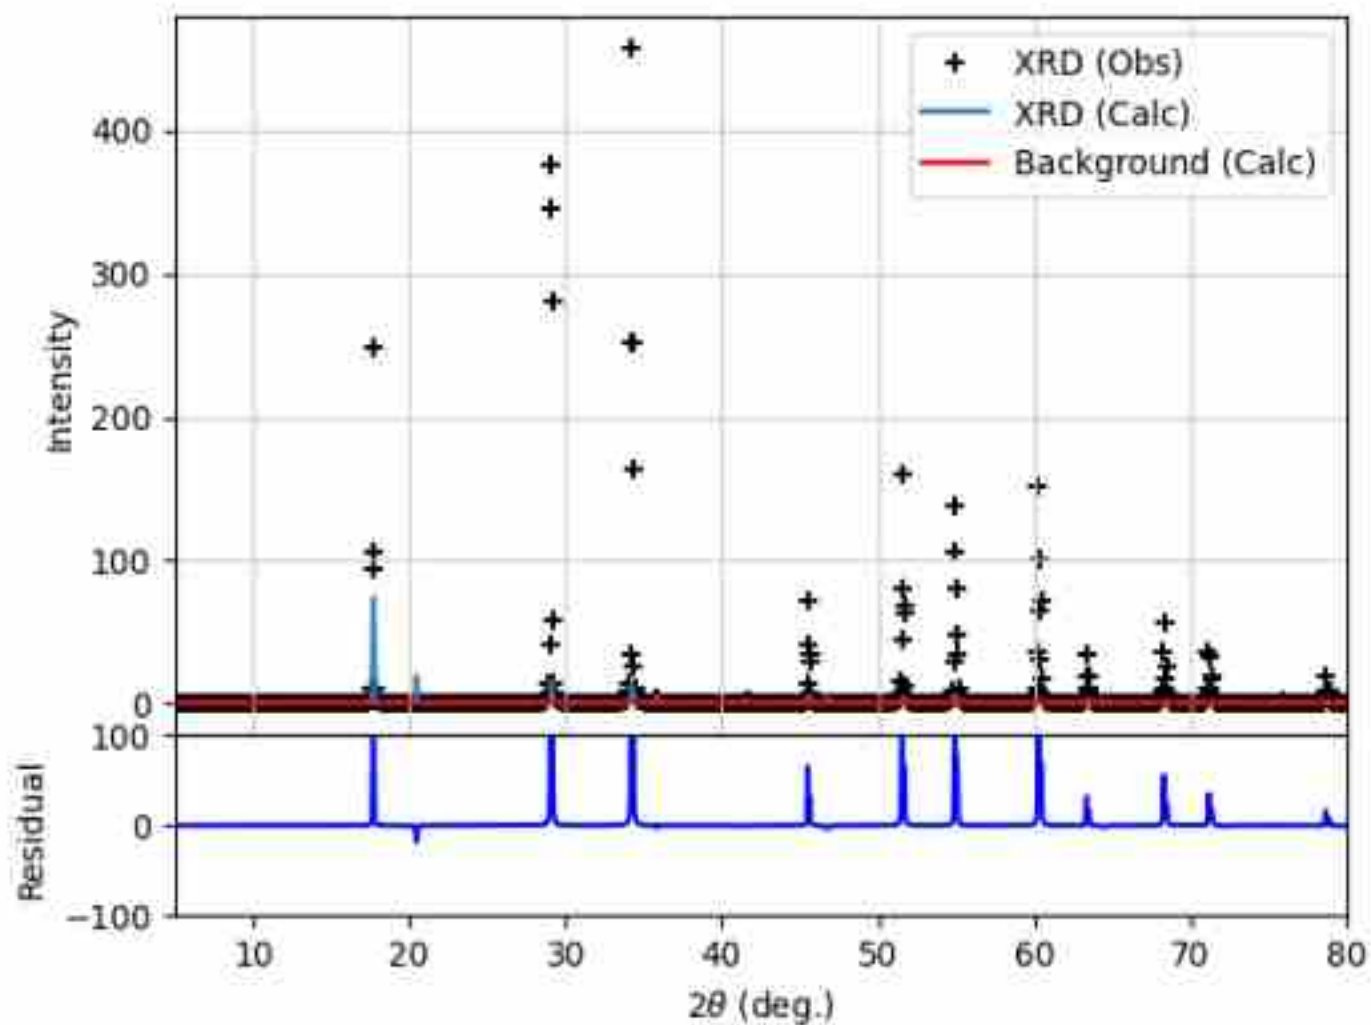

| RMSE before RR | Rwp      | RMSE after RR |
|----------------|----------|---------------|
| 0.402          | 85.08303 | None          |

# Tl2C16

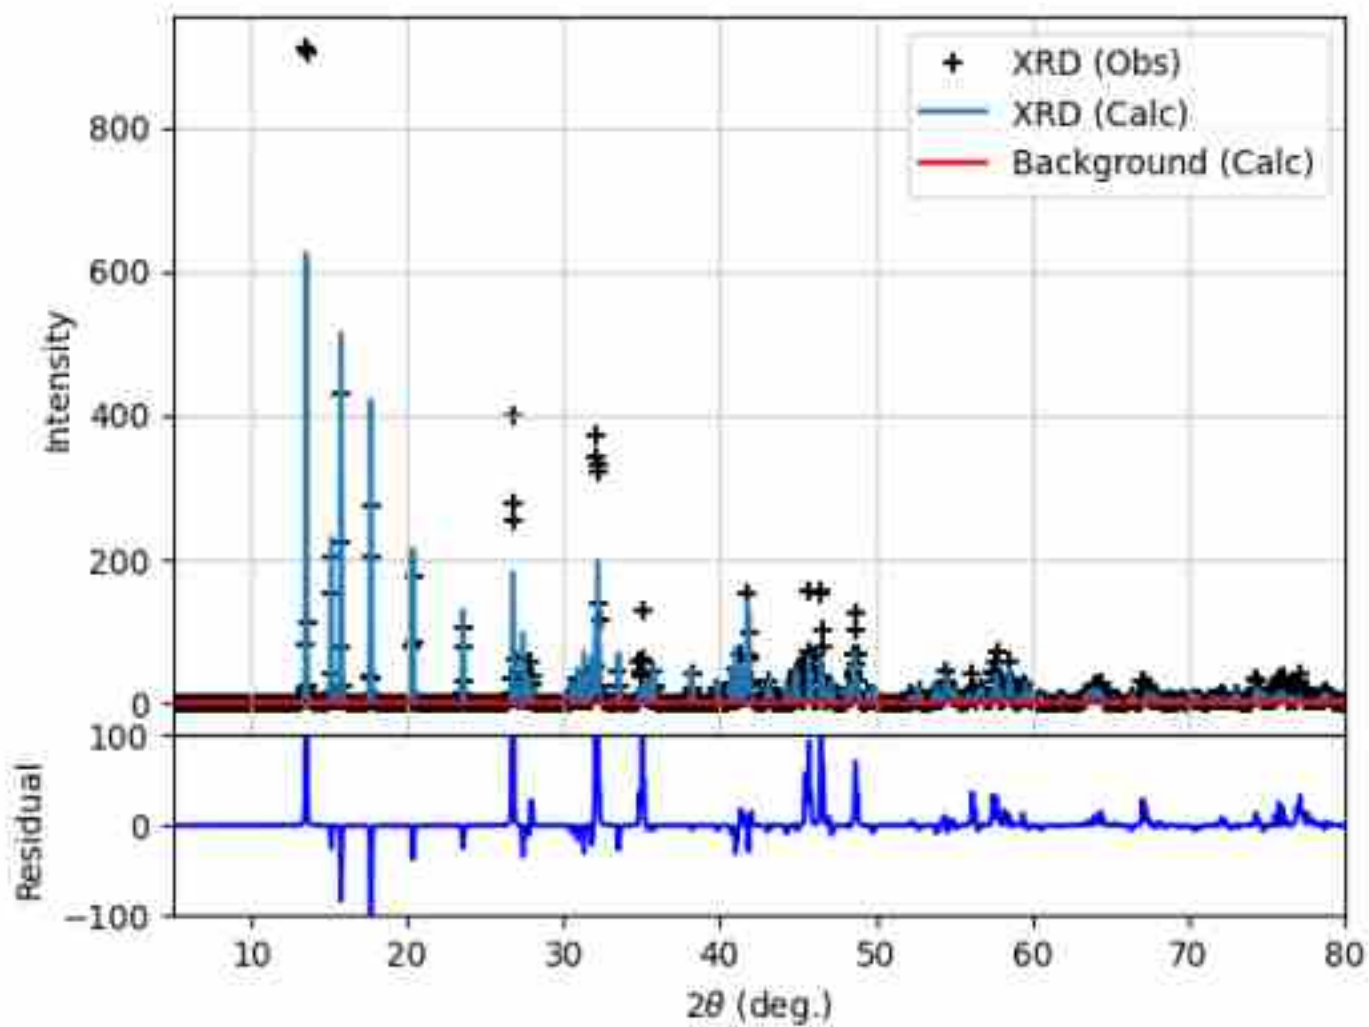

| RMSE before RR | Rwp      | RMSE after RR |
|----------------|----------|---------------|
| 0.402          | 45.09717 | None          |

# Ag<sub>8</sub>Ge<sub>1</sub>Te<sub>6</sub>

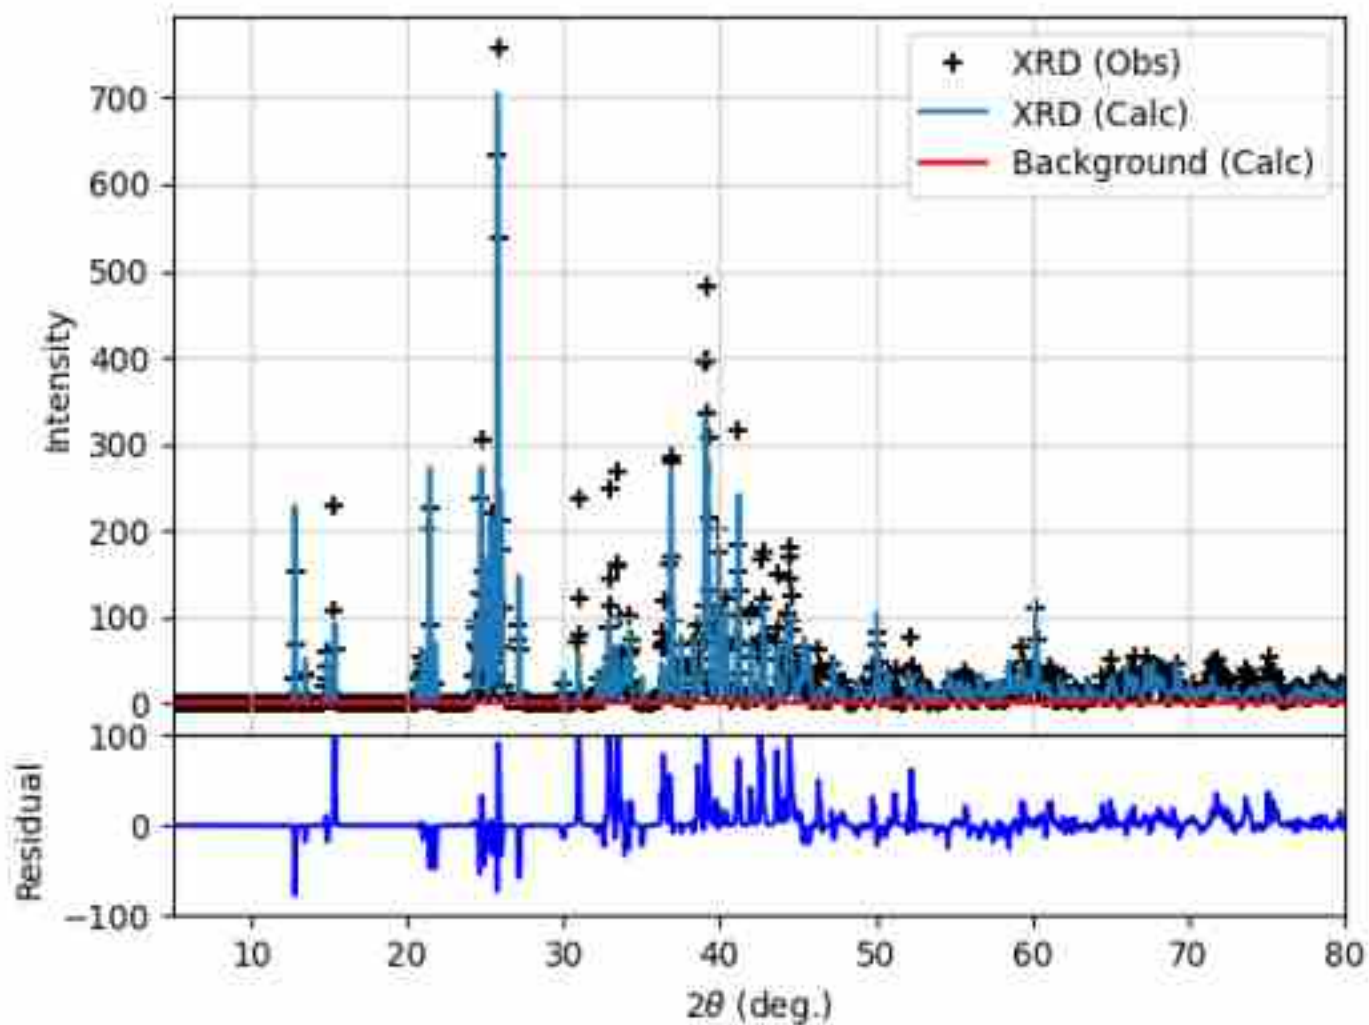

| RMSE before RR | Rwp     | RMSE after RR |
|----------------|---------|---------------|
| 0.403          | 42.0291 | 0.40536       |

# Mn<sub>6</sub>O<sub>5</sub>F<sub>7</sub>

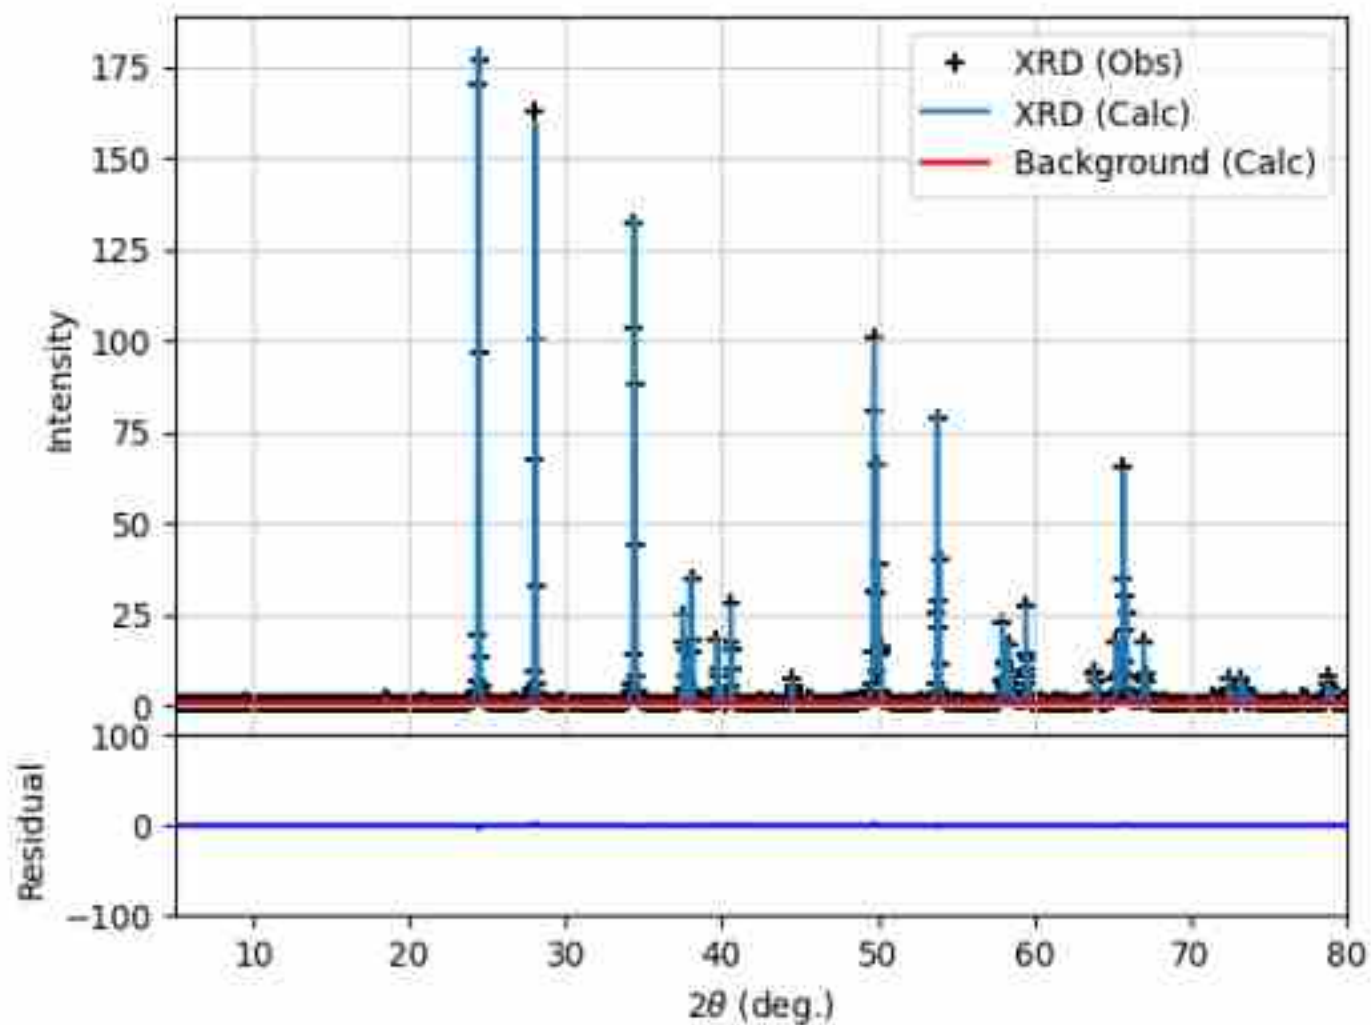

| RMSE before RR | Rwp     | RMSE after RR |
|----------------|---------|---------------|
| 0.403          | 1.41413 | None          |

# Mn<sub>8</sub>Fe<sub>2</sub>C<sub>4</sub>

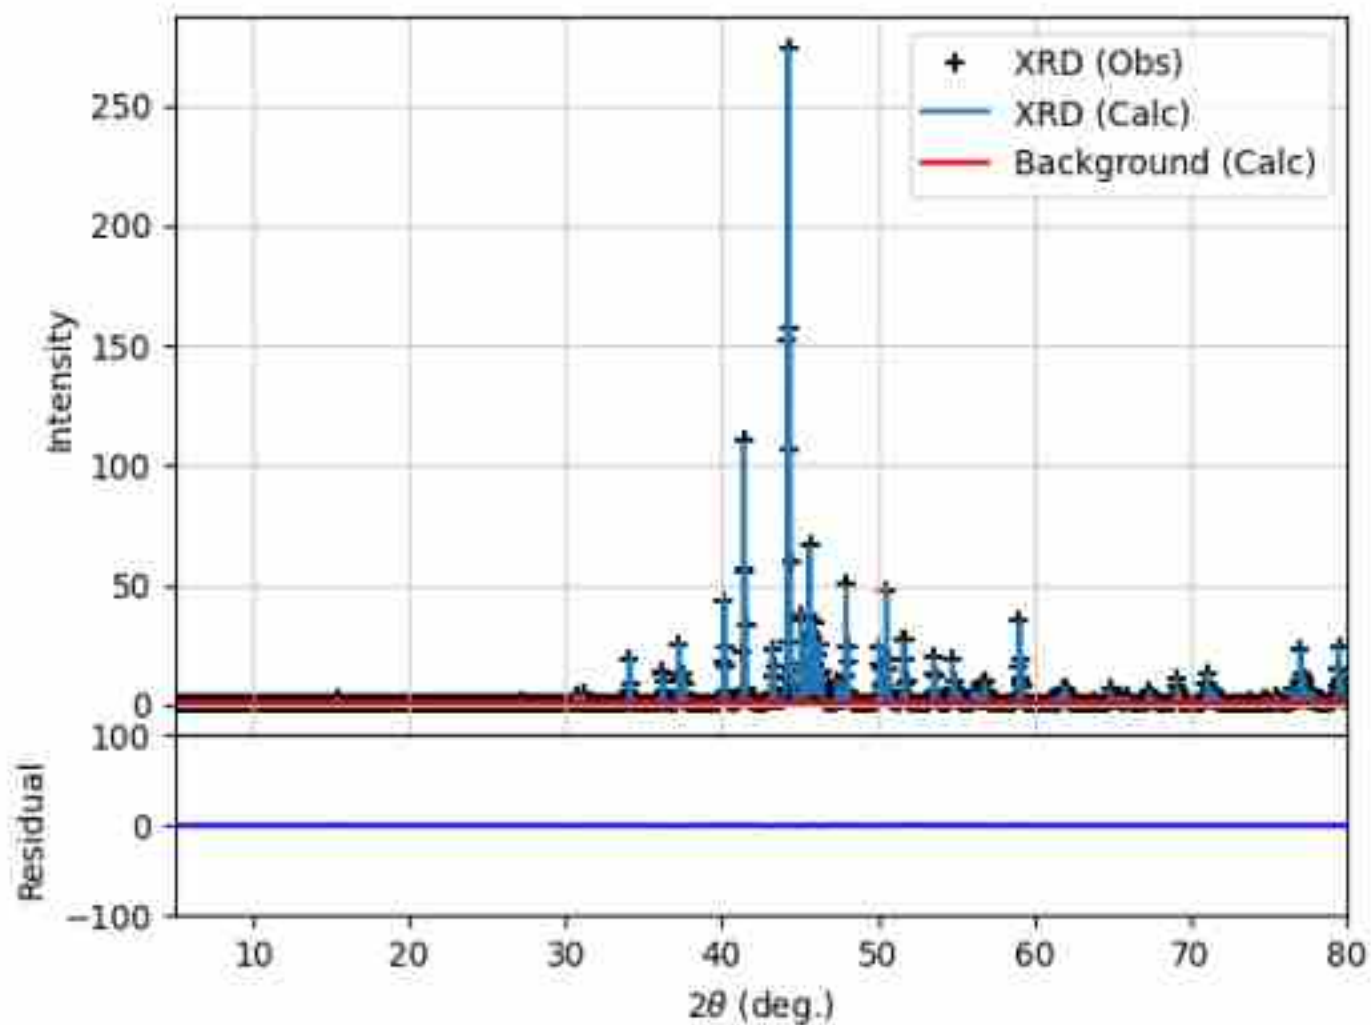

| RMSE before RR | Rwp     | RMSE after RR |
|----------------|---------|---------------|
| 0.403          | 1.34522 | 0.45441       |



# Nd1Fe5Co5Mo2

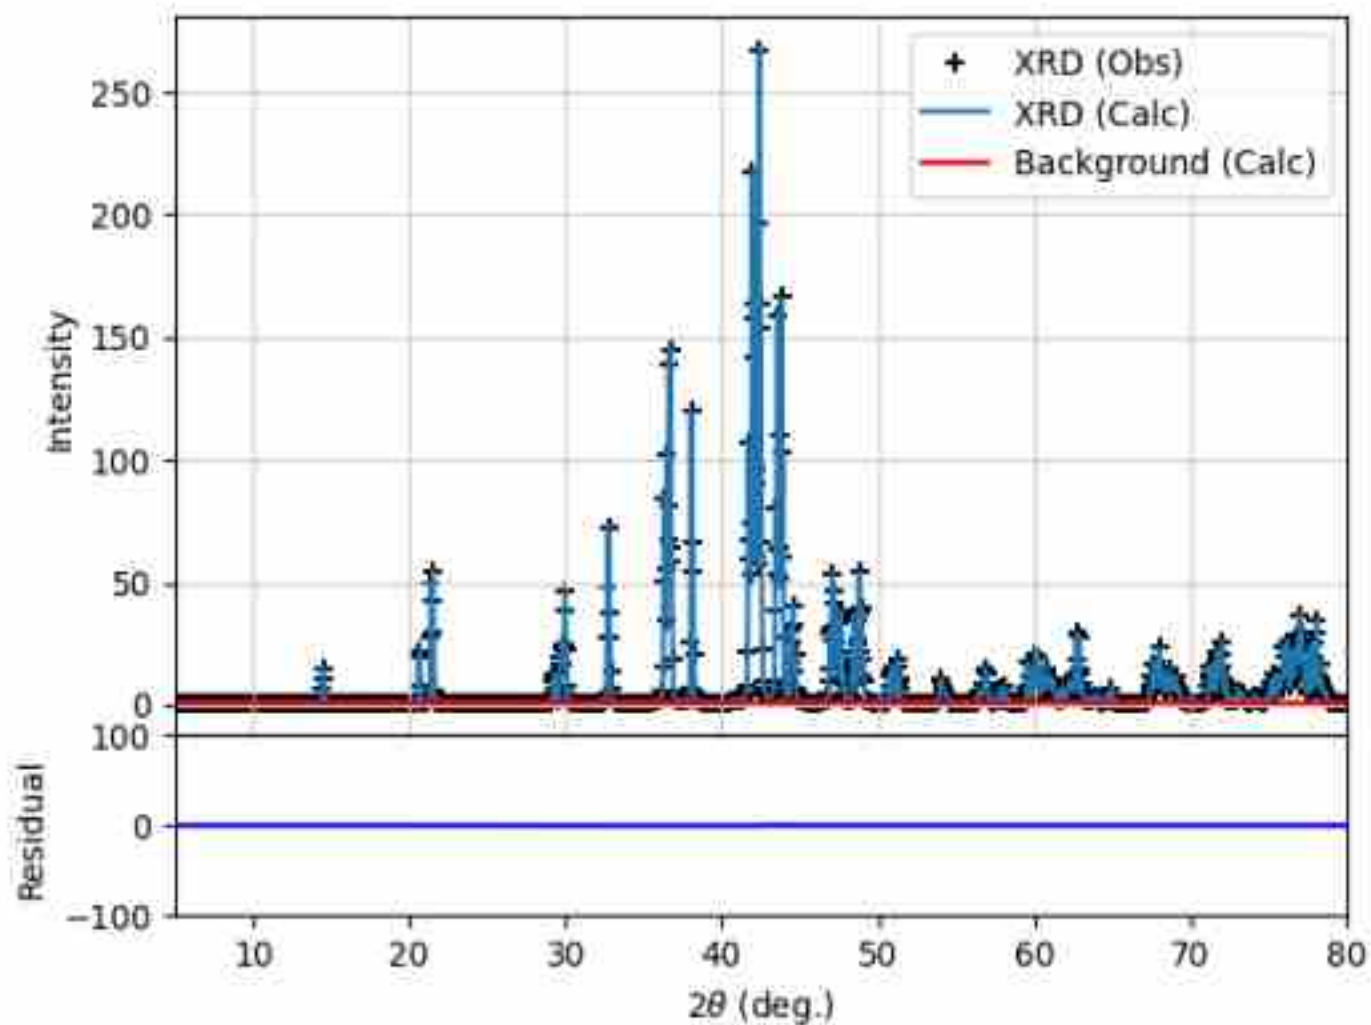

| RMSE before RR | Rwp     | RMSE after RR |
|----------------|---------|---------------|
| 0.403          | 0.28624 | 0.40712       |

# Pb2C4O8

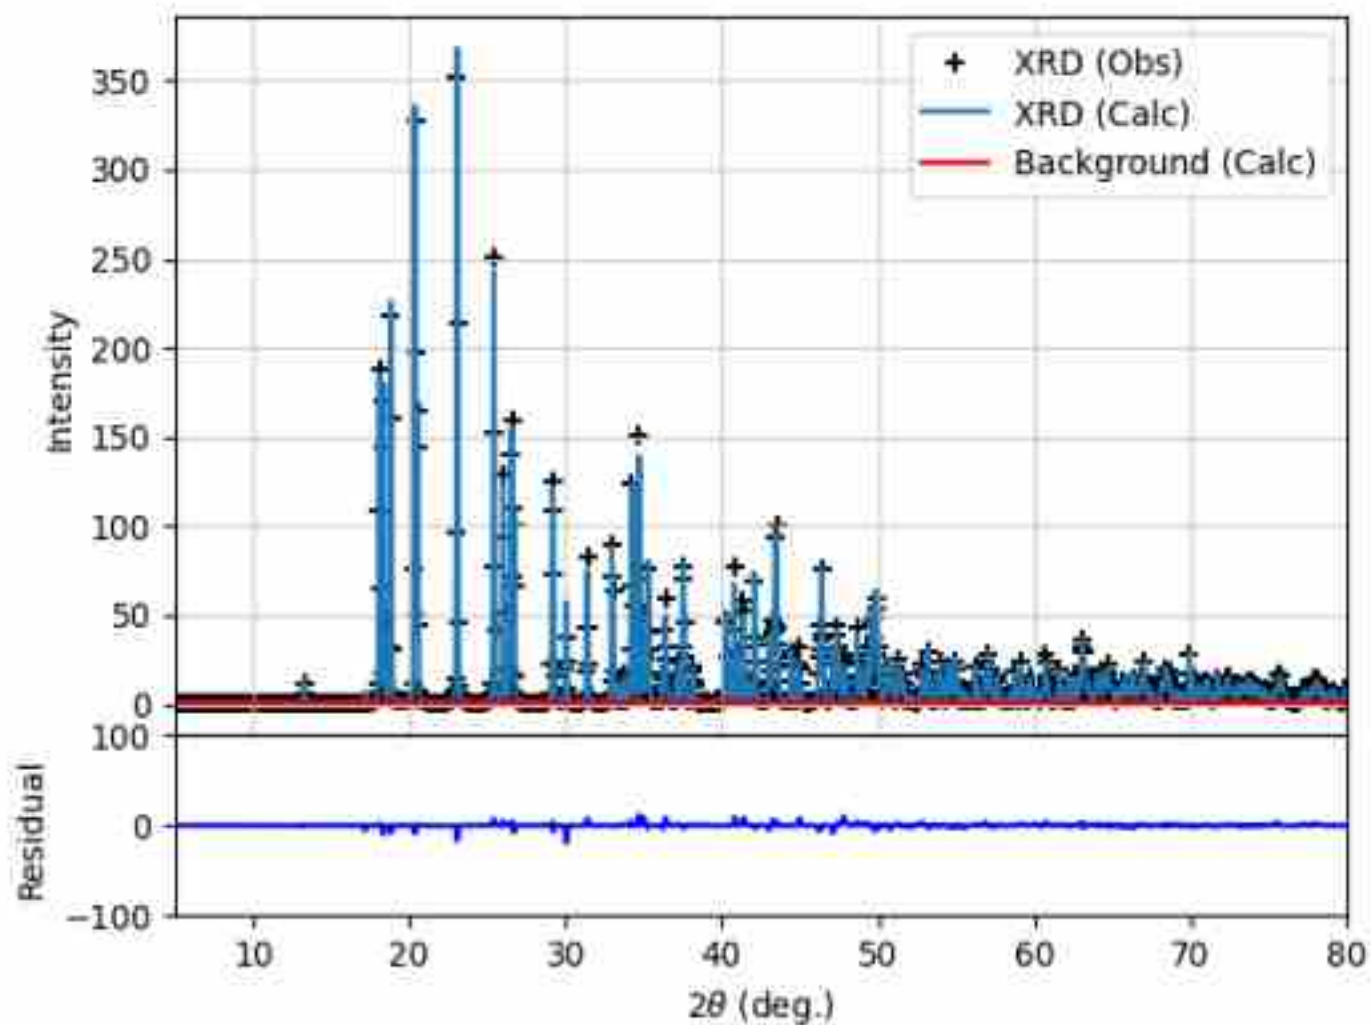

| RMSE before RR | Rwp      | RMSE after RR |
|----------------|----------|---------------|
| 0.403          | 10.34766 | None          |

# H4S2O8

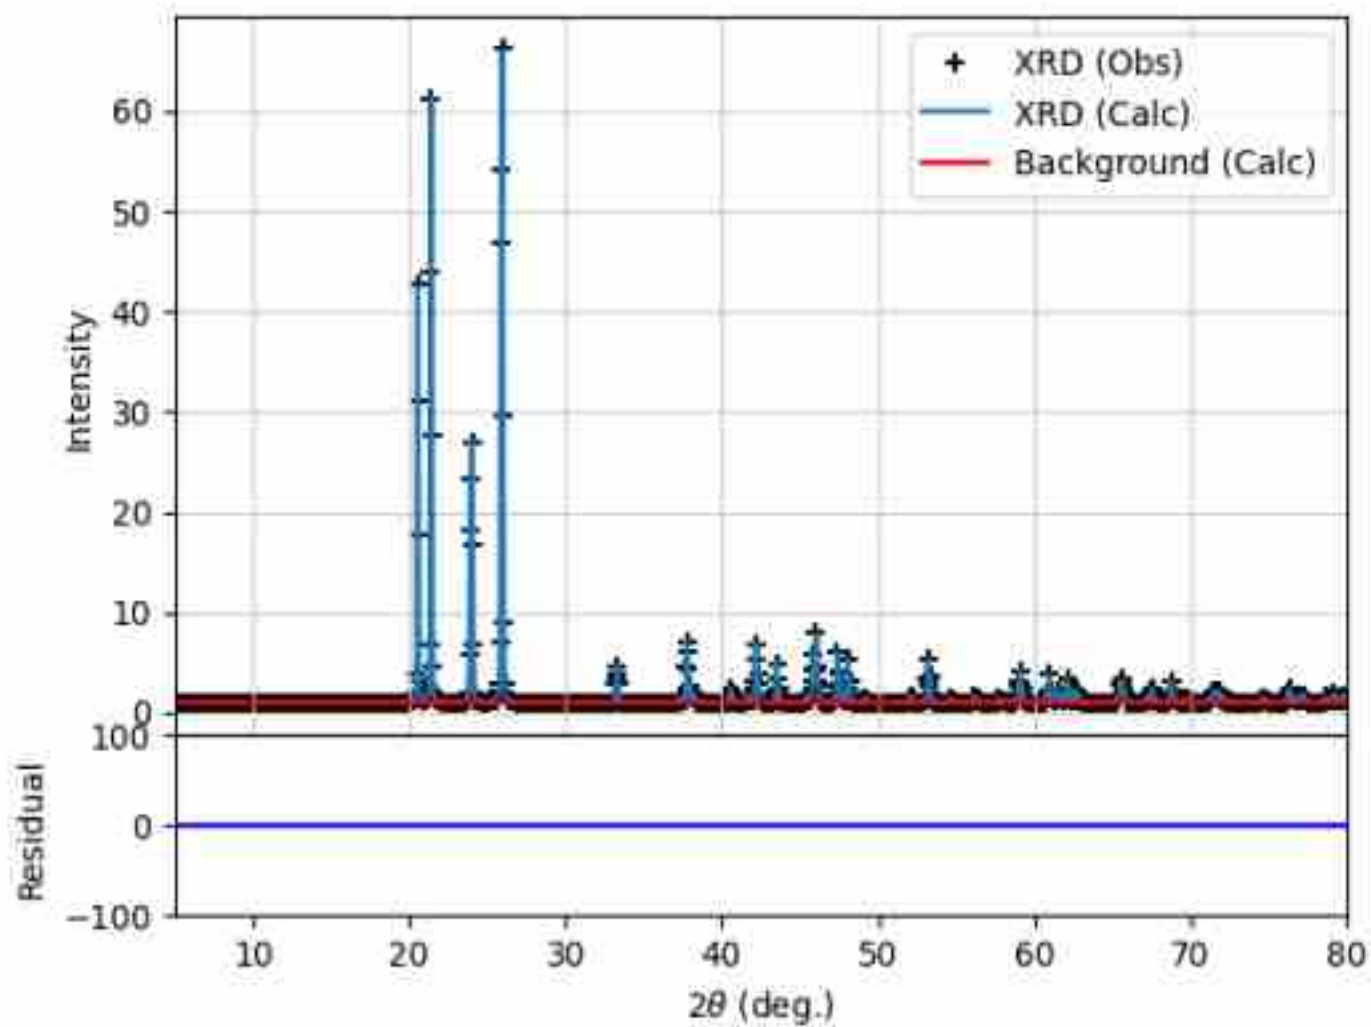

| RMSE before RR | Rwp     | RMSE after RR |
|----------------|---------|---------------|
| 0.404          | 0.31196 | 0.16735       |

# La8S6N4

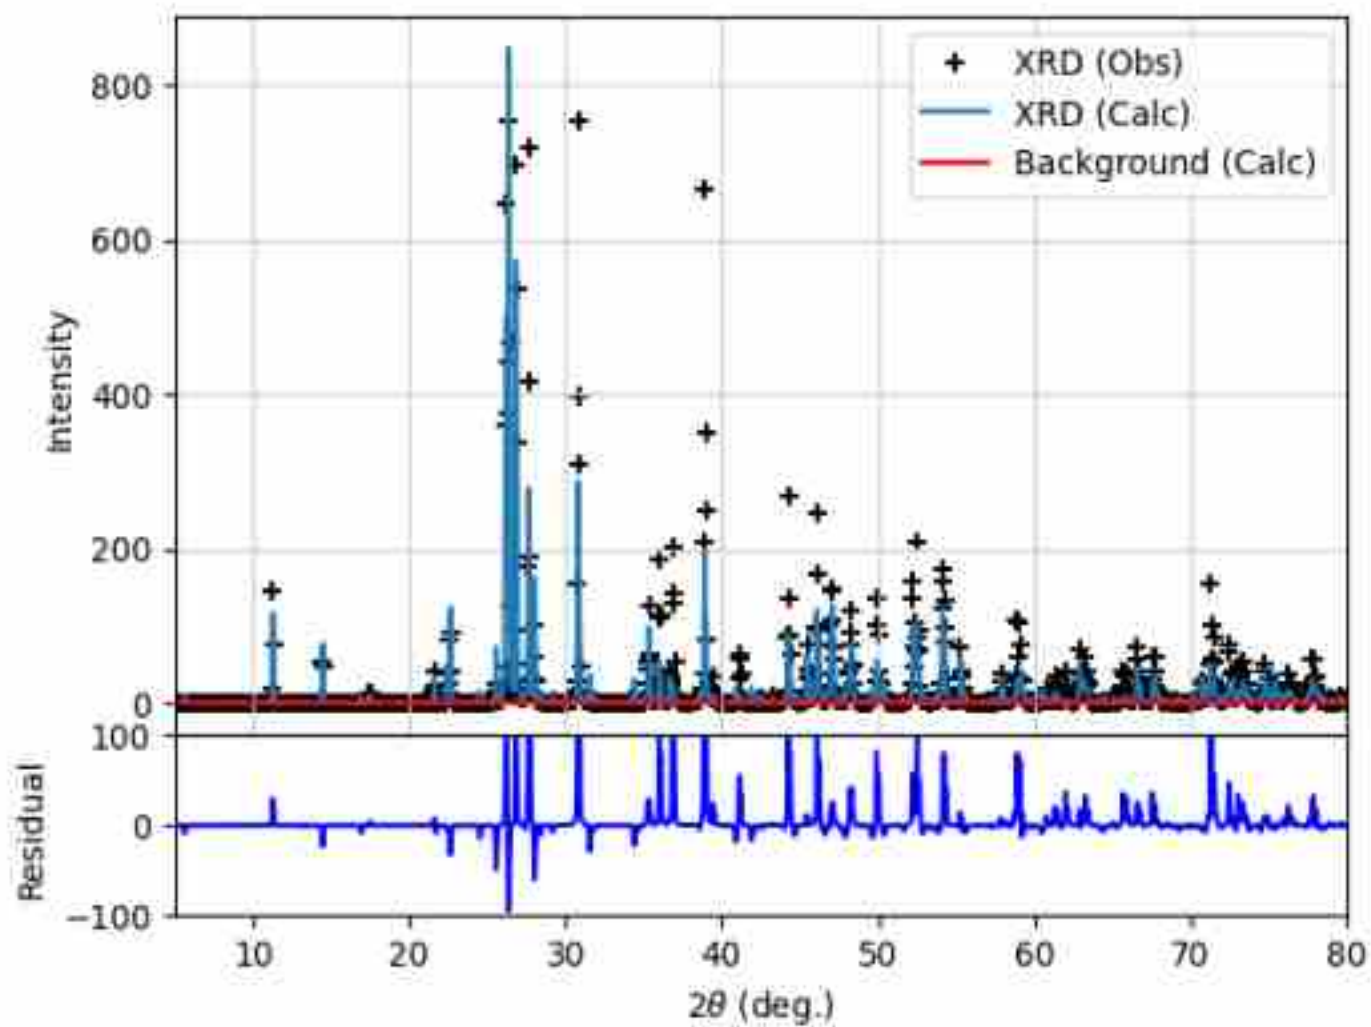

| RMSE before RR | Rwp      | RMSE after RR |
|----------------|----------|---------------|
| 0.404          | 54.47959 | None          |

# Si6O12

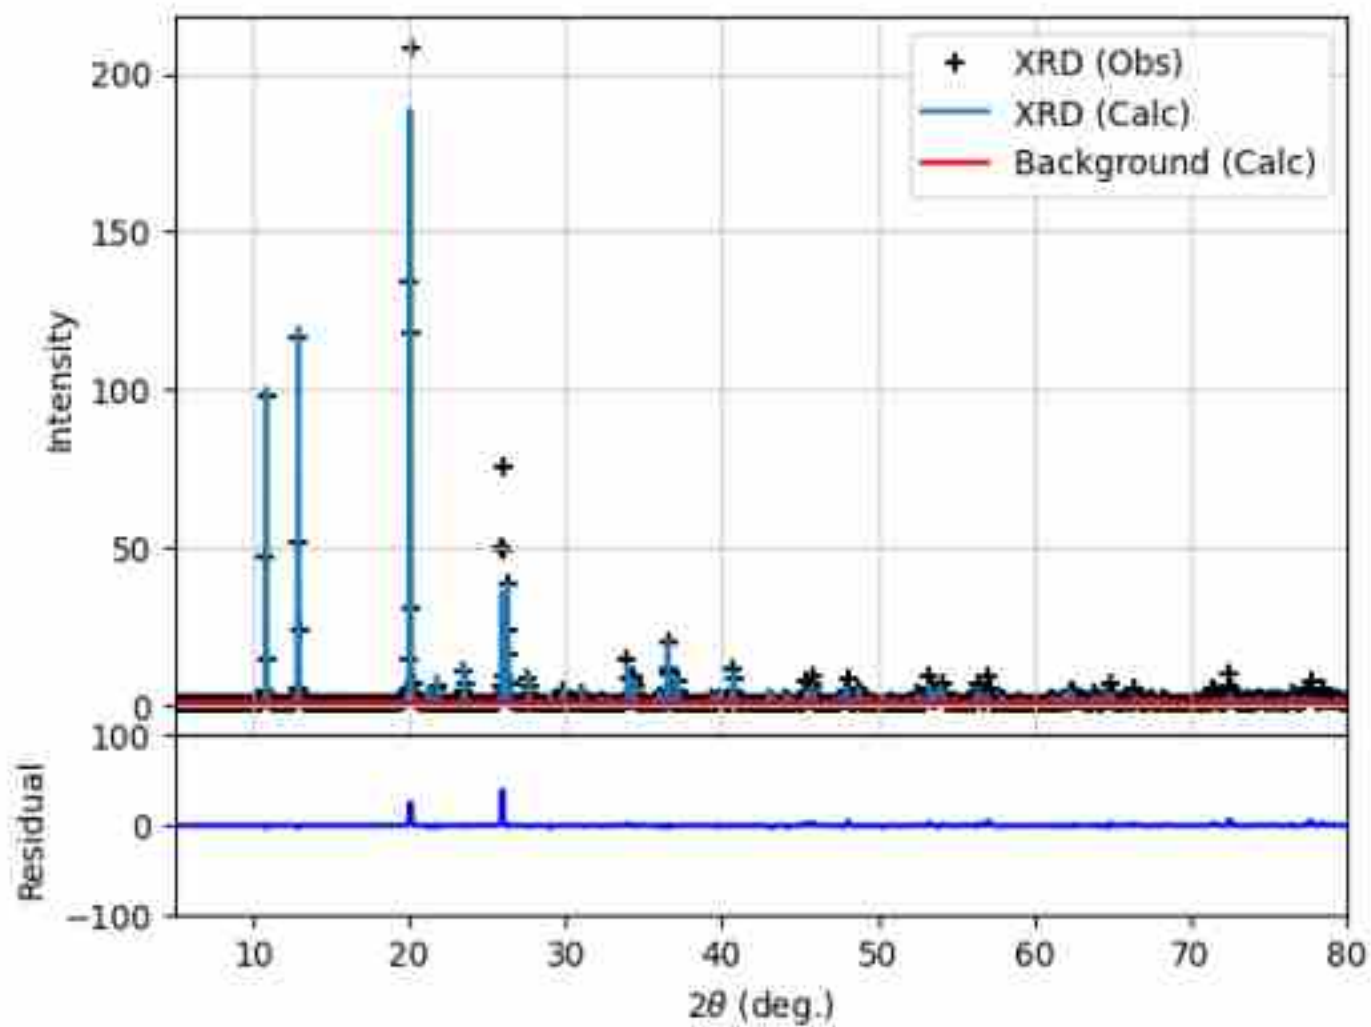

| RMSE before RR | Rwp      | RMSE after RR |
|----------------|----------|---------------|
| 0.404          | 26.26795 | None          |

# V6O10F2

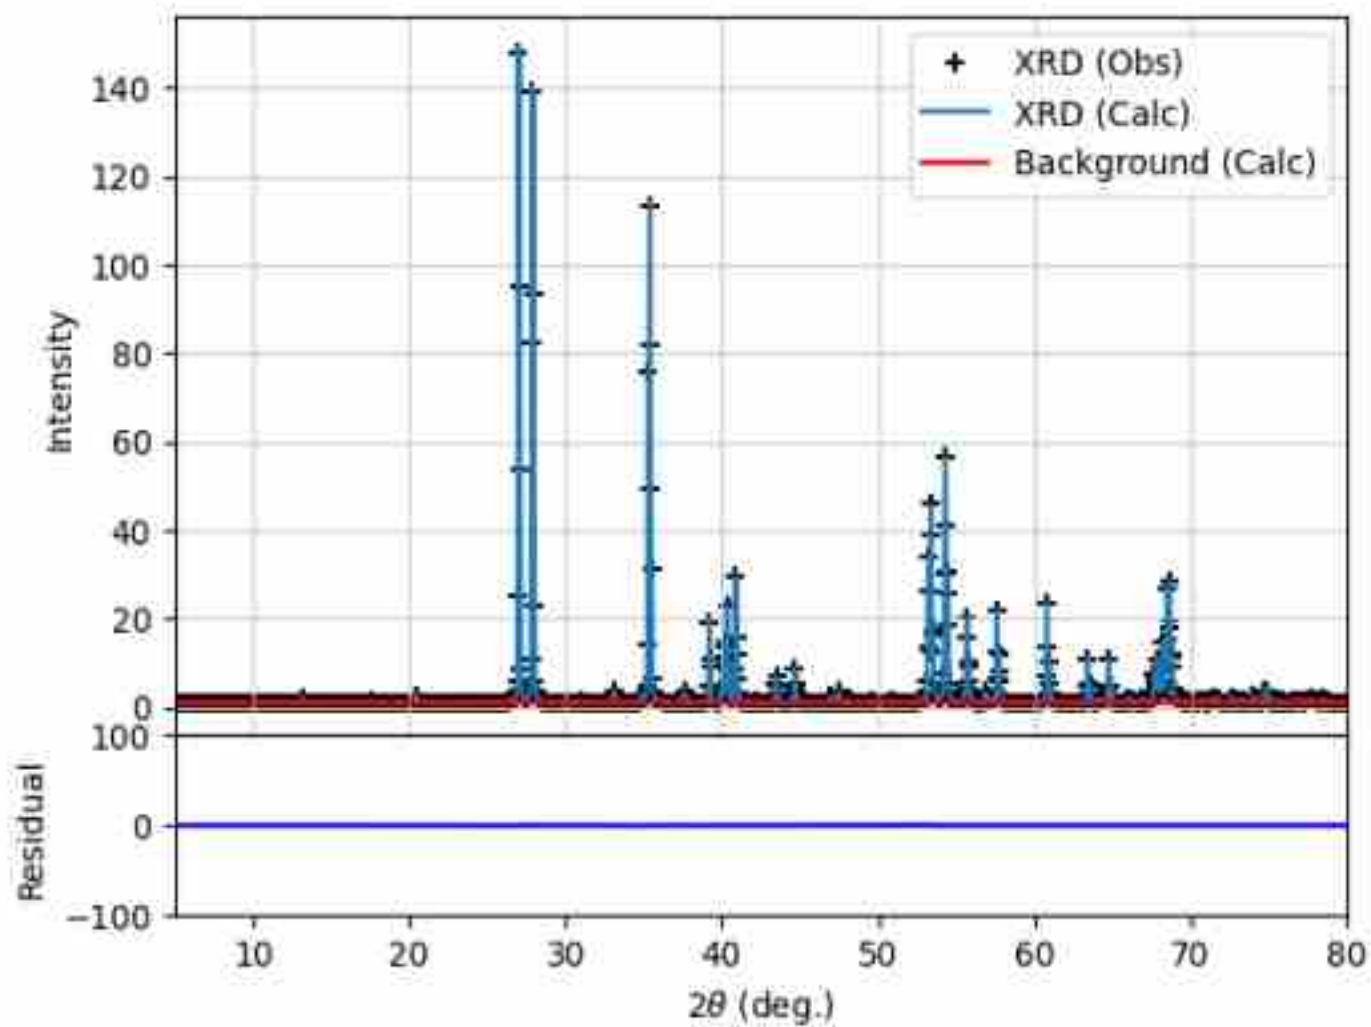

| RMSE before RR | Rwp     | RMSE after RR |
|----------------|---------|---------------|
| 0.404          | 1.25596 | 0.40175       |

# Al<sub>3</sub>Si<sub>3</sub>Mo<sub>3</sub>

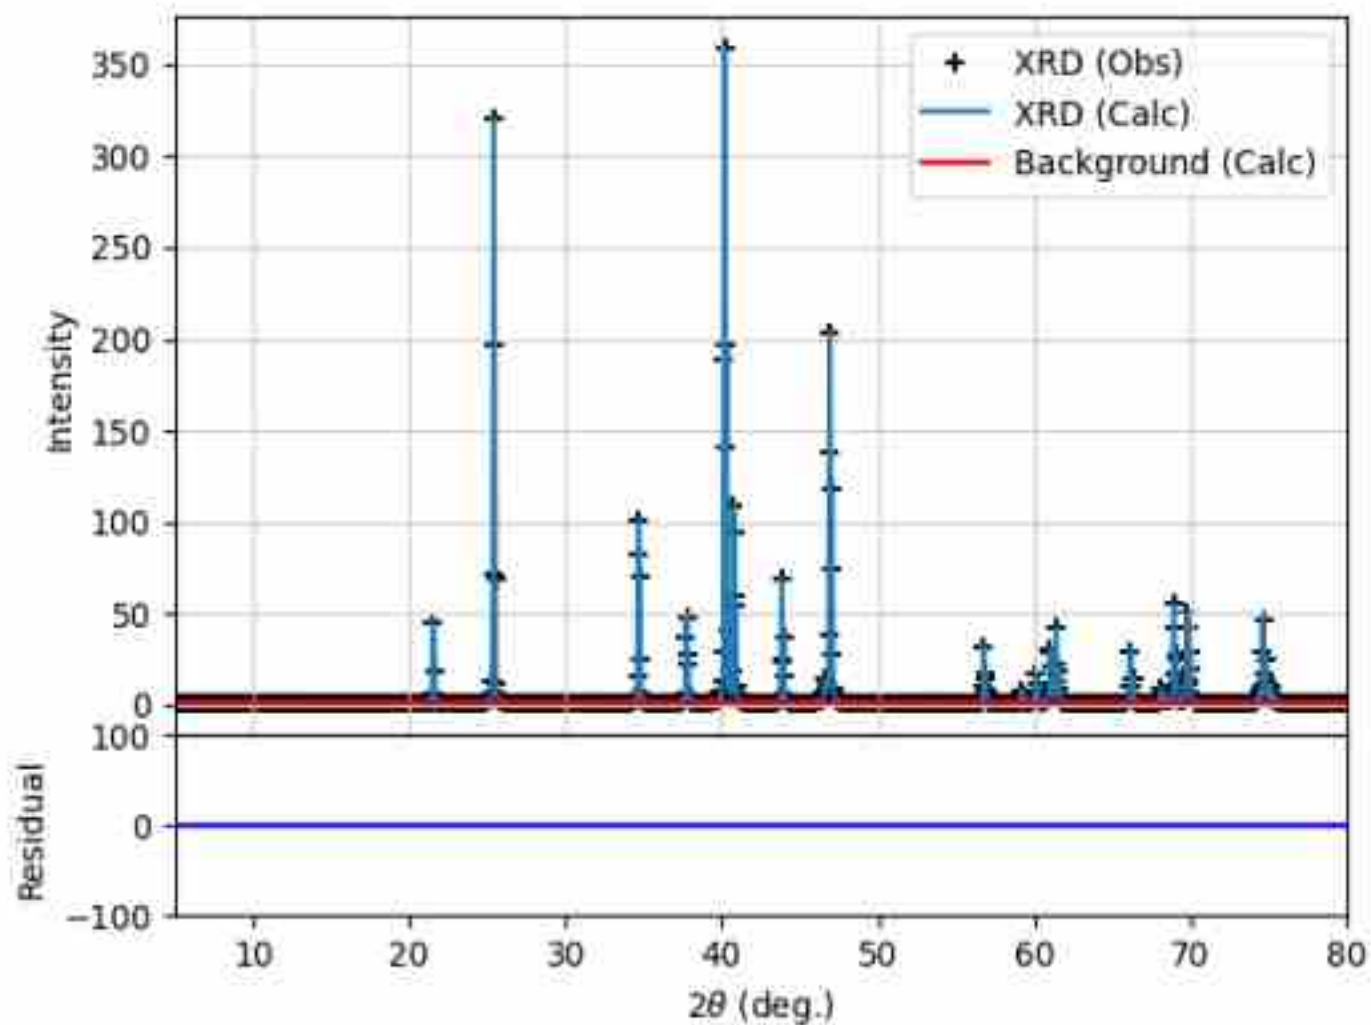

| RMSE before RR | Rwp     | RMSE after RR |
|----------------|---------|---------------|
| 0.405          | 0.06455 | 0.411         |

# Ge<sub>2</sub>As<sub>2</sub>Au<sub>2</sub>

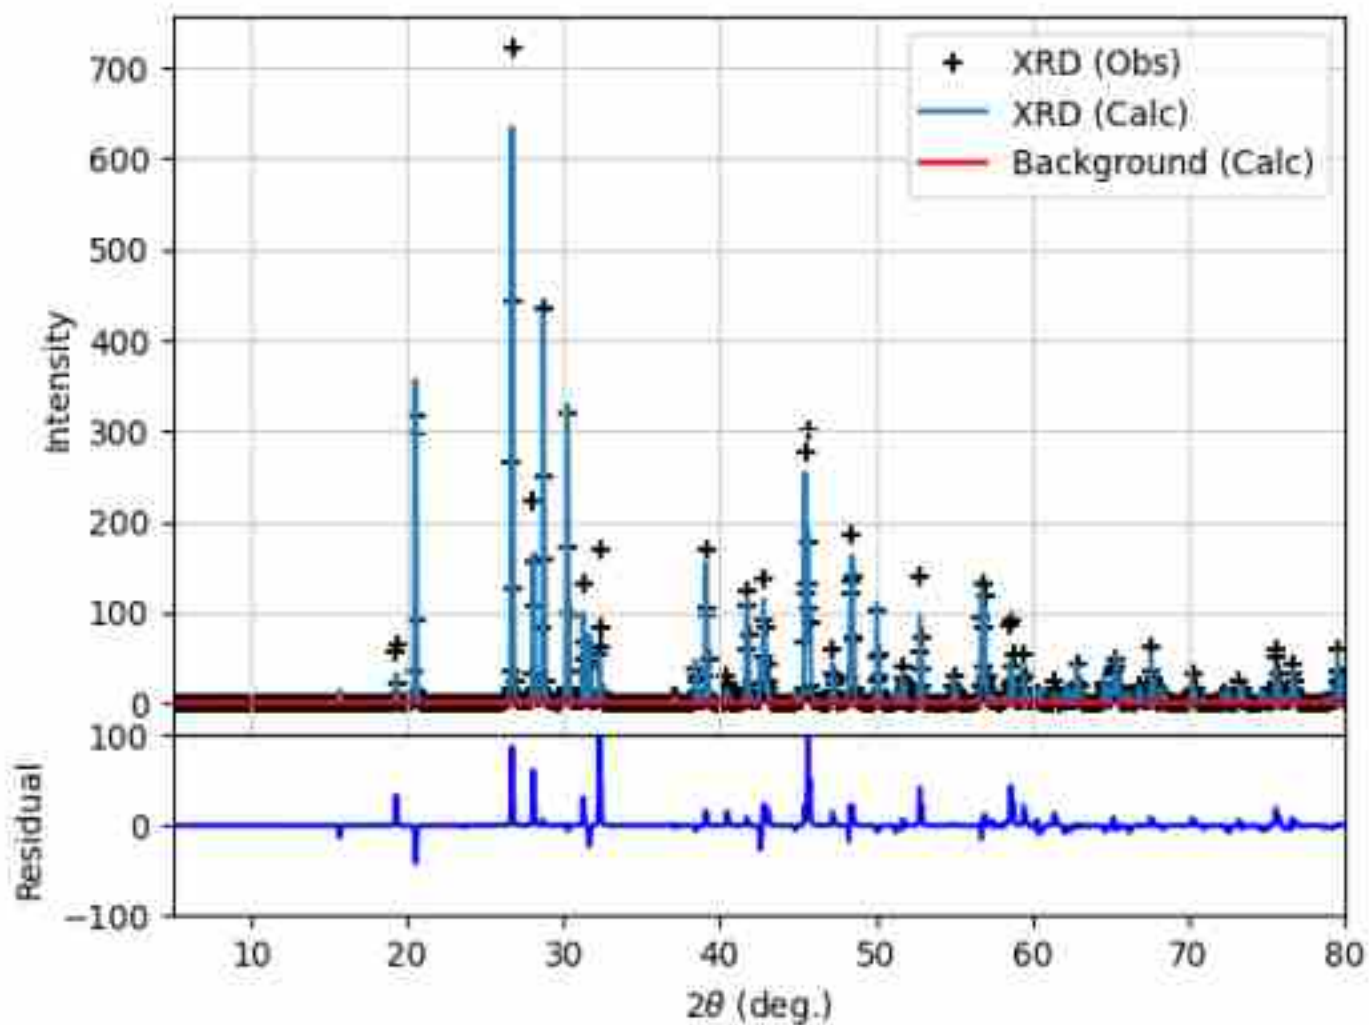

| RMSE before RR | Rwp      | RMSE after RR |
|----------------|----------|---------------|
| 0.405          | 31.54961 | 0.32284       |



# Y4C2N4O4

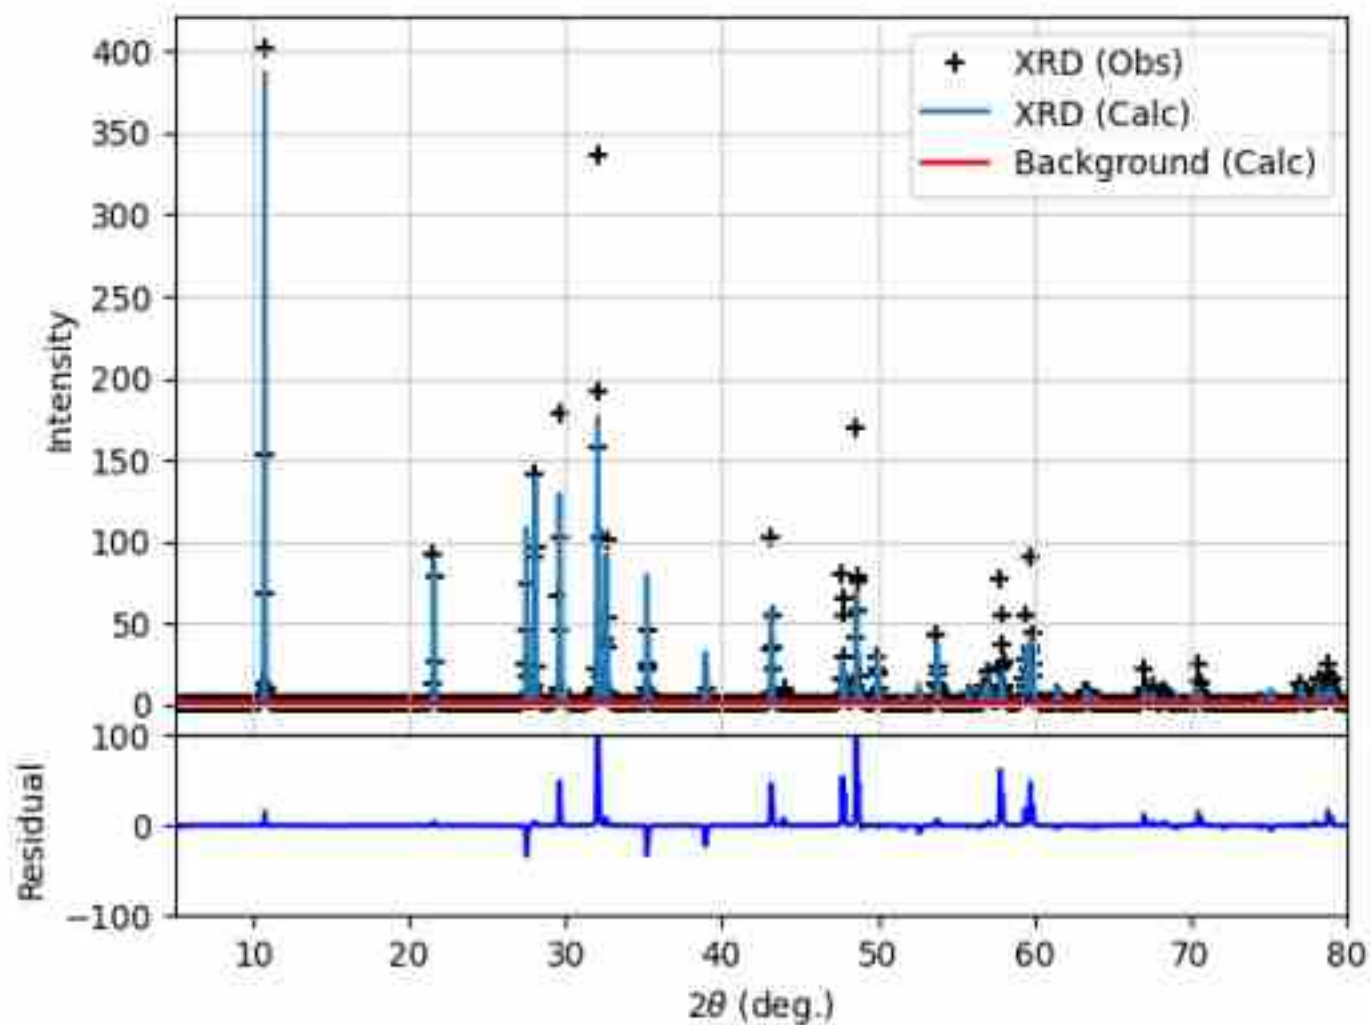

| RMSE before RR | Rwp      | RMSE after RR |
|----------------|----------|---------------|
| 0.405          | 41.89335 | None          |

# Zr<sub>4</sub>Cr<sub>4</sub>Co<sub>4</sub>

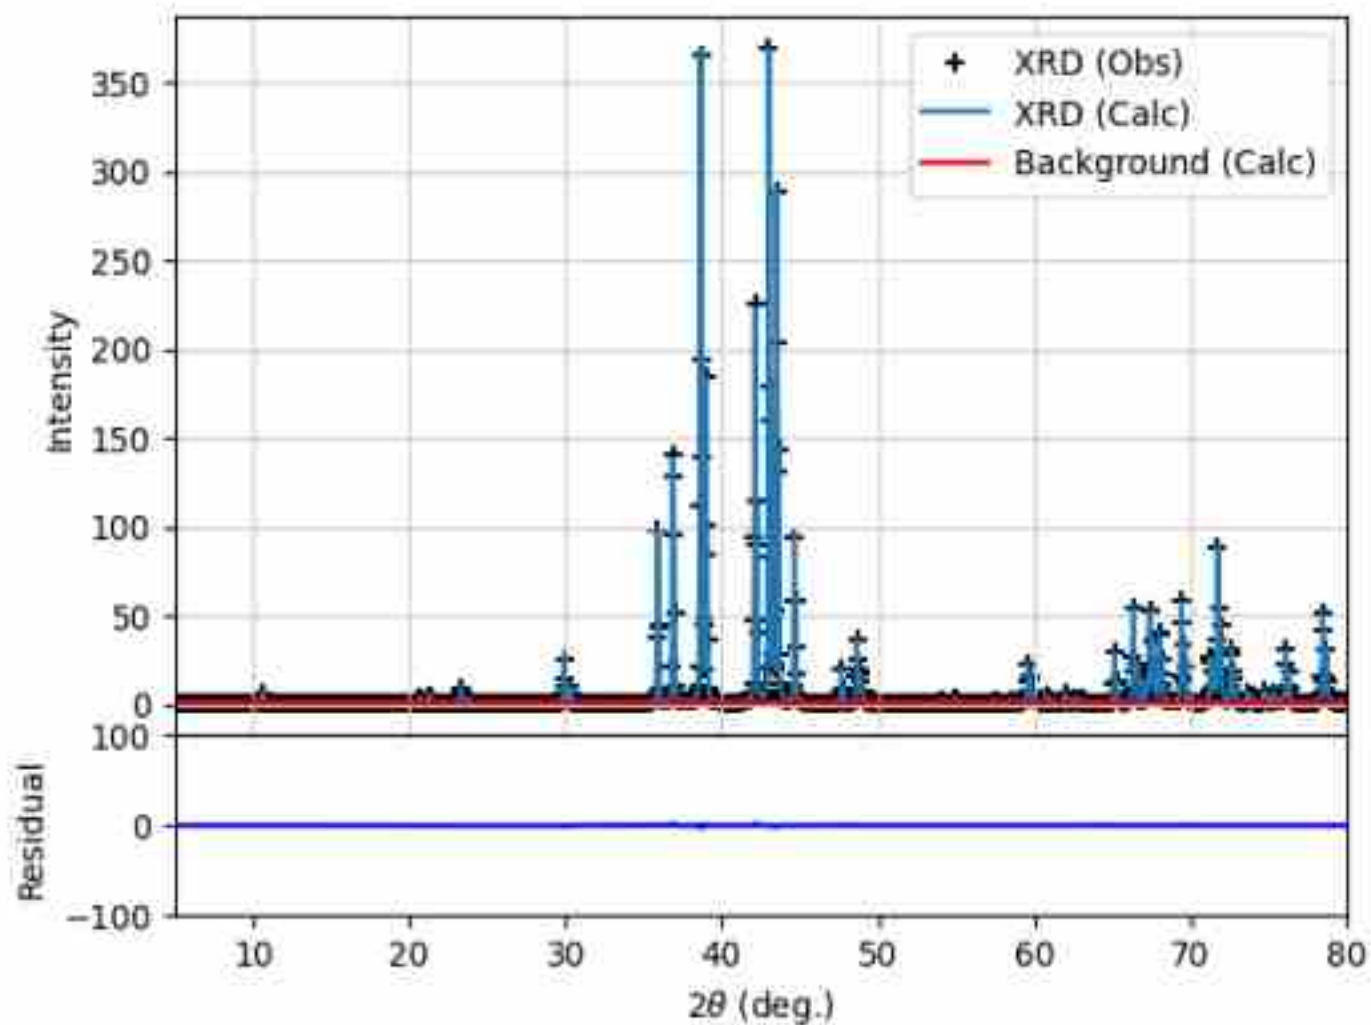

| RMSE before RR | Rwp     | RMSE after RR |
|----------------|---------|---------------|
| 0.405          | 0.95593 | 0.39918       |

# Co6O2F10

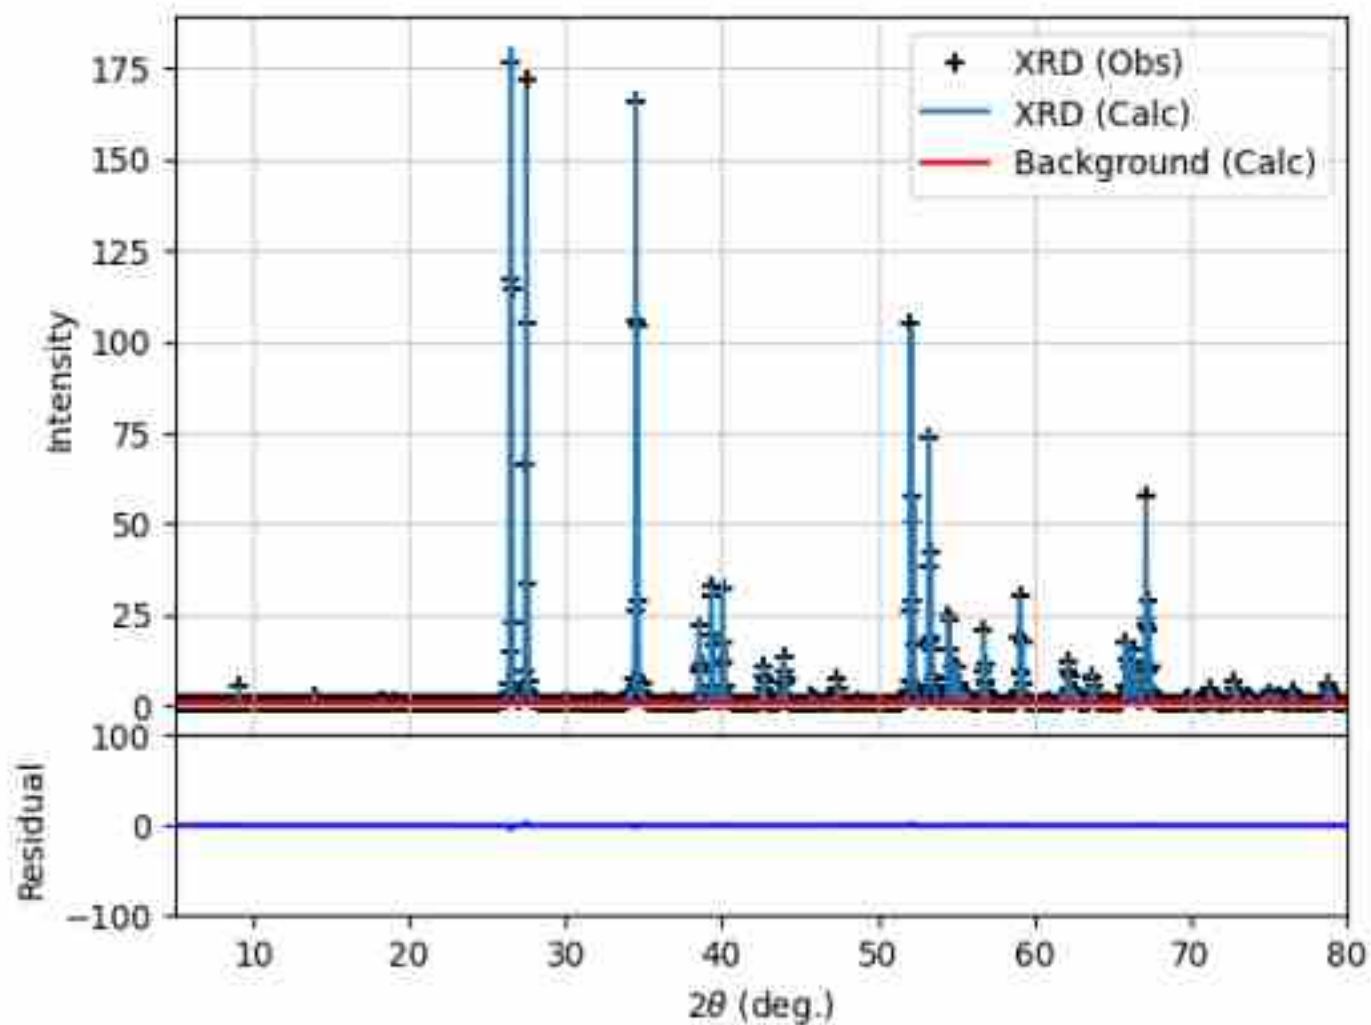

| RMSE before RR | Rwp     | RMSE after RR |
|----------------|---------|---------------|
| 0.406          | 1.96061 | 0.38393       |

# Re4P12

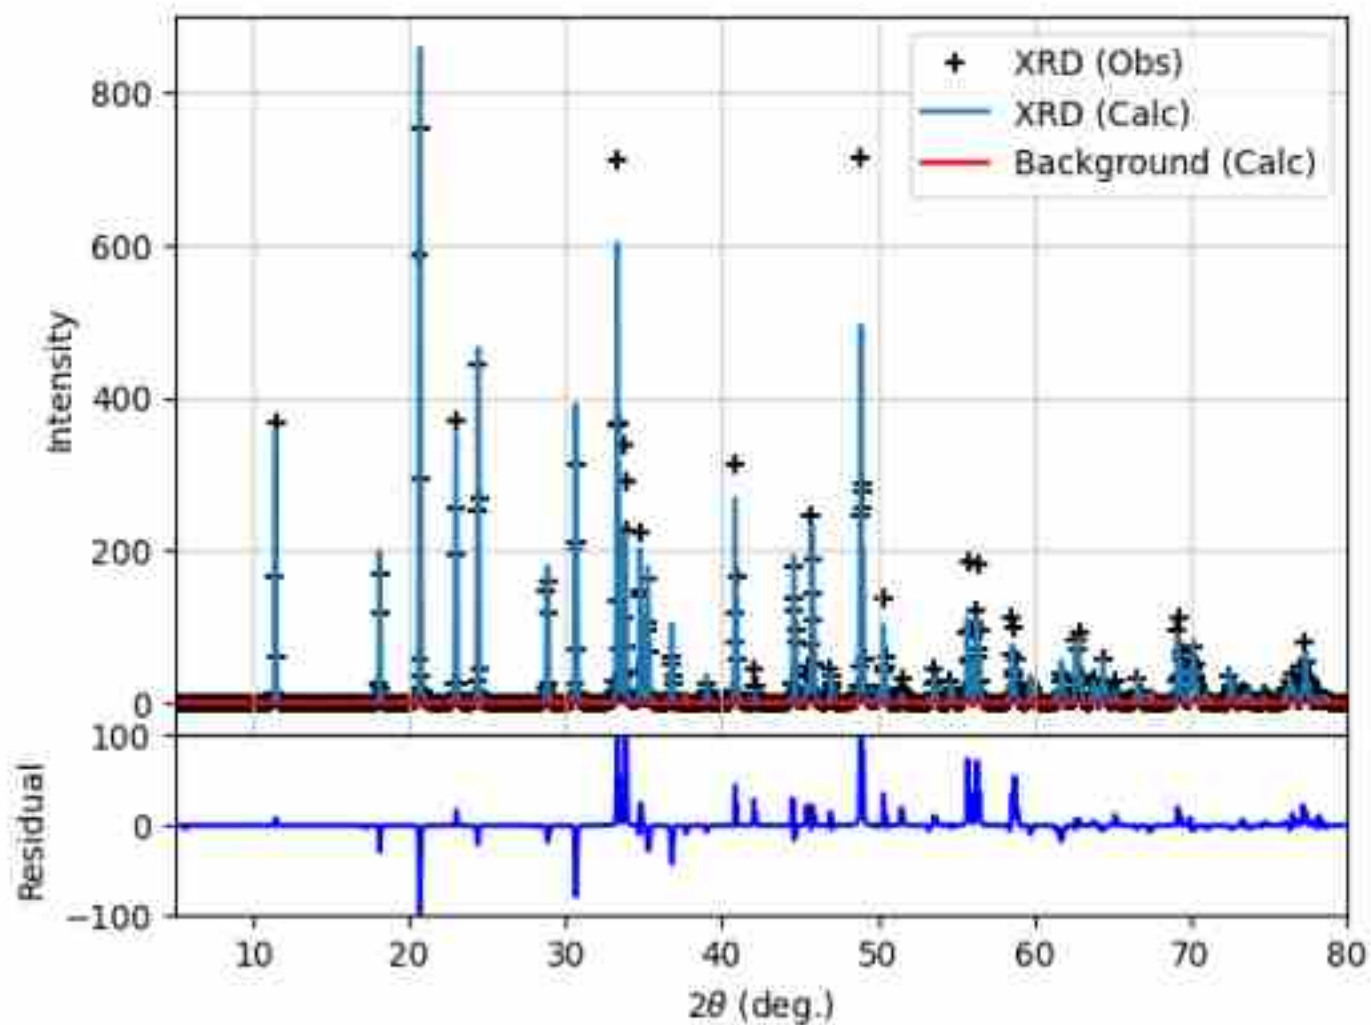

| RMSE before RR | Rwp      | RMSE after RR |
|----------------|----------|---------------|
| 0.406          | 24.79071 | None          |

# Sr<sub>4</sub>Te<sub>4</sub>O<sub>12</sub>

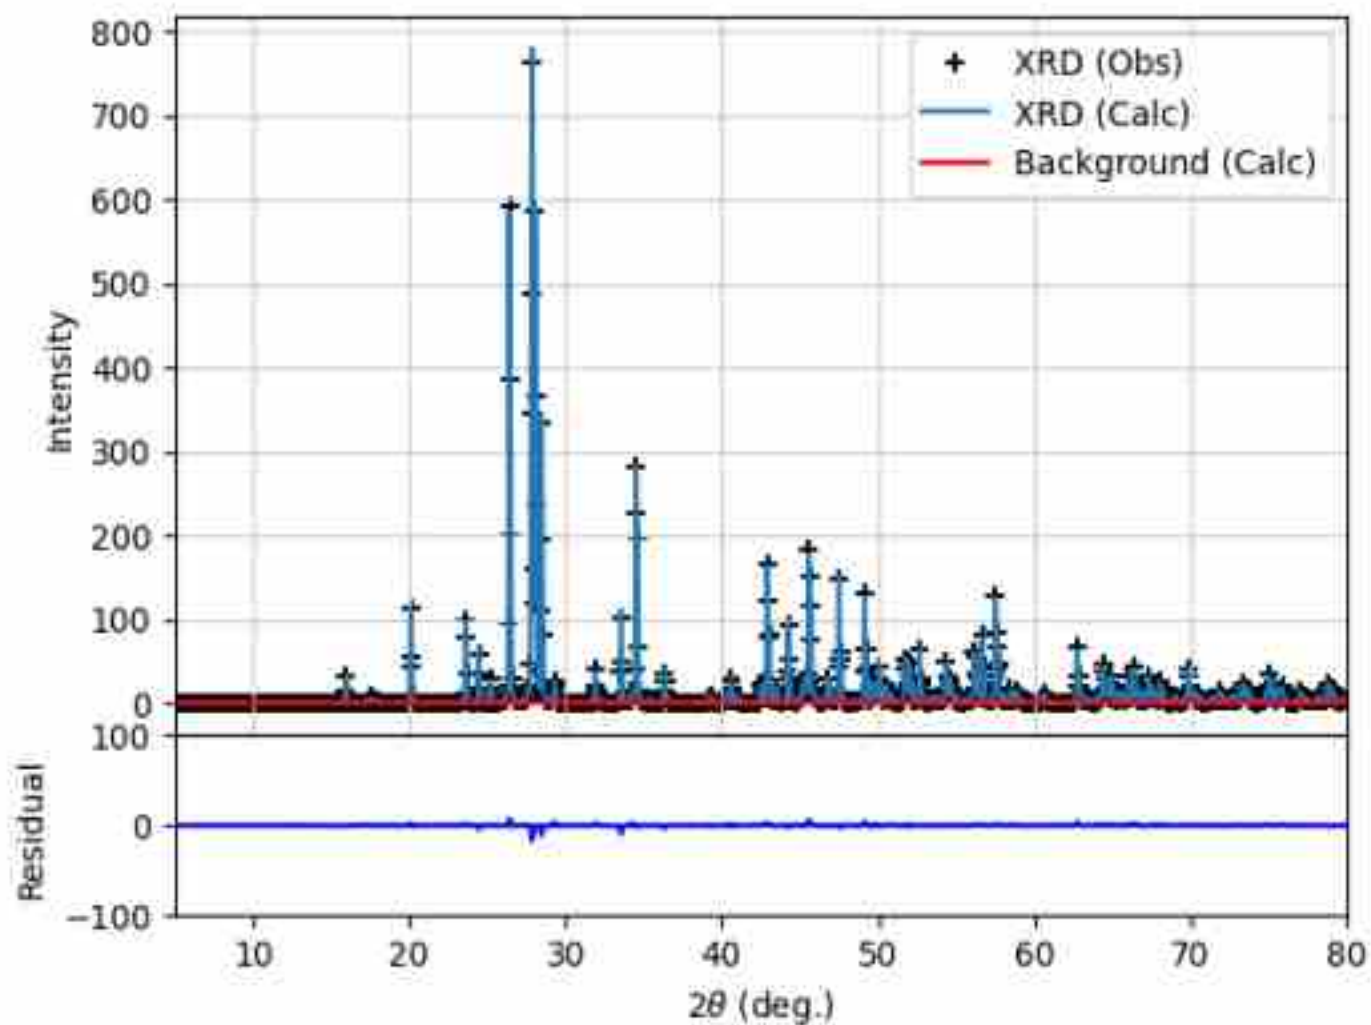

| RMSE before RR | Rwp     | RMSE after RR |
|----------------|---------|---------------|
| 0.406          | 3.53494 | 0.22989       |

# In<sub>4</sub>Te<sub>4</sub>I<sub>4</sub>

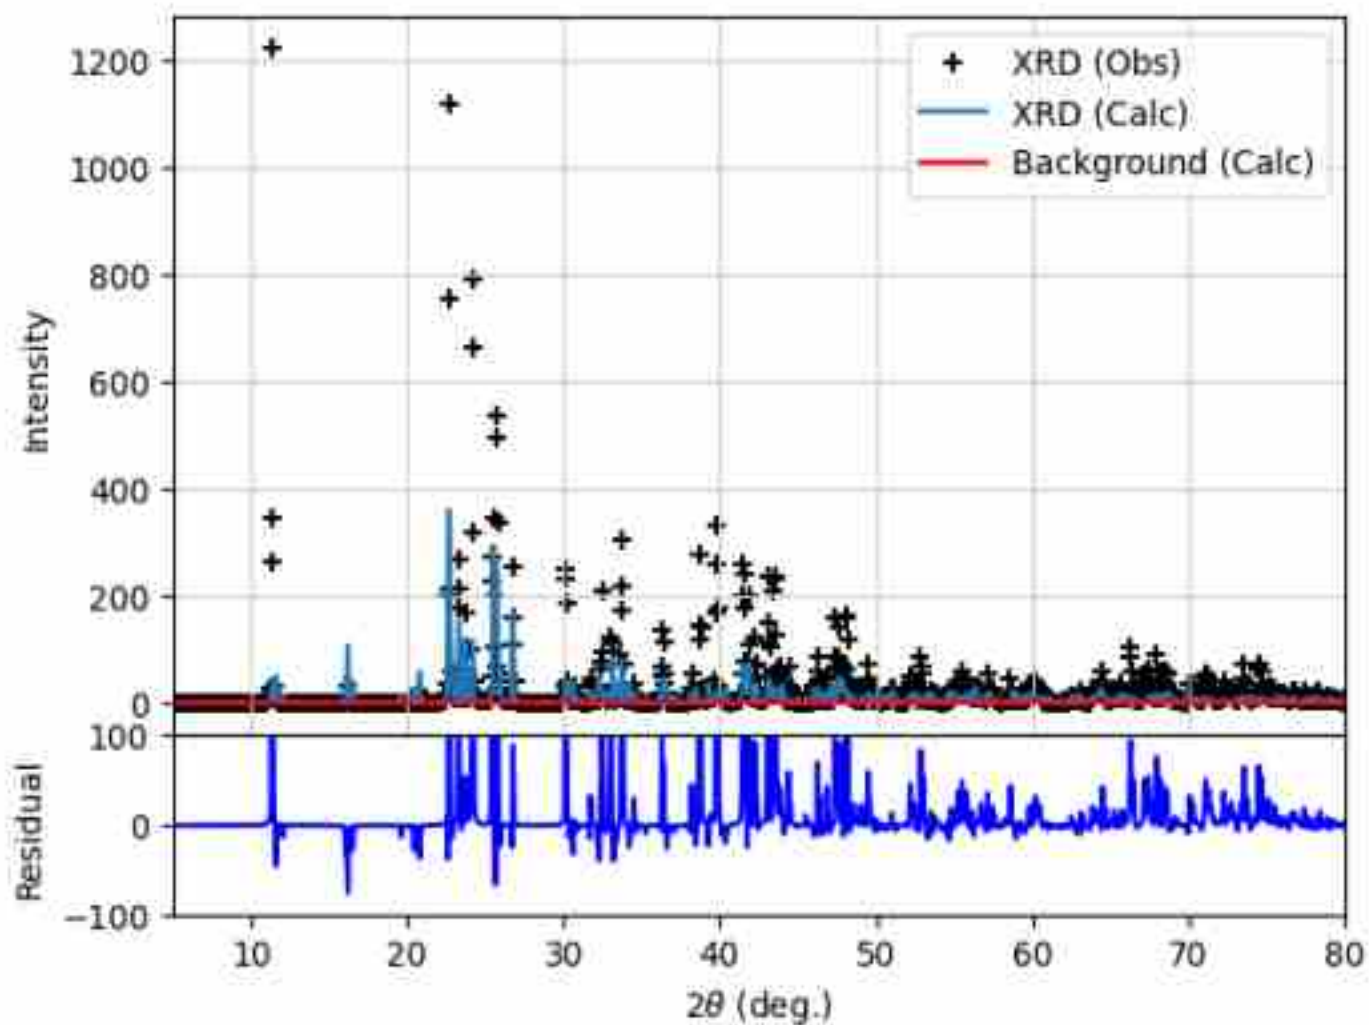

| RMSE before RR | Rwp      | RMSE after RR |
|----------------|----------|---------------|
| 0.408          | 78.03357 | 0.46933       |

# Li<sub>2</sub>Mn<sub>1</sub>V<sub>3</sub>O<sub>8</sub>

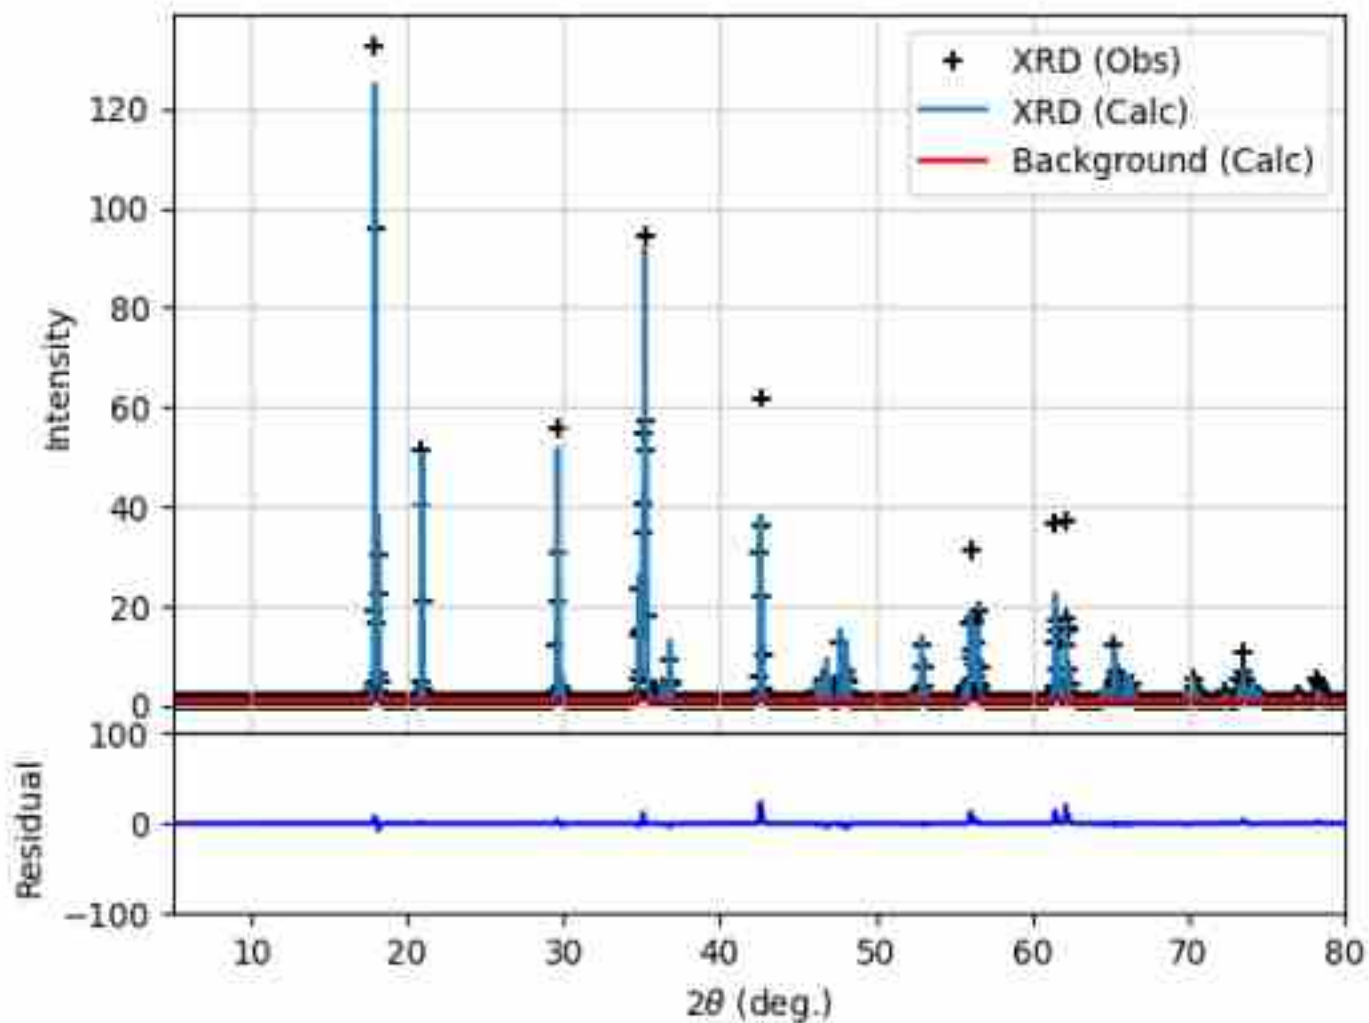

| RMSE before RR | Rwp      | RMSE after RR |
|----------------|----------|---------------|
| 0.409          | 21.21061 | None          |

# Nd4Zn10Pb2

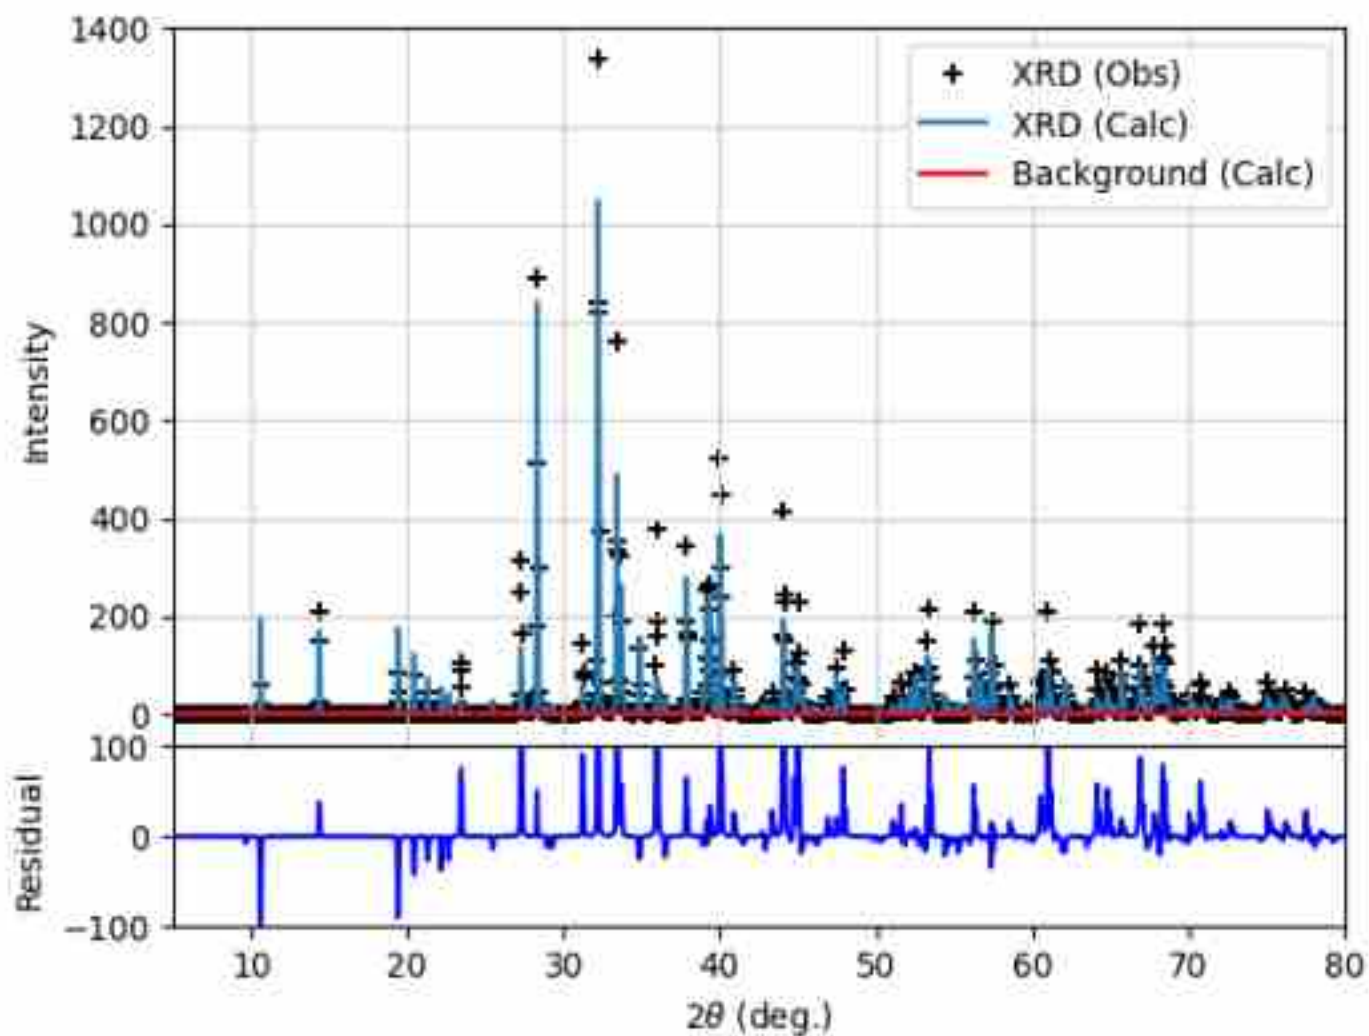

| RMSE before RR | Rwp      | RMSE after RR |
|----------------|----------|---------------|
| 0.409          | 45.31785 | None          |



# U6Co4Ni8

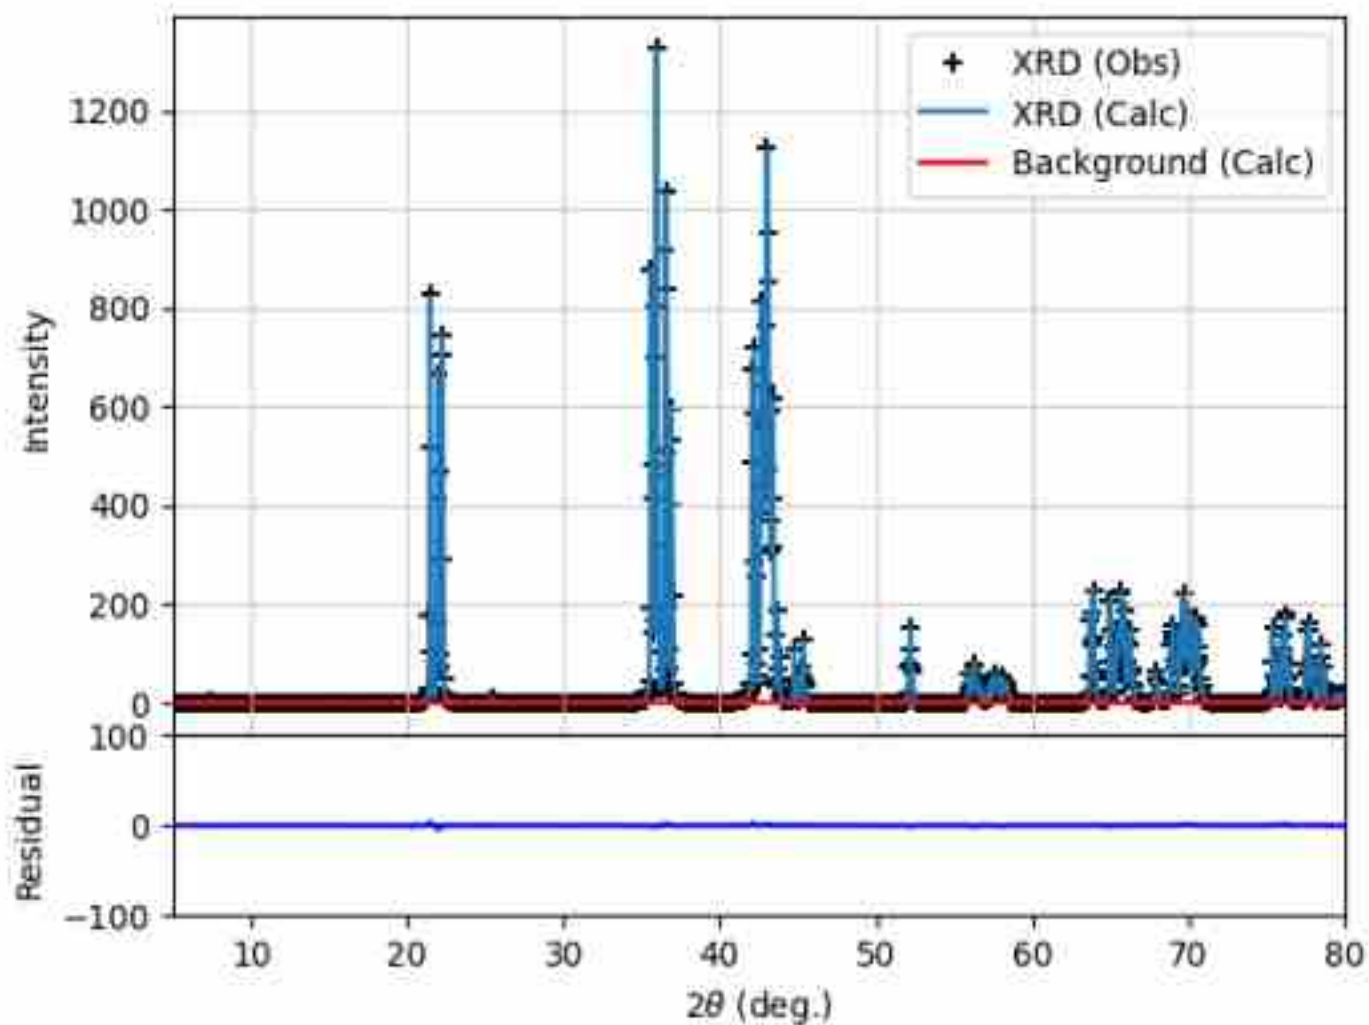

| RMSE before RR | Rwp     | RMSE after RR |
|----------------|---------|---------------|
| 0.409          | 0.96808 | 0.32379       |

# Zn1B2Ir2

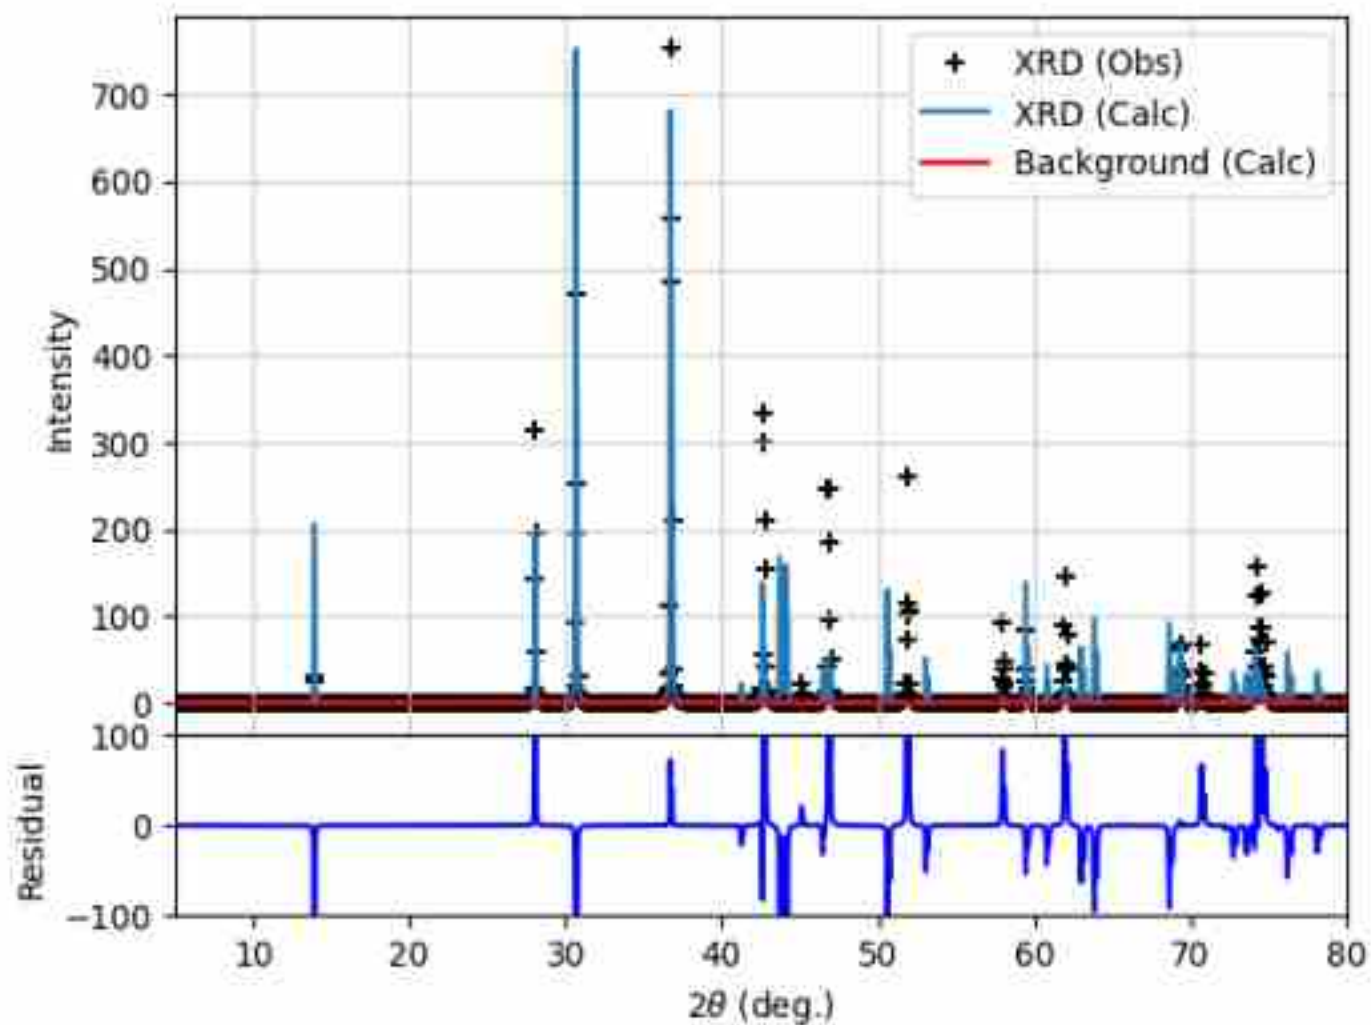

| RMSE before RR | Rwp   | RMSE after RR |
|----------------|-------|---------------|
| 0.409          | 100.0 | 0.47062       |

# Sn6Br12

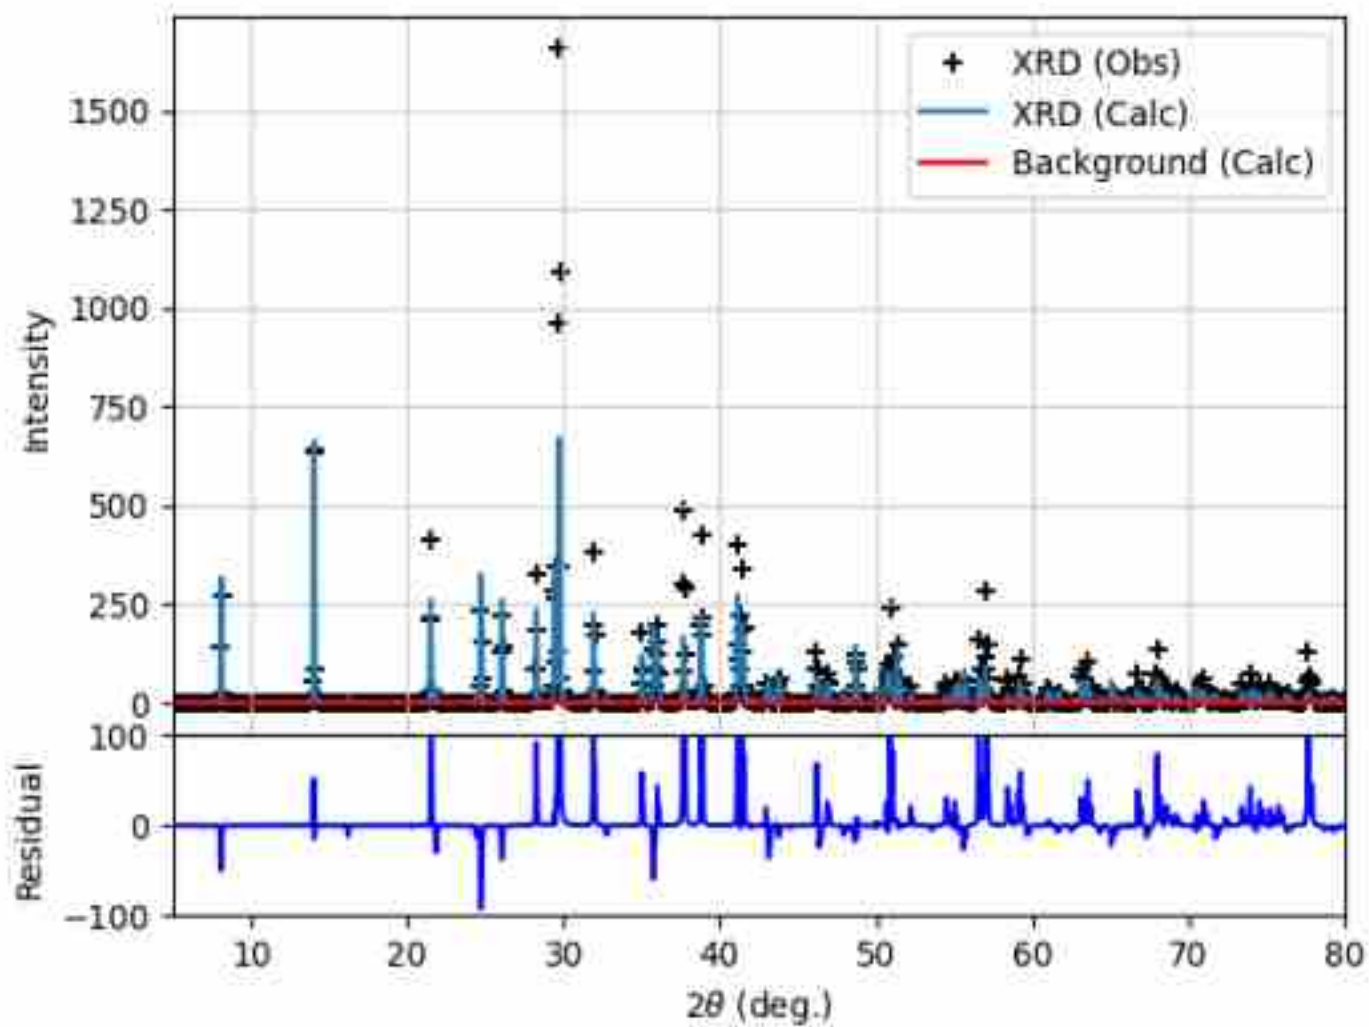

| RMSE before RR | Rwp      | RMSE after RR |
|----------------|----------|---------------|
| 0.411          | 47.99154 | 0.48129       |

# Ba<sub>2</sub>N<sub>4</sub>

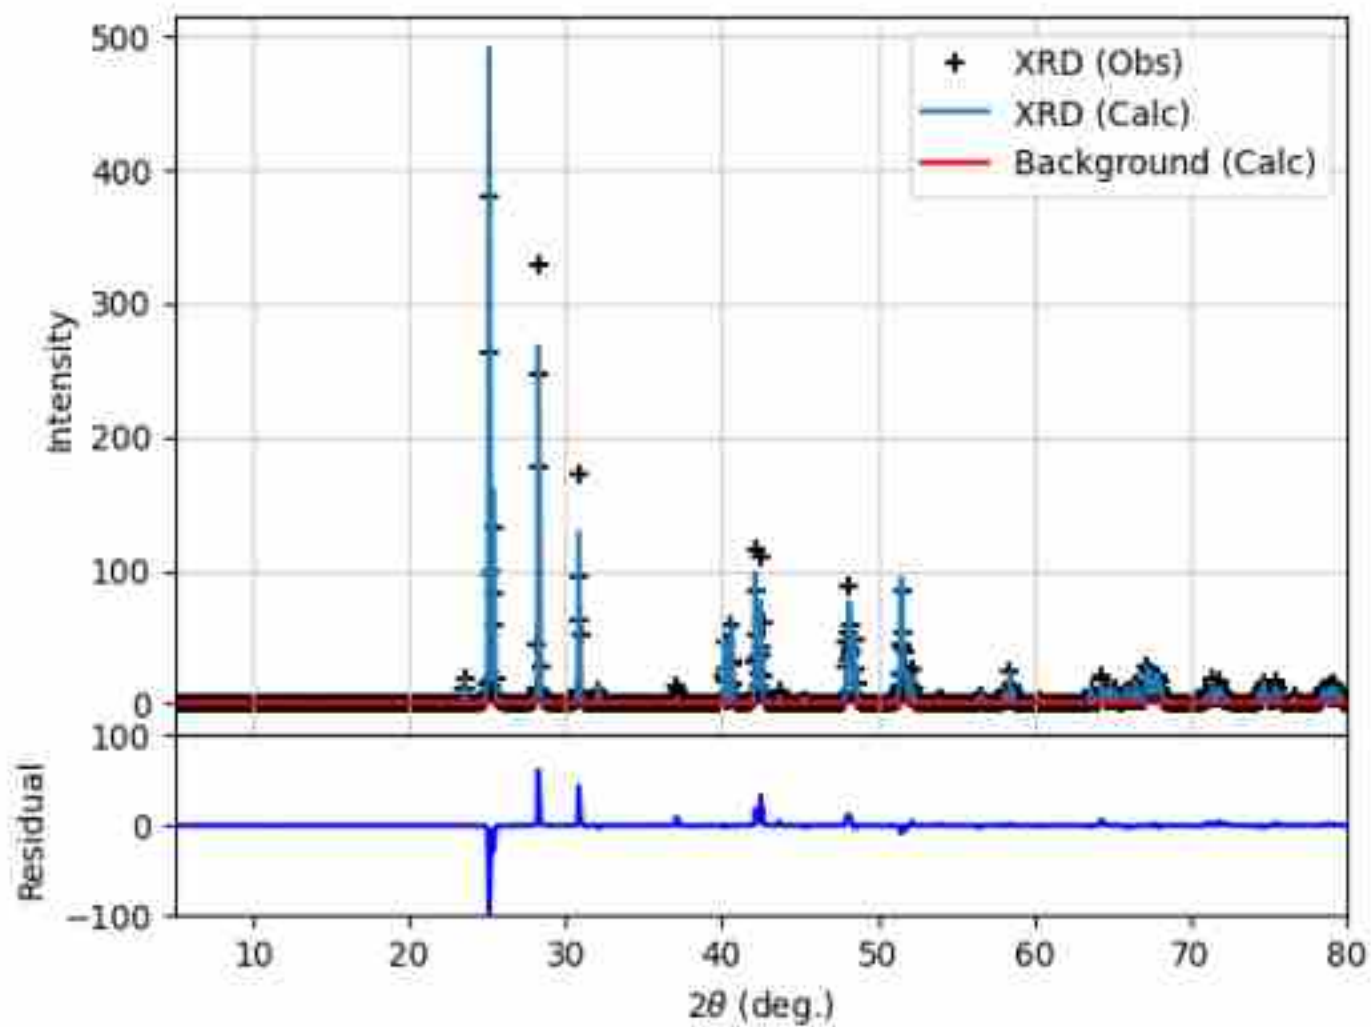

| RMSE before RR | Rwp      | RMSE after RR |
|----------------|----------|---------------|
| 0.412          | 18.94509 | 0.38614       |

# Ba8Al10

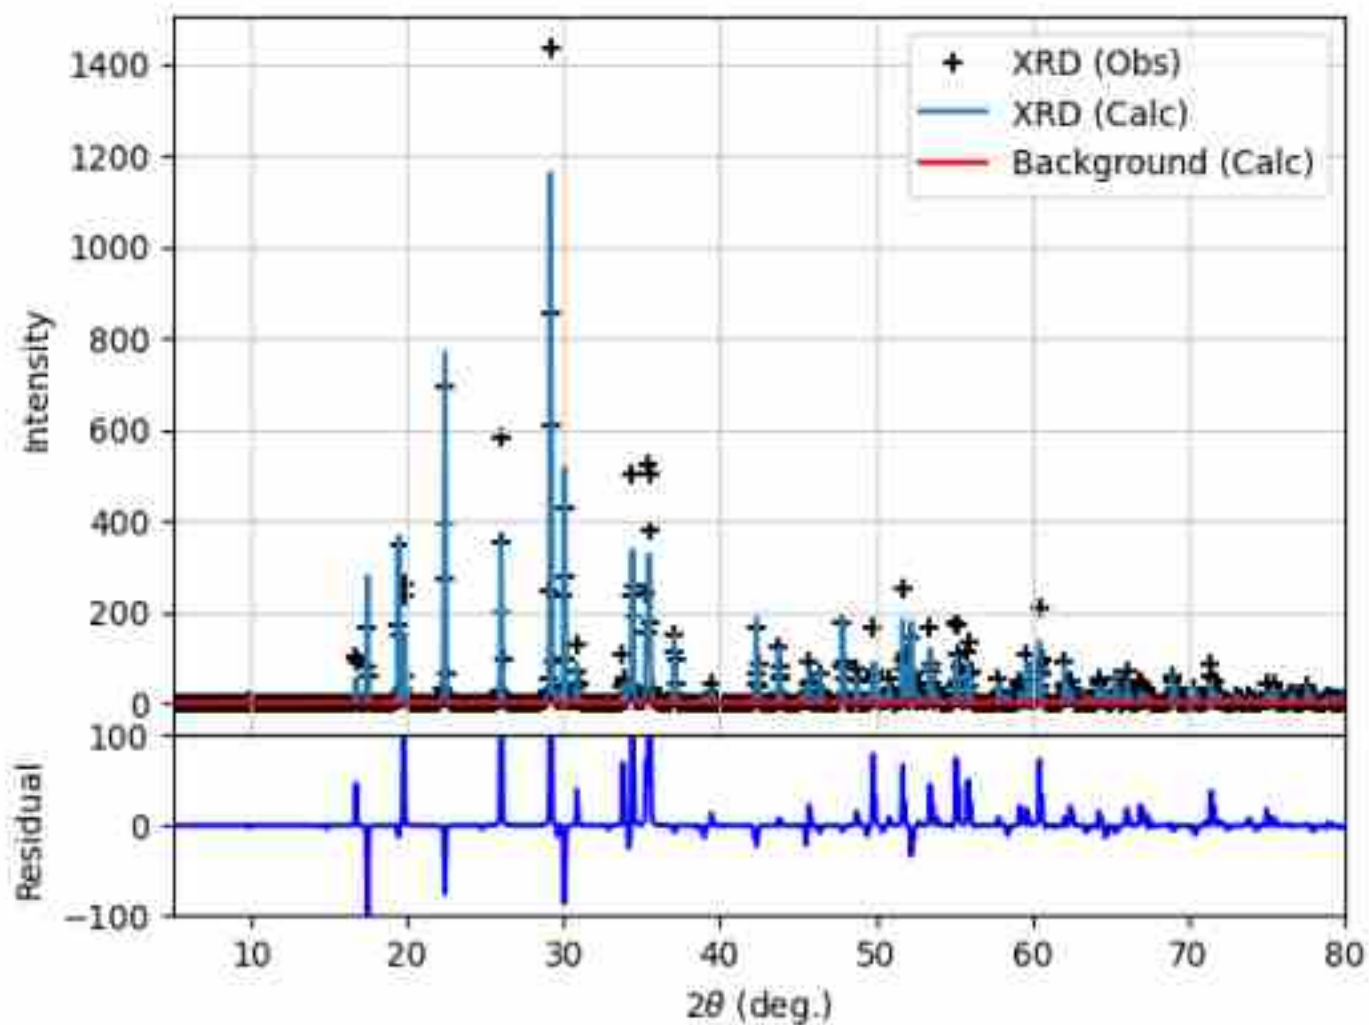

| RMSE before RR | Rwp      | RMSE after RR |
|----------------|----------|---------------|
| 0.412          | 33.08251 | None          |

# Mg<sub>2</sub>Bi<sub>4</sub>O<sub>8</sub>

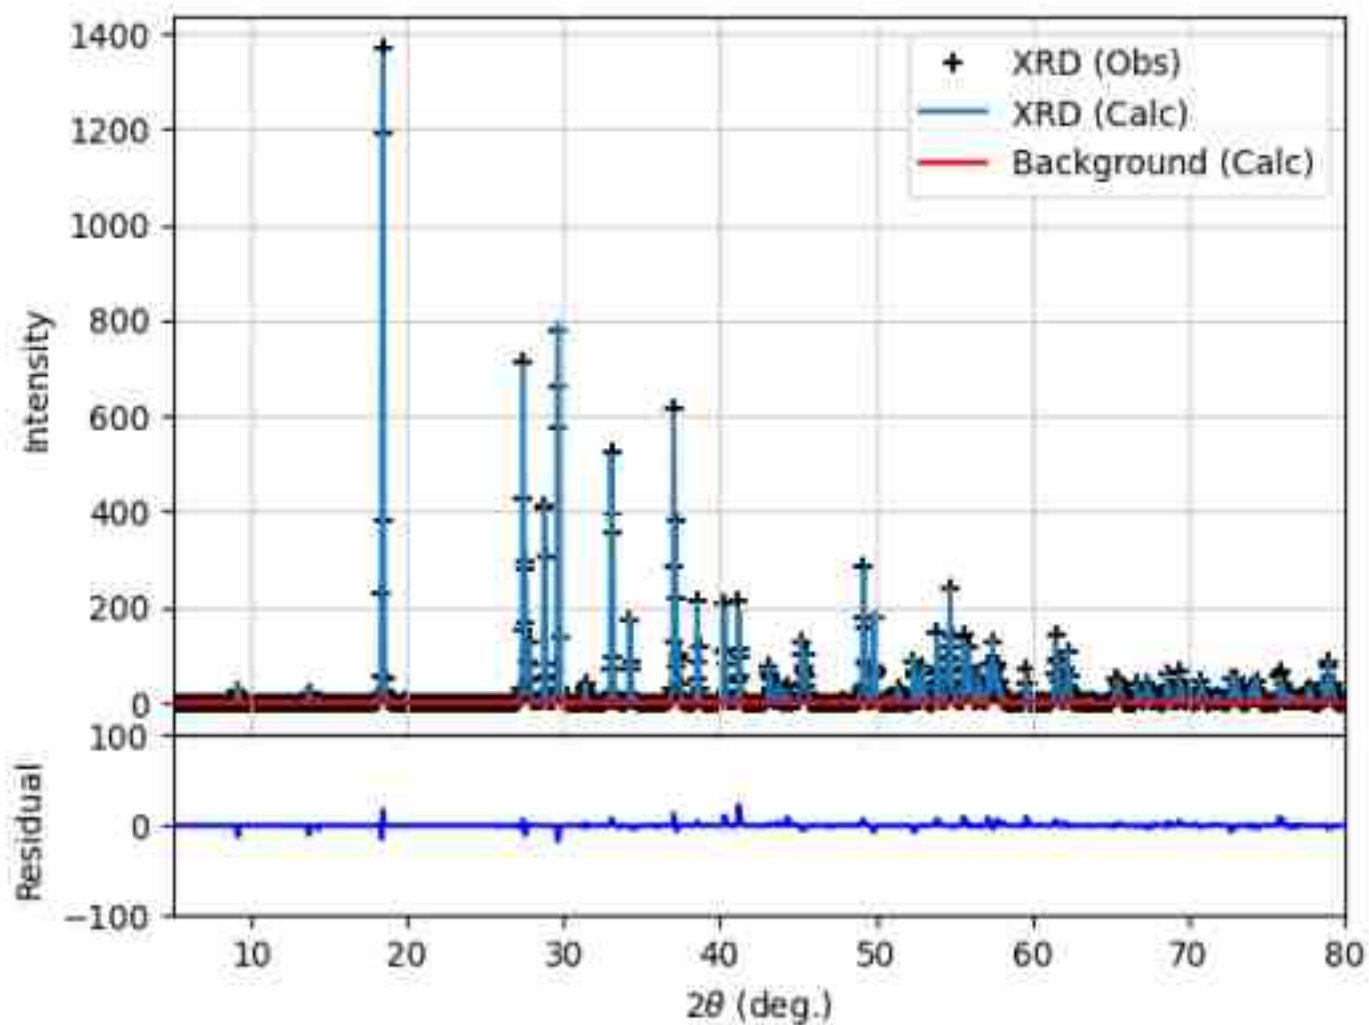

| RMSE before RR | Rwp     | RMSE after RR |
|----------------|---------|---------------|
| 0.412          | 6.14794 | None          |

# Ca<sub>4</sub>Mg<sub>4</sub>Cd<sub>4</sub>

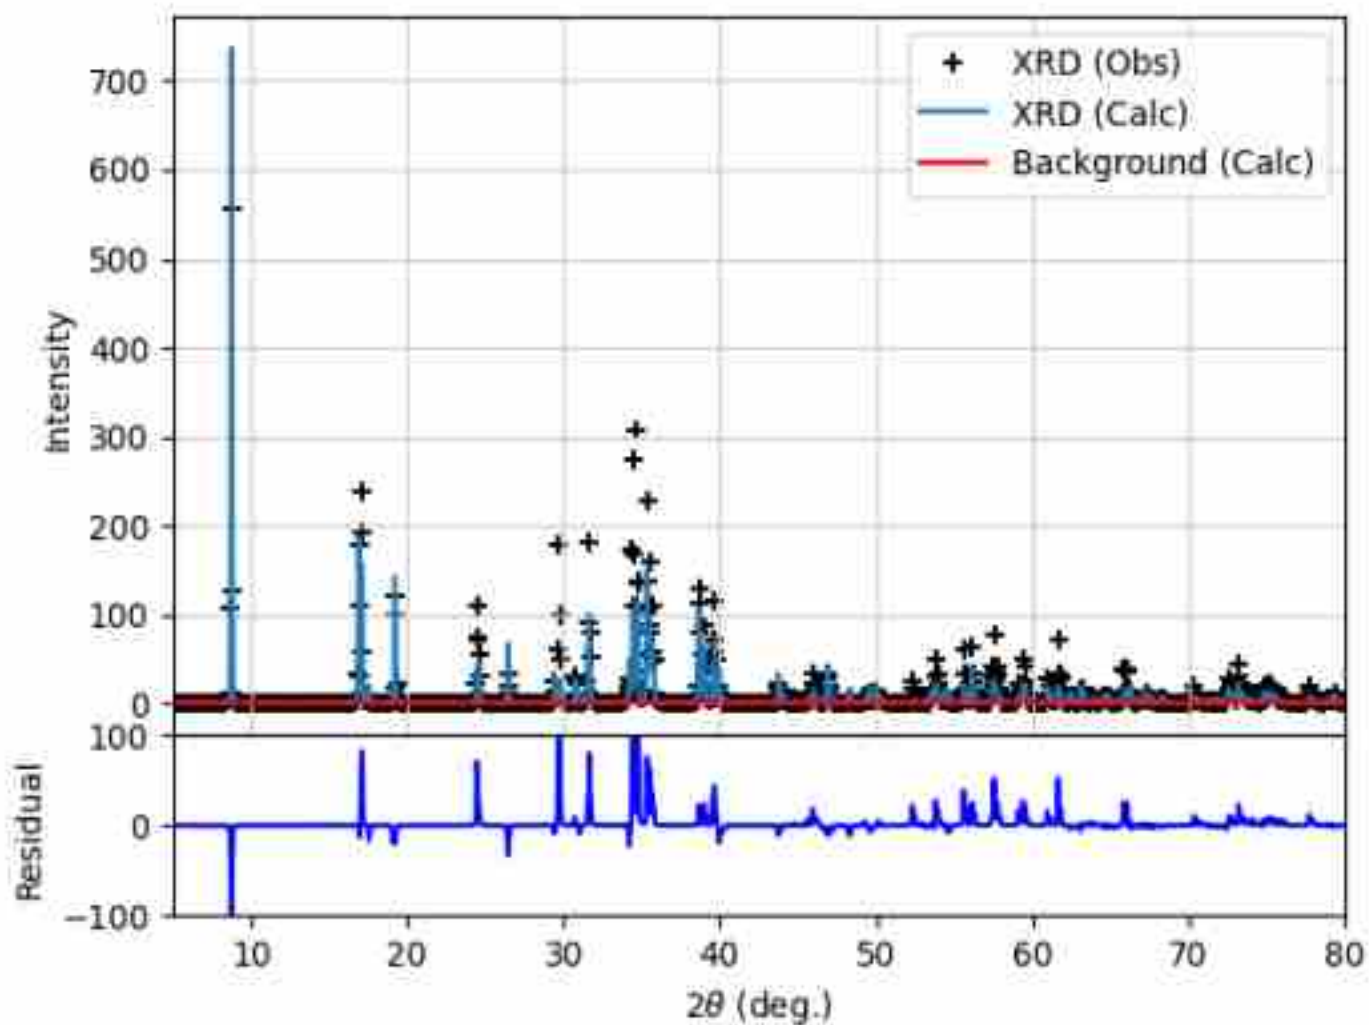

| RMSE before RR | Rwp      | RMSE after RR |
|----------------|----------|---------------|
| 0.413          | 48.71128 | 0.46865       |

# Mn<sub>4</sub>Pb<sub>4</sub>O<sub>12</sub>

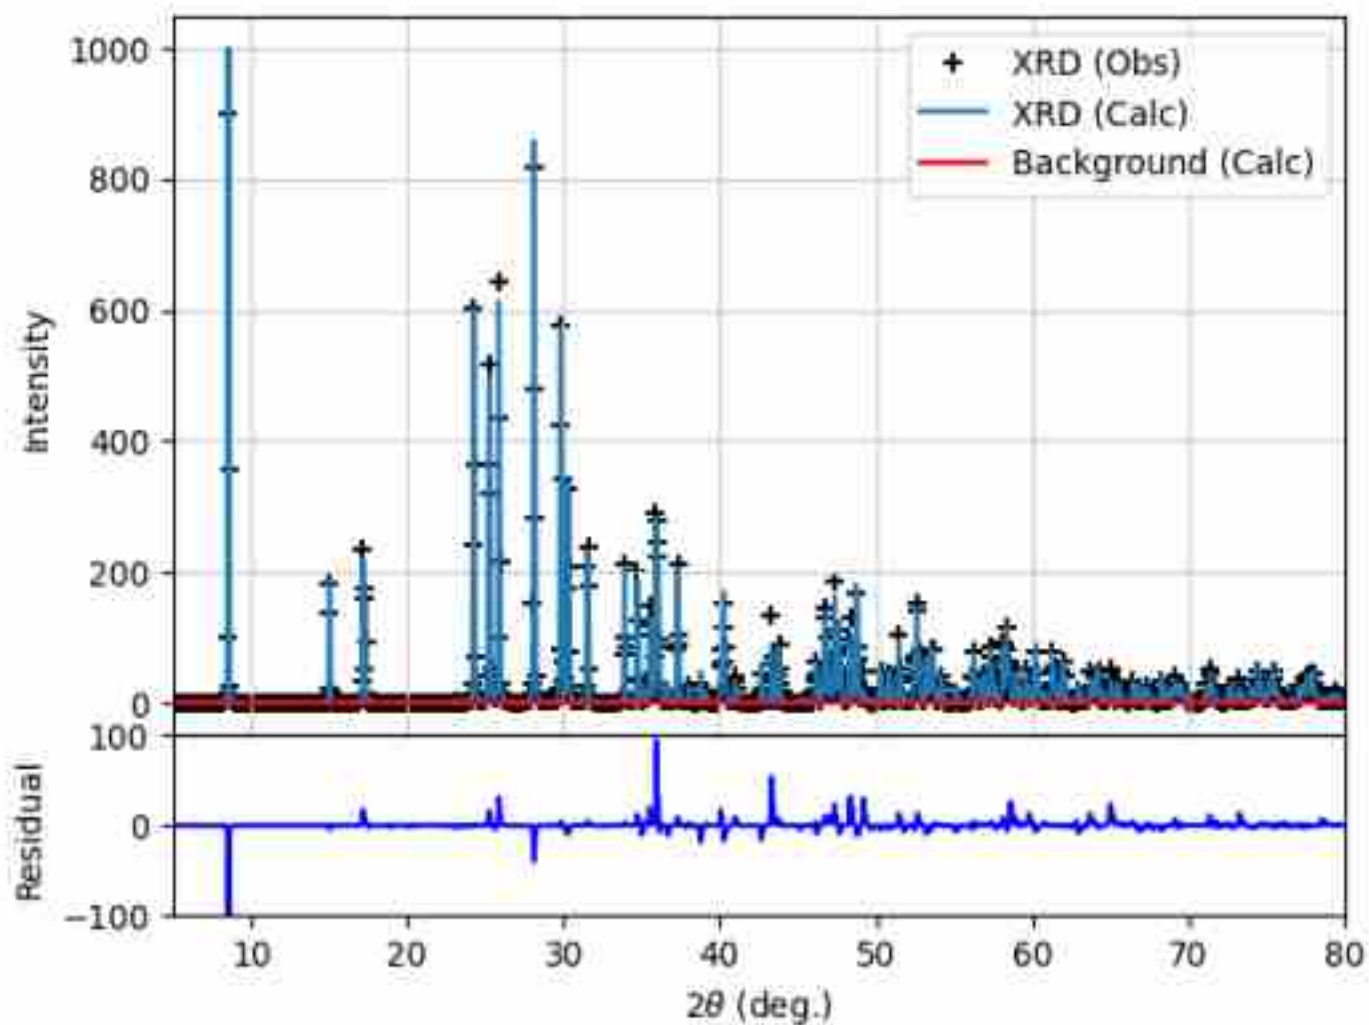

| RMSE before RR | Rwp      | RMSE after RR |
|----------------|----------|---------------|
| 0.413          | 15.01311 | 0.46215       |



# Zr<sub>4</sub>V<sub>4</sub>Co<sub>4</sub>

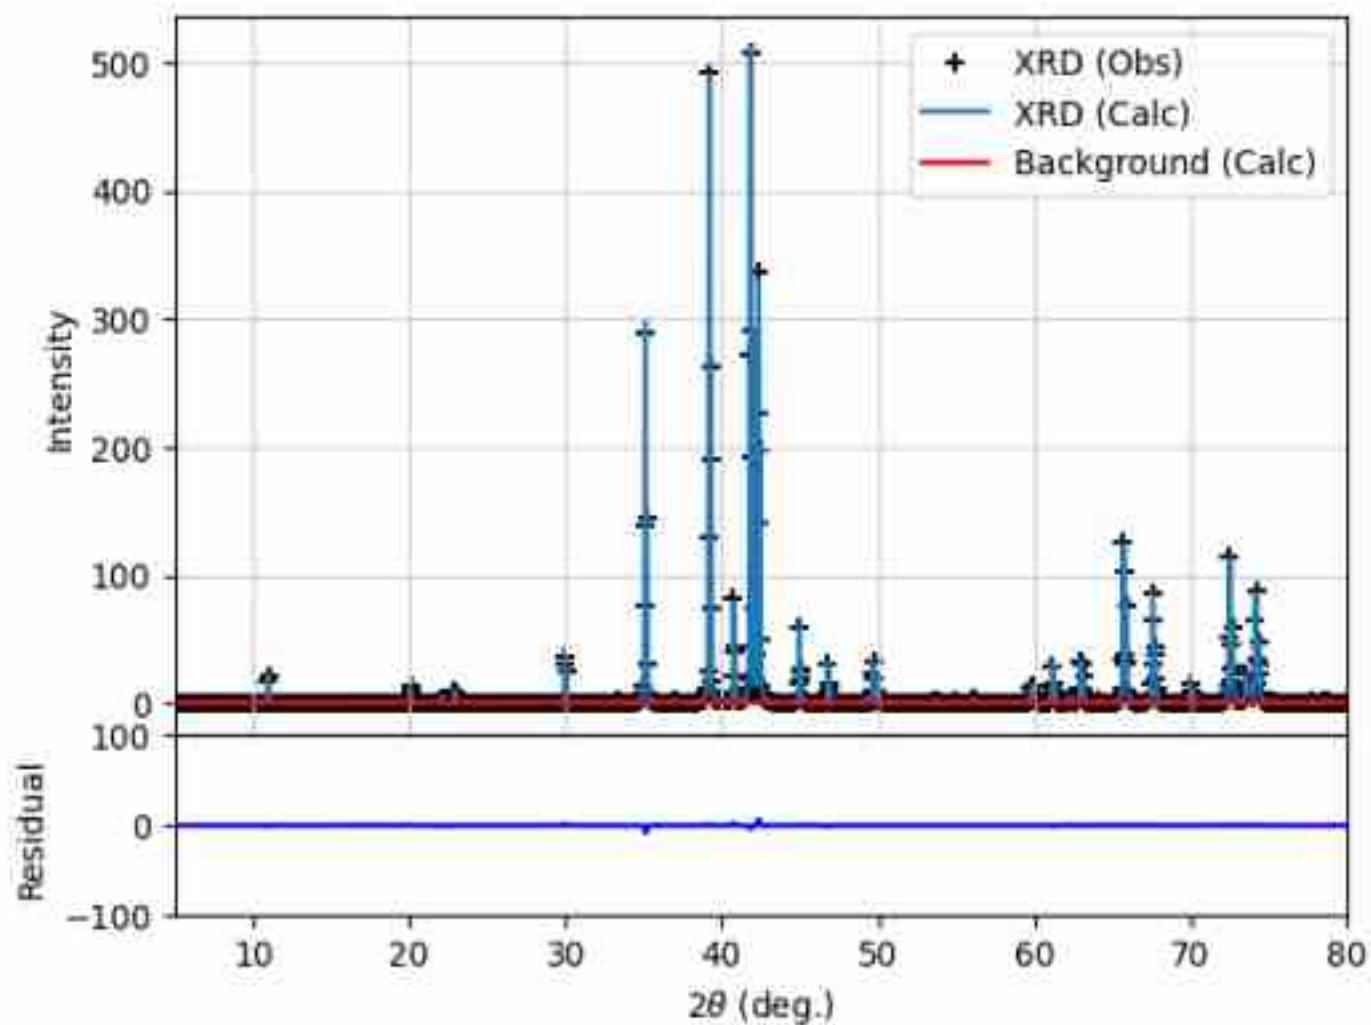

| RMSE before RR | Rwp     | RMSE after RR |
|----------------|---------|---------------|
| 0.413          | 2.33068 | 0.41383       |

# Cs<sub>2</sub>H<sub>2</sub>I<sub>2</sub>F<sub>14</sub>

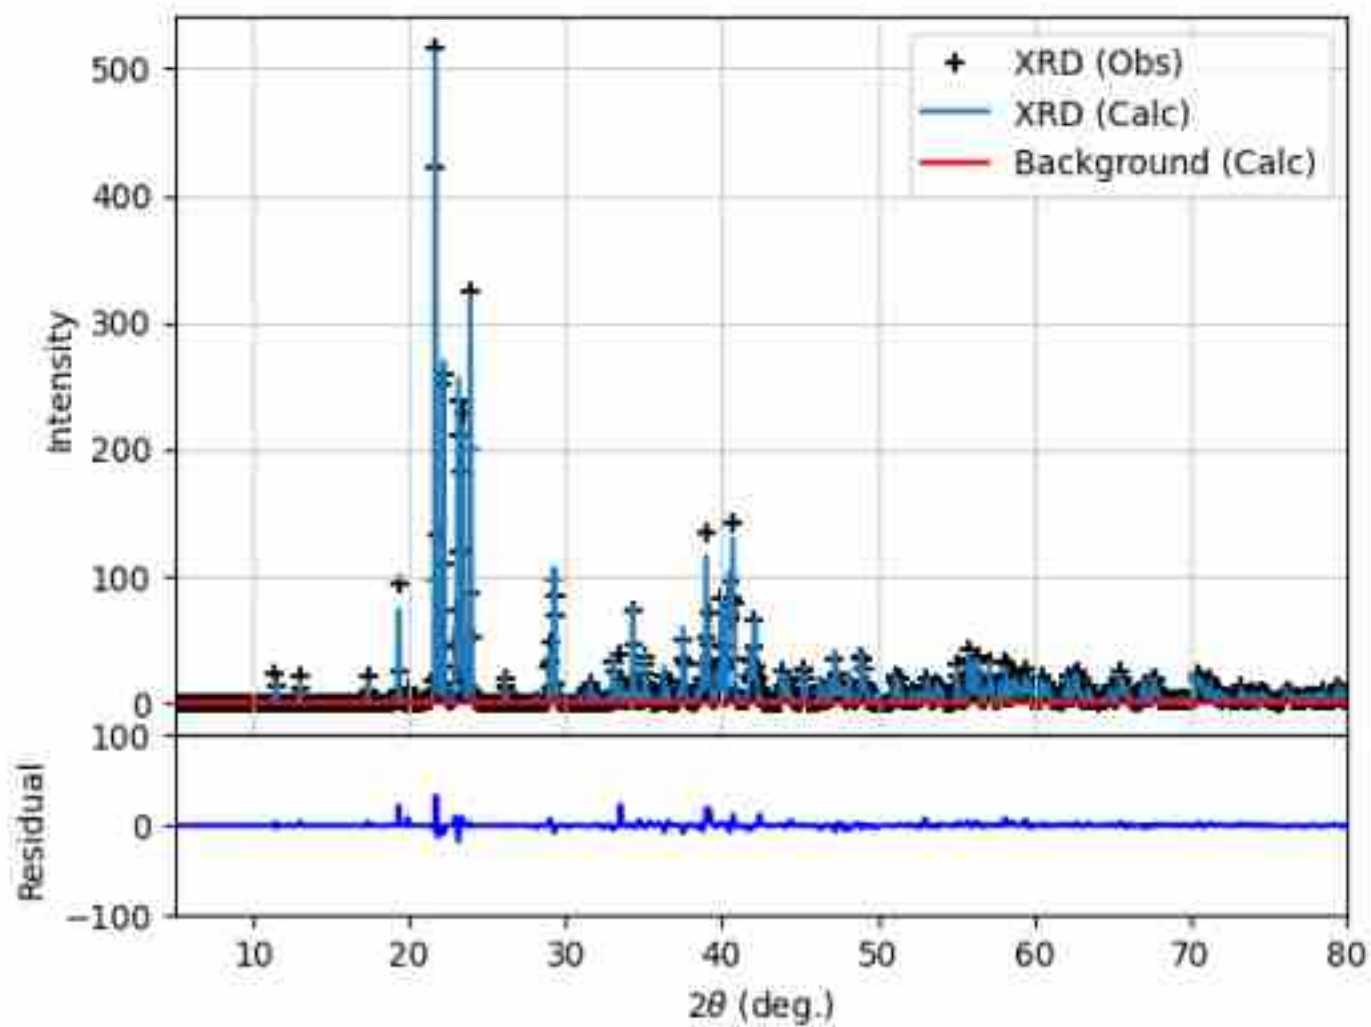

| RMSE before RR | Rwp      | RMSE after RR |
|----------------|----------|---------------|
| 0.414          | 15.01945 | None          |

# Li<sub>2</sub>Co<sub>2</sub>Si<sub>4</sub>O<sub>12</sub>

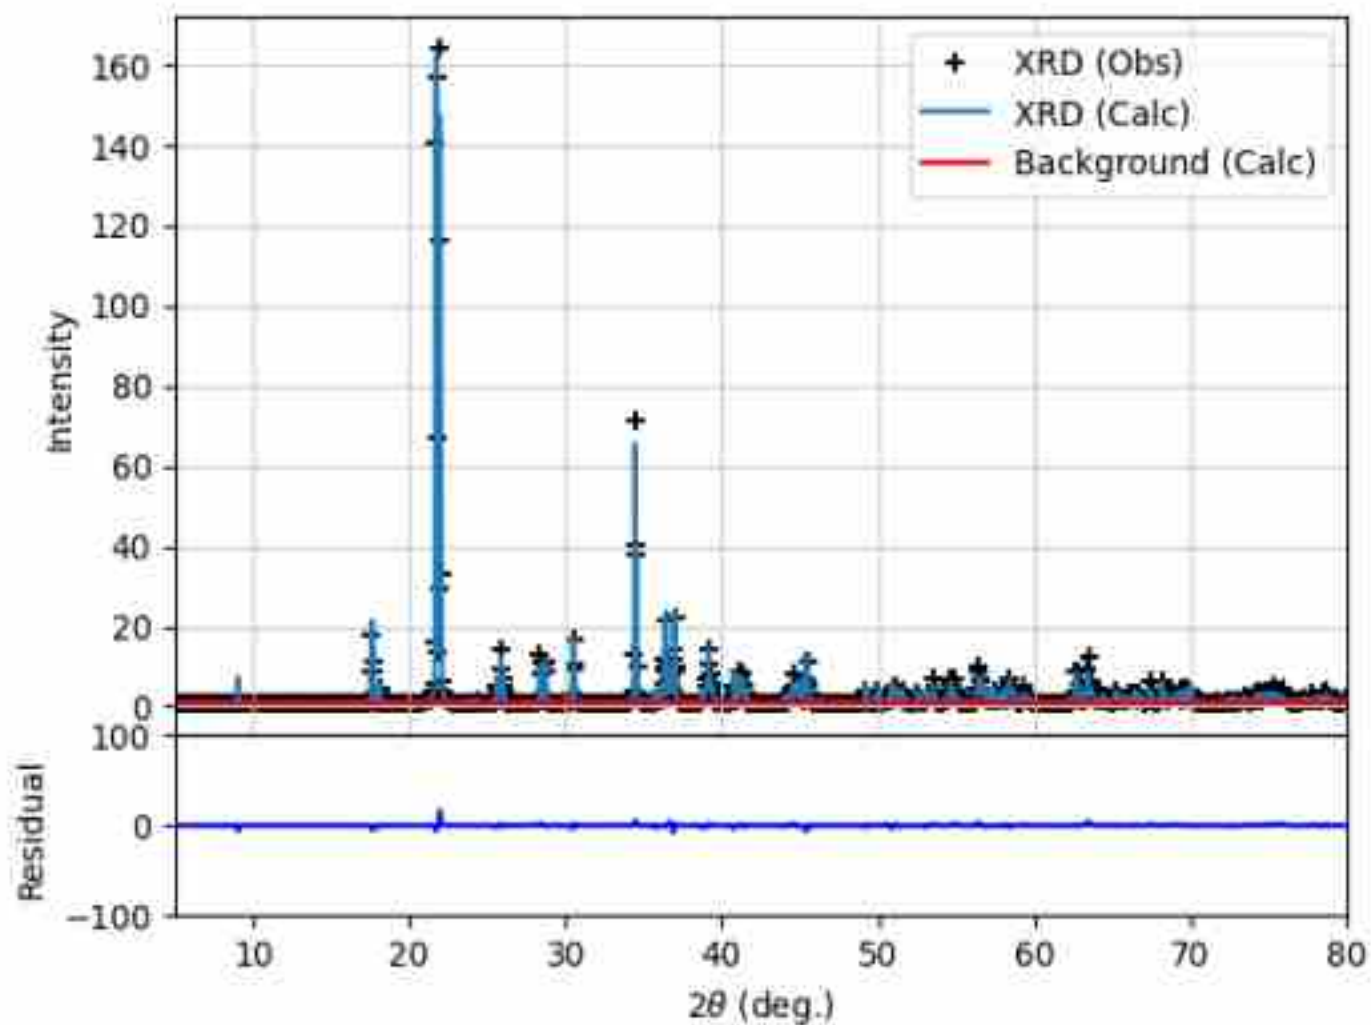

| RMSE before RR | Rwp      | RMSE after RR |
|----------------|----------|---------------|
| 0.414          | 22.55516 | None          |

# A110C6N2

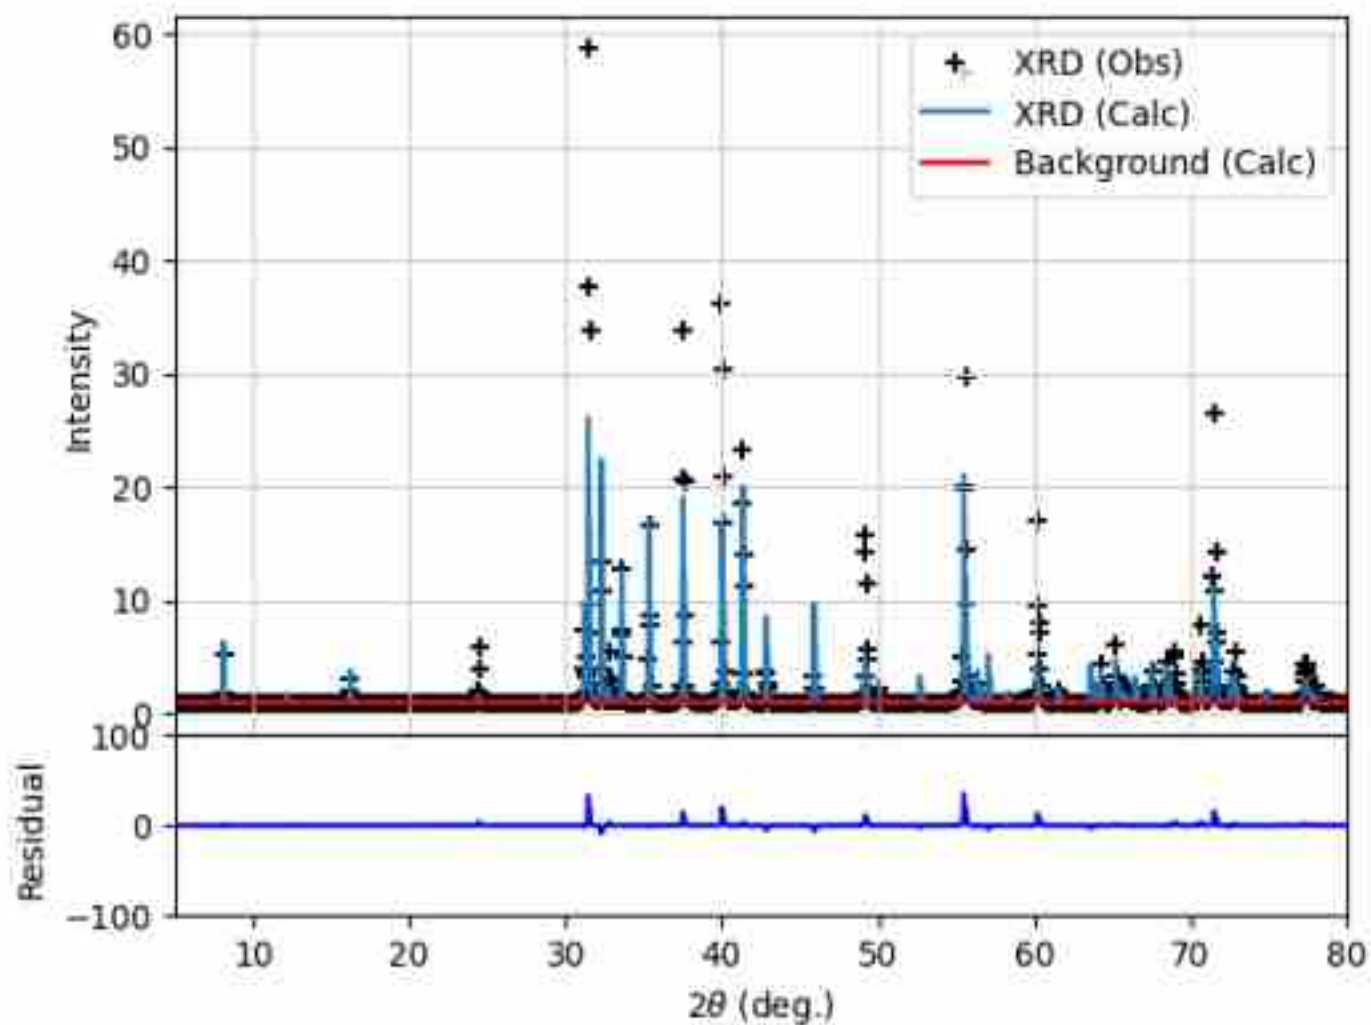

| RMSE before RR | Rwp      | RMSE after RR |
|----------------|----------|---------------|
| 0.415          | 38.15183 | 0.39998       |

# Li<sub>6</sub>Mn<sub>3</sub>Co<sub>1</sub>O<sub>10</sub>

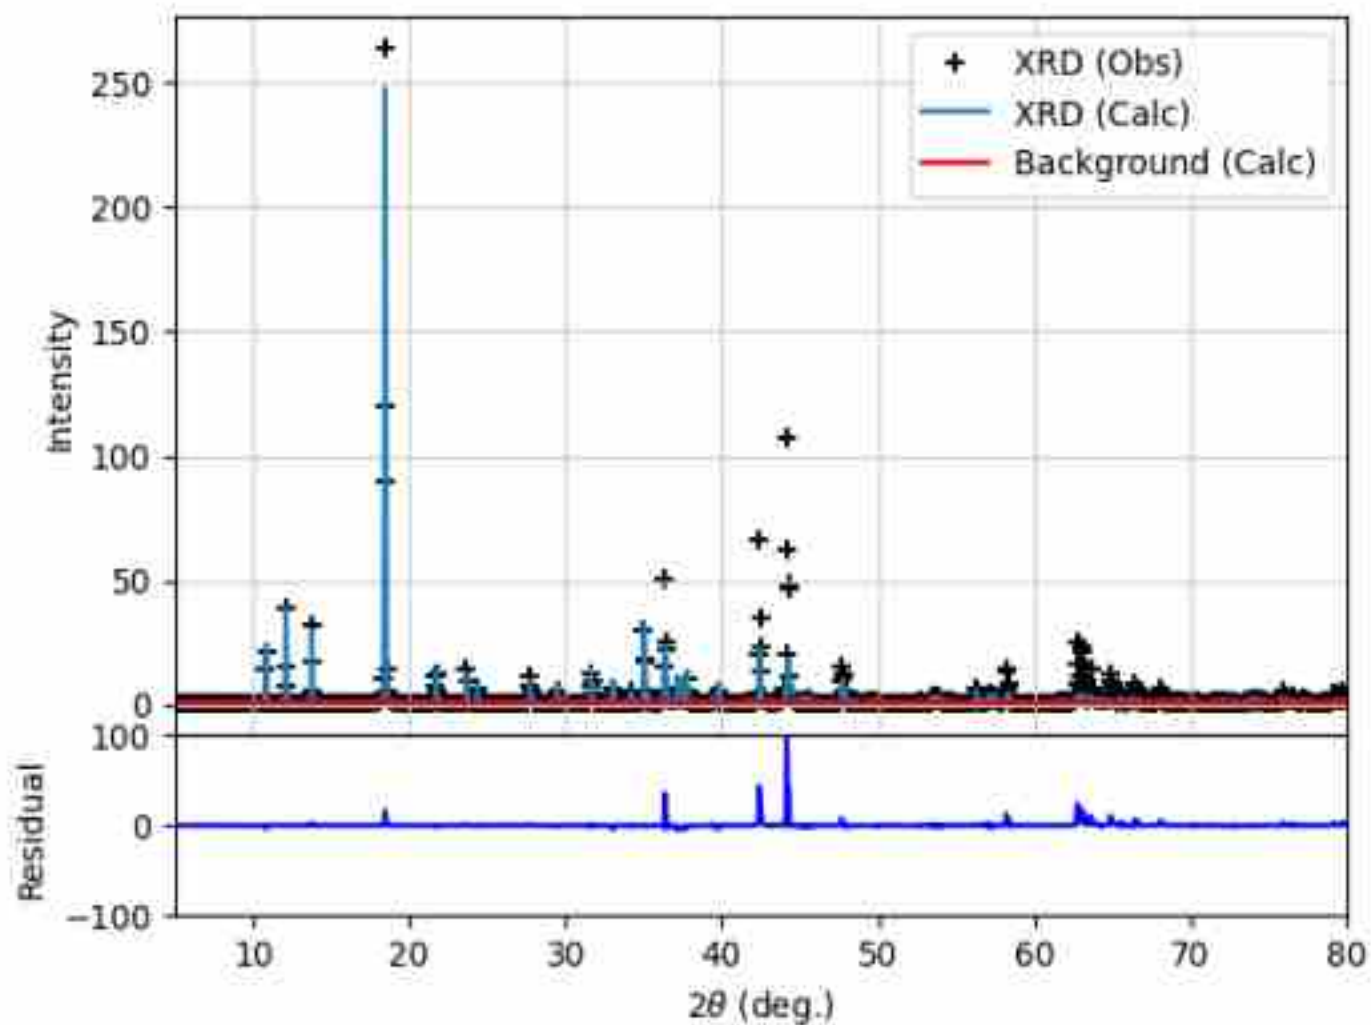

| RMSE before RR | Rwp      | RMSE after RR |
|----------------|----------|---------------|
| 0.415          | 41.78716 | None          |

# Si<sub>2</sub>Hg<sub>6</sub>O<sub>7</sub>

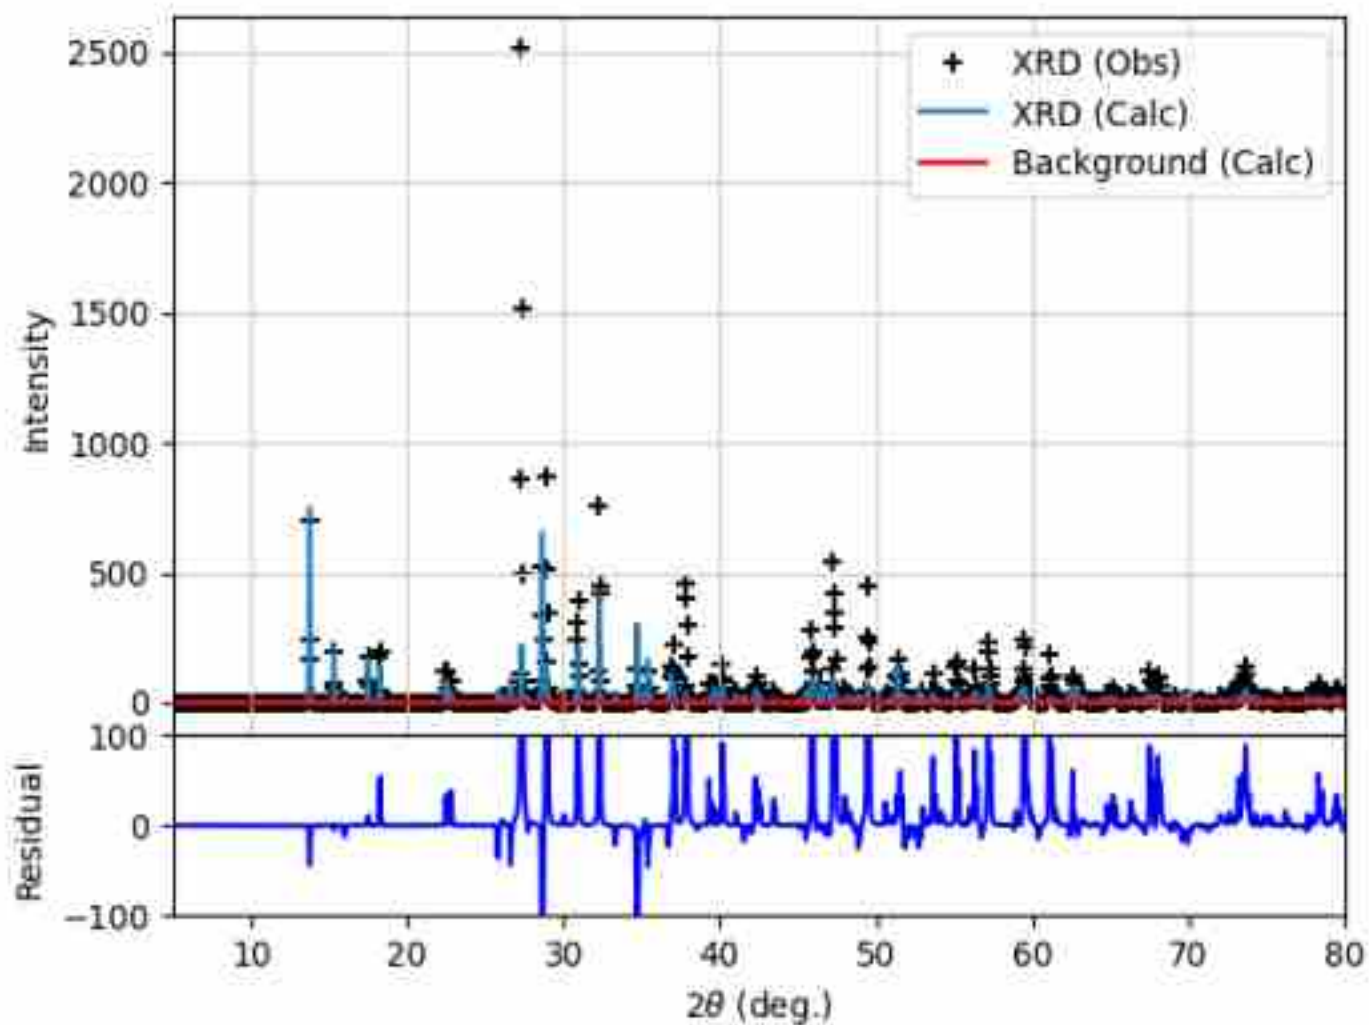

| RMSE before RR | Rwp      | RMSE after RR |
|----------------|----------|---------------|
| 0.415          | 68.93349 | None          |

# Sr<sub>3</sub>Li<sub>4</sub>Ge<sub>2</sub>N<sub>6</sub>

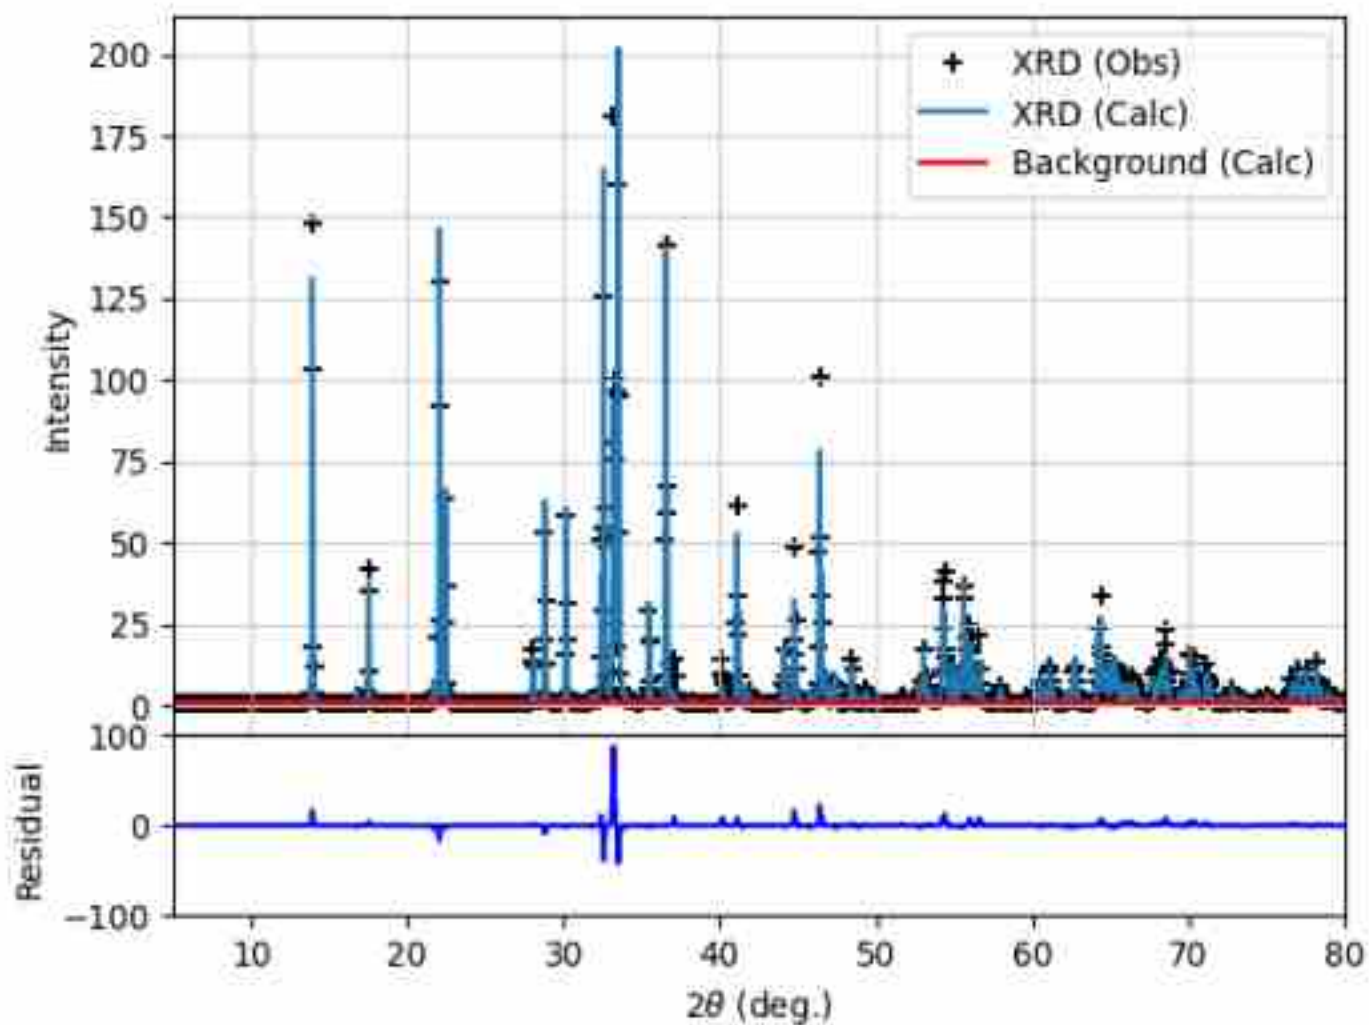

| RMSE before RR | Rwp      | RMSE after RR |
|----------------|----------|---------------|
| 0.415          | 22.15112 | None          |

# Ca<sub>7</sub>Mg<sub>2</sub>N<sub>6</sub>

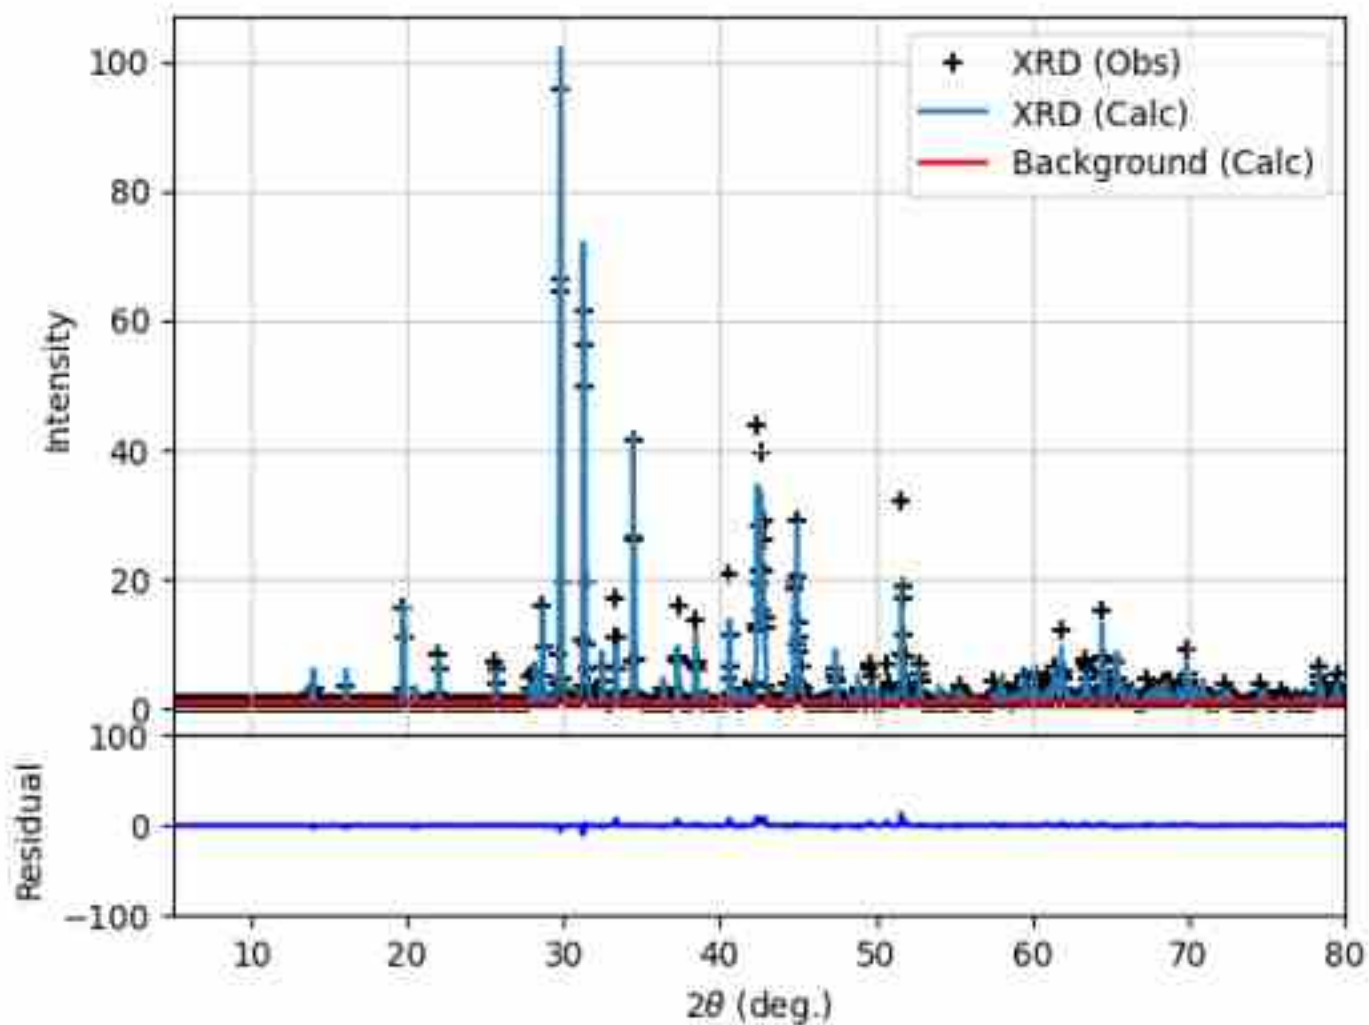

| RMSE before RR | Rwp      | RMSE after RR |
|----------------|----------|---------------|
| 0.416          | 20.68544 | None          |



# Sc7C2C110

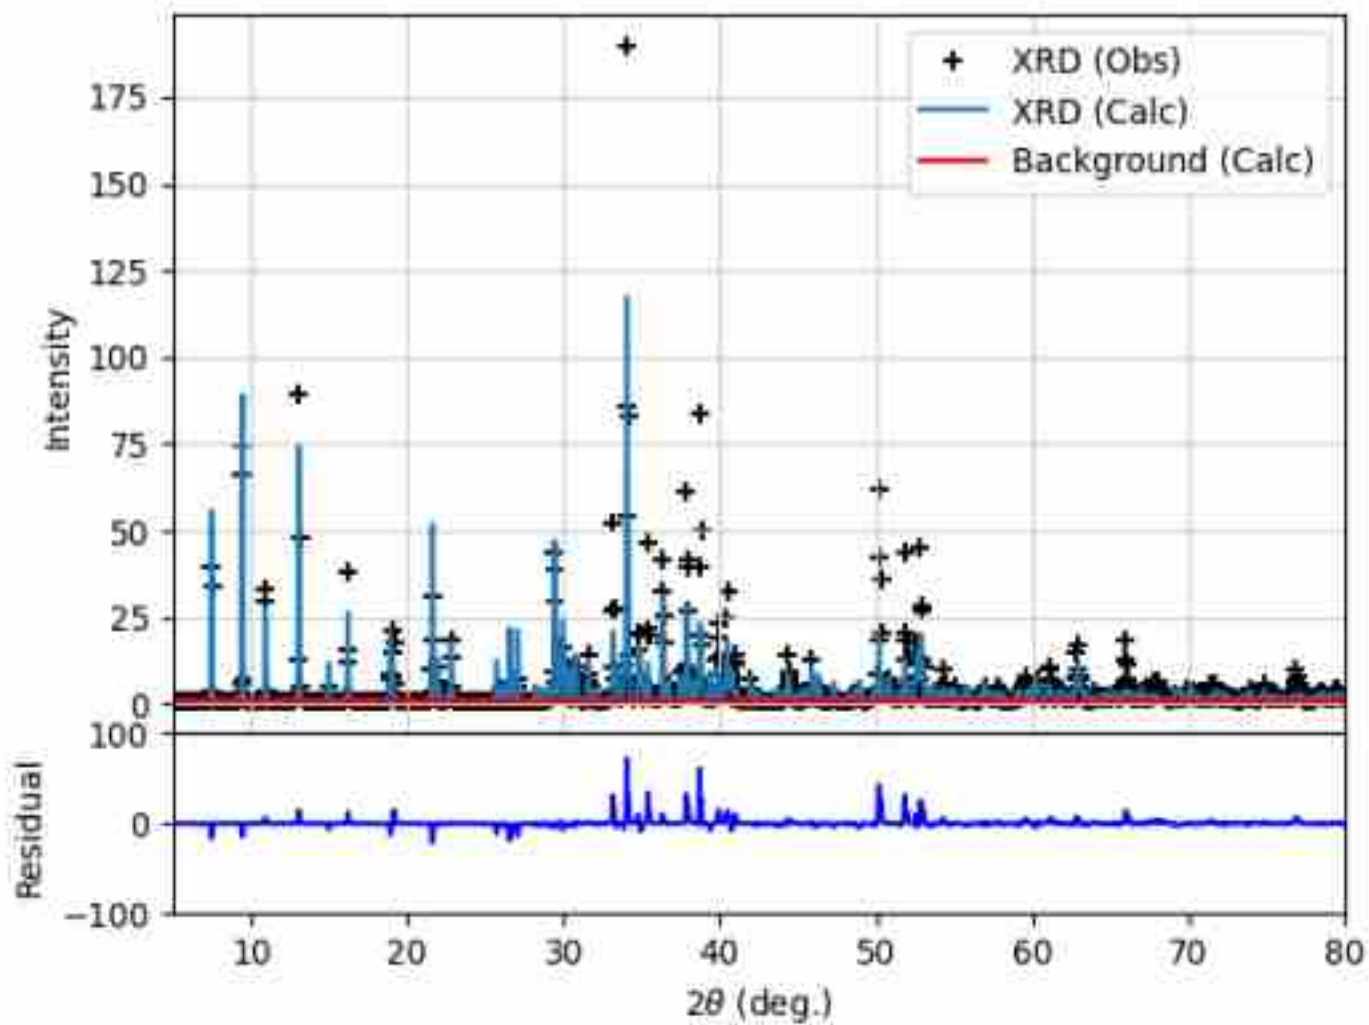

| RMSE before RR | Rwp      | RMSE after RR |
|----------------|----------|---------------|
| 0.416          | 55.27784 | None          |

# V4O7F5

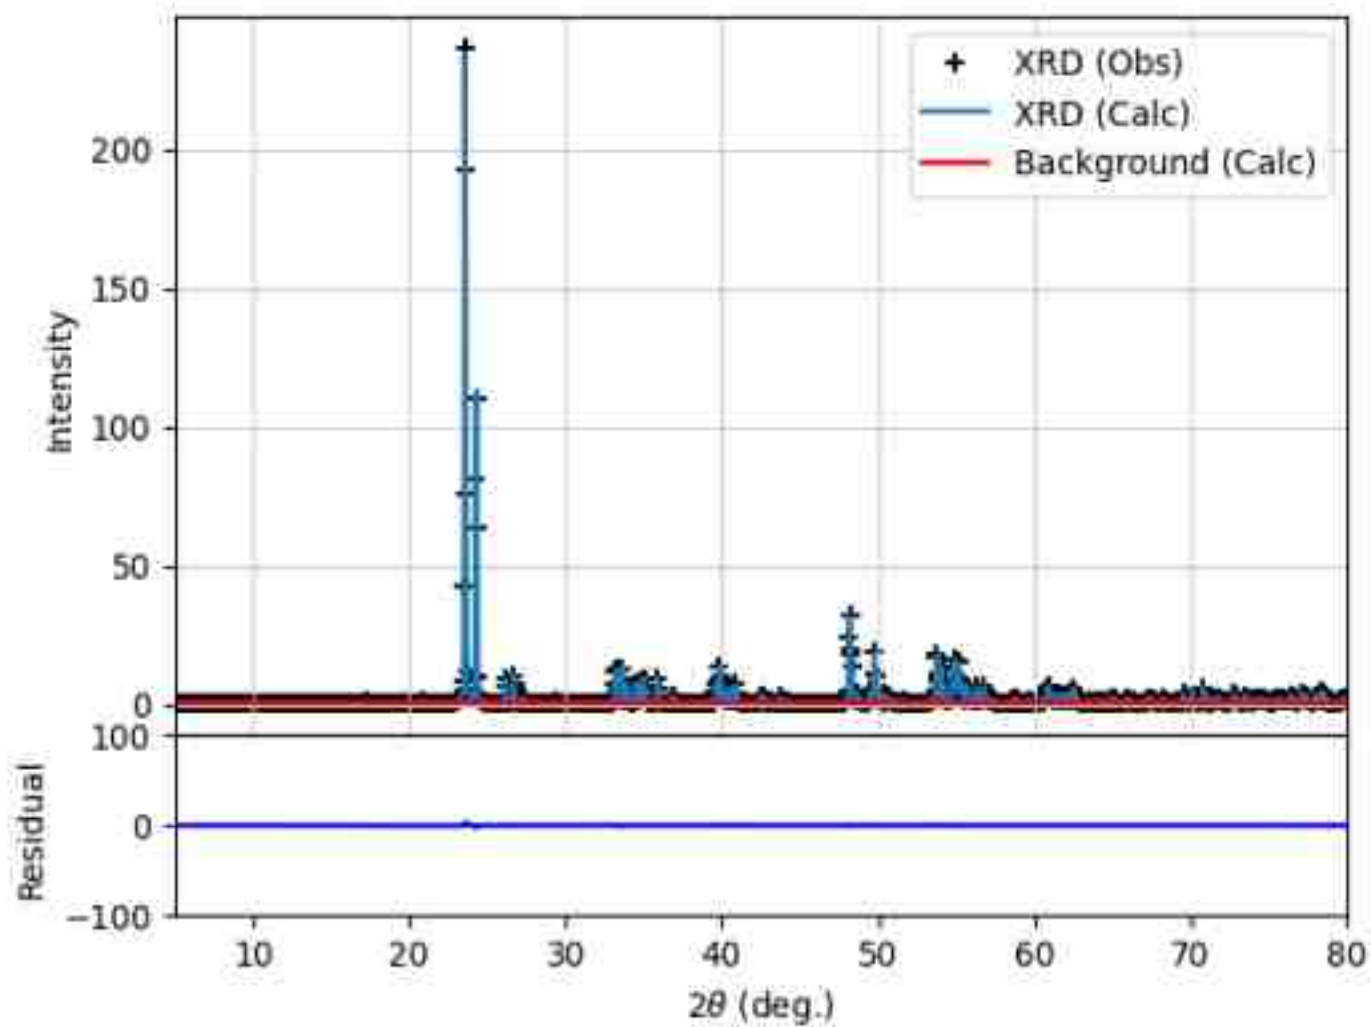

| RMSE before RR | Rwp     | RMSE after RR |
|----------------|---------|---------------|
| 0.416          | 2.46215 | 0.42029       |

# As<sub>2</sub>Br<sub>6</sub>F<sub>12</sub>

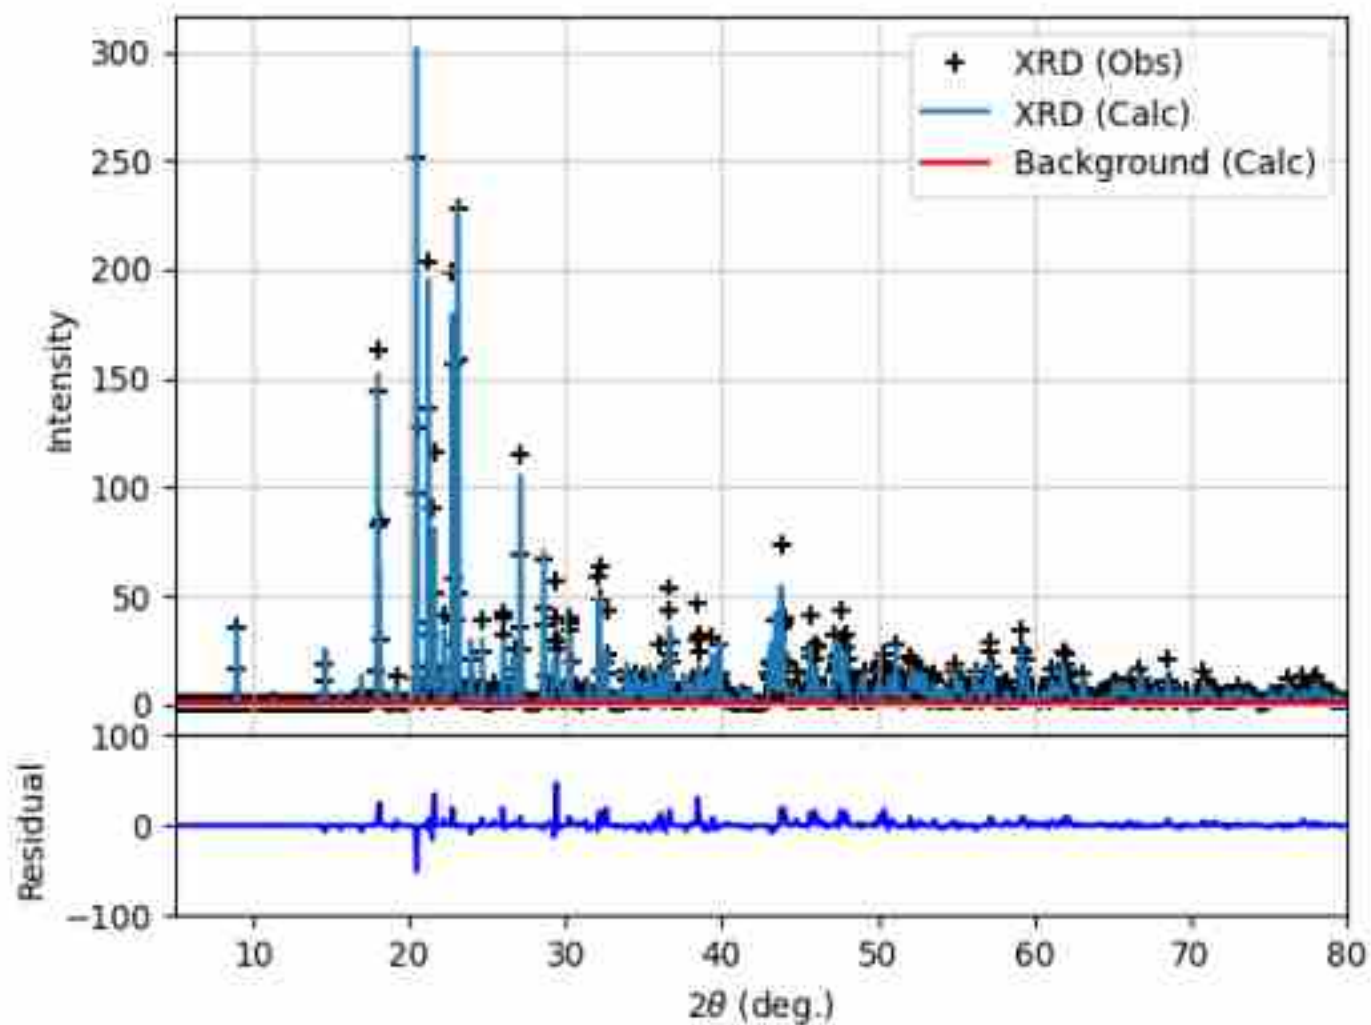

| RMSE before RR | Rwp      | RMSE after RR |
|----------------|----------|---------------|
| 0.417          | 30.13331 | None          |

# Cr4N4

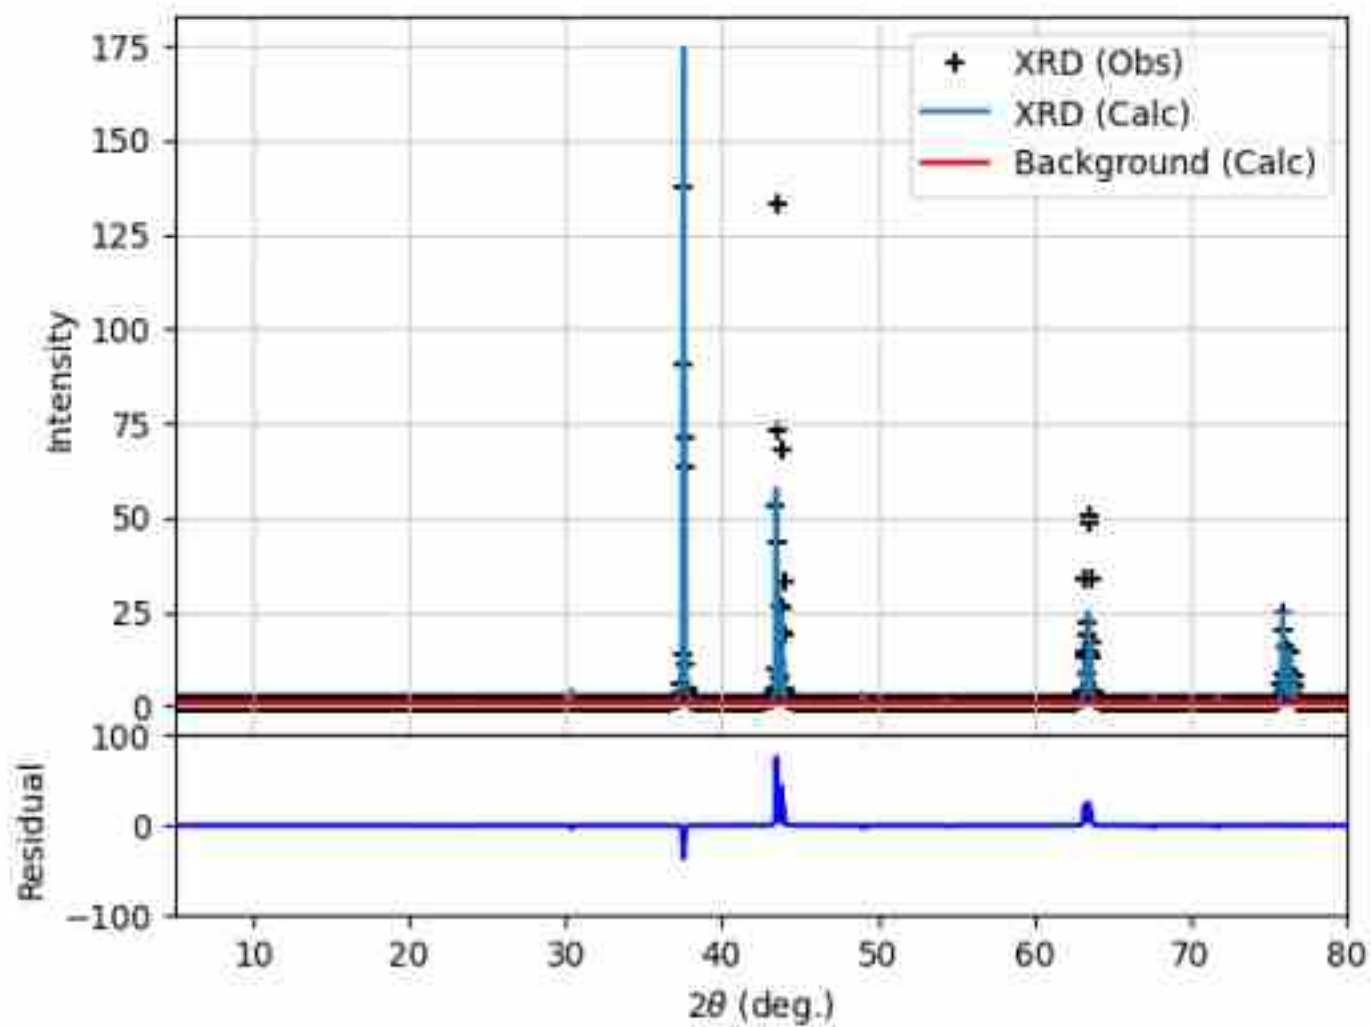

| RMSE before RR | Rwp     | RMSE after RR |
|----------------|---------|---------------|
| 0.417          | 35.5887 | None          |

# Y1Sc1O2

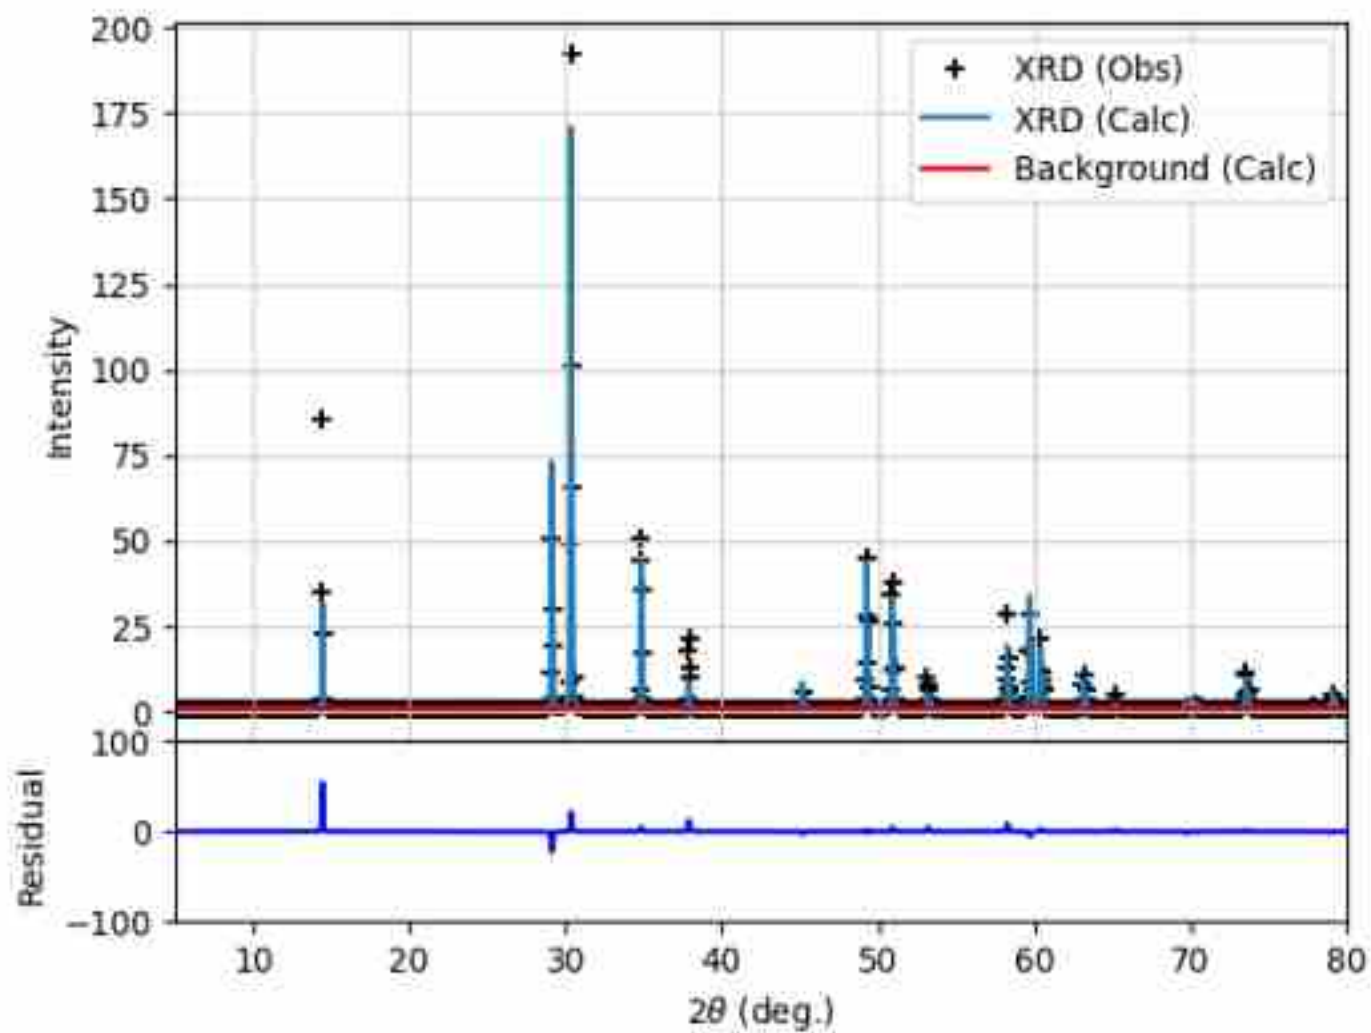

| RMSE before RR | Rwp     | RMSE after RR |
|----------------|---------|---------------|
| 0.417          | 22.7314 | 0.4225        |

# Be<sub>4</sub>Te<sub>10</sub>O<sub>7</sub>

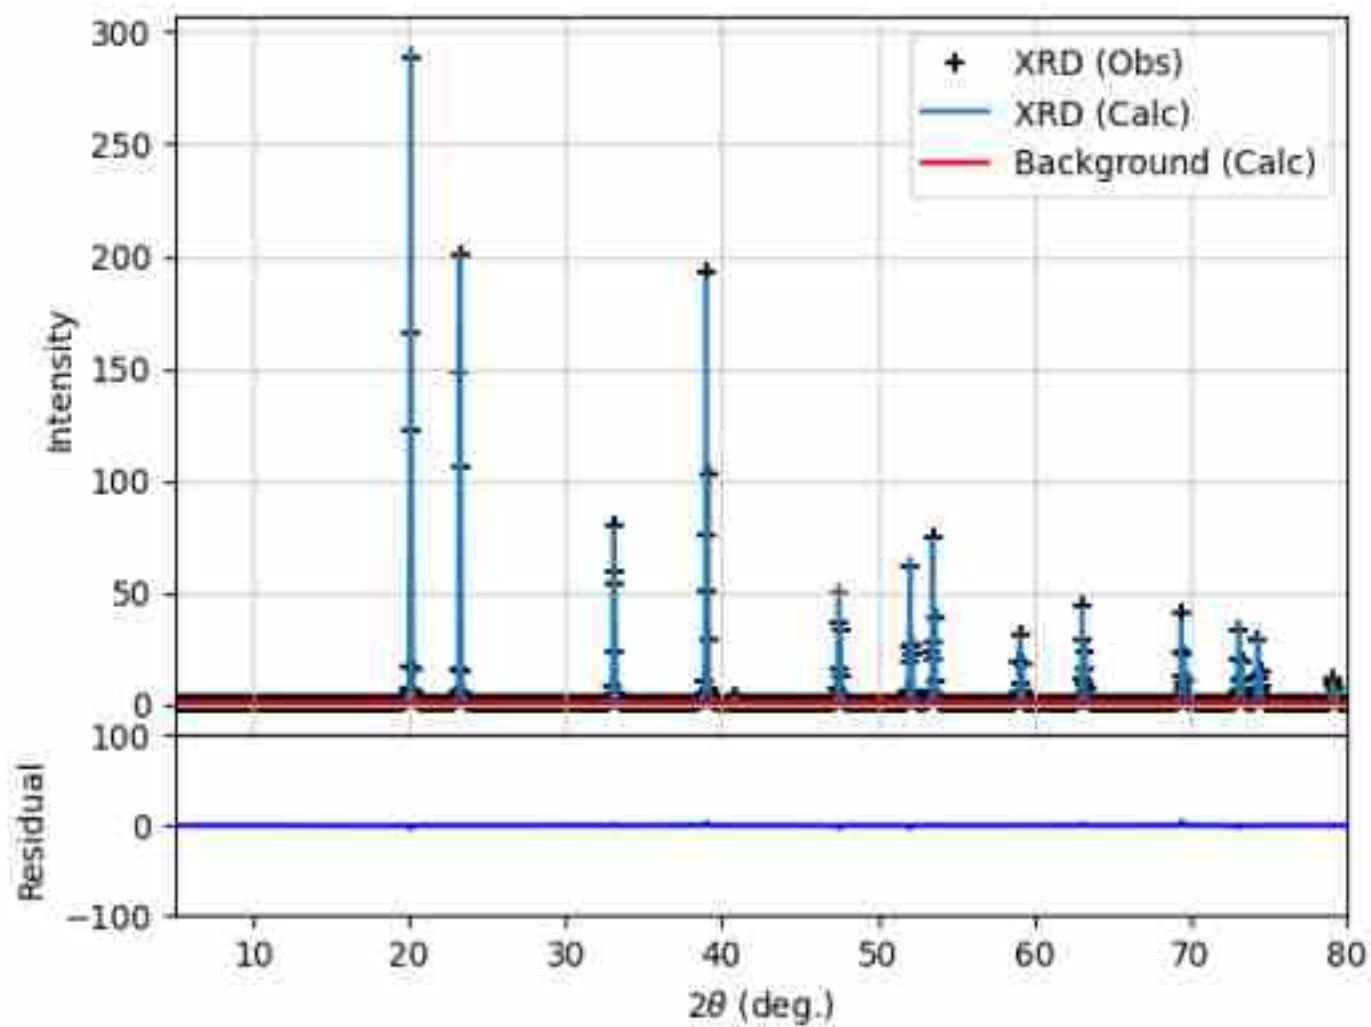

| RMSE before RR | Rwp     | RMSE after RR |
|----------------|---------|---------------|
| 0.418          | 2.75111 | 0.20668       |

# Bi8O12

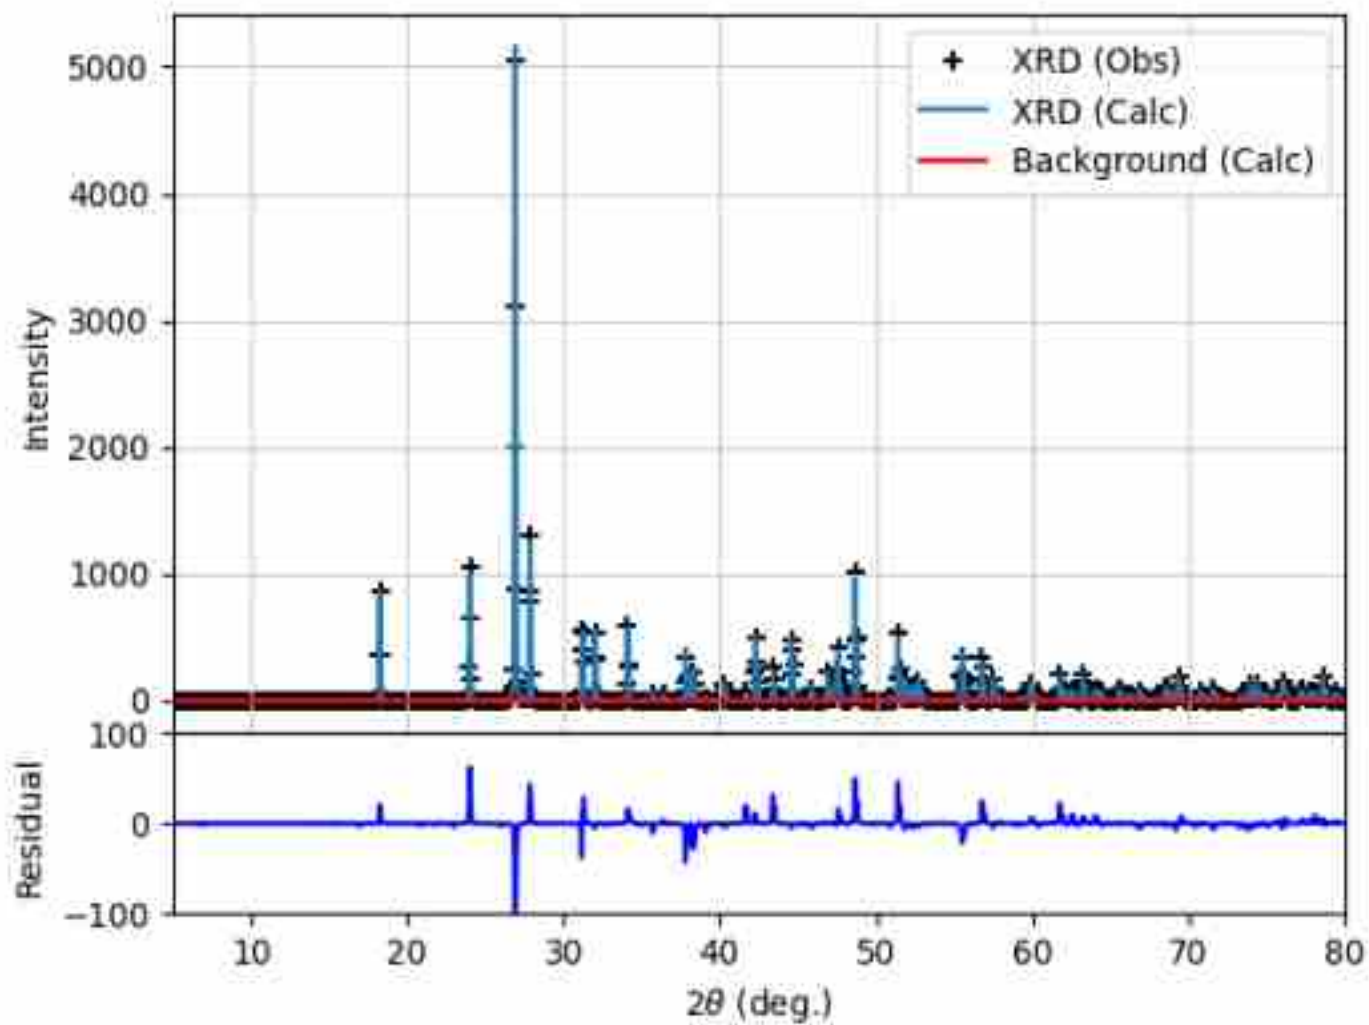

| RMSE before RR | Rwp     | RMSE after RR |
|----------------|---------|---------------|
| 0.418          | 6.55567 | 0.45958       |

# Na<sub>8</sub>Sn<sub>4</sub>O<sub>8</sub>

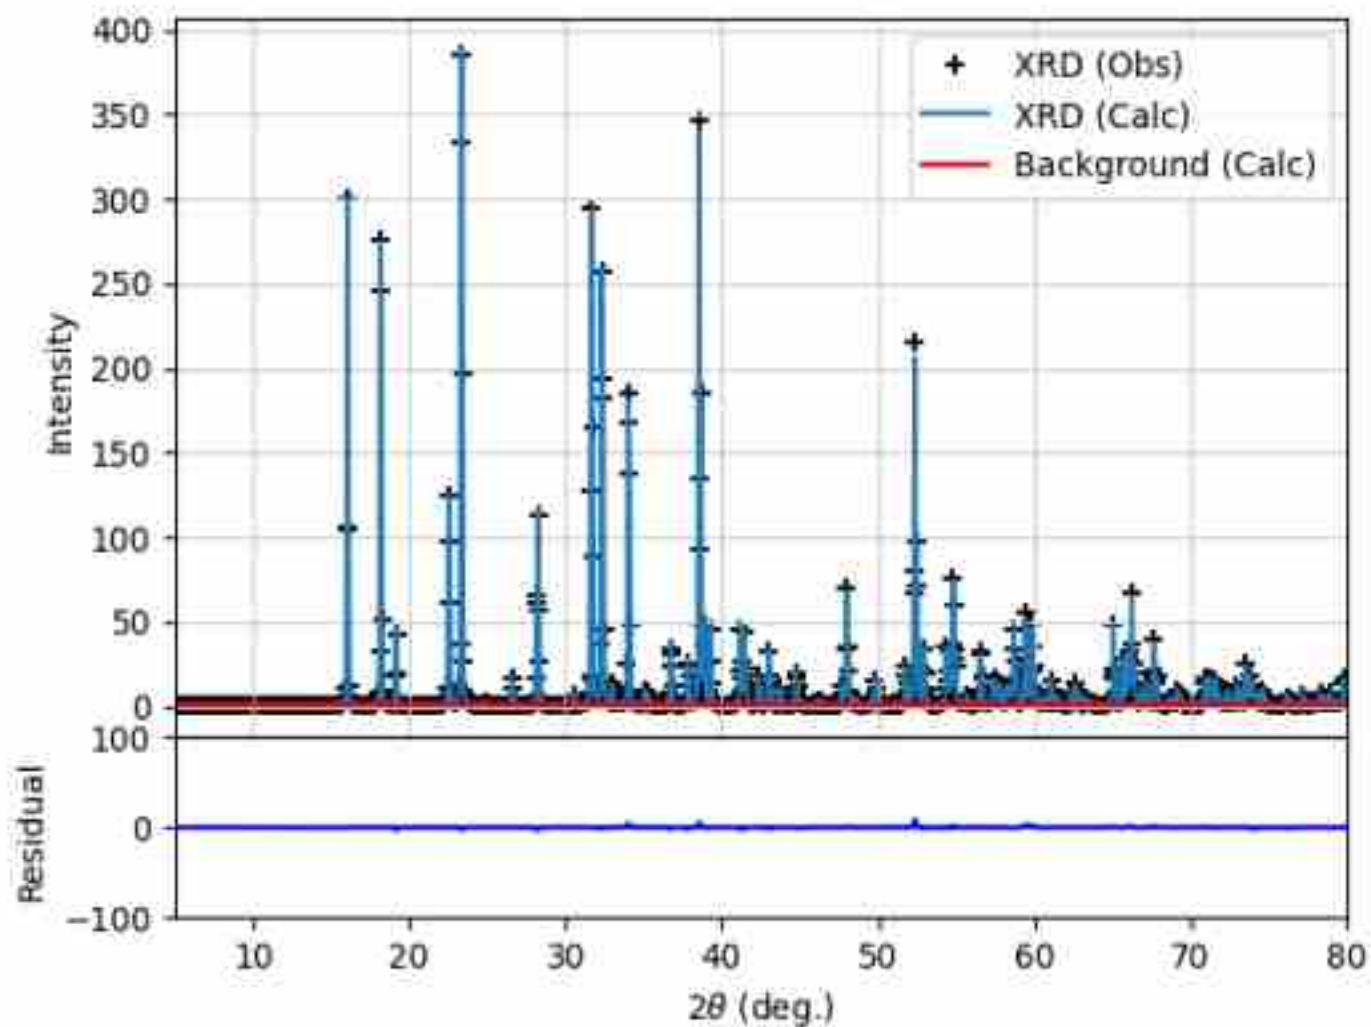

| RMSE before RR | Rwp     | RMSE after RR |
|----------------|---------|---------------|
| 0.418          | 3.35788 | 0.07746       |



# V6O7F5

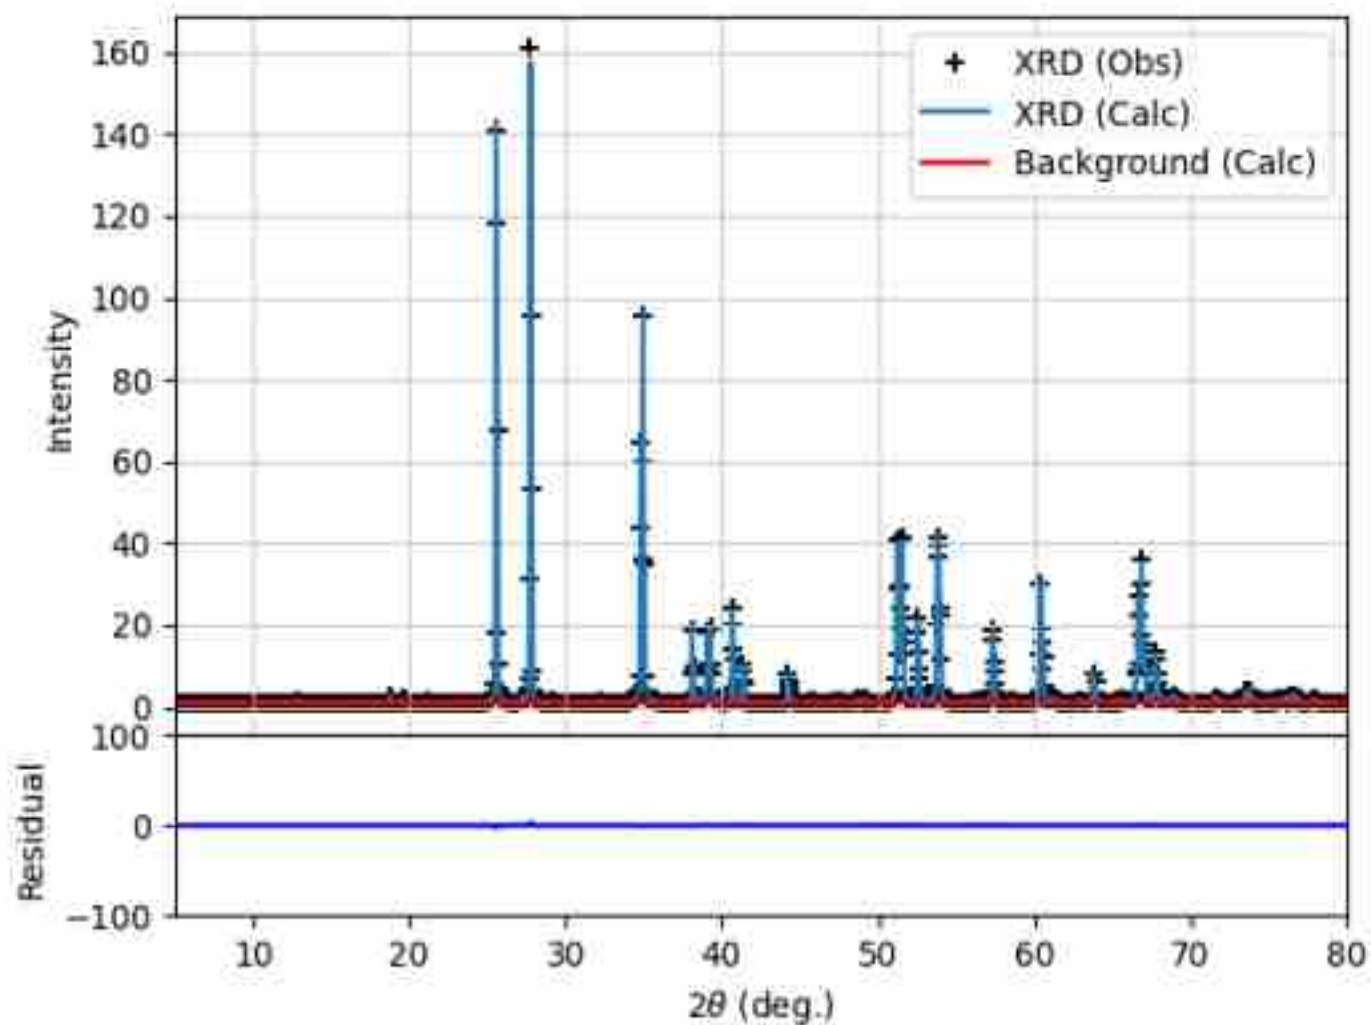

| RMSE before RR | Rwp     | RMSE after RR |
|----------------|---------|---------------|
| 0.418          | 1.63173 | 0.41297       |

# Mn6O10F2

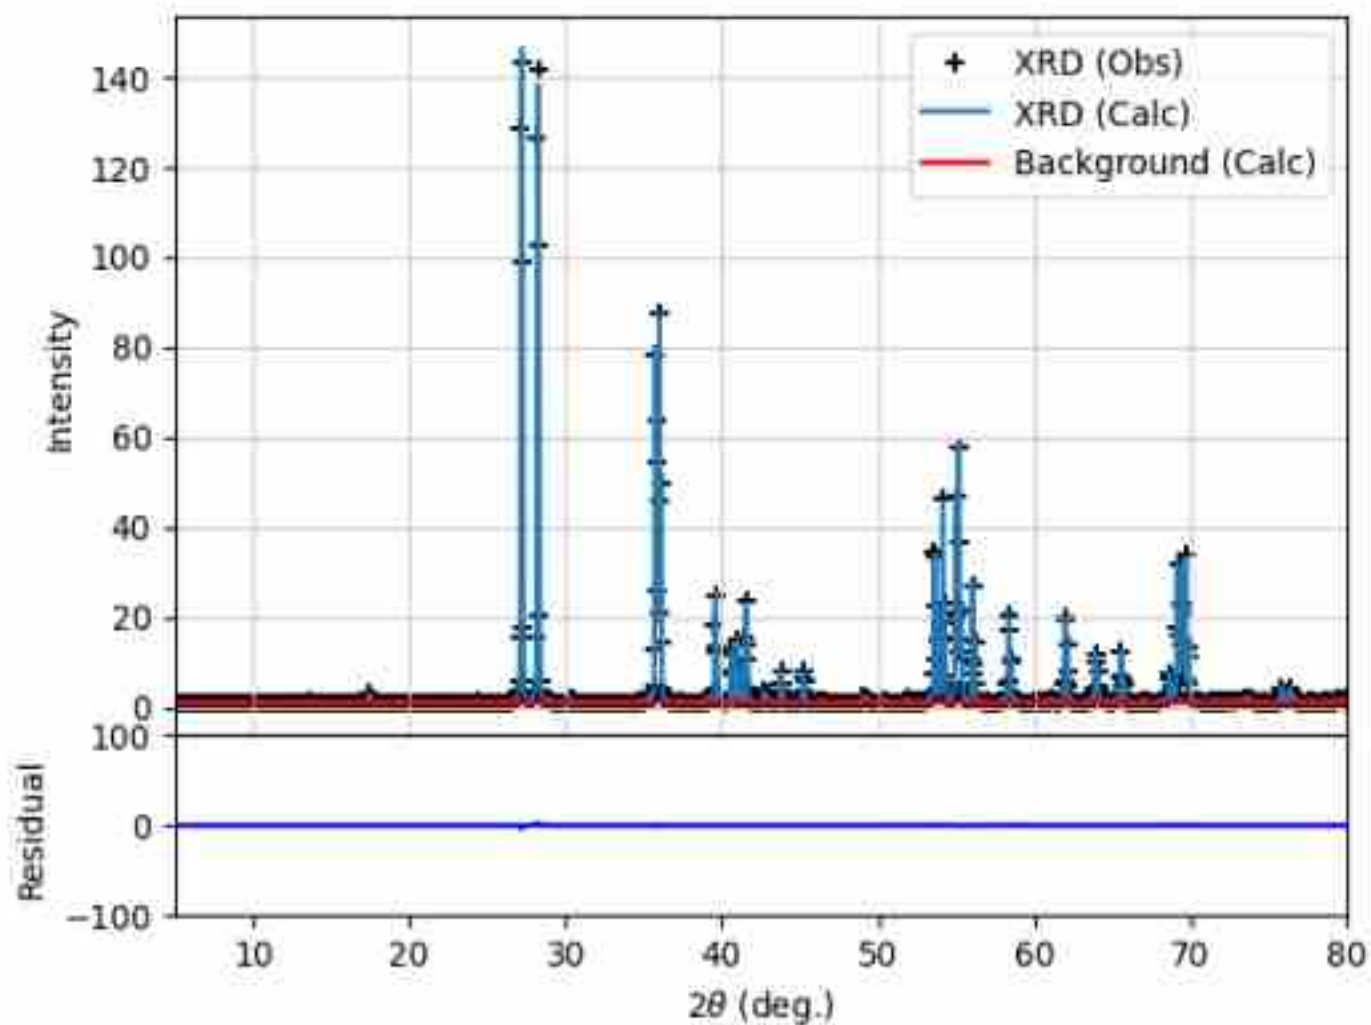

| RMSE before RR | Rwp     | RMSE after RR |
|----------------|---------|---------------|
| 0.419          | 1.76526 | 0.42679       |

Rb<sub>2</sub>Pb<sub>2</sub>F<sub>6</sub>

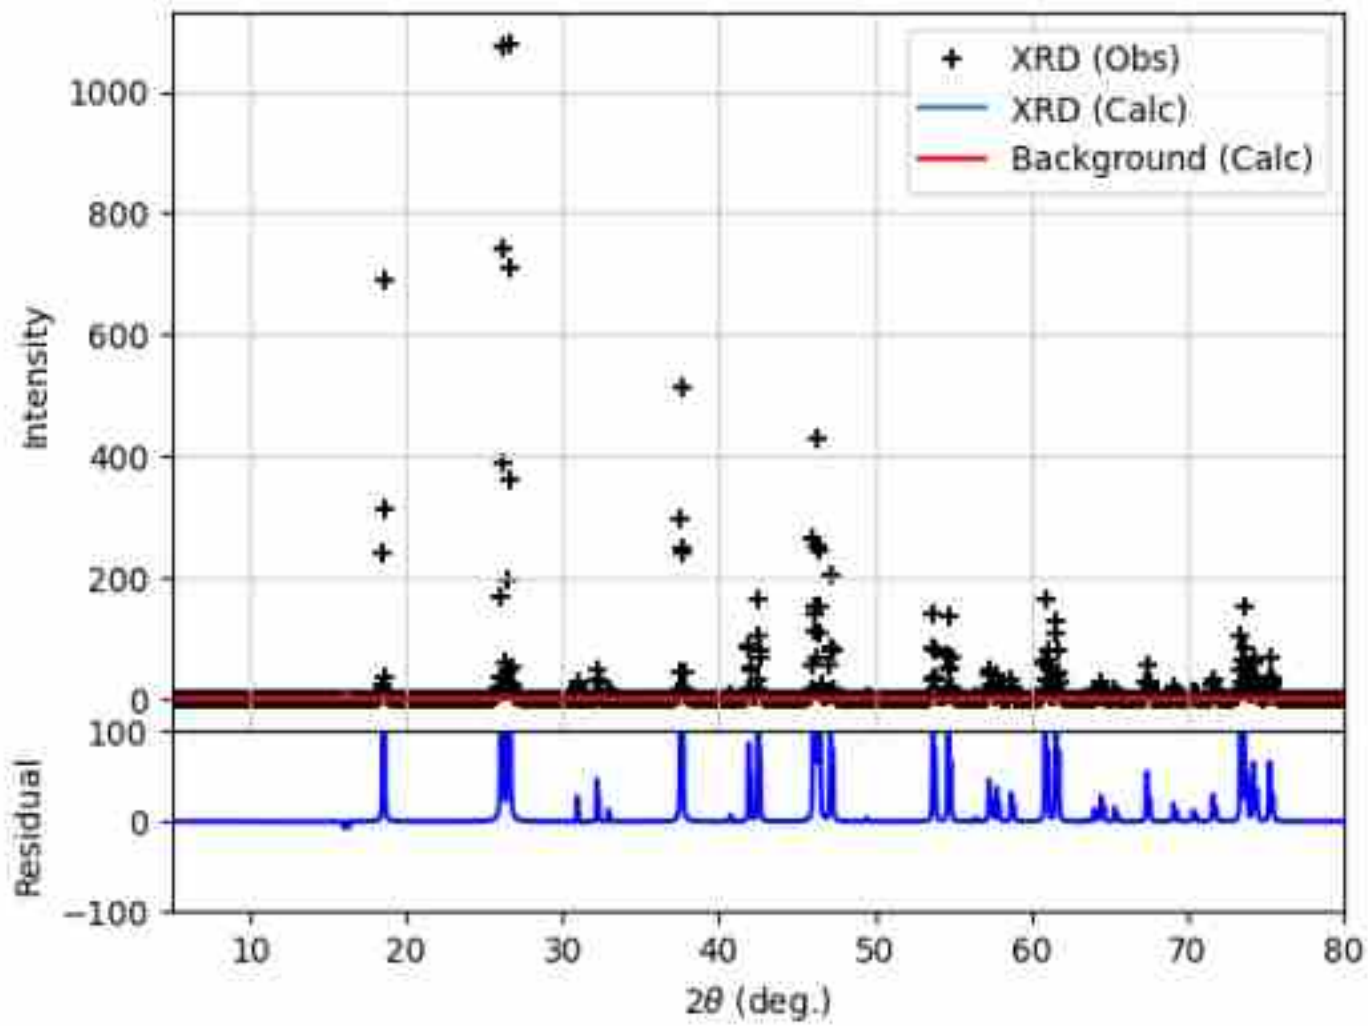

| RMSE before RR | Rwp      | RMSE after RR |
|----------------|----------|---------------|
| 0.419          | 94.10437 | None          |

# Rb<sub>4</sub>Mo<sub>2</sub>O<sub>4</sub>F<sub>8</sub>

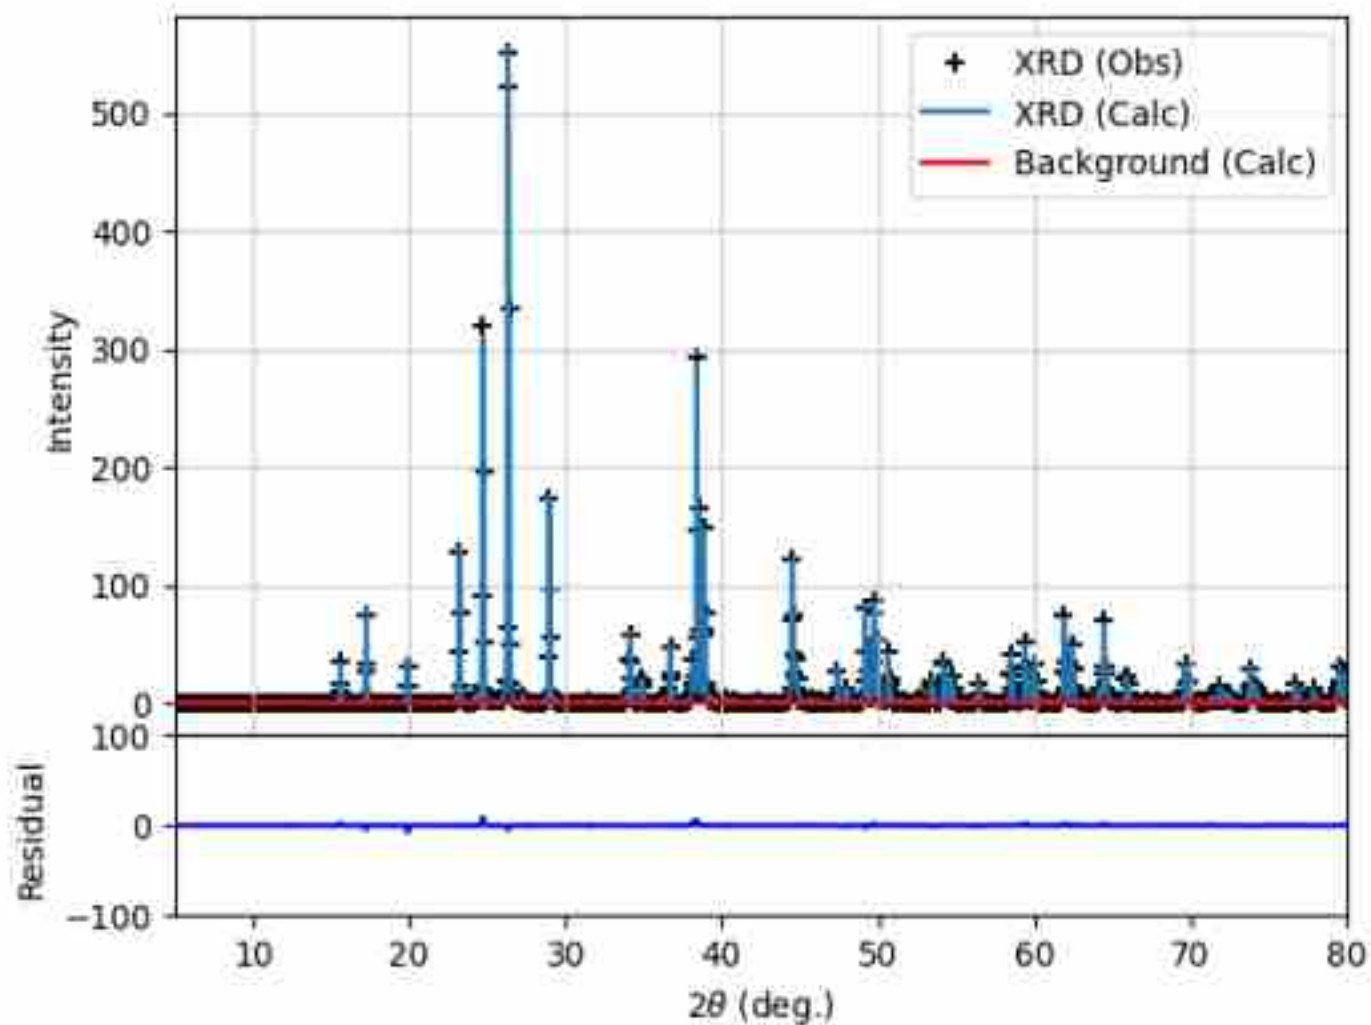

| RMSE before RR | Rwp     | RMSE after RR |
|----------------|---------|---------------|
| 0.419          | 4.44451 | None          |

# U6Cu4Sb6

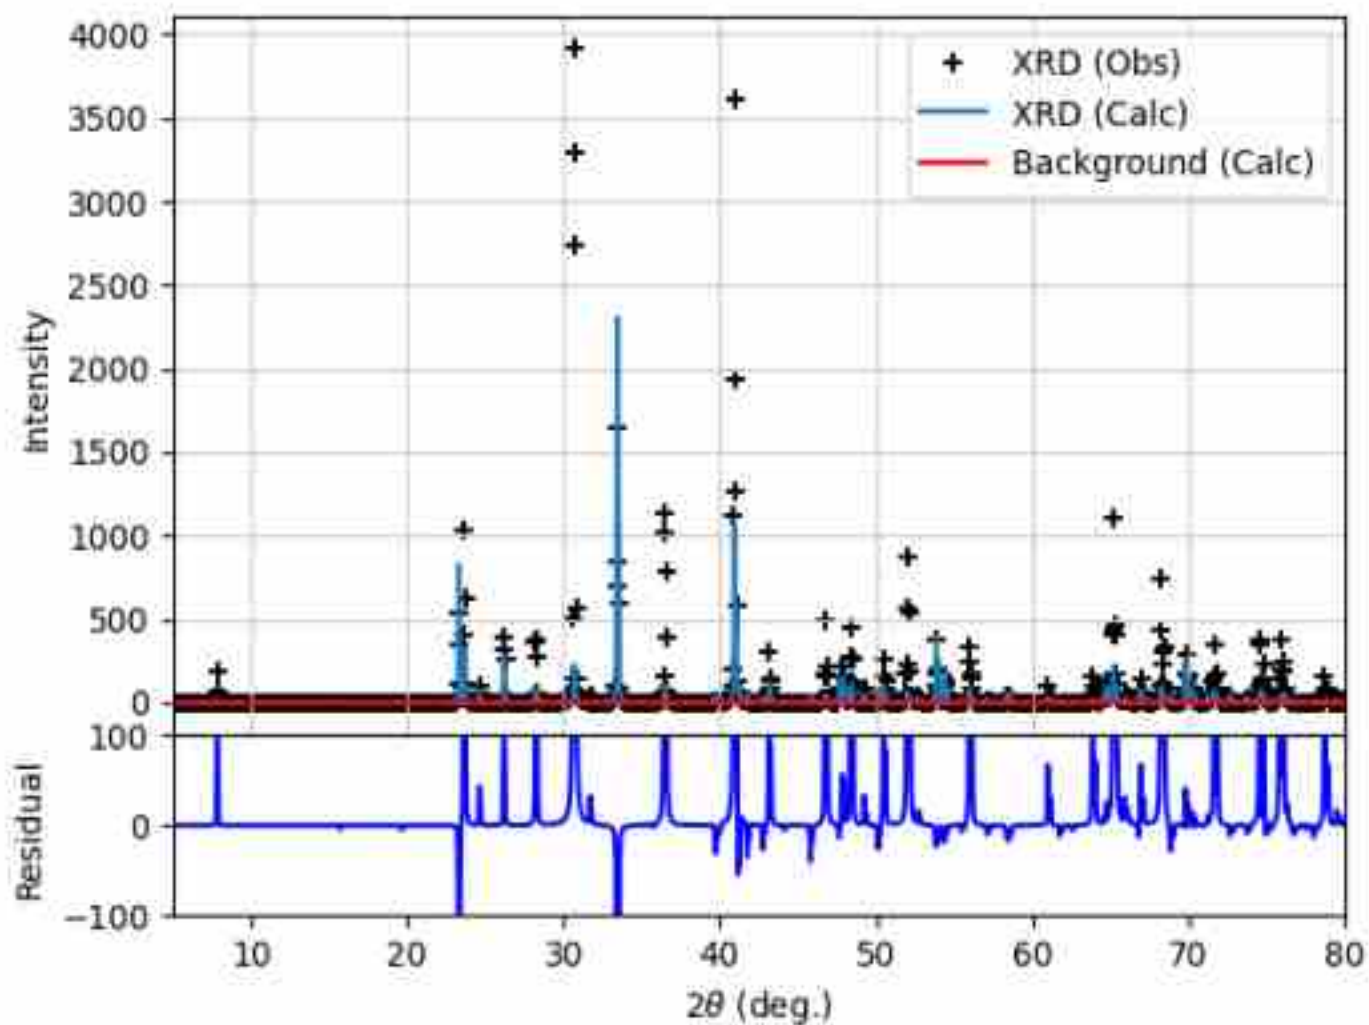

| RMSE before RR | Rwp      | RMSE after RR |
|----------------|----------|---------------|
| 0.419          | 76.63698 | 0.44248       |

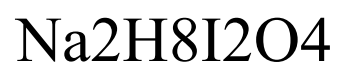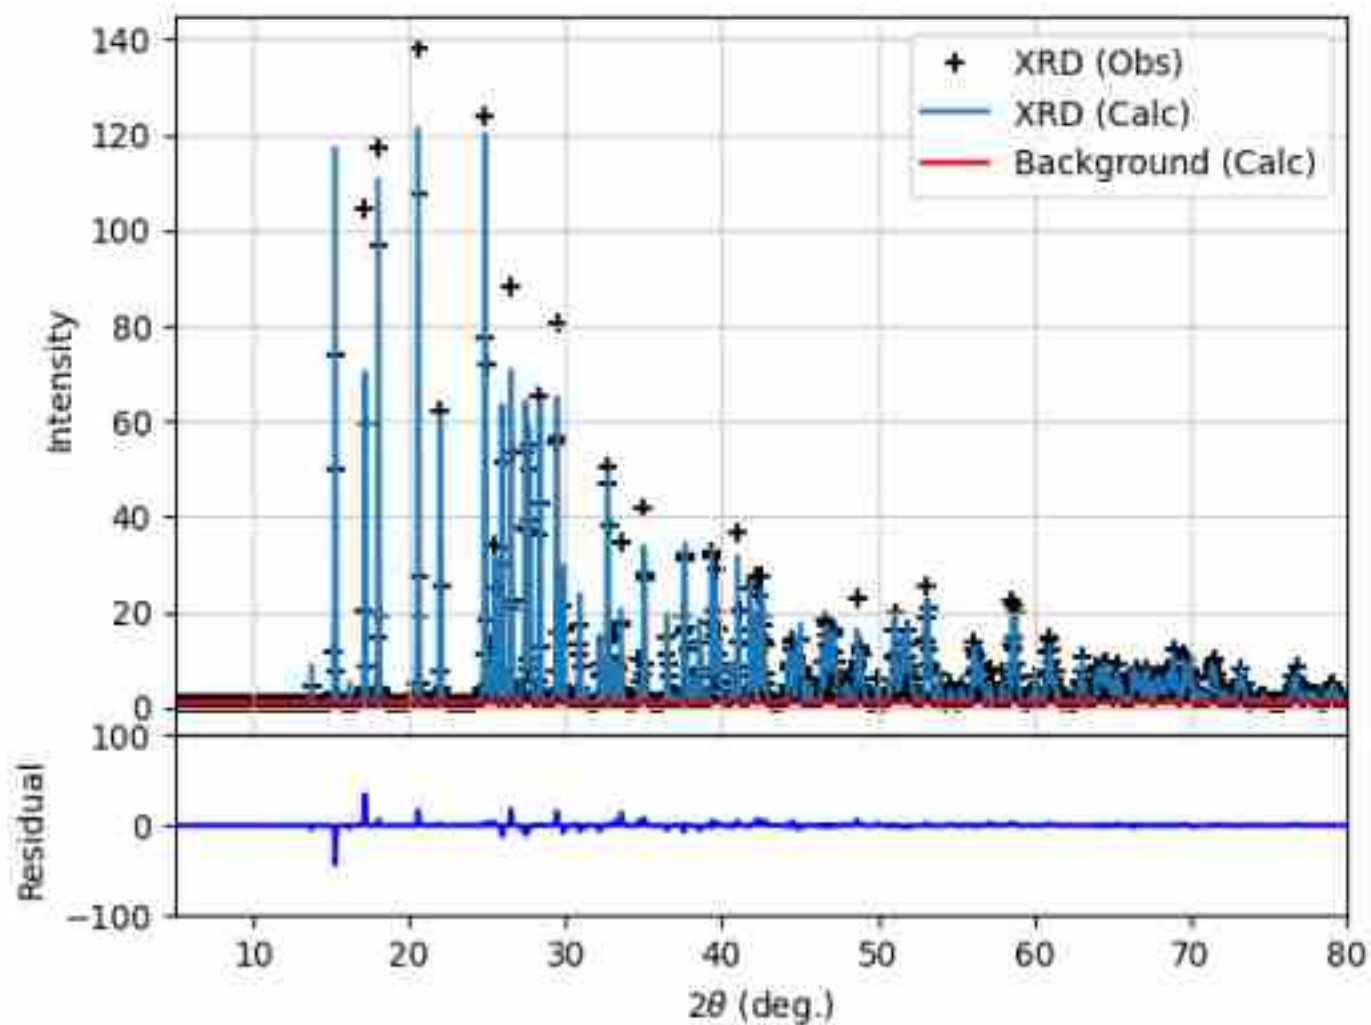

| RMSE before RR | Rwp      | RMSE after RR |
|----------------|----------|---------------|
| 0.421          | 18.39514 | None          |

# Y4Se4F4

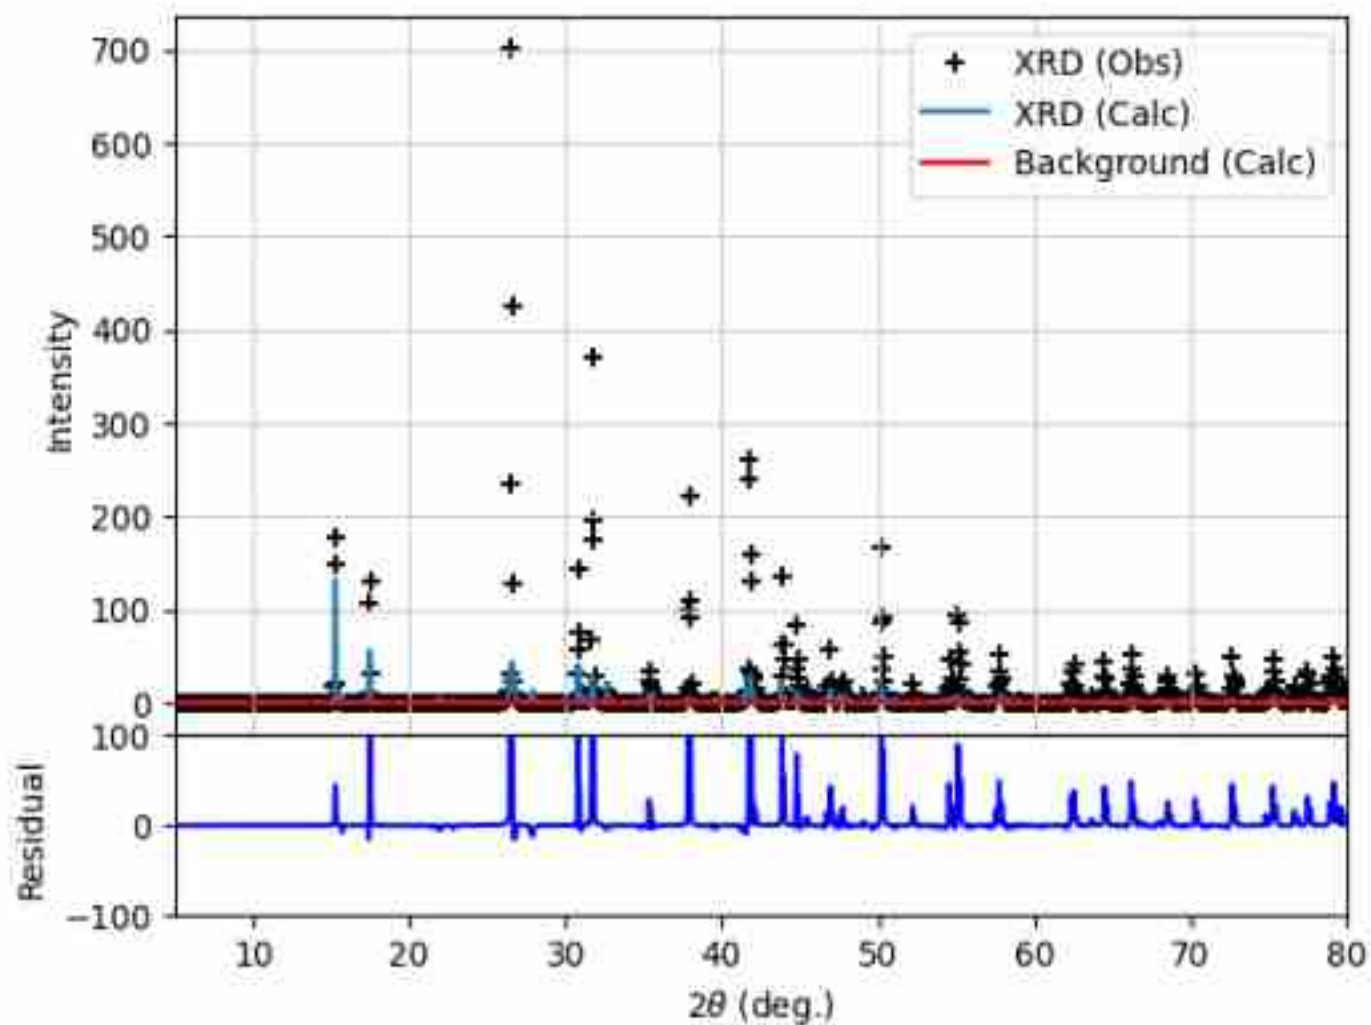

| RMSE before RR | Rwp      | RMSE after RR |
|----------------|----------|---------------|
| 0.421          | 80.10834 | None          |

# Eu10Al10

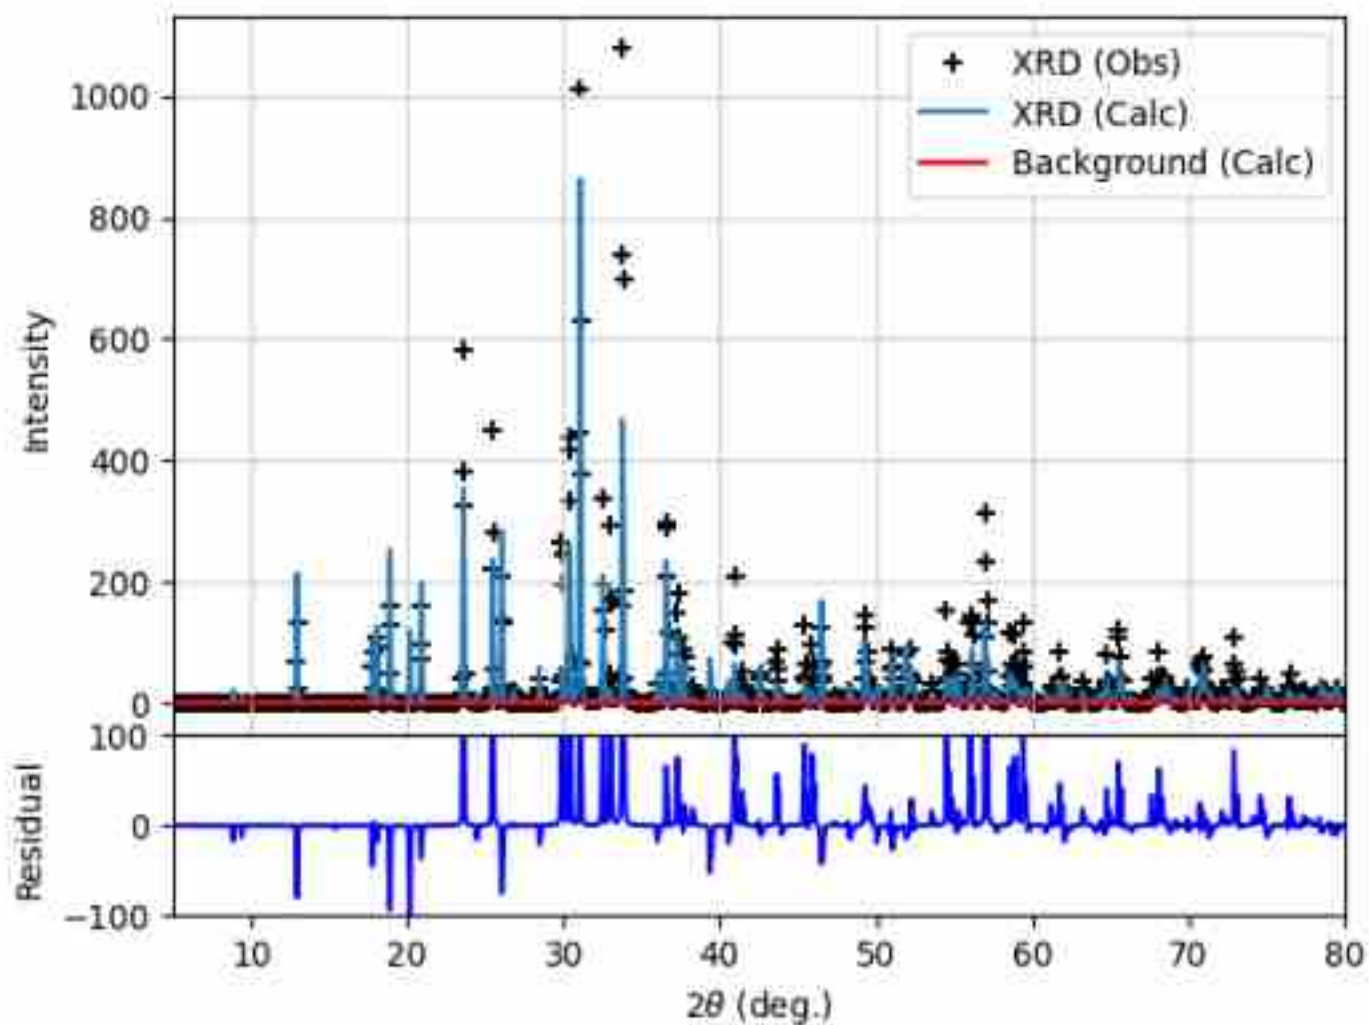

| RMSE before RR | Rwp      | RMSE after RR |
|----------------|----------|---------------|
| 0.422          | 56.66173 | None          |



# Ga<sub>4</sub>H<sub>4</sub>C<sub>18</sub>

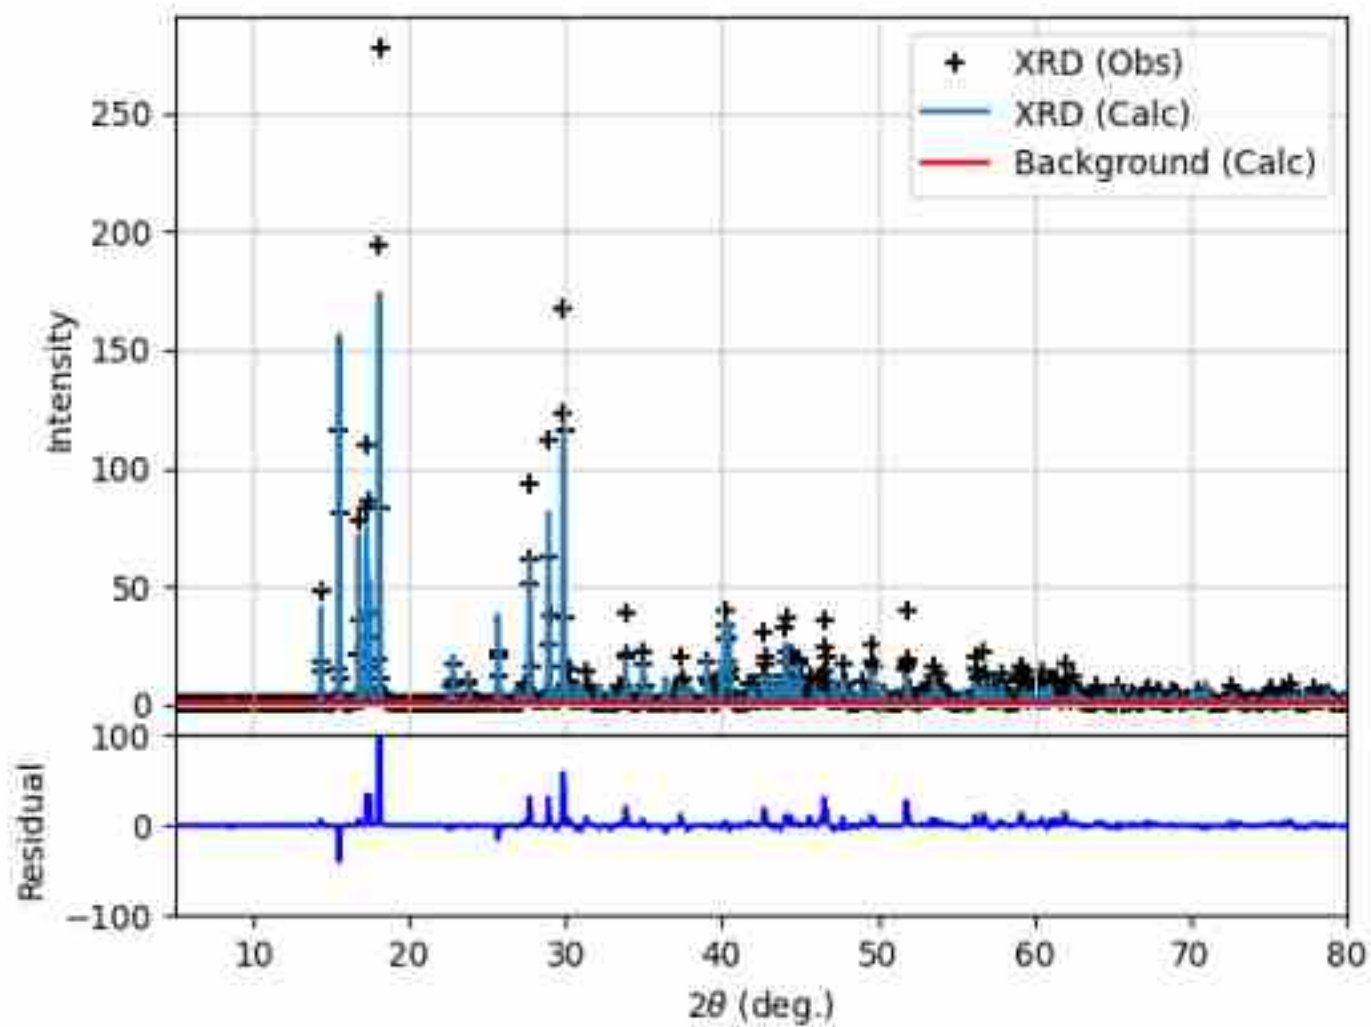

| RMSE before RR | Rwp      | RMSE after RR |
|----------------|----------|---------------|
| 0.422          | 42.44855 | None          |

# Ca<sub>2</sub>Zn<sub>3</sub>Au<sub>9</sub>

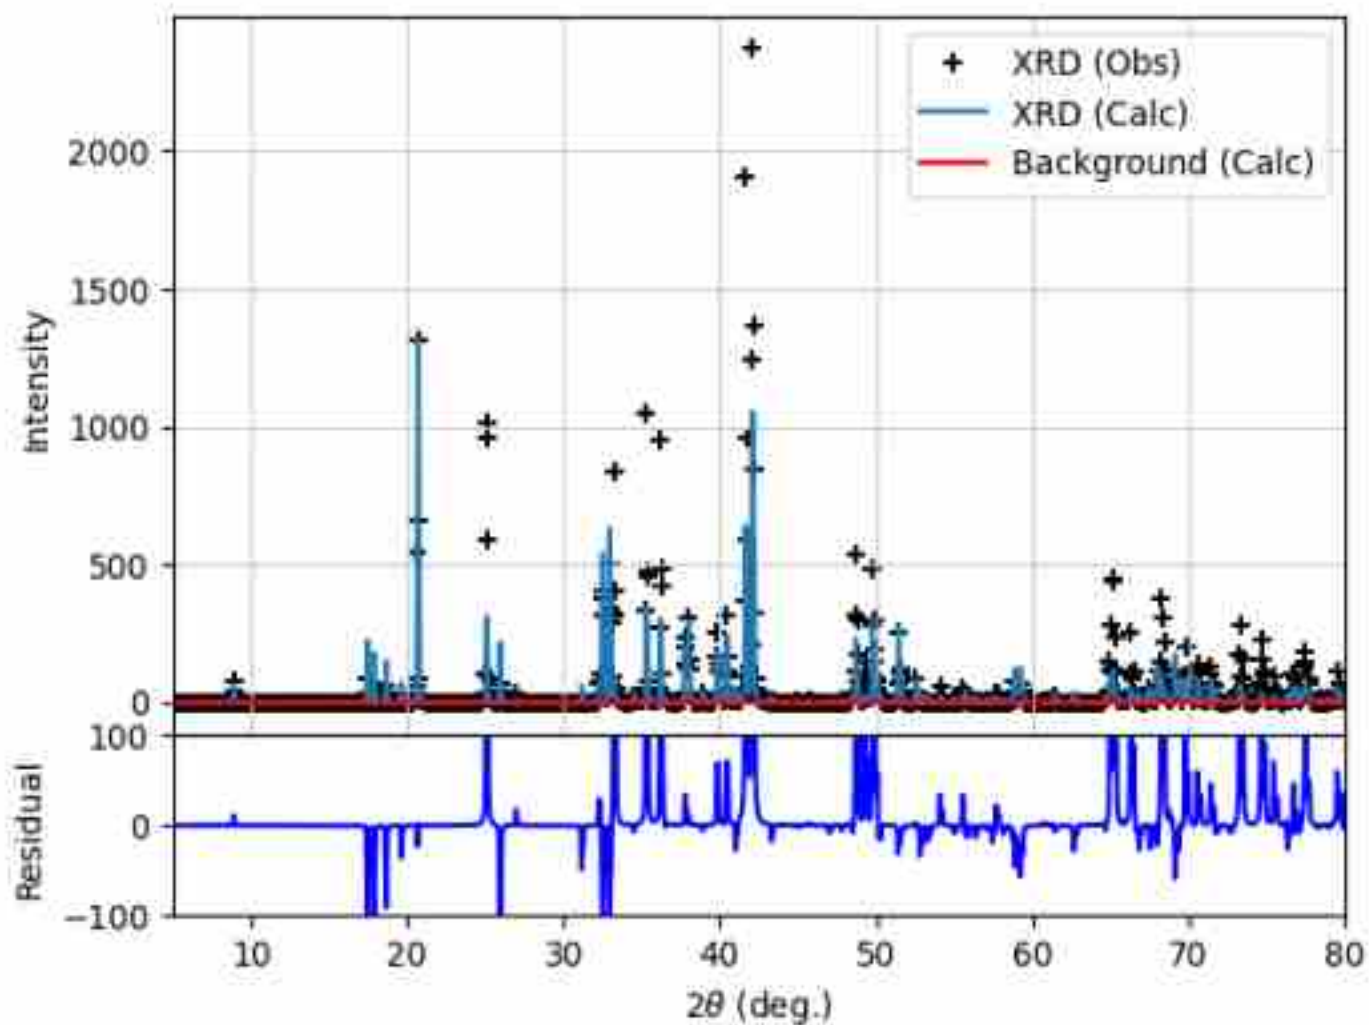

| RMSE before RR | Rwp      | RMSE after RR |
|----------------|----------|---------------|
| 0.423          | 61.60783 | None          |

# In<sub>2</sub>Hg<sub>5</sub>Te<sub>8</sub>

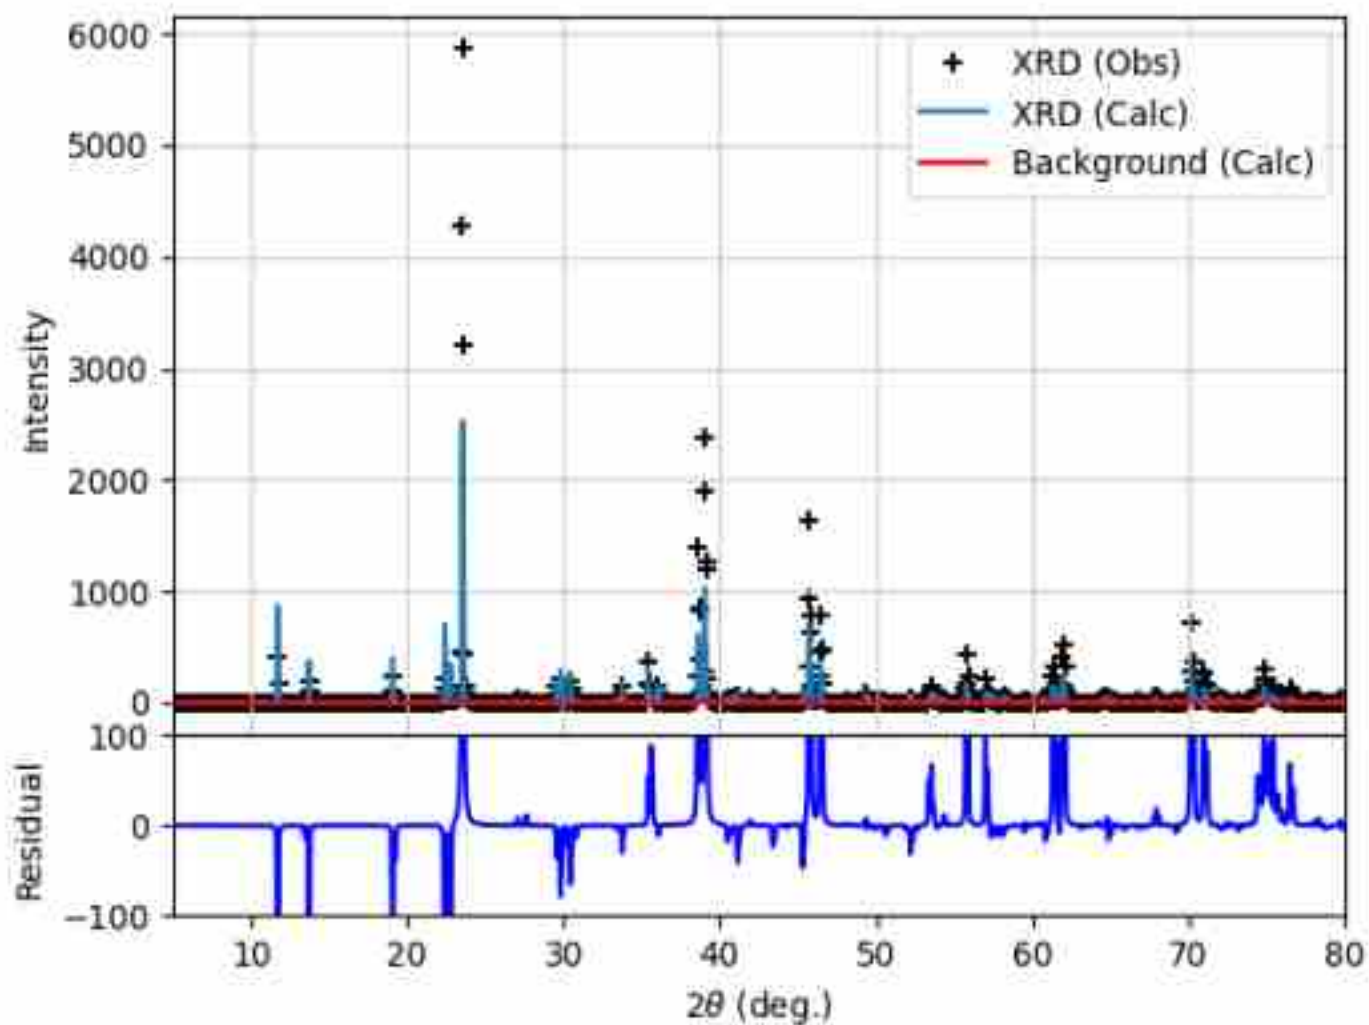

| RMSE before RR | Rwp      | RMSE after RR |
|----------------|----------|---------------|
| 0.423          | 59.52289 | None          |

# Ca<sub>2</sub>Sn<sub>3</sub>S<sub>8</sub>

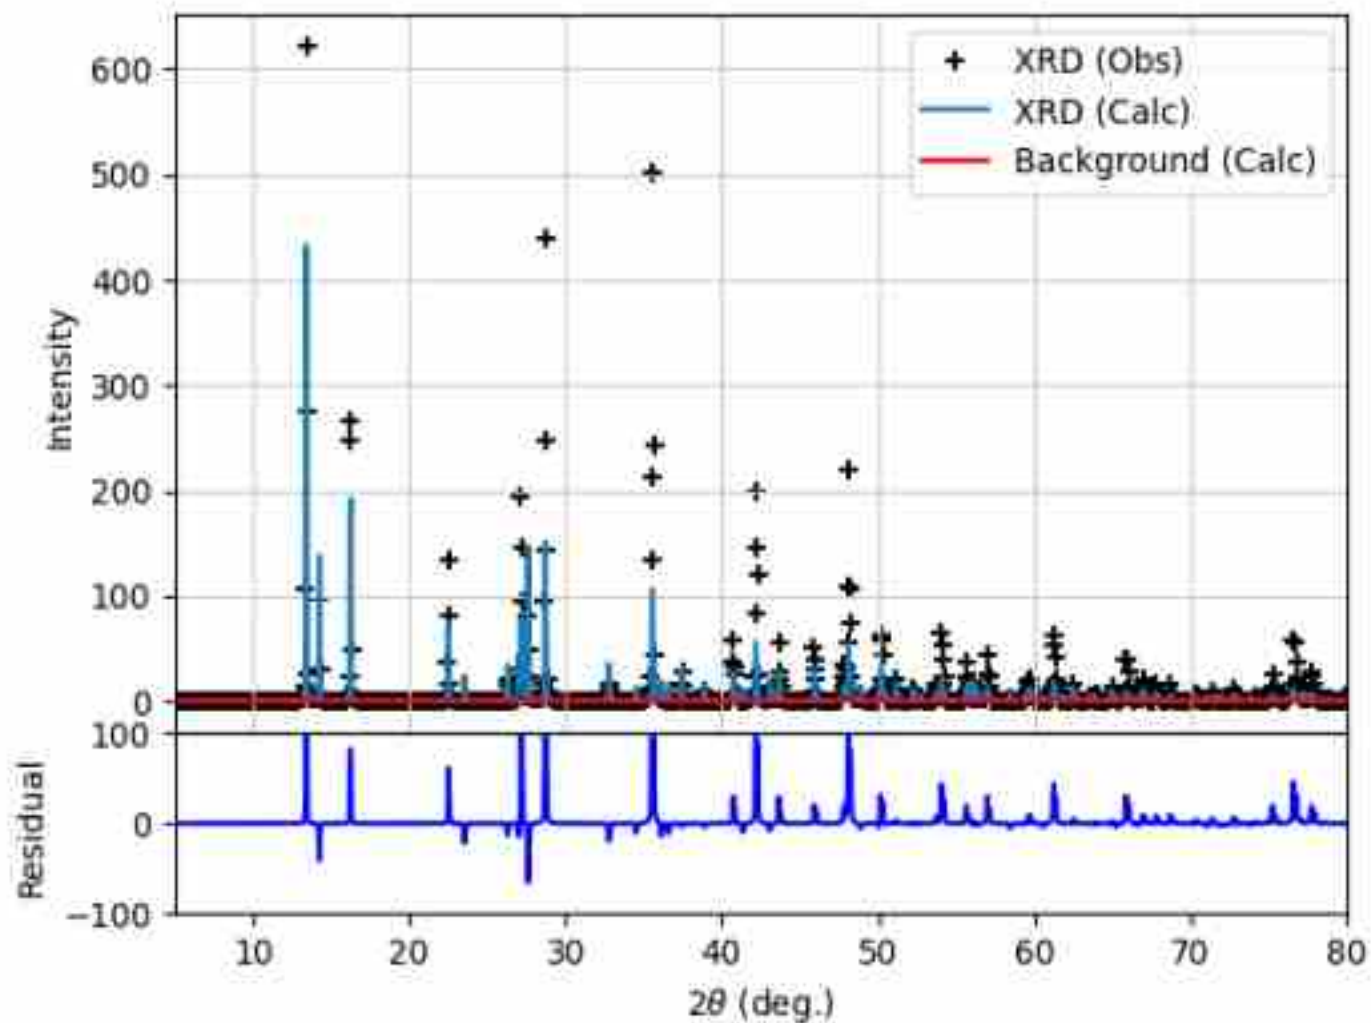

| RMSE before RR | Rwp      | RMSE after RR |
|----------------|----------|---------------|
| 0.424          | 58.84055 | None          |

# Cr<sub>4</sub>Co<sub>2</sub>Se<sub>2</sub>S<sub>6</sub>

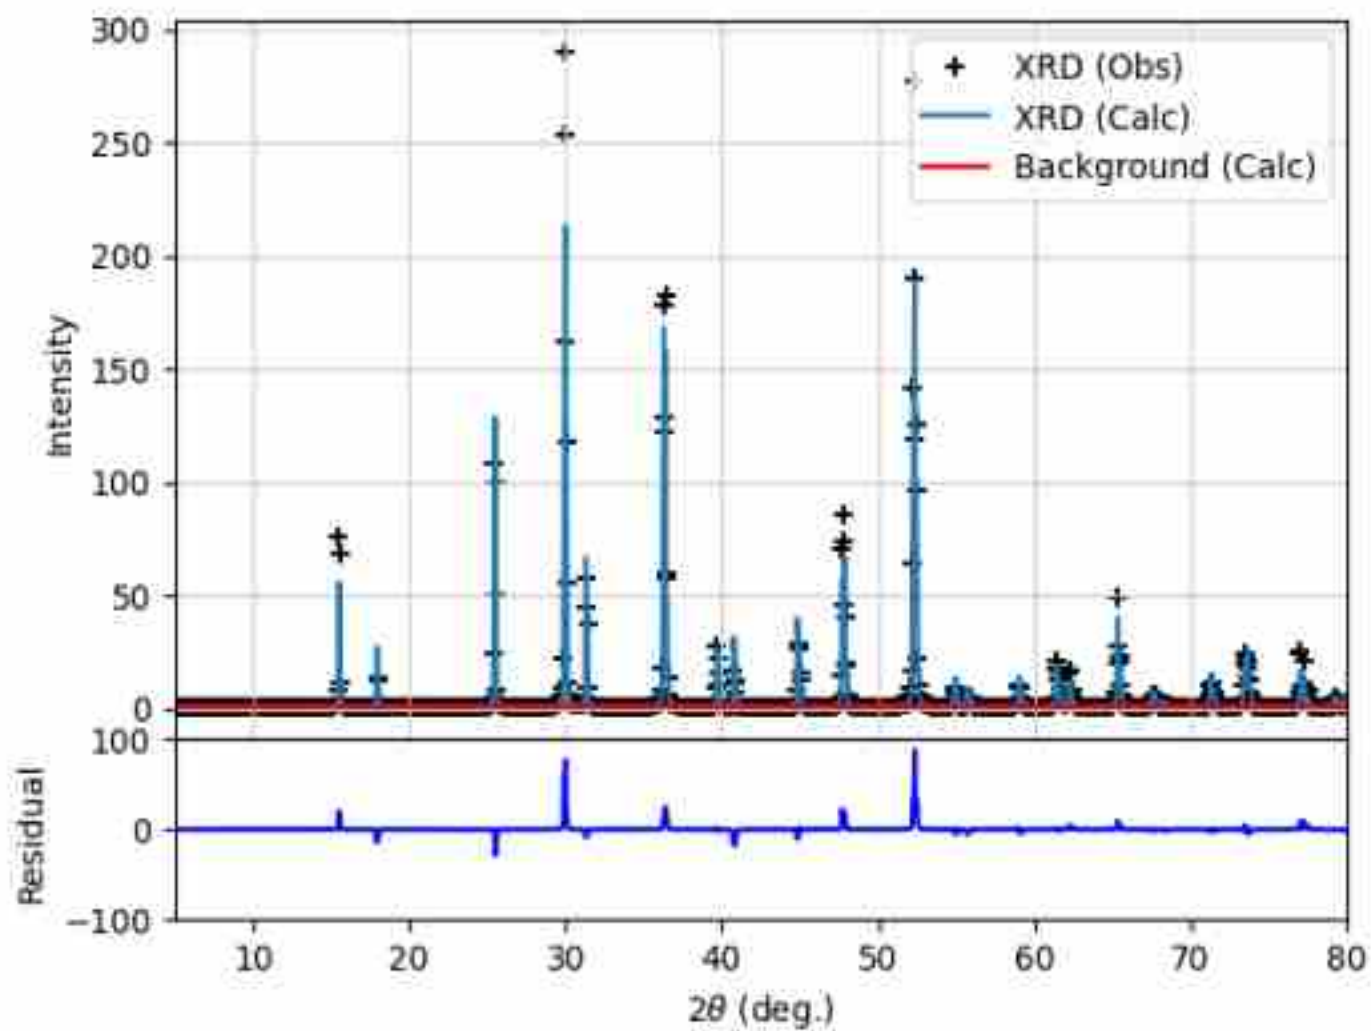

| RMSE before RR | Rwp      | RMSE after RR |
|----------------|----------|---------------|
| 0.424          | 26.78995 | 0.46527       |

# Ba7Al13

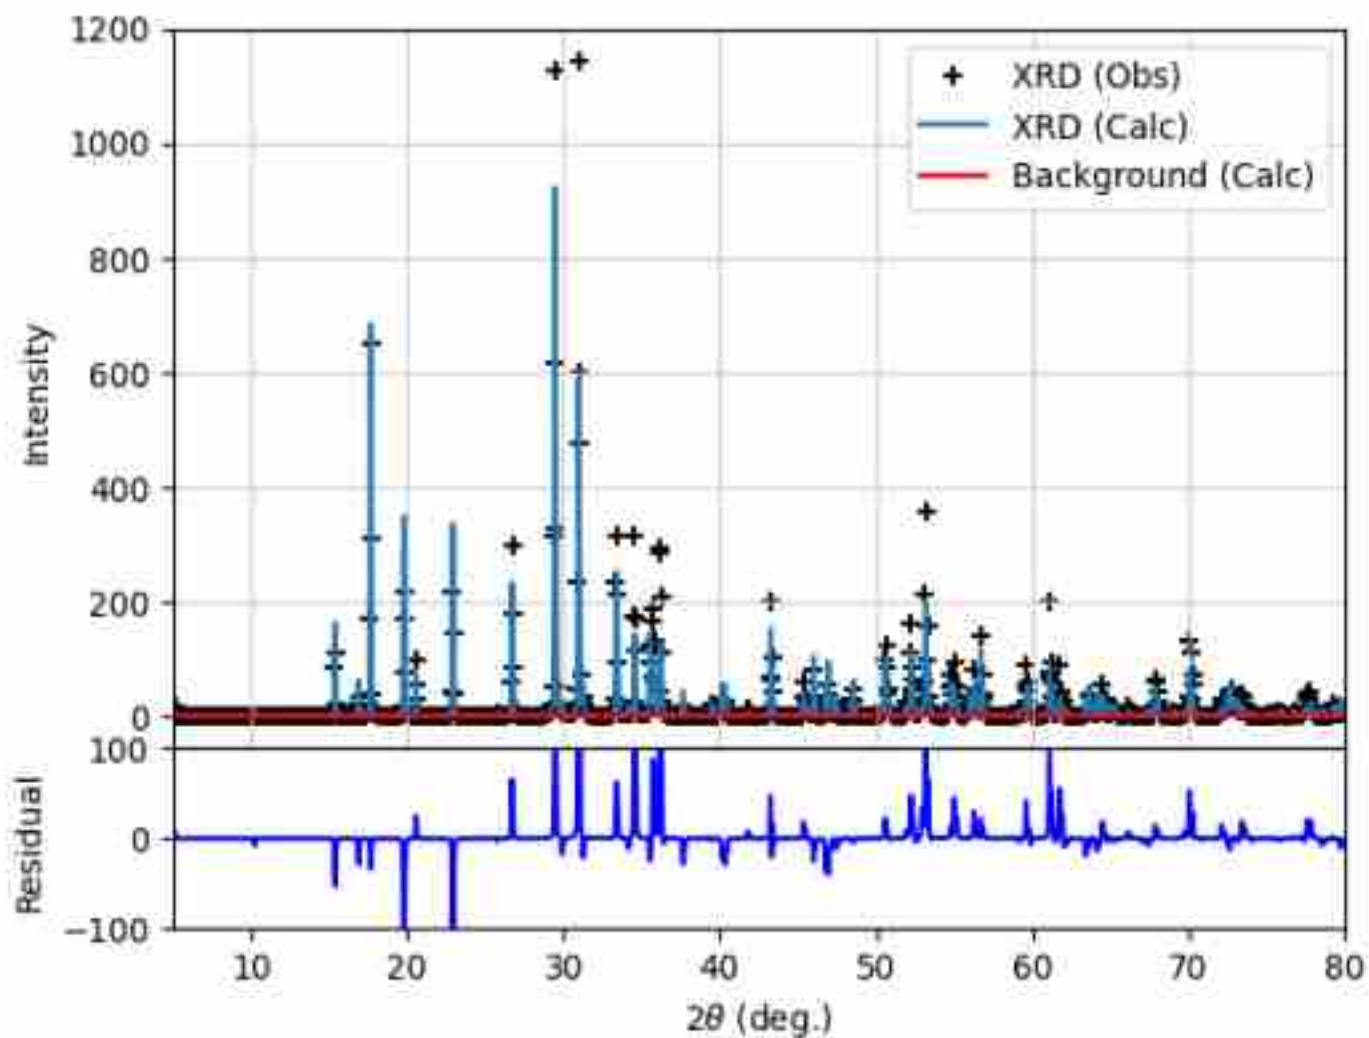

| RMSE before RR | Rwp      | RMSE after RR |
|----------------|----------|---------------|
| 0.425          | 40.22717 | None          |

# Ce<sub>4</sub>In<sub>8</sub>Pt<sub>8</sub>

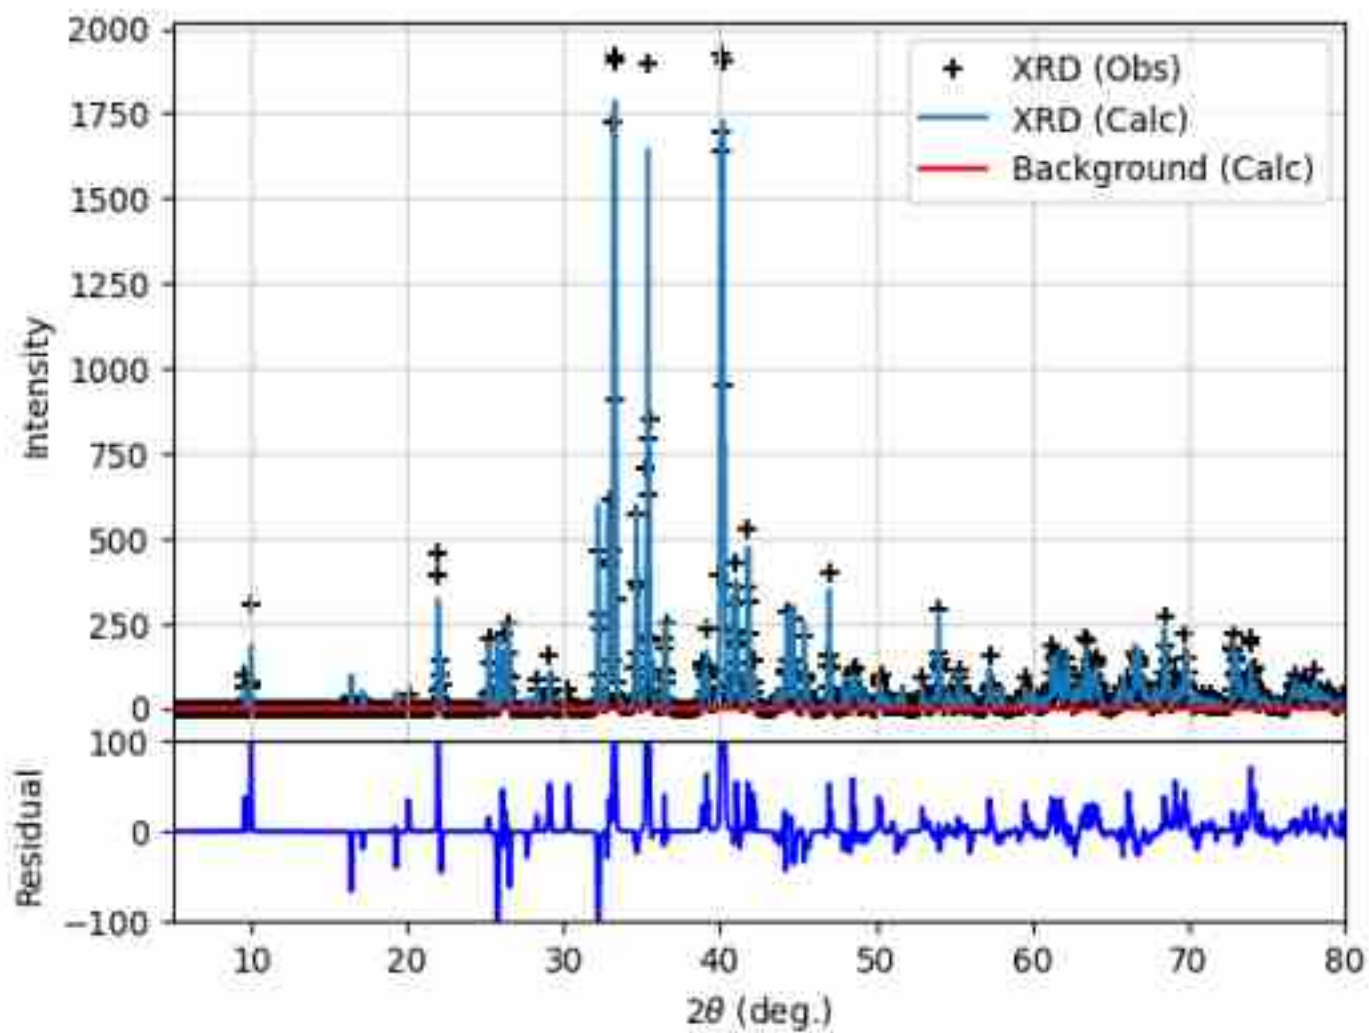

| RMSE before RR | Rwp      | RMSE after RR |
|----------------|----------|---------------|
| 0.425          | 26.16348 | 0.42025       |

# Co1H1

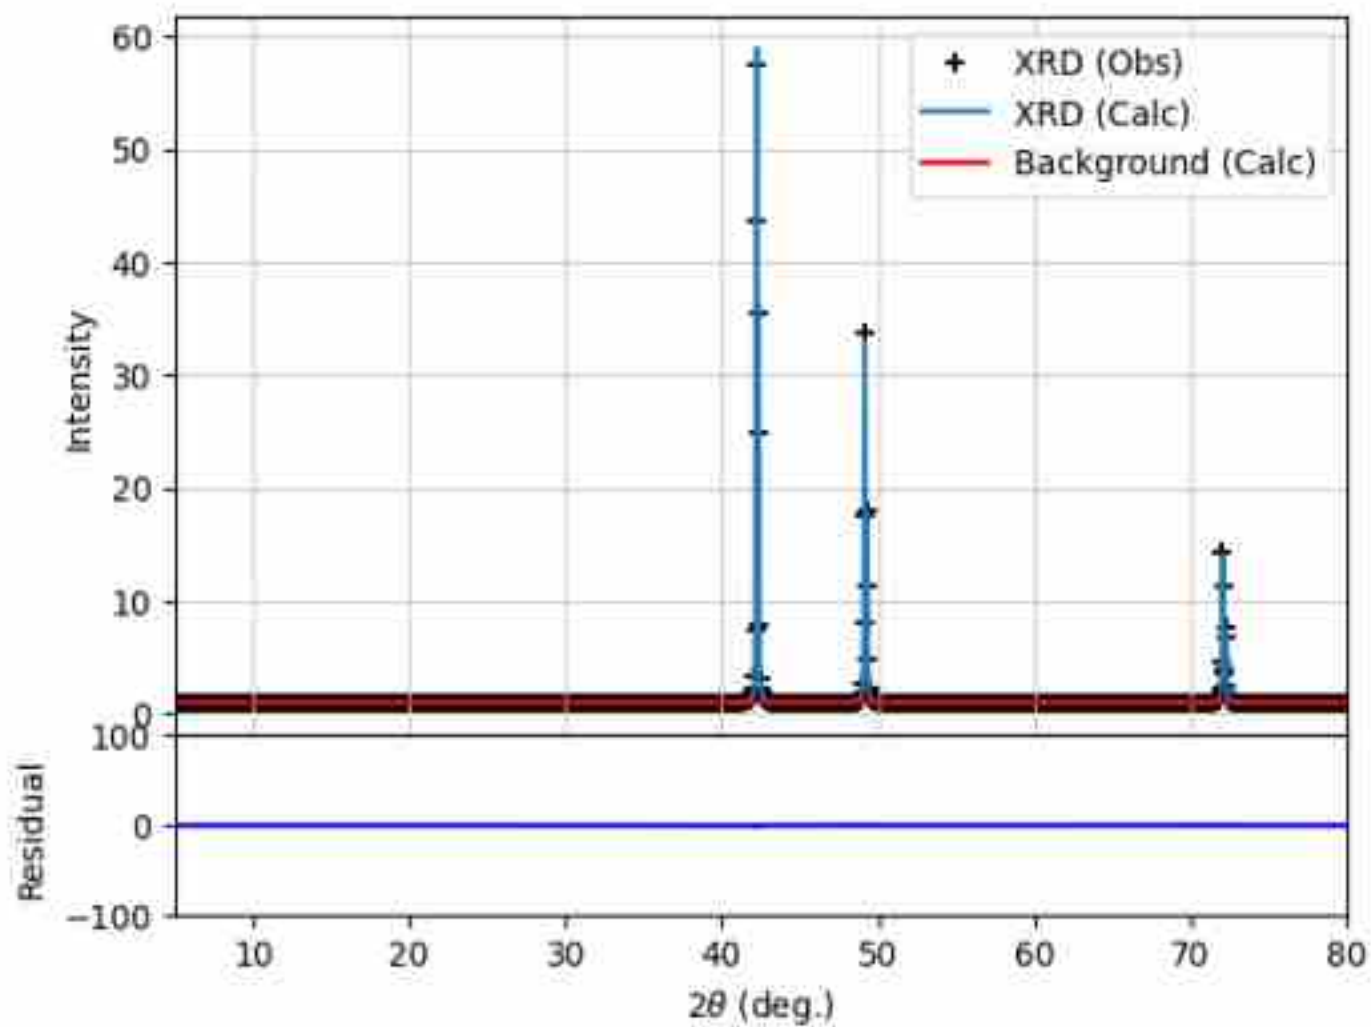

| RMSE before RR | Rwp     | RMSE after RR |
|----------------|---------|---------------|
| 0.425          | 1.00954 | 0.09274       |



# Li<sub>4</sub>Mn<sub>4</sub>F<sub>12</sub>

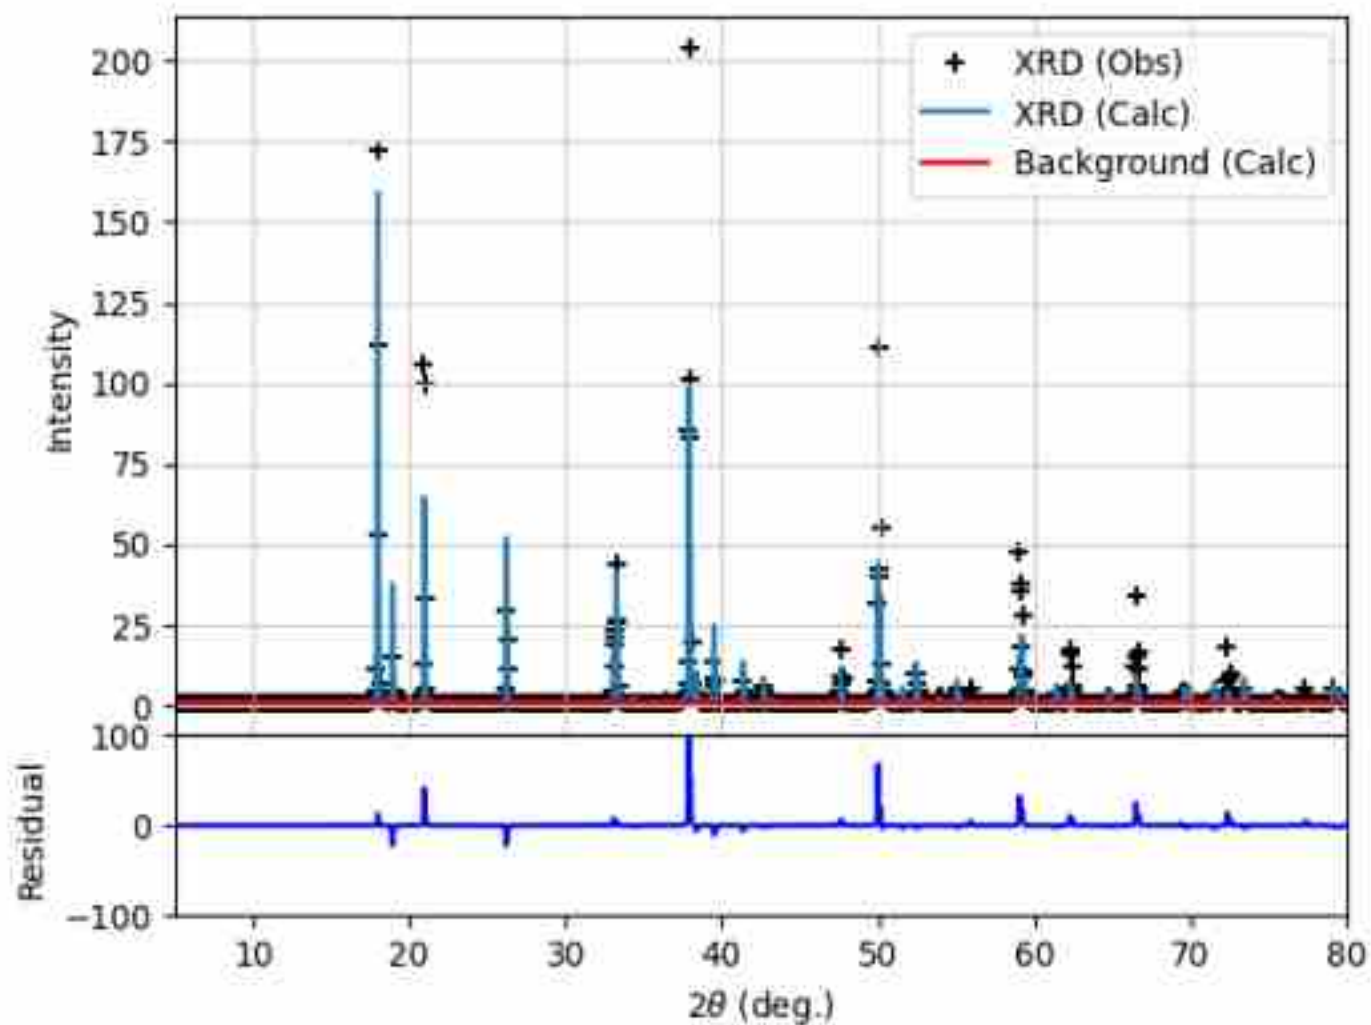

| RMSE before RR | Rwp      | RMSE after RR |
|----------------|----------|---------------|
| 0.425          | 40.65767 | None          |

# Sr<sub>3</sub>Ta<sub>3</sub>N<sub>3</sub>O<sub>6</sub>

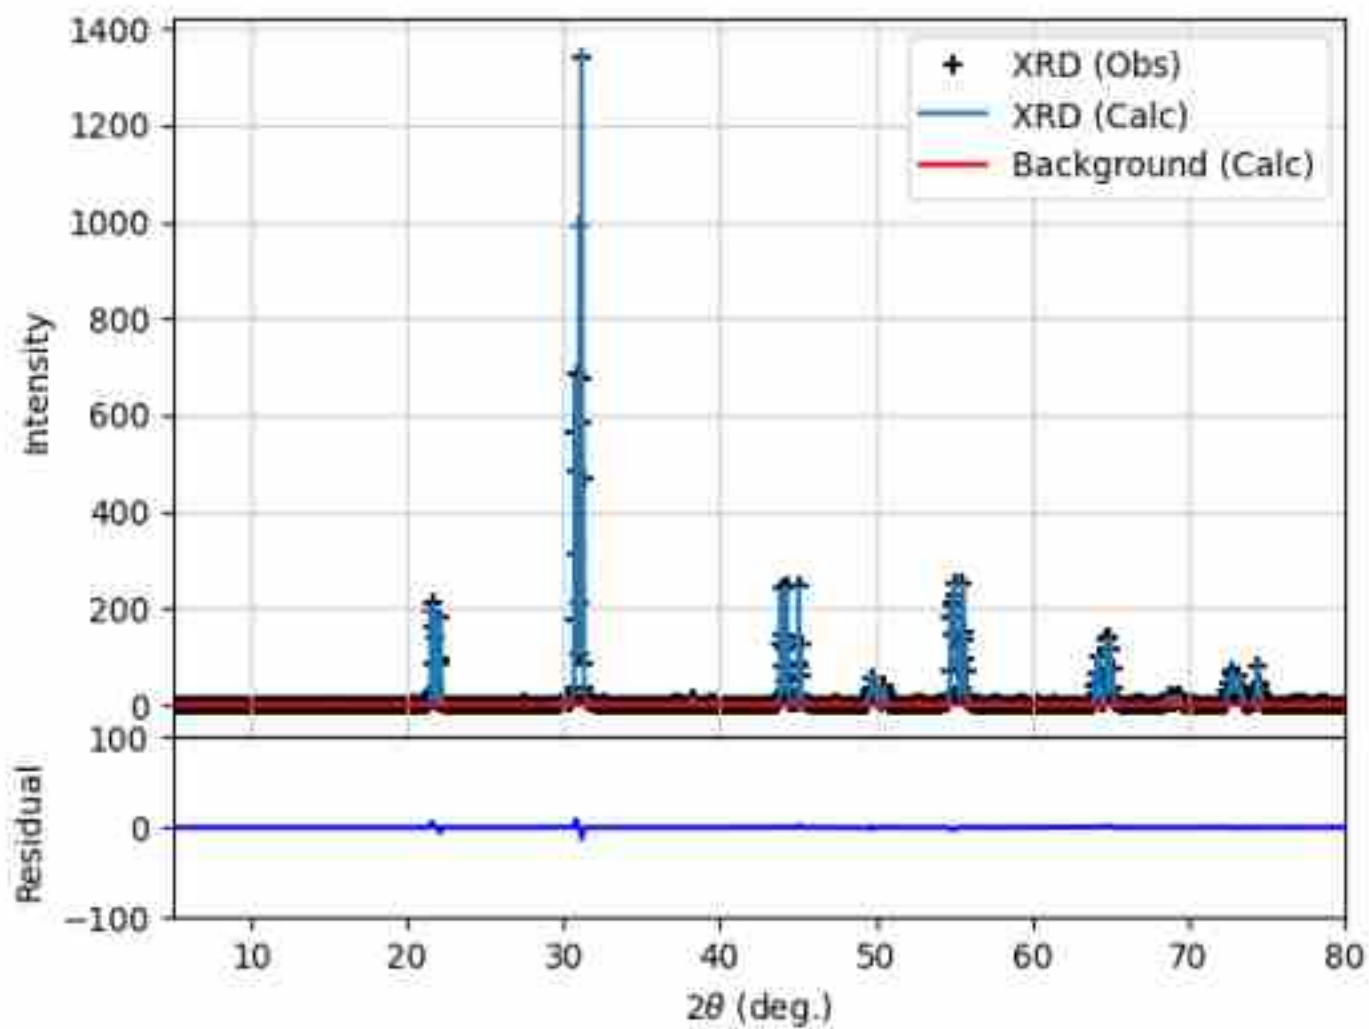

| RMSE before RR | Rwp    | RMSE after RR |
|----------------|--------|---------------|
| 0.425          | 1.5748 | 0.4176        |

# Li<sub>4</sub>Mg<sub>4</sub>N<sub>4</sub>

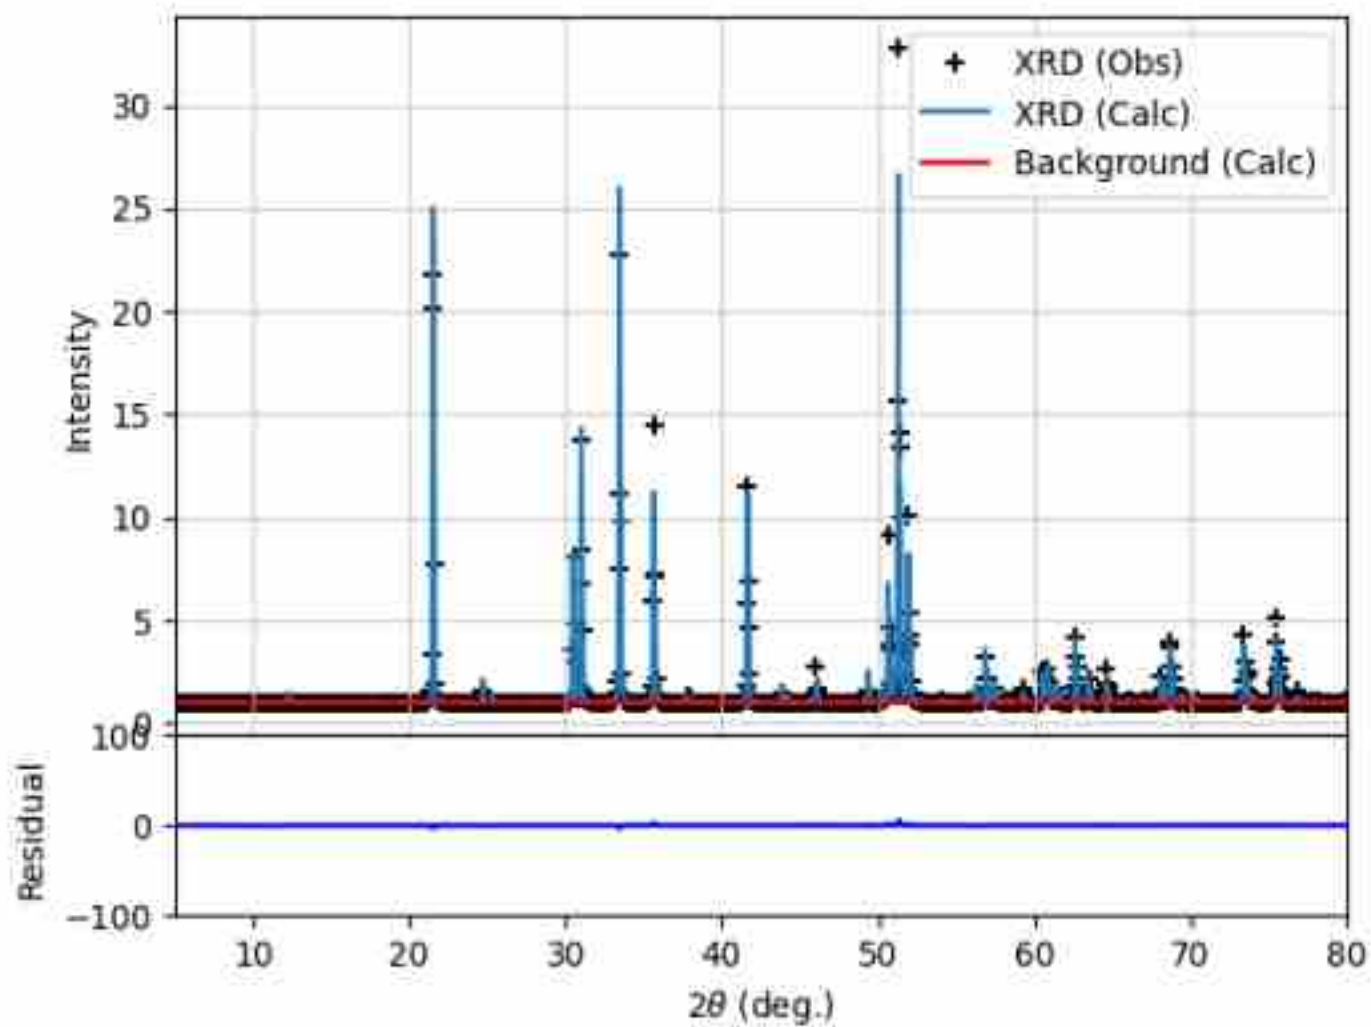

| RMSE before RR | Rwp     | RMSE after RR |
|----------------|---------|---------------|
| 0.426          | 8.25721 | 0.44039       |

# Li<sub>4</sub>Ti<sub>2</sub>Ni<sub>4</sub>O<sub>10</sub>

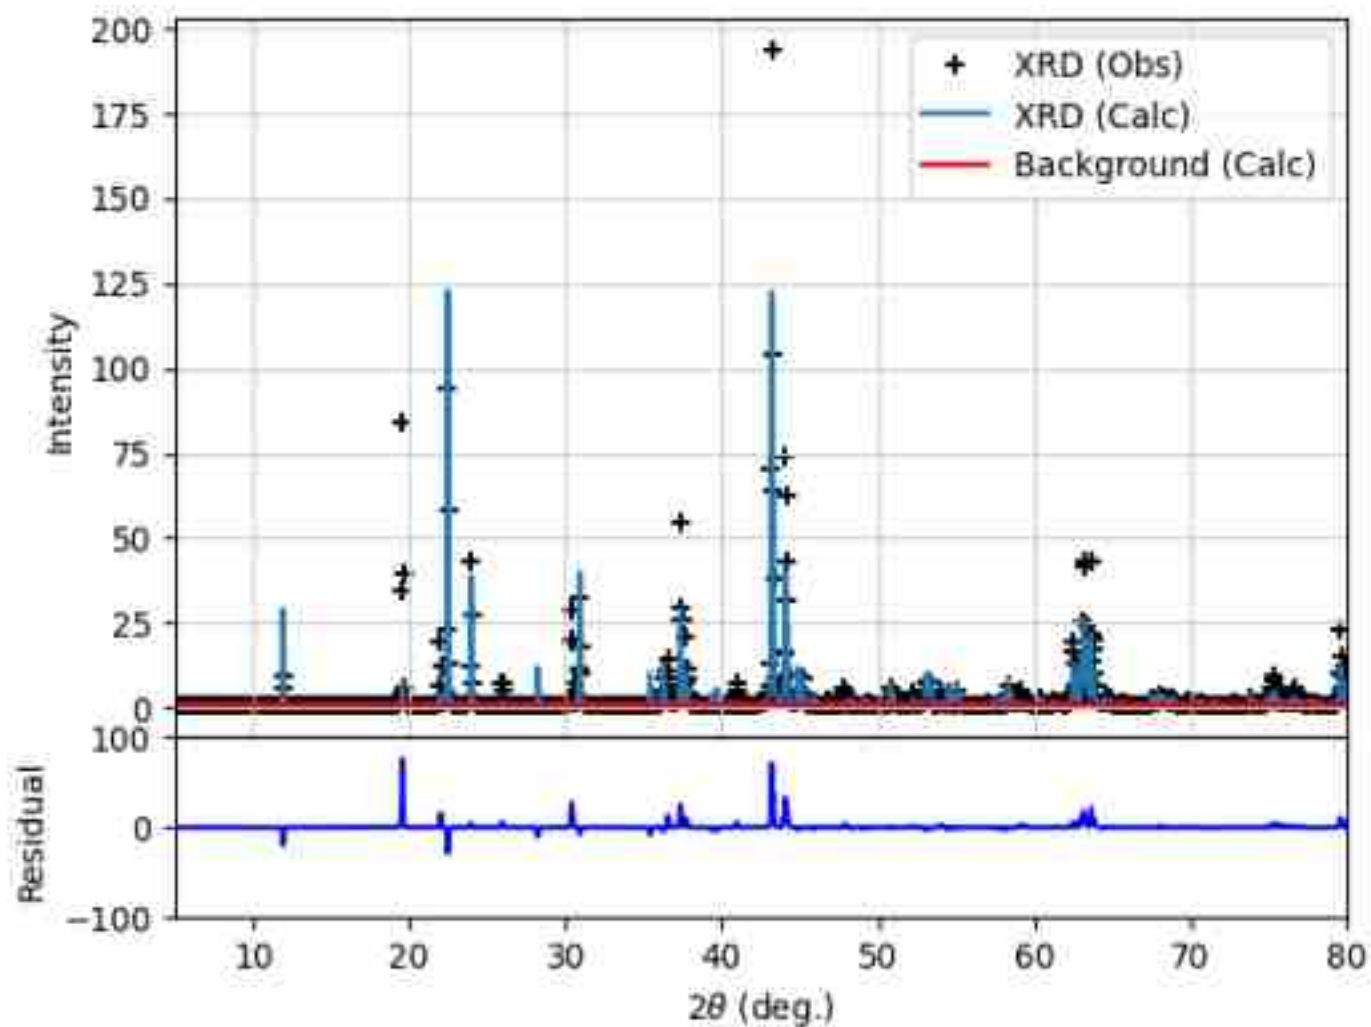

| RMSE before RR | Rwp      | RMSE after RR |
|----------------|----------|---------------|
| 0.426          | 46.60147 | 0.4165        |

# Li<sub>5</sub>Mn<sub>3</sub>Cr<sub>2</sub>O<sub>10</sub>

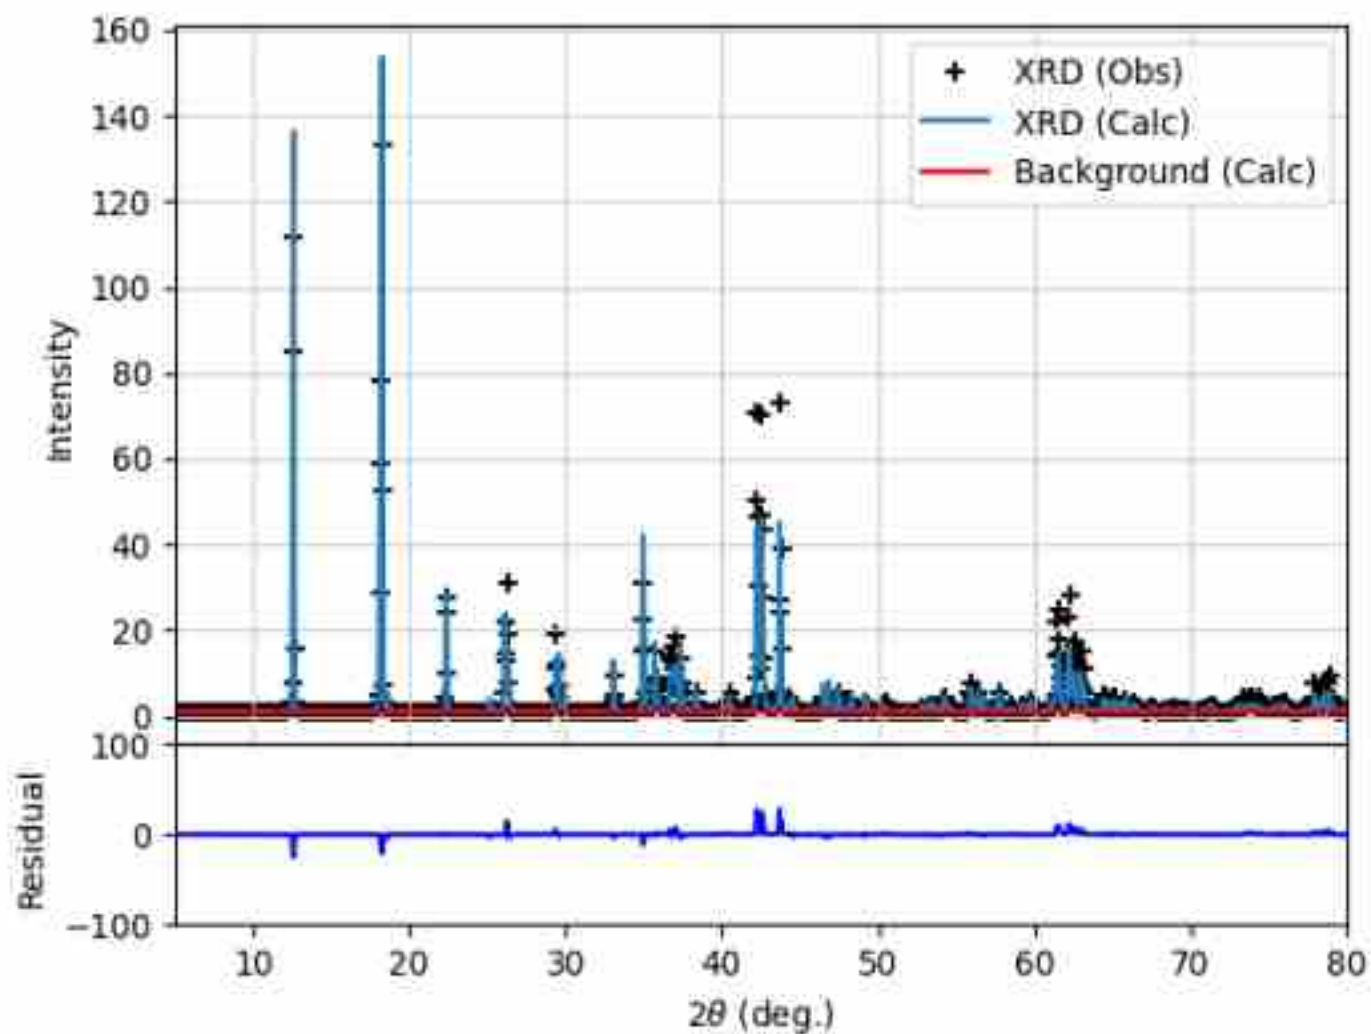

| RMSE before RR | Rwp      | RMSE after RR |
|----------------|----------|---------------|
| 0.426          | 27.27487 | None          |

# Ce12Ga8

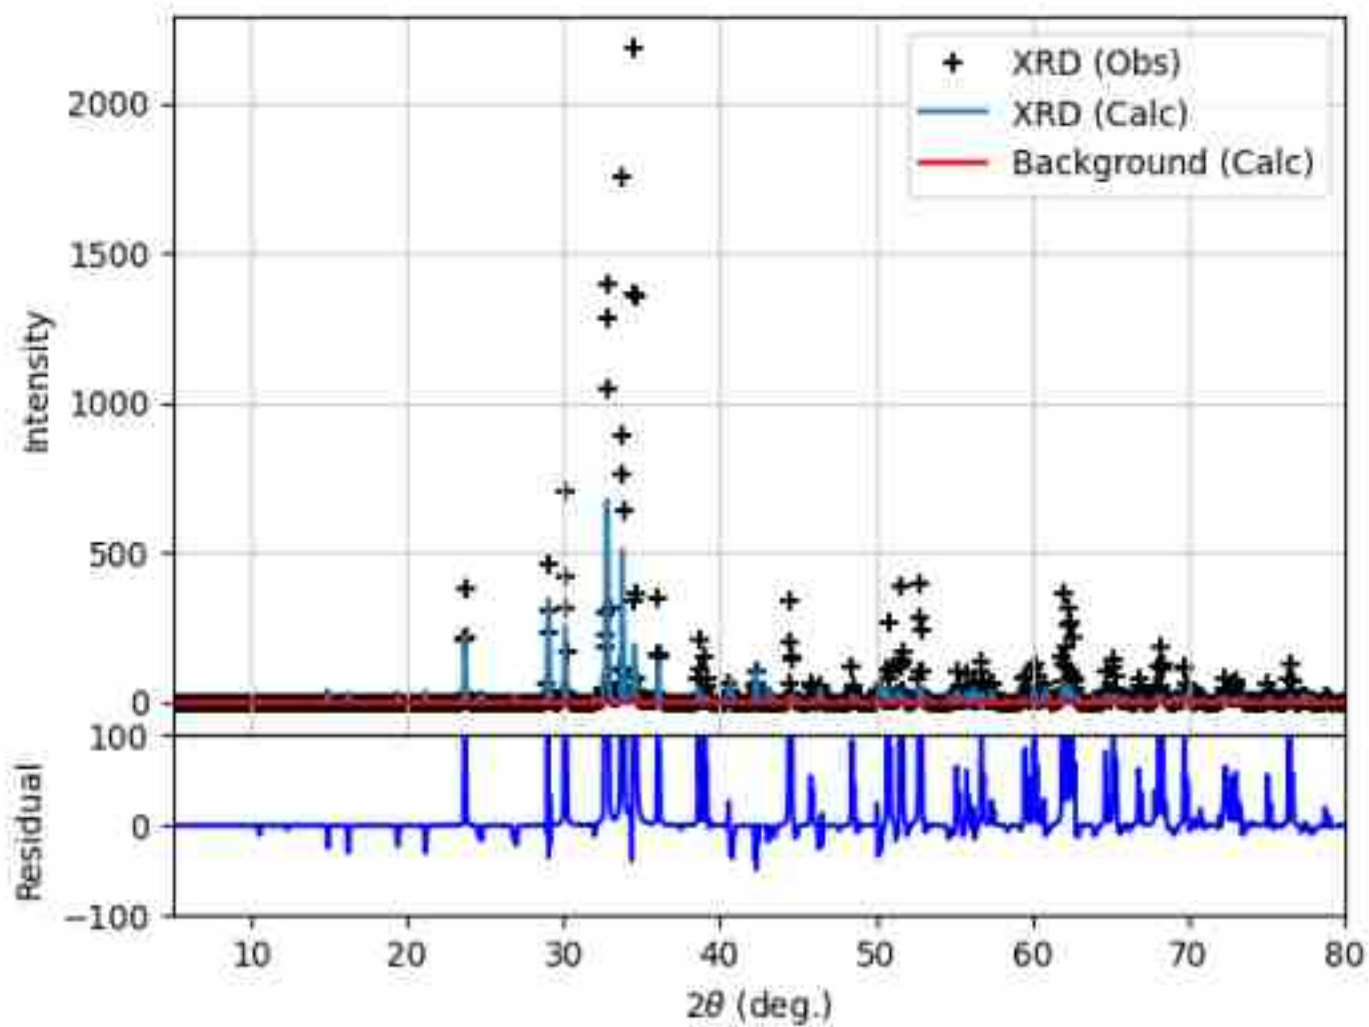

| RMSE before RR | Rwp      | RMSE after RR |
|----------------|----------|---------------|
| 0.427          | 75.17436 | 0.4831        |

# Tl<sub>2</sub>Bi<sub>4</sub>Cl<sub>14</sub>

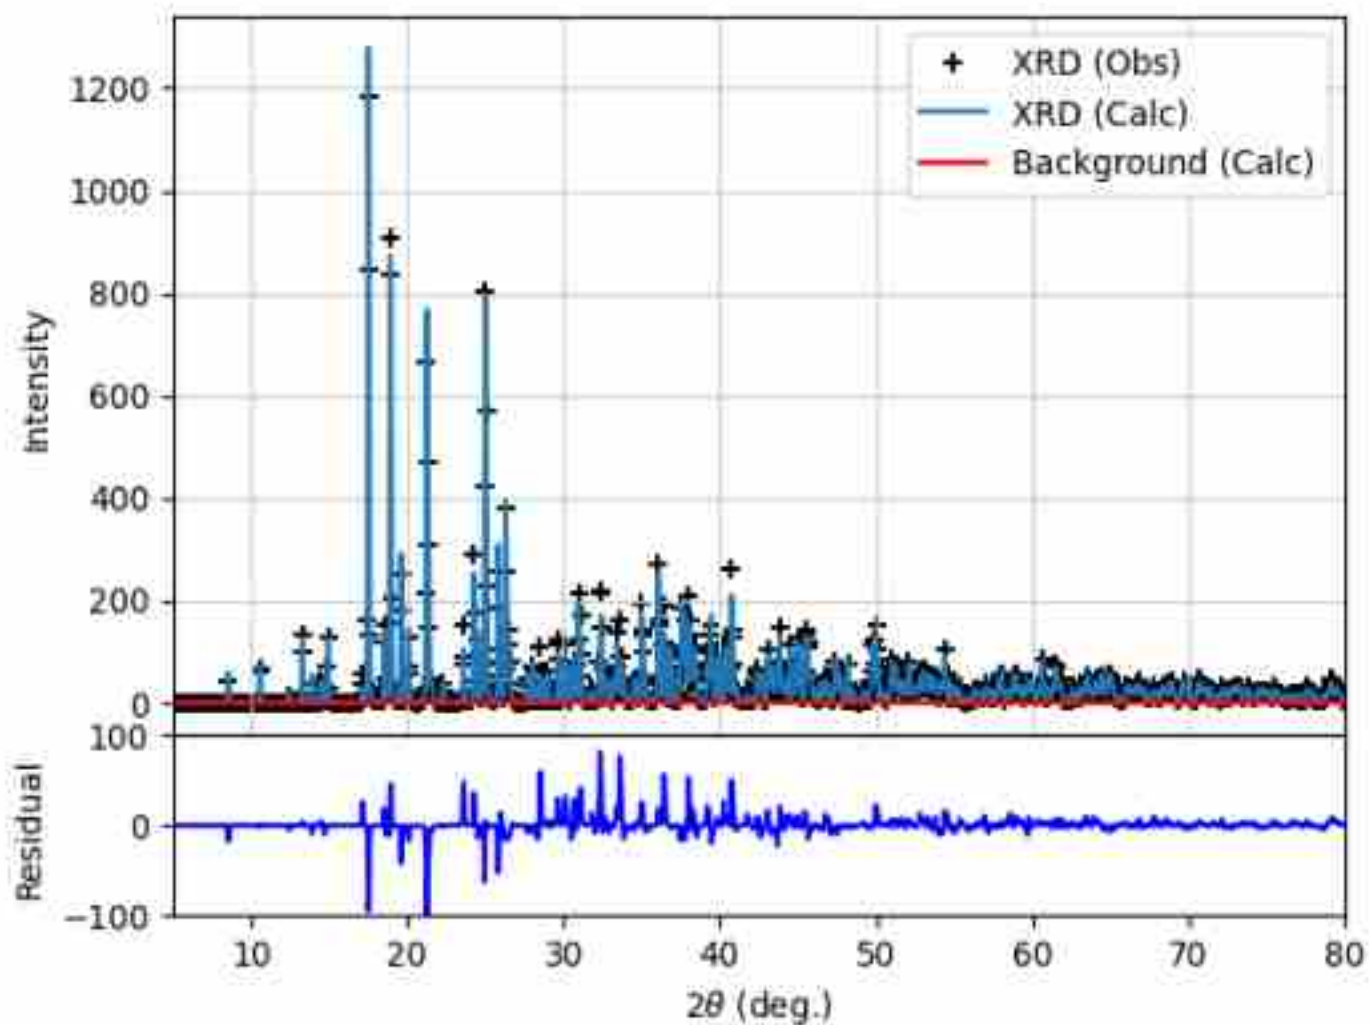

| RMSE before RR | Rwp      | RMSE after RR |
|----------------|----------|---------------|
| 0.427          | 16.64637 | None          |

# Al<sub>2</sub>ZnSe<sub>2</sub>S<sub>2</sub>

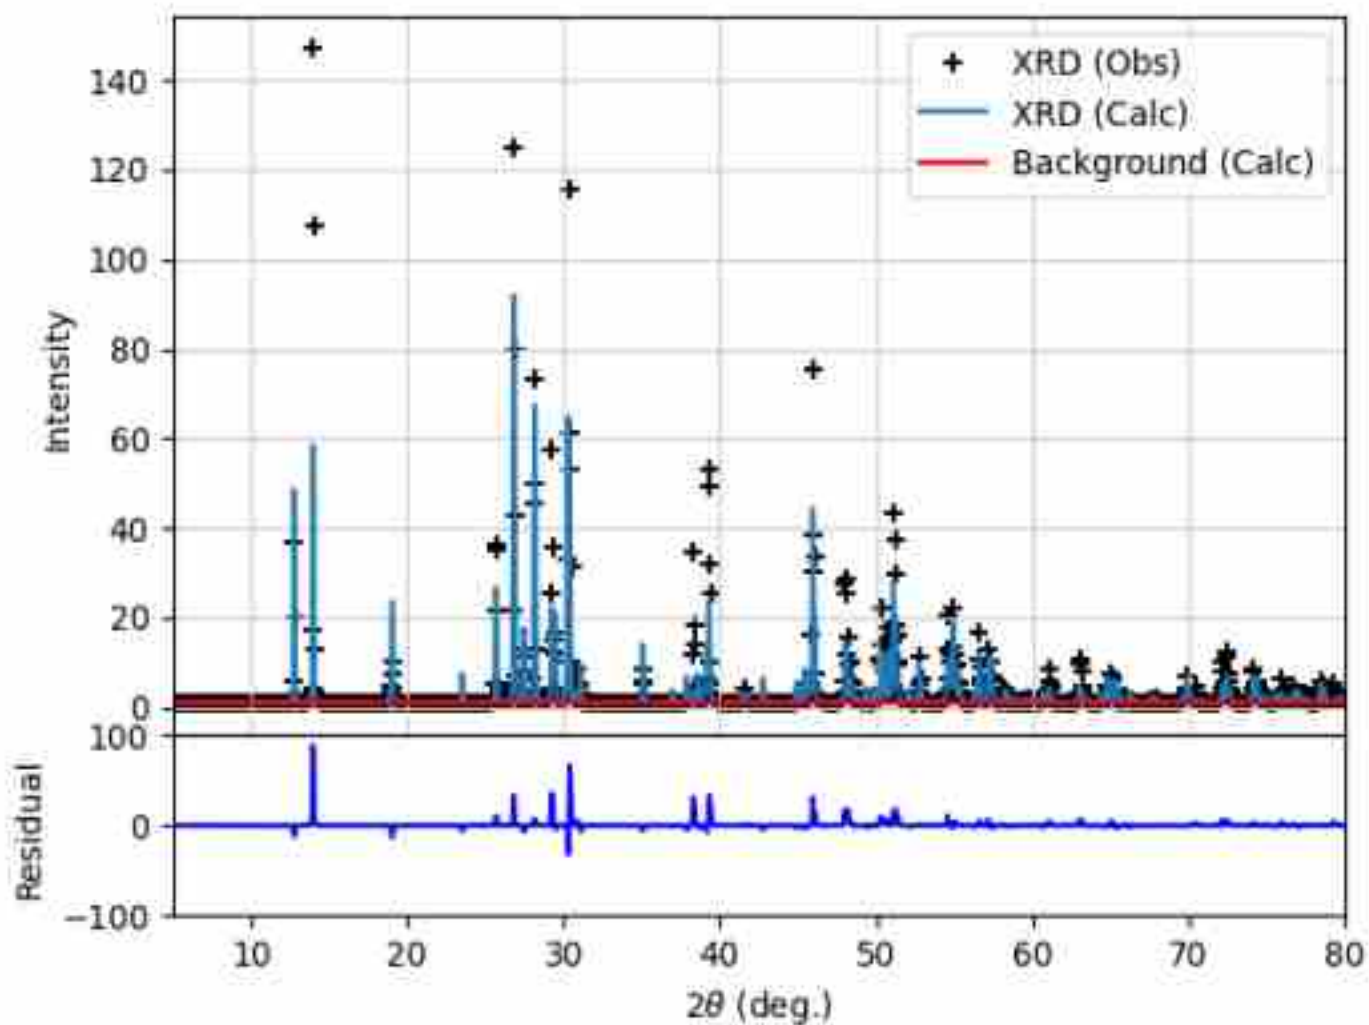

| RMSE before RR | Rwp      | RMSE after RR |
|----------------|----------|---------------|
| 0.428          | 43.68161 | 0.45208       |



# Bi8I8

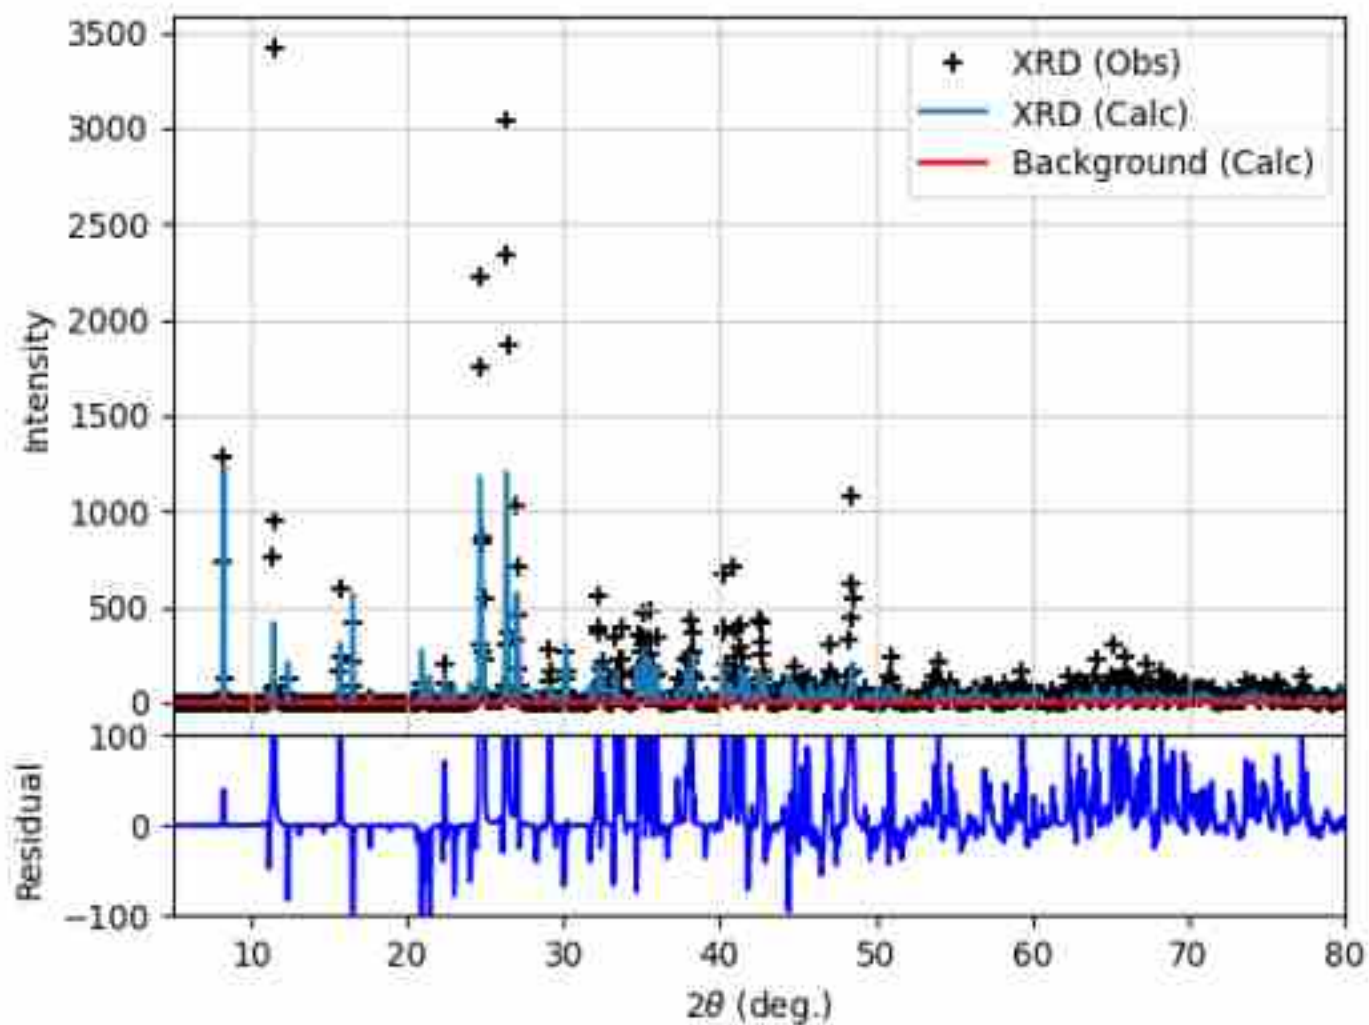

| RMSE before RR | Rwp      | RMSE after RR |
|----------------|----------|---------------|
| 0.431          | 65.65378 | None          |

# Bi8I6Br2

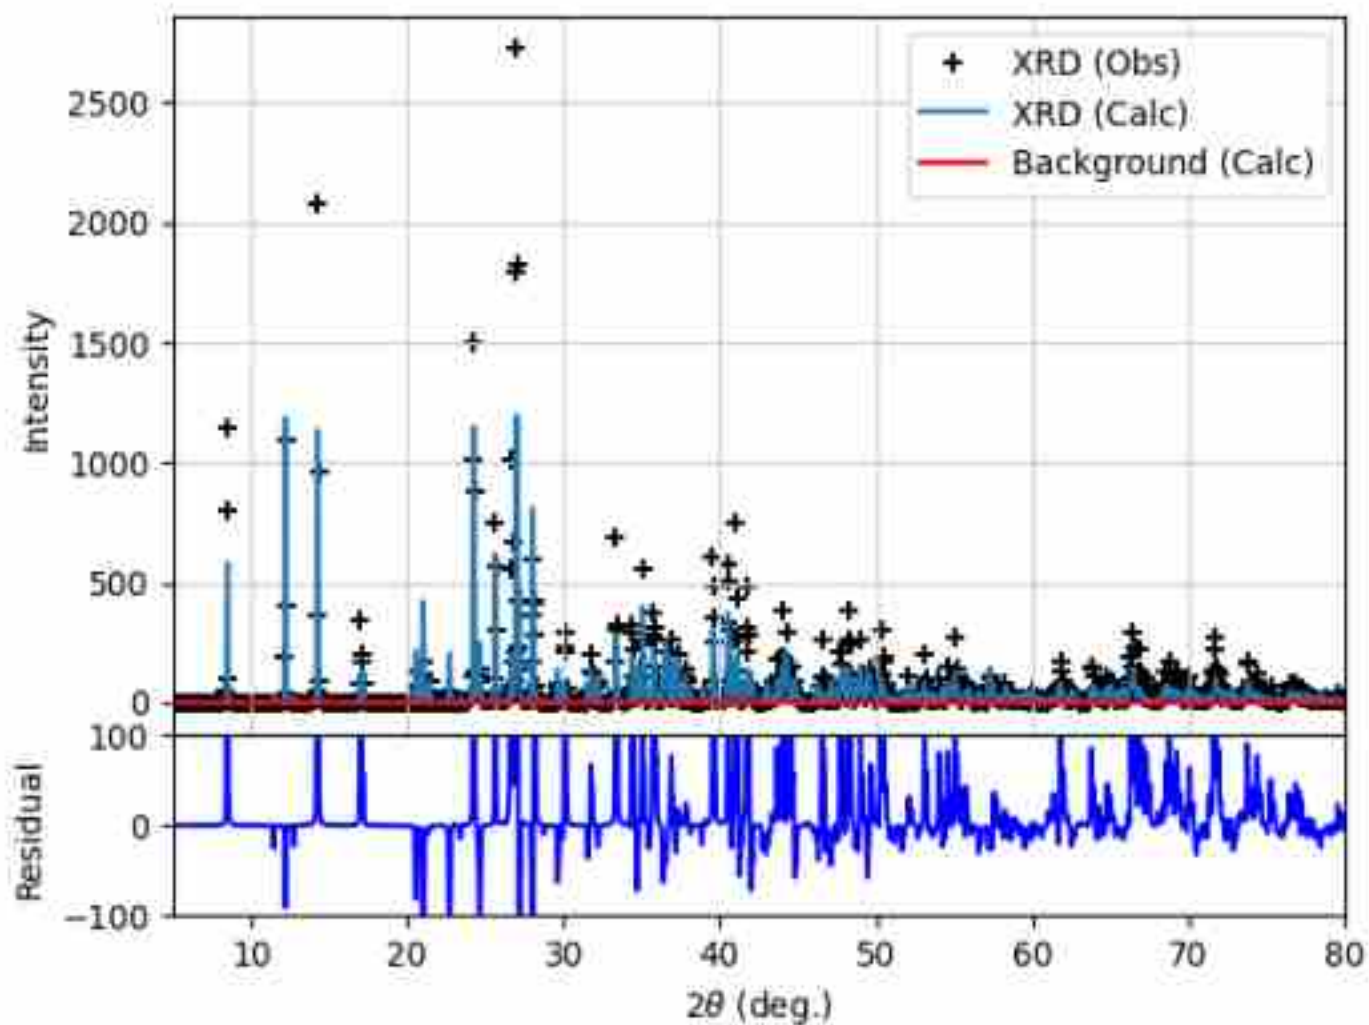

| RMSE before RR | Rwp      | RMSE after RR |
|----------------|----------|---------------|
| 0.432          | 55.46662 | None          |

# Co6O2F10

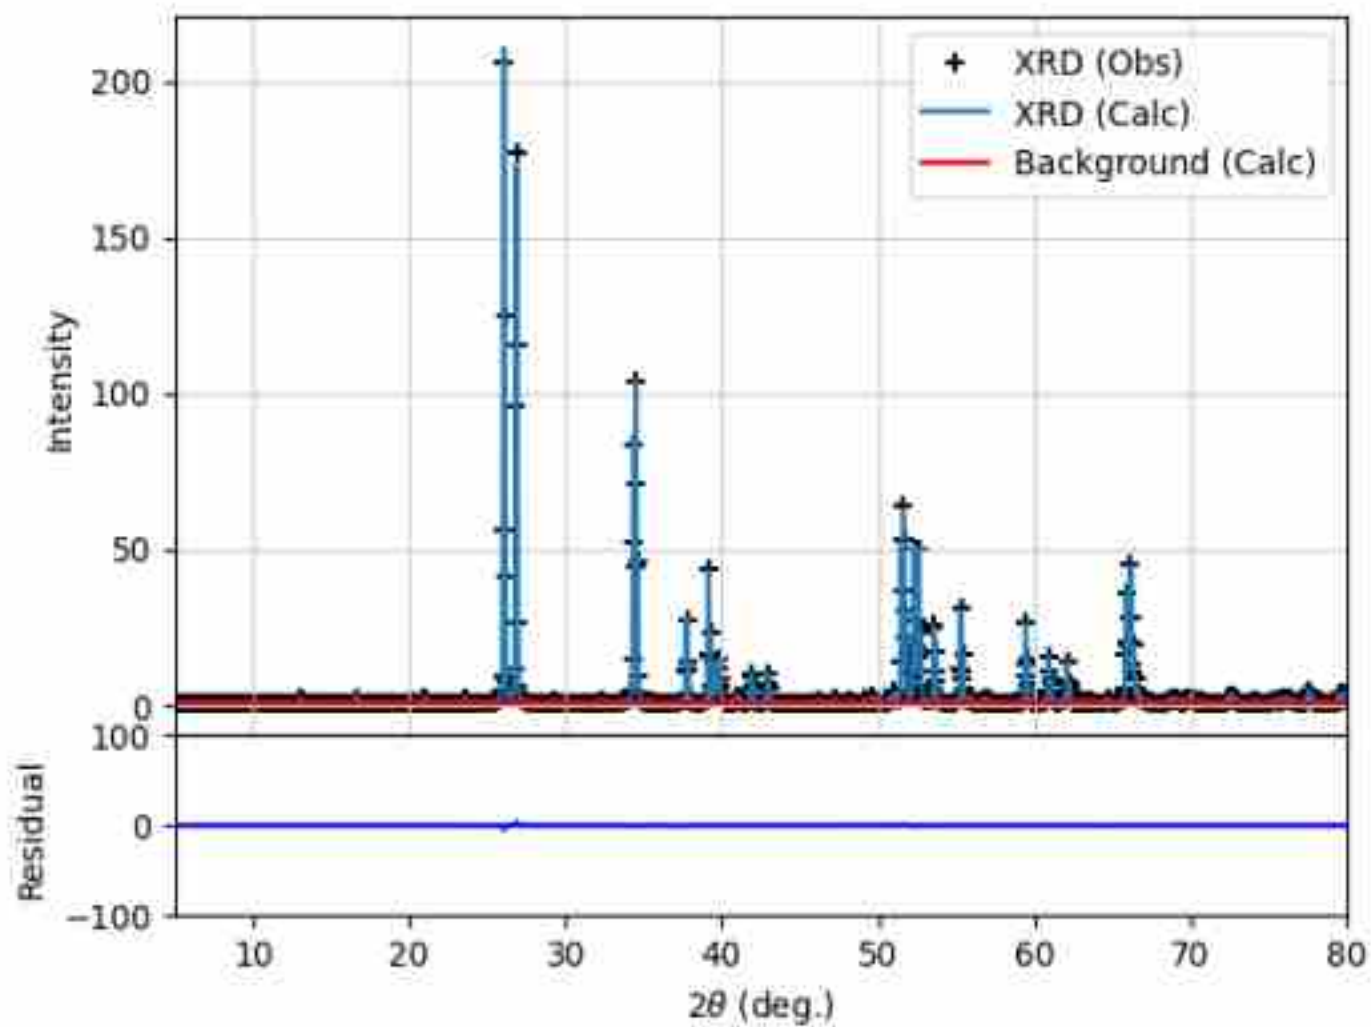

| RMSE before RR | Rwp     | RMSE after RR |
|----------------|---------|---------------|
| 0.432          | 1.62276 | None          |

# Lu1Mg2Cr3S8

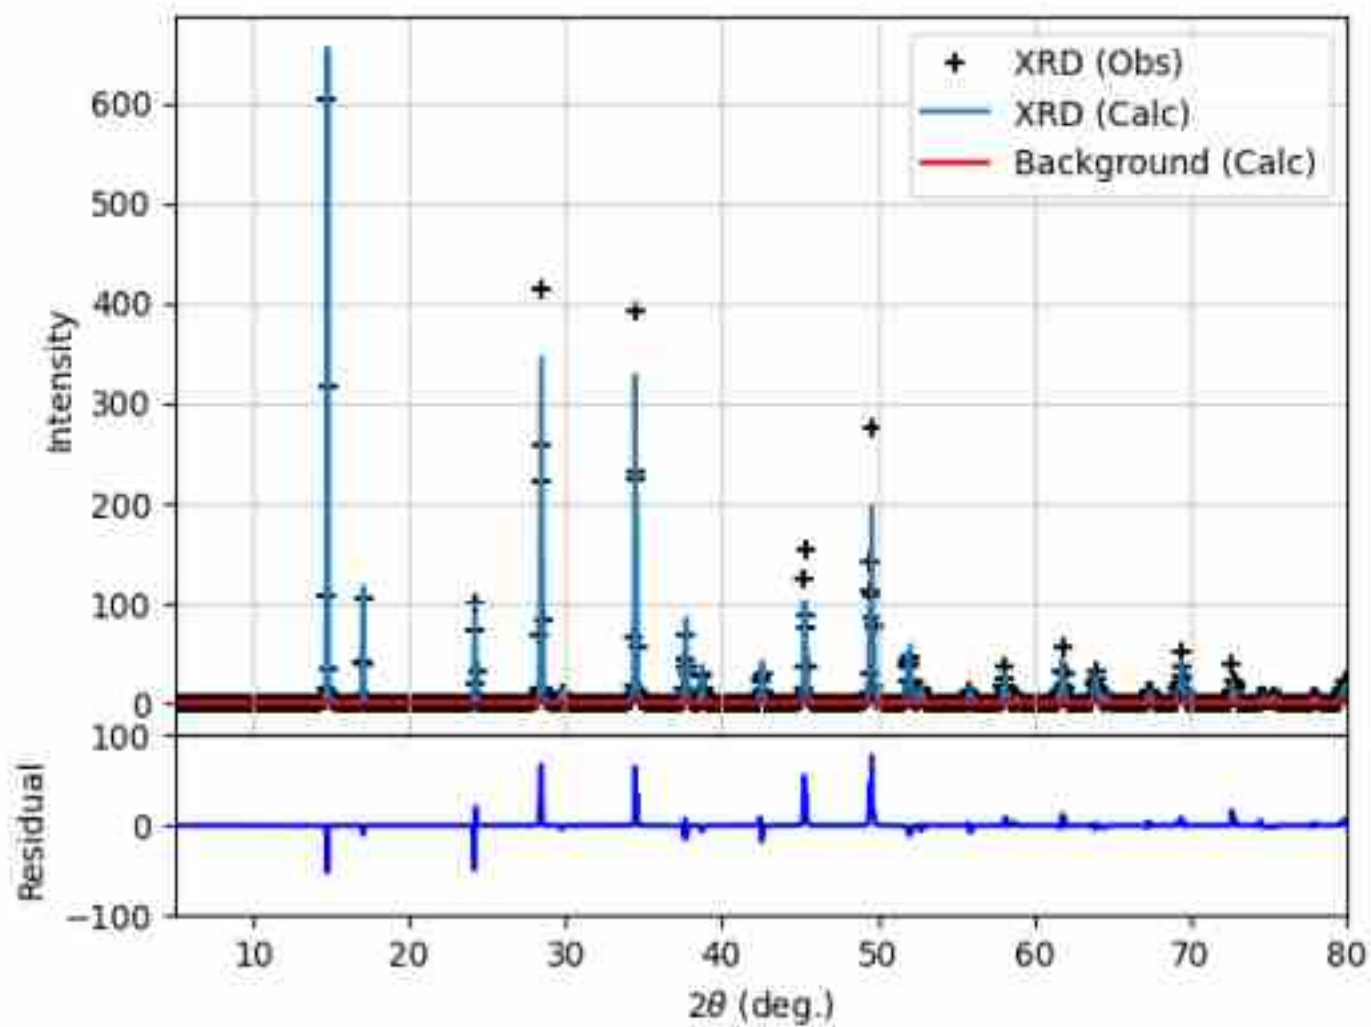

| RMSE before RR | Rwp      | RMSE after RR |
|----------------|----------|---------------|
| 0.432          | 22.96606 | None          |

N4

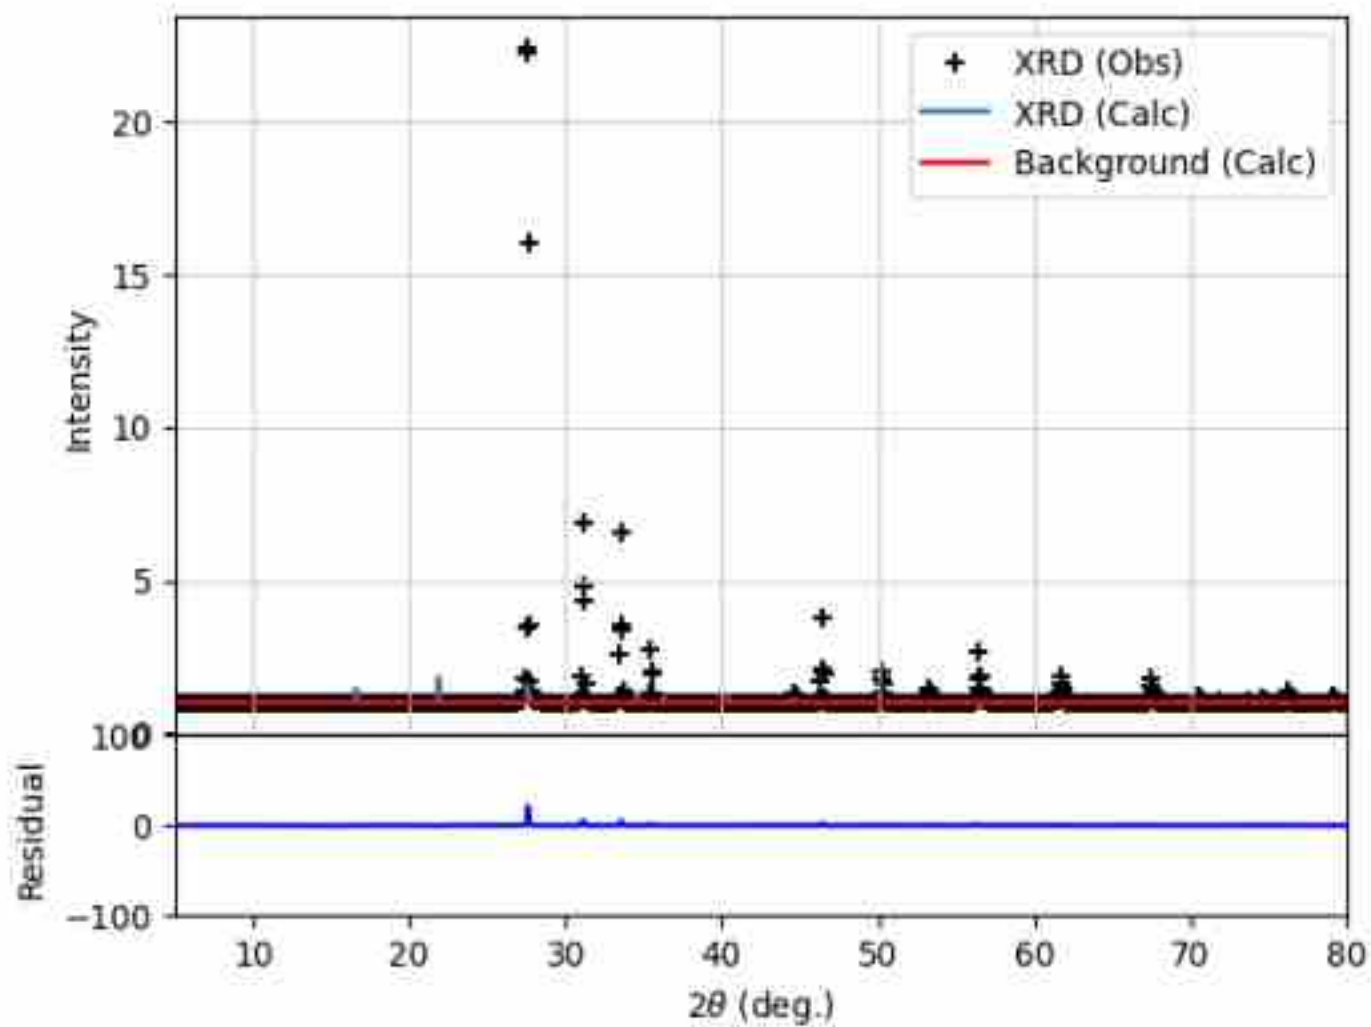

| RMSE before RR | Rwp      | RMSE after RR |
|----------------|----------|---------------|
| 0.432          | 23.70748 | 0.43007       |

# V2Pb1O2F8

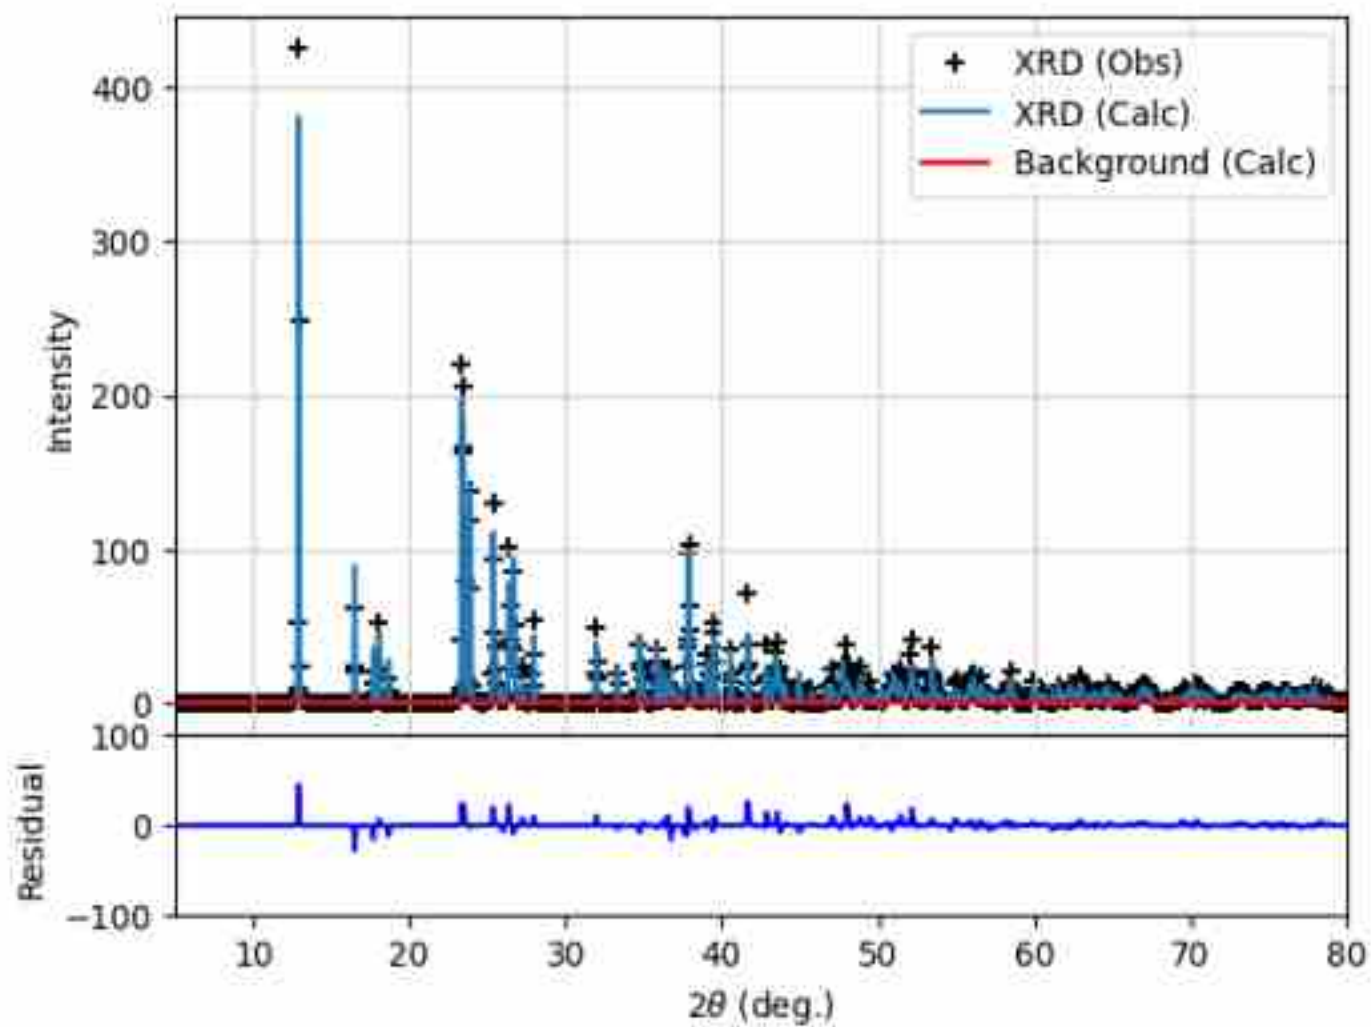

| RMSE before RR | Rwp      | RMSE after RR |
|----------------|----------|---------------|
| 0.433          | 26.44332 | None          |

# Ce<sub>4</sub>Zn<sub>4</sub>Cu<sub>10</sub>

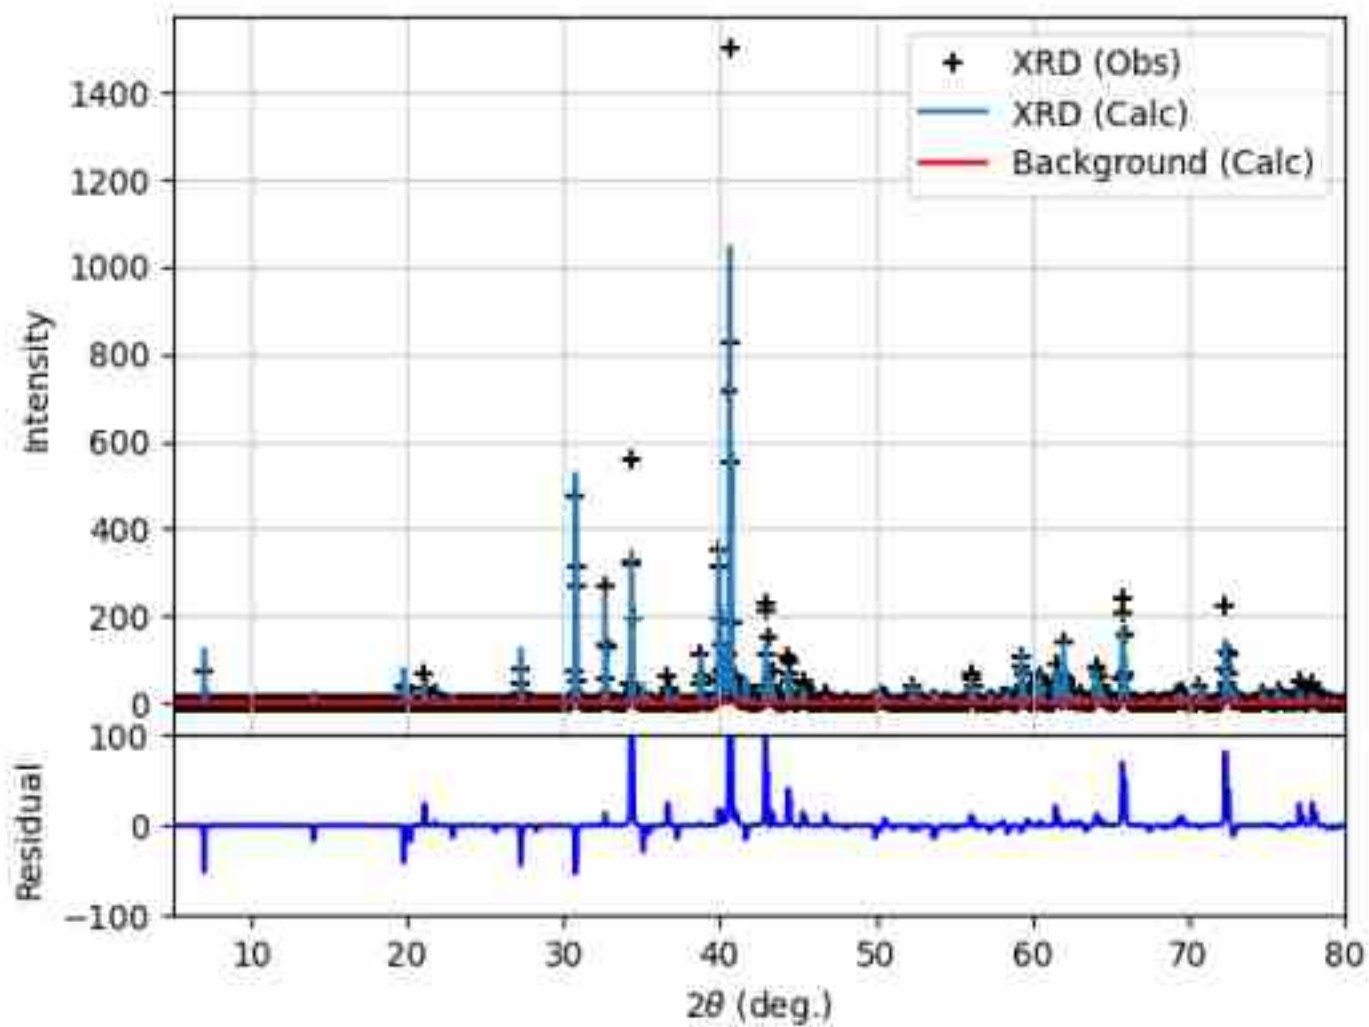

| RMSE before RR | Rwp      | RMSE after RR |
|----------------|----------|---------------|
| 0.434          | 36.89925 | 0.45553       |

# I4O4F12

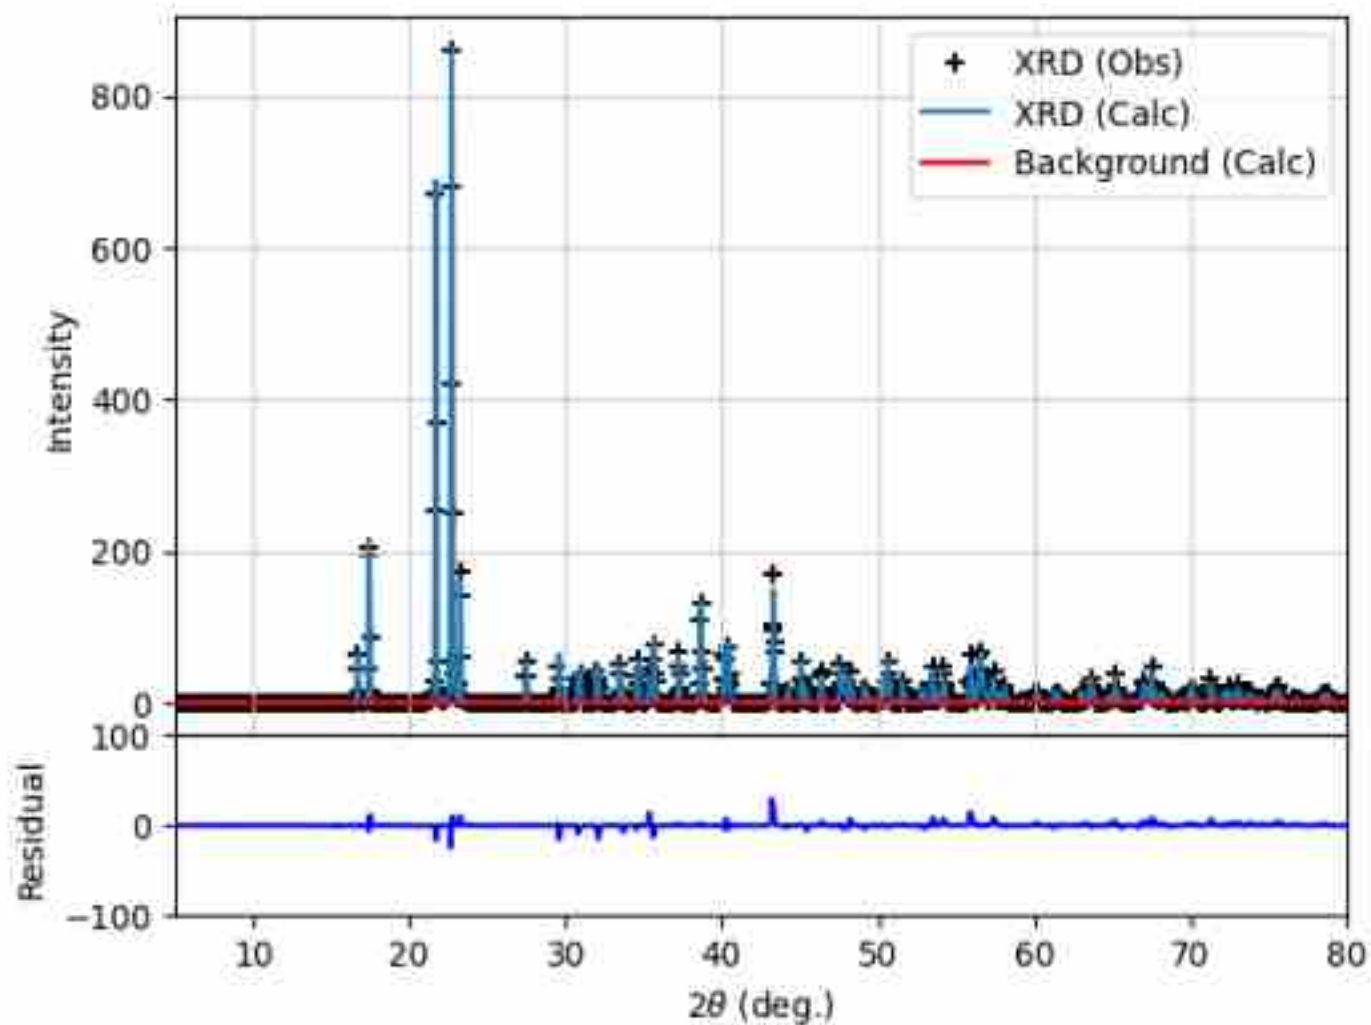

| RMSE before RR | Rwp      | RMSE after RR |
|----------------|----------|---------------|
| 0.434          | 11.71022 | None          |



# Li<sub>4</sub>Ti<sub>2</sub>Fe<sub>2</sub>O<sub>8</sub>

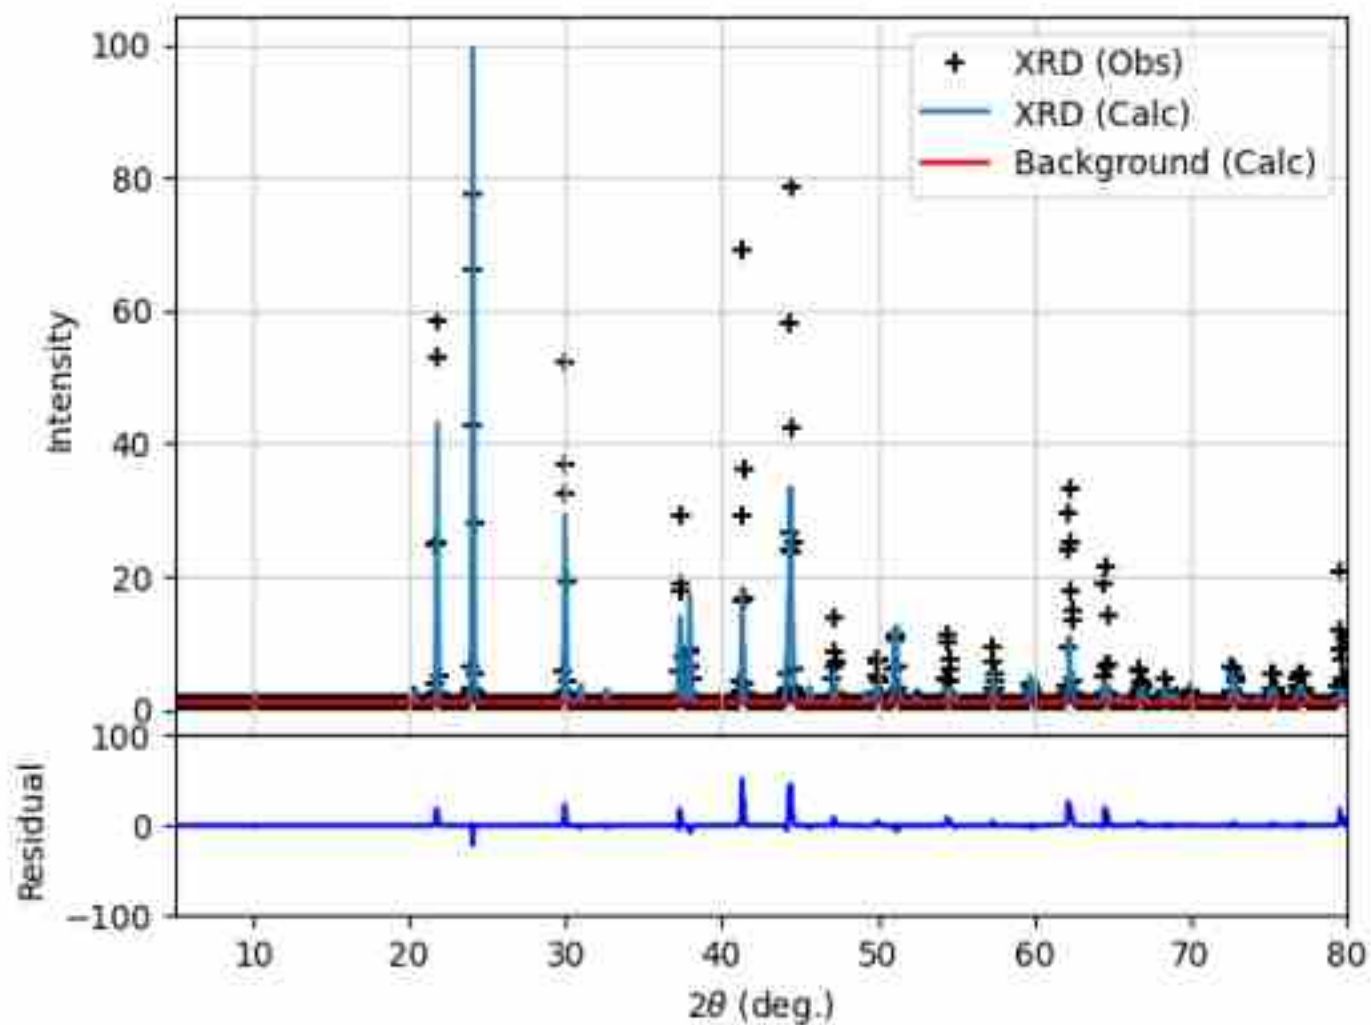

| RMSE before RR | Rwp      | RMSE after RR |
|----------------|----------|---------------|
| 0.434          | 42.50648 | None          |

# Ni<sub>9</sub>Bi<sub>1</sub>Te<sub>1</sub>S<sub>8</sub>

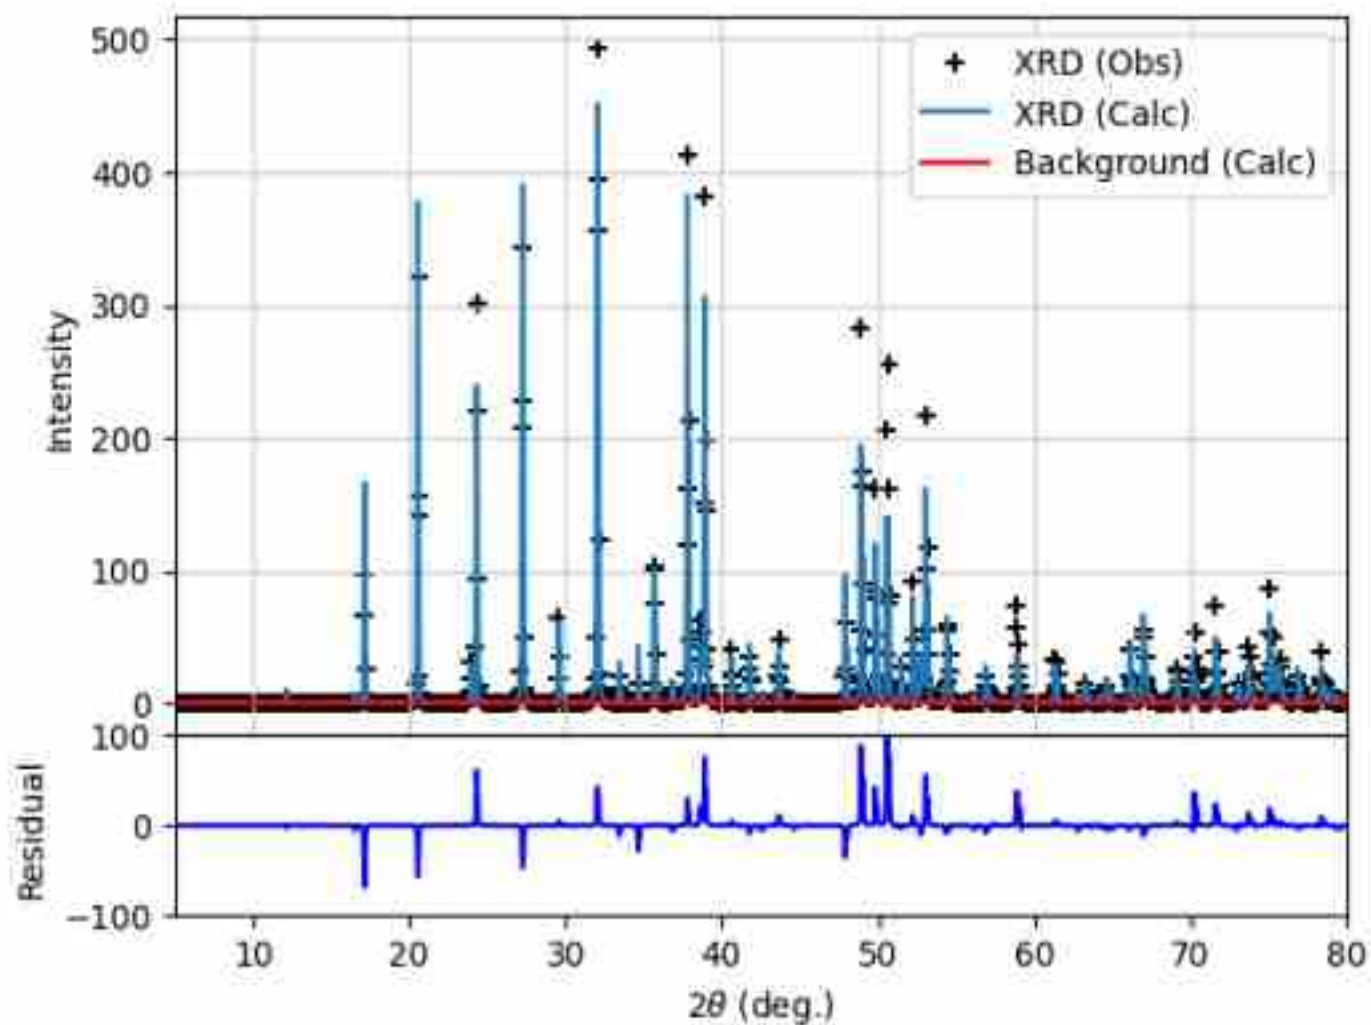

| RMSE before RR | Rwp     | RMSE after RR |
|----------------|---------|---------------|
| 0.434          | 28.2452 | None          |

# Re6Se8Cl12

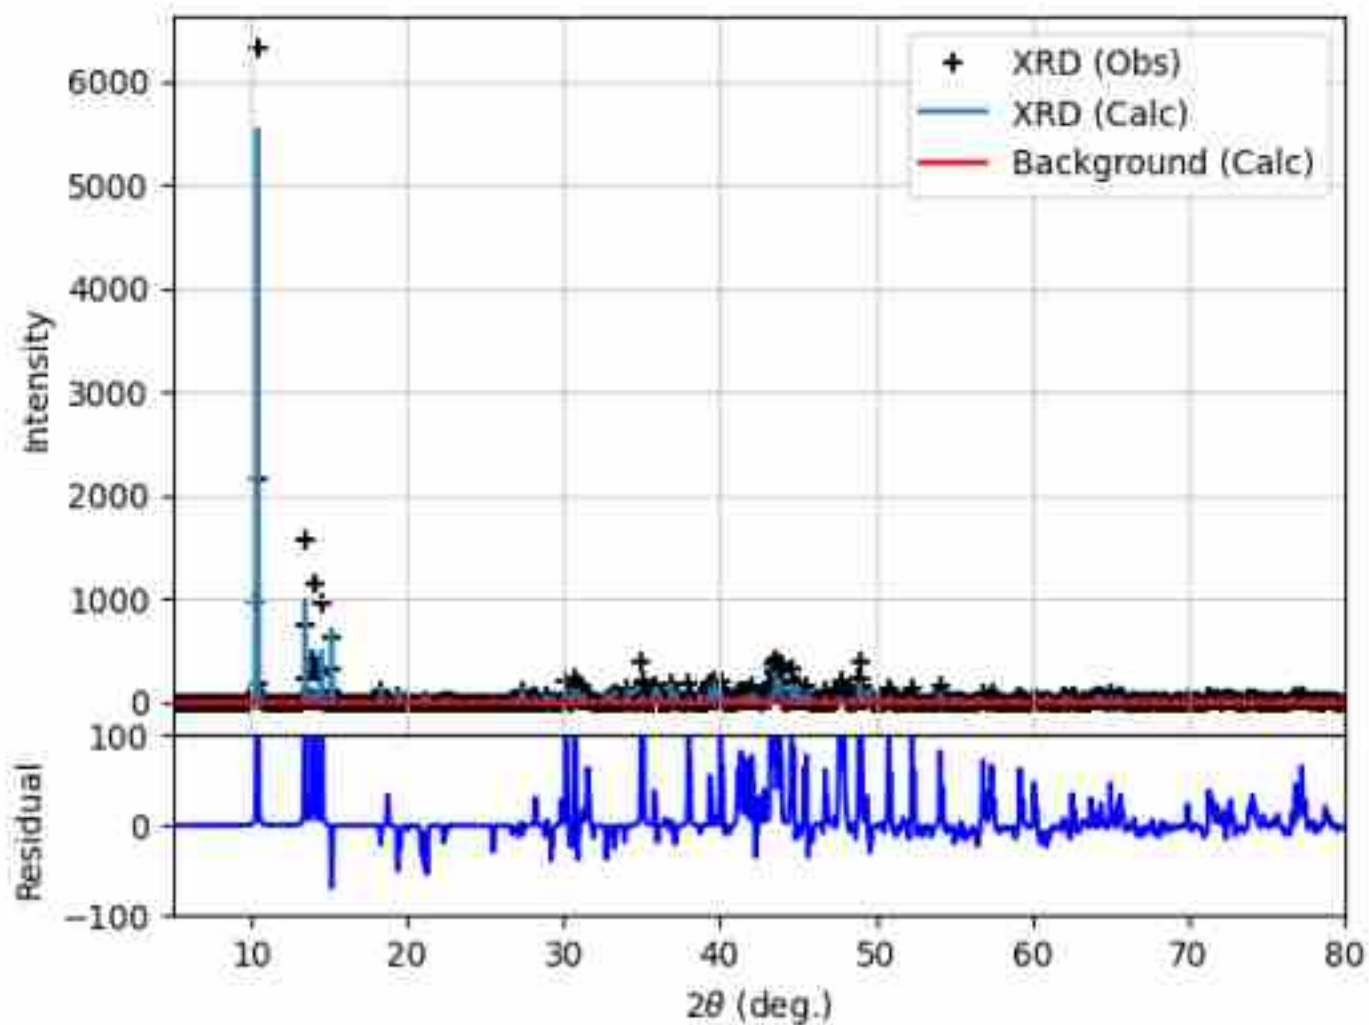

| RMSE before RR | Rwp      | RMSE after RR |
|----------------|----------|---------------|
| 0.435          | 59.07726 | None          |

# Y1Mn6Co6

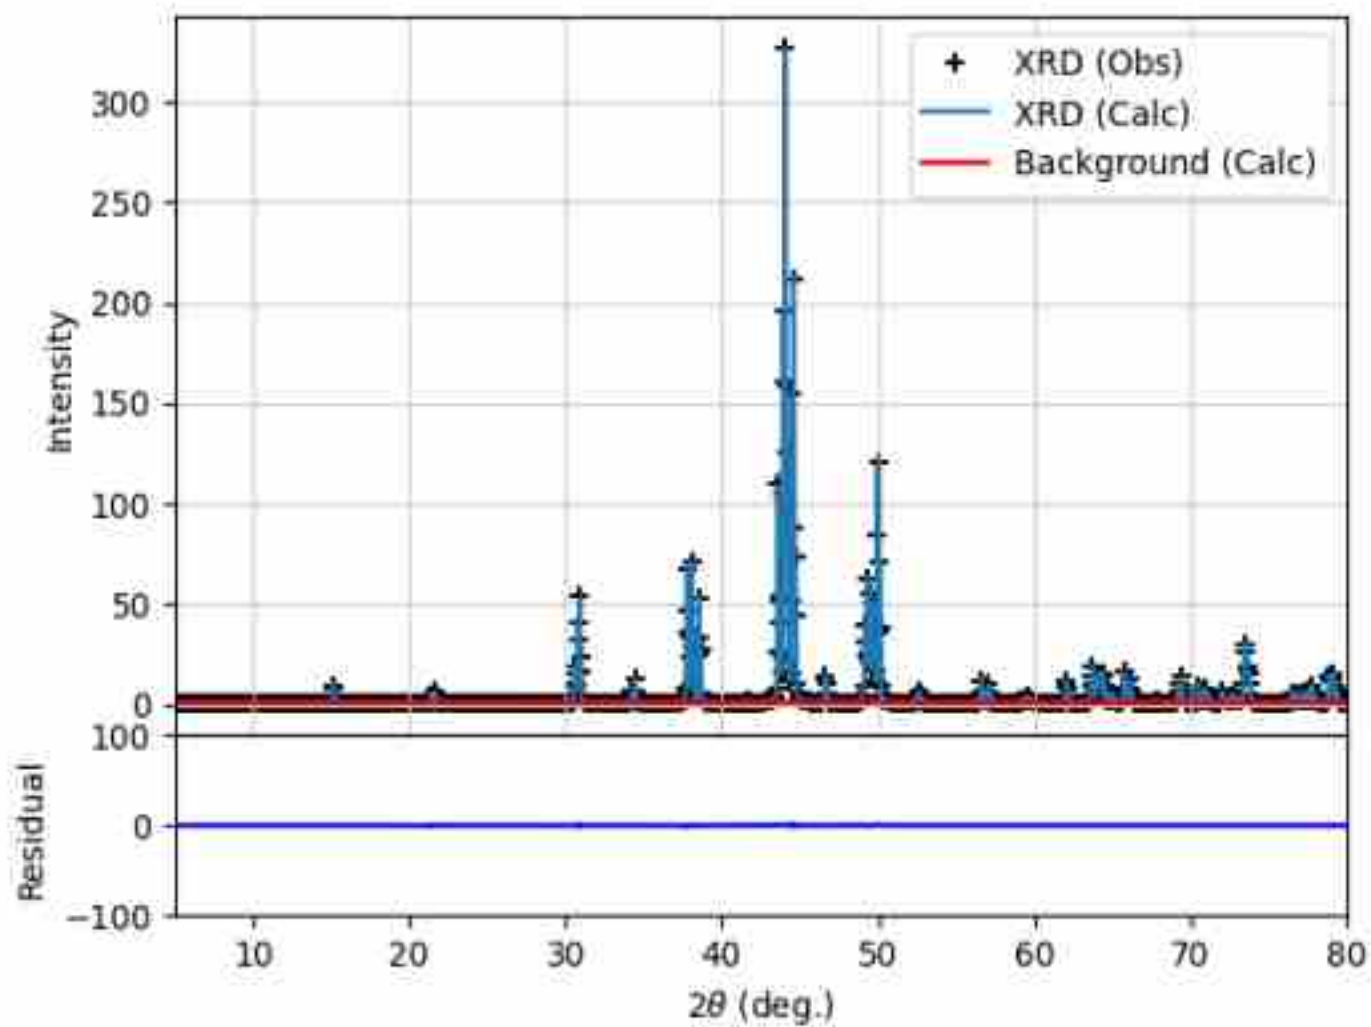

| RMSE before RR | Rwp     | RMSE after RR |
|----------------|---------|---------------|
| 0.435          | 1.58954 | 0.43247       |

# La<sub>2</sub>Er<sub>8</sub>Ge<sub>6</sub>

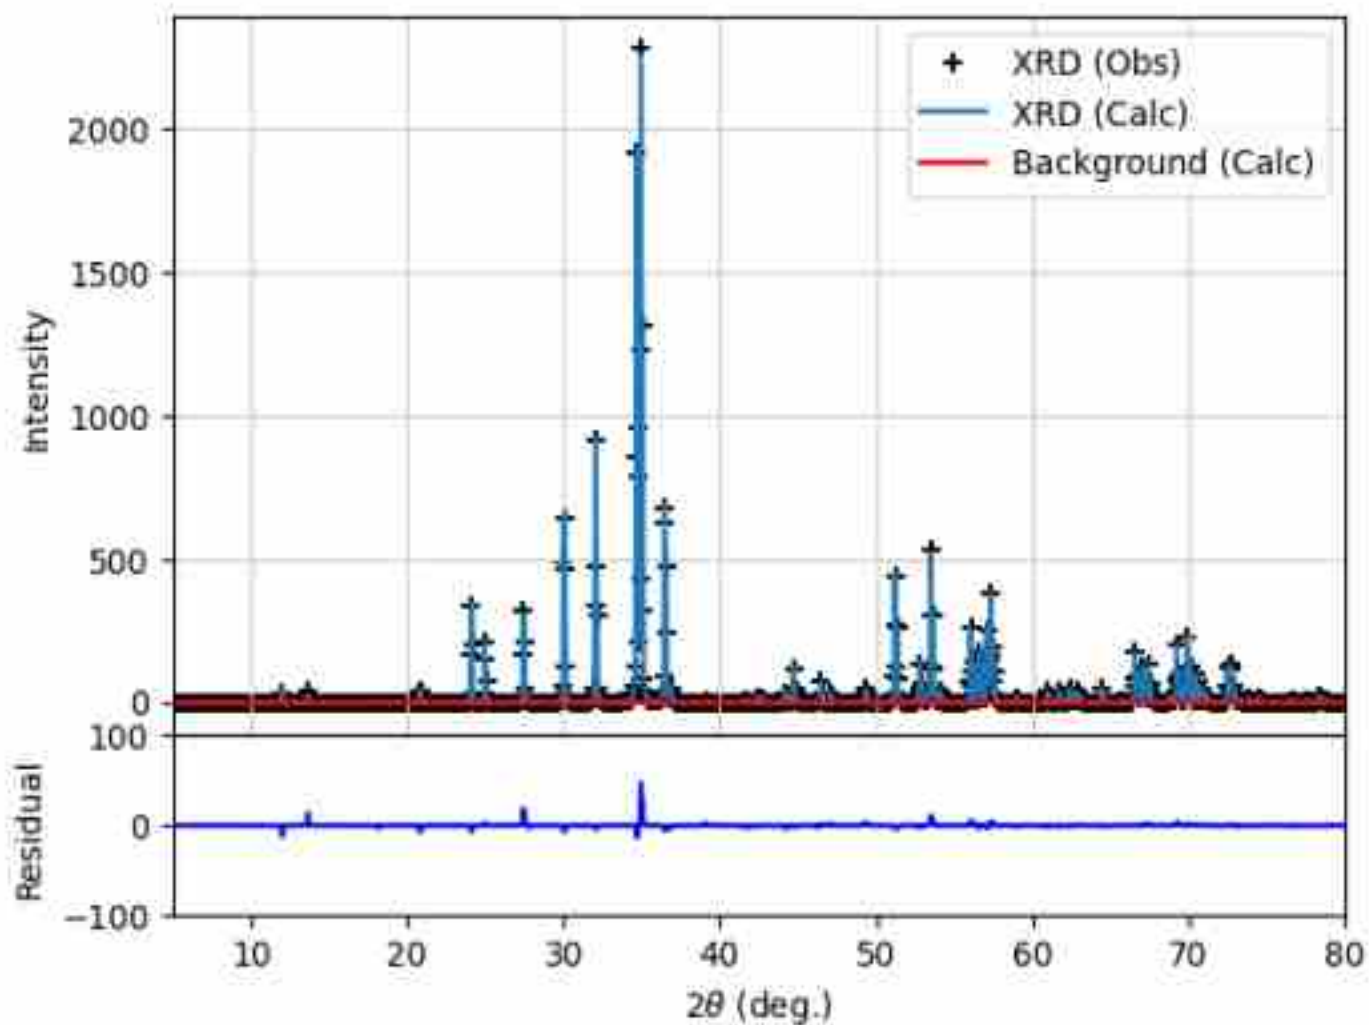

| RMSE before RR | Rwp     | RMSE after RR |
|----------------|---------|---------------|
| 0.436          | 3.86043 | 0.48744       |

# Li1Zr1S2

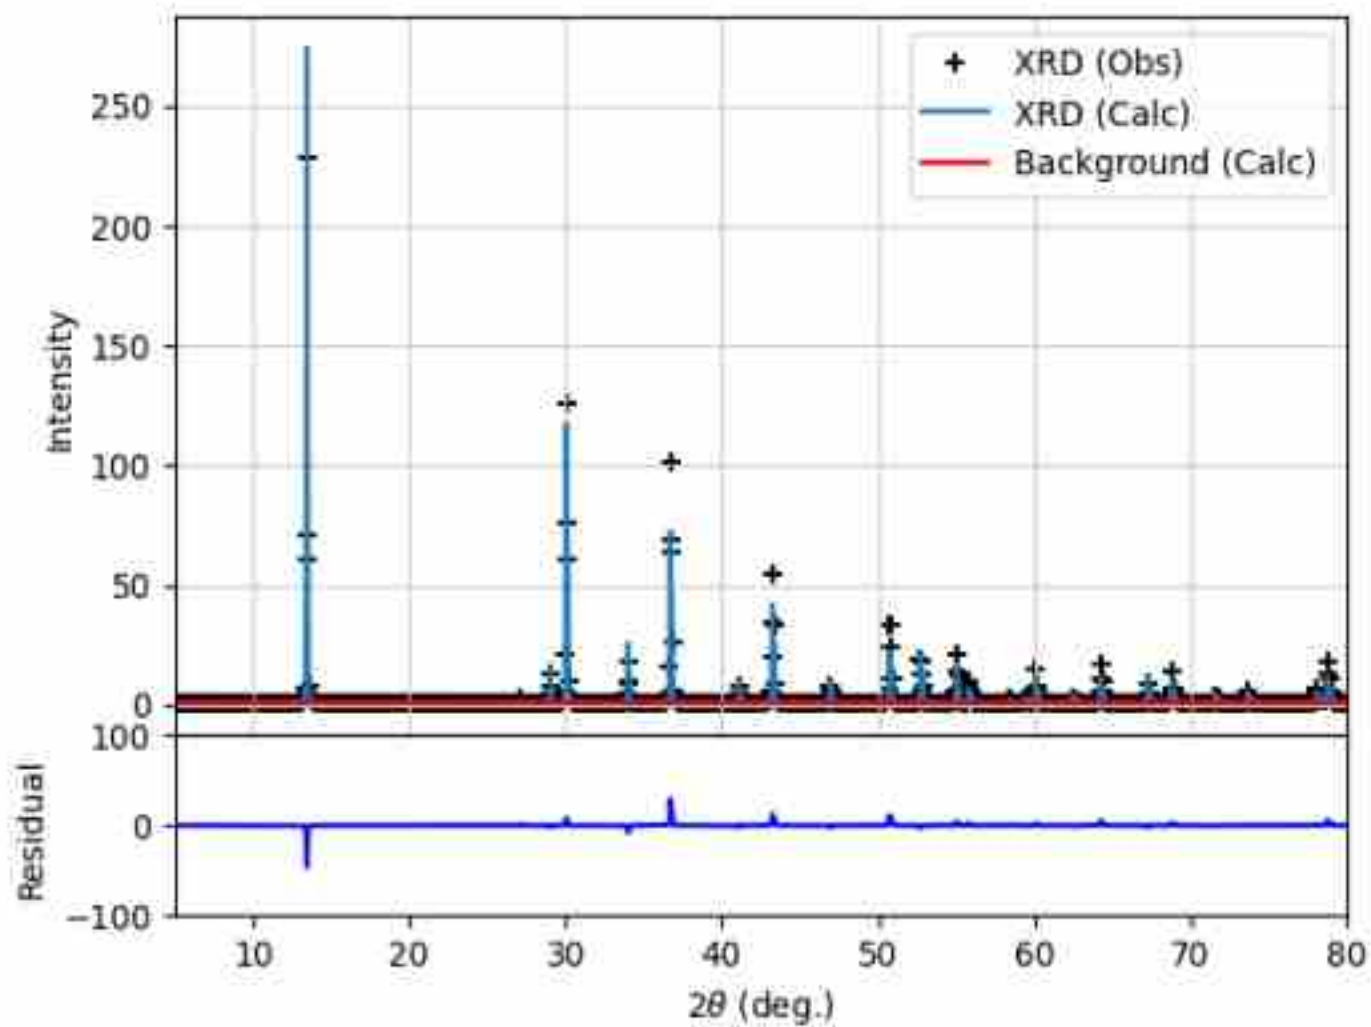

| RMSE before RR | Rwp      | RMSE after RR |
|----------------|----------|---------------|
| 0.436          | 16.92613 | None          |

# Ti1Ni4Ge108

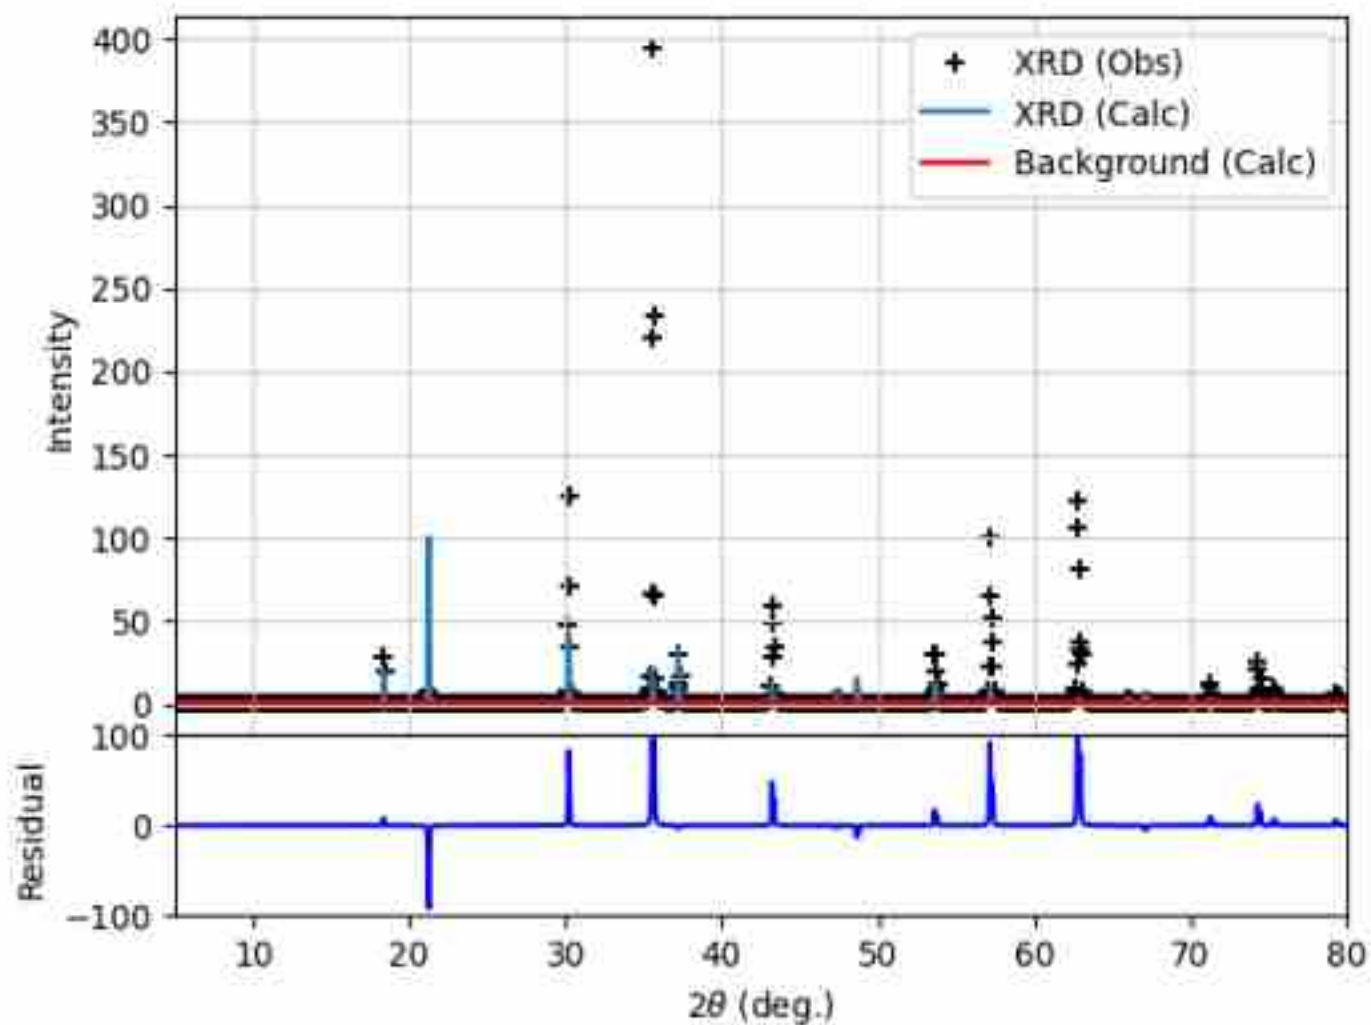

| RMSE before RR | Rwp   | RMSE after RR |
|----------------|-------|---------------|
| 0.436          | 100.0 | None          |

# Ni8Sn4P4

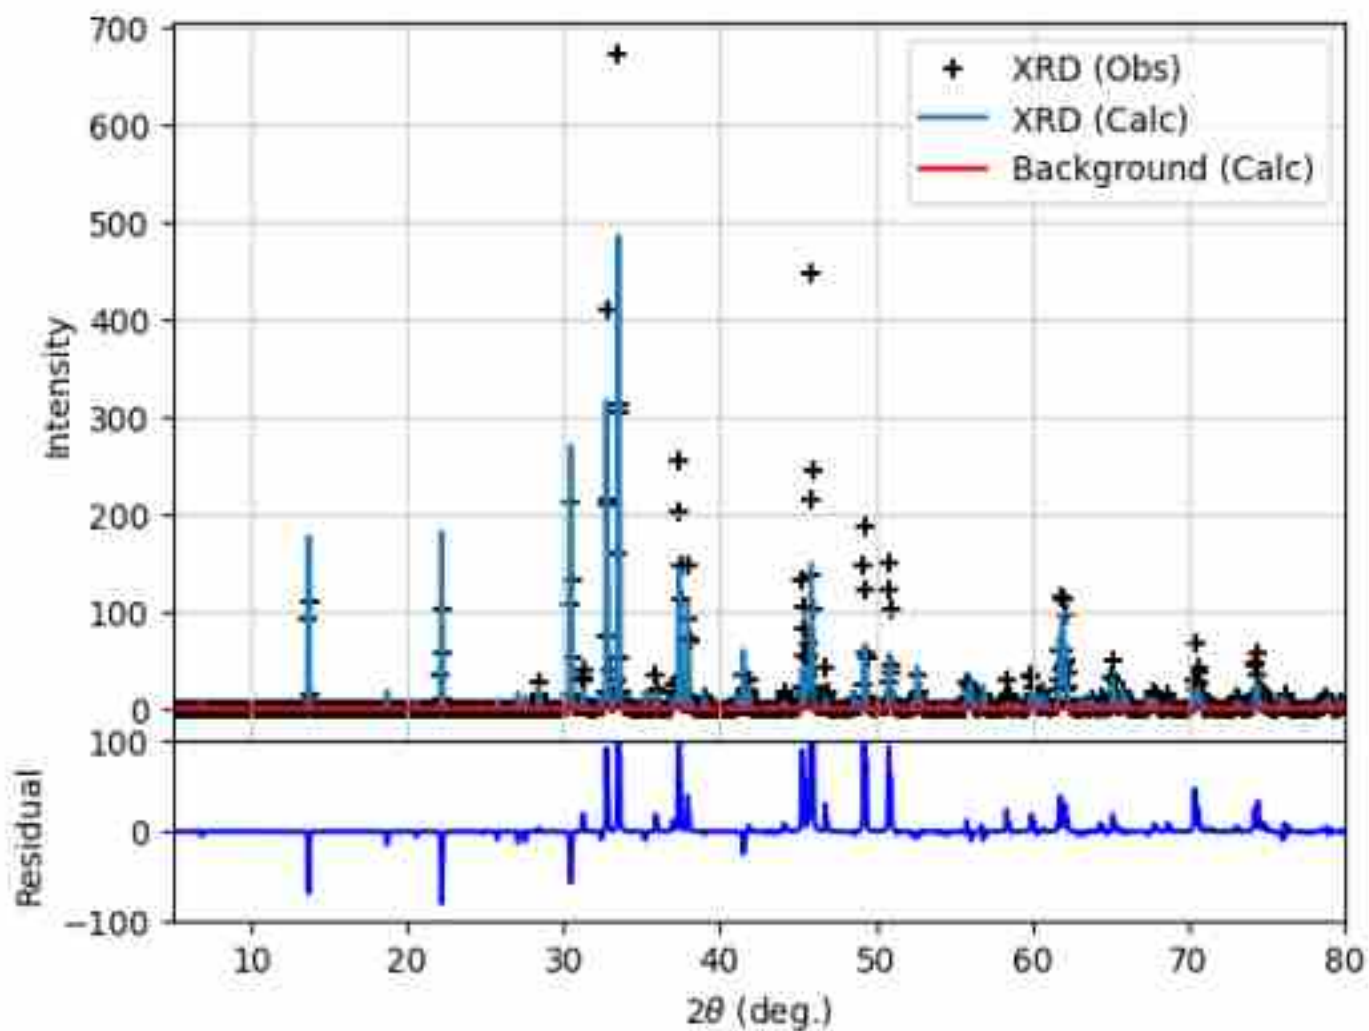

| RMSE before RR | Rwp      | RMSE after RR |
|----------------|----------|---------------|
| 0.438          | 49.56396 | None          |



# Tc8P12

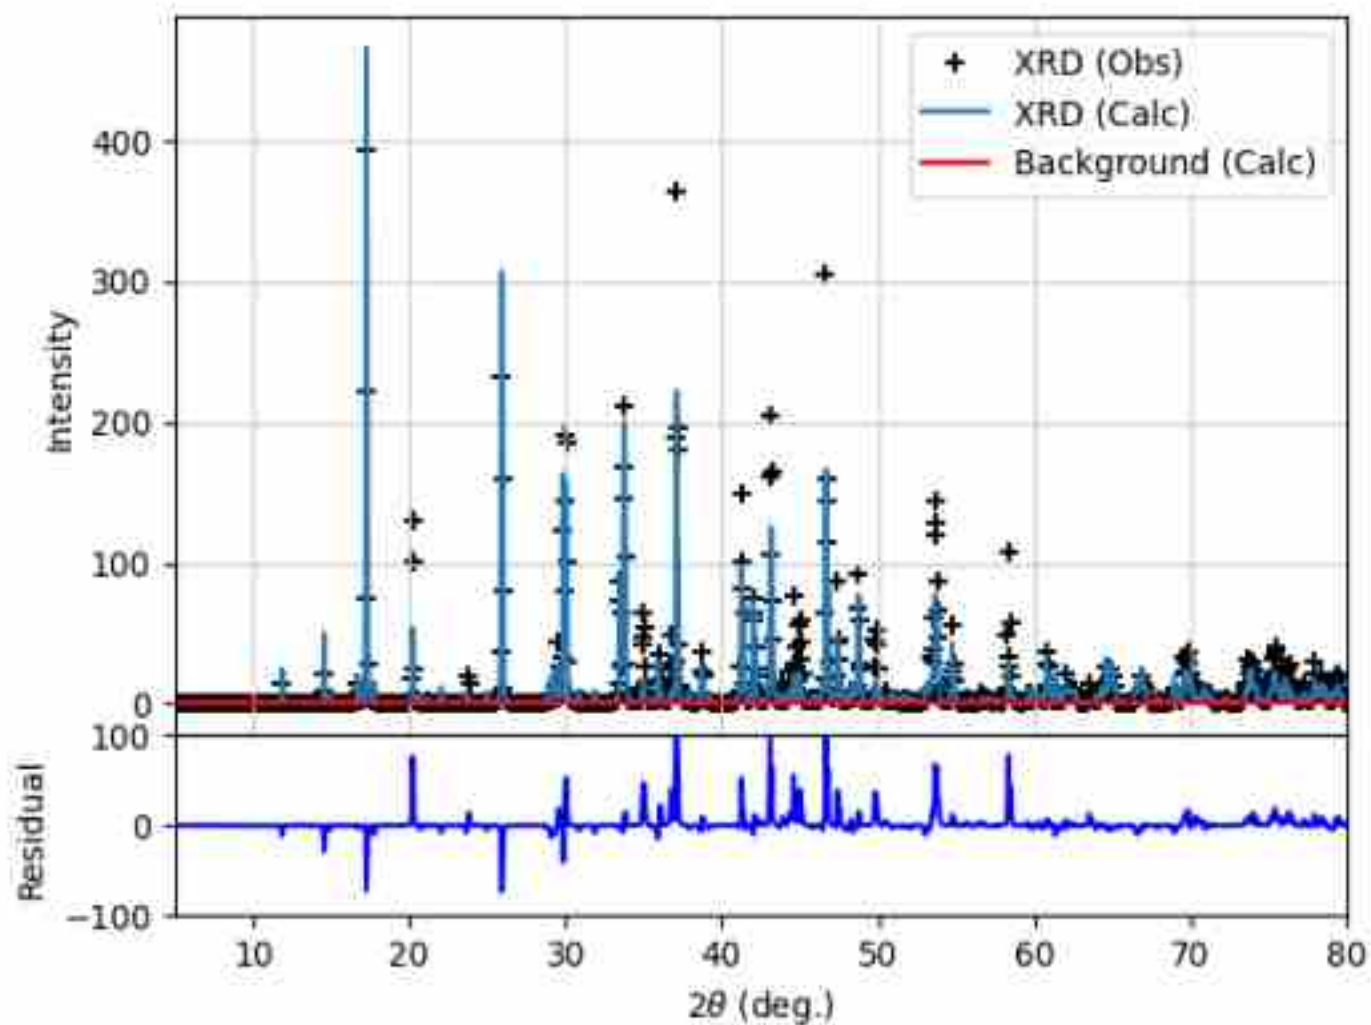

| RMSE before RR | Rwp      | RMSE after RR |
|----------------|----------|---------------|
| 0.439          | 46.14988 | None          |

# B6Ir4

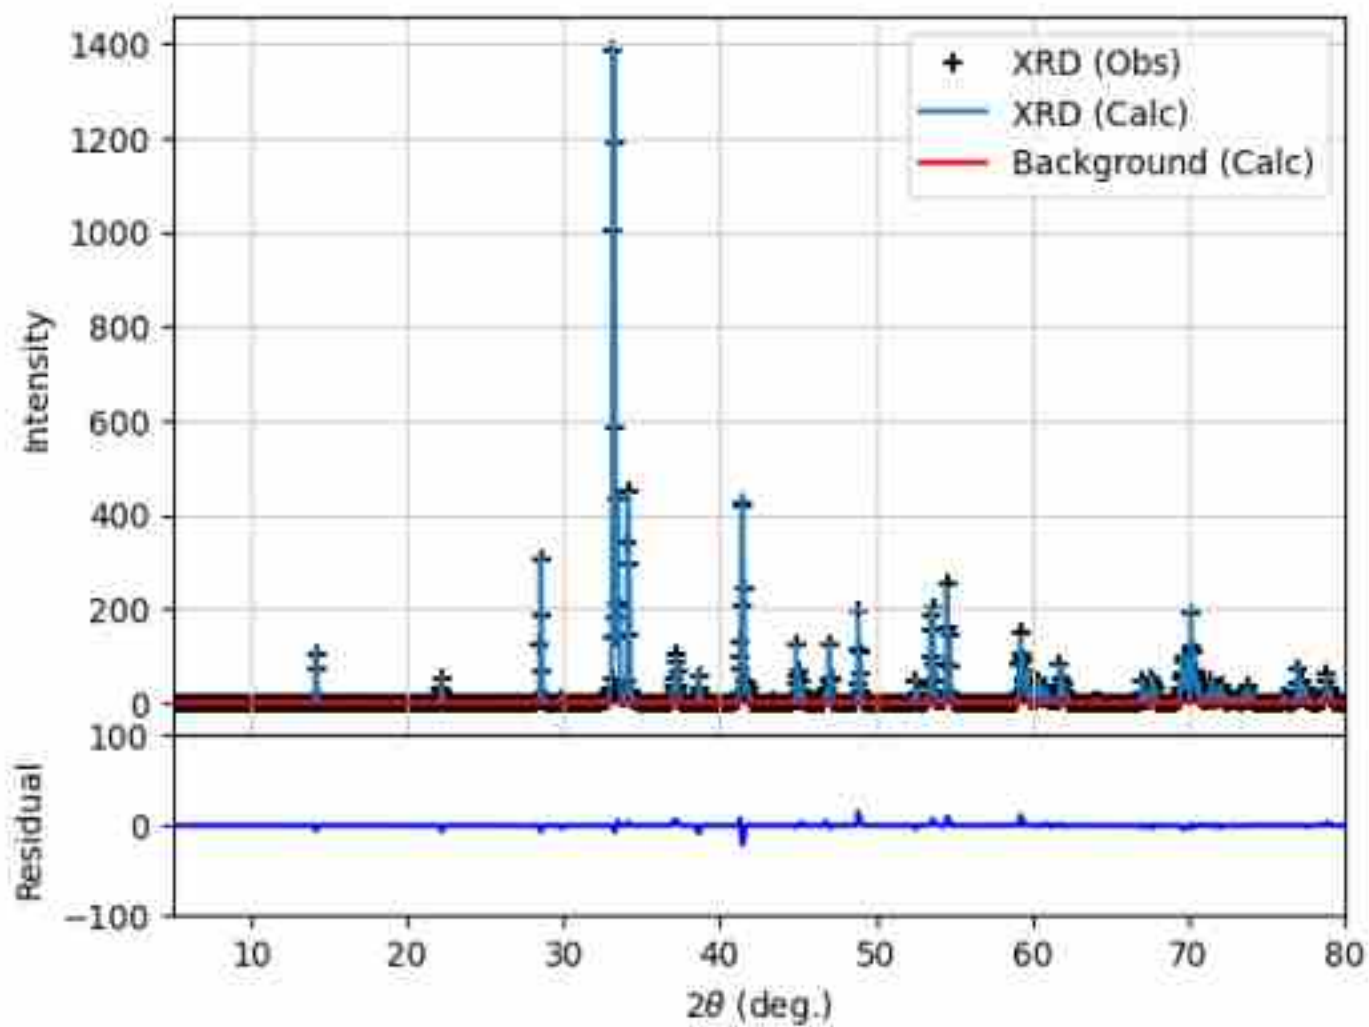

| RMSE before RR | Rwp     | RMSE after RR |
|----------------|---------|---------------|
| 0.442          | 3.96696 | 0.38888       |

# Ca<sub>6</sub>Ag<sub>3</sub>Ge<sub>5</sub>

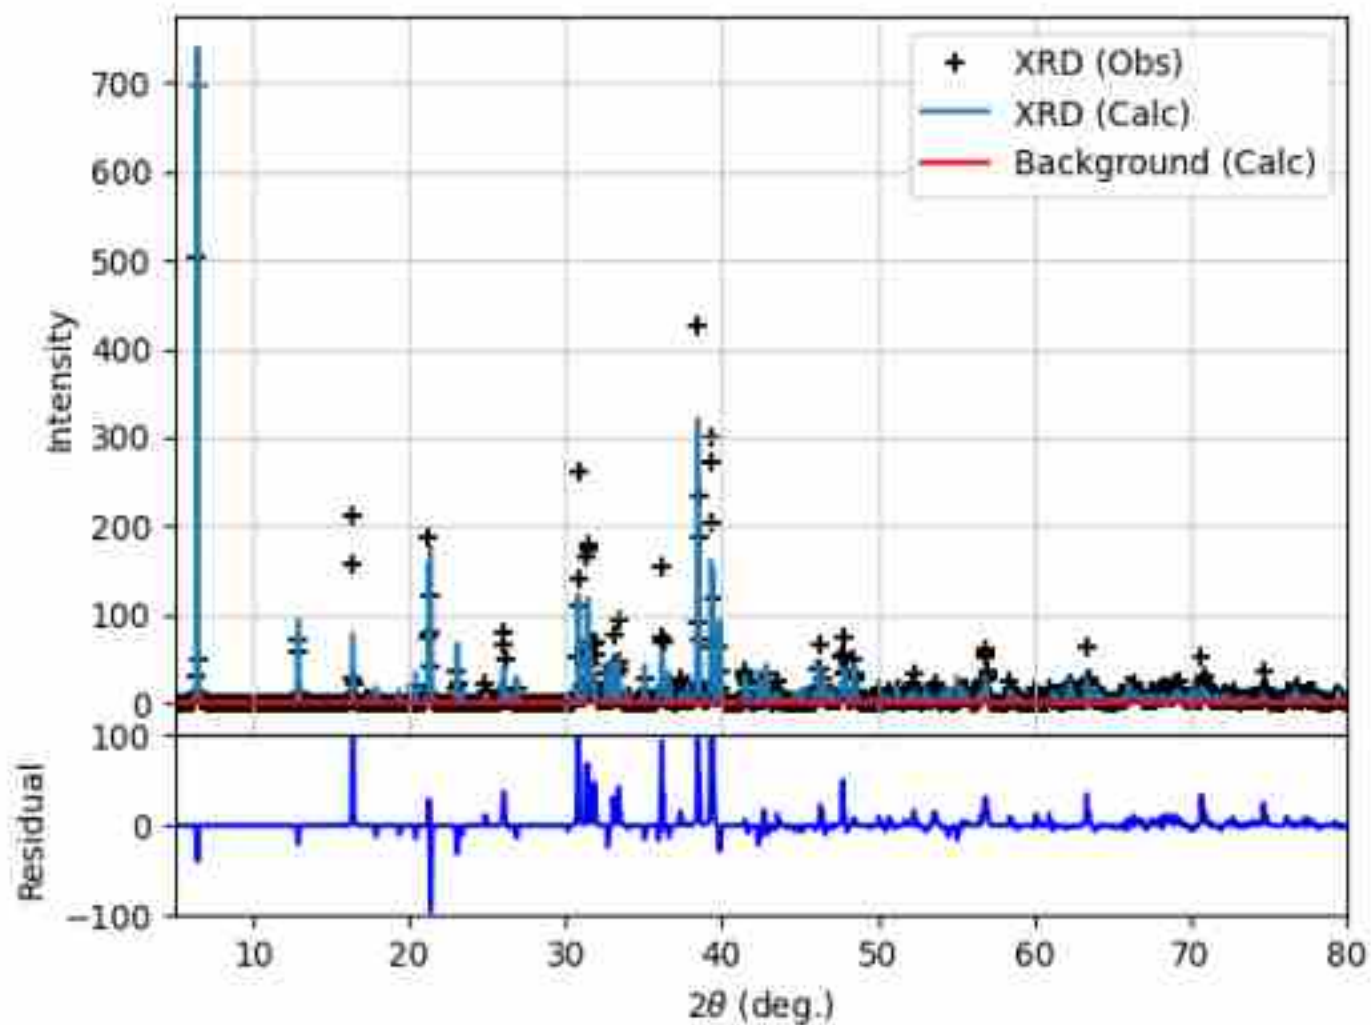

| RMSE before RR | Rwp      | RMSE after RR |
|----------------|----------|---------------|
| 0.442          | 45.39001 | None          |

# Hg8Cl4O4

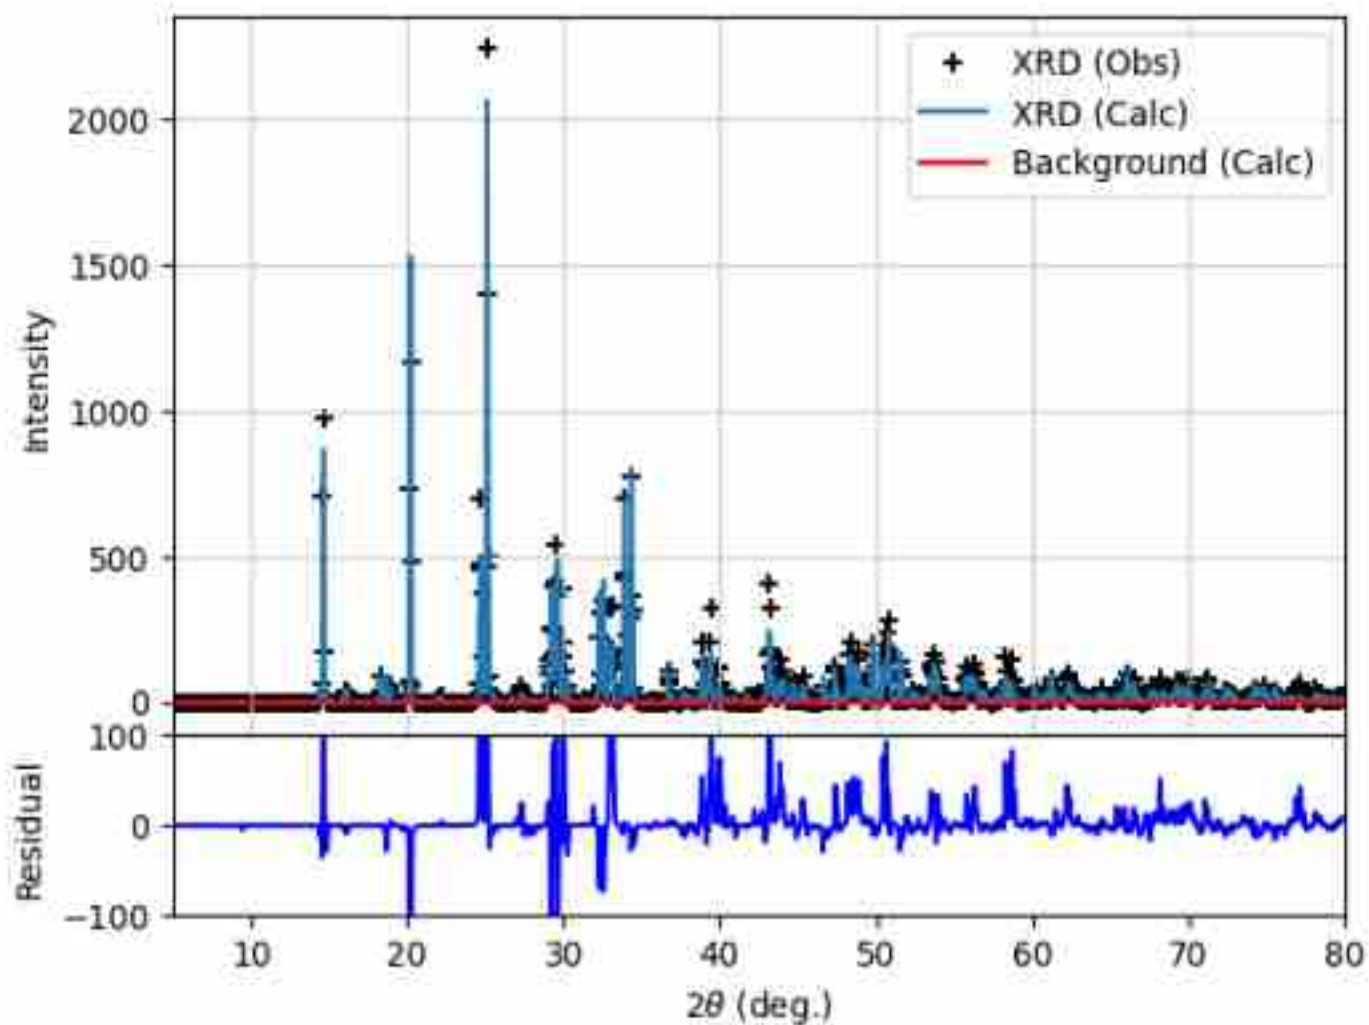

| RMSE before RR | Rwp      | RMSE after RR |
|----------------|----------|---------------|
| 0.442          | 31.78235 | None          |

# Ba<sub>2</sub>Al<sub>4</sub>Si<sub>4</sub>

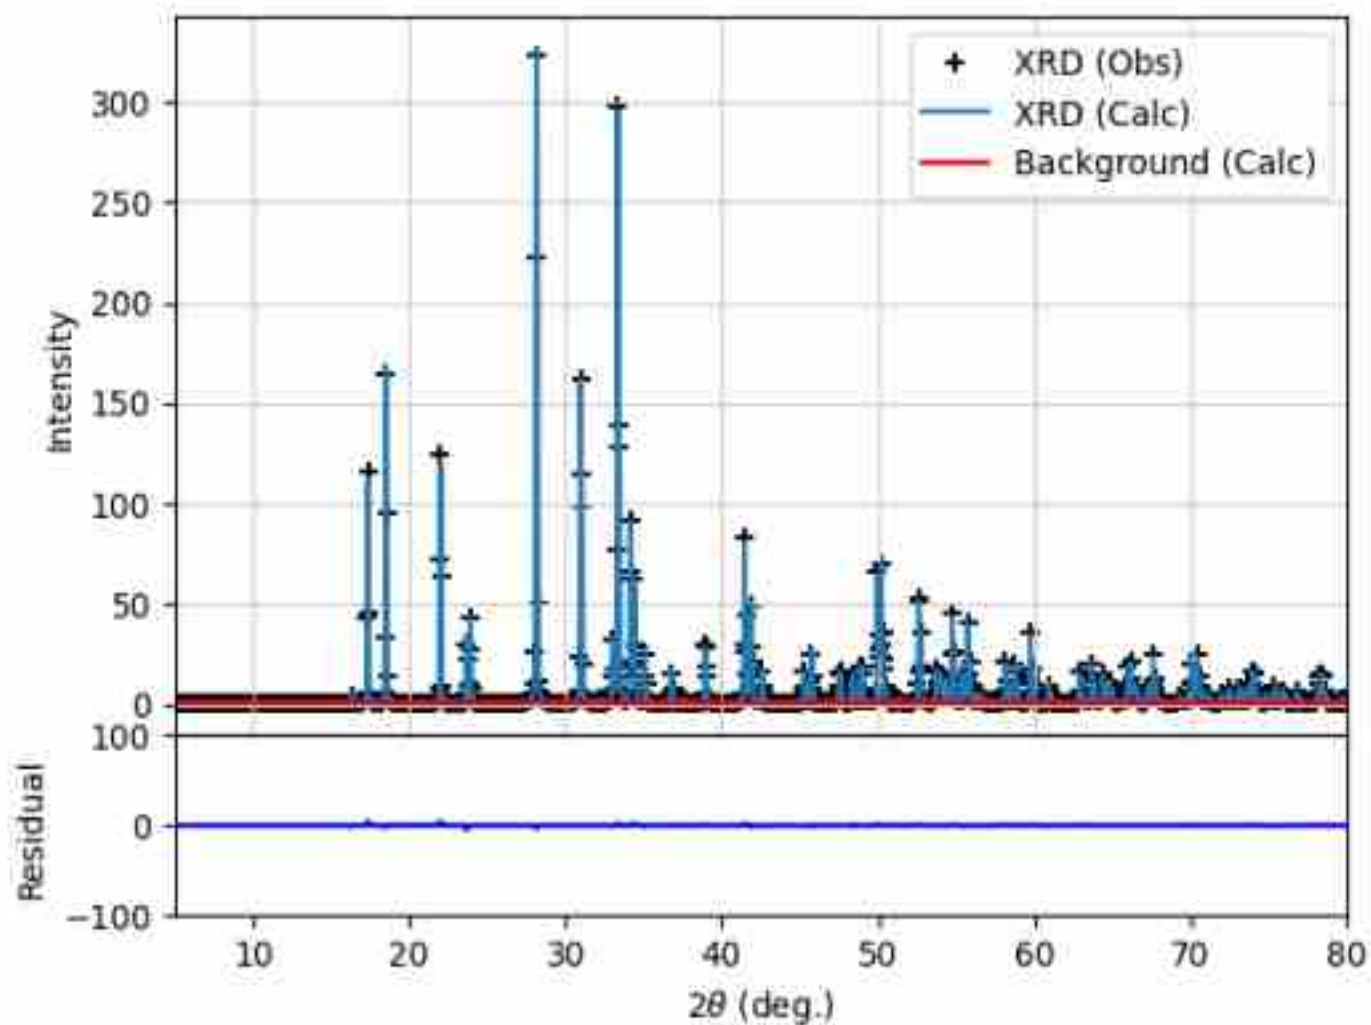

| RMSE before RR | Rwp     | RMSE after RR |
|----------------|---------|---------------|
| 0.443          | 2.81117 | None          |

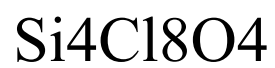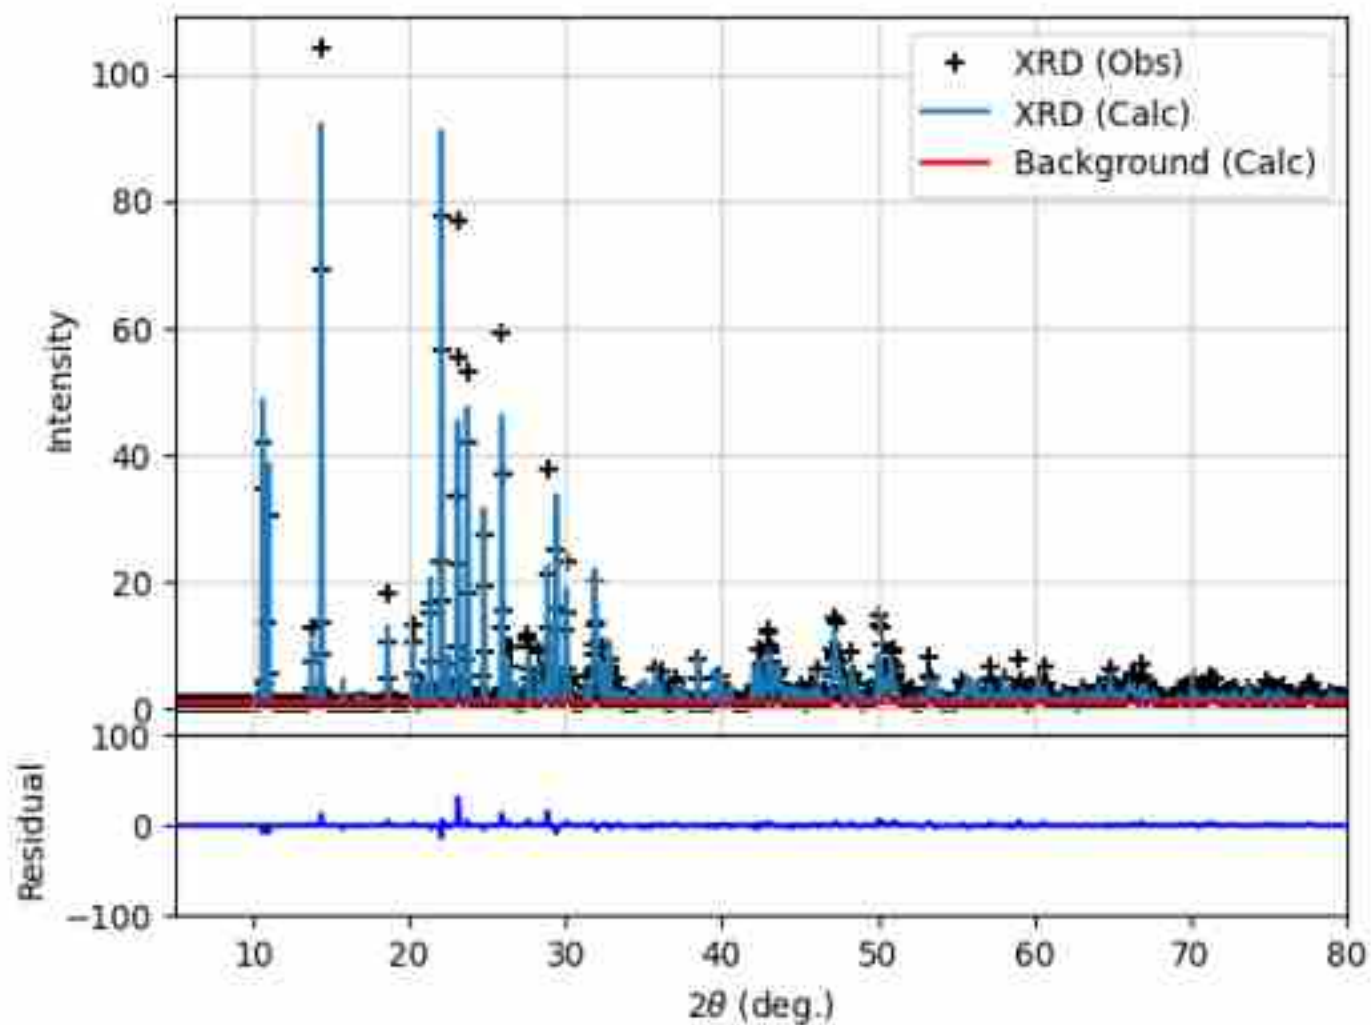

| RMSE before RR | Rwp      | RMSE after RR |
|----------------|----------|---------------|
| 0.443          | 26.73374 | None          |

# Fe8Re12

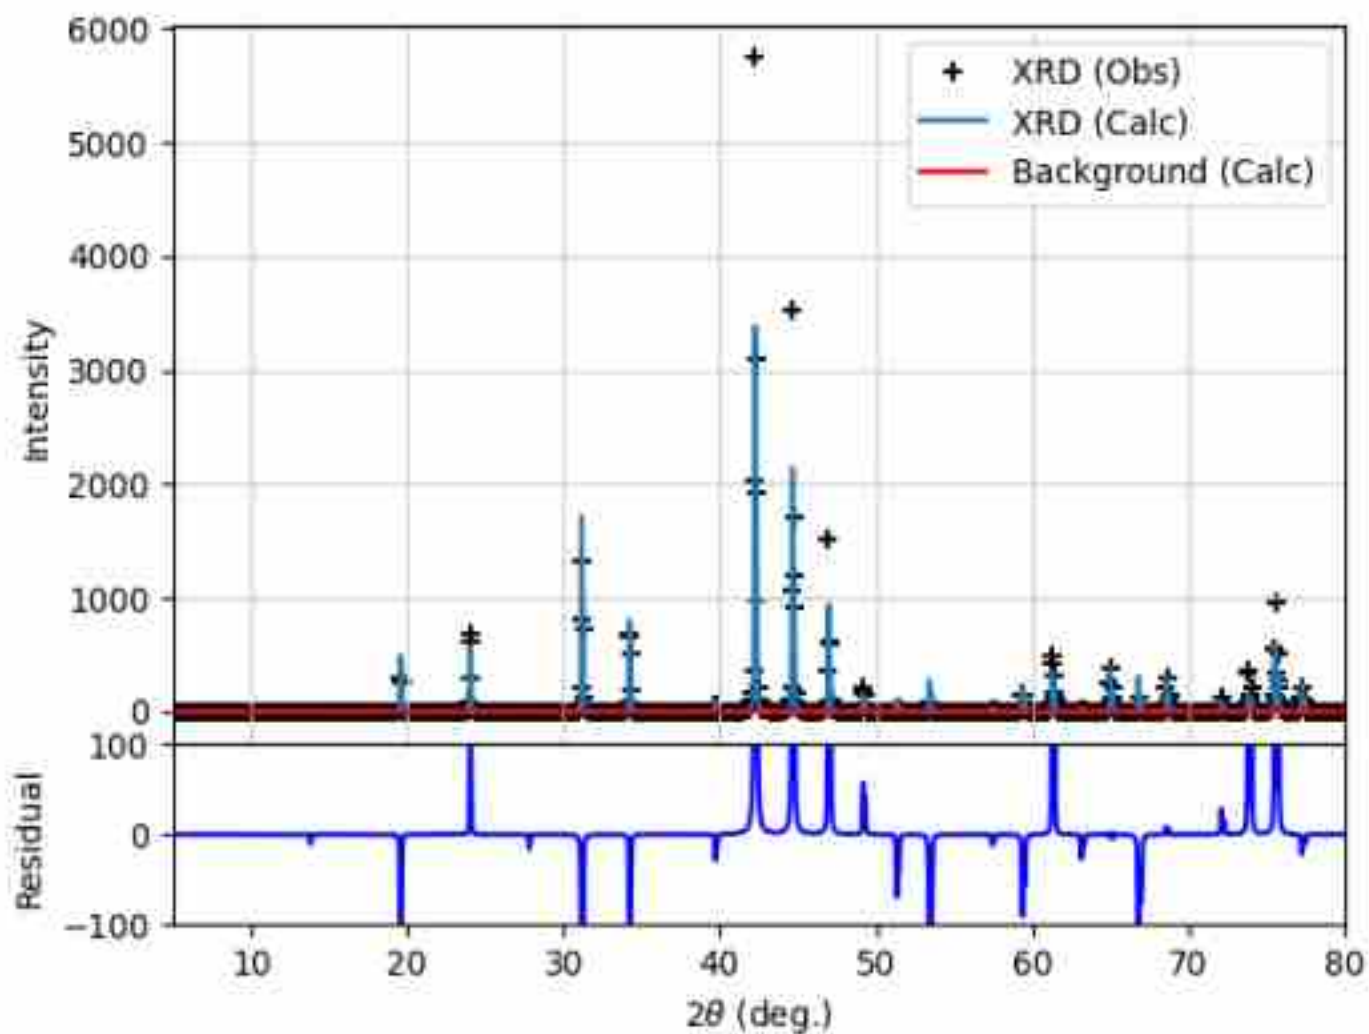

| RMSE before RR | Rwp     | RMSE after RR |
|----------------|---------|---------------|
| 0.444          | 43.2148 | 0.45731       |

# Li<sub>4</sub>Mn<sub>2</sub>Si<sub>2</sub>O<sub>8</sub>

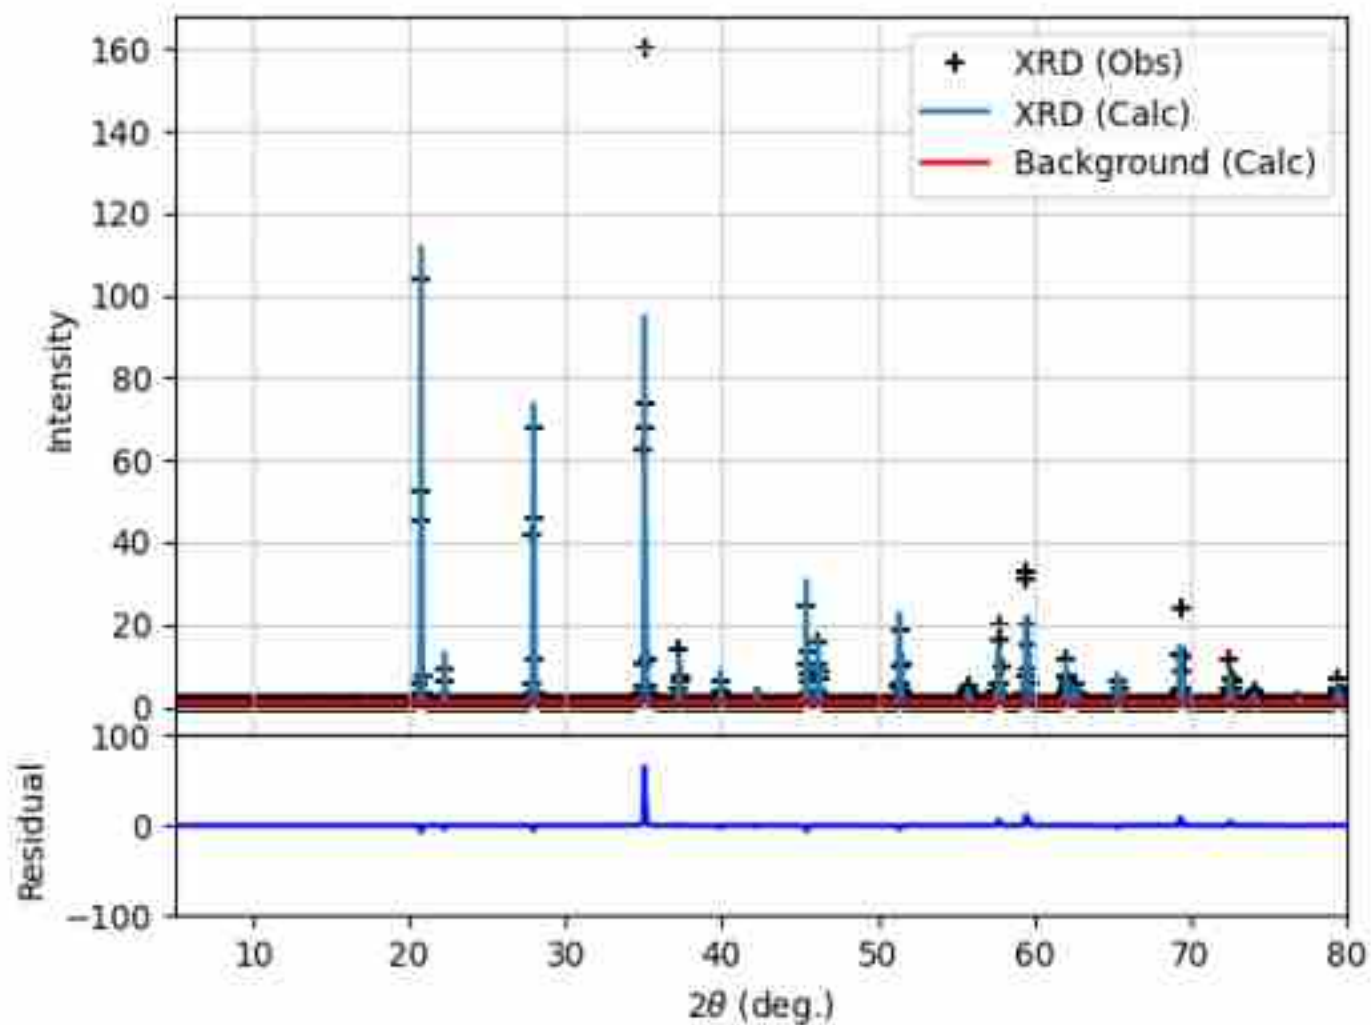

| RMSE before RR | Rwp      | RMSE after RR |
|----------------|----------|---------------|
| 0.444          | 20.16971 | None          |



# Mn<sub>6</sub>Ni<sub>2</sub>P<sub>4</sub>

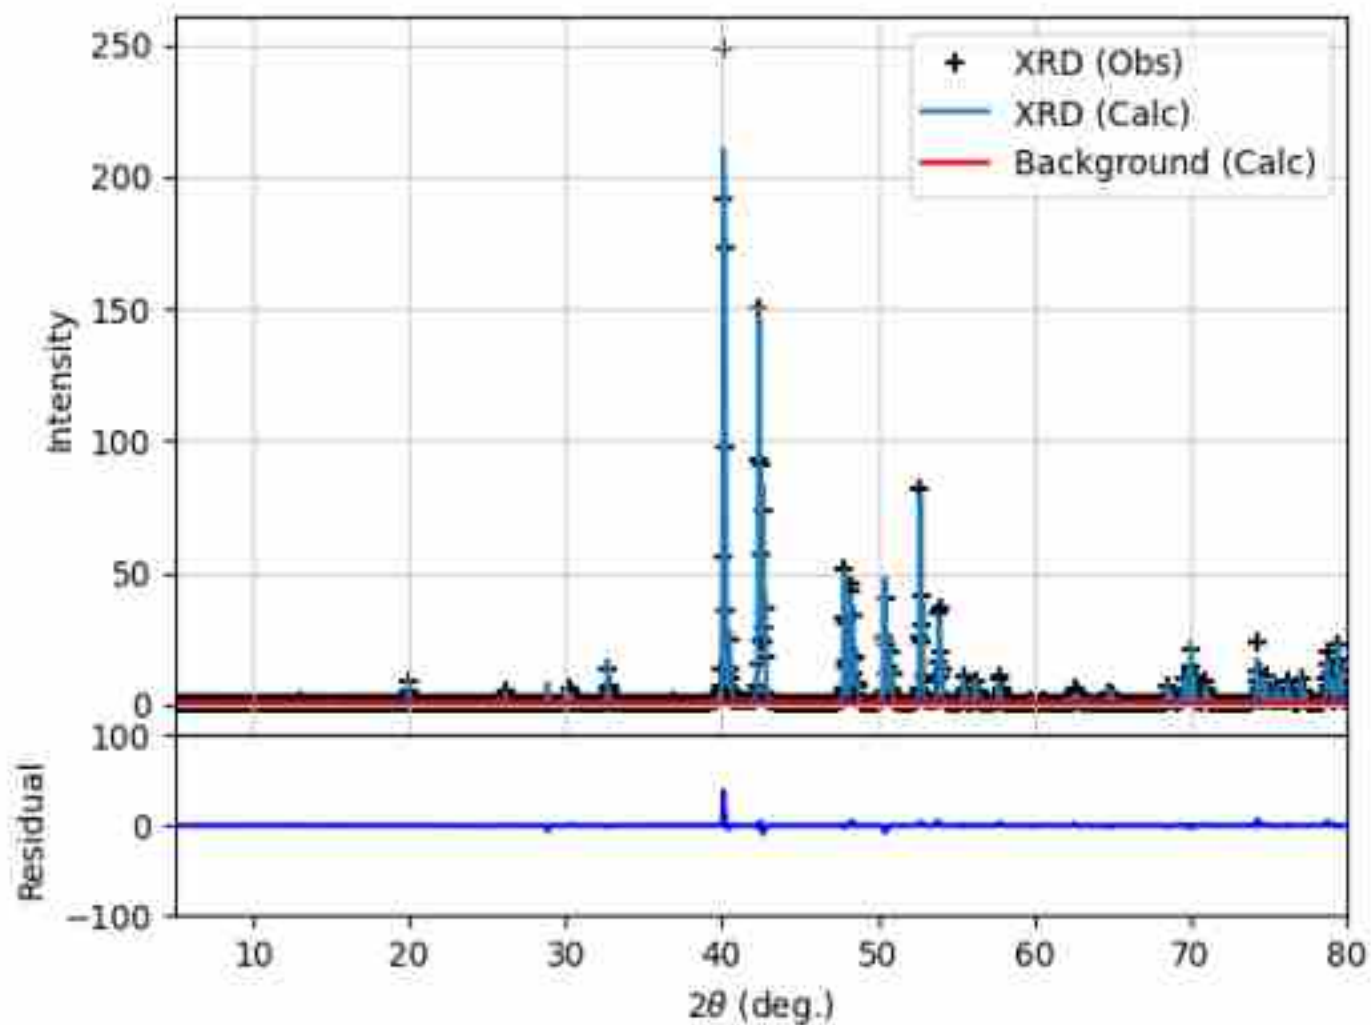

| RMSE before RR | Rwp      | RMSE after RR |
|----------------|----------|---------------|
| 0.444          | 12.88709 | 0.44354       |

# Be<sub>4</sub>B<sub>8</sub>C<sub>8</sub>

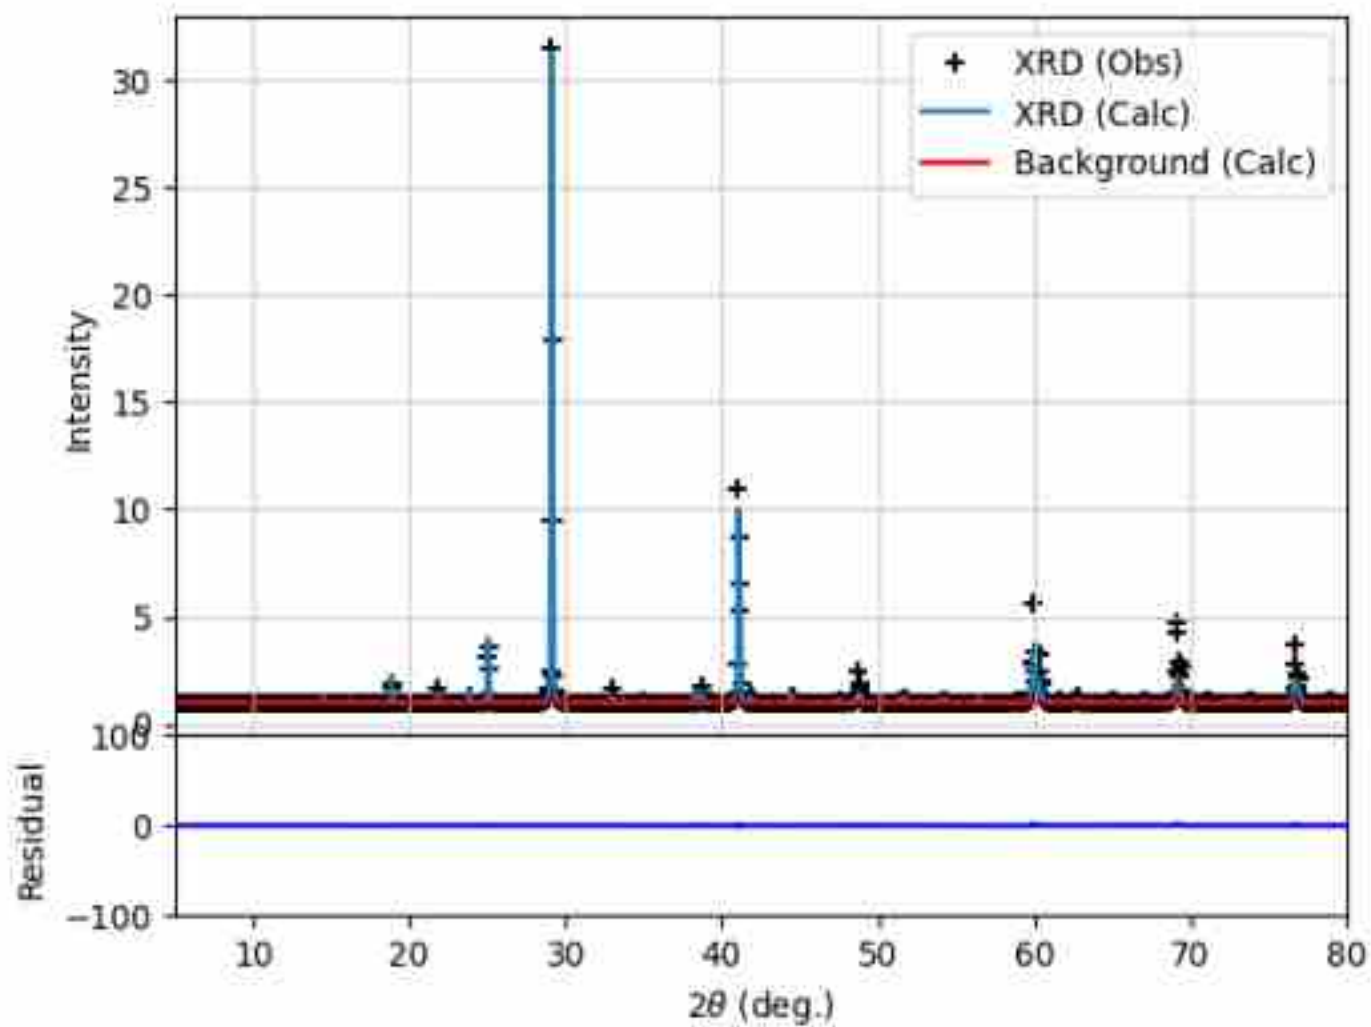

| RMSE before RR | Rwp    | RMSE after RR |
|----------------|--------|---------------|
| 0.445          | 8.6556 | None          |

# Li<sub>2</sub>Cu<sub>3</sub>F<sub>8</sub>

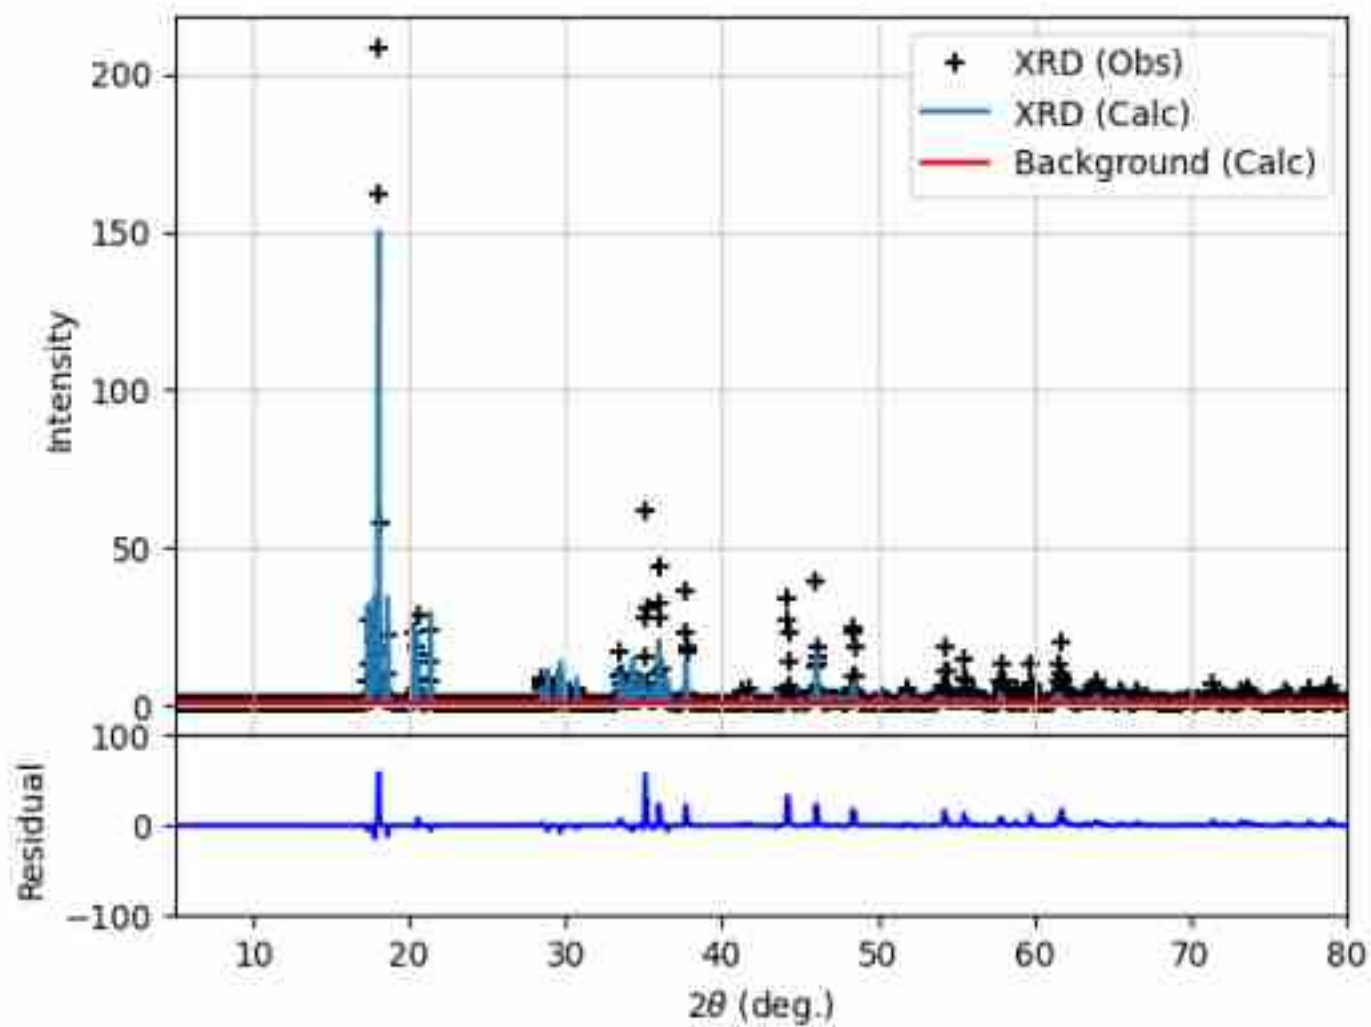

| RMSE before RR | Rwp      | RMSE after RR |
|----------------|----------|---------------|
| 0.445          | 46.13508 | None          |

# Ca<sub>2</sub>Ge<sub>4</sub>

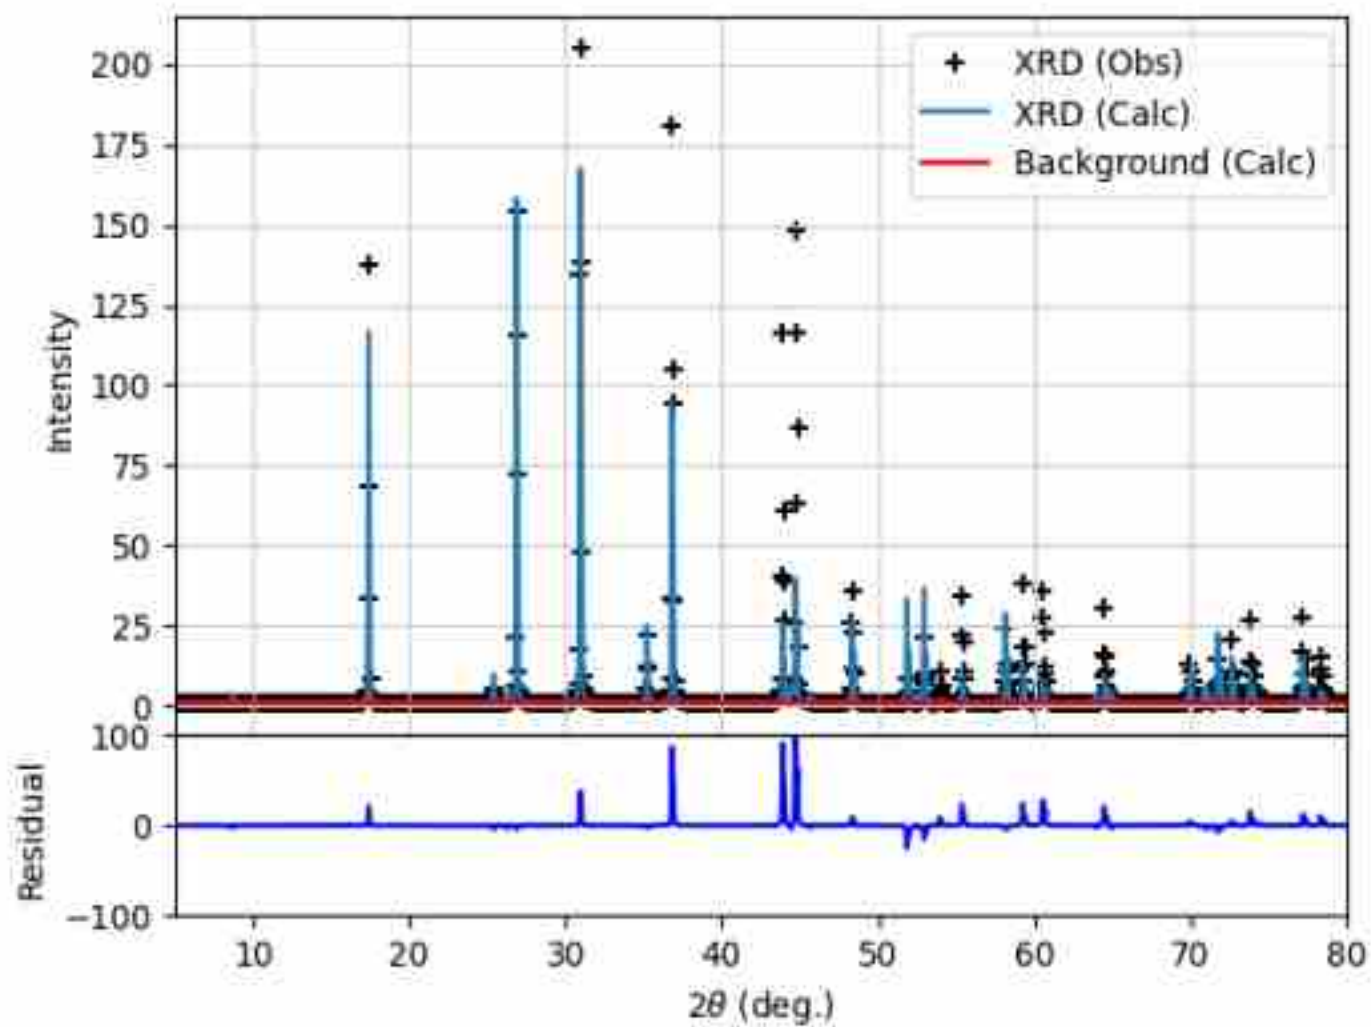

| RMSE before RR | Rwp      | RMSE after RR |
|----------------|----------|---------------|
| 0.446          | 47.83005 | 0.40853       |

# Li<sub>6</sub>U<sub>3</sub>N<sub>6</sub>

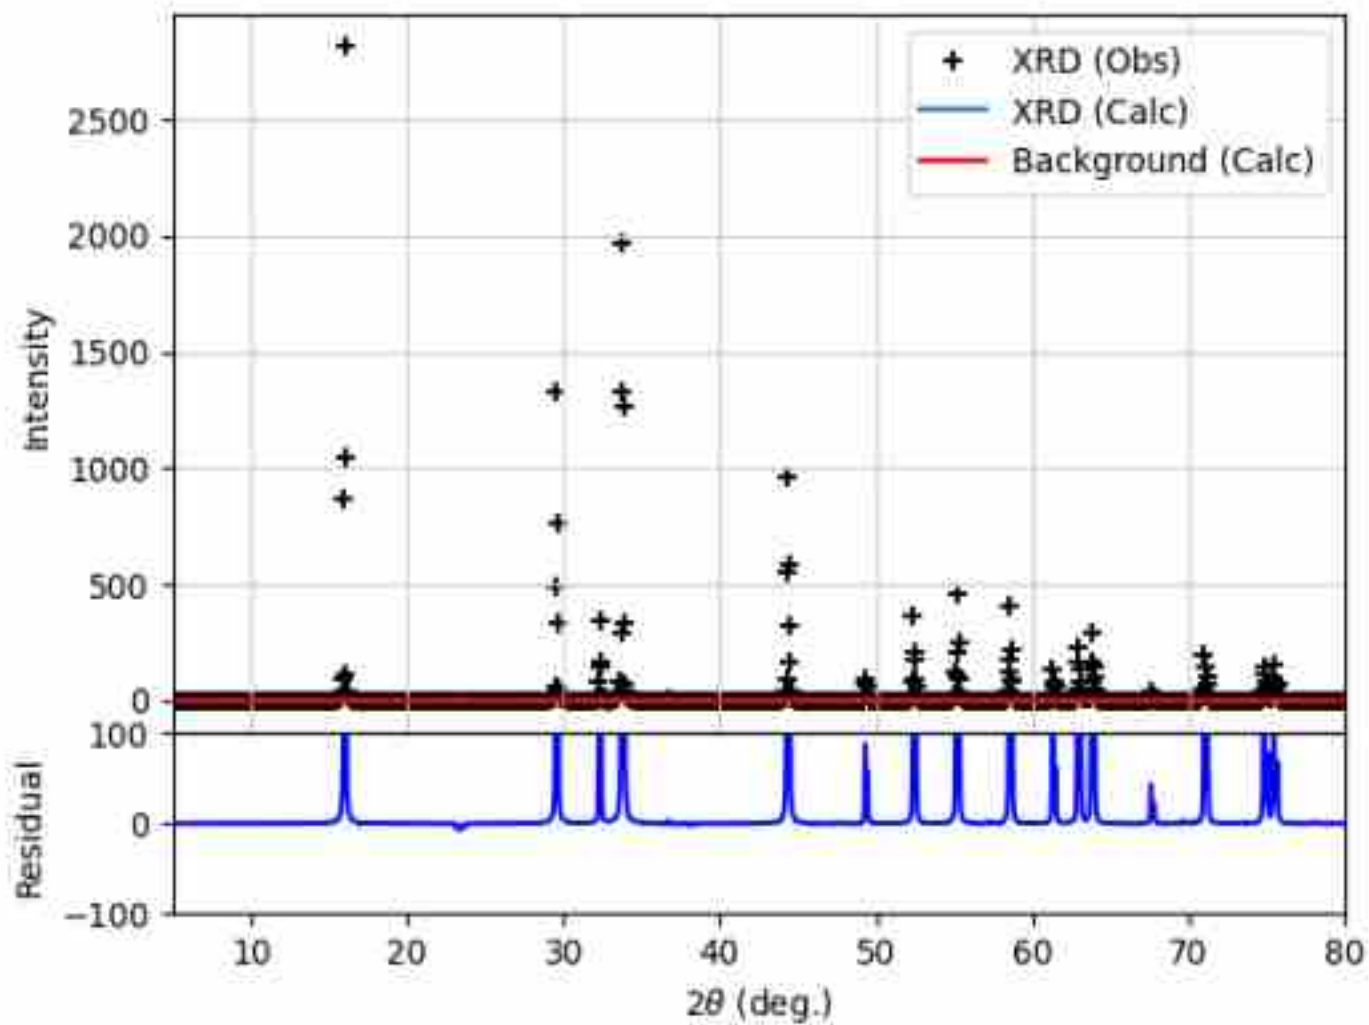

| RMSE before RR | Rwp      | RMSE after RR |
|----------------|----------|---------------|
| 0.446          | 95.96328 | None          |

# Nb4Se4I4

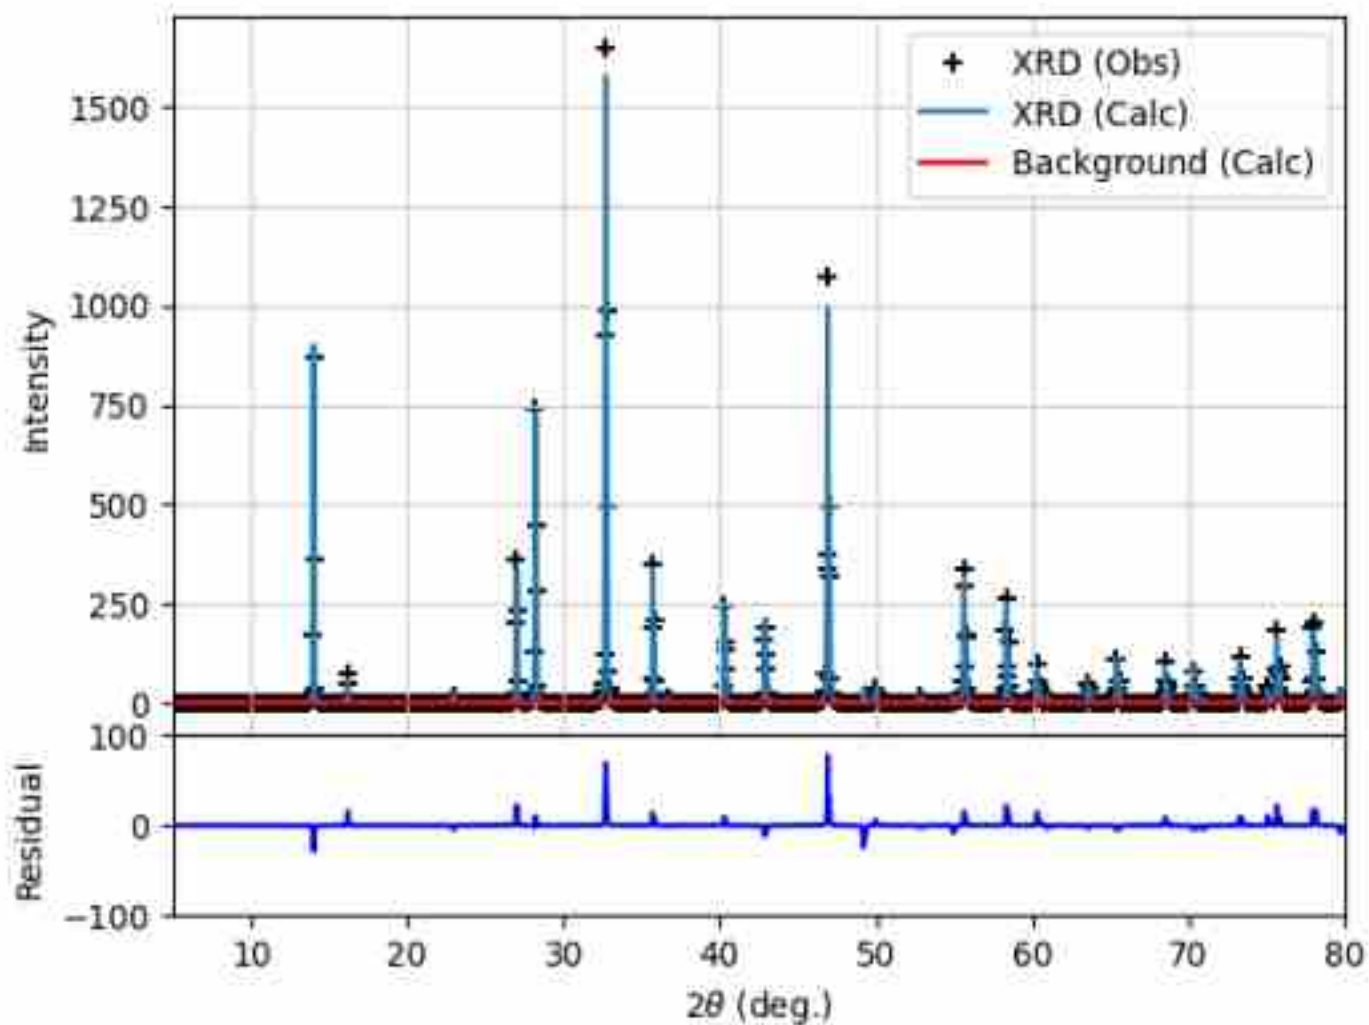

| RMSE before RR | Rwp      | RMSE after RR |
|----------------|----------|---------------|
| 0.446          | 10.57297 | None          |

# Y<sub>2</sub>Sb<sub>2</sub>Pb<sub>4</sub>O<sub>12</sub>

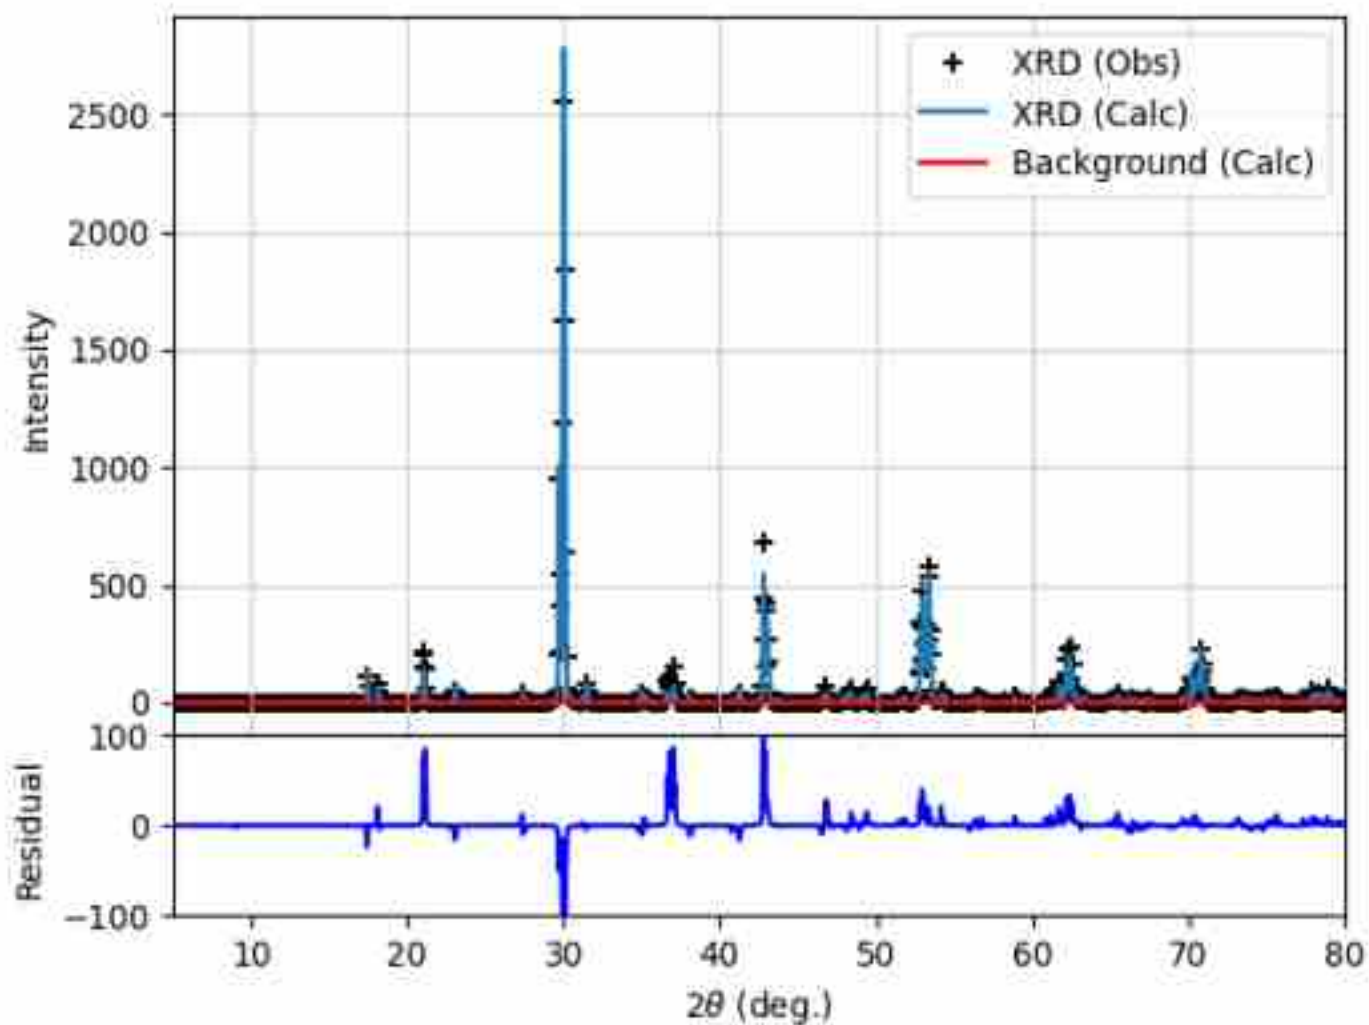

| RMSE before RR | Rwp      | RMSE after RR |
|----------------|----------|---------------|
| 0.446          | 19.35442 | None          |

# Hg8Cl4O4

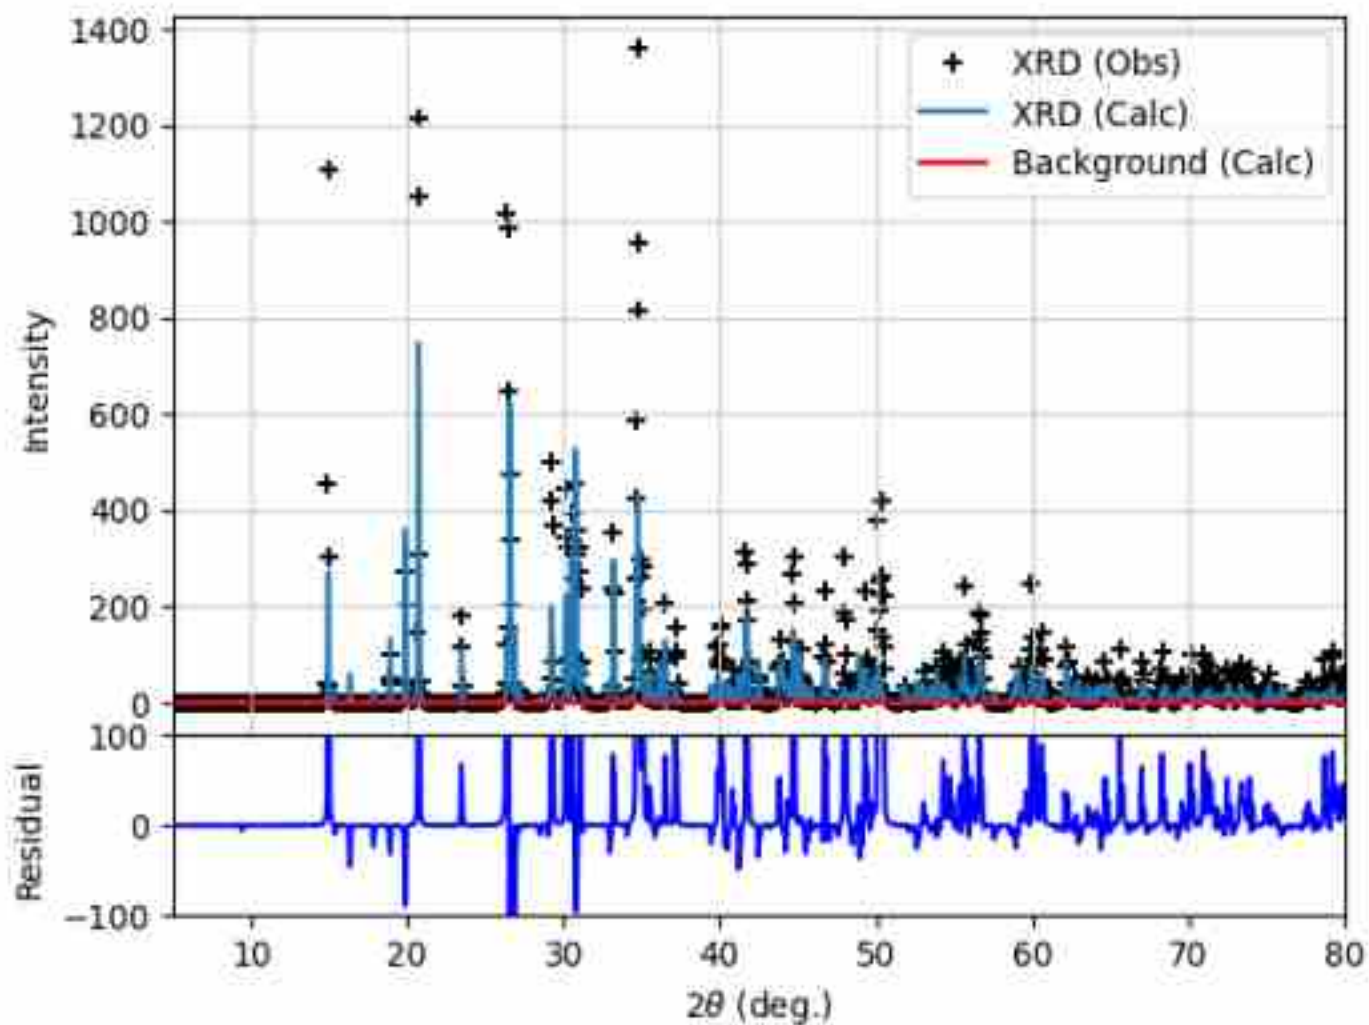

| RMSE before RR | Rwp      | RMSE after RR |
|----------------|----------|---------------|
| 0.447          | 64.46765 | None          |



# Ho<sub>3</sub>Er<sub>3</sub>Mn<sub>1</sub>Bi<sub>2</sub>

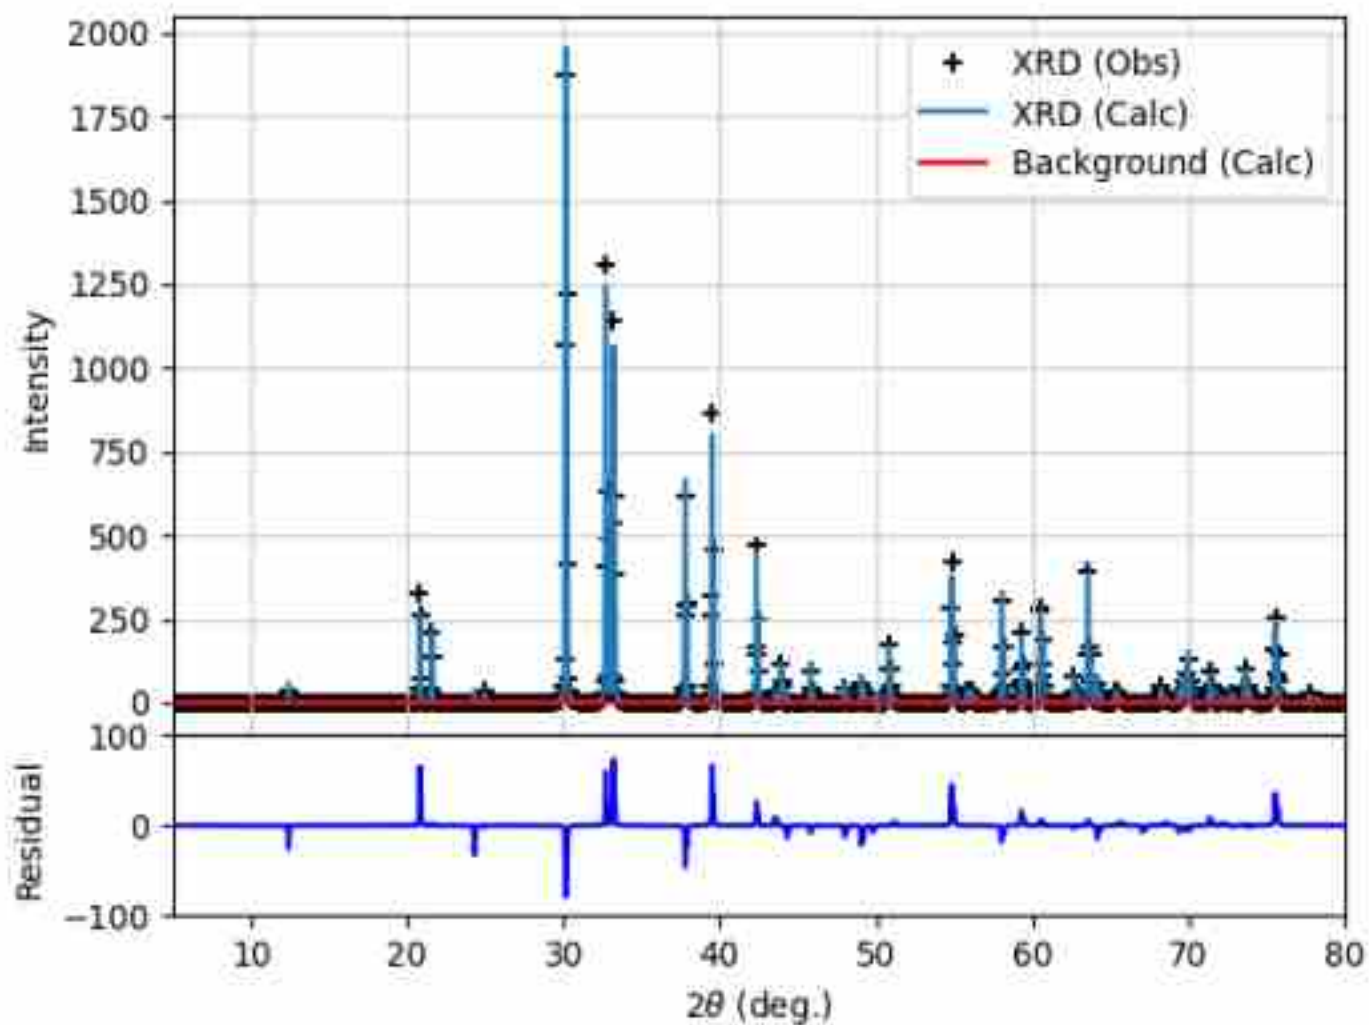

| RMSE before RR | Rwp      | RMSE after RR |
|----------------|----------|---------------|
| 0.447          | 18.41765 | 0.44932       |

# Th1Ni2H2

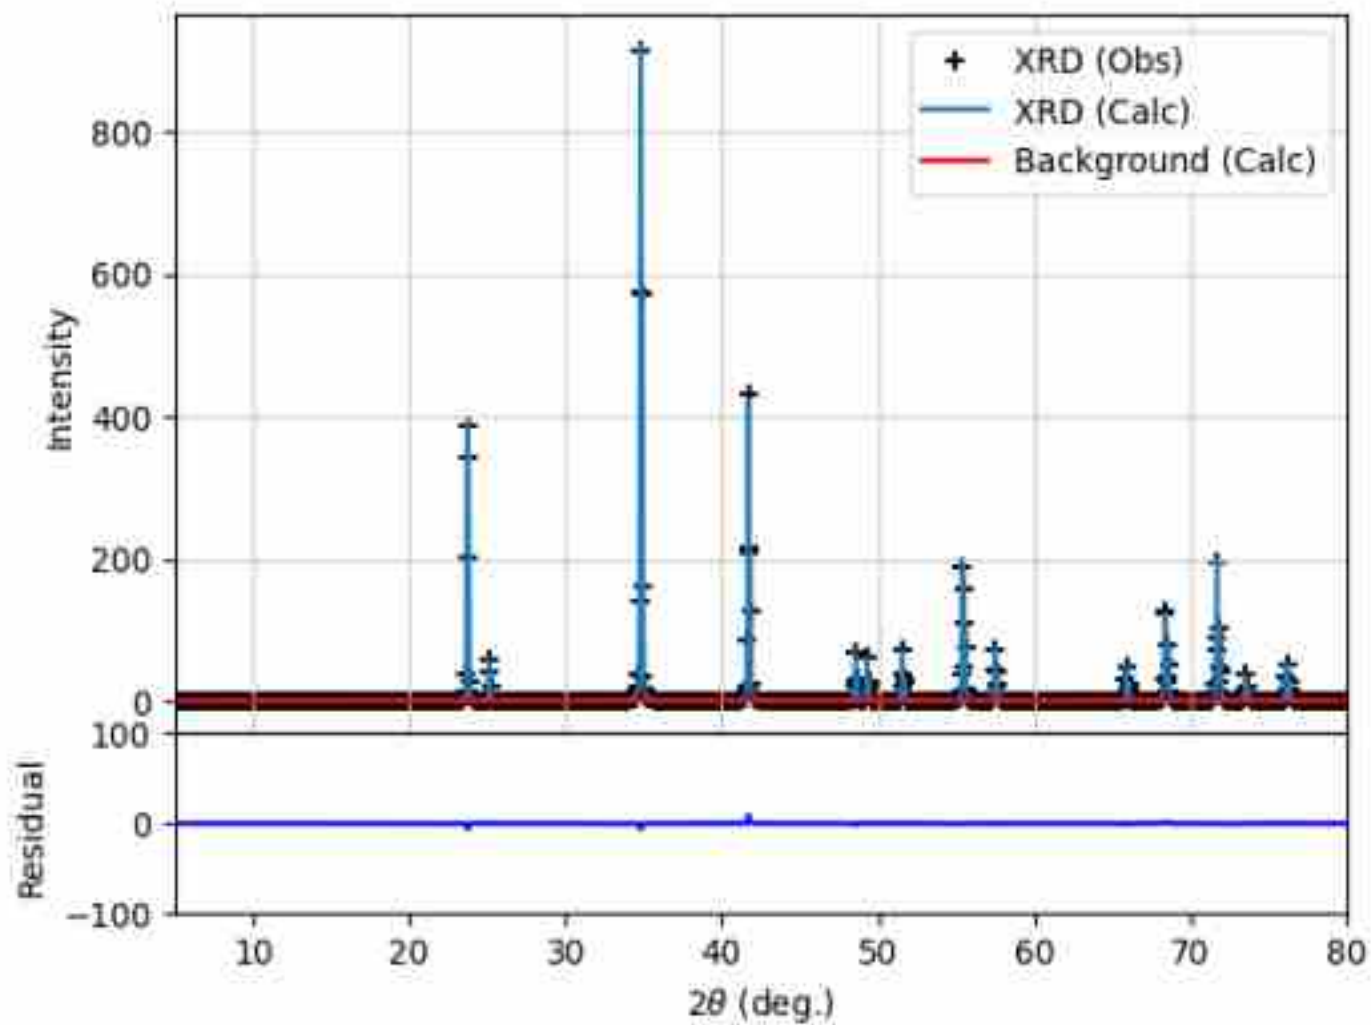

| RMSE before RR | Rwp    | RMSE after RR |
|----------------|--------|---------------|
| 0.447          | 1.2021 | 0.24793       |

# C14O4F12

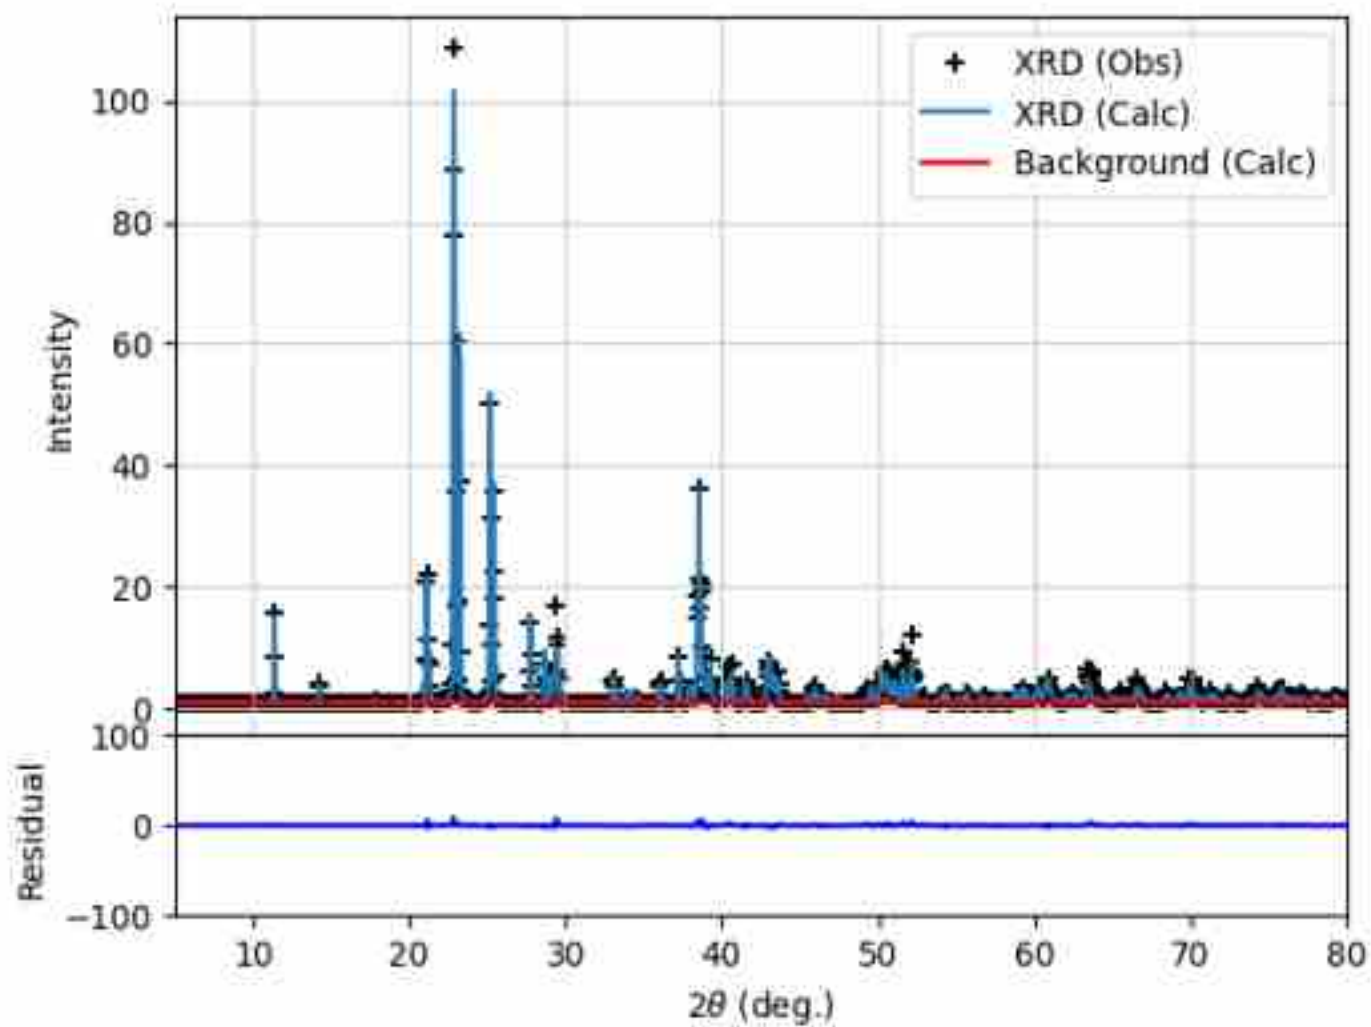

| RMSE before RR | Rwp      | RMSE after RR |
|----------------|----------|---------------|
| 0.448          | 17.80062 | 0.42927       |

# Na<sub>2</sub>B<sub>2</sub>Pt<sub>6</sub>

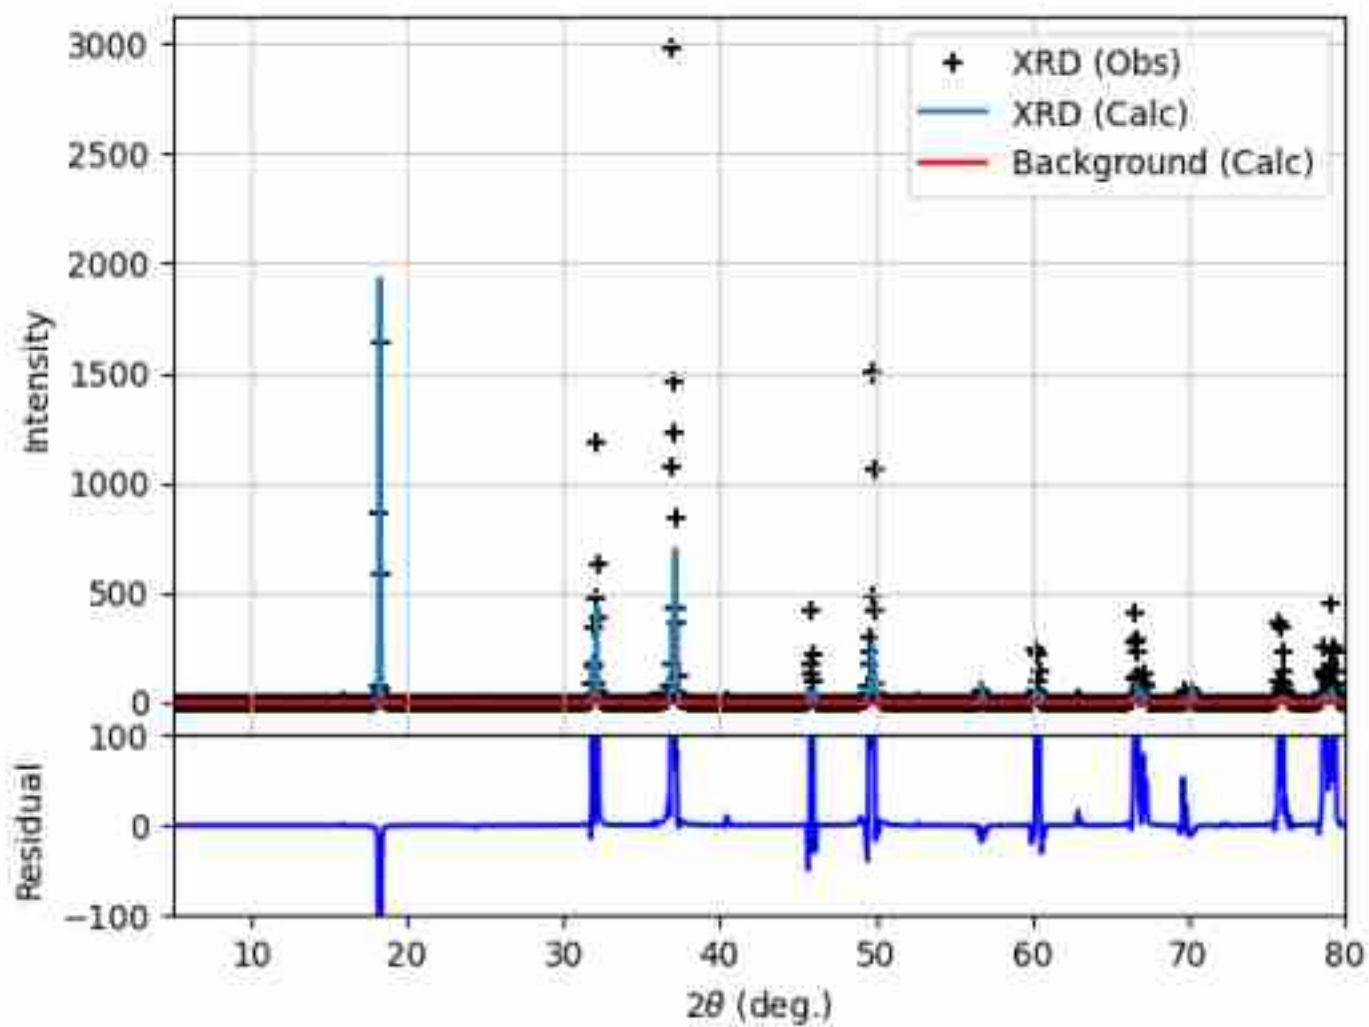

| RMSE before RR | Rwp      | RMSE after RR |
|----------------|----------|---------------|
| 0.448          | 71.56355 | None          |

# Sr<sub>3</sub>Ni<sub>6</sub>P<sub>6</sub>

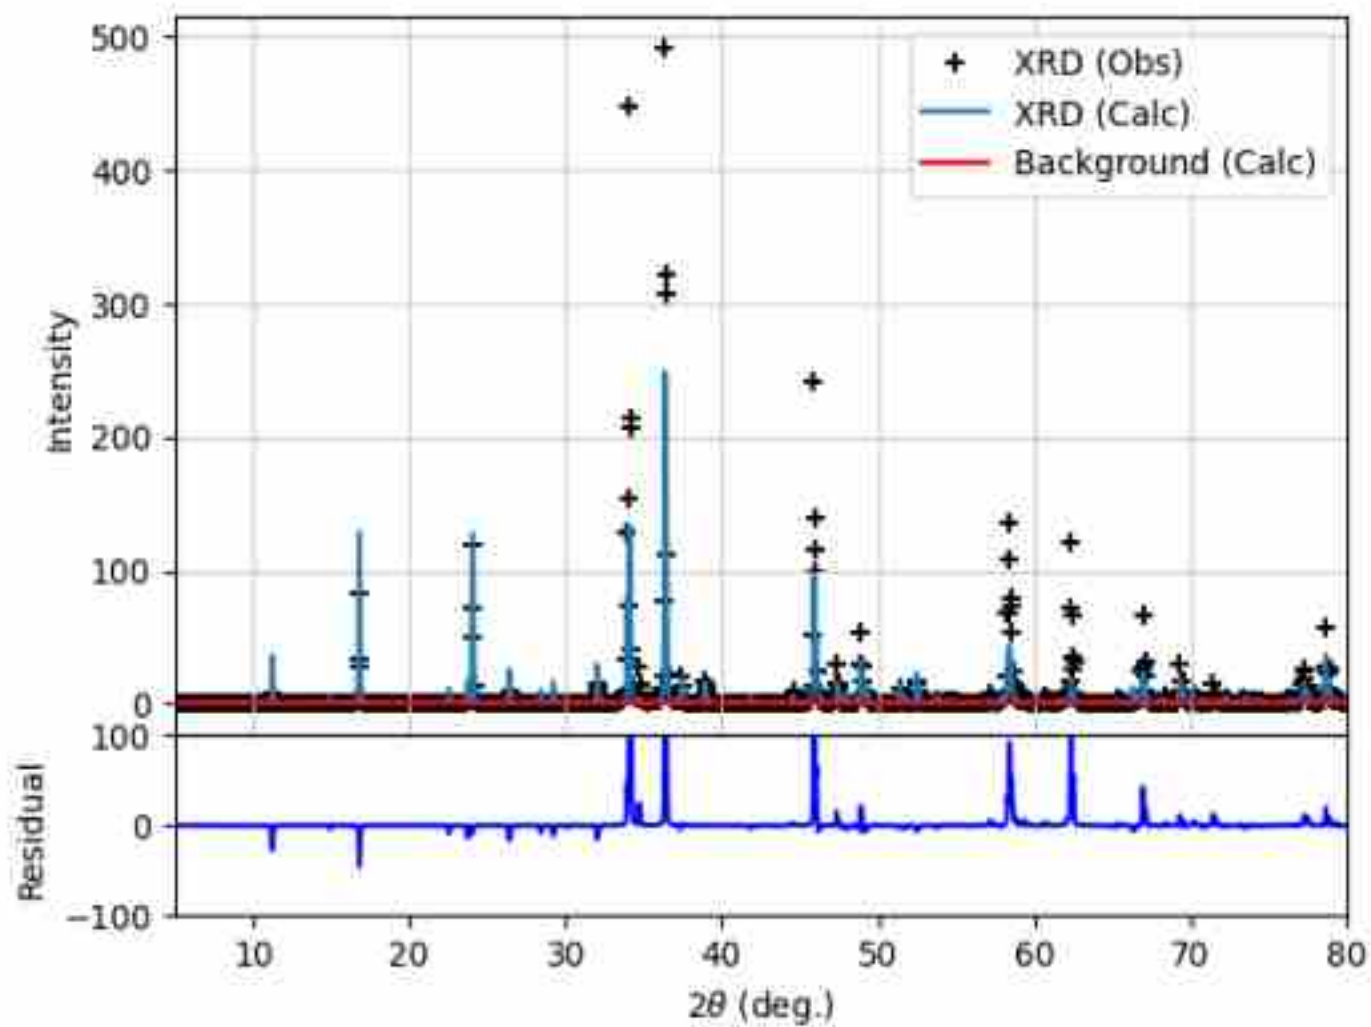

| RMSE before RR | Rwp      | RMSE after RR |
|----------------|----------|---------------|
| 0.448          | 56.40198 | None          |

# Li1Au1S4O14

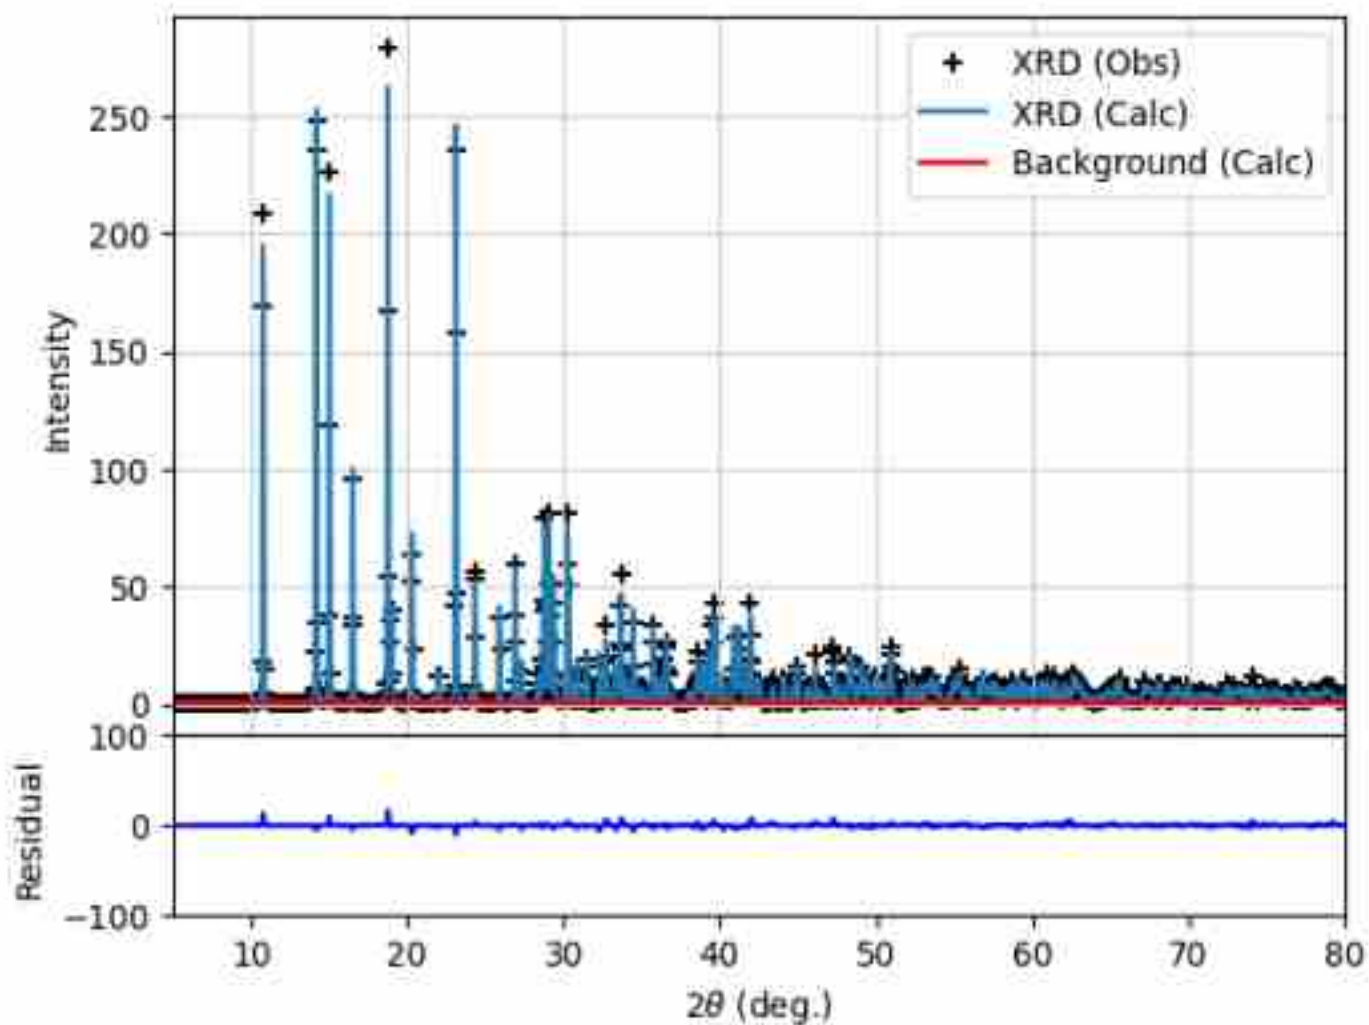

| RMSE before RR | Rwp      | RMSE after RR |
|----------------|----------|---------------|
| 0.449          | 13.41971 | None          |

# Li<sub>5</sub>Ni<sub>5</sub>O<sub>10</sub>

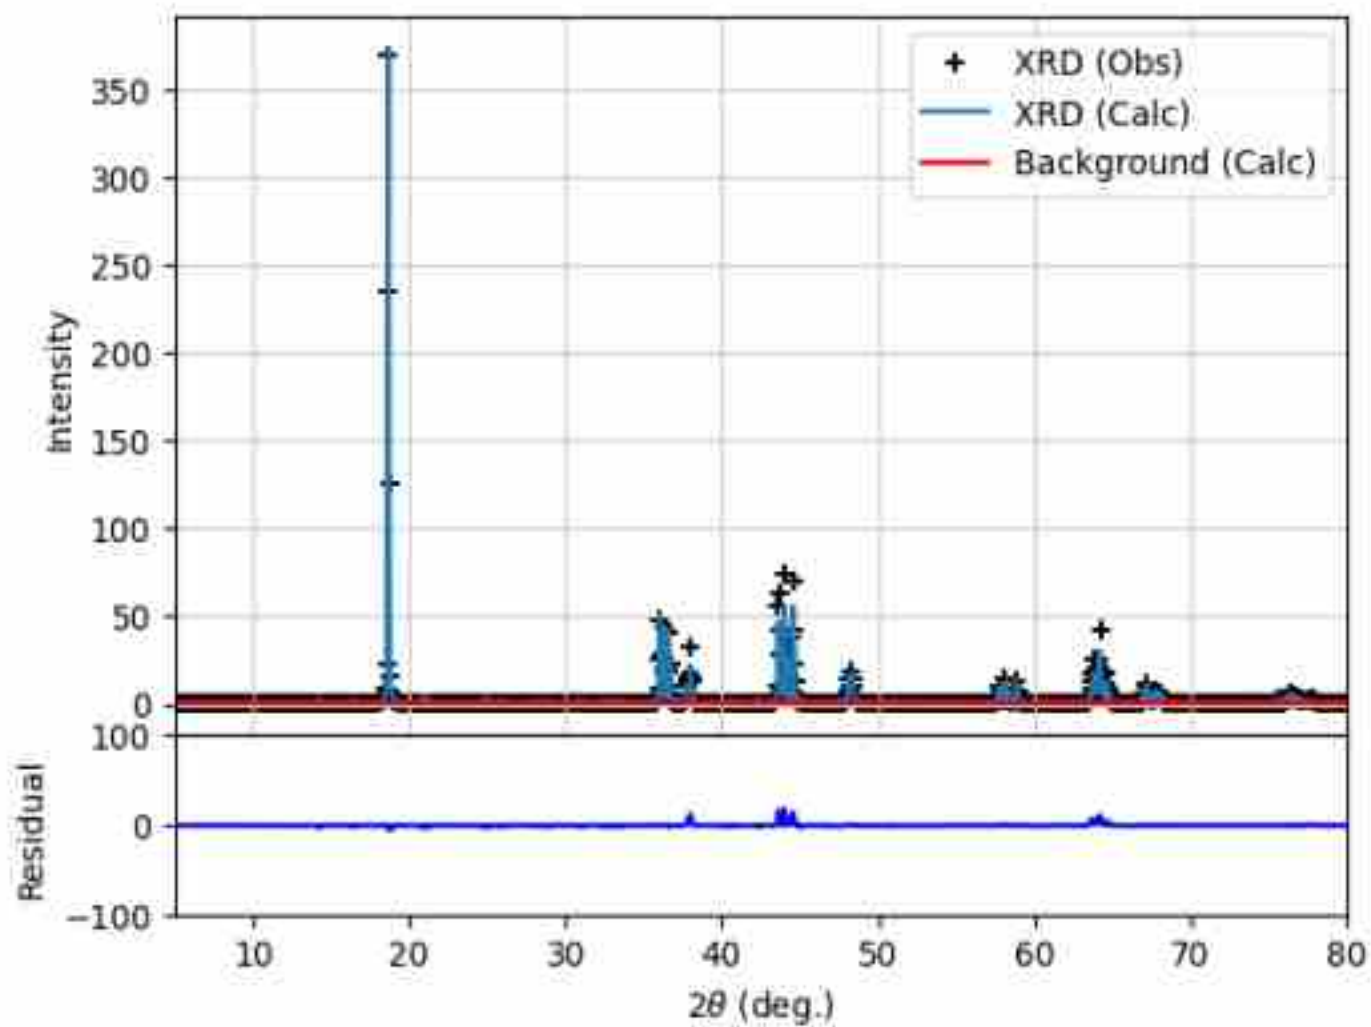

| RMSE before RR | Rwp      | RMSE after RR |
|----------------|----------|---------------|
| 0.449          | 24.26609 | None          |

# V4O4F8

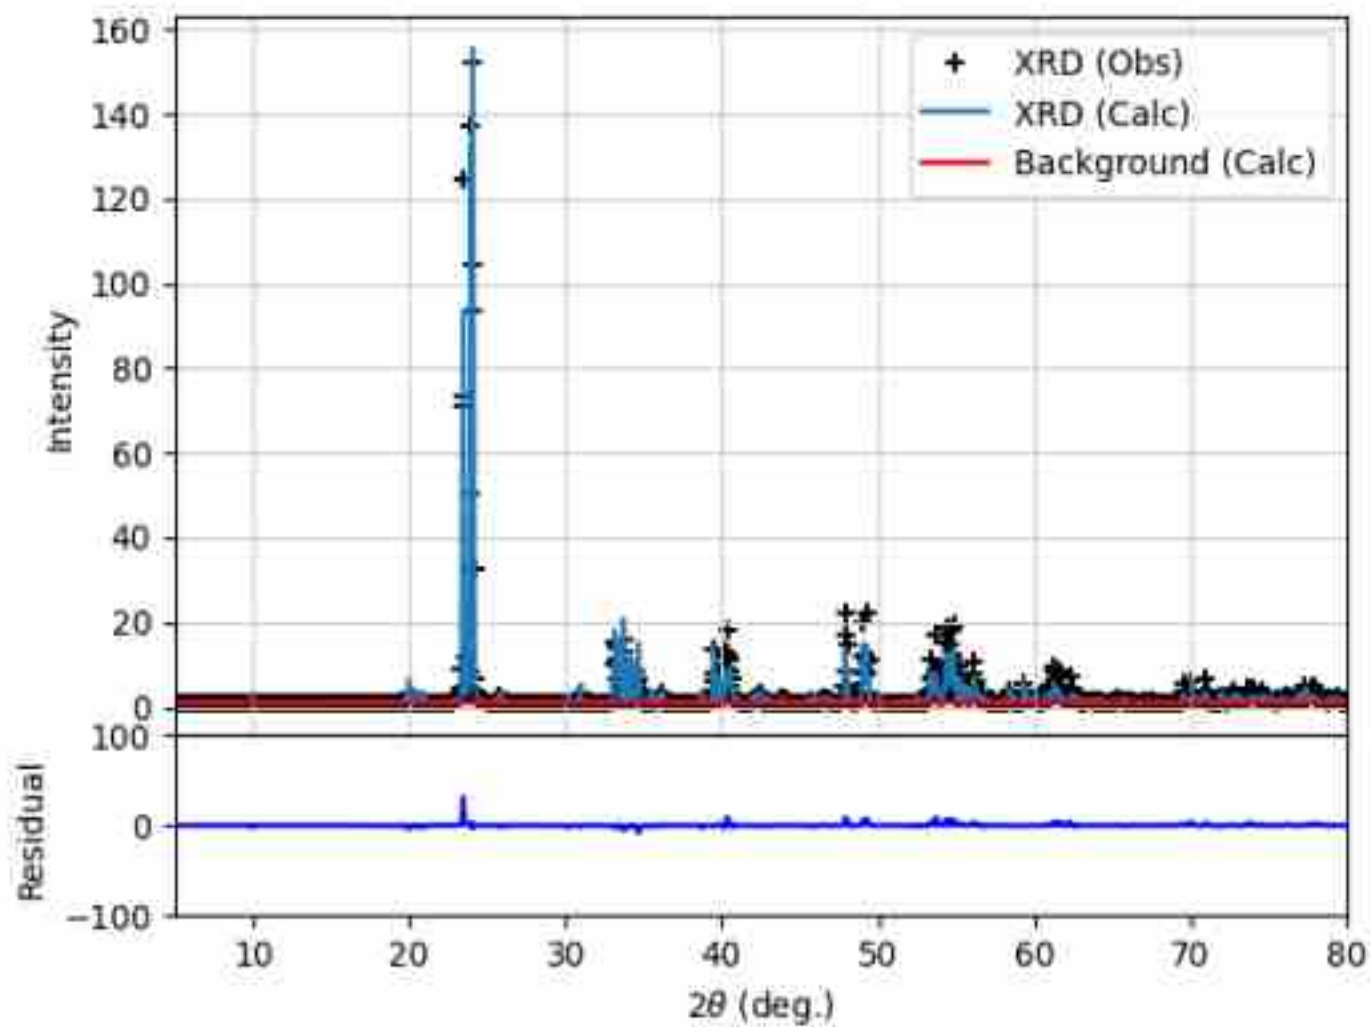

| RMSE before RR | Rwp      | RMSE after RR |
|----------------|----------|---------------|
| 0.451          | 27.39932 | None          |



# Eu<sub>4</sub>Zn<sub>6</sub>Ge<sub>2</sub>

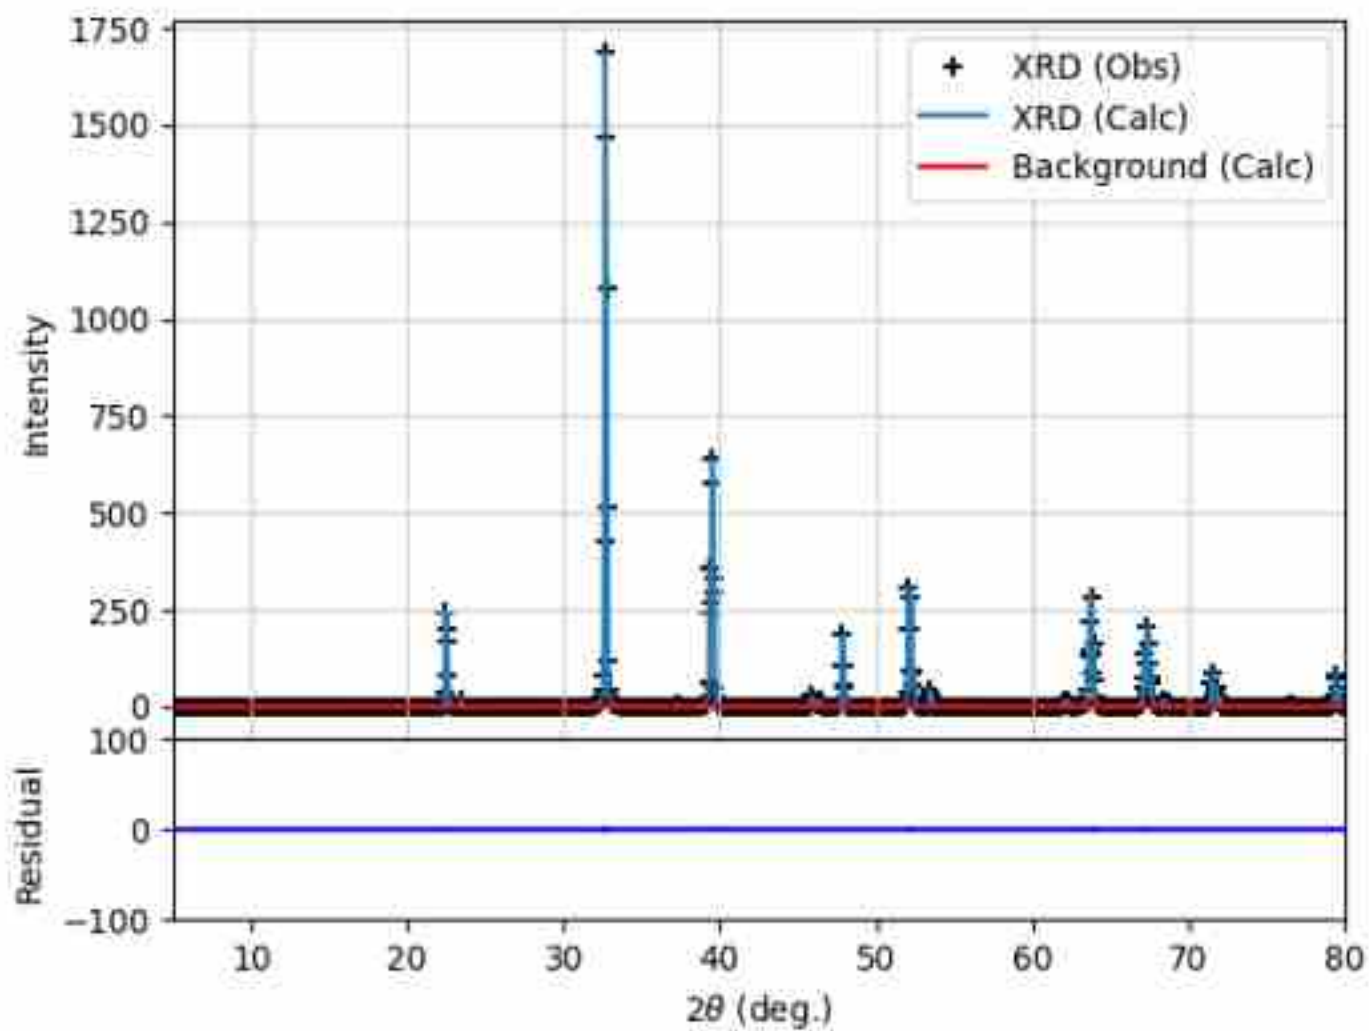

| RMSE before RR | Rwp     | RMSE after RR |
|----------------|---------|---------------|
| 0.452          | 0.70332 | None          |

# Na1Te1H6O6F1

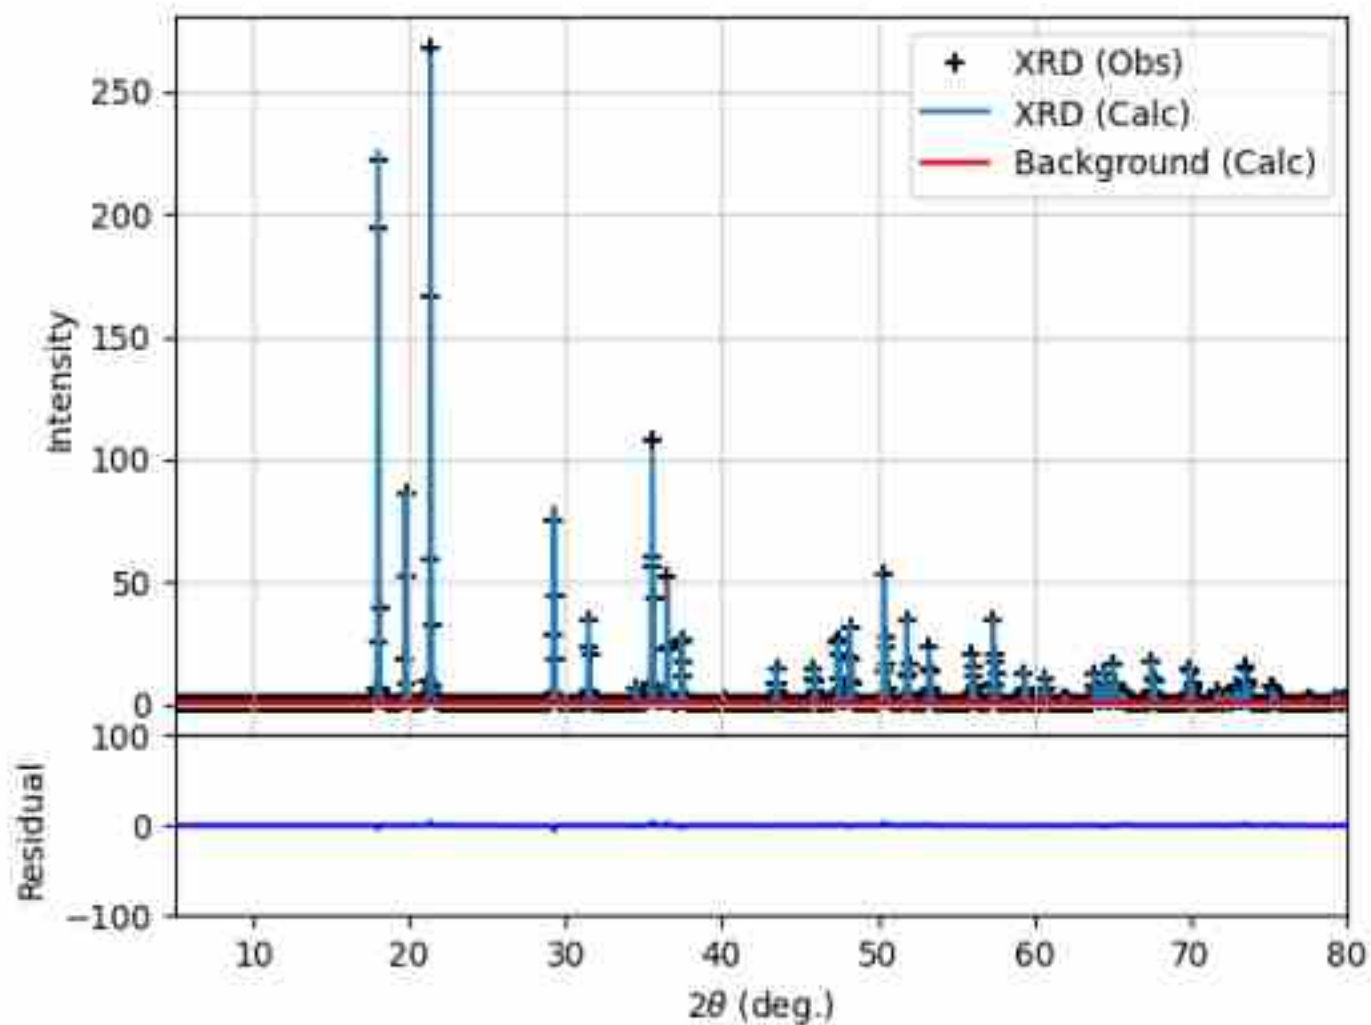

| RMSE before RR | Rwp     | RMSE after RR |
|----------------|---------|---------------|
| 0.453          | 4.18363 | None          |

# Ca4Cu4N4

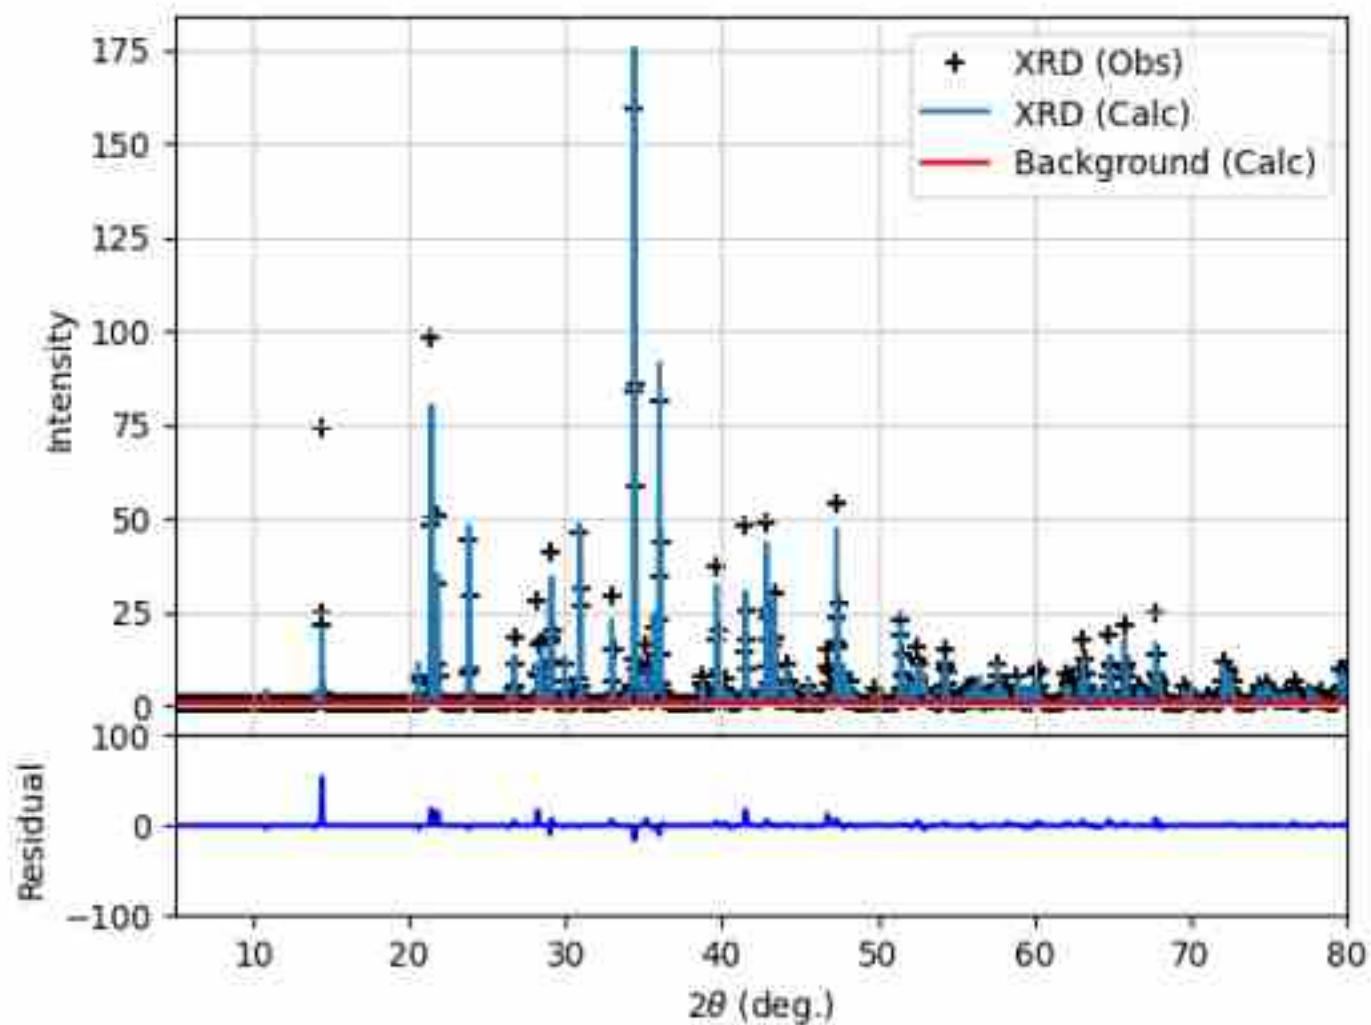

| RMSE before RR | Rwp      | RMSE after RR |
|----------------|----------|---------------|
| 0.455          | 26.24499 | None          |

# Hf6In8

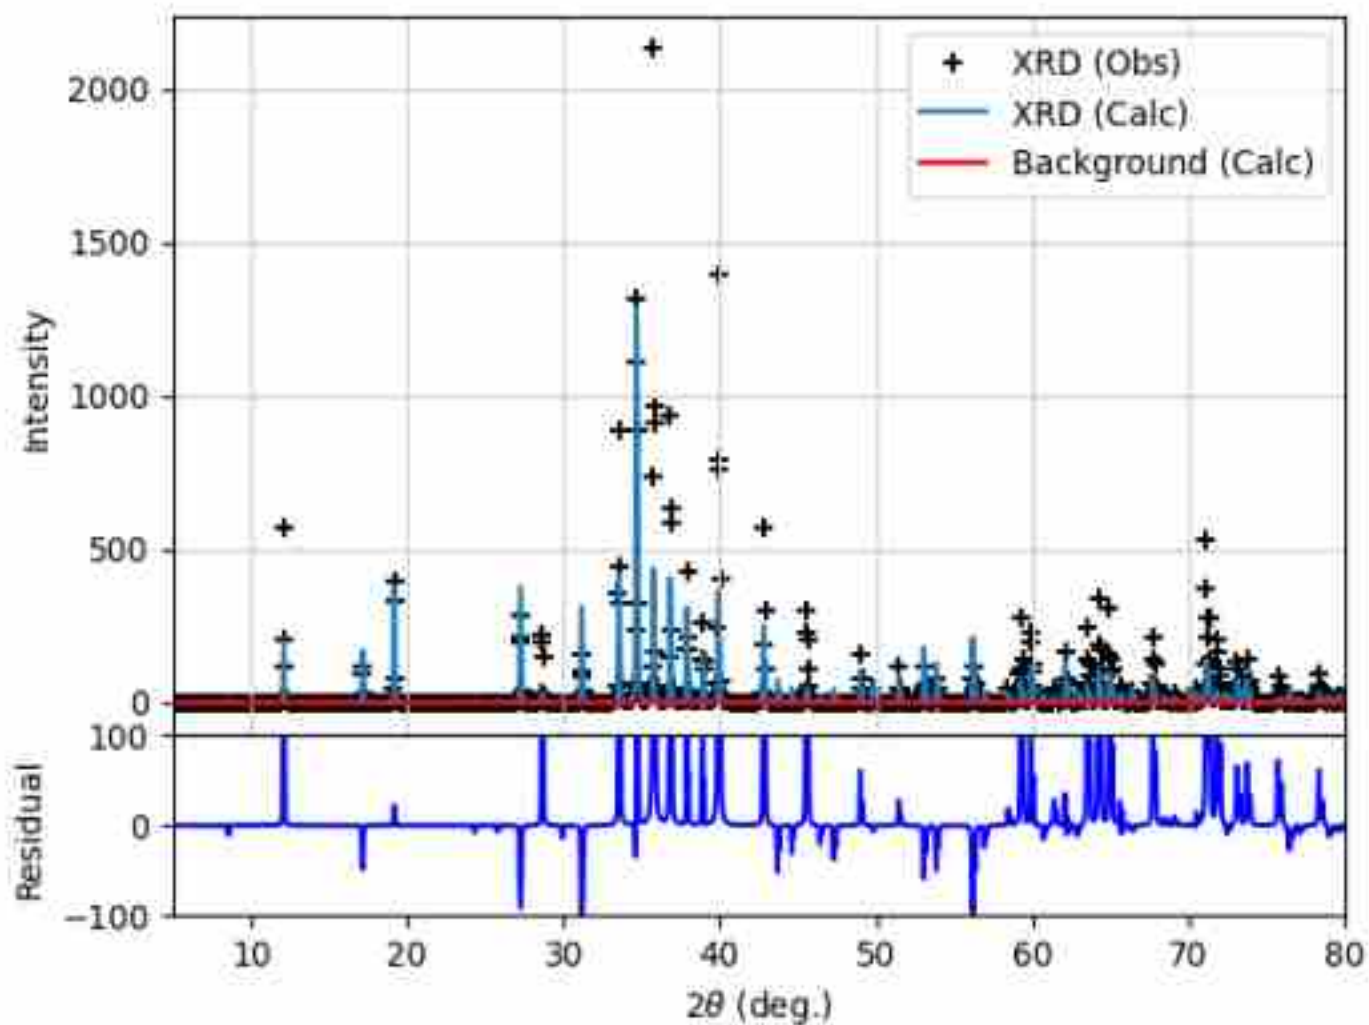

| RMSE before RR | Rwp      | RMSE after RR |
|----------------|----------|---------------|
| 0.455          | 63.40683 | None          |

# Nb<sub>4</sub>Se<sub>4</sub>Br<sub>4</sub>

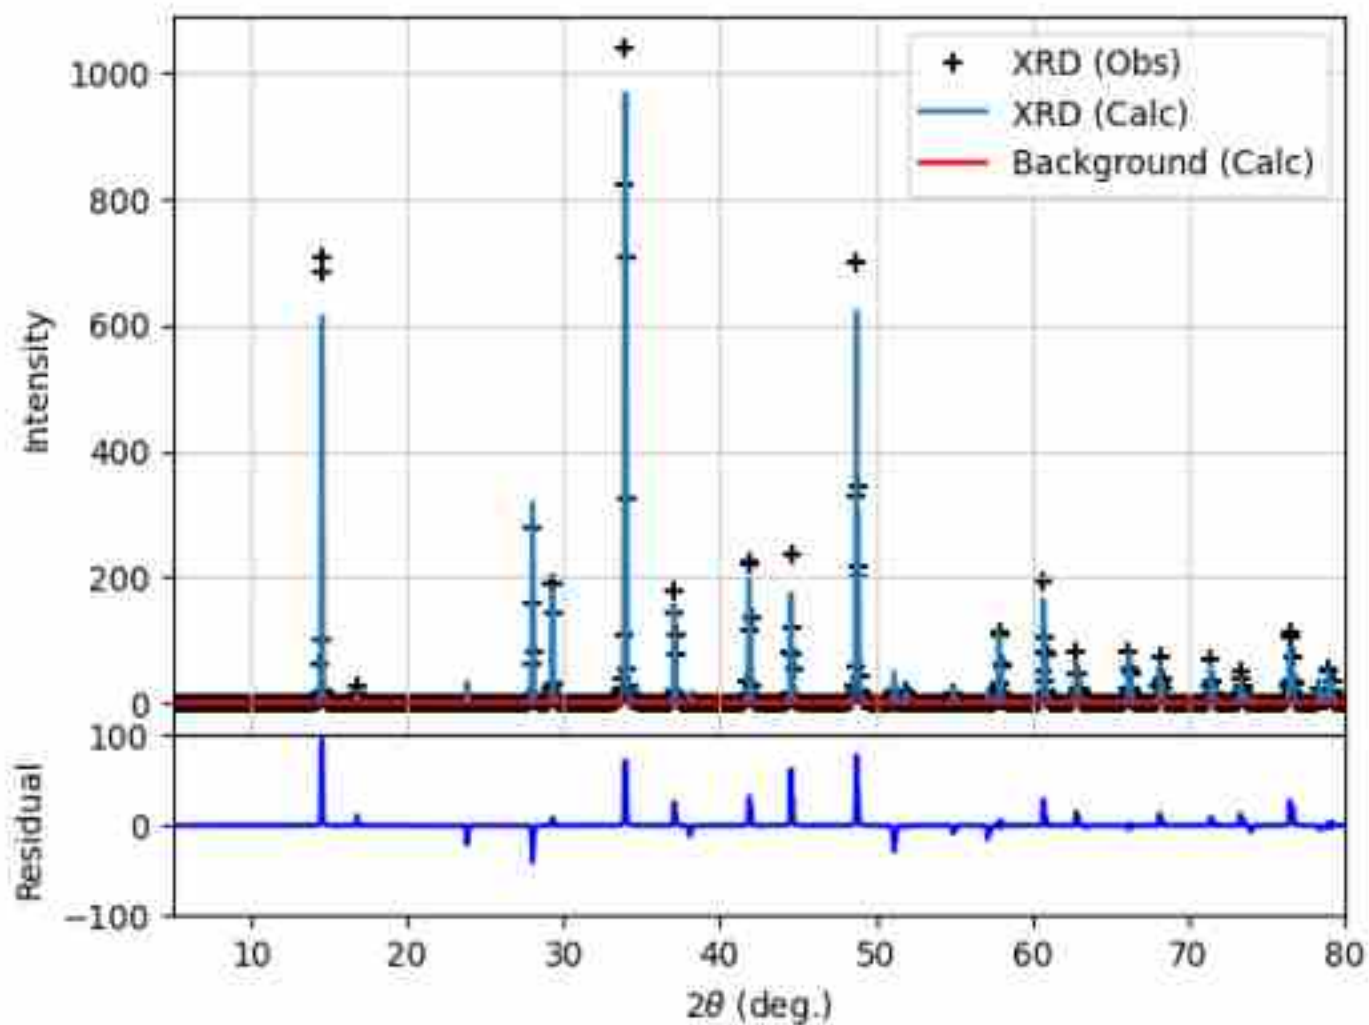

| RMSE before RR | Rwp      | RMSE after RR |
|----------------|----------|---------------|
| 0.455          | 21.66143 | 0.43692       |

# Li<sub>2</sub>Ni<sub>2</sub>P<sub>2</sub>O<sub>8</sub>

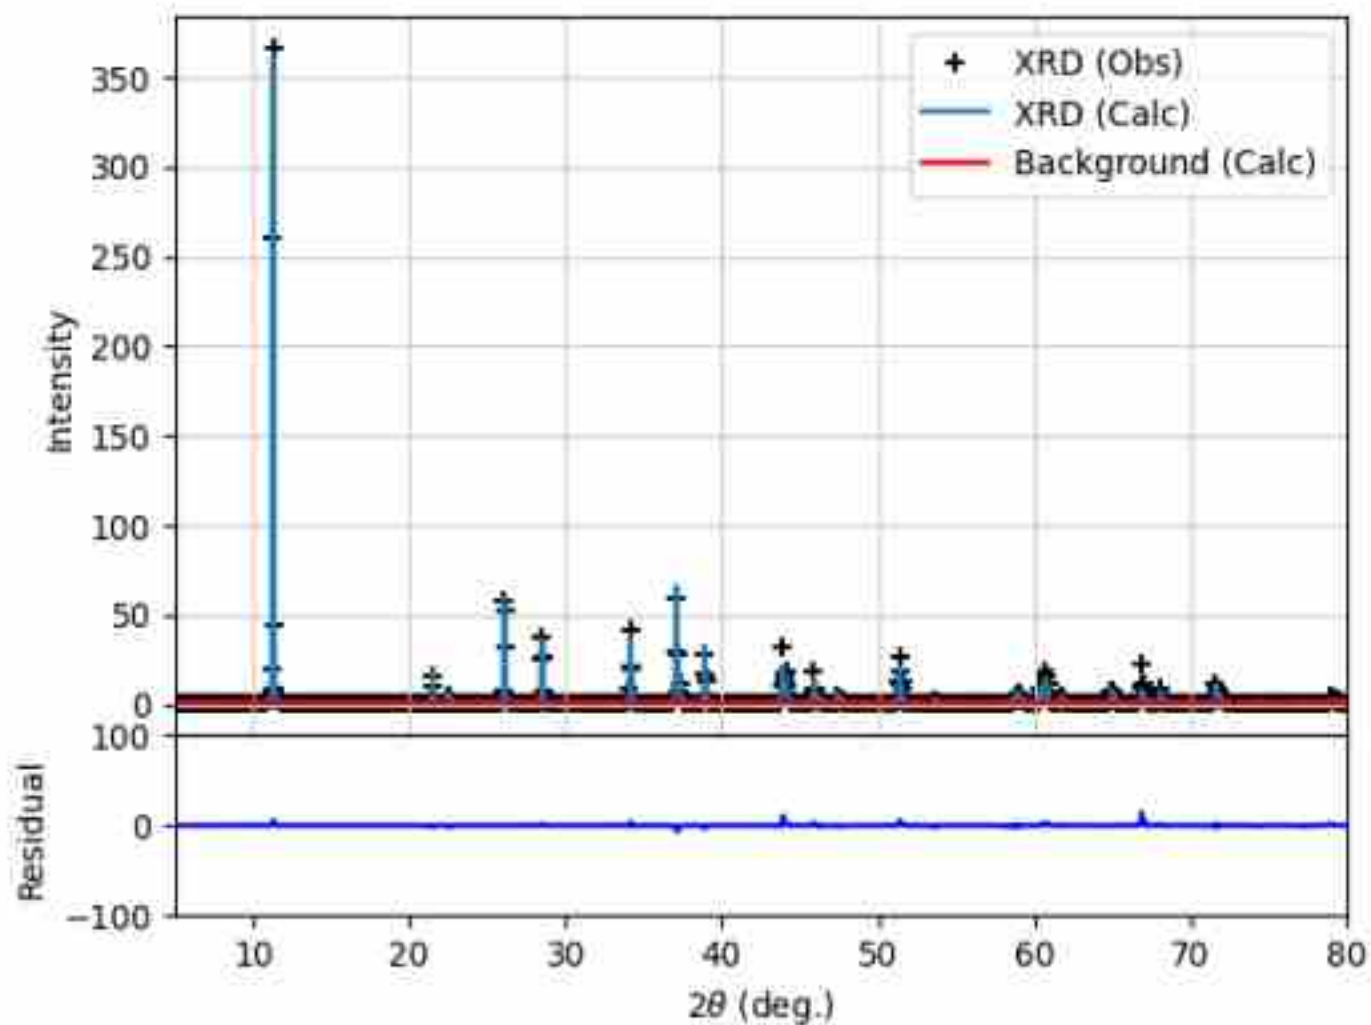

| RMSE before RR | Rwp      | RMSE after RR |
|----------------|----------|---------------|
| 0.461          | 14.13985 | None          |

# Nd<sub>4</sub>Mg<sub>3</sub>Co<sub>2</sub>

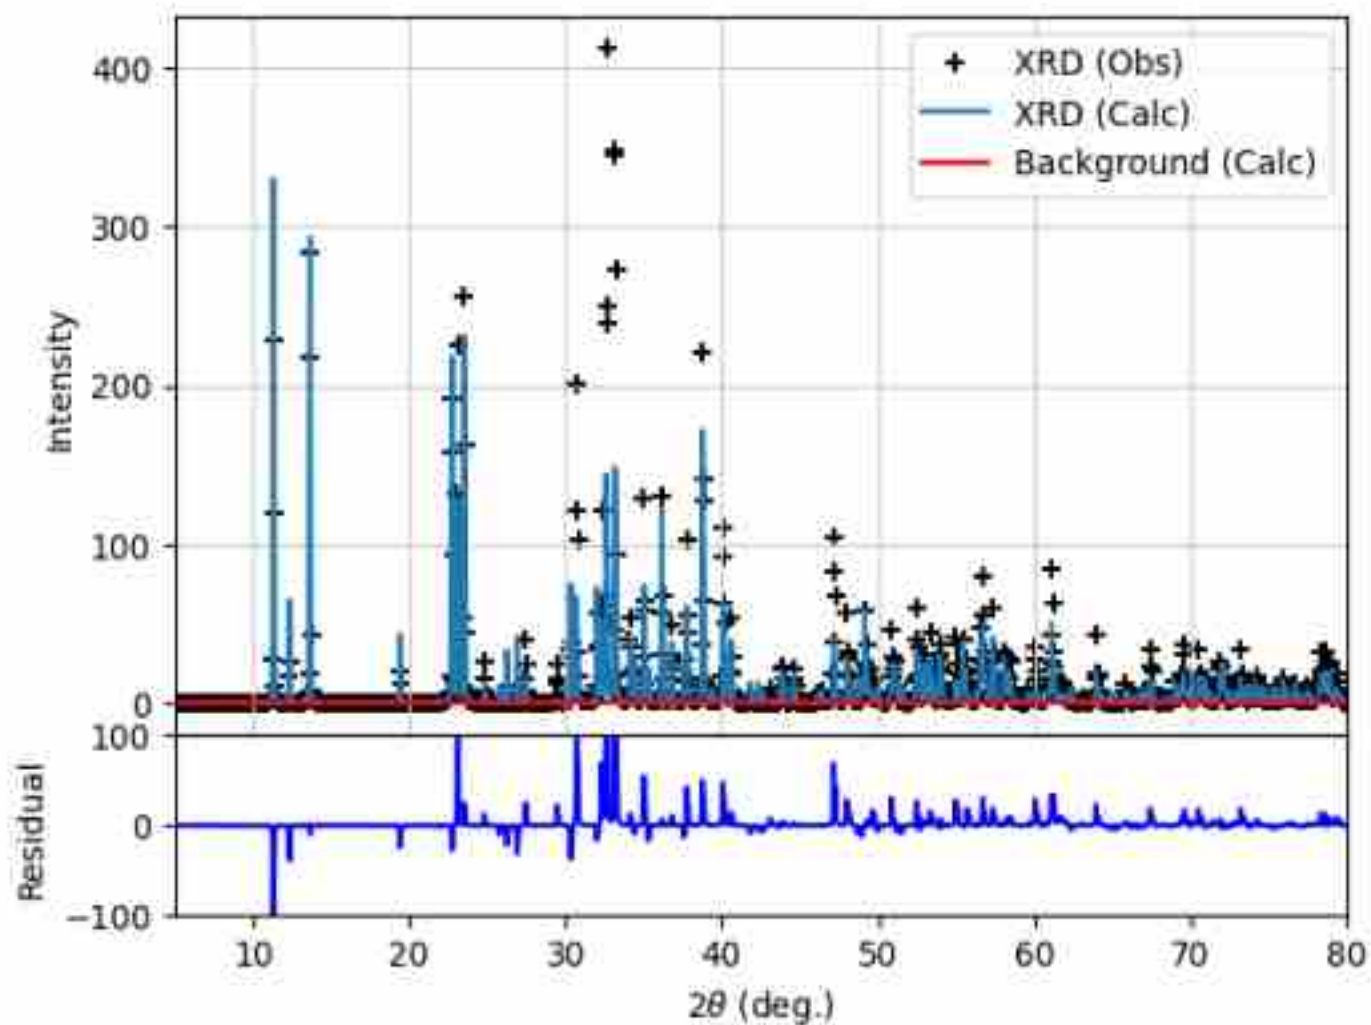

| RMSE before RR | Rwp      | RMSE after RR |
|----------------|----------|---------------|
| 0.462          | 48.45701 | 0.46533       |

# Mo2H8O10

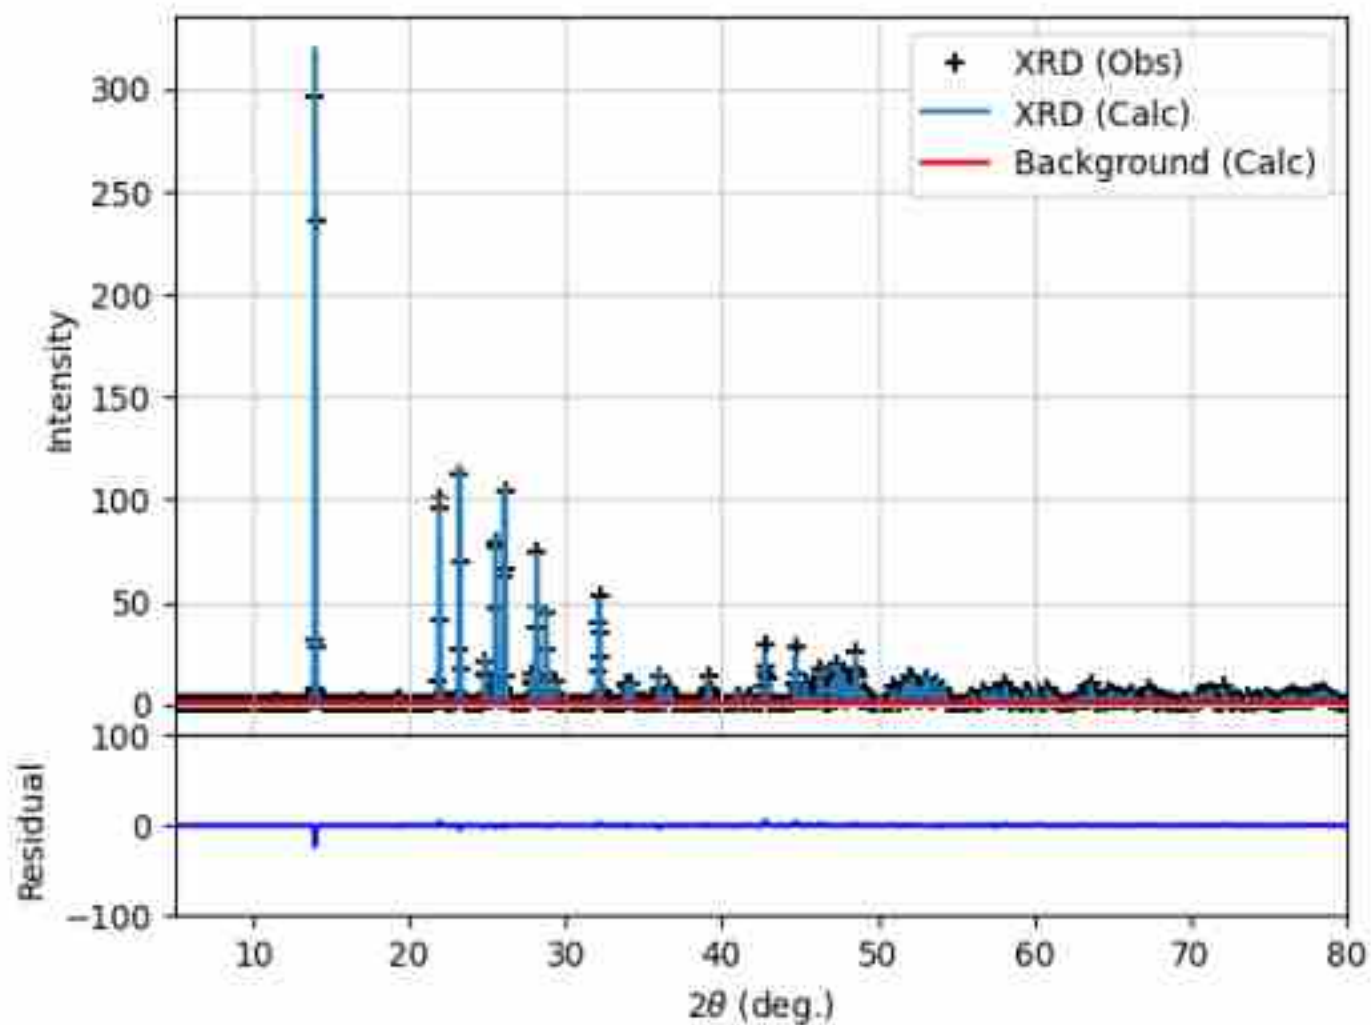

| RMSE before RR | Rwp     | RMSE after RR |
|----------------|---------|---------------|
| 0.463          | 7.35121 | None          |



# Sn2P2

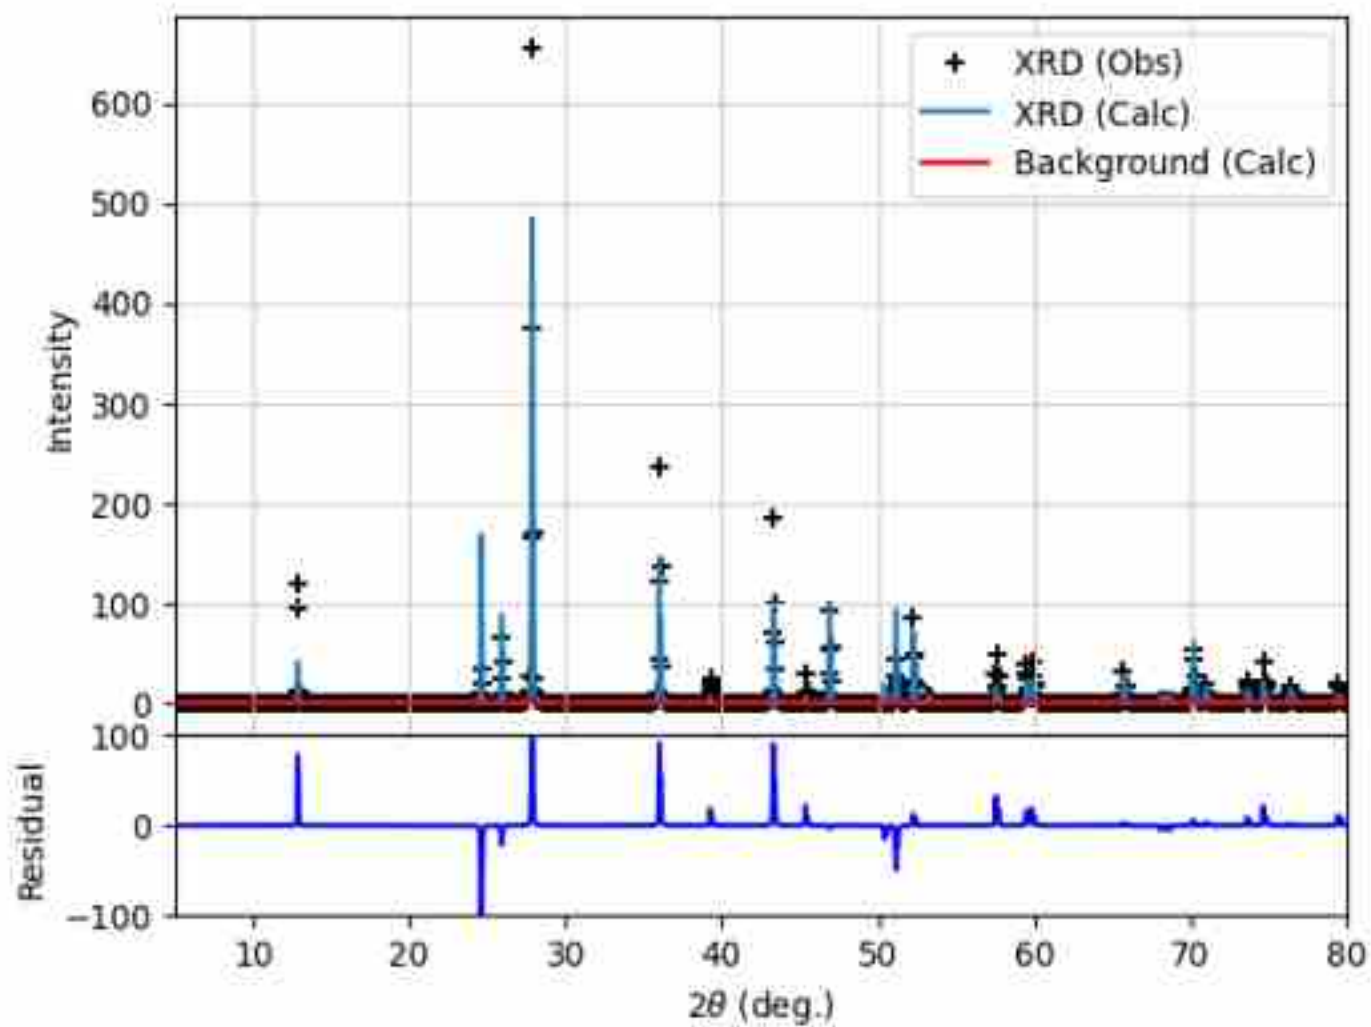

| RMSE before RR | Rwp      | RMSE after RR |
|----------------|----------|---------------|
| 0.463          | 56.76627 | 0.46902       |

# V4H4O12

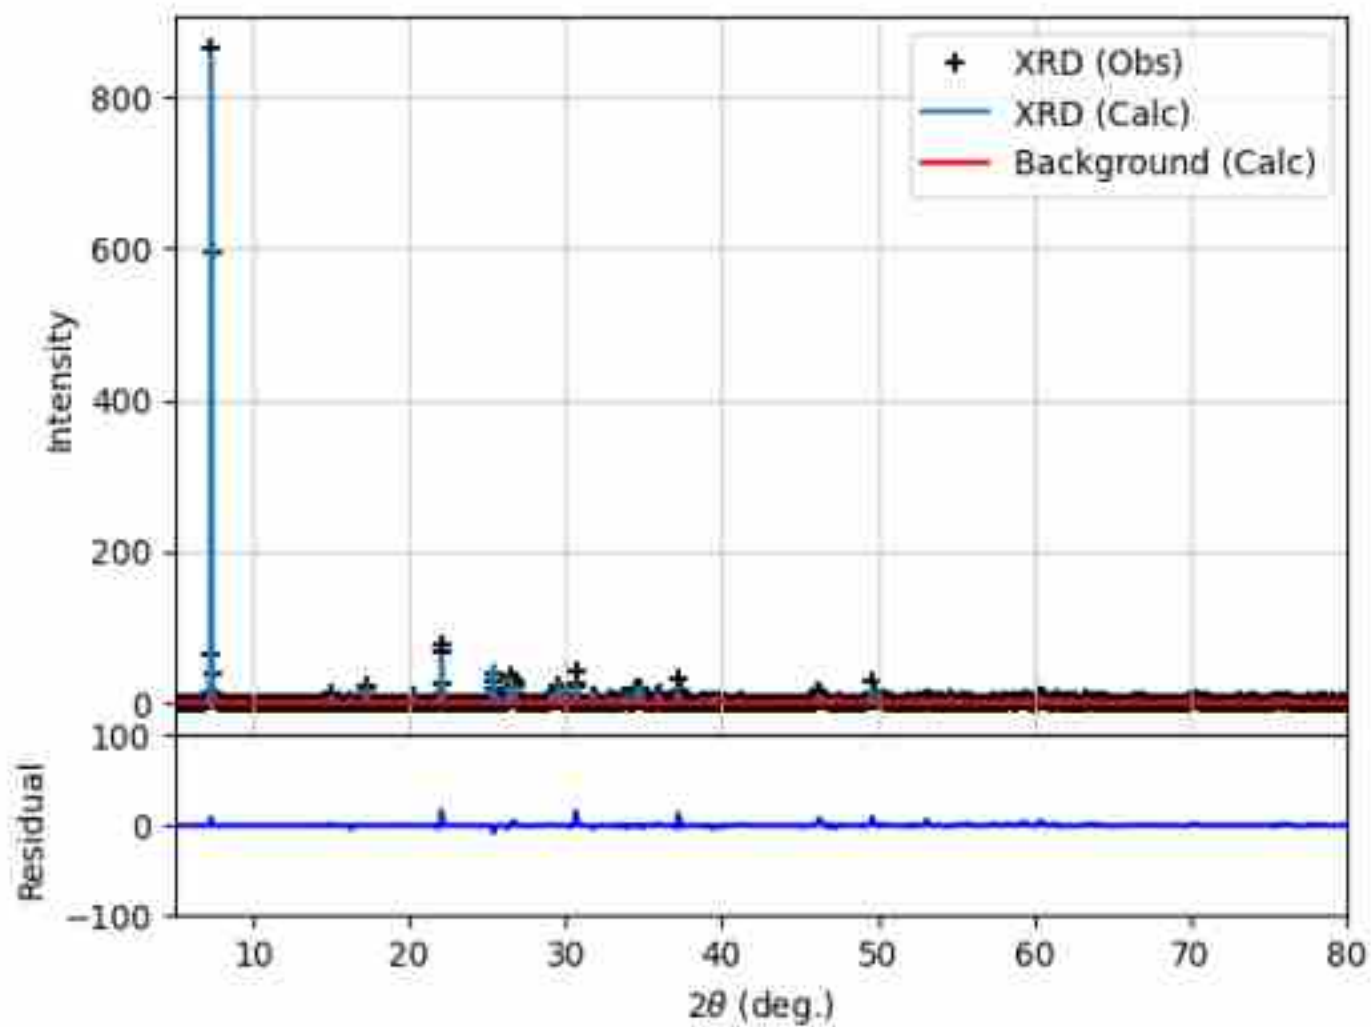

| RMSE before RR | Rwp      | RMSE after RR |
|----------------|----------|---------------|
| 0.463          | 20.72531 | None          |

# Ni1N2F14

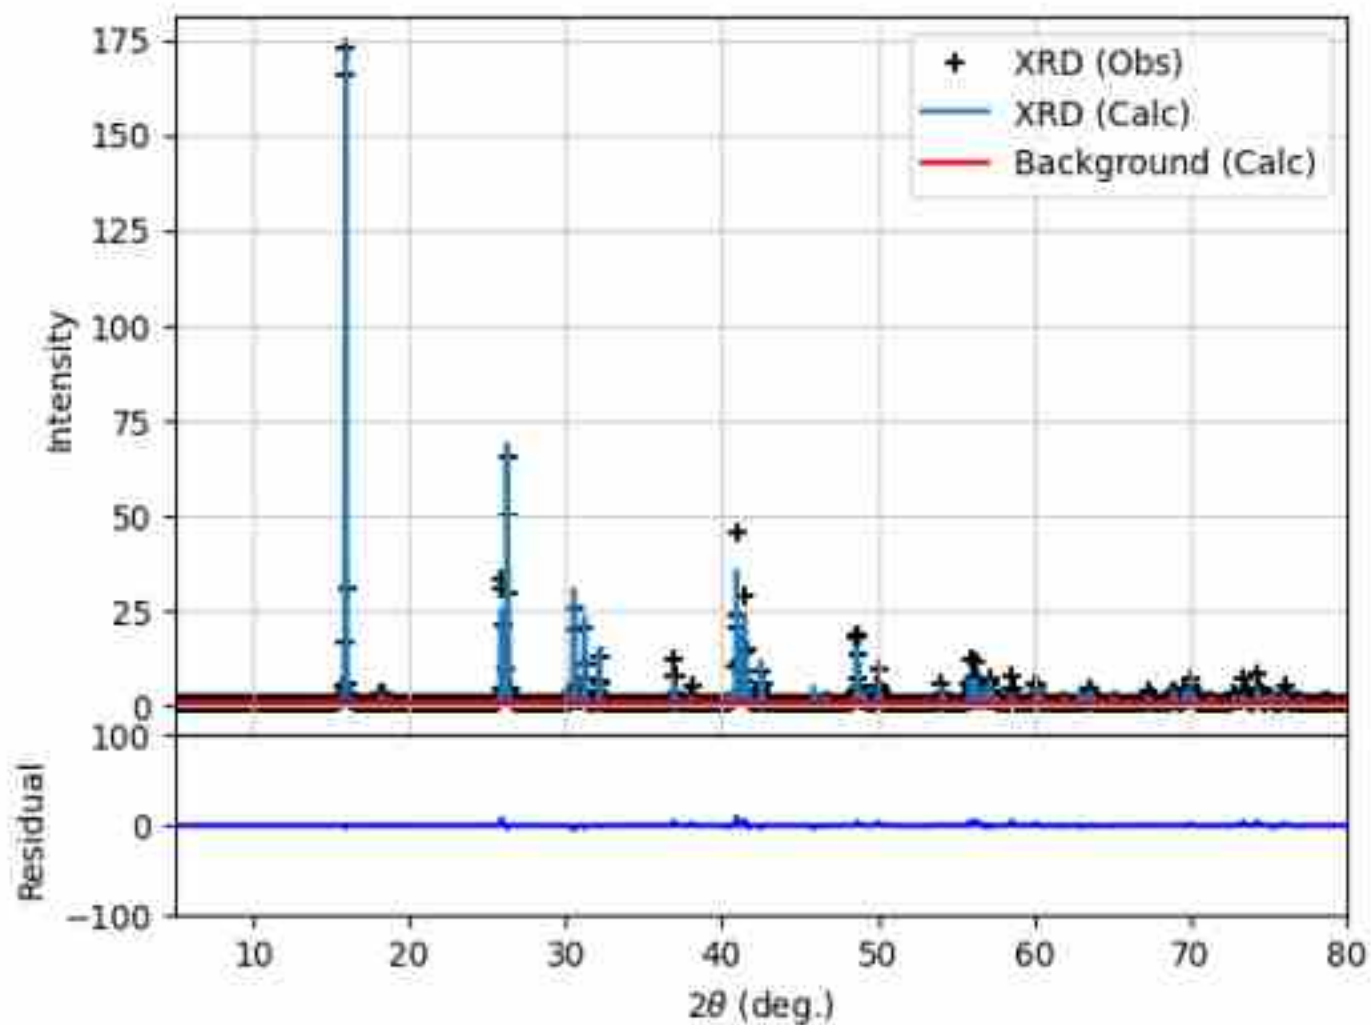

| RMSE before RR | Rwp      | RMSE after RR |
|----------------|----------|---------------|
| 0.464          | 19.61015 | None          |

# Li1Sb1Au1

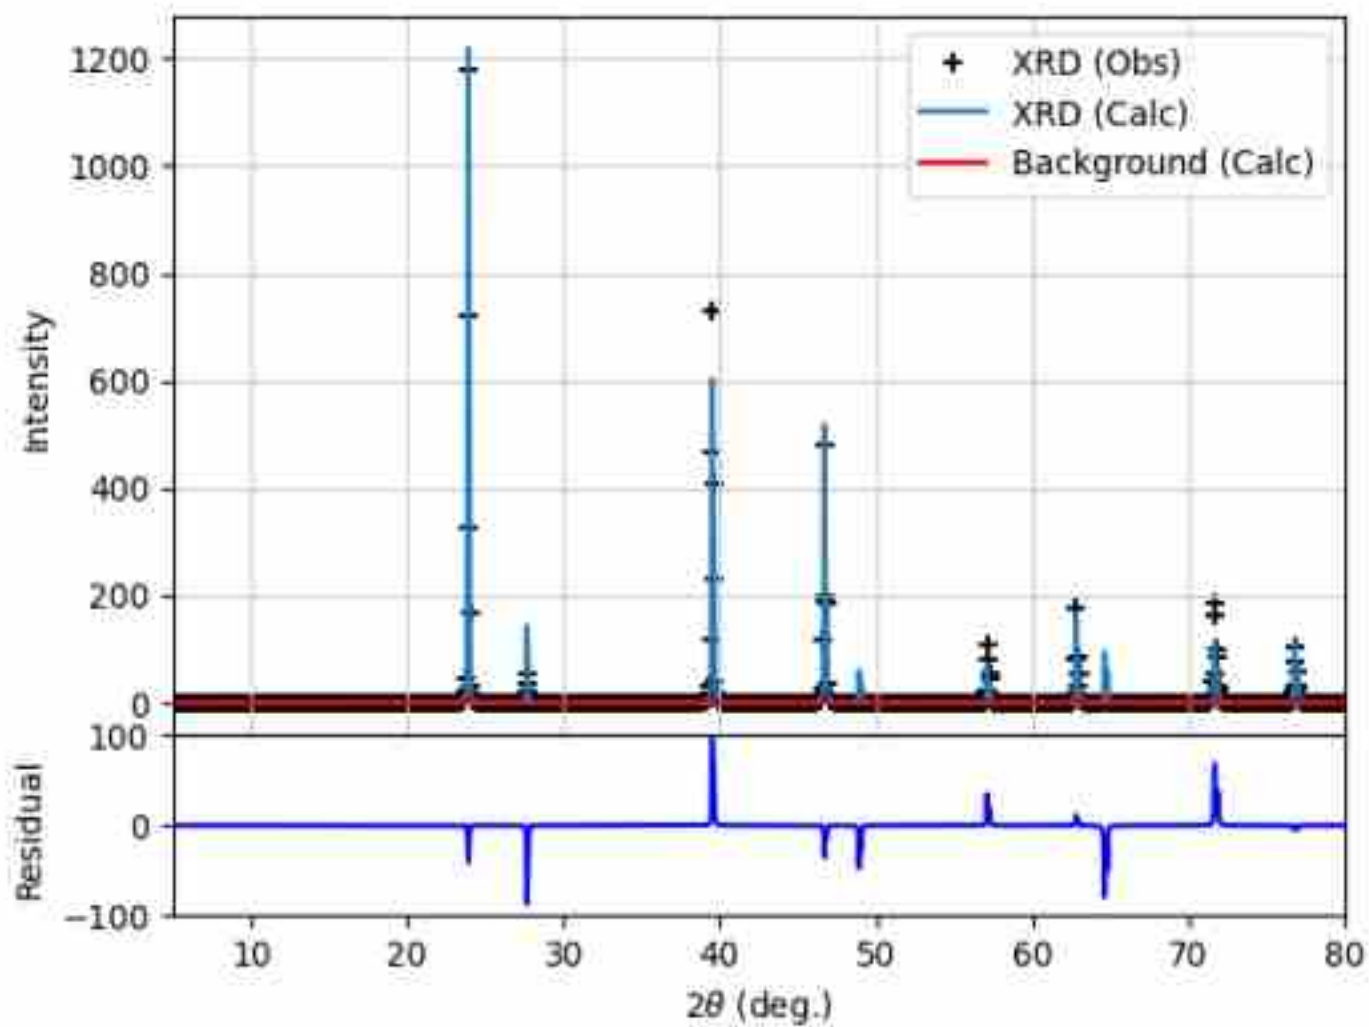

| RMSE before RR | Rwp      | RMSE after RR |
|----------------|----------|---------------|
| 0.466          | 48.11881 | 0.24385       |

# Na<sub>2</sub>P<sub>2</sub>Pd<sub>2</sub>S<sub>8</sub>

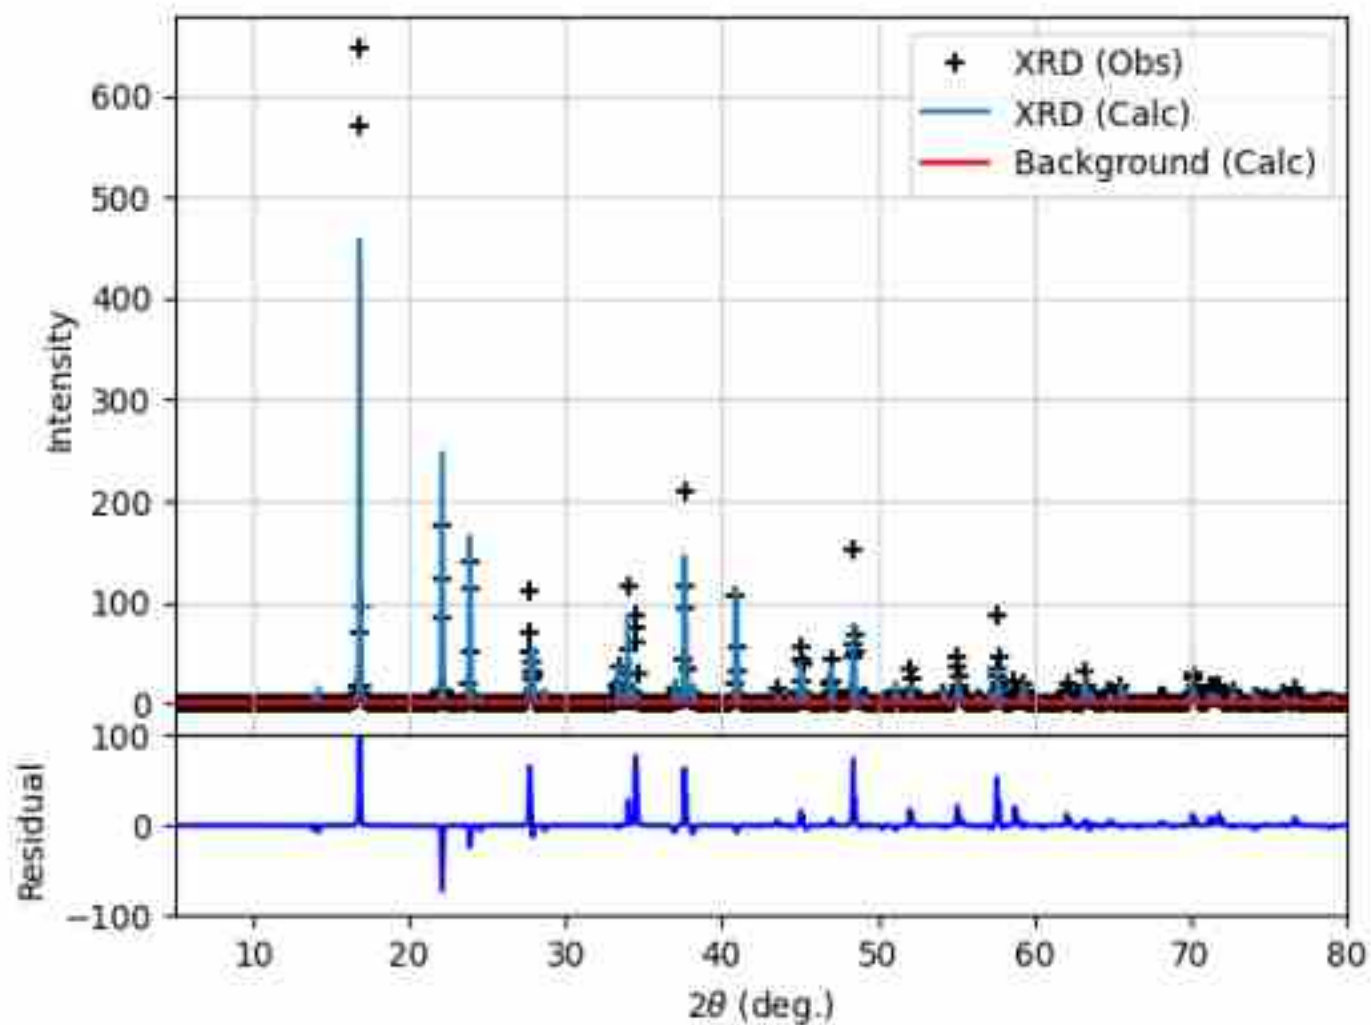

| RMSE before RR | Rwp     | RMSE after RR |
|----------------|---------|---------------|
| 0.466          | 39.6673 | None          |

# Na<sub>4</sub>Co<sub>6</sub>O<sub>8</sub>

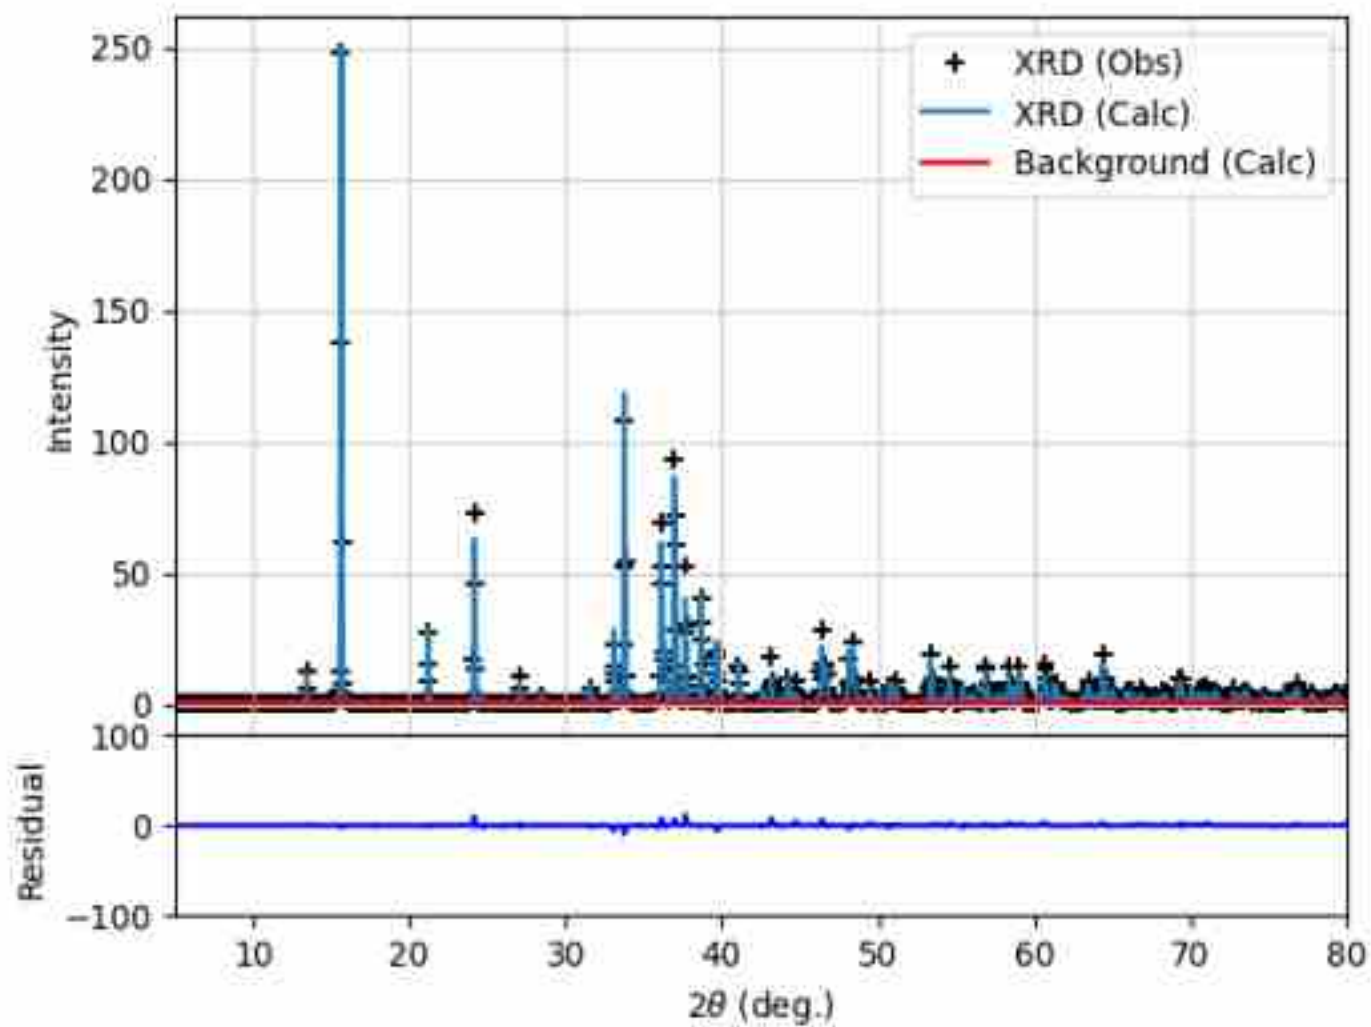

| RMSE before RR | Rwp      | RMSE after RR |
|----------------|----------|---------------|
| 0.466          | 16.16015 | None          |

# Sr<sub>2</sub>H<sub>3</sub>N<sub>1</sub>O<sub>6</sub>

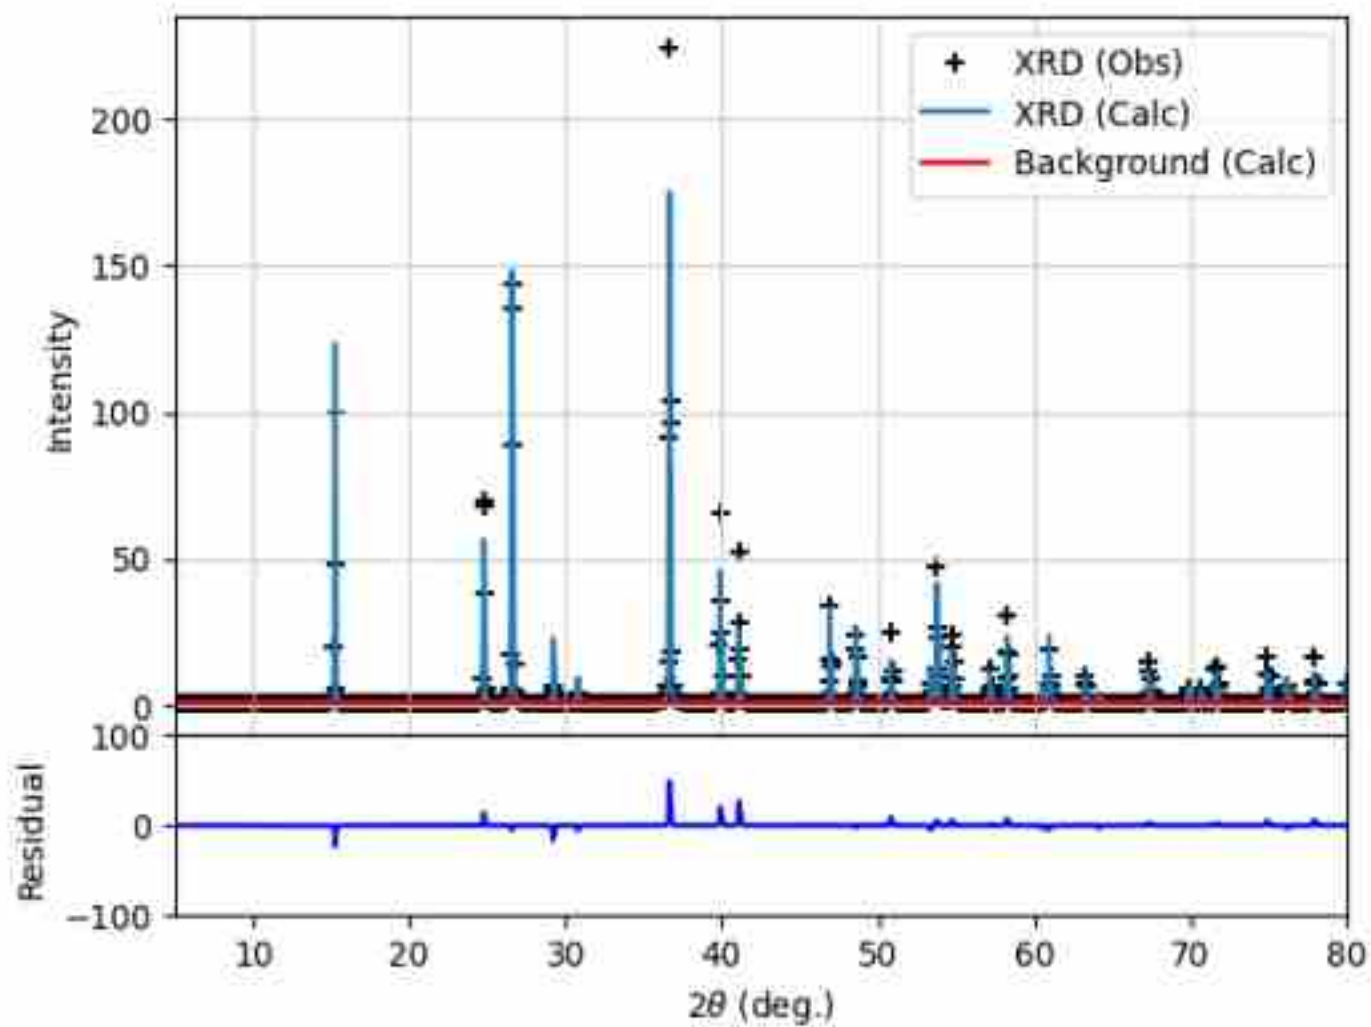

| RMSE before RR | Rwp      | RMSE after RR |
|----------------|----------|---------------|
| 0.466          | 25.08845 | None          |

# Sr<sub>2</sub>Sn<sub>4</sub>Hg<sub>4</sub>

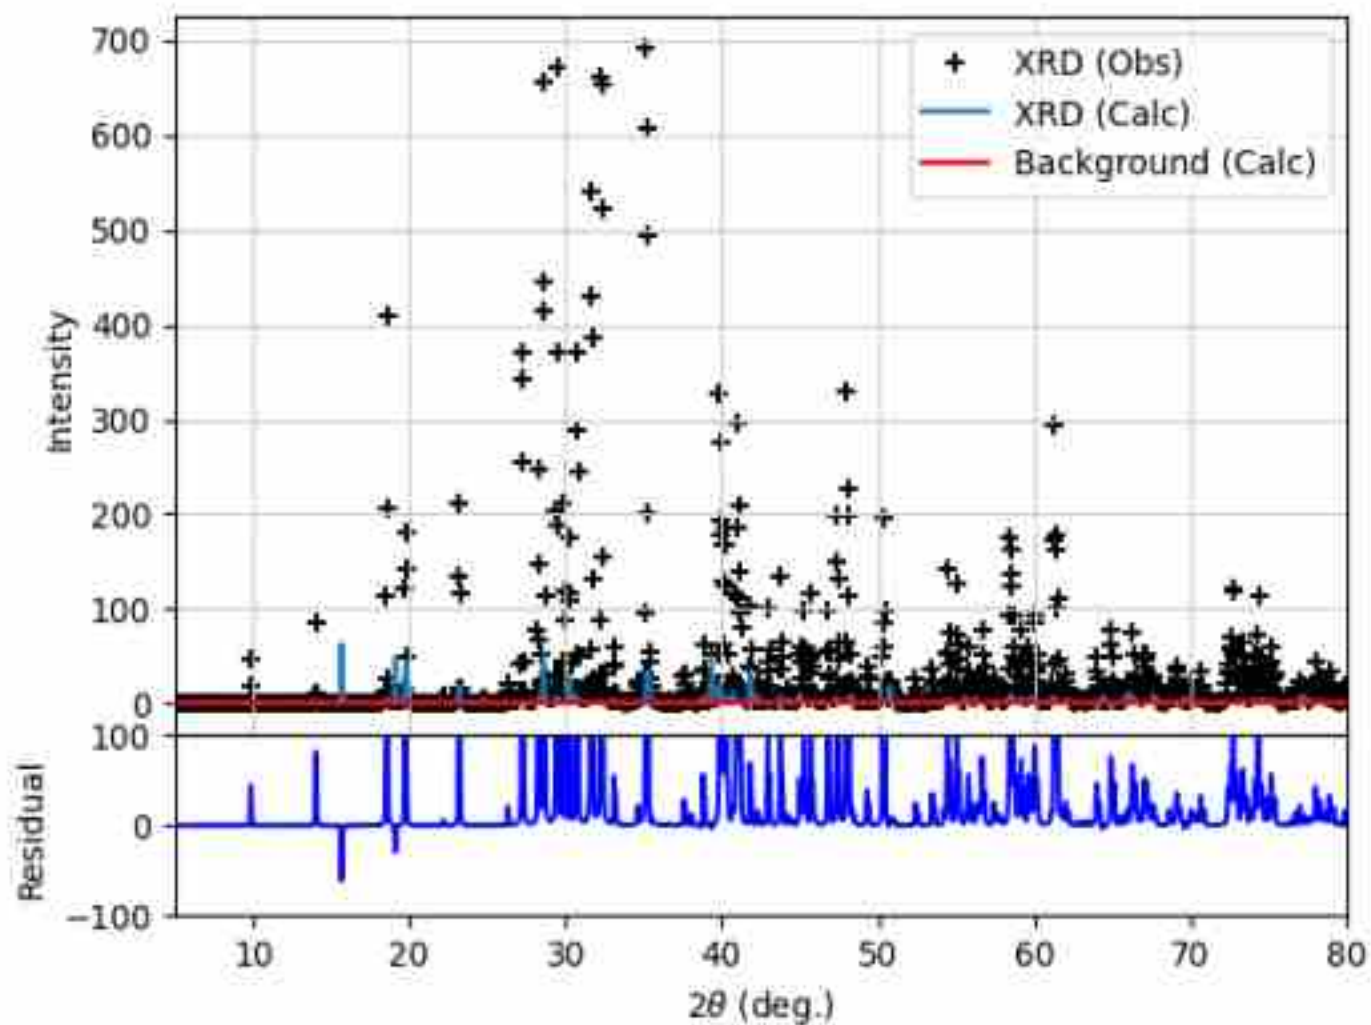

| RMSE before RR | Rwp      | RMSE after RR |
|----------------|----------|---------------|
| 0.466          | 97.71477 | None          |



# La<sub>4</sub>Ni<sub>10</sub>C<sub>6</sub>

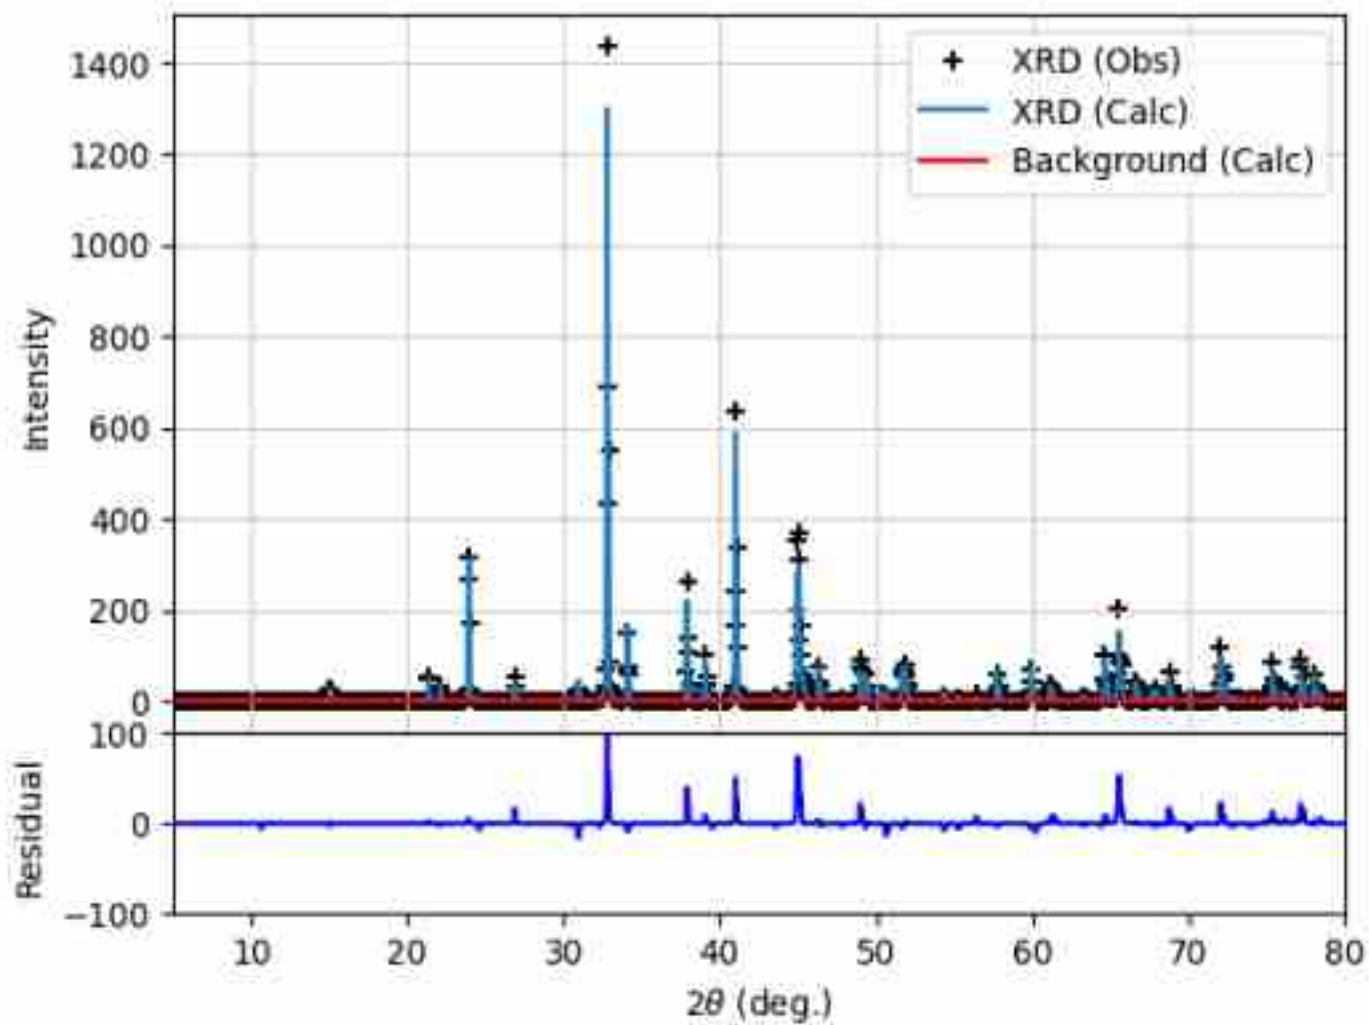

| RMSE before RR | Rwp      | RMSE after RR |
|----------------|----------|---------------|
| 0.467          | 20.71665 | None          |

# Mn<sub>4</sub>Cu<sub>8</sub>Se<sub>8</sub>

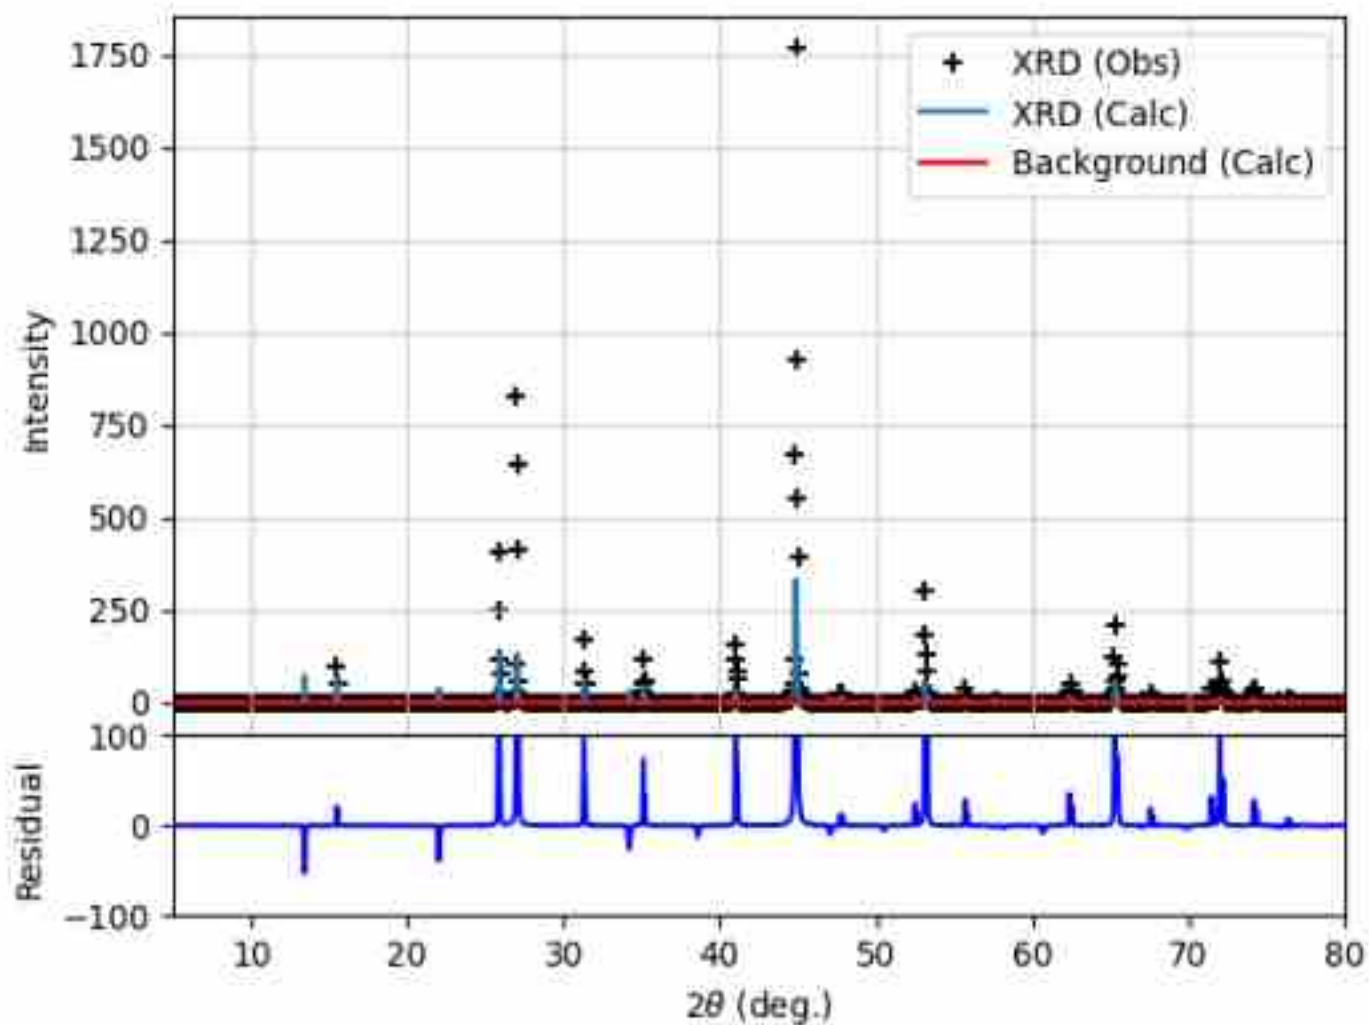

| RMSE before RR | Rwp      | RMSE after RR |
|----------------|----------|---------------|
| 0.467          | 83.14556 | 0.45962       |

# Ba1Mg2Fe1H8

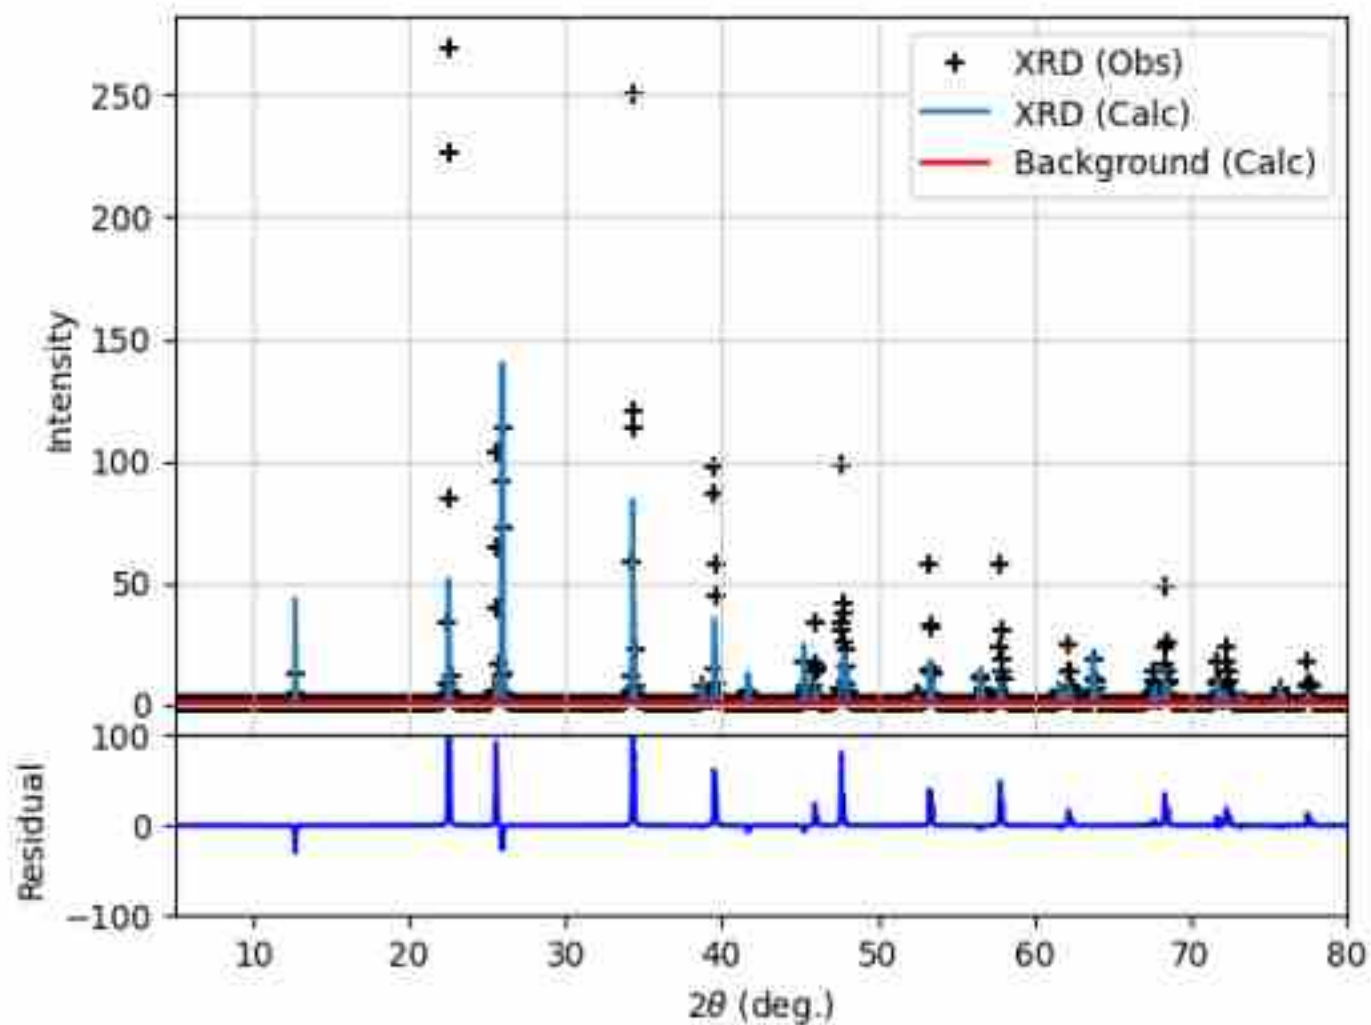

| RMSE before RR | Rwp     | RMSE after RR |
|----------------|---------|---------------|
| 0.468          | 58.1896 | None          |

# Cr<sub>4</sub>In<sub>1</sub>Cu<sub>1</sub>S<sub>8</sub>

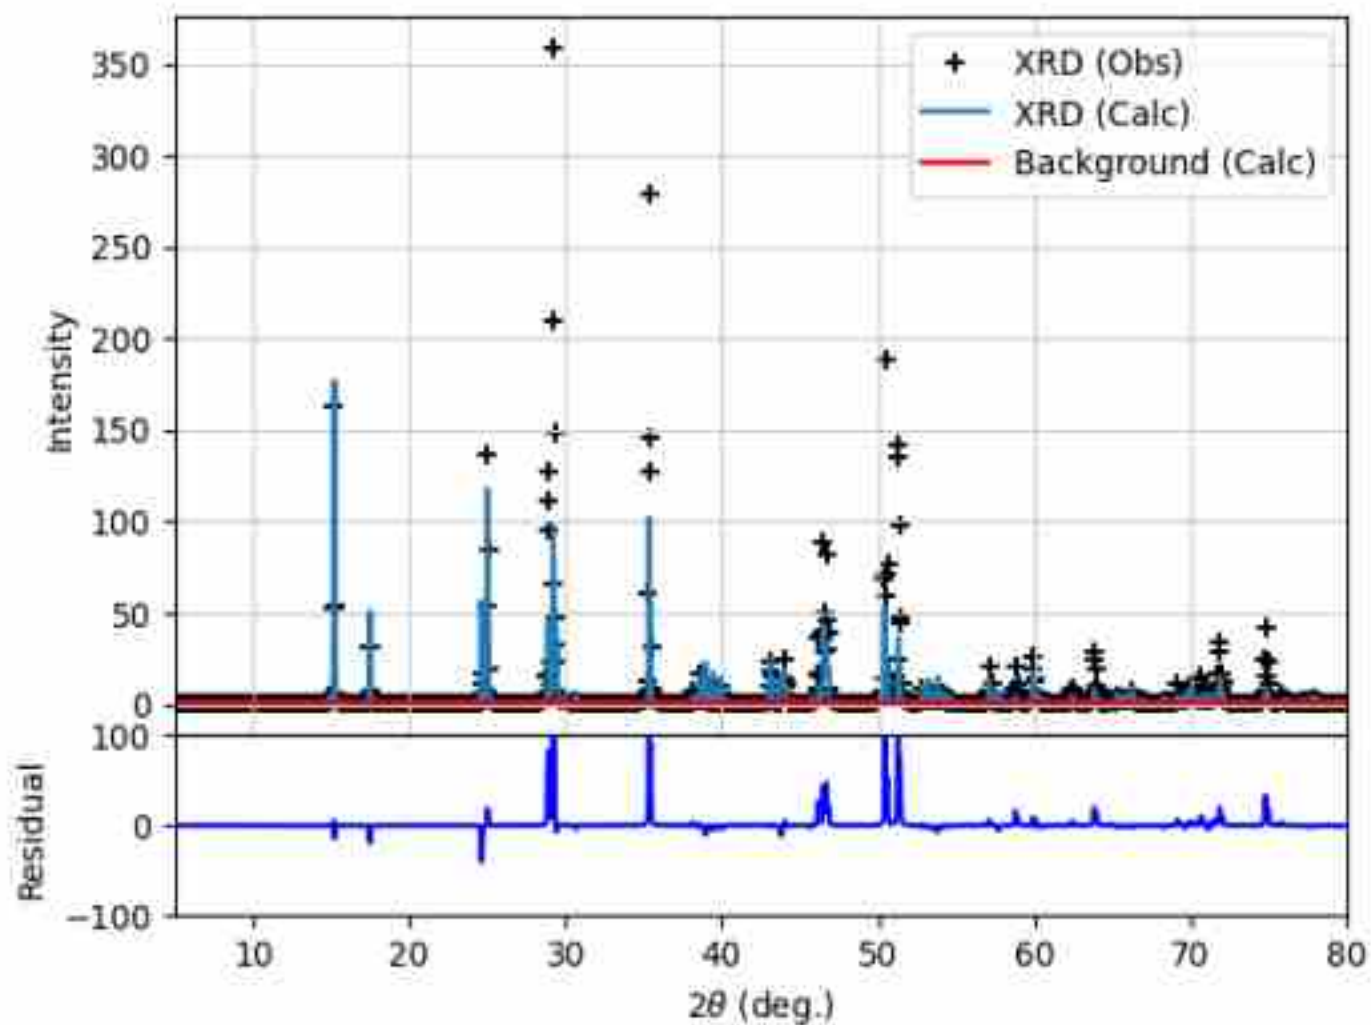

| RMSE before RR | Rwp      | RMSE after RR |
|----------------|----------|---------------|
| 0.469          | 57.10822 | None          |

# Ga1Cu1Ge1Se4

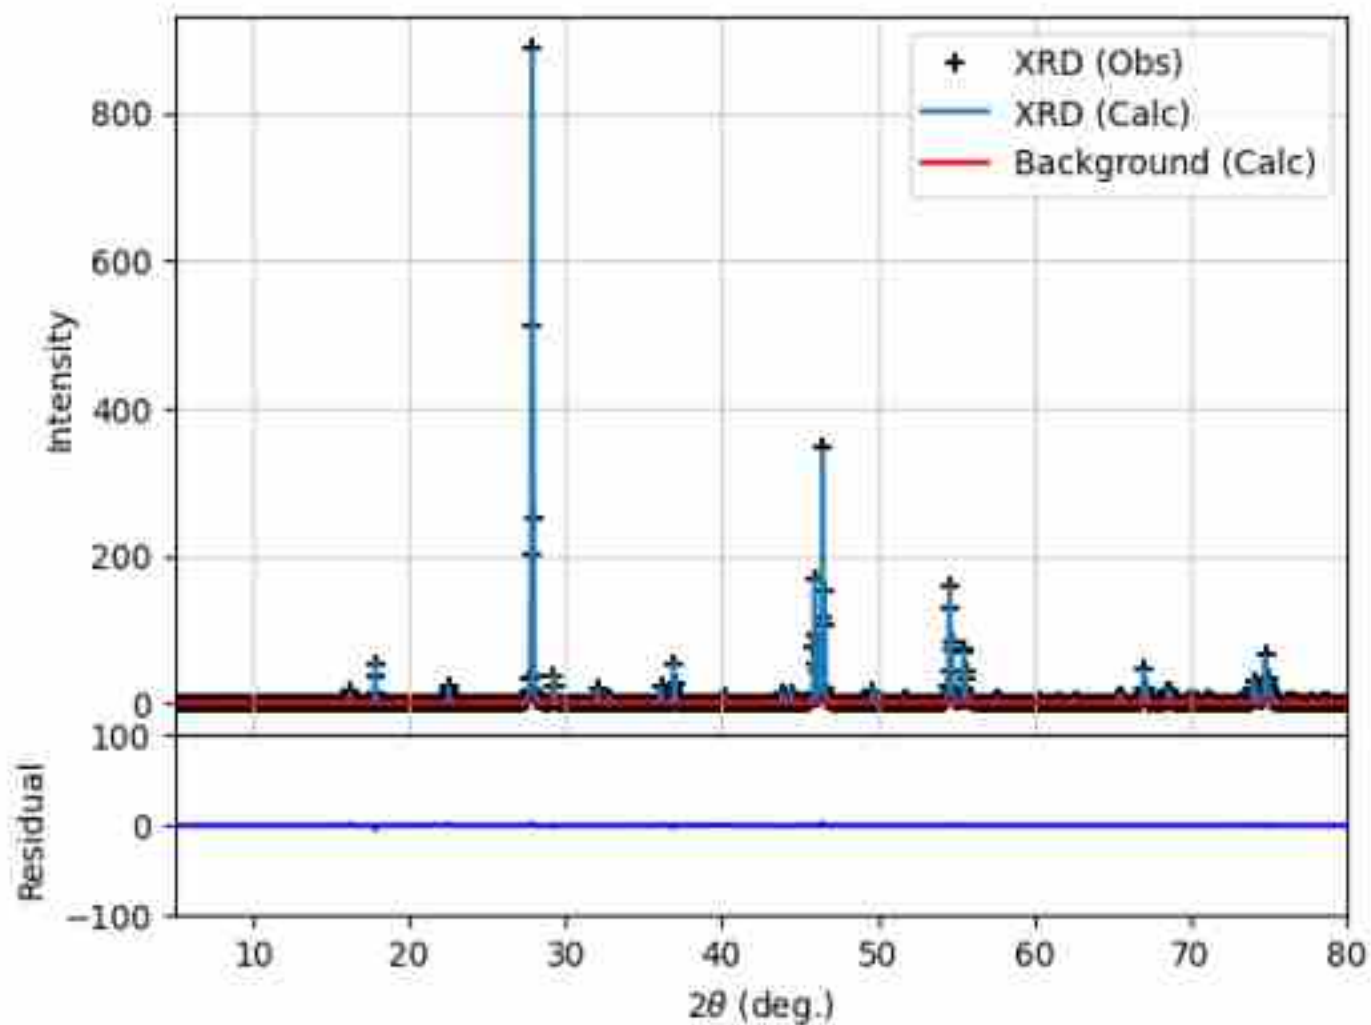

| RMSE before RR | Rwp     | RMSE after RR |
|----------------|---------|---------------|
| 0.469          | 2.14038 | 0.47696       |

# Y6O5F8

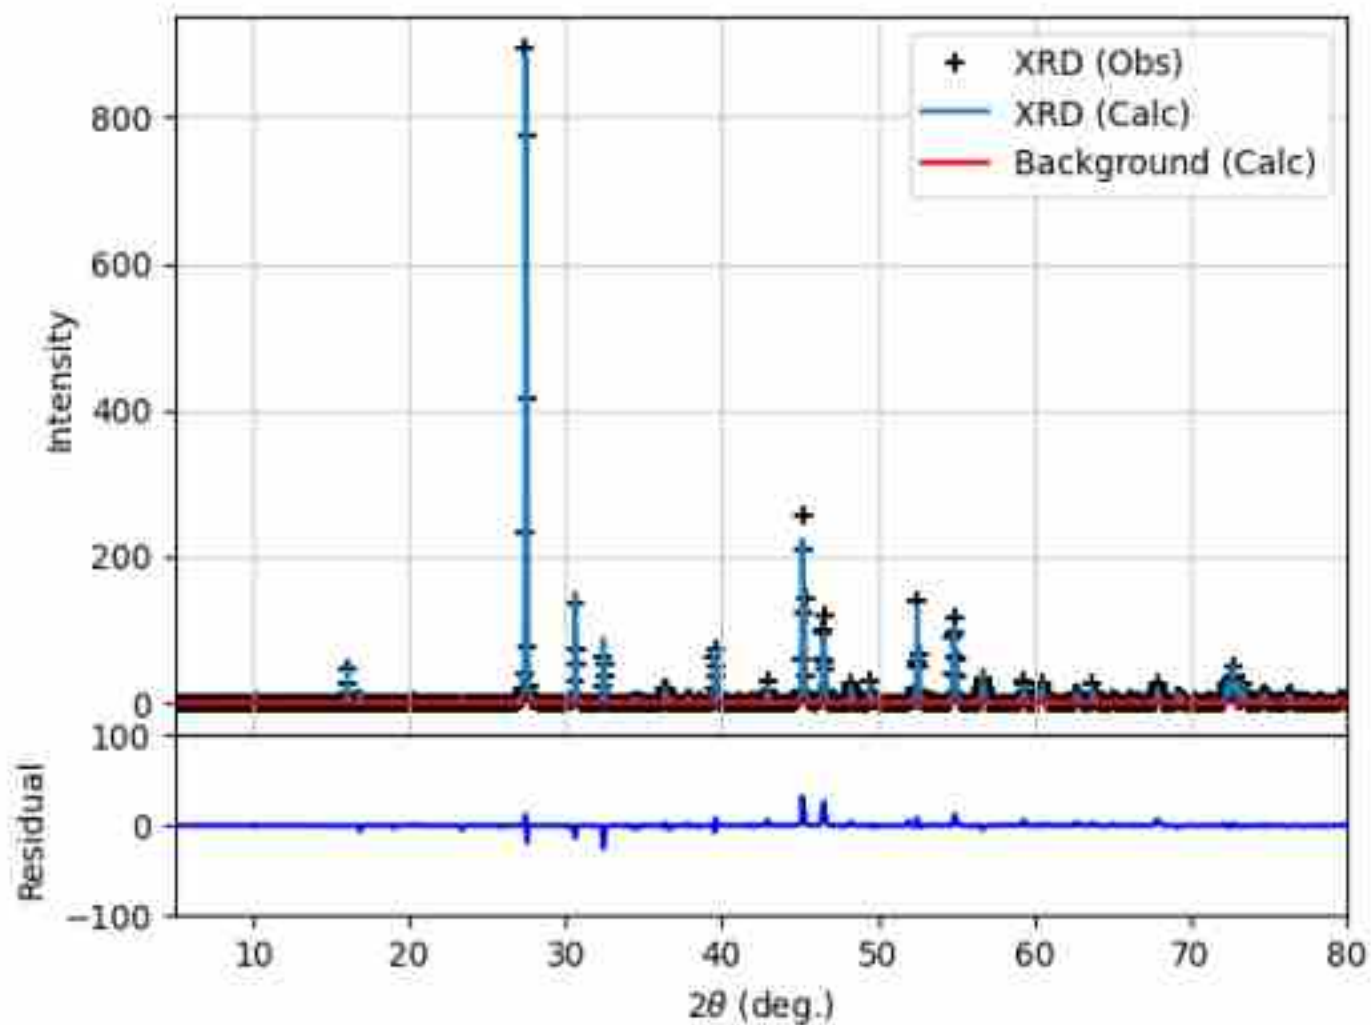

| RMSE before RR | Rwp      | RMSE after RR |
|----------------|----------|---------------|
| 0.469          | 15.54038 | None          |

# Ce4Si4Ir8

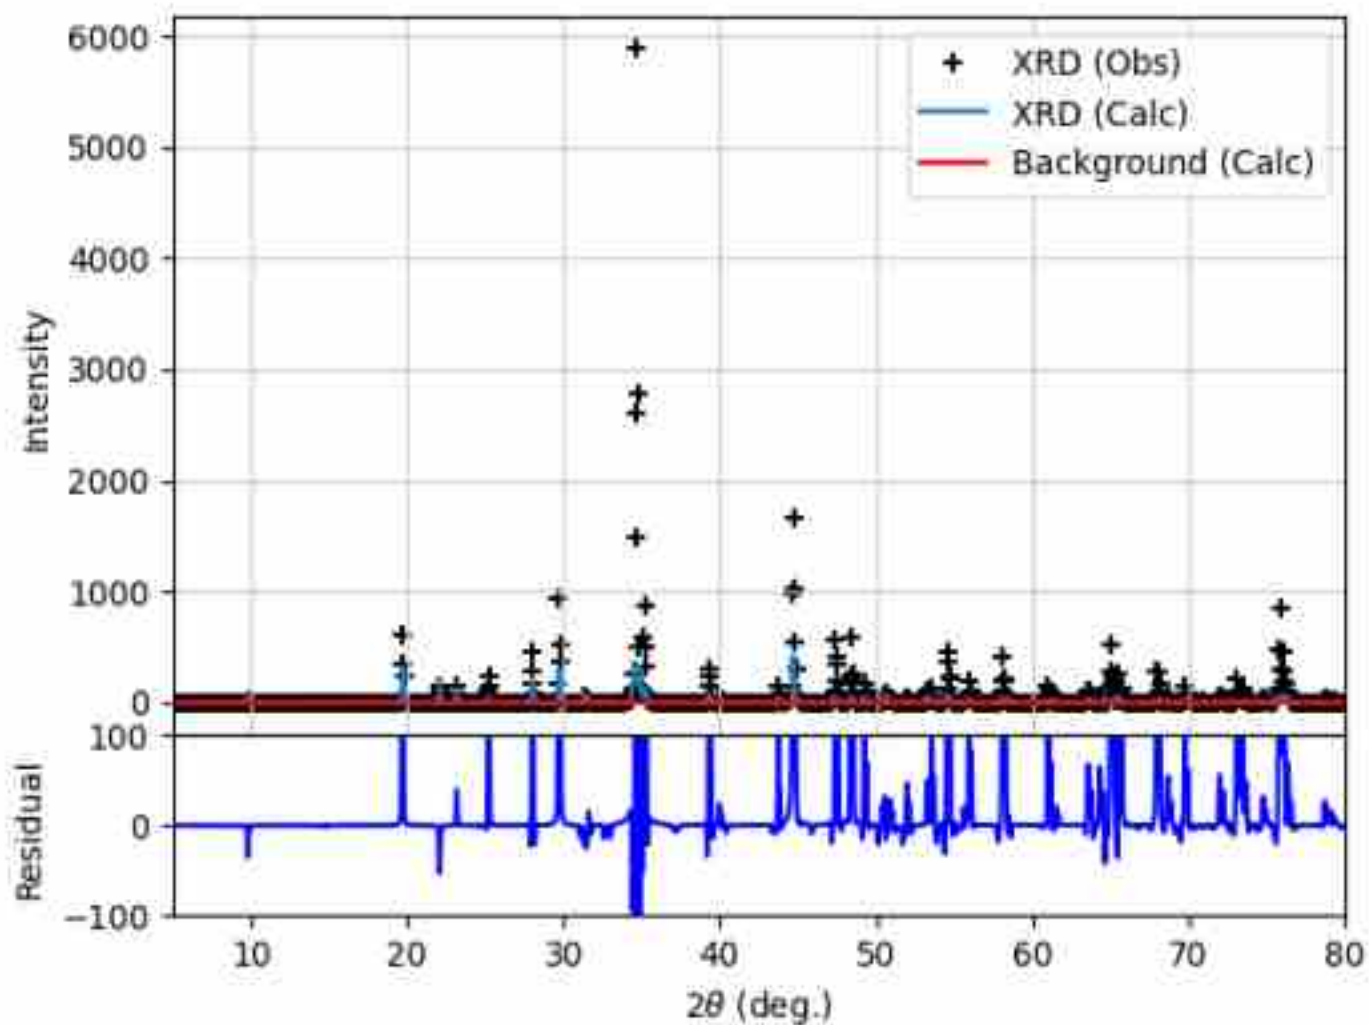

| RMSE before RR | Rwp      | RMSE after RR |
|----------------|----------|---------------|
| 0.471          | 82.49071 | None          |

# Fe6Ni2P4

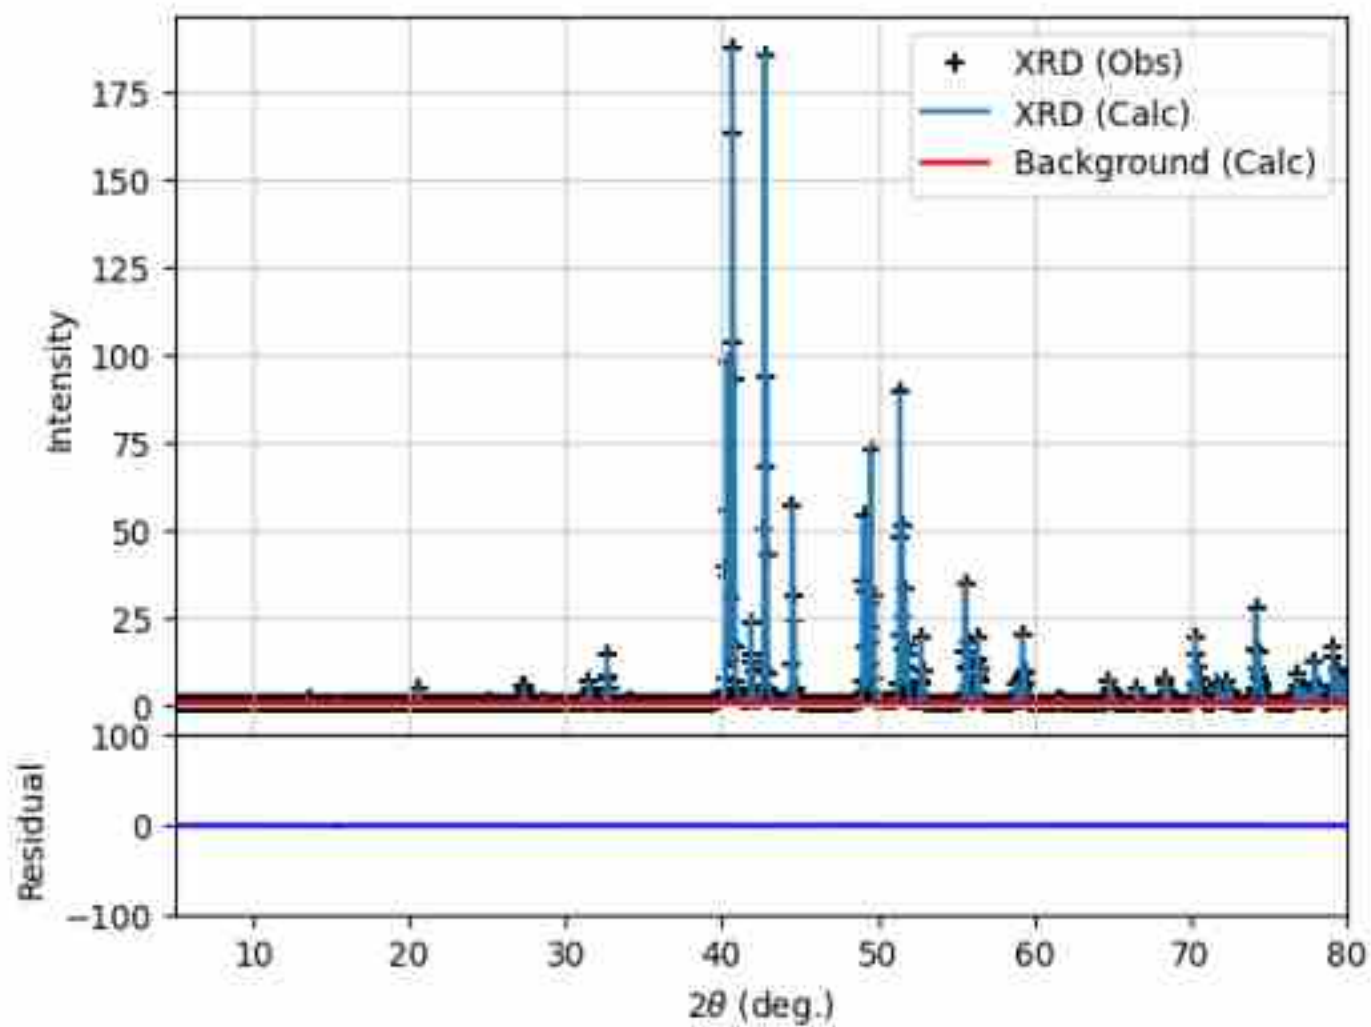

| RMSE before RR | Rwp     | RMSE after RR |
|----------------|---------|---------------|
| 0.471          | 2.68942 | None          |



# Na<sub>2</sub>Cu<sub>2</sub>O<sub>4</sub>

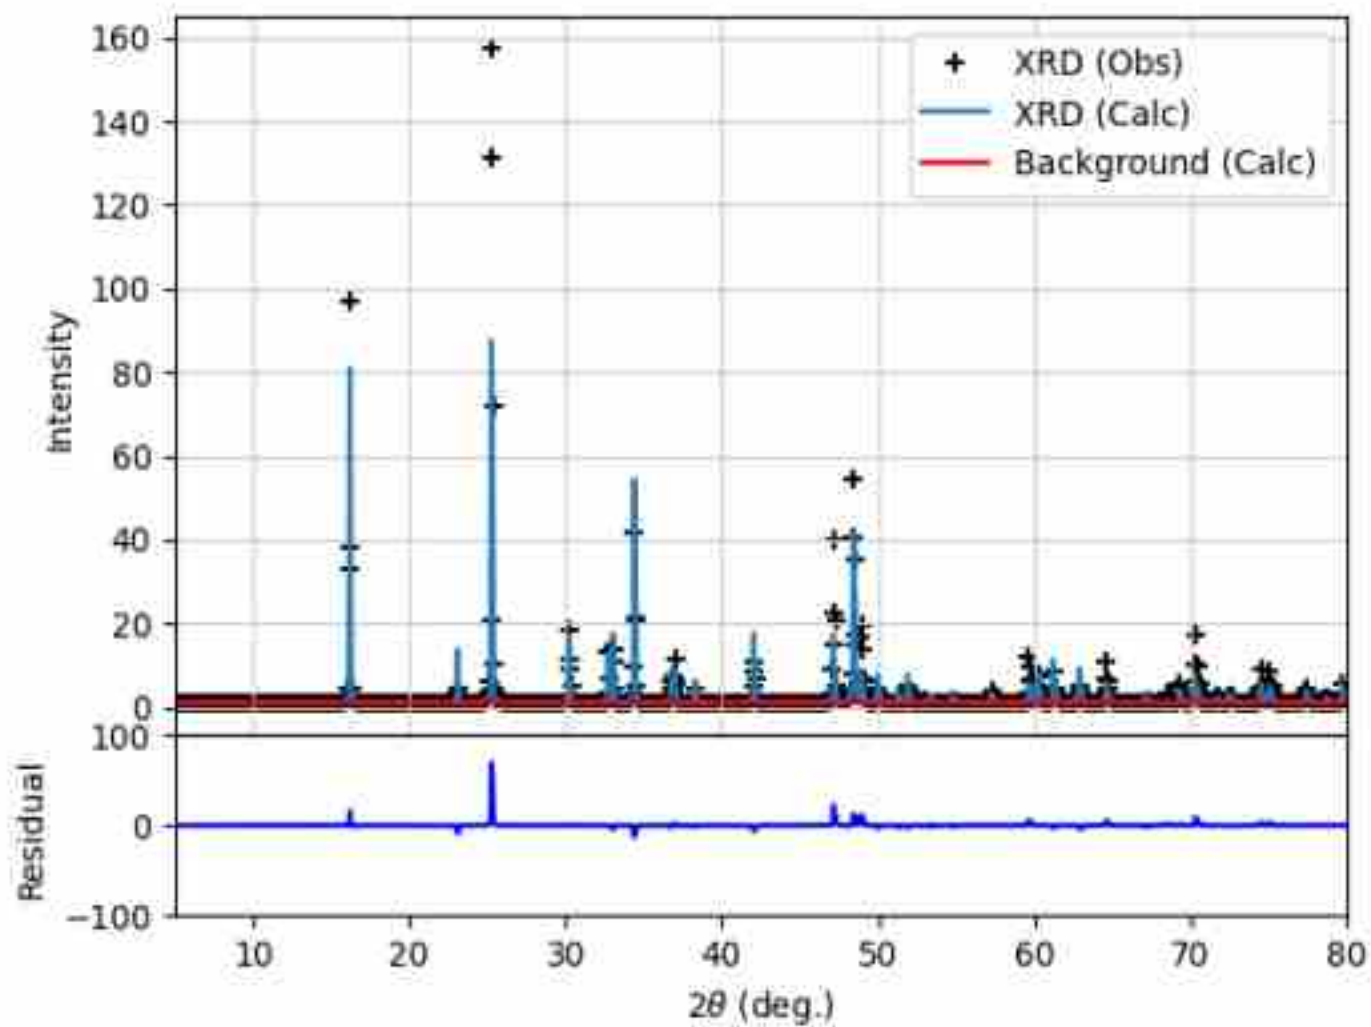

| RMSE before RR | Rwp      | RMSE after RR |
|----------------|----------|---------------|
| 0.471          | 31.23609 | None          |

# In1Ag1Sn1Se4

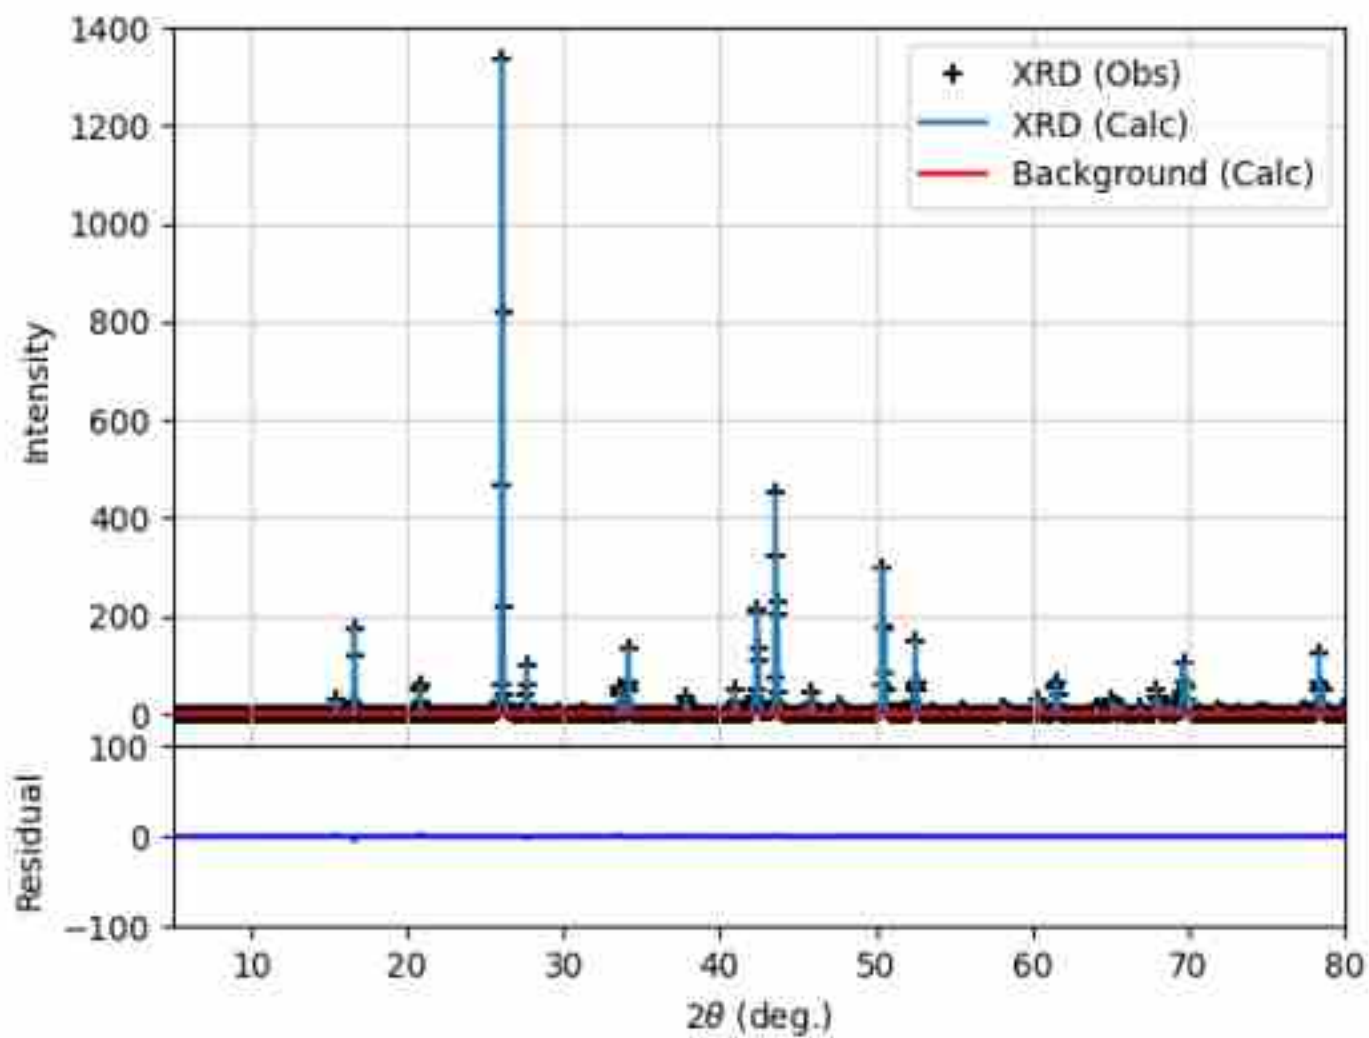

| RMSE before RR | Rwp     | RMSE after RR |
|----------------|---------|---------------|
| 0.472          | 1.19434 | 0.47977       |

# P2Pd3S8

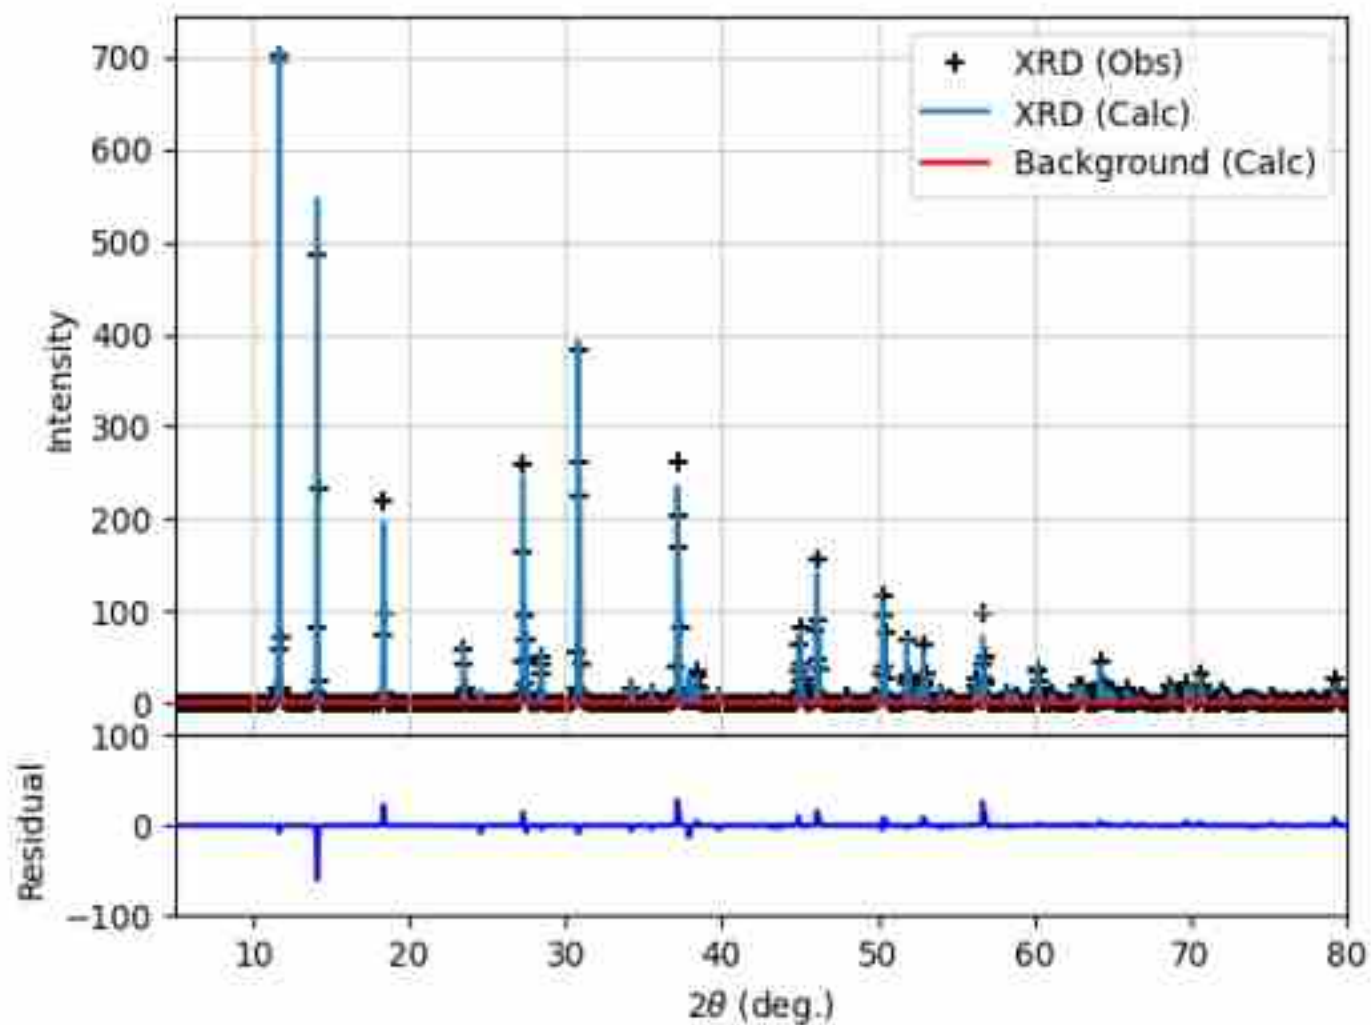

| RMSE before RR | Rwp      | RMSE after RR |
|----------------|----------|---------------|
| 0.472          | 12.21255 | None          |

# Zr10Ga3Sb3

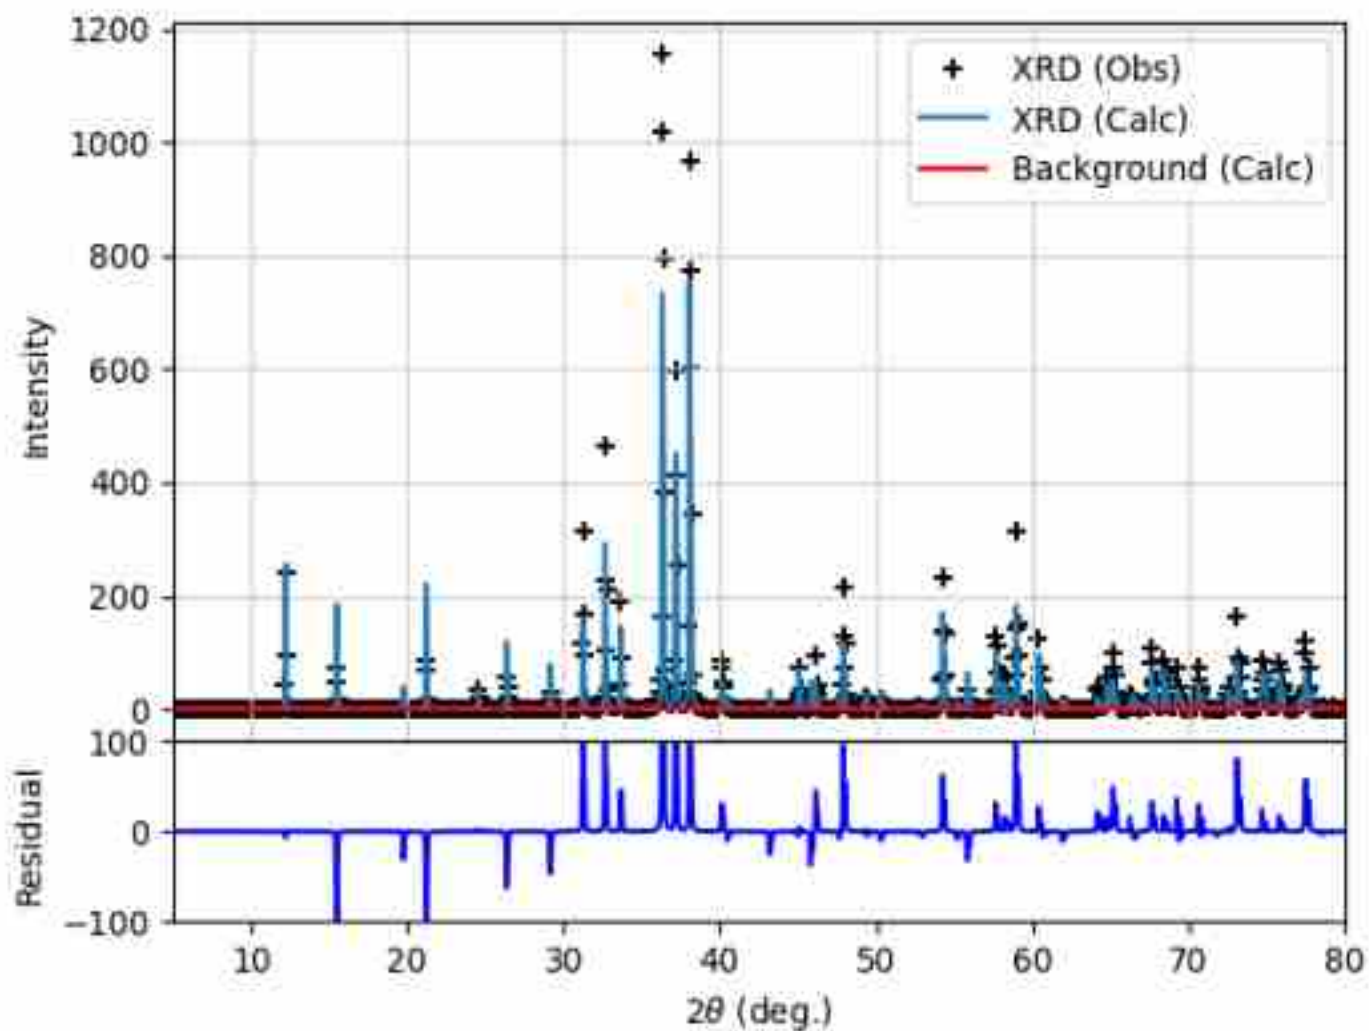

| RMSE before RR | Rwp      | RMSE after RR |
|----------------|----------|---------------|
| 0.472          | 43.55804 | None          |

# Al<sub>11</sub>In<sub>3</sub>Cu<sub>4</sub>Se<sub>8</sub>

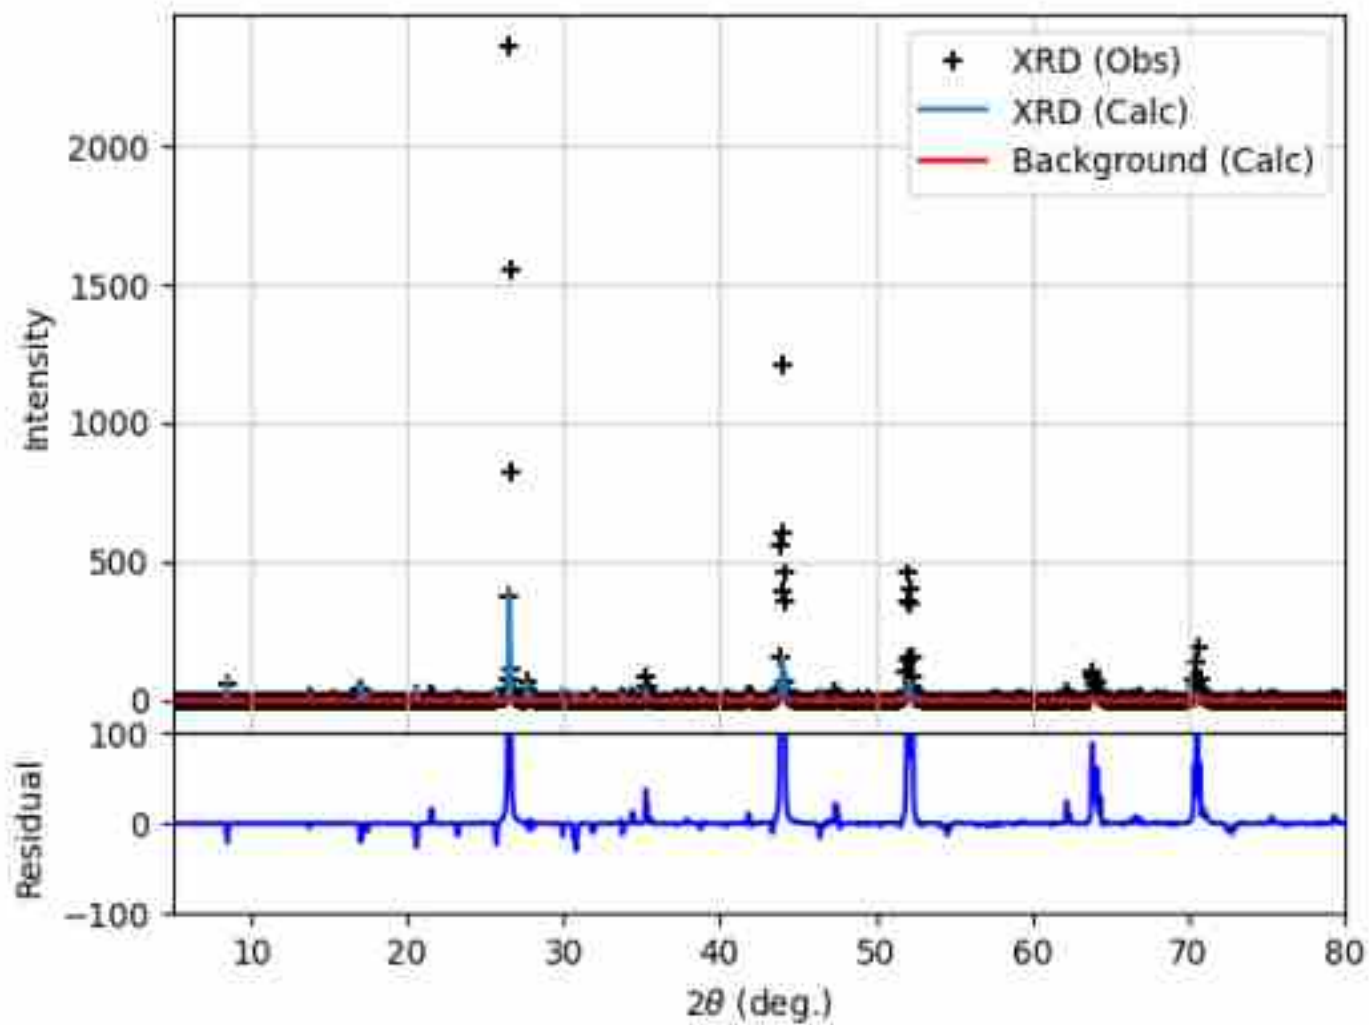

| RMSE before RR | Rwp      | RMSE after RR |
|----------------|----------|---------------|
| 0.473          | 81.39372 | 0.45775       |

# Eu4Bi8

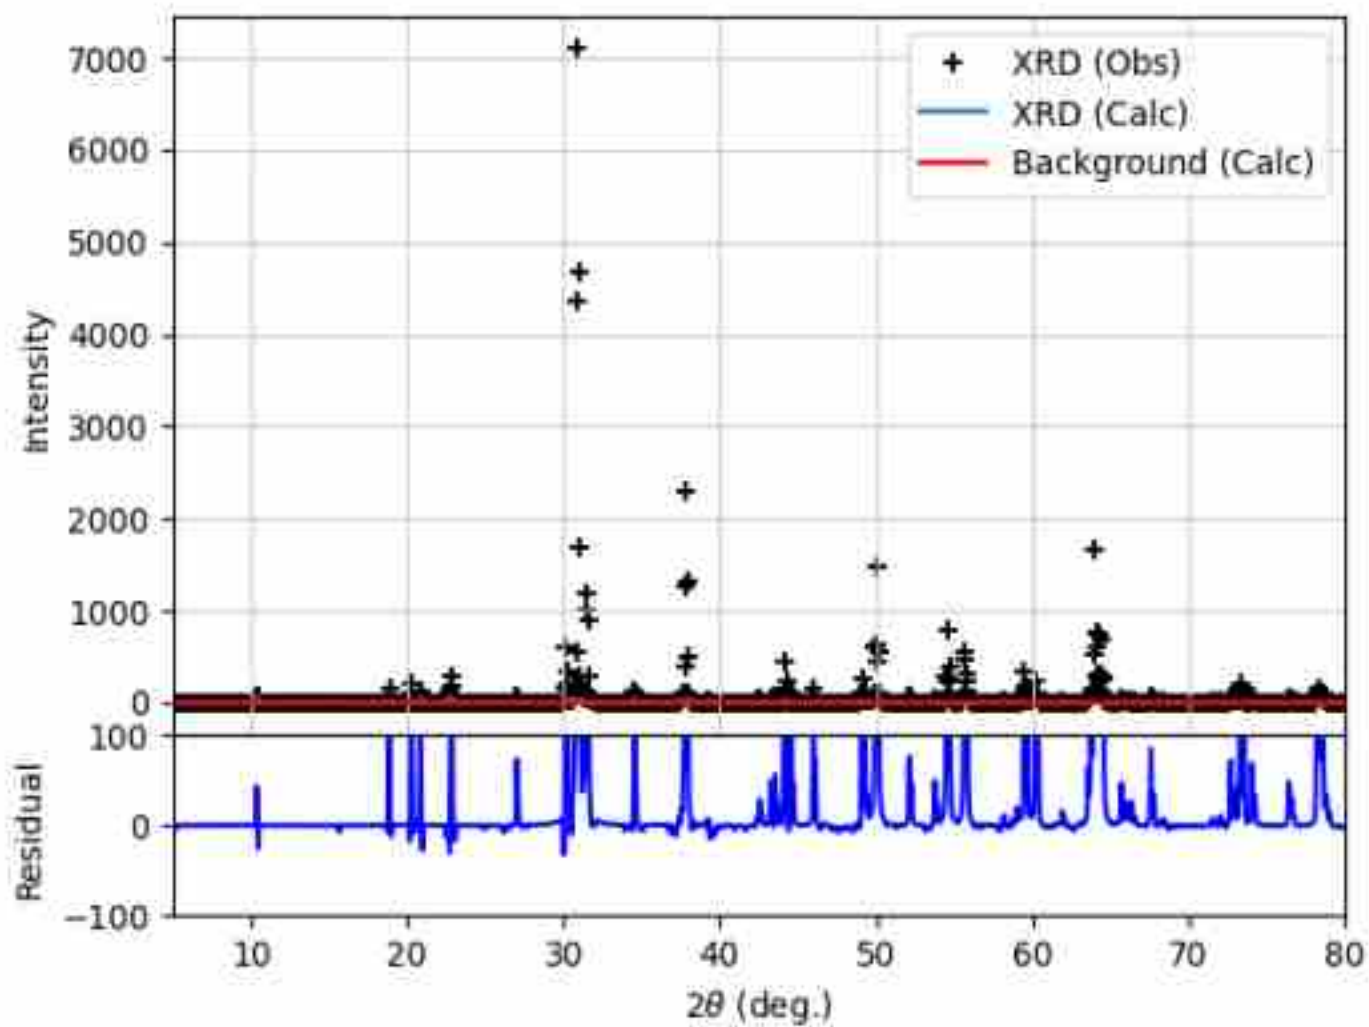

| RMSE before RR | Rwp      | RMSE after RR |
|----------------|----------|---------------|
| 0.474          | 96.16956 | None          |

# In<sub>4</sub>Ga<sub>4</sub>Se<sub>8</sub>

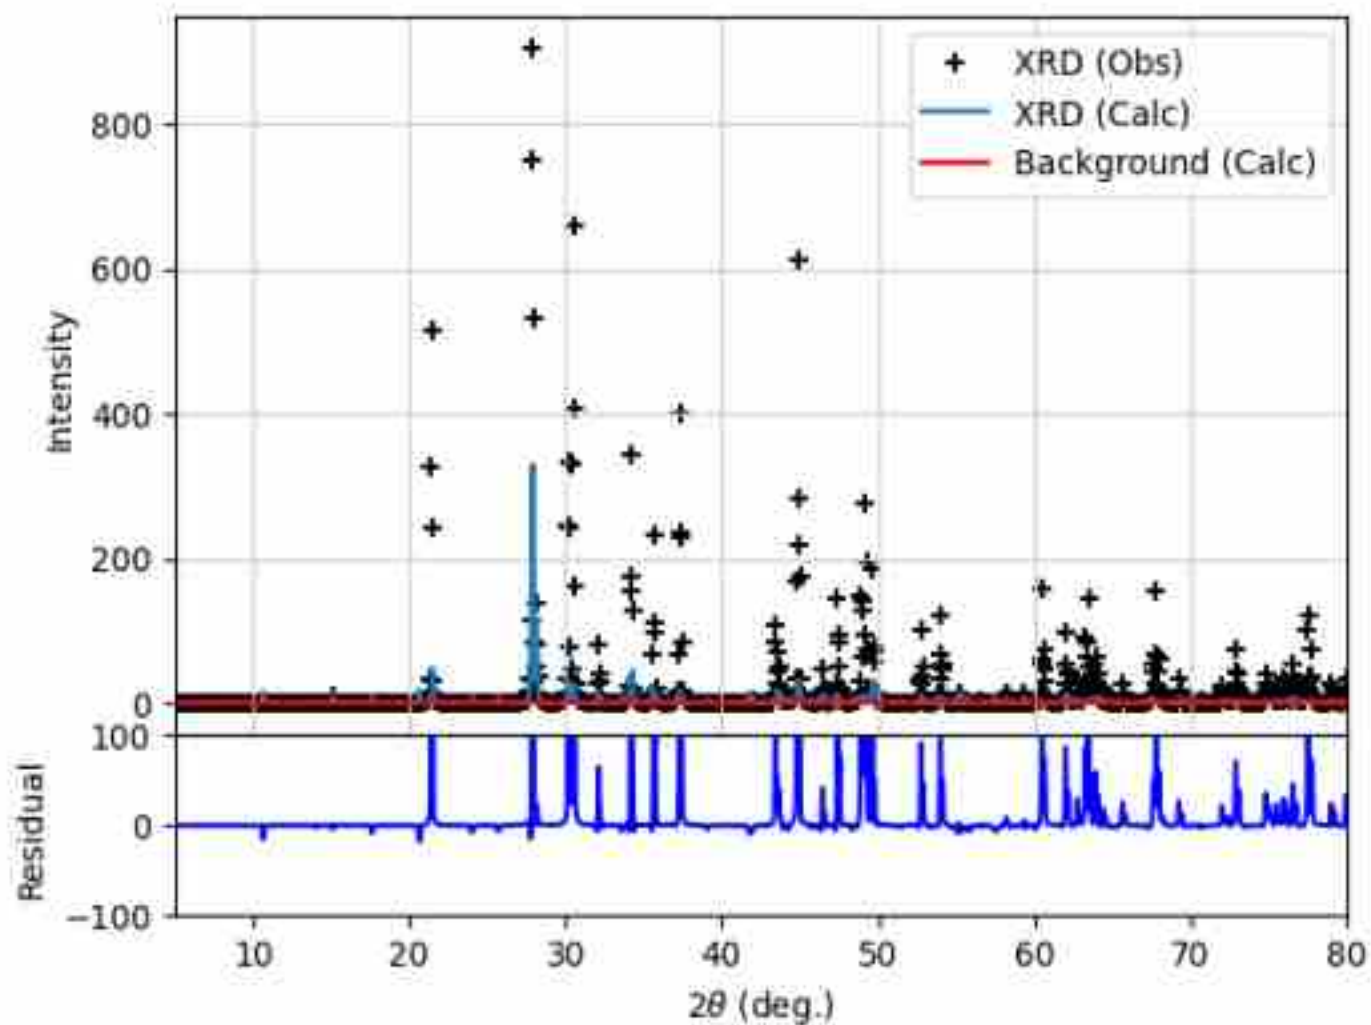

| RMSE before RR | Rwp      | RMSE after RR |
|----------------|----------|---------------|
| 0.474          | 84.99254 | 0.48625       |

# Cd<sub>1</sub>In<sub>2</sub>Se<sub>4</sub>

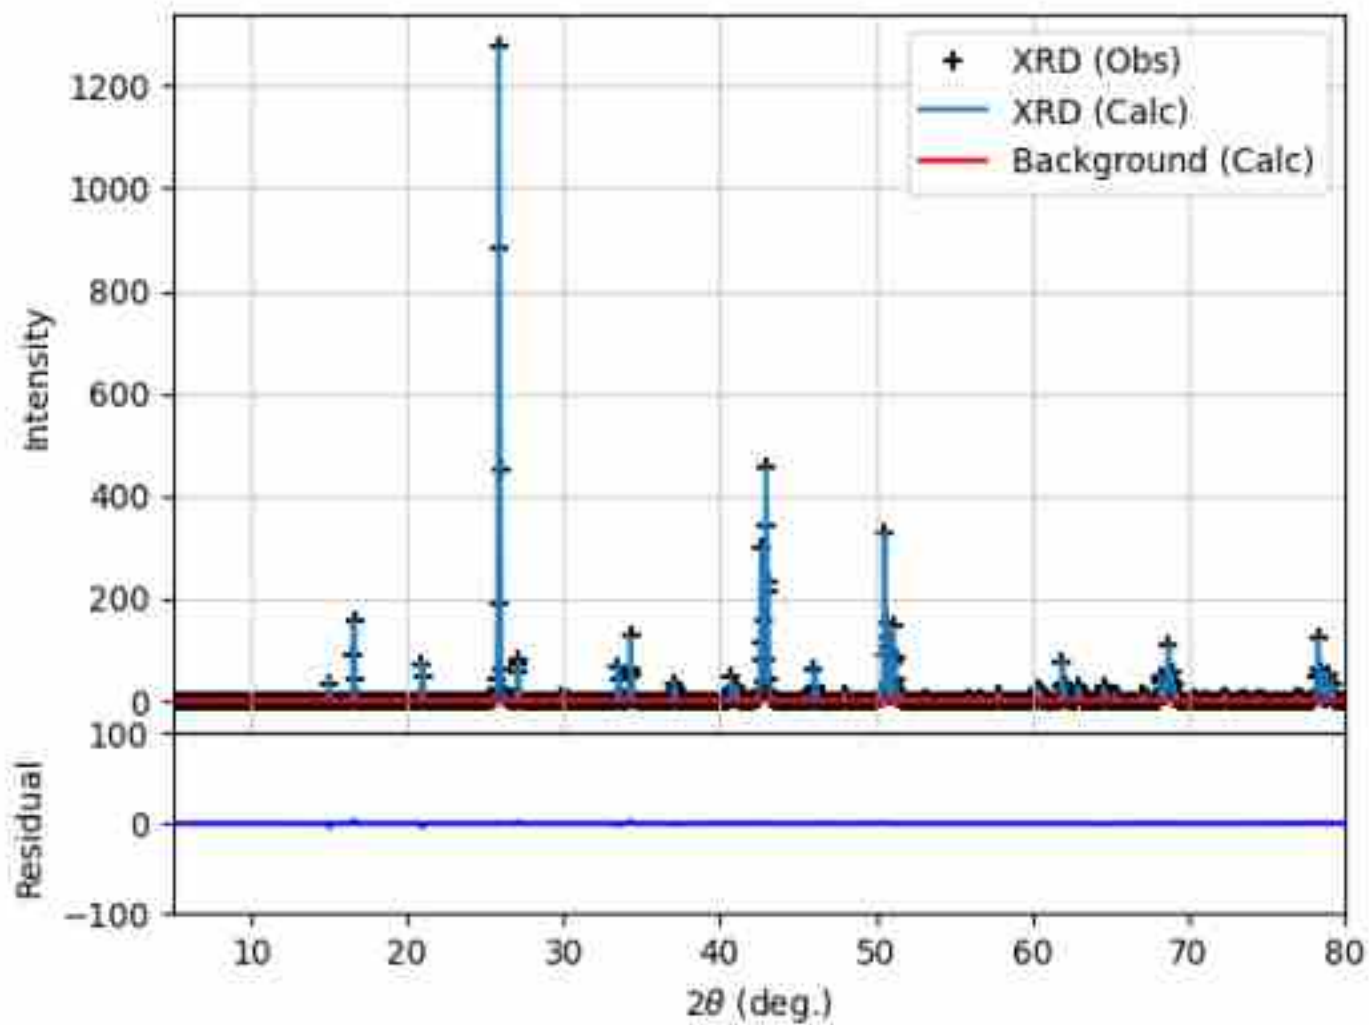

| RMSE before RR | Rwp     | RMSE after RR |
|----------------|---------|---------------|
| 0.475          | 1.52967 | 0.47591       |



# Li1U3O8

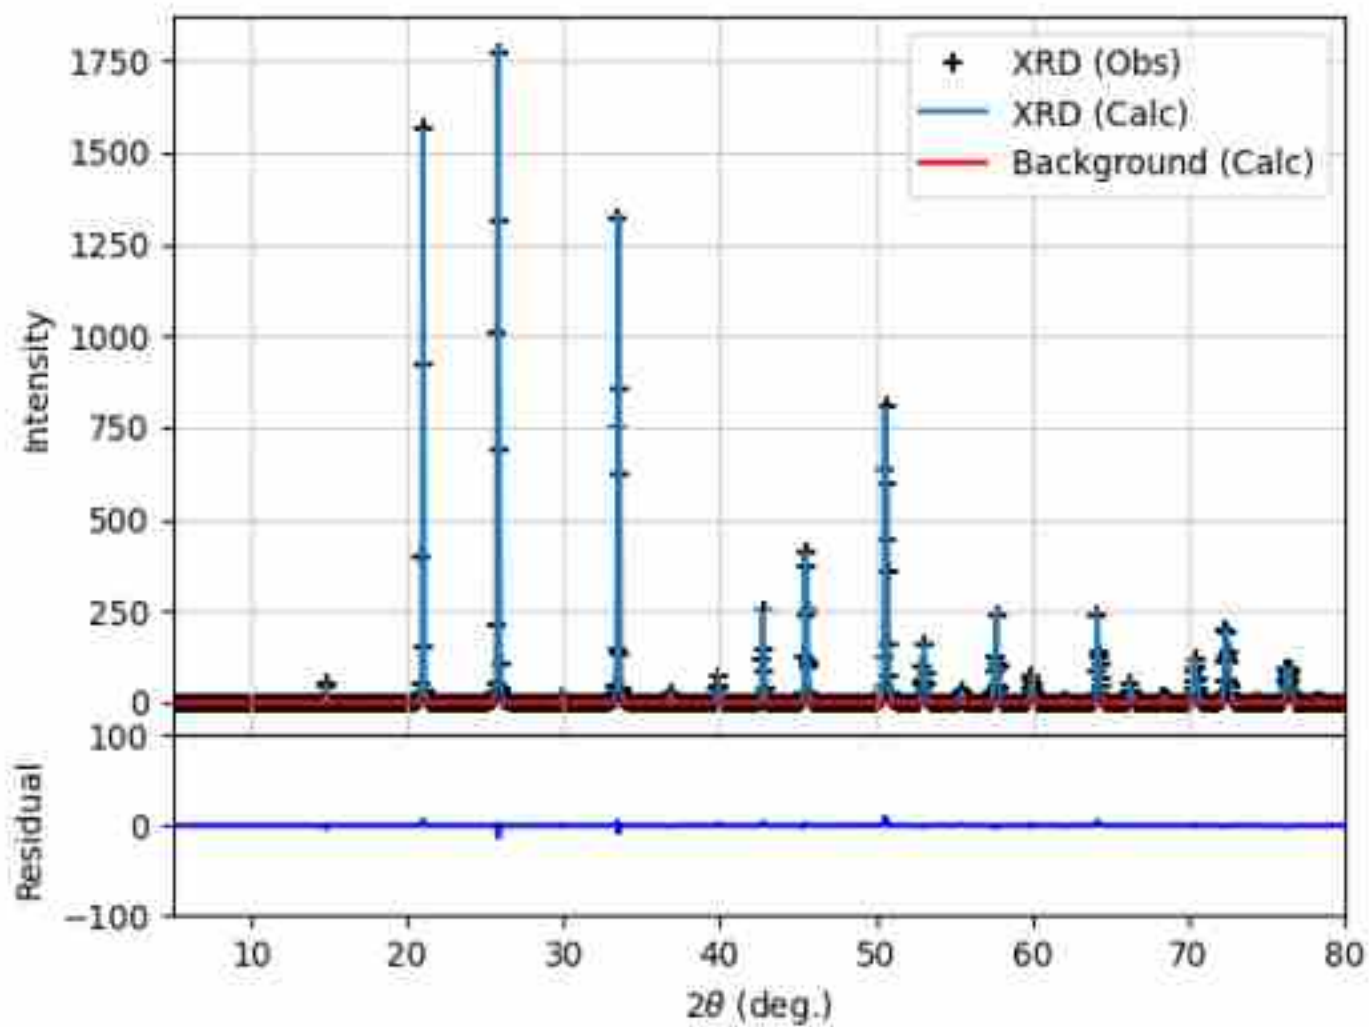

| RMSE before RR | Rwp     | RMSE after RR |
|----------------|---------|---------------|
| 0.475          | 1.24411 | 0.33158       |

# Li<sub>14</sub>I<sub>2</sub>N<sub>4</sub>

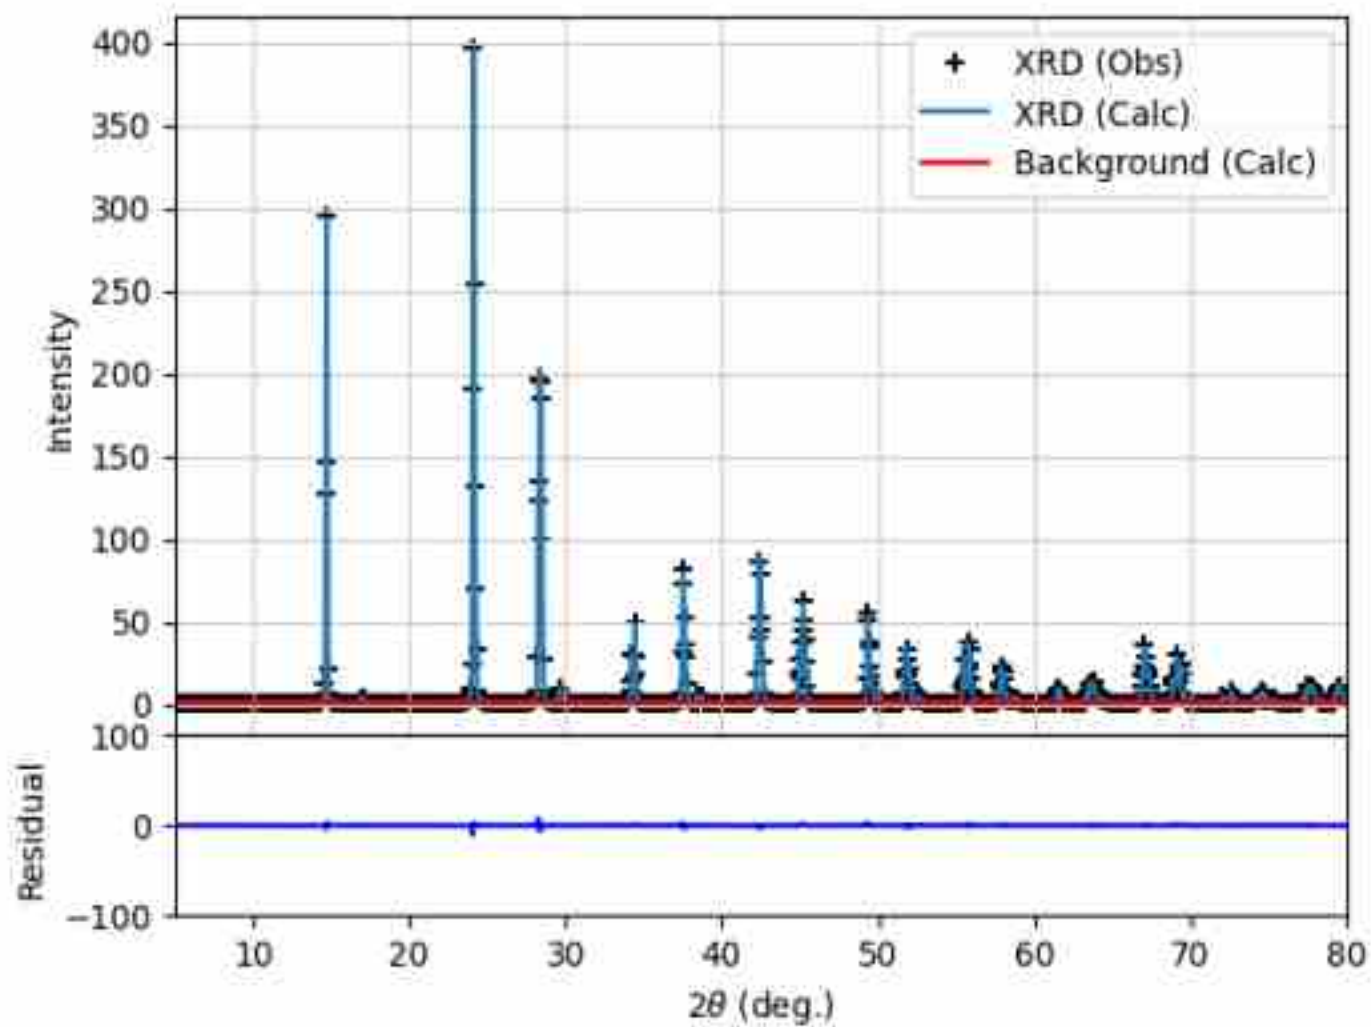

| RMSE before RR | Rwp     | RMSE after RR |
|----------------|---------|---------------|
| 0.475          | 3.06521 | None          |

# Sr6Al4In8

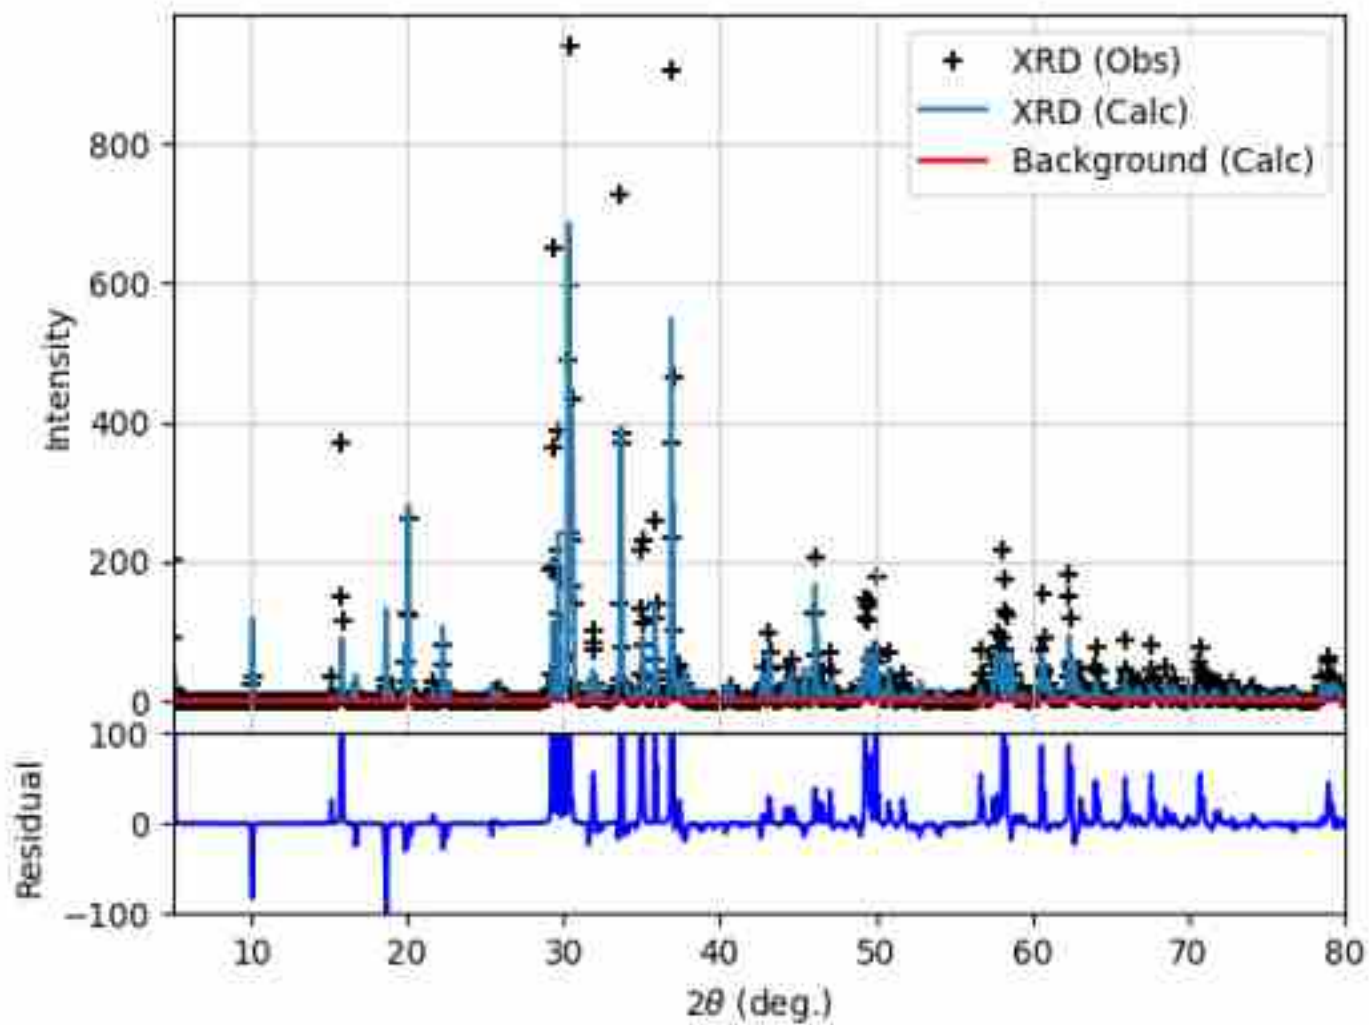

| RMSE before RR | Rwp      | RMSE after RR |
|----------------|----------|---------------|
| 0.475          | 54.48082 | 0.45103       |

# V4O4F12

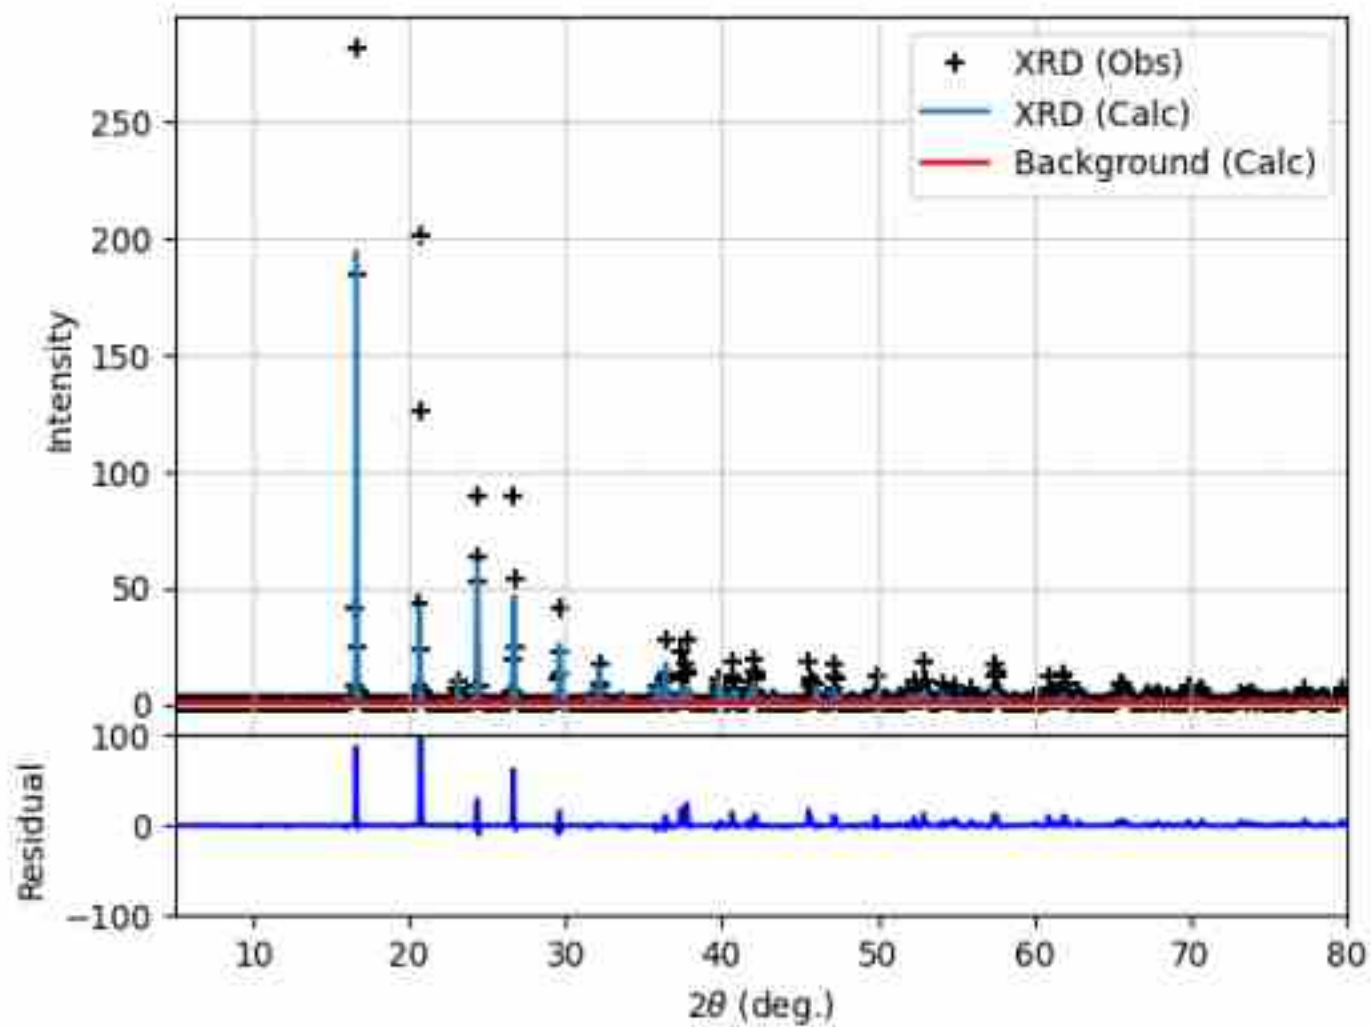

| RMSE before RR | Rwp      | RMSE after RR |
|----------------|----------|---------------|
| 0.475          | 49.61991 | None          |

# V6O8F4

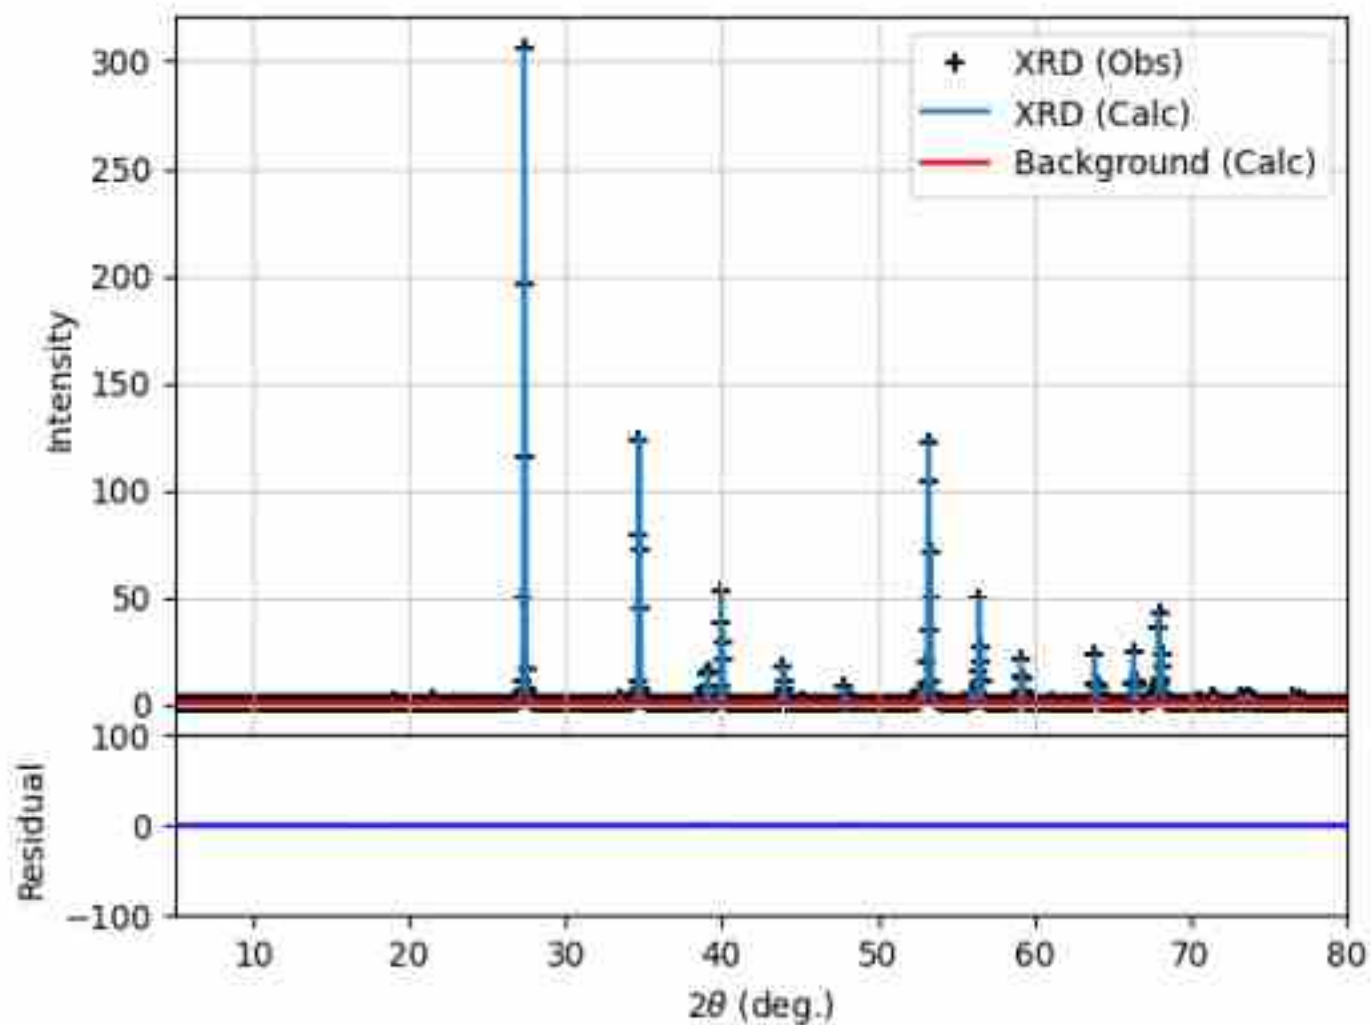

| RMSE before RR | Rwp     | RMSE after RR |
|----------------|---------|---------------|
| 0.475          | 1.02729 | None          |

# As8S12

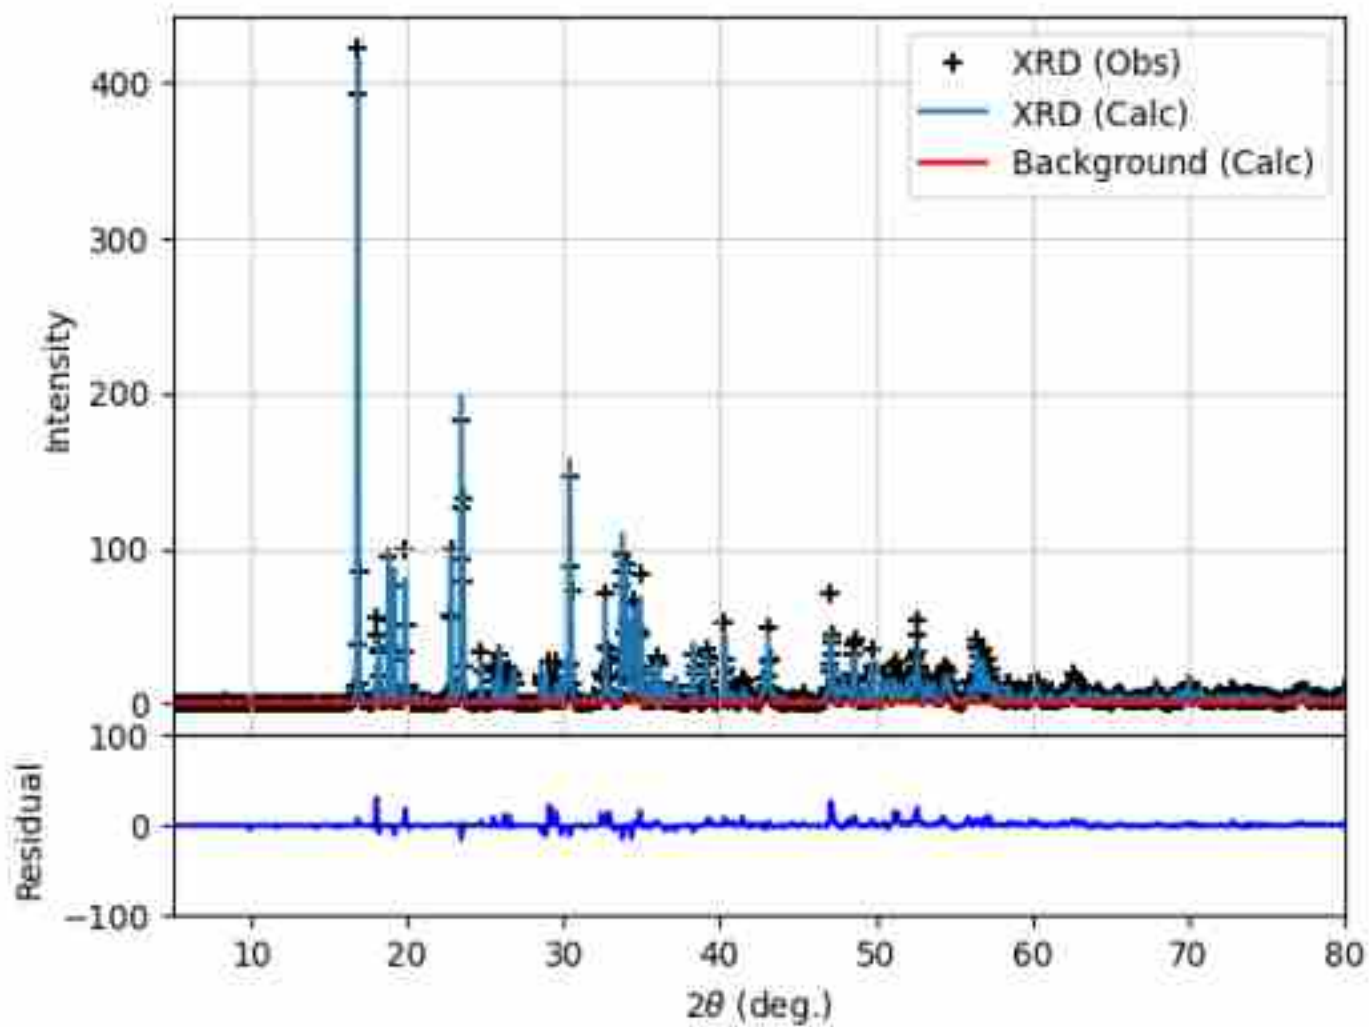

| RMSE before RR | Rwp      | RMSE after RR |
|----------------|----------|---------------|
| 0.477          | 27.02887 | 0.32345       |

# Ca<sub>2</sub>Cu<sub>2</sub>F<sub>10</sub>

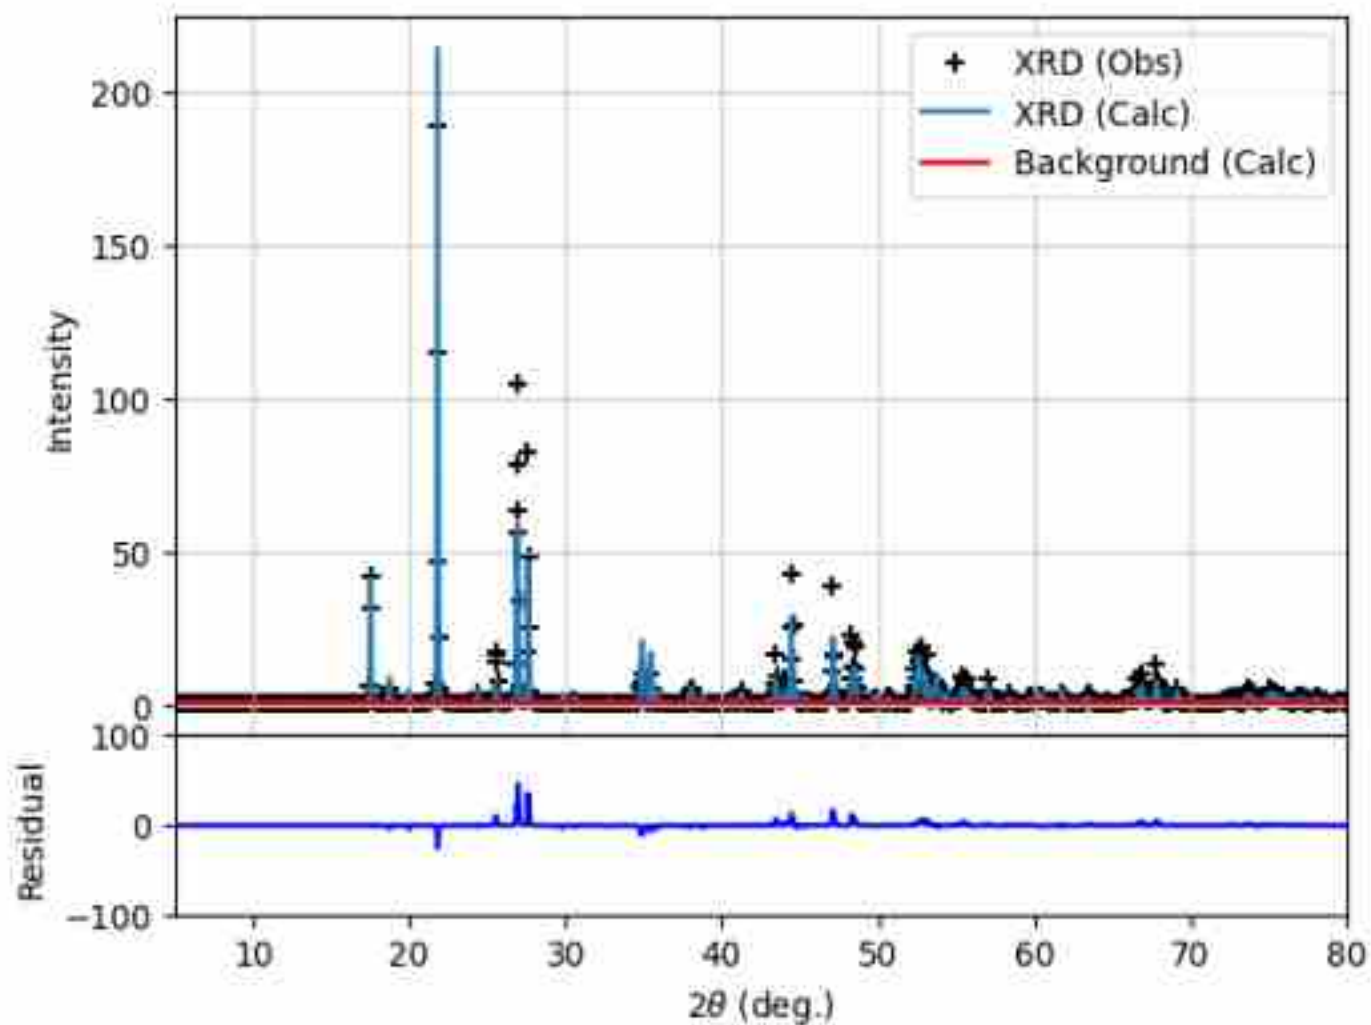

| RMSE before RR | Rwp      | RMSE after RR |
|----------------|----------|---------------|
| 0.477          | 32.81892 | None          |

# Mg1S2

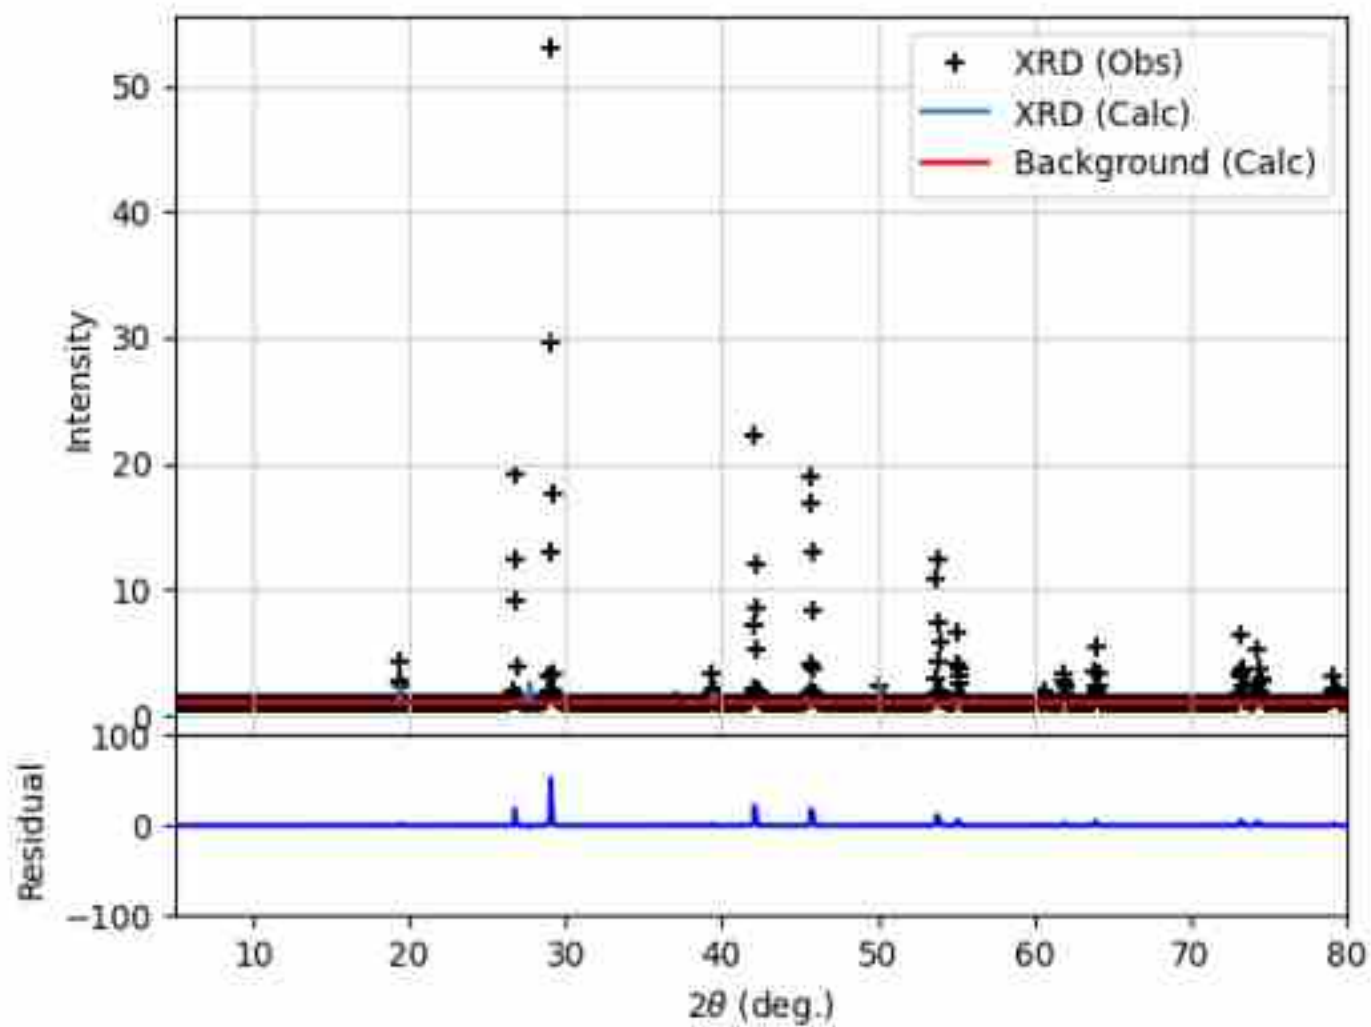

| RMSE before RR | Rwp      | RMSE after RR |
|----------------|----------|---------------|
| 0.477          | 42.17104 | None          |



# V<sub>3</sub>Si<sub>12</sub>Mo<sub>3</sub>

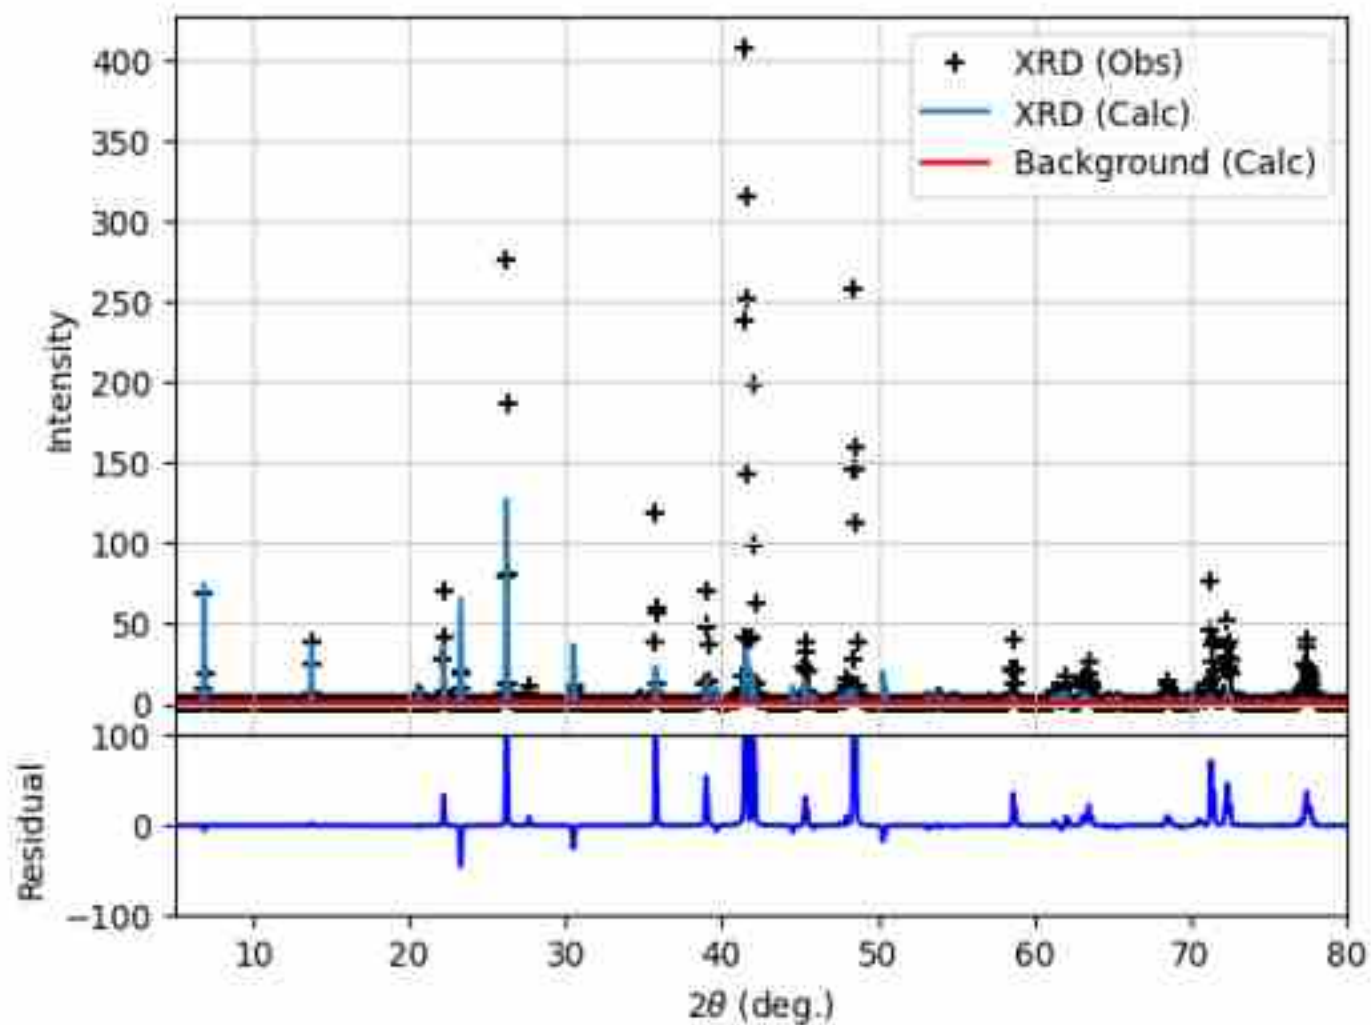

| RMSE before RR | Rwp      | RMSE after RR |
|----------------|----------|---------------|
| 0.477          | 78.42399 | None          |

Cr<sub>2</sub>Sn<sub>8</sub>Au<sub>2</sub>

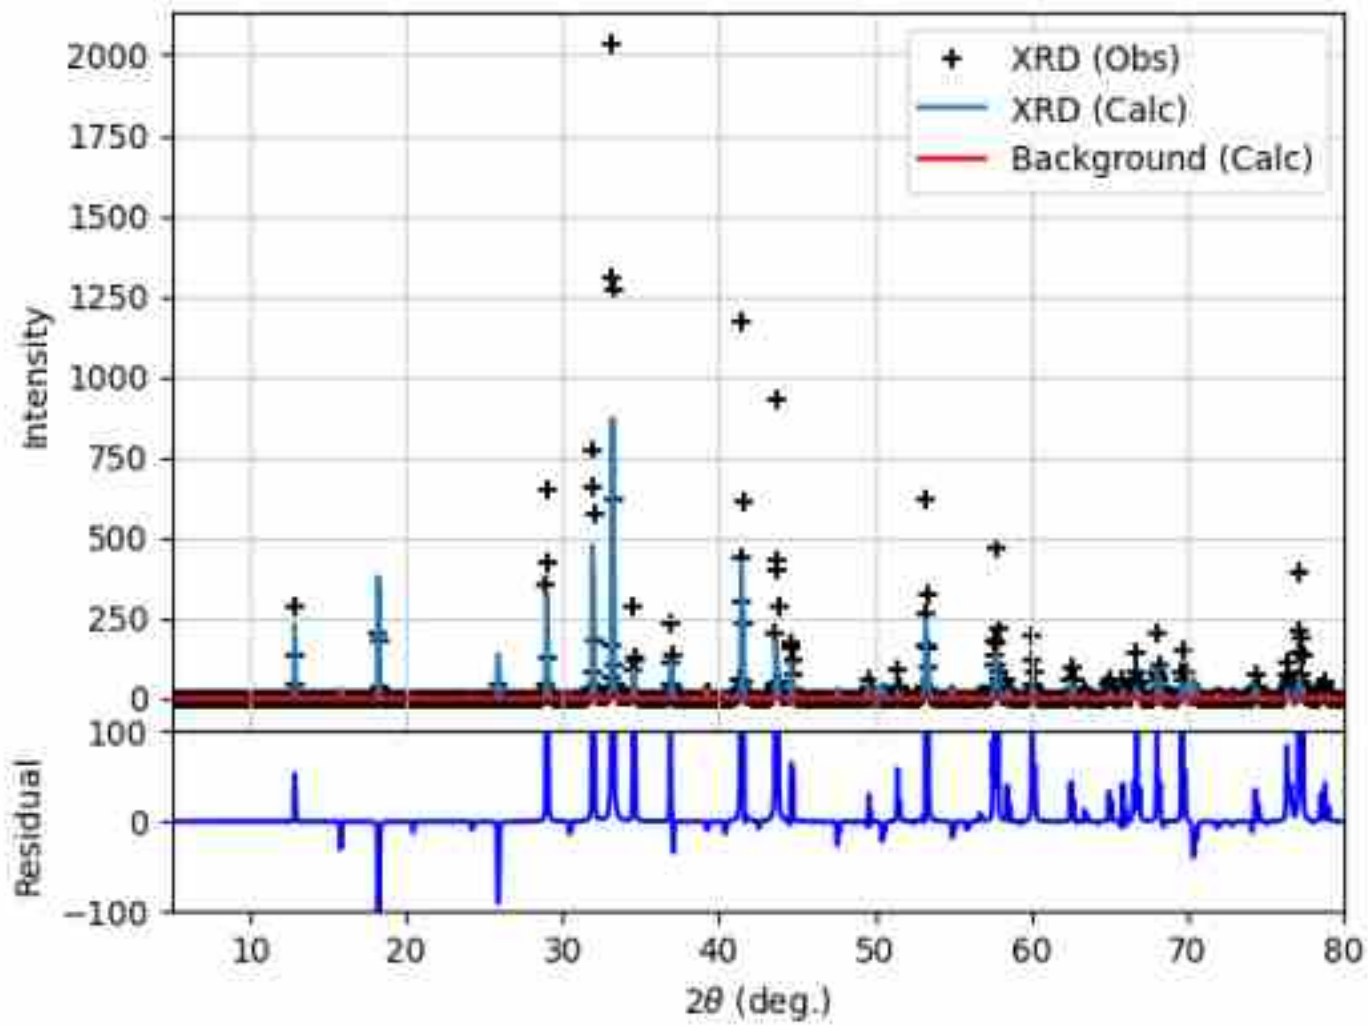

| RMSE before RR | Rwp      | RMSE after RR |
|----------------|----------|---------------|
| 0.478          | 65.60464 | None          |

# Nb<sub>8</sub>Se<sub>4</sub>

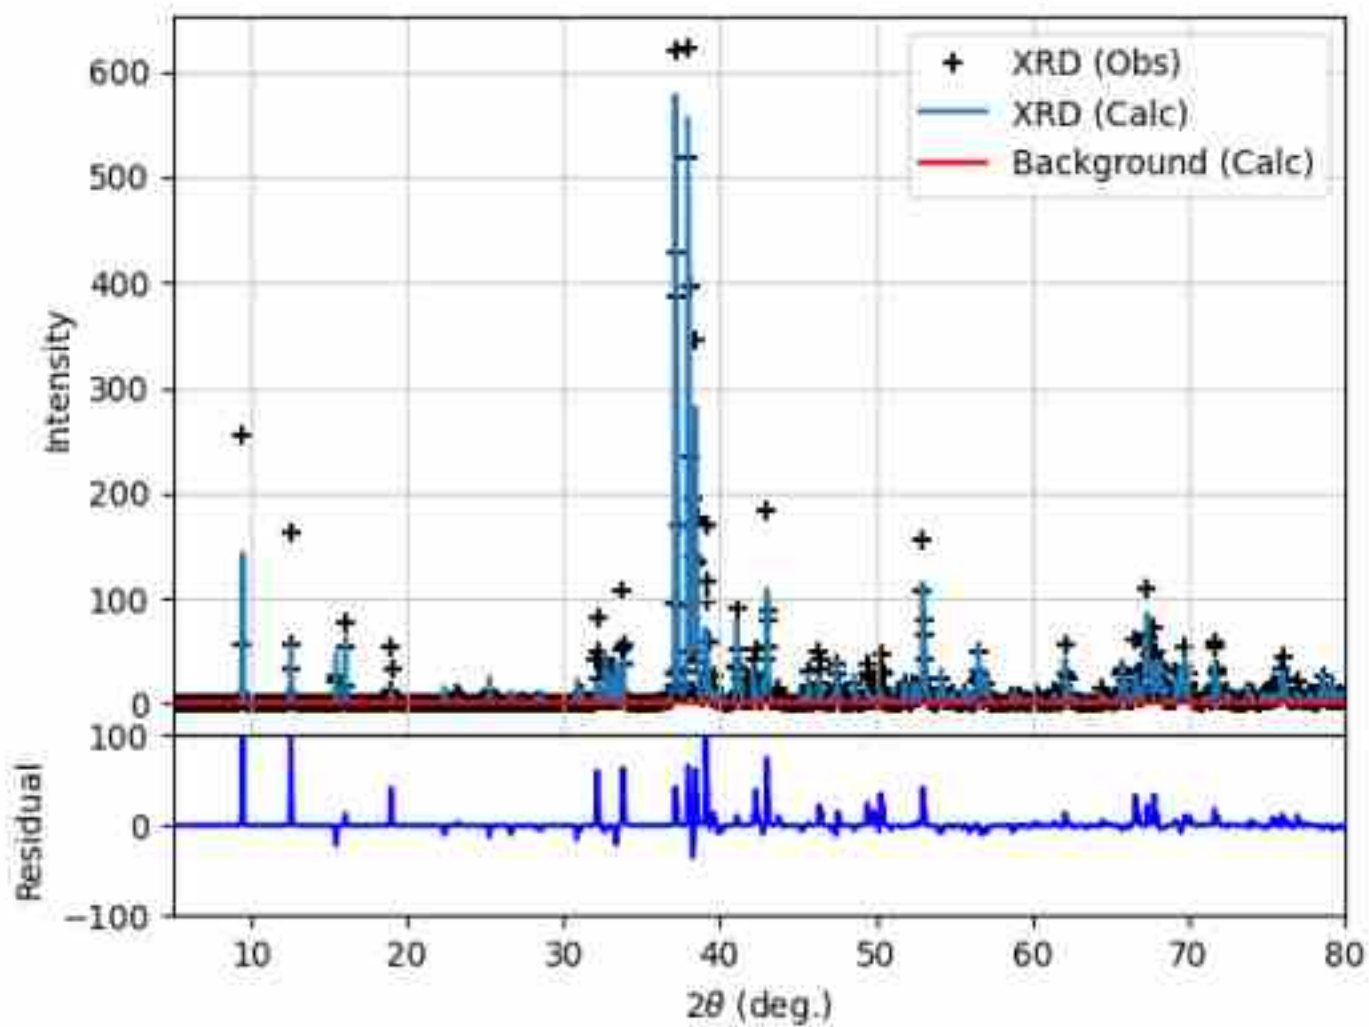

| RMSE before RR | Rwp      | RMSE after RR |
|----------------|----------|---------------|
| 0.478          | 38.35288 | None          |

# Mg<sub>1</sub>In<sub>2</sub>Te<sub>4</sub>

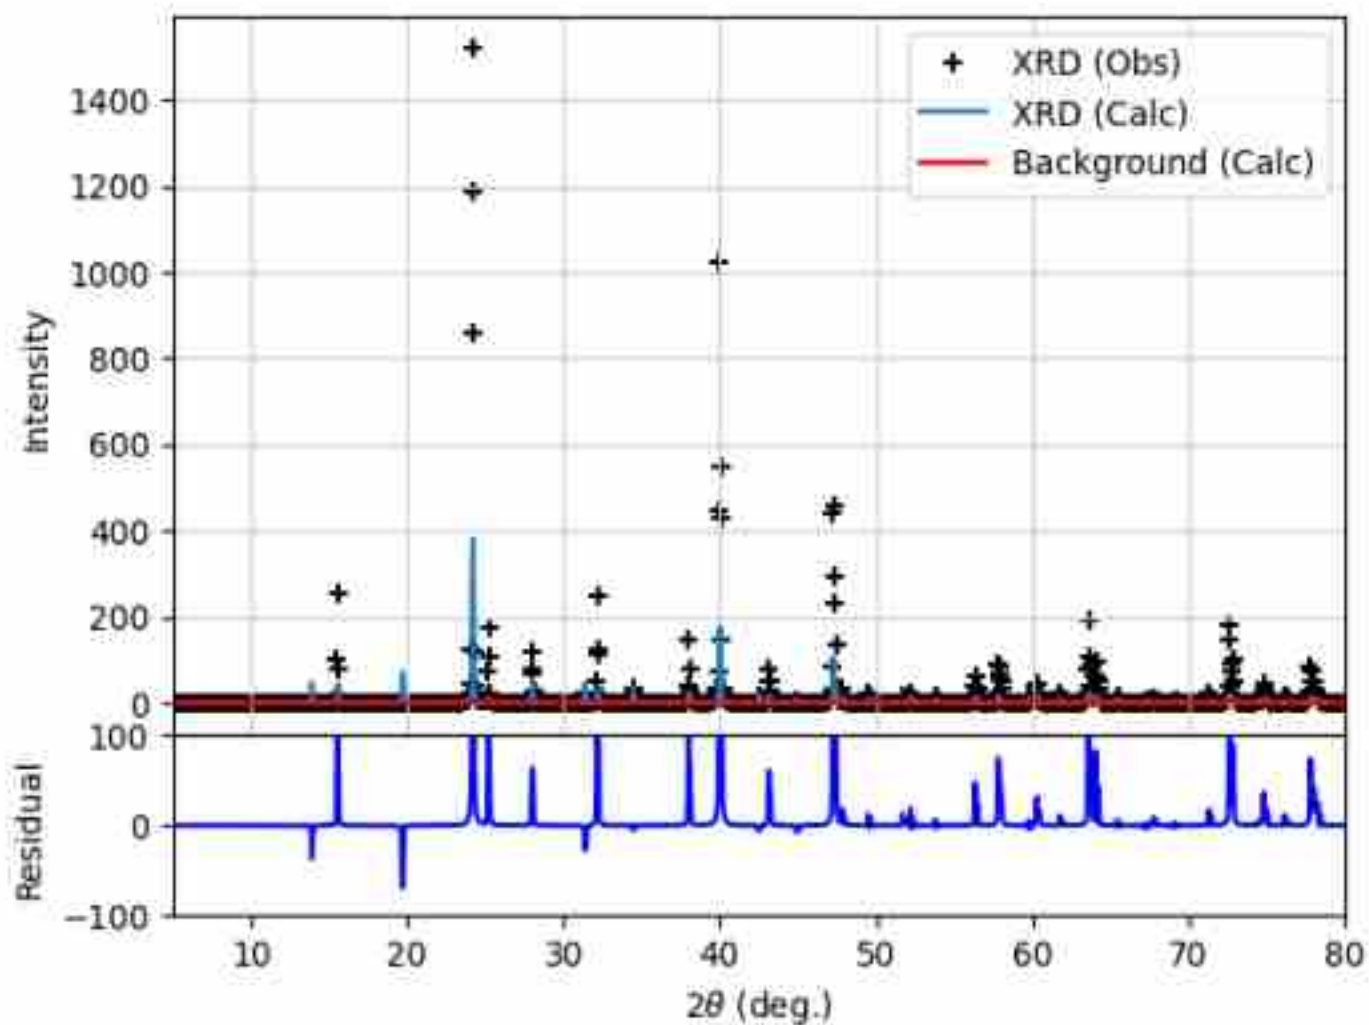

| RMSE before RR | Rwp      | RMSE after RR |
|----------------|----------|---------------|
| 0.479          | 87.22059 | 0.47807       |

# U<sub>2</sub>Nb<sub>4</sub>O<sub>14</sub>

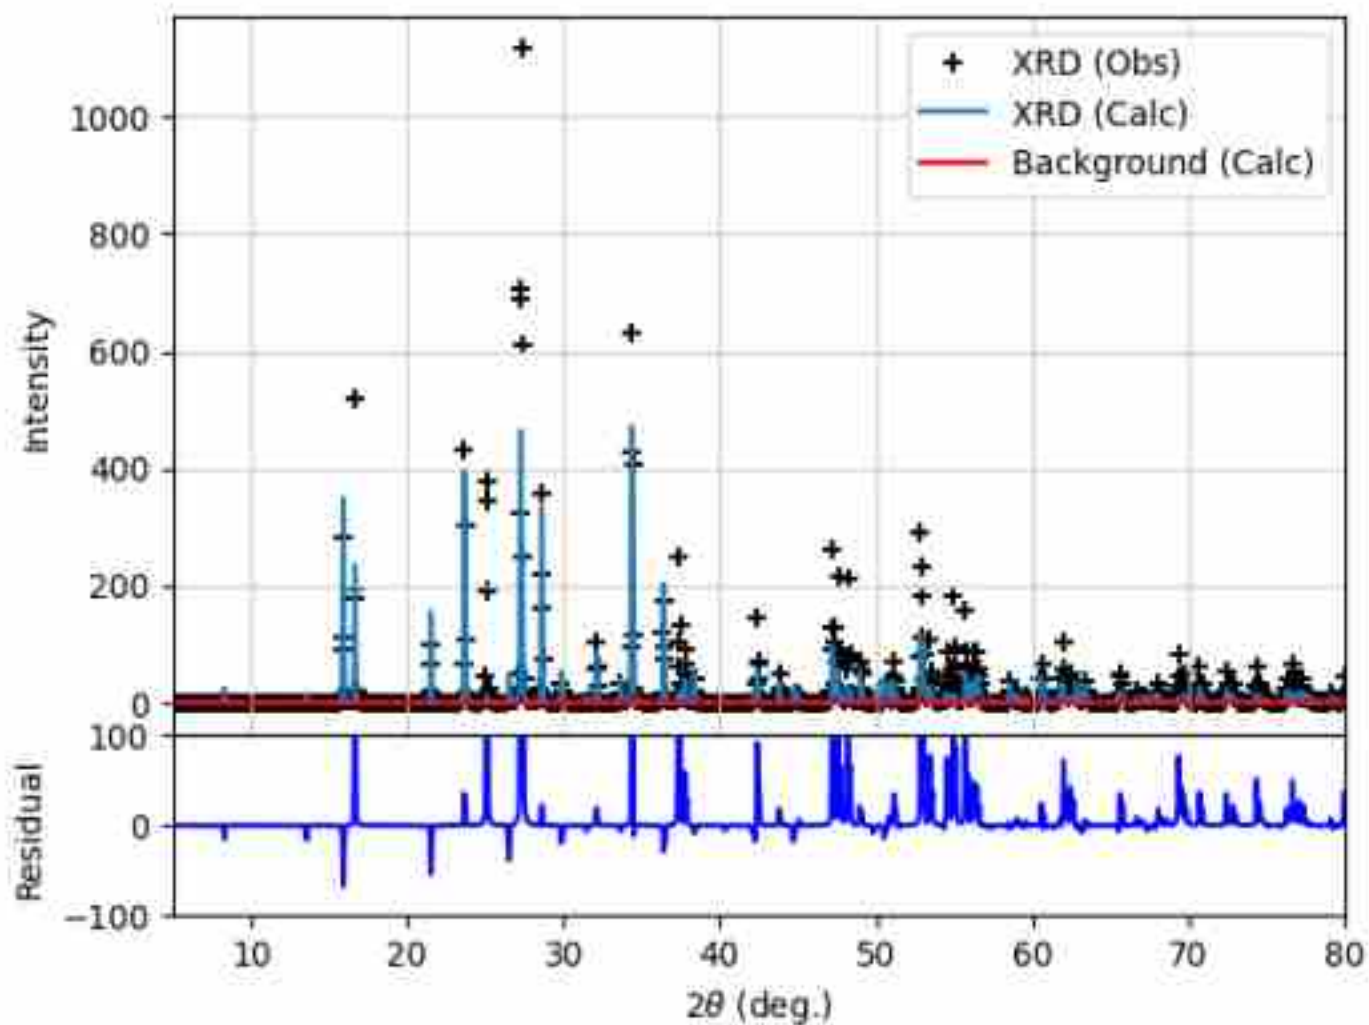

| RMSE before RR | Rwp      | RMSE after RR |
|----------------|----------|---------------|
| 0.481          | 59.67691 | None          |

# Ce<sub>2</sub>Sn<sub>8</sub>Pd<sub>4</sub>

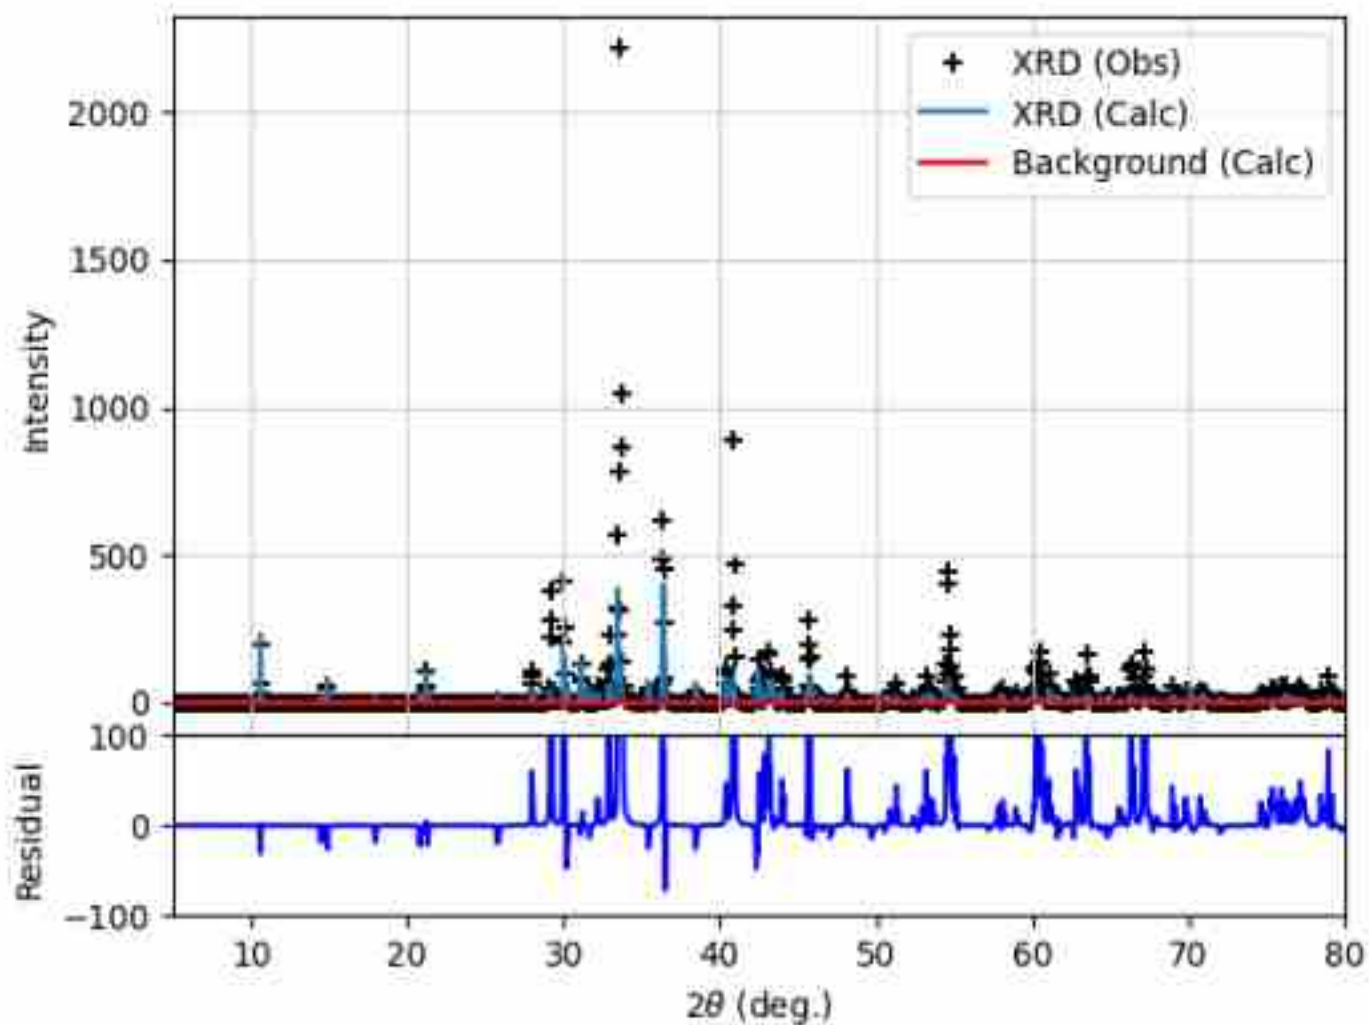

| RMSE before RR | Rwp      | RMSE after RR |
|----------------|----------|---------------|
| 0.482          | 75.98963 | 0.43553       |

# K4Na2As2

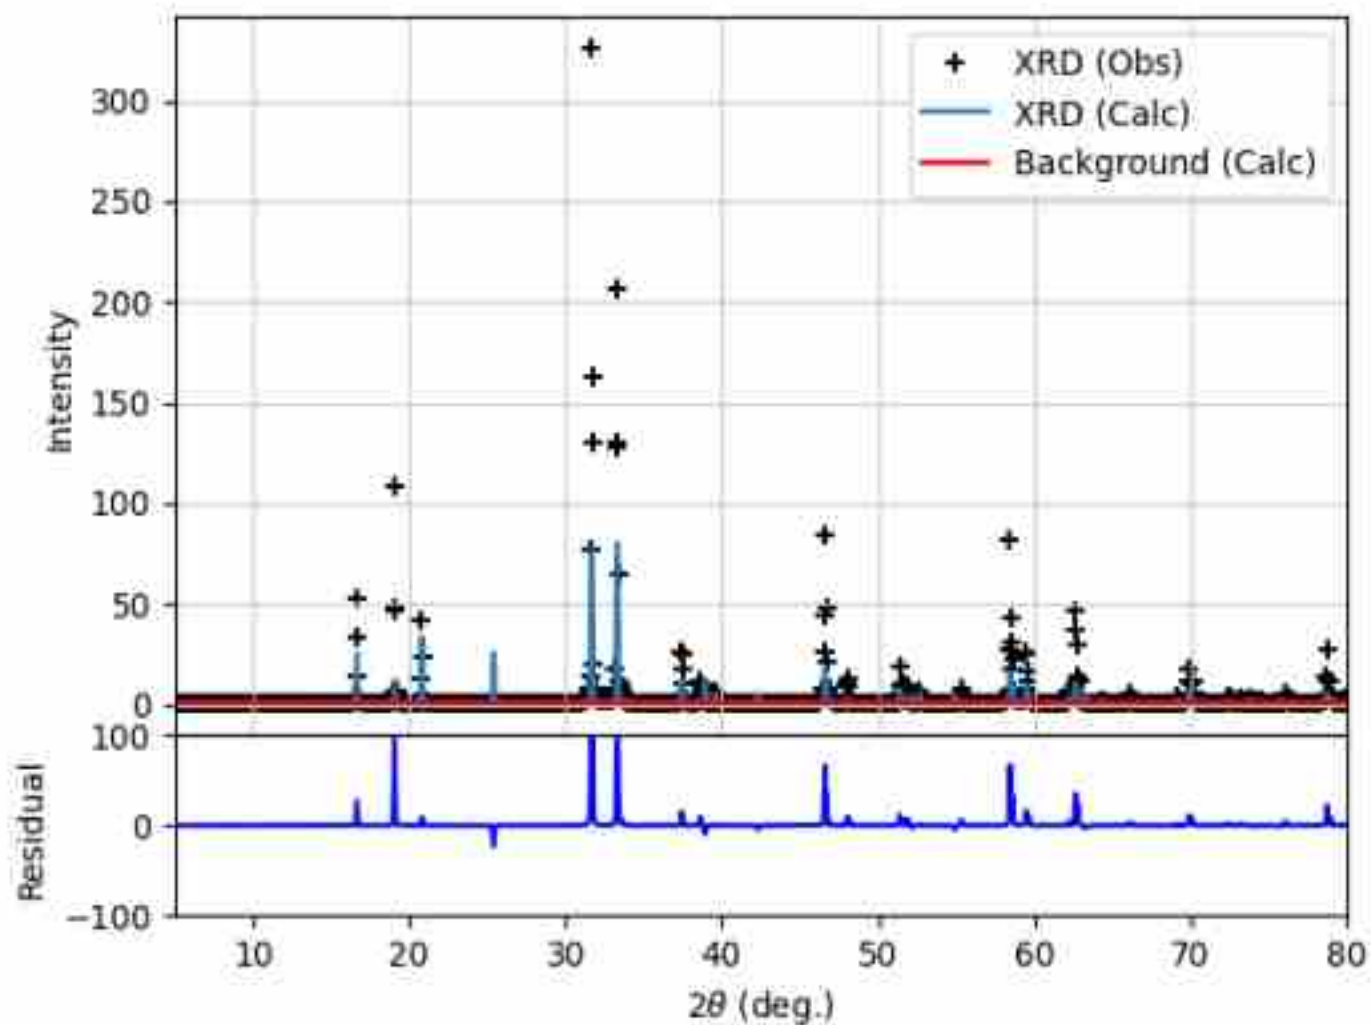

| RMSE before RR | Rwp     | RMSE after RR |
|----------------|---------|---------------|
| 0.482          | 65.1952 | 0.48003       |



# Pr<sub>4</sub>Mg<sub>7</sub>Ge<sub>6</sub>

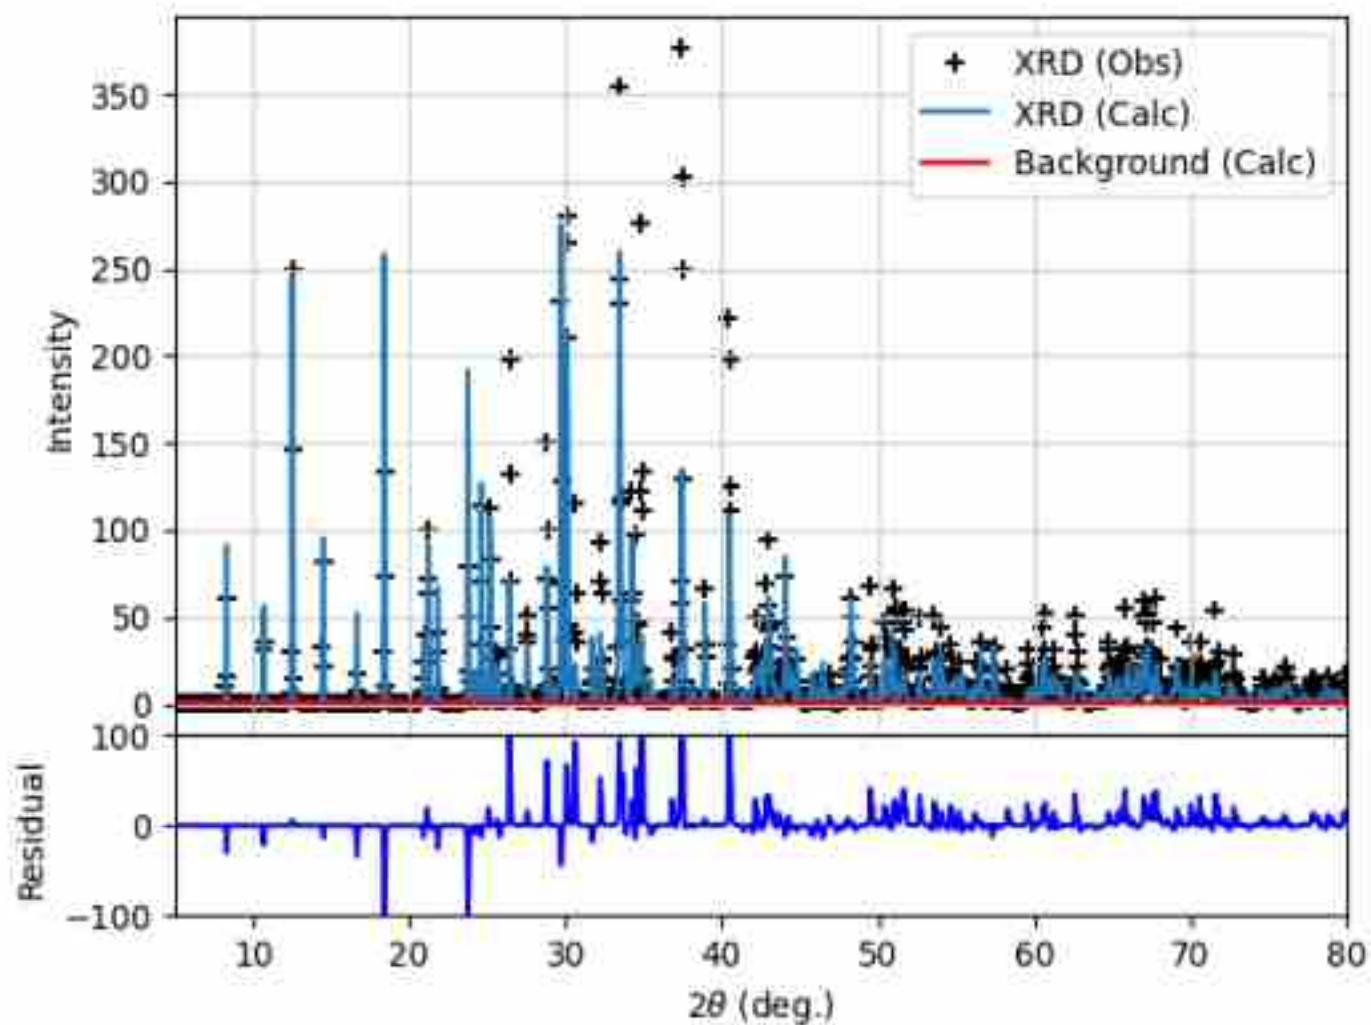

| RMSE before RR | Rwp      | RMSE after RR |
|----------------|----------|---------------|
| 0.482          | 51.11924 | None          |



# Zr<sub>2</sub>B<sub>1</sub>Ir<sub>6</sub>

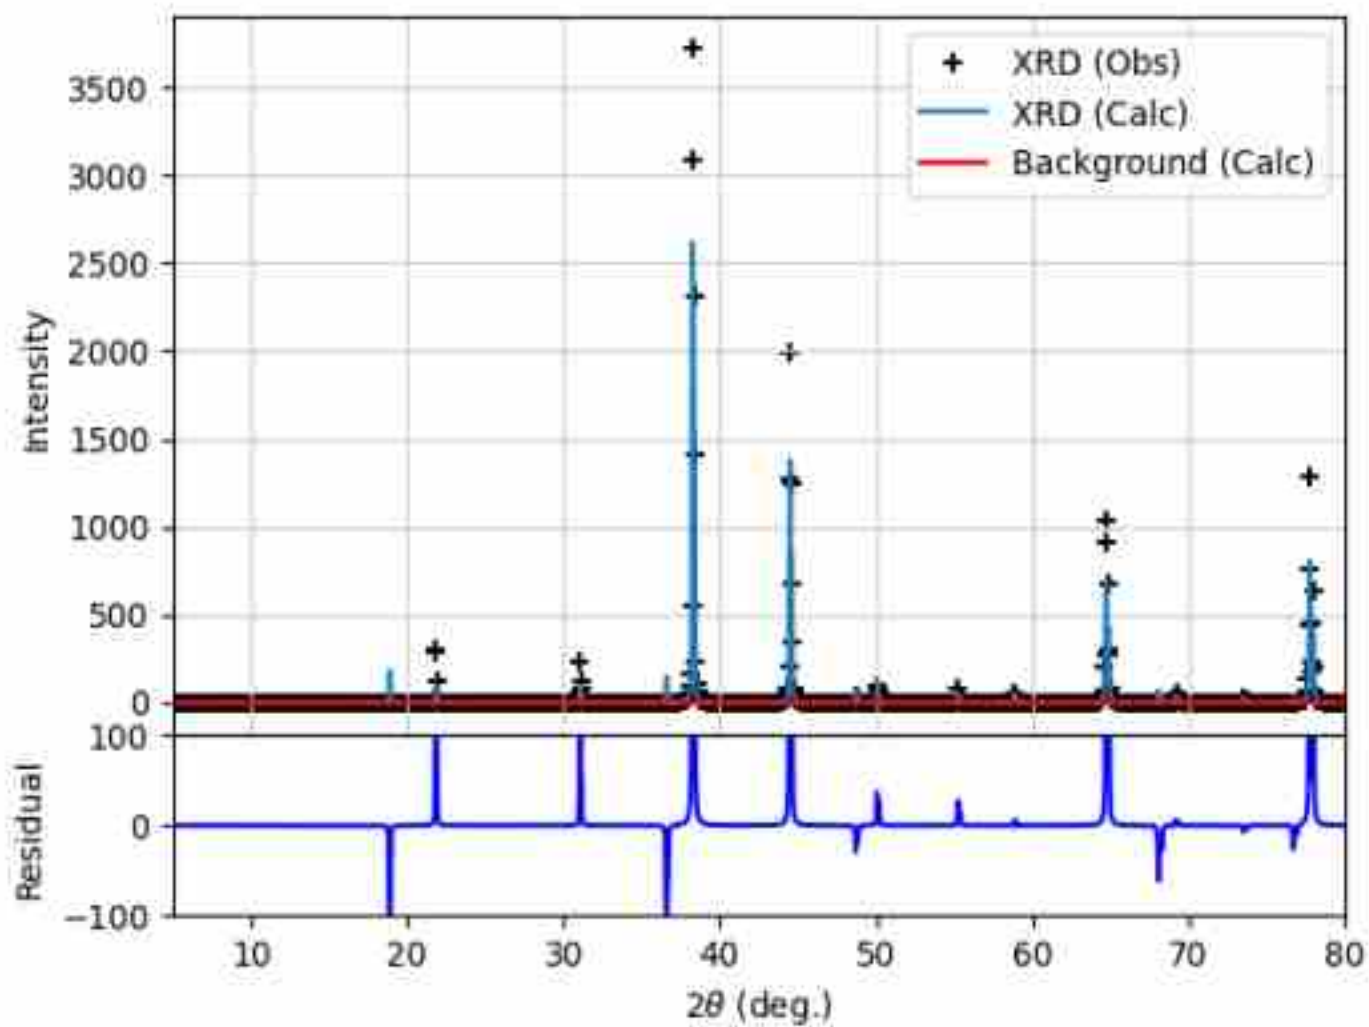

| RMSE before RR | Rwp      | RMSE after RR |
|----------------|----------|---------------|
| 0.483          | 62.19813 | 0.49439       |

# B12C3

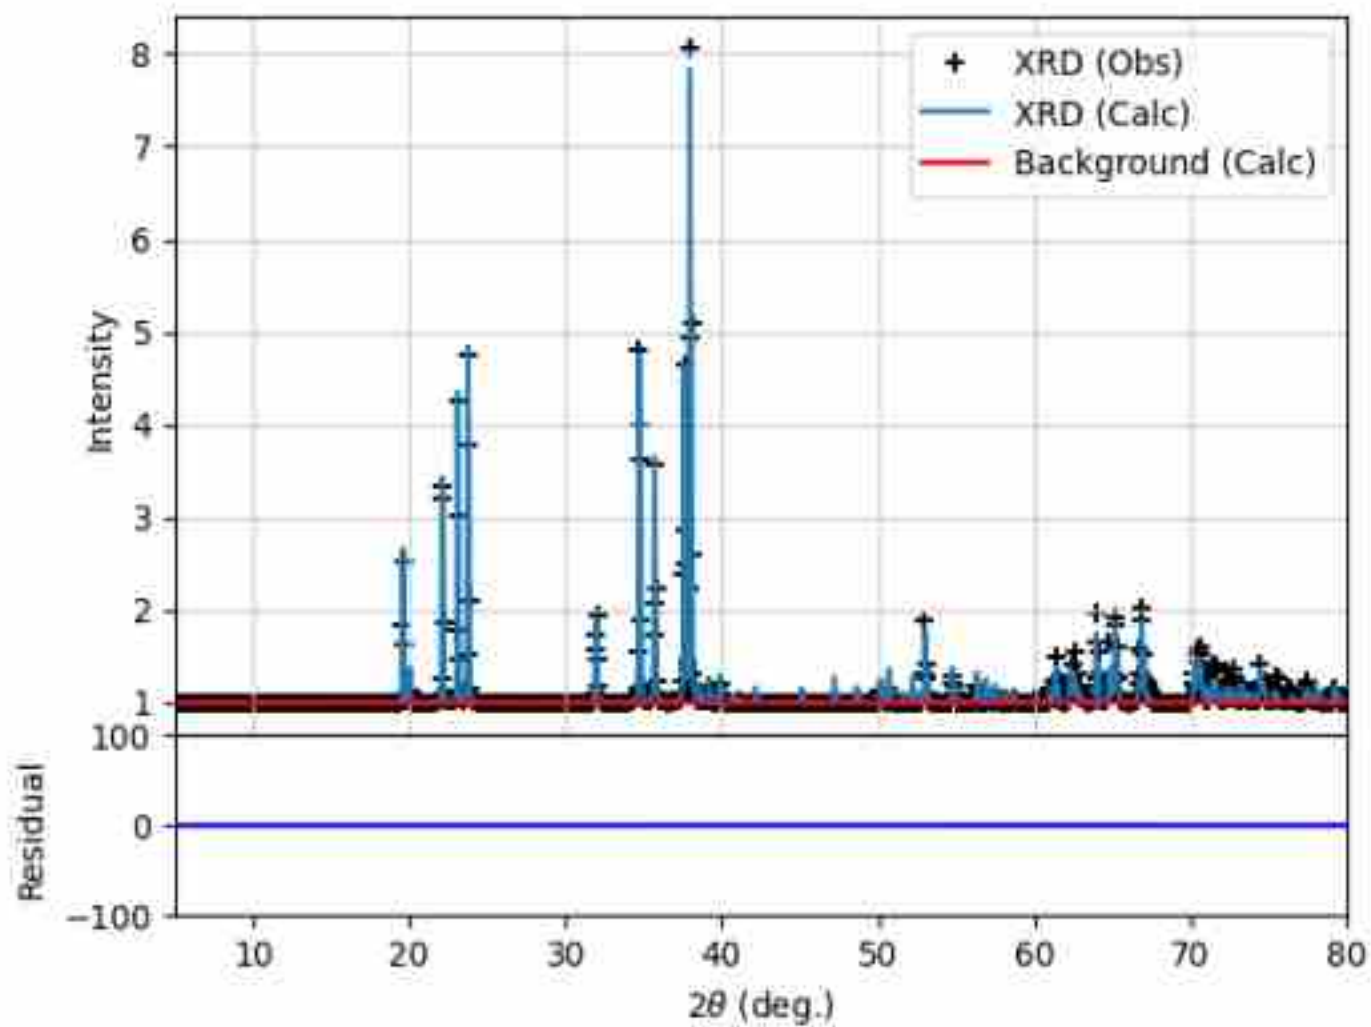

| RMSE before RR | Rwp     | RMSE after RR |
|----------------|---------|---------------|
| 0.484          | 3.36634 | None          |

# Li<sub>2</sub>Mn<sub>4</sub>F<sub>14</sub>

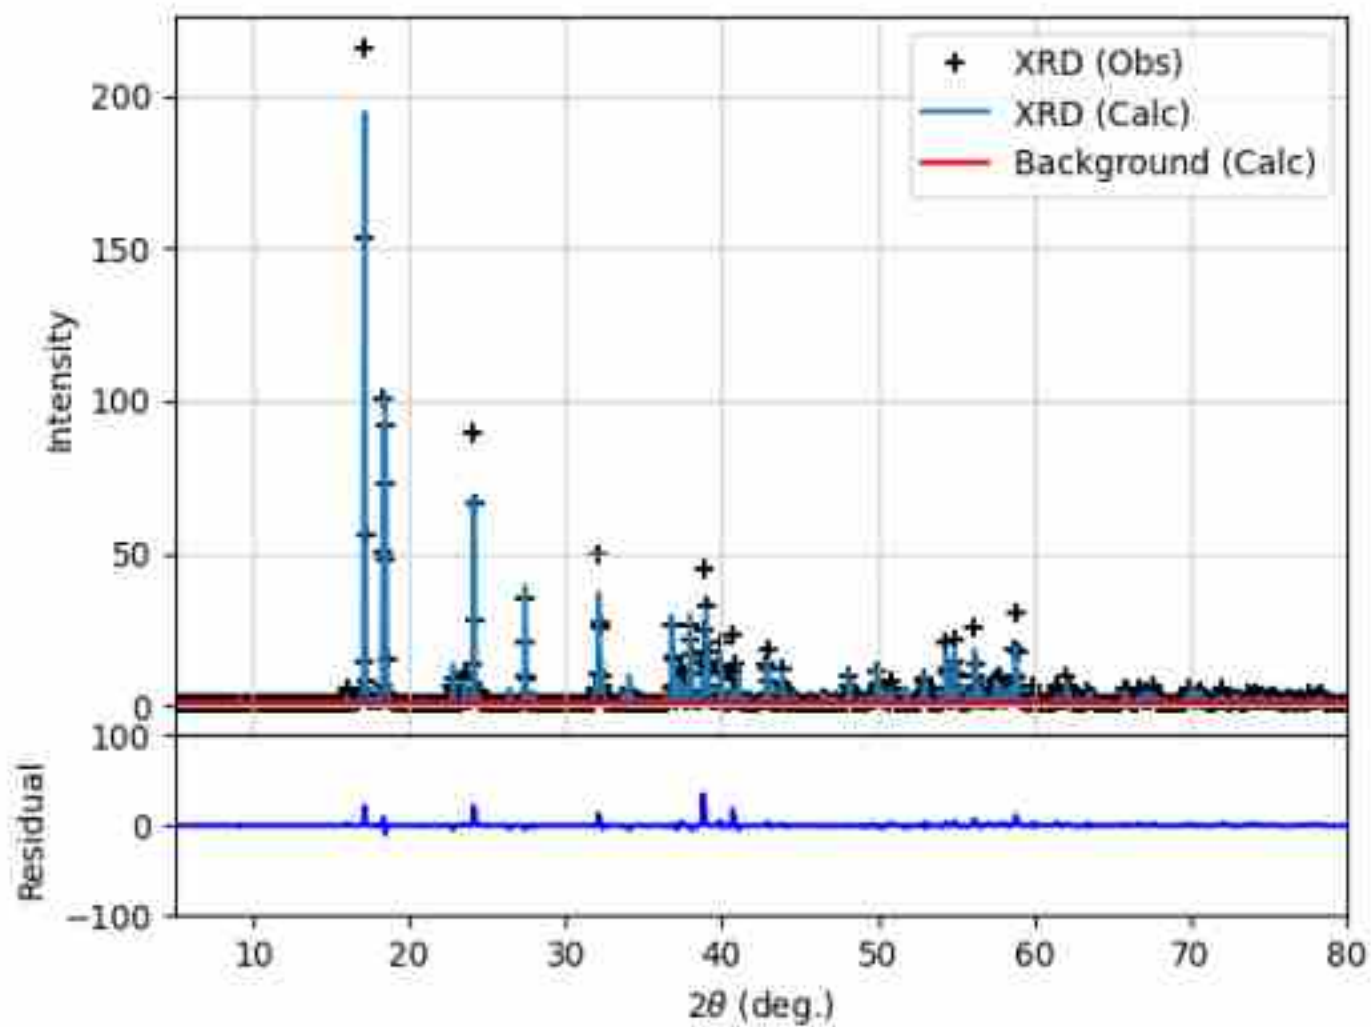

| RMSE before RR | Rwp      | RMSE after RR |
|----------------|----------|---------------|
| 0.484          | 27.37533 | None          |

# V<sub>2</sub>Te<sub>2</sub>O<sub>7</sub>F<sub>2</sub>

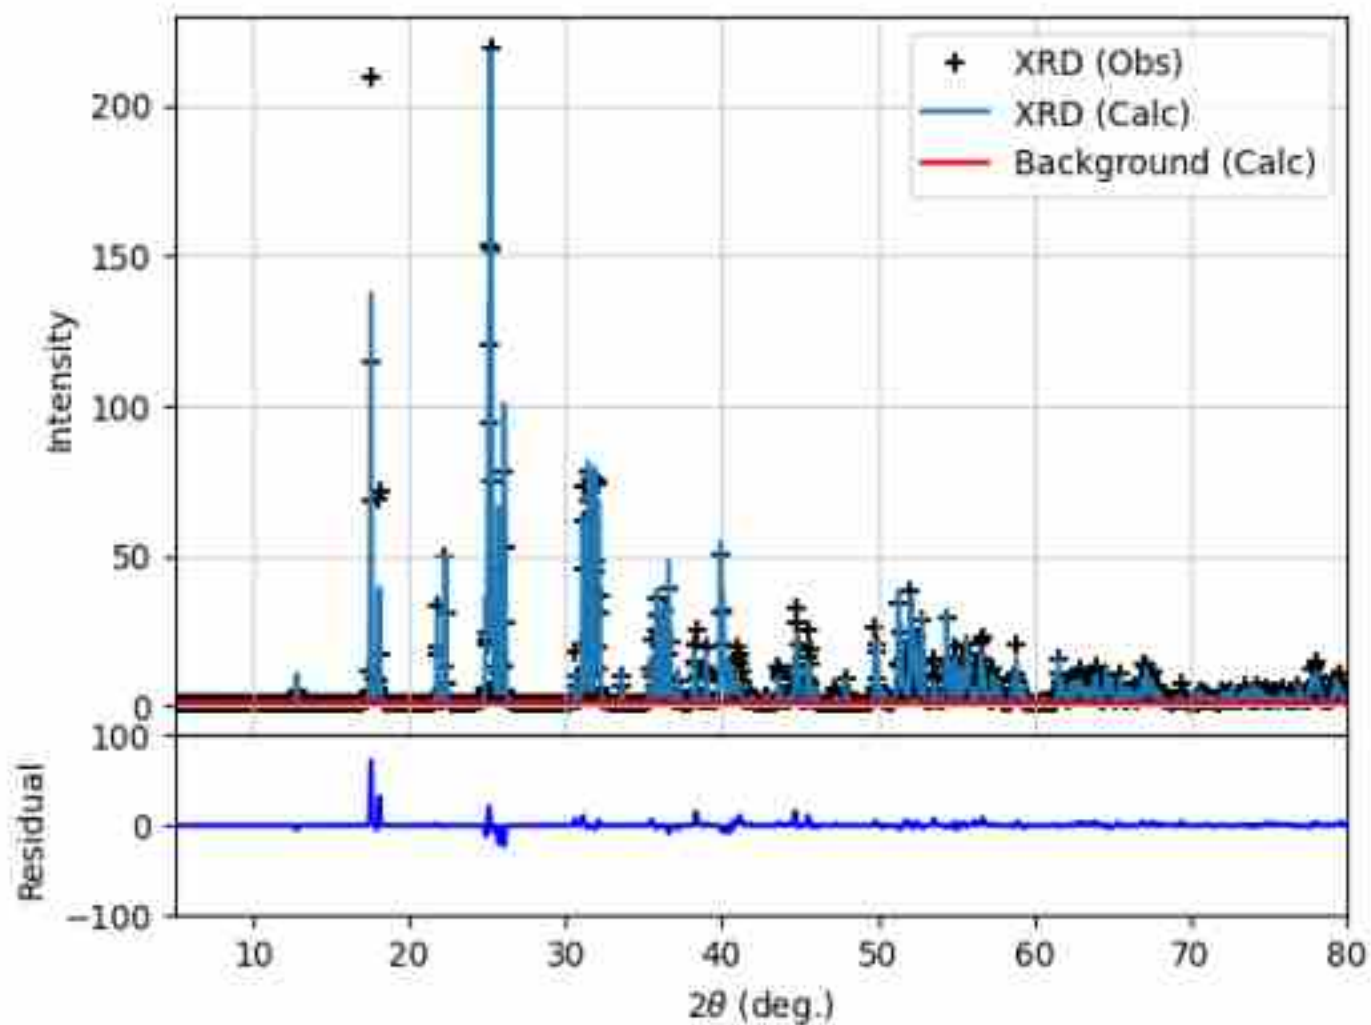

| RMSE before RR | Rwp      | RMSE after RR |
|----------------|----------|---------------|
| 0.484          | 23.97818 | None          |

# W2O2F8

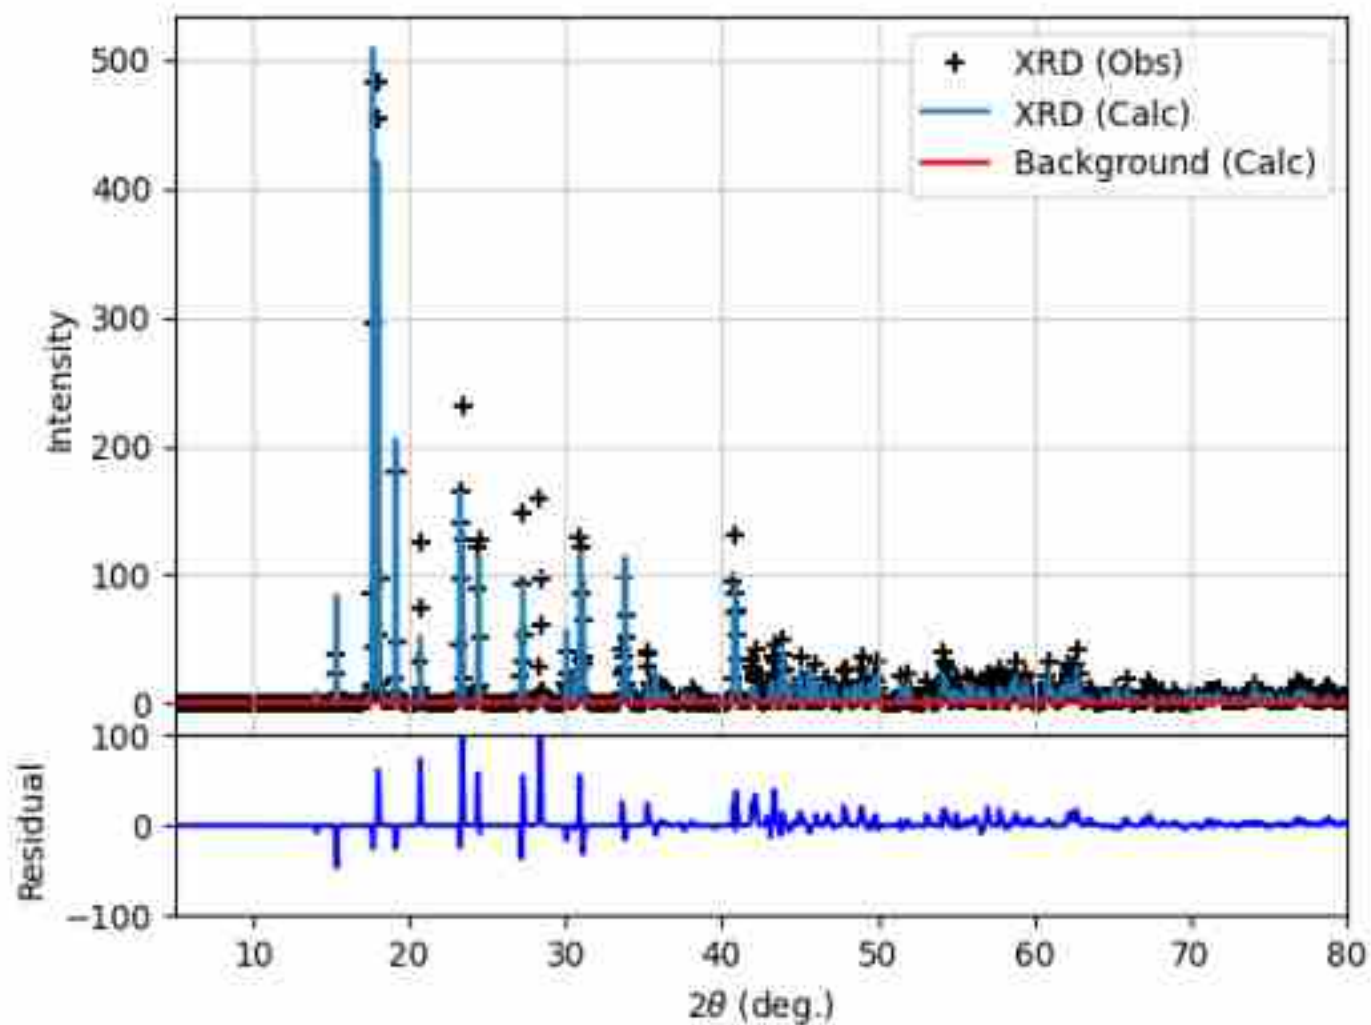

| RMSE before RR | Rwp      | RMSE after RR |
|----------------|----------|---------------|
| 0.484          | 42.79014 | None          |

# V6O8F4

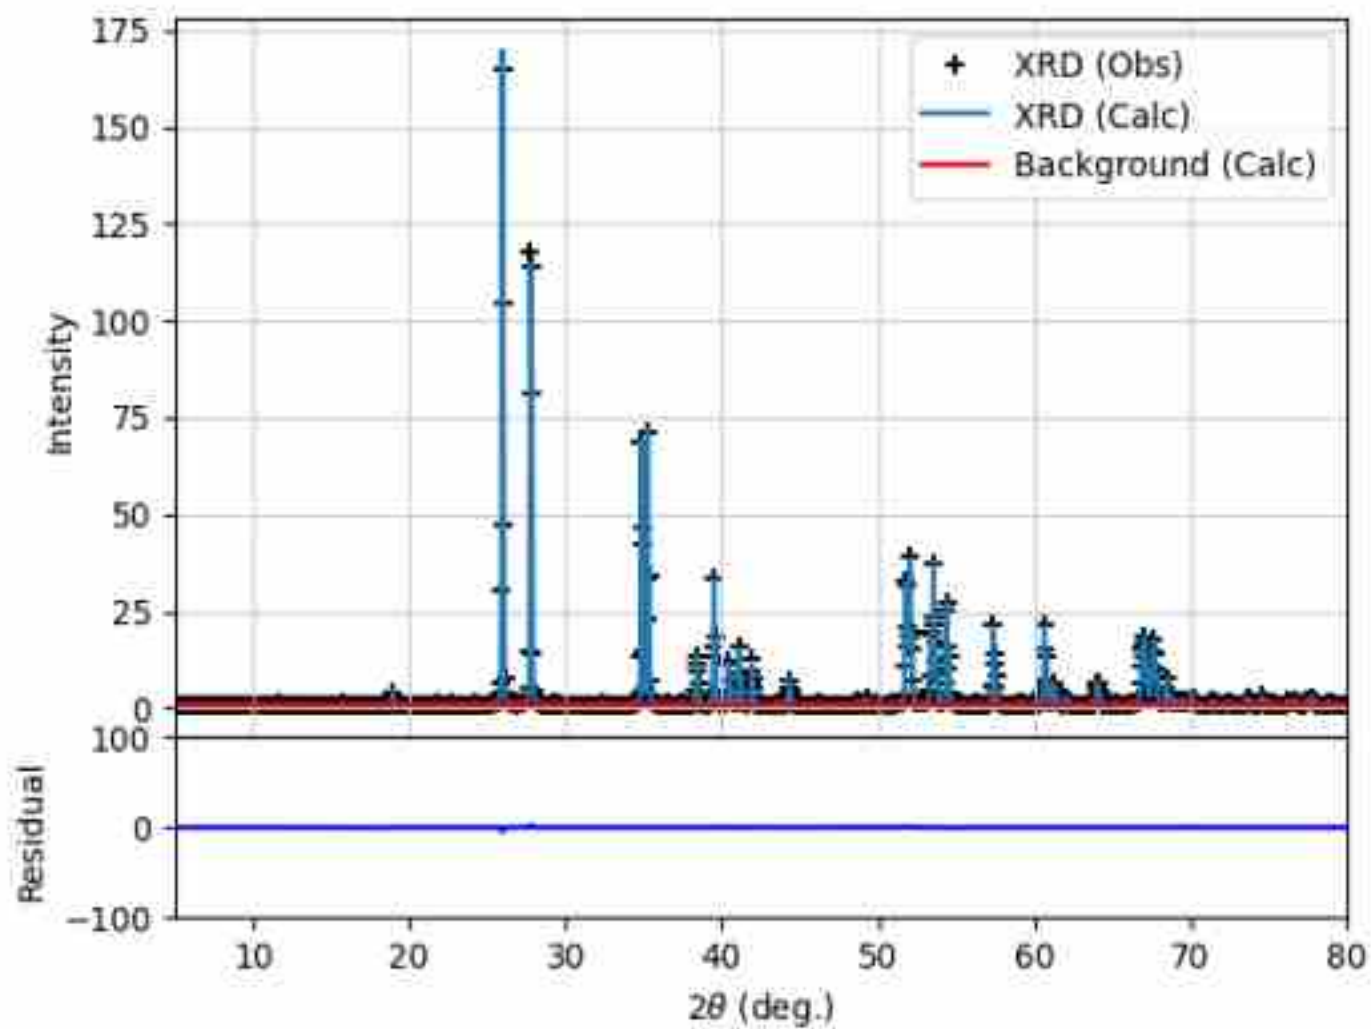

| RMSE before RR | Rwp     | RMSE after RR |
|----------------|---------|---------------|
| 0.486          | 1.82161 | 0.4034        |

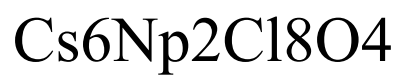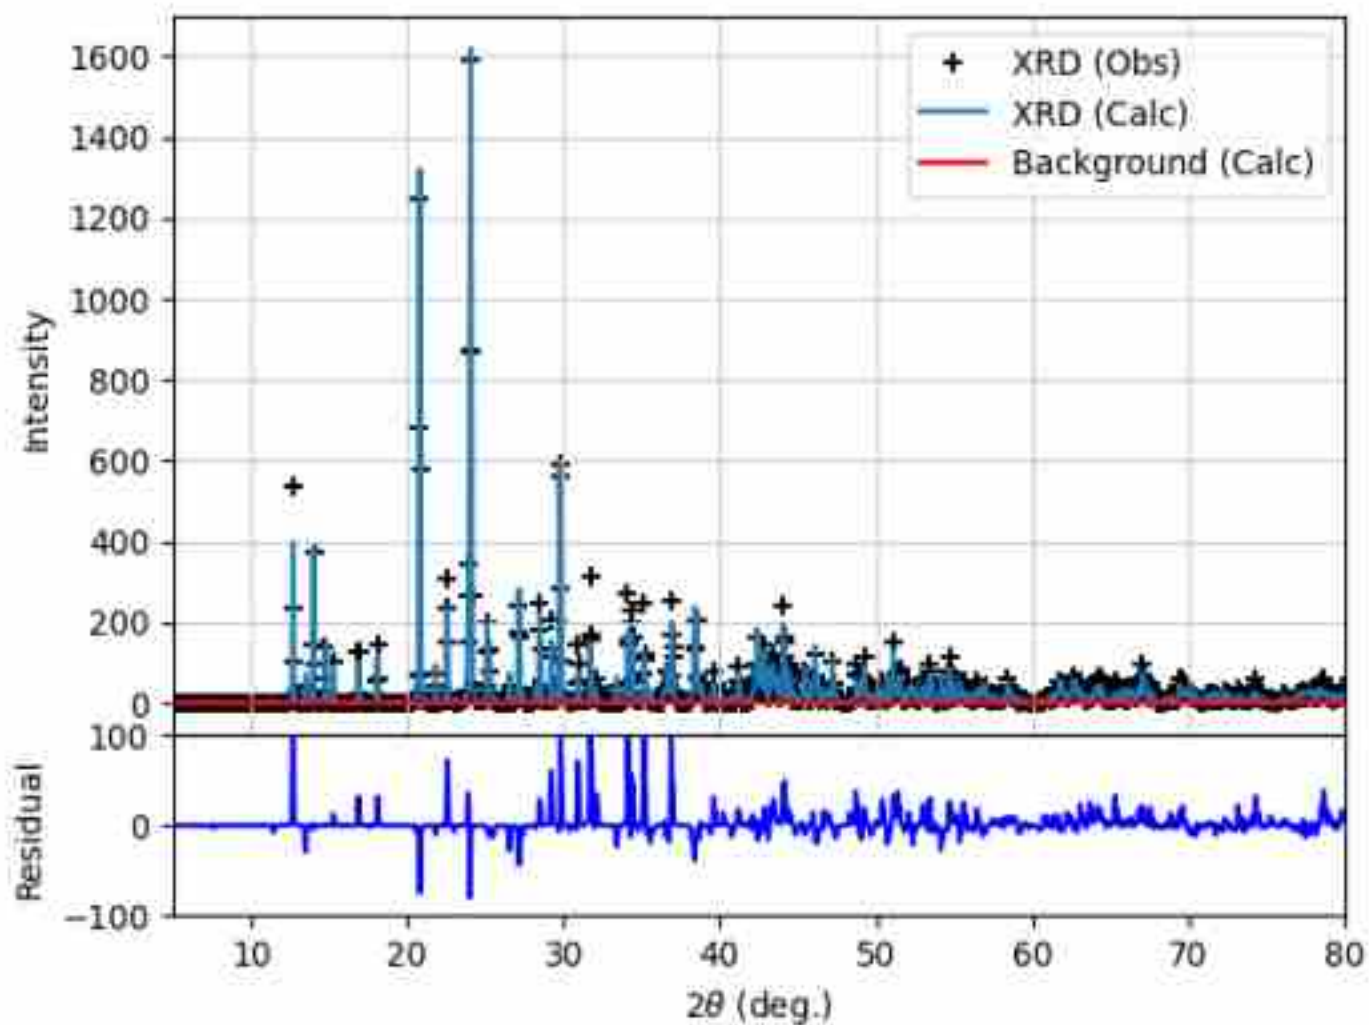

| RMSE before RR | Rwp      | RMSE after RR |
|----------------|----------|---------------|
| 0.487          | 29.39218 | None          |

# Gd<sub>3</sub>Zn<sub>5</sub>Ge<sub>1</sub>

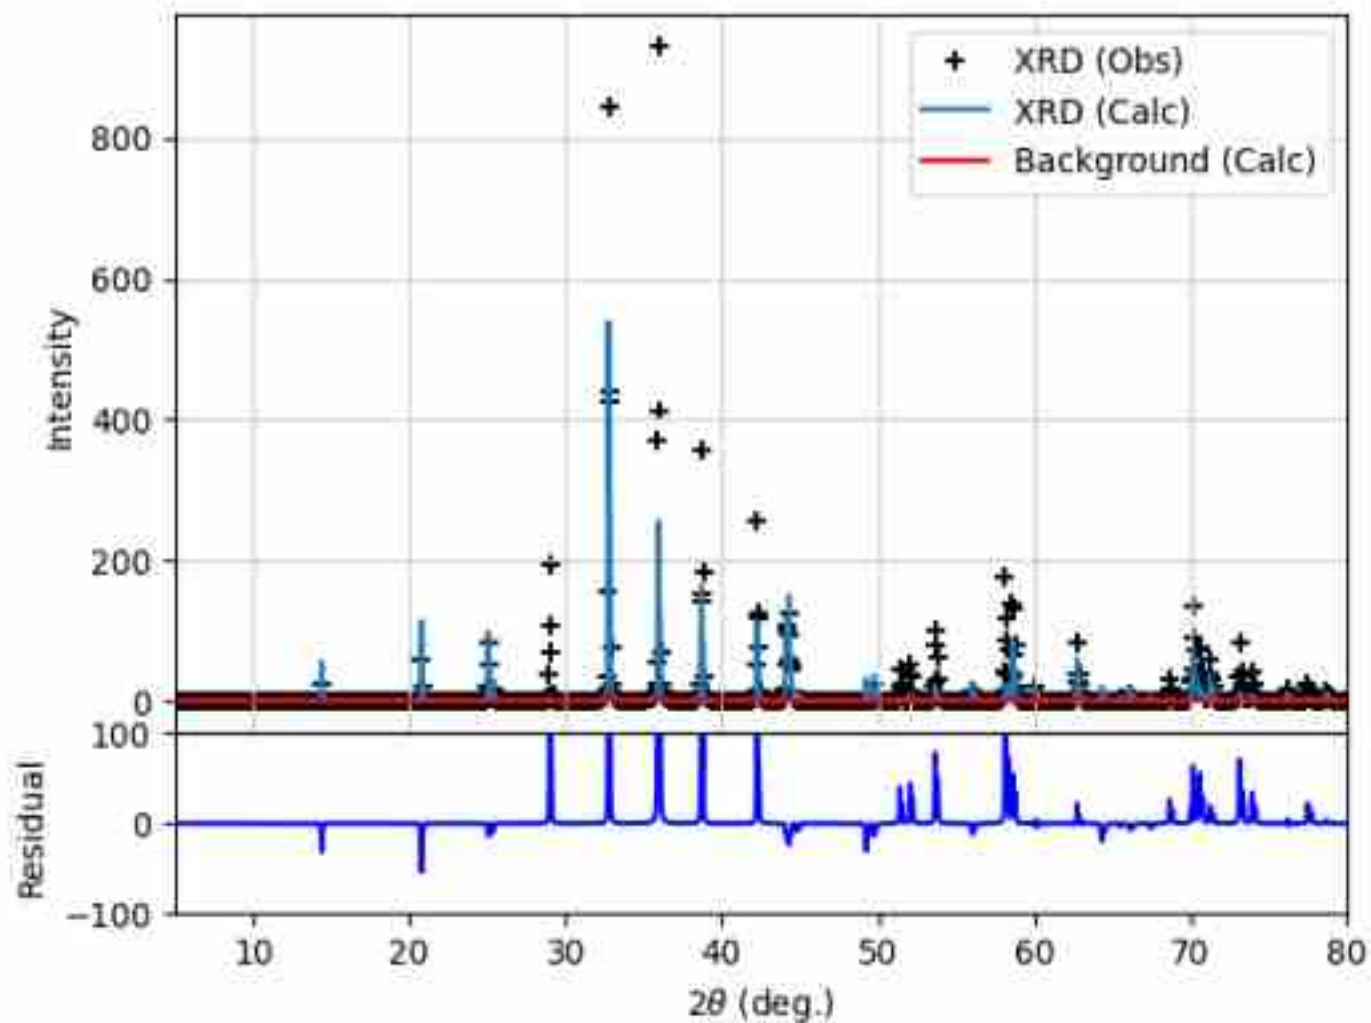

| RMSE before RR | Rwp      | RMSE after RR |
|----------------|----------|---------------|
| 0.487          | 66.68637 | None          |



# Cd<sub>3</sub>Cu<sub>2</sub>P<sub>10</sub>

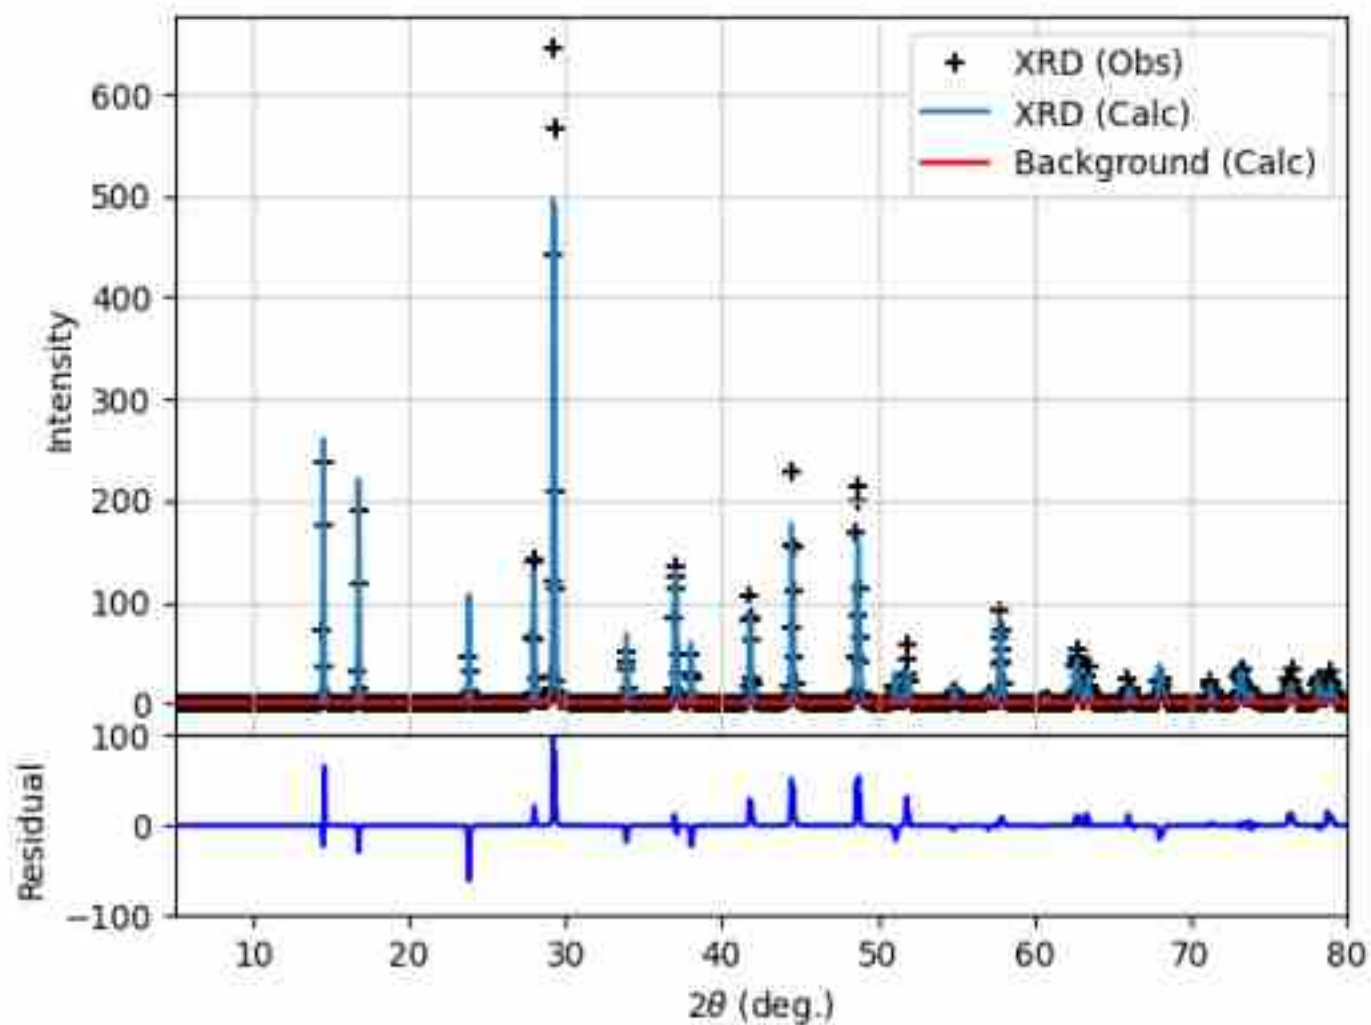

| RMSE before RR | Rwp     | RMSE after RR |
|----------------|---------|---------------|
| 0.488          | 28.3588 | None          |

# Li<sub>3</sub>V<sub>4</sub>O<sub>11</sub>F<sub>1</sub>

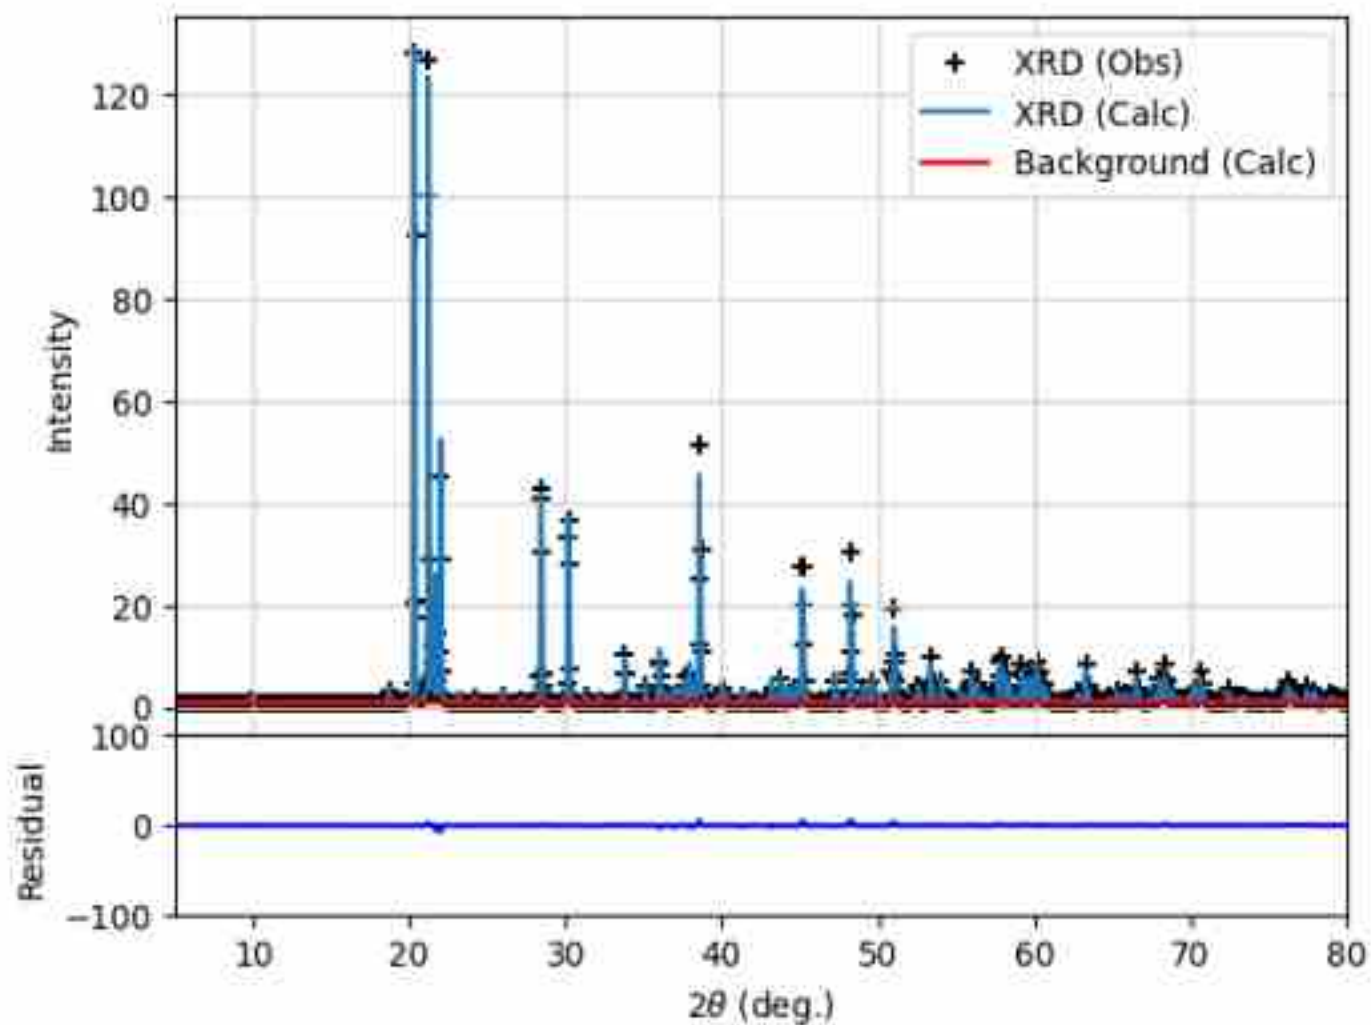

| RMSE before RR | Rwp      | RMSE after RR |
|----------------|----------|---------------|
| 0.488          | 11.32651 | 0.31054       |

# V6O8F4

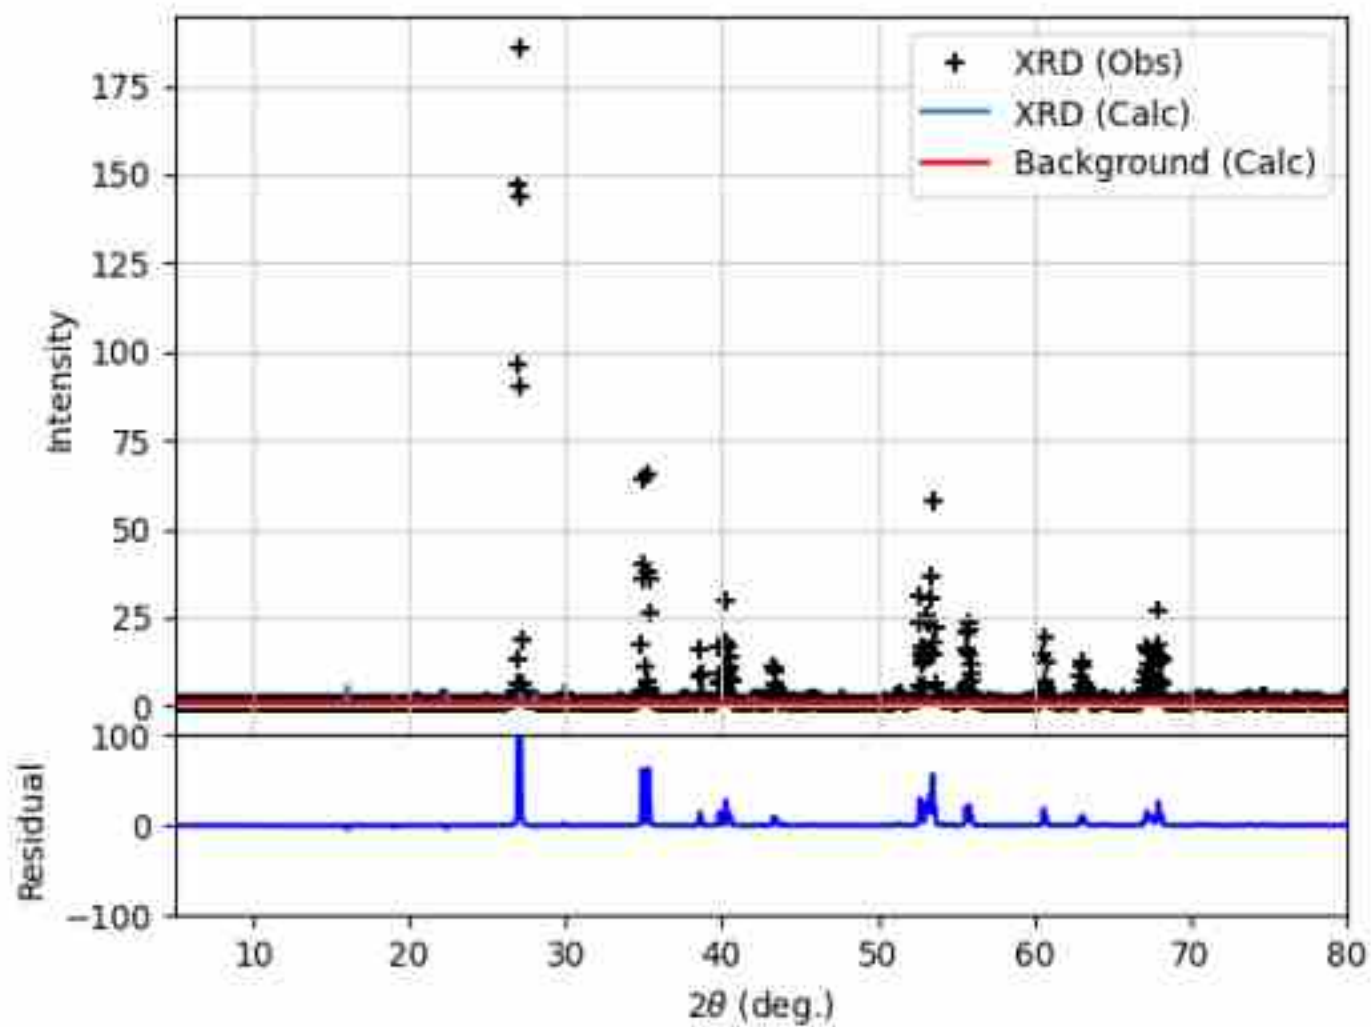

| RMSE before RR | Rwp      | RMSE after RR |
|----------------|----------|---------------|
| 0.488          | 73.99028 | None          |

# Li<sub>3</sub>Fe<sub>3</sub>F<sub>12</sub>

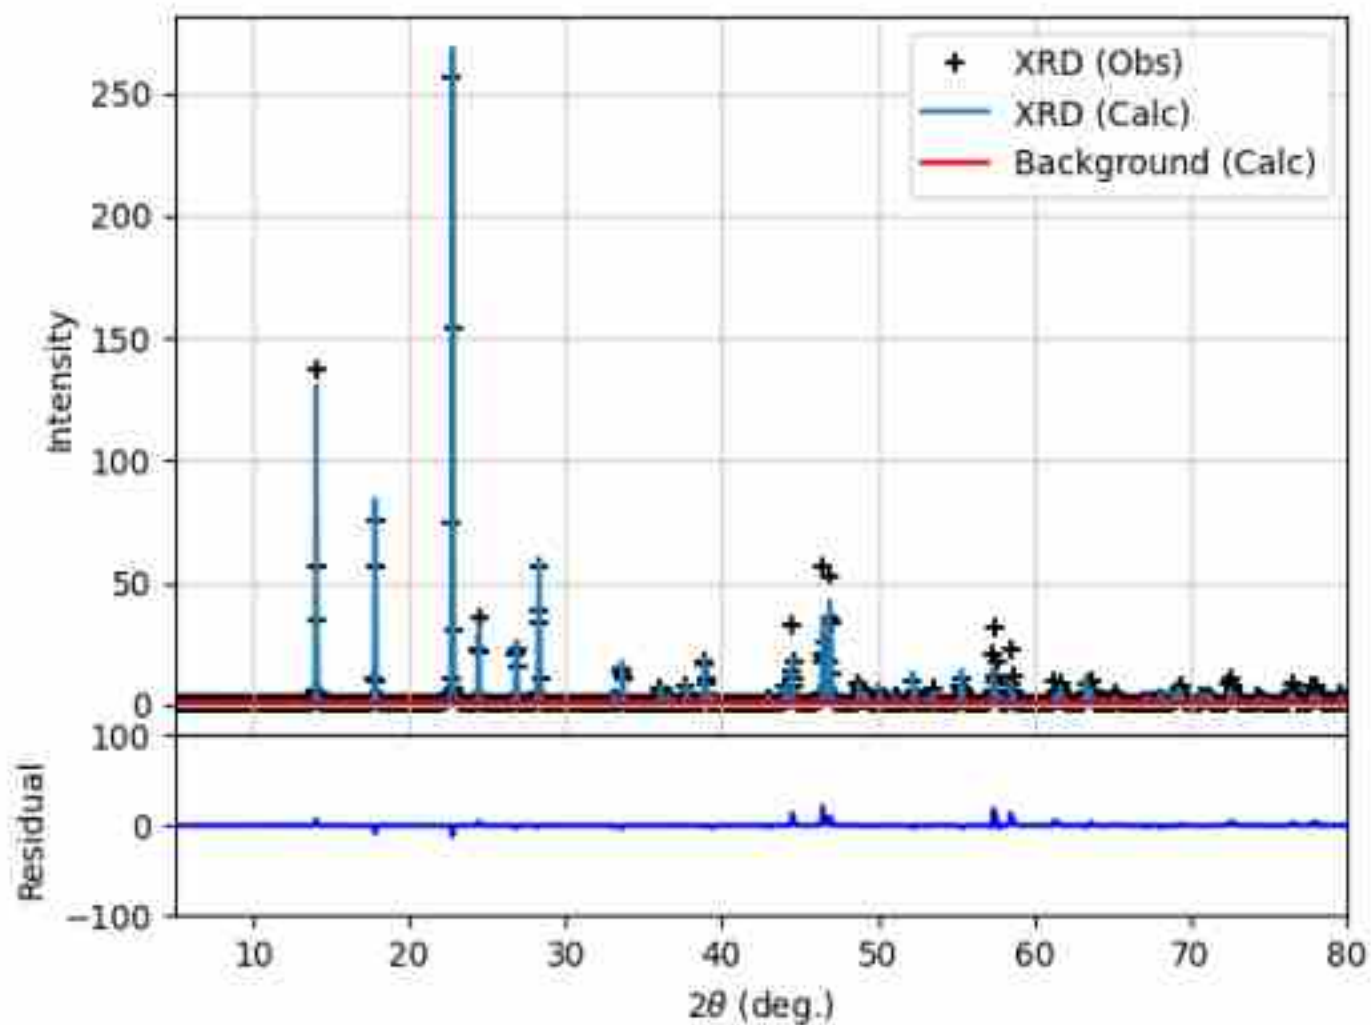

| RMSE before RR | Rwp      | RMSE after RR |
|----------------|----------|---------------|
| 0.489          | 20.37001 | None          |

Nd6In8Ge2

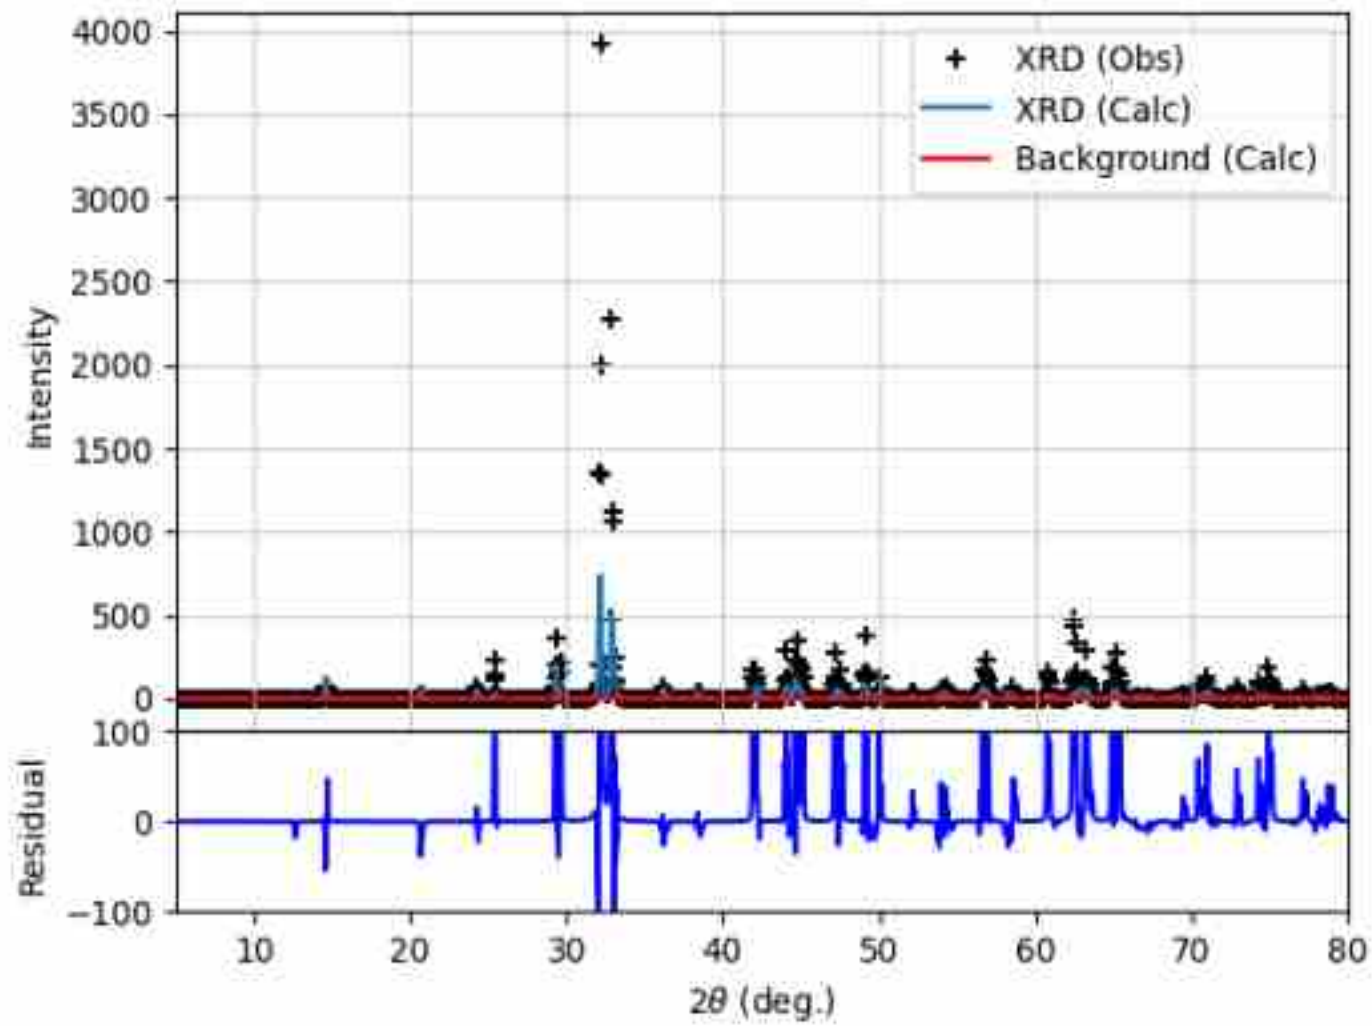

| RMSE before RR | Rwp      | RMSE after RR |
|----------------|----------|---------------|
| 0.492          | 74.72408 | None          |

# Ag<sub>5</sub>Au<sub>3</sub>S<sub>4</sub>

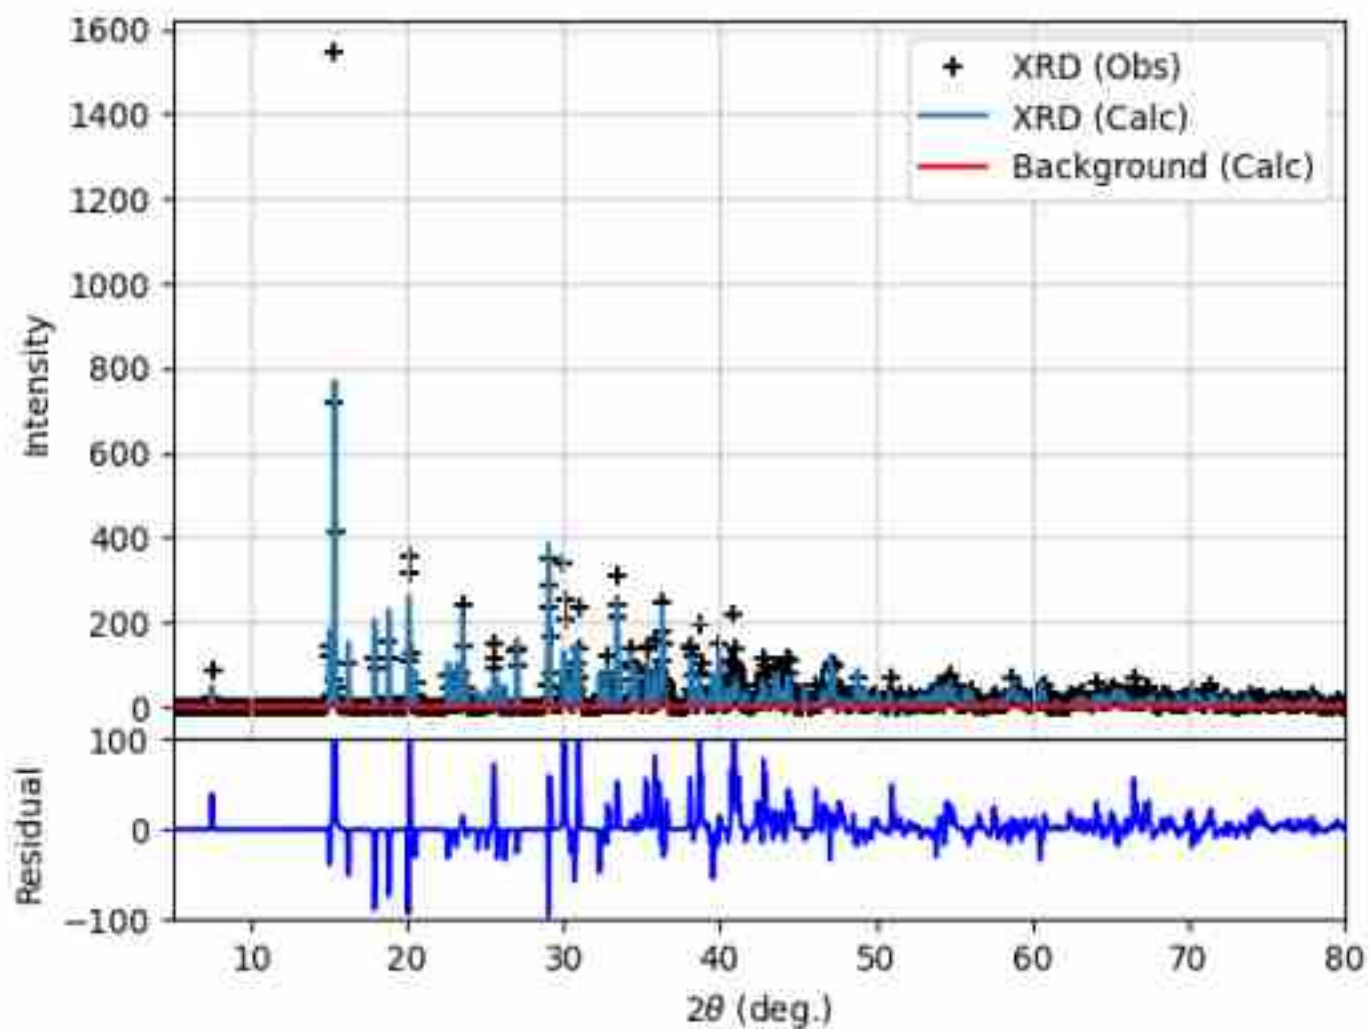

| RMSE before RR | Rwp      | RMSE after RR |
|----------------|----------|---------------|
| 0.493          | 45.97222 | None          |

# Ni<sub>3</sub>Sn<sub>4</sub>Pt<sub>2</sub>

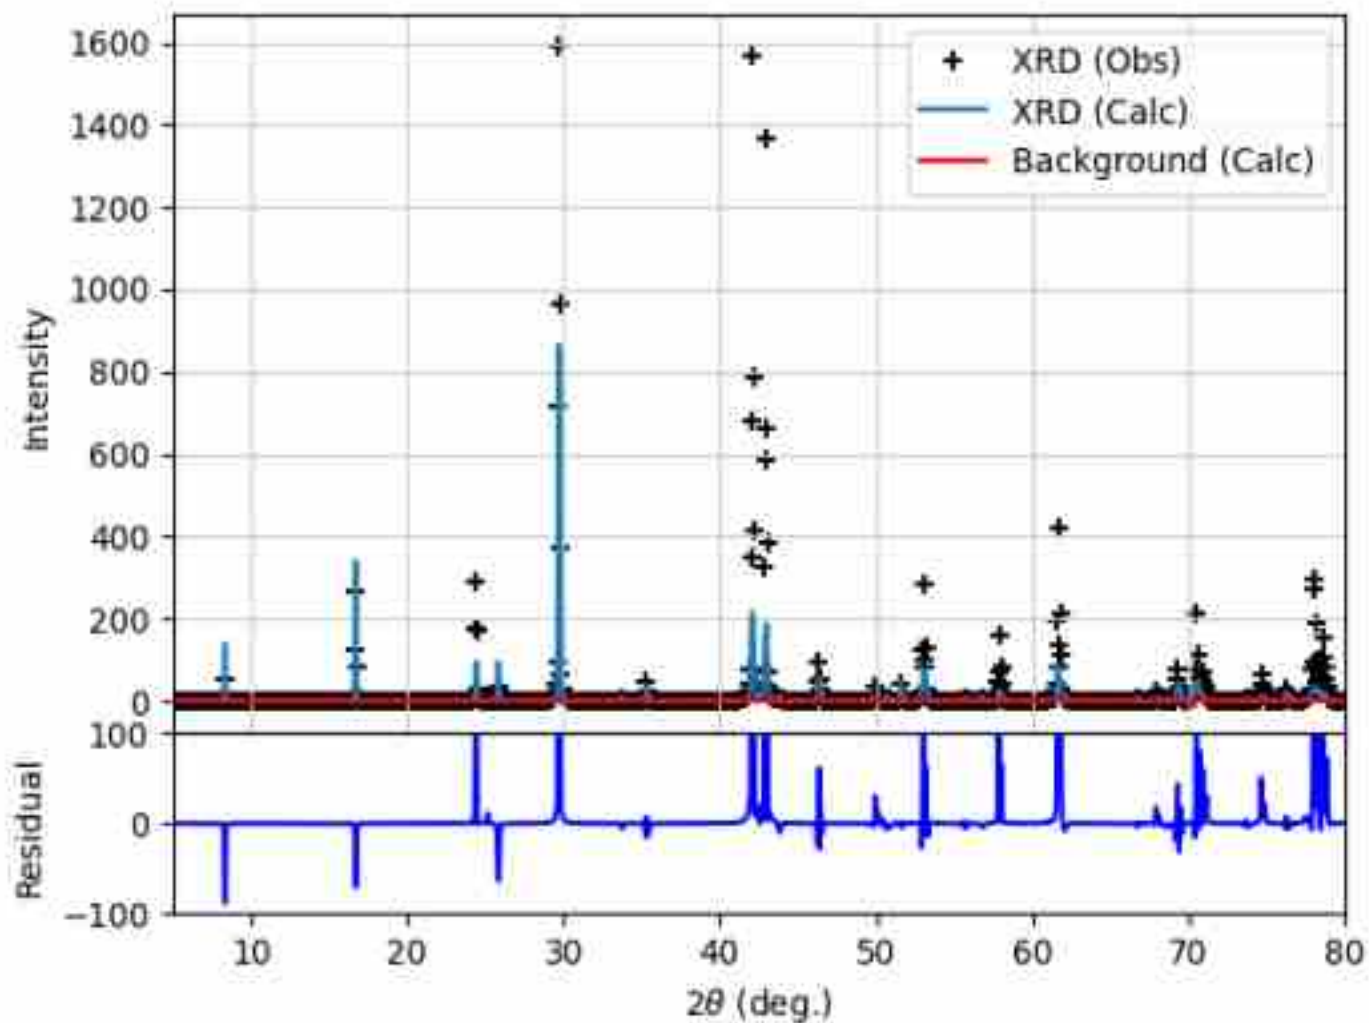

| RMSE before RR | Rwp      | RMSE after RR |
|----------------|----------|---------------|
| 0.493          | 69.50977 | None          |

# Li<sub>2</sub>Nb<sub>2</sub>O<sub>6</sub>

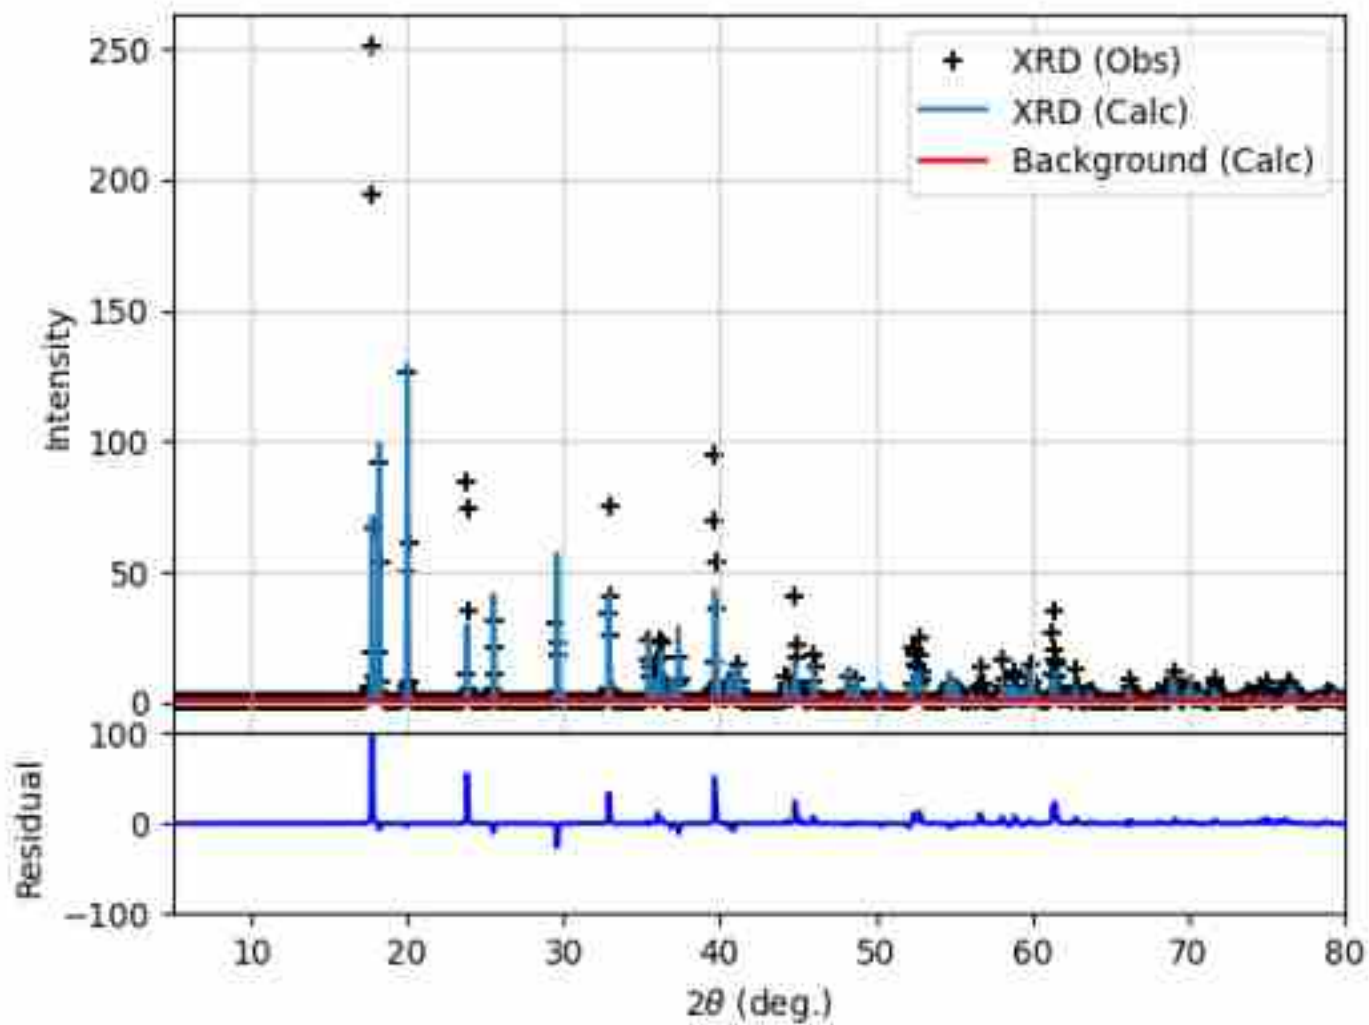

| RMSE before RR | Rwp      | RMSE after RR |
|----------------|----------|---------------|
| 0.496          | 44.00022 | None          |



# Ca<sub>4</sub>P<sub>4</sub>Pt<sub>4</sub>

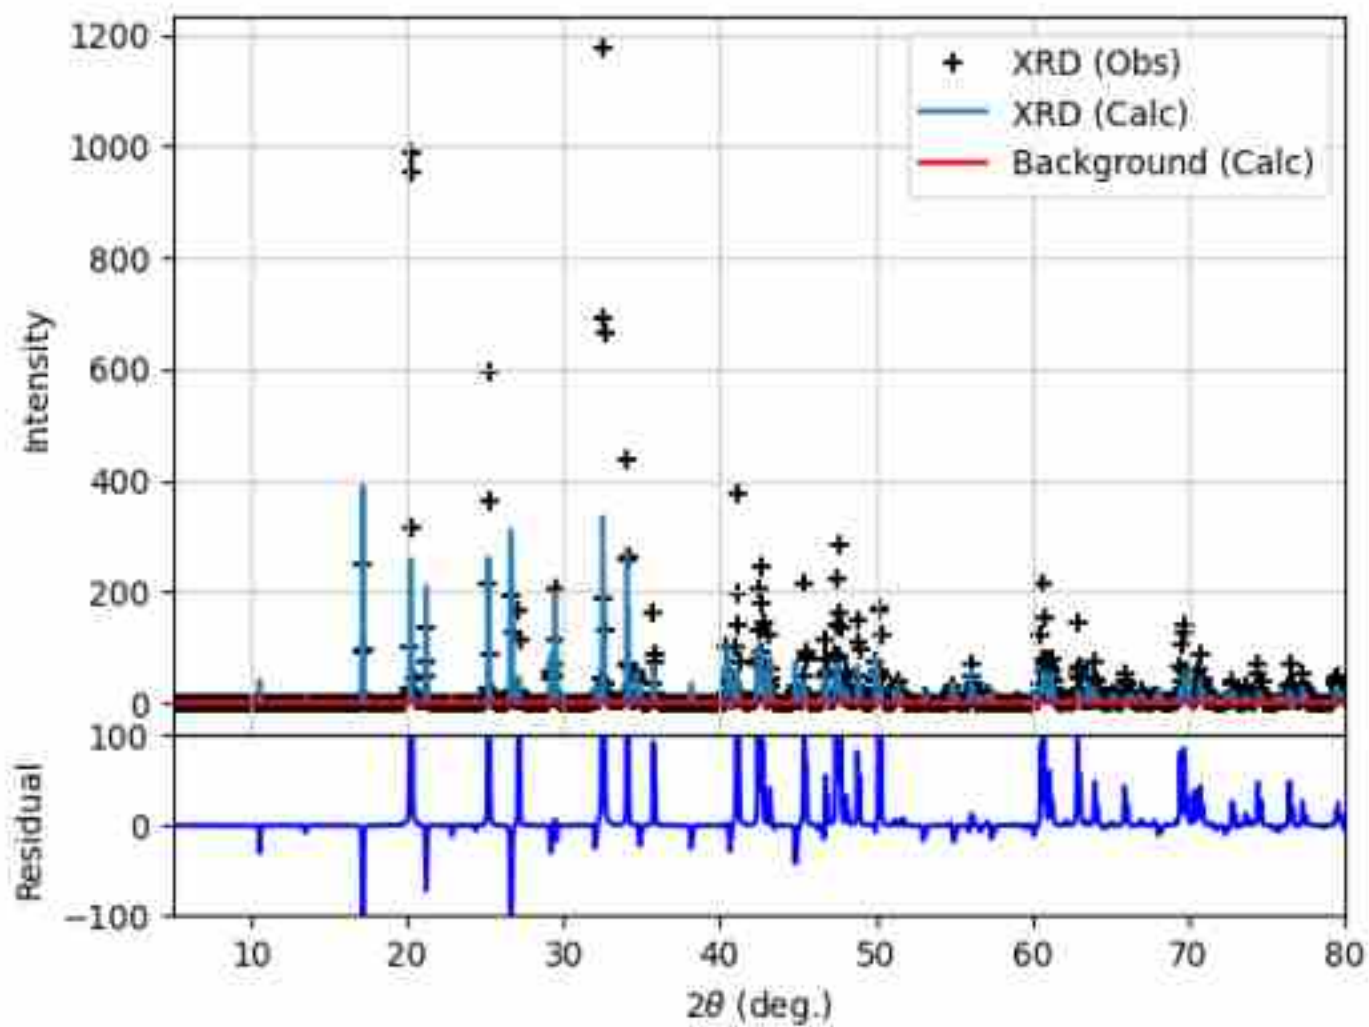

| RMSE before RR | Rwp      | RMSE after RR |
|----------------|----------|---------------|
| 0.497          | 65.01623 | None          |

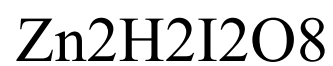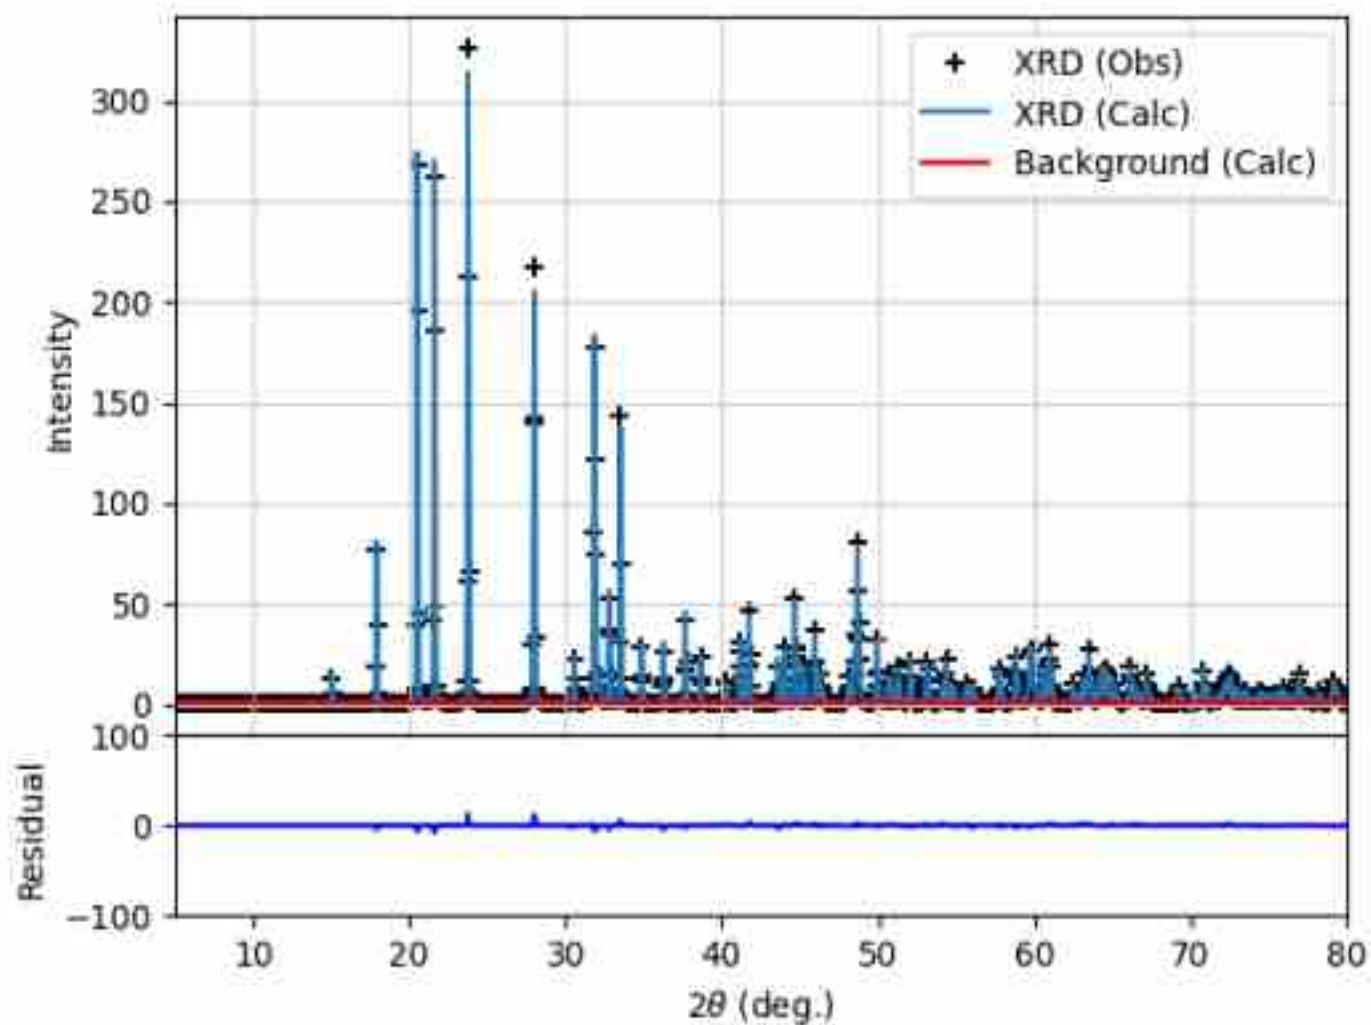

| RMSE before RR | Rwp     | RMSE after RR |
|----------------|---------|---------------|
| 0.497          | 6.10517 | None          |

# La<sub>2</sub>Ge<sub>4</sub>Pd<sub>3</sub>Pt<sub>1</sub>

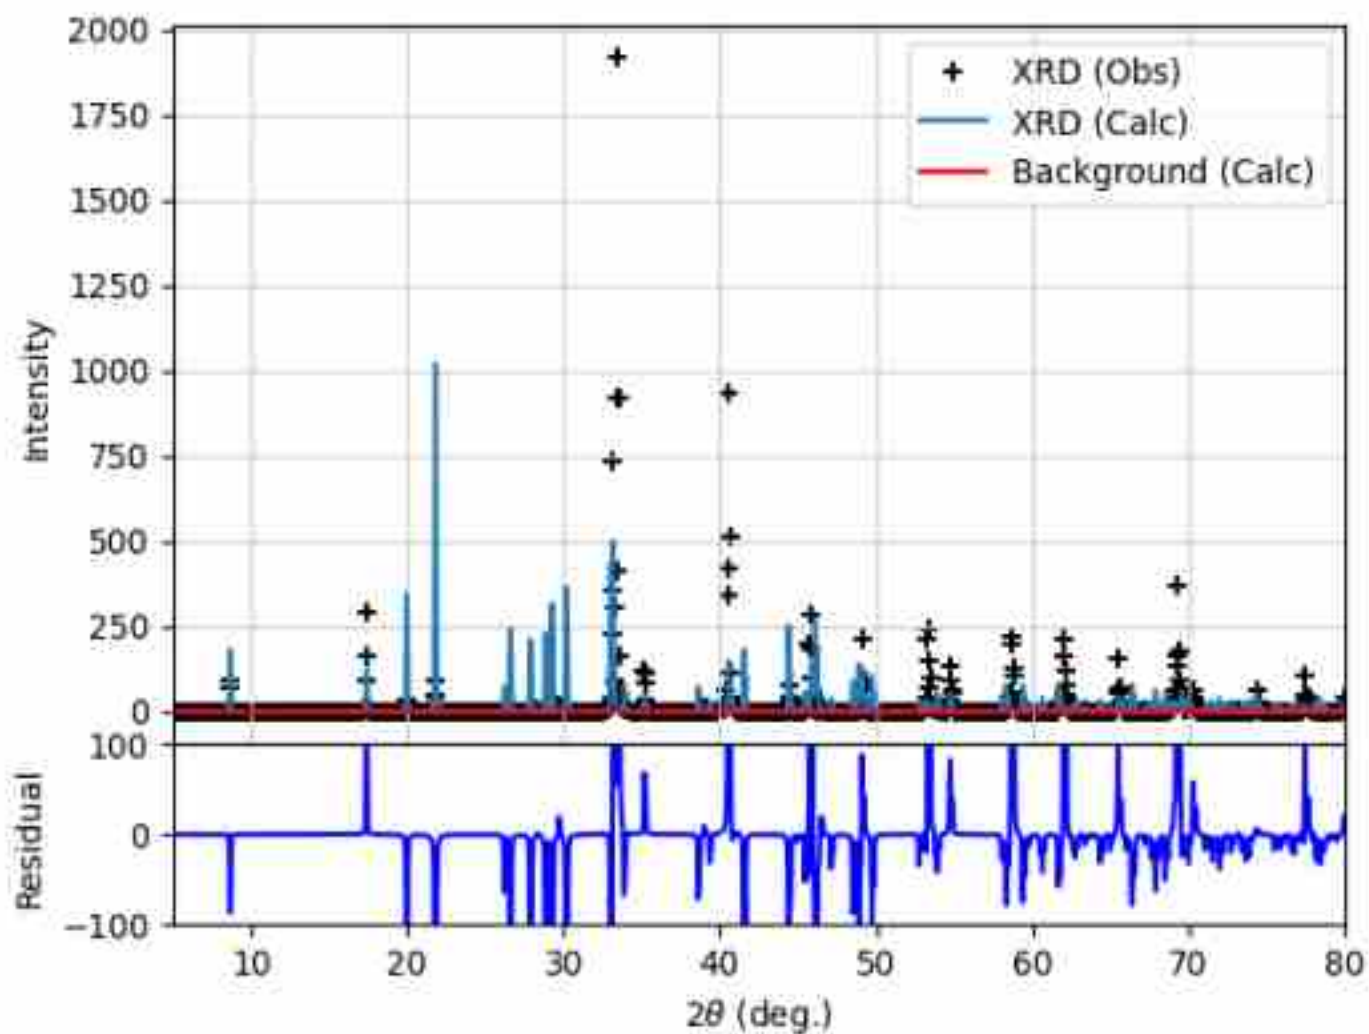

| RMSE before RR | Rwp   | RMSE after RR |
|----------------|-------|---------------|
| 0.498          | 100.0 | None          |

# La10Ni2Ge6

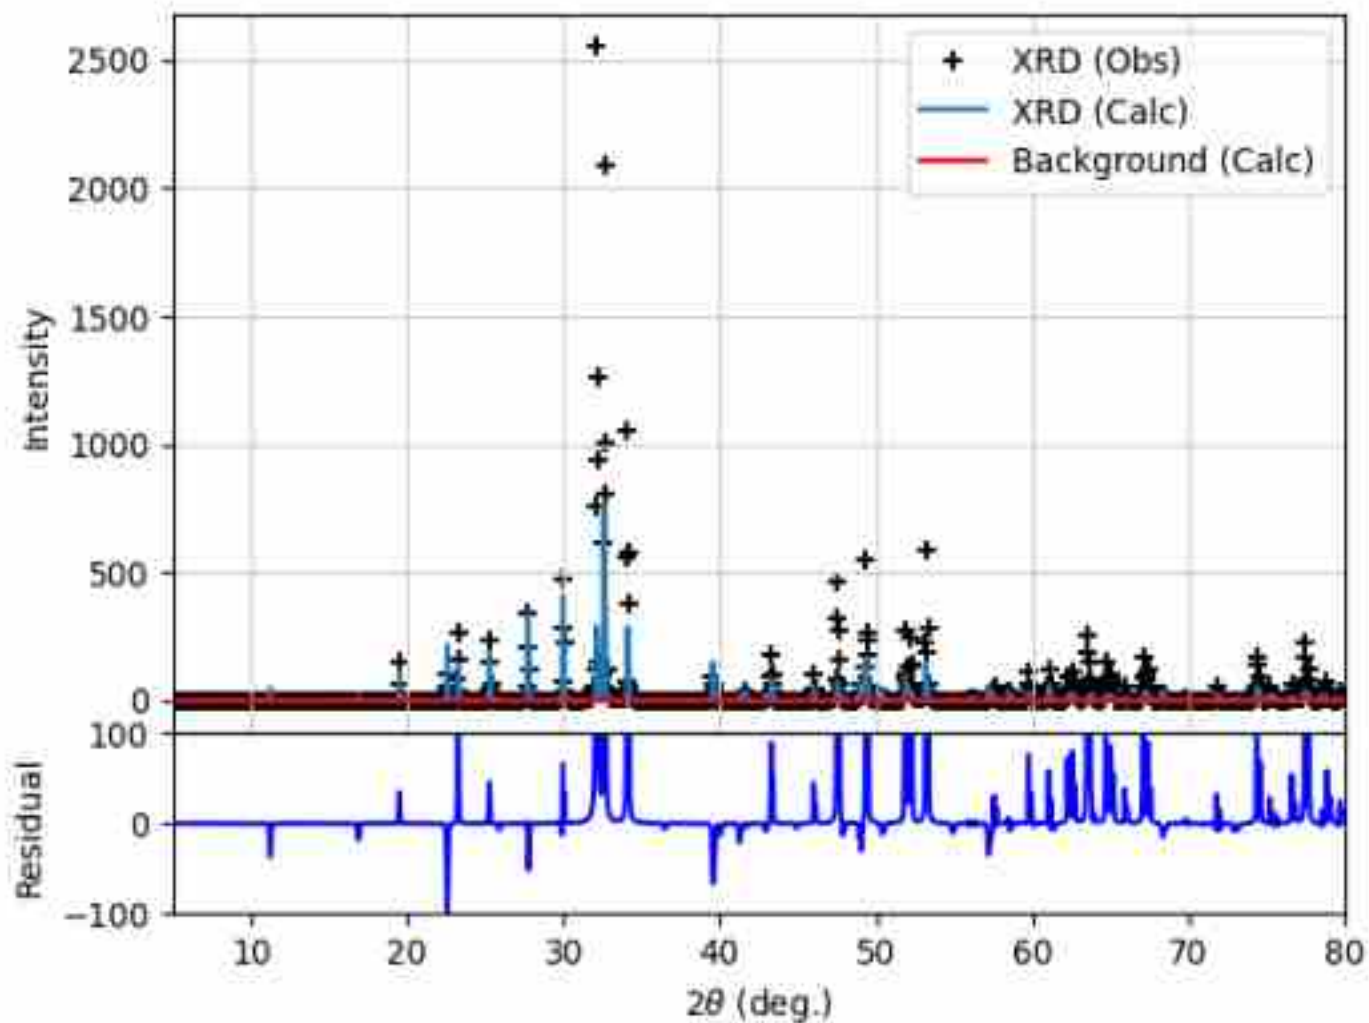

| RMSE before RR | Rwp      | RMSE after RR |
|----------------|----------|---------------|
| 0.498          | 70.09837 | None          |

# Na<sub>4</sub>Be<sub>2</sub>B<sub>4</sub>O<sub>10</sub>

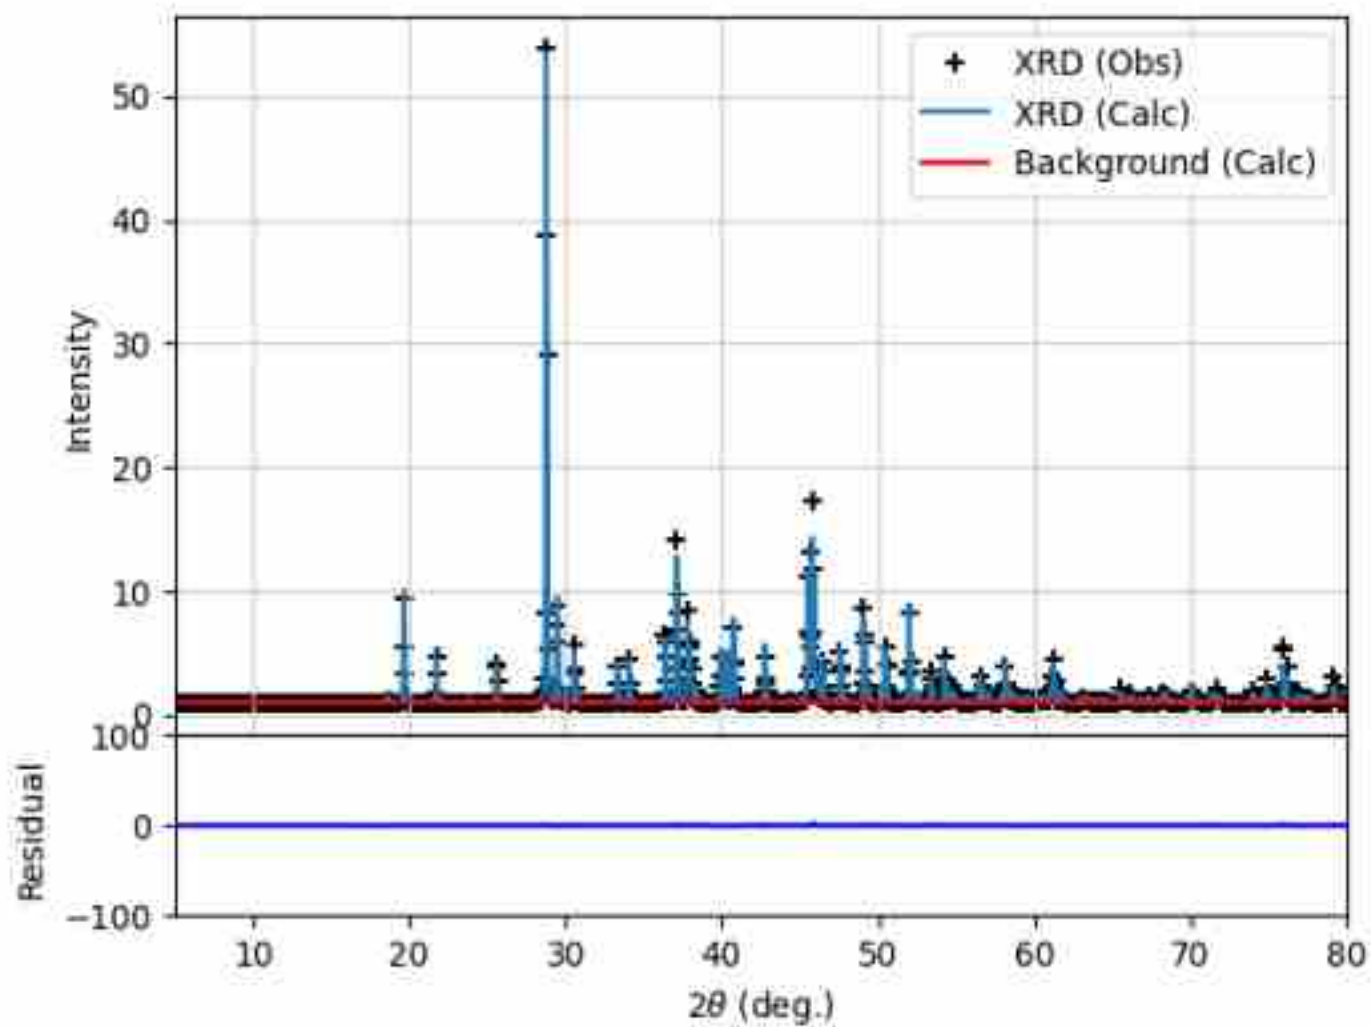

| RMSE before RR | Rwp     | RMSE after RR |
|----------------|---------|---------------|
| 0.498          | 7.38177 | None          |

# U4Se4S4

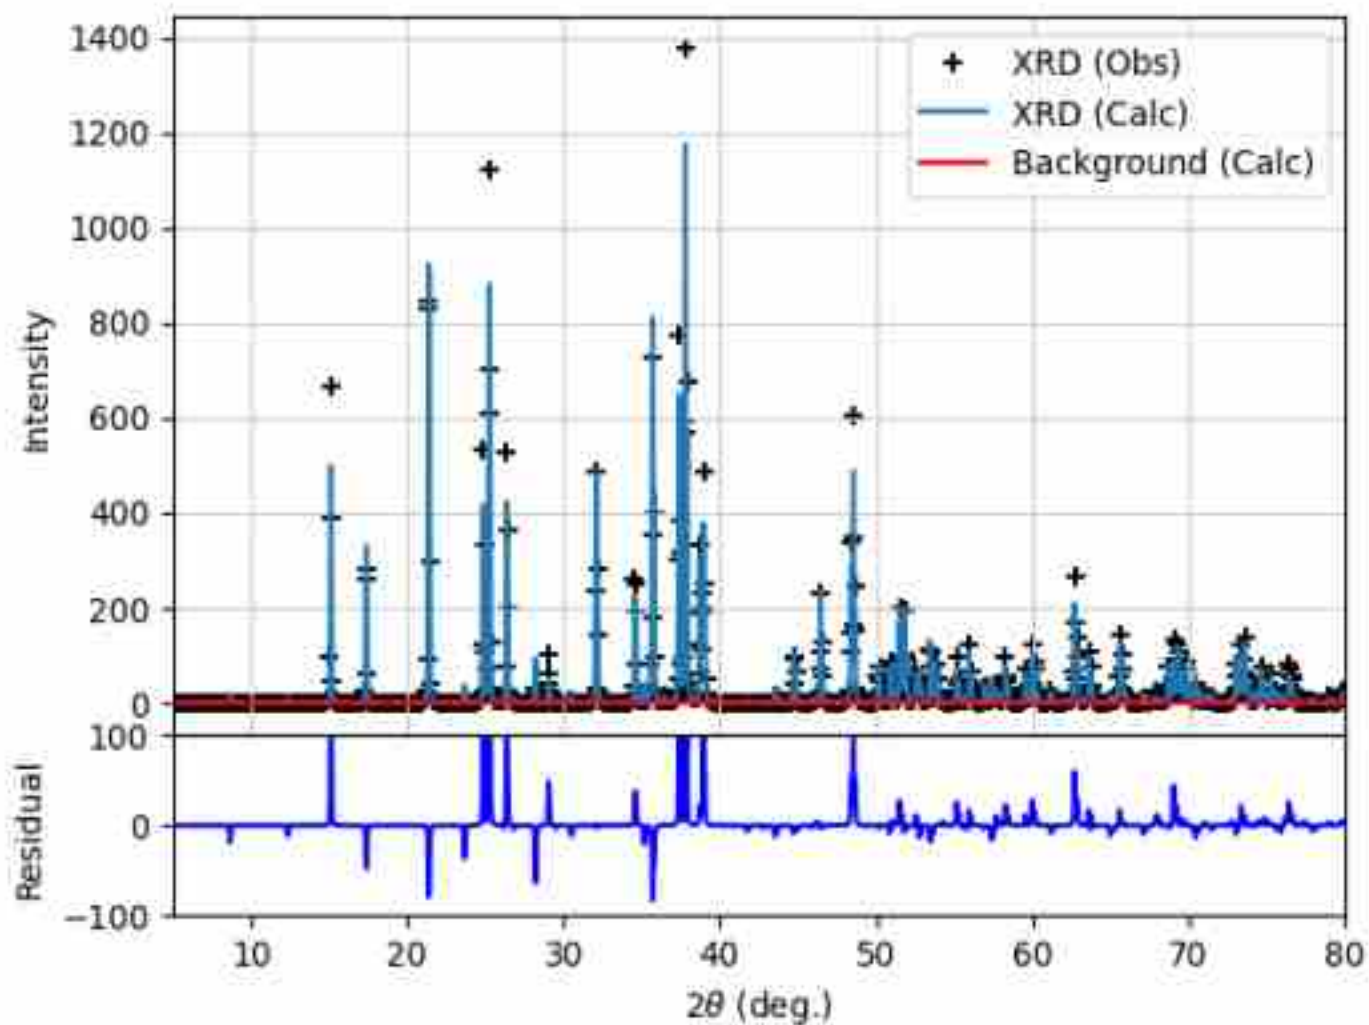

| RMSE before RR | Rwp      | RMSE after RR |
|----------------|----------|---------------|
| 0.498          | 30.43834 | 0.4973        |

# V2O2F6

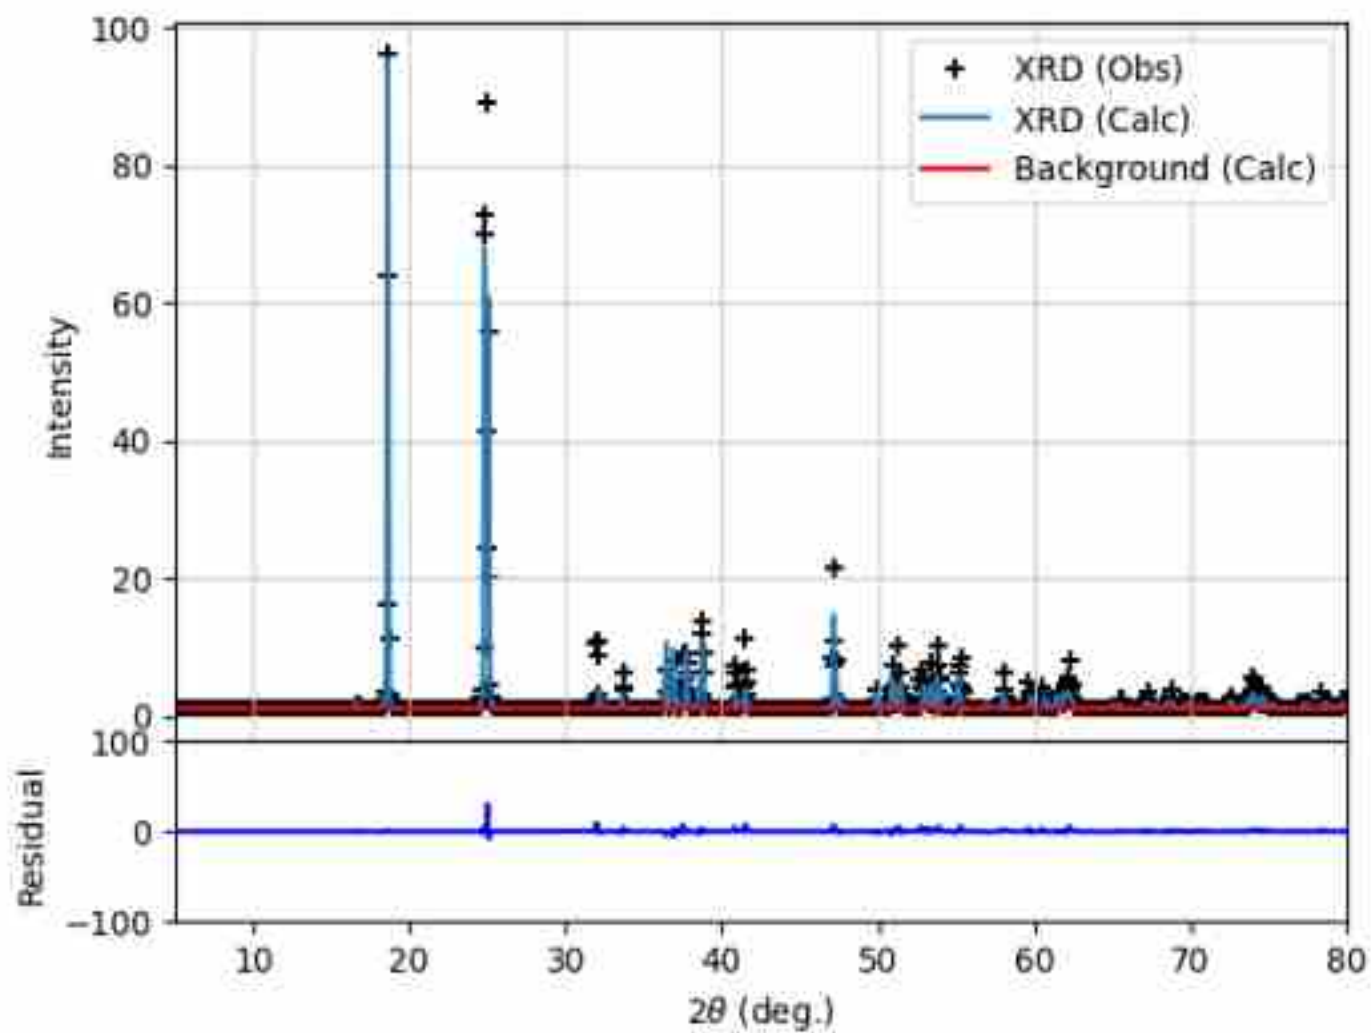

| RMSE before RR | Rwp      | RMSE after RR |
|----------------|----------|---------------|
| 0.498          | 30.04528 | None          |

# P2Au2S8

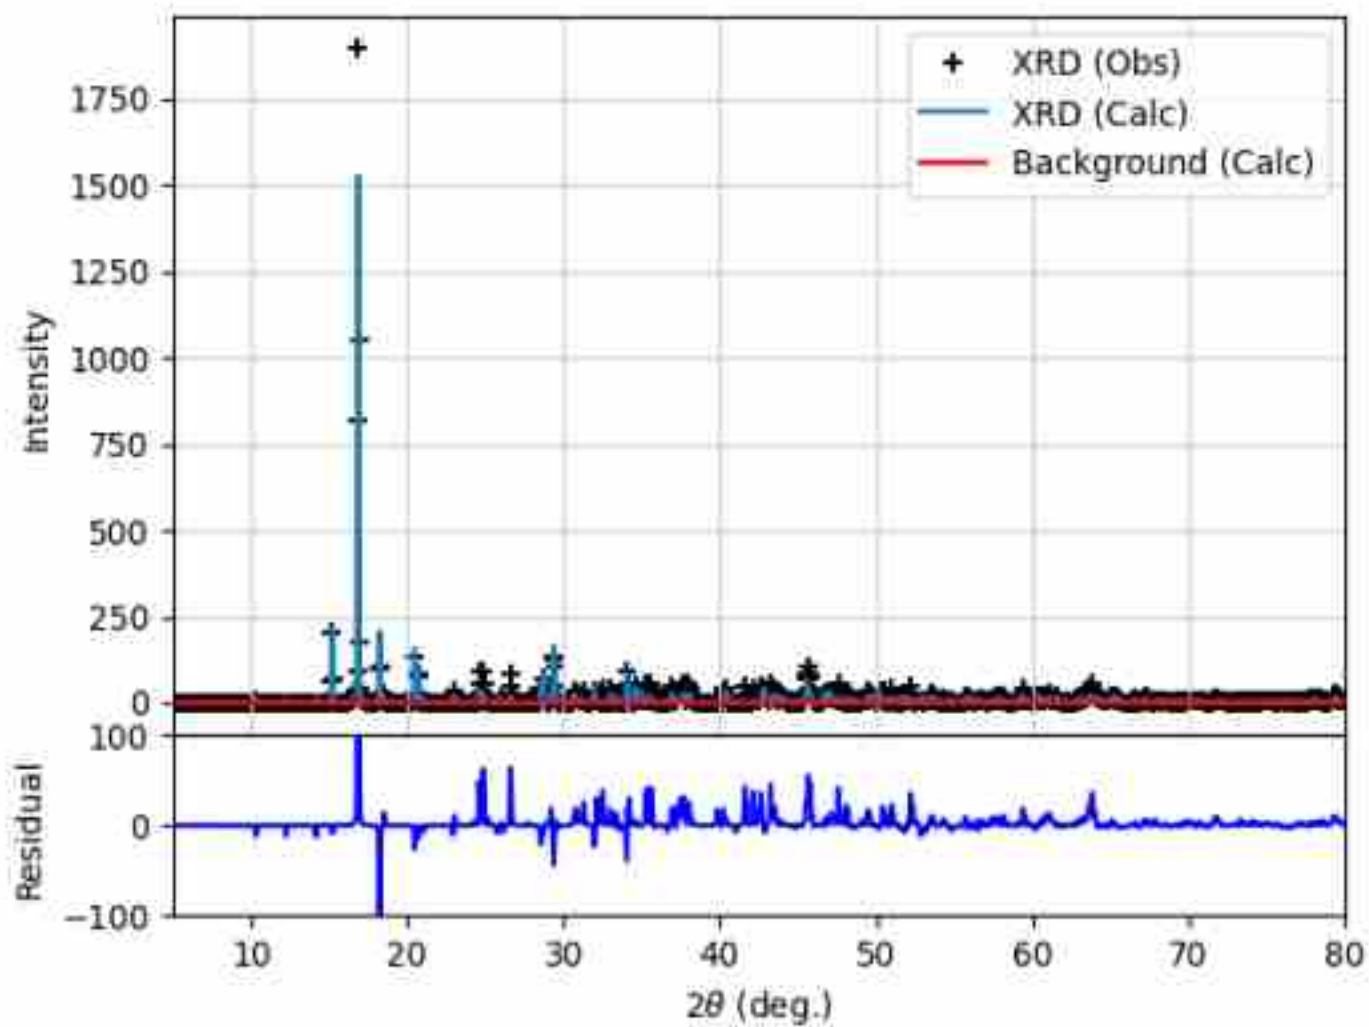

| RMSE before RR | Rwp      | RMSE after RR |
|----------------|----------|---------------|
| 0.499          | 44.26961 | None          |
